# Supplementary material
Source: publisher figshare collection journal article supplement (https://gsajournals.figshare.com/articles/dataset/_/12014913)
Supplement: Supplementary file 1048 [file 1]

IPI00847558.1|SIMILAR TO NON-POU DOMAIN-CONTAINING OCTAMER-E

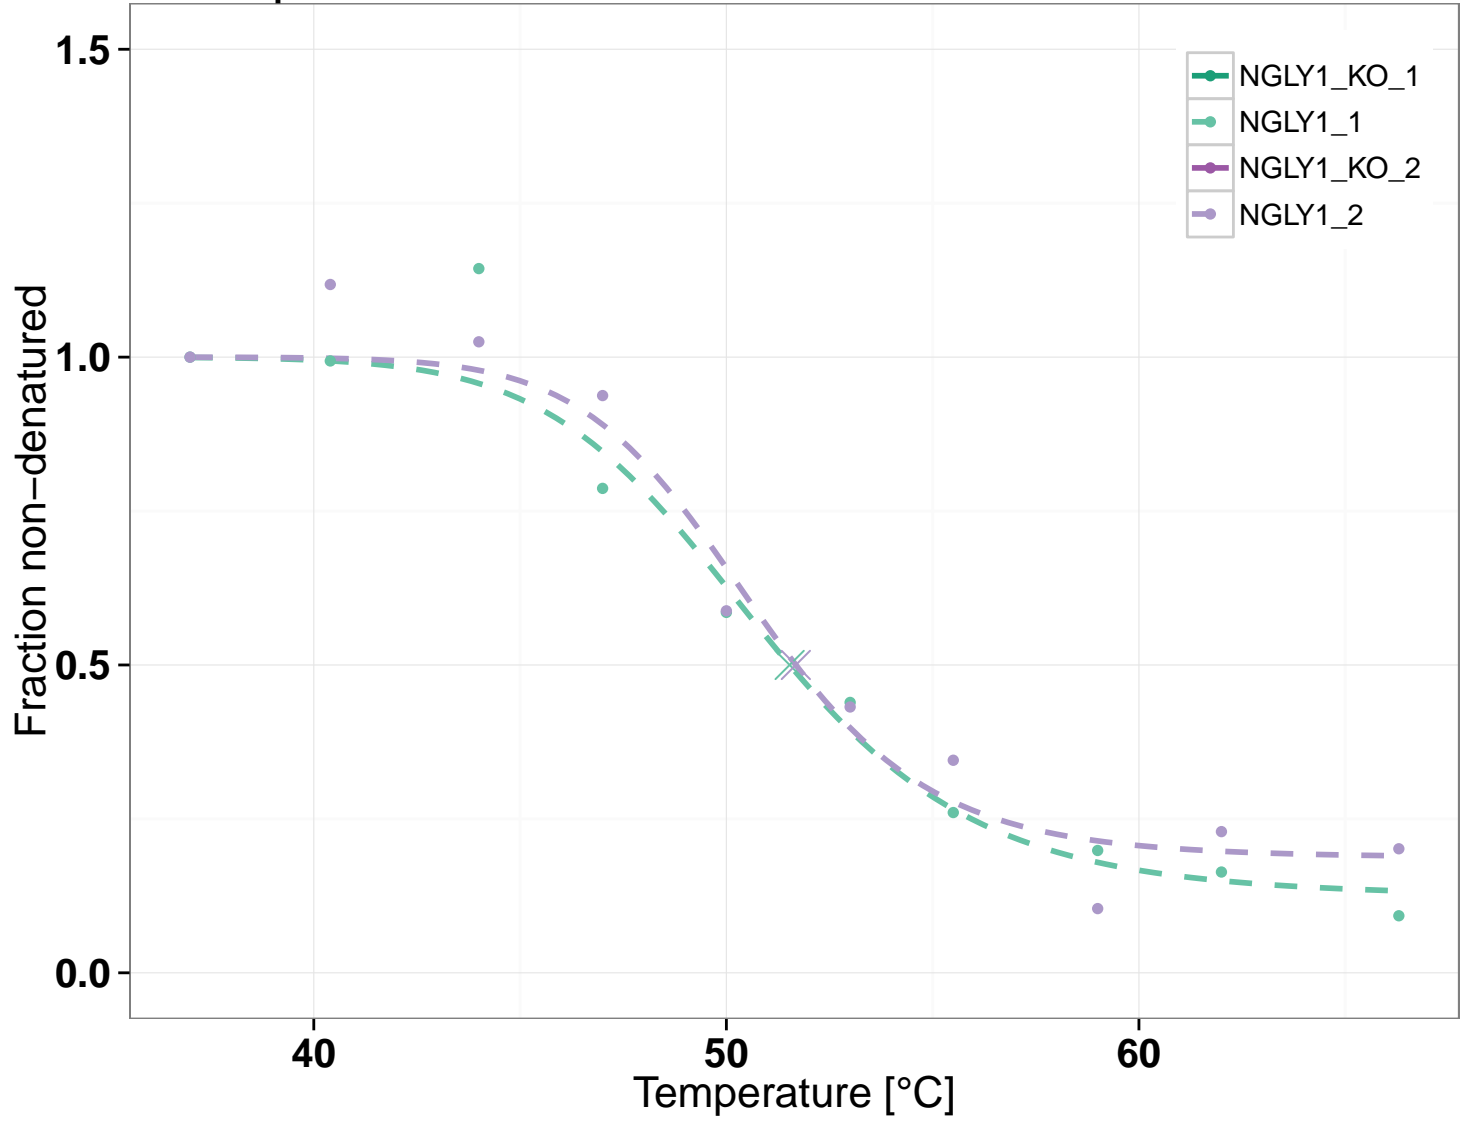

|            | meltPoint | slope  | plateau | R2   |
|------------|-----------|--------|---------|------|
| NGLY1_KO_1 | -         | -      | -       | -    |
| NGLY1_1    | 51.53     | -0.084 | 0.12    | 0.97 |
| NGLY1_KO_2 | -         | -      | -       | -    |
| NGLY1_2    | 51.68     | -0.096 | 0.19    | 0.97 |
