# Supplementary material
Source: publisher figshare collection journal article supplement (https://gsajournals.figshare.com/articles/dataset/_/12014913)
Supplement: Supplementary file 3164 [file 1]

IPI00102986.1|SIMILAR TO FIBRINOGEN, GAMMA POLYPEPTIDE.

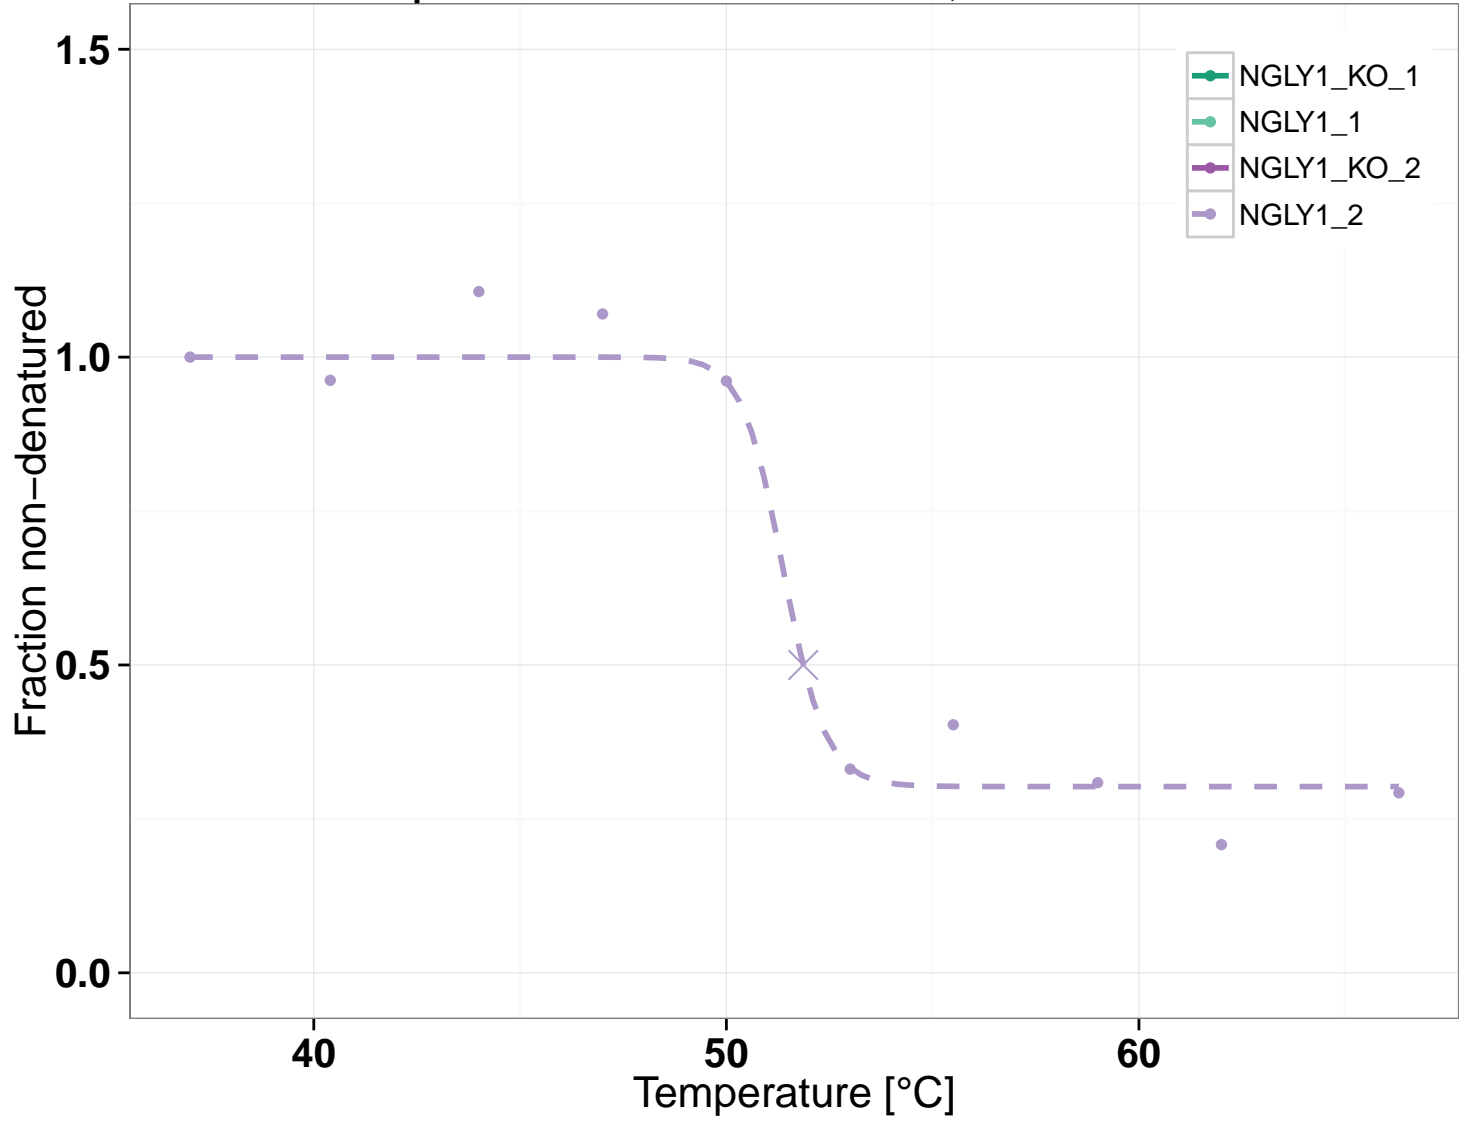

|            | meltPoint | slope | plateau | R2   |
|------------|-----------|-------|---------|------|
| NGLY1_KO_1 | —         | —     | —       | —    |
| NGLY1_1    | —         | —     | —       | —    |
| NGLY1_KO_2 | —         | —     | —       | —    |
| NGLY1_2    | 51.86     | -0.34 | 0.3     | 0.97 |
