# Supplementary material
Source: publisher figshare collection journal article supplement (https://gsajournals.figshare.com/articles/dataset/_/12014913)
Supplement: Supplementary file 4692 [file 1]

IPI00747947.1|SIMILAR TO POU DOMAIN, CLASS 2, TRANSCRIPTION FA

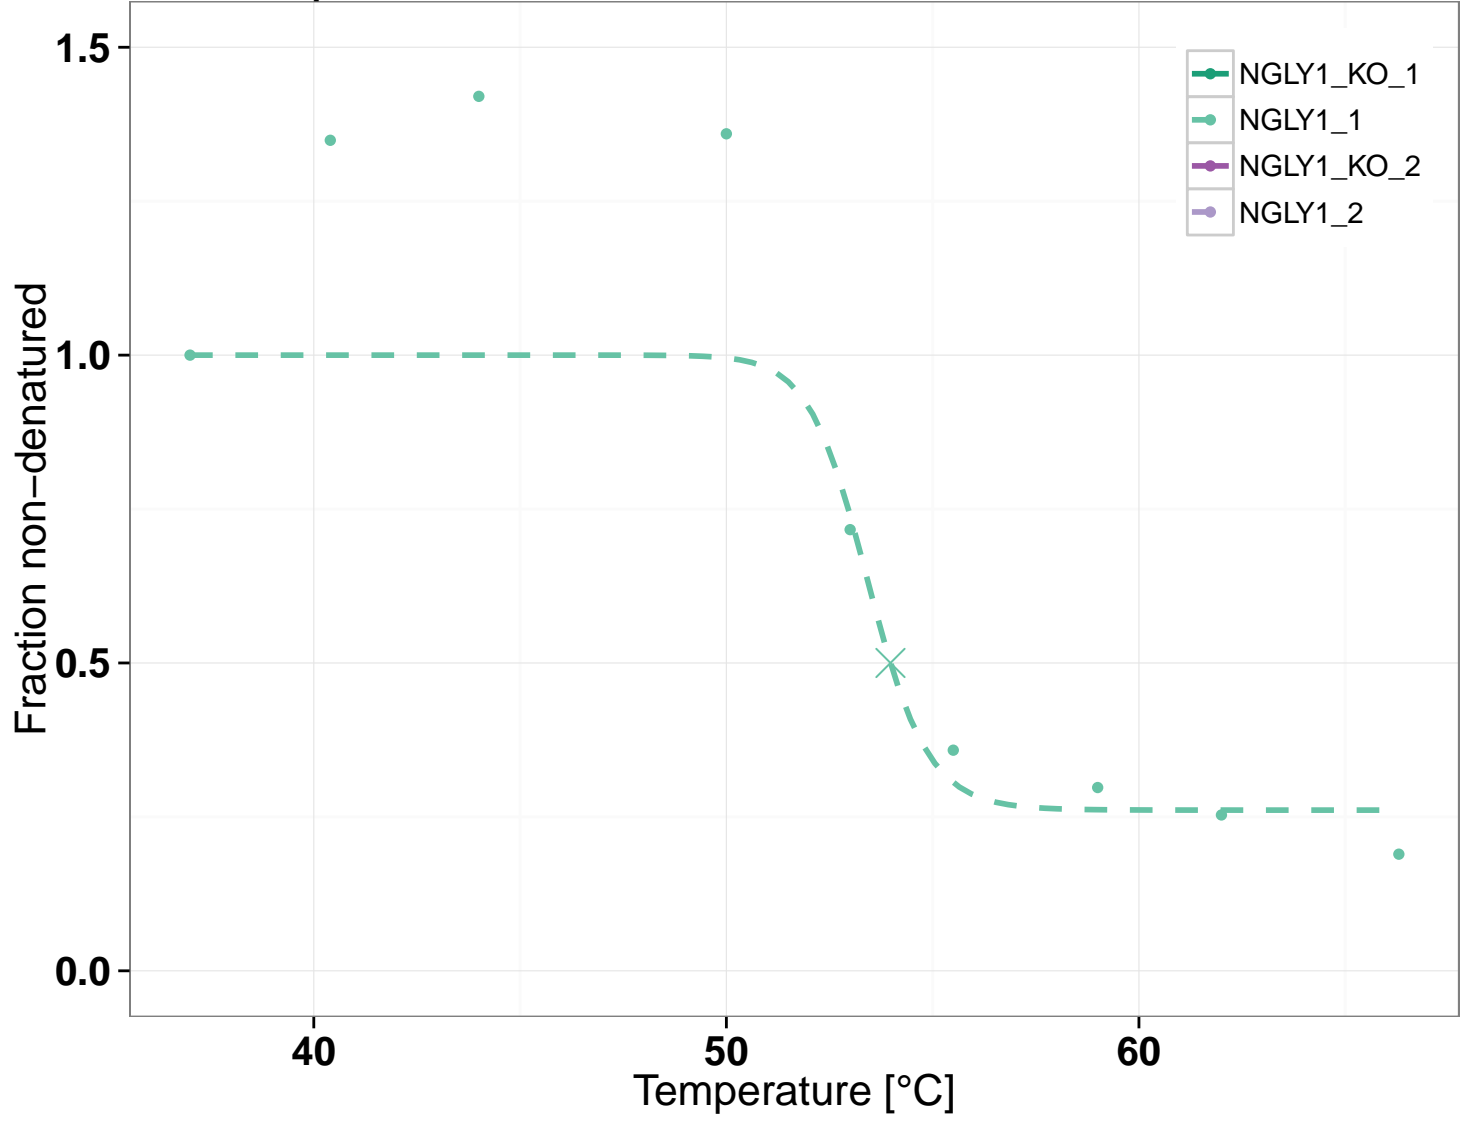

|            | meltPoint | slope | plateau | R2   |
|------------|-----------|-------|---------|------|
| NGLY1_KO_1 | -         | -     | -       | -    |
| NGLY1_1    | 53.98     | -0.26 | 0.26    | 0.71 |
| NGLY1_KO_2 | -         | -     | -       | -    |
| NGLY1_2    | -         | -     | -       | -    |
