# Supplementary material
Source: publisher figshare collection journal article supplement (https://gsajournals.figshare.com/articles/dataset/_/12014913)
Supplement: Supplementary file 6686 [file 1]

IPI00063684.1|SIMILAR TO 60 KDA HEAT SHOCK PROTEIN, MITOCHOND

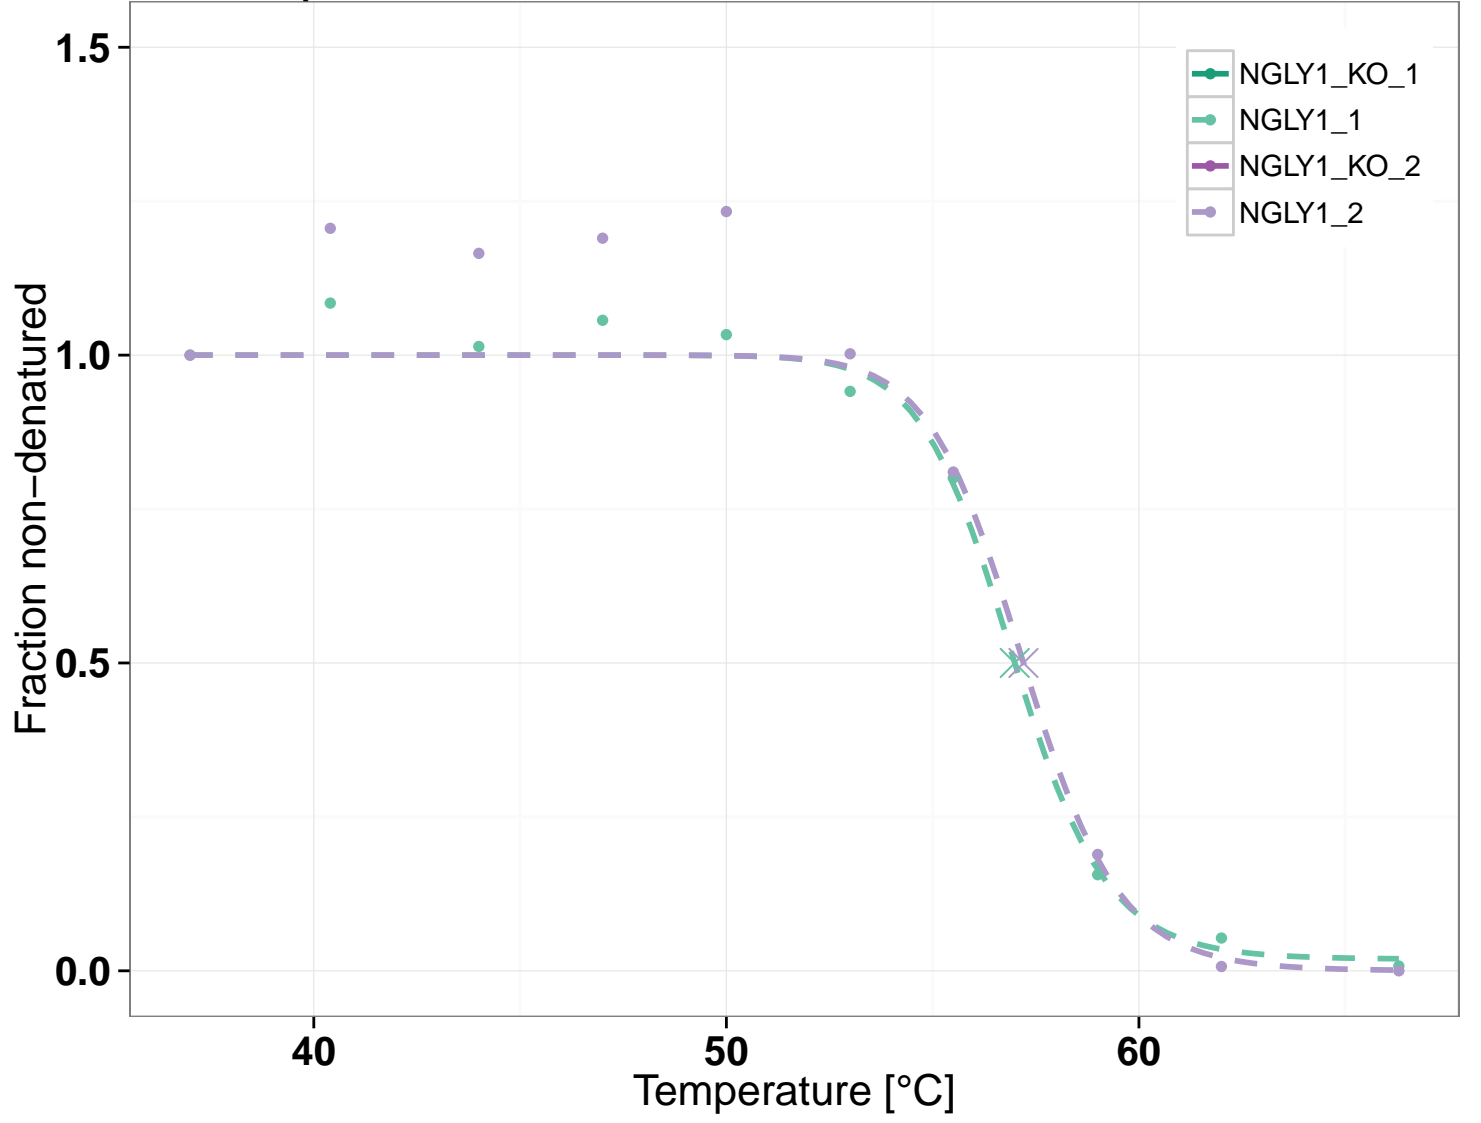

|            | meltPoint | slope | plateau | R2   |
|------------|-----------|-------|---------|------|
| NGLY1_KO_1 | -         | -     | -       | -    |
| NGLY1_1    | 56.99     | -0.22 | 0.02    | 0.99 |
| NGLY1_KO_2 | -         | -     | -       | -    |
| NGLY1_2    | 57.2      | -0.22 | 0       | 0.93 |
