# Supplementary material
Source: publisher figshare collection journal article supplement (https://gsajournals.figshare.com/articles/dataset/_/12014913)
Supplement: Supplementary file 6915 [file 1]

IPI00258419.2|SIMILAR TO HEAT SHOCK COGNATE 71 KDA PROTEIN

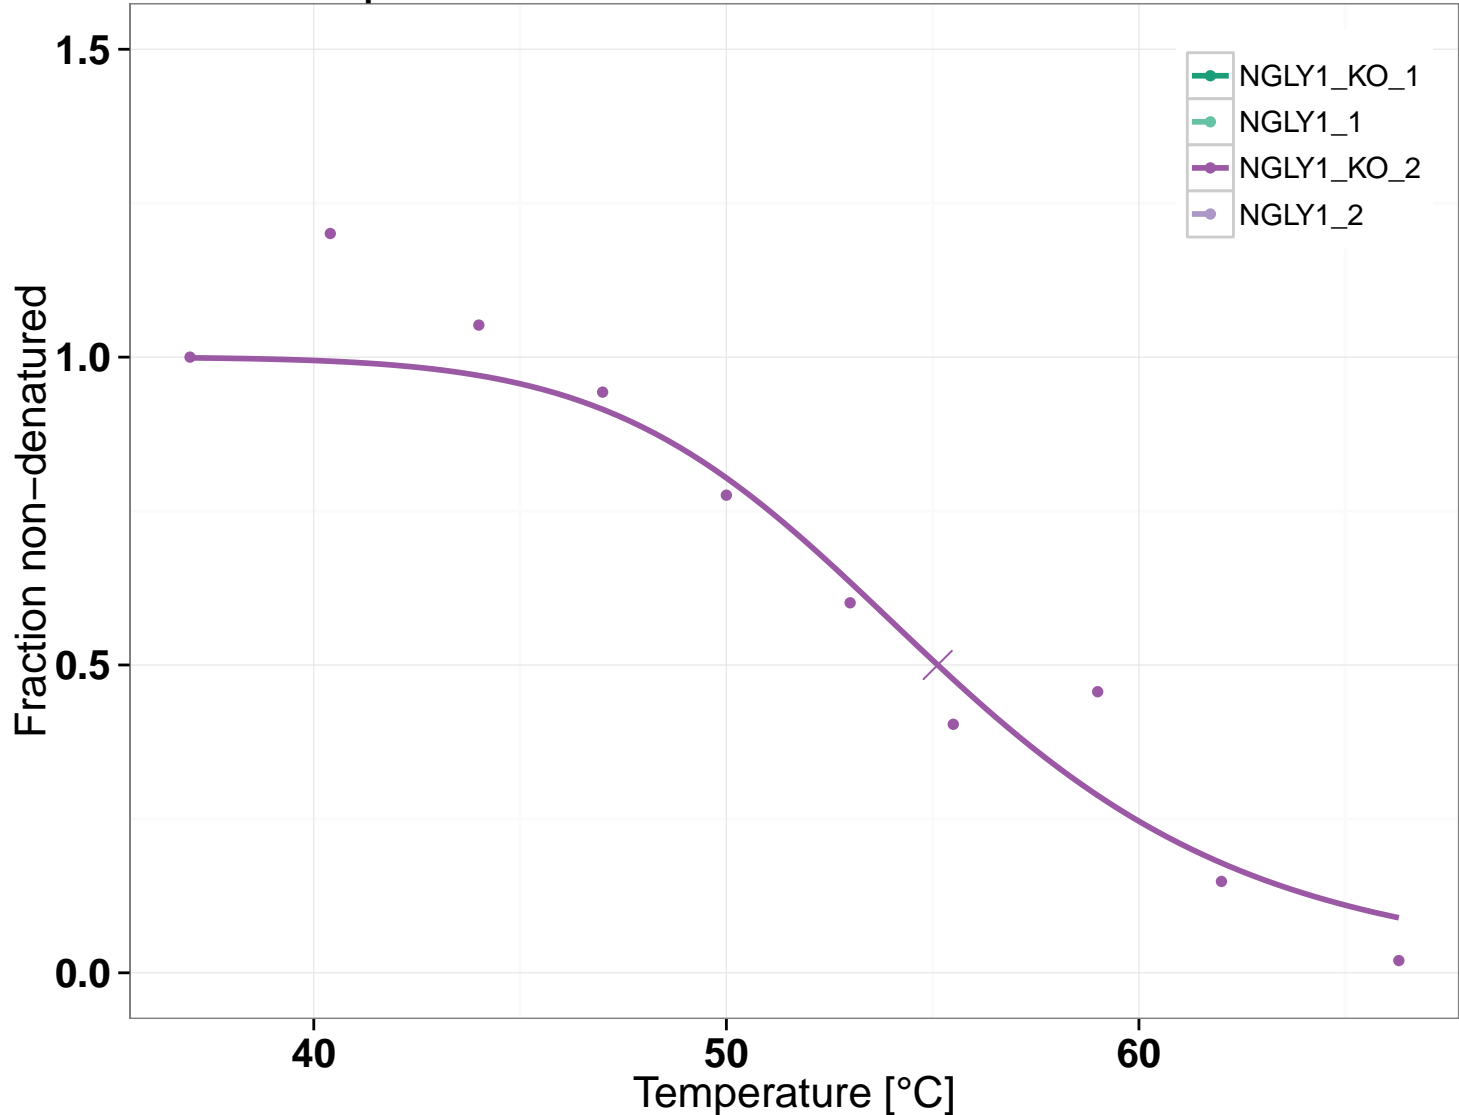

|            | meltPoint | slope  | plateau | R2   |
|------------|-----------|--------|---------|------|
| NGLY1_KO_1 | -         | -      | -       | -    |
| NGLY1_1    | -         | -      | -       | -    |
| NGLY1_KO_2 | 55.12     | -0.064 | 0       | 0.94 |
| NGLY1_2    | -         | -      | -       | -    |
