# Supplementary material (part 1 of 85)
Source: publisher figshare collection journal article supplement (https://gsajournals.figshare.com/articles/dataset/_/12014913)

IPI00005969.3|CAPZA1

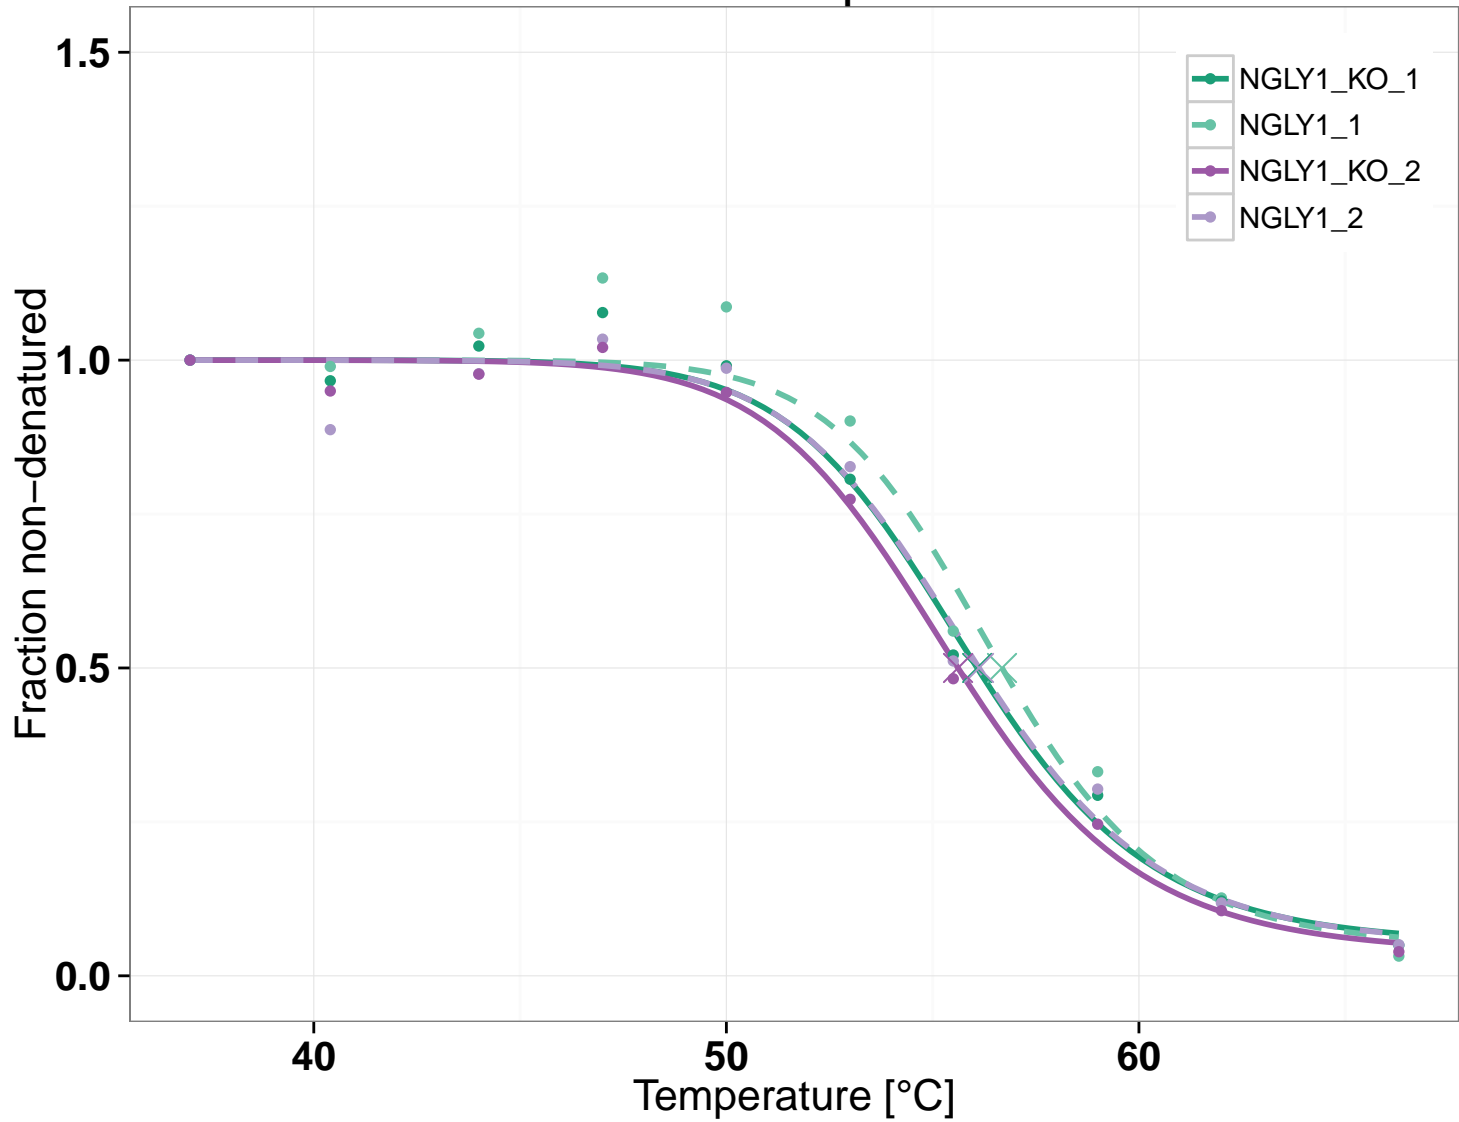

|            | meltPoint | slope | plateau | R2   |
|------------|-----------|-------|---------|------|
| NGLY1_KO_1 | 56.08     | -0.11 | 0.05    | 0.99 |
| NGLY1_1    | 56.68     | -0.12 | 0.05    | 0.97 |
| NGLY1_KO_2 | 55.62     | -0.11 | 0.04    | 1    |
| NGLY1_2    | 56.12     | -0.11 | 0.05    | 0.98 |

Supplement: Supplementary file 1 [file 1]

# IPI00291398.2|TIA1

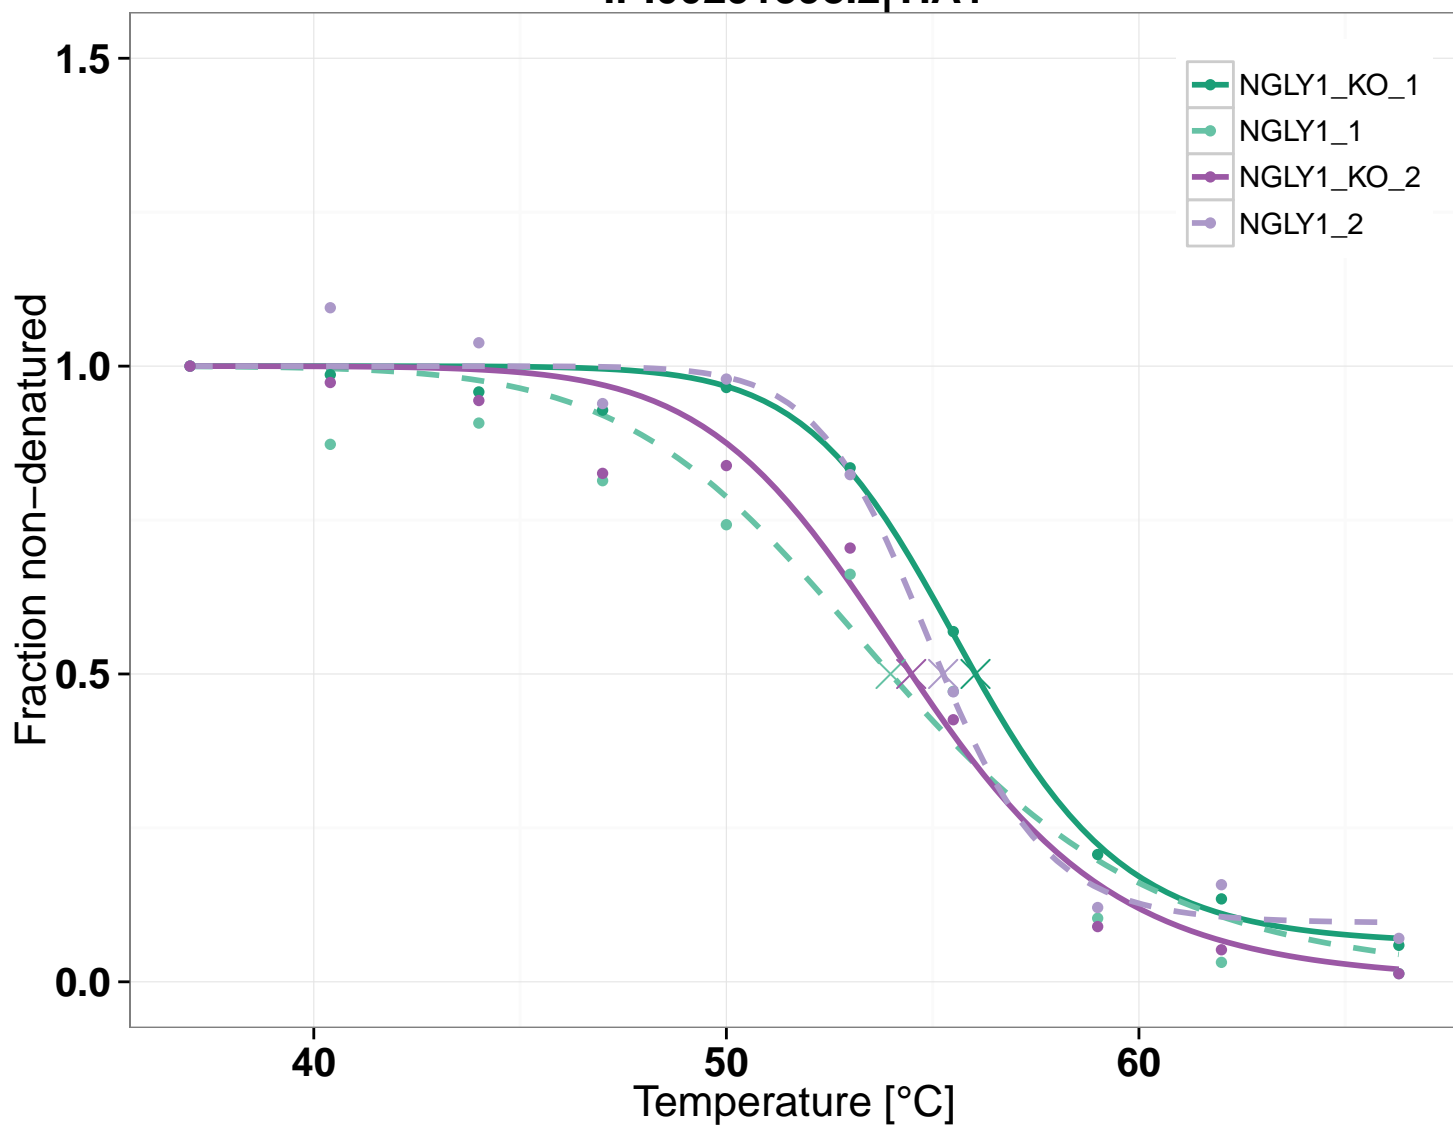

|            | meltPoint | slope  | plateau | R2   |
|------------|-----------|--------|---------|------|
| NGLY1_KO_1 | 56.04     | -0.12  | 0.06    | 0.99 |
| NGLY1_1    | 53.98     | -0.077 | 0       | 0.95 |
| NGLY1_KO_2 | 54.48     | -0.1   | 0       | 0.98 |
| NGLY1_2    | 55.25     | -0.16  | 0.1     | 0.99 |

Supplement: Supplementary file 2 [file 1]

# IPI00031015.1|SLBP

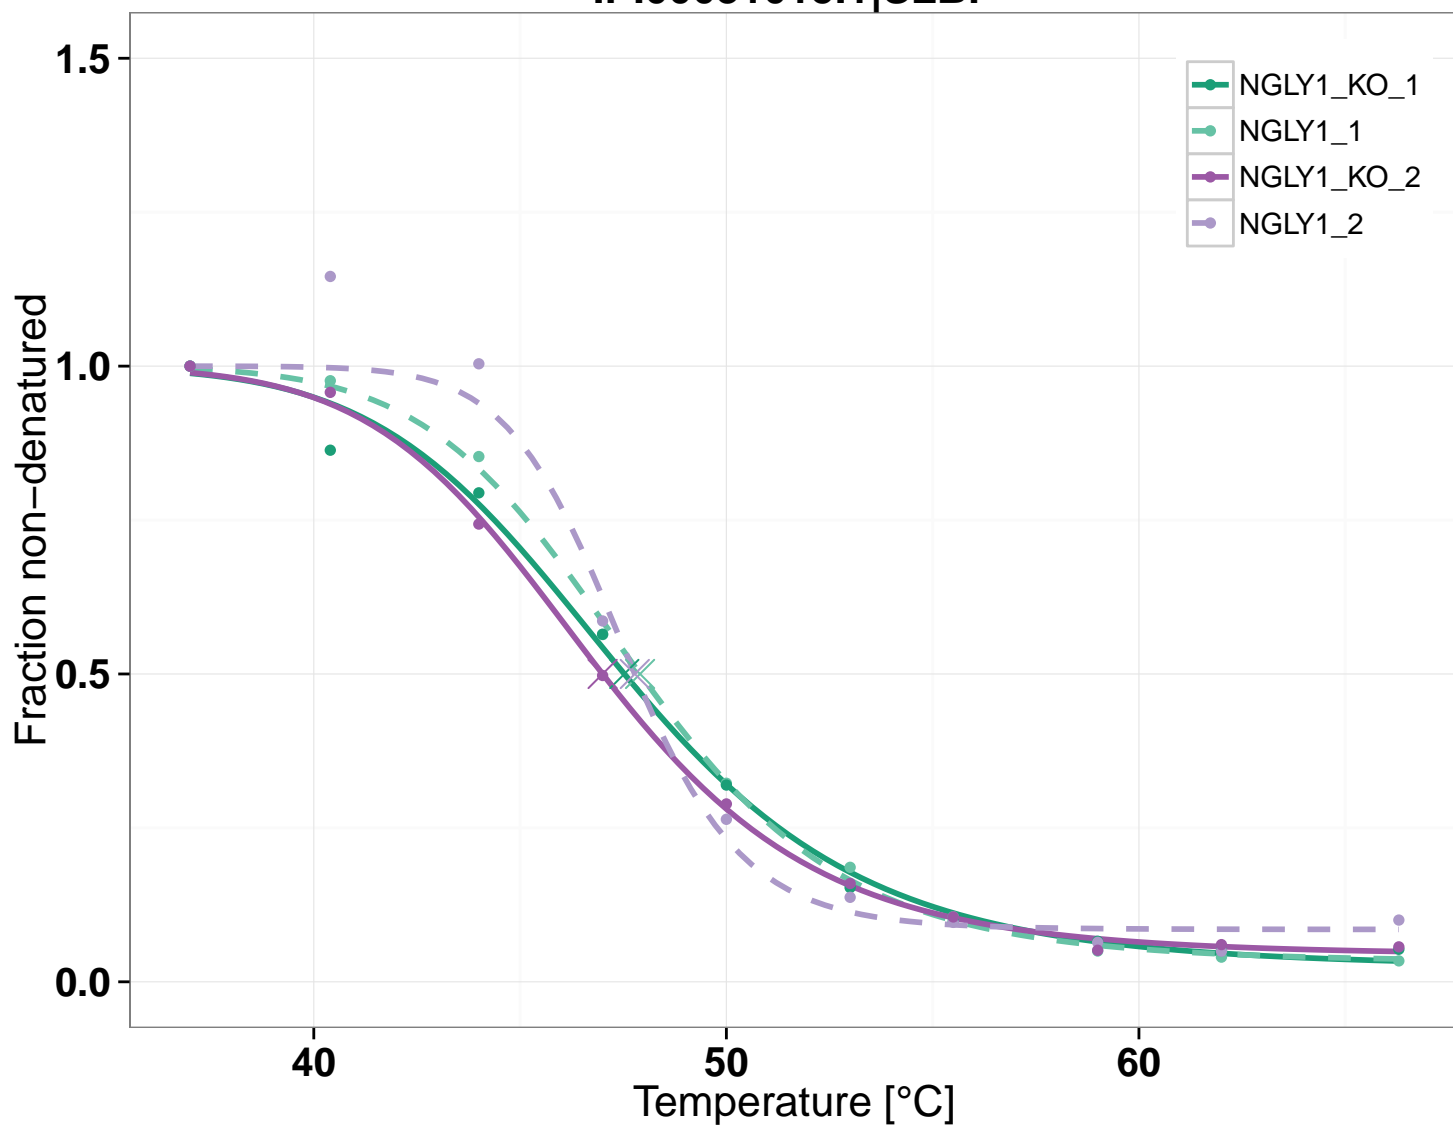

|            | meltPoint | slope  | plateau | R2   |
|------------|-----------|--------|---------|------|
| NGLY1_KO_1 | 47.53     | -0.082 | 0.02    | 0.99 |
| NGLY1_1    | 47.91     | -0.095 | 0.03    | 1    |
| NGLY1_KO_2 | 47        | -0.088 | 0.04    | 1    |
| NGLY1_2    | 47.78     | -0.16  | 0.09    | 0.98 |

Supplement: Supplementary file 3 [file 1]

IPI00383163.5|THYN1

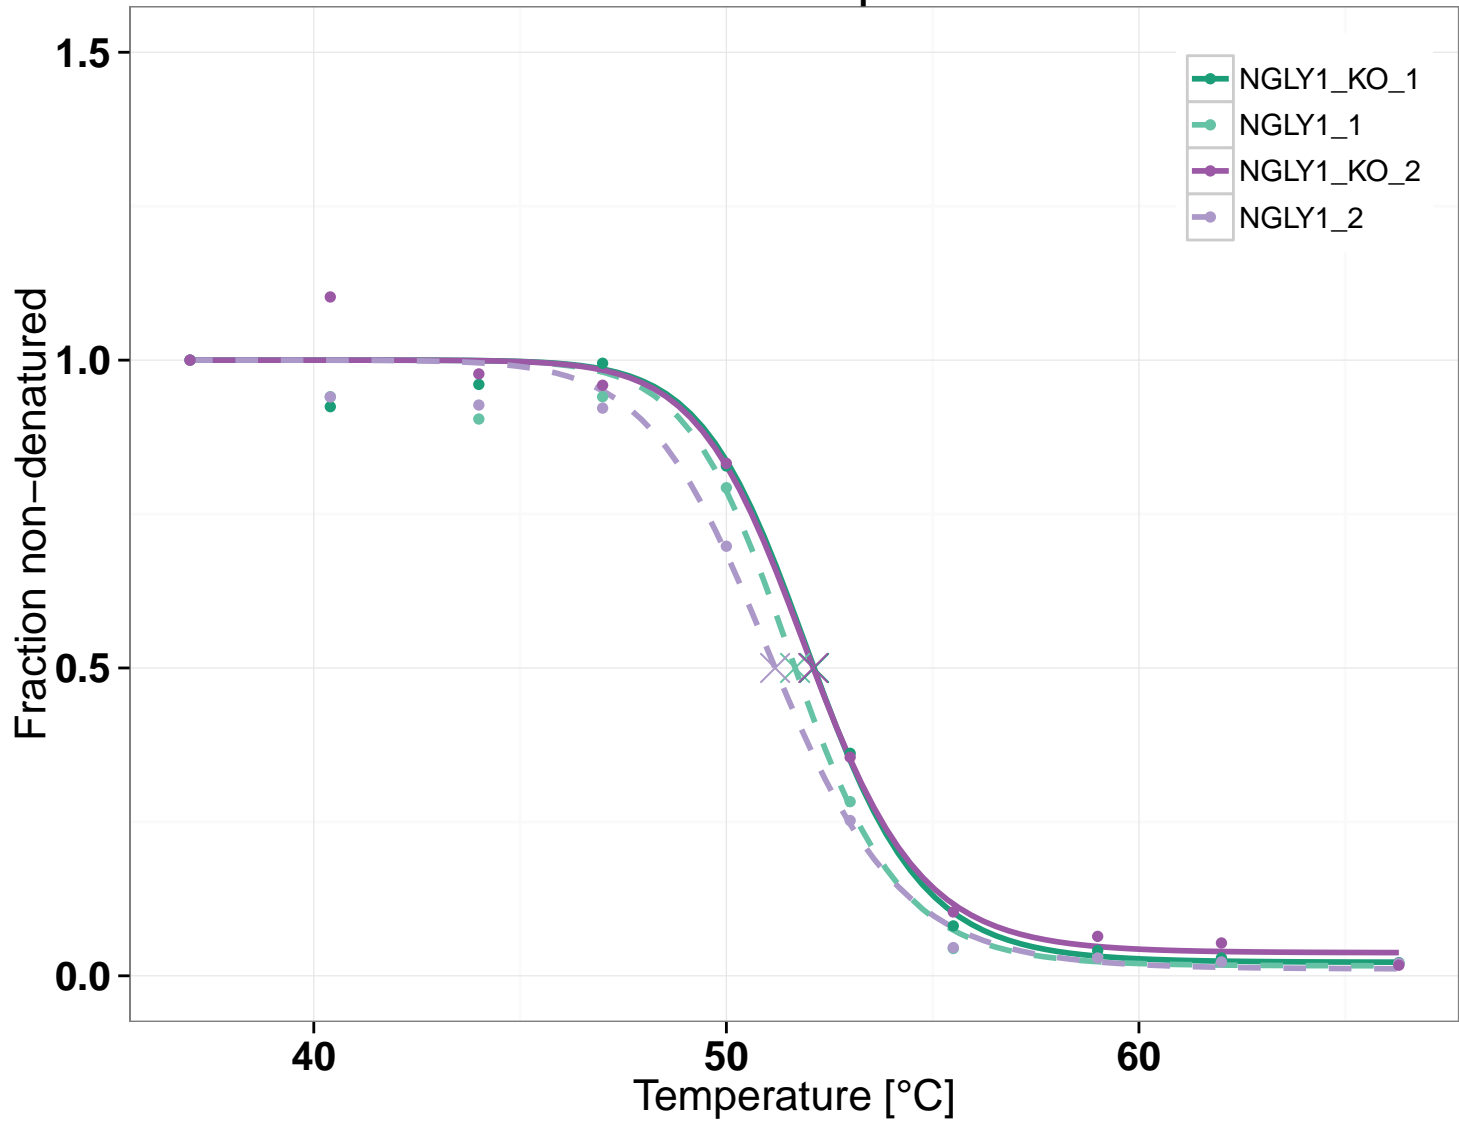

|            | meltPoint | slope | plateau | R2   |
|------------|-----------|-------|---------|------|
| NGLY1_KO_1 | 52.13     | -0.18 | 0.02    | 1    |
| NGLY1_1    | 51.67     | -0.19 | 0.02    | 0.99 |
| NGLY1_KO_2 | 52.11     | -0.18 | 0.04    | 0.99 |
| NGLY1_2    | 51.18     | -0.16 | 0.01    | 0.99 |

Supplement: Supplementary file 4 [file 1]

# IPI00551024.4|DAK

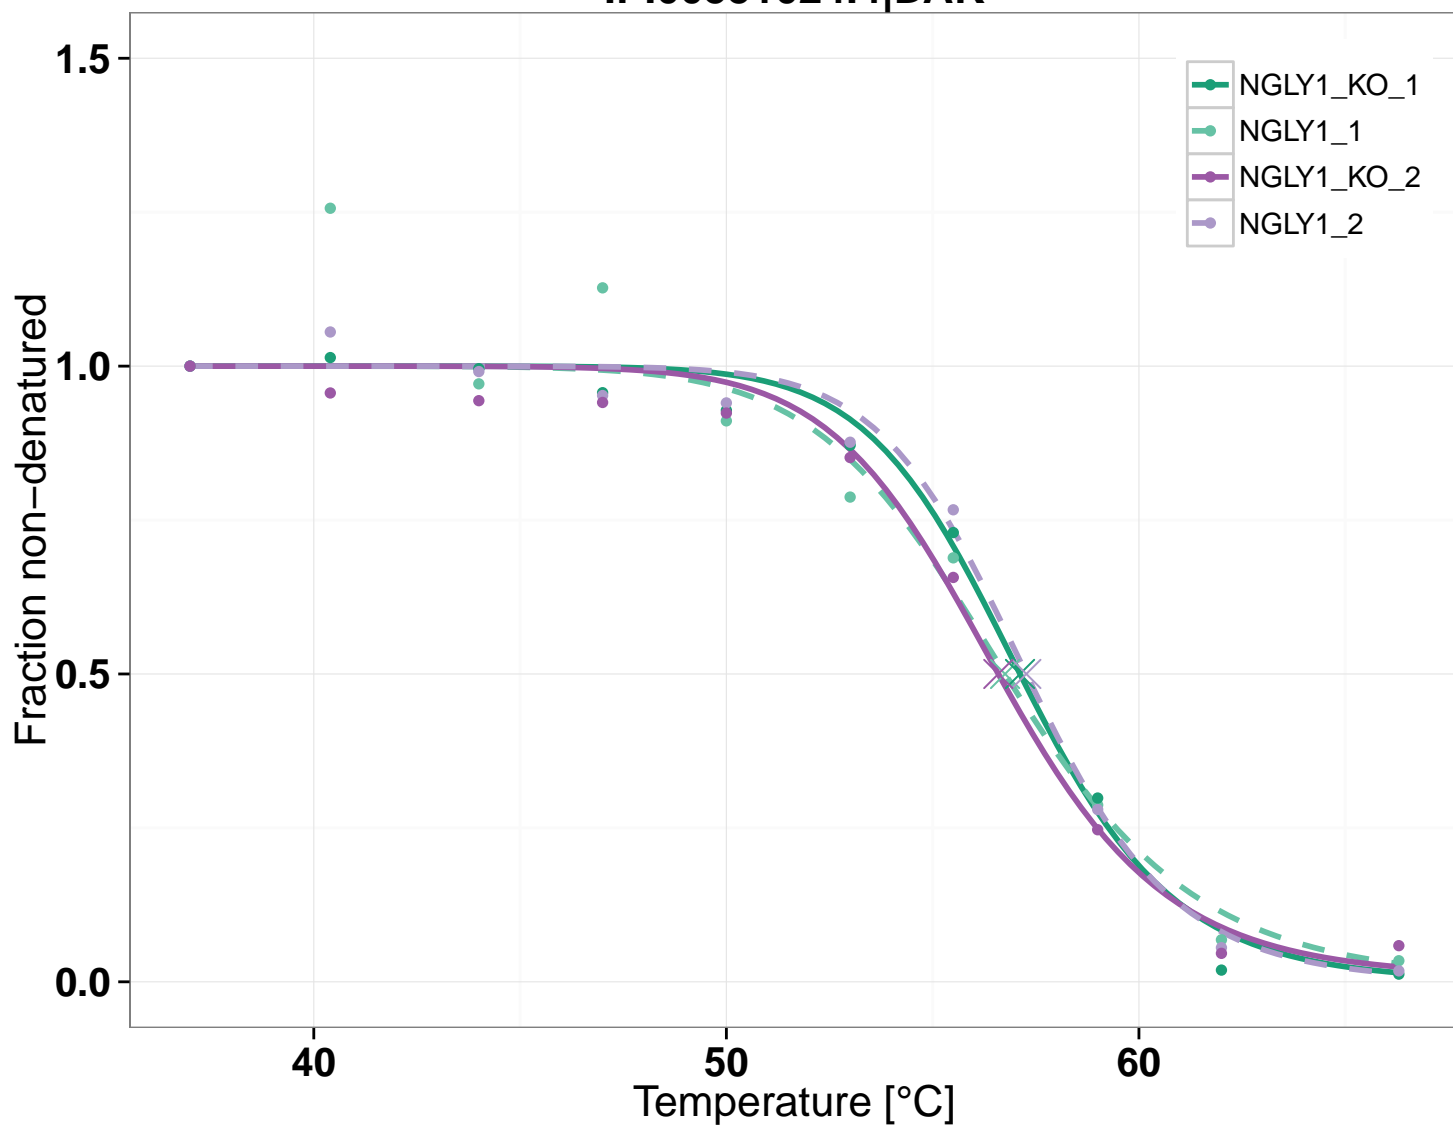

|            | meltPoint | slope | plateau | R2   |
|------------|-----------|-------|---------|------|
| NGLY1_KO_1 | 57.12     | -0.13 | 0       | 0.99 |
| NGLY1_1    | 56.76     | -0.11 | 0       | 0.94 |
| NGLY1_KO_2 | 56.59     | -0.12 | 0.01    | 0.99 |
| NGLY1_2    | 57.27     | -0.14 | 0       | 0.99 |

Supplement: Supplementary file 5 [file 1]

IPI00783001.1|METT5D1

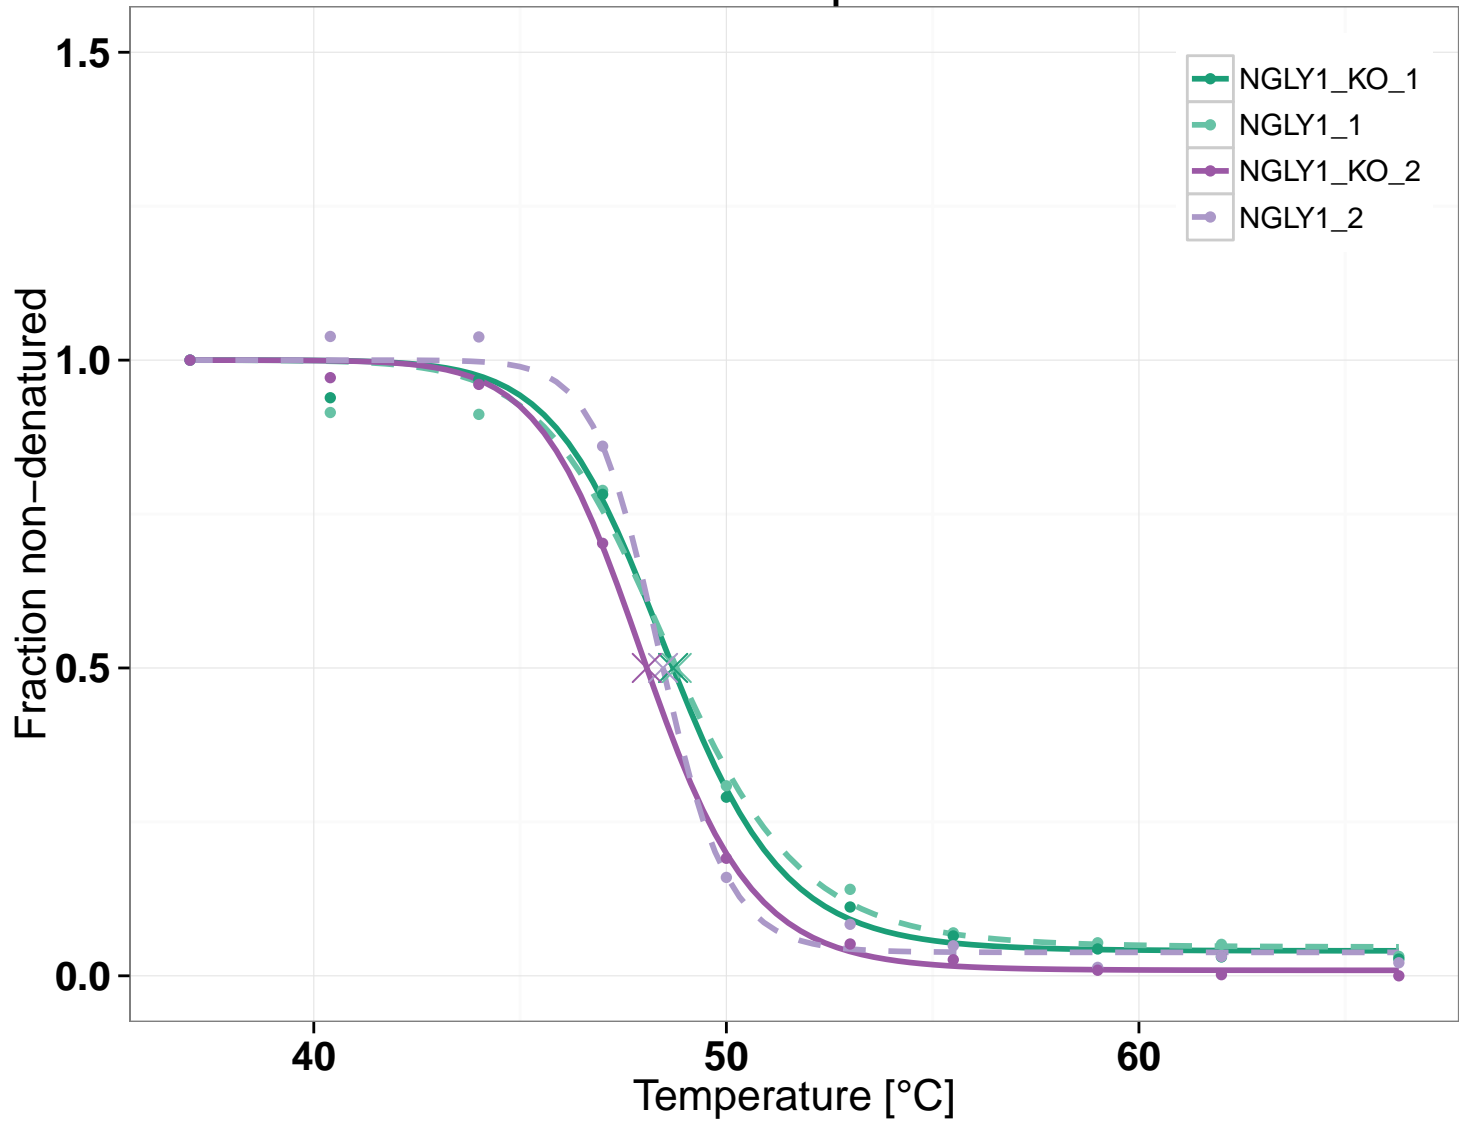

|            | meltPoint | slope | plateau | R2   |
|------------|-----------|-------|---------|------|
| NGLY1_KO_1 | 48.71     | -0.17 | 0.04    | 1    |
| NGLY1_1    | 48.8      | -0.15 | 0.05    | 0.99 |
| NGLY1_KO_2 | 48.07     | -0.19 | 0.01    | 1    |
| NGLY1_2    | 48.46     | -0.3  | 0.04    | 1    |

Supplement: Supplementary file 6 [file 1]

IPI00419575.6|C7ORF20

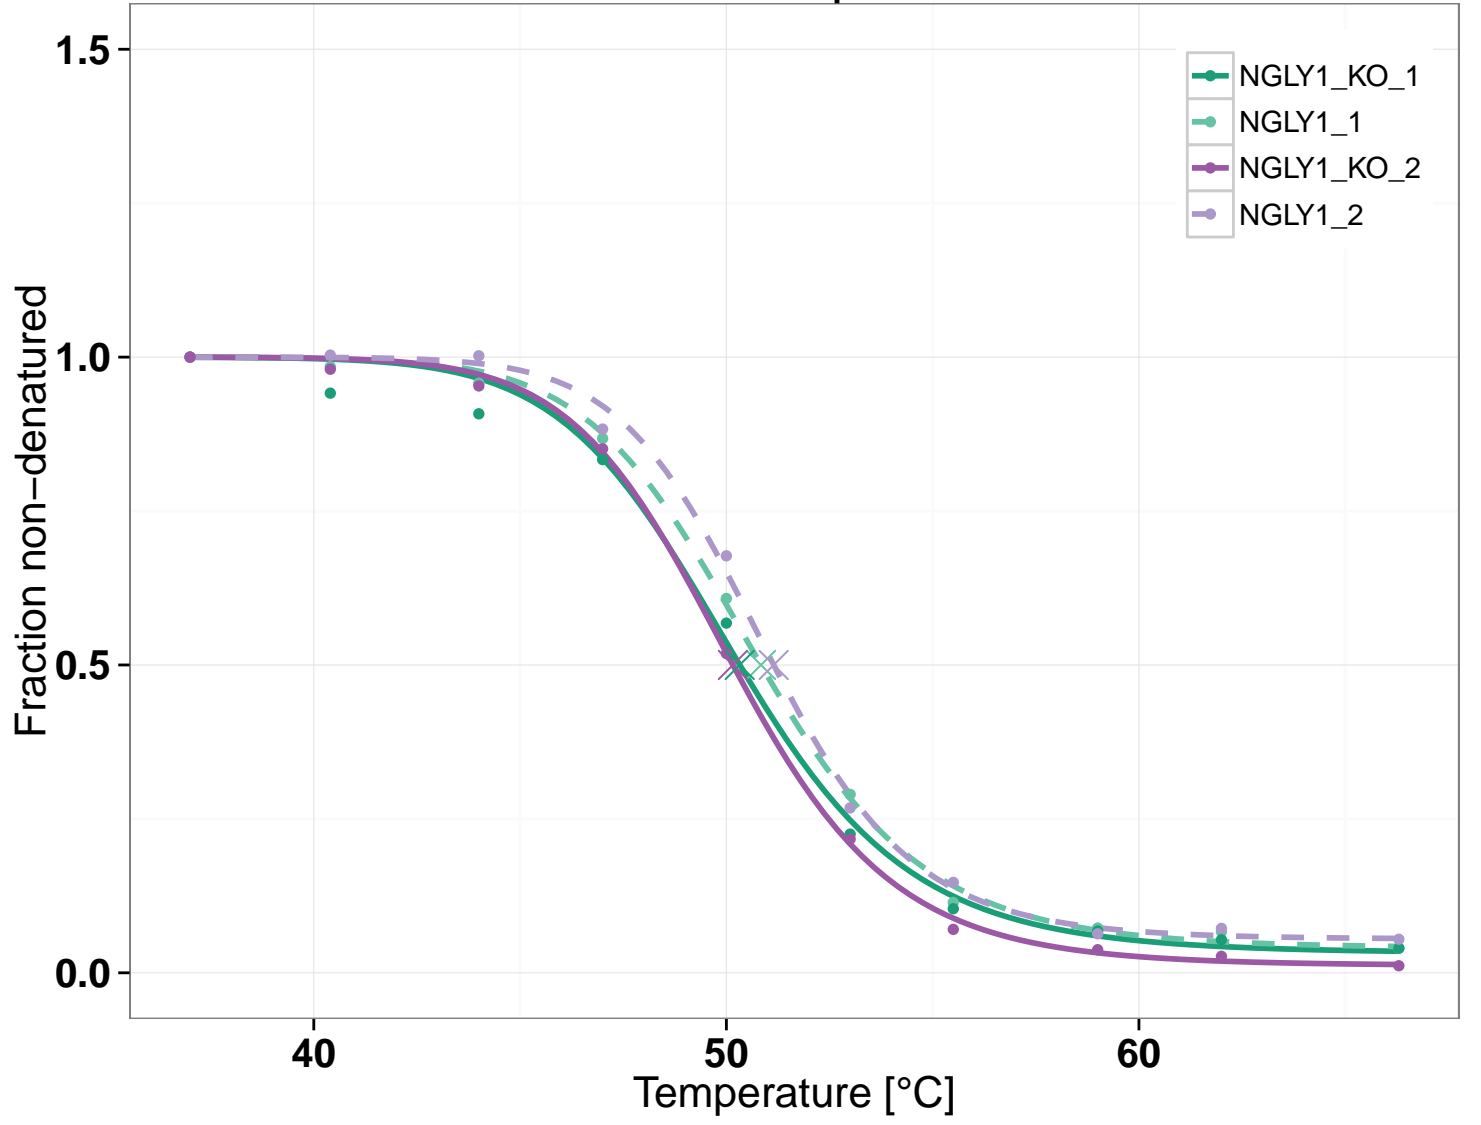

|            | meltPoint | slope | plateau | R2   |
|------------|-----------|-------|---------|------|
| NGLY1_KO_1 | 50.32     | -0.11 | 0.03    | 0.99 |
| NGLY1_1    | 50.84     | -0.12 | 0.04    | 1    |
| NGLY1_KO_2 | 50.16     | -0.13 | 0.01    | 1    |
| NGLY1_2    | 51.15     | -0.13 | 0.05    | 1    |

Supplement: Supplementary file 7 [file 1]

IPI00470401.3|TMEM68

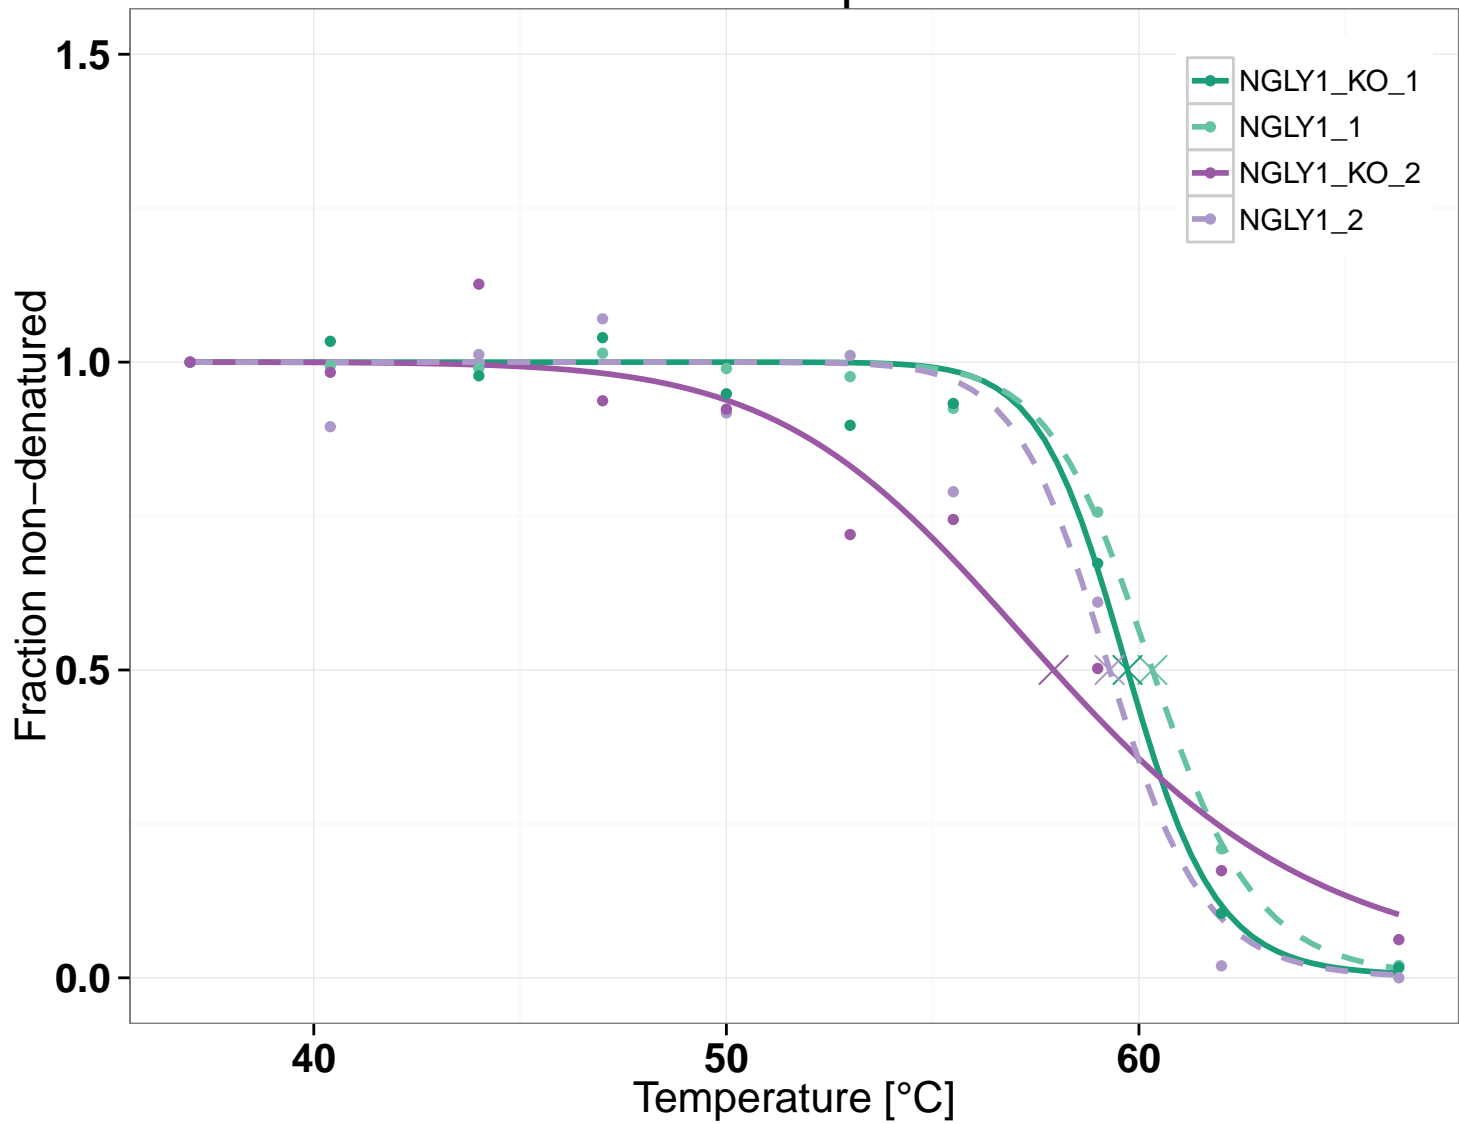

|            | meltPoint | slope  | plateau | R2   |
|------------|-----------|--------|---------|------|
| NGLY1_KO_1 | 59.72     | -0.23  | 0       | 0.99 |
| NGLY1_1    | 60.33     | -0.2   | 0       | 1    |
| NGLY1_KO_2 | 57.93     | -0.075 | 0       | 0.96 |
| NGLY1_2    | 59.29     | -0.22  | 0       | 0.96 |

Supplement: Supplementary file 8 [file 1]

# IPI00328867.6|SRC

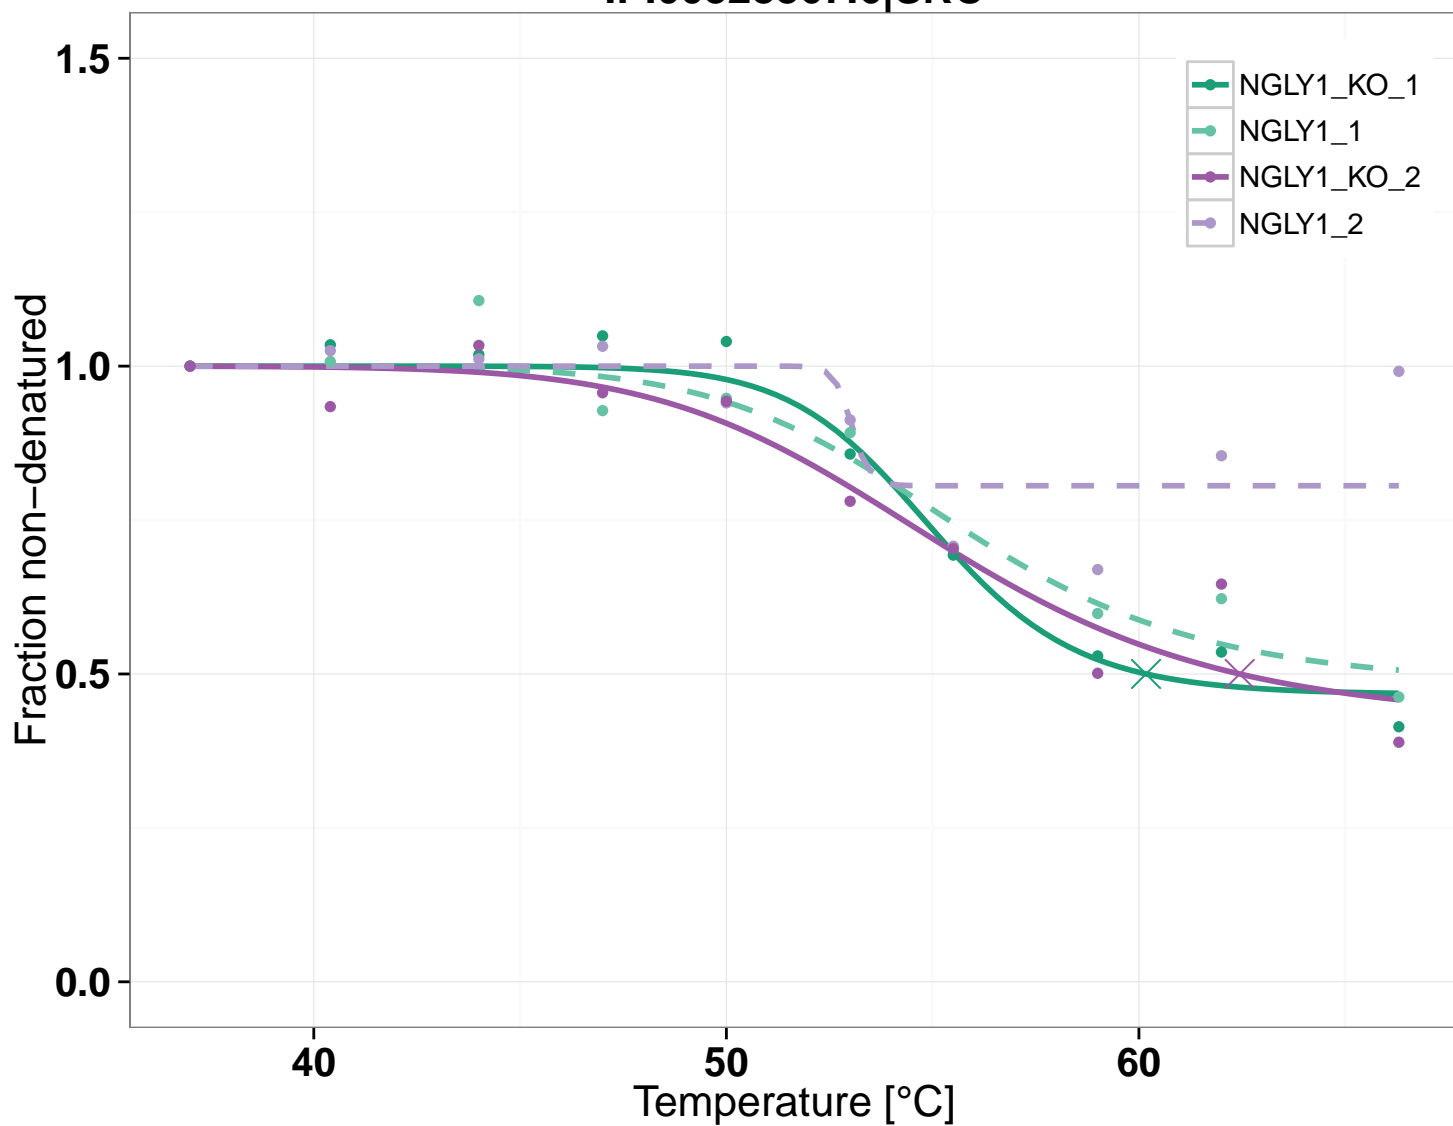

|            | meltPoint | slope  | plateau | R2   |
|------------|-----------|--------|---------|------|
| NGLY1_KO_1 | 60.17     | -0.077 | 0.47    | 0.97 |
| NGLY1_1    | -         | -0.044 | 0.48    | 0.94 |
| NGLY1_KO_2 | 62.44     | -0.042 | 0.42    | 0.92 |
| NGLY1_2    | -         | -0.23  | 0.81    | 0.55 |

Supplement: Supplementary file 9 [file 1]

# IPI00646336.1|ZNF358

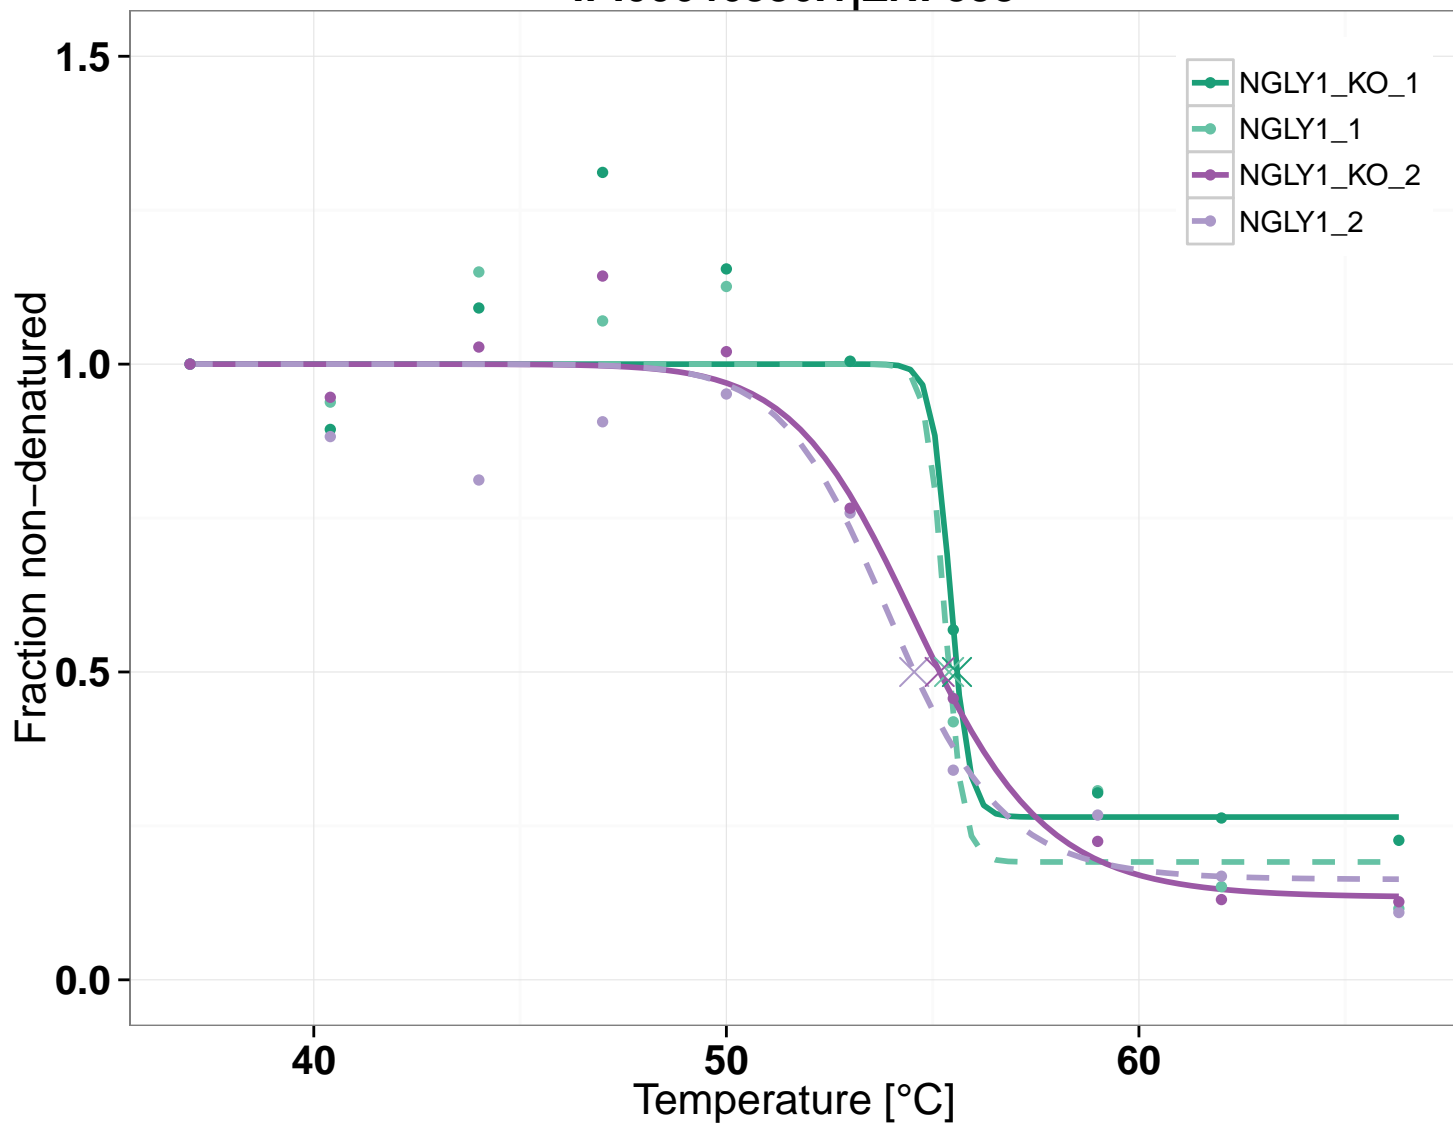

|            | meltPoint | slope | plateau | R2   |
|------------|-----------|-------|---------|------|
| NGLY1_KO_1 | 55.59     | -0.83 | 0.26    | 0.9  |
| NGLY1_1    | 55.4      | -0.91 | 0.19    | 0.96 |
| NGLY1_KO_2 | 55.17     | -0.14 | 0.13    | 0.98 |
| NGLY1_2    | 54.55     | -0.15 | 0.16    | 0.94 |

Supplement: Supplementary file 10 [file 1]

IPI00852584.3|RBM33

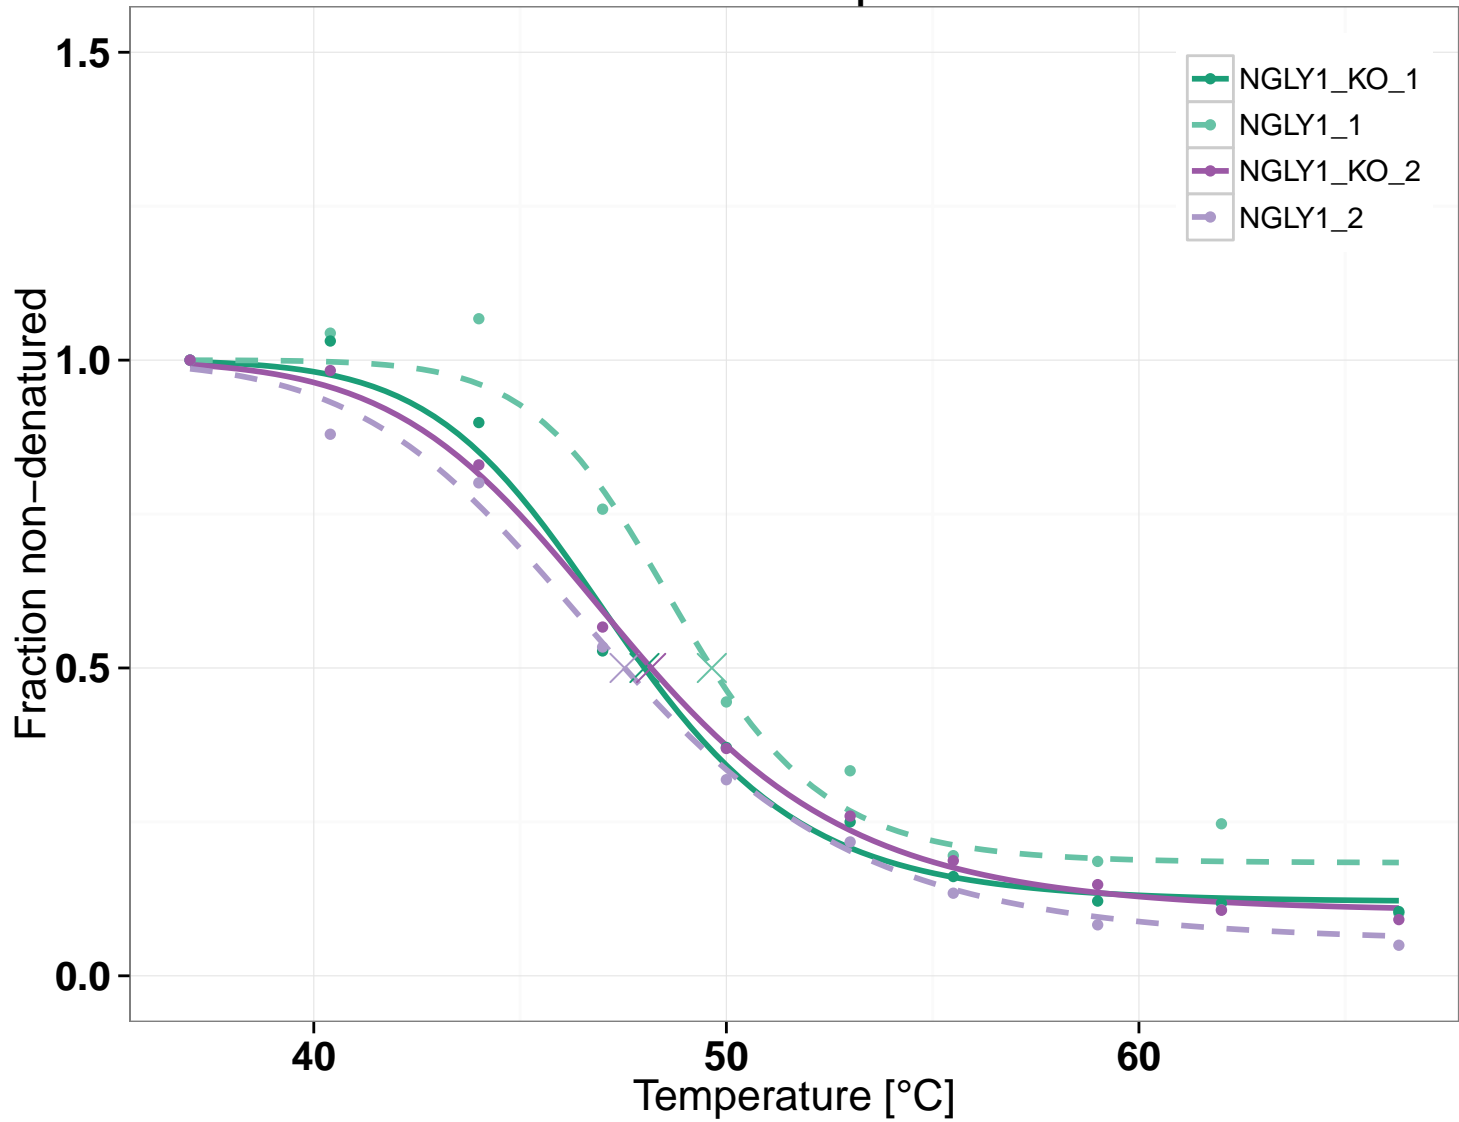

|            | meltPoint | slope  | plateau | R2   |
|------------|-----------|--------|---------|------|
| NGLY1_KO_1 | 48.01     | -0.097 | 0.12    | 0.99 |
| NGLY1_1    | 49.65     | -0.12  | 0.18    | 0.98 |
| NGLY1_KO_2 | 48.18     | -0.081 | 0.1     | 1    |
| NGLY1_2    | 47.53     | -0.078 | 0.05    | 0.99 |

Supplement: Supplementary file 11 [file 1]

IPI00337612.2|DCBLD1

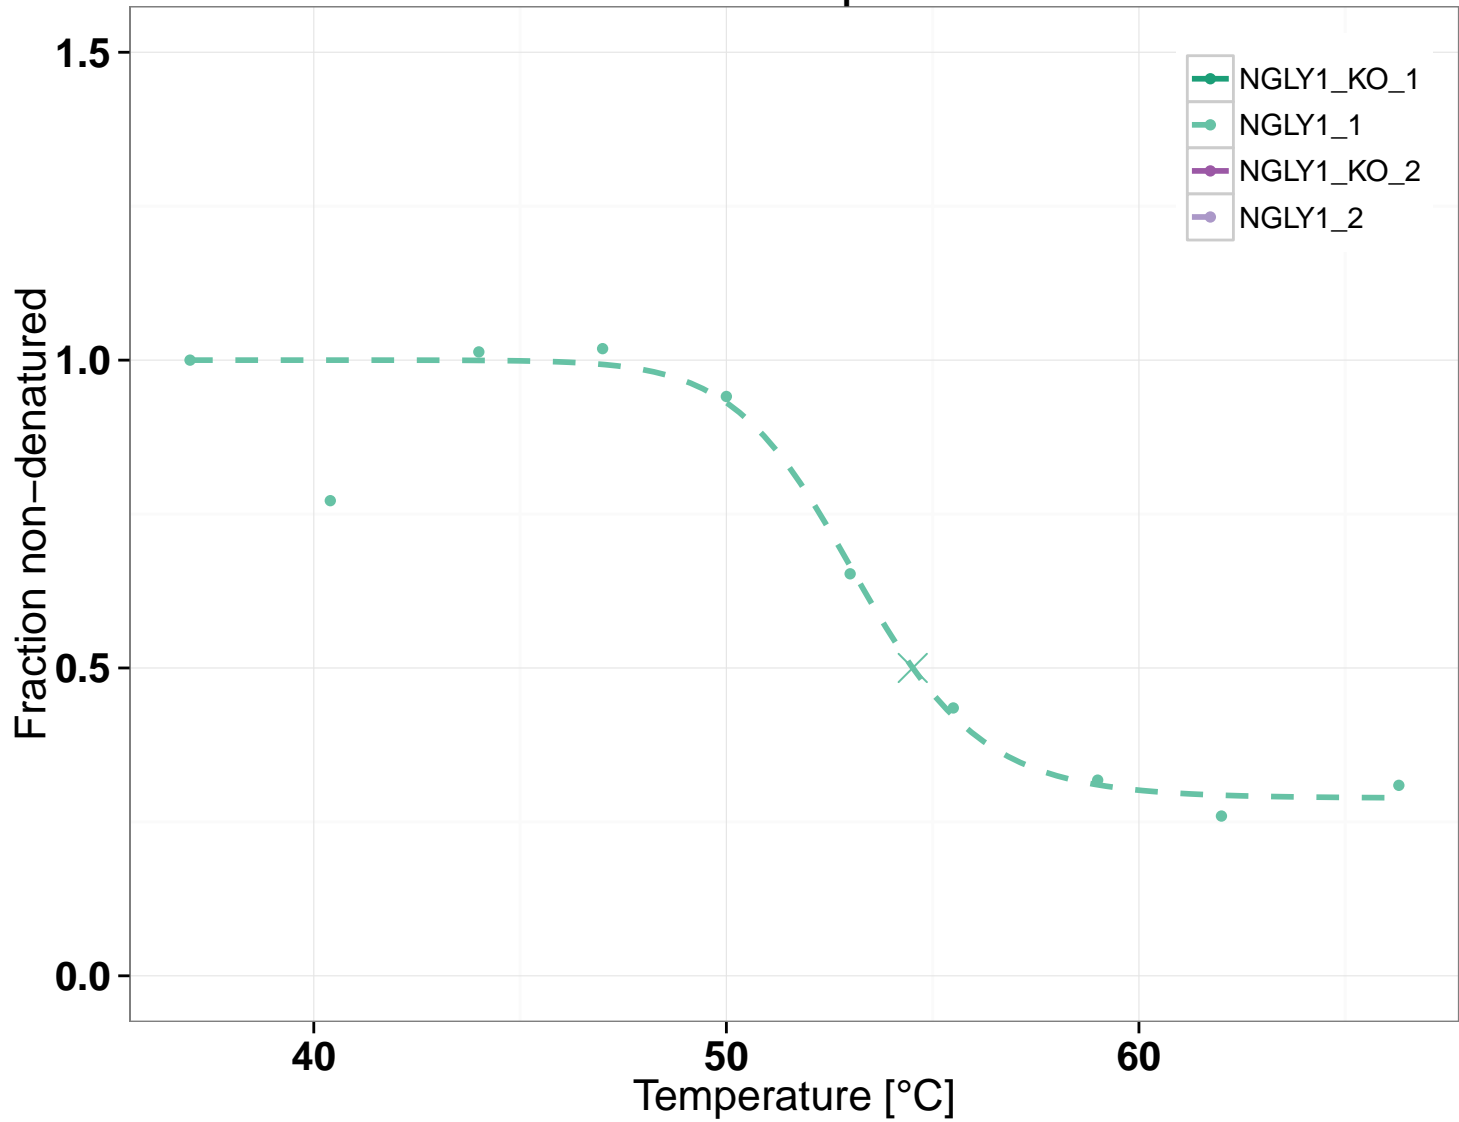

|            | meltPoint | slope | plateau | R2   |
|------------|-----------|-------|---------|------|
| NGLY1_KO_1 | –         | –     | –       | –    |
| NGLY1_1    | 54.52     | –0.12 | 0.29    | 0.94 |
| NGLY1_KO_2 | –         | –     | –       | –    |
| NGLY1_2    | –         | –     | –       | –    |

Supplement: Supplementary file 12 [file 1]

IPI00887678.1|LOC654188

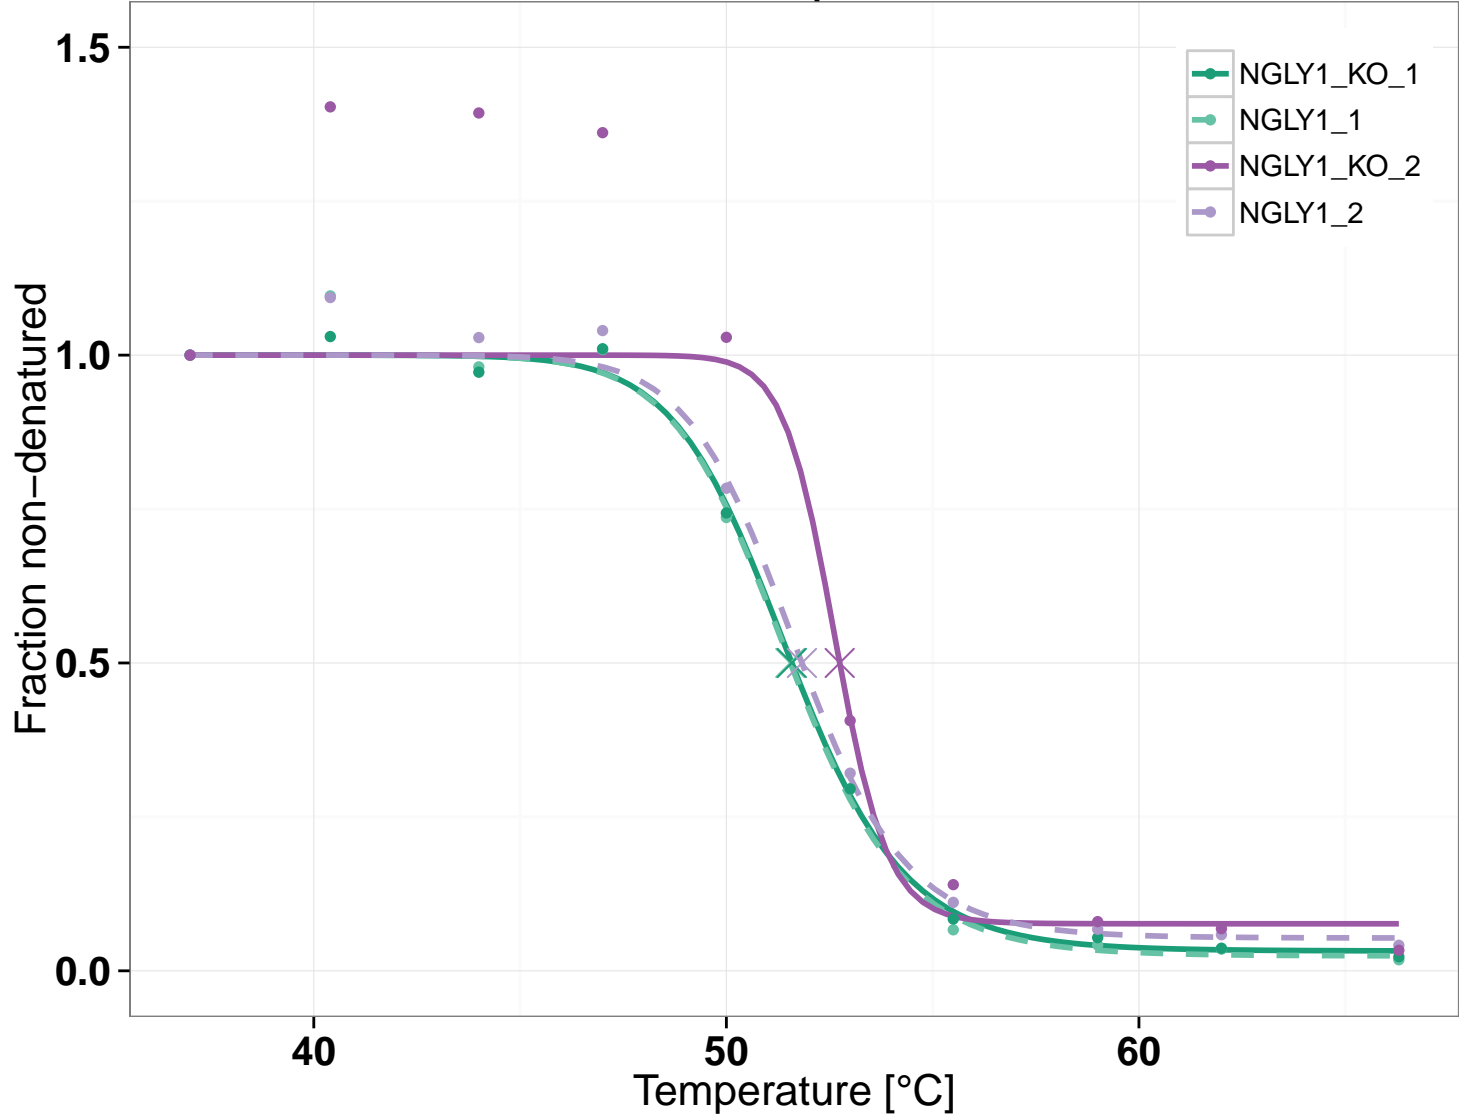

|            | meltPoint | slope | plateau | R2   |
|------------|-----------|-------|---------|------|
| NGLY1_KO_1 | 51.59     | -0.17 | 0.03    | 1    |
| NGLY1_1    | 51.55     | -0.17 | 0.02    | 0.99 |
| NGLY1_KO_2 | 52.75     | -0.37 | 0.08    | 0.86 |
| NGLY1_2    | 51.83     | -0.18 | 0.05    | 0.99 |

Supplement: Supplementary file 13 [file 1]

# IPI00016542.5|WDR76

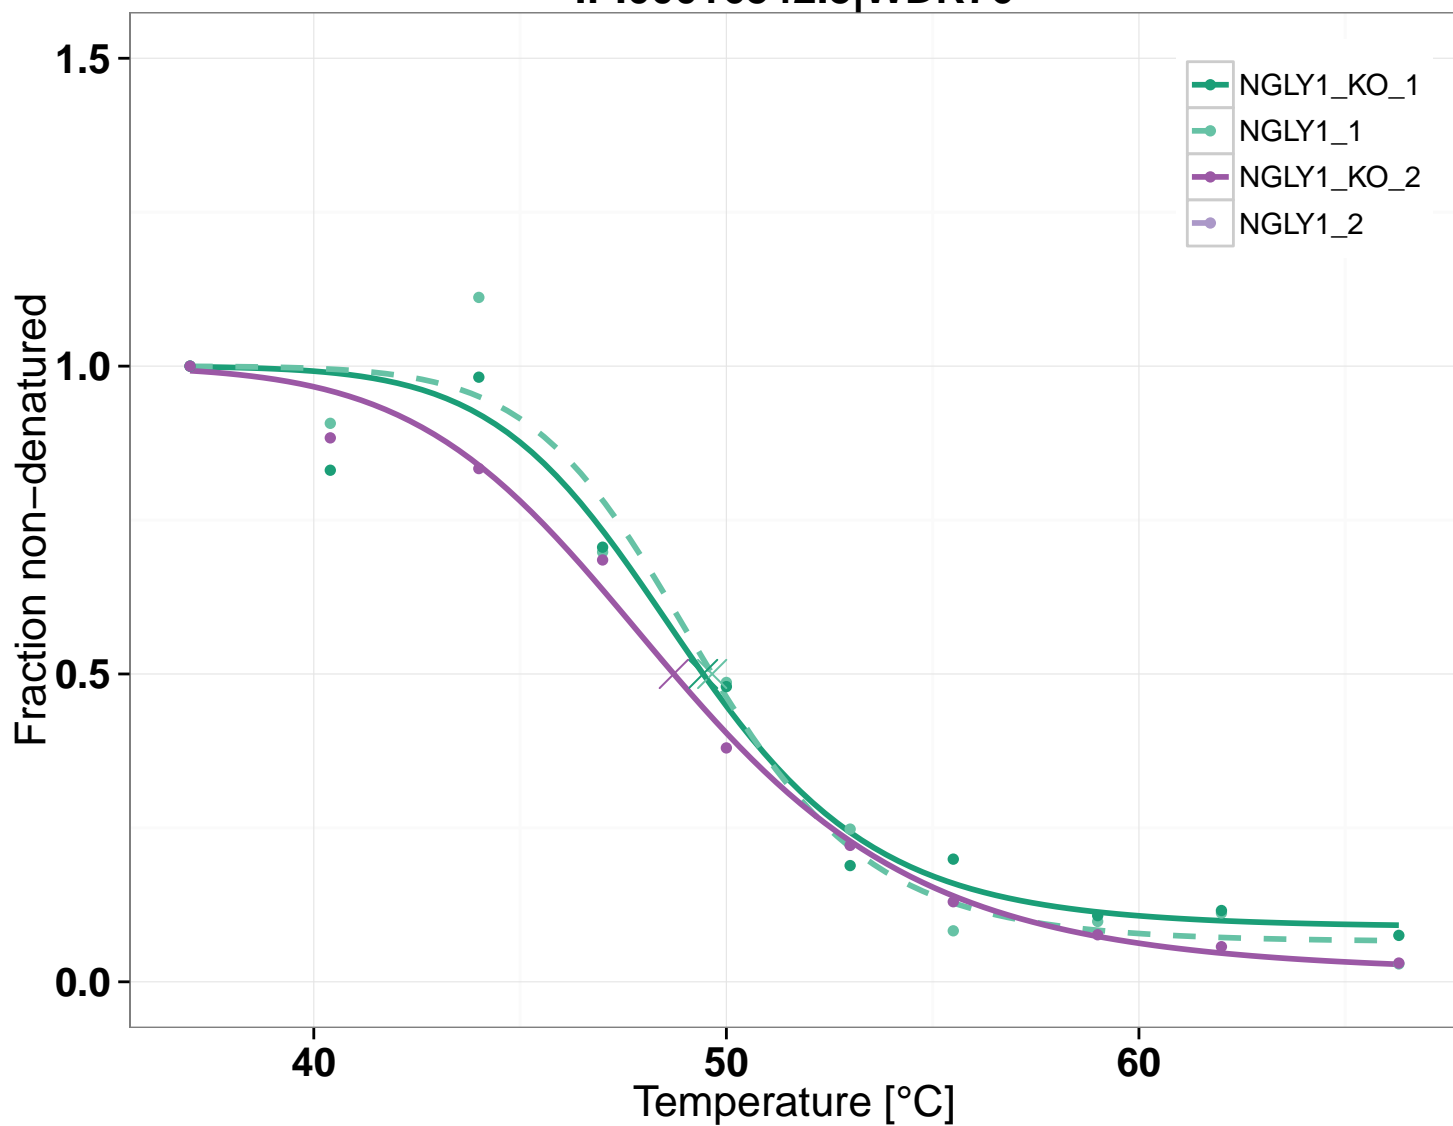

|            | meltPoint | slope  | plateau | R2   |
|------------|-----------|--------|---------|------|
| NGLY1_KO_1 | 49.44     | -0.098 | 0.09    | 0.97 |
| NGLY1_1    | 49.66     | -0.11  | 0.06    | 0.97 |
| NGLY1_KO_2 | 48.73     | -0.08  | 0.01    | 0.99 |
| NGLY1_2    | -         | -      | -       | -    |

Supplement: Supplementary file 14 [file 1]

IPI00020050.5|DDX28

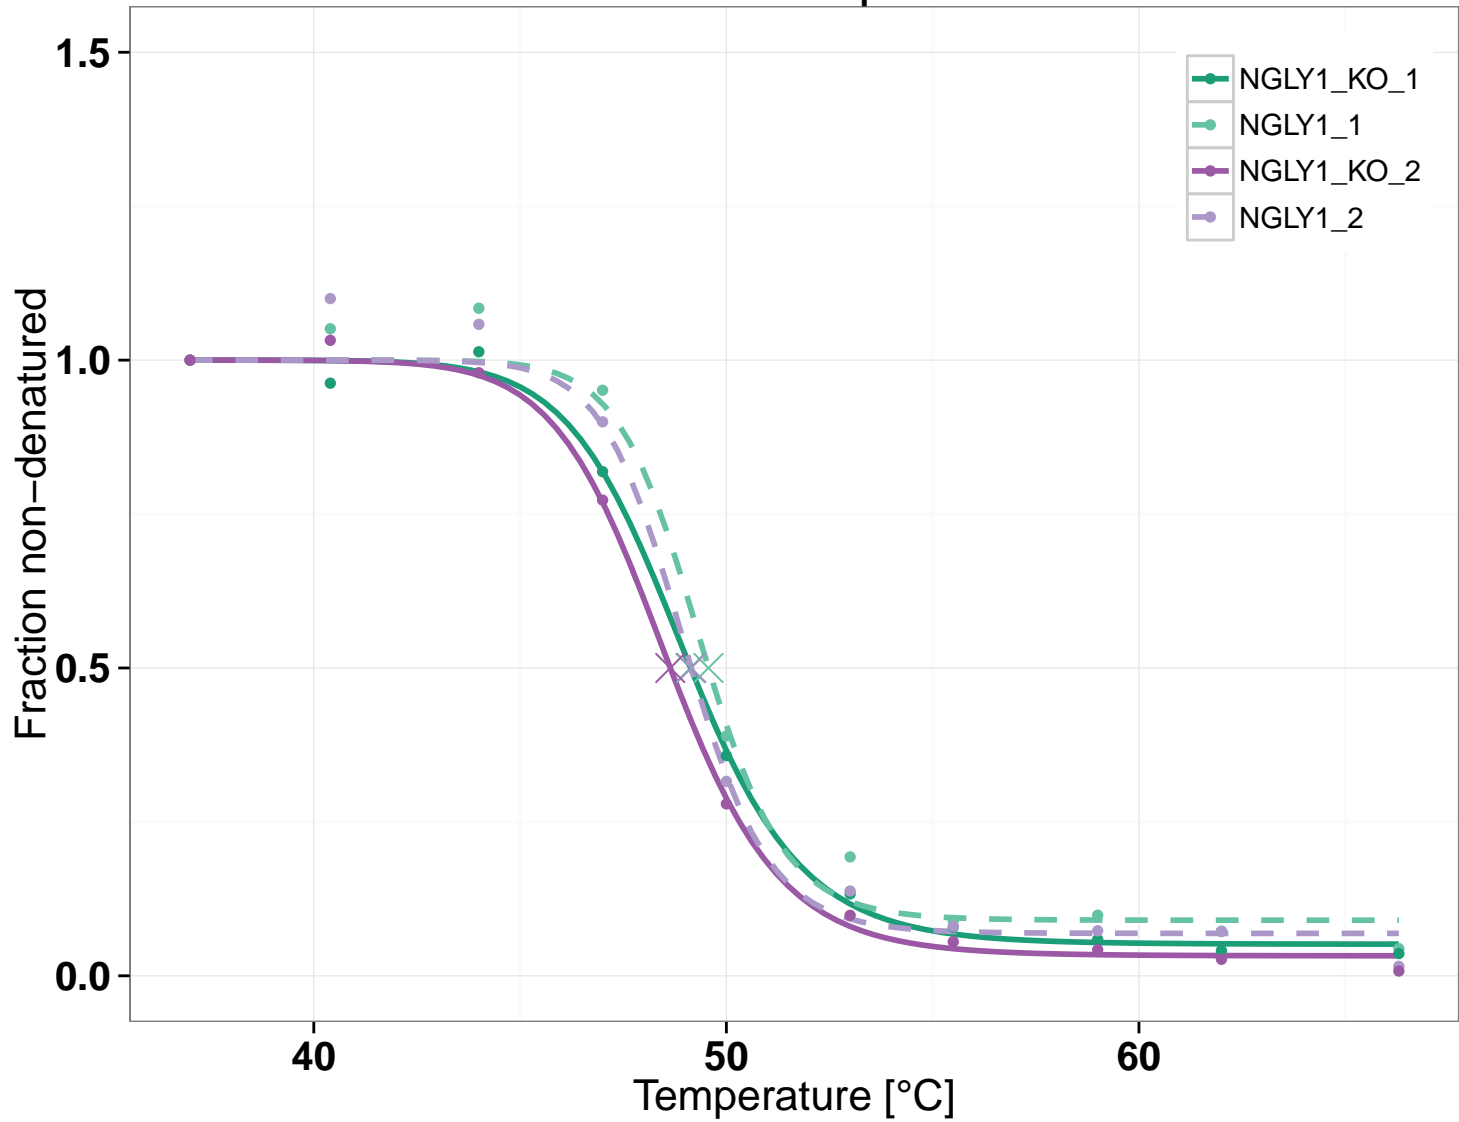

|            | meltPoint | slope | plateau | R2   |
|------------|-----------|-------|---------|------|
| NGLY1_KO_1 | 49.13     | -0.17 | 0.05    | 1    |
| NGLY1_1    | 49.57     | -0.23 | 0.09    | 0.99 |
| NGLY1_KO_2 | 48.64     | -0.18 | 0.03    | 1    |
| NGLY1_2    | 49.15     | -0.23 | 0.07    | 0.99 |

Supplement: Supplementary file 15 [file 1]

# IPI00026111.3|TMCO1

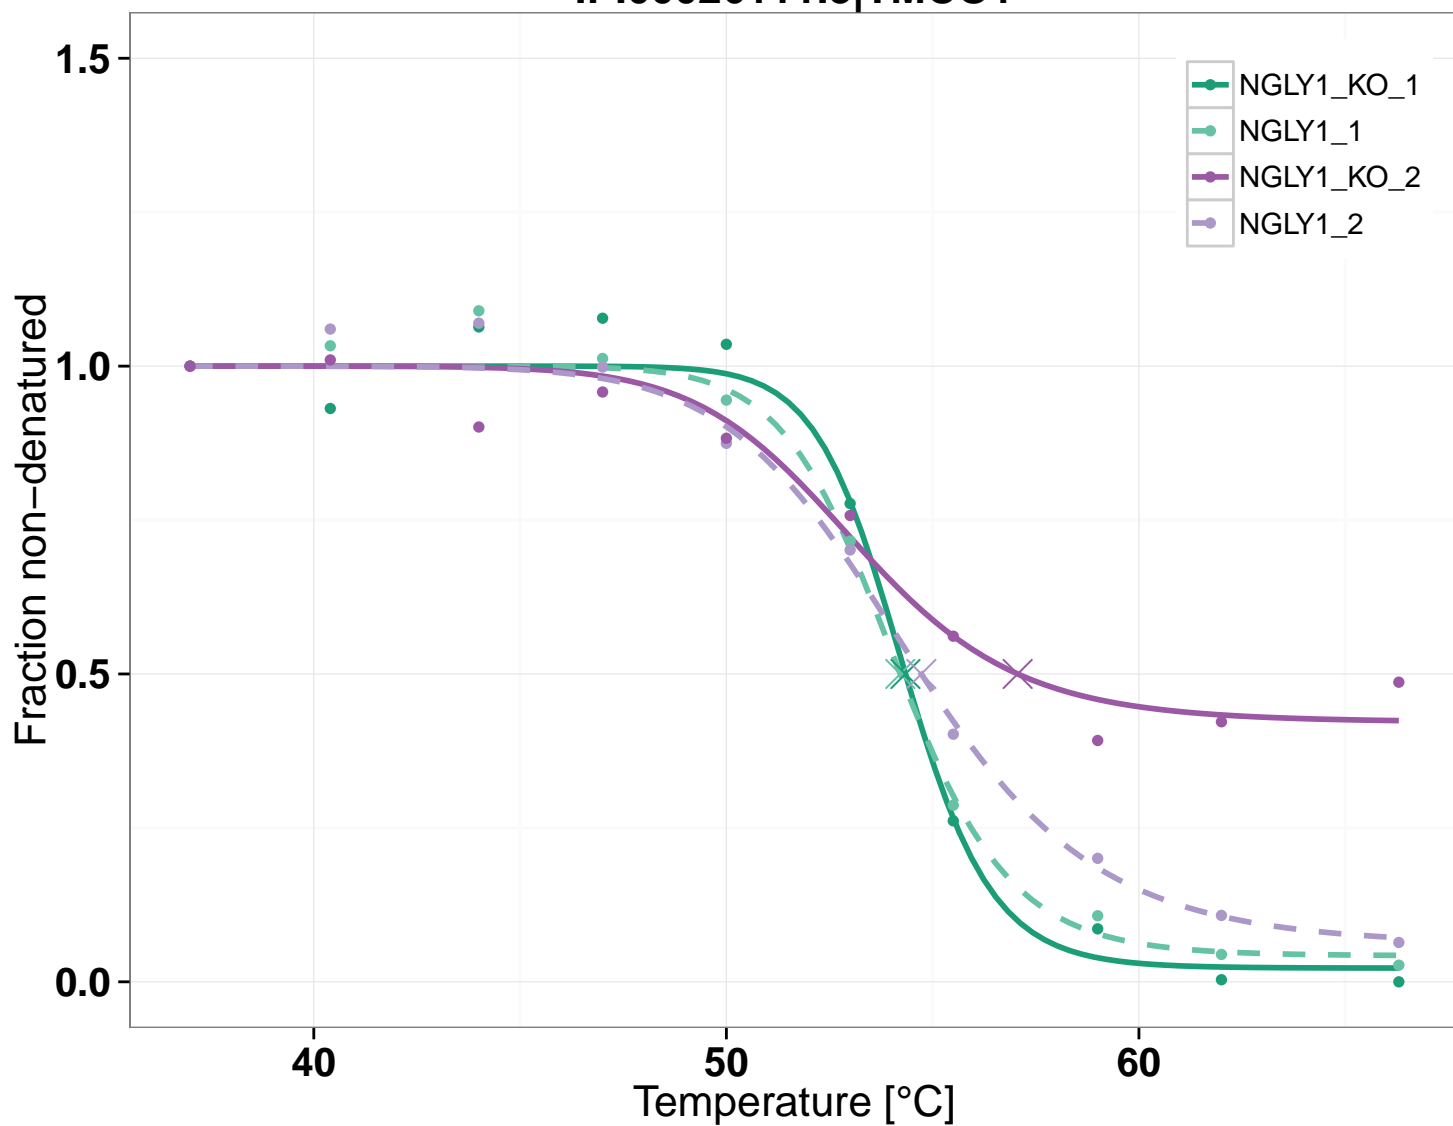

|            | meltPoint | slope  | plateau | R2   |
|------------|-----------|--------|---------|------|
| NGLY1_KO_1 | 54.34     | -0.23  | 0.02    | 0.99 |
| NGLY1_1    | 54.21     | -0.17  | 0.04    | 0.99 |
| NGLY1_KO_2 | 57.06     | -0.074 | 0.42    | 0.96 |
| NGLY1_2    | 54.73     | -0.11  | 0.06    | 0.99 |

Supplement: Supplementary file 16 [file 1]

IPI00885012.1|EP400NL

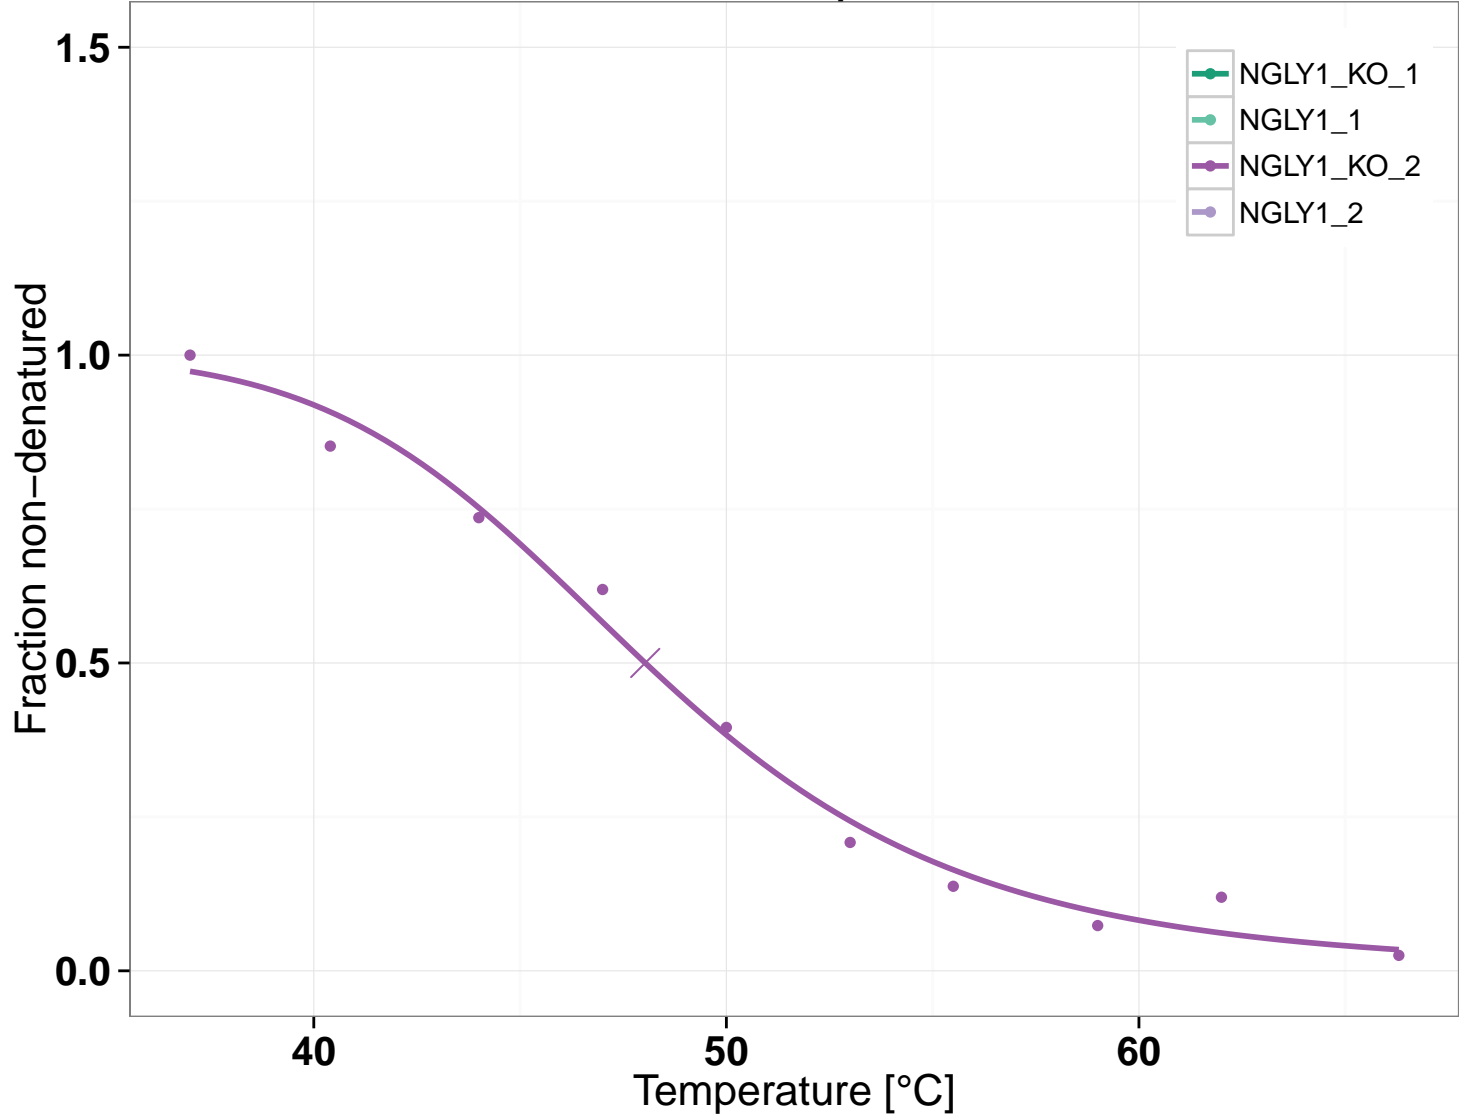

|            | meltPoint | slope  | plateau | R2   |
|------------|-----------|--------|---------|------|
| NGLY1_KO_1 | -         | -      | -       | -    |
| NGLY1_1    | -         | -      | -       | -    |
| NGLY1_KO_2 | 48.03     | -0.065 | 0       | 0.99 |
| NGLY1_2    | -         | -      | -       | -    |

Supplement: Supplementary file 17 [file 1]

# IPI00465315.6|CYCS

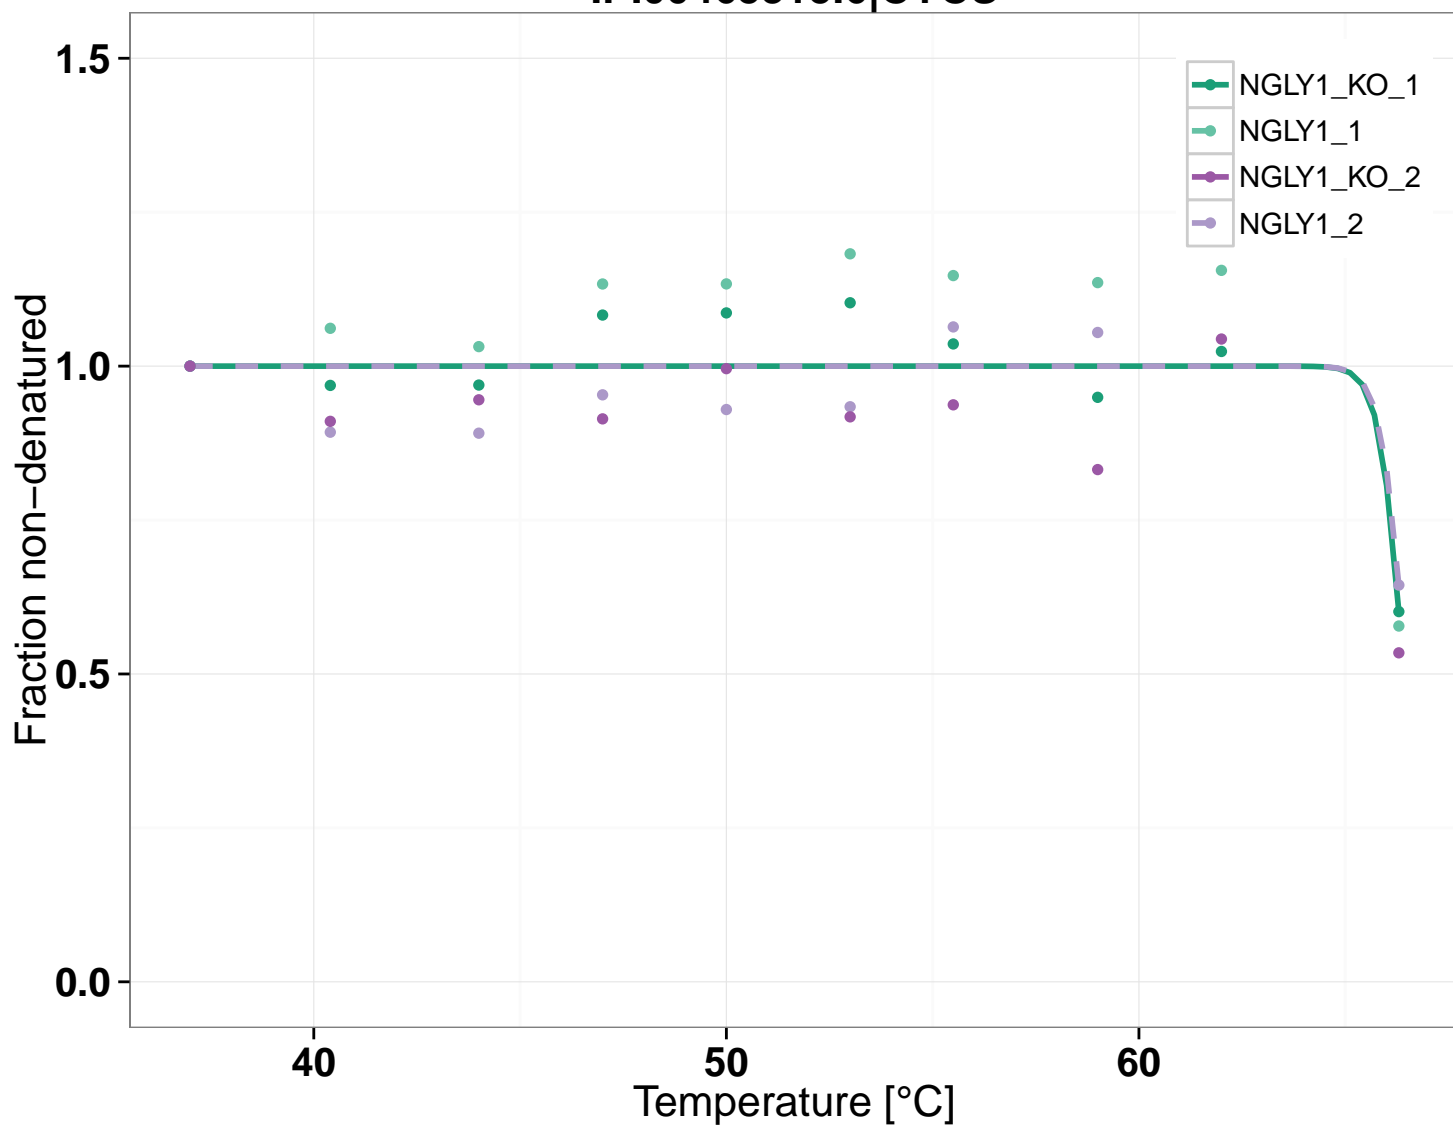

|            | meltPoint | slope | plateau | R2   |
|------------|-----------|-------|---------|------|
| NGLY1_KO_1 | -         | -     | 0       | 0.83 |
| NGLY1_1    | -         | -     | -       | -    |
| NGLY1_KO_2 | -         | -     | -       | -    |
| NGLY1_2    | -         | -     | 0       | 0.53 |

Supplement: Supplementary file 18 [file 1]

IPI00084571.4|MRPL39

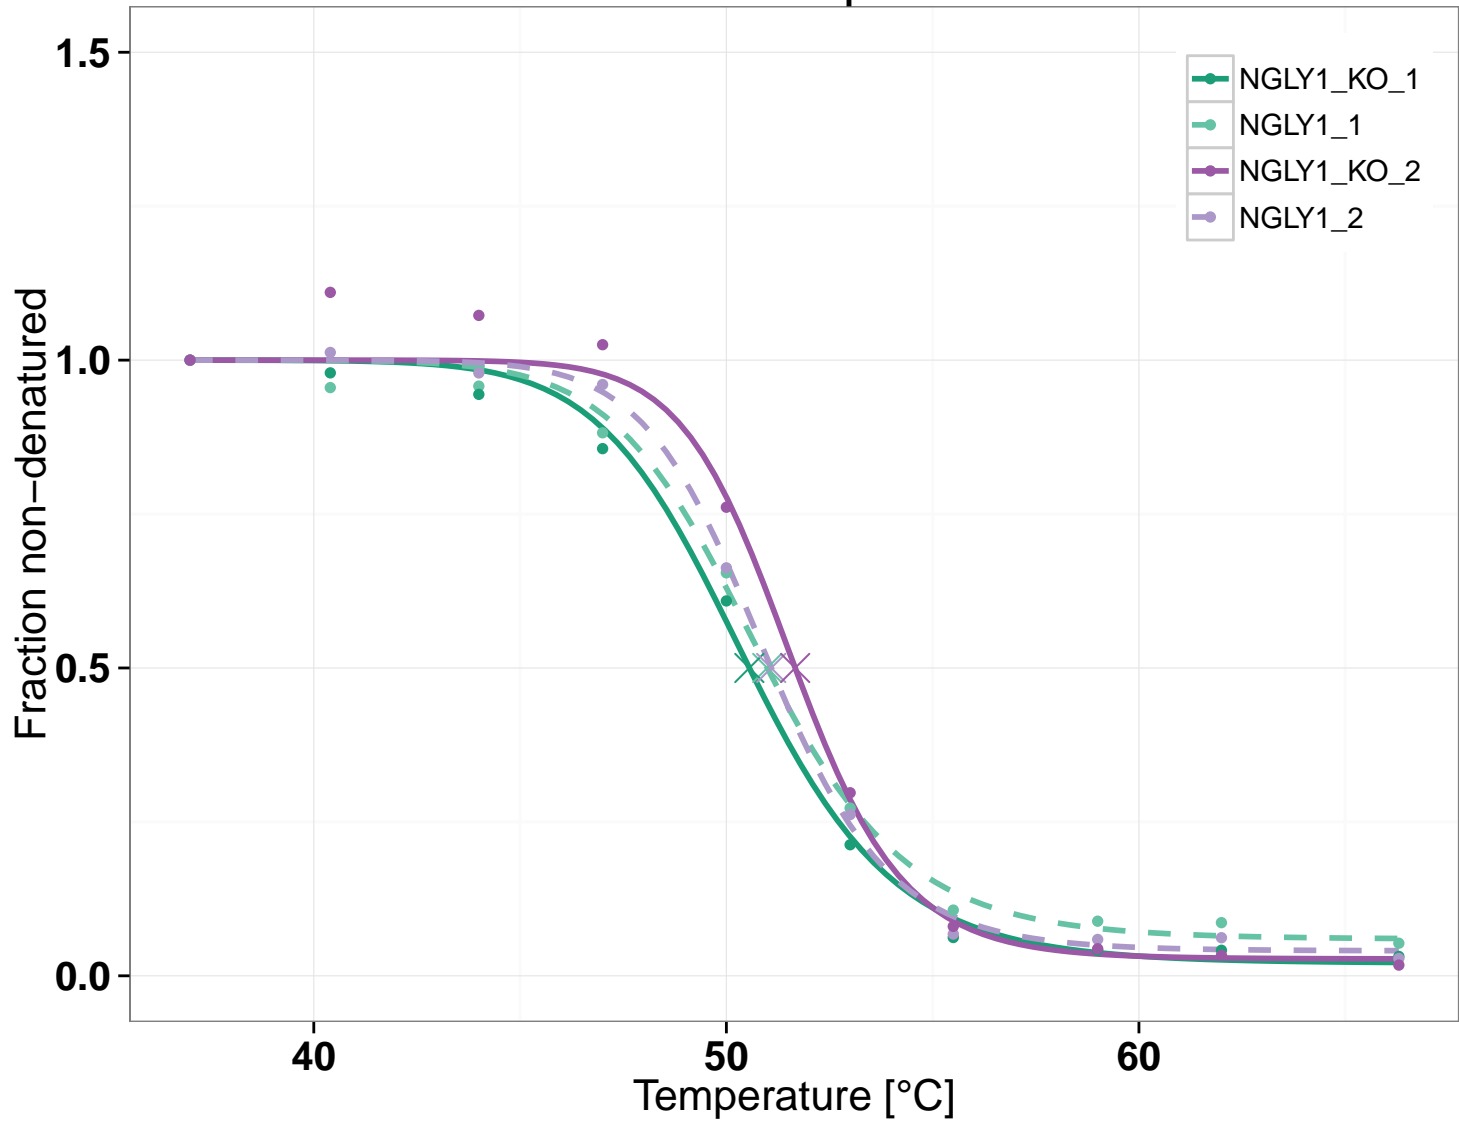

|            | meltPoint | slope | plateau | R2   |
|------------|-----------|-------|---------|------|
| NGLY1_KO_1 | 50.56     | -0.14 | 0.02    | 1    |
| NGLY1_1    | 50.99     | -0.13 | 0.06    | 1    |
| NGLY1_KO_2 | 51.67     | -0.18 | 0.03    | 0.99 |
| NGLY1_2    | 51.09     | -0.16 | 0.04    | 1    |

Supplement: Supplementary file 19 [file 1]

# IPI00007052.6|FIS1

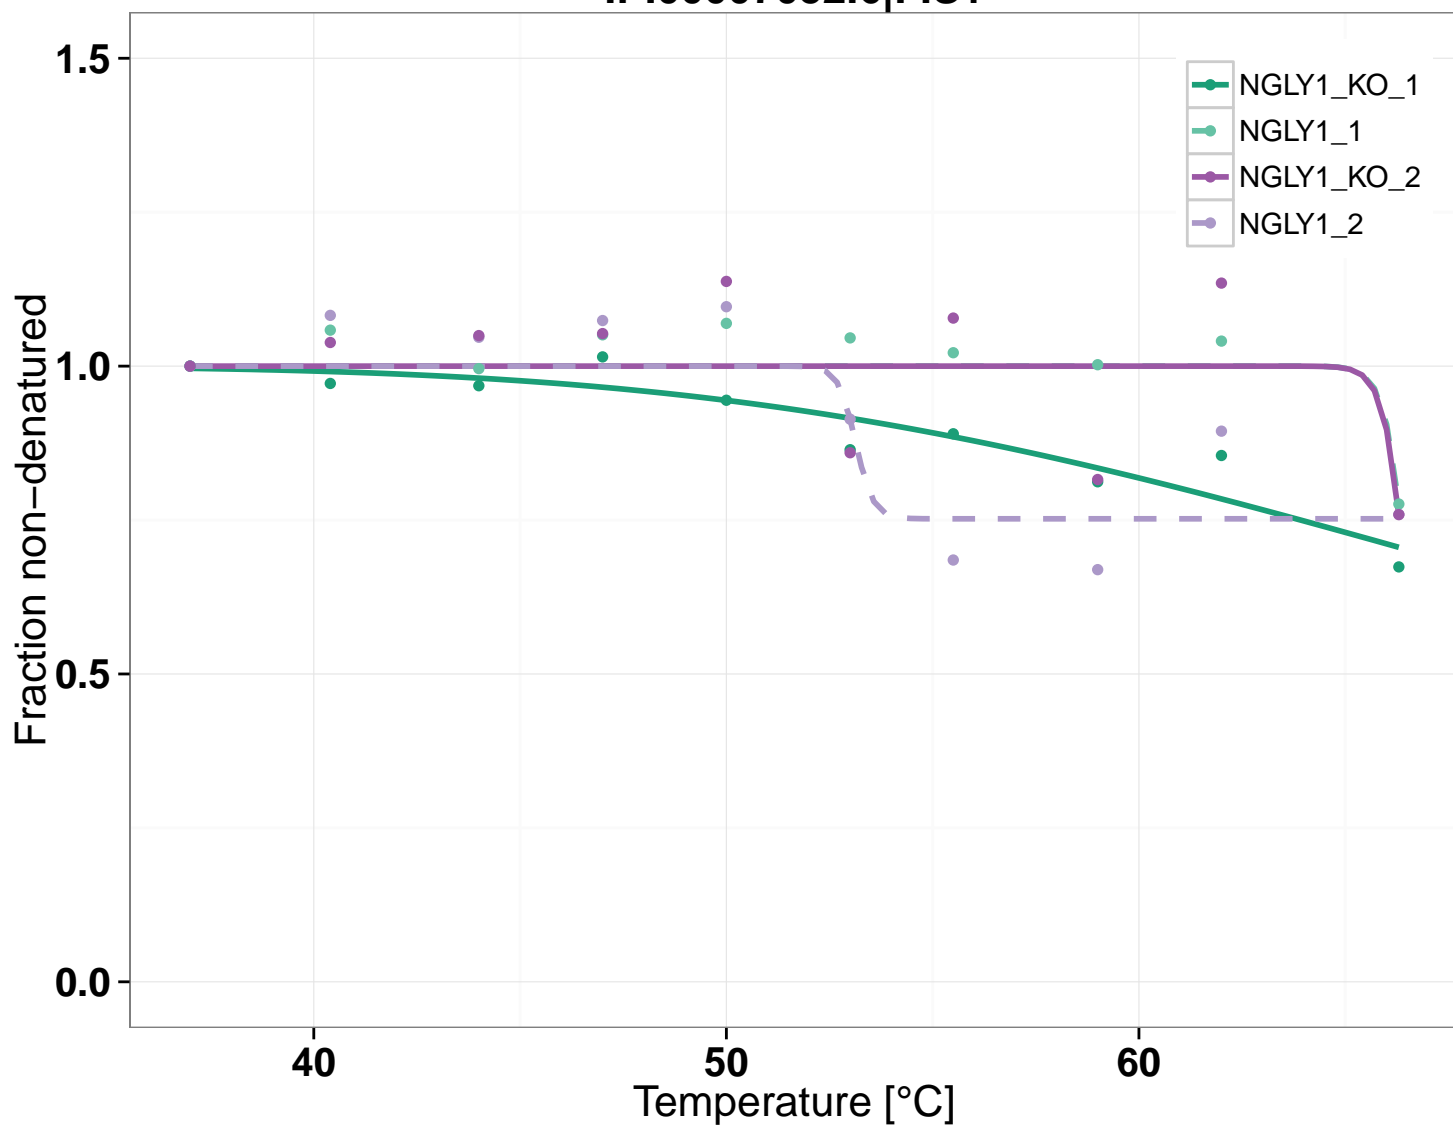

|            | meltPoint | slope | plateau | R2   |
|------------|-----------|-------|---------|------|
| NGLY1_KO_1 | —         | —     | 0       | 0.88 |
| NGLY1_1    | —         | —     | 0       | 0.77 |
| NGLY1_KO_2 | —         | —     | 0       | 0.36 |
| NGLY1_2    | —         | -0.29 | 0.75    | 0.78 |

Supplement: Supplementary file 20 [file 1]

# IPI00012284.1|ERCC8

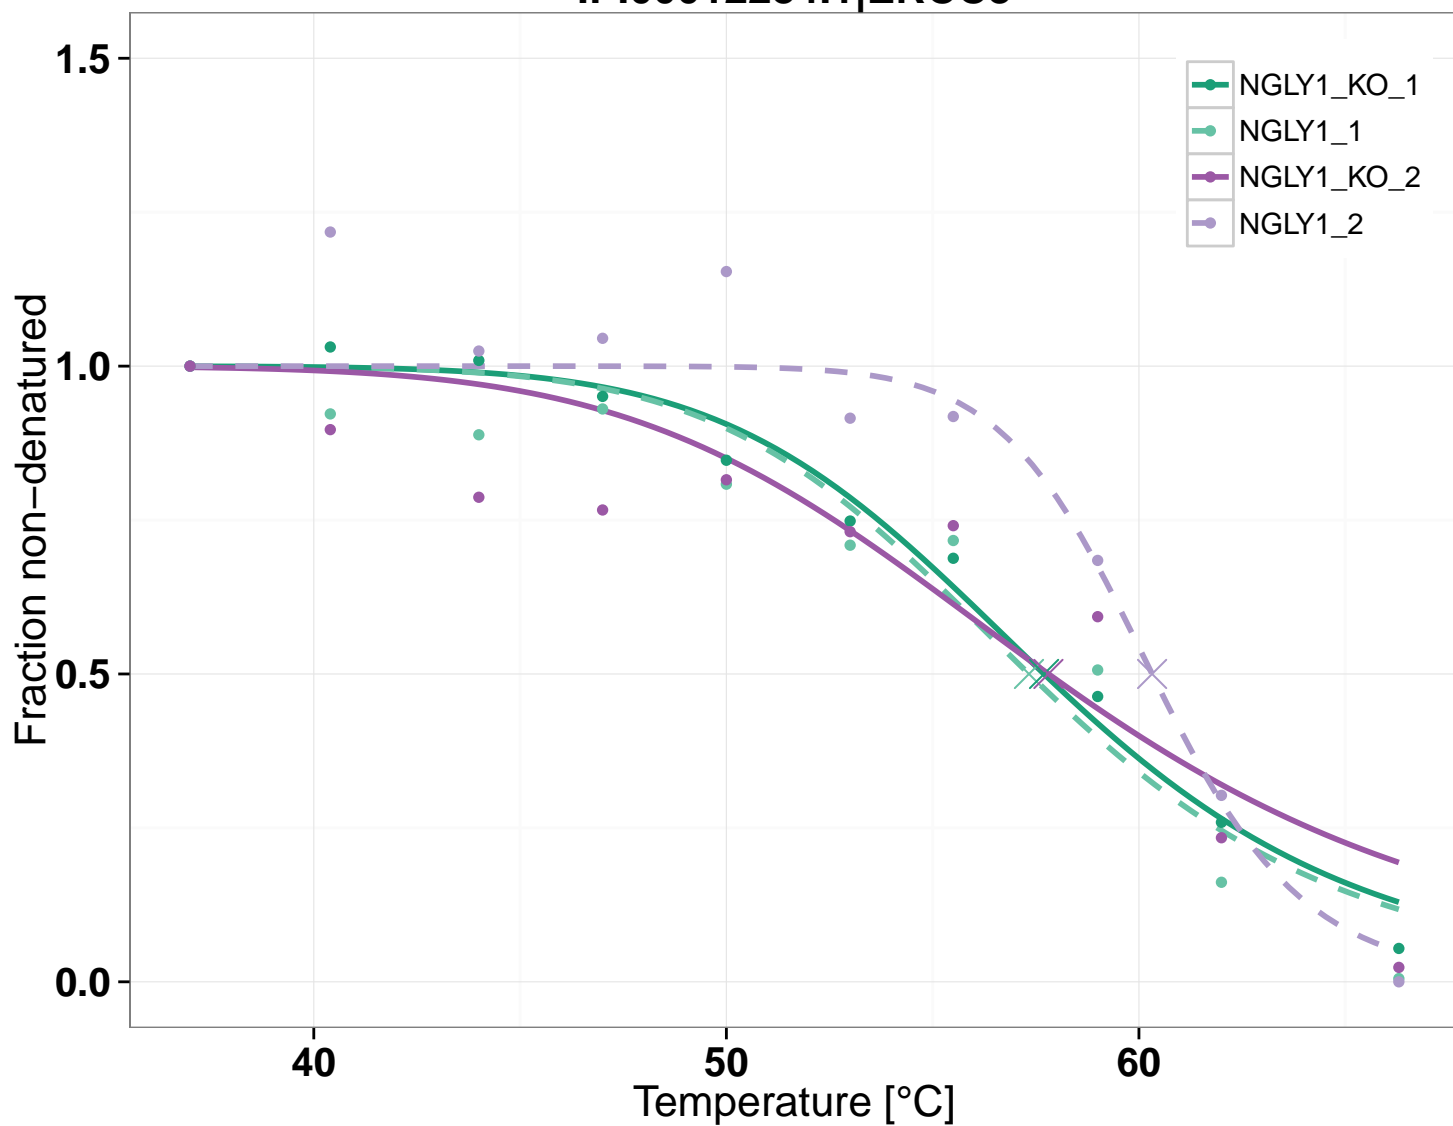

|            | meltPoint | slope  | plateau | R2   |
|------------|-----------|--------|---------|------|
| NGLY1_KO_1 | 57.7      | -0.065 | 0       | 0.98 |
| NGLY1_1    | 57.33     | -0.066 | 0       | 0.93 |
| NGLY1_KO_2 | 57.81     | -0.05  | 0       | 0.82 |
| NGLY1_2    | 60.32     | -0.14  | 0       | 0.94 |

Supplement: Supplementary file 21 [file 1]

IPI00033944.1|SOCS2

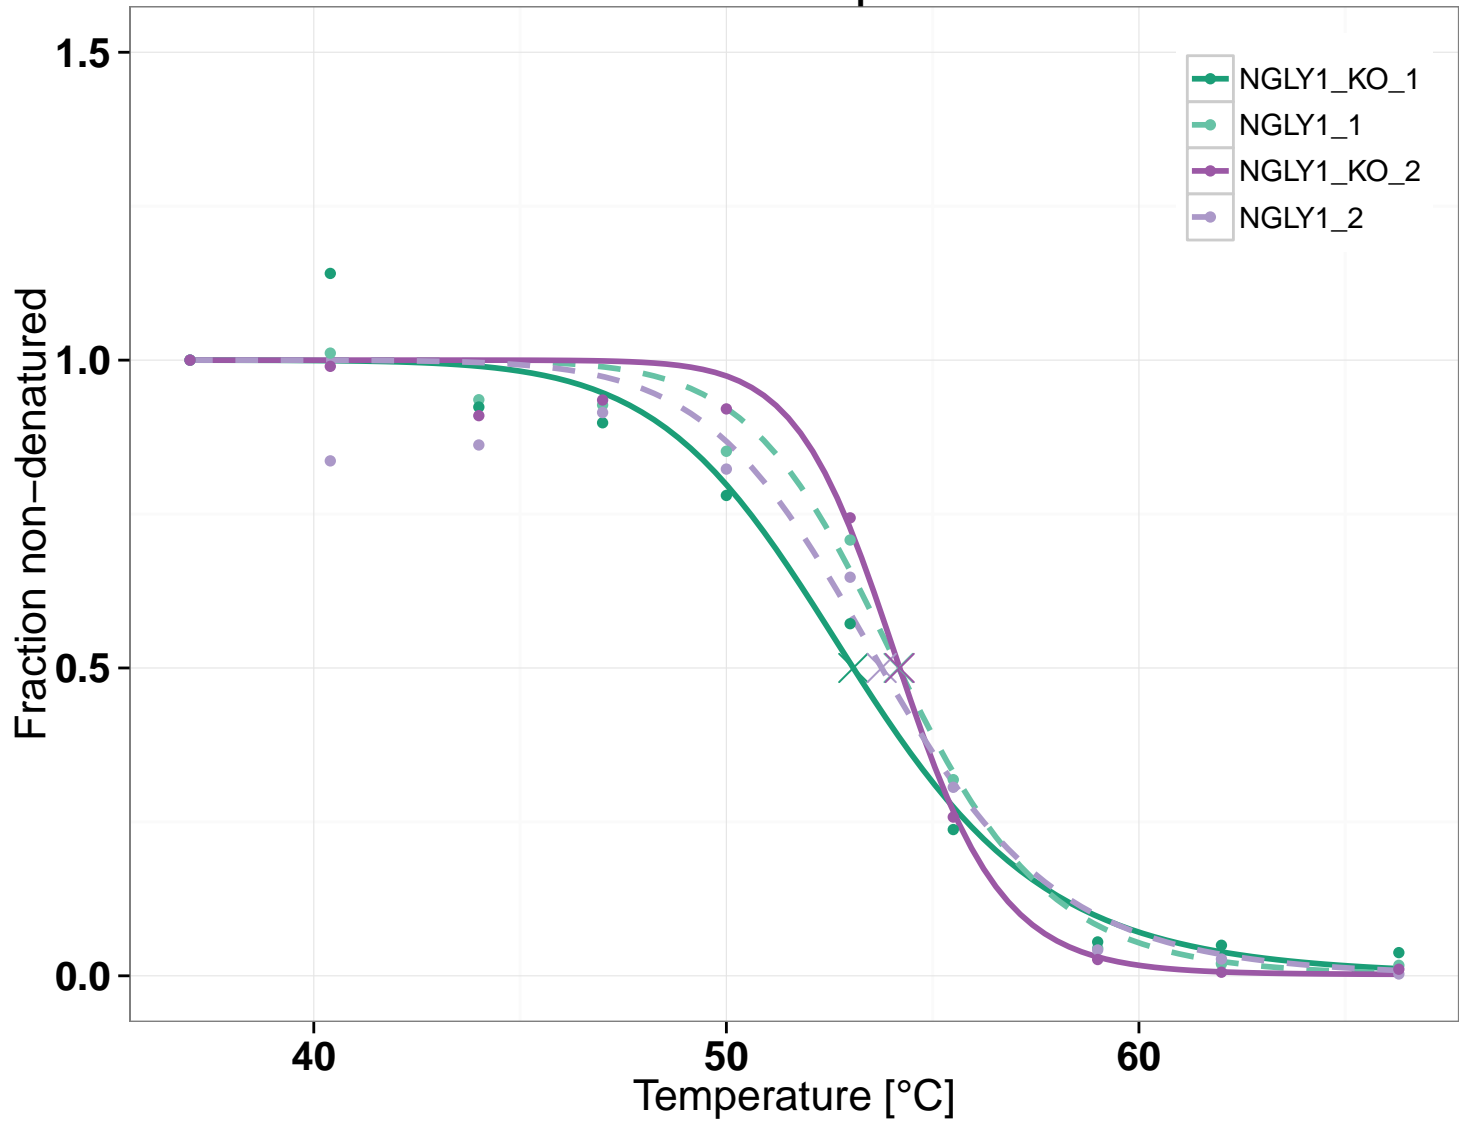

|            | meltPoint | slope | plateau | R2   |
|------------|-----------|-------|---------|------|
| NGLY1_KO_1 | 53.08     | -0.11 | 0       | 0.98 |
| NGLY1_1    | 54.17     | -0.14 | 0       | 0.99 |
| NGLY1_KO_2 | 54.2      | -0.2  | 0       | 0.99 |
| NGLY1_2    | 53.76     | -0.12 | 0       | 0.96 |

Supplement: Supplementary file 22 [file 1]

# IPI00386591.5|C14ORF149

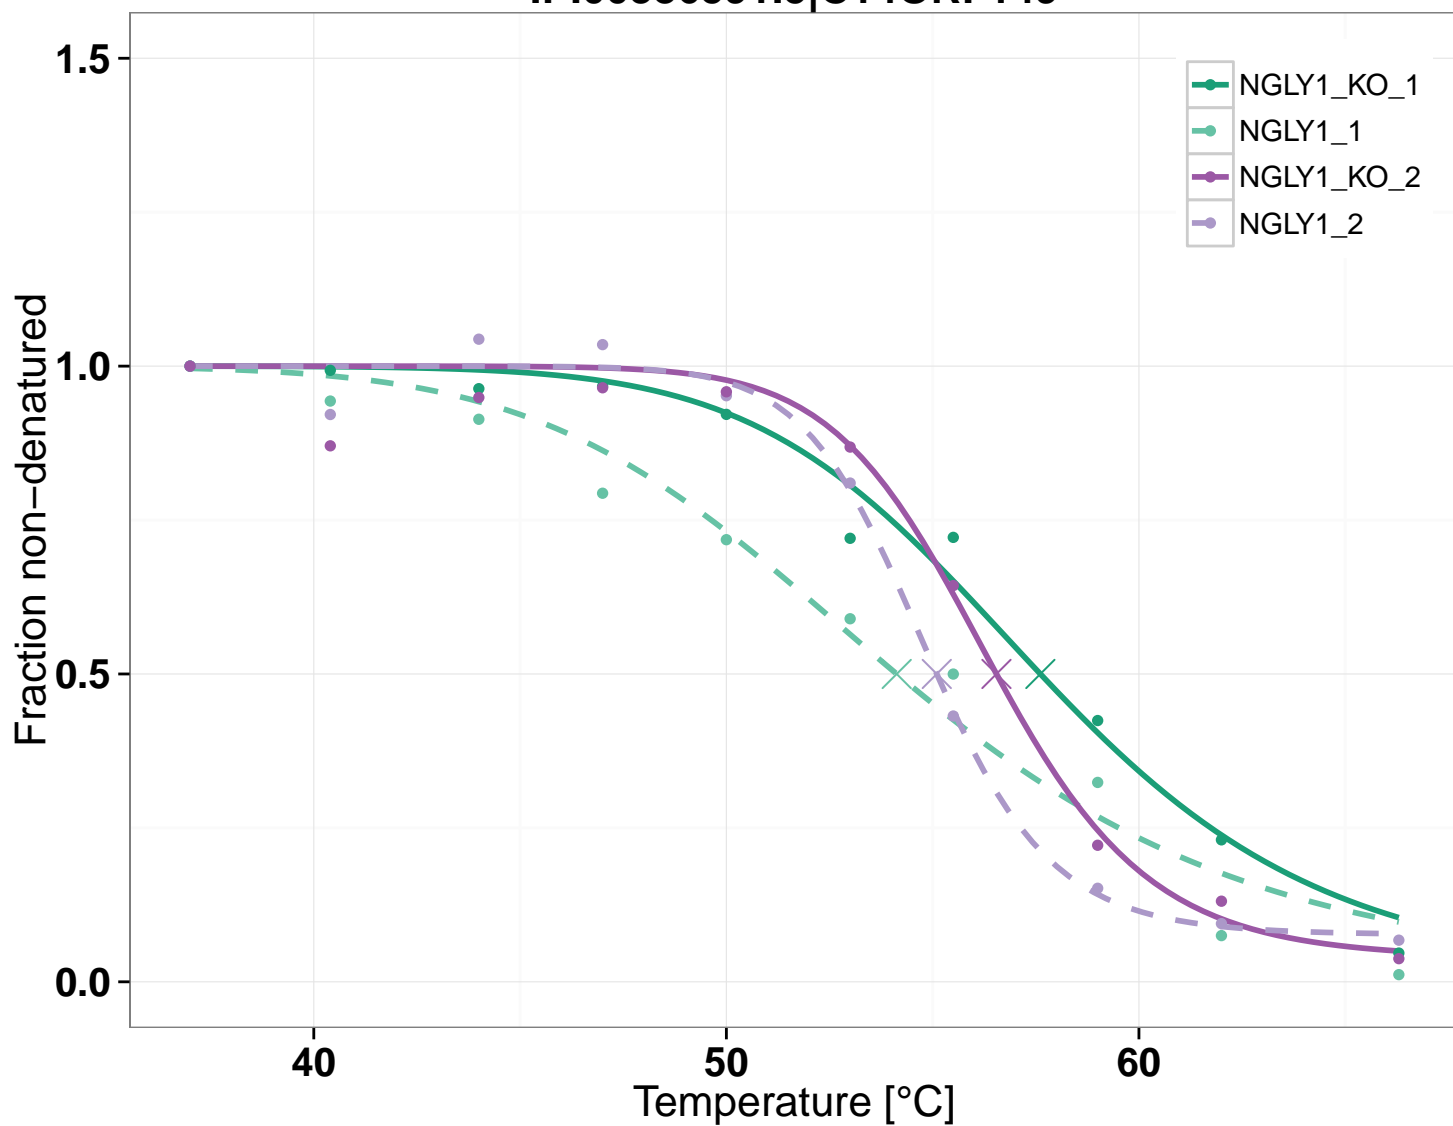

|            | meltPoint | slope  | plateau | R2   |
|------------|-----------|--------|---------|------|
| NGLY1_KO_1 | 57.61     | -0.072 | 0       | 0.98 |
| NGLY1_1    | 54.13     | -0.058 | 0       | 0.97 |
| NGLY1_KO_2 | 56.55     | -0.12  | 0.04    | 0.98 |
| NGLY1_2    | 55.1      | -0.15  | 0.08    | 0.99 |

Supplement: Supplementary file 23 [file 1]

# IPI00446798.1|MTCP1

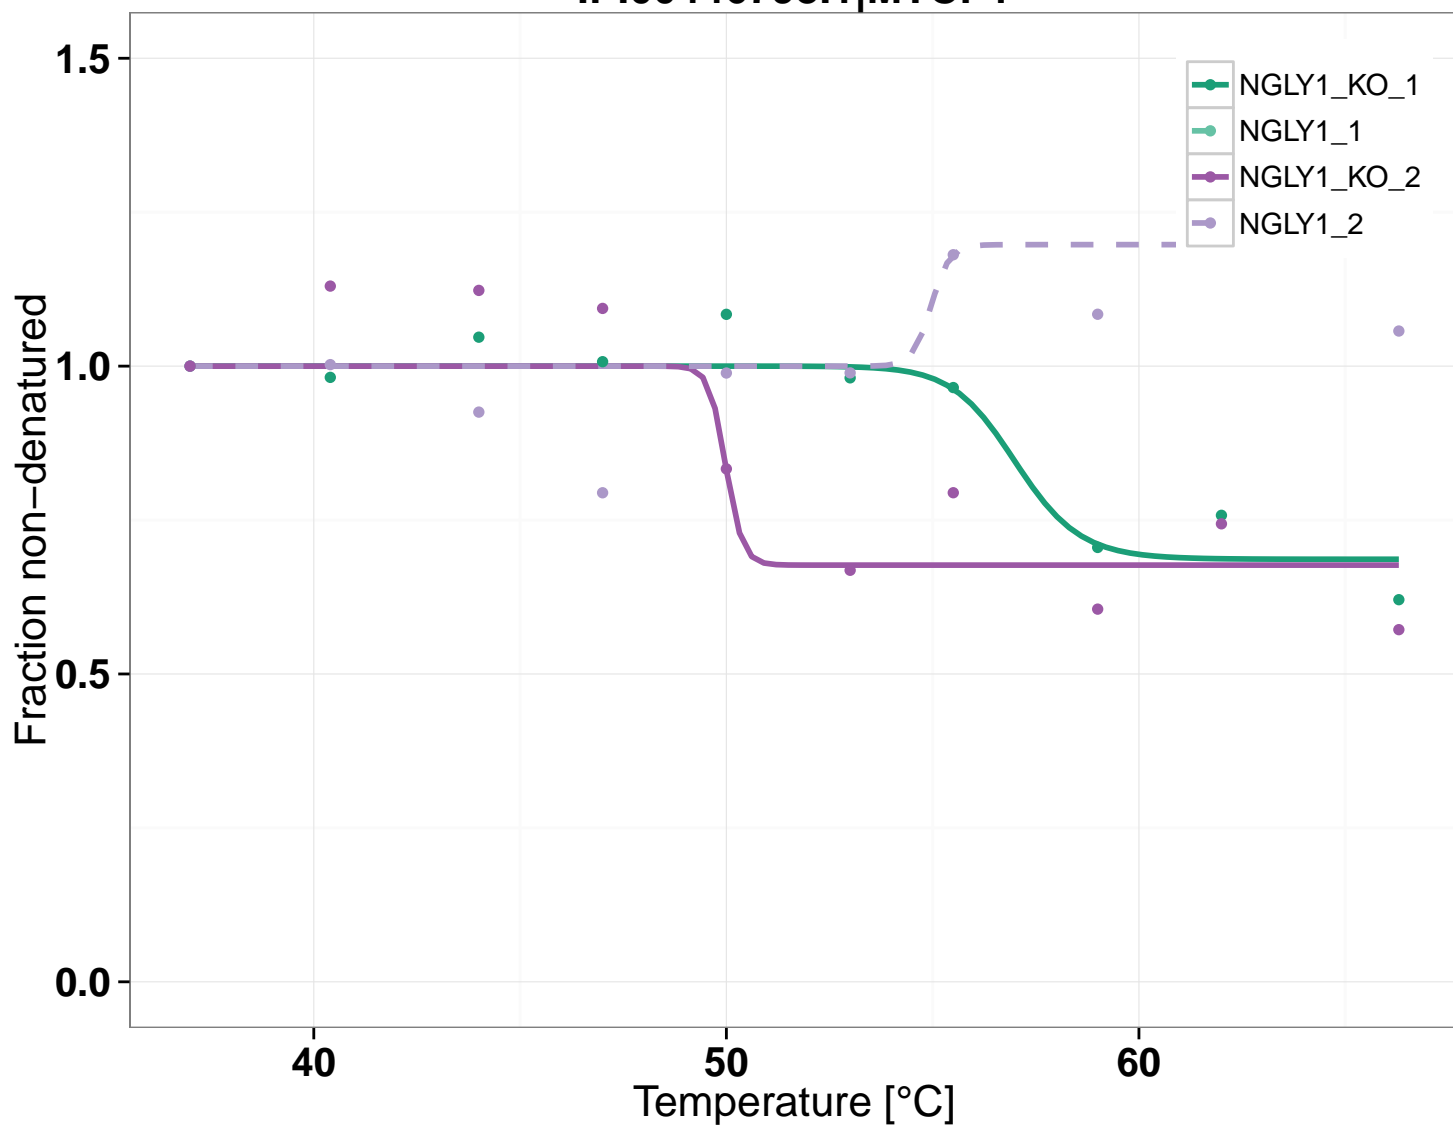

|            | meltPoint | slope | plateau | R2   |
|------------|-----------|-------|---------|------|
| NGLY1_KO_1 | —         | −0.1  | 0.69    | 0.92 |
| NGLY1_1    | —         | —     | —       | —    |
| NGLY1_KO_2 | —         | −0.4  | 0.68    | 0.82 |
| NGLY1_2    | —         | 0.22  | 1.2     | 0.47 |

Supplement: Supplementary file 24 [file 1]

IPI00215615.1|ATP7A

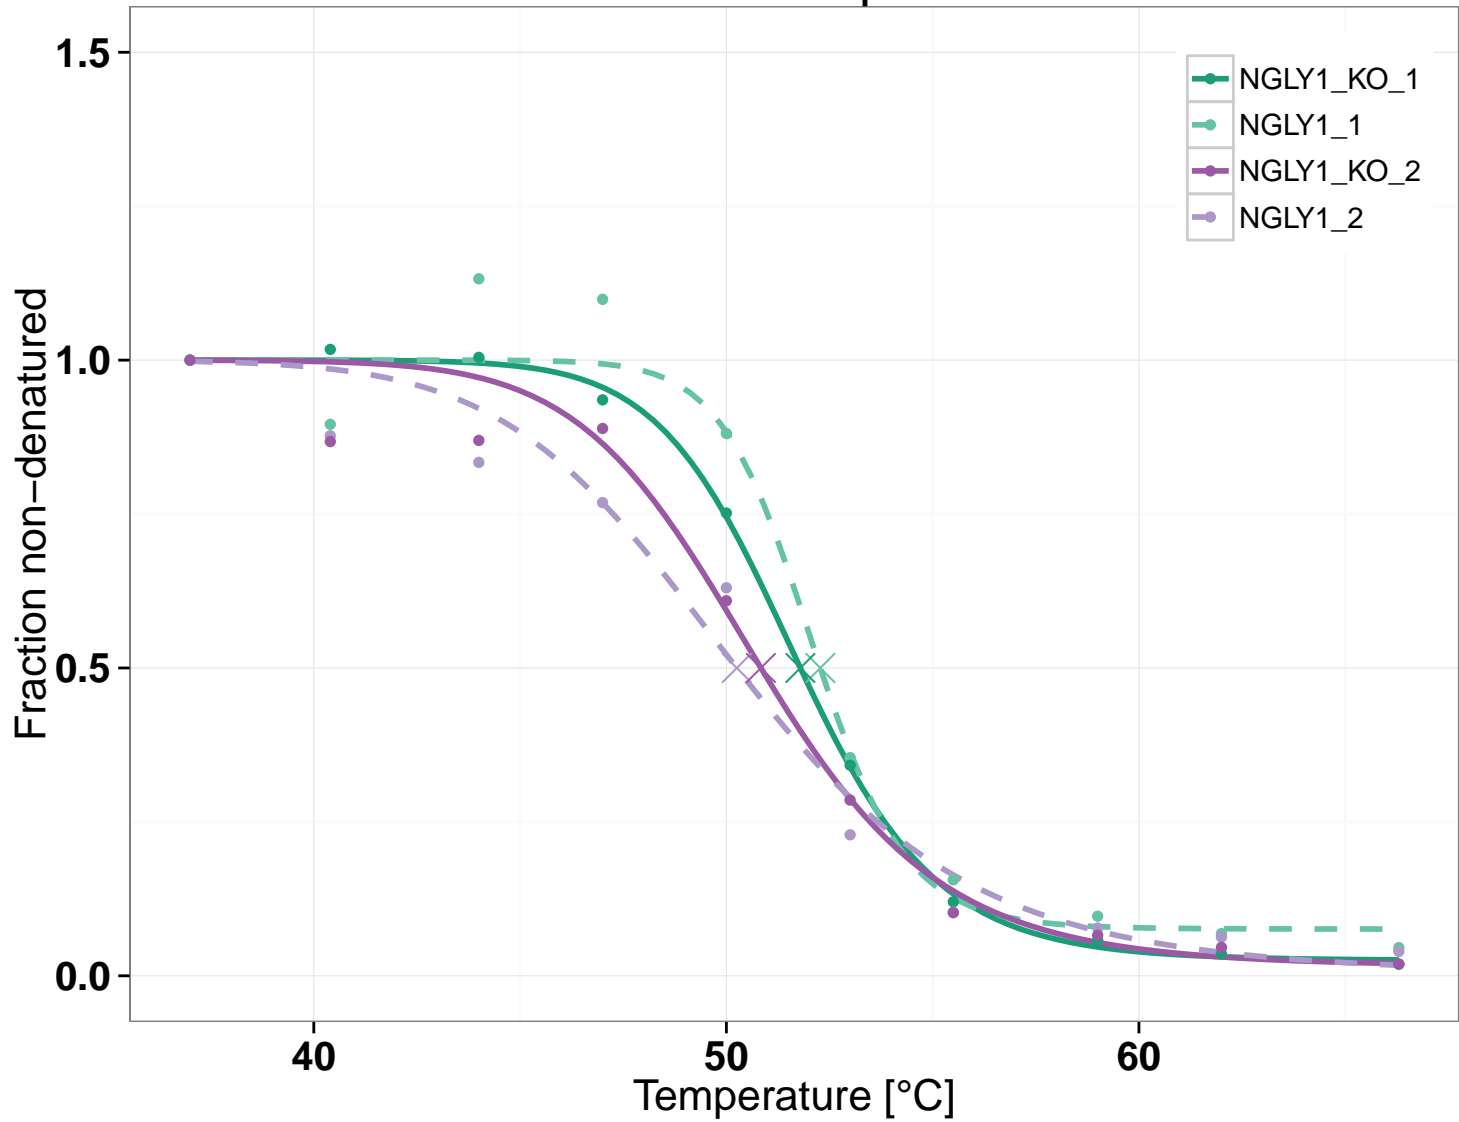

|            | meltPoint | slope  | plateau | R2   |
|------------|-----------|--------|---------|------|
| NGLY1_KO_1 | 51.79     | -0.14  | 0.02    | 1    |
| NGLY1_1    | 52.28     | -0.21  | 0.08    | 0.98 |
| NGLY1_KO_2 | 50.84     | -0.11  | 0.02    | 0.98 |
| NGLY1_2    | 50.25     | -0.087 | 0       | 0.97 |

Supplement: Supplementary file 25 [file 1]

IPI00003783.1|MAP2K2

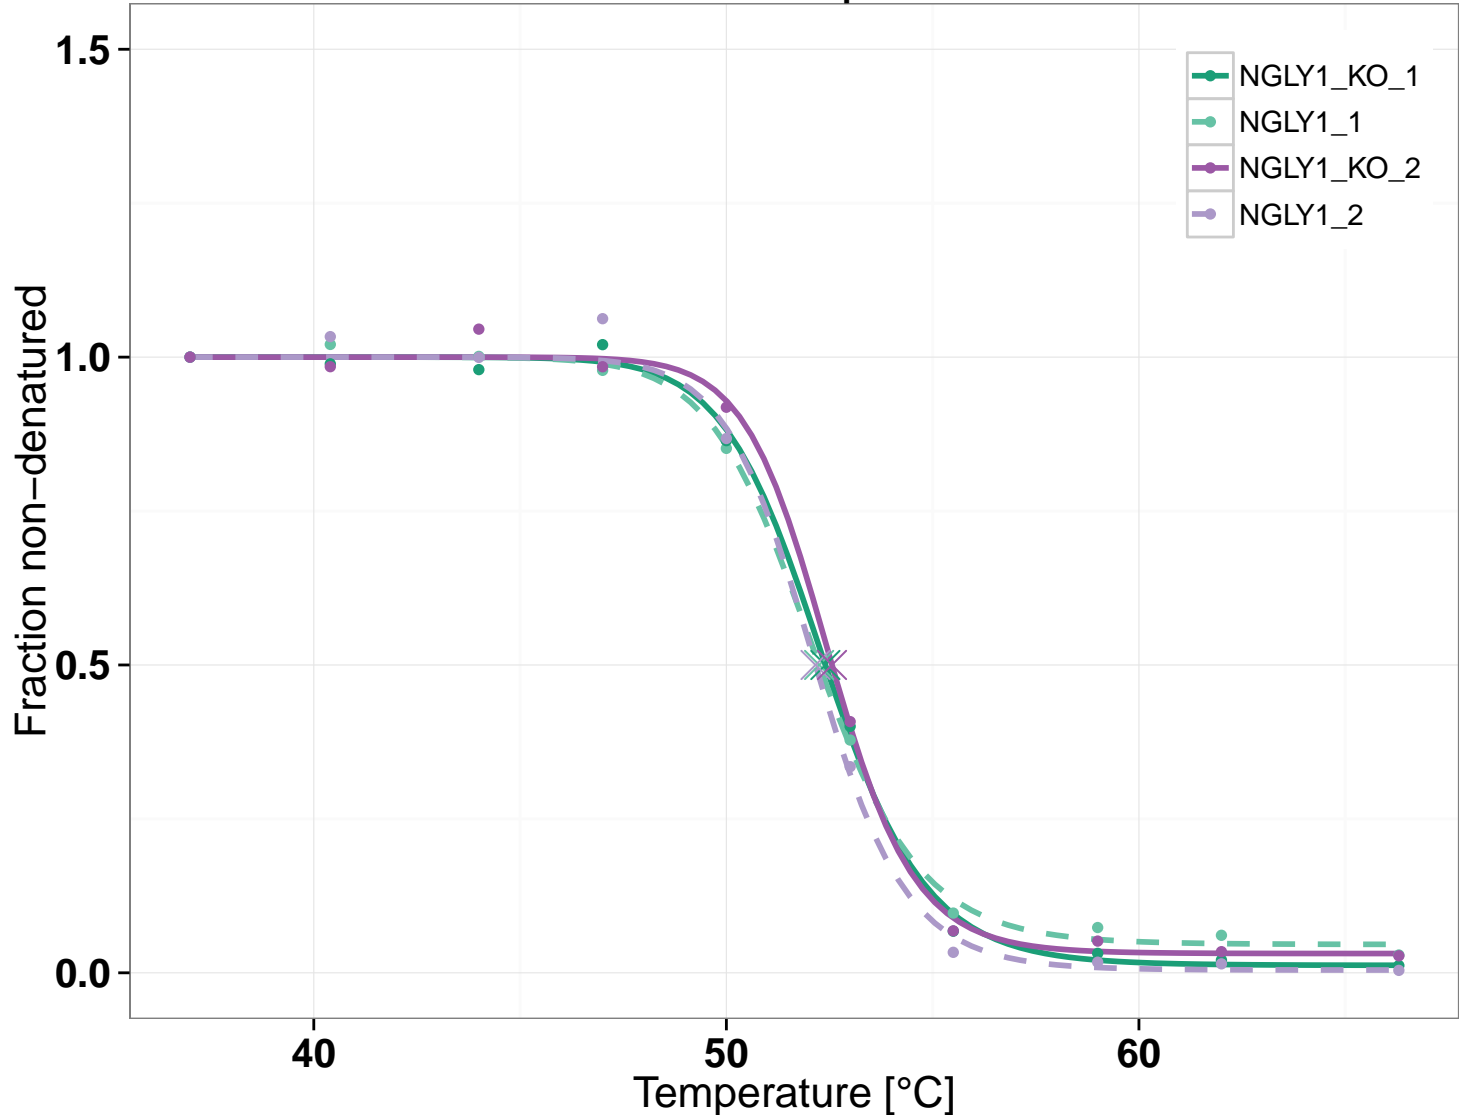

|            | meltPoint | slope | plateau | R2 |
|------------|-----------|-------|---------|----|
| NGLY1_KO_1 | 52.4      | -0.2  | 0.01    | 1  |
| NGLY1_1    | 52.25     | -0.19 | 0.05    | 1  |
| NGLY1_KO_2 | 52.56     | -0.24 | 0.03    | 1  |
| NGLY1_2    | 52.16     | -0.23 | 0       | 1  |

Supplement: Supplementary file 26 [file 1]

IPI00000874.1|PRDX1

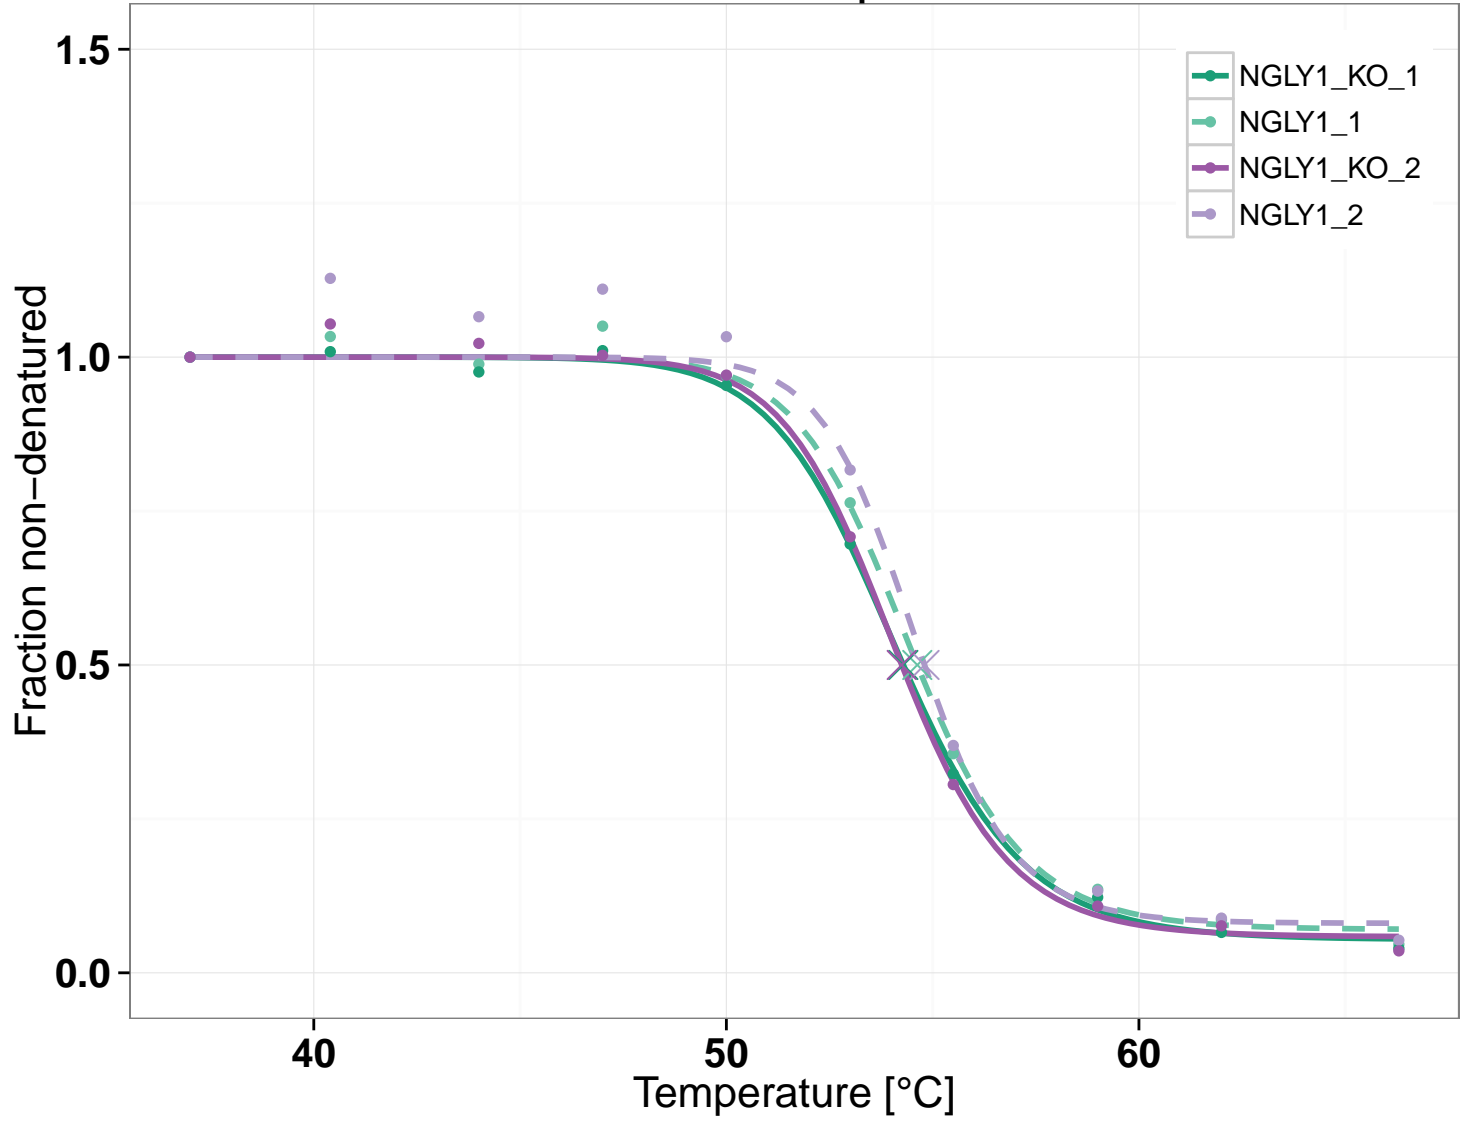

|            | meltPoint | slope | plateau | R2   |
|------------|-----------|-------|---------|------|
| NGLY1_KO_1 | 54.29     | -0.15 | 0.05    | 1    |
| NGLY1_1    | 54.63     | -0.17 | 0.07    | 1    |
| NGLY1_KO_2 | 54.25     | -0.17 | 0.06    | 1    |
| NGLY1_2    | 54.8      | -0.2  | 0.08    | 0.98 |

Supplement: Supplementary file 27 [file 1]

# IPI00879750.1|SNRPD3

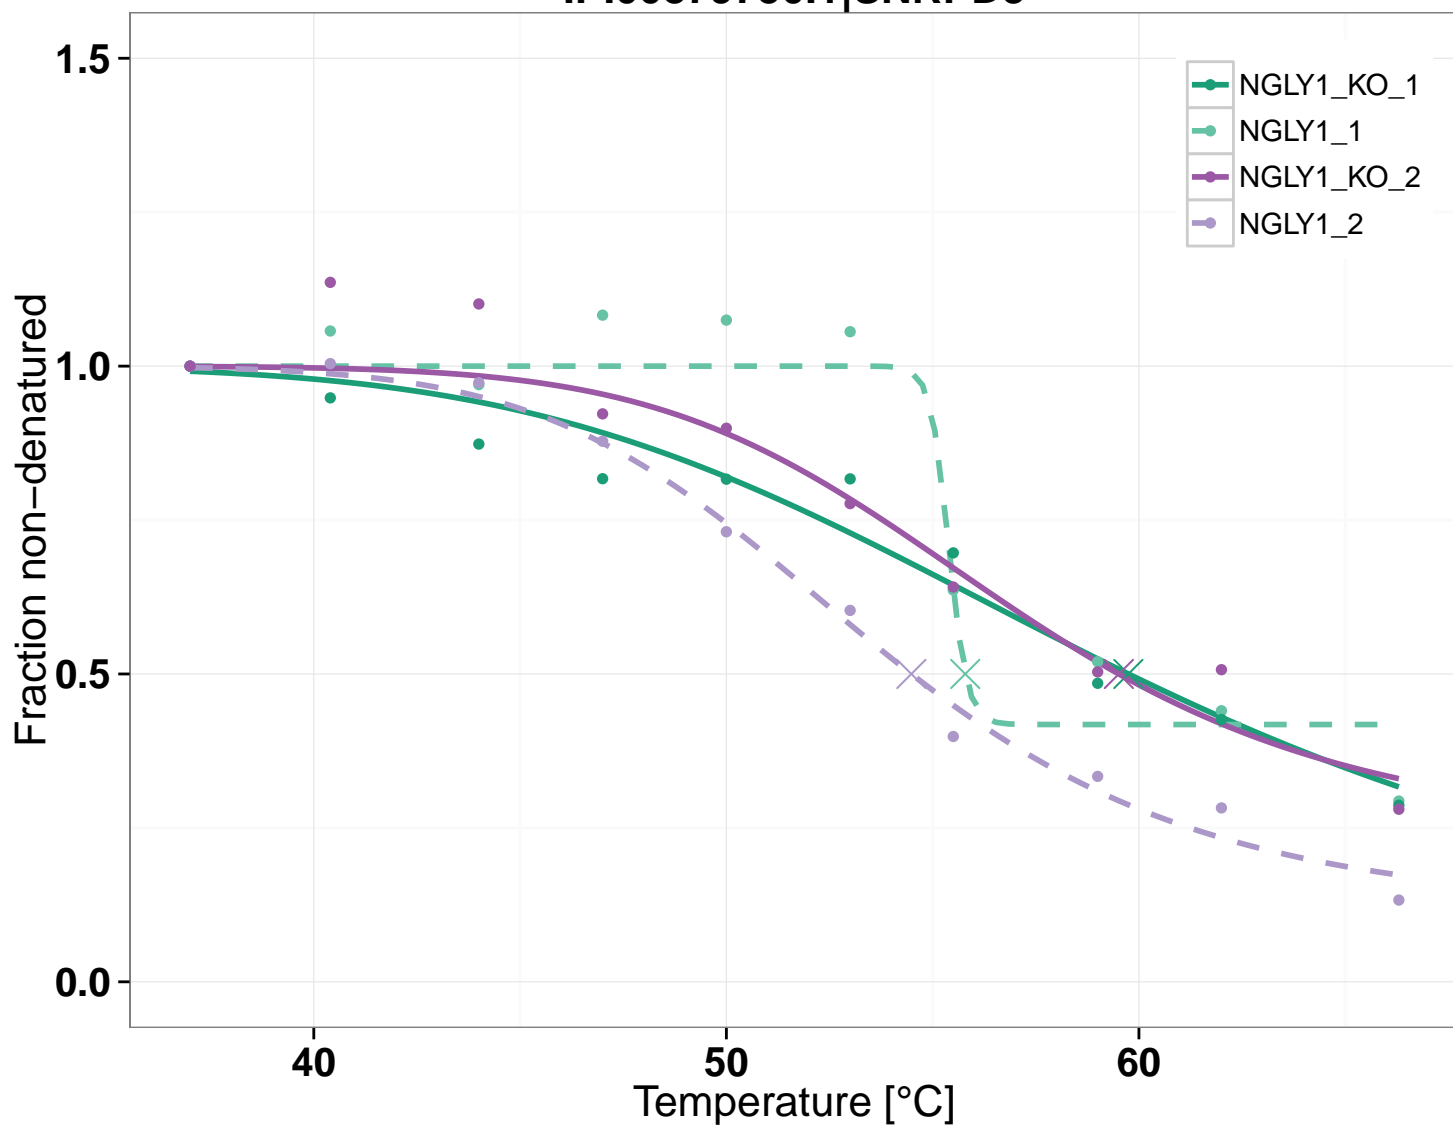

|            | meltPoint | slope  | plateau | R2   |
|------------|-----------|--------|---------|------|
| NGLY1_KO_1 | 59.74     | -0.035 | 0       | 0.95 |
| NGLY1_1    | 55.79     | -0.66  | 0.42    | 0.95 |
| NGLY1_KO_2 | 59.51     | -0.046 | 0.23    | 0.94 |
| NGLY1_2    | 54.48     | -0.056 | 0.11    | 0.99 |

Supplement: Supplementary file 28 [file 1]

# IPI00293331.3|POP1

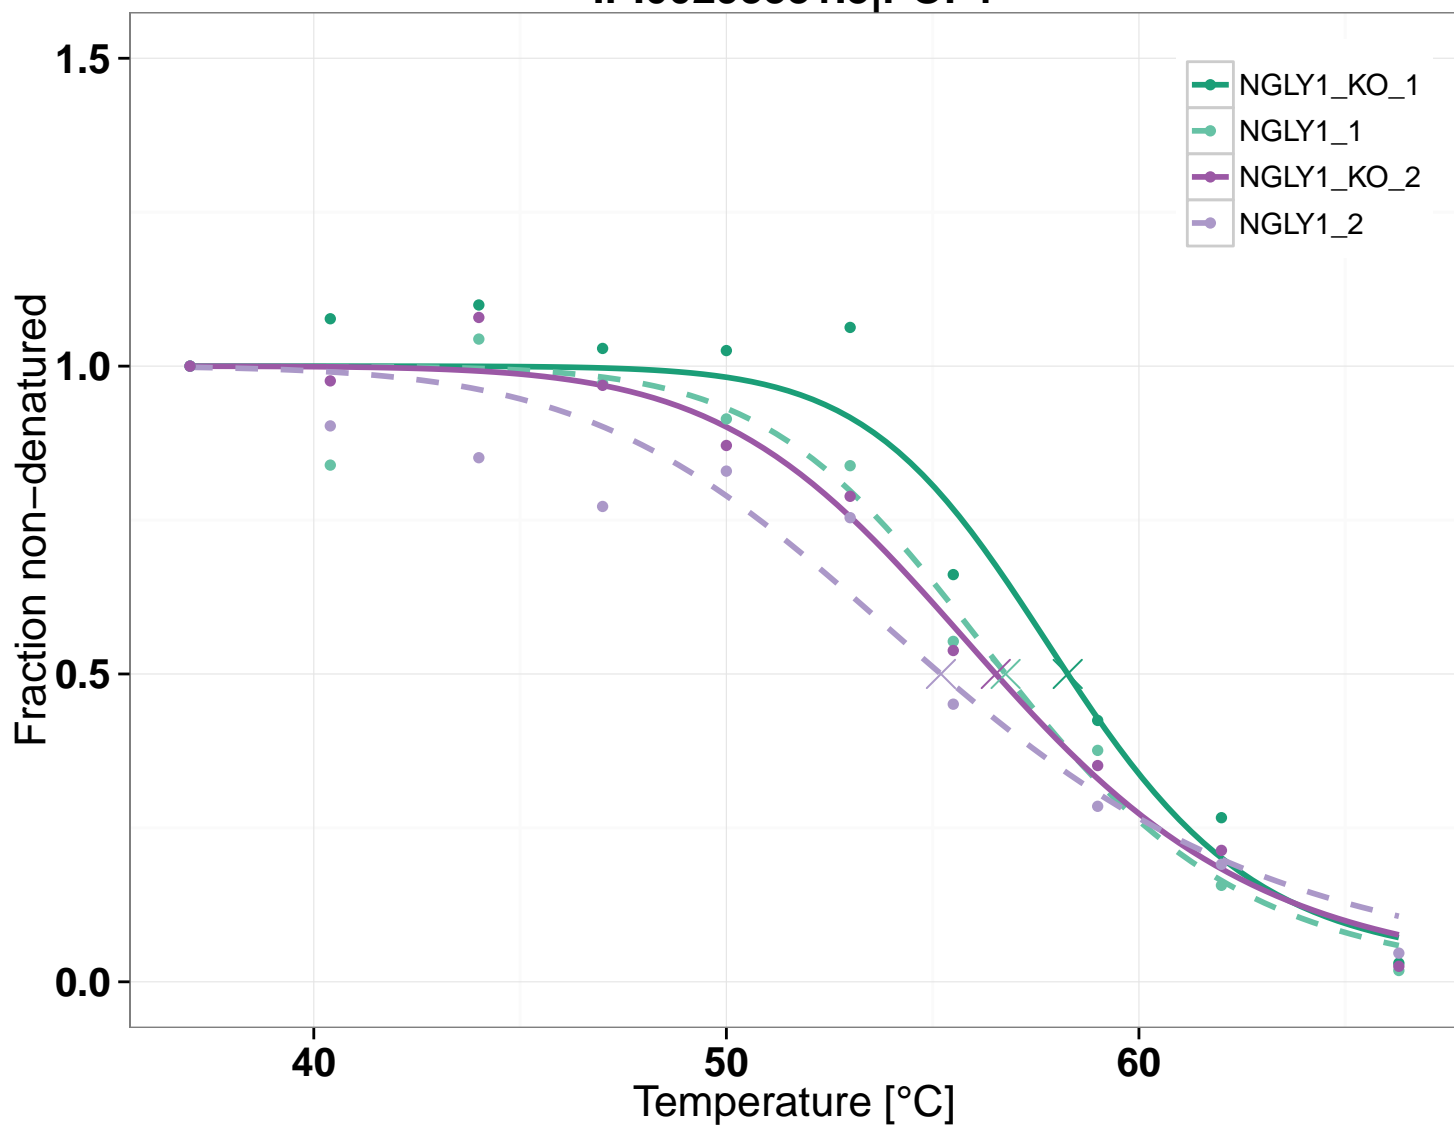

|            | meltPoint | slope  | plateau | R2   |
|------------|-----------|--------|---------|------|
| NGLY1_KO_1 | 58.27     | -0.1   | 0.03    | 0.96 |
| NGLY1_1    | 56.77     | -0.086 | 0       | 0.97 |
| NGLY1_KO_2 | 56.53     | -0.076 | 0       | 0.99 |
| NGLY1_2    | 55.2      | -0.059 | 0       | 0.94 |

Supplement: Supplementary file 29 [file 1]

IPI00102316.3|IPI00102316.3

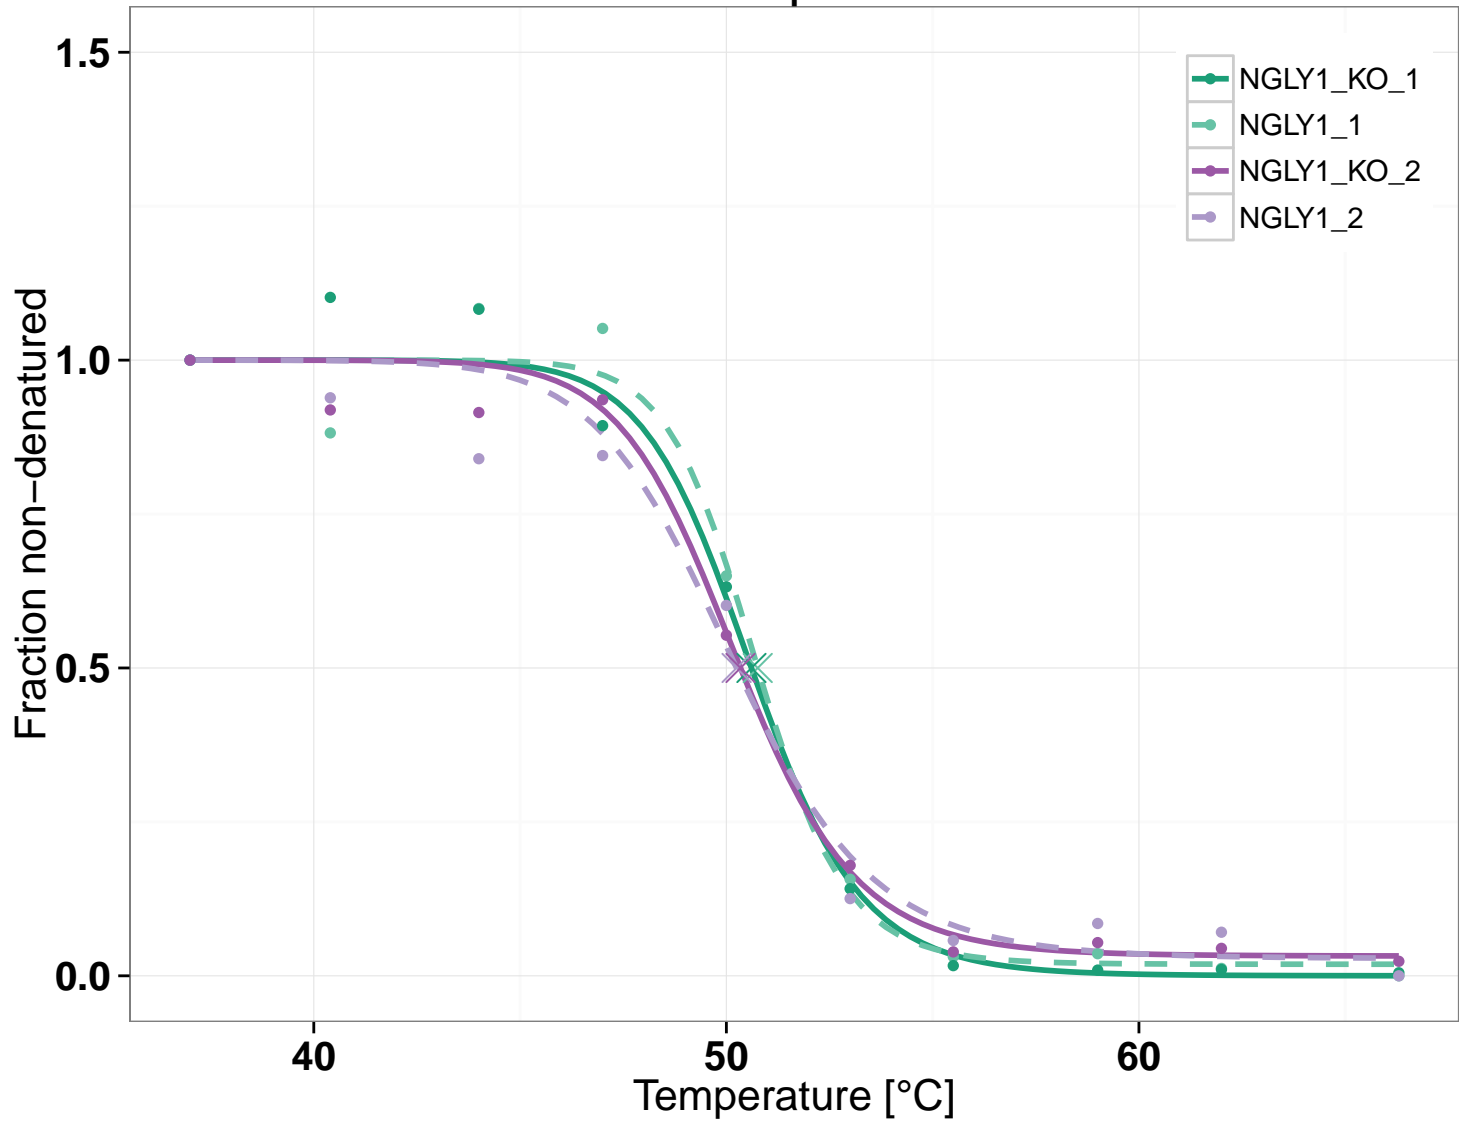

|            | meltPoint | slope | plateau | R2   |
|------------|-----------|-------|---------|------|
| NGLY1_KO_1 | 50.61     | -0.19 | 0       | 0.99 |
| NGLY1_1    | 50.76     | -0.23 | 0.02    | 0.99 |
| NGLY1_KO_2 | 50.34     | -0.17 | 0.03    | 0.99 |
| NGLY1_2    | 50.25     | -0.14 | 0.03    | 0.98 |

Supplement: Supplementary file 30 [file 1]

IPI00386141.1|RBM23

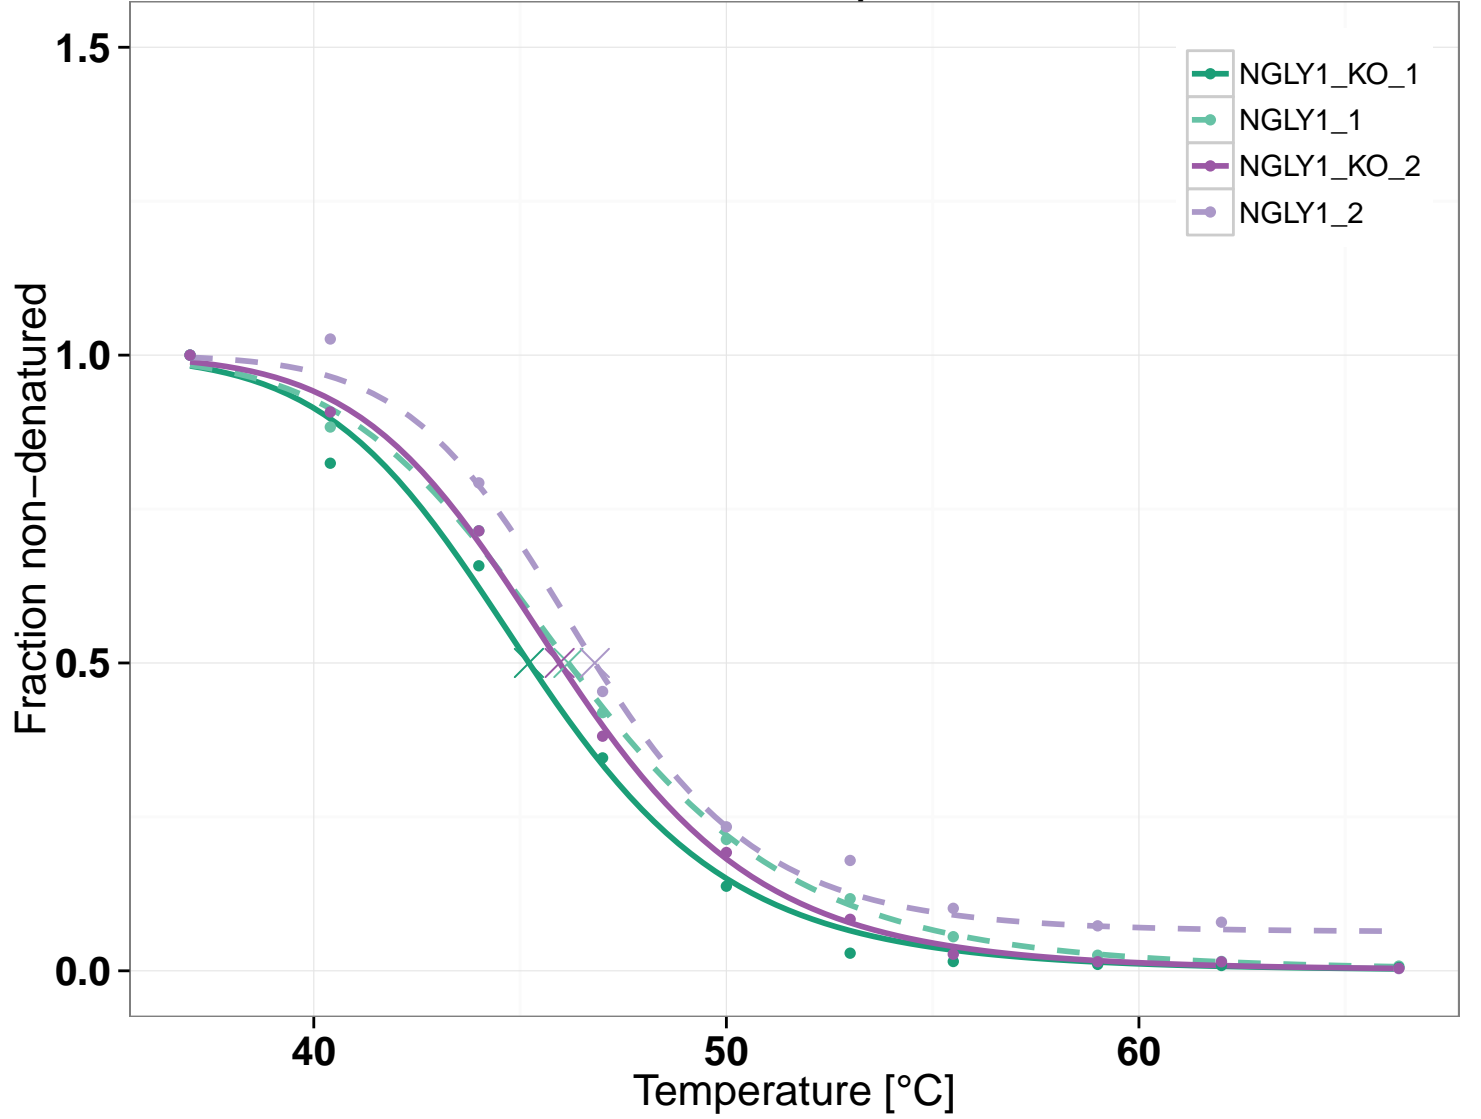

|            | meltPoint | slope  | plateau | R2   |
|------------|-----------|--------|---------|------|
| NGLY1_KO_1 | 45.21     | -0.1   | 0       | 0.99 |
| NGLY1_1    | 46.17     | -0.091 | 0       | 1    |
| NGLY1_KO_2 | 45.96     | -0.1   | 0       | 1    |
| NGLY1_2    | 46.81     | -0.11  | 0.06    | 0.99 |

Supplement: Supplementary file 31 [file 1]

IPI00016559.6|THG1L

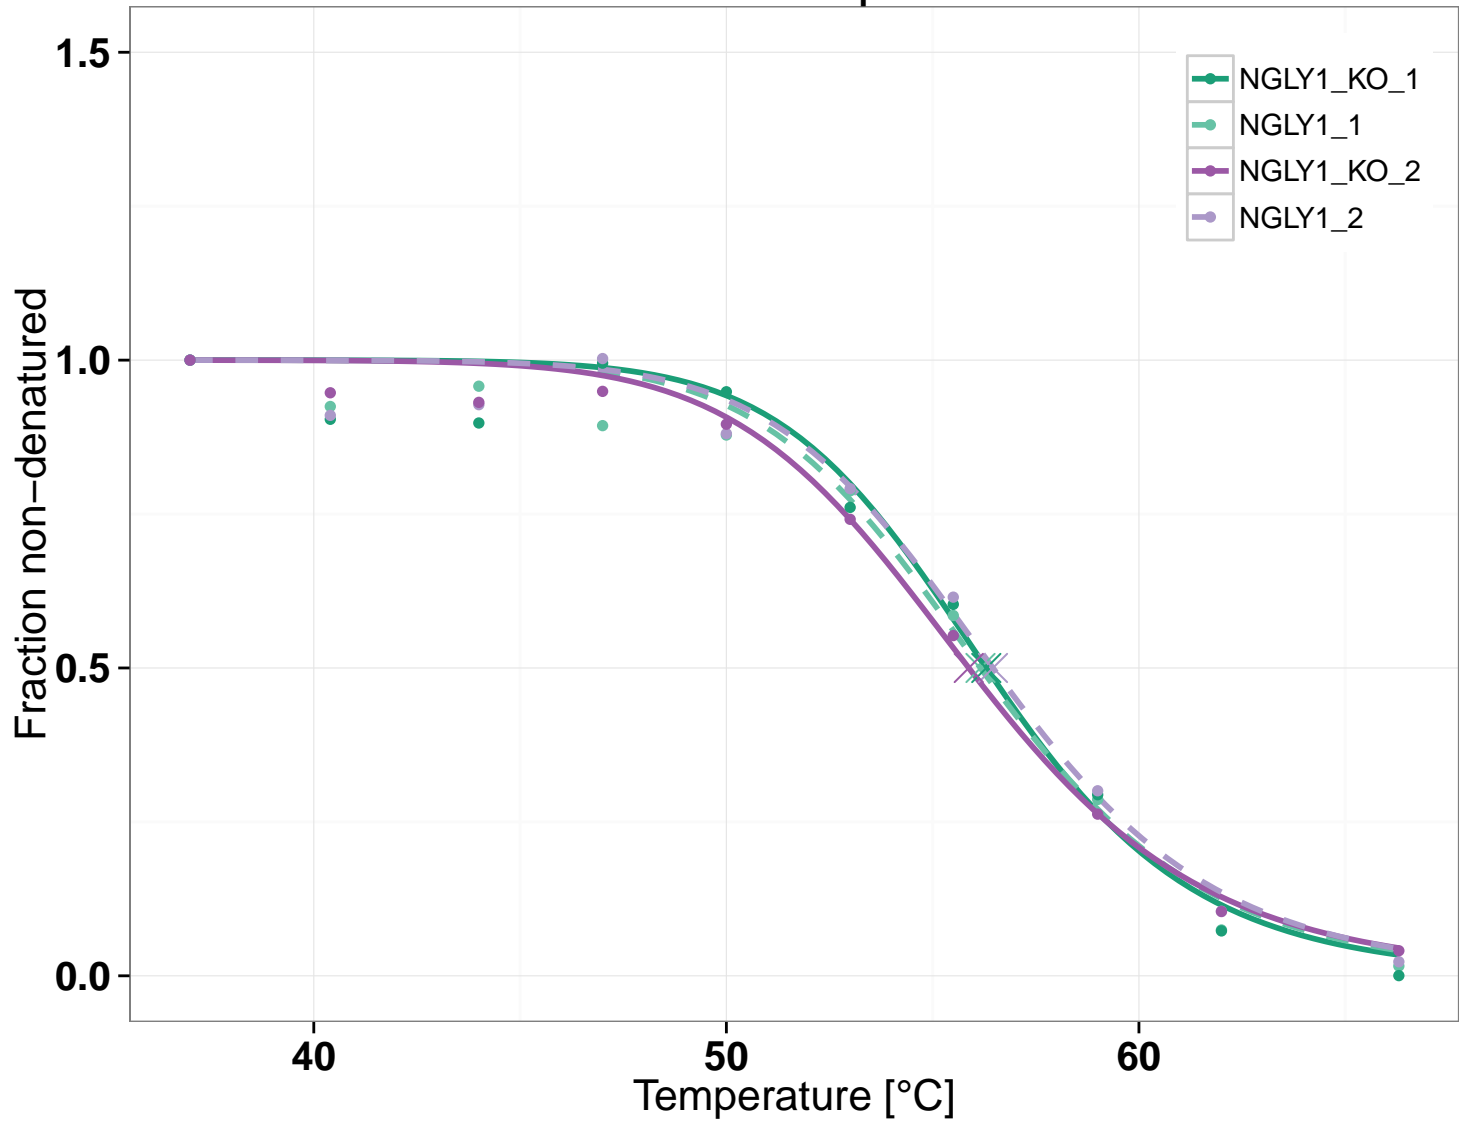

|            | meltPoint | slope  | plateau | R2   |
|------------|-----------|--------|---------|------|
| NGLY1_KO_1 | 56.3      | -0.099 | 0       | 0.98 |
| NGLY1_1    | 56.16     | -0.093 | 0       | 0.98 |
| NGLY1_KO_2 | 55.88     | -0.088 | 0       | 0.99 |
| NGLY1_2    | 56.46     | -0.093 | 0       | 0.99 |

Supplement: Supplementary file 32 [file 1]

IPI00003706.1|RBMS2

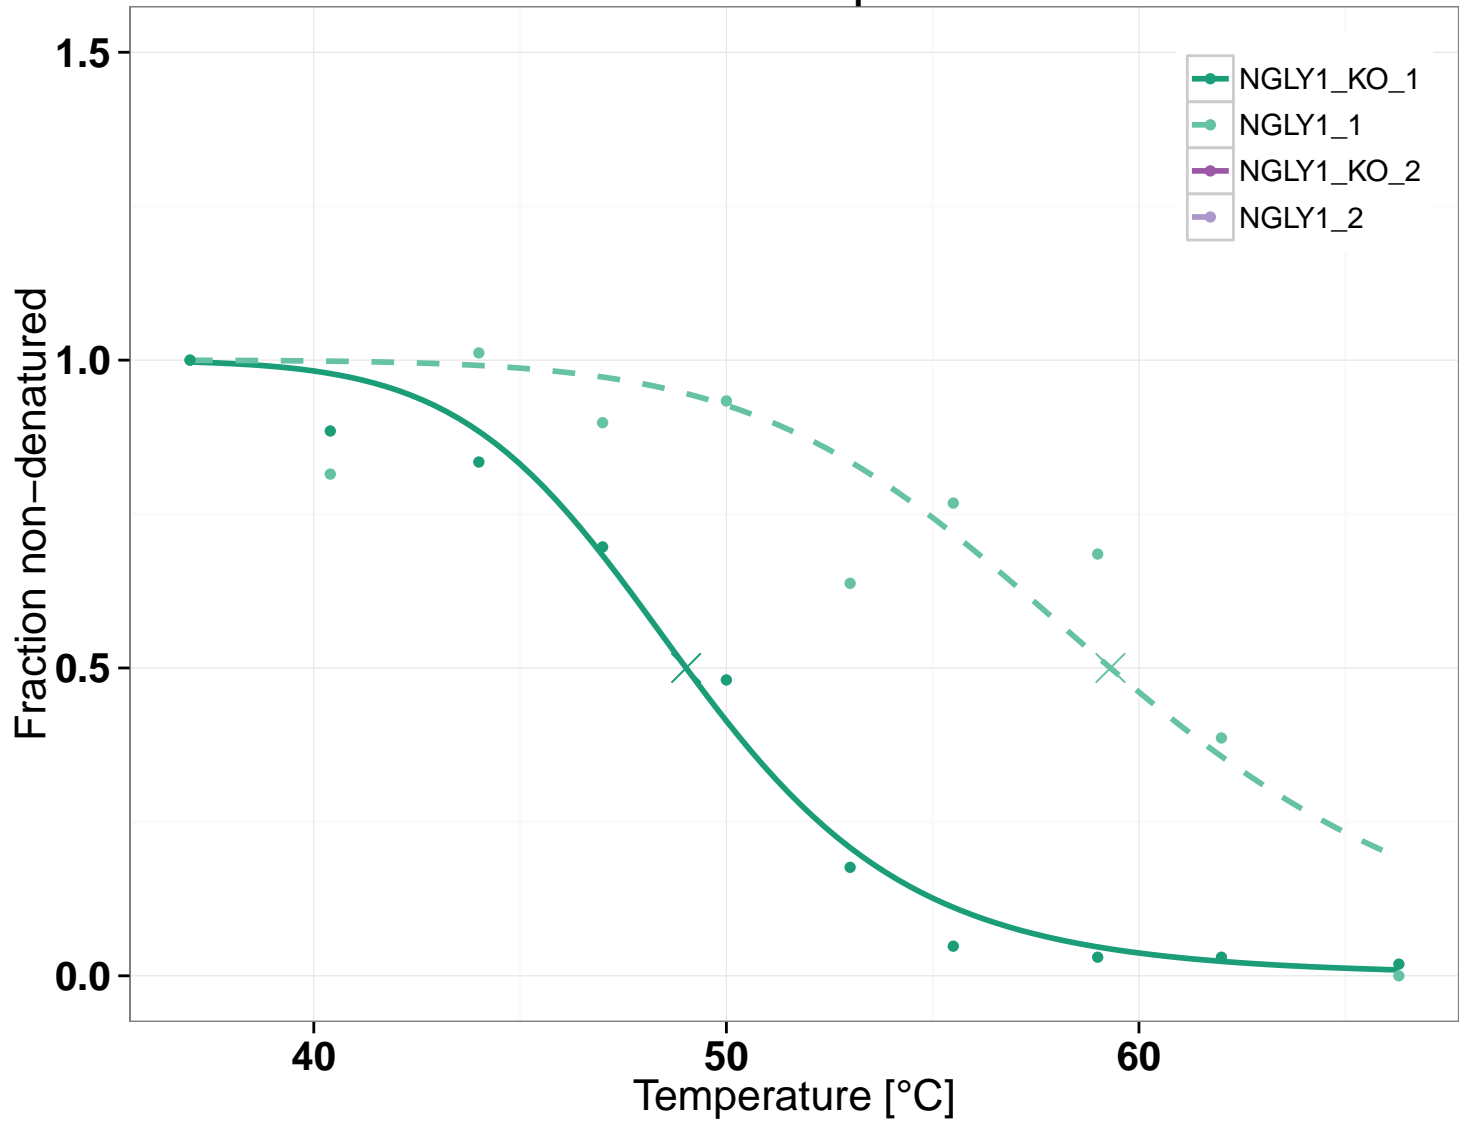

|            | meltPoint | slope  | plateau | R2   |
|------------|-----------|--------|---------|------|
| NGLY1_KO_1 | 49.03     | -0.092 | 0       | 0.99 |
| NGLY1_1    | 59.31     | -0.059 | 0       | 0.83 |
| NGLY1_KO_2 | -         | -      | -       | -    |
| NGLY1_2    | -         | -      | -       | -    |

Supplement: Supplementary file 33 [file 1]

# IPI00027988.1|CTCF

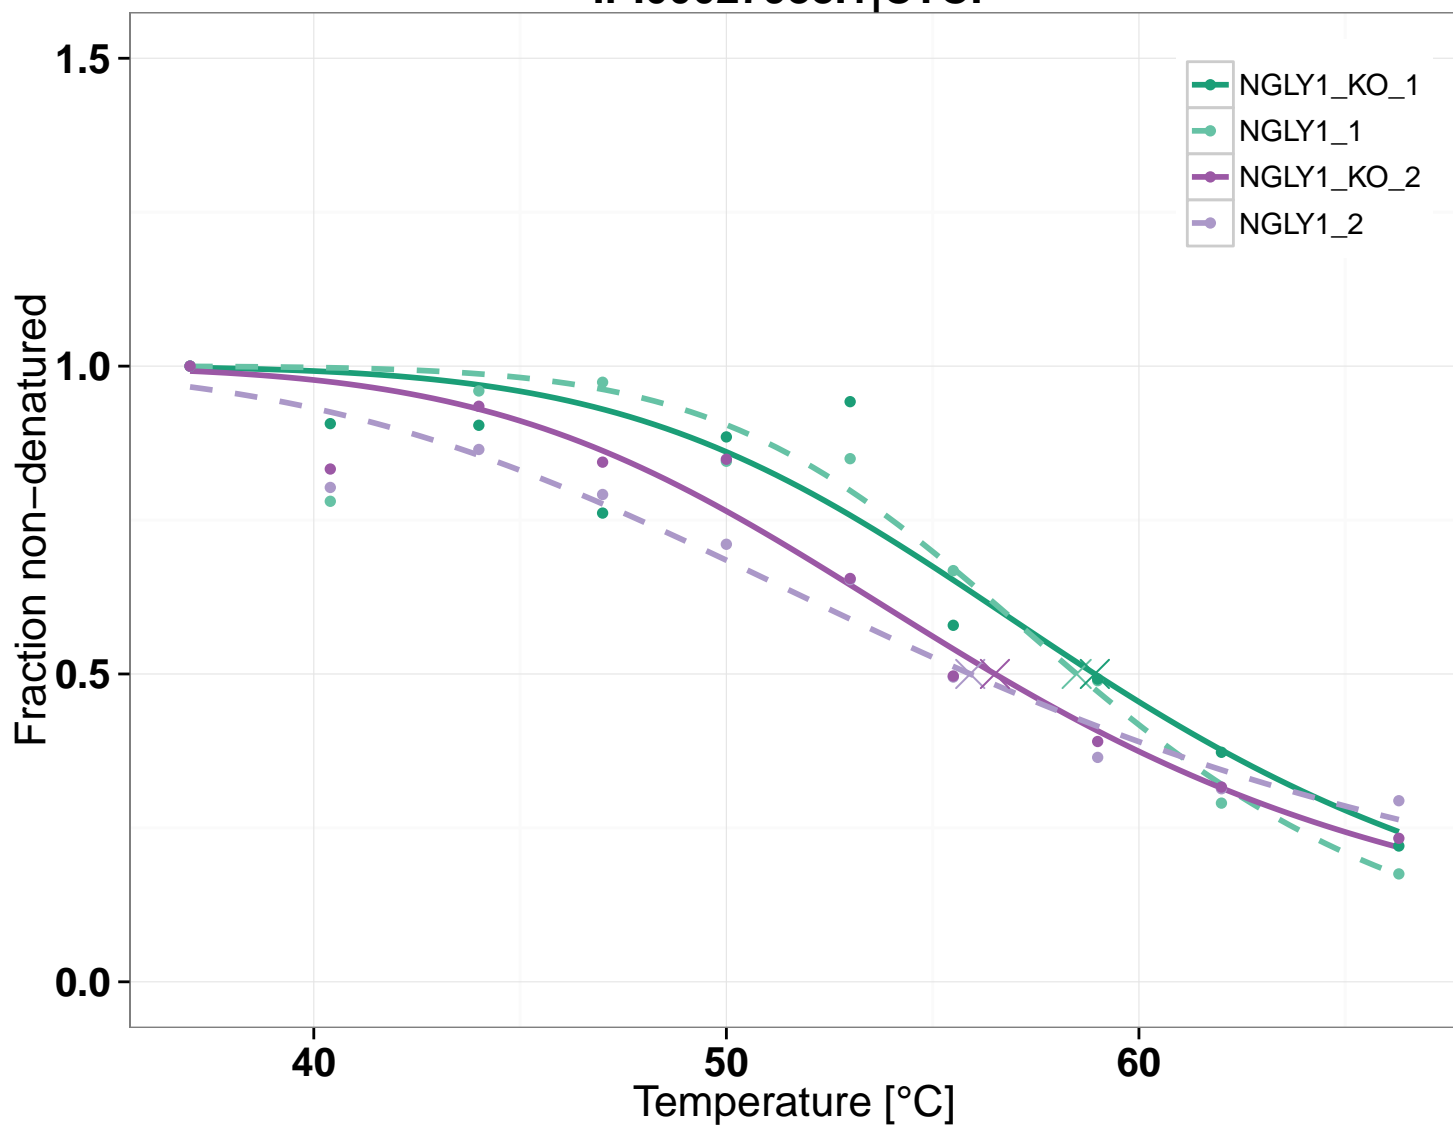

|            | meltPoint | slope  | plateau | R2   |
|------------|-----------|--------|---------|------|
| NGLY1_KO_1 | 58.93     | -0.045 | 0       | 0.88 |
| NGLY1_1    | 58.49     | -0.058 | 0       | 0.93 |
| NGLY1_KO_2 | 56.51     | -0.042 | 0.03    | 0.96 |
| NGLY1_2    | 55.91     | -0.032 | 0       | 0.95 |

Supplement: Supplementary file 34 [file 1]

IPI00003894.1|RNF11

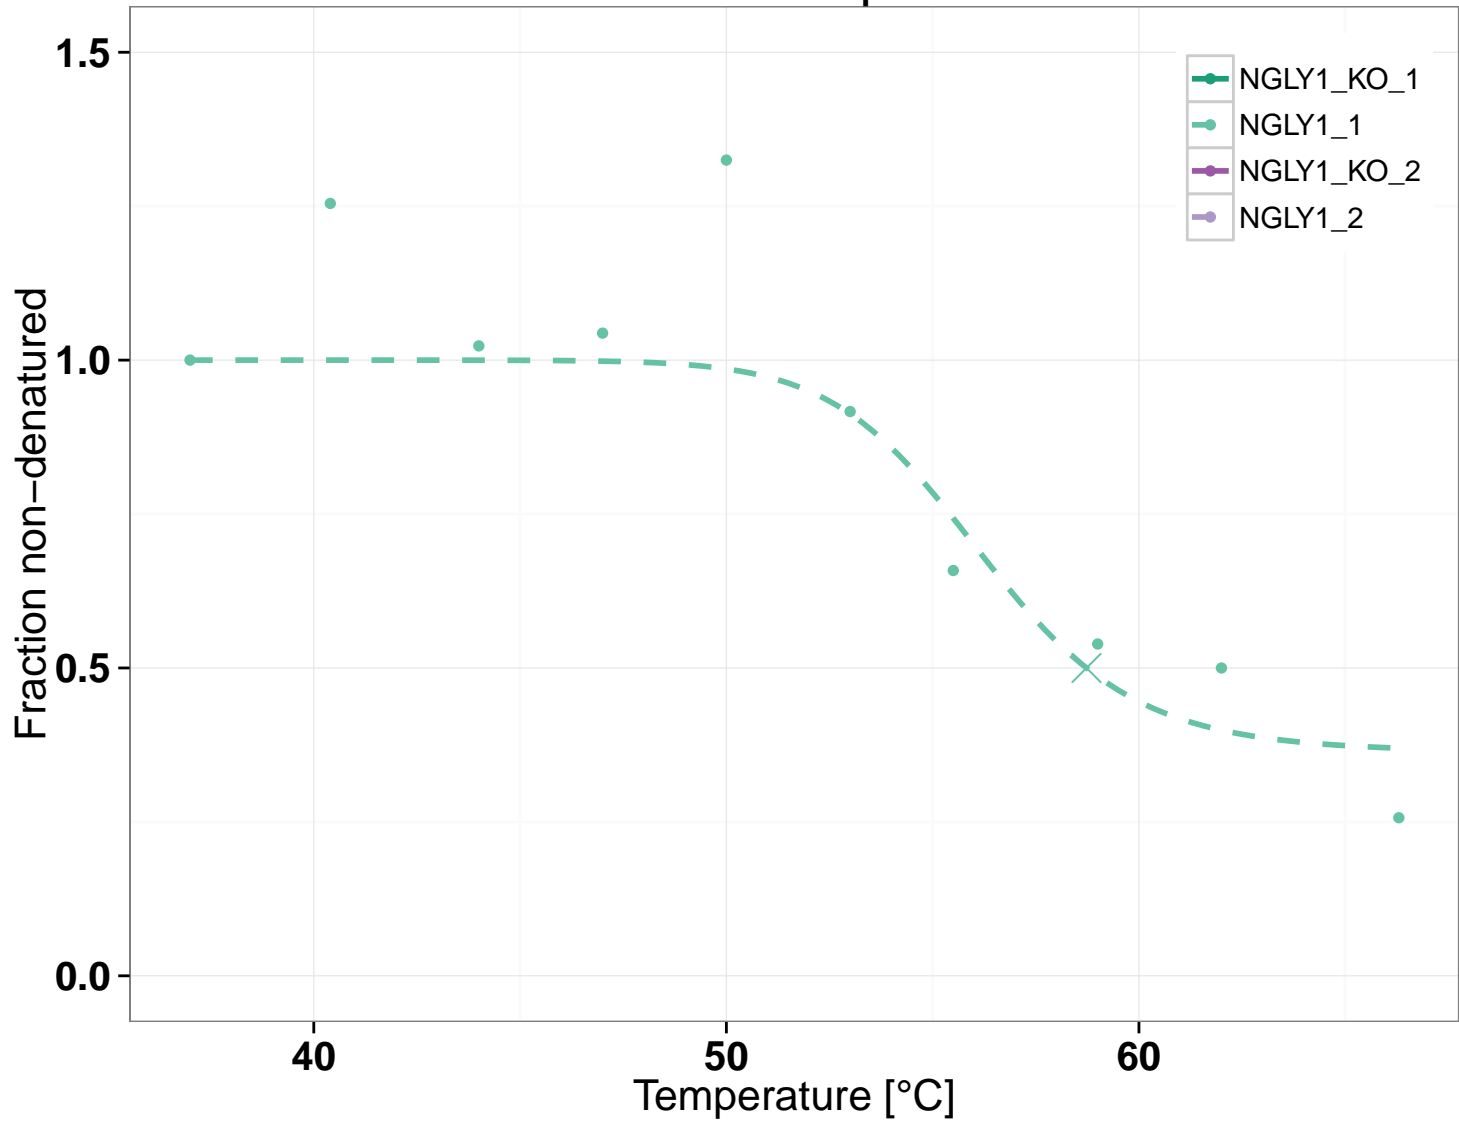

|            | meltPoint | slope  | plateau | R2  |
|------------|-----------|--------|---------|-----|
| NGLY1_KO_1 | —         | —      | —       | —   |
| NGLY1_1    | 58.73     | -0.086 | 0.36    | 0.8 |
| NGLY1_KO_2 | —         | —      | —       | —   |
| NGLY1_2    | —         | —      | —       | —   |

Supplement: Supplementary file 35 [file 1]

IPI00024255.2|GPKOW

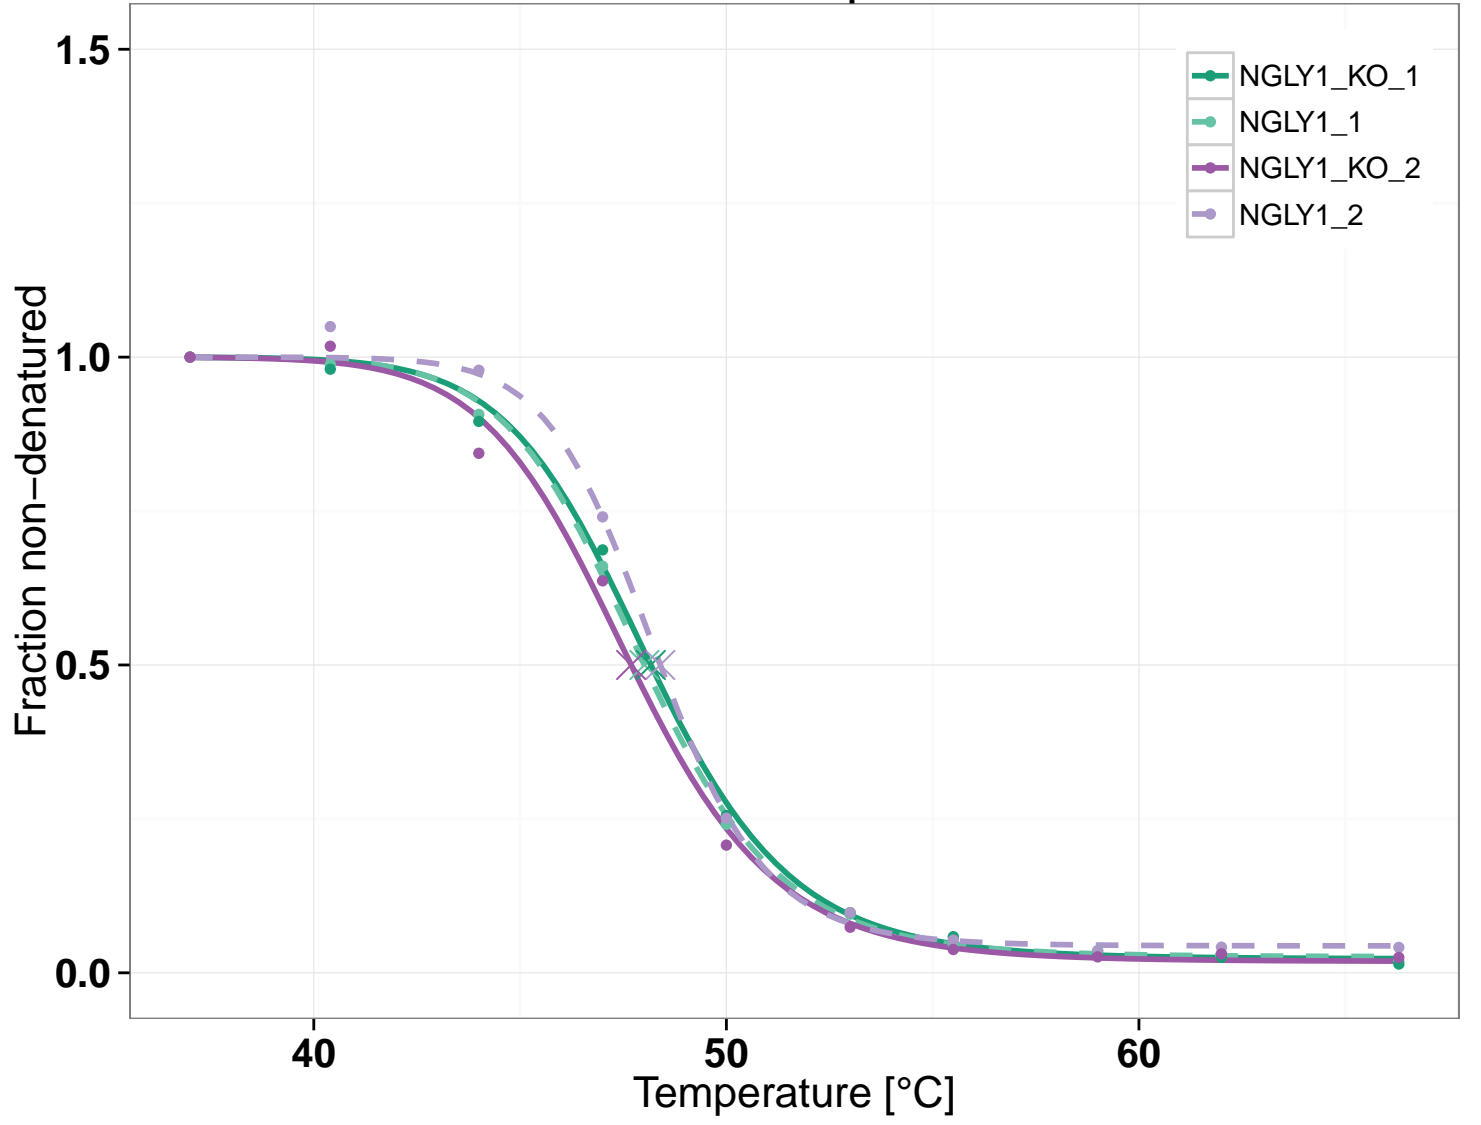

|            | meltPoint | slope | plateau | R2 |
|------------|-----------|-------|---------|----|
| NGLY1_KO_1 | 48.17     | -0.14 | 0.02    | 1  |
| NGLY1_1    | 48.01     | -0.14 | 0.03    | 1  |
| NGLY1_KO_2 | 47.69     | -0.14 | 0.02    | 1  |
| NGLY1_2    | 48.4      | -0.18 | 0.04    | 1  |

Supplement: Supplementary file 36 [file 1]

# IPI00217950.5|HMGN2

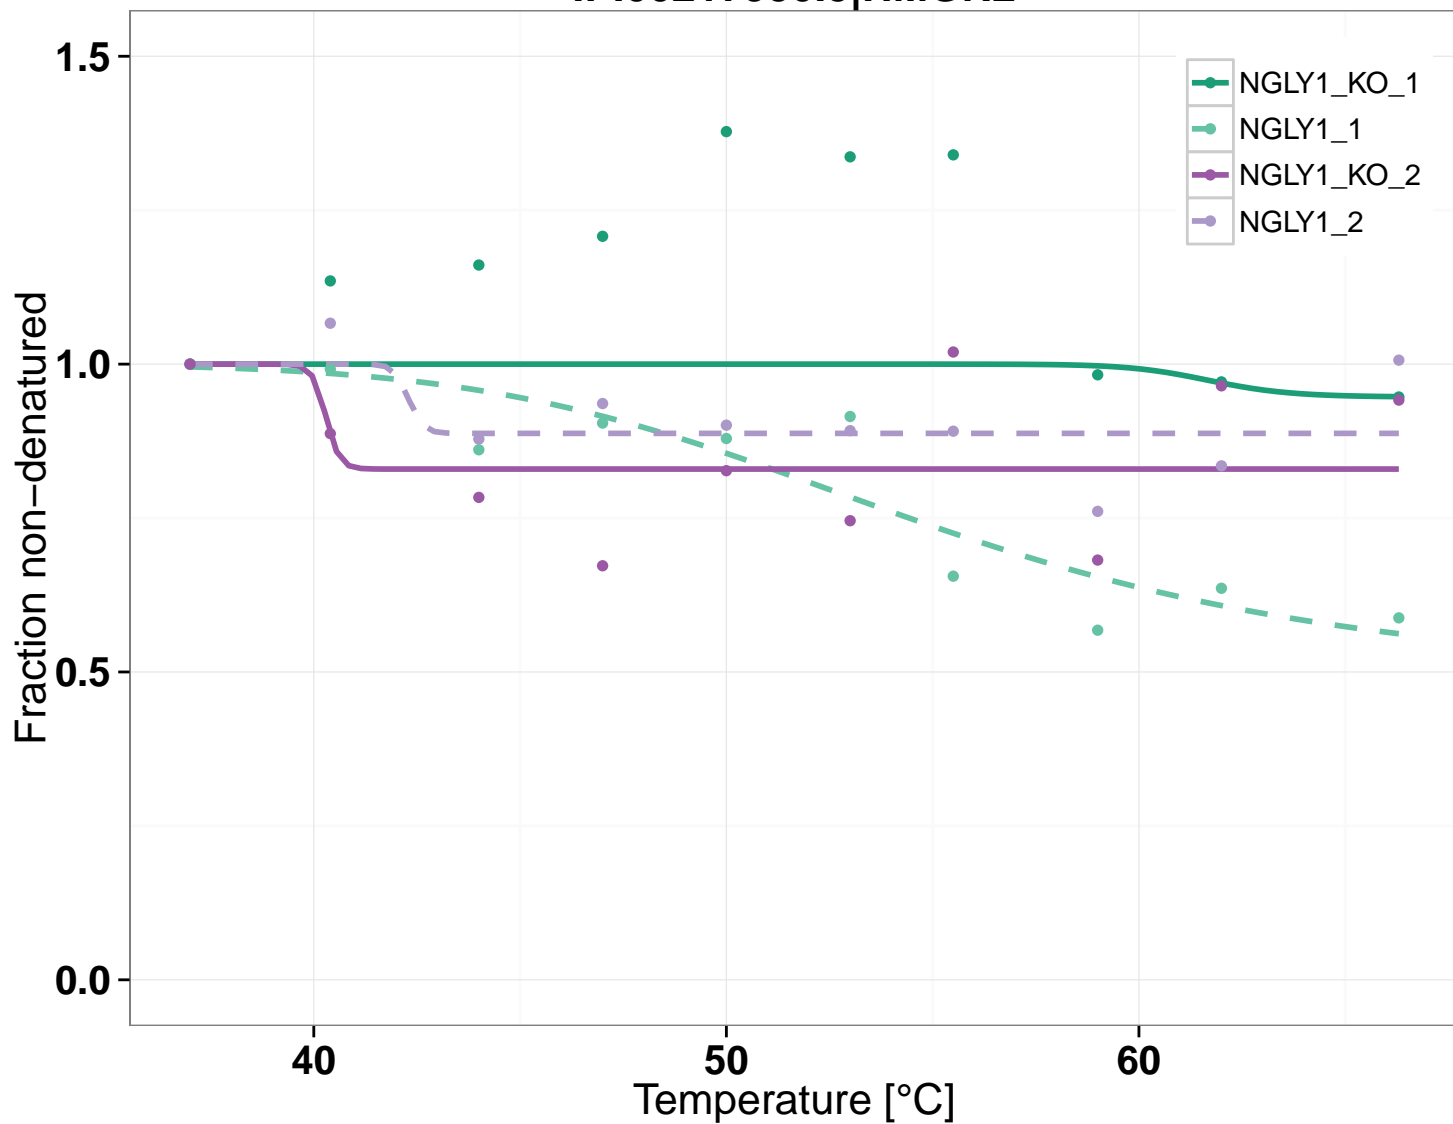

|            | meltPoint | slope  | plateau | R2    |
|------------|-----------|--------|---------|-------|
| NGLY1_KO_1 | –         | –0.014 | 0.95    | –0.84 |
| NGLY1_1    | –         | –0.024 | 0.48    | 0.84  |
| NGLY1_KO_2 | –         | –0.26  | 0.83    | 0.18  |
| NGLY1_2    | –         | –0.17  | 0.89    | 0.44  |

Supplement: Supplementary file 37 [file 1]

# IPI00000634.1|CCDC6

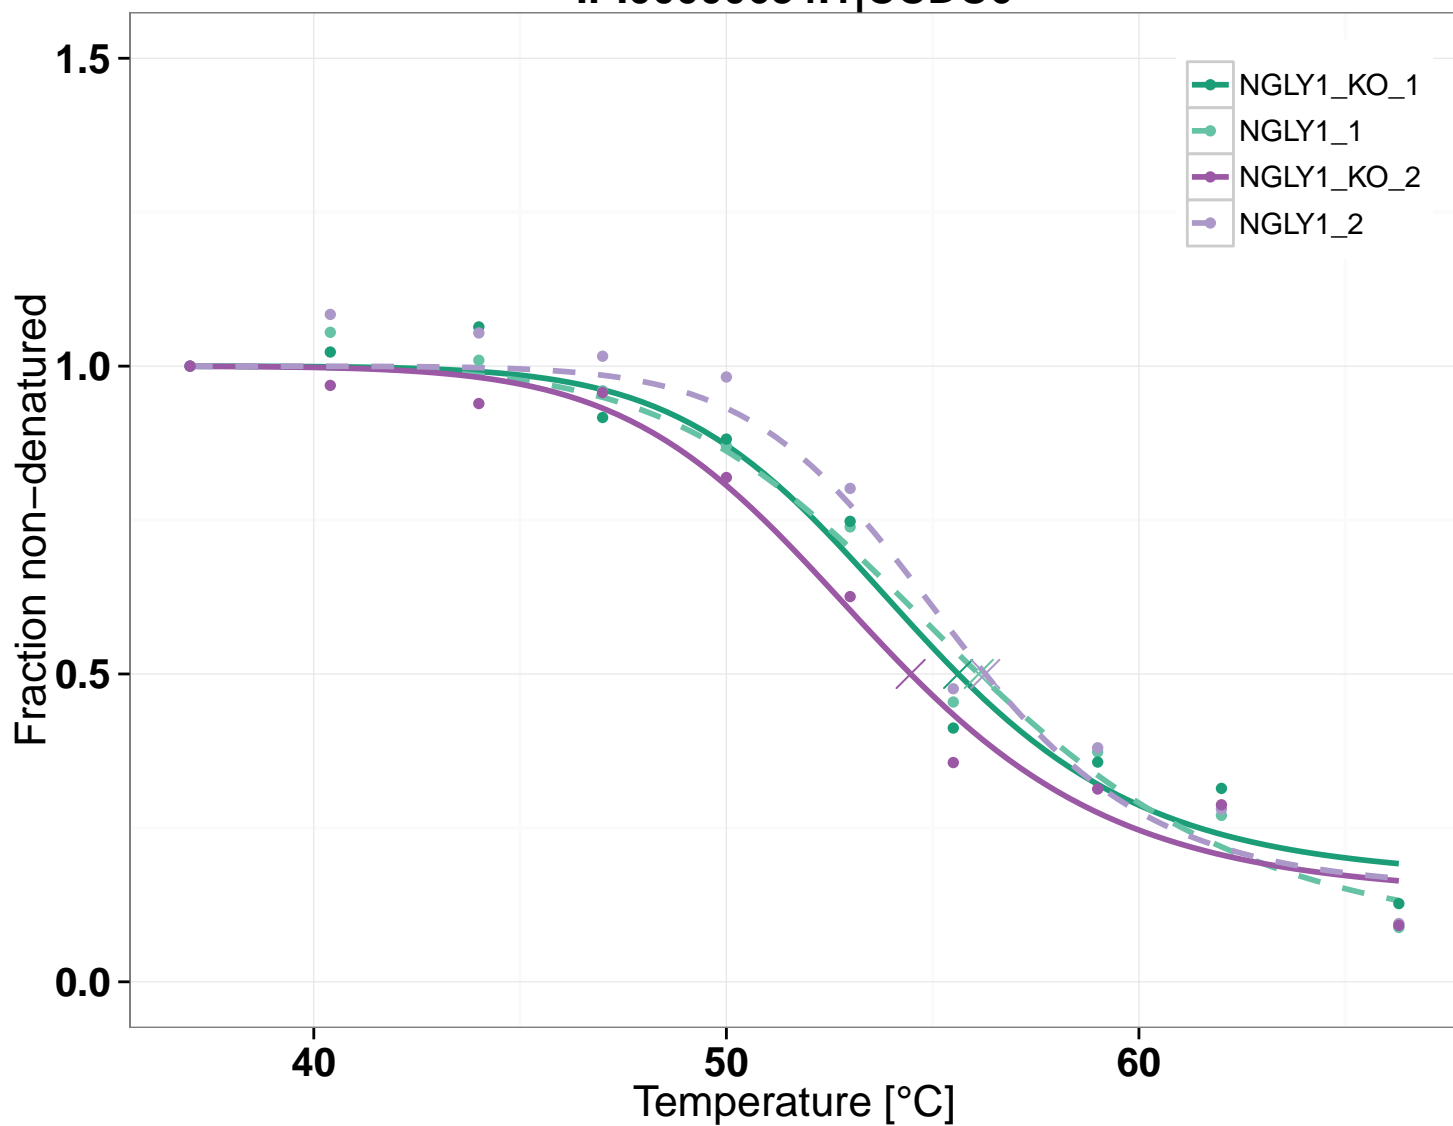

|            | meltPoint | slope  | plateau | R2   |
|------------|-----------|--------|---------|------|
| NGLY1_KO_1 | 55.62     | -0.074 | 0.17    | 0.97 |
| NGLY1_1    | 56.12     | -0.067 | 0.06    | 0.98 |
| NGLY1_KO_2 | 54.47     | -0.073 | 0.14    | 0.98 |
| NGLY1_2    | 56.28     | -0.088 | 0.15    | 0.97 |

Supplement: Supplementary file 38 [file 1]

IPI00719426.1|PEX26

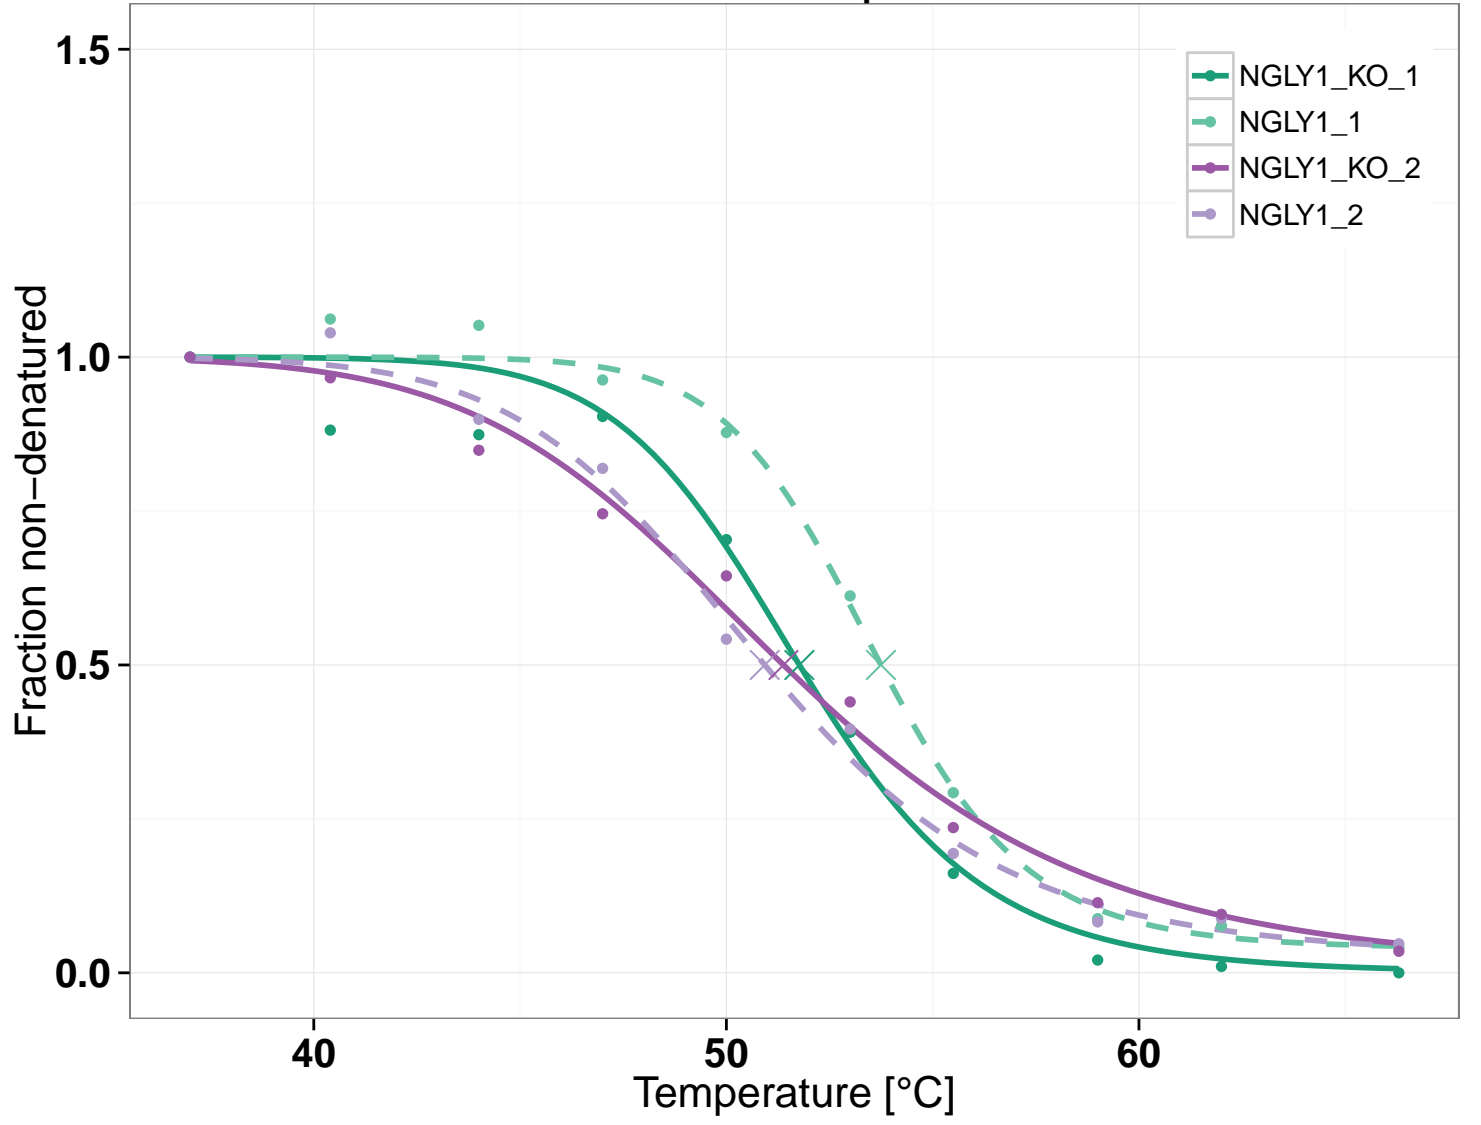

|            | meltPoint | slope  | plateau | R2   |
|------------|-----------|--------|---------|------|
| NGLY1_KO_1 | 51.77     | -0.11  | 0       | 0.98 |
| NGLY1_1    | 53.75     | -0.13  | 0.04    | 1    |
| NGLY1_KO_2 | 51.38     | -0.066 | 0       | 0.99 |
| NGLY1_2    | 50.93     | -0.081 | 0.02    | 0.99 |

Supplement: Supplementary file 39 [file 1]

IPI00383949.2|LARP2

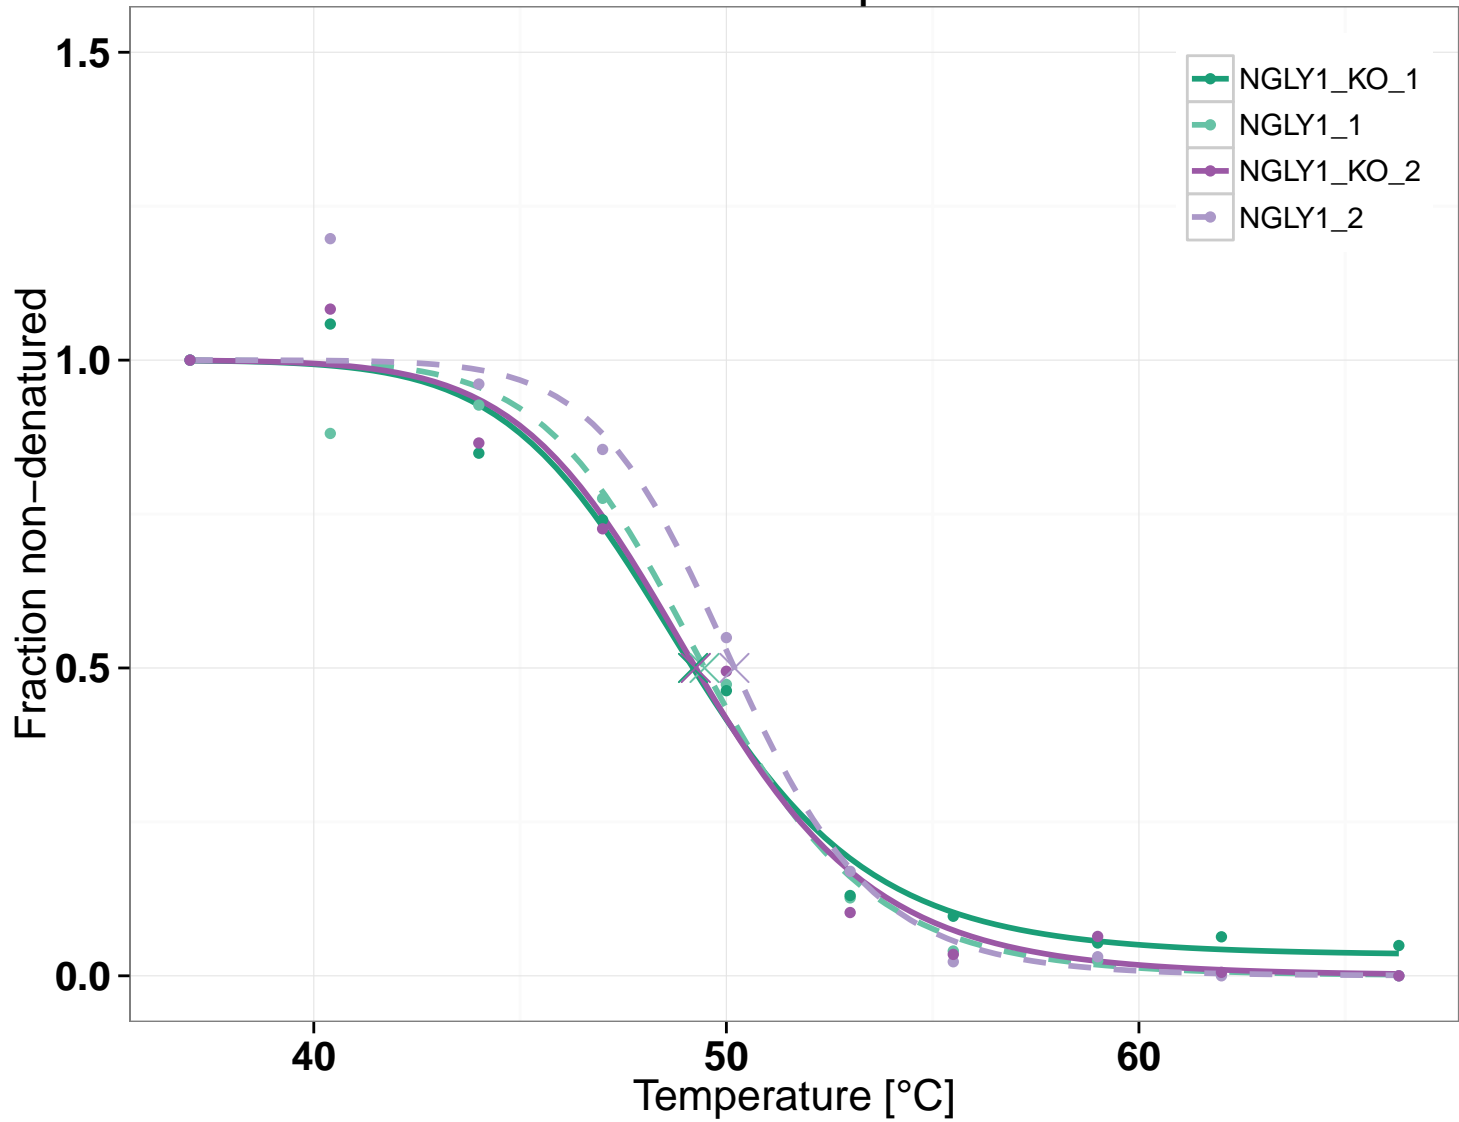

|            | meltPoint | slope | plateau | R2   |
|------------|-----------|-------|---------|------|
| NGLY1_KO_1 | 49.19     | -0.11 | 0.03    | 0.99 |
| NGLY1_1    | 49.47     | -0.13 | 0       | 0.99 |
| NGLY1_KO_2 | 49.26     | -0.11 | 0       | 0.98 |
| NGLY1_2    | 50.19     | -0.15 | 0       | 0.98 |

Supplement: Supplementary file 40 [file 1]

# IPI00010255.3|RHBDD2

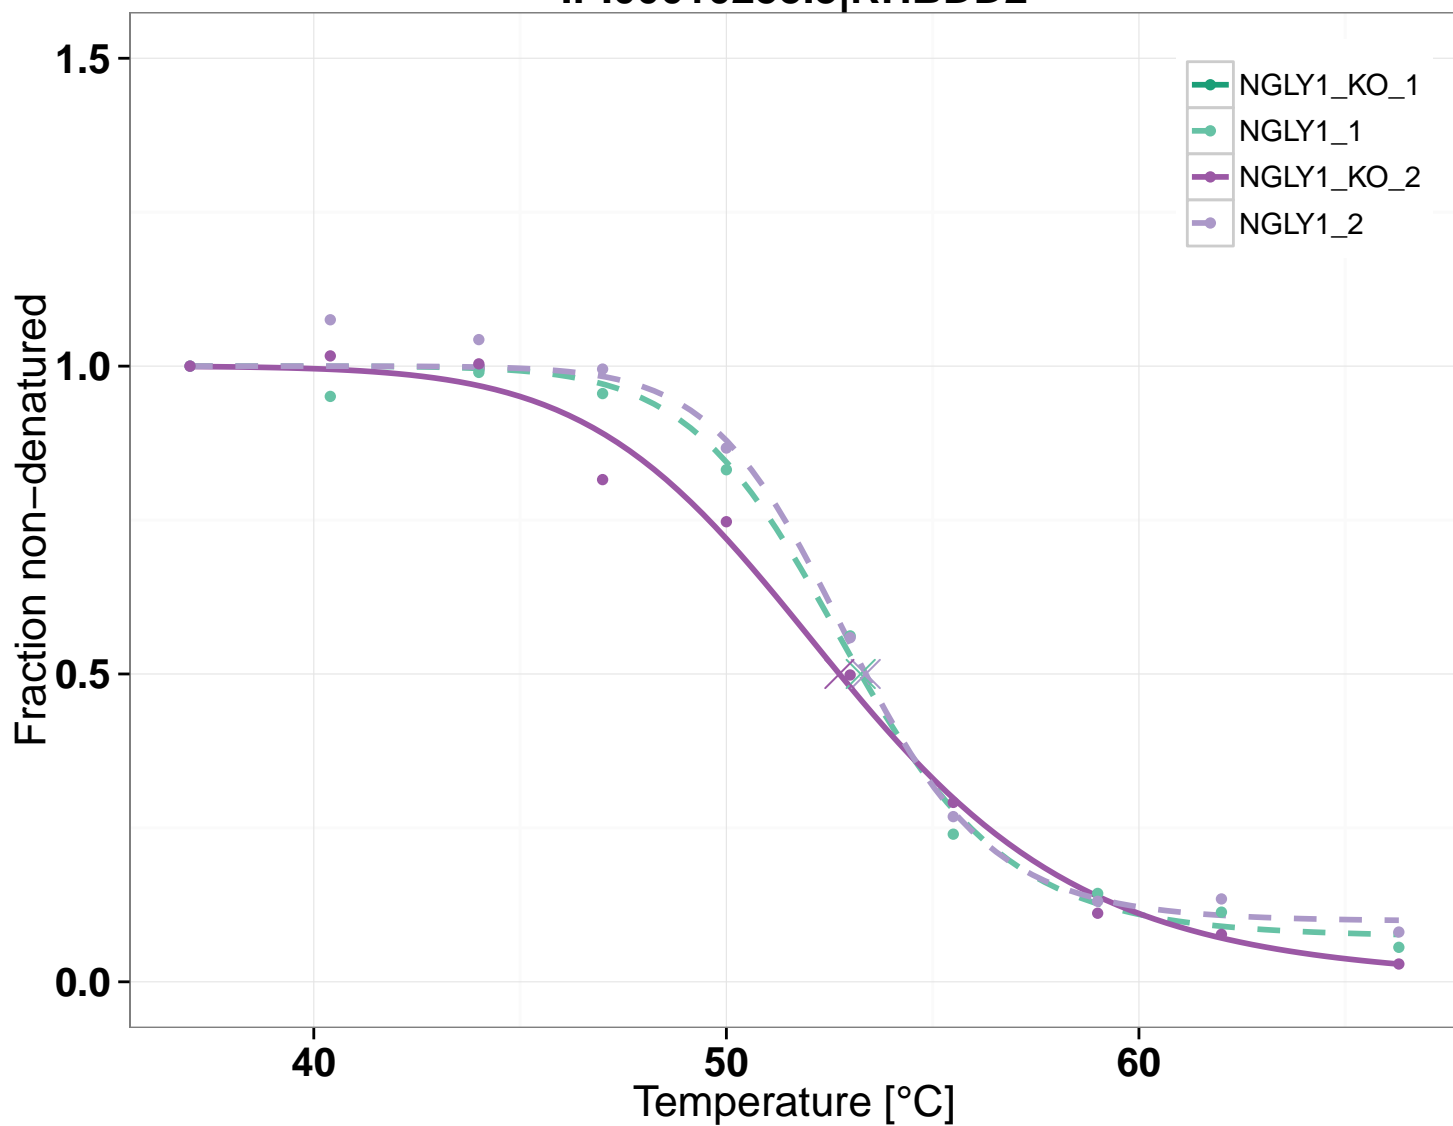

|            | meltPoint | slope  | plateau | R2   |
|------------|-----------|--------|---------|------|
| NGLY1_KO_1 | —         | —      | —       | —    |
| NGLY1_1    | 53.26     | -0.12  | 0.07    | 1    |
| NGLY1_KO_2 | 52.74     | -0.083 | 0       | 0.99 |
| NGLY1_2    | 53.38     | -0.13  | 0.1     | 0.99 |

Supplement: Supplementary file 41 [file 1]

IPI00000155.6|N-PAC

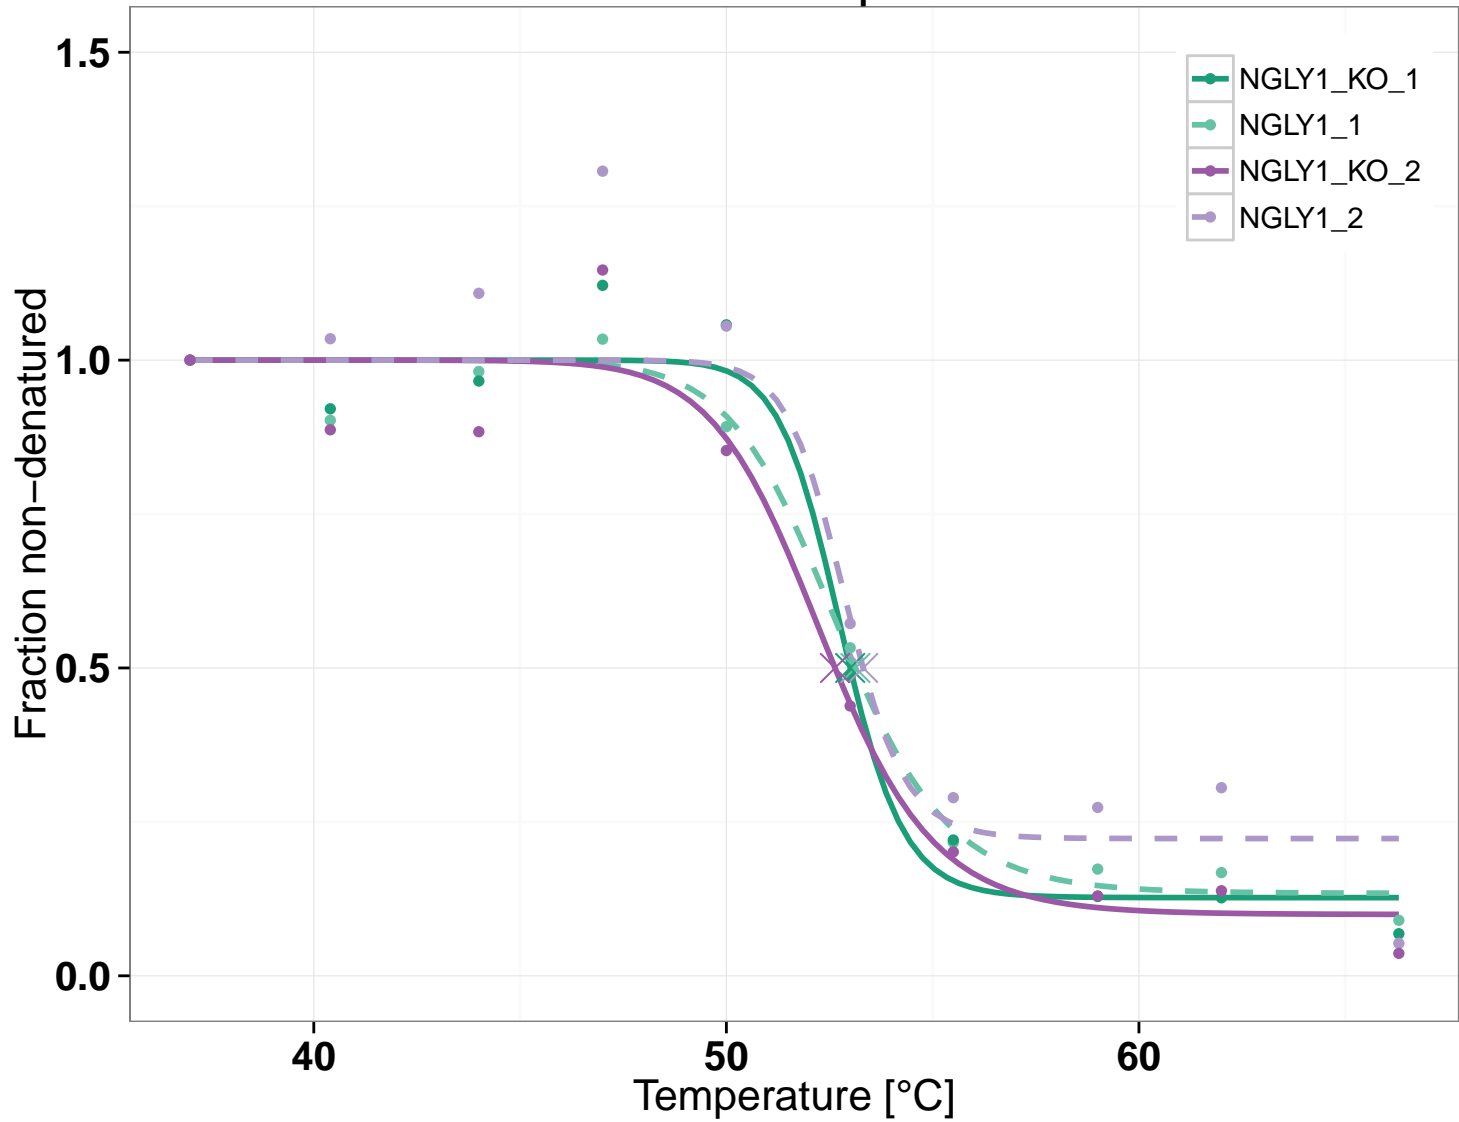

|            | meltPoint | slope | plateau | R2   |
|------------|-----------|-------|---------|------|
| NGLY1_KO_1 | 53        | -0.29 | 0.13    | 0.98 |
| NGLY1_1    | 53.13     | -0.16 | 0.13    | 0.99 |
| NGLY1_KO_2 | 52.63     | -0.17 | 0.1     | 0.96 |
| NGLY1_2    | 53.32     | -0.27 | 0.22    | 0.92 |

Supplement: Supplementary file 42 [file 1]

# IPI00910977.1|MPST

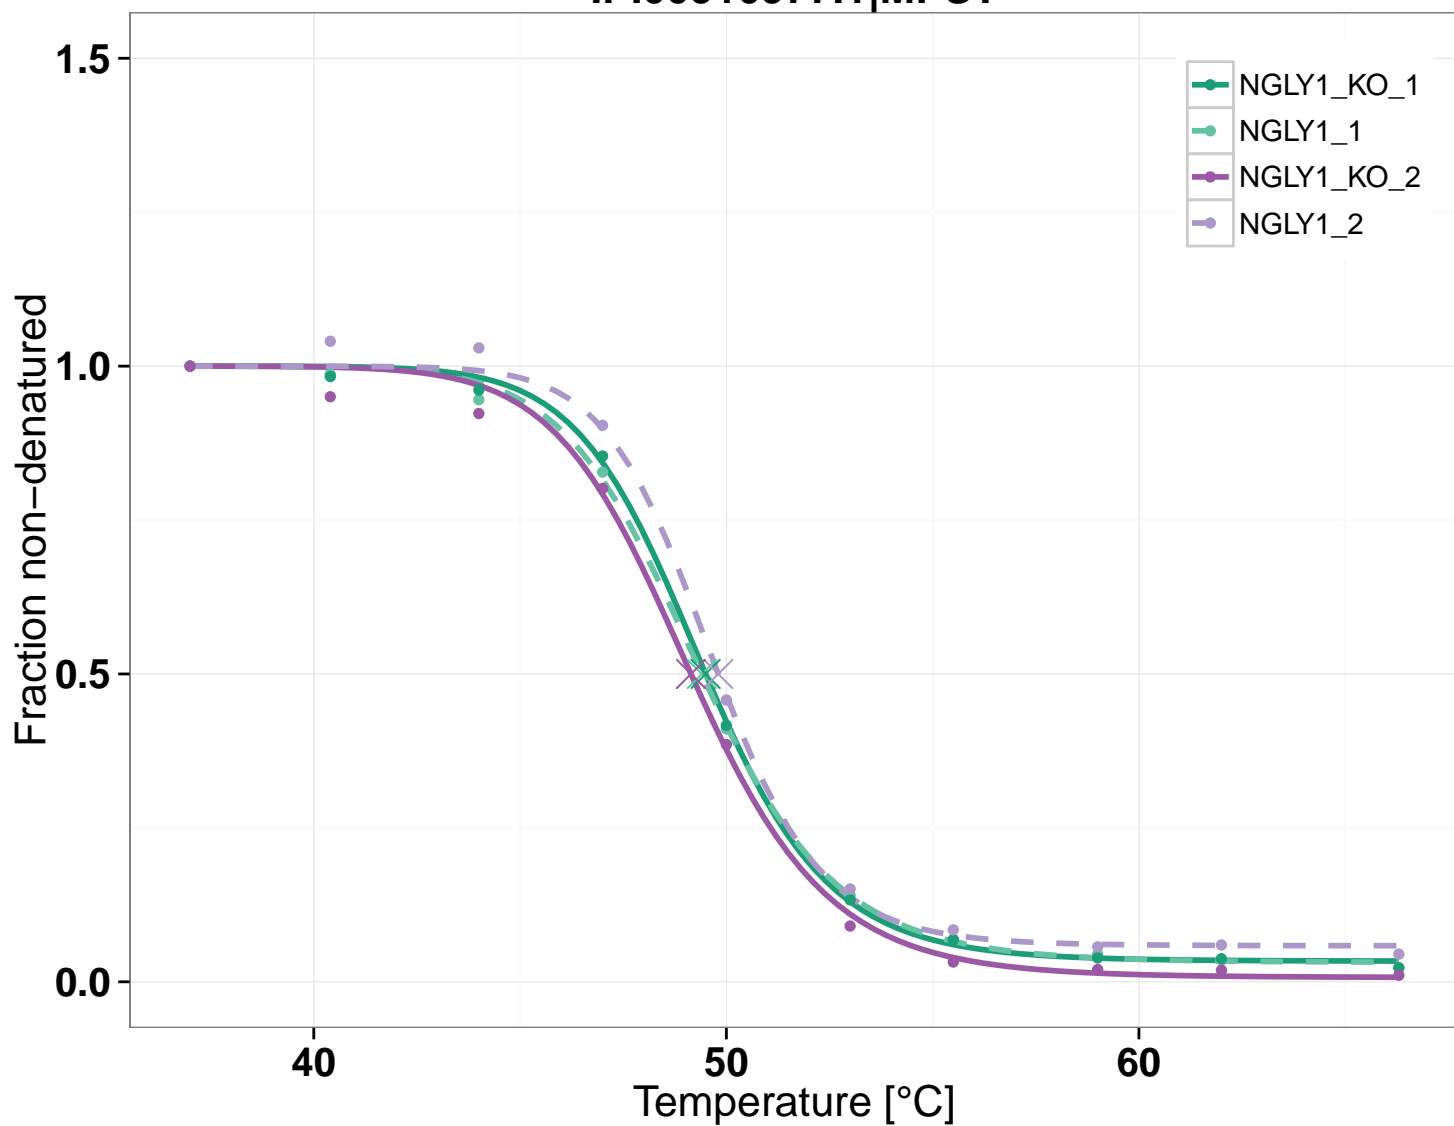

|            | meltPoint | slope | plateau | R2 |
|------------|-----------|-------|---------|----|
| NGLY1_KO_1 | 49.5      | -0.16 | 0.03    | 1  |
| NGLY1_1    | 49.4      | -0.15 | 0.03    | 1  |
| NGLY1_KO_2 | 49.14     | -0.15 | 0.01    | 1  |
| NGLY1_2    | 49.8      | -0.18 | 0.06    | 1  |

Supplement: Supplementary file 43 [file 1]

# IPI00167368.2|NARG1L

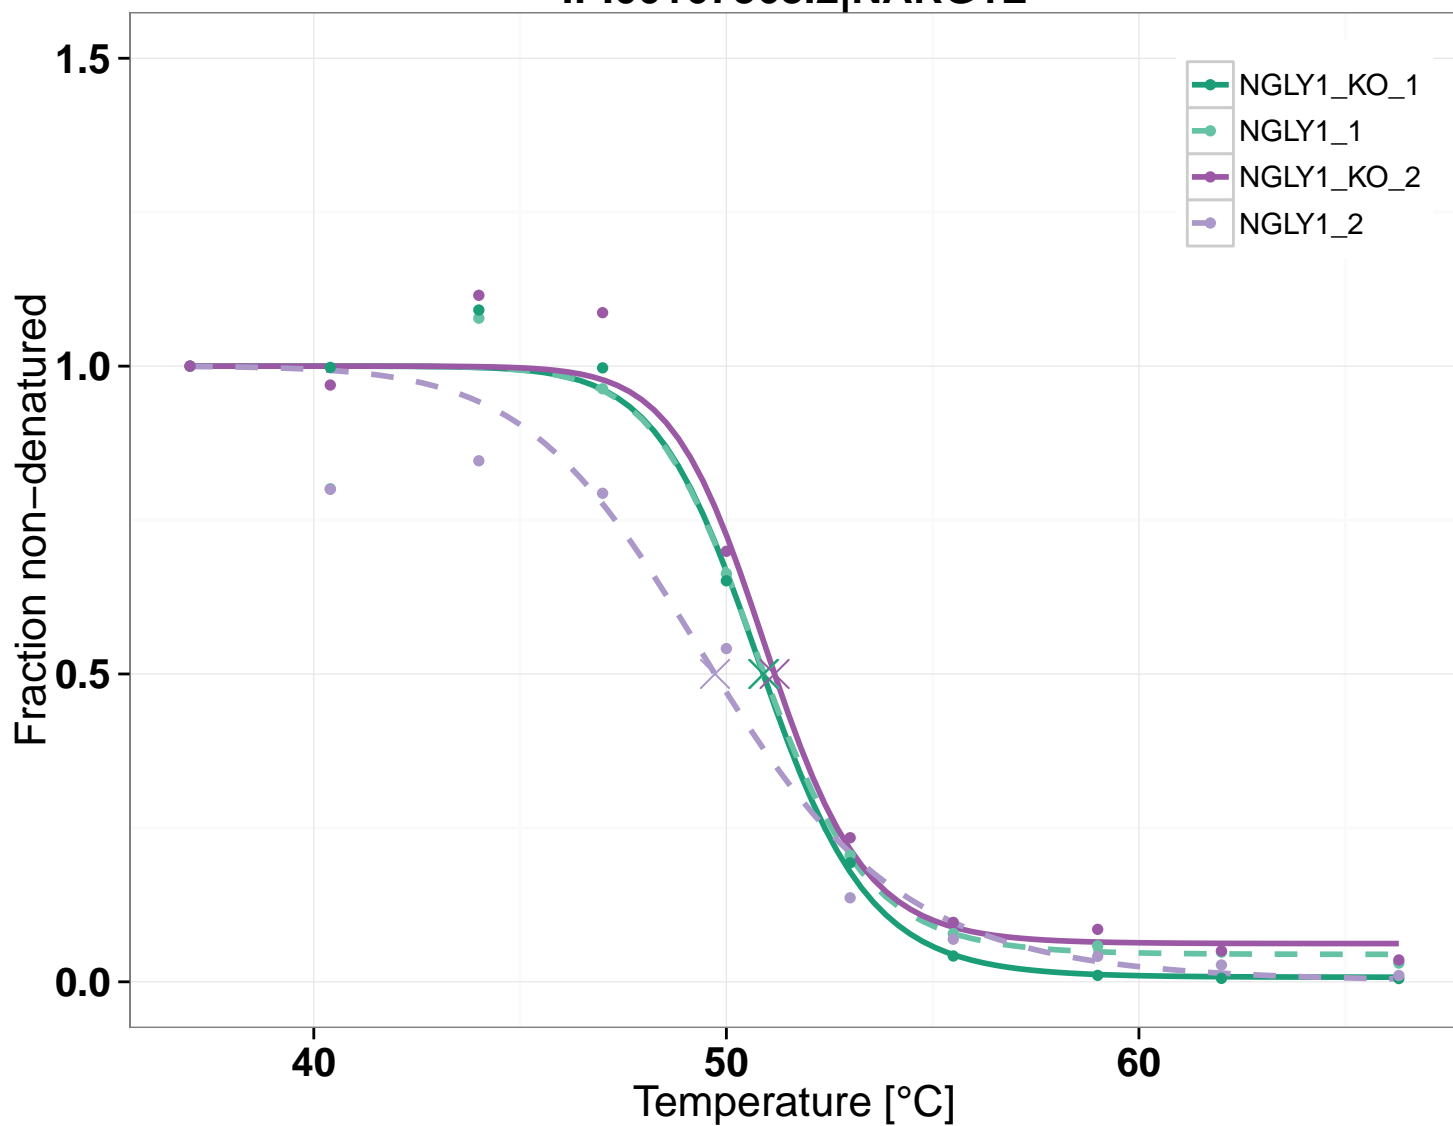

|            | meltPoint | slope | plateau | R2   |
|------------|-----------|-------|---------|------|
| NGLY1_KO_1 | 50.89     | -0.19 | 0.01    | 1    |
| NGLY1_1    | 50.92     | -0.18 | 0.04    | 0.97 |
| NGLY1_KO_2 | 51.17     | -0.2  | 0.06    | 0.99 |
| NGLY1_2    | 49.72     | -0.11 | 0       | 0.96 |

Supplement: Supplementary file 44 [file 1]

IPI00328868.3|HS1BP3

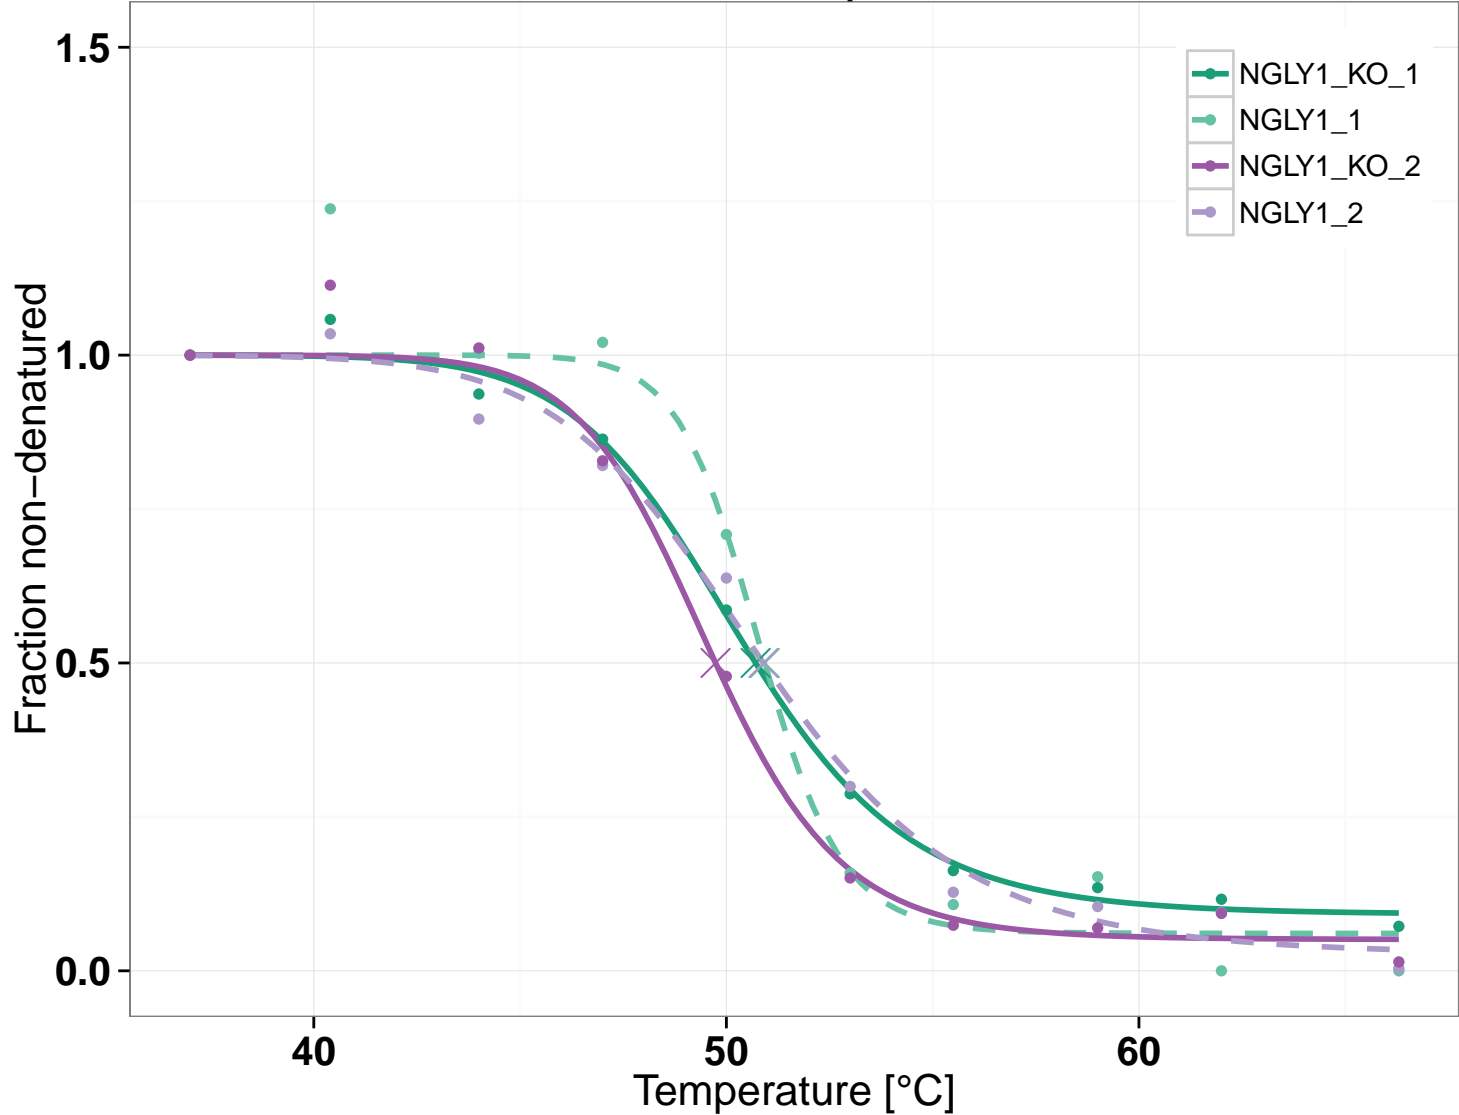

Supplement: Supplementary file 45 [file 1]

IPI00012303.3|SELENBP1

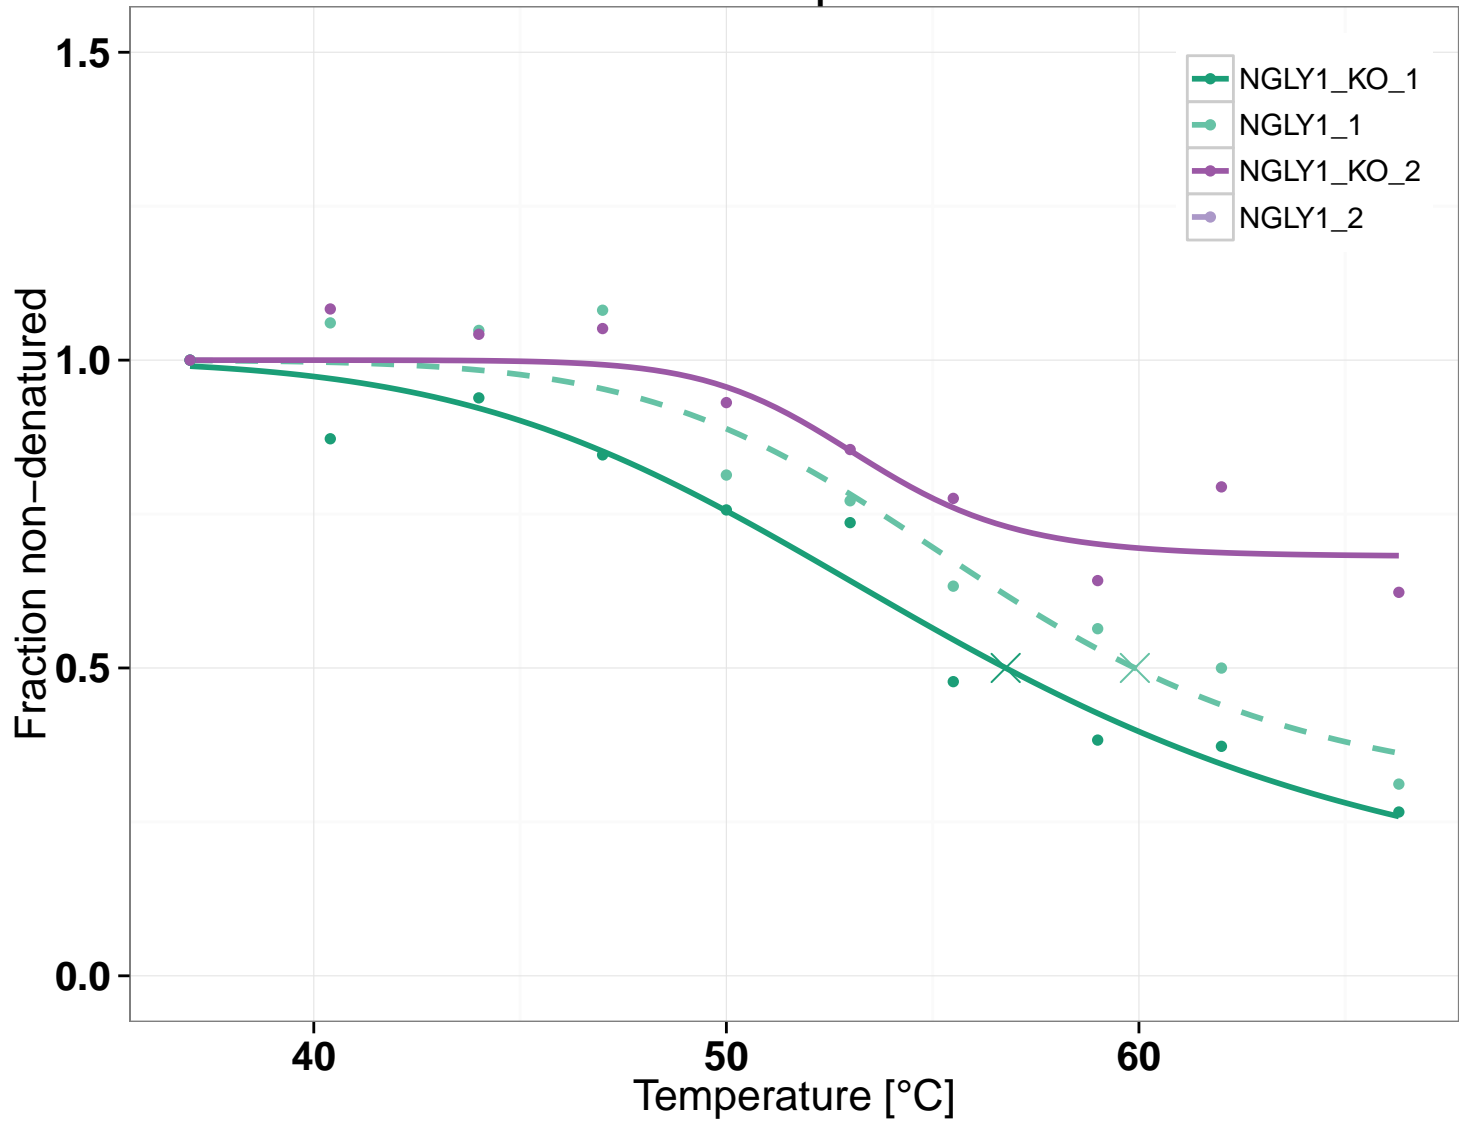

|            | meltPoint | slope  | plateau | R2   |
|------------|-----------|--------|---------|------|
| NGLY1_KO_1 | 56.77     | -0.039 | 0.09    | 0.96 |
| NGLY1_1    | 59.9      | -0.044 | 0.28    | 0.94 |
| NGLY1_KO_2 | -         | -0.042 | 0.68    | 0.88 |
| NGLY1_2    | -         | -      | -       | -    |

Supplement: Supplementary file 46 [file 1]

IPI00028347.9|FBXO31

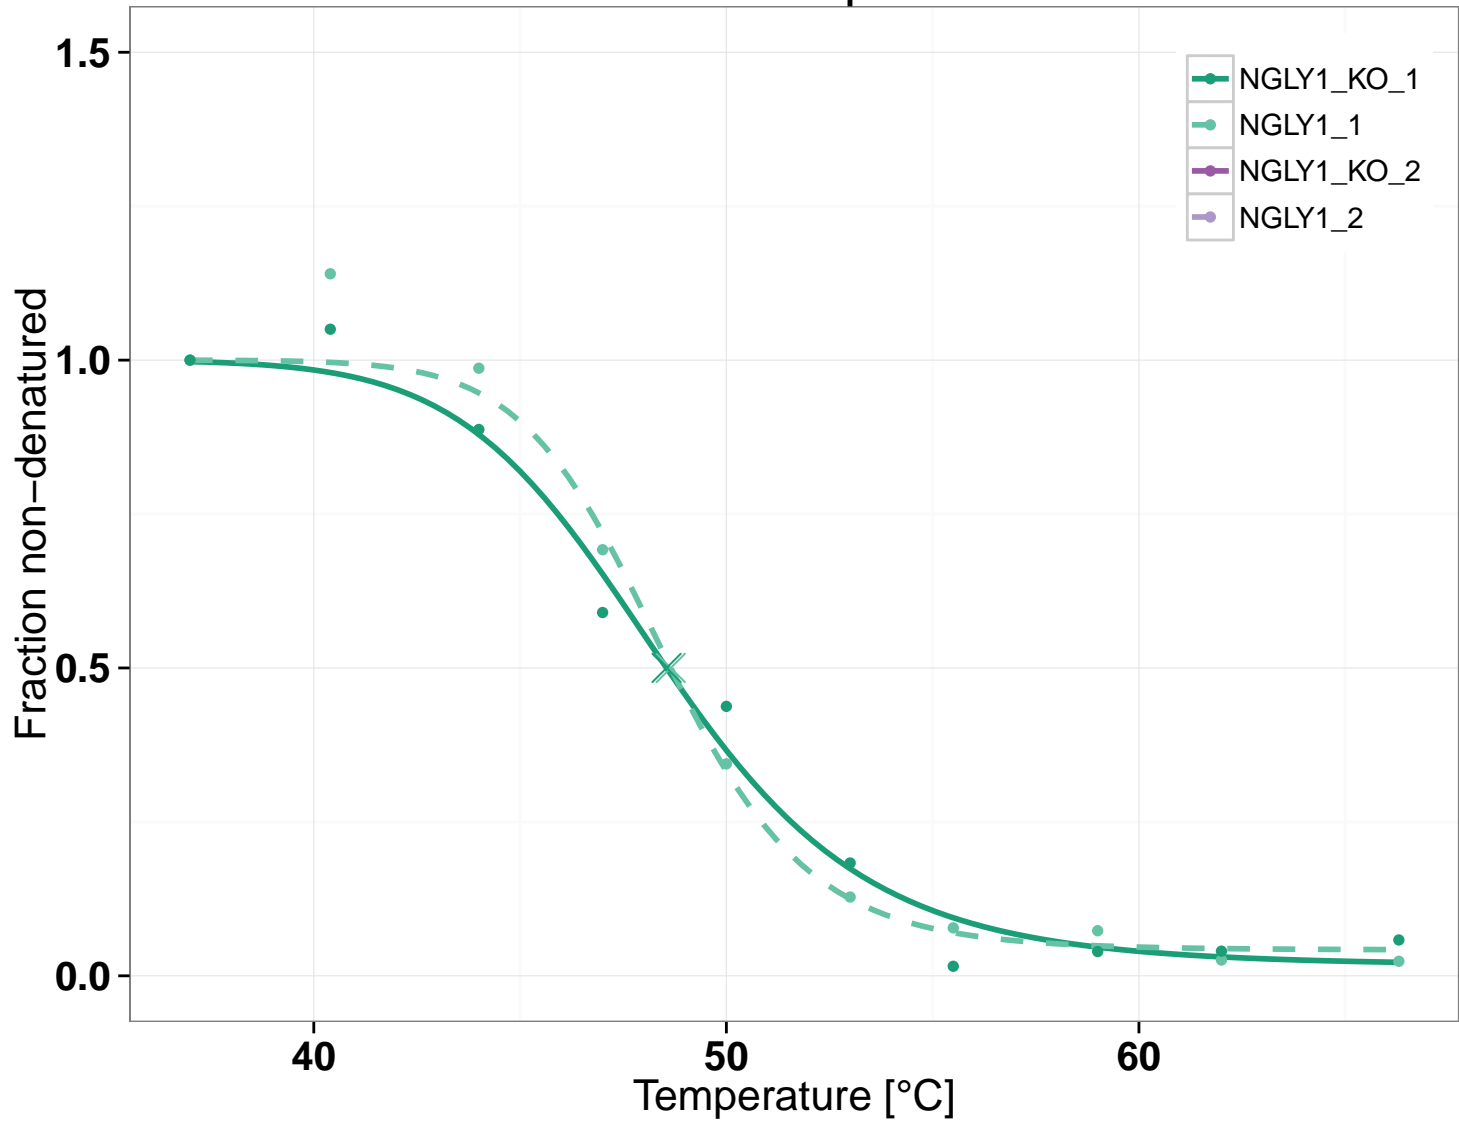

|            | meltPoint | slope  | plateau | R2   |
|------------|-----------|--------|---------|------|
| NGLY1_KO_1 | 48.55     | -0.099 | 0.02    | 0.99 |
| NGLY1_1    | 48.65     | -0.14  | 0.04    | 0.99 |
| NGLY1_KO_2 | -         | -      | -       | -    |
| NGLY1_2    | -         | -      | -       | -    |

Supplement: Supplementary file 47 [file 1]

IPI00297723.2|RBM6

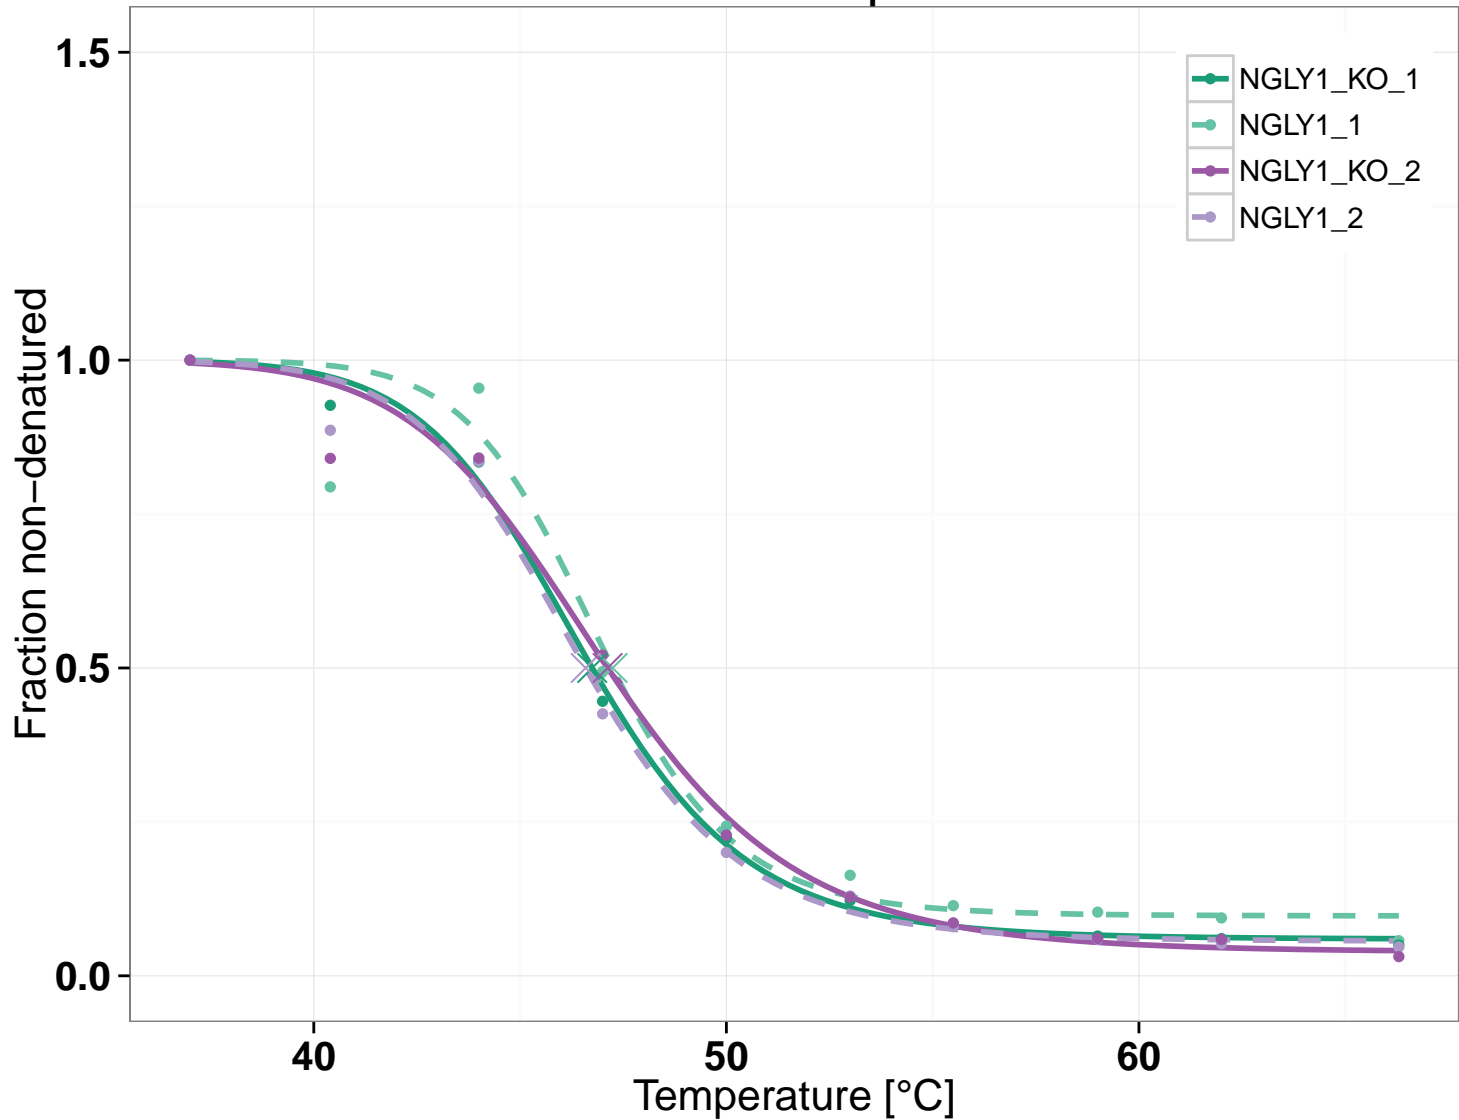

|            | meltPoint | slope | plateau | R2   |
|------------|-----------|-------|---------|------|
| NGLY1_KO_1 | 46.75     | -0.12 | 0.06    | 1    |
| NGLY1_1    | 47.24     | -0.14 | 0.1     | 0.96 |
| NGLY1_KO_2 | 47.12     | -0.1  | 0.04    | 0.99 |
| NGLY1_2    | 46.59     | -0.12 | 0.06    | 0.99 |

Supplement: Supplementary file 48 [file 1]

IPI00784017.2|KIAA1324L

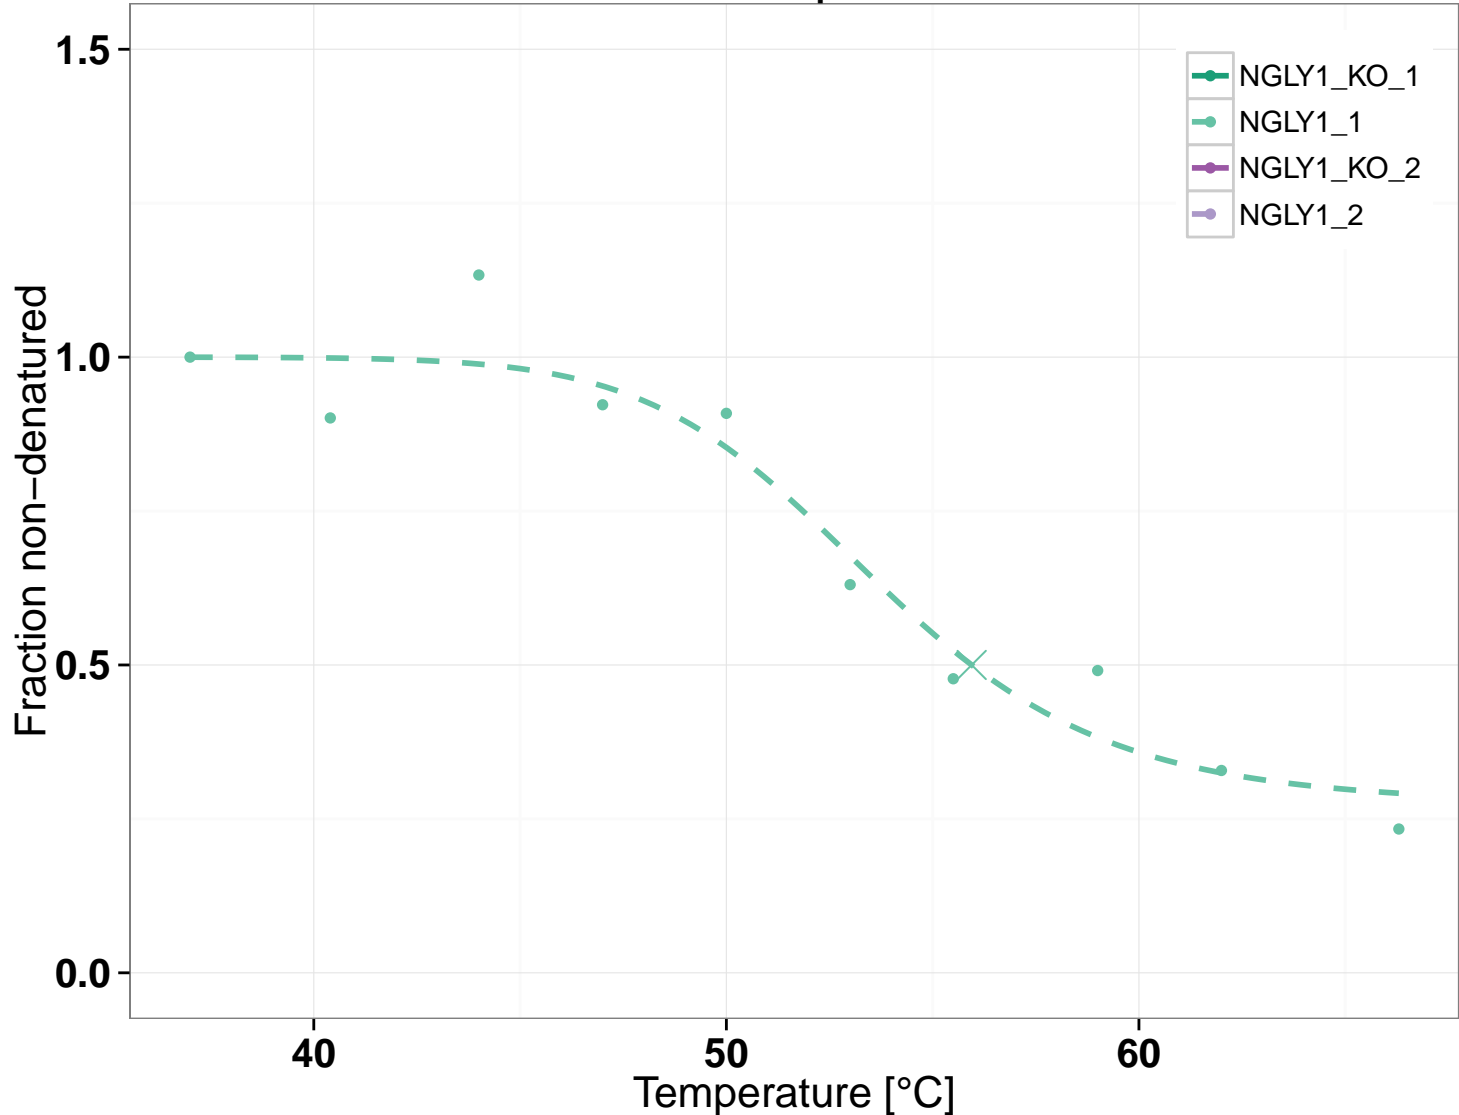

|            | meltPoint | slope  | plateau | R2   |
|------------|-----------|--------|---------|------|
| NGLY1_KO_1 | -         | -      | -       | -    |
| NGLY1_1    | 55.95     | -0.065 | 0.27    | 0.94 |
| NGLY1_KO_2 | -         | -      | -       | -    |
| NGLY1_2    | -         | -      | -       | -    |

Supplement: Supplementary file 49 [file 1]

# IPI00412298.3|ATR

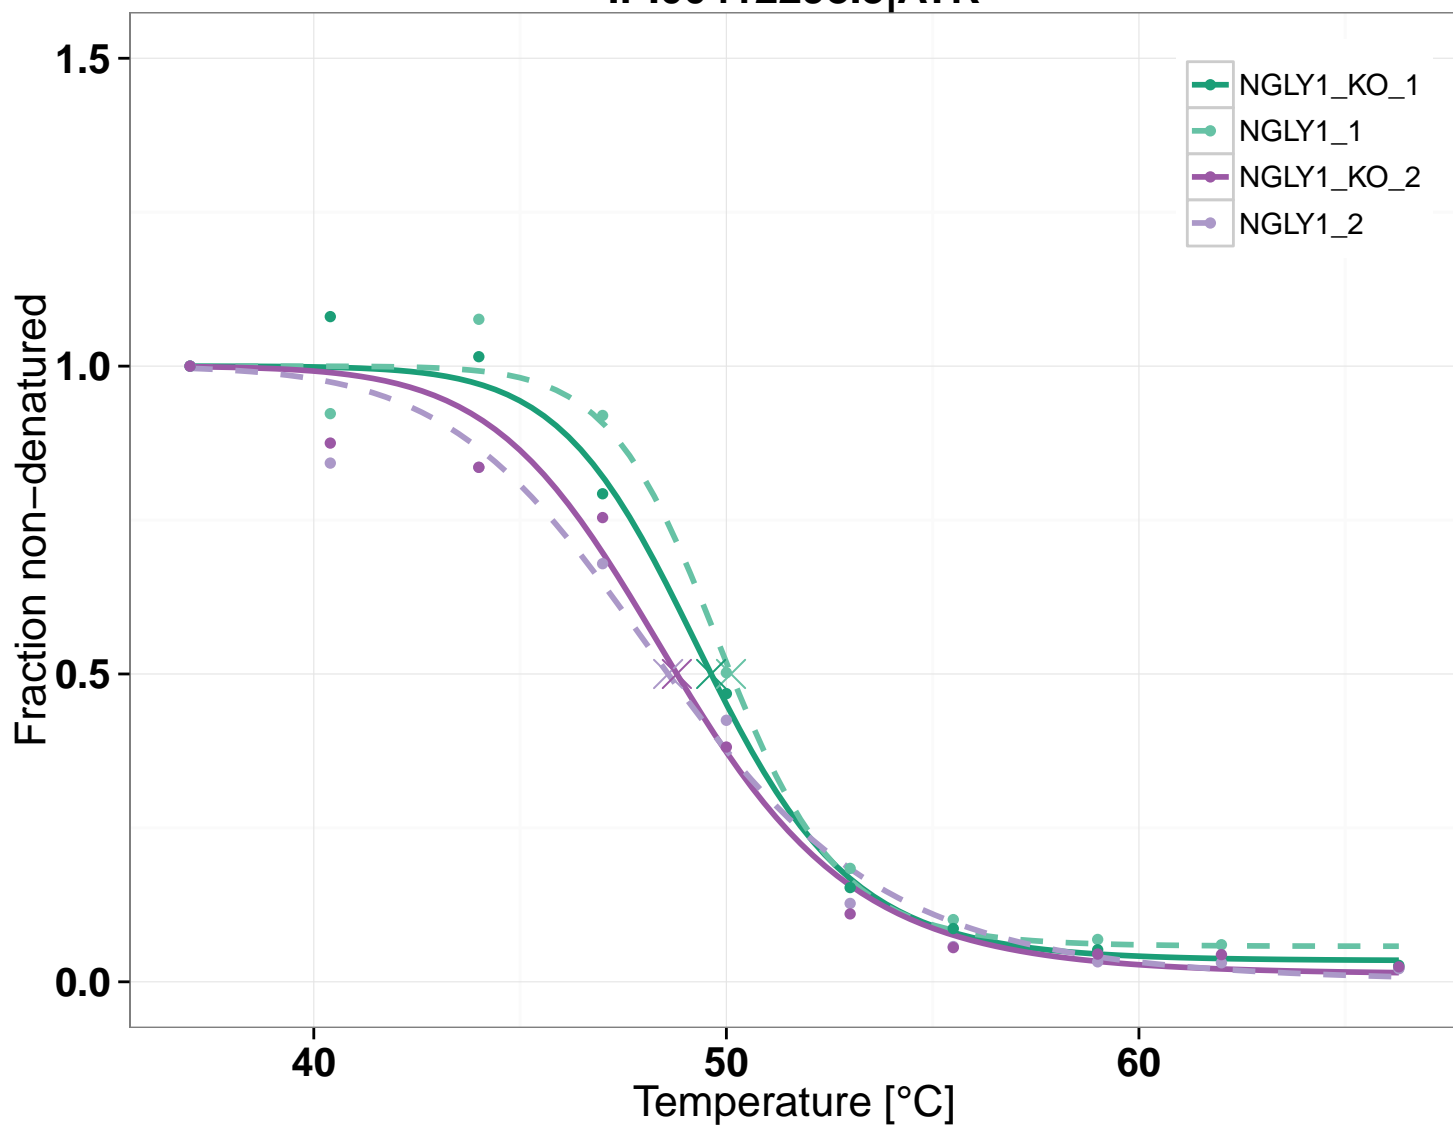

|            | meltPoint | slope  | plateau | R2   |
|------------|-----------|--------|---------|------|
| NGLY1_KO_1 | 49.63     | -0.14  | 0.03    | 0.99 |
| NGLY1_1    | 50.11     | -0.17  | 0.06    | 0.99 |
| NGLY1_KO_2 | 48.8      | -0.11  | 0.01    | 0.98 |
| NGLY1_2    | 48.59     | -0.093 | 0       | 0.98 |

Supplement: Supplementary file 50 [file 1]

# IPI00015972.1|COX6C

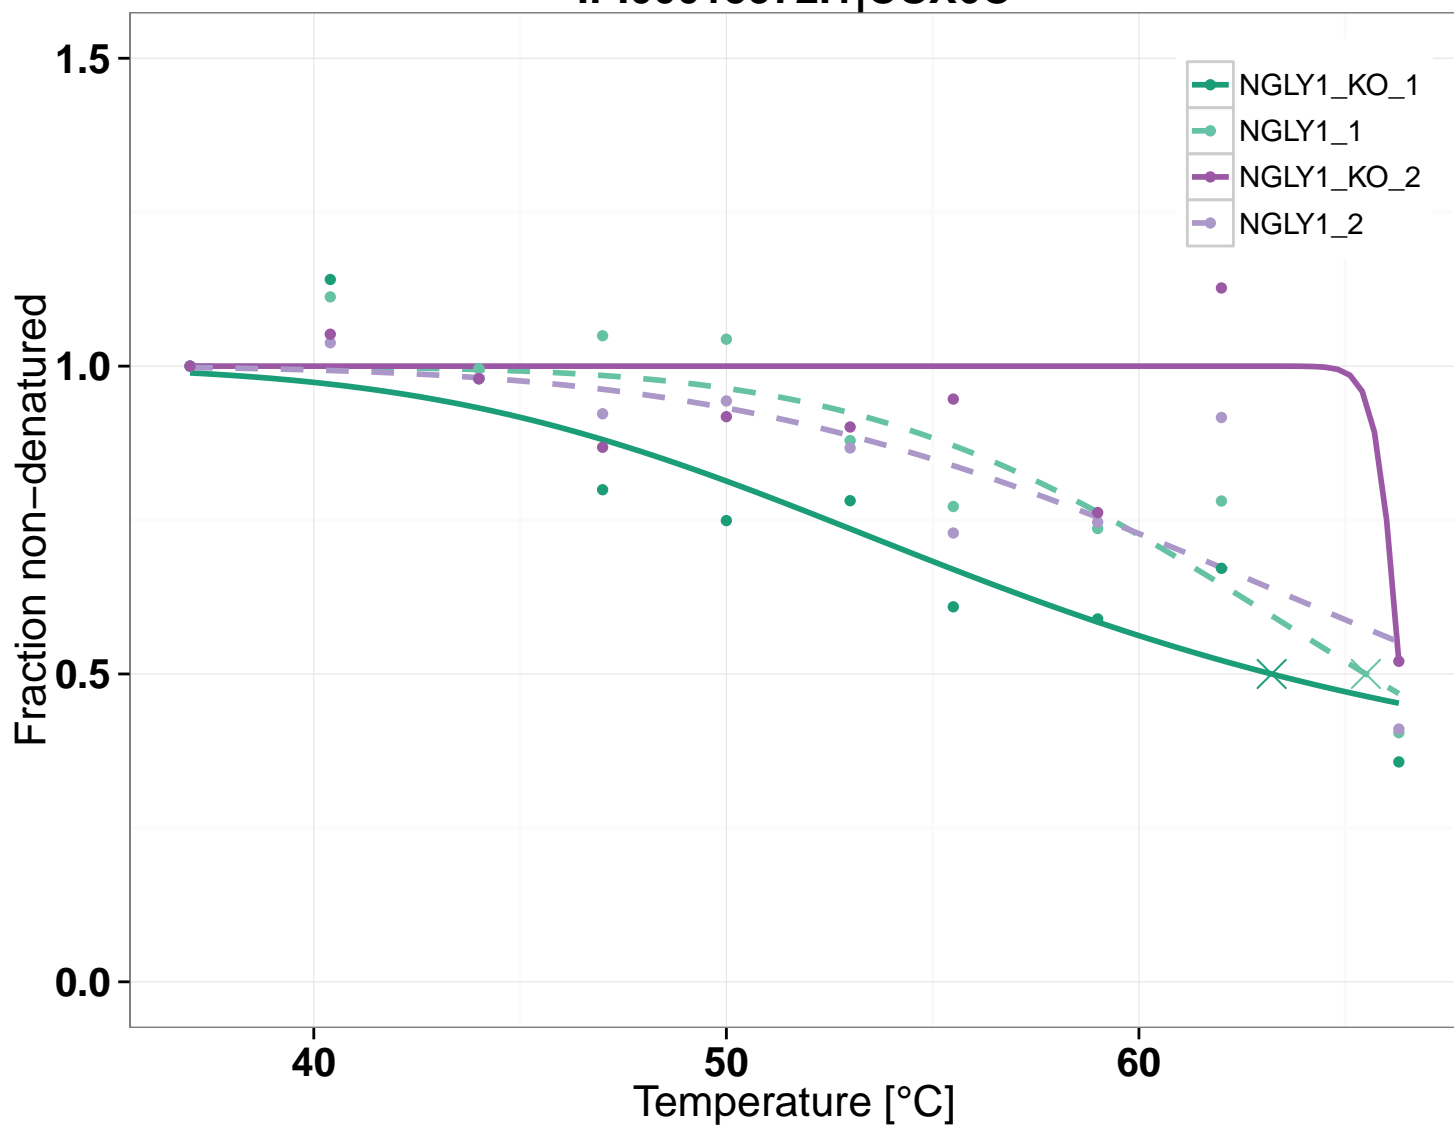

|            | meltPoint | slope  | plateau | R2   |
|------------|-----------|--------|---------|------|
| NGLY1_KO_1 | 63.22     | -0.027 | 0.27    | 0.83 |
| NGLY1_1    | 65.5      | -0.042 | 0       | 0.86 |
| NGLY1_KO_2 | -         | -      | 0       | 0.56 |
| NGLY1_2    | -         | -0.028 | 0       | 0.69 |

Supplement: Supplementary file 51 [file 1]

IPI00032498.1|DCTN5

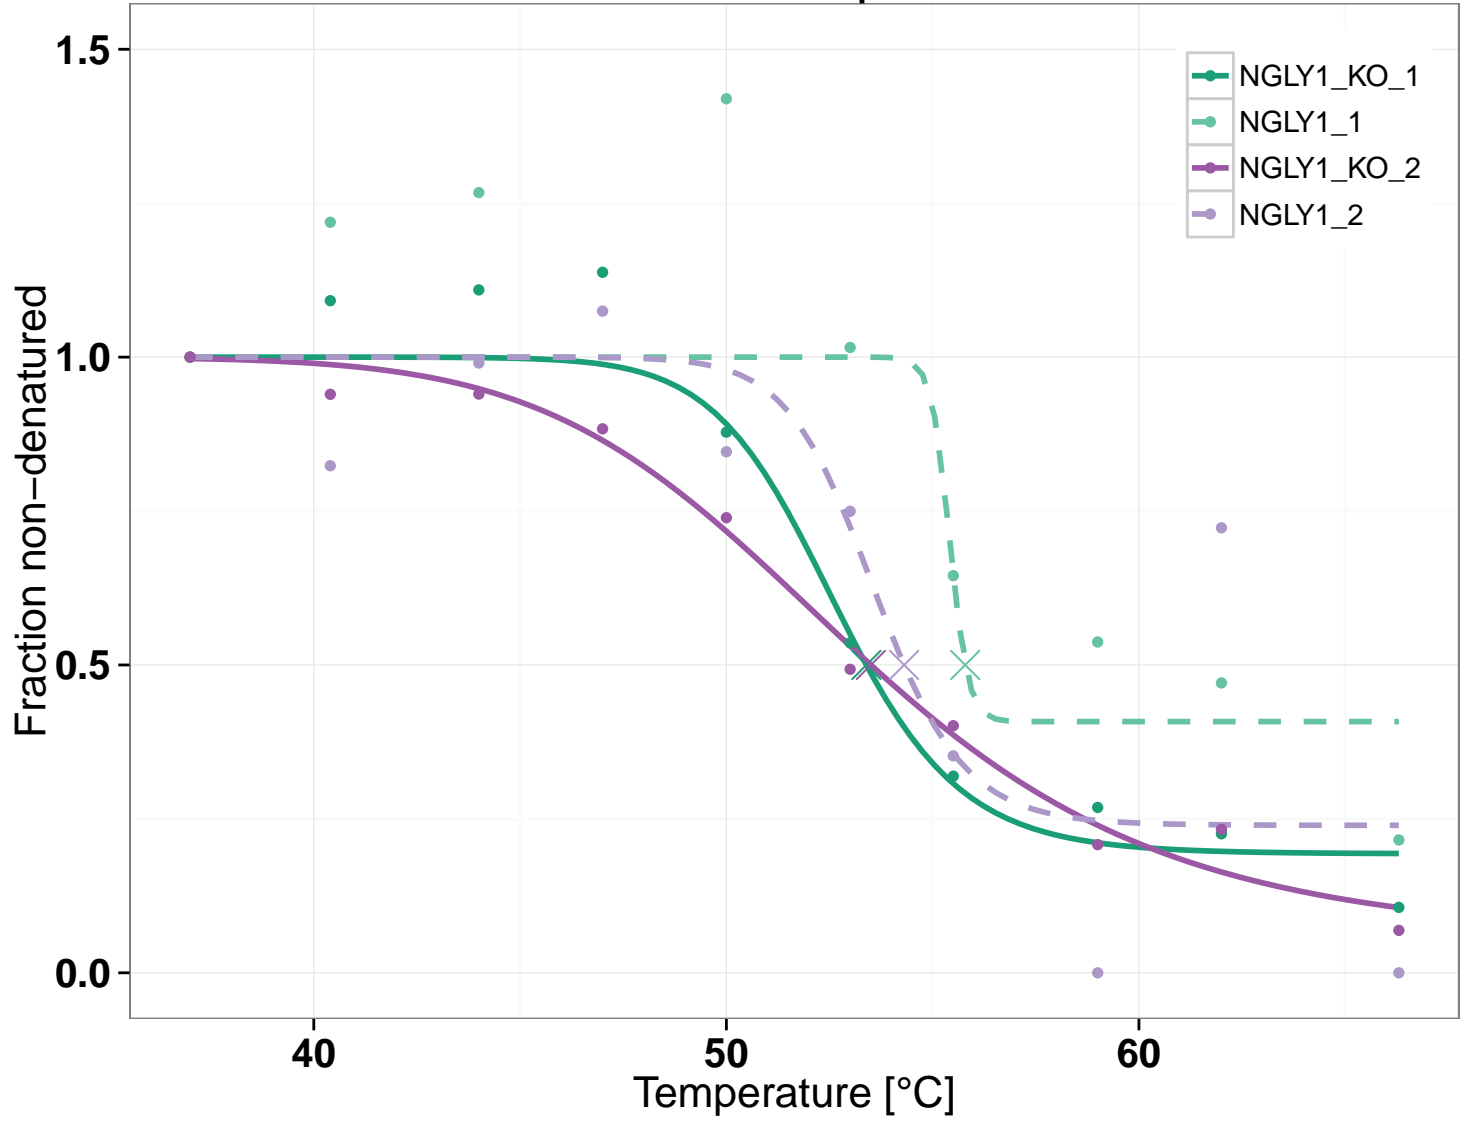

|            | meltPoint | slope  | plateau | R2   |
|------------|-----------|--------|---------|------|
| NGLY1_KO_1 | 53.39     | -0.13  | 0.19    | 0.96 |
| NGLY1_1    | 55.79     | -0.67  | 0.41    | 0.63 |
| NGLY1_KO_2 | 53.5      | -0.063 | 0.05    | 0.99 |
| NGLY1_2    | 54.31     | -0.18  | 0.24    | 0.72 |

Supplement: Supplementary file 52 [file 1]

IPI00869136.1|PCNXL3

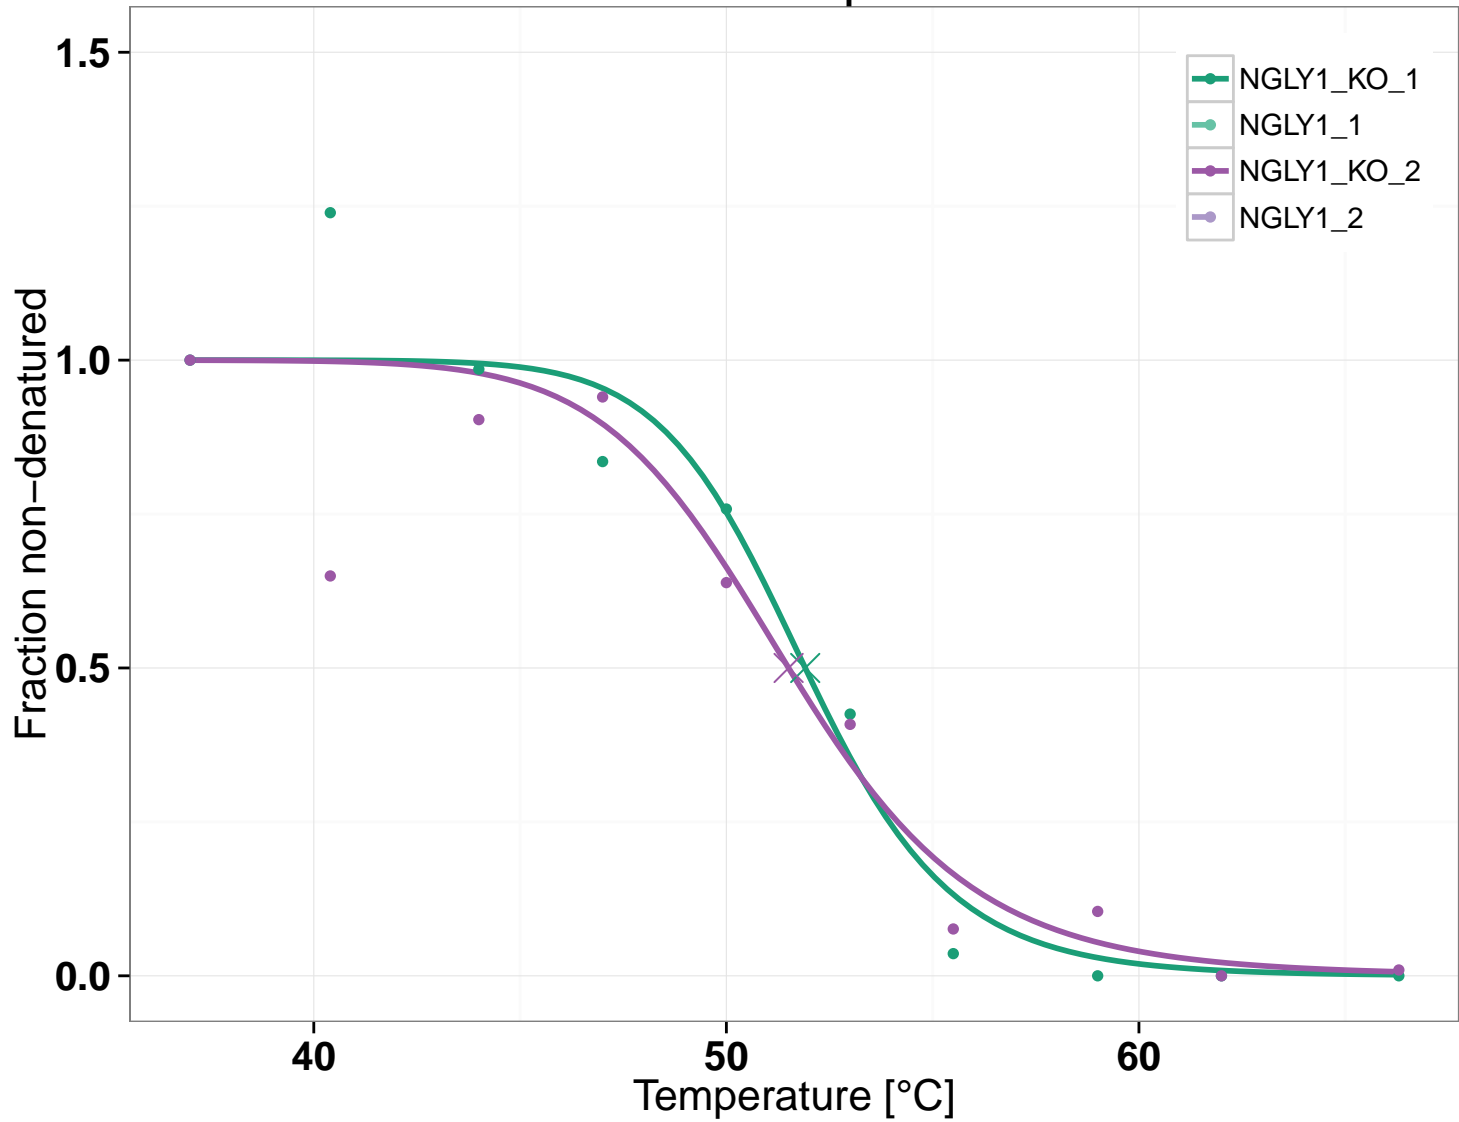

|            | meltPoint | slope | plateau | R2   |
|------------|-----------|-------|---------|------|
| NGLY1_KO_1 | 51.91     | -0.14 | 0       | 0.96 |
| NGLY1_1    | -         | -     | -       | -    |
| NGLY1_KO_2 | 51.51     | -0.11 | 0       | 0.9  |
| NGLY1_2    | -         | -     | -       | -    |

Supplement: Supplementary file 53 [file 1]

IPI00412329.7|CRTC1

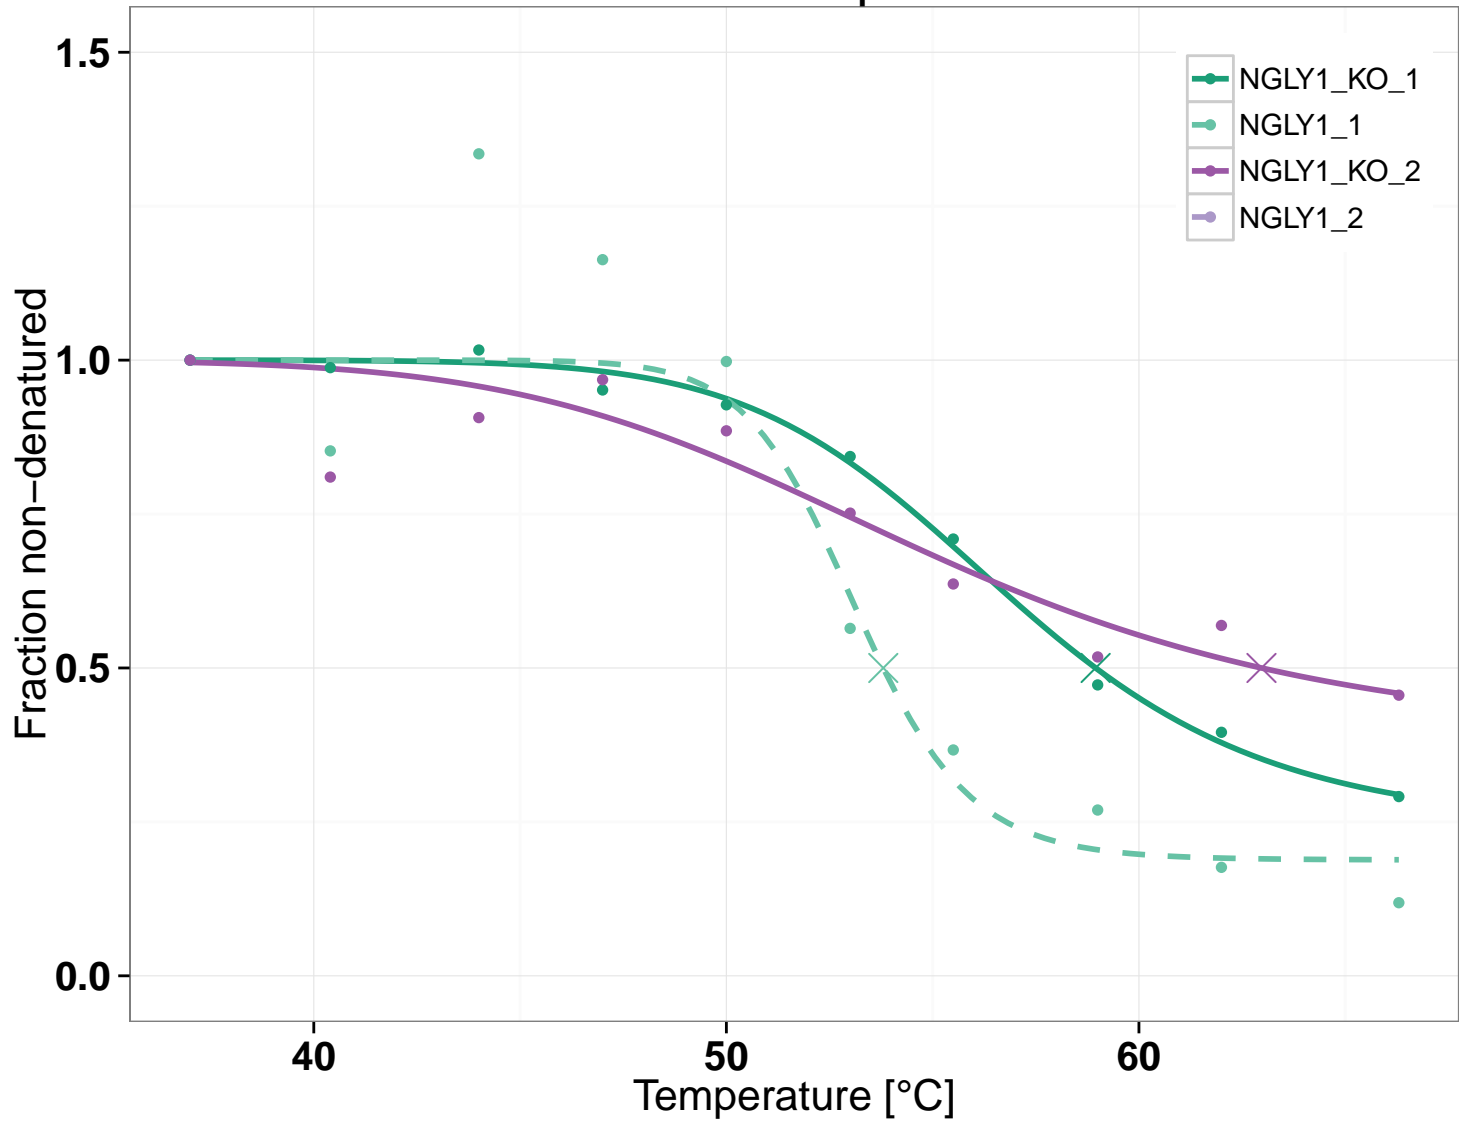

|            | meltPoint | slope  | plateau | R2   |
|------------|-----------|--------|---------|------|
| NGLY1_KO_1 | 58.95     | -0.06  | 0.24    | 1    |
| NGLY1_1    | 53.8      | -0.15  | 0.19    | 0.9  |
| NGLY1_KO_2 | 62.97     | -0.031 | 0.37    | 0.86 |
| NGLY1_2    | -         | -      | -       | -    |

Supplement: Supplementary file 54 [file 1]

# IPI00152685.10|TTC15

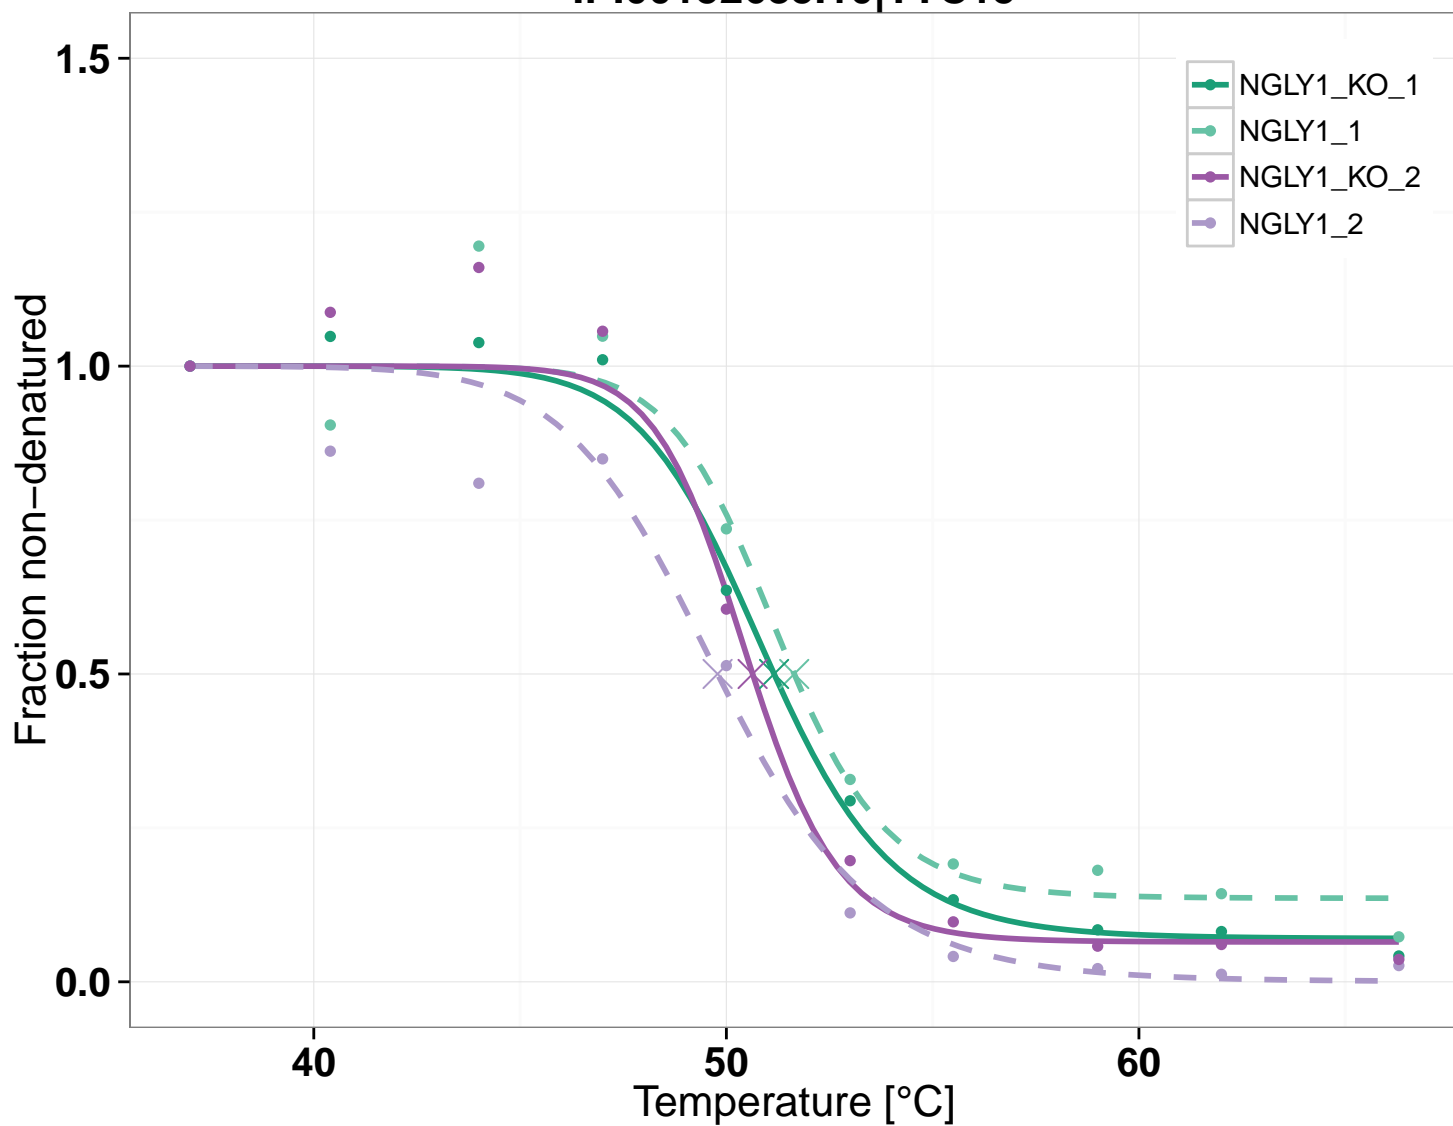

|            | meltPoint | slope | plateau | R2   |
|------------|-----------|-------|---------|------|
| NGLY1_KO_1 | 51.16     | -0.15 | 0.07    | 0.99 |
| NGLY1_1    | 51.64     | -0.16 | 0.14    | 0.97 |
| NGLY1_KO_2 | 50.64     | -0.21 | 0.06    | 0.98 |
| NGLY1_2    | 49.79     | -0.13 | 0       | 0.97 |

Supplement: Supplementary file 55 [file 1]

IPI00045764.3|TMEM209

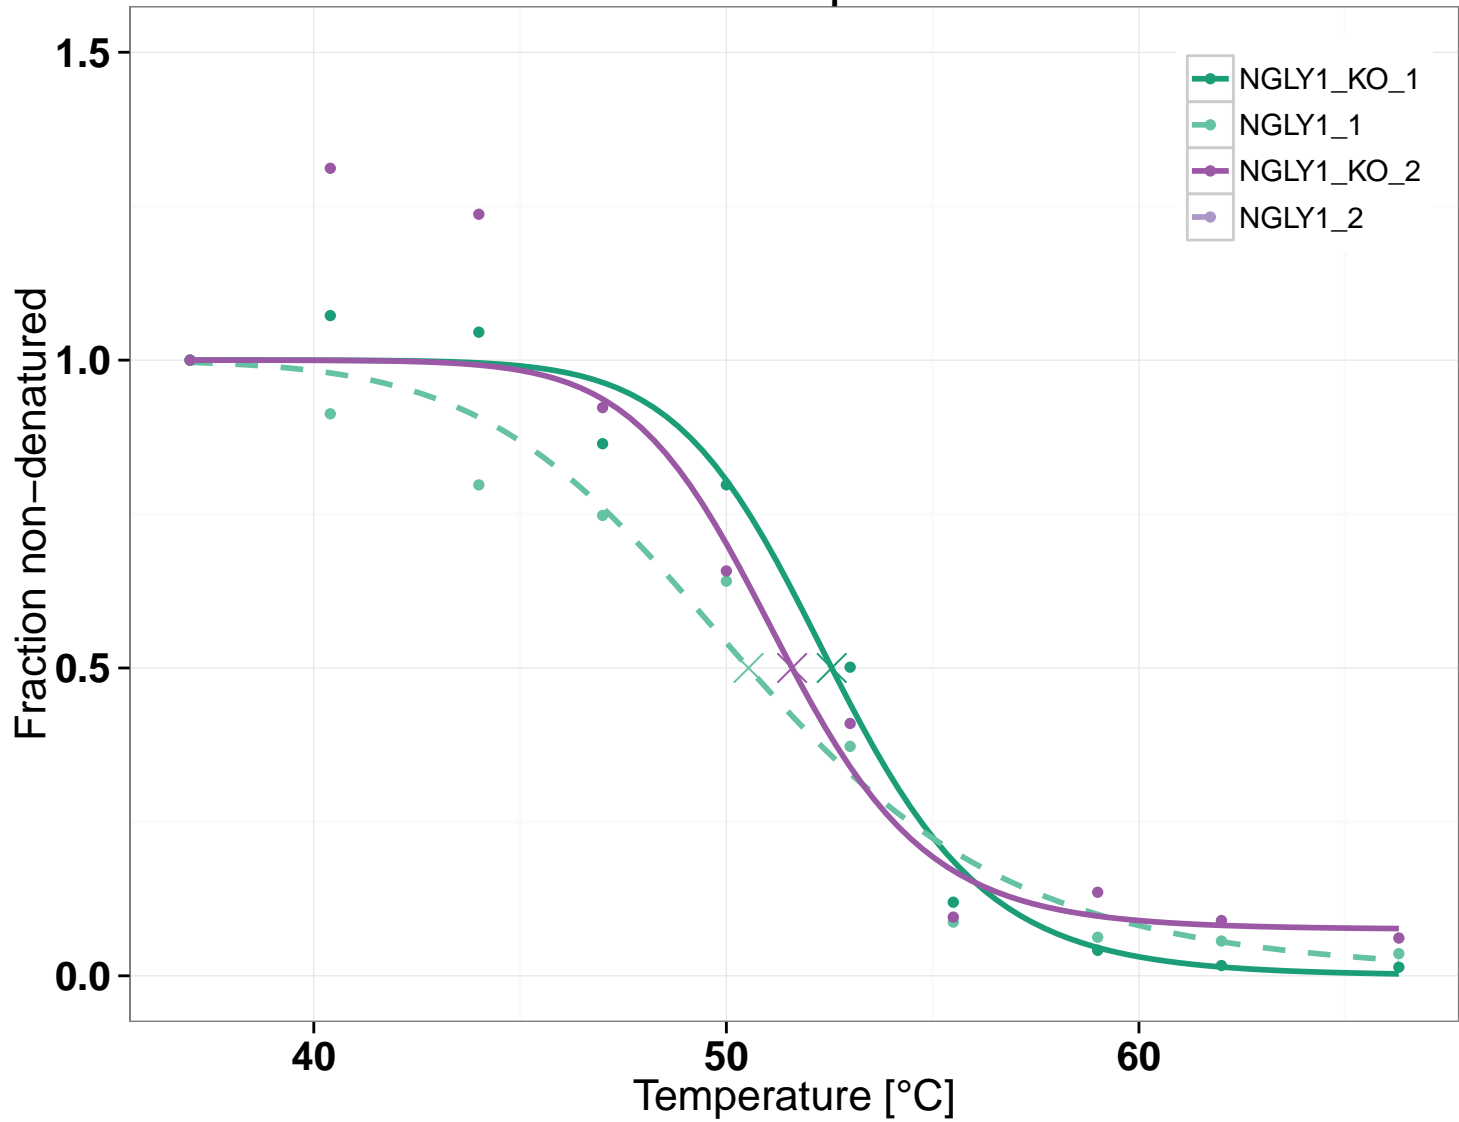

|            | meltPoint | slope  | plateau | R2   |
|------------|-----------|--------|---------|------|
| NGLY1_KO_1 | 52.55     | -0.13  | 0       | 0.99 |
| NGLY1_1    | 50.54     | -0.077 | 0       | 0.97 |
| NGLY1_KO_2 | 51.59     | -0.13  | 0.08    | 0.92 |
| NGLY1_2    | -         | -      | -       | -    |

Supplement: Supplementary file 56 [file 1]

# IPI00005139.2|RBL1

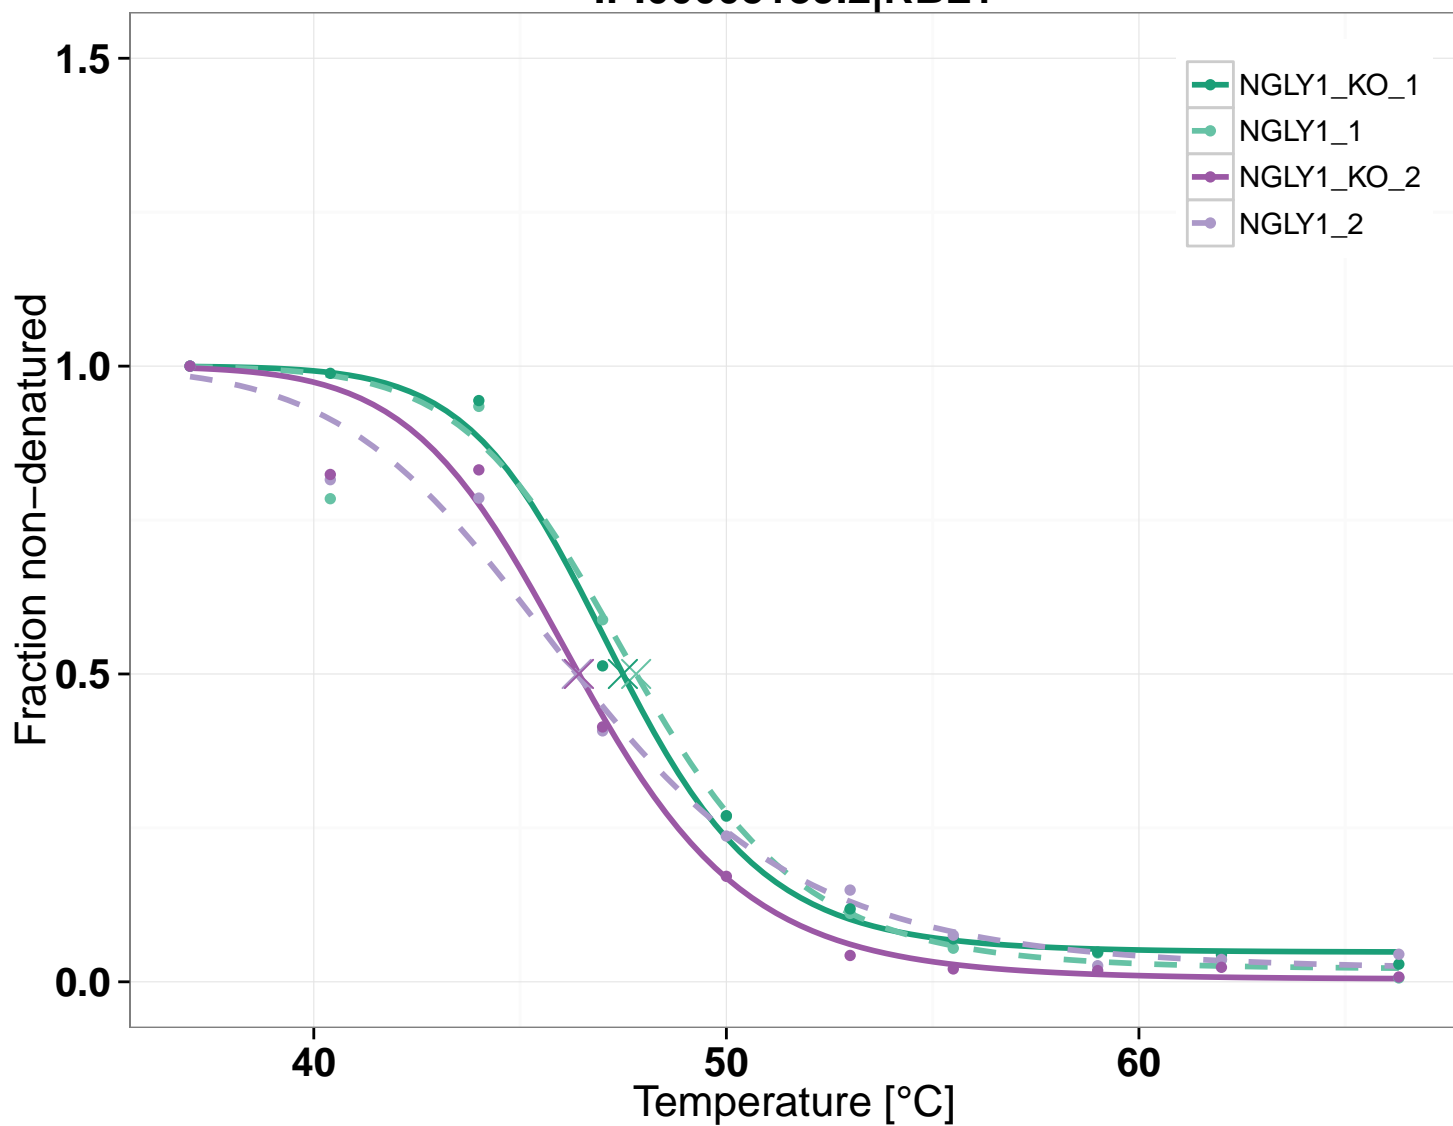

|            | meltPoint | slope  | plateau | R2   |
|------------|-----------|--------|---------|------|
| NGLY1_KO_1 | 47.49     | -0.13  | 0.05    | 0.99 |
| NGLY1_1    | 47.81     | -0.12  | 0.02    | 0.97 |
| NGLY1_KO_2 | 46.43     | -0.12  | 0       | 0.98 |
| NGLY1_2    | 46.37     | -0.087 | 0.02    | 0.98 |

Supplement: Supplementary file 57 [file 1]

IPI00302860.2|DHX33

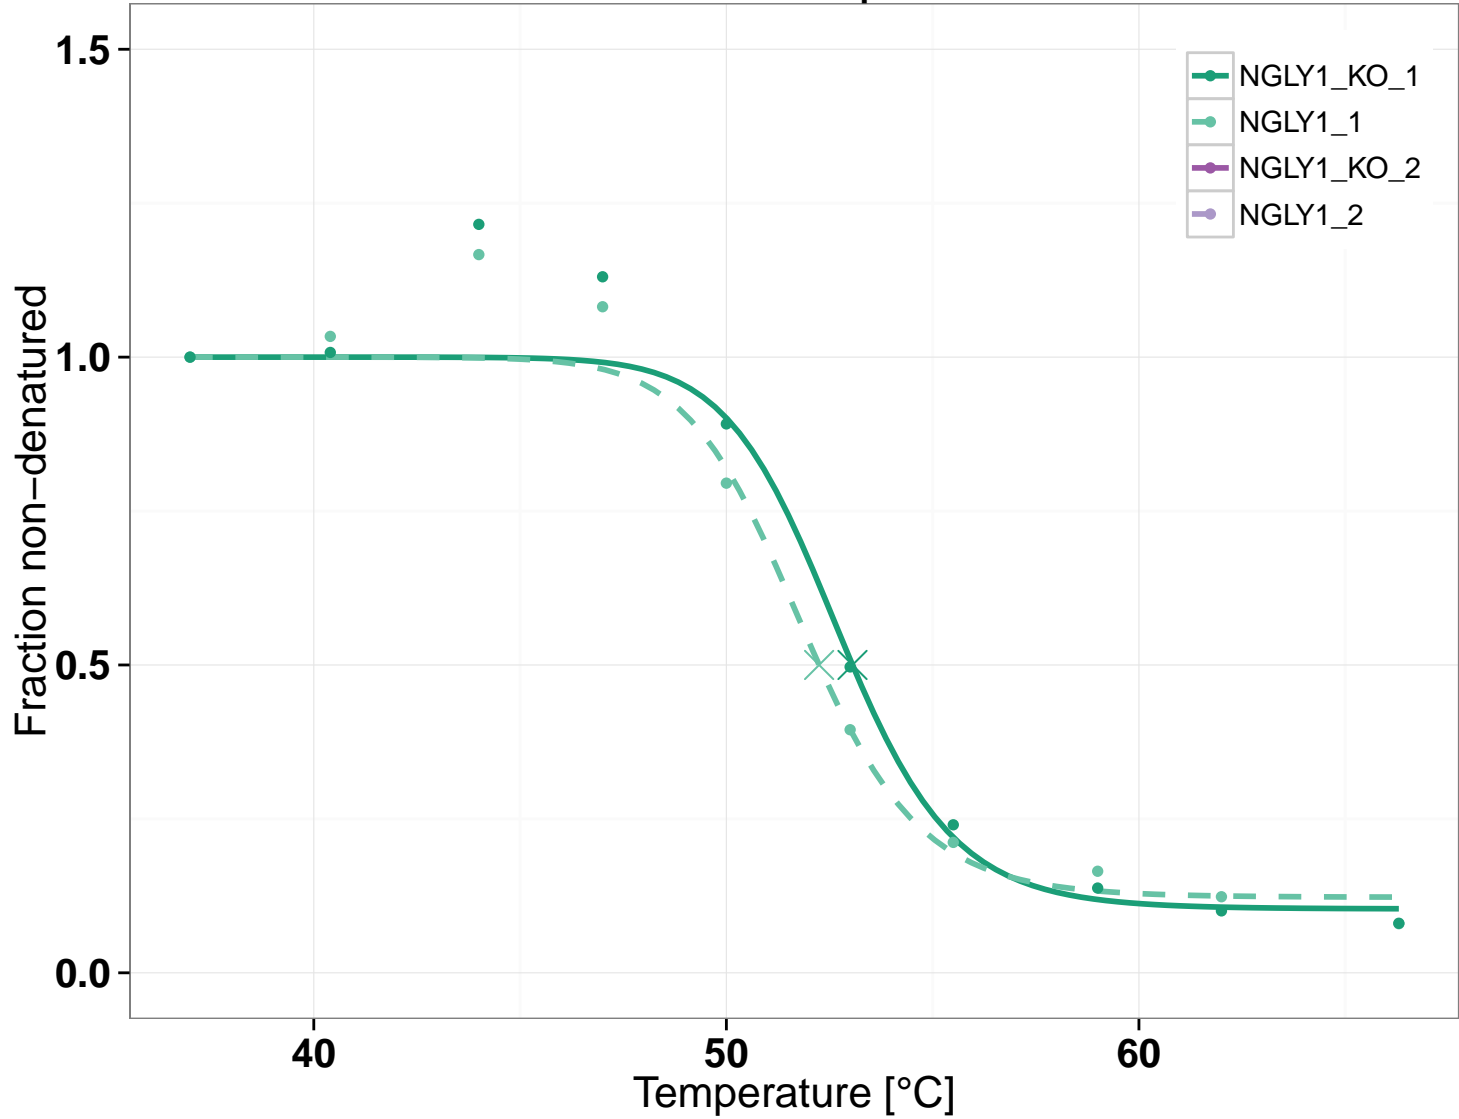

|            | meltPoint | slope | plateau | R2   |
|------------|-----------|-------|---------|------|
| NGLY1_KO_1 | 53.06     | -0.16 | 0.1     | 0.97 |
| NGLY1_1    | 52.25     | -0.16 | 0.12    | 0.98 |
| NGLY1_KO_2 | -         | -     | -       | -    |
| NGLY1_2    | -         | -     | -       | -    |

Supplement: Supplementary file 58 [file 1]

IPI00288894.1|ADAM17

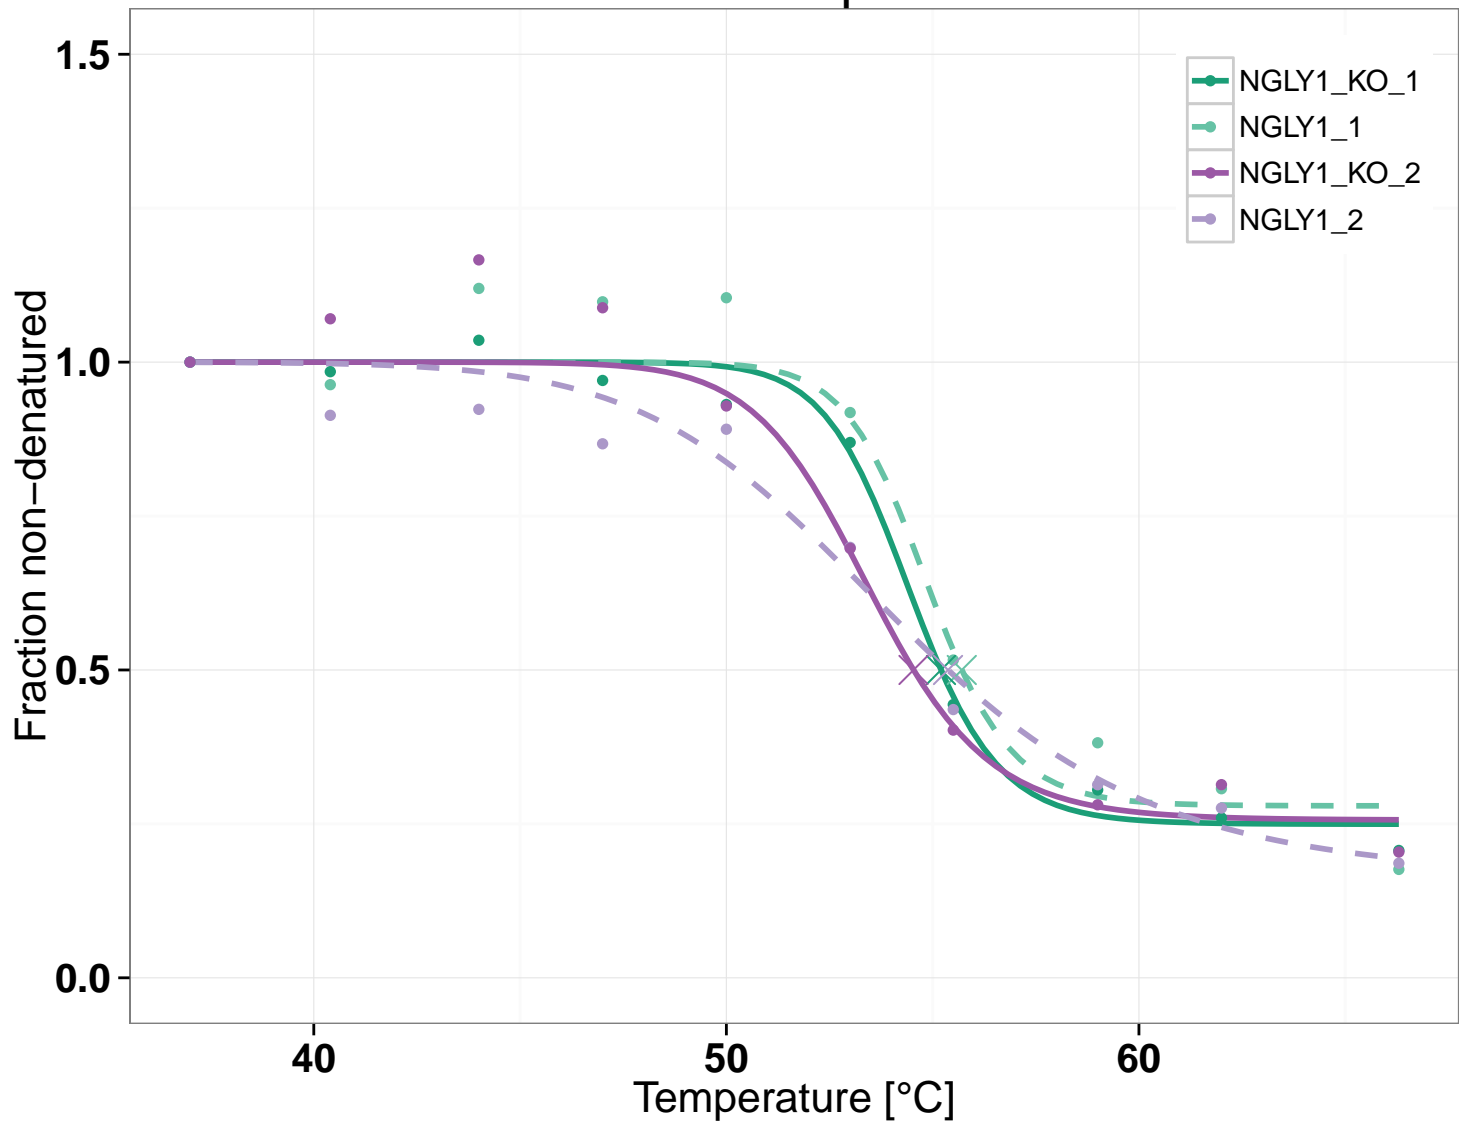

|            | meltPoint | slope  | plateau | R2   |
|------------|-----------|--------|---------|------|
| NGLY1_KO_1 | 55.2      | -0.18  | 0.25    | 0.99 |
| NGLY1_1    | 55.71     | -0.18  | 0.28    | 0.95 |
| NGLY1_KO_2 | 54.54     | -0.13  | 0.26    | 0.96 |
| NGLY1_2    | 55.37     | -0.068 | 0.16    | 0.97 |

Supplement: Supplementary file 59 [file 1]

# IPI00216171.3|ENO2

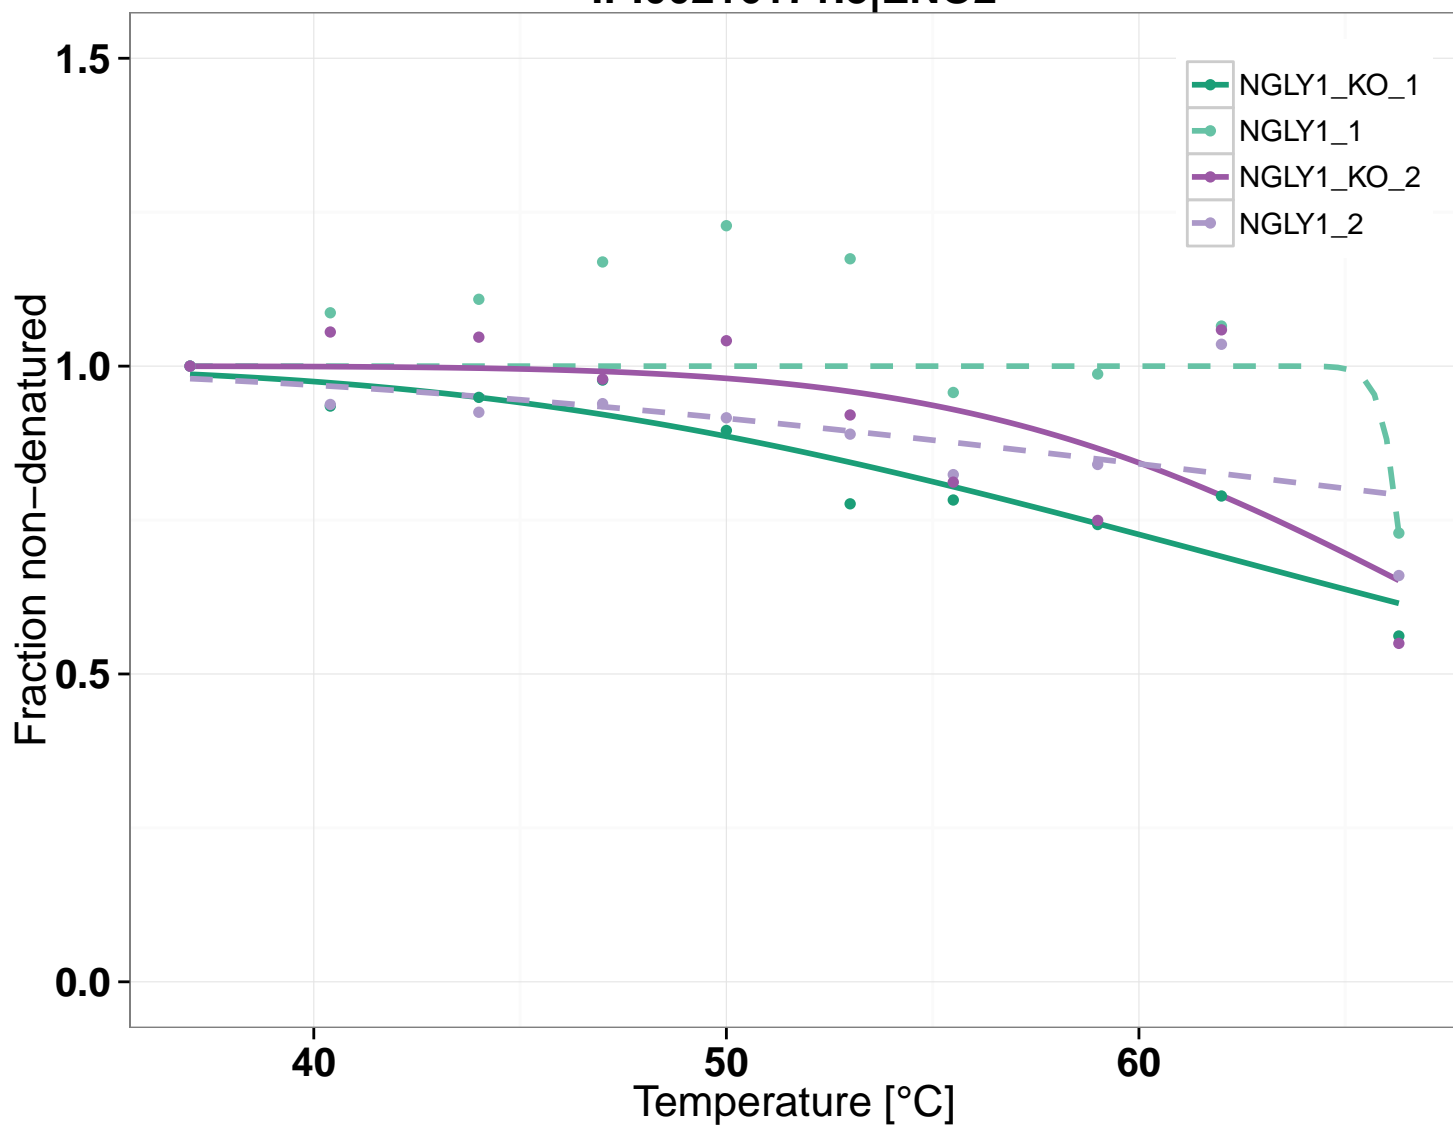

|            | meltPoint | slope  | plateau | R2   |
|------------|-----------|--------|---------|------|
| NGLY1_KO_1 | —         | −0.018 | 0       | 0.87 |
| NGLY1_1    | —         | —      | 0       | 0.26 |
| NGLY1_KO_2 | —         | —      | 0       | 0.53 |
| NGLY1_2    | —         | −0.008 | 0       | 0.33 |

Supplement: Supplementary file 60 [file 1]

IPI00815713.1|TCOF1

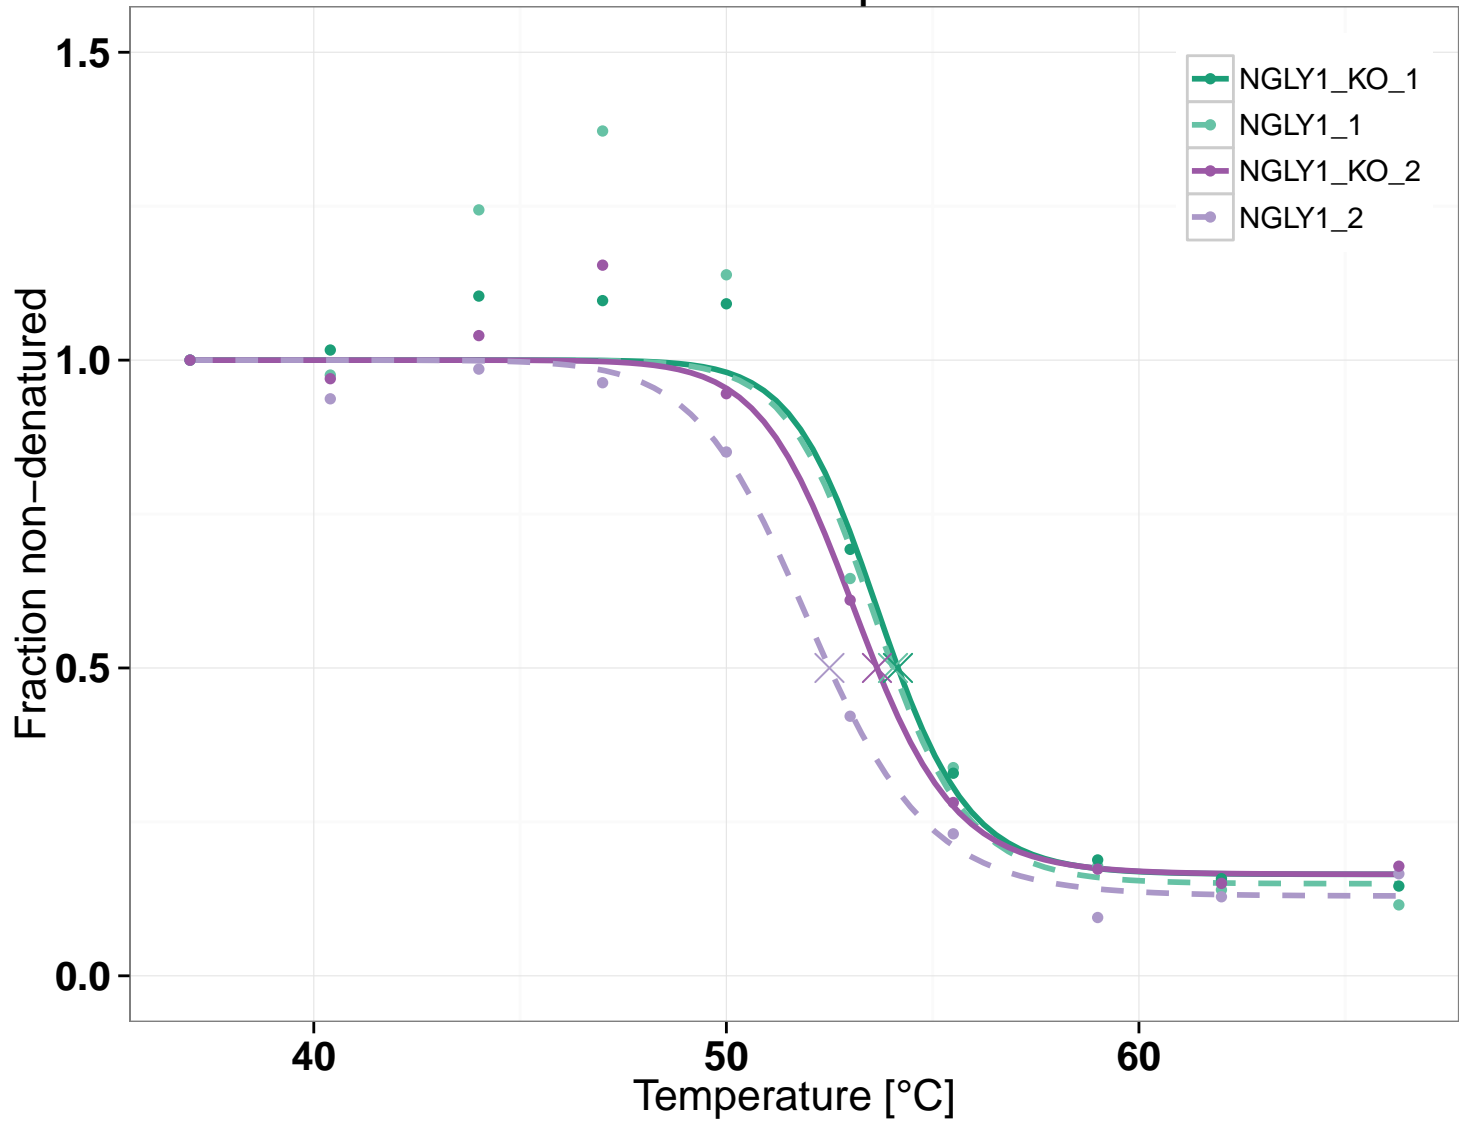

|            | meltPoint | slope | plateau | R2   |
|------------|-----------|-------|---------|------|
| NGLY1_KO_1 | 54.16     | -0.19 | 0.16    | 0.98 |
| NGLY1_1    | 54.04     | -0.19 | 0.15    | 0.89 |
| NGLY1_KO_2 | 53.65     | -0.18 | 0.16    | 0.98 |
| NGLY1_2    | 52.5      | -0.15 | 0.13    | 0.99 |

Supplement: Supplementary file 61 [file 1]

IPI00853224.1|STARD7

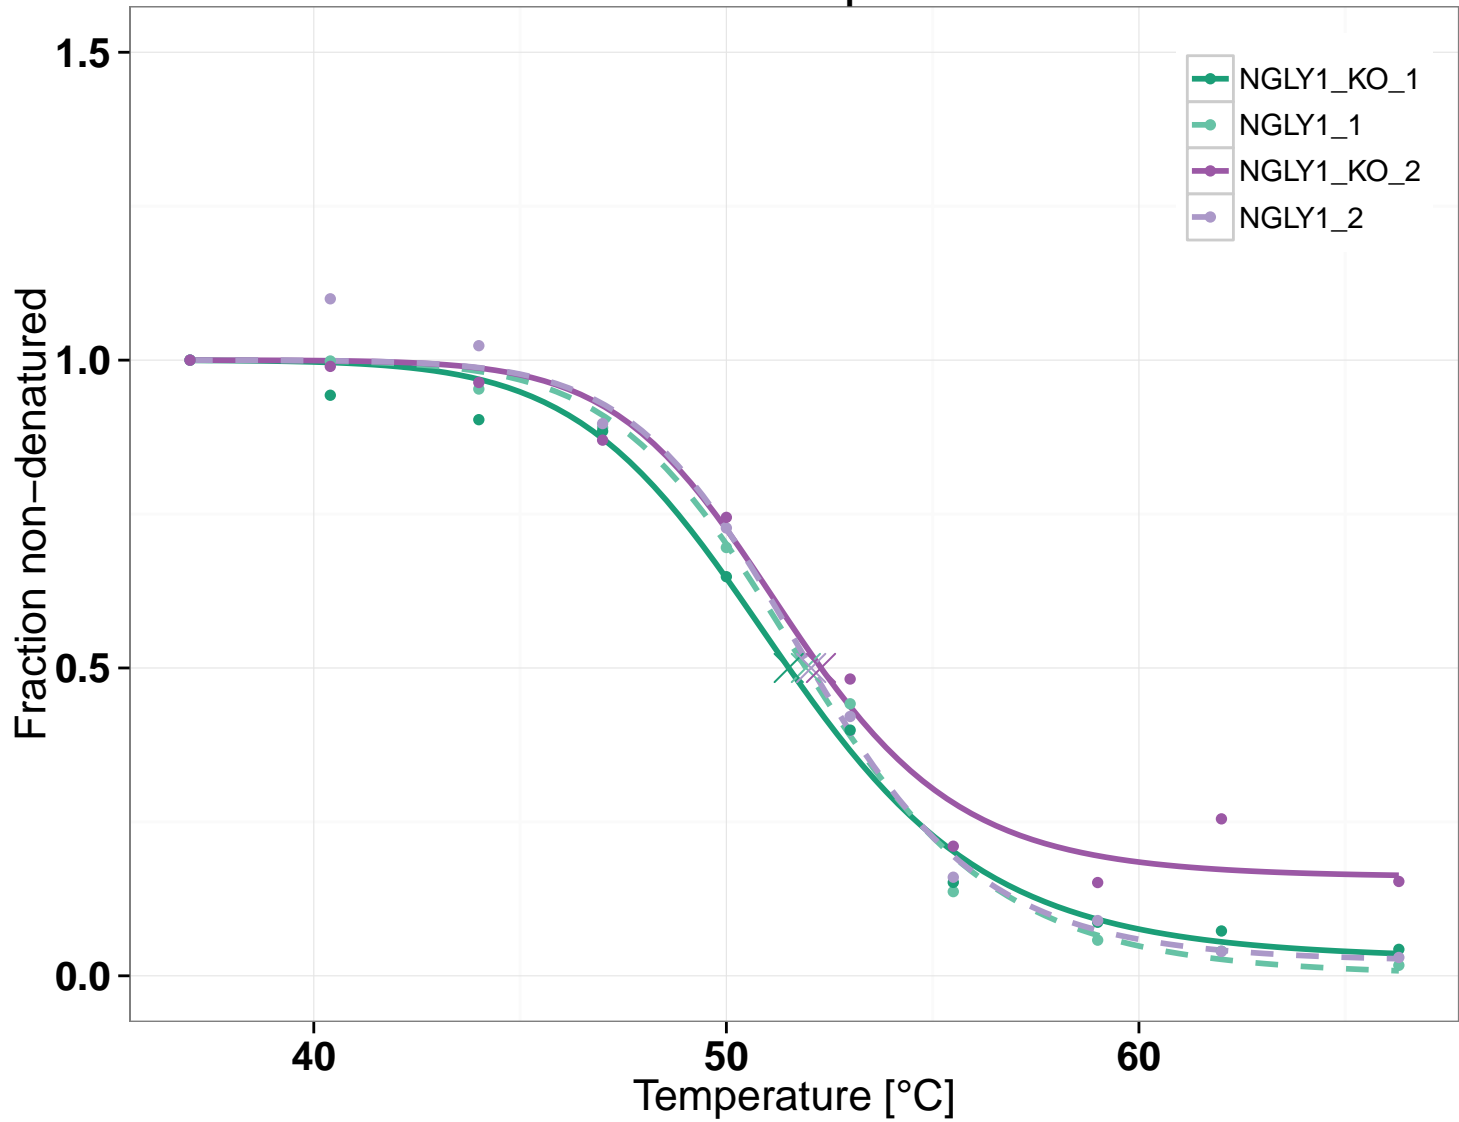

|            | meltPoint | slope  | plateau | R2   |
|------------|-----------|--------|---------|------|
| NGLY1_KO_1 | 51.51     | -0.097 | 0.03    | 0.99 |
| NGLY1_1    | 51.93     | -0.11  | 0       | 1    |
| NGLY1_KO_2 | 52.29     | -0.1   | 0.16    | 0.98 |
| NGLY1_2    | 52.06     | -0.11  | 0.02    | 0.99 |

Supplement: Supplementary file 62 [file 1]

# IPI00217869.4|C17ORF101

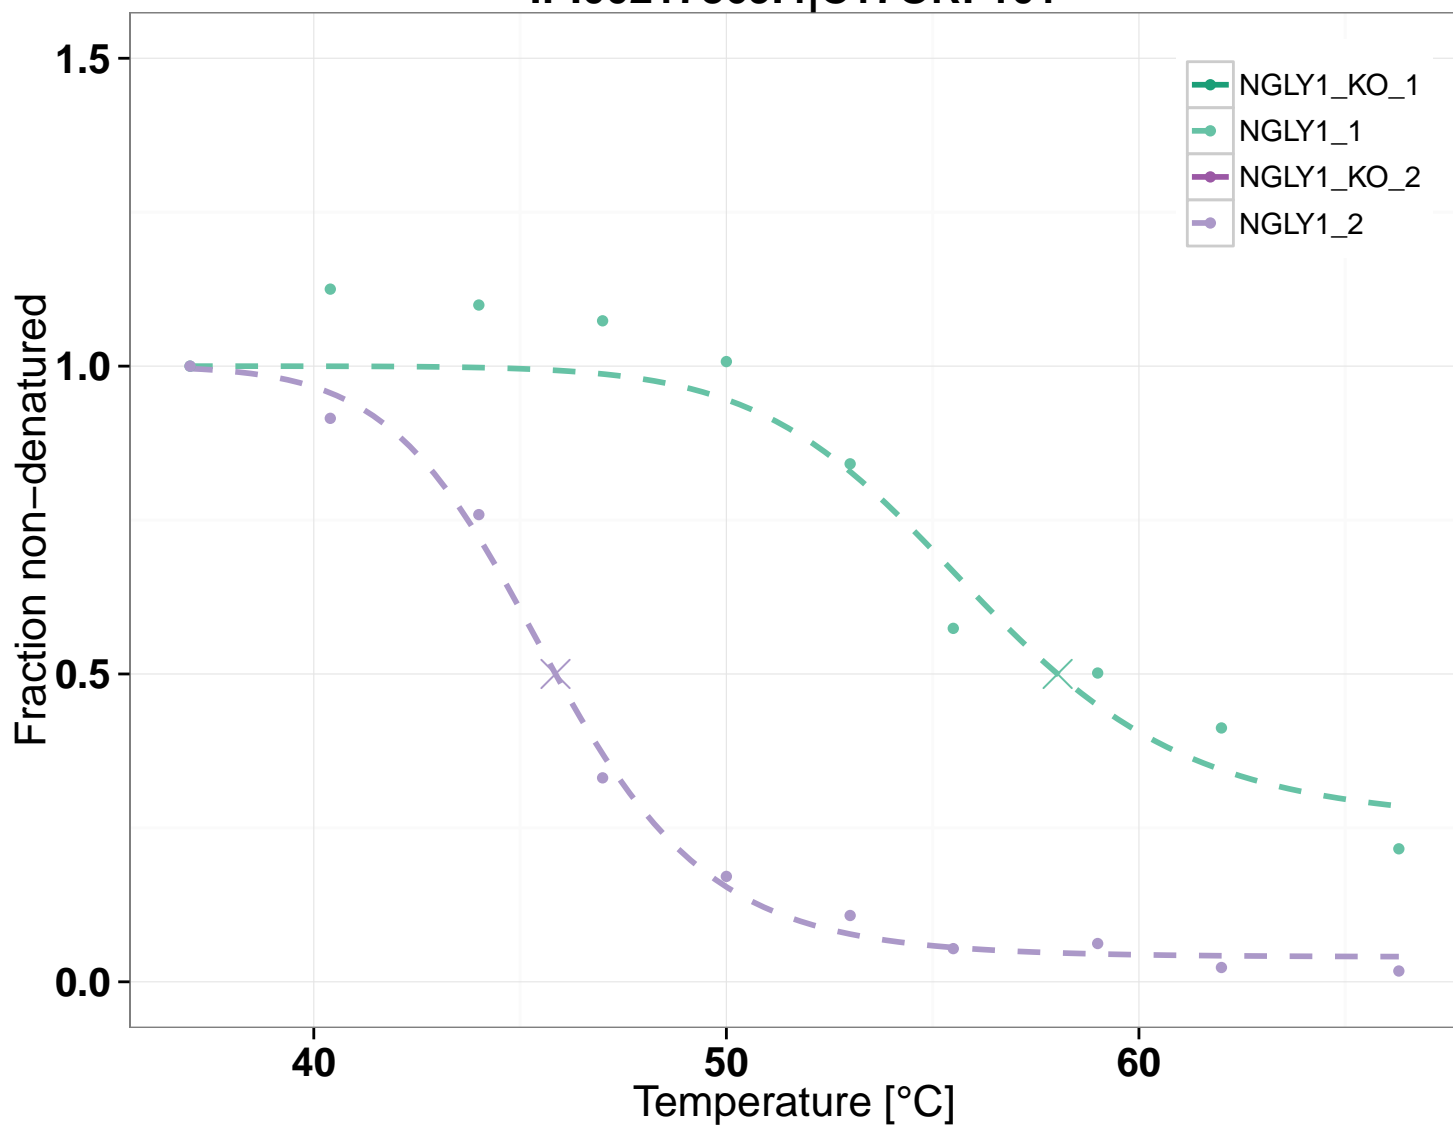

|            | meltPoint | slope | plateau | R2   |
|------------|-----------|-------|---------|------|
| NGLY1_KO_1 | -         | -     | -       | -    |
| NGLY1_1    | 58.03     | -0.07 | 0.26    | 0.94 |
| NGLY1_KO_2 | -         | -     | -       | -    |
| NGLY1_2    | 45.86     | -0.12 | 0.04    | 0.99 |

Supplement: Supplementary file 63 [file 1]

# IPI00900269.1|SMARCA4

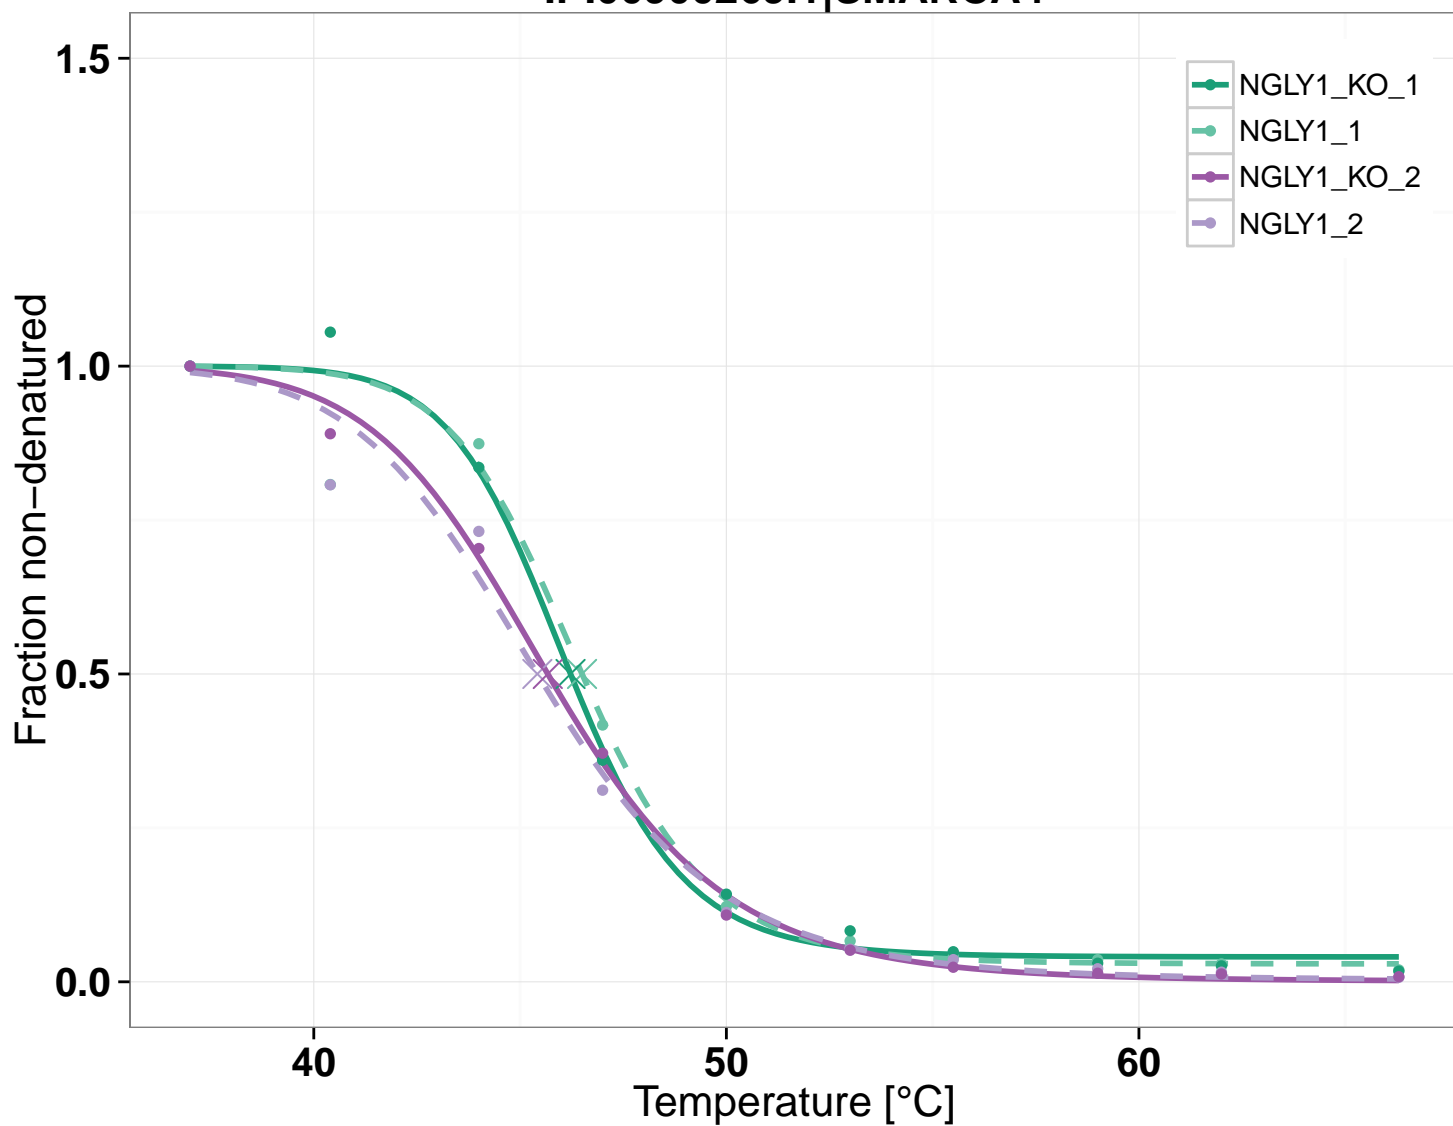

|            | meltPoint | slope | plateau | R2   |
|------------|-----------|-------|---------|------|
| NGLY1_KO_1 | 46.22     | -0.17 | 0.04    | 1    |
| NGLY1_1    | 46.5      | -0.15 | 0.03    | 0.98 |
| NGLY1_KO_2 | 45.67     | -0.12 | 0       | 1    |
| NGLY1_2    | 45.42     | -0.11 | 0       | 0.98 |

Supplement: Supplementary file 64 [file 1]

# IPI00217143.3|SDHA

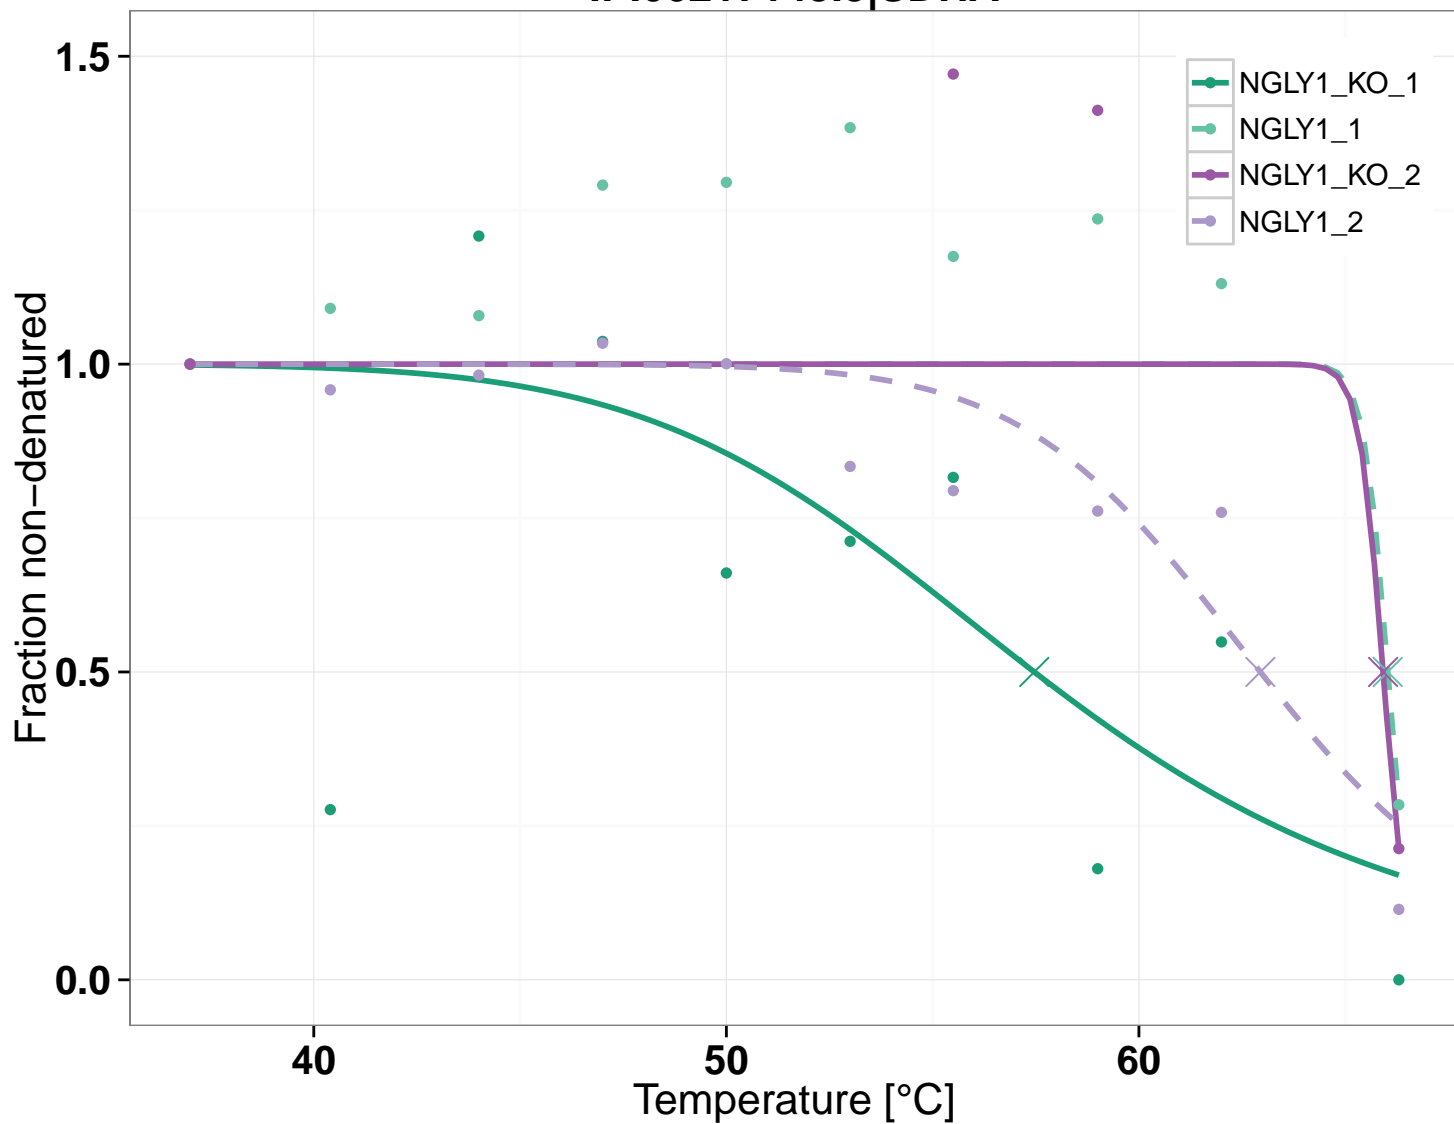

|            | meltPoint | slope  | plateau | R2    |
|------------|-----------|--------|---------|-------|
| NGLY1_KO_1 | 57.46     | -0.053 | 0       | 0.42  |
| NGLY1_1    | 66.03     | -0.86  | 0       | 0.49  |
| NGLY1_KO_2 | 65.92     | -0.86  | 0       | -0.74 |
| NGLY1_2    | 62.94     | -0.086 | 0       | 0.85  |

Supplement: Supplementary file 65 [file 1]

IPI00917181.1|HNRNPH2

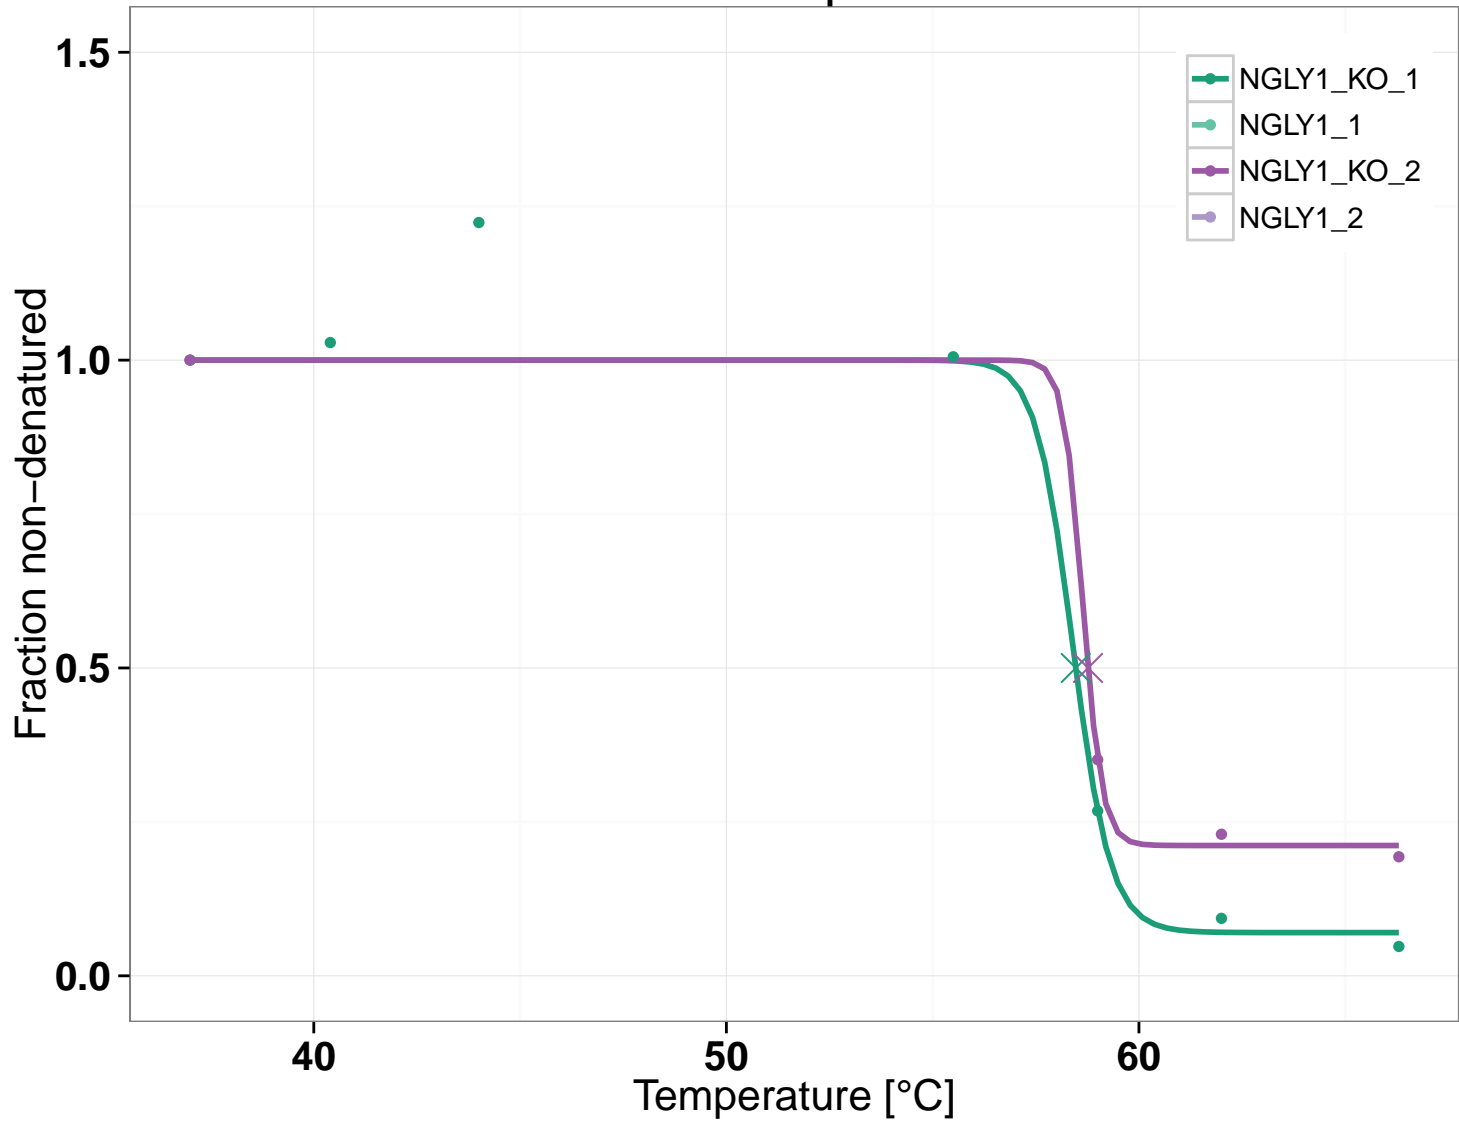

|            | meltPoint | slope | plateau | R2    |
|------------|-----------|-------|---------|-------|
| NGLY1_KO_1 | 58.47     | -0.51 | 0.07    | 0.62  |
| NGLY1_1    | -         | -     | -       | -     |
| NGLY1_KO_2 | 58.77     | -0.84 | 0.21    | -0.07 |
| NGLY1_2    | -         | -     | -       | -     |

Supplement: Supplementary file 66 [file 1]

IPI00902504.1|SYVN1

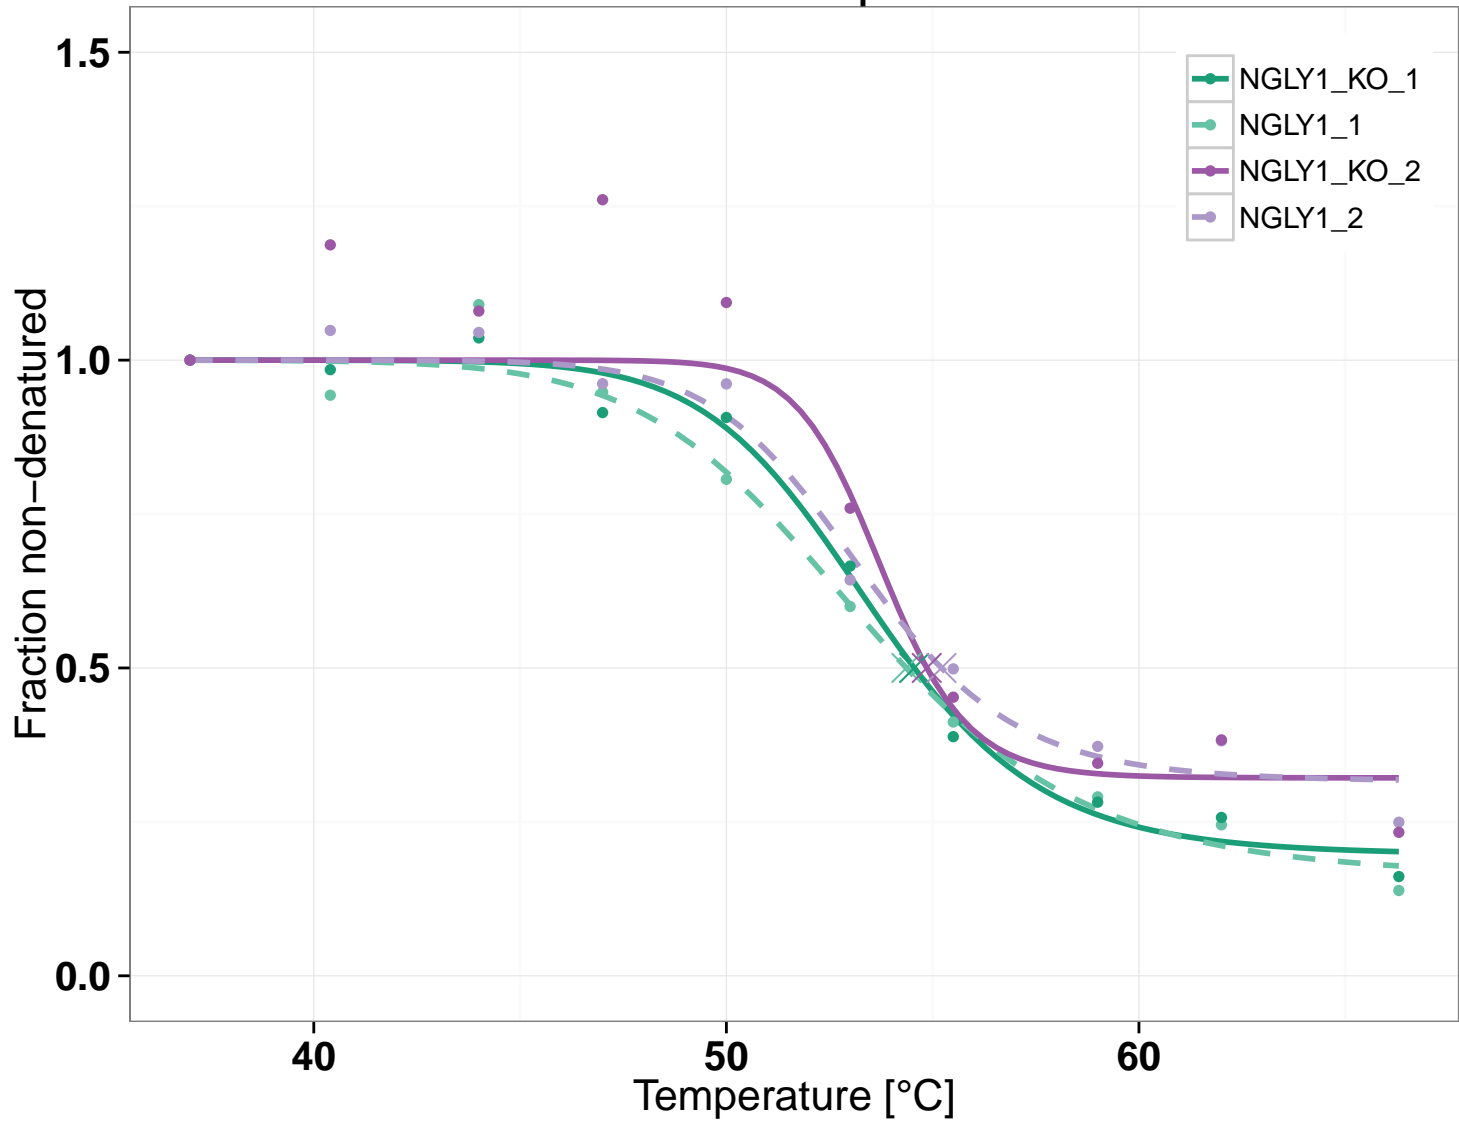

|            | meltPoint | slope  | plateau | R2   |
|------------|-----------|--------|---------|------|
| NGLY1_KO_1 | 54.55     | -0.099 | 0.2     | 0.99 |
| NGLY1_1    | 54.36     | -0.078 | 0.16    | 0.98 |
| NGLY1_KO_2 | 54.86     | -0.16  | 0.32    | 0.9  |
| NGLY1_2    | 55.21     | -0.092 | 0.32    | 0.98 |

Supplement: Supplementary file 67 [file 1]

IPI00550655.4|SPIN1

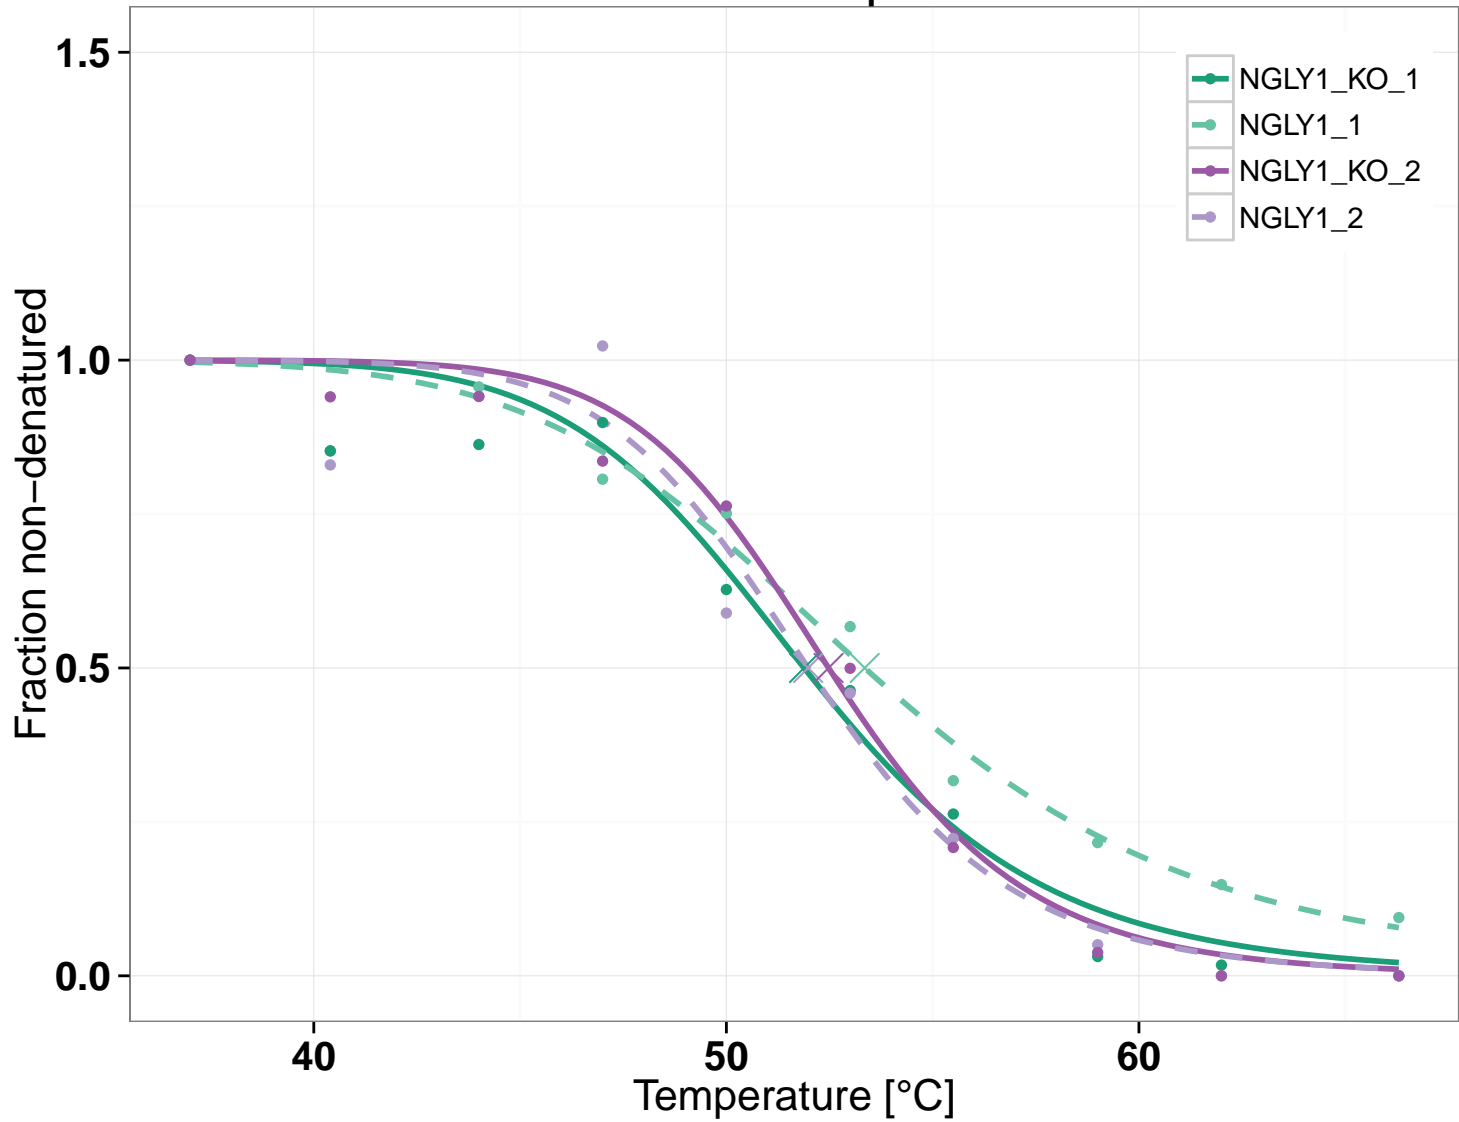

|            | meltPoint | slope  | plateau | R2   |
|------------|-----------|--------|---------|------|
| NGLY1_KO_1 | 51.88     | -0.086 | 0       | 0.97 |
| NGLY1_1    | 53.35     | -0.062 | 0.01    | 0.97 |
| NGLY1_KO_2 | 52.48     | -0.1   | 0       | 0.99 |
| NGLY1_2    | 51.98     | -0.1   | 0       | 0.96 |

Supplement: Supplementary file 68 [file 1]

IPI00917770.1|SFXN5

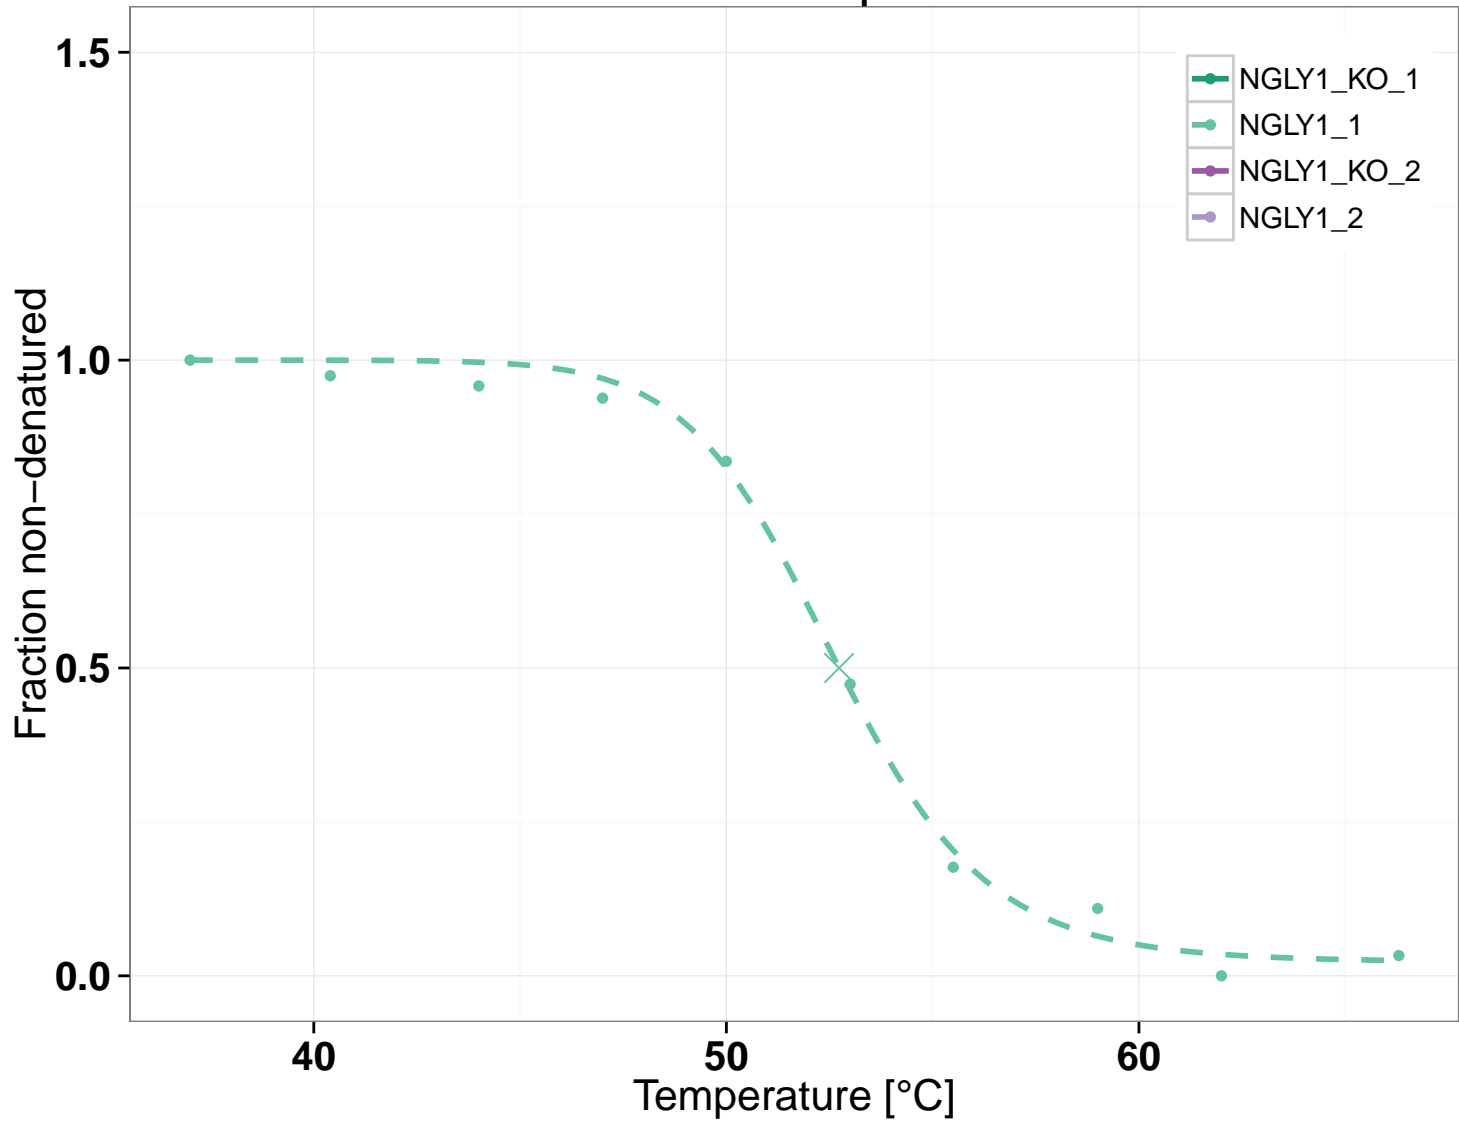

|            | meltPoint | slope | plateau | R2 |
|------------|-----------|-------|---------|----|
| NGLY1_KO_1 | -         | -     | -       | -  |
| NGLY1_1    | 52.73     | -0.13 | 0.02    | 1  |
| NGLY1_KO_2 | -         | -     | -       | -  |
| NGLY1_2    | -         | -     | -       | -  |

Supplement: Supplementary file 69 [file 1]

# IPI00031557.2|CTH

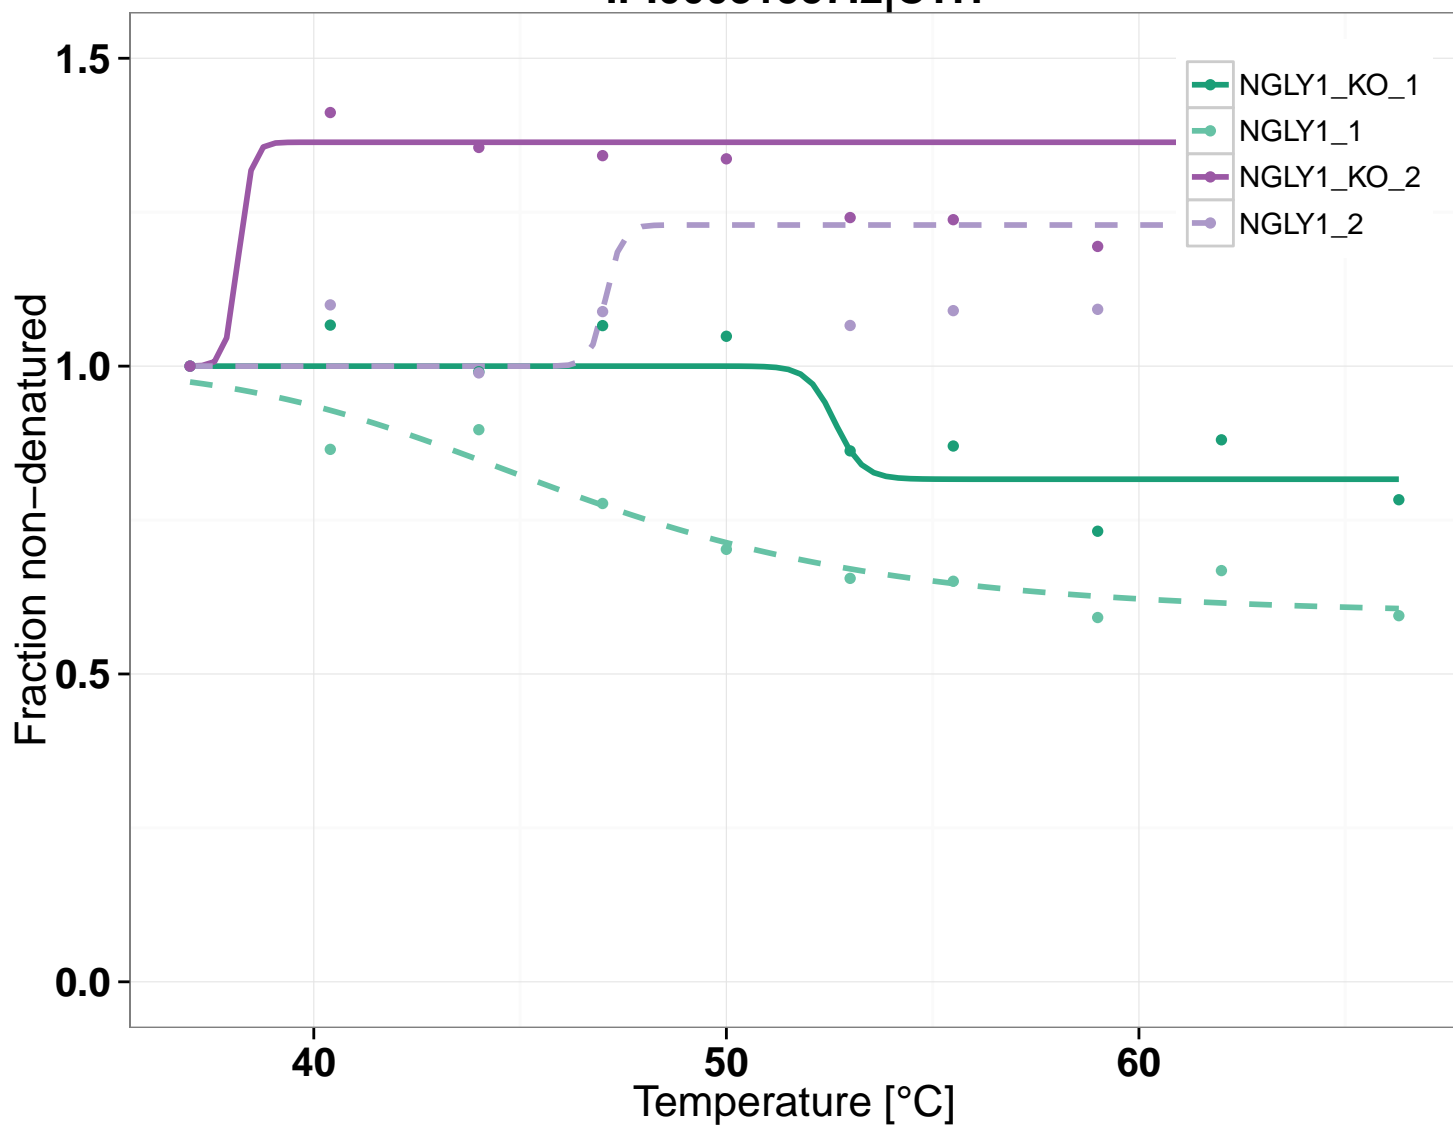

|            | meltPoint | slope  | plateau | R2   |
|------------|-----------|--------|---------|------|
| NGLY1_KO_1 | —         | -0.14  | 0.82    | 0.8  |
| NGLY1_1    | —         | -0.025 | 0.59    | 0.93 |
| NGLY1_KO_2 | —         | 0.6    | 1.36    | 0.43 |
| NGLY1_2    | —         | 0.3    | 1.23    | 0.33 |

Supplement: Supplementary file 70 [file 1]

IPI00013735.1|FASTKD2

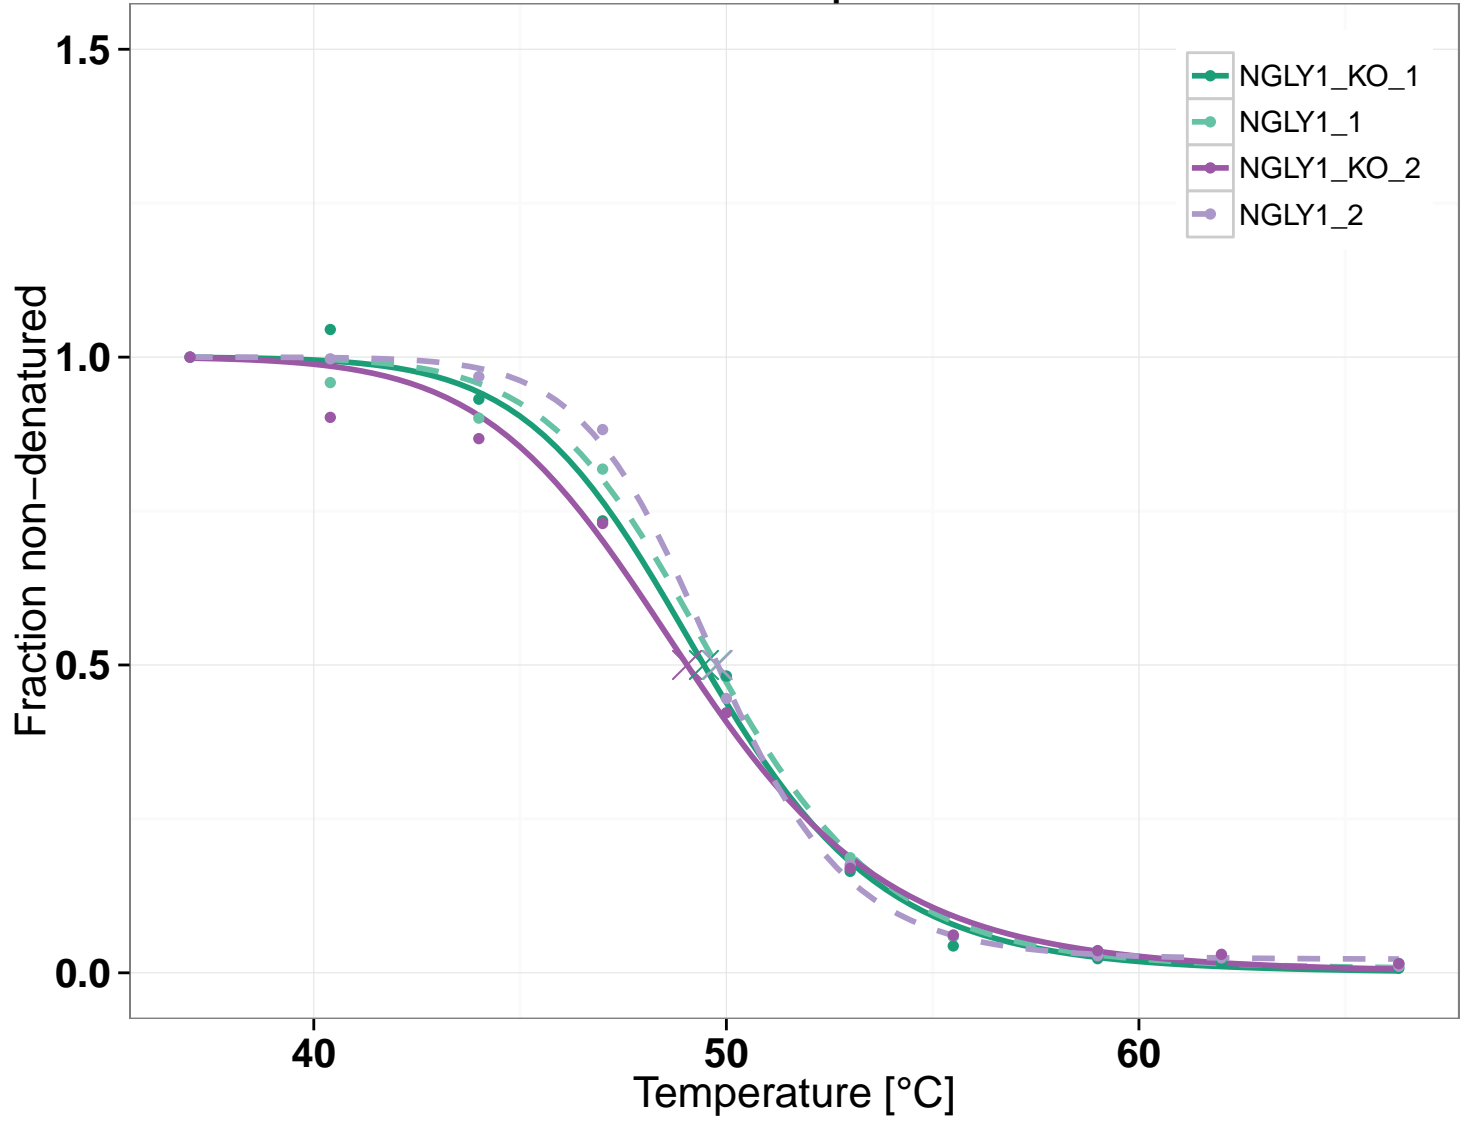

|            | meltPoint | slope | plateau | R2   |
|------------|-----------|-------|---------|------|
| NGLY1_KO_1 | 49.46     | -0.12 | 0       | 1    |
| NGLY1_1    | 49.76     | -0.12 | 0.01    | 1    |
| NGLY1_KO_2 | 49.05     | -0.1  | 0       | 0.99 |
| NGLY1_2    | 49.79     | -0.15 | 0.02    | 1    |

Supplement: Supplementary file 71 [file 1]

IPI00062751.1|RBM18

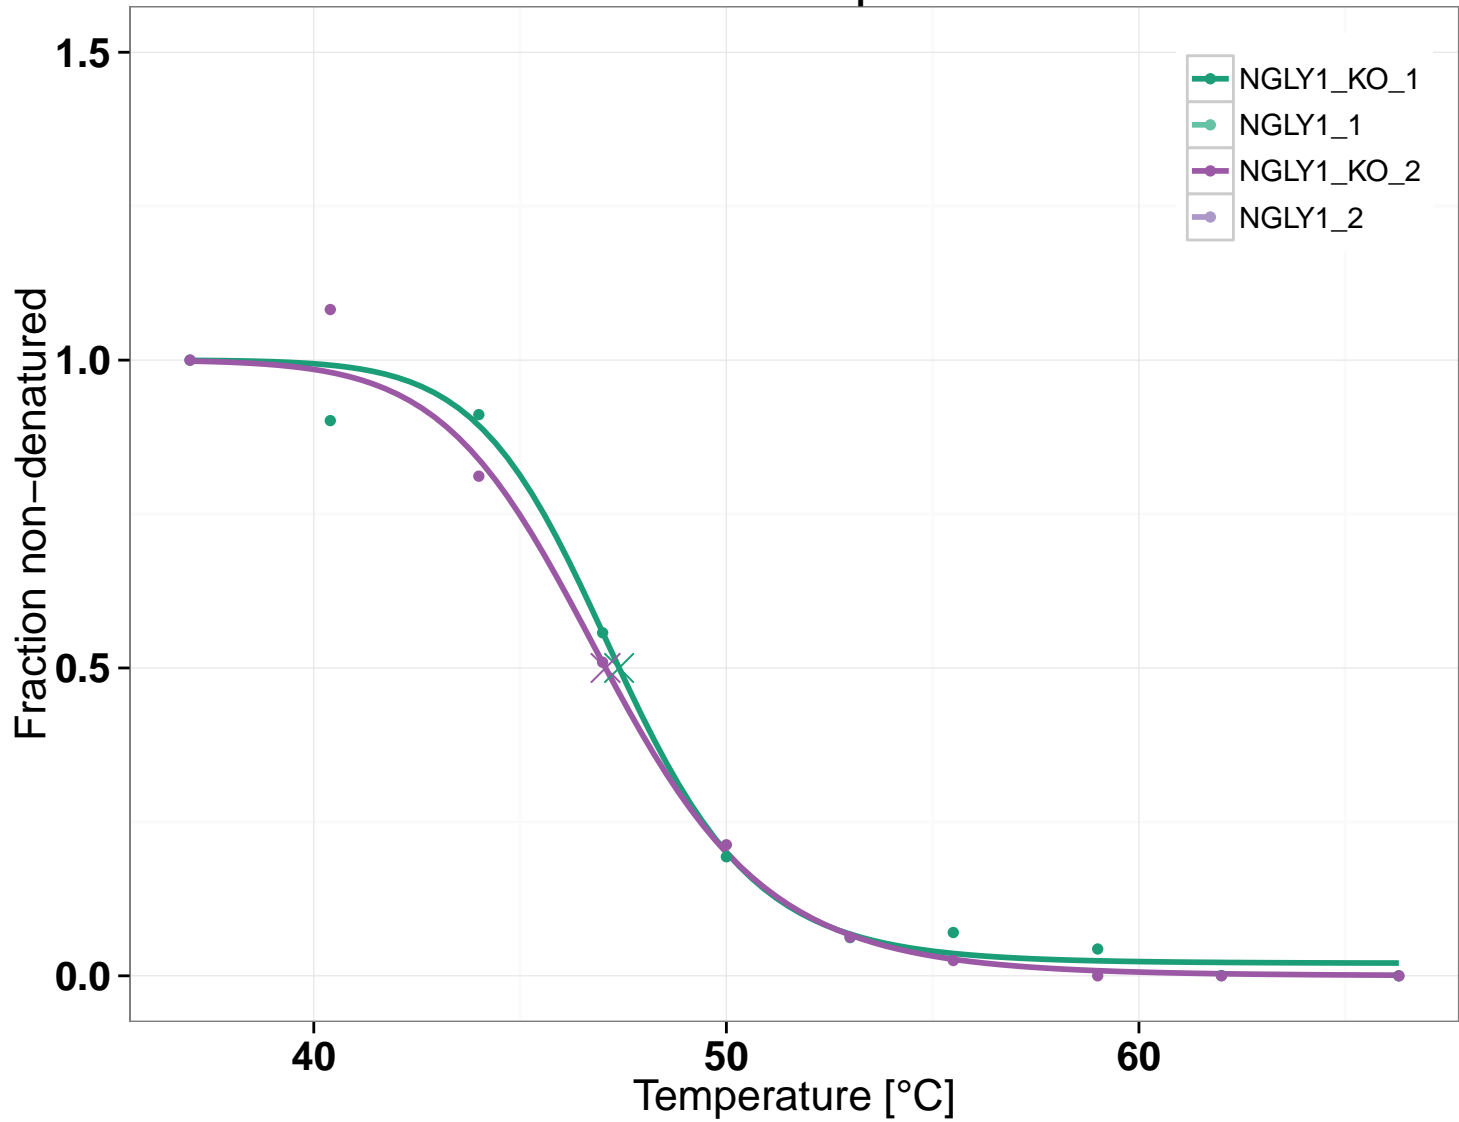

|            | meltPoint | slope | plateau | R2   |
|------------|-----------|-------|---------|------|
| NGLY1_KO_1 | 47.4      | -0.14 | 0.02    | 0.99 |
| NGLY1_1    | -         | -     | -       | -    |
| NGLY1_KO_2 | 47.07     | -0.13 | 0       | 0.99 |
| NGLY1_2    | -         | -     | -       | -    |

Supplement: Supplementary file 72 [file 1]

IPI00008380.1|PPP2CA

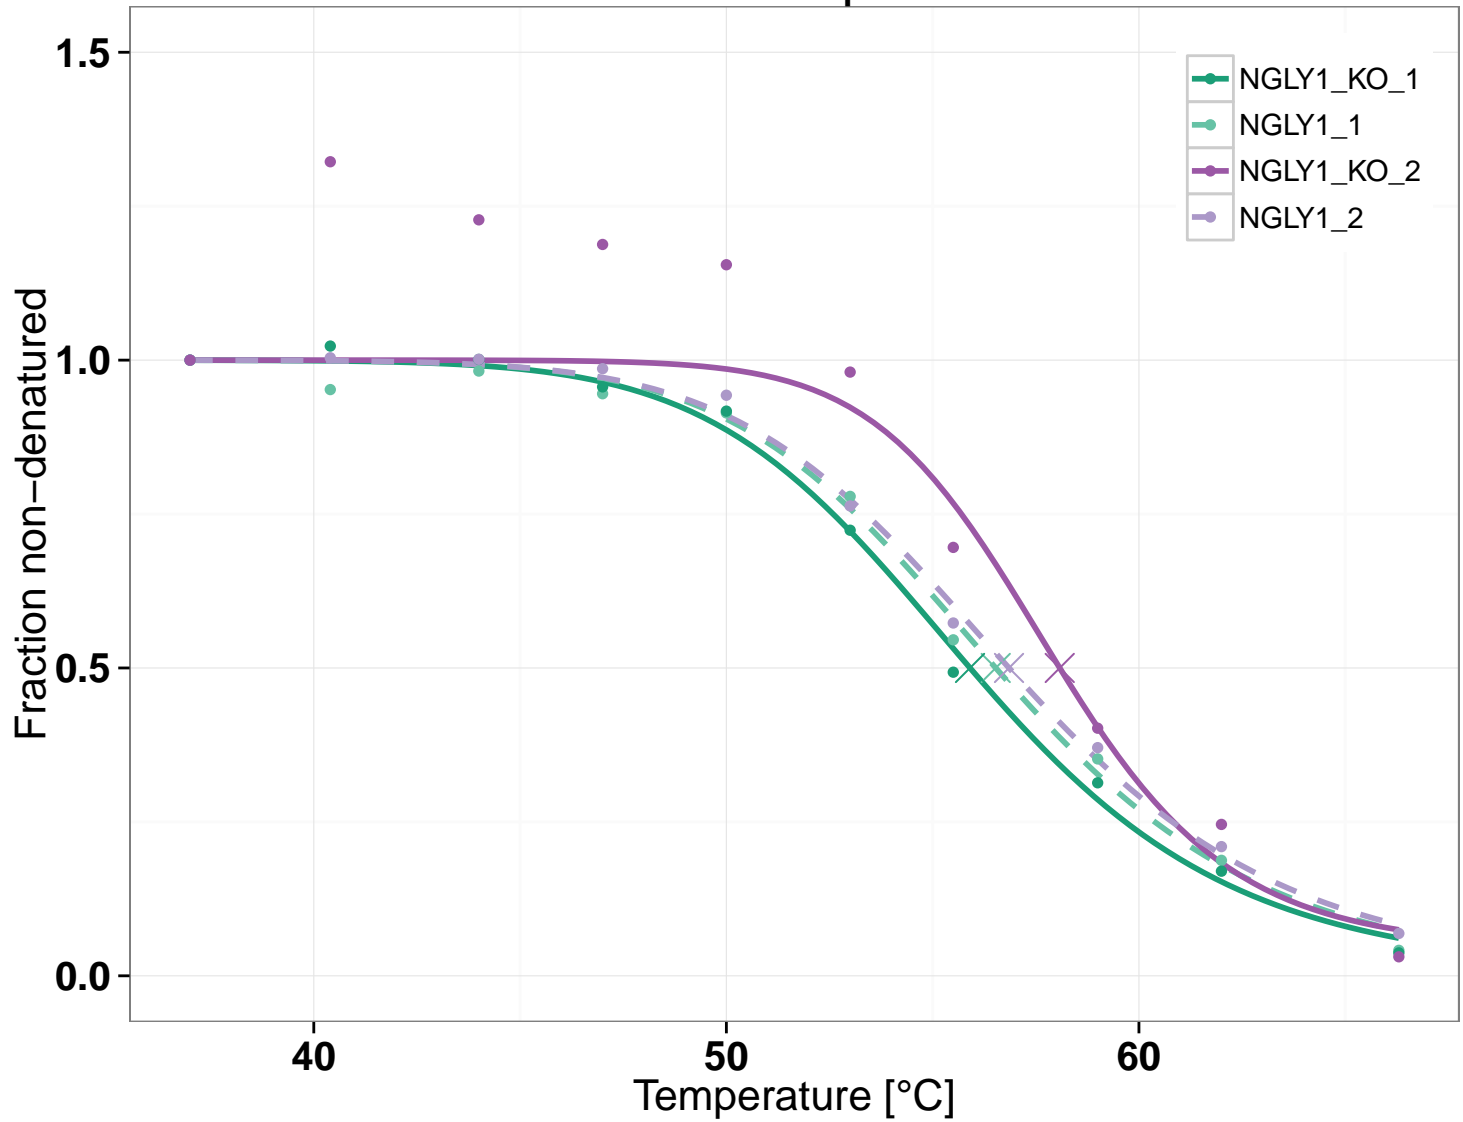

|            | meltPoint | slope  | plateau | R2   |
|------------|-----------|--------|---------|------|
| NGLY1_KO_1 | 55.91     | -0.079 | 0       | 1    |
| NGLY1_1    | 56.53     | -0.077 | 0       | 0.99 |
| NGLY1_KO_2 | 58.08     | -0.11  | 0.04    | 0.87 |
| NGLY1_2    | 56.85     | -0.075 | 0       | 1    |

Supplement: Supplementary file 73 [file 1]

IPI00018411.4|ZNF629

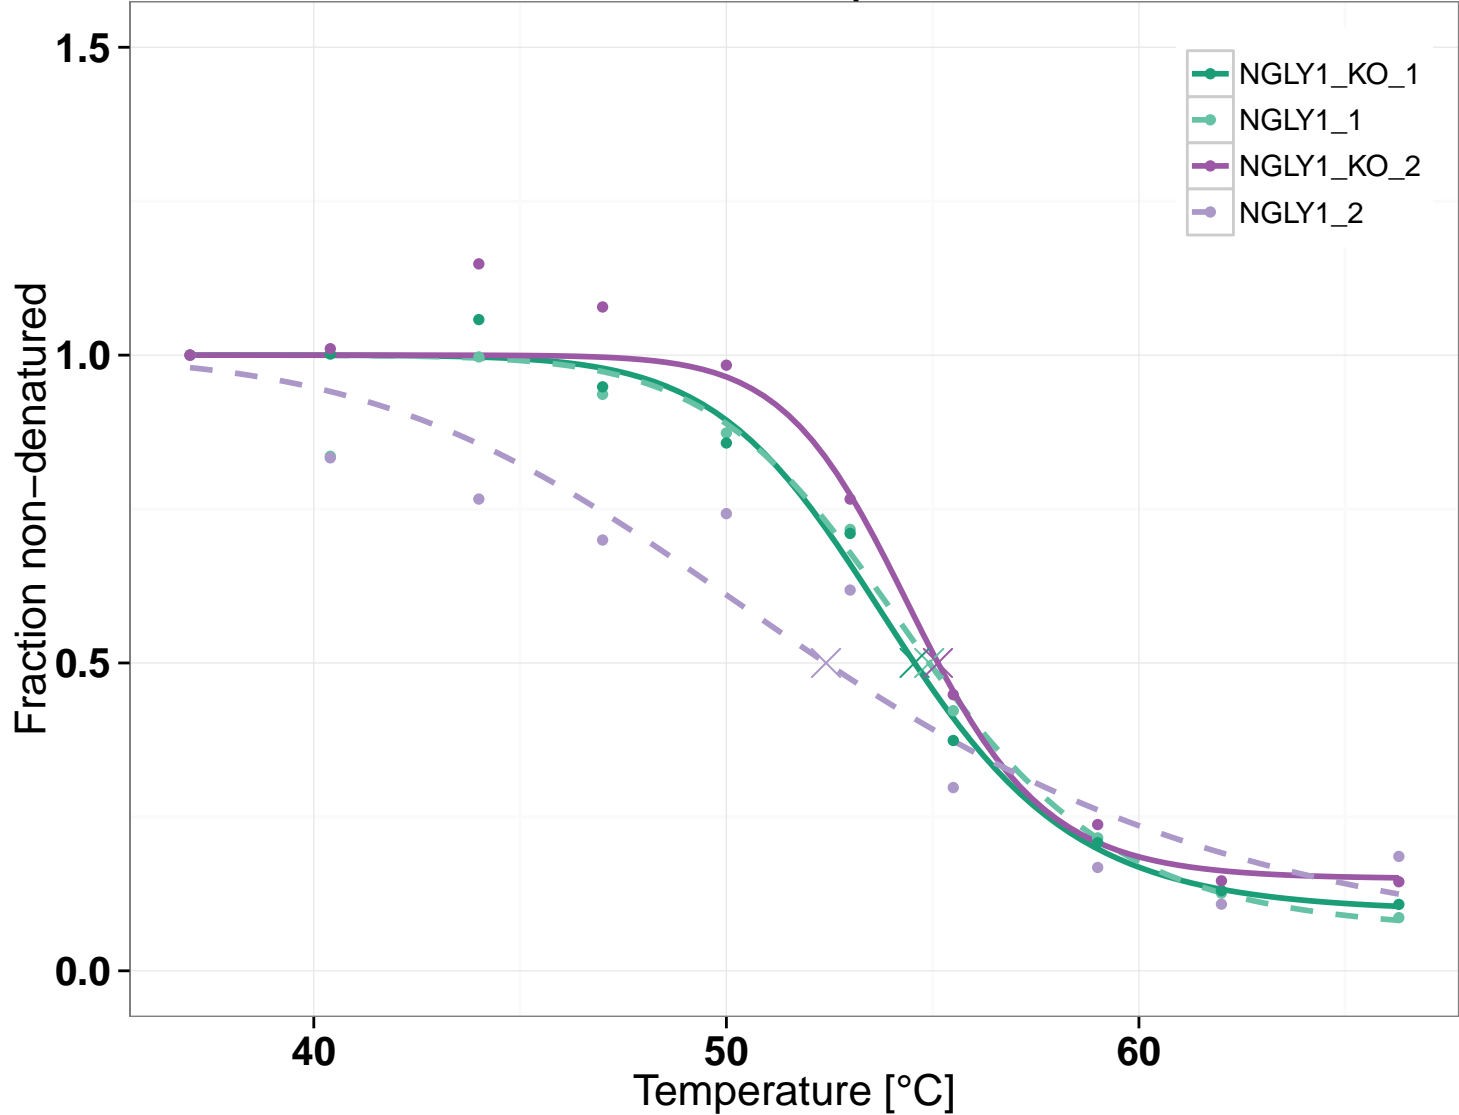

|            | meltPoint | slope  | plateau | R2   |
|------------|-----------|--------|---------|------|
| NGLY1_KO_1 | 54.56     | -0.1   | 0.1     | 0.99 |
| NGLY1_1    | 54.92     | -0.095 | 0.06    | 0.98 |
| NGLY1_KO_2 | 55.13     | -0.13  | 0.15    | 0.98 |
| NGLY1_2    | 52.42     | -0.046 | 0       | 0.91 |

Supplement: Supplementary file 74 [file 1]

IPI00783109.1|MTSS1L

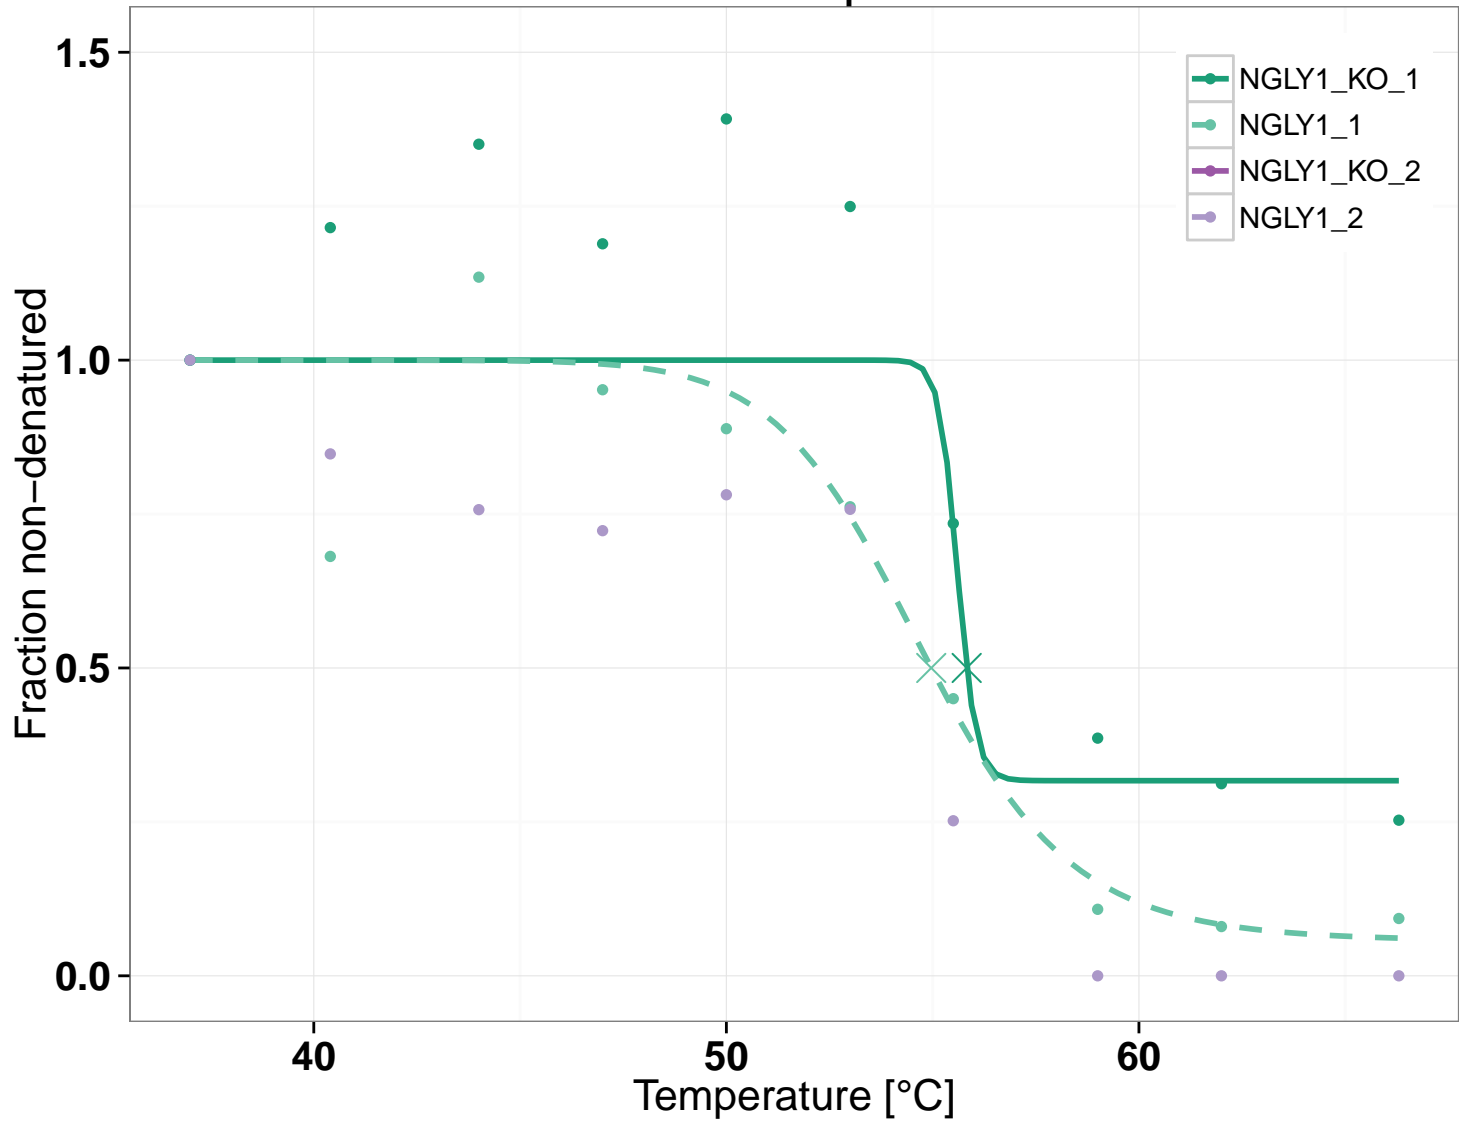

|            | meltPoint | slope | plateau | R2   |
|------------|-----------|-------|---------|------|
| NGLY1_KO_1 | 55.83     | -0.77 | 0.32    | 0.76 |
| NGLY1_1    | 54.97     | -0.13 | 0.06    | 0.91 |
| NGLY1_KO_2 | -         | -     | -       | -    |
| NGLY1_2    | -         | -     | -       | -    |

Supplement: Supplementary file 75 [file 1]

# IPI00168336.1|LEMD2

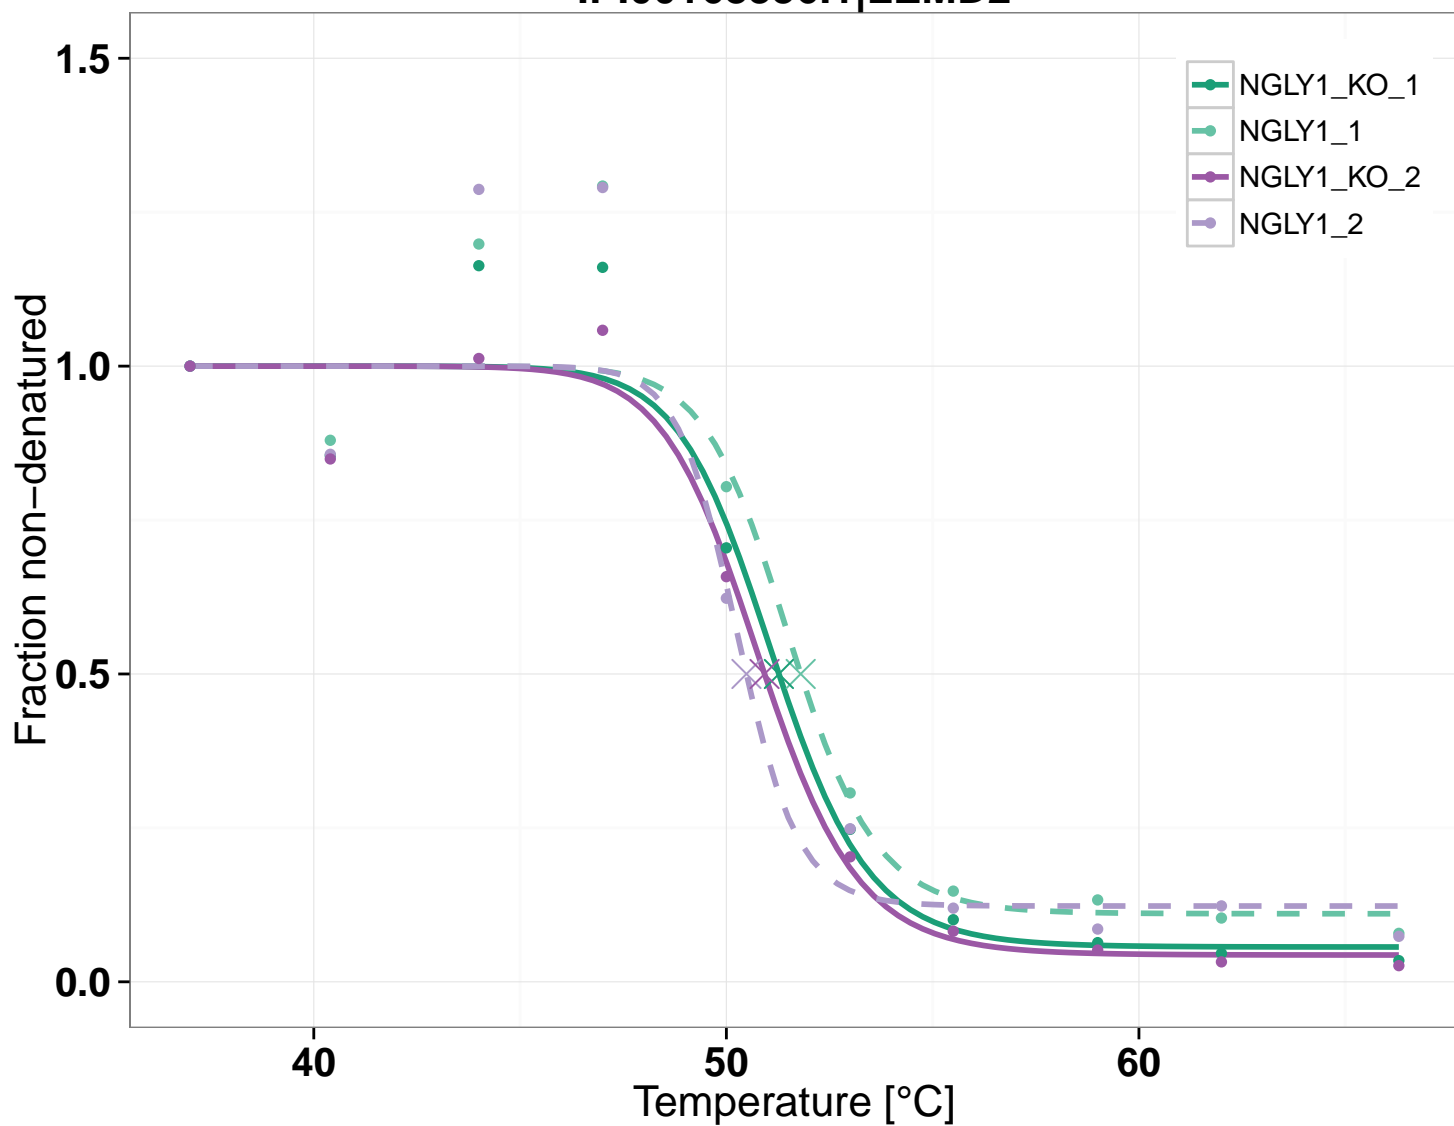

|            | meltPoint | slope | plateau | R2   |
|------------|-----------|-------|---------|------|
| NGLY1_KO_1 | 51.27     | -0.2  | 0.06    | 0.96 |
| NGLY1_1    | 51.8      | -0.21 | 0.11    | 0.93 |
| NGLY1_KO_2 | 50.93     | -0.2  | 0.04    | 0.98 |
| NGLY1_2    | 50.49     | -0.3  | 0.12    | 0.91 |

Supplement: Supplementary file 76 [file 1]

# IPI00009291.1|VRK3

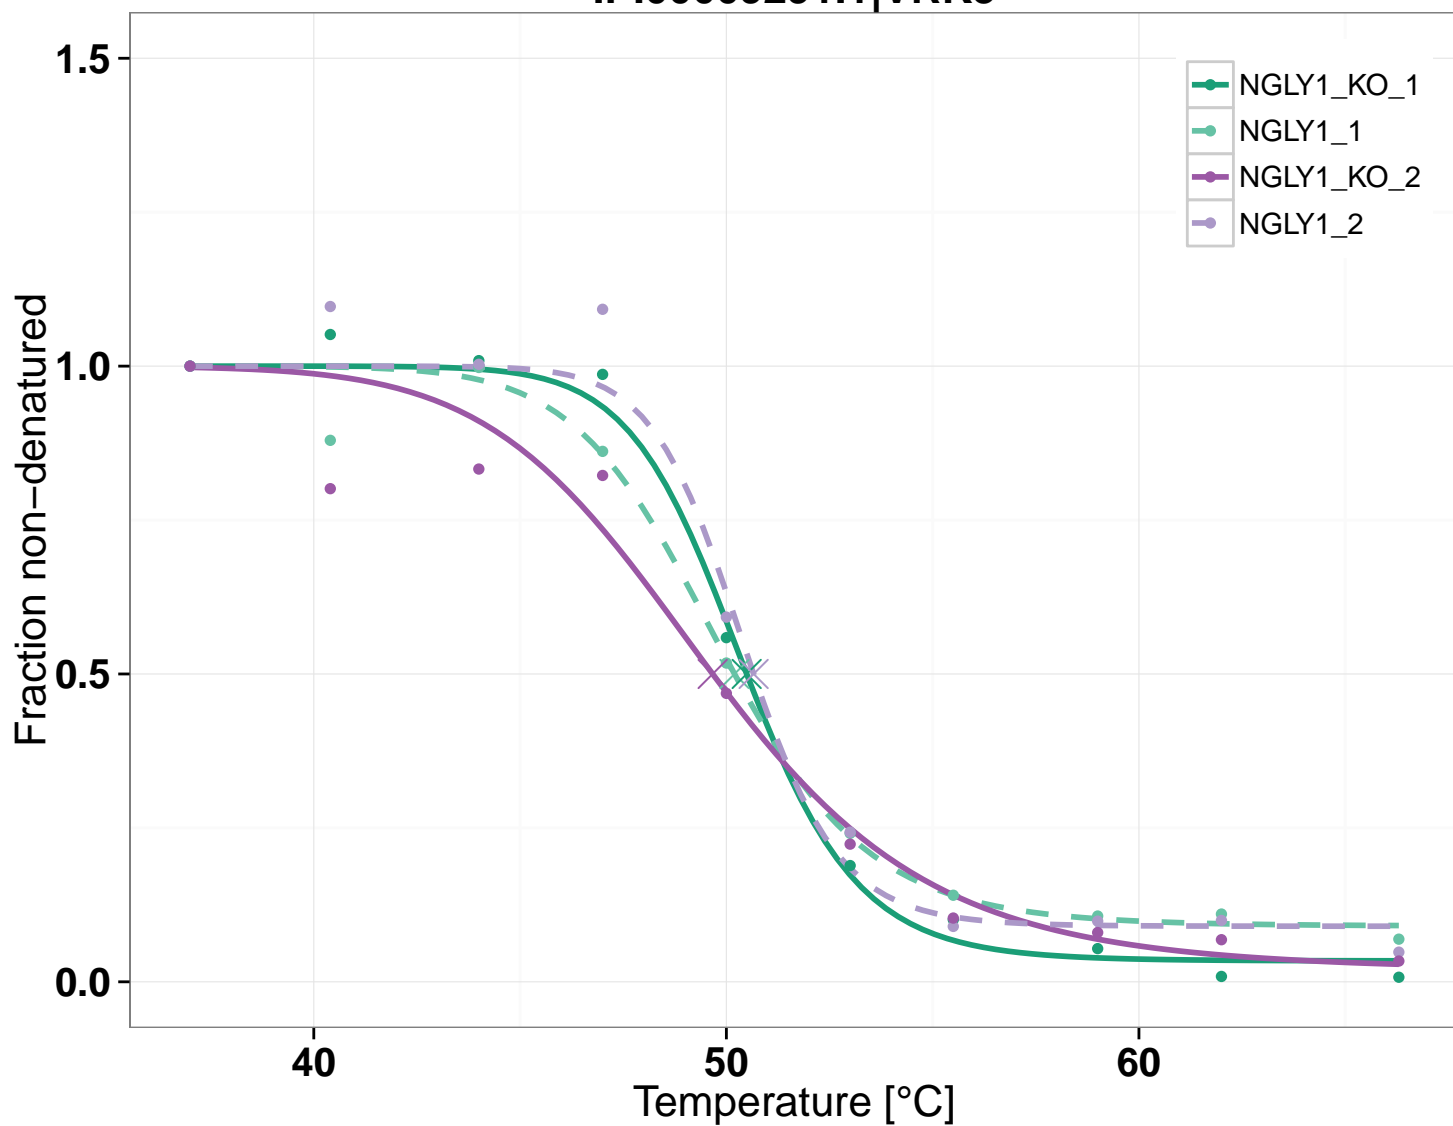

|            | meltPoint | slope  | plateau | R2   |
|------------|-----------|--------|---------|------|
| NGLY1_KO_1 | 50.49     | -0.17  | 0.03    | 1    |
| NGLY1_1    | 50.2      | -0.13  | 0.09    | 0.99 |
| NGLY1_KO_2 | 49.67     | -0.091 | 0.02    | 0.96 |
| NGLY1_2    | 50.66     | -0.2   | 0.09    | 0.98 |

Supplement: Supplementary file 77 [file 1]

# IPI00867599.2|CYTB

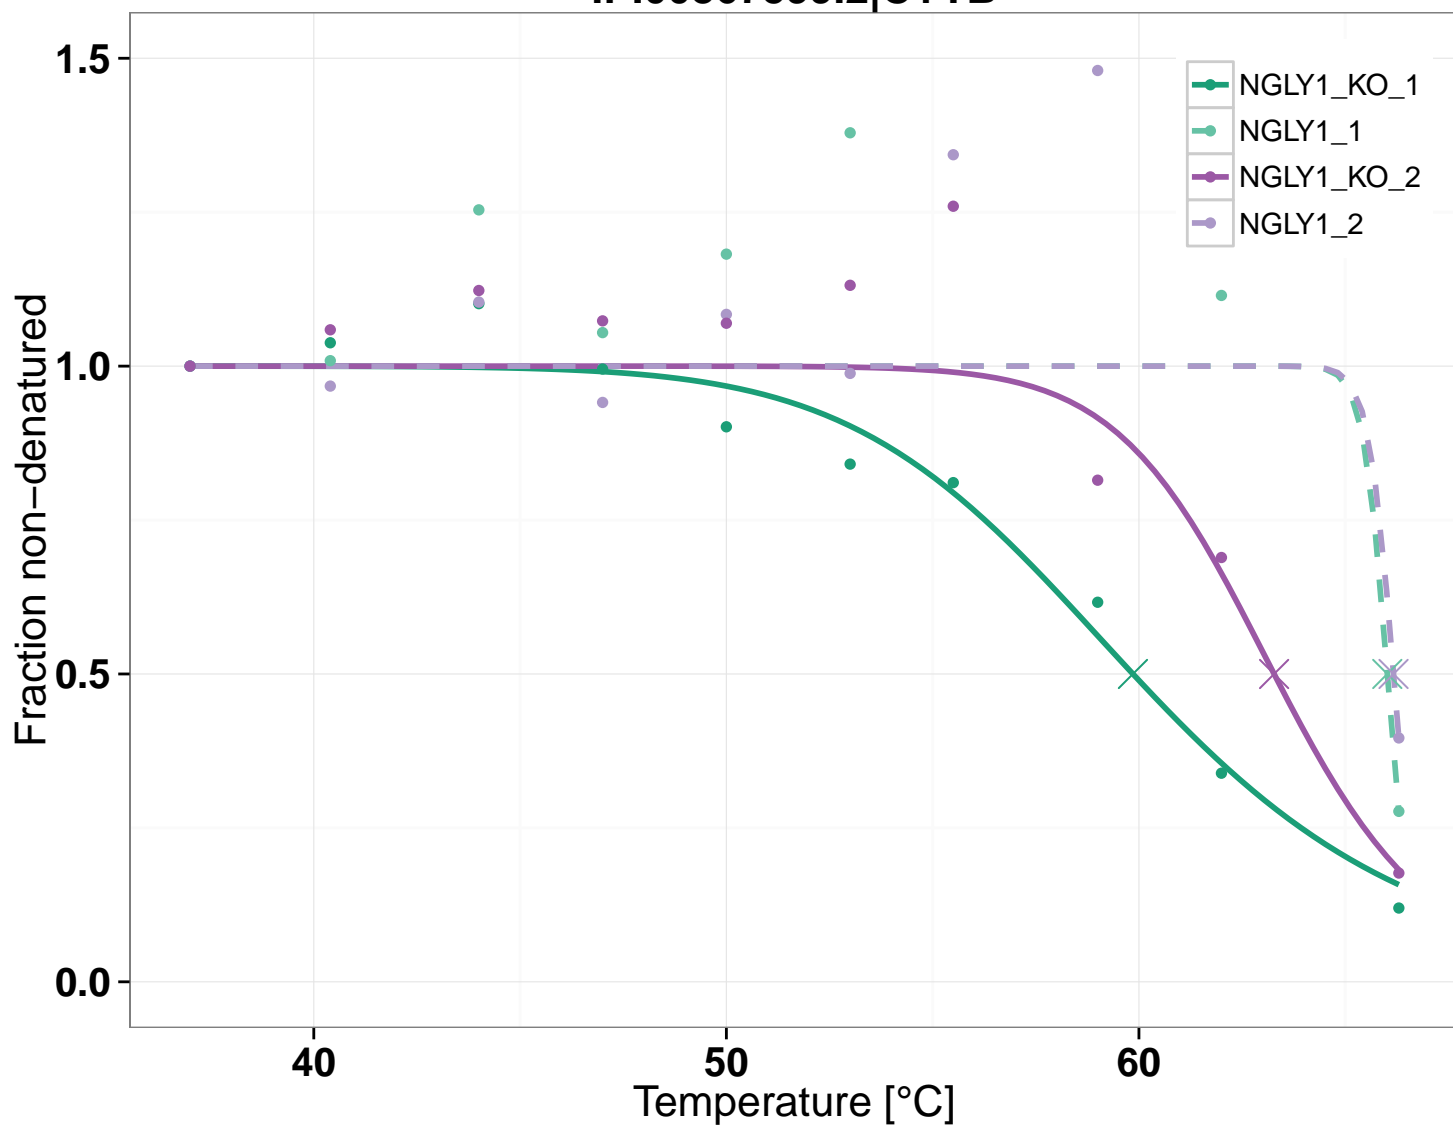

|            | meltPoint | slope  | plateau | R2   |
|------------|-----------|--------|---------|------|
| NGLY1_KO_1 | 59.85     | -0.073 | 0       | 0.97 |
| NGLY1_1    | 66.02     | -0.86  | 0       | 0.25 |
| NGLY1_KO_2 | 63.28     | -0.13  | 0       | 0.85 |
| NGLY1_2    | 66.17     | -0.82  | 0       | 0.45 |

Supplement: Supplementary file 78 [file 1]

# IPI00441344.2|GLB1

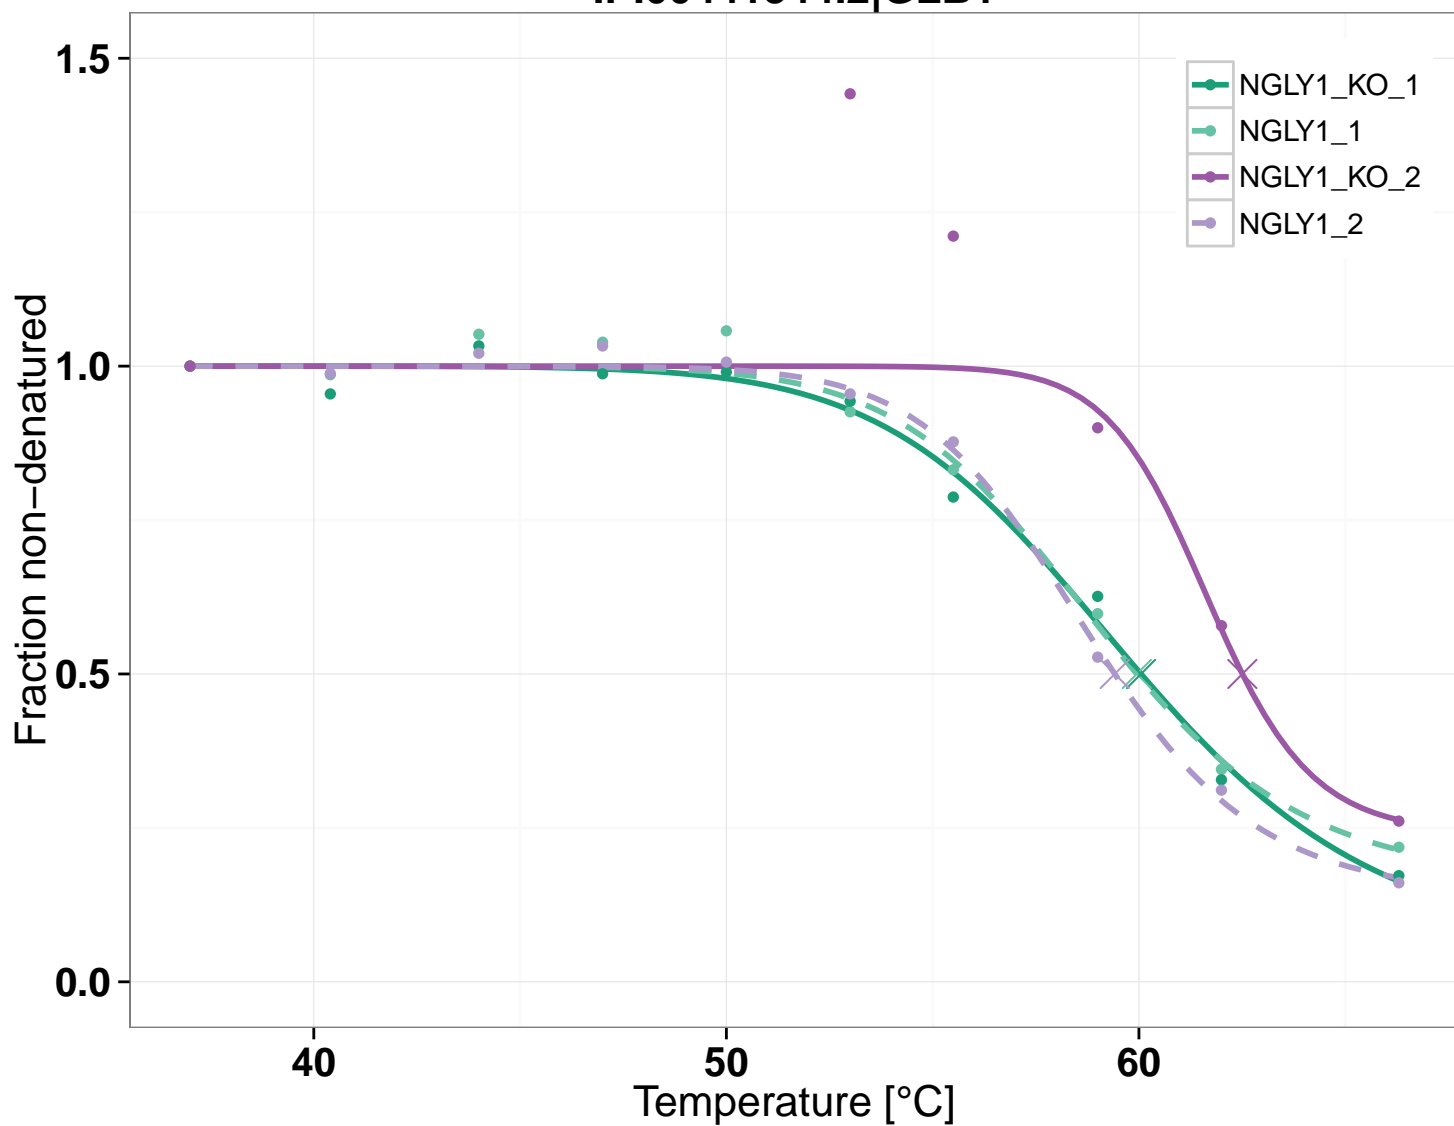

|            | meltPoint | slope  | plateau | R2   |
|------------|-----------|--------|---------|------|
| NGLY1_KO_1 | 60.05     | -0.08  | 0.04    | 0.99 |
| NGLY1_1    | 59.95     | -0.086 | 0.16    | 0.99 |
| NGLY1_KO_2 | 62.51     | -0.15  | 0.24    | 0.13 |
| NGLY1_2    | 59.41     | -0.11  | 0.14    | 1    |

Supplement: Supplementary file 79 [file 1]

IPI00076597.3|ALKBH3

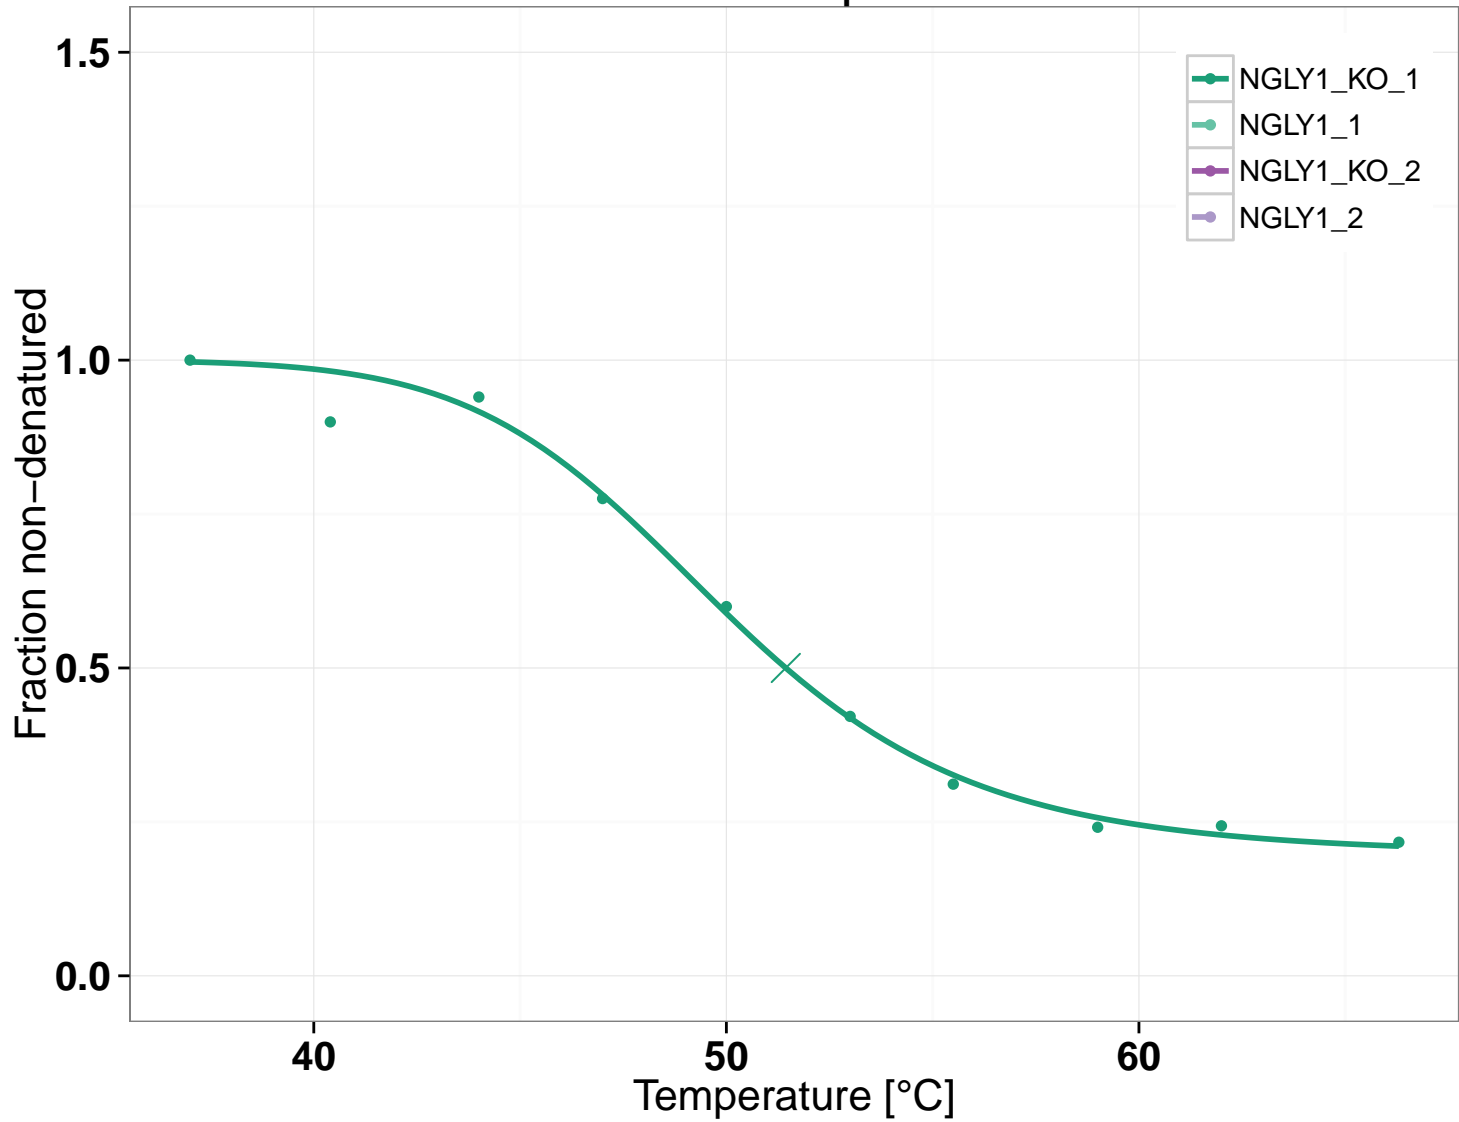

|            | meltPoint | slope  | plateau | R2   |
|------------|-----------|--------|---------|------|
| NGLY1_KO_1 | 51.44     | -0.066 | 0.2     | 0.99 |
| NGLY1_1    | -         | -      | -       | -    |
| NGLY1_KO_2 | -         | -      | -       | -    |
| NGLY1_2    | -         | -      | -       | -    |

Supplement: Supplementary file 80 [file 1]

# IPI00329692.3|NMT1

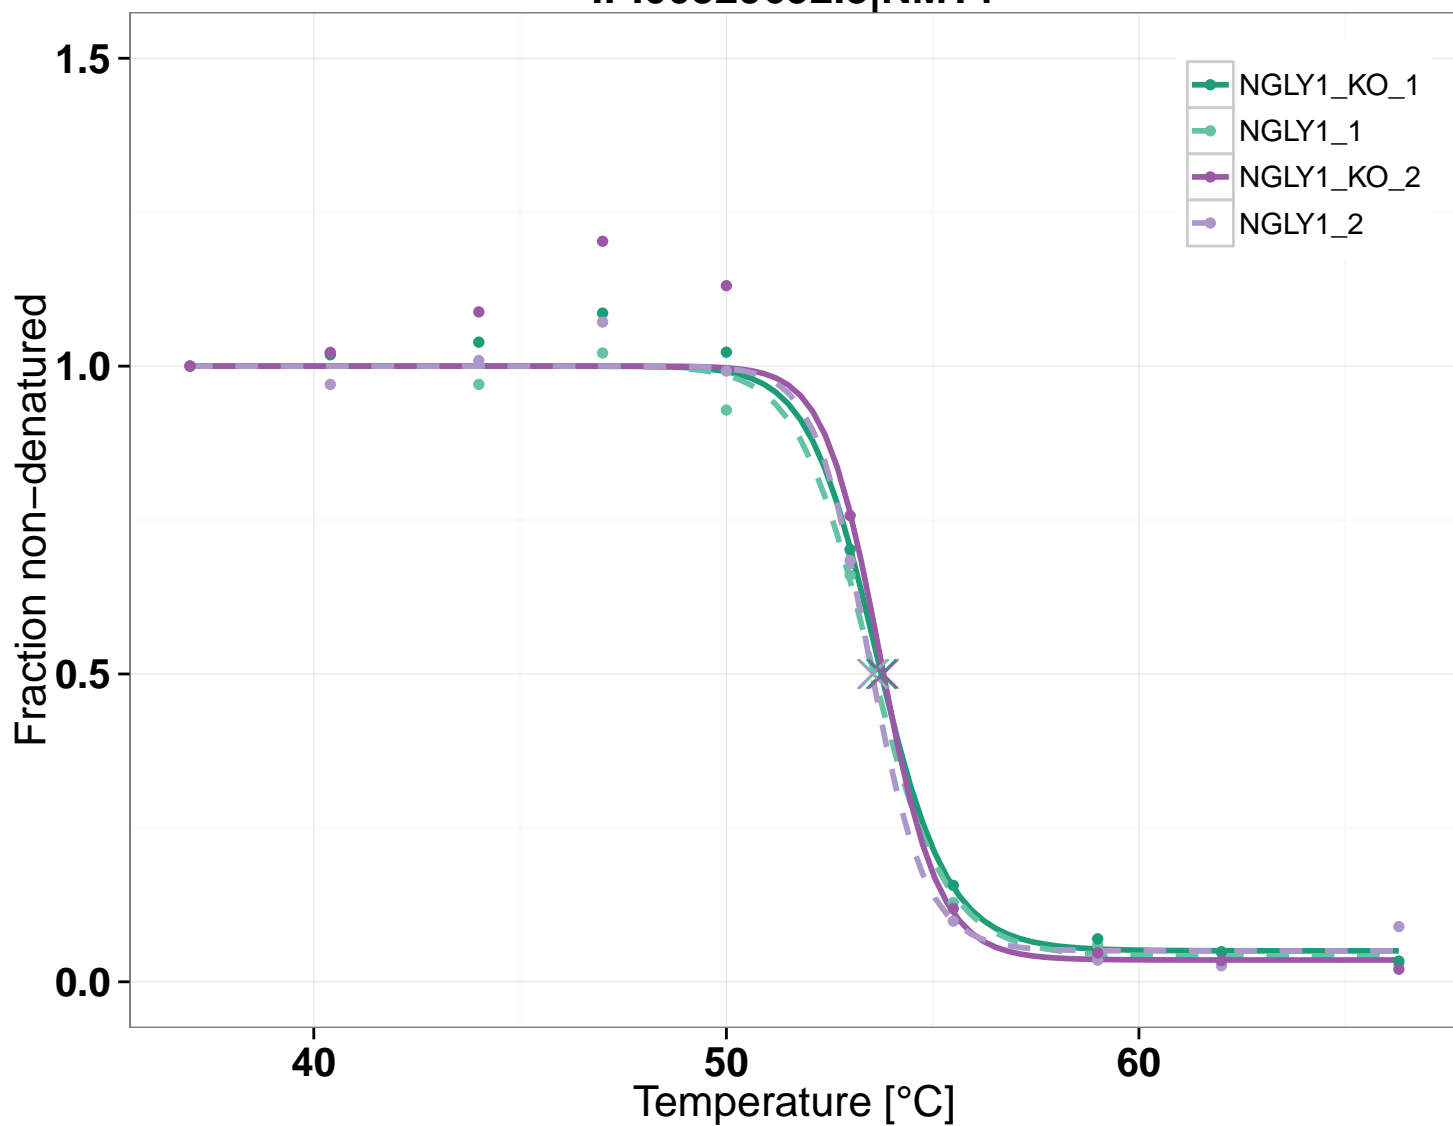

|            | meltPoint | slope | plateau | R2   |
|------------|-----------|-------|---------|------|
| NGLY1_KO_1 | 53.75     | -0.28 | 0.05    | 0.99 |
| NGLY1_1    | 53.58     | -0.27 | 0.04    | 1    |
| NGLY1_KO_2 | 53.81     | -0.35 | 0.04    | 0.97 |
| NGLY1_2    | 53.53     | -0.35 | 0.05    | 1    |

Supplement: Supplementary file 81 [file 1]

IPI00182180.2|OTUD6B

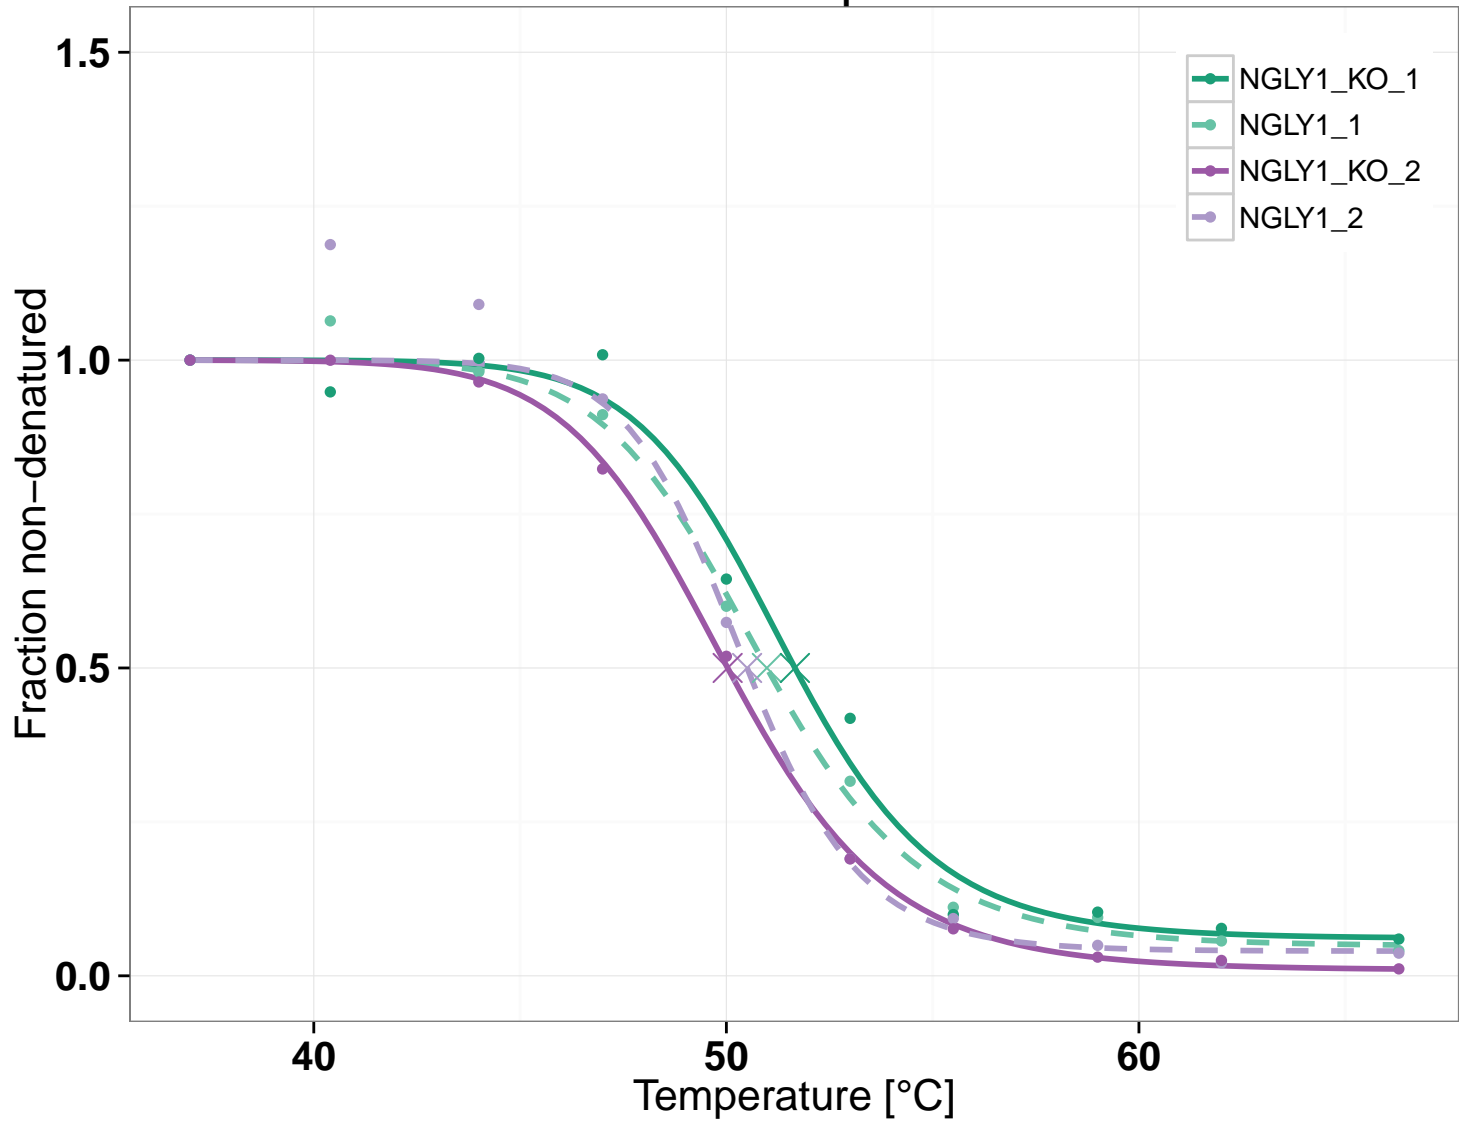

|            | meltPoint | slope | plateau | R2   |
|------------|-----------|-------|---------|------|
| NGLY1_KO_1 | 51.66     | -0.13 | 0.06    | 0.99 |
| NGLY1_1    | 50.98     | -0.12 | 0.05    | 1    |
| NGLY1_KO_2 | 50.03     | -0.13 | 0.01    | 1    |
| NGLY1_2    | 50.5      | -0.17 | 0.04    | 0.98 |

Supplement: Supplementary file 82 [file 1]

# IPI00743335.1|MYO1C

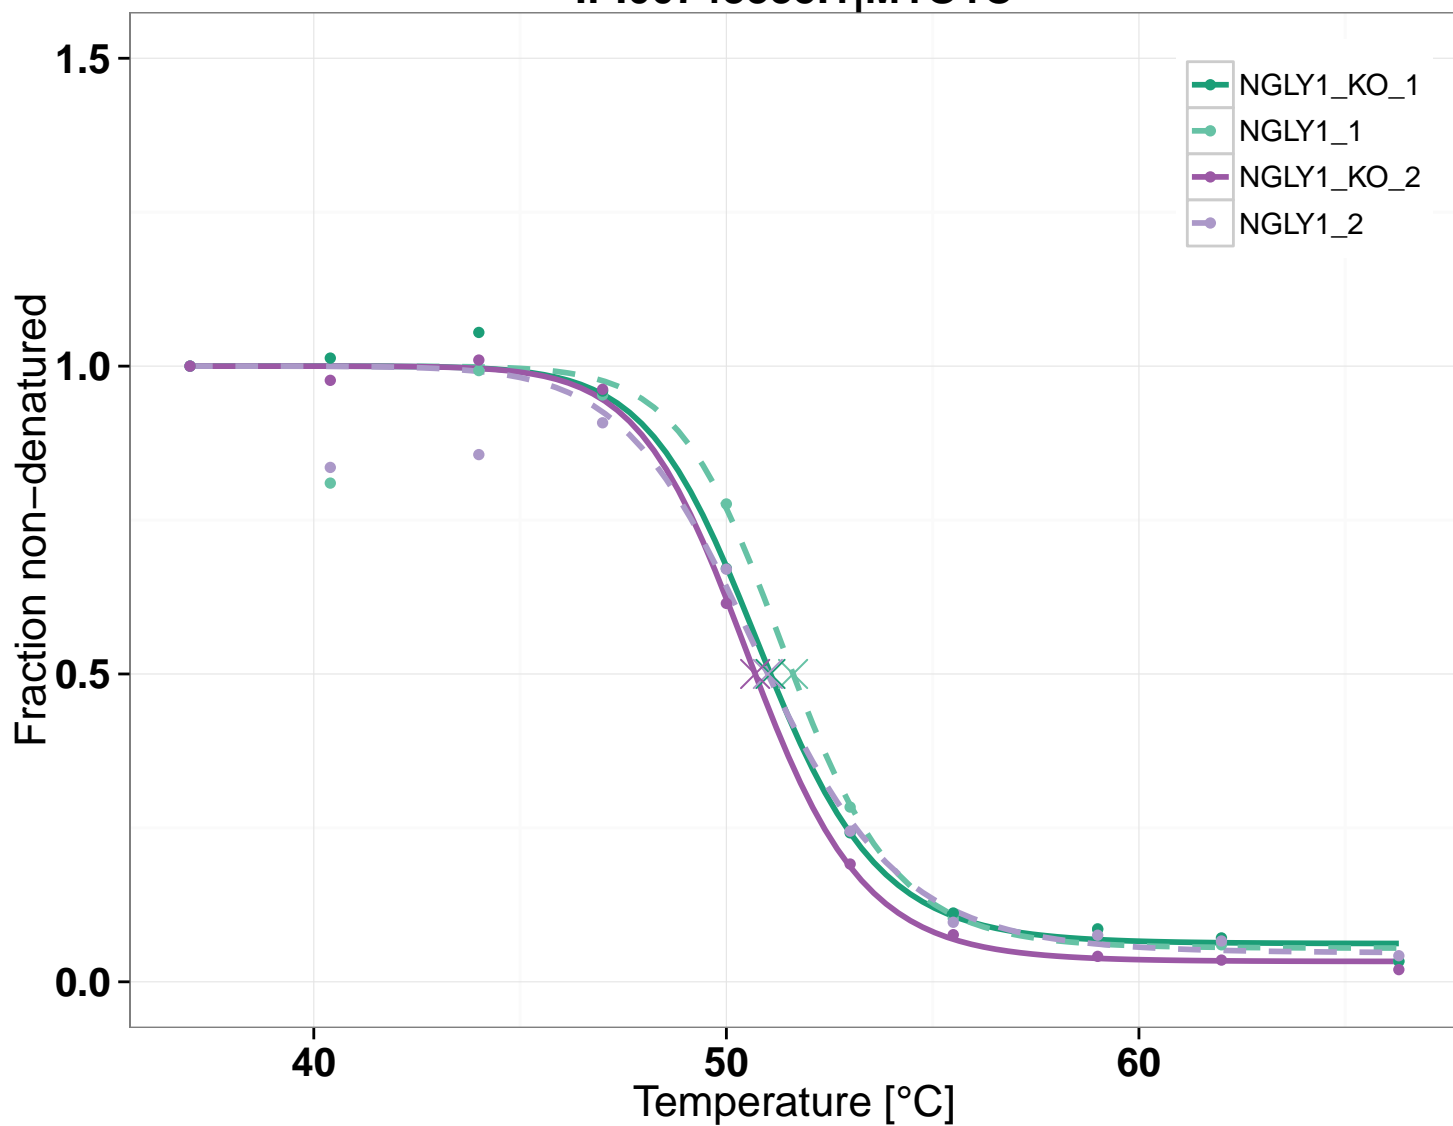

|            | meltPoint | slope | plateau | R2   |
|------------|-----------|-------|---------|------|
| NGLY1_KO_1 | 51.07     | -0.17 | 0.06    | 1    |
| NGLY1_1    | 51.62     | -0.18 | 0.05    | 0.98 |
| NGLY1_KO_2 | 50.7      | -0.18 | 0.03    | 1    |
| NGLY1_2    | 51.01     | -0.14 | 0.05    | 0.97 |

Supplement: Supplementary file 83 [file 1]

IPI00013774.1|HDAC1

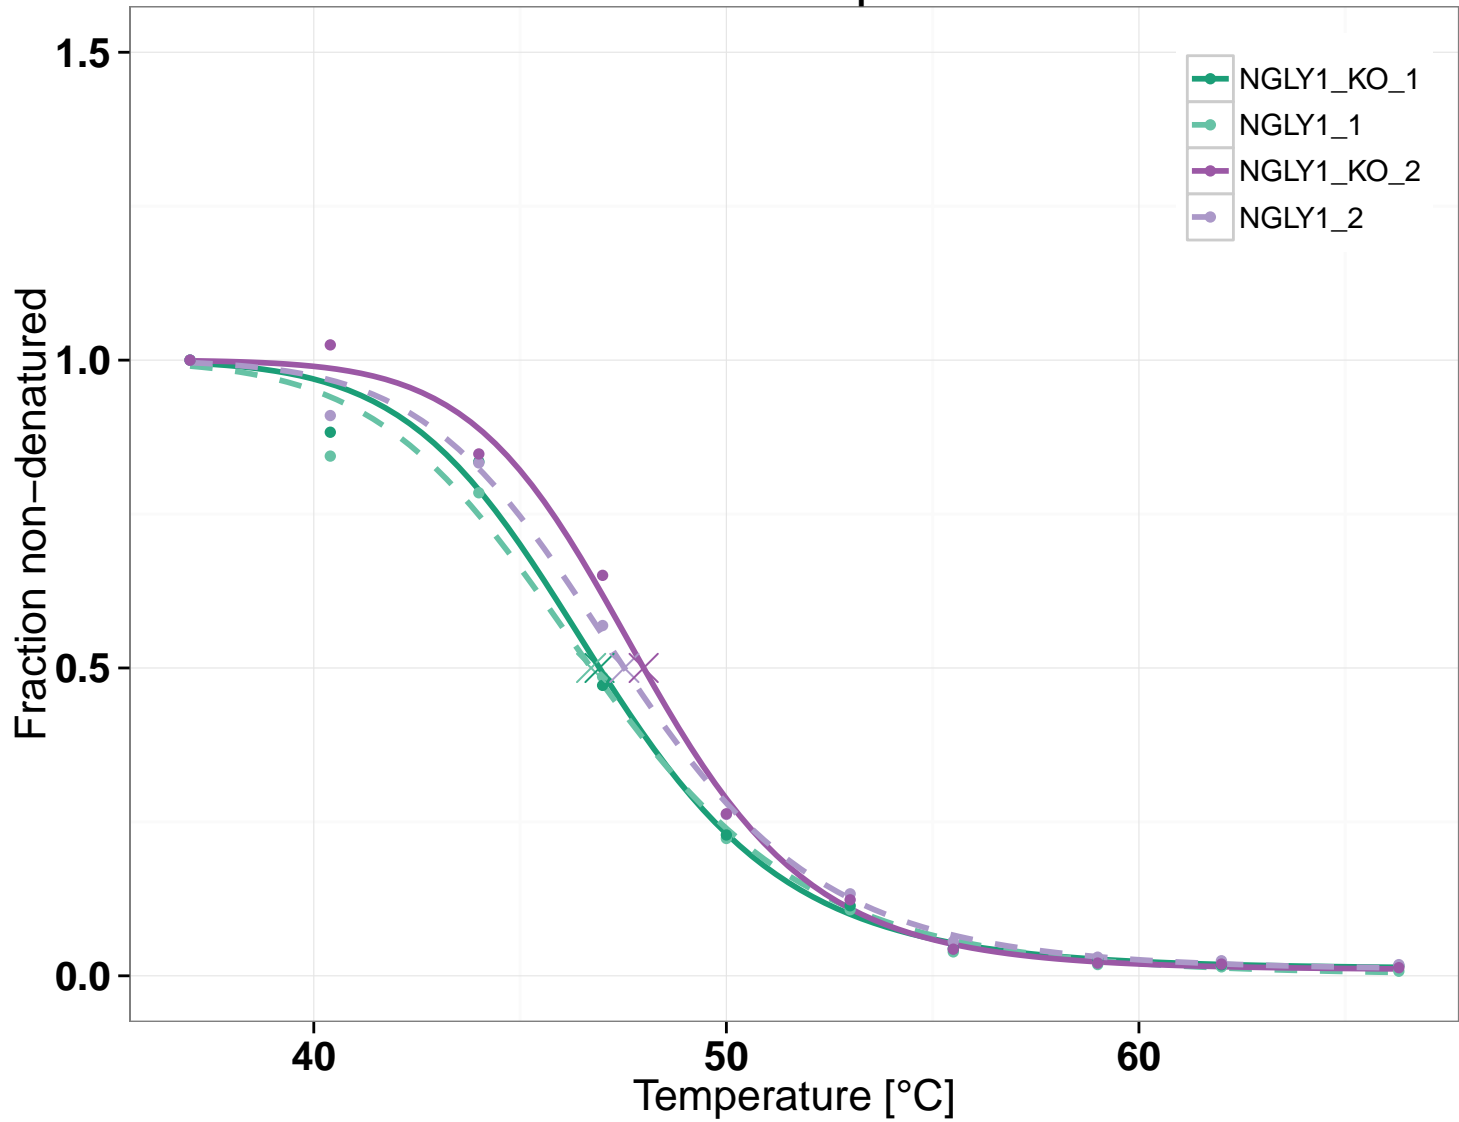

|            | meltPoint | slope  | plateau | R2   |
|------------|-----------|--------|---------|------|
| NGLY1_KO_1 | 46.93     | -0.11  | 0.01    | 0.99 |
| NGLY1_1    | 46.72     | -0.096 | 0       | 0.99 |
| NGLY1_KO_2 | 48        | -0.12  | 0.01    | 1    |
| NGLY1_2    | 47.53     | -0.1   | 0.01    | 1    |

Supplement: Supplementary file 84 [file 1]

IPI00413817.3|SERINC1

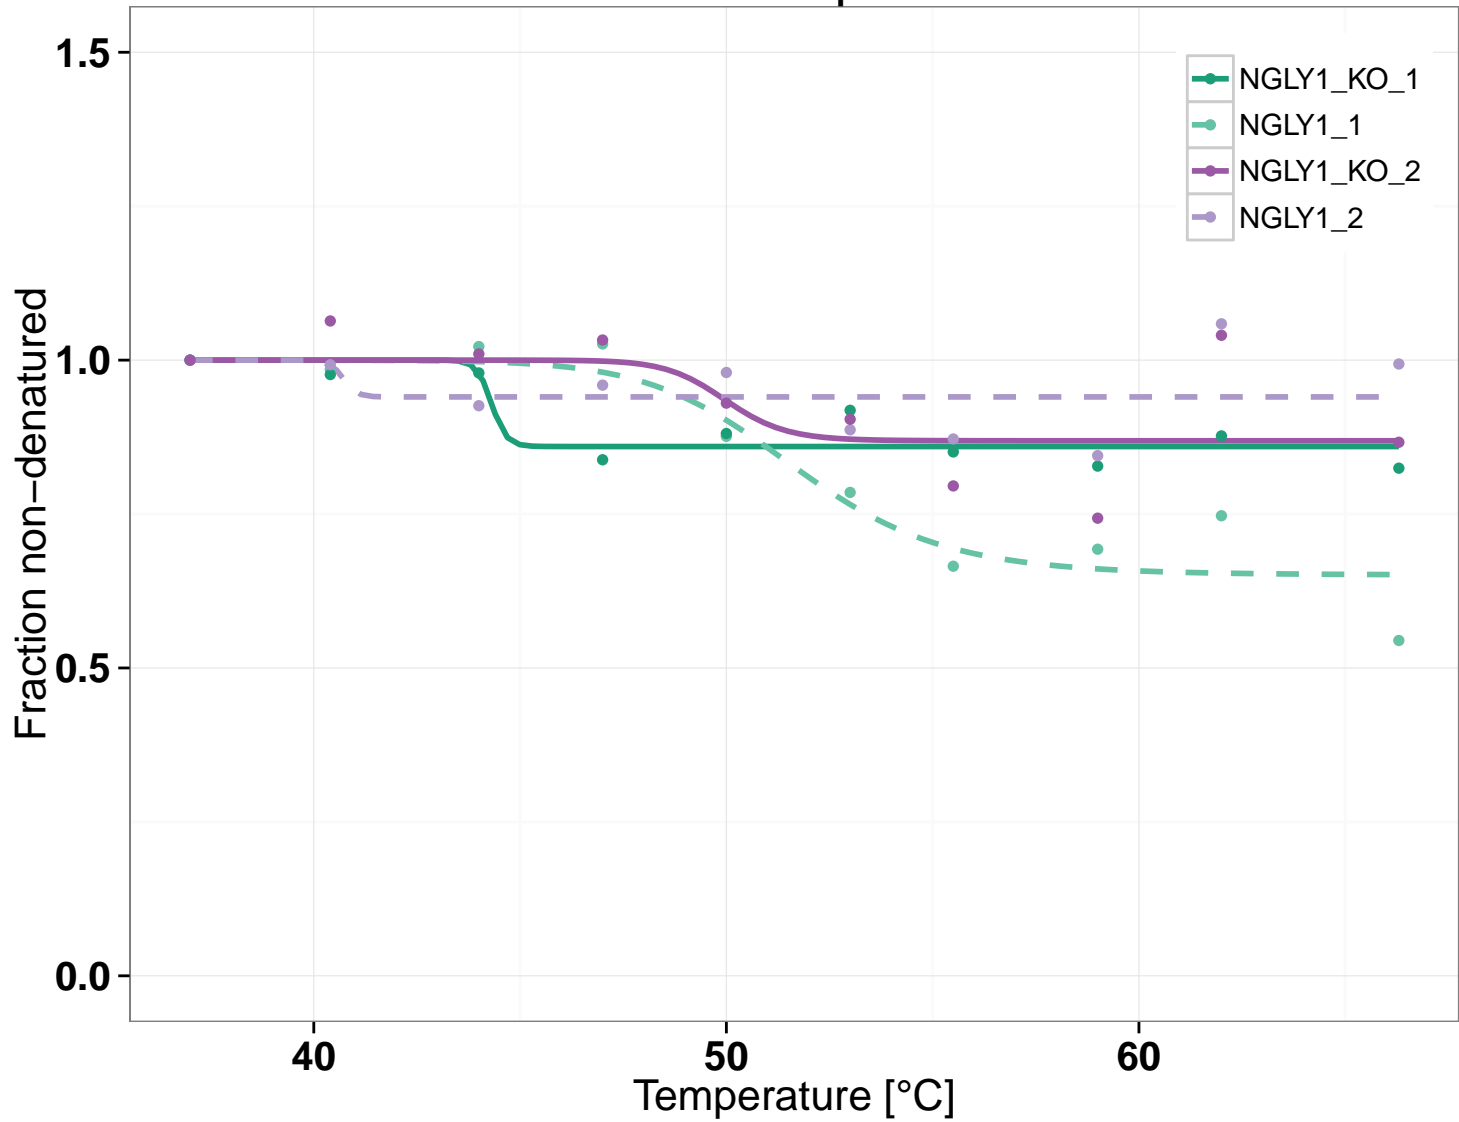

|            | meltPoint | slope  | plateau | R2   |
|------------|-----------|--------|---------|------|
| NGLY1_KO_1 | -         | -0.2   | 0.86    | 0.81 |
| NGLY1_1    | -         | -0.048 | 0.65    | 0.9  |
| NGLY1_KO_2 | -         | -0.045 | 0.87    | 0.48 |
| NGLY1_2    | -         | -0.092 | 0.94    | 0.12 |

Supplement: Supplementary file 85 [file 1]

IPI00872816.1|SMURF2

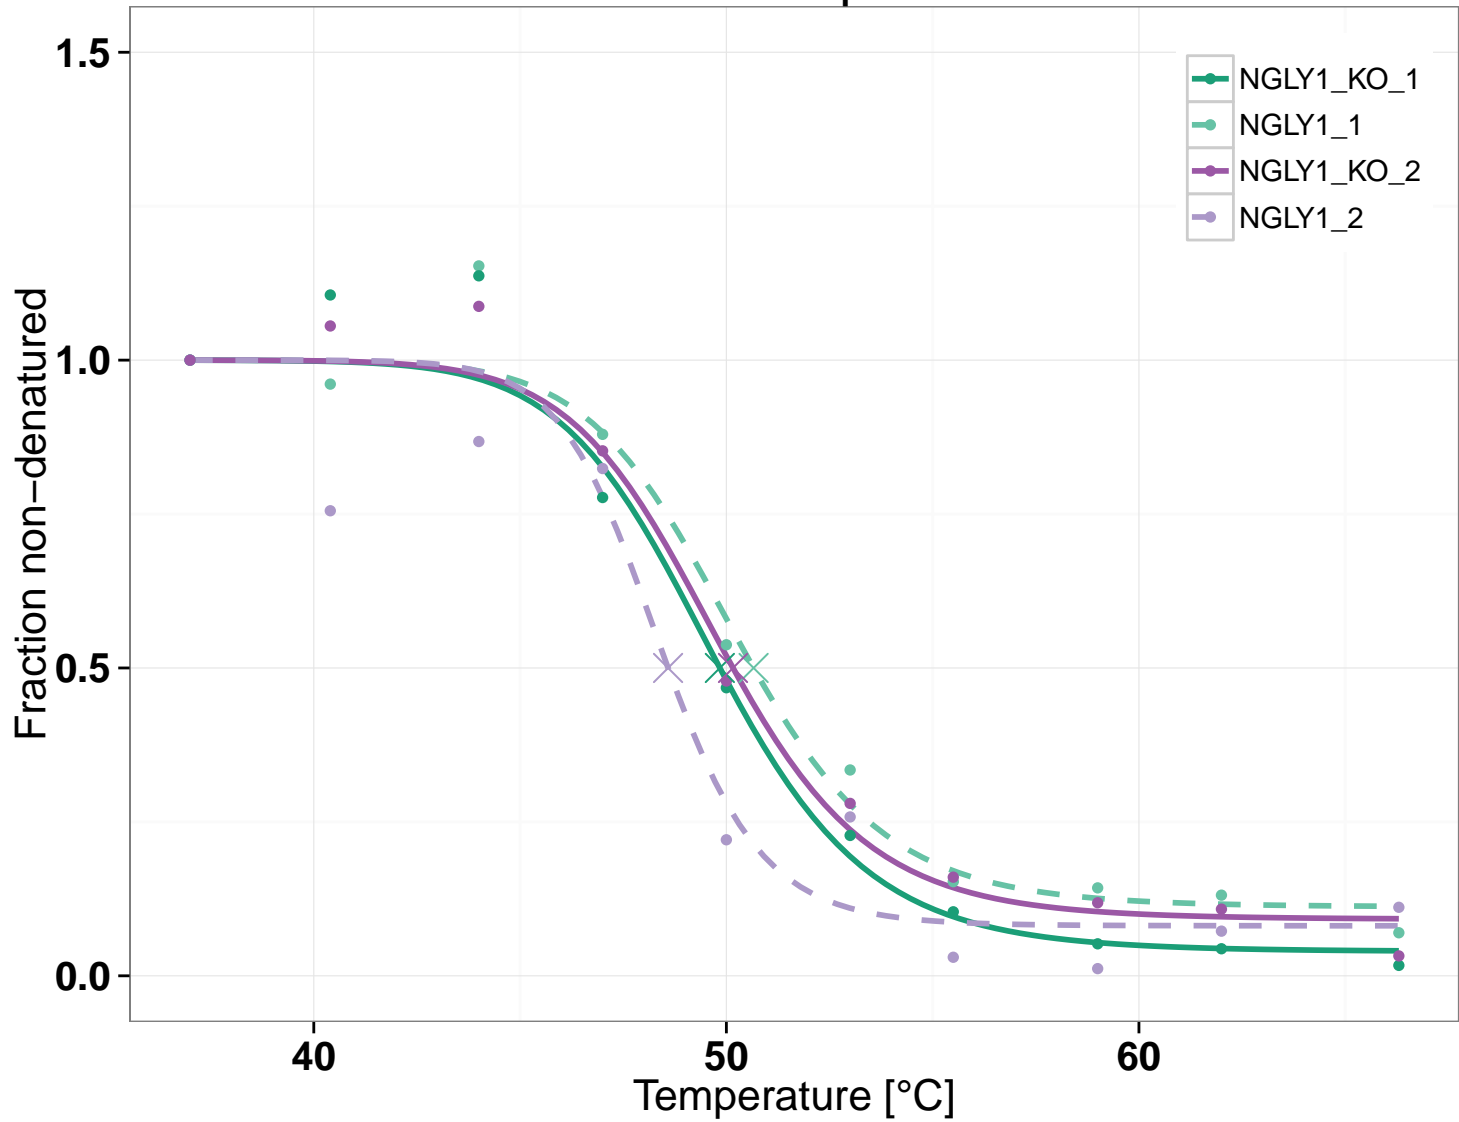

|            | meltPoint | slope | plateau | R2   |
|------------|-----------|-------|---------|------|
| NGLY1_KO_1 | 49.84     | -0.13 | 0.04    | 0.98 |
| NGLY1_1    | 50.66     | -0.12 | 0.11    | 0.98 |
| NGLY1_KO_2 | 50.16     | -0.13 | 0.09    | 0.99 |
| NGLY1_2    | 48.59     | -0.19 | 0.08    | 0.92 |

Supplement: Supplementary file 86 [file 1]

IPI00297626.4|STXBP3

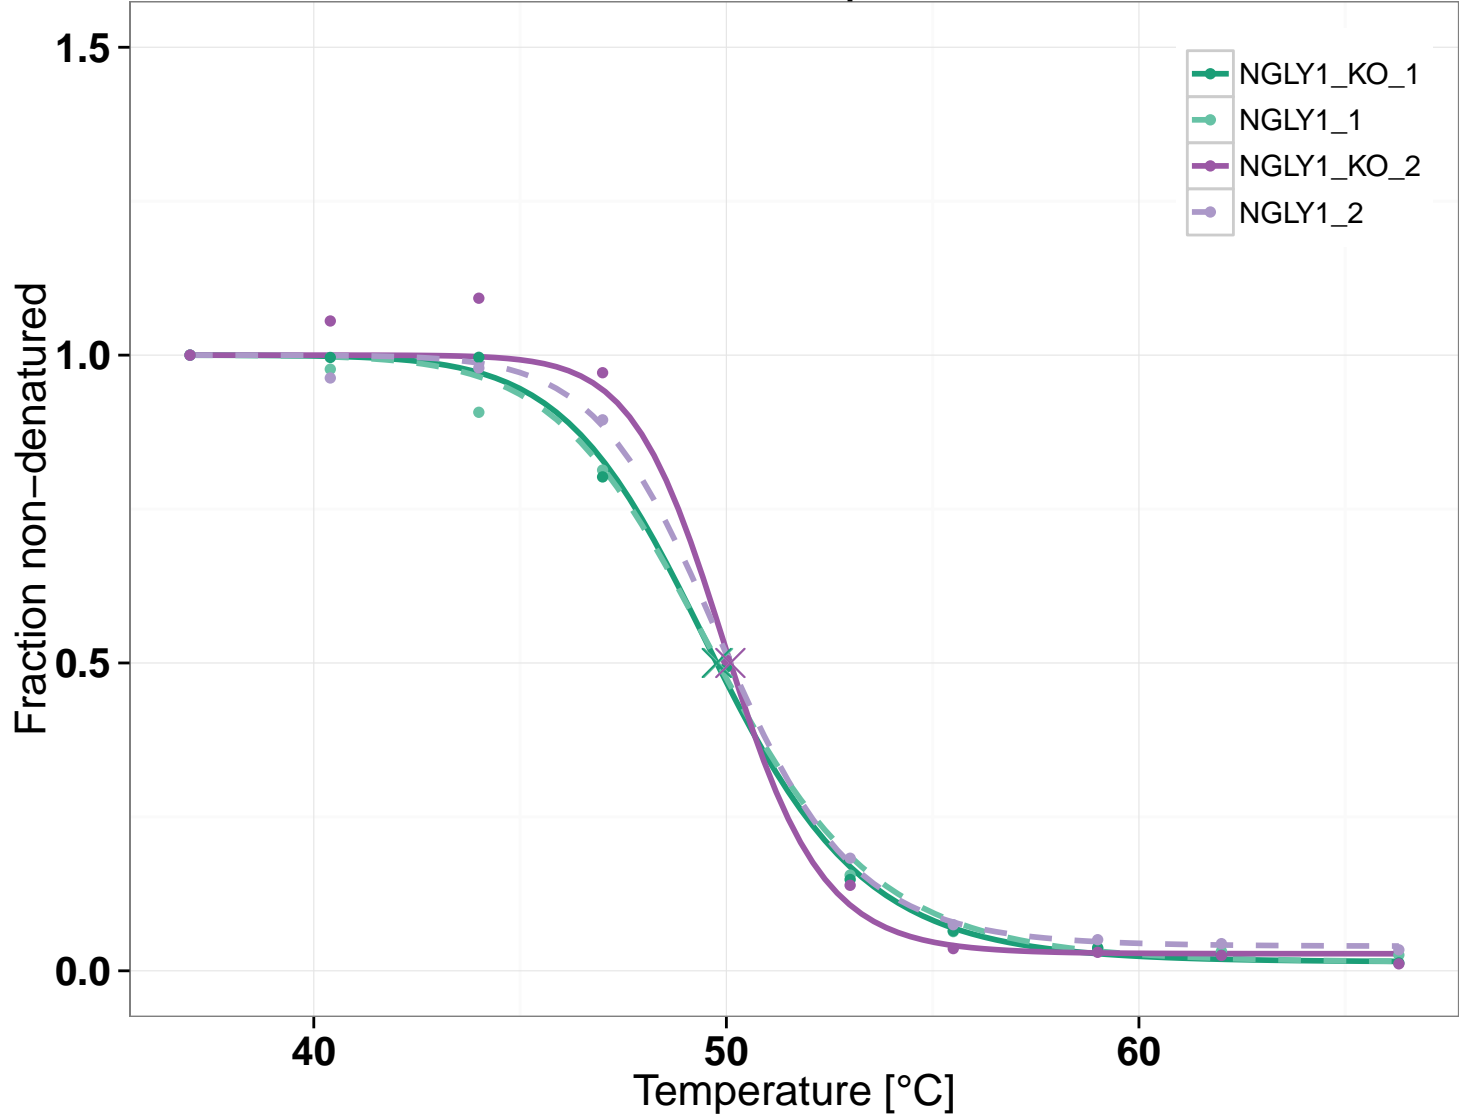

|            | meltPoint | slope | plateau | R2   |
|------------|-----------|-------|---------|------|
| NGLY1_KO_1 | 49.77     | -0.14 | 0.01    | 1    |
| NGLY1_1    | 49.8      | -0.13 | 0.01    | 1    |
| NGLY1_KO_2 | 50.1      | -0.21 | 0.03    | 0.99 |
| NGLY1_2    | 50.1      | -0.15 | 0.04    | 1    |

Supplement: Supplementary file 87 [file 1]

# IPI00550575.2|NRBF2

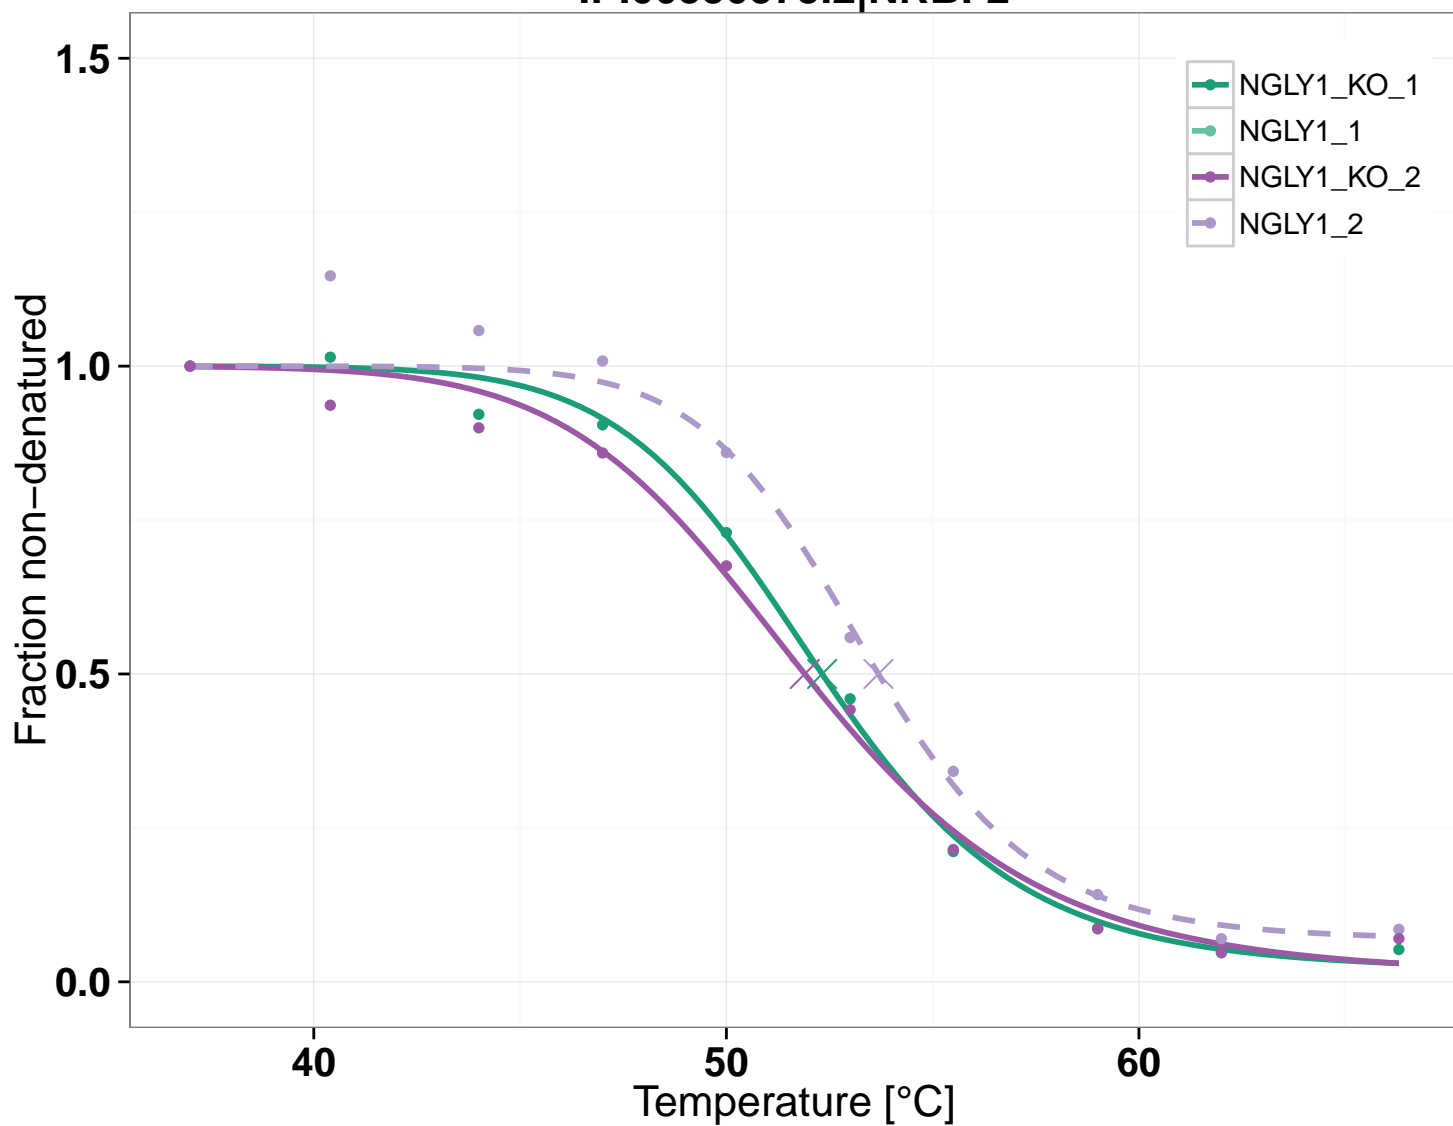

Supplement: Supplementary file 88 [file 1]

IPI00657646.1|ZYG11A

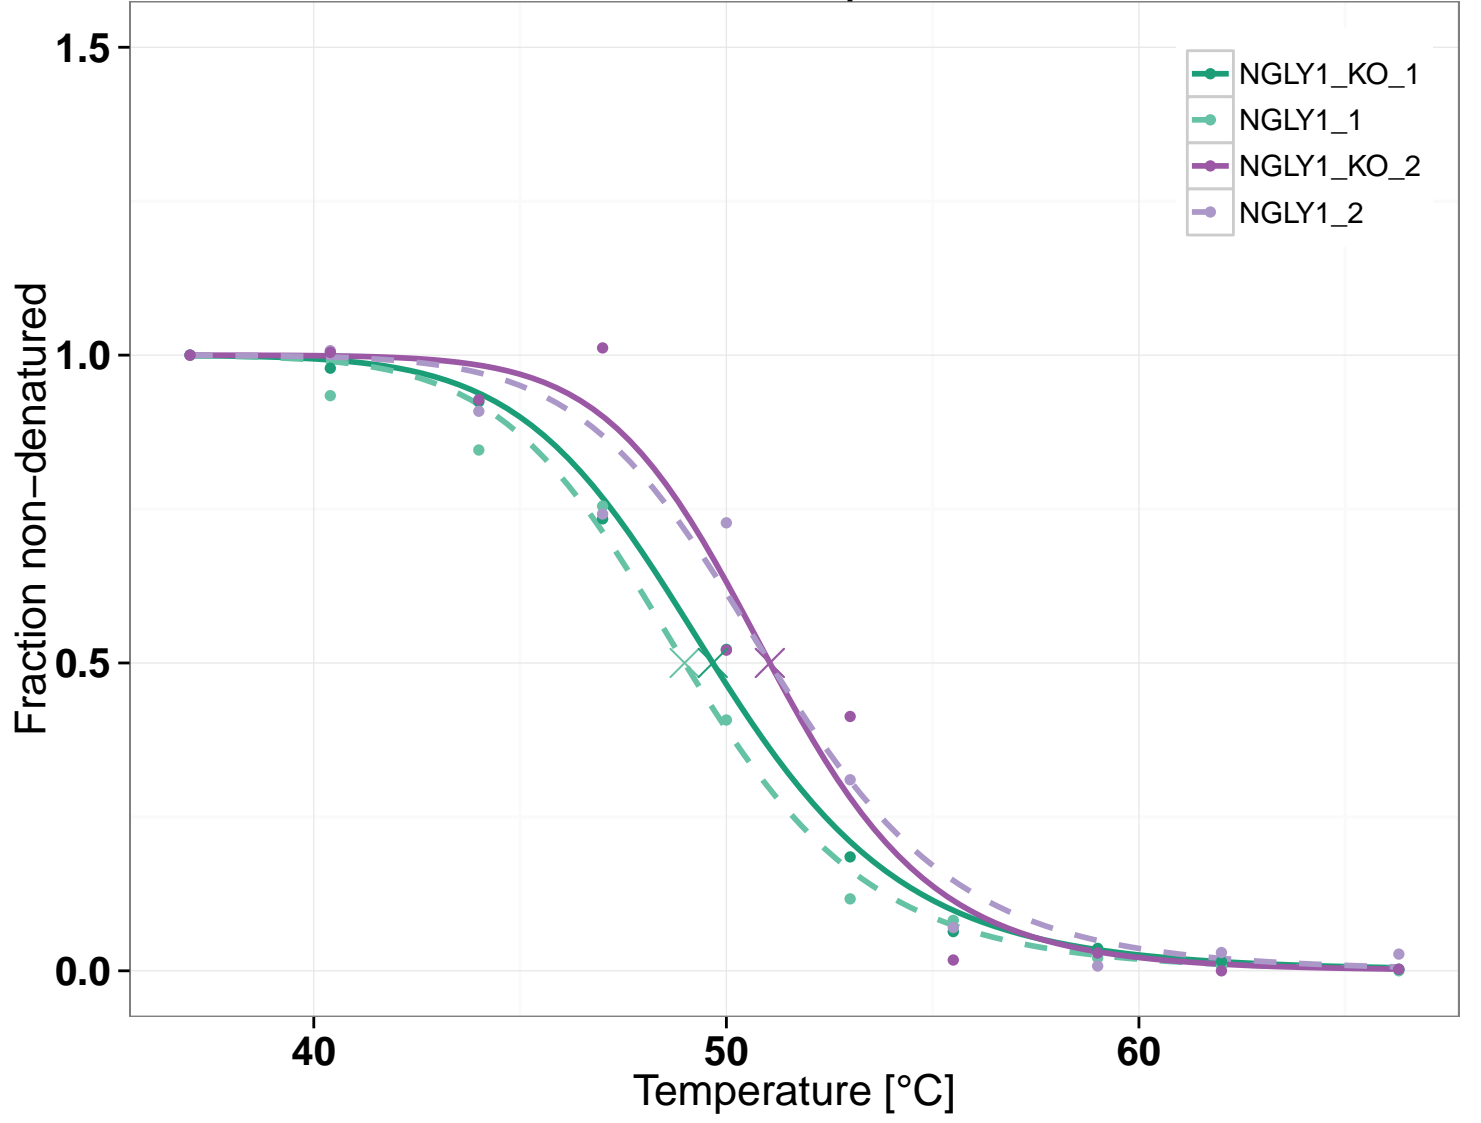

|            | meltPoint | slope | plateau | R2   |
|------------|-----------|-------|---------|------|
| NGLY1_KO_1 | 49.67     | -0.11 | 0       | 1    |
| NGLY1_1    | 48.99     | -0.11 | 0       | 0.99 |
| NGLY1_KO_2 | 51.05     | -0.13 | 0       | 0.97 |
| NGLY1_2    | 51.05     | -0.11 | 0       | 0.98 |

Supplement: Supplementary file 89 [file 1]

IPI00003318.1|ZNHIT2

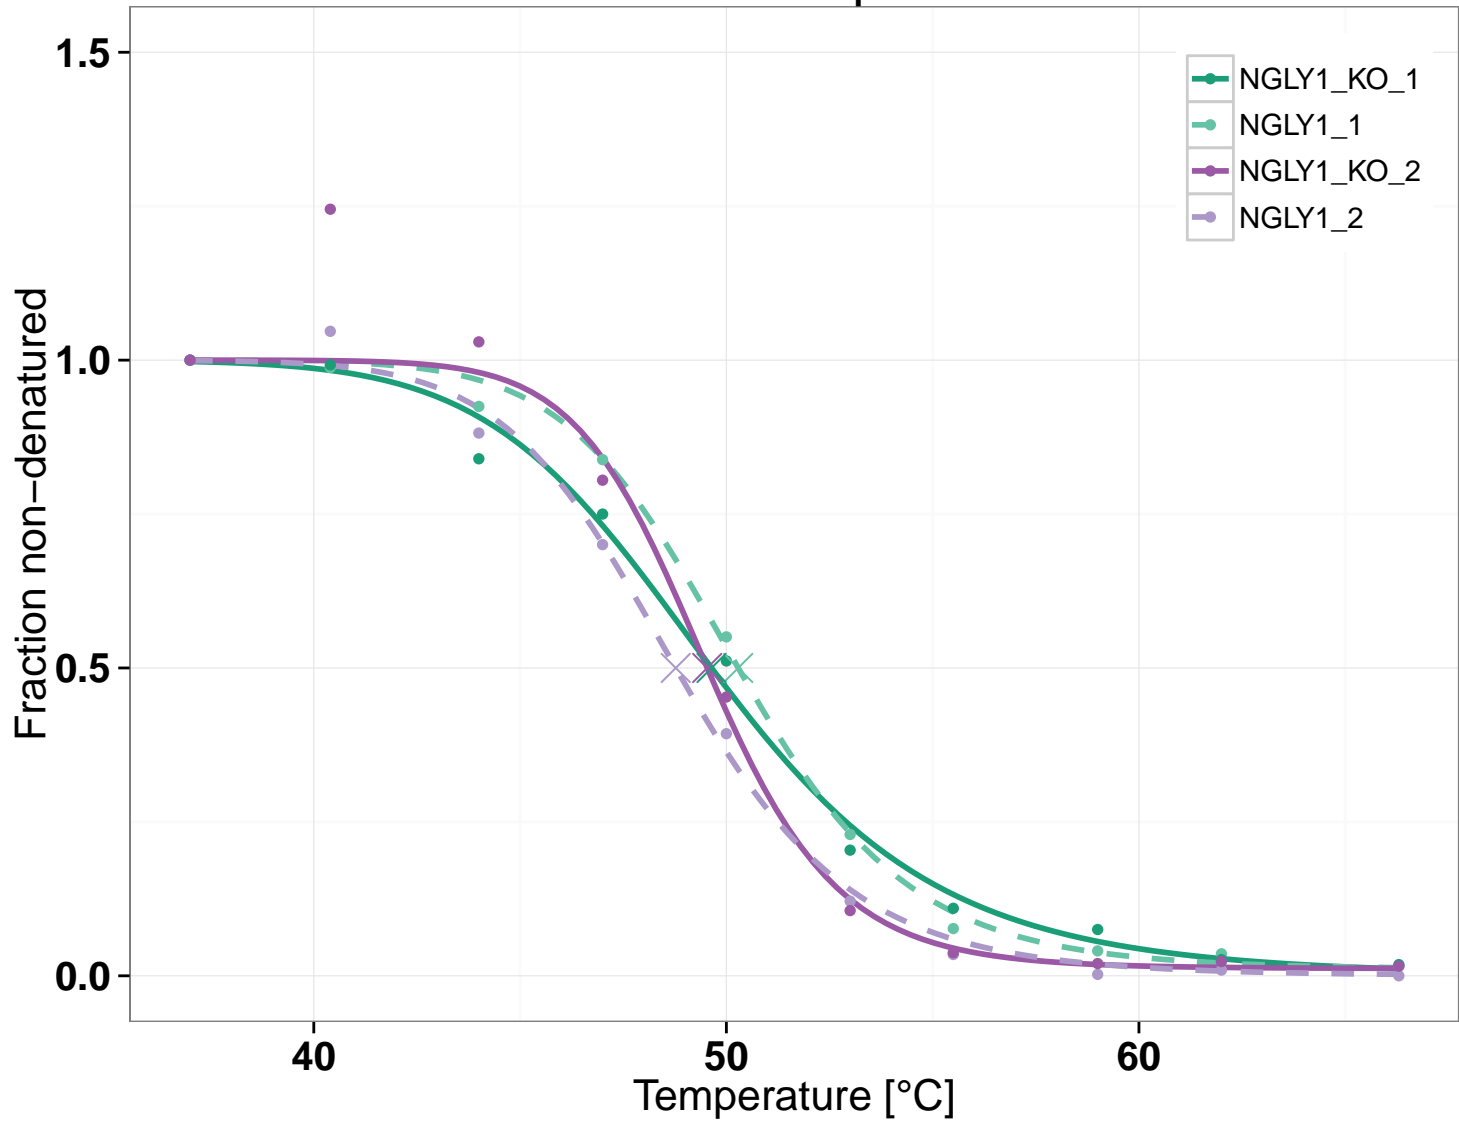

|            | meltPoint | slope  | plateau | R2   |
|------------|-----------|--------|---------|------|
| NGLY1_KO_1 | 49.64     | -0.091 | 0       | 0.99 |
| NGLY1_1    | 50.29     | -0.12  | 0.01    | 1    |
| NGLY1_KO_2 | 49.54     | -0.16  | 0.01    | 0.97 |
| NGLY1_2    | 48.77     | -0.12  | 0       | 1    |

Supplement: Supplementary file 90 [file 1]

IPI00887701.1|LOC728064

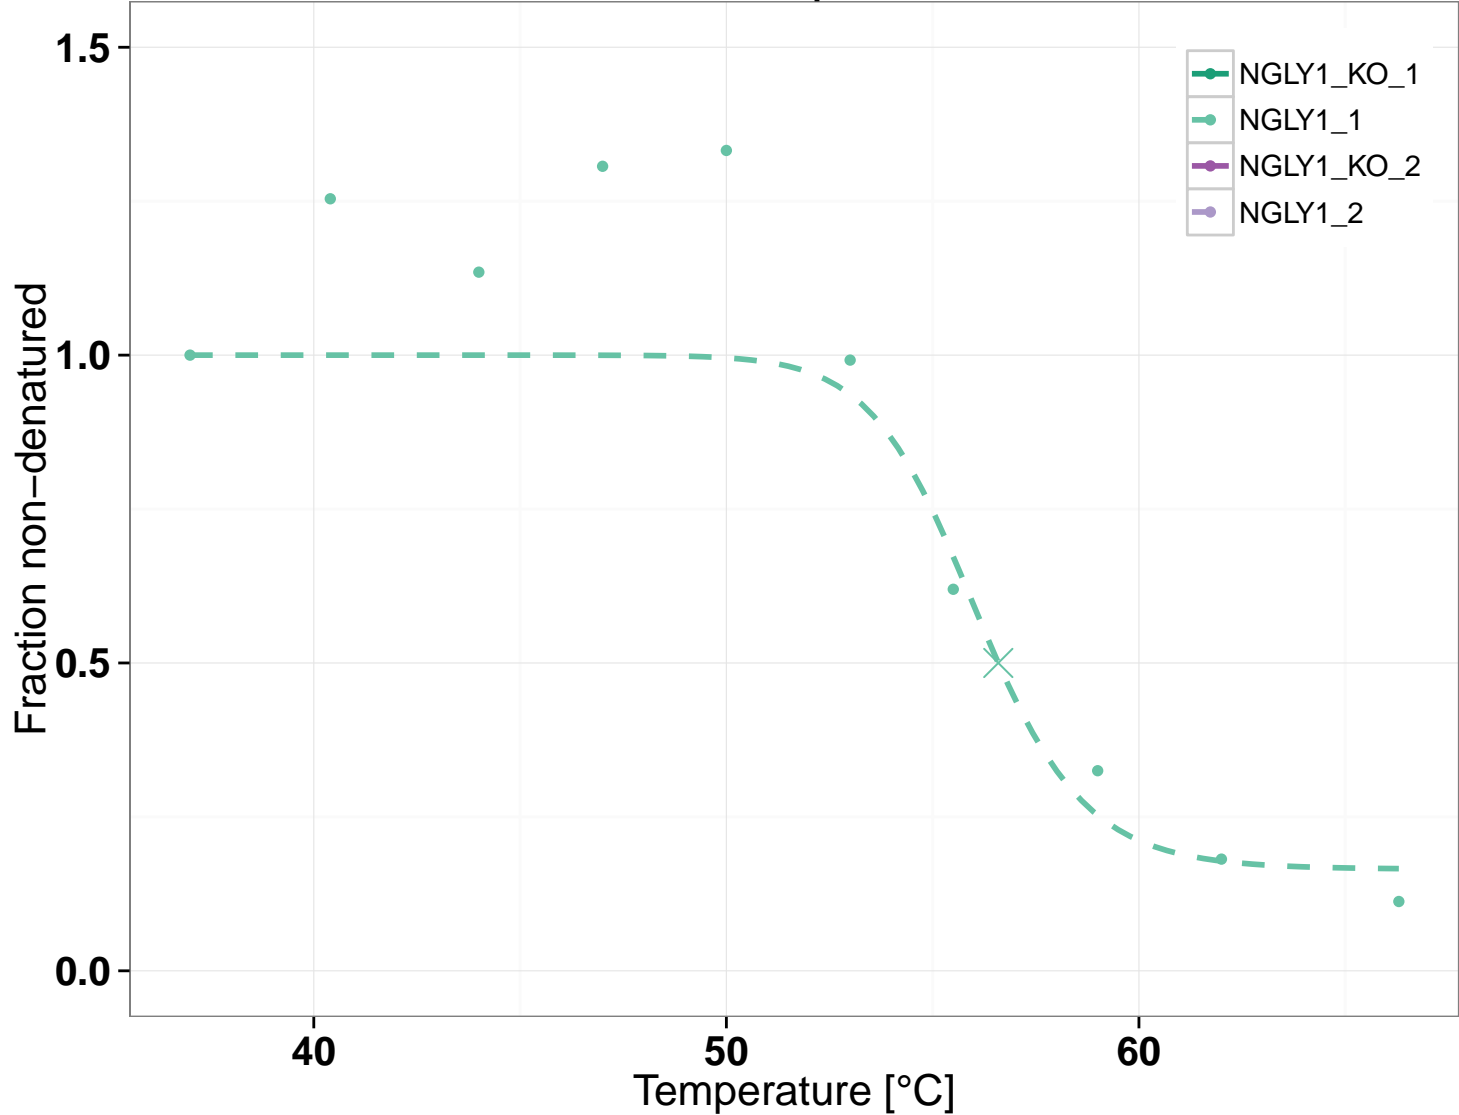

|            | meltPoint | slope | plateau | R2   |
|------------|-----------|-------|---------|------|
| NGLY1_KO_1 | -         | -     | -       | -    |
| NGLY1_1    | 56.59     | -0.16 | 0.16    | 0.85 |
| NGLY1_KO_2 | -         | -     | -       | -    |
| NGLY1_2    | -         | -     | -       | -    |

Supplement: Supplementary file 91 [file 1]

# IPI00177728.3|CNDP2

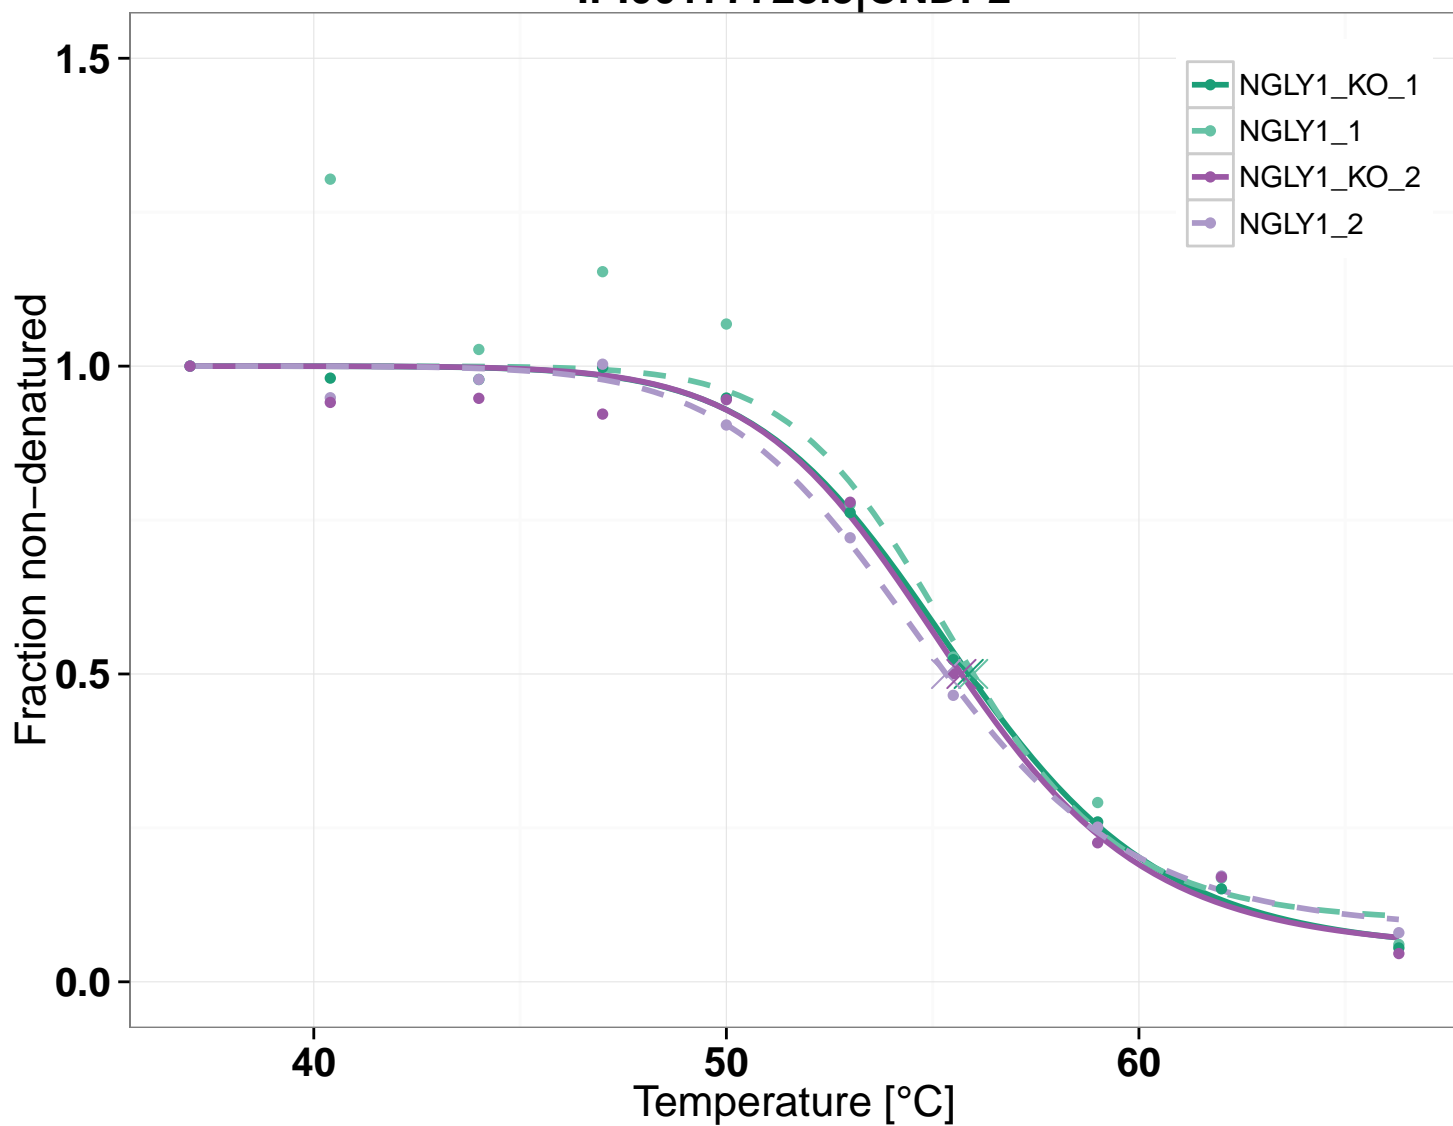

|            | meltPoint | slope  | plateau | R2   |
|------------|-----------|--------|---------|------|
| NGLY1_KO_1 | 55.87     | -0.097 | 0.05    | 1    |
| NGLY1_1    | 55.98     | -0.11  | 0.1     | 0.92 |
| NGLY1_KO_2 | 55.7      | -0.1   | 0.05    | 0.99 |
| NGLY1_2    | 55.33     | -0.093 | 0.08    | 1    |

Supplement: Supplementary file 92 [file 1]

IPI00024163.1|POLR3A

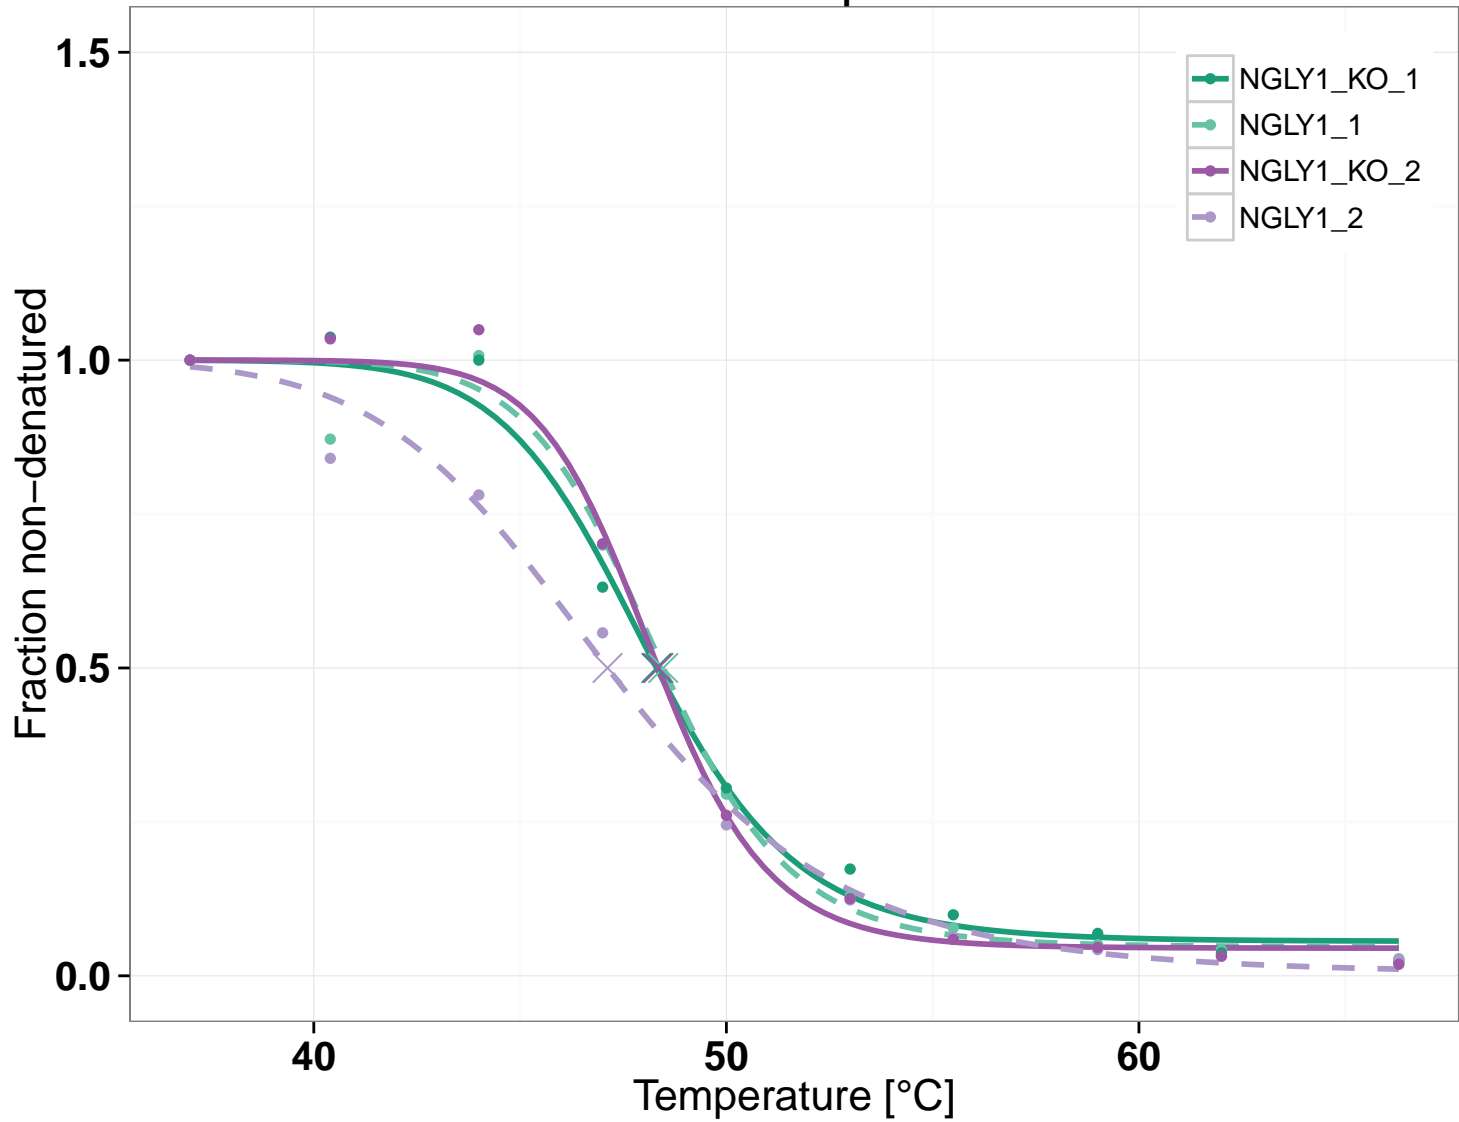

|            | meltPoint | slope  | plateau | R2   |
|------------|-----------|--------|---------|------|
| NGLY1_KO_1 | 48.31     | -0.13  | 0.06    | 0.99 |
| NGLY1_1    | 48.47     | -0.15  | 0.05    | 0.99 |
| NGLY1_KO_2 | 48.35     | -0.17  | 0.04    | 0.99 |
| NGLY1_2    | 47.12     | -0.089 | 0       | 0.99 |

Supplement: Supplementary file 93 [file 1]

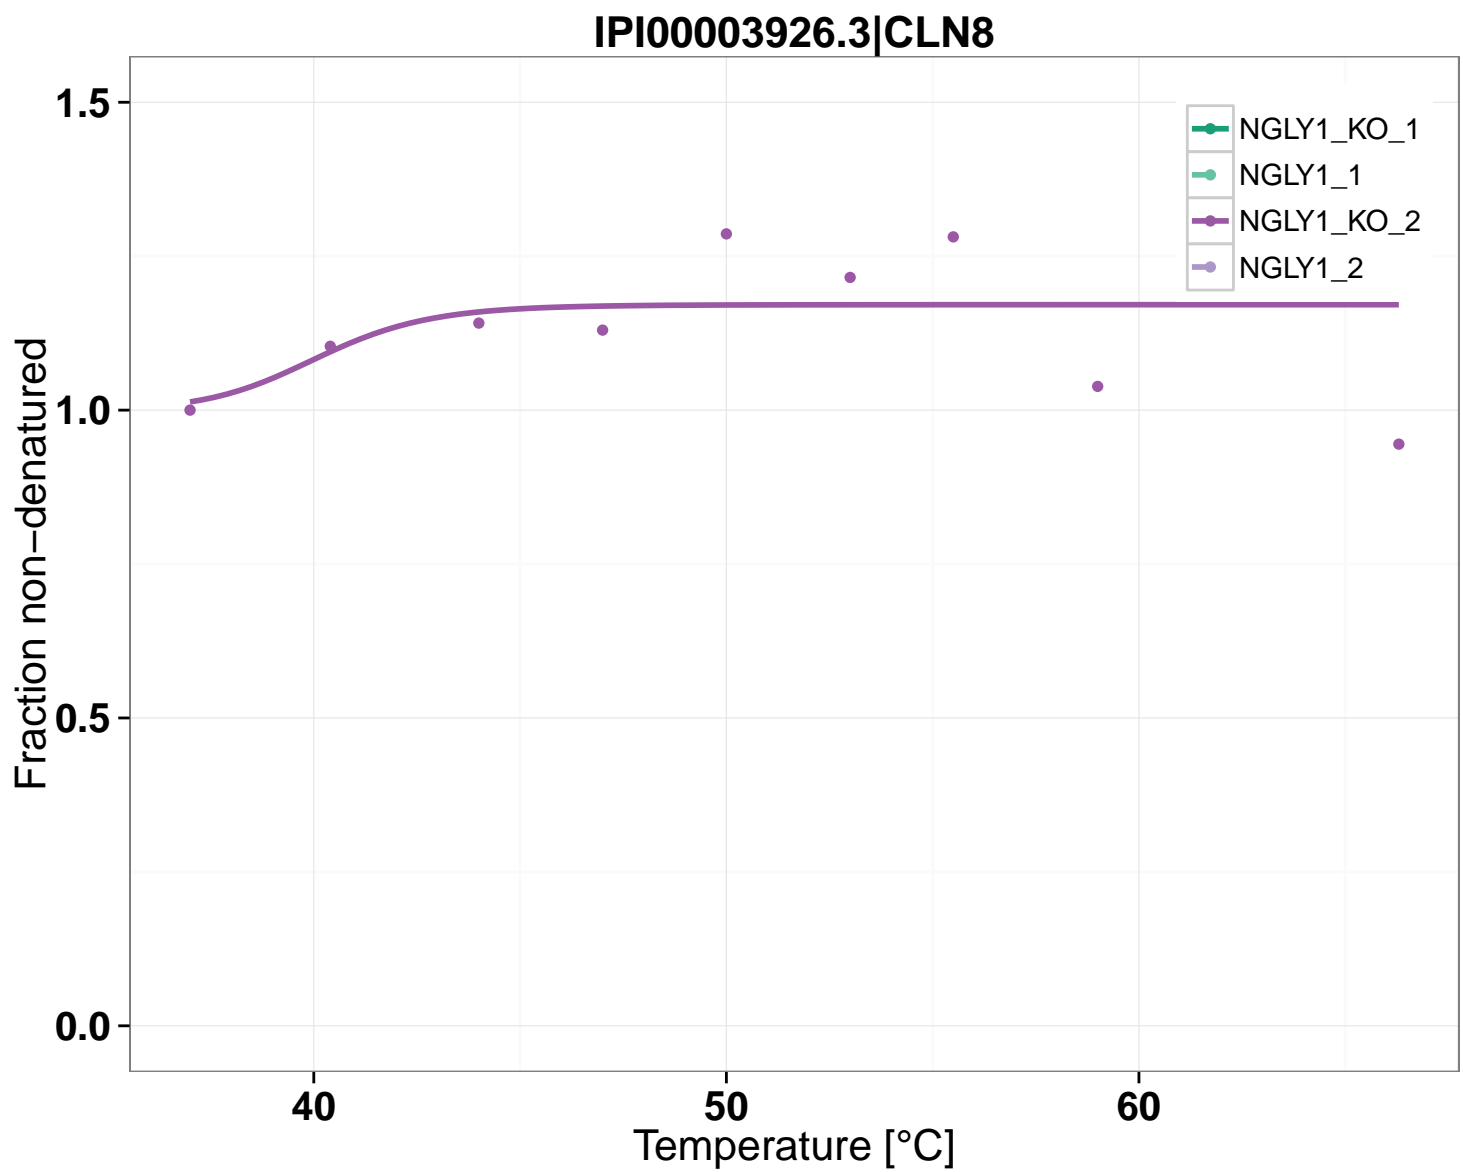

|            | meltPoint | slope | plateau | R2   |
|------------|-----------|-------|---------|------|
| NGLY1_KO_1 | —         | —     | —       | —    |
| NGLY1_1    | —         | —     | —       | —    |
| NGLY1_KO_2 | —         | 0.032 | 1.17    | 0.19 |
| NGLY1_2    | —         | —     | —       | —    |

Supplement: Supplementary file 94 [file 1]

IPI00012215.1|C9ORF16

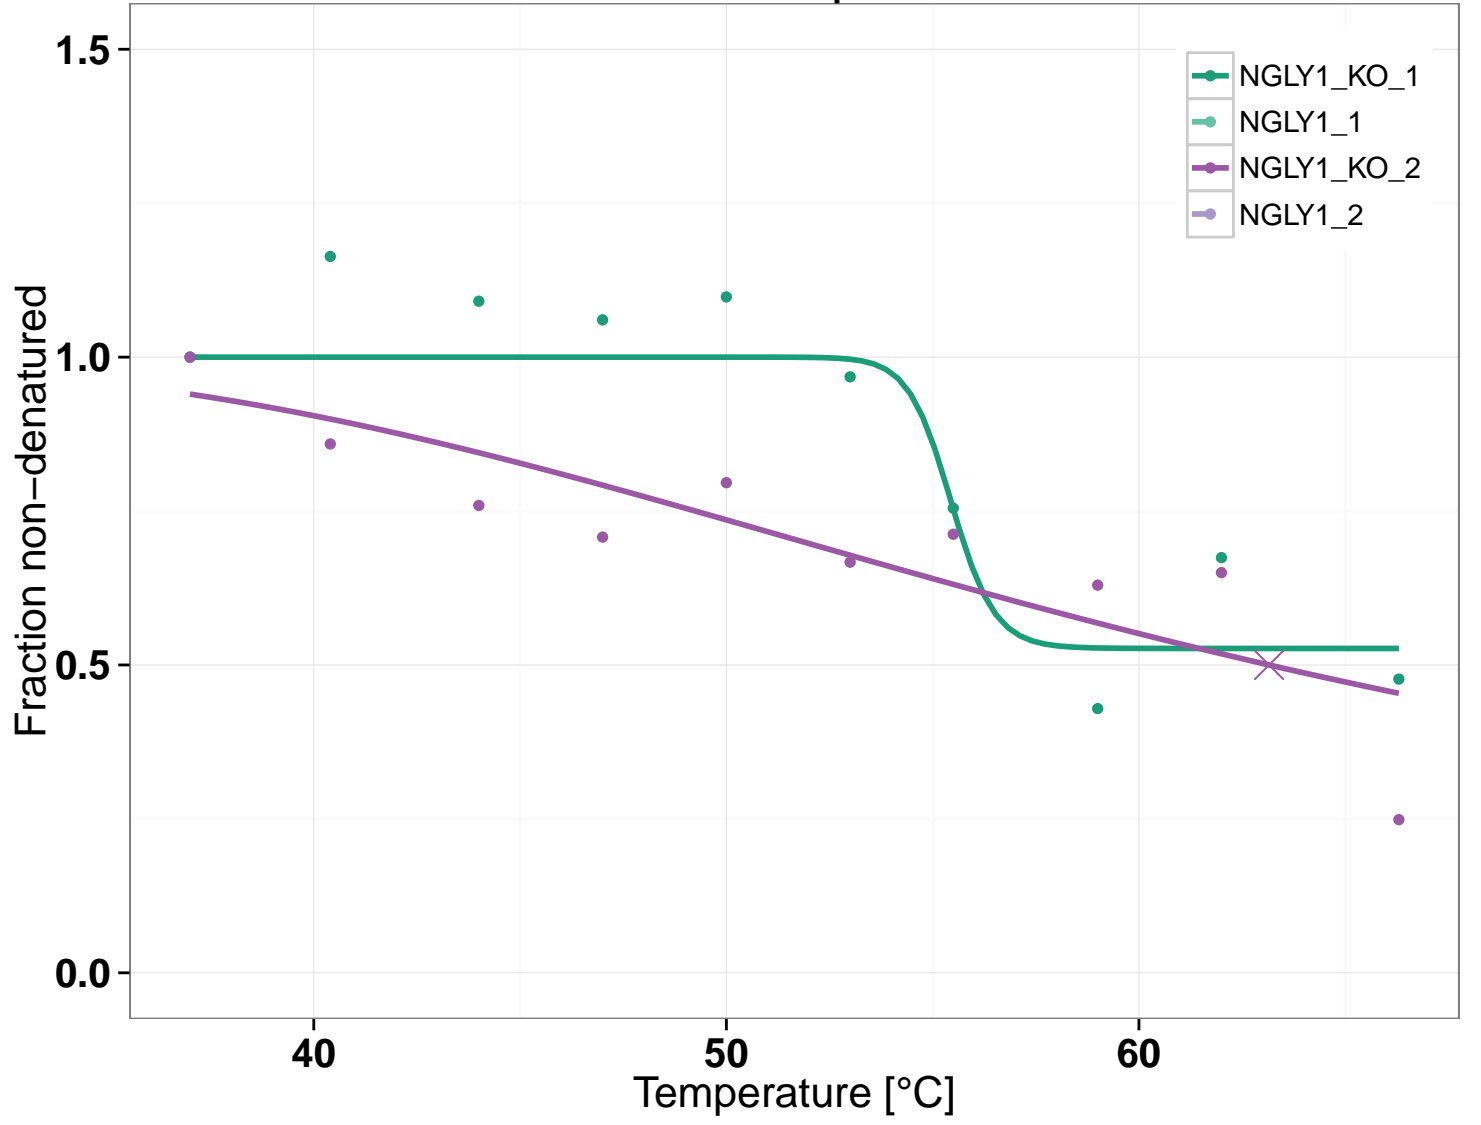

|            | meltPoint | slope  | plateau | R2   |
|------------|-----------|--------|---------|------|
| NGLY1_KO_1 | —         | -0.23  | 0.53    | 0.87 |
| NGLY1_1    | —         | —      | —       | —    |
| NGLY1_KO_2 | 63.16     | -0.019 | 0       | 0.73 |
| NGLY1_2    | —         | —      | —       | —    |

Supplement: Supplementary file 95 [file 1]

# IPI00829865.1|TMTC3

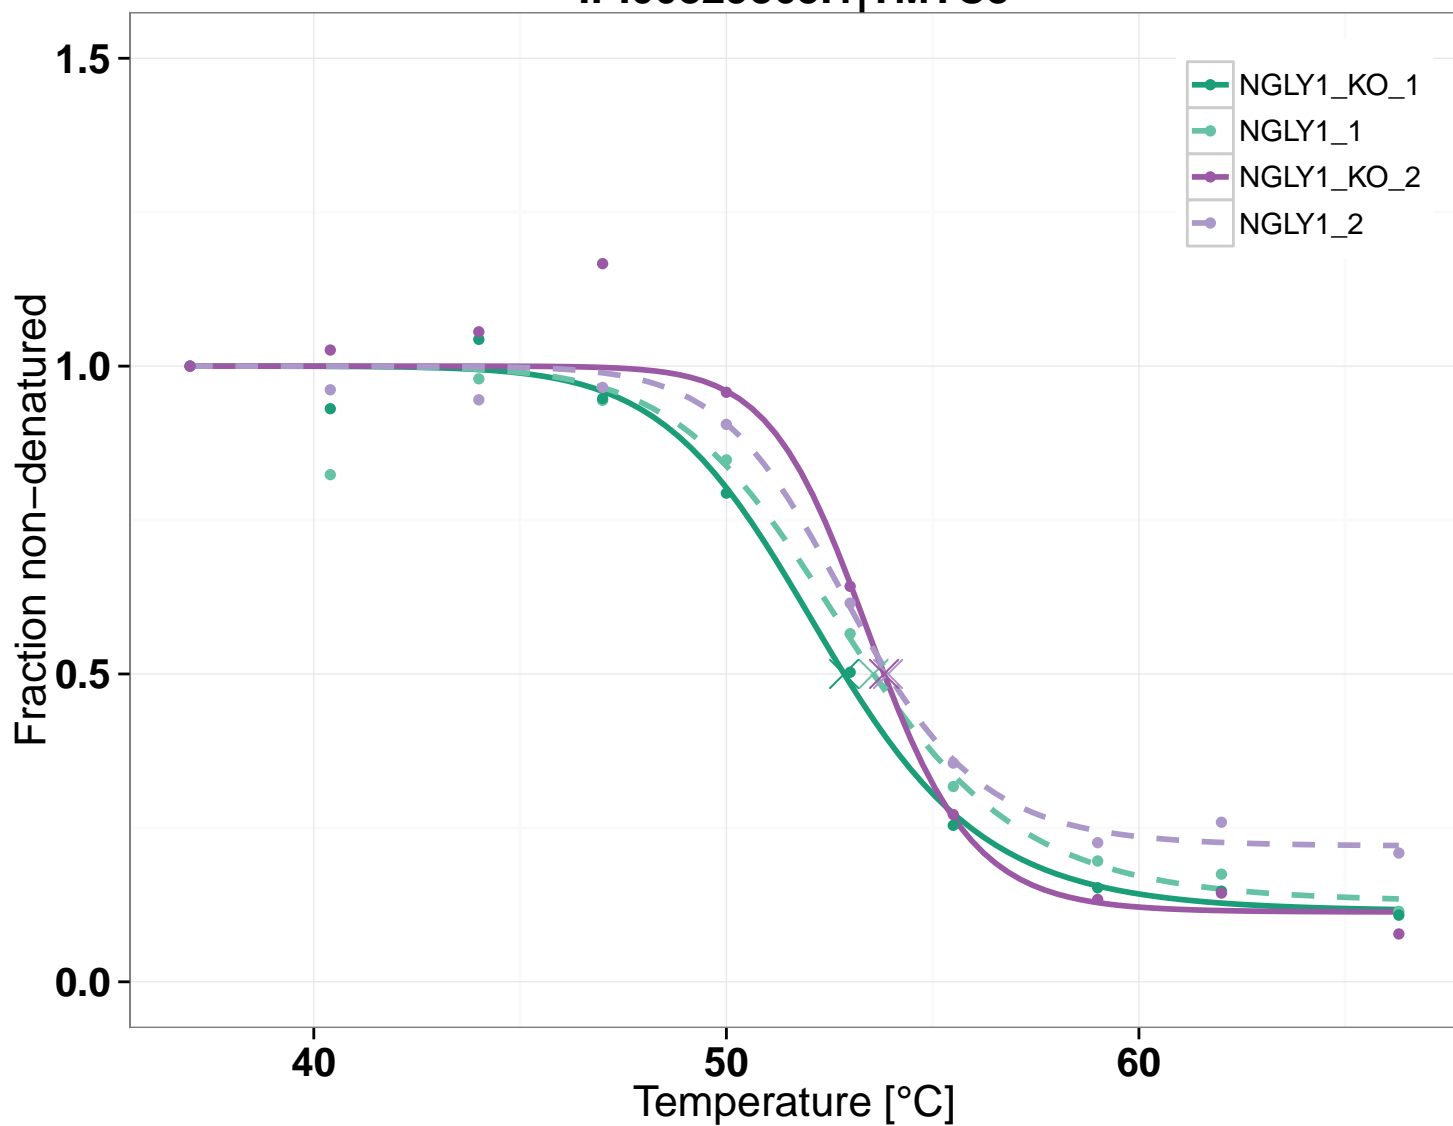

|            | meltPoint | slope | plateau | R2   |
|------------|-----------|-------|---------|------|
| NGLY1_KO_1 | 52.85     | -0.11 | 0.11    | 0.99 |
| NGLY1_1    | 53.57     | -0.1  | 0.13    | 0.97 |
| NGLY1_KO_2 | 53.82     | -0.18 | 0.11    | 0.98 |
| NGLY1_2    | 53.92     | -0.12 | 0.22    | 0.99 |

Supplement: Supplementary file 96 [file 1]

IPI00413100.1|PHLDB1

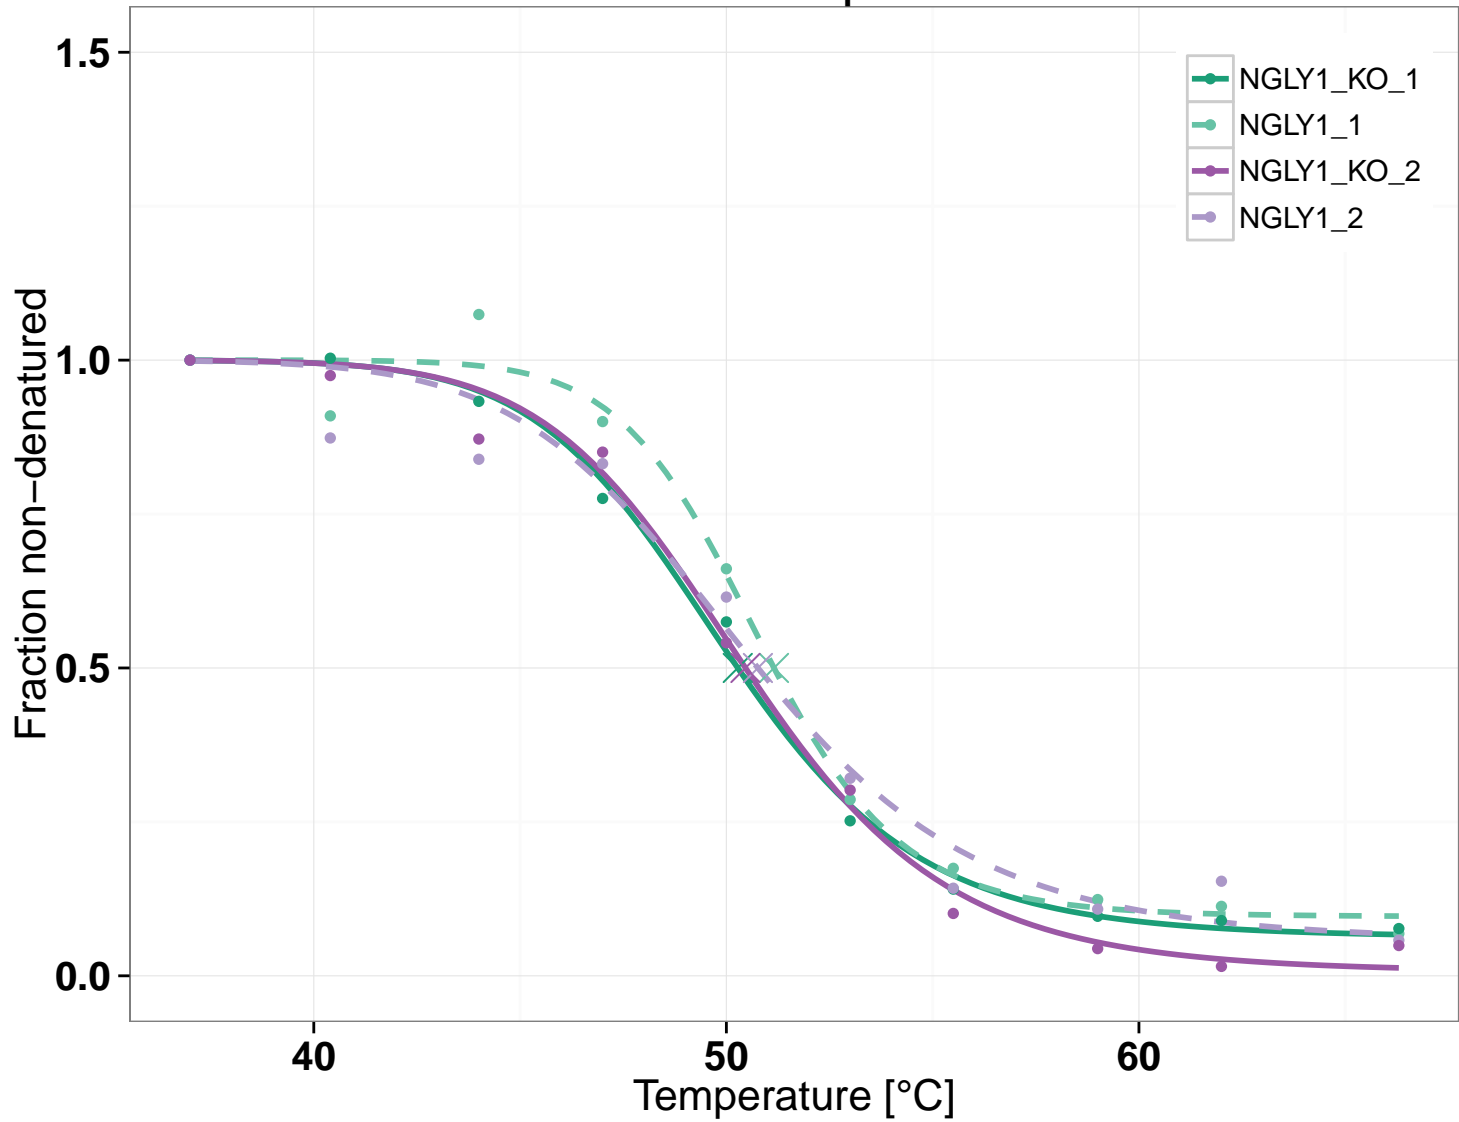

|            | meltPoint | slope  | plateau | R2   |
|------------|-----------|--------|---------|------|
| NGLY1_KO_1 | 50.28     | -0.1   | 0.06    | 1    |
| NGLY1_1    | 51.15     | -0.13  | 0.1     | 0.99 |
| NGLY1_KO_2 | 50.46     | -0.1   | 0.01    | 0.99 |
| NGLY1_2    | 50.76     | -0.085 | 0.05    | 0.97 |

Supplement: Supplementary file 97 [file 1]

# IPI00019346.1|RAP2A

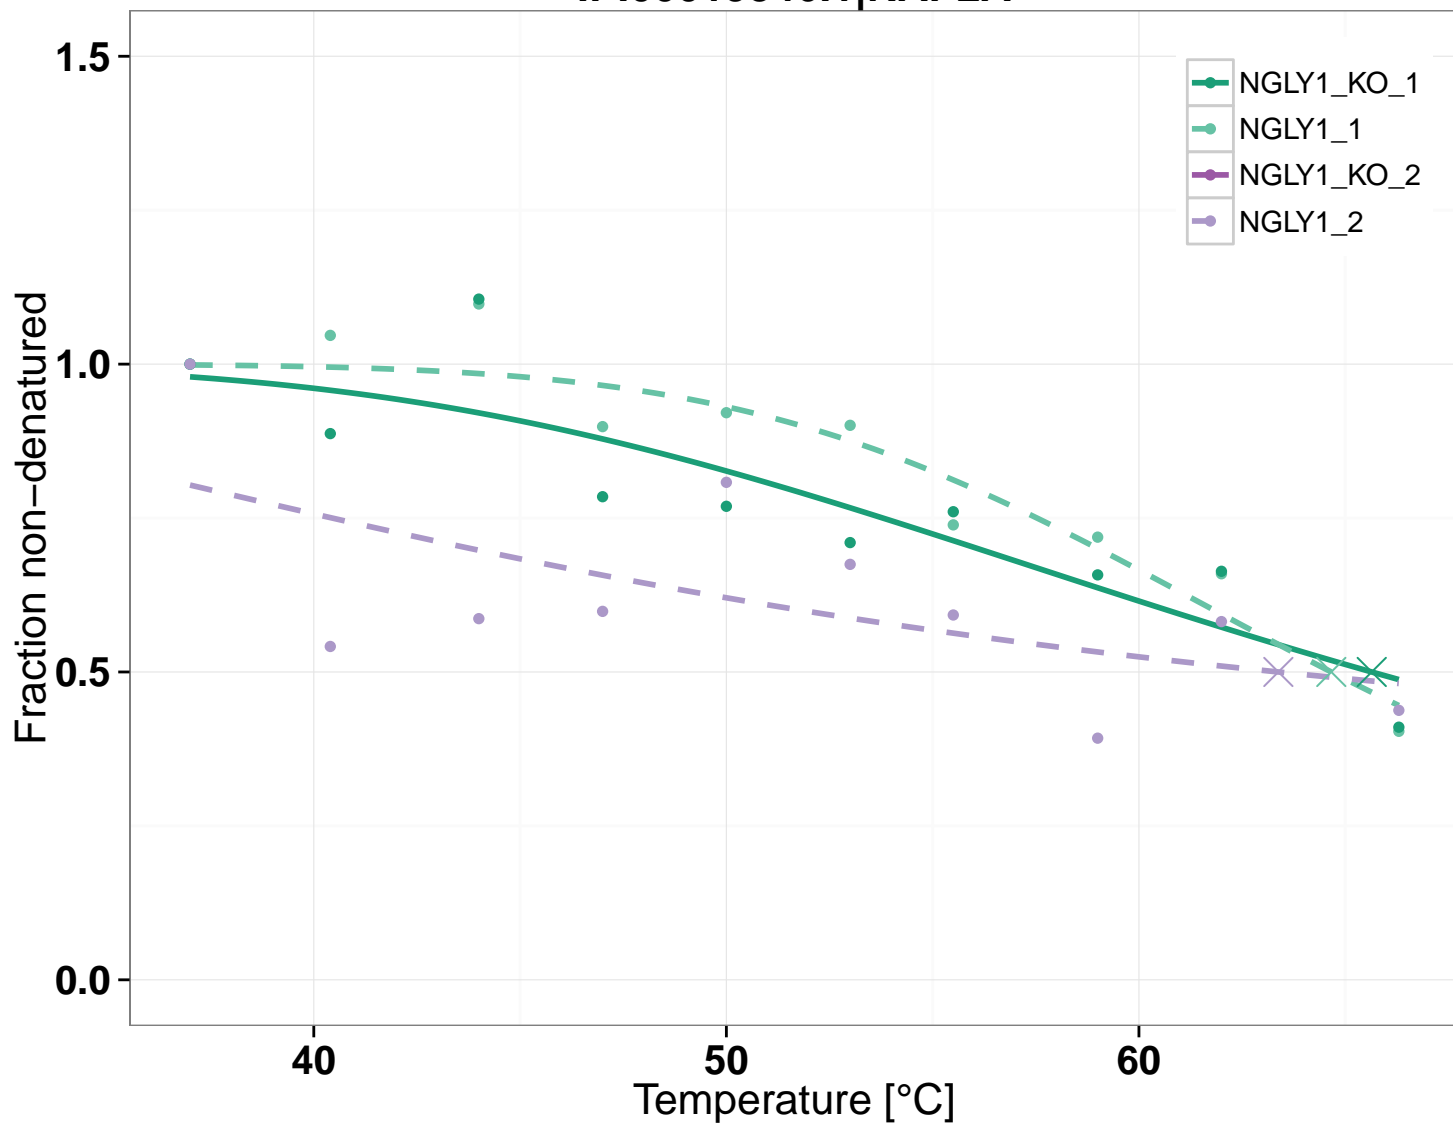

|            | meltPoint | slope  | plateau | R2   |
|------------|-----------|--------|---------|------|
| NGLY1_KO_1 | 65.64     | -0.022 | 0       | 0.79 |
| NGLY1_1    | 64.66     | -0.036 | 0       | 0.92 |
| NGLY1_KO_2 | -         | -      | -       | -    |
| NGLY1_2    | 63.38     | -      | 0.2     | 0.39 |

Supplement: Supplementary file 98 [file 1]

IPI00250316.1|CDC2L6

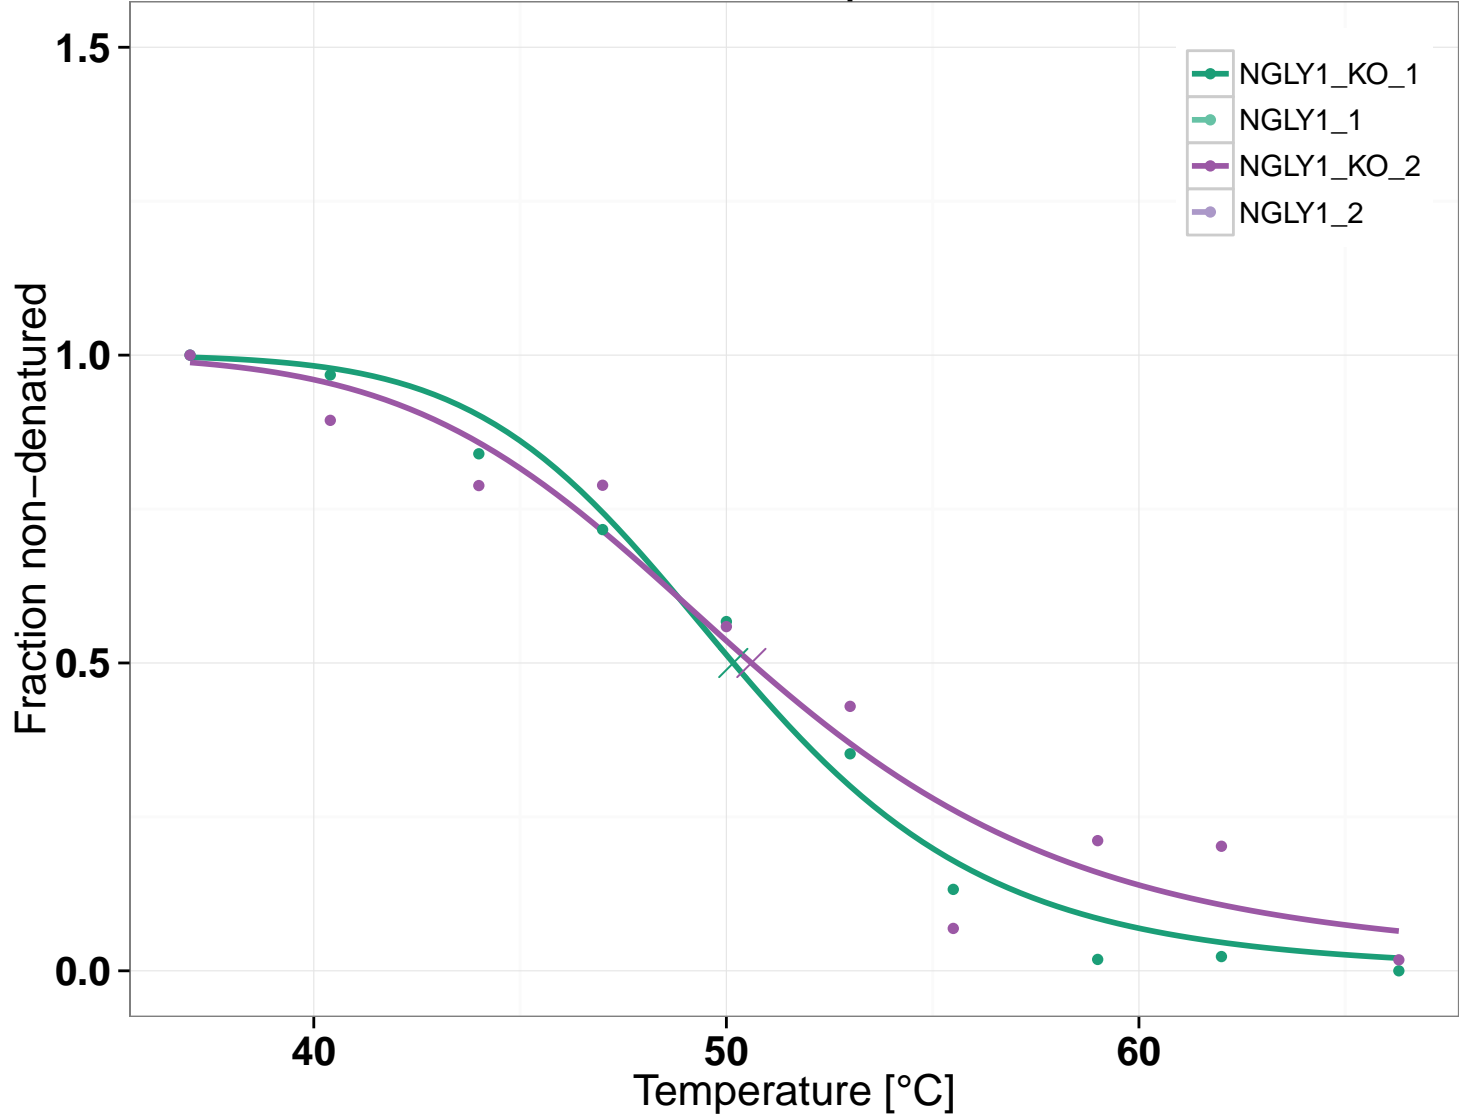

|            | meltPoint | slope  | plateau | R2   |
|------------|-----------|--------|---------|------|
| NGLY1_KO_1 | 50.17     | -0.08  | 0       | 0.99 |
| NGLY1_1    | -         | -      | -       | -    |
| NGLY1_KO_2 | 50.61     | -0.061 | 0.01    | 0.94 |
| NGLY1_2    | -         | -      | -       | -    |

Supplement: Supplementary file 99 [file 1]

IPI00889783.1|LOC100132129

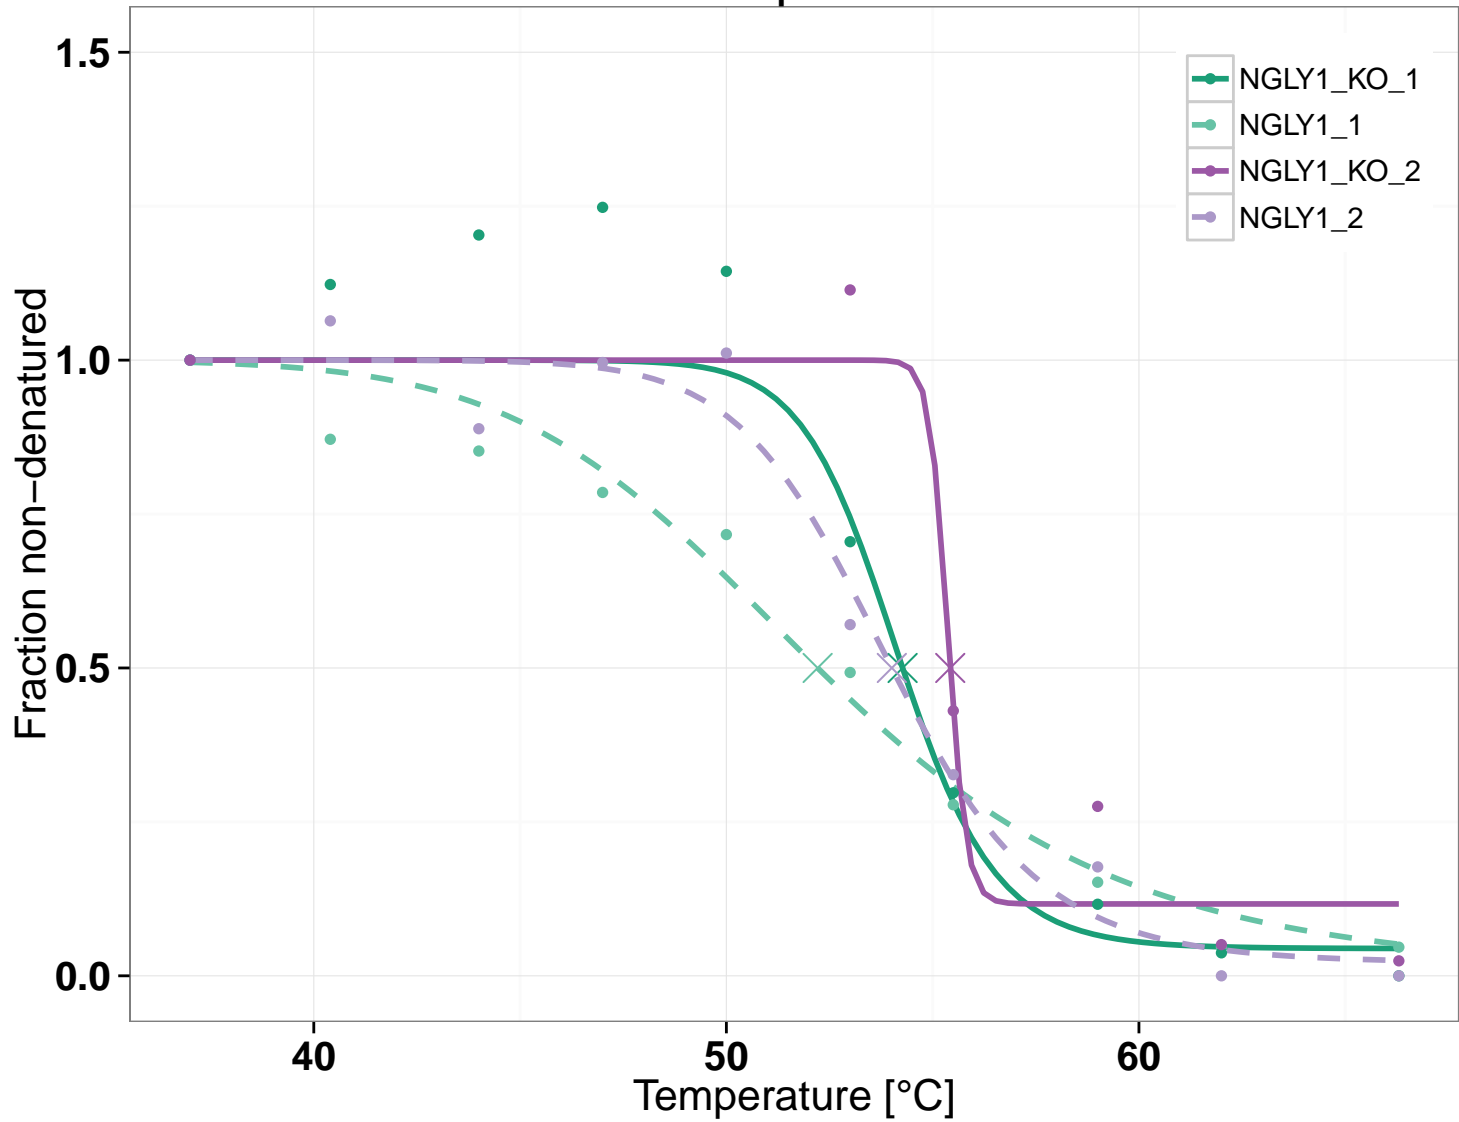

|            | meltPoint | slope  | plateau | R2   |
|------------|-----------|--------|---------|------|
| NGLY1_KO_1 | 54.27     | -0.2   | 0.04    | 0.94 |
| NGLY1_1    | 52.21     | -0.067 | 0       | 0.97 |
| NGLY1_KO_2 | 55.43     | -1     | 0.12    | 0.5  |
| NGLY1_2    | 54.01     | -0.13  | 0.02    | 0.98 |

Supplement: Supplementary file 100 [file 1]
