# Supplementary material (part 2 of 85)
Source: publisher figshare collection journal article supplement (https://gsajournals.figshare.com/articles/dataset/_/12014913)

# IPI00903079.1|B3KWJ4\_HUMAN

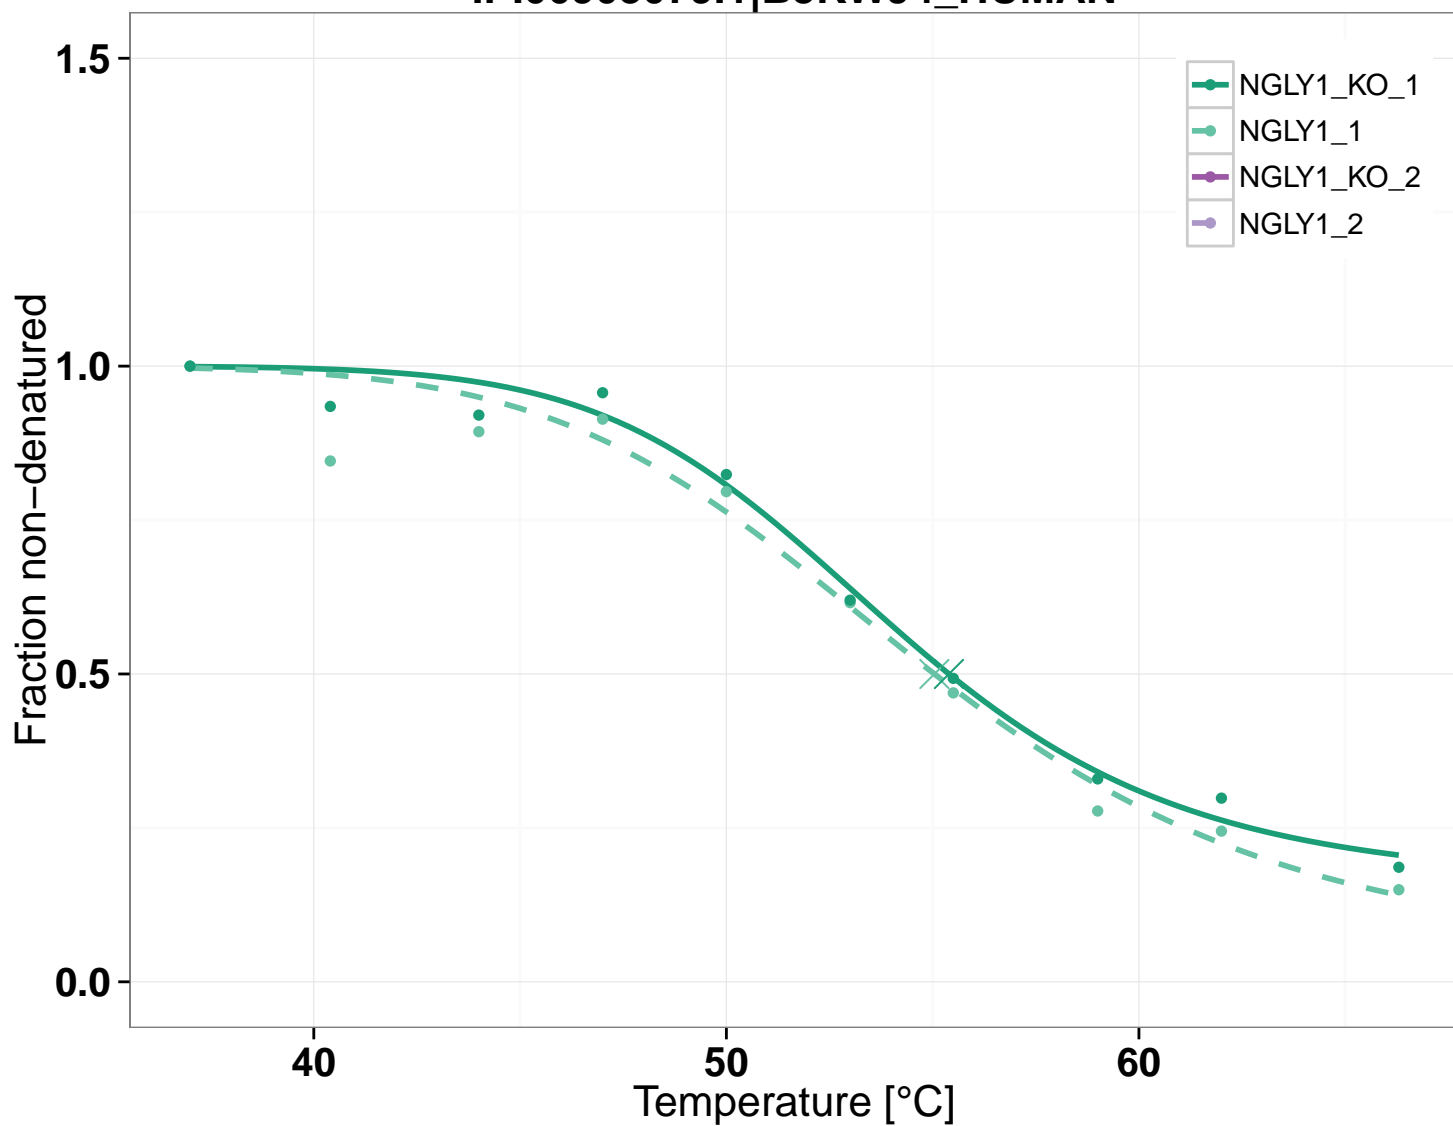

|            | meltPoint | slope  | plateau | R2   |
|------------|-----------|--------|---------|------|
| NGLY1_KO_1 | 55.4      | -0.06  | 0.16    | 0.99 |
| NGLY1_1    | 55.04     | -0.054 | 0.03    | 0.97 |
| NGLY1_KO_2 | -         | -      | -       | -    |
| NGLY1_2    | -         | -      | -       | -    |

Supplement: Supplementary file 101 [file 1]

# IPI00845479.1|CUGBP2

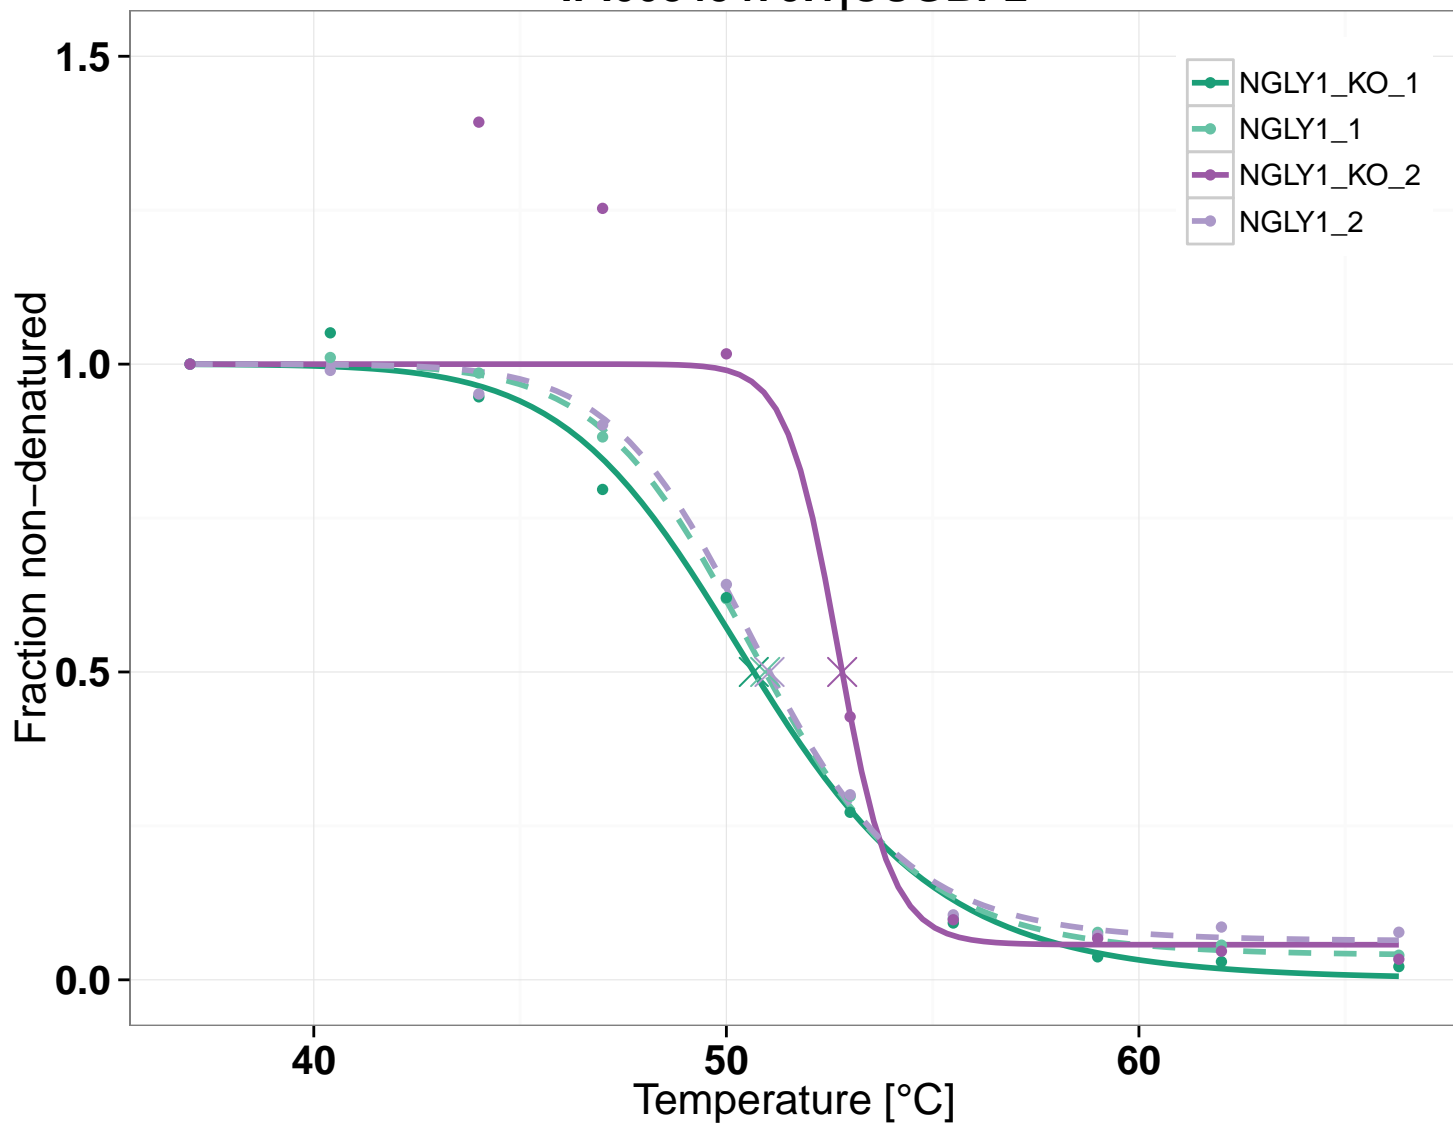

|            | meltPoint | slope | plateau | R2   |
|------------|-----------|-------|---------|------|
| NGLY1_KO_1 | 50.66     | -0.11 | 0       | 0.99 |
| NGLY1_1    | 50.94     | -0.12 | 0.04    | 1    |
| NGLY1_KO_2 | 52.81     | -0.37 | 0.06    | 0.84 |
| NGLY1_2    | 51.05     | -0.13 | 0.06    | 1    |

Supplement: Supplementary file 102 [file 1]

IPI00641384.2|SEC16A

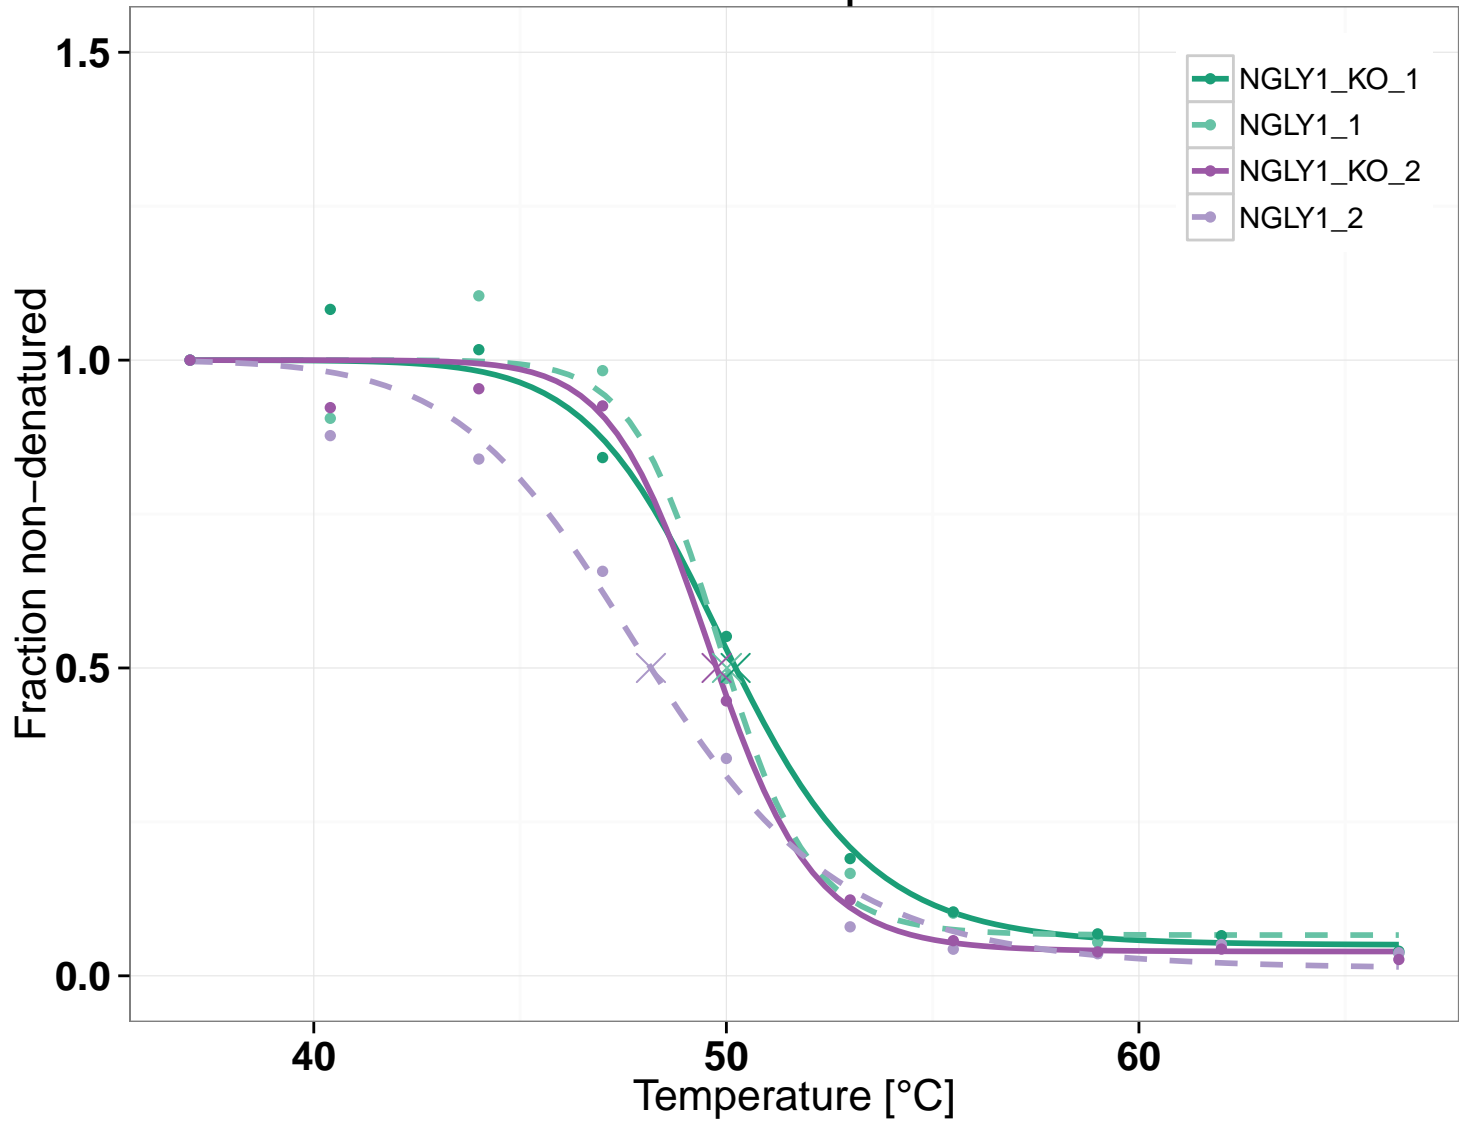

|            | meltPoint | slope | plateau | R2   |
|------------|-----------|-------|---------|------|
| NGLY1_KO_1 | 50.22     | -0.14 | 0.05    | 0.99 |
| NGLY1_1    | 50.01     | -0.21 | 0.07    | 0.99 |
| NGLY1_KO_2 | 49.76     | -0.19 | 0.04    | 1    |
| NGLY1_2    | 48.17     | -0.11 | 0.01    | 0.99 |

Supplement: Supplementary file 103 [file 1]

IPI00021175.1|CRKRS

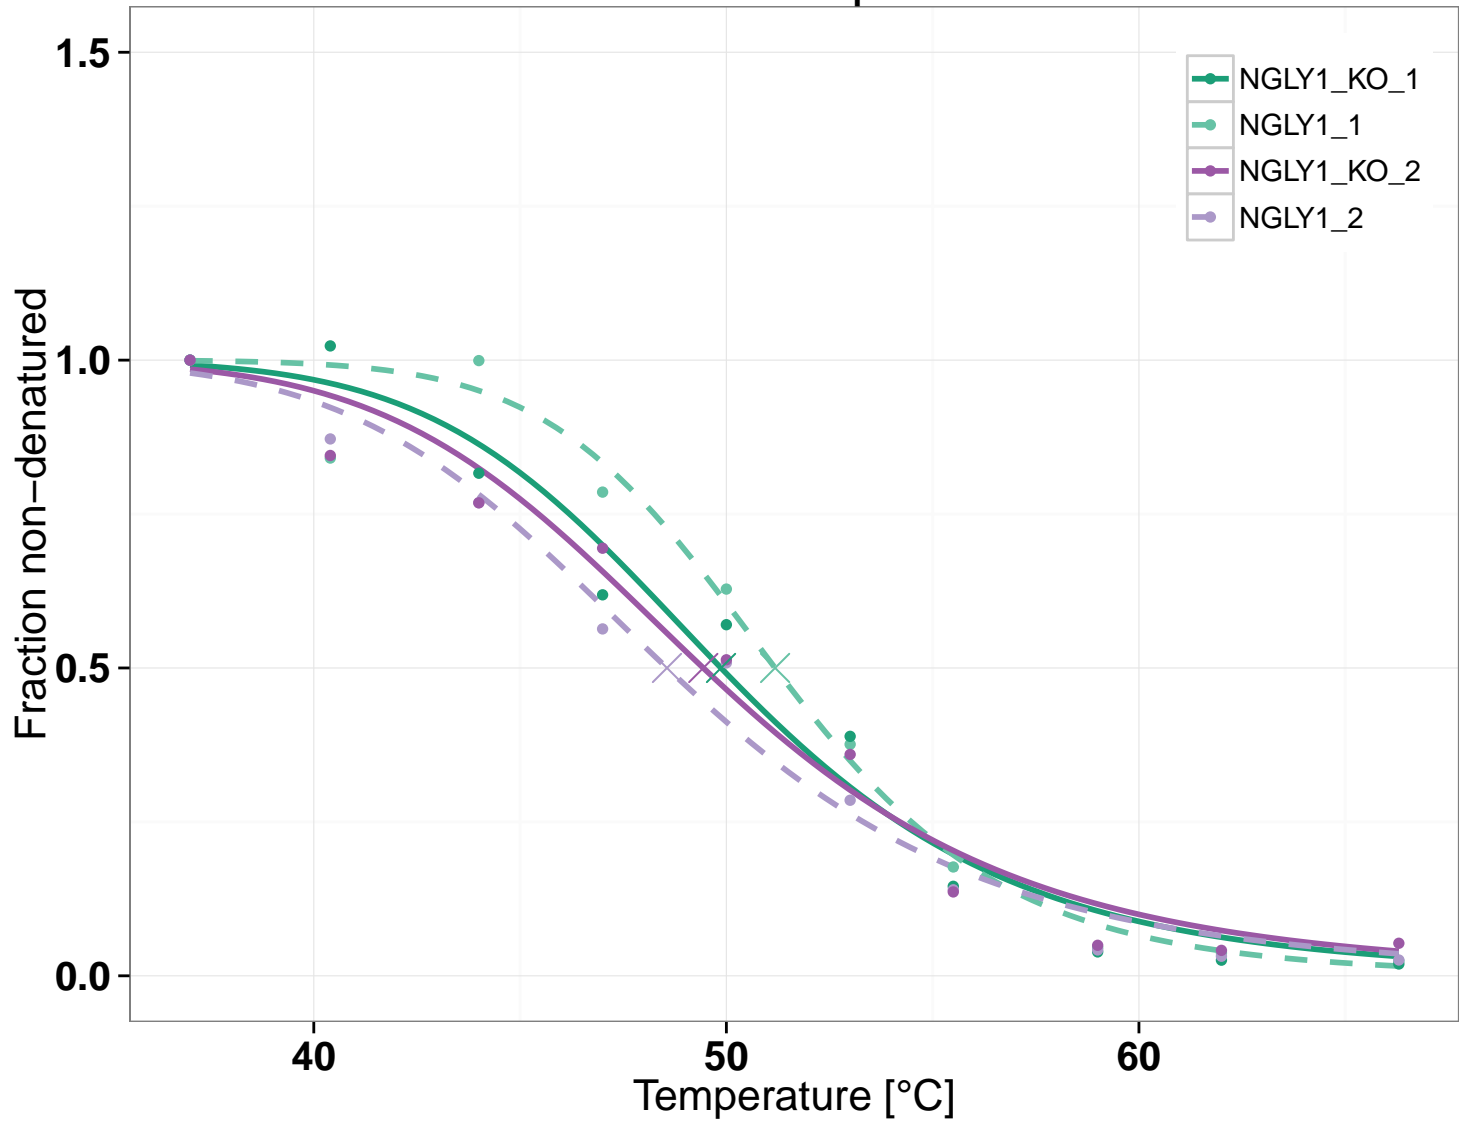

|            | meltPoint | slope  | plateau | R2   |
|------------|-----------|--------|---------|------|
| NGLY1_KO_1 | 49.87     | -0.071 | 0       | 0.98 |
| NGLY1_1    | 51.18     | -0.09  | 0       | 0.98 |
| NGLY1_KO_2 | 49.44     | -0.065 | 0       | 0.98 |
| NGLY1_2    | 48.56     | -0.065 | 0       | 0.98 |

Supplement: Supplementary file 104 [file 1]

# IPI00418412.3|C16ORF84

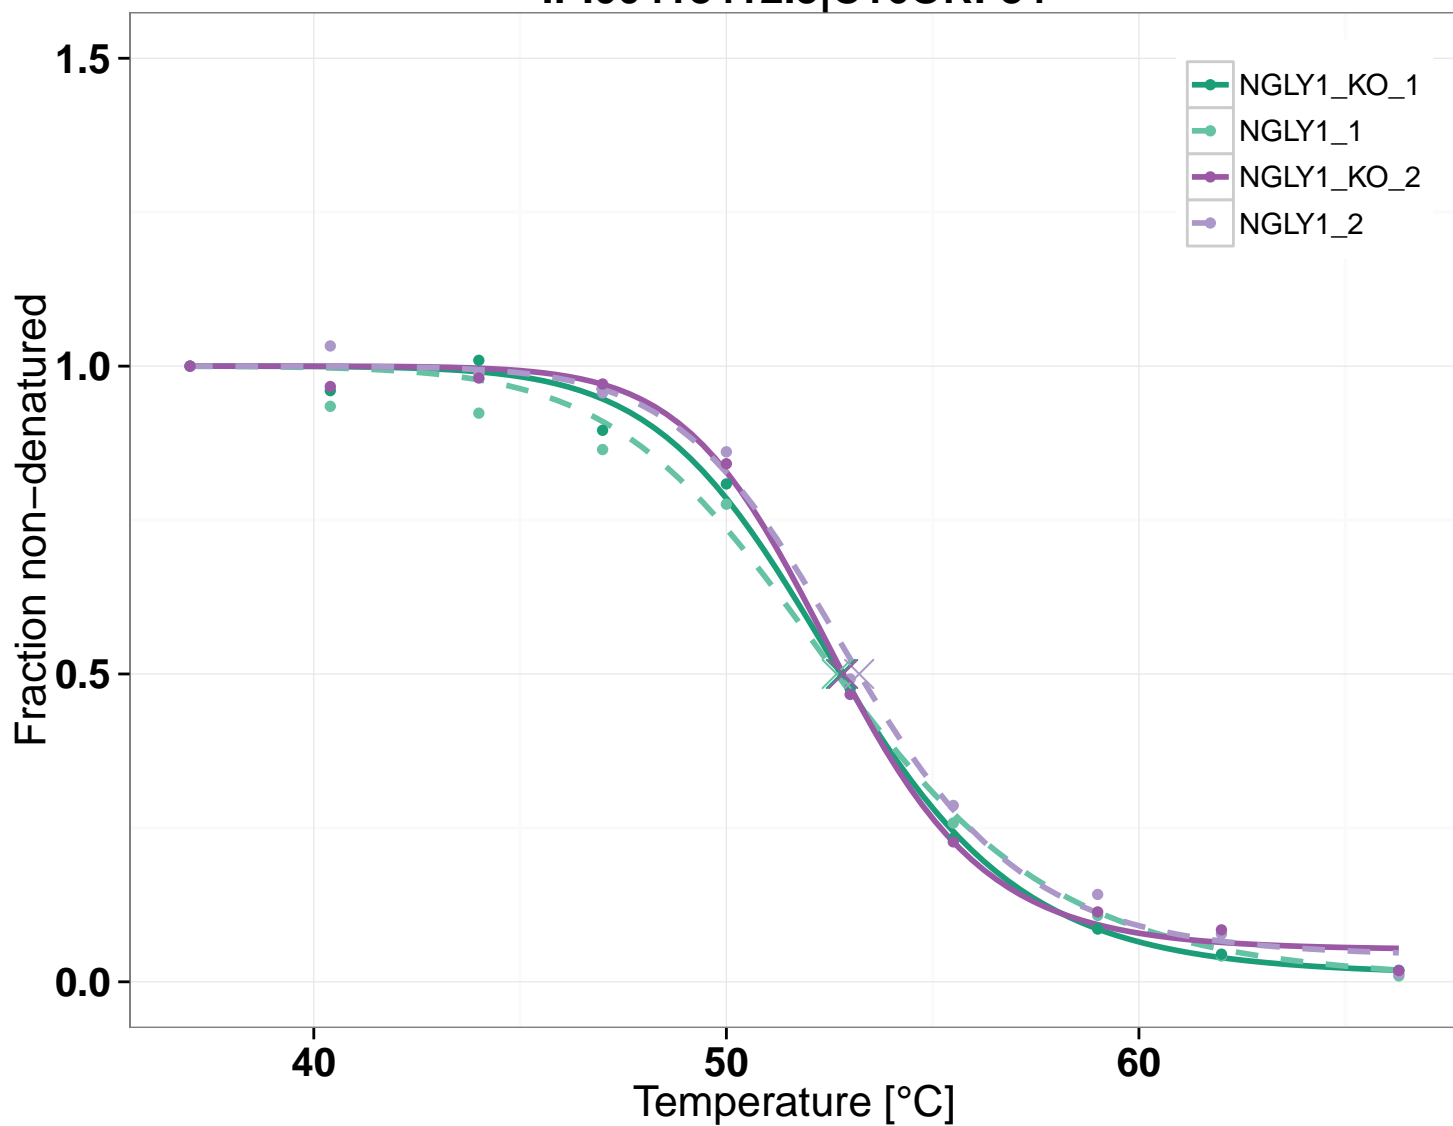

|            | meltPoint | slope  | plateau | R2   |
|------------|-----------|--------|---------|------|
| NGLY1_KO_1 | 52.78     | -0.11  | 0.01    | 1    |
| NGLY1_1    | 52.67     | -0.092 | 0       | 0.99 |
| NGLY1_KO_2 | 52.83     | -0.13  | 0.05    | 1    |
| NGLY1_2    | 53.22     | -0.11  | 0.04    | 1    |

Supplement: Supplementary file 105 [file 1]

# IPI00166009.2|FBXL11

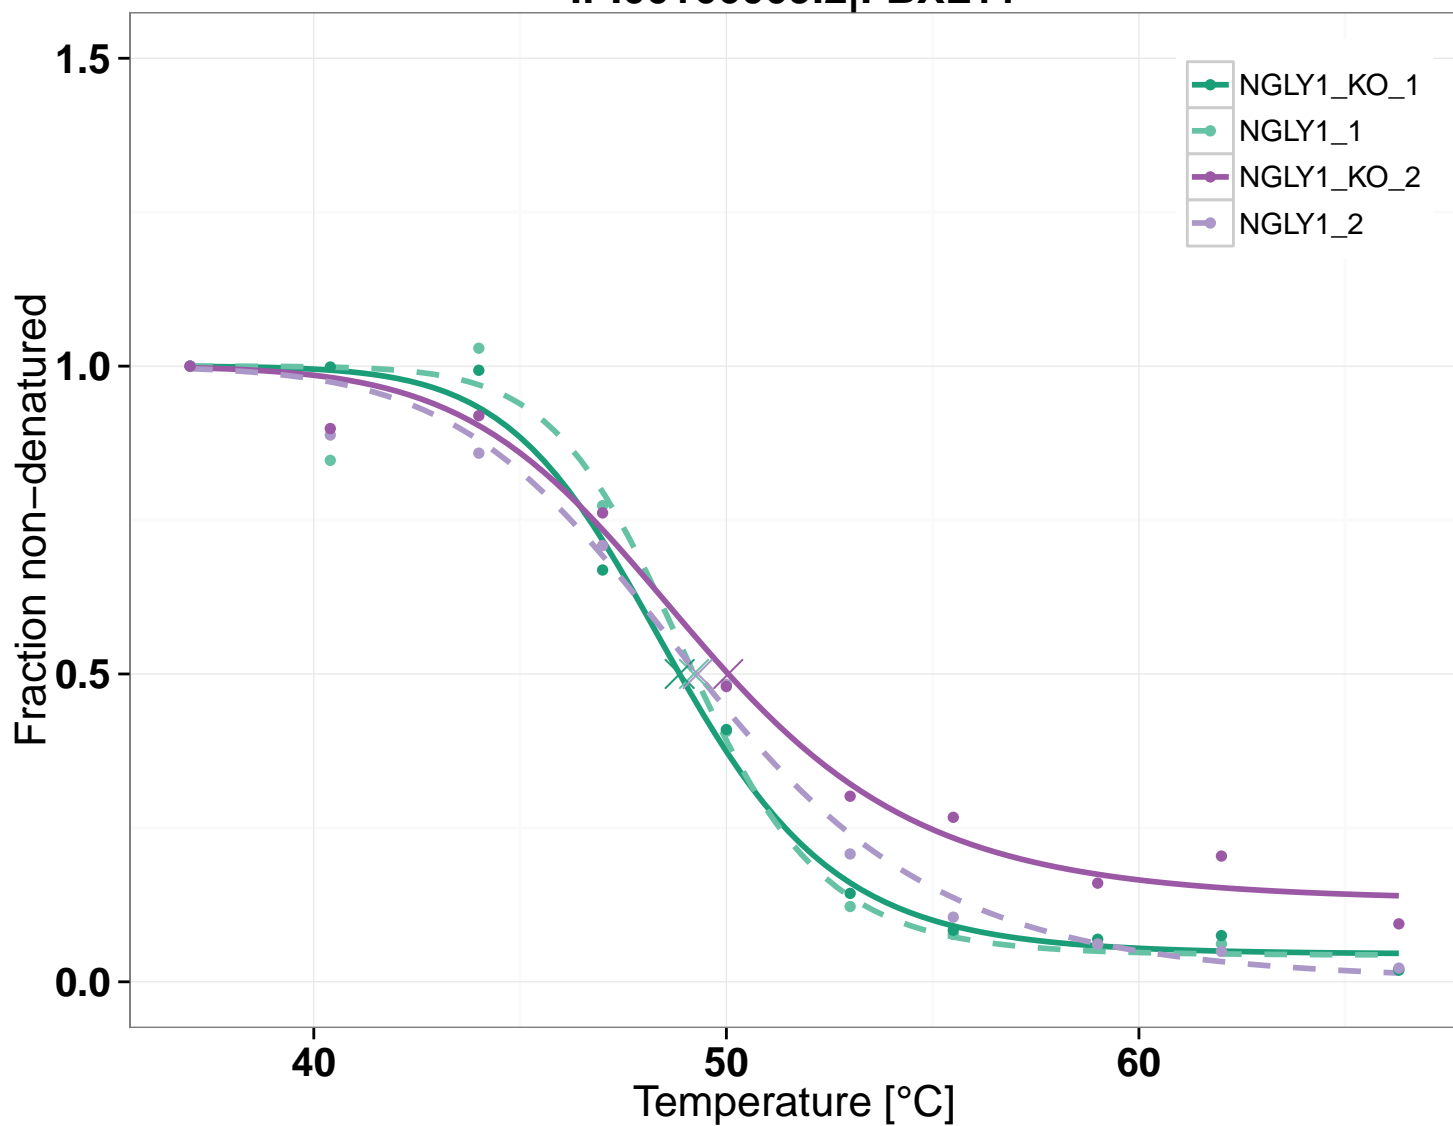

|            | meltPoint | slope  | plateau | R2   |
|------------|-----------|--------|---------|------|
| NGLY1_KO_1 | 48.87     | -0.12  | 0.04    | 0.99 |
| NGLY1_1    | 49.21     | -0.15  | 0.04    | 0.98 |
| NGLY1_KO_2 | 50.05     | -0.079 | 0.13    | 0.99 |
| NGLY1_2    | 49.3      | -0.085 | 0       | 0.99 |

Supplement: Supplementary file 106 [file 1]

IPI00644701.1|SLC7A6

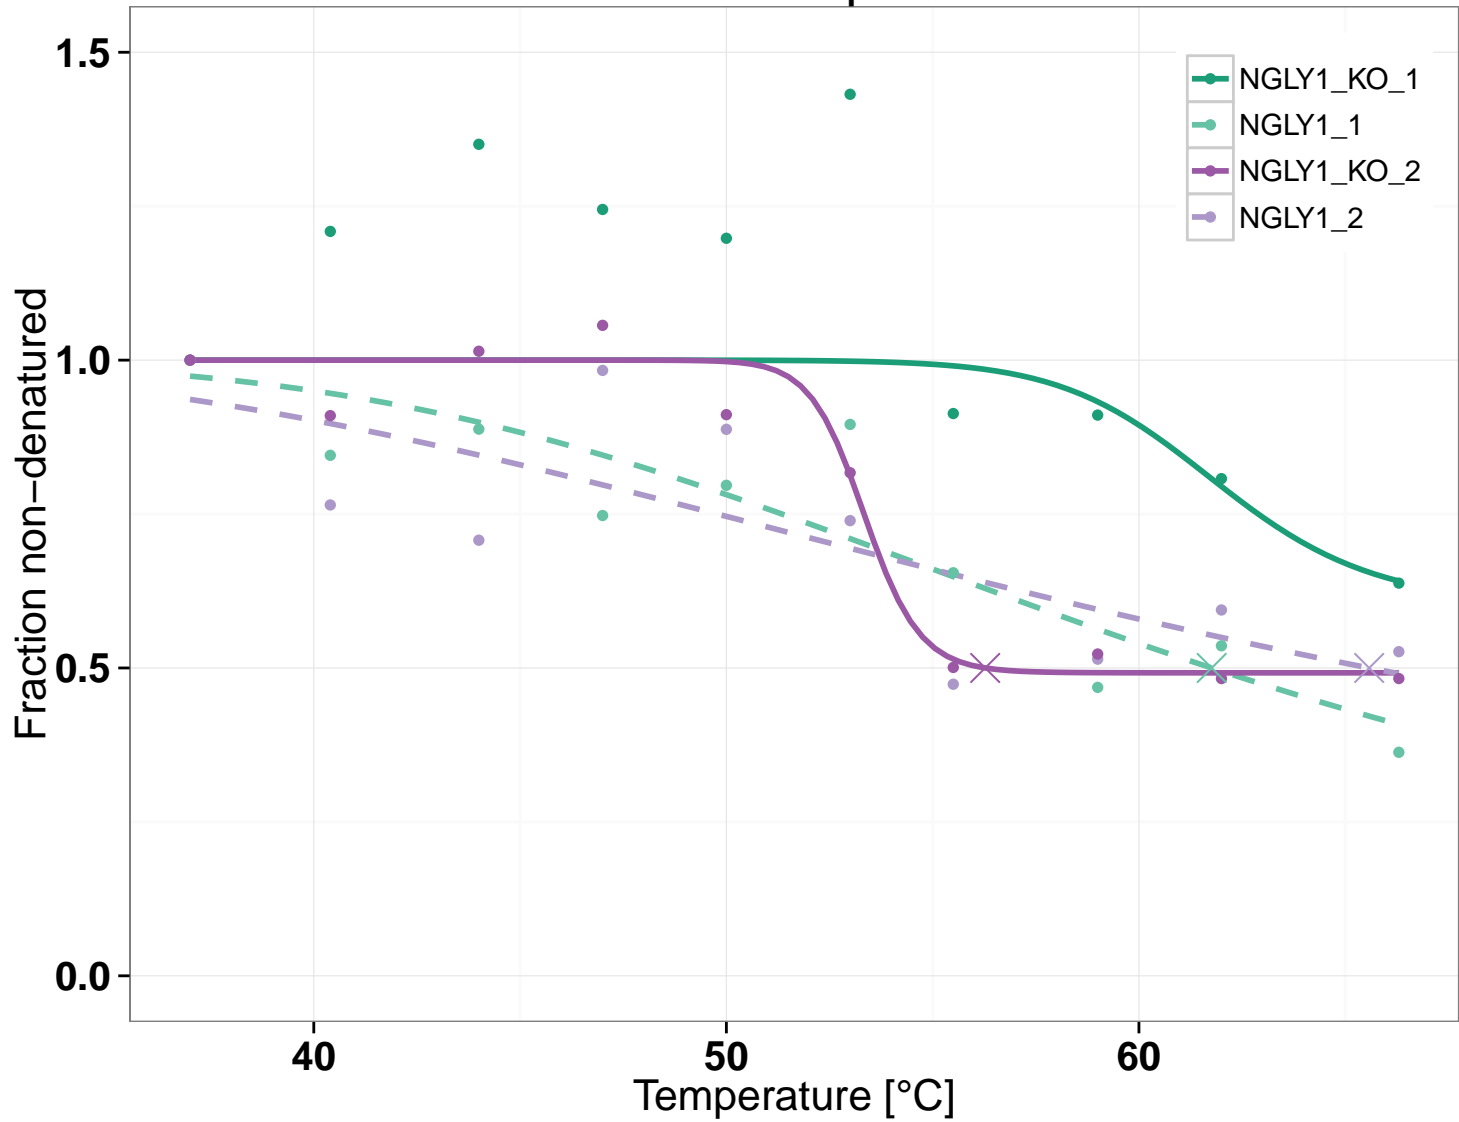

|            | meltPoint | slope  | plateau | R2   |
|------------|-----------|--------|---------|------|
| NGLY1_KO_1 | -         | -0.053 | 0.6     | 0.22 |
| NGLY1_1    | 61.76     | -0.025 | 0       | 0.83 |
| NGLY1_KO_2 | 56.27     | -0.19  | 0.49    | 0.96 |
| NGLY1_2    | 65.58     | -0.017 | 0.02    | 0.59 |

Supplement: Supplementary file 107 [file 1]

# IPI00029605.1|GALNS

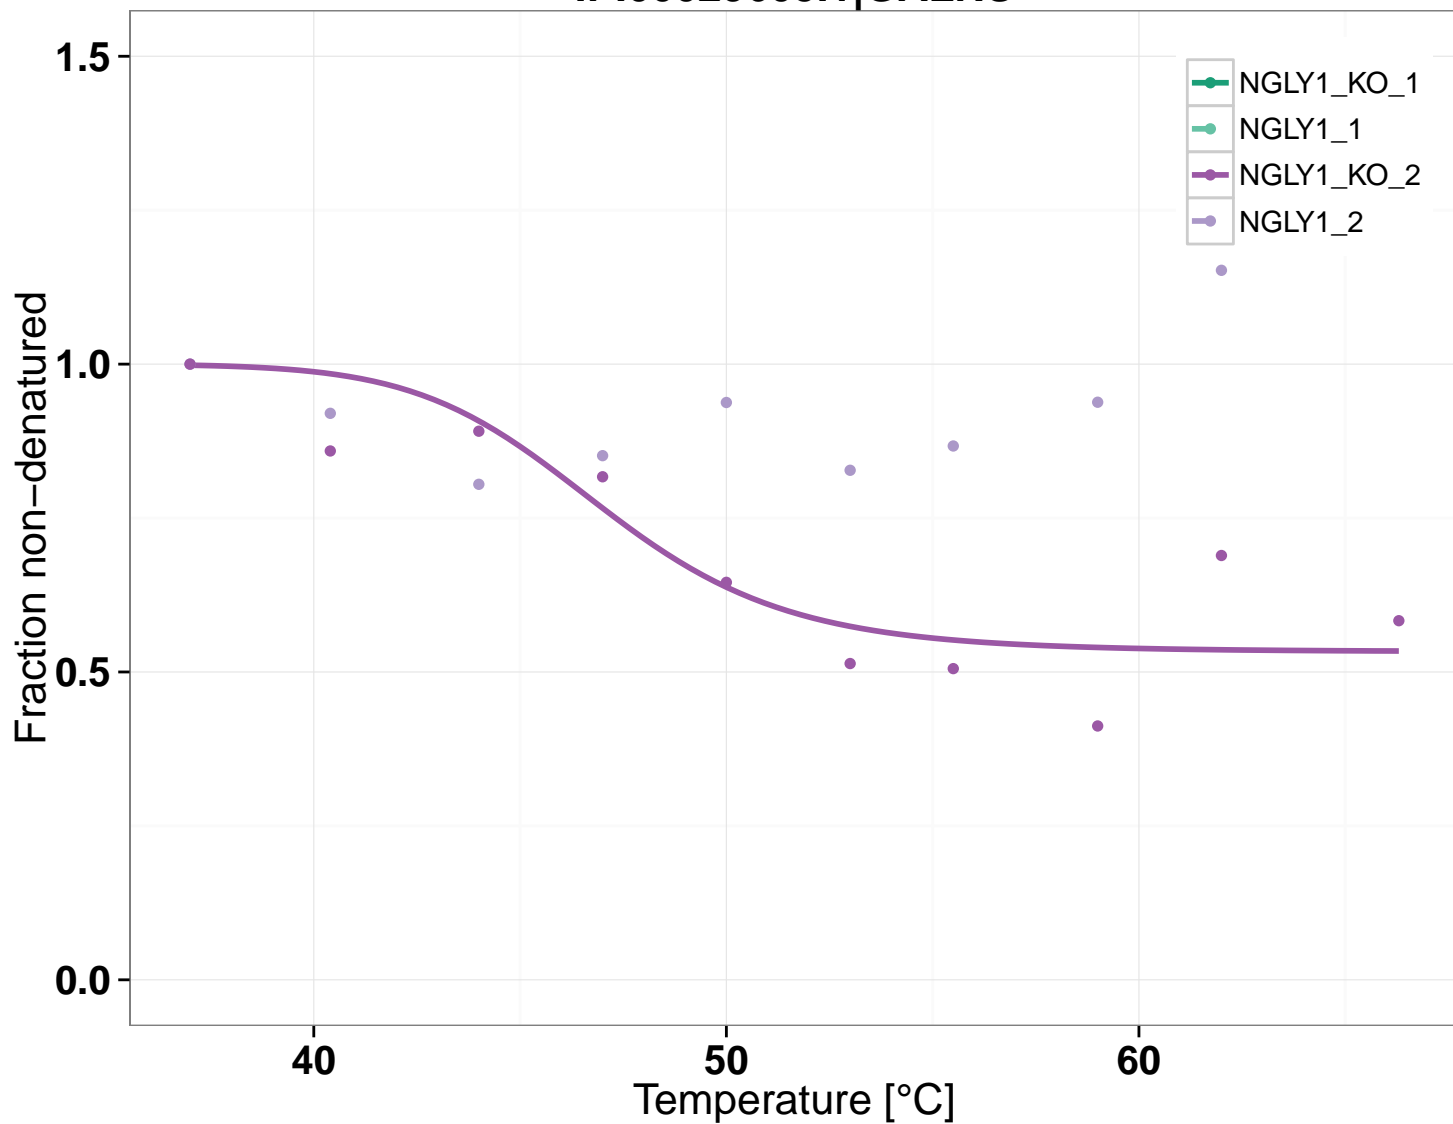

|            | meltPoint | slope  | plateau | R2  |
|------------|-----------|--------|---------|-----|
| NGLY1_KO_1 | —         | —      | —       | —   |
| NGLY1_1    | —         | —      | —       | —   |
| NGLY1_KO_2 | —         | -0.052 | 0.53    | 0.8 |
| NGLY1_2    | —         | —      | —       | —   |

Supplement: Supplementary file 108 [file 1]

IPI00028359.2|SH3BP5L

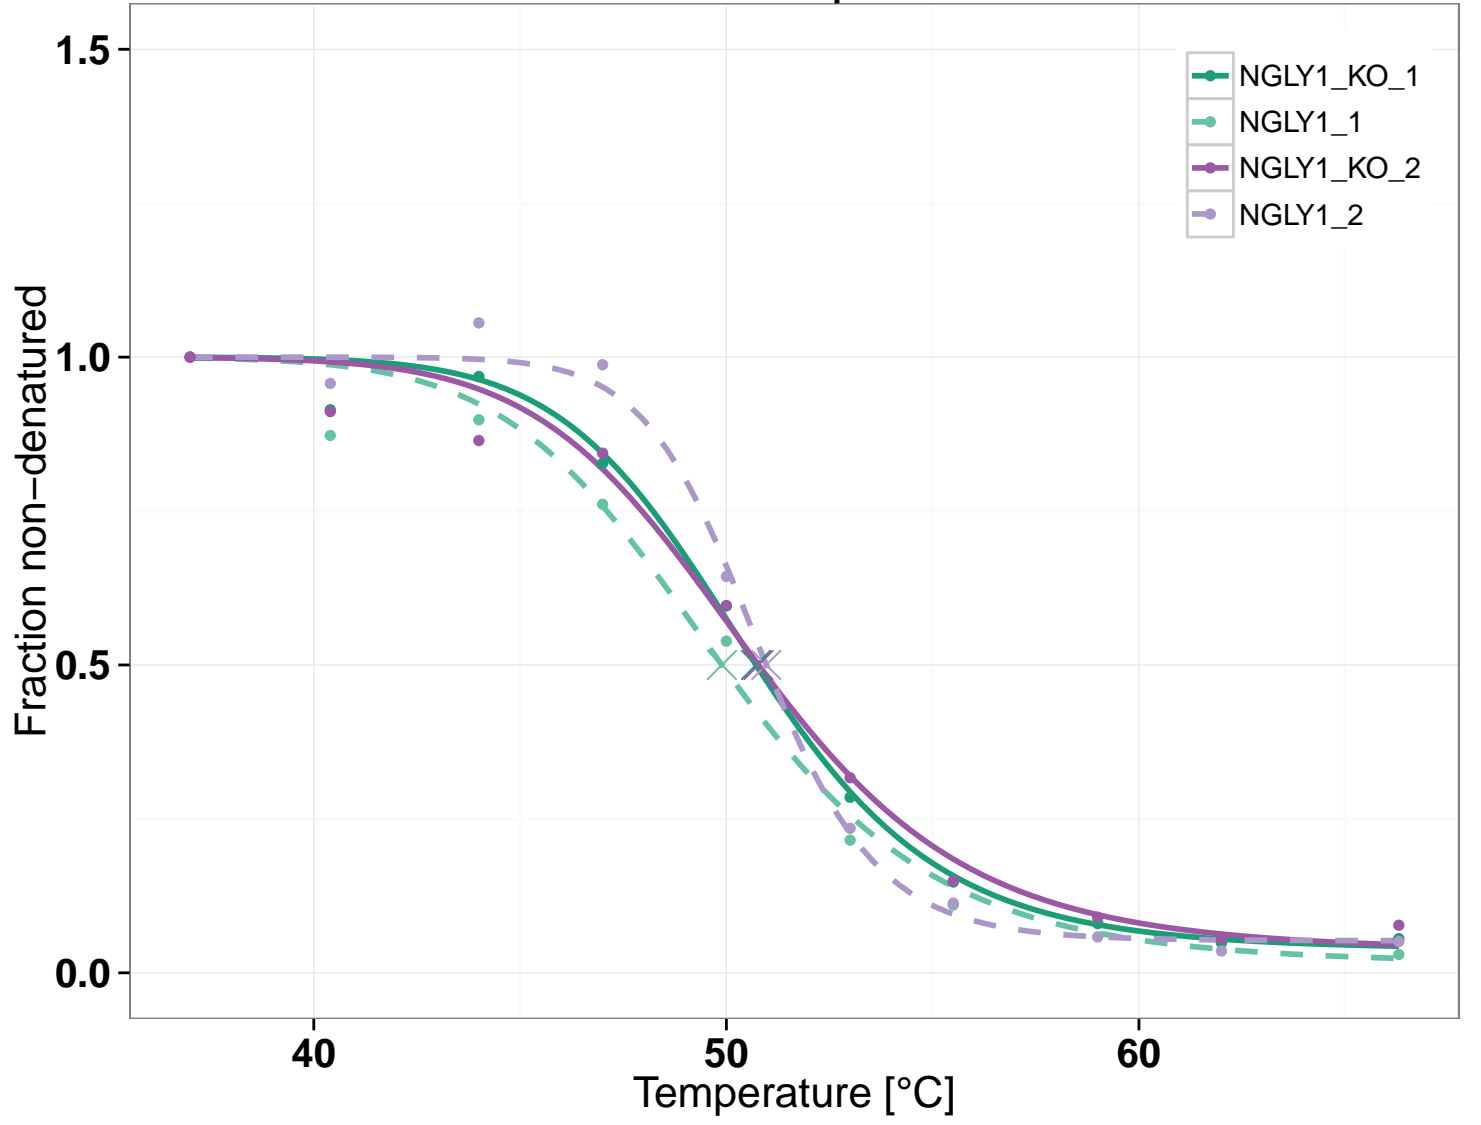

|            | meltPoint | slope  | plateau | R2   |
|------------|-----------|--------|---------|------|
| NGLY1_KO_1 | 50.72     | -0.1   | 0.04    | 0.99 |
| NGLY1_1    | 49.89     | -0.094 | 0.01    | 0.99 |
| NGLY1_KO_2 | 50.78     | -0.092 | 0.04    | 0.99 |
| NGLY1_2    | 50.97     | -0.17  | 0.05    | 1    |

Supplement: Supplementary file 109 [file 1]

IPI00020004.3|TMEM97

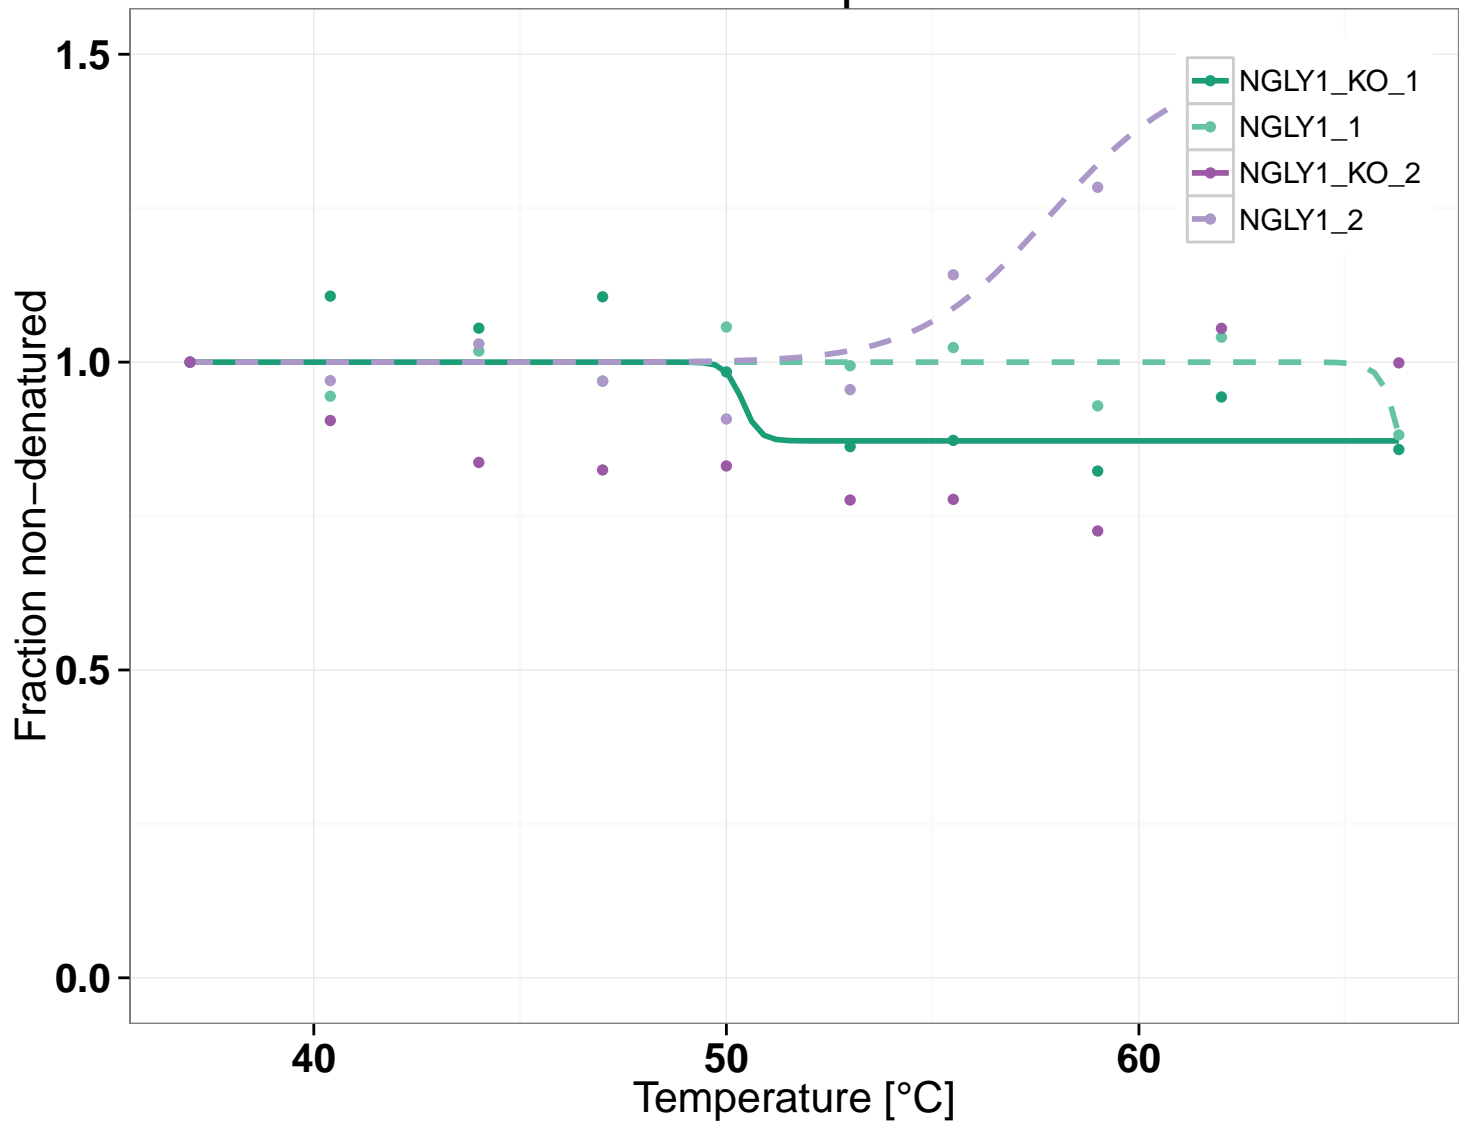

|            | meltPoint | slope | plateau | R2   |
|------------|-----------|-------|---------|------|
| NGLY1_KO_1 | -         | -0.16 | 0.87    | 0.67 |
| NGLY1_1    | -         | -     | 0       | 0.45 |
| NGLY1_KO_2 | -         | -     | -       | -    |
| NGLY1_2    | -         | 0.075 | 1.5     | 0.95 |

Supplement: Supplementary file 110 [file 1]

IPI00016768.3|LDHAL6B

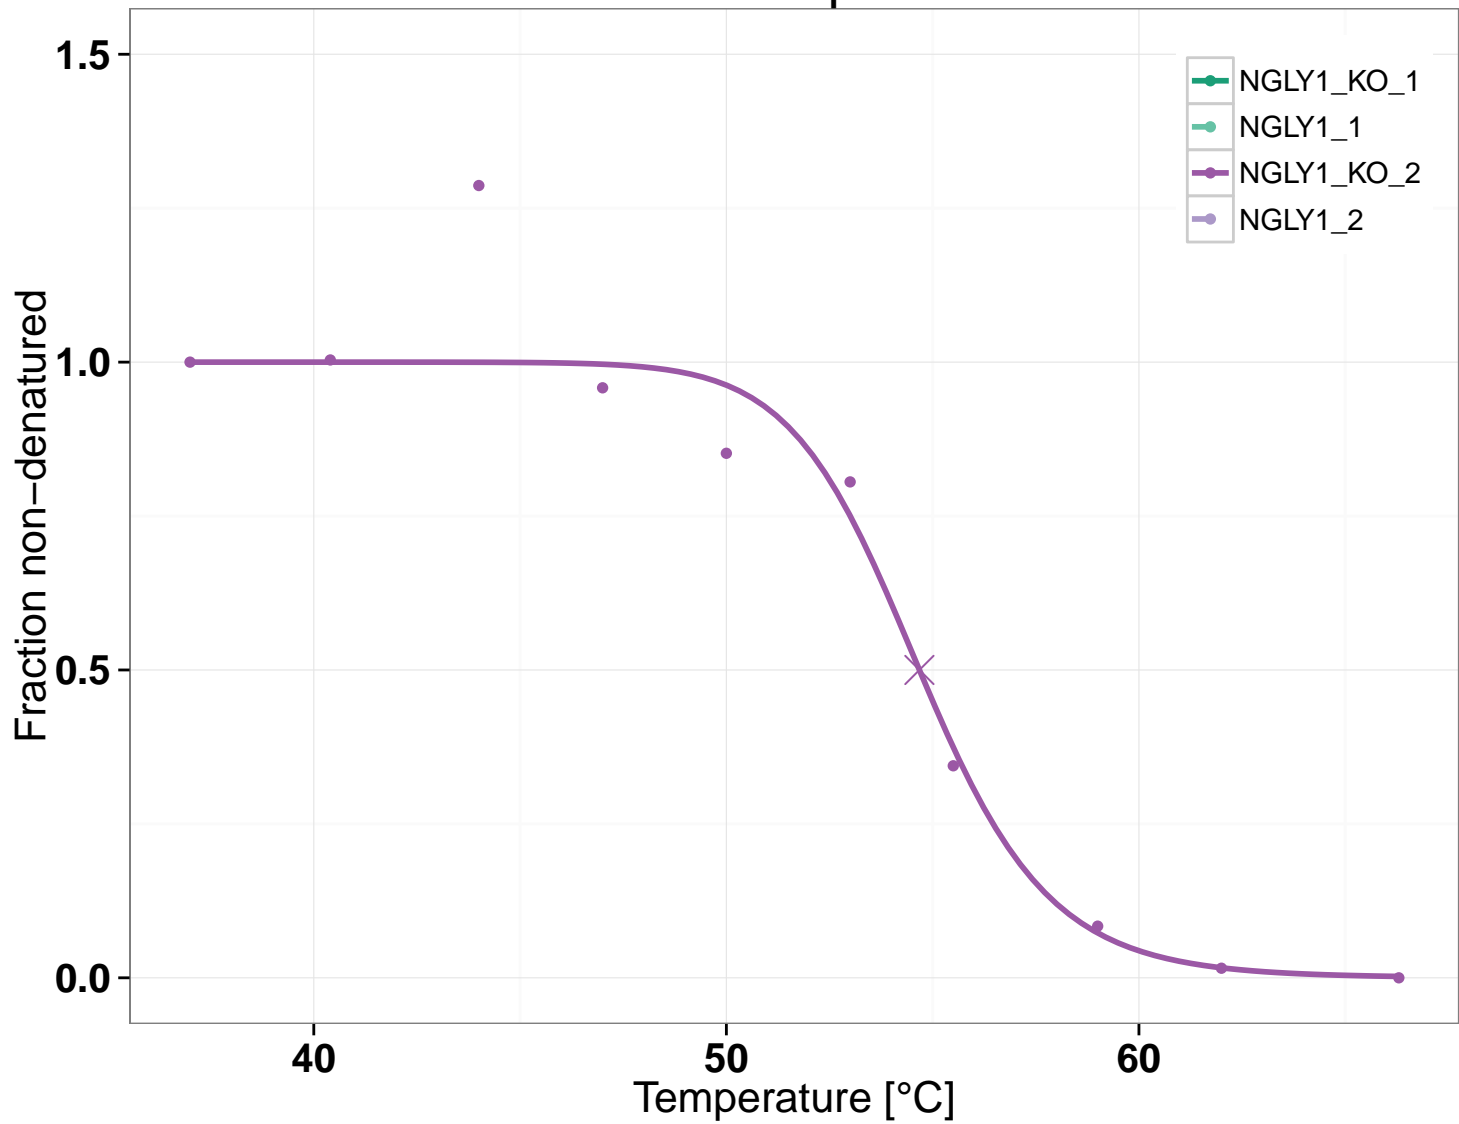

|            | meltPoint | slope | plateau | R2   |
|------------|-----------|-------|---------|------|
| NGLY1_KO_1 | -         | -     | -       | -    |
| NGLY1_1    | -         | -     | -       | -    |
| NGLY1_KO_2 | 54.68     | -0.16 | 0       | 0.95 |
| NGLY1_2    | -         | -     | -       | -    |

Supplement: Supplementary file 111 [file 1]

IPI00220503.9|DCTN2

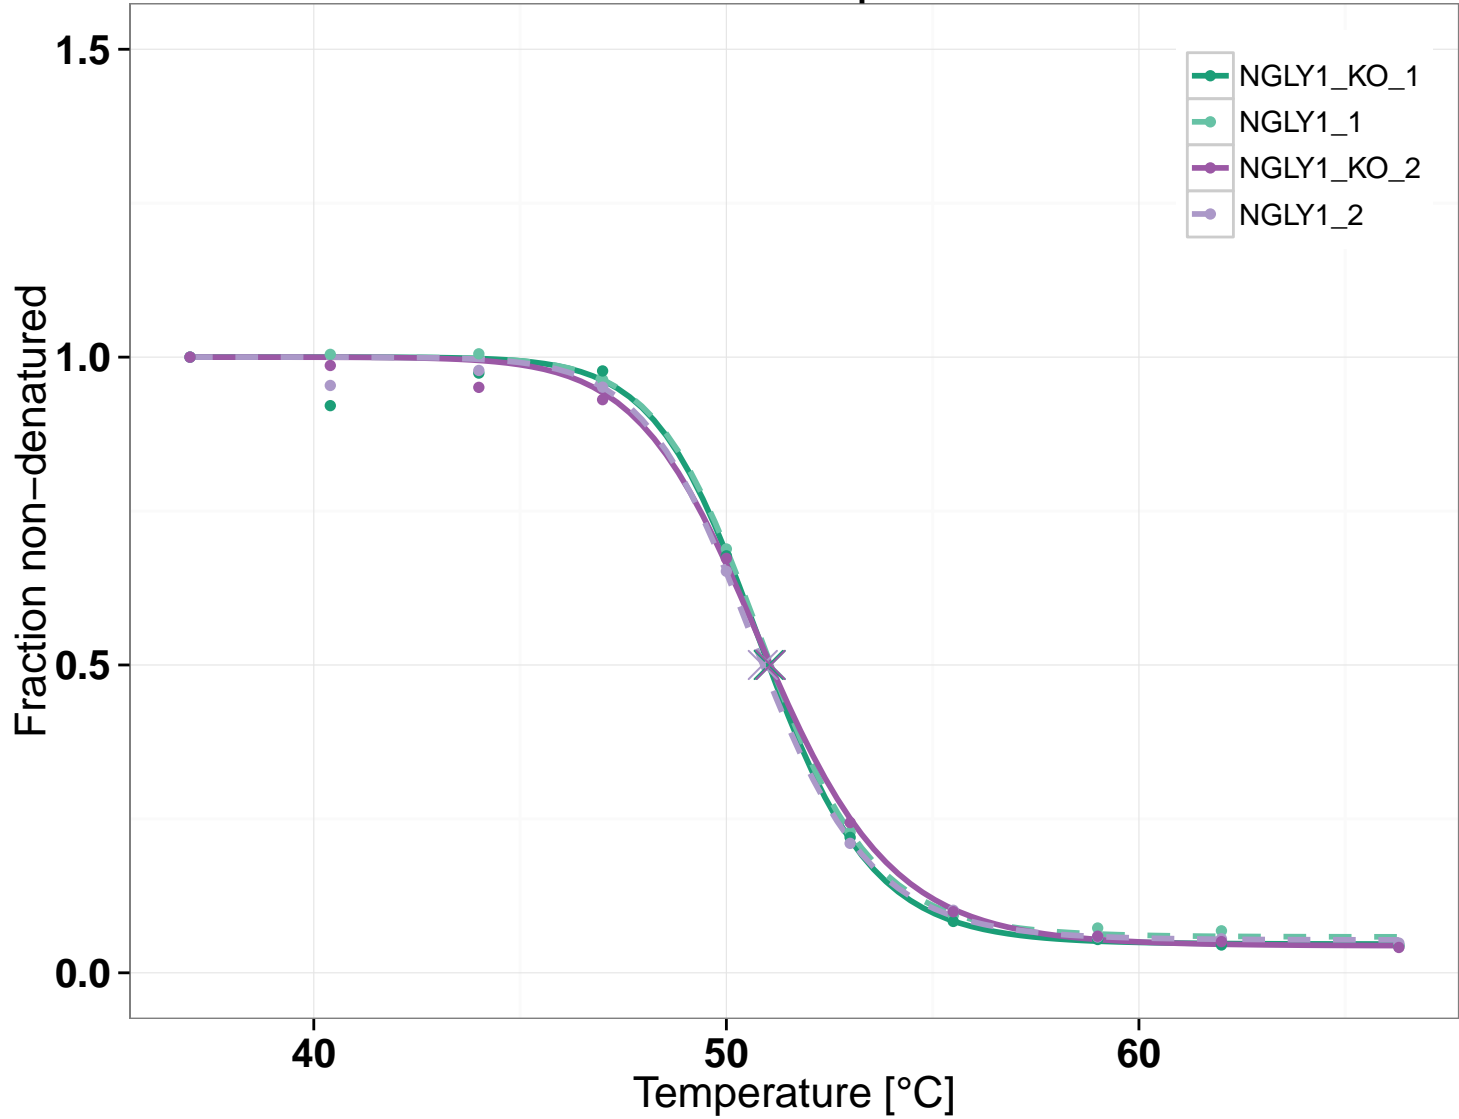

|            | meltPoint | slope | plateau | R2 |
|------------|-----------|-------|---------|----|
| NGLY1_KO_1 | 51.03     | -0.18 | 0.05    | 1  |
| NGLY1_1    | 51.08     | -0.18 | 0.06    | 1  |
| NGLY1_KO_2 | 51.07     | -0.16 | 0.04    | 1  |
| NGLY1_2    | 50.88     | -0.17 | 0.05    | 1  |

Supplement: Supplementary file 112 [file 1]

# IPI00024871.1|CBFB

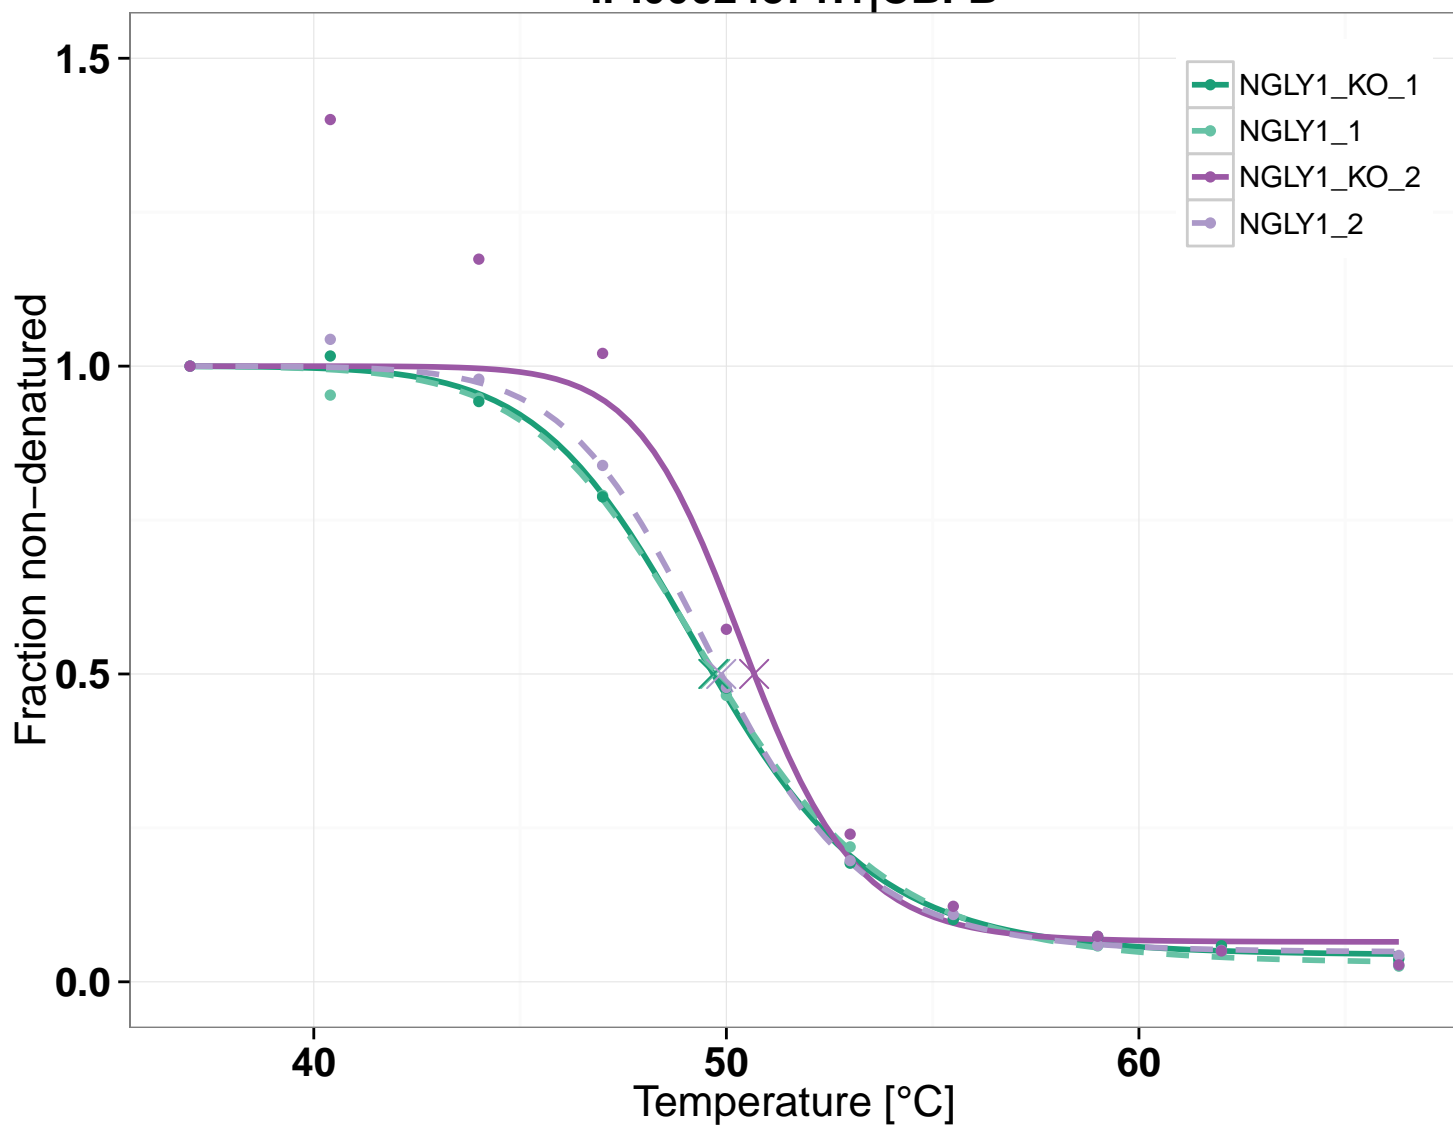

|            | meltPoint | slope | plateau | R2   |
|------------|-----------|-------|---------|------|
| NGLY1_KO_1 | 49.68     | -0.12 | 0.04    | 1    |
| NGLY1_1    | 49.73     | -0.11 | 0.03    | 1    |
| NGLY1_KO_2 | 50.67     | -0.17 | 0.06    | 0.92 |
| NGLY1_2    | 49.88     | -0.13 | 0.05    | 1    |

Supplement: Supplementary file 113 [file 1]

# IPI00431697.1|RP13-36C9 6

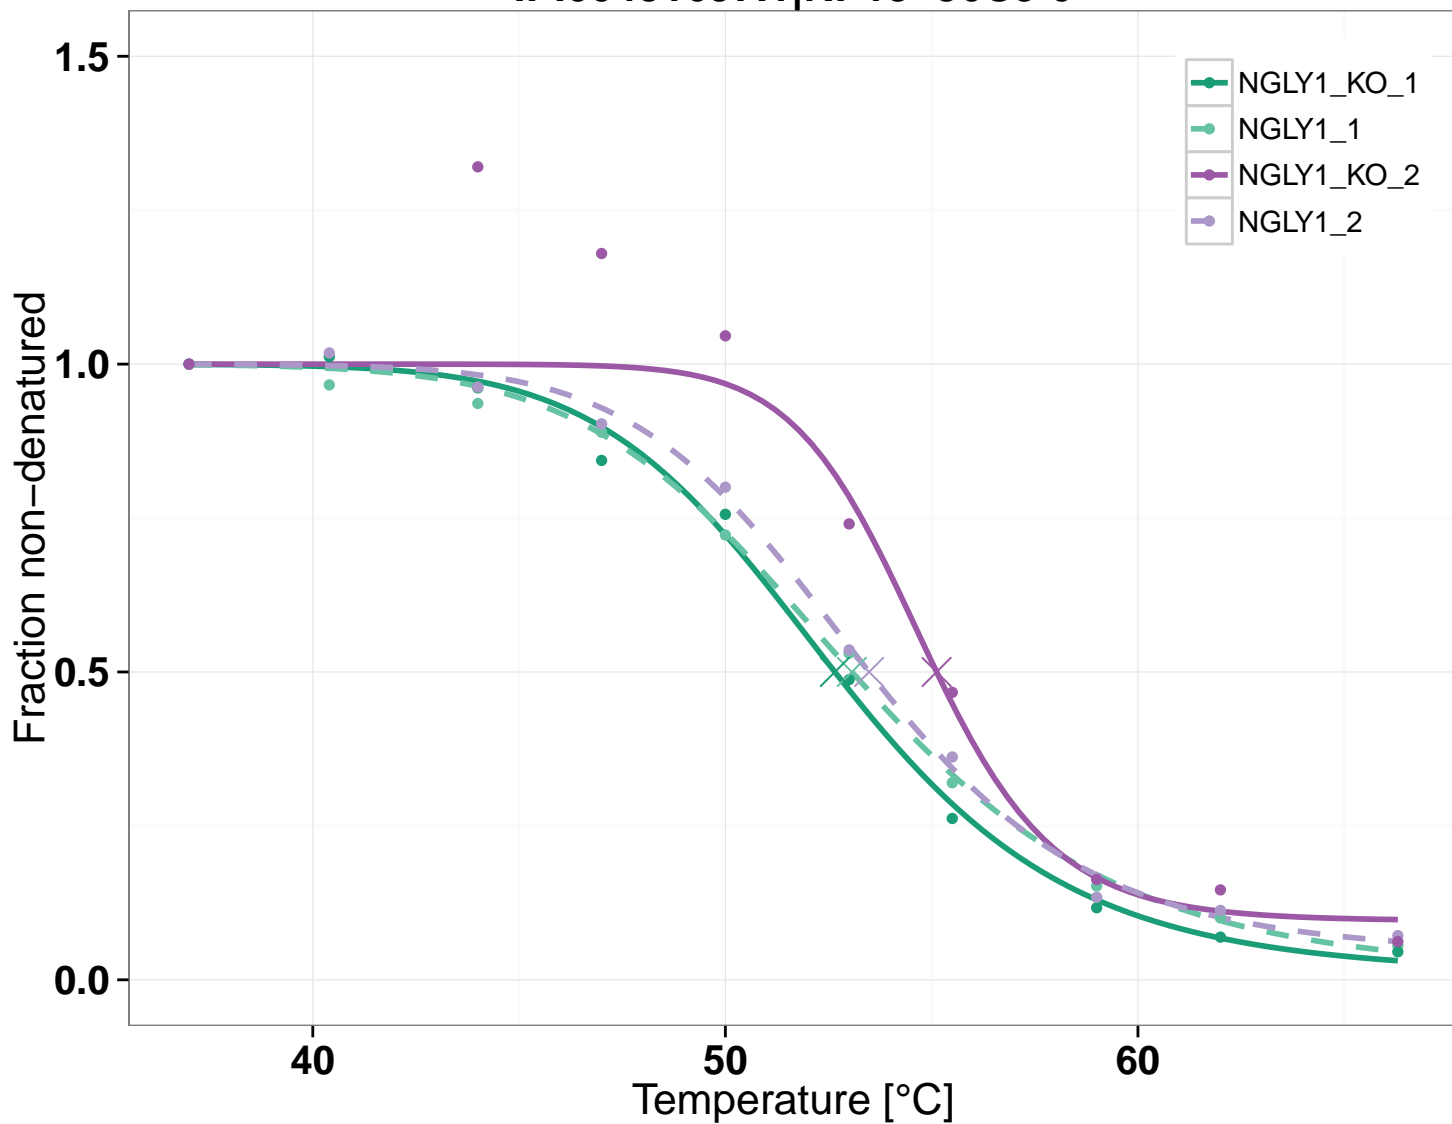

|            | meltPoint | slope  | plateau | R2   |
|------------|-----------|--------|---------|------|
| NGLY1_KO_1 | 52.65     | -0.087 | 0.01    | 1    |
| NGLY1_1    | 53.07     | -0.076 | 0.01    | 1    |
| NGLY1_KO_2 | 55.12     | -0.14  | 0.1     | 0.83 |
| NGLY1_2    | 53.48     | -0.087 | 0.04    | 1    |

Supplement: Supplementary file 114 [file 1]

IPI00031960.2|POLR1A

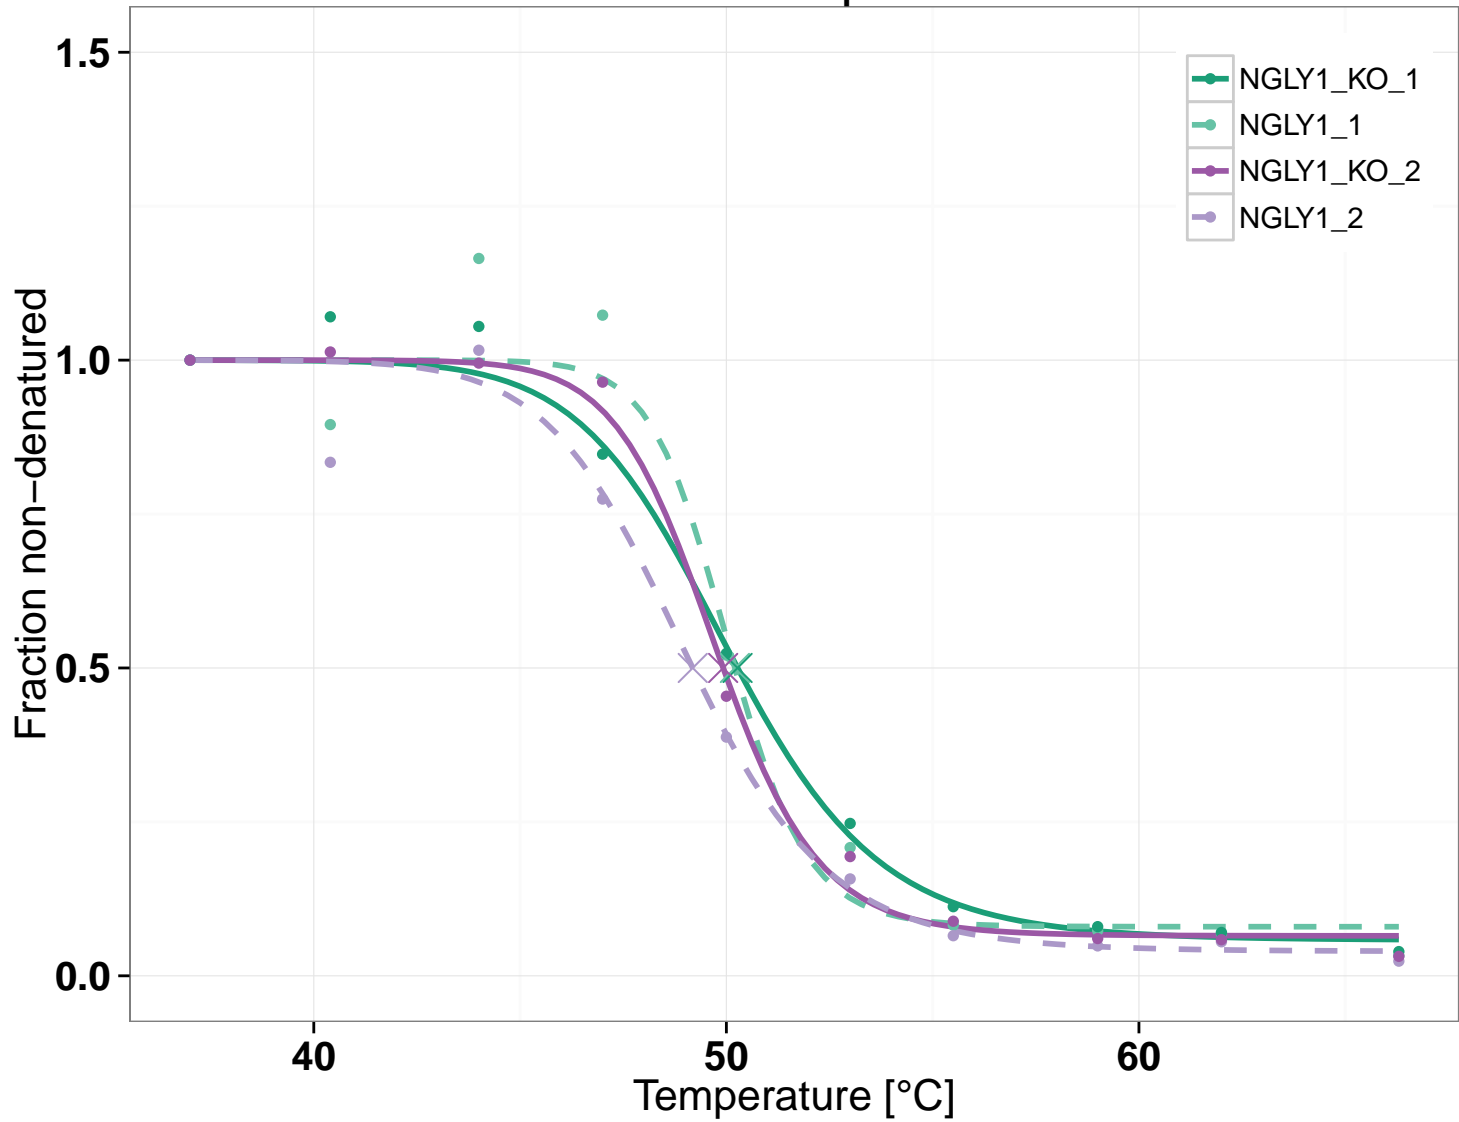

|            | meltPoint | slope | plateau | R2   |
|------------|-----------|-------|---------|------|
| NGLY1_KO_1 | 50.27     | -0.13 | 0.06    | 0.99 |
| NGLY1_1    | 50.21     | -0.24 | 0.08    | 0.97 |
| NGLY1_KO_2 | 49.92     | -0.19 | 0.06    | 1    |
| NGLY1_2    | 49.18     | -0.14 | 0.04    | 0.98 |

Supplement: Supplementary file 115 [file 1]

IPI00220987.1|PEX10

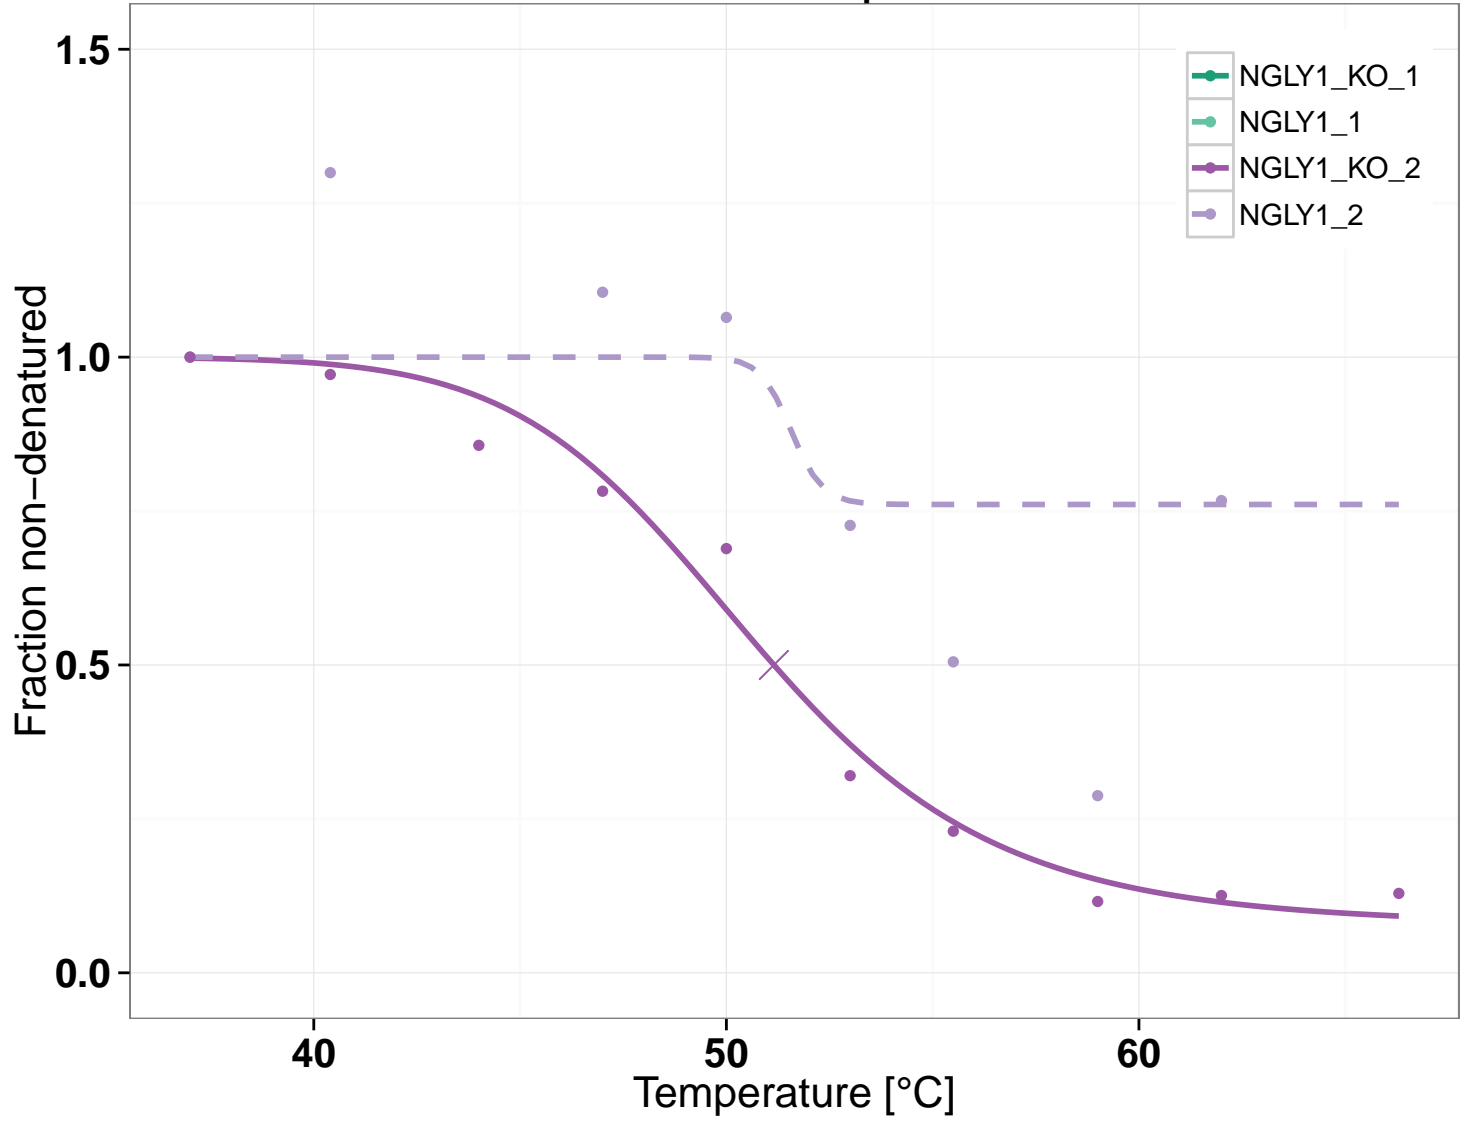

|            | meltPoint | slope  | plateau | R2   |
|------------|-----------|--------|---------|------|
| NGLY1_KO_1 | —         | —      | —       | —    |
| NGLY1_1    | —         | —      | —       | —    |
| NGLY1_KO_2 | 51.15     | -0.079 | 0.08    | 0.98 |
| NGLY1_2    | —         | -0.16  | 0.76    | 0.17 |

Supplement: Supplementary file 116 [file 1]

# IPI00005715.5|UBE4B

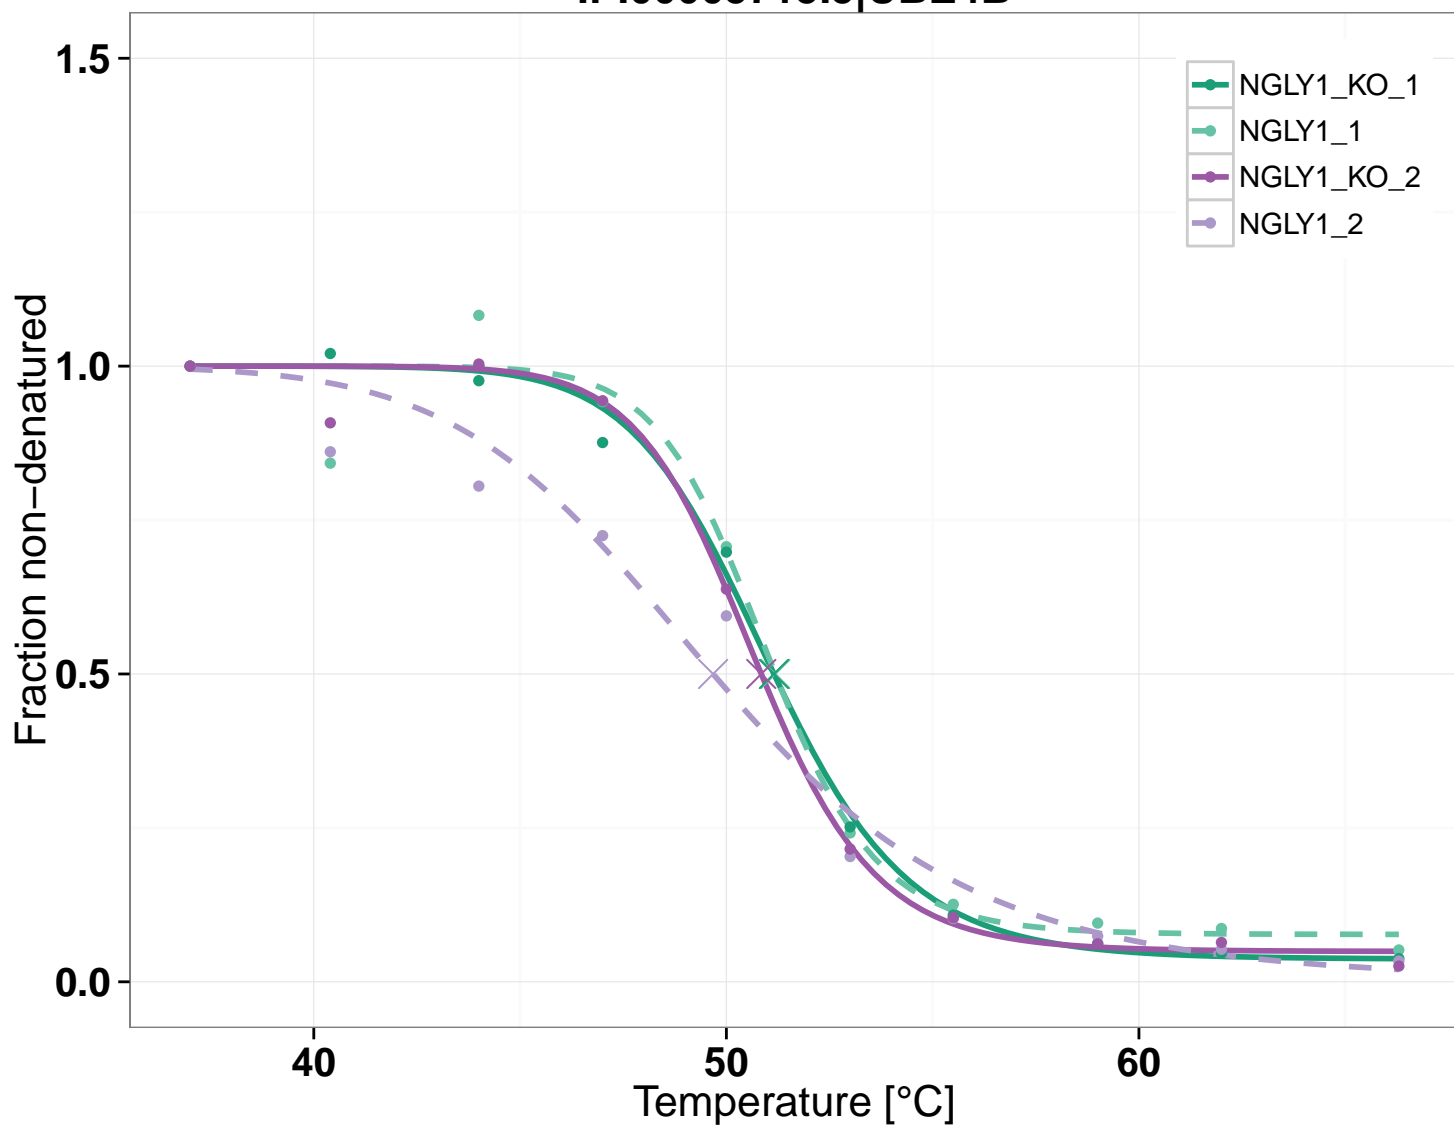

|            | meltPoint | slope  | plateau | R2   |
|------------|-----------|--------|---------|------|
| NGLY1_KO_1 | 51.15     | -0.14  | 0.04    | 1    |
| NGLY1_1    | 51.19     | -0.17  | 0.08    | 0.98 |
| NGLY1_KO_2 | 50.85     | -0.16  | 0.05    | 0.99 |
| NGLY1_2    | 49.68     | -0.079 | 0       | 0.97 |

Supplement: Supplementary file 117 [file 1]

# IPI00006586.1|TOX4

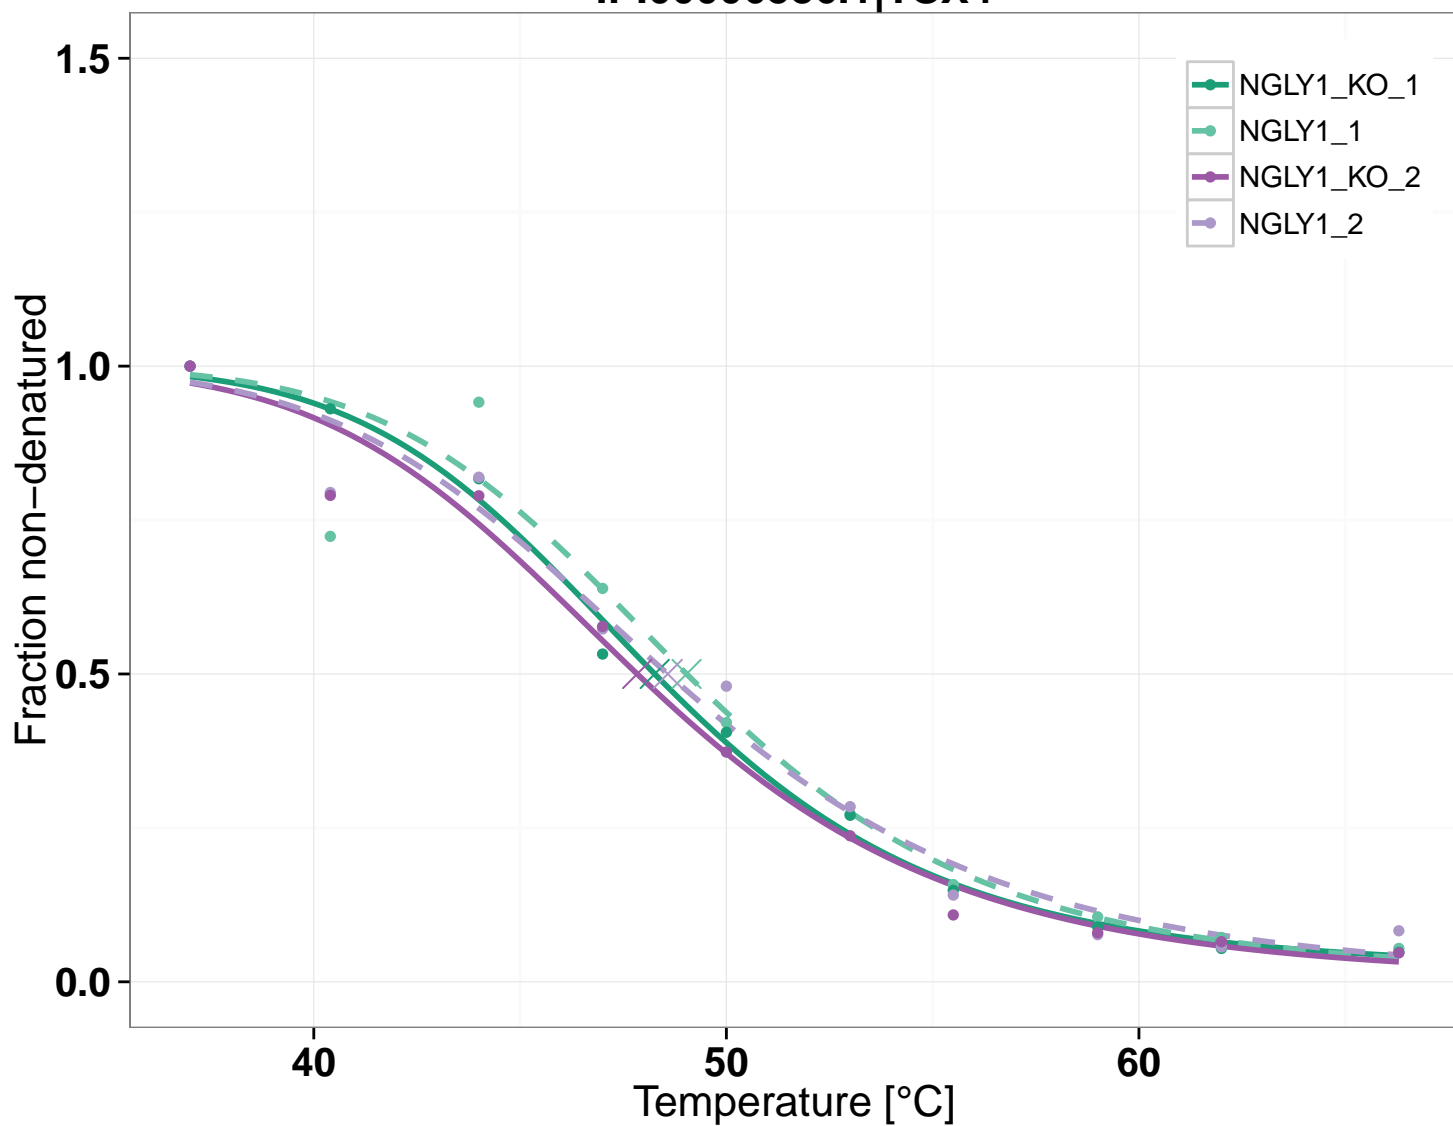

|            | meltPoint | slope  | plateau | R2   |
|------------|-----------|--------|---------|------|
| NGLY1_KO_1 | 48.26     | -0.07  | 0.02    | 1    |
| NGLY1_1    | 49.04     | -0.068 | 0.01    | 0.95 |
| NGLY1_KO_2 | 47.84     | -0.065 | 0       | 0.98 |
| NGLY1_2    | 48.58     | -0.061 | 0       | 0.98 |

Supplement: Supplementary file 118 [file 1]

IPI00217949.12|UBE2S

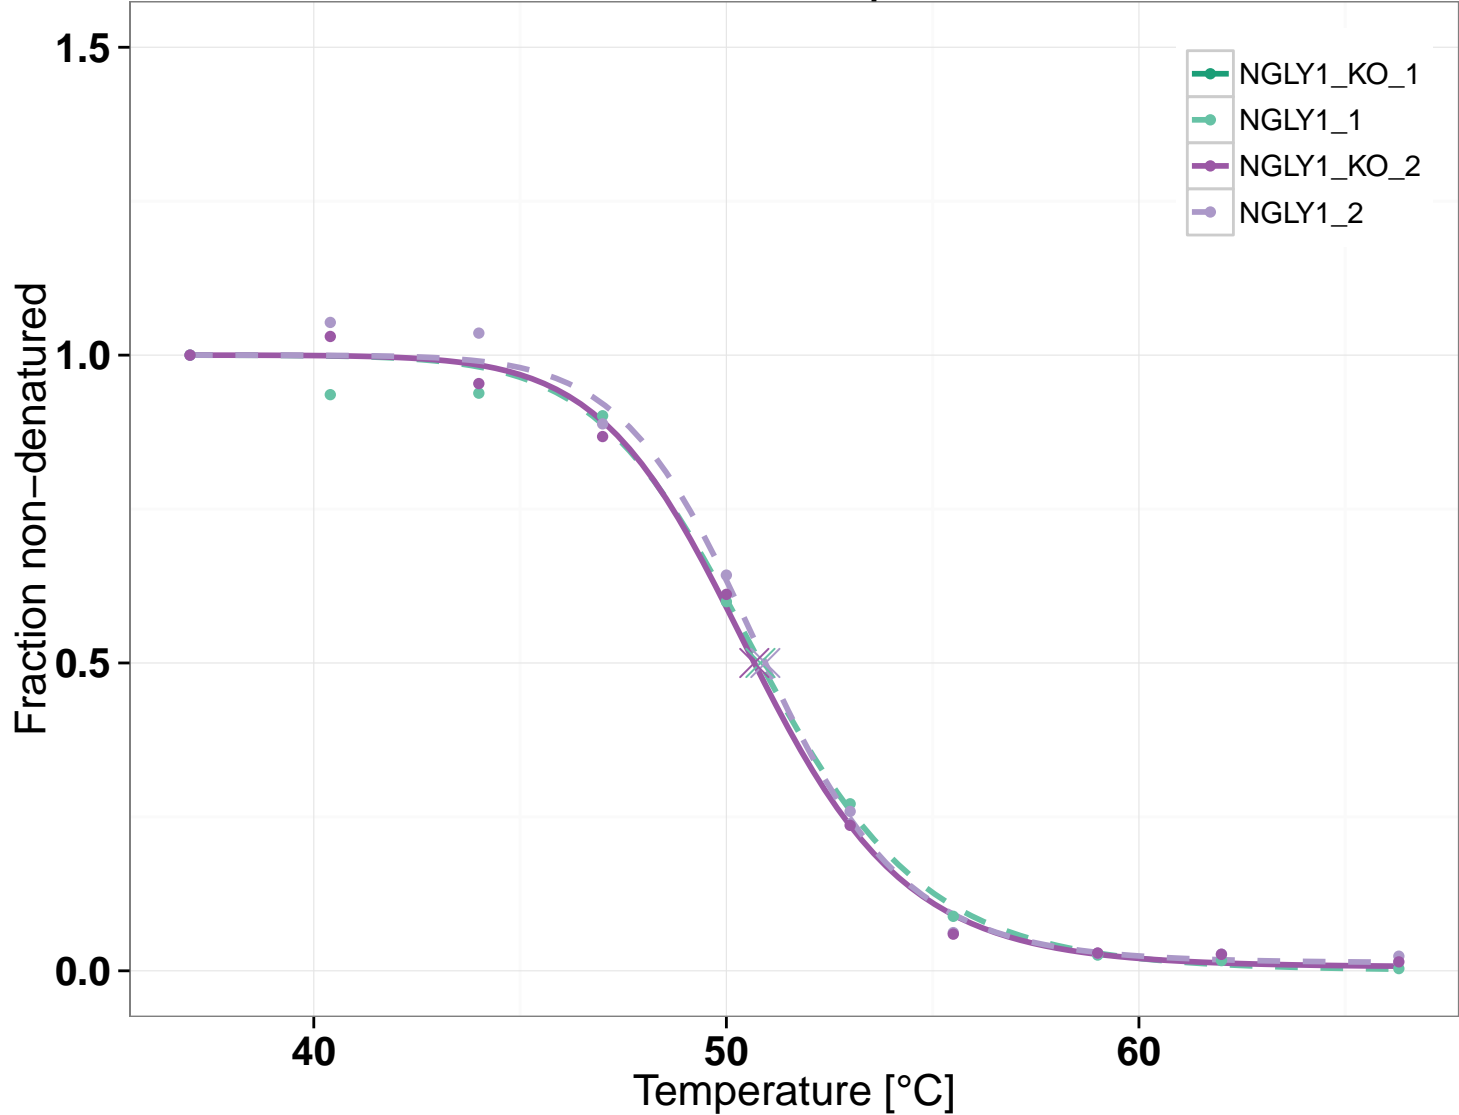

|            | meltPoint | slope | plateau | R2 |
|------------|-----------|-------|---------|----|
| NGLY1_KO_1 | -         | -     | -       | -  |
| NGLY1_1    | 50.83     | -0.13 | 0       | 1  |
| NGLY1_KO_2 | 50.68     | -0.13 | 0.01    | 1  |
| NGLY1_2    | 50.94     | -0.14 | 0.01    | 1  |

Supplement: Supplementary file 119 [file 1]

IPI00000795.5|C4ORF16

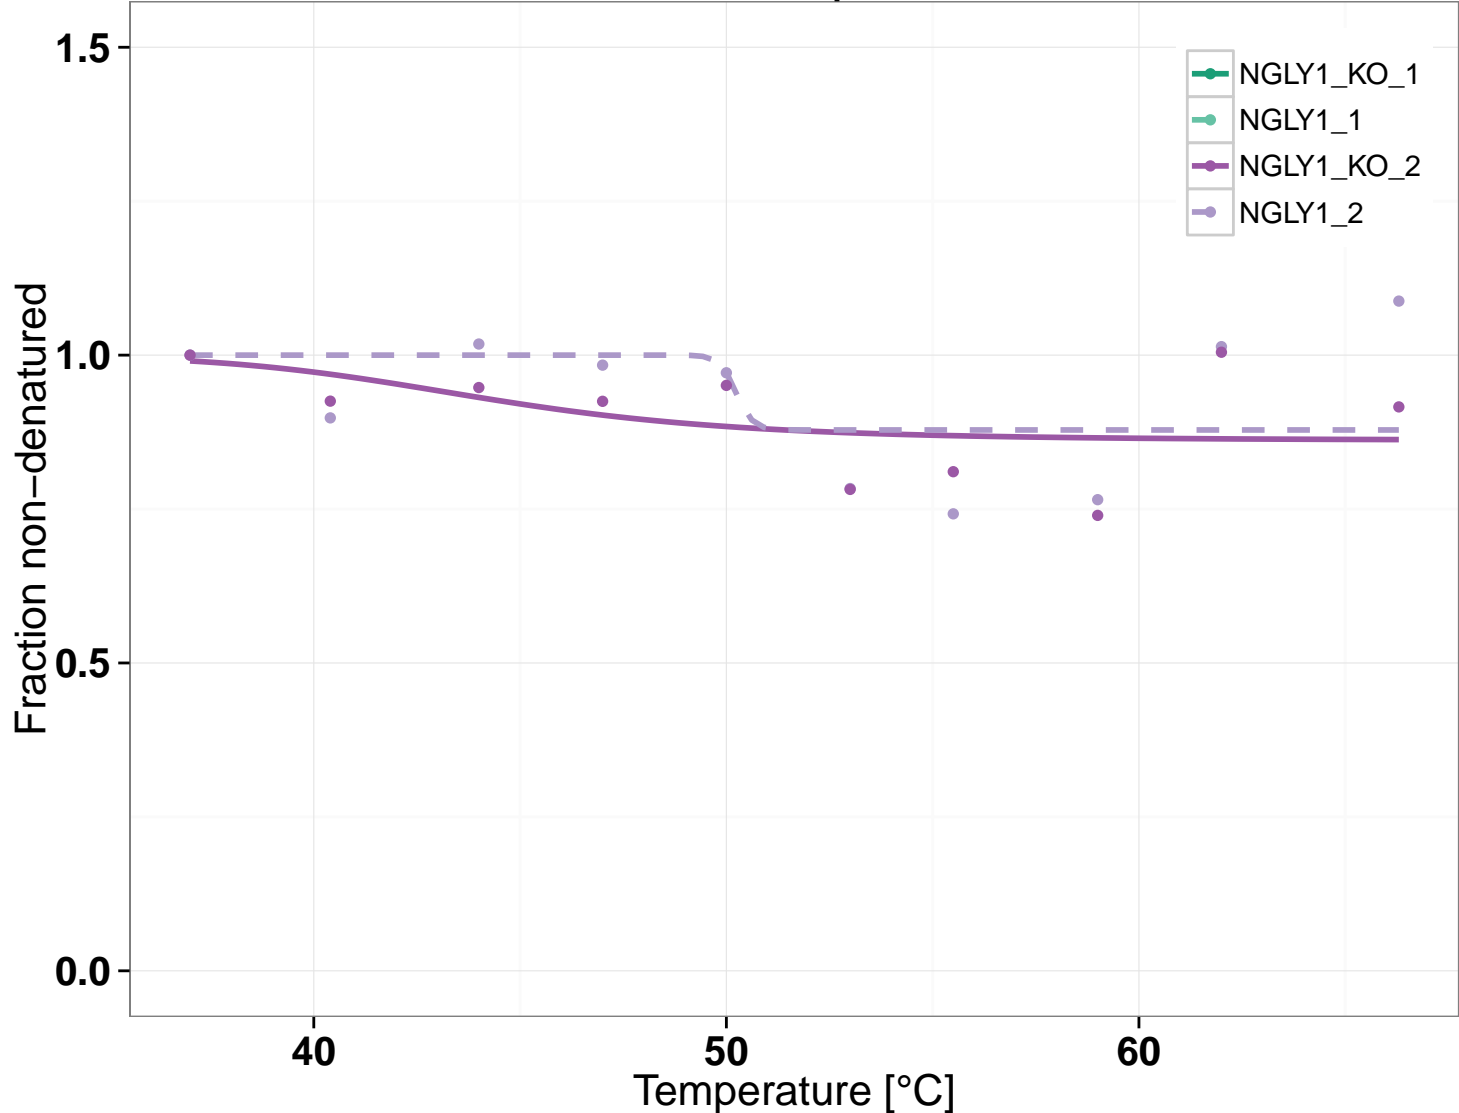

|            | meltPoint | slope  | plateau | R2   |
|------------|-----------|--------|---------|------|
| NGLY1_KO_1 | -         | -      | -       | -    |
| NGLY1_1    | -         | -      | -       | -    |
| NGLY1_KO_2 | -         | -0.011 | 0.86    | 0.23 |
| NGLY1_2    | -         | -0.15  | 0.88    | 0.15 |

Supplement: Supplementary file 120 [file 1]

IPI00019046.4|RBM22

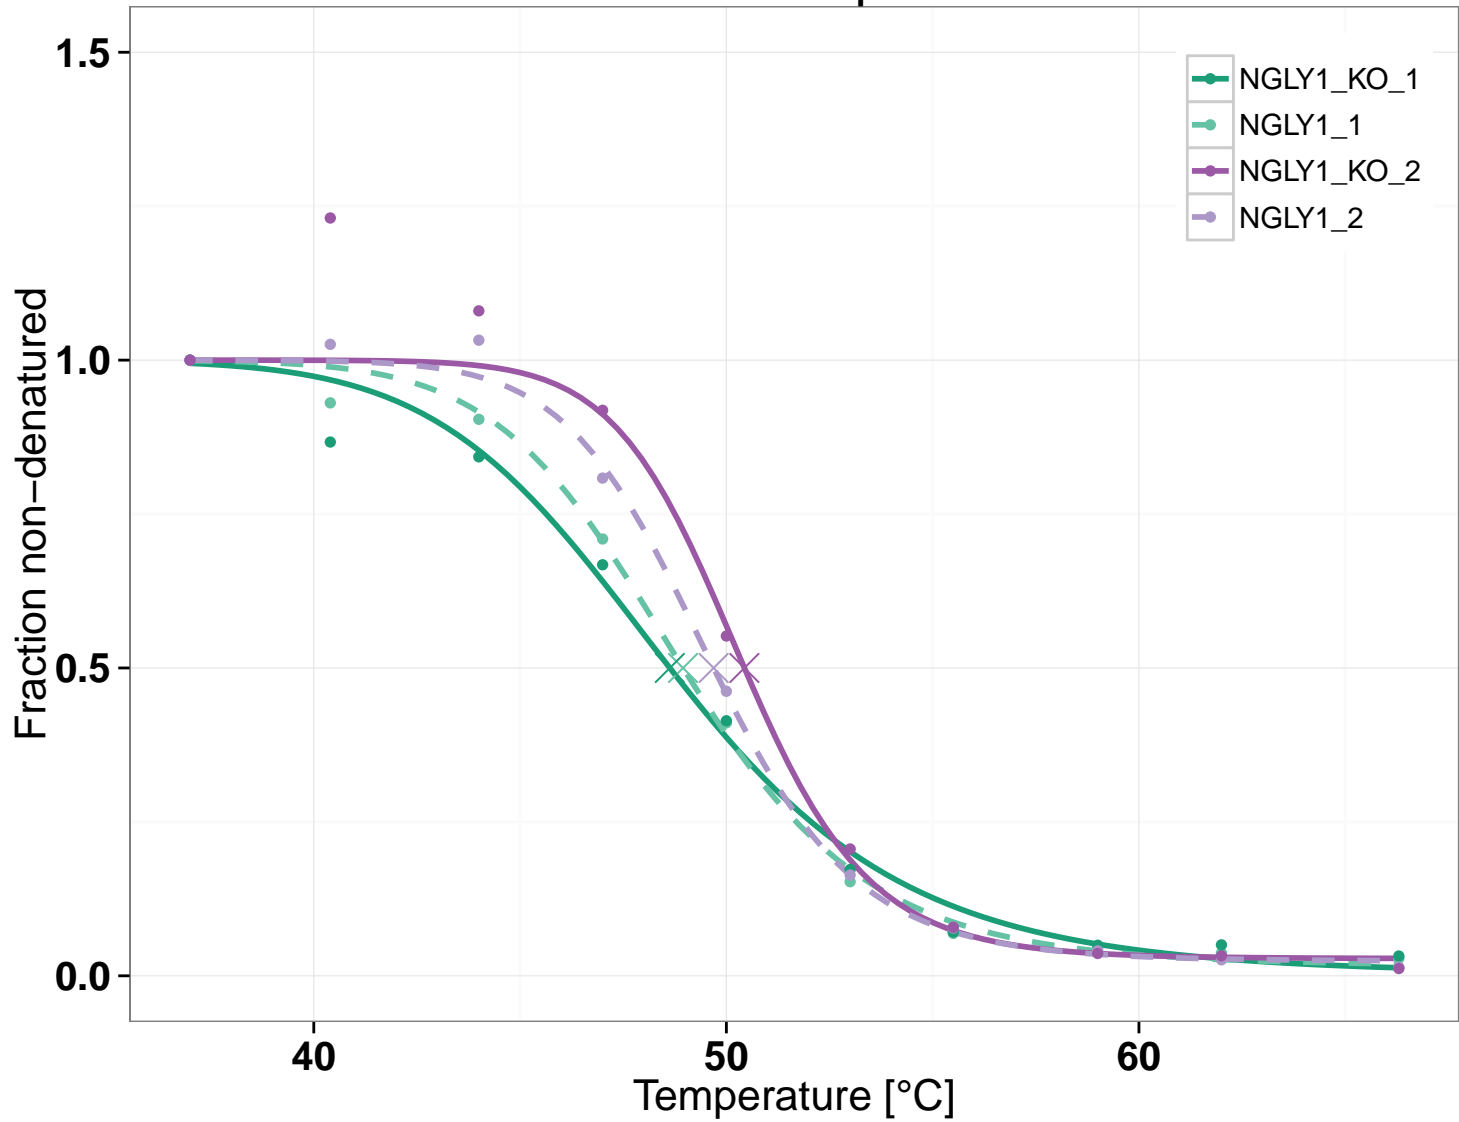

|            | meltPoint | slope  | plateau | R2   |
|------------|-----------|--------|---------|------|
| NGLY1_KO_1 | 48.63     | -0.087 | 0       | 0.99 |
| NGLY1_1    | 48.95     | -0.11  | 0.02    | 1    |
| NGLY1_KO_2 | 50.44     | -0.16  | 0.03    | 0.97 |
| NGLY1_2    | 49.69     | -0.14  | 0.02    | 1    |

Supplement: Supplementary file 121 [file 1]

# IPI00749113.2|DUT

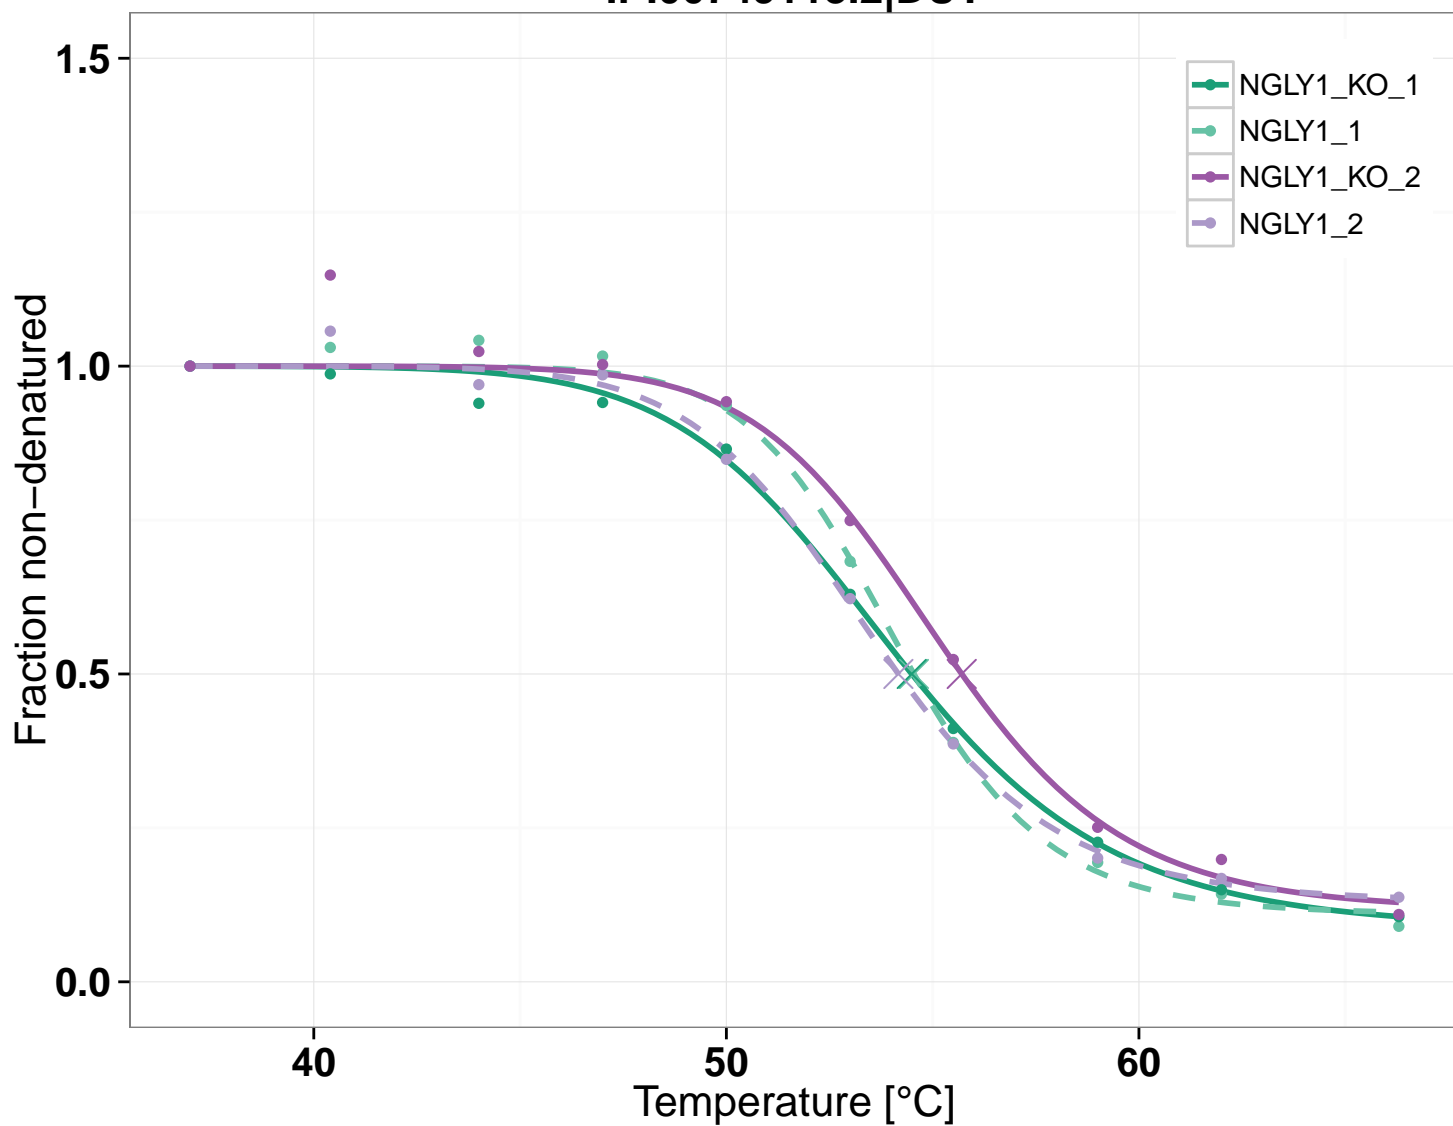

|            | meltPoint | slope  | plateau | R2   |
|------------|-----------|--------|---------|------|
| NGLY1_KO_1 | 54.49     | -0.086 | 0.08    | 1    |
| NGLY1_1    | 54.55     | -0.12  | 0.11    | 1    |
| NGLY1_KO_2 | 55.7      | -0.099 | 0.12    | 0.98 |
| NGLY1_2    | 54.17     | -0.098 | 0.13    | 1    |

Supplement: Supplementary file 122 [file 1]

IPI00556024.1|ELOVL5

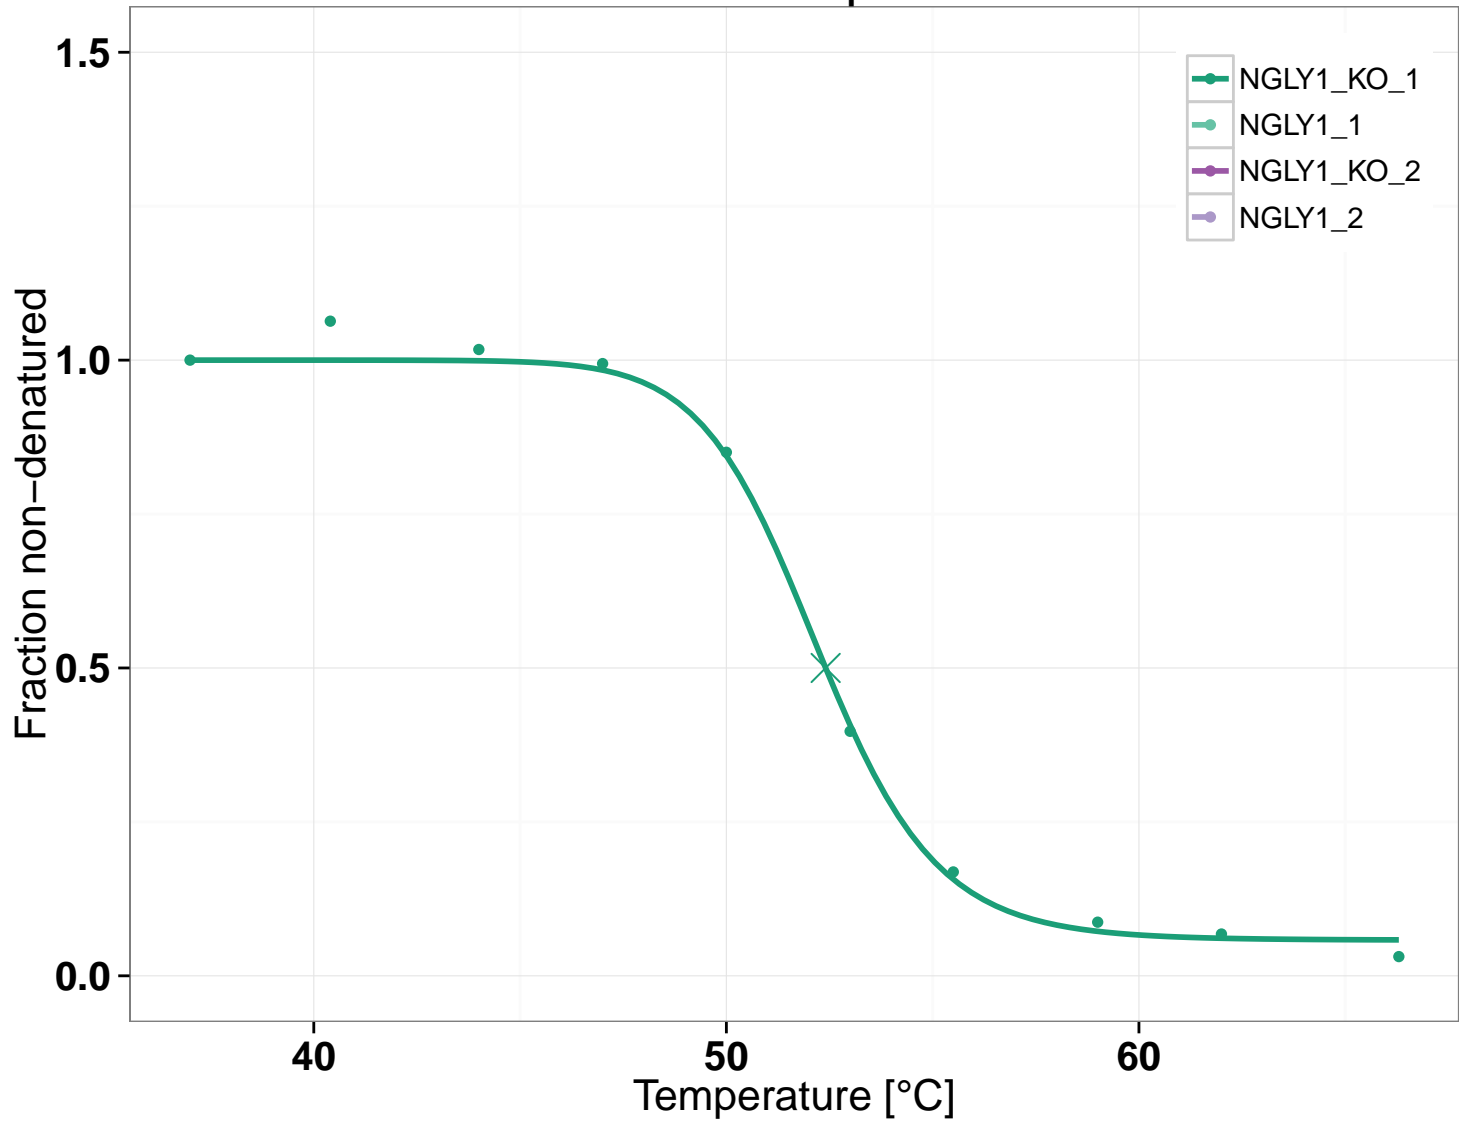

|            | meltPoint | slope | plateau | R2 |
|------------|-----------|-------|---------|----|
| NGLY1_KO_1 | 52.41     | -0.16 | 0.06    | 1  |
| NGLY1_1    | -         | -     | -       | -  |
| NGLY1_KO_2 | -         | -     | -       | -  |
| NGLY1_2    | -         | -     | -       | -  |

Supplement: Supplementary file 123 [file 1]

IPI00016703.2|DHCR24

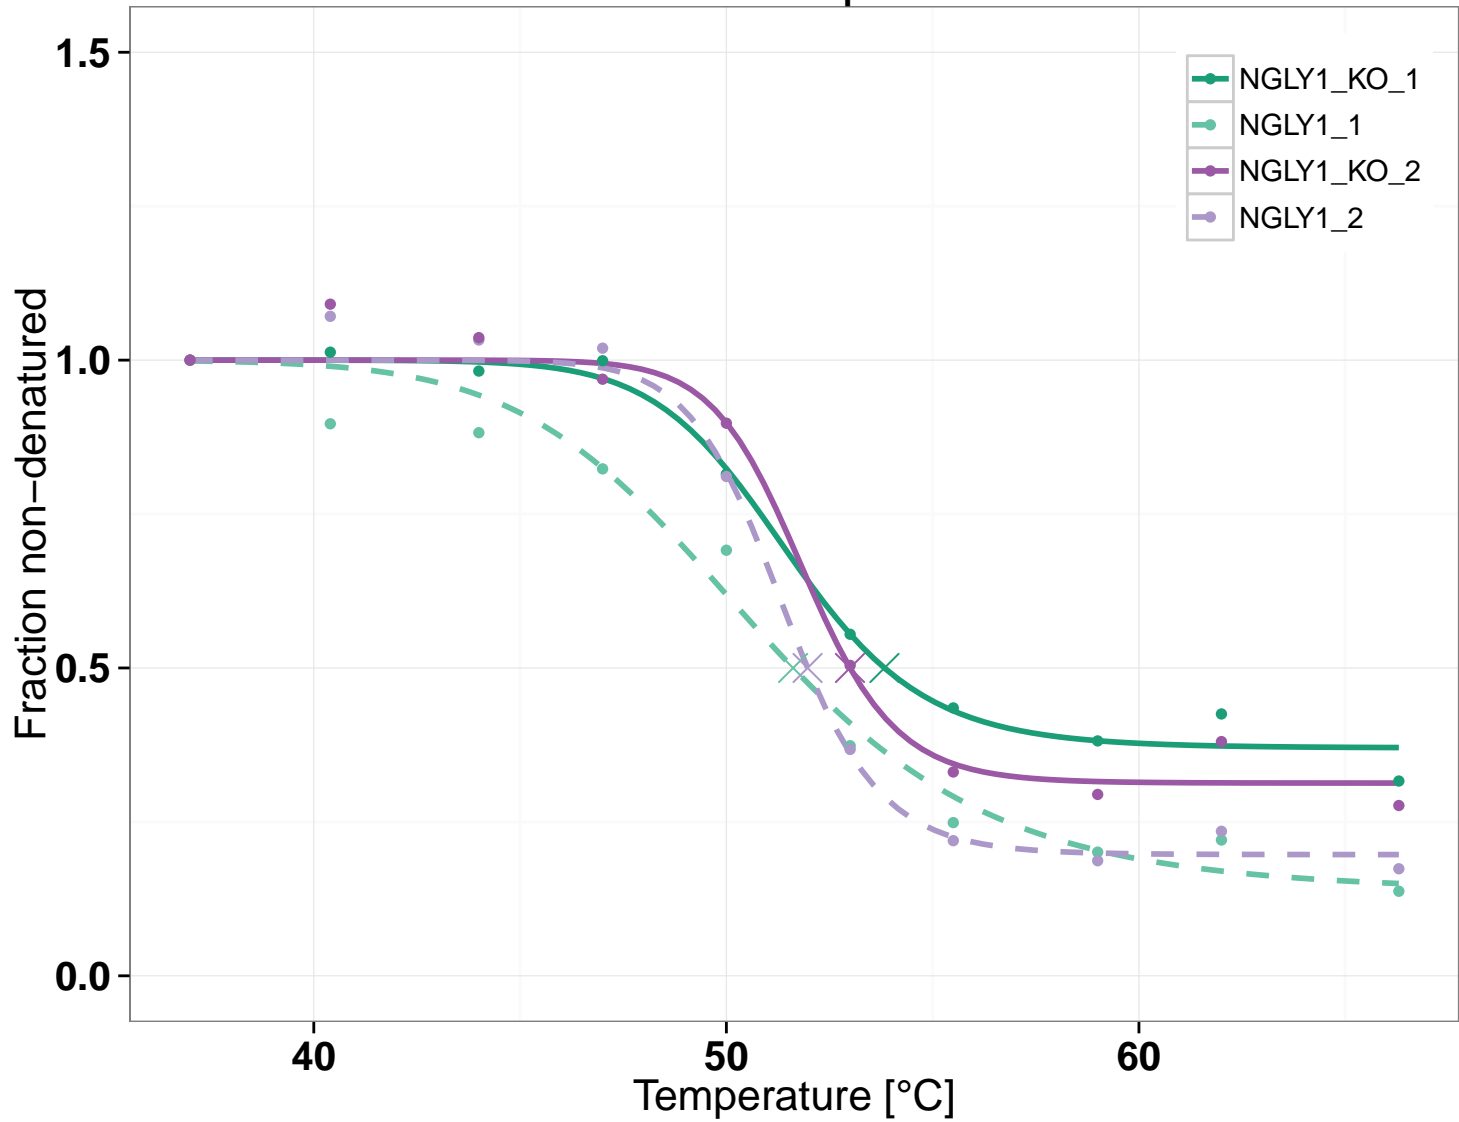

|            | meltPoint | slope  | plateau | R2   |
|------------|-----------|--------|---------|------|
| NGLY1_KO_1 | 53.83     | -0.096 | 0.37    | 0.99 |
| NGLY1_1    | 51.62     | -0.076 | 0.14    | 0.98 |
| NGLY1_KO_2 | 53        | -0.15  | 0.31    | 0.98 |
| NGLY1_2    | 51.97     | -0.17  | 0.2     | 0.99 |

Supplement: Supplementary file 124 [file 1]

# IPI00297475.3|DPM3

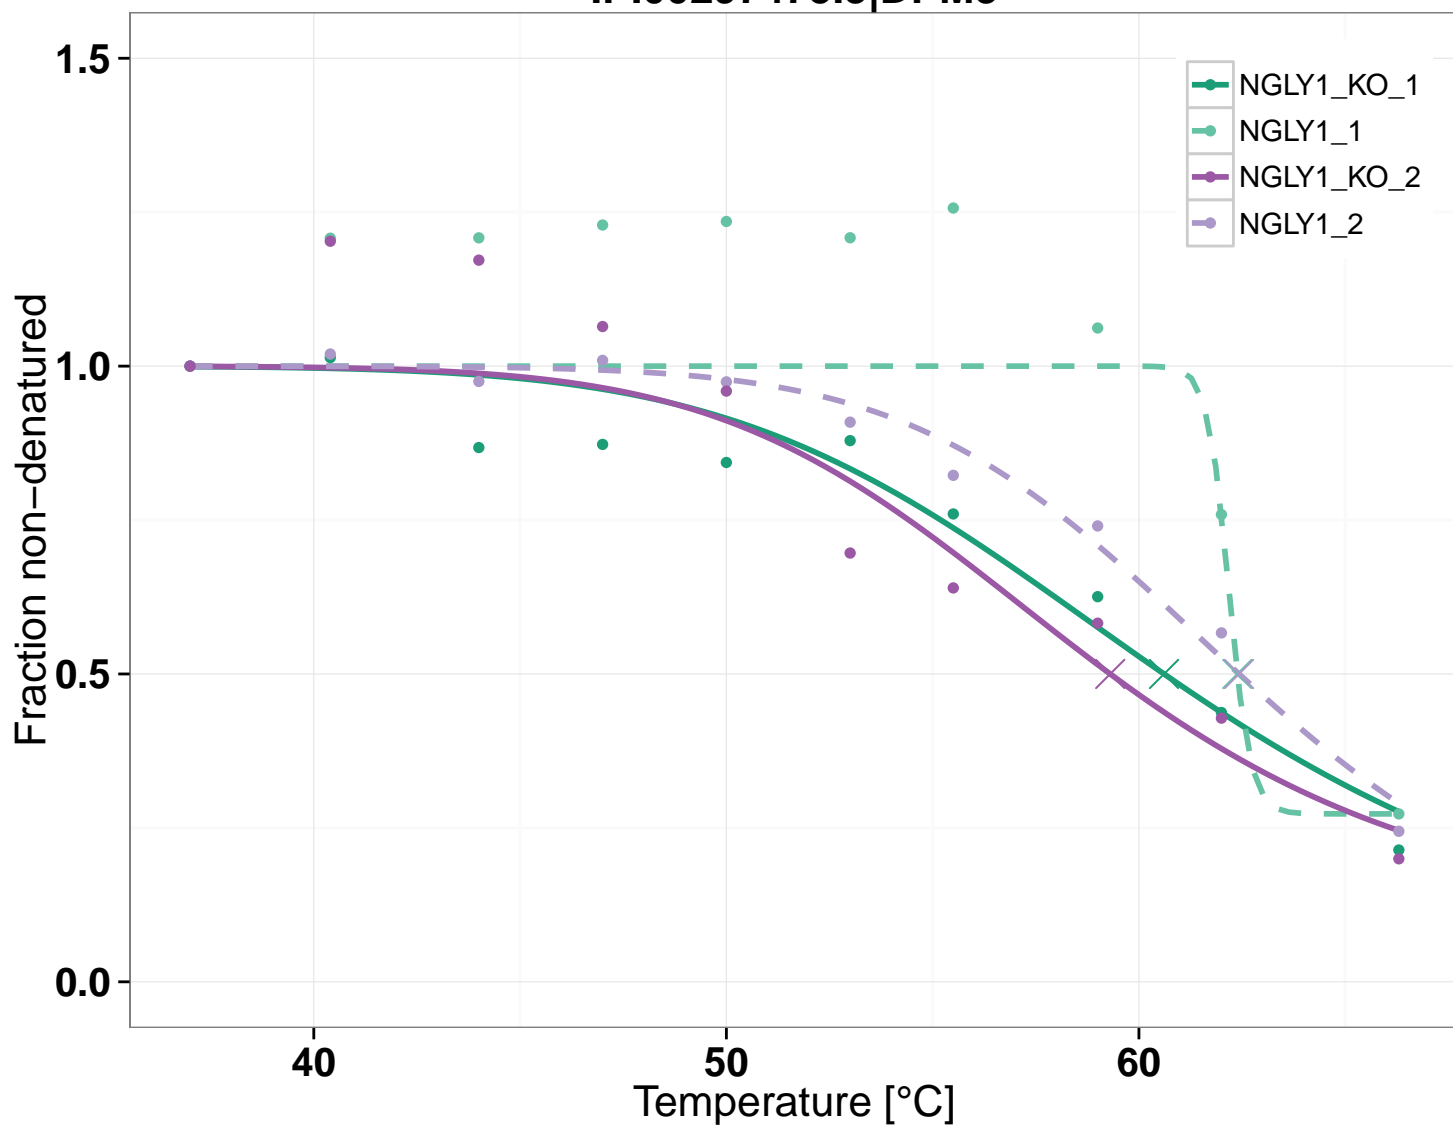

|            | meltPoint | slope  | plateau | R2   |
|------------|-----------|--------|---------|------|
| NGLY1_KO_1 | 60.61     | -0.048 | 0       | 0.94 |
| NGLY1_1    | 62.38     | -0.71  | 0.27    | 0.65 |
| NGLY1_KO_2 | 59.3      | -0.053 | 0.09    | 0.89 |
| NGLY1_2    | 62.43     | -0.062 | 0       | 0.98 |

Supplement: Supplementary file 125 [file 1]

# IPI00152653.3|DNAH5

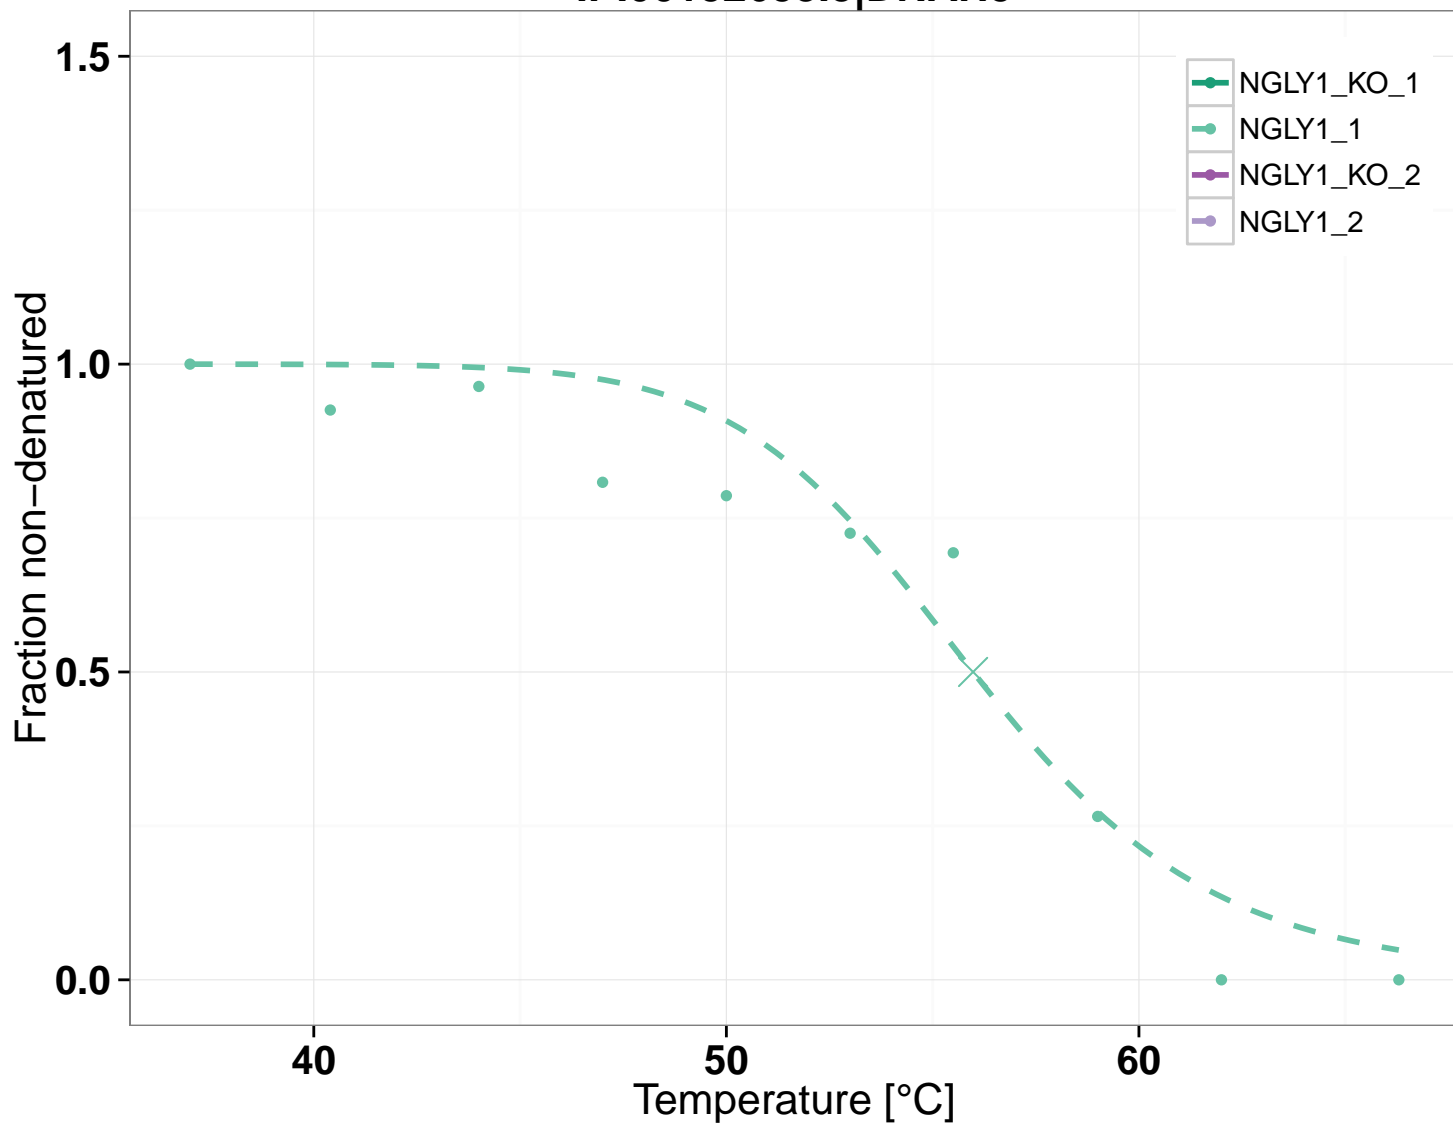

|            | meltPoint | slope  | plateau | R2   |
|------------|-----------|--------|---------|------|
| NGLY1_KO_1 | —         | —      | —       | —    |
| NGLY1_1    | 55.98     | -0.086 | 0       | 0.93 |
| NGLY1_KO_2 | —         | —      | —       | —    |
| NGLY1_2    | —         | —      | —       | —    |

Supplement: Supplementary file 126 [file 1]

# IPI00019022.2|ABCB8

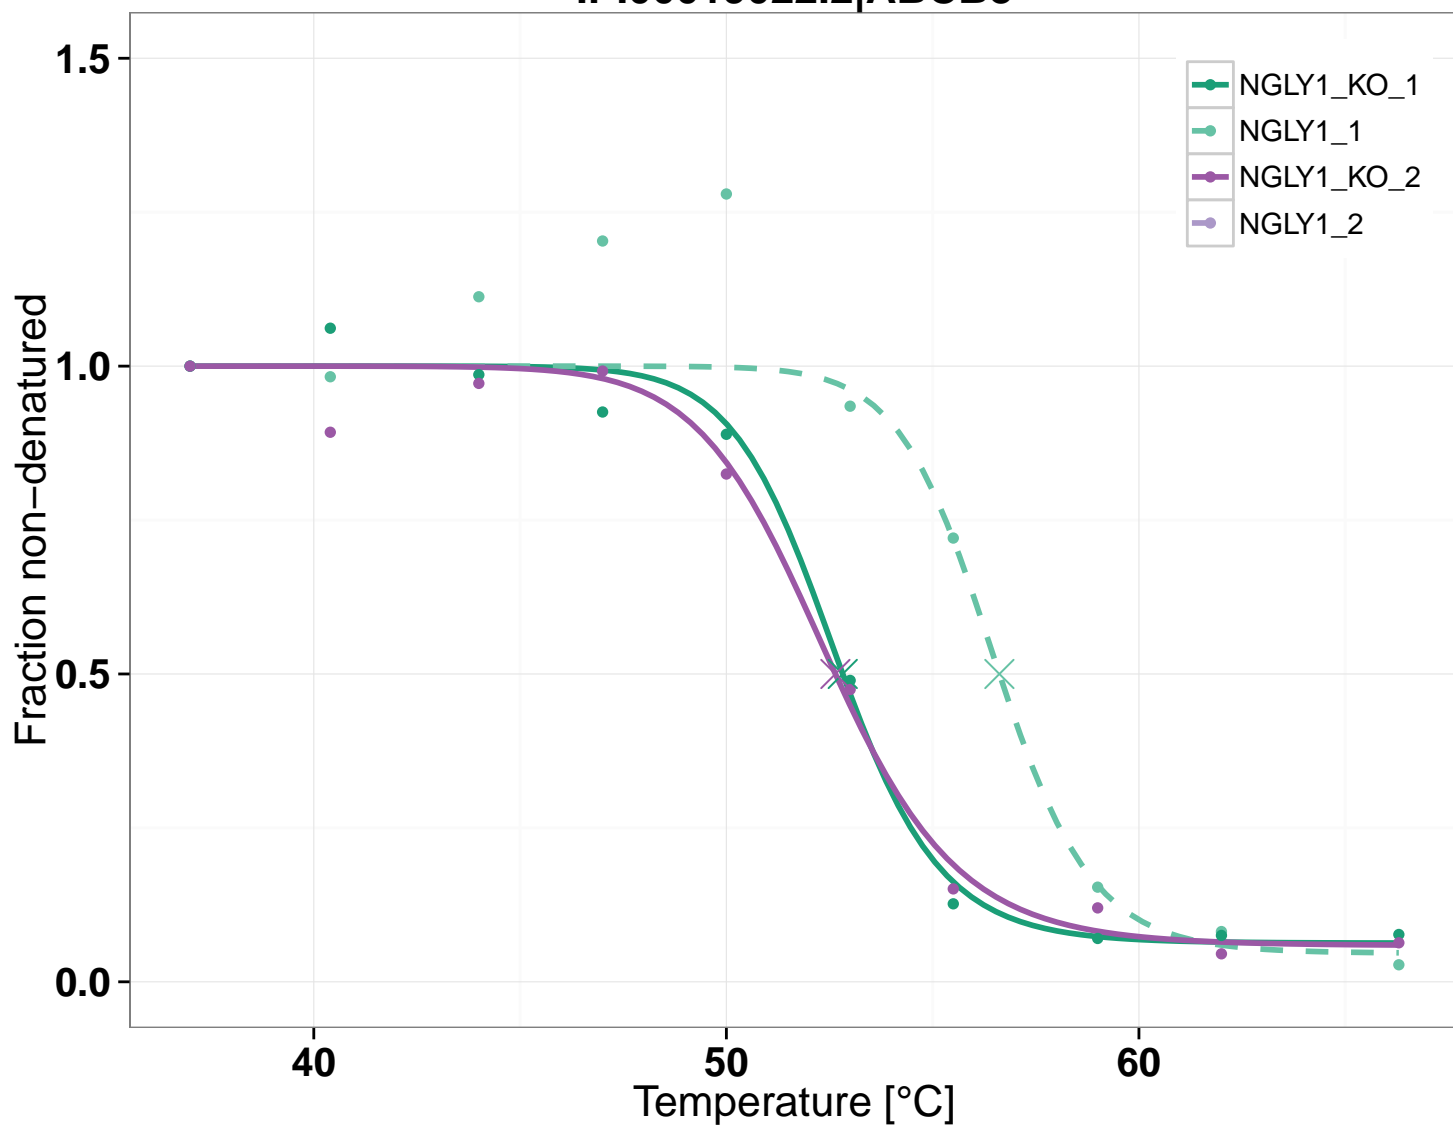

|            | meltPoint | slope | plateau | R2   |
|------------|-----------|-------|---------|------|
| NGLY1_KO_1 | 52.82     | -0.19 | 0.06    | 0.99 |
| NGLY1_1    | 56.62     | -0.2  | 0.05    | 0.94 |
| NGLY1_KO_2 | 52.64     | -0.15 | 0.06    | 0.99 |
| NGLY1_2    | -         | -     | -       | -    |

Supplement: Supplementary file 127 [file 1]

# IPI00008085.5|SLC39A10

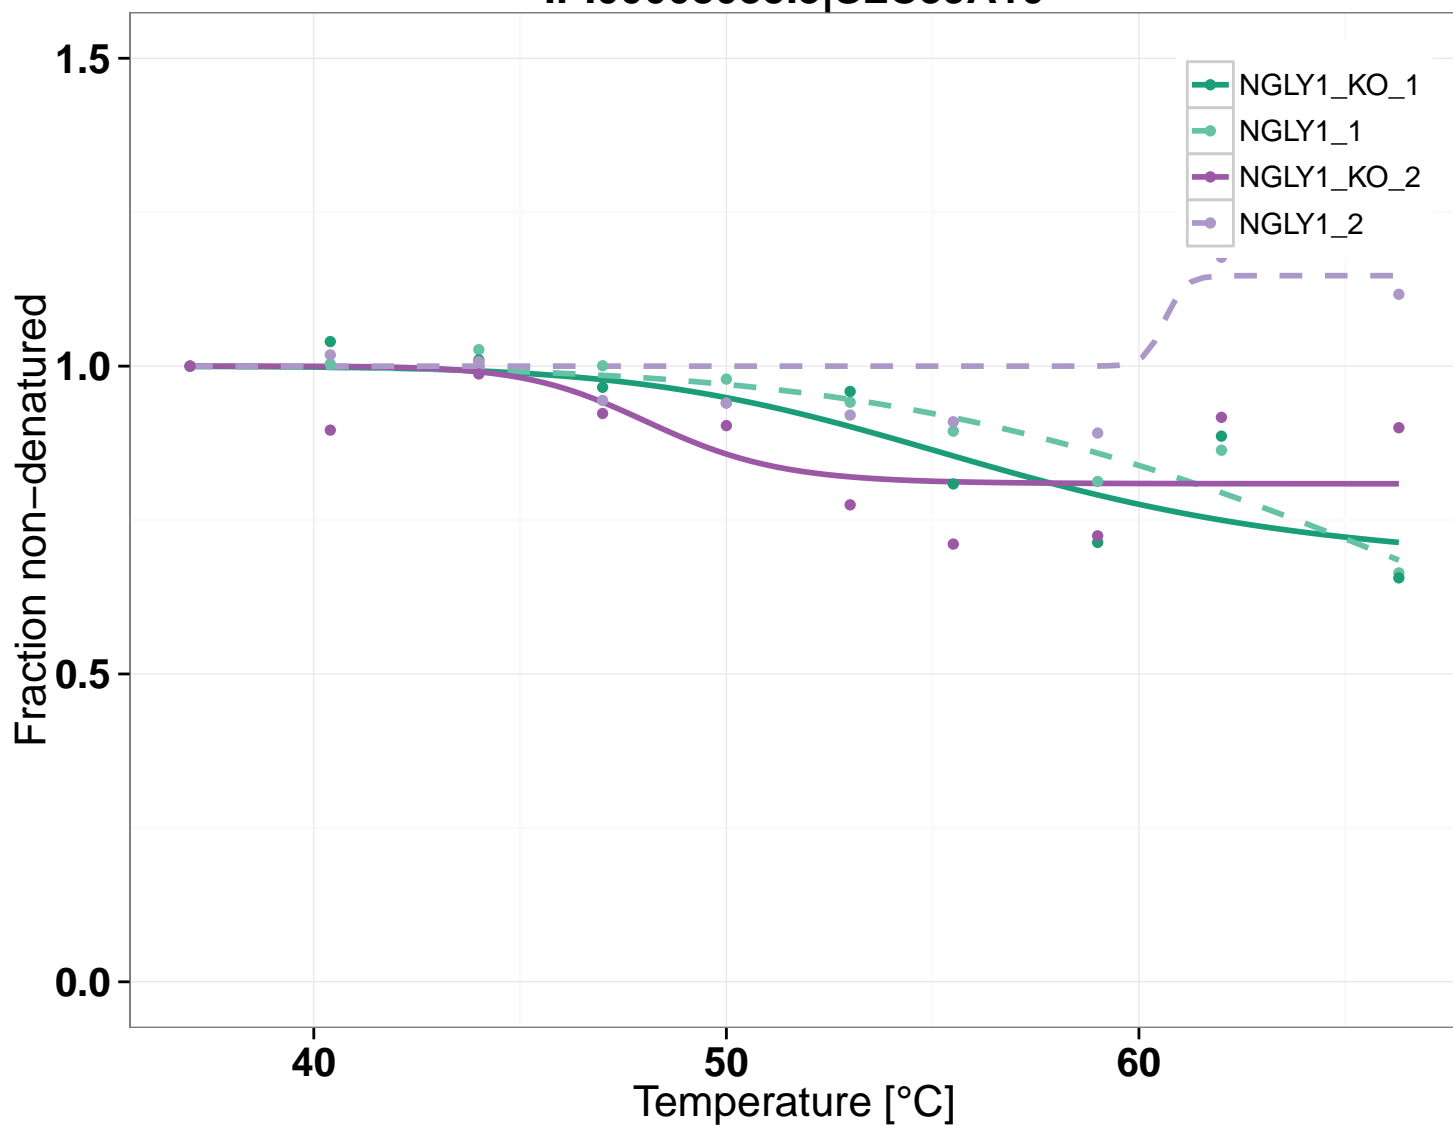

|            | meltPoint | slope  | plateau | R2   |
|------------|-----------|--------|---------|------|
| NGLY1_KO_1 | –         | –0.019 | 0.67    | 0.77 |
| NGLY1_1    | –         | –      | 0       | 0.92 |
| NGLY1_KO_2 | –         | –0.031 | 0.81    | 0.44 |
| NGLY1_2    | –         | 0.15   | 1.15    | 0.55 |

Supplement: Supplementary file 128 [file 1]

IPI00014400.4|DNAJB12

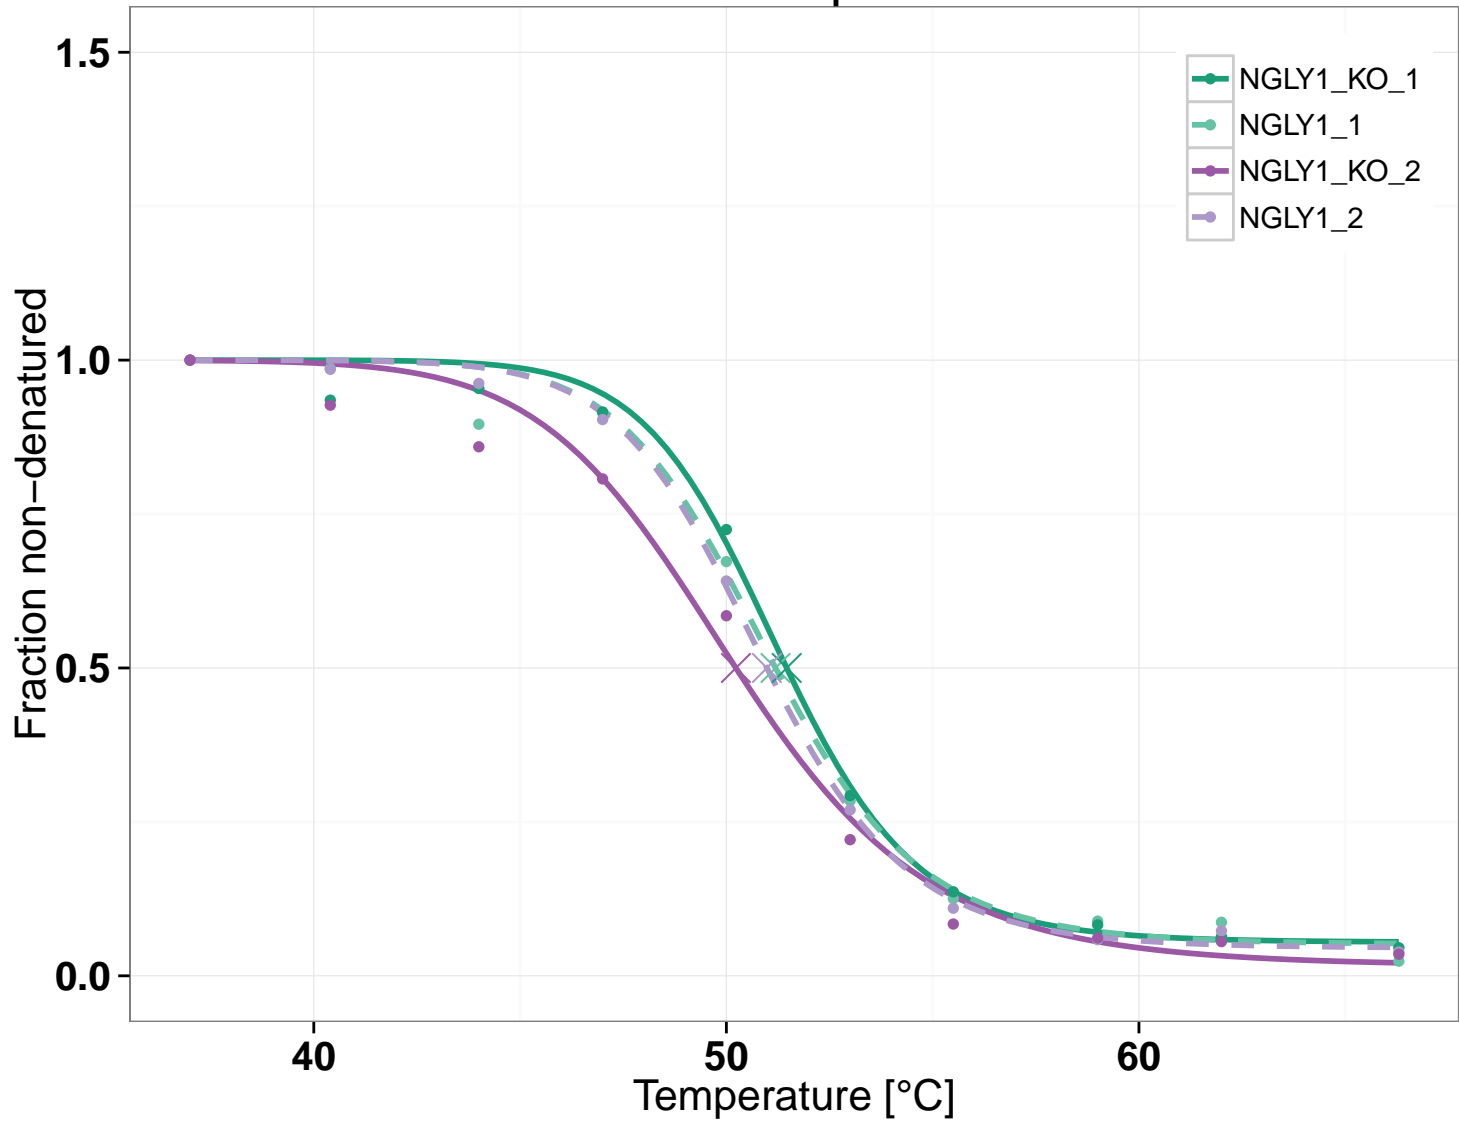

|            | meltPoint | slope | plateau | R2   |
|------------|-----------|-------|---------|------|
| NGLY1_KO_1 | 51.46     | -0.14 | 0.05    | 1    |
| NGLY1_1    | 51.19     | -0.13 | 0.05    | 0.99 |
| NGLY1_KO_2 | 50.23     | -0.1  | 0.02    | 0.99 |
| NGLY1_2    | 50.98     | -0.13 | 0.05    | 1    |

Supplement: Supplementary file 129 [file 1]

IPI00032966.5|BIN3

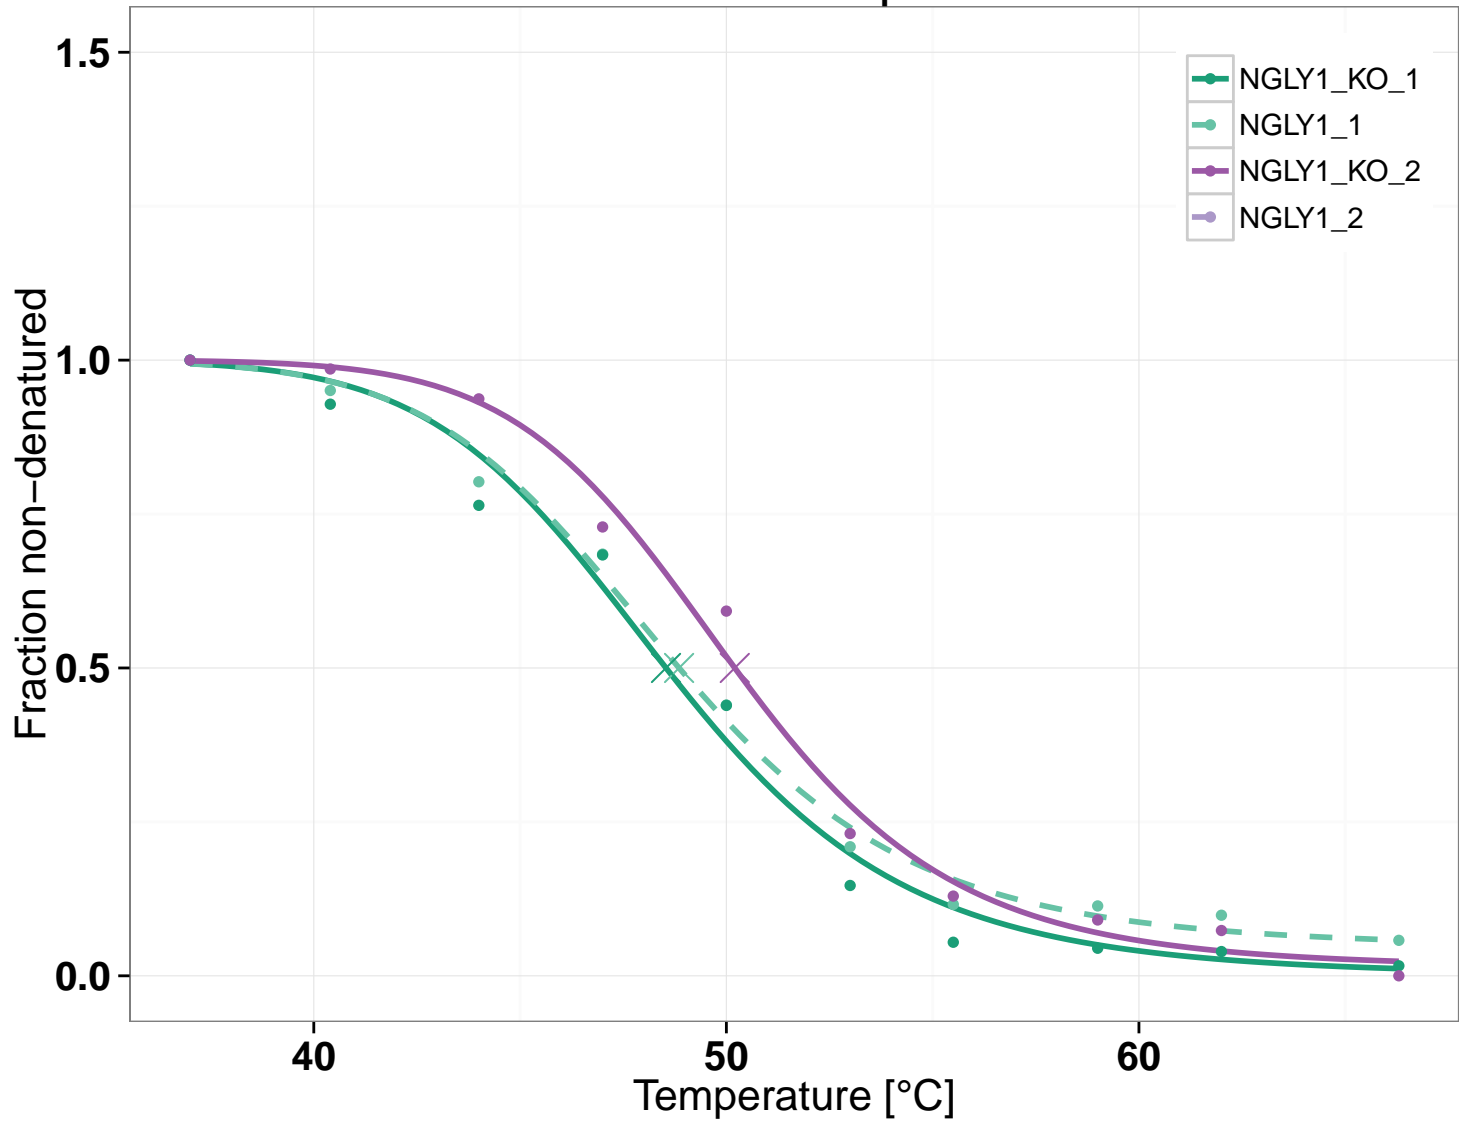

|            | meltPoint | slope  | plateau | R2   |
|------------|-----------|--------|---------|------|
| NGLY1_KO_1 | 48.54     | -0.087 | 0       | 0.99 |
| NGLY1_1    | 48.85     | -0.081 | 0.05    | 0.99 |
| NGLY1_KO_2 | 50.2      | -0.093 | 0.01    | 0.99 |
| NGLY1_2    | -         | -      | -       | -    |

Supplement: Supplementary file 130 [file 1]

# IPI00443799.2|SLC38A10

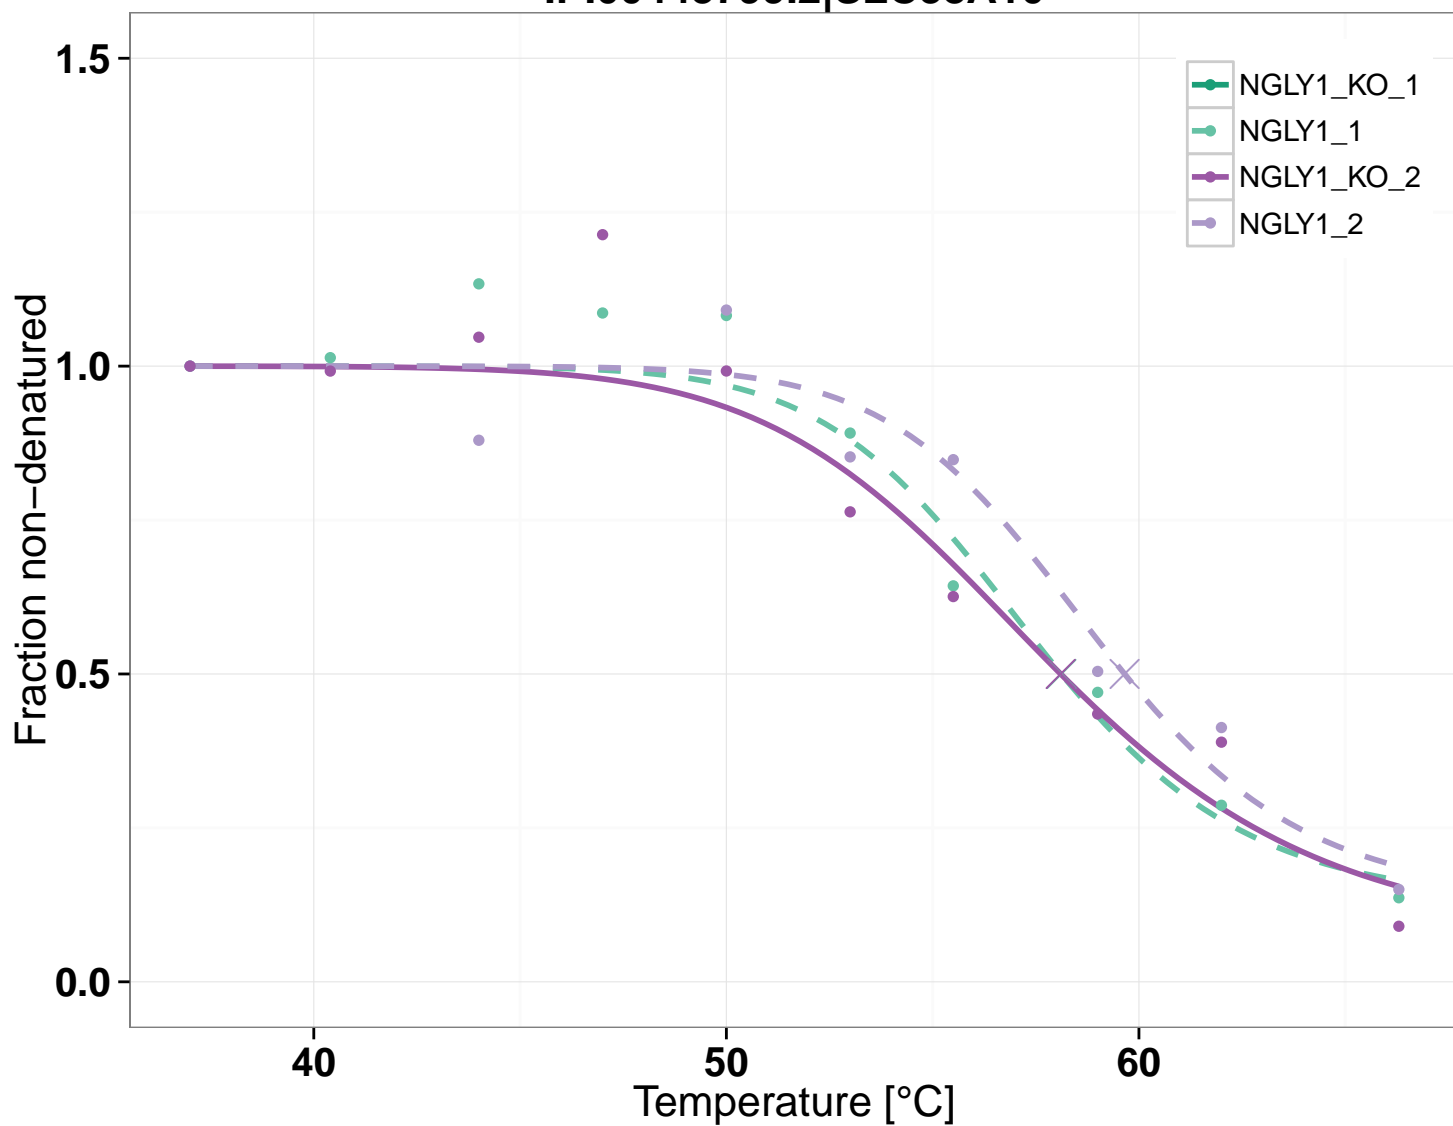

|            | meltPoint | slope  | plateau | R2   |
|------------|-----------|--------|---------|------|
| NGLY1_KO_1 | —         | —      | —       | —    |
| NGLY1_1    | 58.12     | -0.086 | 0.12    | 0.96 |
| NGLY1_KO_2 | 58.1      | -0.069 | 0.06    | 0.93 |
| NGLY1_2    | 59.65     | -0.087 | 0.13    | 0.44 |

Supplement: Supplementary file 131 [file 1]

IPI00020191.1|PTP4A2

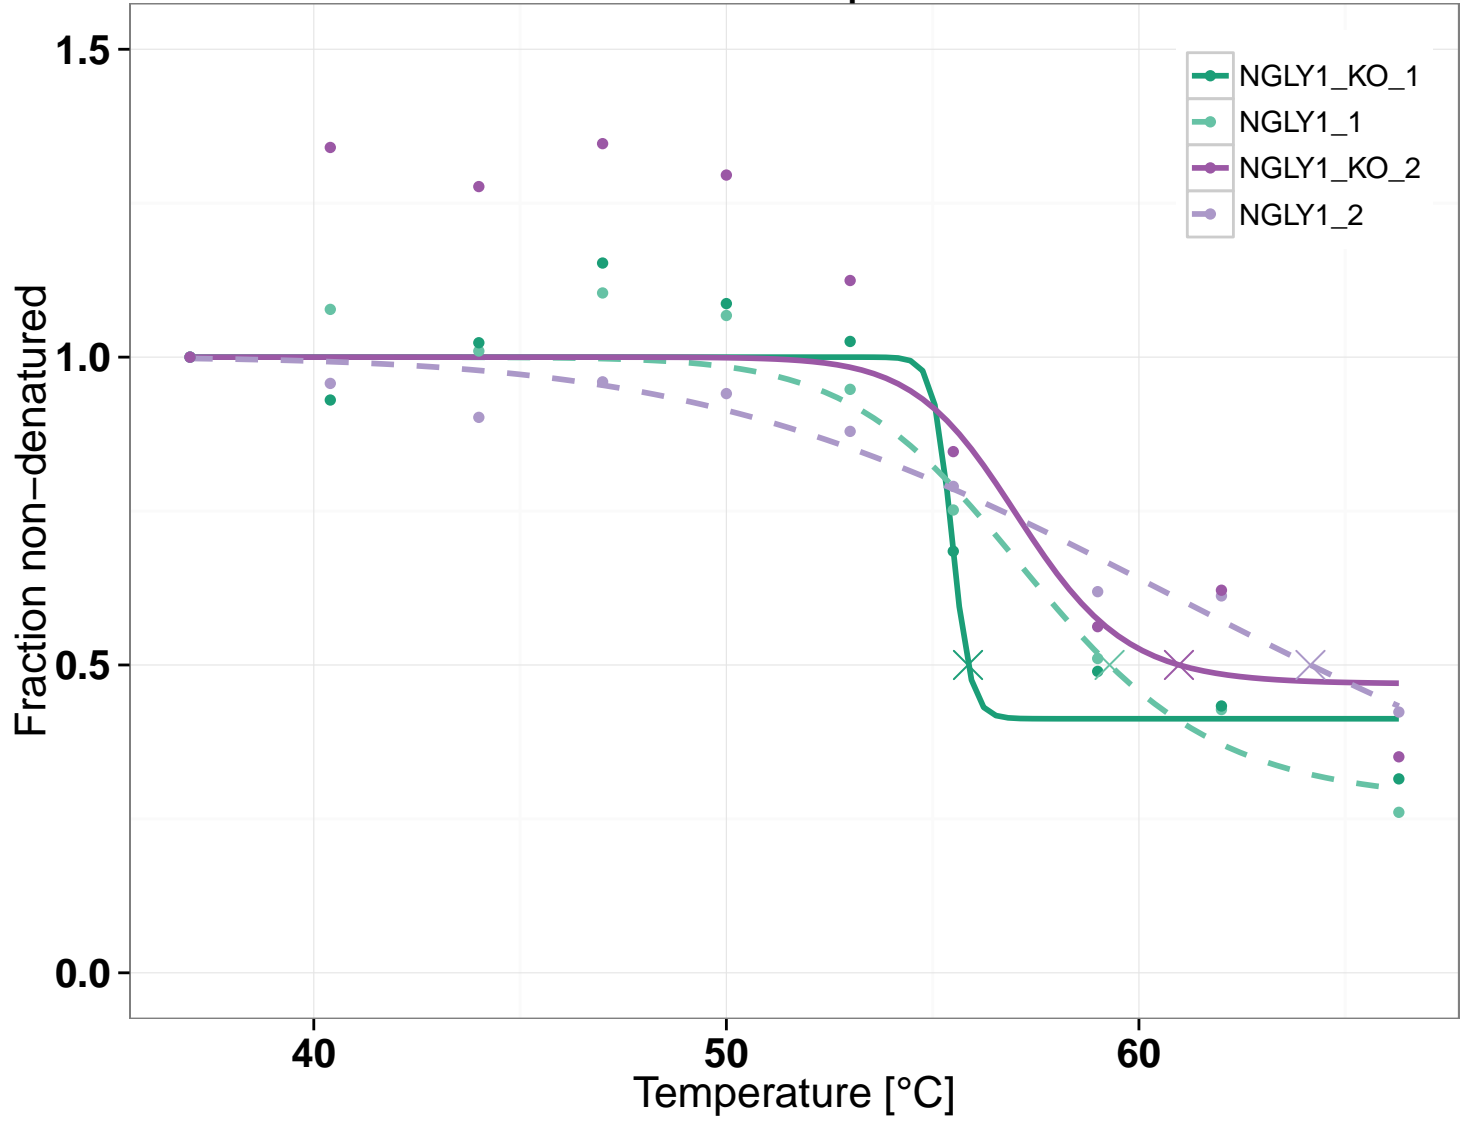

|            | meltPoint | slope  | plateau | R2   |
|------------|-----------|--------|---------|------|
| NGLY1_KO_1 | 55.86     | -0.66  | 0.41    | 0.94 |
| NGLY1_1    | 59.29     | -0.081 | 0.28    | 0.96 |
| NGLY1_KO_2 | 60.97     | -0.1   | 0.47    | 0.62 |
| NGLY1_2    | 64.16     | -0.034 | 0       | 0.96 |

Supplement: Supplementary file 132 [file 1]

# IPI00154473.5|GFM1

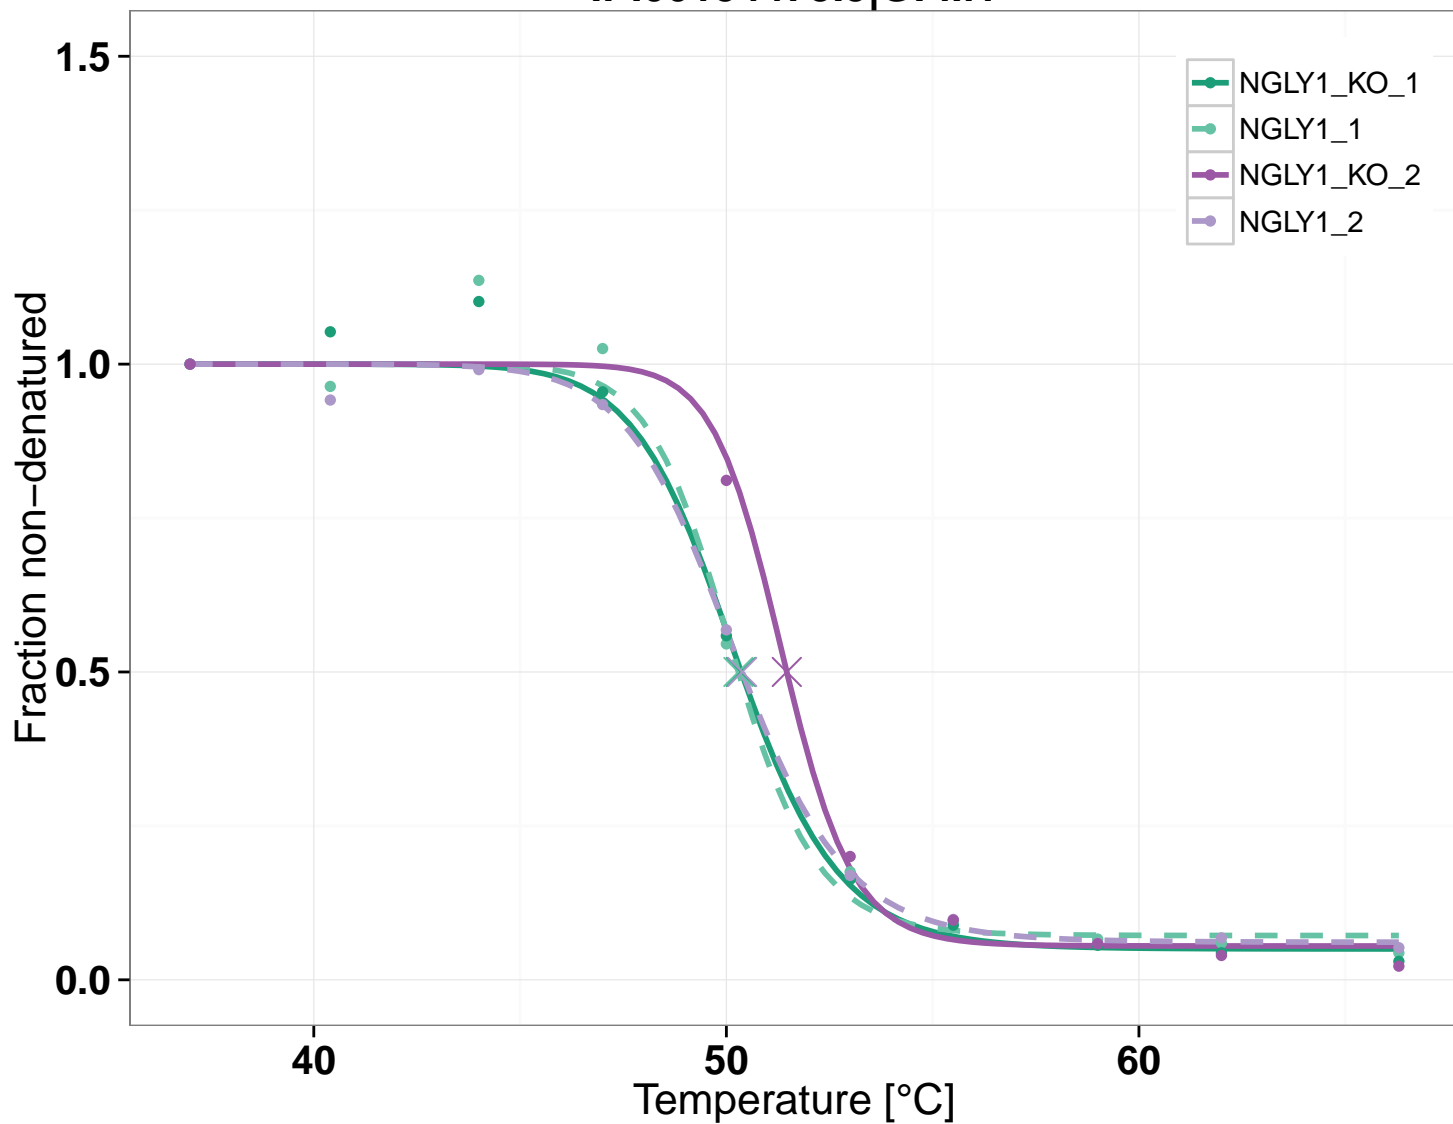

|            | meltPoint | slope | plateau | R2   |
|------------|-----------|-------|---------|------|
| NGLY1_KO_1 | 50.36     | -0.19 | 0.05    | 0.99 |
| NGLY1_1    | 50.29     | -0.23 | 0.07    | 0.99 |
| NGLY1_KO_2 | 51.46     | -0.28 | 0.05    | 0.73 |
| NGLY1_2    | 50.38     | -0.18 | 0.06    | 1    |

Supplement: Supplementary file 133 [file 1]

IPI00102909.2|FAM172A

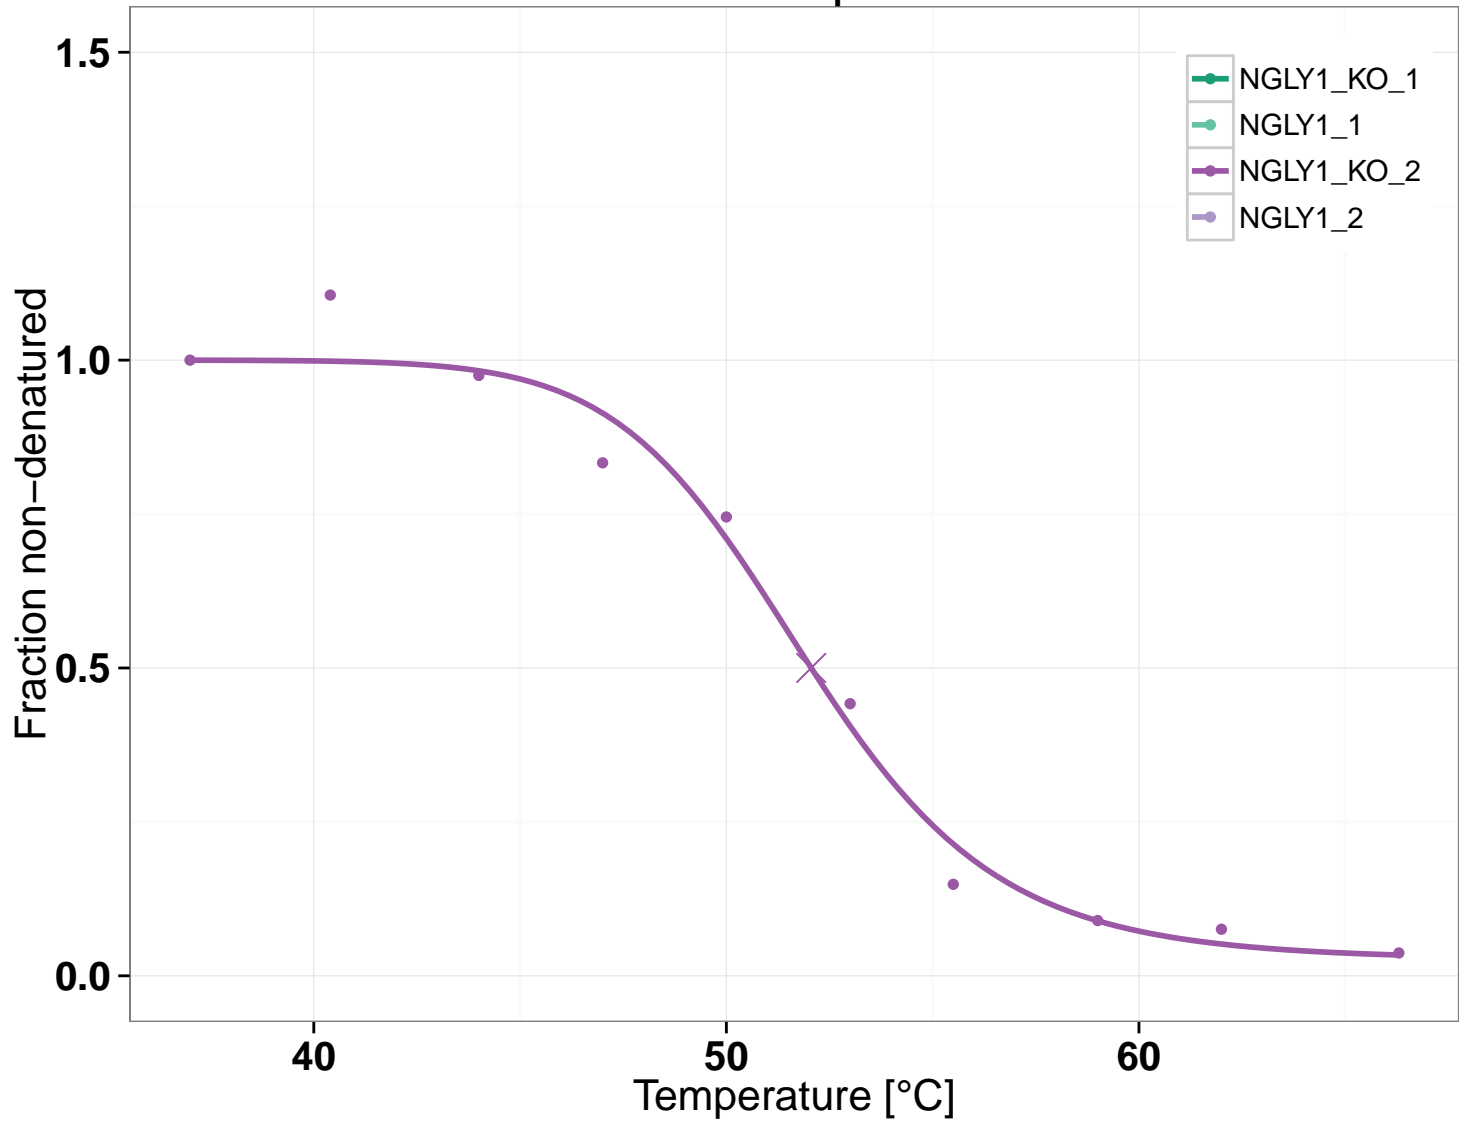

|            | meltPoint | slope | plateau | R2   |
|------------|-----------|-------|---------|------|
| NGLY1_KO_1 | —         | —     | —       | —    |
| NGLY1_1    | —         | —     | —       | —    |
| NGLY1_KO_2 | 52.06     | -0.11 | 0.03    | 0.98 |
| NGLY1_2    | —         | —     | —       | —    |

Supplement: Supplementary file 134 [file 1]

IPI00297477.3|SNRPA1

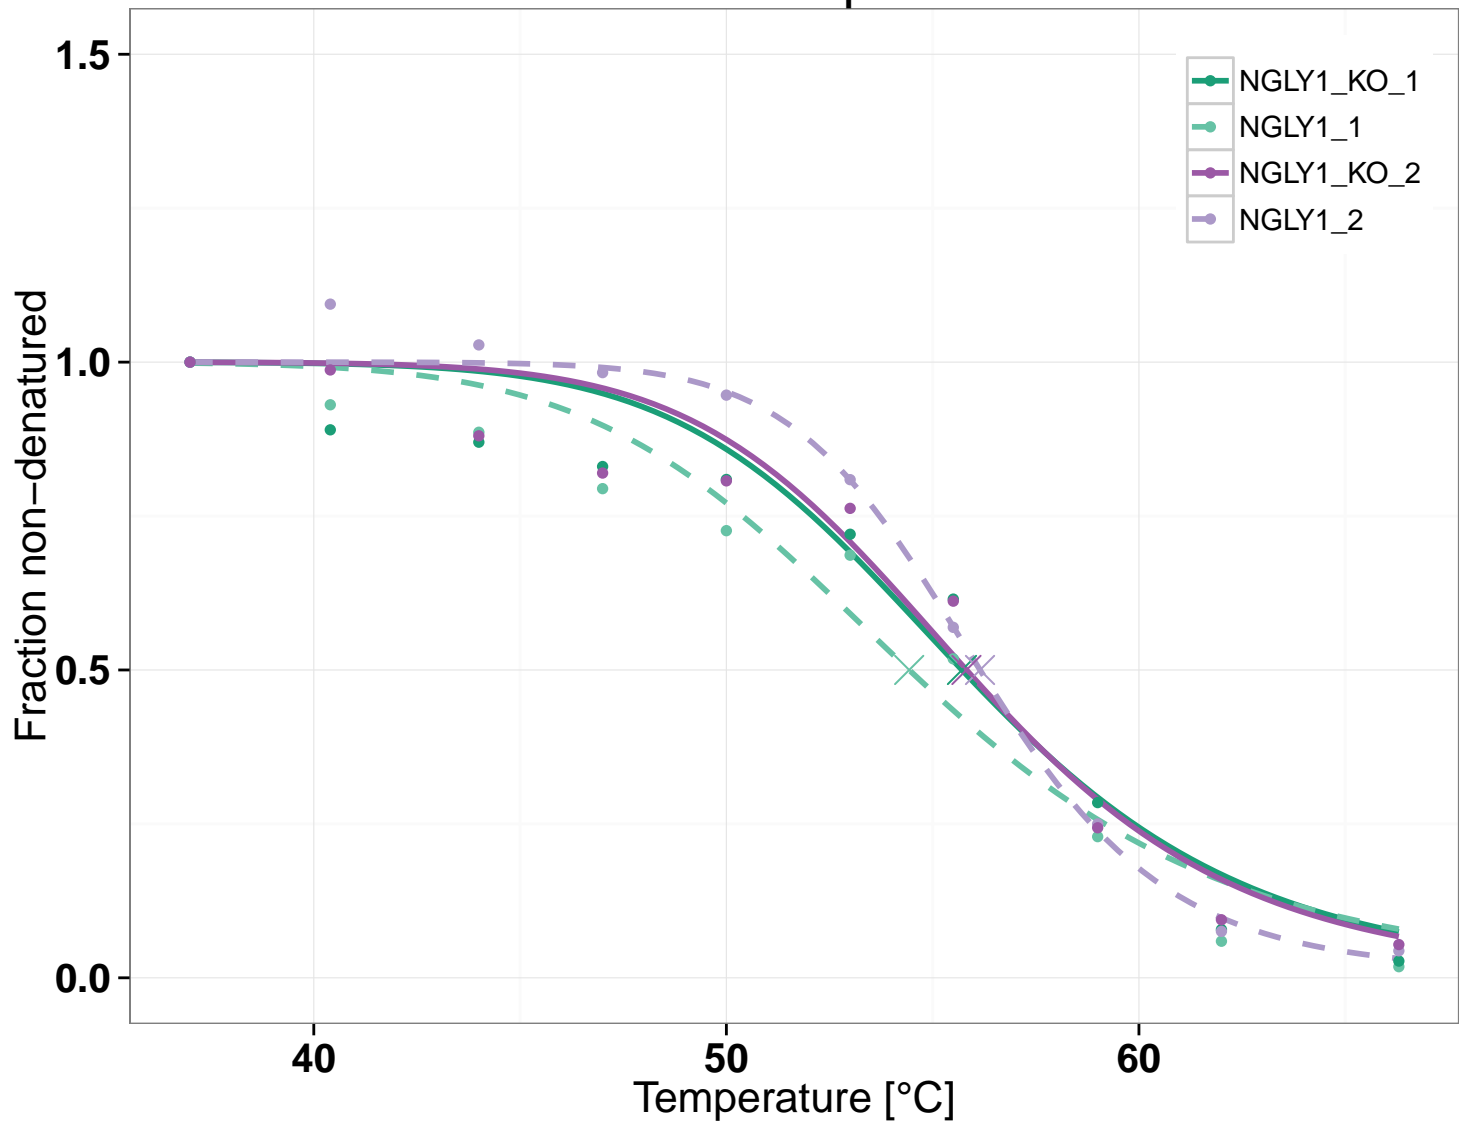

|            | meltPoint | slope  | plateau | R2   |
|------------|-----------|--------|---------|------|
| NGLY1_KO_1 | 55.71     | -0.072 | 0       | 0.94 |
| NGLY1_1    | 54.43     | -0.064 | 0       | 0.96 |
| NGLY1_KO_2 | 55.82     | -0.076 | 0       | 0.96 |
| NGLY1_2    | 56.15     | -0.11  | 0.01    | 0.99 |

Supplement: Supplementary file 135 [file 1]

# IPI00021107.5|XYLB

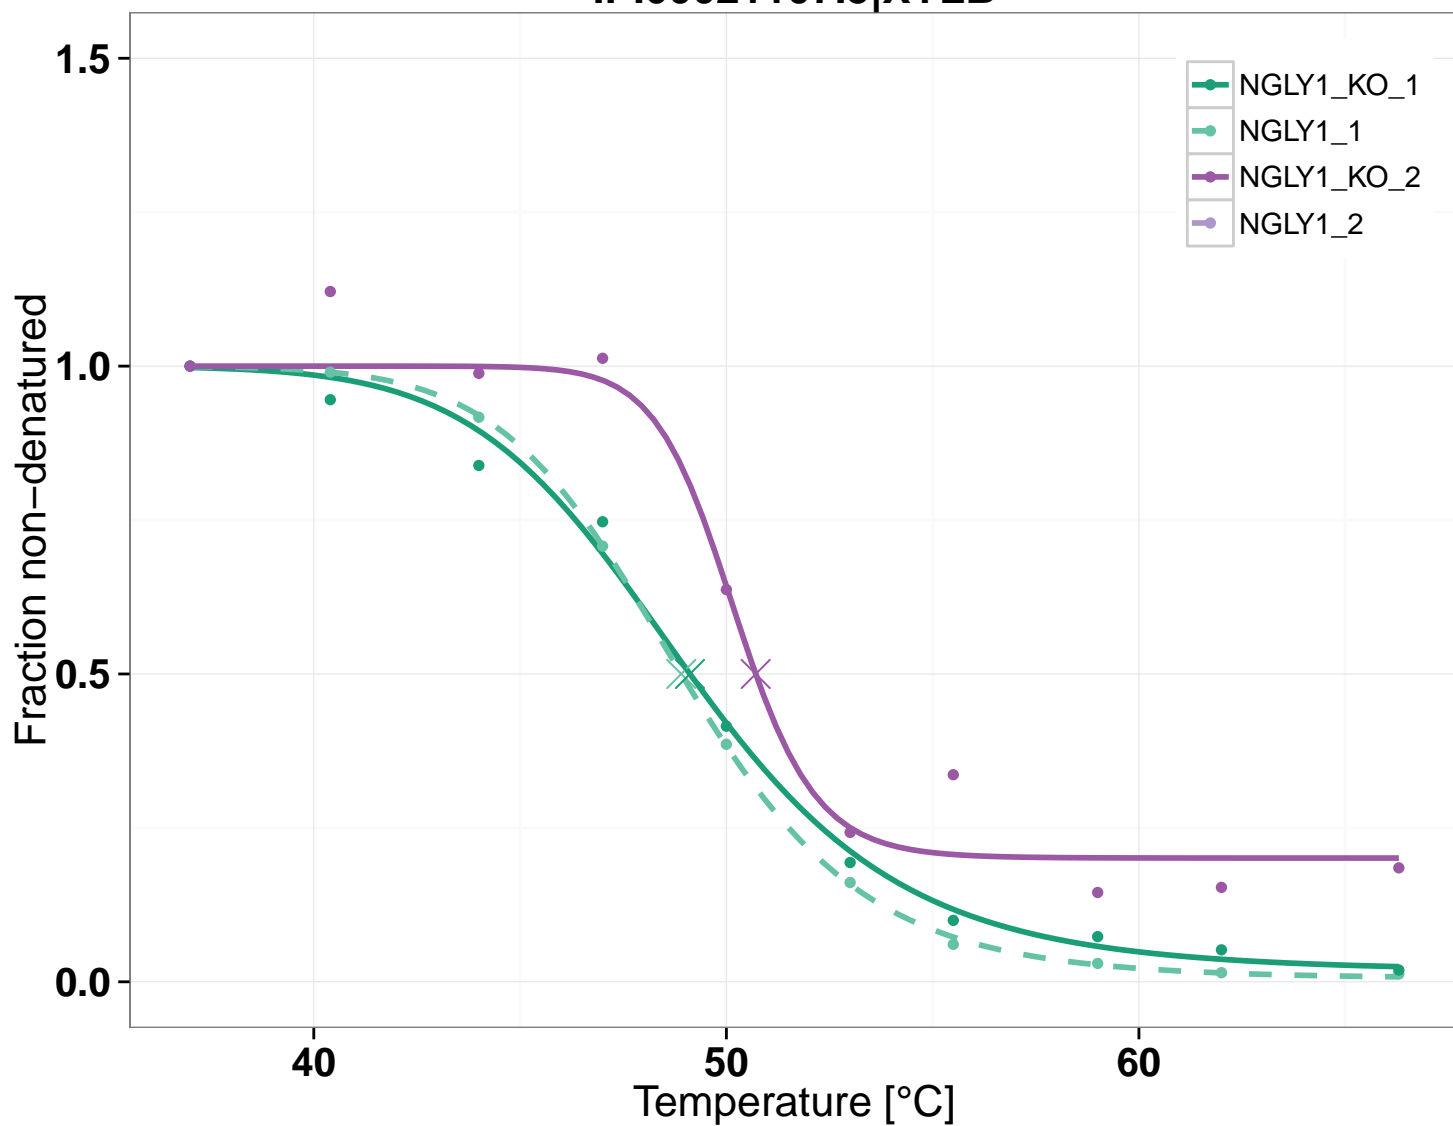

|            | meltPoint | slope  | plateau | R2   |
|------------|-----------|--------|---------|------|
| NGLY1_KO_1 | 49.12     | -0.094 | 0.02    | 0.99 |
| NGLY1_1    | 48.91     | -0.11  | 0       | 1    |
| NGLY1_KO_2 | 50.71     | -0.21  | 0.2     | 0.97 |
| NGLY1_2    | -         | -      | -       | -    |

Supplement: Supplementary file 136 [file 1]

IPI00218718.2|ACSL6

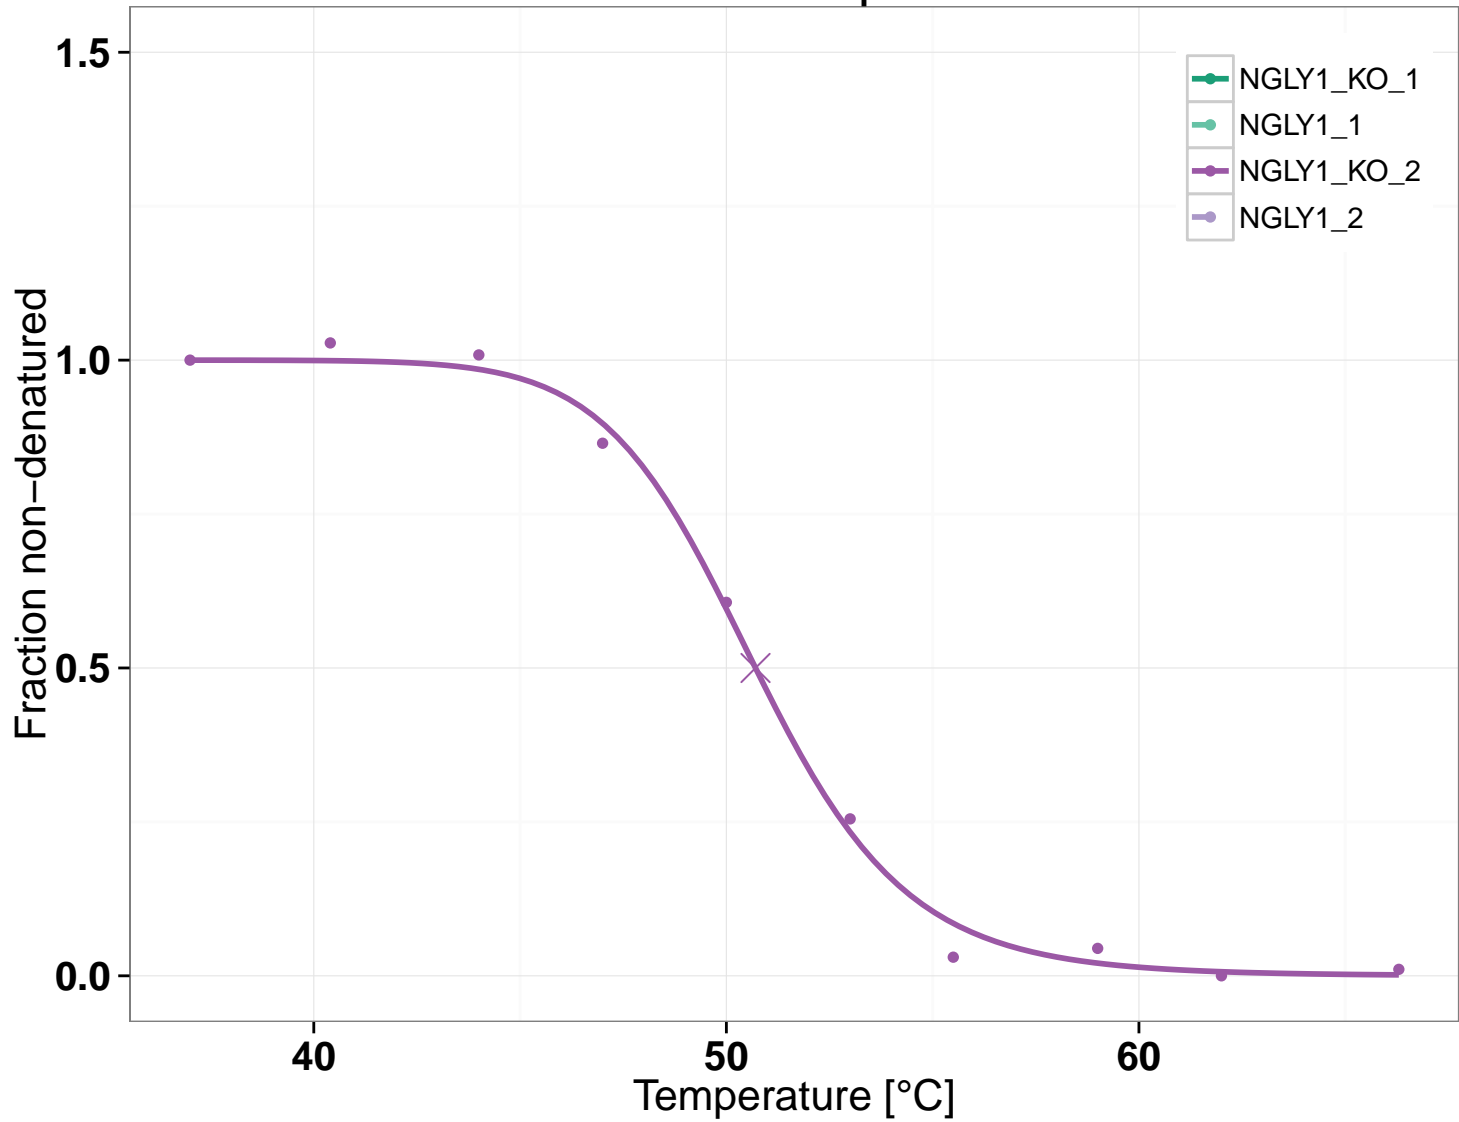

|            | meltPoint | slope | plateau | R2 |
|------------|-----------|-------|---------|----|
| NGLY1_KO_1 | -         | -     | -       | -  |
| NGLY1_1    | -         | -     | -       | -  |
| NGLY1_KO_2 | 50.71     | -0.14 | 0       | 1  |
| NGLY1_2    | -         | -     | -       | -  |

Supplement: Supplementary file 137 [file 1]

IPI00306505.2|SPRY1

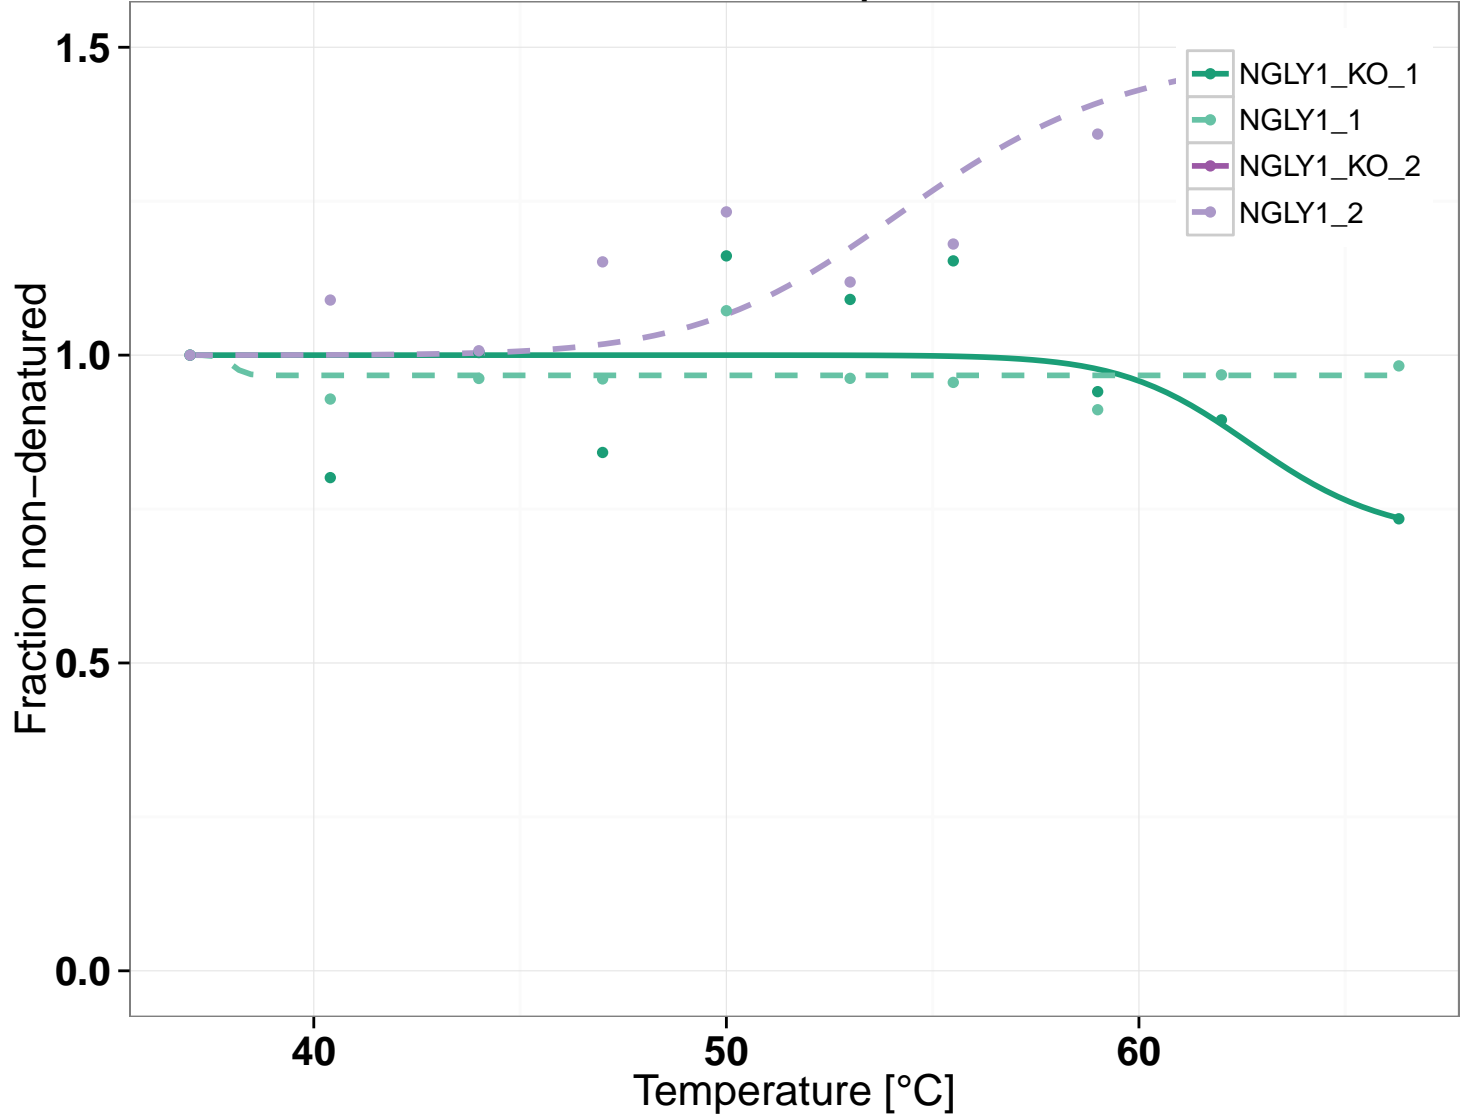

|            | meltPoint | slope  | plateau | R2   |
|------------|-----------|--------|---------|------|
| NGLY1_KO_1 | -         | -0.046 | 0.7     | 0.36 |
| NGLY1_1    | -         | -0.054 | 0.97    | 0.06 |
| NGLY1_KO_2 | -         | -      | -       | -    |
| NGLY1_2    | -         | 0.047  | 1.5     | 0.7  |

Supplement: Supplementary file 138 [file 1]

# IPI00031758.3|CHKB

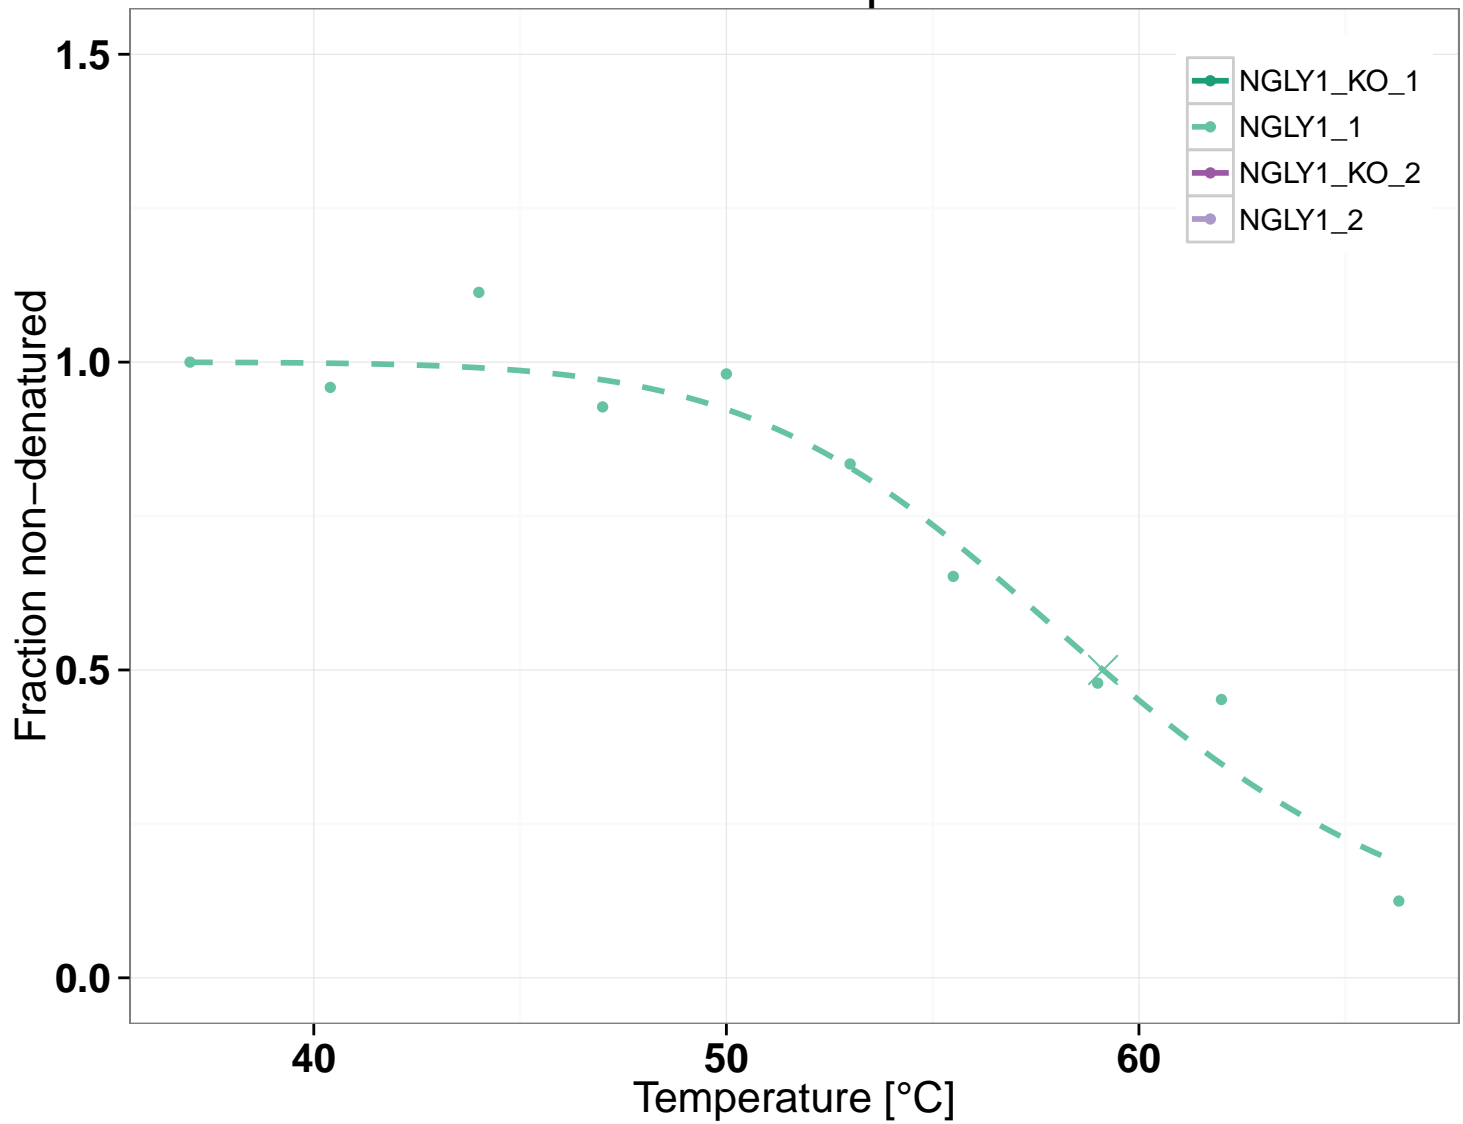

|            | meltPoint | slope  | plateau | R2   |
|------------|-----------|--------|---------|------|
| NGLY1_KO_1 | —         | —      | —       | —    |
| NGLY1_1    | 59.13     | −0.059 | 0       | 0.95 |
| NGLY1_KO_2 | —         | —      | —       | —    |
| NGLY1_2    | —         | —      | —       | —    |

Supplement: Supplementary file 139 [file 1]

IPI00413895.2|GOLGA2

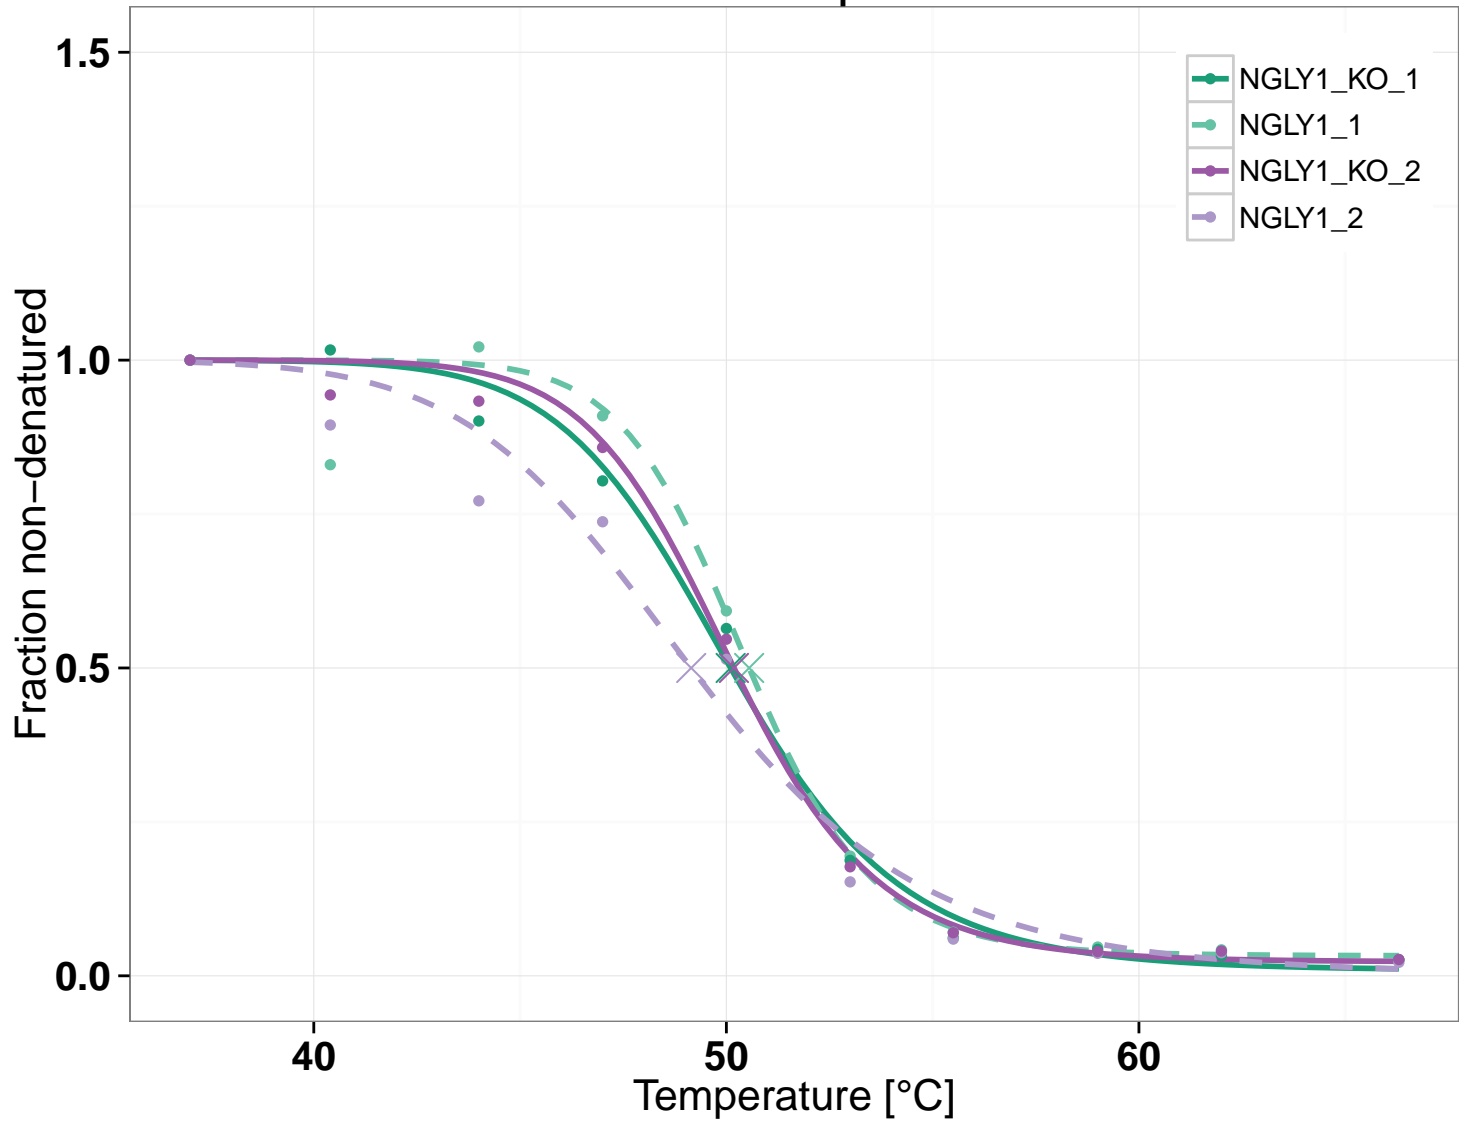

|            | meltPoint | slope  | plateau | R2   |
|------------|-----------|--------|---------|------|
| NGLY1_KO_1 | 50.1      | -0.12  | 0.01    | 0.99 |
| NGLY1_1    | 50.55     | -0.16  | 0.03    | 0.98 |
| NGLY1_KO_2 | 50.18     | -0.14  | 0.02    | 1    |
| NGLY1_2    | 49.15     | -0.089 | 0       | 0.97 |

Supplement: Supplementary file 140 [file 1]

IPI00154533.9|ALKBH8

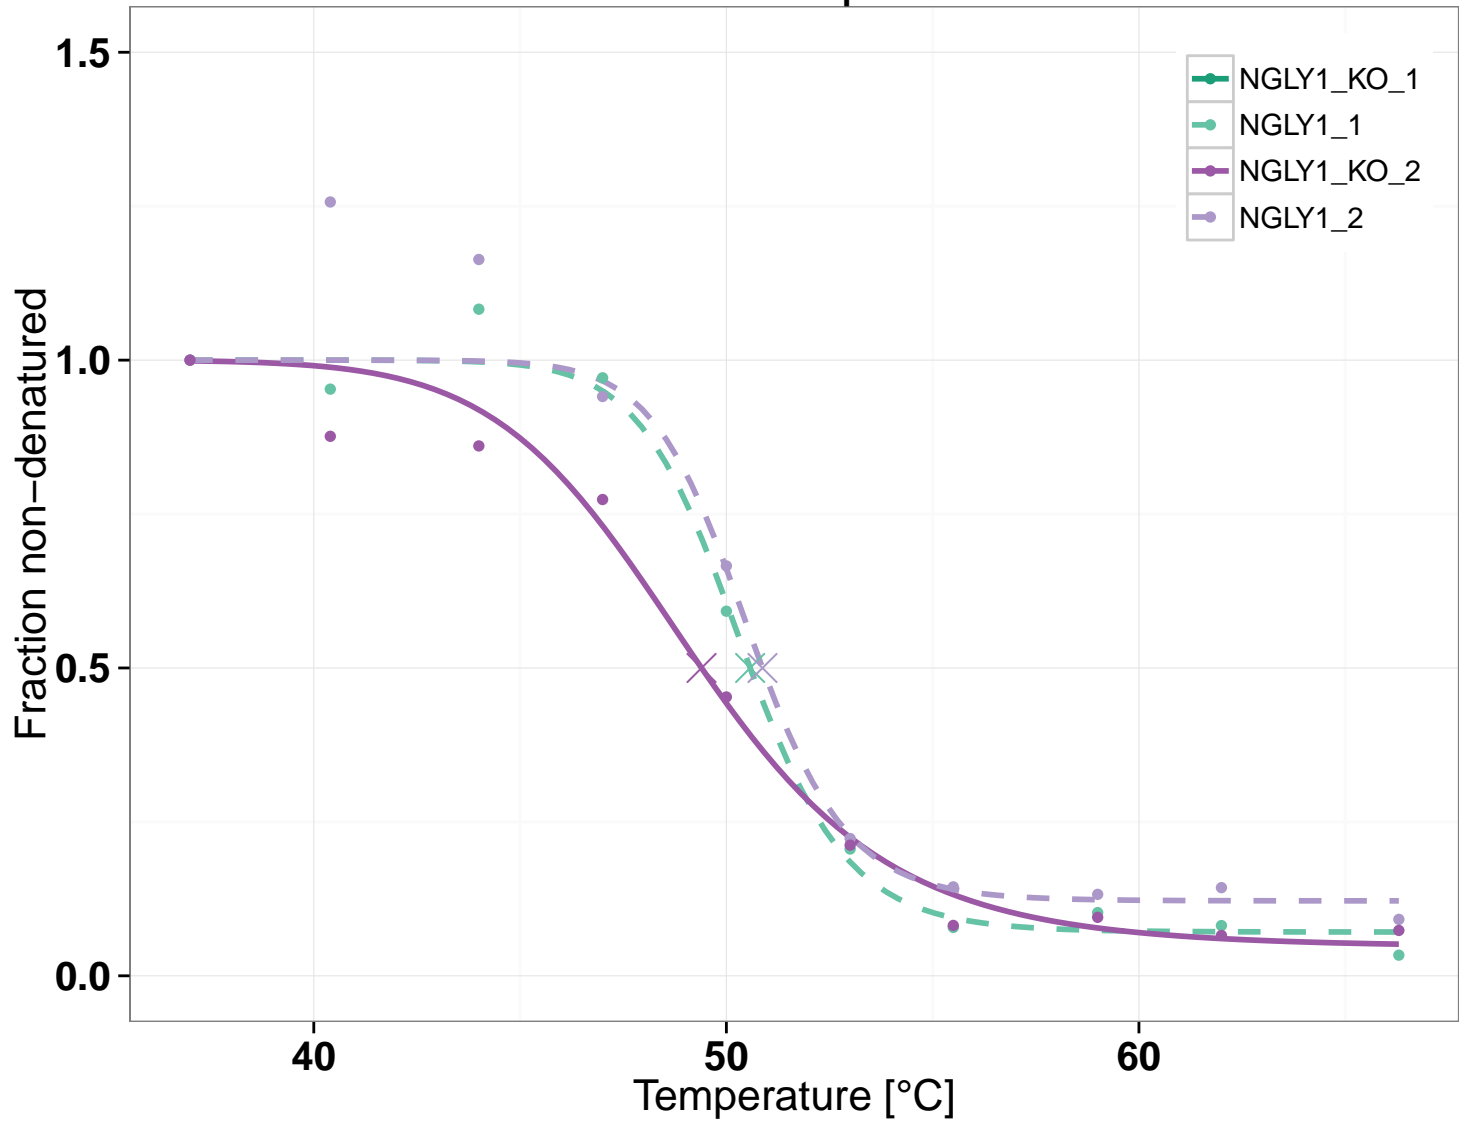

|            | meltPoint | slope  | plateau | R2   |
|------------|-----------|--------|---------|------|
| NGLY1_KO_1 | —         | —      | —       | —    |
| NGLY1_1    | 50.58     | -0.18  | 0.07    | 0.99 |
| NGLY1_KO_2 | 49.4      | -0.099 | 0.05    | 0.98 |
| NGLY1_2    | 50.88     | -0.19  | 0.12    | 0.95 |

Supplement: Supplementary file 141 [file 1]

IPI00217409.1|SLC37A4

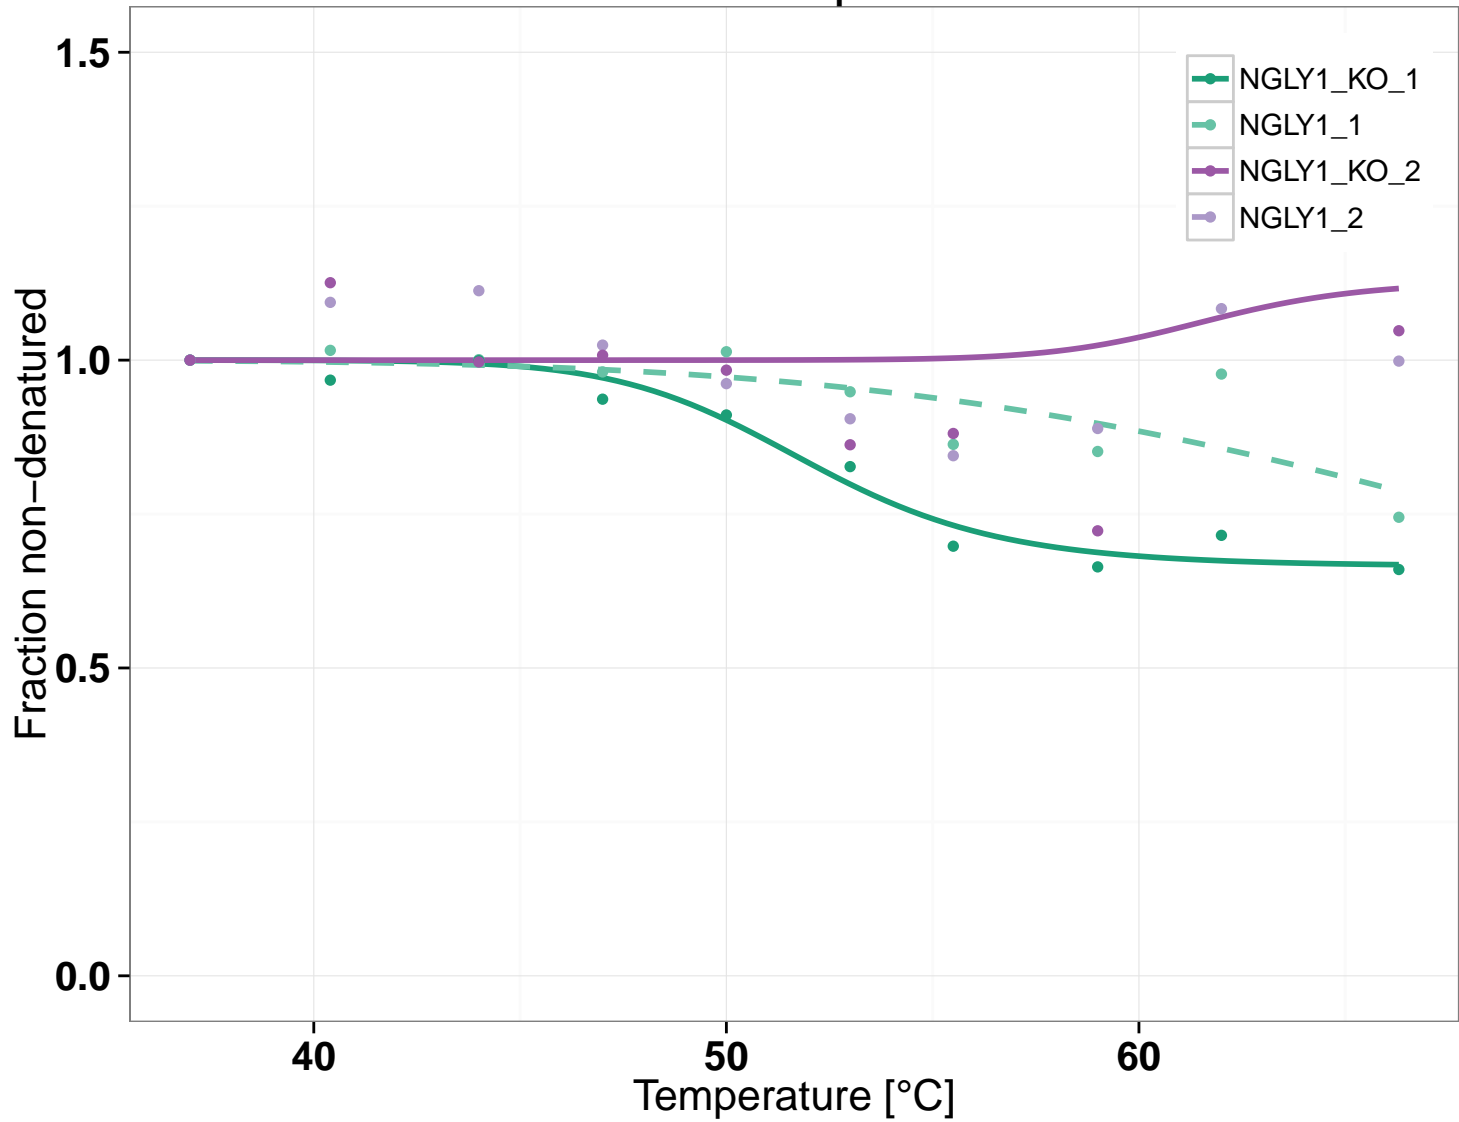

|            | meltPoint | slope  | plateau | R2   |
|------------|-----------|--------|---------|------|
| NGLY1_KO_1 | –         | –0.036 | 0.66    | 0.96 |
| NGLY1_1    | –         | –      | 0       | 0.65 |
| NGLY1_KO_2 | –         | 0.017  | 1.13    | 0.09 |
| NGLY1_2    | –         | –      | –       | –    |

Supplement: Supplementary file 142 [file 1]

IPI00009685.4|ARHGAP22

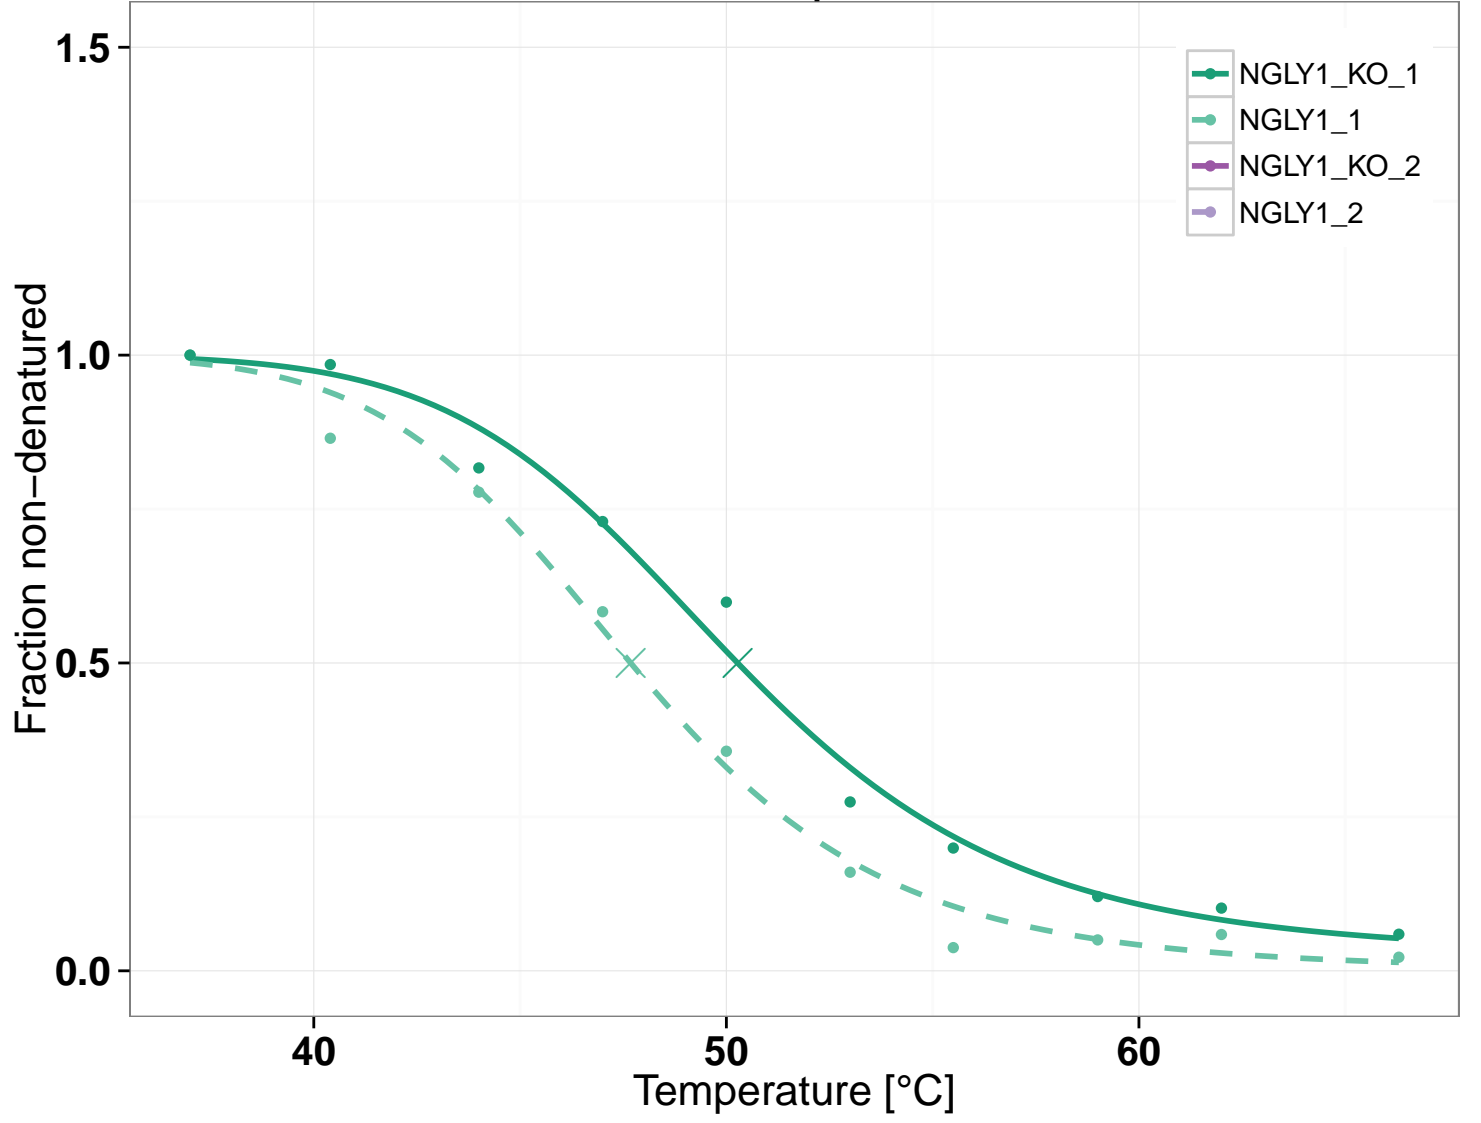

|            | meltPoint | slope  | plateau | R2   |
|------------|-----------|--------|---------|------|
| NGLY1_KO_1 | 50.27     | -0.071 | 0.02    | 0.99 |
| NGLY1_1    | 47.68     | -0.081 | 0       | 0.99 |
| NGLY1_KO_2 | -         | -      | -       | -    |
| NGLY1_2    | -         | -      | -       | -    |

Supplement: Supplementary file 143 [file 1]

IPI00853078.1|SENP7

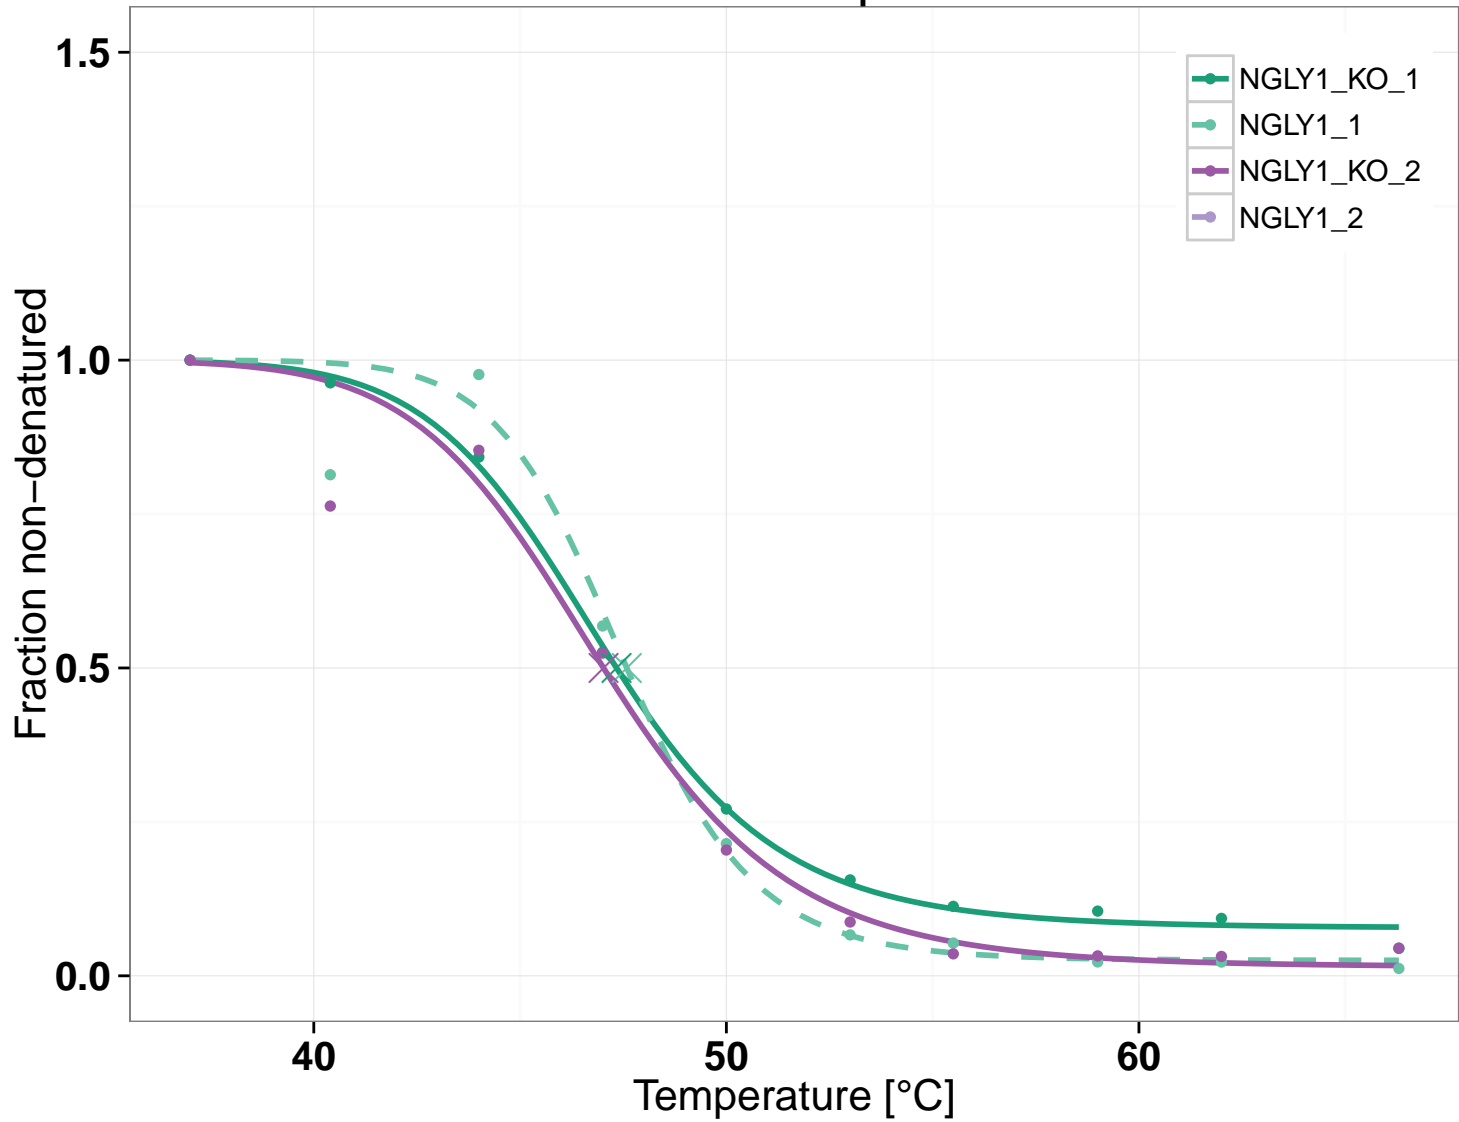

|            | meltPoint | slope | plateau | R2   |
|------------|-----------|-------|---------|------|
| NGLY1_KO_1 | 47.34     | -0.11 | 0.08    | 1    |
| NGLY1_1    | 47.59     | -0.16 | 0.02    | 0.98 |
| NGLY1_KO_2 | 47.02     | -0.11 | 0.01    | 0.97 |
| NGLY1_2    | -         | -     | -       | -    |

Supplement: Supplementary file 144 [file 1]

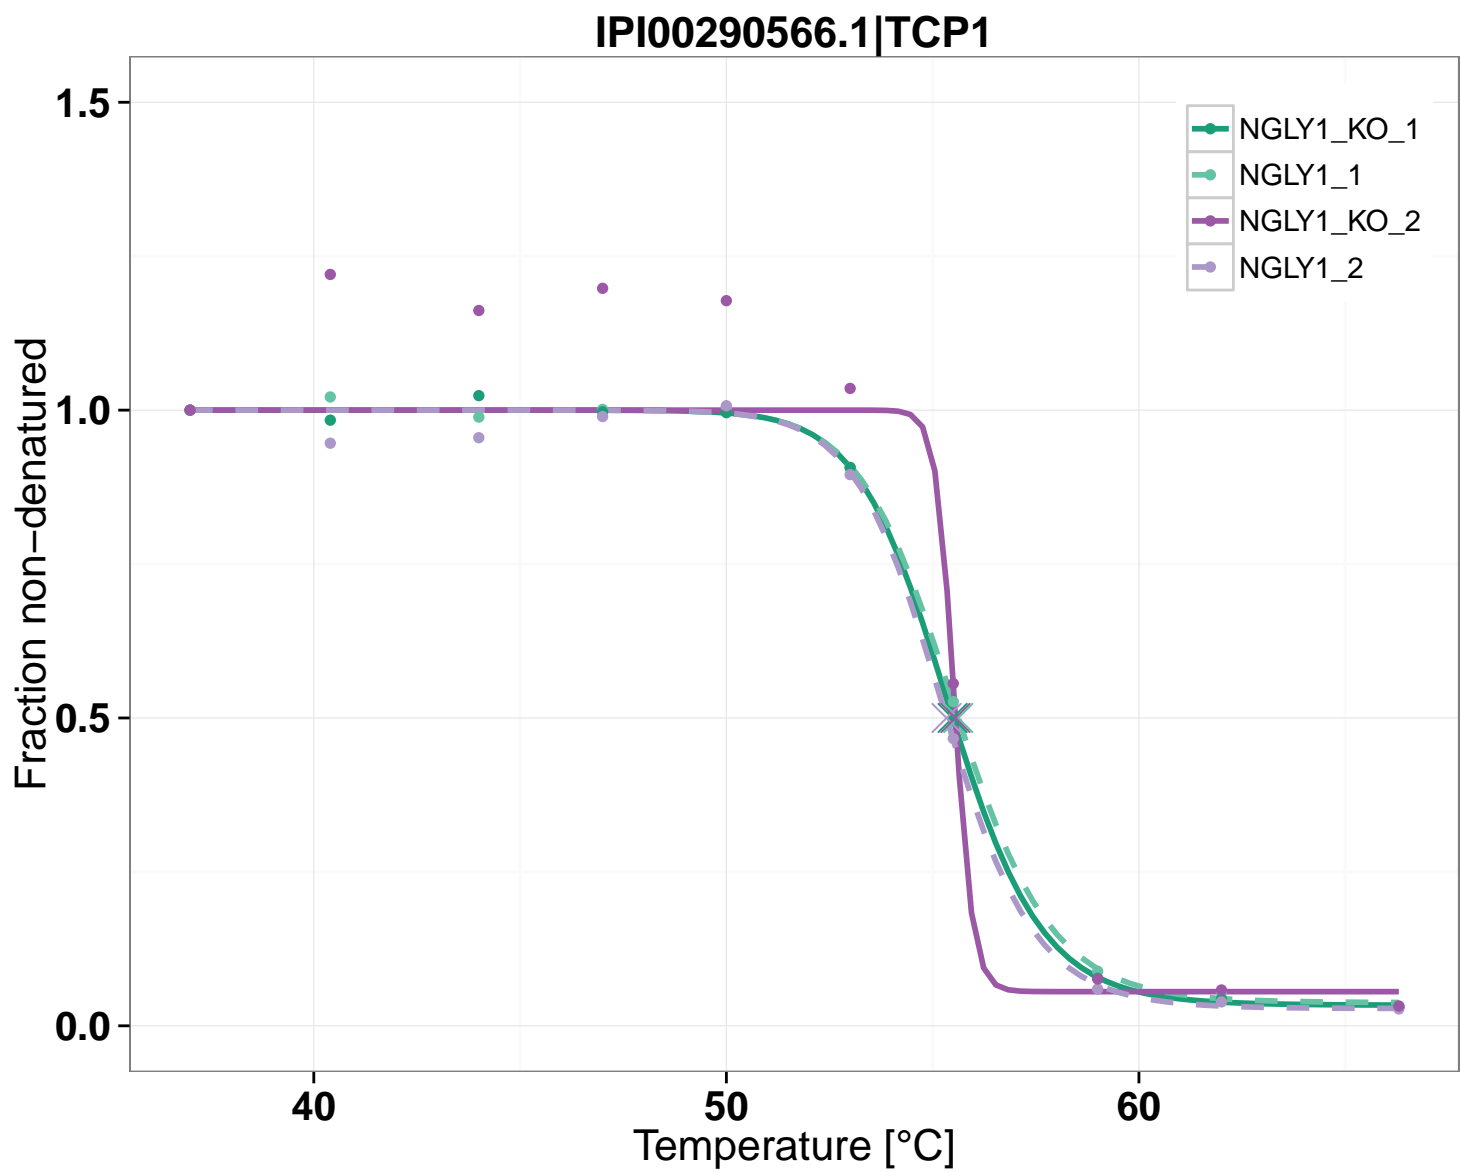

|            | meltPoint | slope | plateau | R2   |
|------------|-----------|-------|---------|------|
| NGLY1_KO_1 | 55.48     | -0.22 | 0.03    | 1    |
| NGLY1_1    | 55.62     | -0.21 | 0.04    | 1    |
| NGLY1_KO_2 | 55.55     | -1.1  | 0.06    | 0.94 |
| NGLY1_2    | 55.34     | -0.22 | 0.03    | 1    |

Supplement: Supplementary file 145 [file 1]

# IPI00640085.1|UBR2

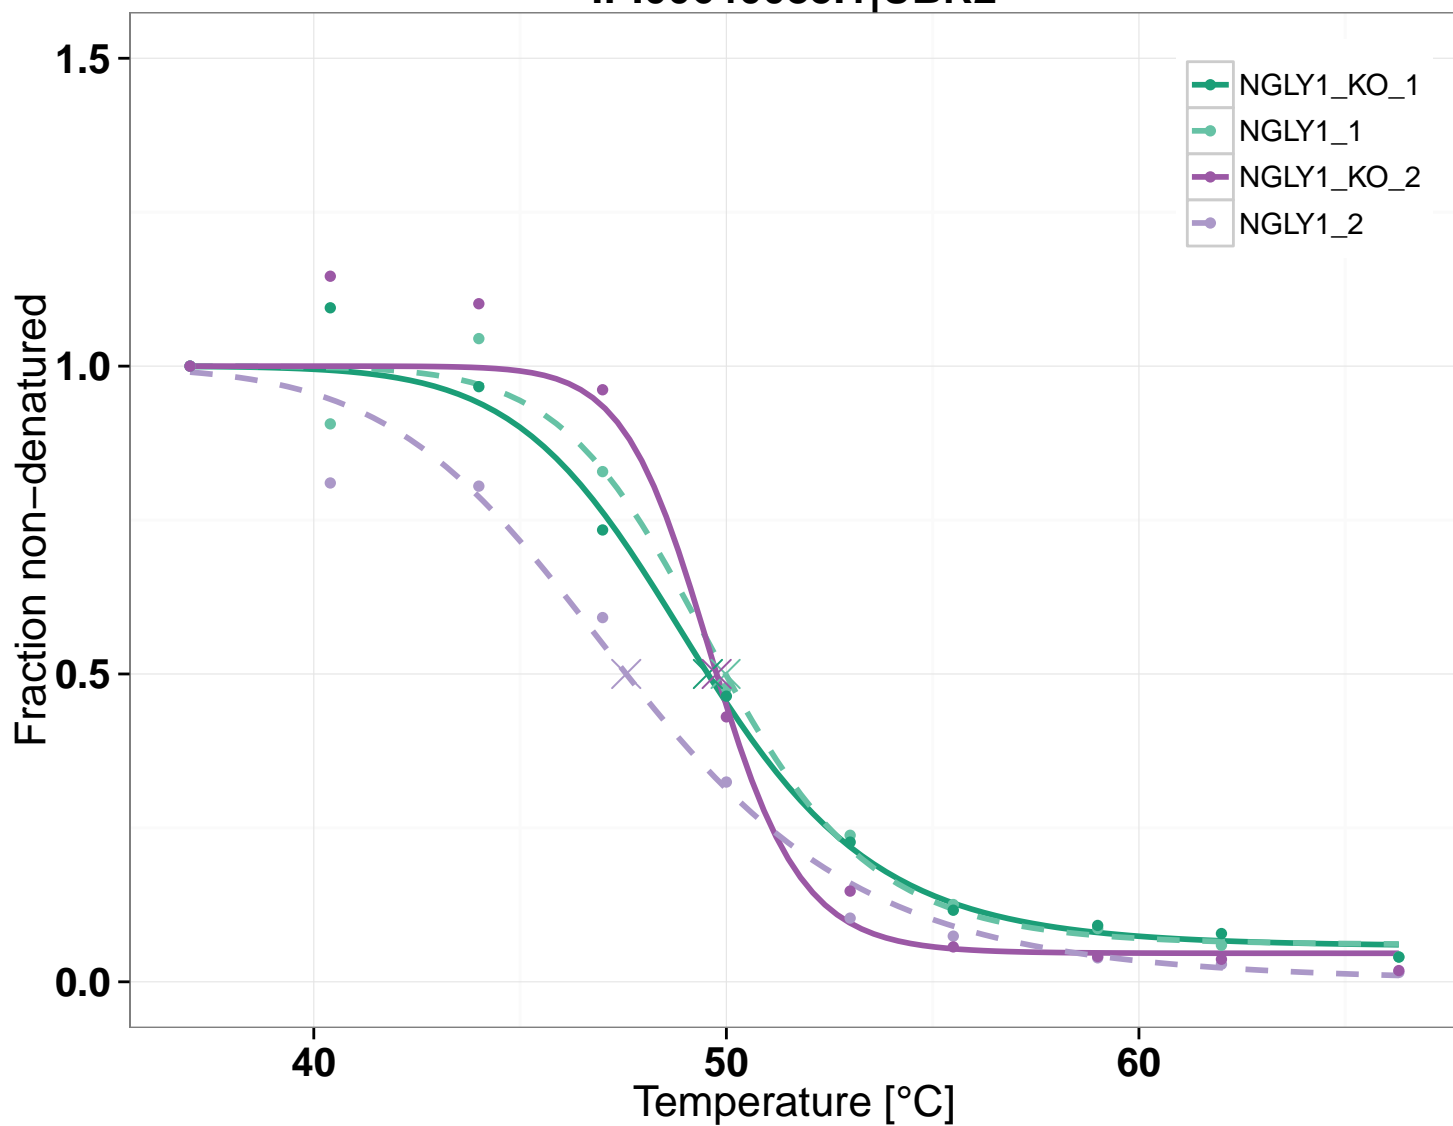

|            | meltPoint | slope  | plateau | R2   |
|------------|-----------|--------|---------|------|
| NGLY1_KO_1 | 49.55     | -0.11  | 0.06    | 0.99 |
| NGLY1_1    | 49.98     | -0.12  | 0.06    | 0.99 |
| NGLY1_KO_2 | 49.76     | -0.22  | 0.05    | 0.98 |
| NGLY1_2    | 47.57     | -0.086 | 0       | 0.98 |

Supplement: Supplementary file 146 [file 1]

# IPI00031420.3|UGDH

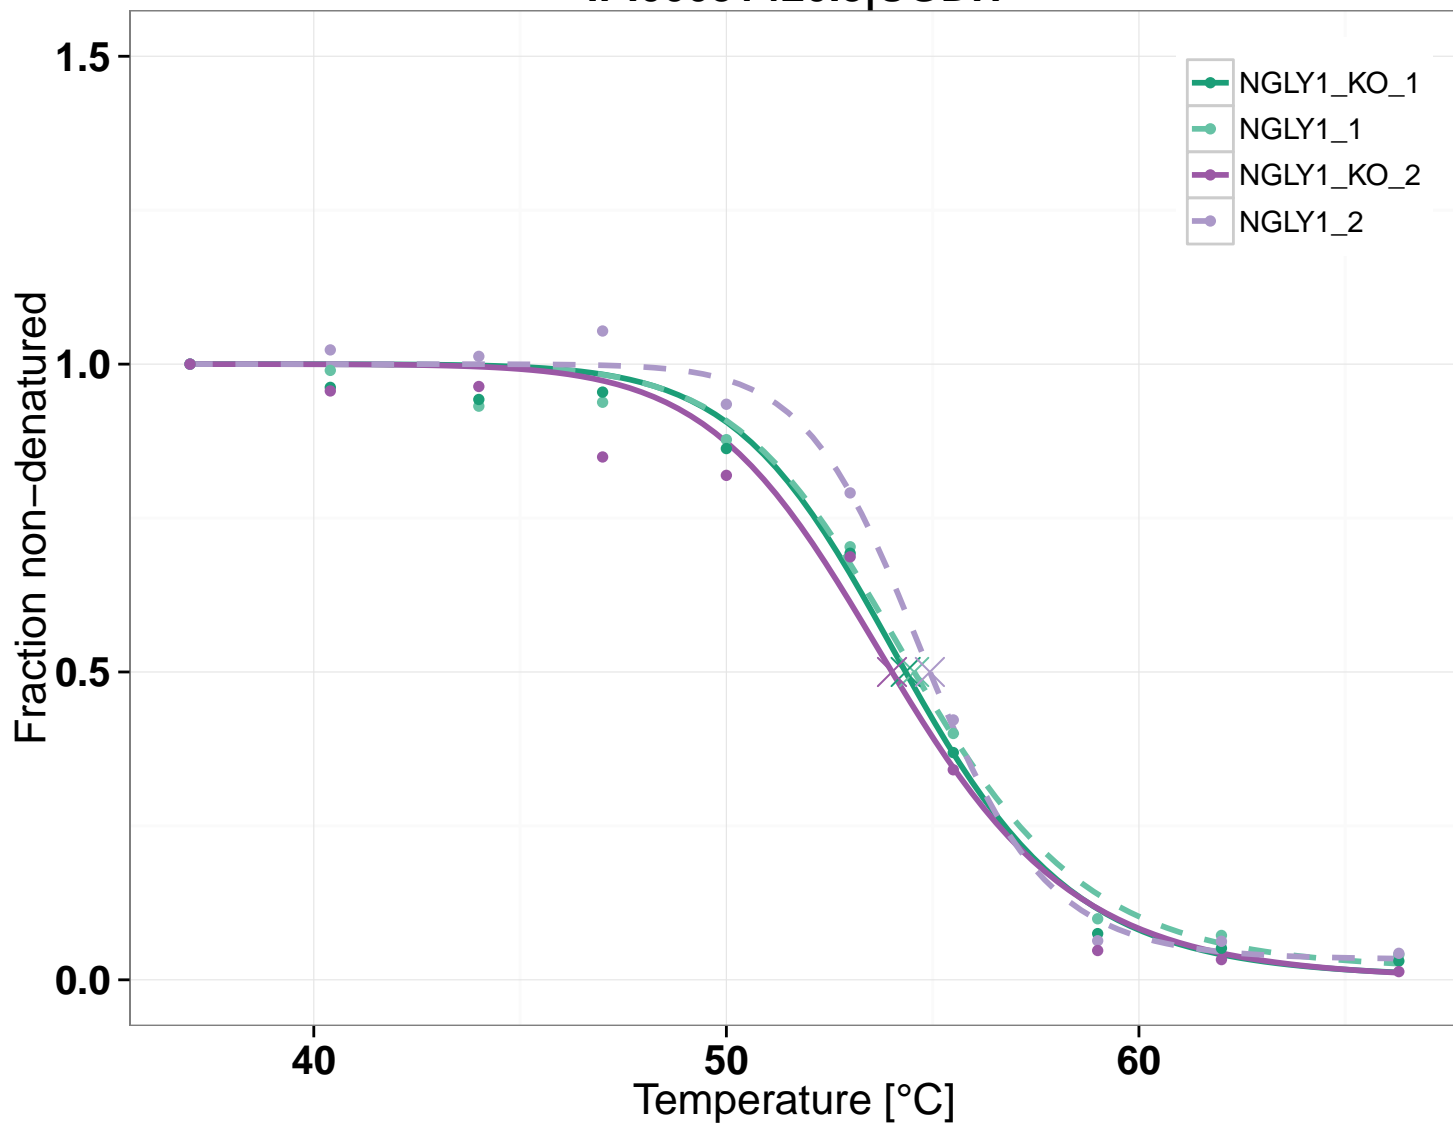

|            | meltPoint | slope | plateau | R2   |
|------------|-----------|-------|---------|------|
| NGLY1_KO_1 | 54.35     | -0.12 | 0       | 0.99 |
| NGLY1_1    | 54.55     | -0.12 | 0.02    | 0.99 |
| NGLY1_KO_2 | 54.01     | -0.11 | 0       | 0.98 |
| NGLY1_2    | 54.93     | -0.17 | 0.03    | 1    |

Supplement: Supplementary file 147 [file 1]

IPI00419342.4|SNRNP48

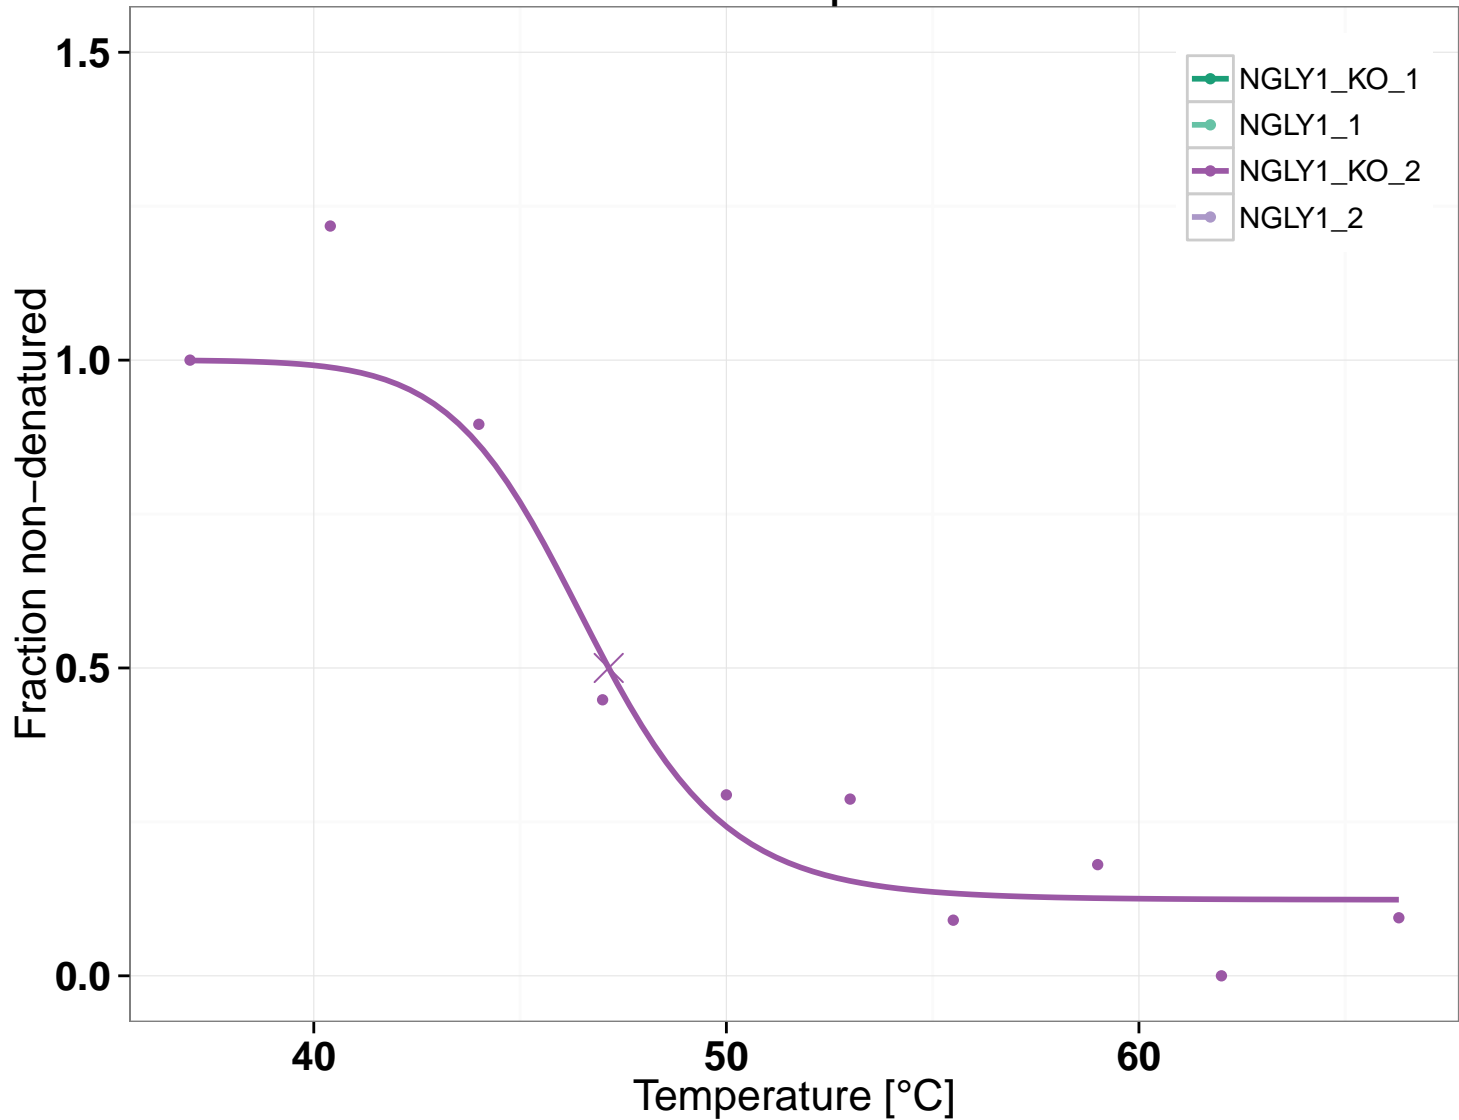

|            | meltPoint | slope | plateau | R2   |
|------------|-----------|-------|---------|------|
| NGLY1_KO_1 | —         | —     | —       | —    |
| NGLY1_1    | —         | —     | —       | —    |
| NGLY1_KO_2 | 47.15     | −0.13 | 0.12    | 0.94 |
| NGLY1_2    | —         | —     | —       | —    |

Supplement: Supplementary file 148 [file 1]

IPI00027194.1|STX18

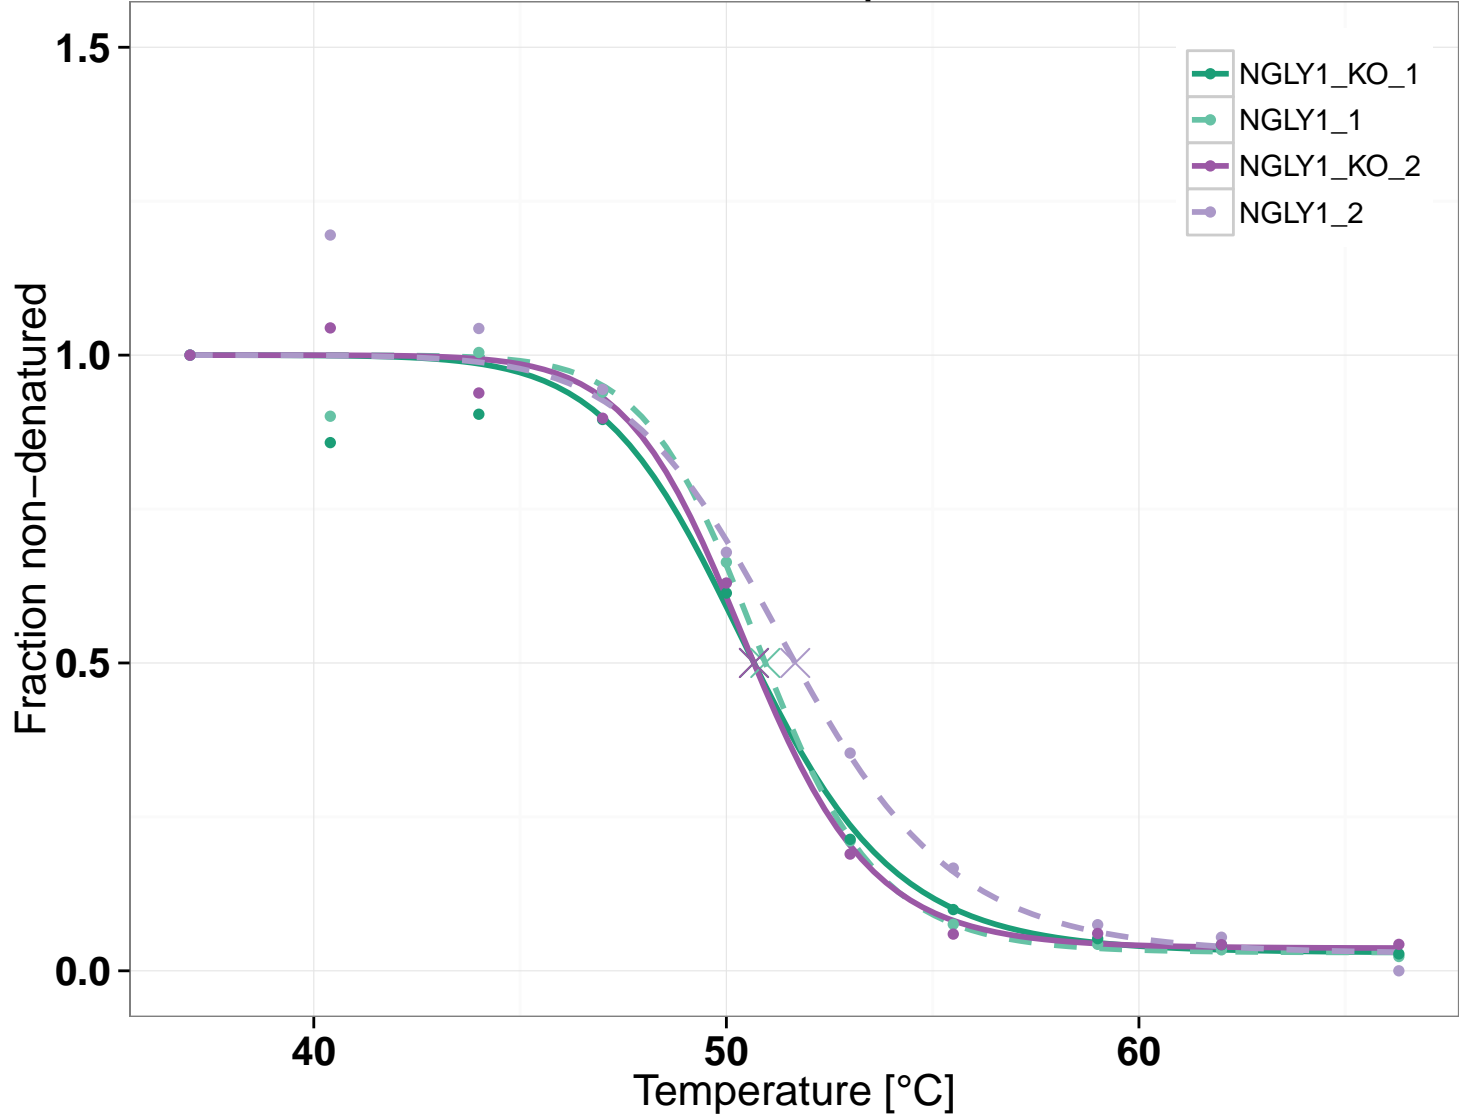

|            | meltPoint | slope | plateau | R2   |
|------------|-----------|-------|---------|------|
| NGLY1_KO_1 | 50.67     | -0.14 | 0.03    | 0.98 |
| NGLY1_1    | 50.94     | -0.17 | 0.03    | 0.99 |
| NGLY1_KO_2 | 50.67     | -0.16 | 0.04    | 1    |
| NGLY1_2    | 51.67     | -0.12 | 0.03    | 0.98 |

Supplement: Supplementary file 149 [file 1]

# IPI00872929.2|APOBEC3C

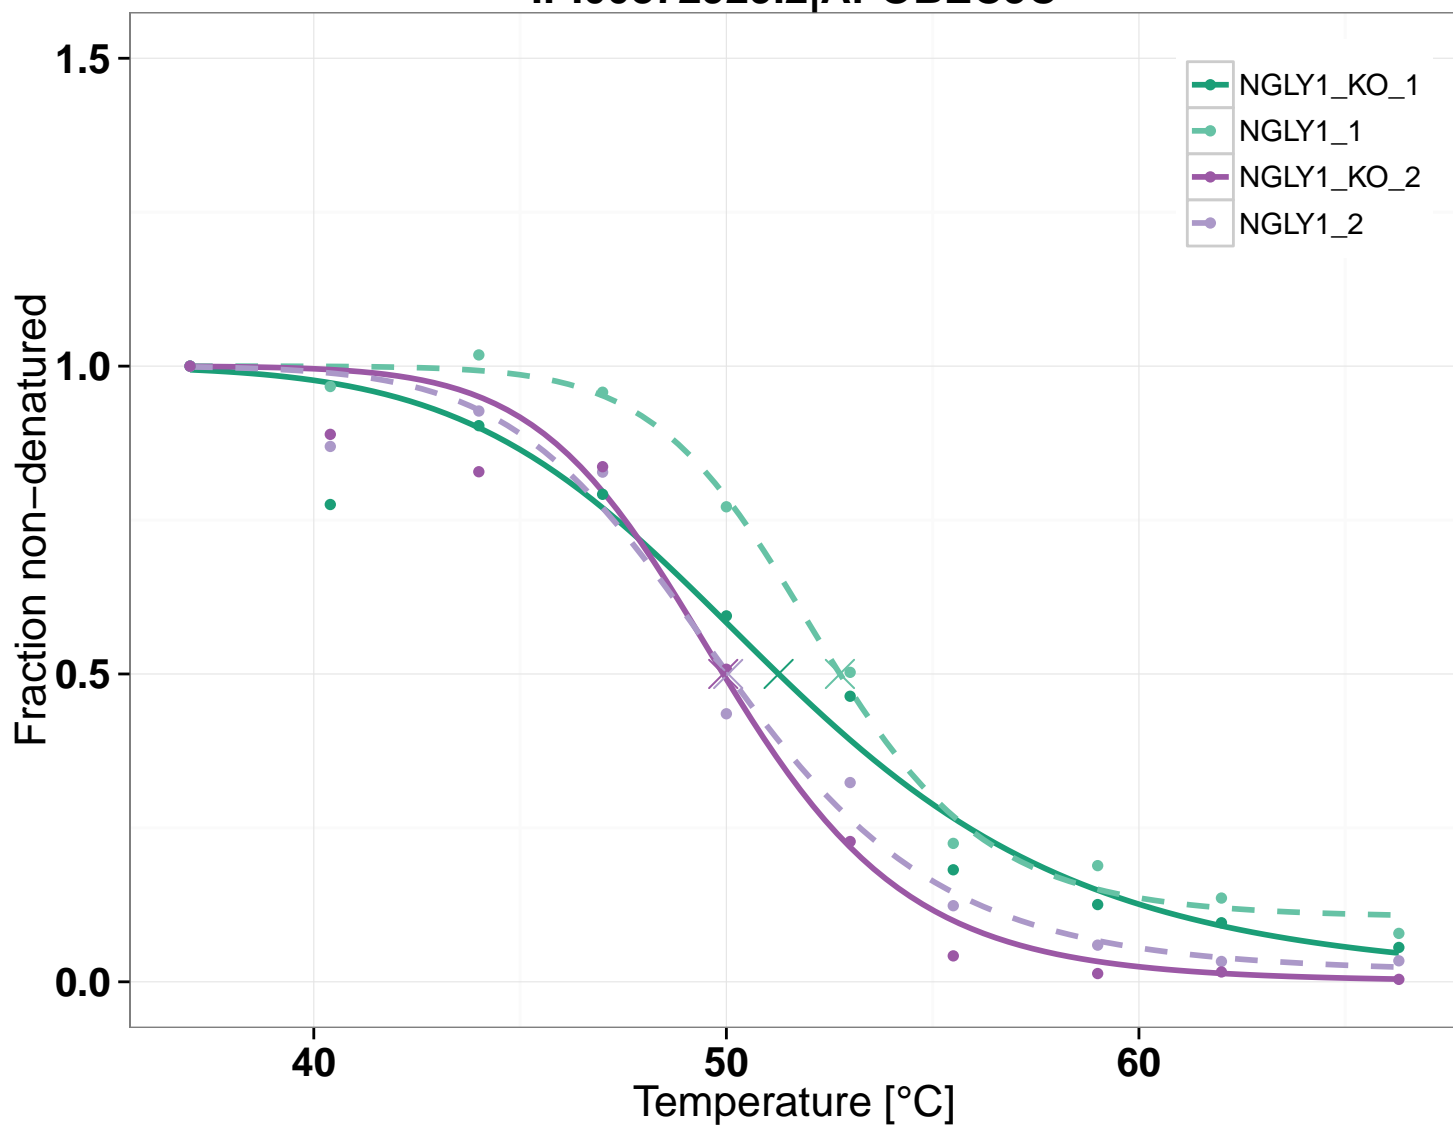

|            | meltPoint | slope  | plateau | R2   |
|------------|-----------|--------|---------|------|
| NGLY1_KO_1 | 51.27     | -0.066 | 0       | 0.96 |
| NGLY1_1    | 52.75     | -0.11  | 0.1     | 0.99 |
| NGLY1_KO_2 | 49.92     | -0.11  | 0       | 0.98 |
| NGLY1_2    | 50.04     | -0.094 | 0.01    | 0.98 |

Supplement: Supplementary file 150 [file 1]

IPI00886969.1|LOC643677

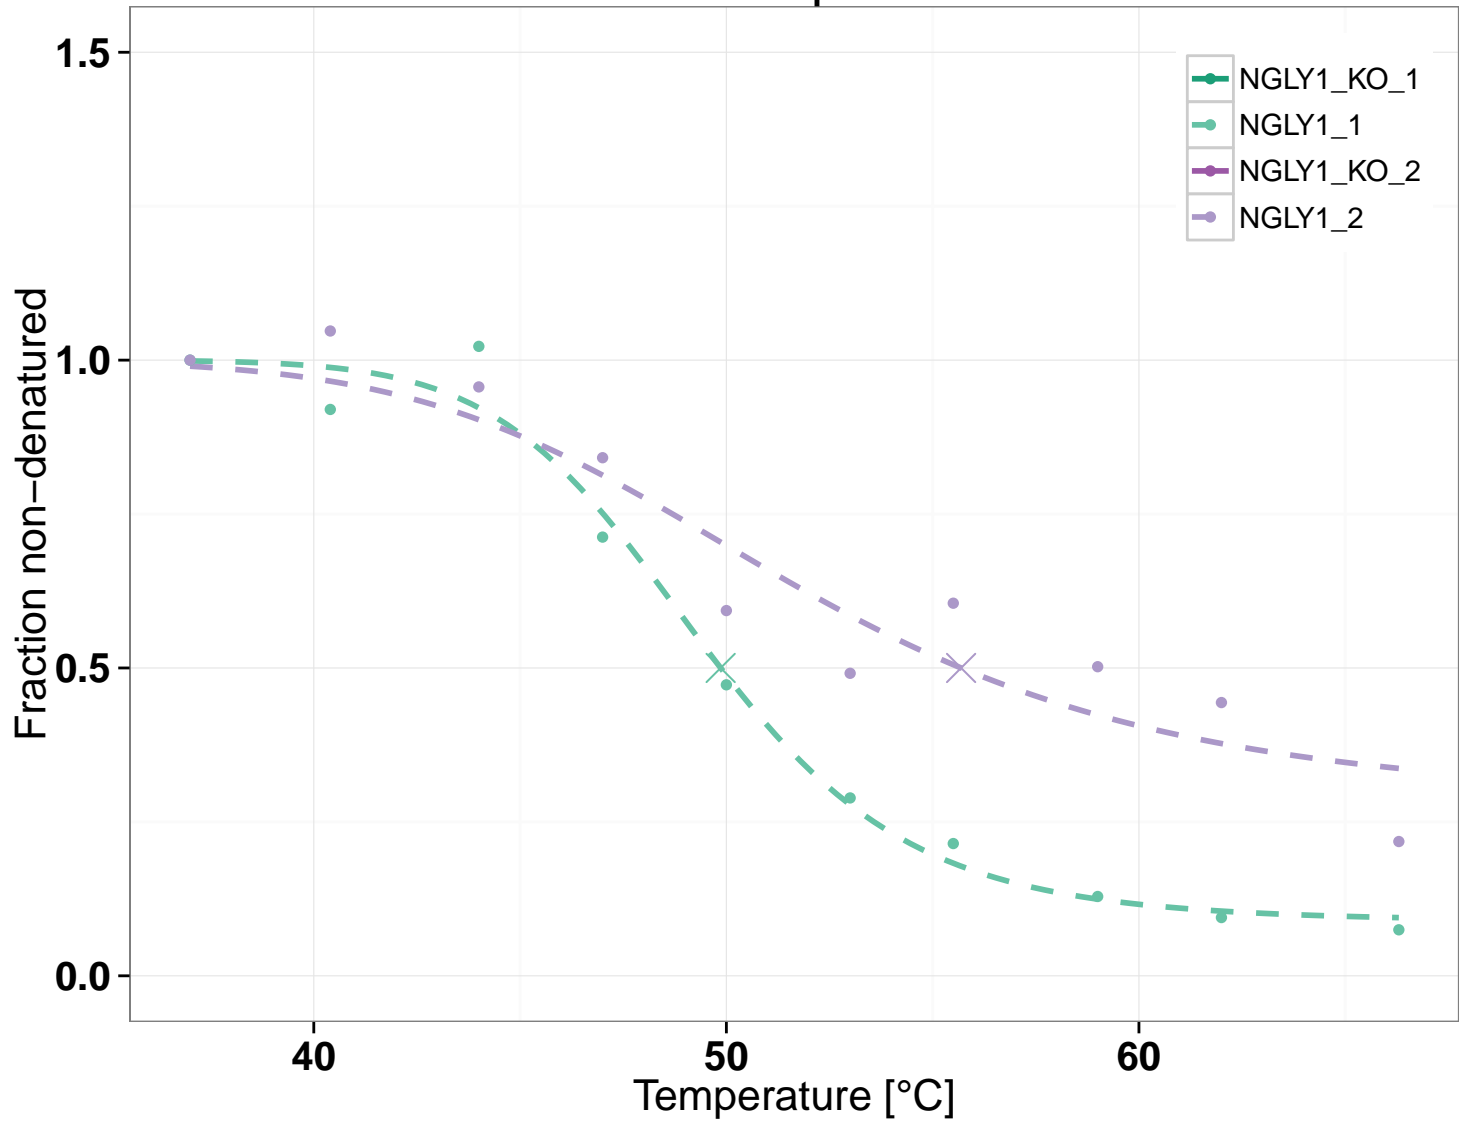

|            | meltPoint | slope  | plateau | R2   |
|------------|-----------|--------|---------|------|
| NGLY1_KO_1 | -         | -      | -       | -    |
| NGLY1_1    | 49.86     | -0.091 | 0.09    | 0.99 |
| NGLY1_KO_2 | -         | -      | -       | -    |
| NGLY1_2    | 55.69     | -0.039 | 0.28    | 0.91 |

Supplement: Supplementary file 151 [file 1]

IPI00307591.5|ZNF609

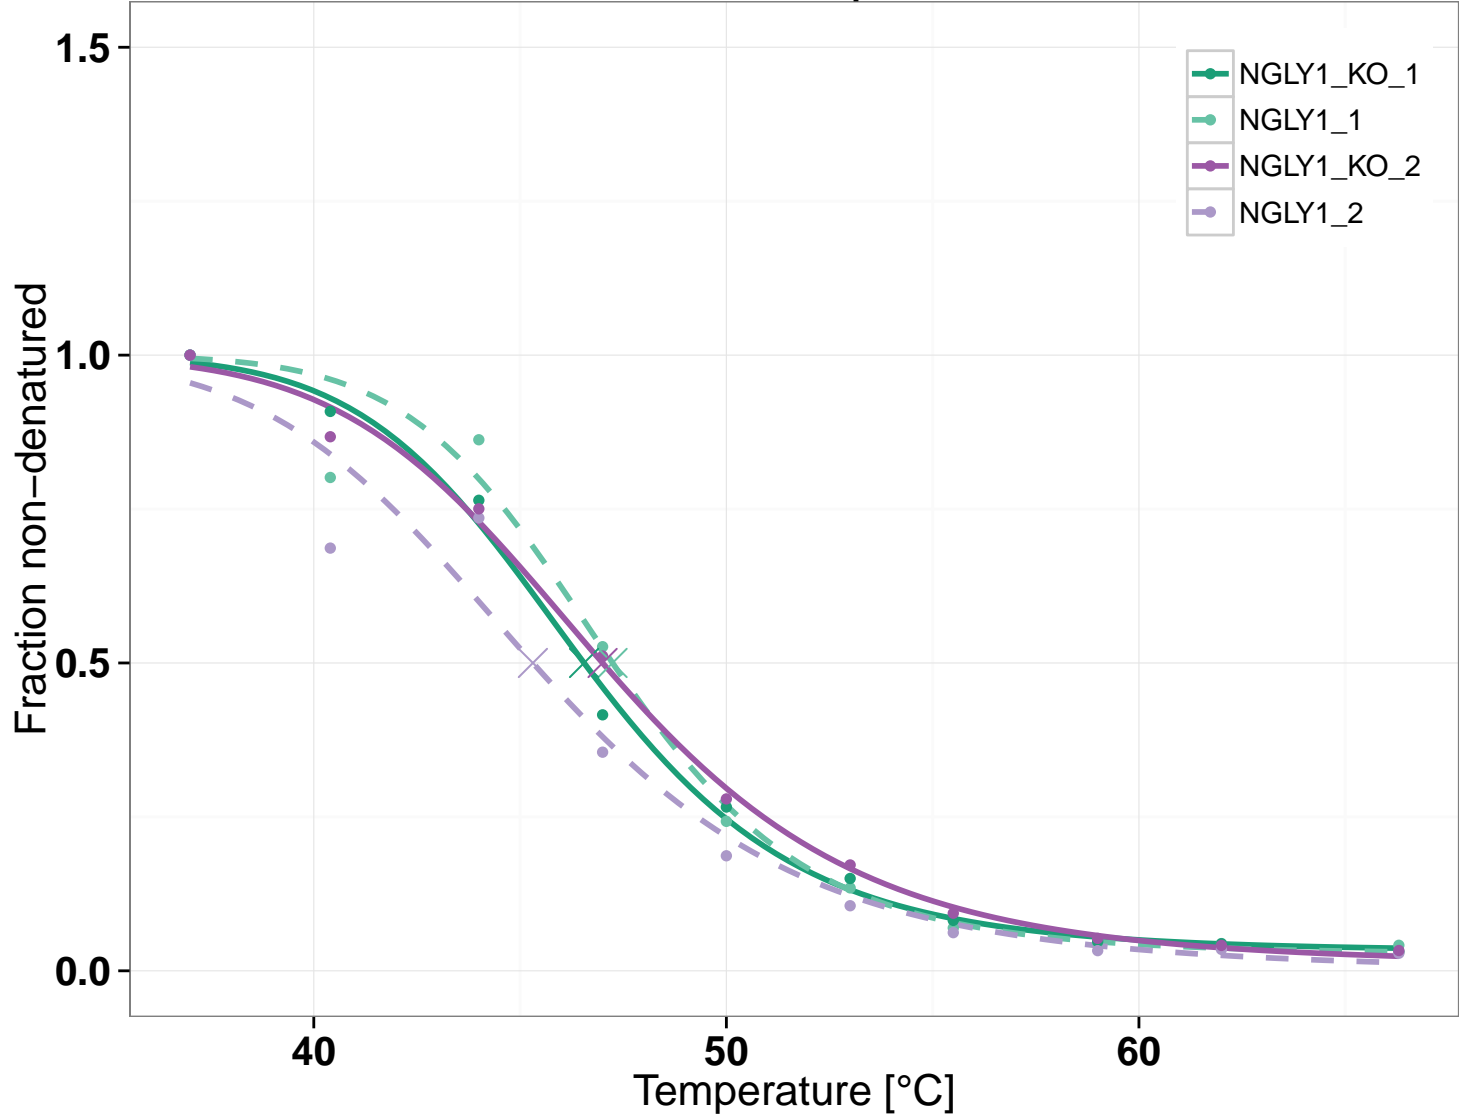

|            | meltPoint | slope  | plateau | R2   |
|------------|-----------|--------|---------|------|
| NGLY1_KO_1 | 46.55     | -0.091 | 0.03    | 1    |
| NGLY1_1    | 47.24     | -0.1   | 0.03    | 0.98 |
| NGLY1_KO_2 | 47        | -0.079 | 0.01    | 1    |
| NGLY1_2    | 45.31     | -0.077 | 0       | 0.96 |

Supplement: Supplementary file 152 [file 1]

IPI00910727.1|RPL28

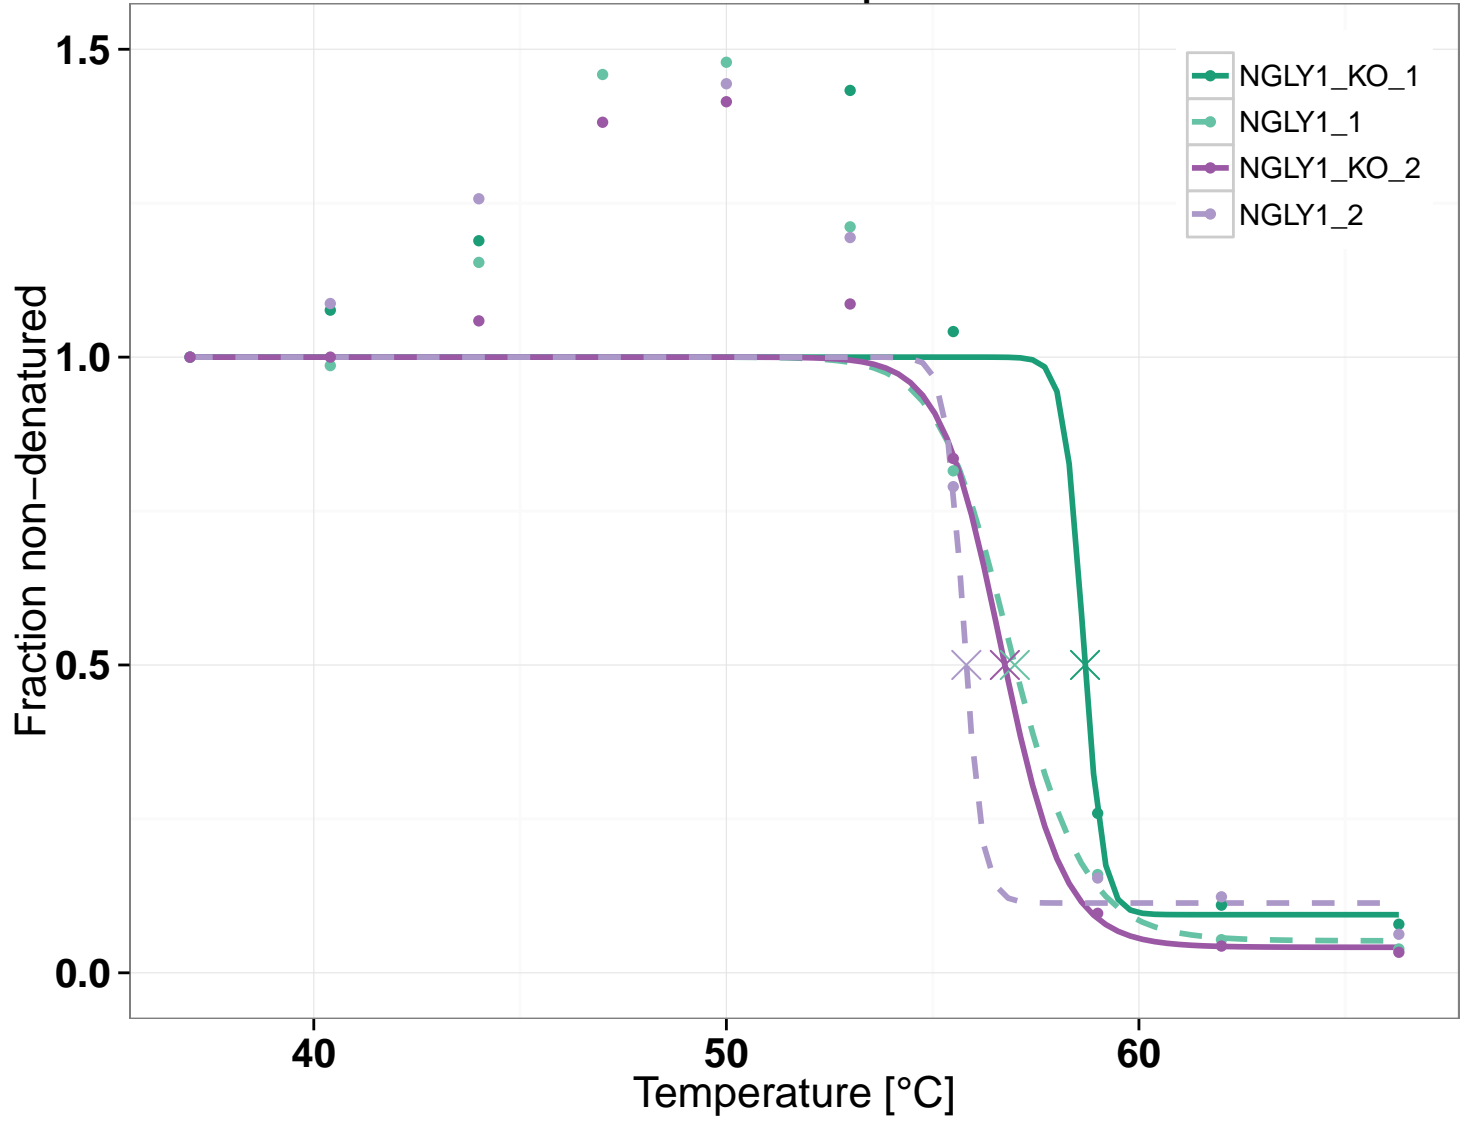

|            | meltPoint | slope | plateau | R2   |
|------------|-----------|-------|---------|------|
| NGLY1_KO_1 | 58.69     | -0.97 | 0.09    | 0.68 |
| NGLY1_1    | 56.99     | -0.27 | 0.05    | 0.82 |
| NGLY1_KO_2 | 56.75     | -0.32 | 0.04    | 0.87 |
| NGLY1_2    | 55.82     | -0.99 | 0.11    | 0.78 |

Supplement: Supplementary file 153 [file 1]

IPI00913848.1|FERMT2

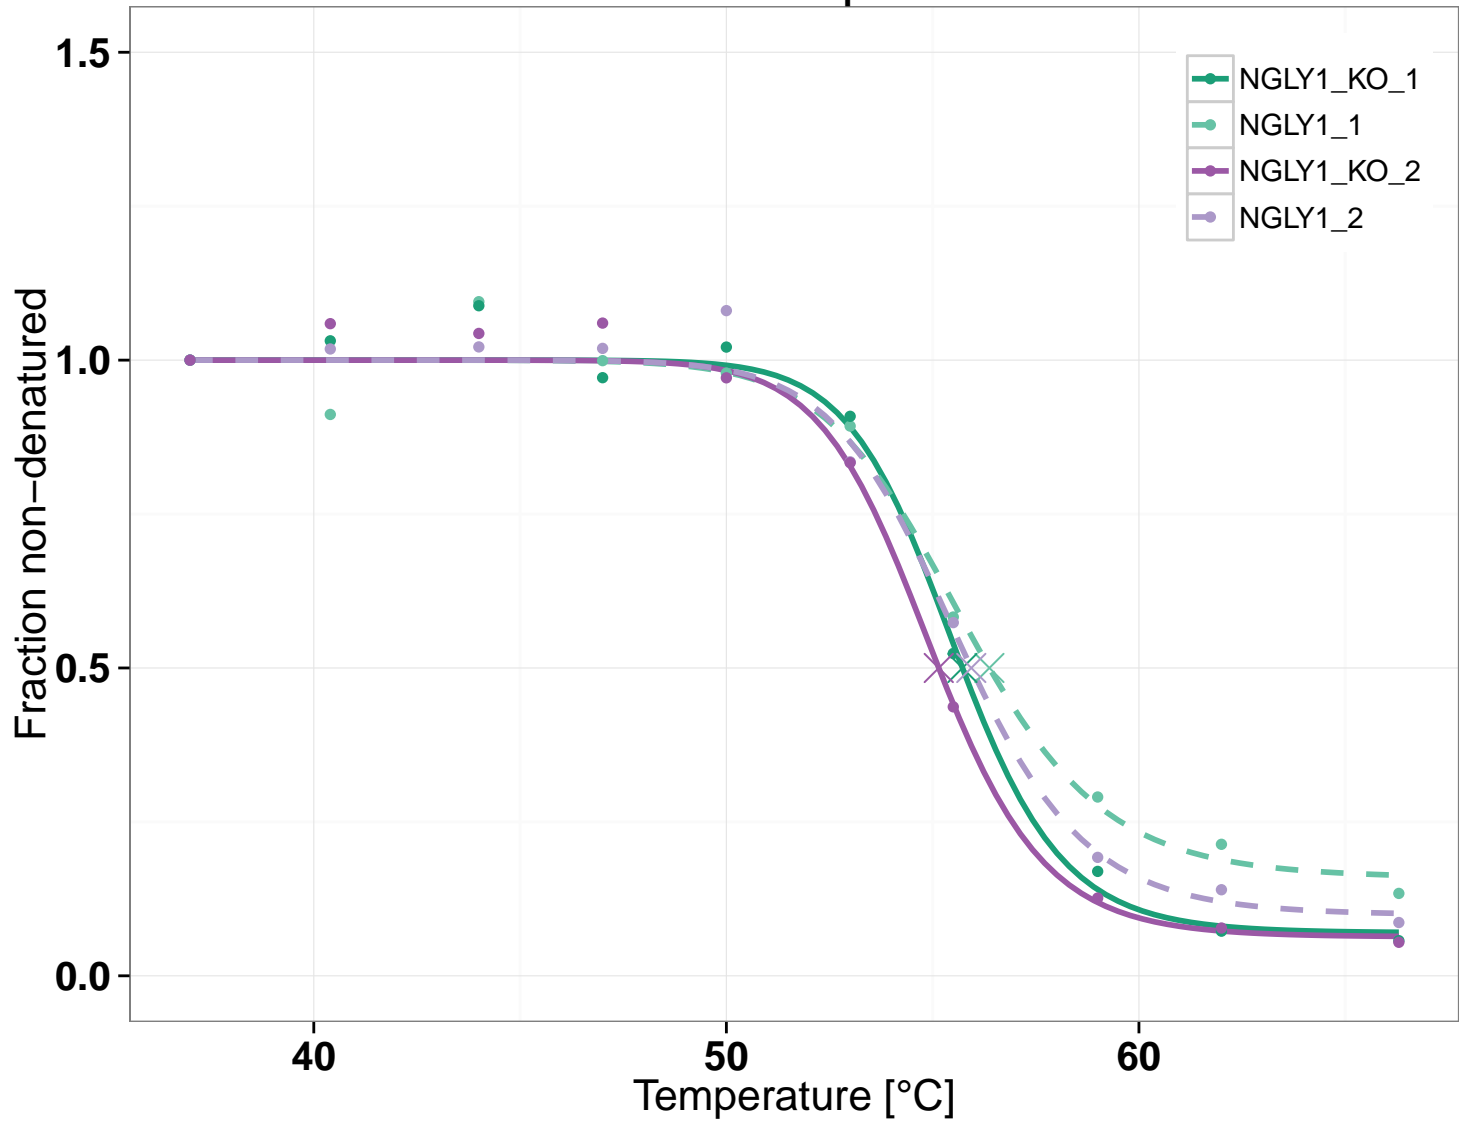

|            | meltPoint | slope | plateau | R2   |
|------------|-----------|-------|---------|------|
| NGLY1_KO_1 | 55.72     | -0.18 | 0.07    | 0.99 |
| NGLY1_1    | 56.38     | -0.12 | 0.16    | 0.98 |
| NGLY1_KO_2 | 55.15     | -0.17 | 0.06    | 0.99 |
| NGLY1_2    | 55.94     | -0.15 | 0.1     | 0.99 |

Supplement: Supplementary file 154 [file 1]

# IPI00871731.1|DDHD2

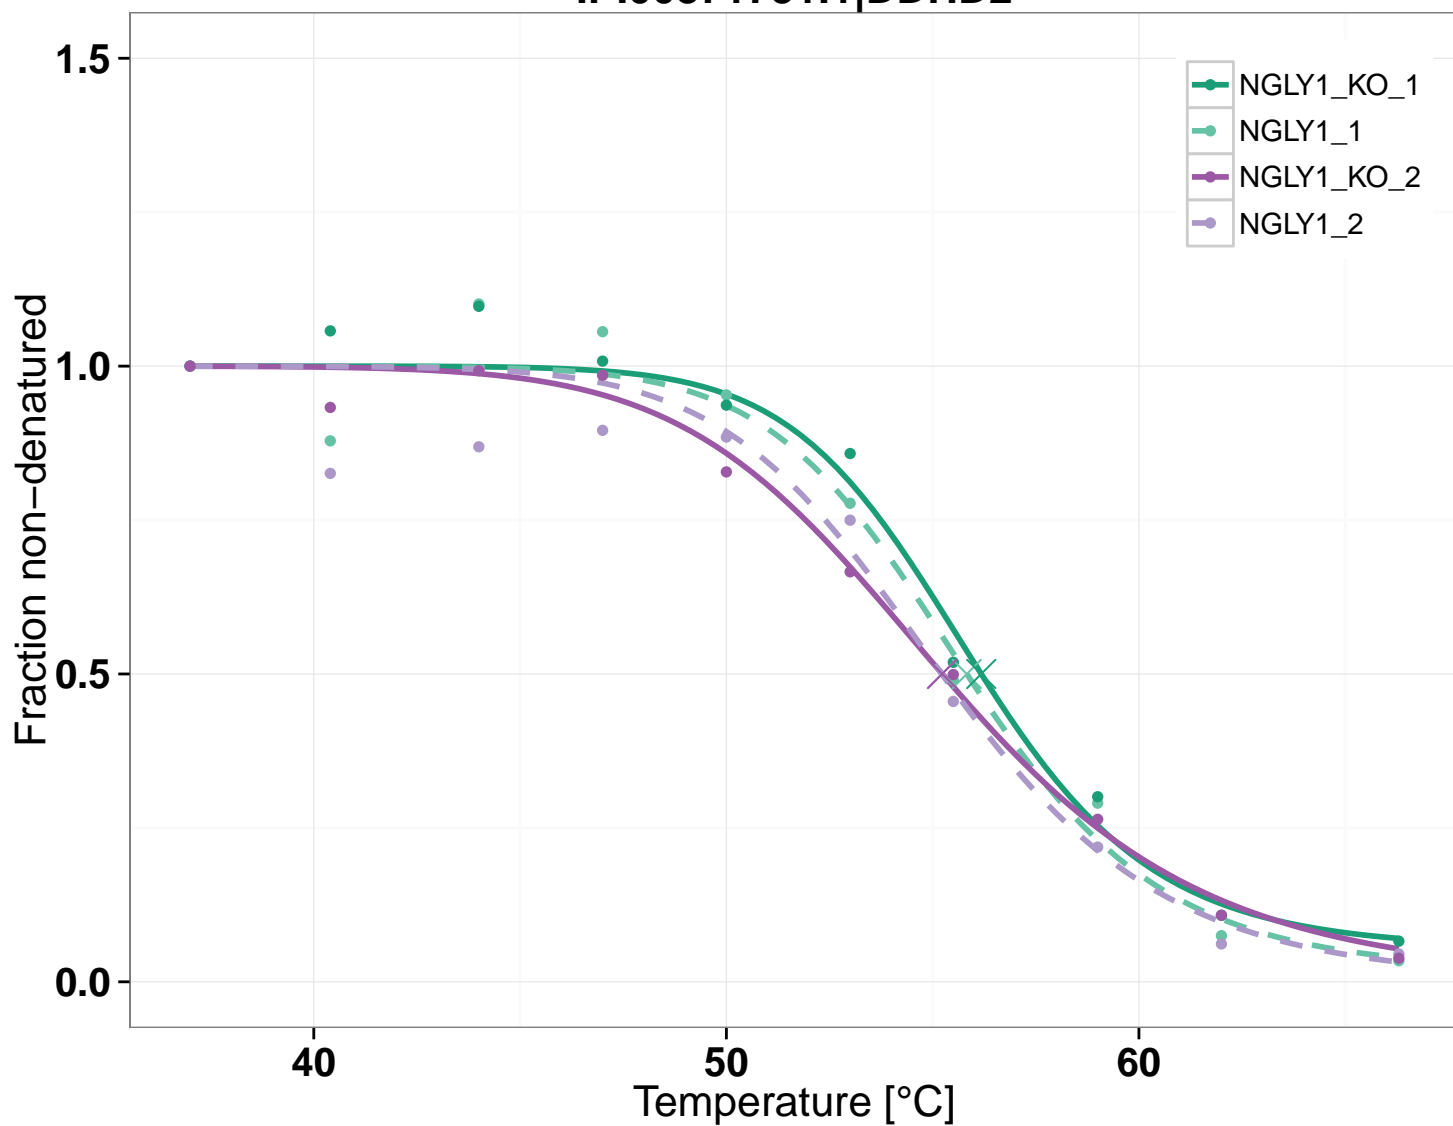

|            | meltPoint | slope  | plateau | R2   |
|------------|-----------|--------|---------|------|
| NGLY1_KO_1 | 56.18     | -0.11  | 0.05    | 0.99 |
| NGLY1_1    | 55.83     | -0.1   | 0.02    | 0.98 |
| NGLY1_KO_2 | 55.23     | -0.079 | 0       | 0.99 |
| NGLY1_2    | 55.22     | -0.093 | 0       | 0.95 |

Supplement: Supplementary file 155 [file 1]

# IPI00414819.2|SKIV2L

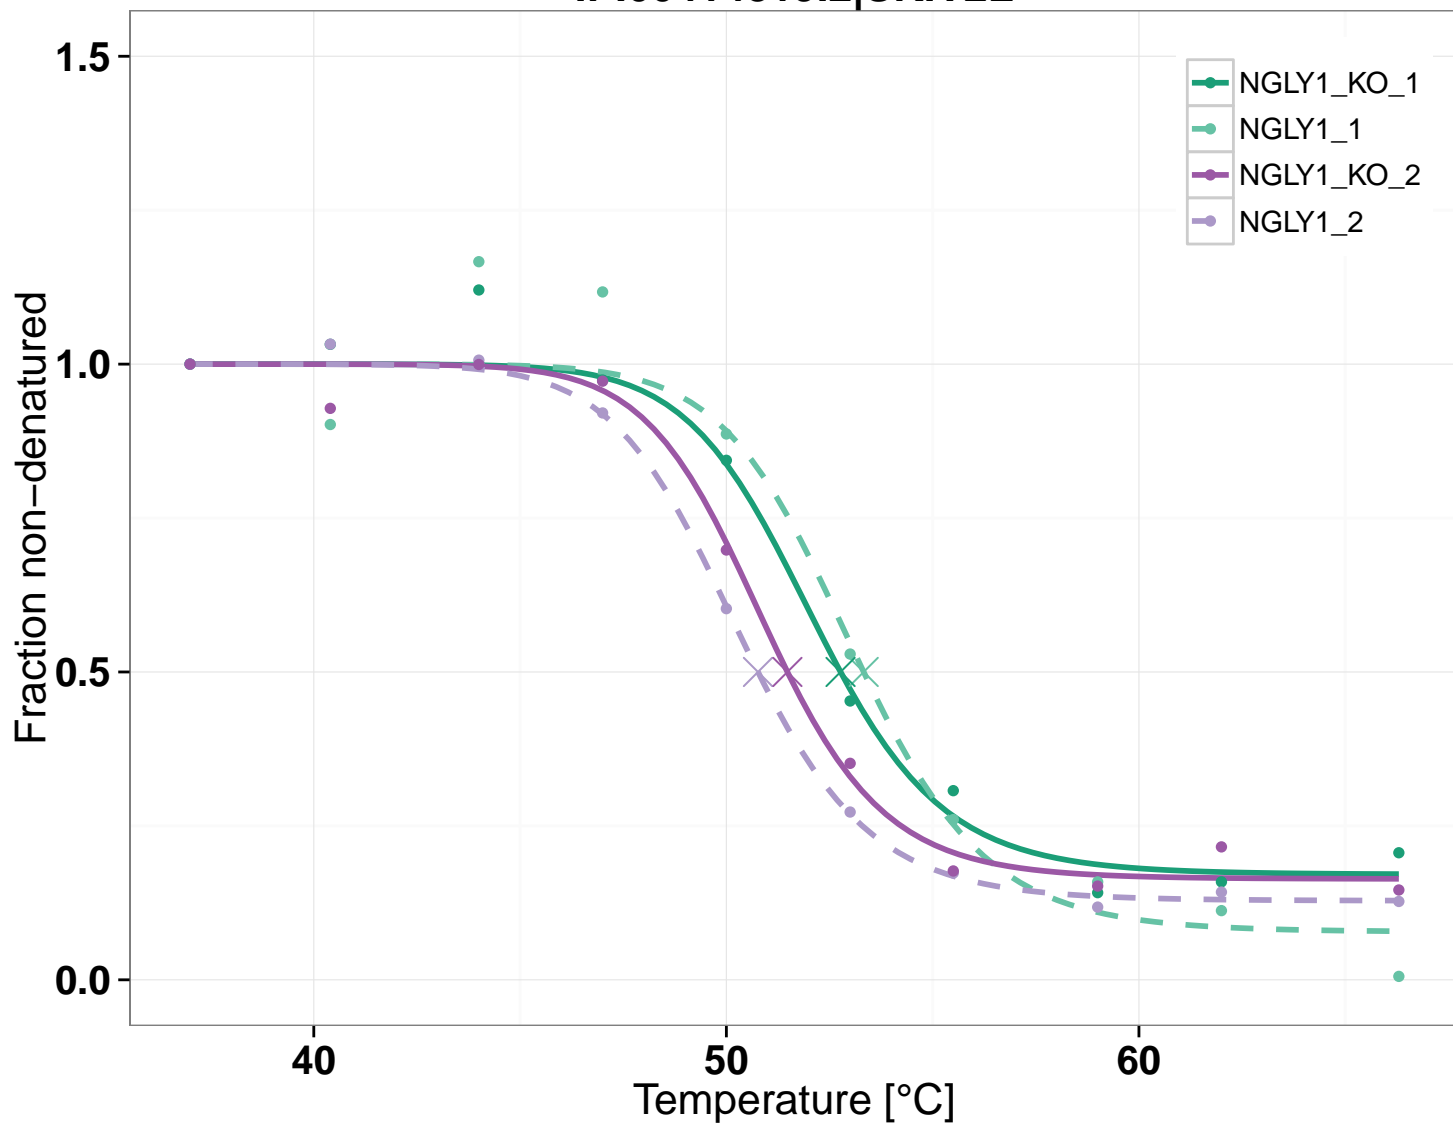

|            | meltPoint | slope | plateau | R2   |
|------------|-----------|-------|---------|------|
| NGLY1_KO_1 | 52.77     | -0.13 | 0.17    | 0.99 |
| NGLY1_1    | 53.33     | -0.14 | 0.08    | 0.97 |
| NGLY1_KO_2 | 51.48     | -0.15 | 0.16    | 0.99 |
| NGLY1_2    | 50.77     | -0.14 | 0.13    | 1    |

Supplement: Supplementary file 156 [file 1]

IPI00027181.2|SC5DL

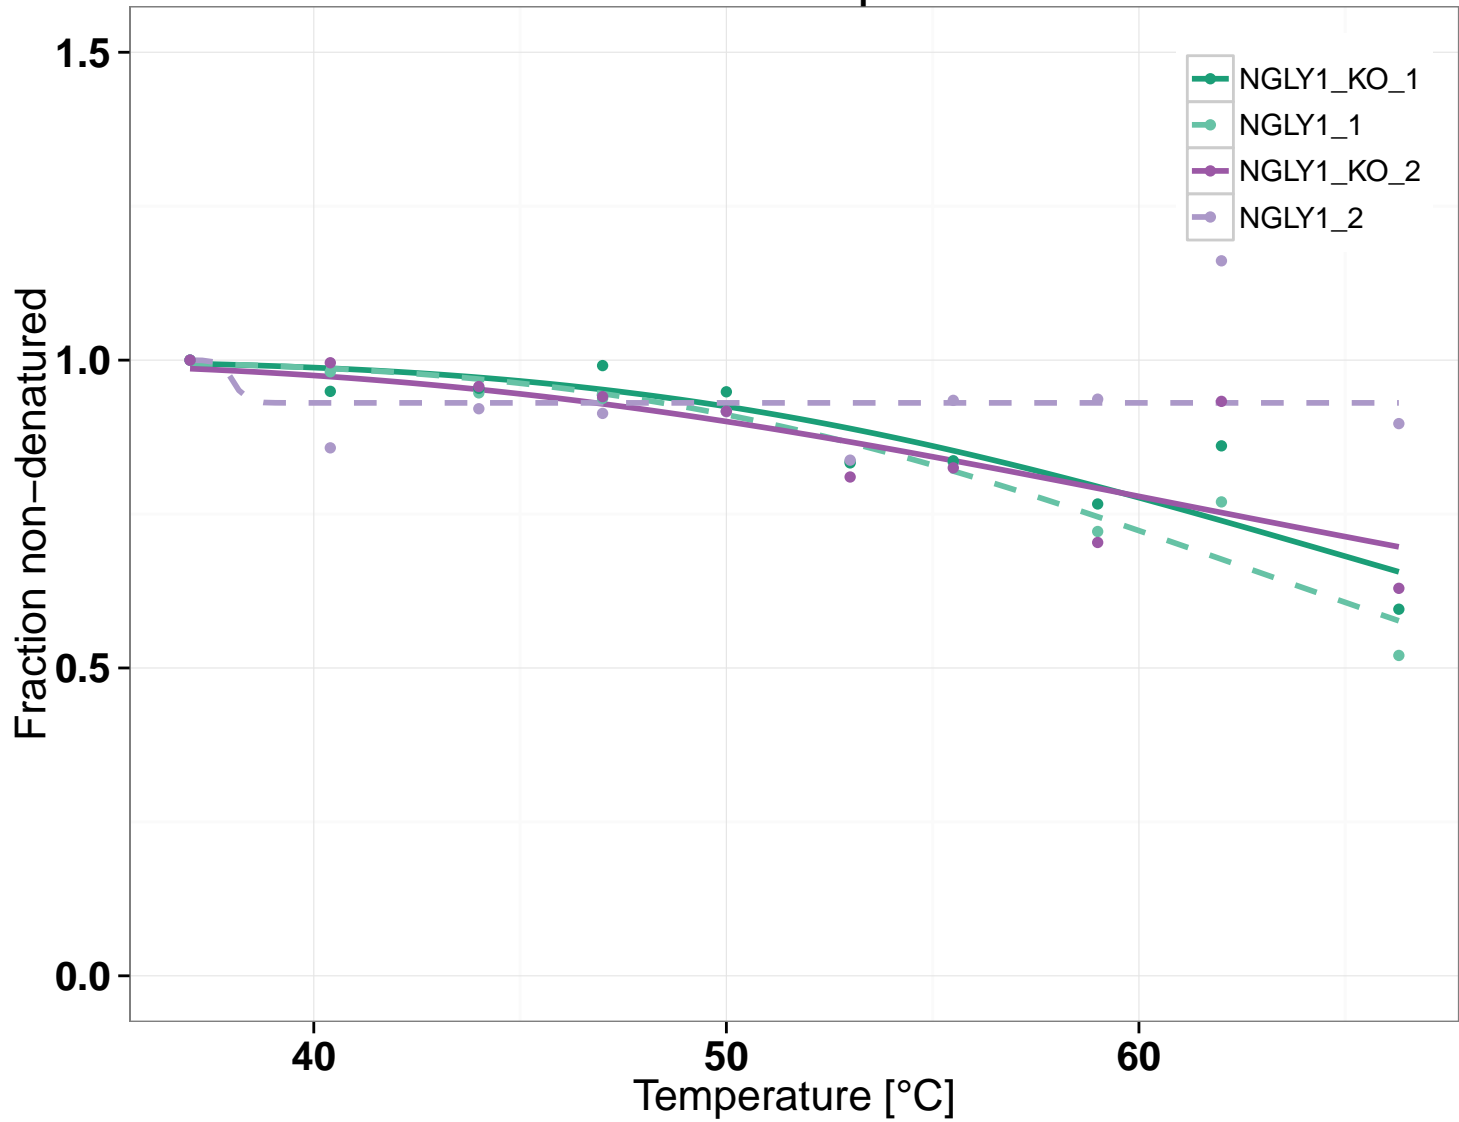

|            | meltPoint | slope  | plateau | R2   |
|------------|-----------|--------|---------|------|
| NGLY1_KO_1 | -         | -0.019 | 0       | 0.81 |
| NGLY1_1    | -         | -0.023 | 0       | 0.93 |
| NGLY1_KO_2 | -         | -0.013 | 0.21    | 0.65 |
| NGLY1_2    | -         | -0.11  | 0.93    | 0.06 |

Supplement: Supplementary file 157 [file 1]

IPI00291893.4|DCUN1D1

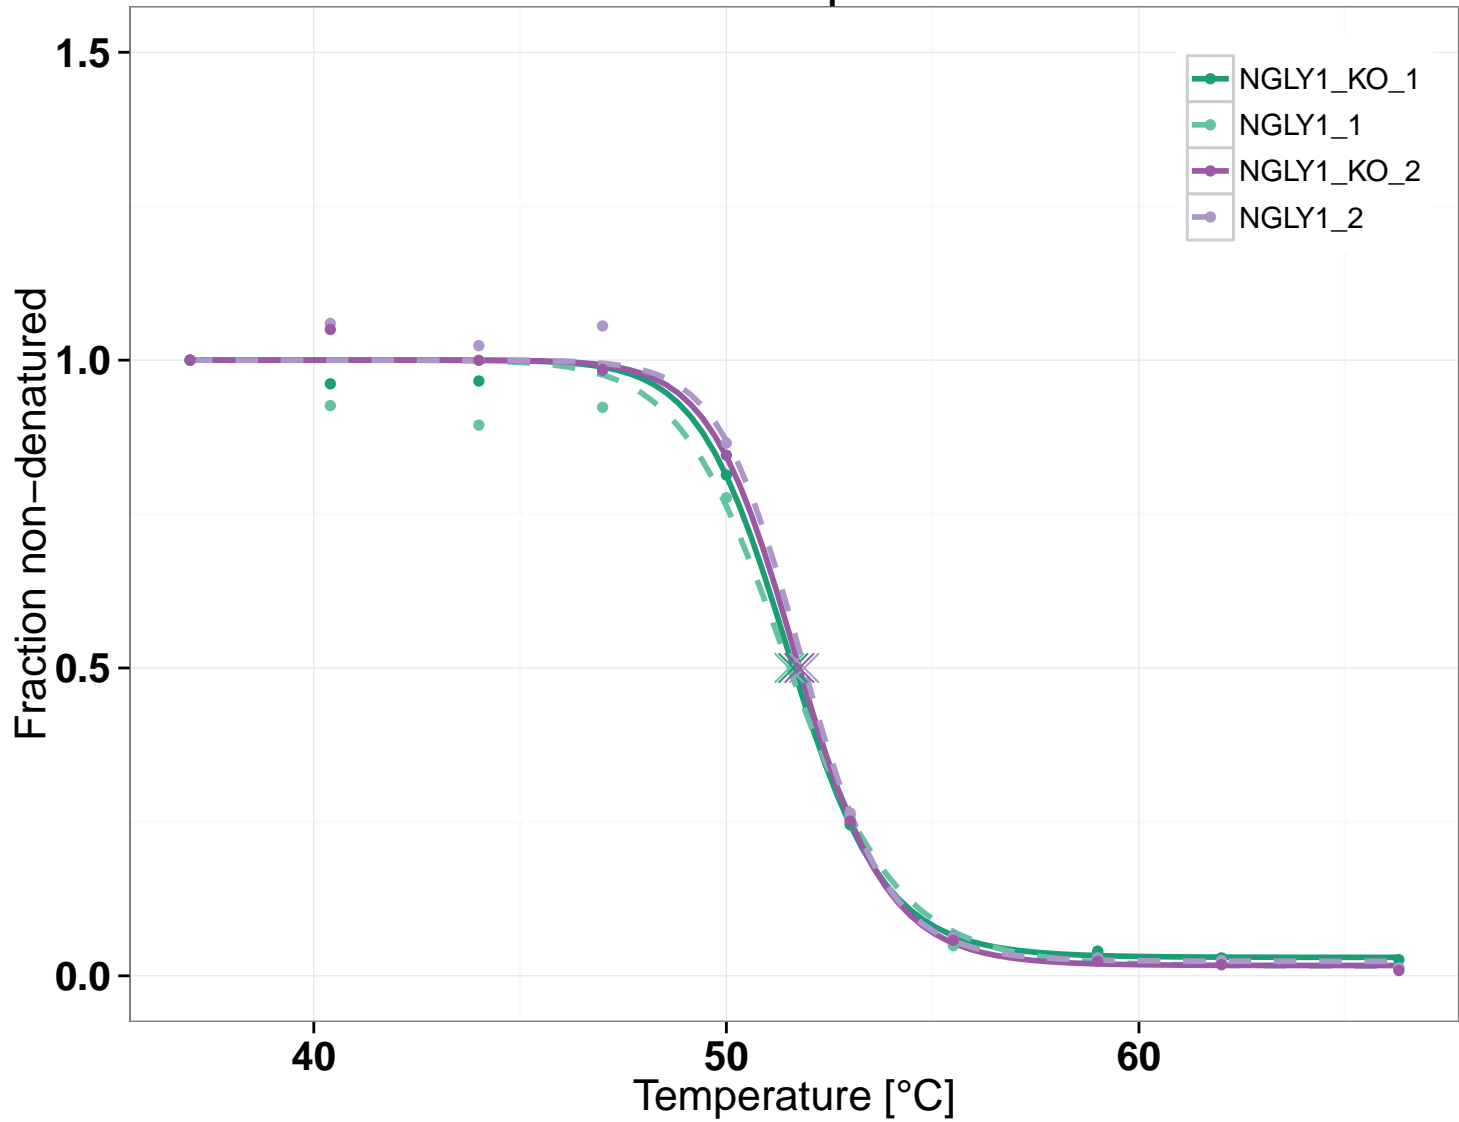

|            | meltPoint | slope | plateau | R2   |
|------------|-----------|-------|---------|------|
| NGLY1_KO_1 | 51.62     | -0.22 | 0.03    | 1    |
| NGLY1_1    | 51.53     | -0.19 | 0.02    | 0.99 |
| NGLY1_KO_2 | 51.77     | -0.23 | 0.02    | 1    |
| NGLY1_2    | 51.89     | -0.24 | 0.02    | 1    |

Supplement: Supplementary file 158 [file 1]

IPI00744182.2|SH3BP5

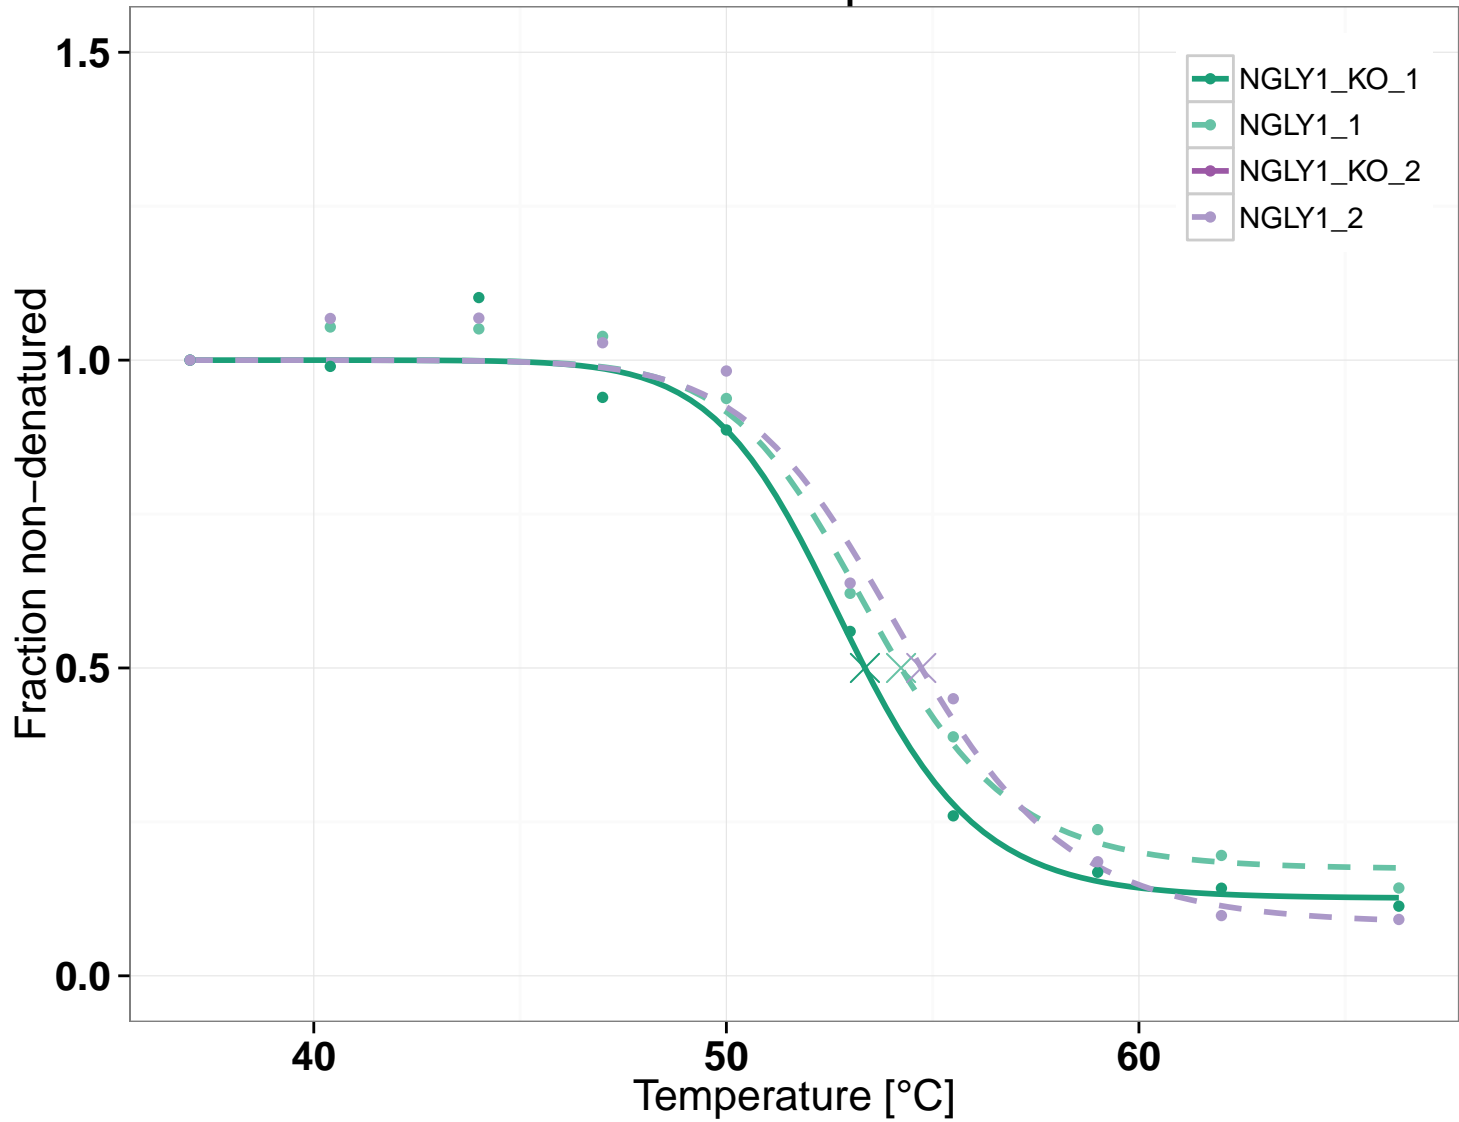

|            | meltPoint | slope | plateau | R2   |
|------------|-----------|-------|---------|------|
| NGLY1_KO_1 | 53.36     | -0.14 | 0.13    | 0.99 |
| NGLY1_1    | 54.23     | -0.12 | 0.17    | 0.99 |
| NGLY1_KO_2 | -         | -     | -       | -    |
| NGLY1_2    | 54.72     | -0.12 | 0.08    | 0.99 |

Supplement: Supplementary file 159 [file 1]

IPI00010141.4|POLE3

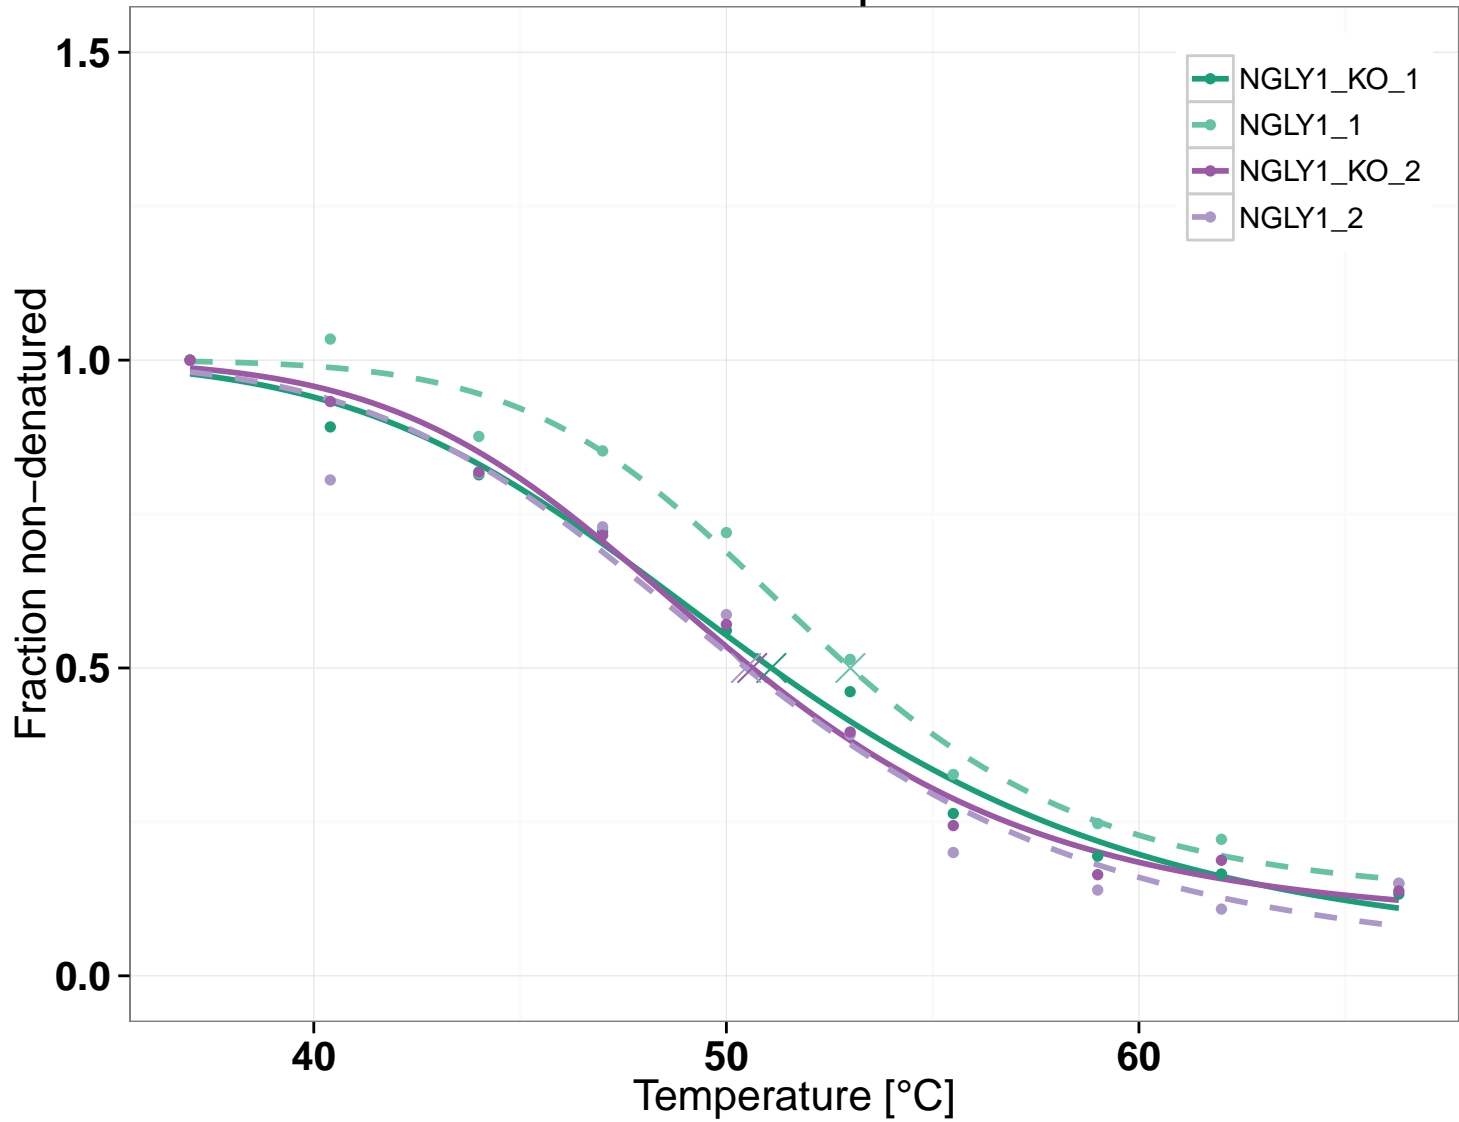

|            | meltPoint | slope  | plateau | R2   |
|------------|-----------|--------|---------|------|
| NGLY1_KO_1 | 51.09     | -0.05  | 0.02    | 0.99 |
| NGLY1_1    | 53.01     | -0.064 | 0.12    | 0.99 |
| NGLY1_KO_2 | 50.63     | -0.058 | 0.08    | 0.99 |
| NGLY1_2    | 50.48     | -0.055 | 0.01    | 0.96 |

Supplement: Supplementary file 160 [file 1]

# IPI00026105.1|SCP2

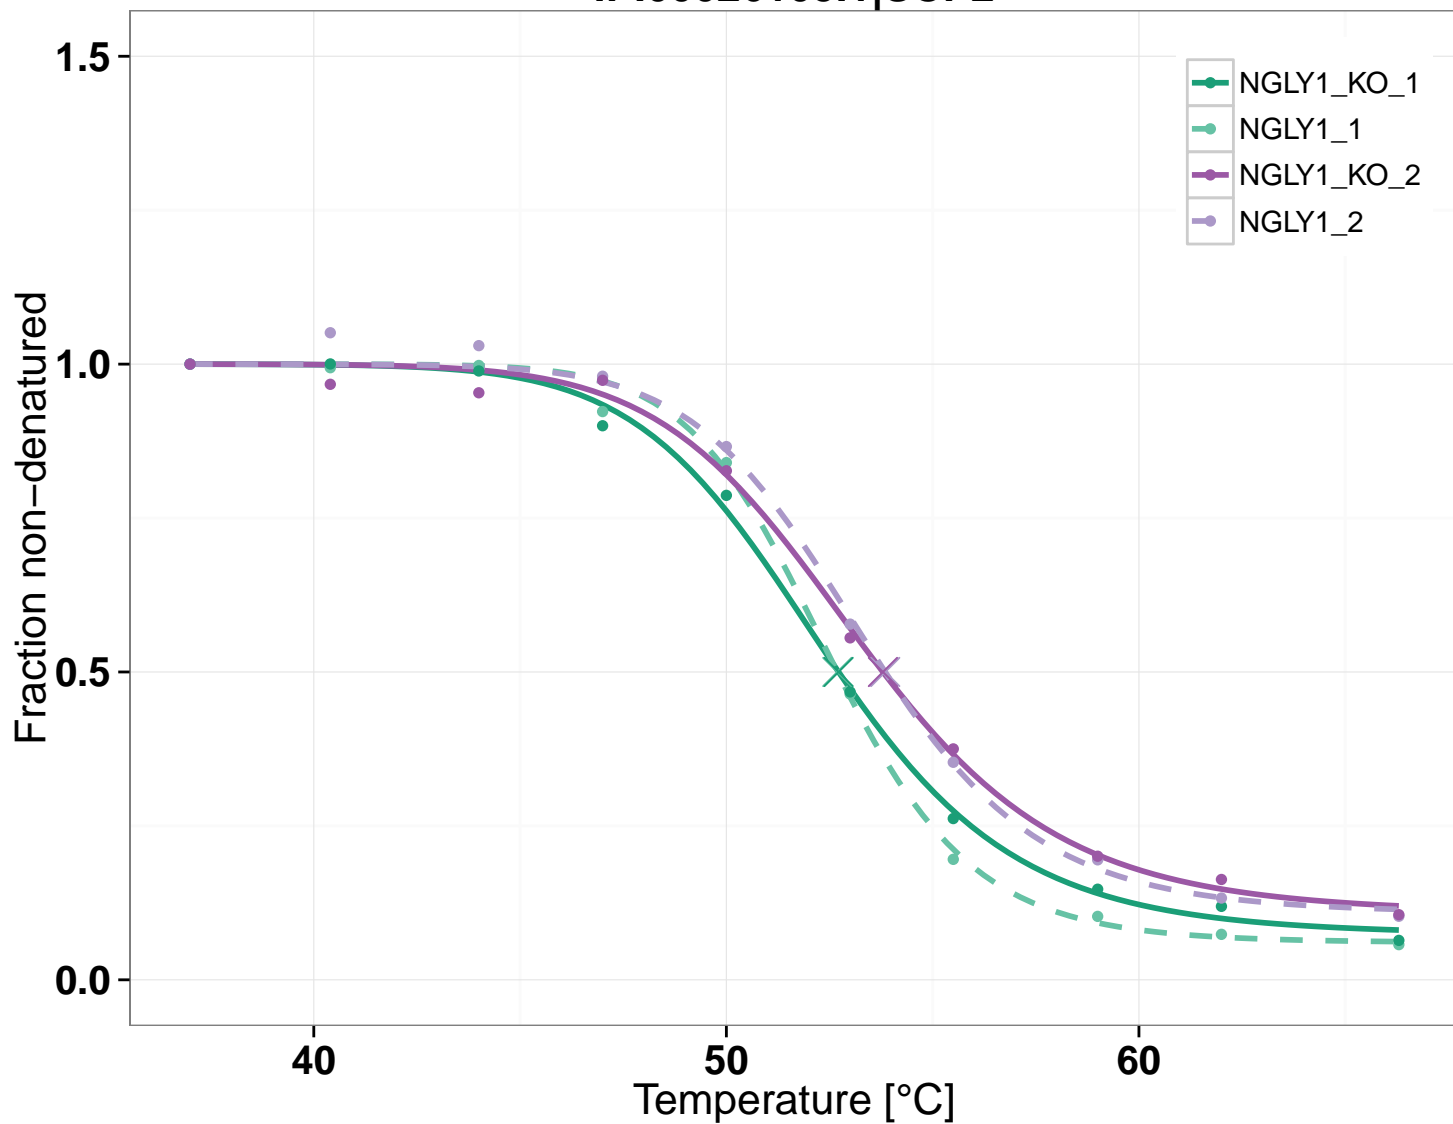

|            | meltPoint | slope  | plateau | R2 |
|------------|-----------|--------|---------|----|
| NGLY1_KO_1 | 52.72     | -0.1   | 0.07    | 1  |
| NGLY1_1    | 52.69     | -0.14  | 0.06    | 1  |
| NGLY1_KO_2 | 53.8      | -0.091 | 0.11    | 1  |
| NGLY1_2    | 53.85     | -0.11  | 0.11    | 1  |

Supplement: Supplementary file 161 [file 1]

IPI00465308.3|PIGS

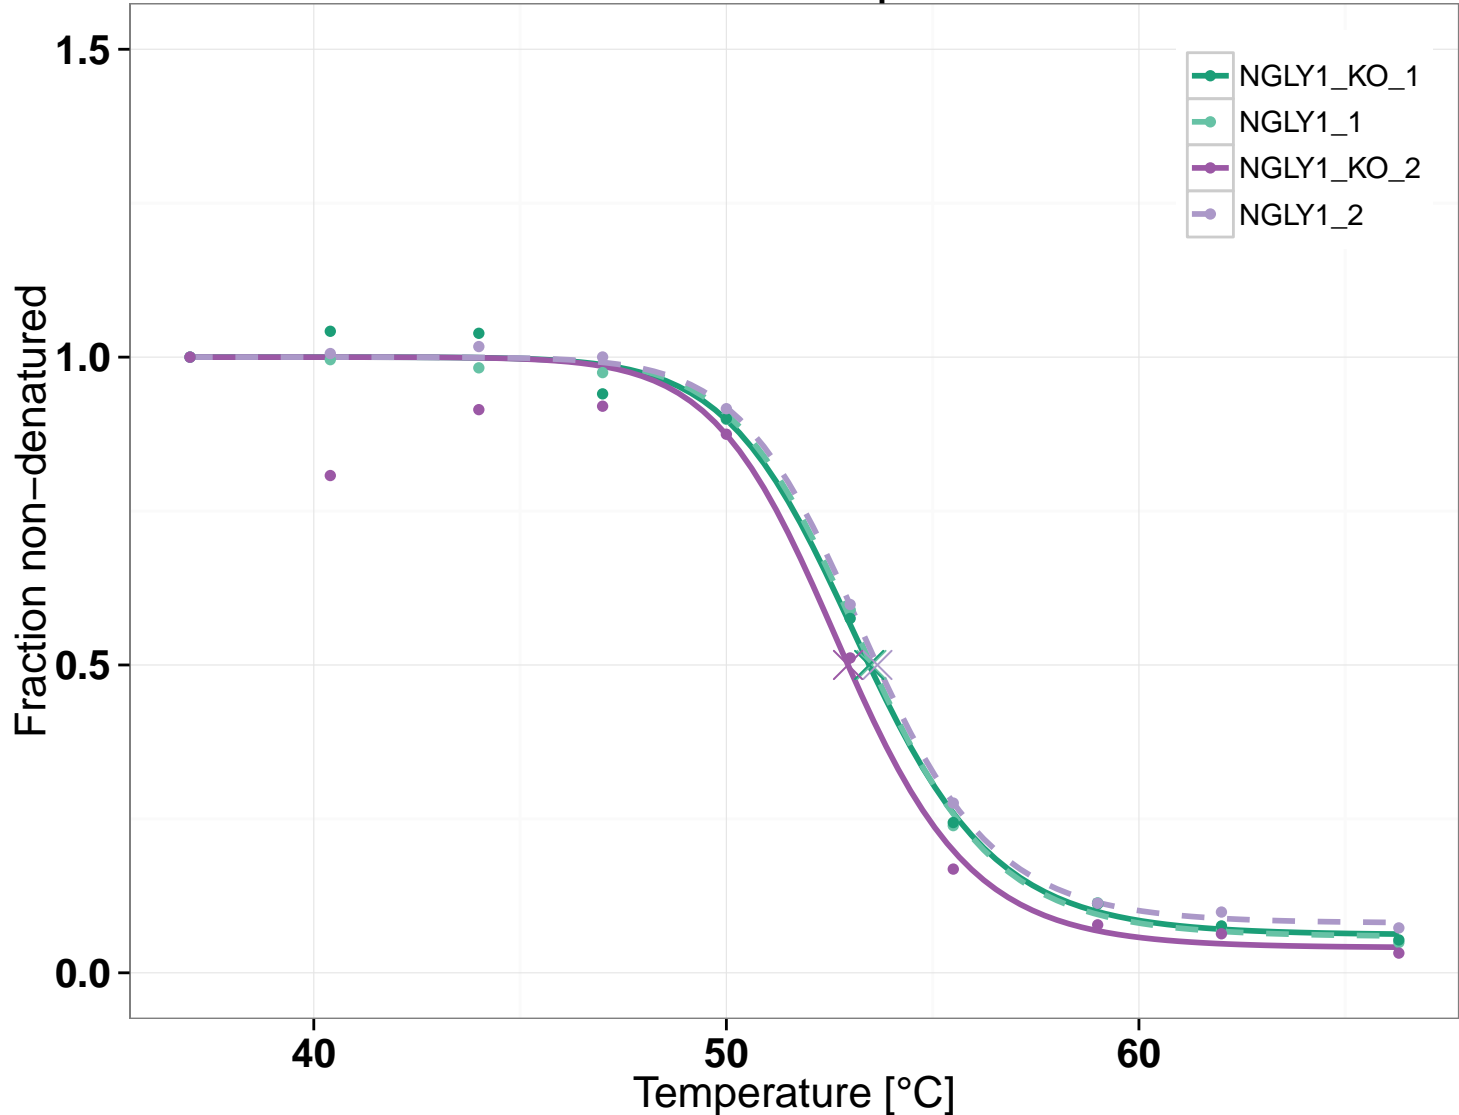

|            | meltPoint | slope | plateau | R2   |
|------------|-----------|-------|---------|------|
| NGLY1_KO_1 | 53.46     | -0.14 | 0.06    | 1    |
| NGLY1_1    | 53.52     | -0.15 | 0.06    | 1    |
| NGLY1_KO_2 | 52.95     | -0.15 | 0.04    | 0.97 |
| NGLY1_2    | 53.66     | -0.15 | 0.08    | 1    |

Supplement: Supplementary file 162 [file 1]

# IPI00031127.1|YIPF4

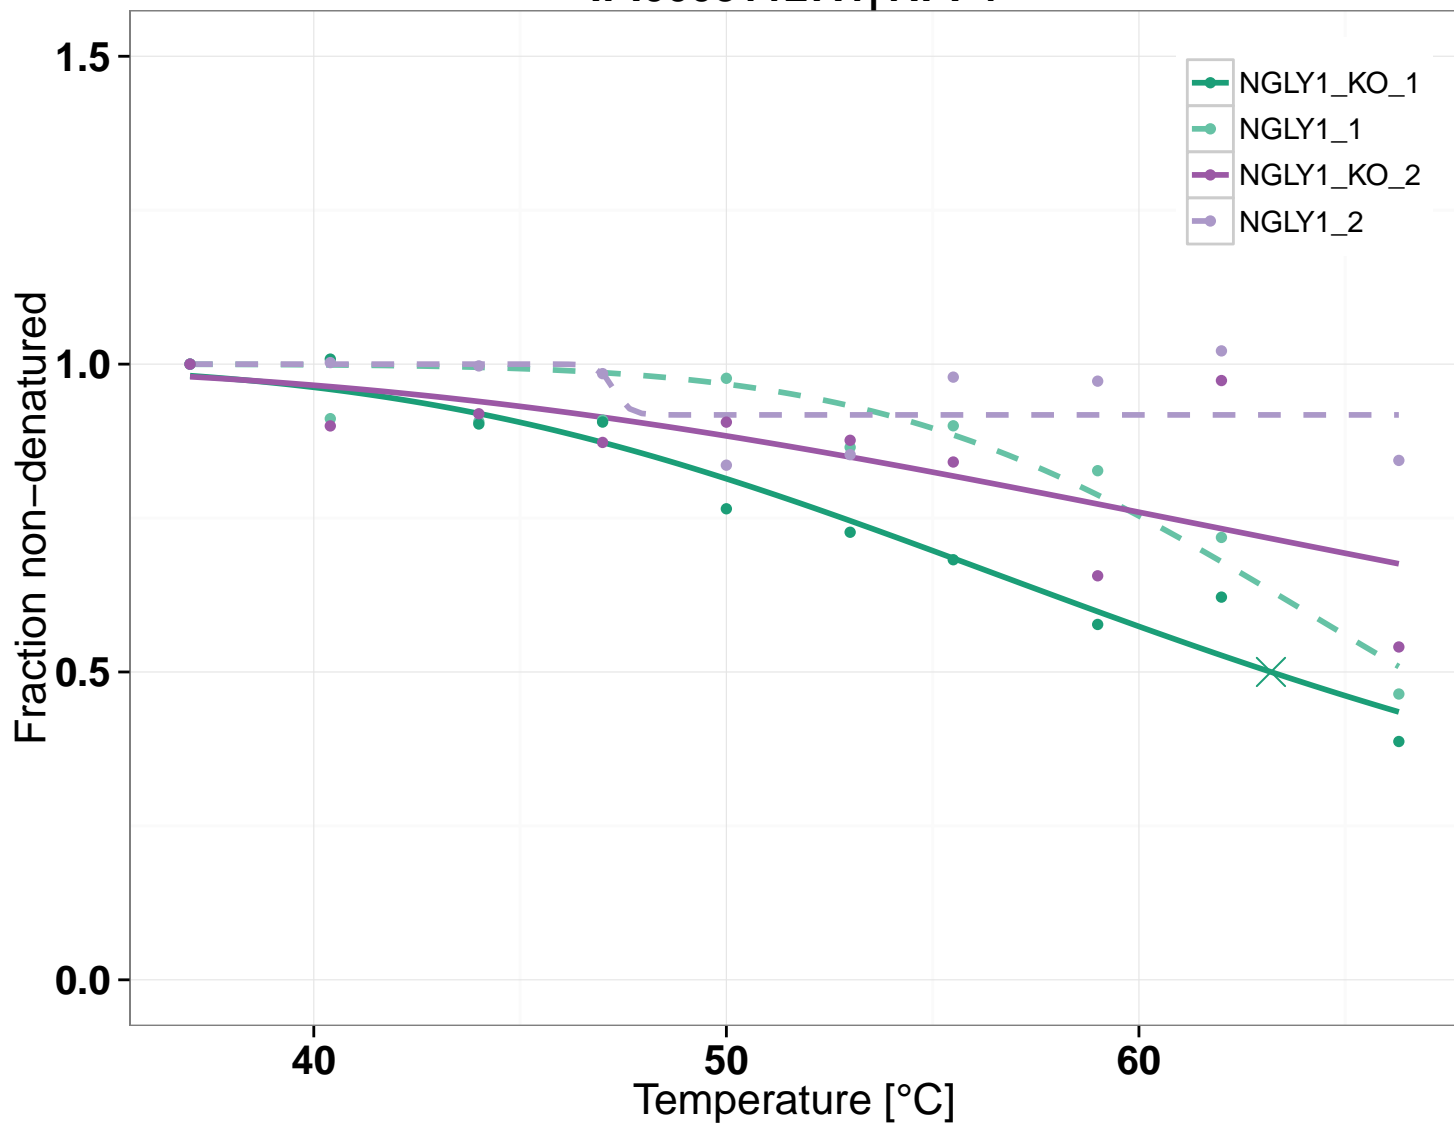

|            | meltPoint | slope  | plateau | R2   |
|------------|-----------|--------|---------|------|
| NGLY1_KO_1 | 63.2      | -0.025 | 0       | 0.95 |
| NGLY1_1    | -         | -0.04  | 0       | 0.86 |
| NGLY1_KO_2 | -         | -0.013 | 0       | 0.46 |
| NGLY1_2    | -         | -0.11  | 0.92    | 0.31 |

Supplement: Supplementary file 163 [file 1]

IPI00332278.1|TMEM55B

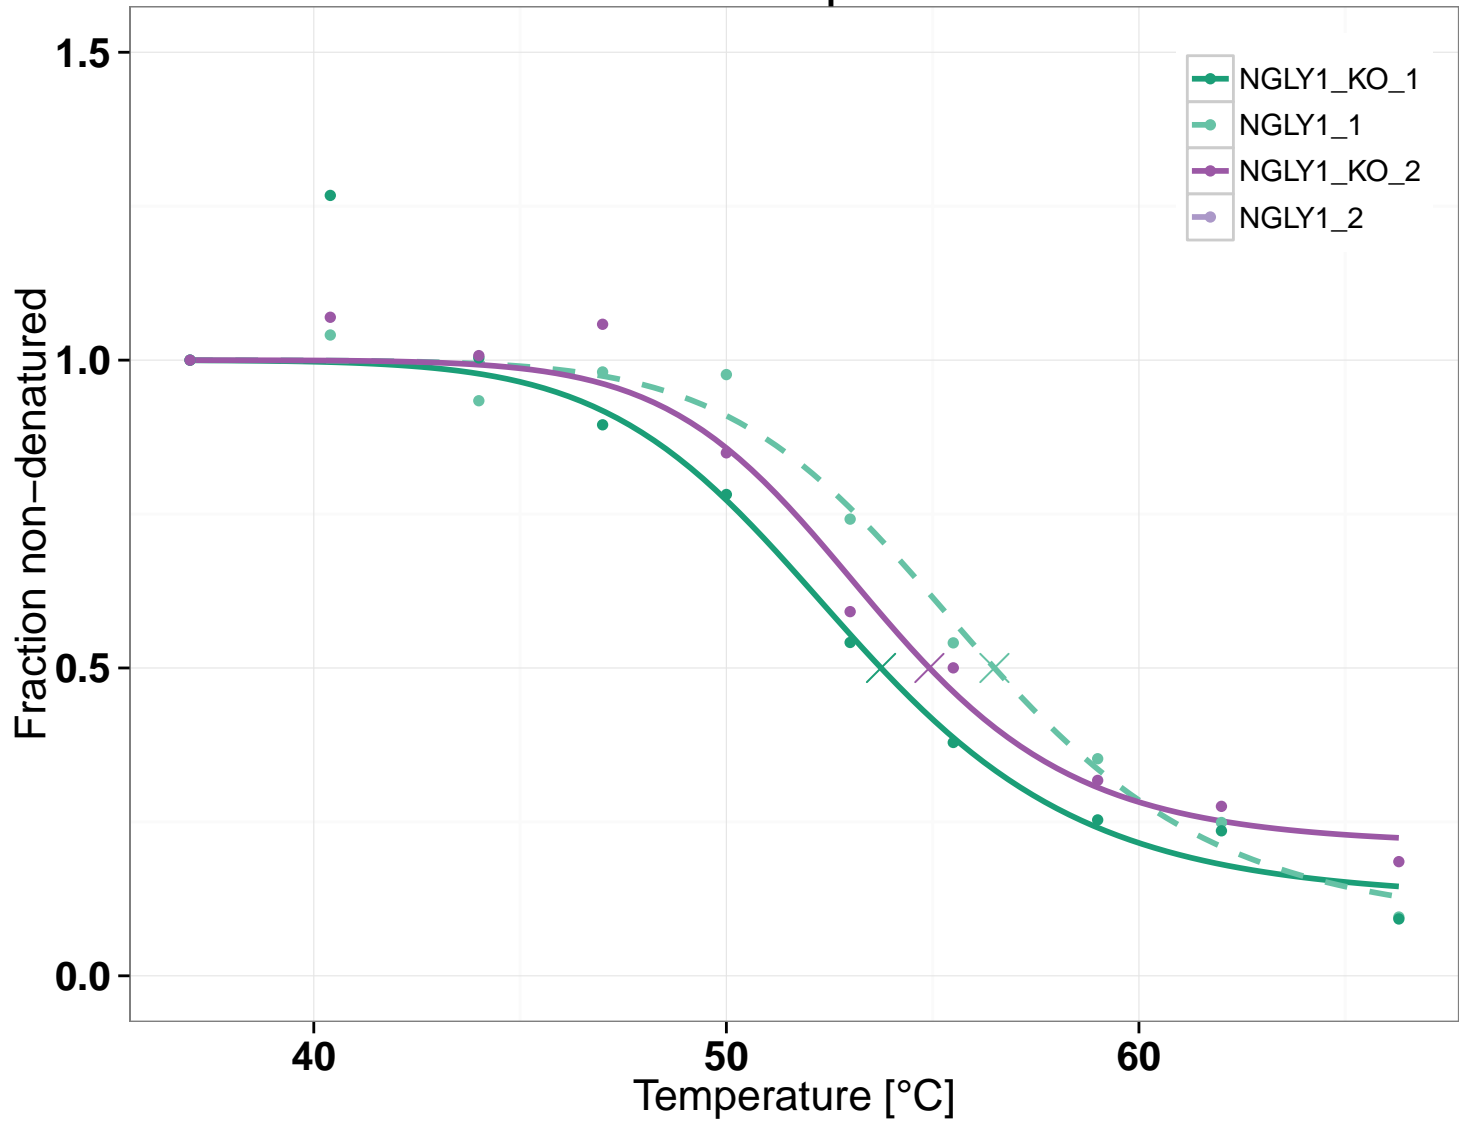

|            | meltPoint | slope  | plateau | R2   |
|------------|-----------|--------|---------|------|
| NGLY1_KO_1 | 53.75     | -0.076 | 0.12    | 0.94 |
| NGLY1_1    | 56.5      | -0.077 | 0.08    | 0.99 |
| NGLY1_KO_2 | 54.92     | -0.08  | 0.21    | 0.98 |
| NGLY1_2    | -         | -      | -       | -    |

Supplement: Supplementary file 164 [file 1]

# IPI00297579.4|CBX3

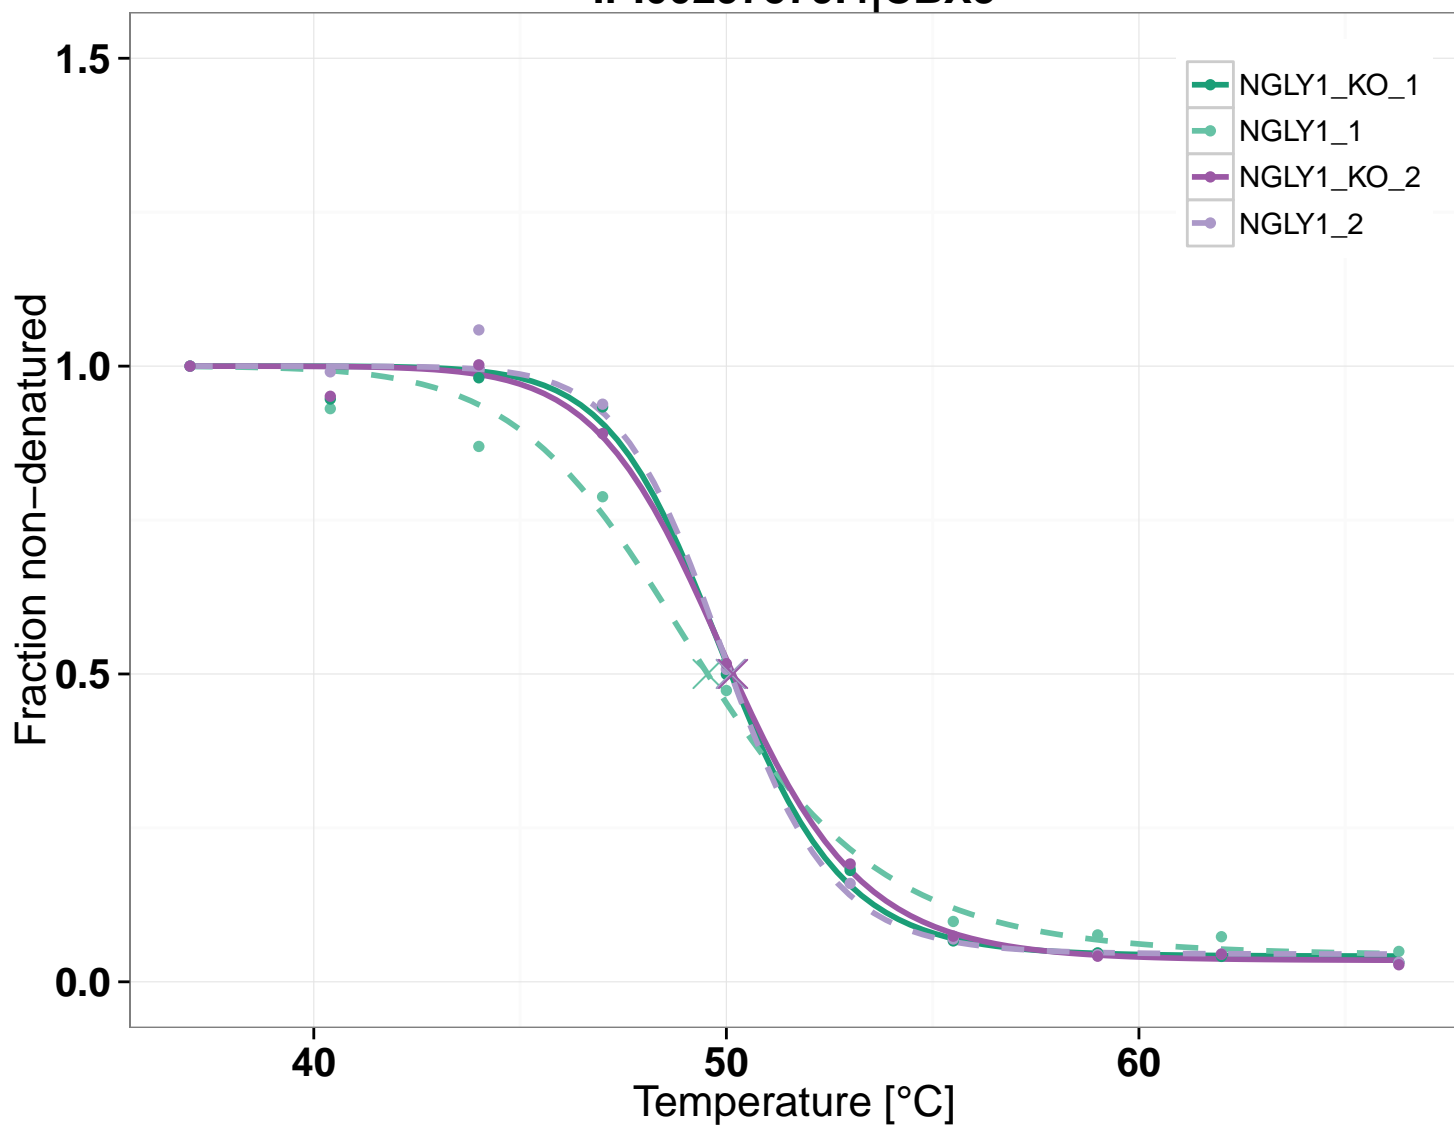

|            | meltPoint | slope | plateau | R2   |
|------------|-----------|-------|---------|------|
| NGLY1_KO_1 | 50.11     | -0.17 | 0.04    | 1    |
| NGLY1_1    | 49.54     | -0.11 | 0.04    | 0.99 |
| NGLY1_KO_2 | 50.16     | -0.15 | 0.03    | 1    |
| NGLY1_2    | 50.11     | -0.19 | 0.05    | 1    |

Supplement: Supplementary file 165 [file 1]

# IPI00032003.1|EMD

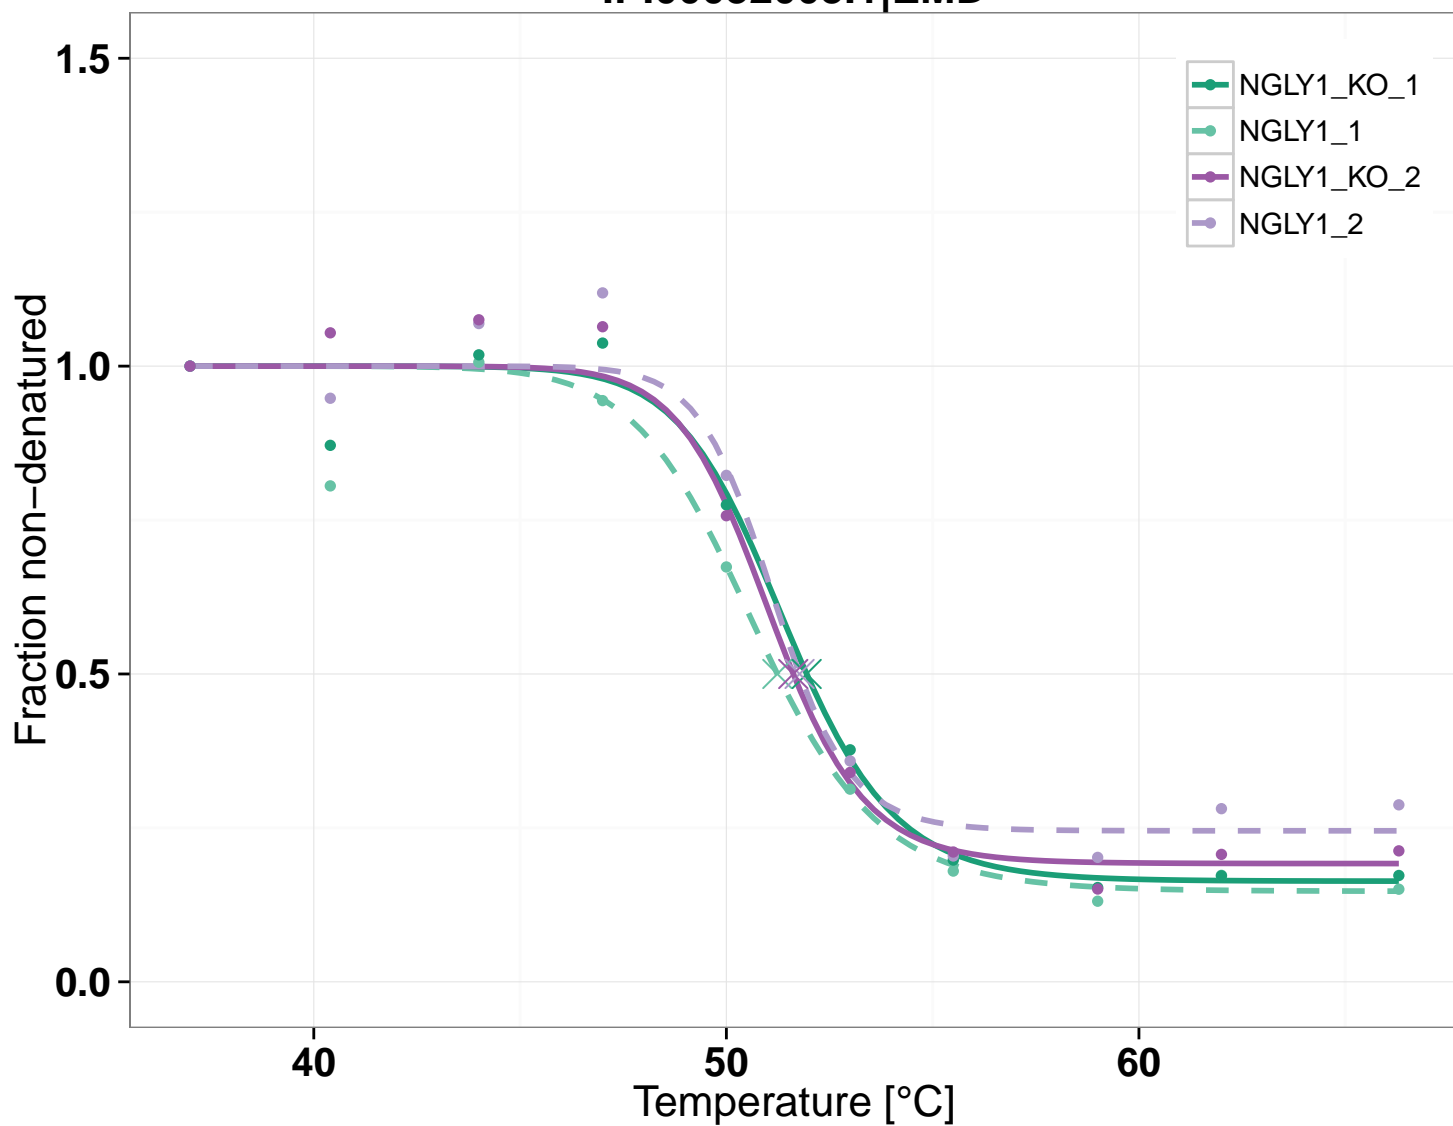

|            | meltPoint | slope | plateau | R2   |
|------------|-----------|-------|---------|------|
| NGLY1_KO_1 | 51.95     | -0.16 | 0.16    | 0.98 |
| NGLY1_1    | 51.24     | -0.14 | 0.15    | 0.97 |
| NGLY1_KO_2 | 51.62     | -0.18 | 0.19    | 0.99 |
| NGLY1_2    | 51.77     | -0.21 | 0.25    | 0.98 |

Supplement: Supplementary file 166 [file 1]

IPI00023542.6|TMED9

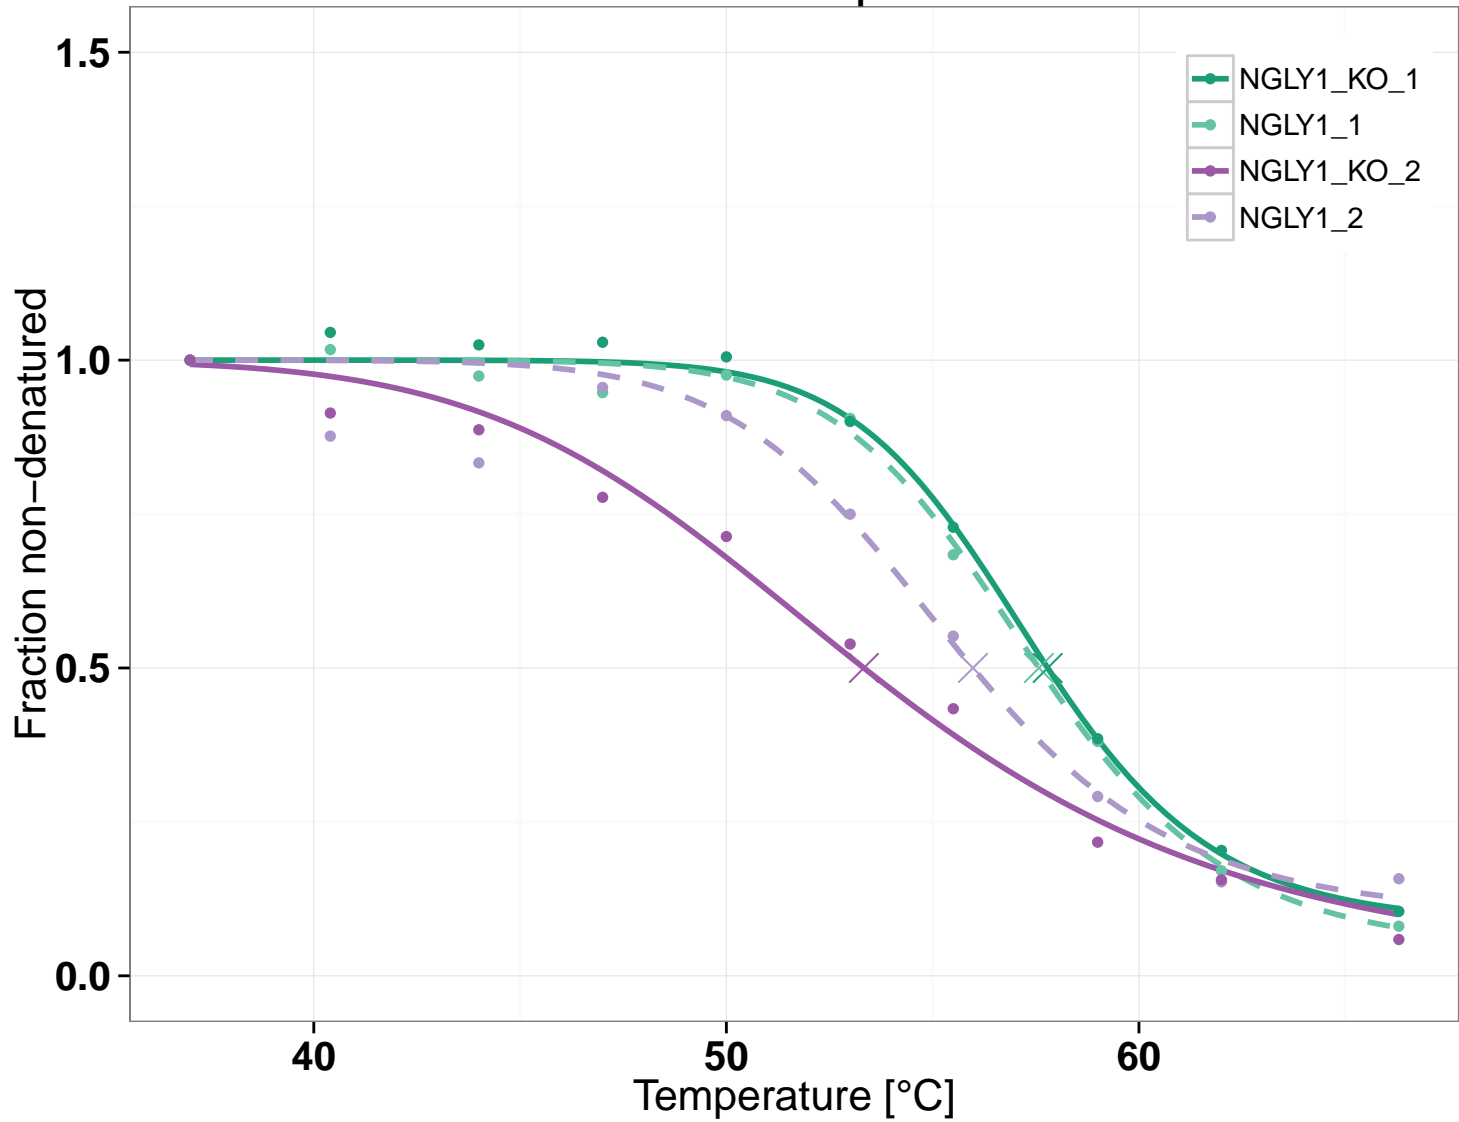

|            | meltPoint | slope  | plateau | R2   |
|------------|-----------|--------|---------|------|
| NGLY1_KO_1 | 57.79     | -0.1   | 0.08    | 1    |
| NGLY1_1    | 57.58     | -0.1   | 0.04    | 1    |
| NGLY1_KO_2 | 53.33     | -0.054 | 0       | 0.99 |
| NGLY1_2    | 55.98     | -0.084 | 0.1     | 0.96 |

Supplement: Supplementary file 167 [file 1]

# IPI00552897.2|MDC1

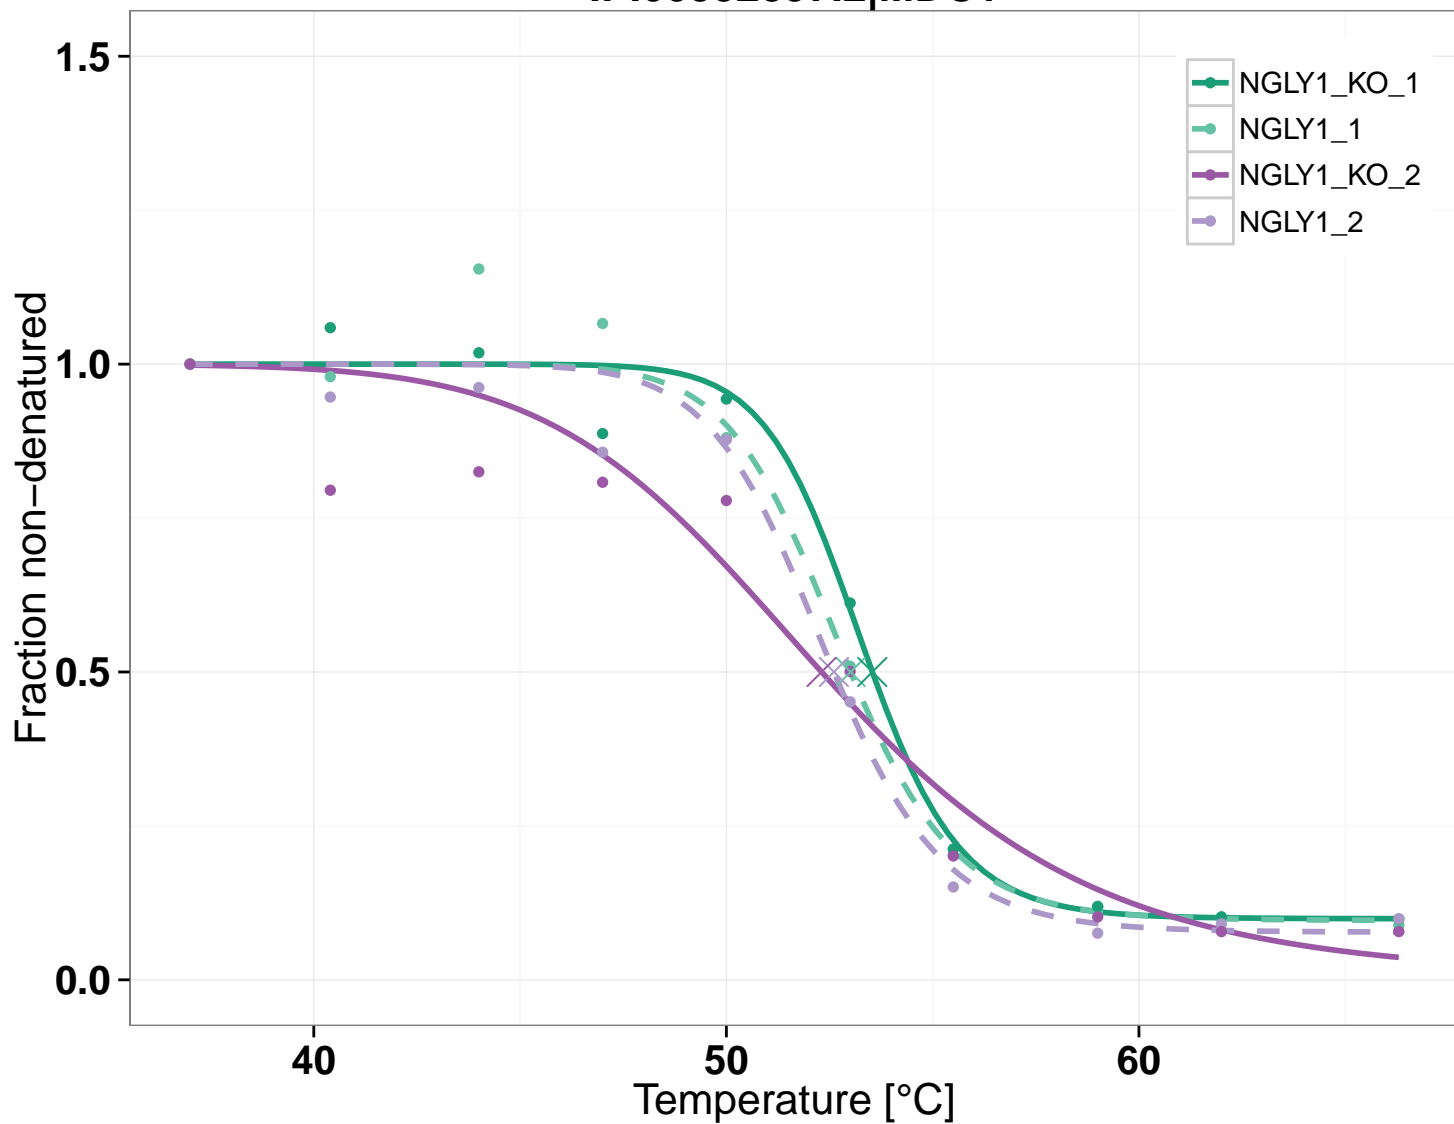

Supplement: Supplementary file 168 [file 1]

IPI00916038.1|TAX1BP1

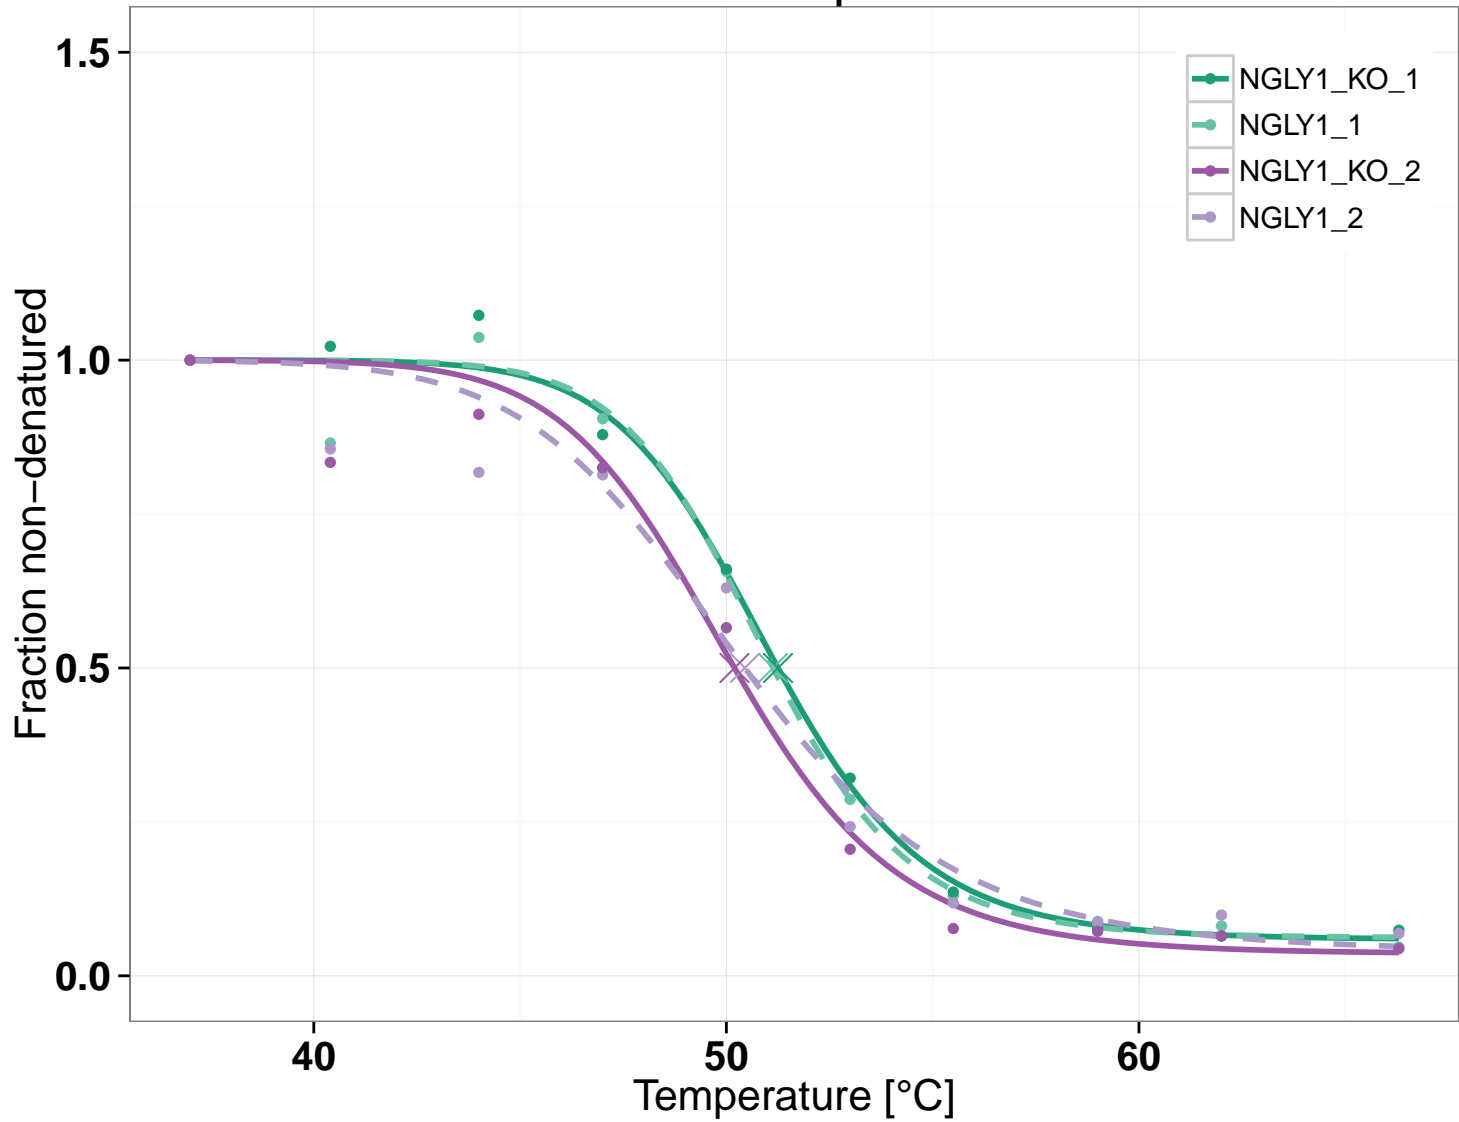

|            | meltPoint | slope  | plateau | R2   |
|------------|-----------|--------|---------|------|
| NGLY1_KO_1 | 51.25     | -0.13  | 0.06    | 0.99 |
| NGLY1_1    | 51.13     | -0.13  | 0.06    | 0.99 |
| NGLY1_KO_2 | 50.2      | -0.12  | 0.04    | 0.98 |
| NGLY1_2    | 50.45     | -0.092 | 0.04    | 0.96 |

Supplement: Supplementary file 169 [file 1]

IPI00009900.1|FAM53C

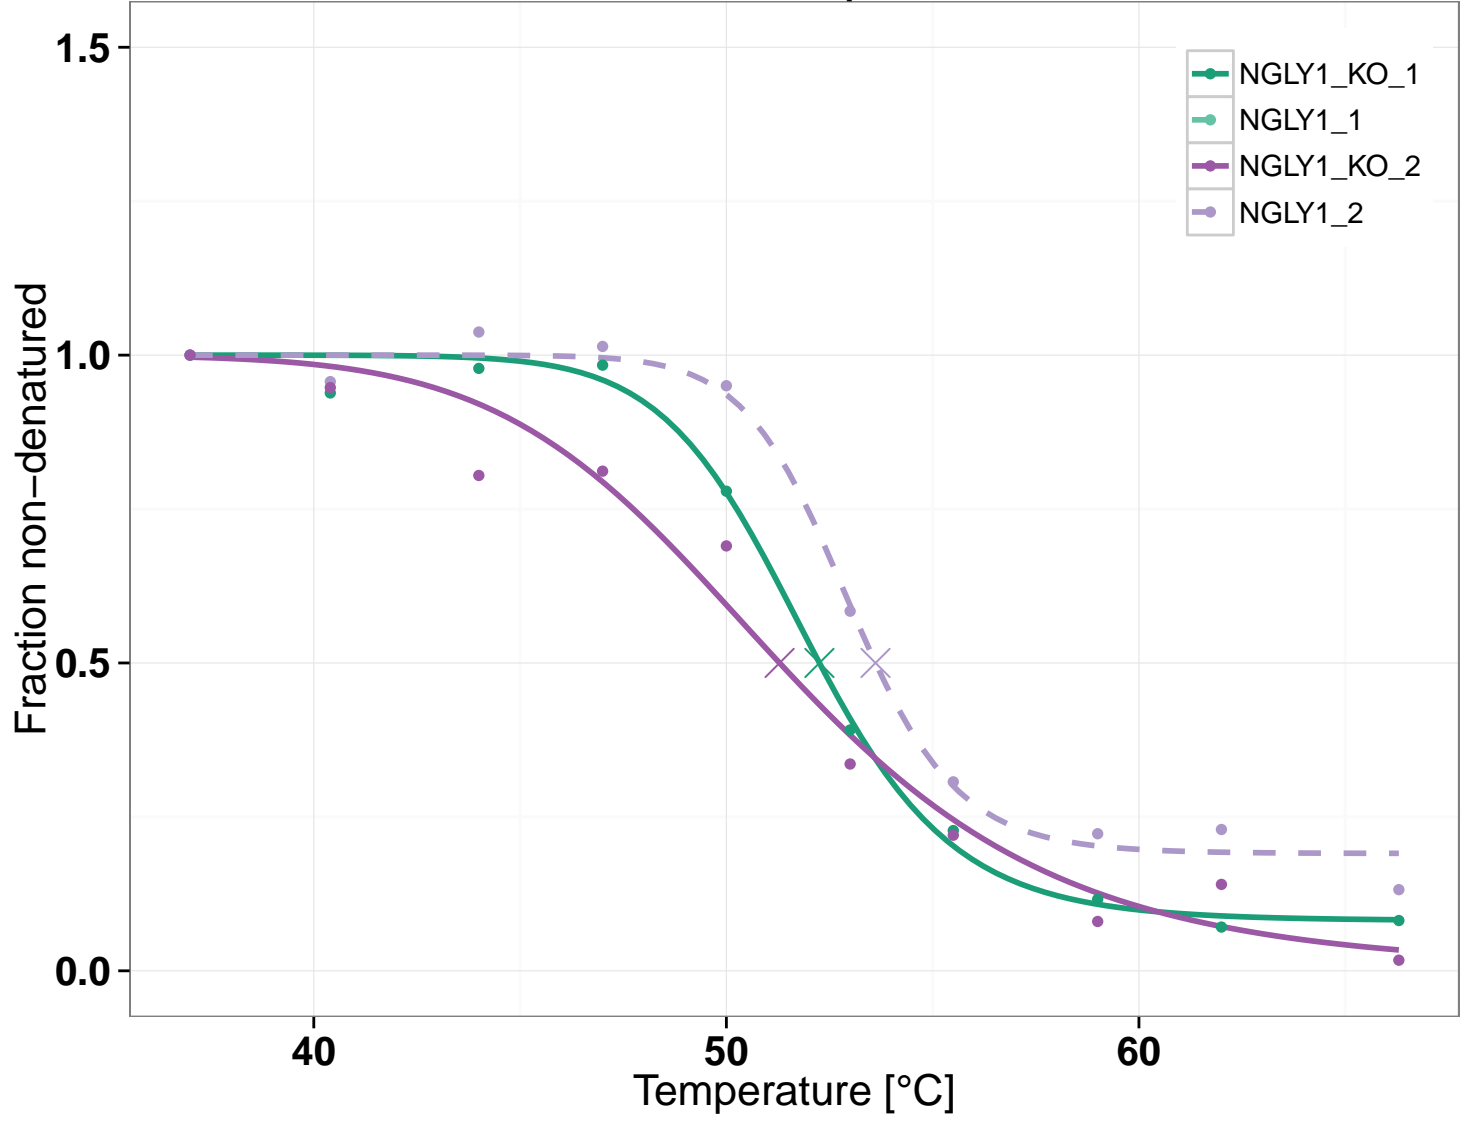

|            | meltPoint | slope  | plateau | R2   |
|------------|-----------|--------|---------|------|
| NGLY1_KO_1 | 52.26     | -0.13  | 0.08    | 1    |
| NGLY1_1    | -         | -      | -       | -    |
| NGLY1_KO_2 | 51.29     | -0.073 | 0       | 0.97 |
| NGLY1_2    | 53.62     | -0.16  | 0.19    | 0.99 |

Supplement: Supplementary file 170 [file 1]

IPI00012479.1|NACAP1

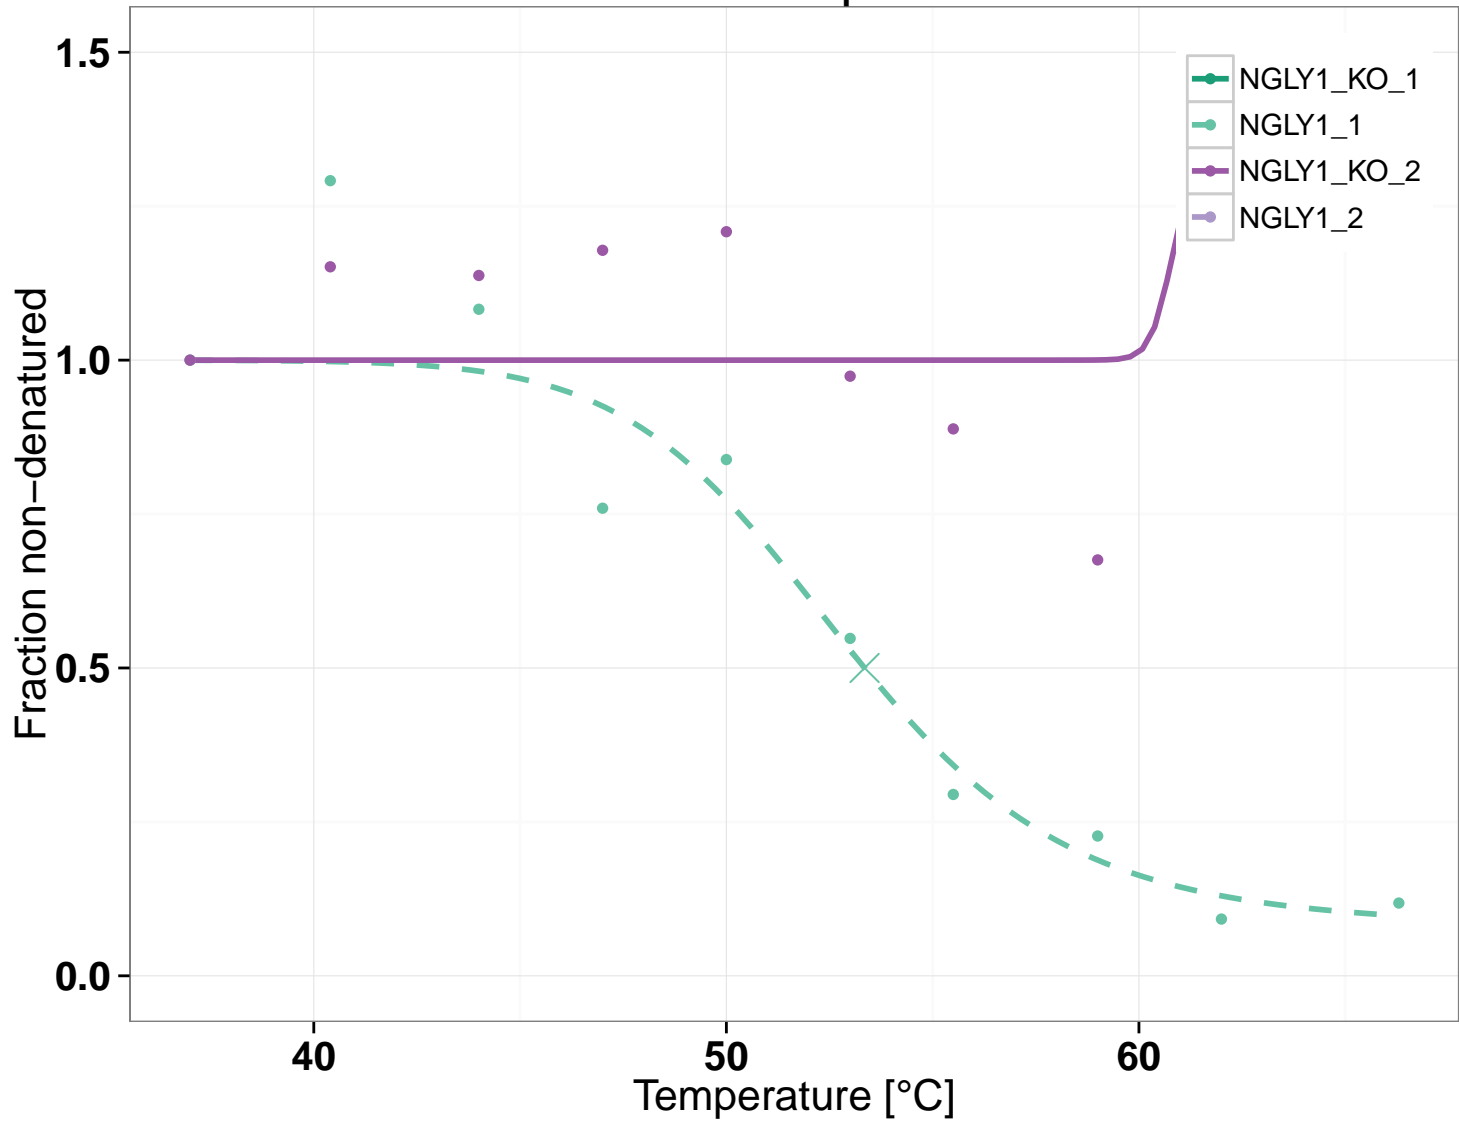

|            | meltPoint | slope  | plateau | R2   |
|------------|-----------|--------|---------|------|
| NGLY1_KO_1 | -         | -      | -       | -    |
| NGLY1_1    | 53.35     | -0.085 | 0.08    | 0.92 |
| NGLY1_KO_2 | -         | 0.31   | 1.31    | 0.34 |
| NGLY1_2    | -         | -      | -       | -    |

Supplement: Supplementary file 171 [file 1]

# IPI00031357.1|PPOX

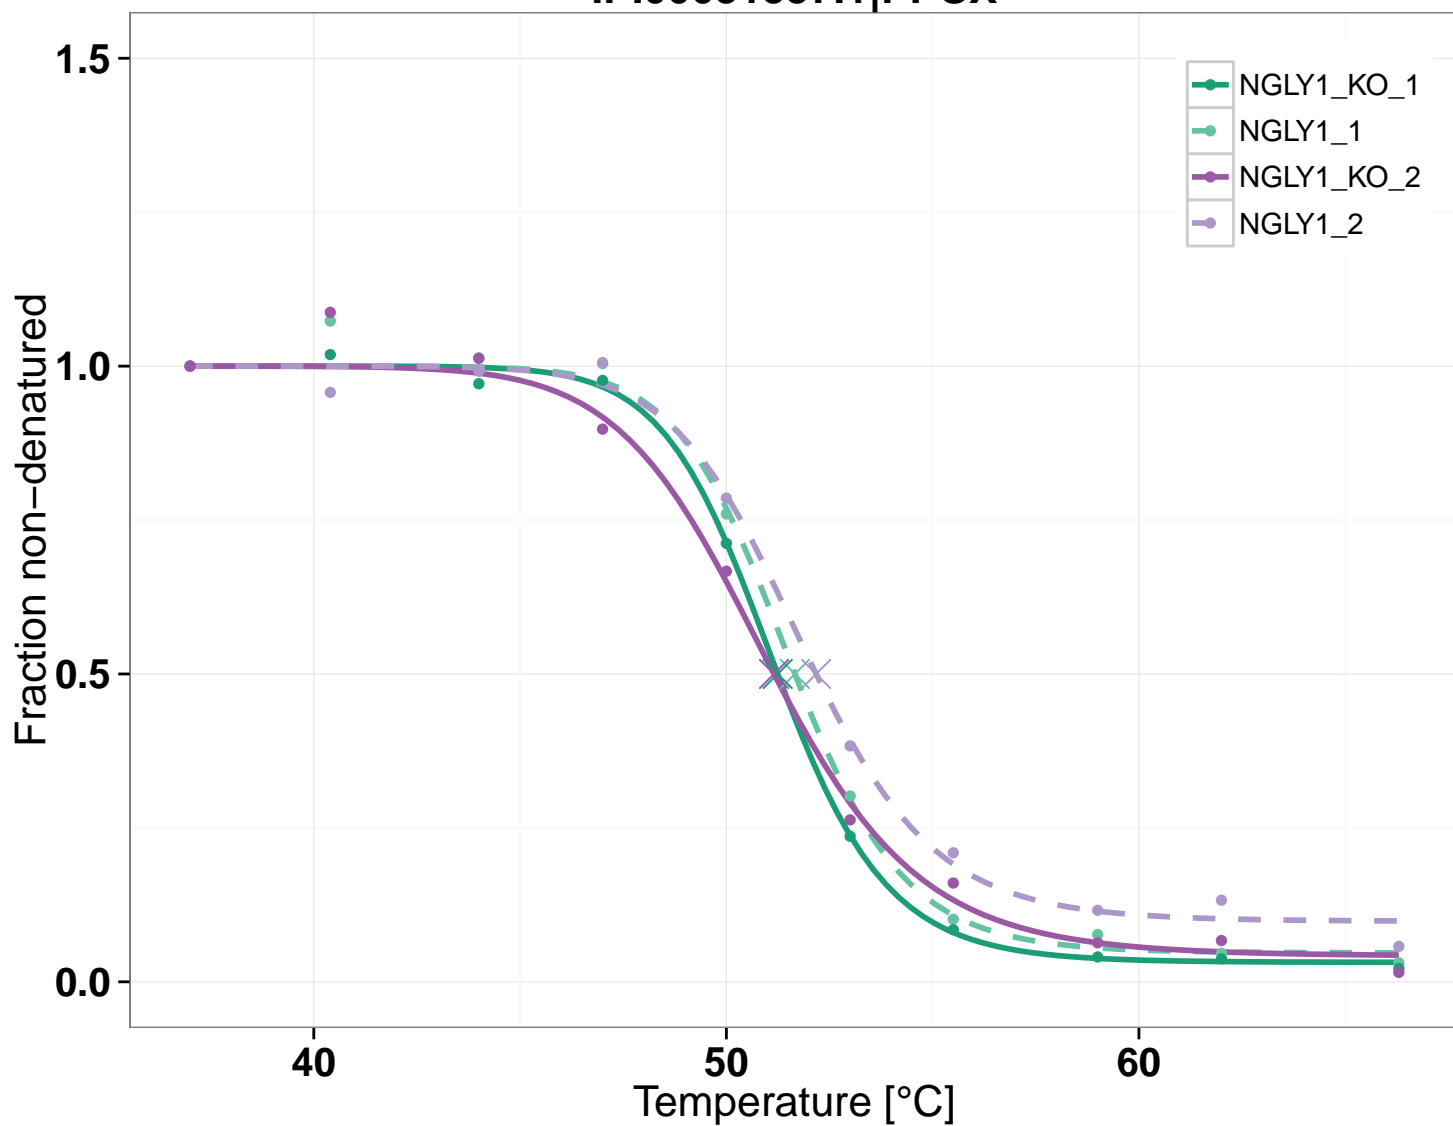

|            | meltPoint | slope | plateau | R2   |
|------------|-----------|-------|---------|------|
| NGLY1_KO_1 | 51.24     | -0.18 | 0.03    | 1    |
| NGLY1_1    | 51.66     | -0.17 | 0.05    | 1    |
| NGLY1_KO_2 | 51.16     | -0.13 | 0.04    | 0.99 |
| NGLY1_2    | 52.18     | -0.14 | 0.1     | 1    |

Supplement: Supplementary file 172 [file 1]

IPI00000977.1|MAP3K11

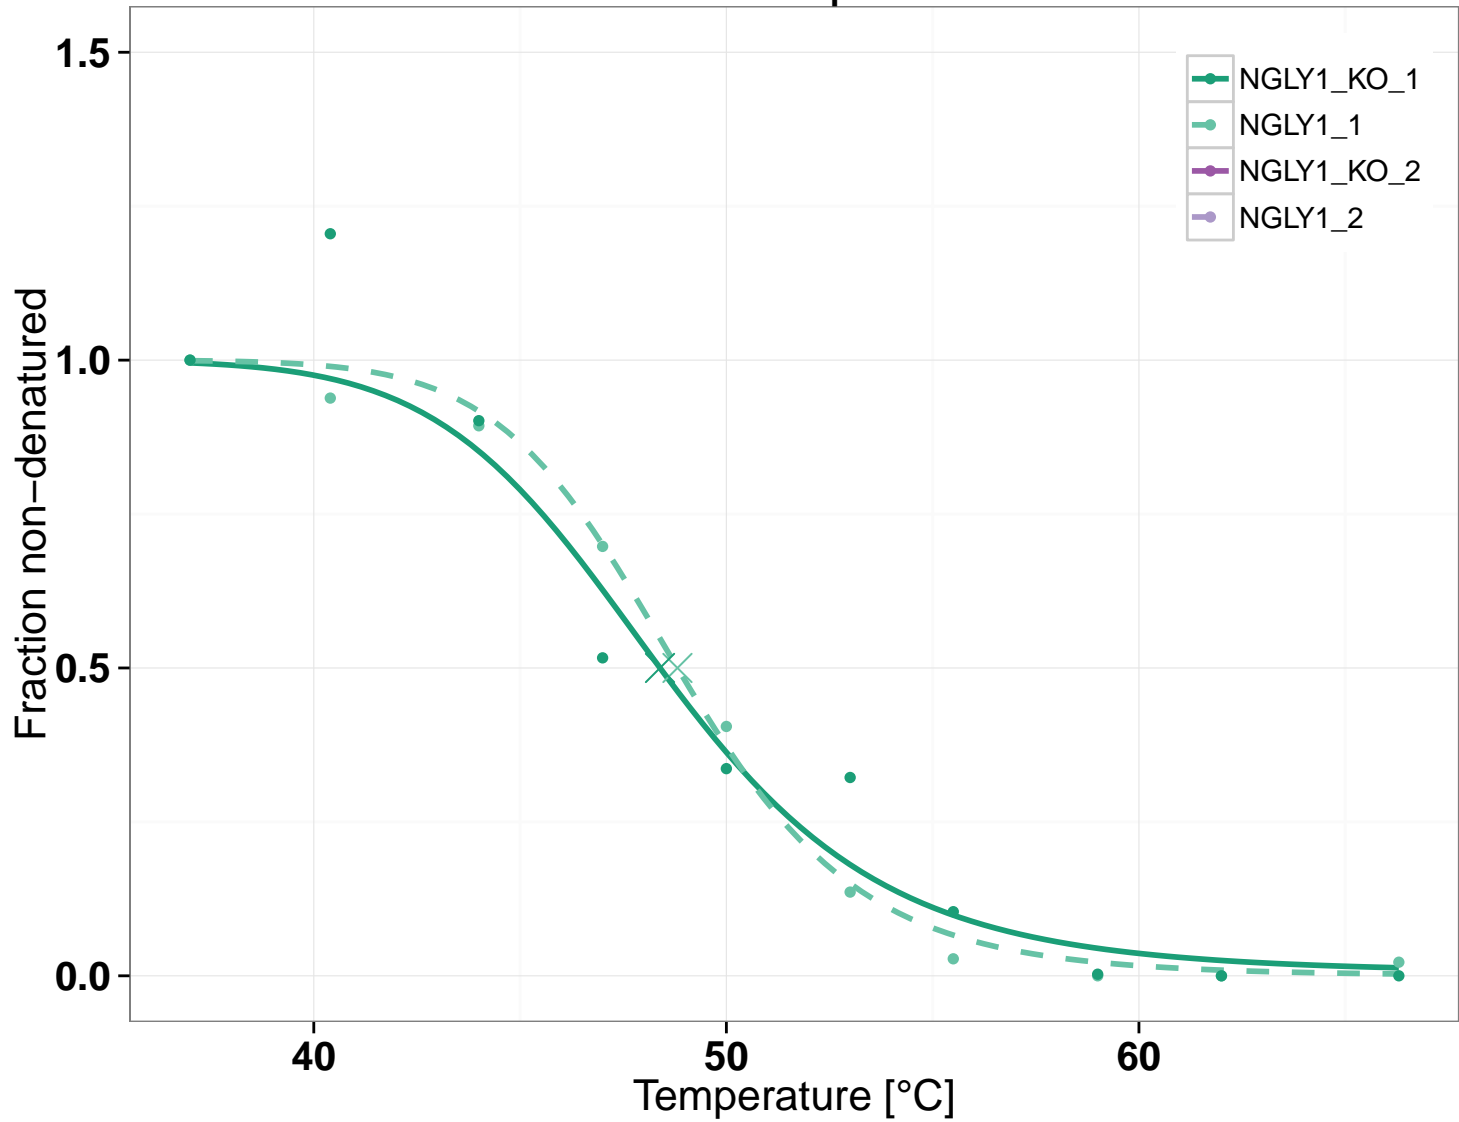

|            | meltPoint | slope  | plateau | R2   |
|------------|-----------|--------|---------|------|
| NGLY1_KO_1 | 48.39     | -0.092 | 0       | 0.95 |
| NGLY1_1    | 48.81     | -0.11  | 0       | 1    |
| NGLY1_KO_2 | -         | -      | -       | -    |
| NGLY1_2    | -         | -      | -       | -    |

Supplement: Supplementary file 173 [file 1]

IPI00018198.3|CEP27

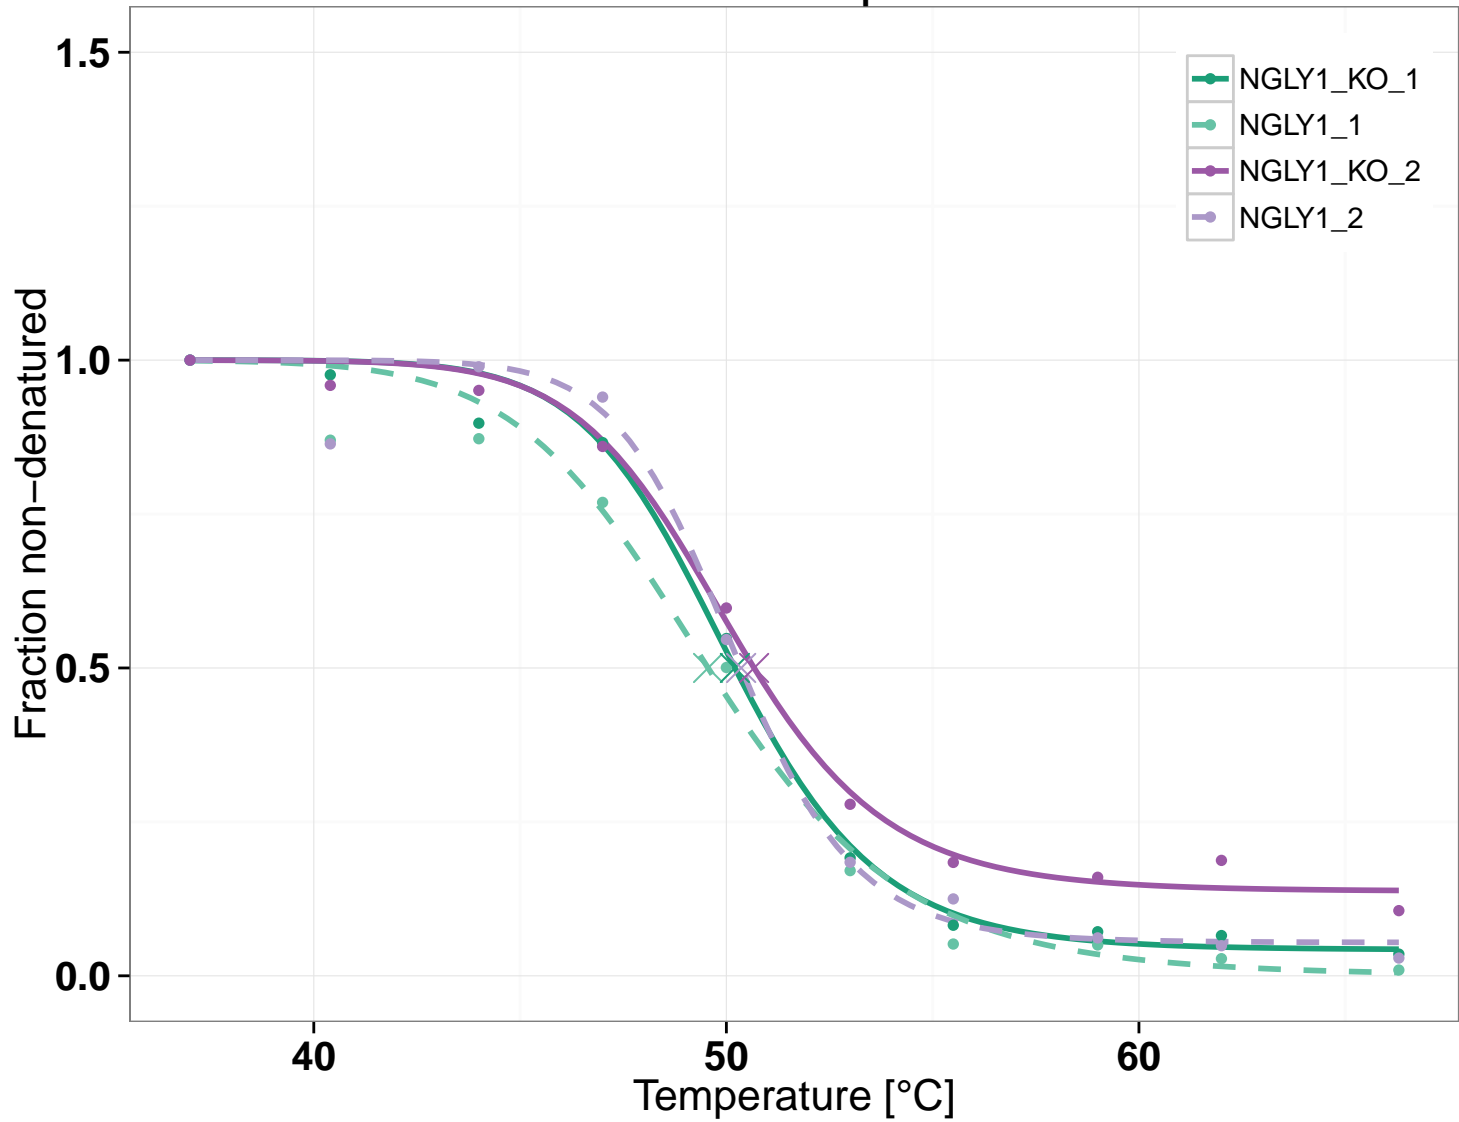

|            | meltPoint | slope | plateau | R2   |
|------------|-----------|-------|---------|------|
| NGLY1_KO_1 | 50.21     | -0.13 | 0.04    | 0.99 |
| NGLY1_1    | 49.56     | -0.11 | 0       | 0.98 |
| NGLY1_KO_2 | 50.67     | -0.11 | 0.14    | 0.99 |
| NGLY1_2    | 50.36     | -0.16 | 0.05    | 0.99 |

Supplement: Supplementary file 174 [file 1]

IPI00790010.1|GULP1

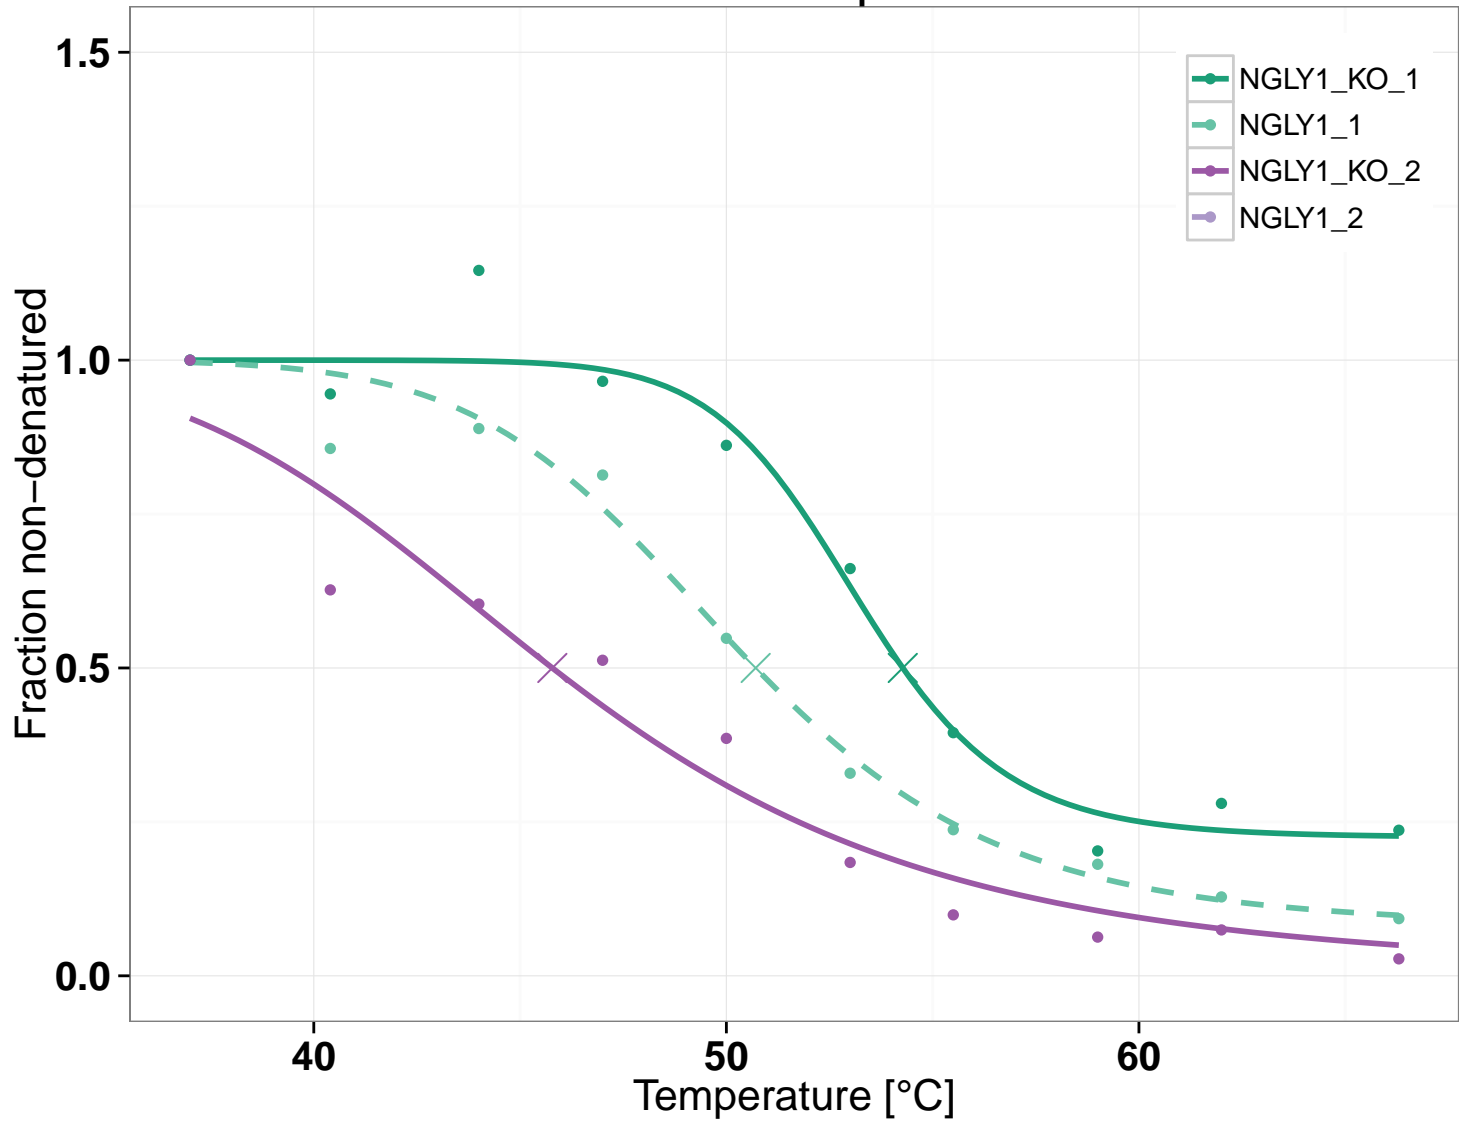

|            | meltPoint | slope  | plateau | R2   |
|------------|-----------|--------|---------|------|
| NGLY1_KO_1 | 54.28     | -0.11  | 0.22    | 0.97 |
| NGLY1_1    | 50.71     | -0.073 | 0.08    | 0.98 |
| NGLY1_KO_2 | 45.78     | -0.054 | 0       | 0.95 |
| NGLY1_2    | -         | -      | -       | -    |

Supplement: Supplementary file 175 [file 1]

IPI00167547.6|BRWD3

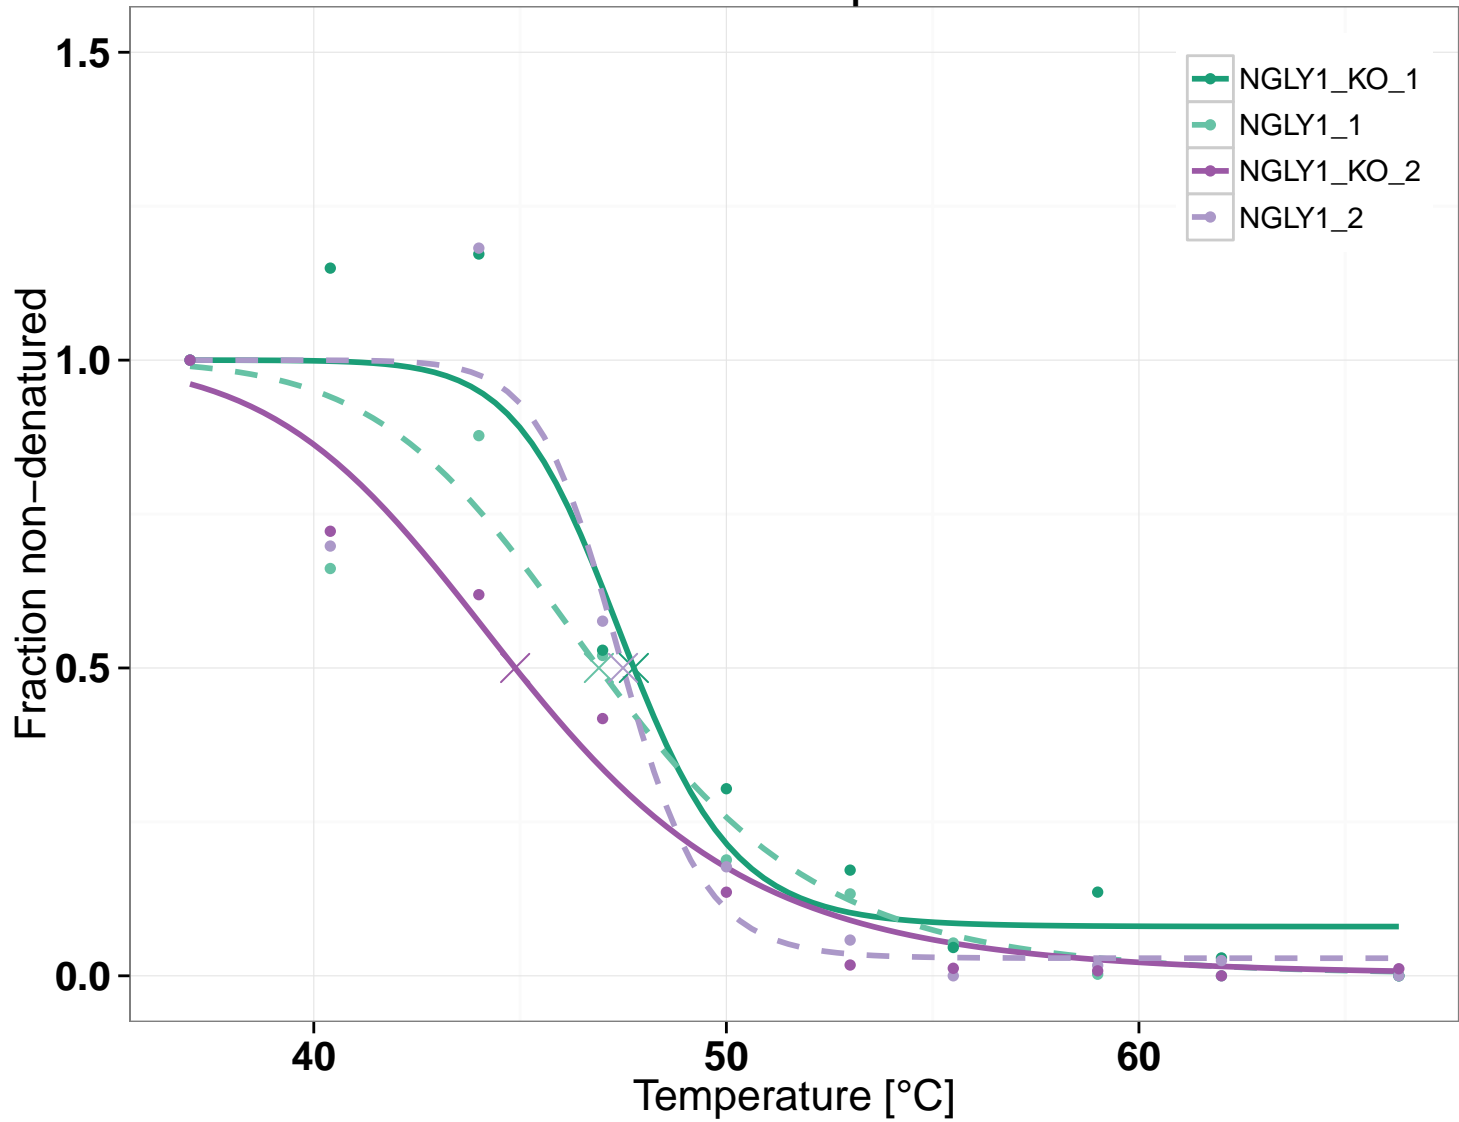

|            | meltPoint | slope  | plateau | R2   |
|------------|-----------|--------|---------|------|
| NGLY1_KO_1 | 47.76     | -0.17  | 0.08    | 0.95 |
| NGLY1_1    | 46.91     | -0.093 | 0       | 0.93 |
| NGLY1_KO_2 | 44.88     | -0.085 | 0       | 0.97 |
| NGLY1_2    | 47.49     | -0.24  | 0.03    | 0.92 |

Supplement: Supplementary file 176 [file 1]

IPI00004968.1|PRPF19

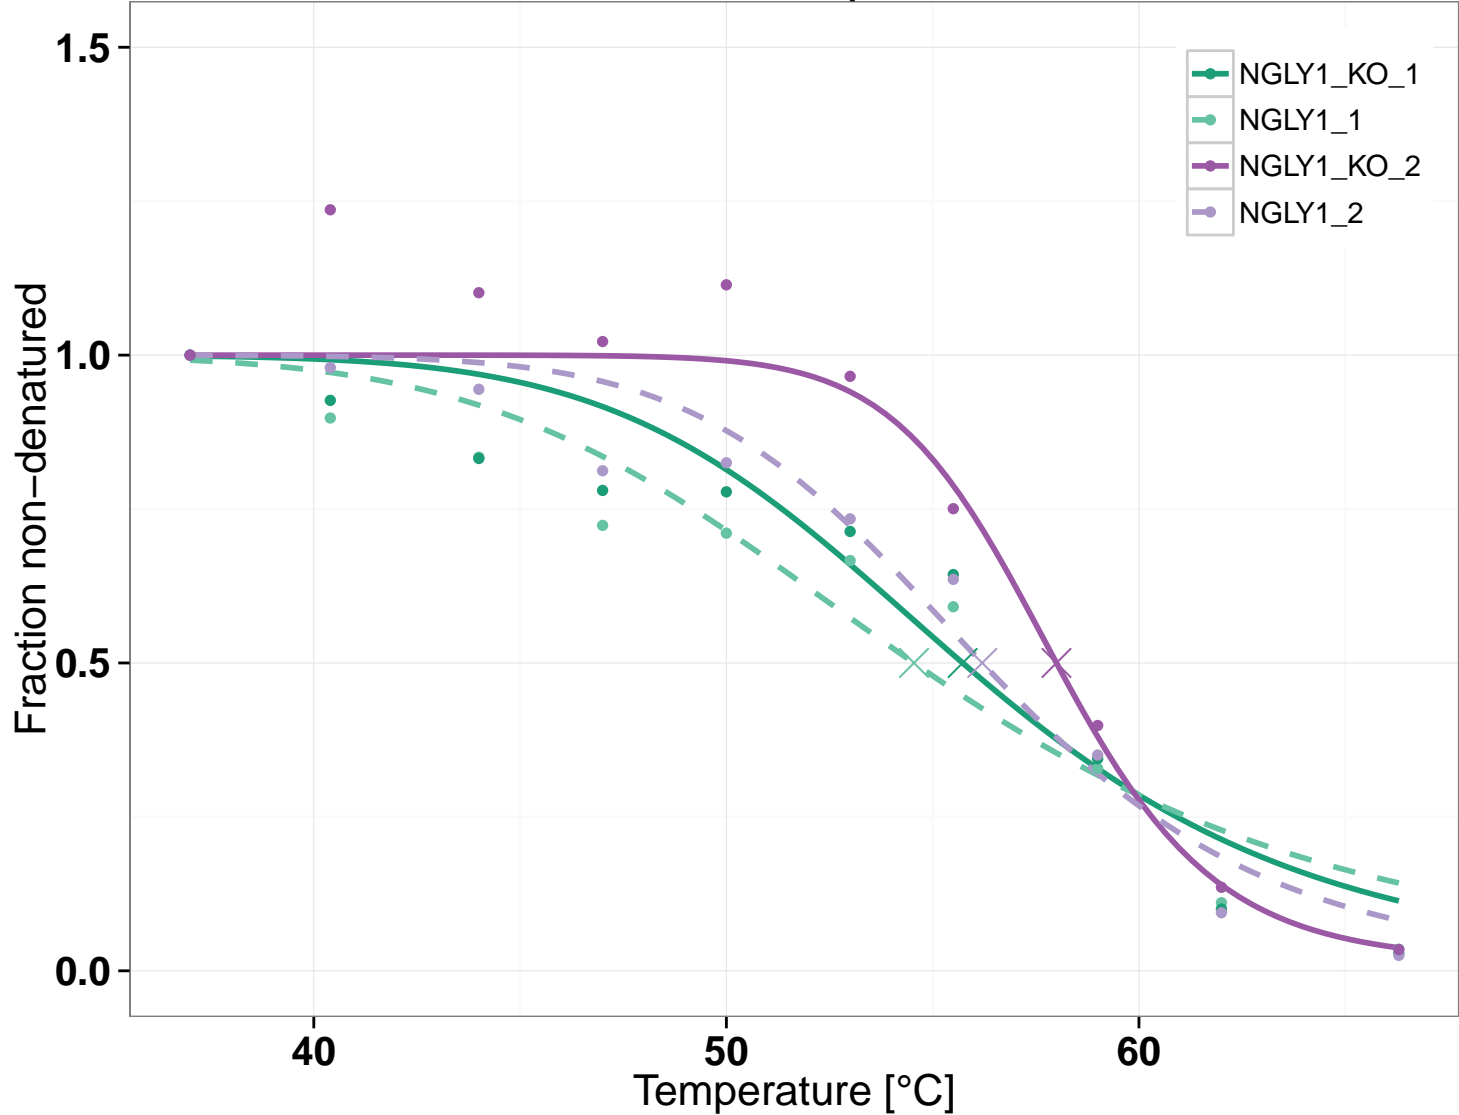

|            | meltPoint | slope  | plateau | R2   |
|------------|-----------|--------|---------|------|
| NGLY1_KO_1 | 55.73     | -0.059 | 0       | 0.92 |
| NGLY1_1    | 54.55     | -0.048 | 0       | 0.92 |
| NGLY1_KO_2 | 58        | -0.13  | 0.01    | 0.95 |
| NGLY1_2    | 56.2      | -0.072 | 0       | 0.96 |

Supplement: Supplementary file 177 [file 1]

IPI00018078.1|MAGEA12

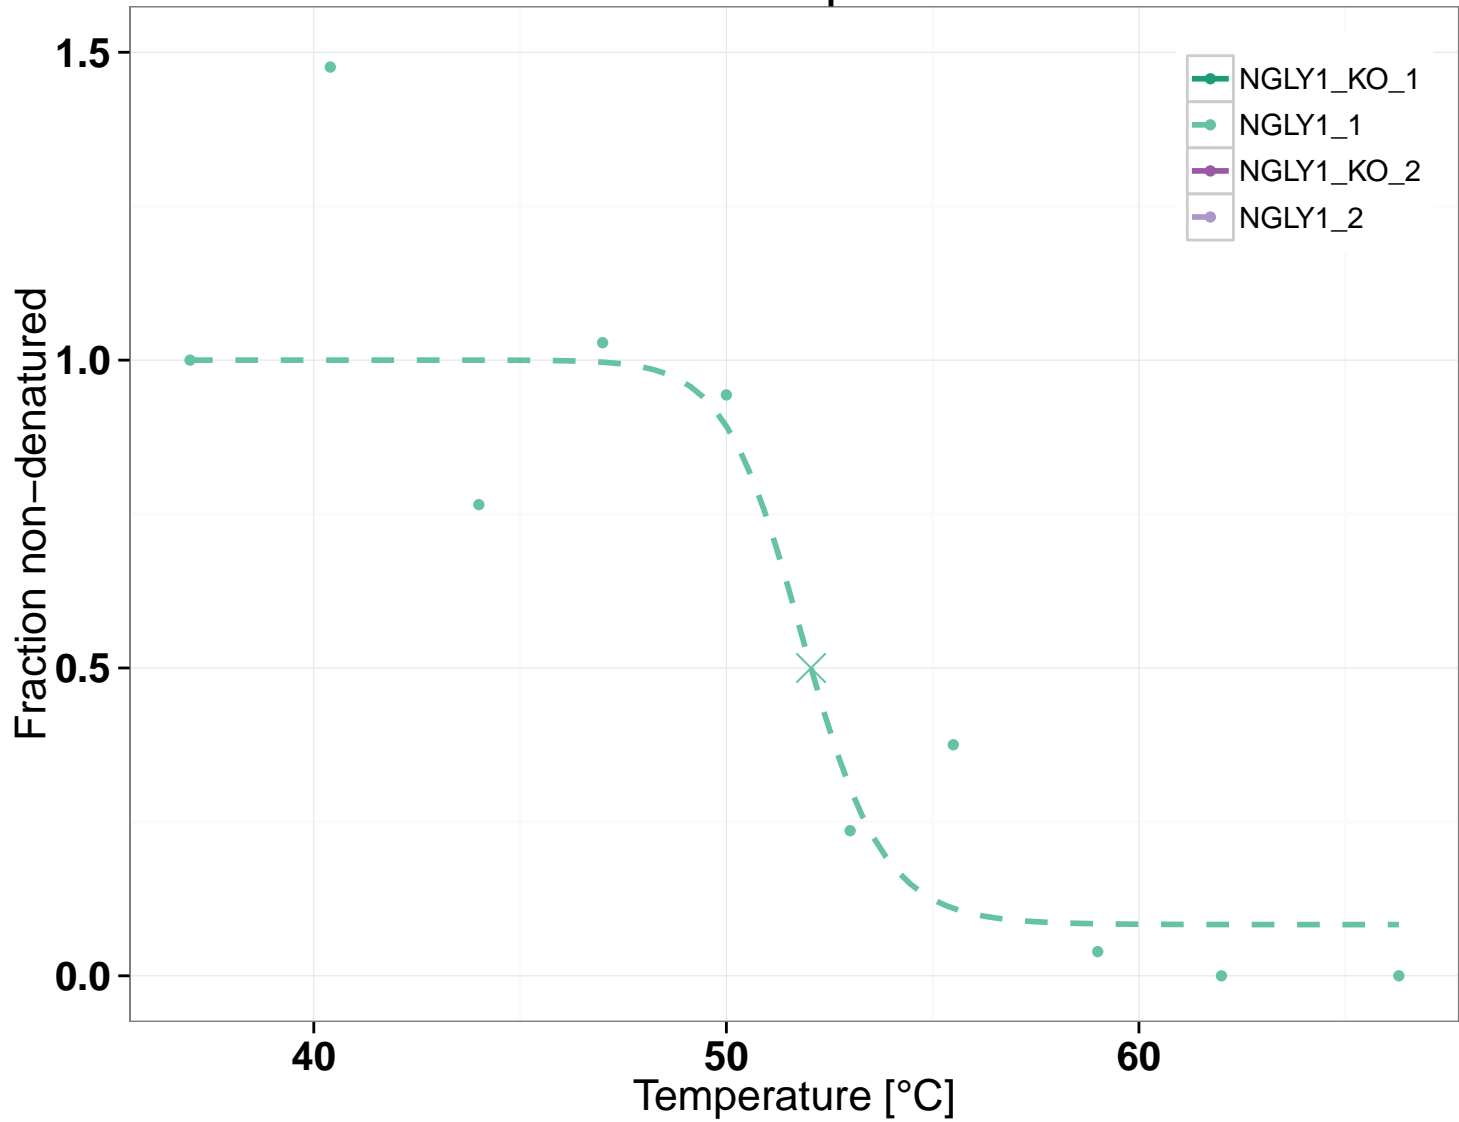

|            | meltPoint | slope | plateau | R2   |
|------------|-----------|-------|---------|------|
| NGLY1_KO_1 | -         | -     | -       | -    |
| NGLY1_1    | 52.05     | -0.24 | 0.08    | 0.85 |
| NGLY1_KO_2 | -         | -     | -       | -    |
| NGLY1_2    | -         | -     | -       | -    |

Supplement: Supplementary file 178 [file 1]

# IPI00187143.1|RAB4B

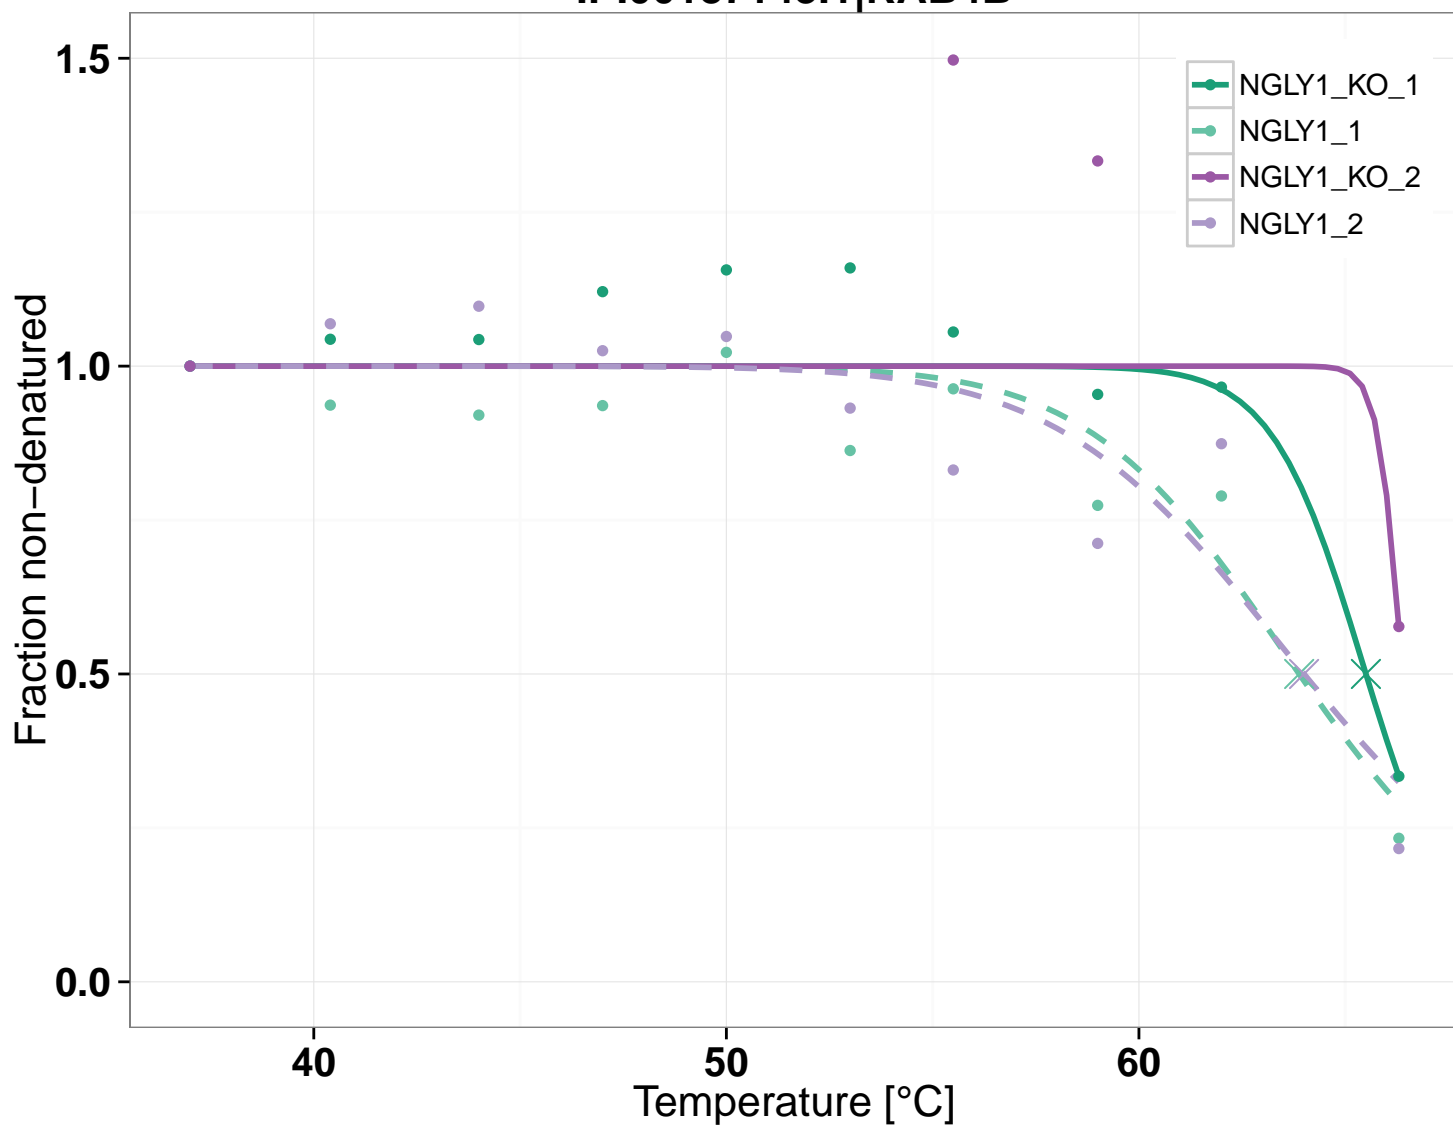

|            | meltPoint | slope  | plateau | R2    |
|------------|-----------|--------|---------|-------|
| NGLY1_KO_1 | 65.5      | -0.22  | 0       | 0.86  |
| NGLY1_1    | 63.88     | -0.097 | 0       | 0.87  |
| NGLY1_KO_2 | -         | -      | 0       | -1.22 |
| NGLY1_2    | 64        | -0.083 | 0       | 0.82  |

Supplement: Supplementary file 179 [file 1]

IPI00375452.2|SLC19A1

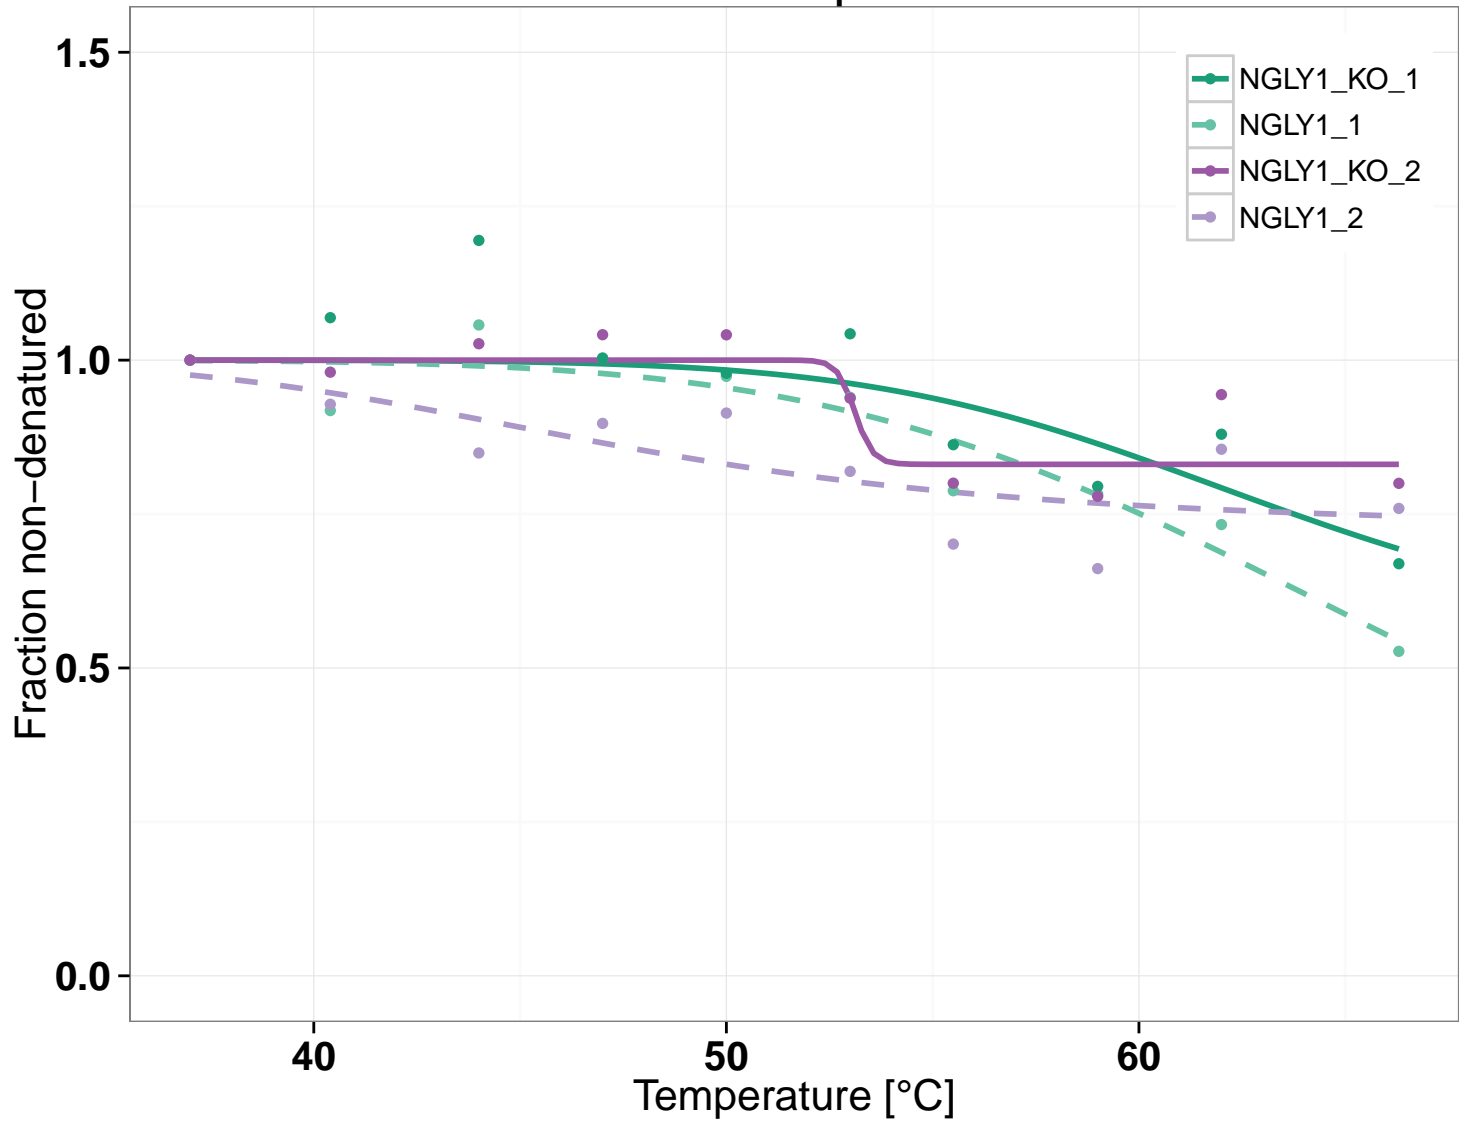

|            | meltPoint | slope  | plateau | R2   |
|------------|-----------|--------|---------|------|
| NGLY1_KO_1 | —         | -0.025 | 0.51    | 0.67 |
| NGLY1_1    | —         | -0.034 | 0       | 0.91 |
| NGLY1_KO_2 | —         | -0.2   | 0.83    | 0.78 |
| NGLY1_2    | —         | -0.013 | 0.72    | 0.6  |

Supplement: Supplementary file 180 [file 1]

IPI00019472.4|SLC1A5

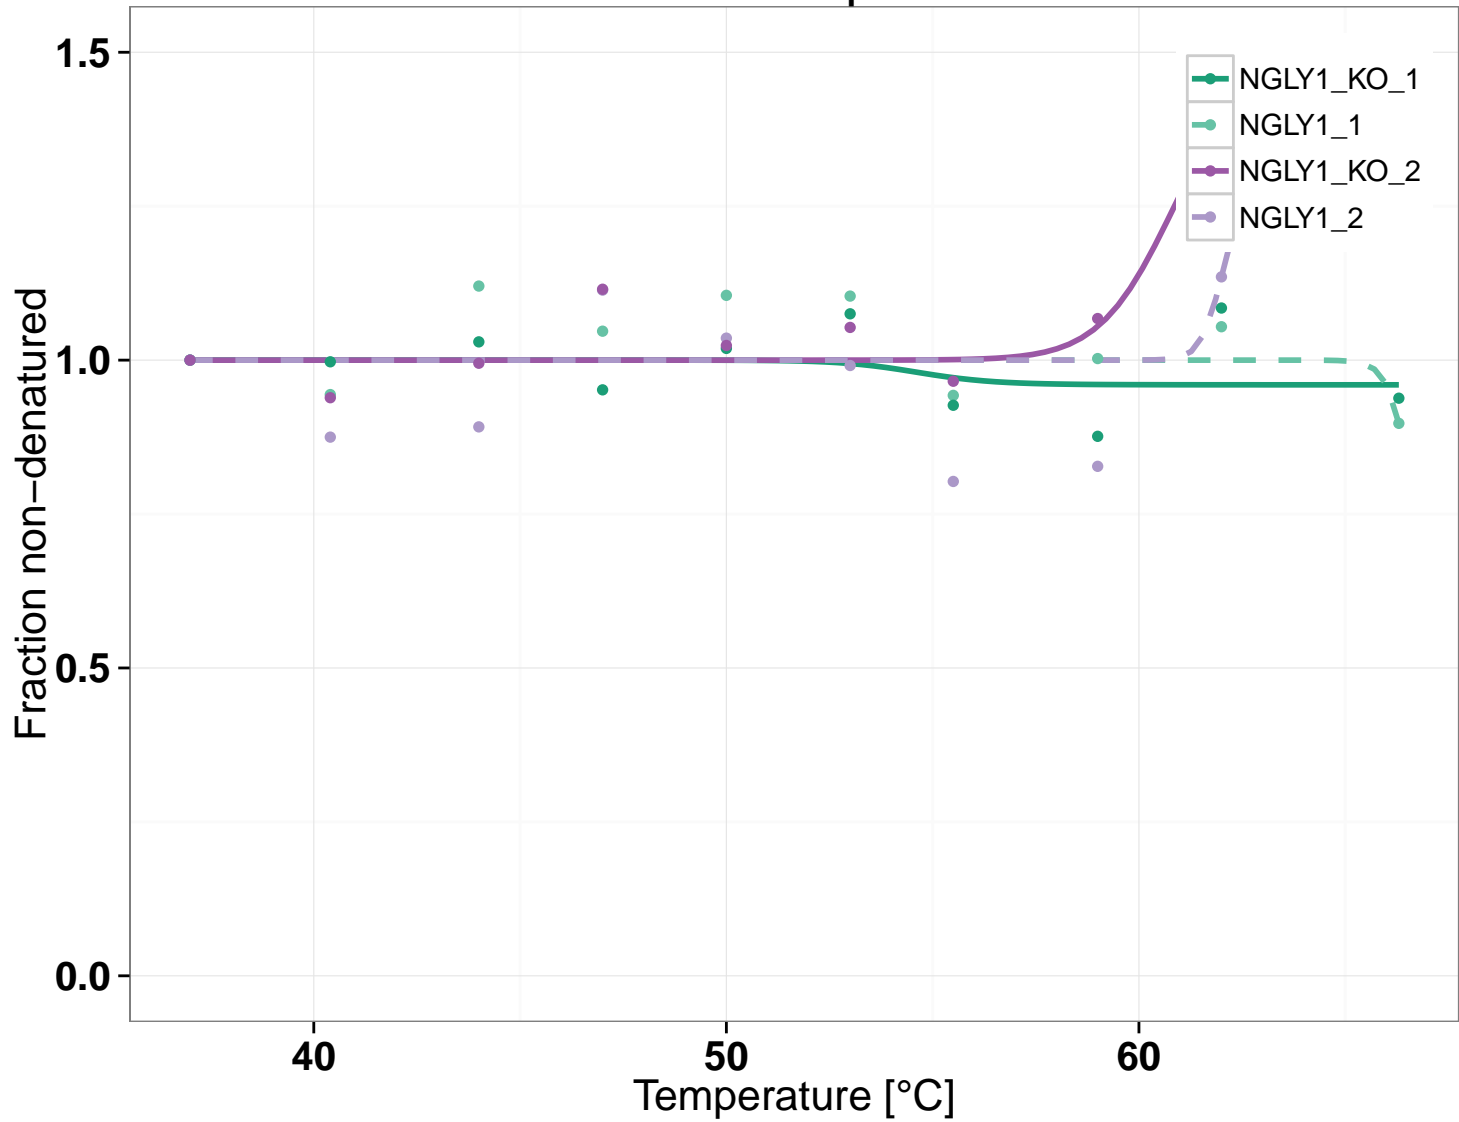

|            | meltPoint | slope  | plateau | R2   |
|------------|-----------|--------|---------|------|
| NGLY1_KO_1 | -         | -0.011 | 0.96    | 0.12 |
| NGLY1_1    | -         | -      | 0       | 0.11 |
| NGLY1_KO_2 | -         | 0.14   | 1.5     | 0.87 |
| NGLY1_2    | -         | 0.27   | 1.27    | 0.46 |

Supplement: Supplementary file 181 [file 1]

# IPI00218729.3|DLG1

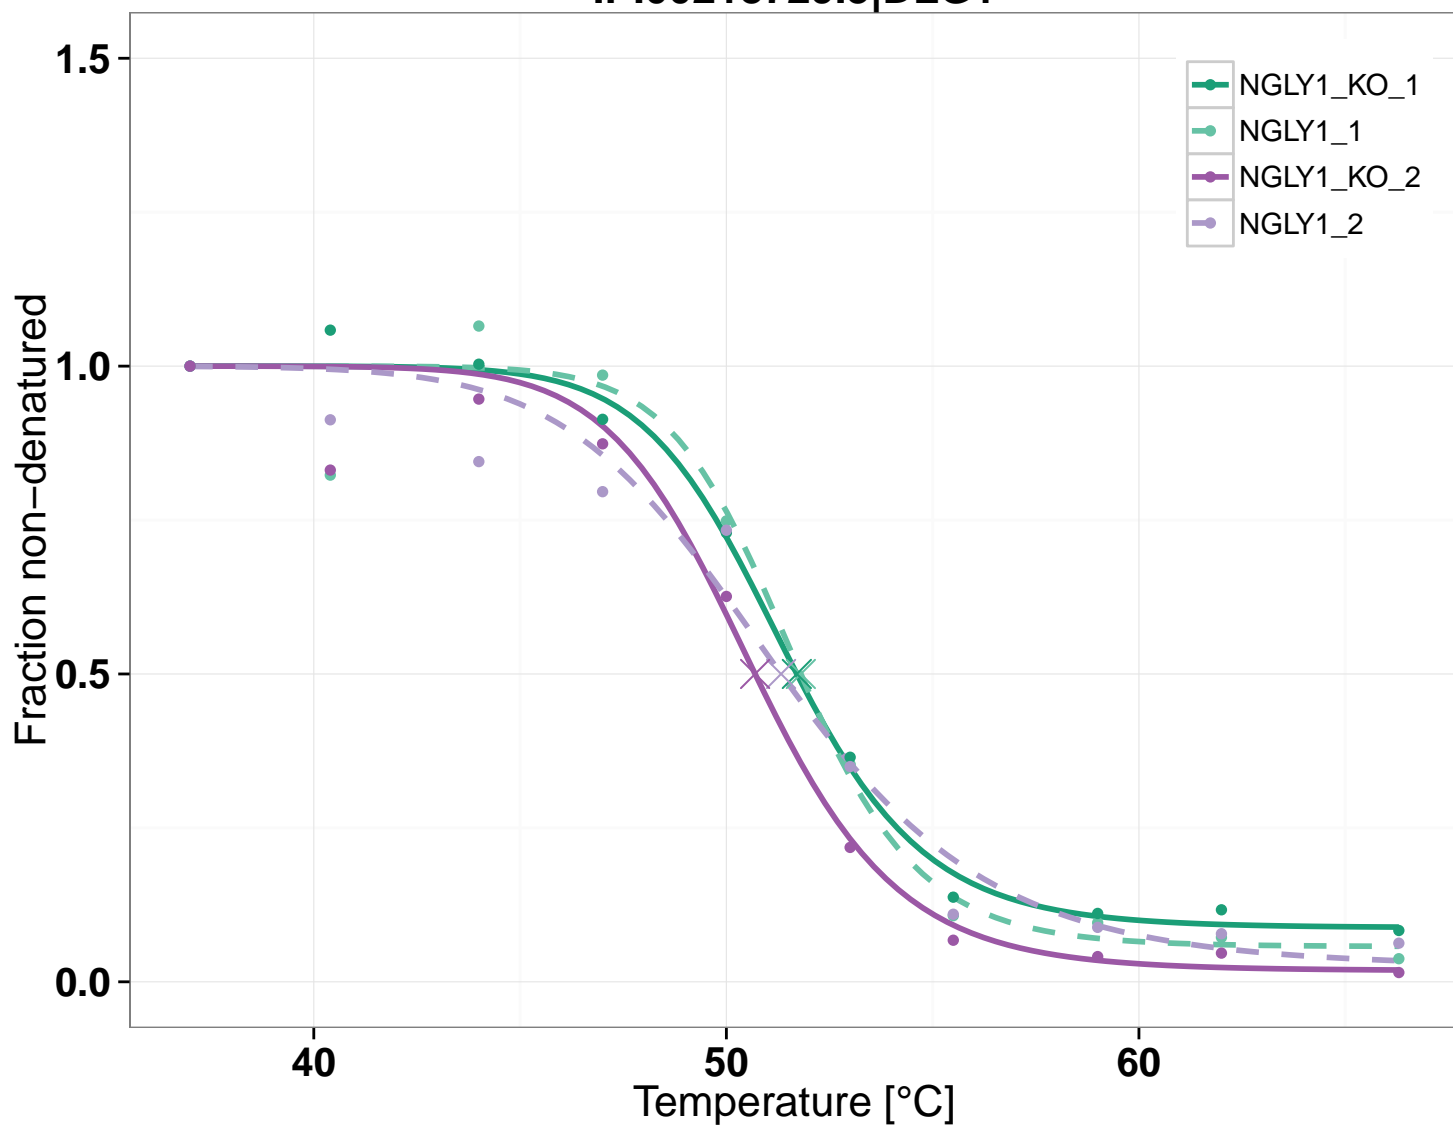

|            | meltPoint | slope  | plateau | R2   |
|------------|-----------|--------|---------|------|
| NGLY1_KO_1 | 51.71     | -0.13  | 0.09    | 1    |
| NGLY1_1    | 51.81     | -0.16  | 0.06    | 0.98 |
| NGLY1_KO_2 | 50.7      | -0.14  | 0.02    | 0.98 |
| NGLY1_2    | 51.33     | -0.094 | 0.02    | 0.97 |

Supplement: Supplementary file 182 [file 1]

IPI00004488.2|ATP6V1F

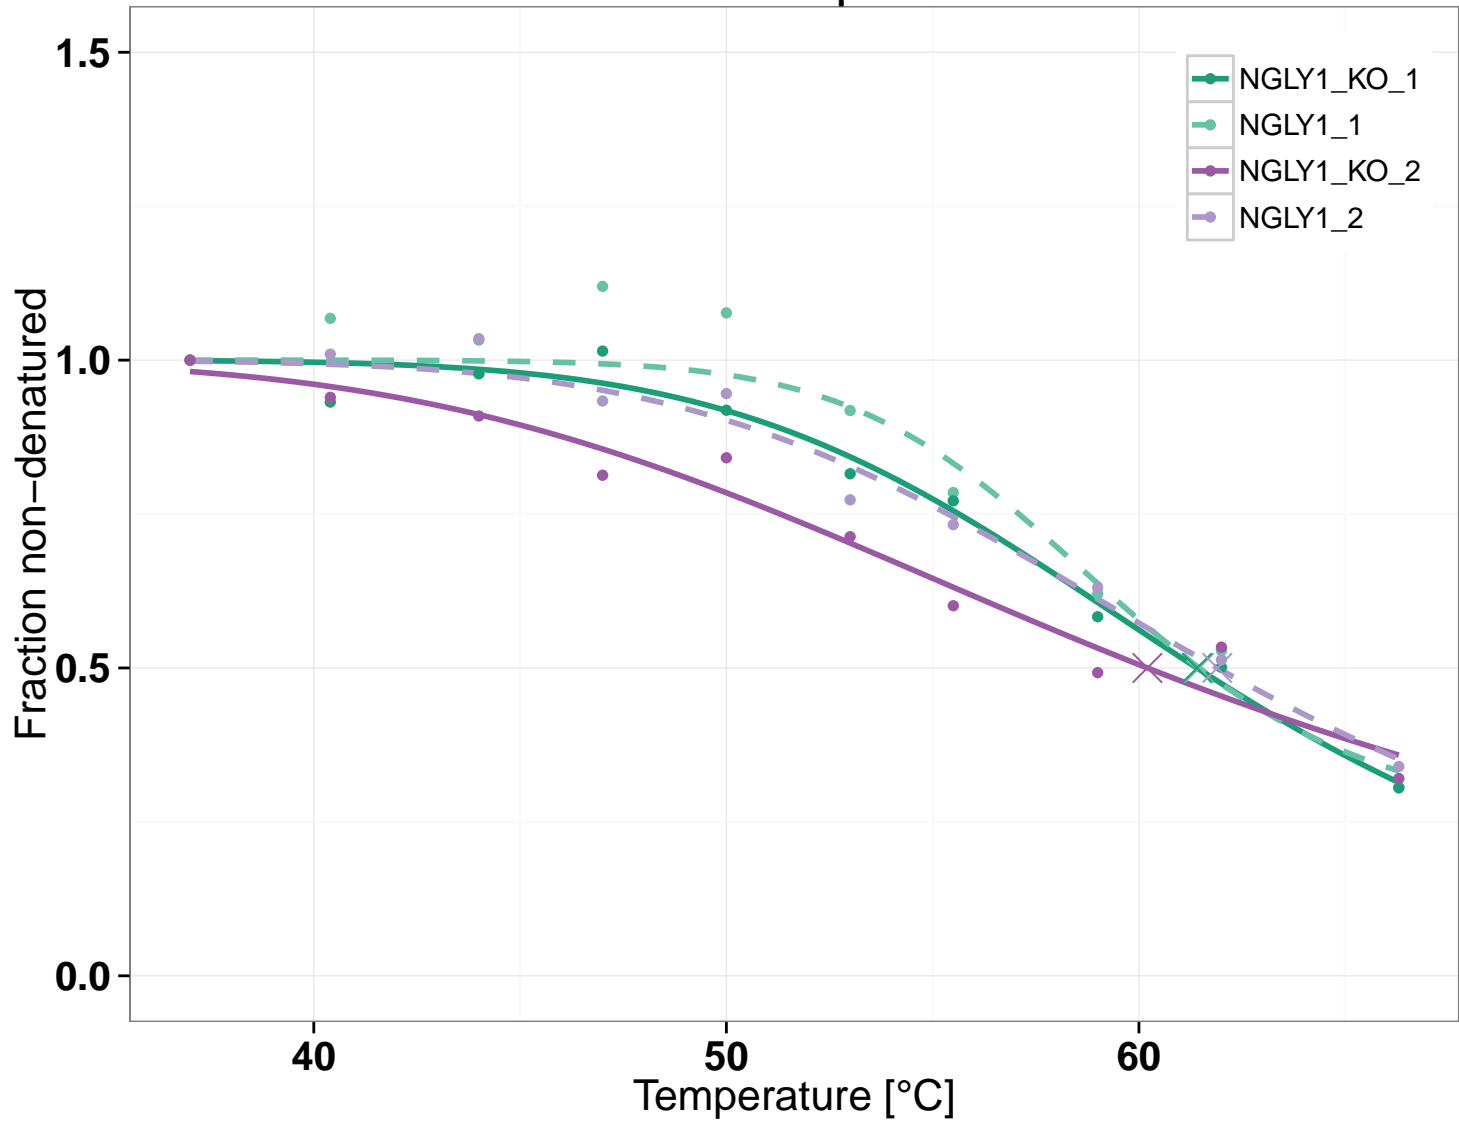

|            | meltPoint | slope  | plateau | R2   |
|------------|-----------|--------|---------|------|
| NGLY1_KO_1 | 61.41     | -0.045 | 0       | 0.98 |
| NGLY1_1    | 61.46     | -0.06  | 0.24    | 0.94 |
| NGLY1_KO_2 | 60.2      | -0.029 | 0       | 0.96 |
| NGLY1_2    | 61.9      | -0.039 | 0.02    | 0.98 |

Supplement: Supplementary file 183 [file 1]

IPI00385449.4|PRKCA

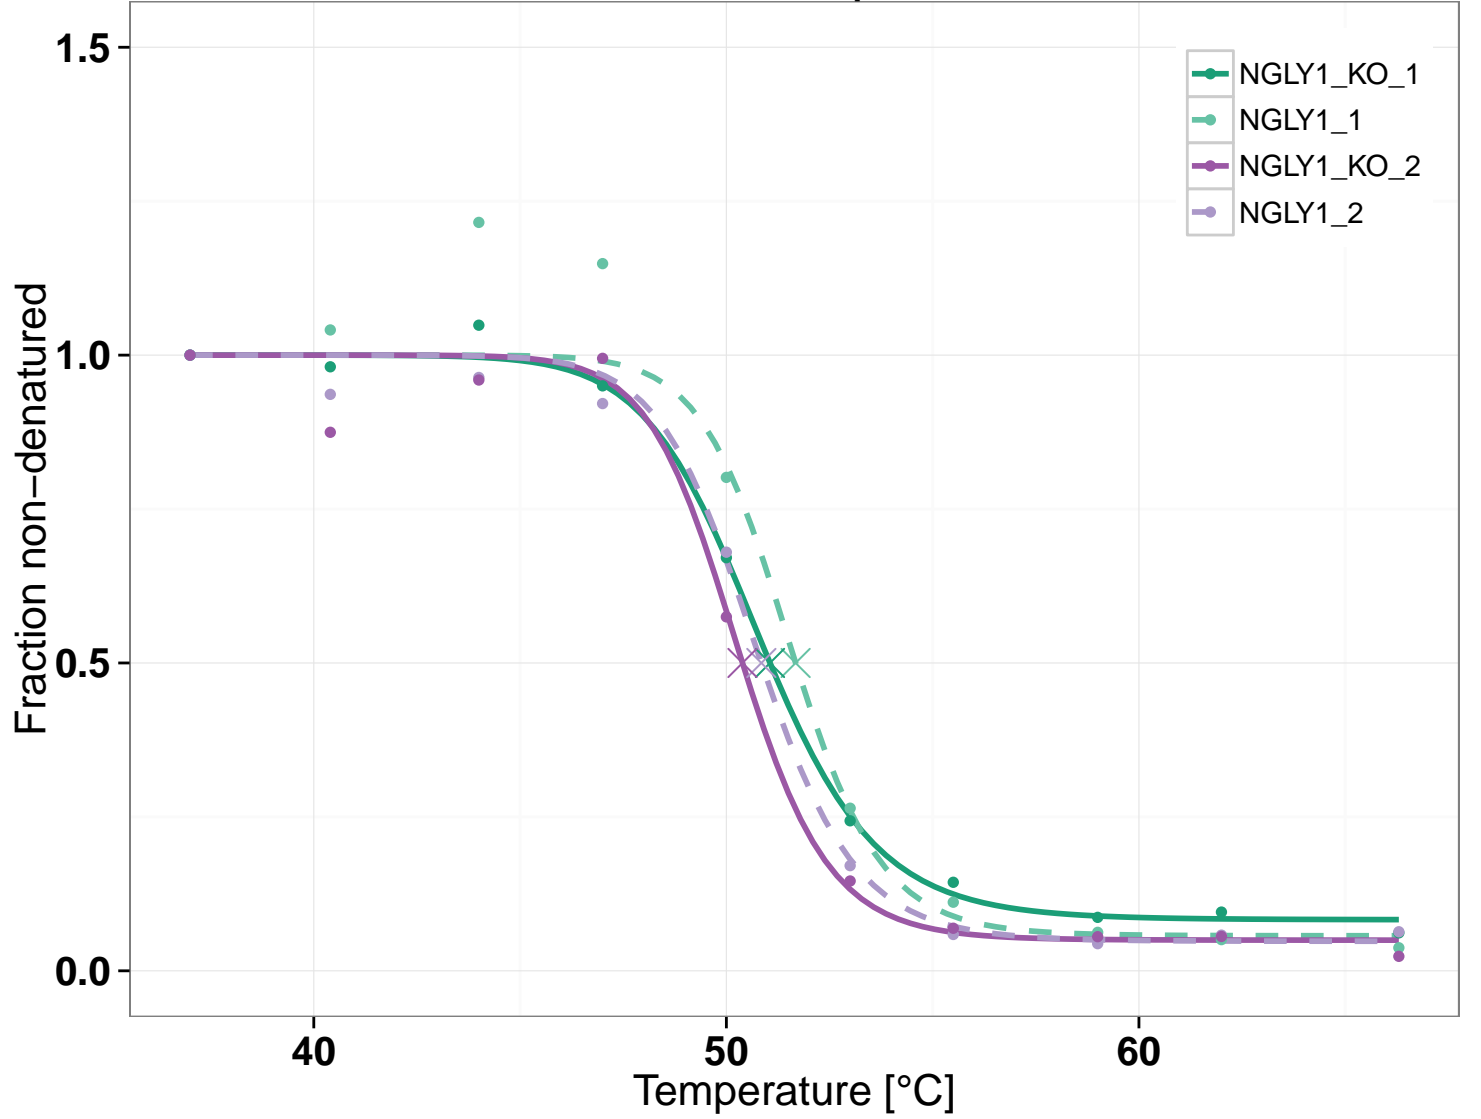

|            | meltPoint | slope | plateau | R2   |
|------------|-----------|-------|---------|------|
| NGLY1_KO_1 | 51.06     | -0.16 | 0.08    | 1    |
| NGLY1_1    | 51.68     | -0.22 | 0.06    | 0.97 |
| NGLY1_KO_2 | 50.39     | -0.22 | 0.05    | 0.99 |
| NGLY1_2    | 50.85     | -0.2  | 0.05    | 1    |

Supplement: Supplementary file 184 [file 1]

IPI00023728.1|GGH

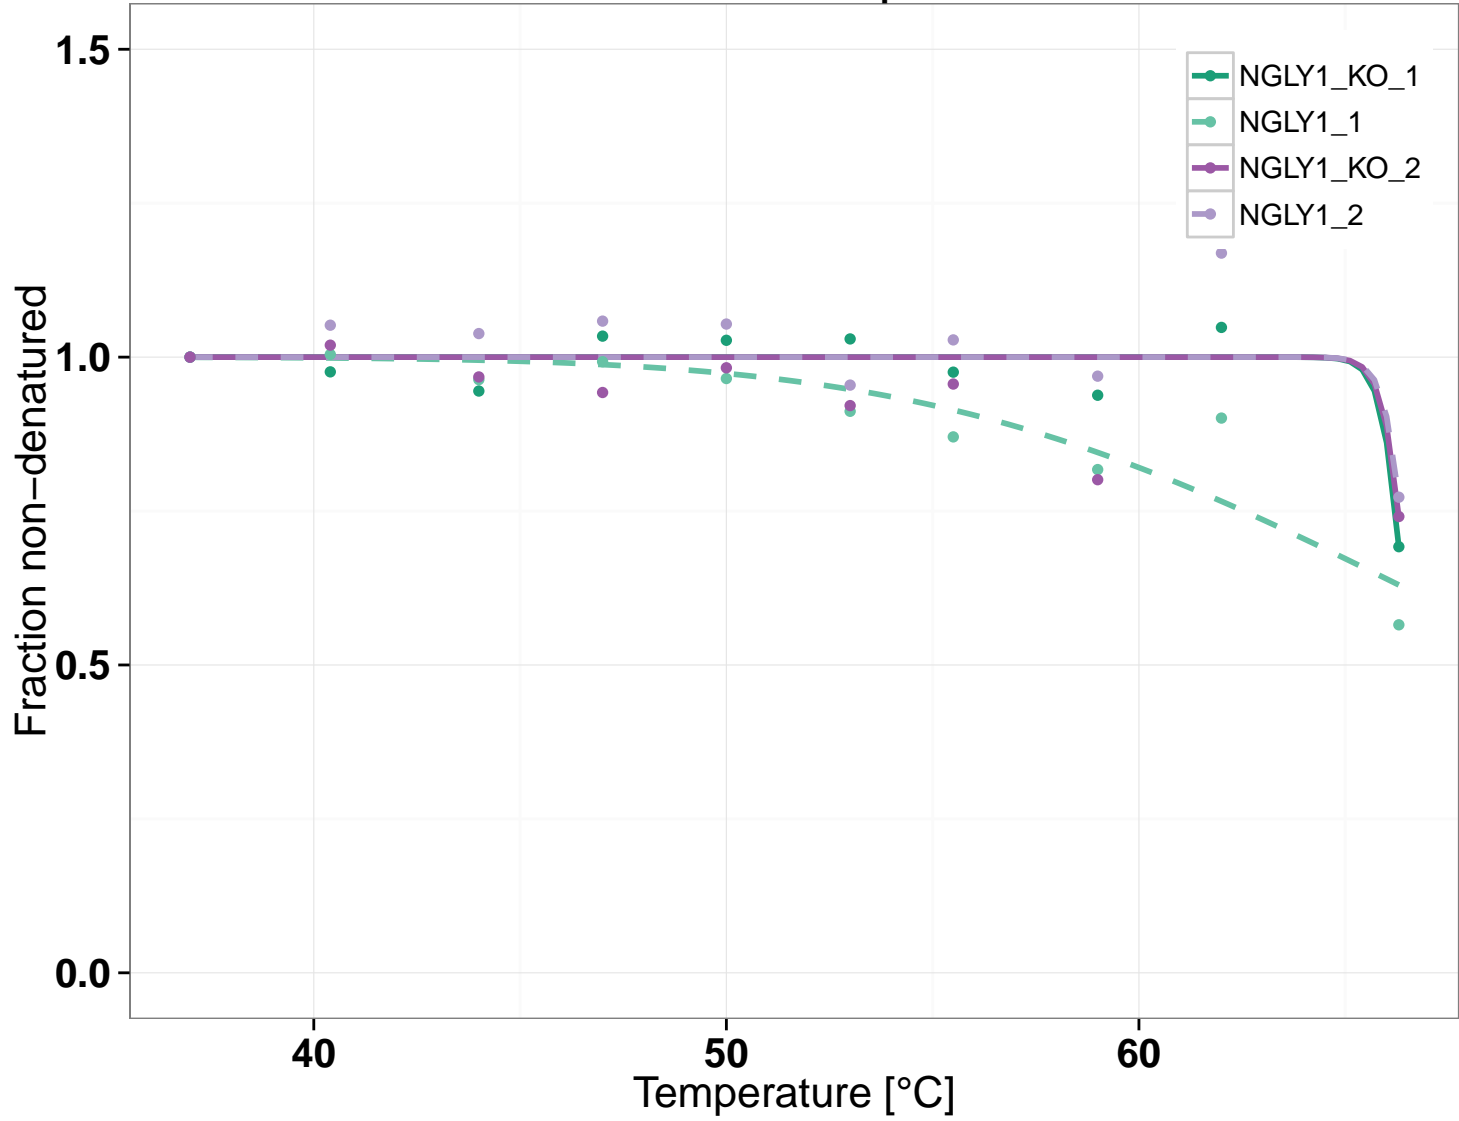

|            | meltPoint | slope | plateau | R2   |
|------------|-----------|-------|---------|------|
| NGLY1_KO_1 | -         | -     | 0       | 0.86 |
| NGLY1_1    | -         | -     | 0       | 0.83 |
| NGLY1_KO_2 | -         | -     | 0       | 0.3  |
| NGLY1_2    | -         | -     | 0       | 0.54 |

Supplement: Supplementary file 185 [file 1]

IPI00873629.1|FRMPD4

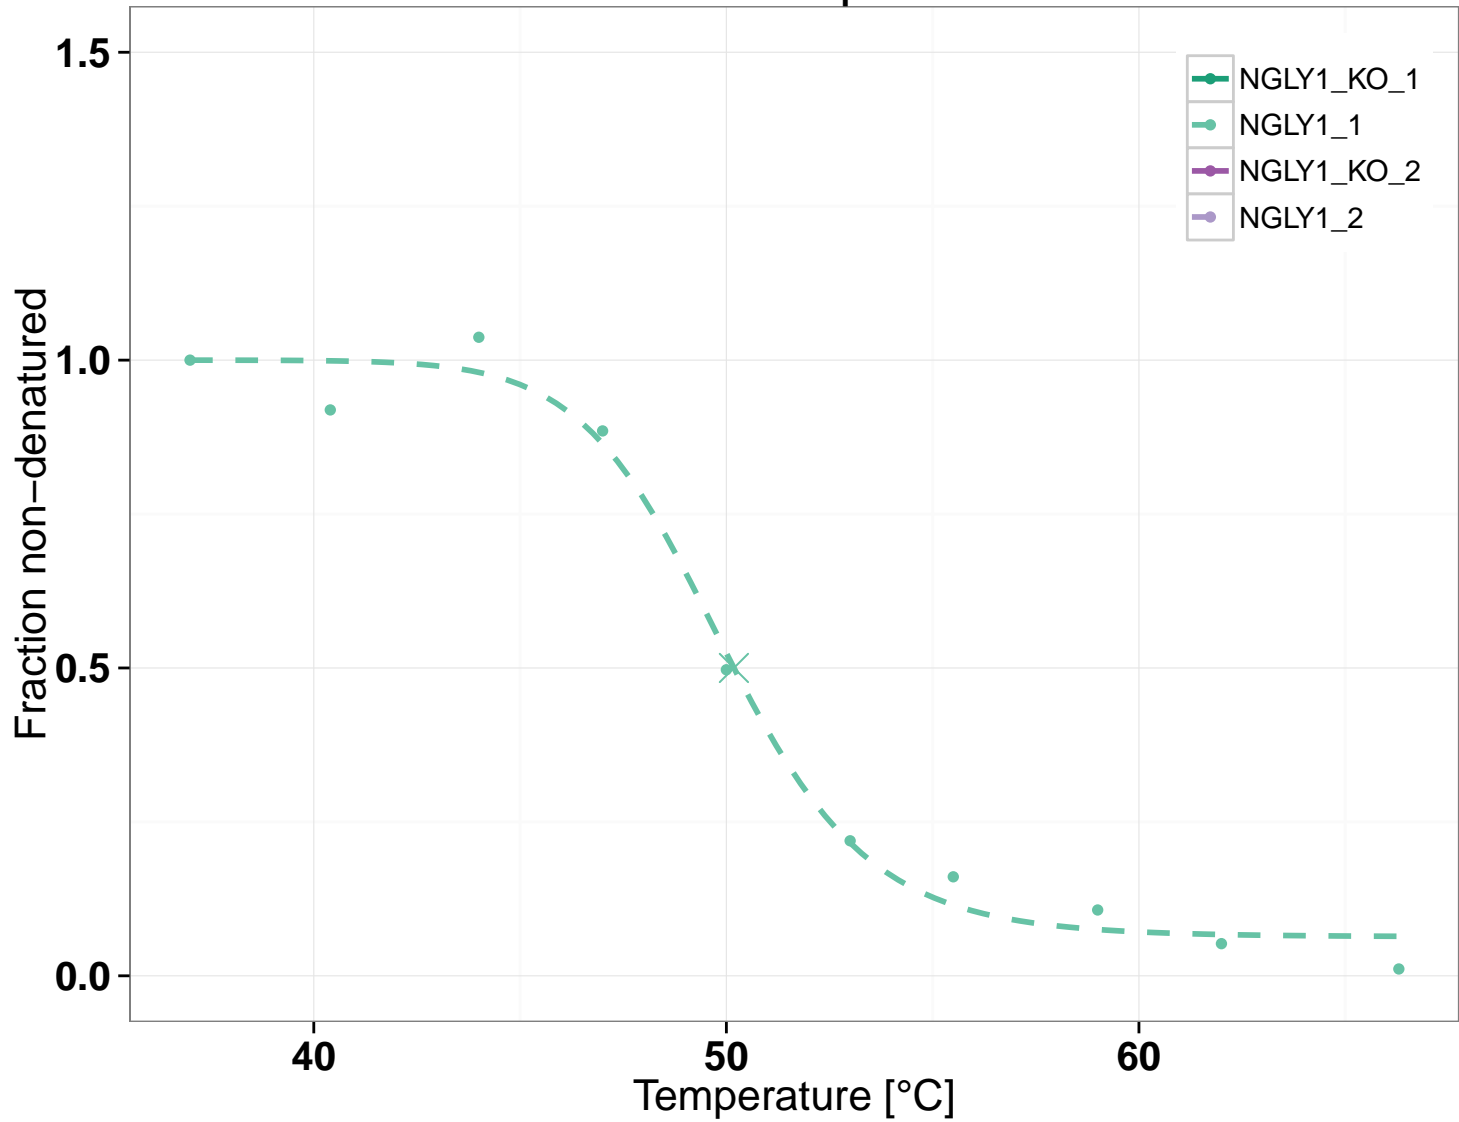

|            | meltPoint | slope | plateau | R2   |
|------------|-----------|-------|---------|------|
| NGLY1_KO_1 | -         | -     | -       | -    |
| NGLY1_1    | 50.18     | -0.13 | 0.06    | 0.99 |
| NGLY1_KO_2 | -         | -     | -       | -    |
| NGLY1_2    | -         | -     | -       | -    |

Supplement: Supplementary file 186 [file 1]

IPI00439948.6|PPP1R13L

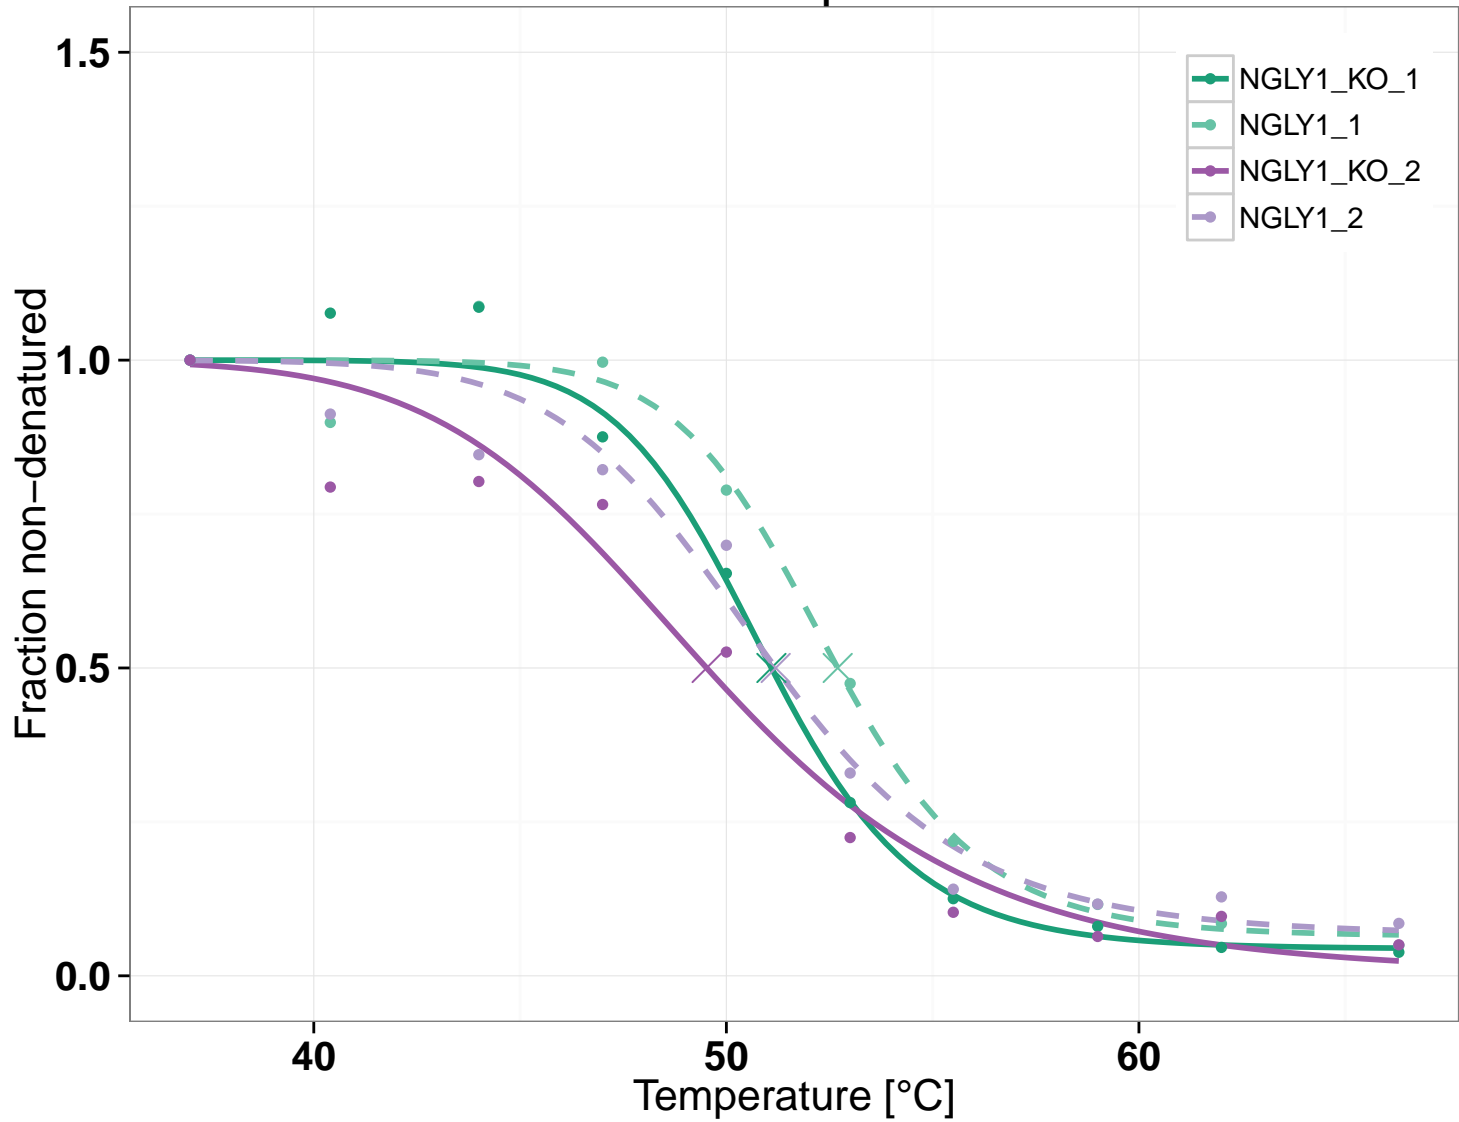

|            | meltPoint | slope  | plateau | R2   |
|------------|-----------|--------|---------|------|
| NGLY1_KO_1 | 51.09     | -0.13  | 0.04    | 0.99 |
| NGLY1_1    | 52.7      | -0.13  | 0.06    | 0.99 |
| NGLY1_KO_2 | 49.52     | -0.075 | 0       | 0.96 |
| NGLY1_2    | 51.2      | -0.094 | 0.07    | 0.97 |

Supplement: Supplementary file 187 [file 1]

# IPI00022881.1|CLTCL1

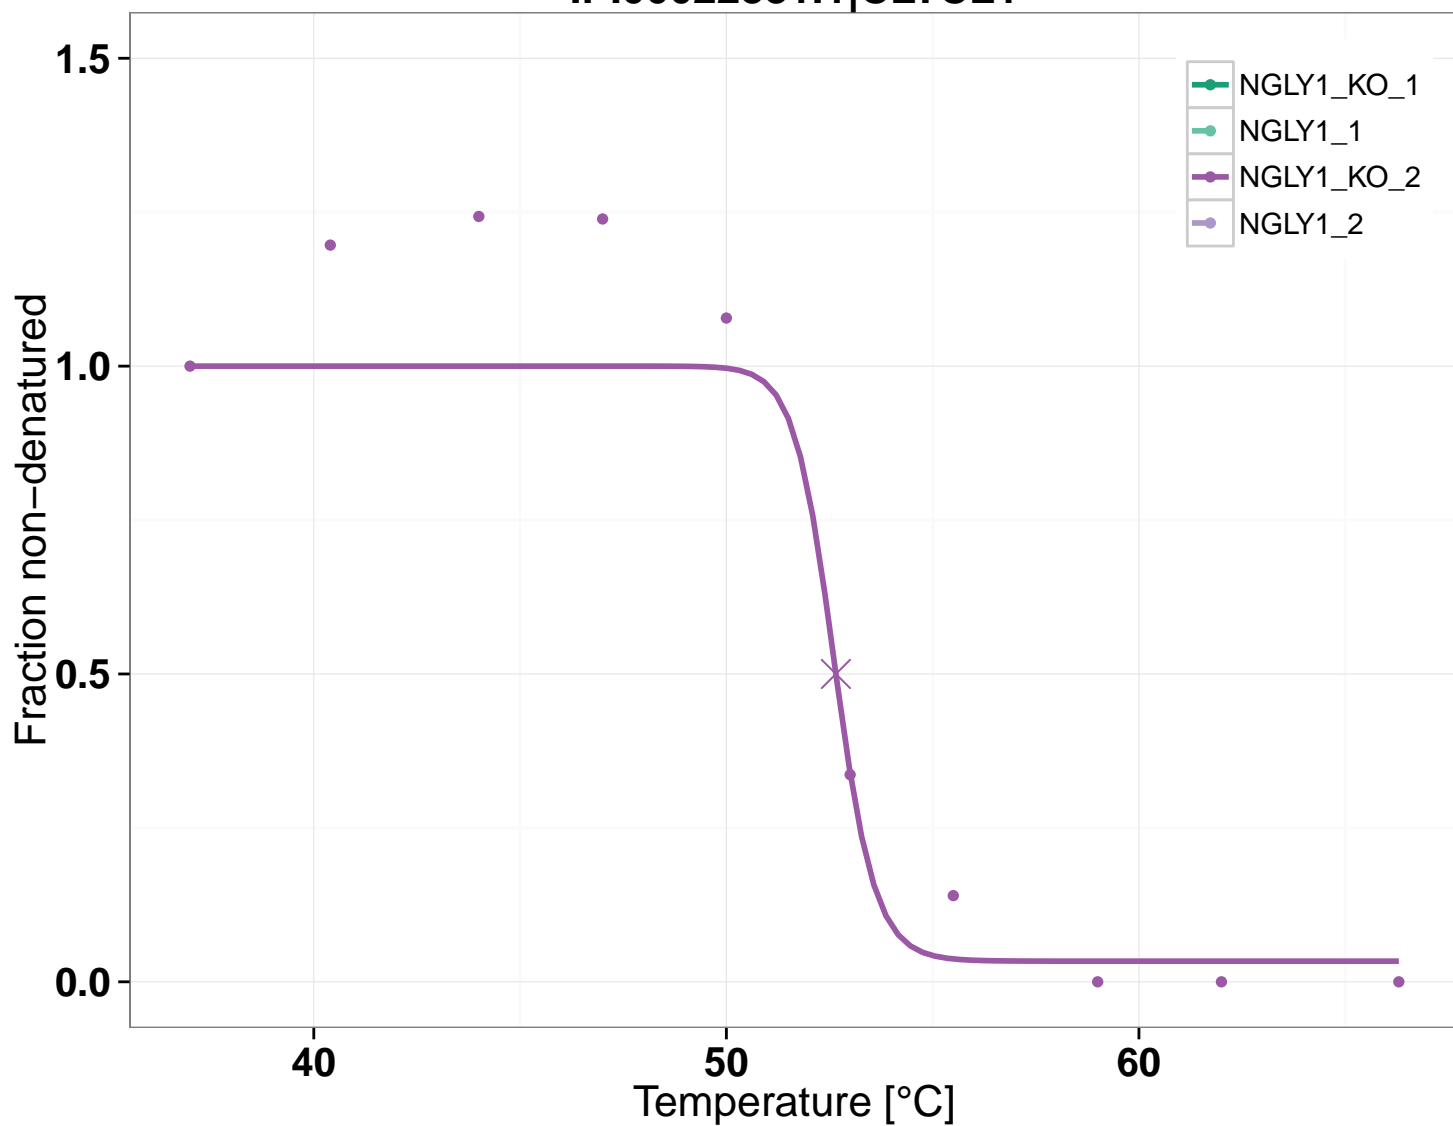

|            | meltPoint | slope | plateau | R2   |
|------------|-----------|-------|---------|------|
| NGLY1_KO_1 | —         | —     | —       | —    |
| NGLY1_1    | —         | —     | —       | —    |
| NGLY1_KO_2 | 52.66     | -0.49 | 0.03    | 0.94 |
| NGLY1_2    | —         | —     | —       | —    |

Supplement: Supplementary file 188 [file 1]

IPI00020602.1|CSNK2A2

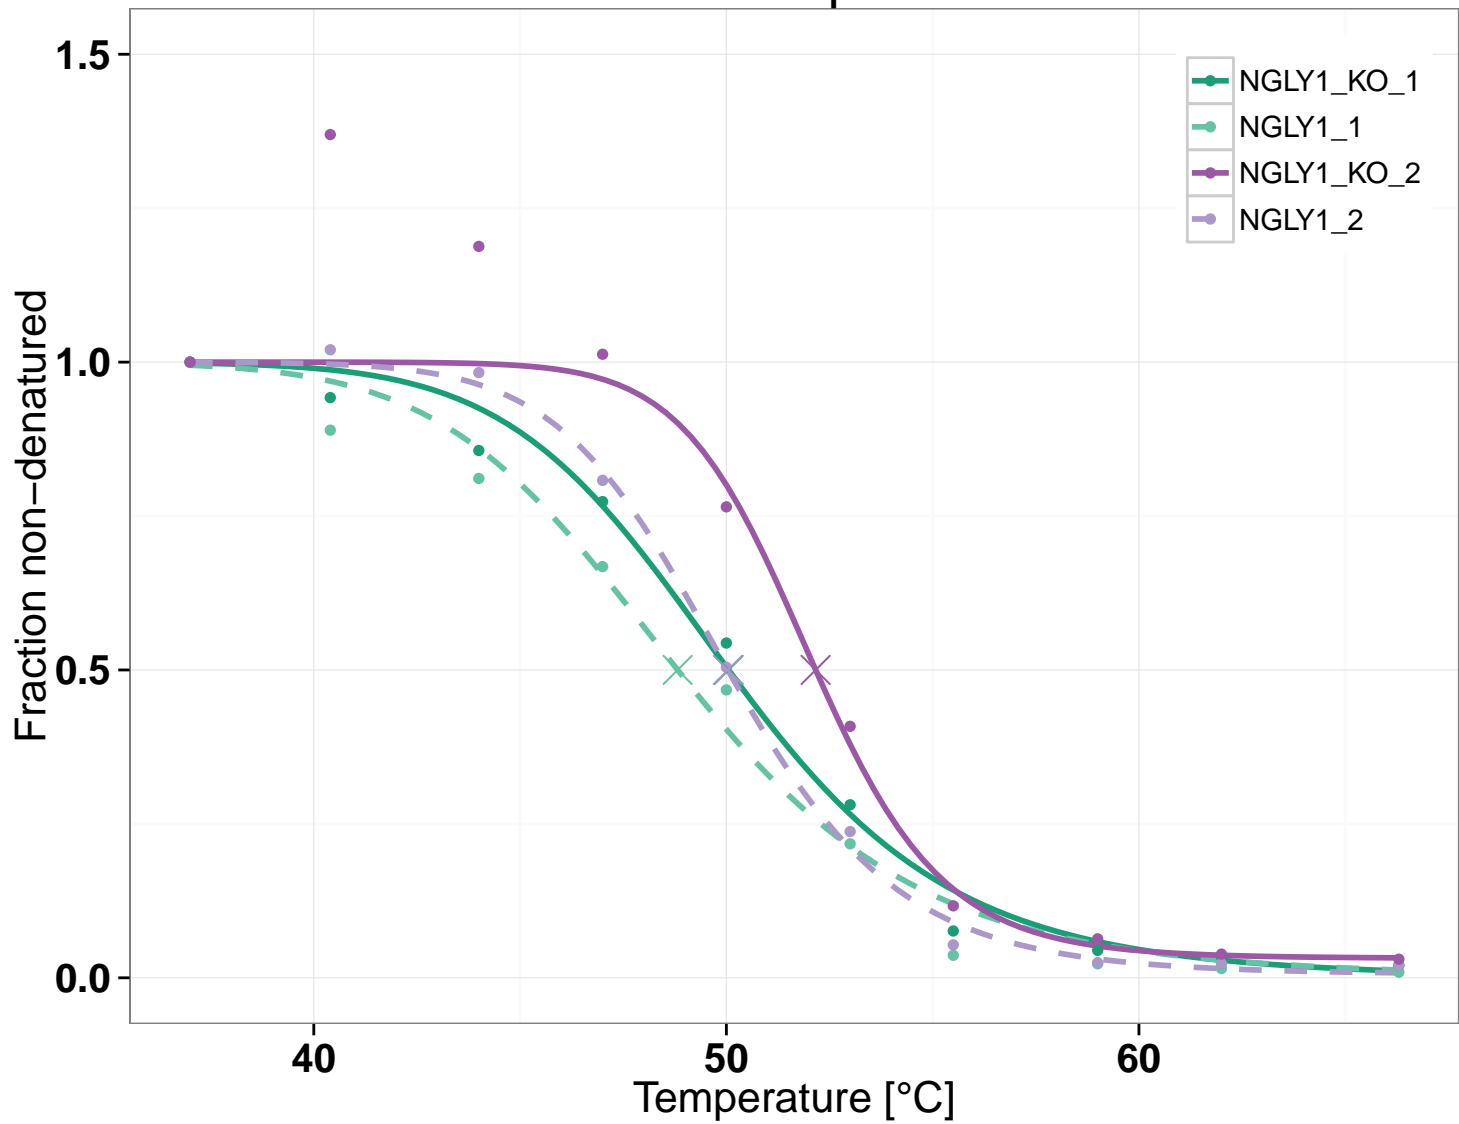

|            | meltPoint | slope  | plateau | R2   |
|------------|-----------|--------|---------|------|
| NGLY1_KO_1 | 50.05     | -0.092 | 0       | 0.99 |
| NGLY1_1    | 48.82     | -0.086 | 0       | 0.99 |
| NGLY1_KO_2 | 52.16     | -0.15  | 0.03    | 0.93 |
| NGLY1_2    | 50.04     | -0.12  | 0.01    | 1    |

Supplement: Supplementary file 189 [file 1]

# IPI00220031.1|PXN

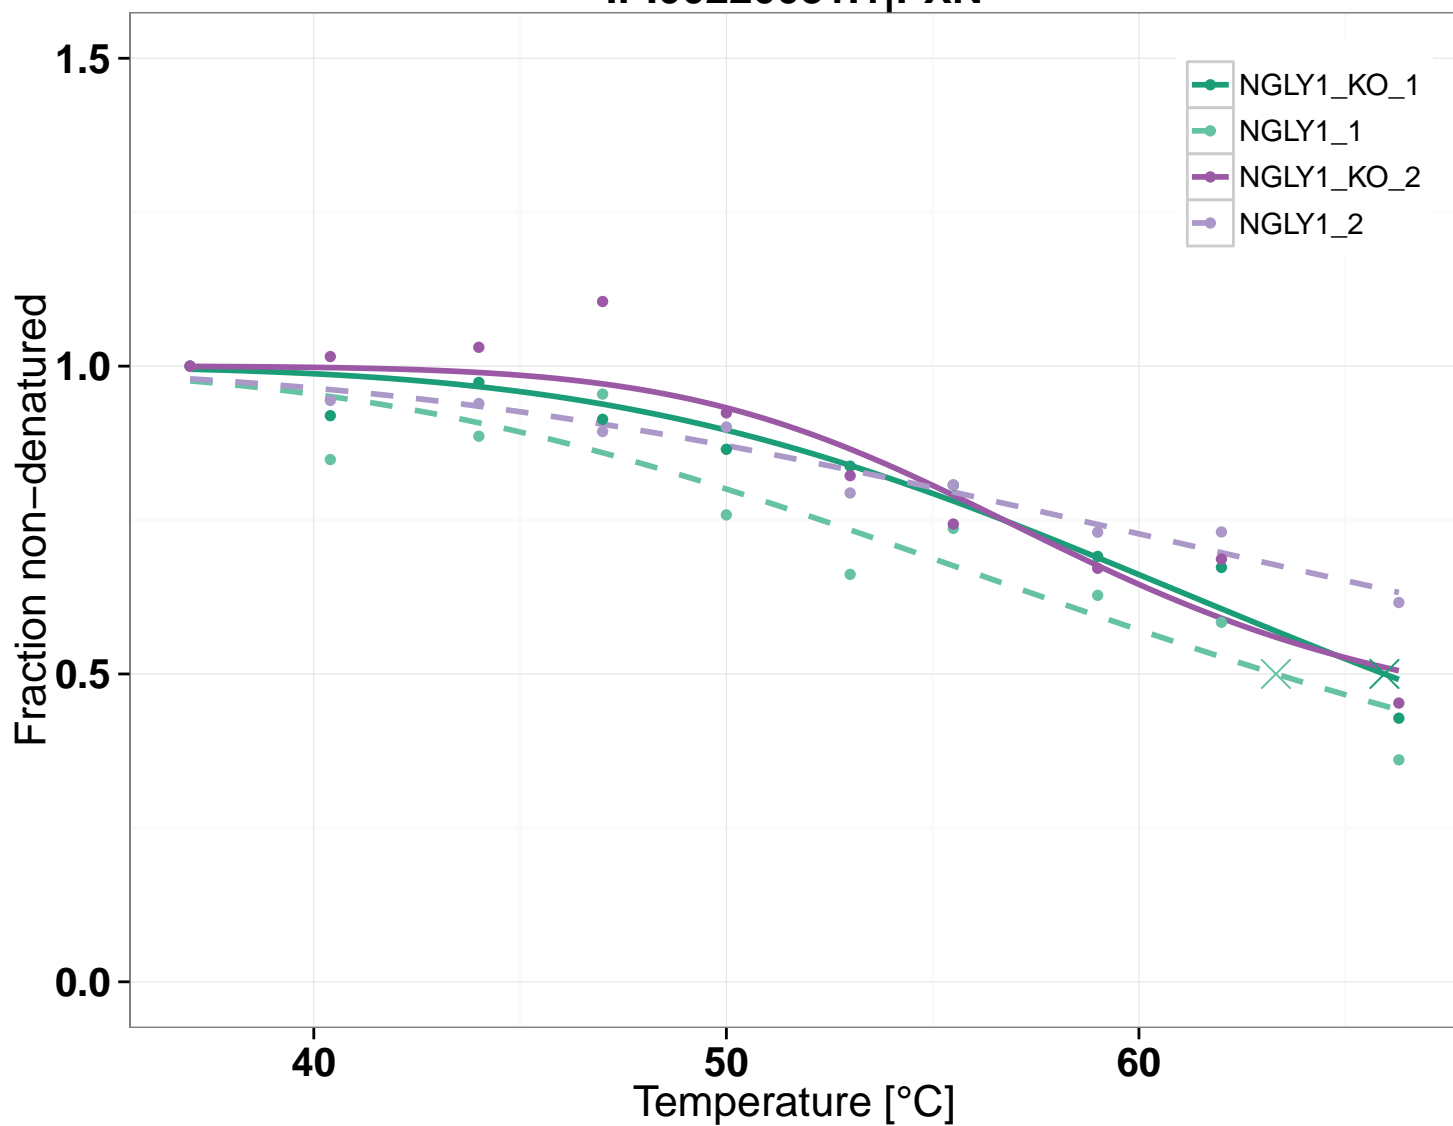

|            | meltPoint | slope  | plateau | R2   |
|------------|-----------|--------|---------|------|
| NGLY1_KO_1 | 65.95     | -0.028 | 0       | 0.94 |
| NGLY1_1    | 63.32     | -0.023 | 0       | 0.87 |
| NGLY1_KO_2 | -         | -0.033 | 0.39    | 0.91 |
| NGLY1_2    | -         | -0.015 | 0       | 0.96 |

Supplement: Supplementary file 190 [file 1]

# IPI00055954.4|WDR43

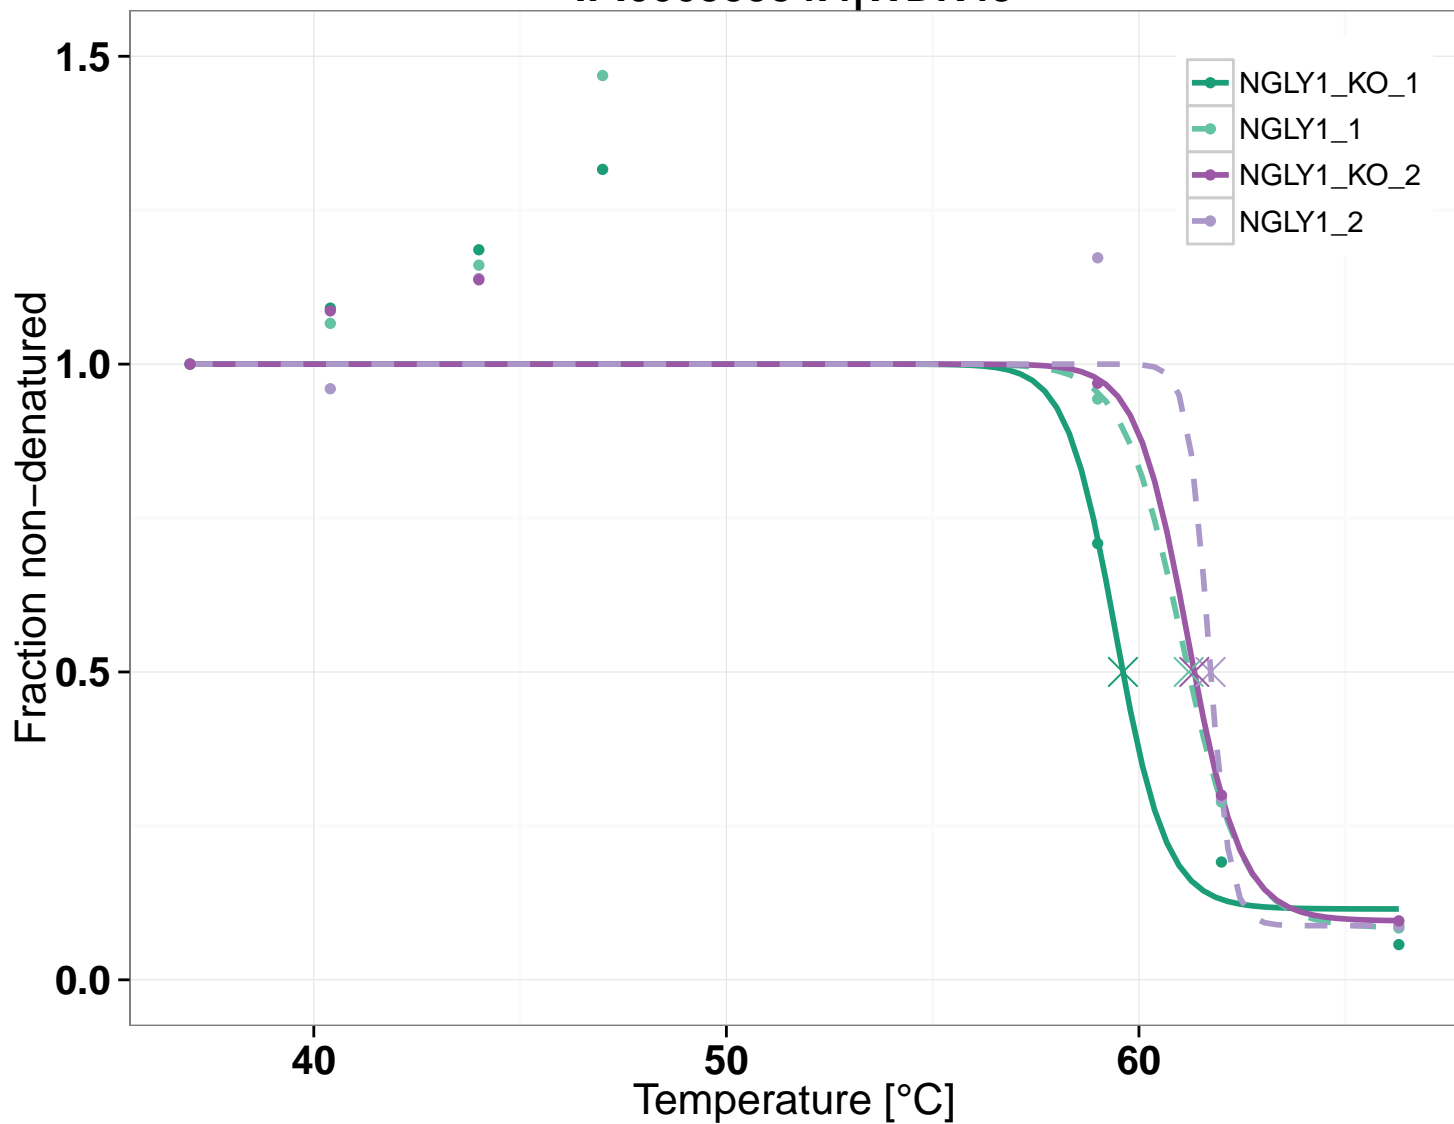

|            | meltPoint | slope | plateau | R2    |
|------------|-----------|-------|---------|-------|
| NGLY1_KO_1 | 59.61     | -0.37 | 0.12    | 0.16  |
| NGLY1_1    | 61.21     | -0.31 | 0.08    | 0.07  |
| NGLY1_KO_2 | 61.34     | -0.36 | 0.1     | -0.21 |
| NGLY1_2    | 61.74     | -0.9  | 0.09    | -0.18 |

Supplement: Supplementary file 191 [file 1]

# IPI00658000.2|IGF2BP3

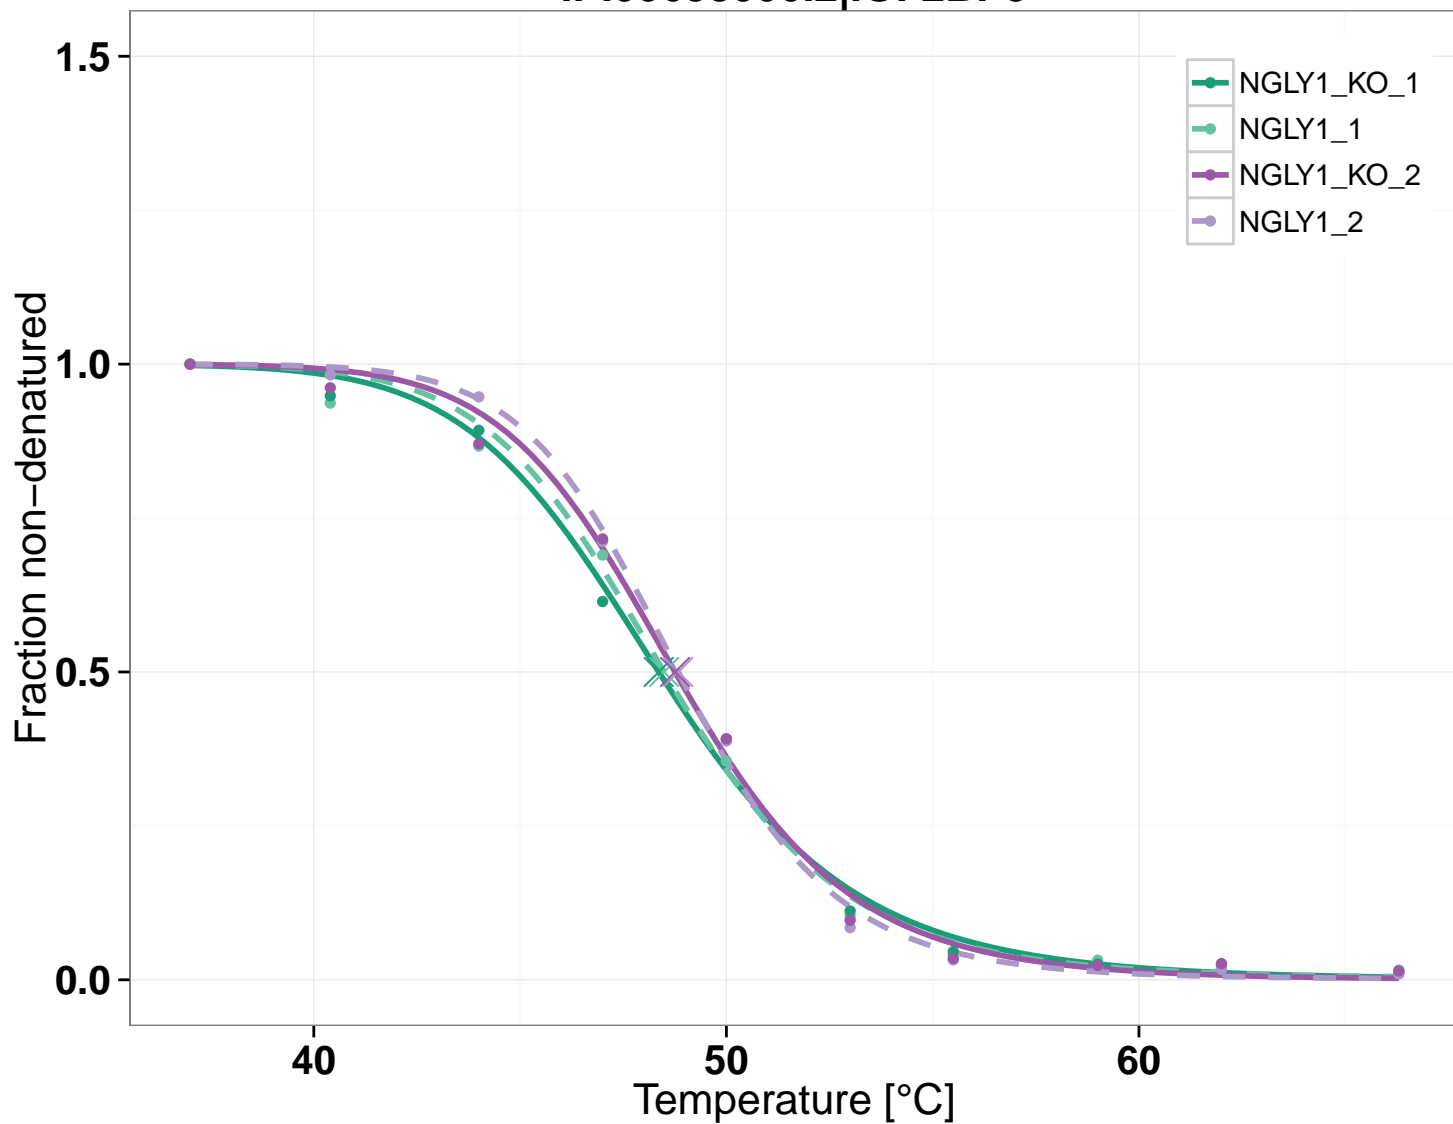

|            | meltPoint | slope | plateau | R2 |
|------------|-----------|-------|---------|----|
| NGLY1_KO_1 | 48.36     | -0.11 | 0       | 1  |
| NGLY1_1    | 48.49     | -0.11 | 0       | 1  |
| NGLY1_KO_2 | 48.76     | -0.12 | 0       | 1  |
| NGLY1_2    | 48.83     | -0.13 | 0       | 1  |

Supplement: Supplementary file 192 [file 1]

IPI00007928.4|PRPF8

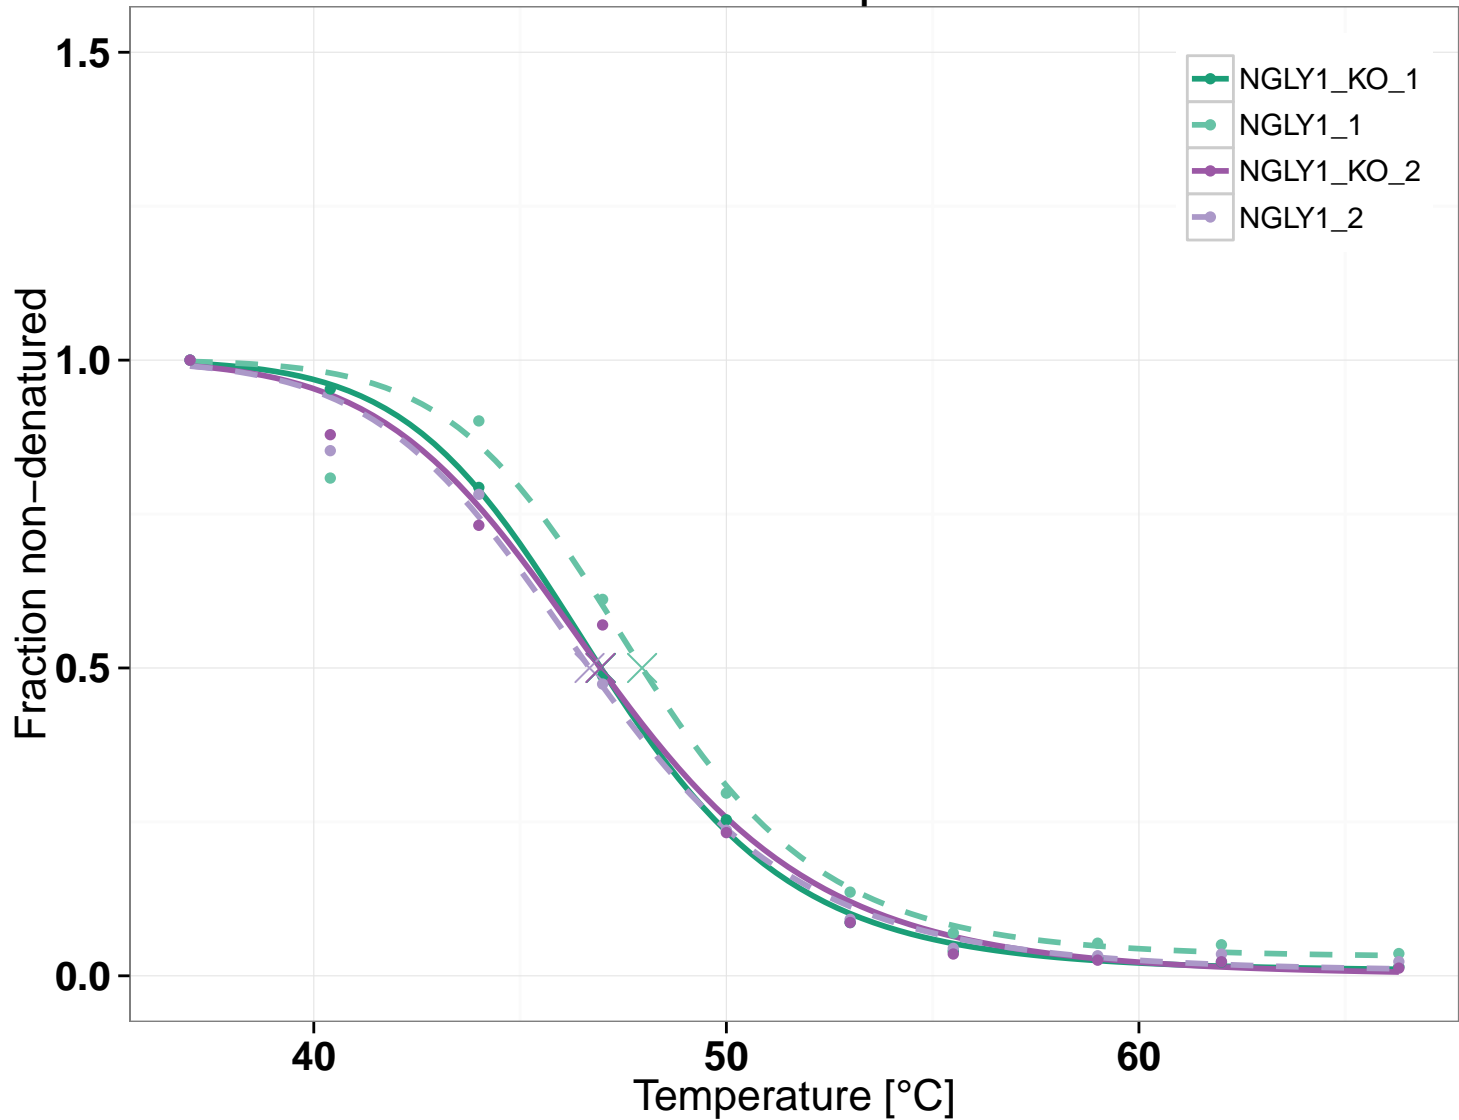

|            | meltPoint | slope  | plateau | R2   |
|------------|-----------|--------|---------|------|
| NGLY1_KO_1 | 46.96     | -0.11  | 0.01    | 1    |
| NGLY1_1    | 47.96     | -0.11  | 0.03    | 0.98 |
| NGLY1_KO_2 | 46.95     | -0.094 | 0       | 0.99 |
| NGLY1_2    | 46.68     | -0.096 | 0.01    | 0.99 |

Supplement: Supplementary file 193 [file 1]

IPI00472054.2|FAM120A

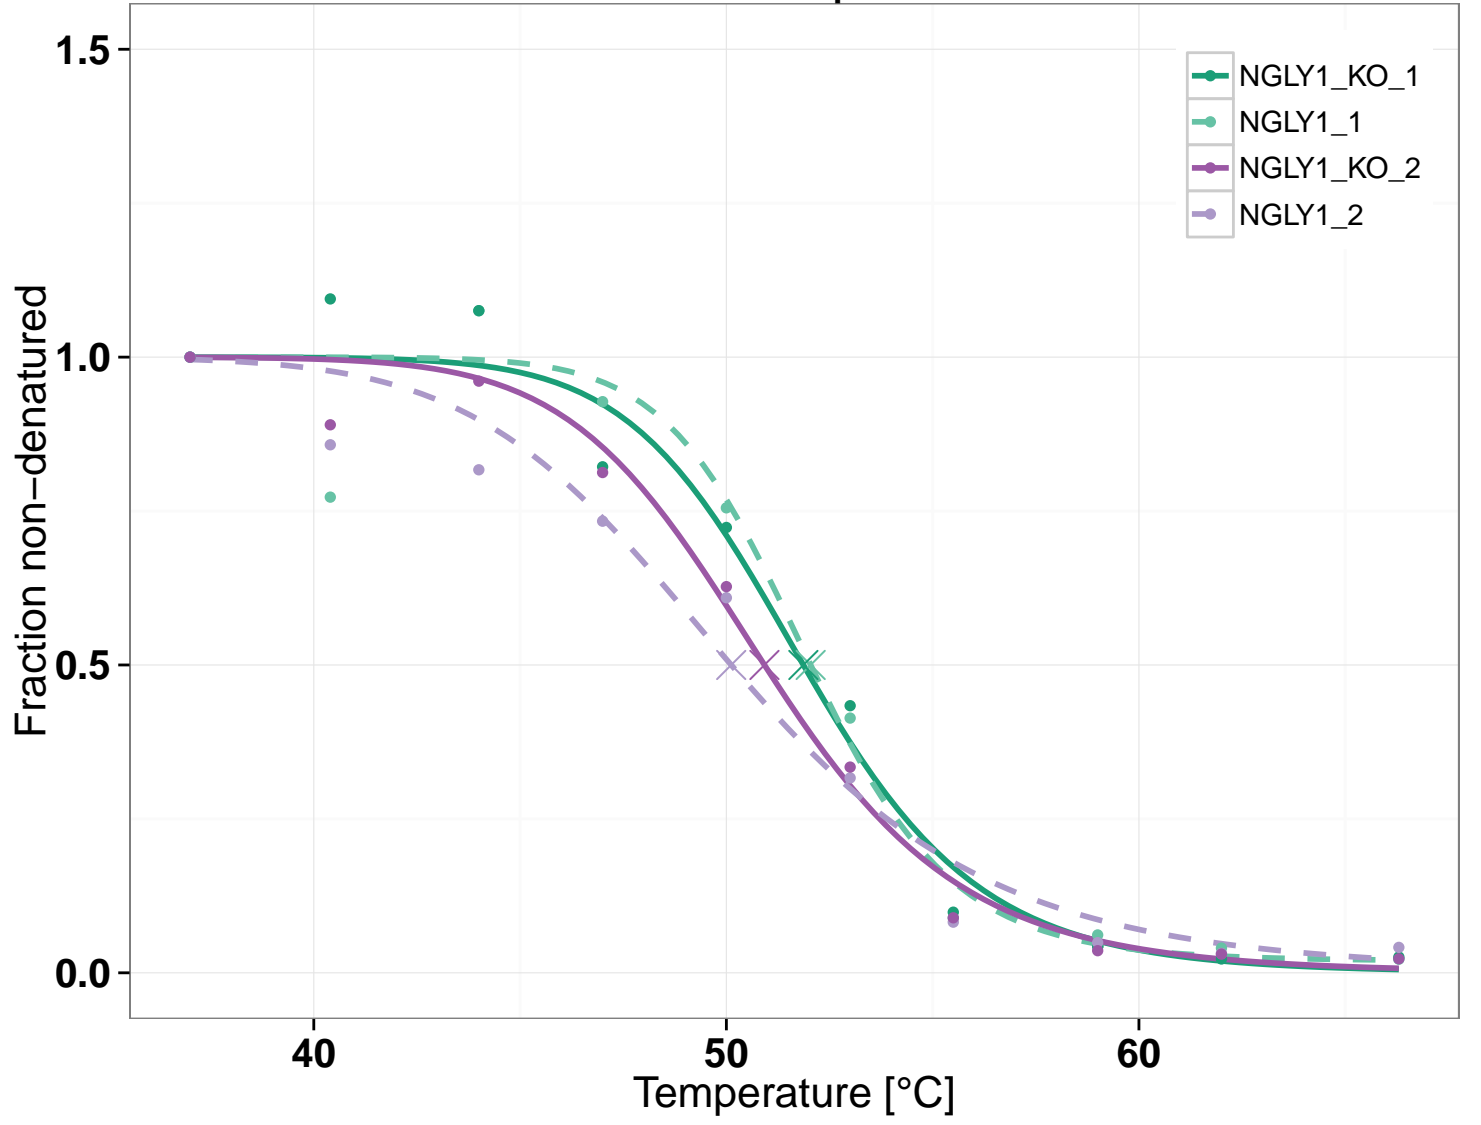

|            | meltPoint | slope  | plateau | R2   |
|------------|-----------|--------|---------|------|
| NGLY1_KO_1 | 51.87     | -0.12  | 0       | 0.98 |
| NGLY1_1    | 52.04     | -0.14  | 0.02    | 0.96 |
| NGLY1_KO_2 | 50.92     | -0.1   | 0       | 0.99 |
| NGLY1_2    | 50.12     | -0.079 | 0       | 0.97 |

Supplement: Supplementary file 194 [file 1]

IPI00003766.4|ETHE1

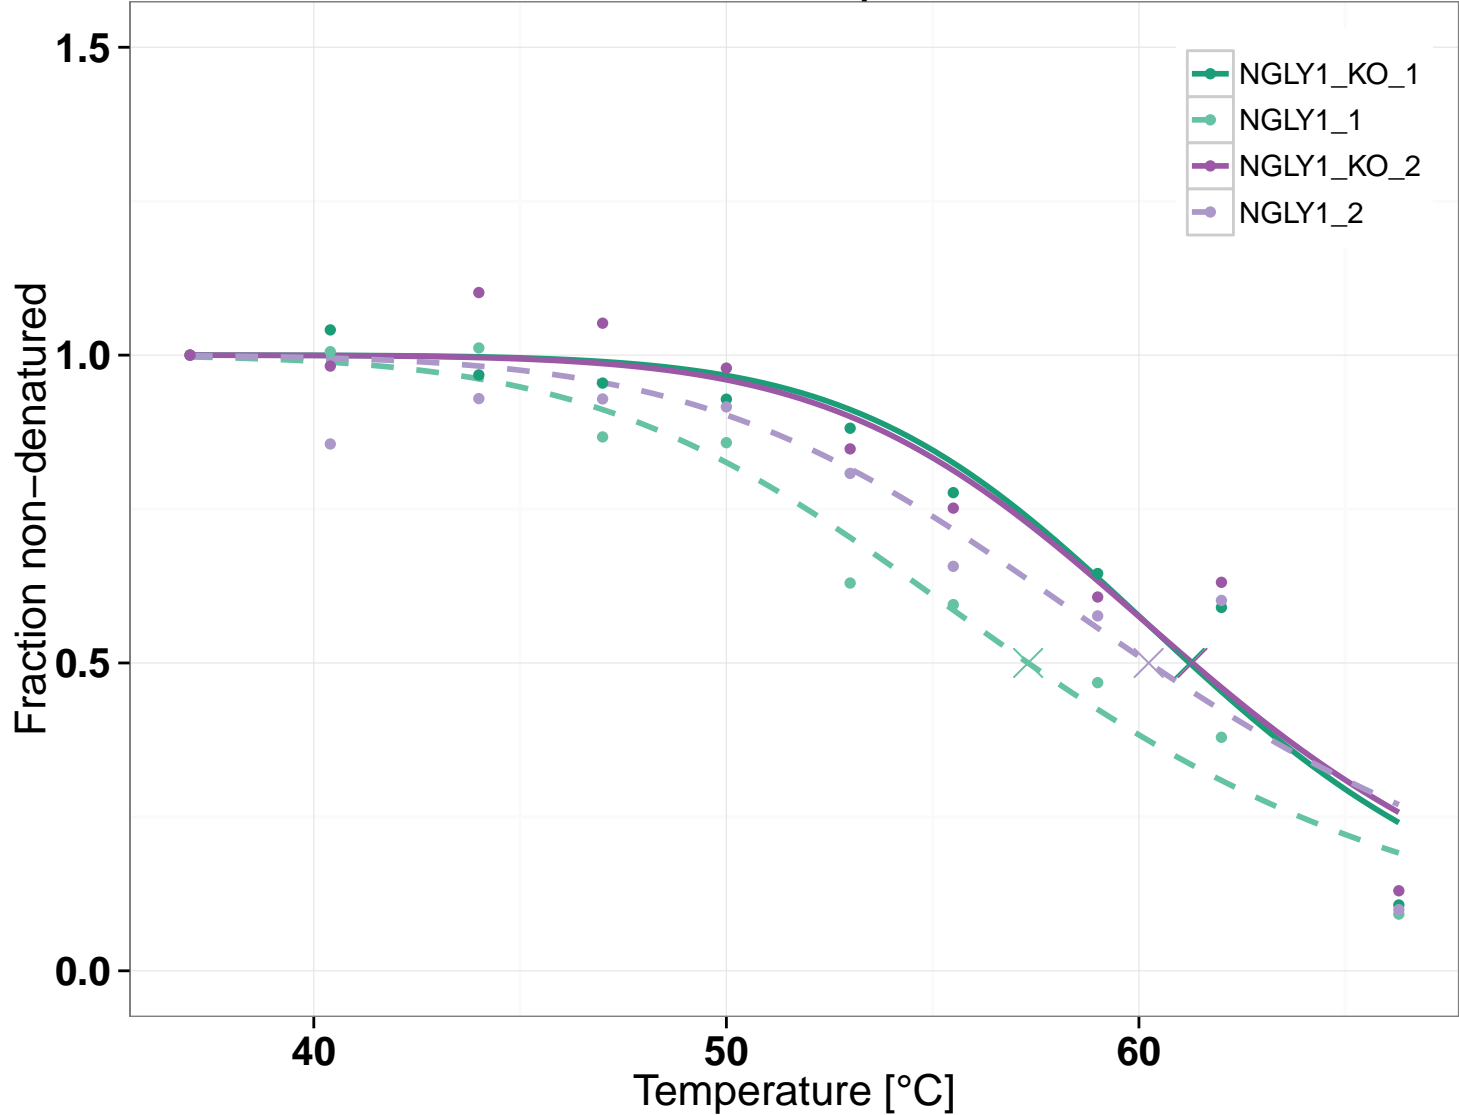

|            | meltPoint | slope  | plateau | R2   |
|------------|-----------|--------|---------|------|
| NGLY1_KO_1 | 61.23     | -0.062 | 0       | 0.94 |
| NGLY1_1    | 57.31     | -0.048 | 0       | 0.97 |
| NGLY1_KO_2 | 61.3      | -0.058 | 0       | 0.91 |
| NGLY1_2    | 60.24     | -0.047 | 0       | 0.86 |

Supplement: Supplementary file 195 [file 1]

IPI00333201.6|TDG

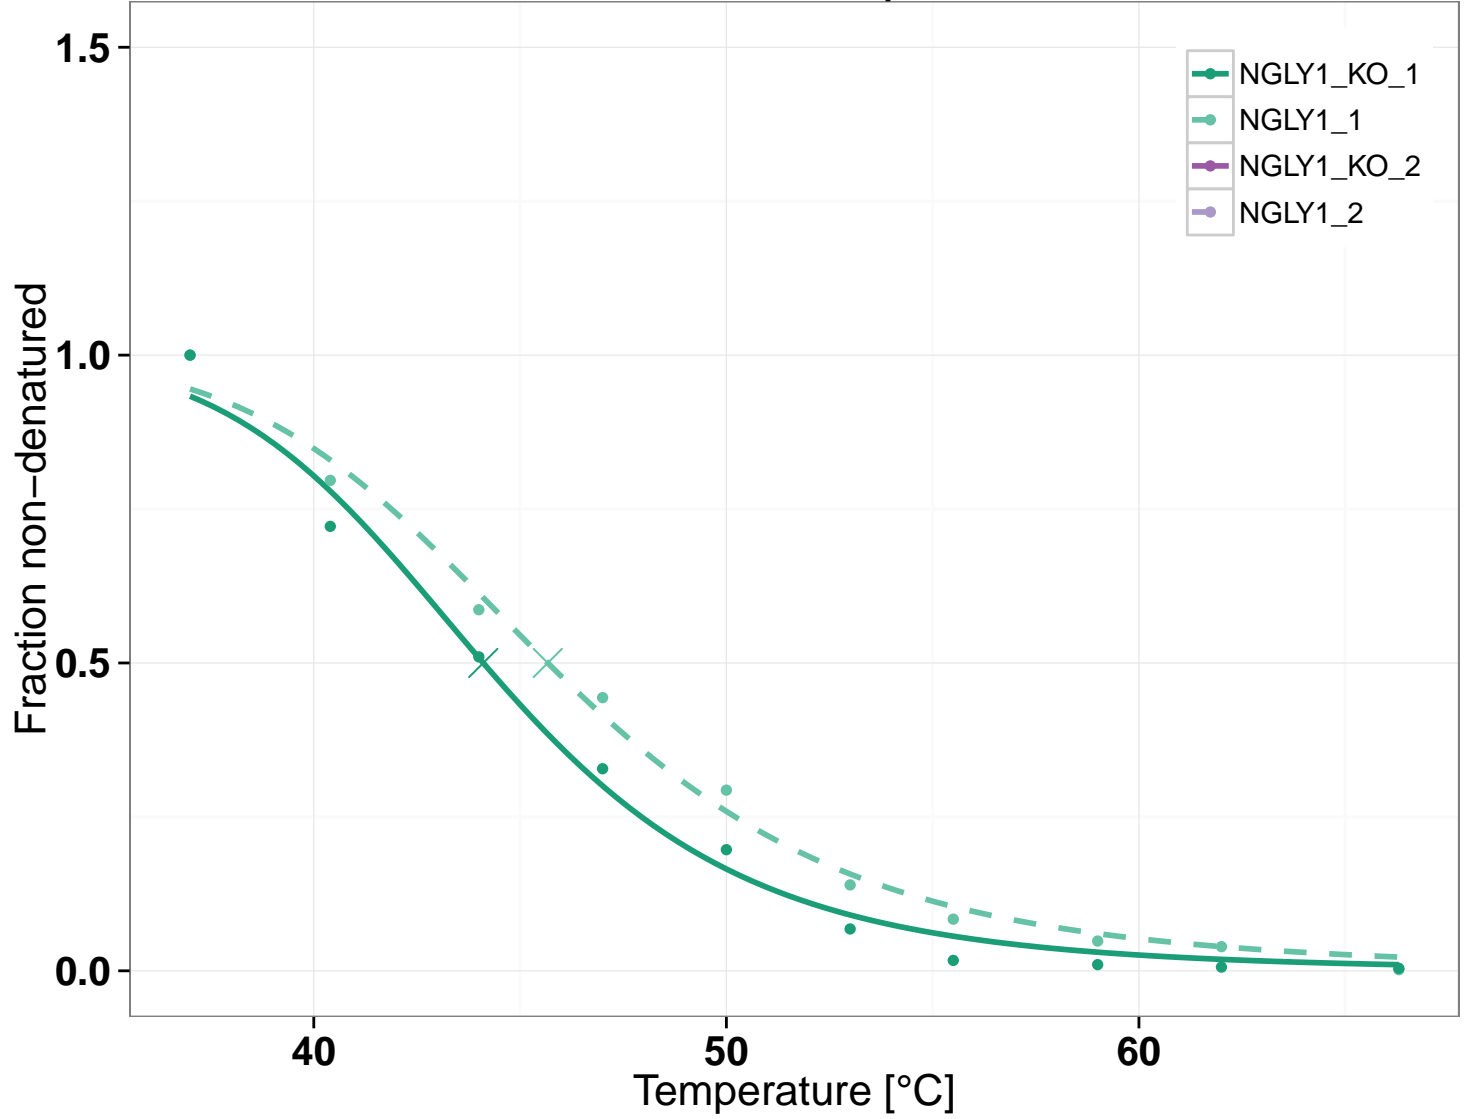

|            | meltPoint | slope  | plateau | R2   |
|------------|-----------|--------|---------|------|
| NGLY1_KO_1 | 44.11     | -0.08  | 0       | 0.99 |
| NGLY1_1    | 45.67     | -0.068 | 0       | 0.99 |
| NGLY1_KO_2 | -         | -      | -       | -    |
| NGLY1_2    | -         | -      | -       | -    |

Supplement: Supplementary file 196 [file 1]

# IPI00783378.3|UBE2O

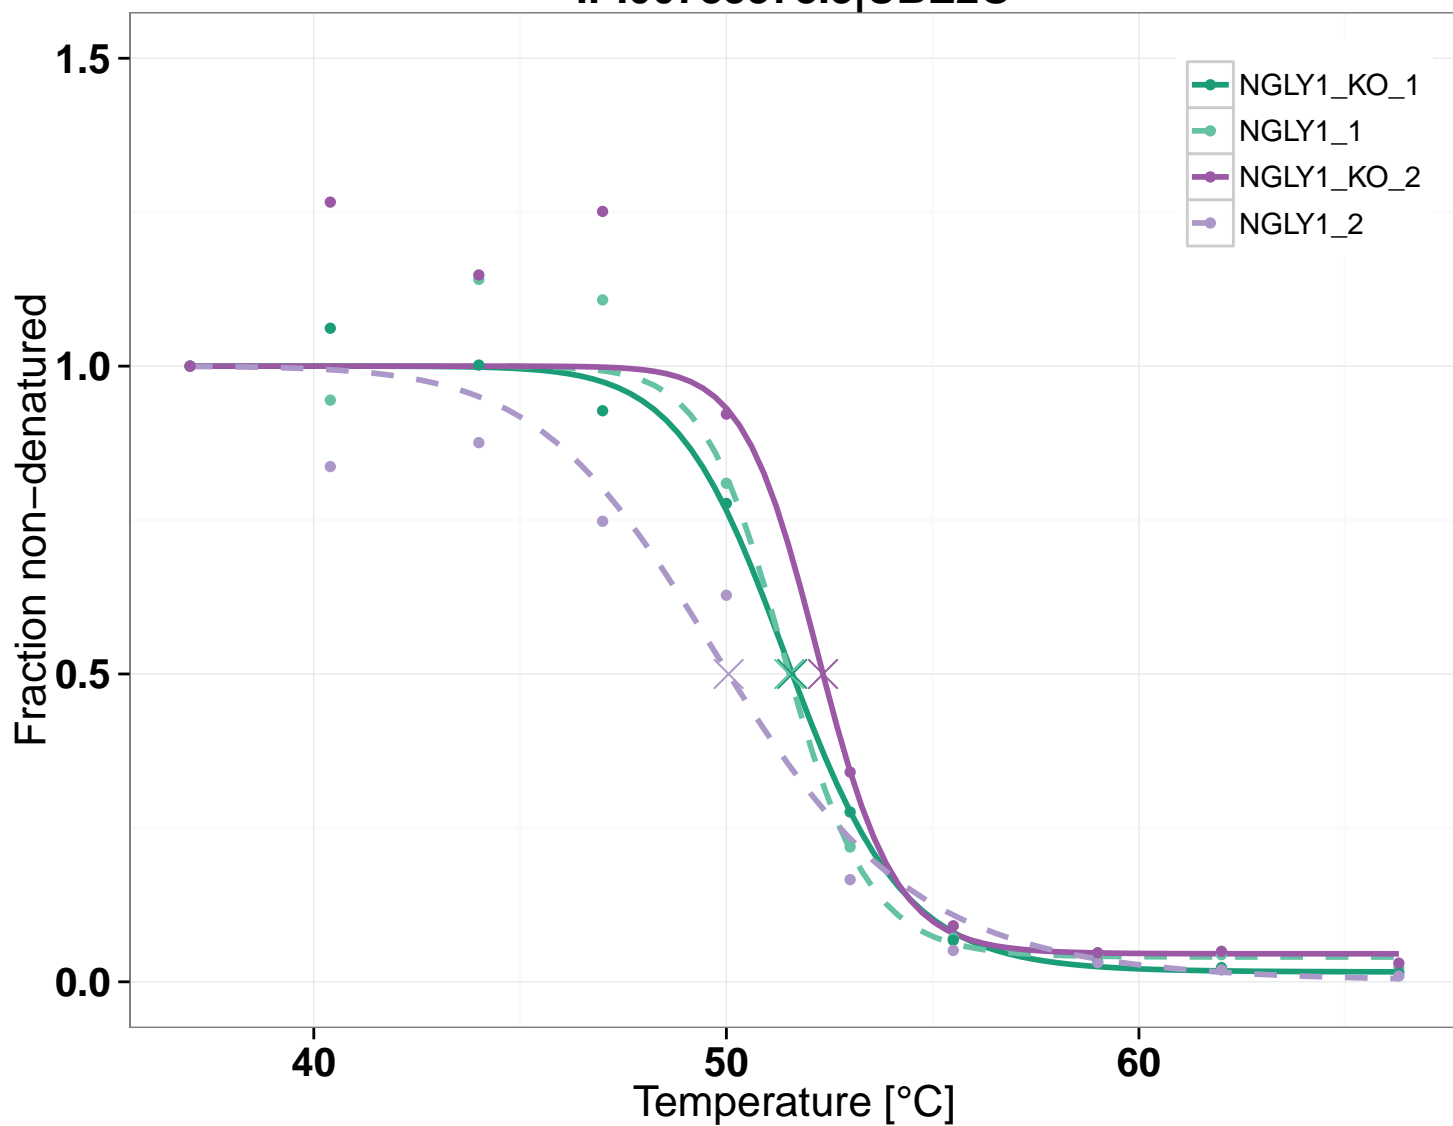

|            | meltPoint | slope | plateau | R2   |
|------------|-----------|-------|---------|------|
| NGLY1_KO_1 | 51.6      | -0.18 | 0.02    | 1    |
| NGLY1_1    | 51.53     | -0.24 | 0.04    | 0.98 |
| NGLY1_KO_2 | 52.34     | -0.26 | 0.05    | 0.94 |
| NGLY1_2    | 50.05     | -0.11 | 0       | 0.96 |

Supplement: Supplementary file 197 [file 1]

IPI00514832.2|TRIM56

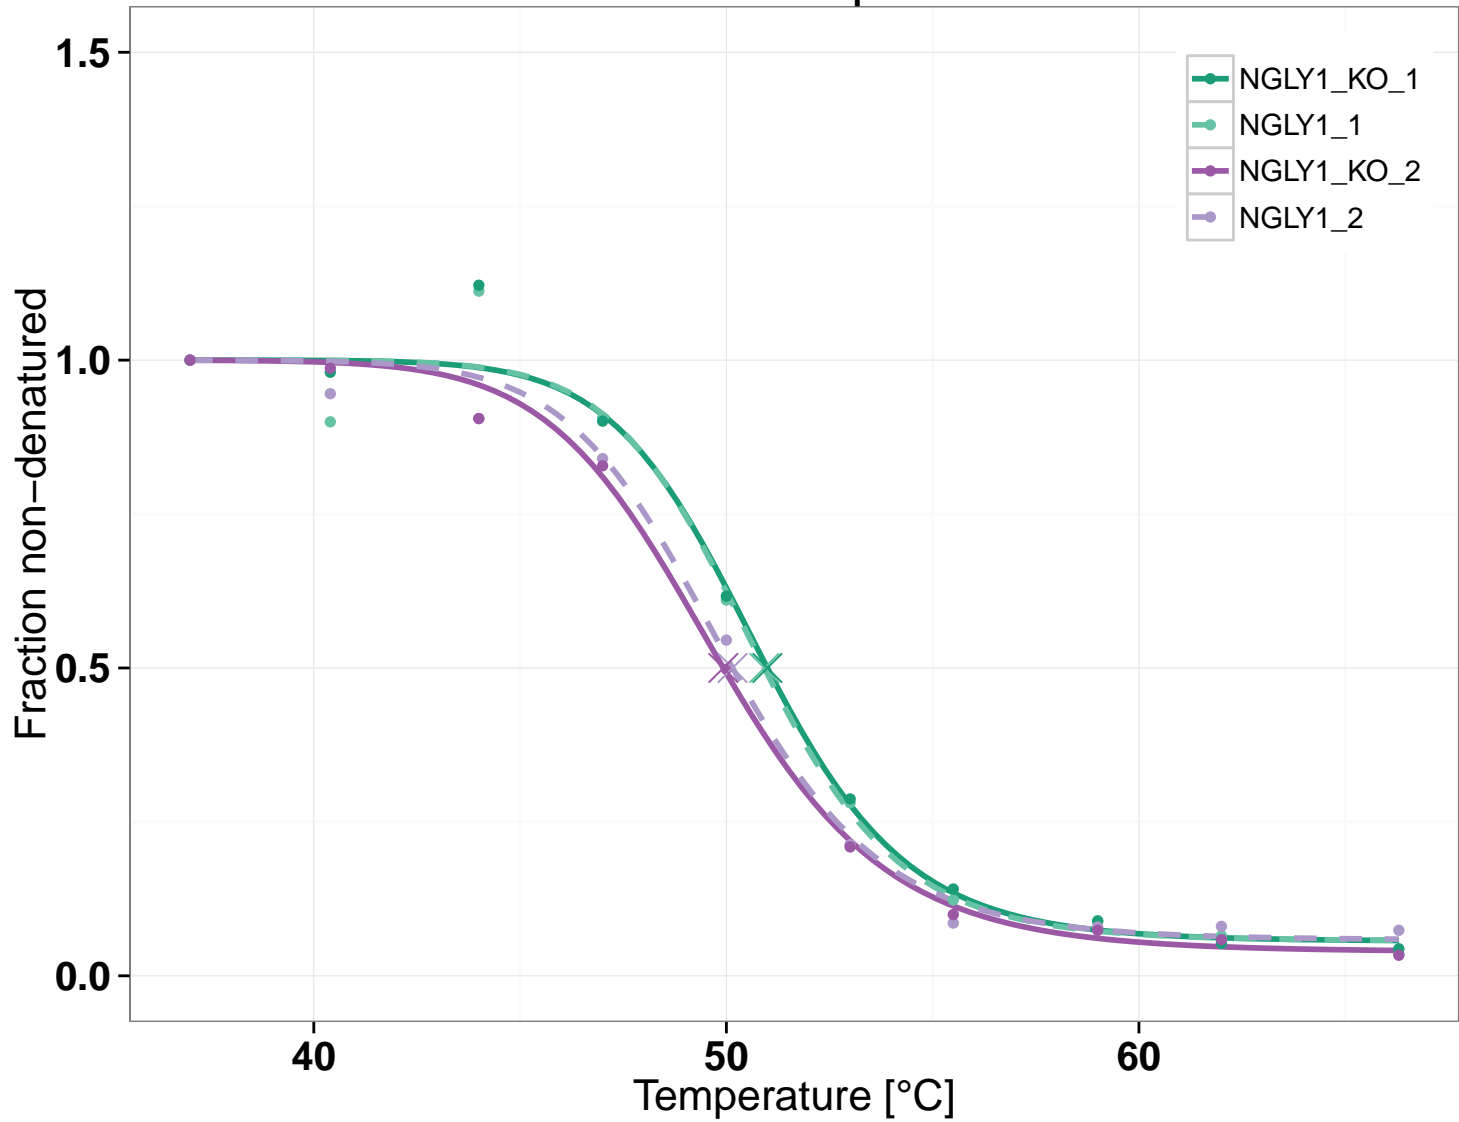

|            | meltPoint | slope | plateau | R2   |
|------------|-----------|-------|---------|------|
| NGLY1_KO_1 | 50.99     | -0.13 | 0.06    | 0.99 |
| NGLY1_1    | 50.92     | -0.14 | 0.06    | 0.98 |
| NGLY1_KO_2 | 49.93     | -0.12 | 0.04    | 1    |
| NGLY1_2    | 50.15     | -0.12 | 0.06    | 0.99 |

Supplement: Supplementary file 198 [file 1]

IPI00013721.2|PRPF4B

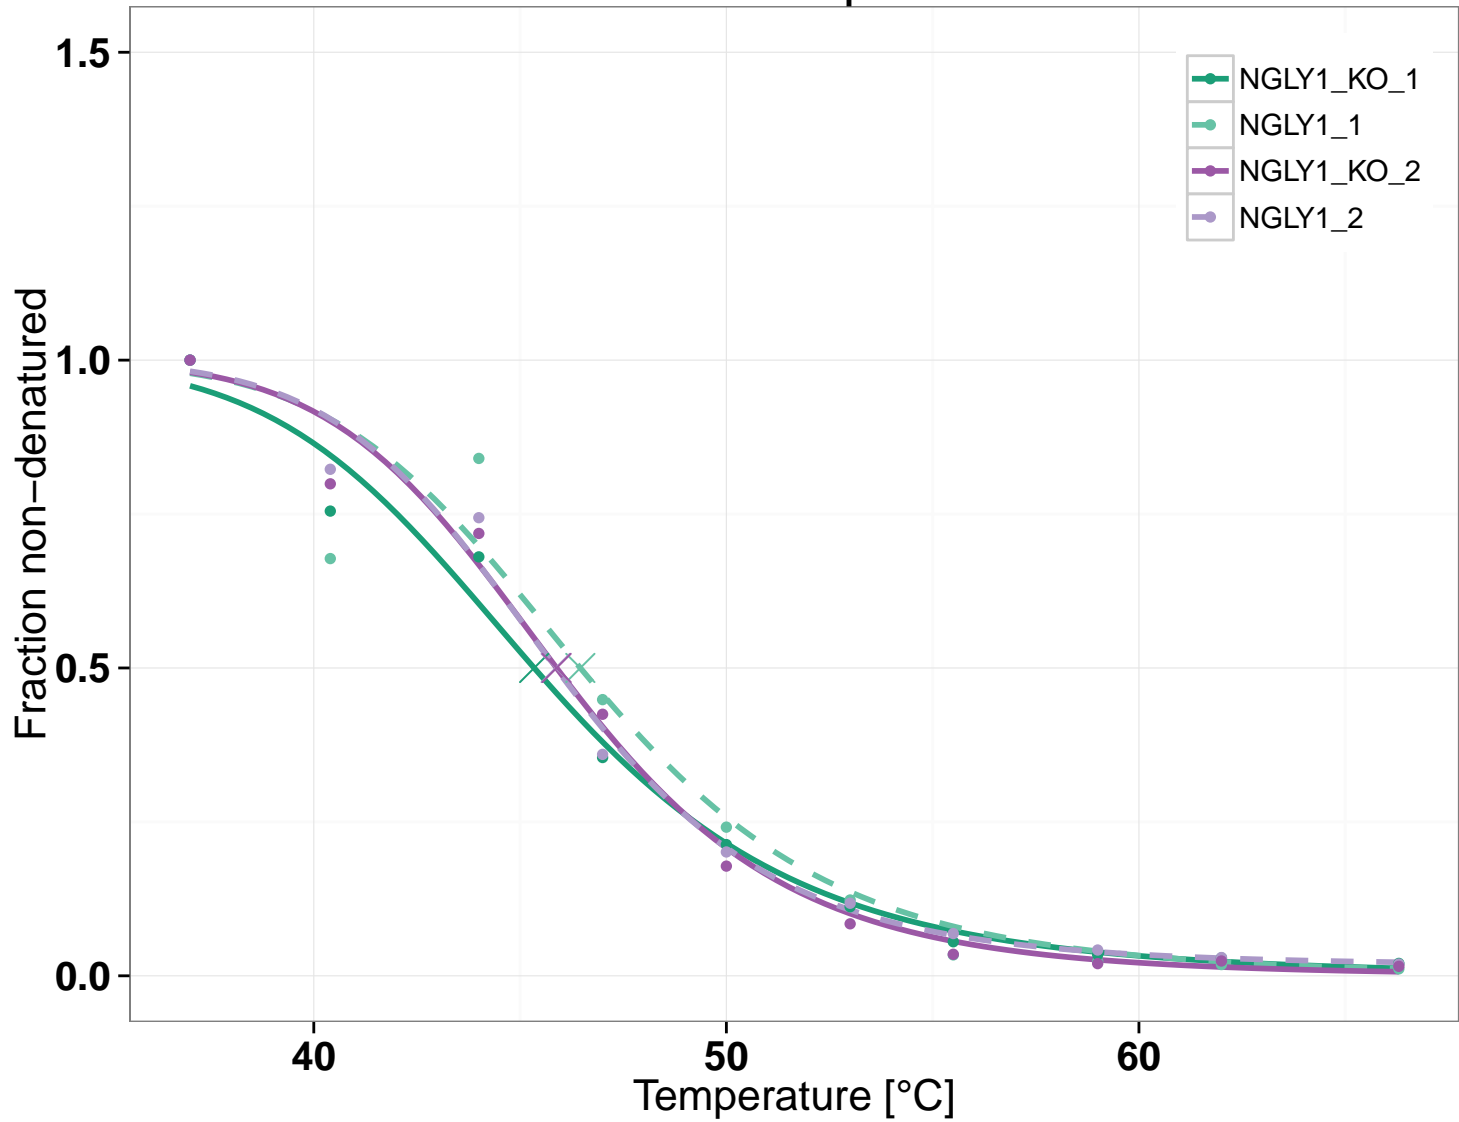

|            | meltPoint | slope  | plateau | R2   |
|------------|-----------|--------|---------|------|
| NGLY1_KO_1 | 45.34     | -0.078 | 0       | 0.99 |
| NGLY1_1    | 46.46     | -0.082 | 0       | 0.94 |
| NGLY1_KO_2 | 45.89     | -0.09  | 0       | 0.99 |
| NGLY1_2    | 45.86     | -0.091 | 0.02    | 0.99 |

Supplement: Supplementary file 199 [file 1]

IPI00549891.3|HS2ST1

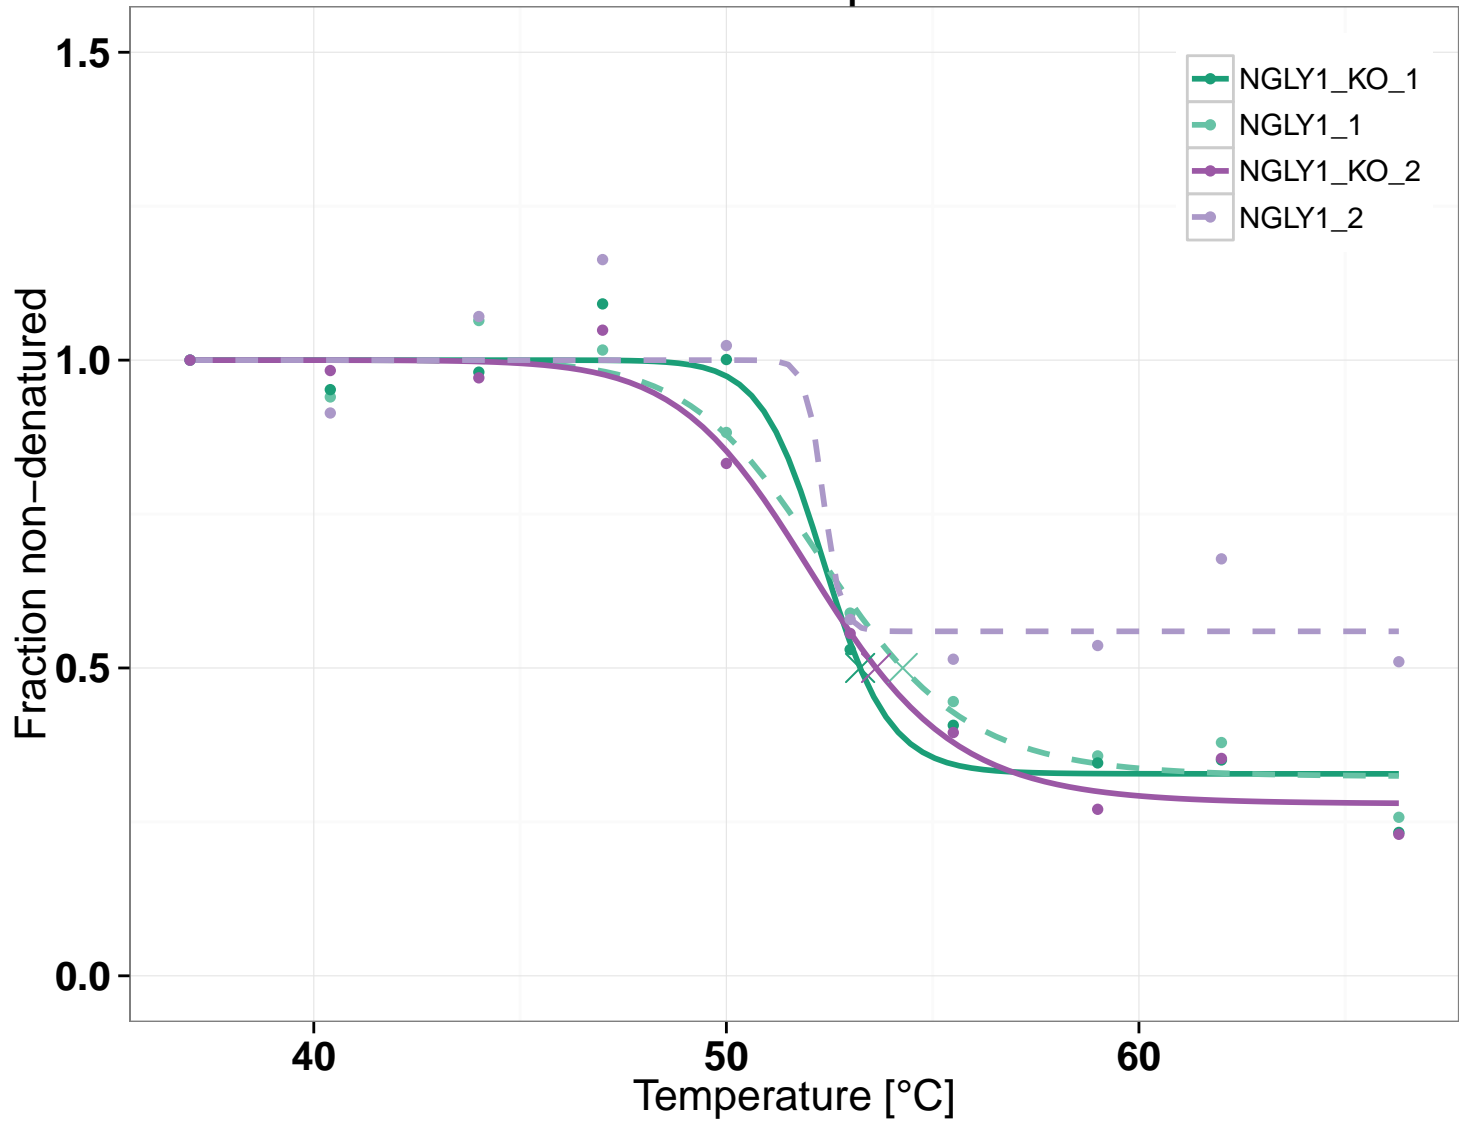

|            | meltPoint | slope | plateau | R2   |
|------------|-----------|-------|---------|------|
| NGLY1_KO_1 | 53.24     | -0.22 | 0.33    | 0.98 |
| NGLY1_1    | 54.28     | -0.1  | 0.32    | 0.98 |
| NGLY1_KO_2 | 53.63     | -0.11 | 0.28    | 0.99 |
| NGLY1_2    | -         | -0.53 | 0.56    | 0.9  |

Supplement: Supplementary file 200 [file 1]
