# Supplementary material (part 3 of 85)
Source: publisher figshare collection journal article supplement (https://gsajournals.figshare.com/articles/dataset/_/12014913)

IPI00152671.7|FAM91A1

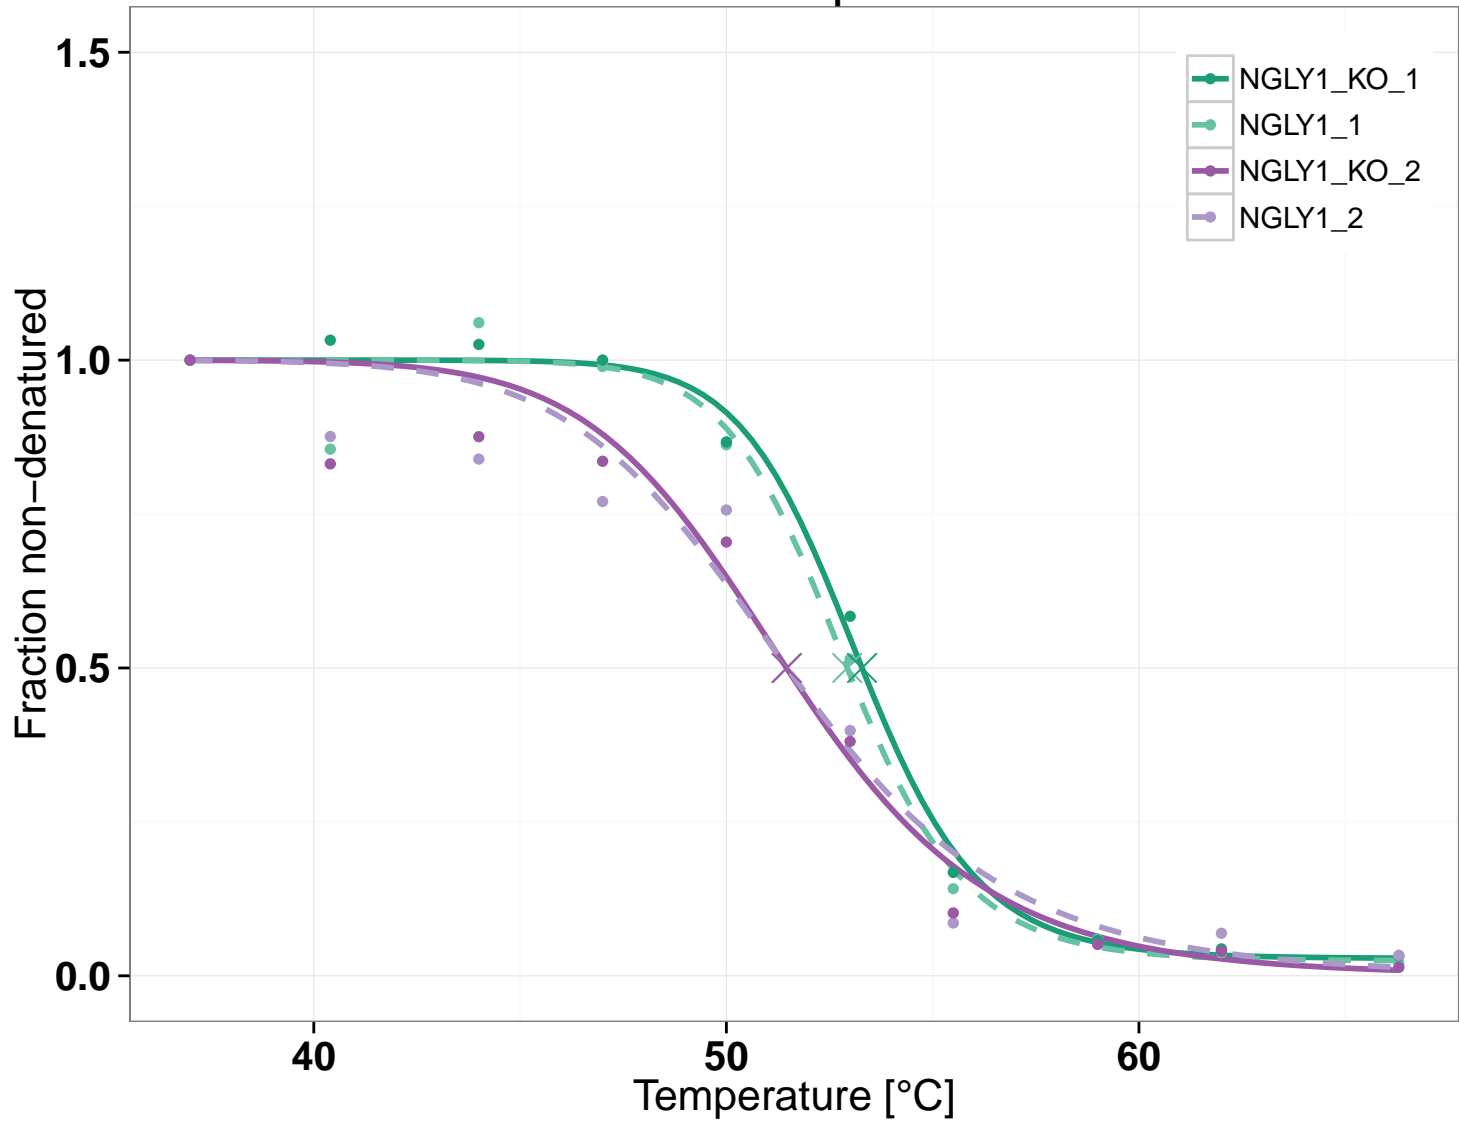

|            | meltPoint | slope  | plateau | R2   |
|------------|-----------|--------|---------|------|
| NGLY1_KO_1 | 53.29     | -0.17  | 0.03    | 1    |
| NGLY1_1    | 52.93     | -0.17  | 0.02    | 0.98 |
| NGLY1_KO_2 | 51.46     | -0.1   | 0       | 0.97 |
| NGLY1_2    | 51.48     | -0.094 | 0       | 0.95 |

Supplement: Supplementary file 201 [file 1]

# IPI00015526.3|EHMT1

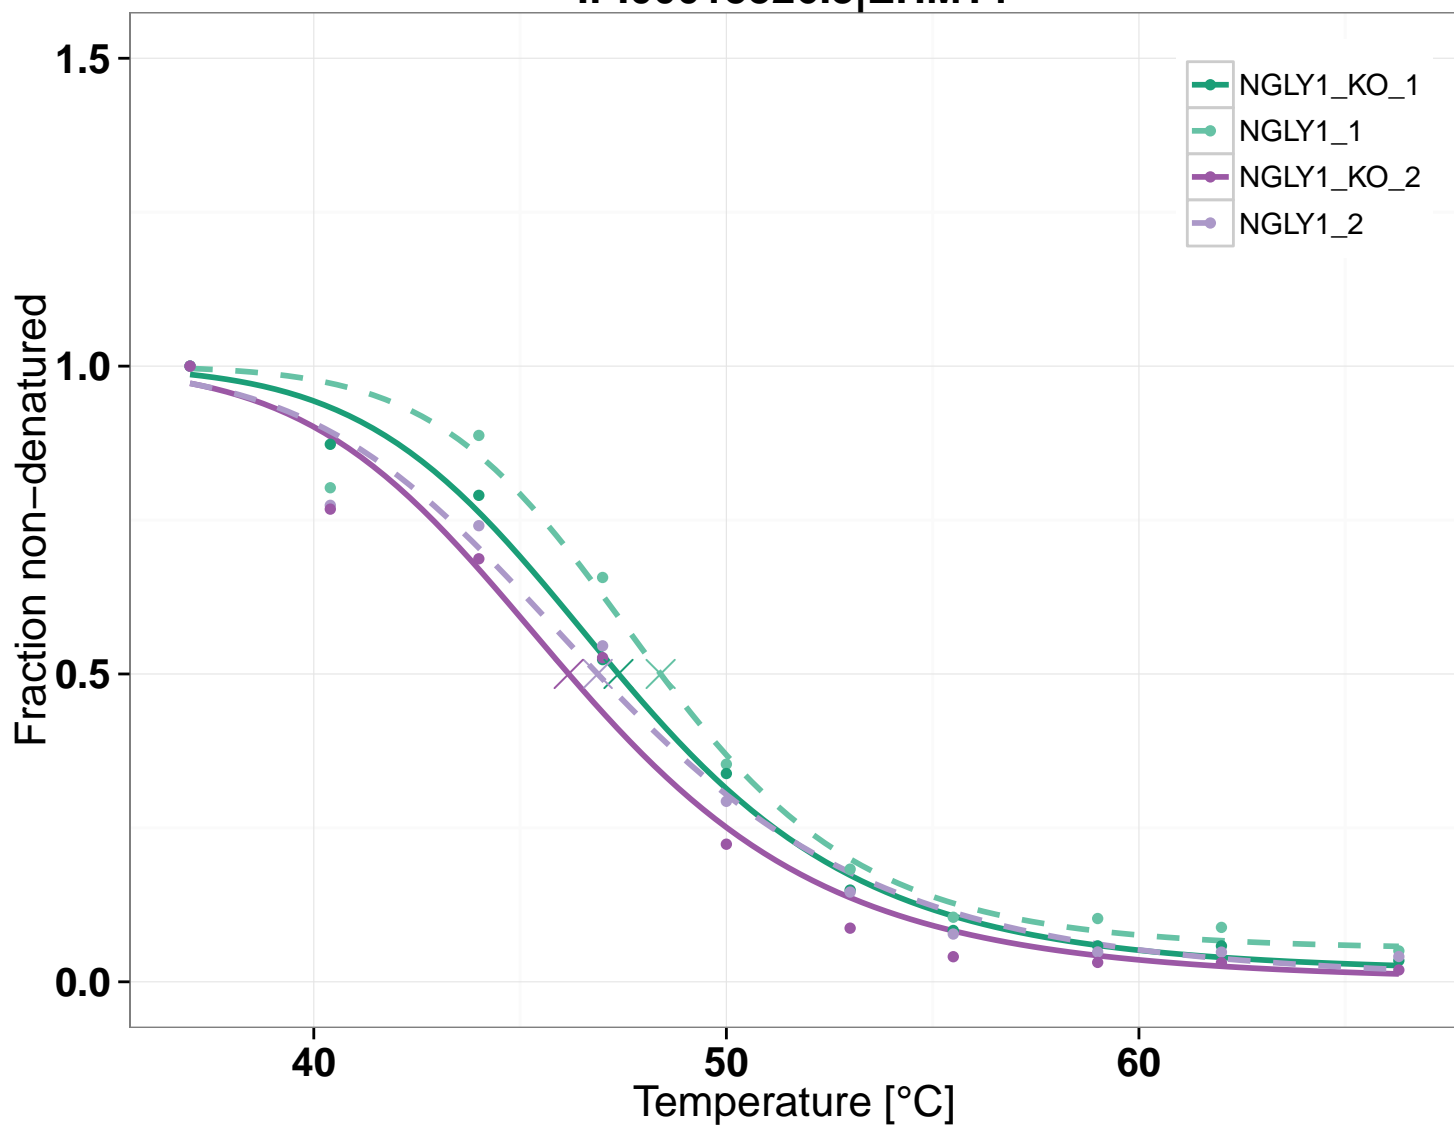

|            | meltPoint | slope  | plateau | R2   |
|------------|-----------|--------|---------|------|
| NGLY1_KO_1 | 47.38     | -0.081 | 0.01    | 0.99 |
| NGLY1_1    | 48.41     | -0.091 | 0.05    | 0.97 |
| NGLY1_KO_2 | 46.18     | -0.079 | 0       | 0.98 |
| NGLY1_2    | 46.88     | -0.072 | 0       | 0.98 |

Supplement: Supplementary file 202 [file 1]

IPI00064241.4|IKZF4

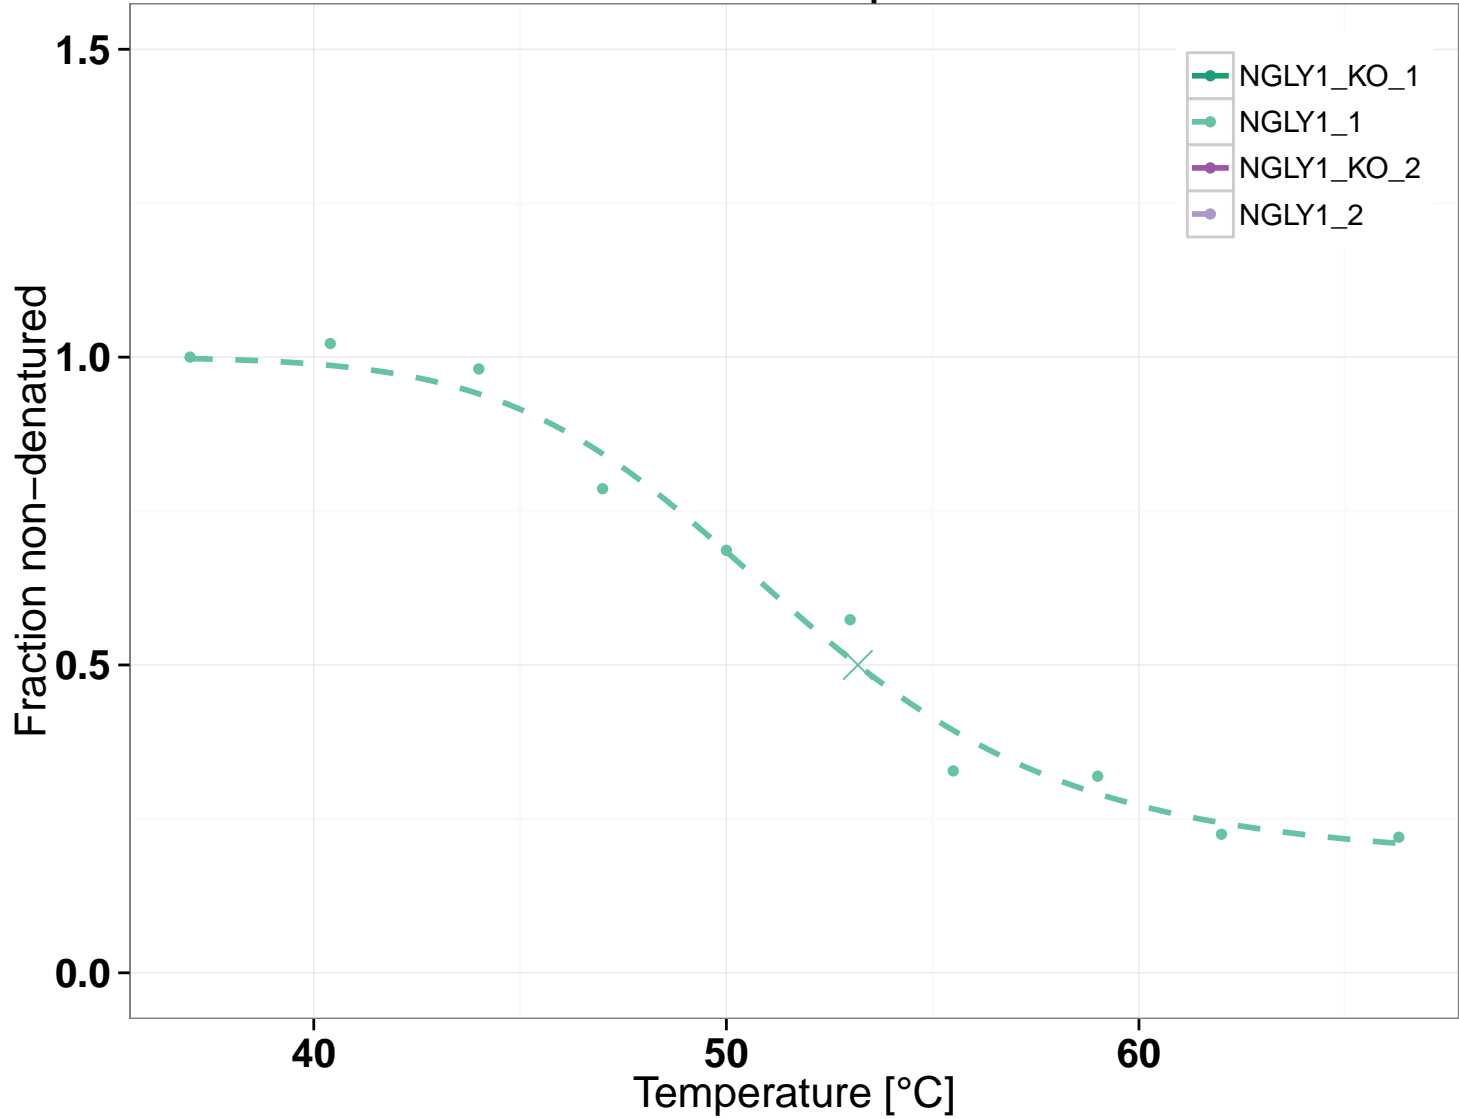

|            | meltPoint | slope | plateau | R2   |
|------------|-----------|-------|---------|------|
| NGLY1_KO_1 | -         | -     | -       | -    |
| NGLY1_1    | 53.19     | -0.06 | 0.18    | 0.98 |
| NGLY1_KO_2 | -         | -     | -       | -    |
| NGLY1_2    | -         | -     | -       | -    |

Supplement: Supplementary file 203 [file 1]

# IPI00025257.1|SEMA7A

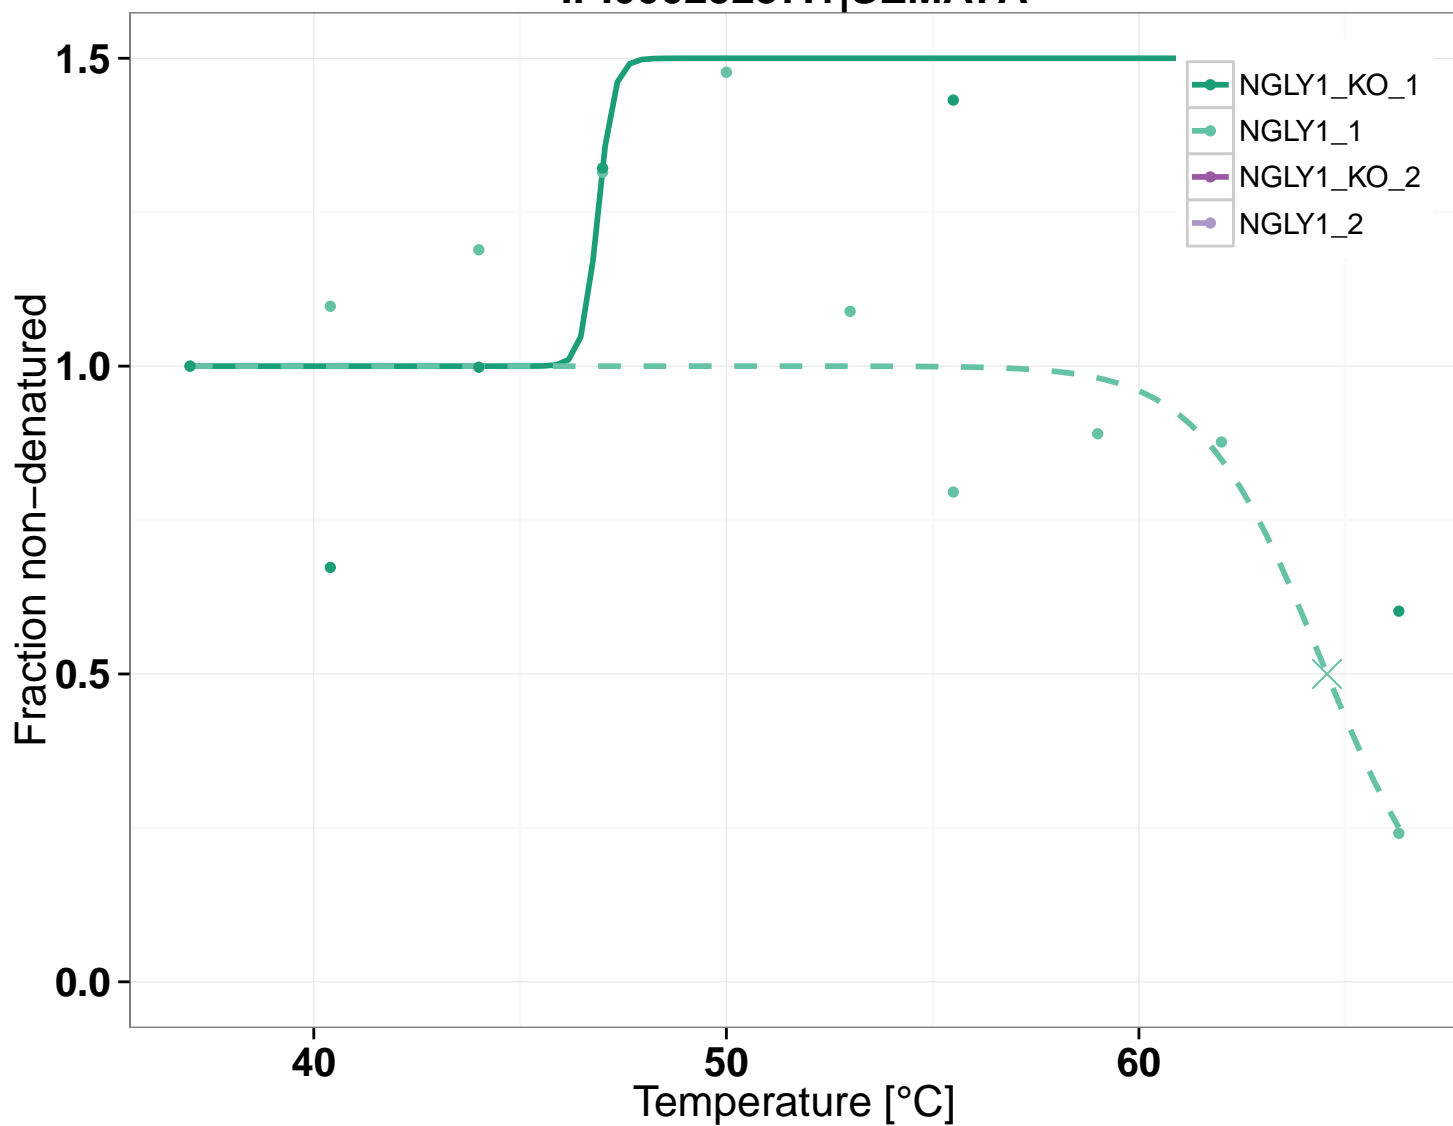

|            | meltPoint | slope | plateau | R2   |
|------------|-----------|-------|---------|------|
| NGLY1_KO_1 | –         | 0.67  | 1.5     | 0.33 |
| NGLY1_1    | 64.56     | –0.16 | 0       | 0.58 |
| NGLY1_KO_2 | –         | –     | –       | –    |
| NGLY1_2    | –         | –     | –       | –    |

Supplement: Supplementary file 204 [file 1]

# IPI00795705.1|AIF1

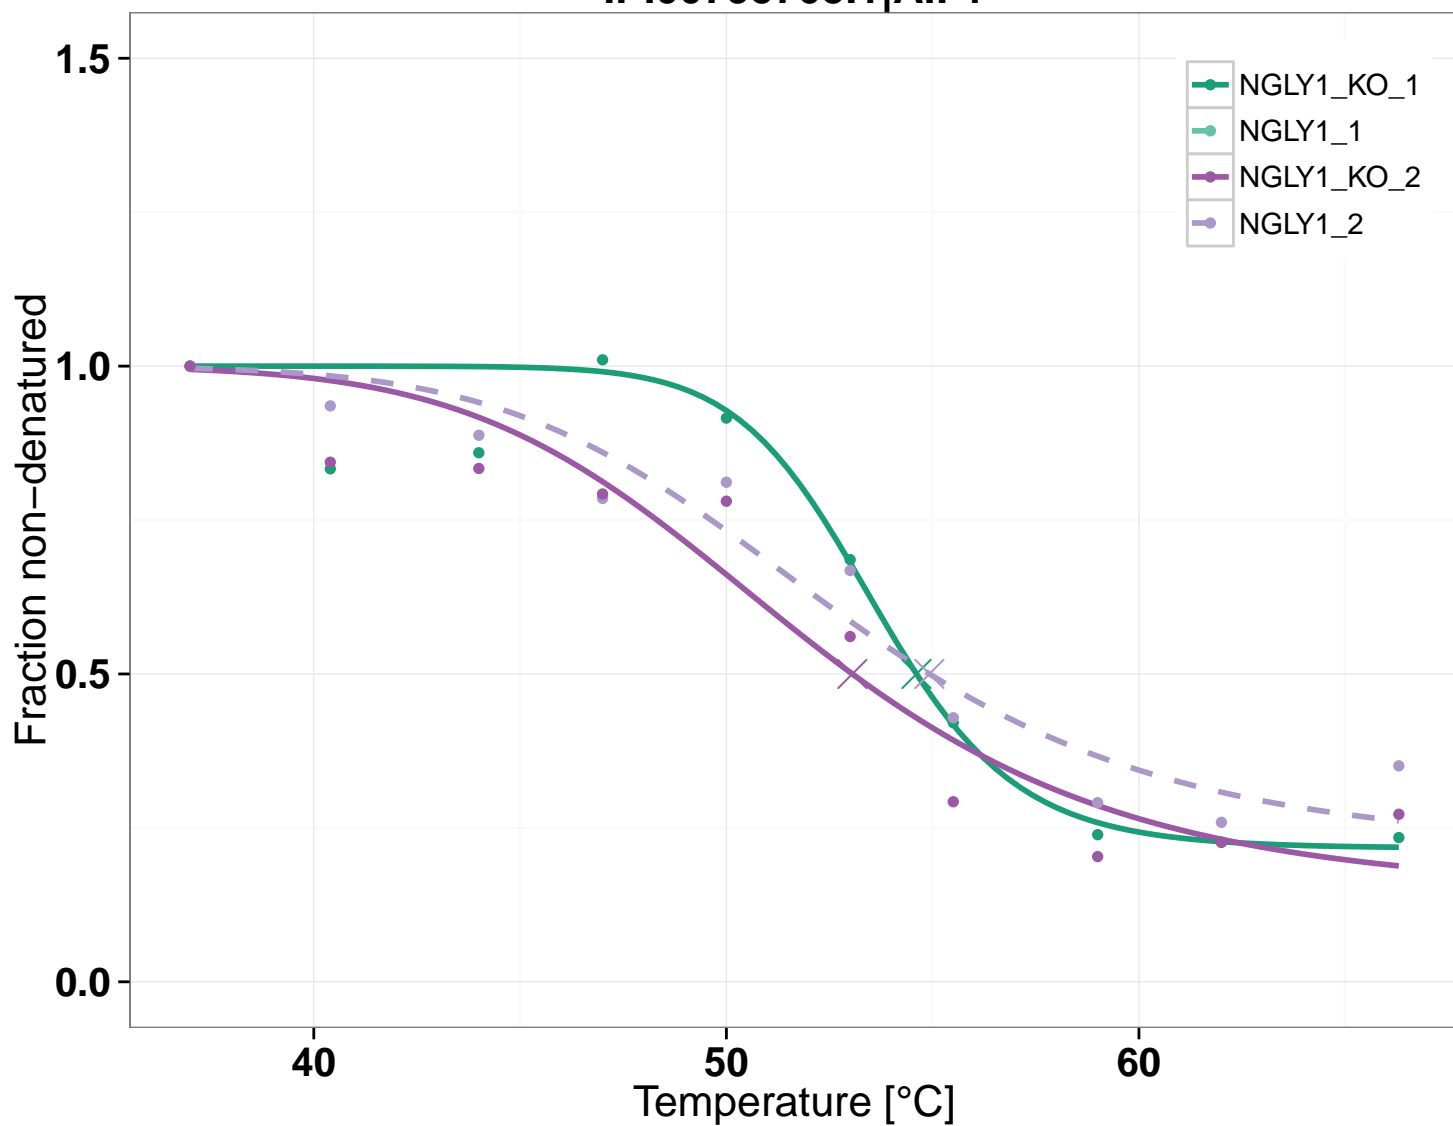

|            | meltPoint | slope  | plateau | R2   |
|------------|-----------|--------|---------|------|
| NGLY1_KO_1 | 54.61     | -0.12  | 0.22    | 0.95 |
| NGLY1_1    | -         | -      | -       | -    |
| NGLY1_KO_2 | 53.05     | -0.054 | 0.14    | 0.92 |
| NGLY1_2    | 54.92     | -0.05  | 0.21    | 0.94 |

Supplement: Supplementary file 205 [file 1]

IPI00807412.1|NT5C3

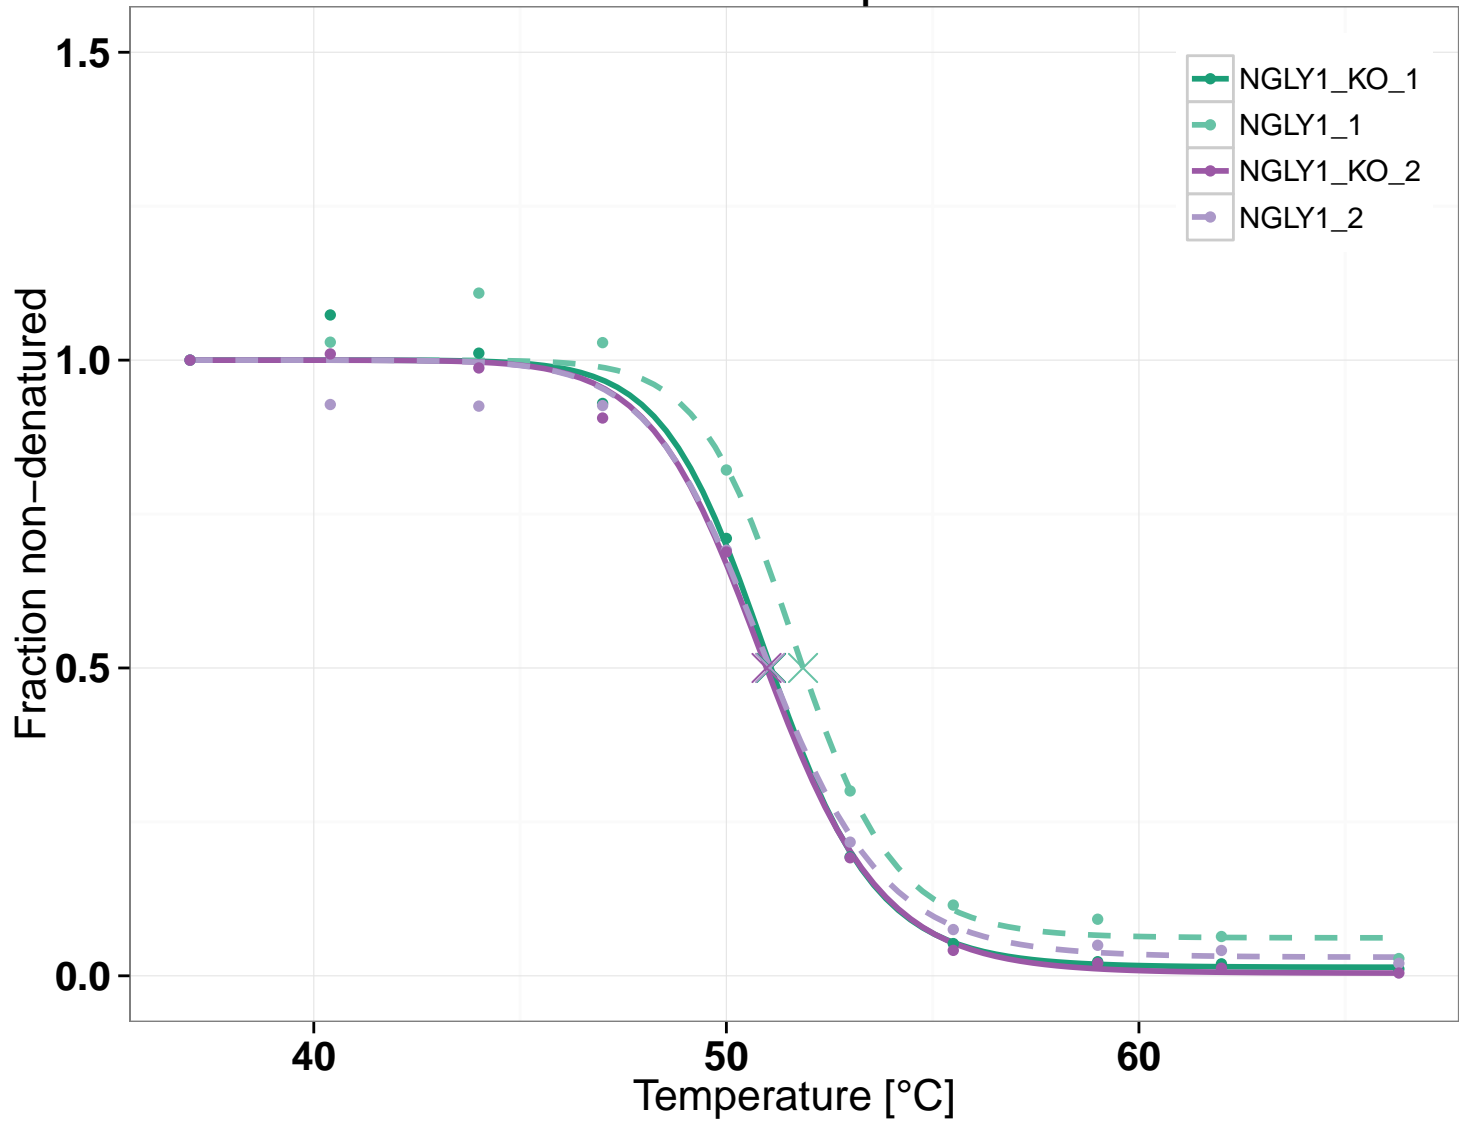

|            | meltPoint | slope | plateau | R2   |
|------------|-----------|-------|---------|------|
| NGLY1_KO_1 | 51.08     | -0.19 | 0.01    | 1    |
| NGLY1_1    | 51.86     | -0.2  | 0.06    | 0.99 |
| NGLY1_KO_2 | 50.97     | -0.18 | 0       | 1    |
| NGLY1_2    | 51.06     | -0.17 | 0.03    | 0.99 |

Supplement: Supplementary file 206 [file 1]

# IPI00328319.8|RBBP4

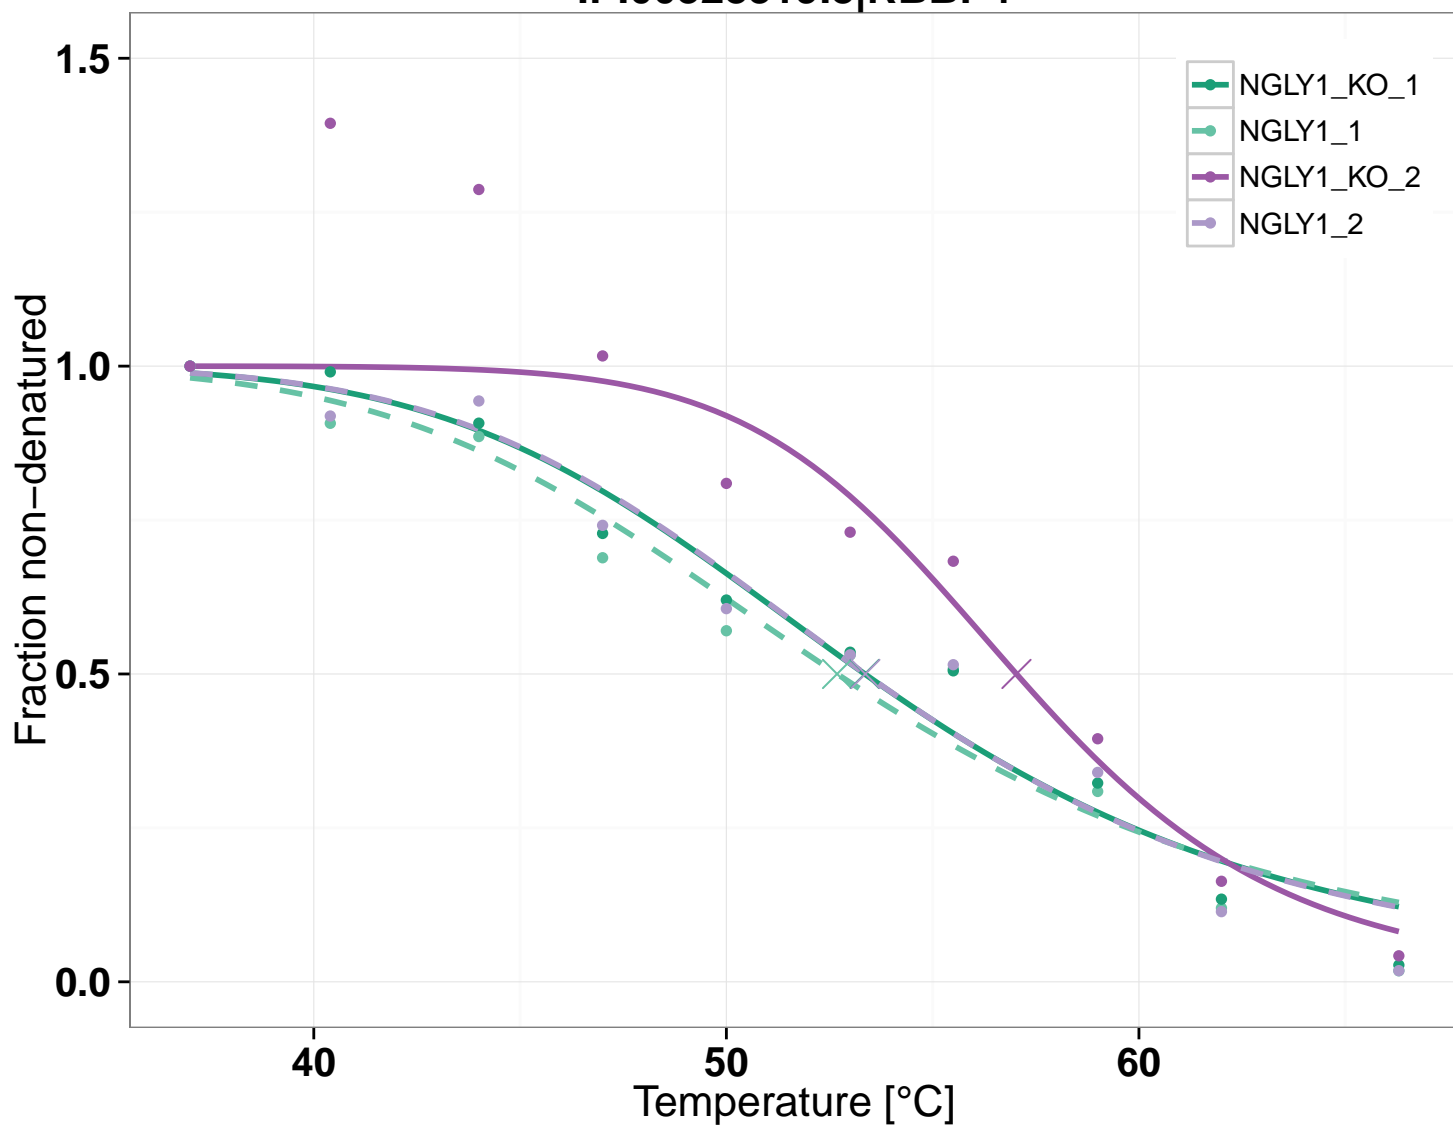

|            | meltPoint | slope  | plateau | R2   |
|------------|-----------|--------|---------|------|
| NGLY1_KO_1 | 53.36     | -0.049 | 0       | 0.97 |
| NGLY1_1    | 52.68     | -0.046 | 0       | 0.95 |
| NGLY1_KO_2 | 57.03     | -0.077 | 0       | 0.85 |
| NGLY1_2    | 53.37     | -0.049 | 0       | 0.96 |

Supplement: Supplementary file 207 [file 1]

IPI00220921.2|SKI

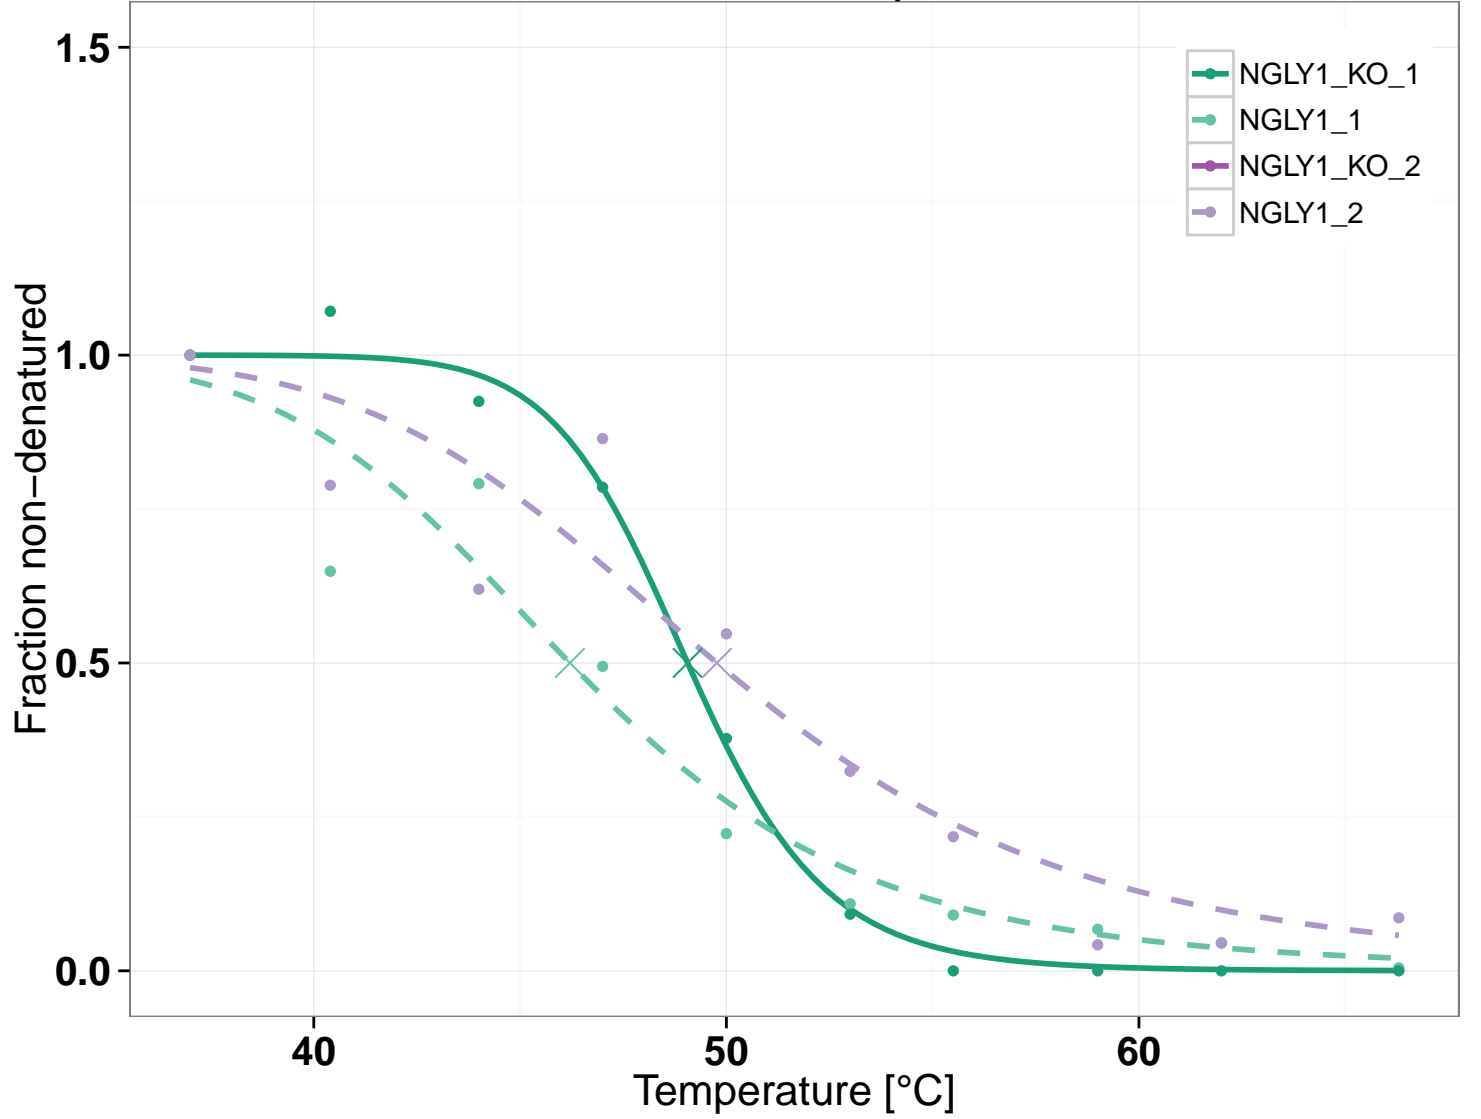

|            | meltPoint | slope  | plateau | R2   |
|------------|-----------|--------|---------|------|
| NGLY1_KO_1 | 49.06     | -0.15  | 0       | 1    |
| NGLY1_1    | 46.21     | -0.071 | 0       | 0.94 |
| NGLY1_KO_2 | -         | -      | -       | -    |
| NGLY1_2    | 49.77     | -0.058 | 0       | 0.9  |

Supplement: Supplementary file 208 [file 1]

IPI00305978.4|AKR7A2

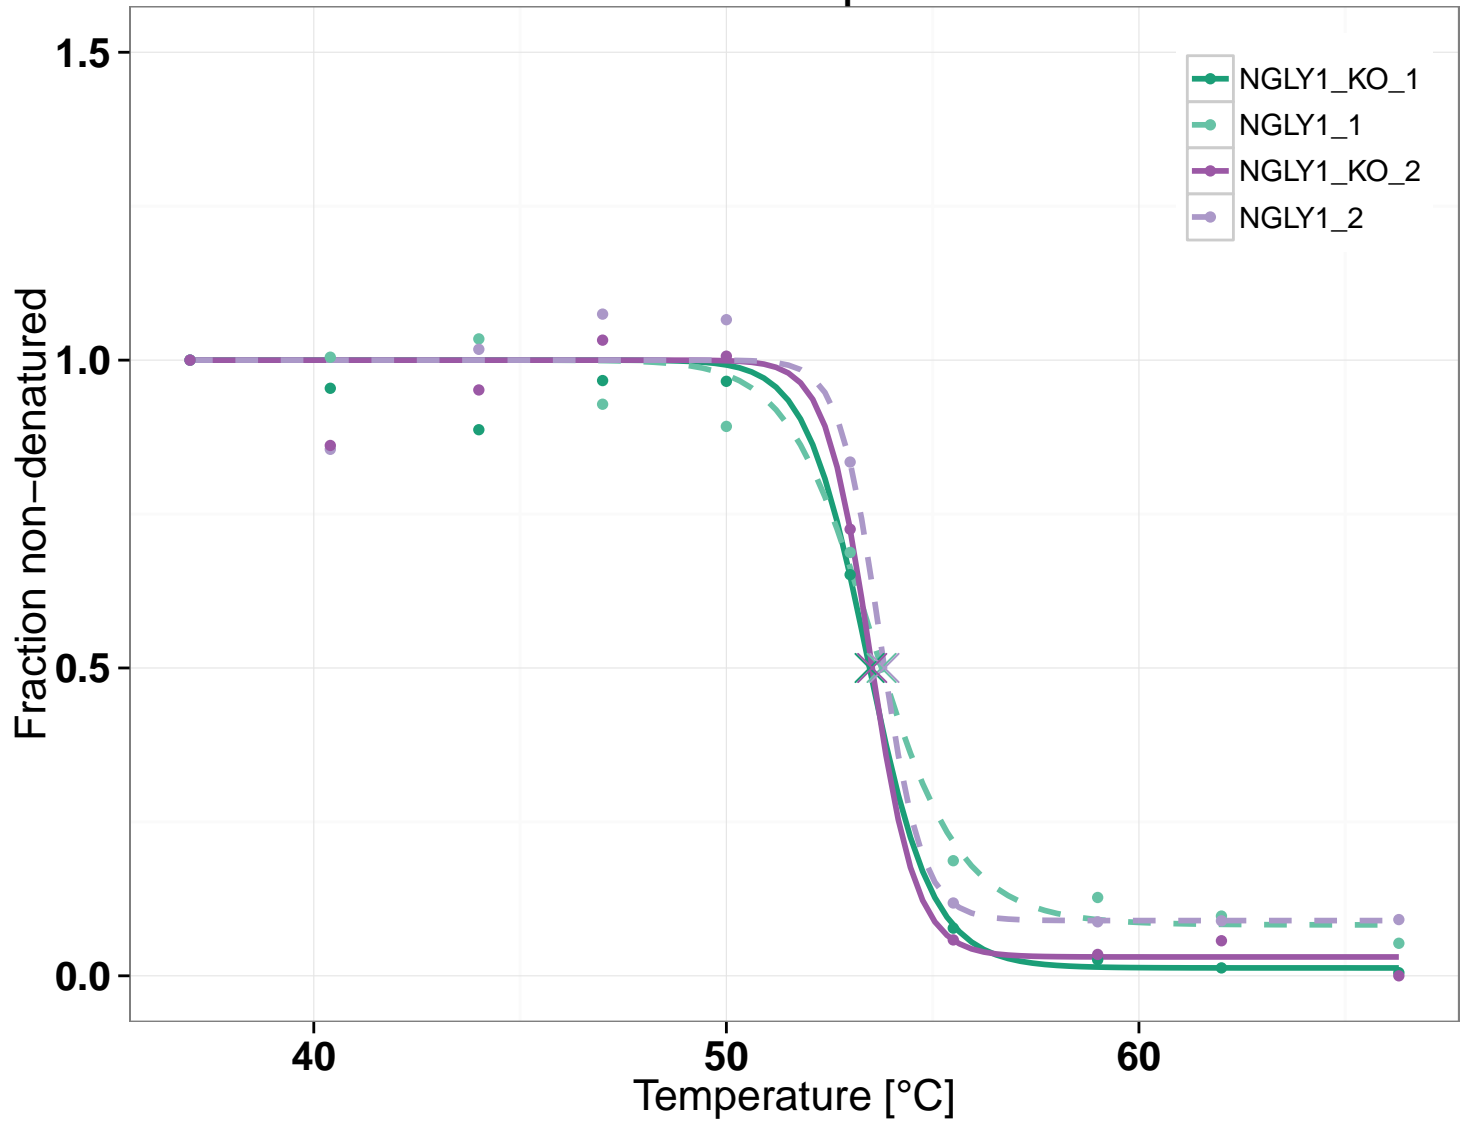

|            | meltPoint | slope | plateau | R2   |
|------------|-----------|-------|---------|------|
| NGLY1_KO_1 | 53.47     | -0.32 | 0.01    | 0.99 |
| NGLY1_1    | 53.76     | -0.22 | 0.08    | 0.99 |
| NGLY1_KO_2 | 53.54     | -0.45 | 0.03    | 0.99 |
| NGLY1_2    | 53.83     | -0.46 | 0.09    | 0.98 |

Supplement: Supplementary file 209 [file 1]

# IPI00477048.2|SIAH1

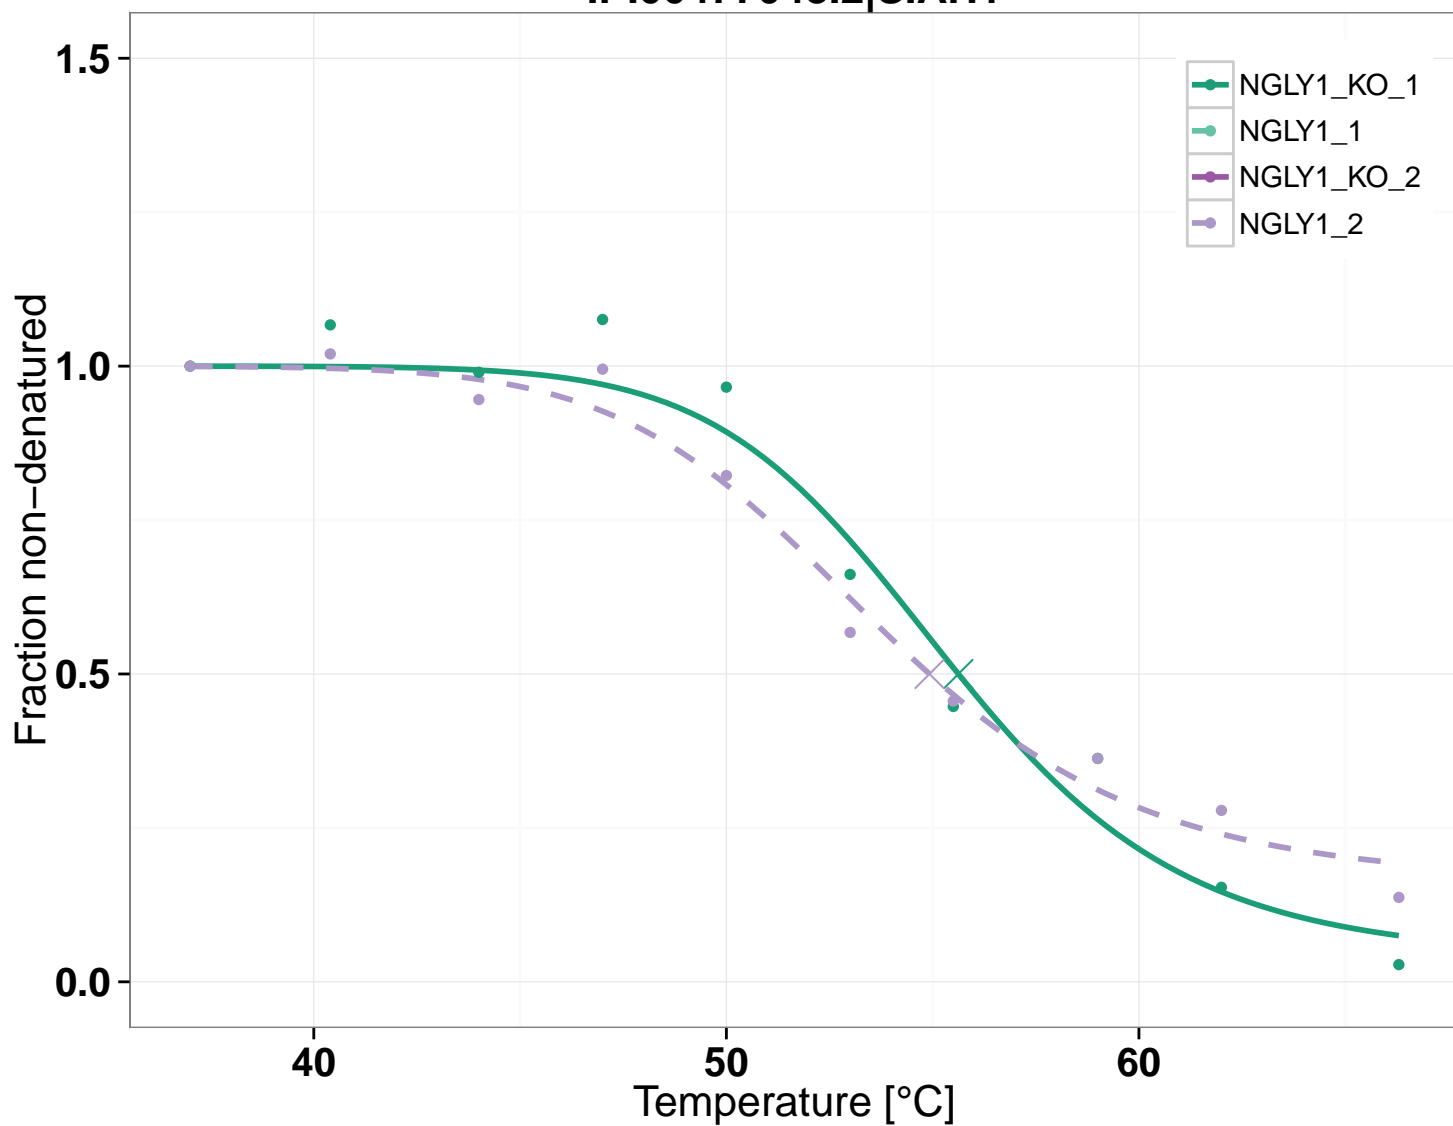

|            | meltPoint | slope  | plateau | R2   |
|------------|-----------|--------|---------|------|
| NGLY1_KO_1 | 55.62     | -0.085 | 0.04    | 0.97 |
| NGLY1_1    | -         | -      | -       | -    |
| NGLY1_KO_2 | -         | -      | -       | -    |
| NGLY1_2    | 54.92     | -0.066 | 0.16    | 0.98 |

Supplement: Supplementary file 210 [file 1]

IPI00644031.2|PLEKHJ1

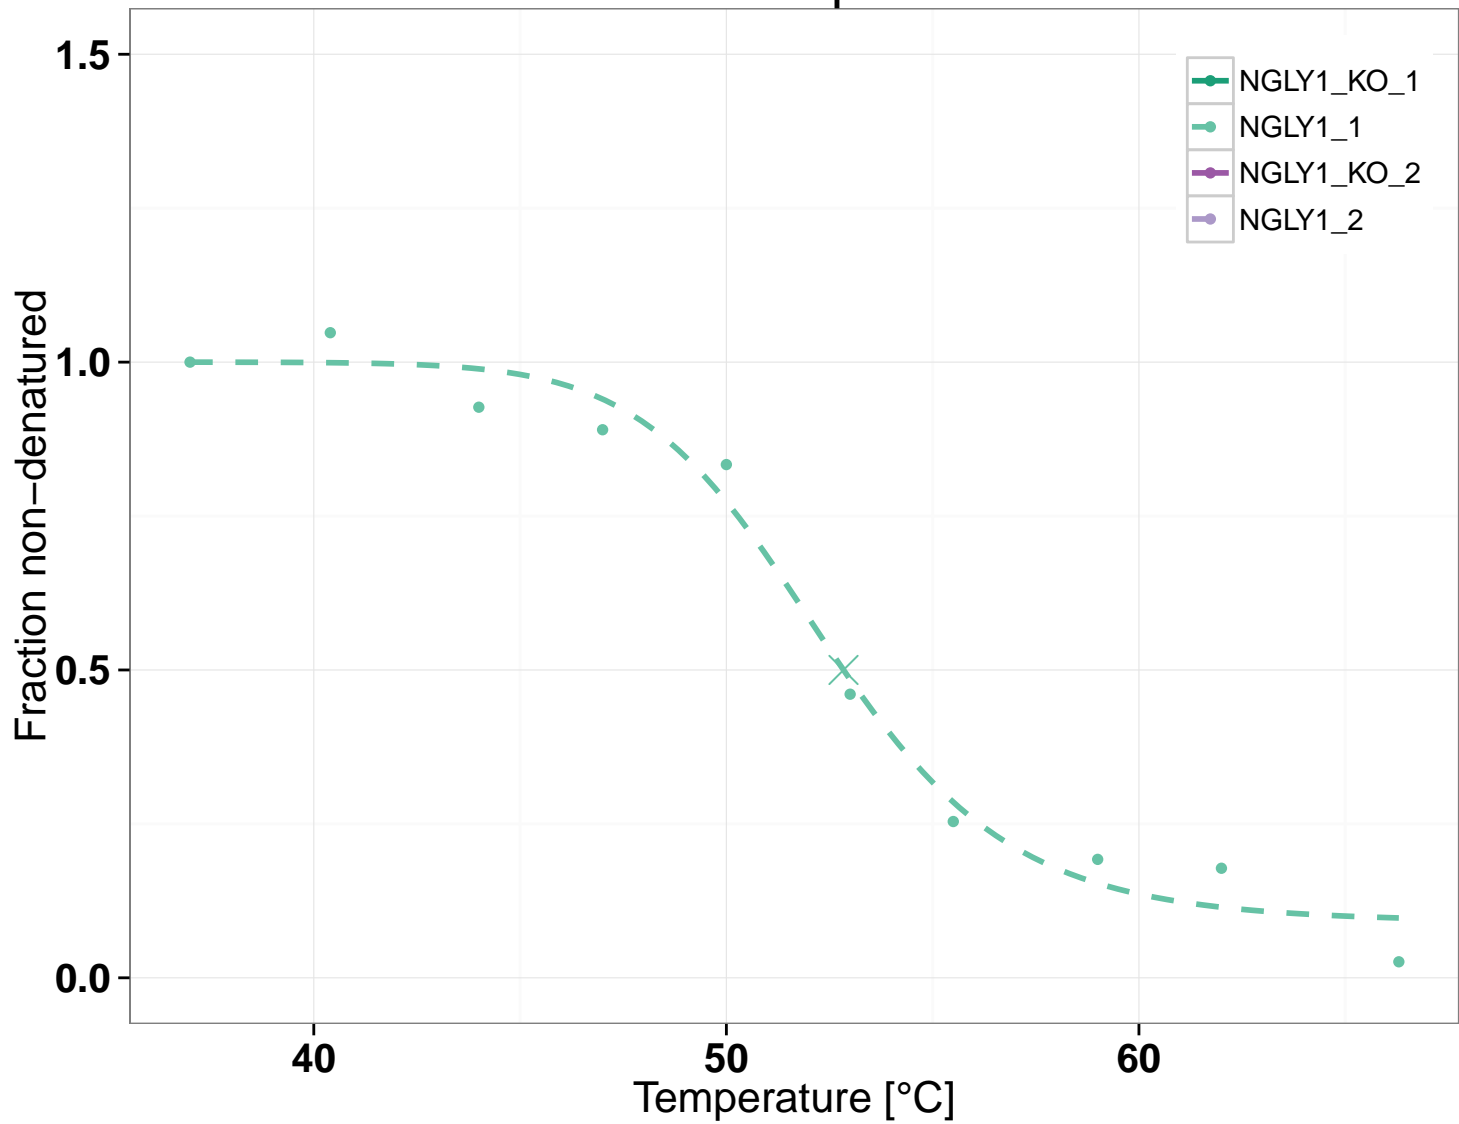

|            | meltPoint | slope | plateau | R2   |
|------------|-----------|-------|---------|------|
| NGLY1_KO_1 | -         | -     | -       | -    |
| NGLY1_1    | 52.84     | -0.1  | 0.09    | 0.98 |
| NGLY1_KO_2 | -         | -     | -       | -    |
| NGLY1_2    | -         | -     | -       | -    |

Supplement: Supplementary file 211 [file 1]

# IPI00174025.4|DNMBP

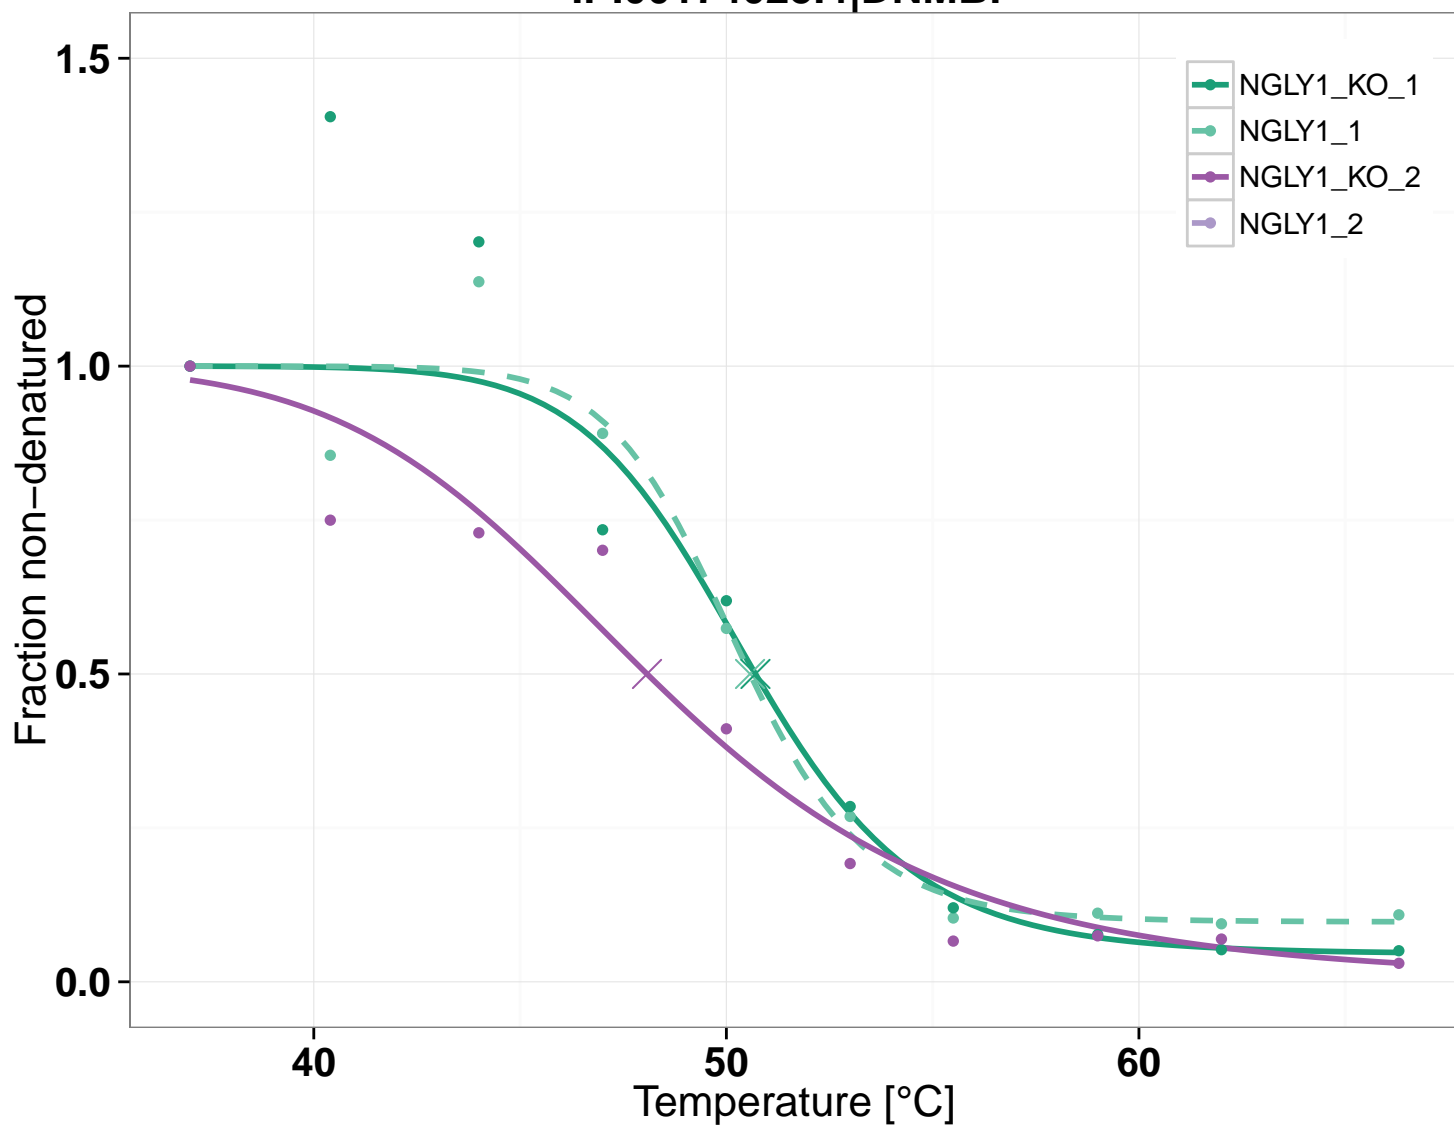

|            | meltPoint | slope  | plateau | R2   |
|------------|-----------|--------|---------|------|
| NGLY1_KO_1 | 50.71     | -0.12  | 0.04    | 0.9  |
| NGLY1_1    | 50.57     | -0.14  | 0.1     | 0.97 |
| NGLY1_KO_2 | 48.08     | -0.067 | 0       | 0.95 |
| NGLY1_2    | —         | —      | —       | —    |

Supplement: Supplementary file 212 [file 1]

IPI00442381.1|Q6ZNN8\_HUMAN

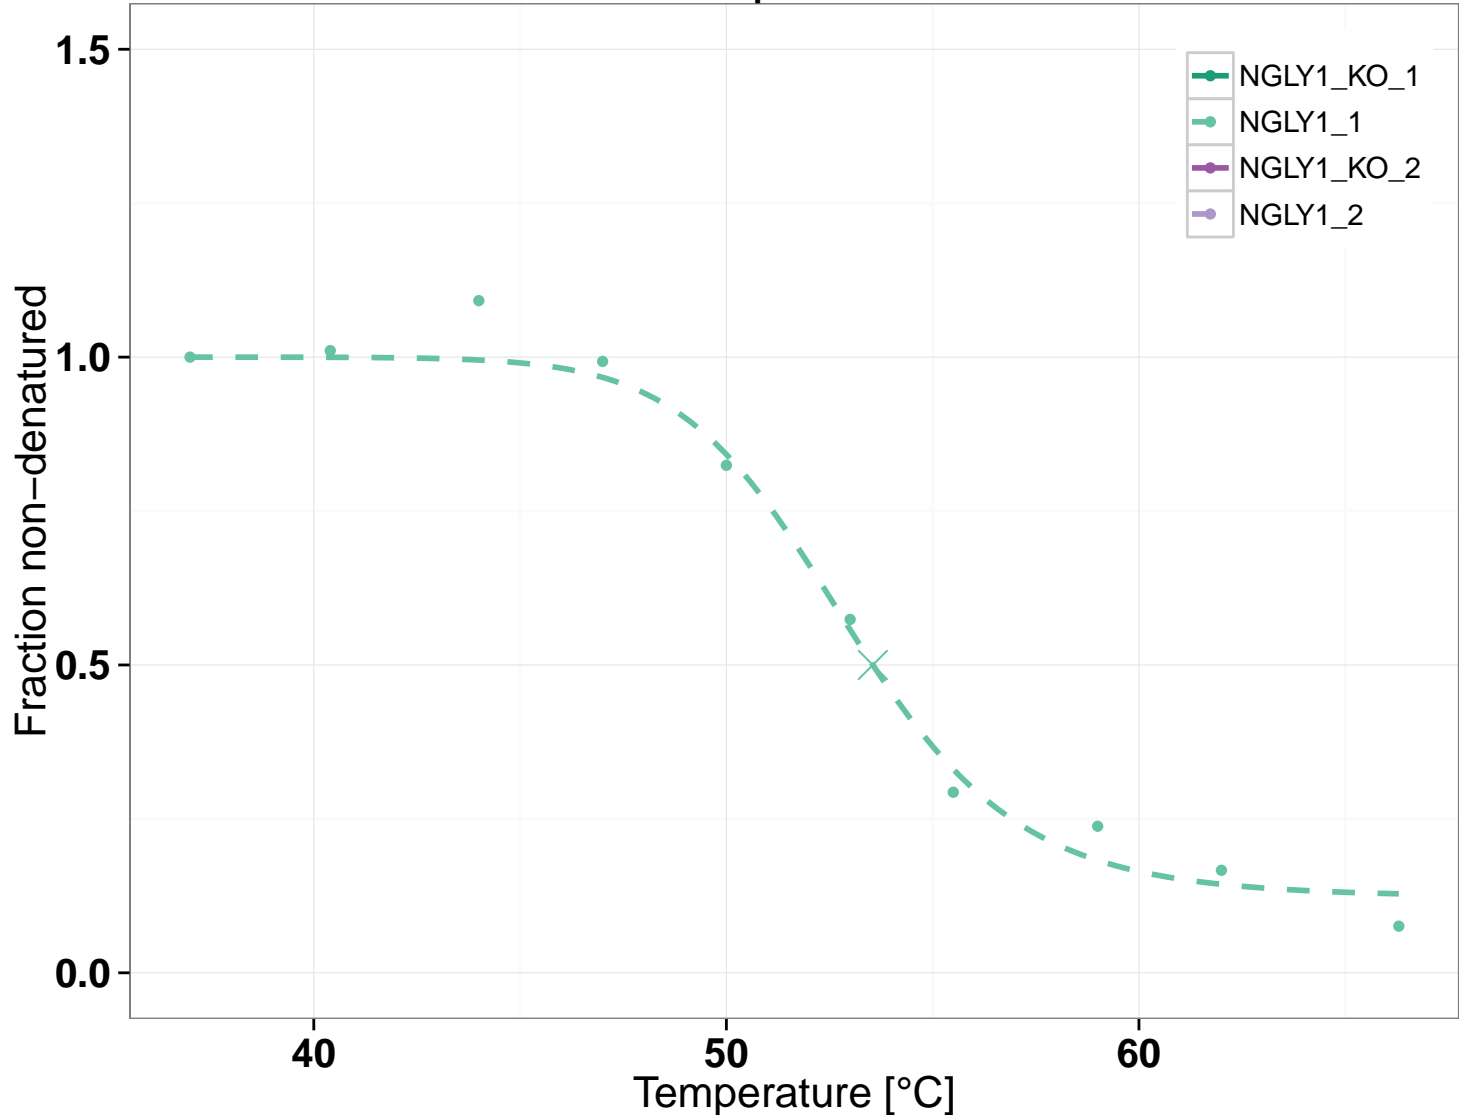

|            | meltPoint | slope | plateau | R2   |
|------------|-----------|-------|---------|------|
| NGLY1_KO_1 | -         | -     | -       | -    |
| NGLY1_1    | 53.55     | -0.11 | 0.12    | 0.99 |
| NGLY1_KO_2 | -         | -     | -       | -    |
| NGLY1_2    | -         | -     | -       | -    |

Supplement: Supplementary file 213 [file 1]

IPI00760837.2|FAM98B

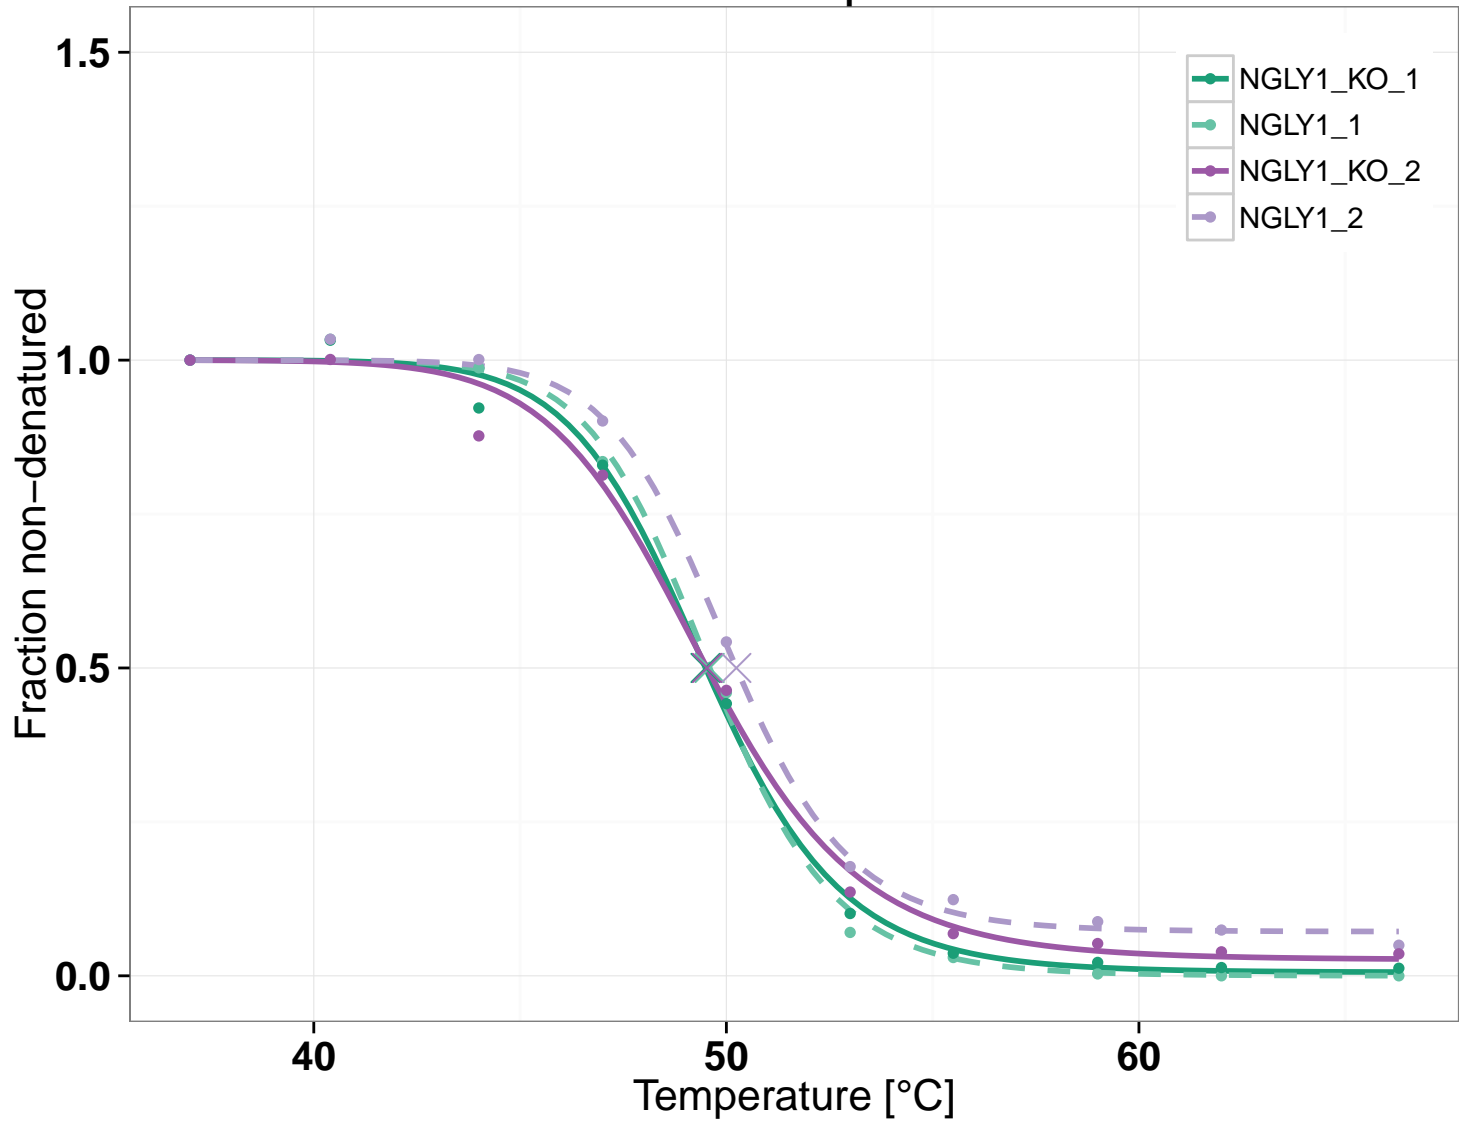

|            | meltPoint | slope | plateau | R2   |
|------------|-----------|-------|---------|------|
| NGLY1_KO_1 | 49.5      | -0.15 | 0.01    | 1    |
| NGLY1_1    | 49.59     | -0.17 | 0       | 1    |
| NGLY1_KO_2 | 49.53     | -0.13 | 0.03    | 0.99 |
| NGLY1_2    | 50.24     | -0.16 | 0.07    | 1    |

Supplement: Supplementary file 214 [file 1]

IPI00414676.6|HSP90AB1

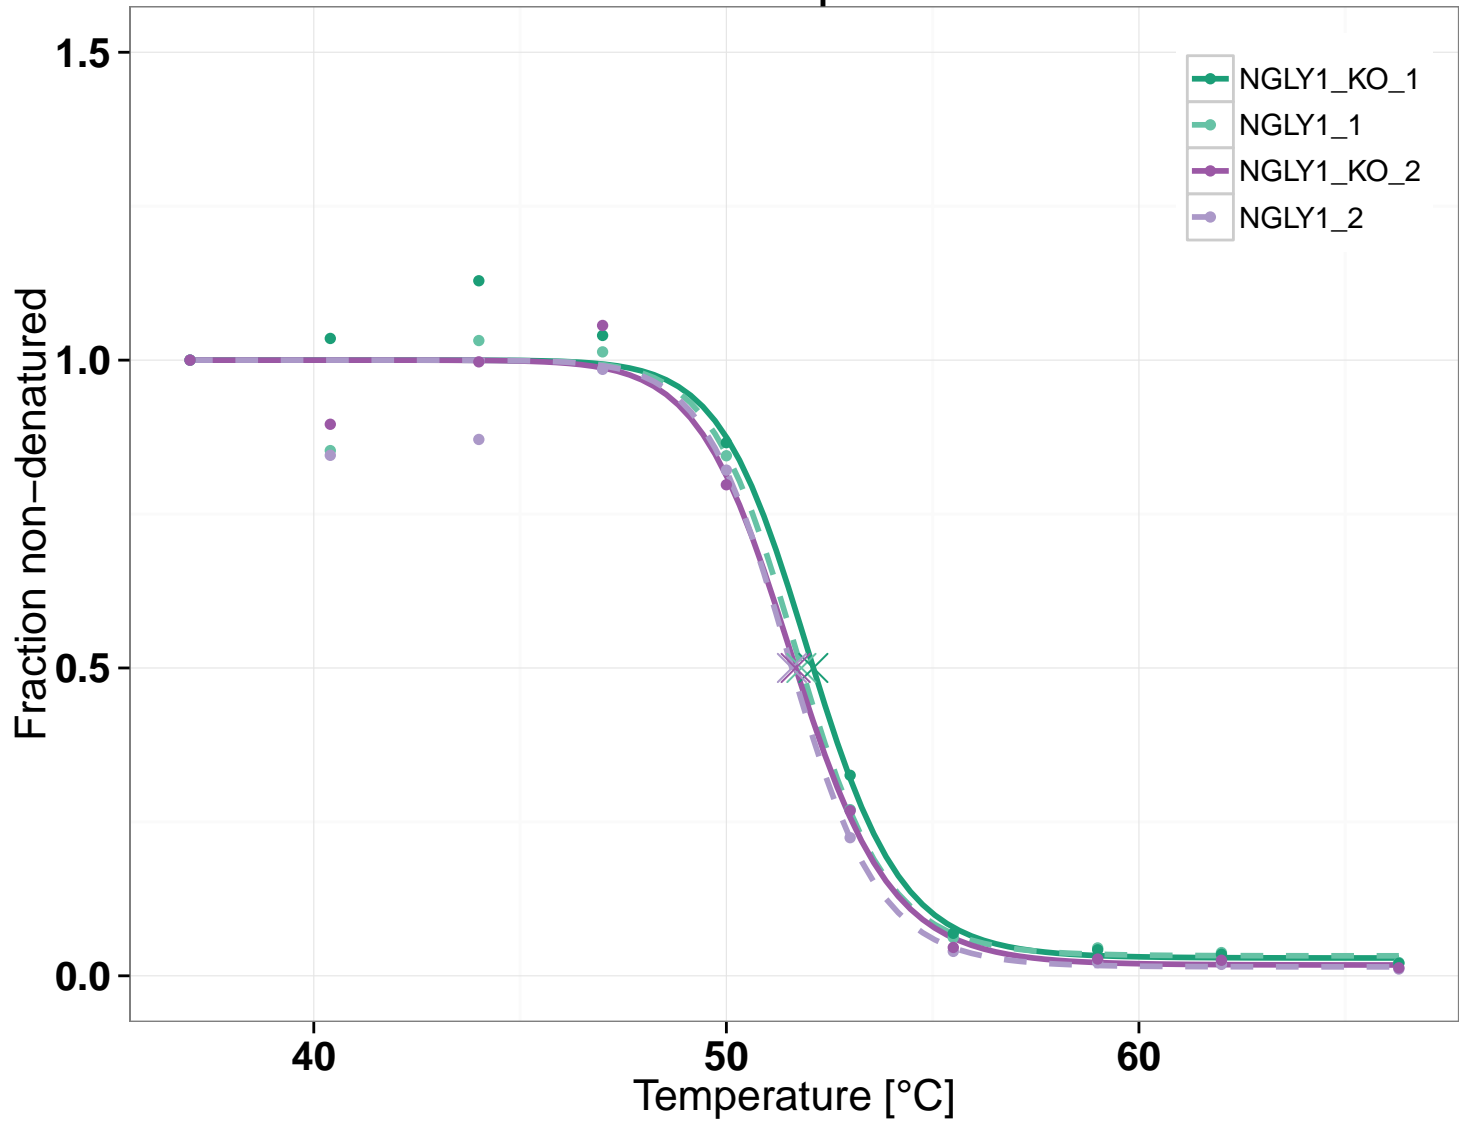

|            | meltPoint | slope | plateau | R2   |
|------------|-----------|-------|---------|------|
| NGLY1_KO_1 | 52.11     | -0.22 | 0.03    | 0.99 |
| NGLY1_1    | 51.82     | -0.23 | 0.03    | 0.99 |
| NGLY1_KO_2 | 51.68     | -0.21 | 0.02    | 0.99 |
| NGLY1_2    | 51.59     | -0.23 | 0.01    | 0.98 |

Supplement: Supplementary file 215 [file 1]

# IPI00376005.2|EIF5A

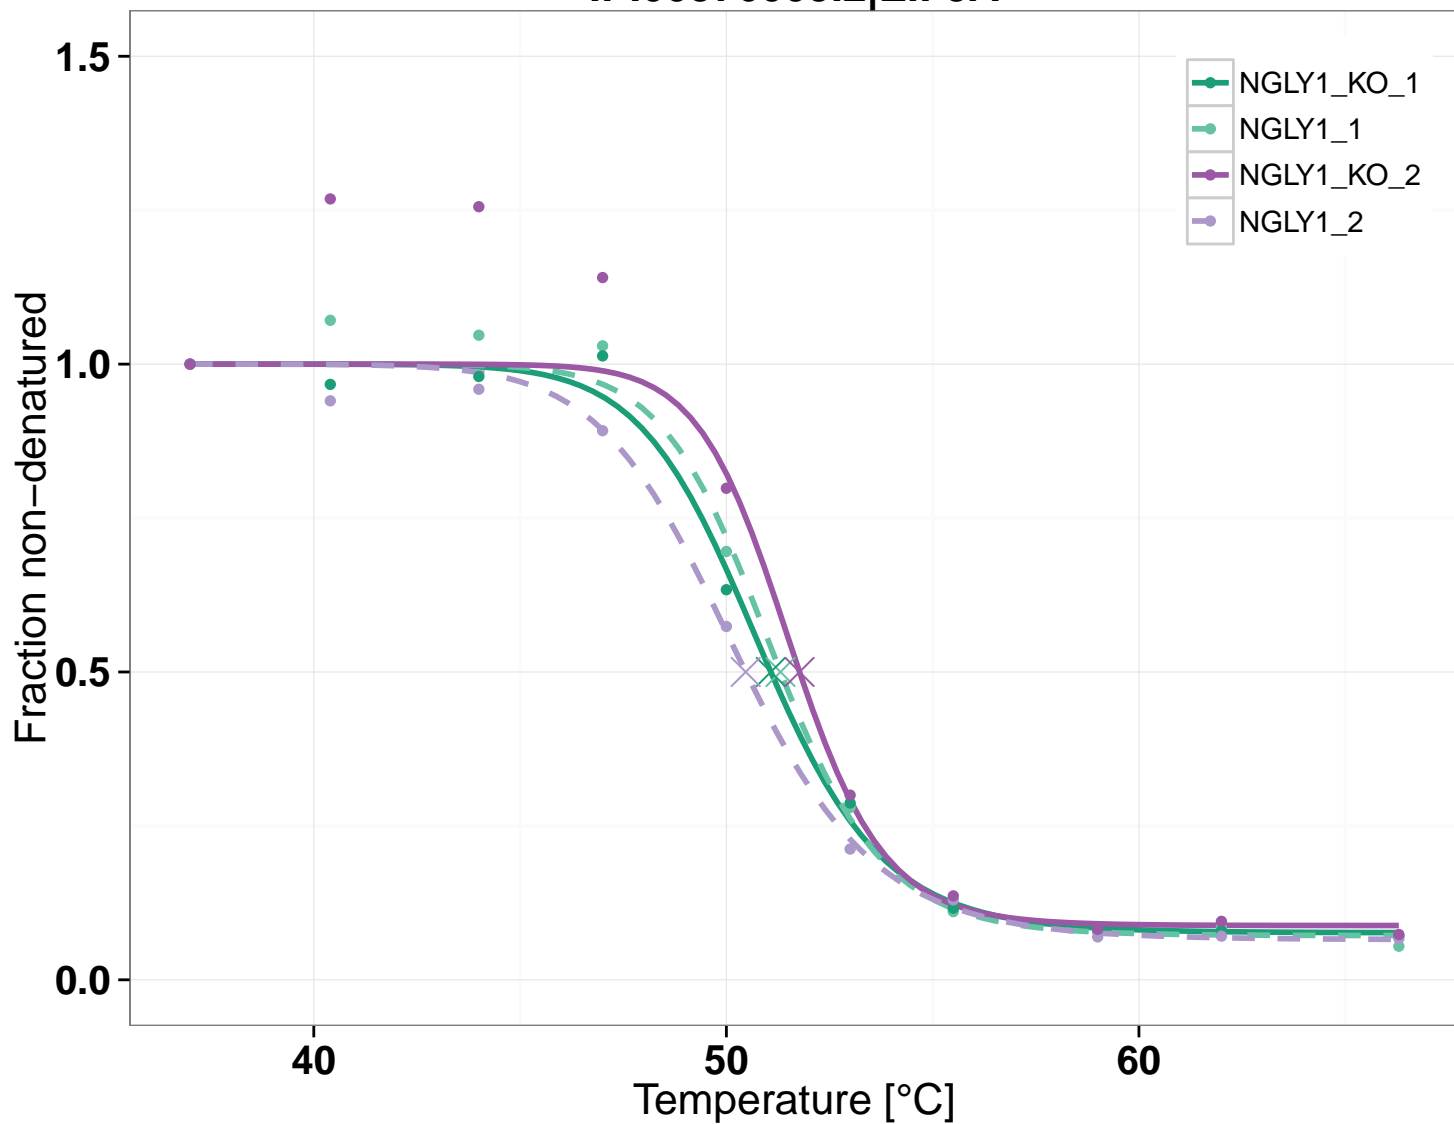

|            | meltPoint | slope | plateau | R2   |
|------------|-----------|-------|---------|------|
| NGLY1_KO_1 | 51.08     | -0.16 | 0.08    | 1    |
| NGLY1_1    | 51.31     | -0.17 | 0.07    | 0.99 |
| NGLY1_KO_2 | 51.77     | -0.2  | 0.09    | 0.93 |
| NGLY1_2    | 50.47     | -0.14 | 0.07    | 1    |

Supplement: Supplementary file 216 [file 1]

IPI00031397.3|ACSL3

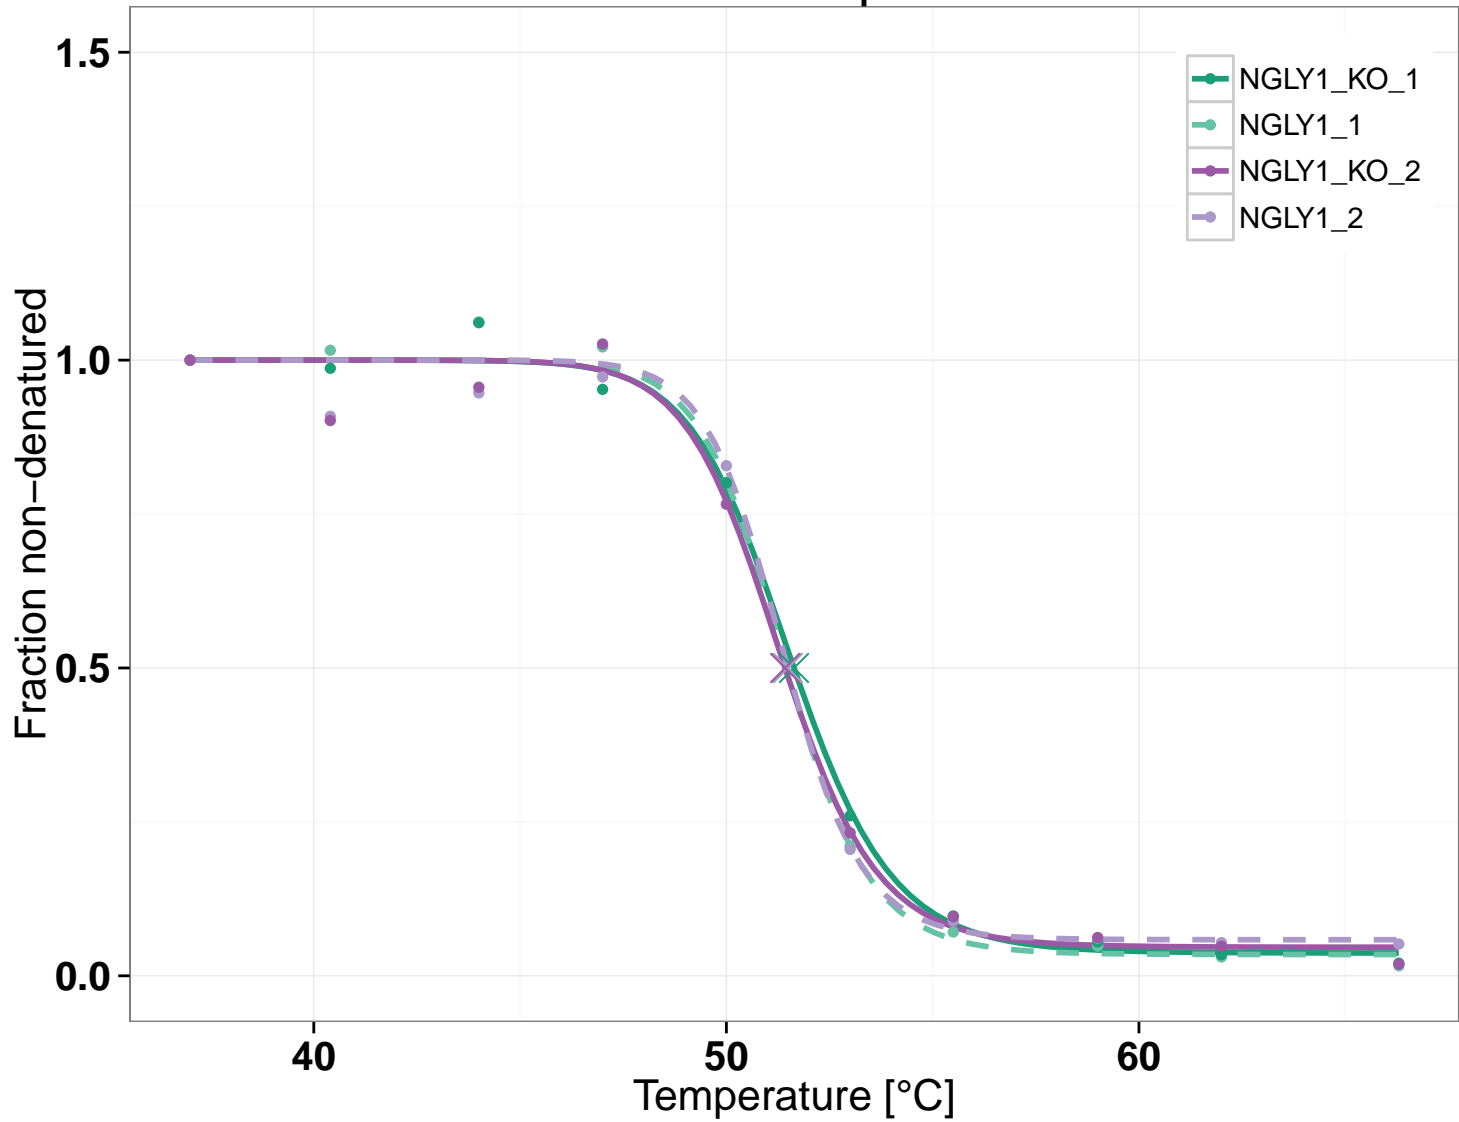

|            | meltPoint | slope | plateau | R2   |
|------------|-----------|-------|---------|------|
| NGLY1_KO_1 | 51.64     | -0.2  | 0.04    | 1    |
| NGLY1_1    | 51.47     | -0.23 | 0.03    | 1    |
| NGLY1_KO_2 | 51.42     | -0.21 | 0.05    | 0.99 |
| NGLY1_2    | 51.49     | -0.25 | 0.06    | 0.99 |

Supplement: Supplementary file 217 [file 1]

# IPI00640316.1|ZNF414

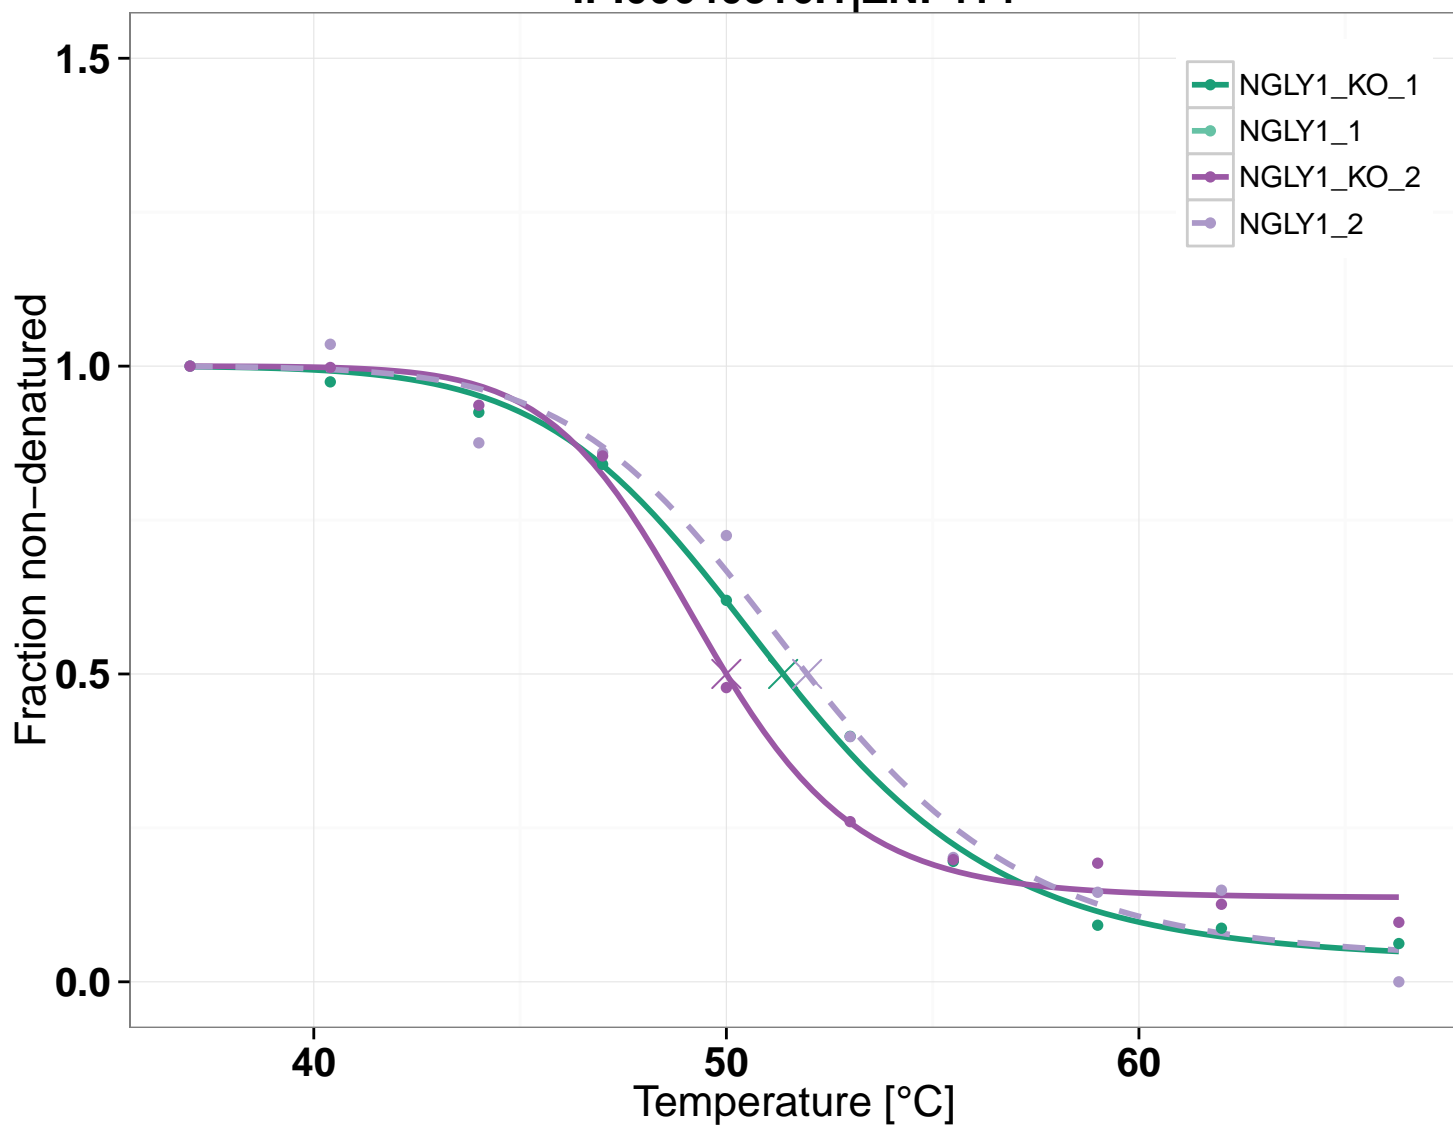

|            | meltPoint | slope  | plateau | R2   |
|------------|-----------|--------|---------|------|
| NGLY1_KO_1 | 51.38     | -0.086 | 0.03    | 1    |
| NGLY1_1    | —         | —      | —       | —    |
| NGLY1_KO_2 | 50        | -0.12  | 0.14    | 1    |
| NGLY1_2    | 51.96     | -0.087 | 0.03    | 0.98 |

Supplement: Supplementary file 218 [file 1]

IPI00029099.5|FAM69A

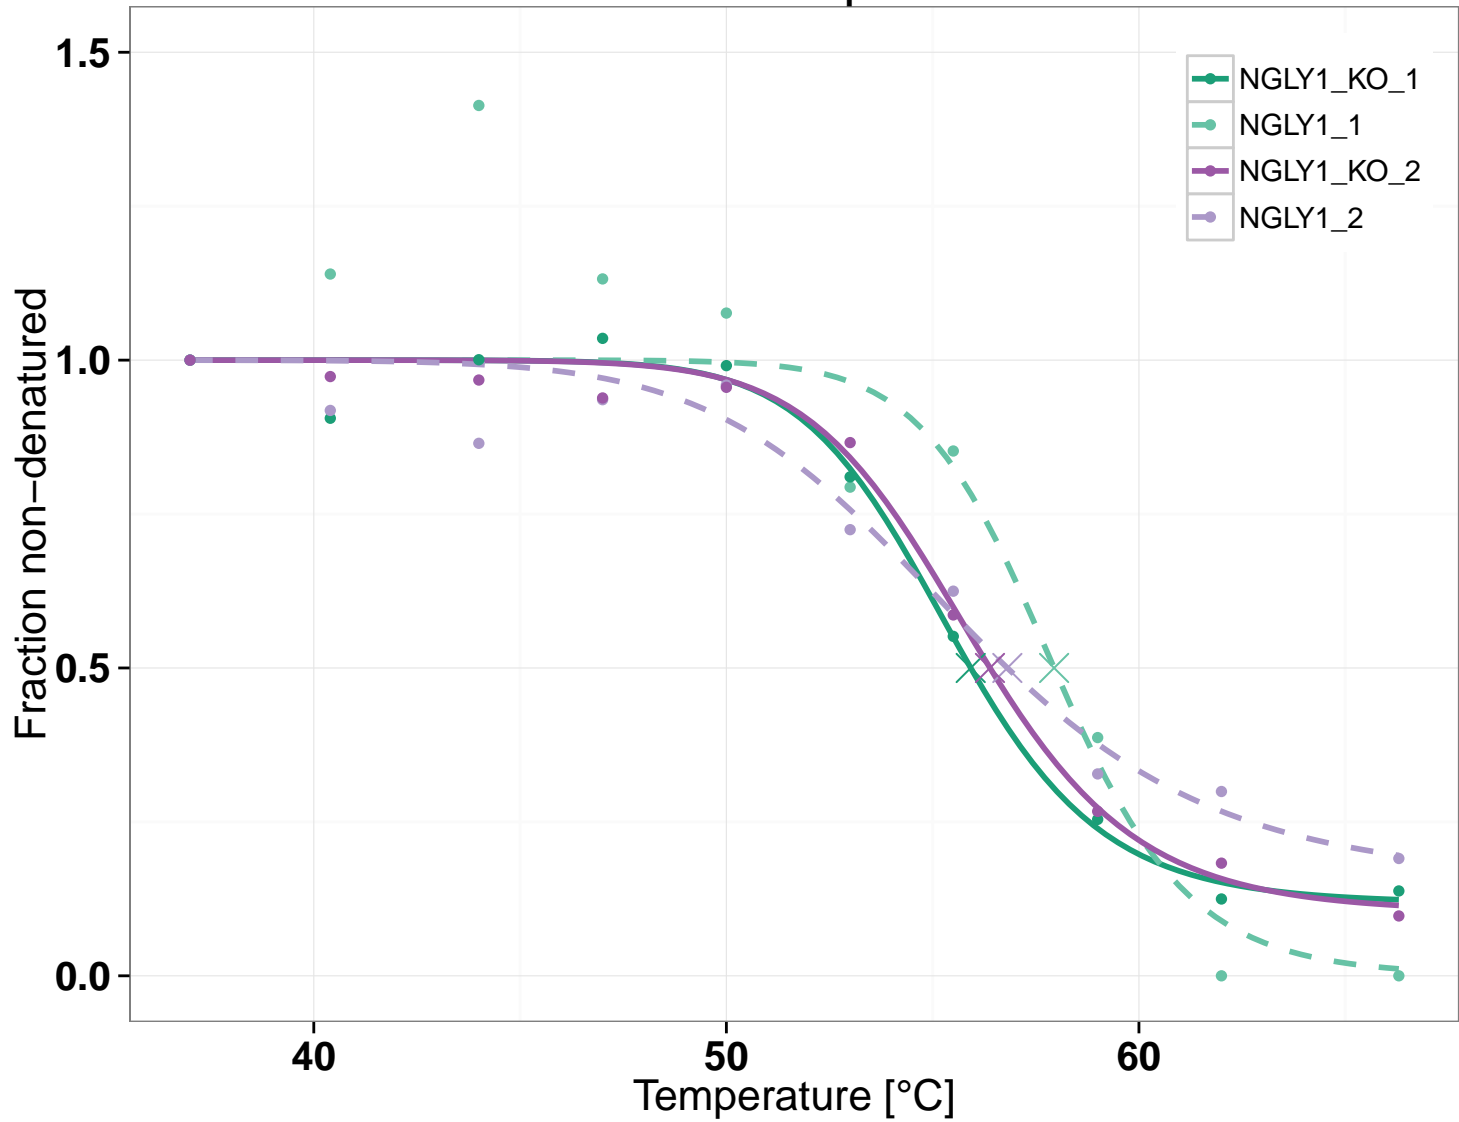

|            | meltPoint | slope | plateau | R2   |
|------------|-----------|-------|---------|------|
| NGLY1_KO_1 | 55.92     | -0.12 | 0.12    | 0.99 |
| NGLY1_1    | 57.94     | -0.15 | 0       | 0.88 |
| NGLY1_KO_2 | 56.39     | -0.11 | 0.1     | 0.99 |
| NGLY1_2    | 56.81     | -0.07 | 0.15    | 0.96 |

Supplement: Supplementary file 219 [file 1]

# IPI00333068.4|ARPC1A

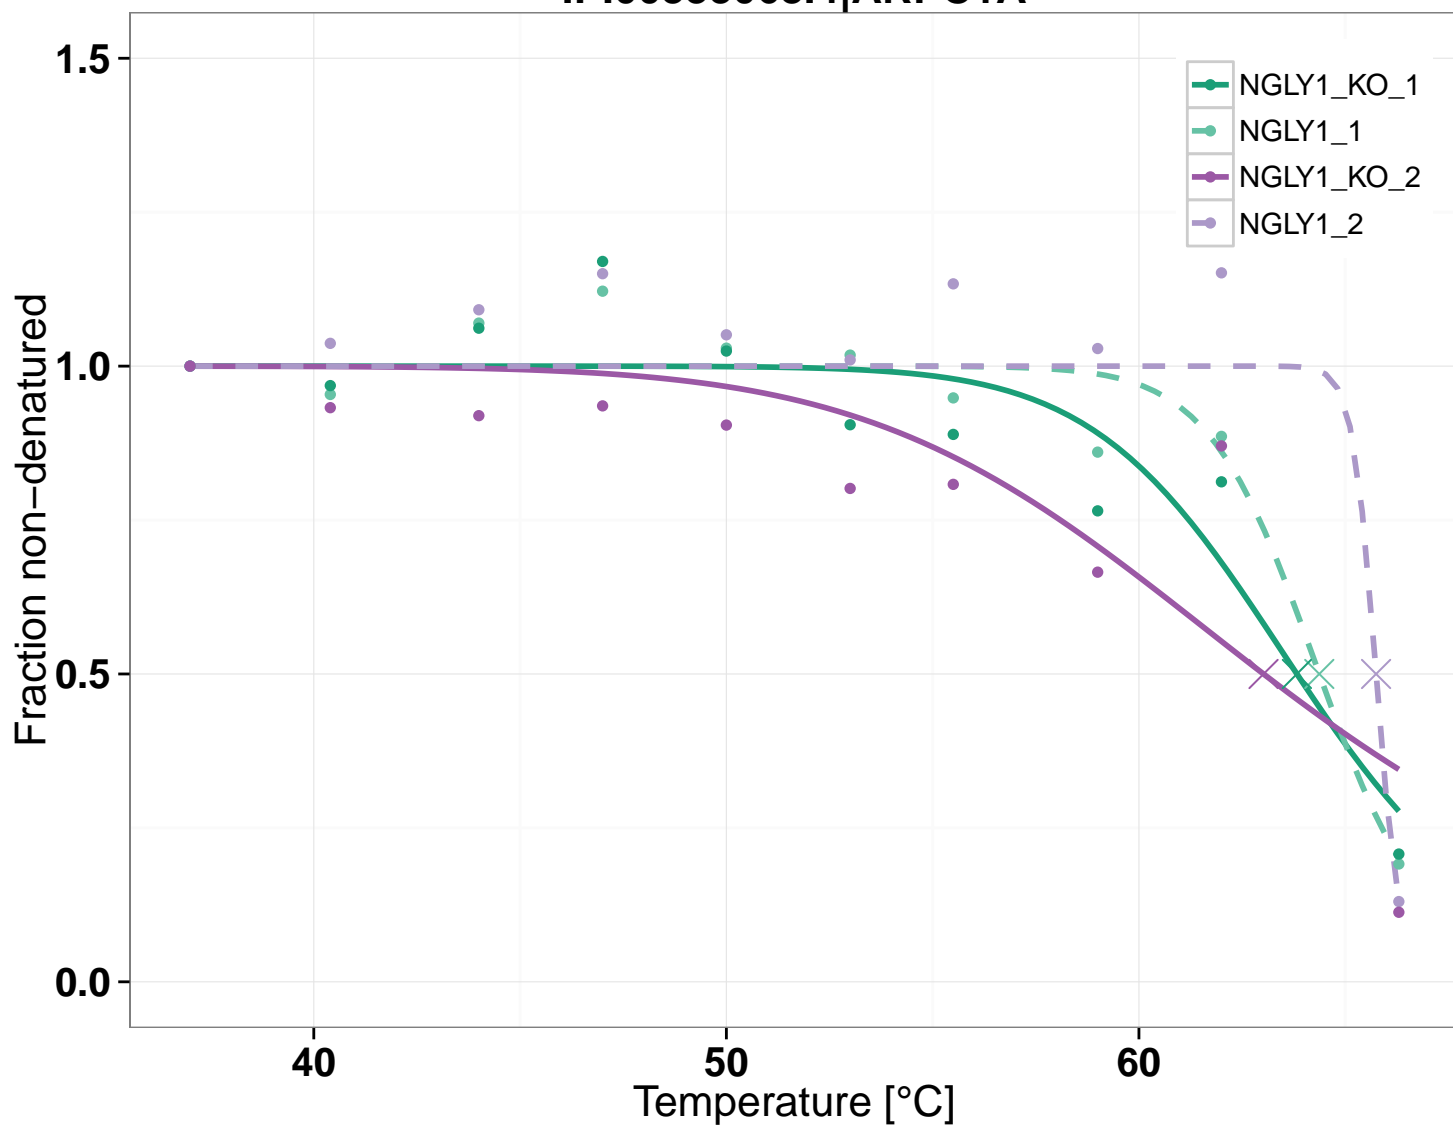

|            | meltPoint | slope  | plateau | R2   |
|------------|-----------|--------|---------|------|
| NGLY1_KO_1 | 63.83     | -0.1   | 0       | 0.86 |
| NGLY1_1    | 64.37     | -0.19  | 0       | 0.93 |
| NGLY1_KO_2 | 63.02     | -0.053 | 0       | 0.68 |
| NGLY1_2    | 65.75     | -0.87  | 0       | 0.91 |

Supplement: Supplementary file 220 [file 1]

IPI00301987.6|FLJ20323

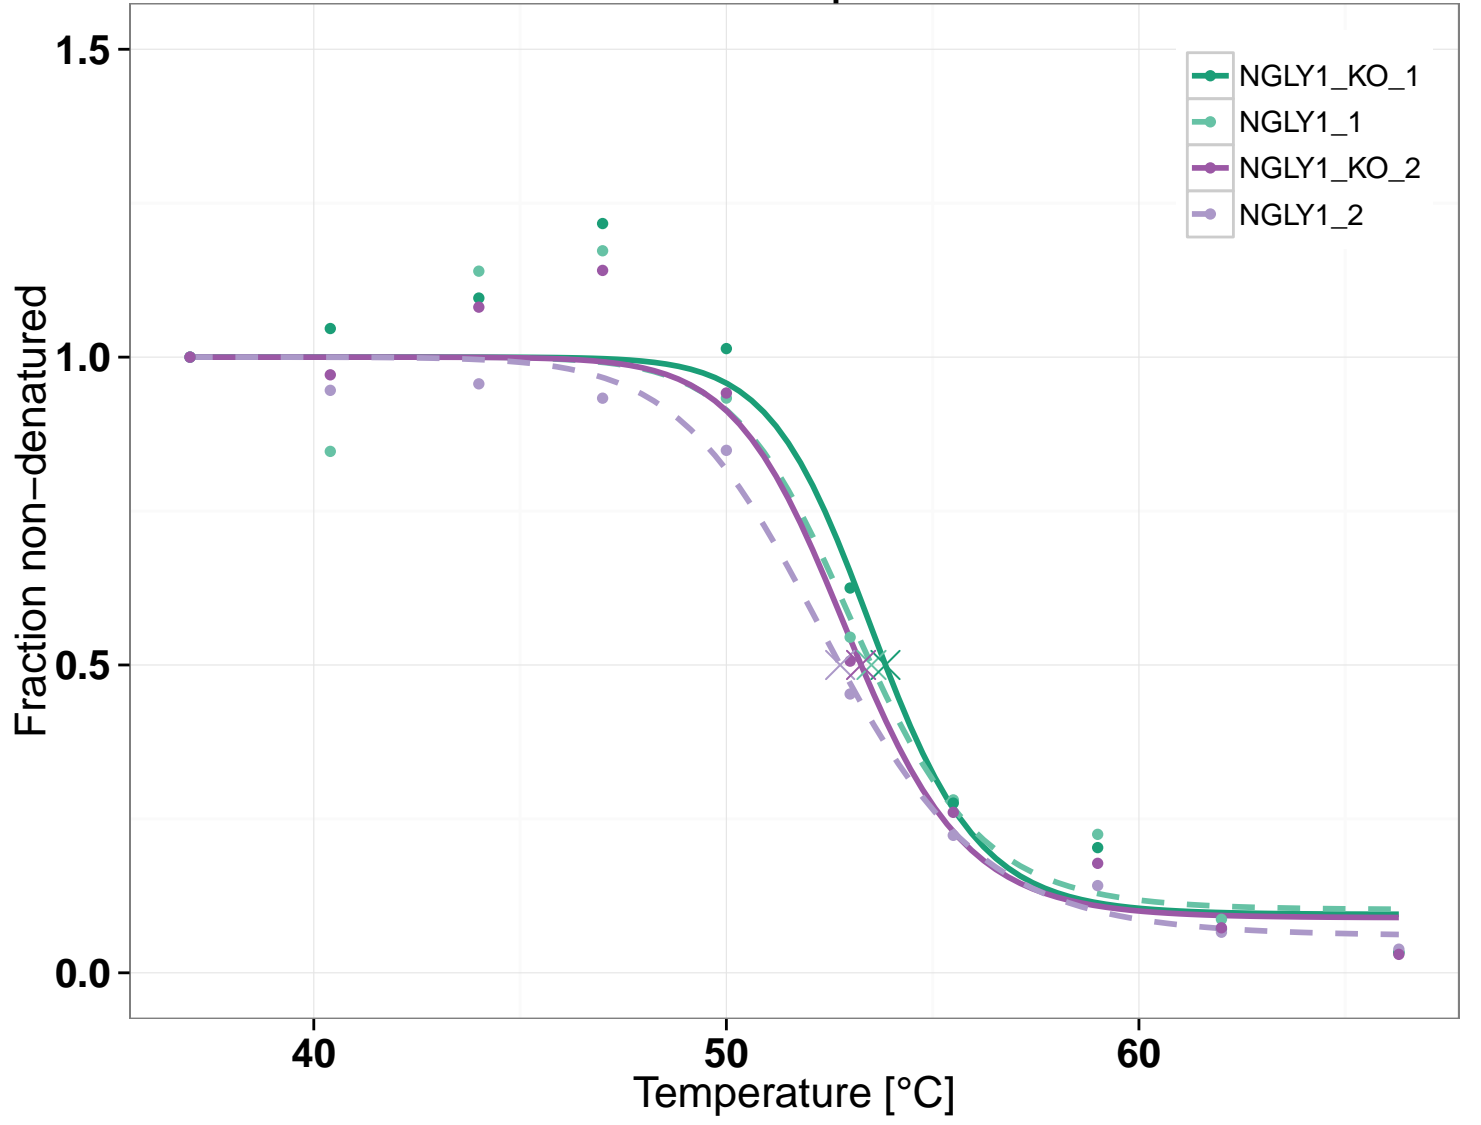

|            | meltPoint | slope | plateau | R2   |
|------------|-----------|-------|---------|------|
| NGLY1_KO_1 | 53.86     | -0.18 | 0.09    | 0.96 |
| NGLY1_1    | 53.52     | -0.15 | 0.1     | 0.95 |
| NGLY1_KO_2 | 53.27     | -0.16 | 0.09    | 0.98 |
| NGLY1_2    | 52.76     | -0.13 | 0.06    | 0.99 |

Supplement: Supplementary file 221 [file 1]

# IPI00552582.3|FKTN

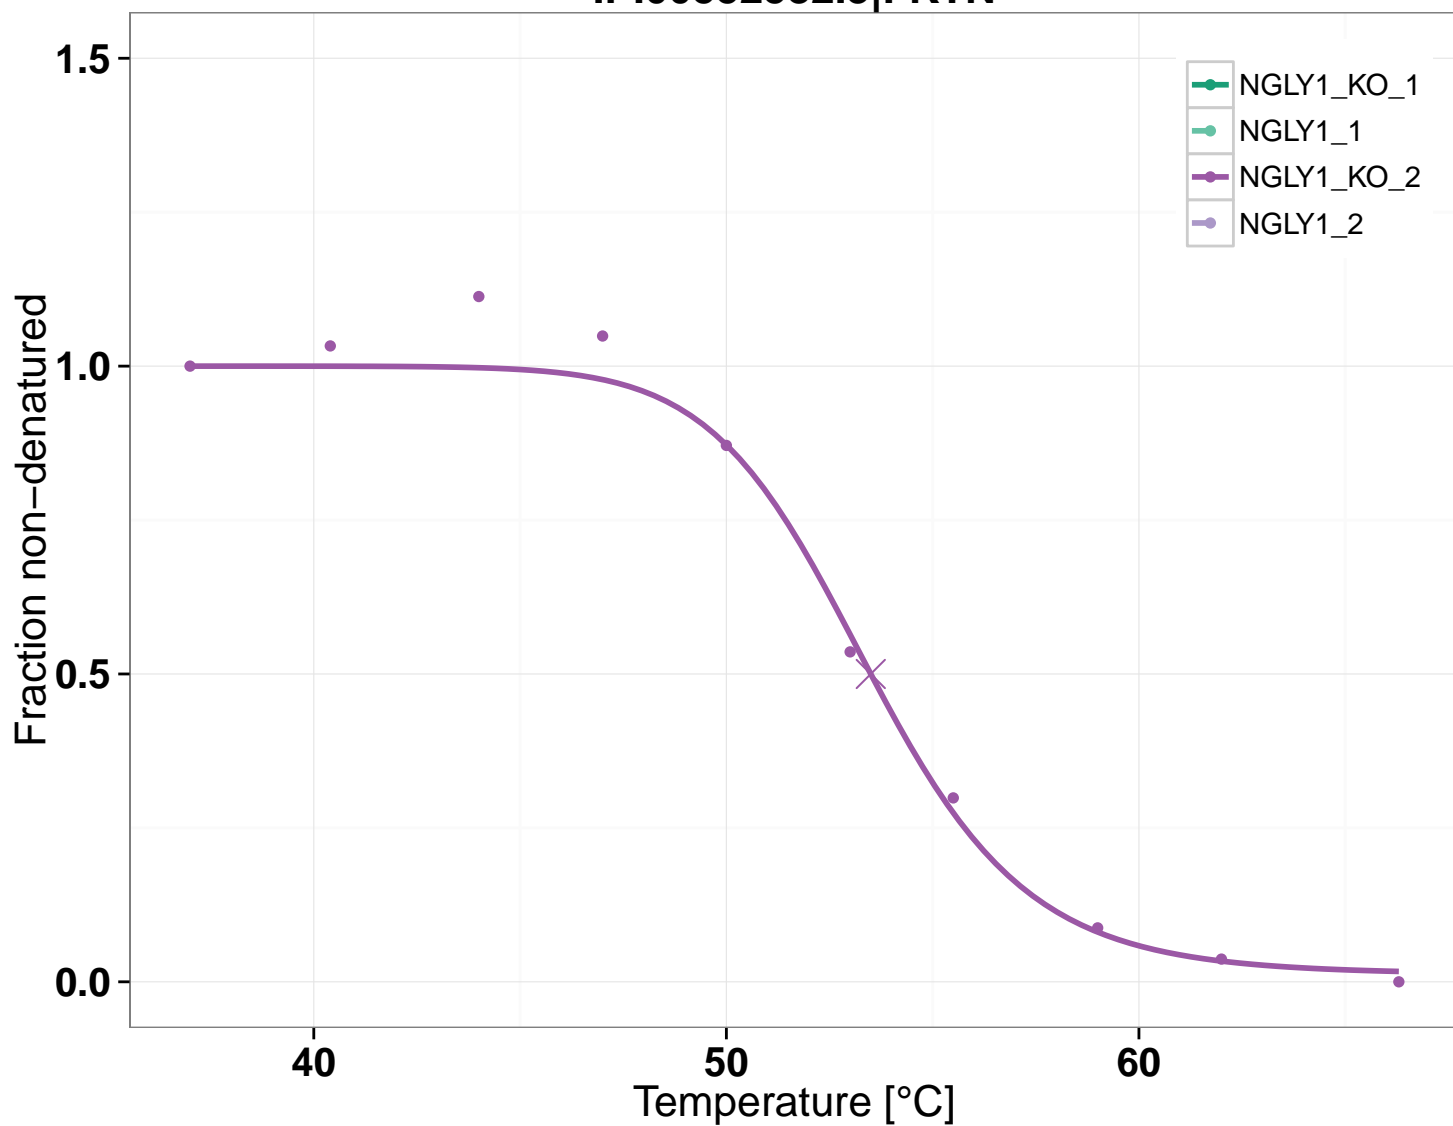

|            | meltPoint | slope | plateau | R2   |
|------------|-----------|-------|---------|------|
| NGLY1_KO_1 | —         | —     | —       | —    |
| NGLY1_1    | —         | —     | —       | —    |
| NGLY1_KO_2 | 53.5      | -0.13 | 0.01    | 0.99 |
| NGLY1_2    | —         | —     | —       | —    |

Supplement: Supplementary file 222 [file 1]

# IPI00022827.1|SLK

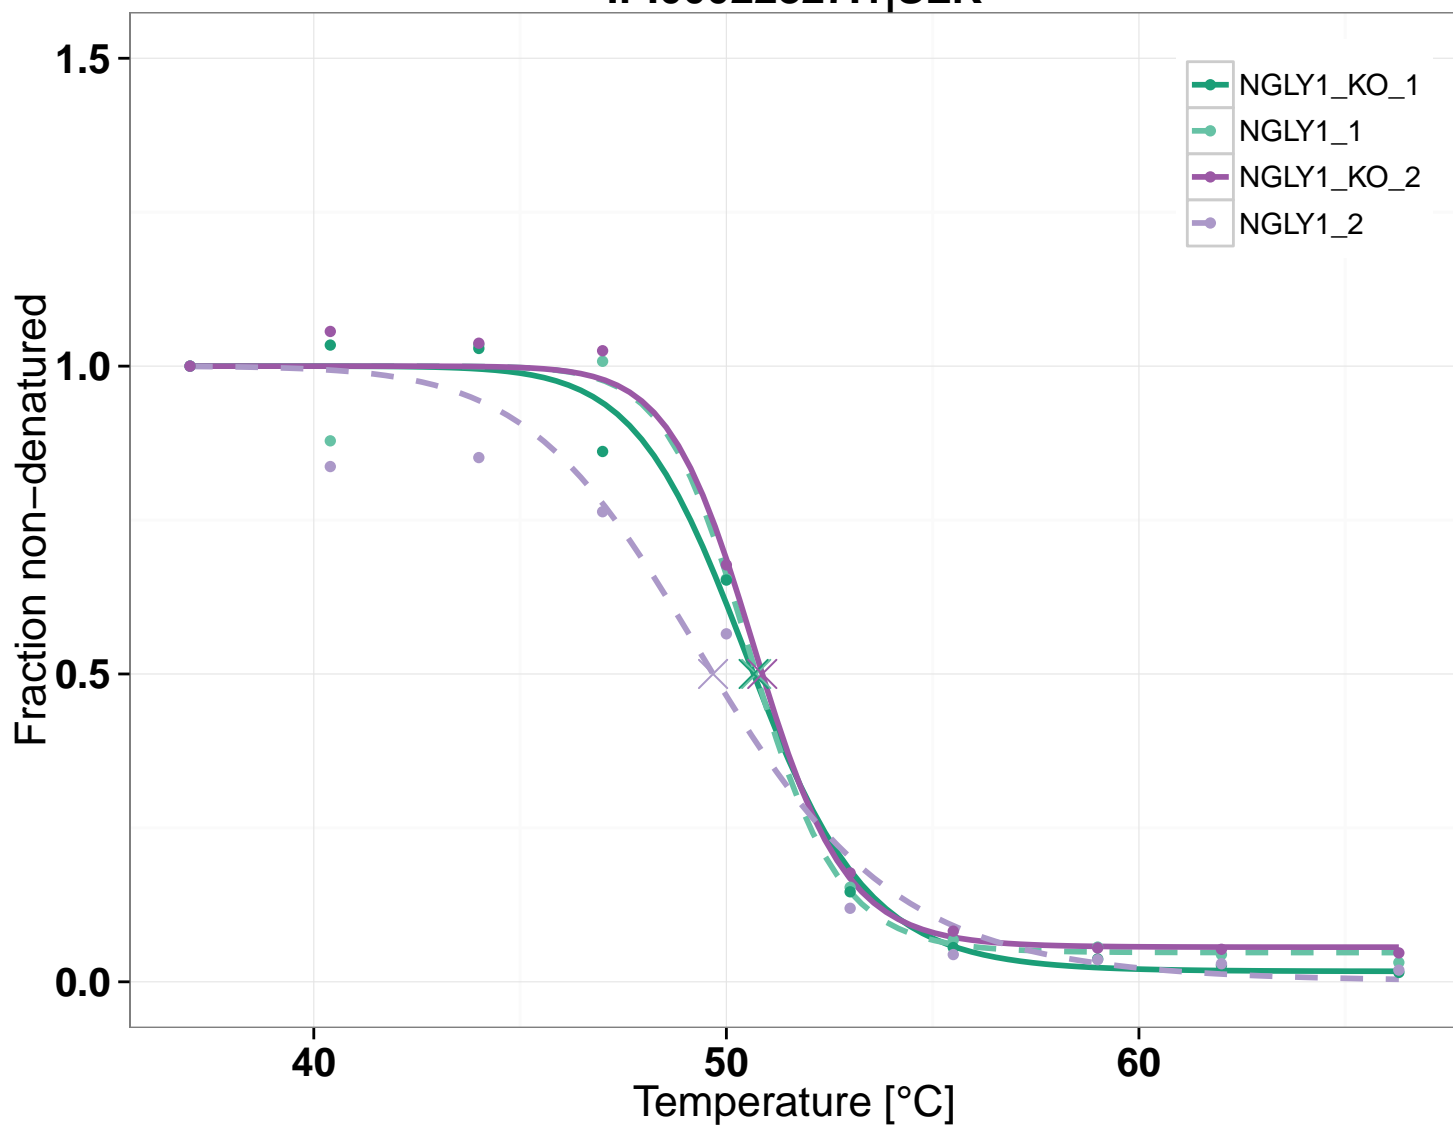

|            | meltPoint | slope | plateau | R2   |
|------------|-----------|-------|---------|------|
| NGLY1_KO_1 | 50.66     | -0.17 | 0.02    | 0.99 |
| NGLY1_1    | 50.72     | -0.23 | 0.05    | 0.99 |
| NGLY1_KO_2 | 50.87     | -0.22 | 0.06    | 1    |
| NGLY1_2    | 49.68     | -0.11 | 0       | 0.97 |

Supplement: Supplementary file 223 [file 1]

# IPI00328753.1|KTN1

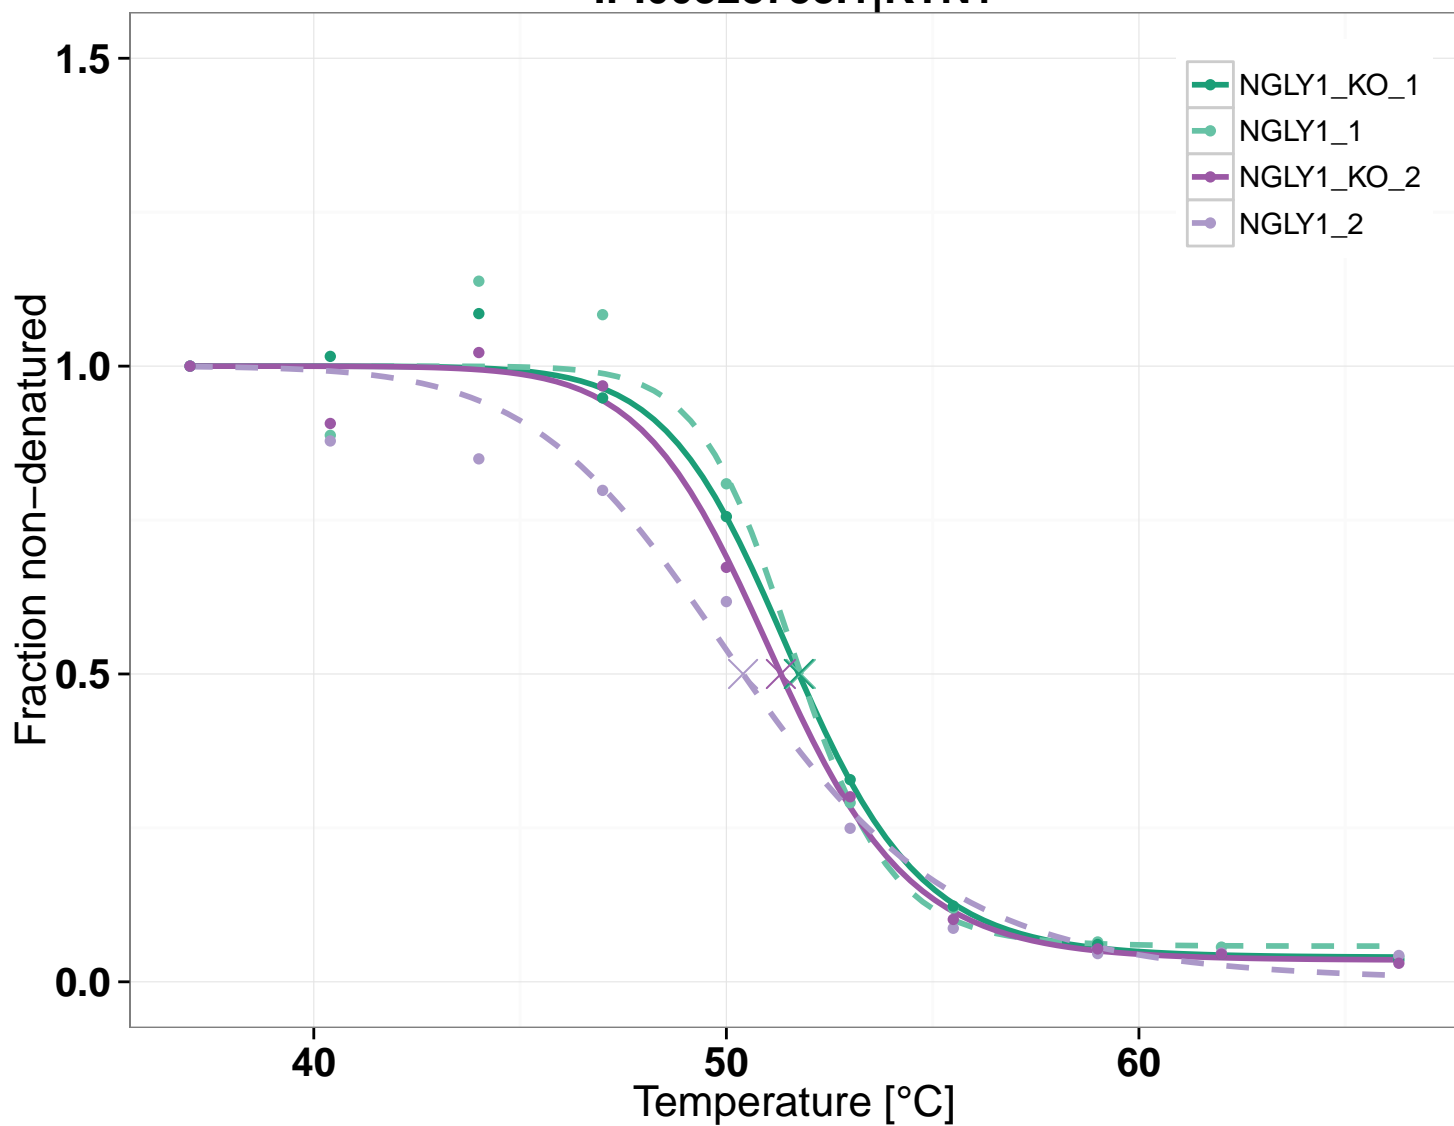

|            | meltPoint | slope  | plateau | R2   |
|------------|-----------|--------|---------|------|
| NGLY1_KO_1 | 51.76     | -0.15  | 0.04    | 1    |
| NGLY1_1    | 51.8      | -0.2   | 0.06    | 0.98 |
| NGLY1_KO_2 | 51.32     | -0.15  | 0.04    | 0.99 |
| NGLY1_2    | 50.4      | -0.097 | 0       | 0.98 |

Supplement: Supplementary file 224 [file 1]

IPI00106638.4|C6ORF153

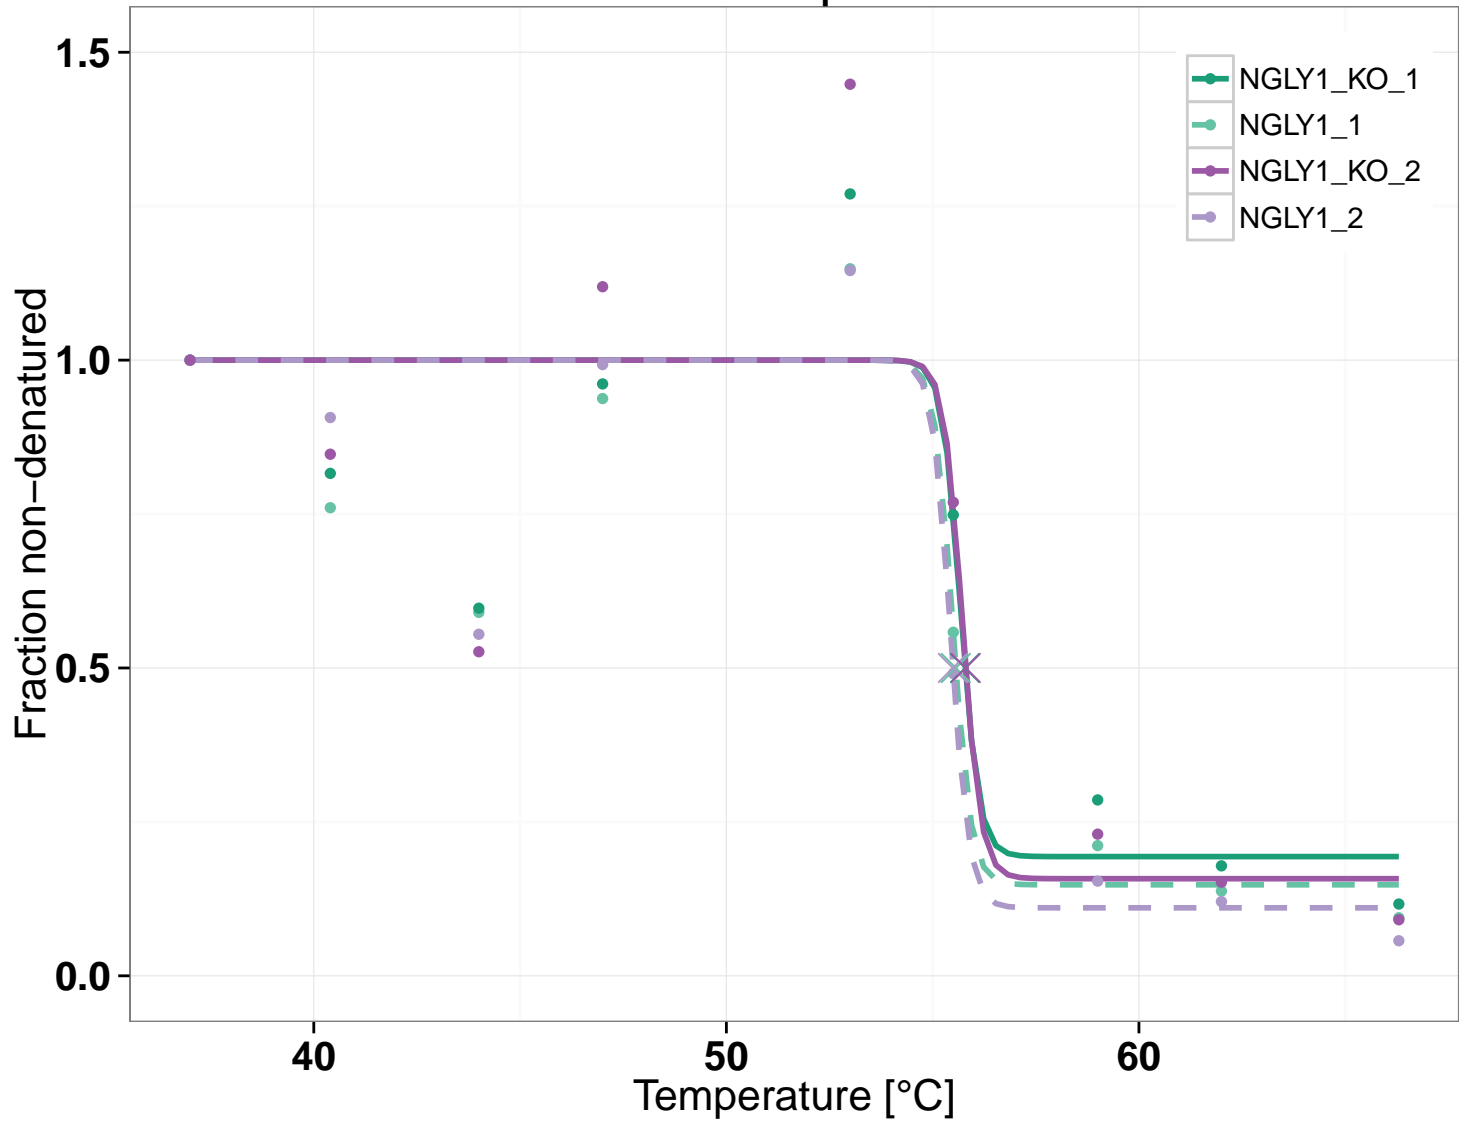

|            | meltPoint | slope | plateau | R2   |
|------------|-----------|-------|---------|------|
| NGLY1_KO_1 | 55.79     | -0.91 | 0.19    | 0.63 |
| NGLY1_1    | 55.56     | -0.96 | 0.15    | 0.68 |
| NGLY1_KO_2 | 55.8      | -0.94 | 0.16    | 0.5  |
| NGLY1_2    | 55.49     | -1    | 0.11    | 0.73 |

Supplement: Supplementary file 225 [file 1]

IPI00005695.1|NDUFA1

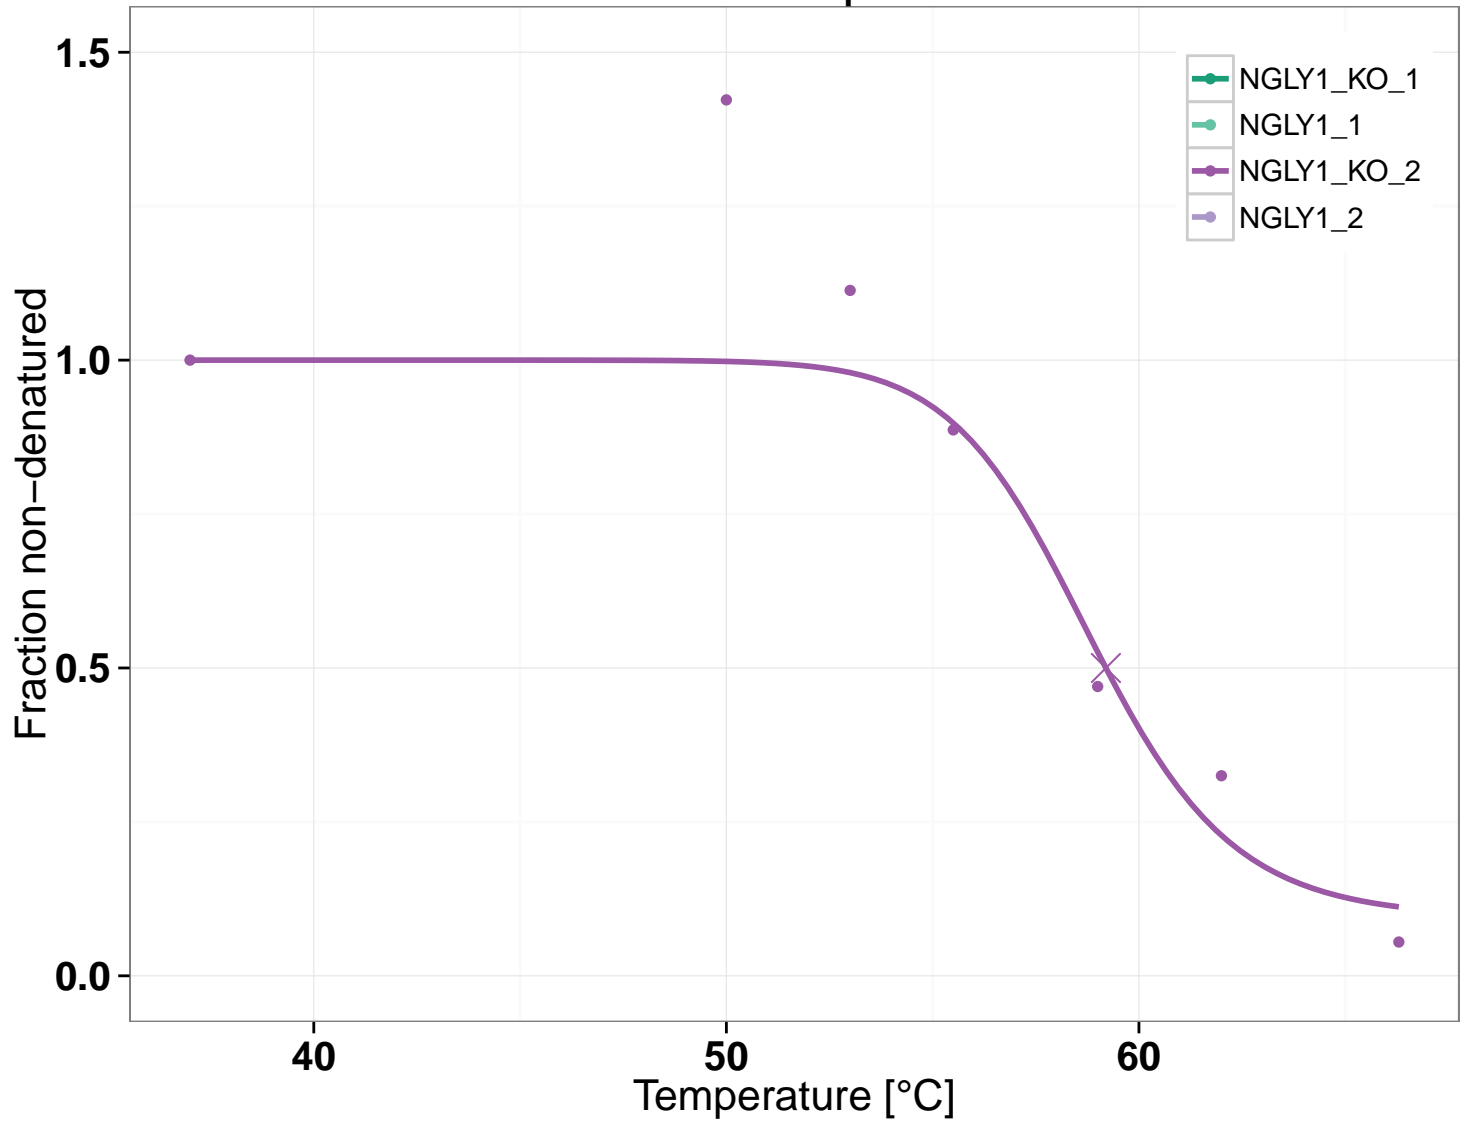

|            | meltPoint | slope | plateau | R2   |
|------------|-----------|-------|---------|------|
| NGLY1_KO_1 | —         | —     | —       | —    |
| NGLY1_1    | —         | —     | —       | —    |
| NGLY1_KO_2 | 59.2      | -0.13 | 0.09    | 0.58 |
| NGLY1_2    | —         | —     | —       | —    |

Supplement: Supplementary file 226 [file 1]

IPI00015178.1|ARFRP1

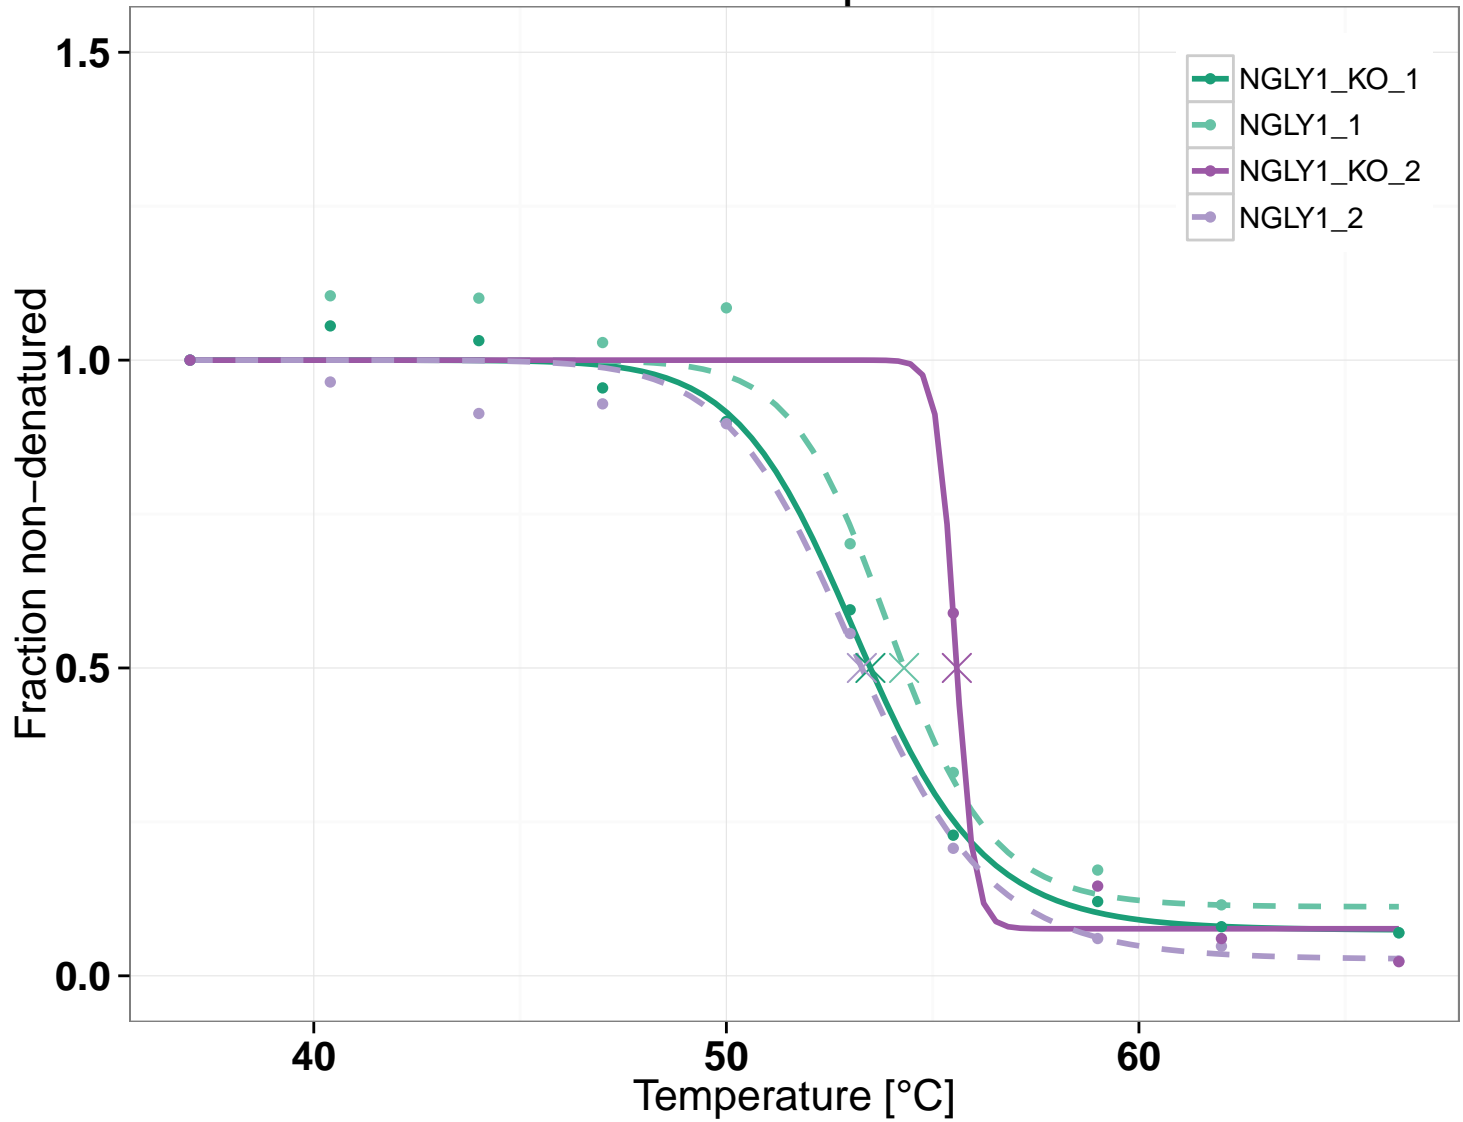

|            | meltPoint | slope | plateau | R2   |
|------------|-----------|-------|---------|------|
| NGLY1_KO_1 | 53.49     | -0.15 | 0.07    | 1    |
| NGLY1_1    | 54.31     | -0.18 | 0.11    | 0.98 |
| NGLY1_KO_2 | 55.59     | -1    | 0.08    | 0.05 |
| NGLY1_2    | 53.28     | -0.15 | 0.03    | 0.99 |

Supplement: Supplementary file 227 [file 1]

# IPI00003479.3|MAPK1

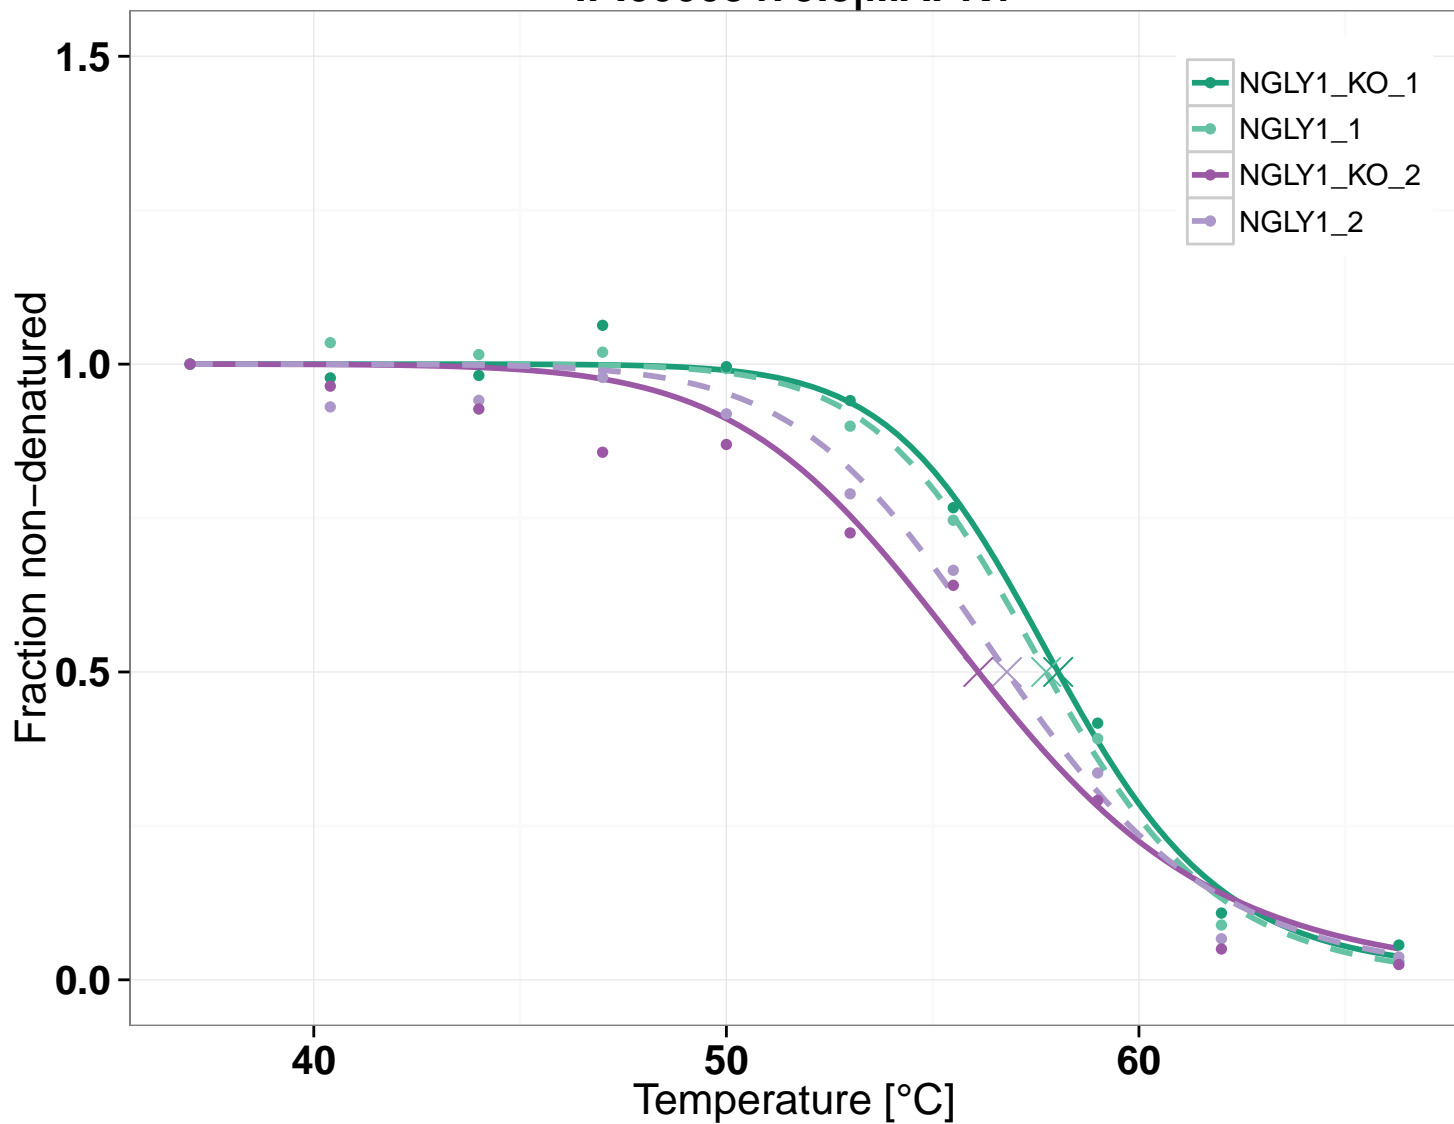

|            | meltPoint | slope  | plateau | R2   |
|------------|-----------|--------|---------|------|
| NGLY1_KO_1 | 58.04     | -0.12  | 0.01    | 0.99 |
| NGLY1_1    | 57.75     | -0.12  | 0       | 1    |
| NGLY1_KO_2 | 56.11     | -0.086 | 0       | 0.97 |
| NGLY1_2    | 56.8      | -0.098 | 0       | 0.99 |

Supplement: Supplementary file 228 [file 1]

IPI00401193.6|KIAA1147

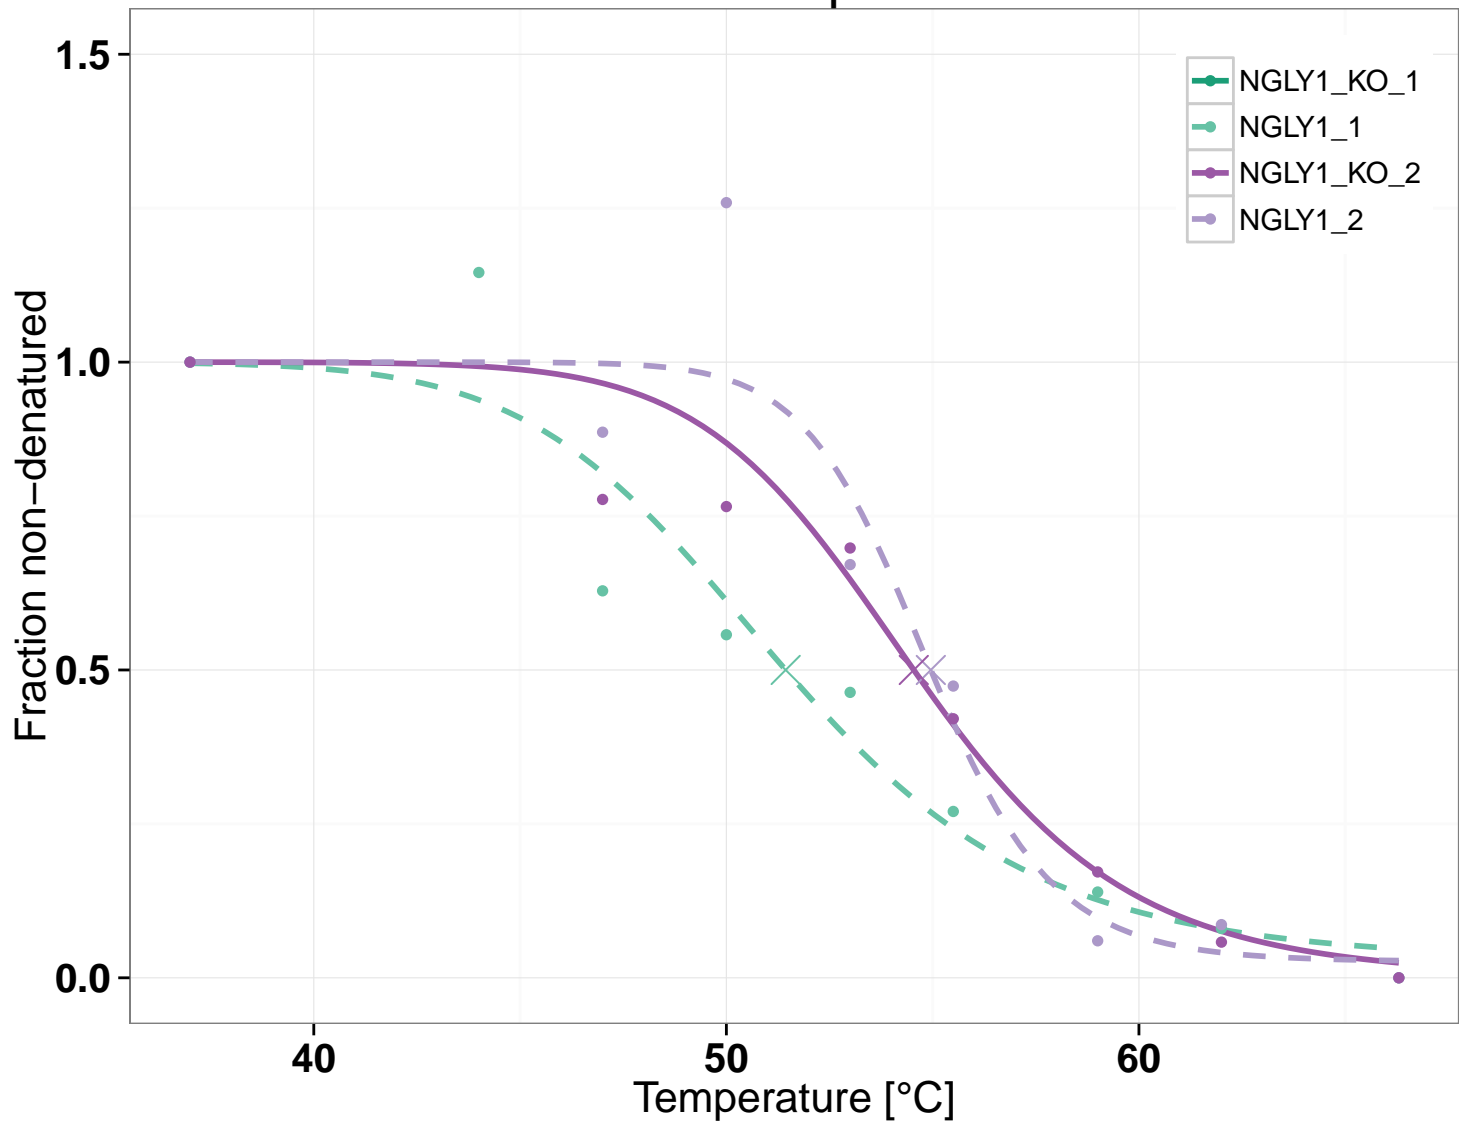

|            | meltPoint | slope  | plateau | R2   |
|------------|-----------|--------|---------|------|
| NGLY1_KO_1 | -         | -      | -       | -    |
| NGLY1_1    | 51.44     | -0.079 | 0.02    | 0.82 |
| NGLY1_KO_2 | 54.54     | -0.096 | 0       | 0.46 |
| NGLY1_2    | 54.96     | -0.16  | 0.03    | 0.38 |

Supplement: Supplementary file 229 [file 1]

IPI00033022.2|DNM2

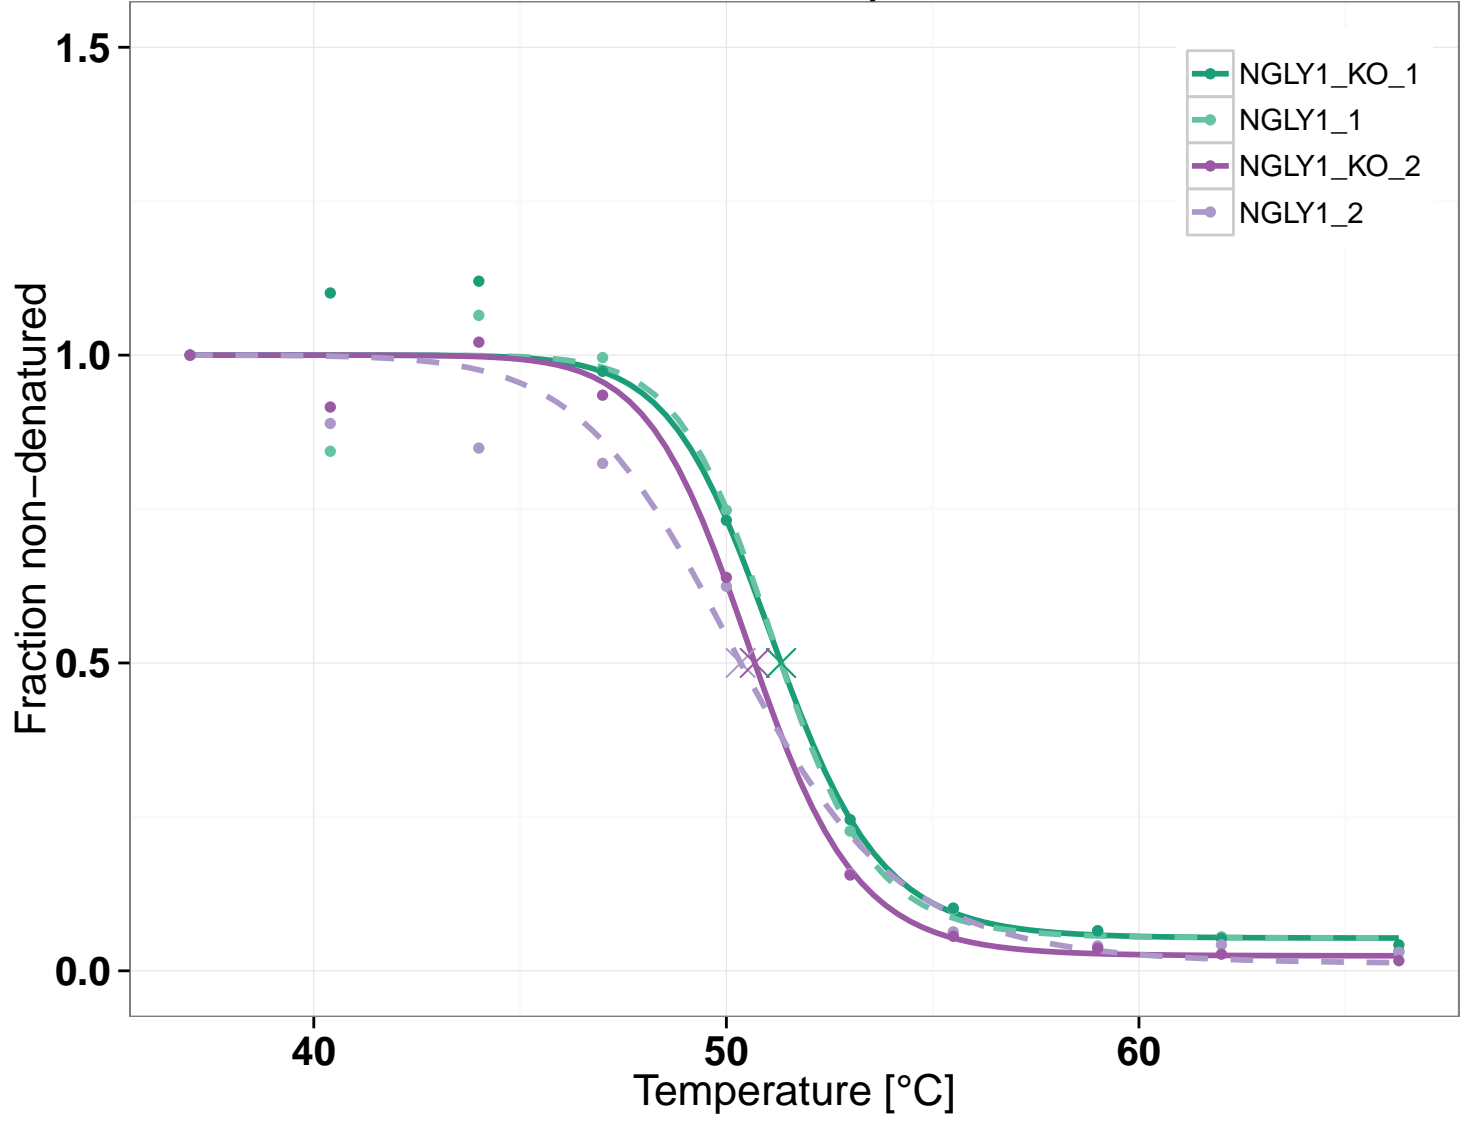

|            | meltPoint | slope | plateau | R2   |
|------------|-----------|-------|---------|------|
| NGLY1_KO_1 | 51.33     | -0.18 | 0.05    | 0.99 |
| NGLY1_1    | 51.32     | -0.2  | 0.05    | 0.98 |
| NGLY1_KO_2 | 50.69     | -0.19 | 0.02    | 1    |
| NGLY1_2    | 50.35     | -0.13 | 0.01    | 0.97 |

Supplement: Supplementary file 230 [file 1]

IPI00025156.4|STUB1

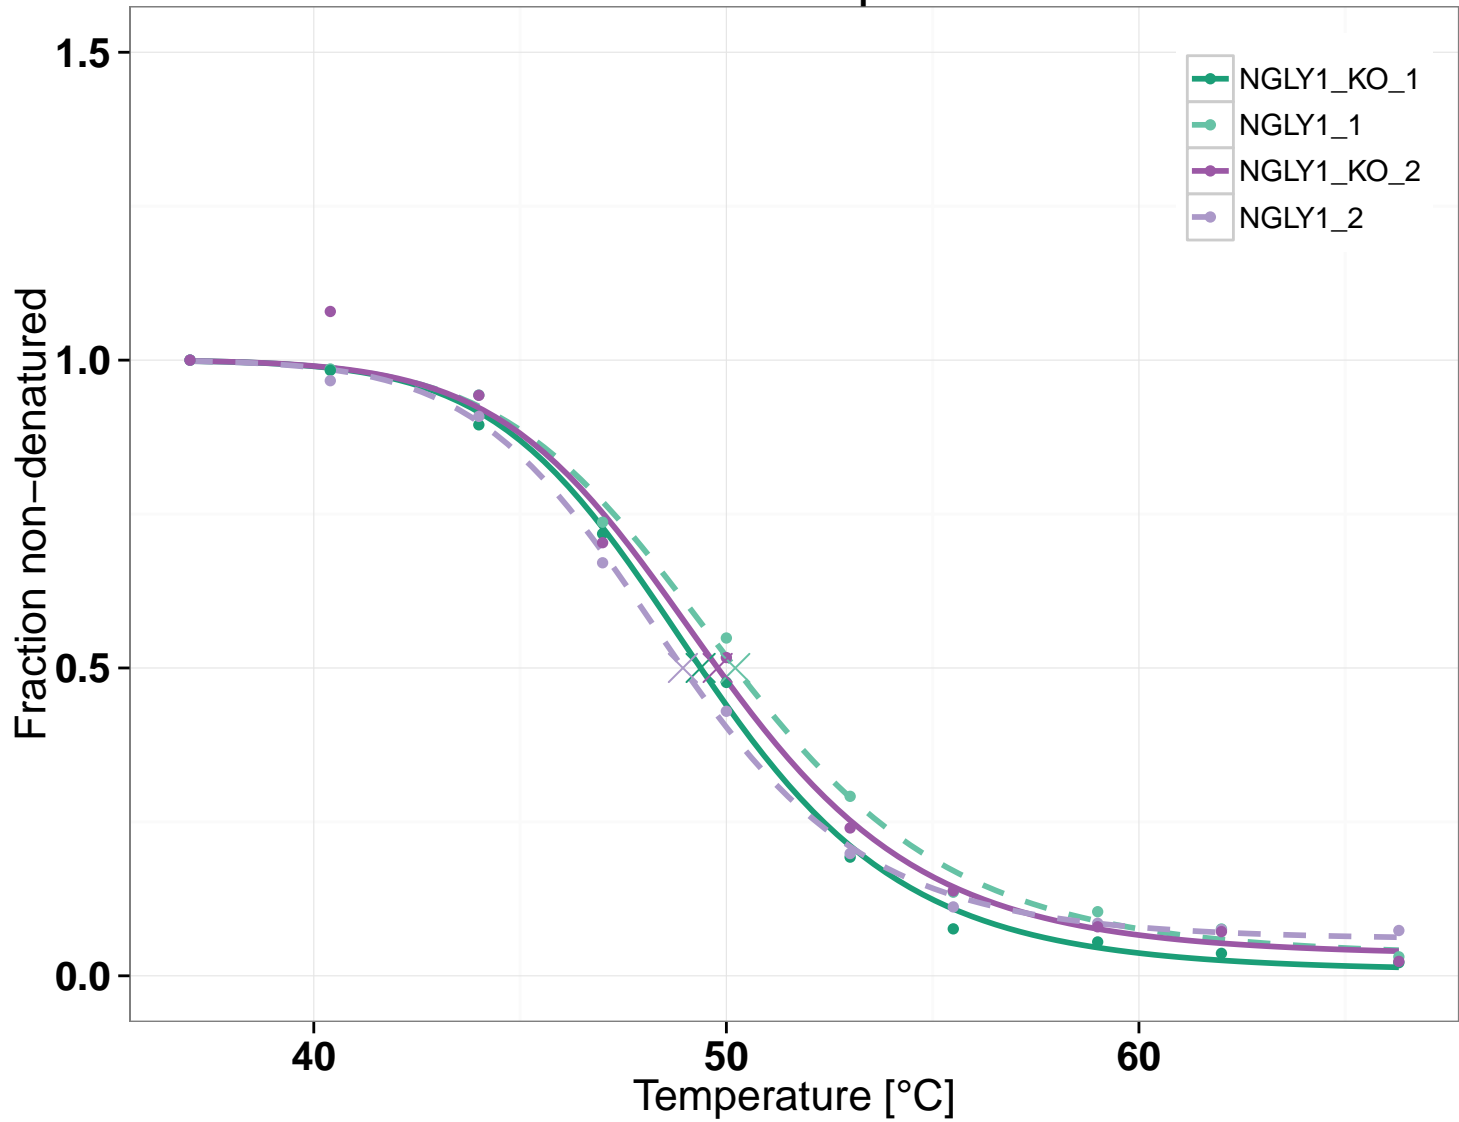

|            | meltPoint | slope  | plateau | R2   |
|------------|-----------|--------|---------|------|
| NGLY1_KO_1 | 49.38     | -0.1   | 0.01    | 1    |
| NGLY1_1    | 50.22     | -0.089 | 0.03    | 1    |
| NGLY1_KO_2 | 49.79     | -0.094 | 0.03    | 0.99 |
| NGLY1_2    | 48.95     | -0.098 | 0.06    | 1    |

Supplement: Supplementary file 231 [file 1]

IPI00784320.2|FAM83H

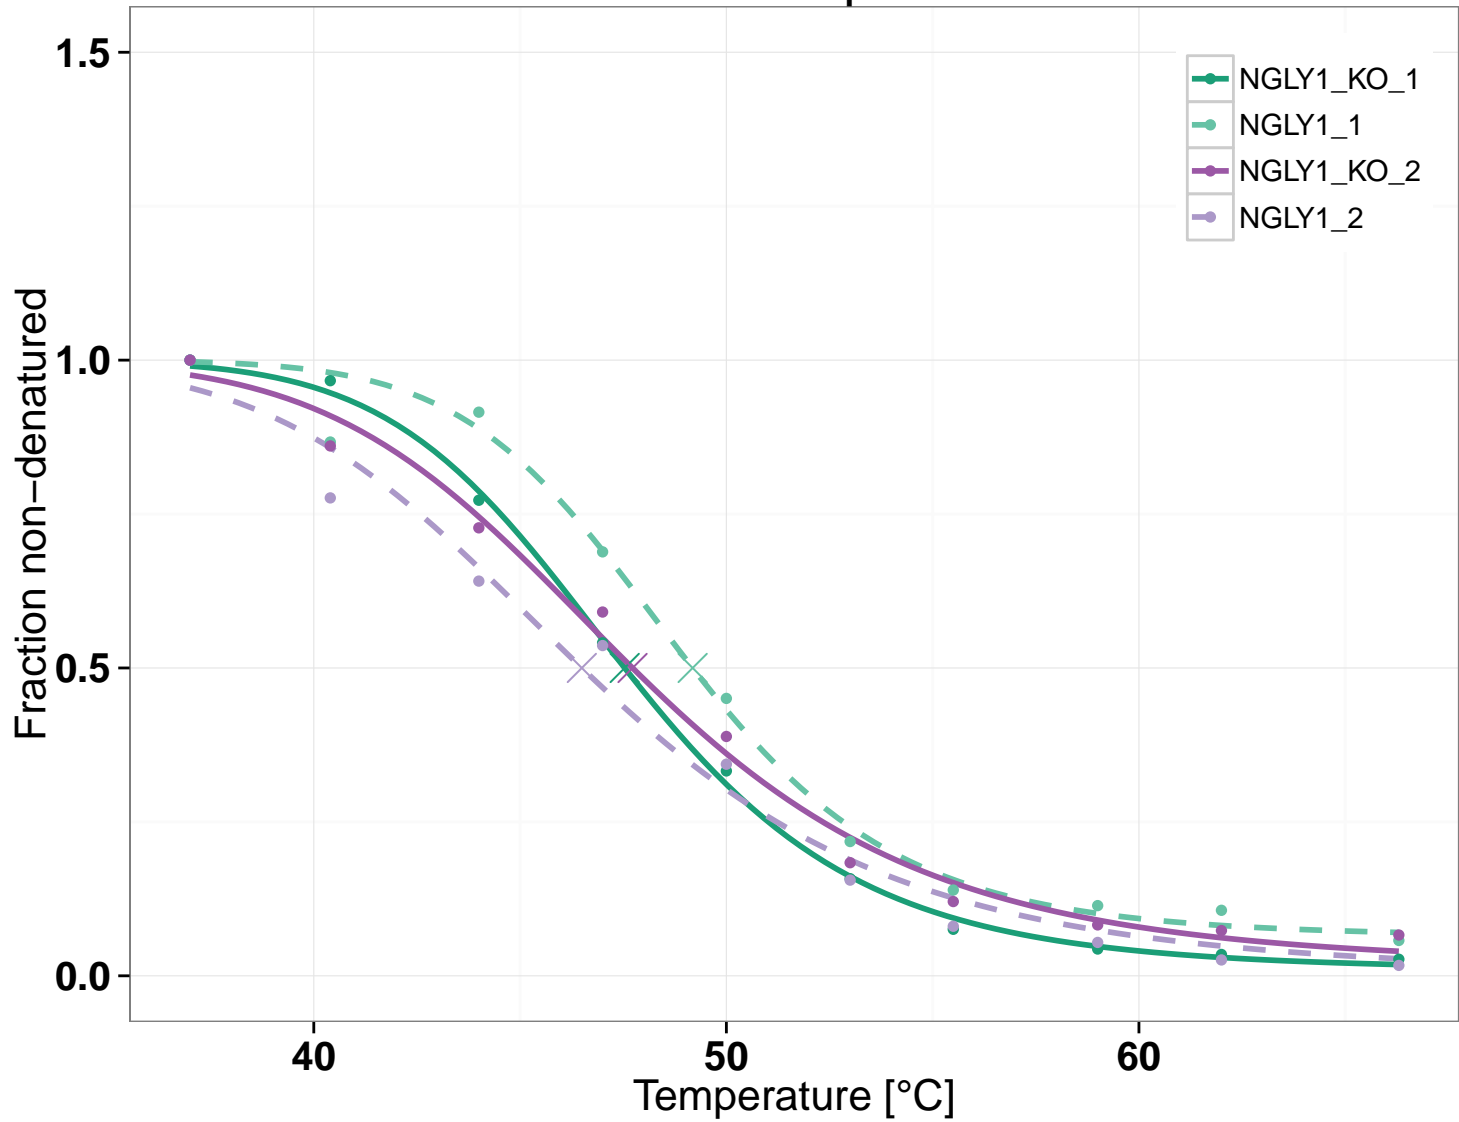

|            | meltPoint | slope  | plateau | R2   |
|------------|-----------|--------|---------|------|
| NGLY1_KO_1 | 47.54     | -0.087 | 0.01    | 1    |
| NGLY1_1    | 49.18     | -0.089 | 0.06    | 0.99 |
| NGLY1_KO_2 | 47.73     | -0.068 | 0.01    | 0.99 |
| NGLY1_2    | 46.5      | -0.066 | 0       | 0.98 |

Supplement: Supplementary file 232 [file 1]

IPI00217355.1|ZC3H7A

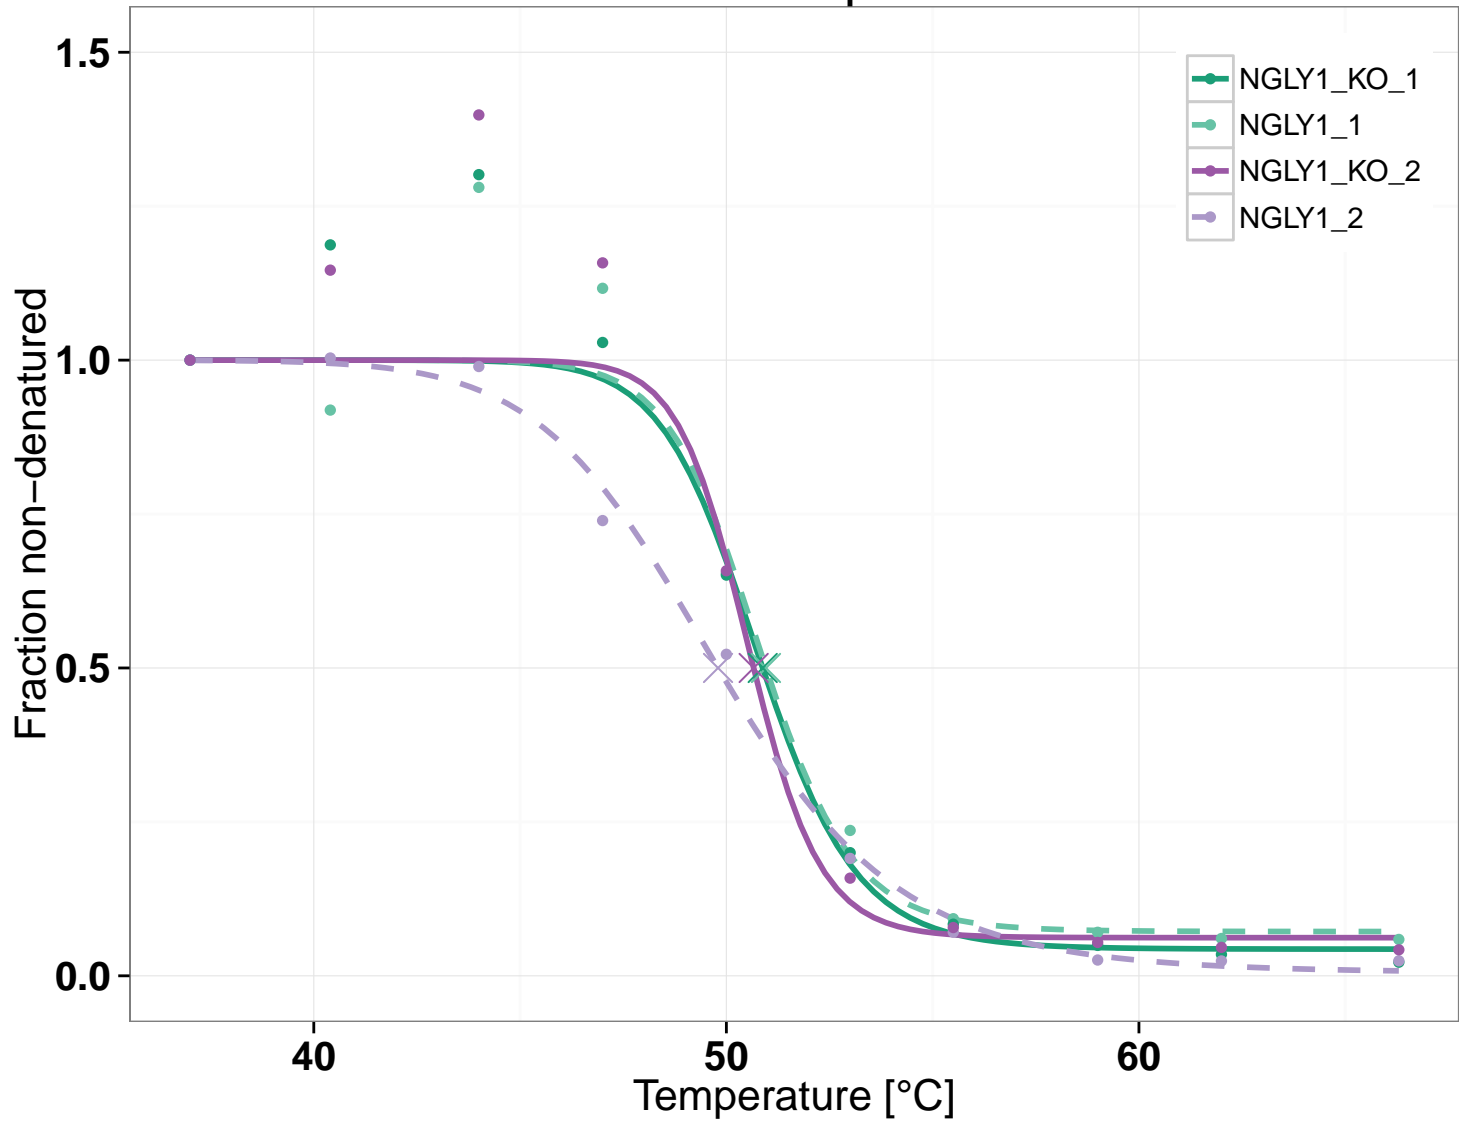

|            | meltPoint | slope | plateau | R2   |
|------------|-----------|-------|---------|------|
| NGLY1_KO_1 | 50.88     | -0.2  | 0.04    | 0.95 |
| NGLY1_1    | 50.96     | -0.21 | 0.07    | 0.95 |
| NGLY1_KO_2 | 50.66     | -0.27 | 0.06    | 0.92 |
| NGLY1_2    | 49.8      | -0.11 | 0       | 1    |

Supplement: Supplementary file 233 [file 1]

# IPI00478892.2|LRIG2

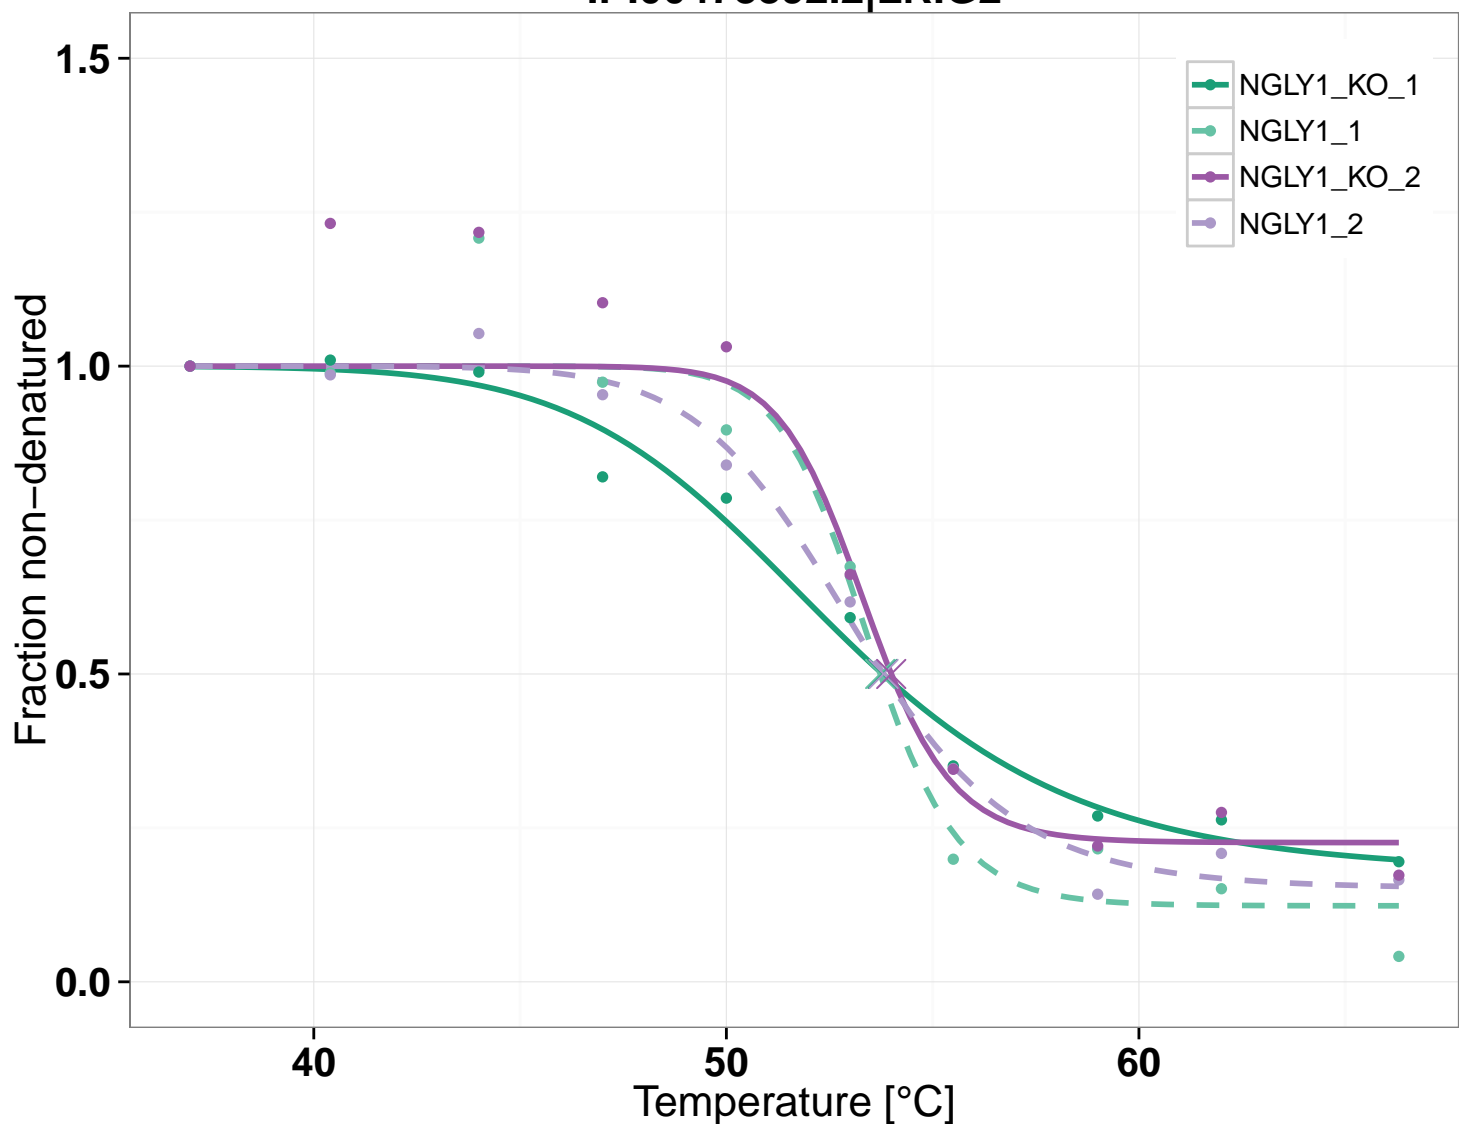

|            | meltPoint | slope  | plateau | R2   |
|------------|-----------|--------|---------|------|
| NGLY1_KO_1 | 53.79     | -0.068 | 0.18    | 0.99 |
| NGLY1_1    | 53.73     | -0.2   | 0.12    | 0.96 |
| NGLY1_KO_2 | 54        | -0.19  | 0.23    | 0.93 |
| NGLY1_2    | 53.81     | -0.11  | 0.15    | 0.99 |

Supplement: Supplementary file 234 [file 1]

IPI00171421.3|C8ORF55

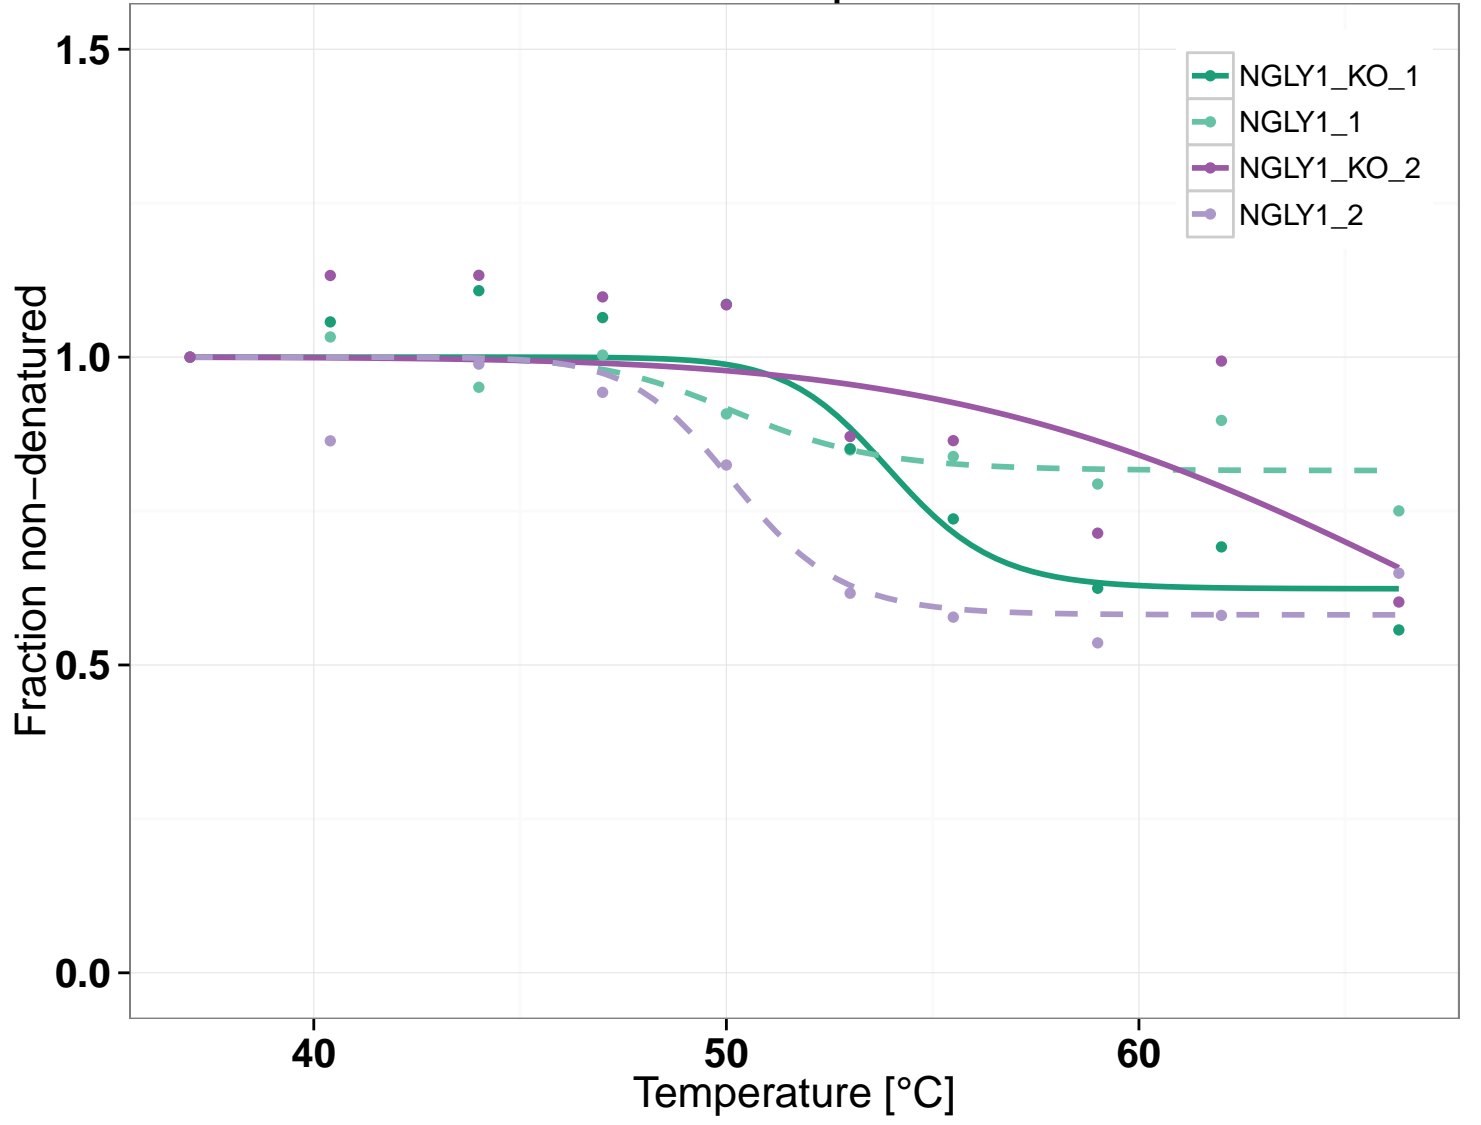

|            | meltPoint | slope  | plateau | R2   |
|------------|-----------|--------|---------|------|
| NGLY1_KO_1 | –         | –0.074 | 0.62    | 0.9  |
| NGLY1_1    | –         | –0.027 | 0.82    | 0.81 |
| NGLY1_KO_2 | –         | –      | 0       | 0.54 |
| NGLY1_2    | –         | –0.082 | 0.58    | 0.91 |

Supplement: Supplementary file 235 [file 1]

# IPI00024524.4|PNO1

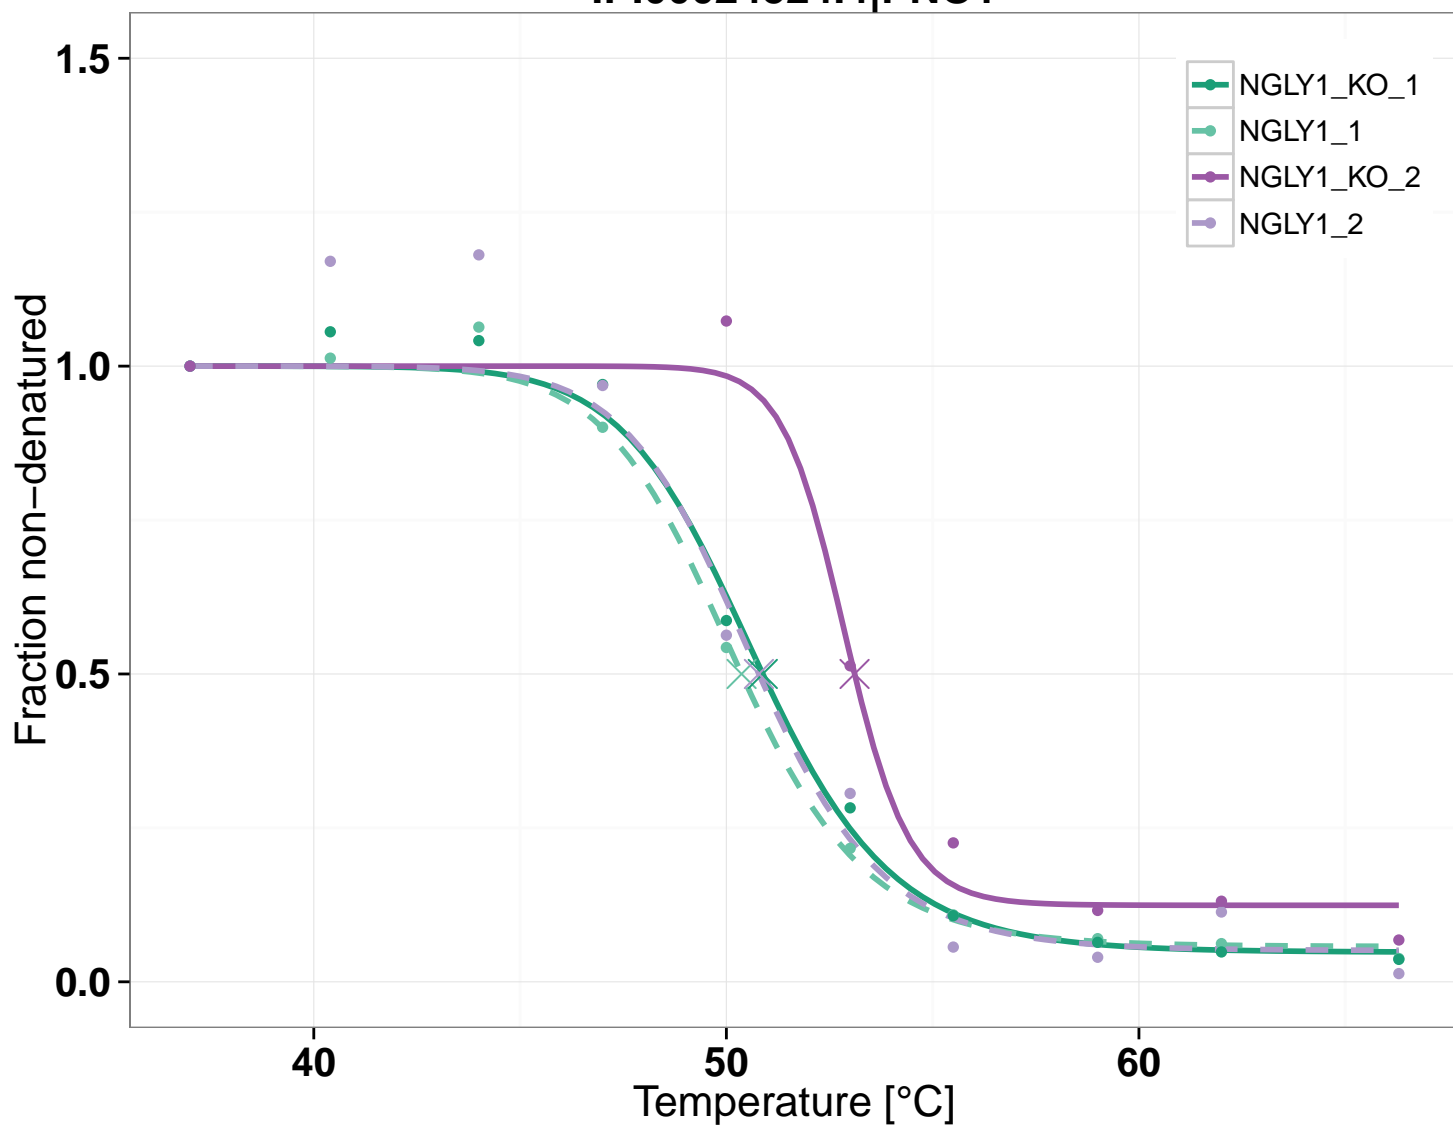

|            | meltPoint | slope | plateau | R2   |
|------------|-----------|-------|---------|------|
| NGLY1_KO_1 | 50.88     | -0.14 | 0.05    | 0.99 |
| NGLY1_1    | 50.37     | -0.15 | 0.06    | 1    |
| NGLY1_KO_2 | 53.11     | -0.29 | 0.12    | 0.66 |
| NGLY1_2    | 50.79     | -0.15 | 0.05    | 0.96 |

Supplement: Supplementary file 236 [file 1]

IPI00169267.3|ATL2

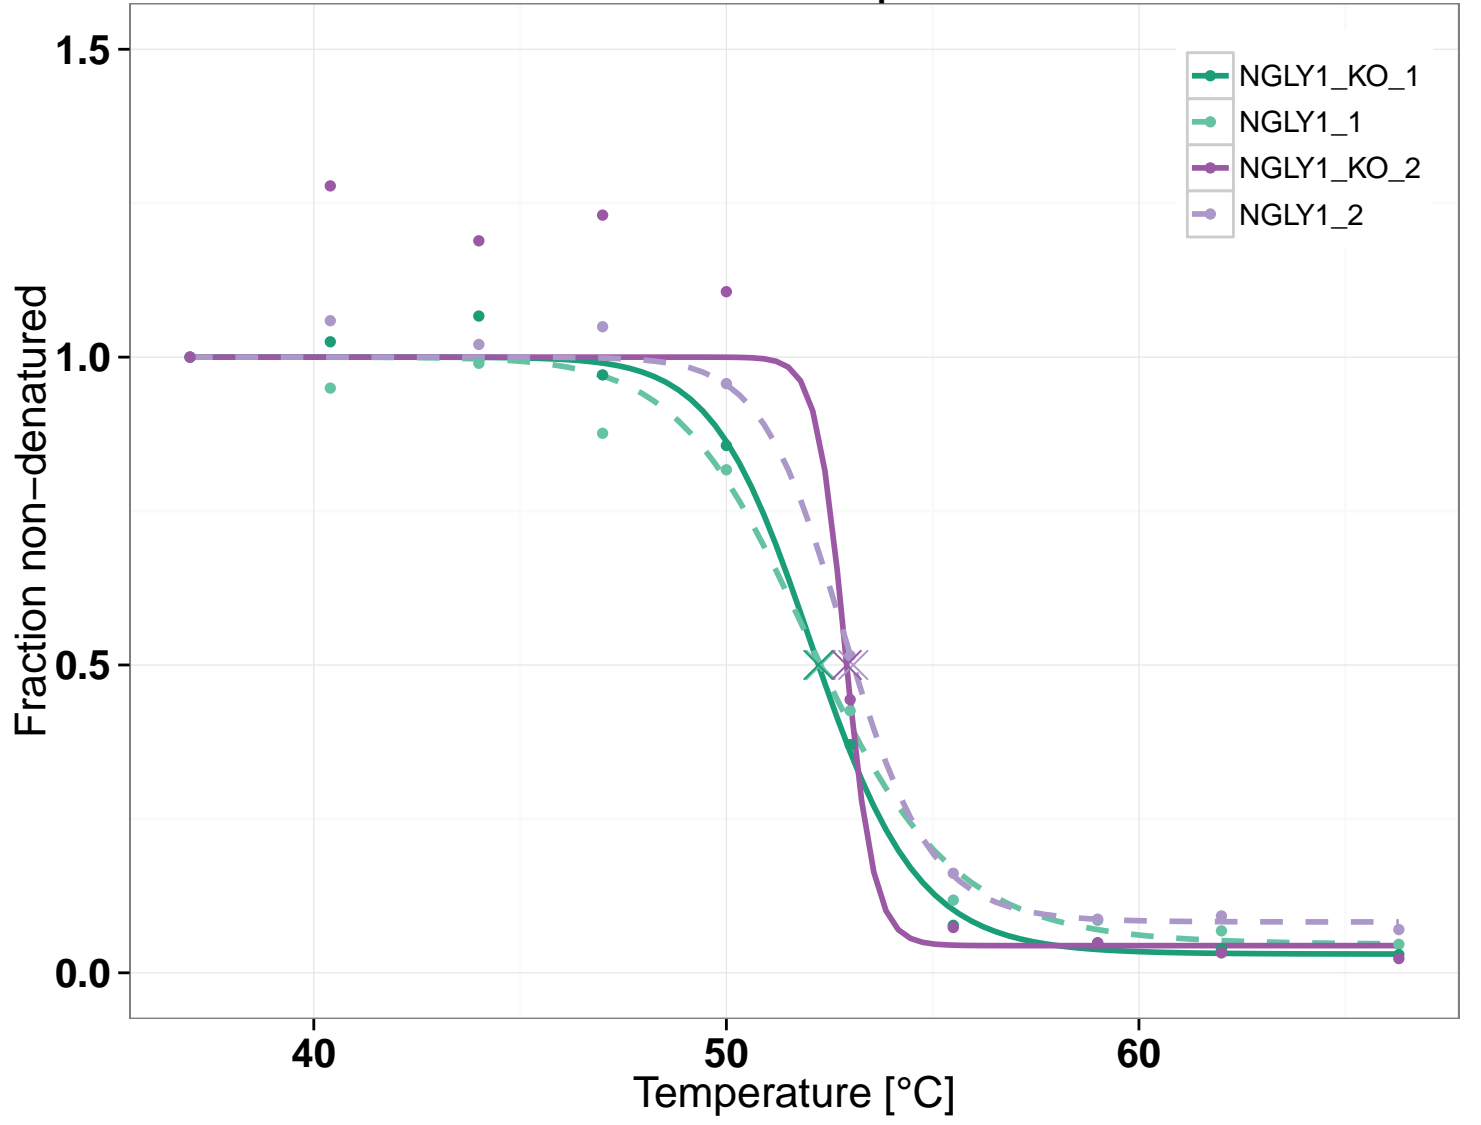

|            | meltPoint | slope | plateau | R2   |
|------------|-----------|-------|---------|------|
| NGLY1_KO_1 | 52.23     | -0.2  | 0.03    | 1    |
| NGLY1_1    | 52.28     | -0.14 | 0.05    | 0.99 |
| NGLY1_KO_2 | 52.92     | -0.68 | 0.04    | 0.94 |
| NGLY1_2    | 53.08     | -0.22 | 0.08    | 1    |

Supplement: Supplementary file 237 [file 1]

IPI00329383.1|ZNF280B

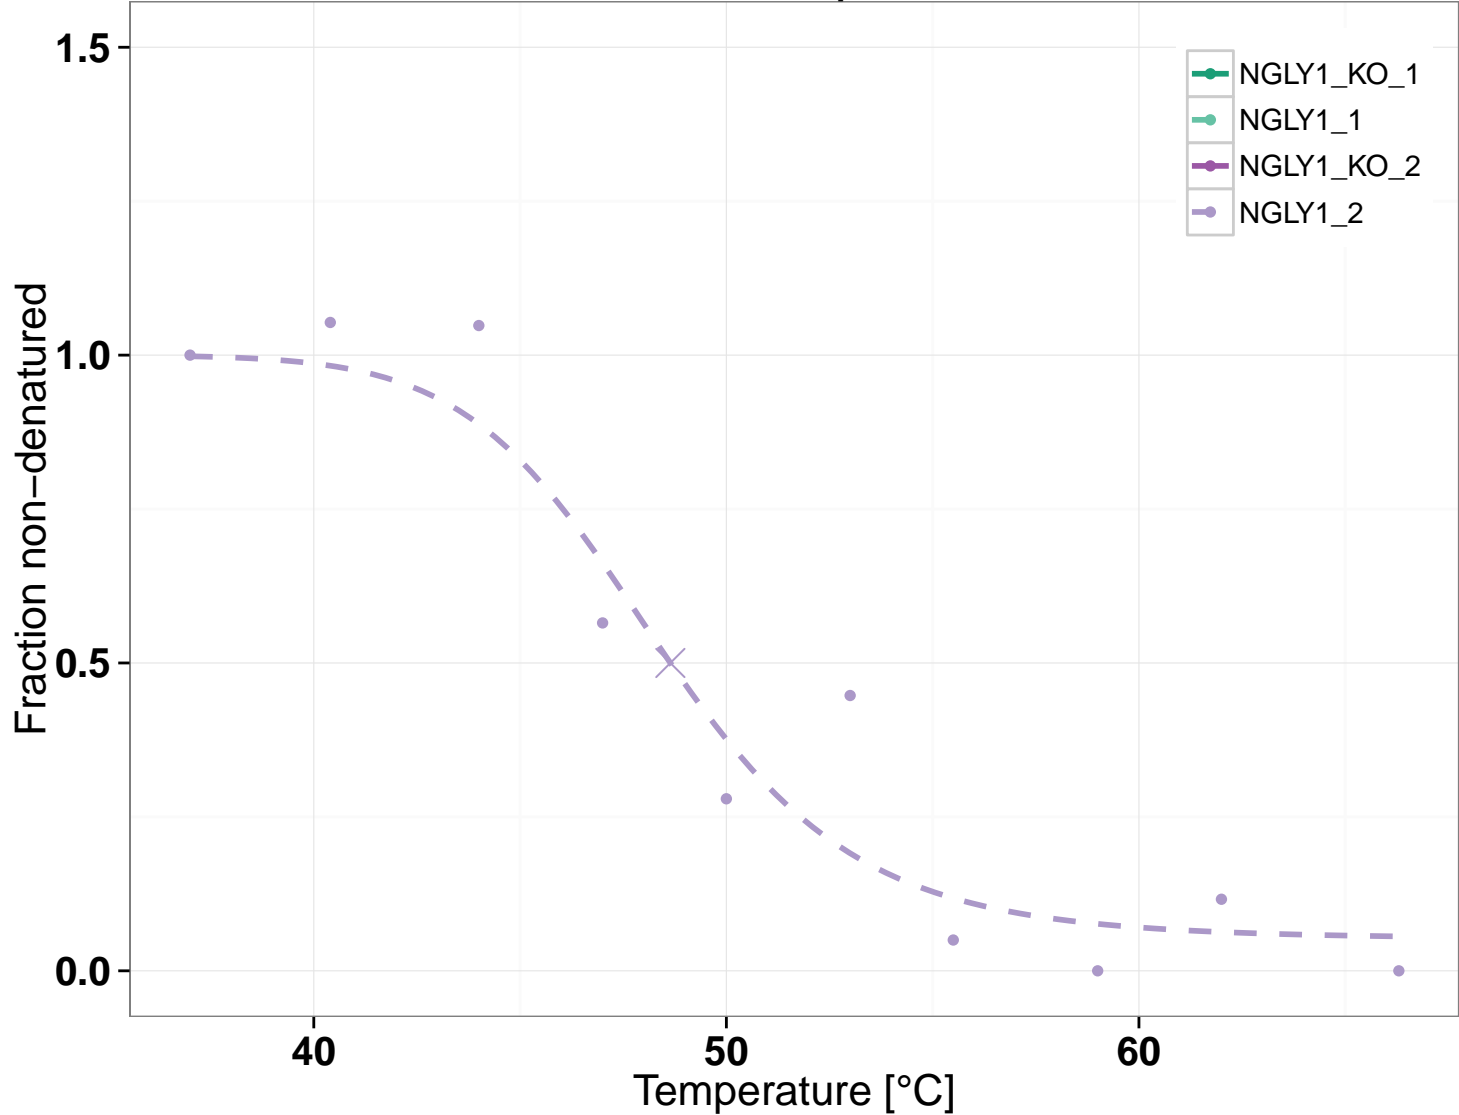

|            | meltPoint | slope | plateau | R2   |
|------------|-----------|-------|---------|------|
| NGLY1_KO_1 | —         | —     | —       | —    |
| NGLY1_1    | —         | —     | —       | —    |
| NGLY1_KO_2 | —         | —     | —       | —    |
| NGLY1_2    | 48.64     | −0.1  | 0.05    | 0.92 |

Supplement: Supplementary file 238 [file 1]

# IPI00023406.1|HCCS

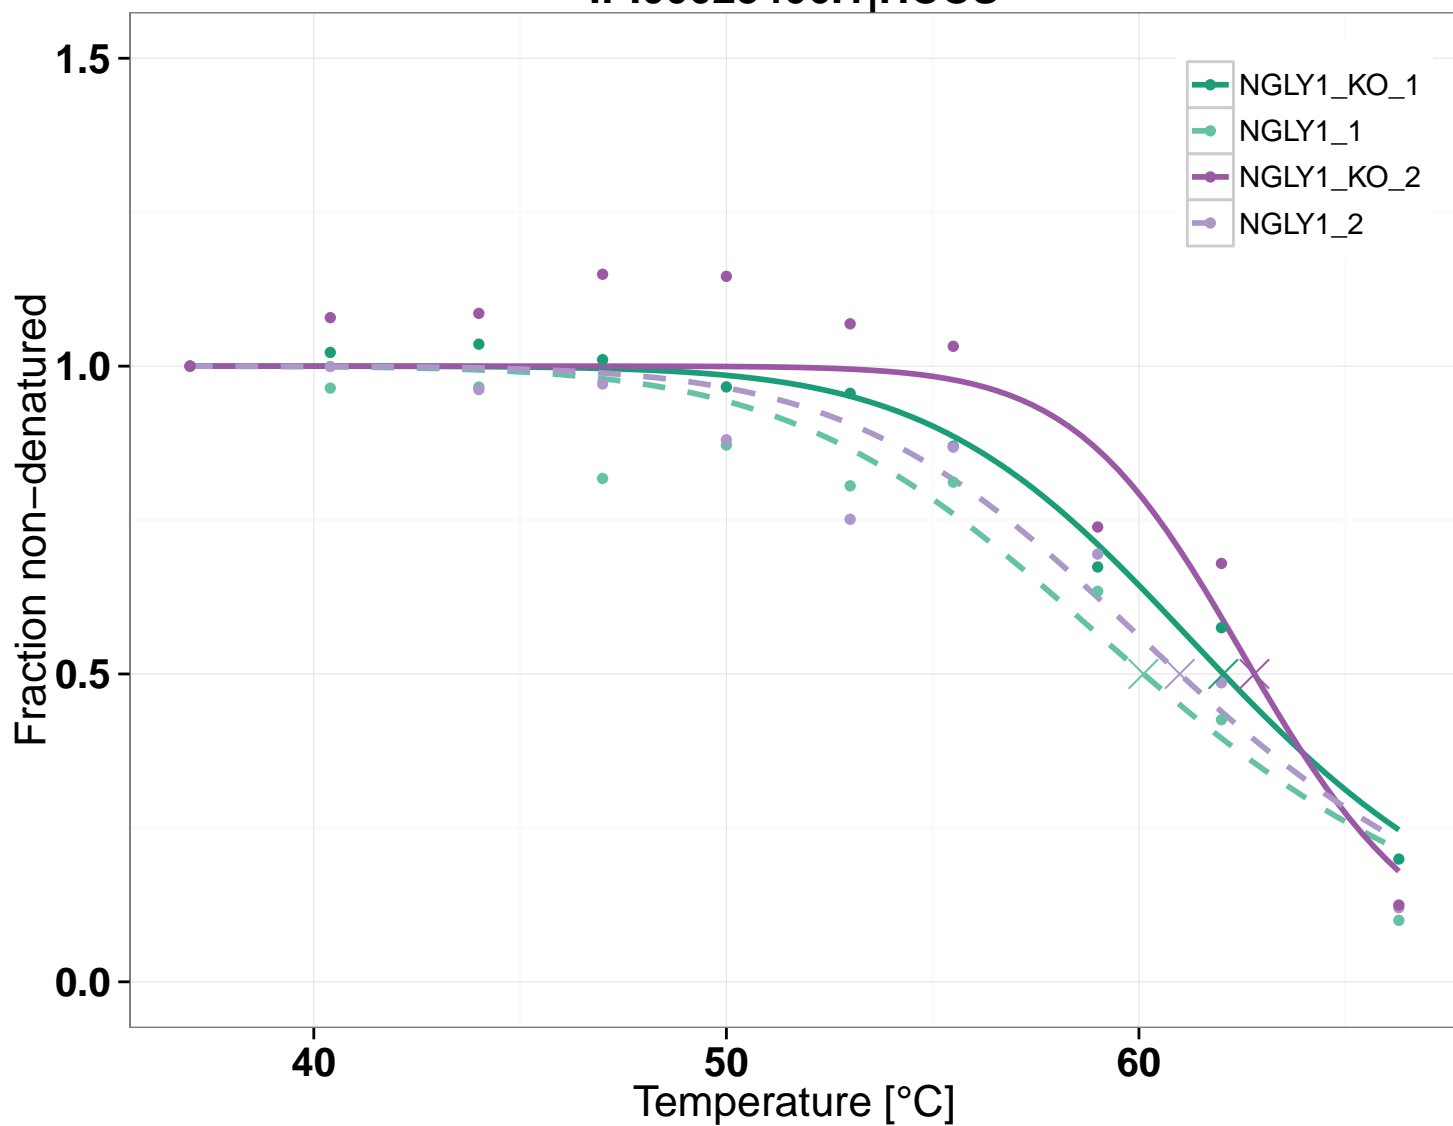

|            | meltPoint | slope  | plateau | R2   |
|------------|-----------|--------|---------|------|
| NGLY1_KO_1 | 62.05     | -0.071 | 0       | 0.98 |
| NGLY1_1    | 60.11     | -0.059 | 0       | 0.92 |
| NGLY1_KO_2 | 62.8      | -0.12  | 0       | 0.9  |
| NGLY1_2    | 60.99     | -0.063 | 0       | 0.92 |

Supplement: Supplementary file 239 [file 1]

IPI00180681.6|CCDC41

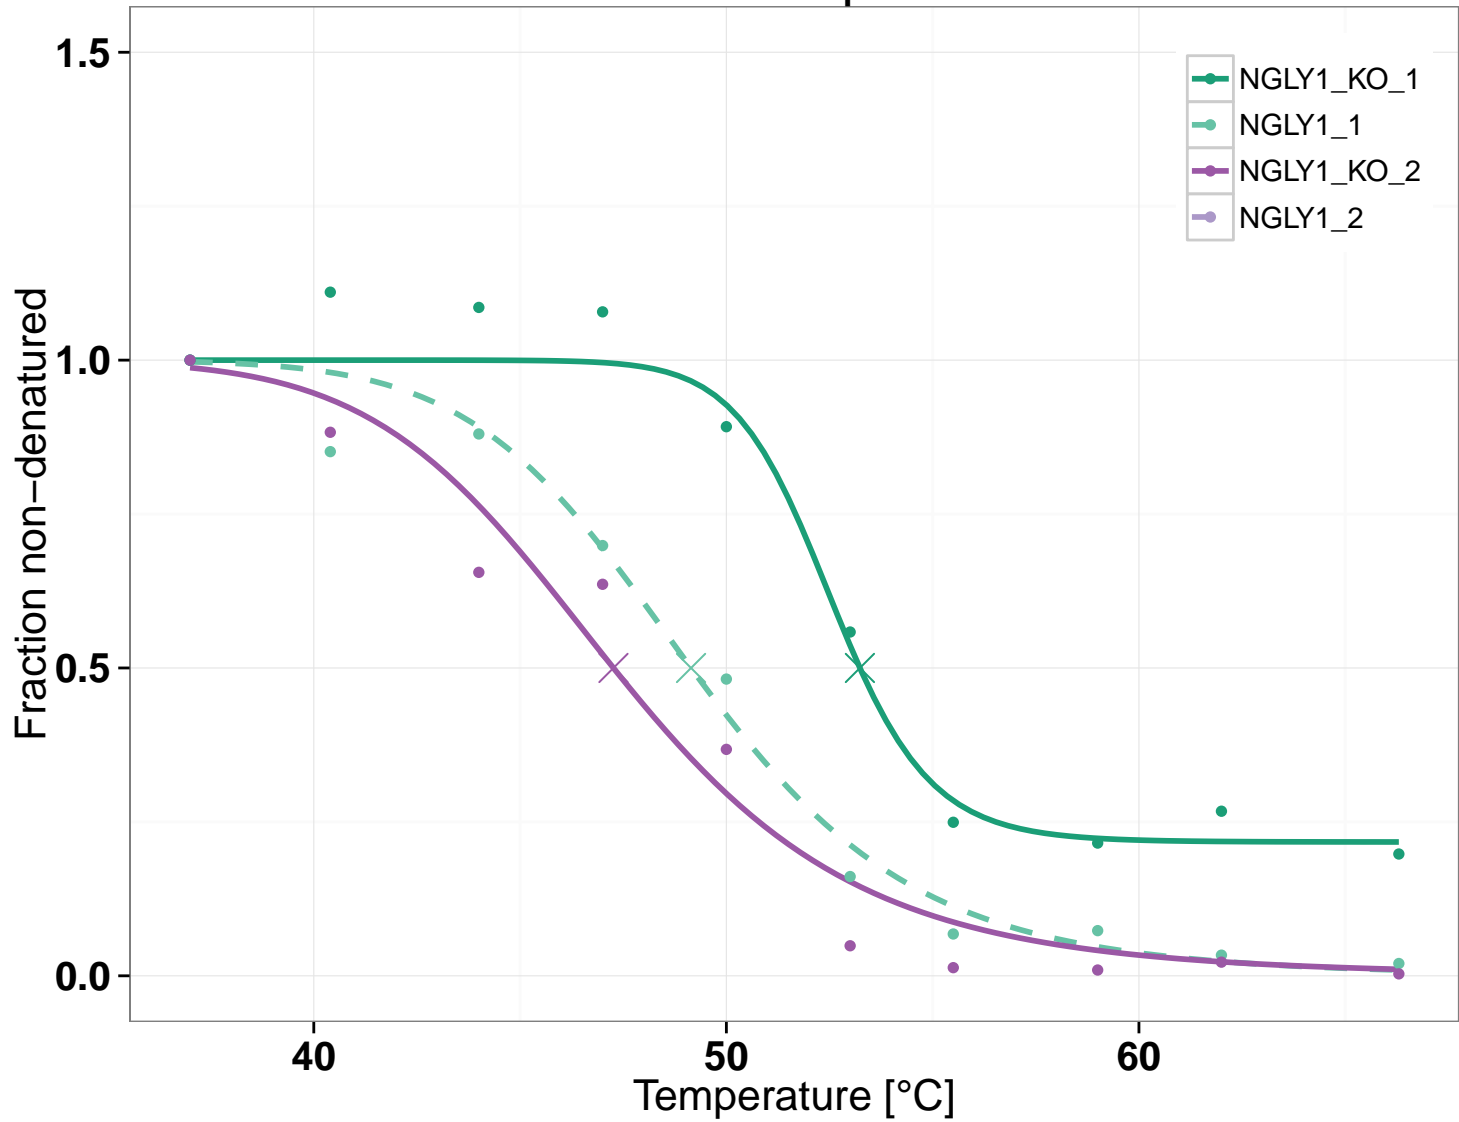

|            | meltPoint | slope  | plateau | R2   |
|------------|-----------|--------|---------|------|
| NGLY1_KO_1 | 53.24     | -0.17  | 0.22    | 0.98 |
| NGLY1_1    | 49.14     | -0.093 | 0       | 0.98 |
| NGLY1_KO_2 | 47.26     | -0.085 | 0       | 0.96 |
| NGLY1_2    | -         | -      | -       | -    |

Supplement: Supplementary file 240 [file 1]

IPI00011590.1|FOSL1

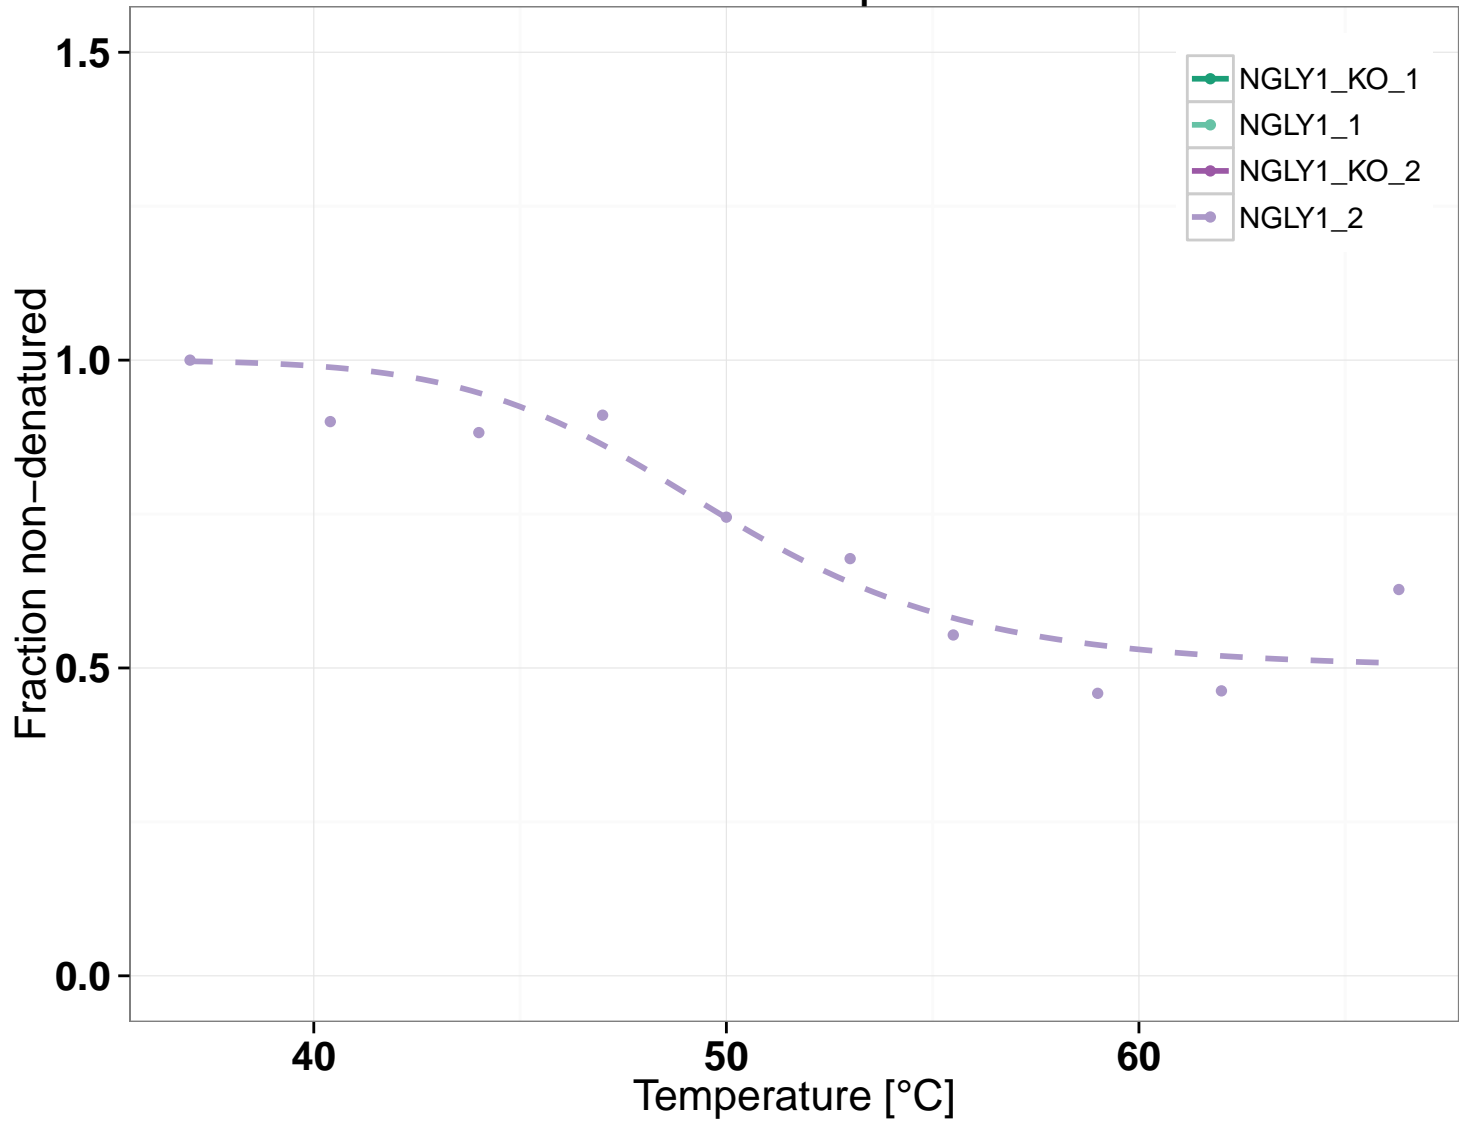

|            | meltPoint | slope  | plateau | R2   |
|------------|-----------|--------|---------|------|
| NGLY1_KO_1 | —         | —      | —       | —    |
| NGLY1_1    | —         | —      | —       | —    |
| NGLY1_KO_2 | —         | —      | —       | —    |
| NGLY1_2    | —         | -0.041 | 0.5     | 0.88 |

Supplement: Supplementary file 241 [file 1]

# IPI00909113.1|PEX5

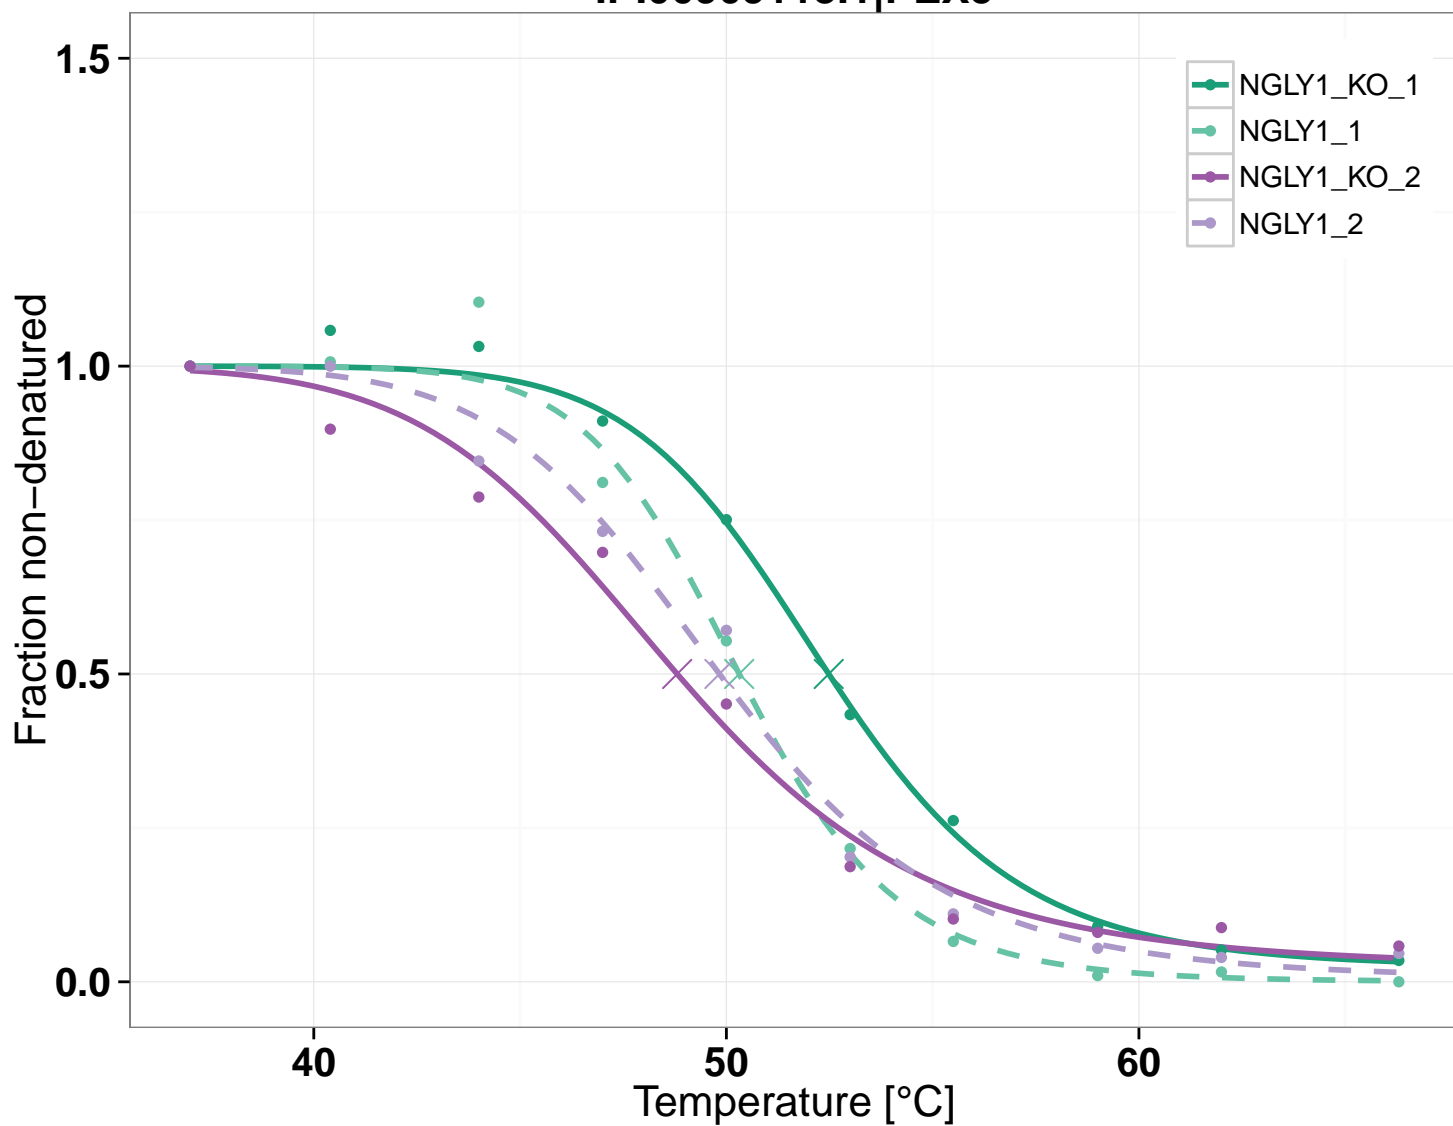

|            | meltPoint | slope  | plateau | R2   |
|------------|-----------|--------|---------|------|
| NGLY1_KO_1 | 52.48     | -0.1   | 0.02    | 1    |
| NGLY1_1    | 50.31     | -0.13  | 0       | 0.99 |
| NGLY1_KO_2 | 48.81     | -0.079 | 0.02    | 0.99 |
| NGLY1_2    | 49.83     | -0.091 | 0       | 0.99 |

Supplement: Supplementary file 242 [file 1]

# IPI00418248.2|HCCA2

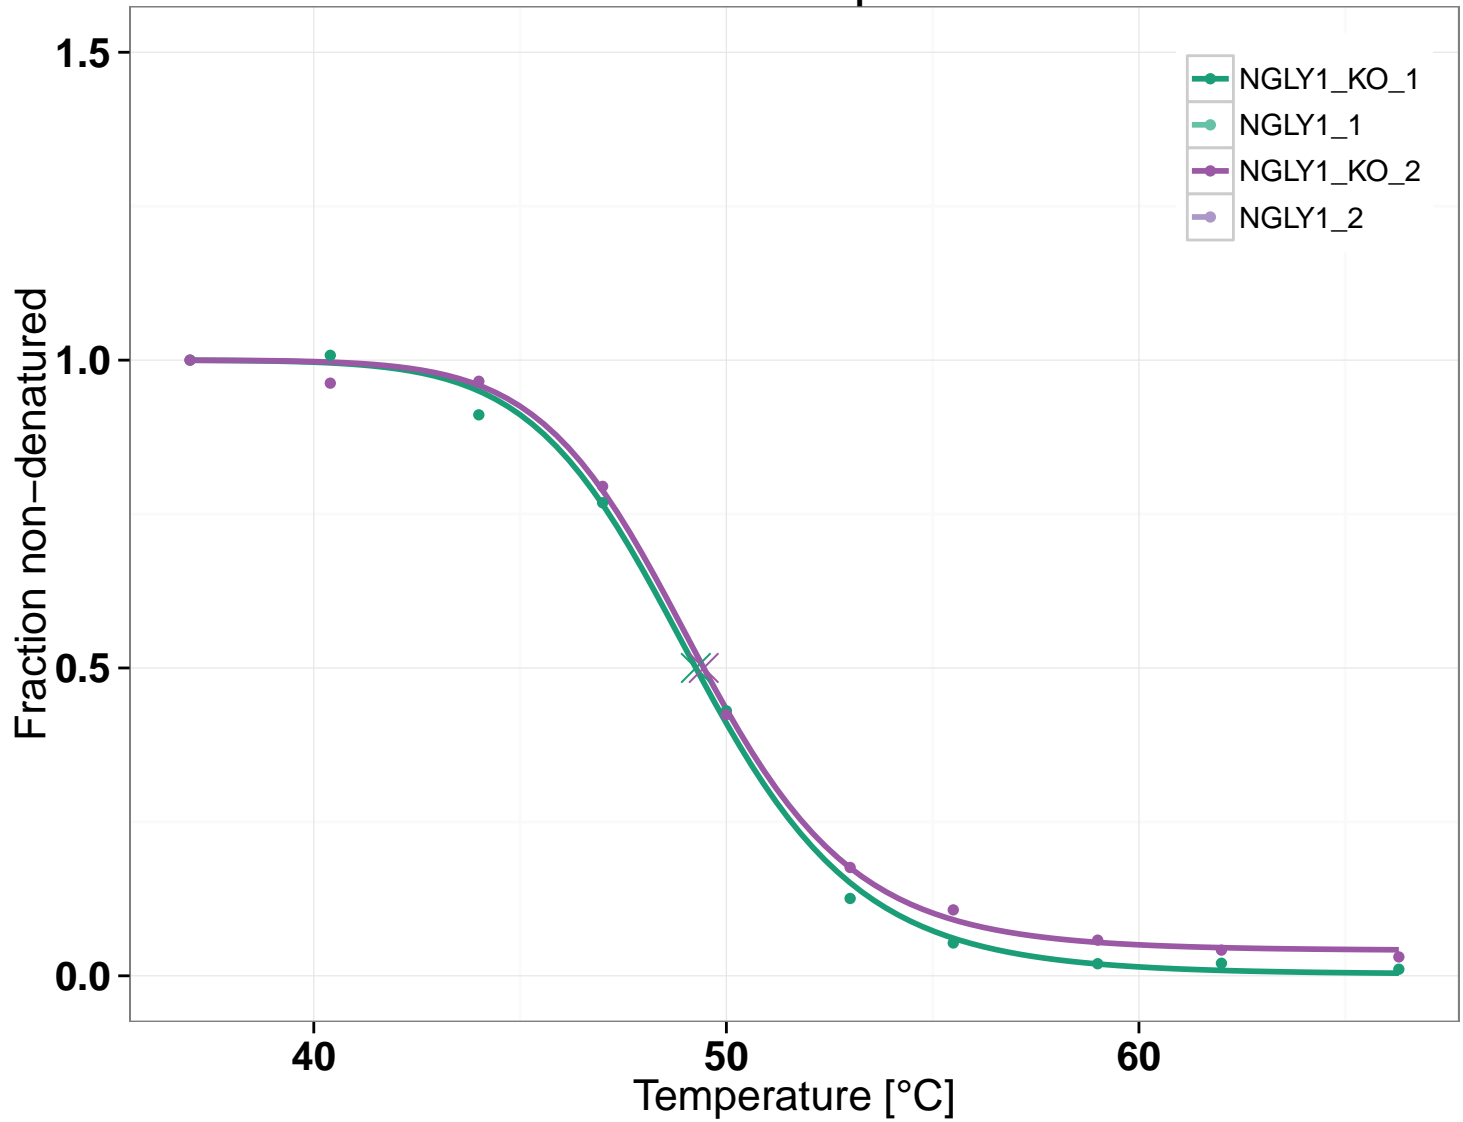

|            | meltPoint | slope | plateau | R2 |
|------------|-----------|-------|---------|----|
| NGLY1_KO_1 | 49.26     | -0.13 | 0       | 1  |
| NGLY1_1    | -         | -     | -       | -  |
| NGLY1_KO_2 | 49.45     | -0.13 | 0.04    | 1  |
| NGLY1_2    | -         | -     | -       | -  |

Supplement: Supplementary file 243 [file 1]

IPI00030847.3|TM9SF3

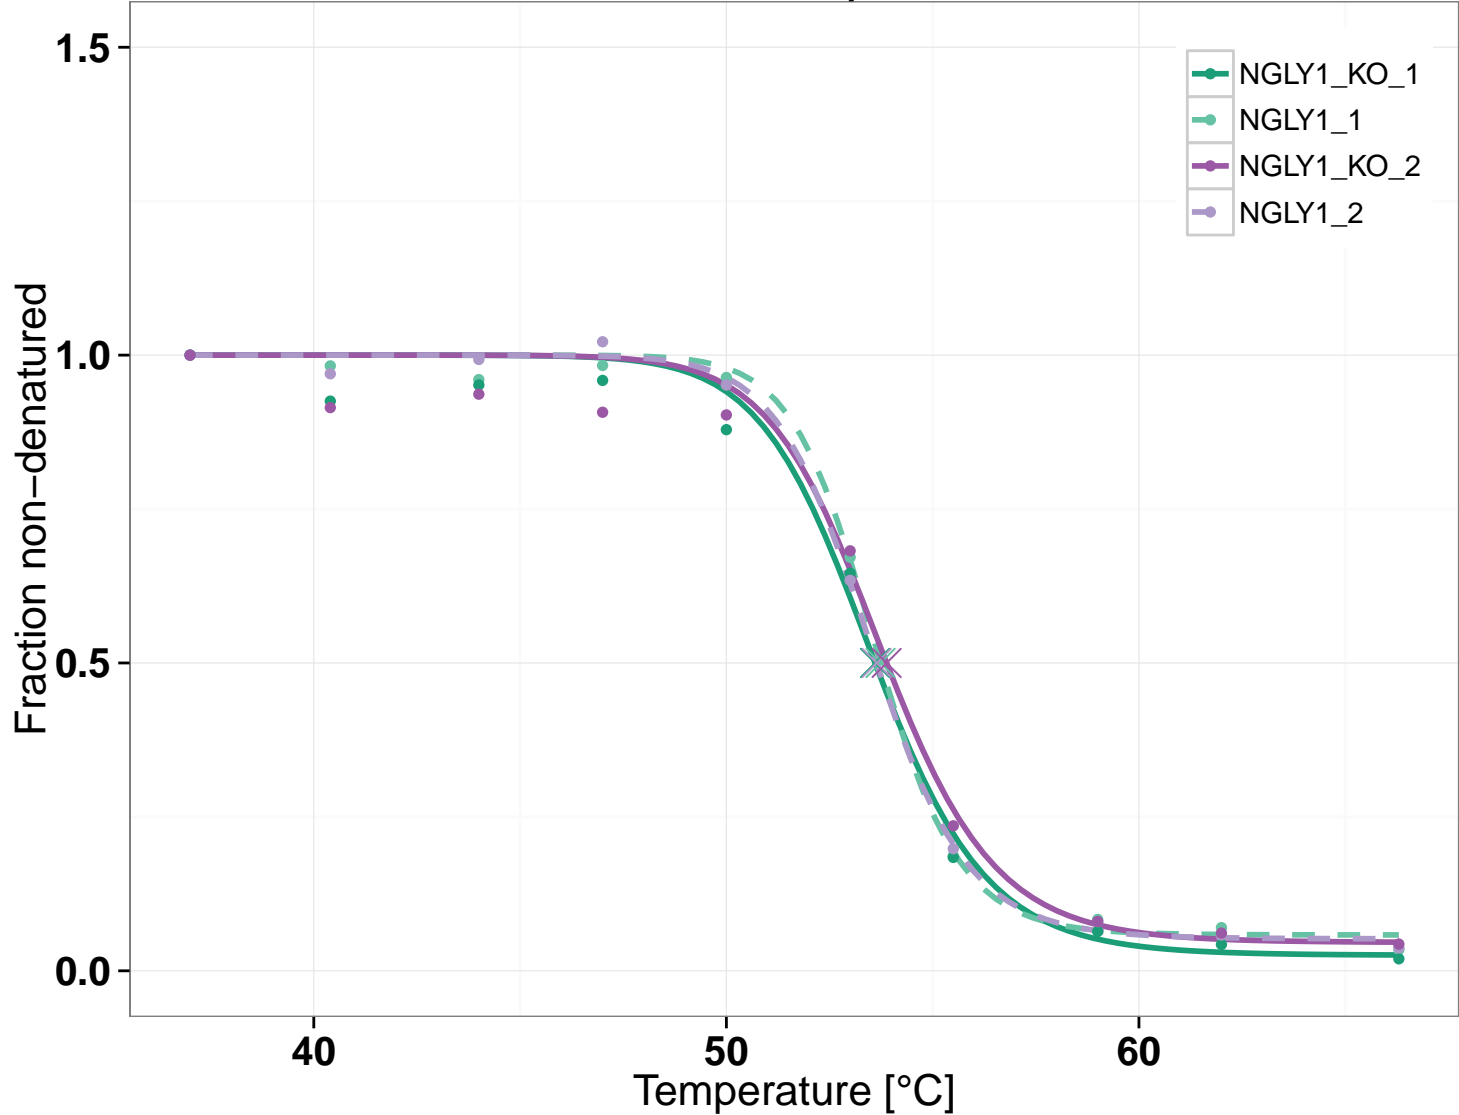

|            | meltPoint | slope | plateau | R2   |
|------------|-----------|-------|---------|------|
| NGLY1_KO_1 | 53.6      | -0.18 | 0.03    | 0.99 |
| NGLY1_1    | 53.74     | -0.23 | 0.06    | 1    |
| NGLY1_KO_2 | 53.88     | -0.17 | 0.05    | 0.99 |
| NGLY1_2    | 53.64     | -0.2  | 0.05    | 1    |

Supplement: Supplementary file 244 [file 1]

# IPI00182164.7|FCHO1

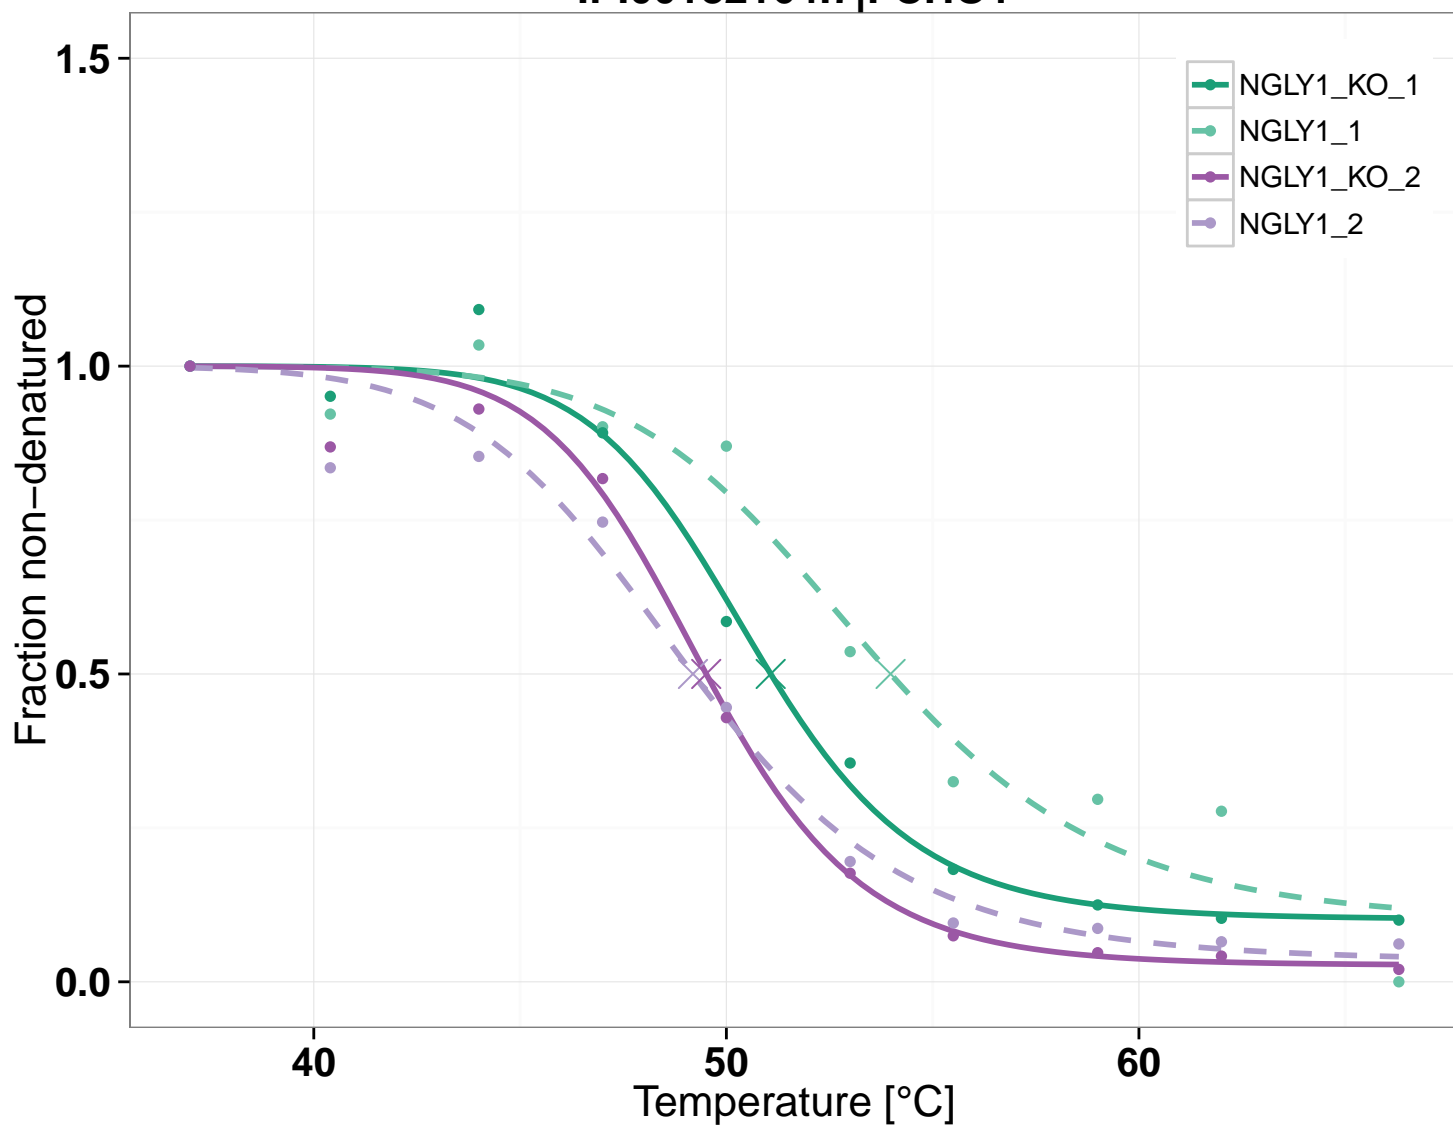

|            | meltPoint | slope  | plateau | R2   |
|------------|-----------|--------|---------|------|
| NGLY1_KO_1 | 51.07     | -0.11  | 0.1     | 0.99 |
| NGLY1_1    | 53.98     | -0.078 | 0.09    | 0.96 |
| NGLY1_KO_2 | 49.51     | -0.13  | 0.03    | 0.99 |
| NGLY1_2    | 49.19     | -0.091 | 0.03    | 0.98 |

Supplement: Supplementary file 245 [file 1]

IPI00871890.1|PICALM

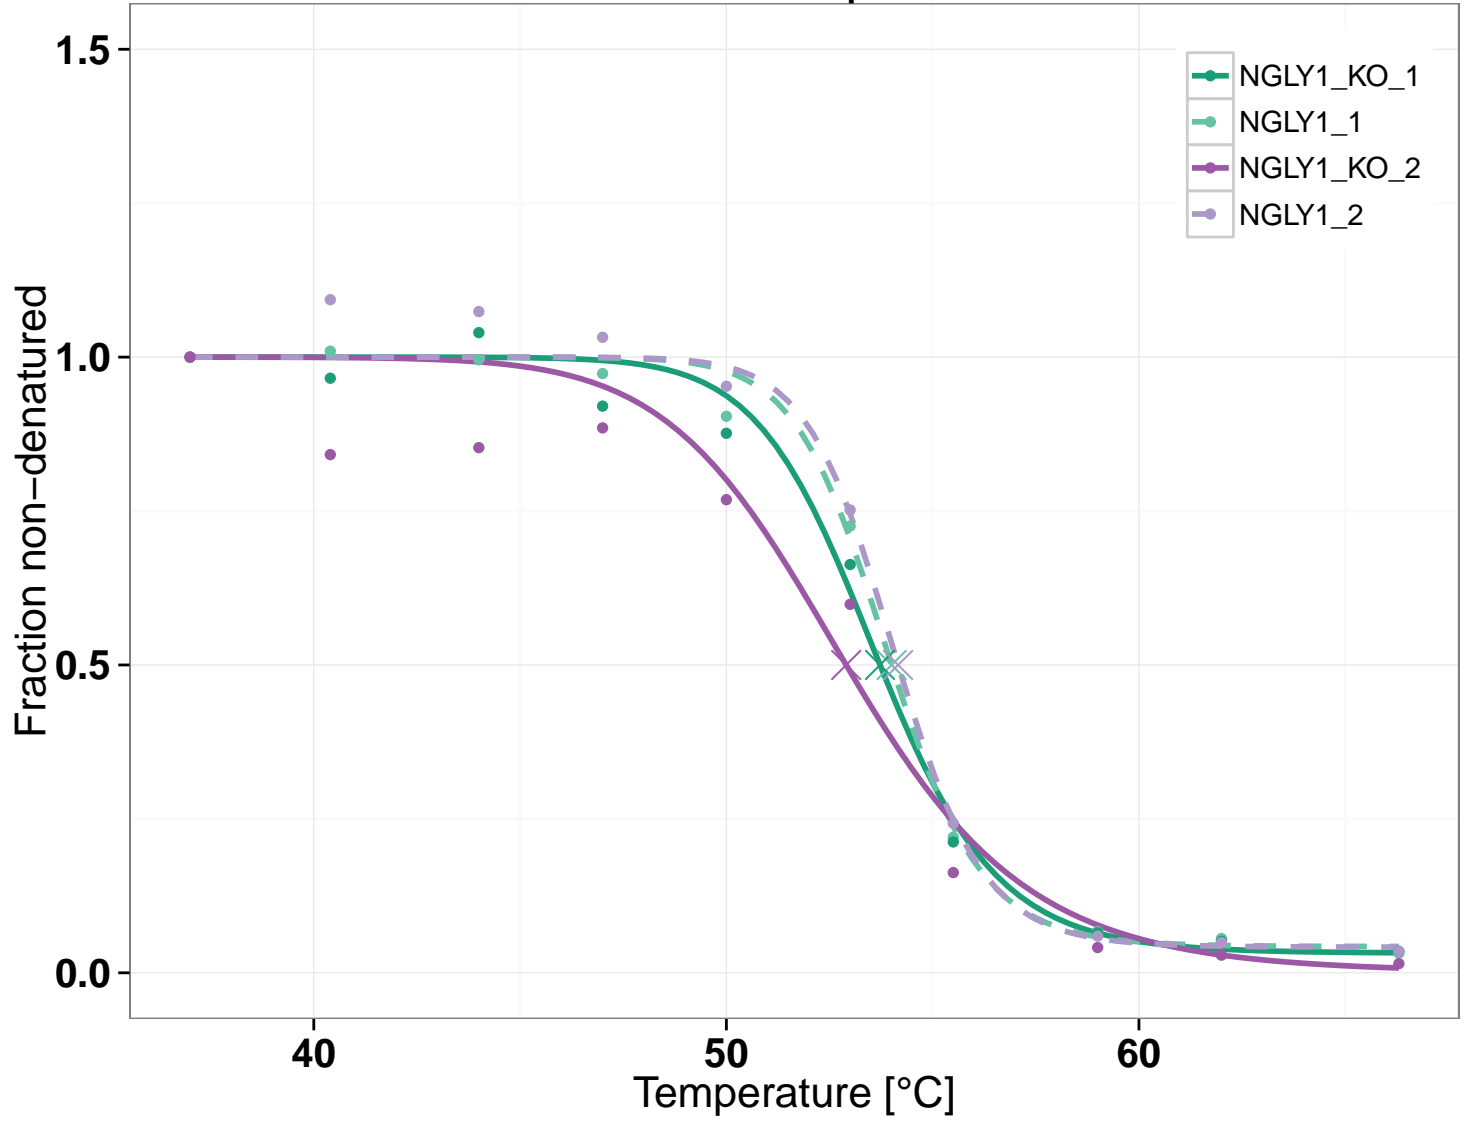

|            | meltPoint | slope | plateau | R2   |
|------------|-----------|-------|---------|------|
| NGLY1_KO_1 | 53.72     | -0.17 | 0.03    | 0.99 |
| NGLY1_1    | 54.01     | -0.21 | 0.04    | 1    |
| NGLY1_KO_2 | 52.9      | -0.11 | 0       | 0.95 |
| NGLY1_2    | 54.16     | -0.22 | 0.04    | 0.99 |

Supplement: Supplementary file 246 [file 1]

IPI00154915.1|PARD3

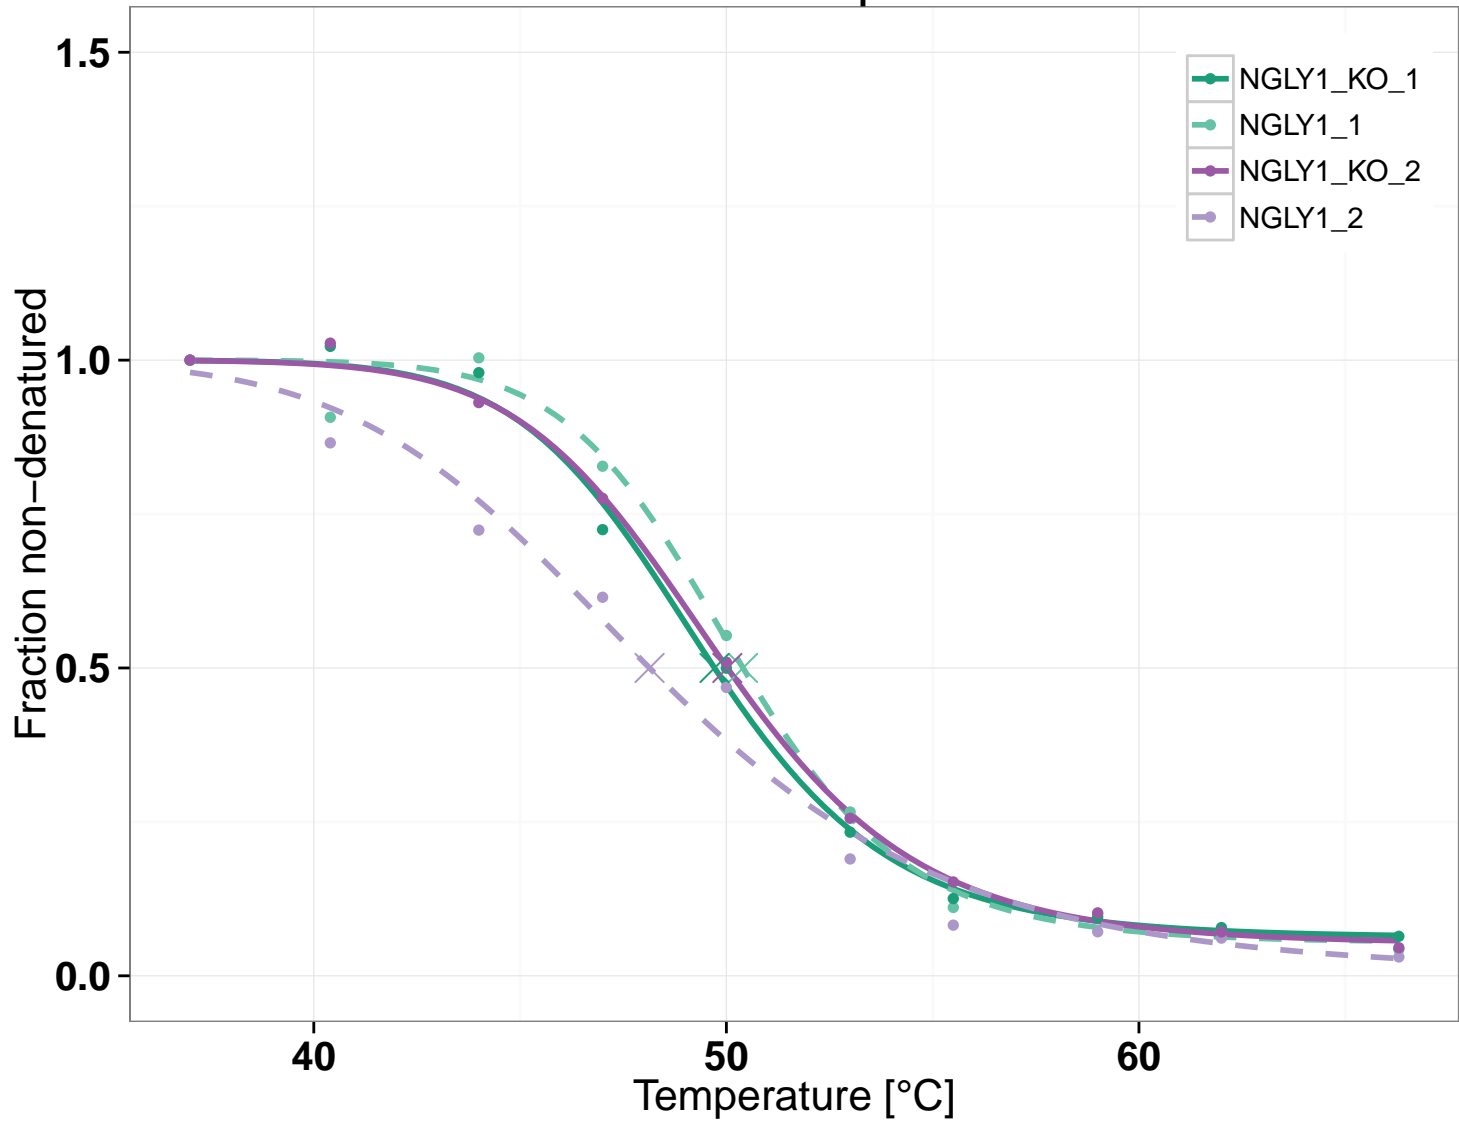

|            | meltPoint | slope  | plateau | R2   |
|------------|-----------|--------|---------|------|
| NGLY1_KO_1 | 49.71     | -0.1   | 0.06    | 1    |
| NGLY1_1    | 50.4      | -0.11  | 0.05    | 0.99 |
| NGLY1_KO_2 | 50.02     | -0.098 | 0.05    | 1    |
| NGLY1_2    | 48.14     | -0.069 | 0       | 0.98 |

Supplement: Supplementary file 247 [file 1]

IPI00016925.1|C12ORF57

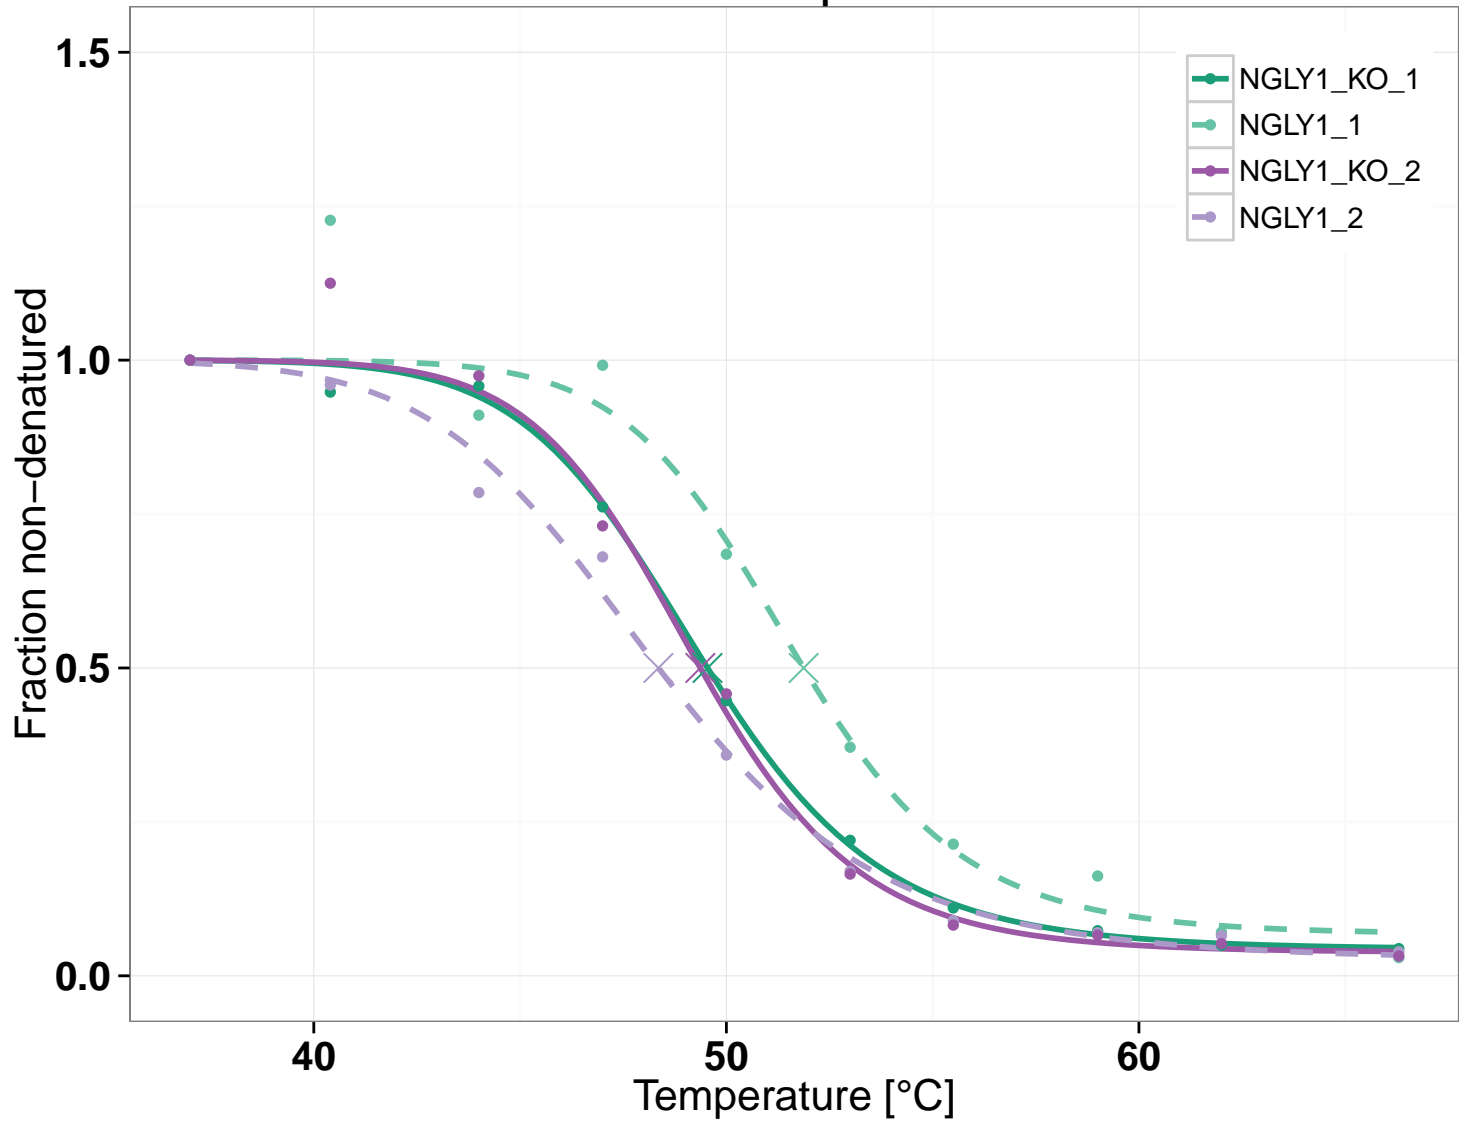

|            | meltPoint | slope | plateau | R2   |
|------------|-----------|-------|---------|------|
| NGLY1_KO_1 | 49.54     | -0.11 | 0.04    | 1    |
| NGLY1_1    | 51.87     | -0.11 | 0.07    | 0.96 |
| NGLY1_KO_2 | 49.37     | -0.12 | 0.04    | 0.99 |
| NGLY1_2    | 48.35     | -0.09 | 0.03    | 0.99 |

Supplement: Supplementary file 248 [file 1]

IPI00032002.1|PIGL

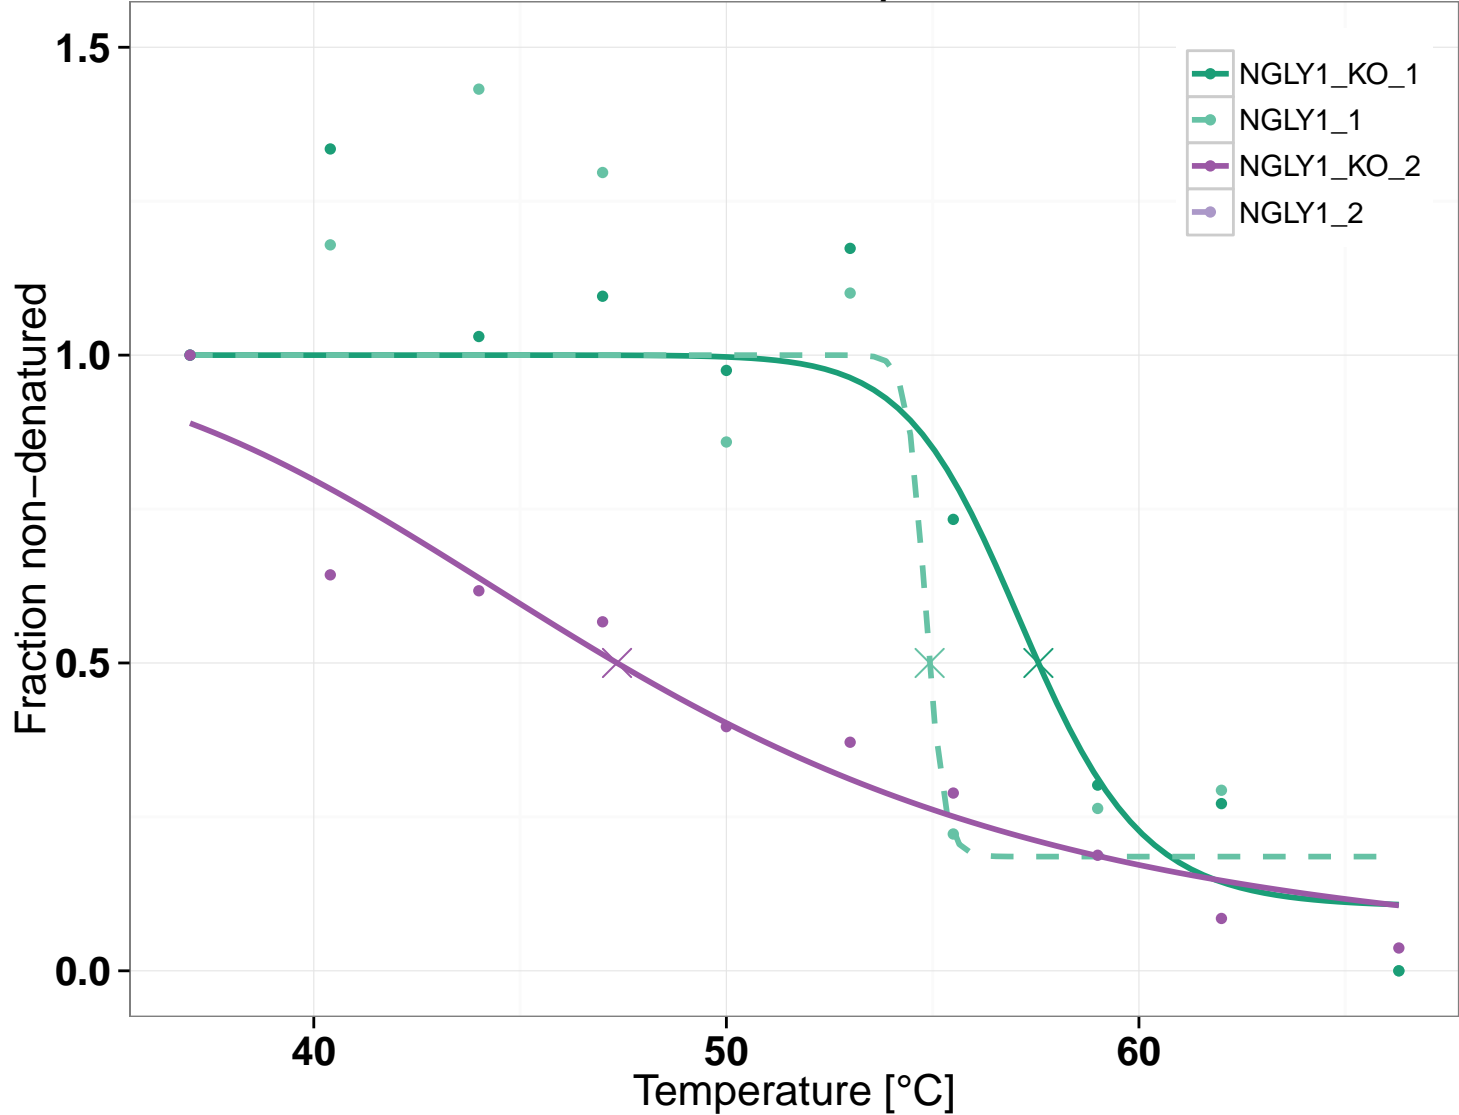

|            | meltPoint | slope  | plateau | R2   |
|------------|-----------|--------|---------|------|
| NGLY1_KO_1 | 57.56     | -0.16  | 0.1     | 0.89 |
| NGLY1_1    | 54.93     | -0.93  | 0.19    | 0.84 |
| NGLY1_KO_2 | 47.35     | -0.042 | 0       | 0.94 |
| NGLY1_2    | -         | -      | -       | -    |

Supplement: Supplementary file 249 [file 1]

IPI00415054.4|KIAA0329

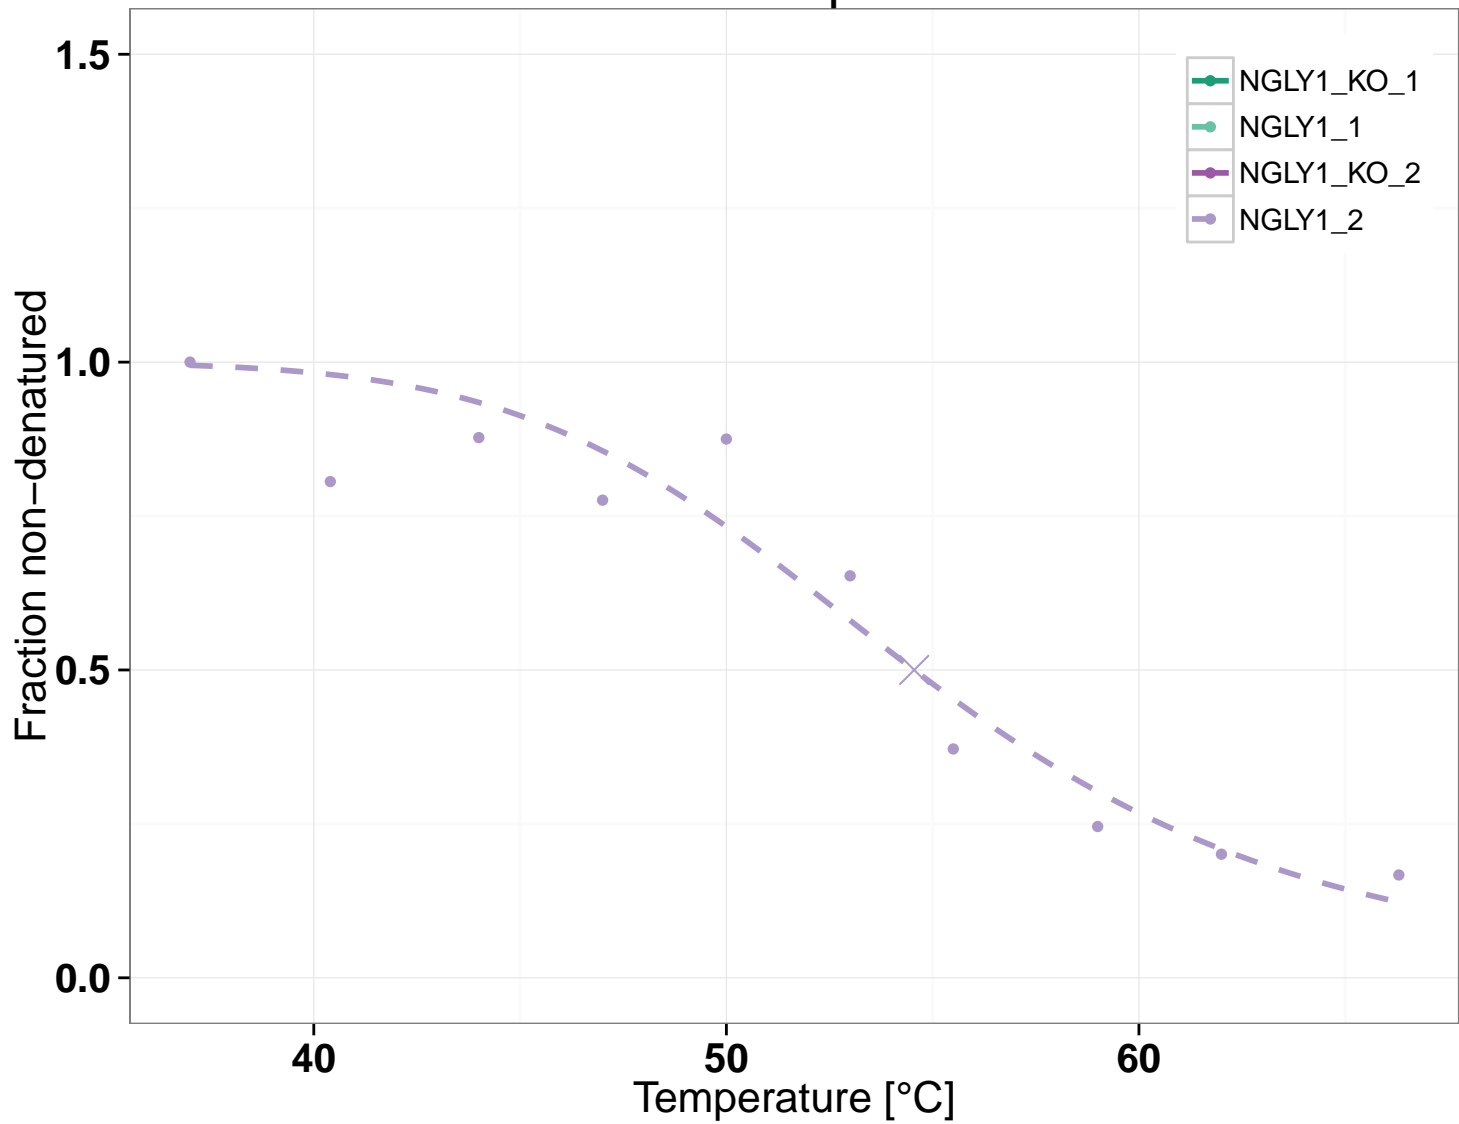

|            | meltPoint | slope  | plateau | R2   |
|------------|-----------|--------|---------|------|
| NGLY1_KO_1 | —         | —      | —       | —    |
| NGLY1_1    | —         | —      | —       | —    |
| NGLY1_KO_2 | —         | —      | —       | —    |
| NGLY1_2    | 54.55     | −0.052 | 0       | 0.92 |

Supplement: Supplementary file 250 [file 1]

IPI00293026.7|EFTUD1

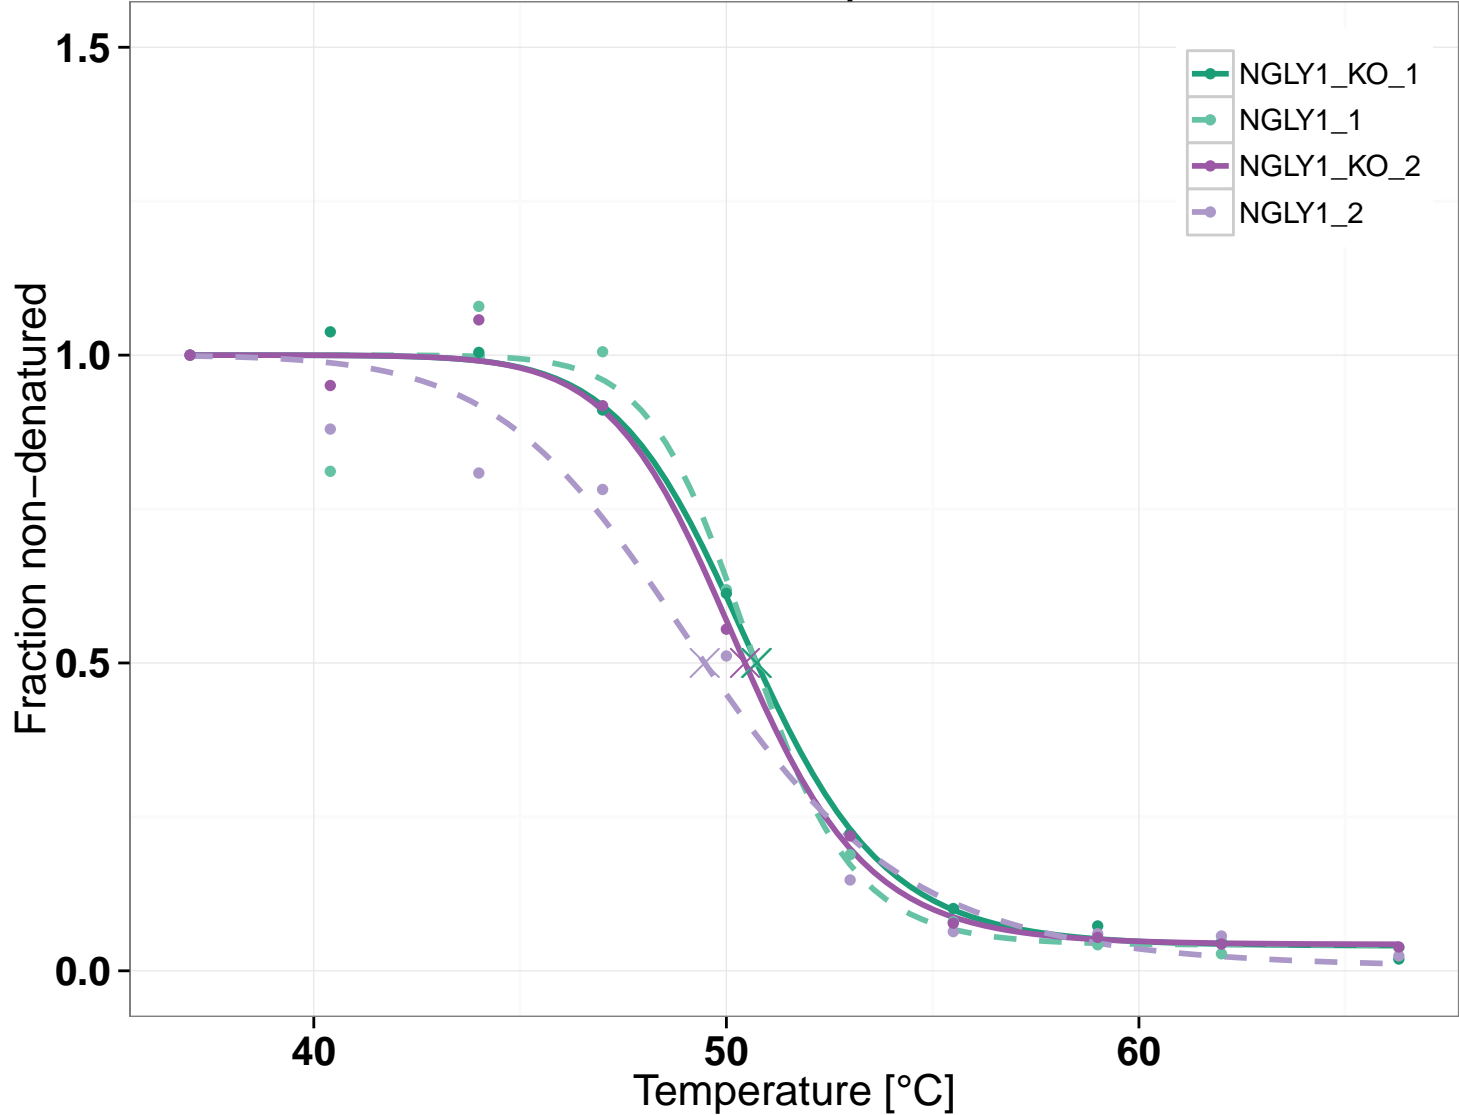

|            | meltPoint | slope  | plateau | R2   |
|------------|-----------|--------|---------|------|
| NGLY1_KO_1 | 50.74     | -0.15  | 0.04    | 1    |
| NGLY1_1    | 50.71     | -0.19  | 0.04    | 0.98 |
| NGLY1_KO_2 | 50.45     | -0.15  | 0.04    | 1    |
| NGLY1_2    | 49.47     | -0.099 | 0       | 0.97 |

Supplement: Supplementary file 251 [file 1]

IPI00472977.2|USP37

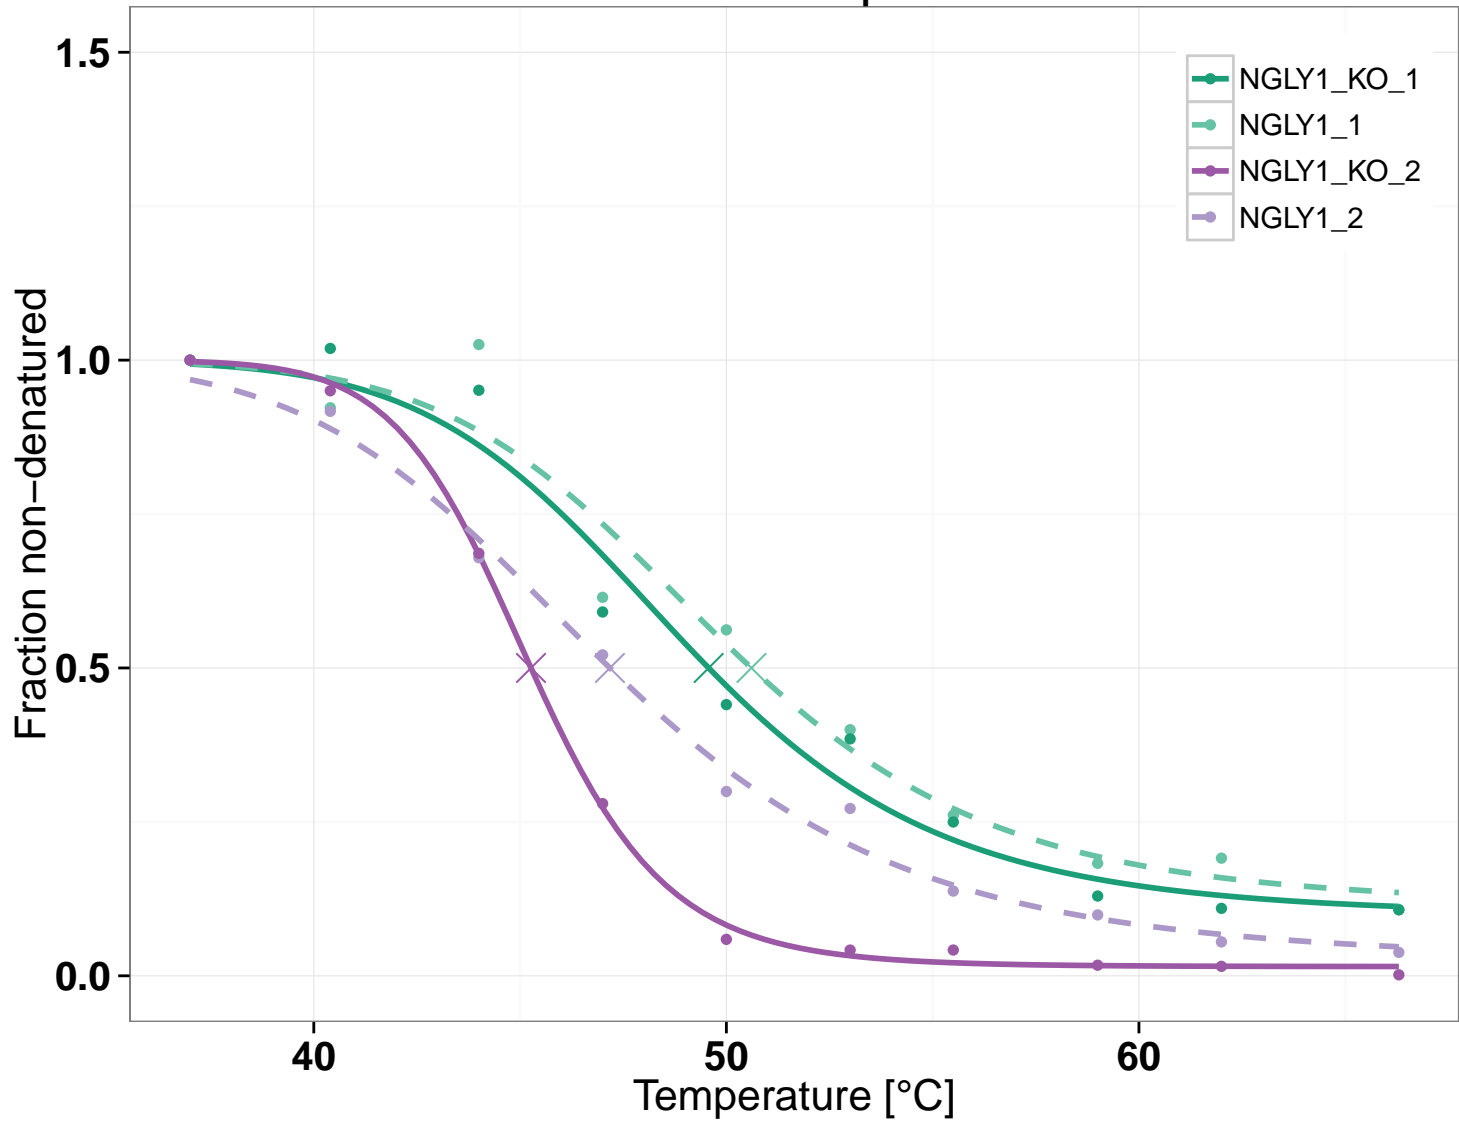

|            | meltPoint | slope  | plateau | R2   |
|------------|-----------|--------|---------|------|
| NGLY1_KO_1 | 49.57     | -0.072 | 0.1     | 0.98 |
| NGLY1_1    | 50.61     | -0.067 | 0.11    | 0.96 |
| NGLY1_KO_2 | 45.26     | -0.15  | 0.01    | 1    |
| NGLY1_2    | 47.18     | -0.067 | 0.02    | 0.99 |

Supplement: Supplementary file 252 [file 1]

IPI00005777.1|MAPKAPK3

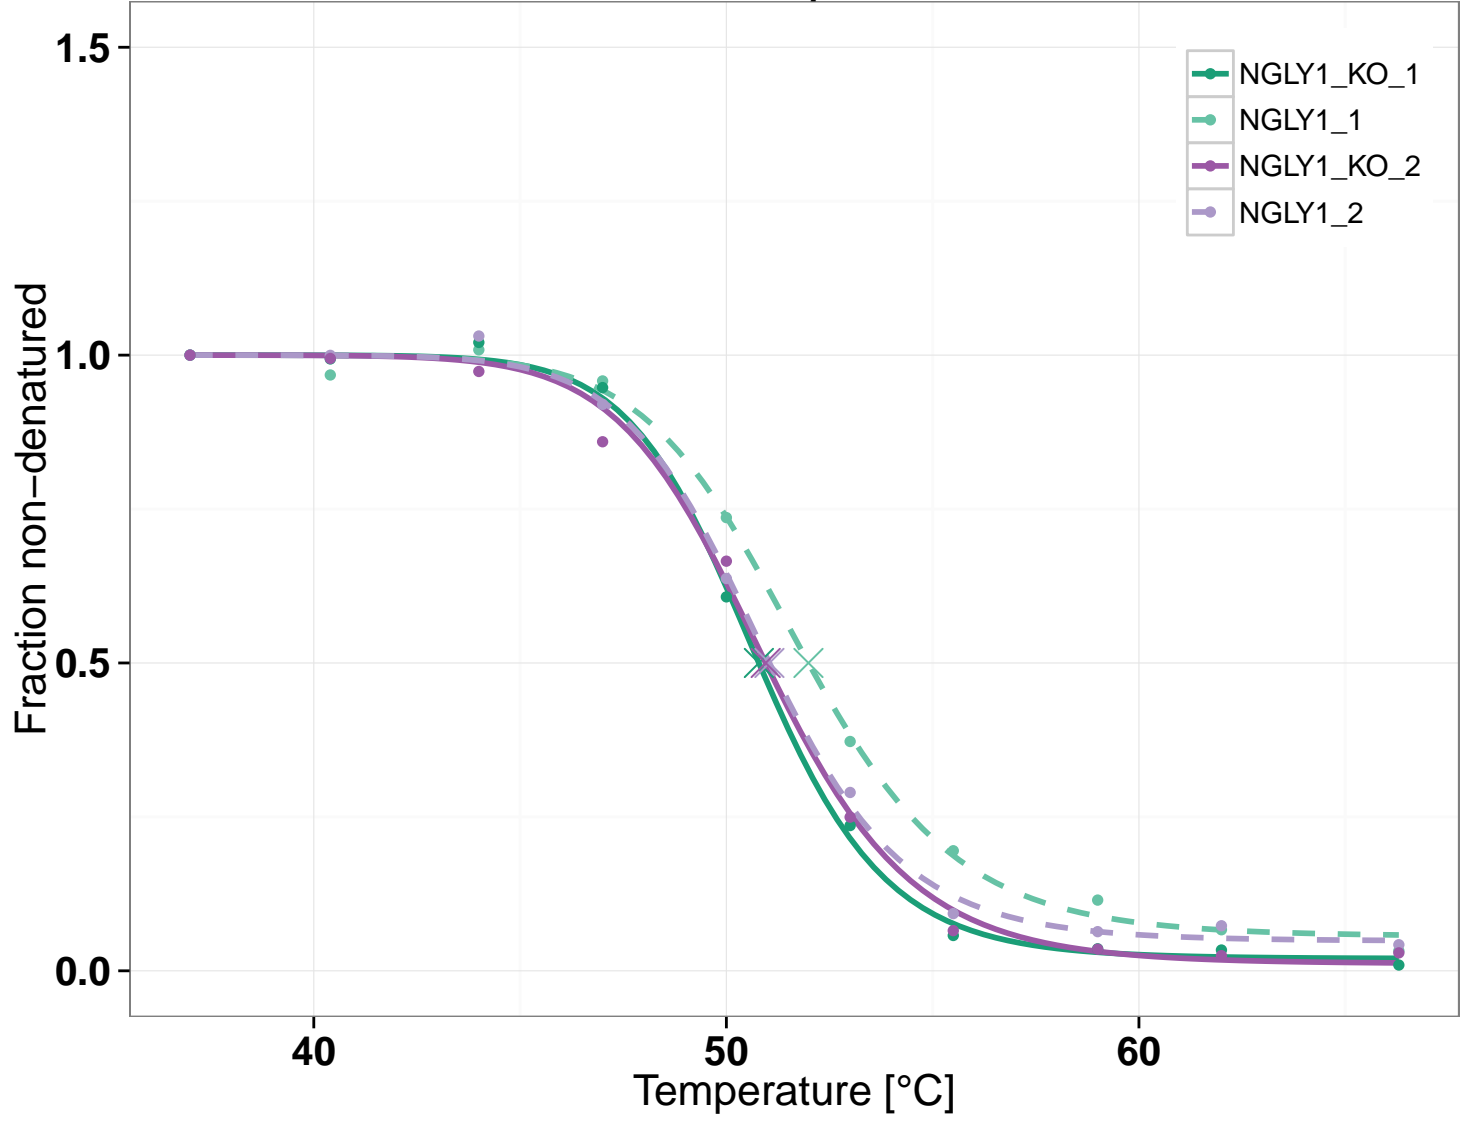

|            | meltPoint | slope | plateau | R2 |
|------------|-----------|-------|---------|----|
| NGLY1_KO_1 | 50.79     | -0.16 | 0.02    | 1  |
| NGLY1_1    | 51.99     | -0.12 | 0.06    | 1  |
| NGLY1_KO_2 | 50.95     | -0.14 | 0.01    | 1  |
| NGLY1_2    | 51.04     | -0.14 | 0.05    | 1  |

Supplement: Supplementary file 253 [file 1]

IPI00399220.6|USP27X

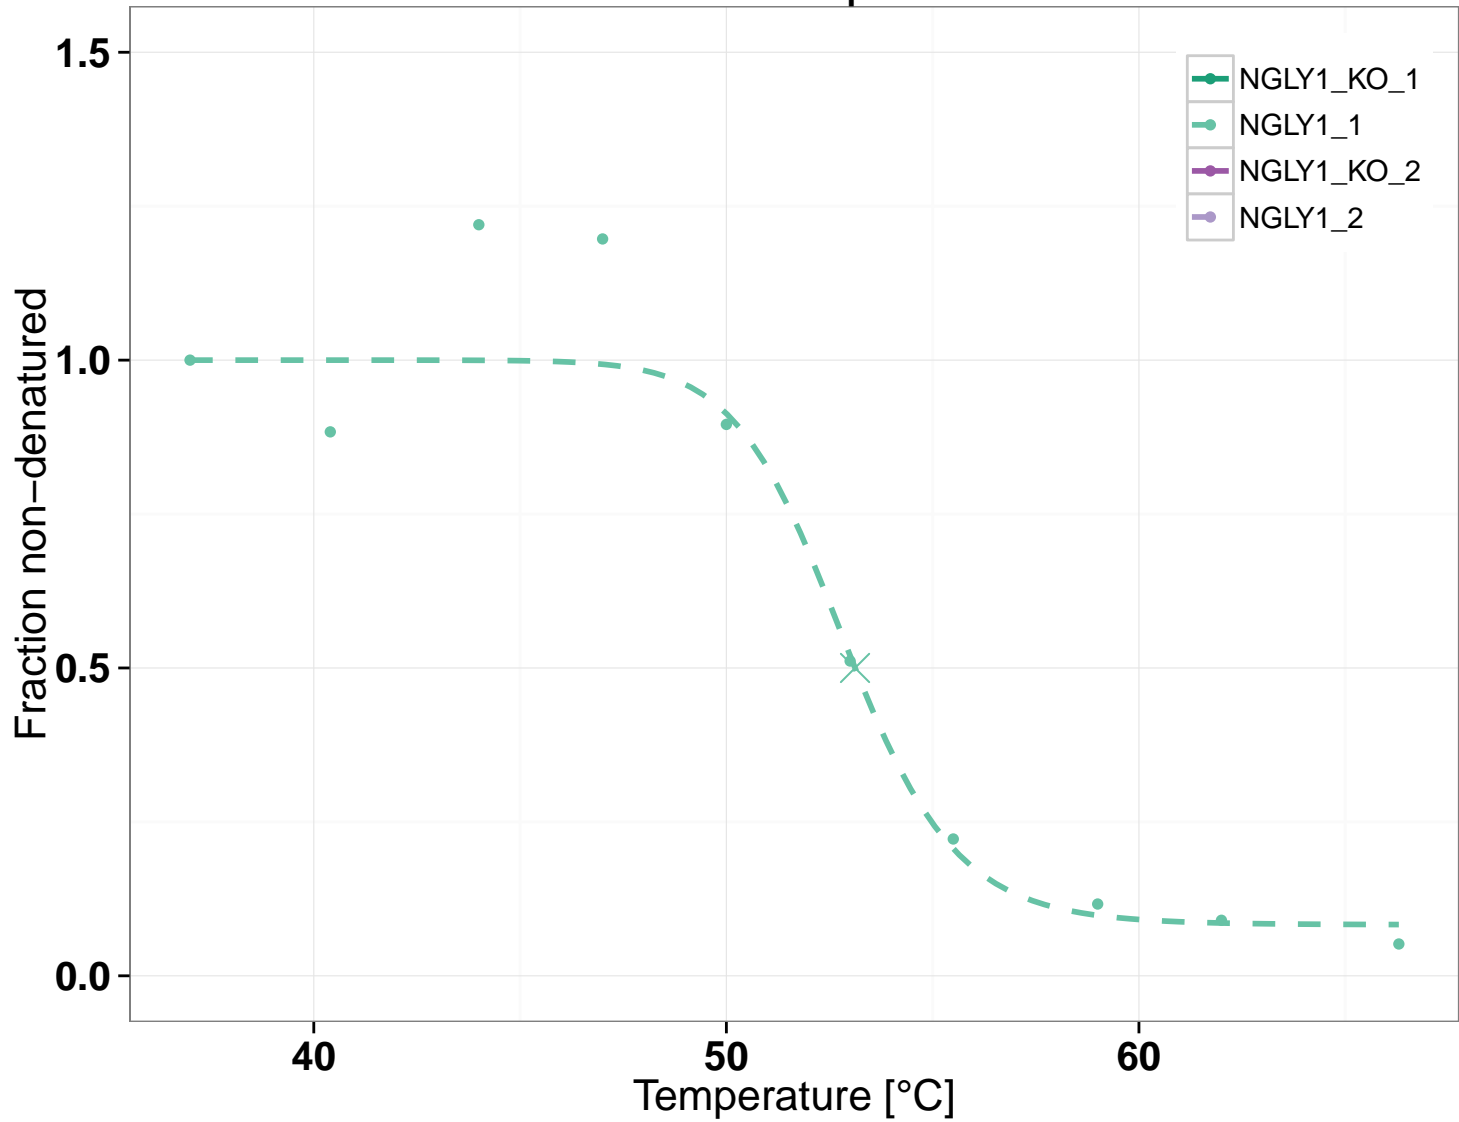

|            | meltPoint | slope | plateau | R2   |
|------------|-----------|-------|---------|------|
| NGLY1_KO_1 | -         | -     | -       | -    |
| NGLY1_1    | 53.12     | -0.17 | 0.08    | 0.95 |
| NGLY1_KO_2 | -         | -     | -       | -    |
| NGLY1_2    | -         | -     | -       | -    |

Supplement: Supplementary file 254 [file 1]

IPI00022758.3|GAN

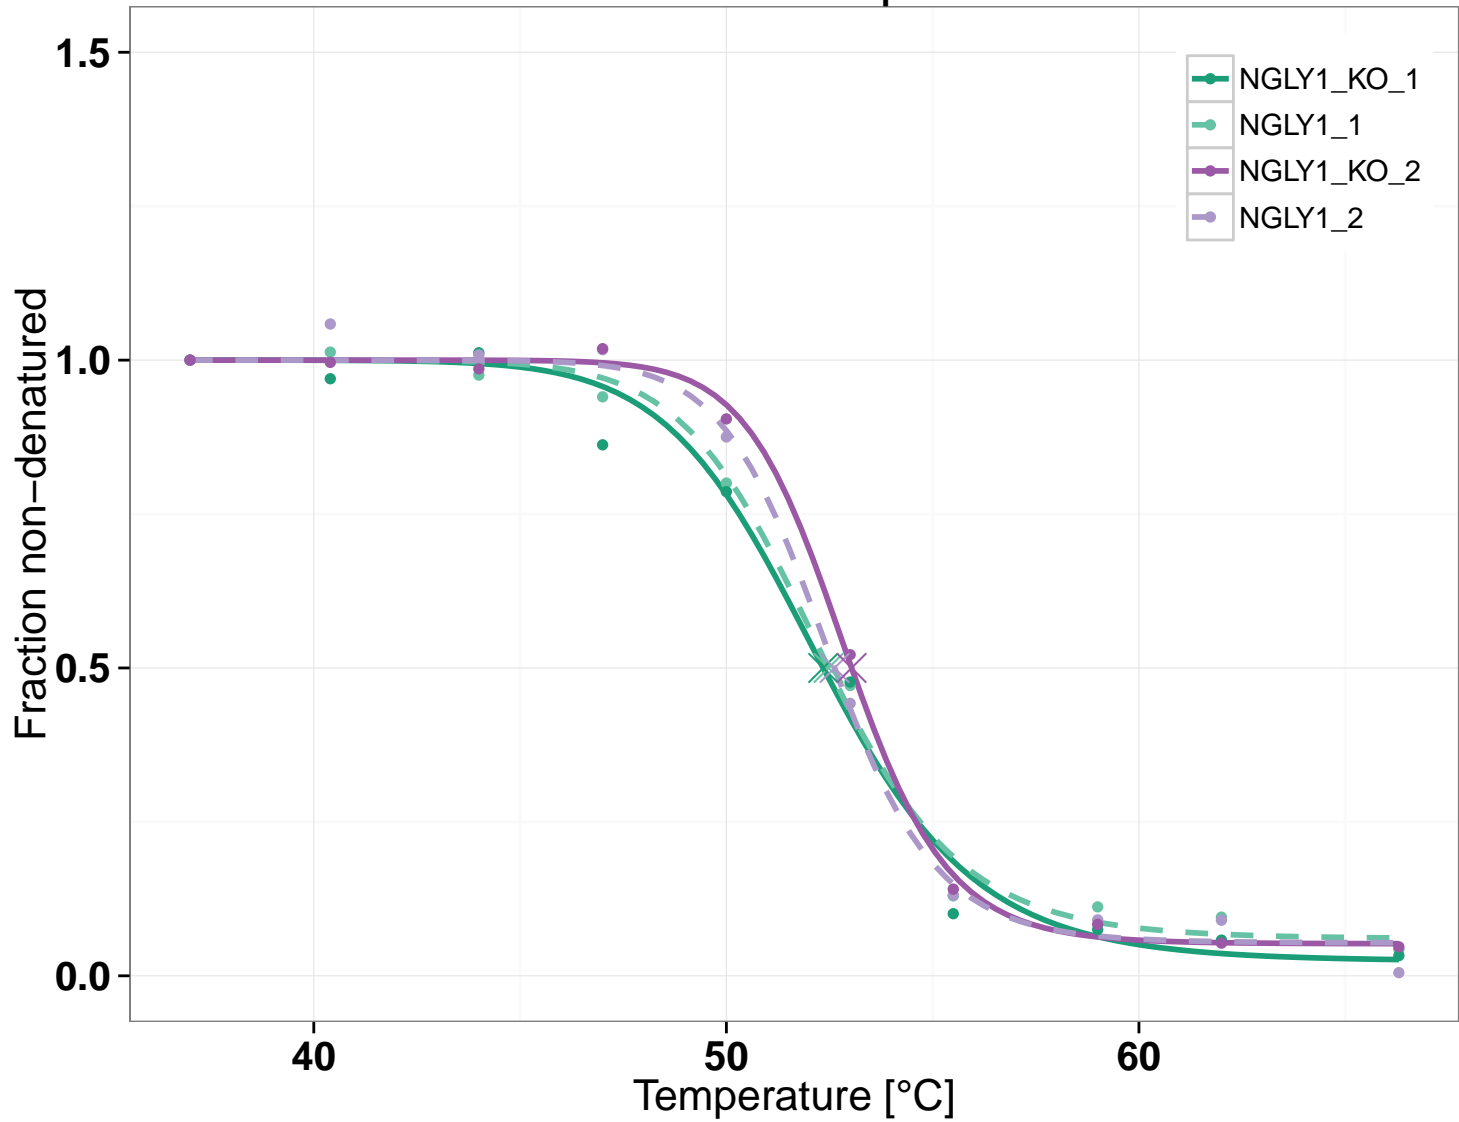

|            | meltPoint | slope | plateau | R2   |
|------------|-----------|-------|---------|------|
| NGLY1_KO_1 | 52.35     | -0.13 | 0.02    | 0.99 |
| NGLY1_1    | 52.48     | -0.14 | 0.06    | 0.99 |
| NGLY1_KO_2 | 53.04     | -0.19 | 0.05    | 1    |
| NGLY1_2    | 52.62     | -0.18 | 0.05    | 1    |

Supplement: Supplementary file 255 [file 1]

# IPI00397229.4|CD97

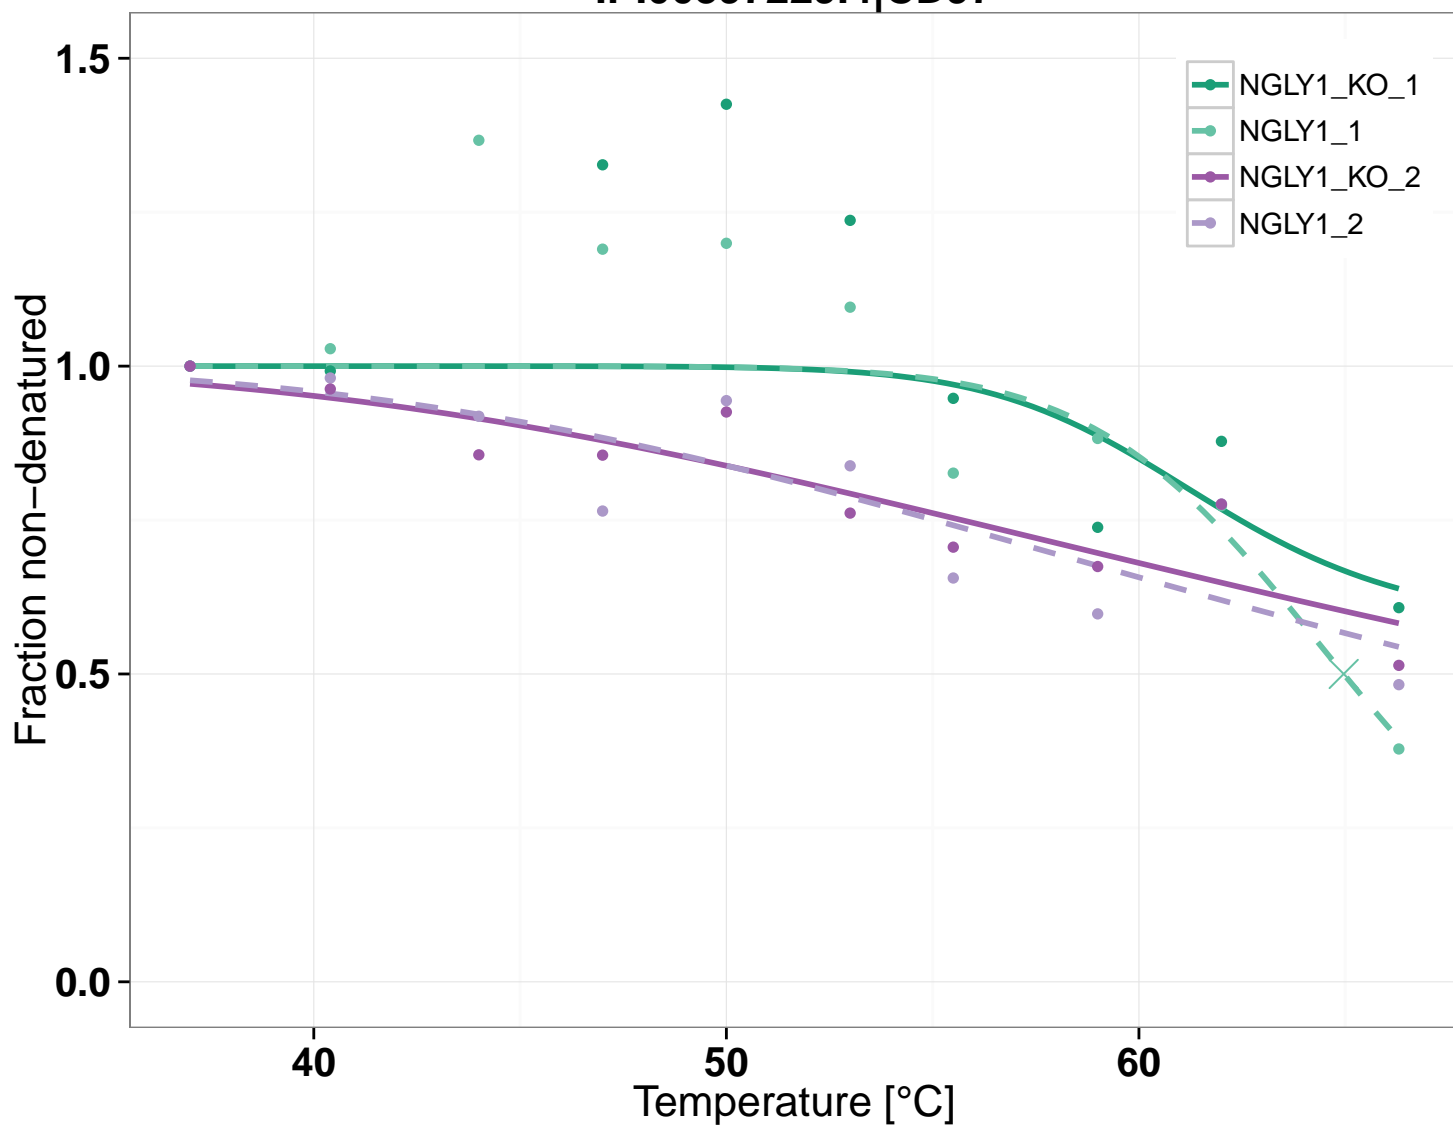

|            | meltPoint | slope  | plateau | R2   |
|------------|-----------|--------|---------|------|
| NGLY1_KO_1 | –         | –0.042 | 0.57    | 0.12 |
| NGLY1_1    | 64.96     | –0.083 | 0       | 0.65 |
| NGLY1_KO_2 | –         | –0.016 | 0       | 0.81 |
| NGLY1_2    | –         | –0.019 | 0       | 0.74 |

Supplement: Supplementary file 256 [file 1]

IPI00011075.1|AGXT2

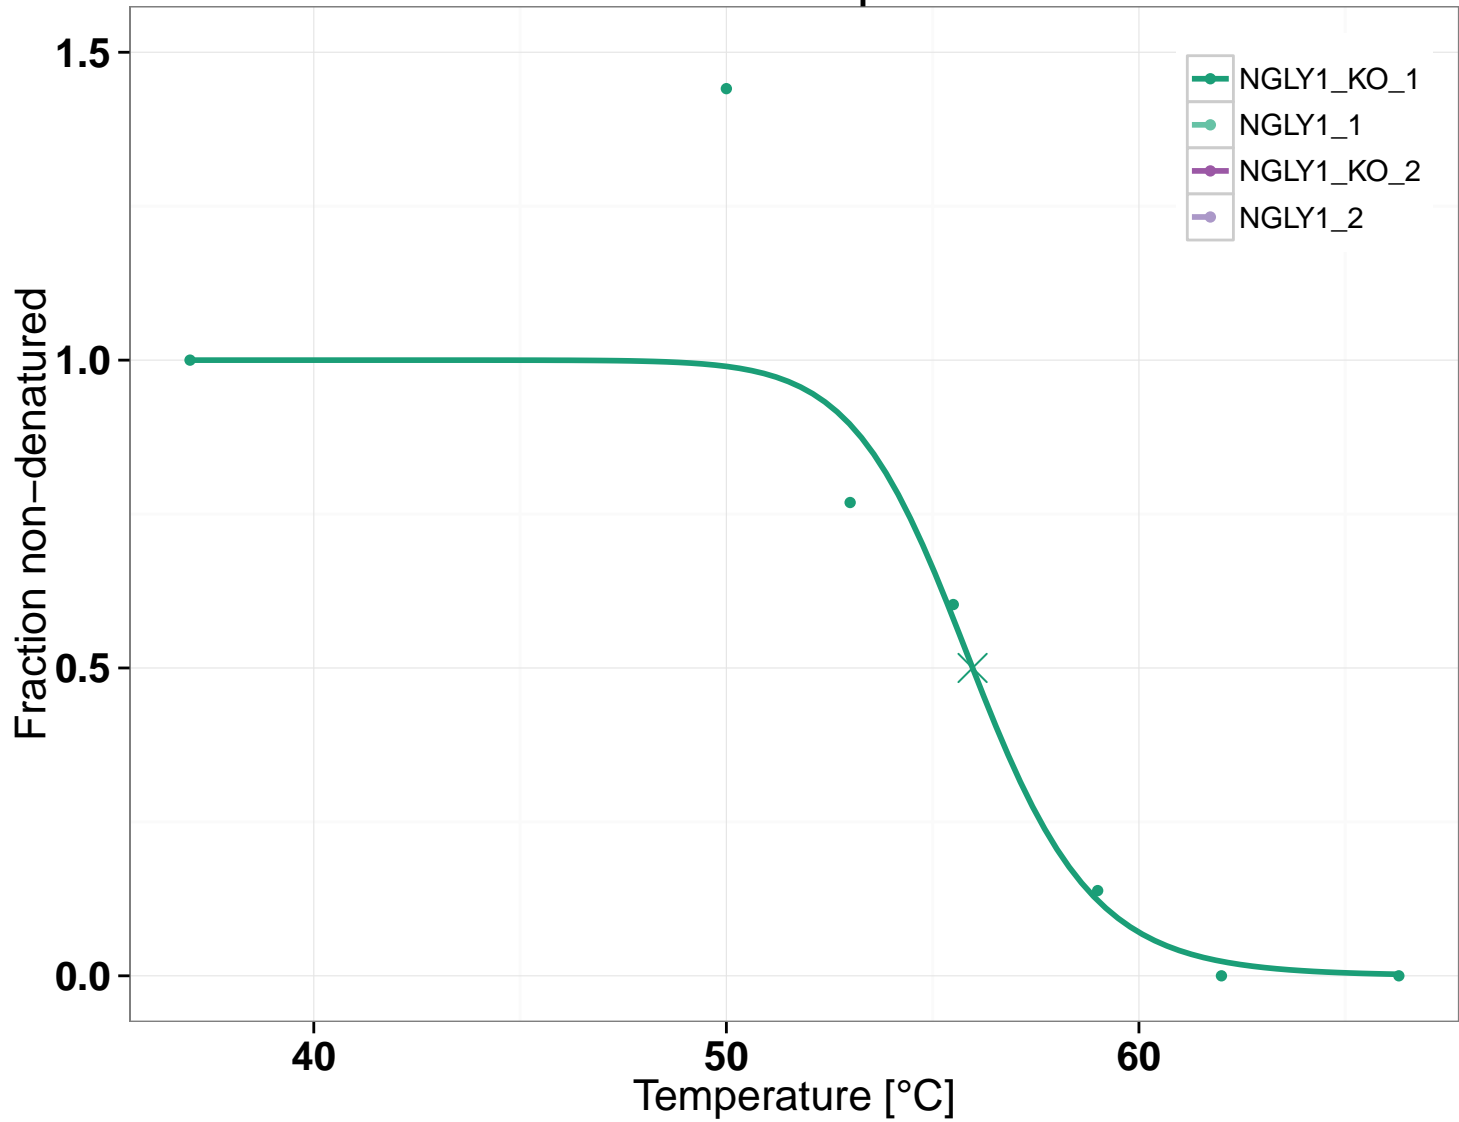

|            | meltPoint | slope | plateau | R2   |
|------------|-----------|-------|---------|------|
| NGLY1_KO_1 | 55.97     | -0.17 | 0       | 0.61 |
| NGLY1_1    | -         | -     | -       | -    |
| NGLY1_KO_2 | -         | -     | -       | -    |
| NGLY1_2    | -         | -     | -       | -    |

Supplement: Supplementary file 257 [file 1]

IPI00015804.1|DUS2L

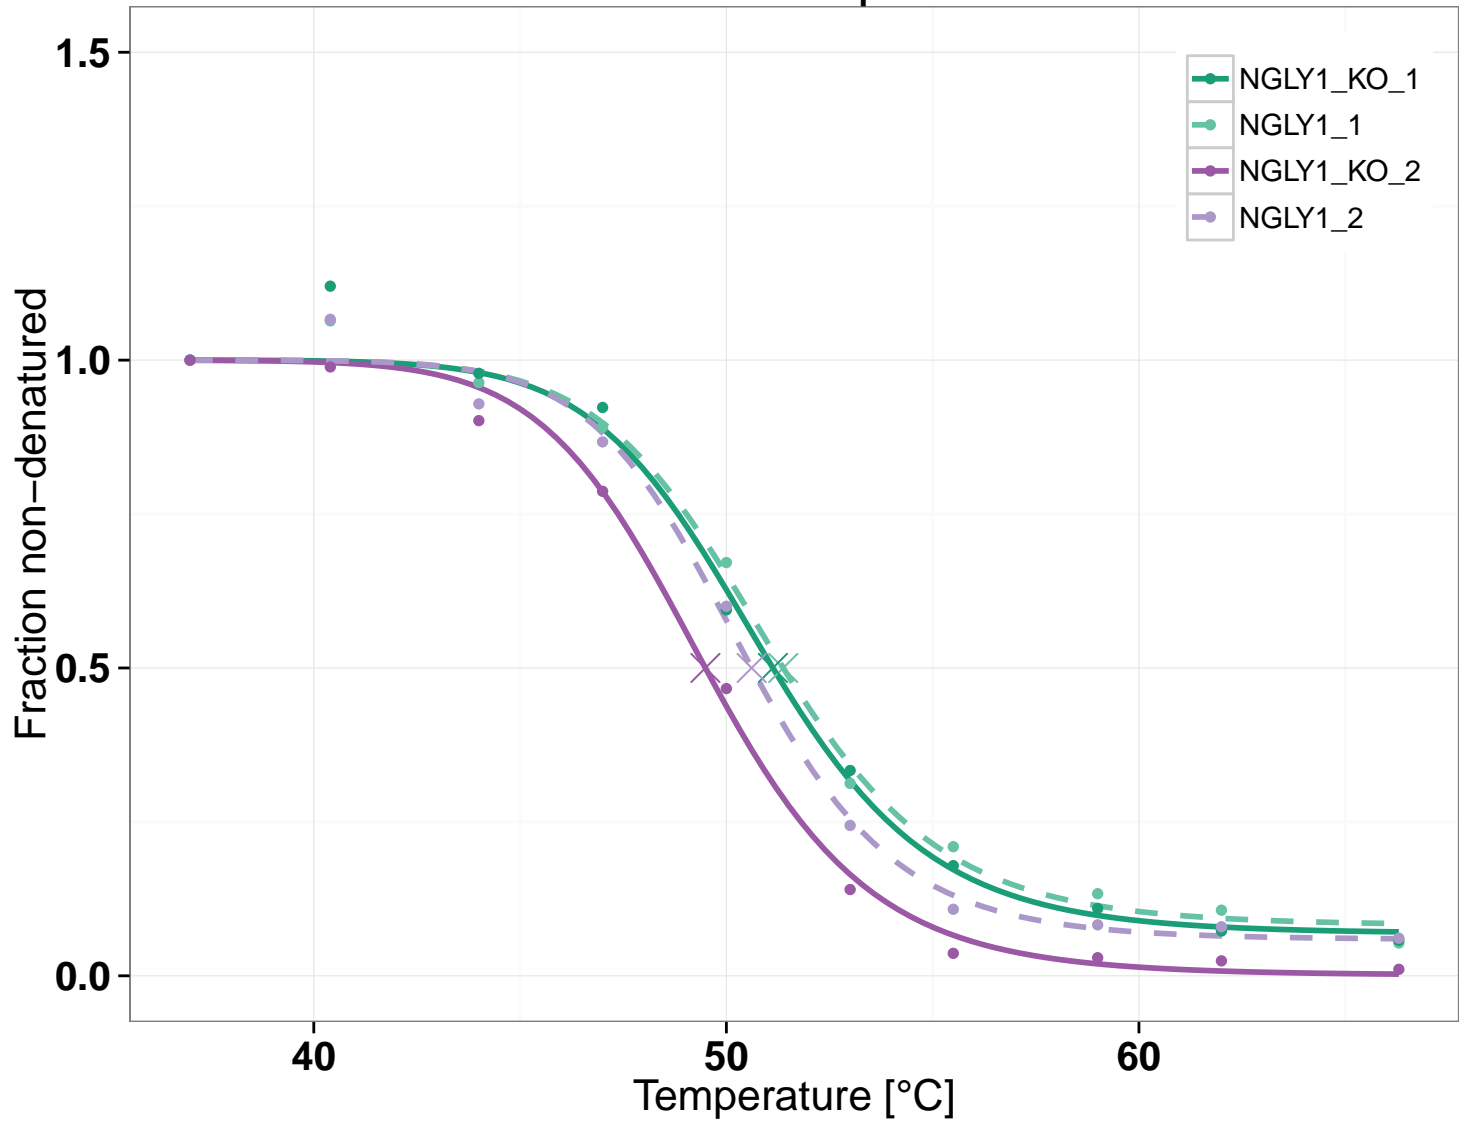

|            | meltPoint | slope | plateau | R2   |
|------------|-----------|-------|---------|------|
| NGLY1_KO_1 | 51.13     | -0.11 | 0.07    | 0.99 |
| NGLY1_1    | 51.38     | -0.11 | 0.08    | 0.99 |
| NGLY1_KO_2 | 49.49     | -0.12 | 0       | 1    |
| NGLY1_2    | 50.61     | -0.13 | 0.06    | 0.99 |

Supplement: Supplementary file 258 [file 1]

IPI00297116.1|PLEKHA4

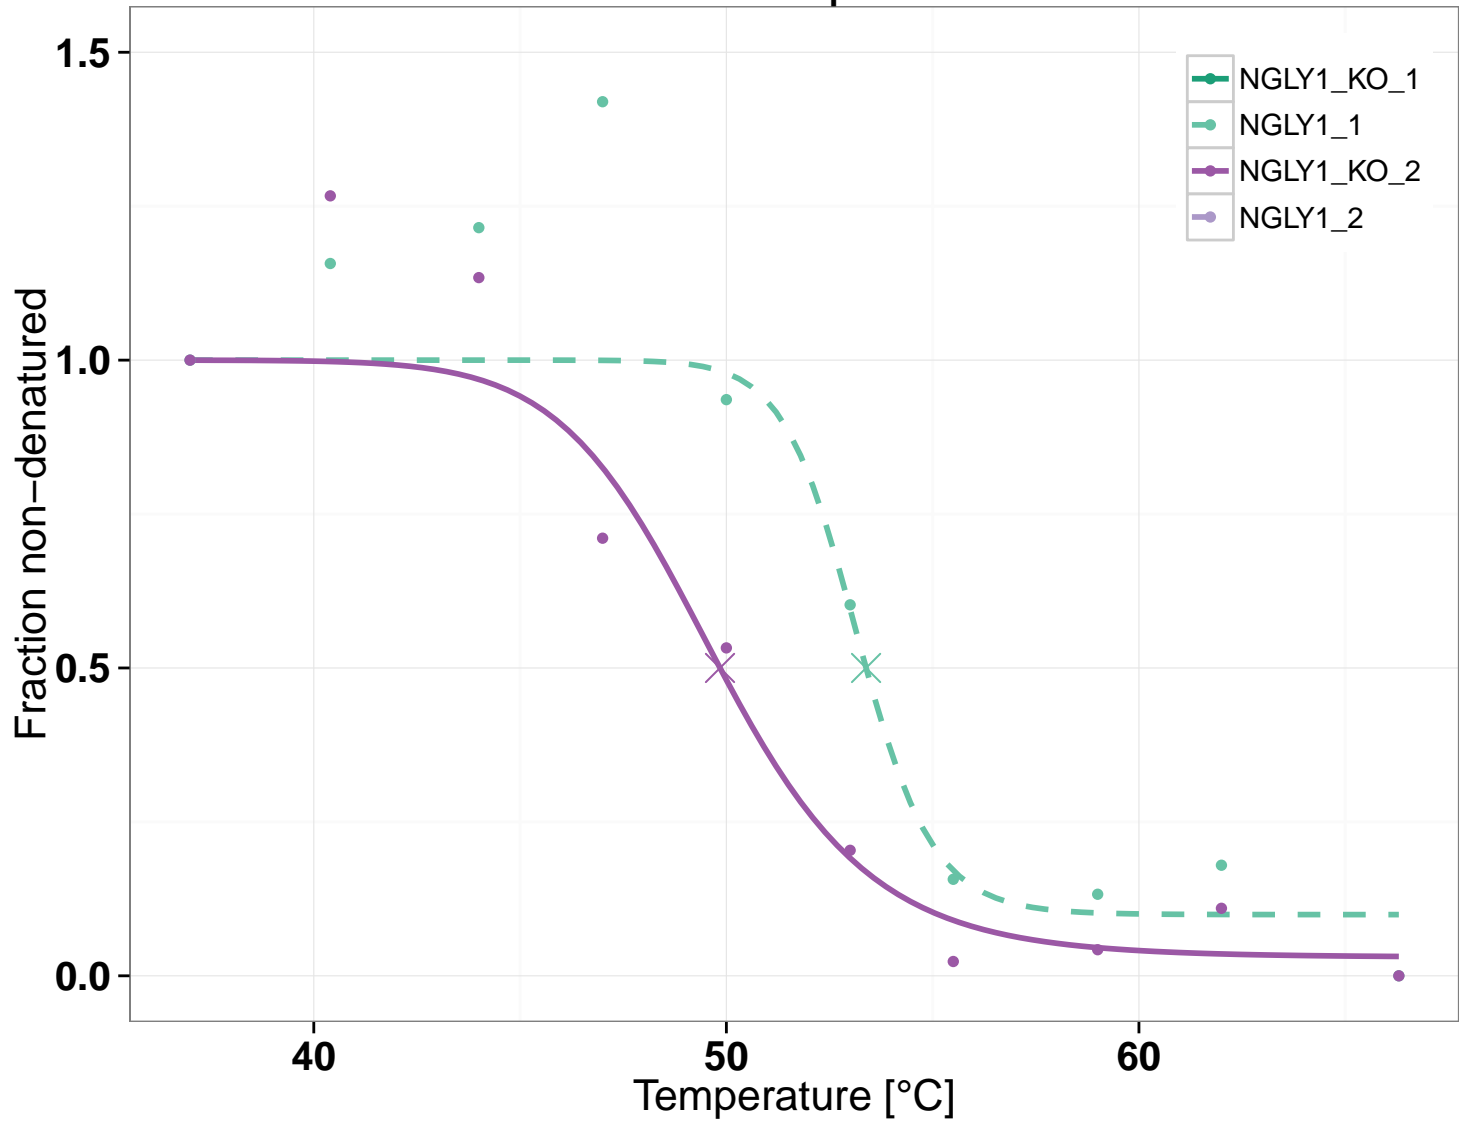

|            | meltPoint | slope | plateau | R2   |
|------------|-----------|-------|---------|------|
| NGLY1_KO_1 | —         | —     | —       | —    |
| NGLY1_1    | 53.39     | -0.25 | 0.1     | 0.89 |
| NGLY1_KO_2 | 49.85     | -0.13 | 0.03    | 0.94 |
| NGLY1_2    | —         | —     | —       | —    |

Supplement: Supplementary file 259 [file 1]

IPI00016532.3|C4ORF27

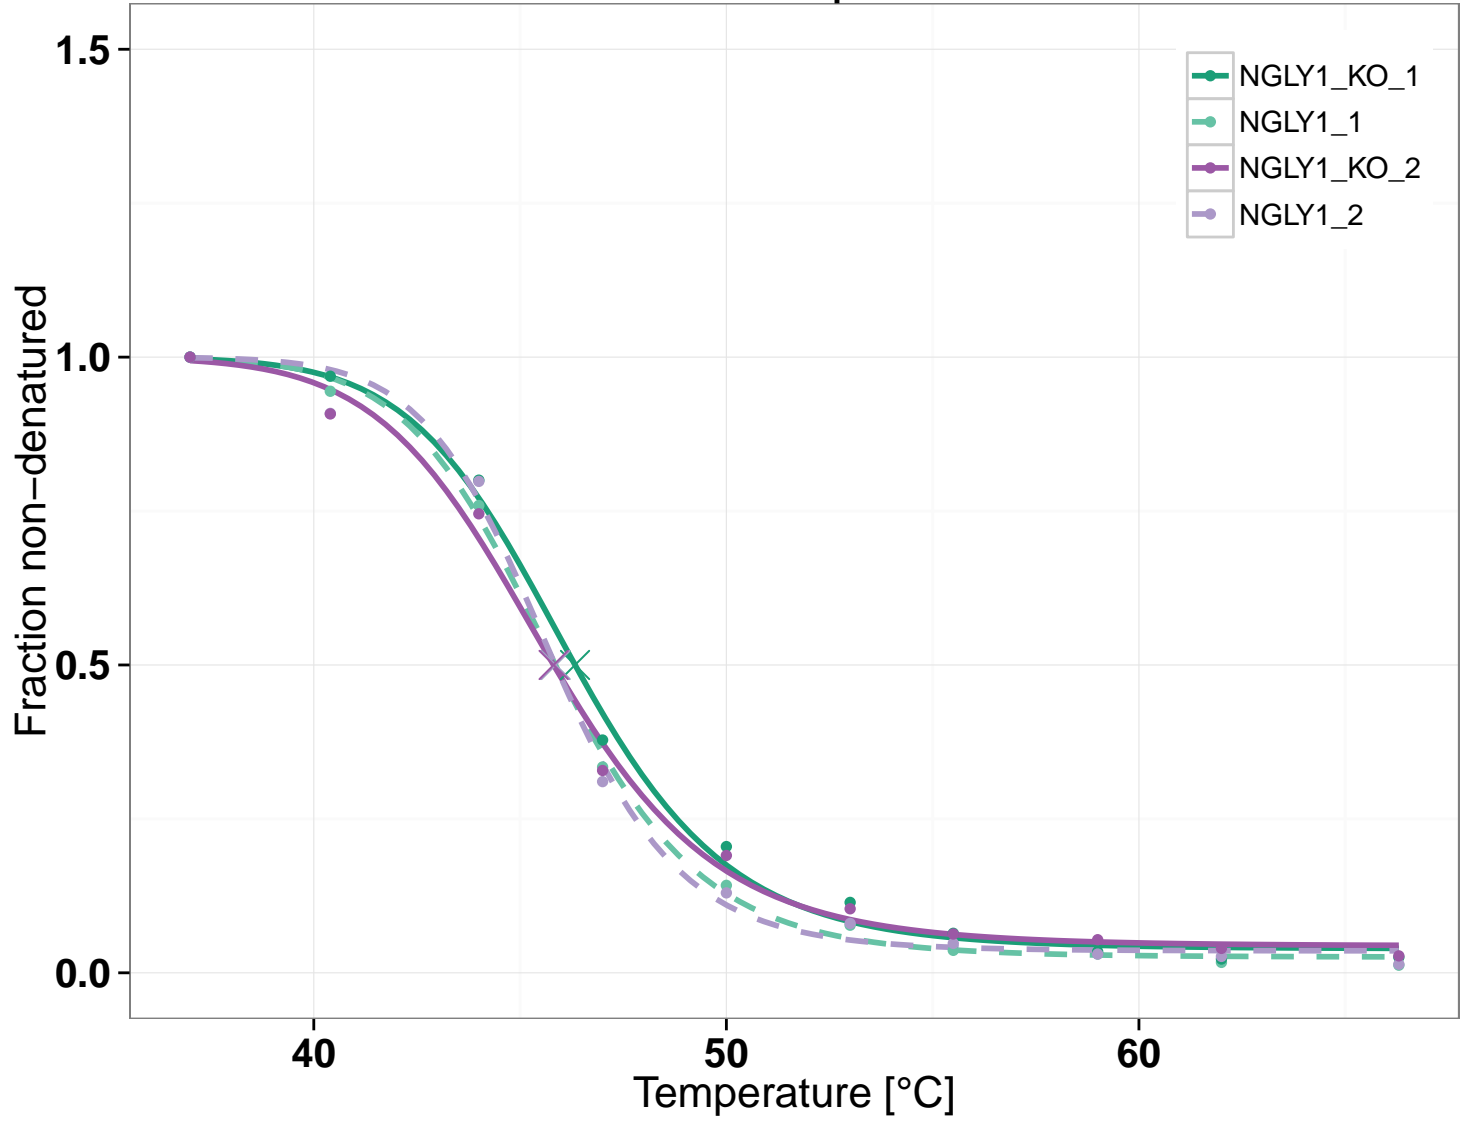

|            | meltPoint | slope | plateau | R2   |
|------------|-----------|-------|---------|------|
| NGLY1_KO_1 | 46.33     | -0.12 | 0.04    | 1    |
| NGLY1_1    | 45.86     | -0.13 | 0.03    | 1    |
| NGLY1_KO_2 | 45.81     | -0.12 | 0.04    | 1    |
| NGLY1_2    | 45.85     | -0.15 | 0.04    | 0.99 |

Supplement: Supplementary file 260 [file 1]

# IPI00009960.6|IMMT

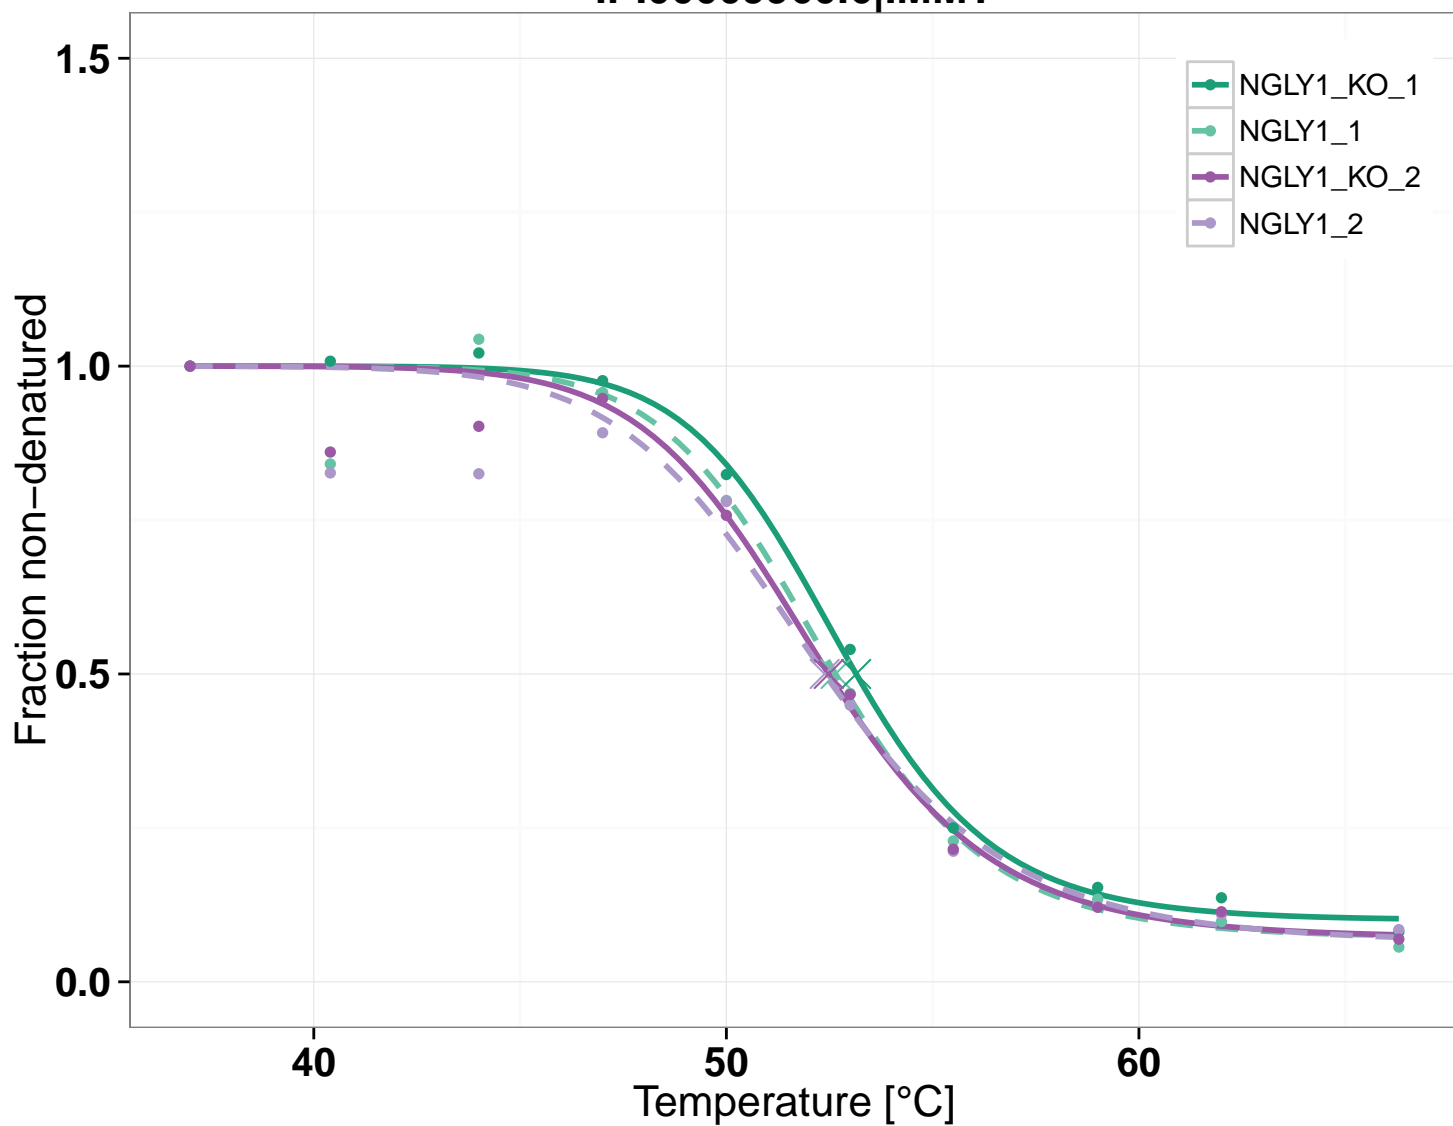

|            | meltPoint | slope  | plateau | R2   |
|------------|-----------|--------|---------|------|
| NGLY1_KO_1 | 53.15     | -0.12  | 0.1     | 1    |
| NGLY1_1    | 52.65     | -0.12  | 0.07    | 0.98 |
| NGLY1_KO_2 | 52.48     | -0.11  | 0.07    | 0.98 |
| NGLY1_2    | 52.38     | -0.098 | 0.06    | 0.95 |

Supplement: Supplementary file 261 [file 1]

# IPI00871174.1|MYCBP

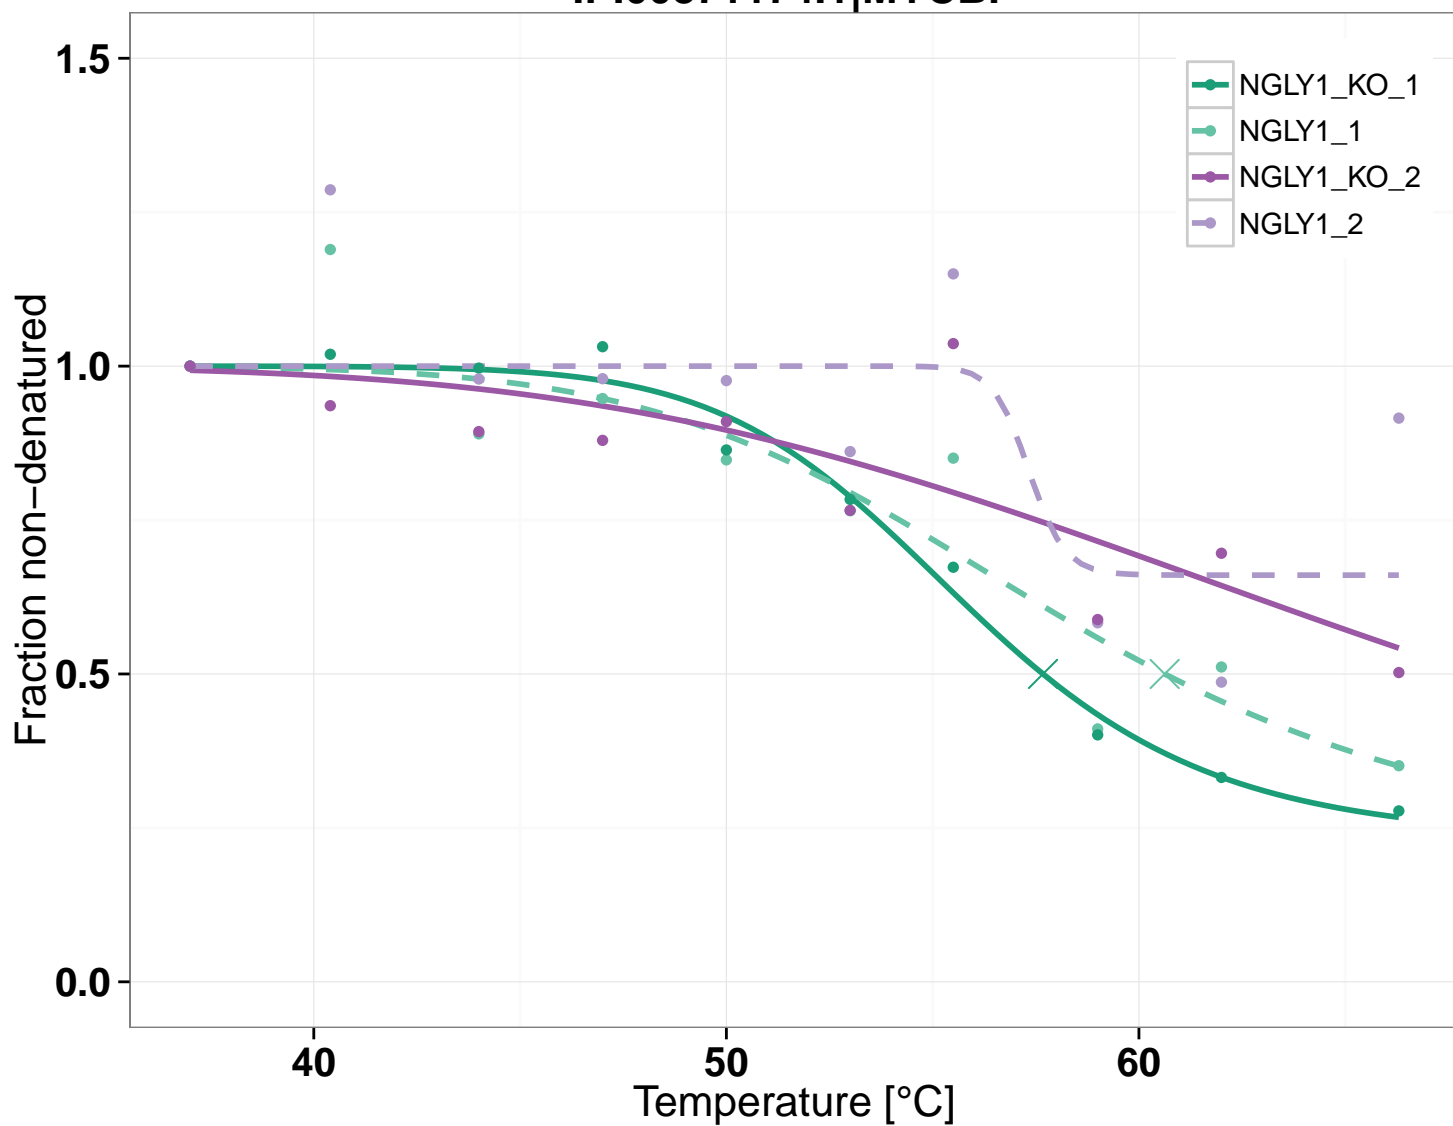

|            | meltPoint | slope  | plateau | R2   |
|------------|-----------|--------|---------|------|
| NGLY1_KO_1 | 57.67     | -0.065 | 0.23    | 0.99 |
| NGLY1_1    | 60.62     | -0.041 | 0.19    | 0.85 |
| NGLY1_KO_2 | -         | -0.024 | 0       | 0.66 |
| NGLY1_2    | -         | -0.2   | 0.66    | 0.55 |

Supplement: Supplementary file 262 [file 1]

# IPI00893383.1|CEBPZ

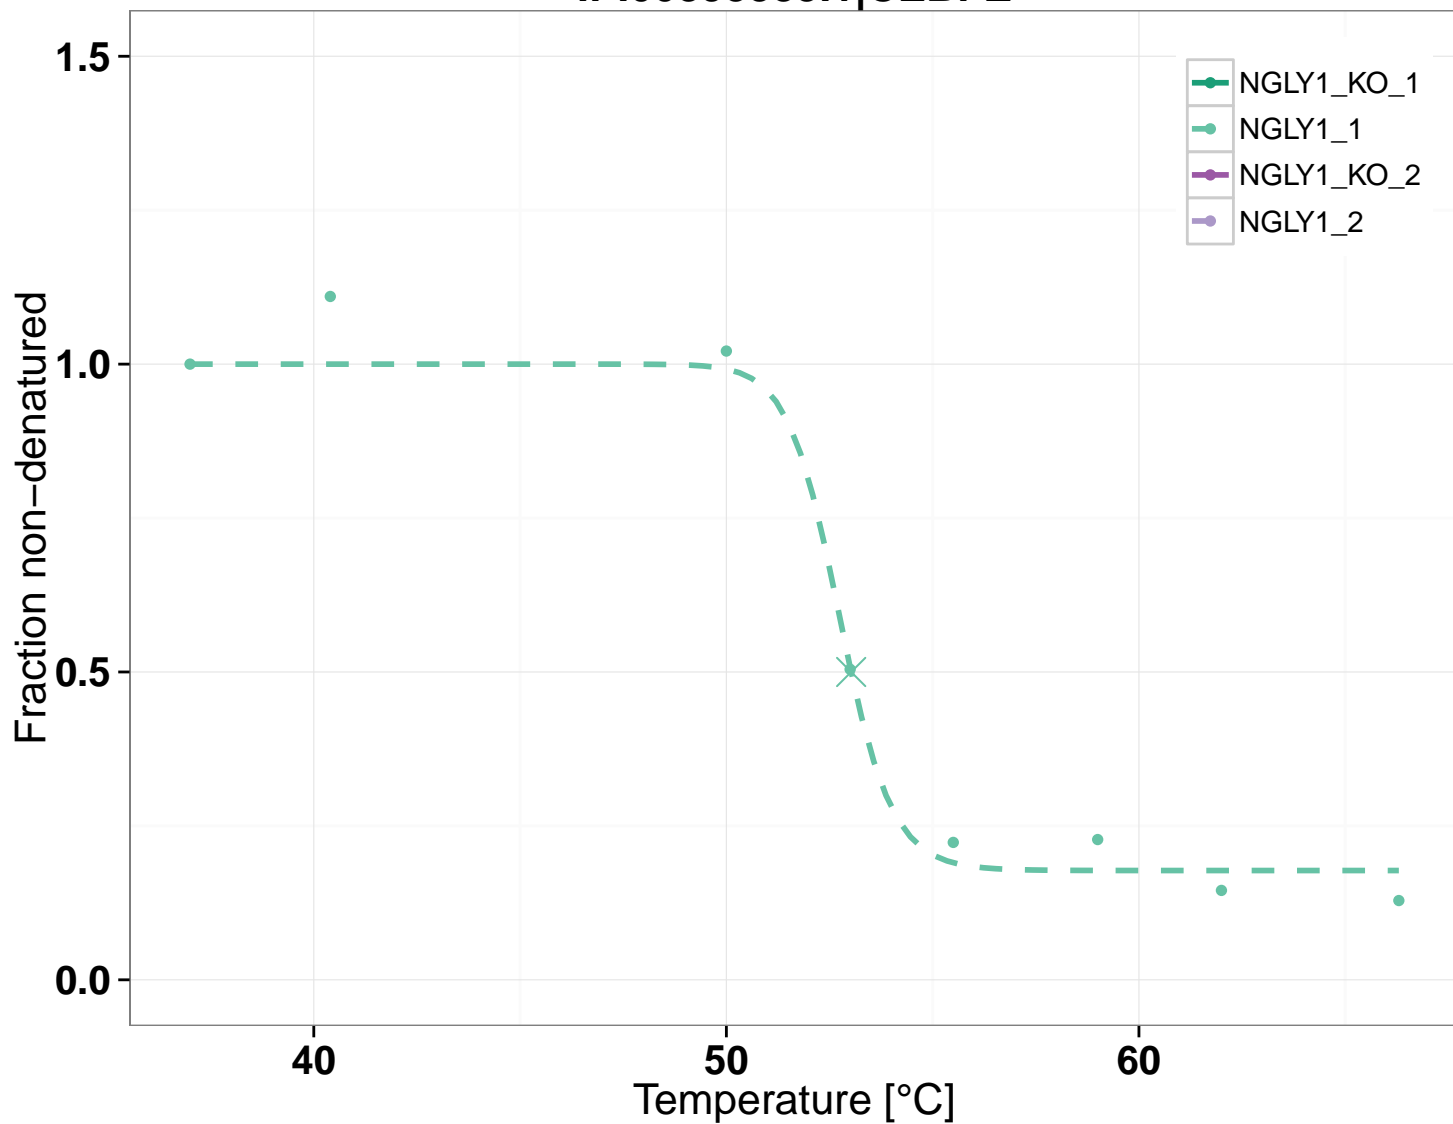

|            | meltPoint | slope | plateau | R2   |
|------------|-----------|-------|---------|------|
| NGLY1_KO_1 | —         | —     | —       | —    |
| NGLY1_1    | 53.03     | -0.33 | 0.18    | 0.47 |
| NGLY1_KO_2 | —         | —     | —       | —    |
| NGLY1_2    | —         | —     | —       | —    |

Supplement: Supplementary file 263 [file 1]

# IPI00010349.1|AGPS

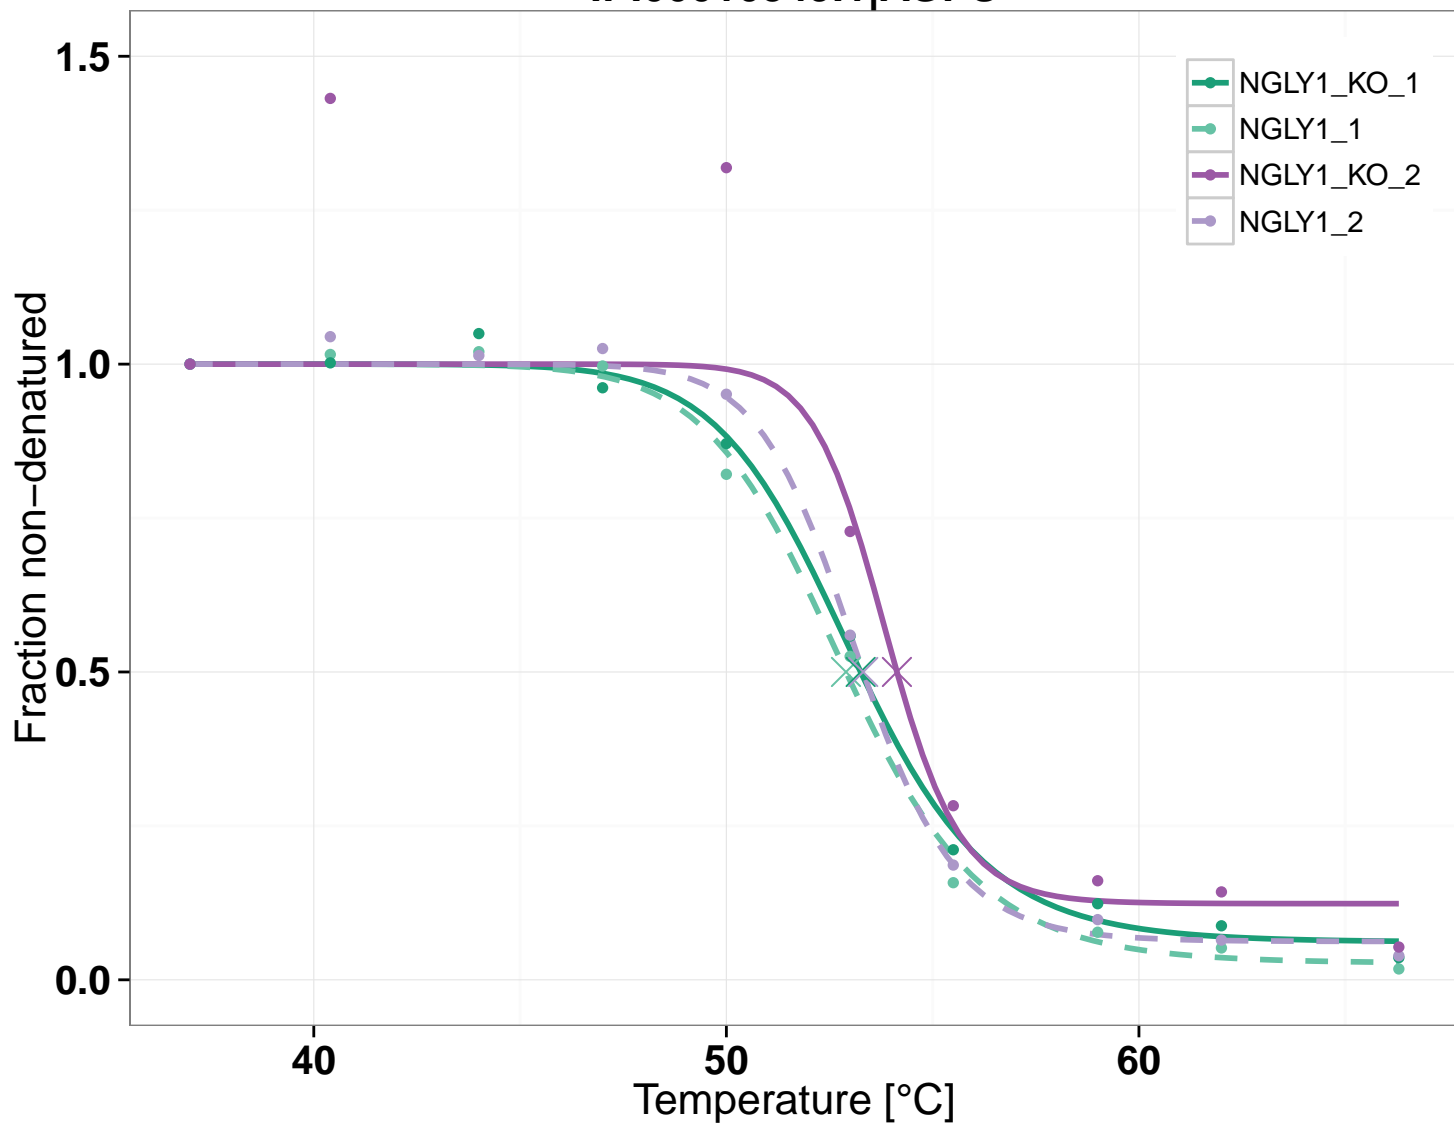

|            | meltPoint | slope | plateau | R2   |
|------------|-----------|-------|---------|------|
| NGLY1_KO_1 | 53.26     | -0.14 | 0.06    | 1    |
| NGLY1_1    | 52.9      | -0.14 | 0.03    | 1    |
| NGLY1_KO_2 | 54.13     | -0.25 | 0.12    | 0.74 |
| NGLY1_2    | 53.32     | -0.2  | 0.06    | 1    |

Supplement: Supplementary file 264 [file 1]

IPI00005087.1|TMOD3

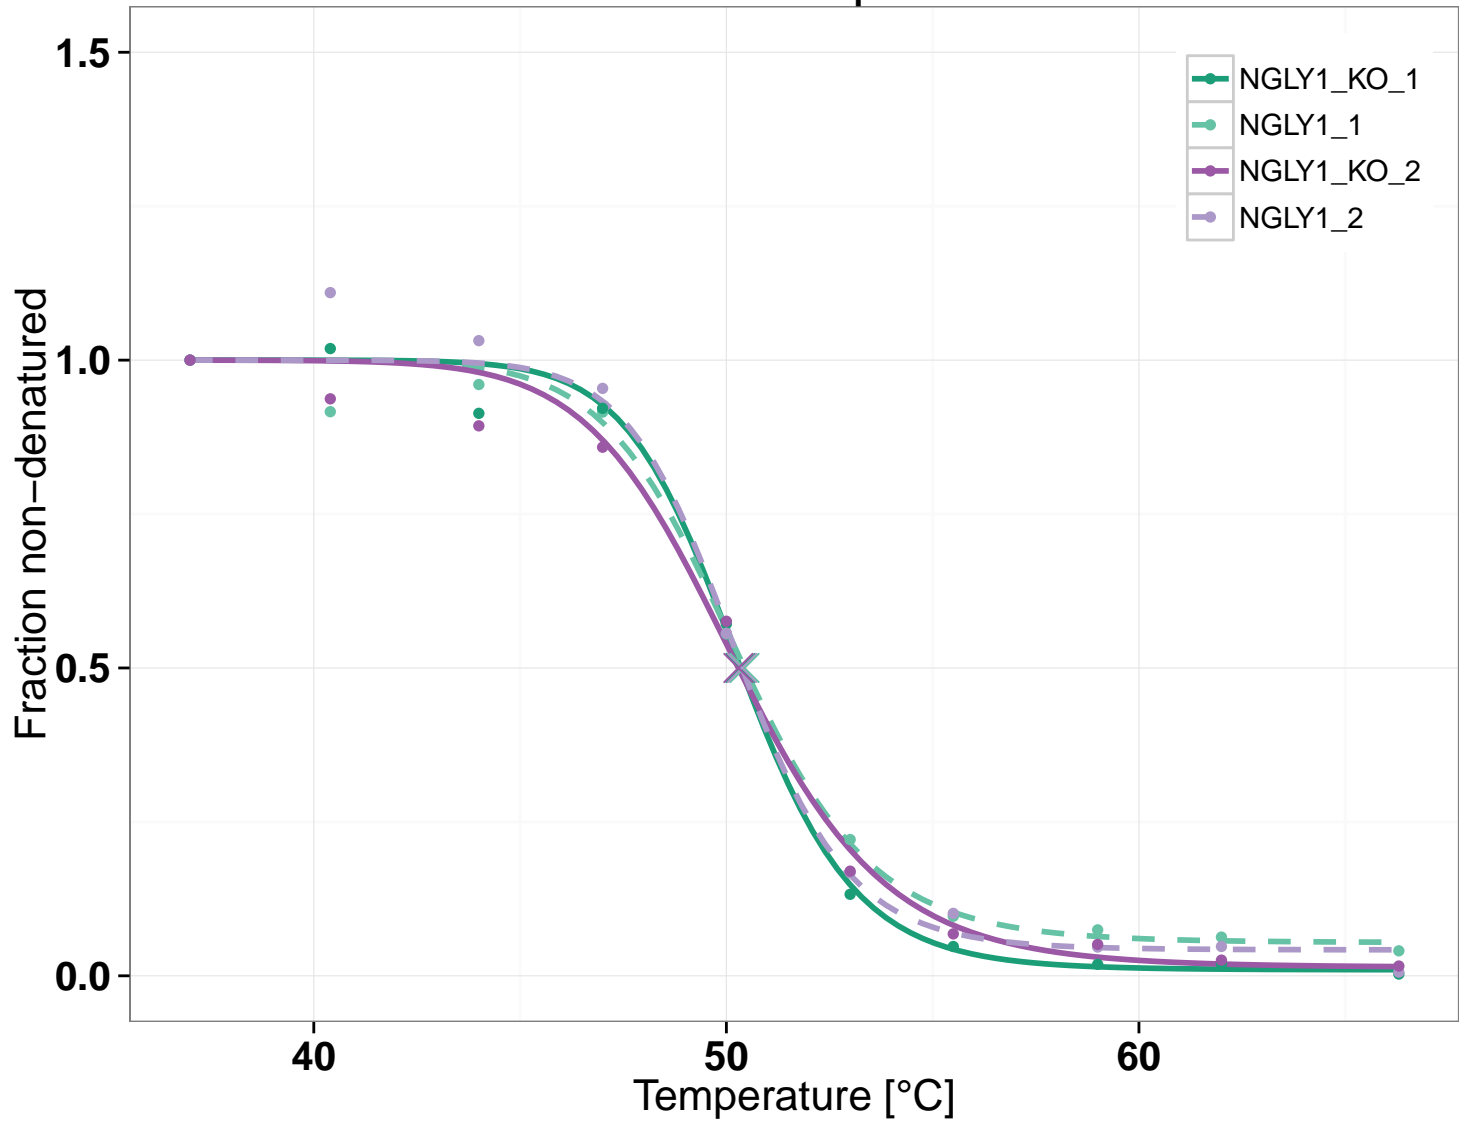

|            | meltPoint | slope | plateau | R2   |
|------------|-----------|-------|---------|------|
| NGLY1_KO_1 | 50.35     | -0.18 | 0.01    | 1    |
| NGLY1_1    | 50.44     | -0.15 | 0.05    | 0.99 |
| NGLY1_KO_2 | 50.29     | -0.14 | 0.01    | 0.99 |
| NGLY1_2    | 50.38     | -0.18 | 0.04    | 0.99 |

Supplement: Supplementary file 265 [file 1]

IPI00180434.3|GRAMD1A

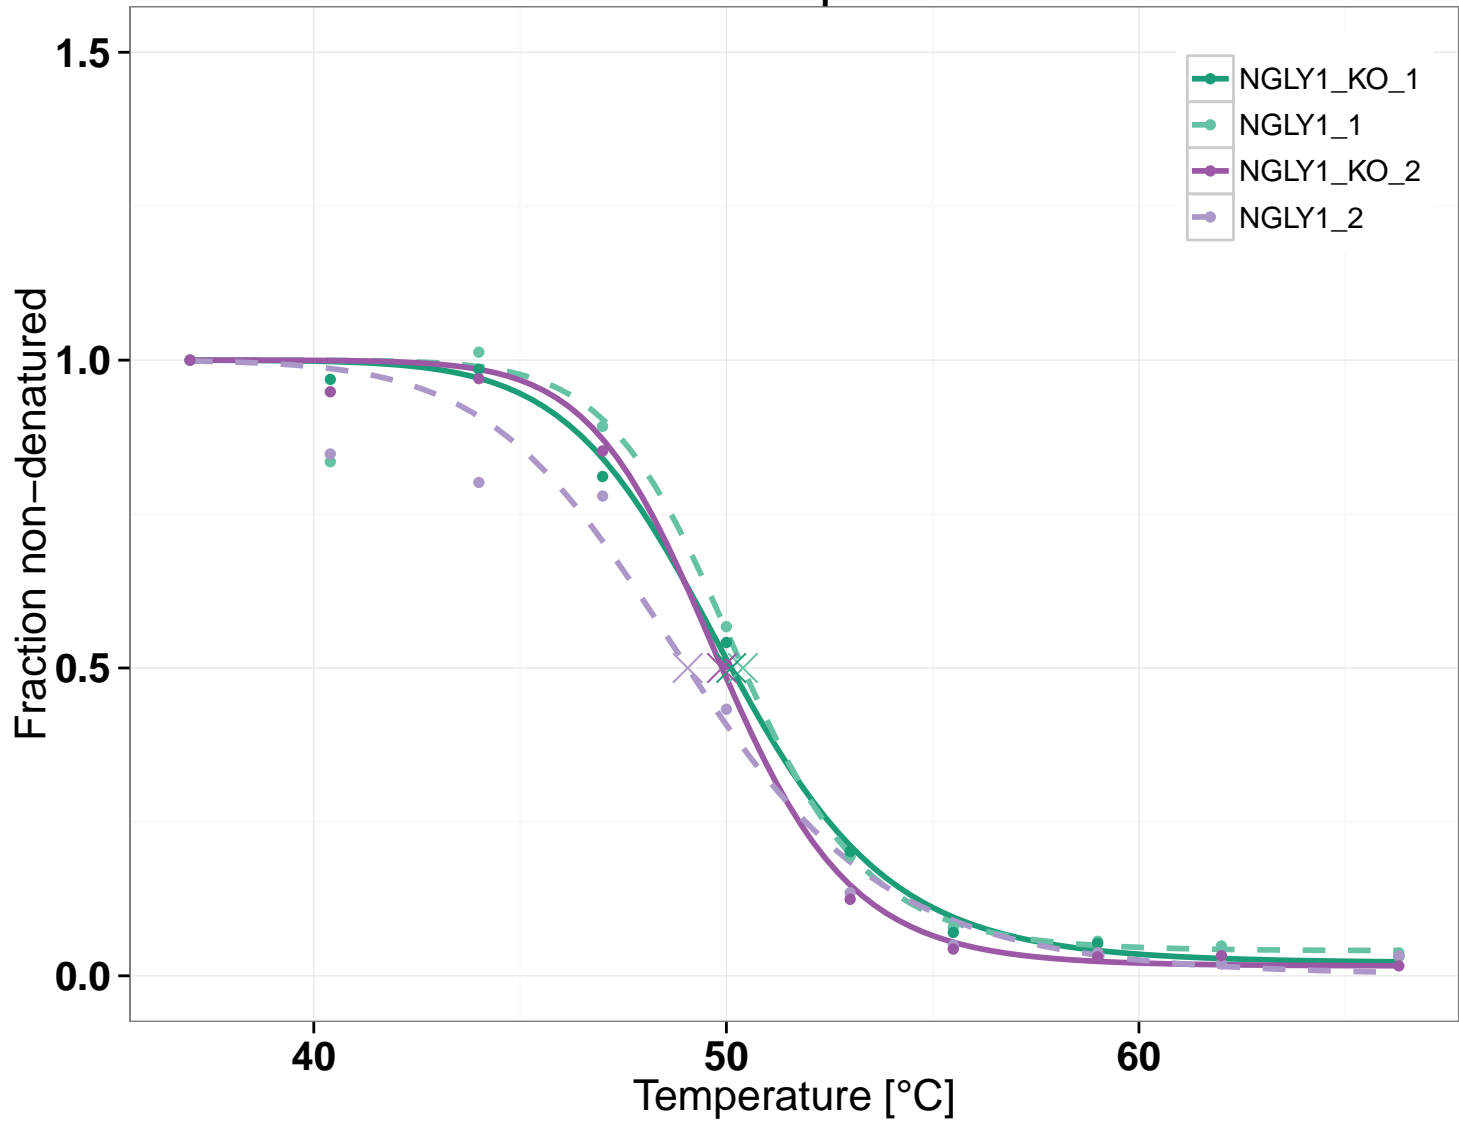

|            | meltPoint | slope | plateau | R2   |
|------------|-----------|-------|---------|------|
| NGLY1_KO_1 | 50.12     | -0.12 | 0.02    | 1    |
| NGLY1_1    | 50.4      | -0.15 | 0.04    | 0.98 |
| NGLY1_KO_2 | 49.9      | -0.16 | 0.02    | 1    |
| NGLY1_2    | 49.06     | -0.1  | 0       | 0.97 |

Supplement: Supplementary file 266 [file 1]

# IPI00871937.1|LMBRD1

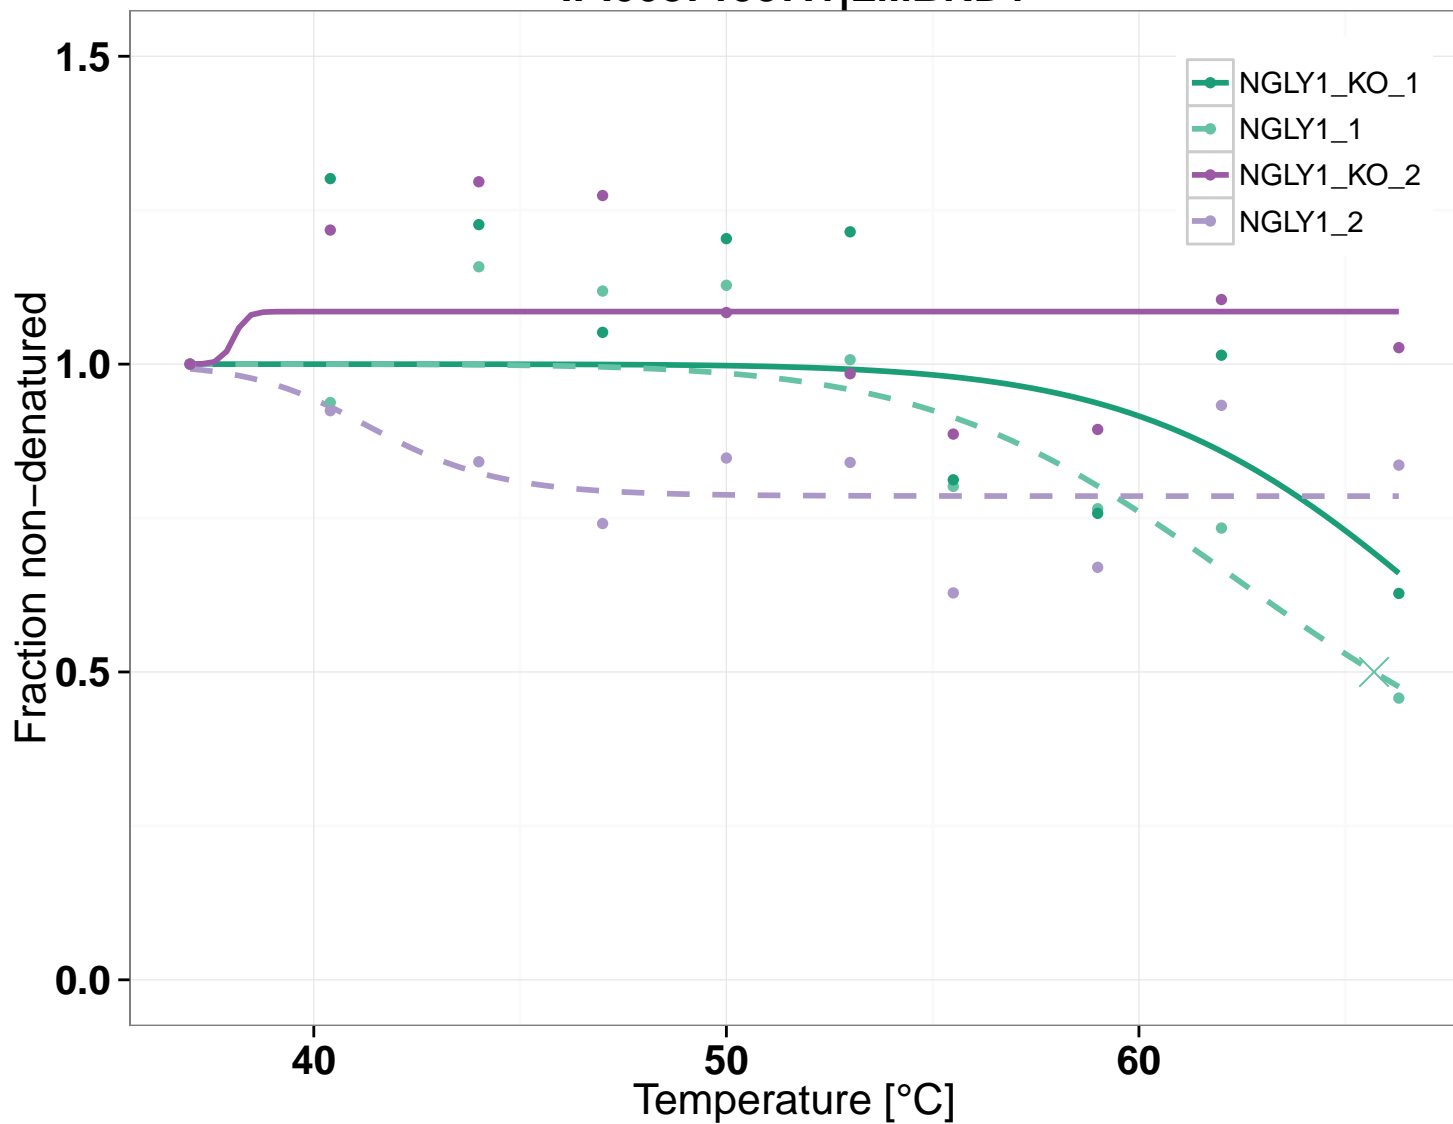

|            | meltPoint | slope  | plateau | R2   |
|------------|-----------|--------|---------|------|
| NGLY1_KO_1 | –         | –      | 0       | 0.3  |
| NGLY1_1    | 65.7      | –0.048 | 0.2     | 0.8  |
| NGLY1_KO_2 | –         | 0.14   | 1.09    | 0.03 |
| NGLY1_2    | –         | –0.035 | 0.79    | 0.41 |

Supplement: Supplementary file 267 [file 1]

IPI00002398.6|KLHL13

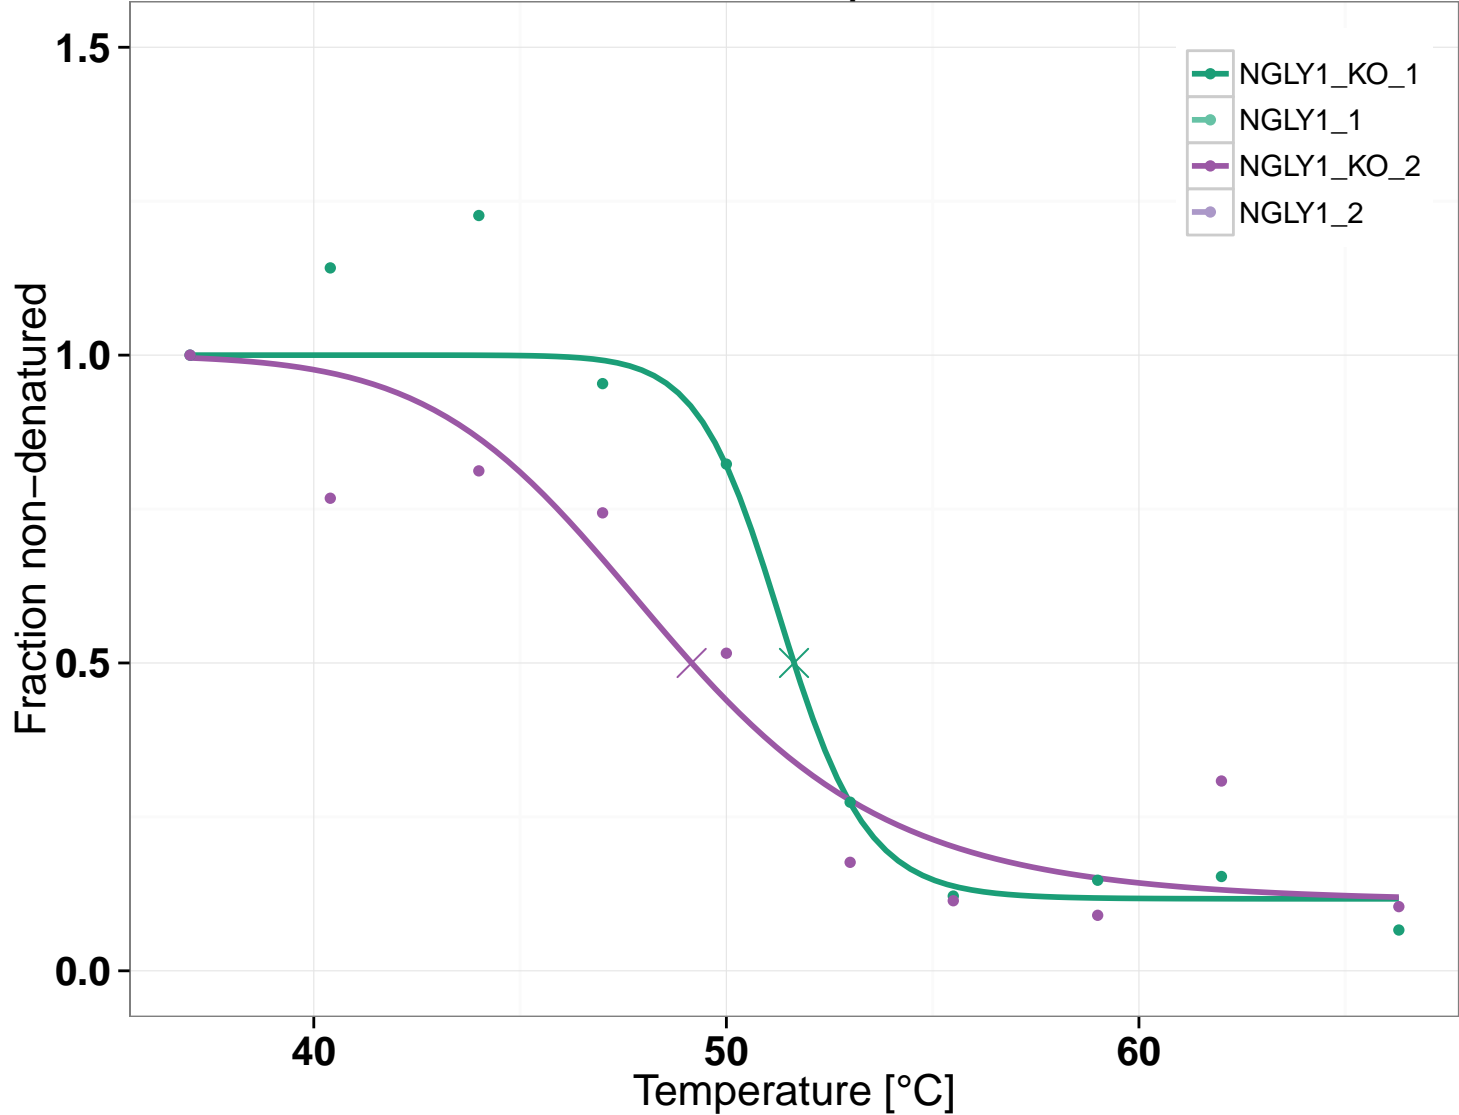

|            | meltPoint | slope  | plateau | R2   |
|------------|-----------|--------|---------|------|
| NGLY1_KO_1 | 51.64     | -0.22  | 0.12    | 0.96 |
| NGLY1_1    | -         | -      | -       | -    |
| NGLY1_KO_2 | 49.16     | -0.079 | 0.11    | 0.9  |
| NGLY1_2    | -         | -      | -       | -    |

Supplement: Supplementary file 268 [file 1]

IPI00302112.1|MAP2K7

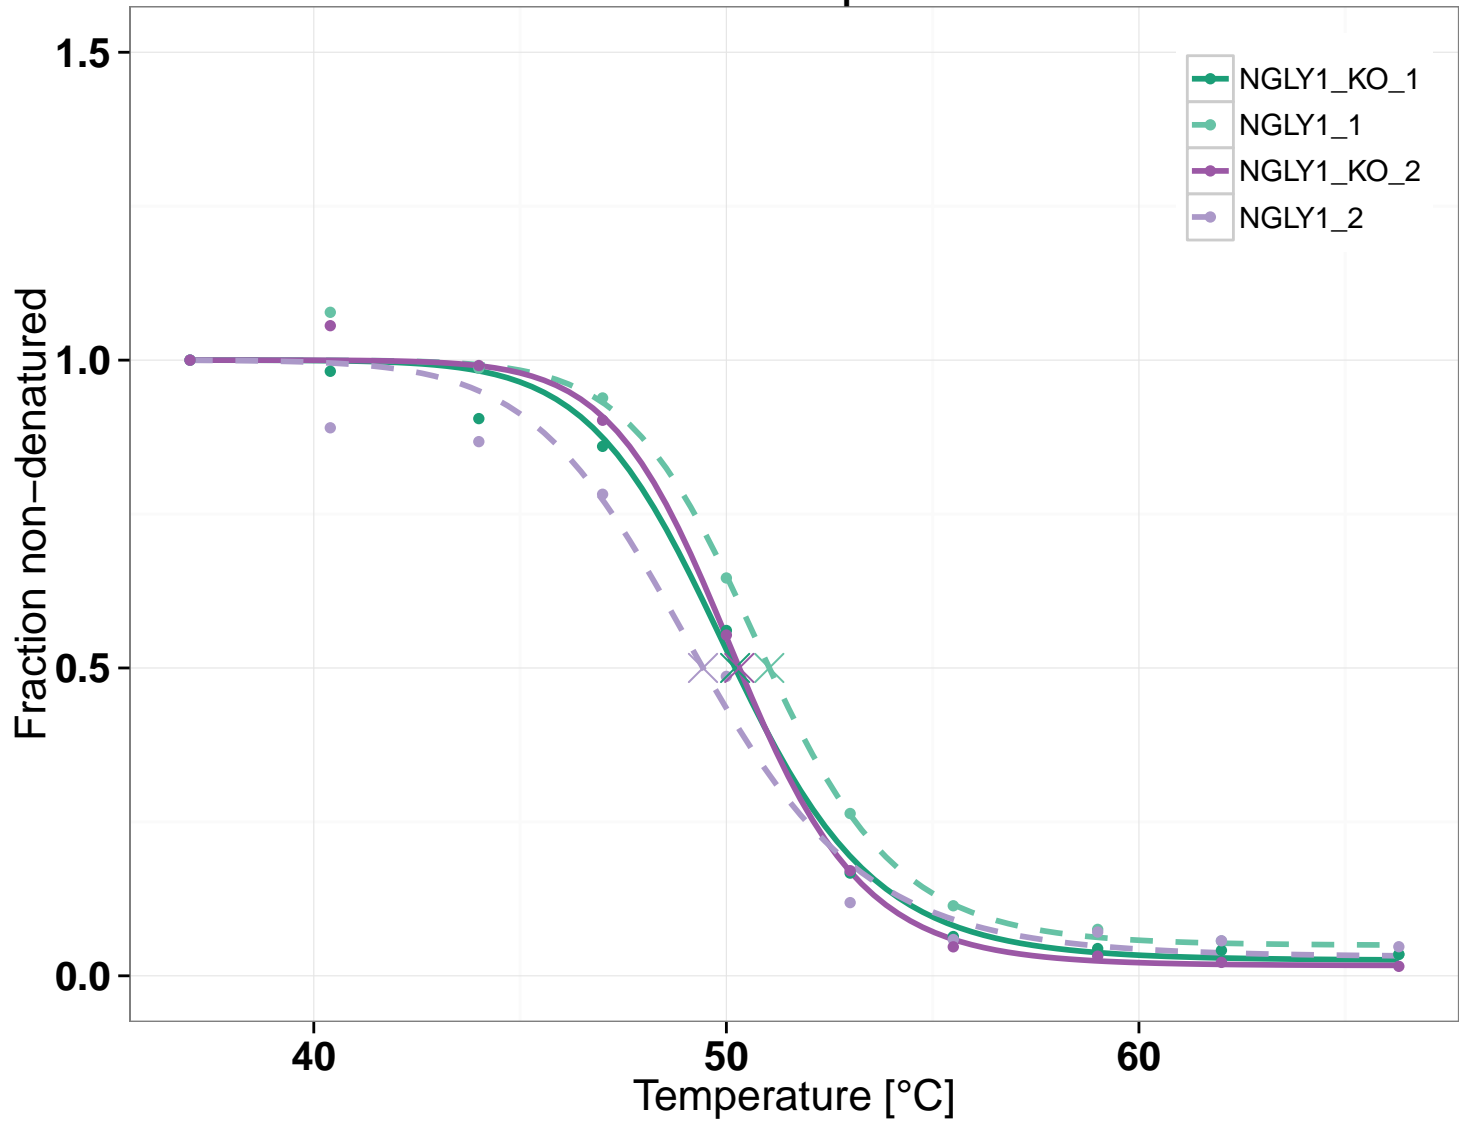

|            | meltPoint | slope | plateau | R2   |
|------------|-----------|-------|---------|------|
| NGLY1_KO_1 | 50.21     | -0.14 | 0.03    | 0.99 |
| NGLY1_1    | 51.04     | -0.15 | 0.05    | 1    |
| NGLY1_KO_2 | 50.31     | -0.16 | 0.02    | 1    |
| NGLY1_2    | 49.43     | -0.12 | 0.03    | 0.98 |

Supplement: Supplementary file 269 [file 1]

IPI00646361.3|NUP214

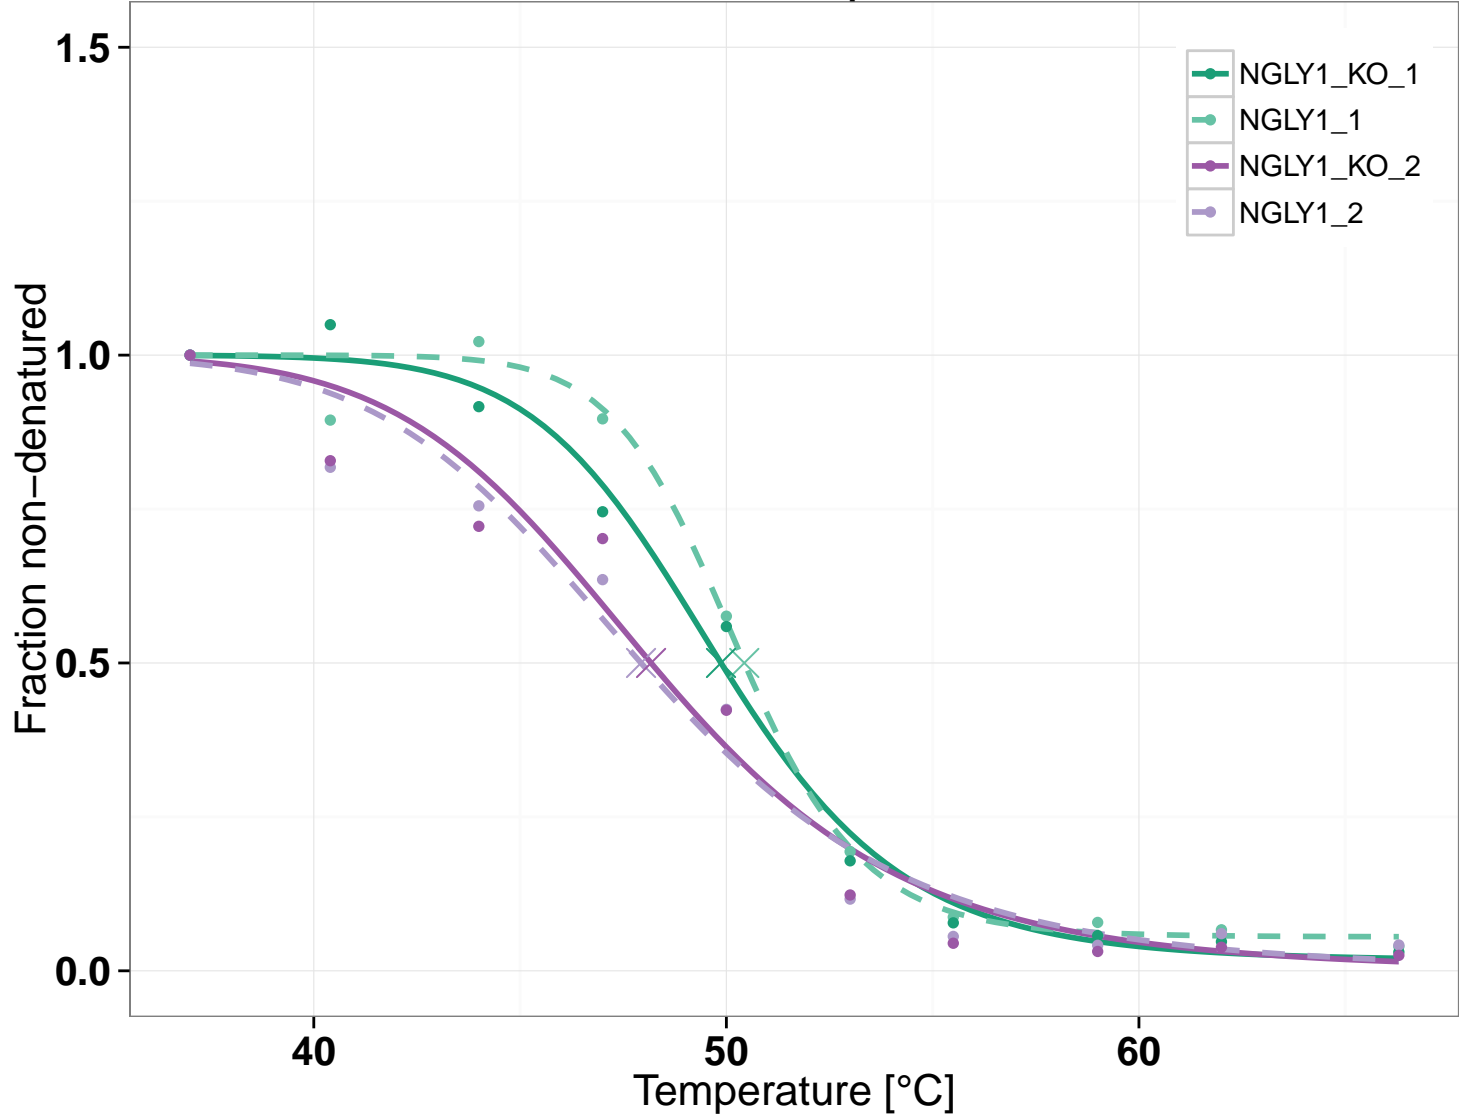

|            | meltPoint | slope  | plateau | R2   |
|------------|-----------|--------|---------|------|
| NGLY1_KO_1 | 49.87     | -0.11  | 0.02    | 0.99 |
| NGLY1_1    | 50.43     | -0.16  | 0.06    | 0.99 |
| NGLY1_KO_2 | 48.17     | -0.081 | 0       | 0.96 |
| NGLY1_2    | 47.93     | -0.077 | 0       | 0.97 |

Supplement: Supplementary file 270 [file 1]

IPI00062558.3|KLHDC3

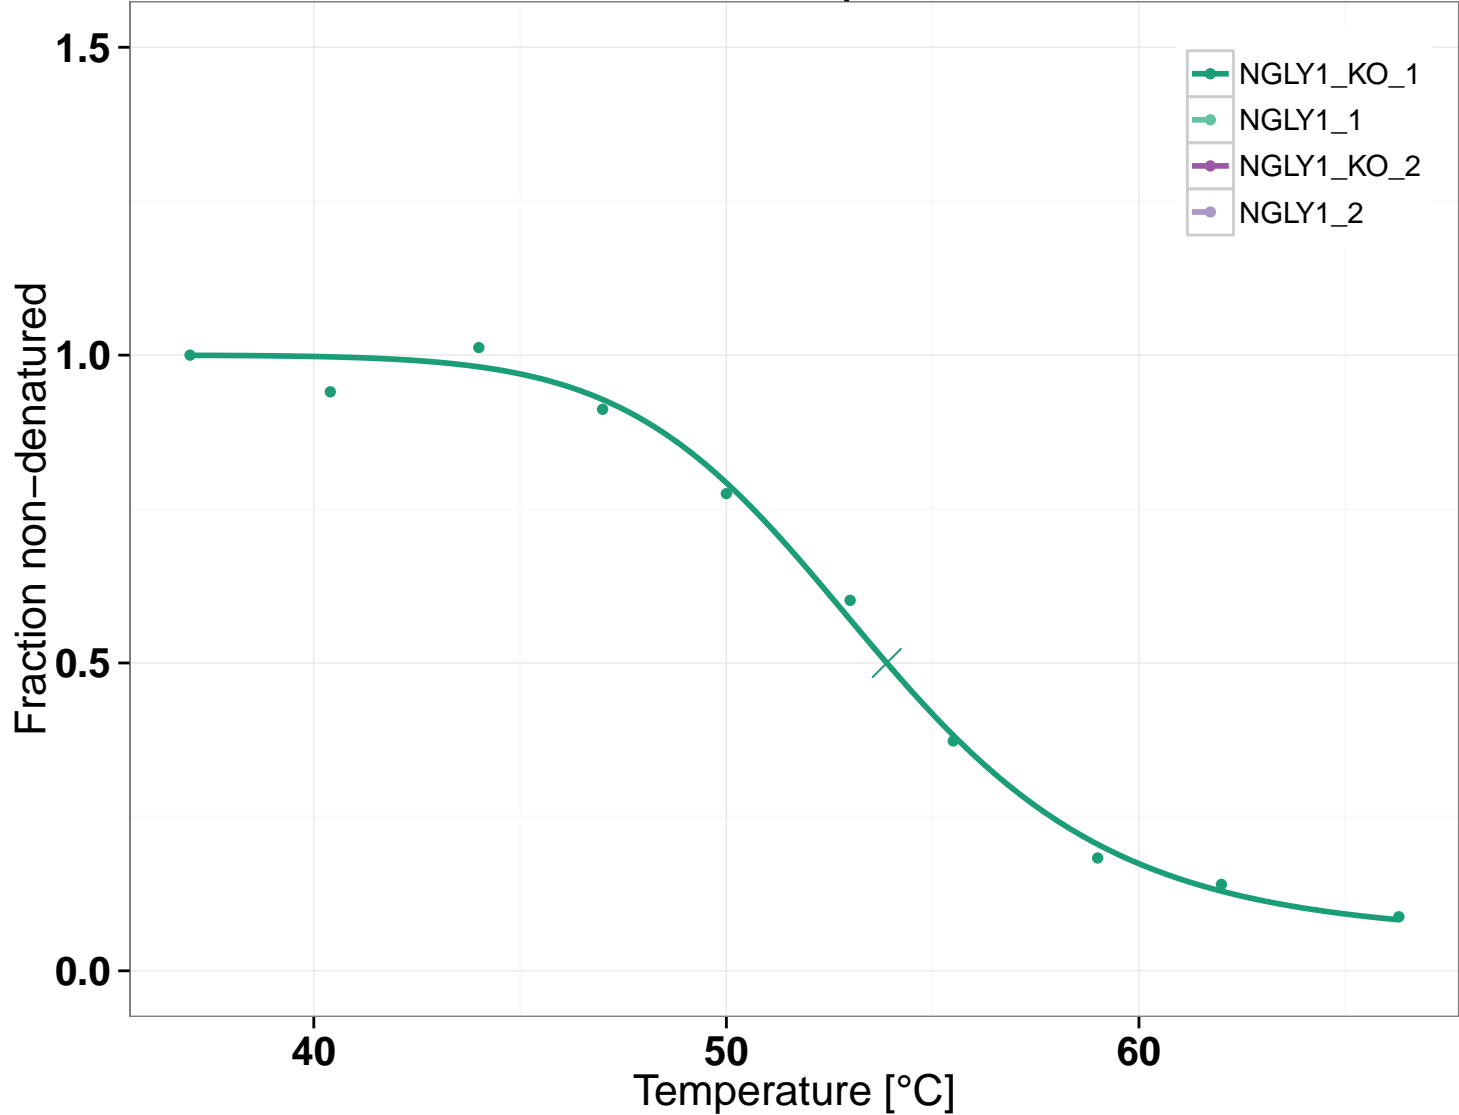

|            | meltPoint | slope | plateau | R2   |
|------------|-----------|-------|---------|------|
| NGLY1_KO_1 | 53.89     | -0.08 | 0.05    | 0.99 |
| NGLY1_1    | -         | -     | -       | -    |
| NGLY1_KO_2 | -         | -     | -       | -    |
| NGLY1_2    | -         | -     | -       | -    |

Supplement: Supplementary file 271 [file 1]

# IPI00055753.6|MTFMT

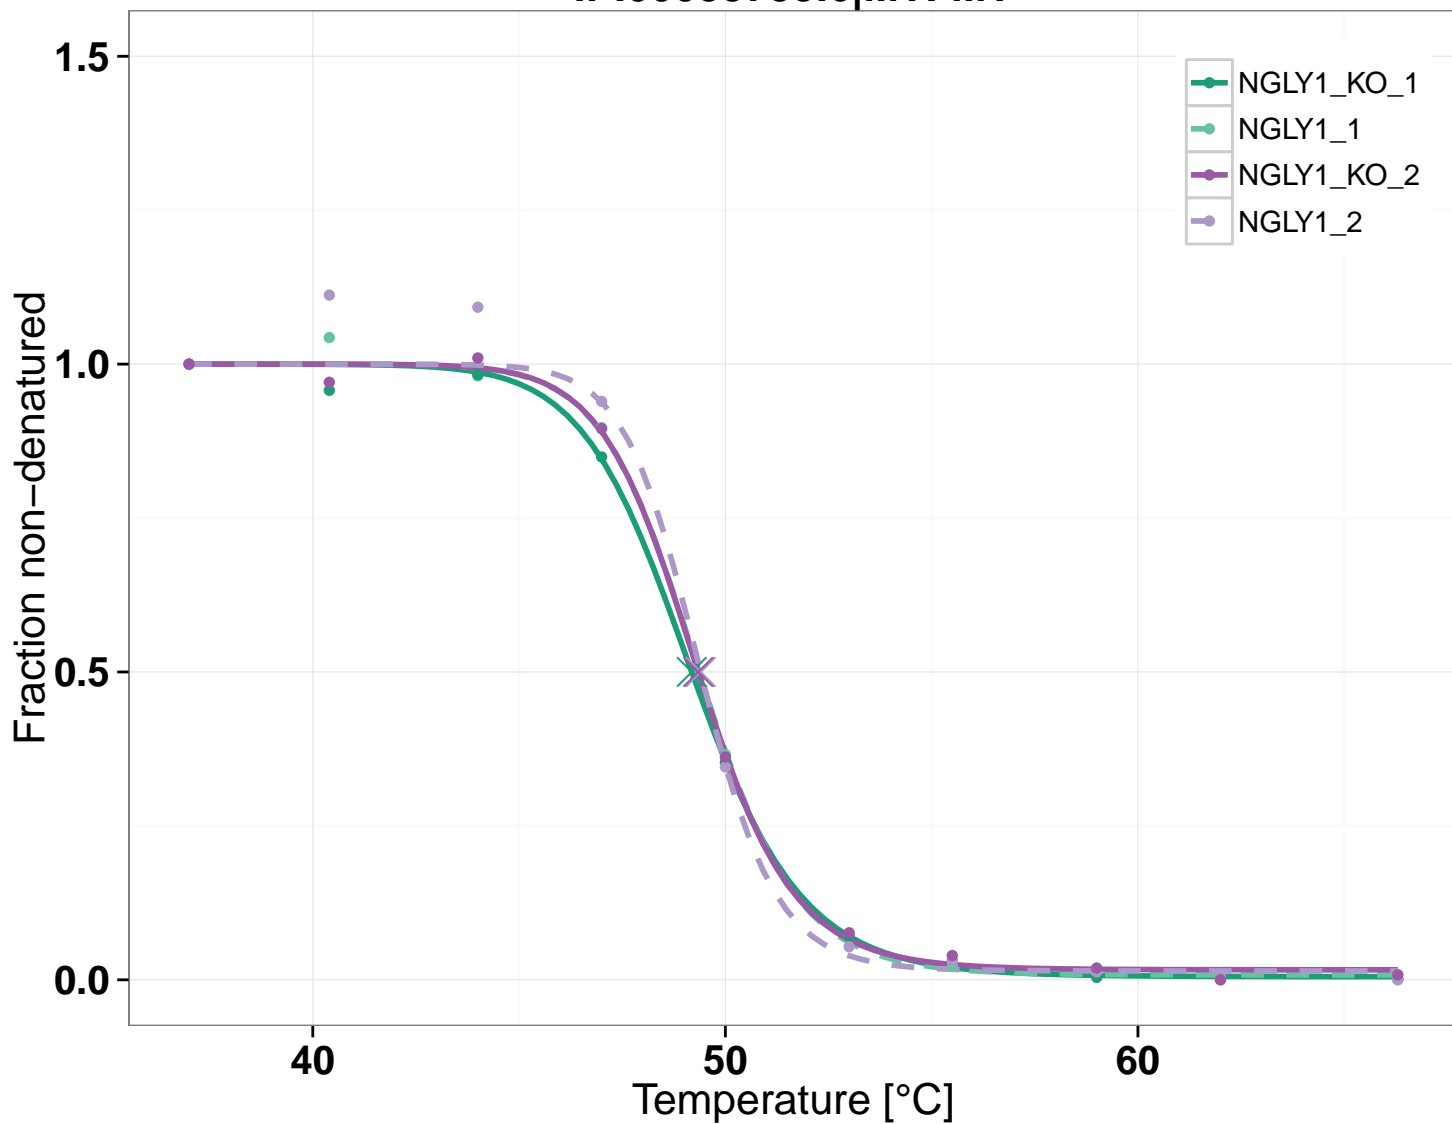

|            | meltPoint | slope | plateau | R2   |
|------------|-----------|-------|---------|------|
| NGLY1_KO_1 | 49.19     | -0.19 | 0.01    | 1    |
| NGLY1_1    | 49.36     | -0.21 | 0.01    | 1    |
| NGLY1_KO_2 | 49.34     | -0.21 | 0.02    | 1    |
| NGLY1_2    | 49.4      | -0.27 | 0.01    | 0.99 |

Supplement: Supplementary file 272 [file 1]

IPI00394809.1|APOOL

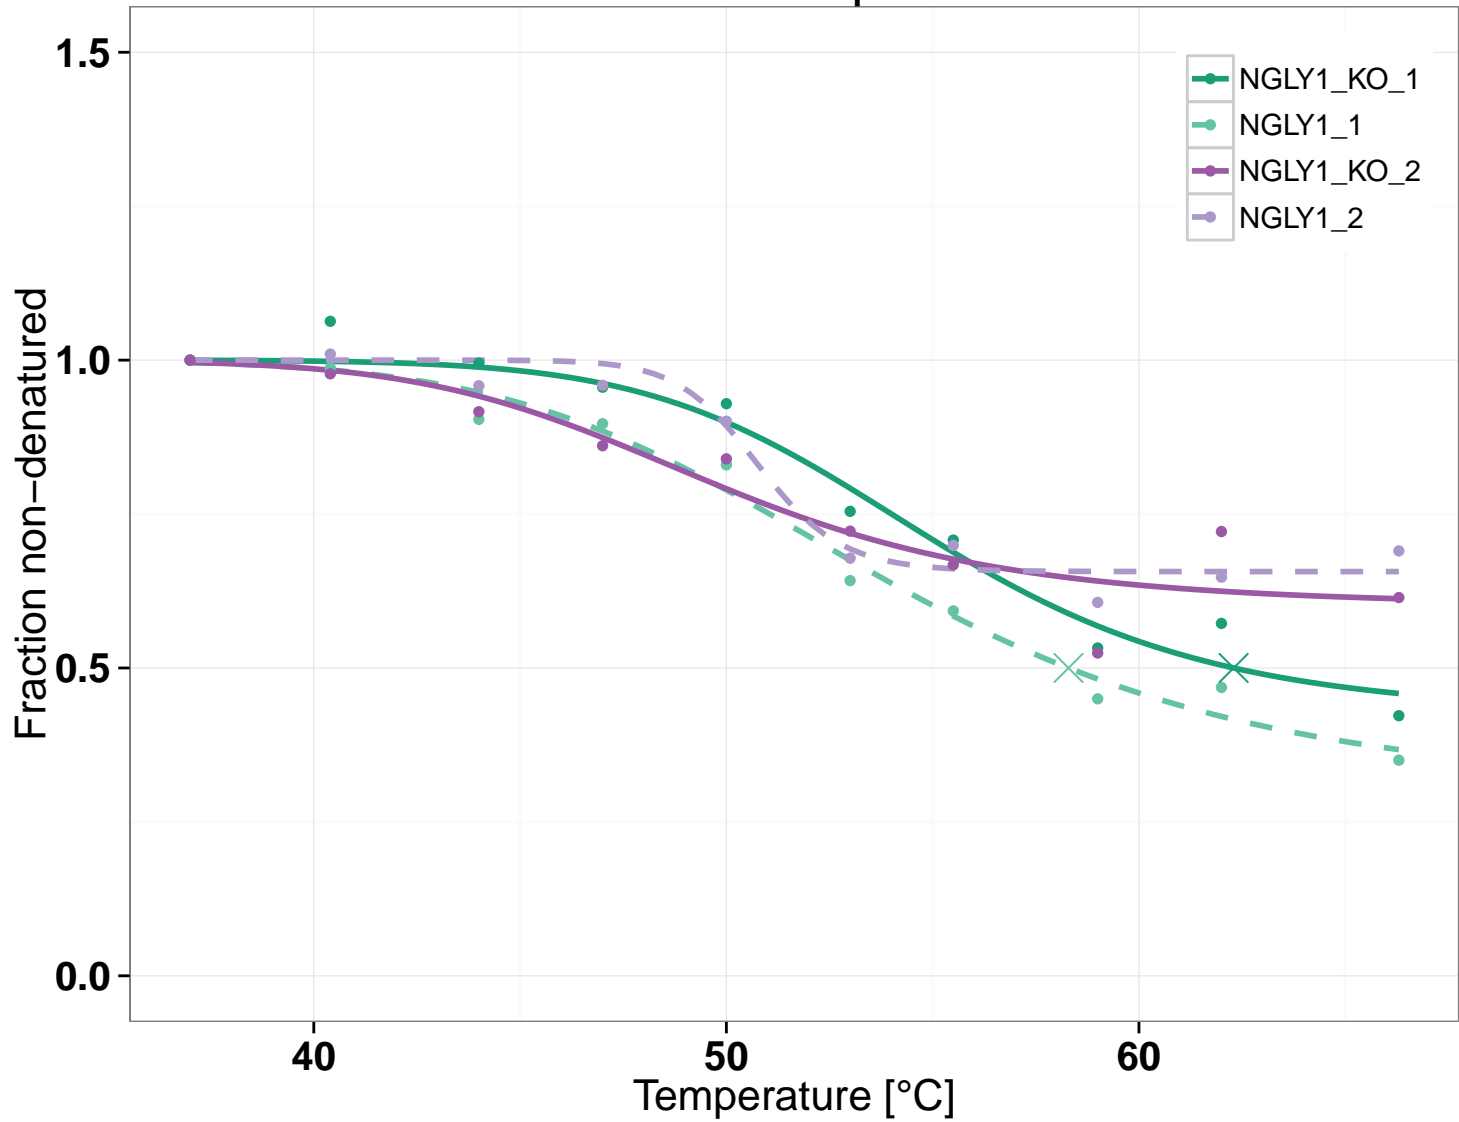

|            | meltPoint | slope  | plateau | R2   |
|------------|-----------|--------|---------|------|
| NGLY1_KO_1 | 62.3      | -0.042 | 0.42    | 0.97 |
| NGLY1_1    | 58.29     | -0.039 | 0.29    | 0.98 |
| NGLY1_KO_2 | -         | -0.028 | 0.6     | 0.88 |
| NGLY1_2    | -         | -0.086 | 0.66    | 0.96 |

Supplement: Supplementary file 273 [file 1]

IPI00171856.1|DOHH

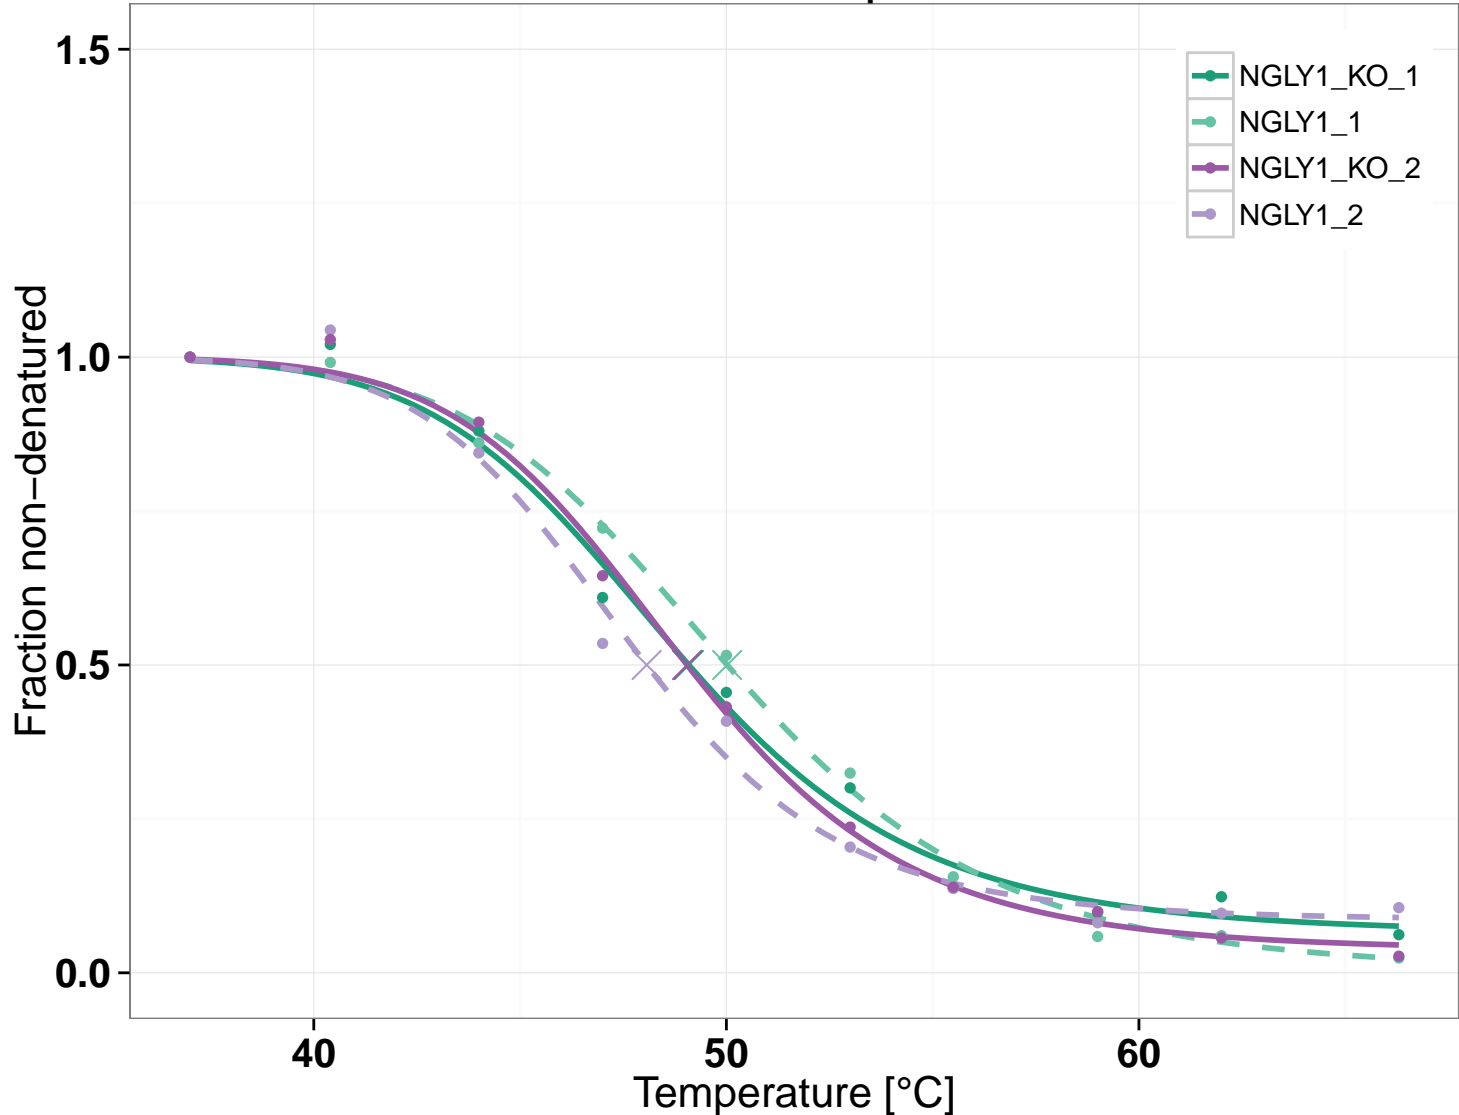

|            | meltPoint | slope  | plateau | R2   |
|------------|-----------|--------|---------|------|
| NGLY1_KO_1 | 49.09     | -0.079 | 0.06    | 0.99 |
| NGLY1_1    | 50.02     | -0.078 | 0       | 1    |
| NGLY1_KO_2 | 49.05     | -0.088 | 0.04    | 1    |
| NGLY1_2    | 48.07     | -0.09  | 0.09    | 0.99 |

Supplement: Supplementary file 274 [file 1]

# IPI00514926.2|GUK1

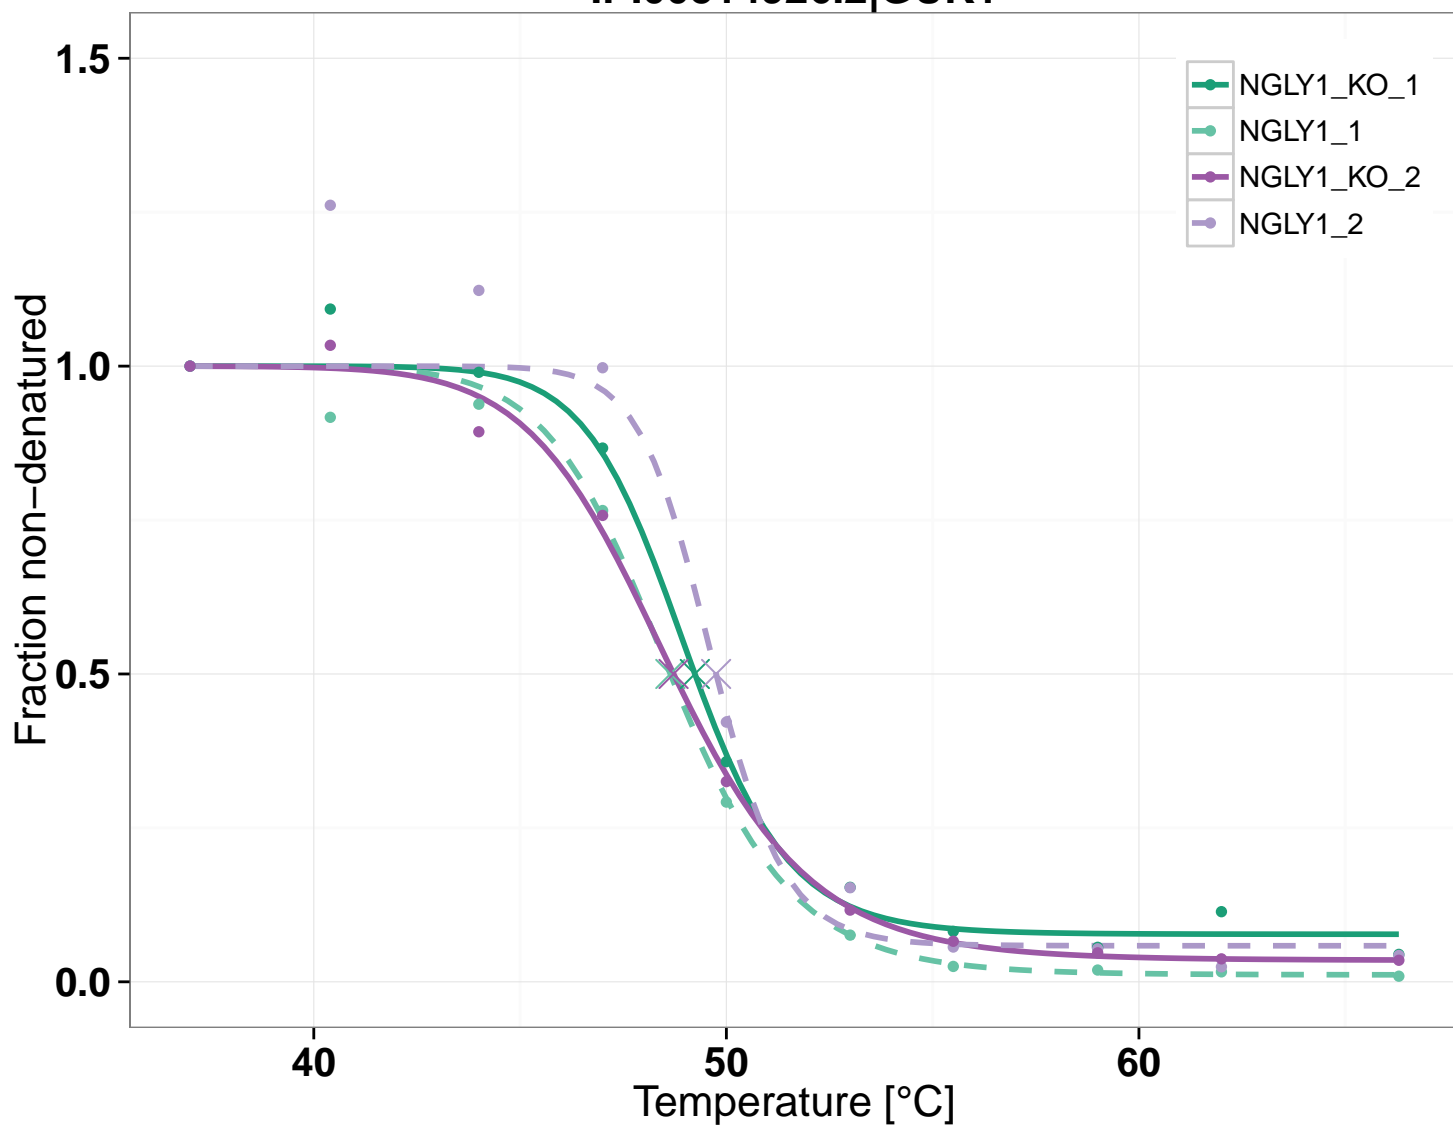

|            | meltPoint | slope | plateau | R2   |
|------------|-----------|-------|---------|------|
| NGLY1_KO_1 | 49.24     | -0.19 | 0.08    | 0.99 |
| NGLY1_1    | 48.64     | -0.16 | 0.01    | 1    |
| NGLY1_KO_2 | 48.72     | -0.14 | 0.03    | 1    |
| NGLY1_2    | 49.75     | -0.27 | 0.06    | 0.96 |

Supplement: Supplementary file 275 [file 1]

IPI00018931.6|VPS35

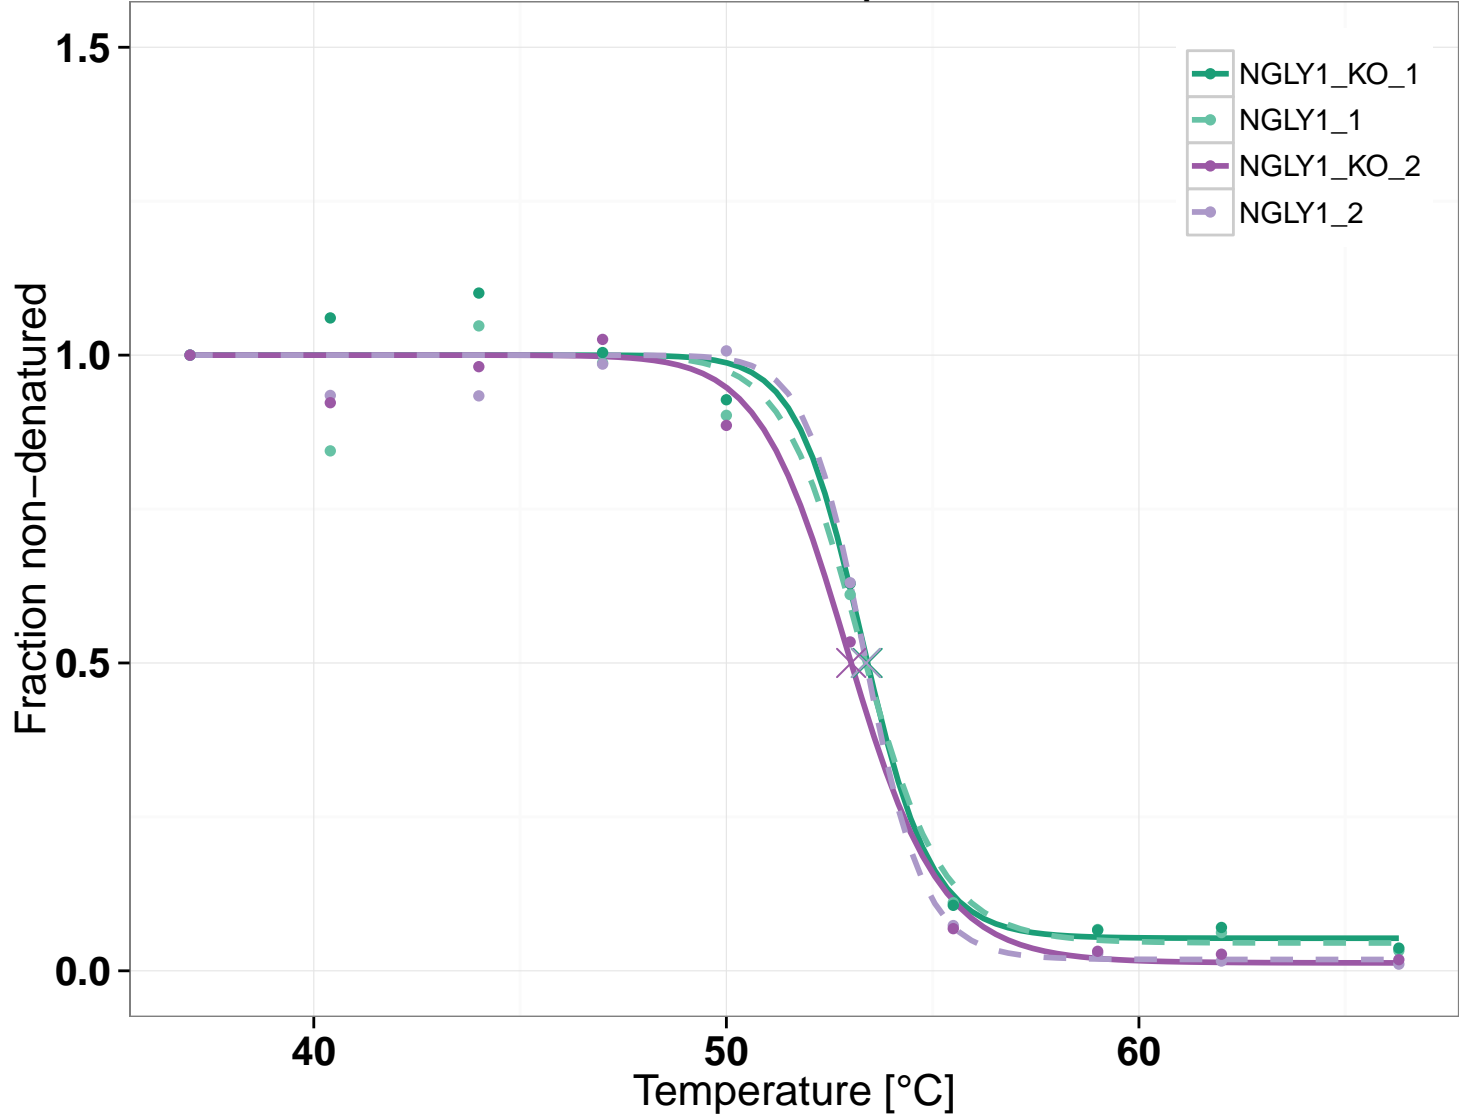

|            | meltPoint | slope | plateau | R2   |
|------------|-----------|-------|---------|------|
| NGLY1_KO_1 | 53.42     | -0.29 | 0.05    | 0.99 |
| NGLY1_1    | 53.38     | -0.25 | 0.05    | 0.98 |
| NGLY1_KO_2 | 53.02     | -0.22 | 0.01    | 0.99 |
| NGLY1_2    | 53.39     | -0.34 | 0.02    | 1    |

Supplement: Supplementary file 276 [file 1]

# IPI00294073.1|COQ7

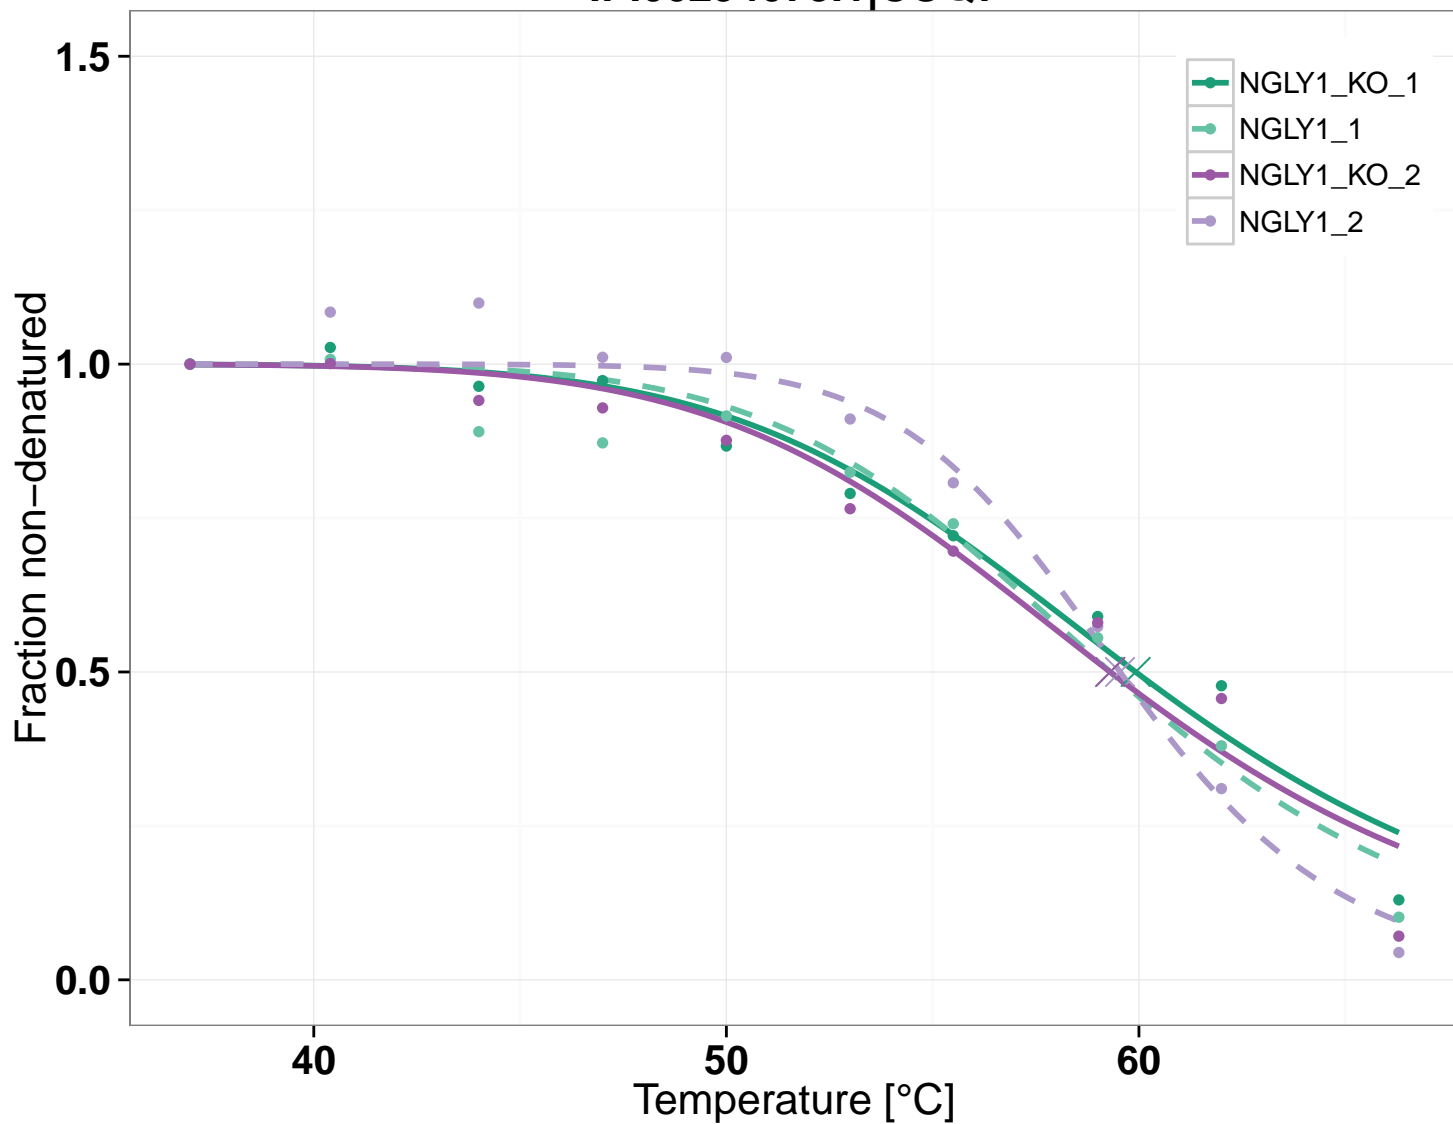

|            | meltPoint | slope  | plateau | R2   |
|------------|-----------|--------|---------|------|
| NGLY1_KO_1 | 59.92     | -0.052 | 0       | 0.97 |
| NGLY1_1    | 59.31     | -0.06  | 0       | 0.96 |
| NGLY1_KO_2 | 59.3      | -0.053 | 0       | 0.95 |
| NGLY1_2    | 59.54     | -0.093 | 0       | 0.98 |

Supplement: Supplementary file 277 [file 1]

IPI00001985.2|VPS18

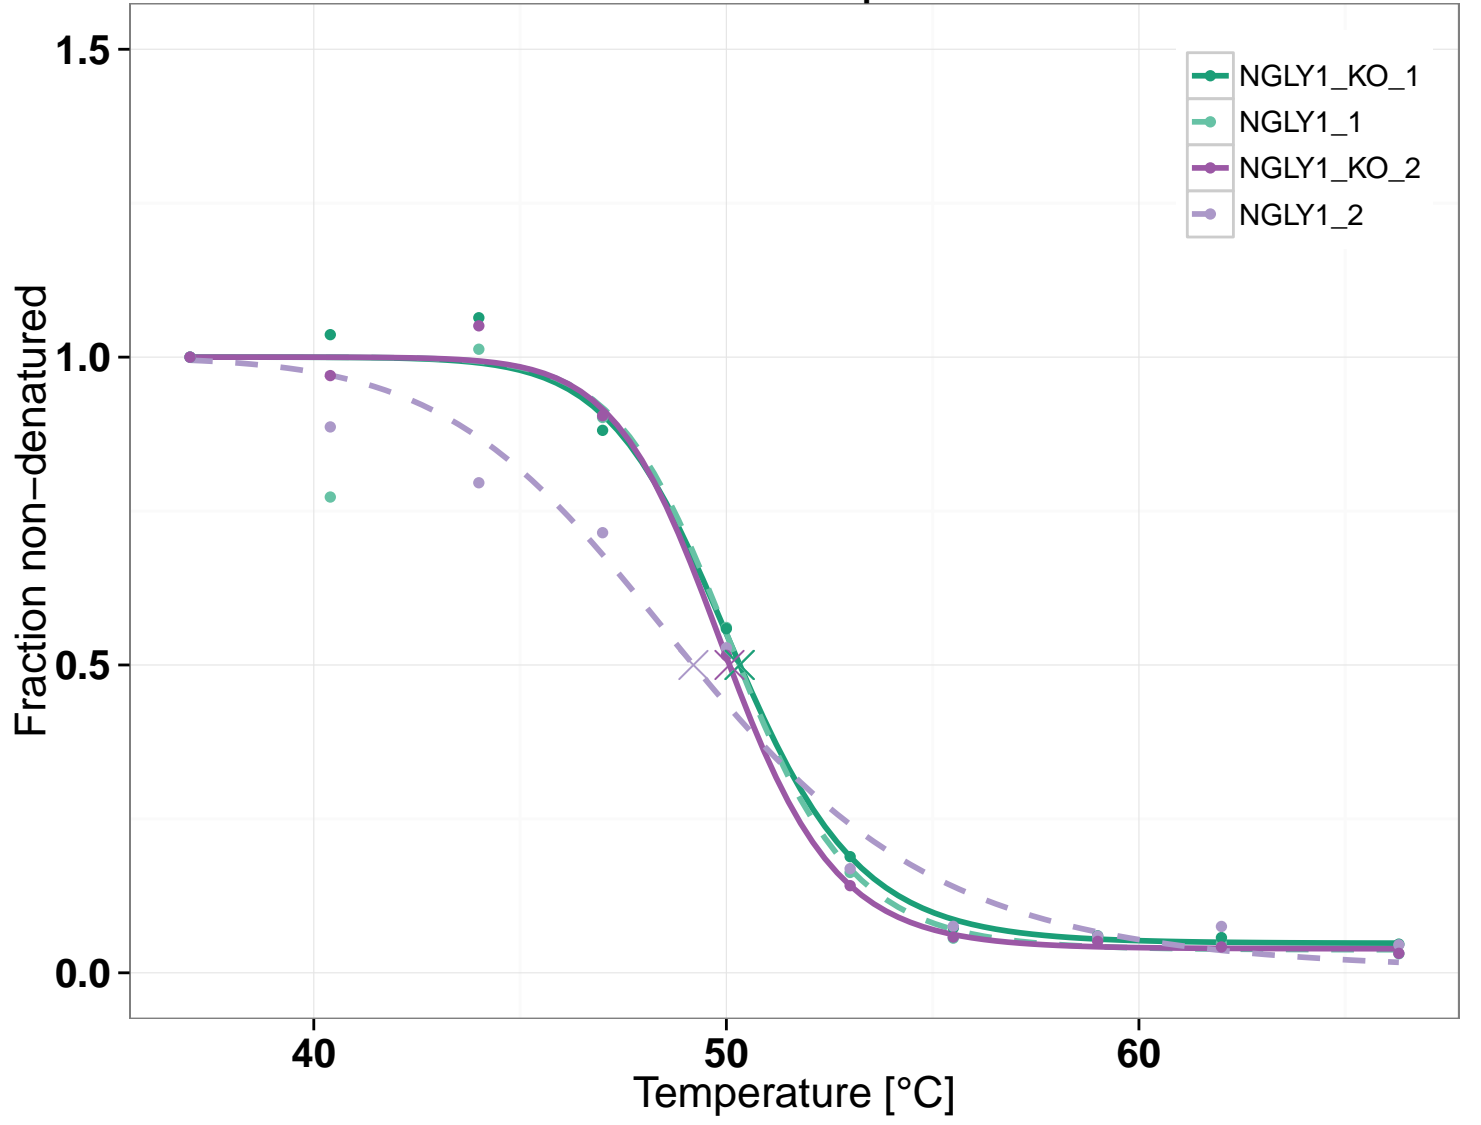

|            | meltPoint | slope  | plateau | R2   |
|------------|-----------|--------|---------|------|
| NGLY1_KO_1 | 50.33     | -0.16  | 0.05    | 1    |
| NGLY1_1    | 50.31     | -0.17  | 0.04    | 0.97 |
| NGLY1_KO_2 | 50.08     | -0.18  | 0.04    | 1    |
| NGLY1_2    | 49.2      | -0.083 | 0       | 0.98 |

Supplement: Supplementary file 278 [file 1]

# IPI00221300.2|EIF2B1

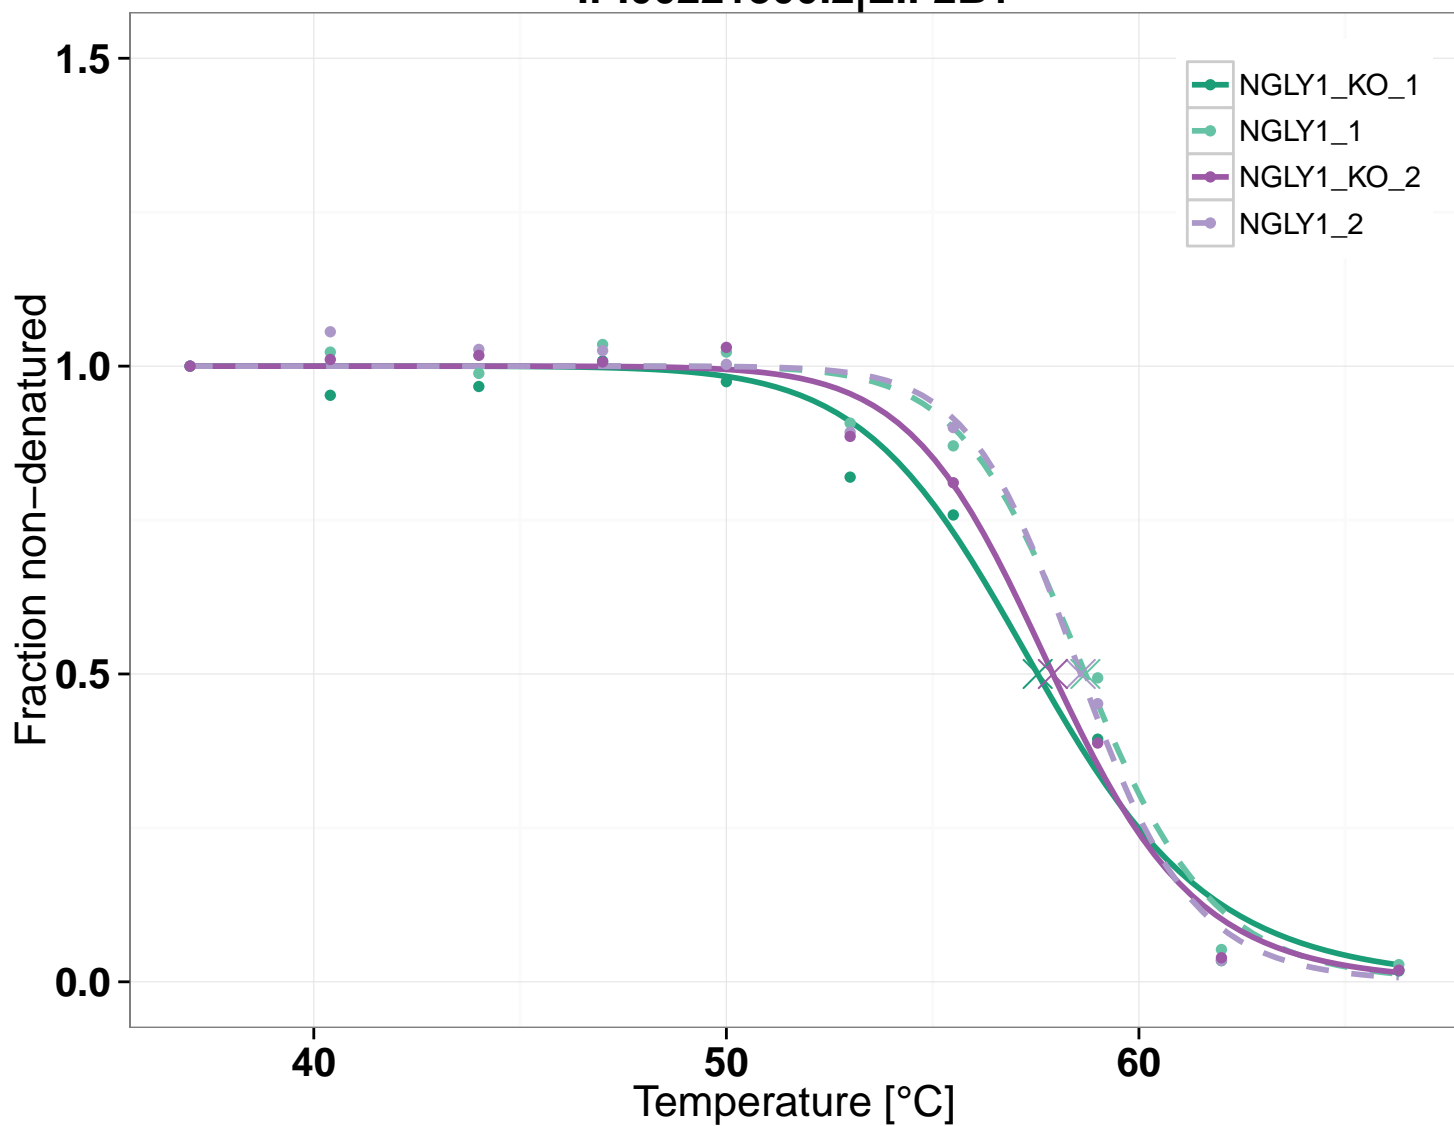

|            | meltPoint | slope | plateau | R2   |
|------------|-----------|-------|---------|------|
| NGLY1_KO_1 | 57.55     | -0.12 | 0       | 0.98 |
| NGLY1_1    | 58.7      | -0.16 | 0       | 0.99 |
| NGLY1_KO_2 | 57.91     | -0.14 | 0       | 0.99 |
| NGLY1_2    | 58.59     | -0.18 | 0       | 0.99 |

Supplement: Supplementary file 279 [file 1]

# IPI00166784.2|NSMCE2

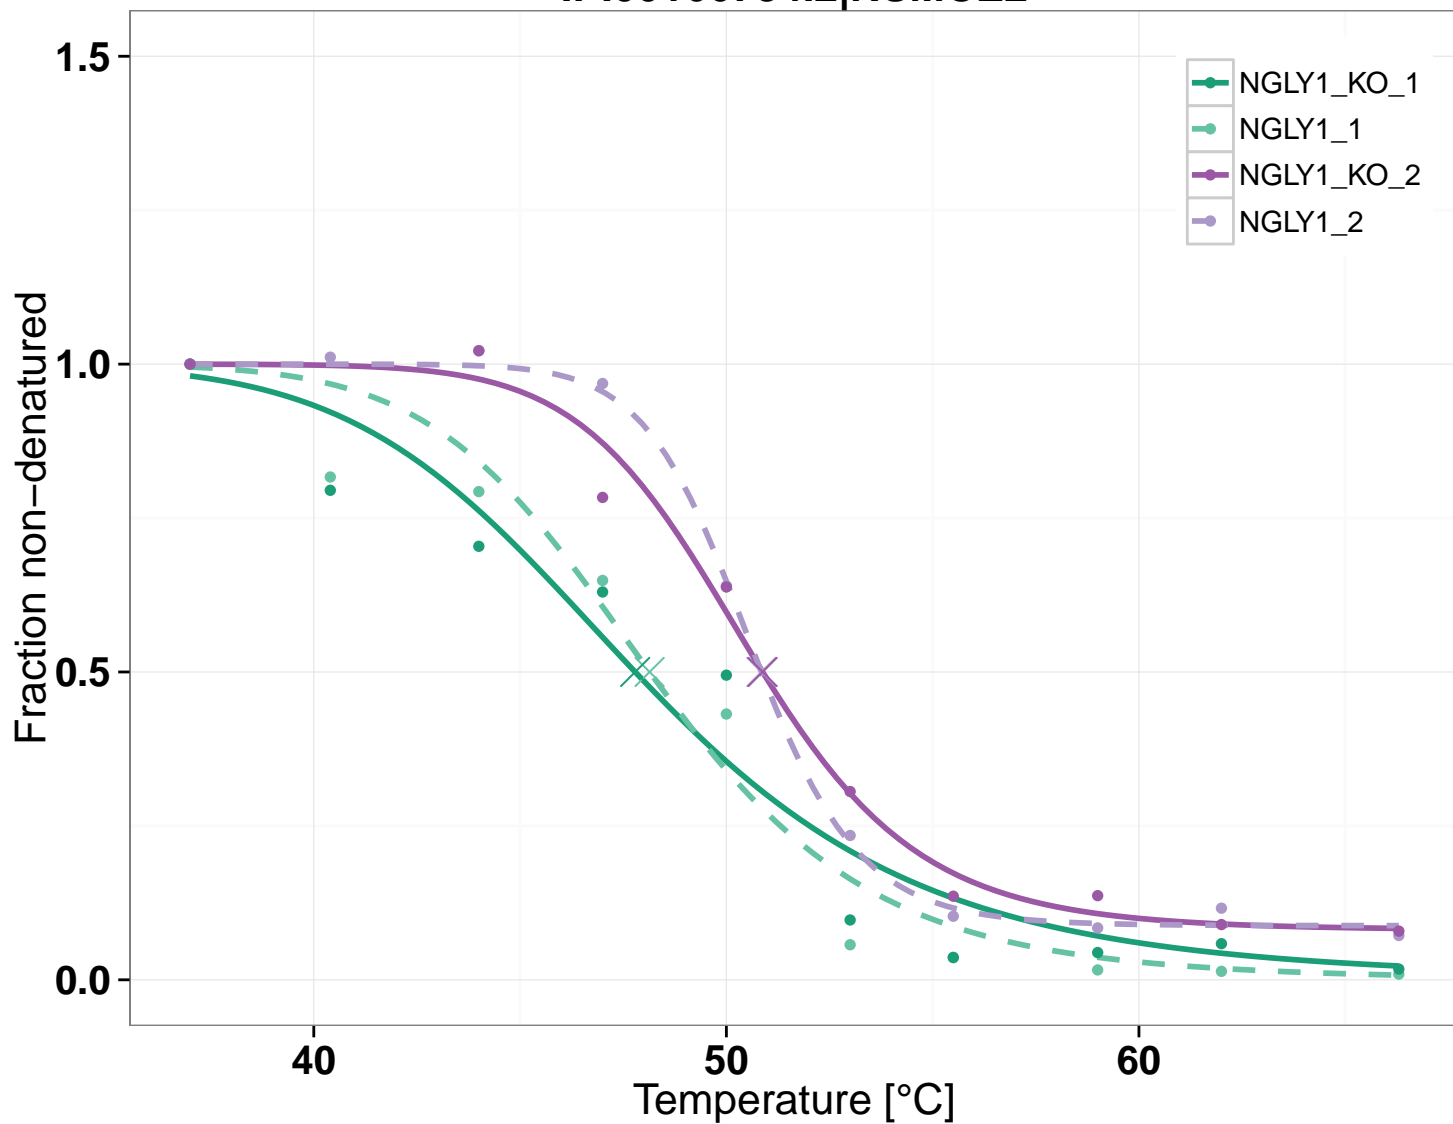

|            | meltPoint | slope  | plateau | R2   |
|------------|-----------|--------|---------|------|
| NGLY1_KO_1 | 47.79     | -0.072 | 0       | 0.95 |
| NGLY1_1    | 48.14     | -0.093 | 0       | 0.97 |
| NGLY1_KO_2 | 50.88     | -0.11  | 0.08    | 0.83 |
| NGLY1_2    | 50.85     | -0.18  | 0.09    | 1    |

Supplement: Supplementary file 280 [file 1]

# IPI00456940.5|RPL7L1

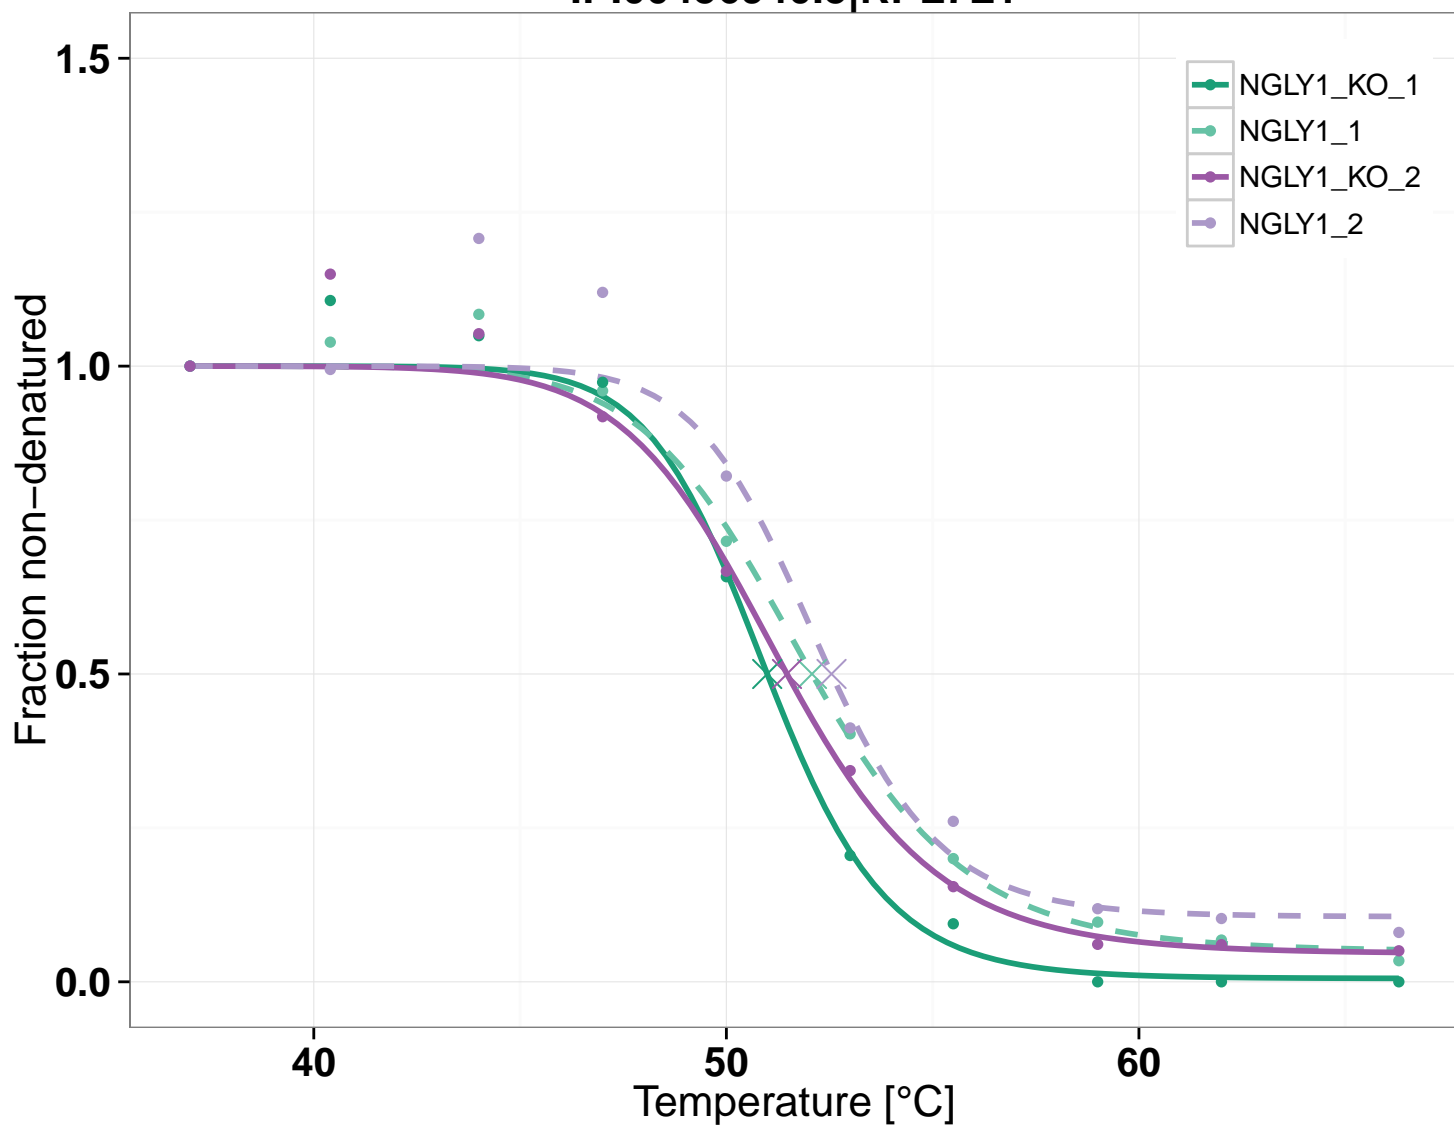

|            | meltPoint | slope | plateau | R2   |
|------------|-----------|-------|---------|------|
| NGLY1_KO_1 | 50.99     | -0.17 | 0.01    | 0.99 |
| NGLY1_1    | 52.07     | -0.12 | 0.05    | 0.99 |
| NGLY1_KO_2 | 51.47     | -0.12 | 0.05    | 0.99 |
| NGLY1_2    | 52.55     | -0.15 | 0.11    | 0.96 |

Supplement: Supplementary file 281 [file 1]

IPI00745889.2|UROS

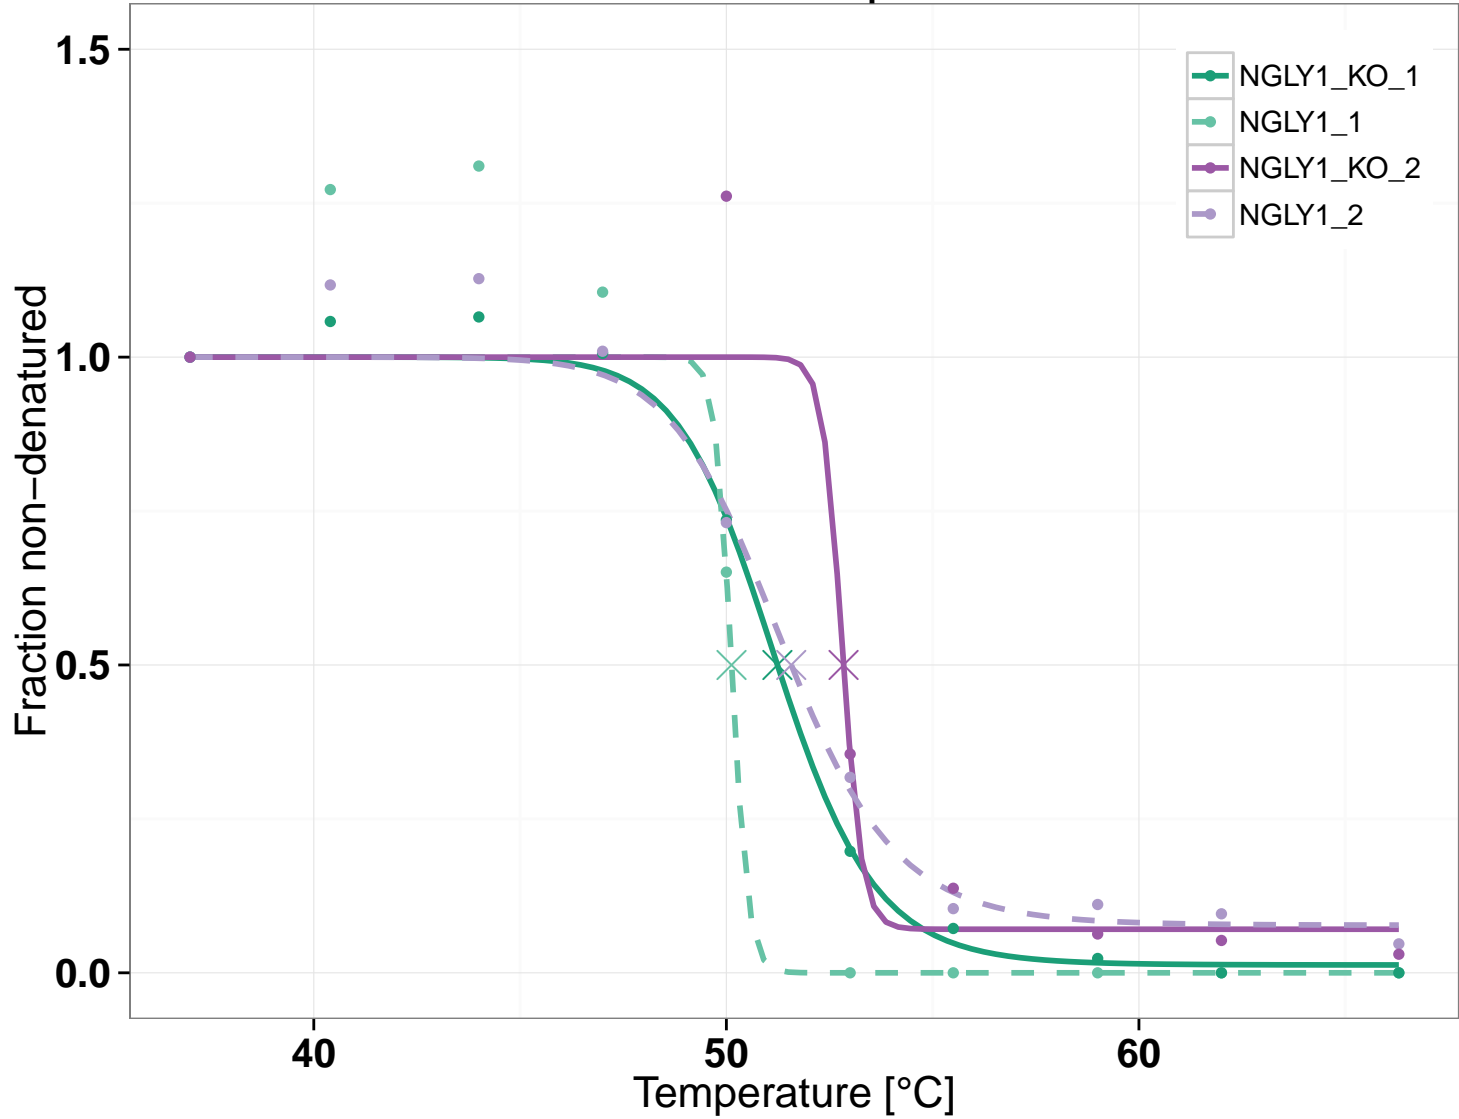

|            | meltPoint | slope | plateau | R2   |
|------------|-----------|-------|---------|------|
| NGLY1_KO_1 | 51.24     | -0.21 | 0.01    | 1    |
| NGLY1_1    | 50.12     | -1.2  | 0       | 0.94 |
| NGLY1_KO_2 | 52.84     | -0.97 | 0.07    | 0.54 |
| NGLY1_2    | 51.57     | -0.17 | 0.08    | 0.98 |

Supplement: Supplementary file 282 [file 1]

# IPI00787607.2|TCAG7 1317

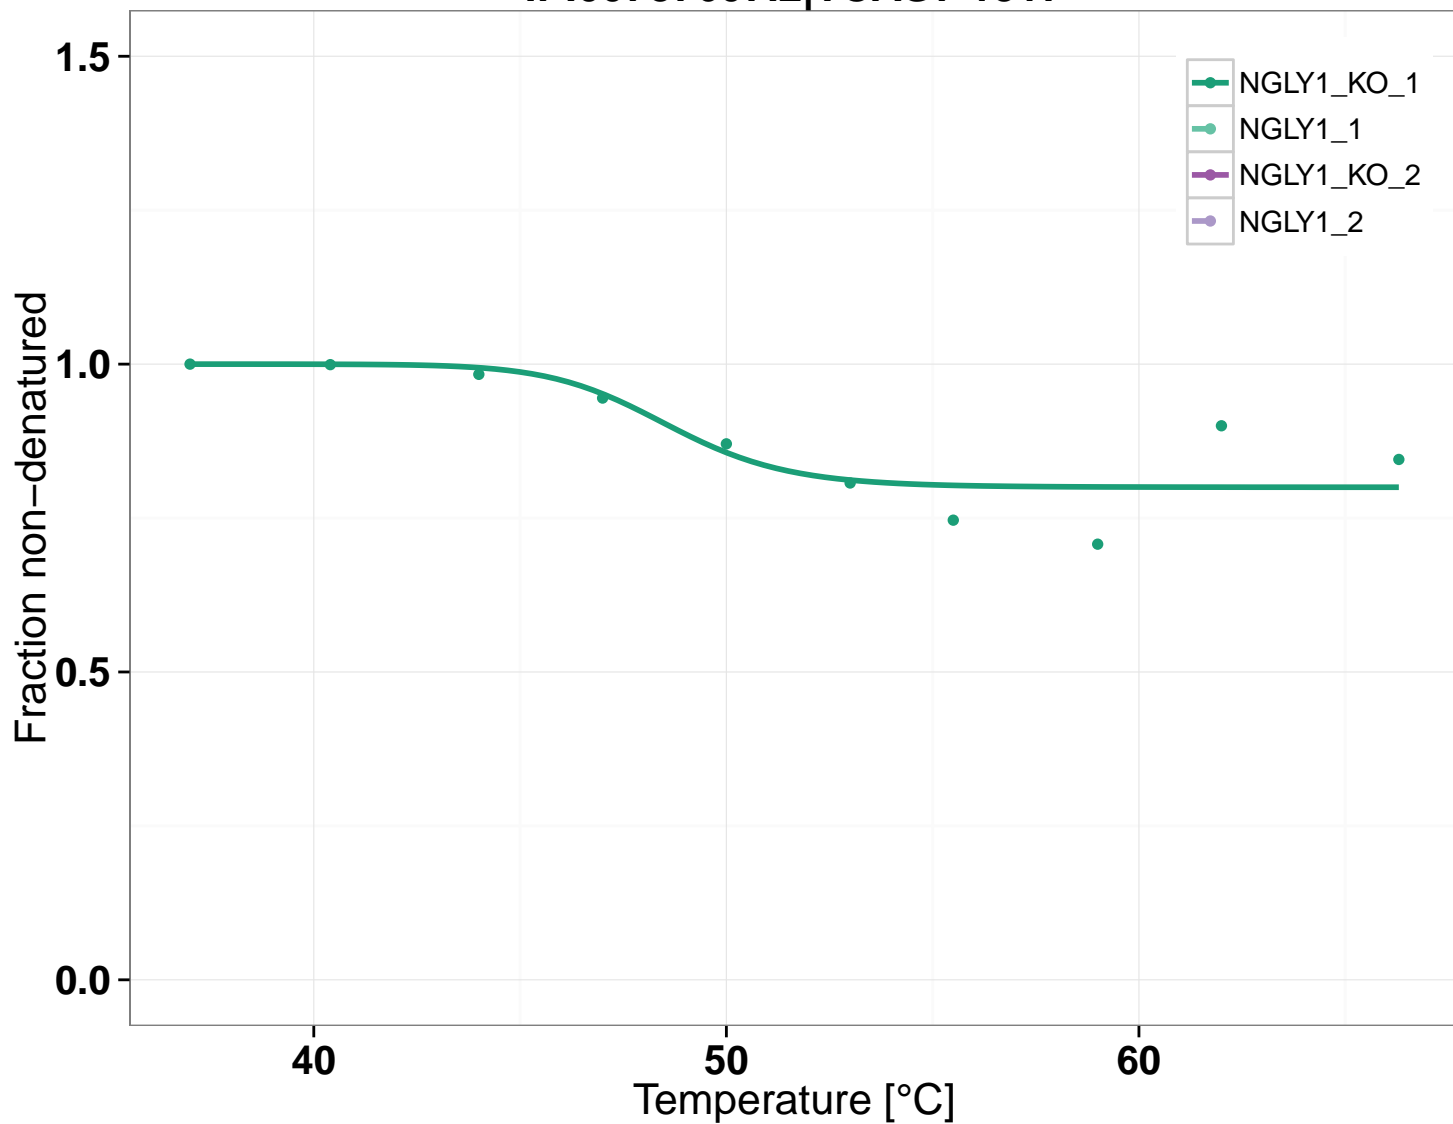

|            | meltPoint | slope  | plateau | R2   |
|------------|-----------|--------|---------|------|
| NGLY1_KO_1 | —         | −0.035 | 0.8     | 0.75 |
| NGLY1_1    | —         | —      | —       | —    |
| NGLY1_KO_2 | —         | —      | —       | —    |
| NGLY1_2    | —         | —      | —       | —    |

Supplement: Supplementary file 283 [file 1]

# IPI00177642.8|CCDC9

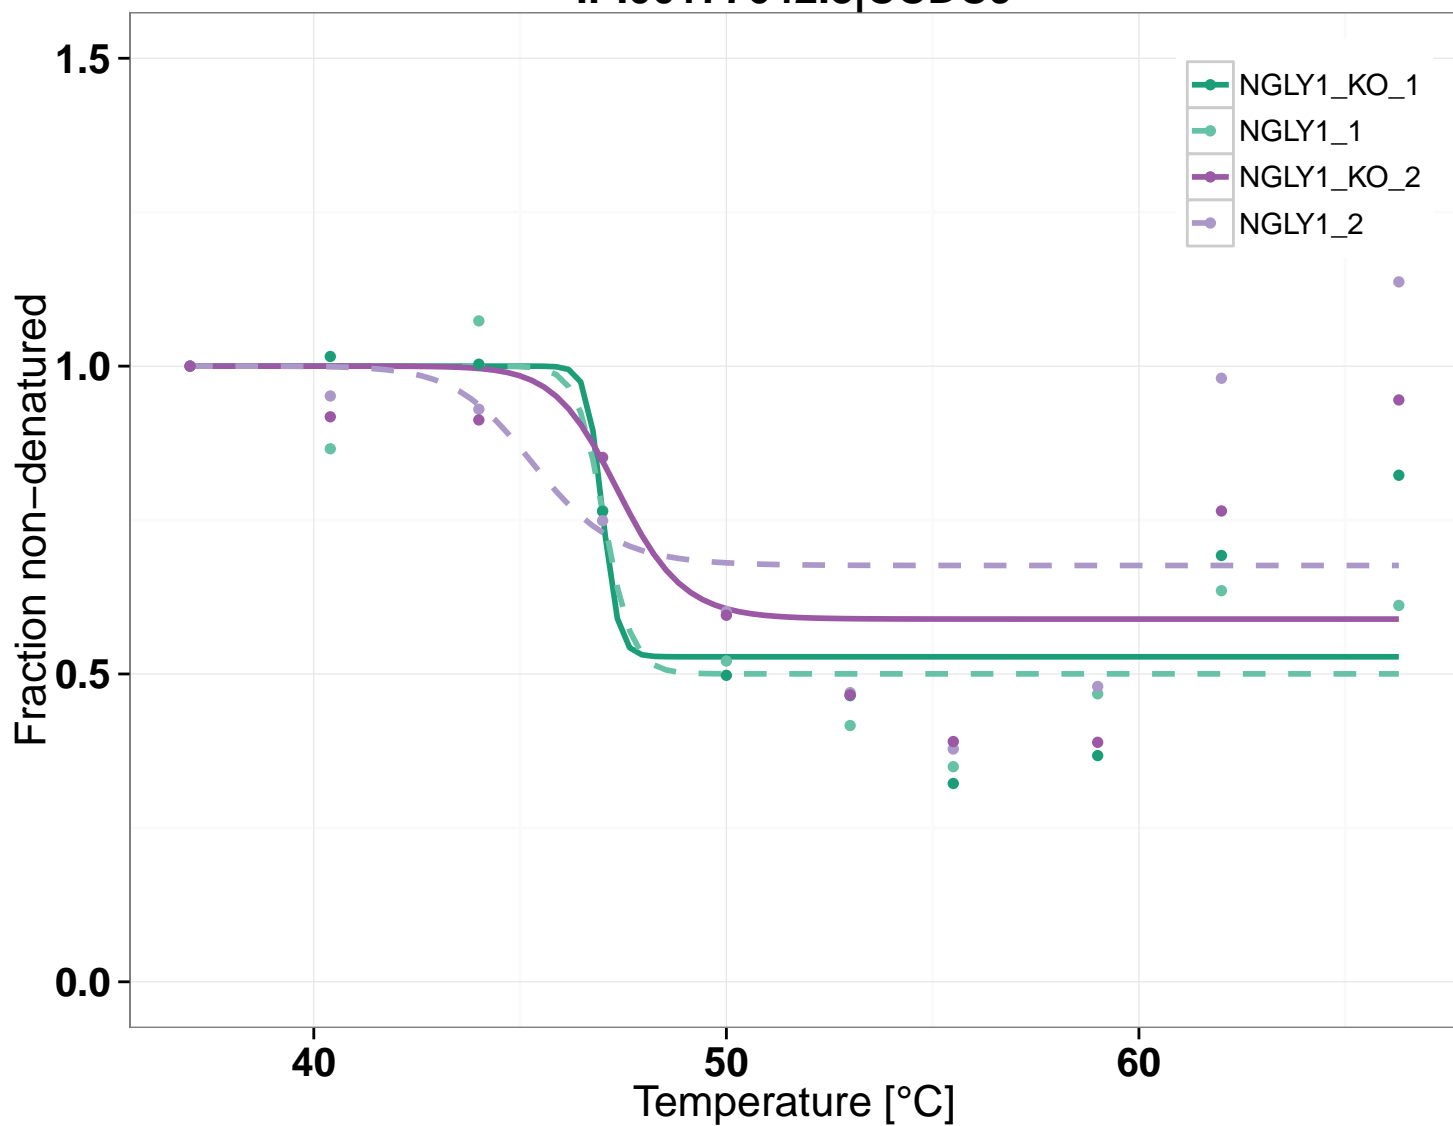

|            | meltPoint | slope  | plateau | R2   |
|------------|-----------|--------|---------|------|
| NGLY1_KO_1 | —         | -0.63  | 0.53    | 0.71 |
| NGLY1_1    | —         | -0.37  | 0.5     | 0.85 |
| NGLY1_KO_2 | —         | -0.13  | 0.59    | 0.49 |
| NGLY1_2    | —         | -0.083 | 0.68    | 0.25 |

Supplement: Supplementary file 284 [file 1]

# IPI00556590.2|RALA

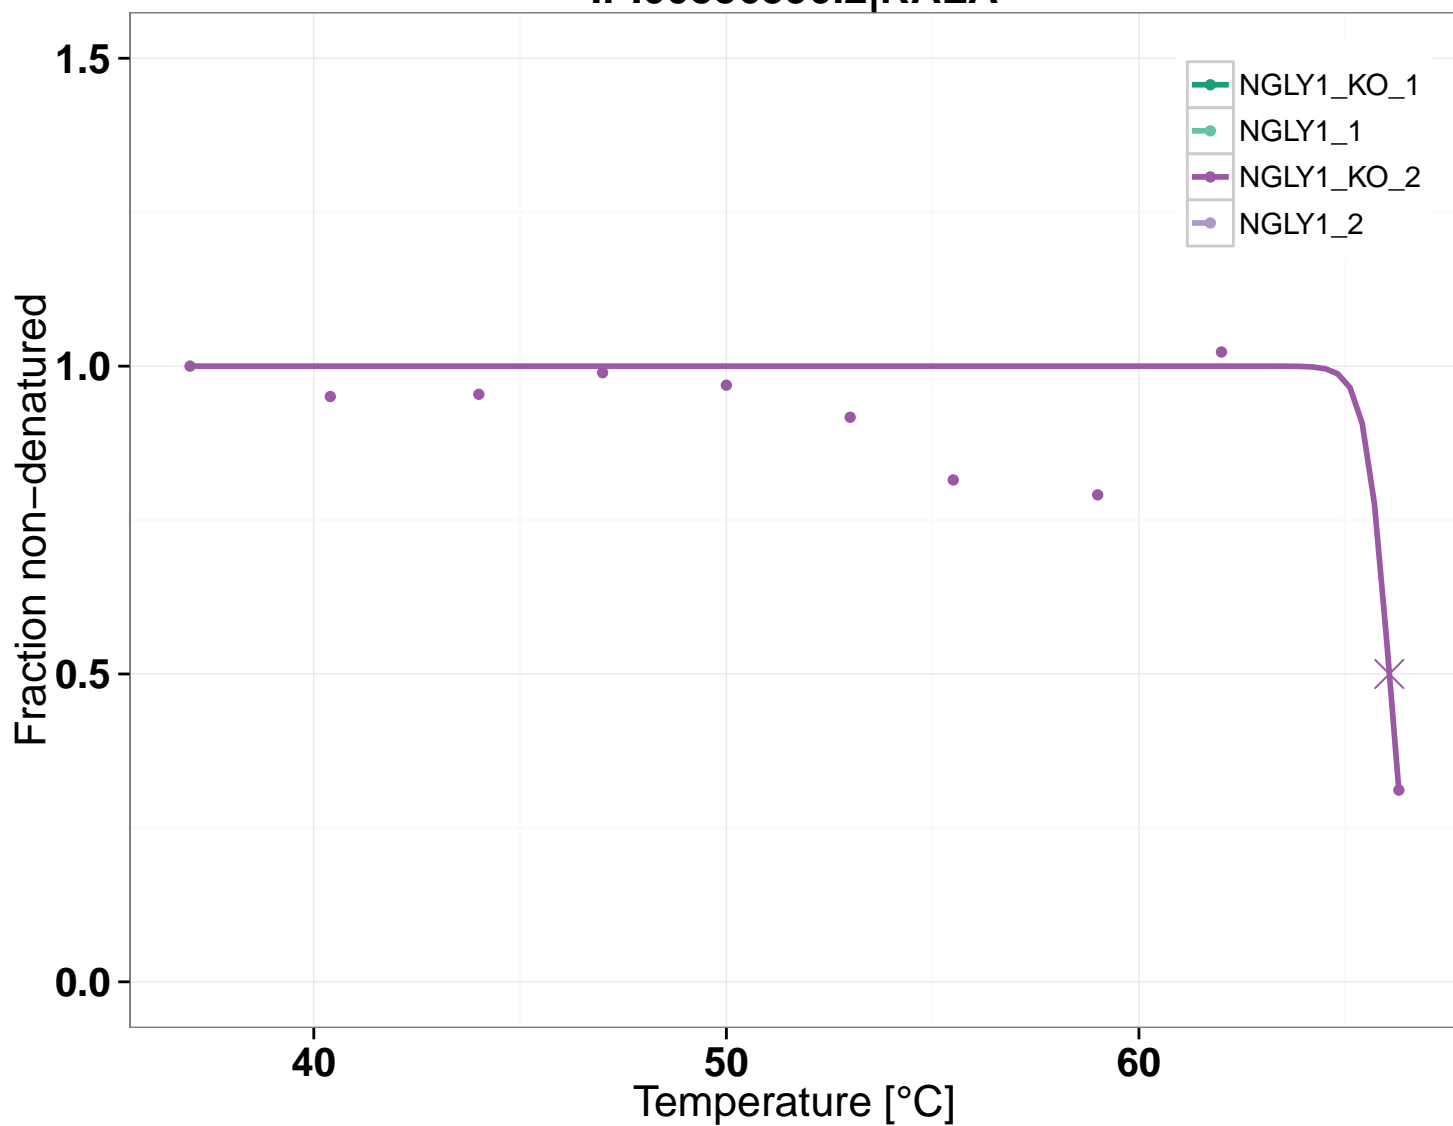

|            | meltPoint | slope | plateau | R2   |
|------------|-----------|-------|---------|------|
| NGLY1_KO_1 | —         | —     | —       | —    |
| NGLY1_1    | —         | —     | —       | —    |
| NGLY1_KO_2 | 66.07     | -0.86 | 0       | 0.77 |
| NGLY1_2    | —         | —     | —       | —    |

Supplement: Supplementary file 285 [file 1]

IPI00298731.2|PPP1R10

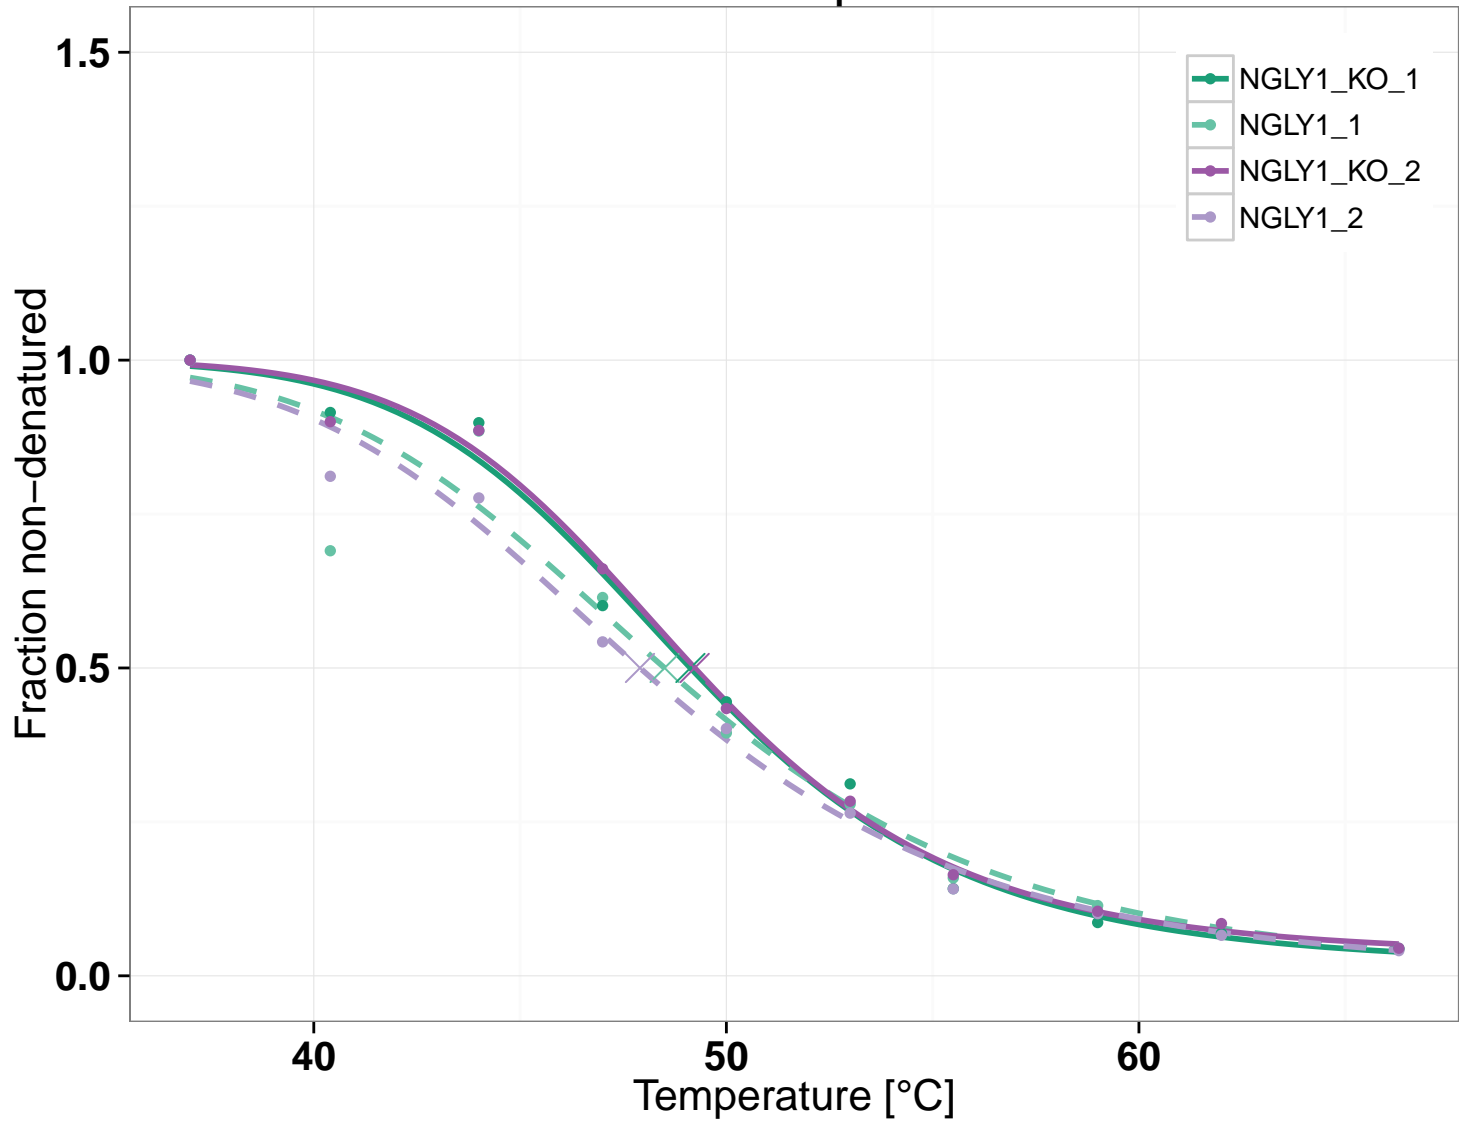

|            | meltPoint | slope  | plateau | R2   |
|------------|-----------|--------|---------|------|
| NGLY1_KO_1 | 49.13     | -0.073 | 0.01    | 0.99 |
| NGLY1_1    | 48.5      | -0.06  | 0       | 0.94 |
| NGLY1_KO_2 | 49.23     | -0.075 | 0.03    | 1    |
| NGLY1_2    | 47.91     | -0.061 | 0       | 0.99 |

Supplement: Supplementary file 286 [file 1]

IPI00027831.1|GRWD1

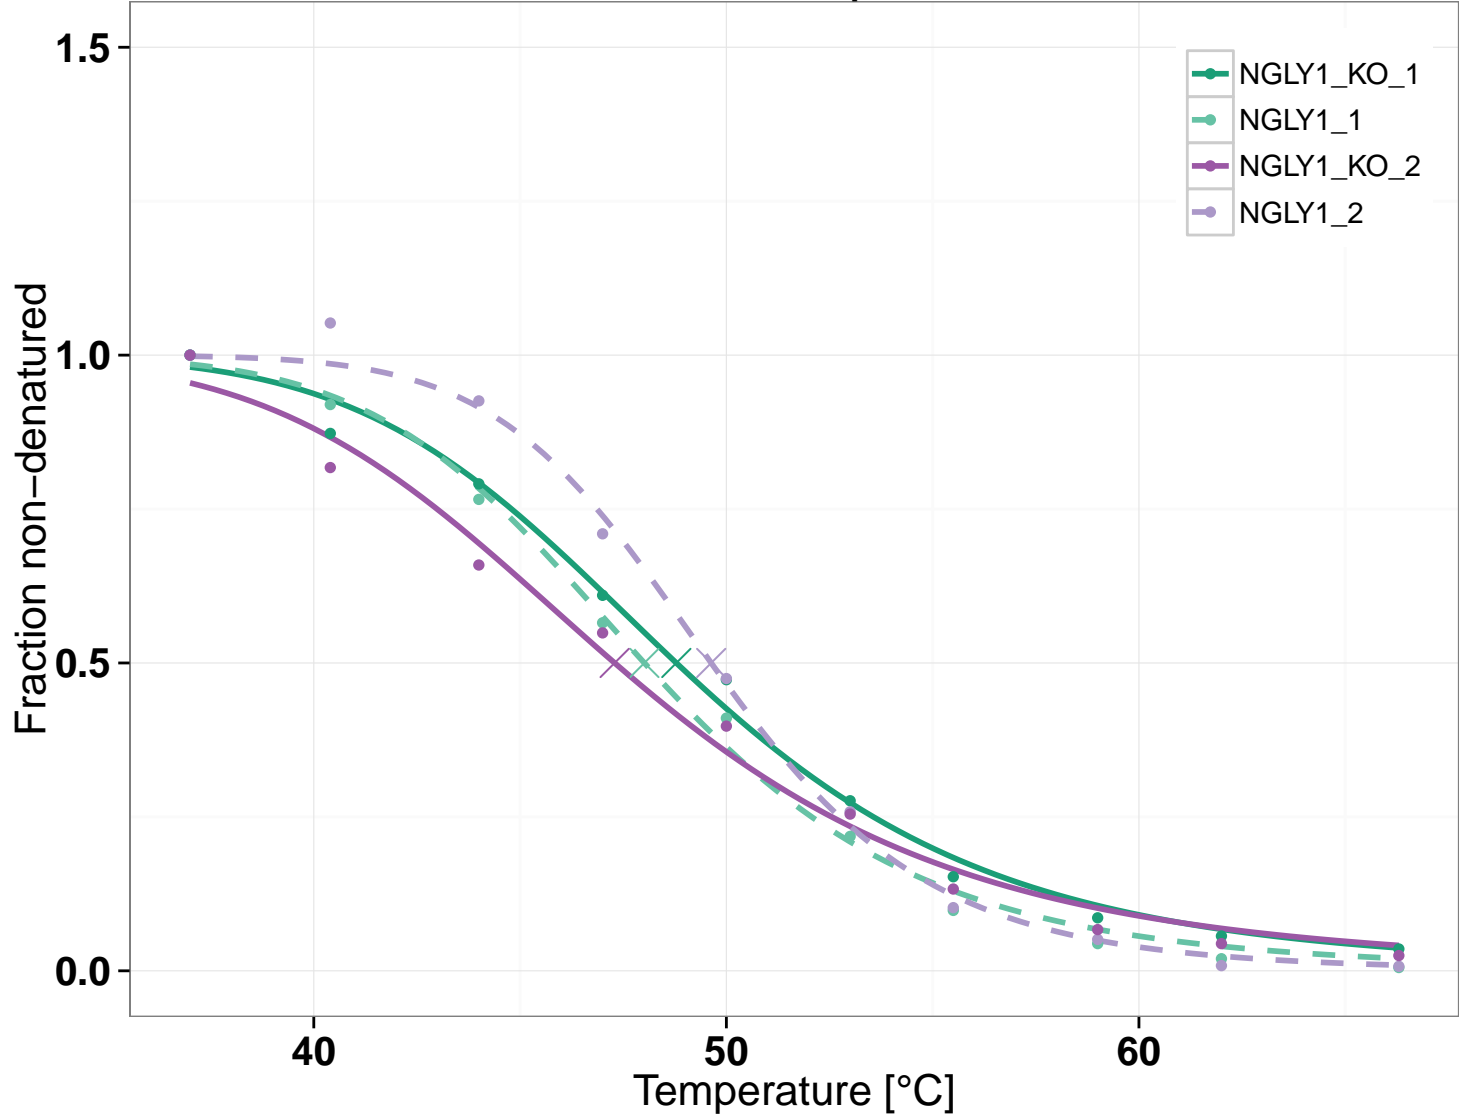

|            | meltPoint | slope  | plateau | R2   |
|------------|-----------|--------|---------|------|
| NGLY1_KO_1 | 48.79     | -0.065 | 0       | 0.99 |
| NGLY1_1    | 48.01     | -0.075 | 0       | 1    |
| NGLY1_KO_2 | 47.29     | -0.06  | 0       | 0.99 |
| NGLY1_2    | 49.63     | -0.095 | 0       | 1    |

Supplement: Supplementary file 287 [file 1]

IPI00005511.1|PHF5A

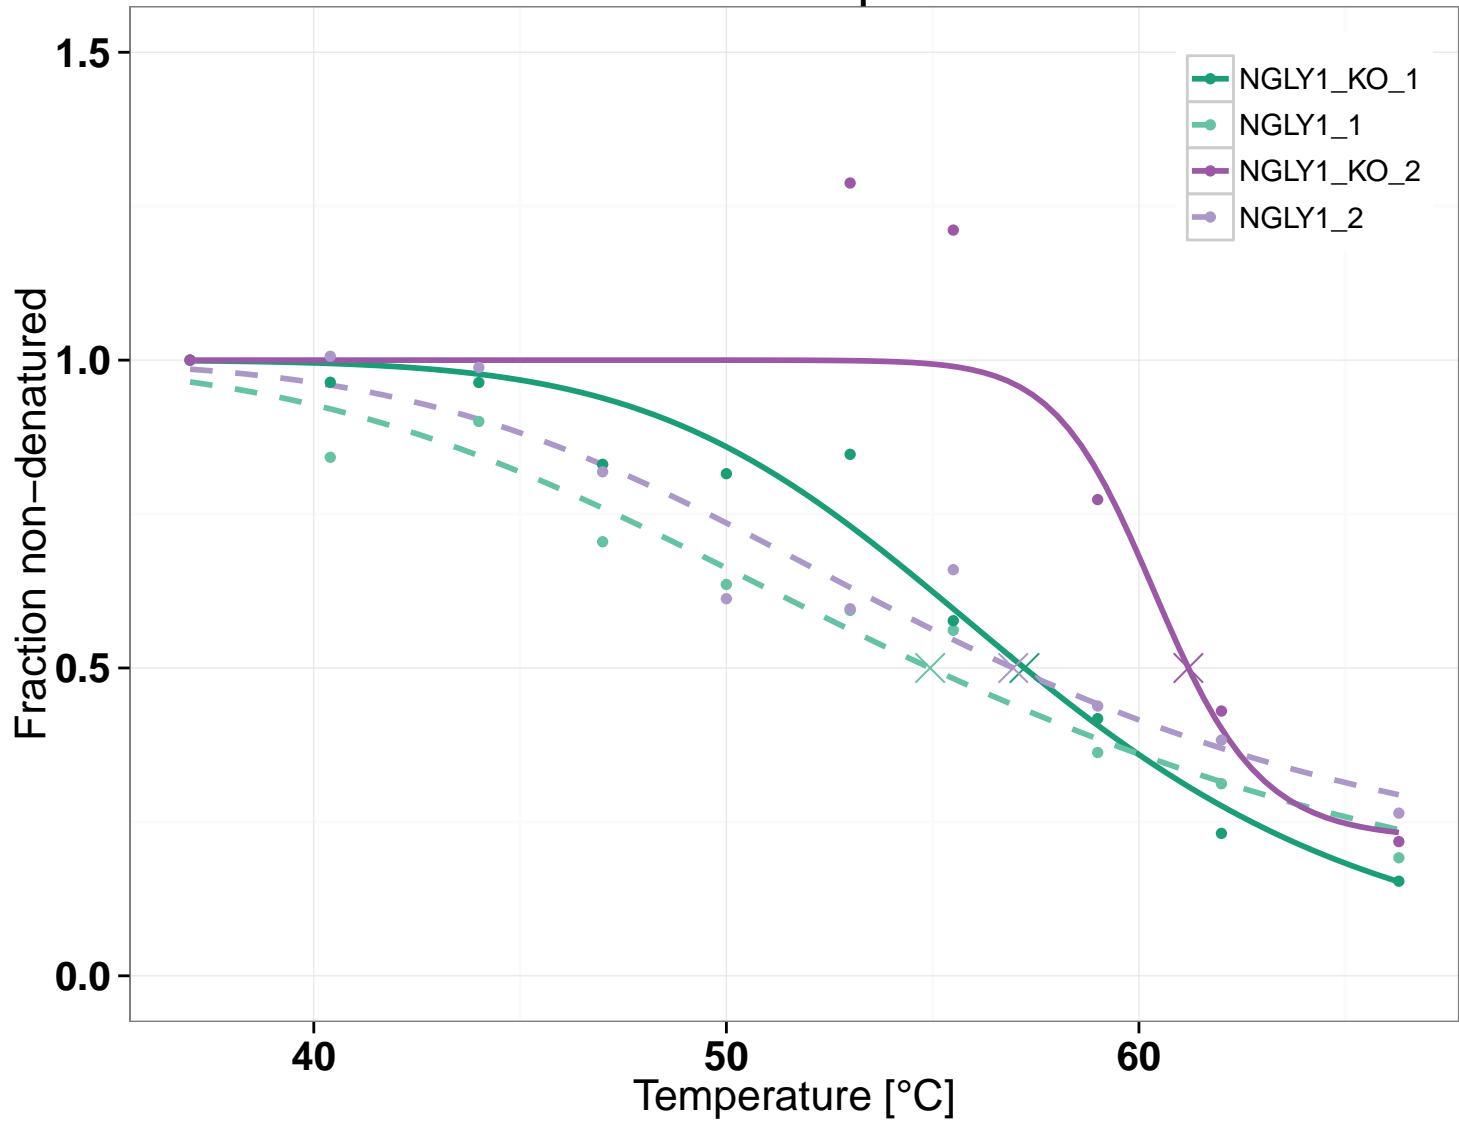

|            | meltPoint | slope  | plateau | R2   |
|------------|-----------|--------|---------|------|
| NGLY1_KO_1 | 57.23     | -0.056 | 0       | 0.97 |
| NGLY1_1    | 54.94     | -0.034 | 0       | 0.96 |
| NGLY1_KO_2 | 61.2      | -0.16  | 0.22    | 0.11 |
| NGLY1_2    | 56.95     | -0.035 | 0.12    | 0.94 |

Supplement: Supplementary file 288 [file 1]

IPI00552277.1|UBL4A

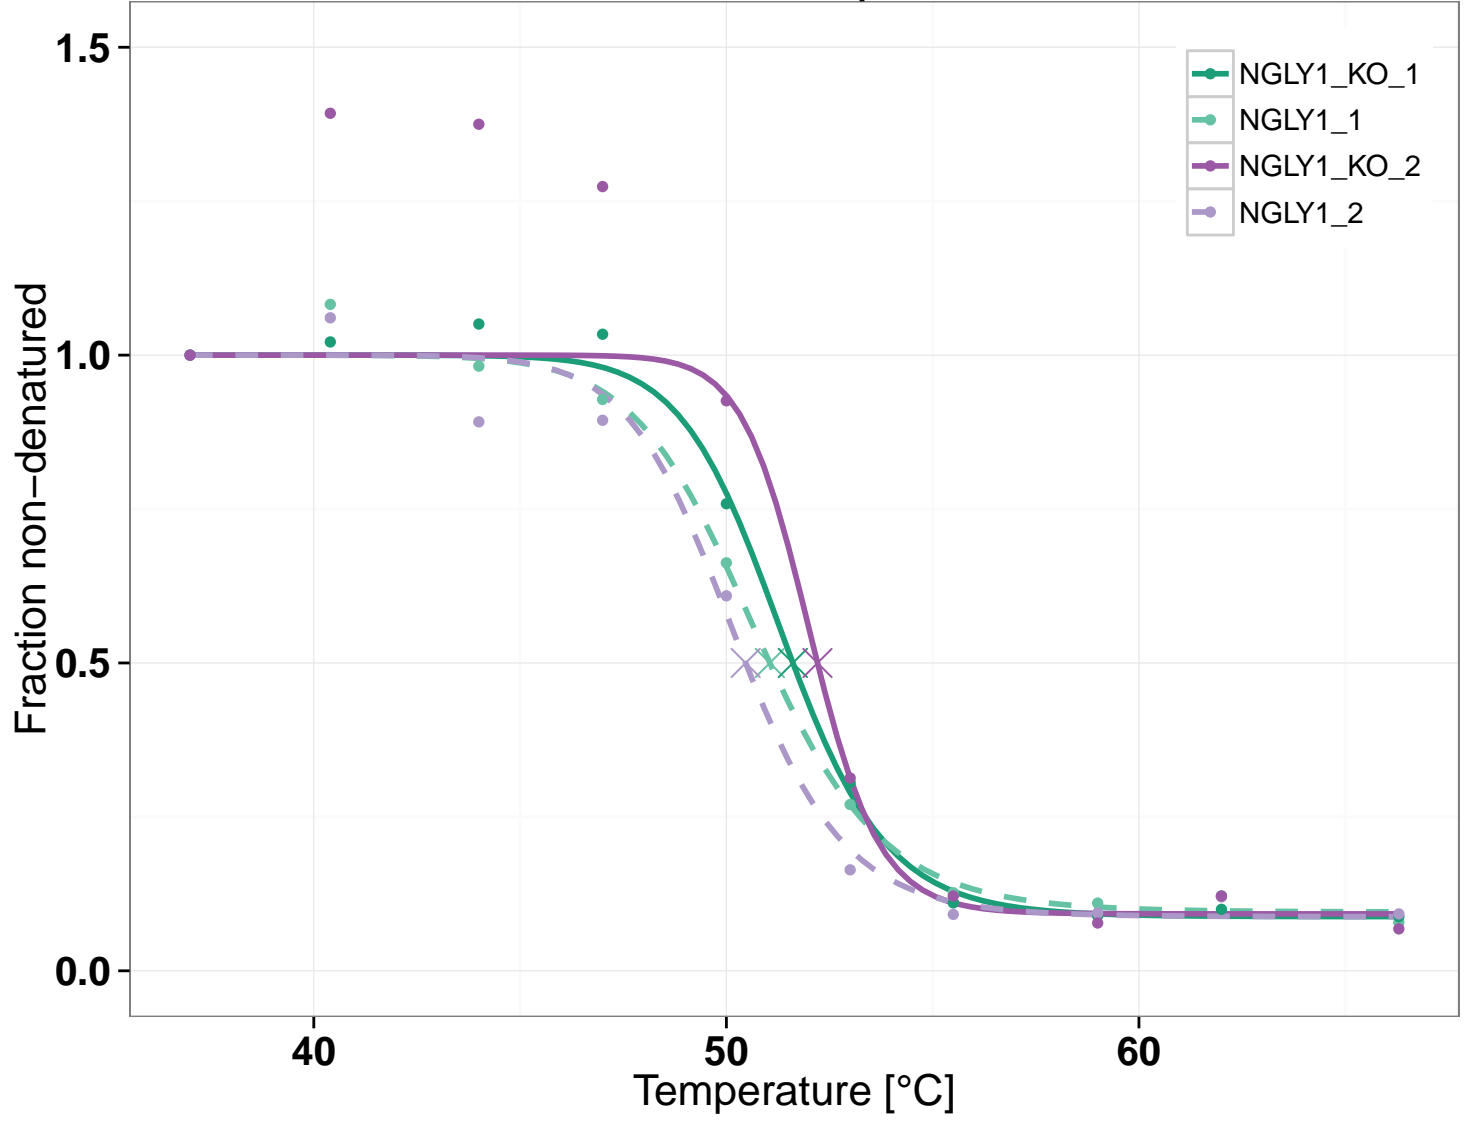

|            | meltPoint | slope | plateau | R2   |
|------------|-----------|-------|---------|------|
| NGLY1_KO_1 | 51.61     | -0.18 | 0.09    | 1    |
| NGLY1_1    | 51.05     | -0.15 | 0.1     | 1    |
| NGLY1_KO_2 | 52.21     | -0.27 | 0.09    | 0.88 |
| NGLY1_2    | 50.47     | -0.17 | 0.09    | 0.99 |

Supplement: Supplementary file 289 [file 1]

# IPI00219655.6|PHYH

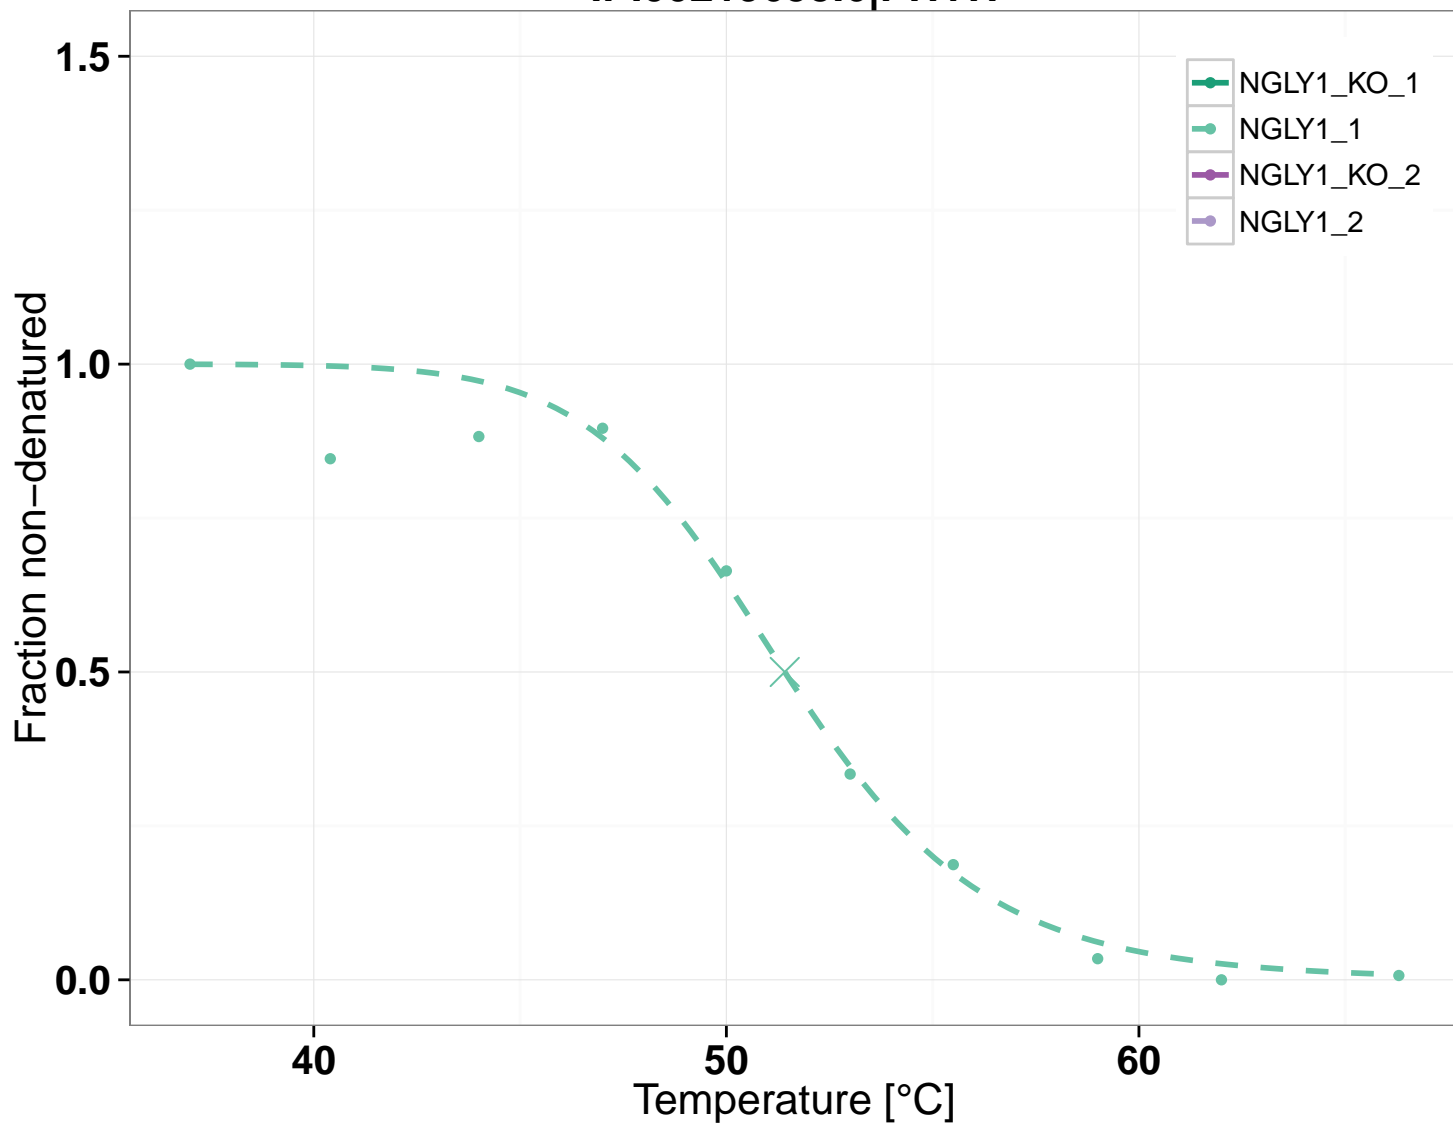

|            | meltPoint | slope | plateau | R2   |
|------------|-----------|-------|---------|------|
| NGLY1_KO_1 | —         | —     | —       | —    |
| NGLY1_1    | 51.41     | -0.1  | 0       | 0.98 |
| NGLY1_KO_2 | —         | —     | —       | —    |
| NGLY1_2    | —         | —     | —       | —    |

Supplement: Supplementary file 290 [file 1]

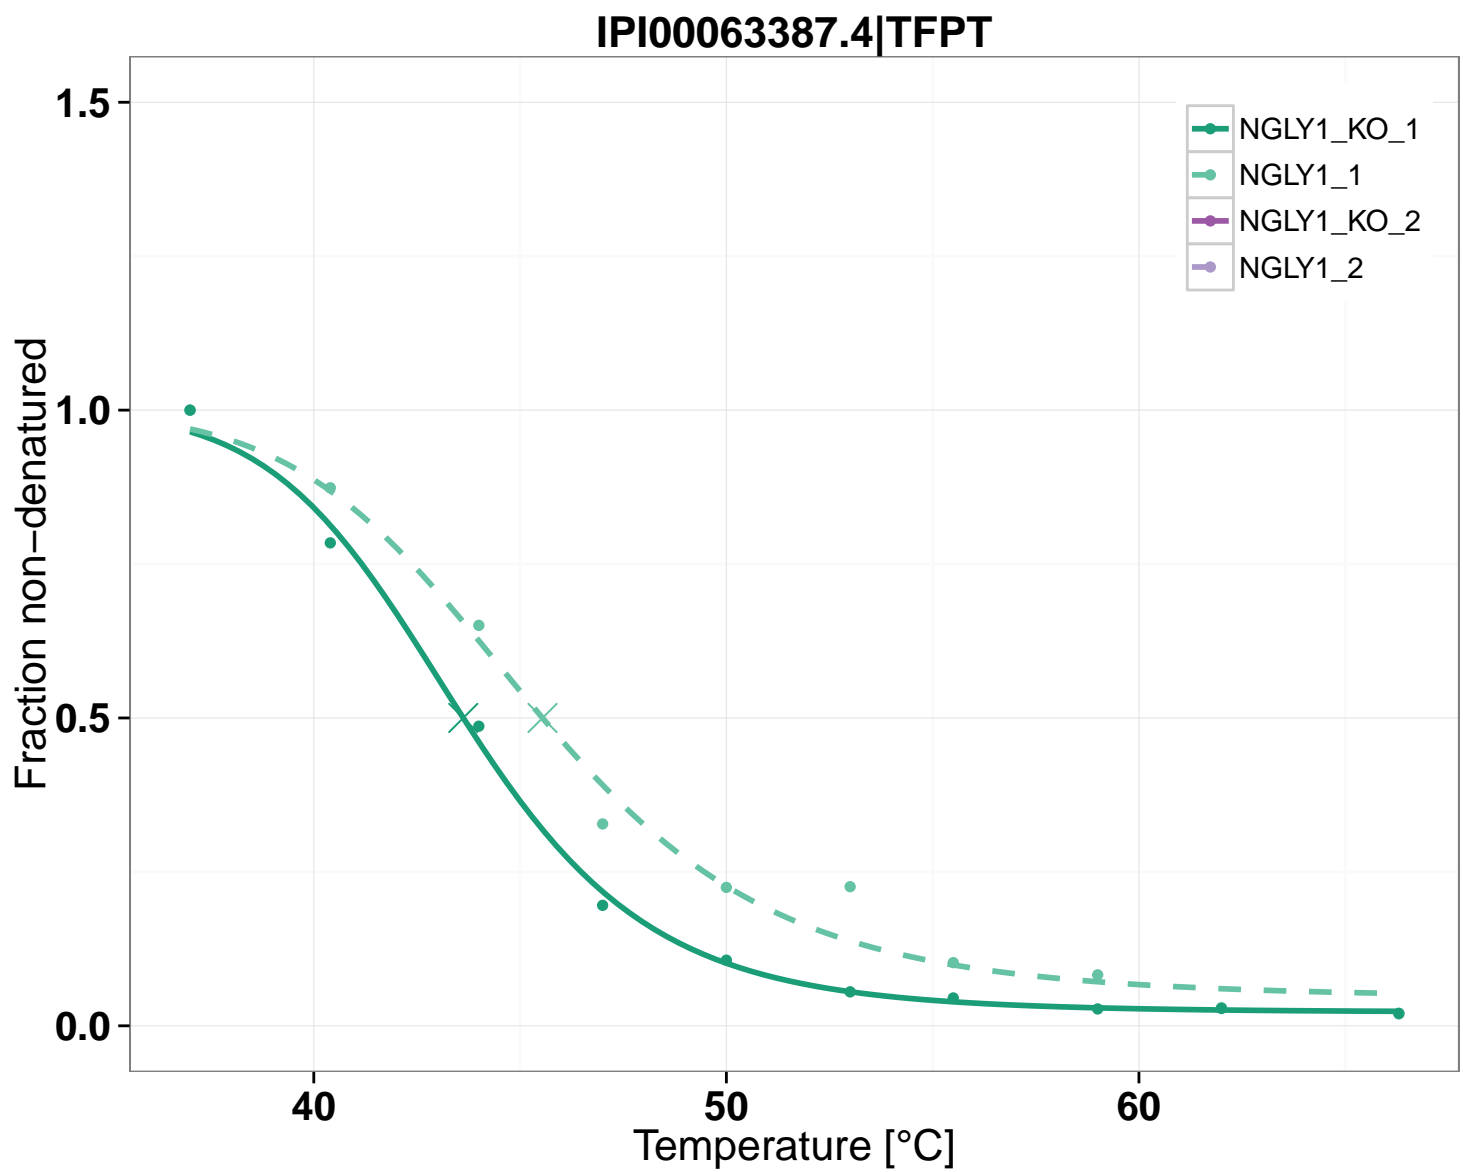

|            | meltPoint | slope  | plateau | R2   |
|------------|-----------|--------|---------|------|
| NGLY1_KO_1 | 43.62     | -0.11  | 0.02    | 1    |
| NGLY1_1    | 45.54     | -0.082 | 0.05    | 0.99 |
| NGLY1_KO_2 | -         | -      | -       | -    |
| NGLY1_2    | -         | -      | -       | -    |

Supplement: Supplementary file 291 [file 1]

# IPI00107339.4|GNB1L

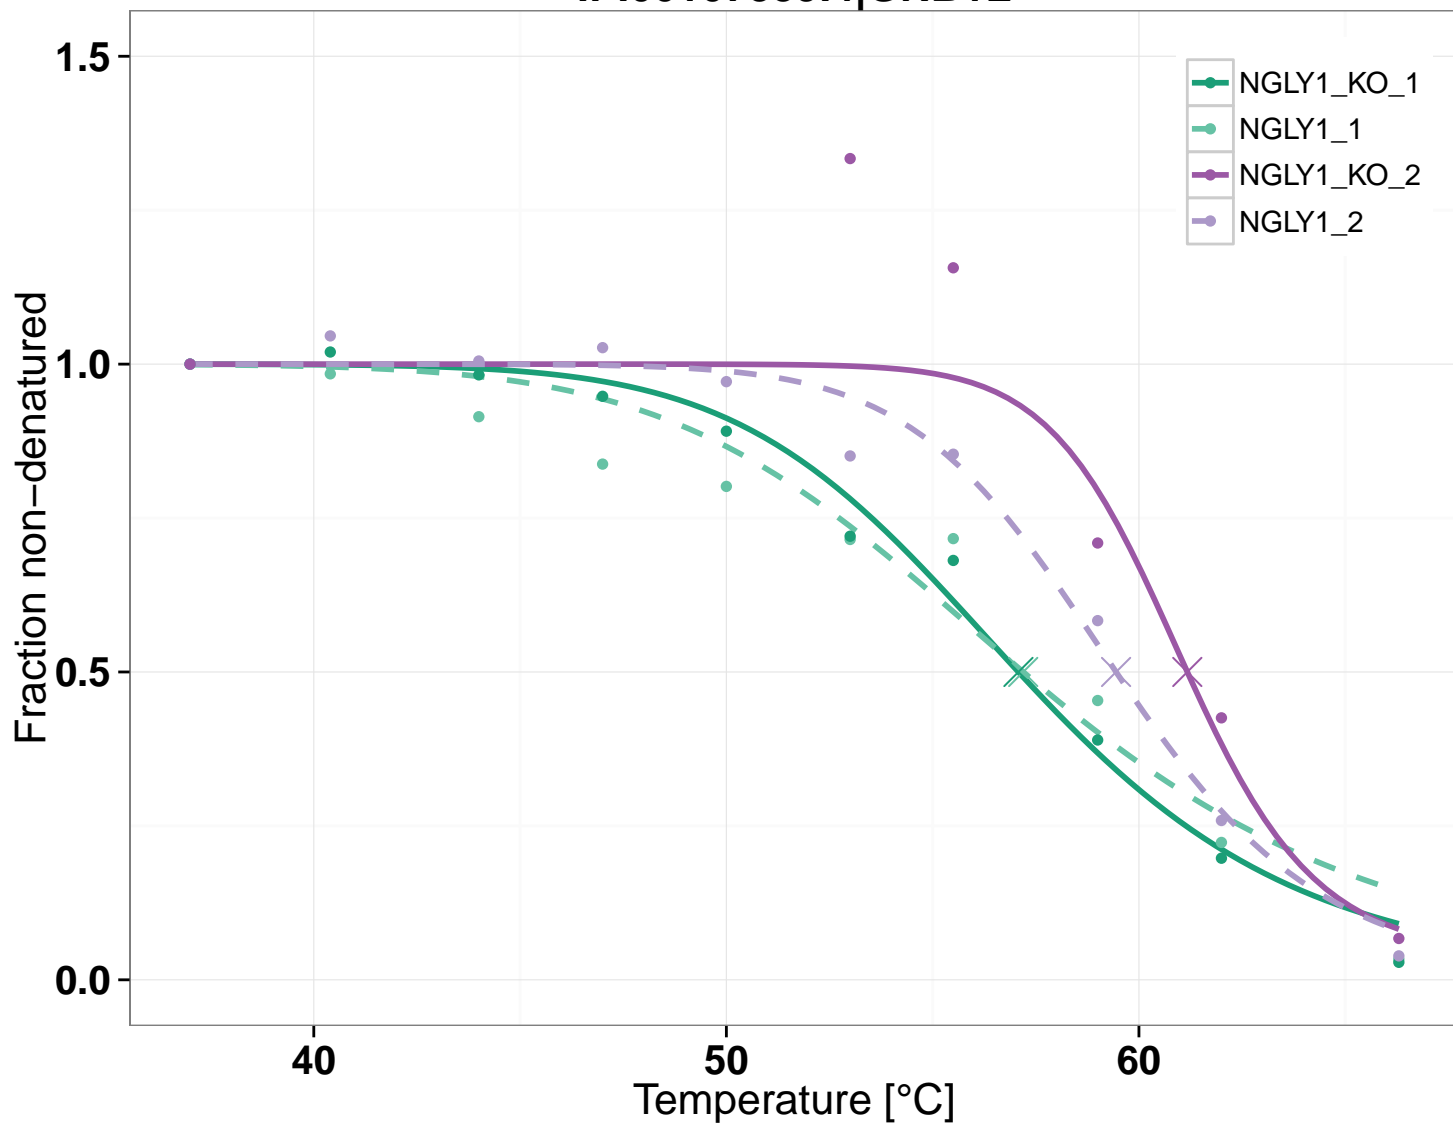

|            | meltPoint | slope  | plateau | R2   |
|------------|-----------|--------|---------|------|
| NGLY1_KO_1 | 57.08     | -0.074 | 0       | 0.99 |
| NGLY1_1    | 57.2      | -0.058 | 0       | 0.95 |
| NGLY1_KO_2 | 61.17     | -0.15  | 0.04    | 0.36 |
| NGLY1_2    | 59.45     | -0.1   | 0       | 0.99 |

Supplement: Supplementary file 292 [file 1]

IPI00871452.1|PWWP2A

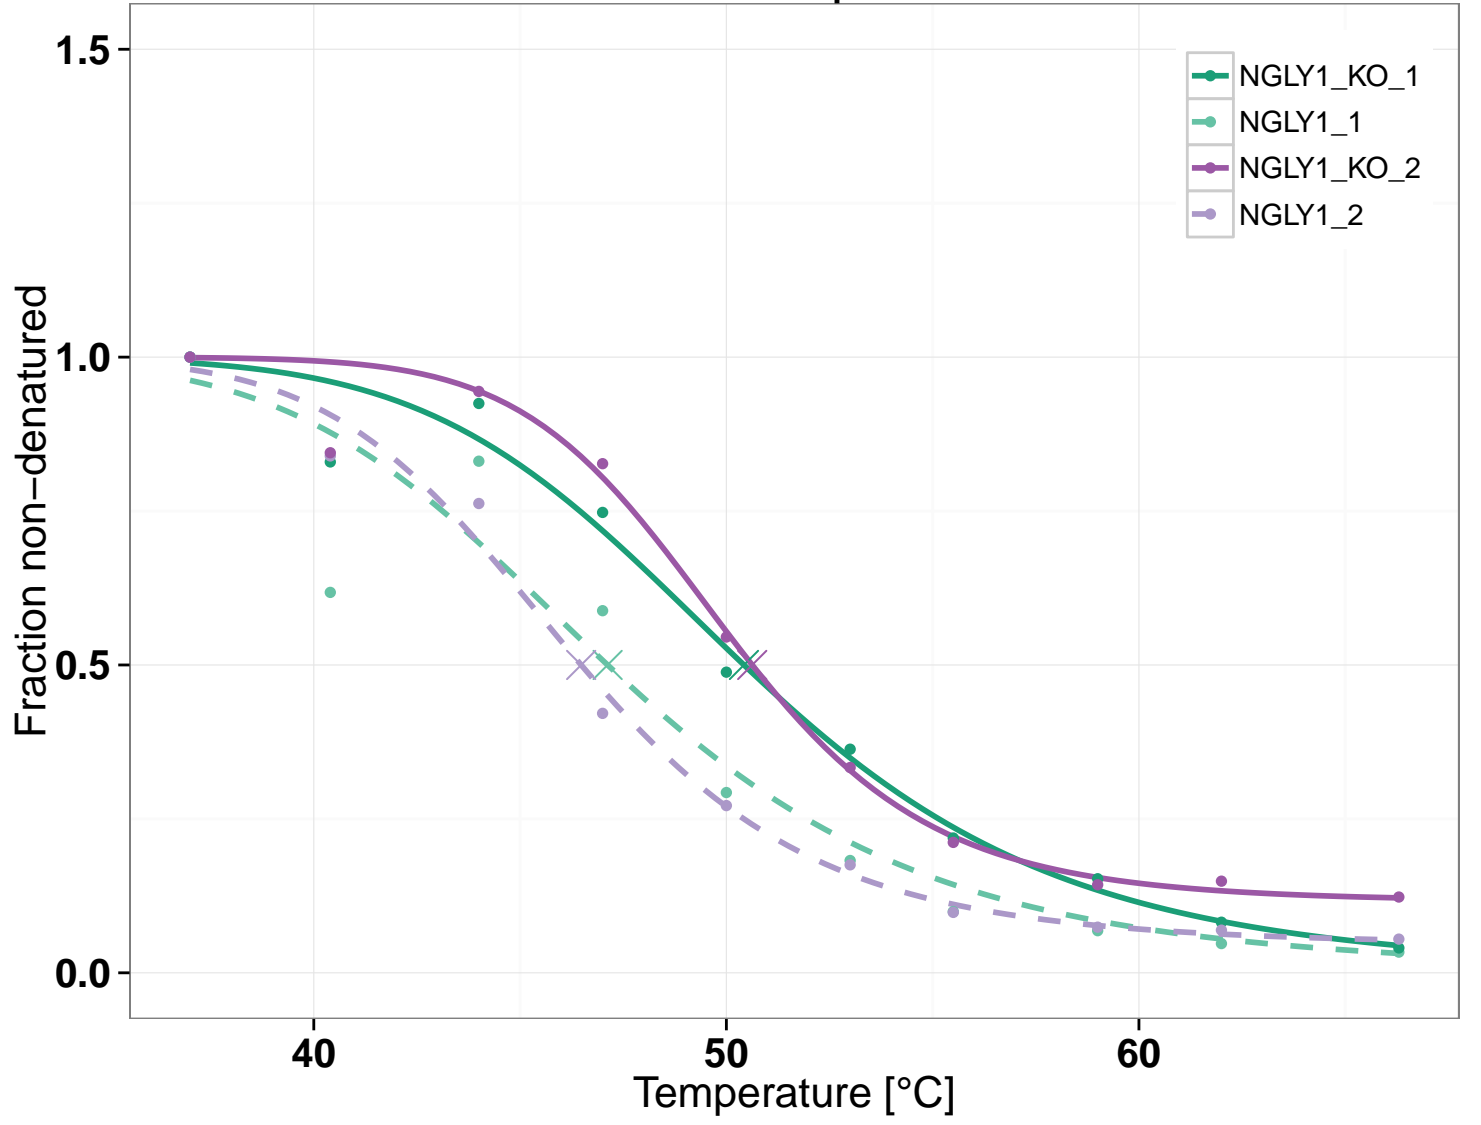

|            | meltPoint | slope  | plateau | R2   |
|------------|-----------|--------|---------|------|
| NGLY1_KO_1 | 50.43     | -0.065 | 0       | 0.98 |
| NGLY1_1    | 47.12     | -0.065 | 0       | 0.91 |
| NGLY1_KO_2 | 50.63     | -0.089 | 0.12    | 0.98 |
| NGLY1_2    | 46.48     | -0.081 | 0.04    | 0.99 |

Supplement: Supplementary file 293 [file 1]

# IPI00292228.1|GSK3A

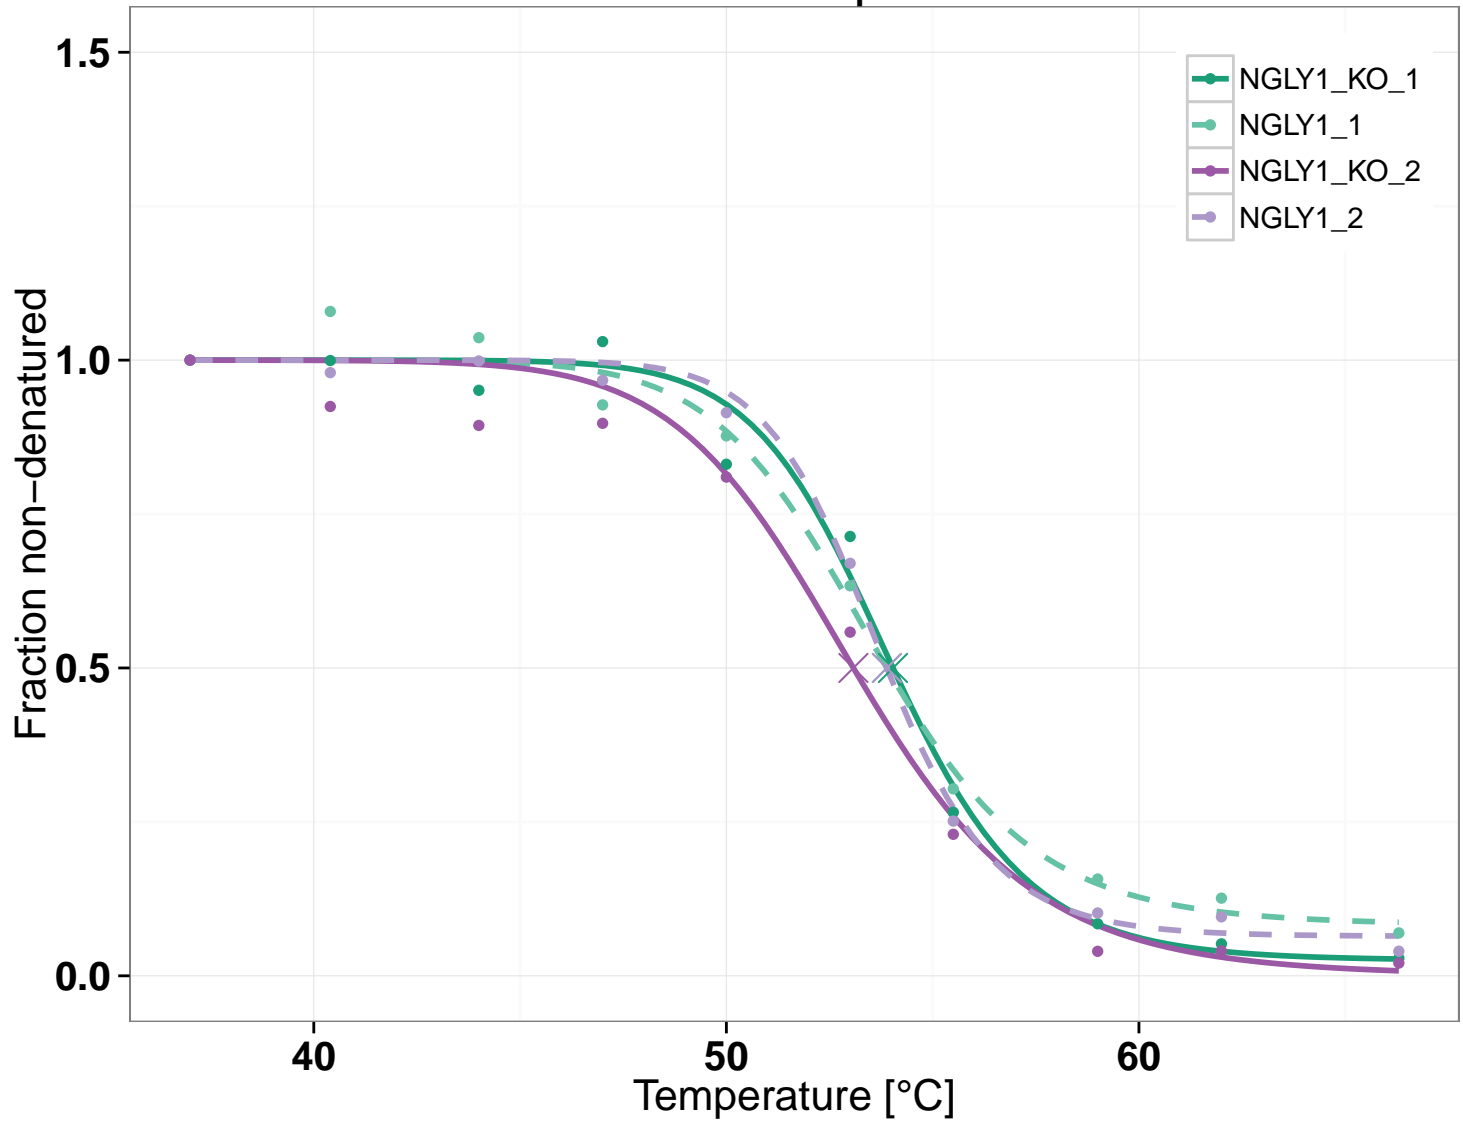

|            | meltPoint | slope | plateau | R2   |
|------------|-----------|-------|---------|------|
| NGLY1_KO_1 | 54.04     | -0.15 | 0.02    | 0.99 |
| NGLY1_1    | 53.89     | -0.12 | 0.08    | 0.99 |
| NGLY1_KO_2 | 53.08     | -0.11 | 0       | 0.98 |
| NGLY1_2    | 53.89     | -0.17 | 0.06    | 1    |

Supplement: Supplementary file 294 [file 1]

IPI00917321.1|INO80B

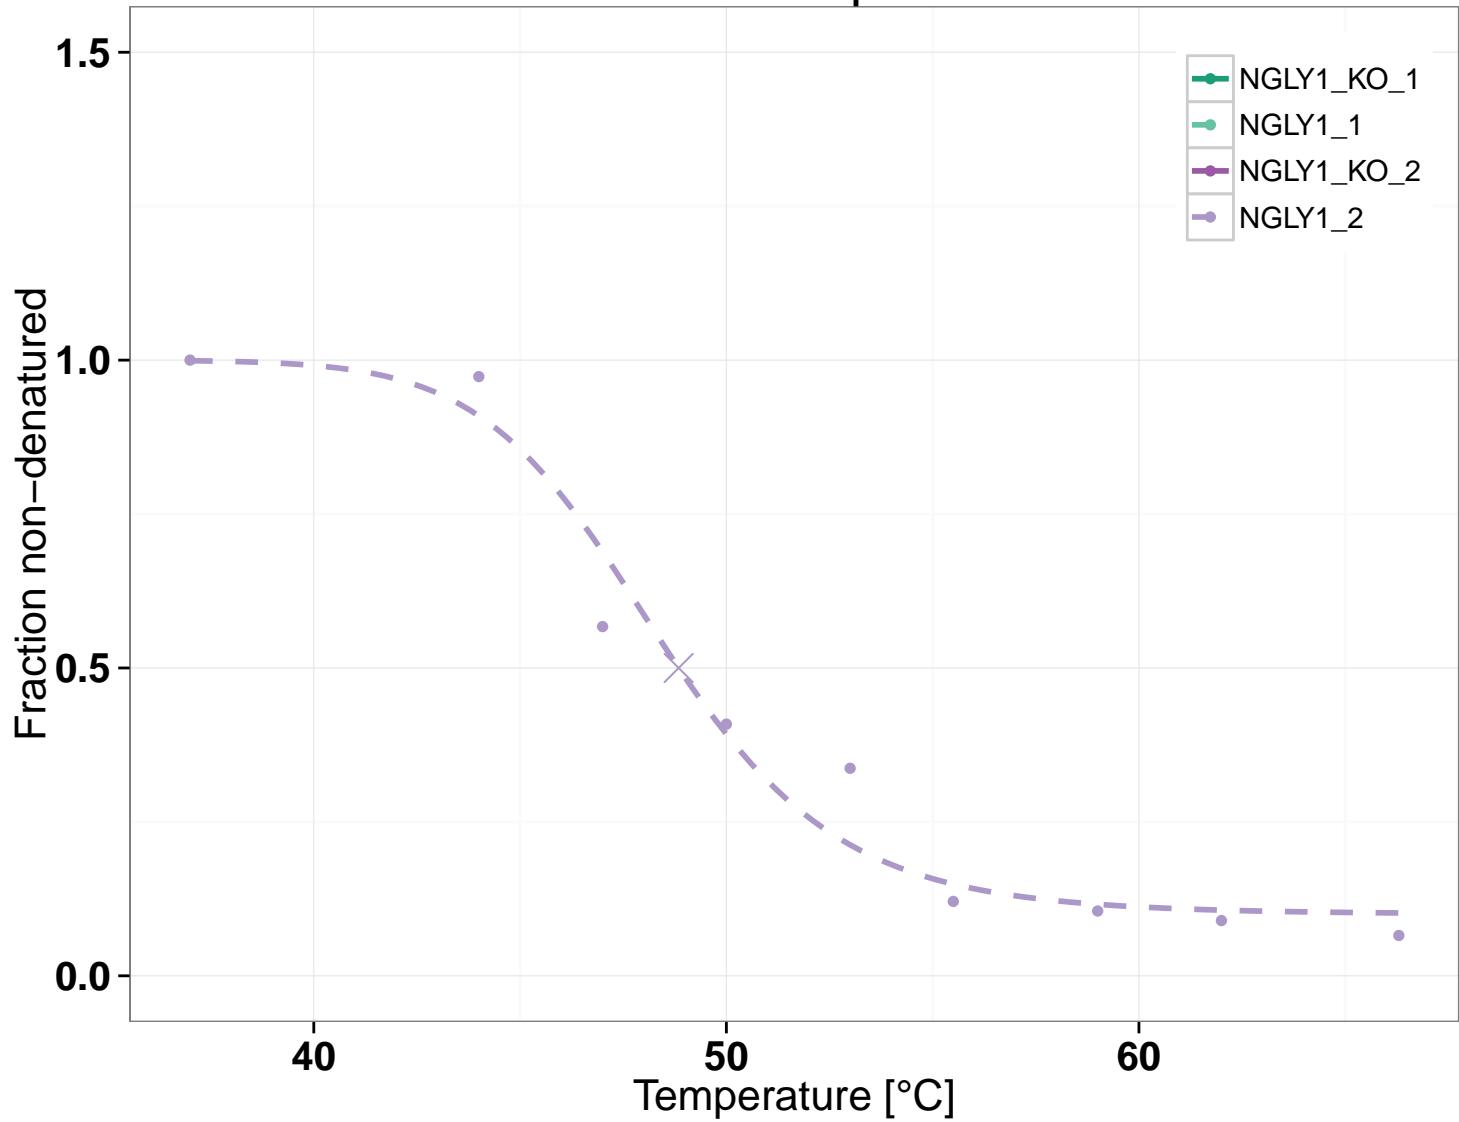

|            | meltPoint | slope | plateau | R2   |
|------------|-----------|-------|---------|------|
| NGLY1_KO_1 | —         | —     | —       | —    |
| NGLY1_1    | —         | —     | —       | —    |
| NGLY1_KO_2 | —         | —     | —       | —    |
| NGLY1_2    | 48.84     | -0.1  | 0.1     | 0.86 |

Supplement: Supplementary file 295 [file 1]

IPI00827967.1|C9ORF86

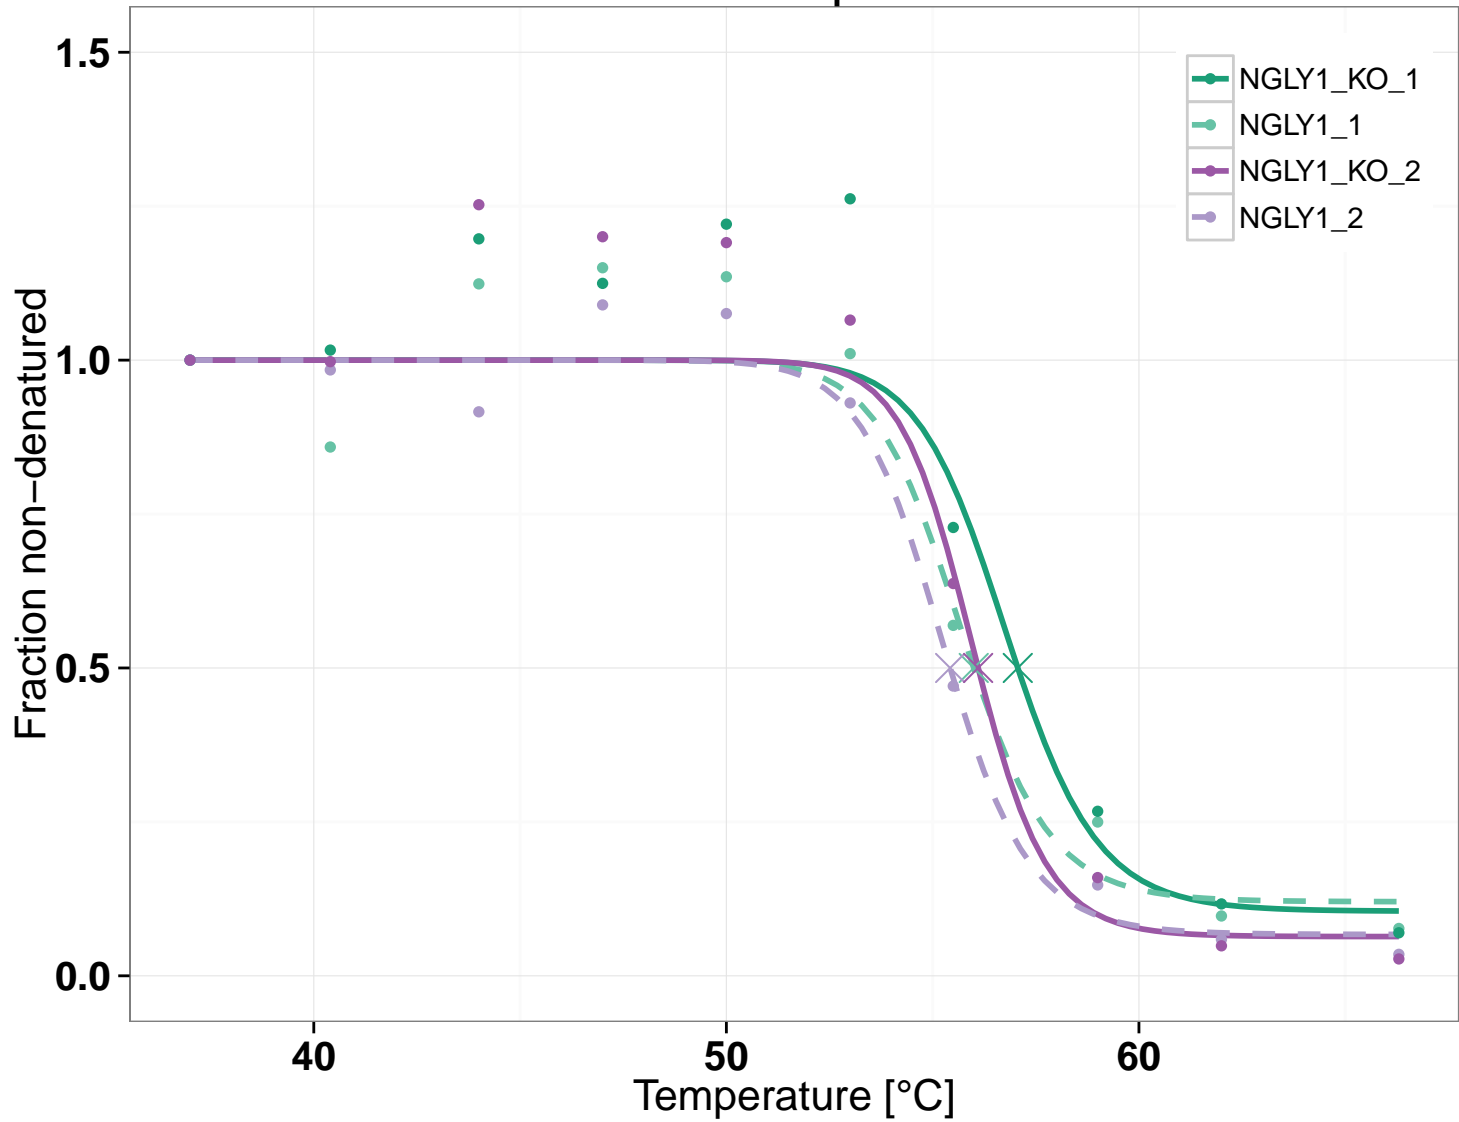

|            | meltPoint | slope | plateau | R2   |
|------------|-----------|-------|---------|------|
| NGLY1_KO_1 | 57.06     | -0.21 | 0.1     | 0.91 |
| NGLY1_1    | 56        | -0.21 | 0.12    | 0.95 |
| NGLY1_KO_2 | 56.1      | -0.26 | 0.06    | 0.93 |
| NGLY1_2    | 55.42     | -0.23 | 0.07    | 0.99 |

Supplement: Supplementary file 296 [file 1]

# IPI00641666.2|DENND2D

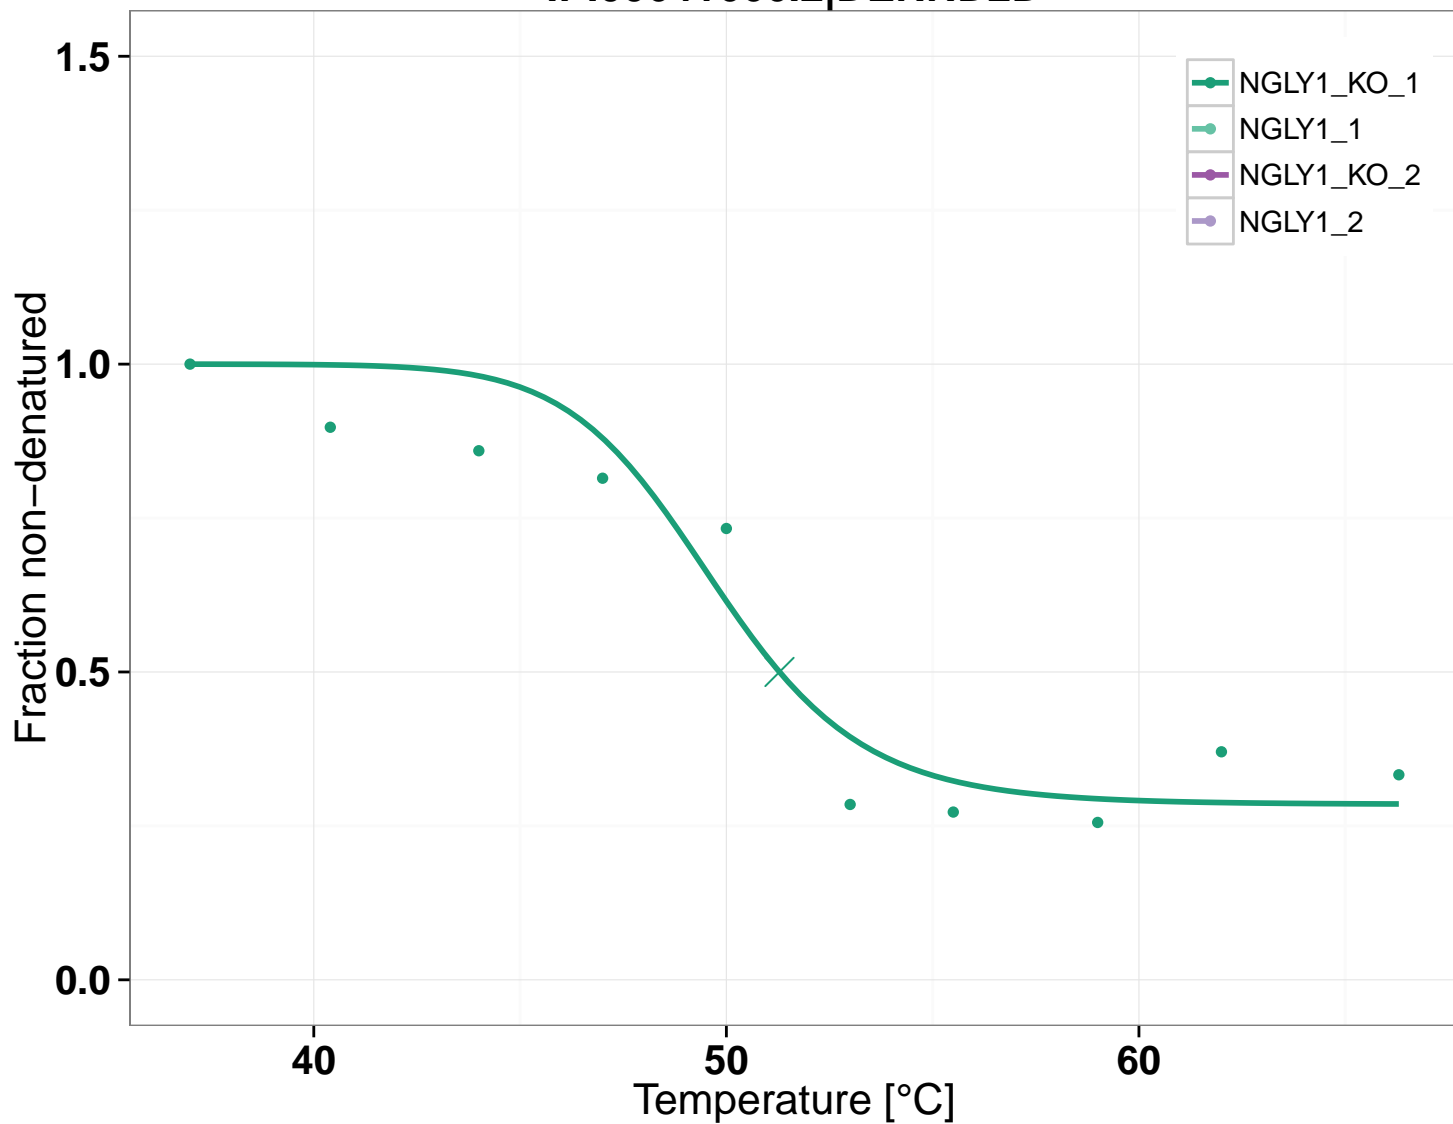

|            | meltPoint | slope | plateau | R2   |
|------------|-----------|-------|---------|------|
| NGLY1_KO_1 | 51.29     | -0.1  | 0.28    | 0.92 |
| NGLY1_1    | -         | -     | -       | -    |
| NGLY1_KO_2 | -         | -     | -       | -    |
| NGLY1_2    | -         | -     | -       | -    |

Supplement: Supplementary file 297 [file 1]

IPI00480200.1|21 KDA PROTEIN.

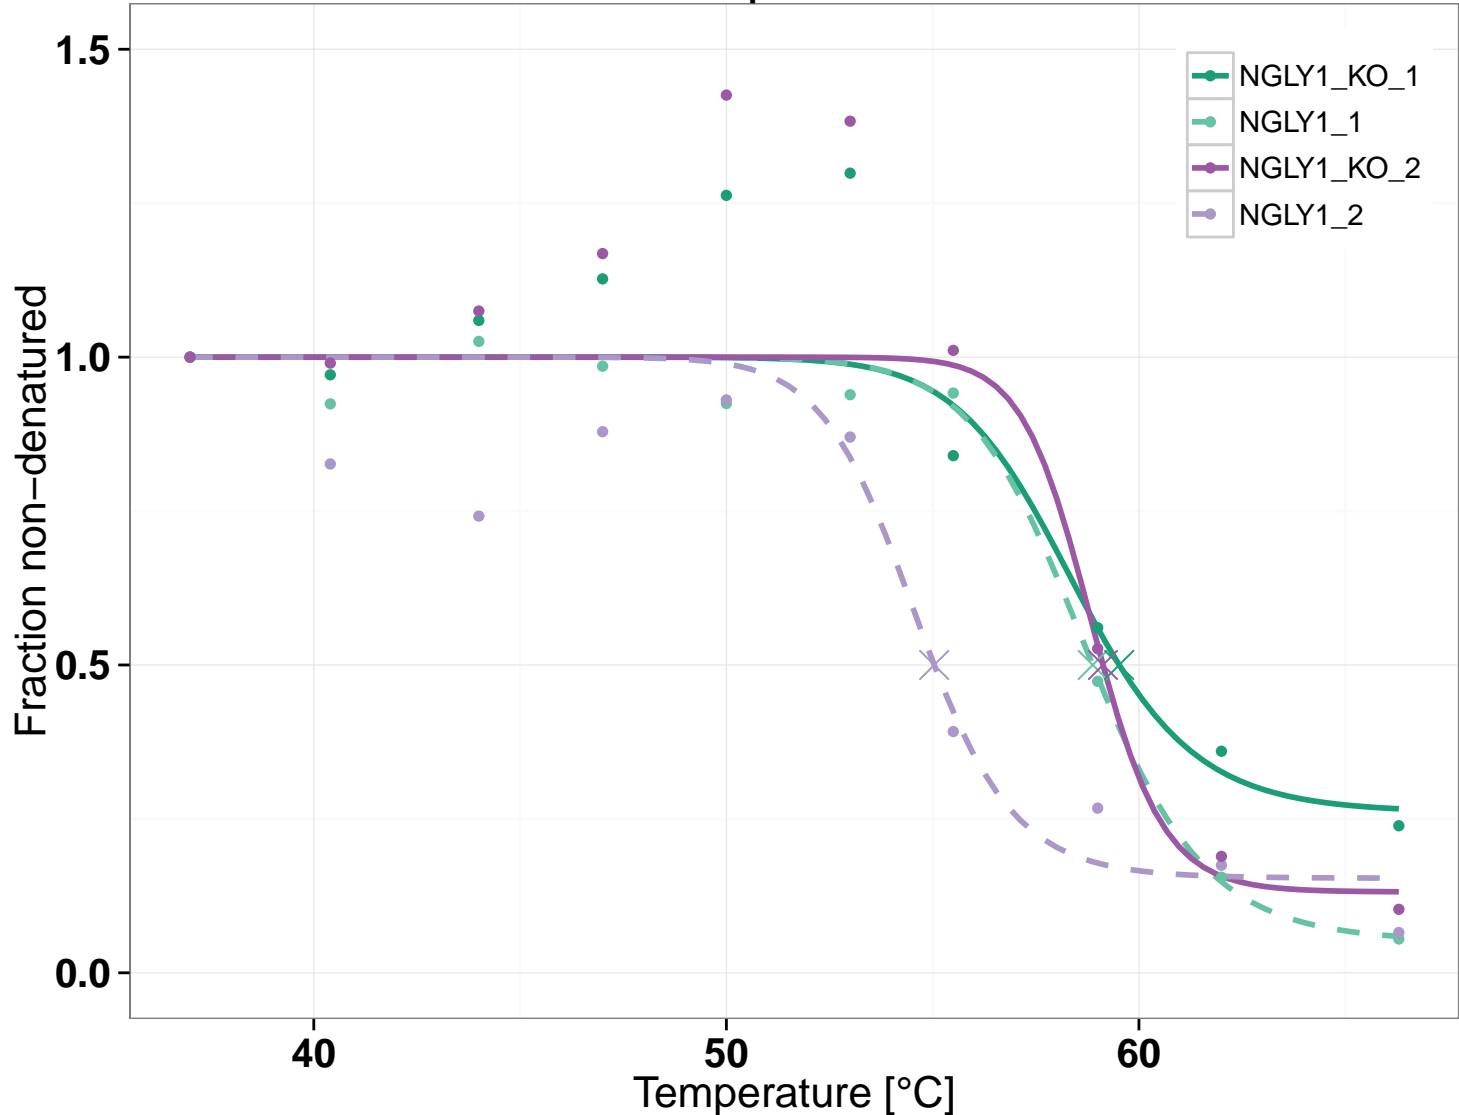

|            | meltPoint | slope | plateau | R2   |
|------------|-----------|-------|---------|------|
| NGLY1_KO_1 | 59.52     | -0.13 | 0.26    | 0.84 |
| NGLY1_1    | 58.88     | -0.17 | 0.05    | 0.99 |
| NGLY1_KO_2 | 59.13     | -0.25 | 0.13    | 0.81 |
| NGLY1_2    | 55.04     | -0.18 | 0.15    | 0.88 |

Supplement: Supplementary file 298 [file 1]

IPI00014174.1|MORF4L2

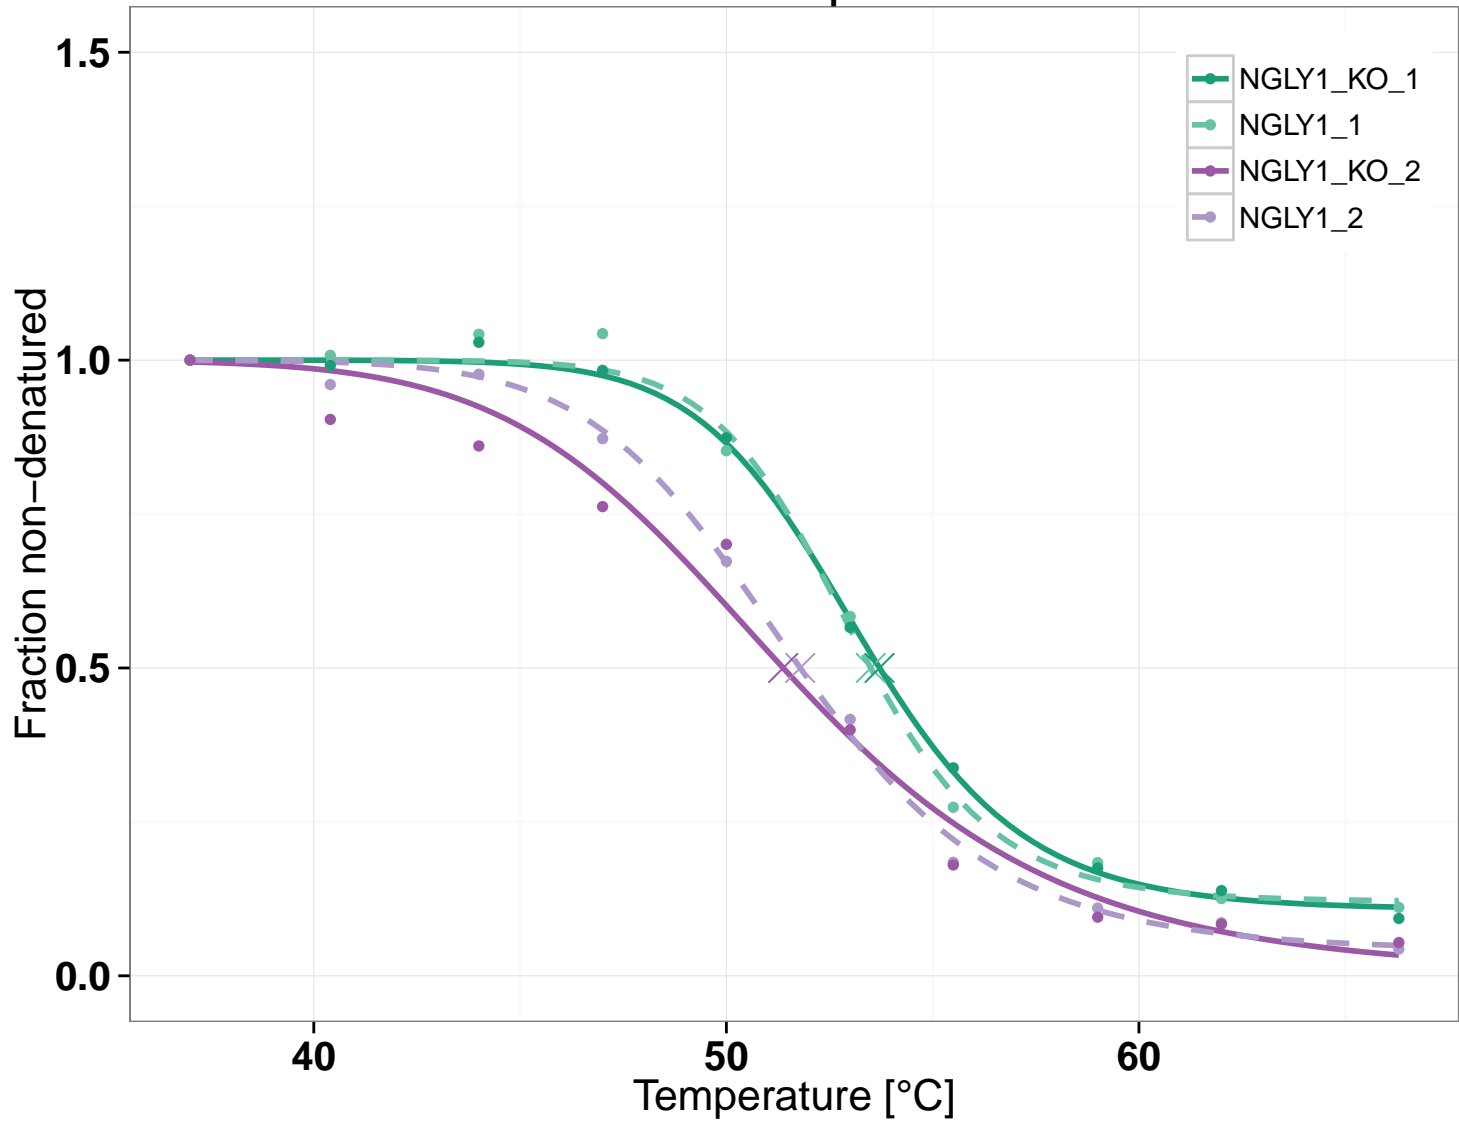

|            | meltPoint | slope  | plateau | R2   |
|------------|-----------|--------|---------|------|
| NGLY1_KO_1 | 53.71     | -0.11  | 0.11    | 1    |
| NGLY1_1    | 53.5      | -0.13  | 0.12    | 0.99 |
| NGLY1_KO_2 | 51.38     | -0.074 | 0       | 0.98 |
| NGLY1_2    | 51.79     | -0.097 | 0.04    | 1    |

Supplement: Supplementary file 299 [file 1]

# IPI00019282.1|PRAME

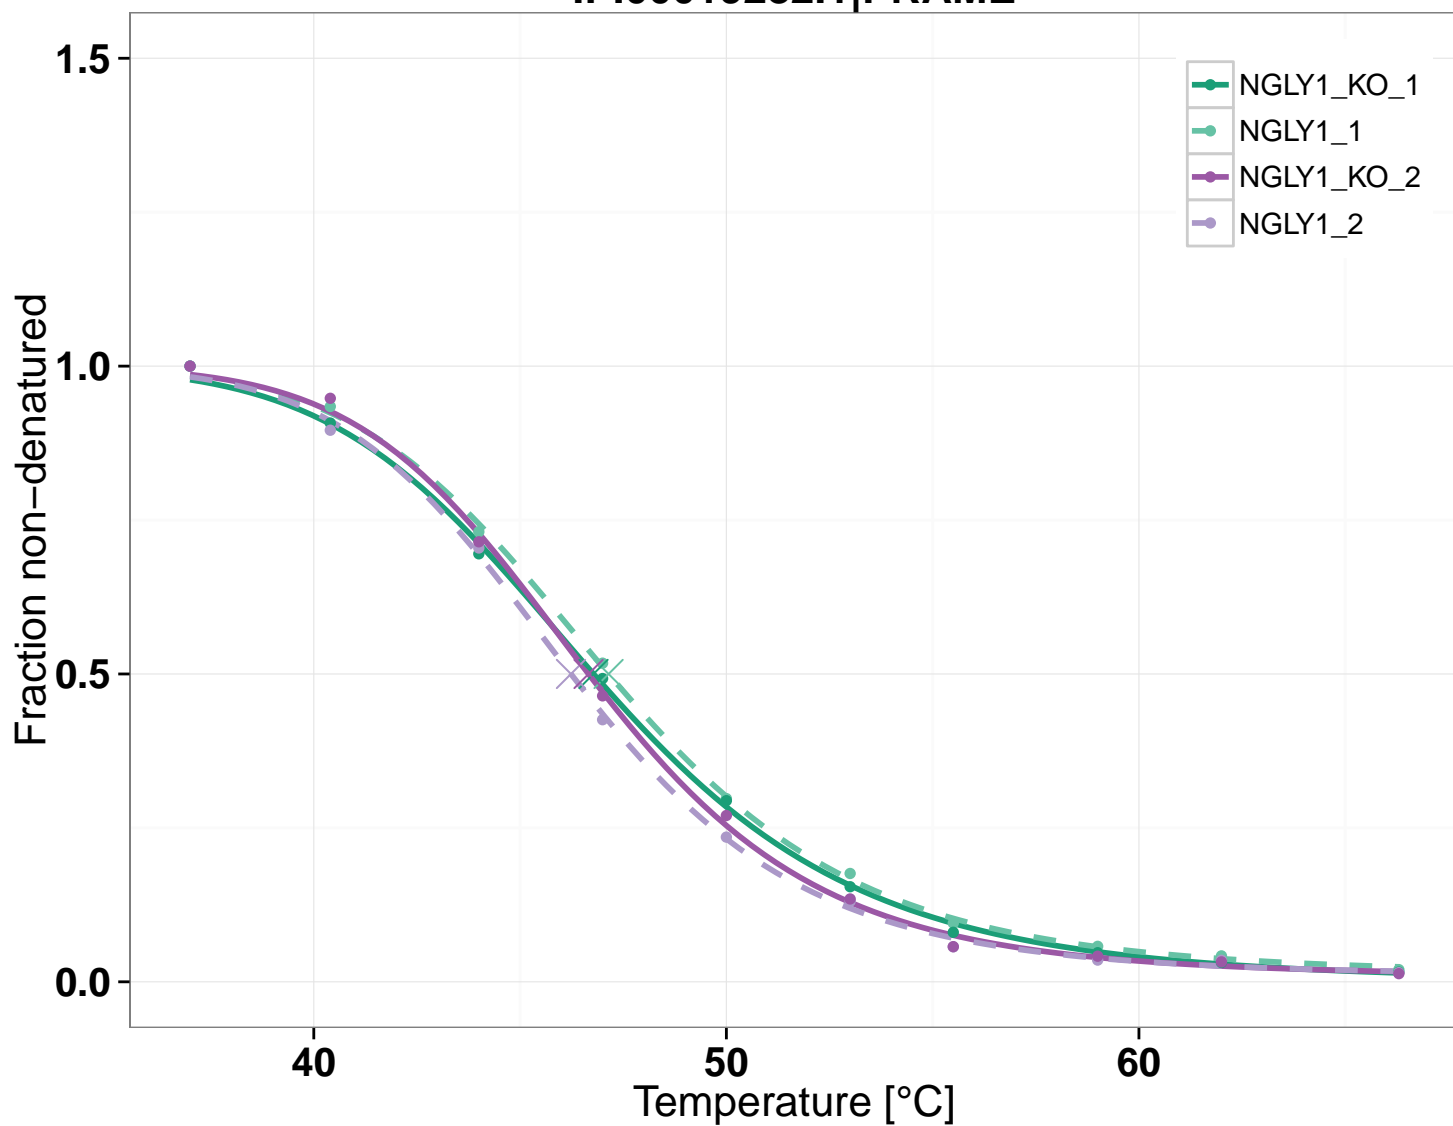

|            | meltPoint | slope  | plateau | R2 |
|------------|-----------|--------|---------|----|
| NGLY1_KO_1 | 46.78     | -0.078 | 0       | 1  |
| NGLY1_1    | 47.14     | -0.08  | 0.01    | 1  |
| NGLY1_KO_2 | 46.66     | -0.089 | 0.01    | 1  |
| NGLY1_2    | 46.23     | -0.088 | 0.01    | 1  |

Supplement: Supplementary file 300 [file 1]
