# Supplementary material (part 4 of 85)
Source: publisher figshare collection journal article supplement (https://gsajournals.figshare.com/articles/dataset/_/12014913)

IPI00165393.1|ANP32E

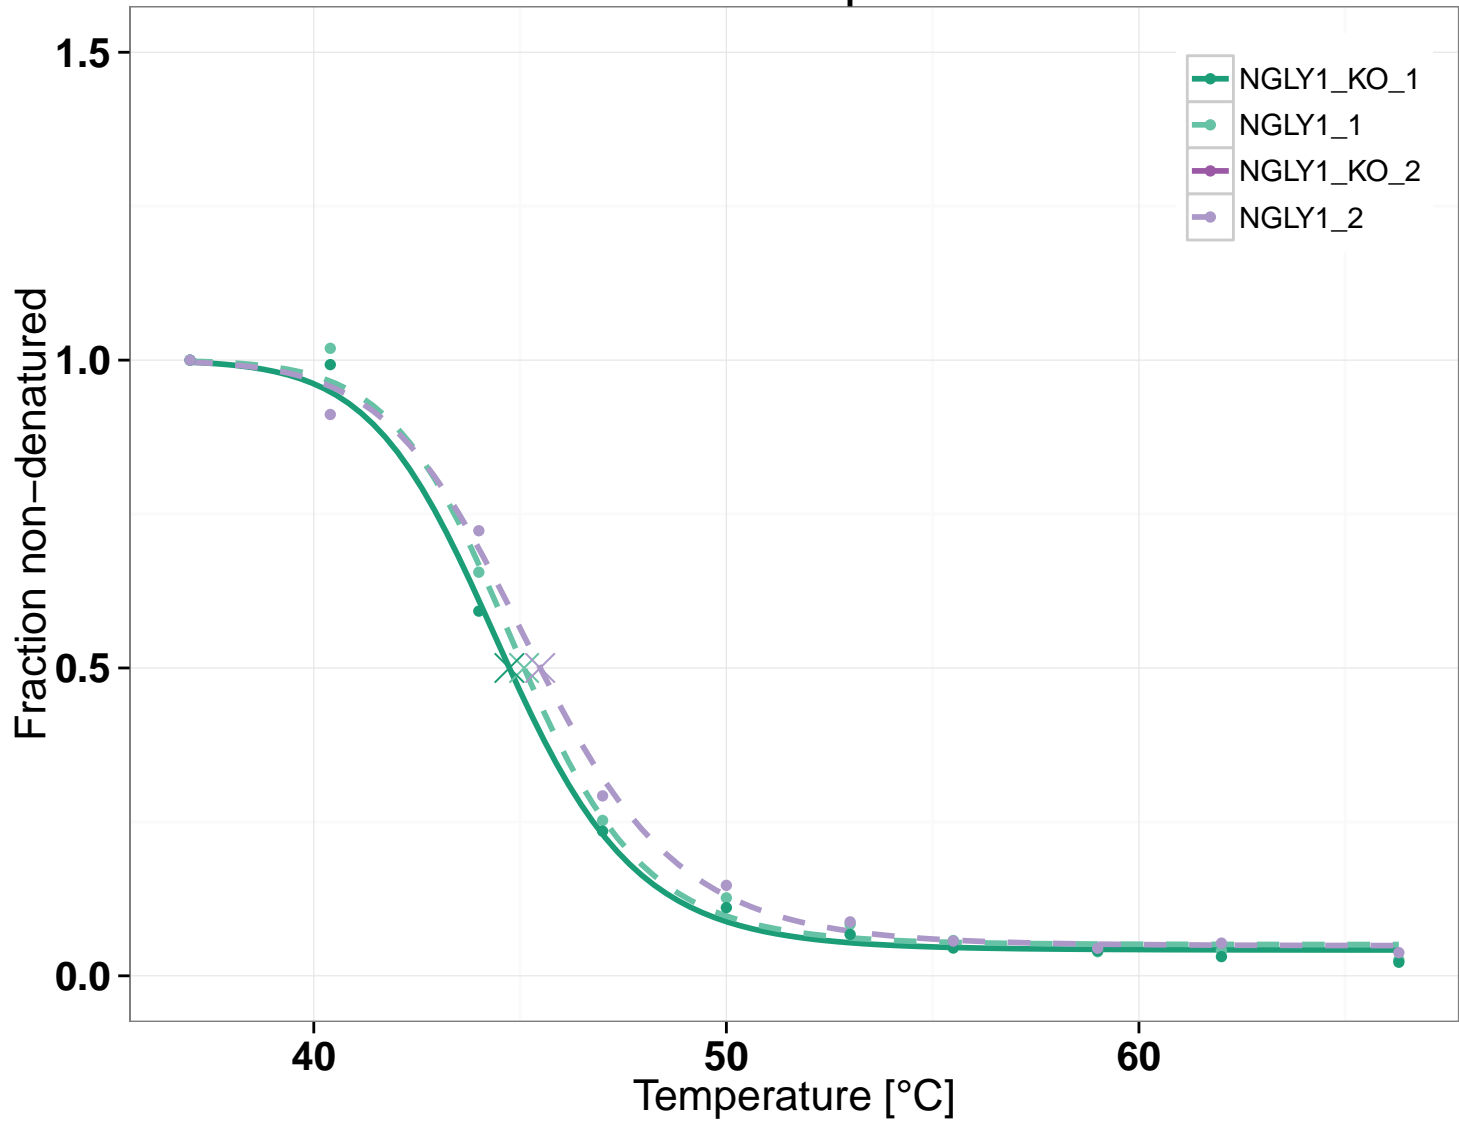

|            | meltPoint | slope | plateau | R2 |
|------------|-----------|-------|---------|----|
| NGLY1_KO_1 | 44.74     | -0.15 | 0.04    | 1  |
| NGLY1_1    | 45.1      | -0.16 | 0.05    | 1  |
| NGLY1_KO_2 | -         | -     | -       | -  |
| NGLY1_2    | 45.49     | -0.13 | 0.05    | 1  |

Supplement: Supplementary file 301 [file 1]

IPI00449909.1|ARHGEF7

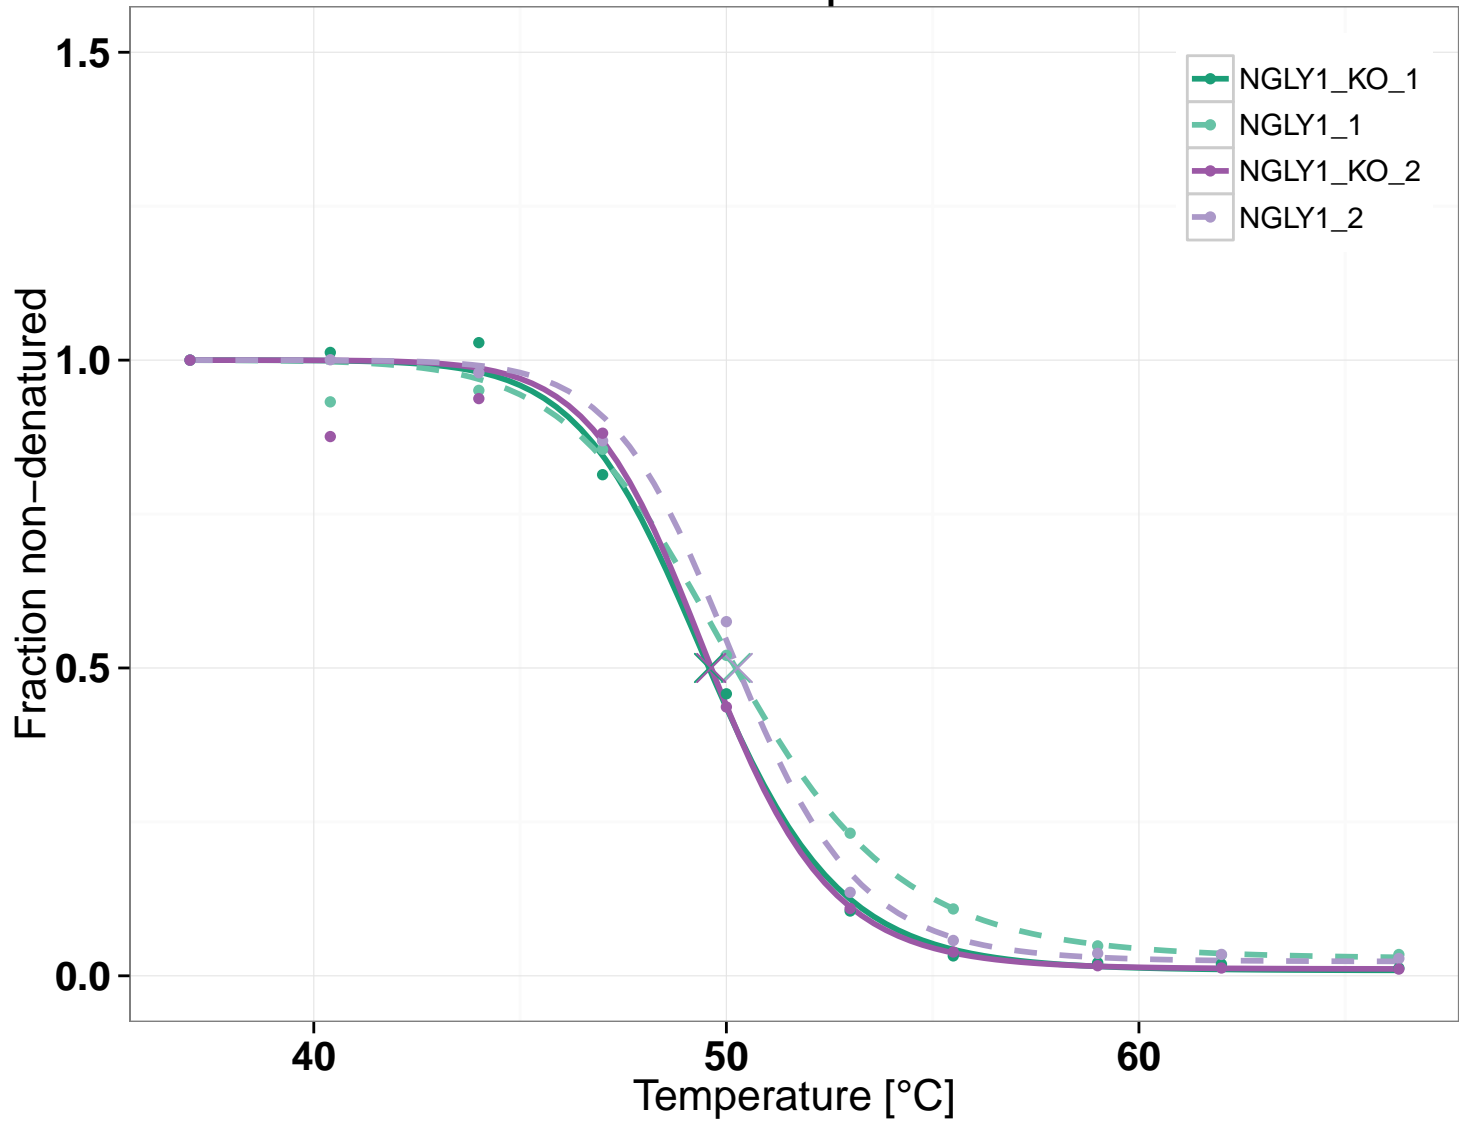

|            | meltPoint | slope | plateau | R2   |
|------------|-----------|-------|---------|------|
| NGLY1_KO_1 | 49.58     | -0.16 | 0.01    | 1    |
| NGLY1_1    | 50.23     | -0.12 | 0.03    | 1    |
| NGLY1_KO_2 | 49.63     | -0.17 | 0.01    | 0.99 |
| NGLY1_2    | 50.28     | -0.16 | 0.02    | 1    |

Supplement: Supplementary file 302 [file 1]

IPI00479018.2|SDCBP

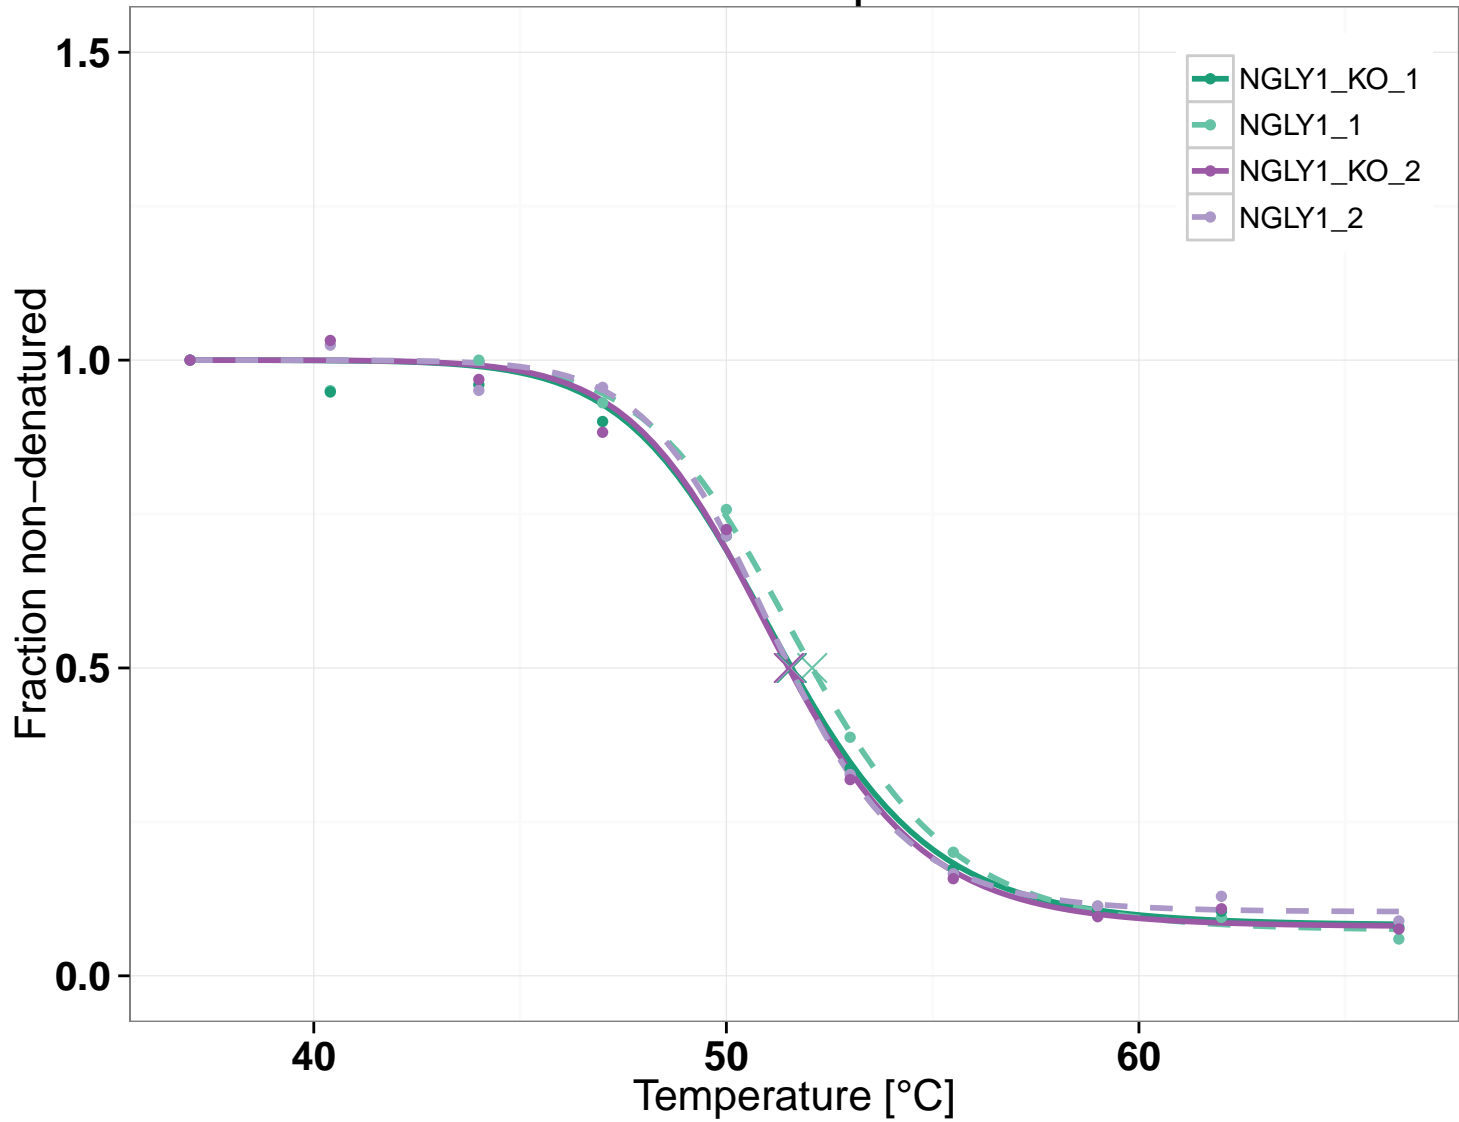

|            | meltPoint | slope | plateau | R2 |
|------------|-----------|-------|---------|----|
| NGLY1_KO_1 | 51.59     | -0.12 | 0.08    | 1  |
| NGLY1_1    | 52.08     | -0.12 | 0.07    | 1  |
| NGLY1_KO_2 | 51.51     | -0.13 | 0.08    | 1  |
| NGLY1_2    | 51.55     | -0.14 | 0.1     | 1  |

Supplement: Supplementary file 303 [file 1]

# IPI00027139.1|INPP1

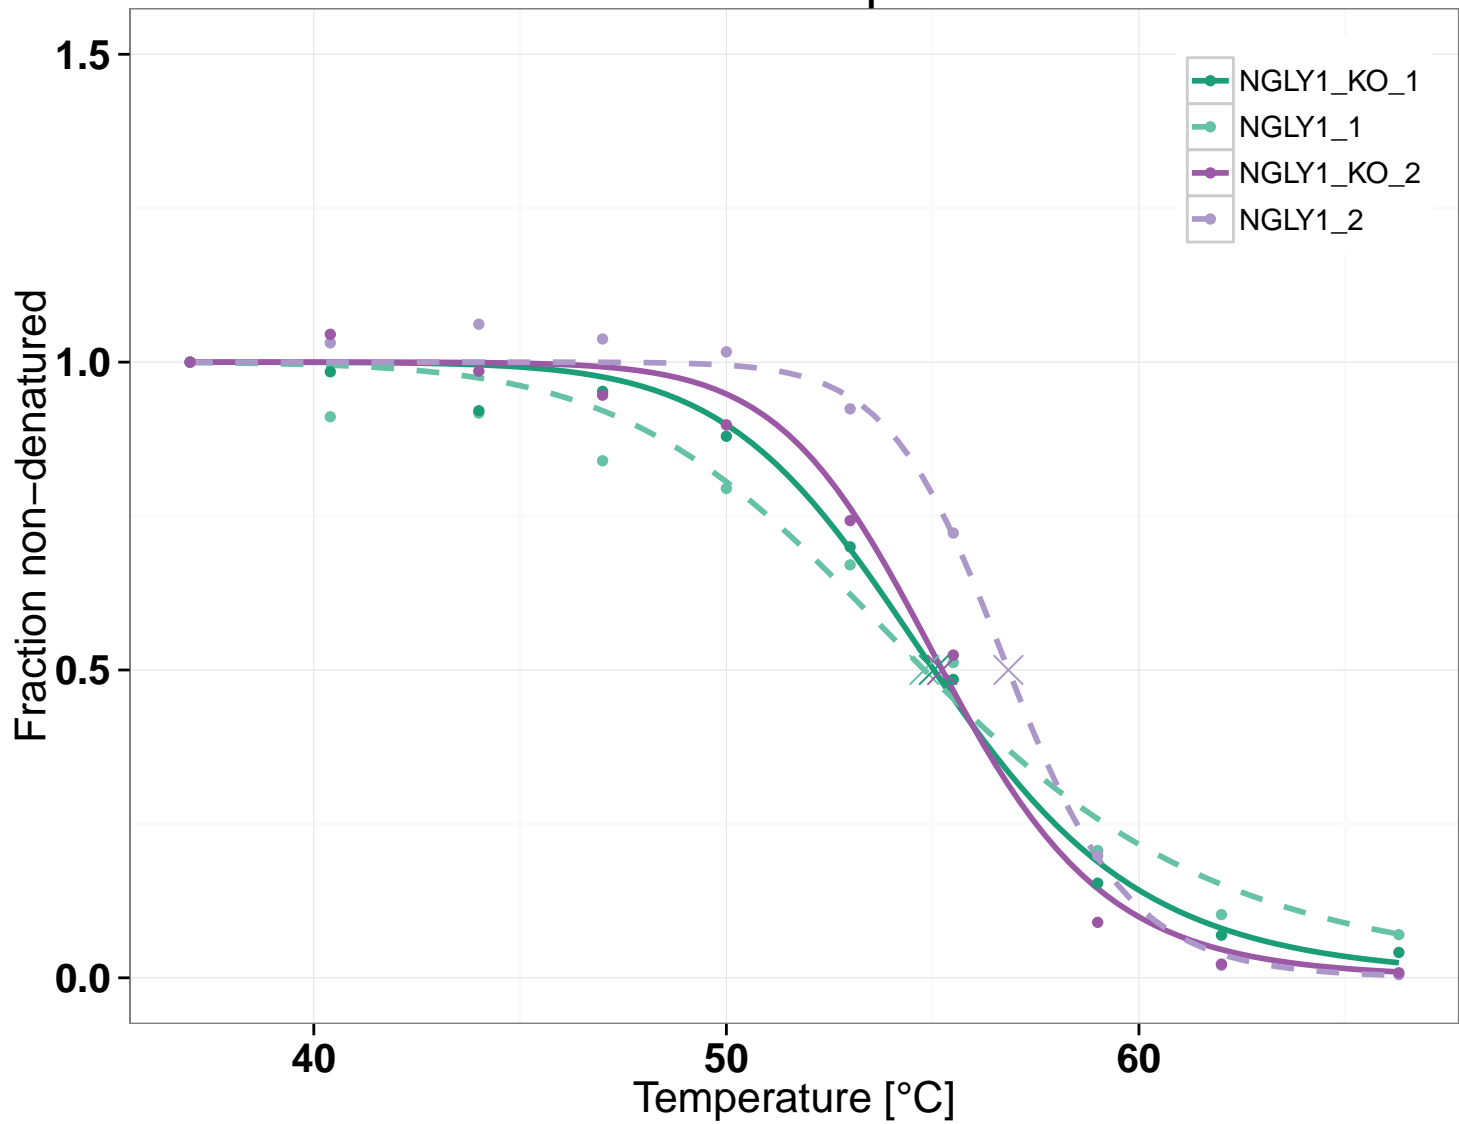

|            | meltPoint | slope  | plateau | R2   |
|------------|-----------|--------|---------|------|
| NGLY1_KO_1 | 55.03     | -0.099 | 0       | 0.99 |
| NGLY1_1    | 54.8      | -0.069 | 0       | 0.98 |
| NGLY1_KO_2 | 55.23     | -0.13  | 0       | 0.99 |
| NGLY1_2    | 56.84     | -0.17  | 0       | 1    |

Supplement: Supplementary file 304 [file 1]

IPI00217687.3|CCDC135

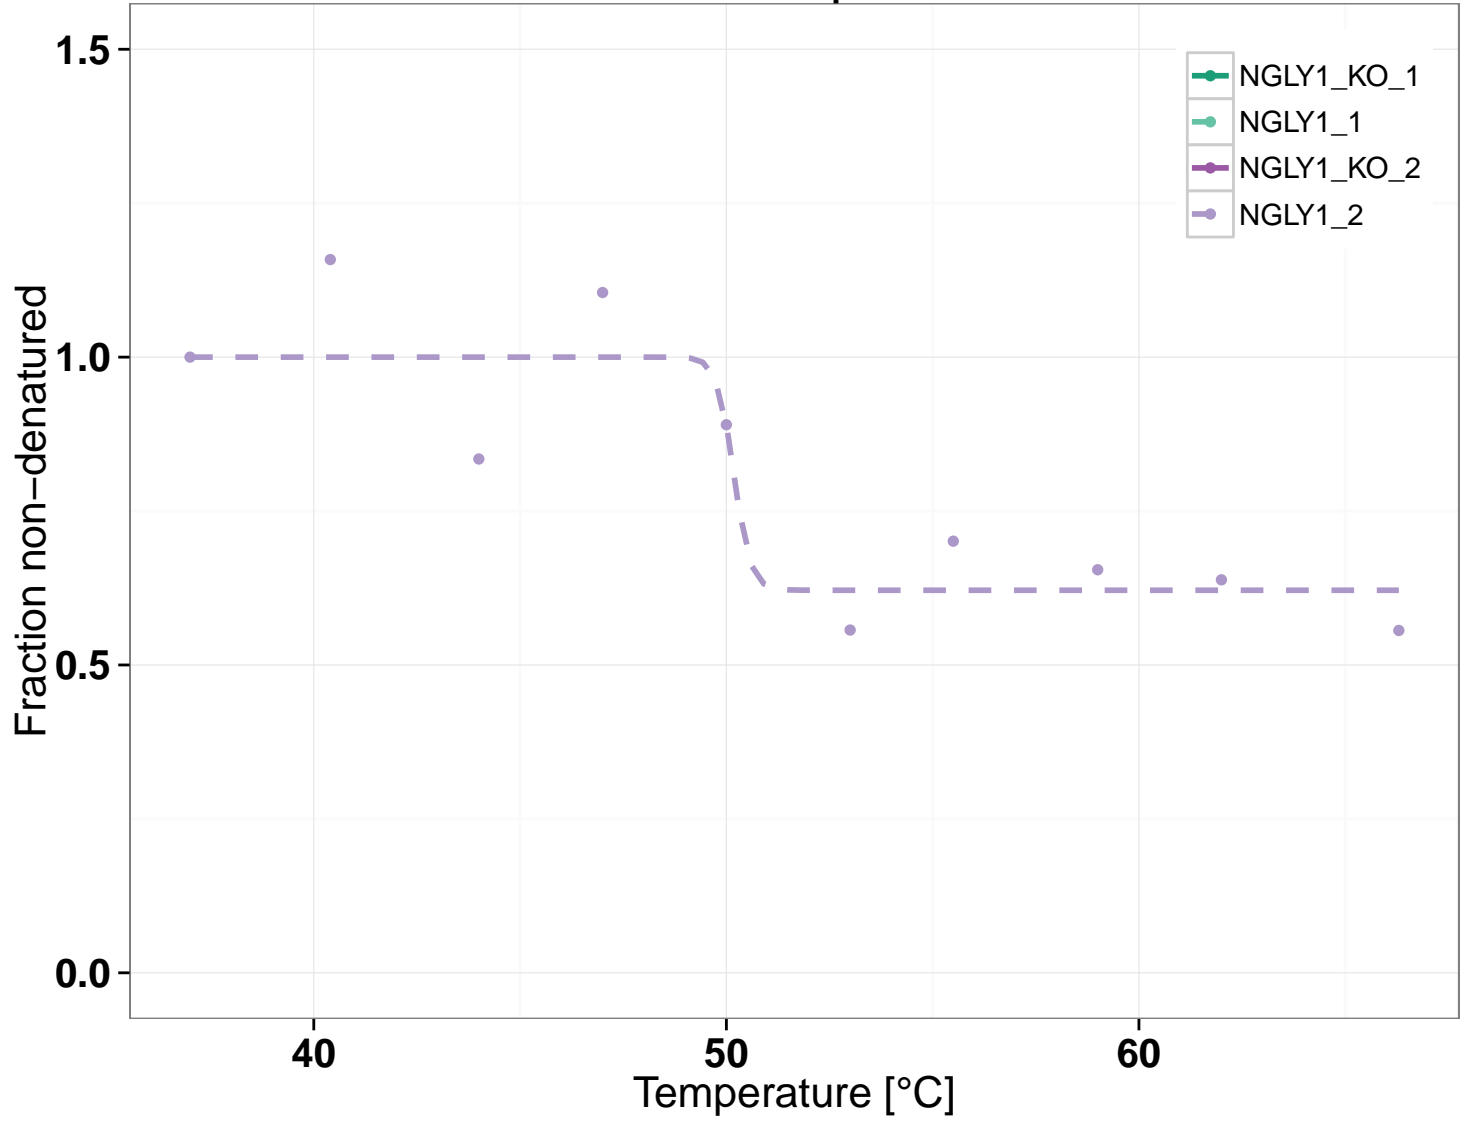

|            | meltPoint | slope | plateau | R2   |
|------------|-----------|-------|---------|------|
| NGLY1_KO_1 | -         | -     | -       | -    |
| NGLY1_1    | -         | -     | -       | -    |
| NGLY1_KO_2 | -         | -     | -       | -    |
| NGLY1_2    | -         | -0.47 | 0.62    | 0.82 |

Supplement: Supplementary file 305 [file 1]

IPI00910735.1|B4DJG9\_HUMAN

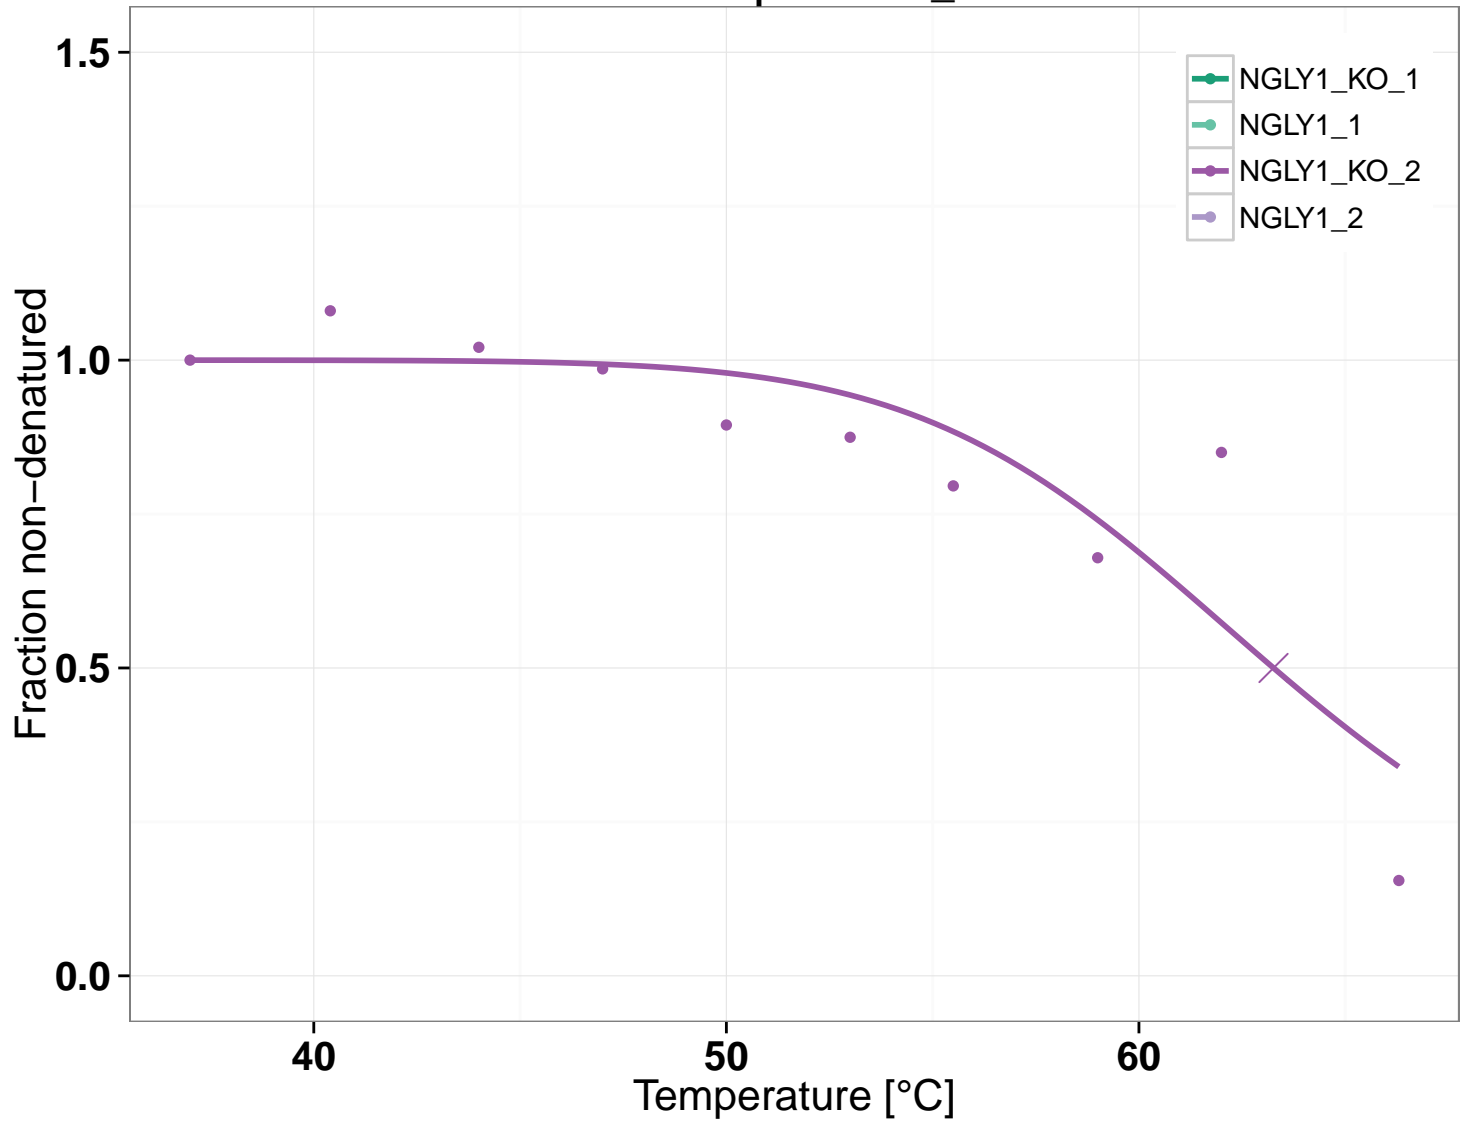

|            | meltPoint | slope  | plateau | R2   |
|------------|-----------|--------|---------|------|
| NGLY1_KO_1 | —         | —      | —       | —    |
| NGLY1_1    | —         | —      | —       | —    |
| NGLY1_KO_2 | 63.26     | -0.058 | 0       | 0.78 |
| NGLY1_2    | —         | —      | —       | —    |

Supplement: Supplementary file 306 [file 1]

IPI00006504.3|EIF2B3

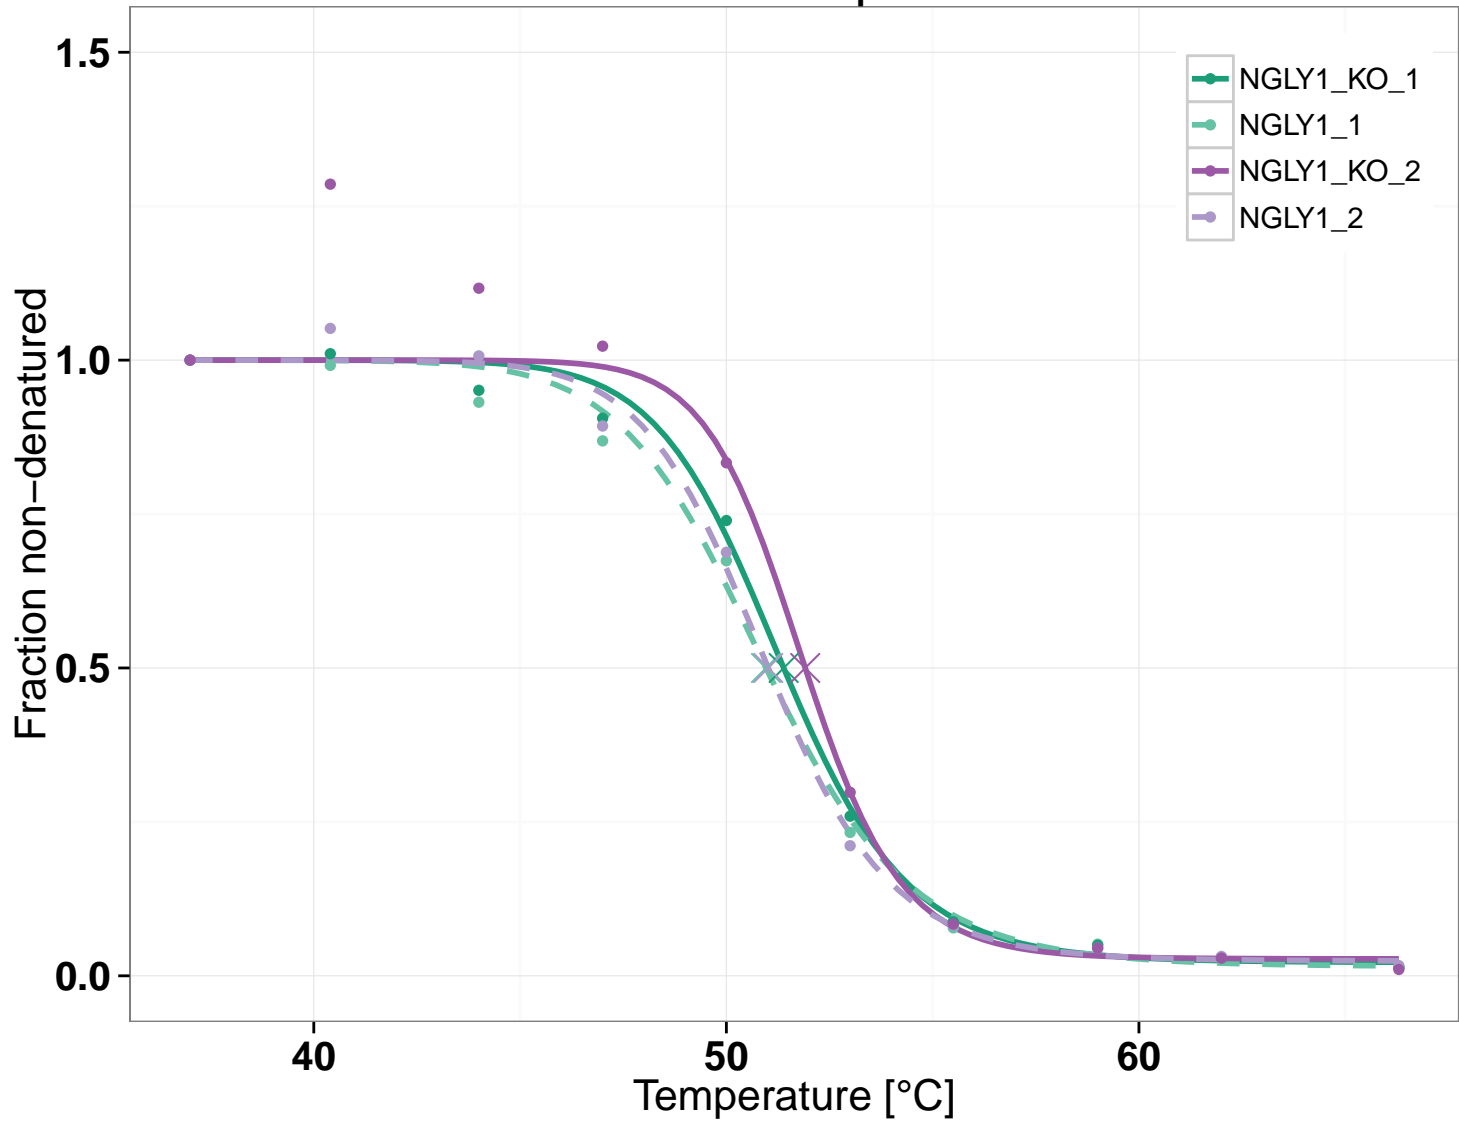

|            | meltPoint | slope | plateau | R2   |
|------------|-----------|-------|---------|------|
| NGLY1_KO_1 | 51.39     | -0.16 | 0.02    | 1    |
| NGLY1_1    | 50.96     | -0.14 | 0.01    | 1    |
| NGLY1_KO_2 | 51.91     | -0.21 | 0.03    | 0.96 |
| NGLY1_2    | 51.02     | -0.16 | 0.02    | 1    |

Supplement: Supplementary file 307 [file 1]

IPI00879566.1|C22ORF25

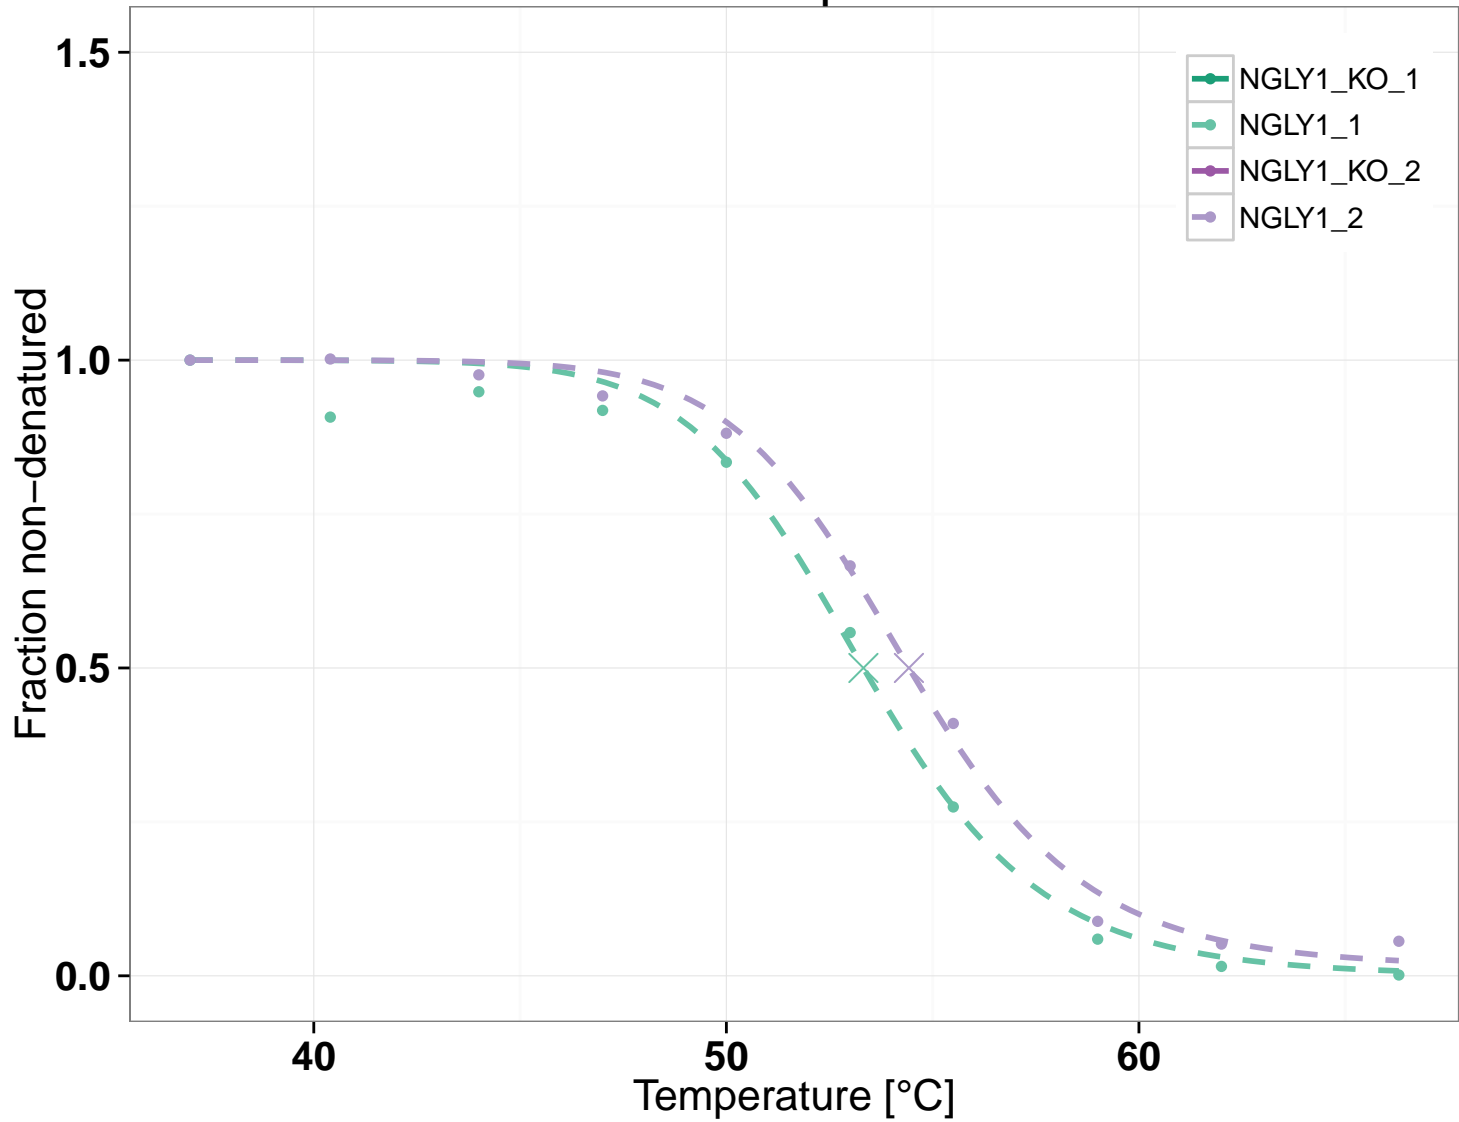

|            | meltPoint | slope | plateau | R2   |
|------------|-----------|-------|---------|------|
| NGLY1_KO_1 | -         | -     | -       | -    |
| NGLY1_1    | 53.32     | -0.12 | 0       | 0.99 |
| NGLY1_KO_2 | -         | -     | -       | -    |
| NGLY1_2    | 54.42     | -0.11 | 0.01    | 1    |

Supplement: Supplementary file 308 [file 1]

# IPI00019226.1|BRD8

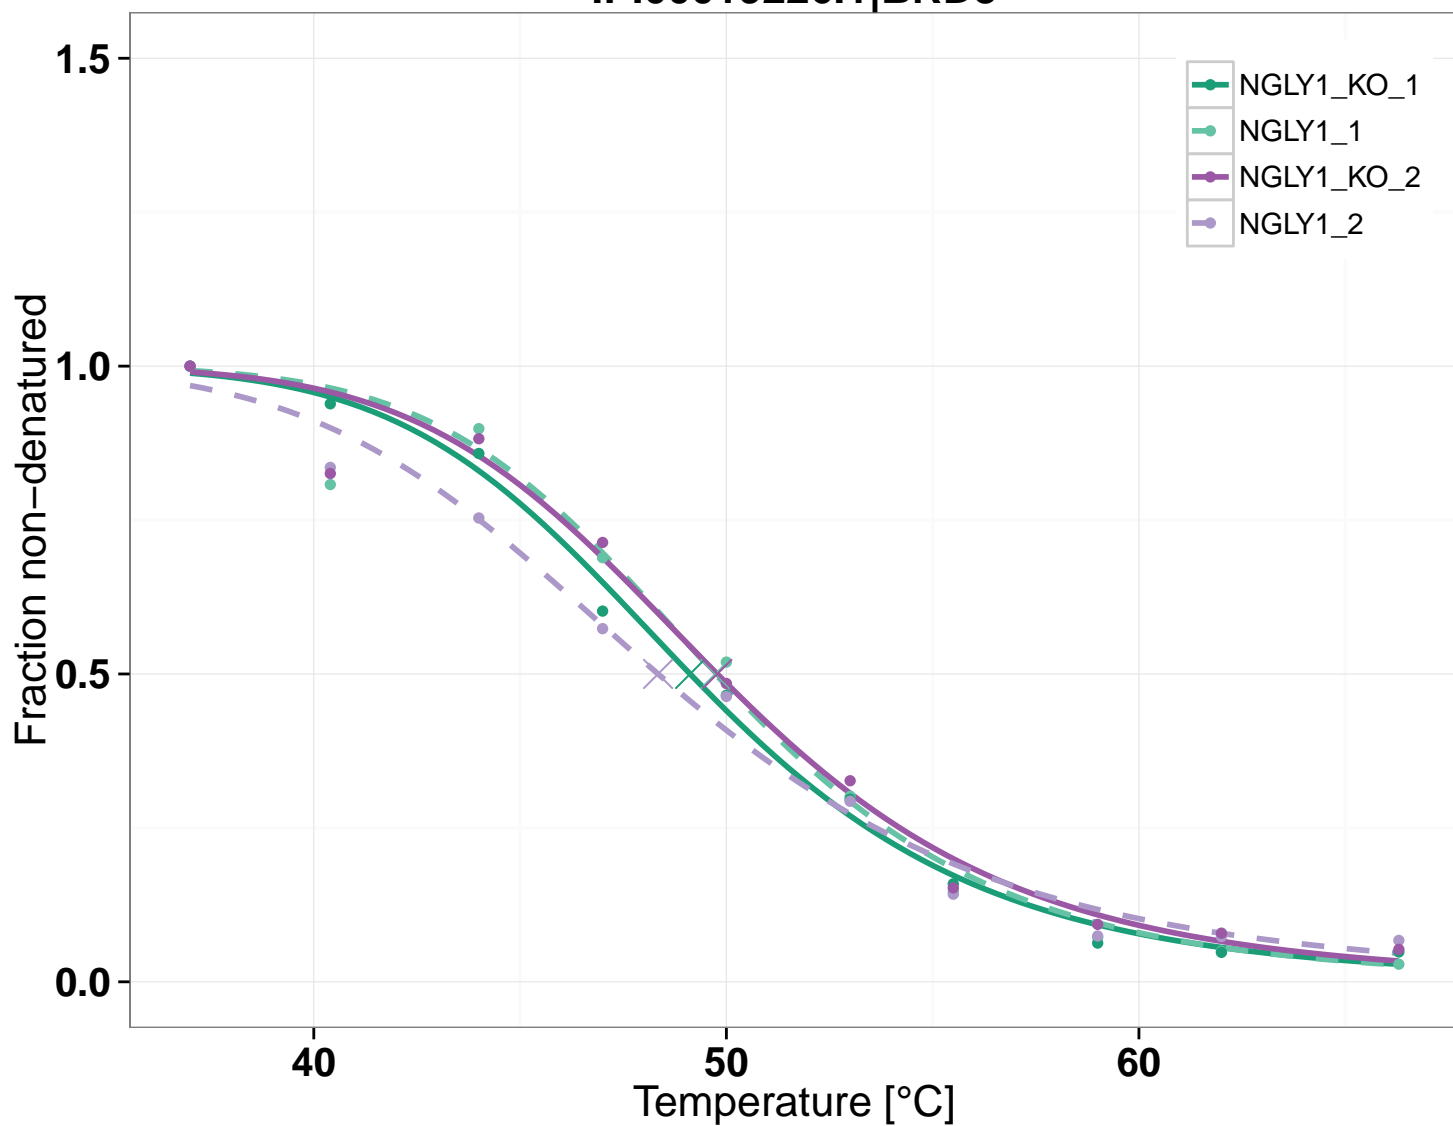

|            | meltPoint | slope  | plateau | R2   |
|------------|-----------|--------|---------|------|
| NGLY1_KO_1 | 49.12     | -0.071 | 0       | 1    |
| NGLY1_1    | 49.73     | -0.073 | 0       | 0.98 |
| NGLY1_KO_2 | 49.78     | -0.069 | 0       | 0.98 |
| NGLY1_2    | 48.35     | -0.06  | 0       | 0.99 |

Supplement: Supplementary file 309 [file 1]

# IPI00009688.1|PIP4K2A

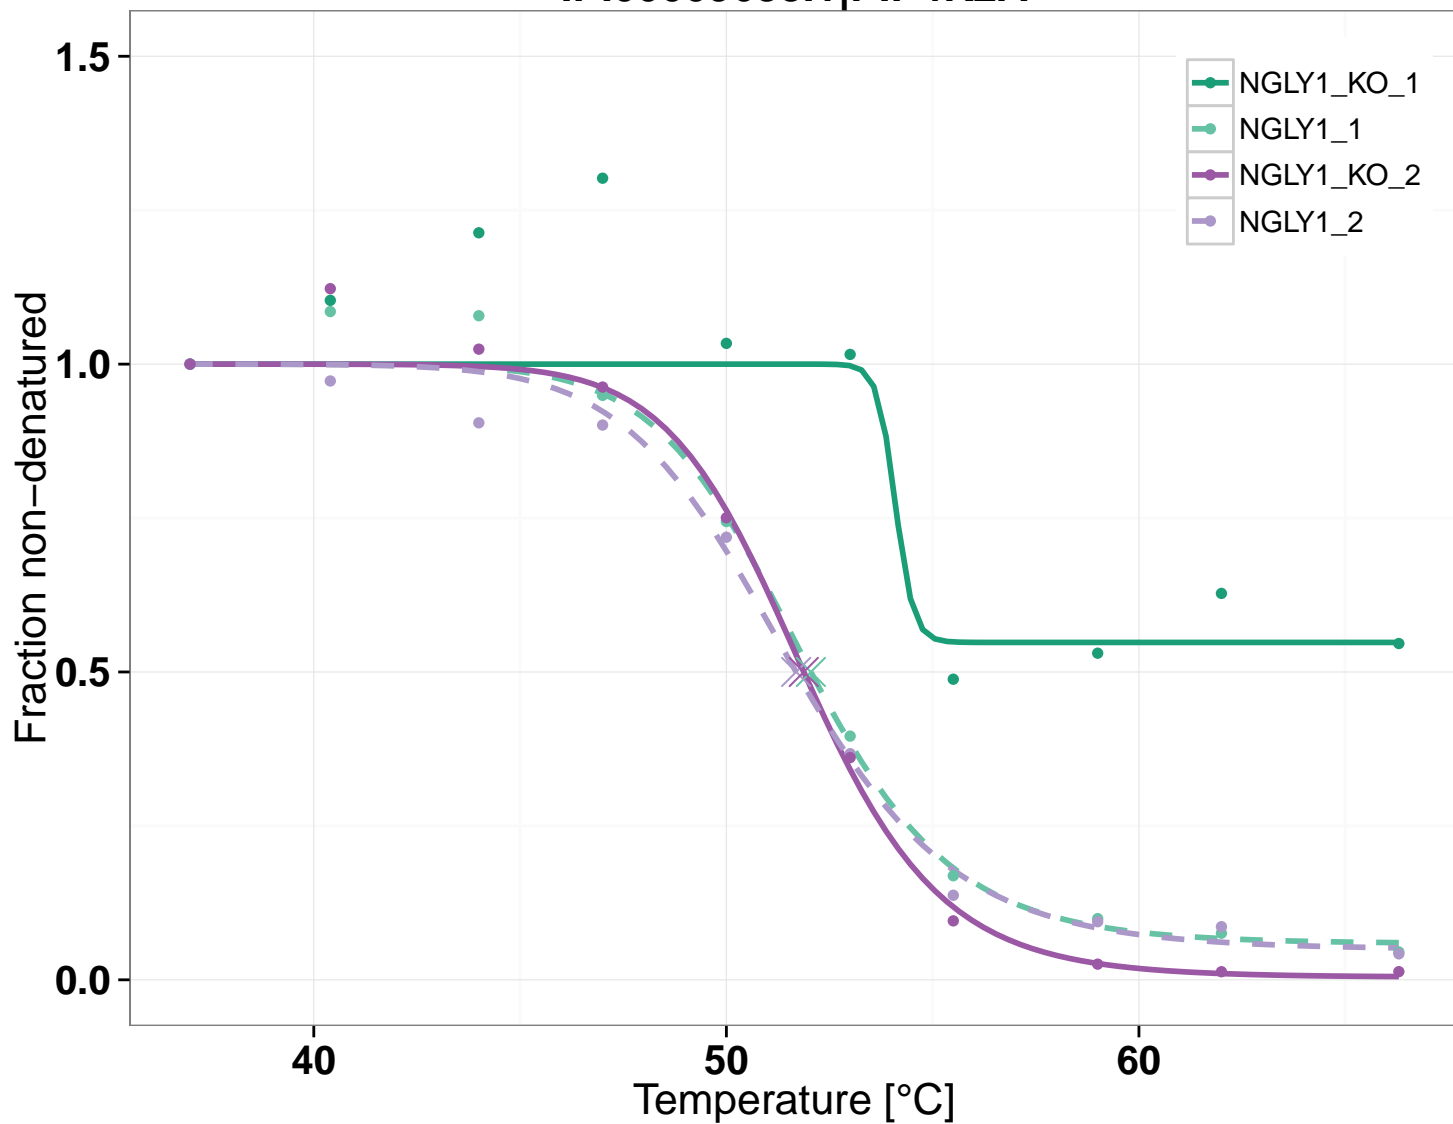

|            | meltPoint | slope | plateau | R2   |
|------------|-----------|-------|---------|------|
| NGLY1_KO_1 | –         | –0.52 | 0.55    | 0.81 |
| NGLY1_1    | 52.05     | –0.13 | 0.06    | 0.99 |
| NGLY1_KO_2 | 51.88     | –0.15 | 0       | 0.99 |
| NGLY1_2    | 51.69     | –0.12 | 0.05    | 0.99 |

Supplement: Supplementary file 310 [file 1]

# IPI00009607.1|RAP2C

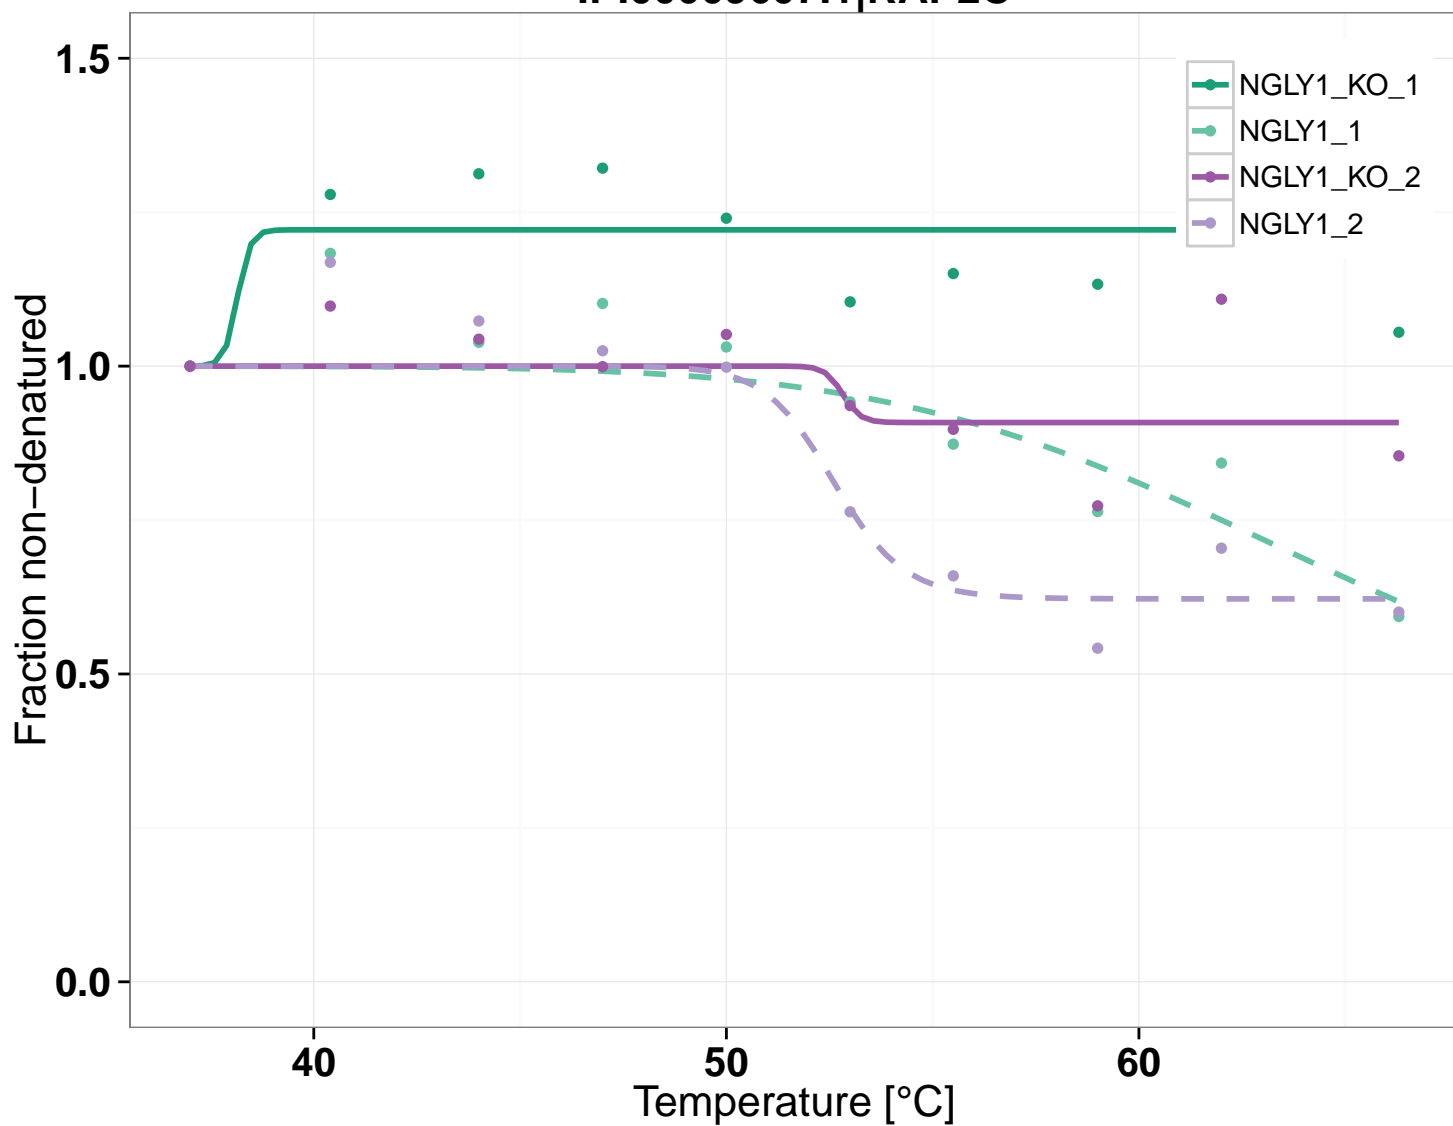

|            | meltPoint | slope  | plateau | R2   |
|------------|-----------|--------|---------|------|
| NGLY1_KO_1 | -         | 0.36   | 1.22    | 0.29 |
| NGLY1_1    | -         | -0.031 | 0.31    | 0.75 |
| NGLY1_KO_2 | -         | -0.11  | 0.91    | 0.3  |
| NGLY1_2    | -         | -0.11  | 0.62    | 0.89 |

Supplement: Supplementary file 311 [file 1]

IPI00027192.6|PLOD1

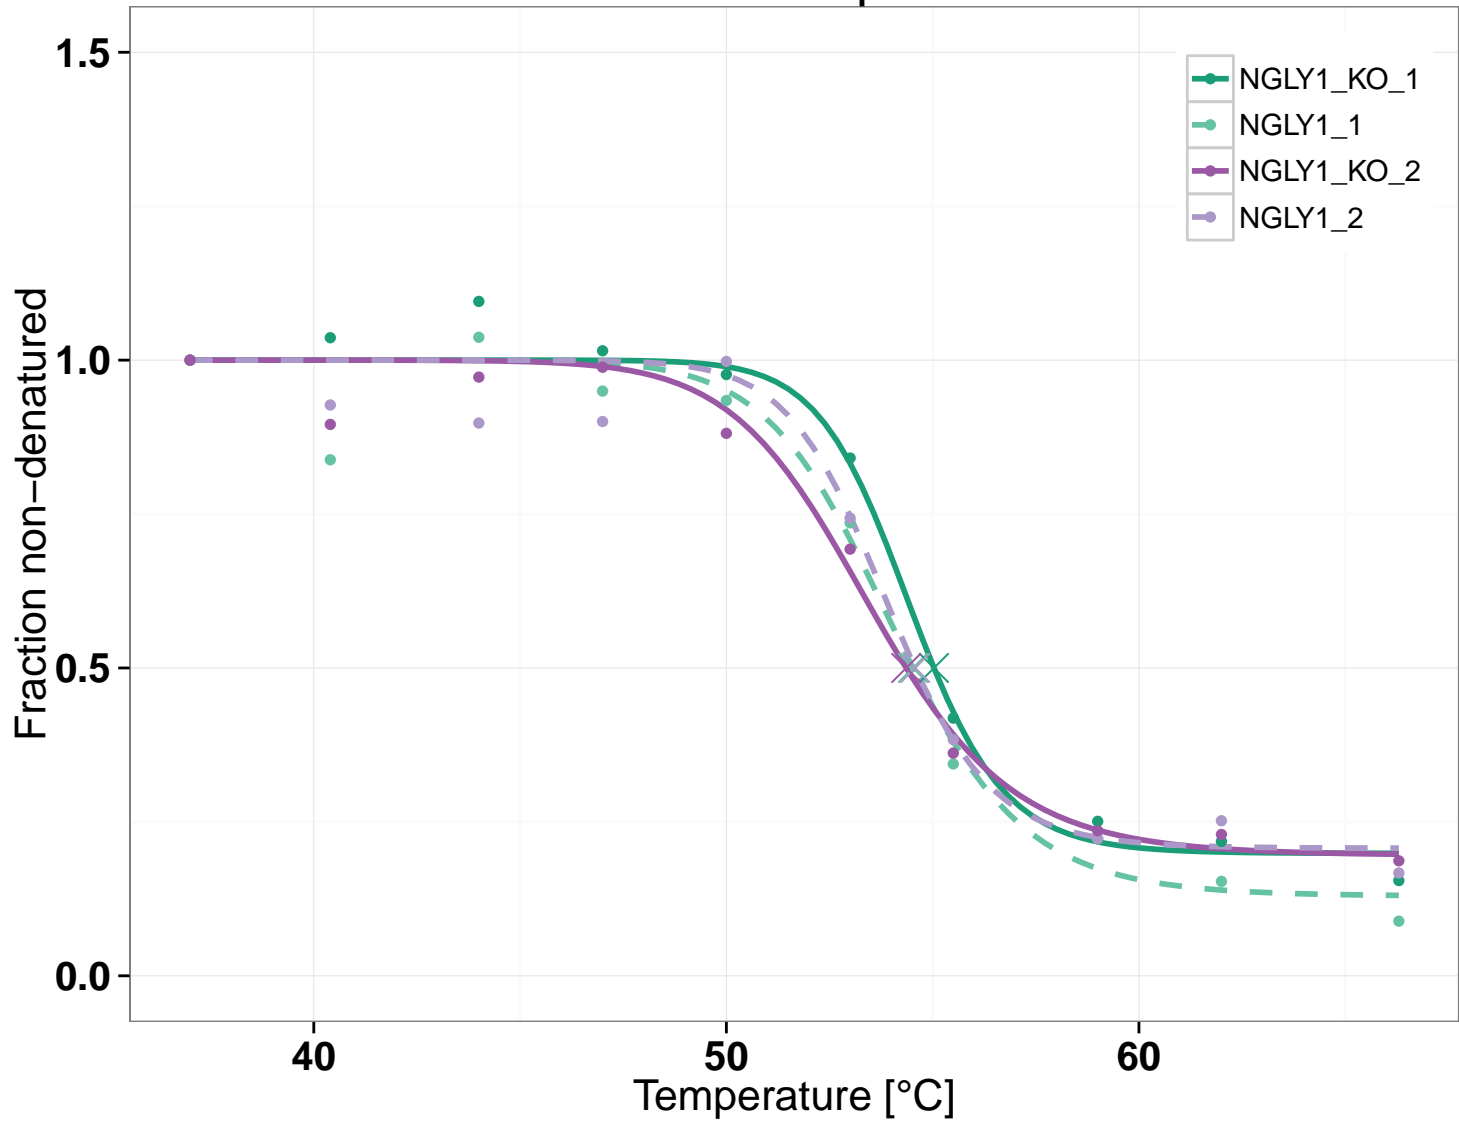

|            | meltPoint | slope | plateau | R2   |
|------------|-----------|-------|---------|------|
| NGLY1_KO_1 | 55.03     | -0.18 | 0.2     | 0.99 |
| NGLY1_1    | 54.52     | -0.14 | 0.13    | 0.97 |
| NGLY1_KO_2 | 54.36     | -0.12 | 0.2     | 0.99 |
| NGLY1_2    | 54.58     | -0.16 | 0.21    | 0.97 |

Supplement: Supplementary file 312 [file 1]

IPI00006552.2|CNOT7

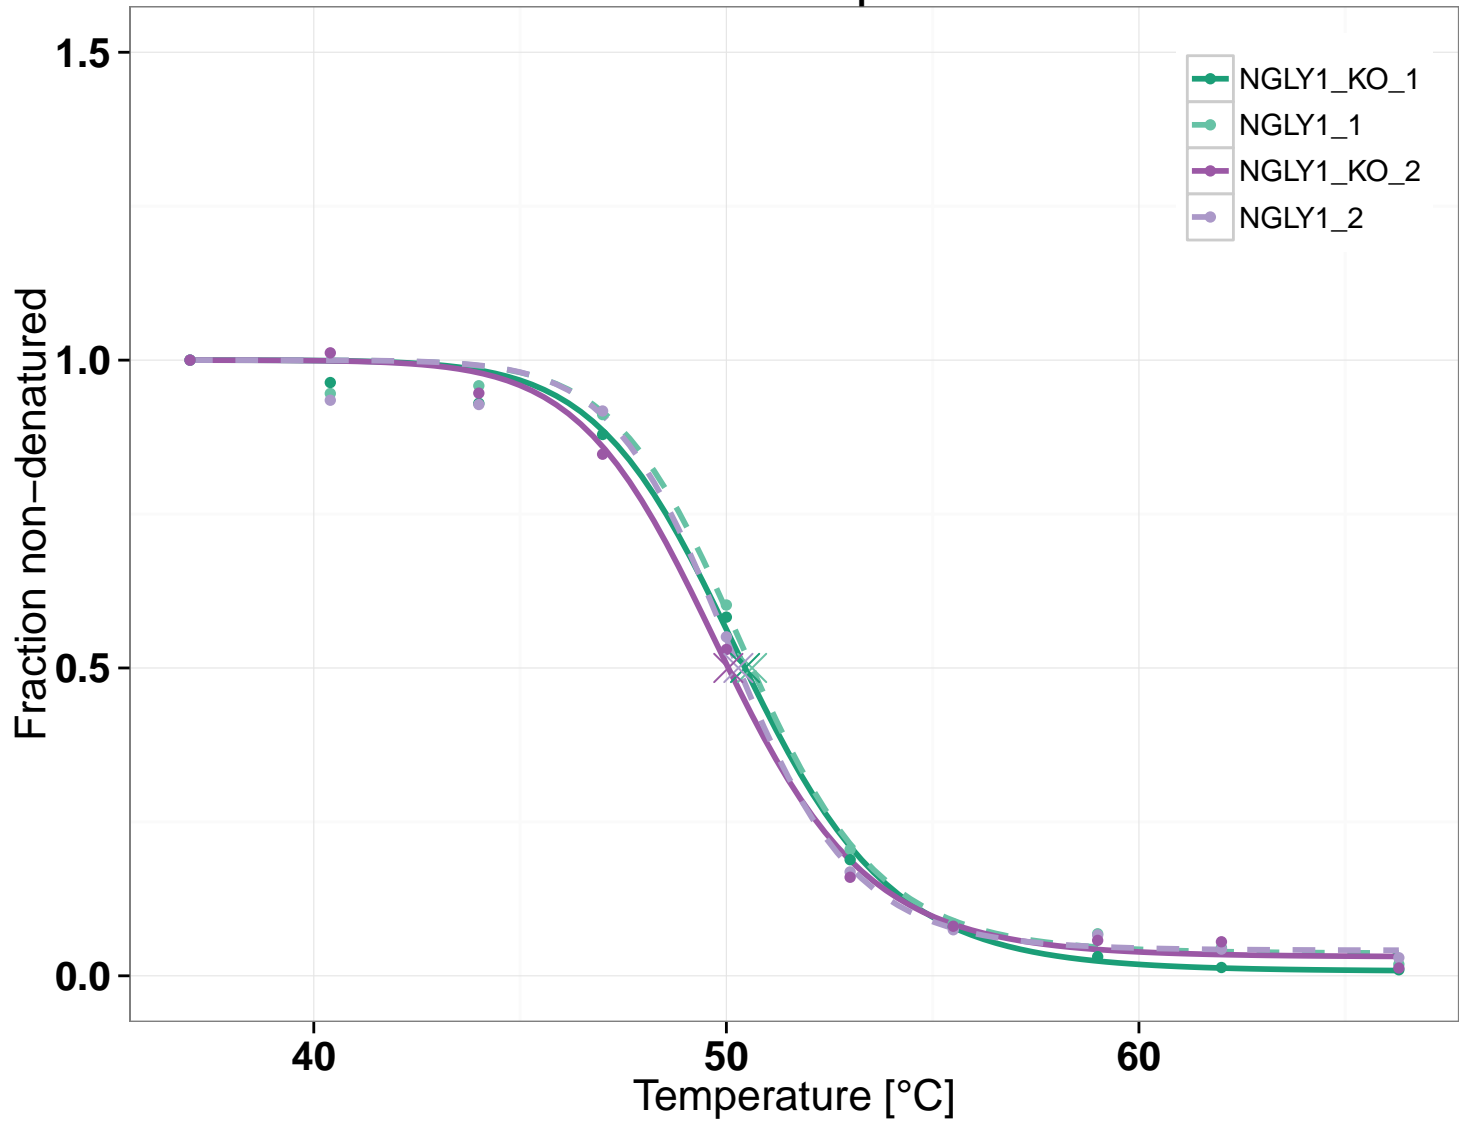

|            | meltPoint | slope | plateau | R2   |
|------------|-----------|-------|---------|------|
| NGLY1_KO_1 | 50.45     | -0.14 | 0.01    | 1    |
| NGLY1_1    | 50.62     | -0.15 | 0.04    | 1    |
| NGLY1_KO_2 | 50.05     | -0.14 | 0.03    | 1    |
| NGLY1_2    | 50.29     | -0.16 | 0.04    | 0.99 |

Supplement: Supplementary file 313 [file 1]

IPI00655631.1|POLD1

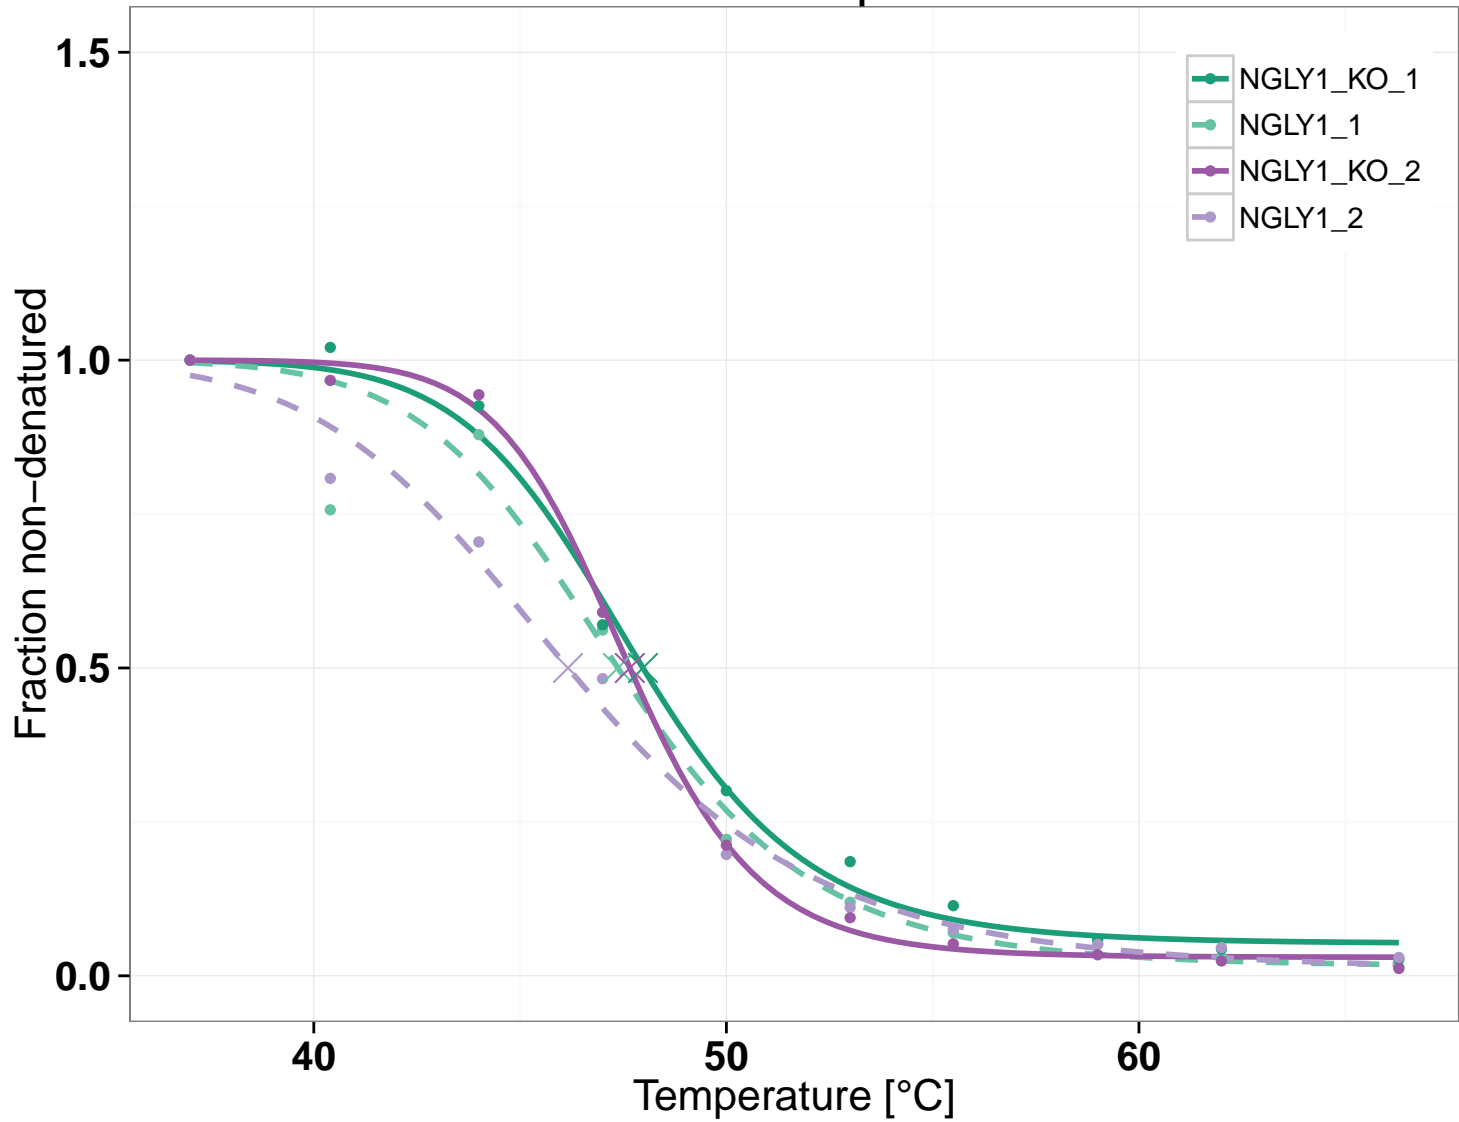

|            | meltPoint | slope  | plateau | R2   |
|------------|-----------|--------|---------|------|
| NGLY1_KO_1 | 47.98     | -0.11  | 0.05    | 0.99 |
| NGLY1_1    | 47.37     | -0.1   | 0.01    | 0.96 |
| NGLY1_KO_2 | 47.66     | -0.15  | 0.03    | 1    |
| NGLY1_2    | 46.16     | -0.081 | 0.01    | 0.99 |

Supplement: Supplementary file 314 [file 1]

IPI00401902.1|ERCC1

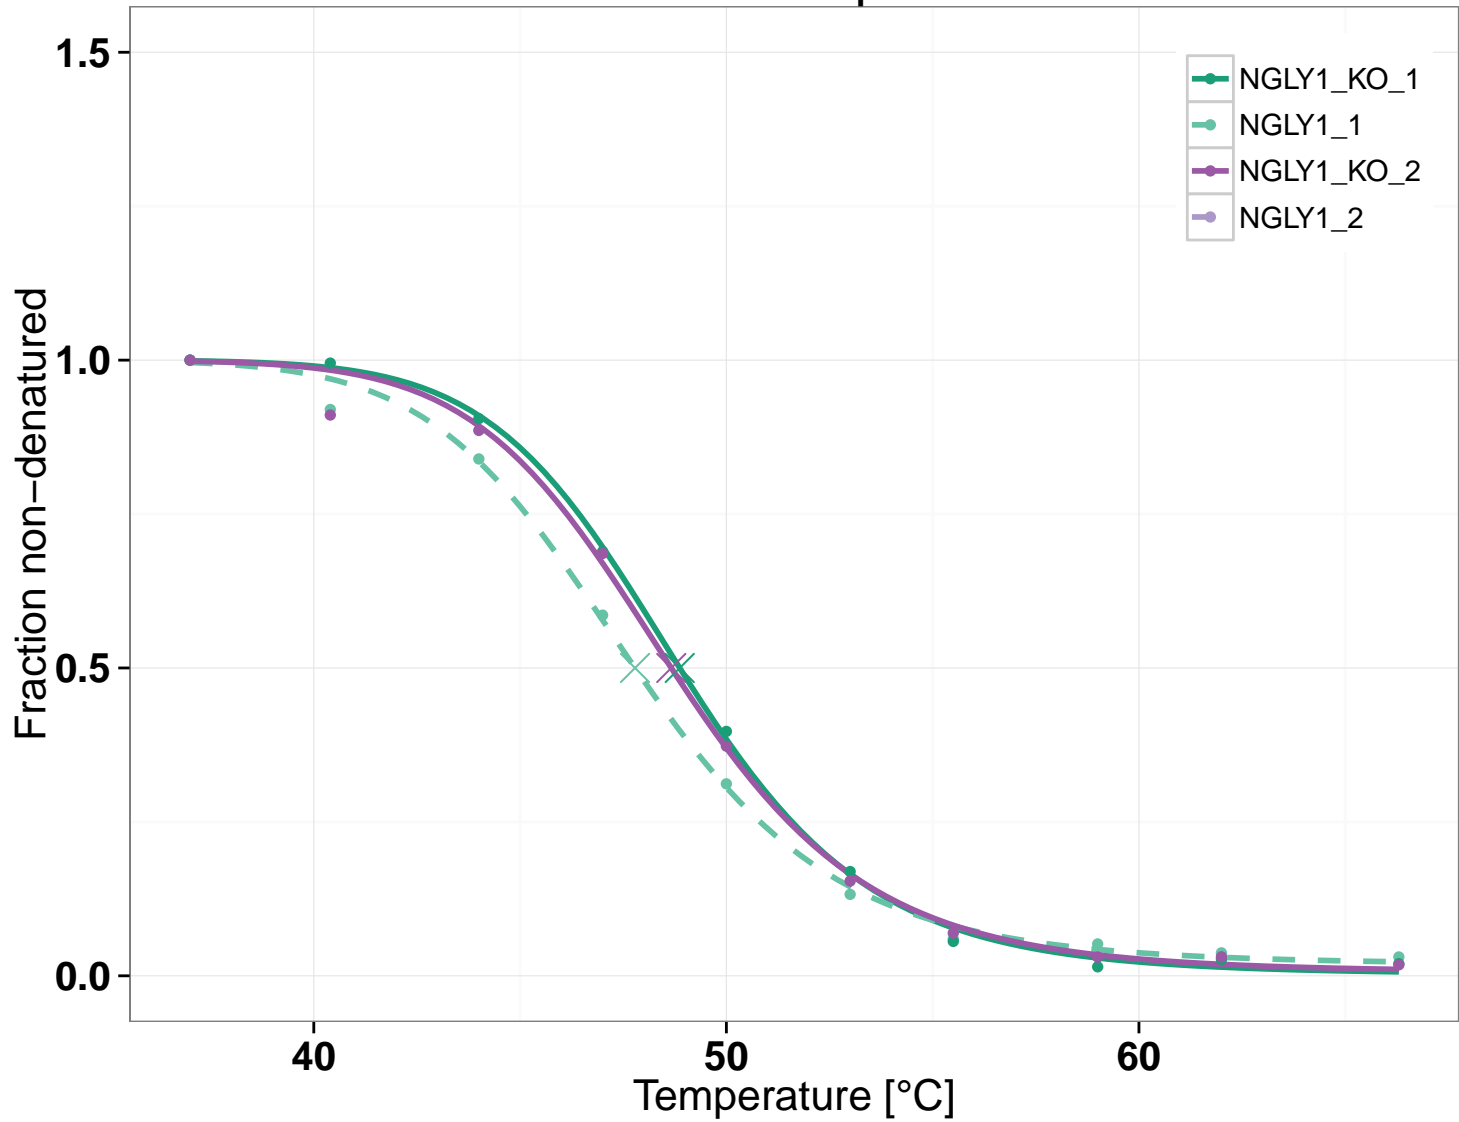

|            | meltPoint | slope  | plateau | R2 |
|------------|-----------|--------|---------|----|
| NGLY1_KO_1 | 48.87     | -0.11  | 0       | 1  |
| NGLY1_1    | 47.79     | -0.099 | 0.02    | 1  |
| NGLY1_KO_2 | 48.66     | -0.1   | 0.01    | 1  |
| NGLY1_2    | -         | -      | -       | -  |

Supplement: Supplementary file 315 [file 1]

# IPI00219649.4|CBS

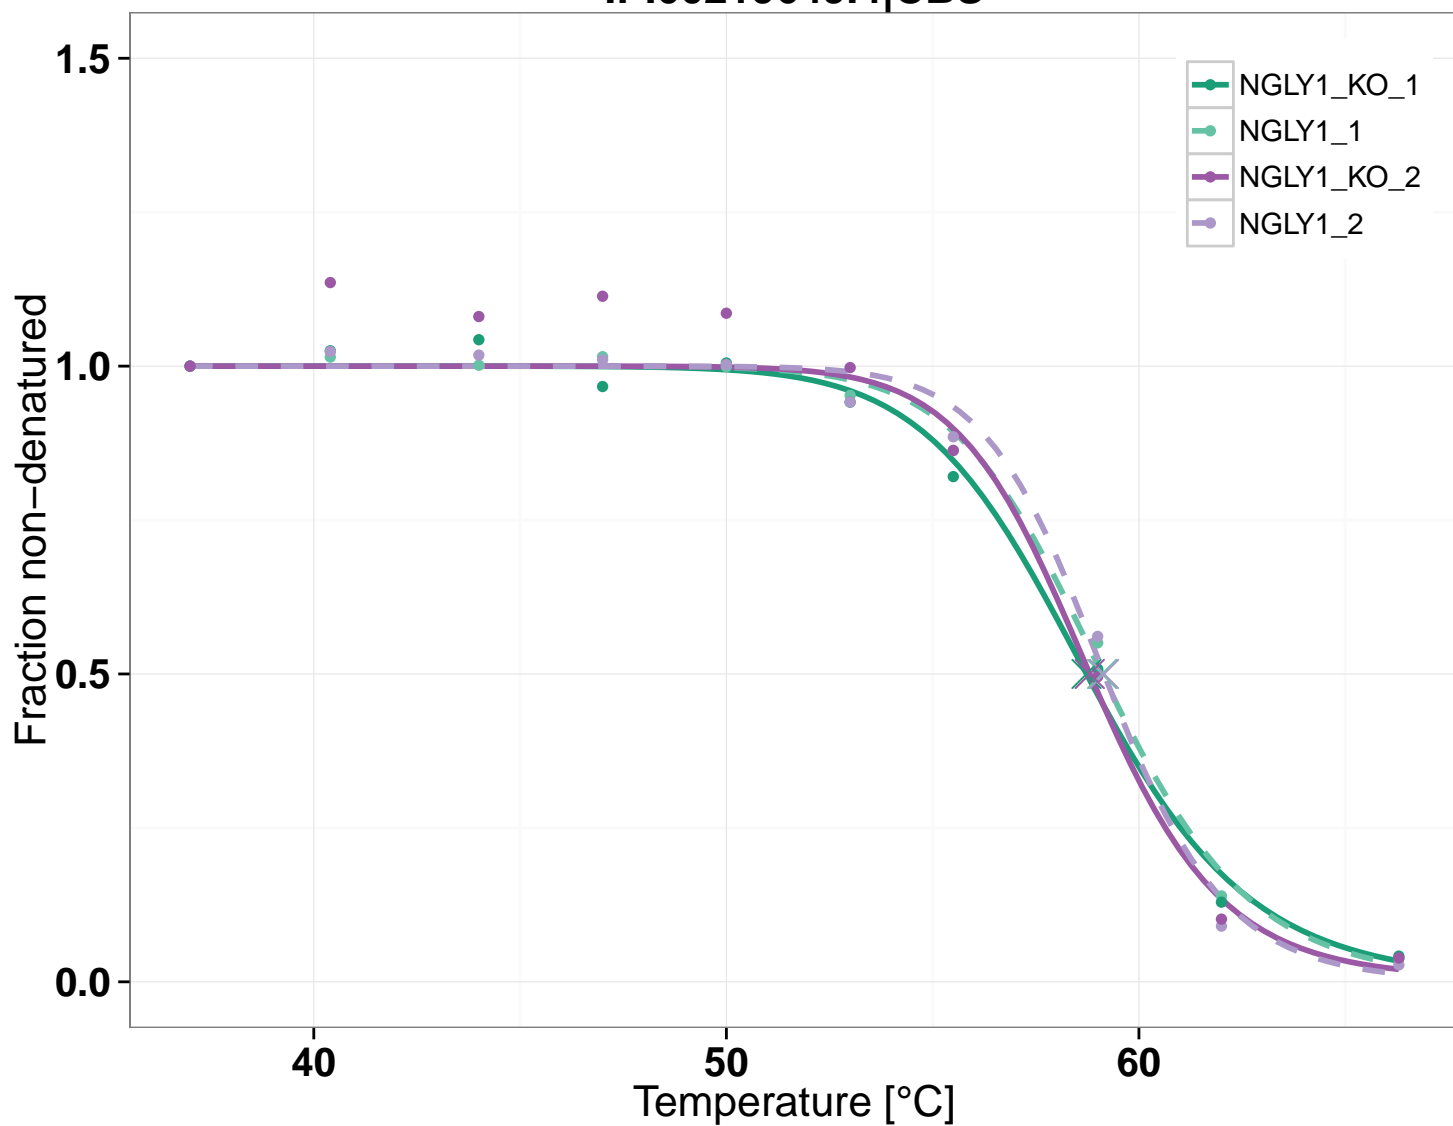

|            | meltPoint | slope | plateau | R2   |
|------------|-----------|-------|---------|------|
| NGLY1_KO_1 | 58.73     | -0.13 | 0       | 0.99 |
| NGLY1_1    | 59.11     | -0.14 | 0       | 1    |
| NGLY1_KO_2 | 58.81     | -0.16 | 0       | 0.97 |
| NGLY1_2    | 59.15     | -0.17 | 0       | 0.99 |

Supplement: Supplementary file 316 [file 1]

IPI00784161.1|SUPT6H

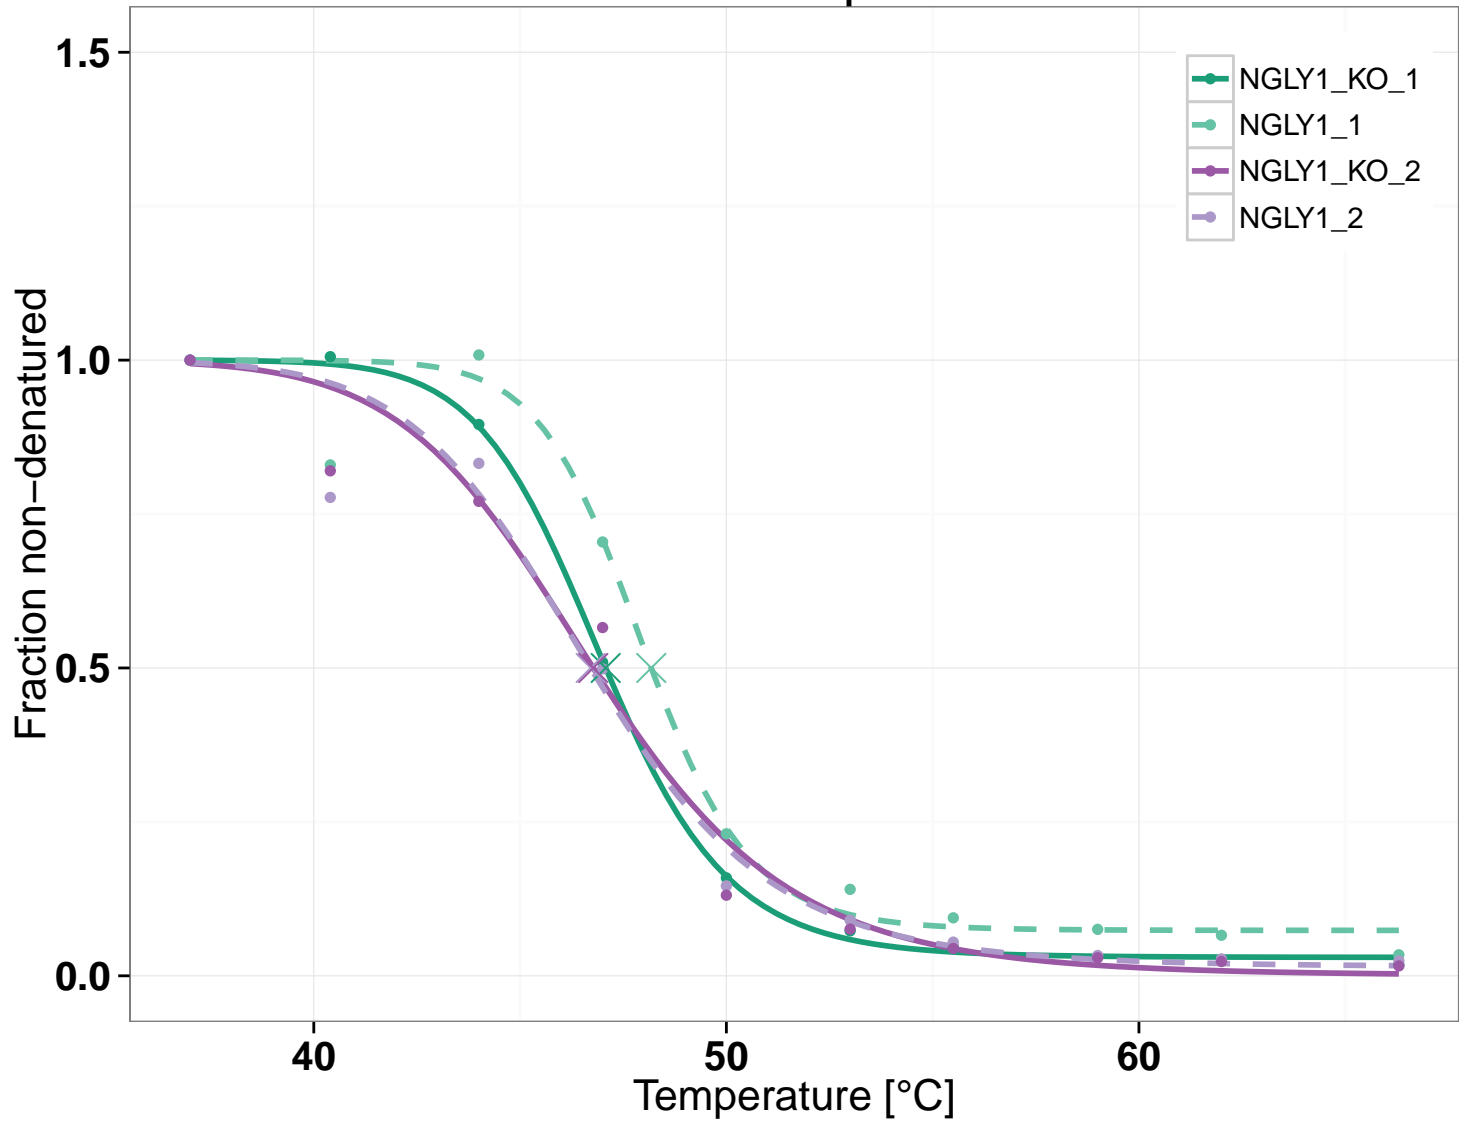

|            | meltPoint | slope | plateau | R2   |
|------------|-----------|-------|---------|------|
| NGLY1_KO_1 | 47.08     | -0.16 | 0.03    | 1    |
| NGLY1_1    | 48.18     | -0.18 | 0.07    | 0.98 |
| NGLY1_KO_2 | 46.77     | -0.11 | 0       | 0.97 |
| NGLY1_2    | 46.71     | -0.11 | 0.01    | 0.97 |

Supplement: Supplementary file 317 [file 1]

IPI00034201.5|TMCO7

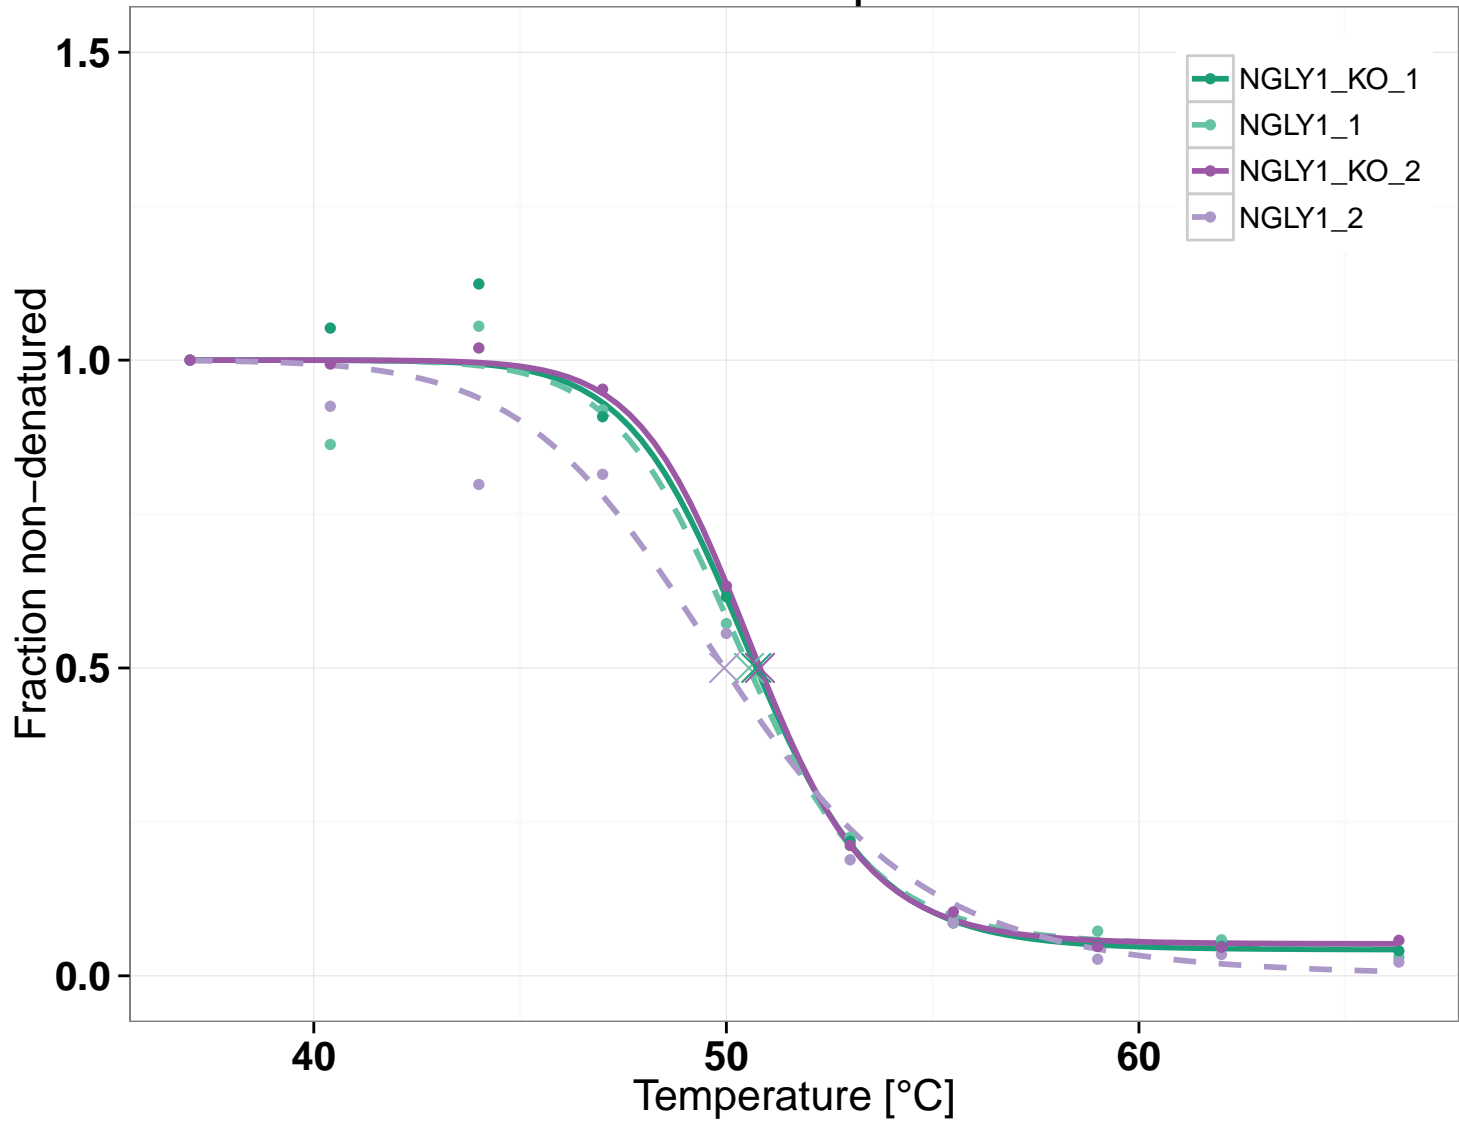

|            | meltPoint | slope | plateau | R2   |
|------------|-----------|-------|---------|------|
| NGLY1_KO_1 | 50.73     | -0.16 | 0.04    | 0.99 |
| NGLY1_1    | 50.55     | -0.15 | 0.05    | 0.99 |
| NGLY1_KO_2 | 50.81     | -0.17 | 0.05    | 1    |
| NGLY1_2    | 49.95     | -0.1  | 0       | 0.98 |

Supplement: Supplementary file 318 [file 1]

IPI00000173.4|LRCH4

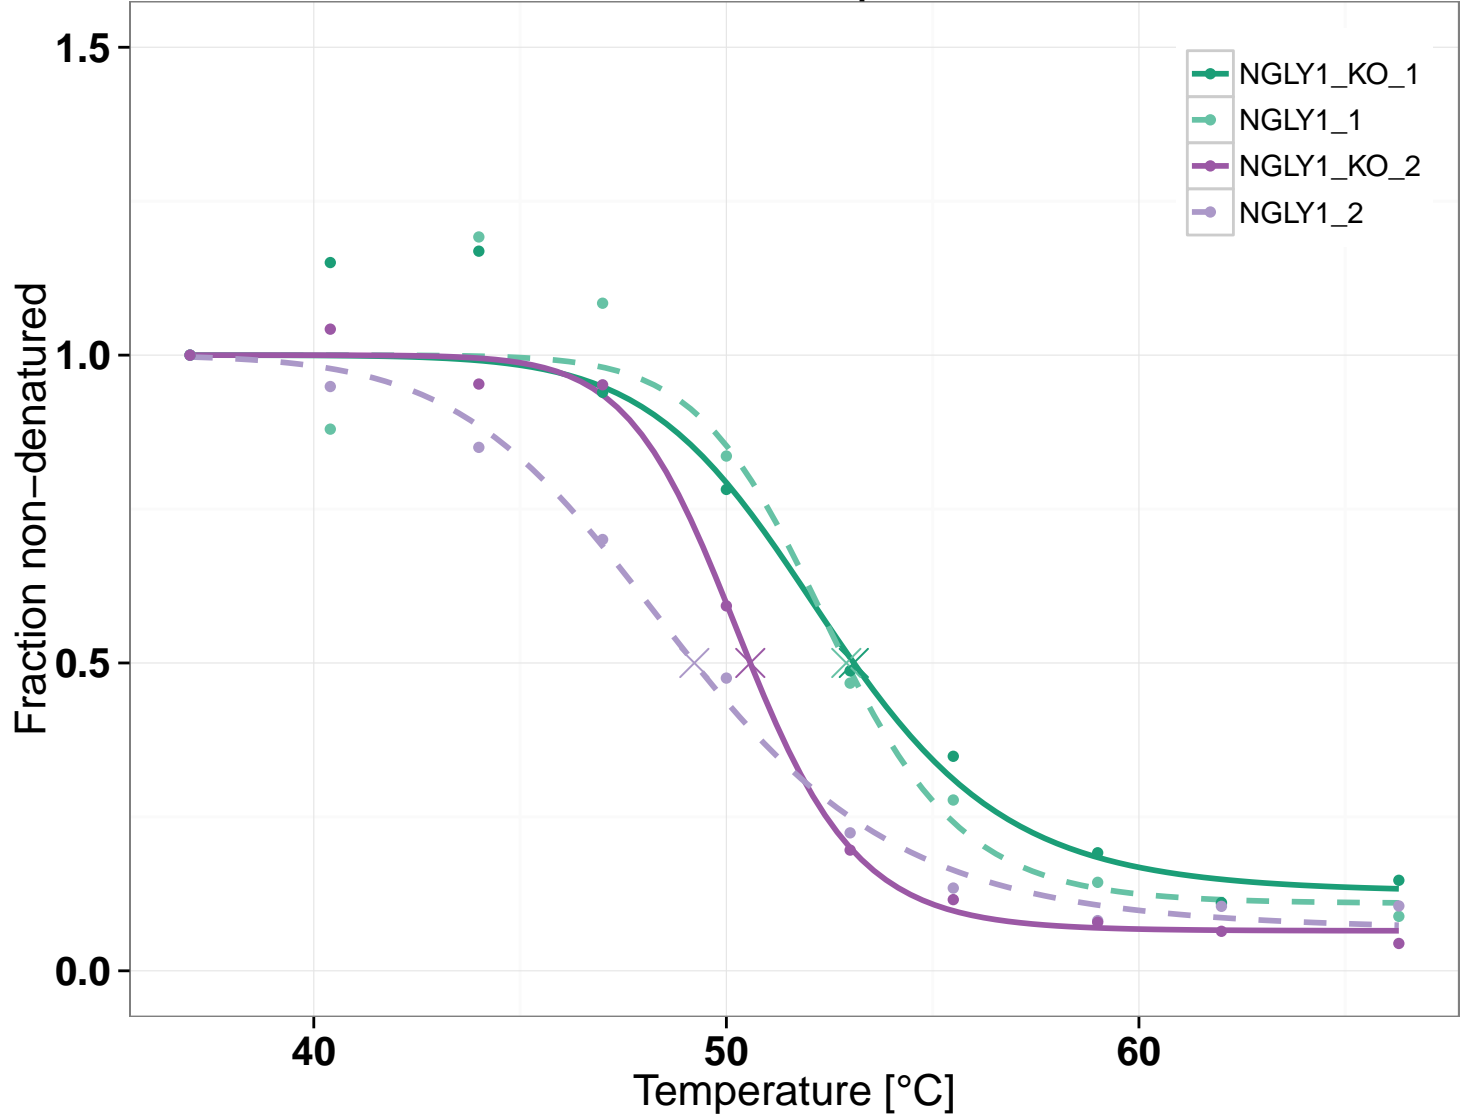

|            | meltPoint | slope  | plateau | R2   |
|------------|-----------|--------|---------|------|
| NGLY1_KO_1 | 53.09     | -0.1   | 0.13    | 0.96 |
| NGLY1_1    | 52.91     | -0.14  | 0.11    | 0.96 |
| NGLY1_KO_2 | 50.58     | -0.17  | 0.06    | 1    |
| NGLY1_2    | 49.22     | -0.087 | 0.07    | 0.99 |

Supplement: Supplementary file 319 [file 1]

IPI00220014.2|IDI1

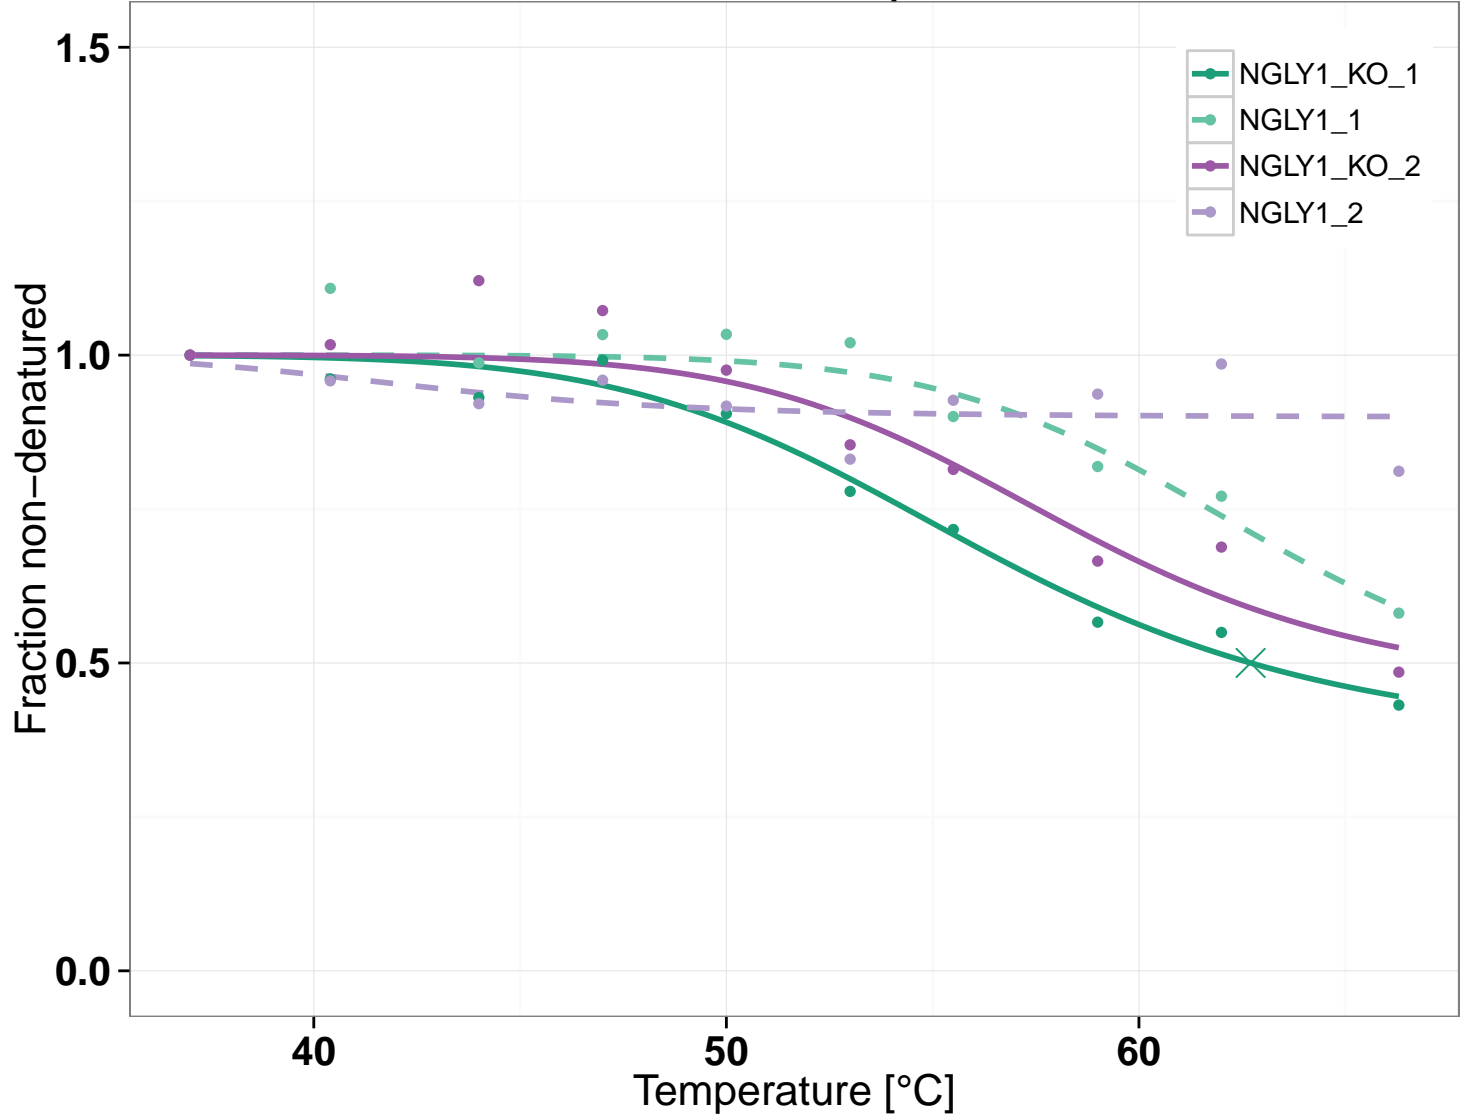

|            | meltPoint | slope   | plateau | R2   |
|------------|-----------|---------|---------|------|
| NGLY1_KO_1 | 62.71     | -0.037  | 0.36    | 0.98 |
| NGLY1_1    | -         | -0.038  | 0.41    | 0.91 |
| NGLY1_KO_2 | -         | -0.036  | 0.45    | 0.91 |
| NGLY1_2    | -         | -0.0075 | 0.9     | 0.27 |

Supplement: Supplementary file 320 [file 1]

# IPI00289357.4|ULK1

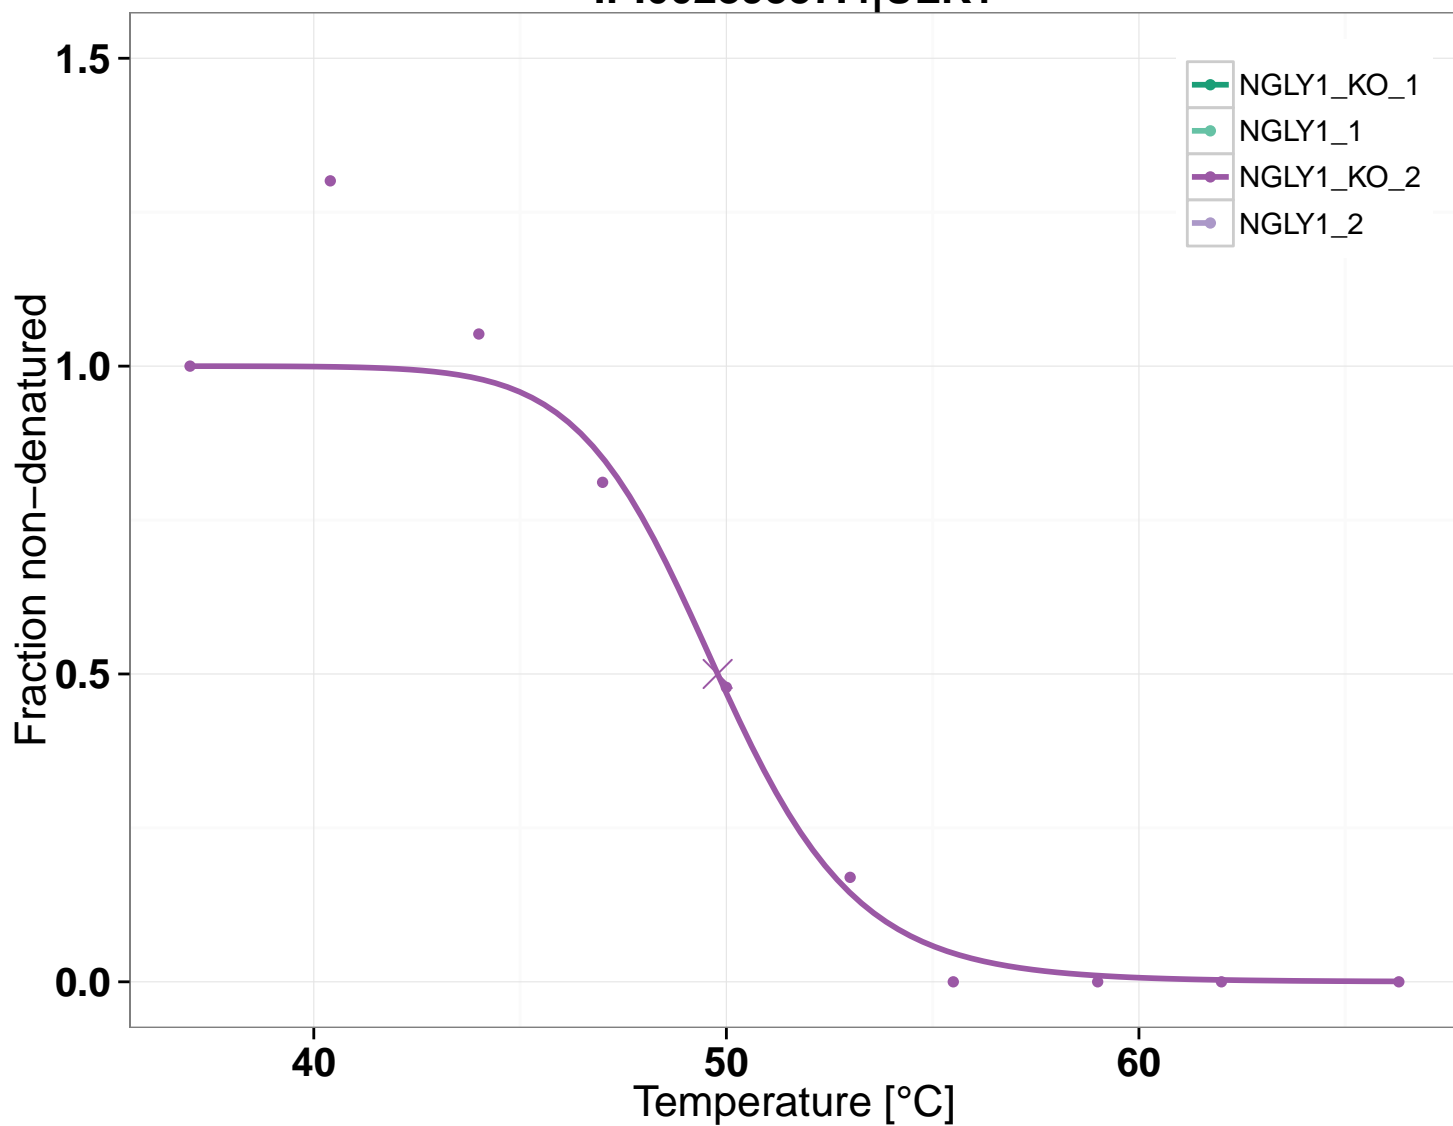

|            | meltPoint | slope | plateau | R2   |
|------------|-----------|-------|---------|------|
| NGLY1_KO_1 | —         | —     | —       | —    |
| NGLY1_1    | —         | —     | —       | —    |
| NGLY1_KO_2 | 49.79     | -0.15 | 0       | 0.96 |
| NGLY1_2    | —         | —     | —       | —    |

Supplement: Supplementary file 321 [file 1]

IPI00304676.5|INTS5

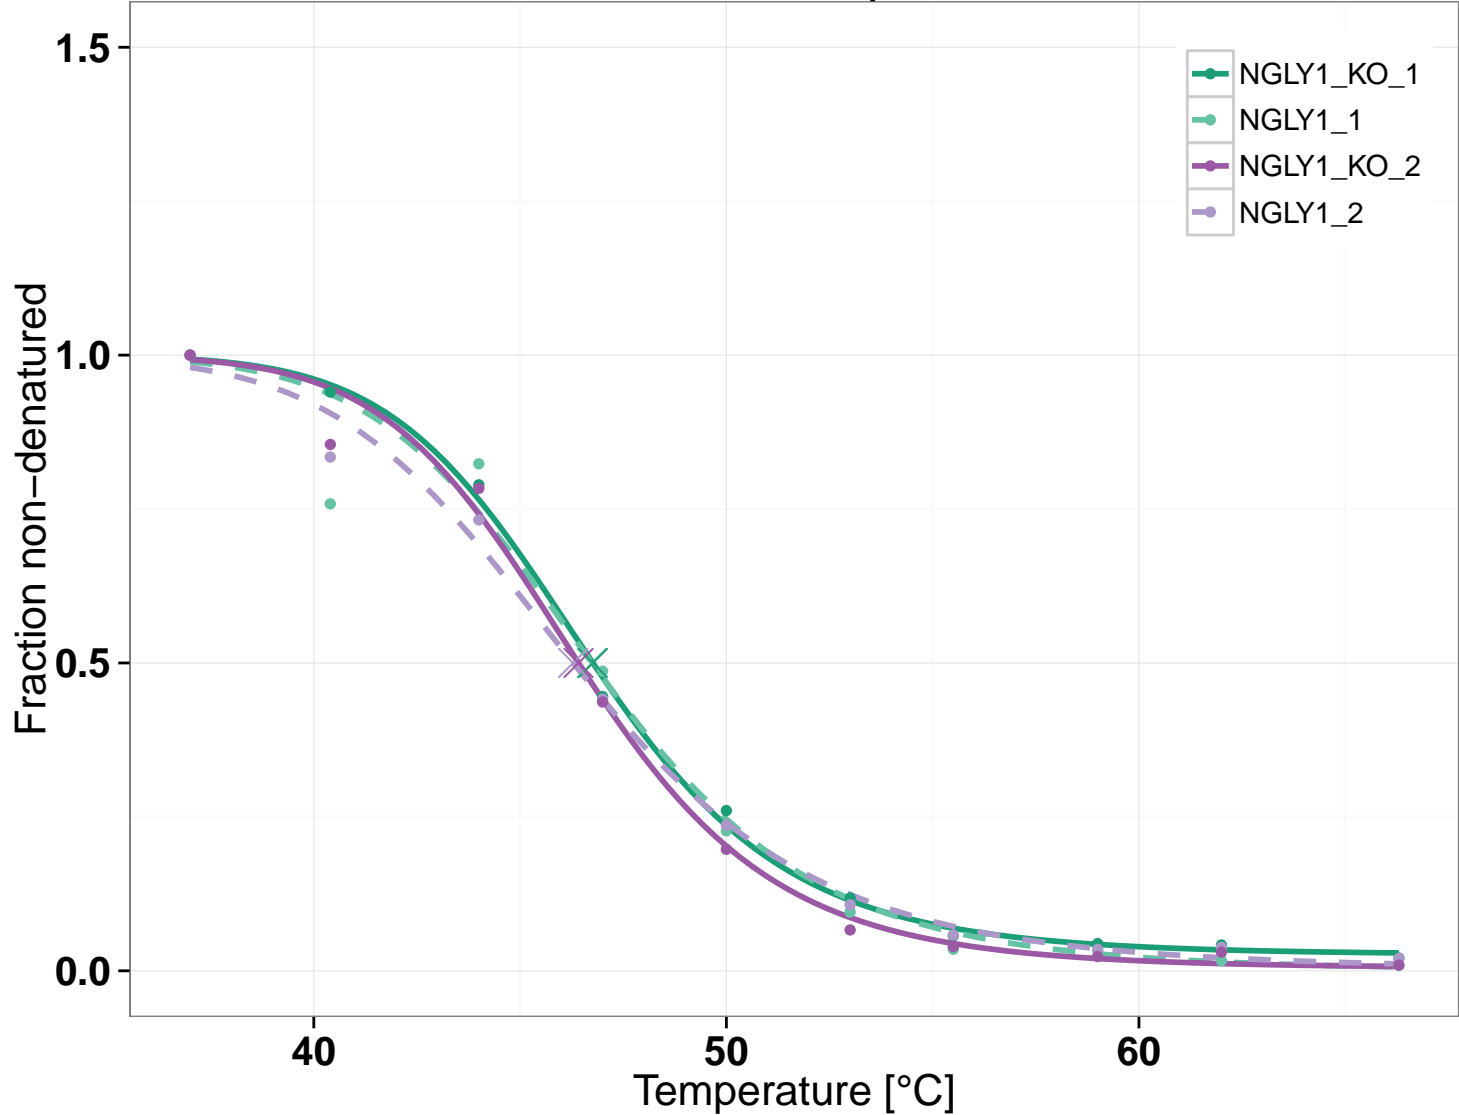

|            | meltPoint | slope  | plateau | R2   |
|------------|-----------|--------|---------|------|
| NGLY1_KO_1 | 46.77     | -0.1   | 0.03    | 1    |
| NGLY1_1    | 46.74     | -0.093 | 0       | 0.97 |
| NGLY1_KO_2 | 46.42     | -0.1   | 0       | 0.99 |
| NGLY1_2    | 46.29     | -0.085 | 0       | 0.99 |

Supplement: Supplementary file 322 [file 1]

IPI00026307.1|CDC40

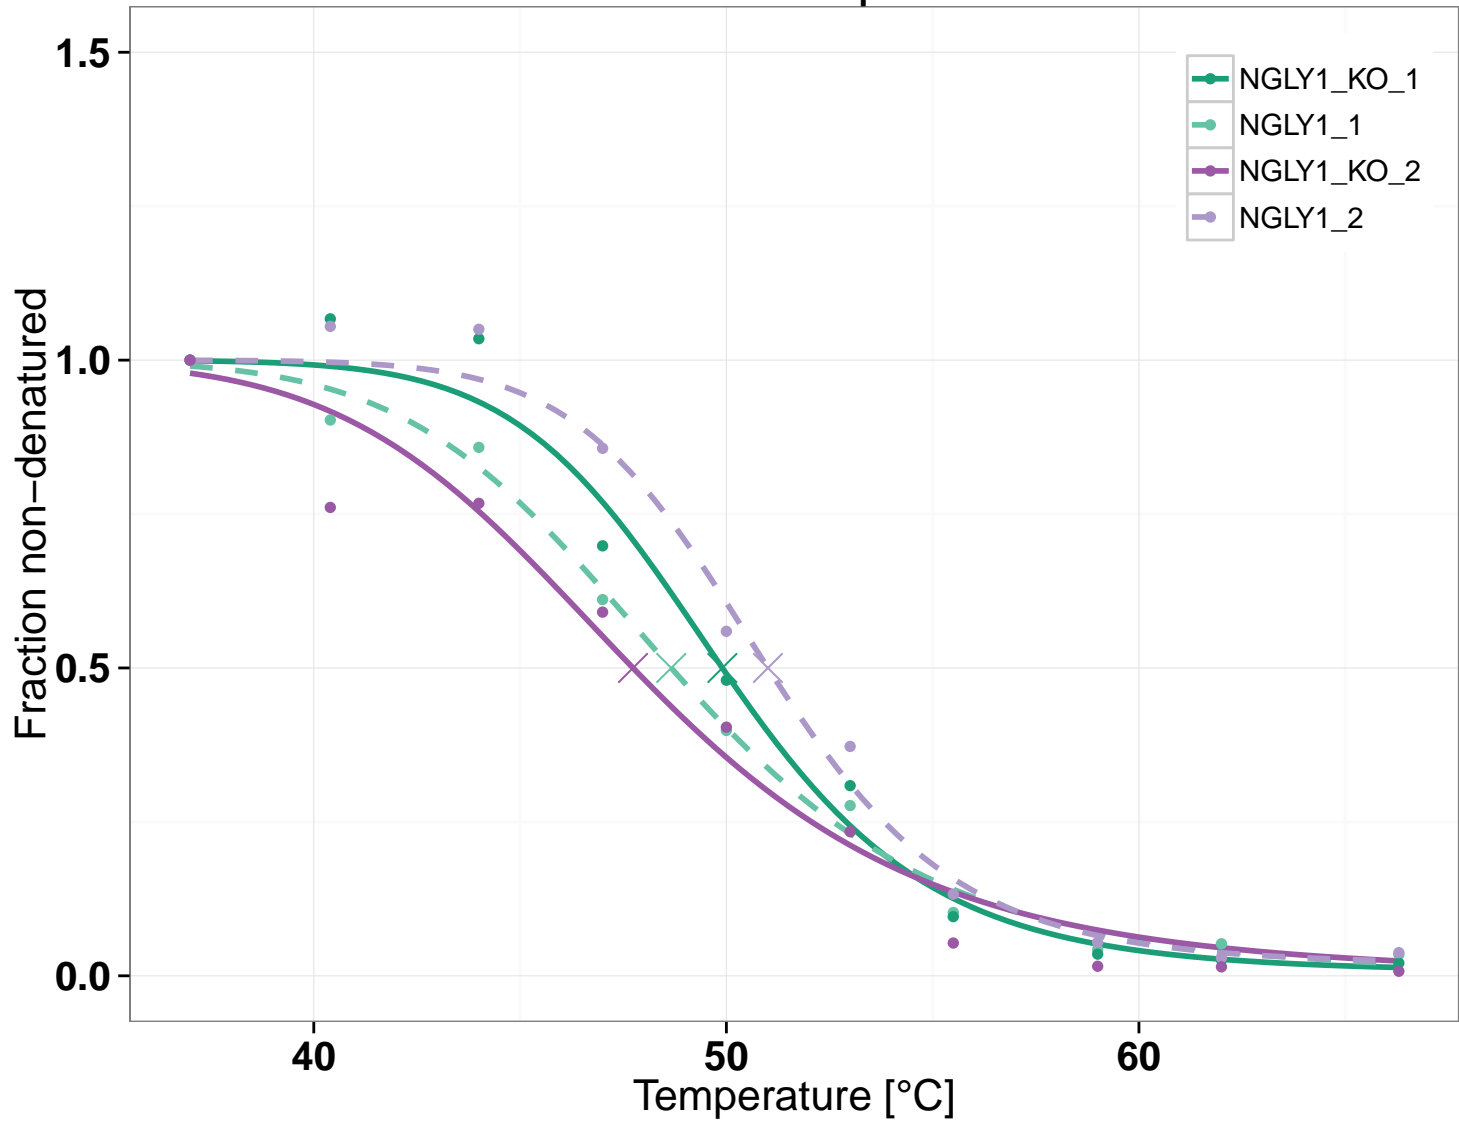

|            | meltPoint | slope  | plateau | R2   |
|------------|-----------|--------|---------|------|
| NGLY1_KO_1 | 49.9      | -0.099 | 0.01    | 0.98 |
| NGLY1_1    | 48.66     | -0.077 | 0       | 0.99 |
| NGLY1_KO_2 | 47.74     | -0.071 | 0       | 0.97 |
| NGLY1_2    | 51.01     | -0.11  | 0.02    | 0.99 |

Supplement: Supplementary file 323 [file 1]

IPI00916170.1|NUPL2

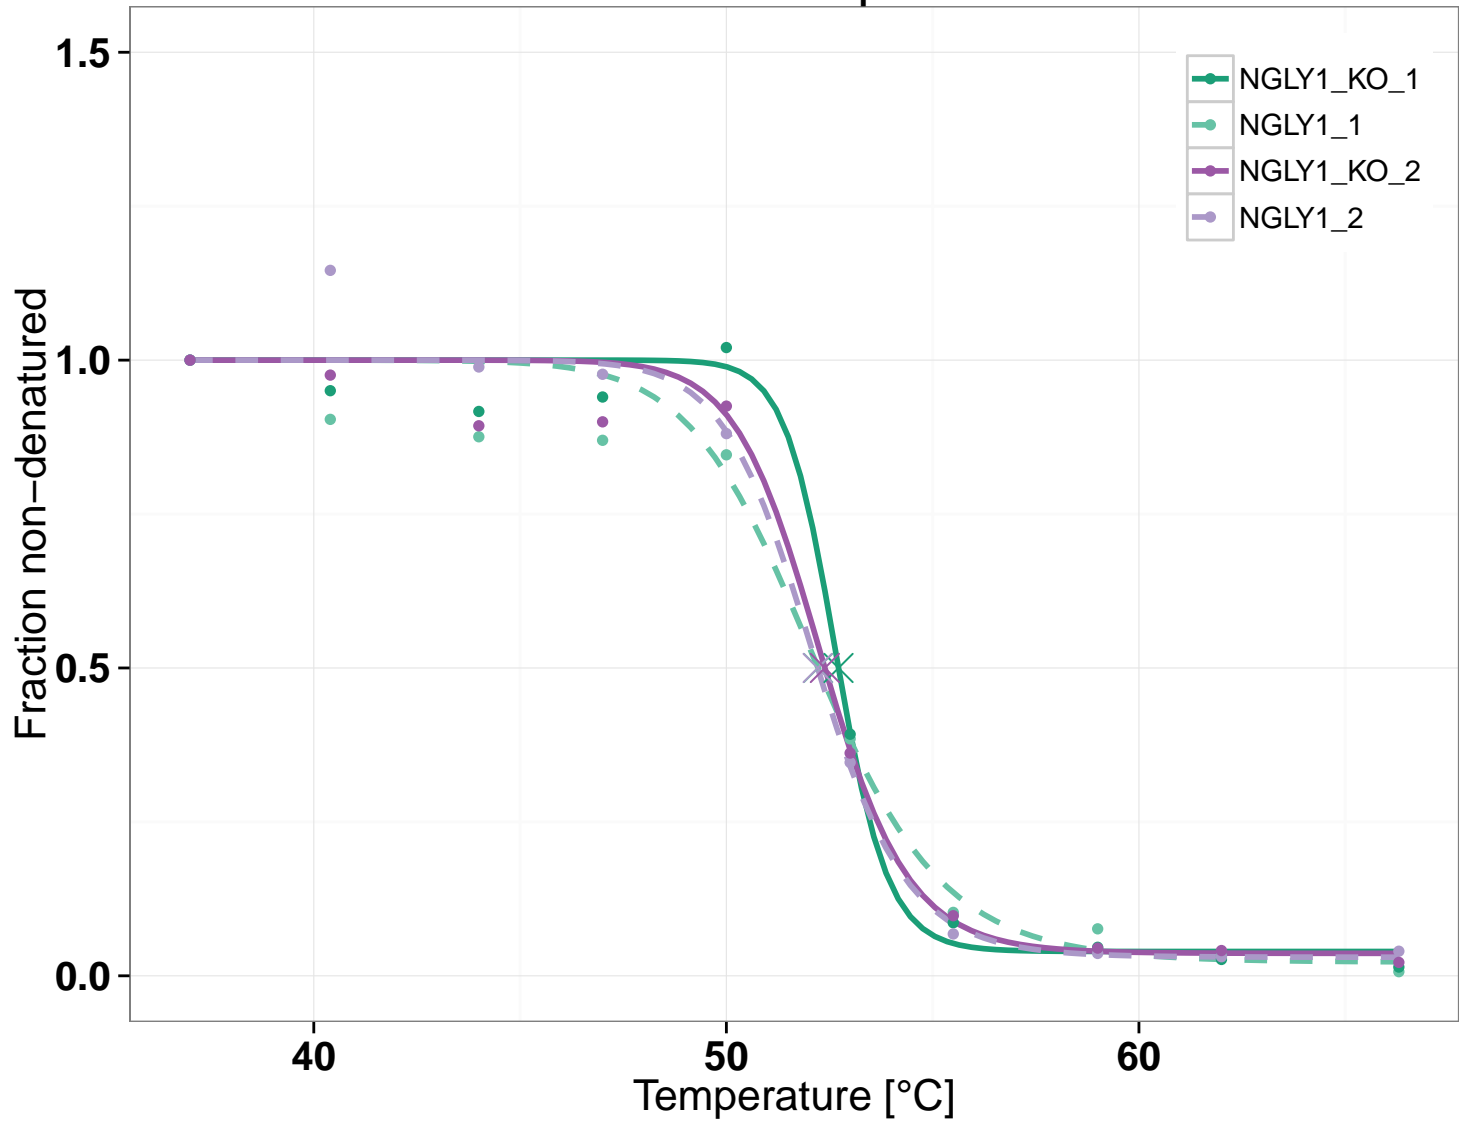

|            | meltPoint | slope | plateau | R2   |
|------------|-----------|-------|---------|------|
| NGLY1_KO_1 | 52.72     | -0.38 | 0.04    | 0.99 |
| NGLY1_1    | 52.22     | -0.16 | 0.02    | 0.98 |
| NGLY1_KO_2 | 52.39     | -0.23 | 0.04    | 0.99 |
| NGLY1_2    | 52.21     | -0.22 | 0.03    | 0.99 |

Supplement: Supplementary file 324 [file 1]

IPI00007426.1|ARL6IP5

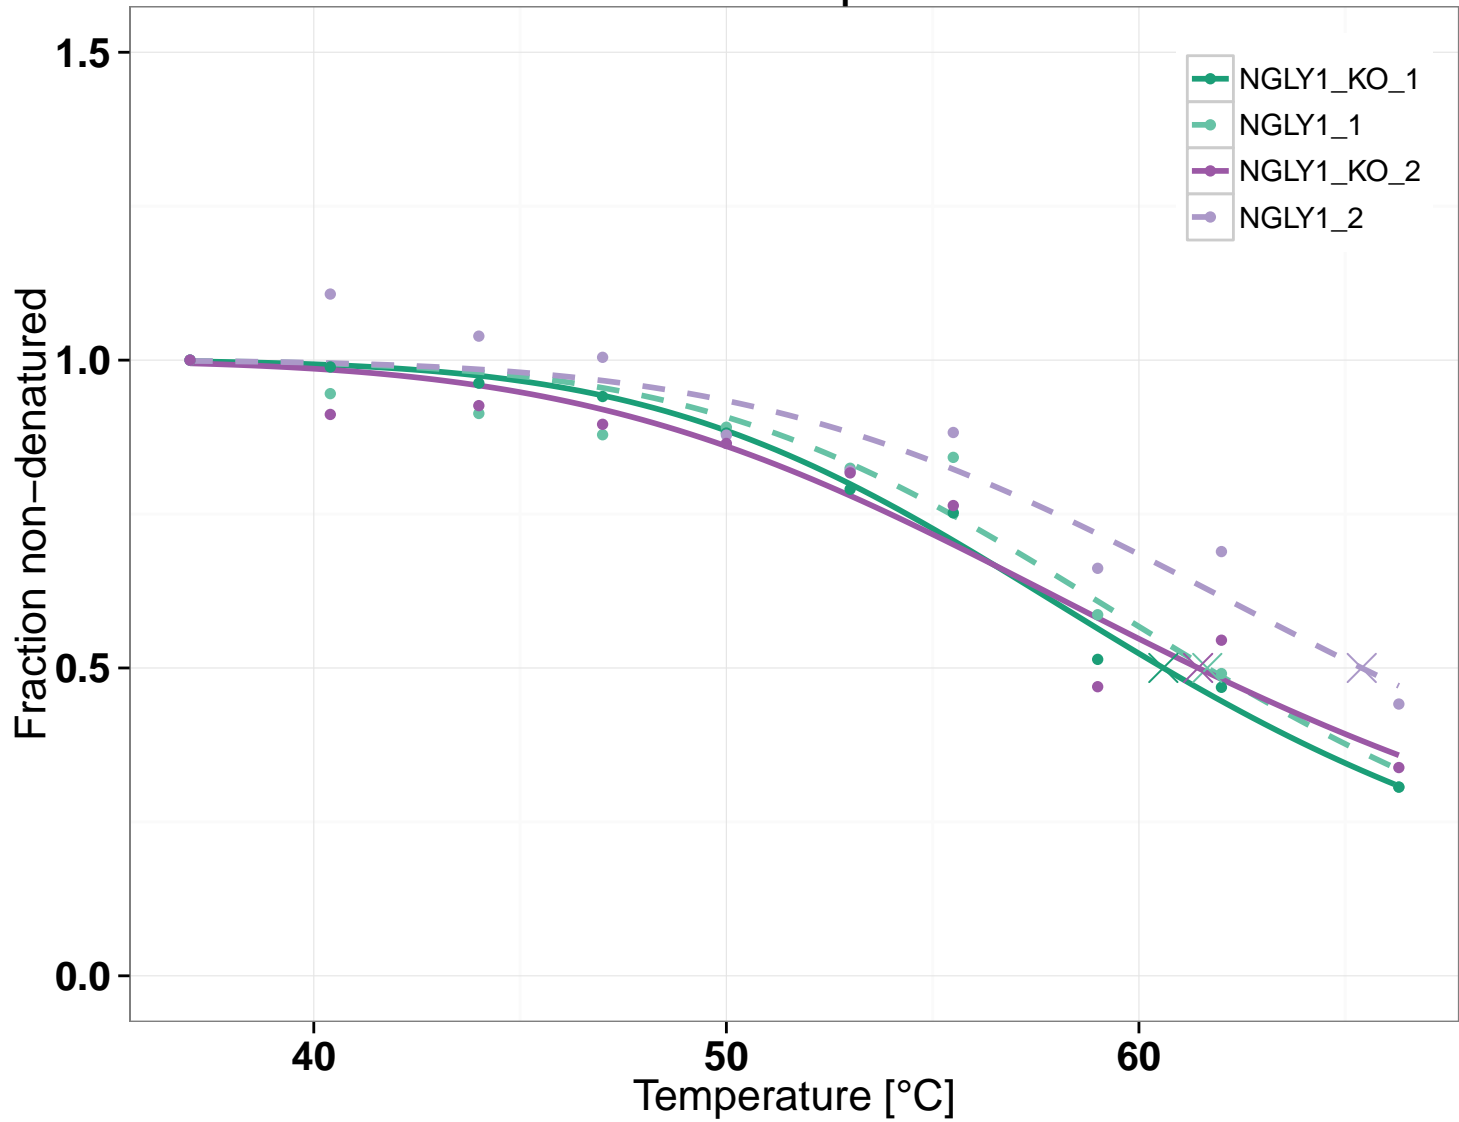

|            | meltPoint | slope  | plateau | R2   |
|------------|-----------|--------|---------|------|
| NGLY1_KO_1 | 60.59     | -0.041 | 0.02    | 0.99 |
| NGLY1_1    | 61.66     | -0.041 | 0       | 0.95 |
| NGLY1_KO_2 | 61.44     | -0.034 | 0       | 0.93 |
| NGLY1_2    | 65.4      | -0.035 | 0       | 0.9  |

Supplement: Supplementary file 325 [file 1]

IPI00021129.4|AP3B1

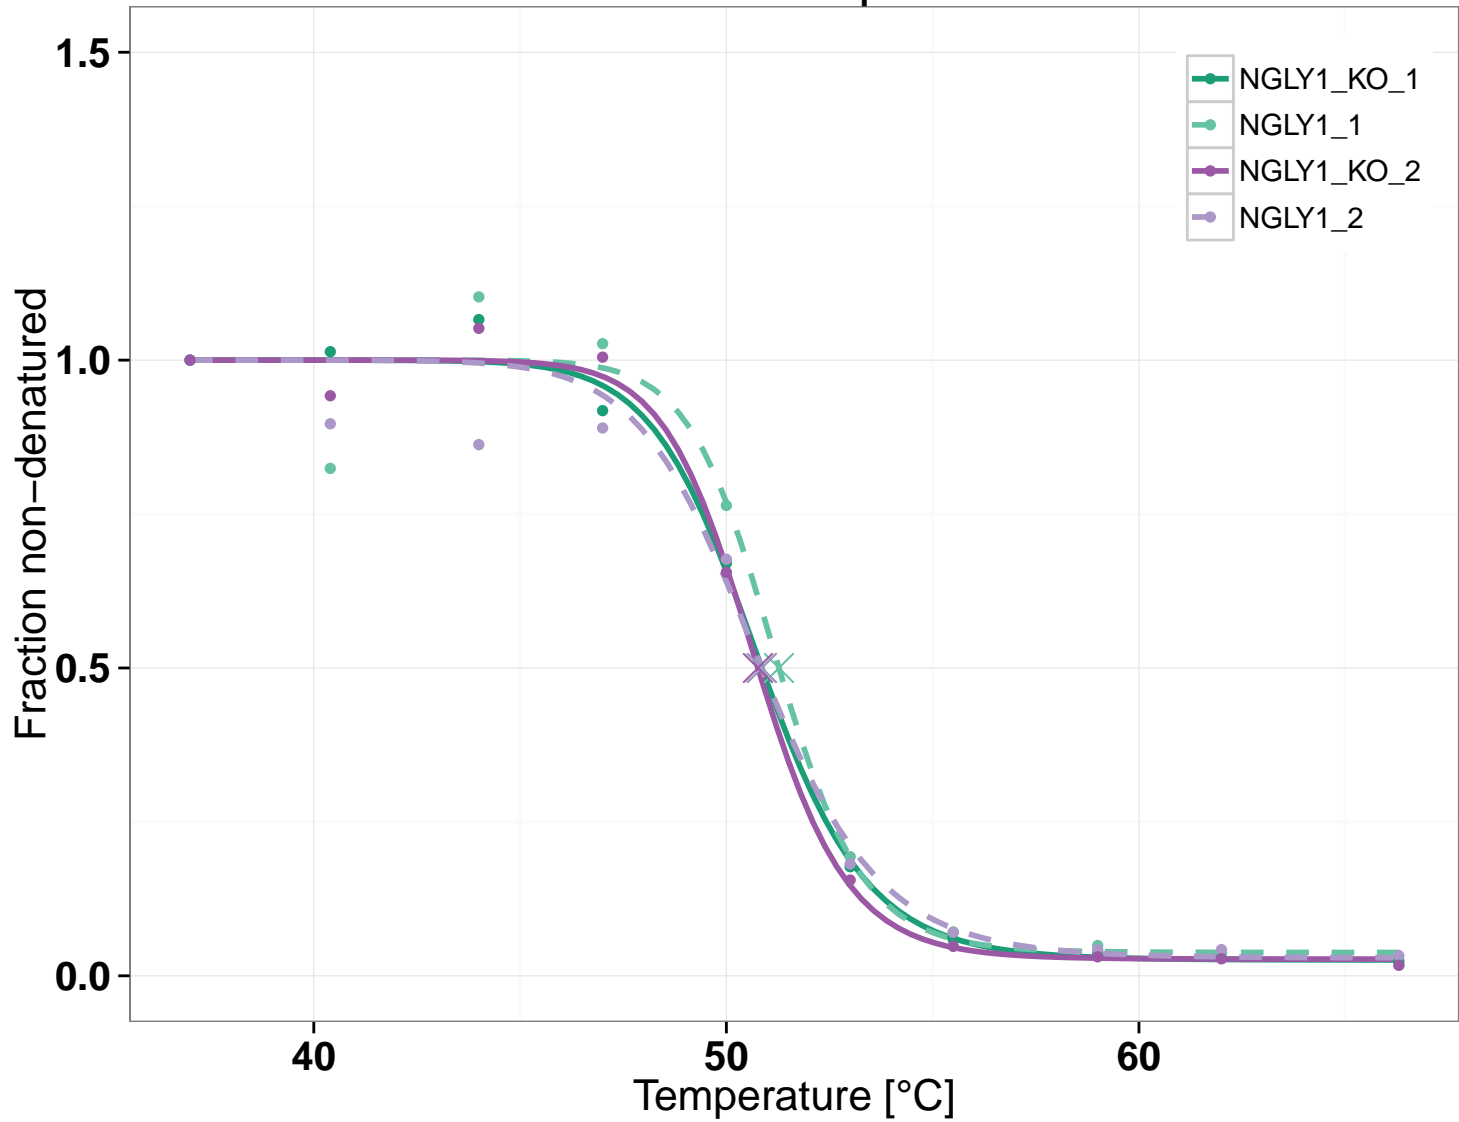

|            | meltPoint | slope | plateau | R2   |
|------------|-----------|-------|---------|------|
| NGLY1_KO_1 | 50.86     | -0.19 | 0.03    | 1    |
| NGLY1_1    | 51.27     | -0.23 | 0.04    | 0.98 |
| NGLY1_KO_2 | 50.77     | -0.22 | 0.03    | 1    |
| NGLY1_2    | 50.85     | -0.17 | 0.03    | 0.98 |

Supplement: Supplementary file 326 [file 1]

# IPI00878557.1|YY1

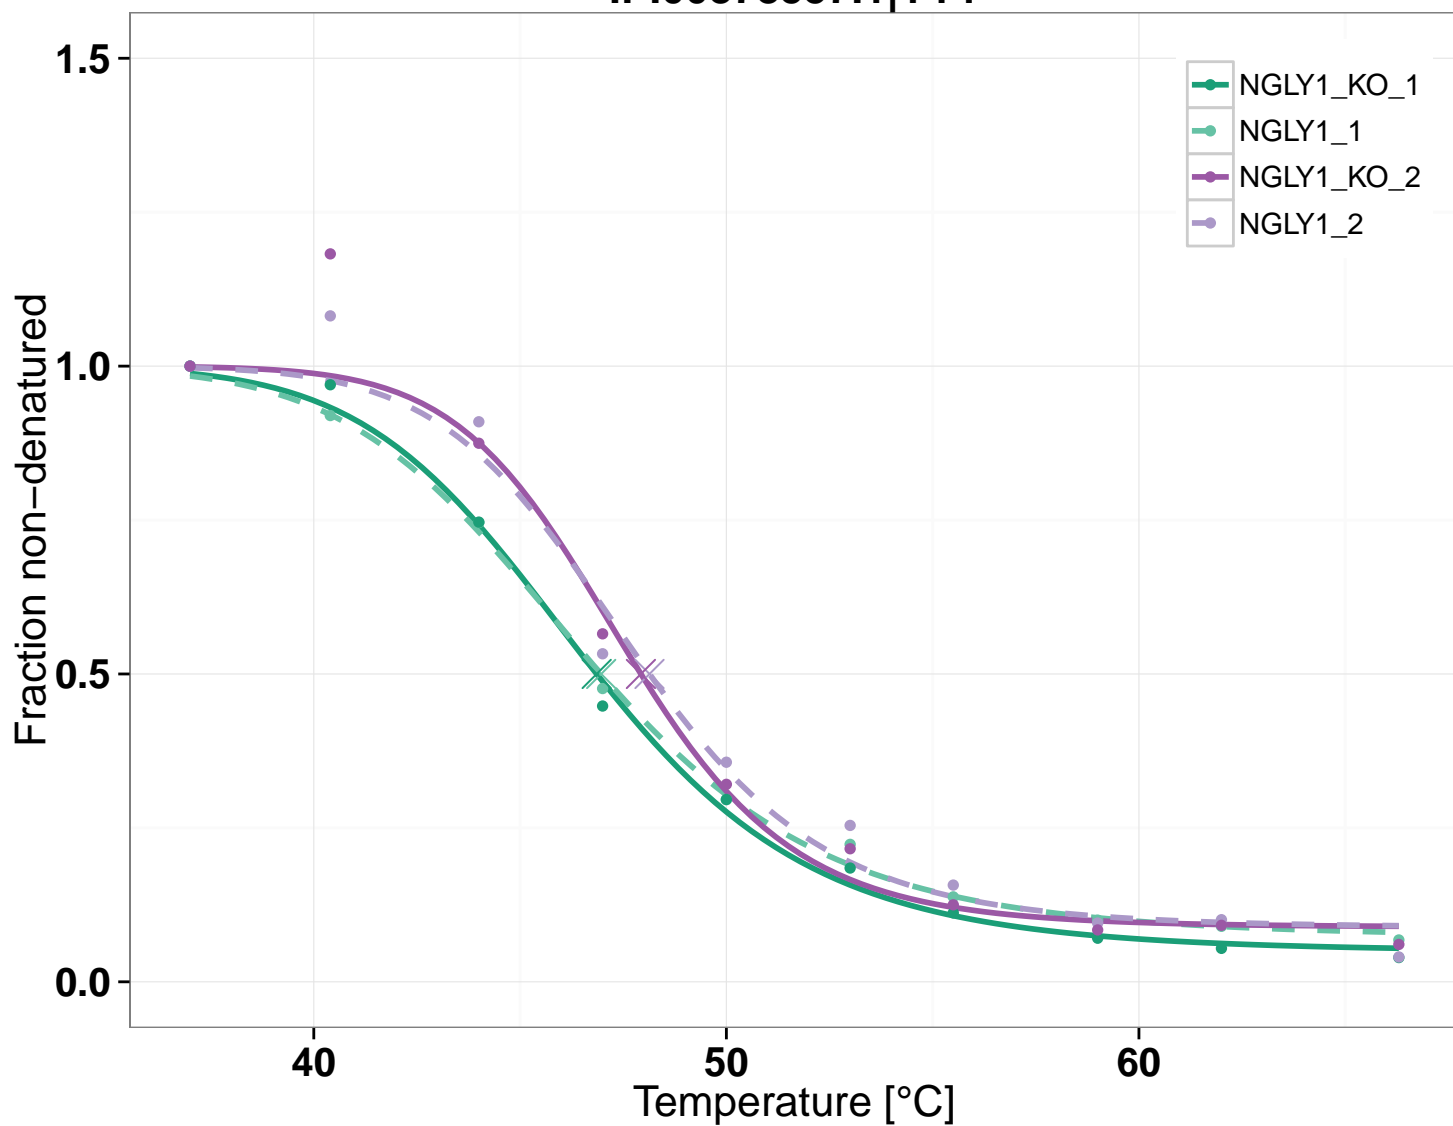

|            | meltPoint | slope  | plateau | R2   |
|------------|-----------|--------|---------|------|
| NGLY1_KO_1 | 46.86     | -0.087 | 0.05    | 1    |
| NGLY1_1    | 46.97     | -0.08  | 0.07    | 1    |
| NGLY1_KO_2 | 47.93     | -0.11  | 0.09    | 0.97 |
| NGLY1_2    | 48.14     | -0.097 | 0.09    | 0.98 |

Supplement: Supplementary file 327 [file 1]

IPI00296909.3|PARP4

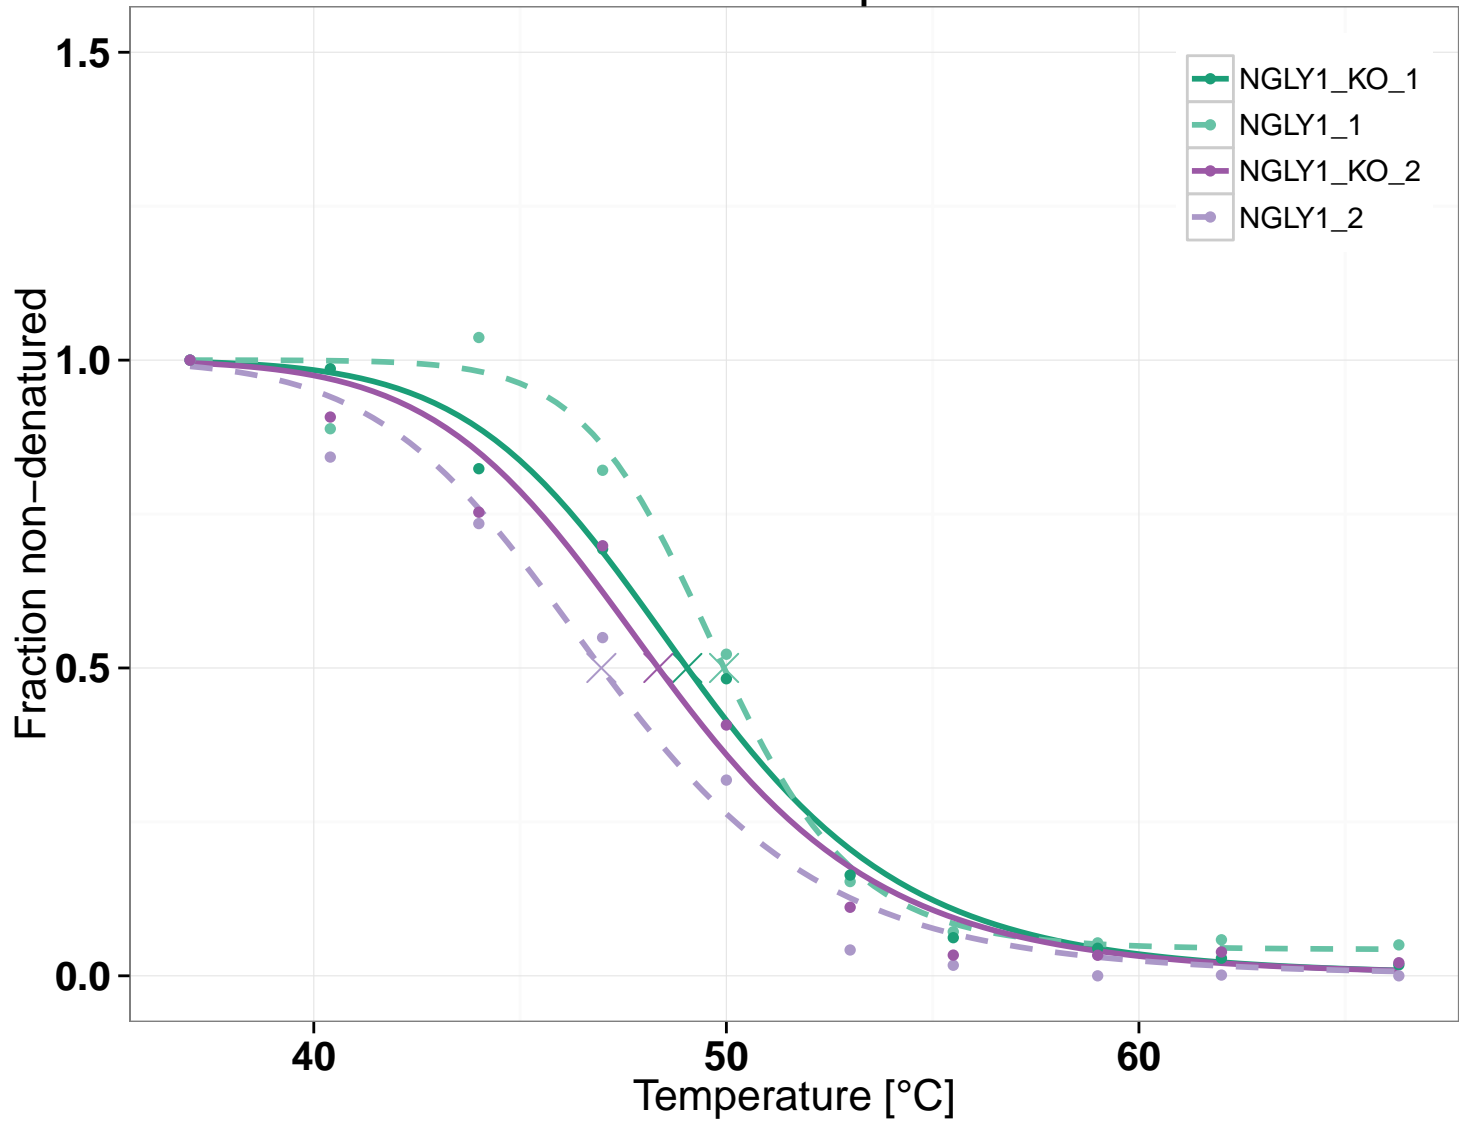

|            | meltPoint | slope  | plateau | R2   |
|------------|-----------|--------|---------|------|
| NGLY1_KO_1 | 49.05     | -0.094 | 0       | 0.99 |
| NGLY1_1    | 49.94     | -0.14  | 0.04    | 0.99 |
| NGLY1_KO_2 | 48.35     | -0.092 | 0       | 0.98 |
| NGLY1_2    | 46.97     | -0.092 | 0       | 0.98 |

Supplement: Supplementary file 328 [file 1]

IPI00438286.2|ERBB2IP

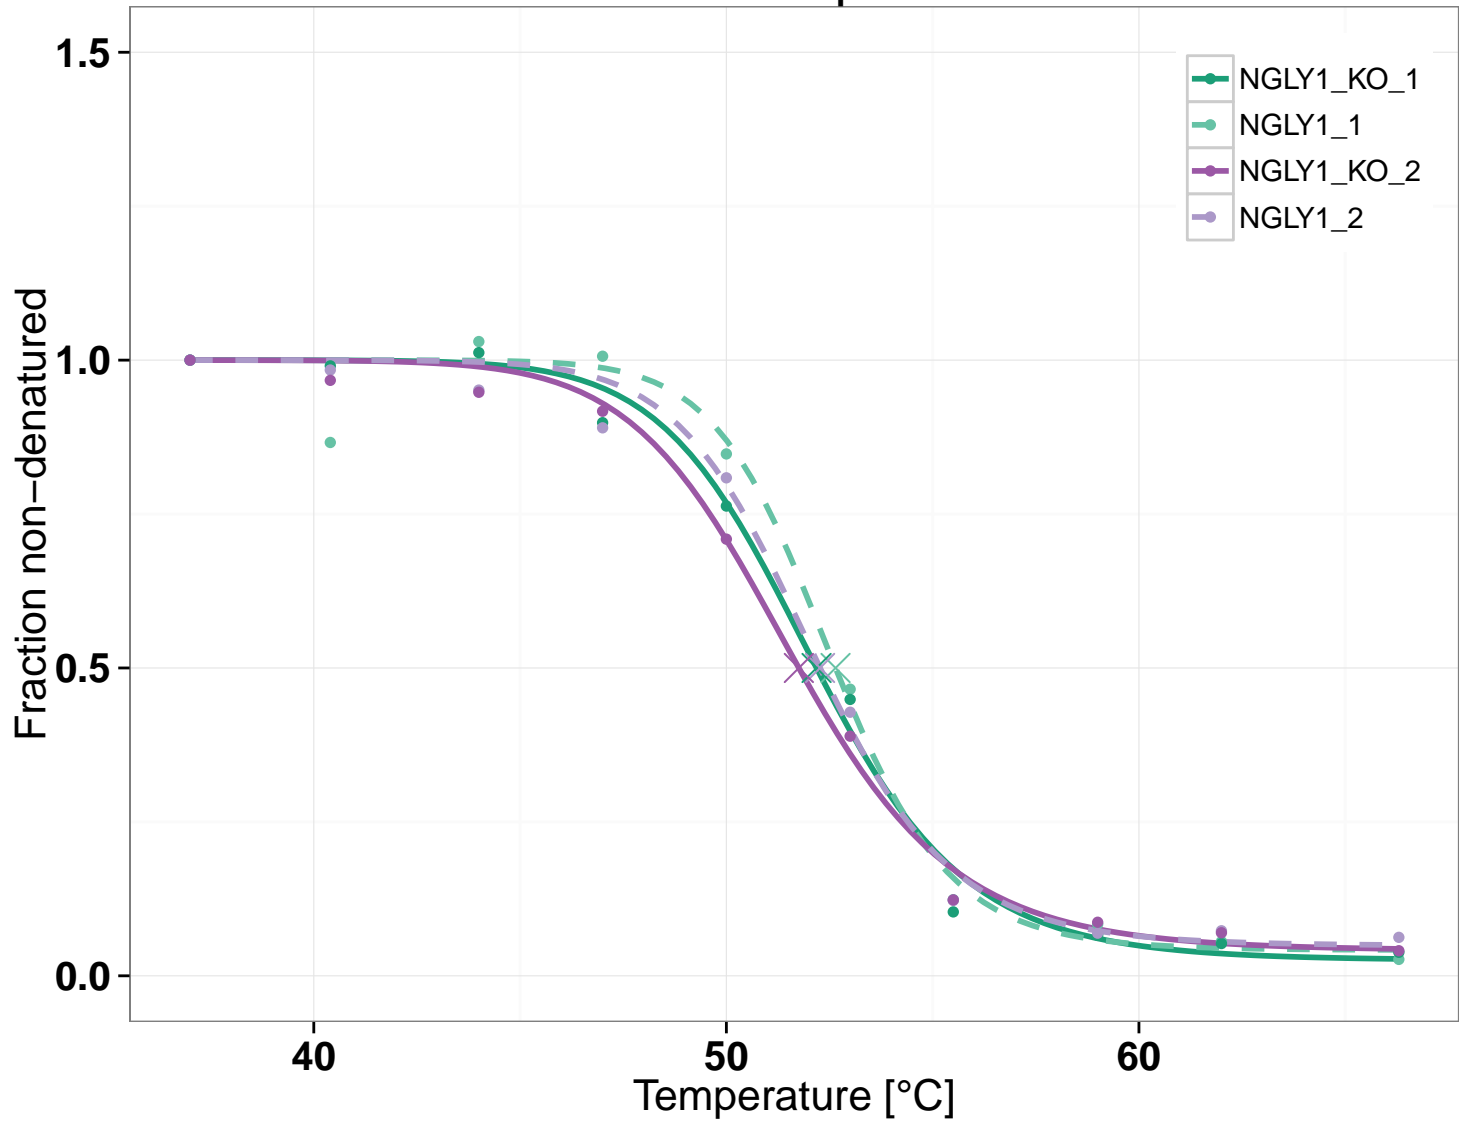

|            | meltPoint | slope | plateau | R2   |
|------------|-----------|-------|---------|------|
| NGLY1_KO_1 | 52.19     | -0.13 | 0.02    | 0.99 |
| NGLY1_1    | 52.65     | -0.17 | 0.04    | 0.99 |
| NGLY1_KO_2 | 51.76     | -0.12 | 0.04    | 1    |
| NGLY1_2    | 52.27     | -0.14 | 0.05    | 0.99 |

Supplement: Supplementary file 329 [file 1]

IPI00003027.1|GEMIN7

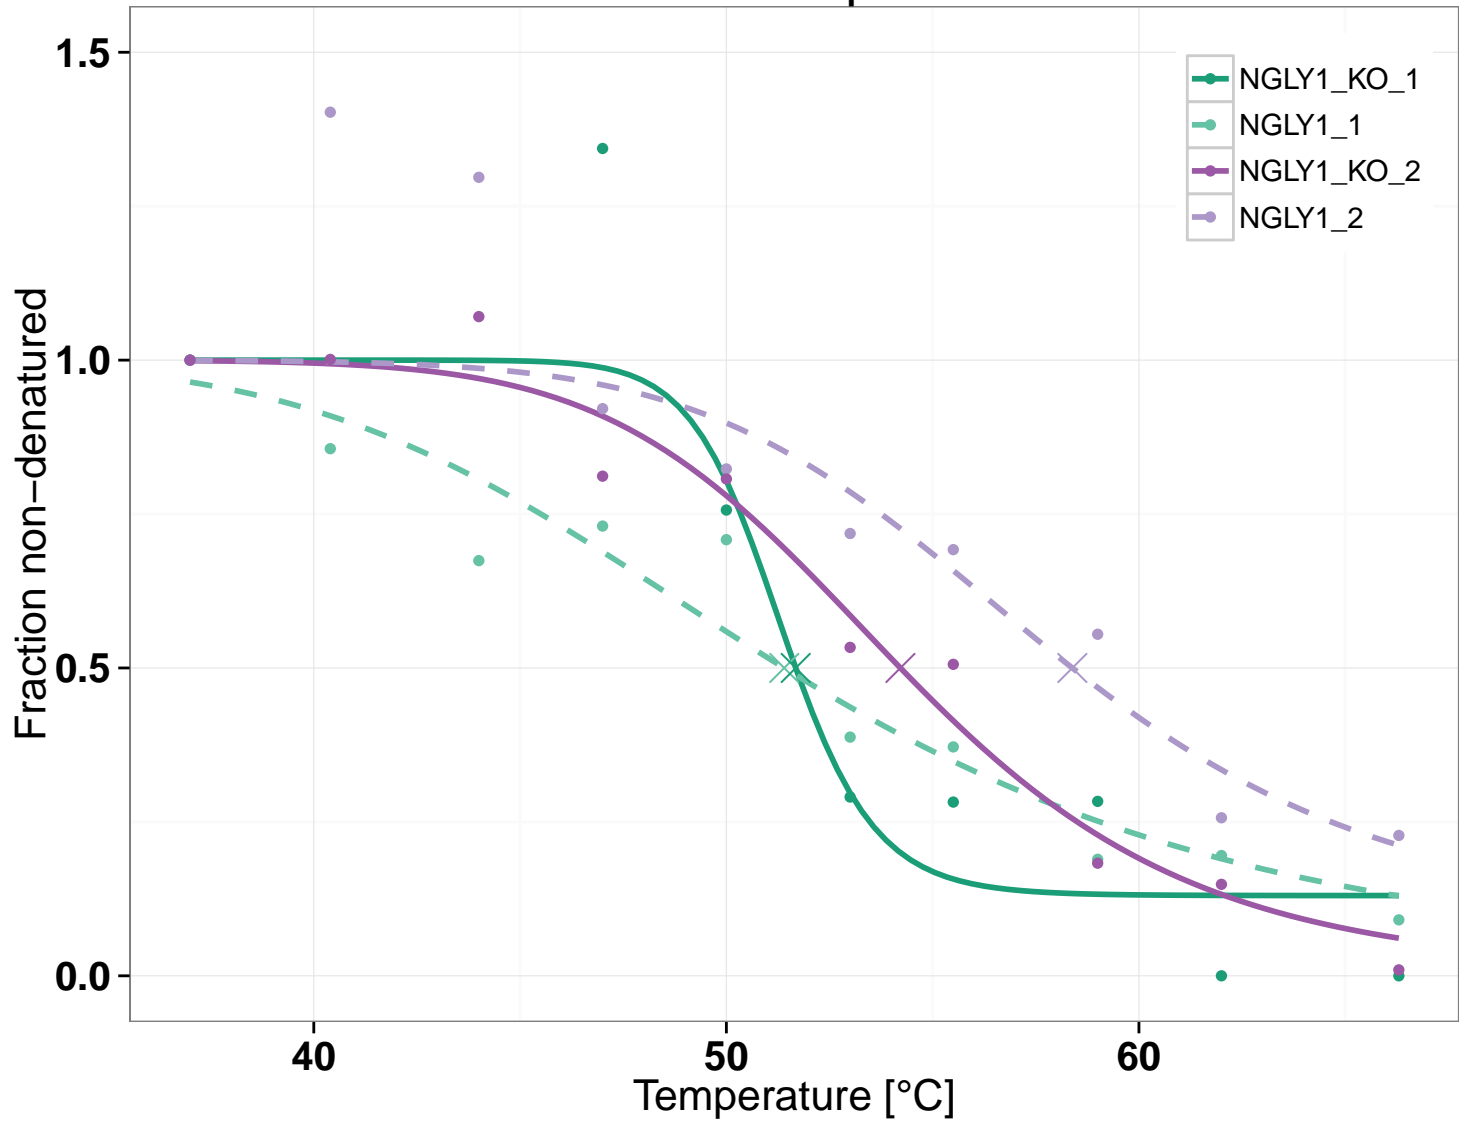

|            | meltPoint | slope  | plateau | R2   |
|------------|-----------|--------|---------|------|
| NGLY1_KO_1 | 51.68     | -0.2   | 0.13    | 0.69 |
| NGLY1_1    | 51.4      | -0.043 | 0       | 0.94 |
| NGLY1_KO_2 | 54.22     | -0.07  | 0       | 0.97 |
| NGLY1_2    | 58.39     | -0.056 | 0.08    | 0.79 |

Supplement: Supplementary file 330 [file 1]

IPI00299463.1|NBN

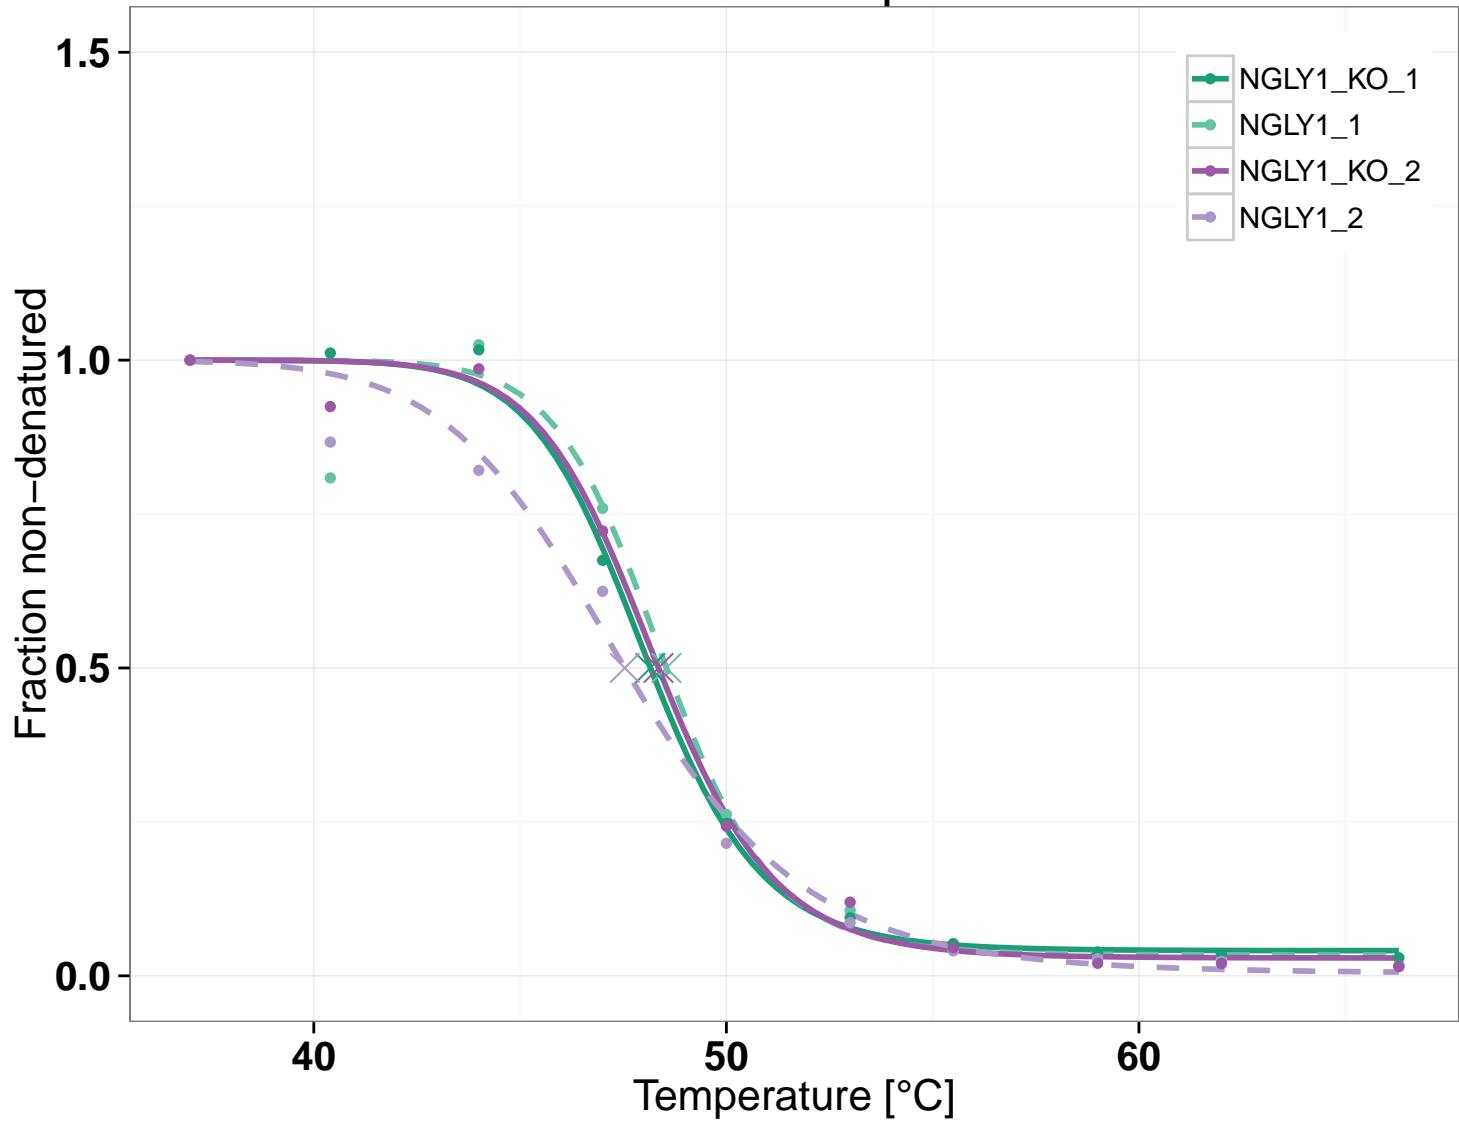

|            | meltPoint | slope | plateau | R2   |
|------------|-----------|-------|---------|------|
| NGLY1_KO_1 | 48.16     | -0.17 | 0.04    | 1    |
| NGLY1_1    | 48.55     | -0.18 | 0.03    | 0.98 |
| NGLY1_KO_2 | 48.36     | -0.17 | 0.03    | 1    |
| NGLY1_2    | 47.54     | -0.11 | 0       | 0.99 |

Supplement: Supplementary file 331 [file 1]

IPI00022883.1|AP3M2

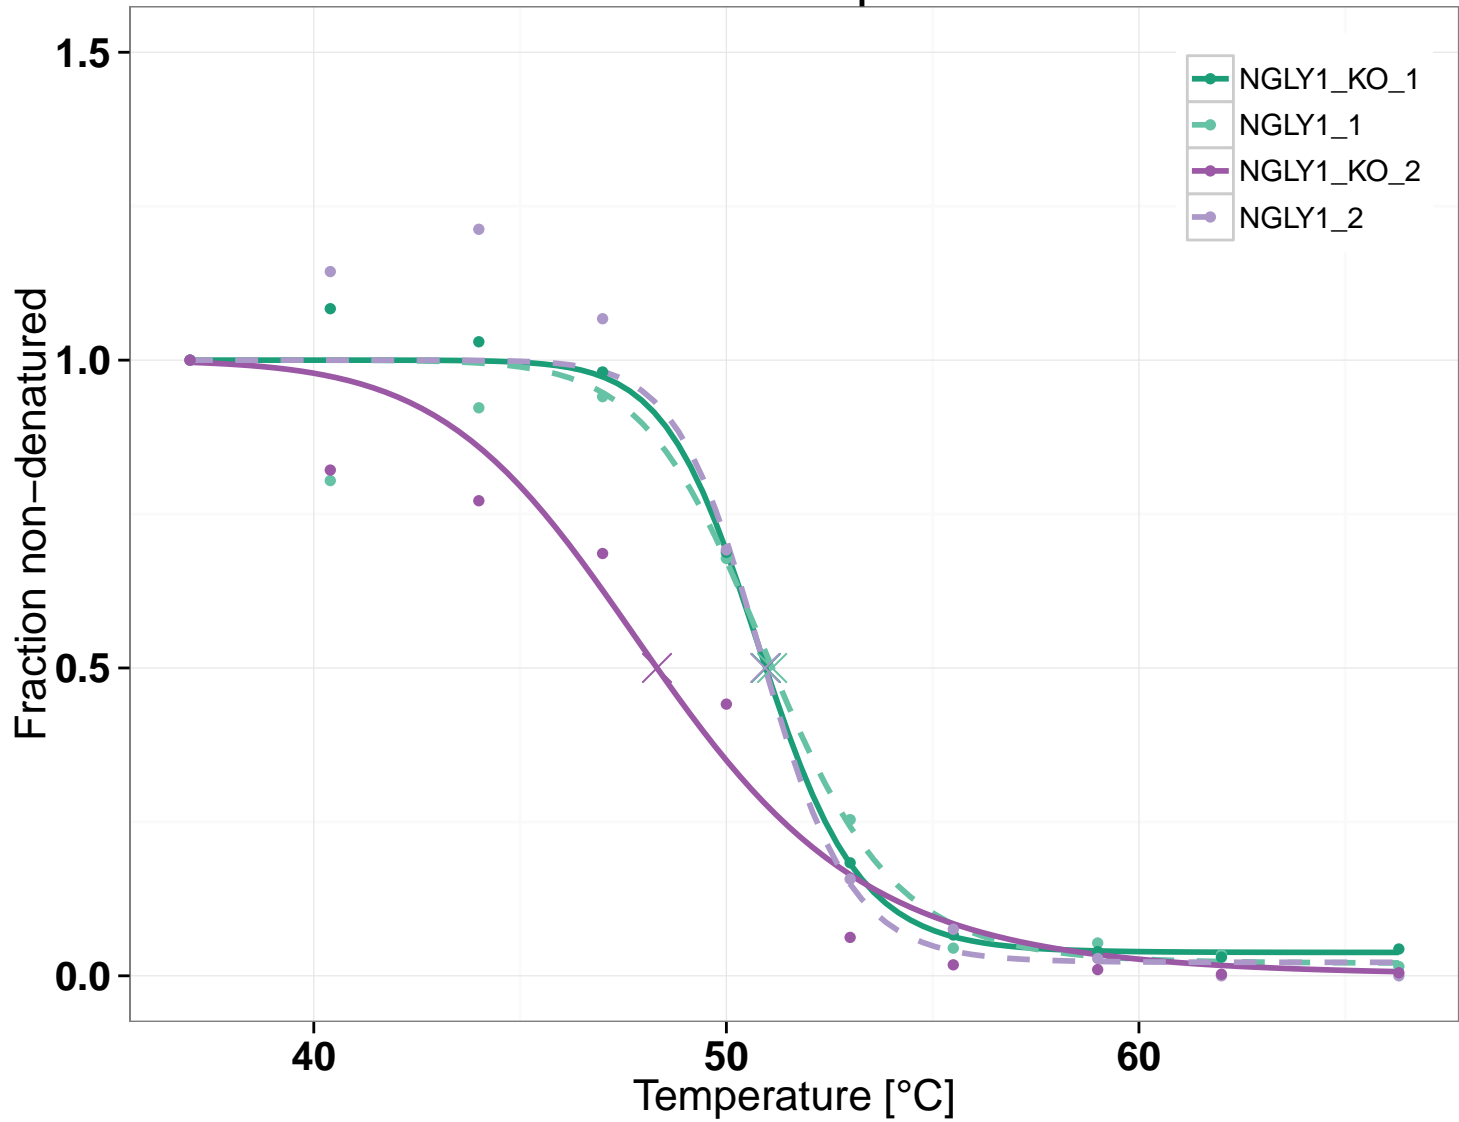

|            | meltPoint | slope  | plateau | R2   |
|------------|-----------|--------|---------|------|
| NGLY1_KO_1 | 50.96     | -0.2   | 0.04    | 1    |
| NGLY1_1    | 51.11     | -0.16  | 0.02    | 0.97 |
| NGLY1_KO_2 | 48.32     | -0.096 | 0       | 0.96 |
| NGLY1_2    | 50.94     | -0.23  | 0.02    | 0.97 |

Supplement: Supplementary file 332 [file 1]

# IPI00215610.2|MPP1

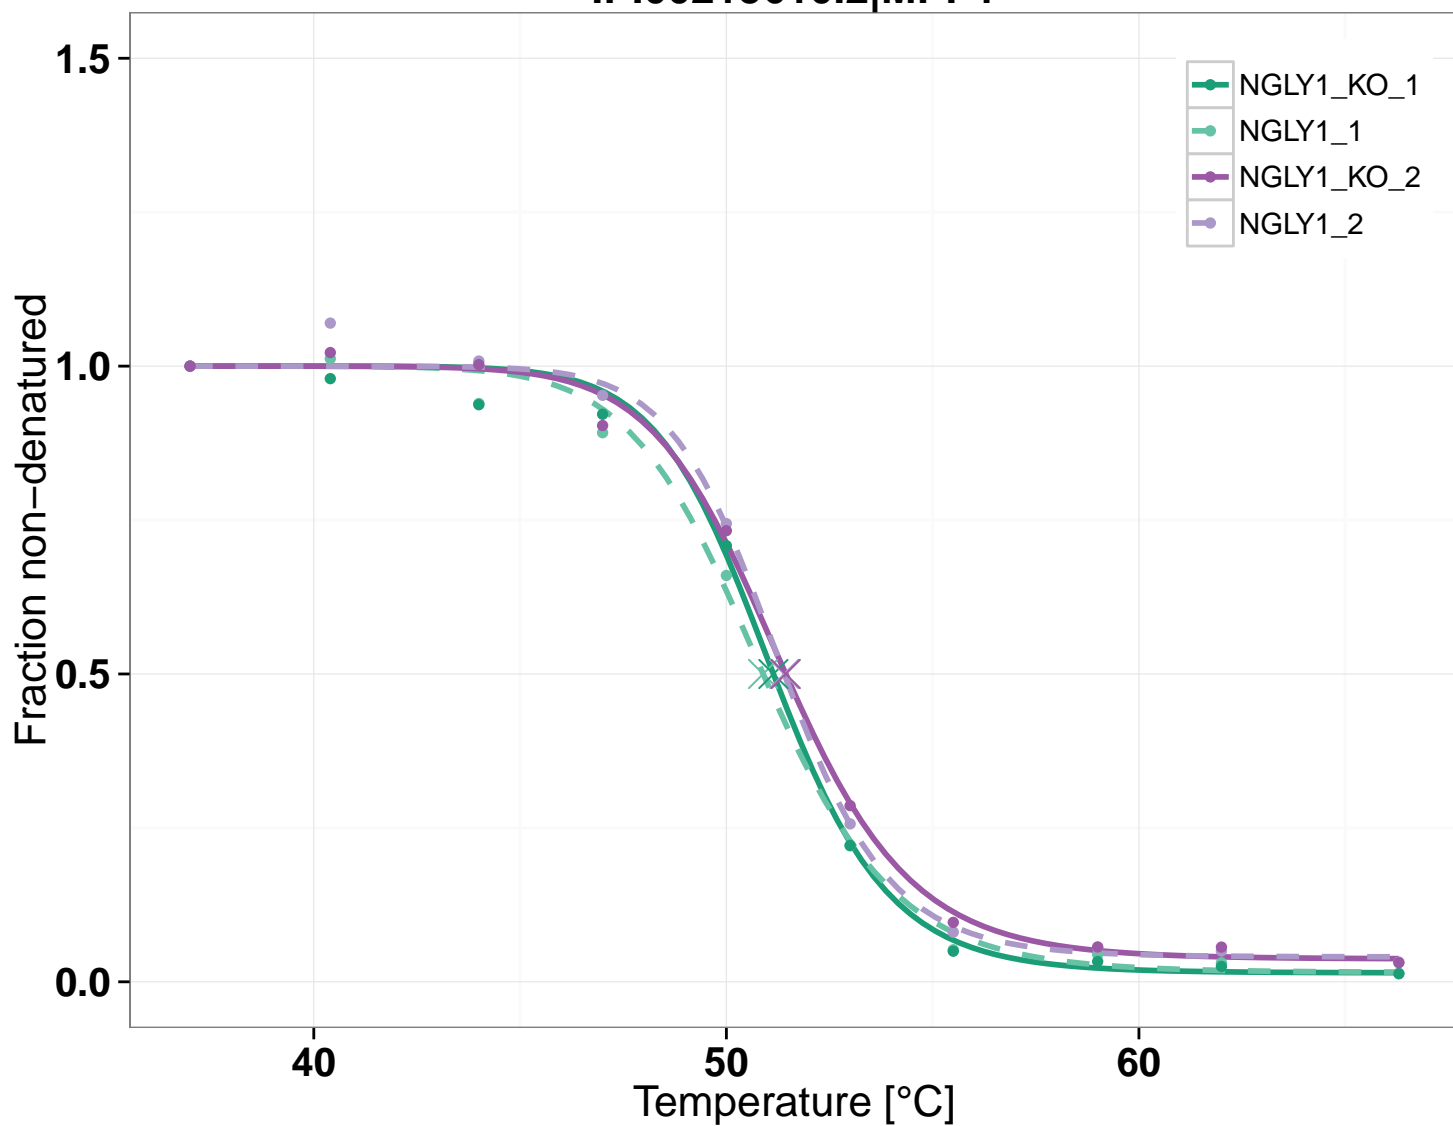

|            | meltPoint | slope | plateau | R2 |
|------------|-----------|-------|---------|----|
| NGLY1_KO_1 | 51.14     | -0.17 | 0.01    | 1  |
| NGLY1_1    | 50.89     | -0.15 | 0.02    | 1  |
| NGLY1_KO_2 | 51.44     | -0.15 | 0.04    | 1  |
| NGLY1_2    | 51.4      | -0.18 | 0.04    | 1  |

Supplement: Supplementary file 333 [file 1]

IPI00025840.2|EFNA1

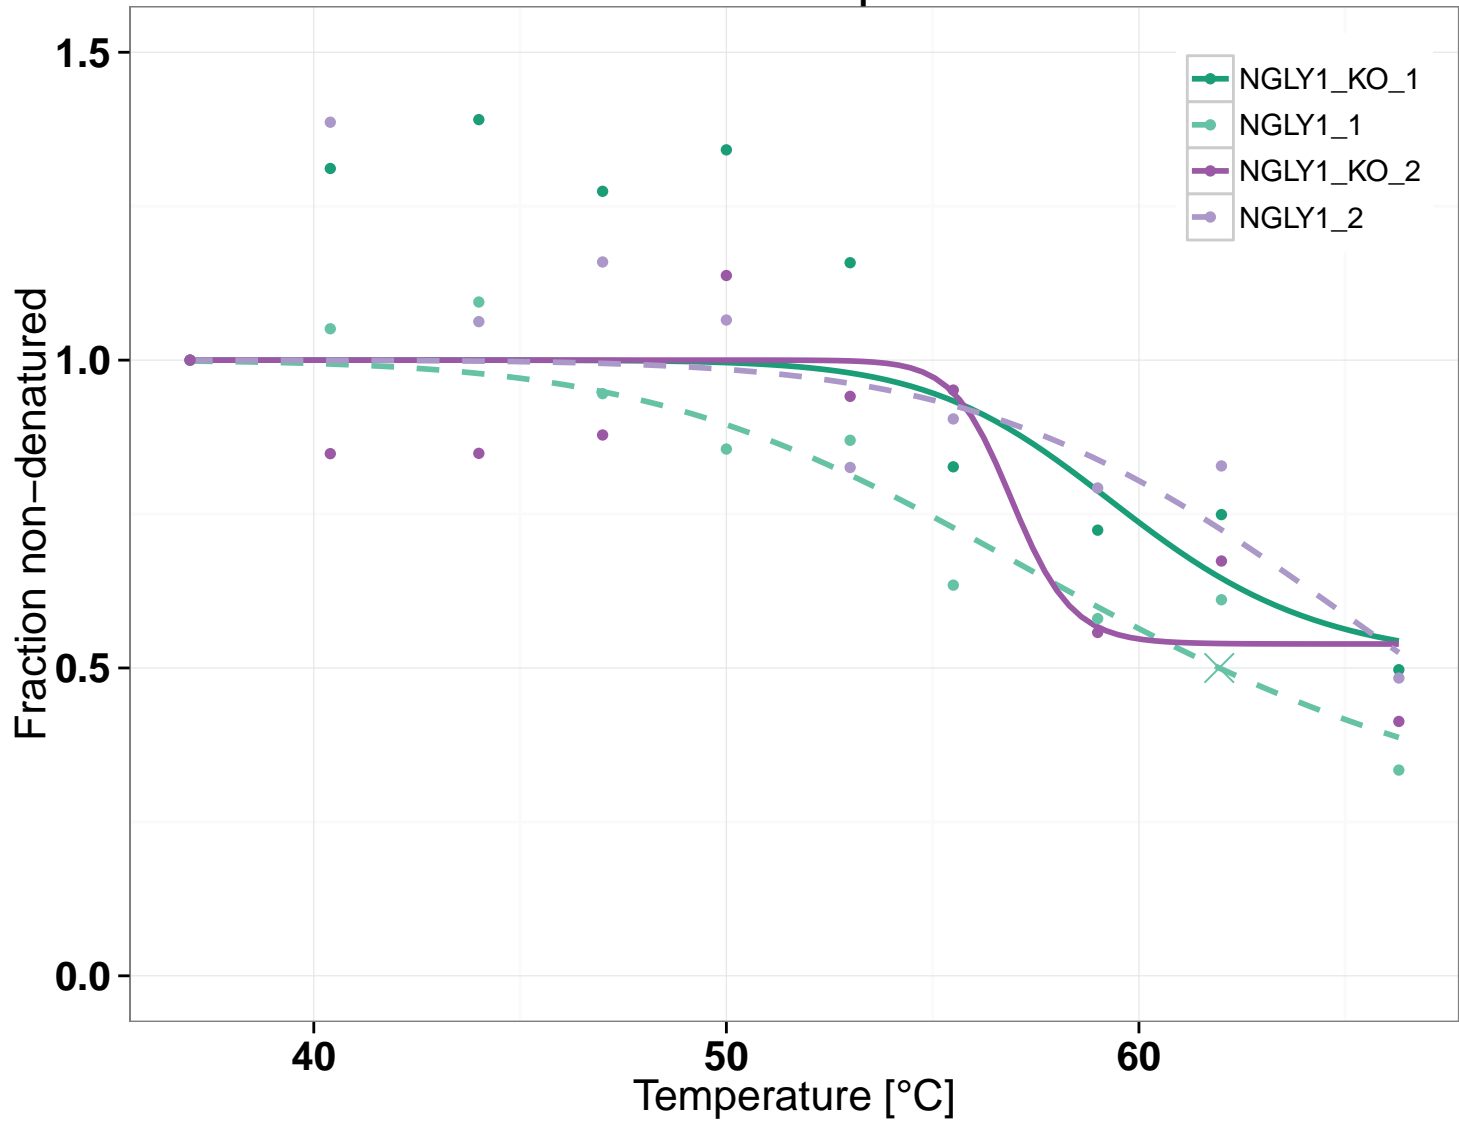

|            | meltPoint | slope  | plateau | R2   |
|------------|-----------|--------|---------|------|
| NGLY1_KO_1 | –         | –0.052 | 0.51    | 0.43 |
| NGLY1_1    | 61.95     | –0.037 | 0.19    | 0.92 |
| NGLY1_KO_2 | –         | –0.16  | 0.54    | 0.73 |
| NGLY1_2    | –         | –0.048 | 0       | 0.59 |

Supplement: Supplementary file 334 [file 1]

IPI00464952.2|SFRS11

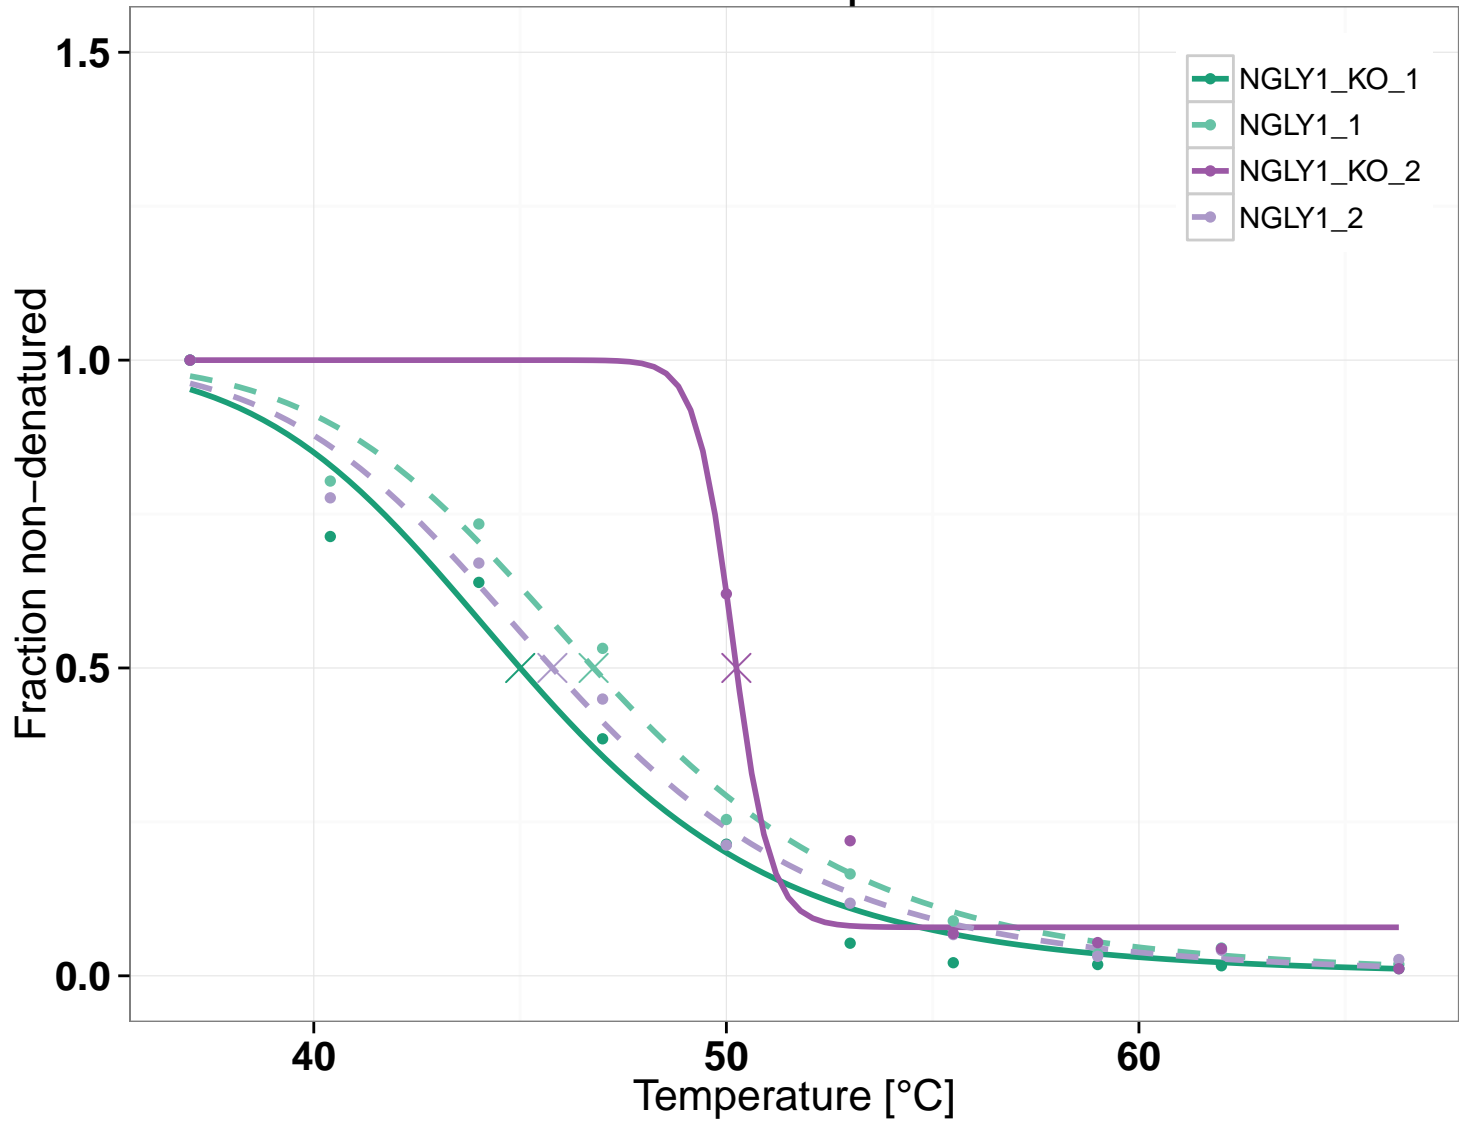

|            | meltPoint | slope  | plateau | R2   |
|------------|-----------|--------|---------|------|
| NGLY1_KO_1 | 45        | -0.079 | 0       | 0.98 |
| NGLY1_1    | 46.78     | -0.075 | 0       | 0.99 |
| NGLY1_KO_2 | 50.24     | -0.51  | 0.08    | 0.52 |
| NGLY1_2    | 45.78     | -0.076 | 0       | 0.99 |

Supplement: Supplementary file 335 [file 1]

# IPI00294754.7|TRIM44

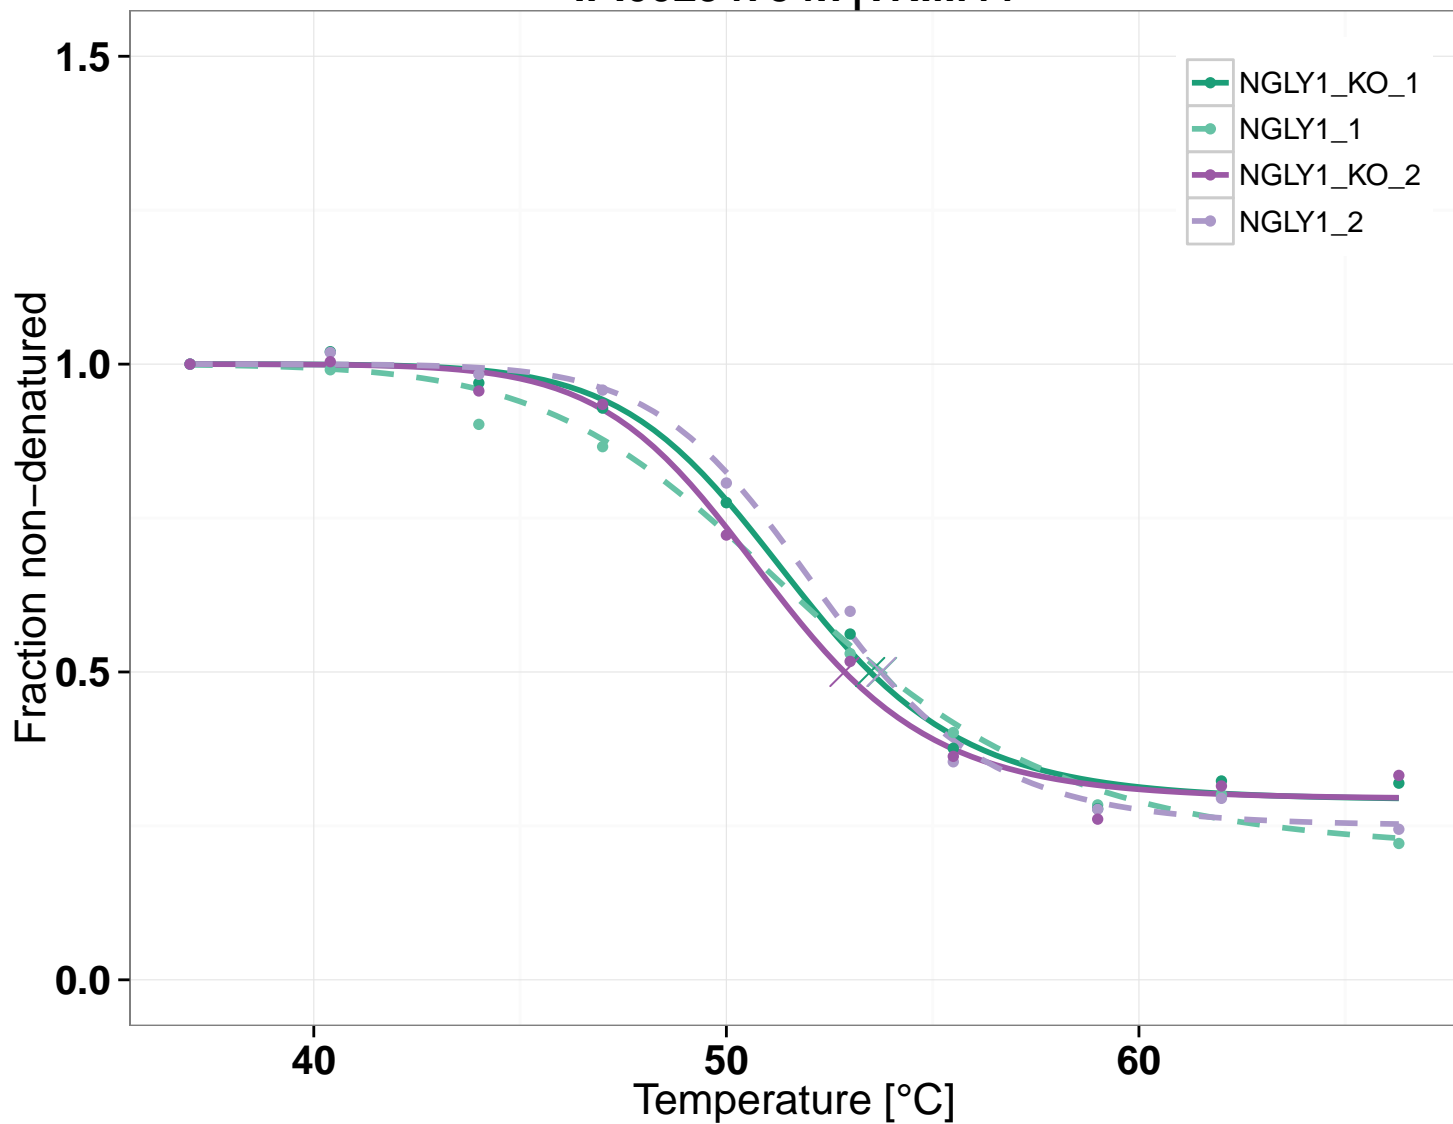

|            | meltPoint | slope  | plateau | R2   |
|------------|-----------|--------|---------|------|
| NGLY1_KO_1 | 53.49     | -0.086 | 0.29    | 0.99 |
| NGLY1_1    | 53.78     | -0.062 | 0.21    | 0.99 |
| NGLY1_KO_2 | 52.86     | -0.088 | 0.29    | 0.99 |
| NGLY1_2    | 53.76     | -0.093 | 0.25    | 1    |

Supplement: Supplementary file 336 [file 1]

IPI00877040.1|ZNF239

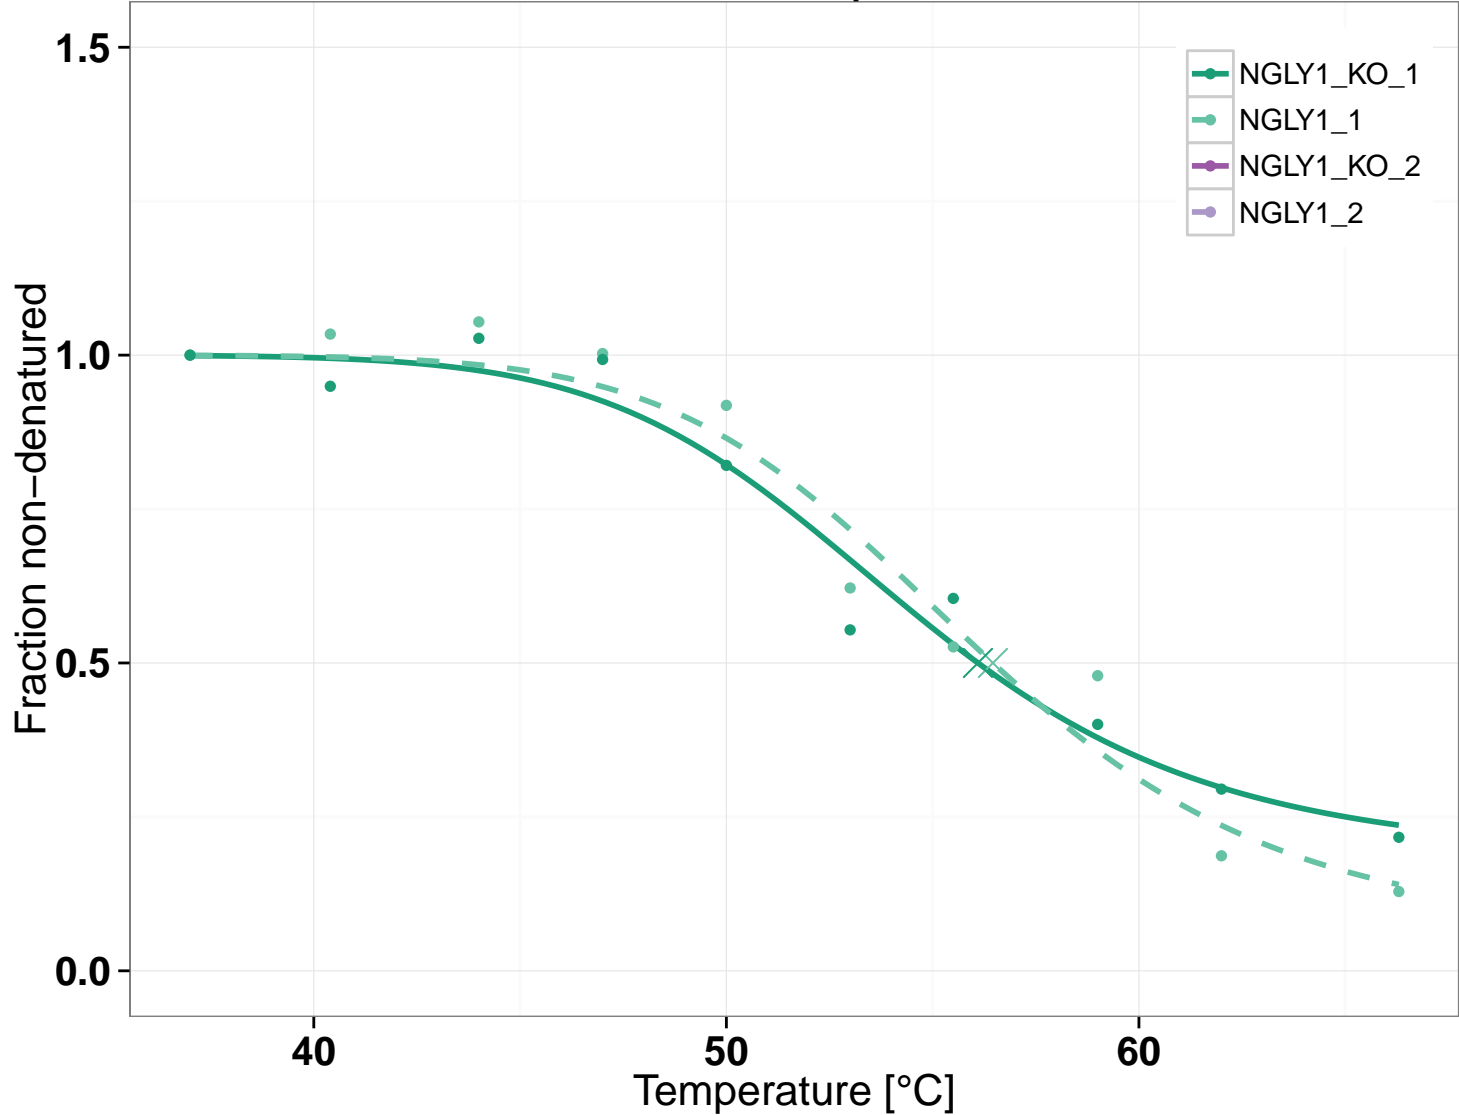

|            | meltPoint | slope  | plateau | R2   |
|------------|-----------|--------|---------|------|
| NGLY1_KO_1 | 56.1      | -0.056 | 0.18    | 0.97 |
| NGLY1_1    | 56.46     | -0.064 | 0.05    | 0.97 |
| NGLY1_KO_2 | -         | -      | -       | -    |
| NGLY1_2    | -         | -      | -       | -    |

Supplement: Supplementary file 337 [file 1]

# IPI00908772.1|DPH1

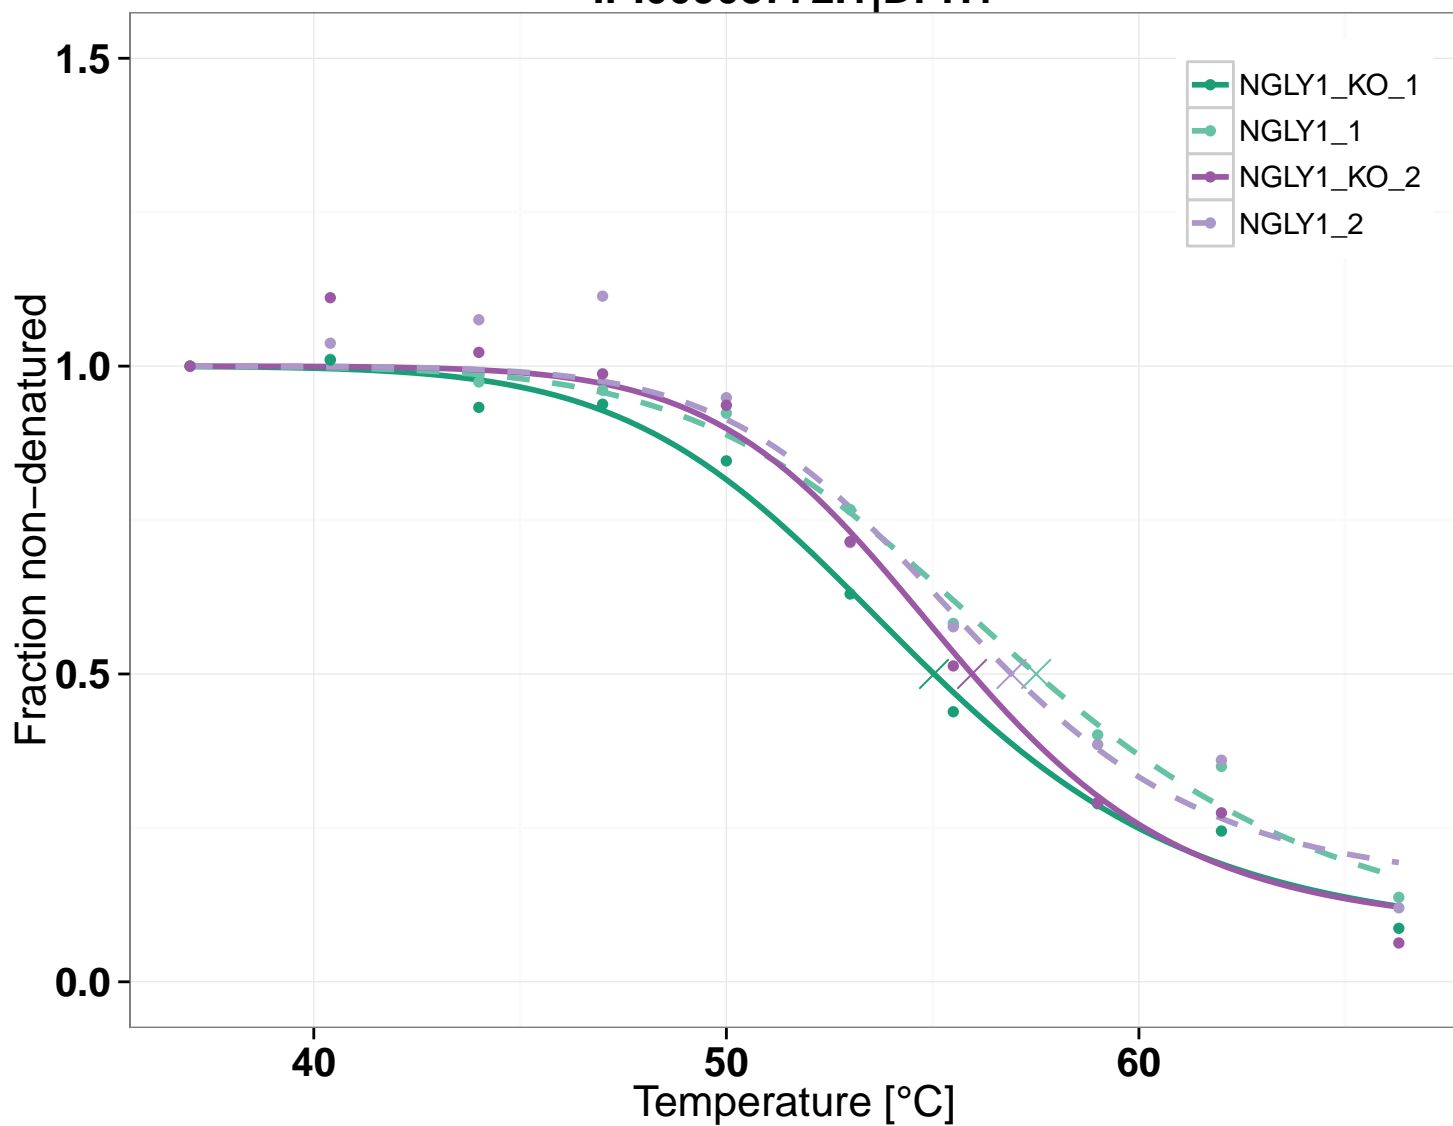

|            | meltPoint | slope  | plateau | R2   |
|------------|-----------|--------|---------|------|
| NGLY1_KO_1 | 55.03     | -0.067 | 0.07    | 0.99 |
| NGLY1_1    | 57.51     | -0.06  | 0.06    | 0.99 |
| NGLY1_KO_2 | 55.96     | -0.08  | 0.08    | 0.98 |
| NGLY1_2    | 56.91     | -0.072 | 0.15    | 0.96 |

Supplement: Supplementary file 338 [file 1]

# IPI00448616.2|DENND3

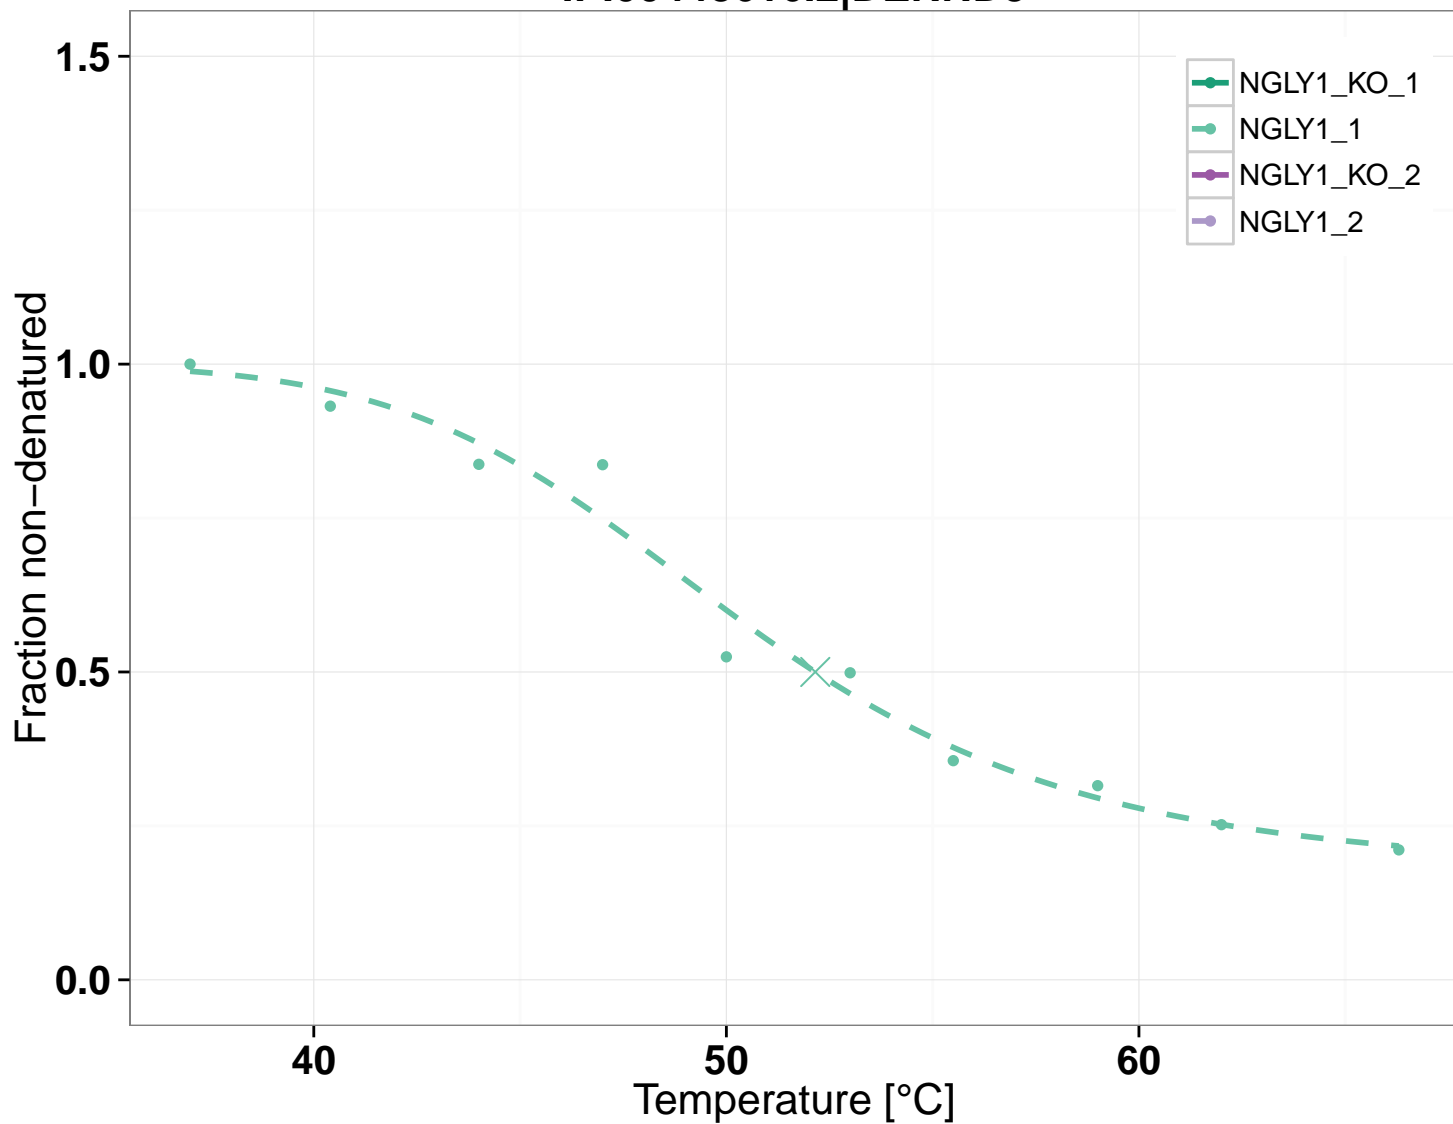

|            | meltPoint | slope | plateau | R2   |
|------------|-----------|-------|---------|------|
| NGLY1_KO_1 | —         | —     | —       | —    |
| NGLY1_1    | 52.16     | -0.05 | 0.17    | 0.98 |
| NGLY1_KO_2 | —         | —     | —       | —    |
| NGLY1_2    | —         | —     | —       | —    |

Supplement: Supplementary file 339 [file 1]

# IPI00012912.1|CPT2

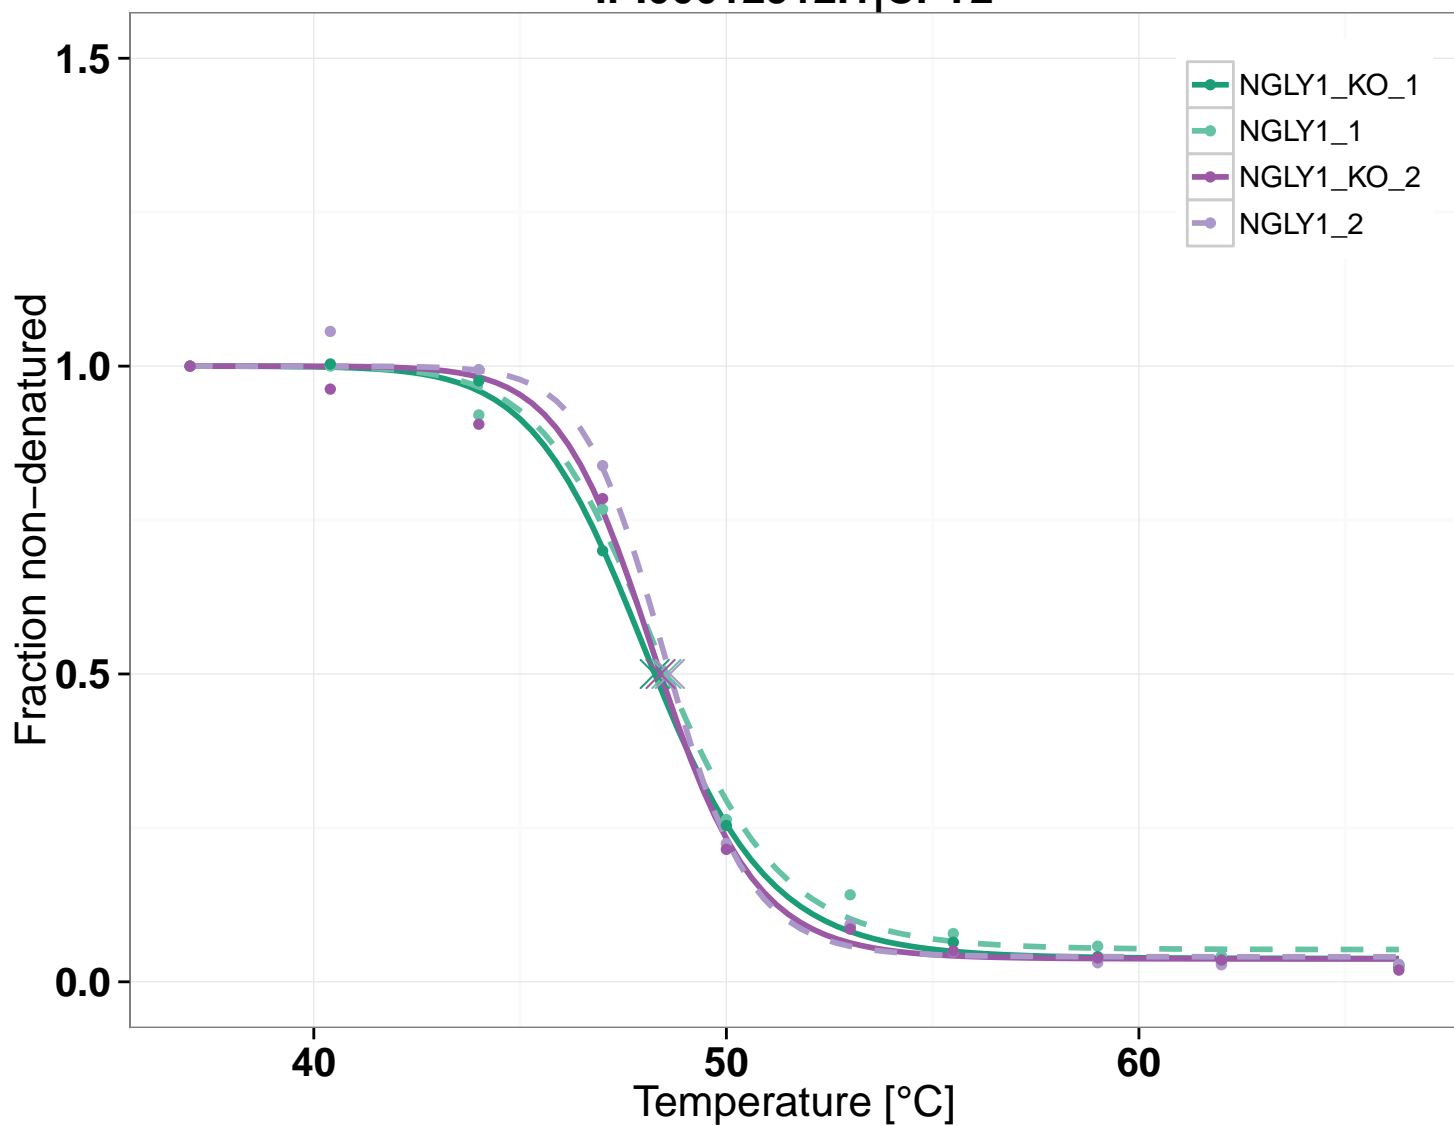

|            | meltPoint | slope | plateau | R2   |
|------------|-----------|-------|---------|------|
| NGLY1_KO_1 | 48.26     | -0.17 | 0.04    | 1    |
| NGLY1_1    | 48.55     | -0.16 | 0.05    | 1    |
| NGLY1_KO_2 | 48.41     | -0.2  | 0.04    | 0.99 |
| NGLY1_2    | 48.63     | -0.24 | 0.04    | 1    |

Supplement: Supplementary file 340 [file 1]

# IPI00013160.2|LGTN

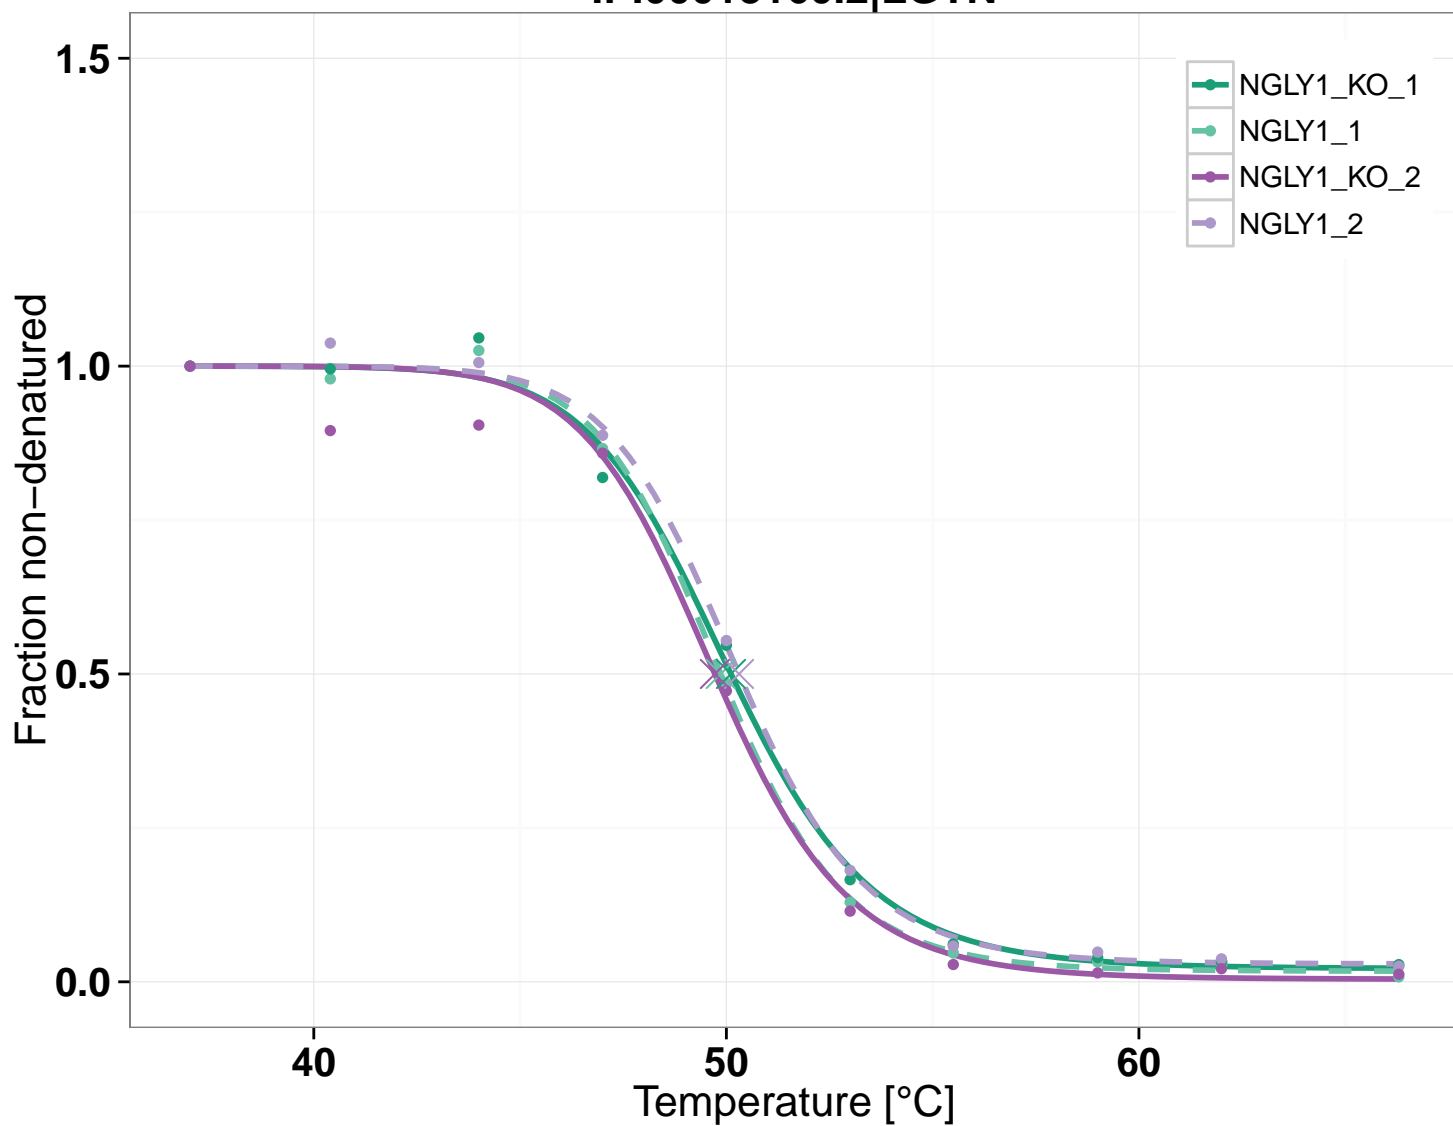

|            | meltPoint | slope | plateau | R2   |
|------------|-----------|-------|---------|------|
| NGLY1_KO_1 | 50.11     | -0.14 | 0.02    | 1    |
| NGLY1_1    | 49.86     | -0.16 | 0.02    | 1    |
| NGLY1_KO_2 | 49.72     | -0.15 | 0       | 0.99 |
| NGLY1_2    | 50.31     | -0.15 | 0.03    | 1    |

Supplement: Supplementary file 341 [file 1]

IPI00009301.1|COPS7B

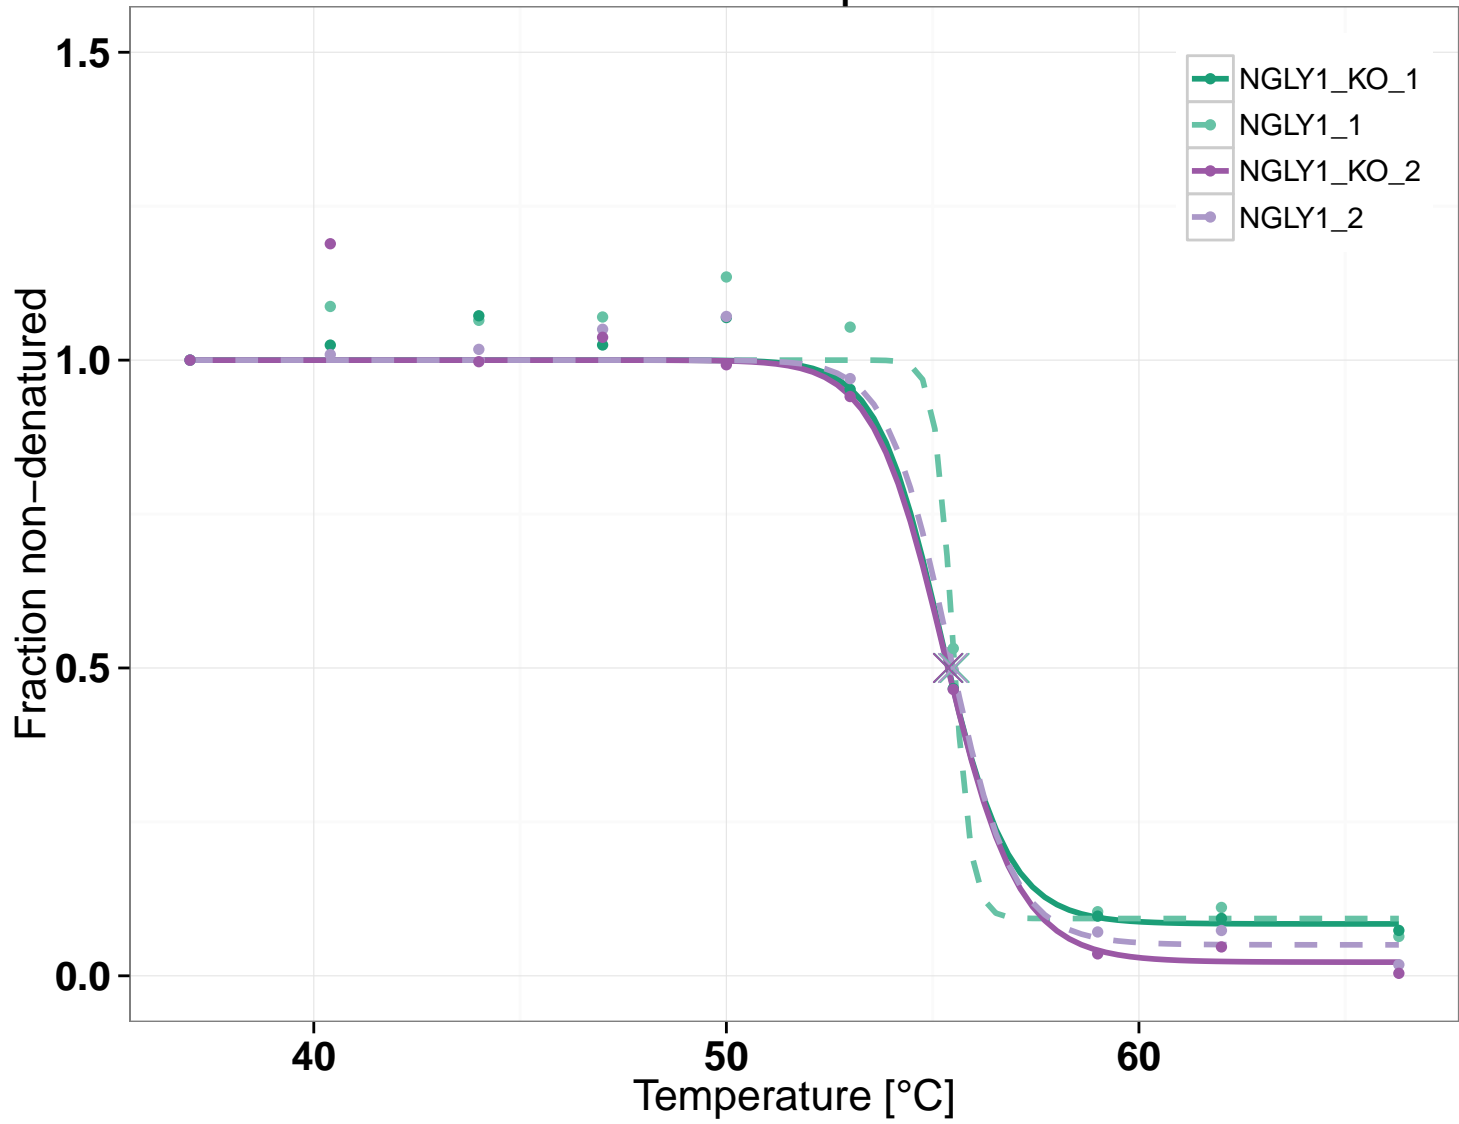

|            | meltPoint | slope | plateau | R2   |
|------------|-----------|-------|---------|------|
| NGLY1_KO_1 | 55.38     | -0.29 | 0.08    | 0.99 |
| NGLY1_1    | 55.53     | -1    | 0.09    | 0.98 |
| NGLY1_KO_2 | 55.37     | -0.28 | 0.02    | 0.98 |
| NGLY1_2    | 55.49     | -0.31 | 0.05    | 0.99 |

Supplement: Supplementary file 342 [file 1]

# IPI00220528.6|SNRPF

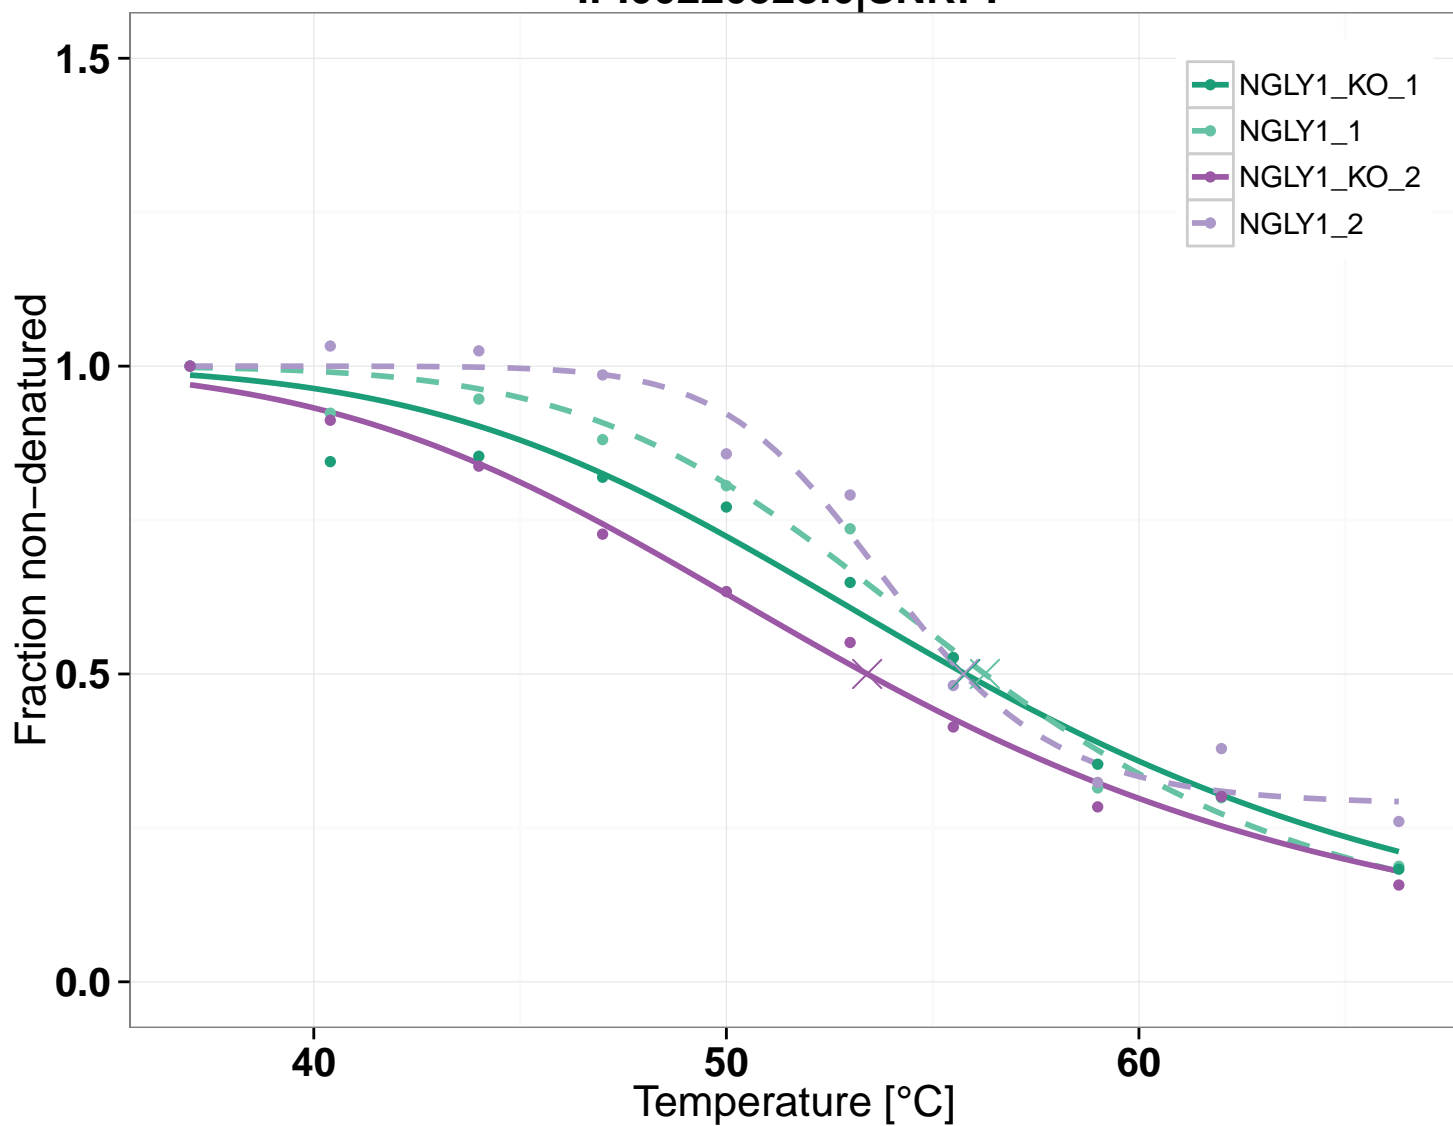

|            | meltPoint | slope  | plateau | R2   |
|------------|-----------|--------|---------|------|
| NGLY1_KO_1 | 55.79     | -0.039 | 0       | 0.97 |
| NGLY1_1    | 56.27     | -0.052 | 0.06    | 0.98 |
| NGLY1_KO_2 | 53.41     | -0.039 | 0       | 0.99 |
| NGLY1_2    | 55.75     | -0.088 | 0.29    | 0.98 |

Supplement: Supplementary file 343 [file 1]

# IPI00002311.3|SCRN3

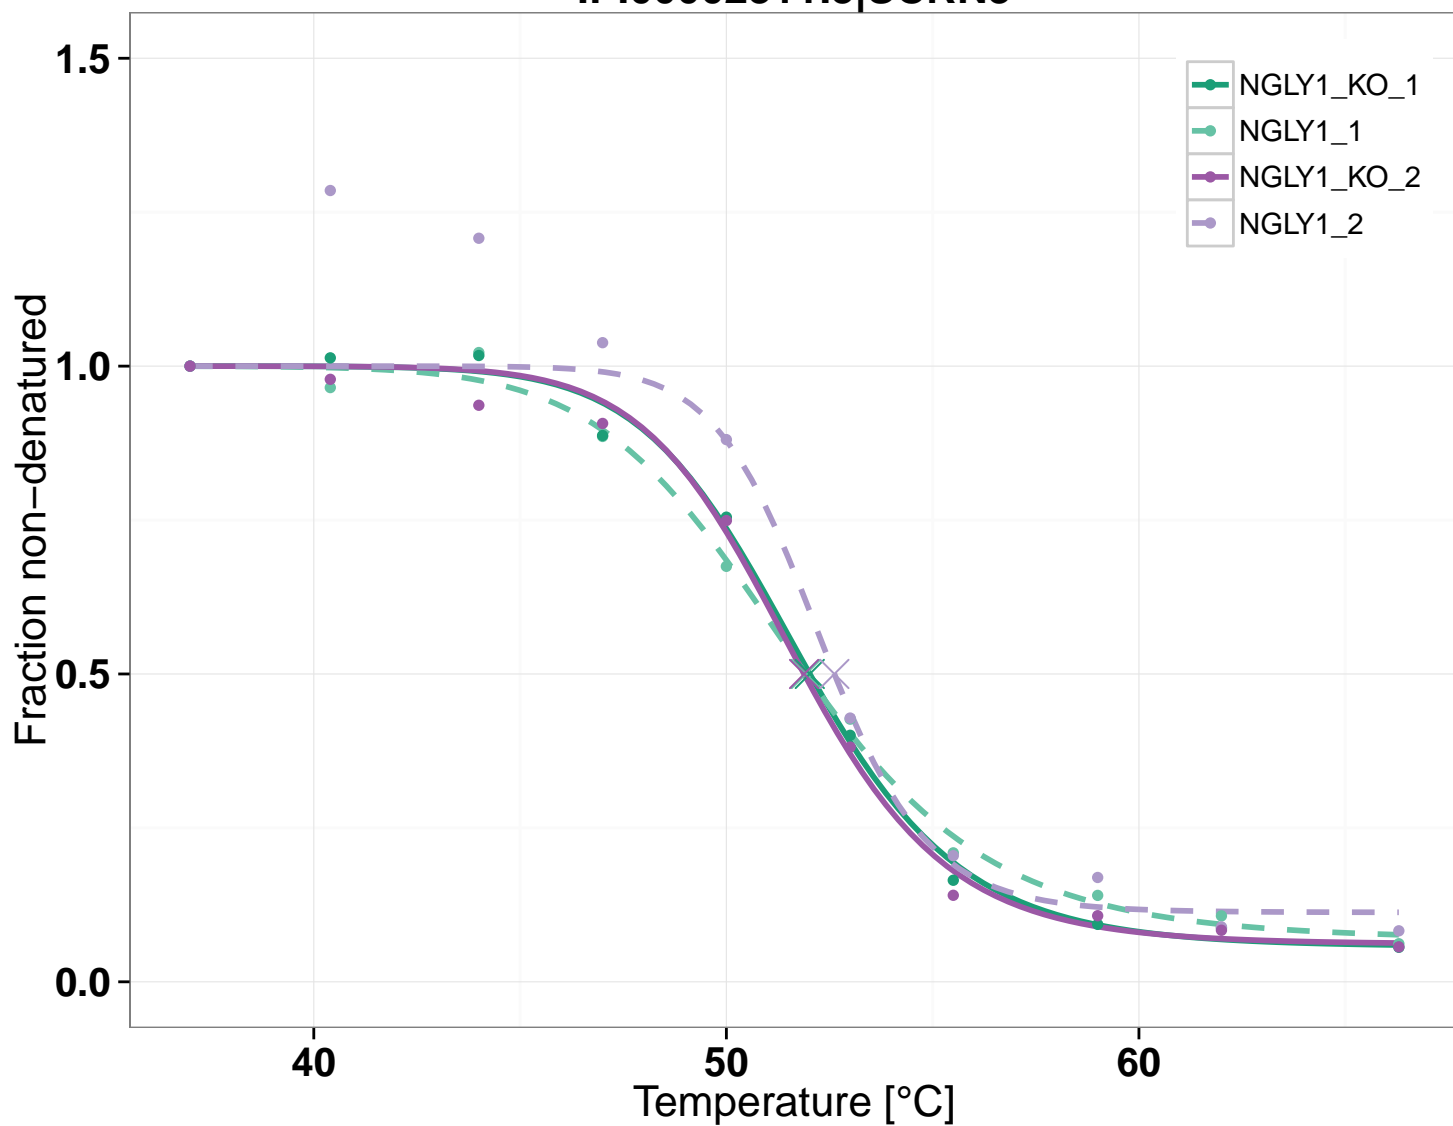

|            | meltPoint | slope  | plateau | R2   |
|------------|-----------|--------|---------|------|
| NGLY1_KO_1 | 52.02     | -0.12  | 0.06    | 1    |
| NGLY1_1    | 51.93     | -0.097 | 0.07    | 1    |
| NGLY1_KO_2 | 51.88     | -0.13  | 0.06    | 1    |
| NGLY1_2    | 52.62     | -0.17  | 0.11    | 0.94 |

Supplement: Supplementary file 344 [file 1]

IPI00394781.4|C2CD2L

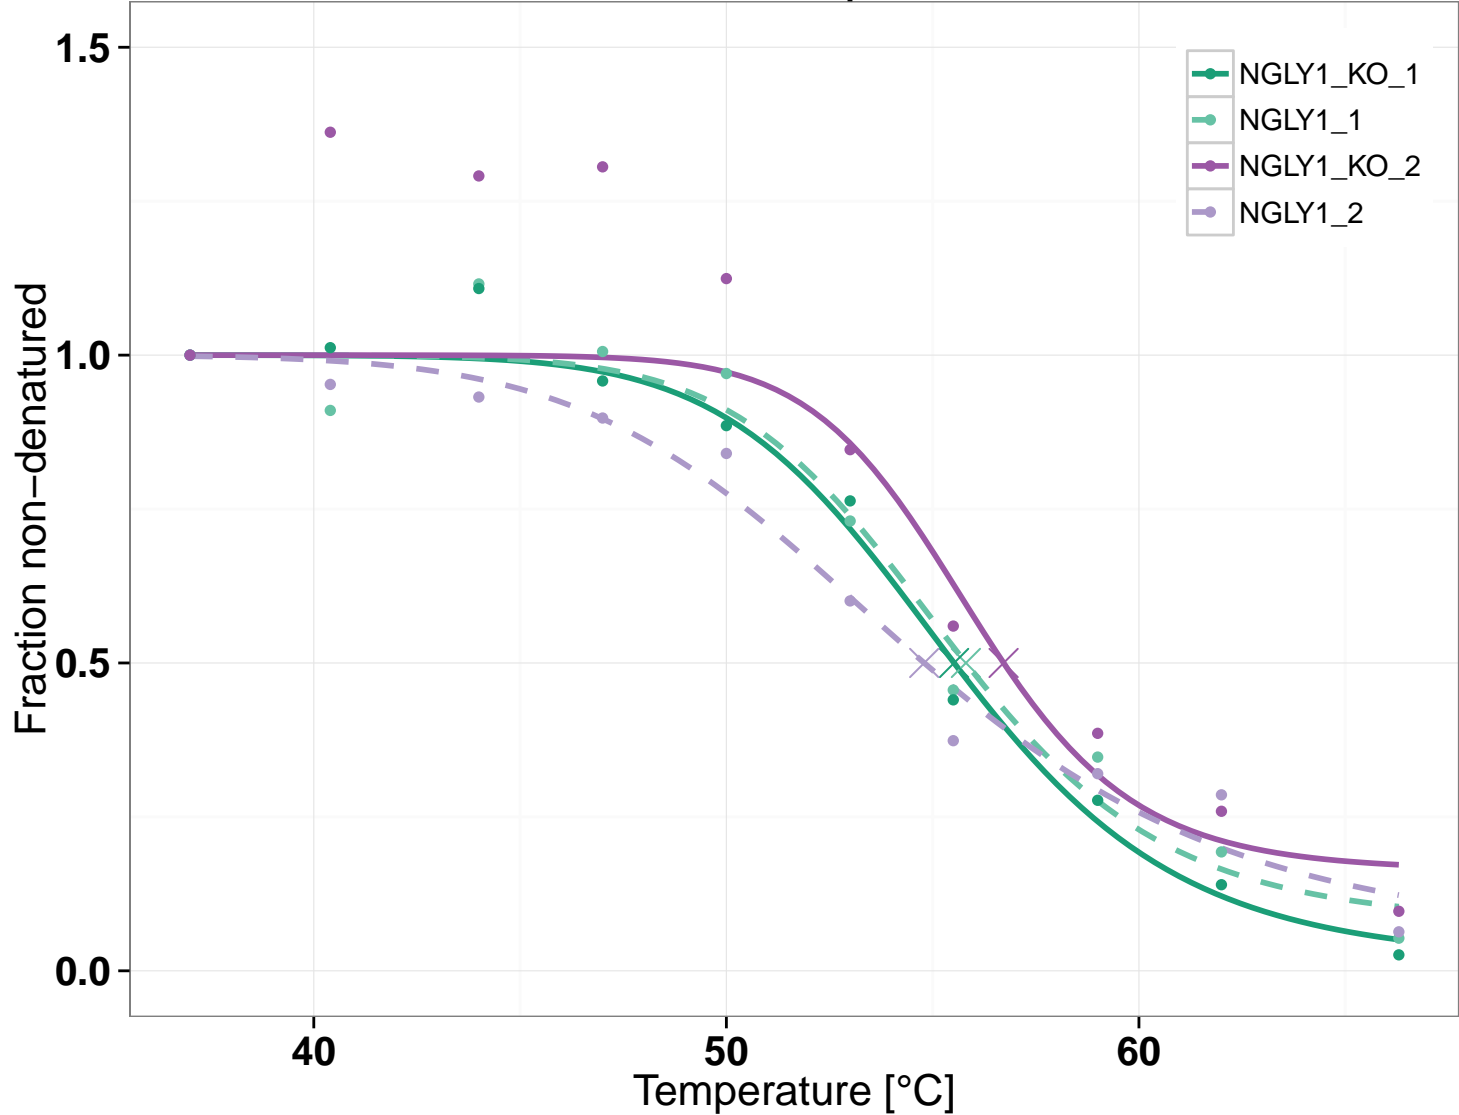

|            | meltPoint | slope  | plateau | R2   |
|------------|-----------|--------|---------|------|
| NGLY1_KO_1 | 55.52     | -0.089 | 0.01    | 0.99 |
| NGLY1_1    | 55.81     | -0.088 | 0.08    | 0.97 |
| NGLY1_KO_2 | 56.72     | -0.11  | 0.16    | 0.82 |
| NGLY1_2    | 54.8      | -0.06  | 0.04    | 0.98 |

Supplement: Supplementary file 345 [file 1]

IPI00873117.1|WWC2

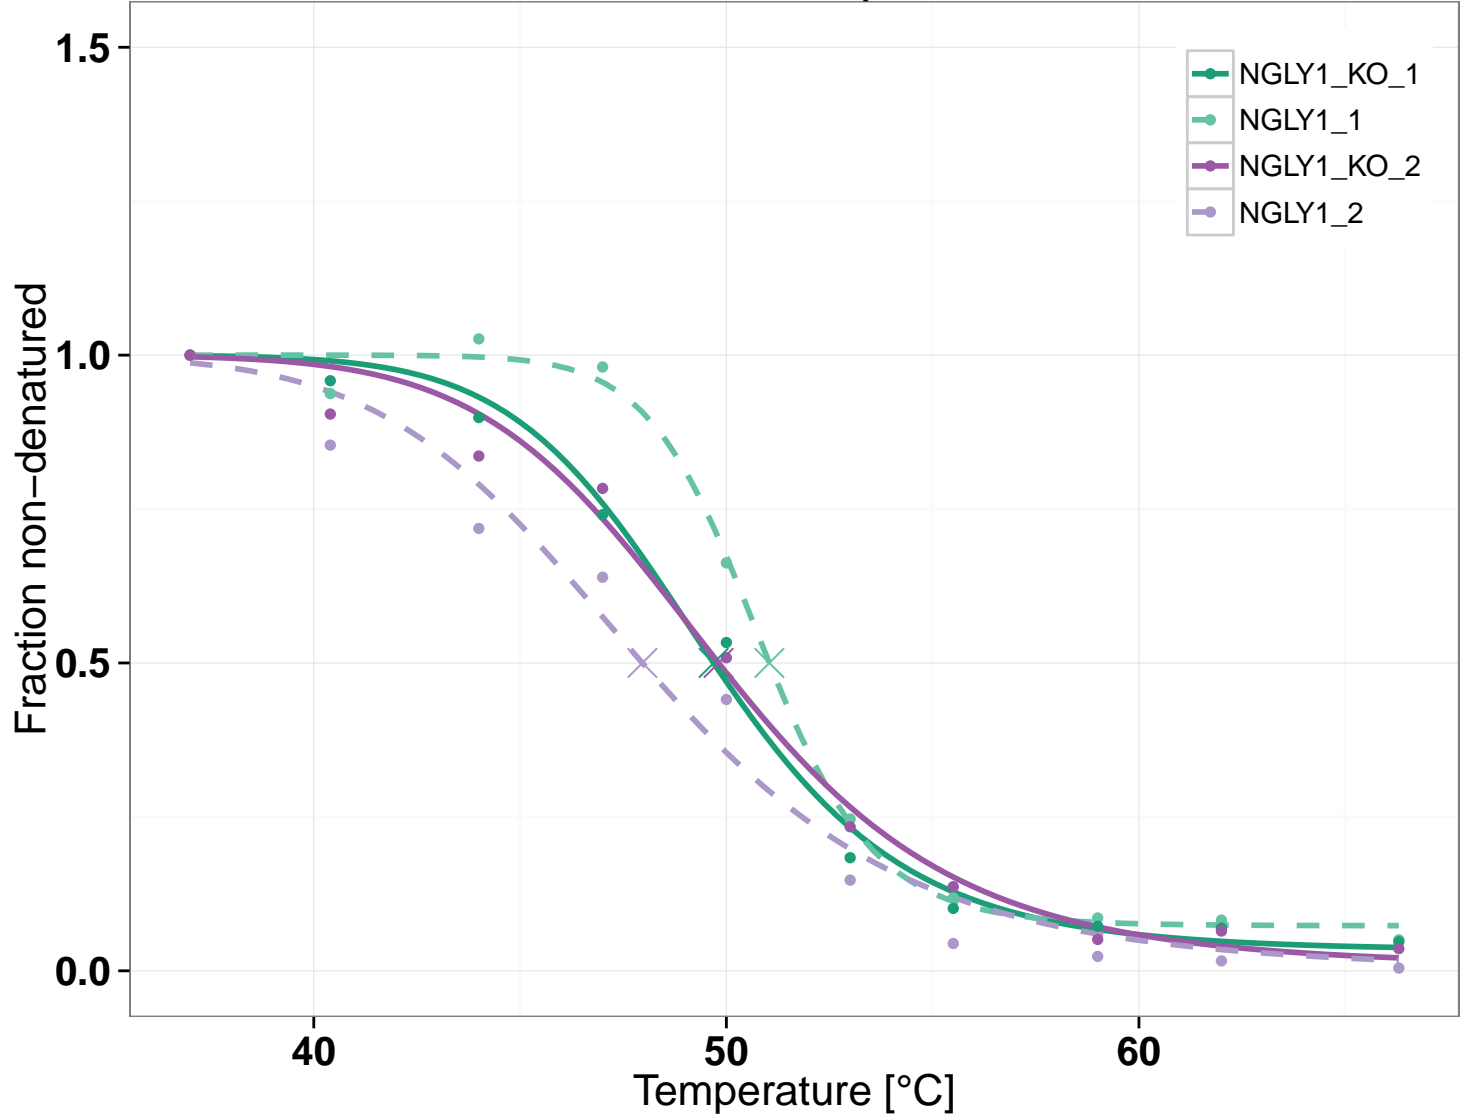

|            | meltPoint | slope  | plateau | R2   |
|------------|-----------|--------|---------|------|
| NGLY1_KO_1 | 49.69     | -0.1   | 0.03    | 0.99 |
| NGLY1_1    | 51.04     | -0.17  | 0.07    | 1    |
| NGLY1_KO_2 | 49.81     | -0.086 | 0.01    | 0.99 |
| NGLY1_2    | 47.96     | -0.078 | 0       | 0.97 |

Supplement: Supplementary file 346 [file 1]

IPI00030652.2|ZIC2

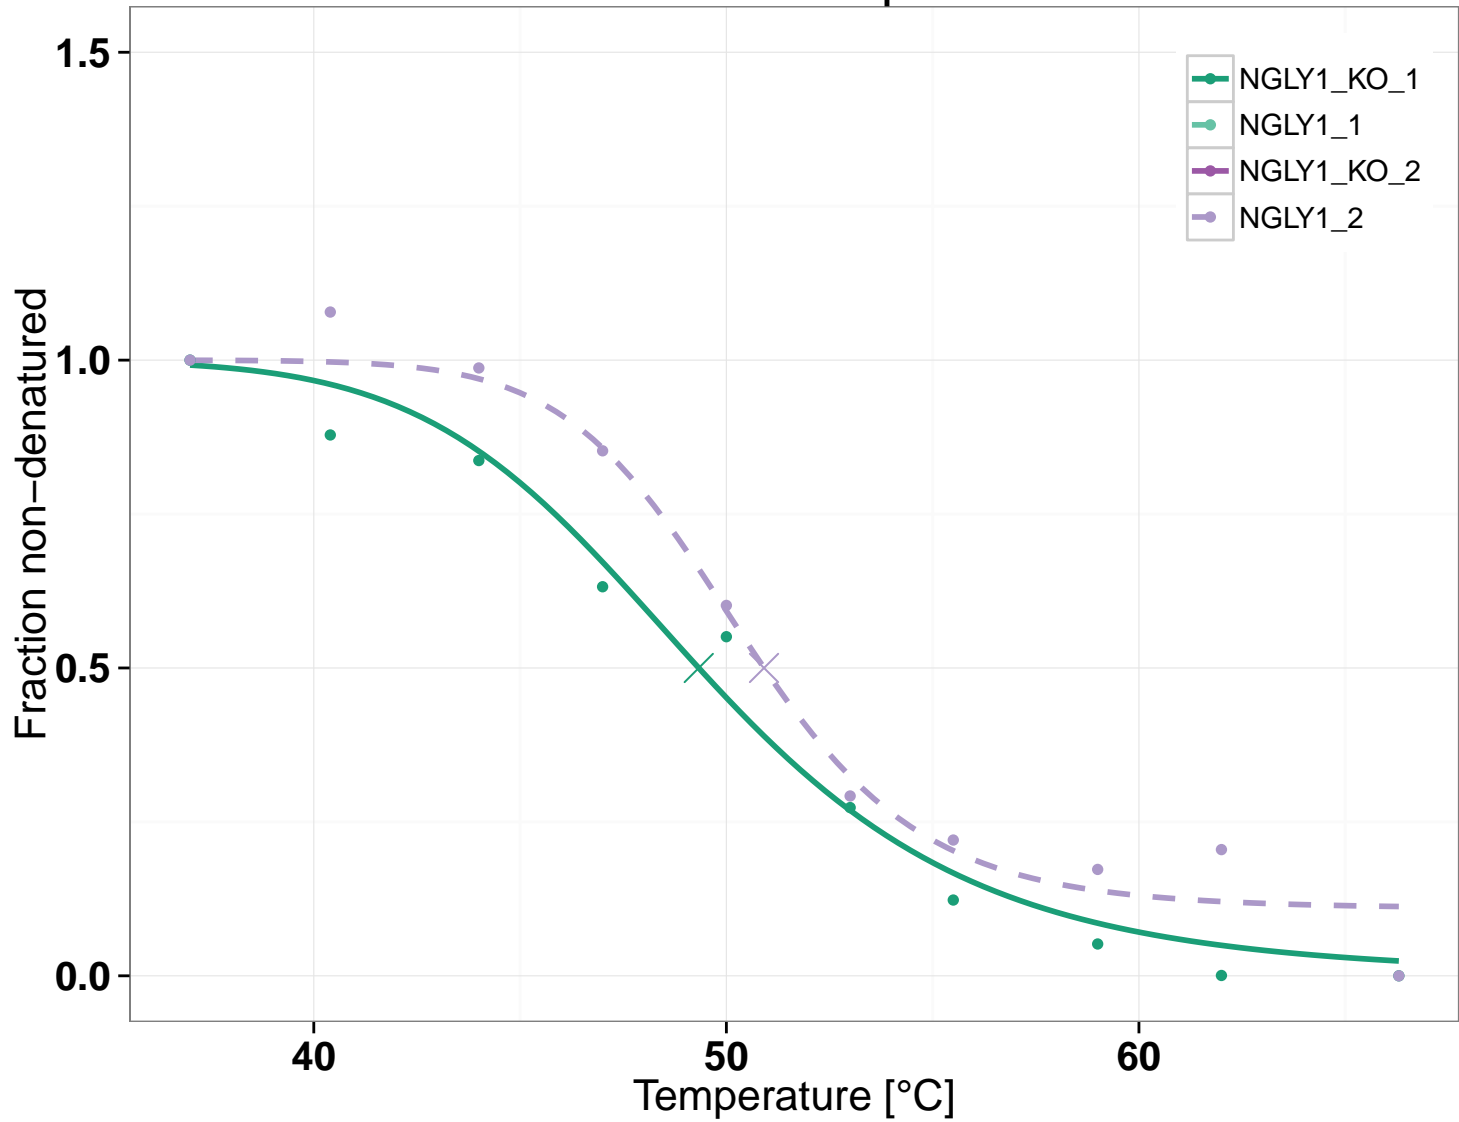

|            | meltPoint | slope  | plateau | R2   |
|------------|-----------|--------|---------|------|
| NGLY1_KO_1 | 49.33     | -0.075 | 0       | 0.98 |
| NGLY1_1    | -         | -      | -       | -    |
| NGLY1_KO_2 | -         | -      | -       | -    |
| NGLY1_2    | 50.91     | -0.1   | 0.11    | 0.98 |

Supplement: Supplementary file 347 [file 1]

IPI00307359.5|OSBPL9

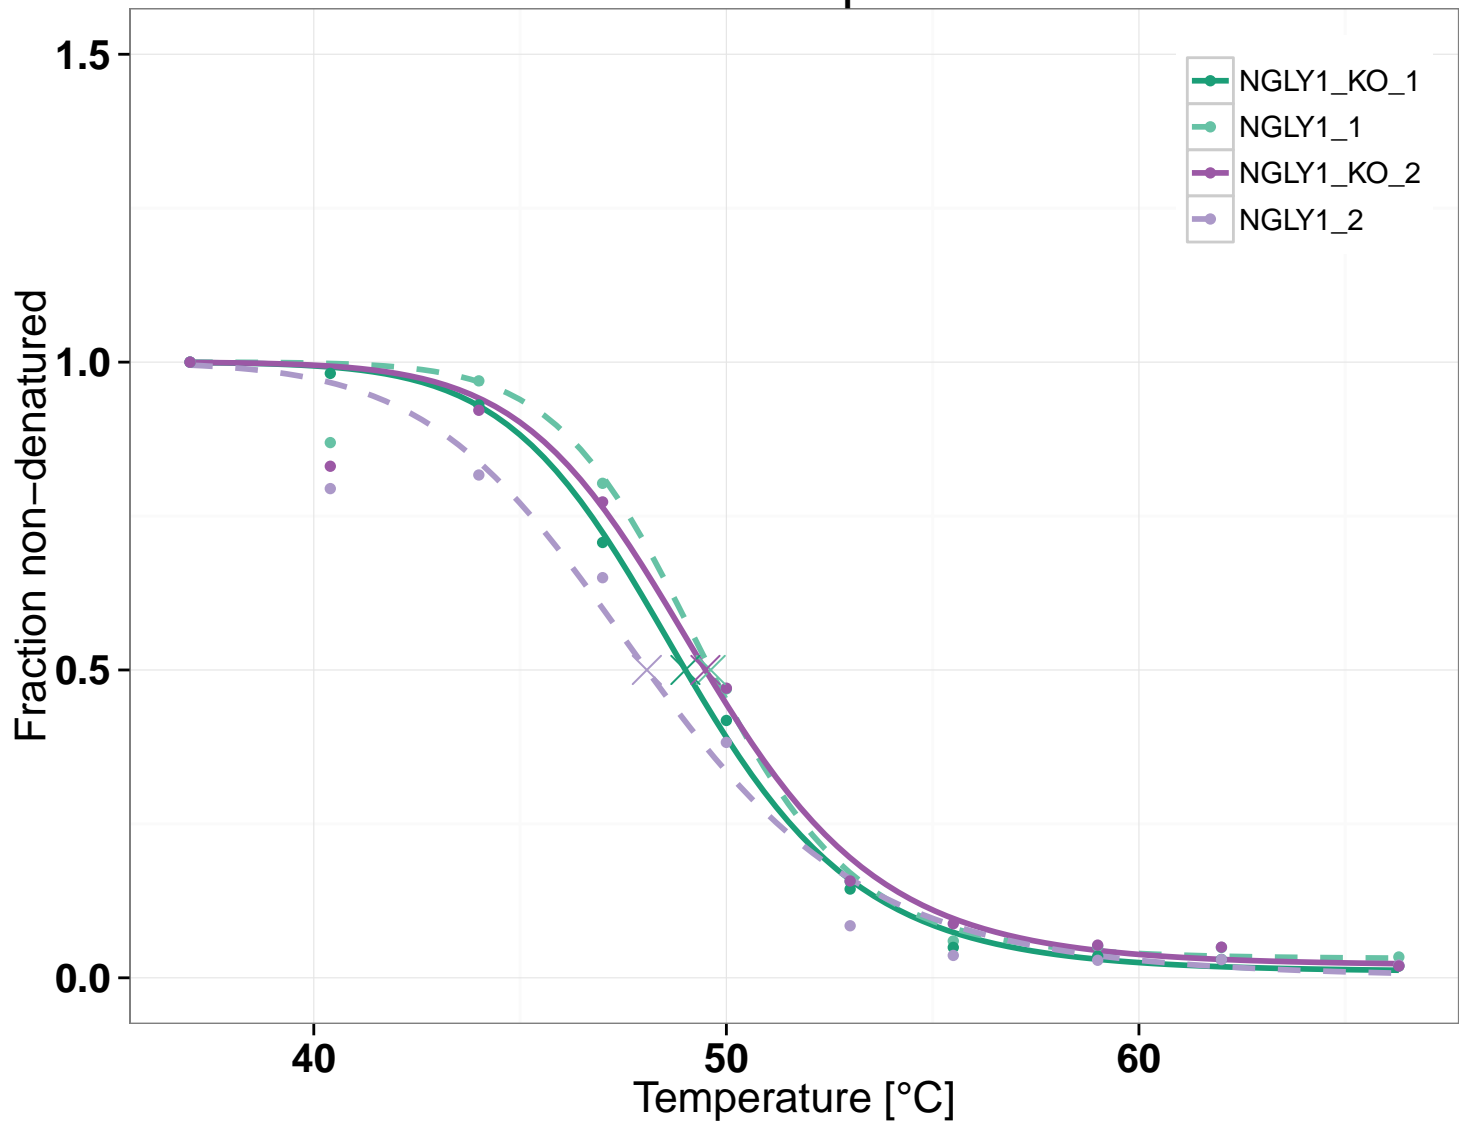

|            | meltPoint | slope  | plateau | R2   |
|------------|-----------|--------|---------|------|
| NGLY1_KO_1 | 49.01     | -0.12  | 0.01    | 1    |
| NGLY1_1    | 49.62     | -0.13  | 0.03    | 0.99 |
| NGLY1_KO_2 | 49.49     | -0.11  | 0.02    | 0.98 |
| NGLY1_2    | 48.07     | -0.094 | 0       | 0.97 |

Supplement: Supplementary file 348 [file 1]

IPI00020947.2|HOXC10

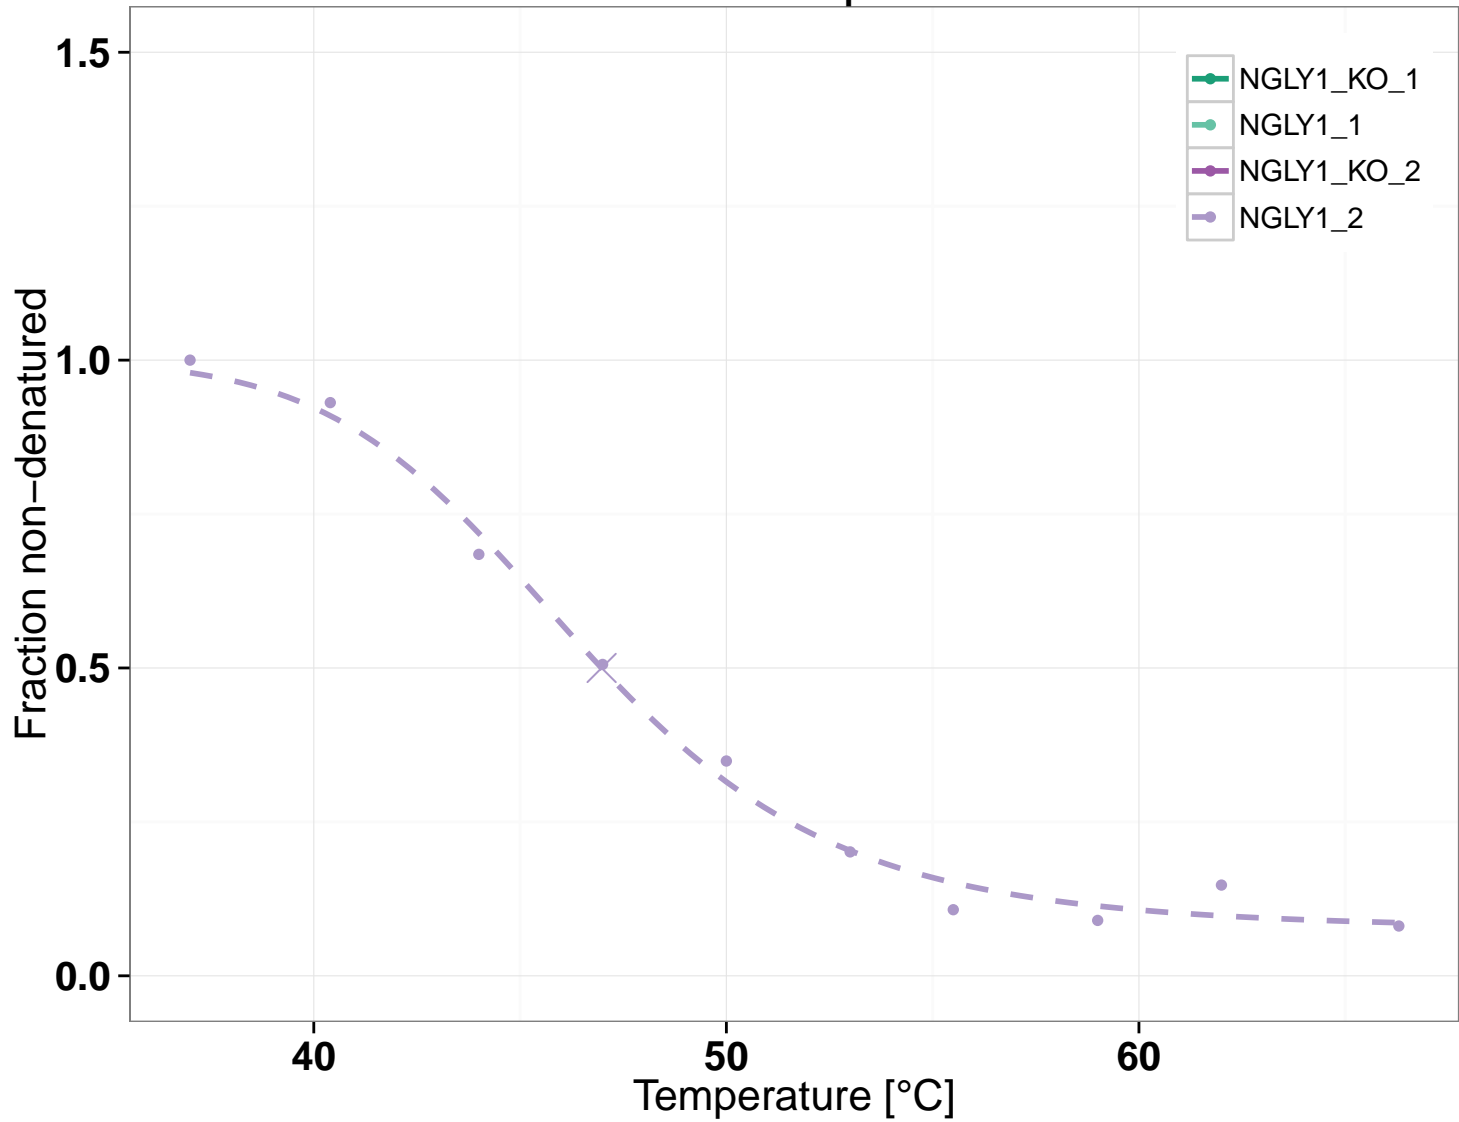

|            | meltPoint | slope  | plateau | R2   |
|------------|-----------|--------|---------|------|
| NGLY1_KO_1 | —         | —      | —       | —    |
| NGLY1_1    | —         | —      | —       | —    |
| NGLY1_KO_2 | —         | —      | —       | —    |
| NGLY1_2    | 46.98     | -0.075 | 0.08    | 0.99 |

Supplement: Supplementary file 349 [file 1]

IPI00162330.3|MRPL37

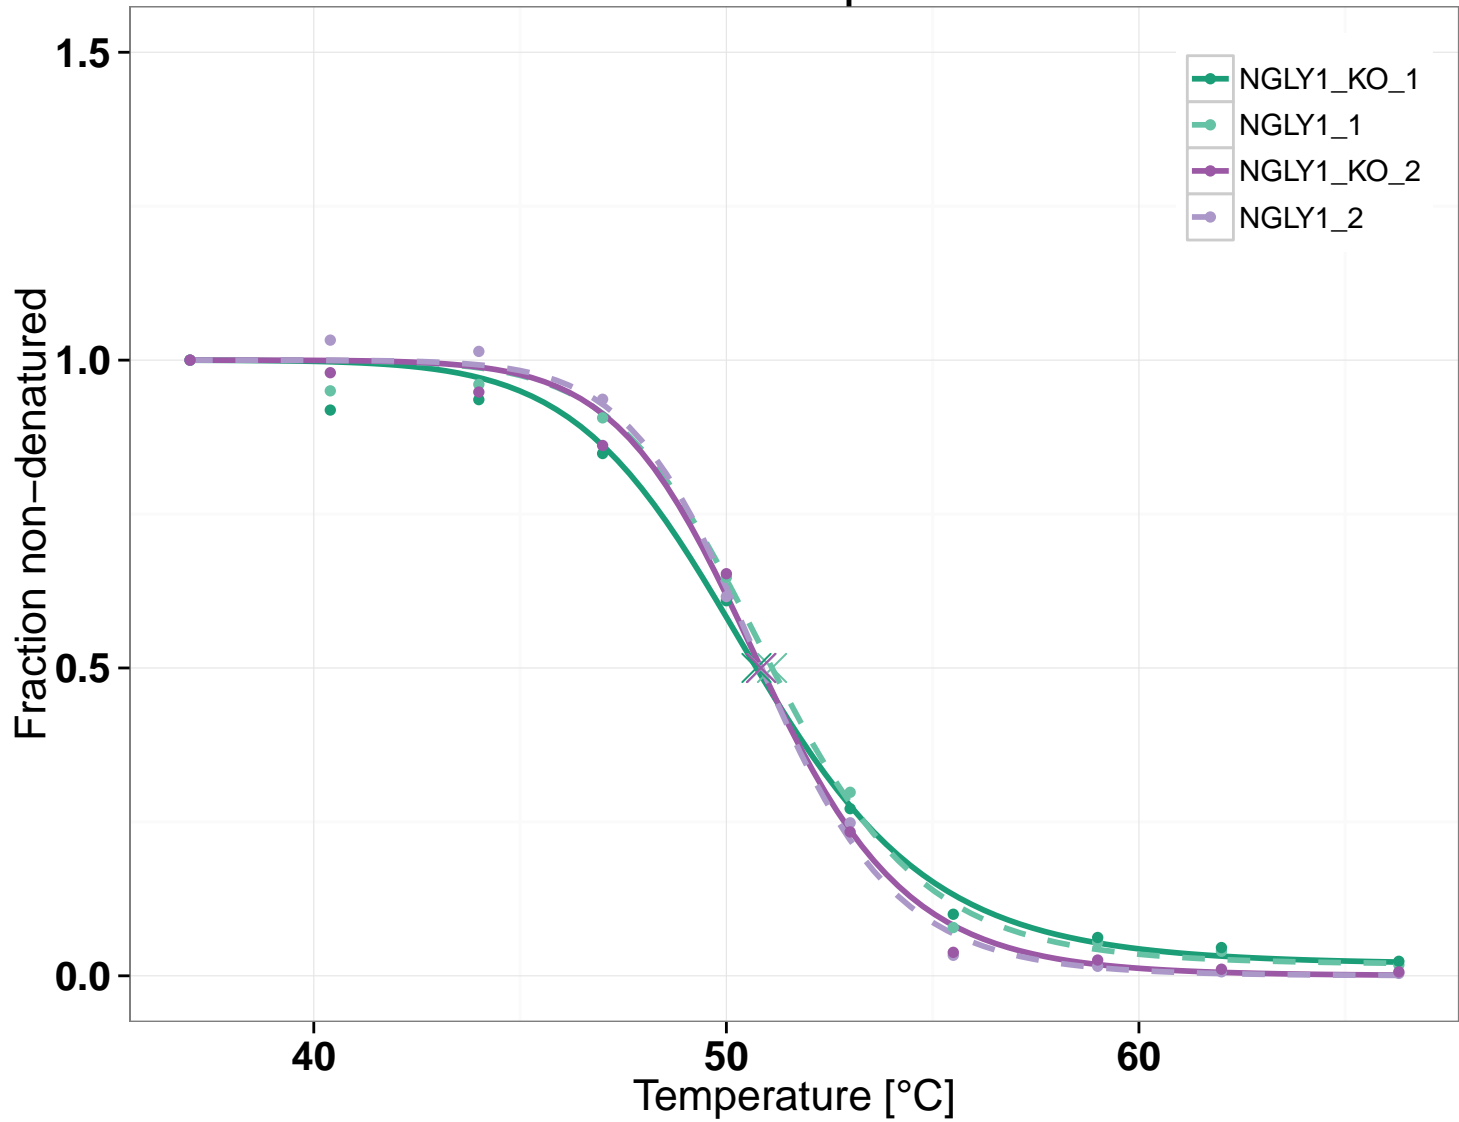

|            | meltPoint | slope | plateau | R2   |
|------------|-----------|-------|---------|------|
| NGLY1_KO_1 | 50.73     | -0.11 | 0.02    | 0.99 |
| NGLY1_1    | 51.11     | -0.13 | 0.02    | 1    |
| NGLY1_KO_2 | 50.84     | -0.14 | 0       | 1    |
| NGLY1_2    | 50.86     | -0.15 | 0       | 1    |

Supplement: Supplementary file 350 [file 1]

# IPI00329057.8|FBXL18

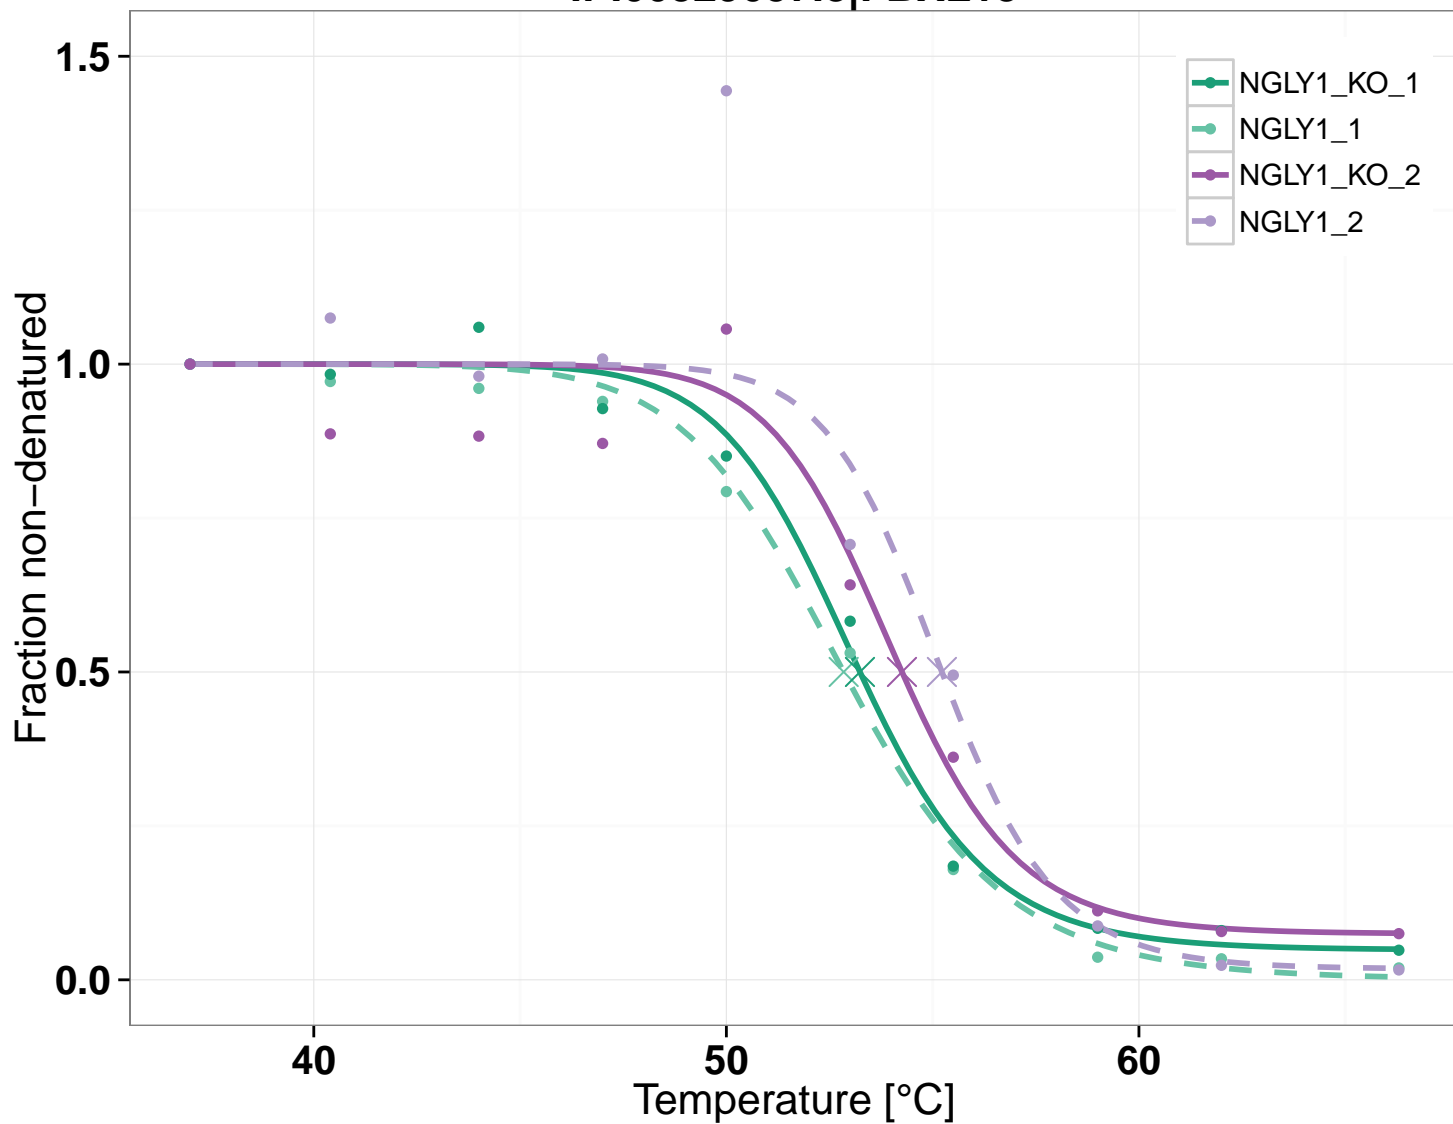

|            | meltPoint | slope | plateau | R2   |
|------------|-----------|-------|---------|------|
| NGLY1_KO_1 | 53.24     | -0.15 | 0.05    | 0.99 |
| NGLY1_1    | 52.84     | -0.13 | 0       | 1    |
| NGLY1_KO_2 | 54.26     | -0.15 | 0.07    | 0.96 |
| NGLY1_2    | 55.22     | -0.18 | 0.02    | 0.9  |

Supplement: Supplementary file 351 [file 1]

IPI00168482.3|GIMAP8

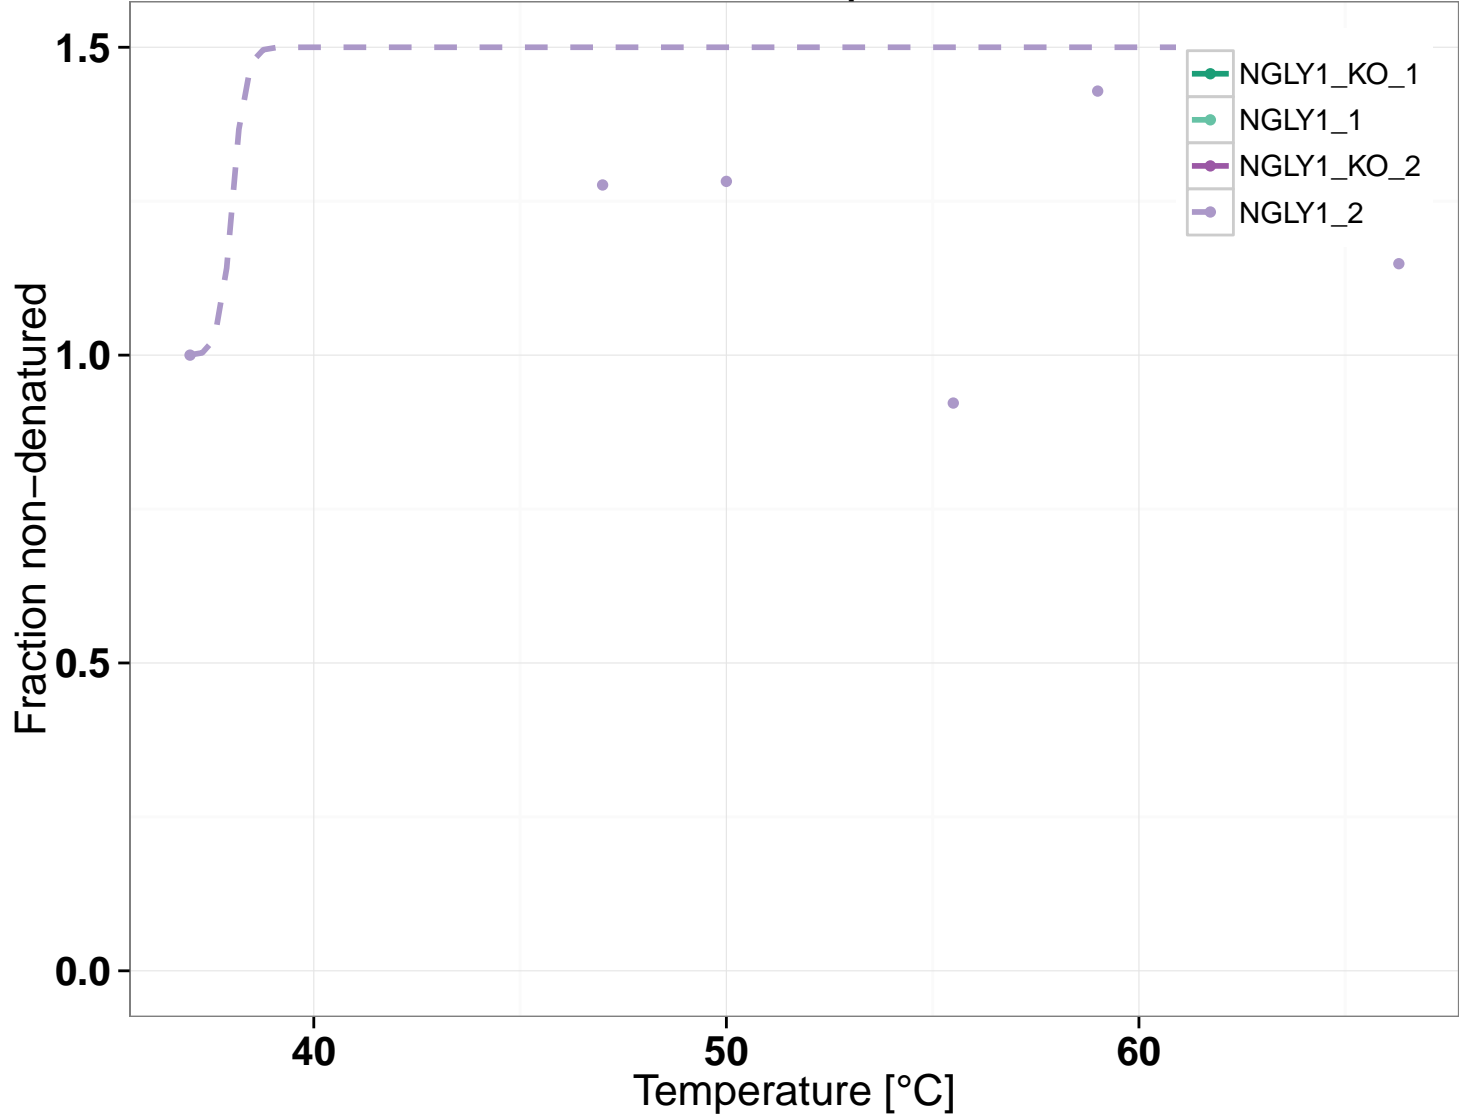

|            | meltPoint | slope | plateau | R2   |
|------------|-----------|-------|---------|------|
| NGLY1_KO_1 | —         | —     | —       | —    |
| NGLY1_1    | —         | —     | —       | —    |
| NGLY1_KO_2 | —         | —     | —       | —    |
| NGLY1_2    | —         | 0.82  | 1.5     | 0.08 |

Supplement: Supplementary file 352 [file 1]

# IPI00167713.2|PIGW

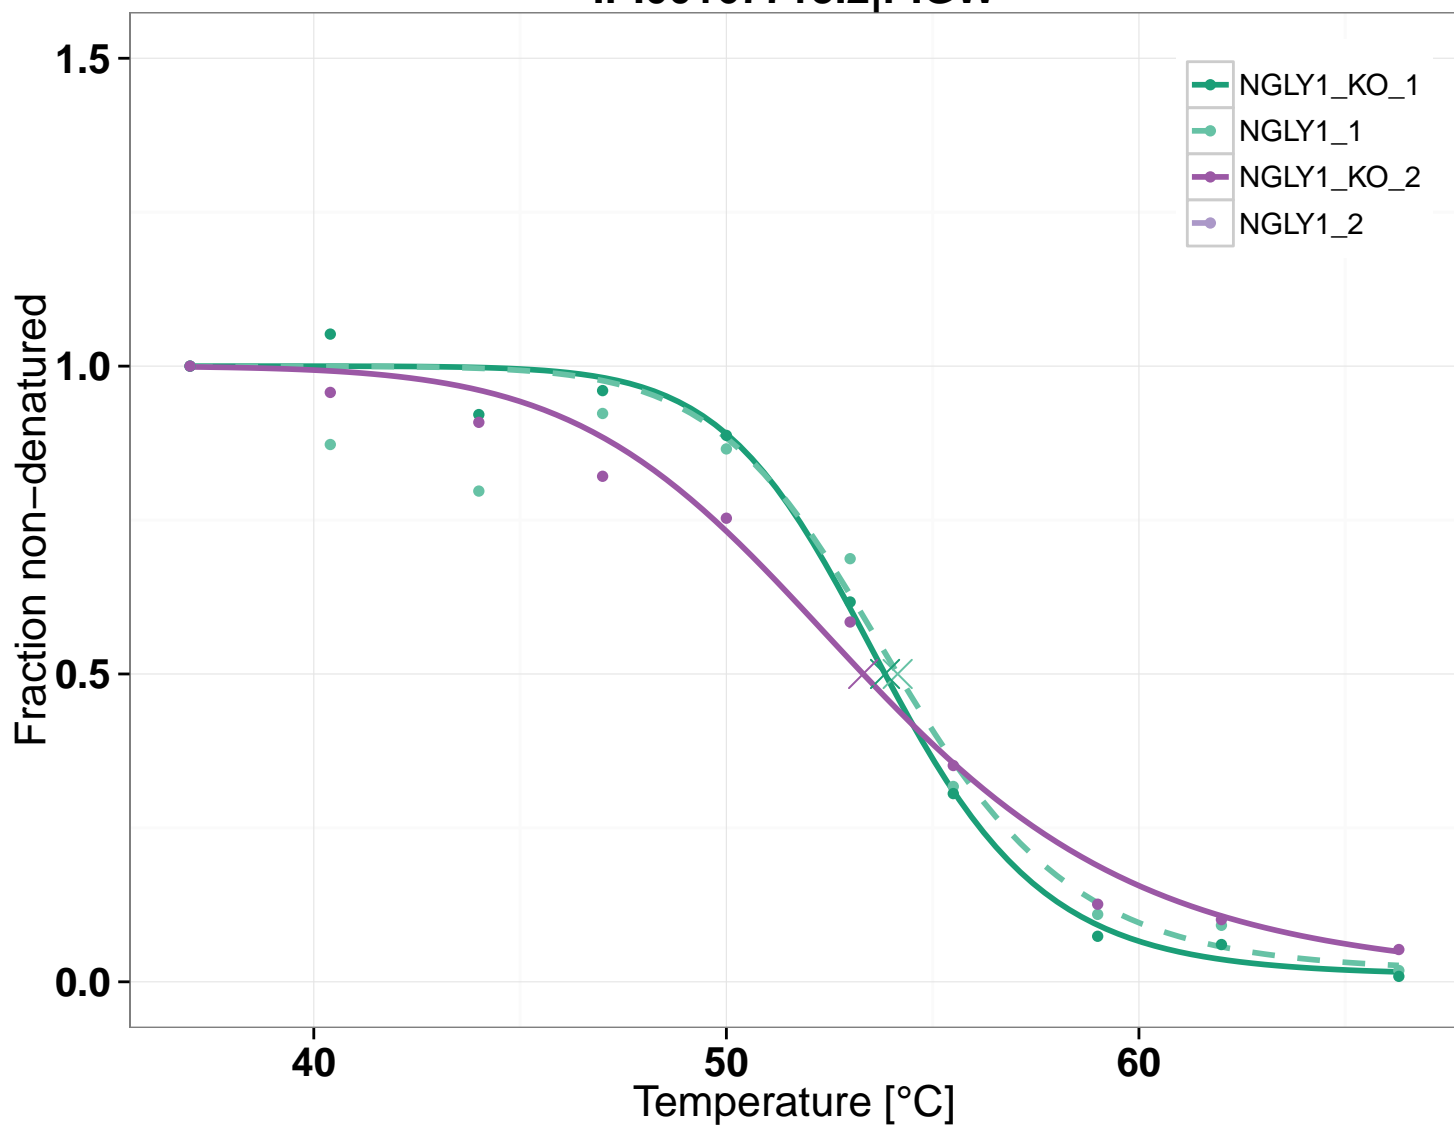

|            | meltPoint | slope  | plateau | R2   |
|------------|-----------|--------|---------|------|
| NGLY1_KO_1 | 53.85     | -0.13  | 0.01    | 0.99 |
| NGLY1_1    | 54.15     | -0.11  | 0.02    | 0.95 |
| NGLY1_KO_2 | 53.32     | -0.072 | 0       | 0.99 |
| NGLY1_2    | -         | -      | -       | -    |

Supplement: Supplementary file 353 [file 1]

# IPI00872692.1|QPRT

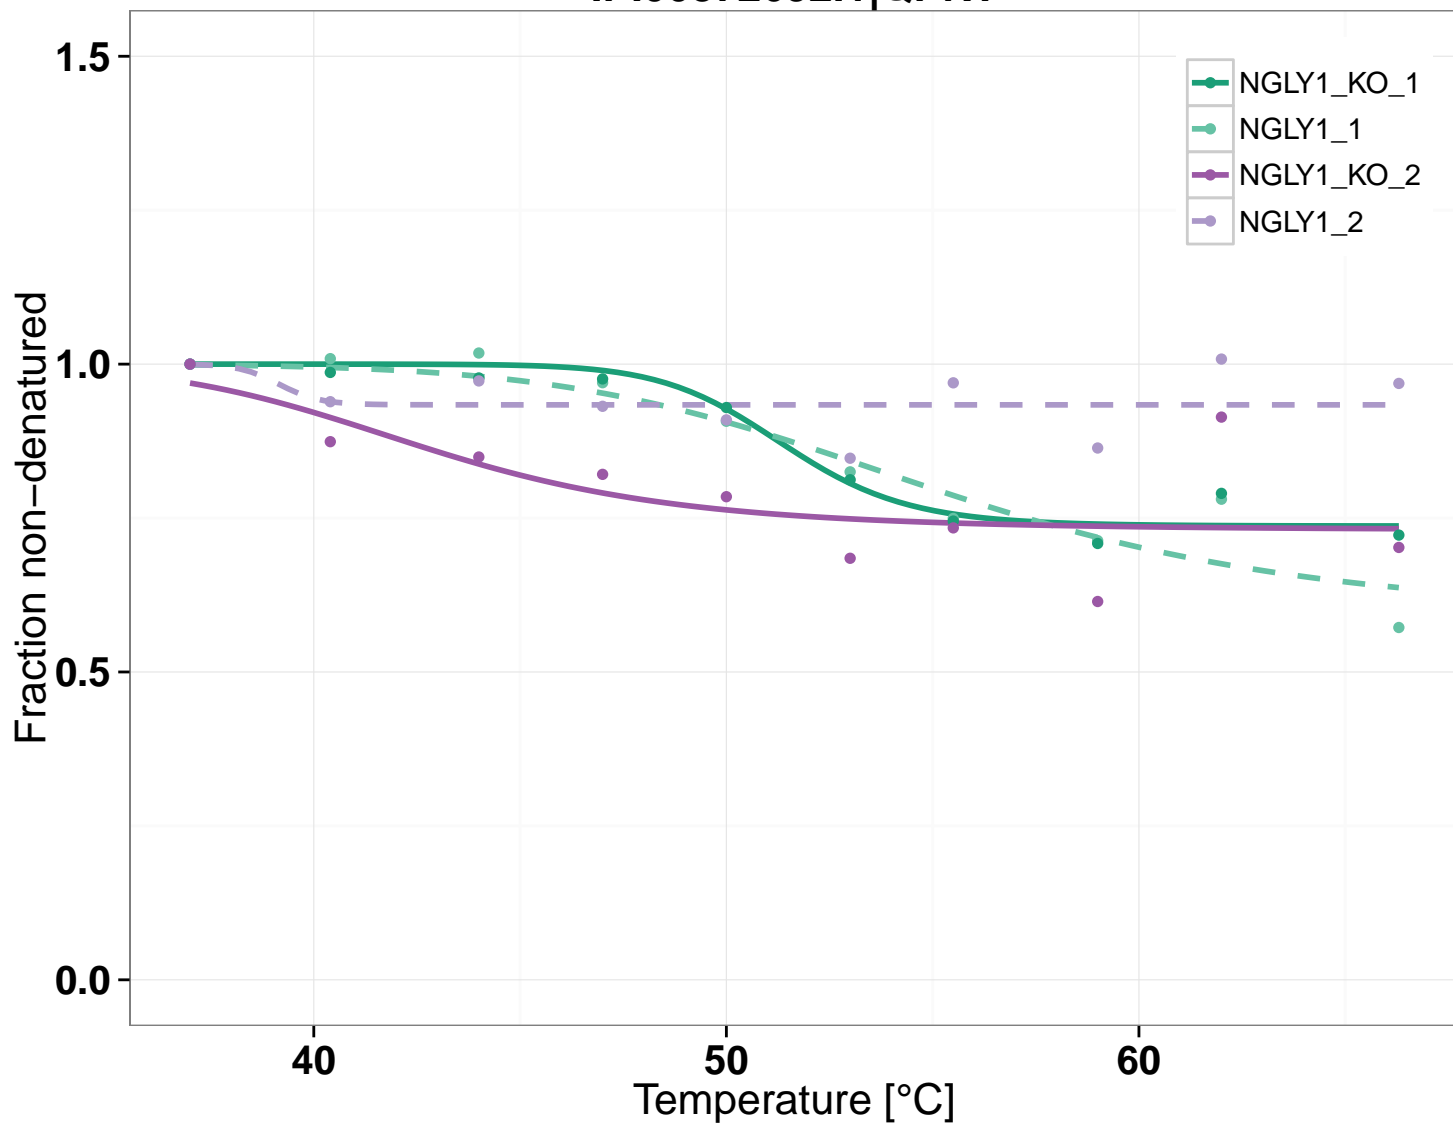

|            | meltPoint | slope  | plateau | R2   |
|------------|-----------|--------|---------|------|
| NGLY1_KO_1 | —         | −0.044 | 0.74    | 0.96 |
| NGLY1_1    | —         | −0.023 | 0.59    | 0.91 |
| NGLY1_KO_2 | —         | −0.022 | 0.73    | 0.54 |
| NGLY1_2    | —         | −0.034 | 0.93    | 0.15 |

Supplement: Supplementary file 354 [file 1]

IPI00789787.1|PACS2

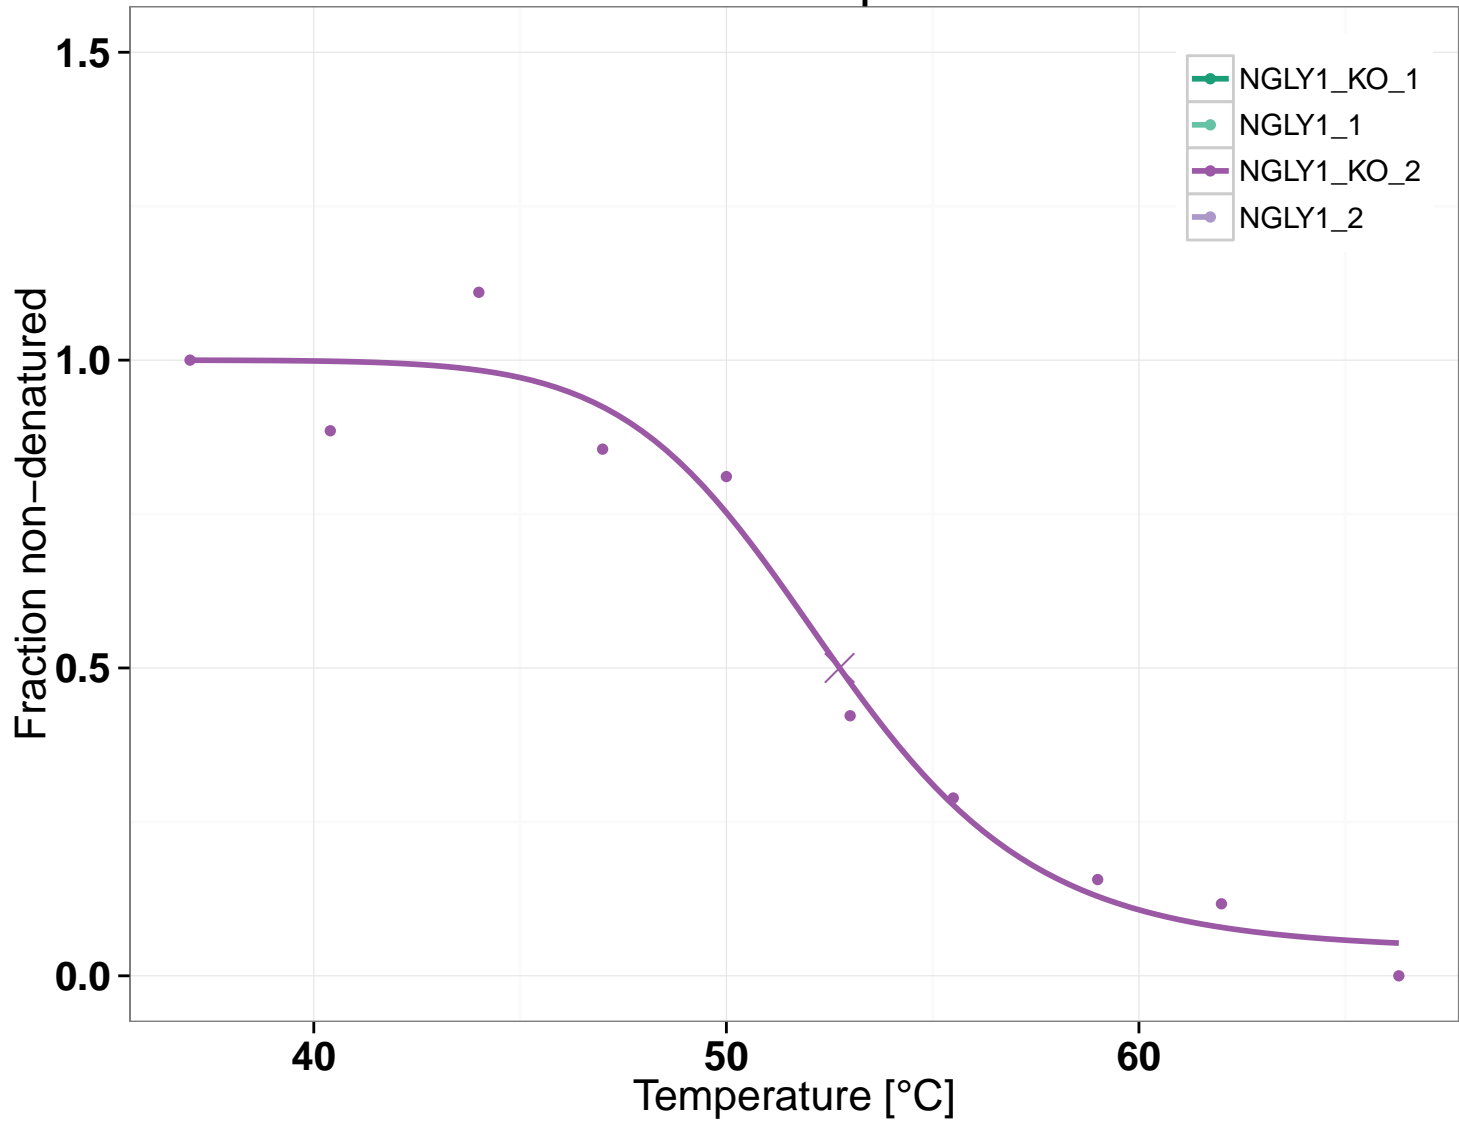

|            | meltPoint | slope  | plateau | R2   |
|------------|-----------|--------|---------|------|
| NGLY1_KO_1 | —         | —      | —       | —    |
| NGLY1_1    | —         | —      | —       | —    |
| NGLY1_KO_2 | 52.74     | -0.096 | 0.04    | 0.97 |
| NGLY1_2    | —         | —      | —       | —    |

Supplement: Supplementary file 355 [file 1]

IPI00023064.1|C6ORF66

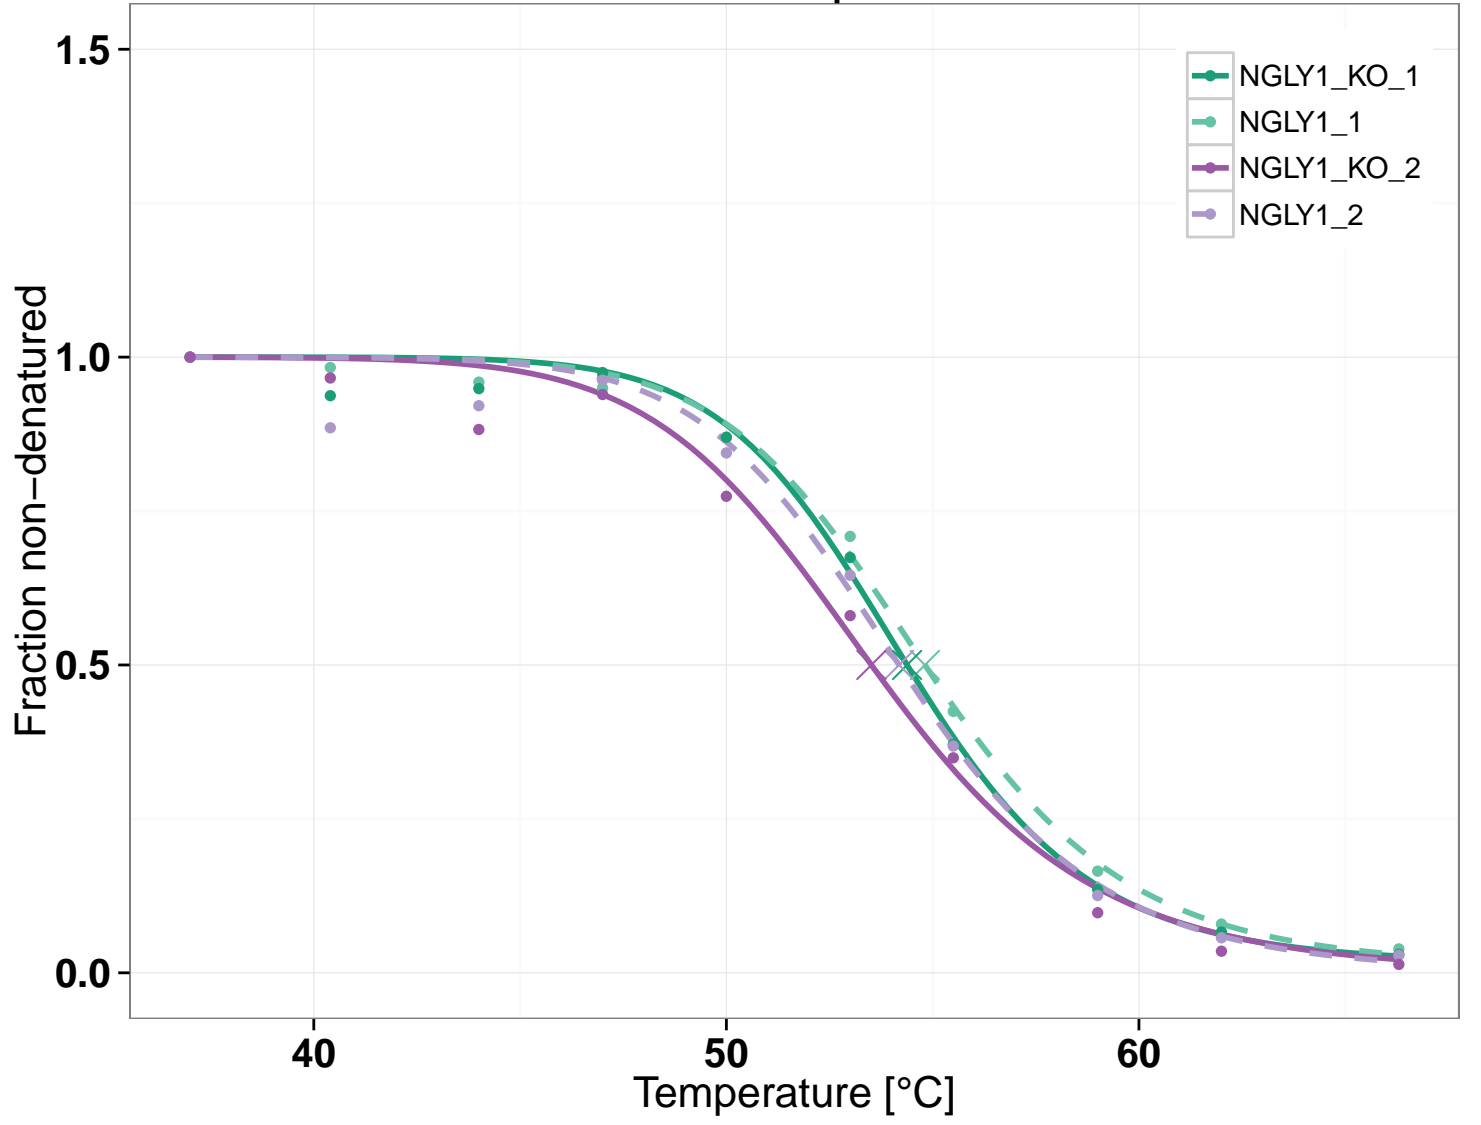

|            | meltPoint | slope  | plateau | R2   |
|------------|-----------|--------|---------|------|
| NGLY1_KO_1 | 54.38     | -0.11  | 0.01    | 1    |
| NGLY1_1    | 54.81     | -0.1   | 0.01    | 1    |
| NGLY1_KO_2 | 53.51     | -0.093 | 0       | 0.99 |
| NGLY1_2    | 54.19     | -0.1   | 0       | 0.99 |

Supplement: Supplementary file 356 [file 1]

IPI00744858.1|ISY1

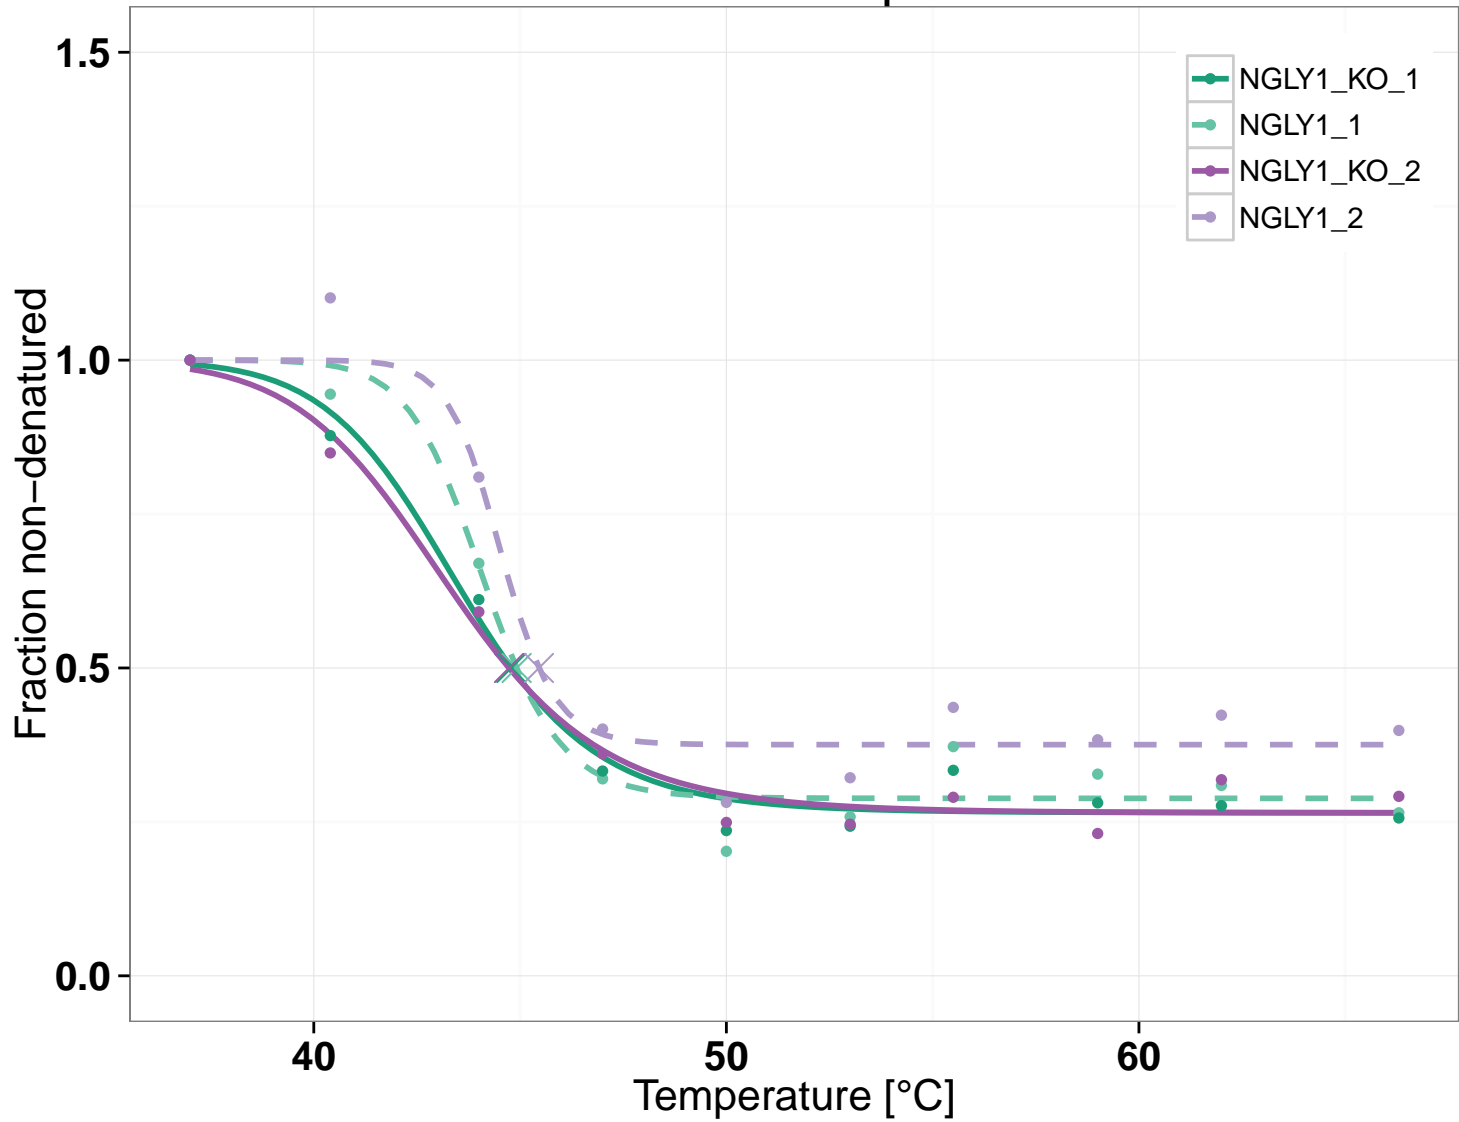

|            | meltPoint | slope  | plateau | R2   |
|------------|-----------|--------|---------|------|
| NGLY1_KO_1 | 44.79     | -0.11  | 0.26    | 0.98 |
| NGLY1_1    | 44.92     | -0.19  | 0.29    | 0.97 |
| NGLY1_KO_2 | 44.73     | -0.099 | 0.26    | 0.99 |
| NGLY1_2    | 45.46     | -0.24  | 0.38    | 0.96 |

Supplement: Supplementary file 357 [file 1]

# IPI00008215.1|ME1

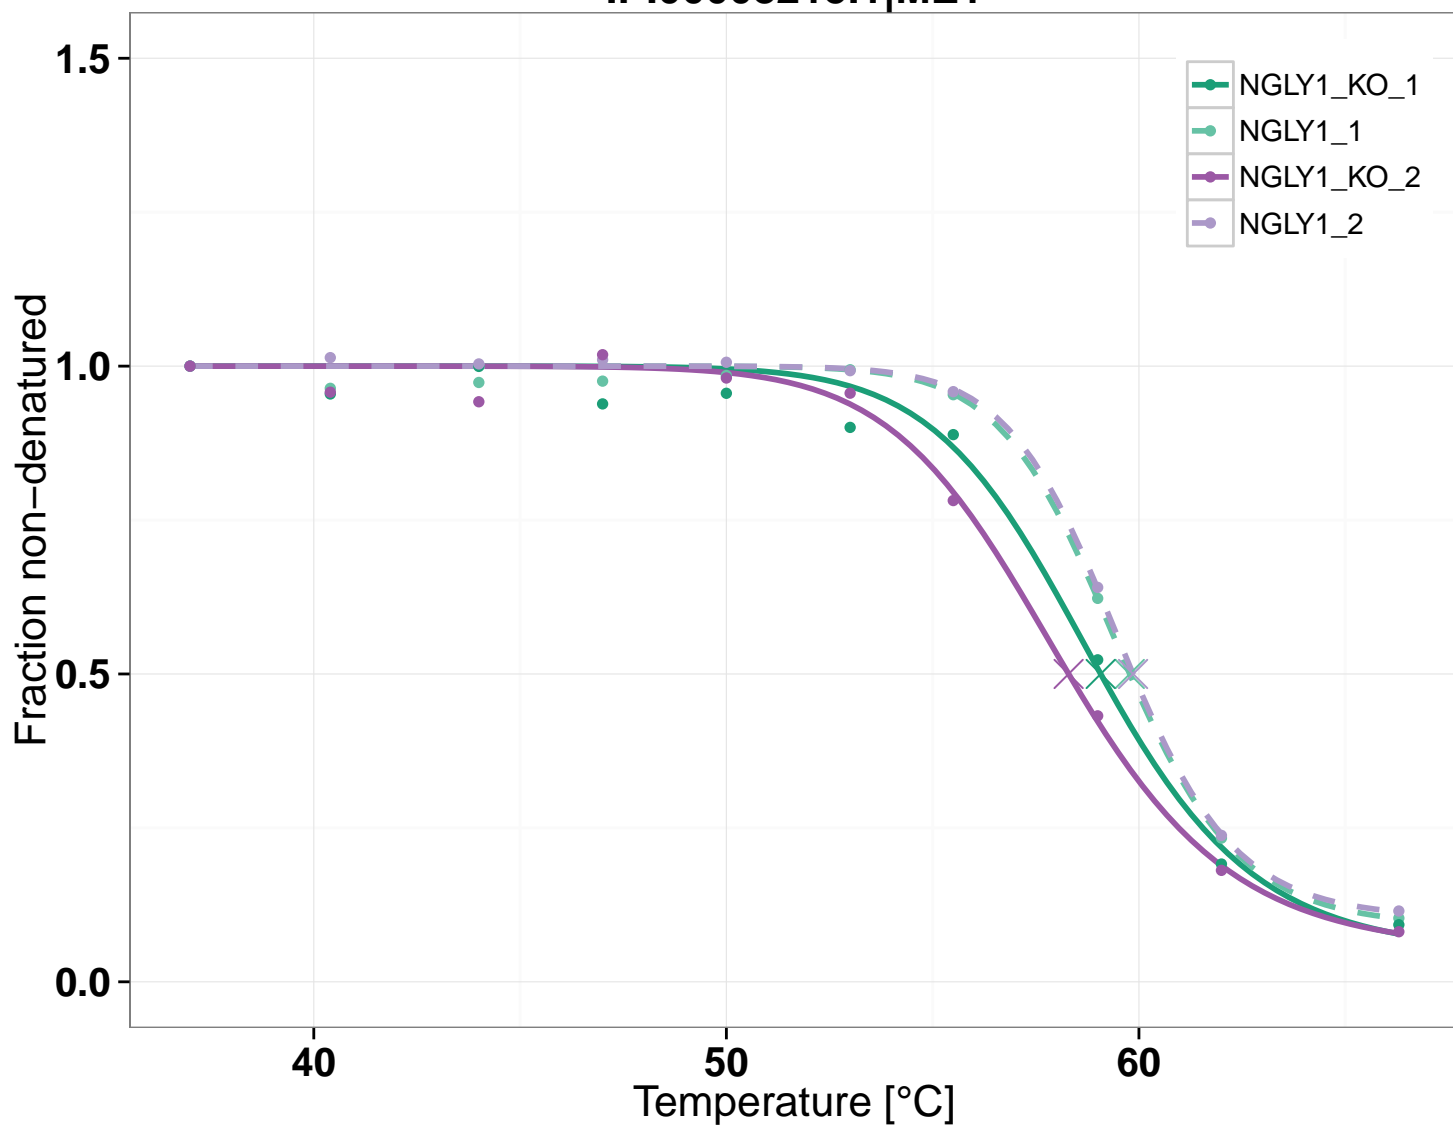

|            | meltPoint | slope | plateau | R2   |
|------------|-----------|-------|---------|------|
| NGLY1_KO_1 | 59.07     | -0.12 | 0.05    | 0.99 |
| NGLY1_1    | 59.78     | -0.16 | 0.09    | 1    |
| NGLY1_KO_2 | 58.3      | -0.11 | 0.05    | 0.99 |
| NGLY1_2    | 59.86     | -0.16 | 0.1     | 1    |

Supplement: Supplementary file 358 [file 1]

IPI00337530.4|REPS1

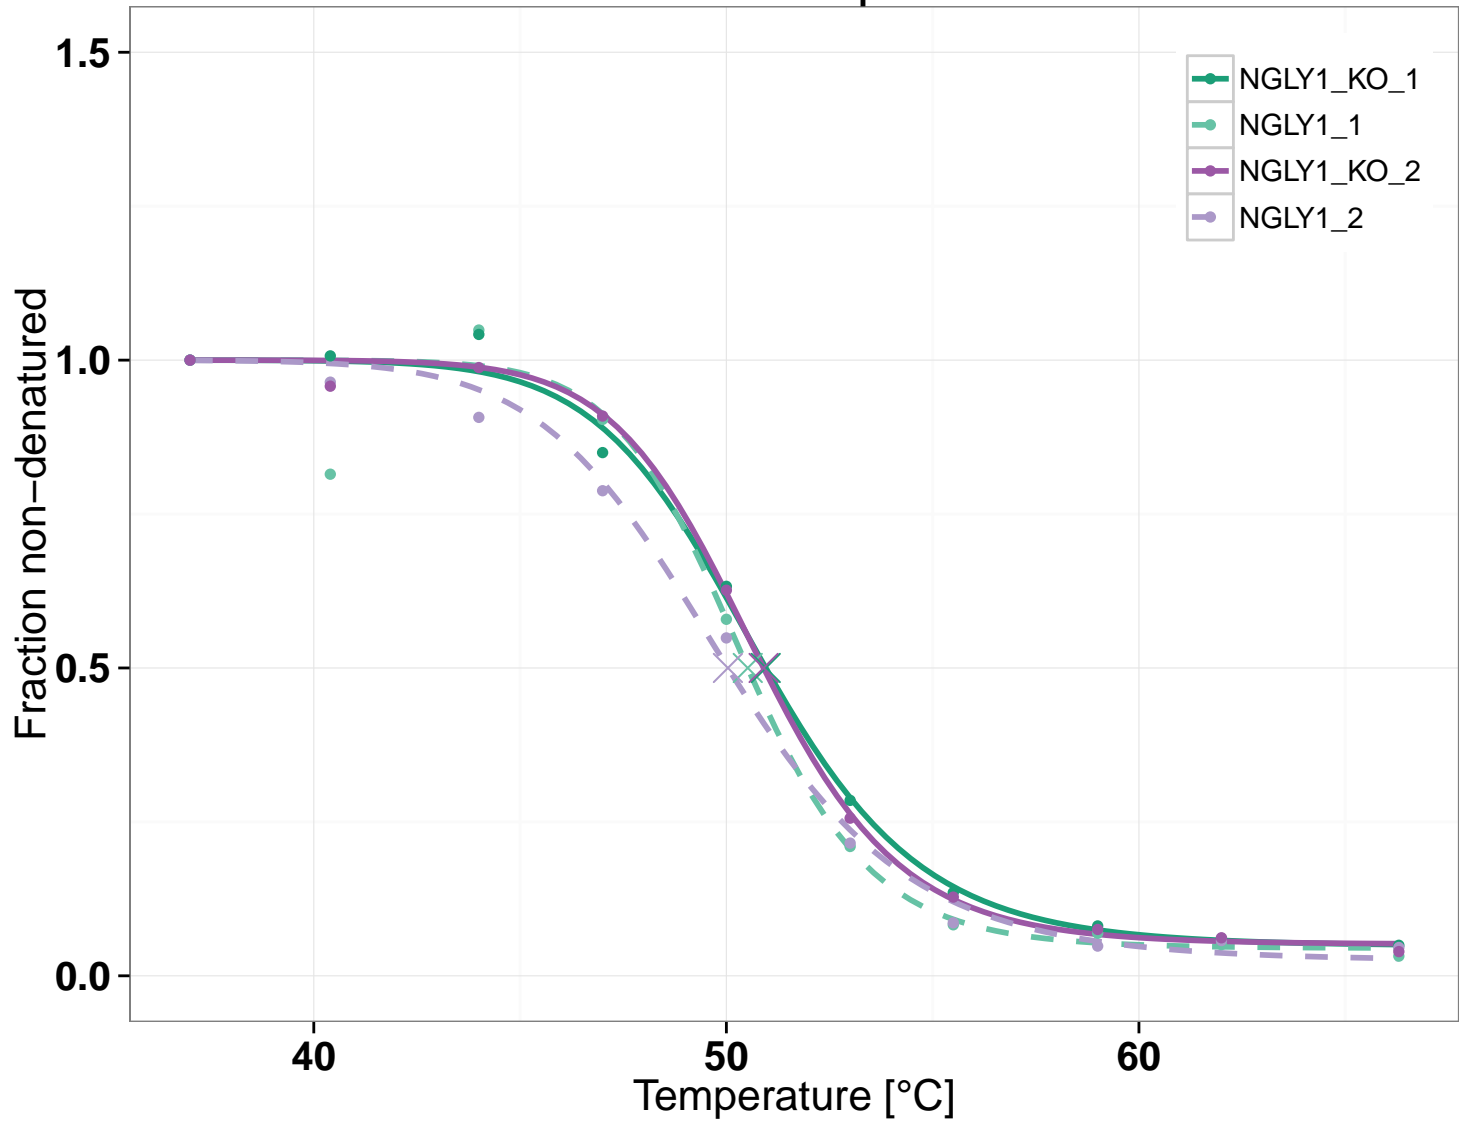

|            | meltPoint | slope | plateau | R2   |
|------------|-----------|-------|---------|------|
| NGLY1_KO_1 | 50.95     | -0.12 | 0.05    | 1    |
| NGLY1_1    | 50.52     | -0.15 | 0.04    | 0.98 |
| NGLY1_KO_2 | 50.9      | -0.14 | 0.05    | 1    |
| NGLY1_2    | 50.04     | -0.11 | 0.02    | 1    |

Supplement: Supplementary file 359 [file 1]

# IPI00003704.4|RBM4B

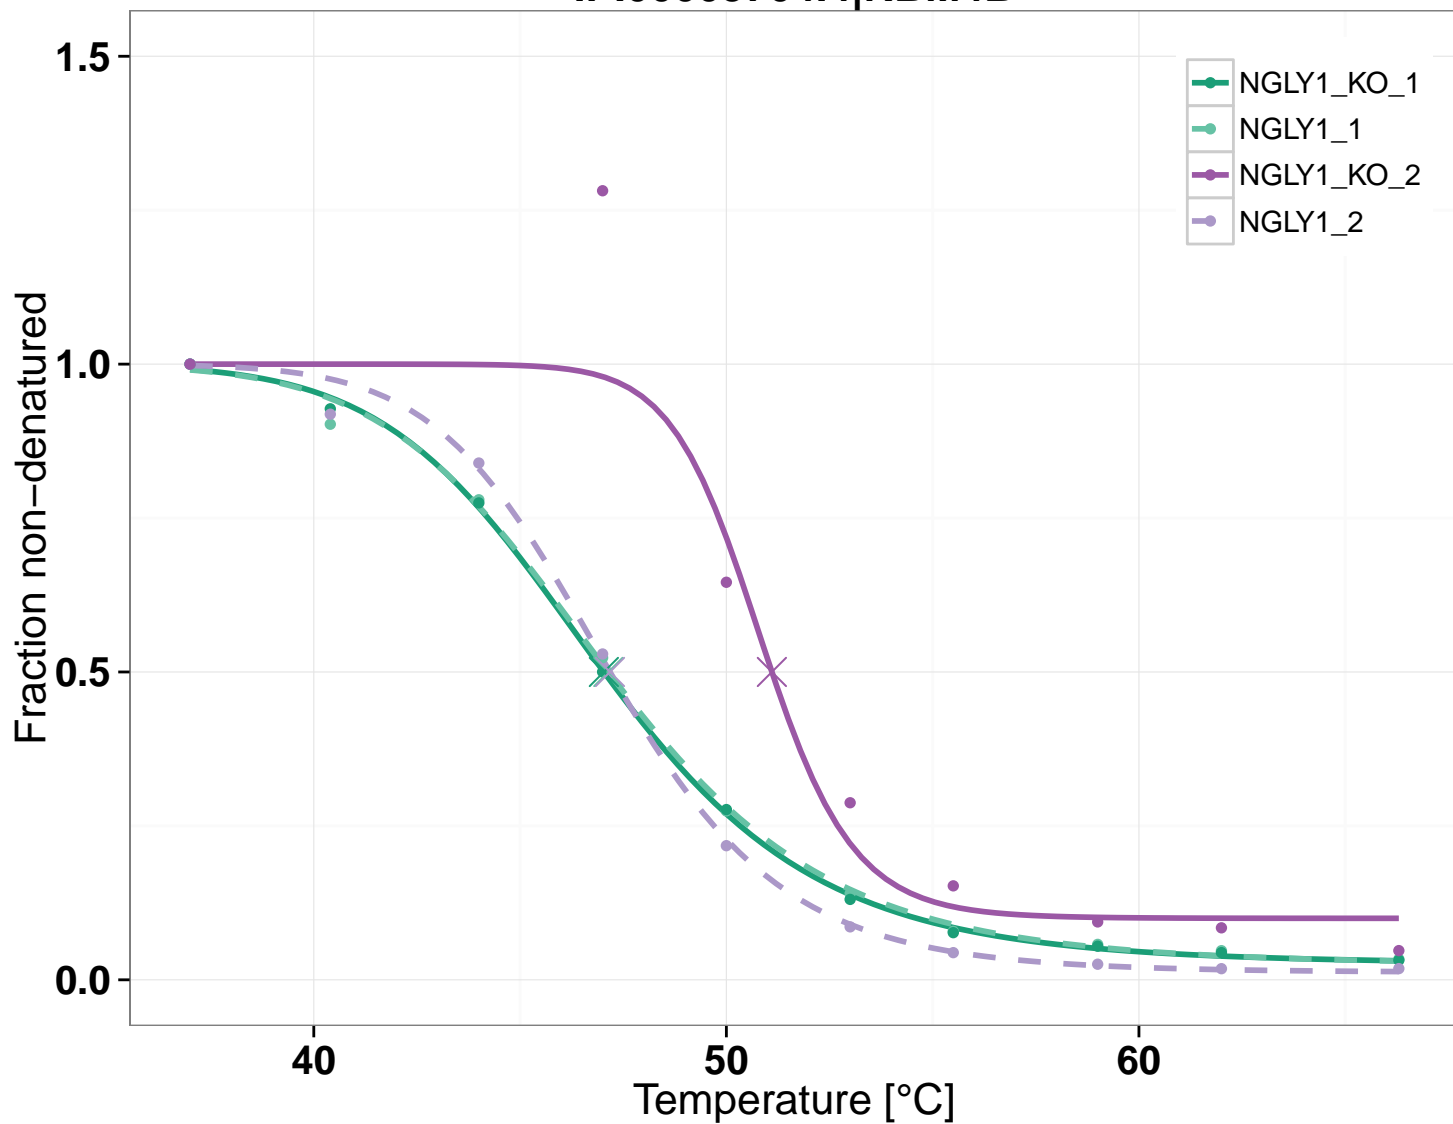

|            | meltPoint | slope  | plateau | R2   |
|------------|-----------|--------|---------|------|
| NGLY1_KO_1 | 47.03     | -0.093 | 0.03    | 1    |
| NGLY1_1    | 47.14     | -0.09  | 0.02    | 1    |
| NGLY1_KO_2 | 51.1      | -0.2   | 0.1     | 0.56 |
| NGLY1_2    | 47.18     | -0.12  | 0.01    | 1    |

Supplement: Supplementary file 360 [file 1]

# IPI00167237.4|TYW3

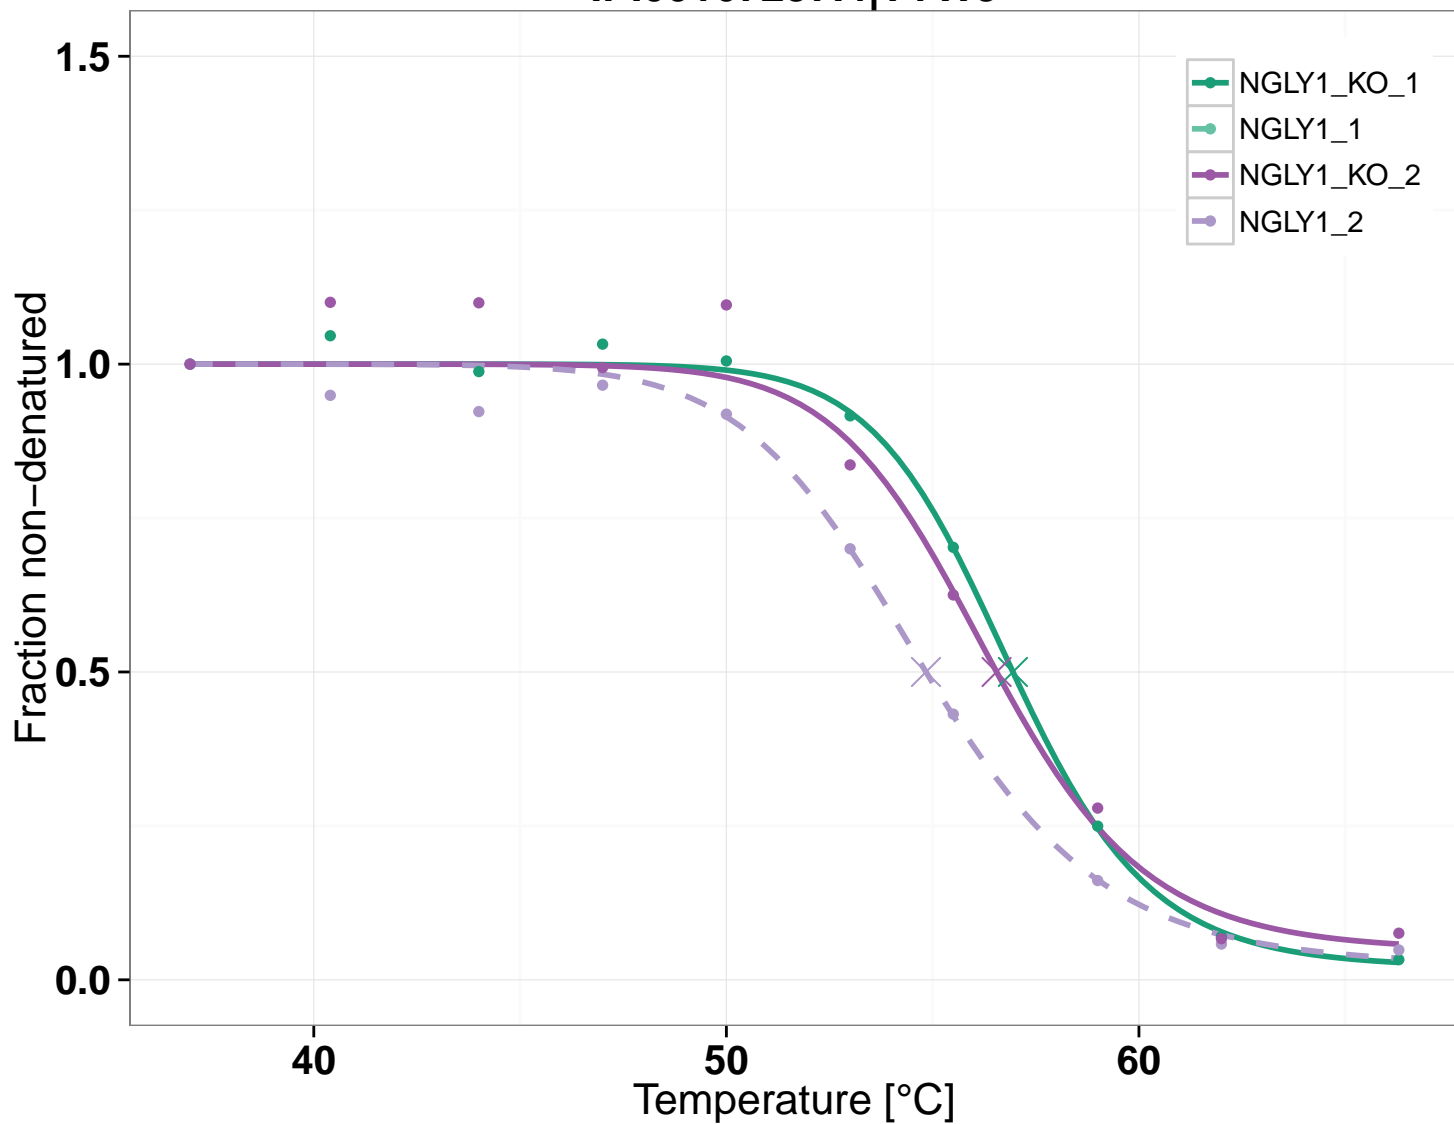

|            | meltPoint | slope | plateau | R2   |
|------------|-----------|-------|---------|------|
| NGLY1_KO_1 | 56.95     | -0.14 | 0.02    | 1    |
| NGLY1_1    | -         | -     | -       | -    |
| NGLY1_KO_2 | 56.55     | -0.13 | 0.05    | 0.98 |
| NGLY1_2    | 54.84     | -0.11 | 0.02    | 0.99 |

Supplement: Supplementary file 361 [file 1]

IPI00419451.4|TRIM65

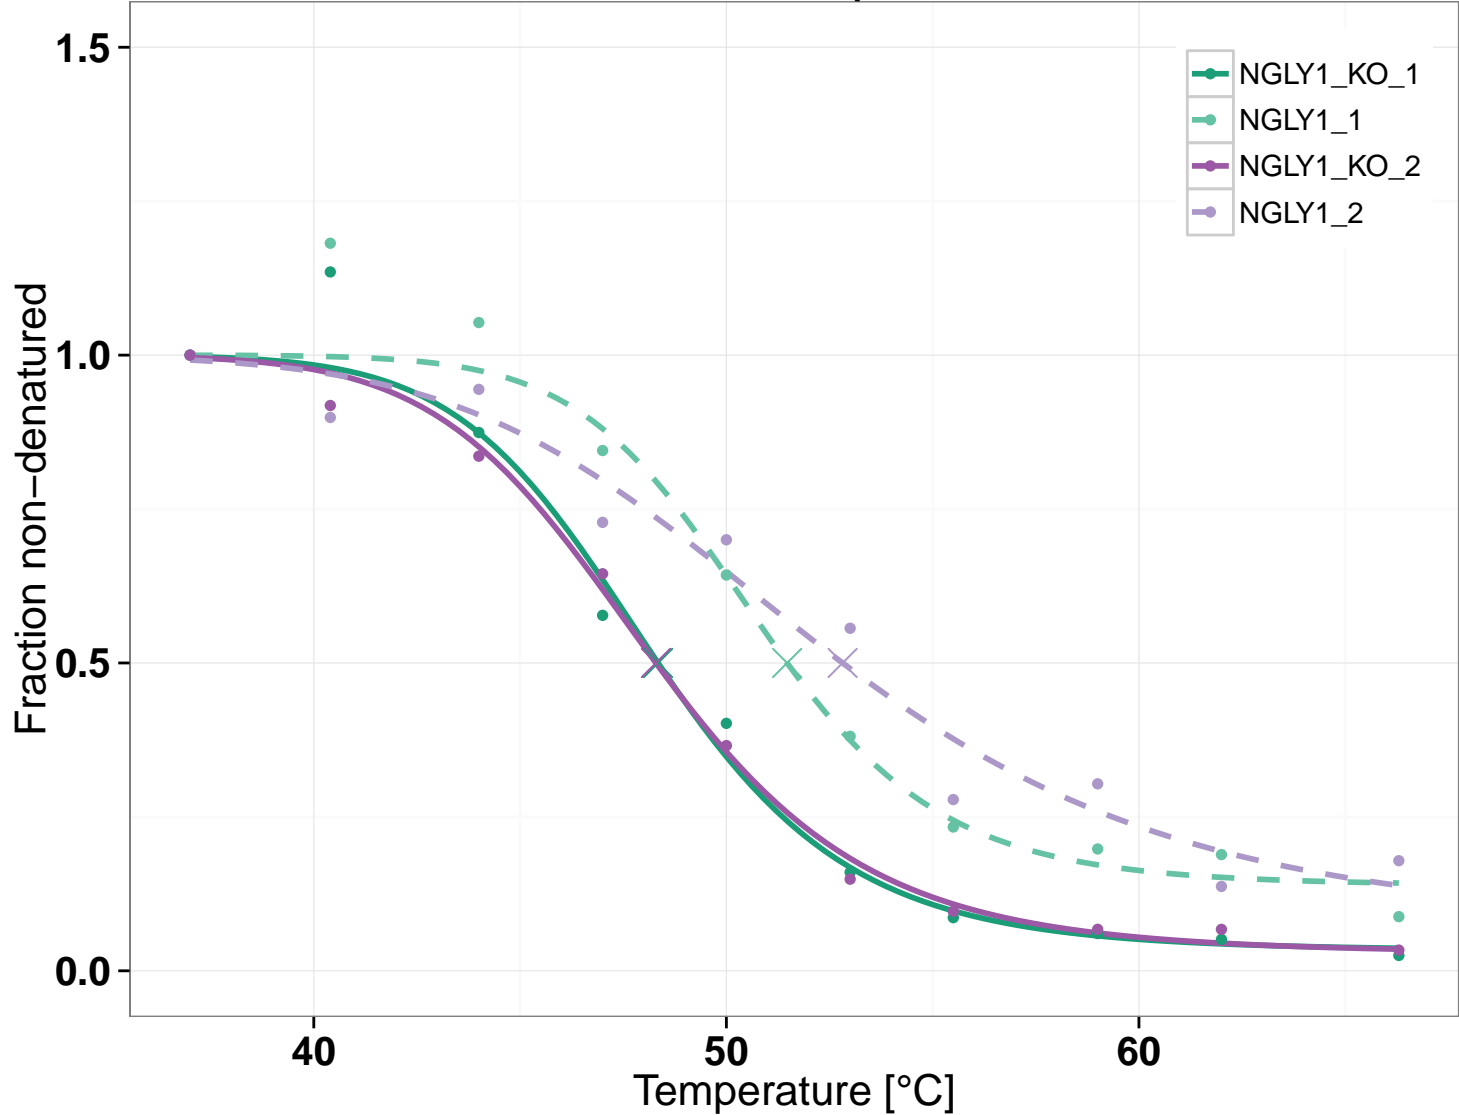

|            | meltPoint | slope  | plateau | R2   |
|------------|-----------|--------|---------|------|
| NGLY1_KO_1 | 48.34     | -0.1   | 0.03    | 0.98 |
| NGLY1_1    | 51.47     | -0.098 | 0.14    | 0.97 |
| NGLY1_KO_2 | 48.29     | -0.093 | 0.03    | 1    |
| NGLY1_2    | 52.82     | -0.053 | 0.07    | 0.96 |

Supplement: Supplementary file 362 [file 1]

IPI00166079.4|VKORC1L1

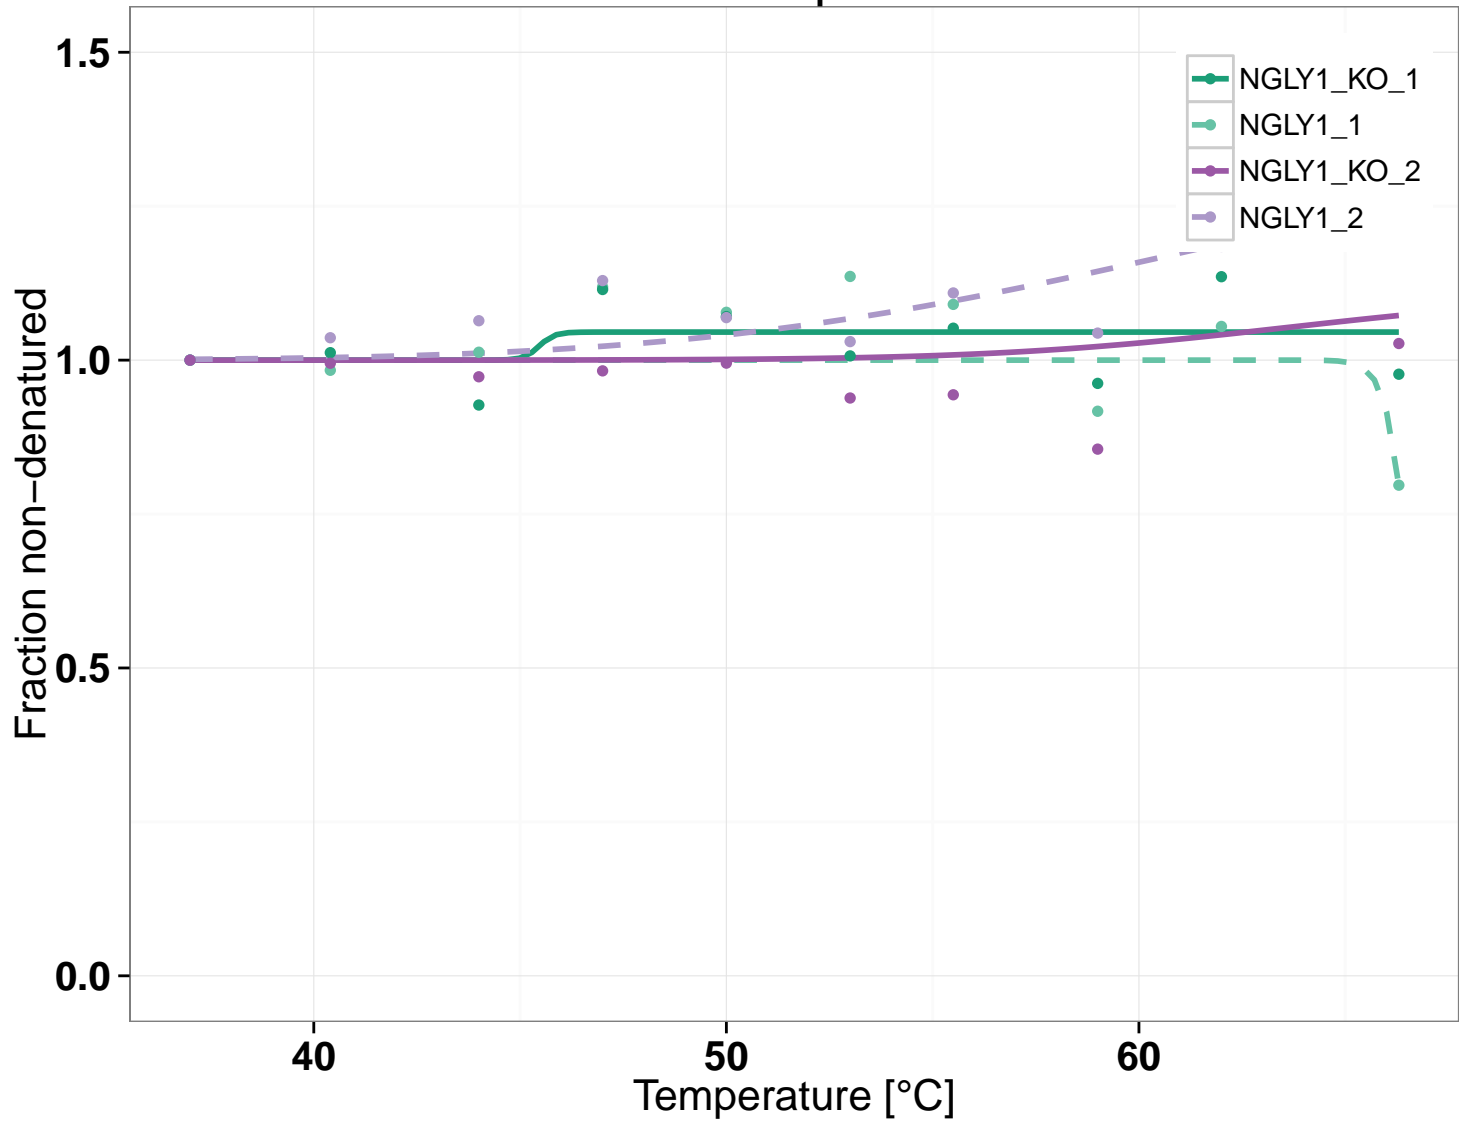

|            | meltPoint | slope  | plateau | R2  |
|------------|-----------|--------|---------|-----|
| NGLY1_KO_1 | —         | 0.063  | 1.05    | 0.2 |
| NGLY1_1    | —         | —      | 0       | 0.4 |
| NGLY1_KO_2 | —         | 0.0075 | 1.12    | 0.1 |
| NGLY1_2    | —         | 0.015  | 1.5     | 0.6 |

Supplement: Supplementary file 363 [file 1]

IPI00555597.2|PTRH2

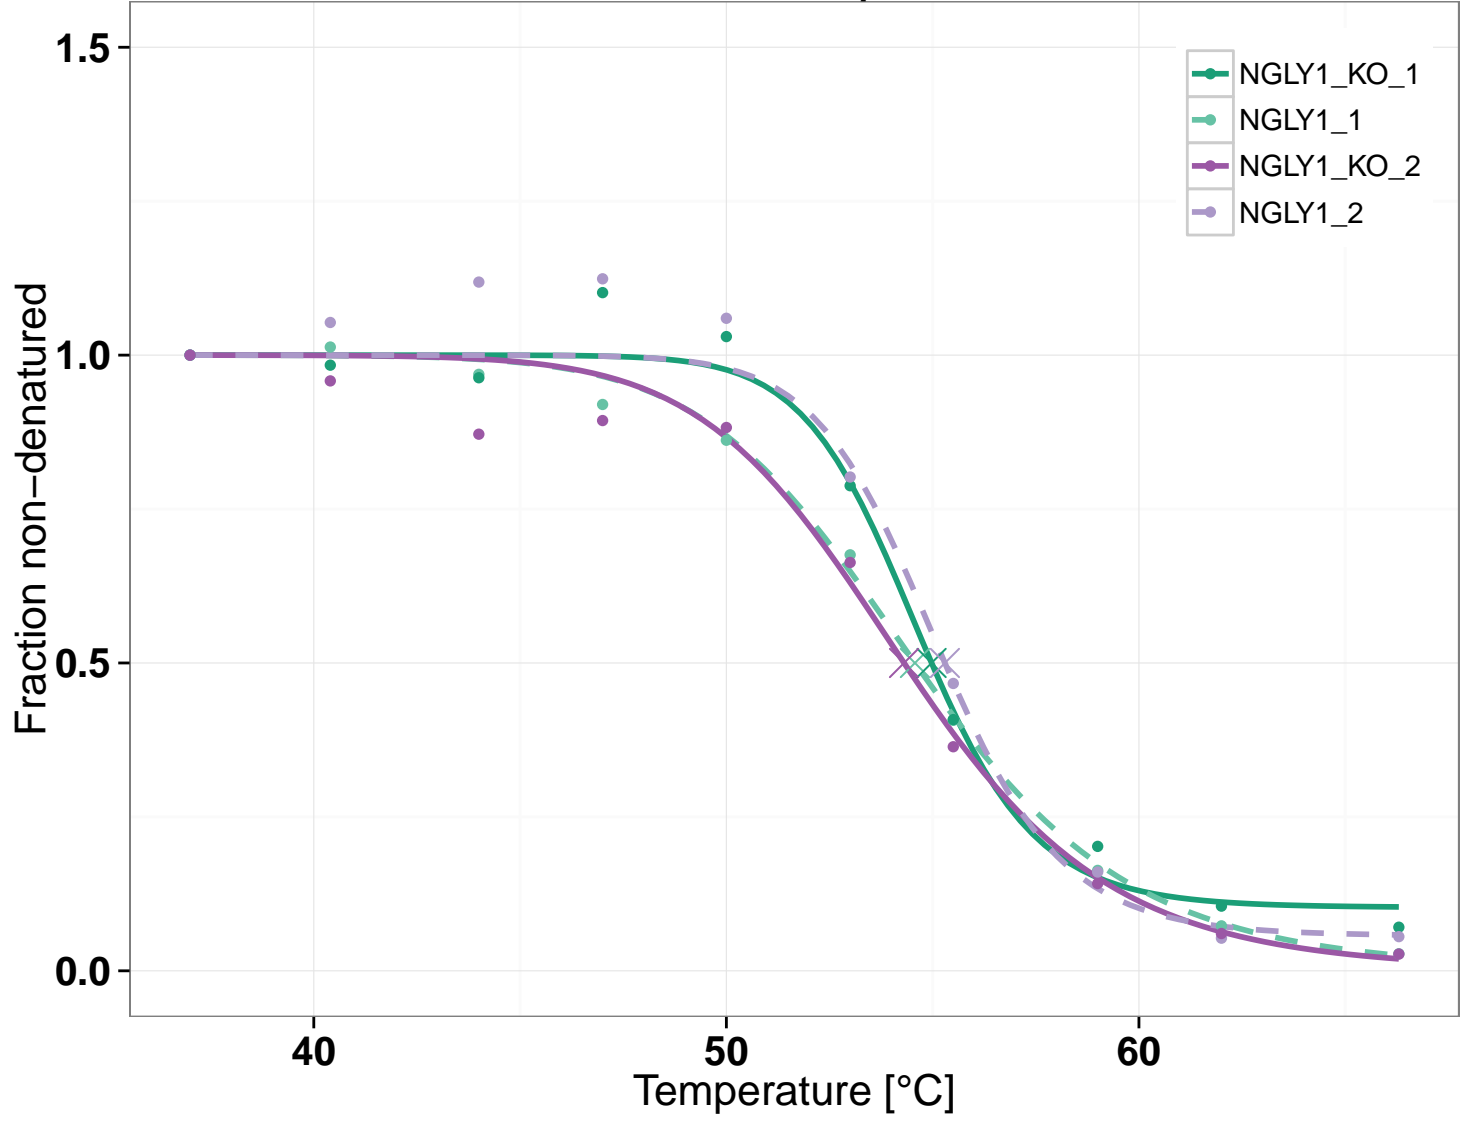

|            | meltPoint | slope  | plateau | R2   |
|------------|-----------|--------|---------|------|
| NGLY1_KO_1 | 54.97     | -0.16  | 0.1     | 0.99 |
| NGLY1_1    | 54.57     | -0.096 | 0       | 1    |
| NGLY1_KO_2 | 54.31     | -0.1   | 0       | 0.98 |
| NGLY1_2    | 55.3      | -0.16  | 0.06    | 0.98 |

Supplement: Supplementary file 364 [file 1]

IPI00454858.4|LOC344875

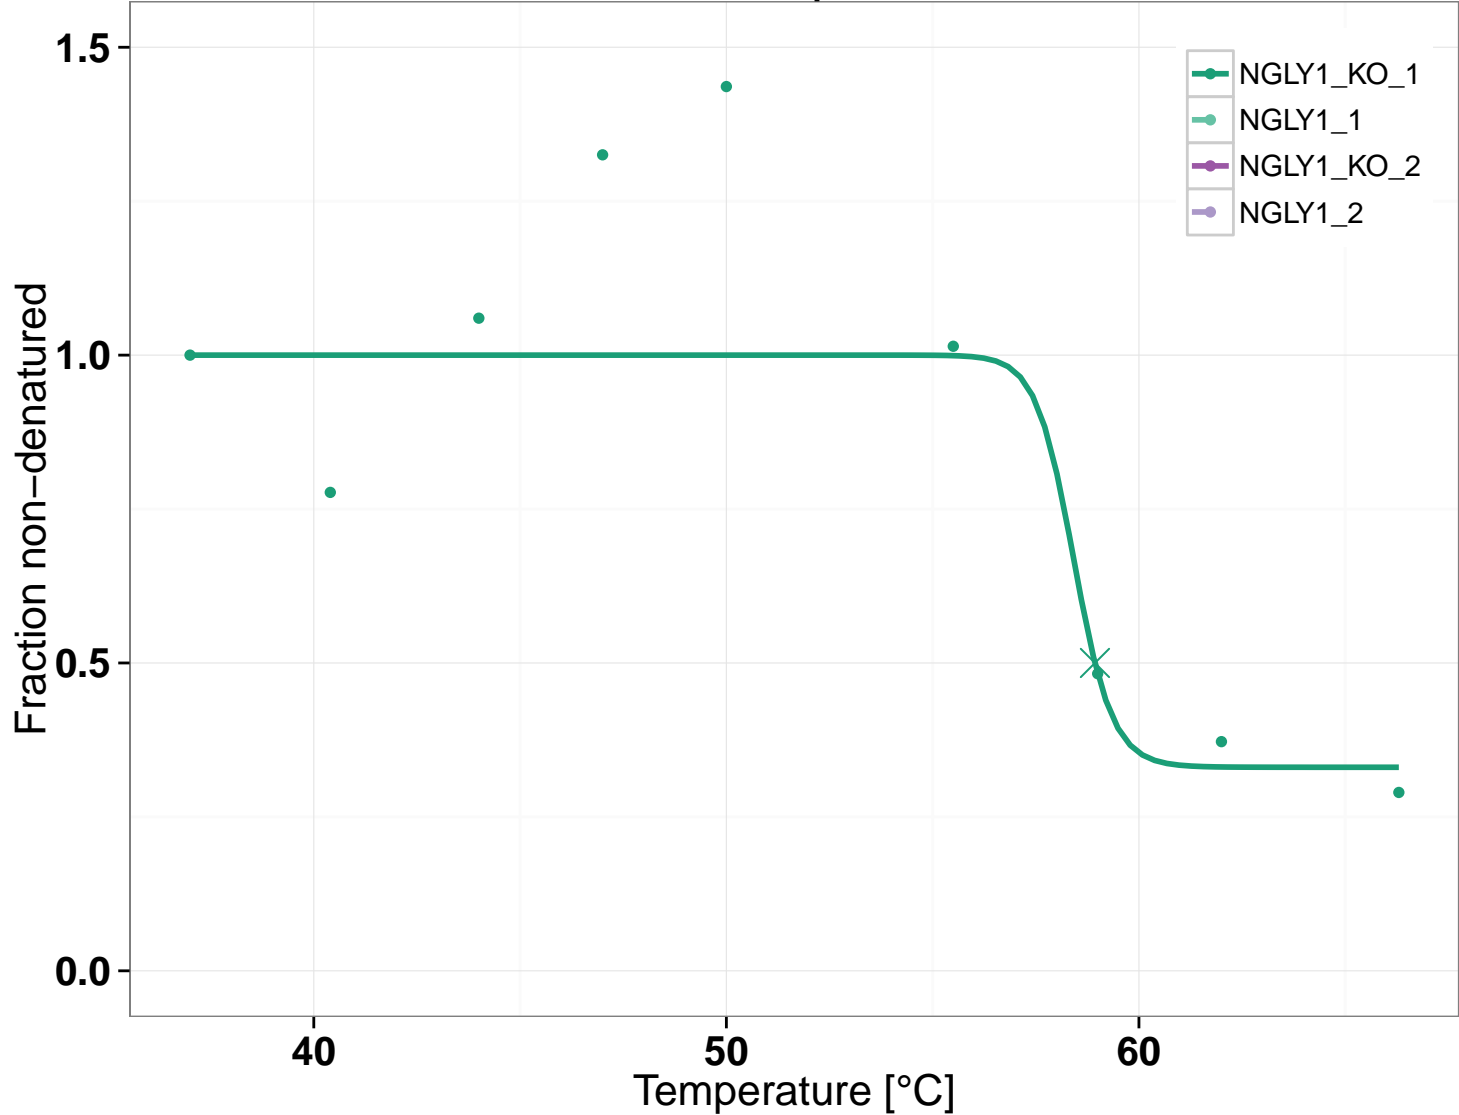

|            | meltPoint | slope | plateau | R2   |
|------------|-----------|-------|---------|------|
| NGLY1_KO_1 | 58.93     | -0.36 | 0.33    | 0.62 |
| NGLY1_1    | -         | -     | -       | -    |
| NGLY1_KO_2 | -         | -     | -       | -    |
| NGLY1_2    | -         | -     | -       | -    |

Supplement: Supplementary file 365 [file 1]

IPI00396060.5|CCDC14

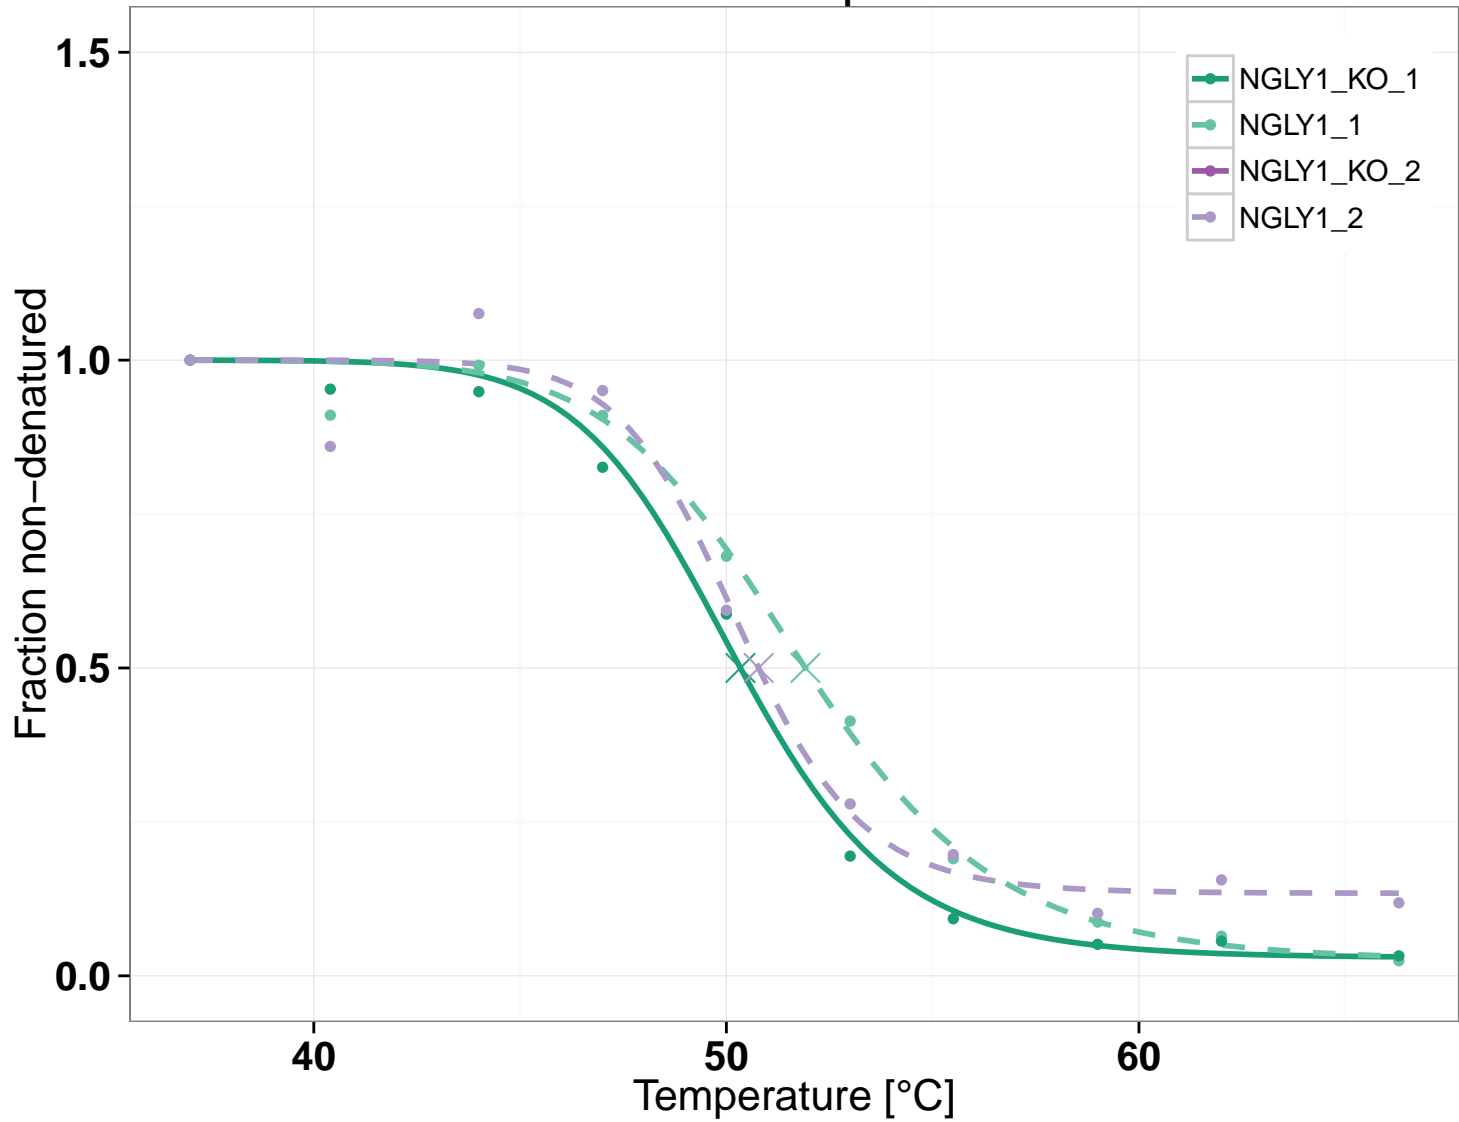

|            | meltPoint | slope | plateau | R2   |
|------------|-----------|-------|---------|------|
| NGLY1_KO_1 | 50.34     | -0.13 | 0.03    | 1    |
| NGLY1_1    | 51.91     | -0.1  | 0.02    | 0.99 |
| NGLY1_KO_2 | -         | -     | -       | -    |
| NGLY1_2    | 50.78     | -0.15 | 0.13    | 0.98 |

Supplement: Supplementary file 366 [file 1]

IPI00396218.2|SCYL2

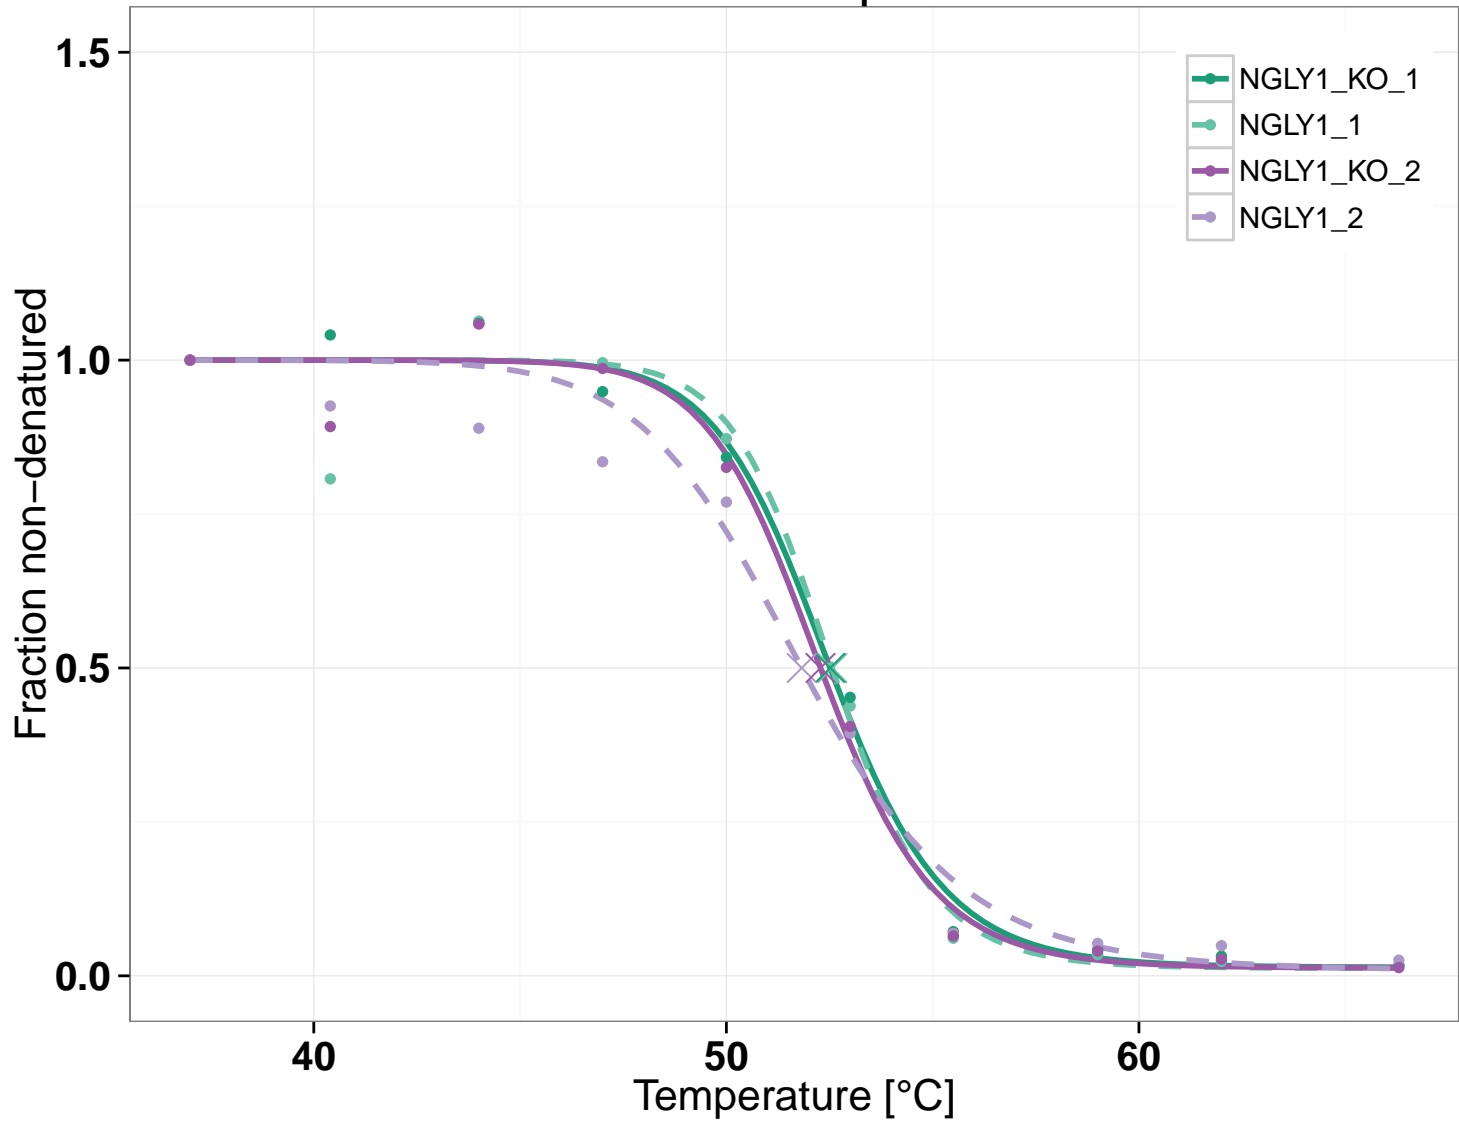

|            | meltPoint | slope | plateau | R2   |
|------------|-----------|-------|---------|------|
| NGLY1_KO_1 | 52.52     | -0.18 | 0.01    | 0.99 |
| NGLY1_1    | 52.57     | -0.2  | 0.01    | 0.98 |
| NGLY1_KO_2 | 52.28     | -0.18 | 0.01    | 0.99 |
| NGLY1_2    | 51.83     | -0.13 | 0.01    | 0.98 |

Supplement: Supplementary file 367 [file 1]

# IPI00102118.2|MLXIP

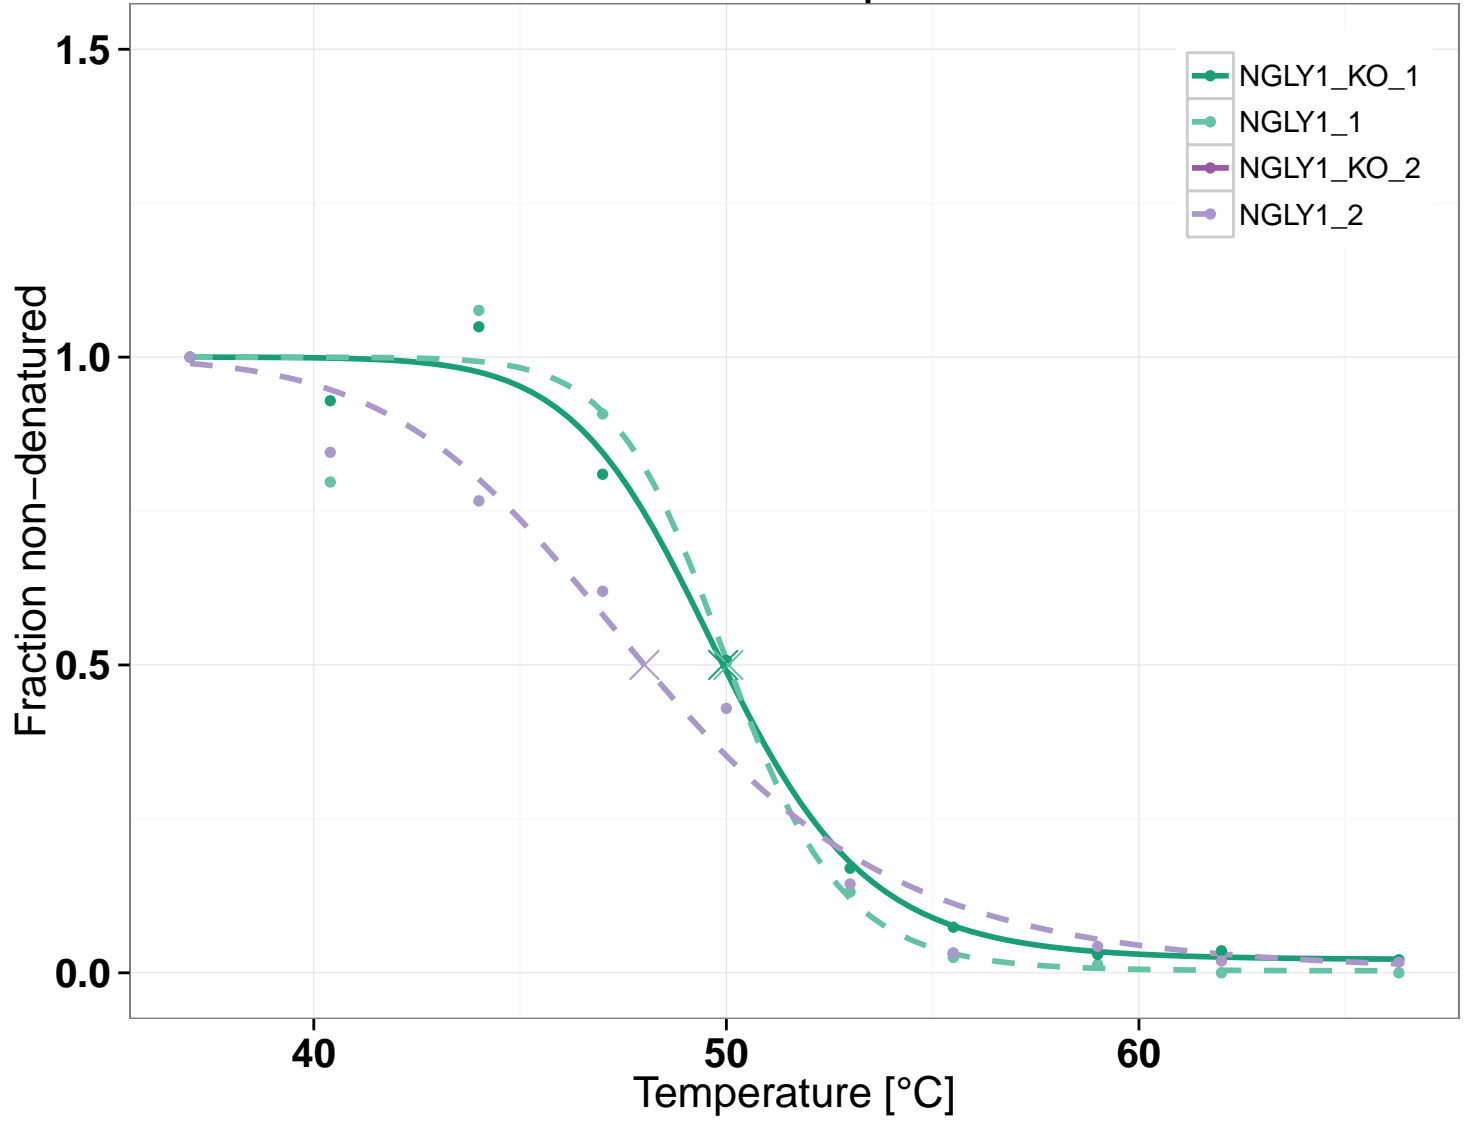

|            | meltPoint | slope  | plateau | R2   |
|------------|-----------|--------|---------|------|
| NGLY1_KO_1 | 49.92     | -0.14  | 0.02    | 0.99 |
| NGLY1_1    | 50.05     | -0.18  | 0       | 0.97 |
| NGLY1_KO_2 | -         | -      | -       | -    |
| NGLY1_2    | 48.01     | -0.081 | 0       | 0.98 |

Supplement: Supplementary file 368 [file 1]

# IPI00157176.1|MEA1

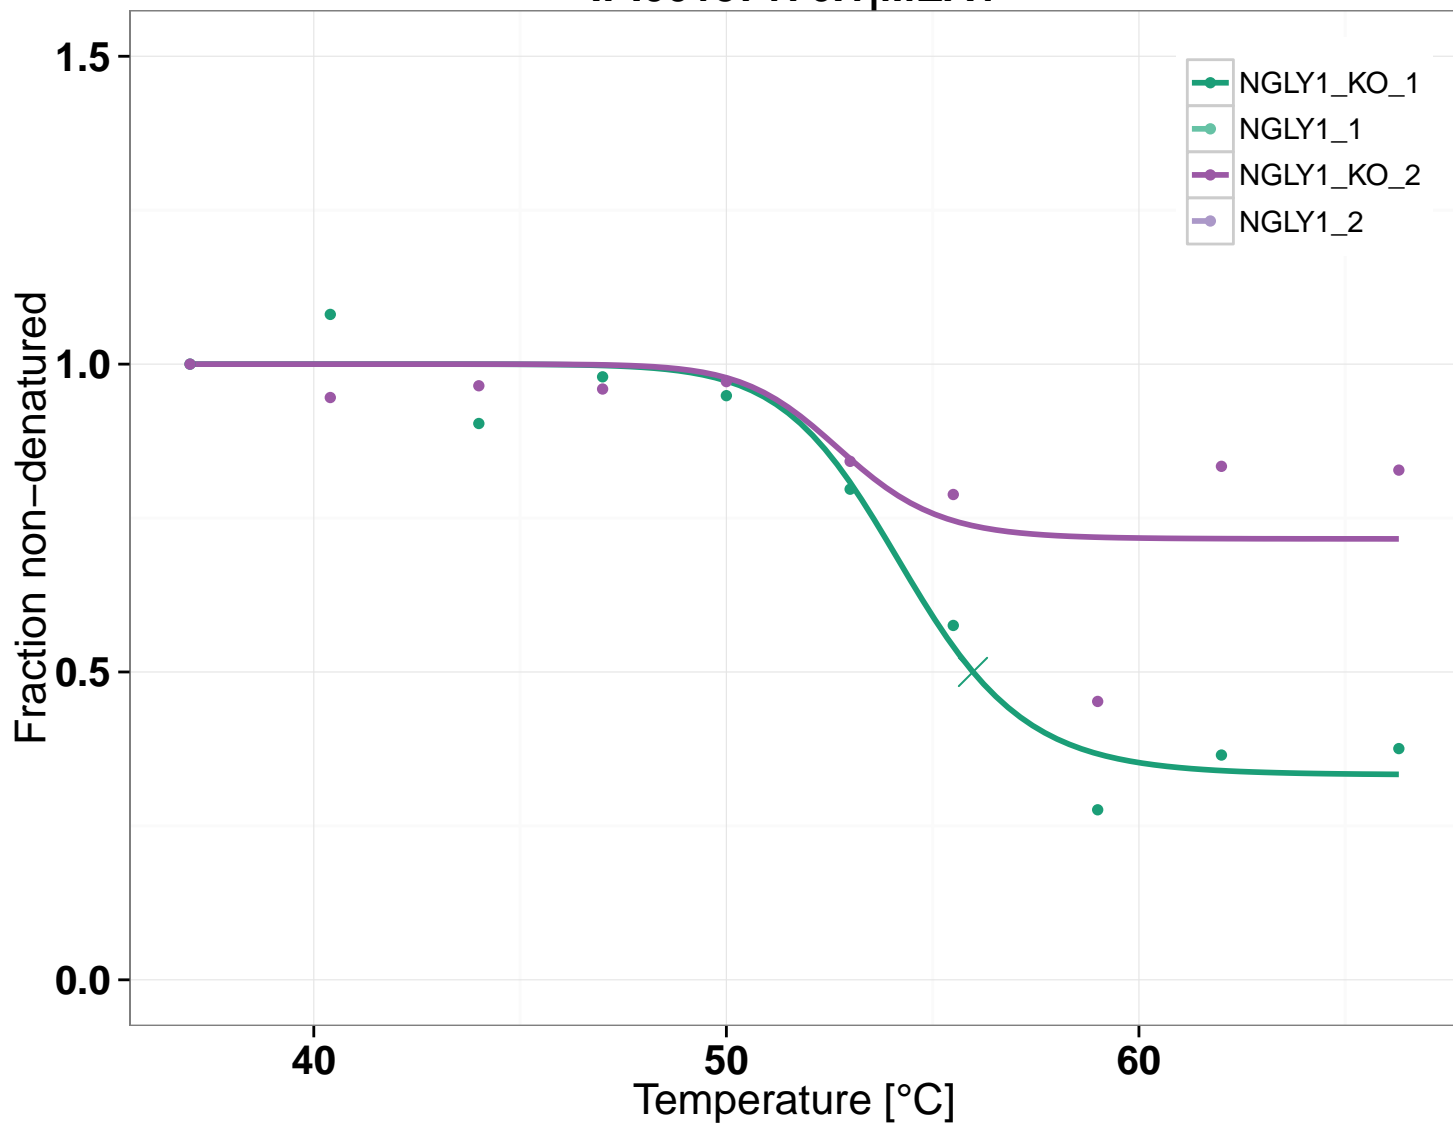

|            | meltPoint | slope | plateau | R2   |
|------------|-----------|-------|---------|------|
| NGLY1_KO_1 | 55.98     | -0.11 | 0.33    | 0.97 |
| NGLY1_1    | -         | -     | -       | -    |
| NGLY1_KO_2 | -         | -0.06 | 0.72    | 0.55 |
| NGLY1_2    | -         | -     | -       | -    |

Supplement: Supplementary file 369 [file 1]

# IPI00024705.1|GIPC1

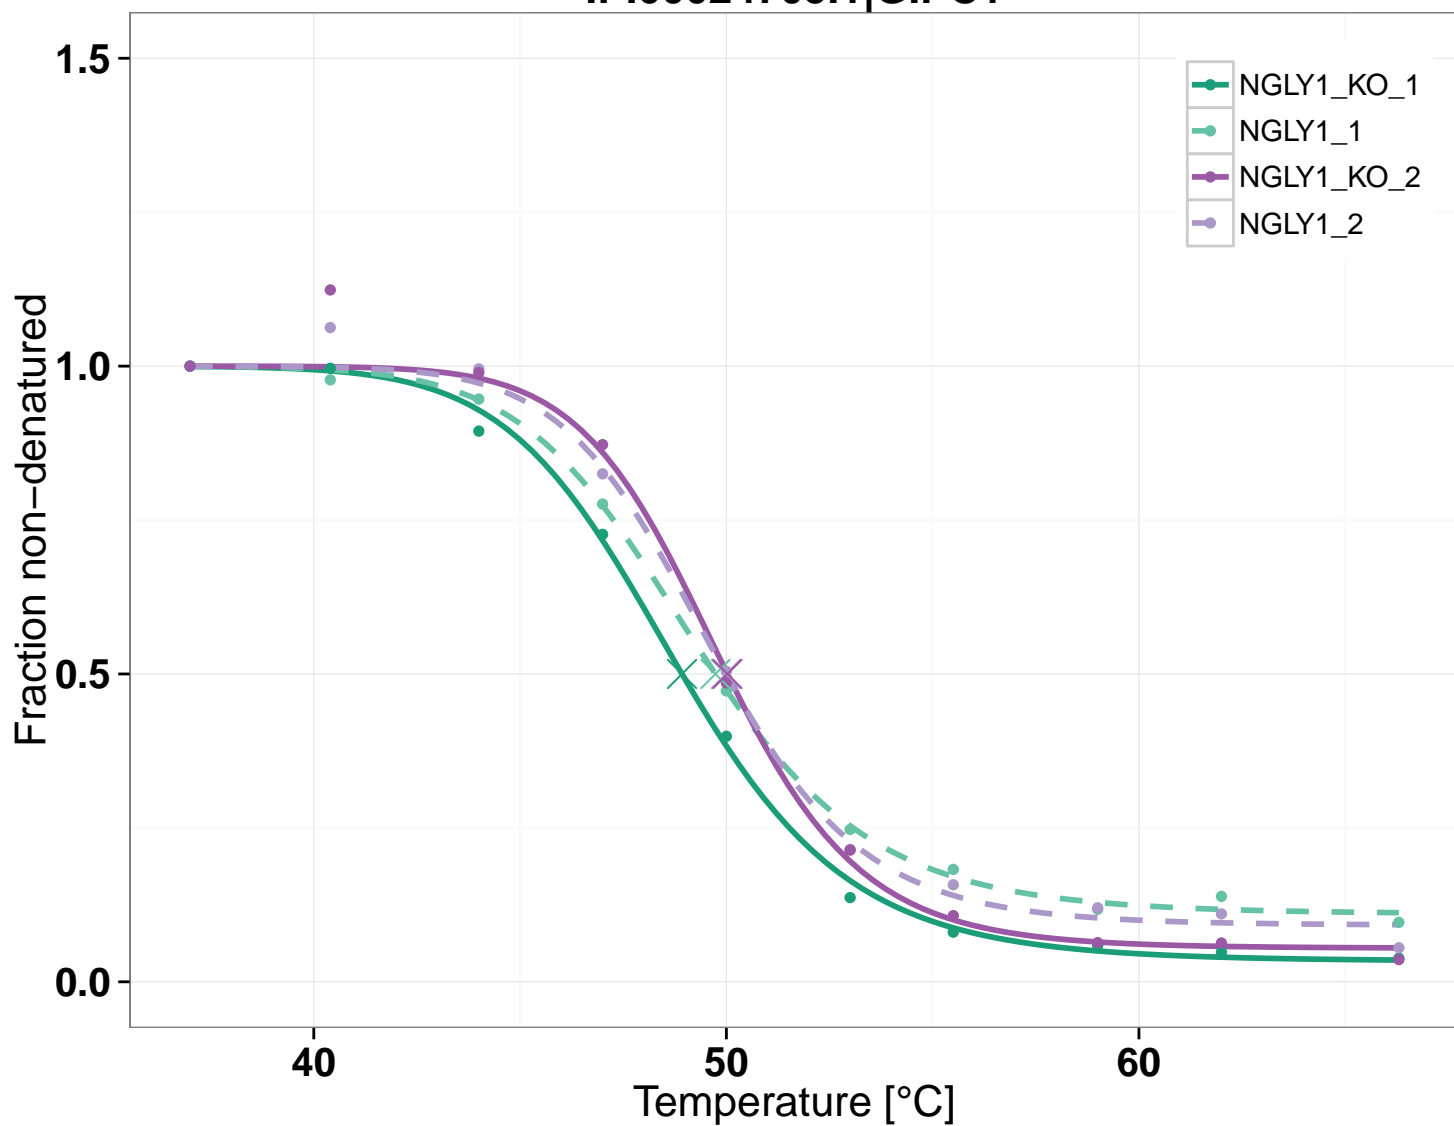

|            | meltPoint | slope | plateau | R2   |
|------------|-----------|-------|---------|------|
| NGLY1_KO_1 | 48.93     | -0.12 | 0.03    | 1    |
| NGLY1_1    | 49.73     | -0.1  | 0.11    | 1    |
| NGLY1_KO_2 | 50.03     | -0.14 | 0.05    | 0.99 |
| NGLY1_2    | 49.99     | -0.12 | 0.09    | 1    |

Supplement: Supplementary file 370 [file 1]

# IPI00375505.3|ZEB1

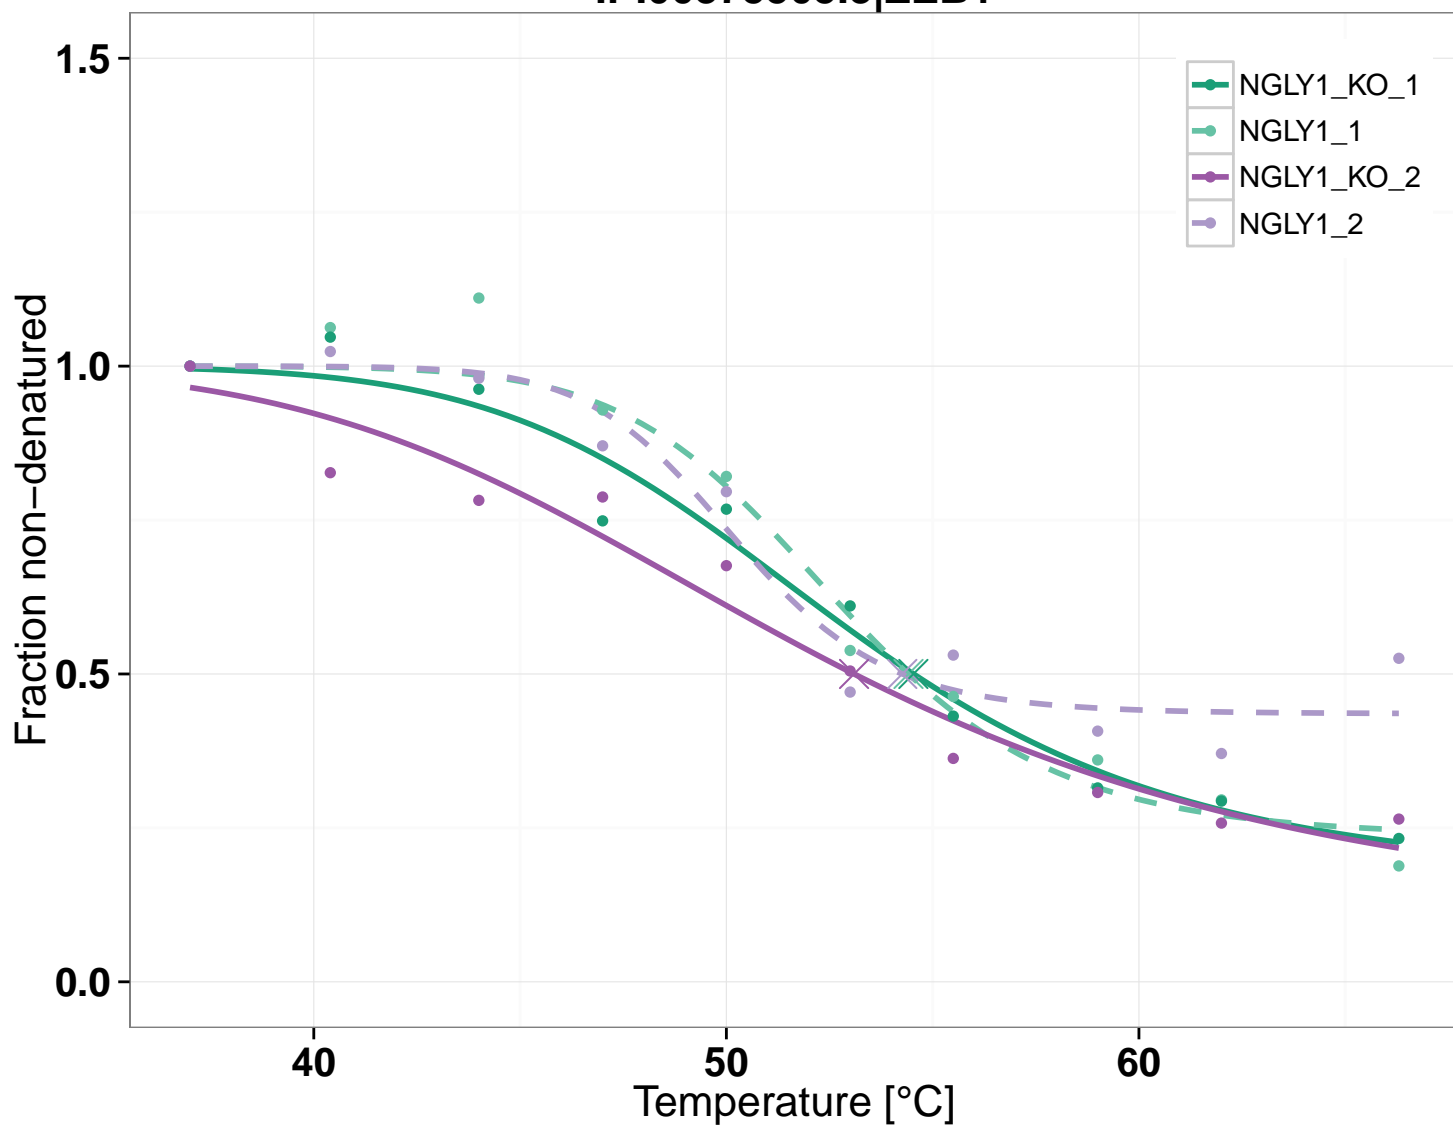

|            | meltPoint | slope  | plateau | R2   |
|------------|-----------|--------|---------|------|
| NGLY1_KO_1 | 54.53     | -0.05  | 0.16    | 0.98 |
| NGLY1_1    | 54.41     | -0.073 | 0.23    | 0.97 |
| NGLY1_KO_2 | 53.1      | -0.038 | 0.08    | 0.96 |
| NGLY1_2    | 54.26     | -0.078 | 0.44    | 0.95 |

Supplement: Supplementary file 371 [file 1]

IPI00296535.1|HACL1

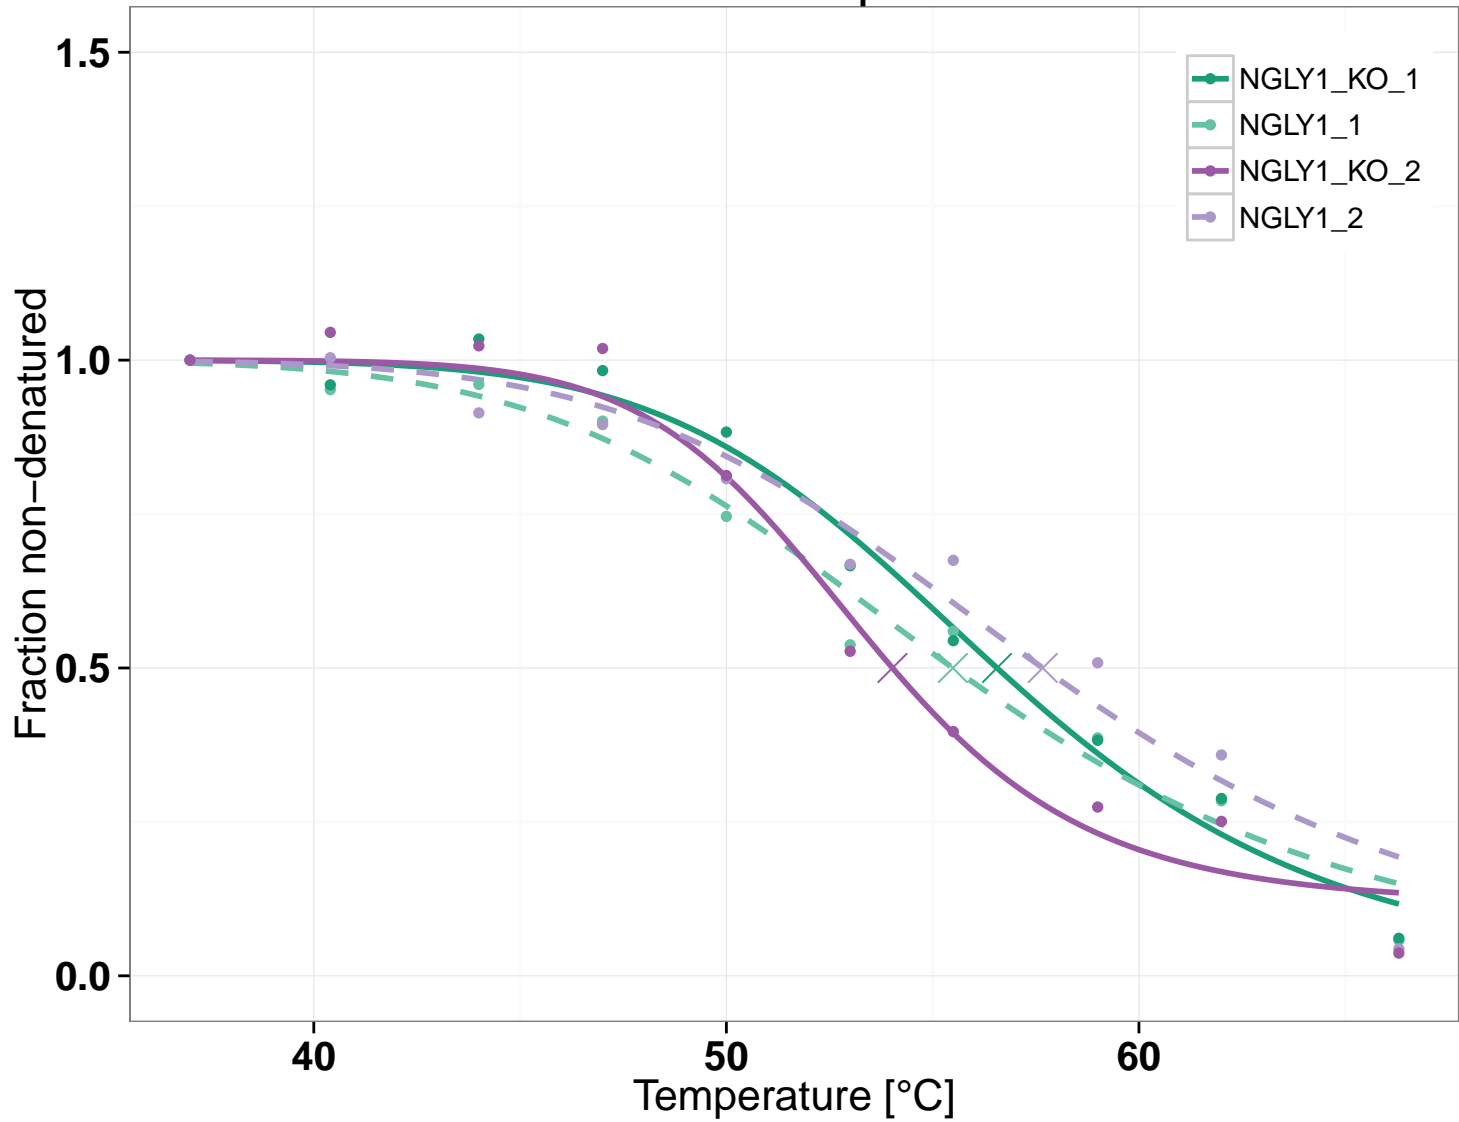

|            | meltPoint | slope  | plateau | R2   |
|------------|-----------|--------|---------|------|
| NGLY1_KO_1 | 56.56     | -0.062 | 0       | 0.99 |
| NGLY1_1    | 55.49     | -0.05  | 0       | 0.97 |
| NGLY1_KO_2 | 54.03     | -0.082 | 0.12    | 0.98 |
| NGLY1_2    | 57.67     | -0.049 | 0       | 0.95 |

Supplement: Supplementary file 372 [file 1]

IPI00047006.6|PIGX

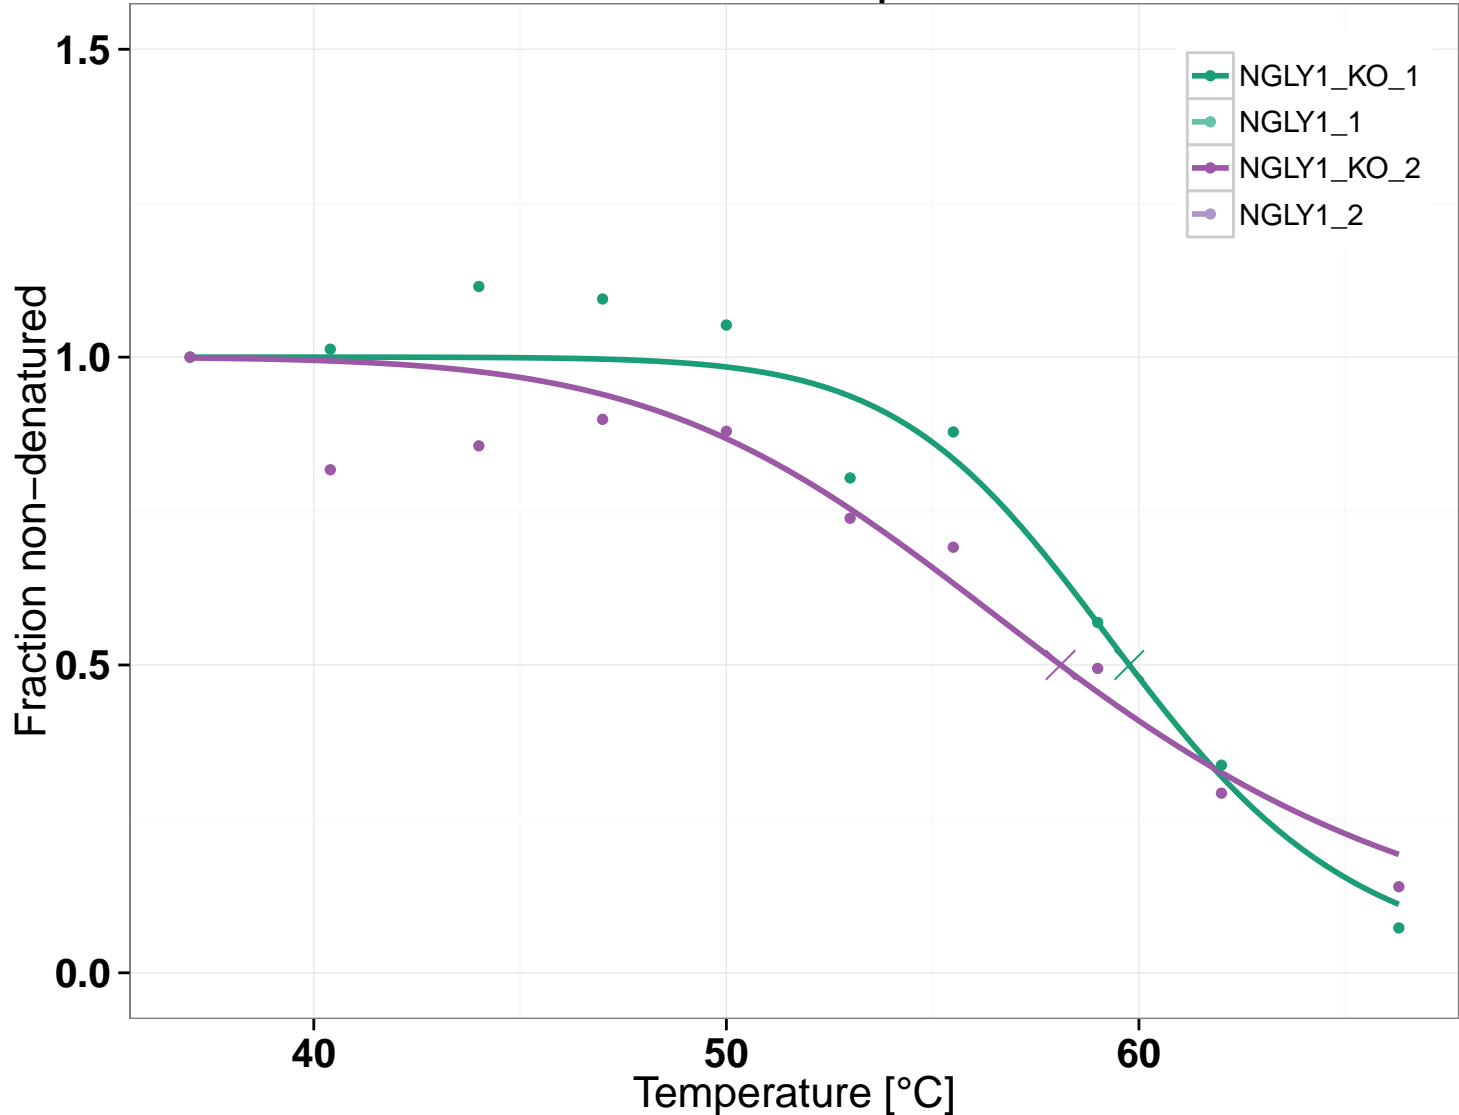

|            | meltPoint | slope  | plateau | R2   |
|------------|-----------|--------|---------|------|
| NGLY1_KO_1 | 59.77     | -0.089 | 0       | 0.96 |
| NGLY1_1    | -         | -      | -       | -    |
| NGLY1_KO_2 | 58.1      | -0.051 | 0       | 0.92 |
| NGLY1_2    | -         | -      | -       | -    |

Supplement: Supplementary file 373 [file 1]

# IPI00056507.5|FBXW5

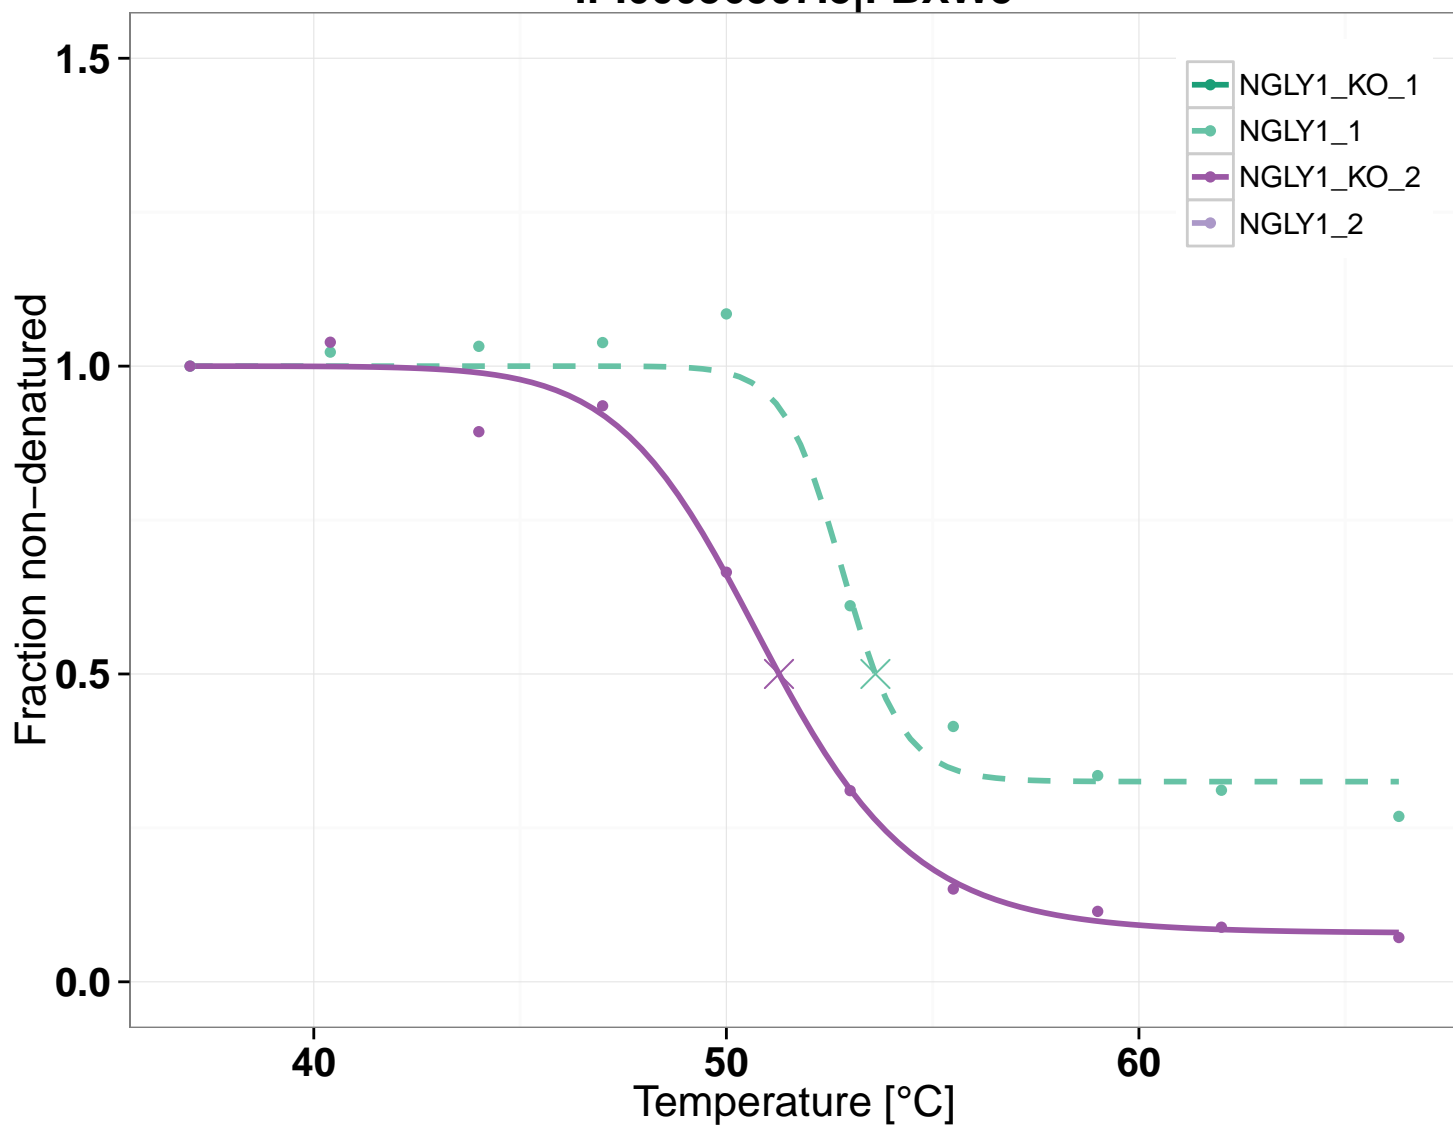

|            | meltPoint | slope | plateau | R2   |
|------------|-----------|-------|---------|------|
| NGLY1_KO_1 | —         | —     | —       | —    |
| NGLY1_1    | 53.61     | -0.23 | 0.33    | 0.98 |
| NGLY1_KO_2 | 51.28     | -0.13 | 0.08    | 0.99 |
| NGLY1_2    | —         | —     | —       | —    |

Supplement: Supplementary file 374 [file 1]

# IPI00007947.1|POLR3G

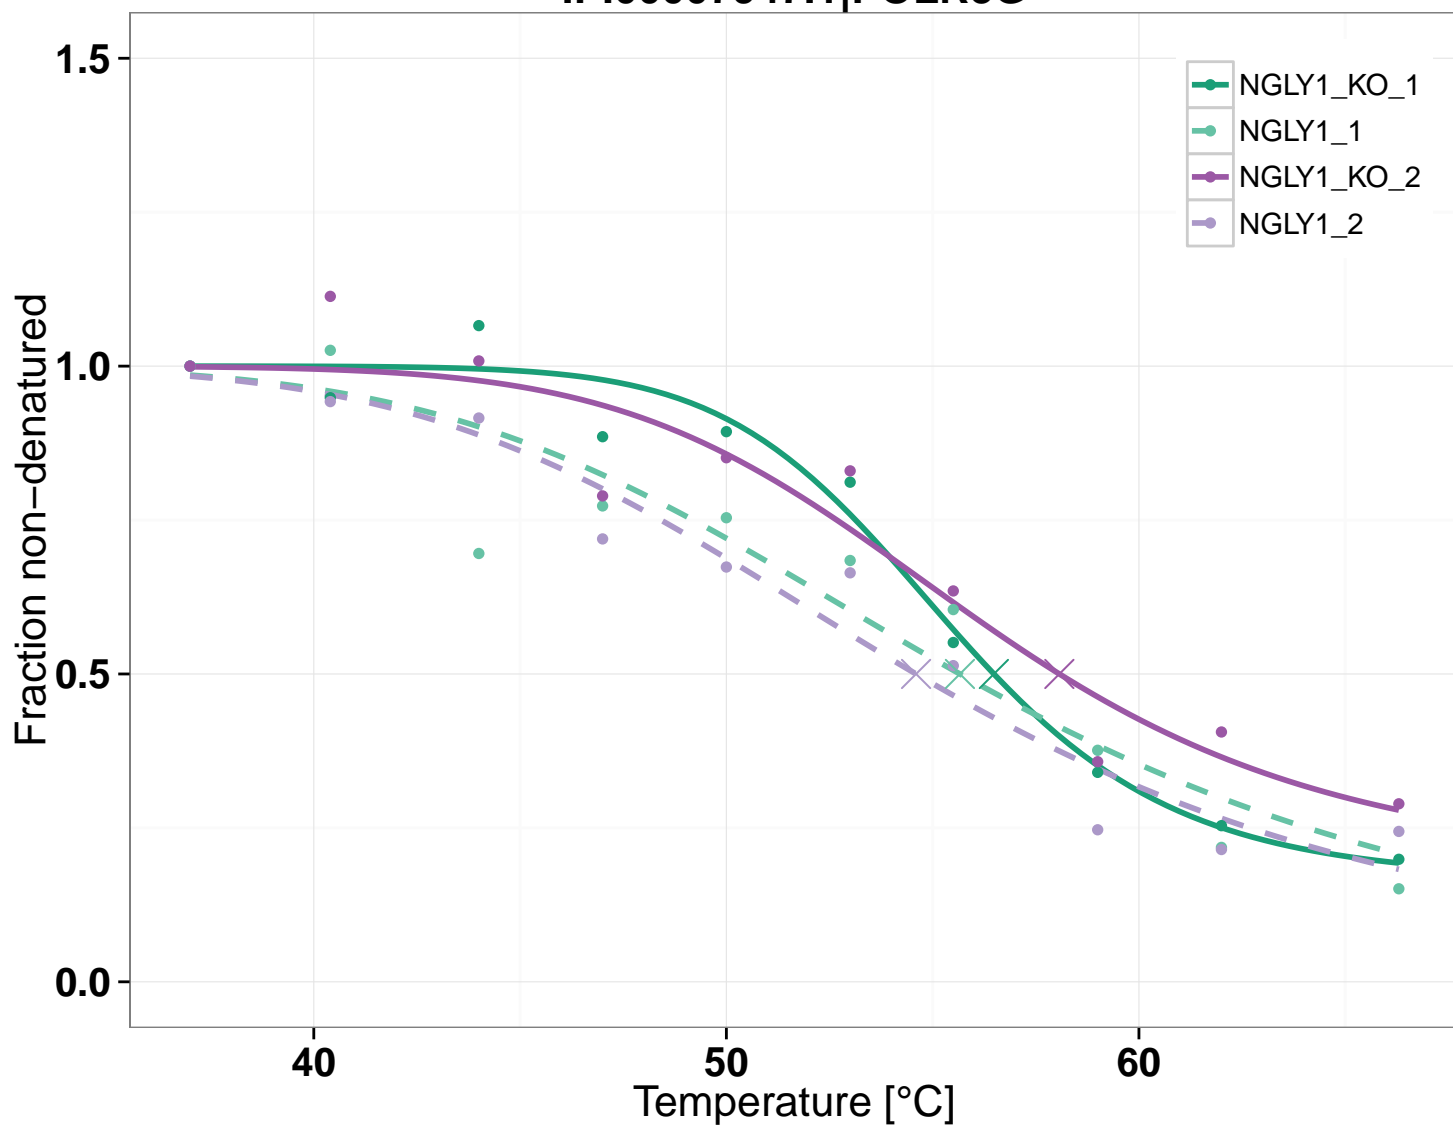

|            | meltPoint | slope  | plateau | R2   |
|------------|-----------|--------|---------|------|
| NGLY1_KO_1 | 56.48     | -0.077 | 0.16    | 0.98 |
| NGLY1_1    | 55.66     | -0.04  | 0       | 0.9  |
| NGLY1_KO_2 | 58.07     | -0.048 | 0.18    | 0.92 |
| NGLY1_2    | 54.6      | -0.041 | 0.01    | 0.95 |

Supplement: Supplementary file 375 [file 1]

IPI00856049.1|RPL22L1

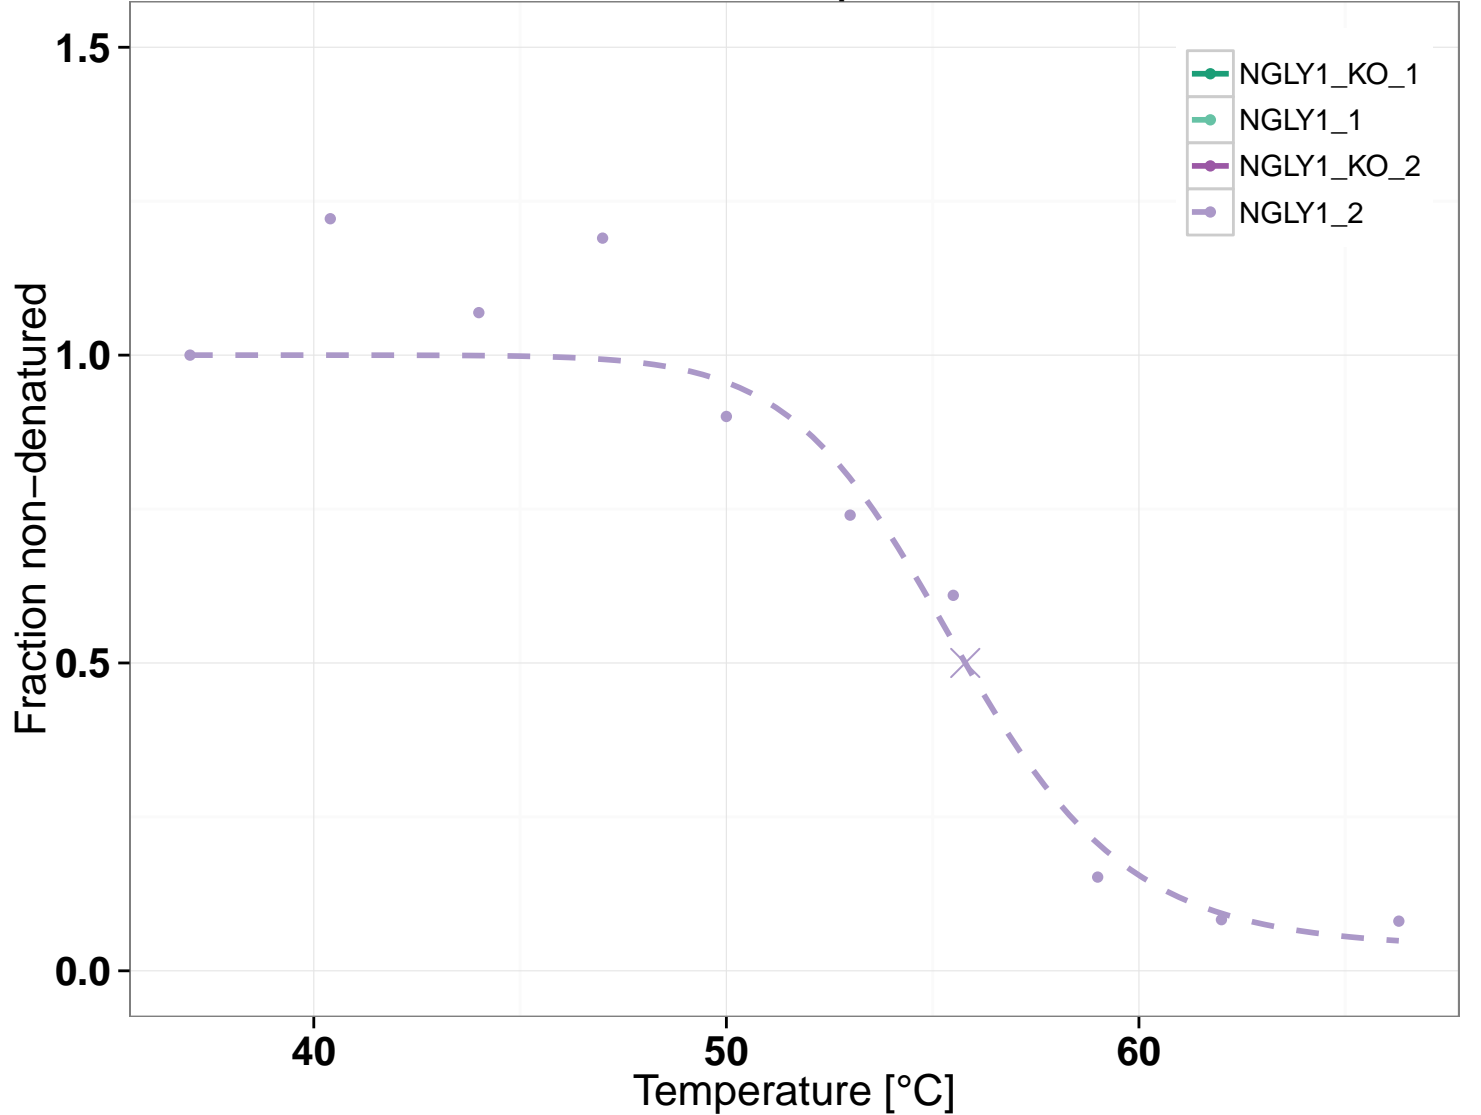

|            | meltPoint | slope | plateau | R2   |
|------------|-----------|-------|---------|------|
| NGLY1_KO_1 | -         | -     | -       | -    |
| NGLY1_1    | -         | -     | -       | -    |
| NGLY1_KO_2 | -         | -     | -       | -    |
| NGLY1_2    | 55.79     | -0.12 | 0.04    | 0.94 |

Supplement: Supplementary file 376 [file 1]

IPI00852643.2|KIAA1109

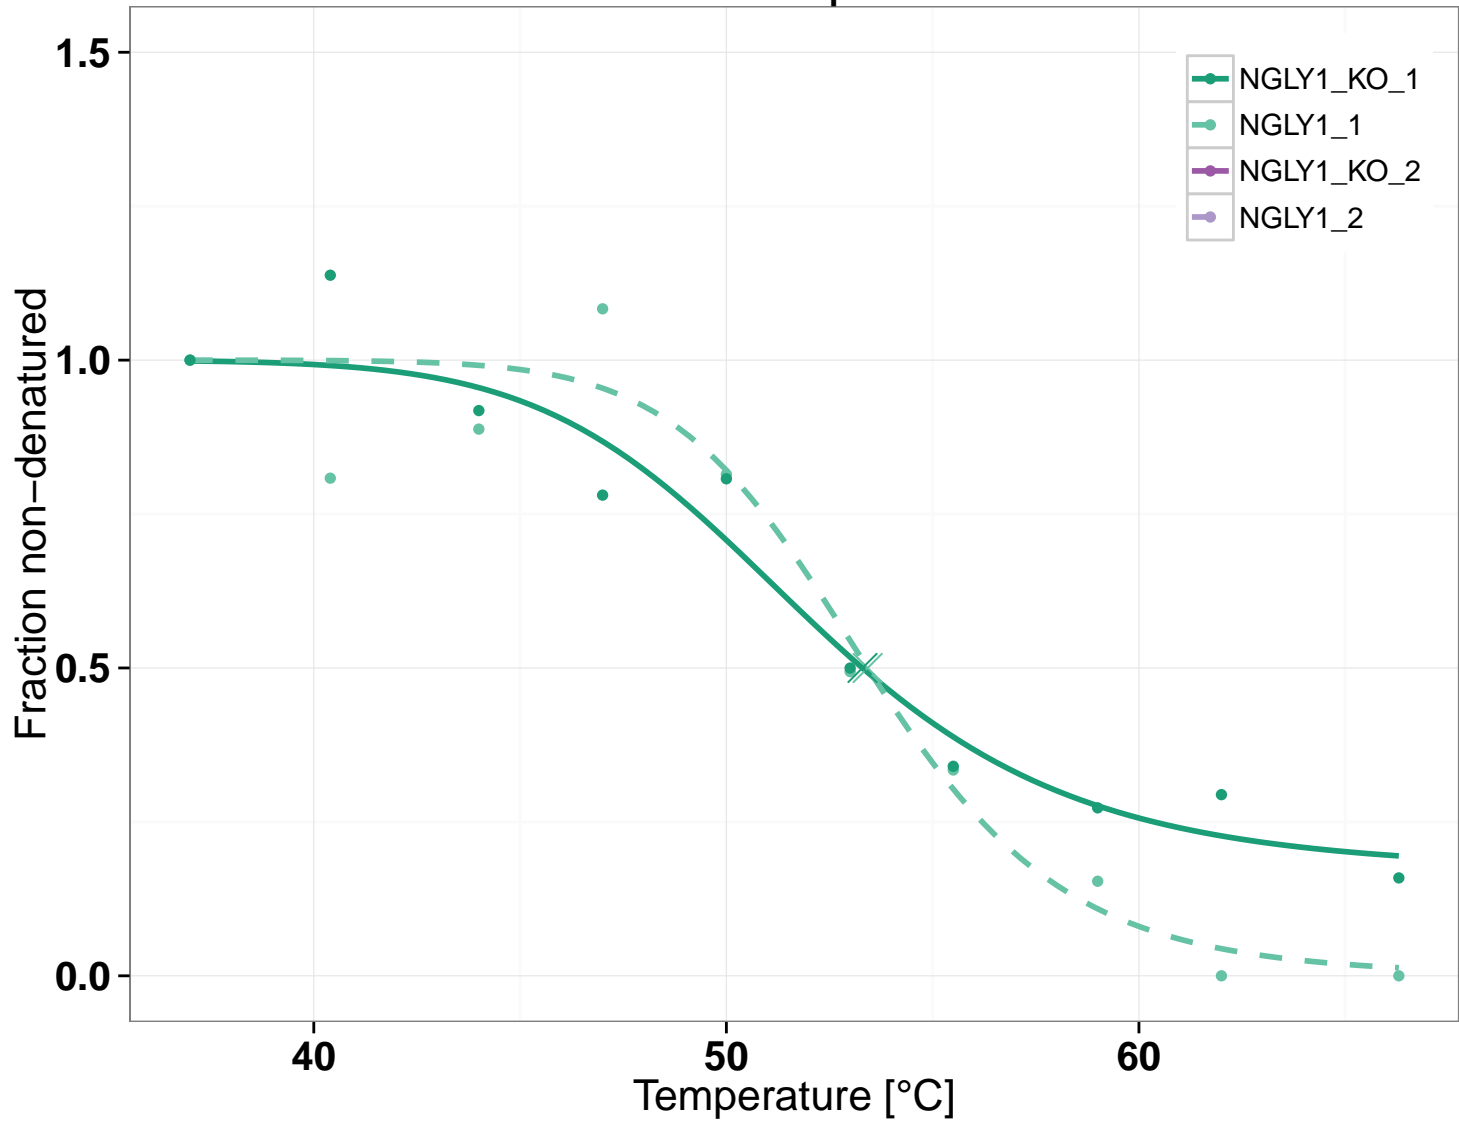

|            | meltPoint | slope  | plateau | R2   |
|------------|-----------|--------|---------|------|
| NGLY1_KO_1 | 53.3      | -0.065 | 0.17    | 0.96 |
| NGLY1_1    | 53.42     | -0.1   | 0       | 0.95 |
| NGLY1_KO_2 | -         | -      | -       | -    |
| NGLY1_2    | -         | -      | -       | -    |

Supplement: Supplementary file 377 [file 1]

IPI00249529.4|CEP78

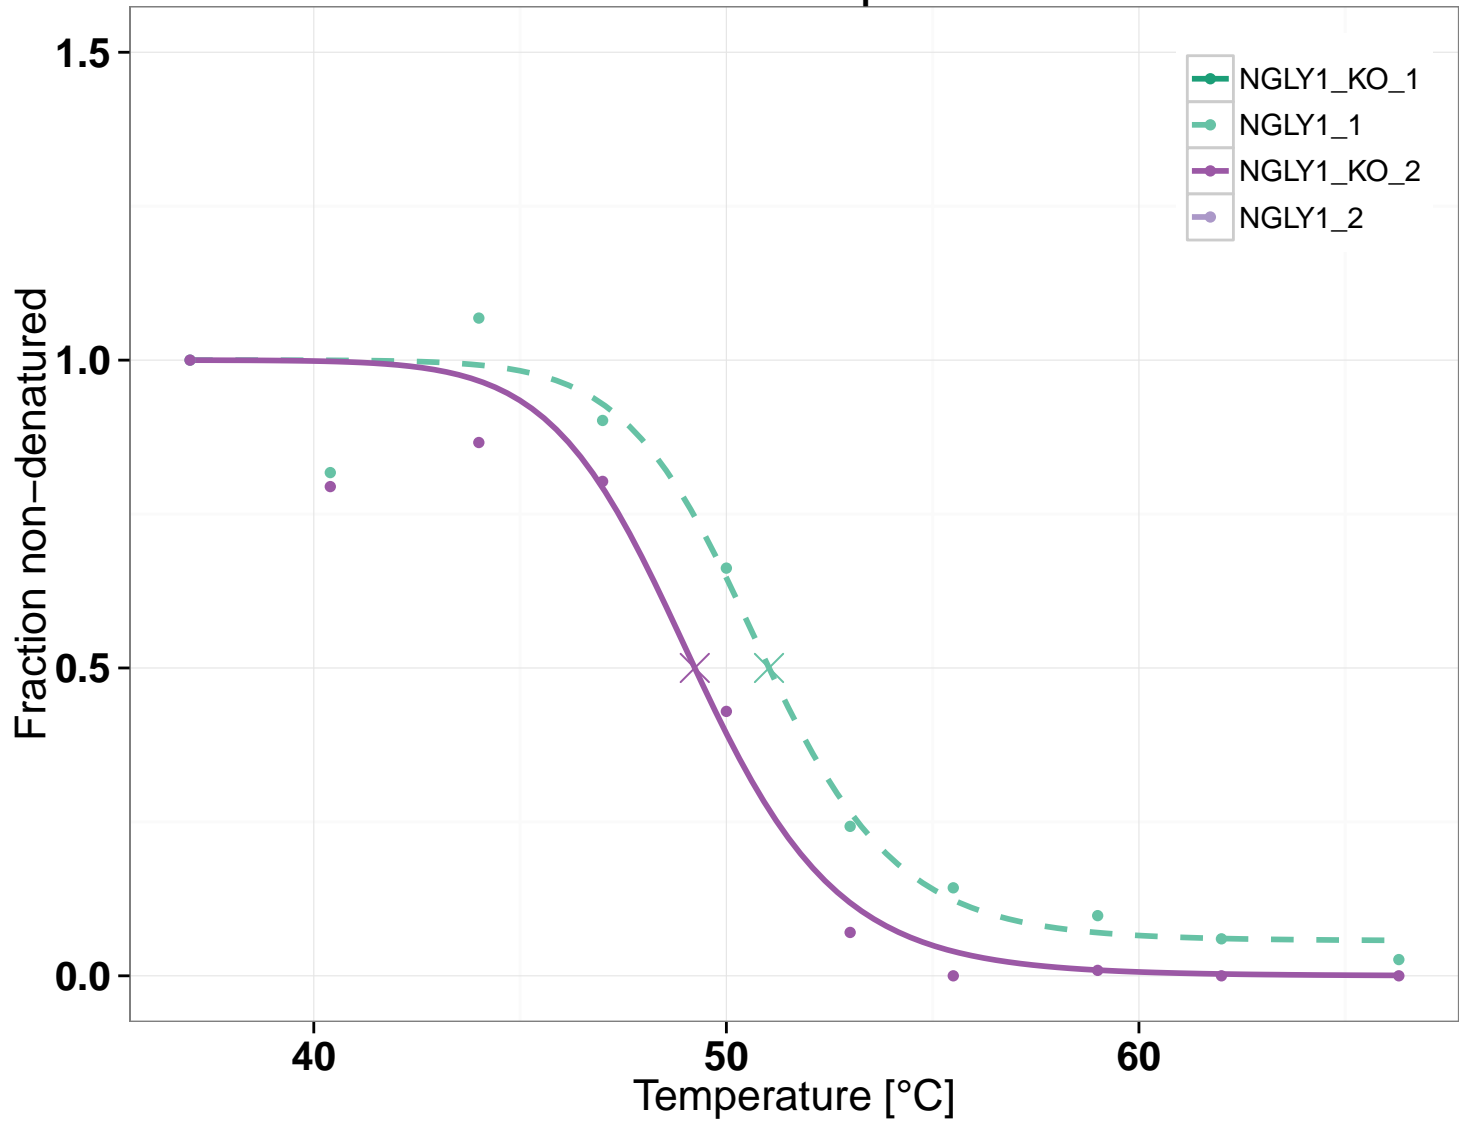

|            | meltPoint | slope | plateau | R2   |
|------------|-----------|-------|---------|------|
| NGLY1_KO_1 | -         | -     | -       | -    |
| NGLY1_1    | 51.03     | -0.14 | 0.06    | 0.97 |
| NGLY1_KO_2 | 49.23     | -0.14 | 0       | 0.97 |
| NGLY1_2    | -         | -     | -       | -    |

Supplement: Supplementary file 378 [file 1]

IPI00396190.2|BTBD9

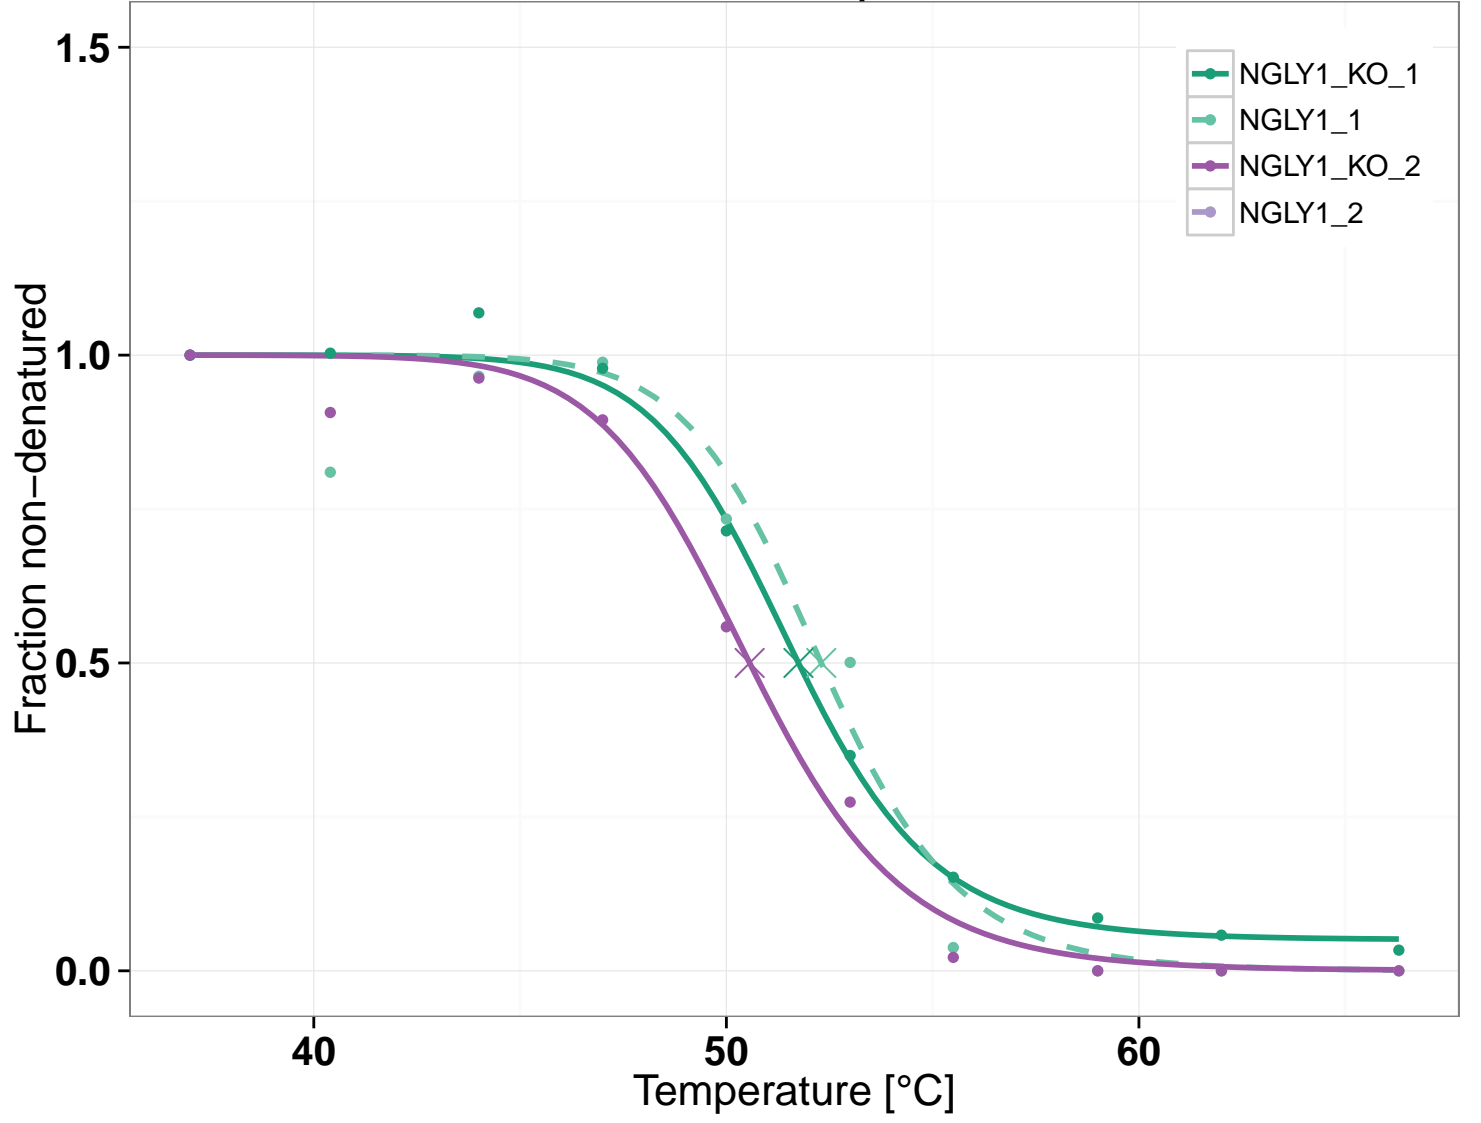

|            | meltPoint | slope | plateau | R2   |
|------------|-----------|-------|---------|------|
| NGLY1_KO_1 | 51.75     | -0.14 | 0.05    | 1    |
| NGLY1_1    | 52.3      | -0.15 | 0       | 0.96 |
| NGLY1_KO_2 | 50.56     | -0.13 | 0       | 0.99 |
| NGLY1_2    | -         | -     | -       | -    |

Supplement: Supplementary file 379 [file 1]

IPI00006471.3|MELK

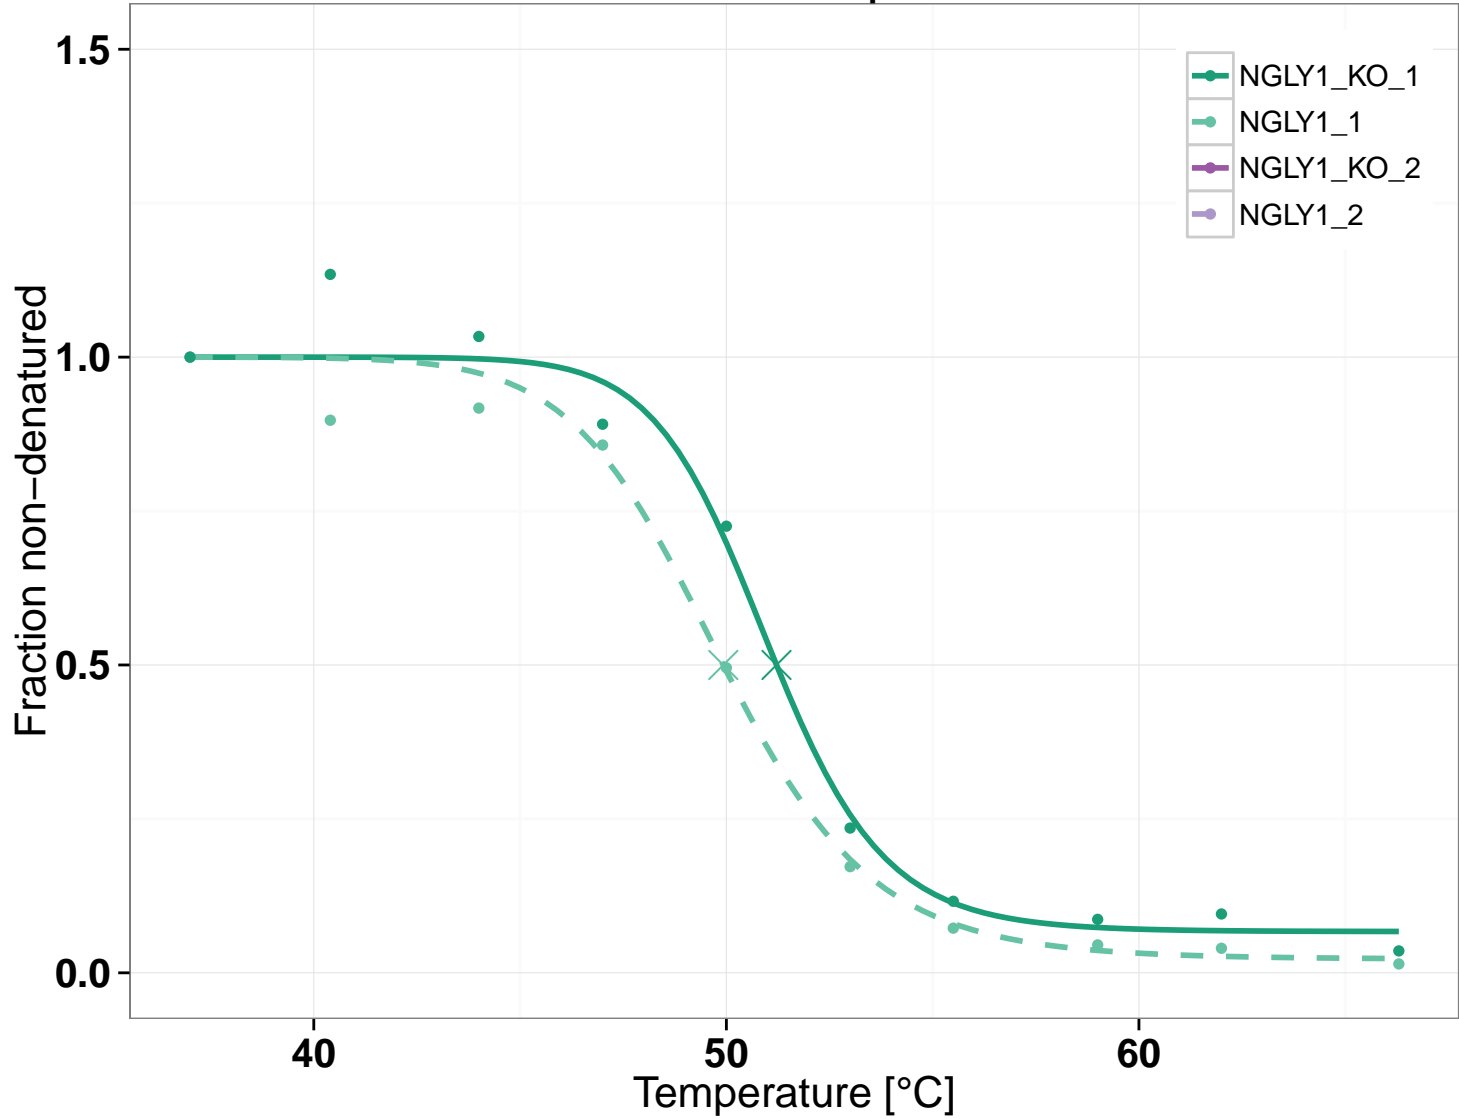

|            | meltPoint | slope | plateau | R2   |
|------------|-----------|-------|---------|------|
| NGLY1_KO_1 | 51.22     | -0.17 | 0.07    | 0.99 |
| NGLY1_1    | 49.93     | -0.13 | 0.02    | 0.99 |
| NGLY1_KO_2 | -         | -     | -       | -    |
| NGLY1_2    | -         | -     | -       | -    |

Supplement: Supplementary file 380 [file 1]

# IPI00000425.2|ATP6V0A2

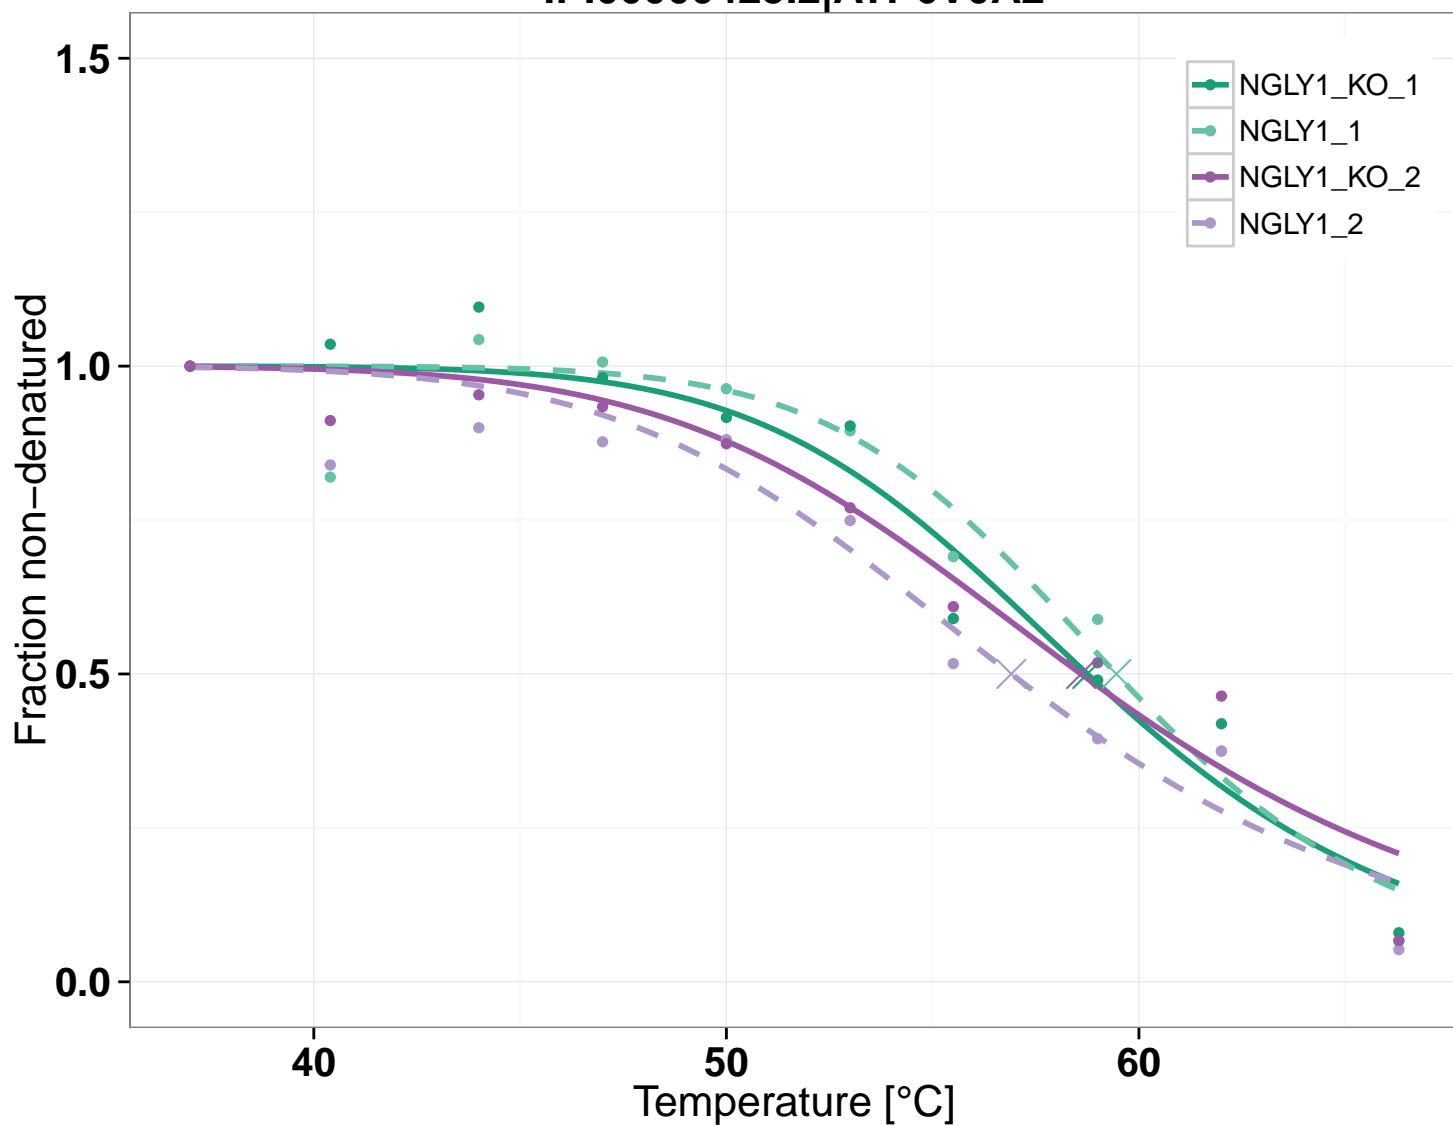

|            | meltPoint | slope  | plateau | R2   |
|------------|-----------|--------|---------|------|
| NGLY1_KO_1 | 58.75     | -0.063 | 0       | 0.95 |
| NGLY1_1    | 59.45     | -0.072 | 0       | 0.94 |
| NGLY1_KO_2 | 58.6      | -0.05  | 0       | 0.94 |
| NGLY1_2    | 56.91     | -0.053 | 0       | 0.93 |

Supplement: Supplementary file 381 [file 1]

# IPI00030511.4|WDR85

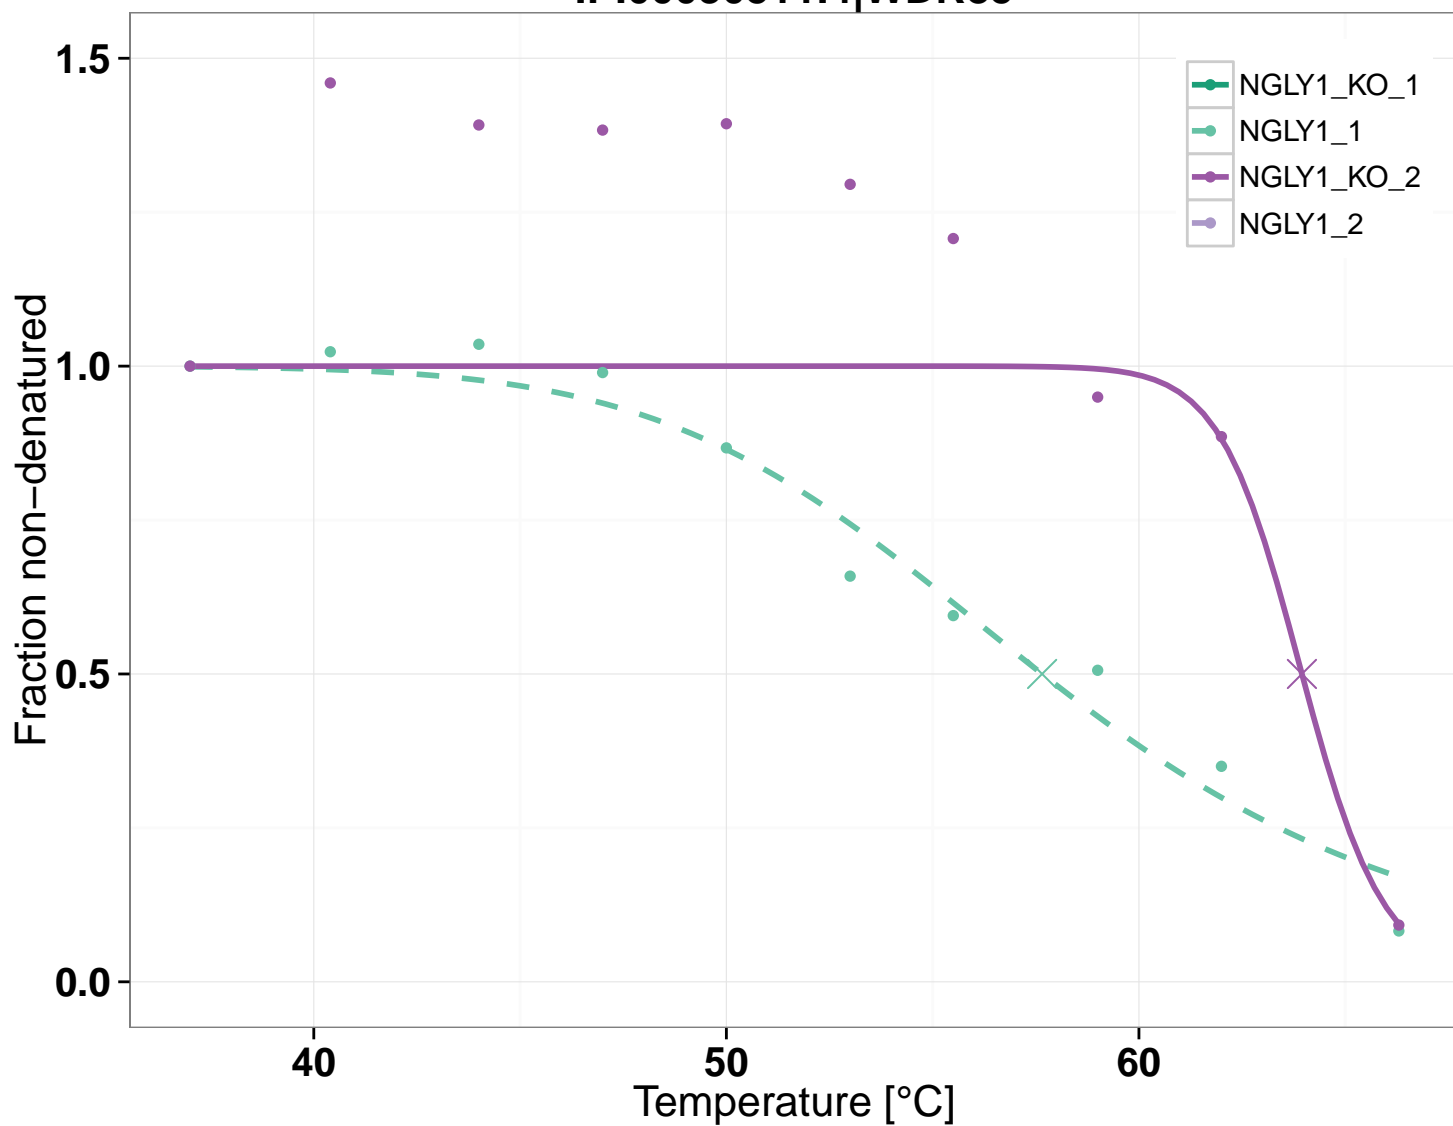

|            | meltPoint | slope  | plateau | R2   |
|------------|-----------|--------|---------|------|
| NGLY1_KO_1 | -         | -      | -       | -    |
| NGLY1_1    | 57.65     | -0.054 | 0       | 0.97 |
| NGLY1_KO_2 | 63.95     | -0.25  | 0       | 0.48 |
| NGLY1_2    | -         | -      | -       | -    |

Supplement: Supplementary file 382 [file 1]

# IPI00031563.4|DDA1

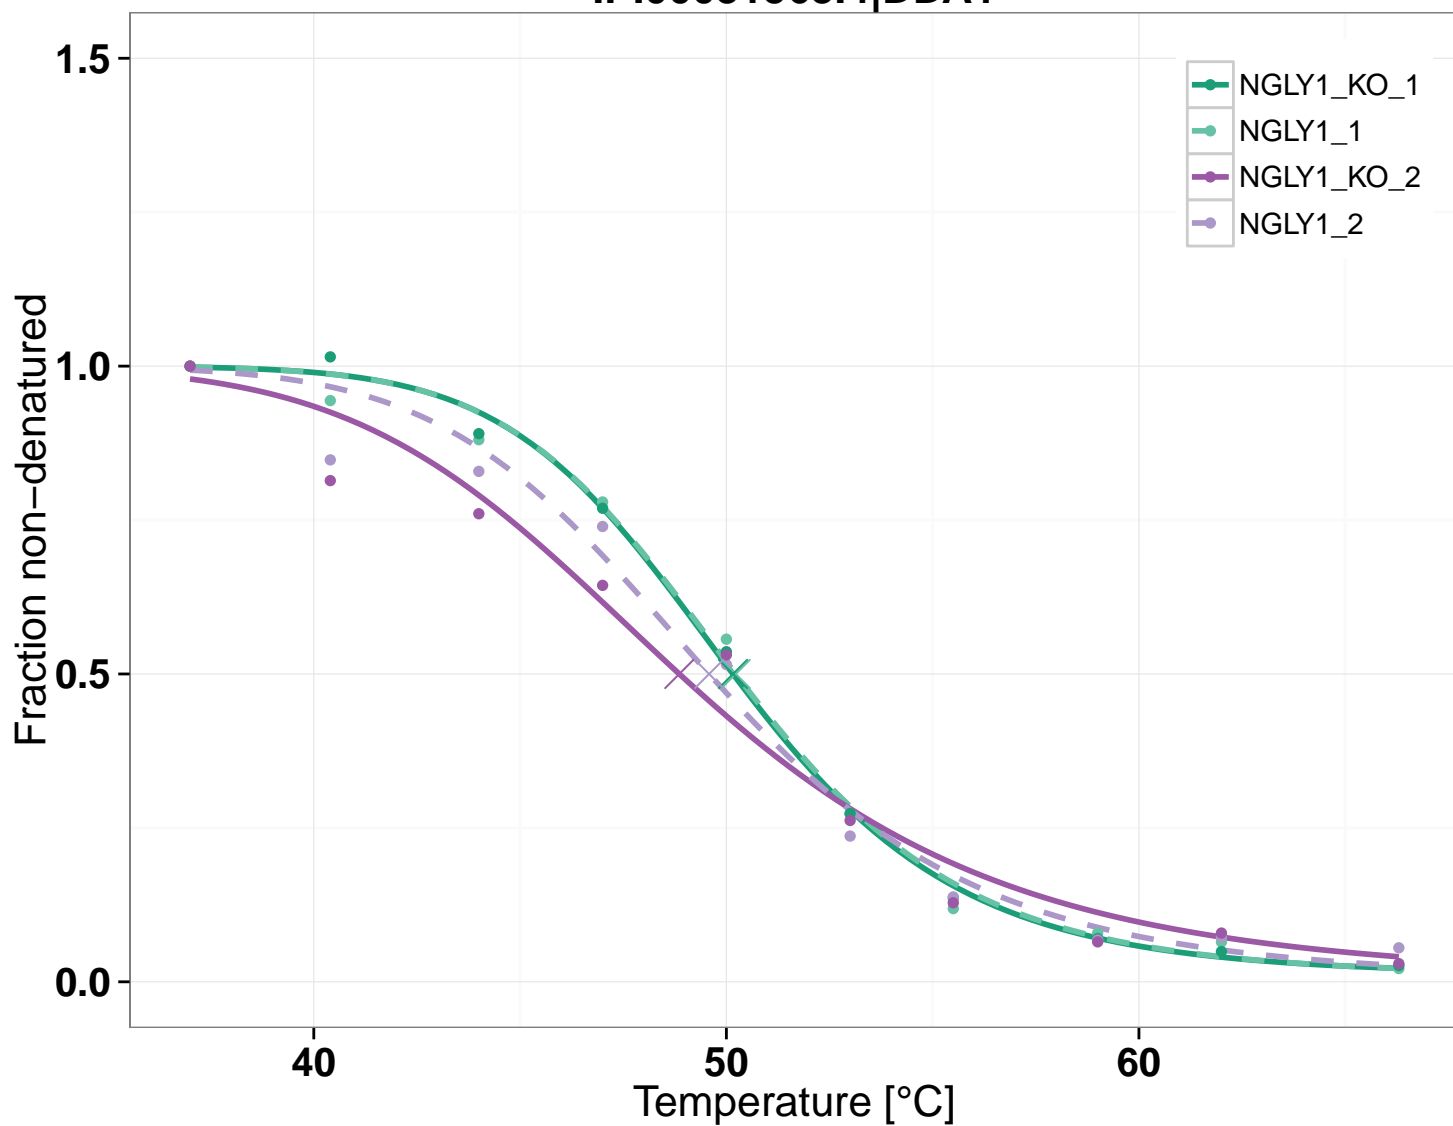

|            | meltPoint | slope  | plateau | R2   |
|------------|-----------|--------|---------|------|
| NGLY1_KO_1 | 50.16     | -0.09  | 0.01    | 1    |
| NGLY1_1    | 50.23     | -0.089 | 0.01    | 0.99 |
| NGLY1_KO_2 | 48.86     | -0.063 | 0       | 0.97 |
| NGLY1_2    | 49.58     | -0.076 | 0       | 0.98 |

Supplement: Supplementary file 383 [file 1]

IPI00827614.1|LONRF2

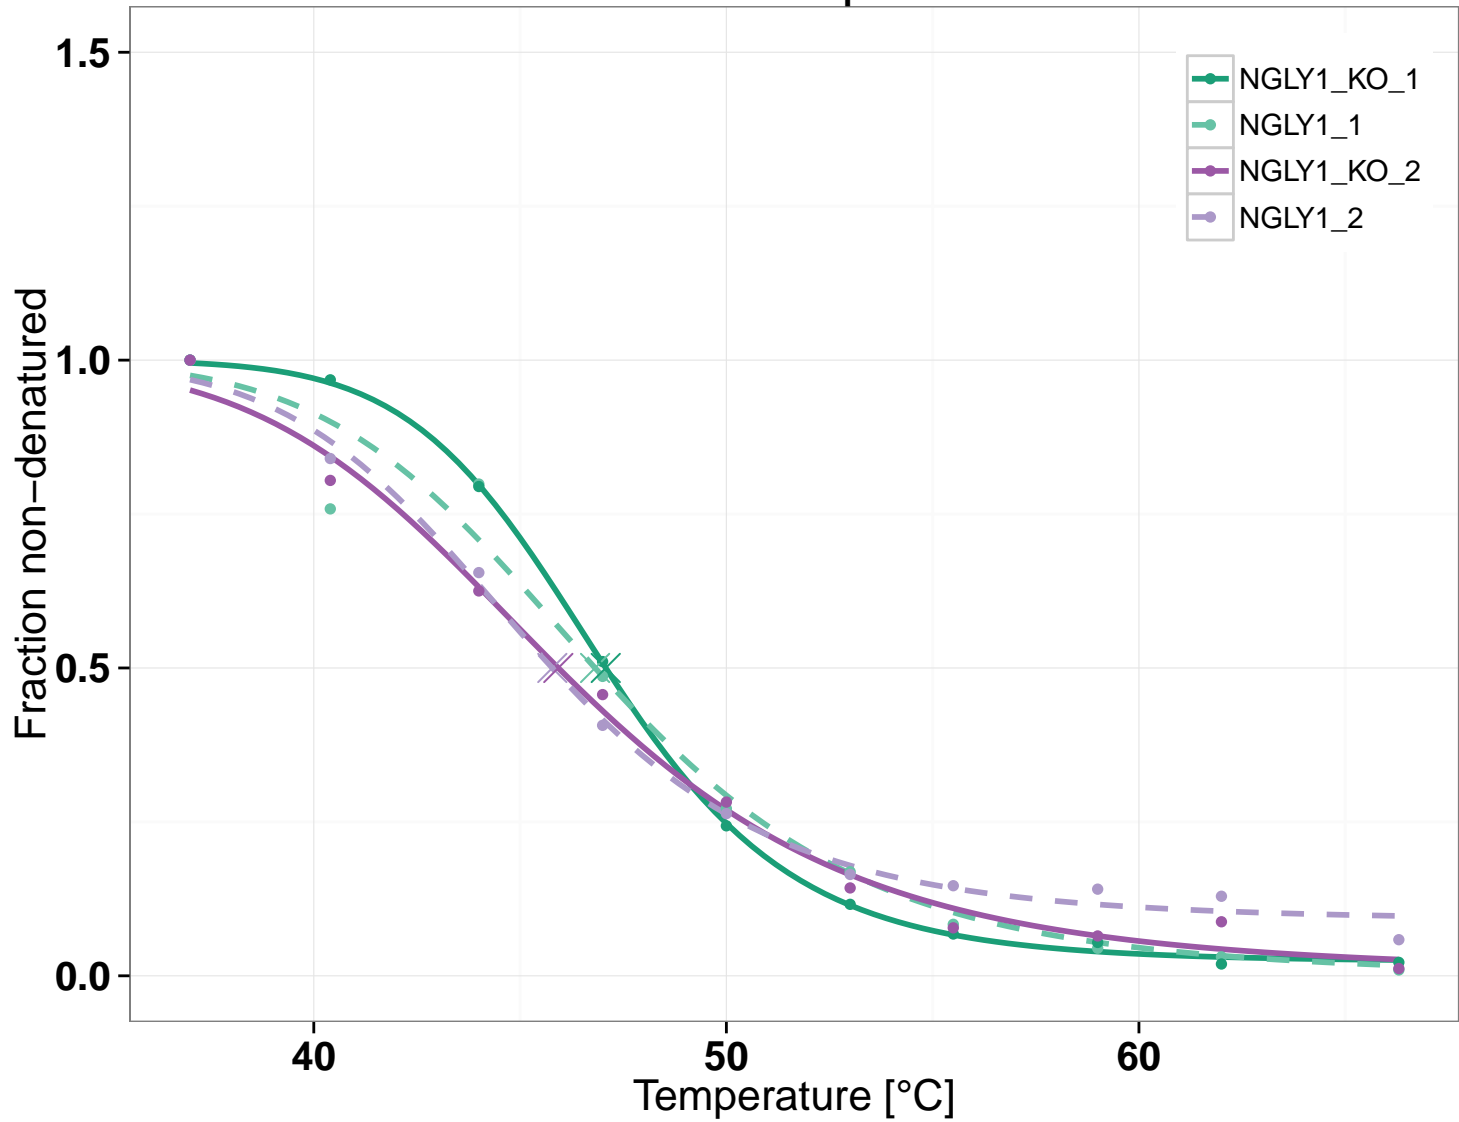

|            | meltPoint | slope  | plateau | R2   |
|------------|-----------|--------|---------|------|
| NGLY1_KO_1 | 47.08     | -0.1   | 0.02    | 1    |
| NGLY1_1    | 46.82     | -0.075 | 0       | 0.98 |
| NGLY1_KO_2 | 45.93     | -0.069 | 0       | 0.99 |
| NGLY1_2    | 45.78     | -0.077 | 0.09    | 0.99 |

Supplement: Supplementary file 384 [file 1]

# IPI00329275.7|VRK2

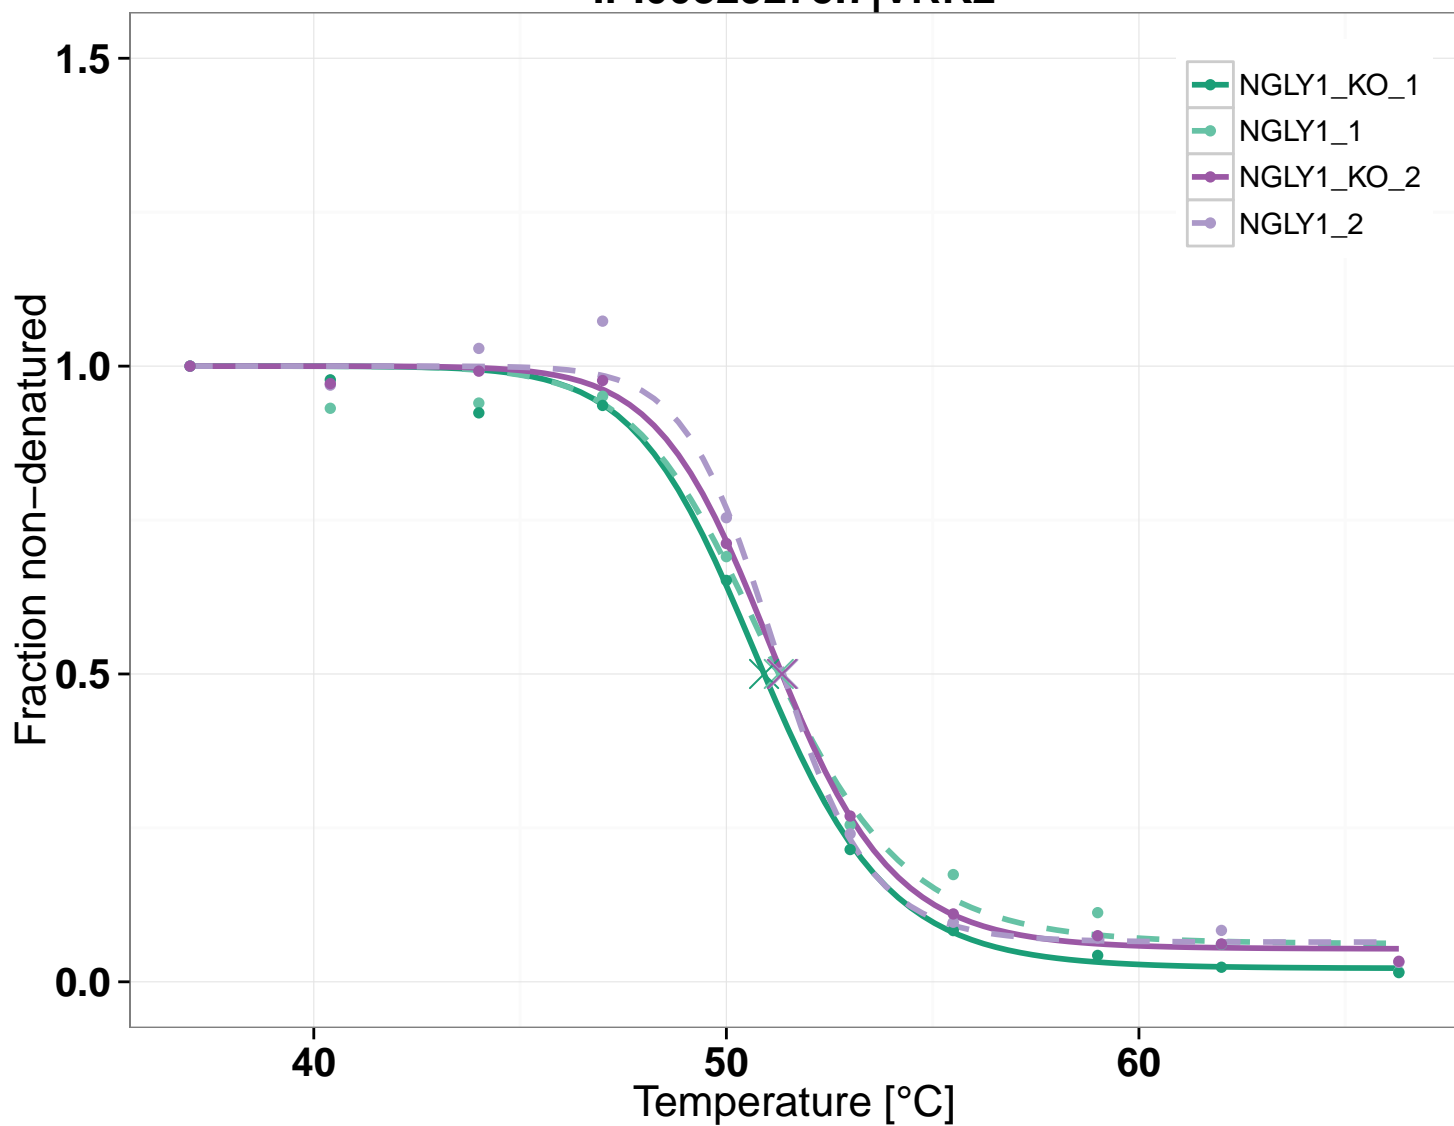

|            | meltPoint | slope | plateau | R2   |
|------------|-----------|-------|---------|------|
| NGLY1_KO_1 | 50.91     | -0.16 | 0.02    | 1    |
| NGLY1_1    | 51.27     | -0.14 | 0.06    | 0.99 |
| NGLY1_KO_2 | 51.35     | -0.17 | 0.05    | 1    |
| NGLY1_2    | 51.38     | -0.21 | 0.06    | 0.99 |

Supplement: Supplementary file 385 [file 1]

IPI00145799.1|FBXL4

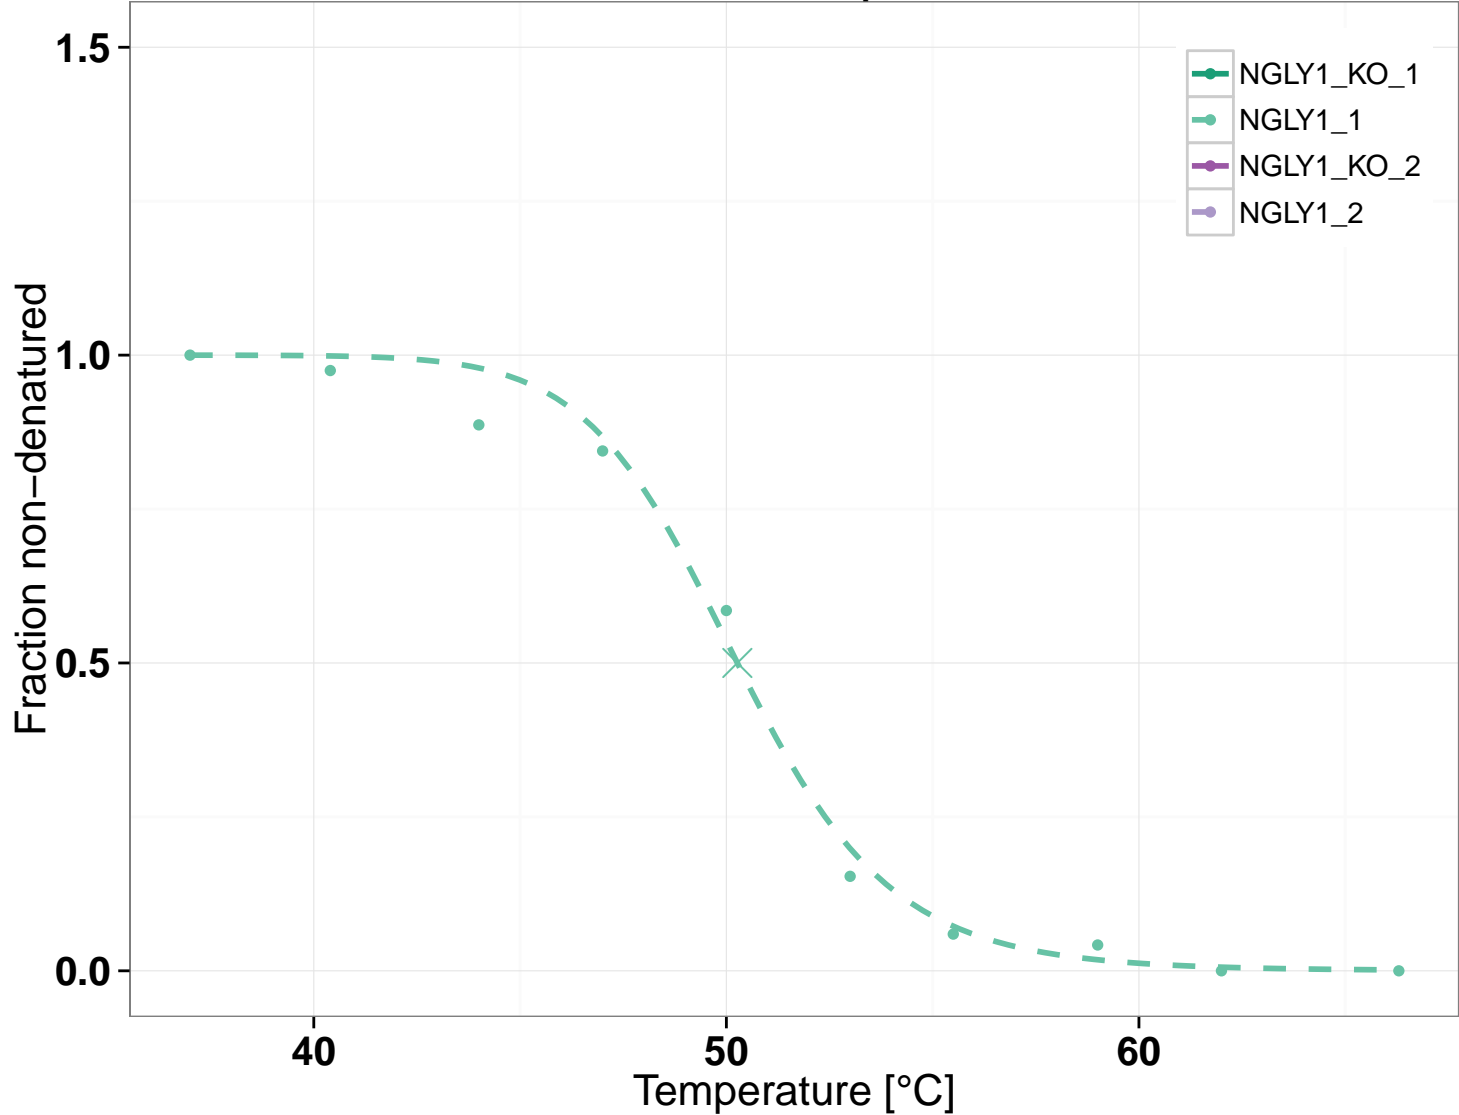

|            | meltPoint | slope | plateau | R2   |
|------------|-----------|-------|---------|------|
| NGLY1_KO_1 | -         | -     | -       | -    |
| NGLY1_1    | 50.27     | -0.14 | 0       | 0.99 |
| NGLY1_KO_2 | -         | -     | -       | -    |
| NGLY1_2    | -         | -     | -       | -    |

Supplement: Supplementary file 386 [file 1]

IPI00480103.3|FAM83D

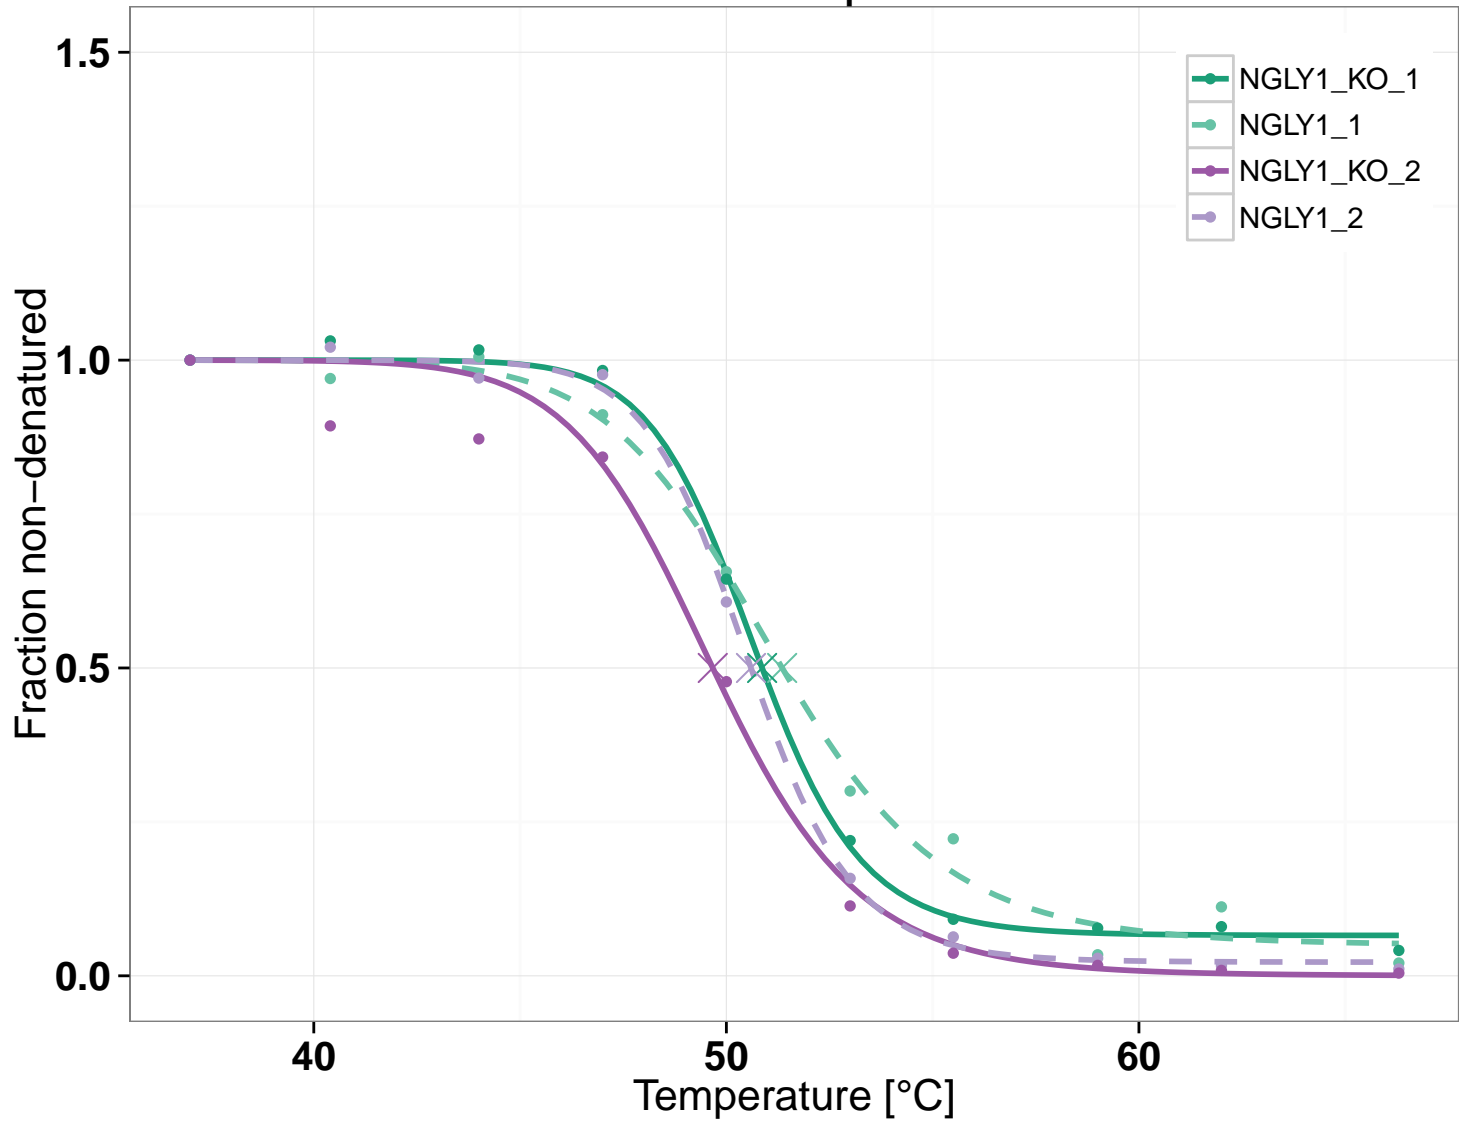

|            | meltPoint | slope | plateau | R2   |
|------------|-----------|-------|---------|------|
| NGLY1_KO_1 | 50.87     | -0.18 | 0.07    | 1    |
| NGLY1_1    | 51.35     | -0.12 | 0.05    | 0.99 |
| NGLY1_KO_2 | 49.67     | -0.14 | 0       | 0.99 |
| NGLY1_2    | 50.6      | -0.19 | 0.02    | 1    |

Supplement: Supplementary file 387 [file 1]

IPI00847689.1|HTATIP2

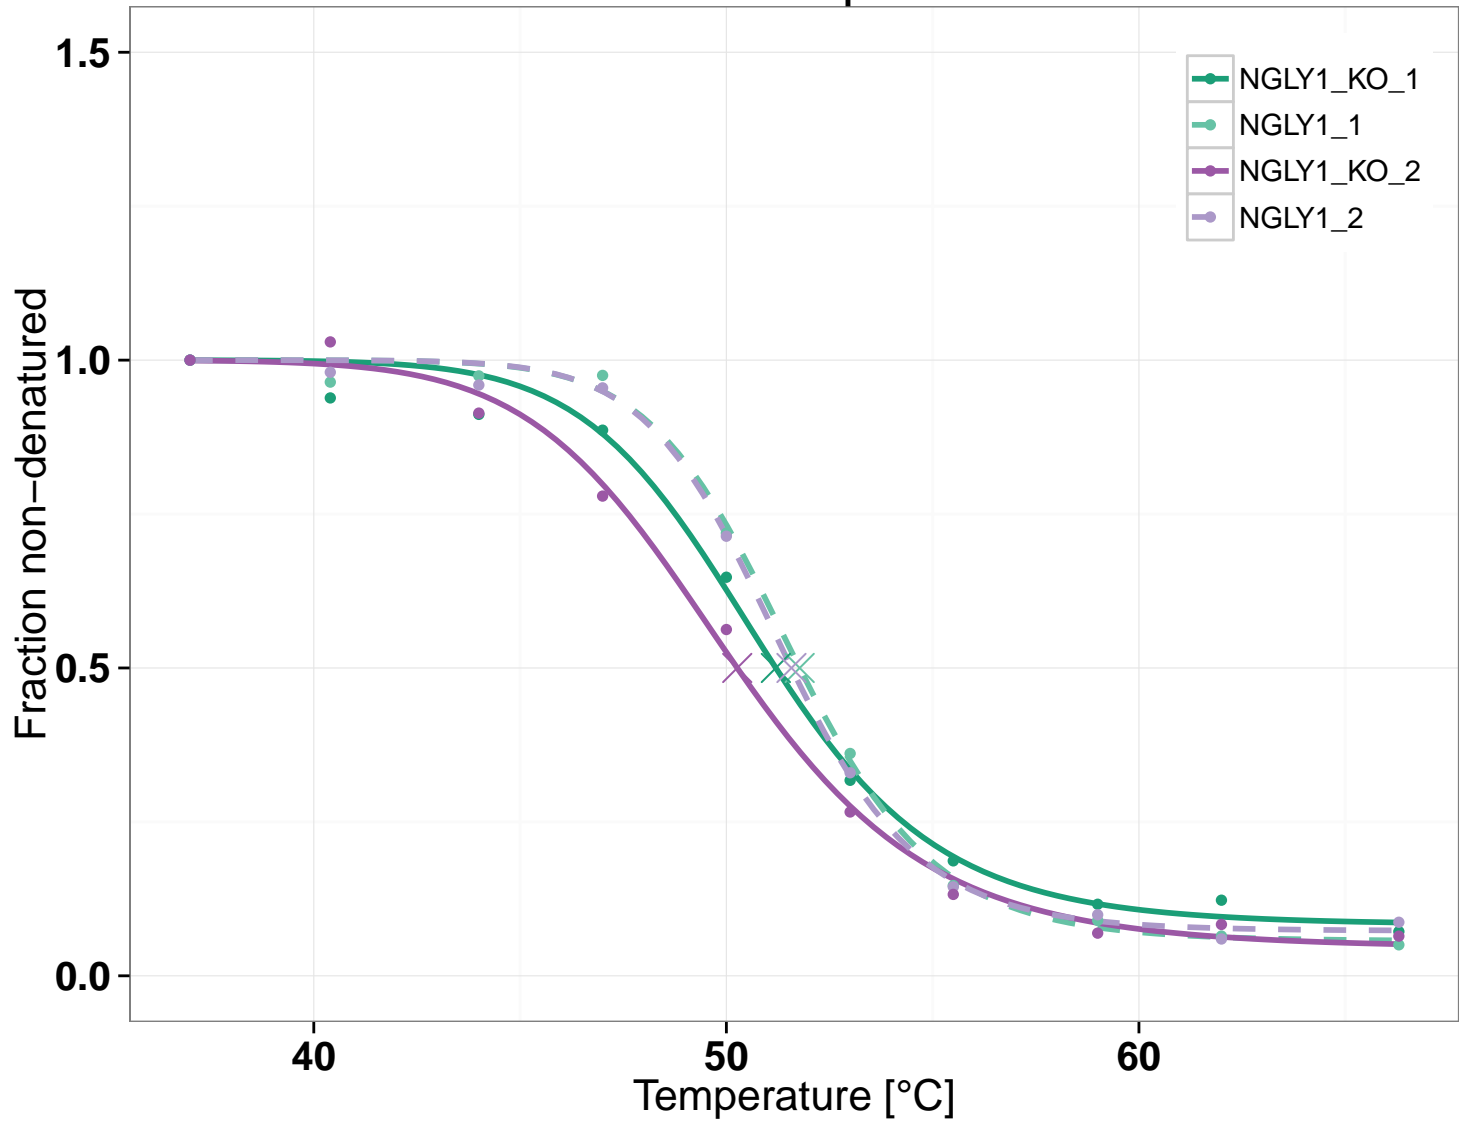

|            | meltPoint | slope  | plateau | R2   |
|------------|-----------|--------|---------|------|
| NGLY1_KO_1 | 51.2      | -0.11  | 0.08    | 0.99 |
| NGLY1_1    | 51.78     | -0.14  | 0.06    | 1    |
| NGLY1_KO_2 | 50.26     | -0.098 | 0.05    | 1    |
| NGLY1_2    | 51.58     | -0.14  | 0.07    | 1    |

Supplement: Supplementary file 388 [file 1]

IPI00000077.1|RNASEH1

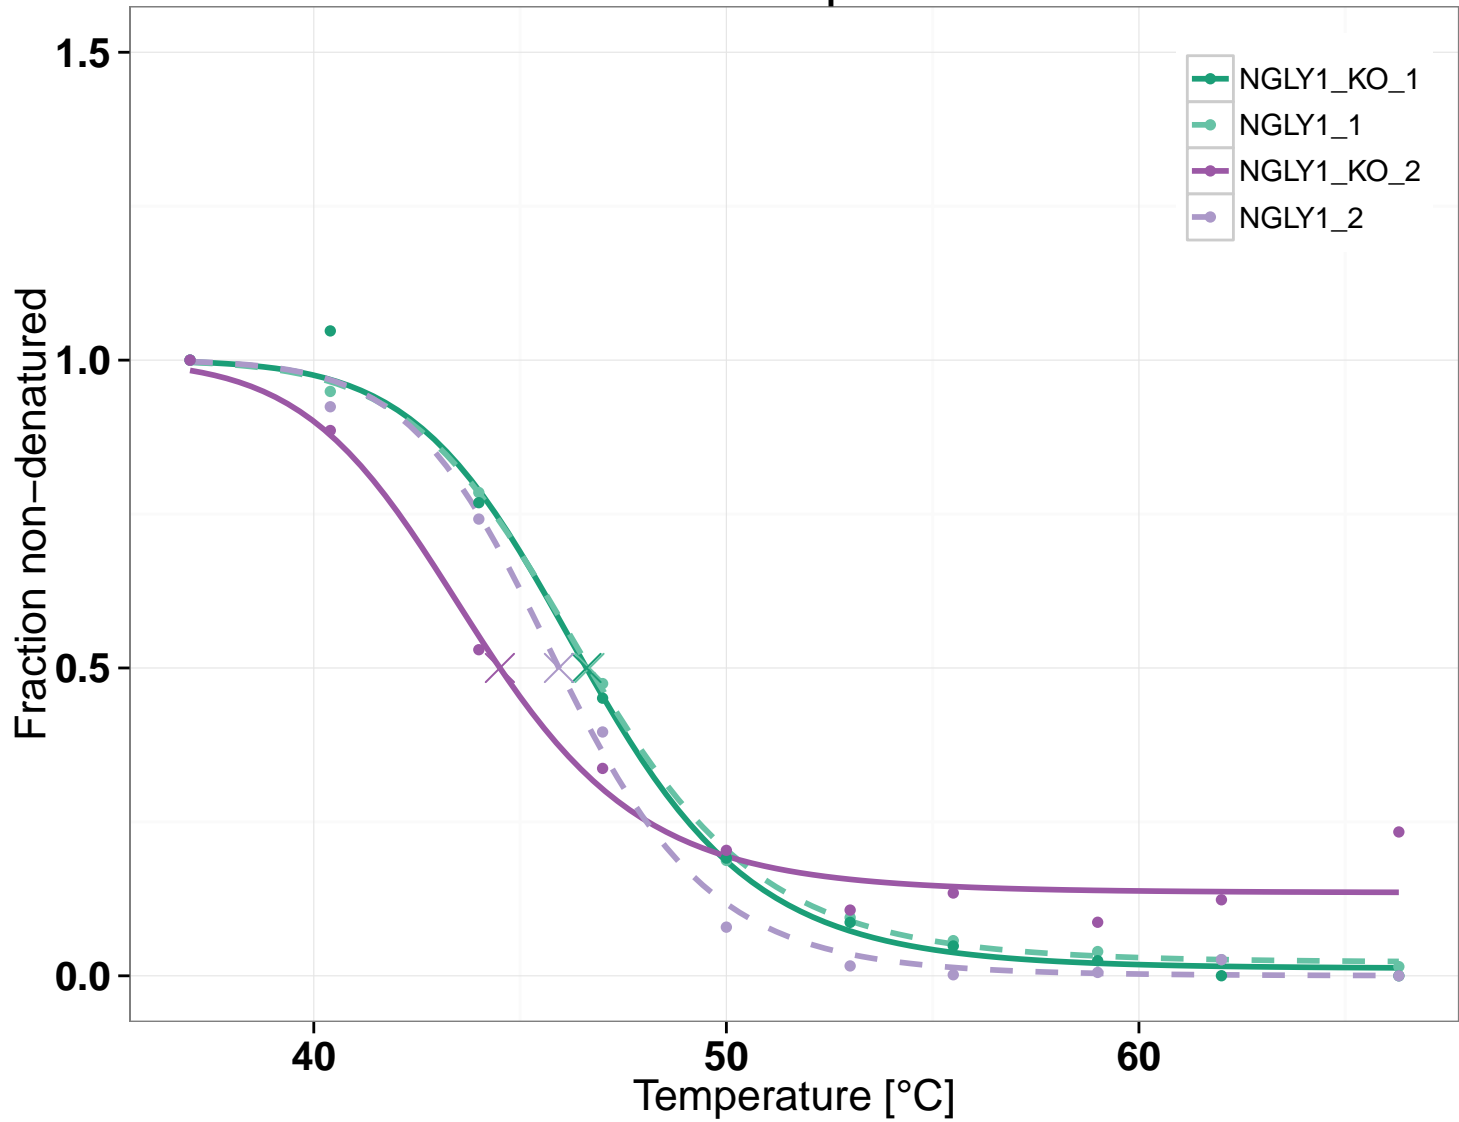

|            | meltPoint | slope | plateau | R2   |
|------------|-----------|-------|---------|------|
| NGLY1_KO_1 | 46.61     | -0.12 | 0.01    | 1    |
| NGLY1_1    | 46.68     | -0.11 | 0.02    | 1    |
| NGLY1_KO_2 | 44.51     | -0.11 | 0.13    | 0.98 |
| NGLY1_2    | 45.94     | -0.14 | 0       | 1    |

Supplement: Supplementary file 389 [file 1]

IPI00410666.1|SCRIB

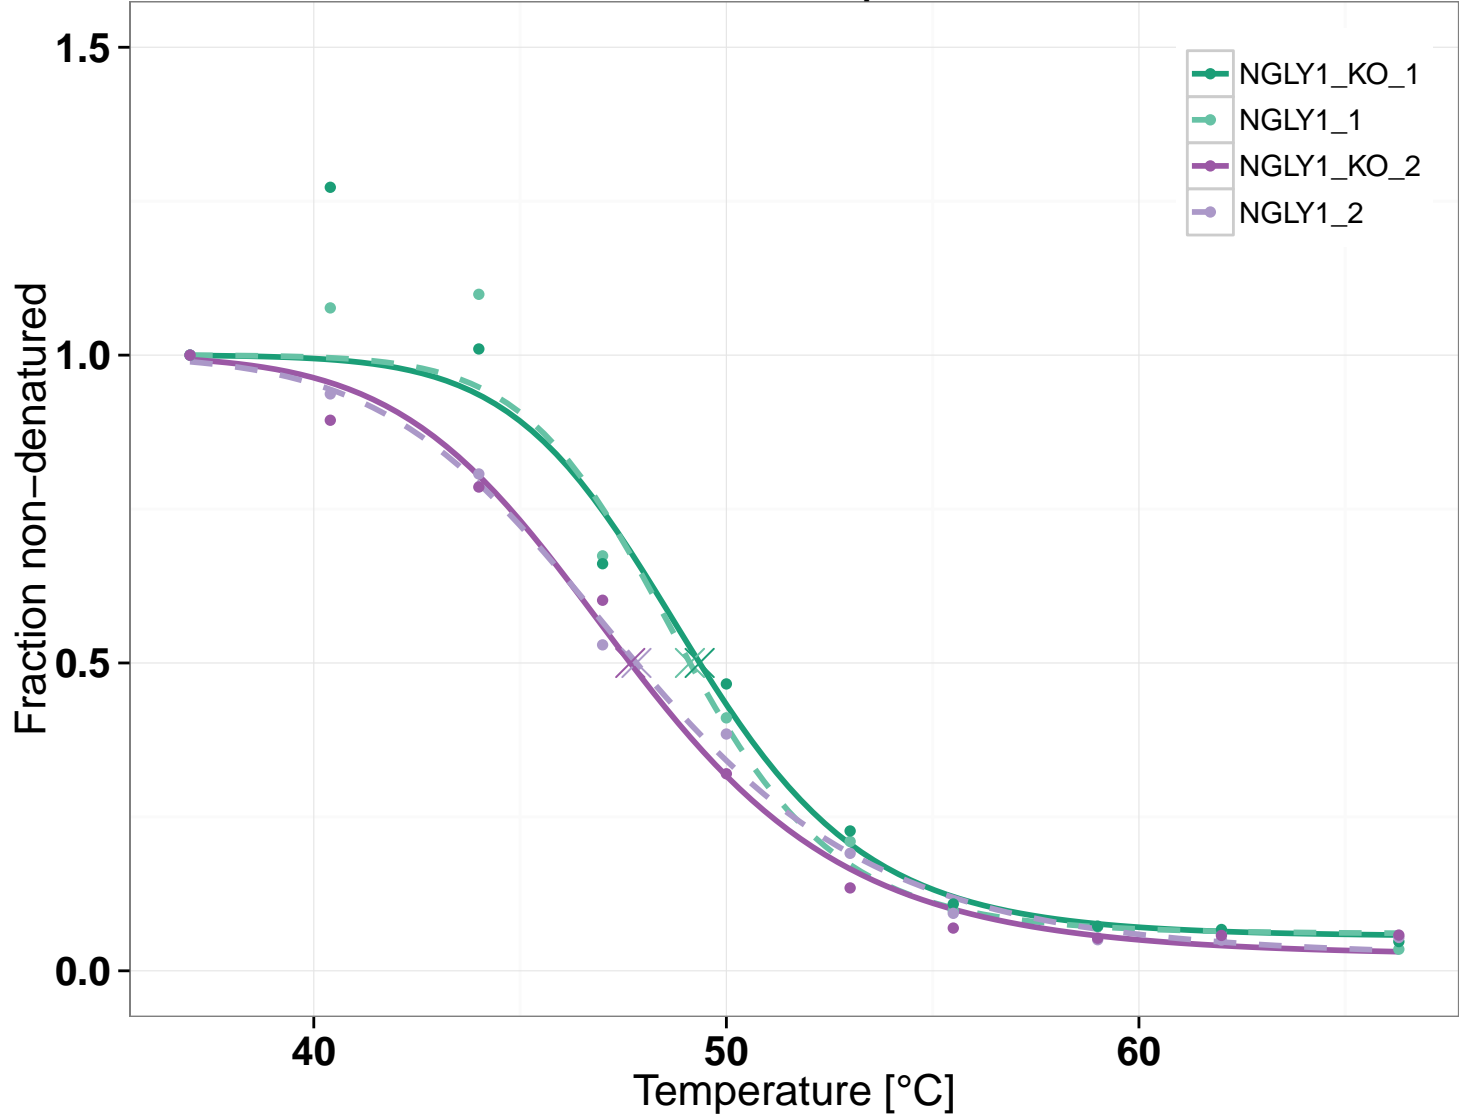

|            | meltPoint | slope  | plateau | R2   |
|------------|-----------|--------|---------|------|
| NGLY1_KO_1 | 49.35     | -0.11  | 0.06    | 0.95 |
| NGLY1_1    | 49.12     | -0.12  | 0.06    | 0.98 |
| NGLY1_KO_2 | 47.67     | -0.089 | 0.02    | 0.99 |
| NGLY1_2    | 47.82     | -0.081 | 0.02    | 1    |

Supplement: Supplementary file 390 [file 1]

# IPI00029447.5|GOSR1

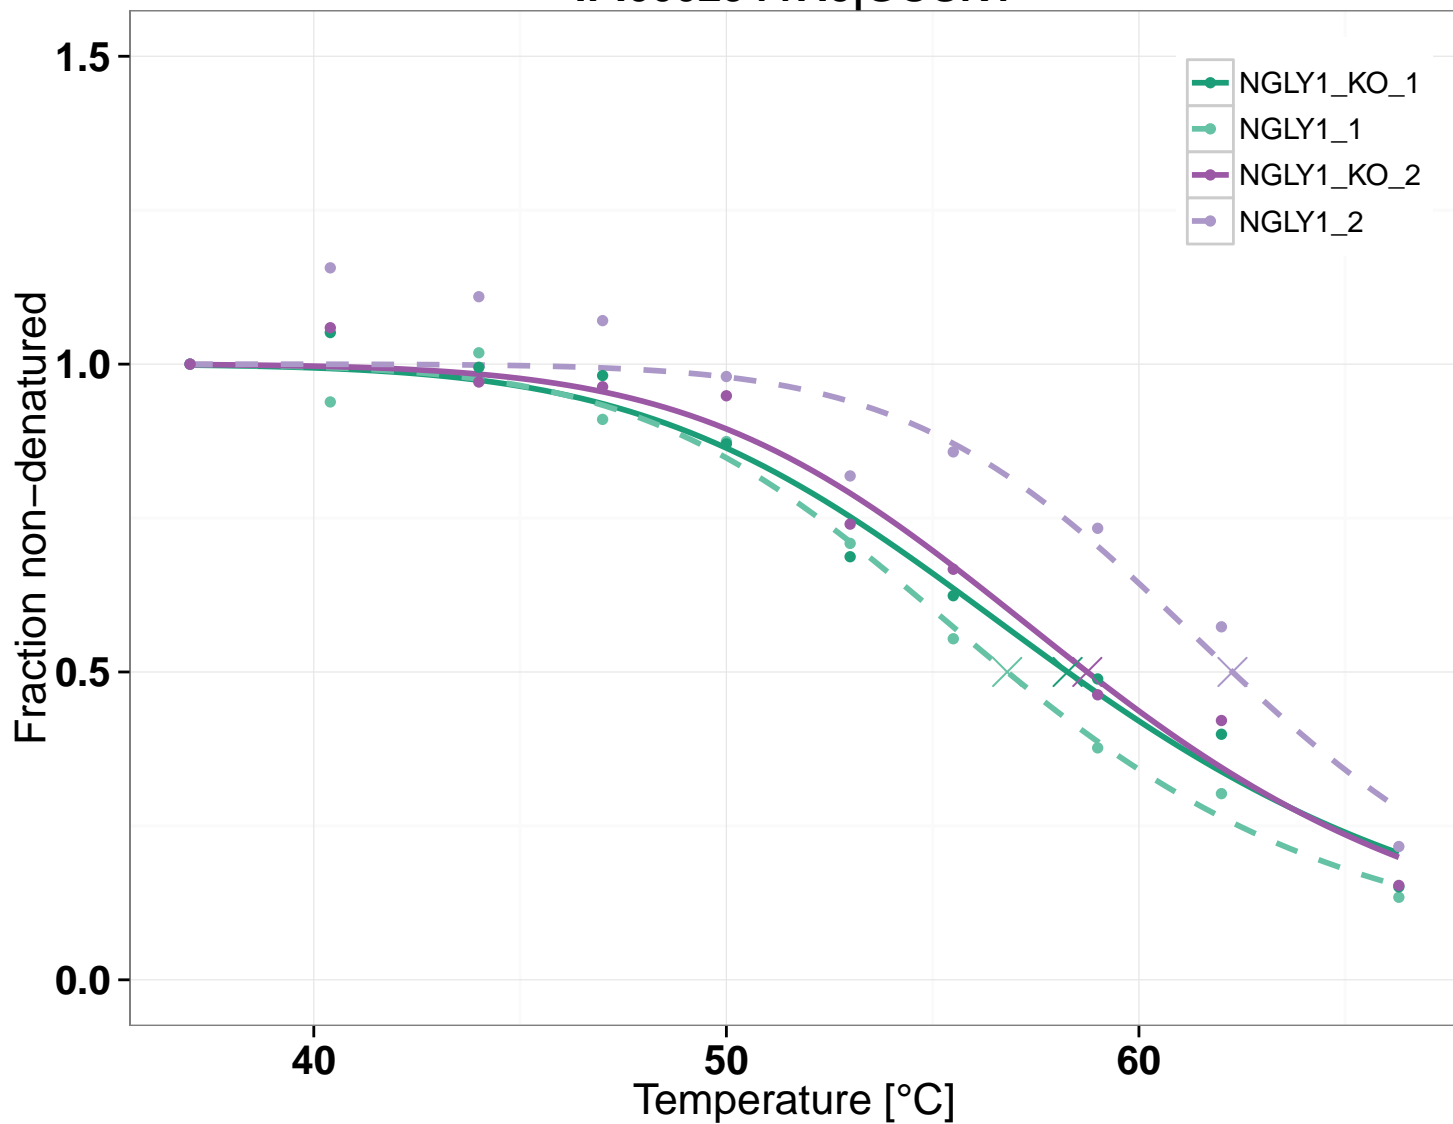

|            | meltPoint | slope  | plateau | R2   |
|------------|-----------|--------|---------|------|
| NGLY1_KO_1 | 58.27     | -0.049 | 0       | 0.98 |
| NGLY1_1    | 56.81     | -0.057 | 0.02    | 0.99 |
| NGLY1_KO_2 | 58.75     | -0.053 | 0       | 0.98 |
| NGLY1_2    | 62.27     | -0.064 | 0       | 0.91 |

Supplement: Supplementary file 391 [file 1]

IPI00291972.2|RTN4IP1

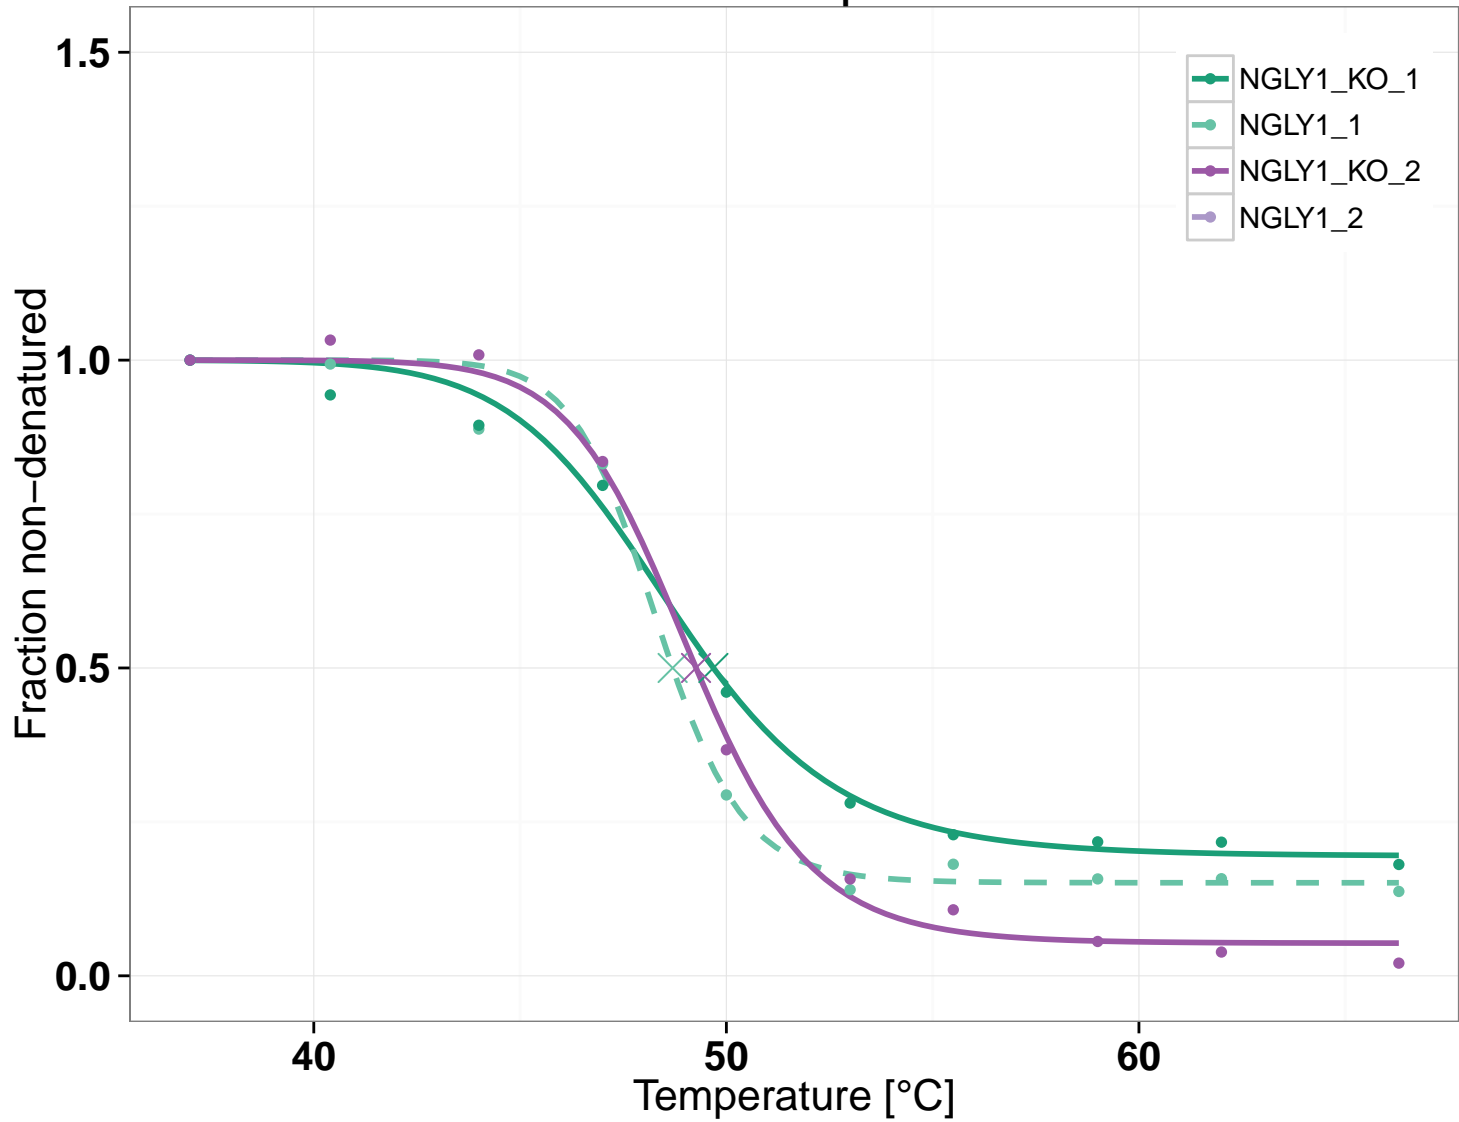

|            | meltPoint | slope | plateau | R2   |
|------------|-----------|-------|---------|------|
| NGLY1_KO_1 | 49.69     | -0.1  | 0.19    | 0.99 |
| NGLY1_1    | 48.7      | -0.2  | 0.15    | 0.99 |
| NGLY1_KO_2 | 49.26     | -0.16 | 0.05    | 1    |
| NGLY1_2    | -         | -     | -       | -    |

Supplement: Supplementary file 392 [file 1]

IPI00015782.1|C16ORF35

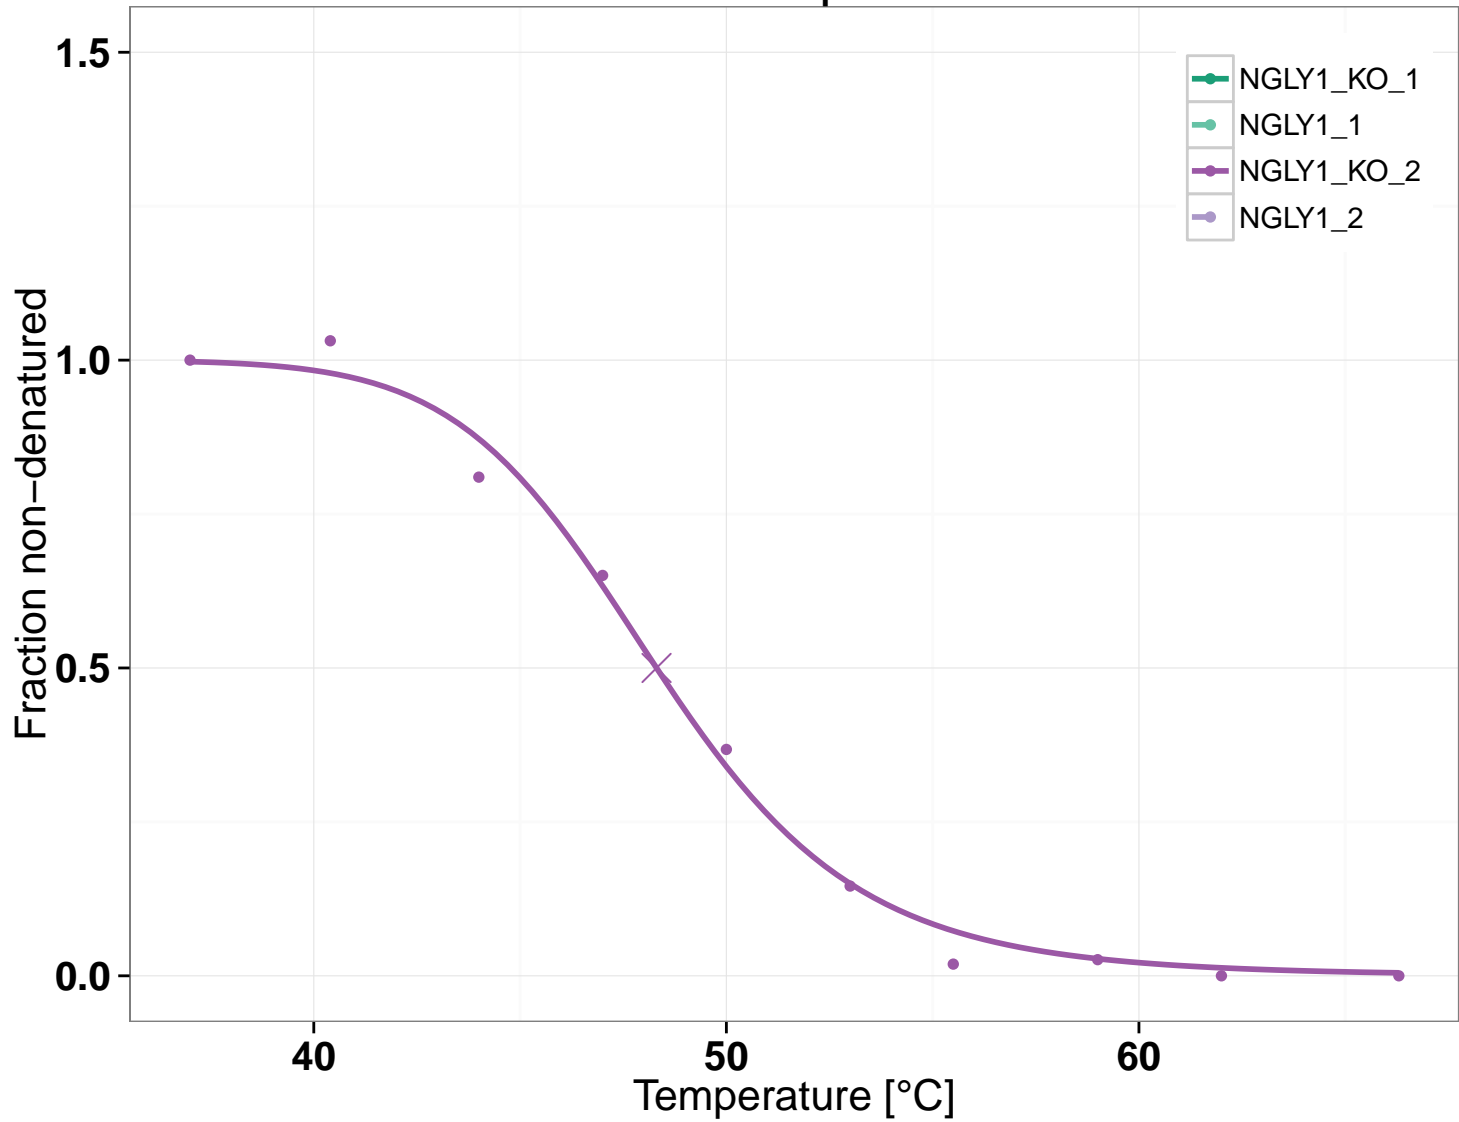

|            | meltPoint | slope | plateau | R2   |
|------------|-----------|-------|---------|------|
| NGLY1_KO_1 | —         | —     | —       | —    |
| NGLY1_1    | —         | —     | —       | —    |
| NGLY1_KO_2 | 48.31     | -0.1  | 0       | 0.99 |
| NGLY1_2    | —         | —     | —       | —    |

Supplement: Supplementary file 393 [file 1]

IPI00867735.1|C8ORF33

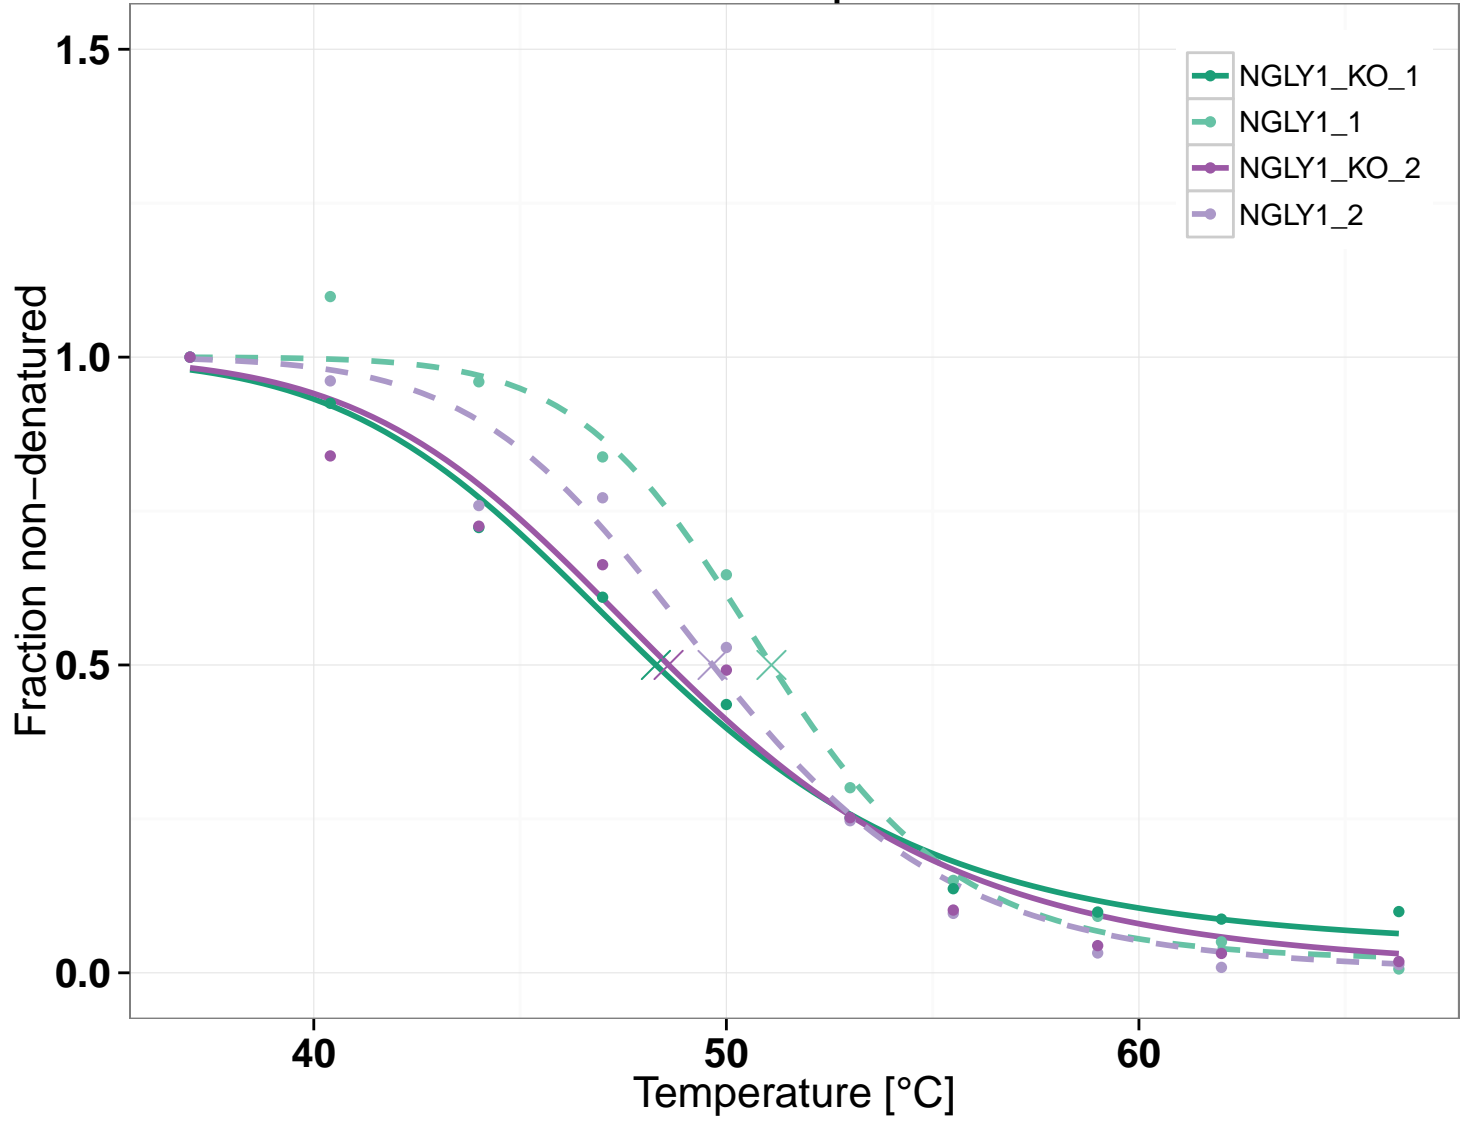

|            | meltPoint | slope  | plateau | R2   |
|------------|-----------|--------|---------|------|
| NGLY1_KO_1 | 48.29     | -0.066 | 0.04    | 0.99 |
| NGLY1_1    | 51.09     | -0.11  | 0.02    | 0.99 |
| NGLY1_KO_2 | 48.6      | -0.068 | 0       | 0.98 |
| NGLY1_2    | 49.66     | -0.086 | 0       | 0.98 |

Supplement: Supplementary file 394 [file 1]

IPI00387084.1|RPS21

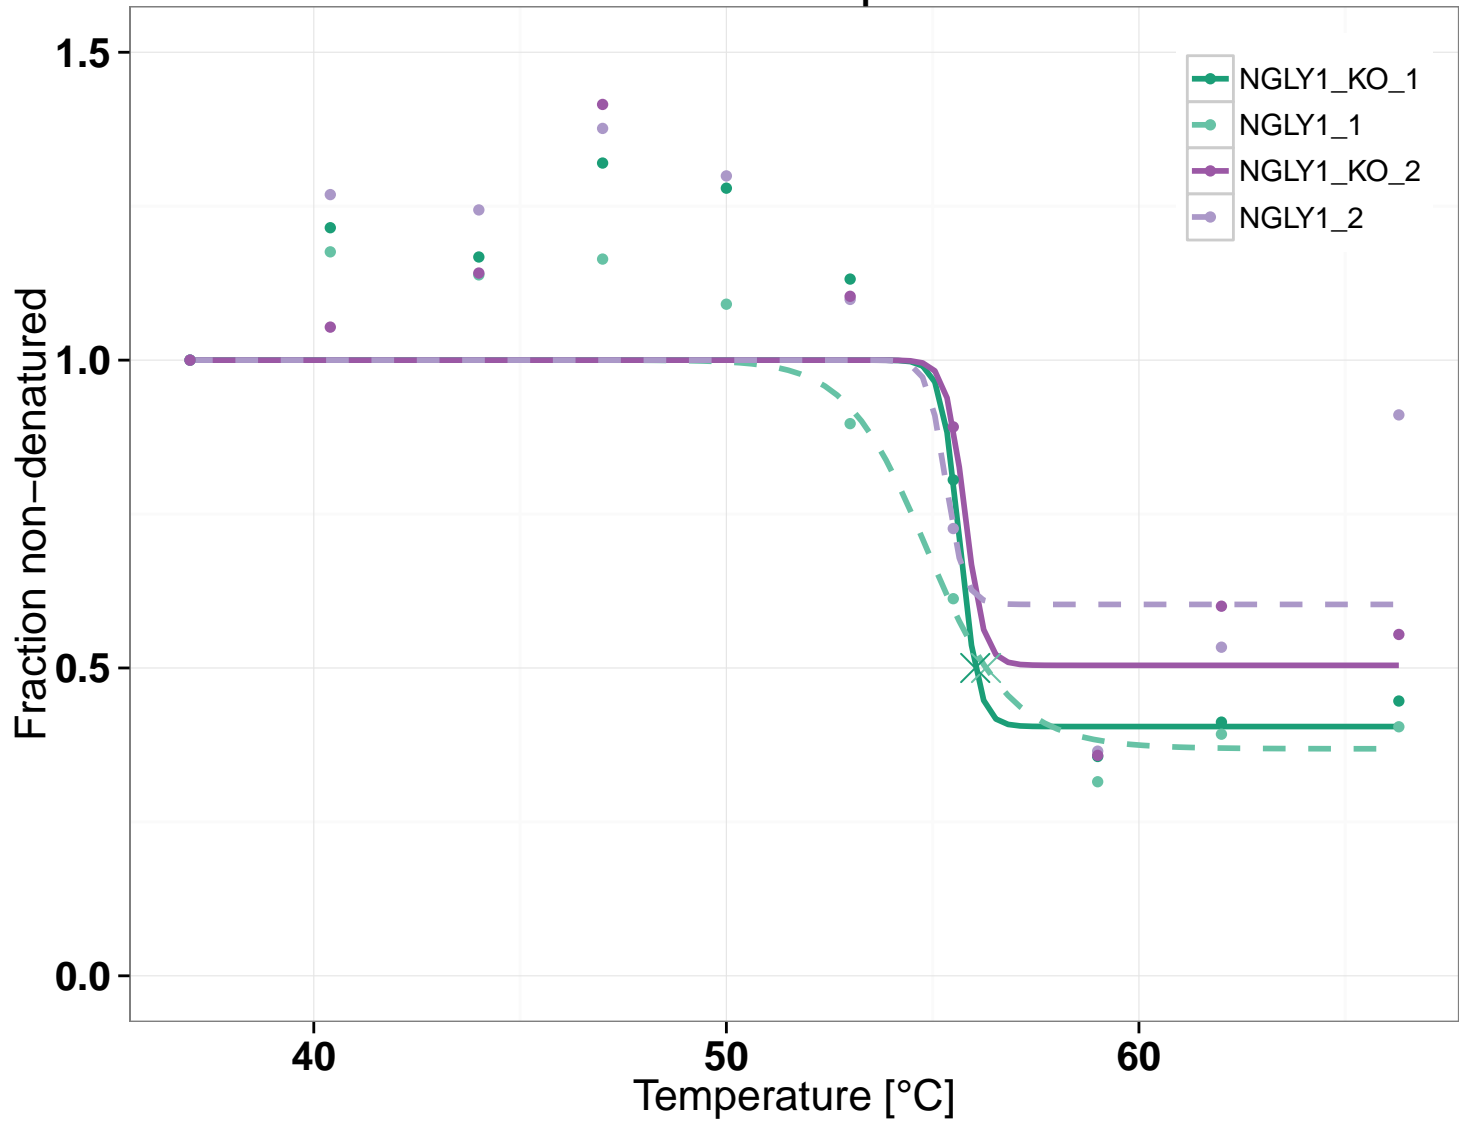

|            | meltPoint | slope | plateau | R2   |
|------------|-----------|-------|---------|------|
| NGLY1_KO_1 | 56.03     | -0.67 | 0.4     | 0.79 |
| NGLY1_1    | 56.29     | -0.16 | 0.37    | 0.92 |
| NGLY1_KO_2 | -         | -0.56 | 0.5     | 0.6  |
| NGLY1_2    | -         | -0.45 | 0.6     | 0.51 |

Supplement: Supplementary file 395 [file 1]

IPI00745955.3|EBNA1BP2

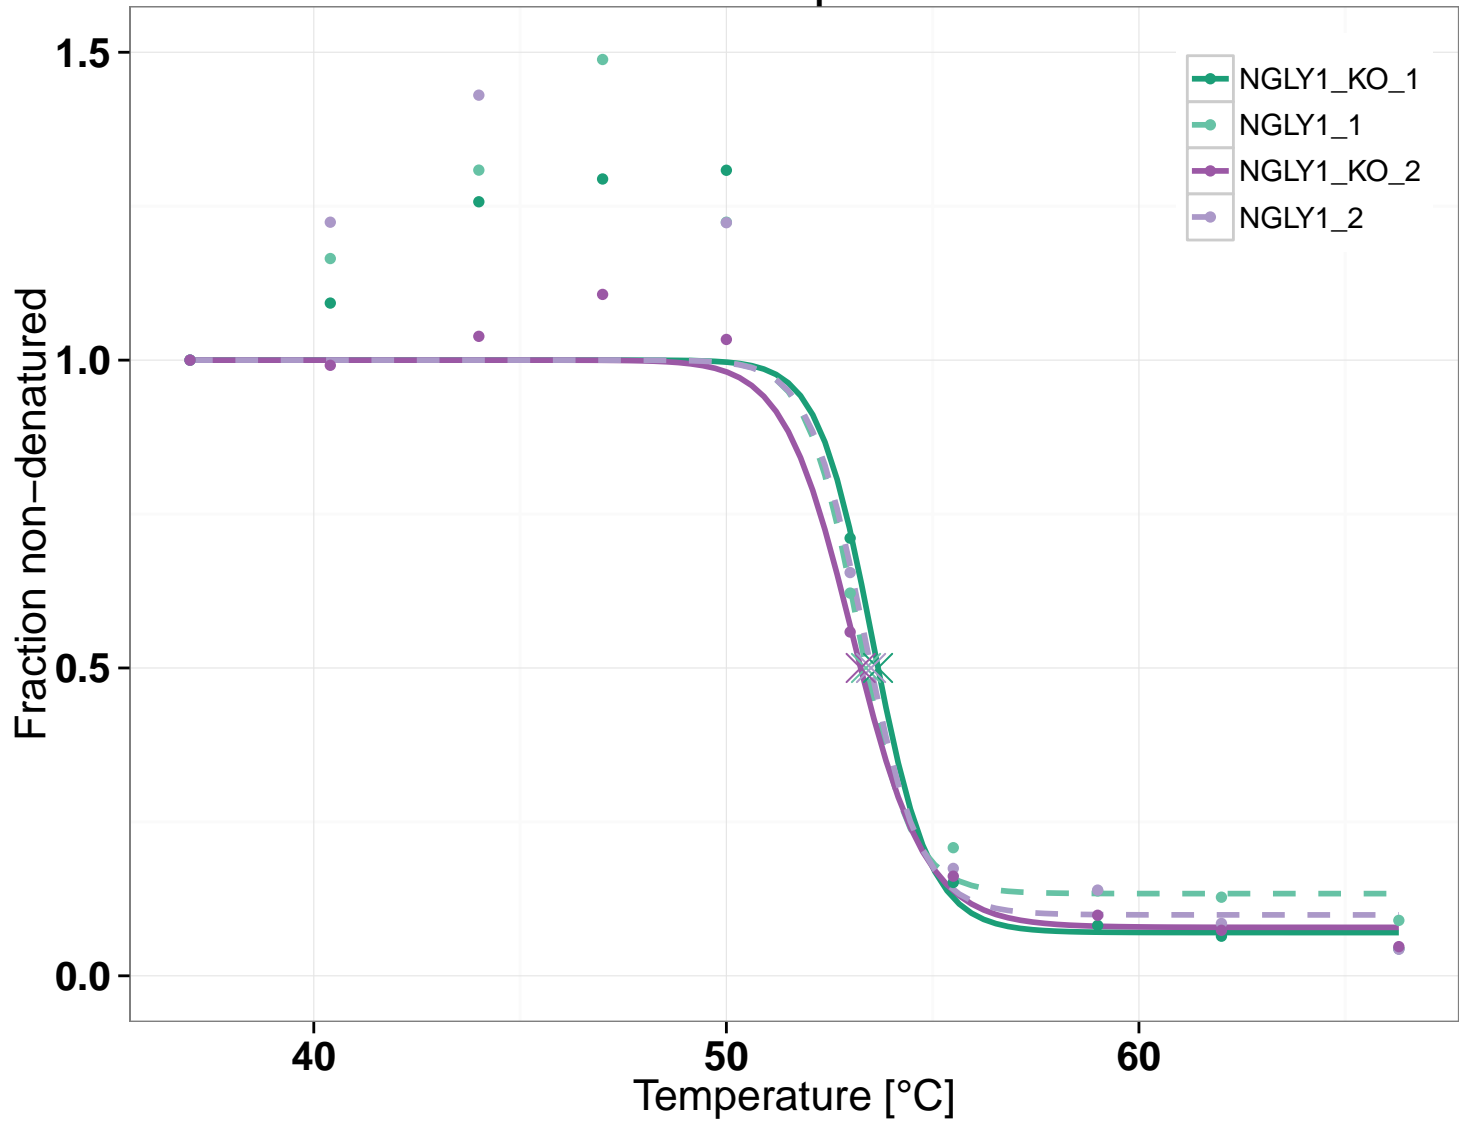

|            | meltPoint | slope | plateau | R2   |
|------------|-----------|-------|---------|------|
| NGLY1_KO_1 | 53.68     | -0.34 | 0.07    | 0.91 |
| NGLY1_1    | 53.38     | -0.34 | 0.13    | 0.85 |
| NGLY1_KO_2 | 53.26     | -0.27 | 0.08    | 0.99 |
| NGLY1_2    | 53.51     | -0.33 | 0.1     | 0.81 |

Supplement: Supplementary file 396 [file 1]

IPI00015135.1|EXTL3

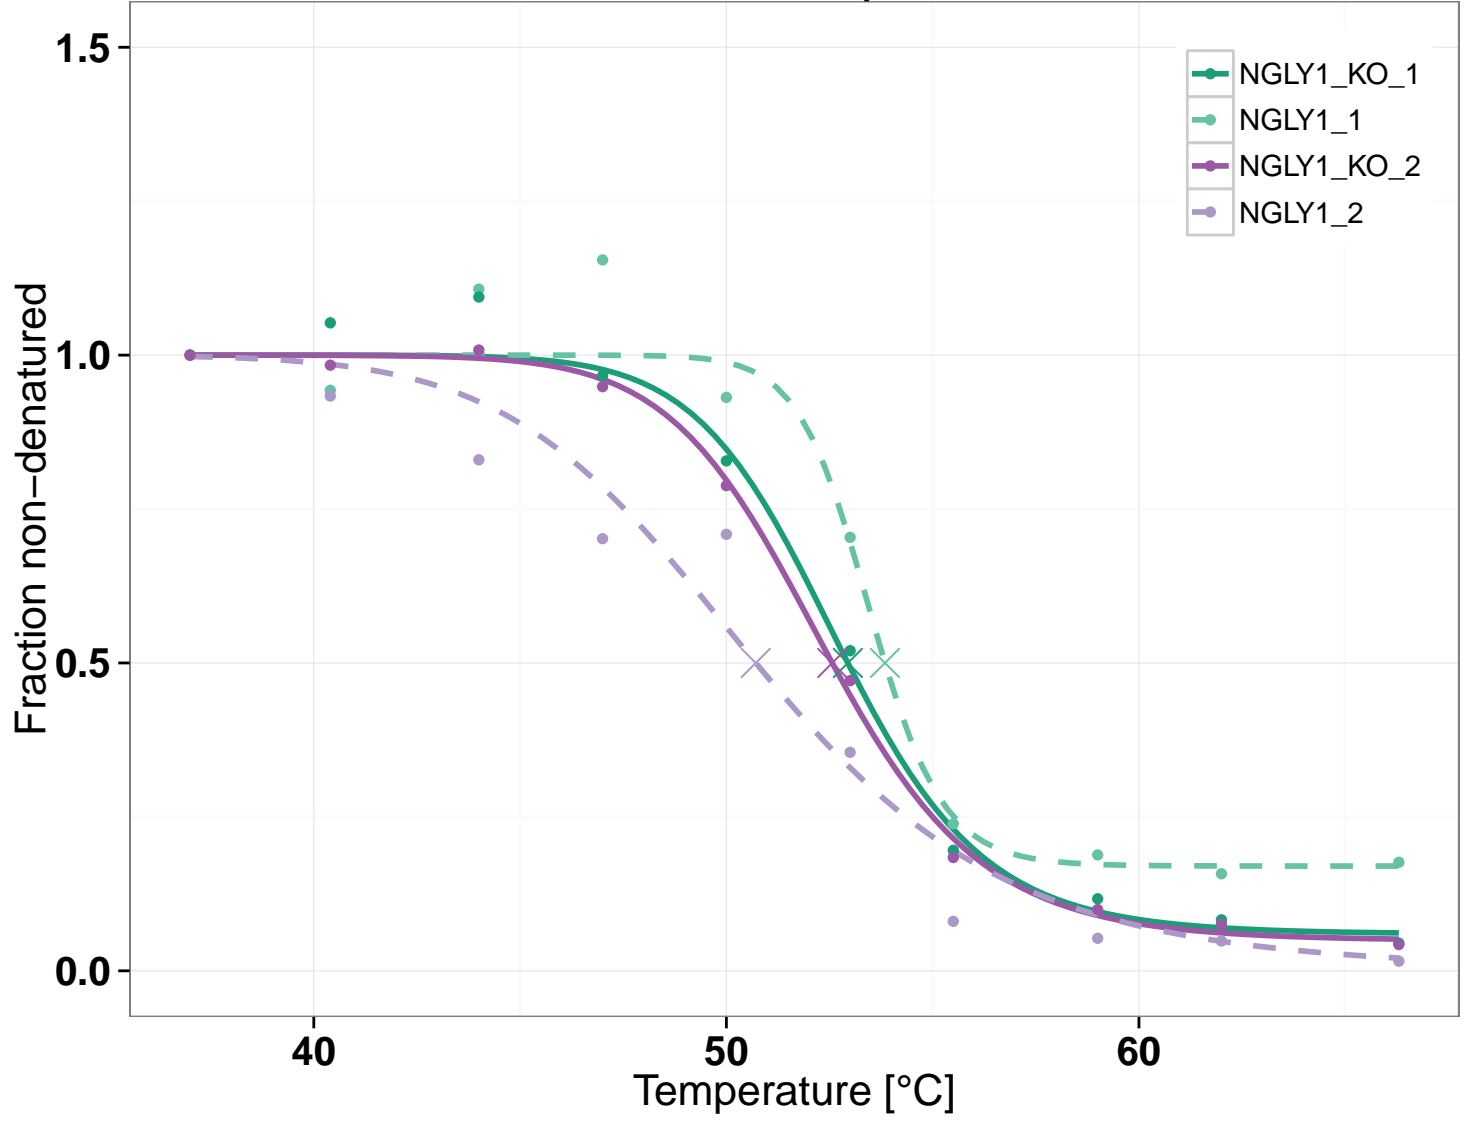

|            | meltPoint | slope  | plateau | R2   |
|------------|-----------|--------|---------|------|
| NGLY1_KO_1 | 52.94     | -0.14  | 0.06    | 0.99 |
| NGLY1_1    | 53.84     | -0.24  | 0.17    | 0.97 |
| NGLY1_KO_2 | 52.57     | -0.13  | 0.05    | 1    |
| NGLY1_2    | 50.71     | -0.082 | 0       | 0.96 |

Supplement: Supplementary file 397 [file 1]

IPI00550026.1|GPBP1L1

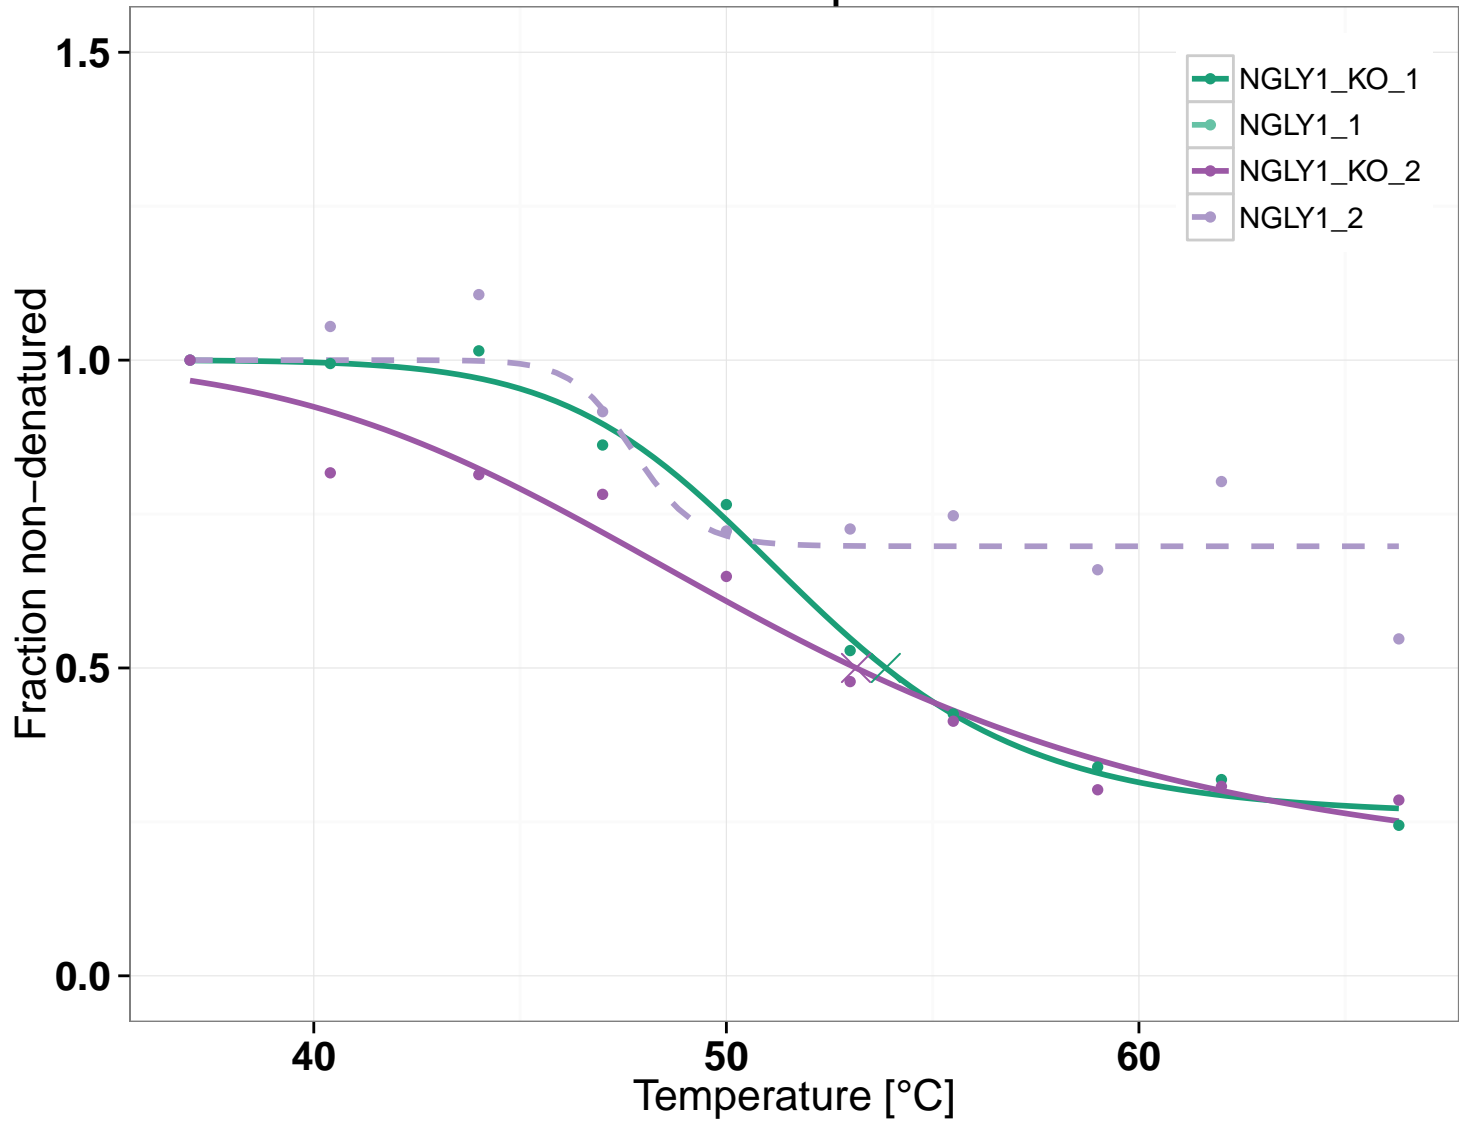

Supplement: Supplementary file 398 [file 1]

IPI00220827.5|TMSB10

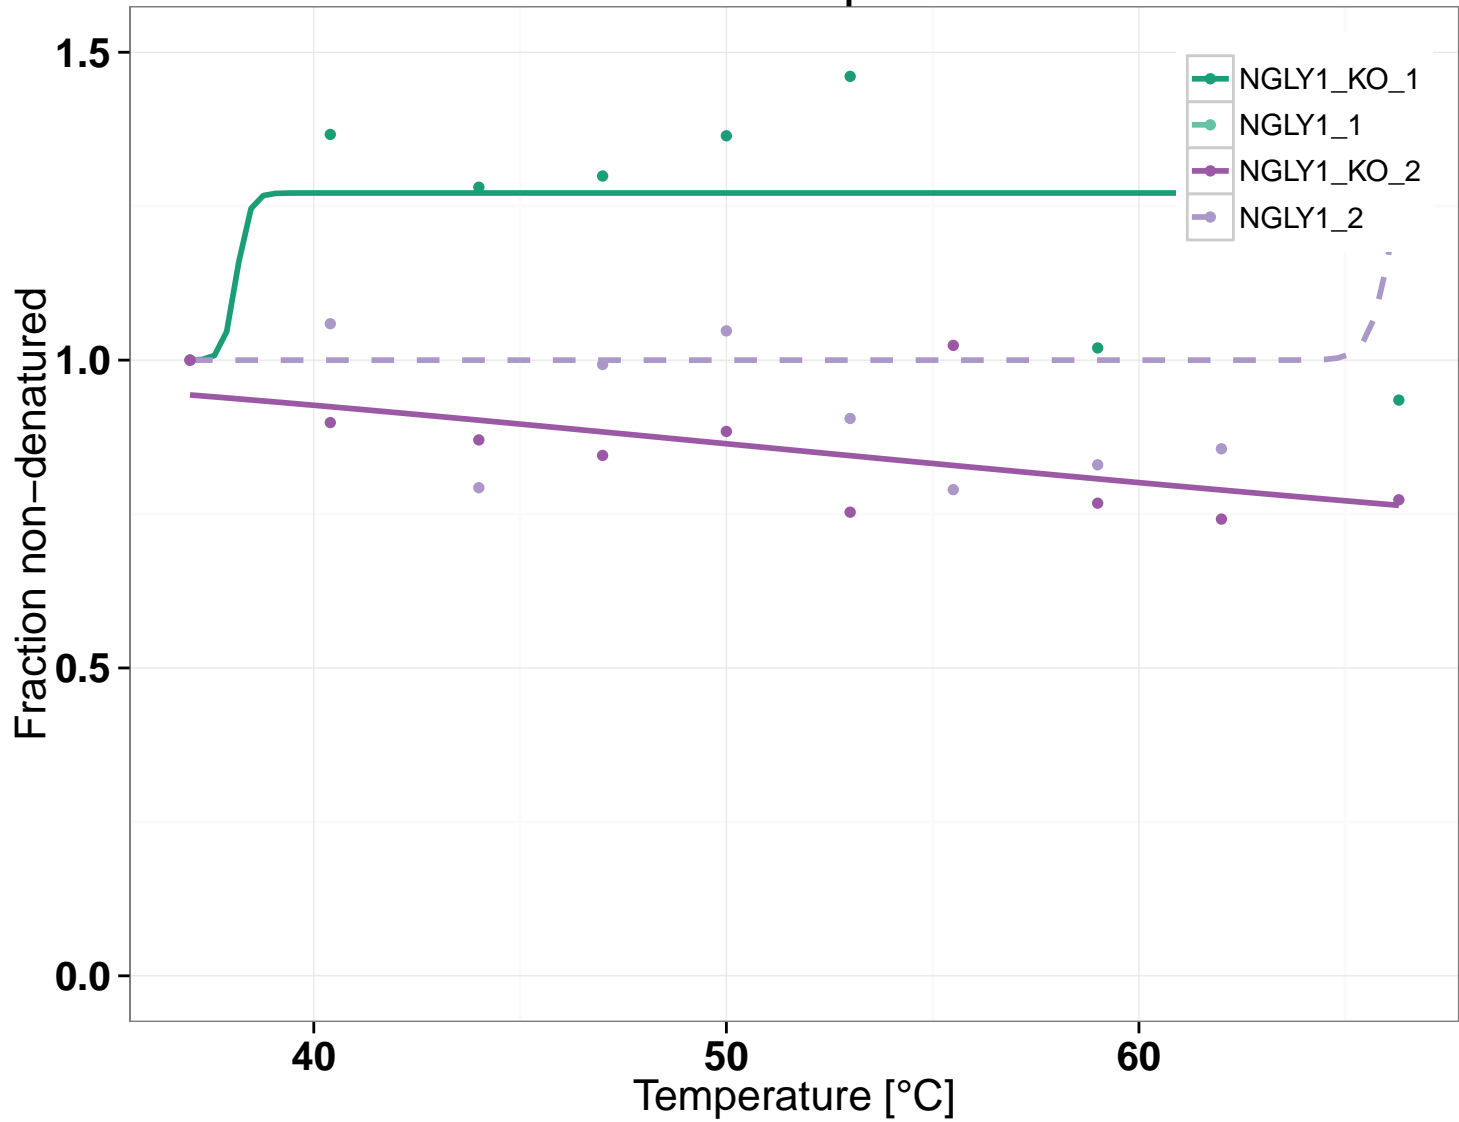

|            | meltPoint | slope   | plateau | R2   |
|------------|-----------|---------|---------|------|
| NGLY1_KO_1 | –         | 0.44    | 1.27    | 0.19 |
| NGLY1_1    | –         | –       | –       | –    |
| NGLY1_KO_2 | –         | –0.0064 | 0       | 0.37 |
| NGLY1_2    | –         | 0.43    | 1.5     | 0.27 |

Supplement: Supplementary file 400 [file 1]

IPI00790974.1|ATG16L1

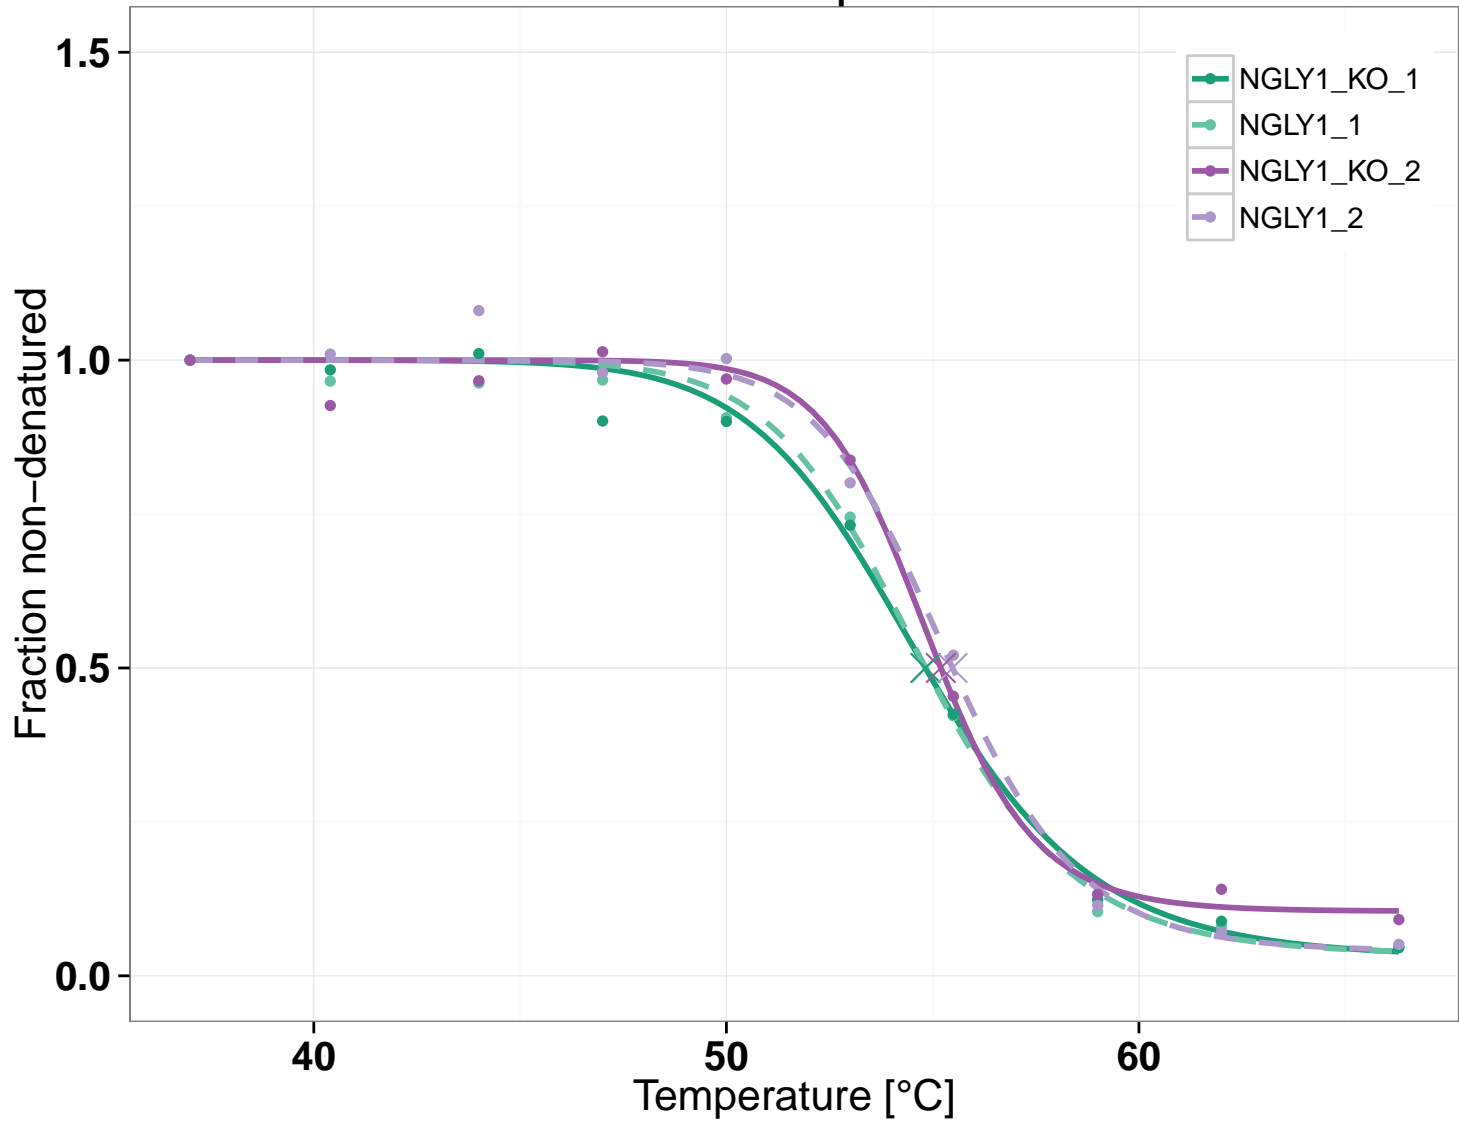

|            | meltPoint | slope | plateau | R2   |
|------------|-----------|-------|---------|------|
| NGLY1_KO_1 | 54.82     | -0.12 | 0.03    | 0.99 |
| NGLY1_1    | 54.83     | -0.13 | 0.03    | 1    |
| NGLY1_KO_2 | 55.2      | -0.17 | 0.1     | 0.99 |
| NGLY1_2    | 55.48     | -0.15 | 0.04    | 0.99 |

Supplement: Supplementary file 401 [file 1]
