# Supplementary material (part 5 of 85)
Source: publisher figshare collection journal article supplement (https://gsajournals.figshare.com/articles/dataset/_/12014913)

# IPI00216190.1|GSK3B

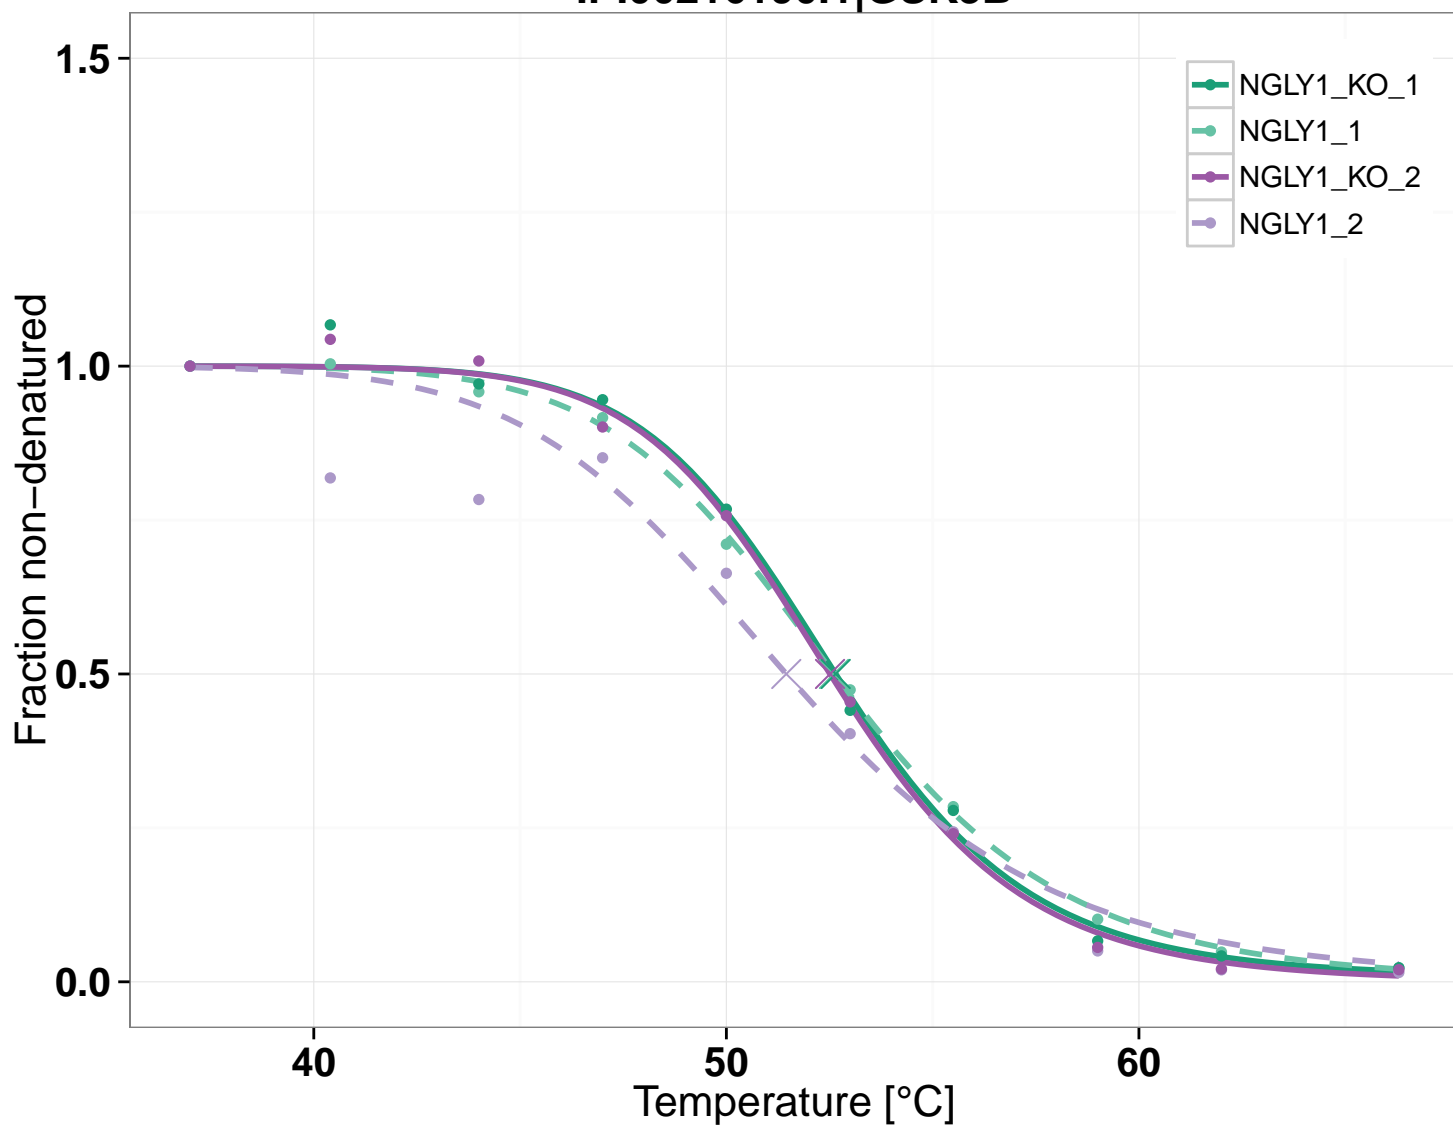

|            | meltPoint | slope  | plateau | R2   |
|------------|-----------|--------|---------|------|
| NGLY1_KO_1 | 52.65     | -0.11  | 0.01    | 1    |
| NGLY1_1    | 52.61     | -0.09  | 0       | 1    |
| NGLY1_KO_2 | 52.51     | -0.11  | 0       | 1    |
| NGLY1_2    | 51.45     | -0.078 | 0       | 0.95 |

Supplement: Supplementary file 402 [file 1]

IPI00006987.1|DDX24

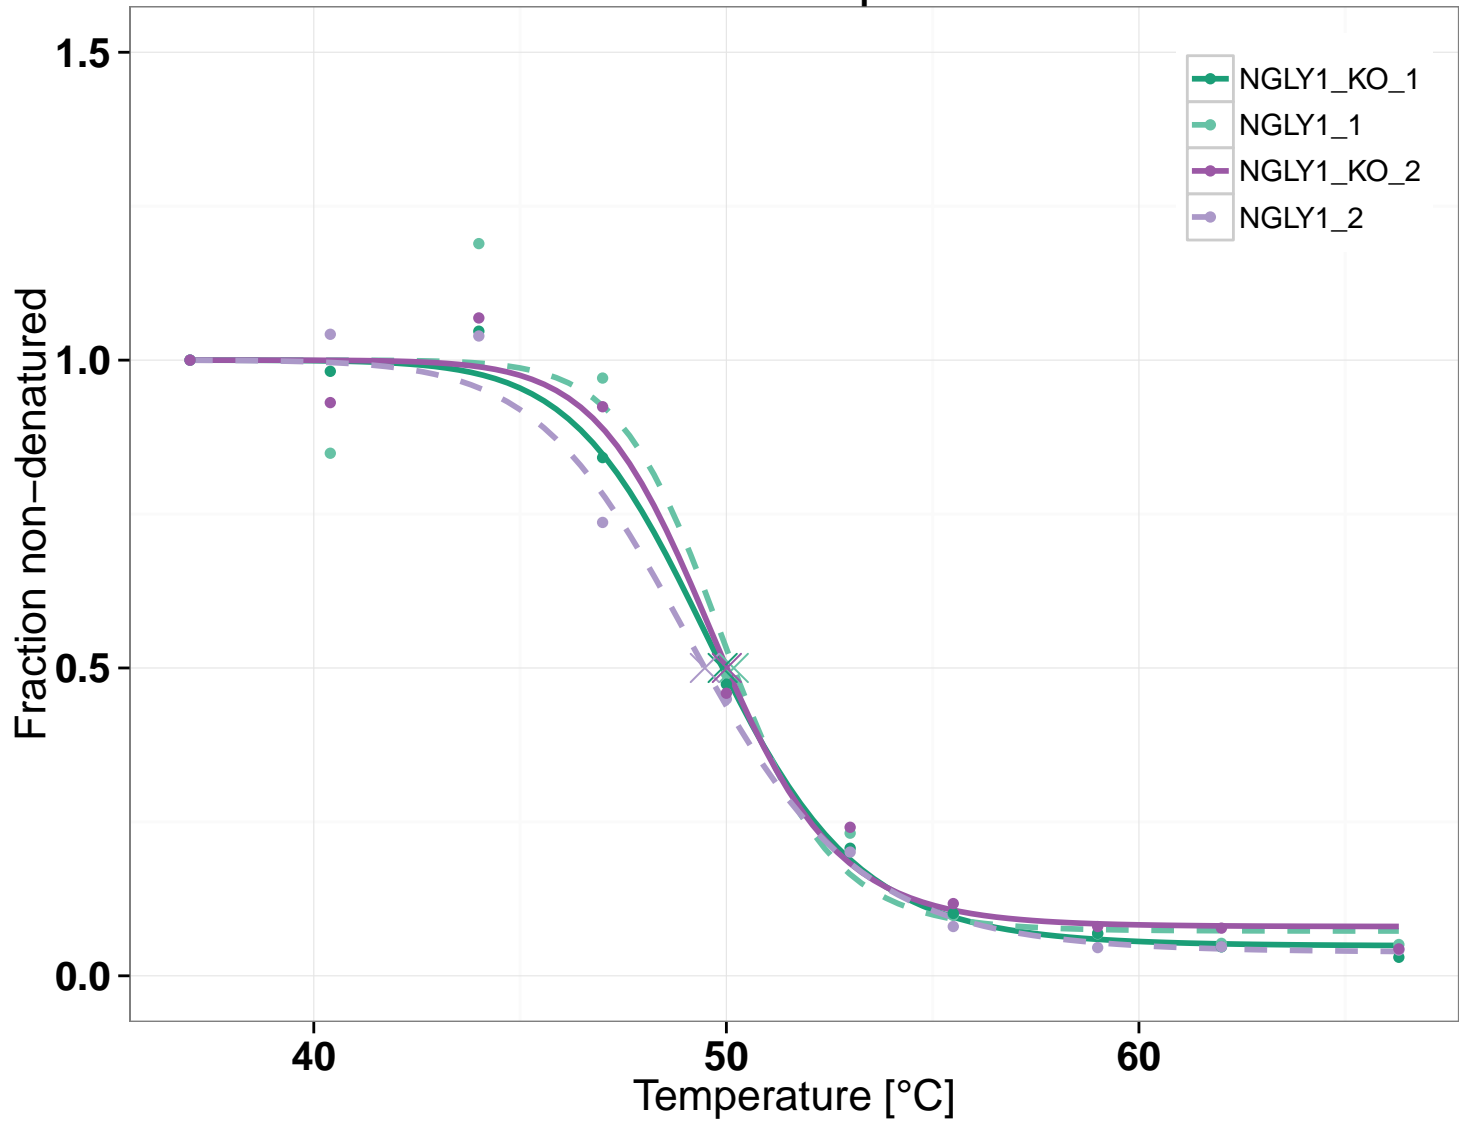

|            | meltPoint | slope | plateau | R2   |
|------------|-----------|-------|---------|------|
| NGLY1_KO_1 | 49.91     | -0.14 | 0.05    | 1    |
| NGLY1_1    | 50.18     | -0.18 | 0.07    | 0.96 |
| NGLY1_KO_2 | 50.01     | -0.16 | 0.08    | 0.99 |
| NGLY1_2    | 49.48     | -0.12 | 0.04    | 0.99 |

Supplement: Supplementary file 403 [file 1]

IPI00169283.1|MOSPD2

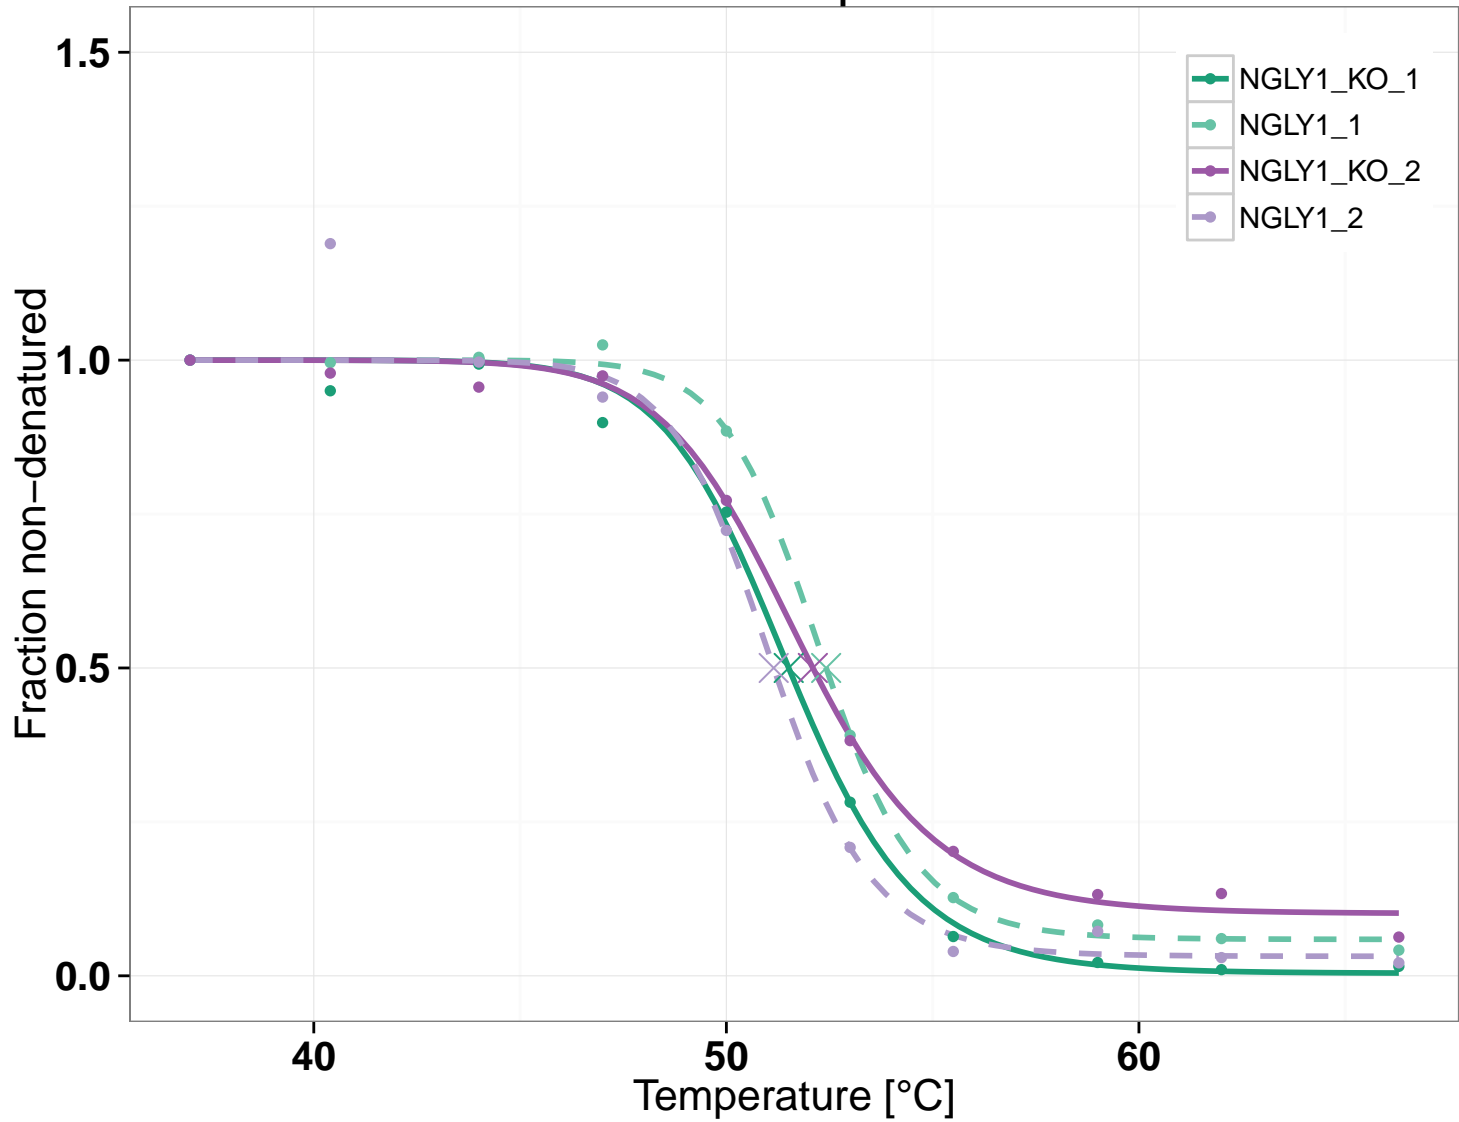

|            | meltPoint | slope | plateau | R2   |
|------------|-----------|-------|---------|------|
| NGLY1_KO_1 | 51.51     | -0.16 | 0       | 1    |
| NGLY1_1    | 52.42     | -0.2  | 0.06    | 1    |
| NGLY1_KO_2 | 52.1      | -0.14 | 0.1     | 1    |
| NGLY1_2    | 51.15     | -0.2  | 0.03    | 0.98 |

Supplement: Supplementary file 404 [file 1]

# IPI00012196.1|ASB8

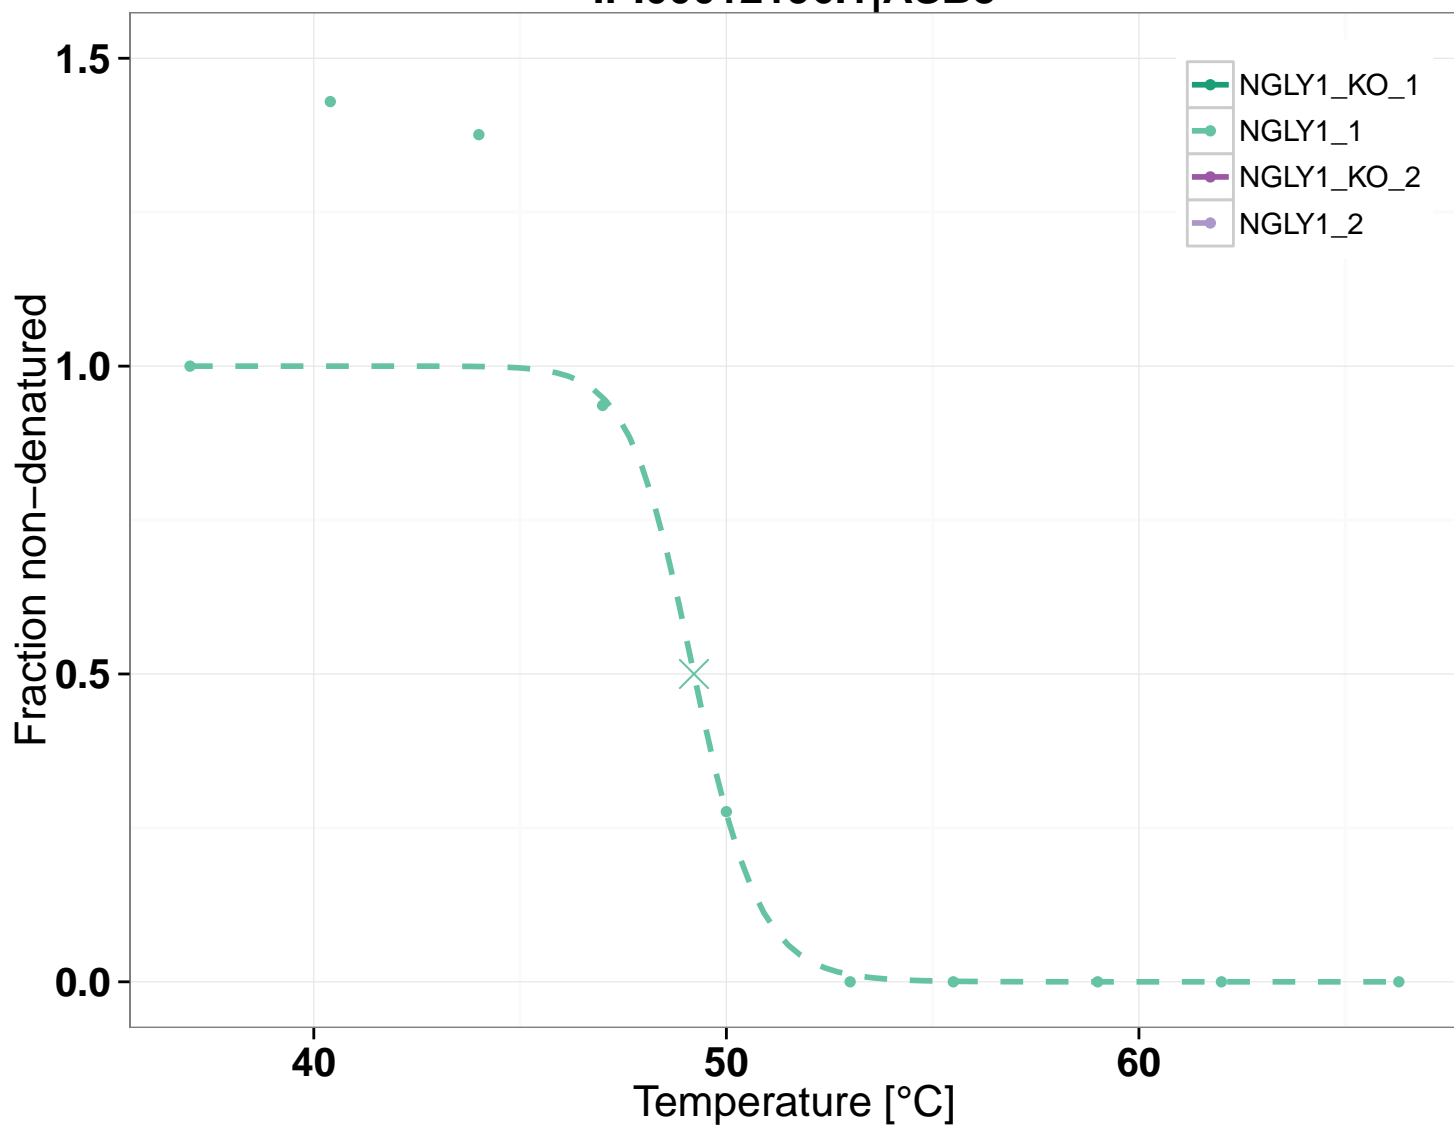

|            | meltPoint | slope | plateau | R2  |
|------------|-----------|-------|---------|-----|
| NGLY1_KO_1 | -         | -     | -       | -   |
| NGLY1_1    | 49.21     | -0.32 | 0       | 0.9 |
| NGLY1_KO_2 | -         | -     | -       | -   |
| NGLY1_2    | -         | -     | -       | -   |

Supplement: Supplementary file 405 [file 1]

IPI00299758.4|CHST12

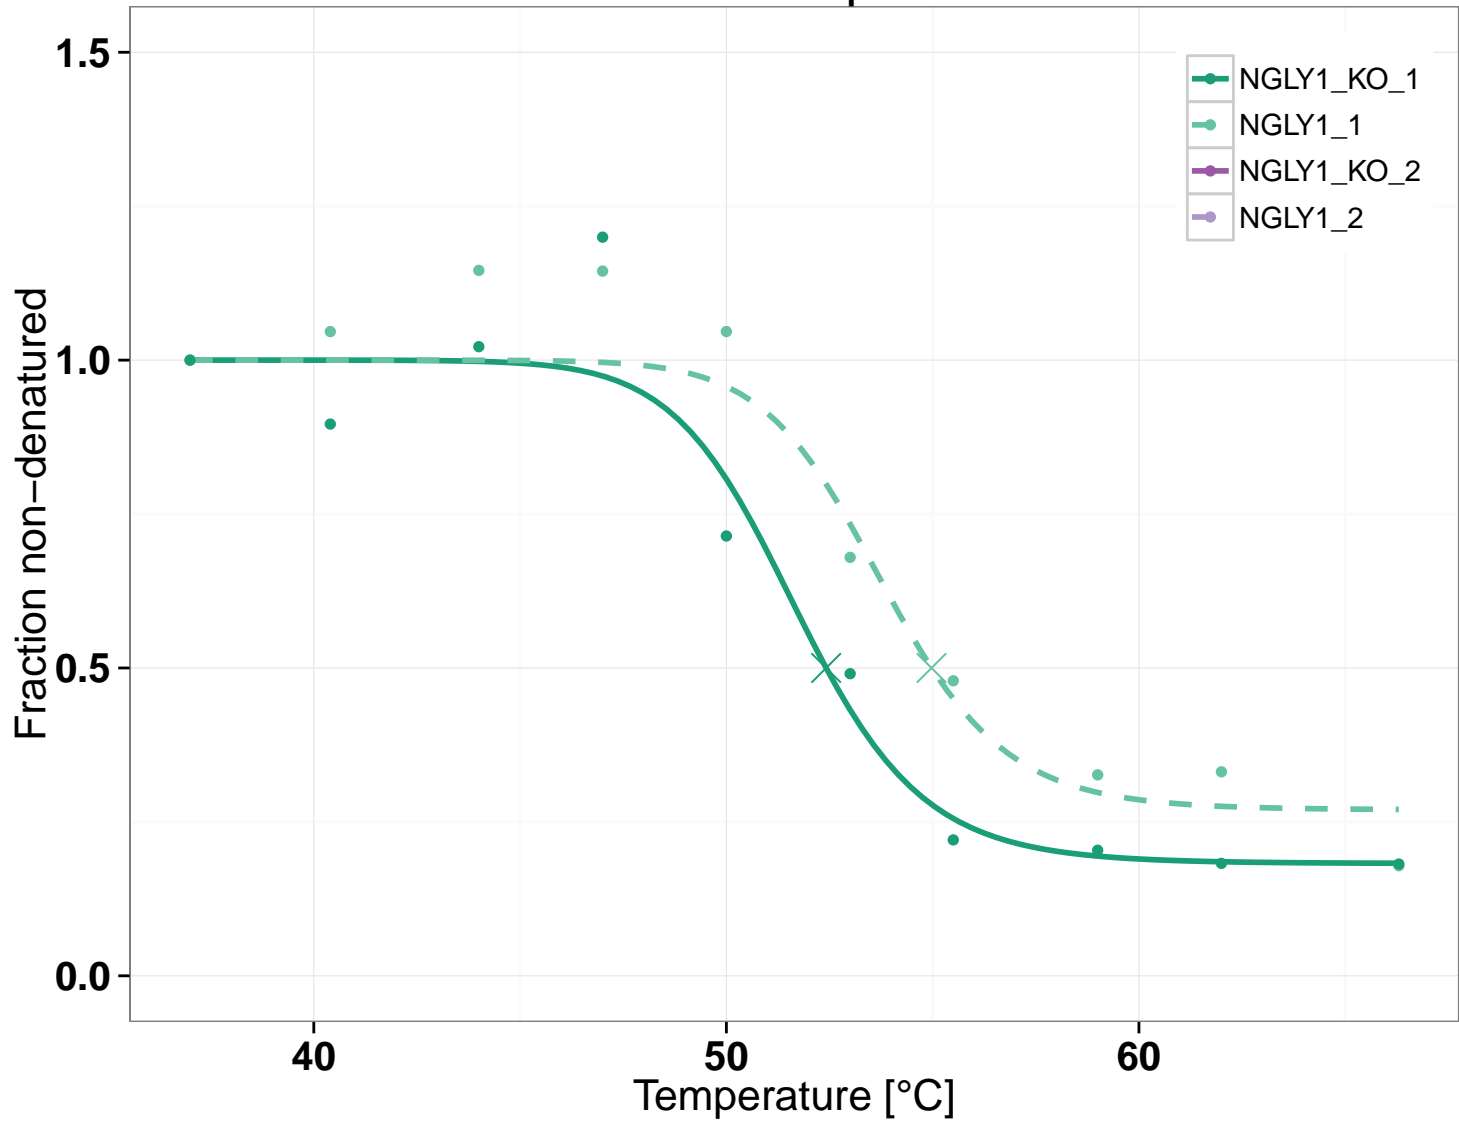

|            | meltPoint | slope | plateau | R2   |
|------------|-----------|-------|---------|------|
| NGLY1_KO_1 | 52.42     | -0.14 | 0.18    | 0.95 |
| NGLY1_1    | 54.97     | -0.12 | 0.27    | 0.95 |
| NGLY1_KO_2 | -         | -     | -       | -    |
| NGLY1_2    | -         | -     | -       | -    |

Supplement: Supplementary file 406 [file 1]

# IPI00384318.1|C14ORF100

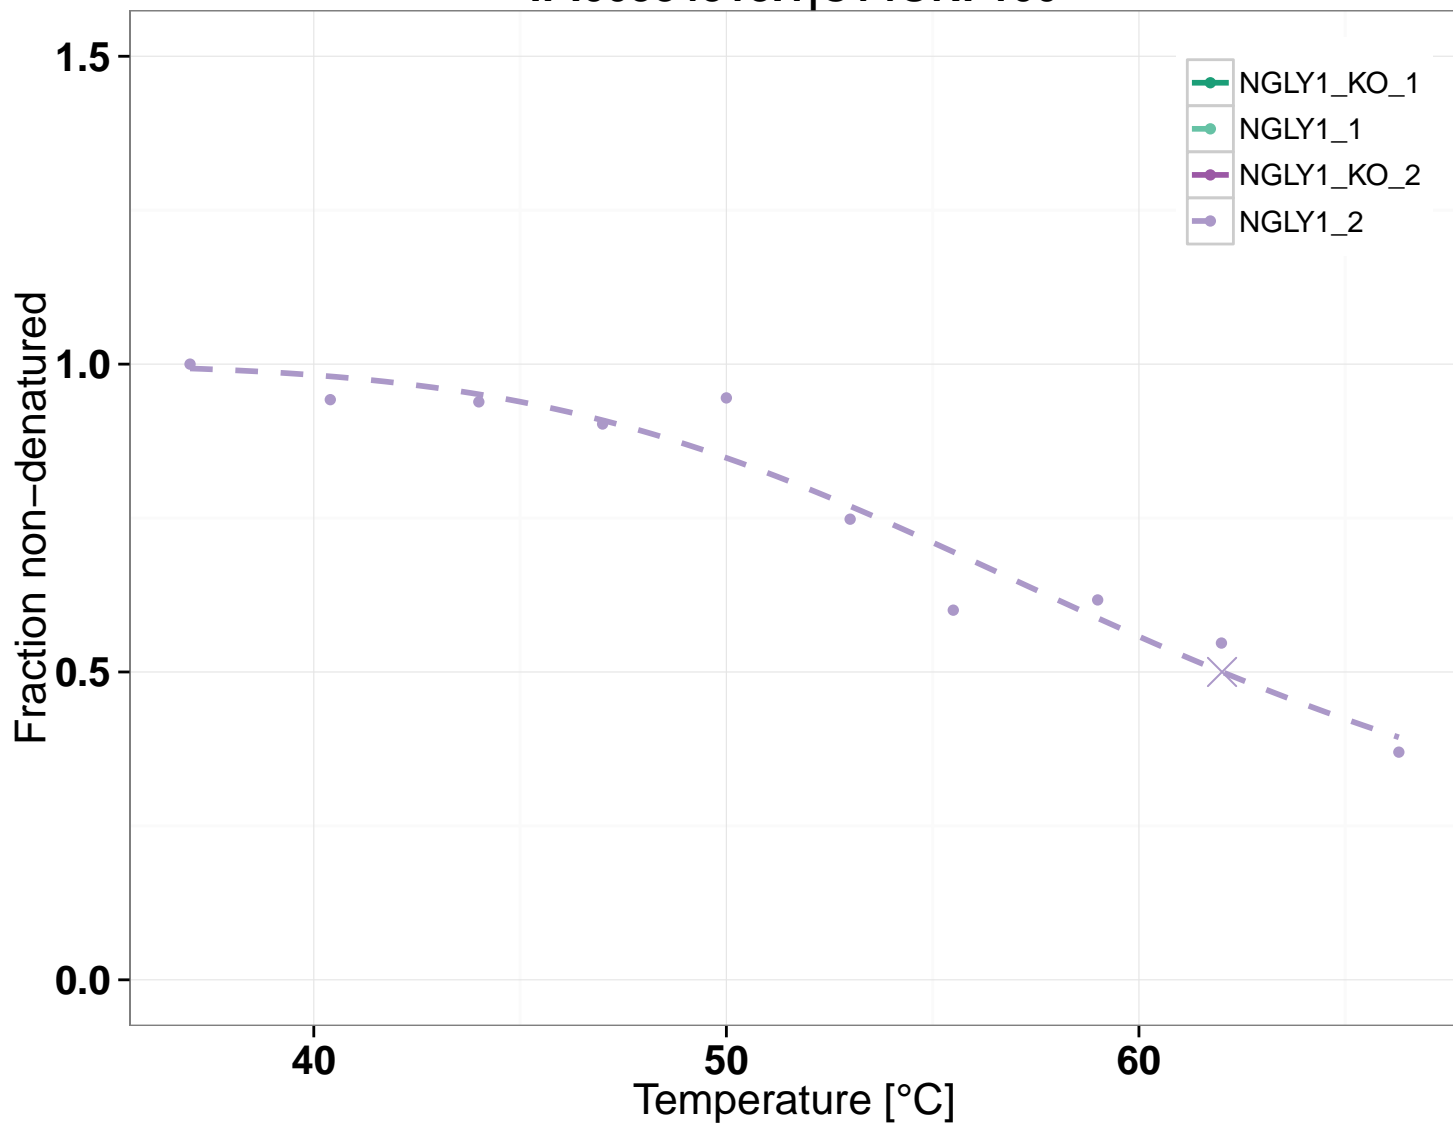

|            | meltPoint | slope  | plateau | R2   |
|------------|-----------|--------|---------|------|
| NGLY1_KO_1 | —         | —      | —       | —    |
| NGLY1_1    | —         | —      | —       | —    |
| NGLY1_KO_2 | —         | —      | —       | —    |
| NGLY1_2    | 62.01     | -0.031 | 0.08    | 0.94 |

Supplement: Supplementary file 407 [file 1]

IPI00217024.1|MAP4K3

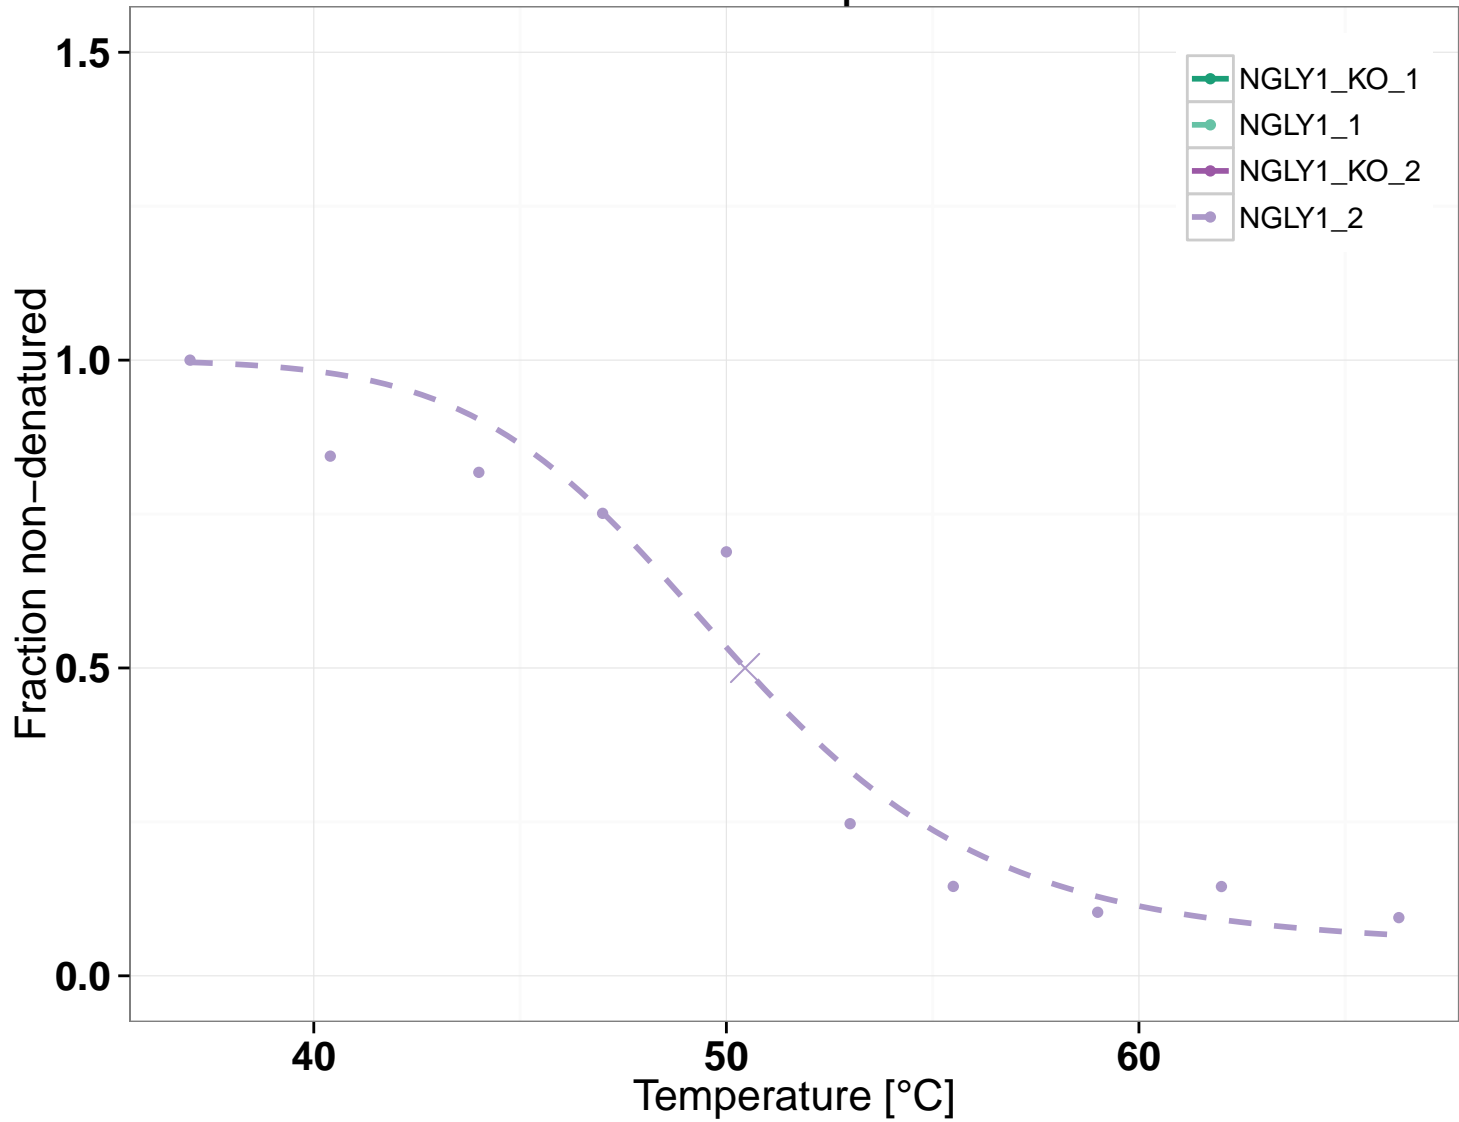

|            | meltPoint | slope  | plateau | R2   |
|------------|-----------|--------|---------|------|
| NGLY1_KO_1 | —         | —      | —       | —    |
| NGLY1_1    | —         | —      | —       | —    |
| NGLY1_KO_2 | —         | —      | —       | —    |
| NGLY1_2    | 50.45     | -0.076 | 0.05    | 0.94 |

Supplement: Supplementary file 408 [file 1]

IPI00747764.3|KPNA6

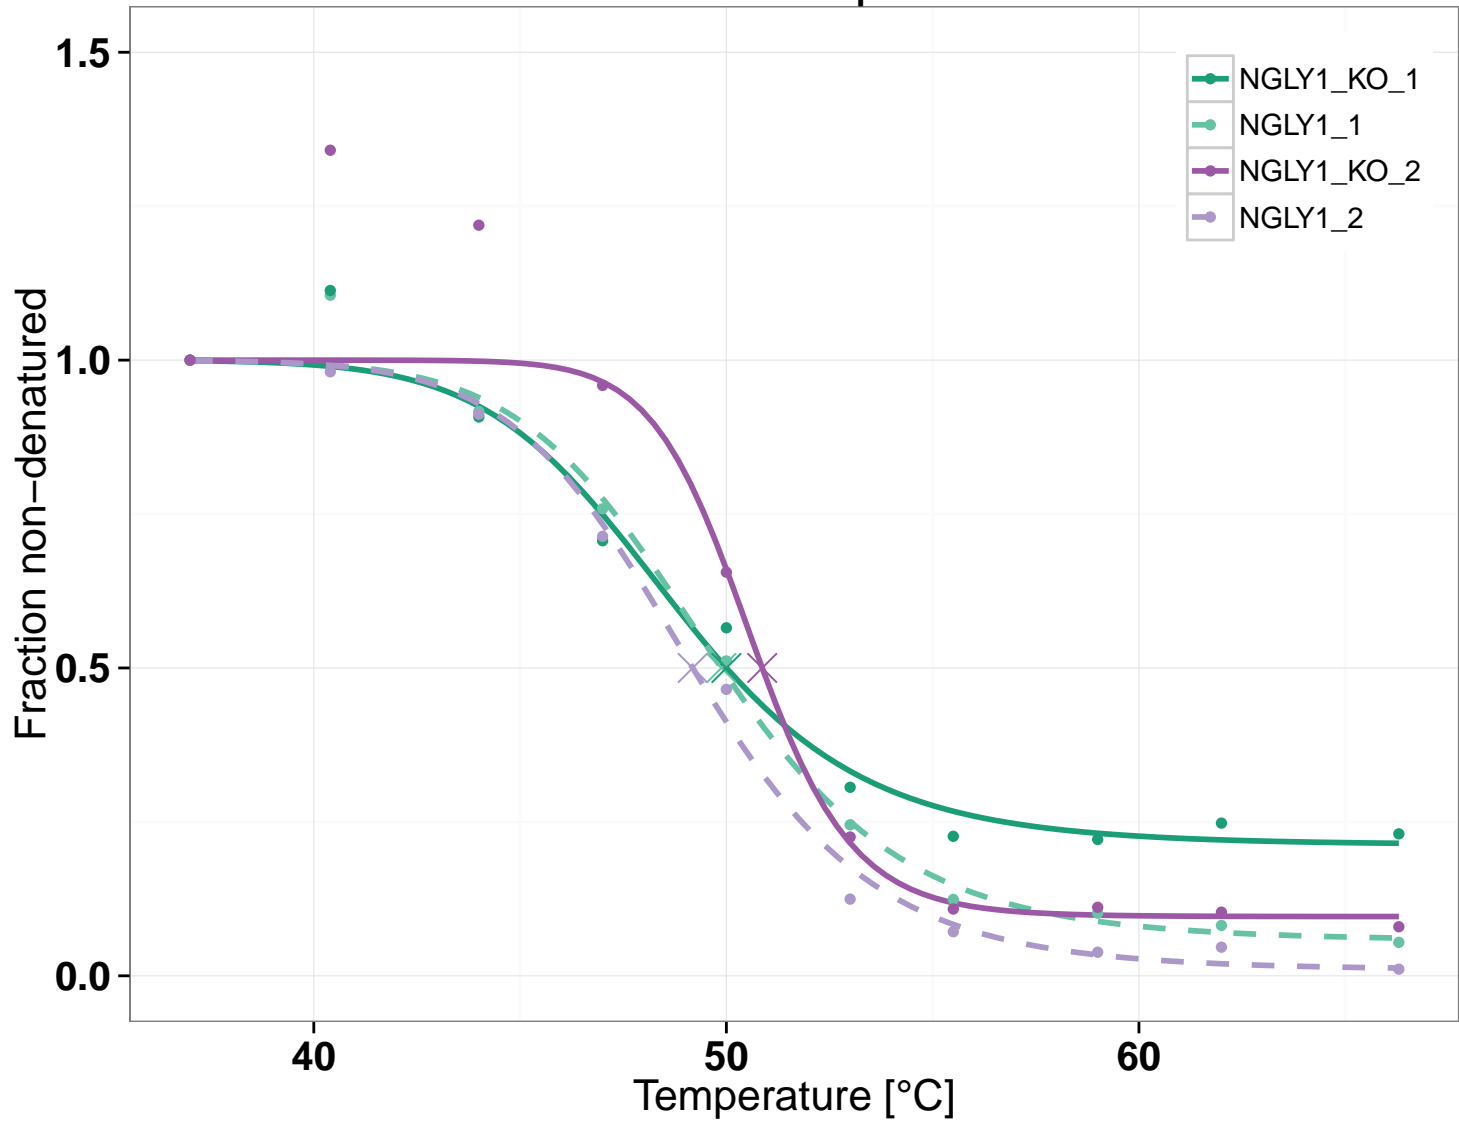

|            | meltPoint | slope  | plateau | R2   |
|------------|-----------|--------|---------|------|
| NGLY1_KO_1 | 50        | -0.086 | 0.21    | 0.98 |
| NGLY1_1    | 49.88     | -0.1   | 0.06    | 0.99 |
| NGLY1_KO_2 | 50.87     | -0.19  | 0.1     | 0.93 |
| NGLY1_2    | 49.18     | -0.11  | 0.01    | 1    |

Supplement: Supplementary file 409 [file 1]

IPI00013167.1|MRPS25

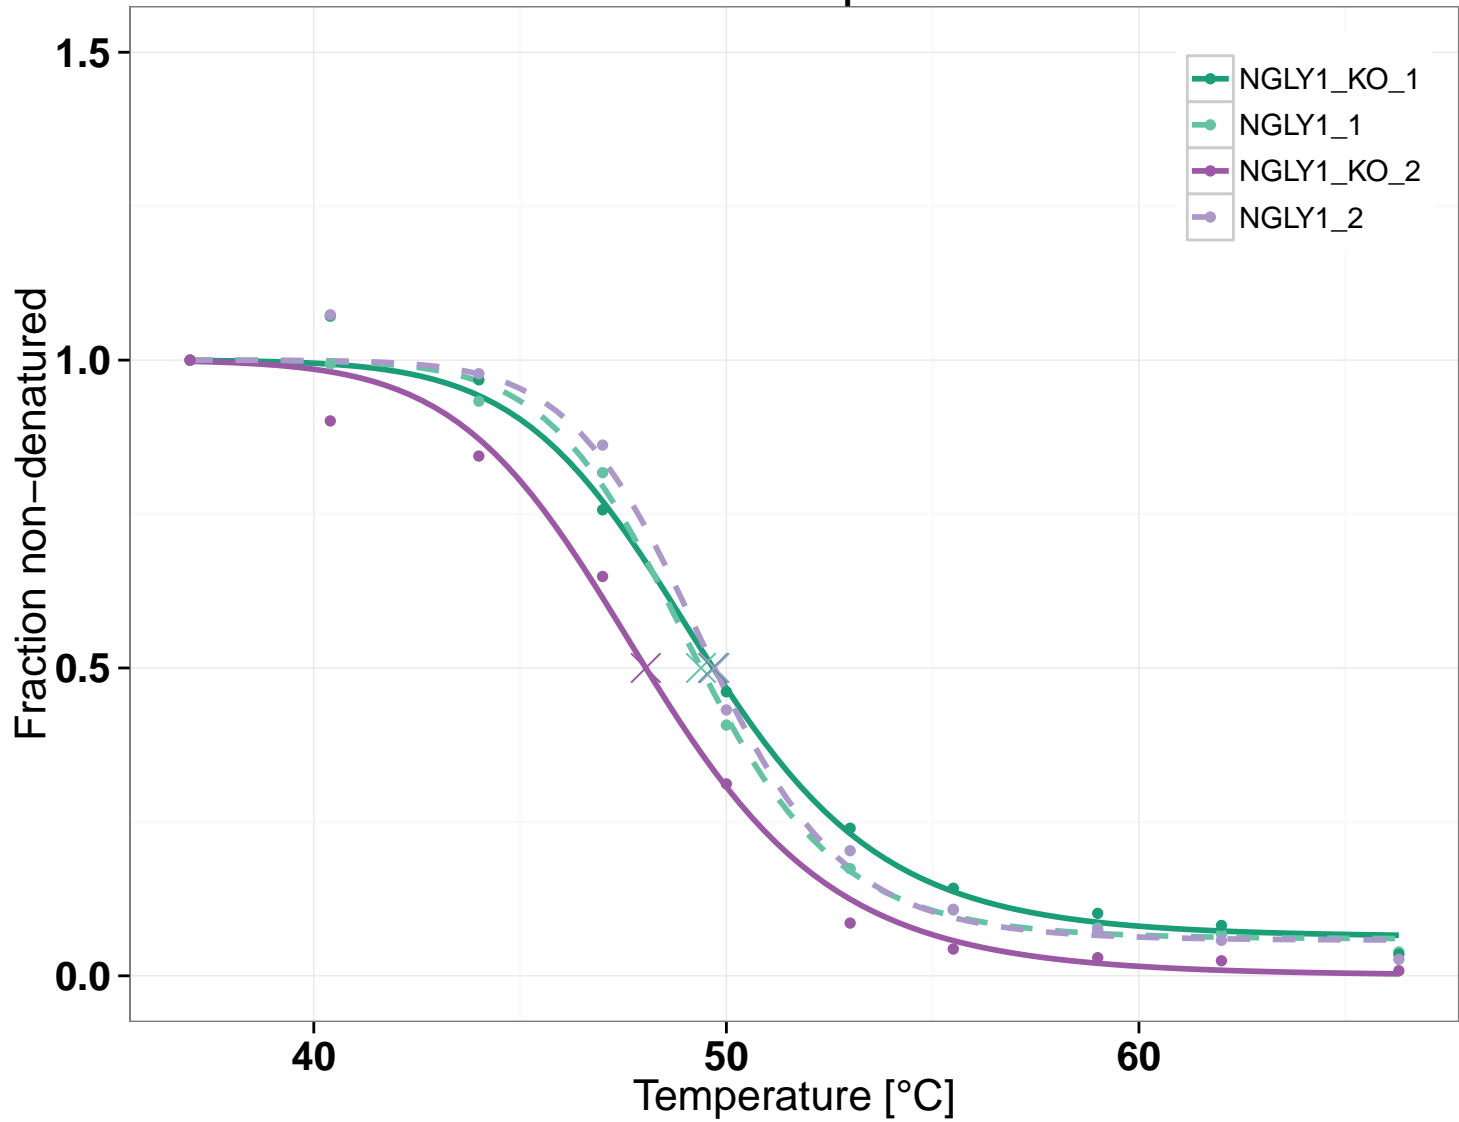

|            | meltPoint | slope | plateau | R2   |
|------------|-----------|-------|---------|------|
| NGLY1_KO_1 | 49.68     | -0.11 | 0.06    | 0.99 |
| NGLY1_1    | 49.38     | -0.13 | 0.06    | 1    |
| NGLY1_KO_2 | 48.05     | -0.11 | 0       | 0.99 |
| NGLY1_2    | 49.71     | -0.14 | 0.06    | 0.99 |

Supplement: Supplementary file 410 [file 1]

# IPI00218466.7|SEC61A1

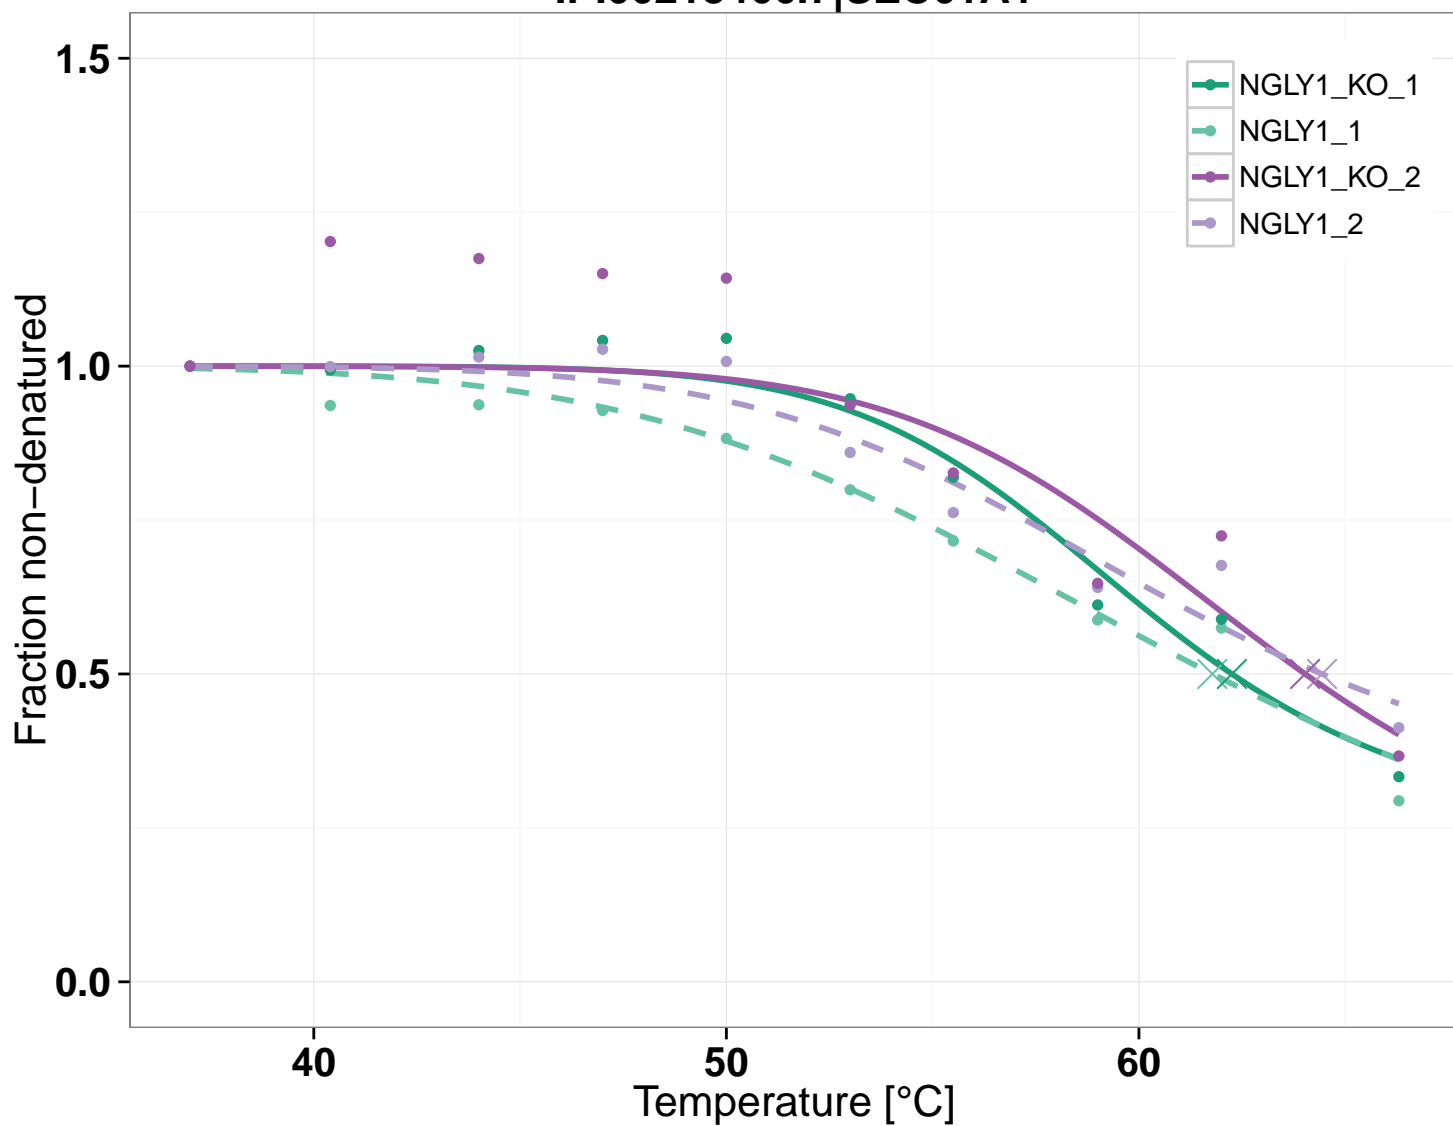

|            | meltPoint | slope  | plateau | R2   |
|------------|-----------|--------|---------|------|
| NGLY1_KO_1 | 62.25     | -0.055 | 0.24    | 0.97 |
| NGLY1_1    | 61.78     | -0.036 | 0       | 0.97 |
| NGLY1_KO_2 | 64.03     | -0.052 | 0.13    | 0.77 |
| NGLY1_2    | 64.44     | -0.037 | 0.26    | 0.94 |

Supplement: Supplementary file 411 [file 1]

IPI00384746.2|CPNE8

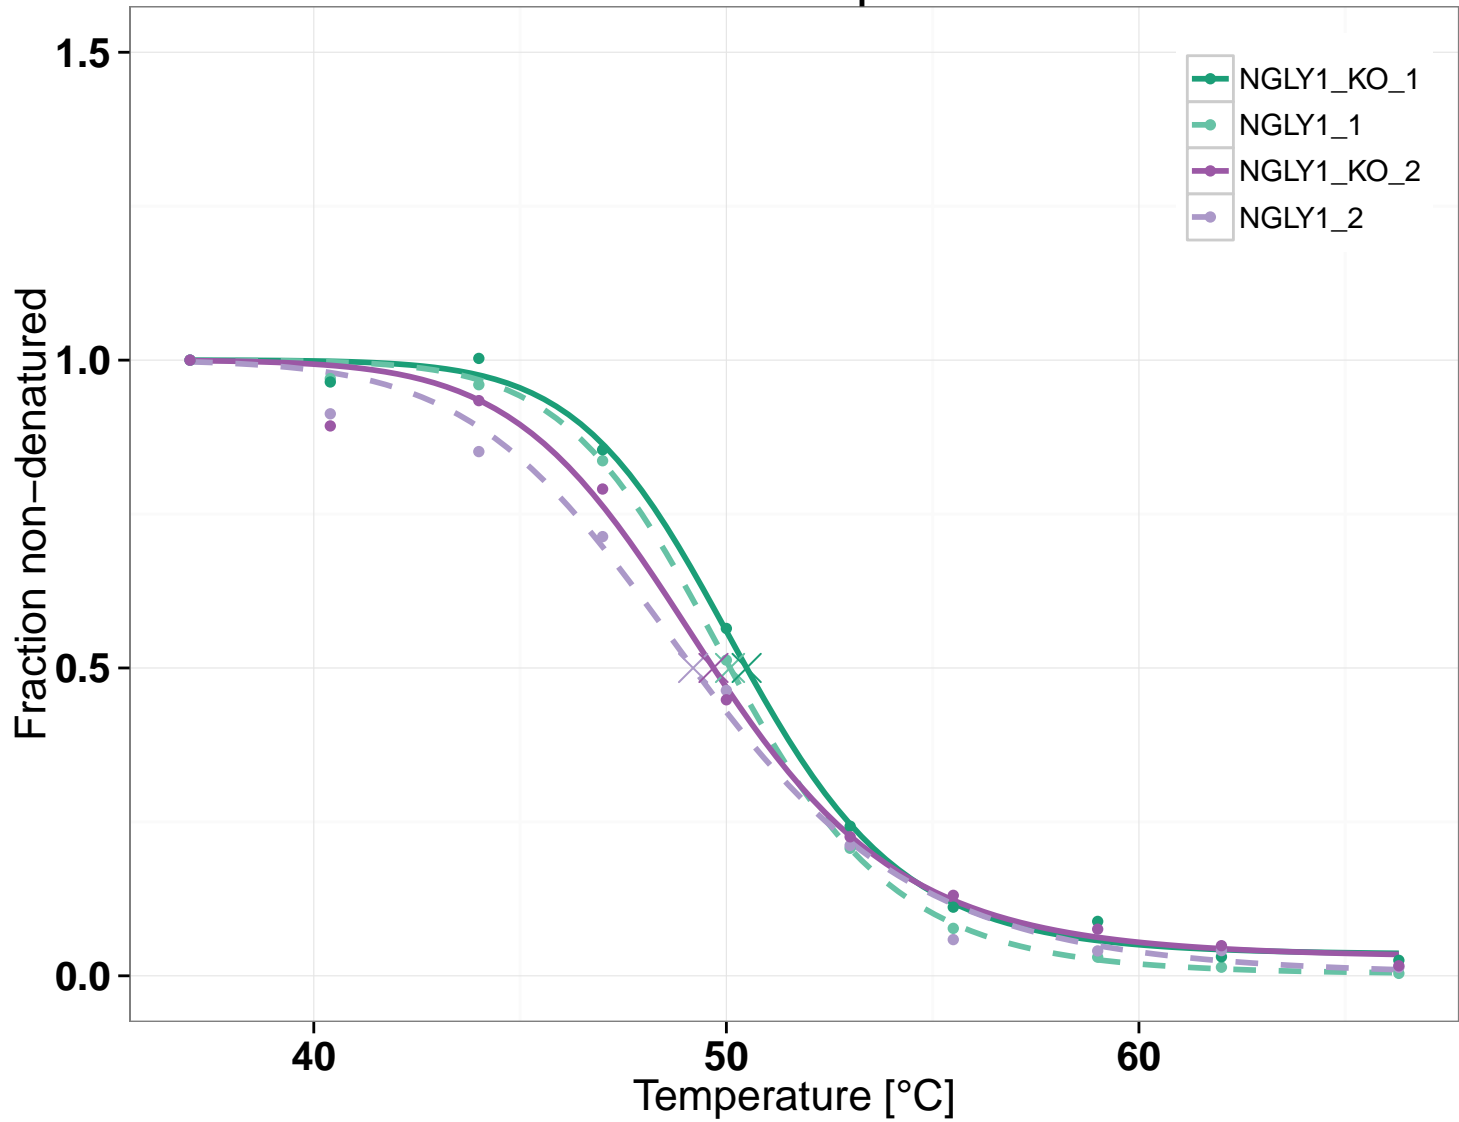

|            | meltPoint | slope  | plateau | R2   |
|------------|-----------|--------|---------|------|
| NGLY1_KO_1 | 50.49     | -0.12  | 0.03    | 1    |
| NGLY1_1    | 50.09     | -0.12  | 0       | 1    |
| NGLY1_KO_2 | 49.69     | -0.1   | 0.03    | 0.99 |
| NGLY1_2    | 49.19     | -0.092 | 0       | 0.99 |

Supplement: Supplementary file 412 [file 1]

IPI00414629.2|UNC119B

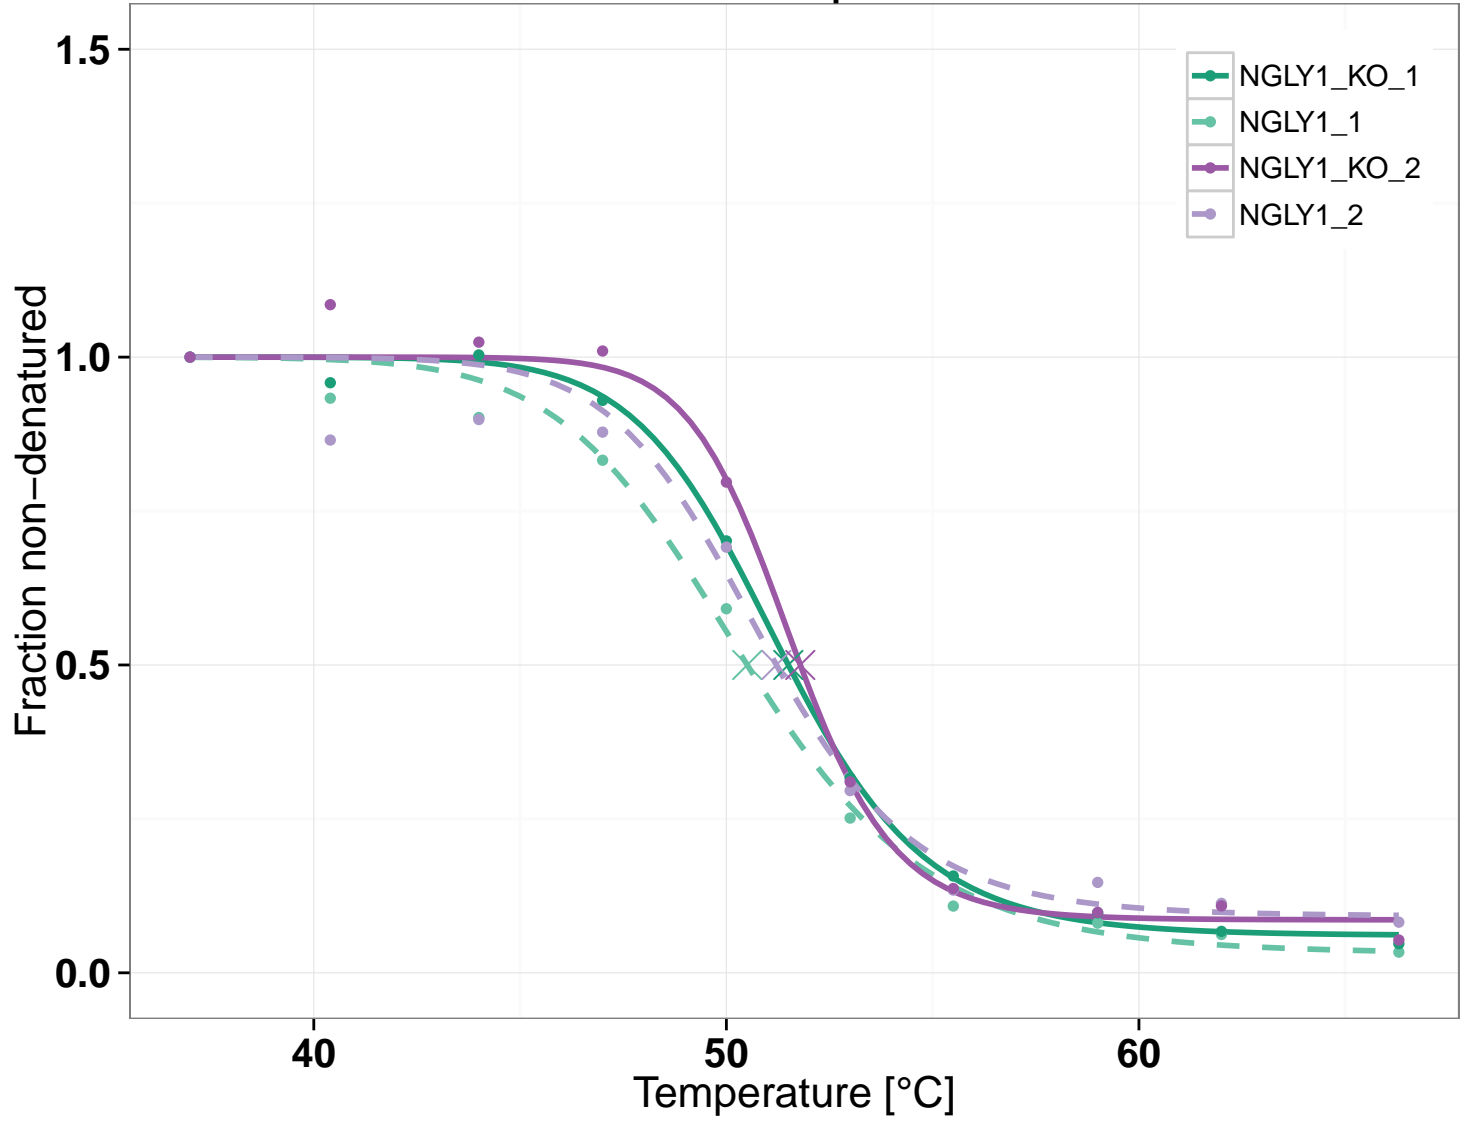

|            | meltPoint | slope | plateau | R2   |
|------------|-----------|-------|---------|------|
| NGLY1_KO_1 | 51.5      | -0.13 | 0.06    | 1    |
| NGLY1_1    | 50.51     | -0.11 | 0.03    | 0.99 |
| NGLY1_KO_2 | 51.79     | -0.18 | 0.09    | 0.99 |
| NGLY1_2    | 51.21     | -0.12 | 0.09    | 0.98 |

Supplement: Supplementary file 413 [file 1]

IPI00022386.2|TXNDC9

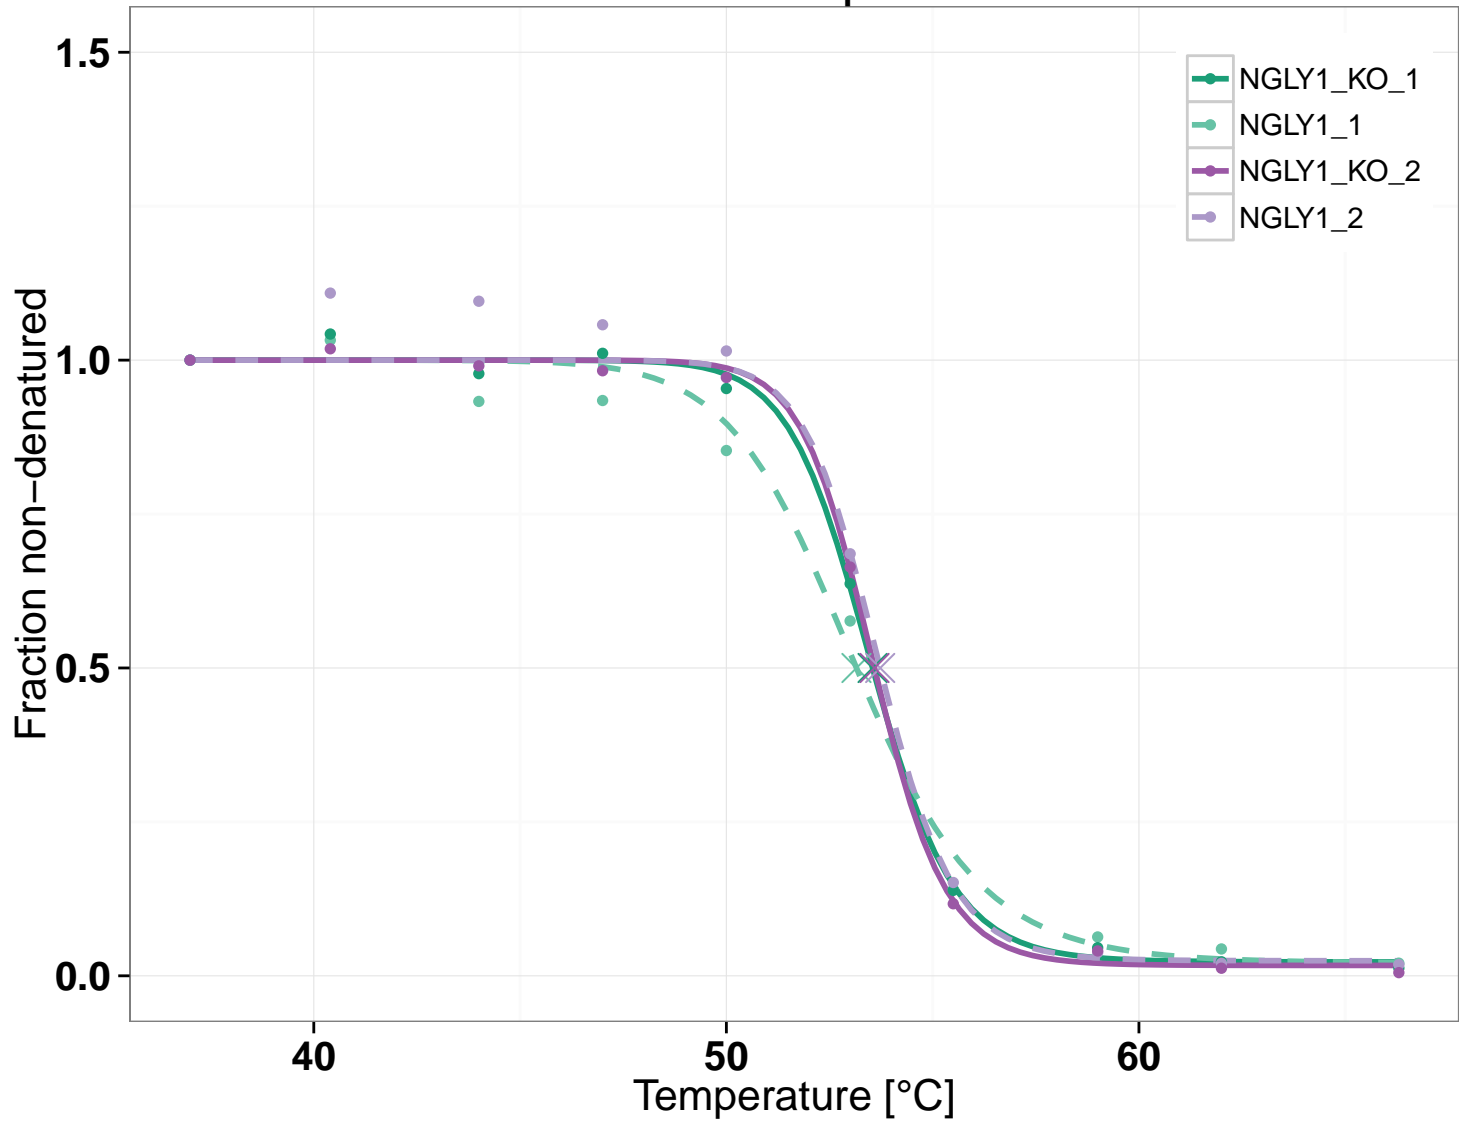

|            | meltPoint | slope | plateau | R2   |
|------------|-----------|-------|---------|------|
| NGLY1_KO_1 | 53.54     | -0.24 | 0.02    | 1    |
| NGLY1_1    | 53.15     | -0.16 | 0.02    | 0.99 |
| NGLY1_KO_2 | 53.59     | -0.28 | 0.02    | 1    |
| NGLY1_2    | 53.73     | -0.27 | 0.02    | 0.99 |

Supplement: Supplementary file 414 [file 1]

IPI00083281.1|APEX2

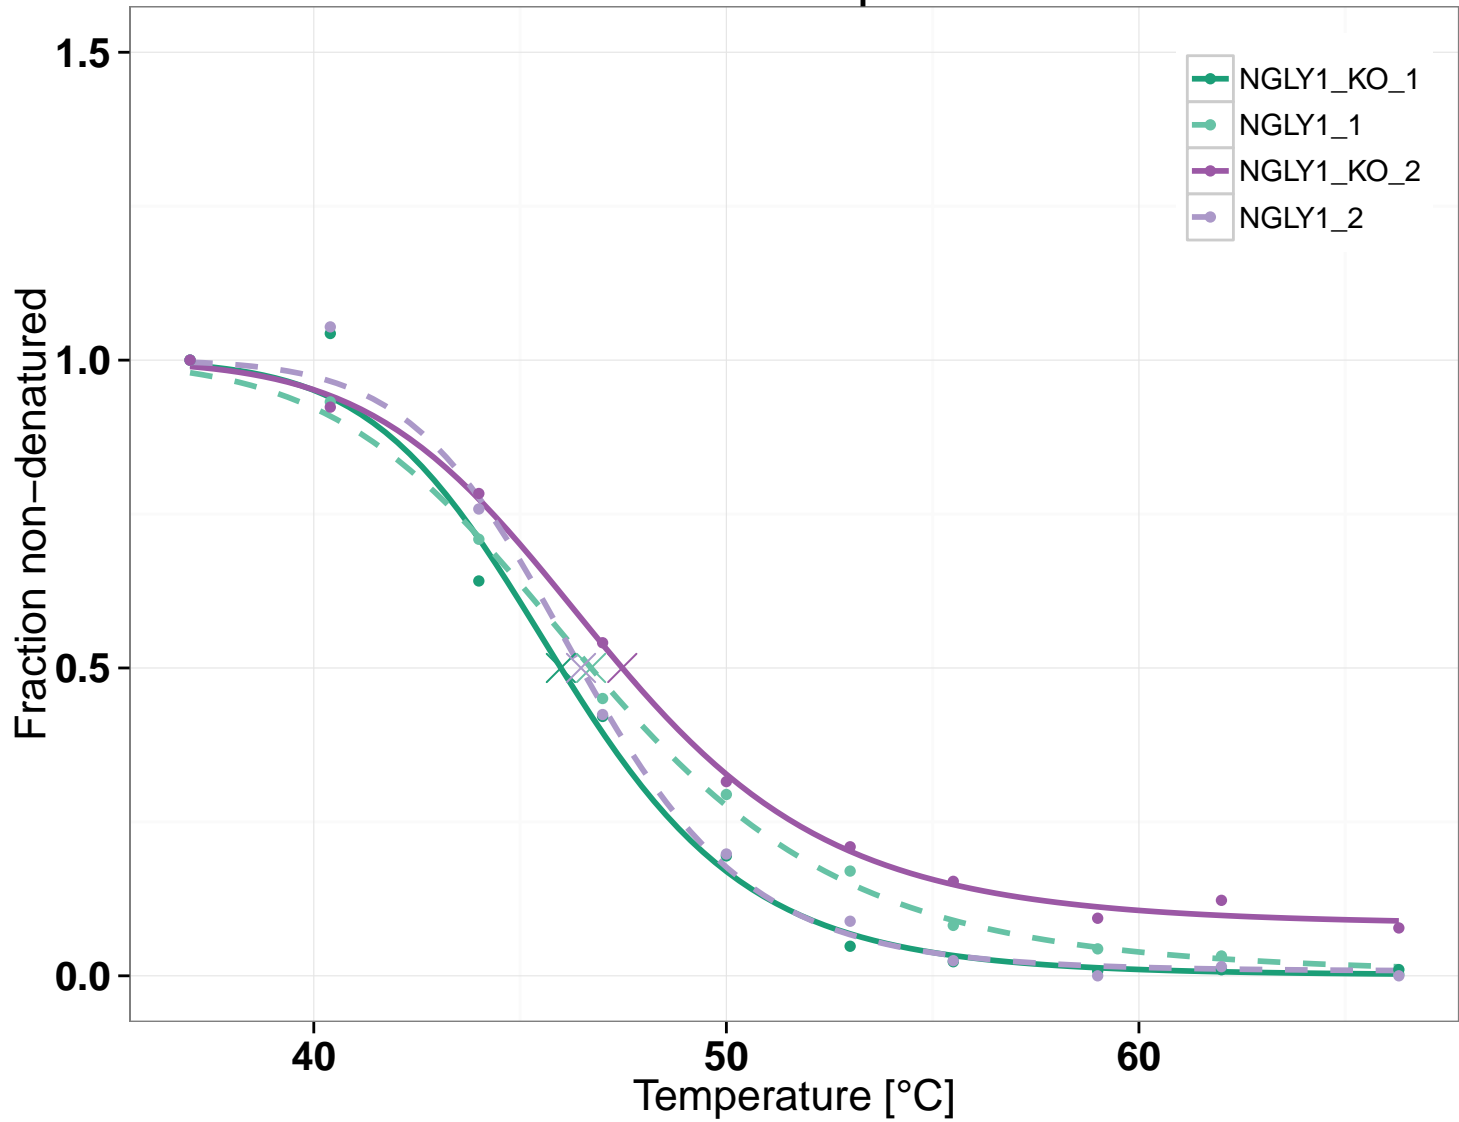

|            | meltPoint | slope  | plateau | R2   |
|------------|-----------|--------|---------|------|
| NGLY1_KO_1 | 45.99     | -0.11  | 0       | 0.99 |
| NGLY1_1    | 46.72     | -0.08  | 0       | 1    |
| NGLY1_KO_2 | 47.48     | -0.082 | 0.08    | 1    |
| NGLY1_2    | 46.48     | -0.12  | 0.01    | 0.99 |

Supplement: Supplementary file 415 [file 1]

# IPI00032370.5|ALG8

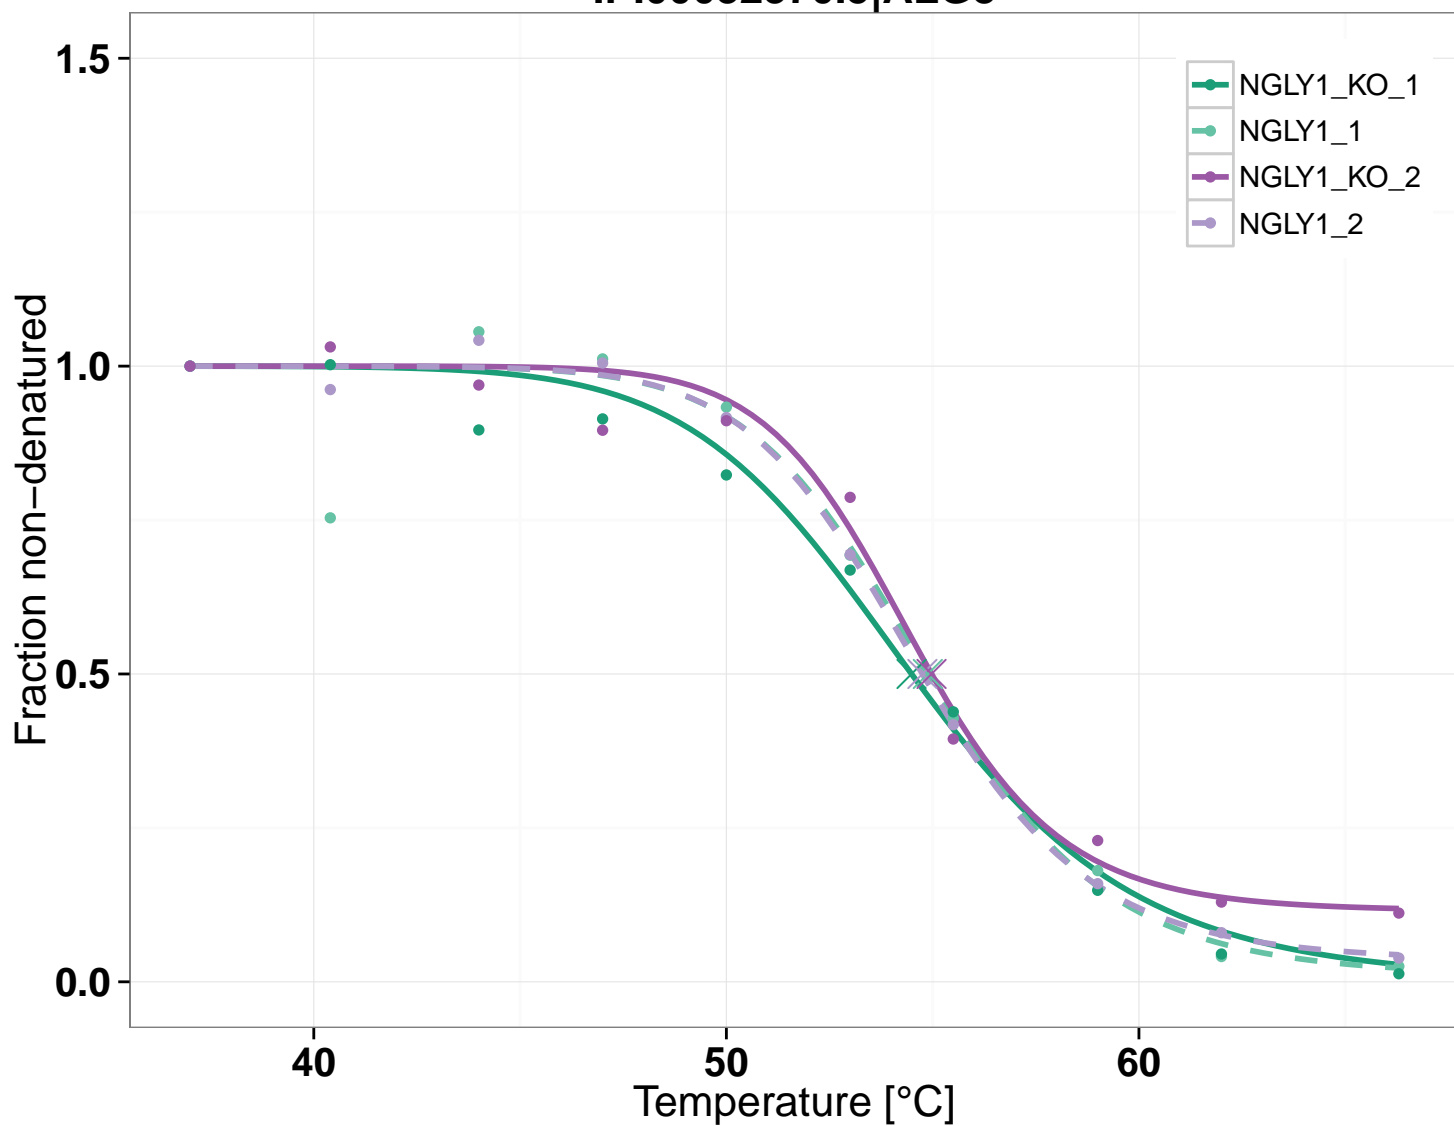

|            | meltPoint | slope  | plateau | R2   |
|------------|-----------|--------|---------|------|
| NGLY1_KO_1 | 54.49     | -0.092 | 0       | 0.99 |
| NGLY1_1    | 54.88     | -0.11  | 0.01    | 0.96 |
| NGLY1_KO_2 | 54.97     | -0.12  | 0.11    | 0.99 |
| NGLY1_2    | 54.75     | -0.12  | 0.03    | 1    |

Supplement: Supplementary file 416 [file 1]

IPI00305144.1|TSSC4

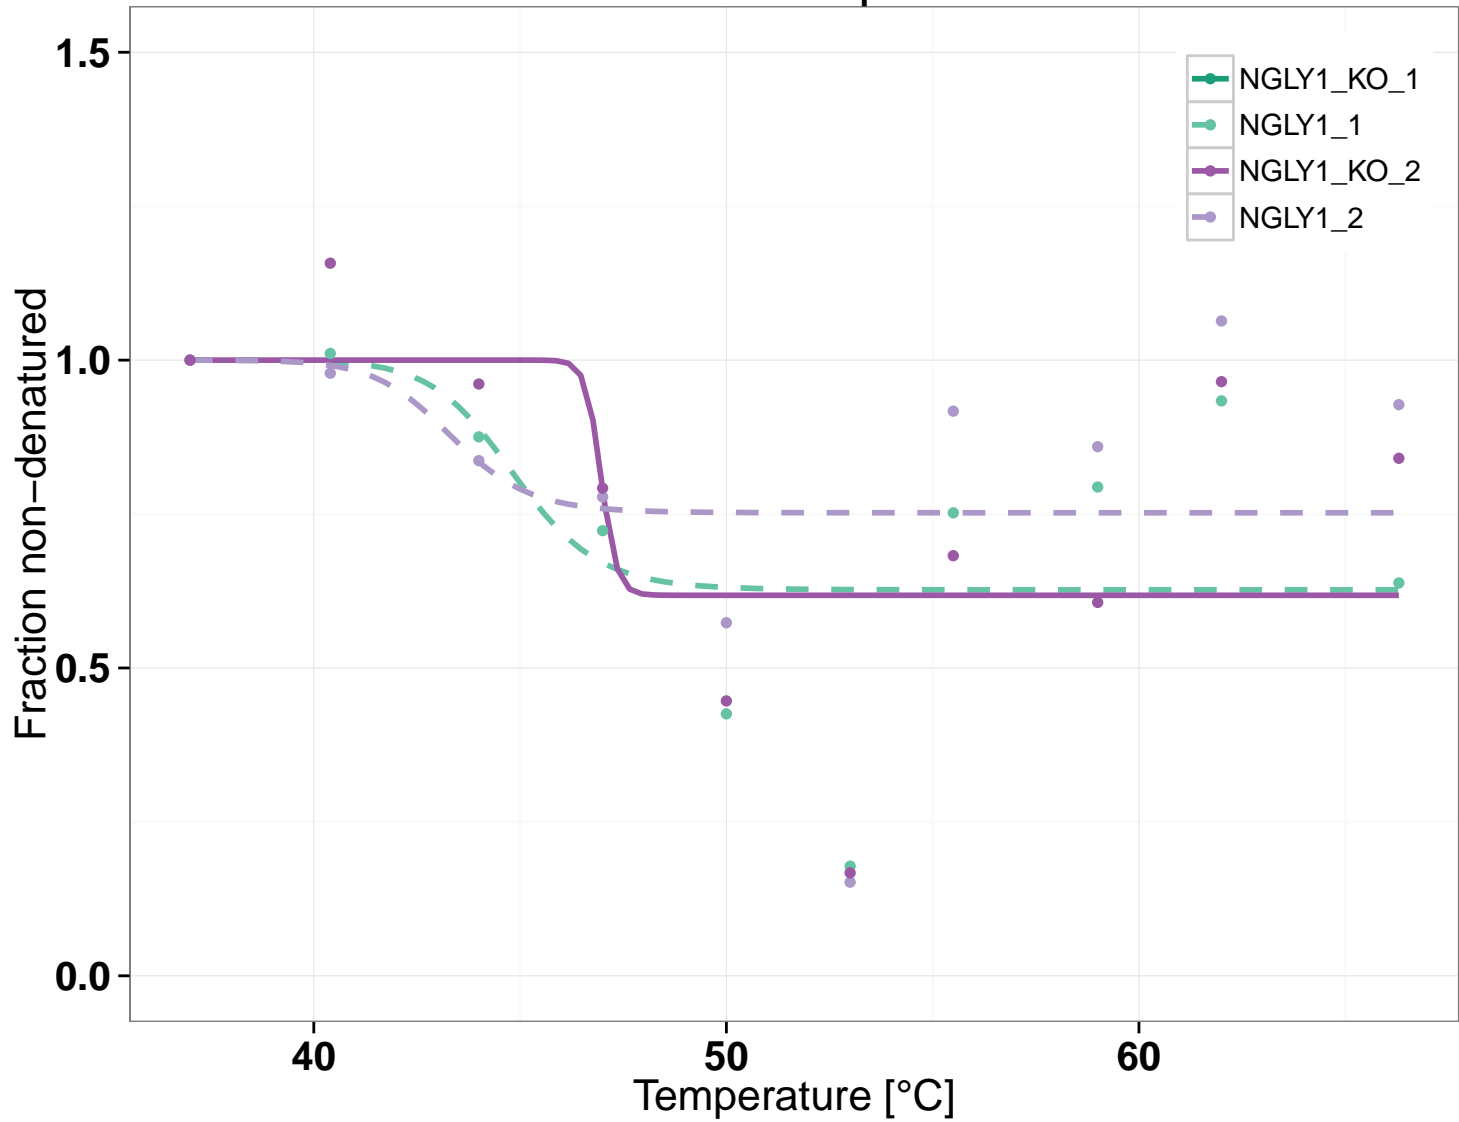

|            | meltPoint | slope  | plateau | R2   |
|------------|-----------|--------|---------|------|
| NGLY1_KO_1 | -         | -      | -       | -    |
| NGLY1_1    | -         | -0.092 | 0.63    | 0.38 |
| NGLY1_KO_2 | -         | -0.51  | 0.62    | 0.45 |
| NGLY1_2    | -         | -0.066 | 0.75    | 0.14 |

Supplement: Supplementary file 417 [file 1]

# IPI00008445.3|URM1

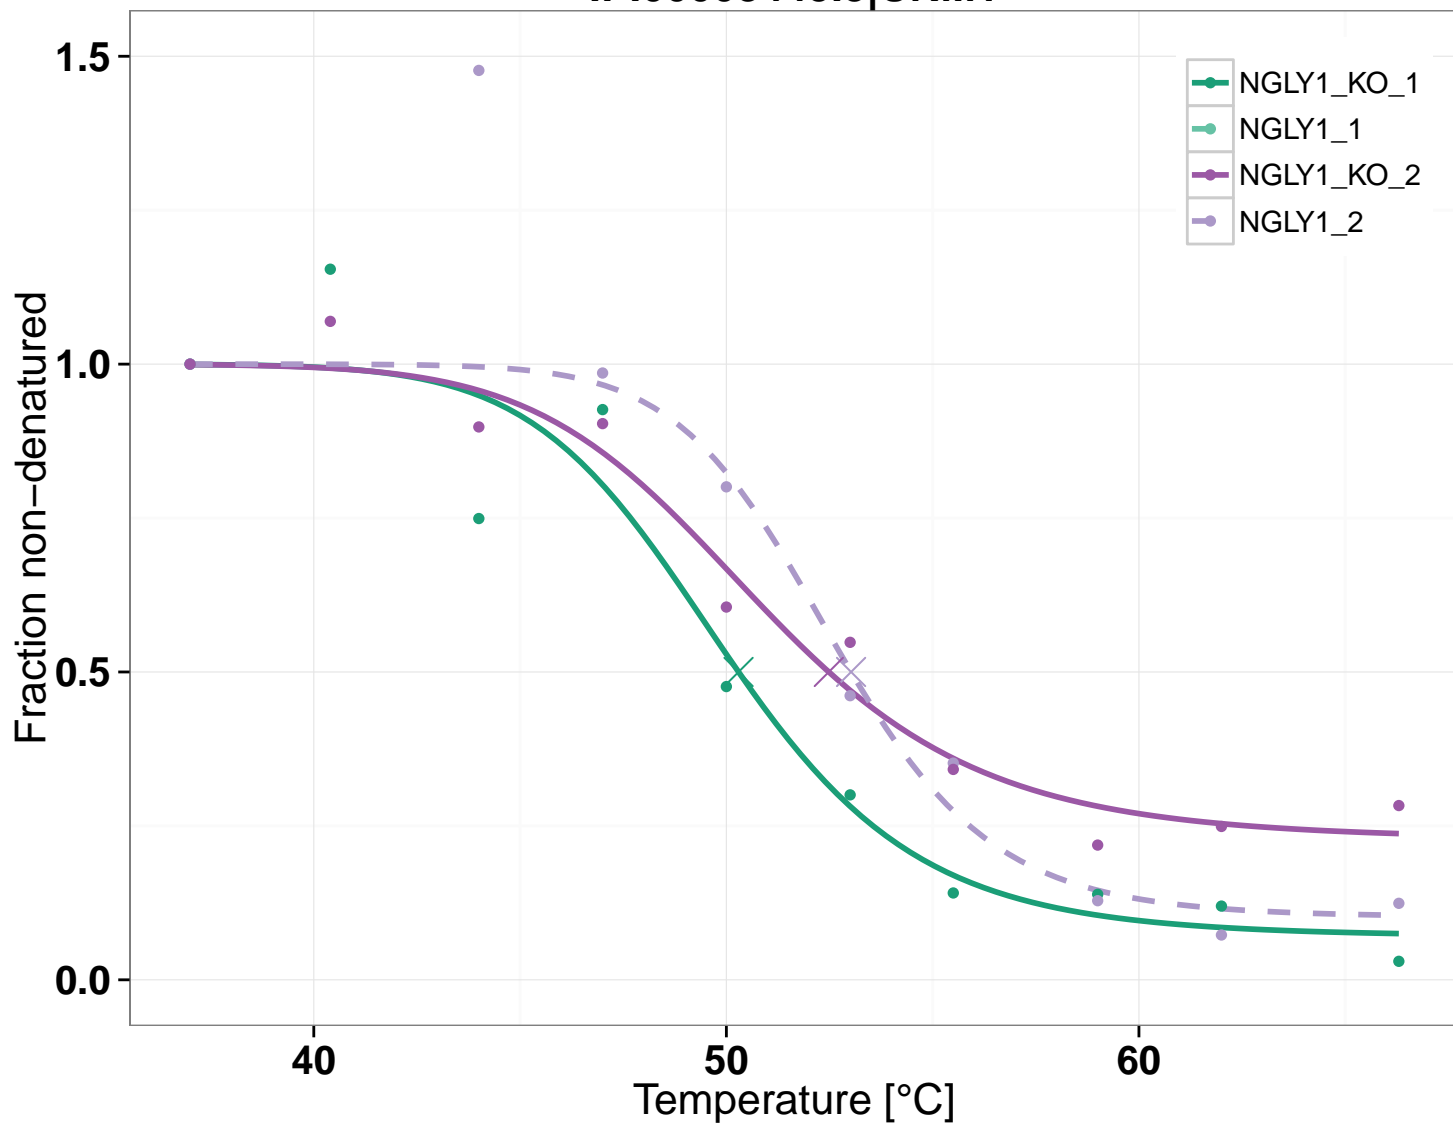

|            | meltPoint | slope  | plateau | R2   |
|------------|-----------|--------|---------|------|
| NGLY1_KO_1 | 50.3      | -0.099 | 0.07    | 0.94 |
| NGLY1_1    | —         | —      | —       | —    |
| NGLY1_KO_2 | 52.48     | -0.071 | 0.23    | 0.97 |
| NGLY1_2    | 53.02     | -0.12  | 0.1     | 0.8  |

Supplement: Supplementary file 418 [file 1]

IPI00059264.3|VPS26B

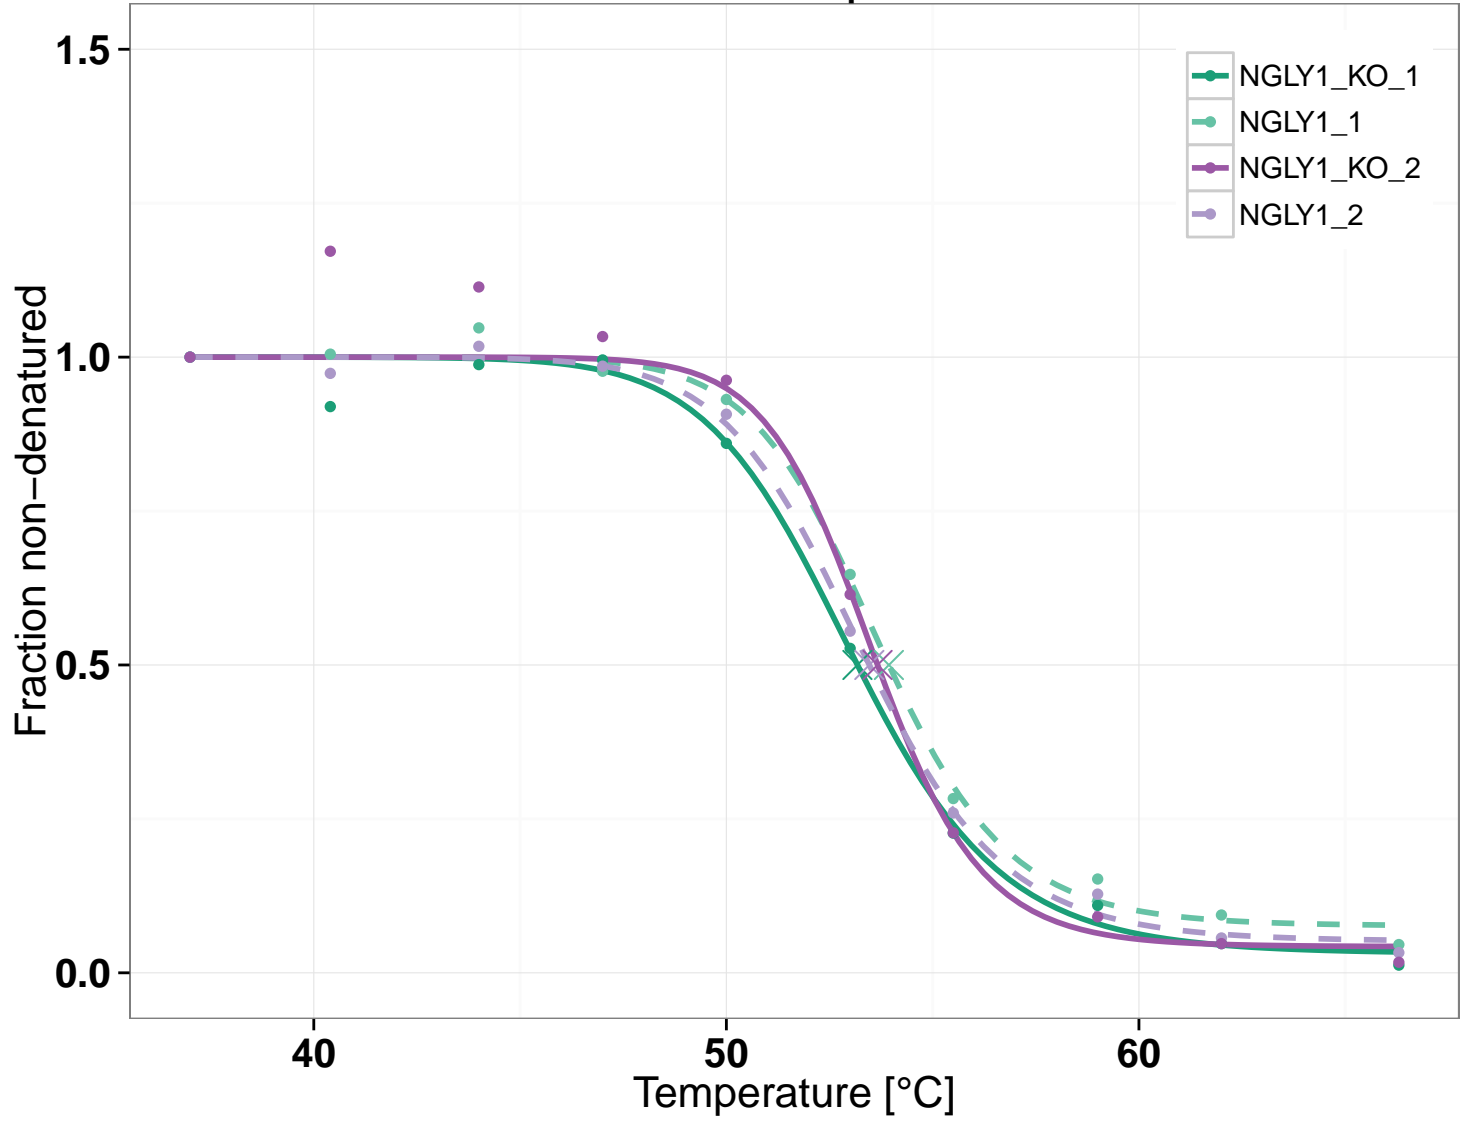

|            | meltPoint | slope | plateau | R2   |
|------------|-----------|-------|---------|------|
| NGLY1_KO_1 | 53.18     | -0.13 | 0.03    | 0.99 |
| NGLY1_1    | 53.94     | -0.15 | 0.08    | 1    |
| NGLY1_KO_2 | 53.66     | -0.18 | 0.04    | 0.98 |
| NGLY1_2    | 53.47     | -0.14 | 0.05    | 1    |

Supplement: Supplementary file 419 [file 1]

# IPI00306835.3|FKTN

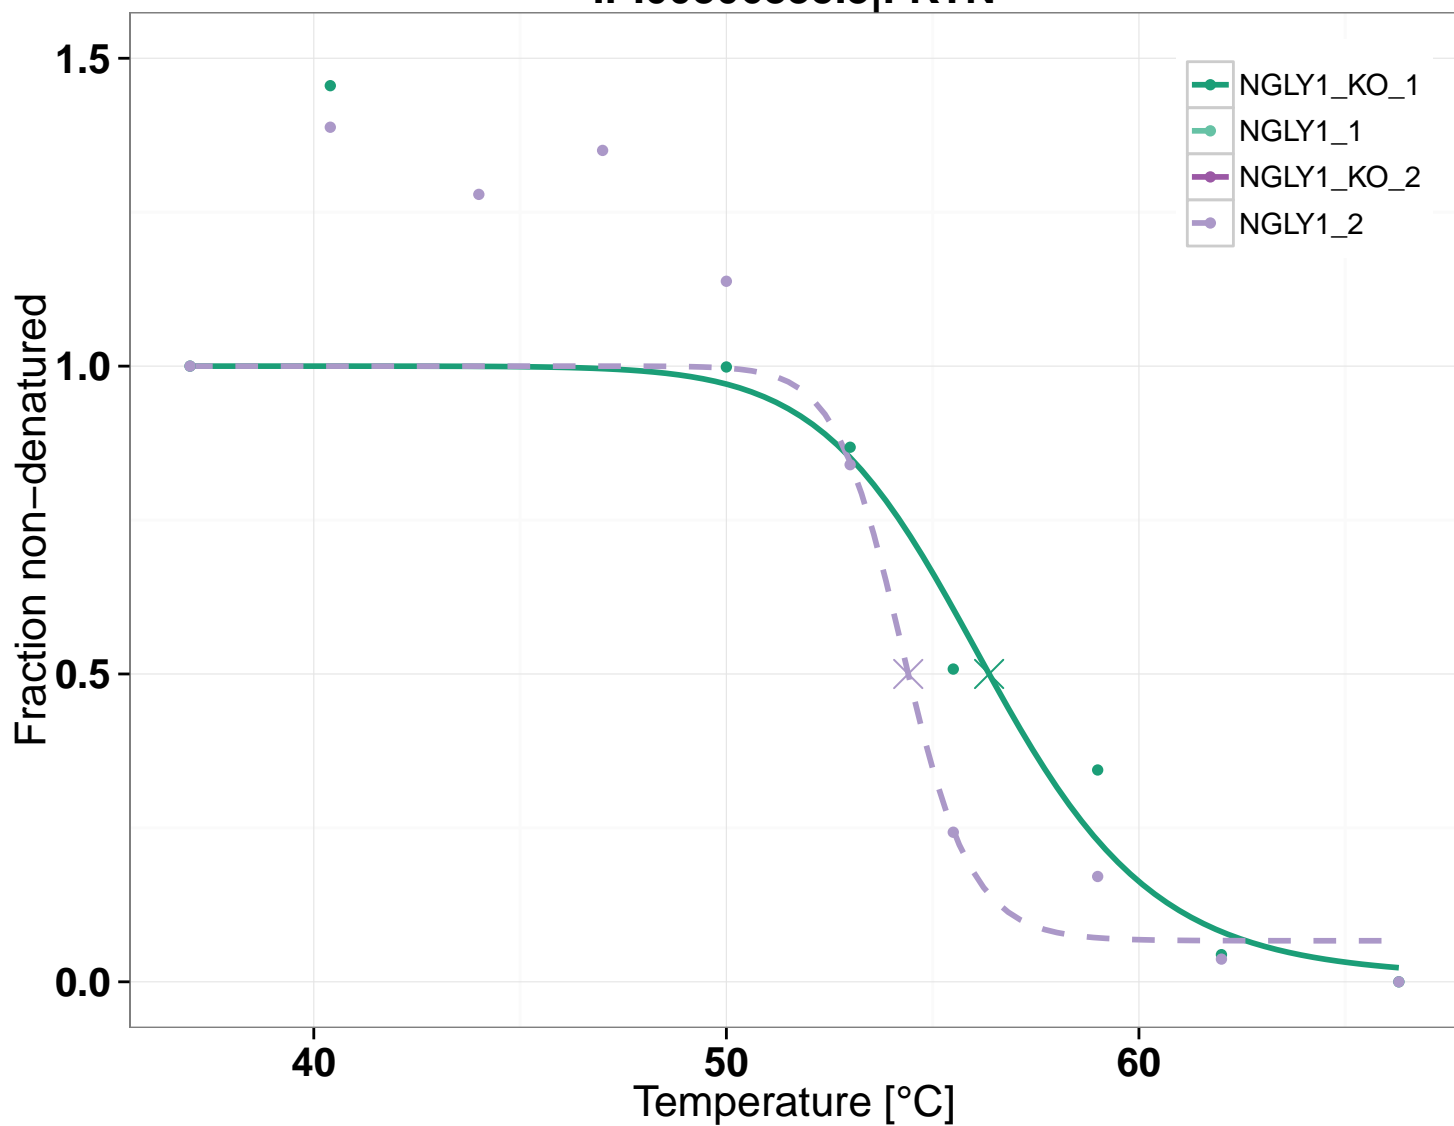

|            | meltPoint | slope | plateau | R2   |
|------------|-----------|-------|---------|------|
| NGLY1_KO_1 | 56.37     | -0.12 | 0.01    | 0.58 |
| NGLY1_1    | -         | -     | -       | -    |
| NGLY1_KO_2 | -         | -     | -       | -    |
| NGLY1_2    | 54.41     | -0.28 | 0.07    | 0.87 |

Supplement: Supplementary file 420 [file 1]

IPI00306419.5|LPCAT3

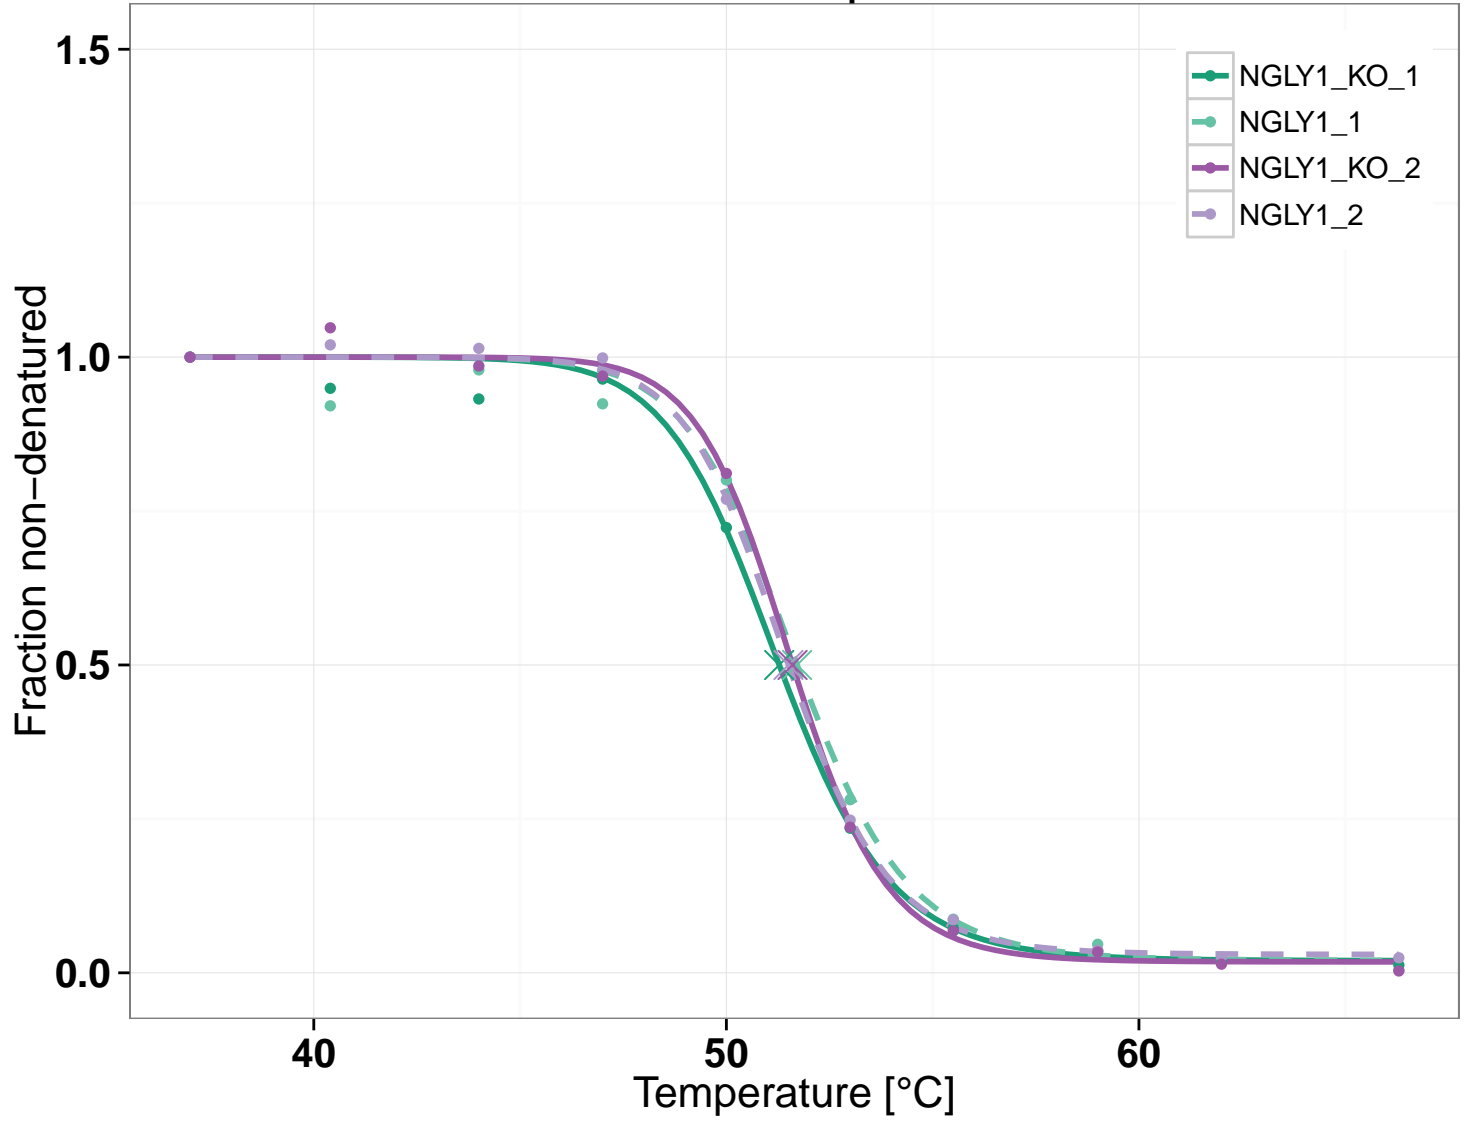

|            | meltPoint | slope | plateau | R2   |
|------------|-----------|-------|---------|------|
| NGLY1_KO_1 | 51.28     | -0.18 | 0.02    | 1    |
| NGLY1_1    | 51.71     | -0.18 | 0.02    | 0.99 |
| NGLY1_KO_2 | 51.6      | -0.21 | 0.02    | 1    |
| NGLY1_2    | 51.51     | -0.19 | 0.03    | 1    |

Supplement: Supplementary file 421 [file 1]

IPI00880048.1|DIS3L2

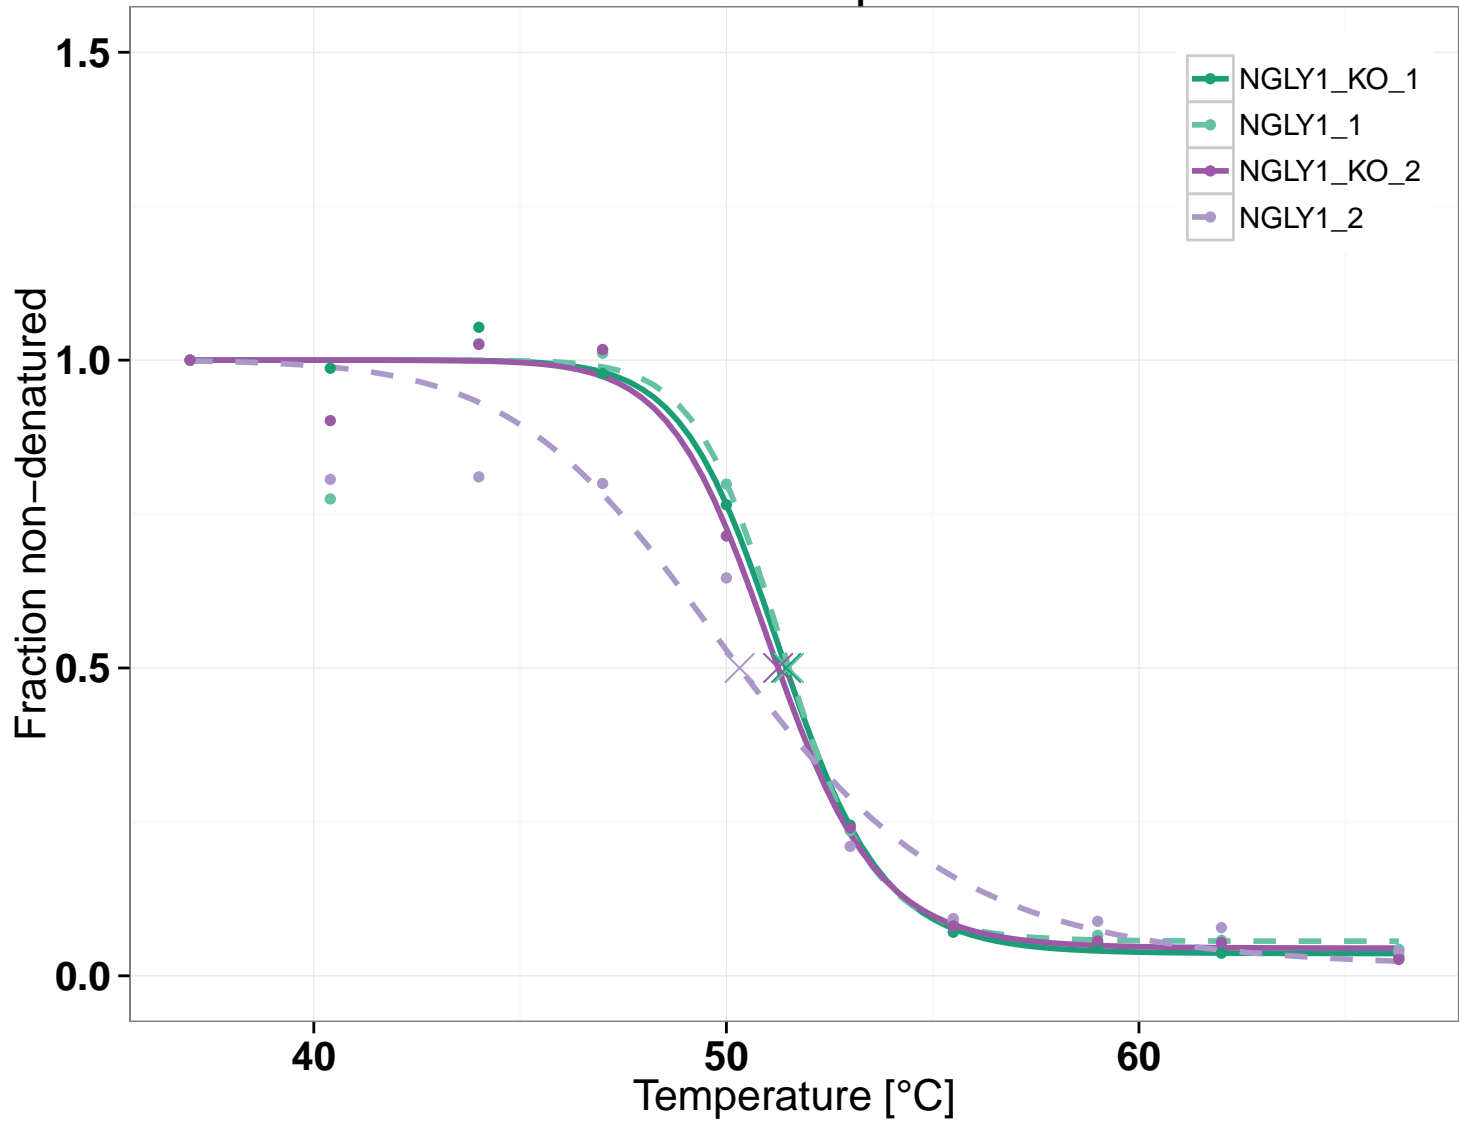

|            | meltPoint | slope  | plateau | R2   |
|------------|-----------|--------|---------|------|
| NGLY1_KO_1 | 51.45     | -0.2   | 0.04    | 1    |
| NGLY1_1    | 51.52     | -0.22  | 0.06    | 0.97 |
| NGLY1_KO_2 | 51.26     | -0.19  | 0.04    | 0.99 |
| NGLY1_2    | 50.32     | -0.091 | 0.01    | 0.94 |

Supplement: Supplementary file 422 [file 1]

# IPI00024976.5|TOMM22

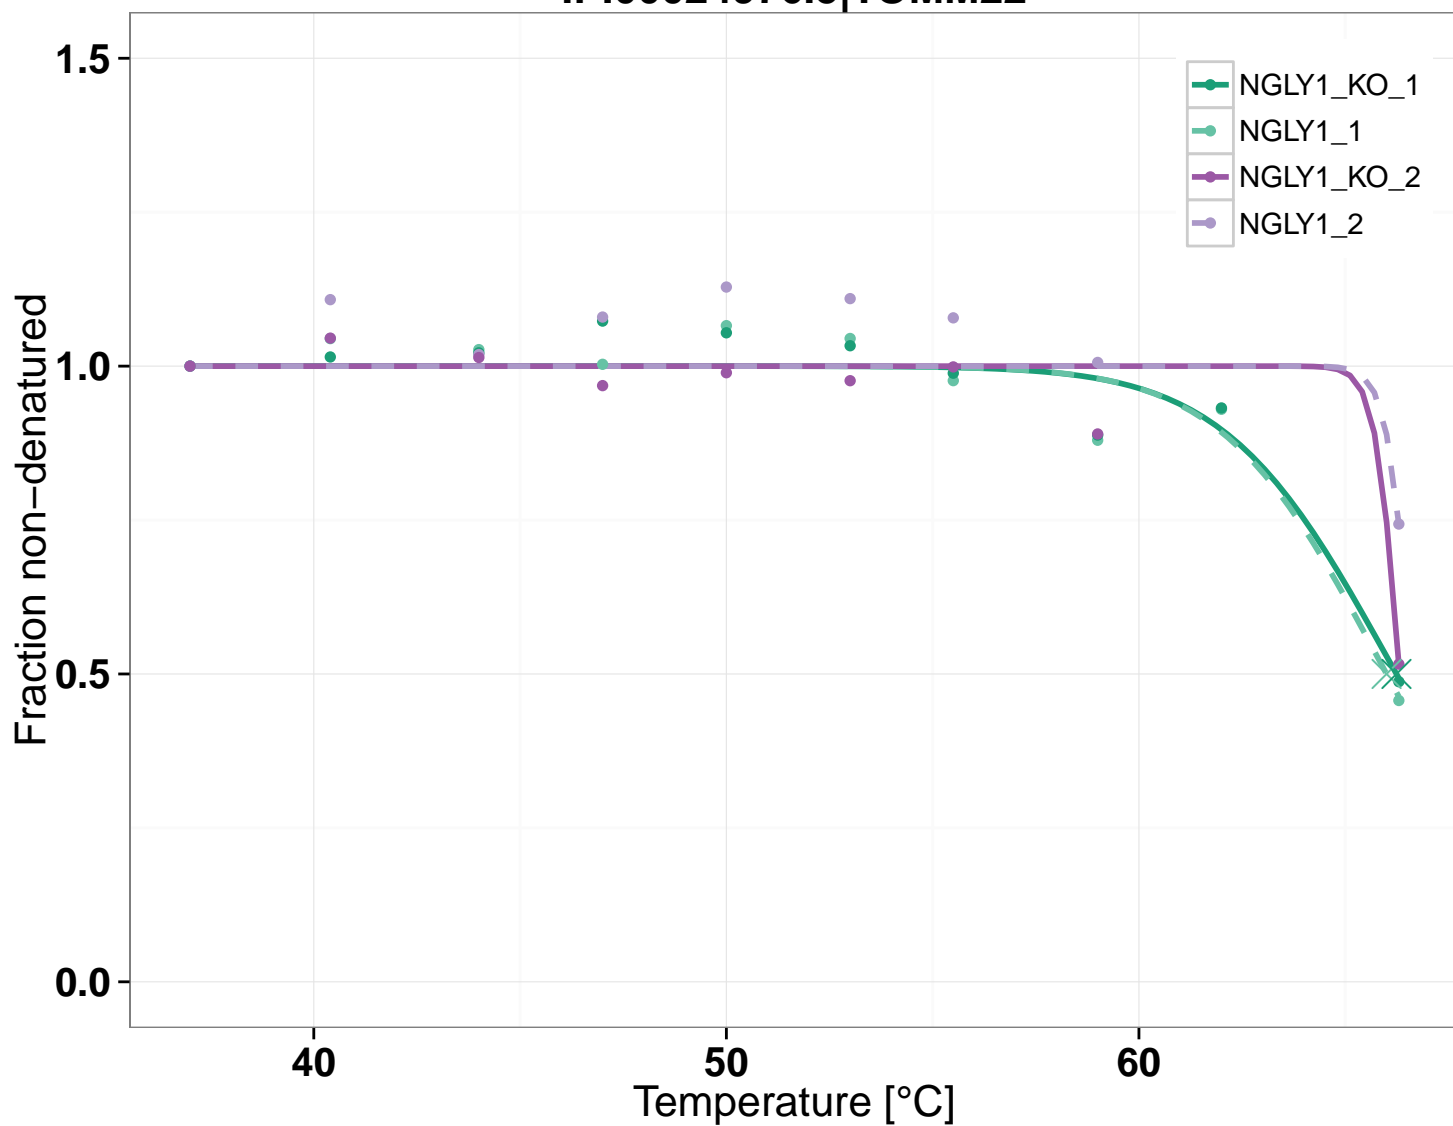

|            | meltPoint | slope | plateau | R2   |
|------------|-----------|-------|---------|------|
| NGLY1_KO_1 | 66.24     | -0.12 | 0       | 0.92 |
| NGLY1_1    | 66        | -0.12 | 0       | 0.93 |
| NGLY1_KO_2 | -         | -     | 0       | 0.78 |
| NGLY1_2    | -         | -     | 0       | 0.28 |

Supplement: Supplementary file 423 [file 1]

# IPI00219622.3|PSMA2

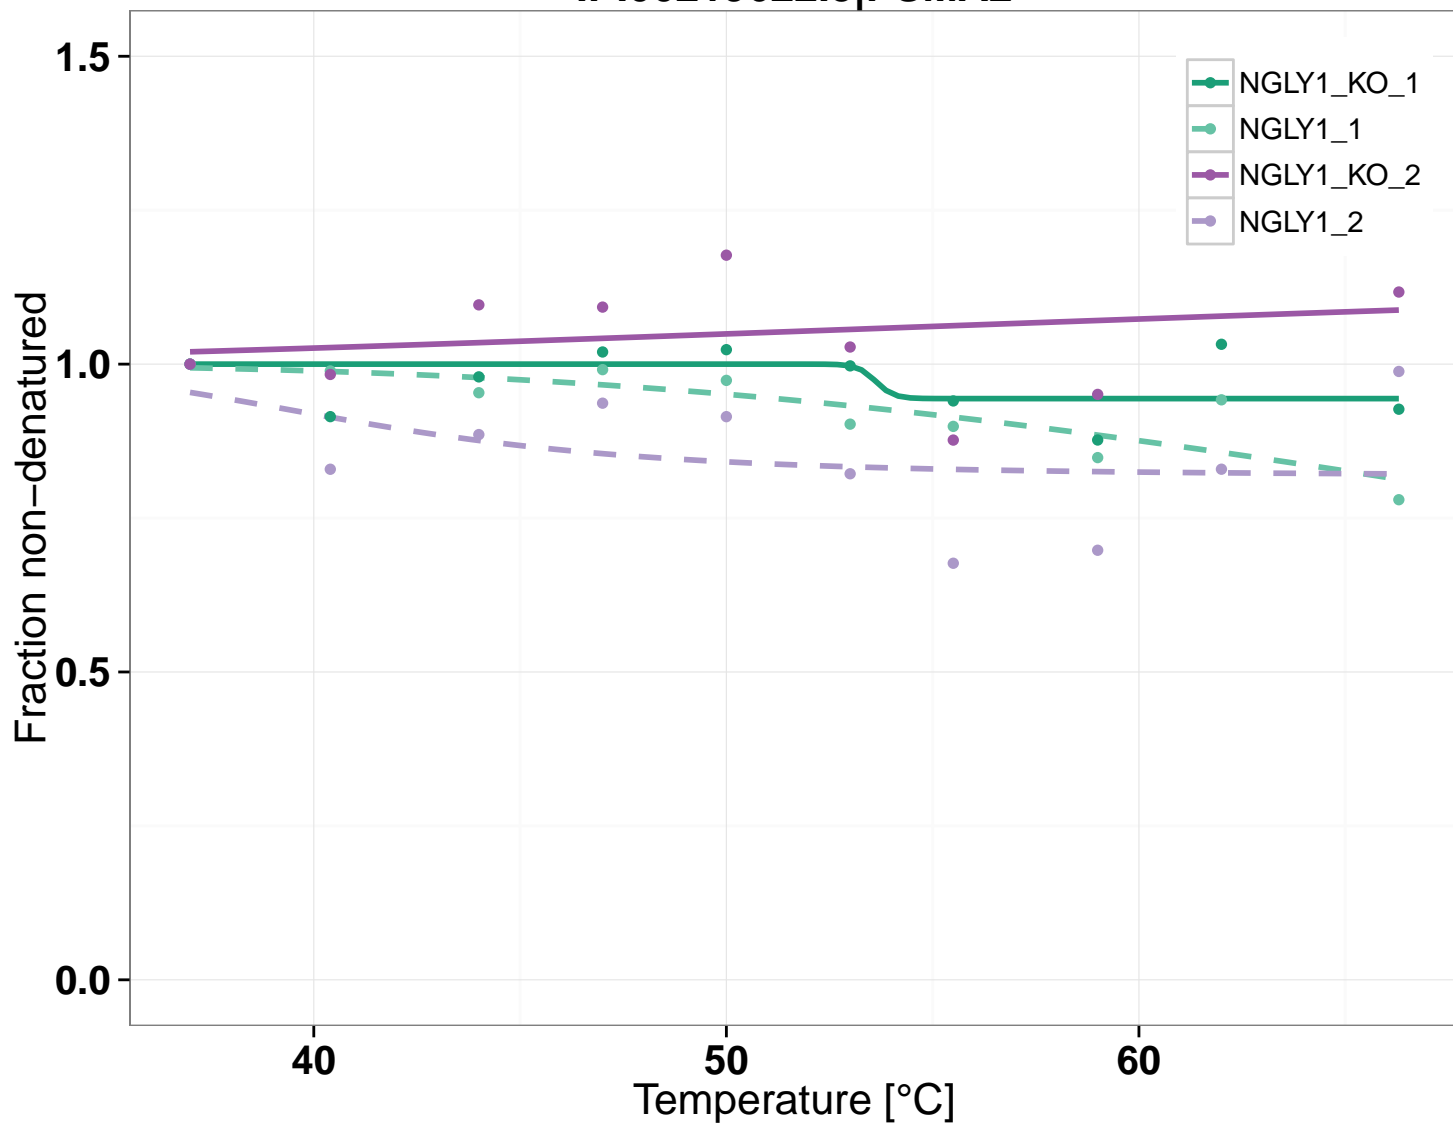

|            | meltPoint | slope  | plateau | R2   |
|------------|-----------|--------|---------|------|
| NGLY1_KO_1 | —         | -0.065 | 0.94    | 0.16 |
| NGLY1_1    | —         | —      | 0       | 0.72 |
| NGLY1_KO_2 | —         | 0.0024 | 1.5     | 0.04 |
| NGLY1_2    | —         | -0.012 | 0.82    | 0.18 |

Supplement: Supplementary file 424 [file 1]

IPI00855787.1|TNKS1BP1

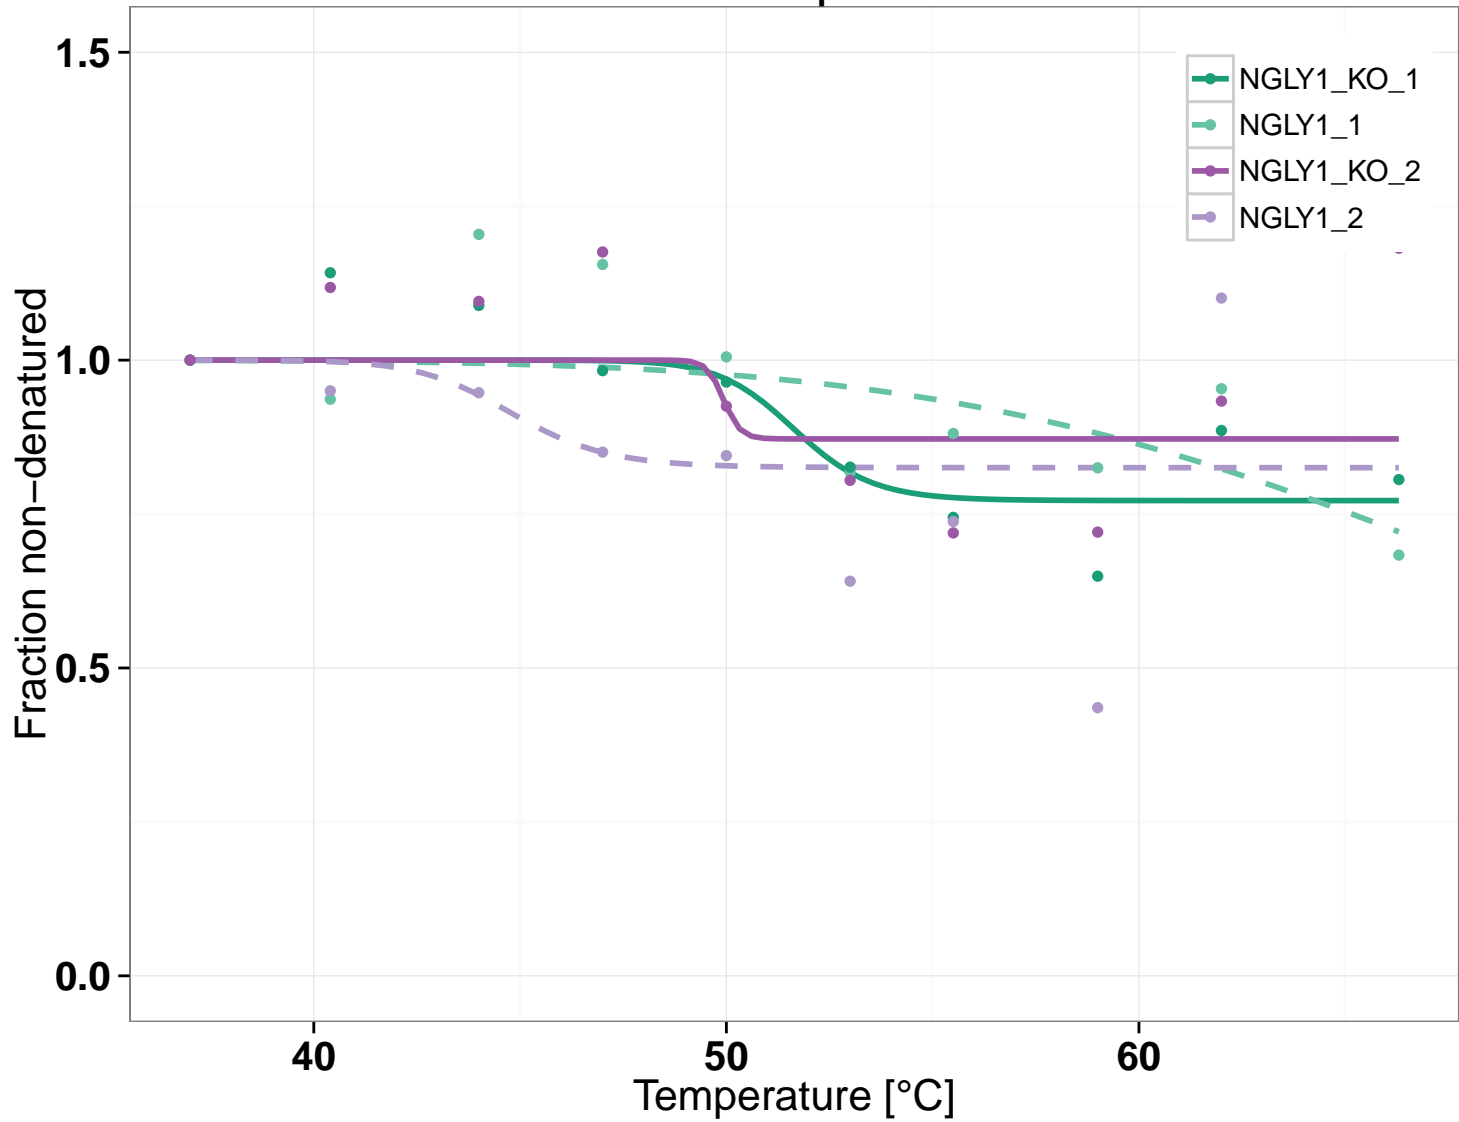

|            | meltPoint | slope  | plateau | R2   |
|------------|-----------|--------|---------|------|
| NGLY1_KO_1 | —         | −0.061 | 0.77    | 0.73 |
| NGLY1_1    | —         | —      | 0       | 0.46 |
| NGLY1_KO_2 | —         | −0.16  | 0.87    | 0.27 |
| NGLY1_2    | —         | −0.038 | 0.83    | 0.09 |

Supplement: Supplementary file 425 [file 1]

# IPI00010428.4|CDCA3

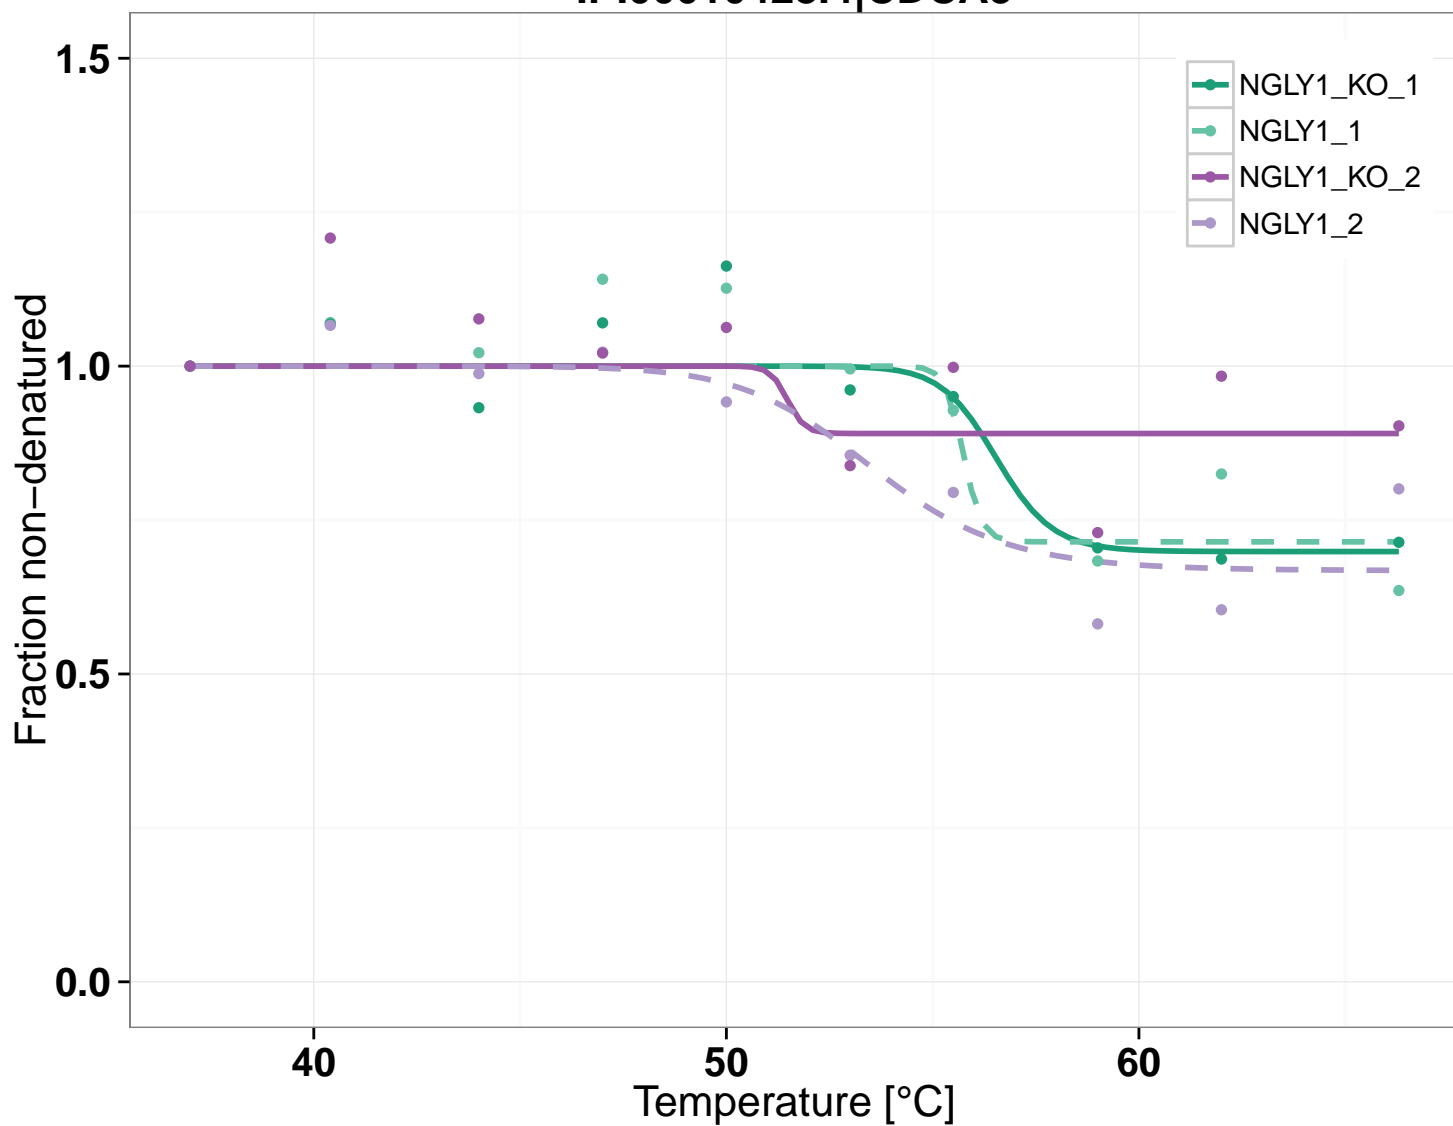

|            | meltPoint | slope  | plateau | R2   |
|------------|-----------|--------|---------|------|
| NGLY1_KO_1 | —         | -0.11  | 0.7     | 0.83 |
| NGLY1_1    | —         | -0.32  | 0.71    | 0.78 |
| NGLY1_KO_2 | —         | -0.13  | 0.89    | 0.36 |
| NGLY1_2    | —         | -0.052 | 0.67    | 0.84 |

Supplement: Supplementary file 426 [file 1]

# IPI00220056.1|KLHDC5

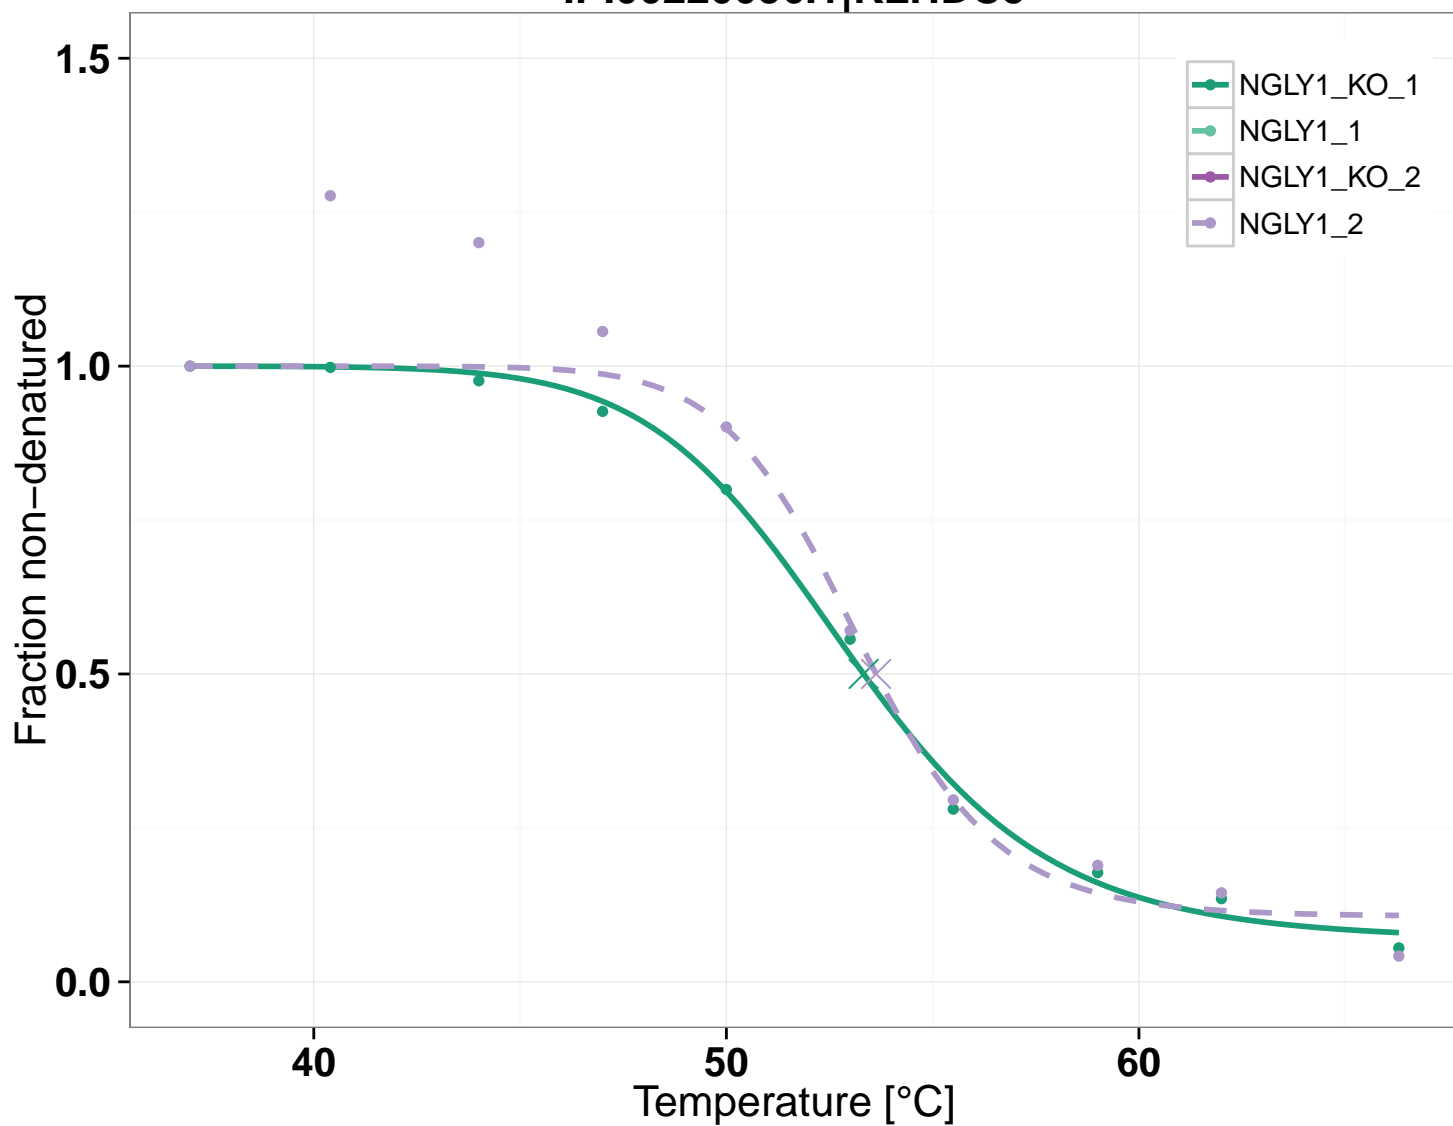

|            | meltPoint | slope  | plateau | R2   |
|------------|-----------|--------|---------|------|
| NGLY1_KO_1 | 53.33     | -0.095 | 0.07    | 1    |
| NGLY1_1    | -         | -      | -       | -    |
| NGLY1_KO_2 | -         | -      | -       | -    |
| NGLY1_2    | 53.63     | -0.13  | 0.11    | 0.94 |

Supplement: Supplementary file 427 [file 1]

# IPI00025718.2|WDR4

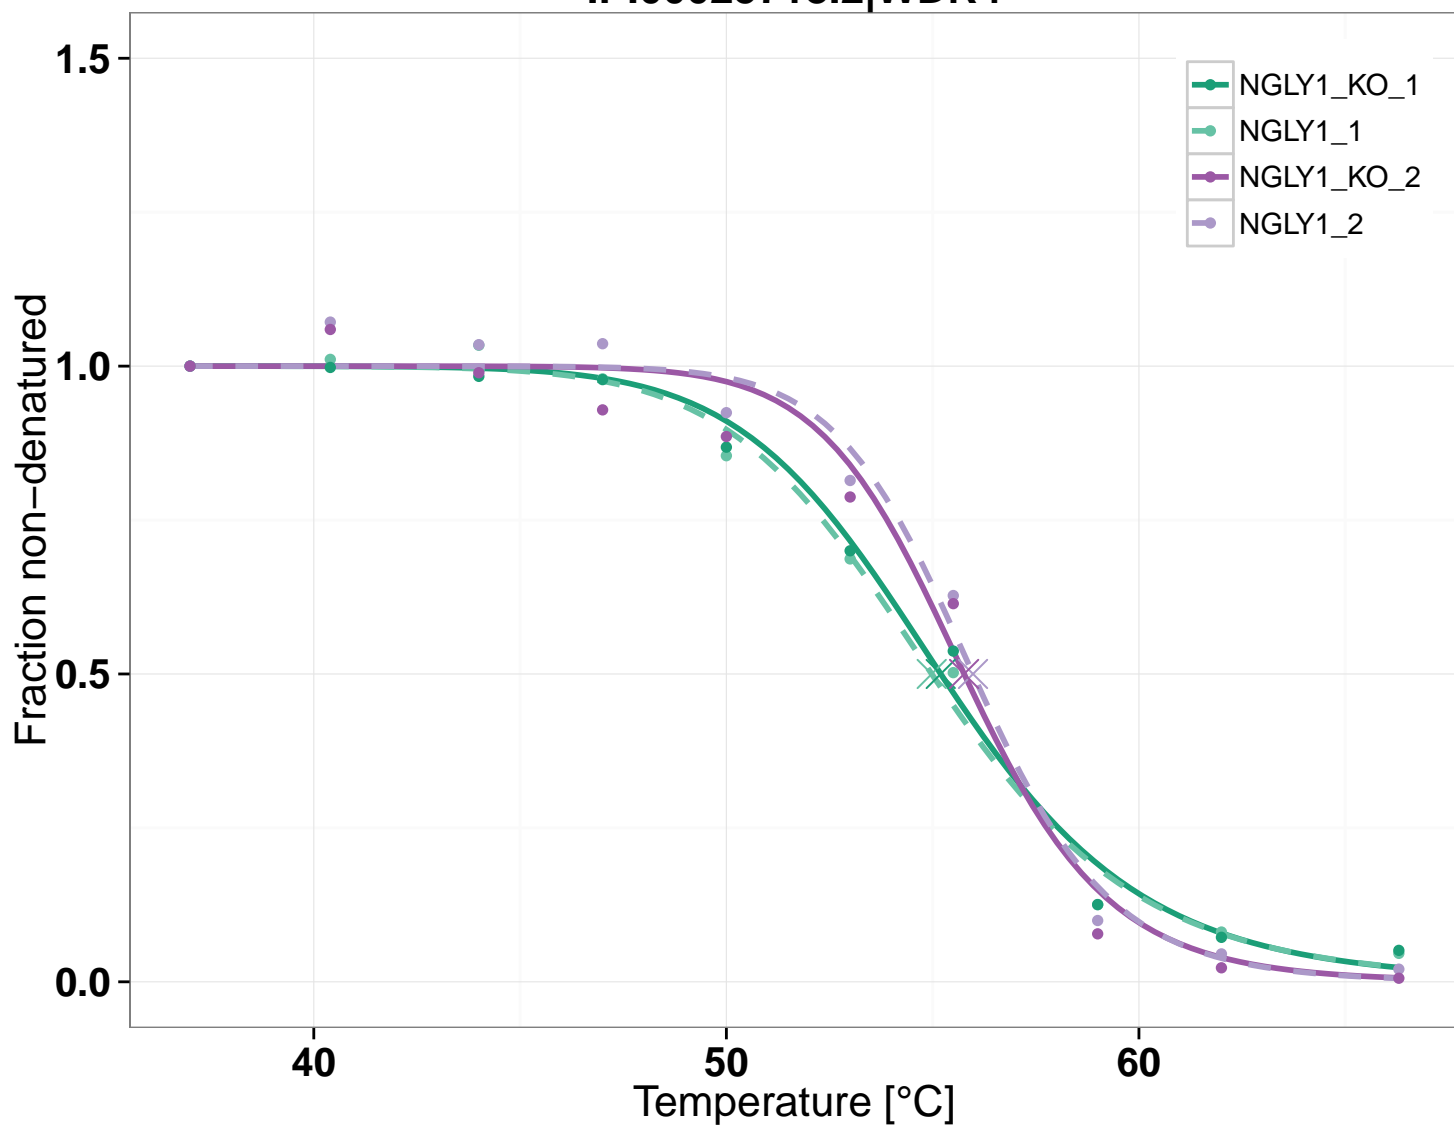

|            | meltPoint | slope | plateau | R2   |
|------------|-----------|-------|---------|------|
| NGLY1_KO_1 | 55.2      | -0.1  | 0       | 0.99 |
| NGLY1_1    | 54.98     | -0.1  | 0       | 0.99 |
| NGLY1_KO_2 | 55.76     | -0.14 | 0       | 0.98 |
| NGLY1_2    | 55.98     | -0.15 | 0       | 0.99 |

Supplement: Supplementary file 428 [file 1]

IPI00328587.4|42 KDA PROTEIN.

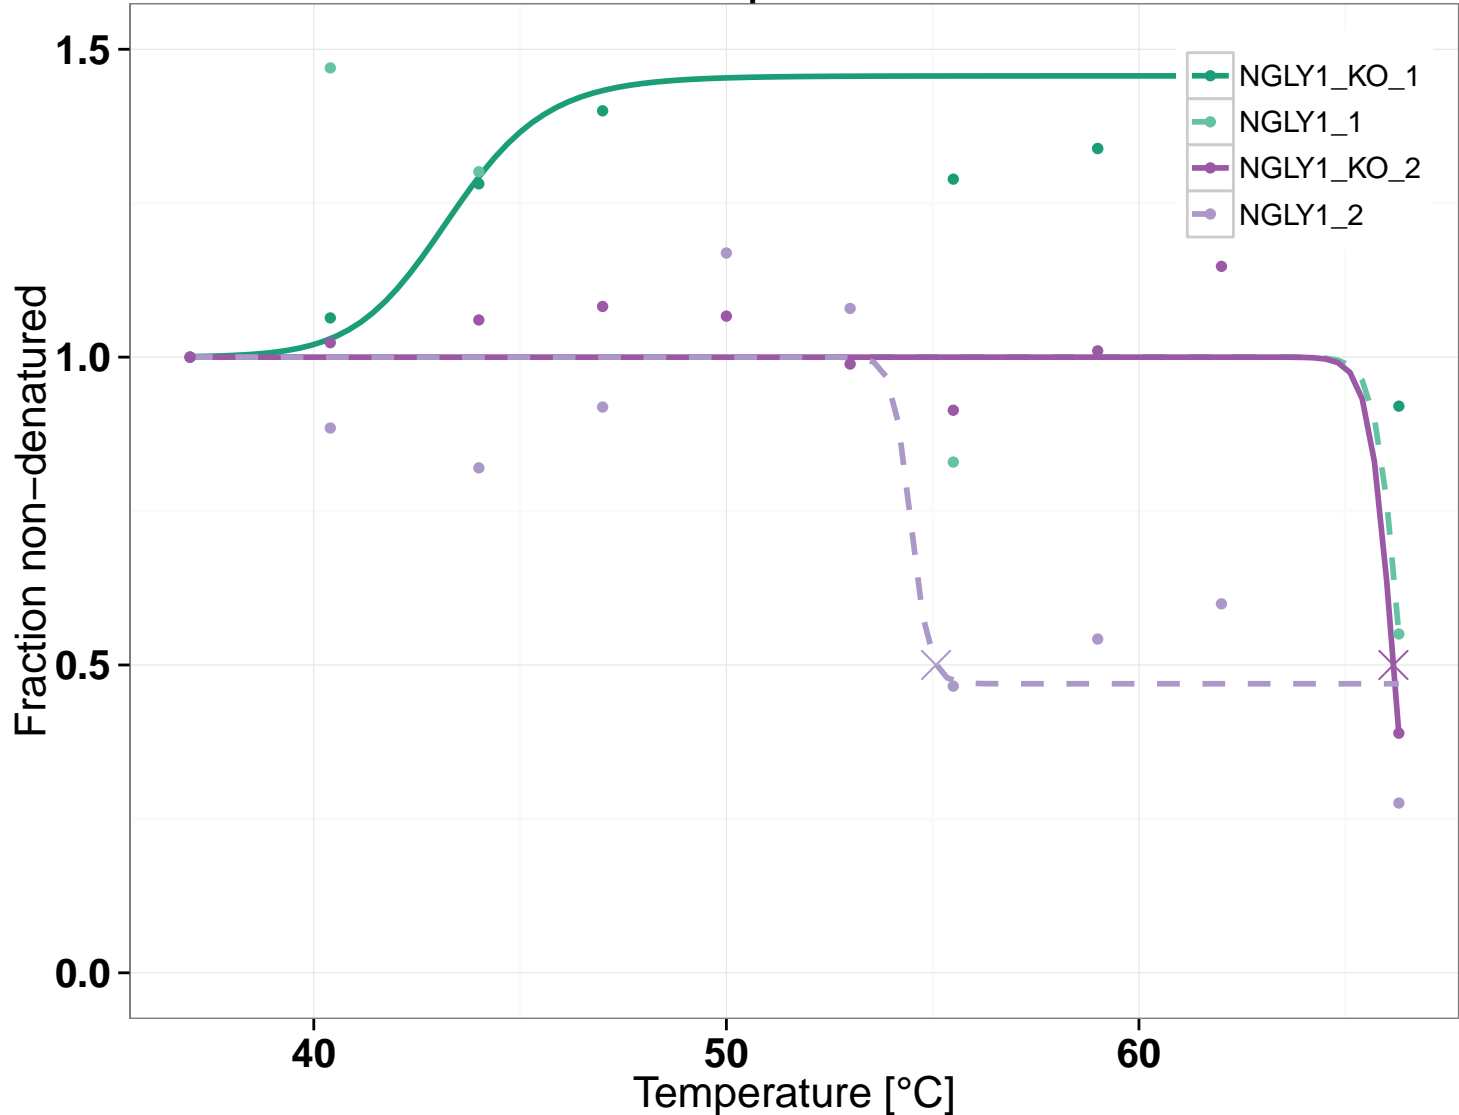

|            | meltPoint | slope | plateau | R2    |
|------------|-----------|-------|---------|-------|
| NGLY1_KO_1 | -         | 0.098 | 1.46    | 0.26  |
| NGLY1_1    | -         | -     | 0.03    | -0.42 |
| NGLY1_KO_2 | 66.17     | -0.86 | 0       | 0.89  |
| NGLY1_2    | 55.08     | -0.61 | 0.47    | 0.81  |

Supplement: Supplementary file 429 [file 1]

# IPI00301263.2|CAD

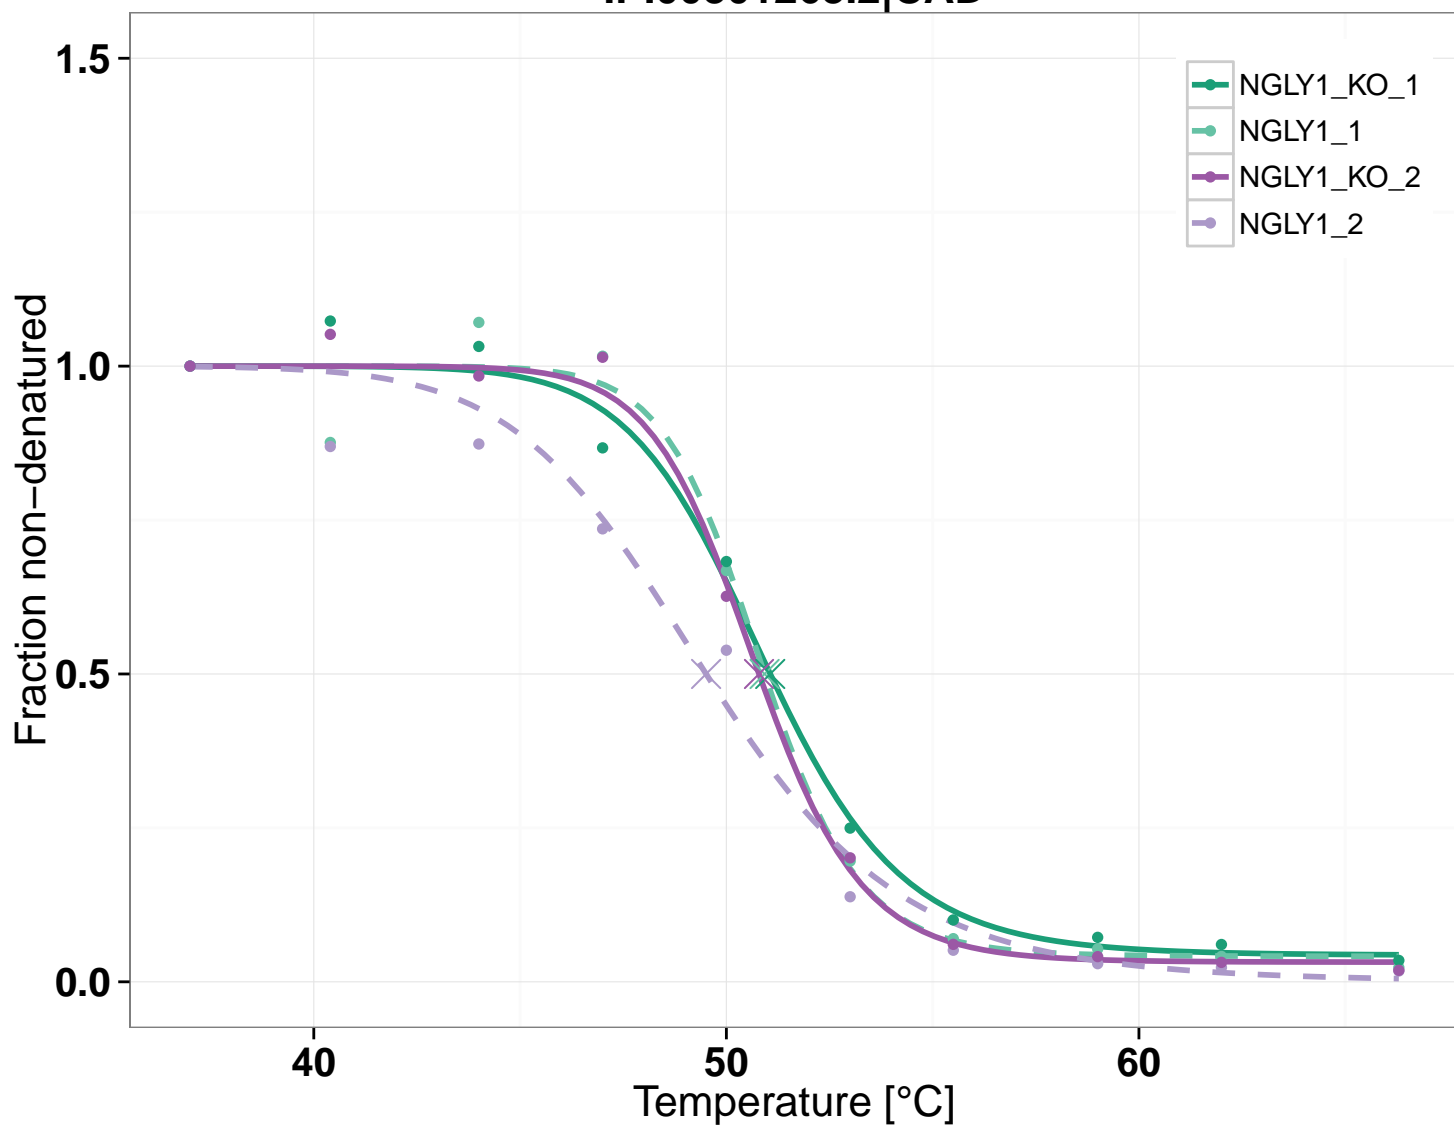

|            | meltPoint | slope | plateau | R2   |
|------------|-----------|-------|---------|------|
| NGLY1_KO_1 | 51.06     | -0.14 | 0.04    | 0.99 |
| NGLY1_1    | 50.93     | -0.2  | 0.04    | 0.99 |
| NGLY1_KO_2 | 50.79     | -0.19 | 0.03    | 1    |
| NGLY1_2    | 49.51     | -0.11 | 0       | 0.98 |

Supplement: Supplementary file 430 [file 1]

IPI00290071.2|WDR42A

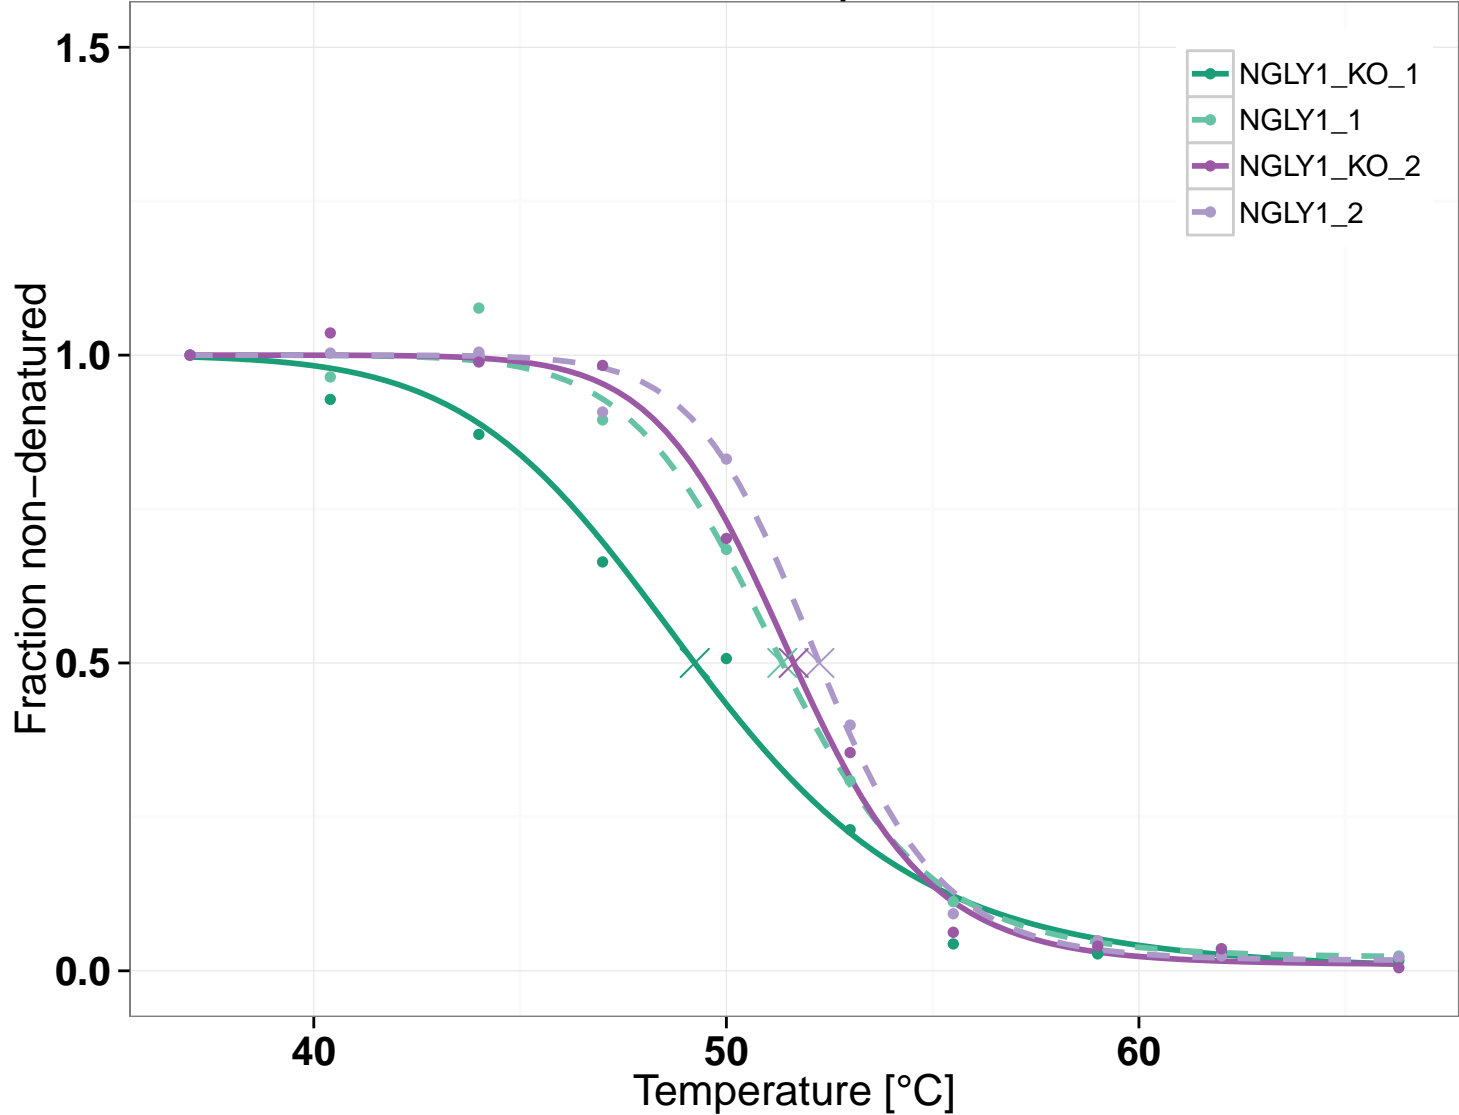

|            | meltPoint | slope | plateau | R2   |
|------------|-----------|-------|---------|------|
| NGLY1_KO_1 | 49.23     | -0.09 | 0       | 0.99 |
| NGLY1_1    | 51.36     | -0.13 | 0.02    | 0.99 |
| NGLY1_KO_2 | 51.63     | -0.15 | 0.01    | 1    |
| NGLY1_2    | 52.25     | -0.16 | 0.02    | 1    |

Supplement: Supplementary file 431 [file 1]

# IPI00816217.1|SMC6

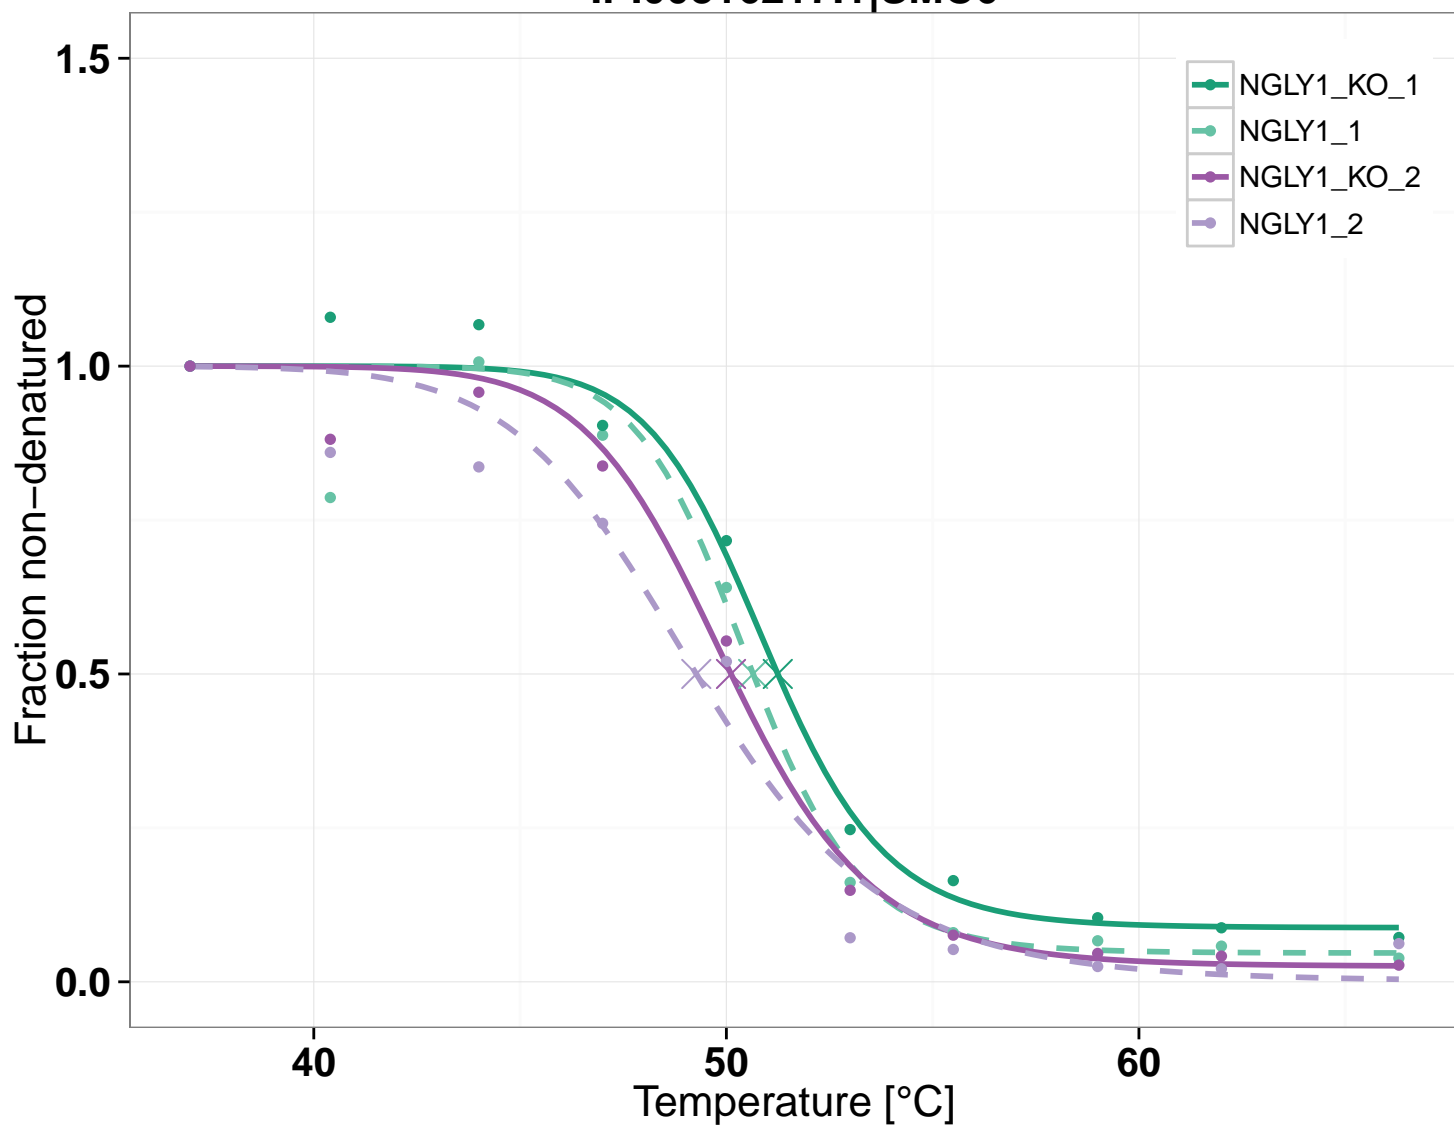

|            | meltPoint | slope | plateau | R2   |
|------------|-----------|-------|---------|------|
| NGLY1_KO_1 | 51.25     | -0.16 | 0.09    | 0.99 |
| NGLY1_1    | 50.65     | -0.17 | 0.05    | 0.97 |
| NGLY1_KO_2 | 50.11     | -0.14 | 0.03    | 0.99 |
| NGLY1_2    | 49.27     | -0.11 | 0       | 0.97 |

Supplement: Supplementary file 432 [file 1]

IPI00644079.2|HNRNPU

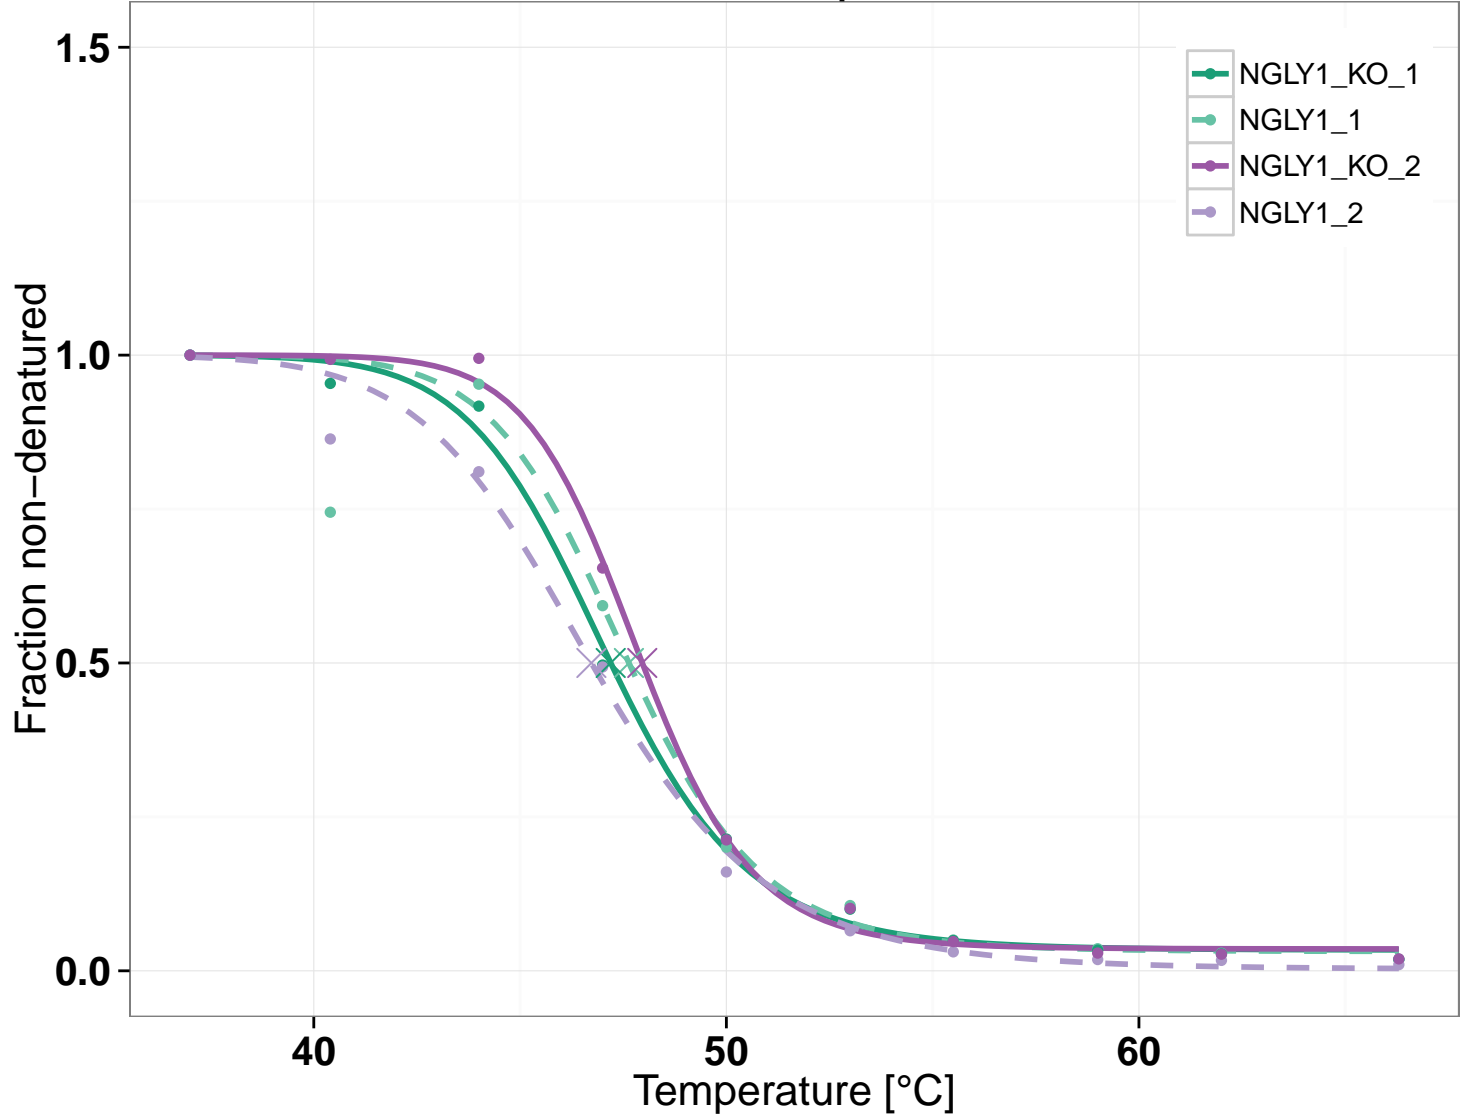

|            | meltPoint | slope | plateau | R2   |
|------------|-----------|-------|---------|------|
| NGLY1_KO_1 | 47.2      | -0.14 | 0.03    | 1    |
| NGLY1_1    | 47.64     | -0.15 | 0.03    | 0.96 |
| NGLY1_KO_2 | 47.96     | -0.18 | 0.04    | 1    |
| NGLY1_2    | 46.73     | -0.12 | 0       | 0.99 |

Supplement: Supplementary file 433 [file 1]

# IPI00076042.2|Q96RI3\_HUMAN

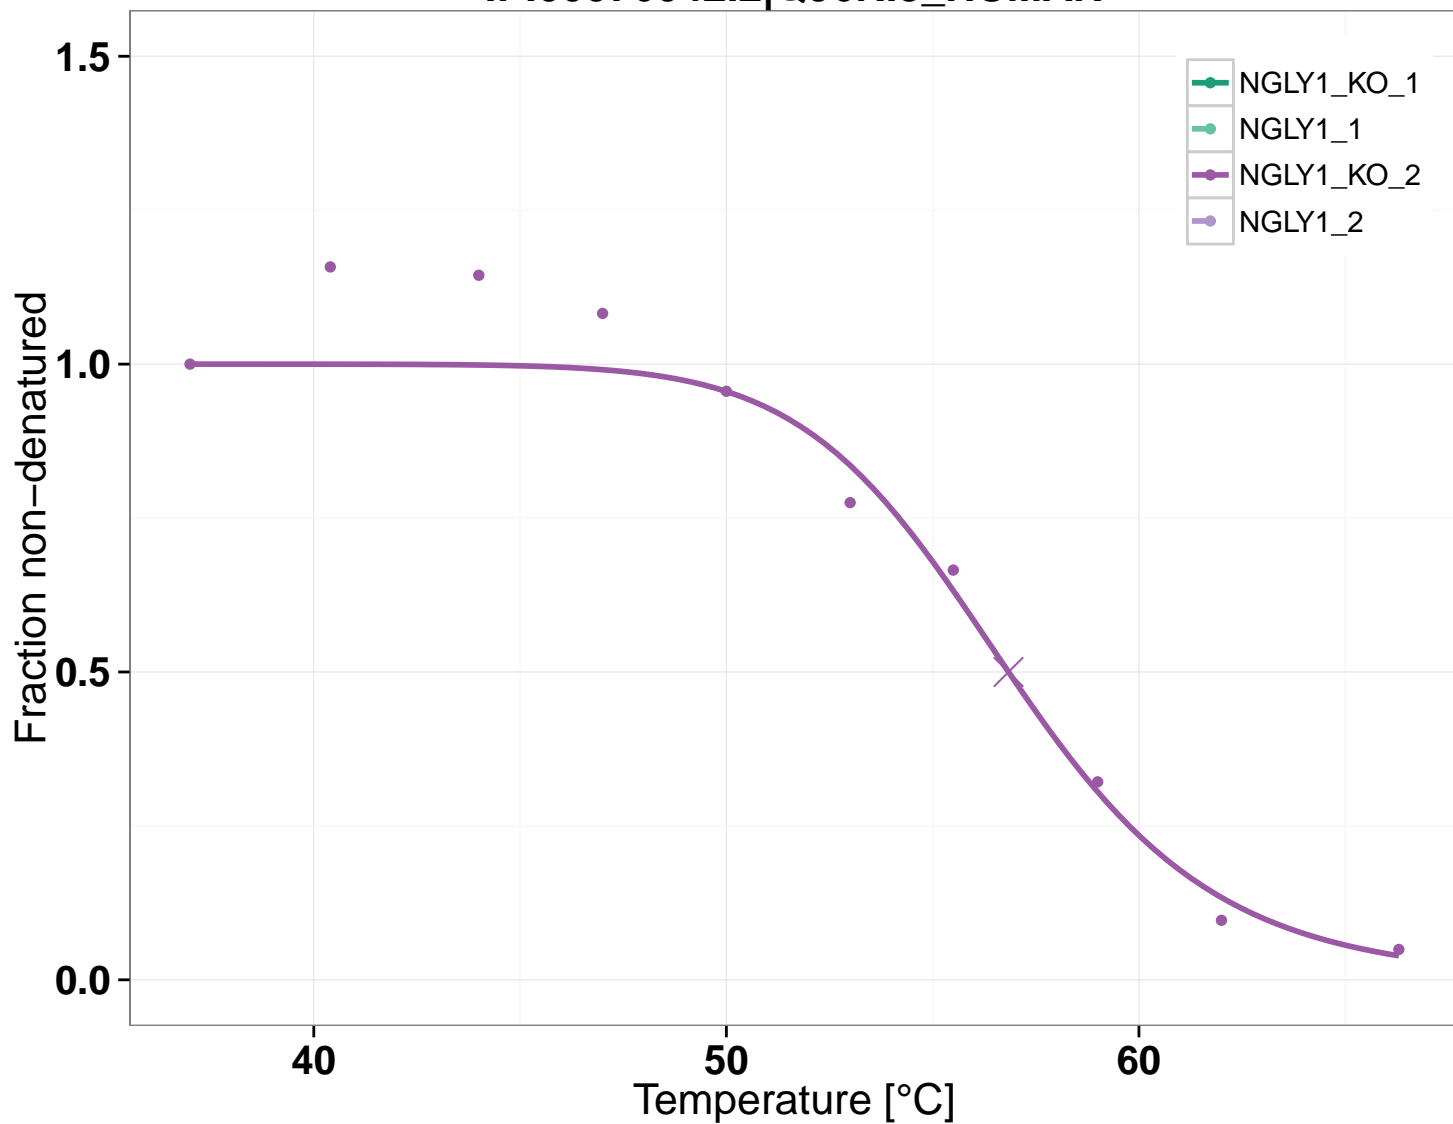

|            | meltPoint | slope | plateau | R2   |
|------------|-----------|-------|---------|------|
| NGLY1_KO_1 | —         | —     | —       | —    |
| NGLY1_1    | —         | —     | —       | —    |
| NGLY1_KO_2 | 56.84     | -0.1  | 0       | 0.96 |
| NGLY1_2    | —         | —     | —       | —    |

Supplement: Supplementary file 434 [file 1]

IPI00329742.2|FAHD2A

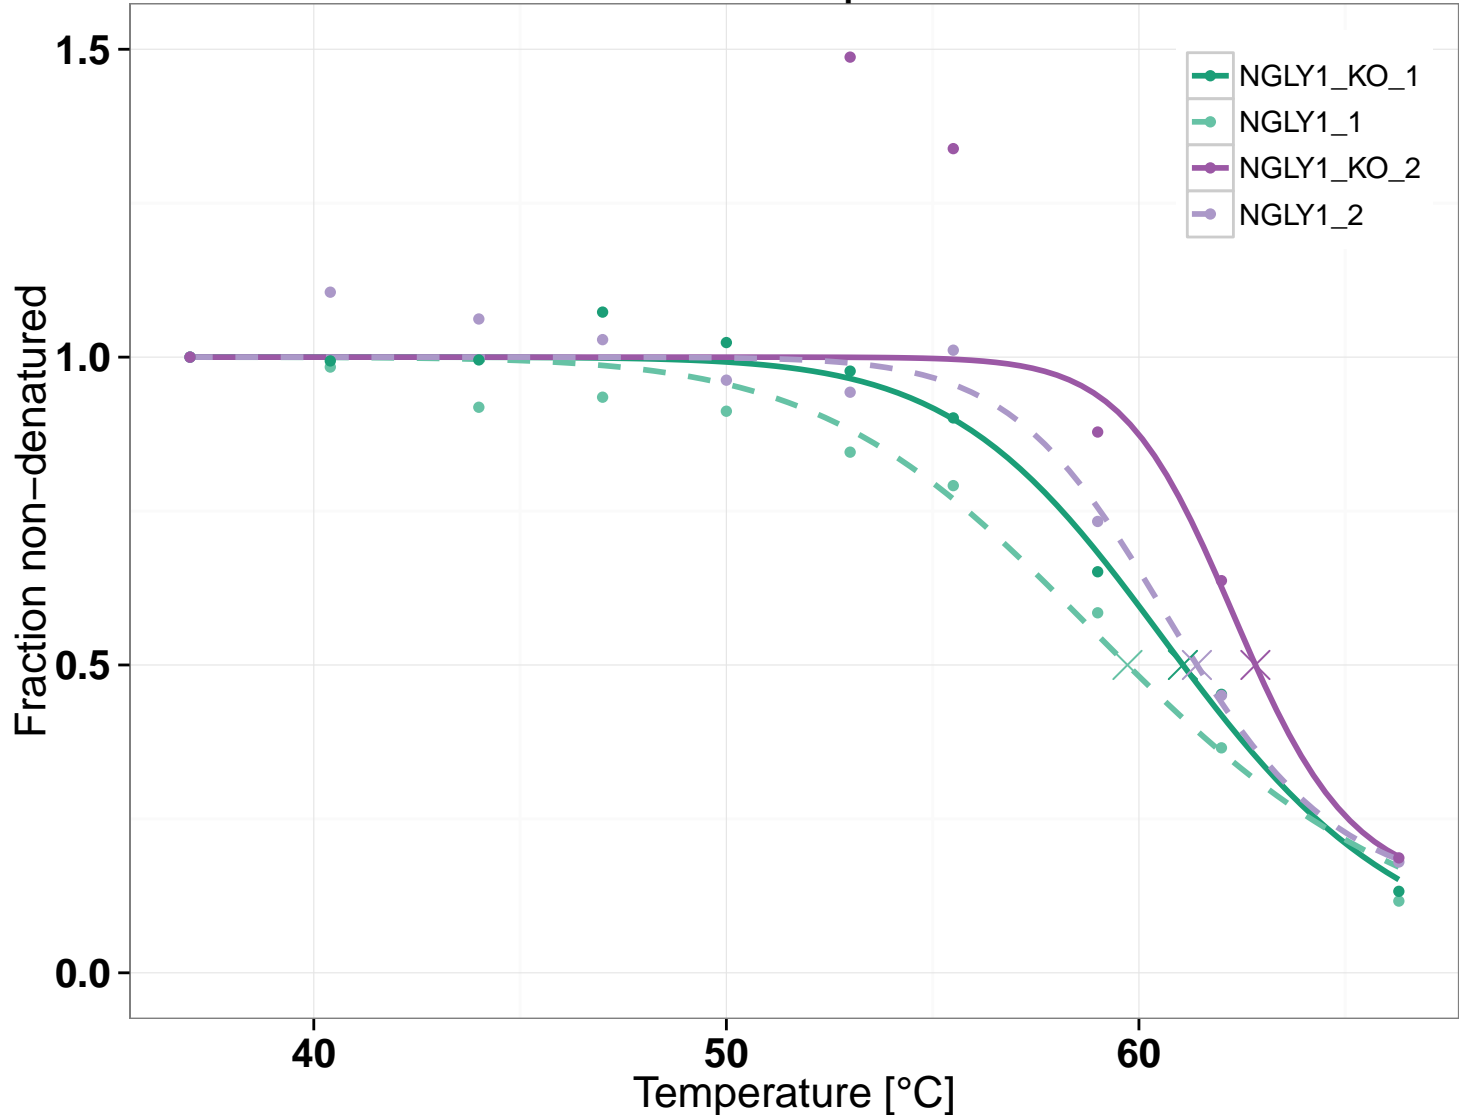

|            | meltPoint | slope  | plateau | R2   |
|------------|-----------|--------|---------|------|
| NGLY1_KO_1 | 61.07     | -0.09  | 0       | 0.99 |
| NGLY1_1    | 59.72     | -0.067 | 0       | 0.98 |
| NGLY1_KO_2 | 62.82     | -0.16  | 0.13    | 0.05 |
| NGLY1_2    | 61.41     | -0.11  | 0.12    | 0.97 |

Supplement: Supplementary file 435 [file 1]

# IPI00815893.1|CHD2

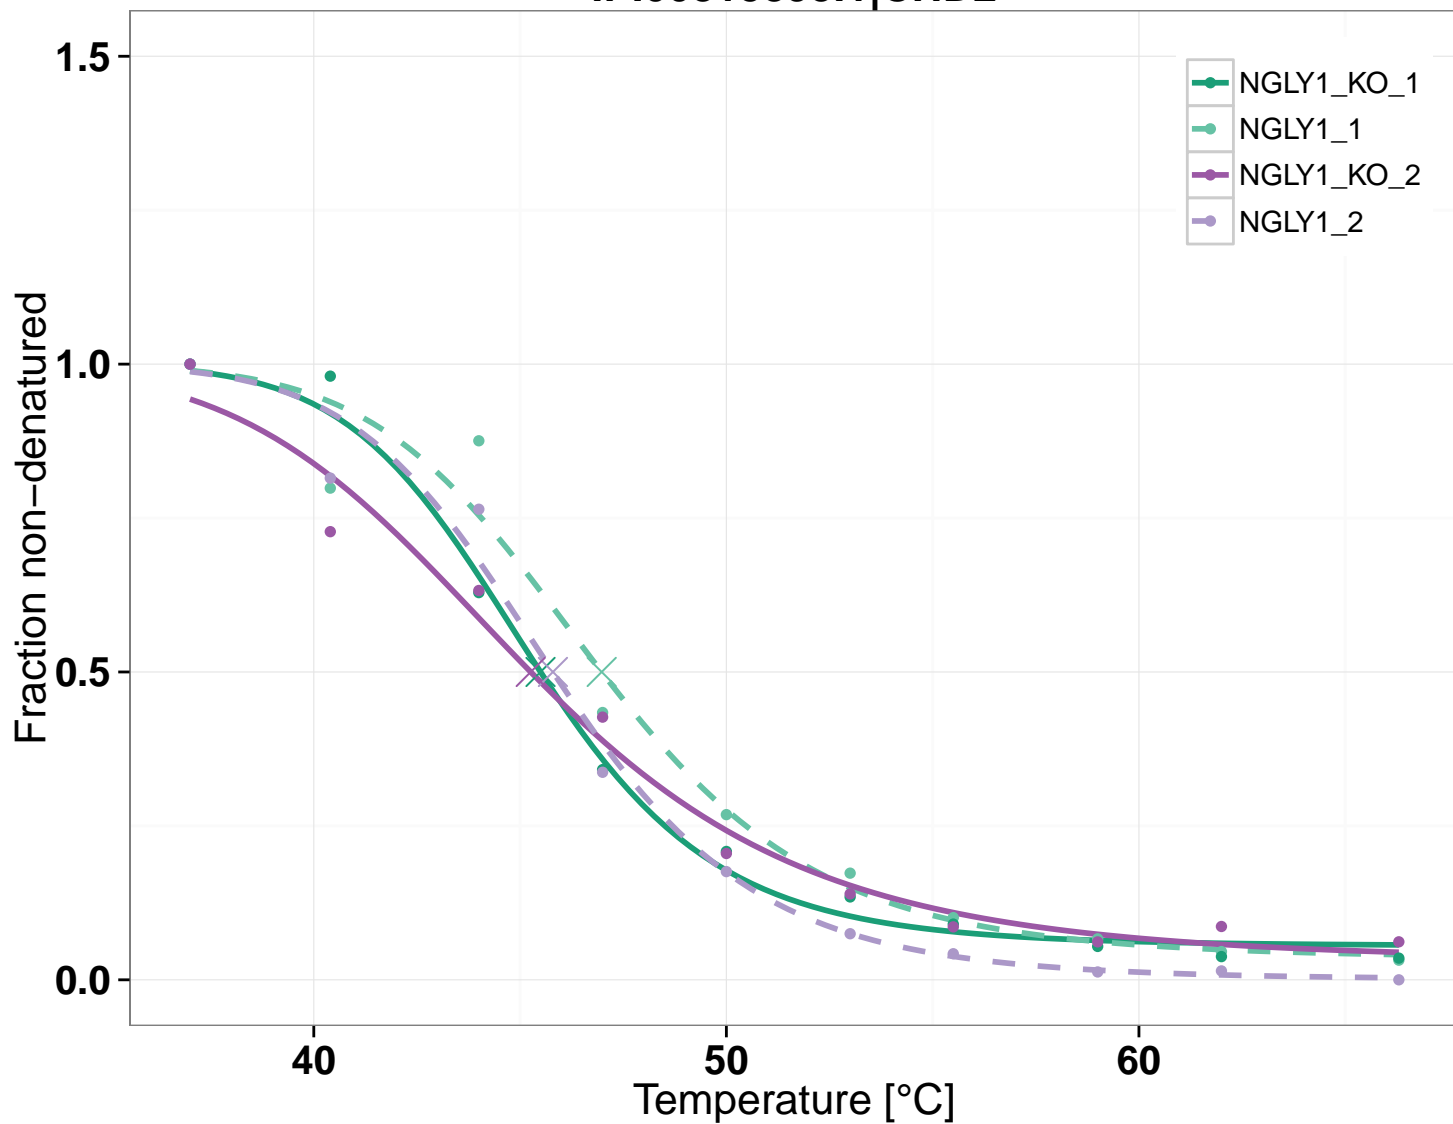

|            | meltPoint | slope  | plateau | R2   |
|------------|-----------|--------|---------|------|
| NGLY1_KO_1 | 45.5      | -0.11  | 0.06    | 0.99 |
| NGLY1_1    | 46.98     | -0.089 | 0.03    | 0.97 |
| NGLY1_KO_2 | 45.26     | -0.071 | 0.03    | 0.98 |
| NGLY1_2    | 45.8      | -0.1   | 0       | 0.98 |

Supplement: Supplementary file 436 [file 1]

IPI00297178.6|DHX16

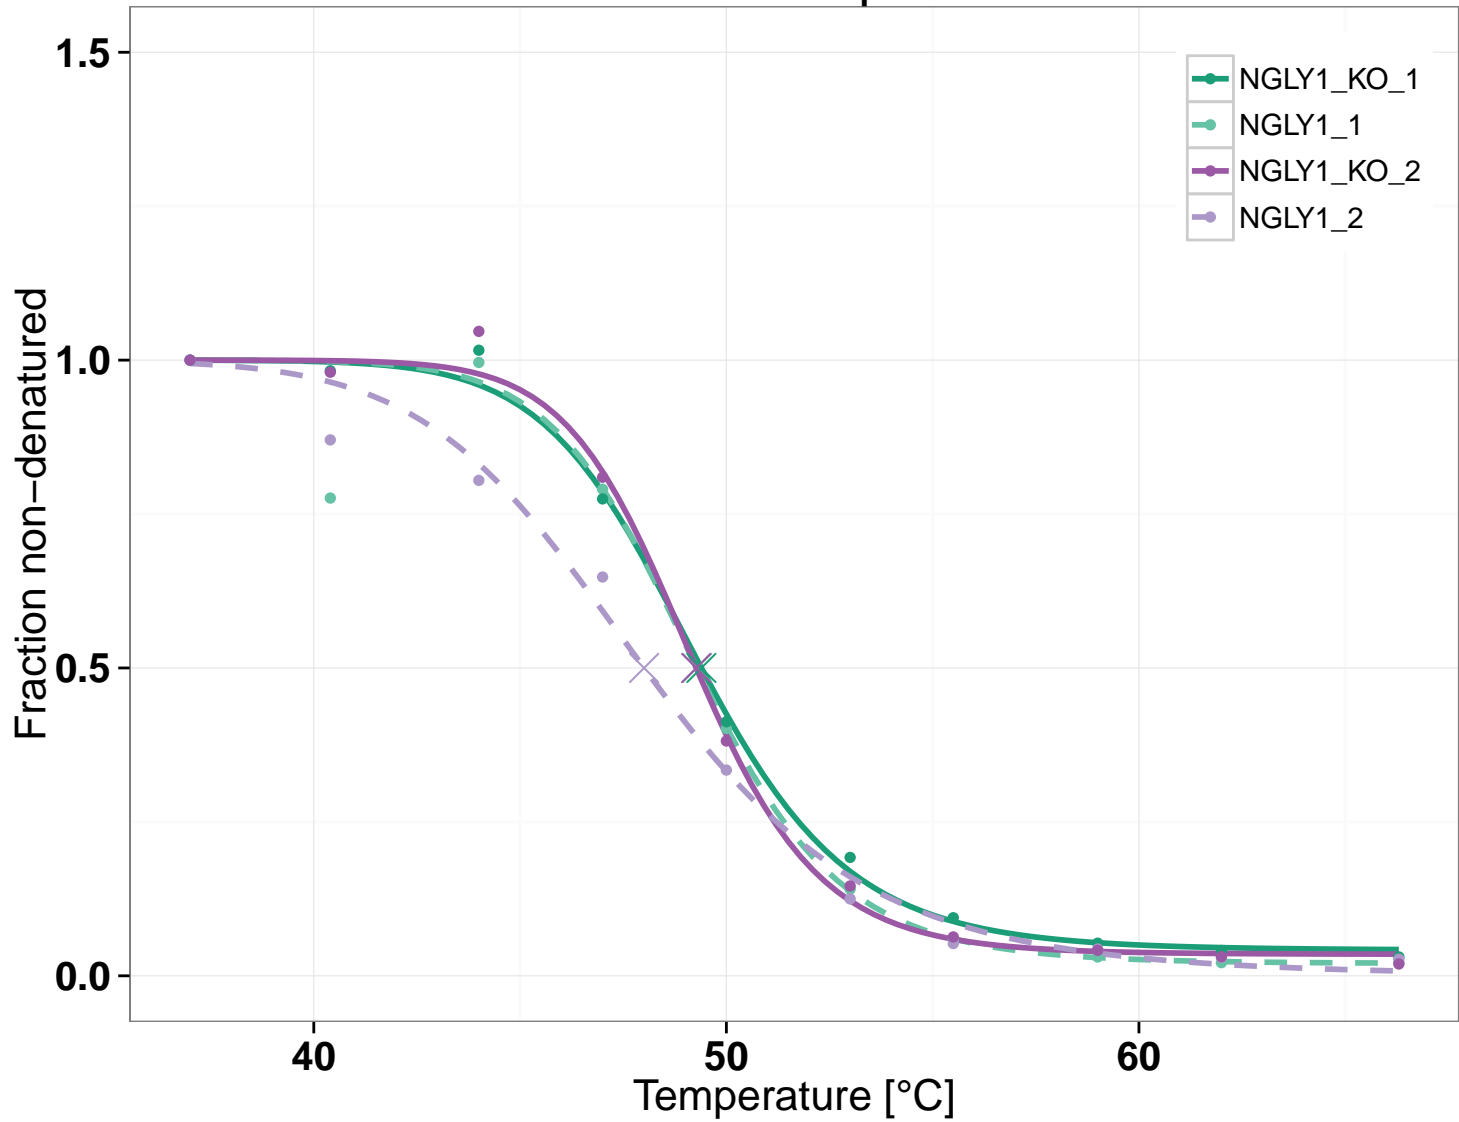

|            | meltPoint | slope  | plateau | R2   |
|------------|-----------|--------|---------|------|
| NGLY1_KO_1 | 49.39     | -0.13  | 0.04    | 1    |
| NGLY1_1    | 49.28     | -0.14  | 0.02    | 0.97 |
| NGLY1_KO_2 | 49.27     | -0.16  | 0.03    | 1    |
| NGLY1_2    | 48.01     | -0.092 | 0       | 0.99 |

Supplement: Supplementary file 437 [file 1]

# IPI00419724.2|SEMA4B

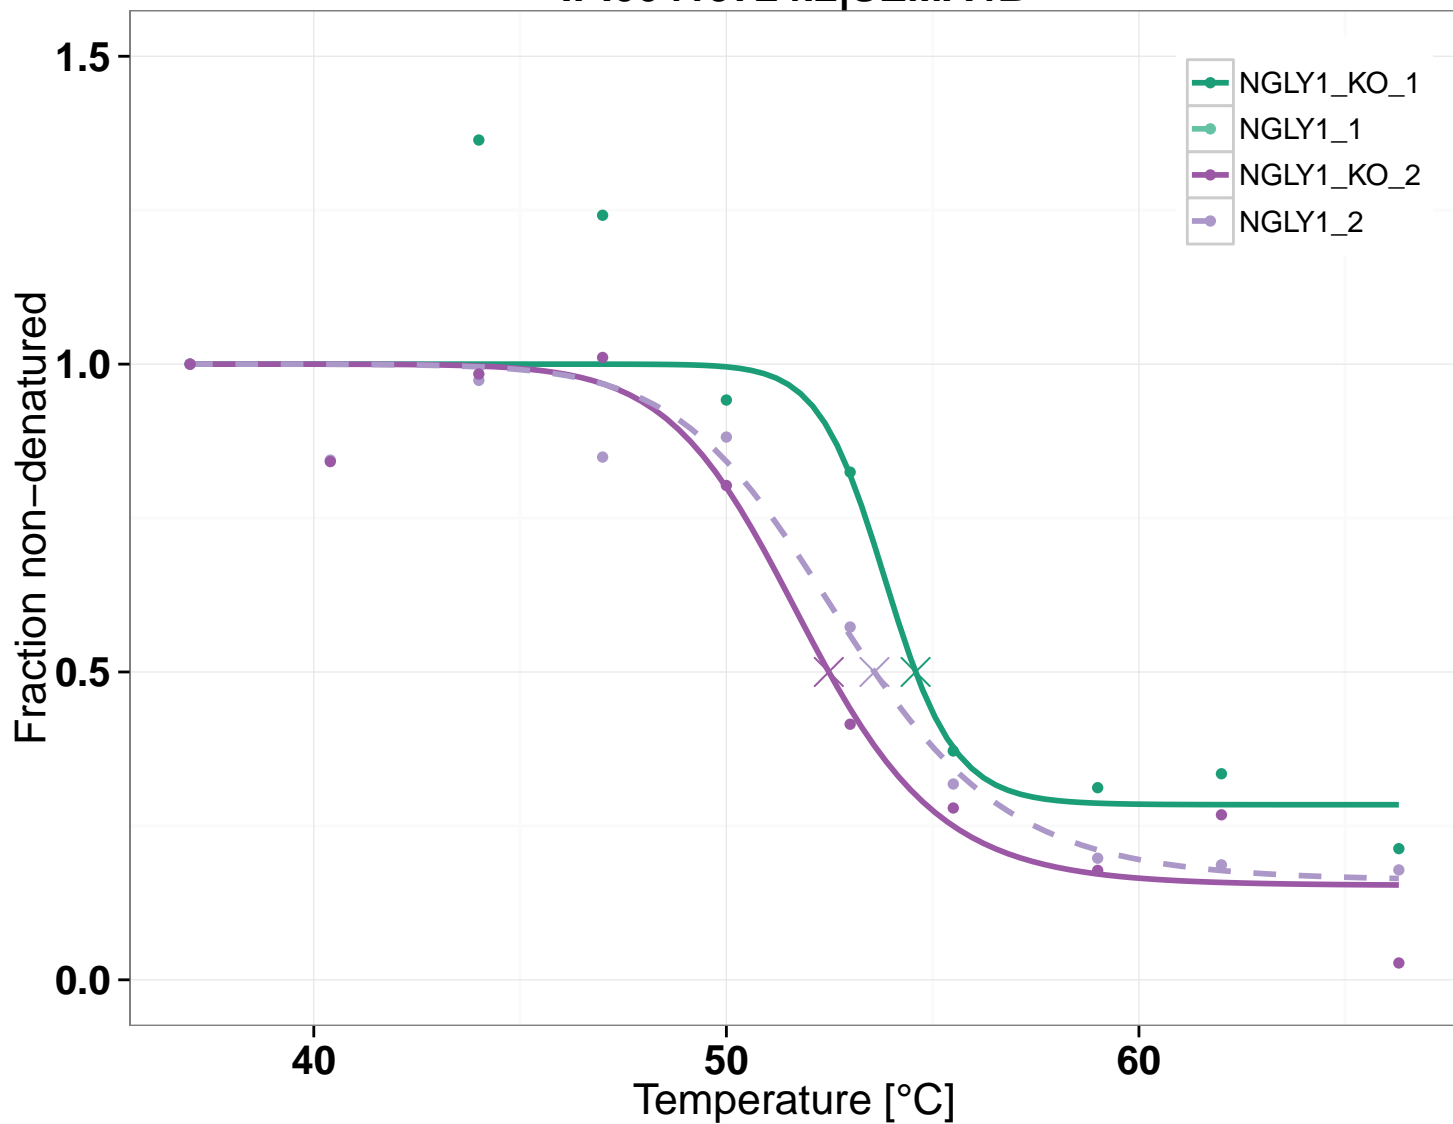

|            | meltPoint | slope | plateau | R2   |
|------------|-----------|-------|---------|------|
| NGLY1_KO_1 | 54.59     | -0.22 | 0.28    | 0.68 |
| NGLY1_1    | -         | -     | -       | -    |
| NGLY1_KO_2 | 52.48     | -0.13 | 0.15    | 0.96 |
| NGLY1_2    | 53.59     | -0.1  | 0.16    | 0.96 |

Supplement: Supplementary file 438 [file 1]

IPI00020226.2|ACOX3

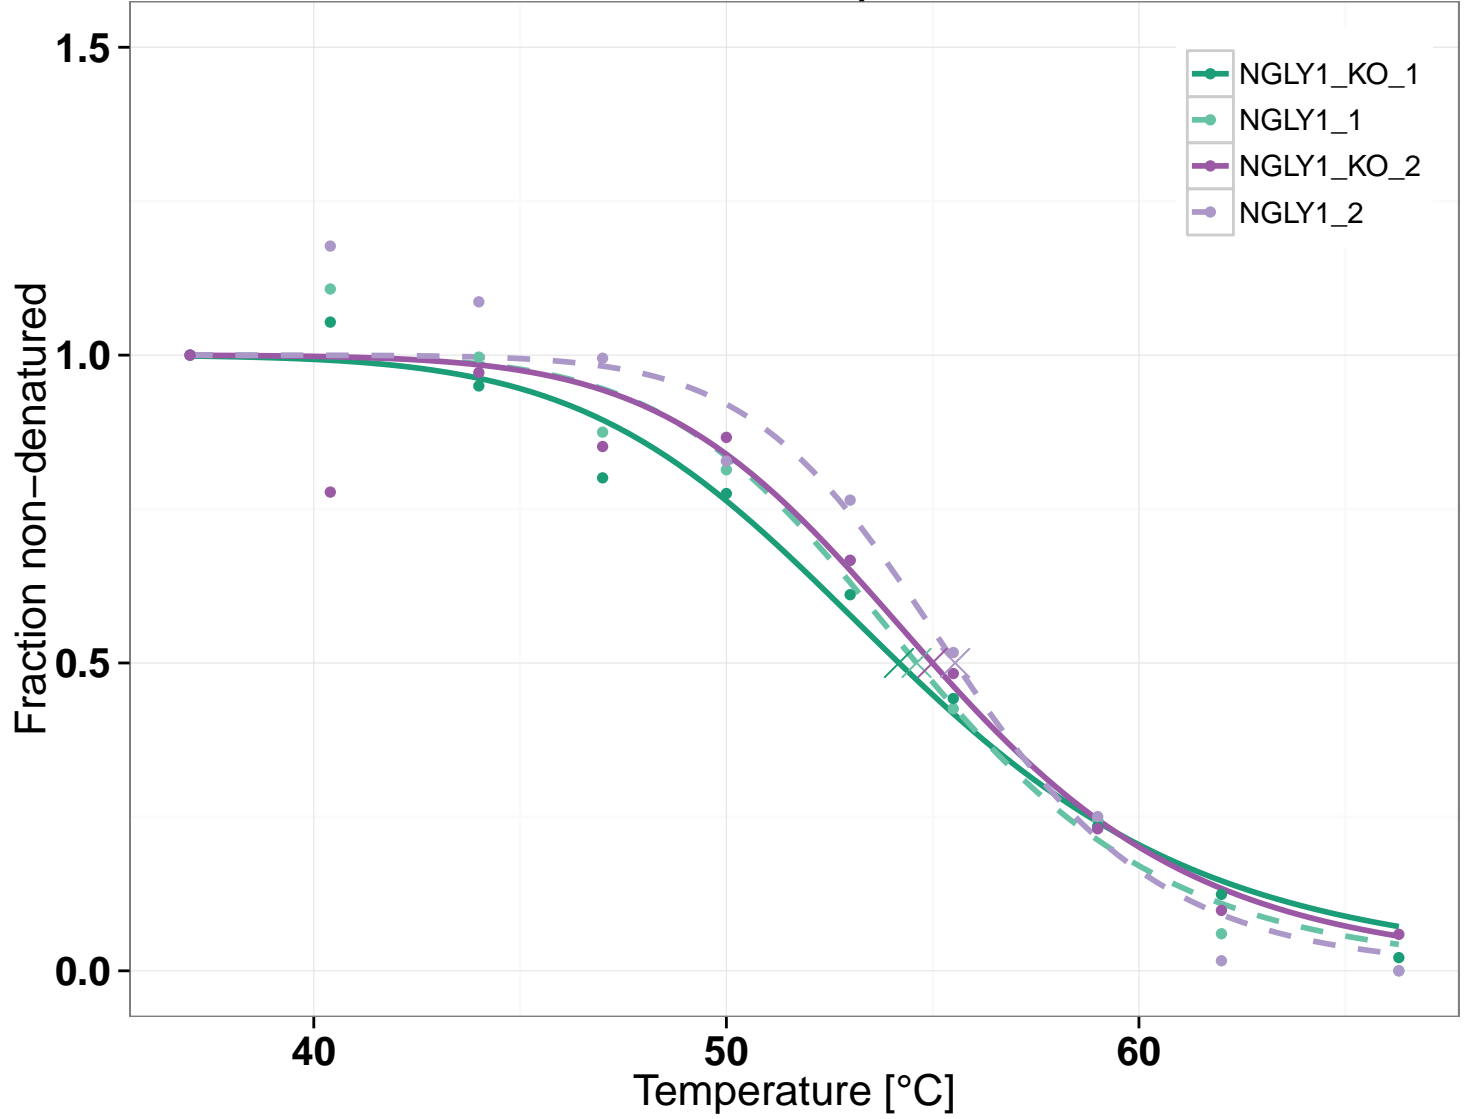

|            | meltPoint | slope  | plateau | R2   |
|------------|-----------|--------|---------|------|
| NGLY1_KO_1 | 54.18     | -0.066 | 0       | 0.99 |
| NGLY1_1    | 54.61     | -0.082 | 0       | 0.98 |
| NGLY1_KO_2 | 54.99     | -0.076 | 0       | 0.95 |
| NGLY1_2    | 55.55     | -0.1   | 0       | 0.97 |

Supplement: Supplementary file 439 [file 1]

IPI00103252.4|RWDD4A

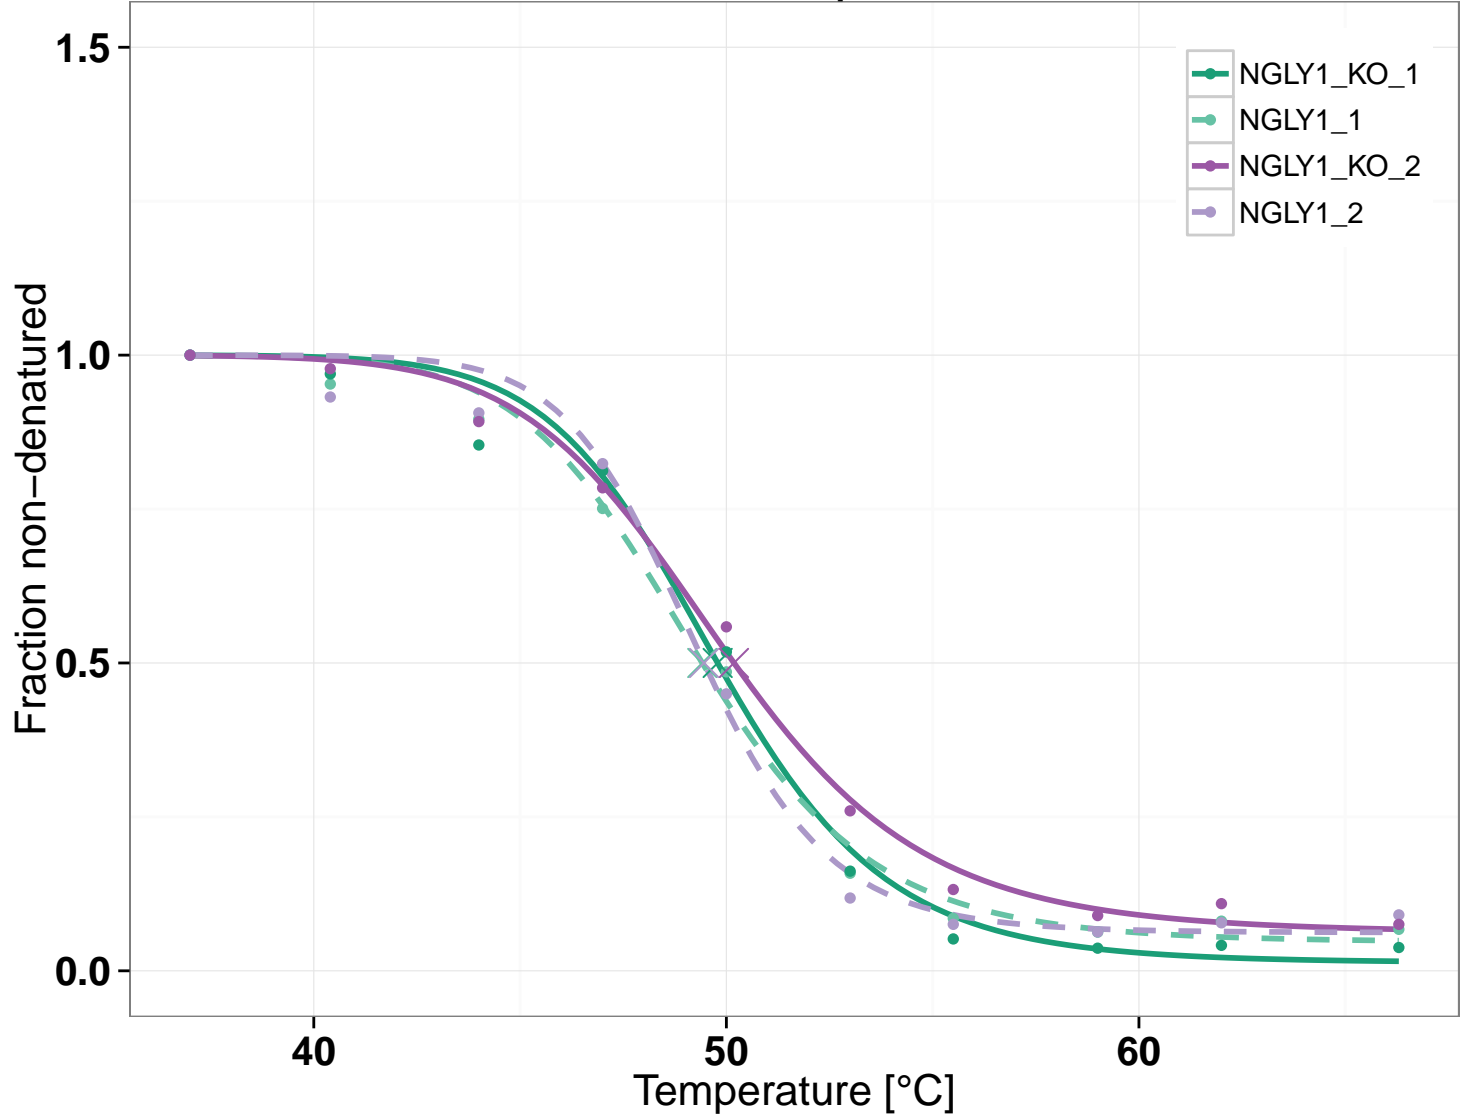

|            | meltPoint | slope  | plateau | R2   |
|------------|-----------|--------|---------|------|
| NGLY1_KO_1 | 49.79     | -0.12  | 0.01    | 0.99 |
| NGLY1_1    | 49.42     | -0.11  | 0.05    | 0.99 |
| NGLY1_KO_2 | 50.18     | -0.097 | 0.06    | 1    |
| NGLY1_2    | 49.46     | -0.15  | 0.06    | 0.99 |

Supplement: Supplementary file 440 [file 1]

# IPI00163729.7|MKL1

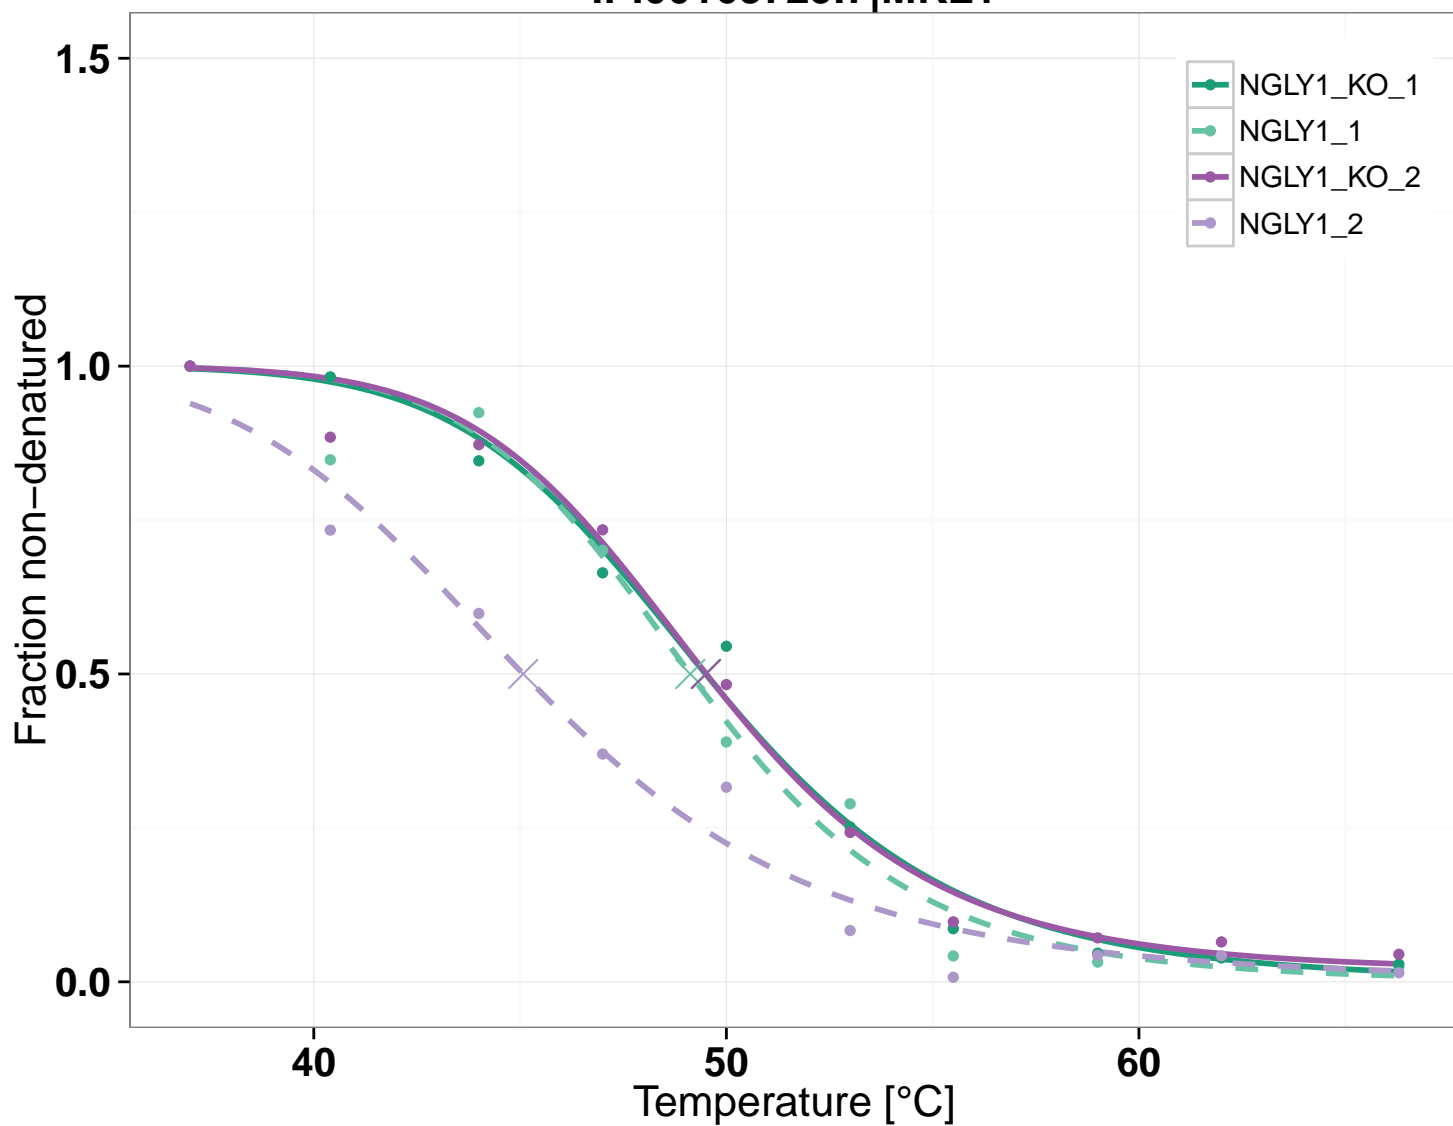

|            | meltPoint | slope  | plateau | R2   |
|------------|-----------|--------|---------|------|
| NGLY1_KO_1 | 49.5      | -0.083 | 0       | 0.99 |
| NGLY1_1    | 49.12     | -0.092 | 0       | 0.98 |
| NGLY1_KO_2 | 49.51     | -0.087 | 0.02    | 0.99 |
| NGLY1_2    | 45.08     | -0.071 | 0       | 0.98 |

Supplement: Supplementary file 441 [file 1]

# IPI00291901.1|IRF3

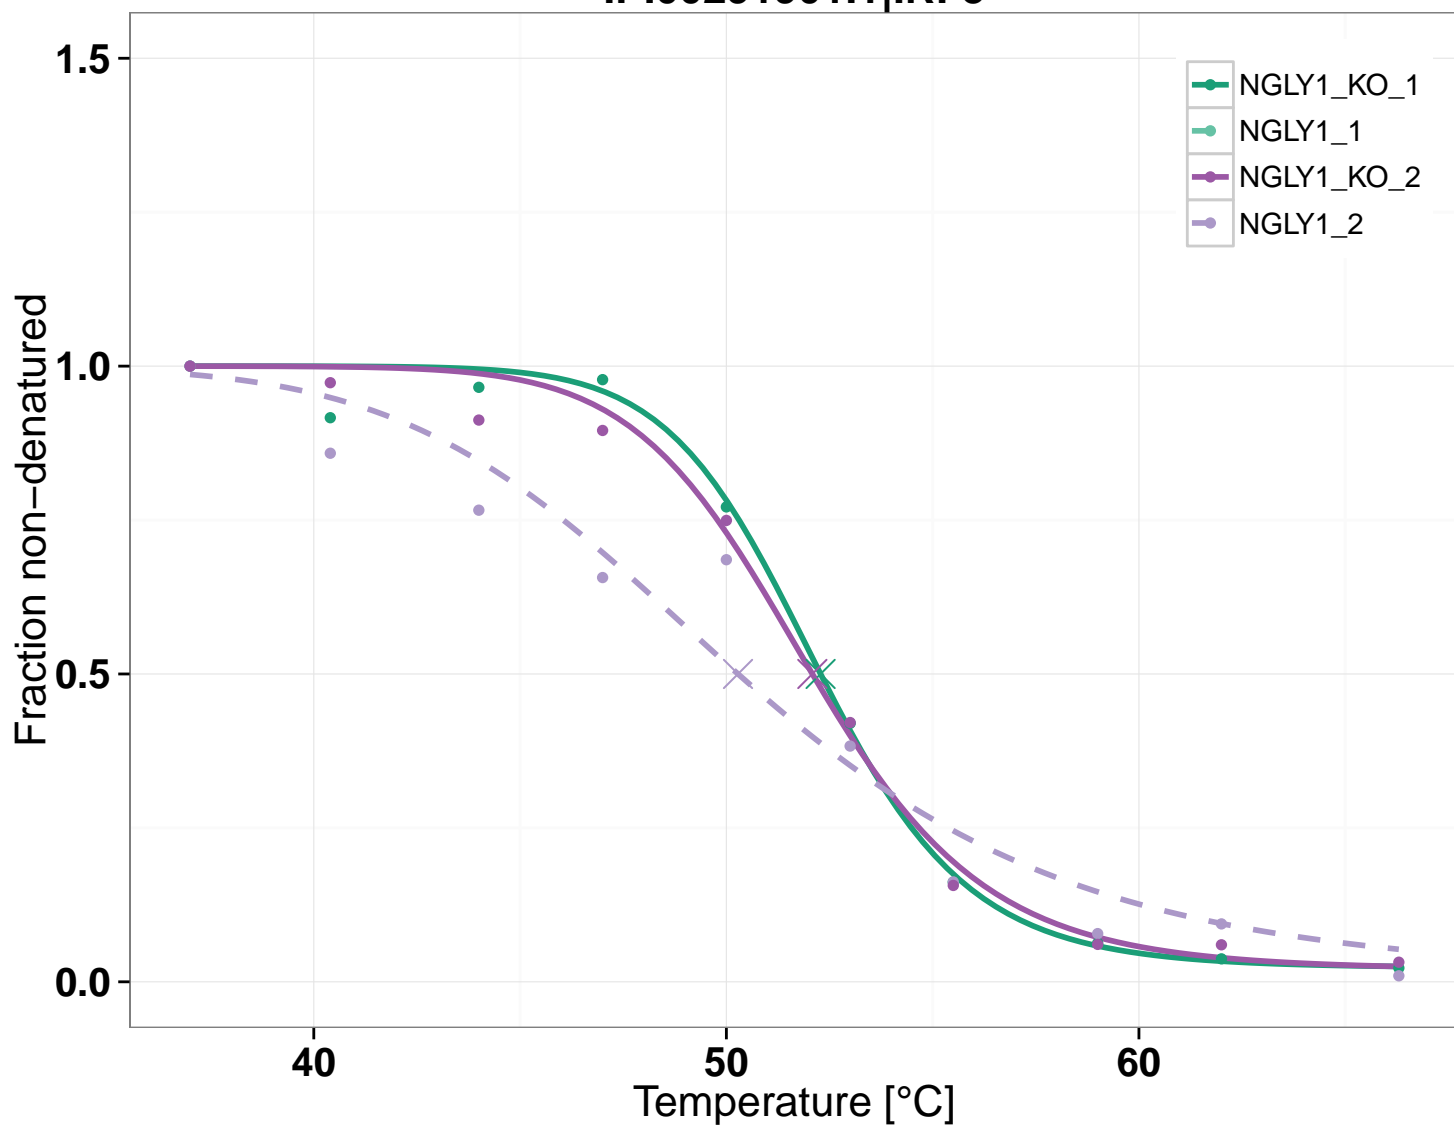

|            | meltPoint | slope  | plateau | R2   |
|------------|-----------|--------|---------|------|
| NGLY1_KO_1 | 52.28     | -0.13  | 0.02    | 0.99 |
| NGLY1_1    | -         | -      | -       | -    |
| NGLY1_KO_2 | 52.08     | -0.11  | 0.02    | 0.99 |
| NGLY1_2    | 50.28     | -0.061 | 0       | 0.95 |

Supplement: Supplementary file 442 [file 1]

IPI00027096.2|MRPL19

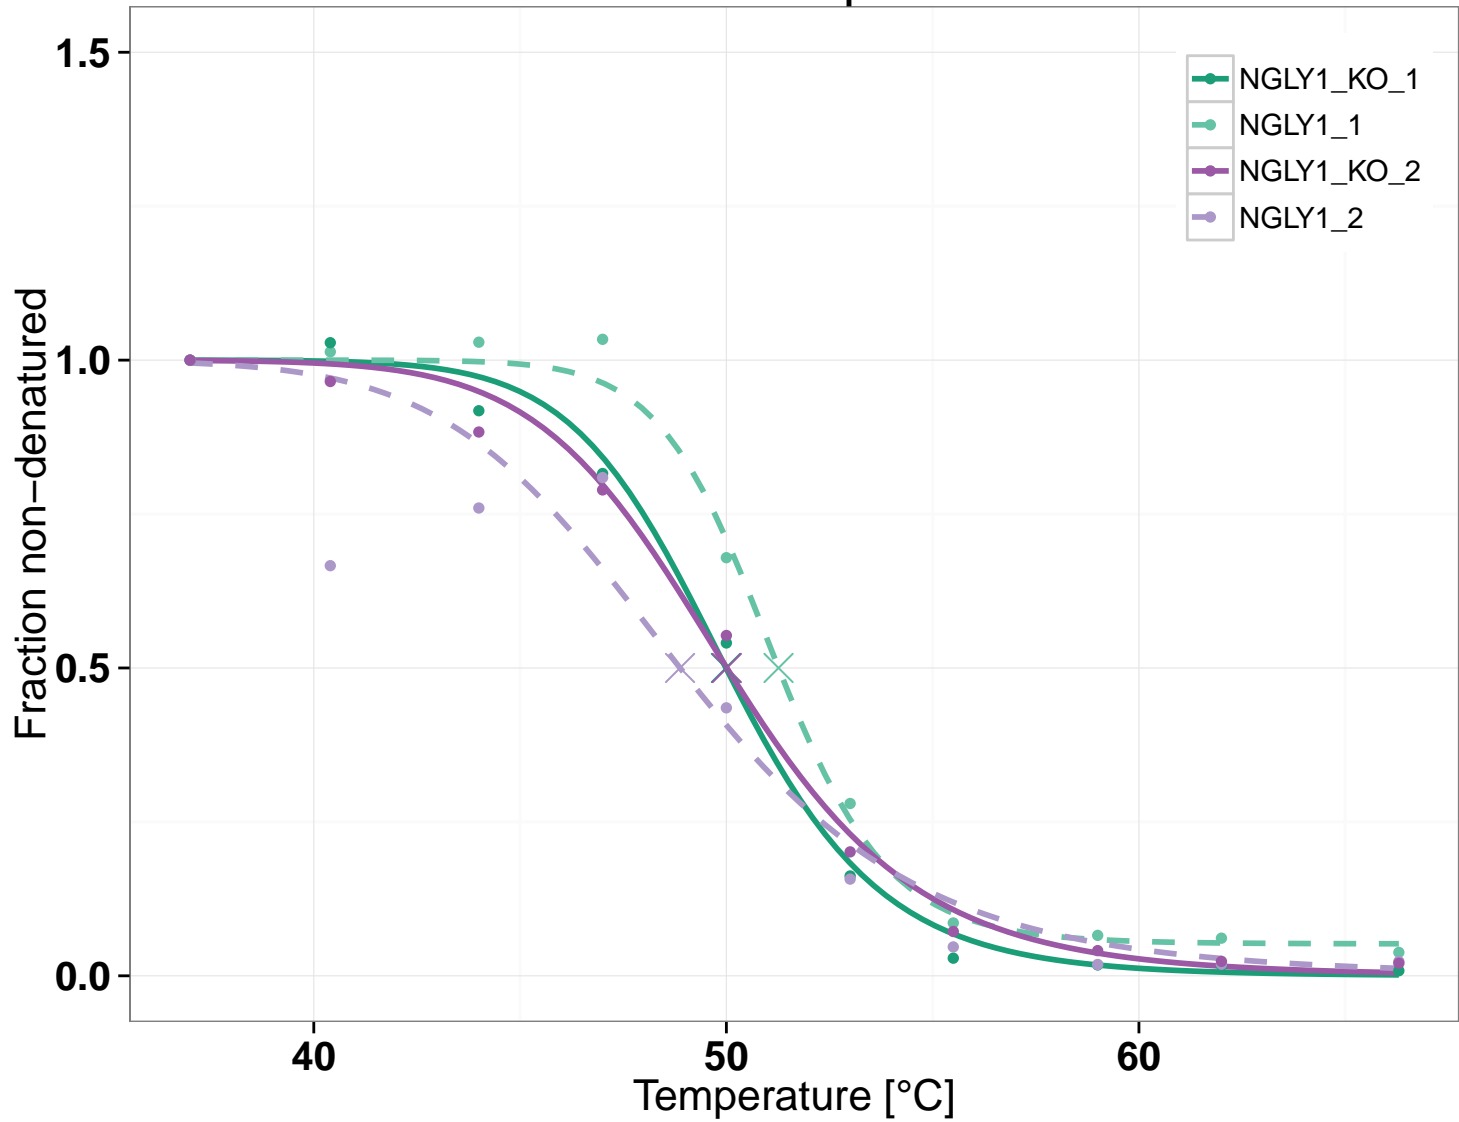

|            | meltPoint | slope  | plateau | R2   |
|------------|-----------|--------|---------|------|
| NGLY1_KO_1 | 49.99     | -0.13  | 0       | 1    |
| NGLY1_1    | 51.26     | -0.17  | 0.05    | 1    |
| NGLY1_KO_2 | 50.01     | -0.11  | 0       | 0.99 |
| NGLY1_2    | 48.88     | -0.087 | 0       | 0.9  |

Supplement: Supplementary file 443 [file 1]

IPI00217773.2|ZZZ3

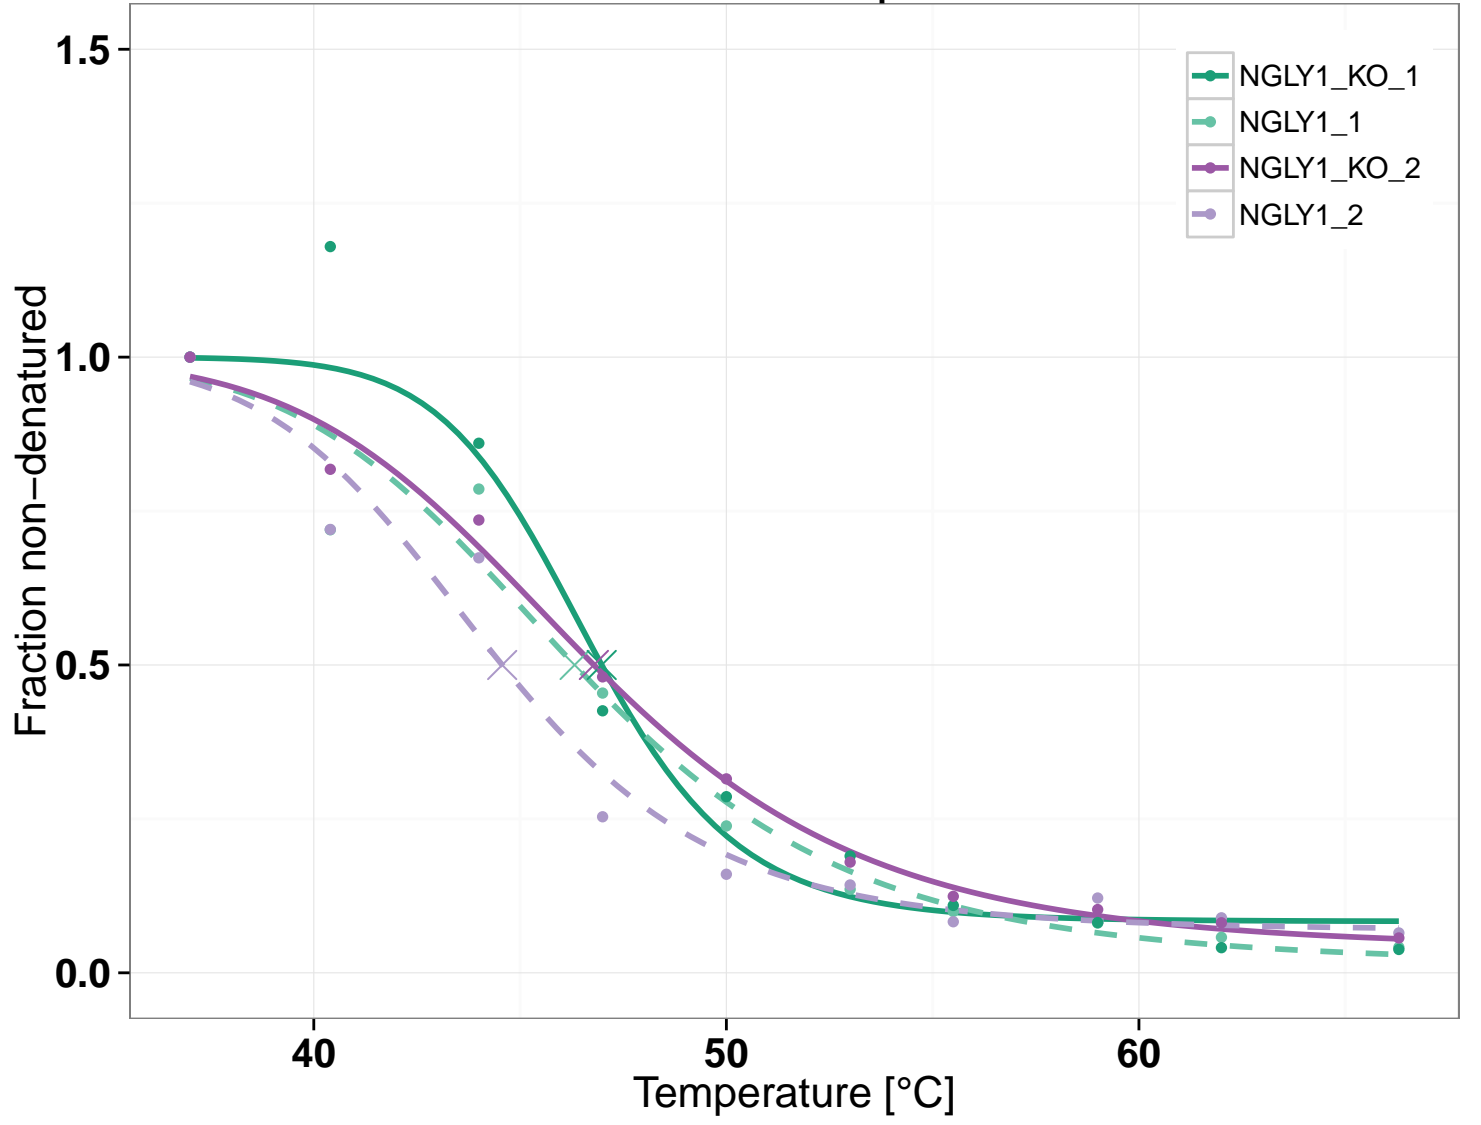

|            | meltPoint | slope  | plateau | R2   |
|------------|-----------|--------|---------|------|
| NGLY1_KO_1 | 46.98     | -0.13  | 0.08    | 0.97 |
| NGLY1_1    | 46.32     | -0.073 | 0.01    | 0.96 |
| NGLY1_KO_2 | 46.79     | -0.07  | 0.04    | 0.99 |
| NGLY1_2    | 44.57     | -0.086 | 0.07    | 0.96 |

Supplement: Supplementary file 444 [file 1]

# IPI00009946.4|TOMM34

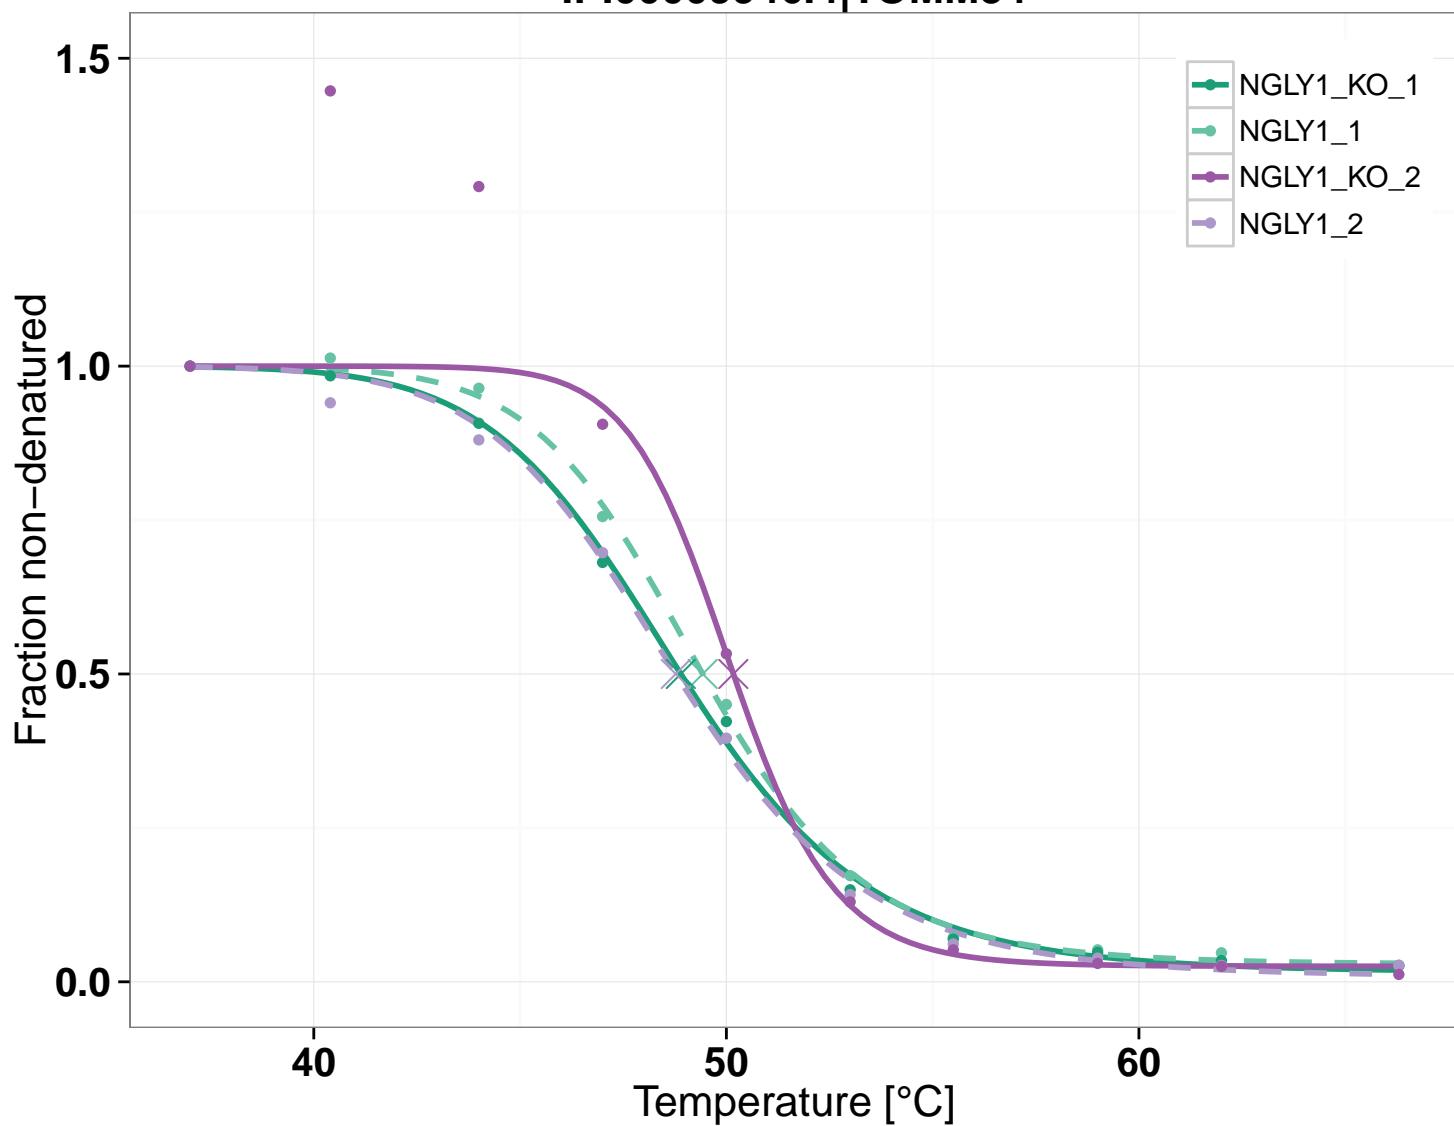

|            | meltPoint | slope | plateau | R2  |
|------------|-----------|-------|---------|-----|
| NGLY1_KO_1 | 48.9      | -0.11 | 0.02    | 1   |
| NGLY1_1    | 49.43     | -0.12 | 0.03    | 1   |
| NGLY1_KO_2 | 50.17     | -0.2  | 0.03    | 0.9 |
| NGLY1_2    | 48.77     | -0.11 | 0.01    | 1   |

Supplement: Supplementary file 445 [file 1]

IPI00847544.1|FMNL3

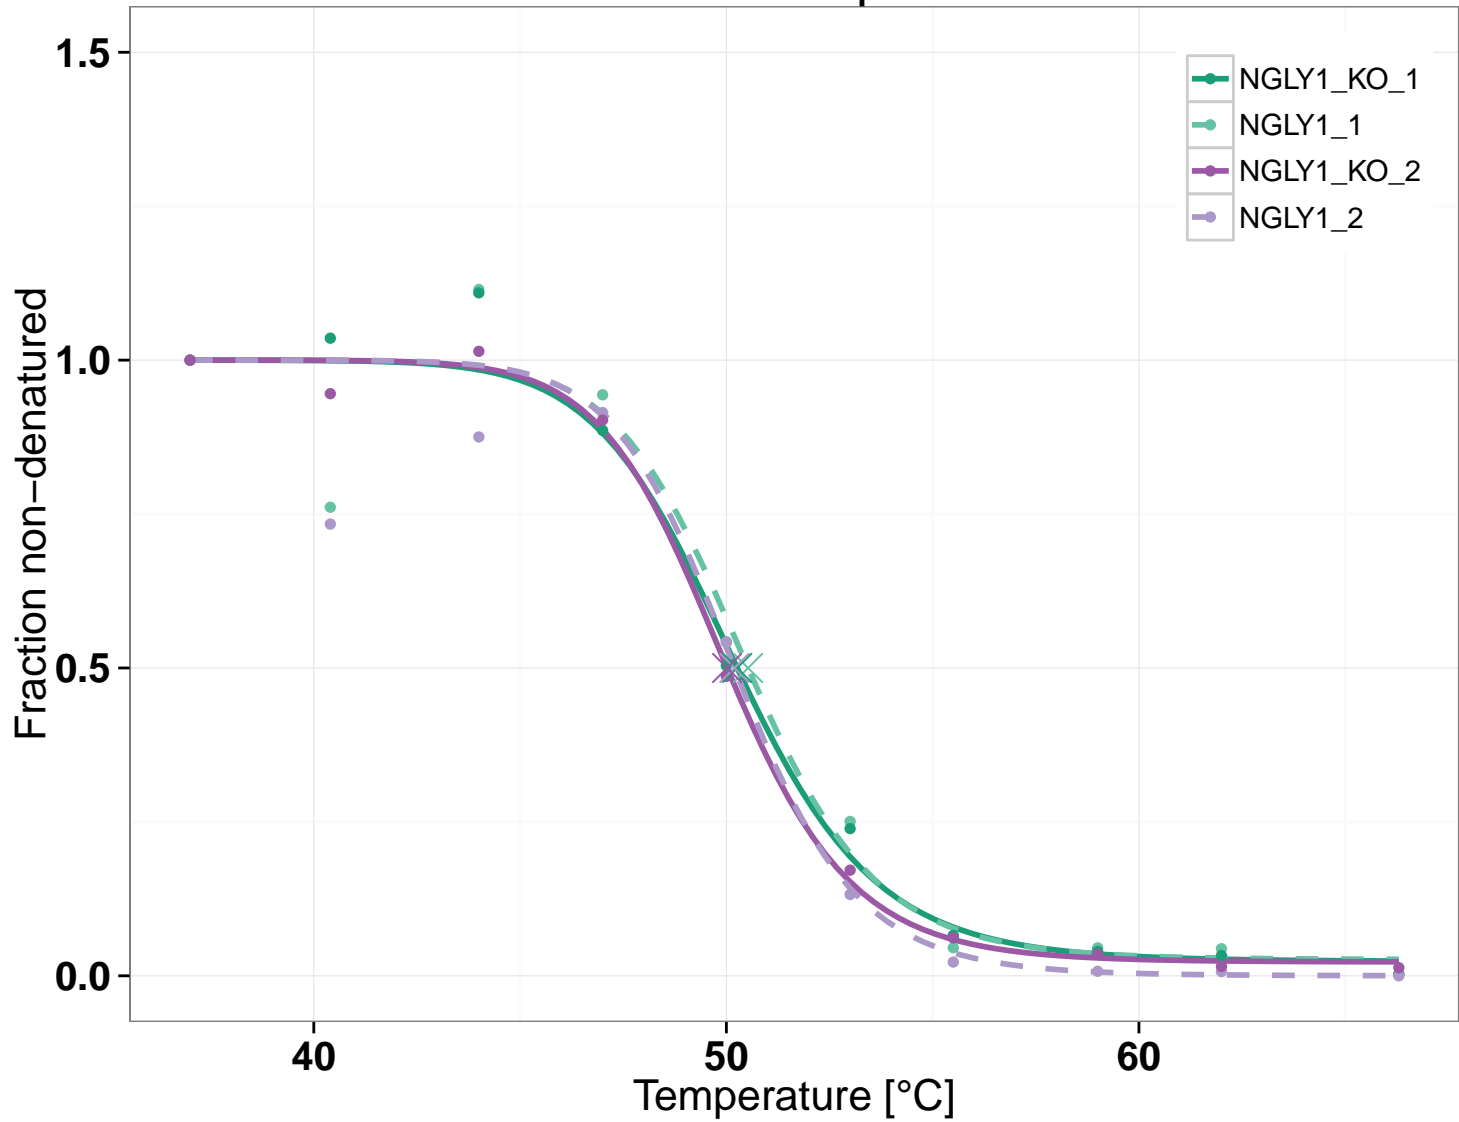

|            | meltPoint | slope | plateau | R2   |
|------------|-----------|-------|---------|------|
| NGLY1_KO_1 | 50.26     | -0.14 | 0.02    | 0.99 |
| NGLY1_1    | 50.53     | -0.15 | 0.03    | 0.96 |
| NGLY1_KO_2 | 50.02     | -0.16 | 0.02    | 1    |
| NGLY1_2    | 50.2      | -0.17 | 0       | 0.95 |

Supplement: Supplementary file 446 [file 1]

IPI00465273.1|UHRF1BP1

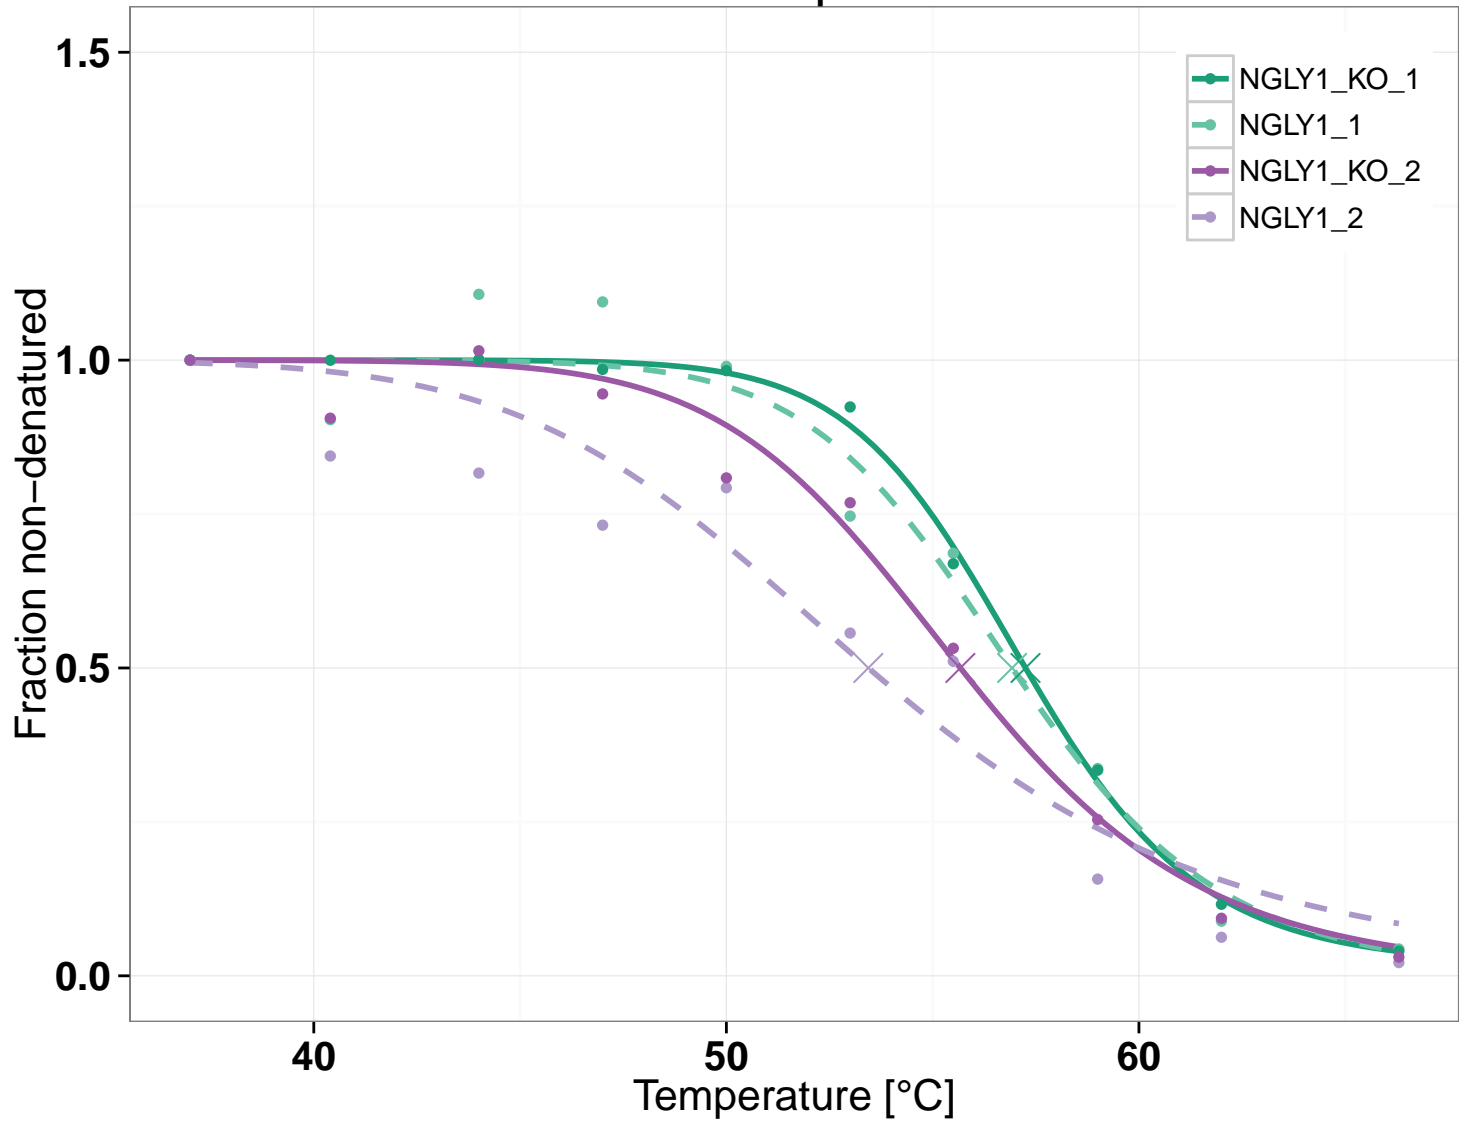

|            | meltPoint | slope  | plateau | R2   |
|------------|-----------|--------|---------|------|
| NGLY1_KO_1 | 57.25     | -0.12  | 0.02    | 1    |
| NGLY1_1    | 56.93     | -0.1   | 0       | 0.97 |
| NGLY1_KO_2 | 55.67     | -0.085 | 0       | 0.98 |
| NGLY1_2    | 53.44     | -0.059 | 0       | 0.92 |

Supplement: Supplementary file 447 [file 1]

# IPI00377128.1|DPP8

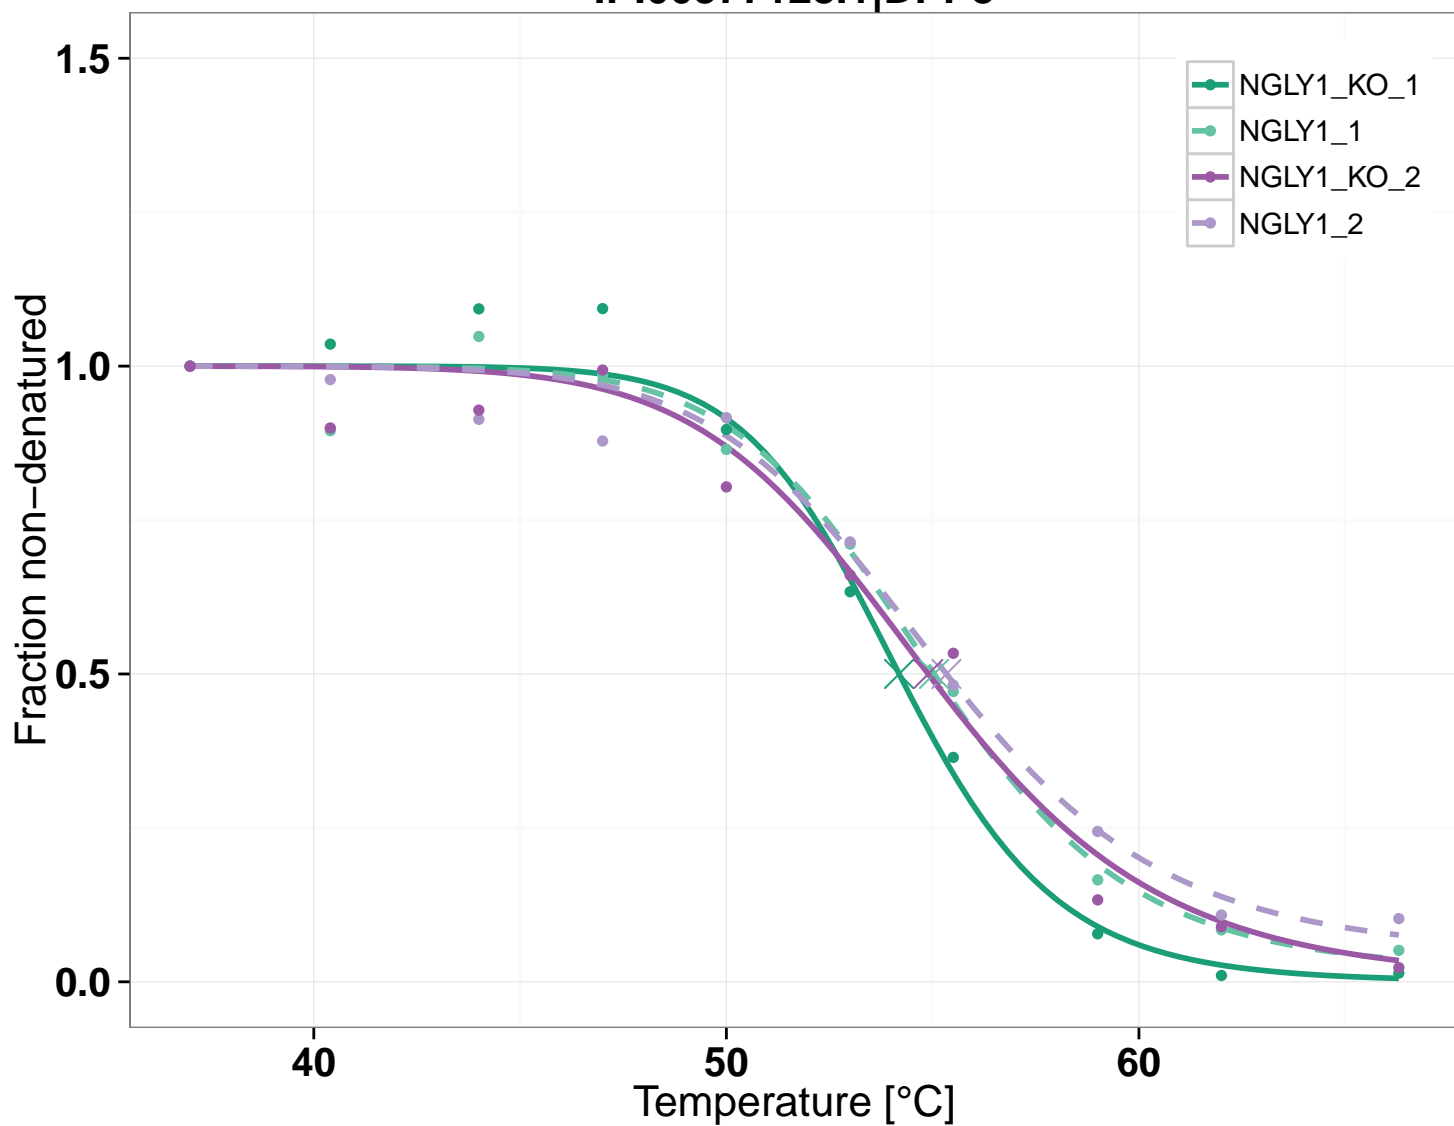

|            | meltPoint | slope  | plateau | R2   |
|------------|-----------|--------|---------|------|
| NGLY1_KO_1 | 54.19     | -0.13  | 0       | 0.99 |
| NGLY1_1    | 55.03     | -0.1   | 0.02    | 0.99 |
| NGLY1_KO_2 | 54.89     | -0.089 | 0       | 0.98 |
| NGLY1_2    | 55.33     | -0.087 | 0.04    | 0.99 |

Supplement: Supplementary file 448 [file 1]

IPI00909924.1|B4DRP7\_HUMAN

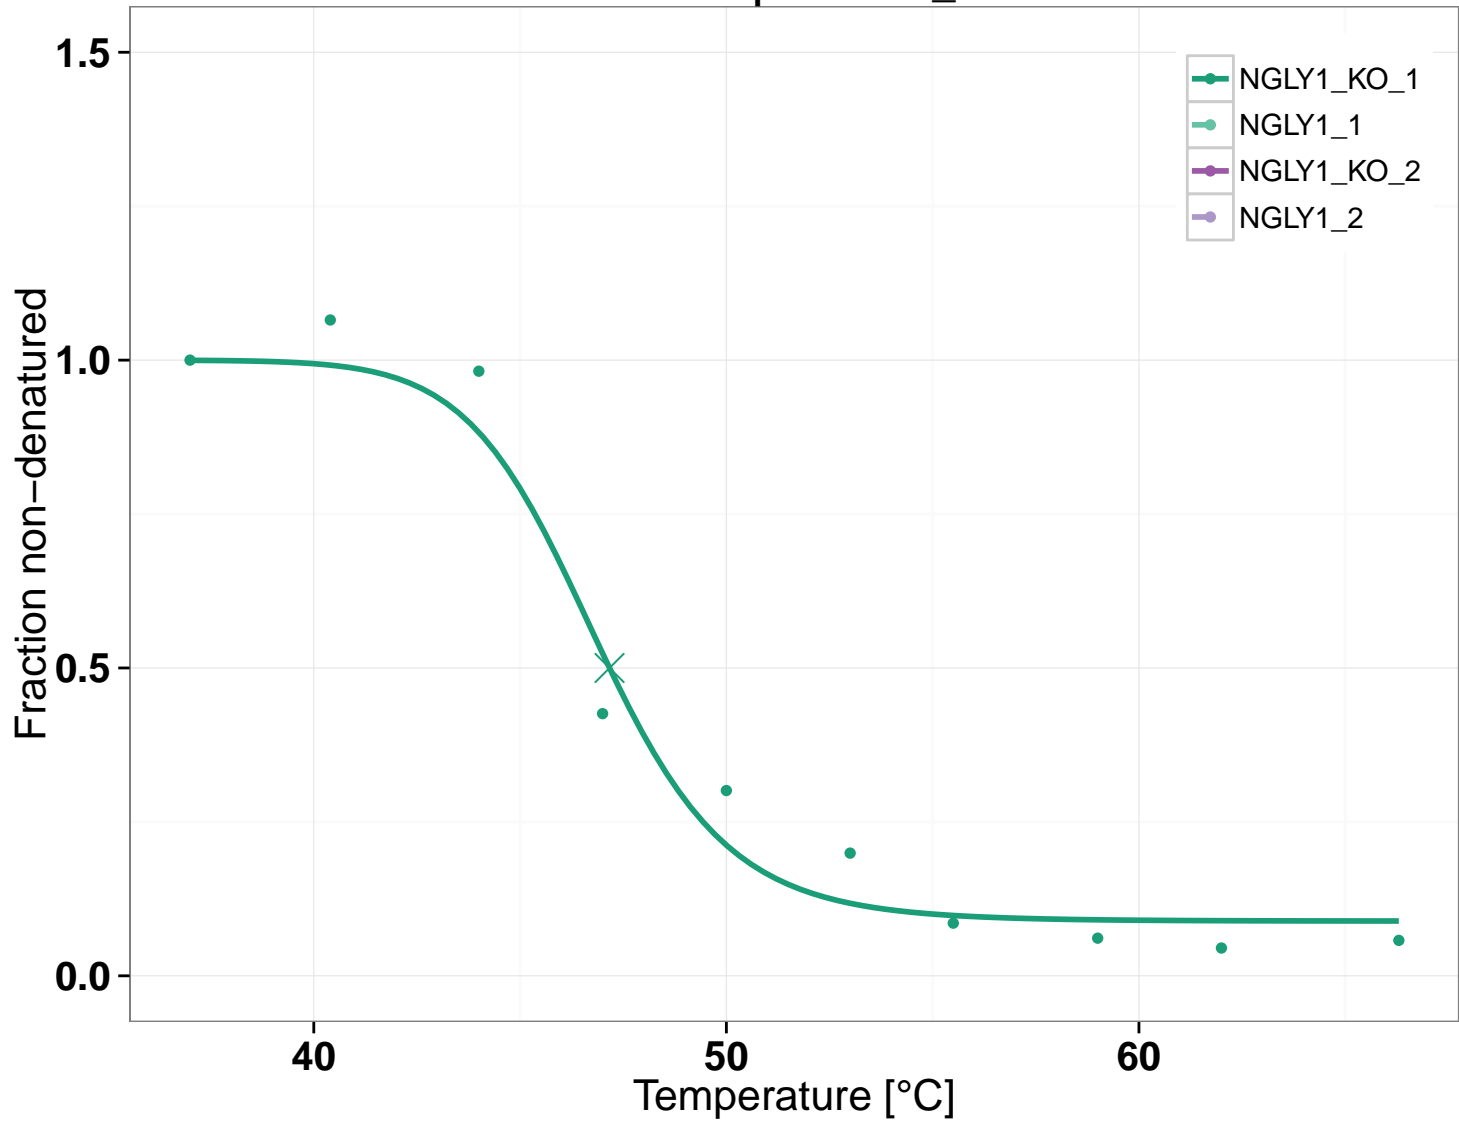

|            | meltPoint | slope | plateau | R2   |
|------------|-----------|-------|---------|------|
| NGLY1_KO_1 | 47.17     | -0.14 | 0.09    | 0.97 |
| NGLY1_1    | -         | -     | -       | -    |
| NGLY1_KO_2 | -         | -     | -       | -    |
| NGLY1_2    | -         | -     | -       | -    |

Supplement: Supplementary file 449 [file 1]

# IPI00853644.1|RIC8B

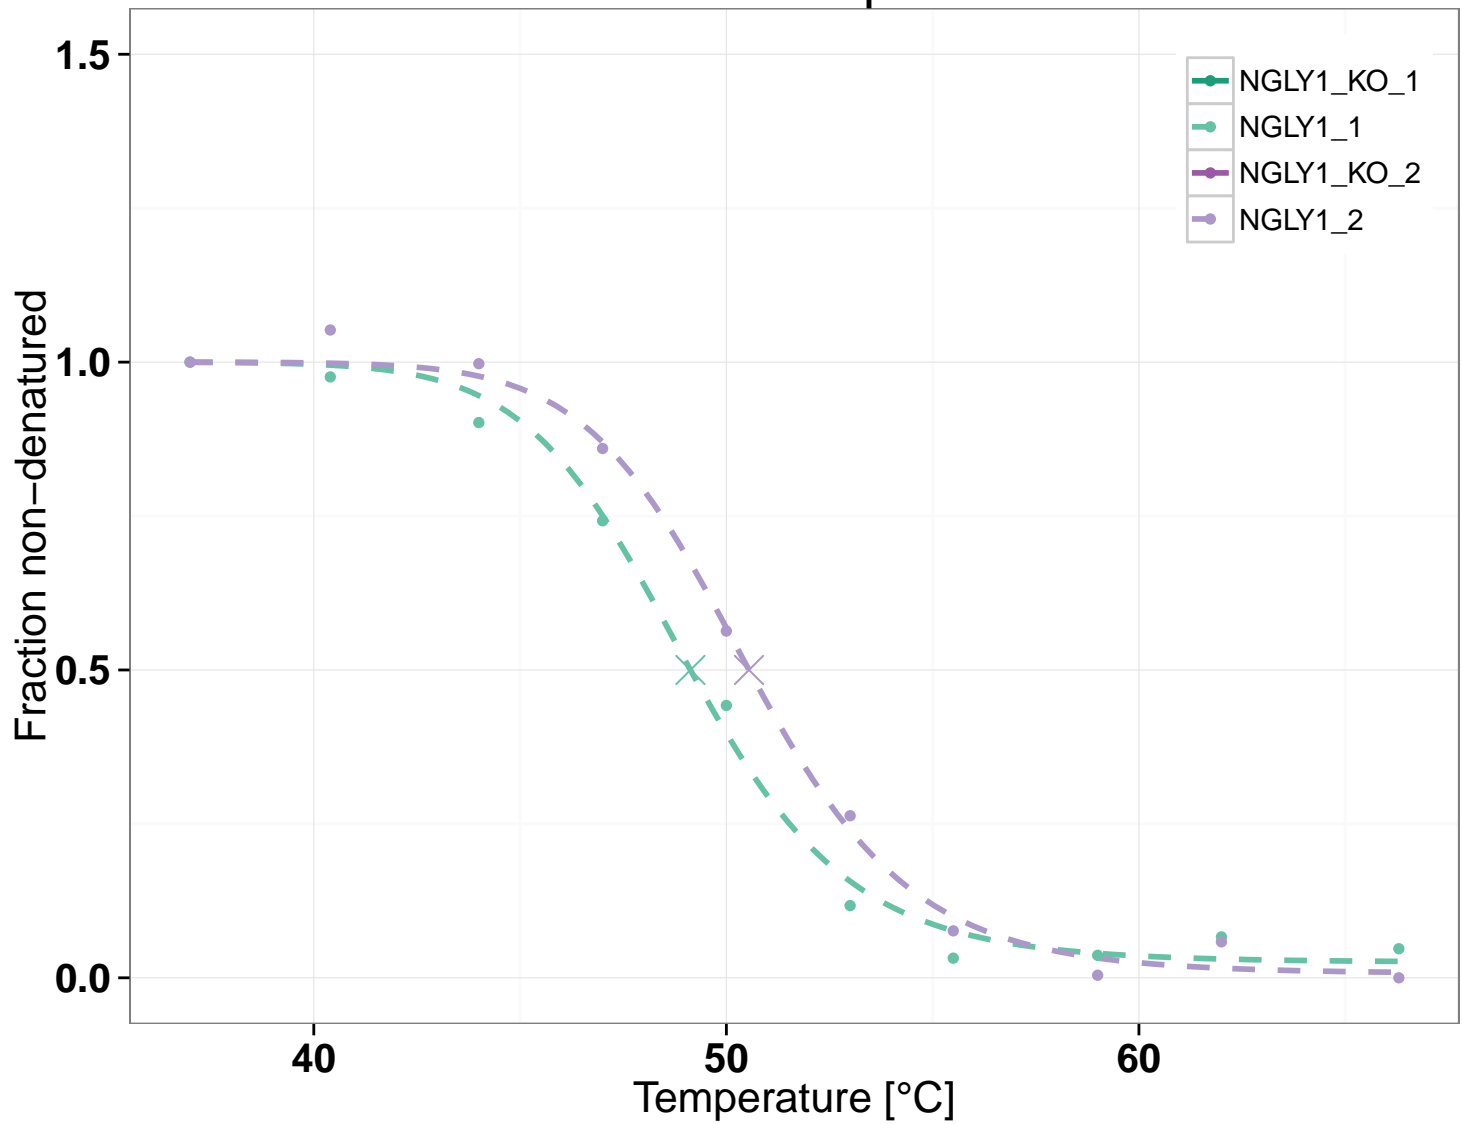

|            | meltPoint | slope | plateau | R2   |
|------------|-----------|-------|---------|------|
| NGLY1_KO_1 | -         | -     | -       | -    |
| NGLY1_1    | 49.13     | -0.12 | 0.03    | 0.99 |
| NGLY1_KO_2 | -         | -     | -       | -    |
| NGLY1_2    | 50.55     | -0.13 | 0.01    | 1    |

Supplement: Supplementary file 450 [file 1]

# IPI00015602.1|TOMM70A

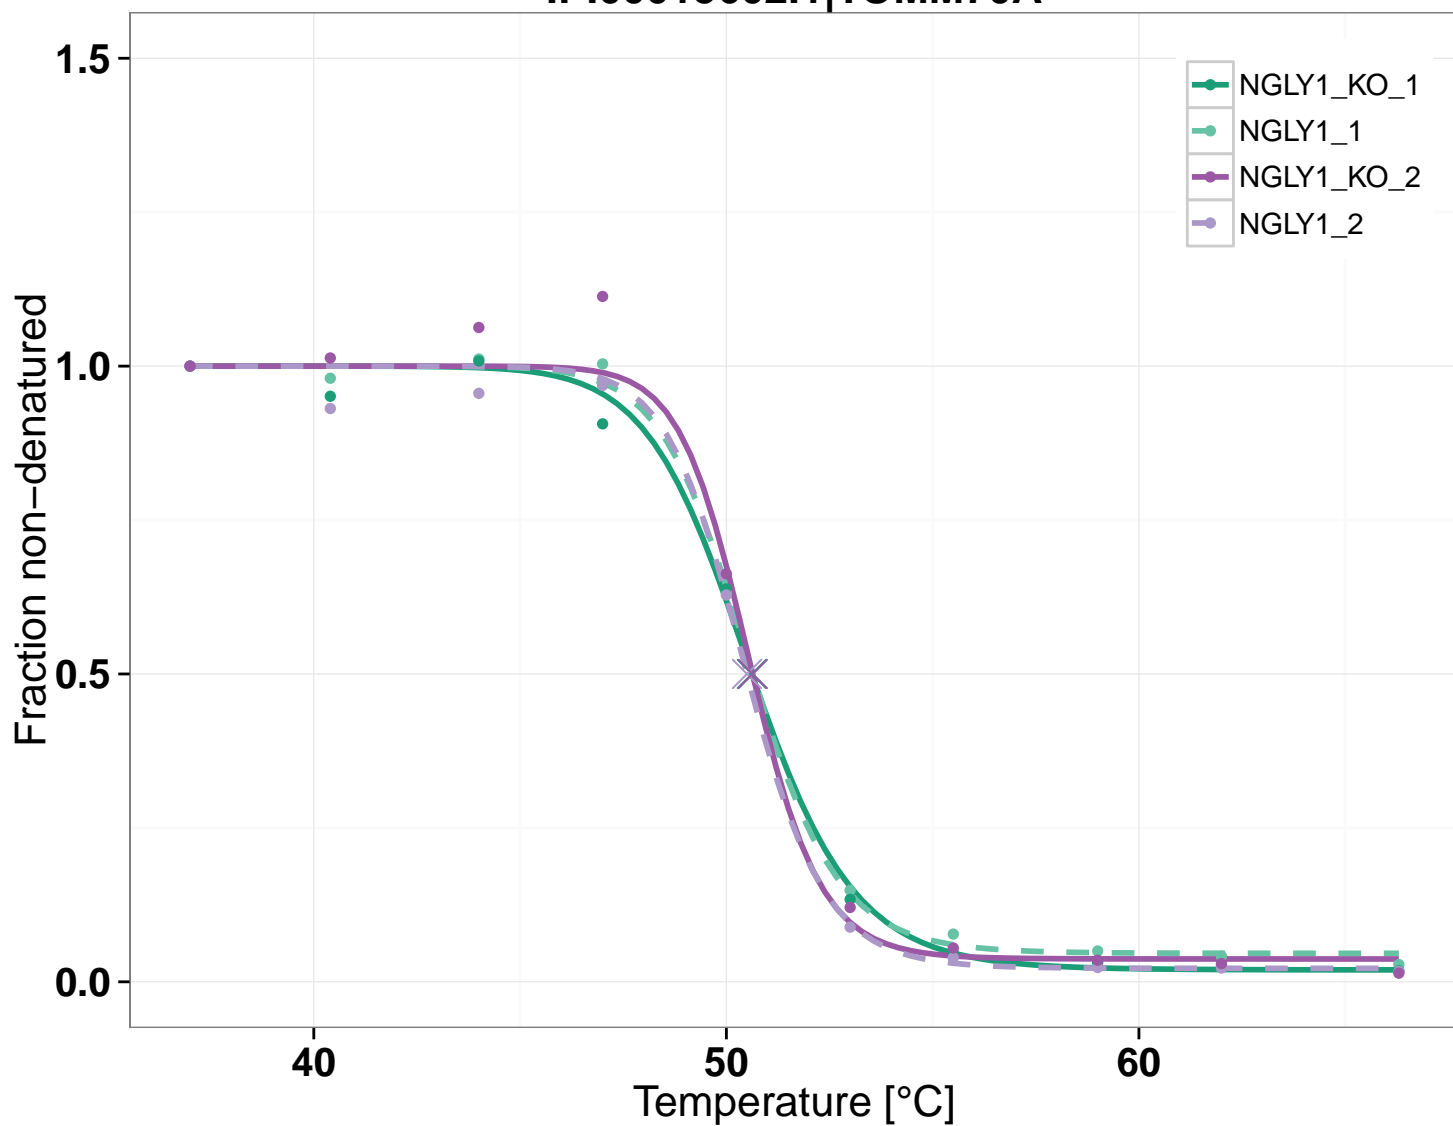

|            | meltPoint | slope | plateau | R2   |
|------------|-----------|-------|---------|------|
| NGLY1_KO_1 | 50.62     | -0.19 | 0.02    | 1    |
| NGLY1_1    | 50.64     | -0.22 | 0.05    | 1    |
| NGLY1_KO_2 | 50.64     | -0.28 | 0.04    | 0.99 |
| NGLY1_2    | 50.5      | -0.25 | 0.02    | 1    |

Supplement: Supplementary file 451 [file 1]

IPI00872032.2|LOC100130211

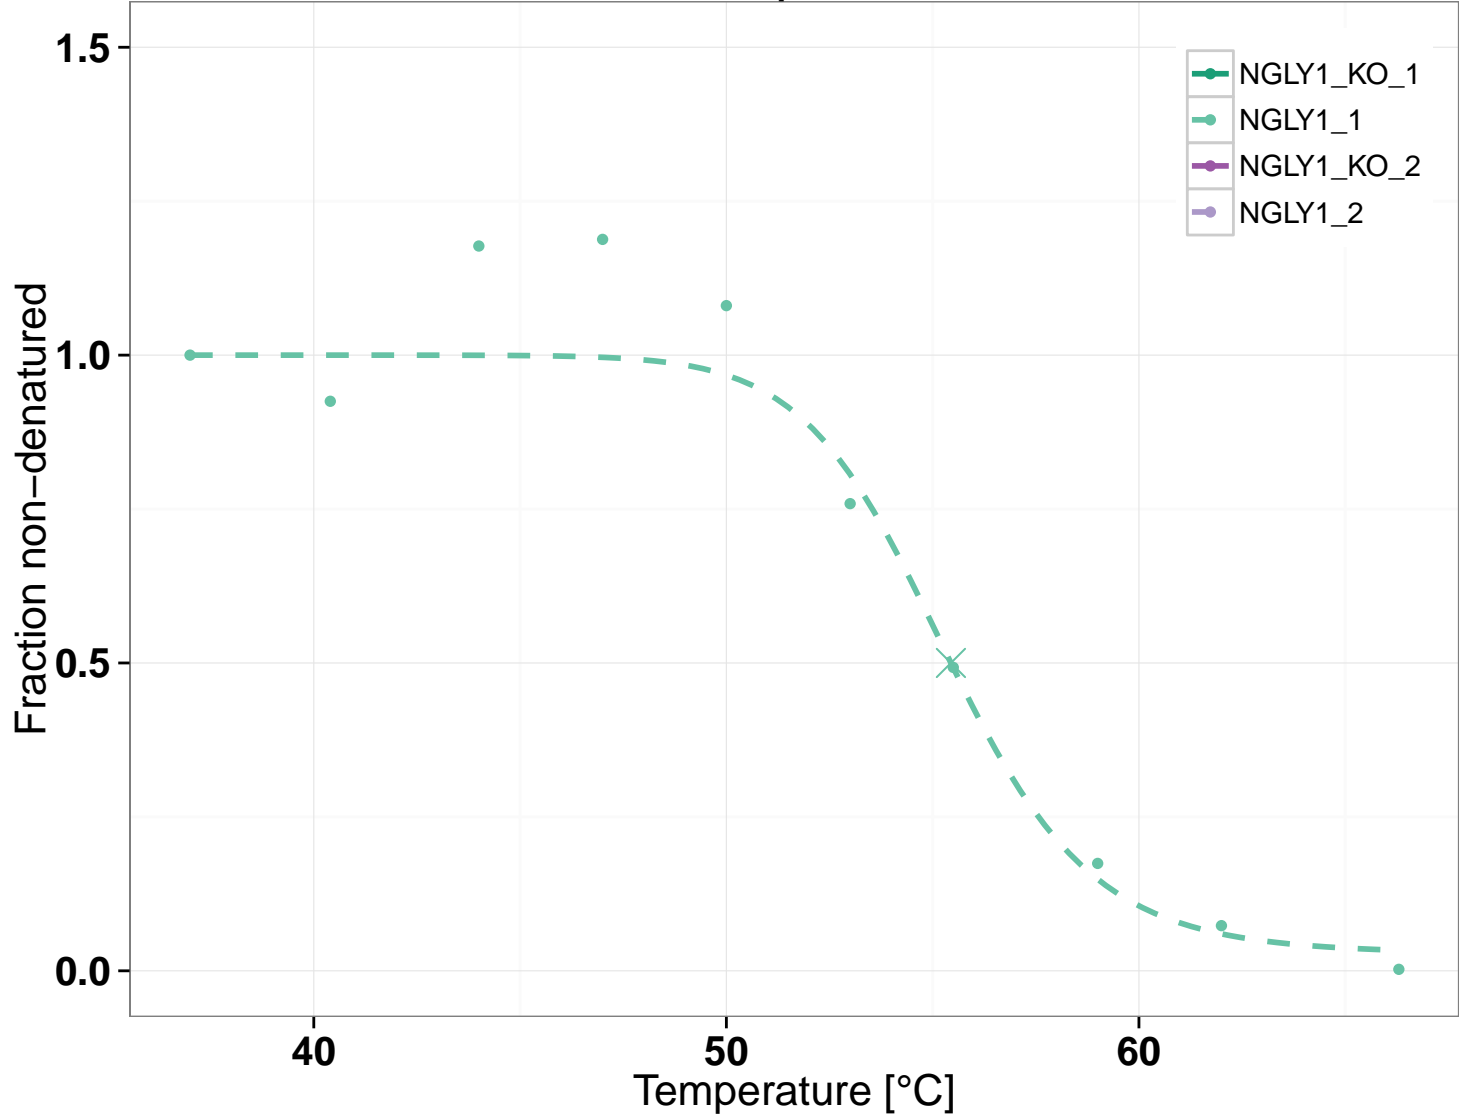

|            | meltPoint | slope | plateau | R2   |
|------------|-----------|-------|---------|------|
| NGLY1_KO_1 | -         | -     | -       | -    |
| NGLY1_1    | 55.44     | -0.14 | 0.03    | 0.95 |
| NGLY1_KO_2 | -         | -     | -       | -    |
| NGLY1_2    | -         | -     | -       | -    |

Supplement: Supplementary file 452 [file 1]

# IPI00013949.1|SGTA

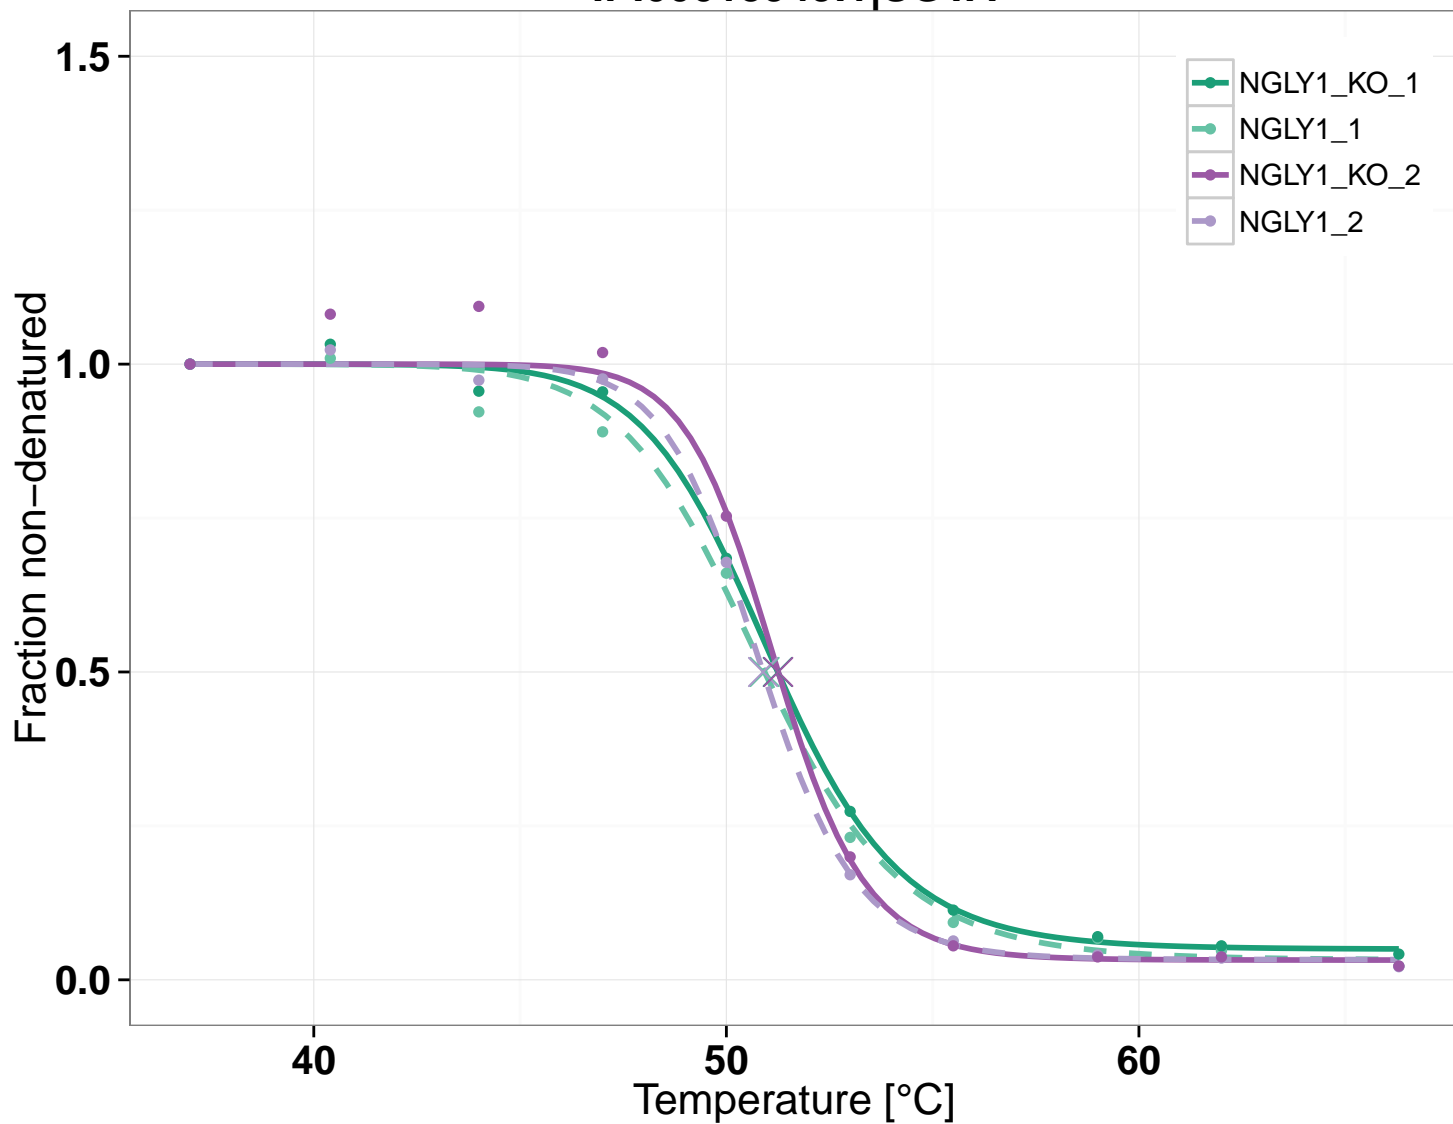

|            | meltPoint | slope | plateau | R2   |
|------------|-----------|-------|---------|------|
| NGLY1_KO_1 | 51.25     | -0.15 | 0.05    | 1    |
| NGLY1_1    | 50.93     | -0.14 | 0.03    | 1    |
| NGLY1_KO_2 | 51.26     | -0.22 | 0.03    | 0.99 |
| NGLY1_2    | 50.89     | -0.21 | 0.03    | 1    |

Supplement: Supplementary file 453 [file 1]

IPI00011069.1|UNG

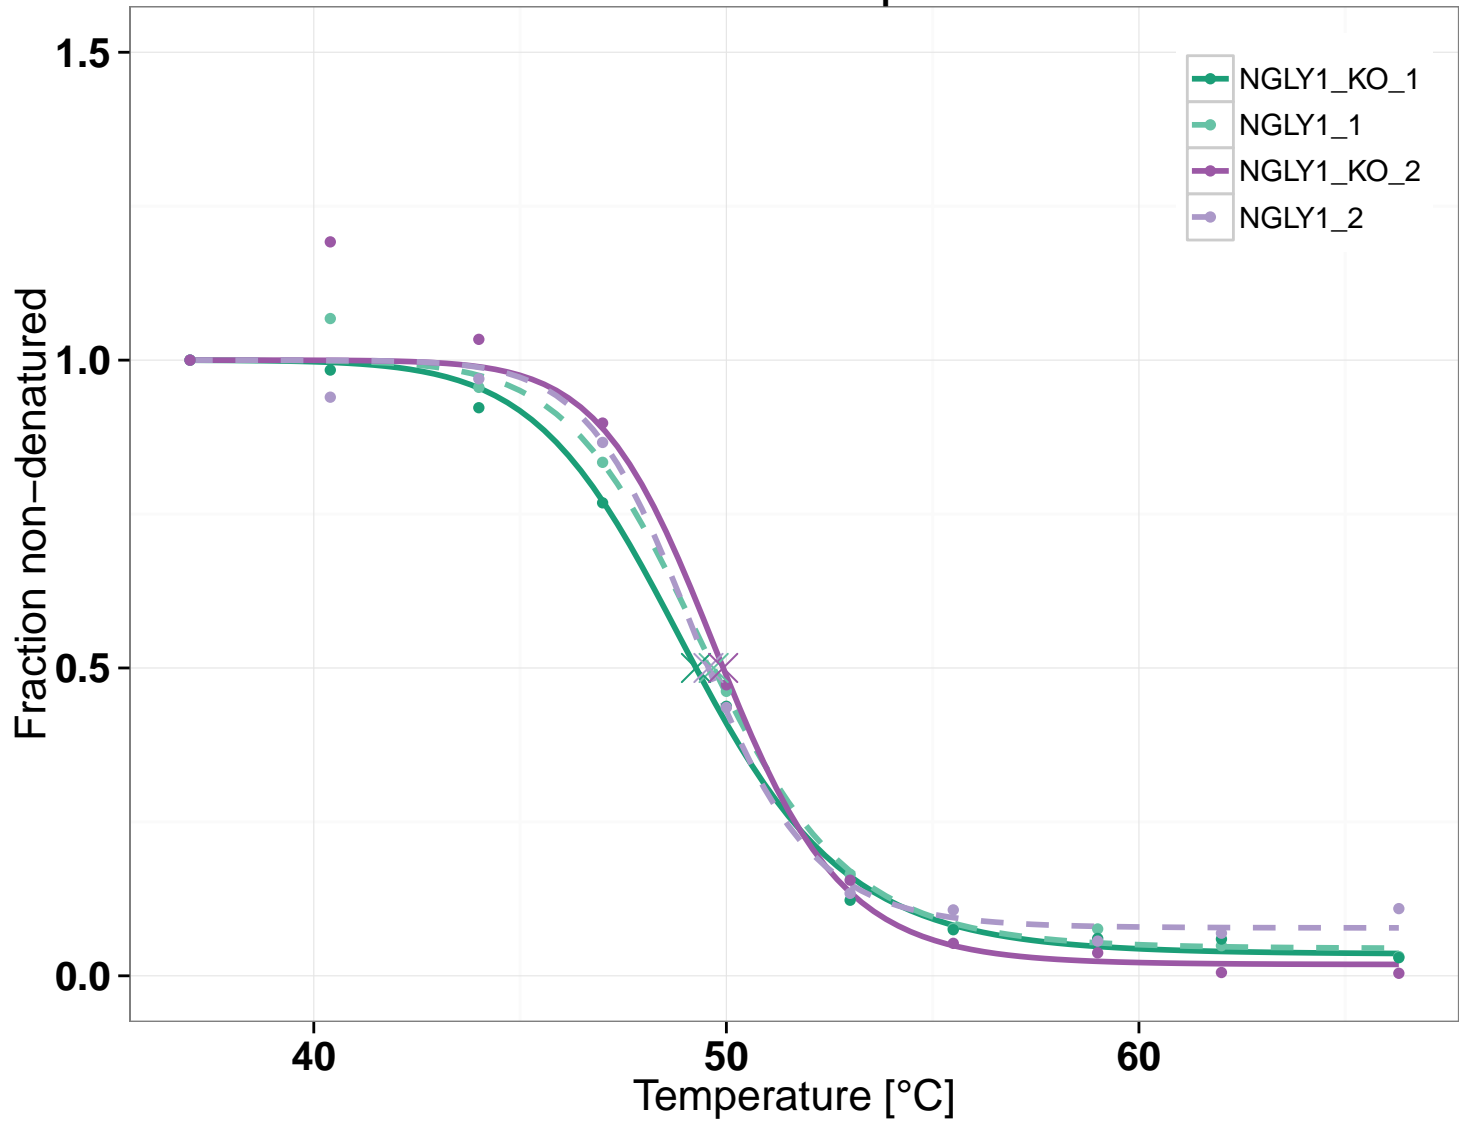

|            | meltPoint | slope | plateau | R2   |
|------------|-----------|-------|---------|------|
| NGLY1_KO_1 | 49.26     | -0.13 | 0.04    | 1    |
| NGLY1_1    | 49.69     | -0.14 | 0.04    | 1    |
| NGLY1_KO_2 | 49.92     | -0.17 | 0.02    | 0.98 |
| NGLY1_2    | 49.57     | -0.17 | 0.08    | 1    |

Supplement: Supplementary file 454 [file 1]

# IPI00024983.1|RTN2

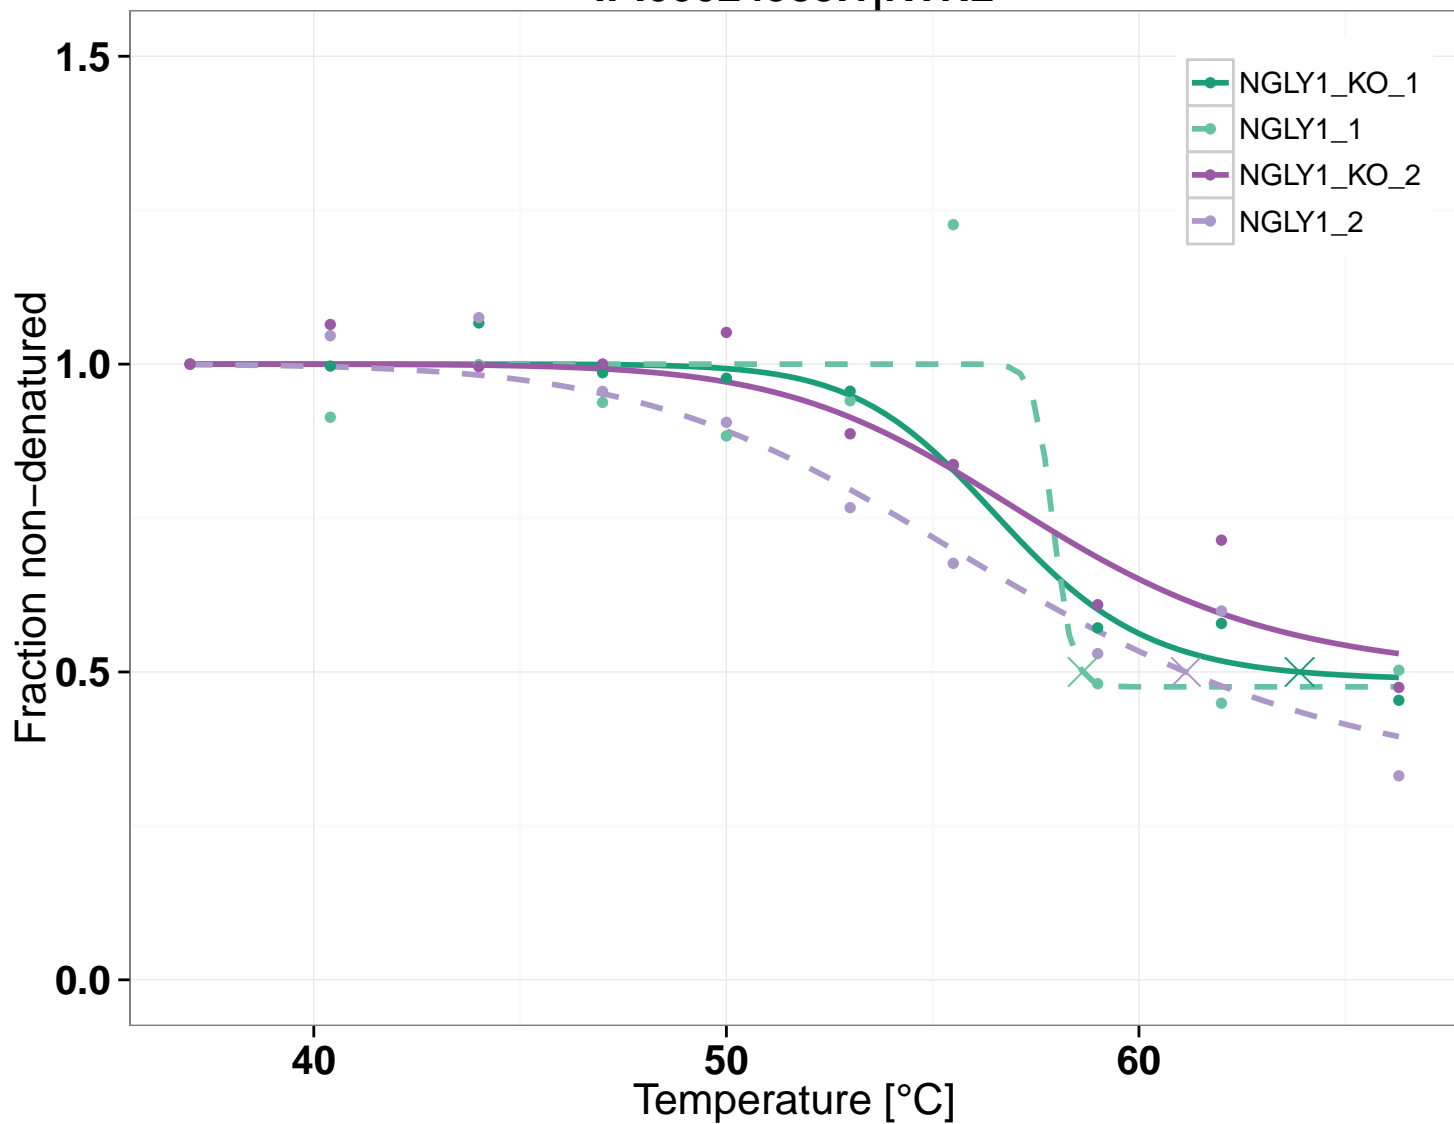

|            | meltPoint | slope  | plateau | R2   |
|------------|-----------|--------|---------|------|
| NGLY1_KO_1 | 63.89     | -0.072 | 0.49    | 0.98 |
| NGLY1_1    | 58.64     | -0.57  | 0.48    | 0.87 |
| NGLY1_KO_2 | -         | -0.042 | 0.49    | 0.91 |
| NGLY1_2    | 61.14     | -0.04  | 0.3     | 0.94 |

Supplement: Supplementary file 455 [file 1]

IPI00872664.1|USP14

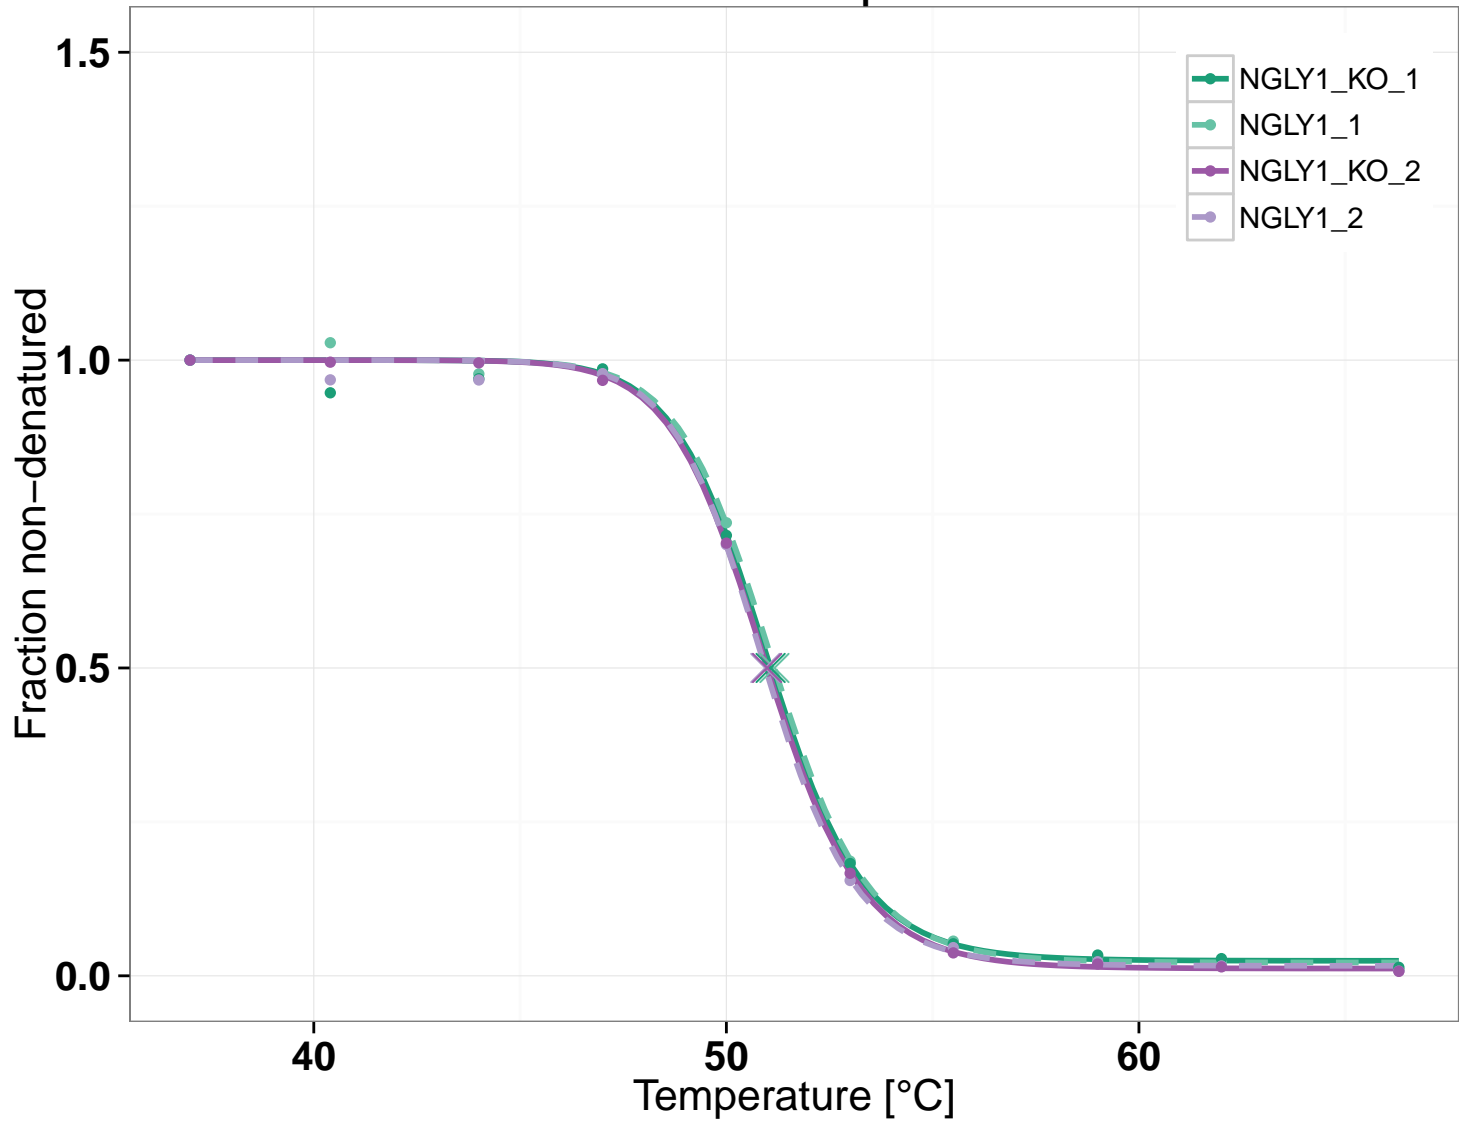

|            | meltPoint | slope | plateau | R2 |
|------------|-----------|-------|---------|----|
| NGLY1_KO_1 | 51.07     | -0.21 | 0.02    | 1  |
| NGLY1_1    | 51.16     | -0.21 | 0.02    | 1  |
| NGLY1_KO_2 | 50.99     | -0.21 | 0.01    | 1  |
| NGLY1_2    | 50.95     | -0.22 | 0.02    | 1  |

Supplement: Supplementary file 456 [file 1]

IPI00465059.4|RHOT2

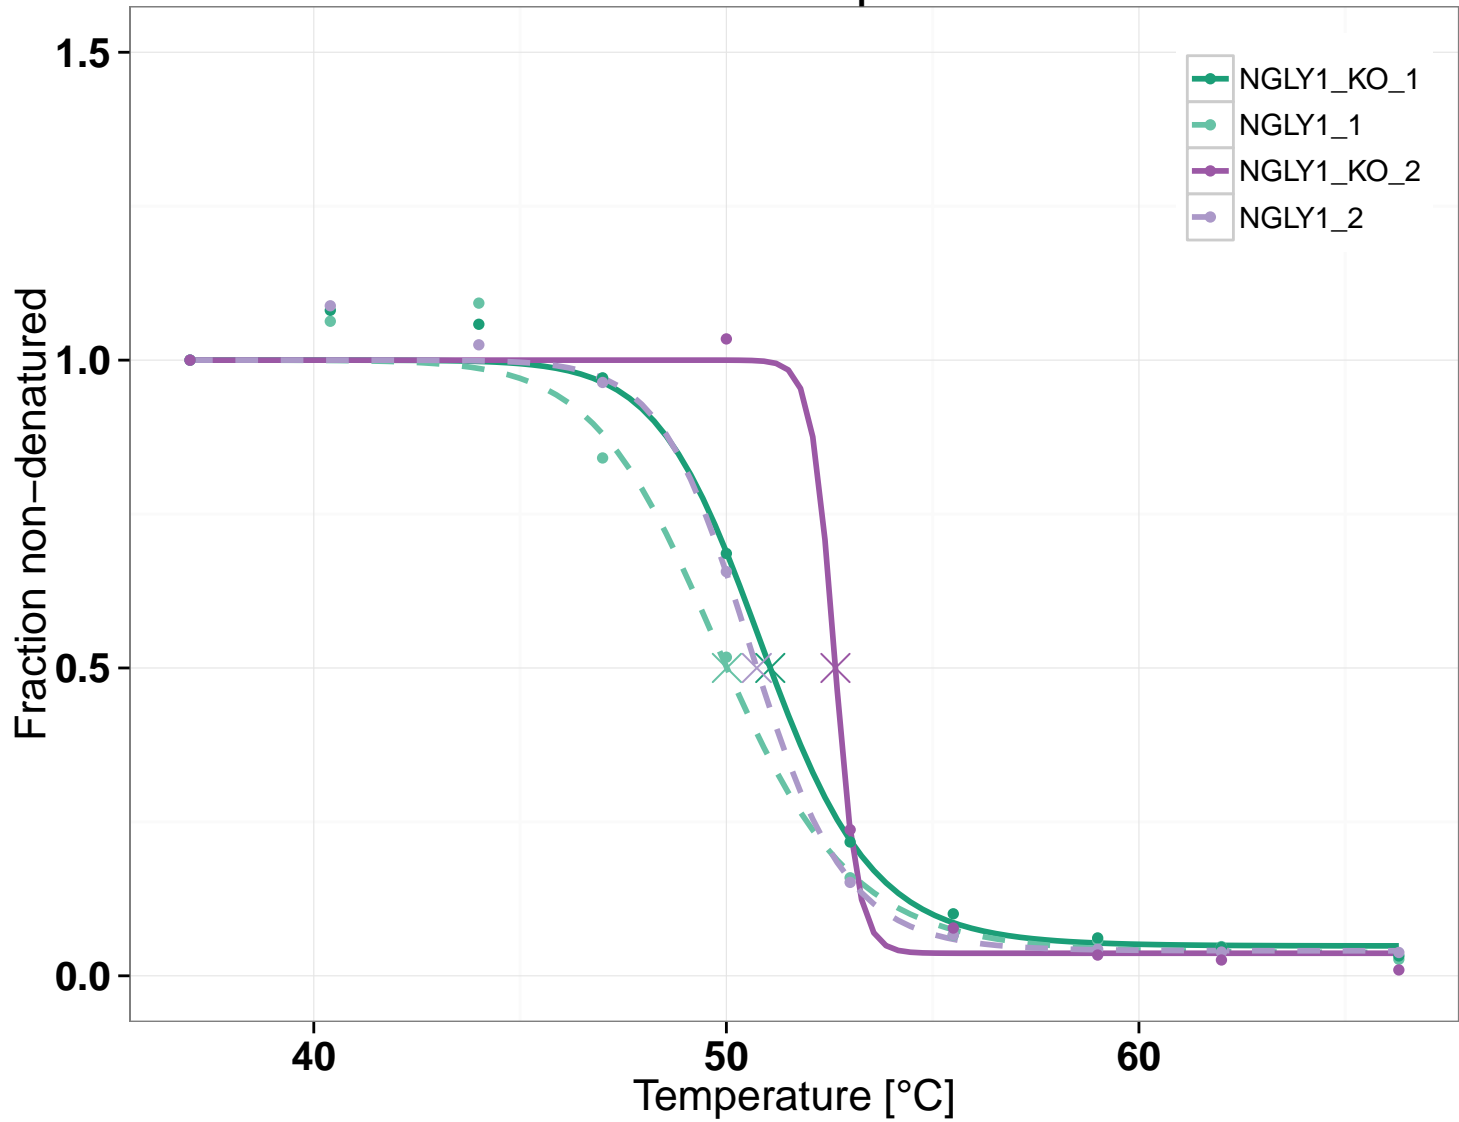

|            | meltPoint | slope | plateau | R2   |
|------------|-----------|-------|---------|------|
| NGLY1_KO_1 | 51.06     | -0.18 | 0.05    | 0.99 |
| NGLY1_1    | 50.01     | -0.15 | 0.04    | 0.99 |
| NGLY1_KO_2 | 52.64     | -0.86 | 0.04    | 0.74 |
| NGLY1_2    | 50.74     | -0.21 | 0.04    | 1    |

Supplement: Supplementary file 457 [file 1]

IPI00464993.4|AGPAT2

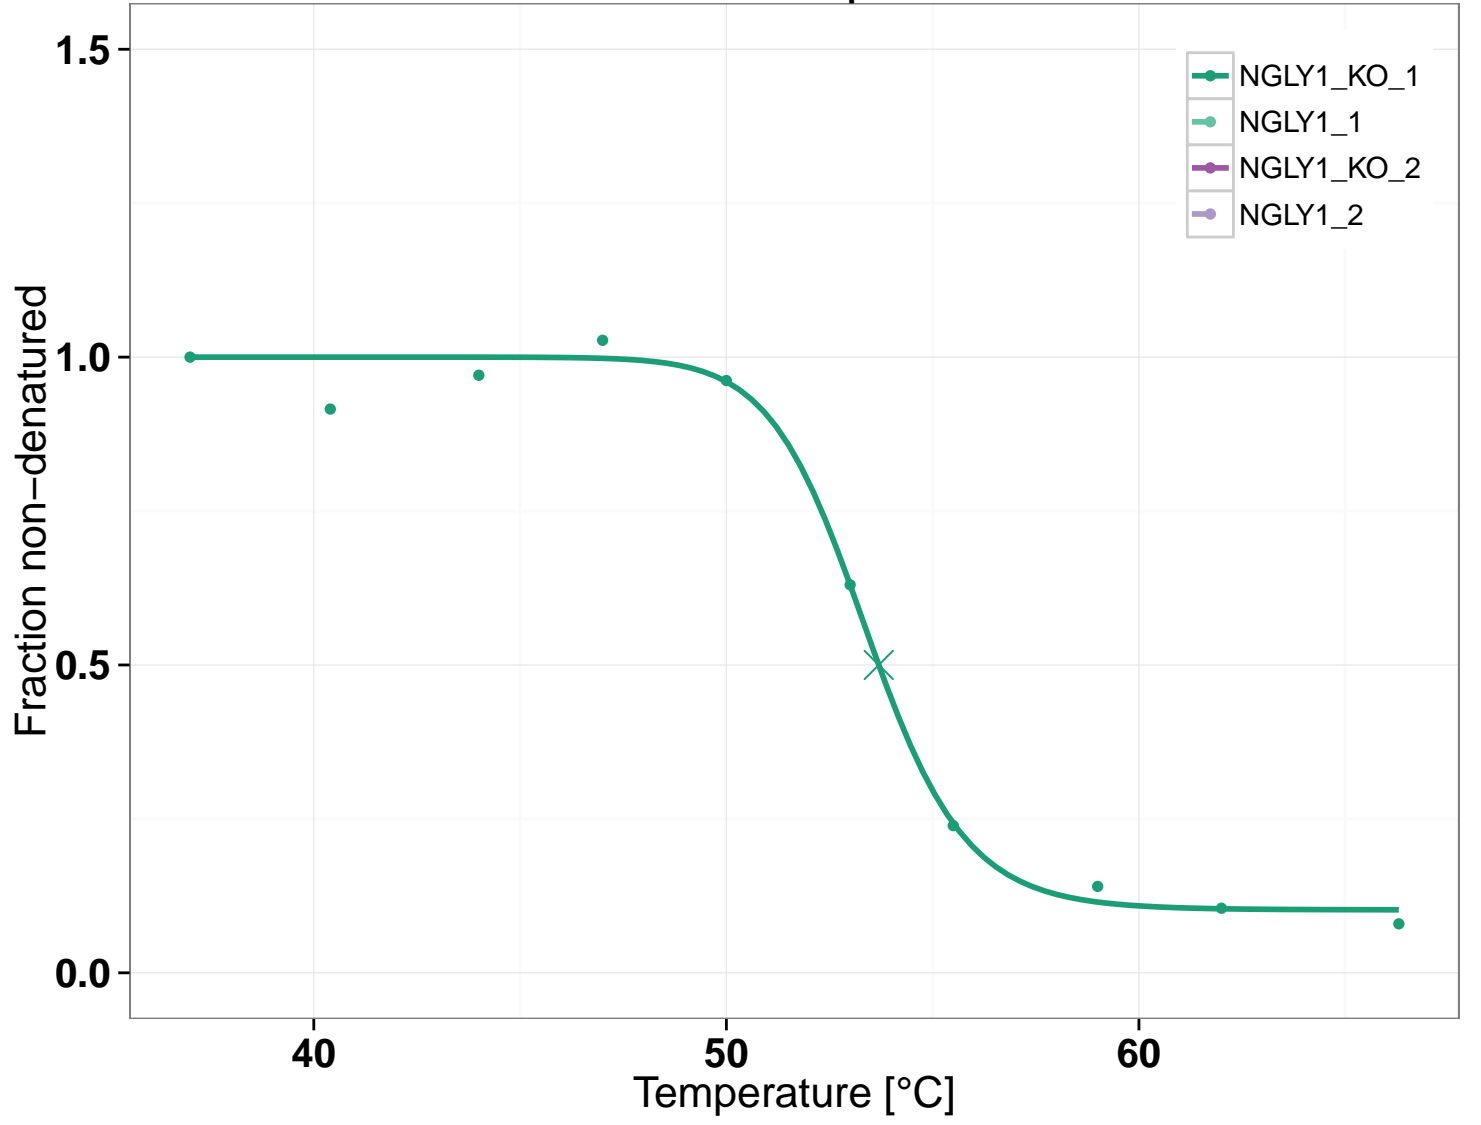

|            | meltPoint | slope | plateau | R2   |
|------------|-----------|-------|---------|------|
| NGLY1_KO_1 | 53.69     | -0.19 | 0.1     | 0.99 |
| NGLY1_1    | -         | -     | -       | -    |
| NGLY1_KO_2 | -         | -     | -       | -    |
| NGLY1_2    | -         | -     | -       | -    |

Supplement: Supplementary file 458 [file 1]

IPI00006077.1|PHF16

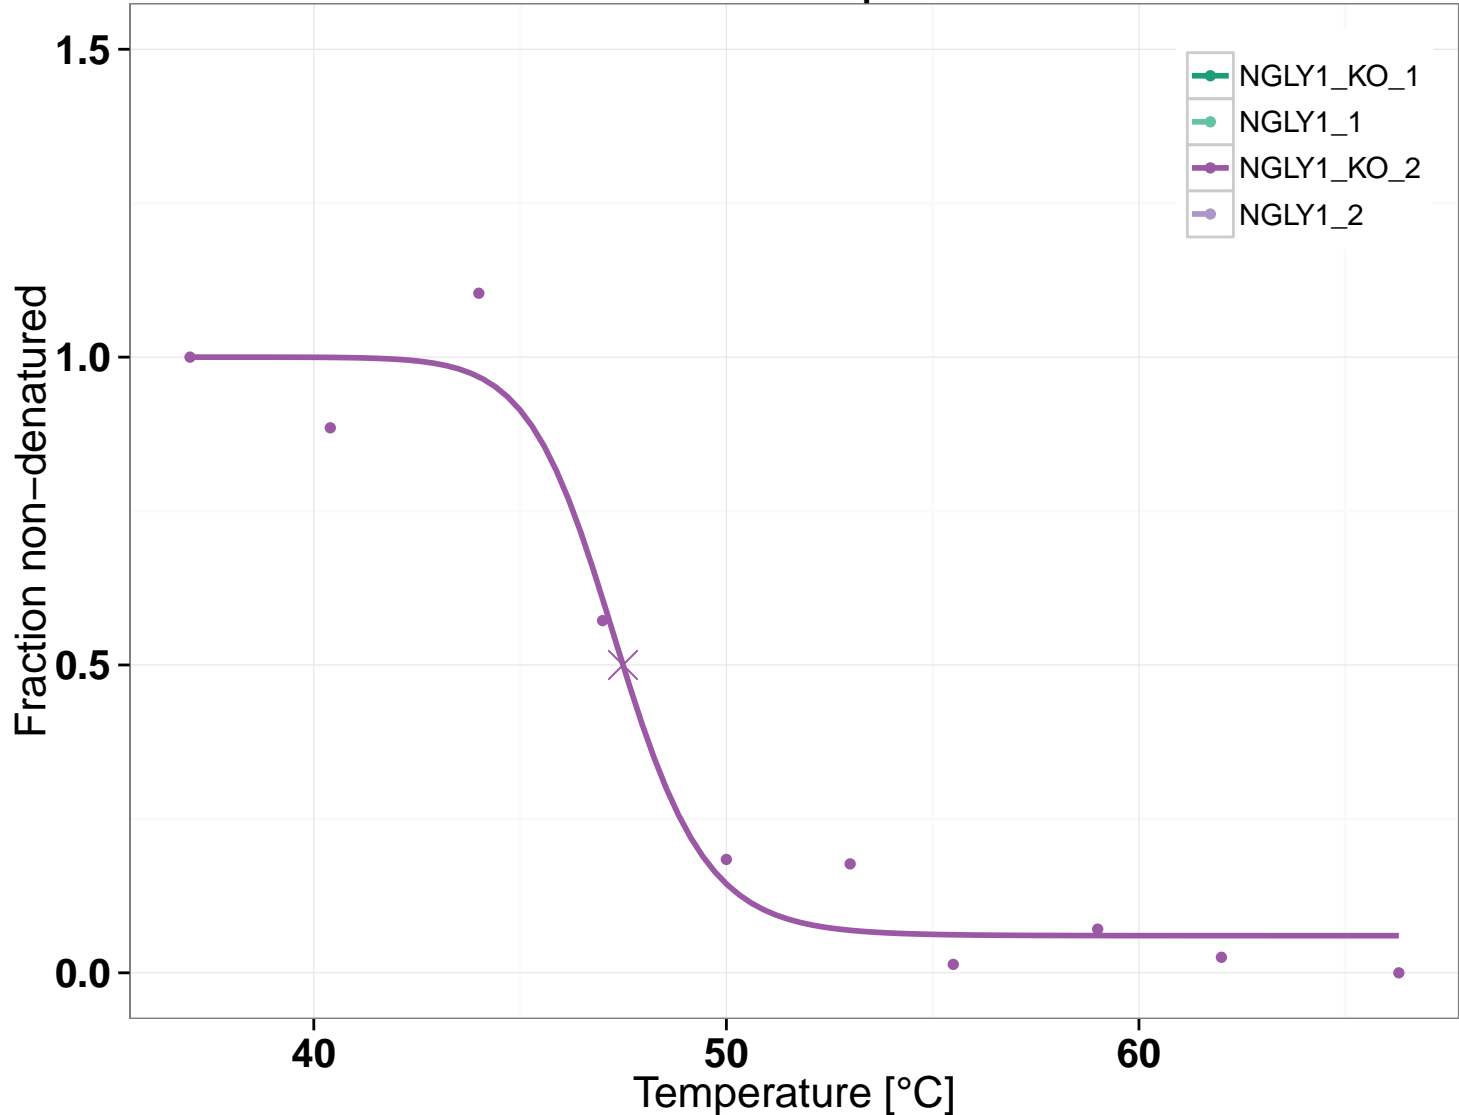

|            | meltPoint | slope | plateau | R2   |
|------------|-----------|-------|---------|------|
| NGLY1_KO_1 | —         | —     | —       | —    |
| NGLY1_1    | —         | —     | —       | —    |
| NGLY1_KO_2 | 47.49     | -0.22 | 0.06    | 0.97 |
| NGLY1_2    | —         | —     | —       | —    |

Supplement: Supplementary file 459 [file 1]

IPI00021410.2|DUS4L

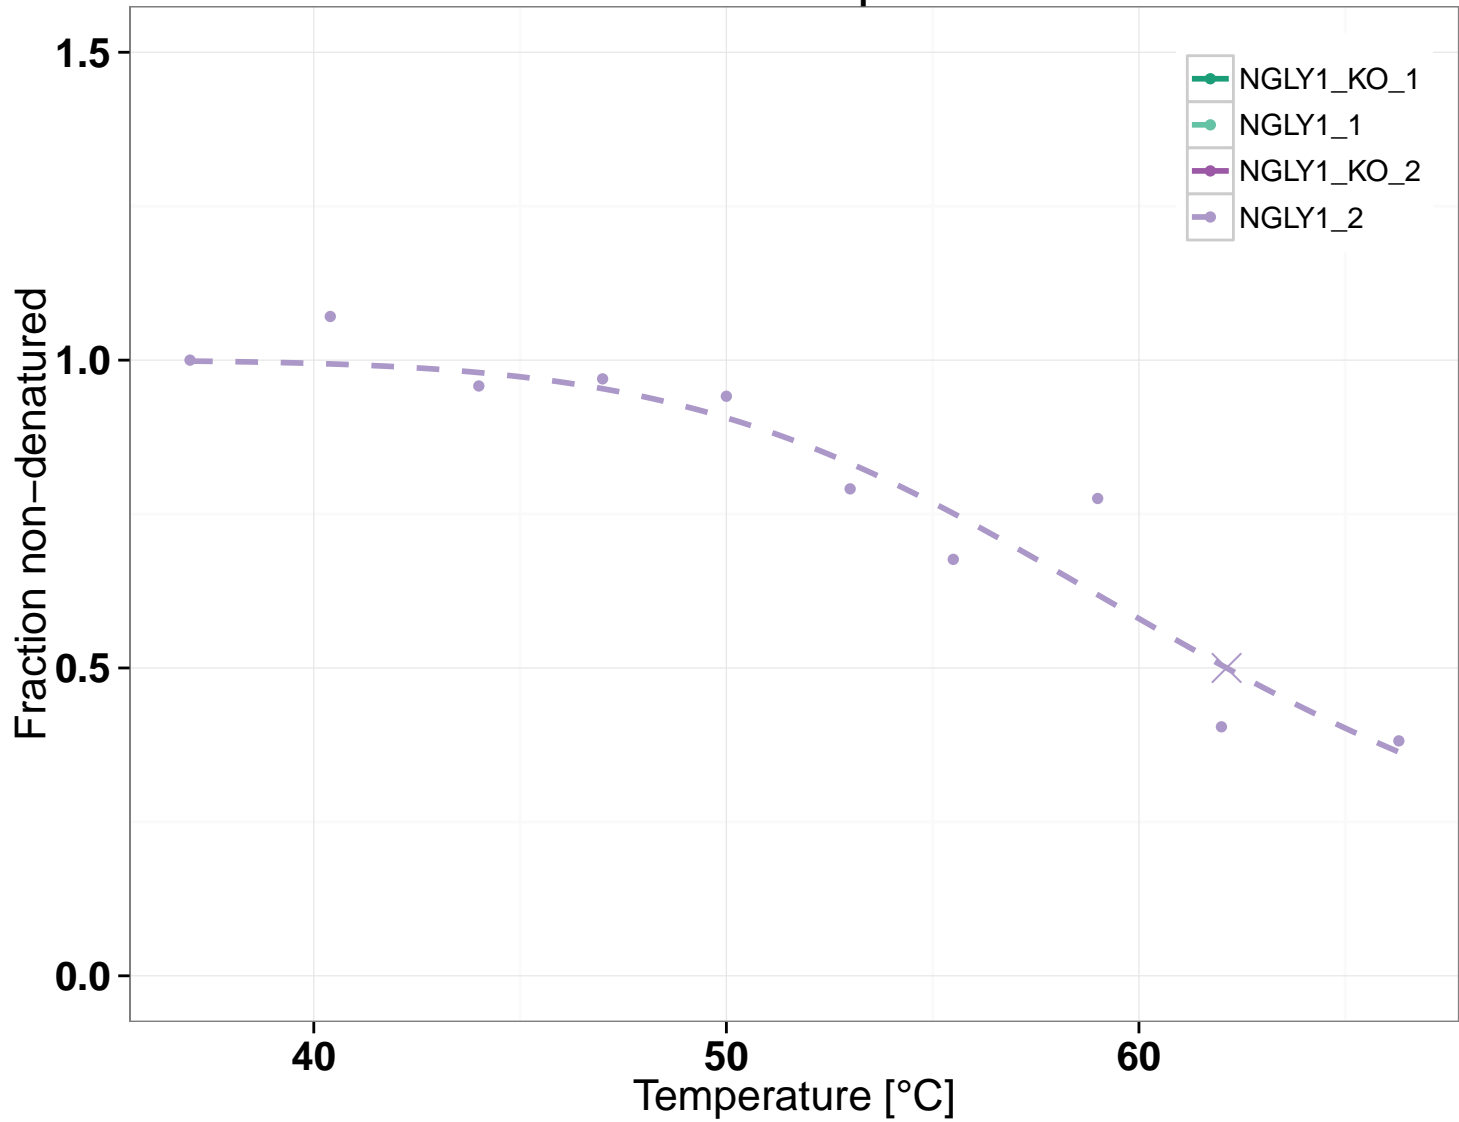

|            | meltPoint | slope  | plateau | R2   |
|------------|-----------|--------|---------|------|
| NGLY1_KO_1 | -         | -      | -       | -    |
| NGLY1_1    | -         | -      | -       | -    |
| NGLY1_KO_2 | -         | -      | -       | -    |
| NGLY1_2    | 62.12     | -0.039 | 0.05    | 0.91 |

Supplement: Supplementary file 460 [file 1]

# IPI00290410.3|DNTTIP2

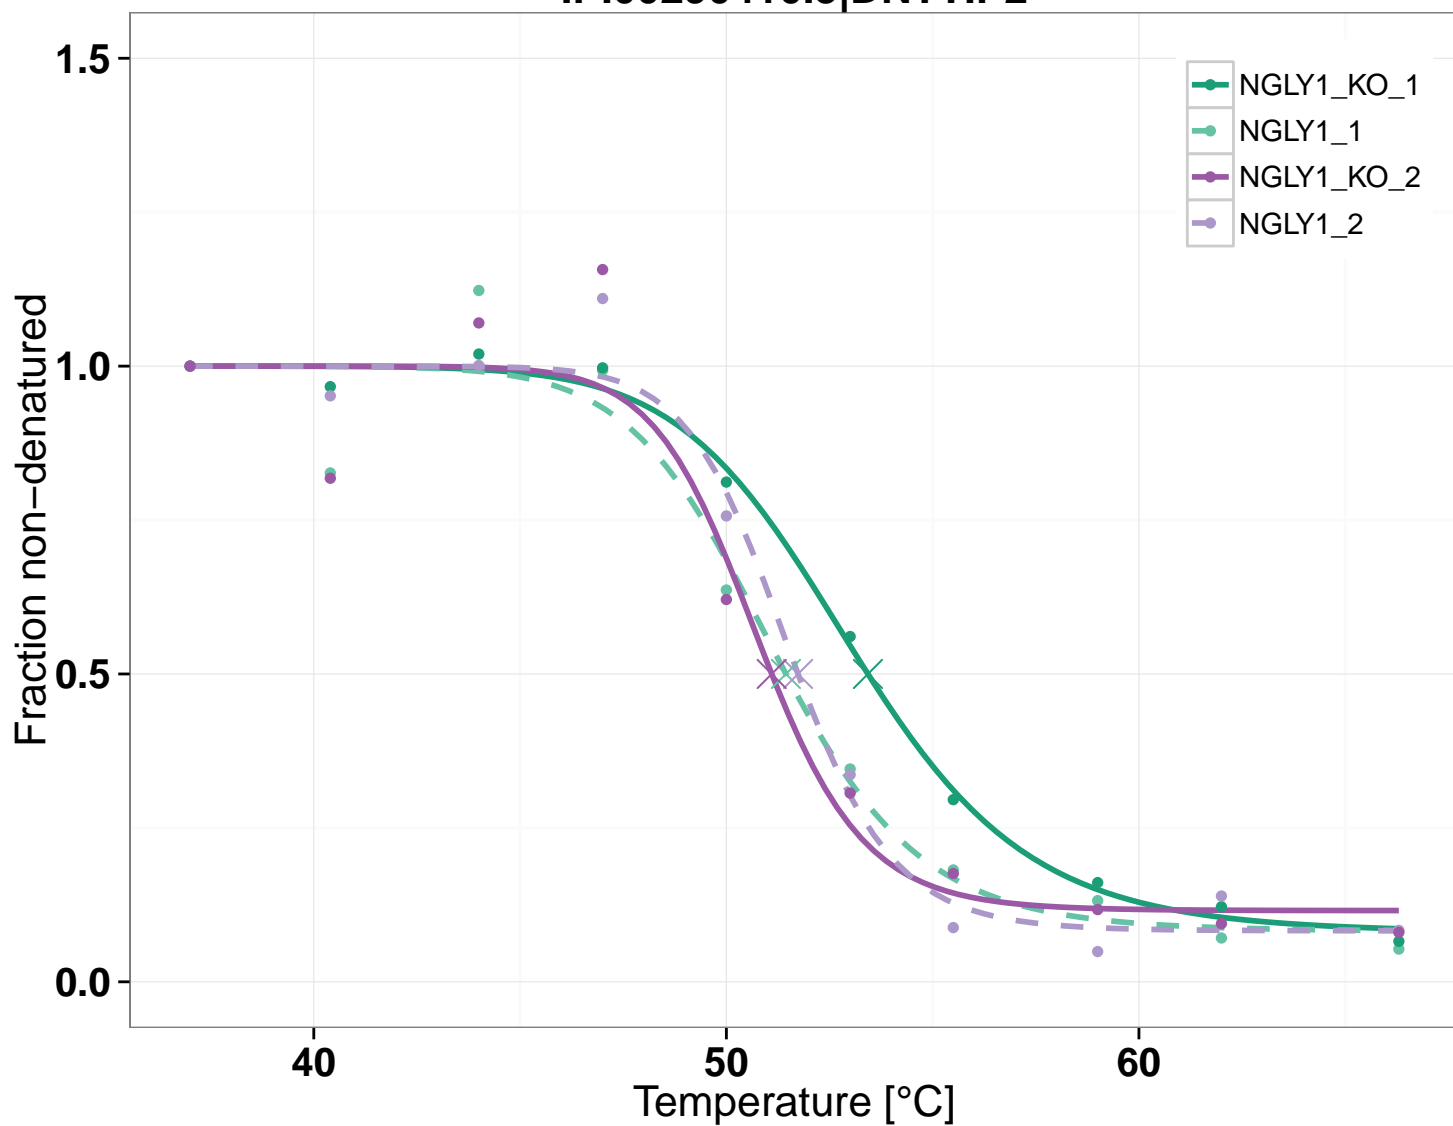

|            | meltPoint | slope | plateau | R2   |
|------------|-----------|-------|---------|------|
| NGLY1_KO_1 | 53.43     | -0.11 | 0.08    | 1    |
| NGLY1_1    | 51.44     | -0.13 | 0.08    | 0.97 |
| NGLY1_KO_2 | 51.1      | -0.17 | 0.12    | 0.95 |
| NGLY1_2    | 51.74     | -0.18 | 0.08    | 0.99 |

Supplement: Supplementary file 461 [file 1]

IPI00017367.6|RDX

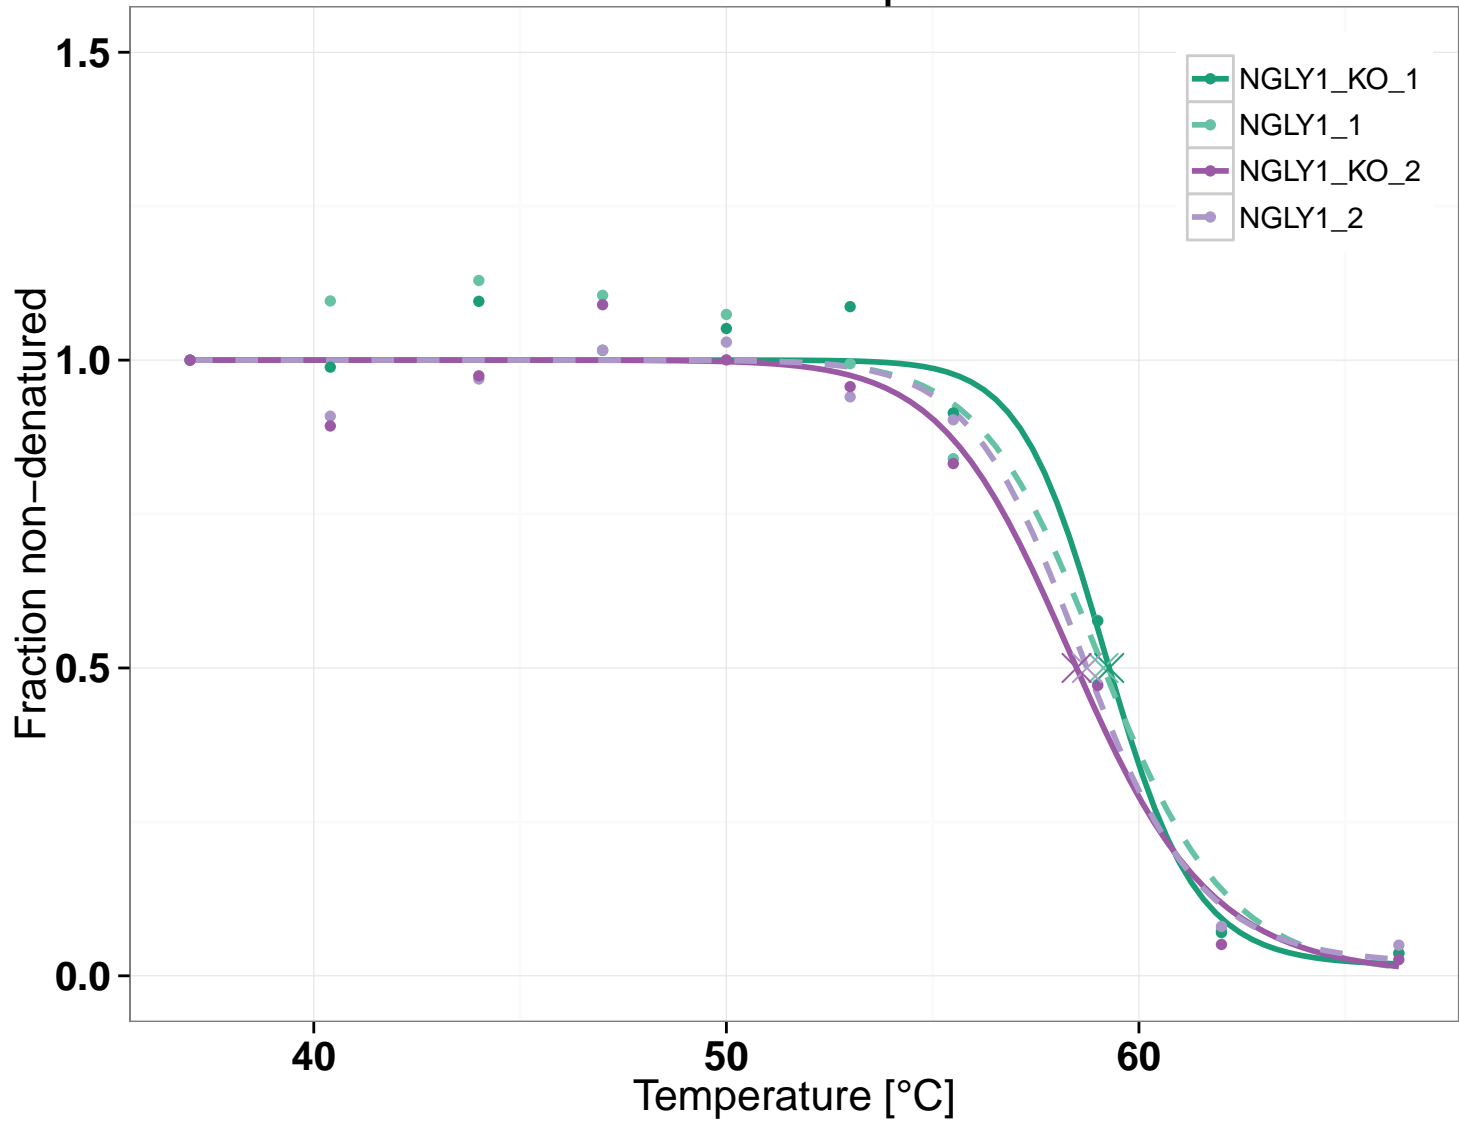

|            | meltPoint | slope | plateau | R2   |
|------------|-----------|-------|---------|------|
| NGLY1_KO_1 | 59.28     | -0.23 | 0.02    | 0.98 |
| NGLY1_1    | 59.14     | -0.17 | 0       | 0.96 |
| NGLY1_KO_2 | 58.49     | -0.15 | 0       | 0.98 |
| NGLY1_2    | 58.74     | -0.17 | 0.02    | 0.99 |

Supplement: Supplementary file 462 [file 1]

IPI00386861.4|PEX16

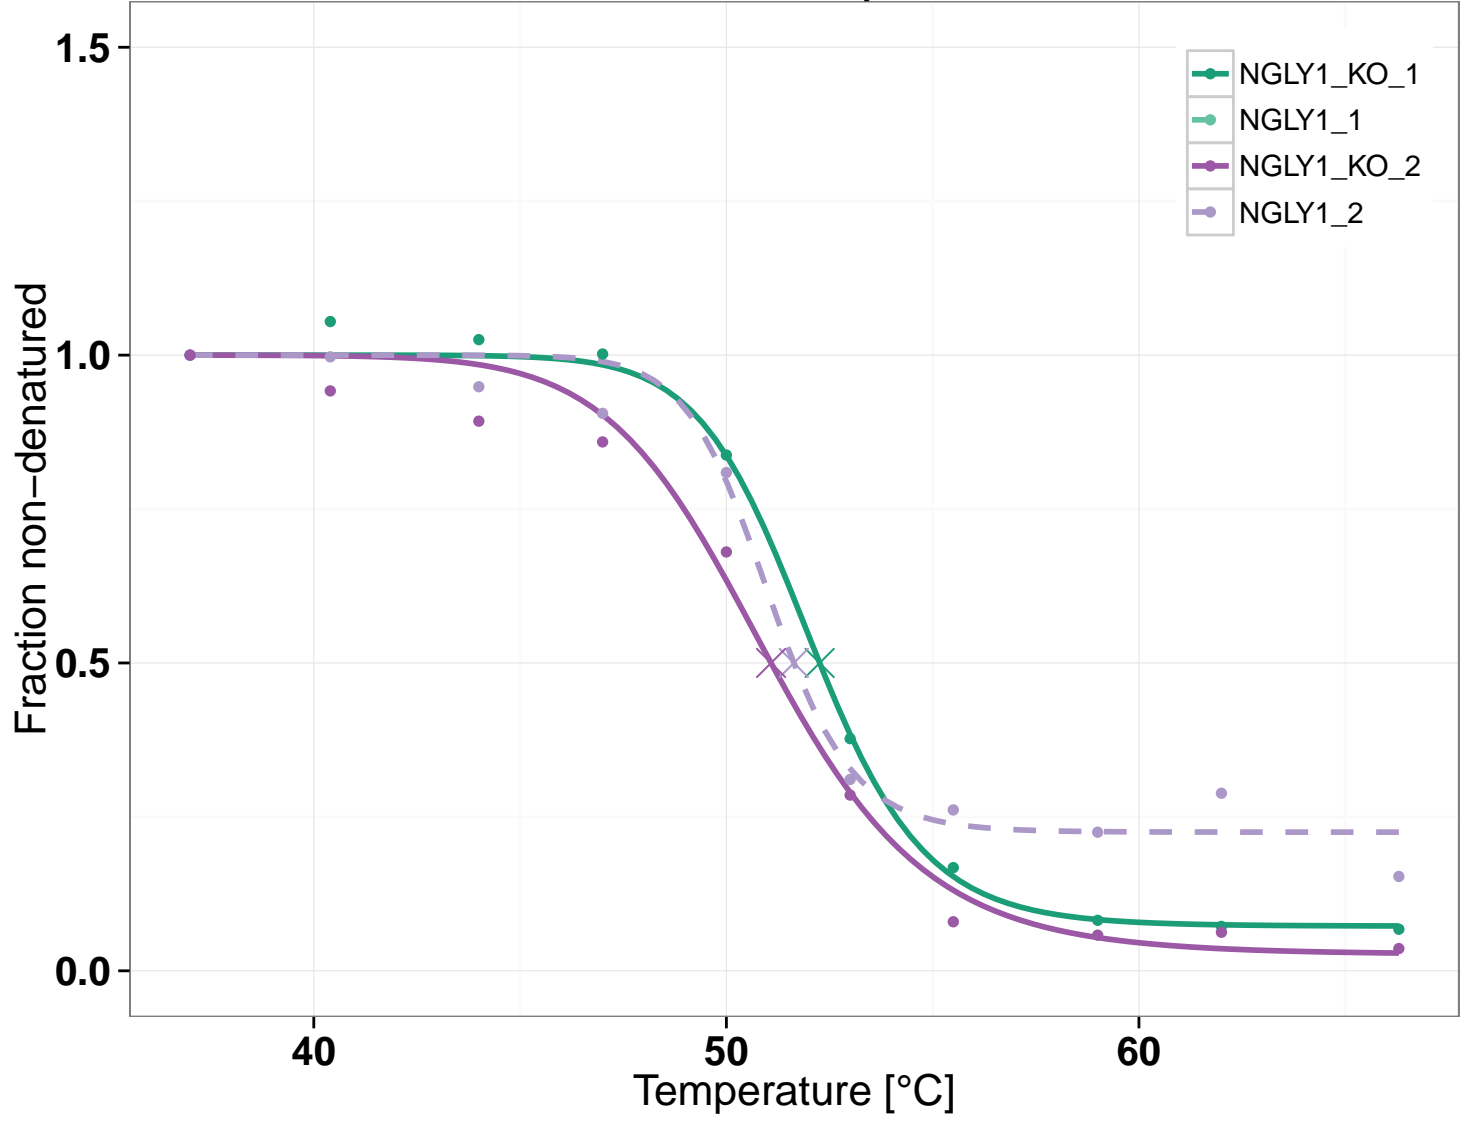

|            | meltPoint | slope | plateau | R2   |
|------------|-----------|-------|---------|------|
| NGLY1_KO_1 | 52.26     | -0.17 | 0.07    | 1    |
| NGLY1_1    | -         | -     | -       | -    |
| NGLY1_KO_2 | 51.08     | -0.12 | 0.03    | 0.99 |
| NGLY1_2    | 51.64     | -0.19 | 0.23    | 0.98 |

Supplement: Supplementary file 463 [file 1]

IPI00165587.3|LGALS8

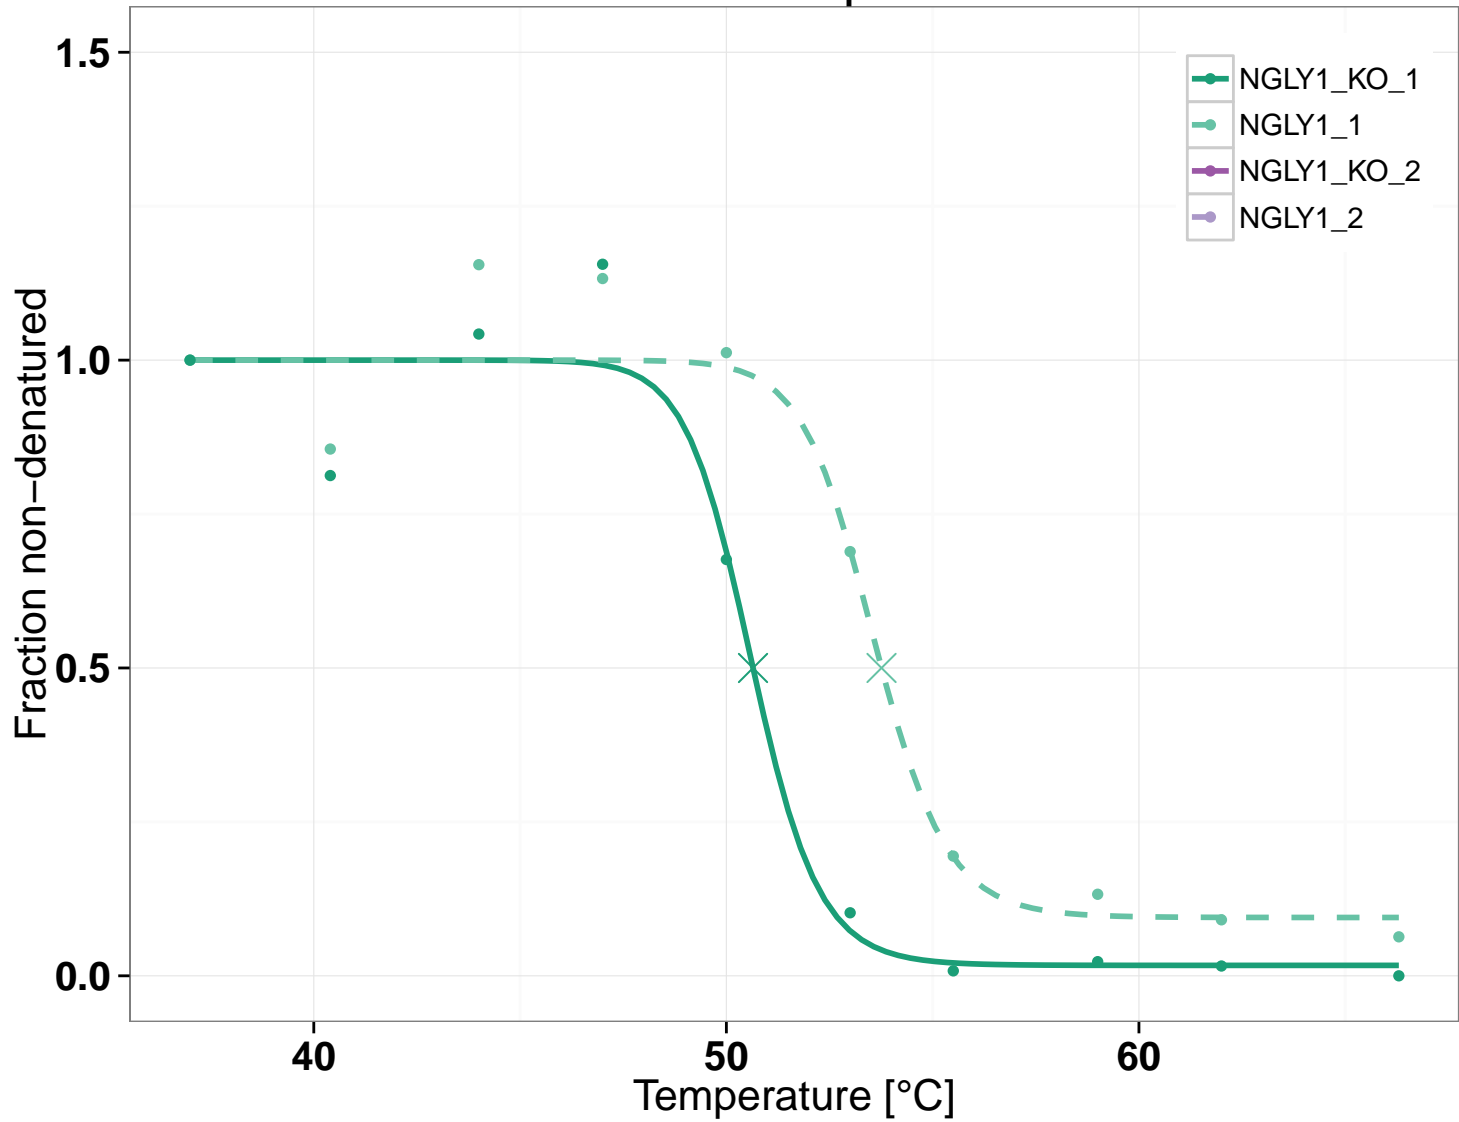

|            | meltPoint | slope | plateau | R2   |
|------------|-----------|-------|---------|------|
| NGLY1_KO_1 | 50.65     | -0.3  | 0.02    | 0.97 |
| NGLY1_1    | 53.76     | -0.26 | 0.09    | 0.97 |
| NGLY1_KO_2 | -         | -     | -       | -    |
| NGLY1_2    | -         | -     | -       | -    |

Supplement: Supplementary file 464 [file 1]

# IPI00410331.2|MYNN

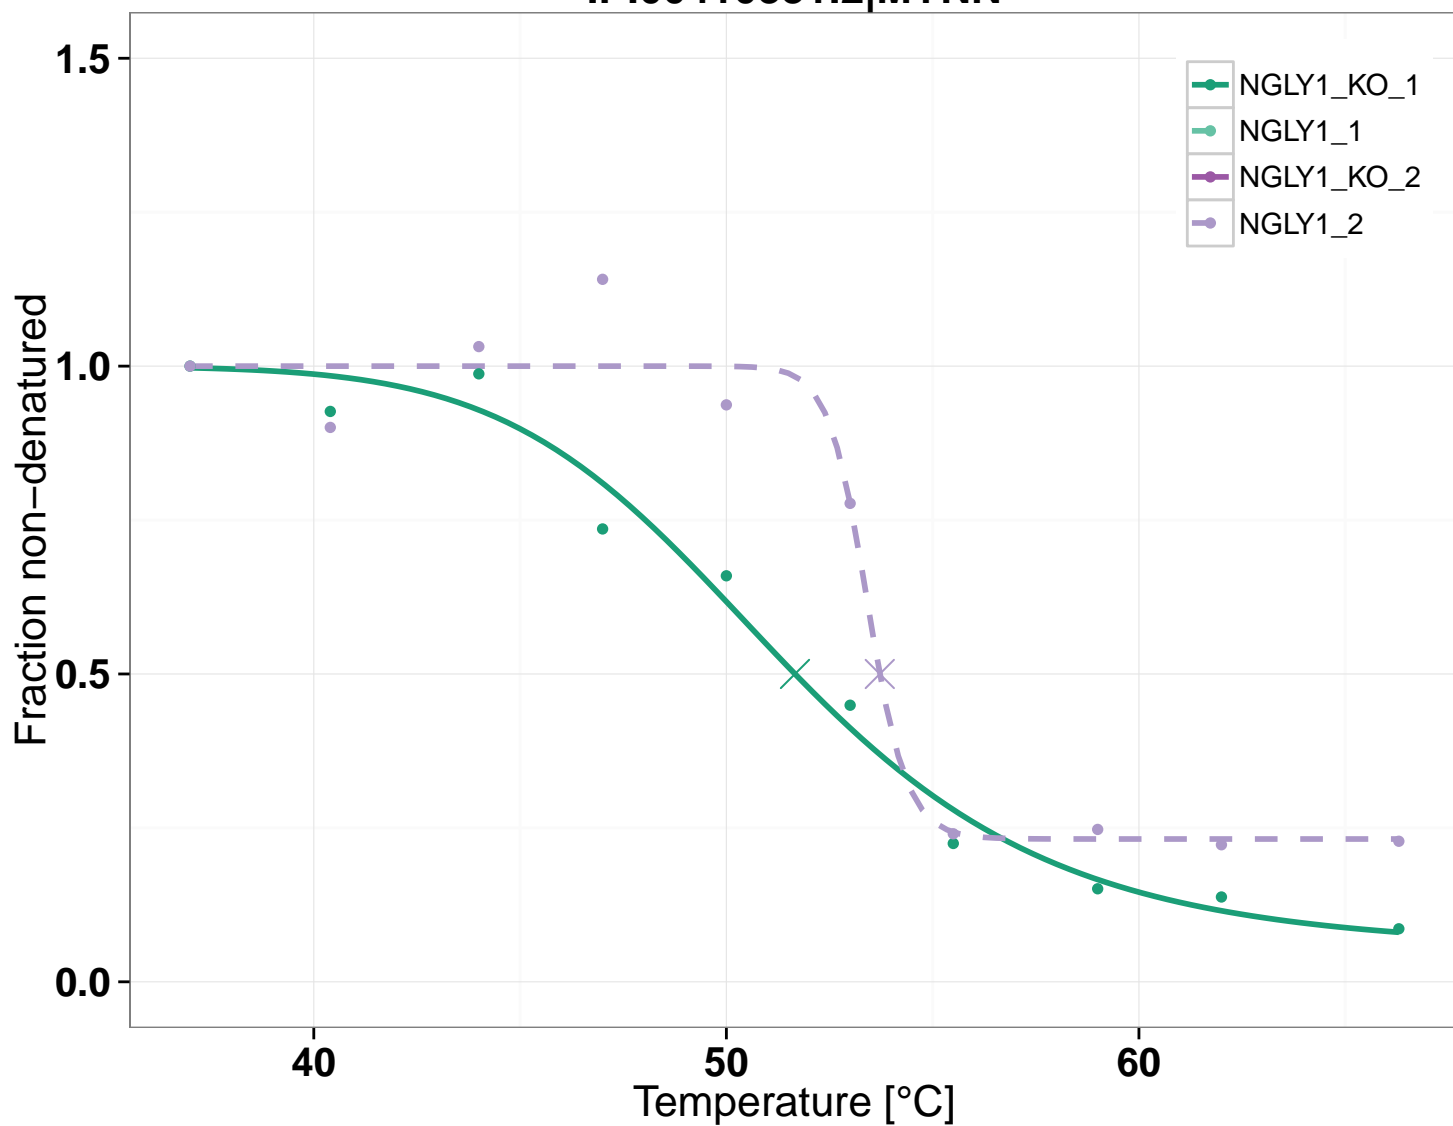

|            | meltPoint | slope  | plateau | R2   |
|------------|-----------|--------|---------|------|
| NGLY1_KO_1 | 51.66     | -0.071 | 0.05    | 0.98 |
| NGLY1_1    | -         | -      | -       | -    |
| NGLY1_KO_2 | -         | -      | -       | -    |
| NGLY1_2    | 53.72     | -0.4   | 0.23    | 0.97 |

Supplement: Supplementary file 465 [file 1]

# IPI00107855.2|HEPH

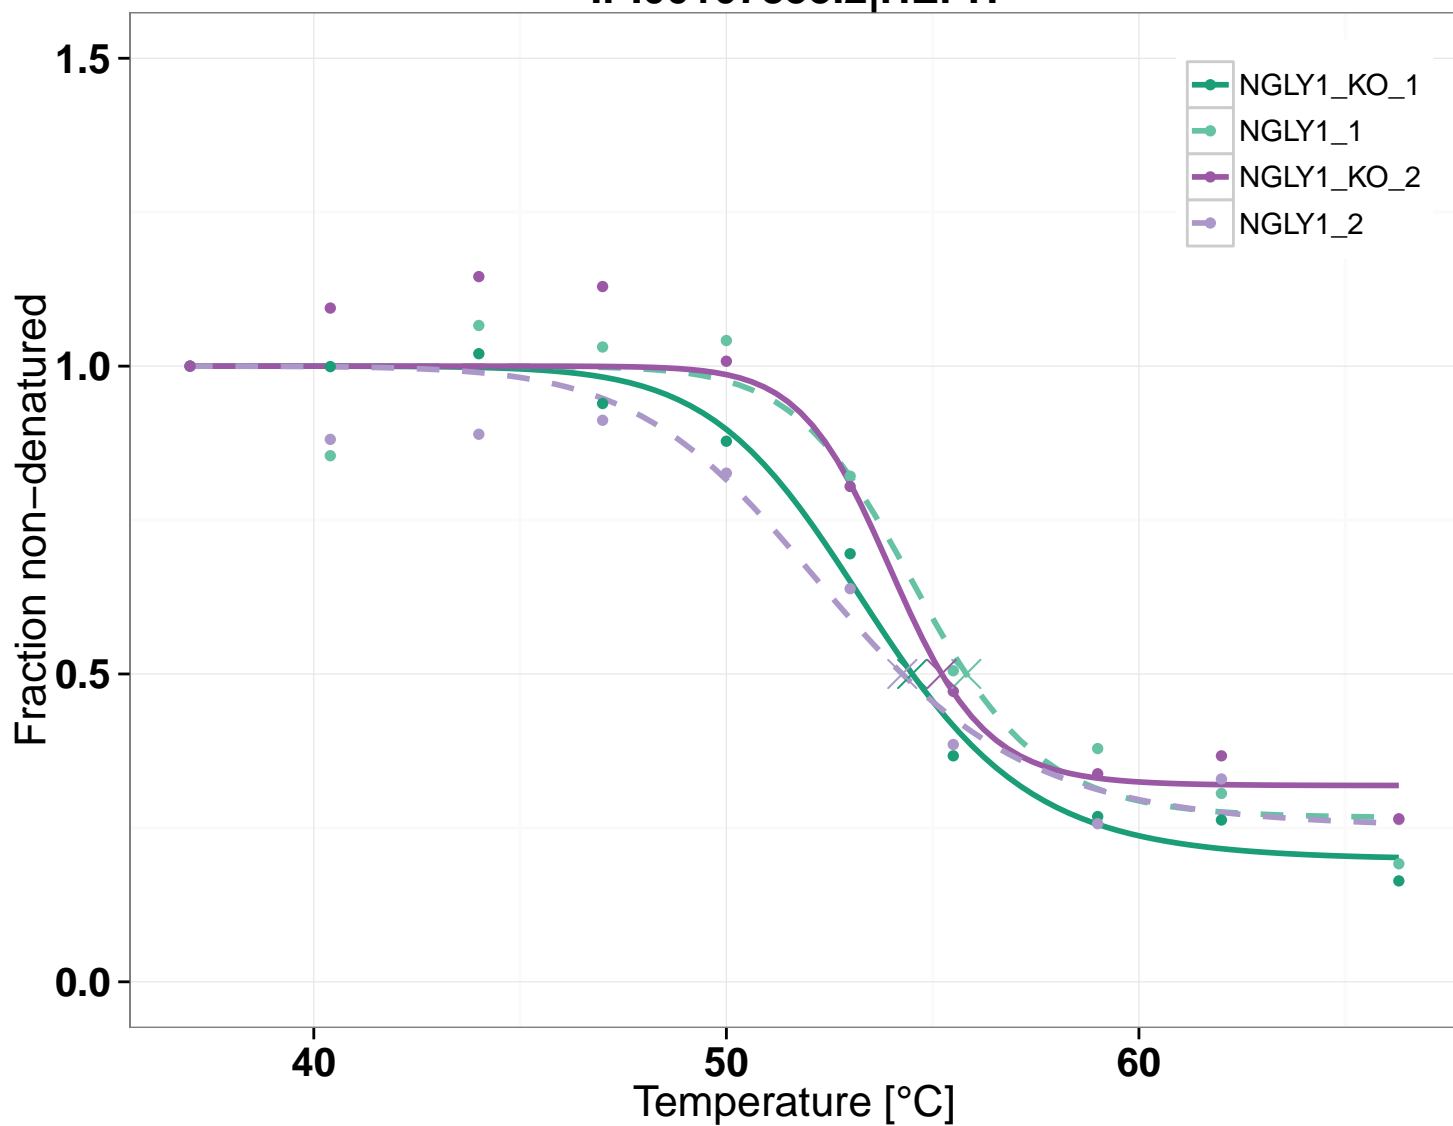

|            | meltPoint | slope  | plateau | R2   |
|------------|-----------|--------|---------|------|
| NGLY1_KO_1 | 54.5      | -0.1   | 0.2     | 0.99 |
| NGLY1_1    | 55.81     | -0.12  | 0.27    | 0.96 |
| NGLY1_KO_2 | 55.22     | -0.15  | 0.32    | 0.96 |
| NGLY1_2    | 54.26     | -0.079 | 0.25    | 0.96 |

Supplement: Supplementary file 466 [file 1]

IPI00642816.2|SRP09

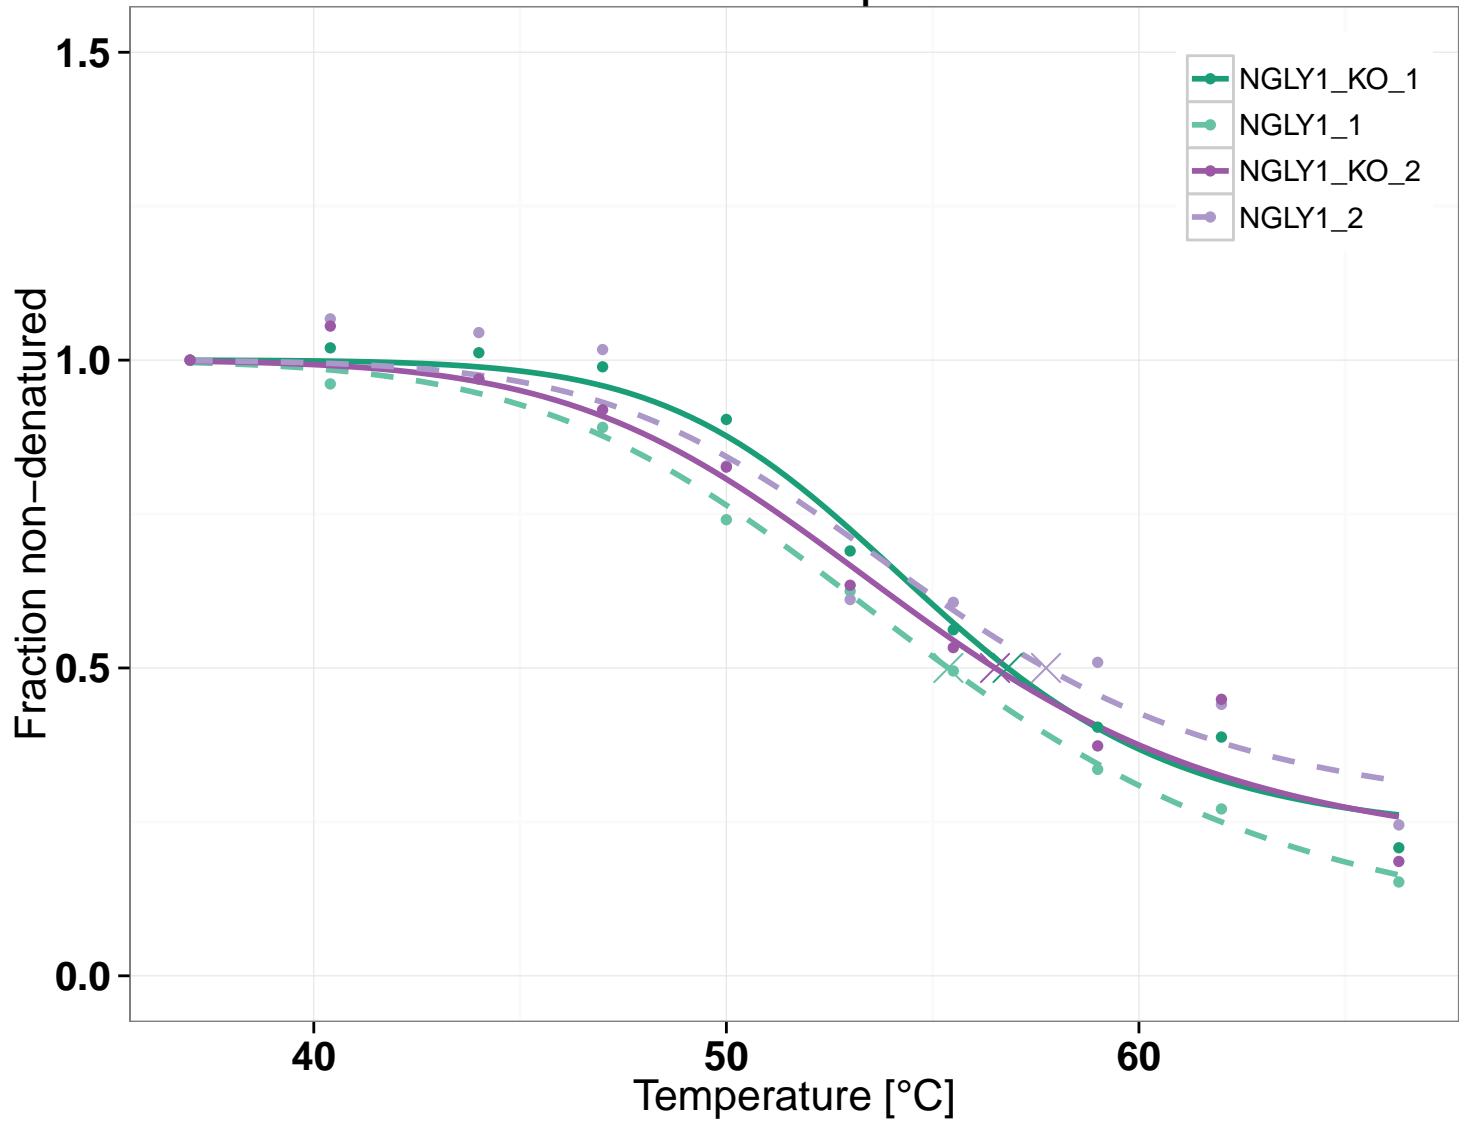

|            | meltPoint | slope  | plateau | R2   |
|------------|-----------|--------|---------|------|
| NGLY1_KO_1 | 56.82     | -0.062 | 0.22    | 0.99 |
| NGLY1_1    | 55.38     | -0.051 | 0.04    | 1    |
| NGLY1_KO_2 | 56.51     | -0.05  | 0.18    | 0.97 |
| NGLY1_2    | 57.75     | -0.048 | 0.25    | 0.95 |

Supplement: Supplementary file 467 [file 1]

IPI00332633.2|RASSF5

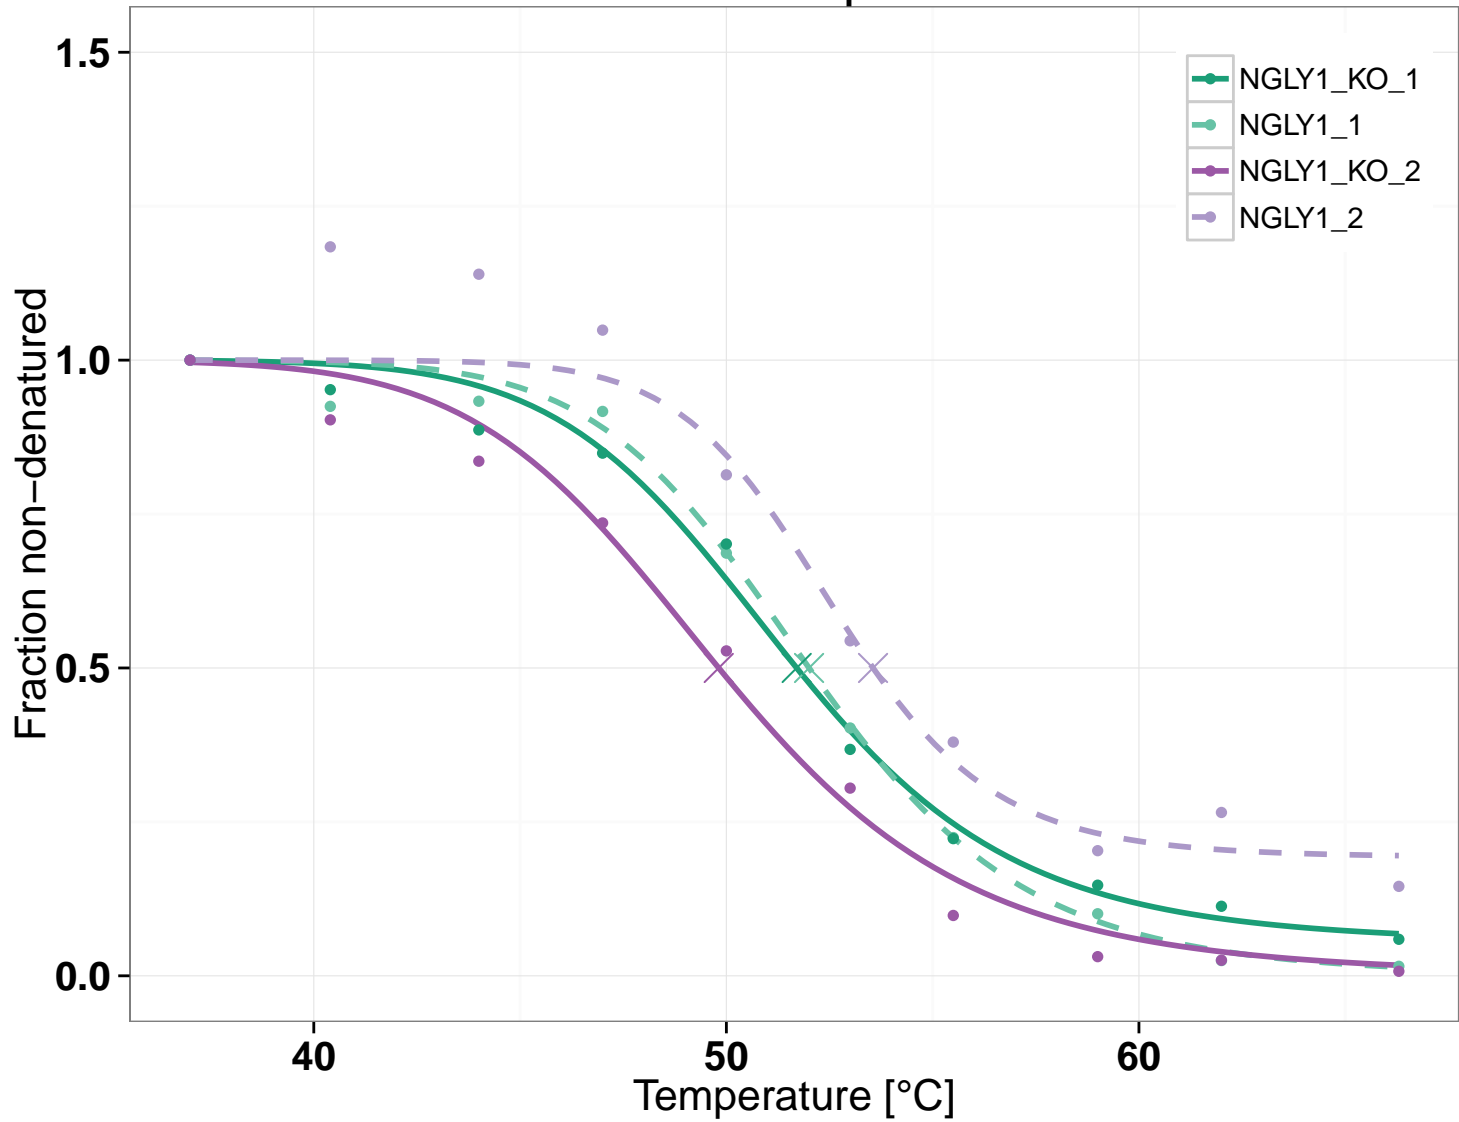

|            | meltPoint | slope  | plateau | R2   |
|------------|-----------|--------|---------|------|
| NGLY1_KO_1 | 51.7      | -0.085 | 0.05    | 0.99 |
| NGLY1_1    | 52        | -0.096 | 0       | 0.99 |
| NGLY1_KO_2 | 49.81     | -0.083 | 0       | 0.99 |
| NGLY1_2    | 53.56     | -0.11  | 0.19    | 0.95 |

Supplement: Supplementary file 468 [file 1]

IPI00179757.6|KIF1C

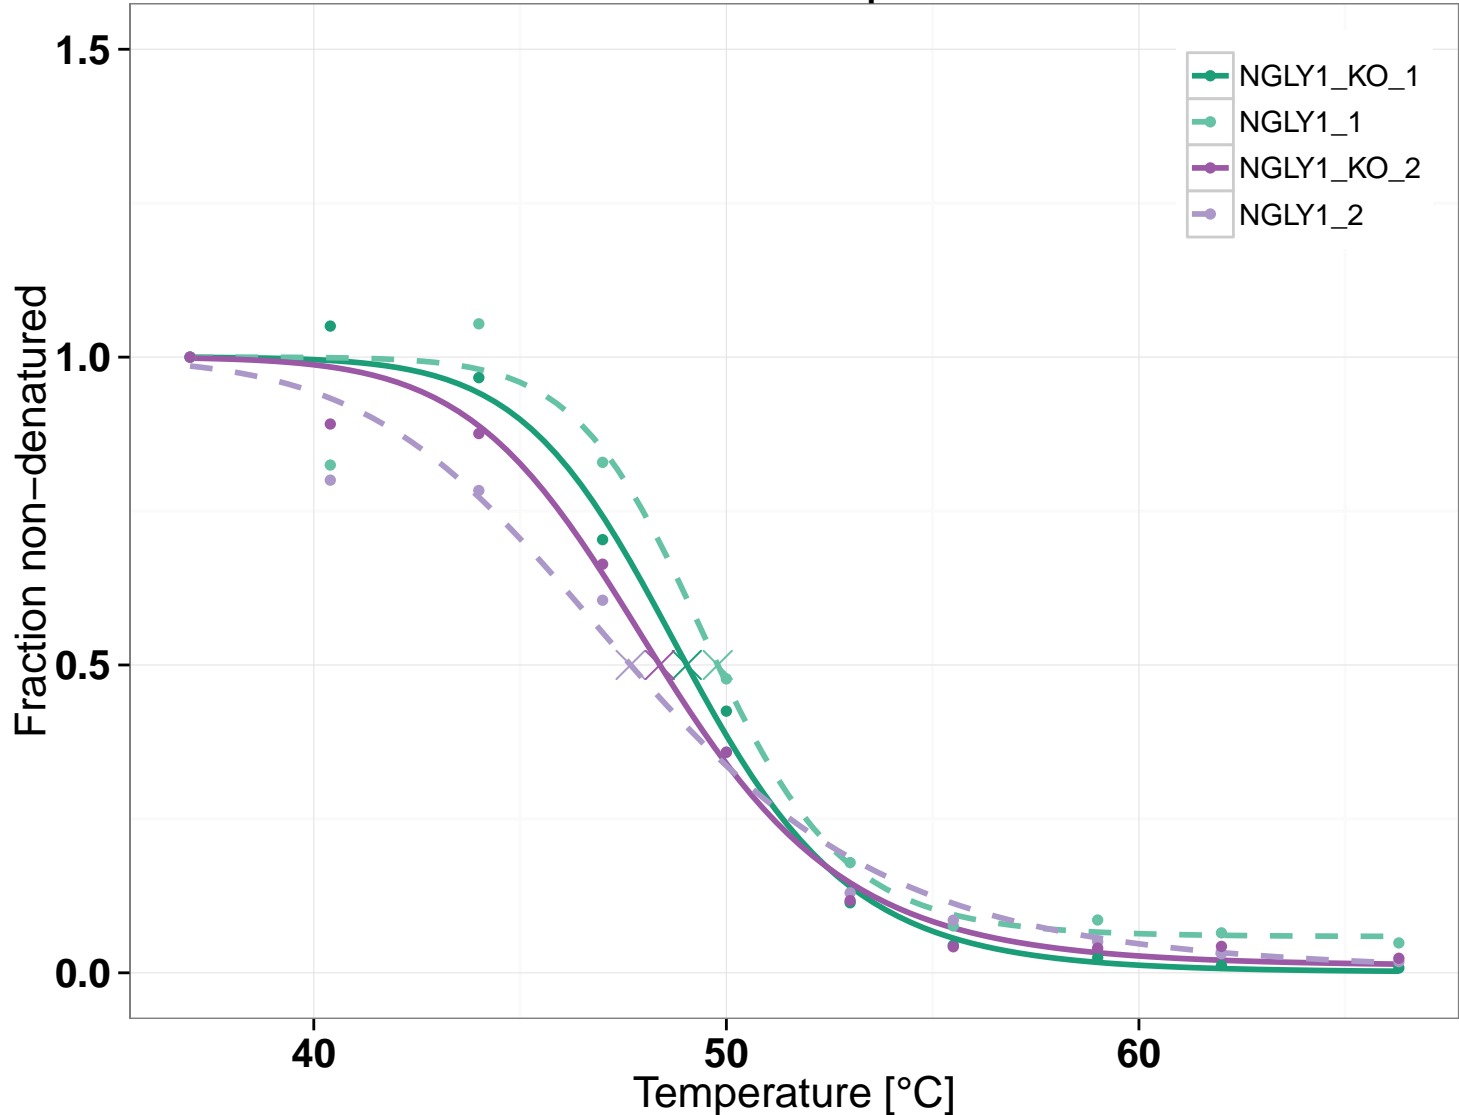

|            | meltPoint | slope  | plateau | R2   |
|------------|-----------|--------|---------|------|
| NGLY1_KO_1 | 49.04     | -0.12  | 0       | 1    |
| NGLY1_1    | 49.79     | -0.14  | 0.06    | 0.98 |
| NGLY1_KO_2 | 48.39     | -0.11  | 0.01    | 0.99 |
| NGLY1_2    | 47.68     | -0.078 | 0       | 0.98 |

Supplement: Supplementary file 469 [file 1]

IPI00022558.2|MPZL1

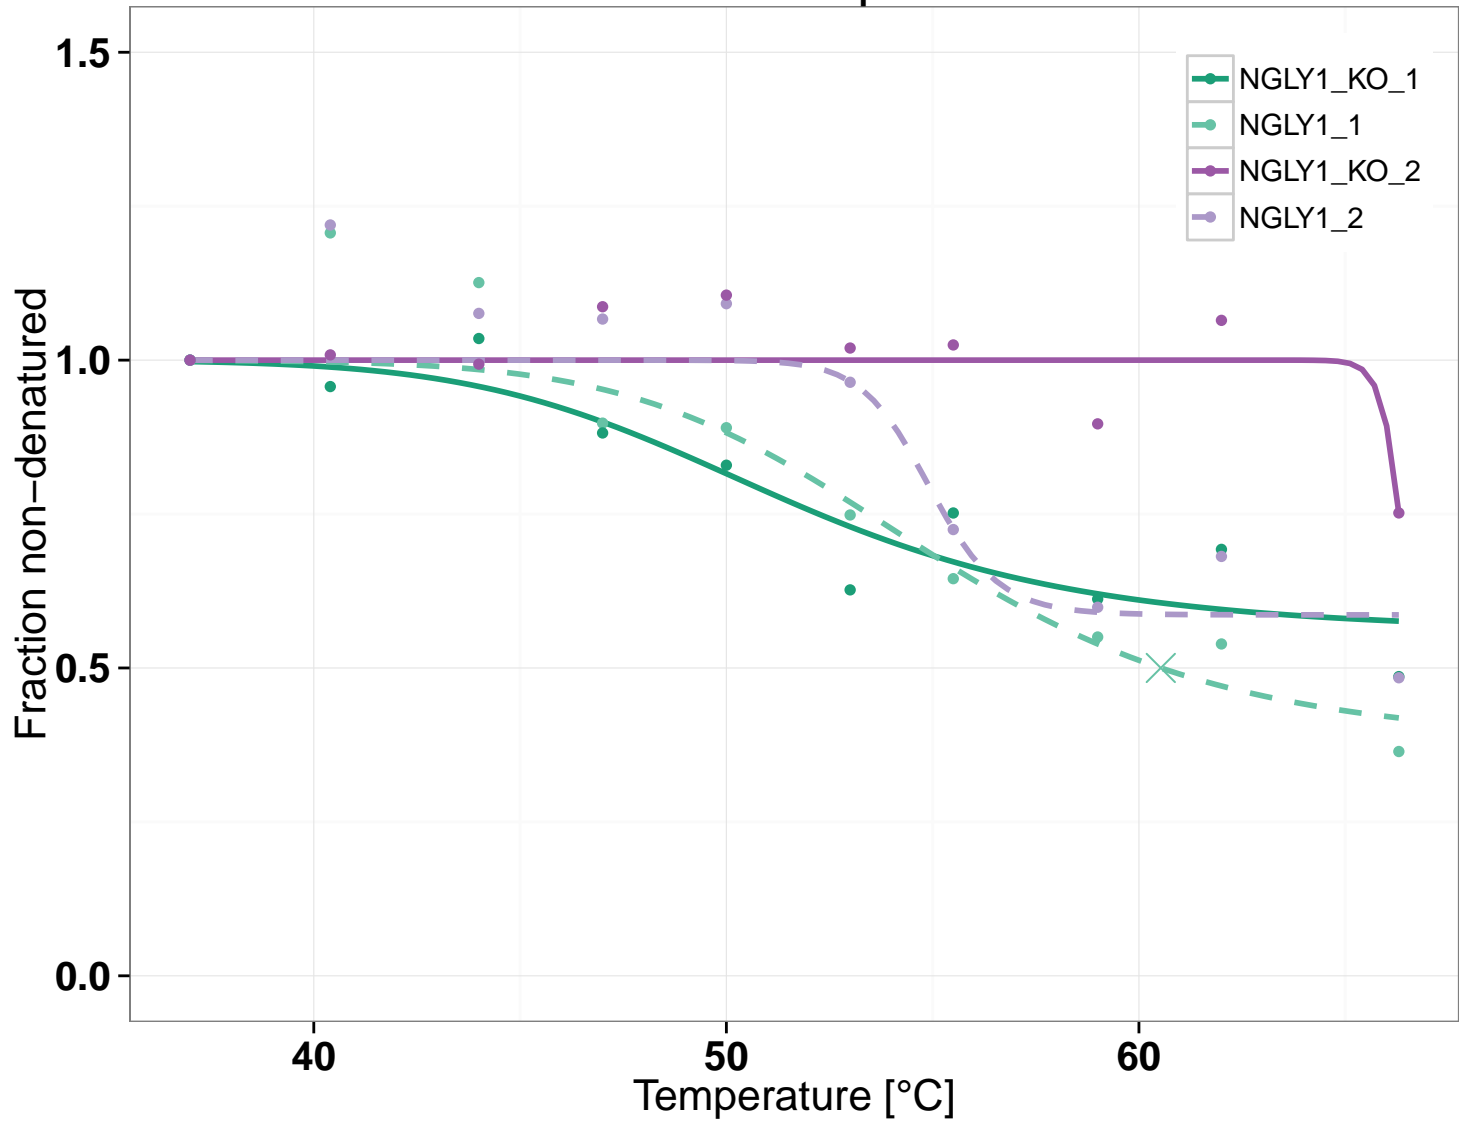

|            | meltPoint | slope  | plateau | R2   |
|------------|-----------|--------|---------|------|
| NGLY1_KO_1 | -         | -0.03  | 0.56    | 0.86 |
| NGLY1_1    | 60.53     | -0.043 | 0.37    | 0.89 |
| NGLY1_KO_2 | -         | -      | 0       | 0.64 |
| NGLY1_2    | -         | -0.12  | 0.59    | 0.84 |

Supplement: Supplementary file 470 [file 1]

IPI00219677.4|DERA

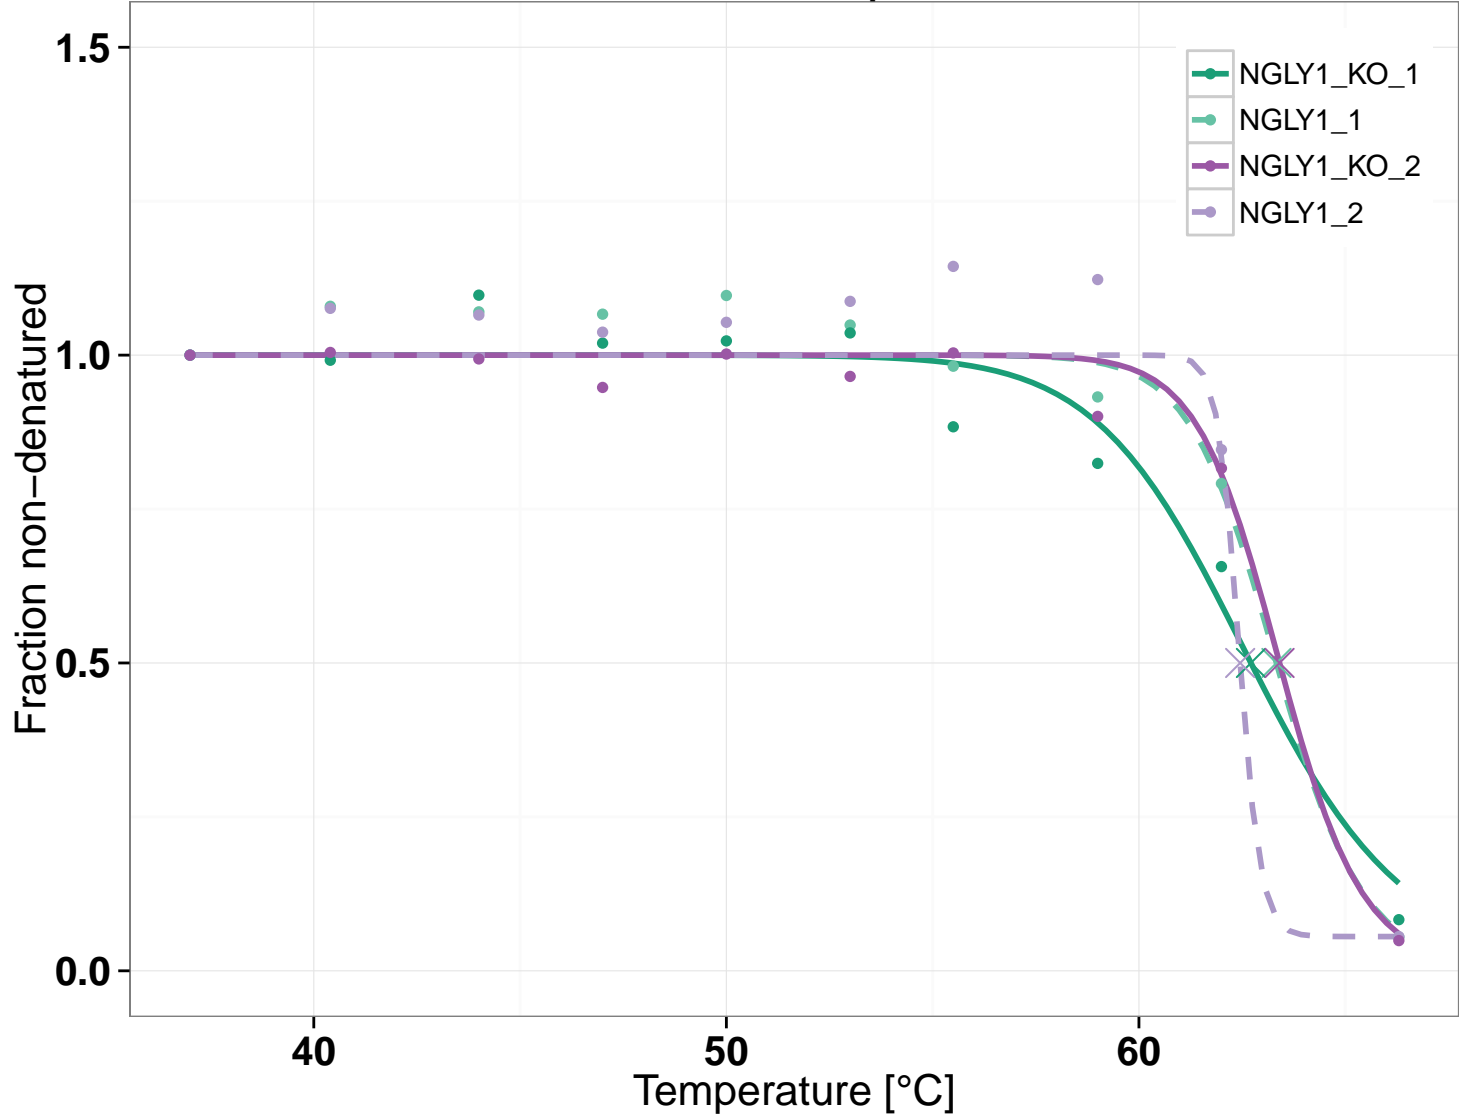

|            | meltPoint | slope | plateau | R2   |
|------------|-----------|-------|---------|------|
| NGLY1_KO_1 | 62.71     | -0.13 | 0       | 0.96 |
| NGLY1_1    | 63.33     | -0.24 | 0       | 0.97 |
| NGLY1_KO_2 | 63.41     | -0.25 | 0       | 0.98 |
| NGLY1_2    | 62.45     | -0.91 | 0.06    | 0.94 |

Supplement: Supplementary file 471 [file 1]

IPI00873445.1|PROS1

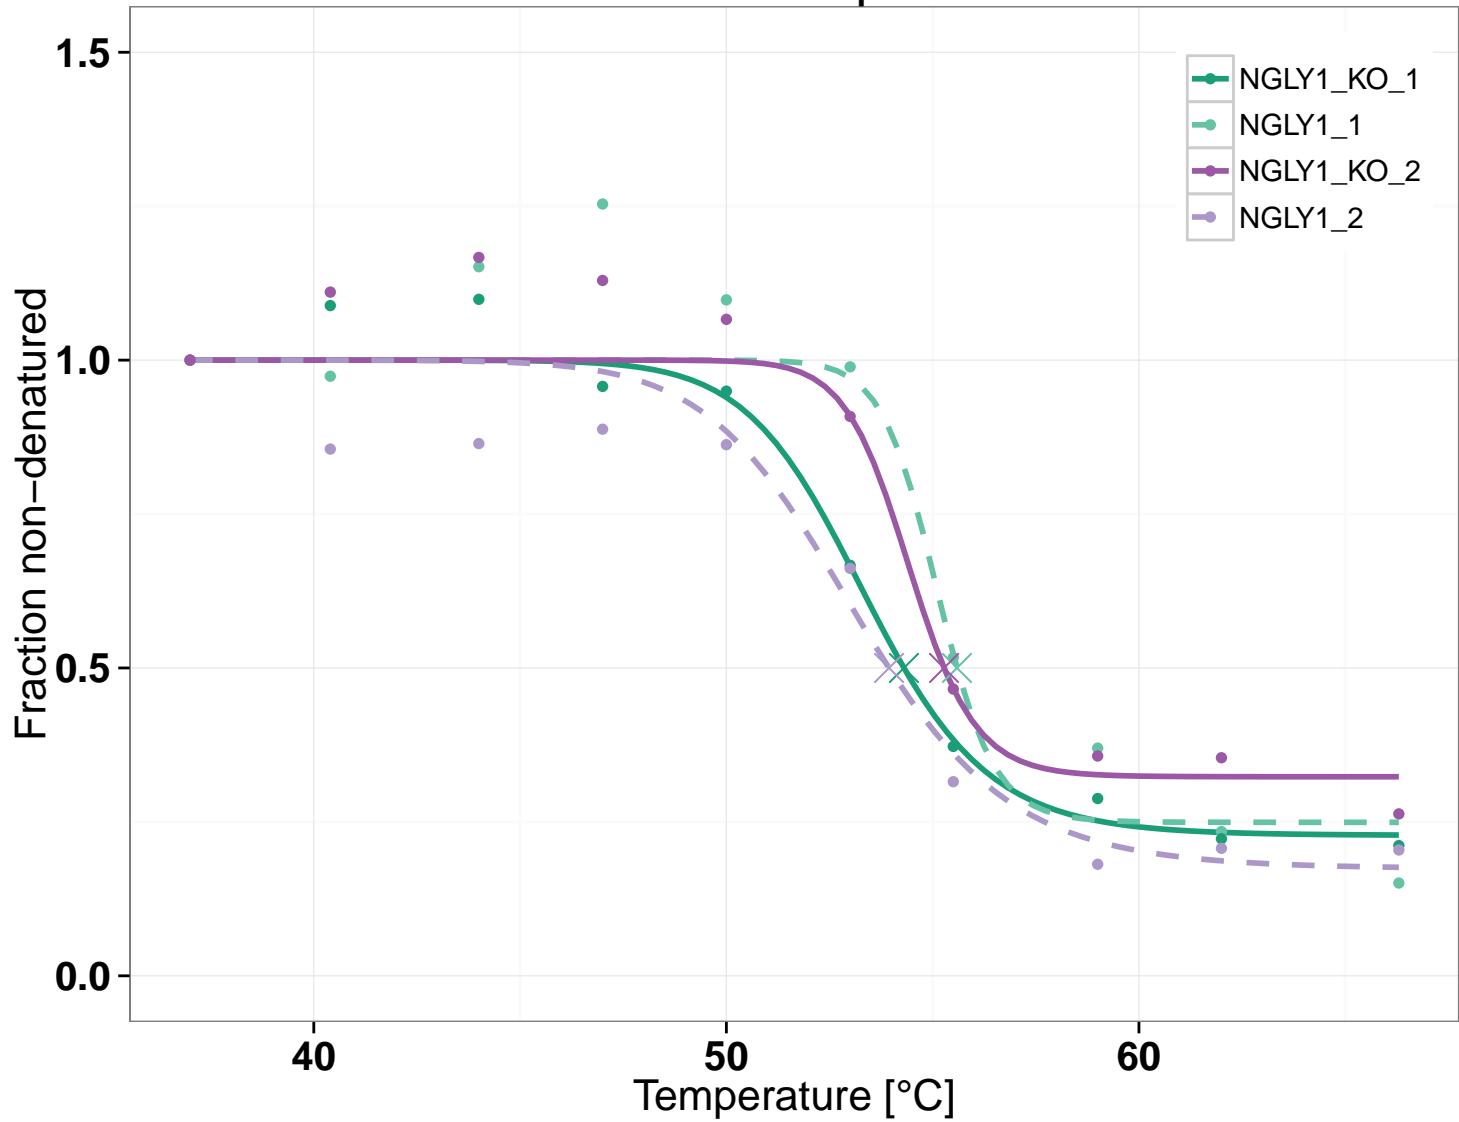

|            | meltPoint | slope | plateau | R2   |
|------------|-----------|-------|---------|------|
| NGLY1_KO_1 | 54.3      | -0.13 | 0.23    | 0.98 |
| NGLY1_1    | 55.59     | -0.28 | 0.25    | 0.92 |
| NGLY1_KO_2 | 55.28     | -0.21 | 0.32    | 0.95 |
| NGLY1_2    | 53.94     | -0.11 | 0.17    | 0.94 |

Supplement: Supplementary file 472 [file 1]

# IPI00015923.2|CCNDBP1

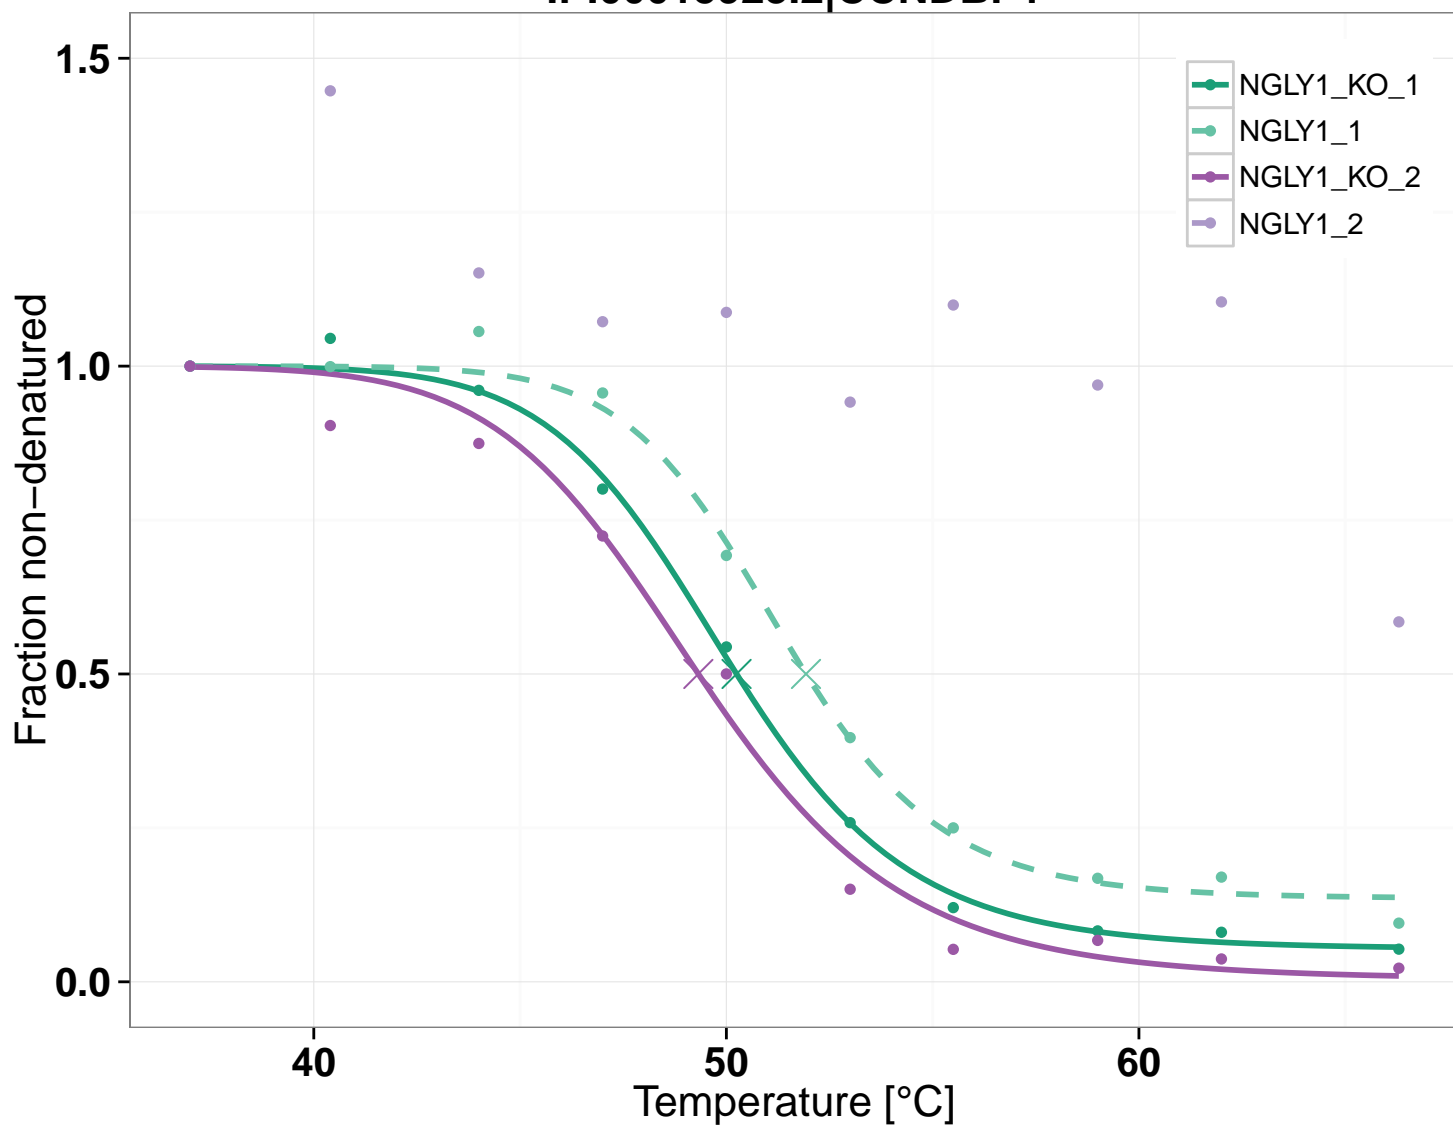

|            | meltPoint | slope | plateau | R2   |
|------------|-----------|-------|---------|------|
| NGLY1_KO_1 | 50.25     | -0.11 | 0.05    | 1    |
| NGLY1_1    | 51.93     | -0.11 | 0.14    | 0.99 |
| NGLY1_KO_2 | 49.32     | -0.1  | 0       | 0.99 |
| NGLY1_2    | -         | -     | -       | -    |

Supplement: Supplementary file 473 [file 1]

# IPI00178700.5|ALG3

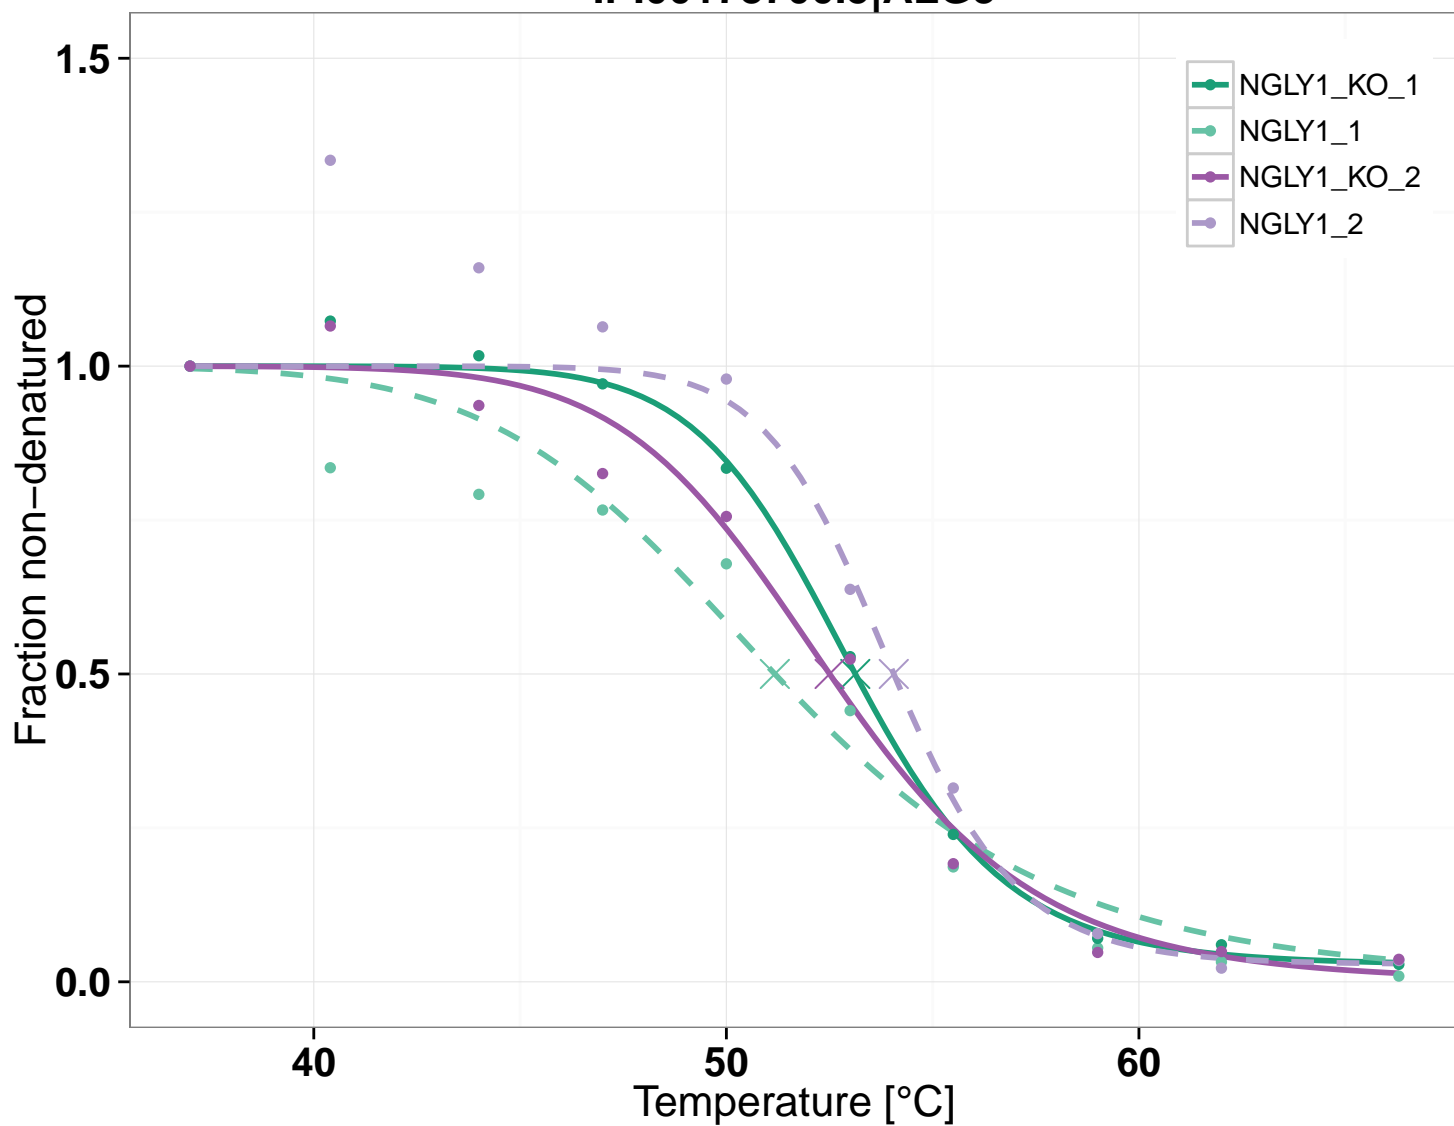

|            | meltPoint | slope  | plateau | R2   |
|------------|-----------|--------|---------|------|
| NGLY1_KO_1 | 53.13     | -0.13  | 0.03    | 1    |
| NGLY1_1    | 51.17     | -0.072 | 0       | 0.95 |
| NGLY1_KO_2 | 52.5      | -0.098 | 0       | 0.98 |
| NGLY1_2    | 54.06     | -0.16  | 0.03    | 0.94 |

Supplement: Supplementary file 474 [file 1]

# IPI00257903.4|ERMP1

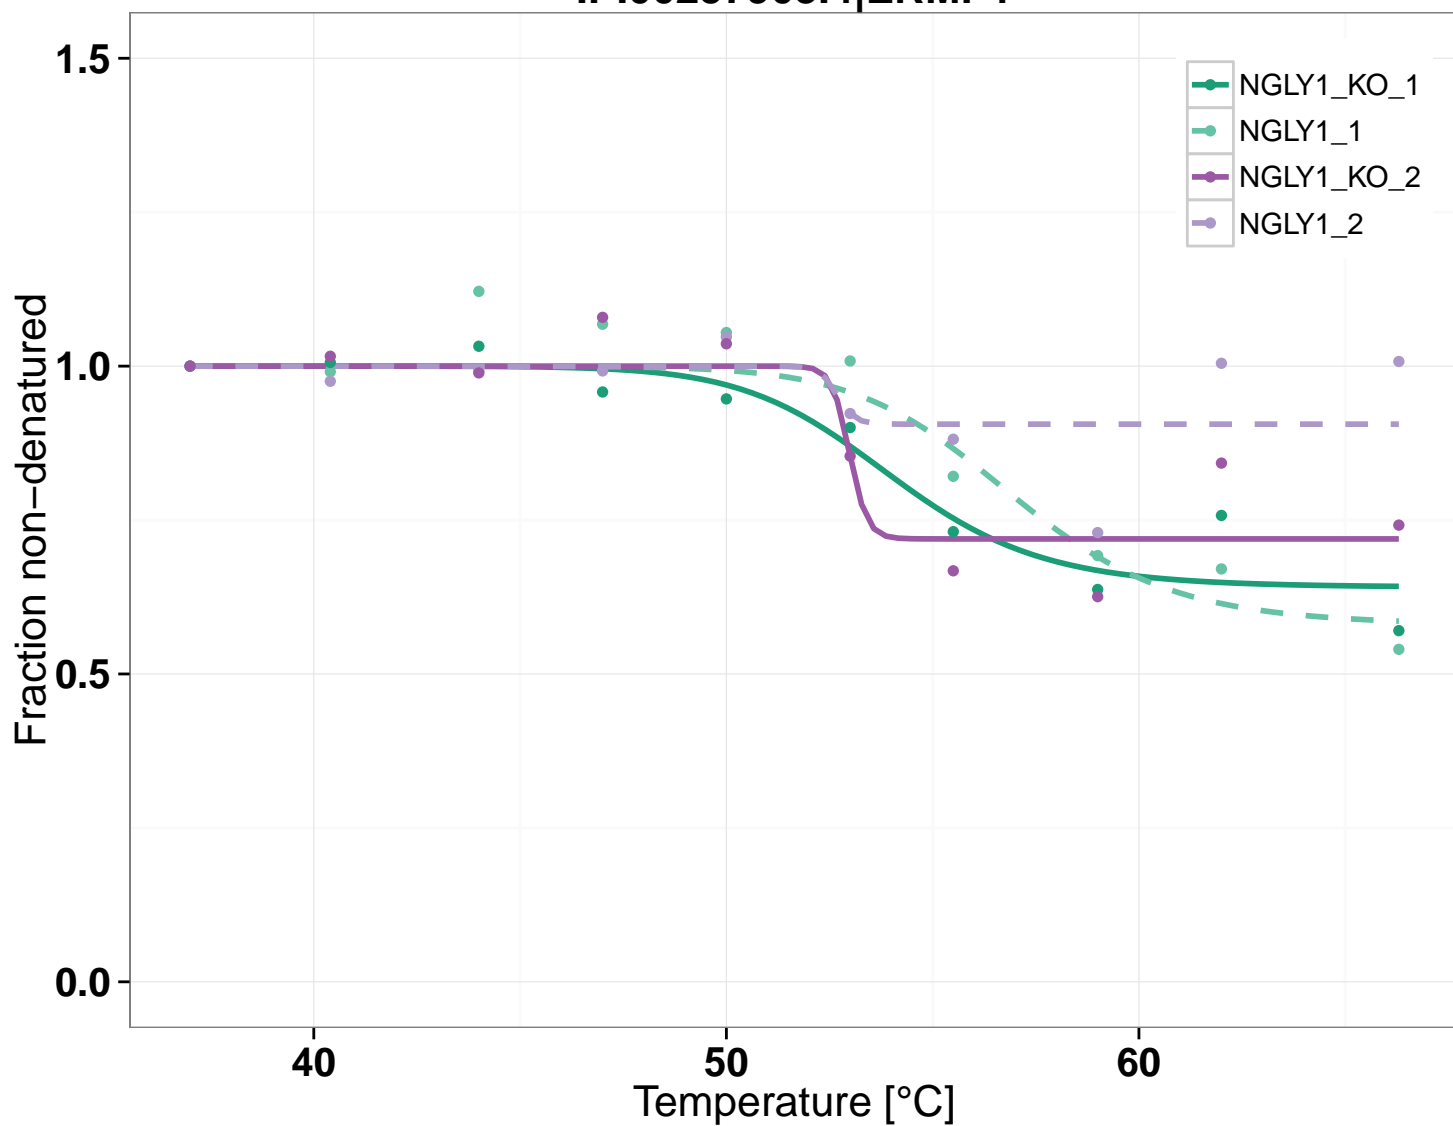

|            | meltPoint | slope  | plateau | R2   |
|------------|-----------|--------|---------|------|
| NGLY1_KO_1 | —         | -0.049 | 0.64    | 0.91 |
| NGLY1_1    | —         | -0.055 | 0.58    | 0.91 |
| NGLY1_KO_2 | —         | -0.33  | 0.72    | 0.85 |
| NGLY1_2    | —         | -0.11  | 0.91    | 0.28 |

Supplement: Supplementary file 475 [file 1]

# IPI00465368.4|CENPT

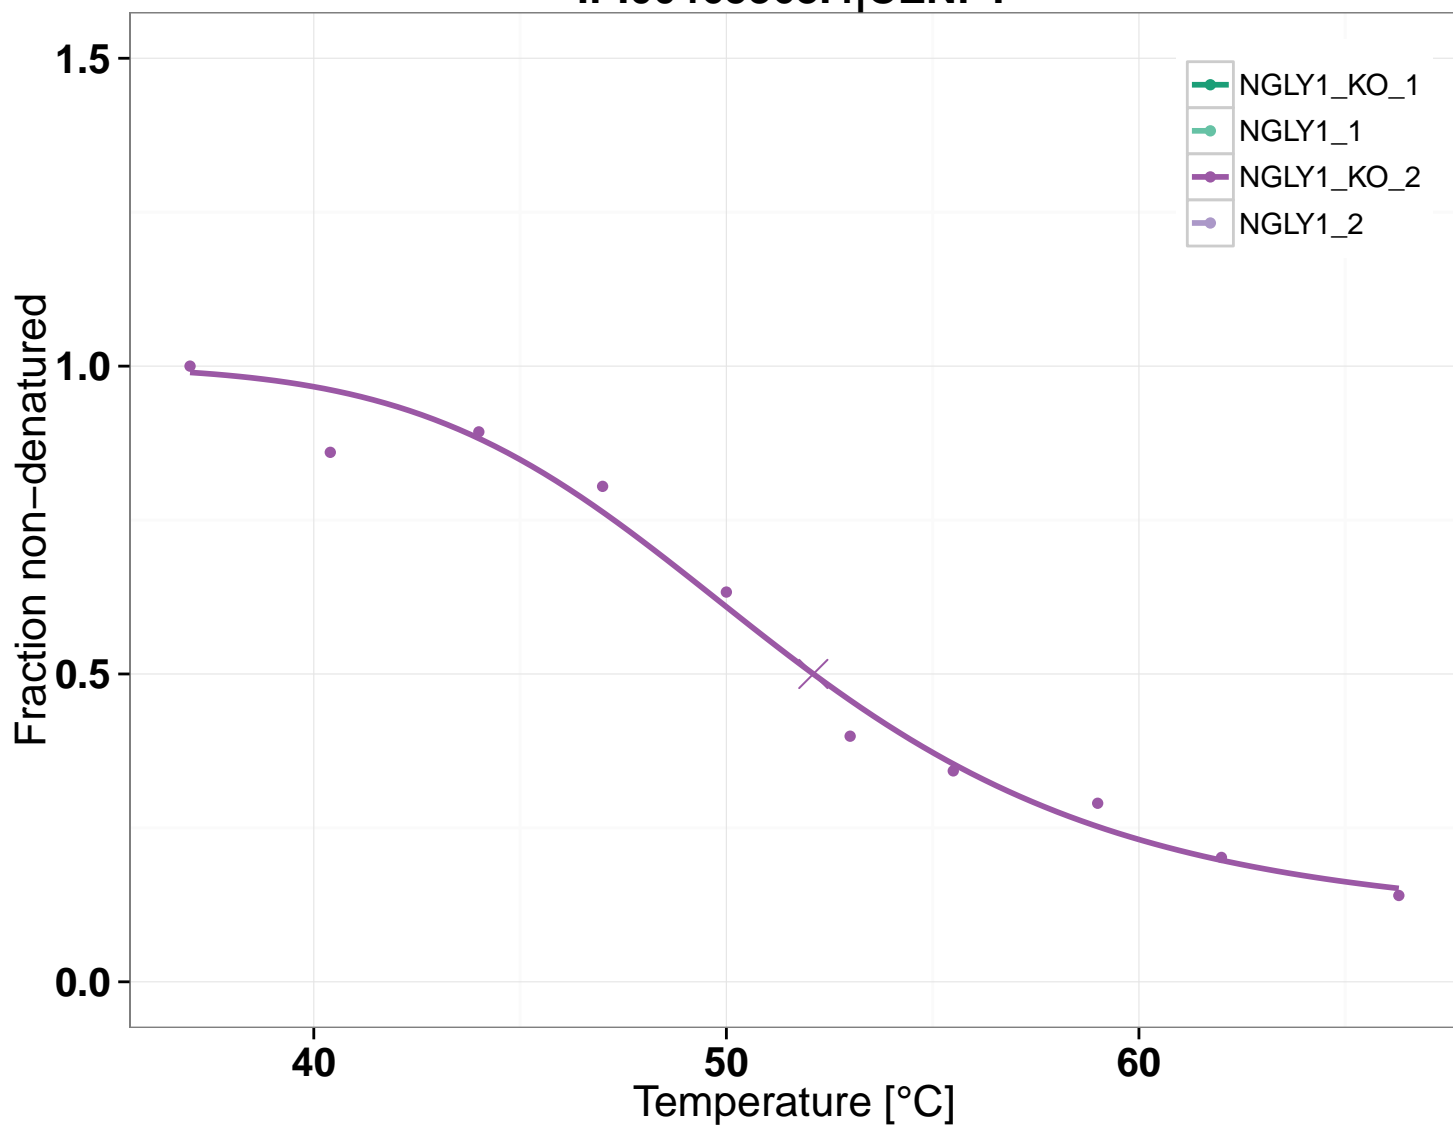

|            | meltPoint | slope  | plateau | R2   |
|------------|-----------|--------|---------|------|
| NGLY1_KO_1 | —         | —      | —       | —    |
| NGLY1_1    | —         | —      | —       | —    |
| NGLY1_KO_2 | 52.11     | -0.053 | 0.09    | 0.98 |
| NGLY1_2    | —         | —      | —       | —    |

Supplement: Supplementary file 476 [file 1]

IPI00452590.1|GPR125

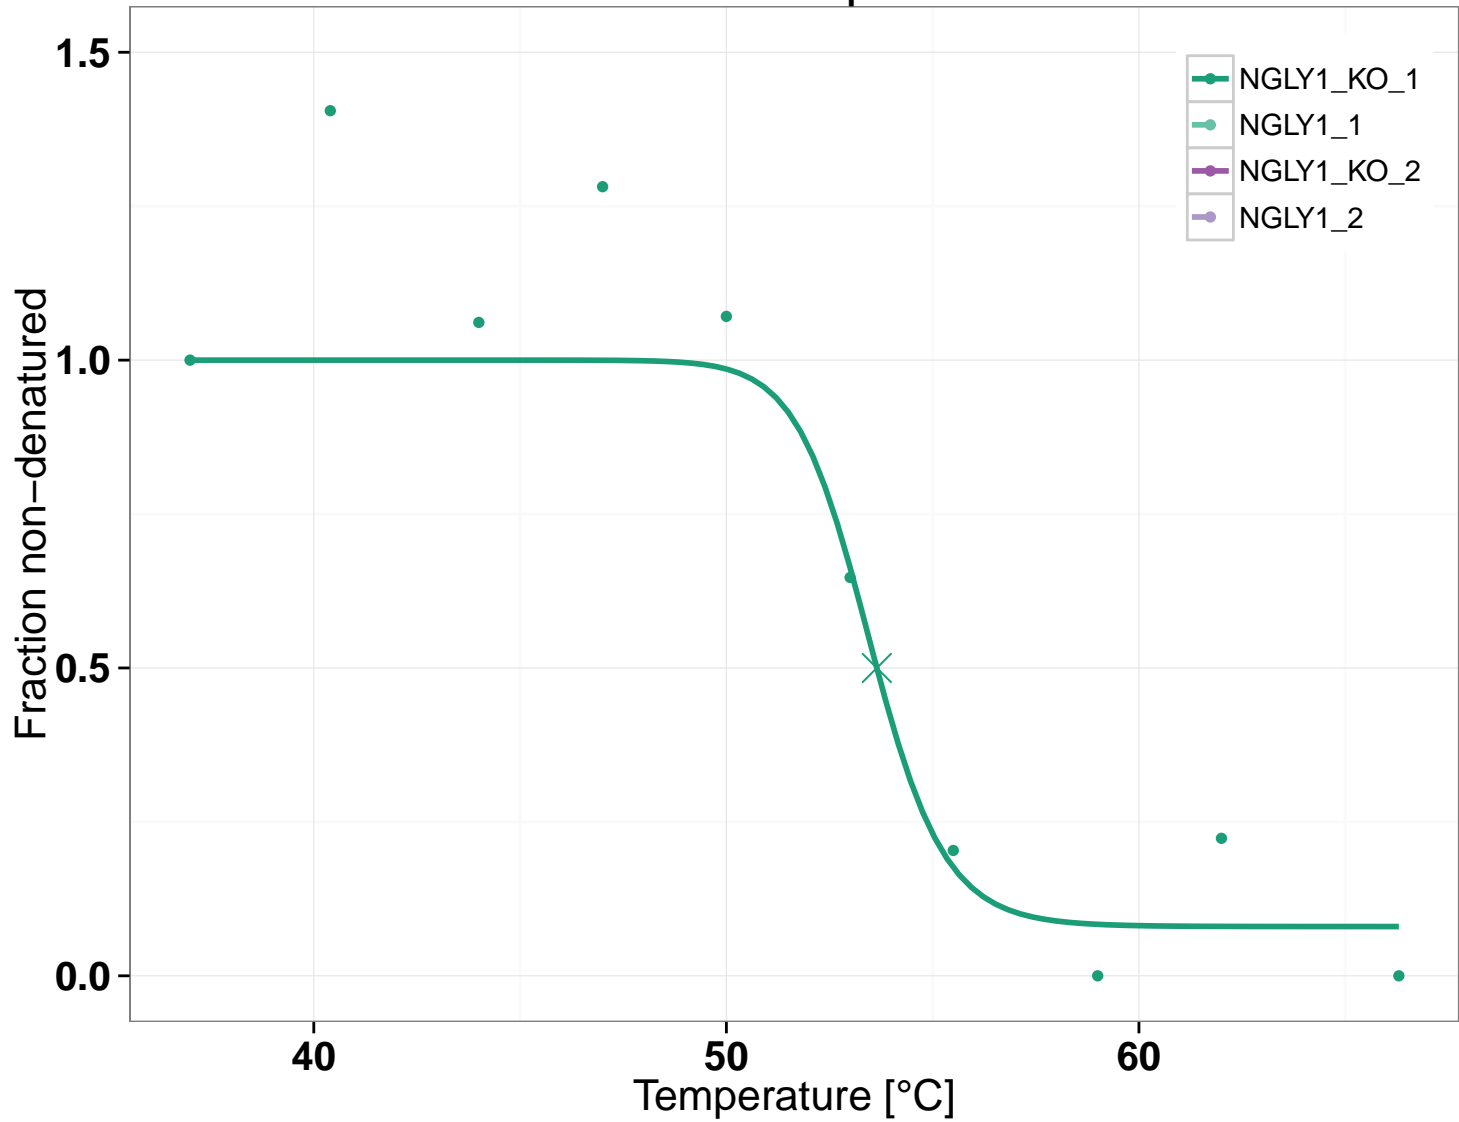

|            | meltPoint | slope | plateau | R2   |
|------------|-----------|-------|---------|------|
| NGLY1_KO_1 | 53.65     | -0.26 | 0.08    | 0.89 |
| NGLY1_1    | -         | -     | -       | -    |
| NGLY1_KO_2 | -         | -     | -       | -    |
| NGLY1_2    | -         | -     | -       | -    |

Supplement: Supplementary file 477 [file 1]

IPI00020196.5|ARMC6

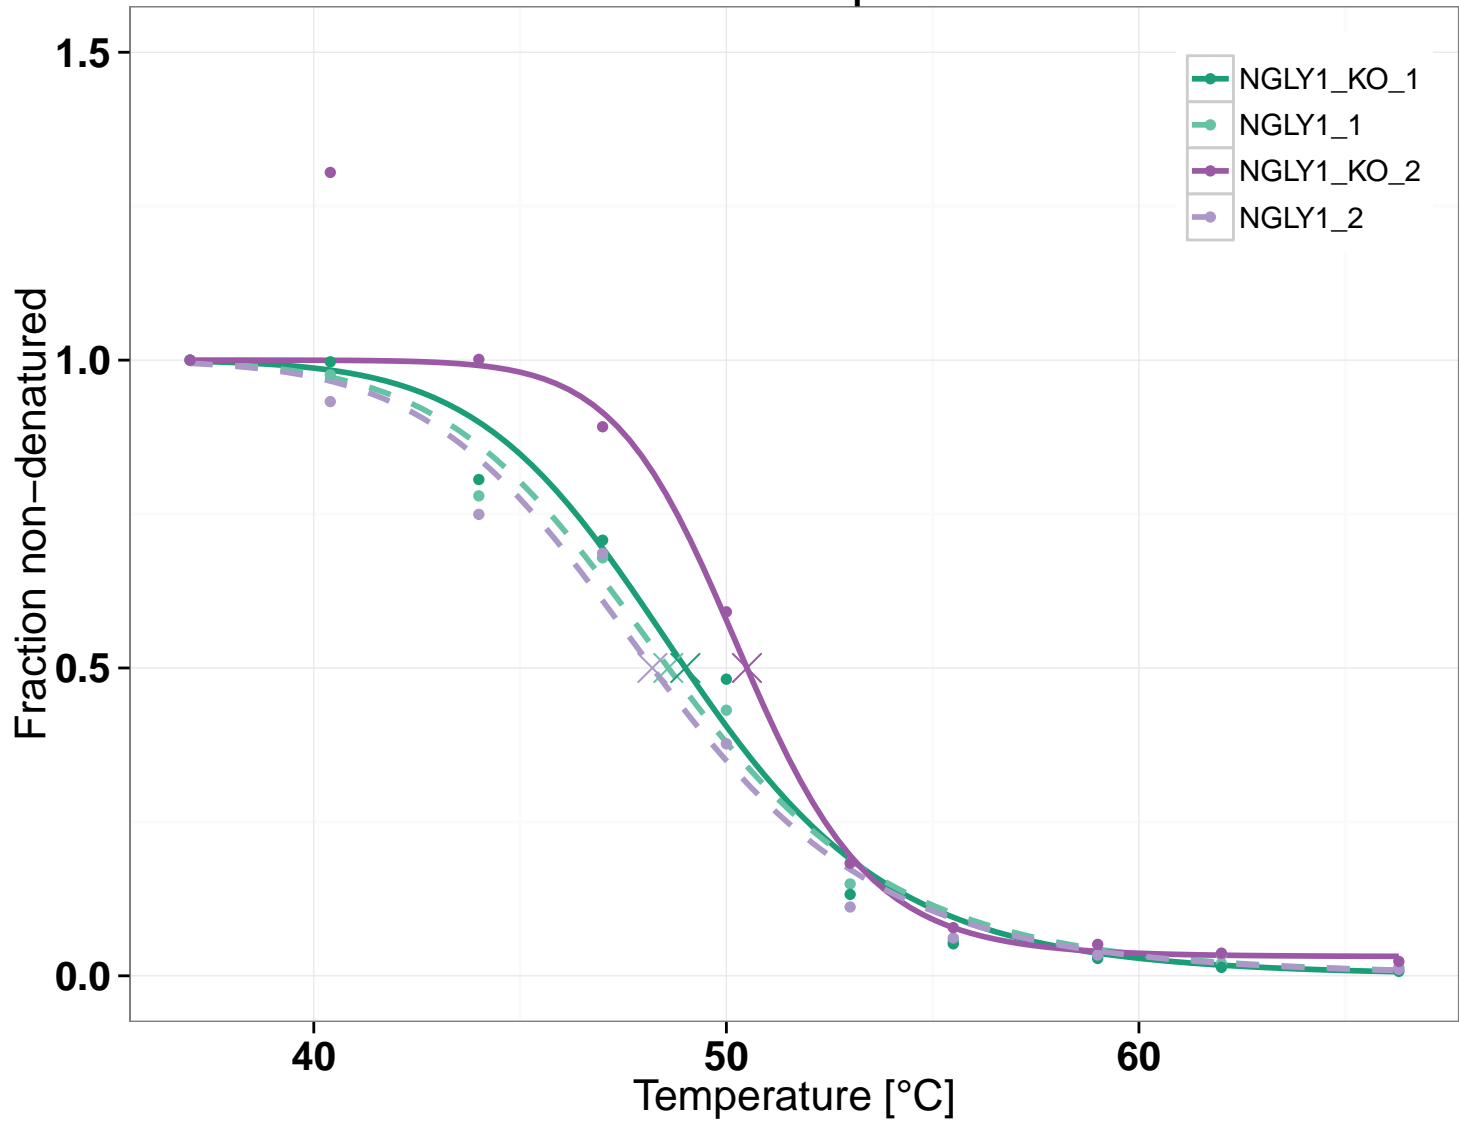

|            | meltPoint | slope  | plateau | R2   |
|------------|-----------|--------|---------|------|
| NGLY1_KO_1 | 49.01     | -0.099 | 0       | 0.99 |
| NGLY1_1    | 48.59     | -0.091 | 0       | 0.99 |
| NGLY1_KO_2 | 50.5      | -0.16  | 0.03    | 0.96 |
| NGLY1_2    | 48.21     | -0.091 | 0       | 0.99 |

Supplement: Supplementary file 478 [file 1]

IPI00004389.3|TUBGCP4

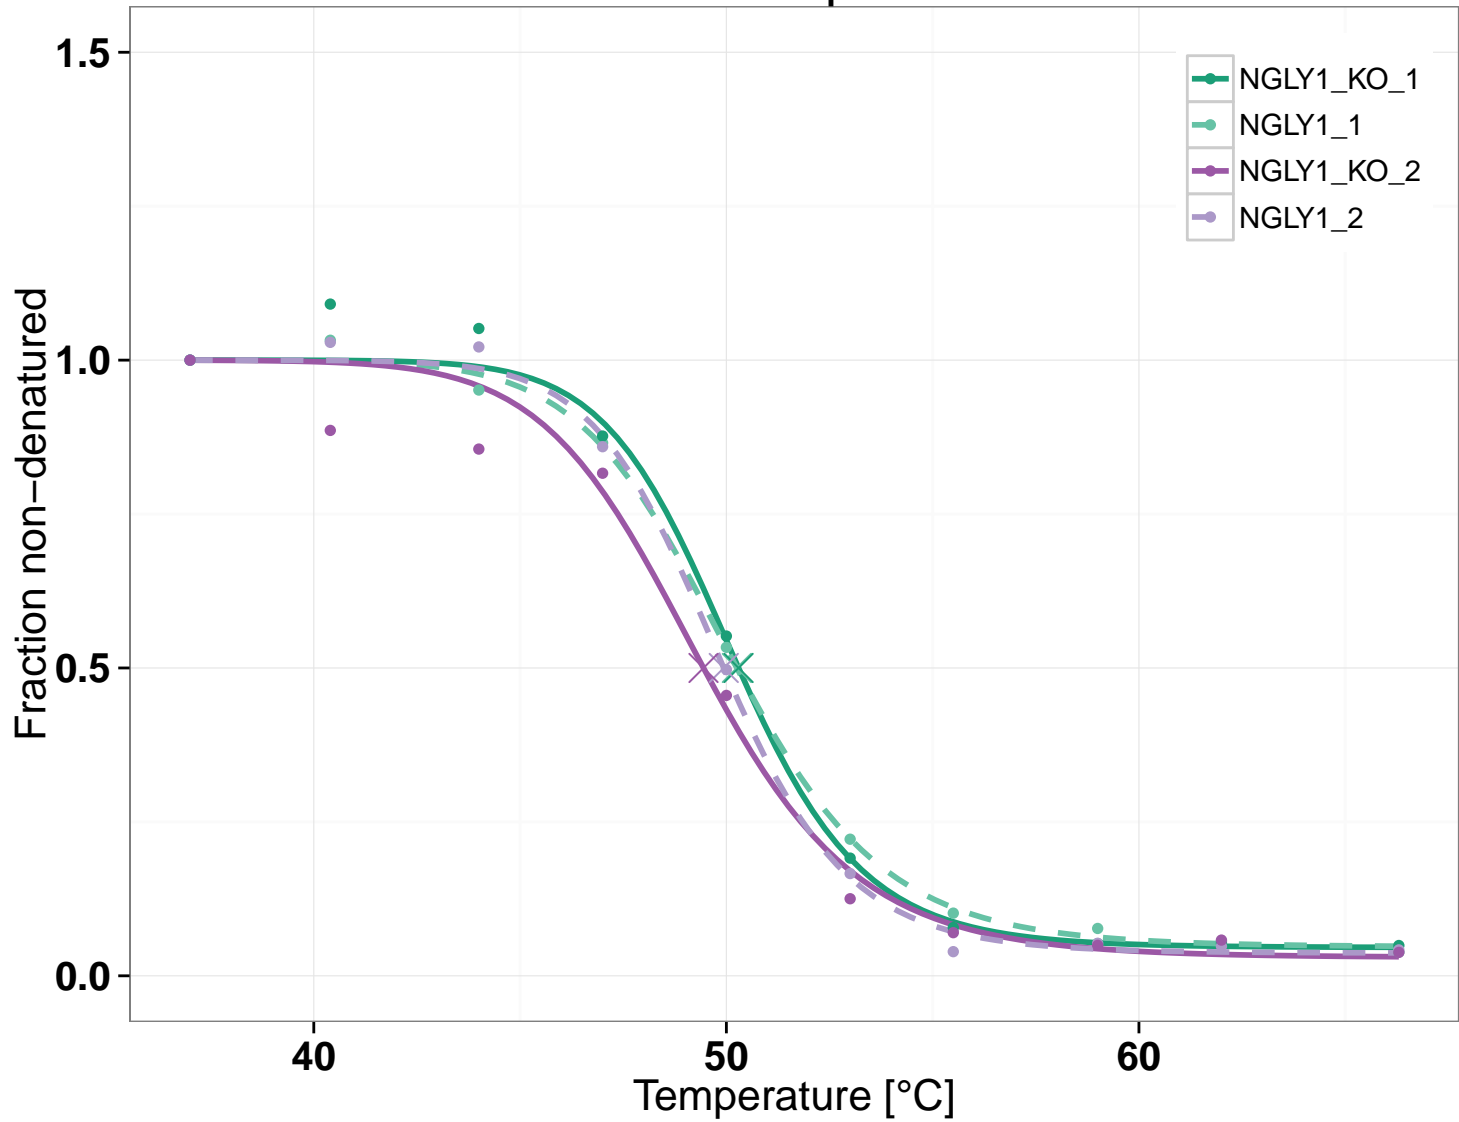

|            | meltPoint | slope | plateau | R2   |
|------------|-----------|-------|---------|------|
| NGLY1_KO_1 | 50.3      | -0.15 | 0.05    | 0.99 |
| NGLY1_1    | 50.25     | -0.13 | 0.05    | 1    |
| NGLY1_KO_2 | 49.45     | -0.13 | 0.03    | 0.98 |
| NGLY1_2    | 49.94     | -0.16 | 0.04    | 1    |

Supplement: Supplementary file 479 [file 1]

IPI00062882.4|ATPBD3

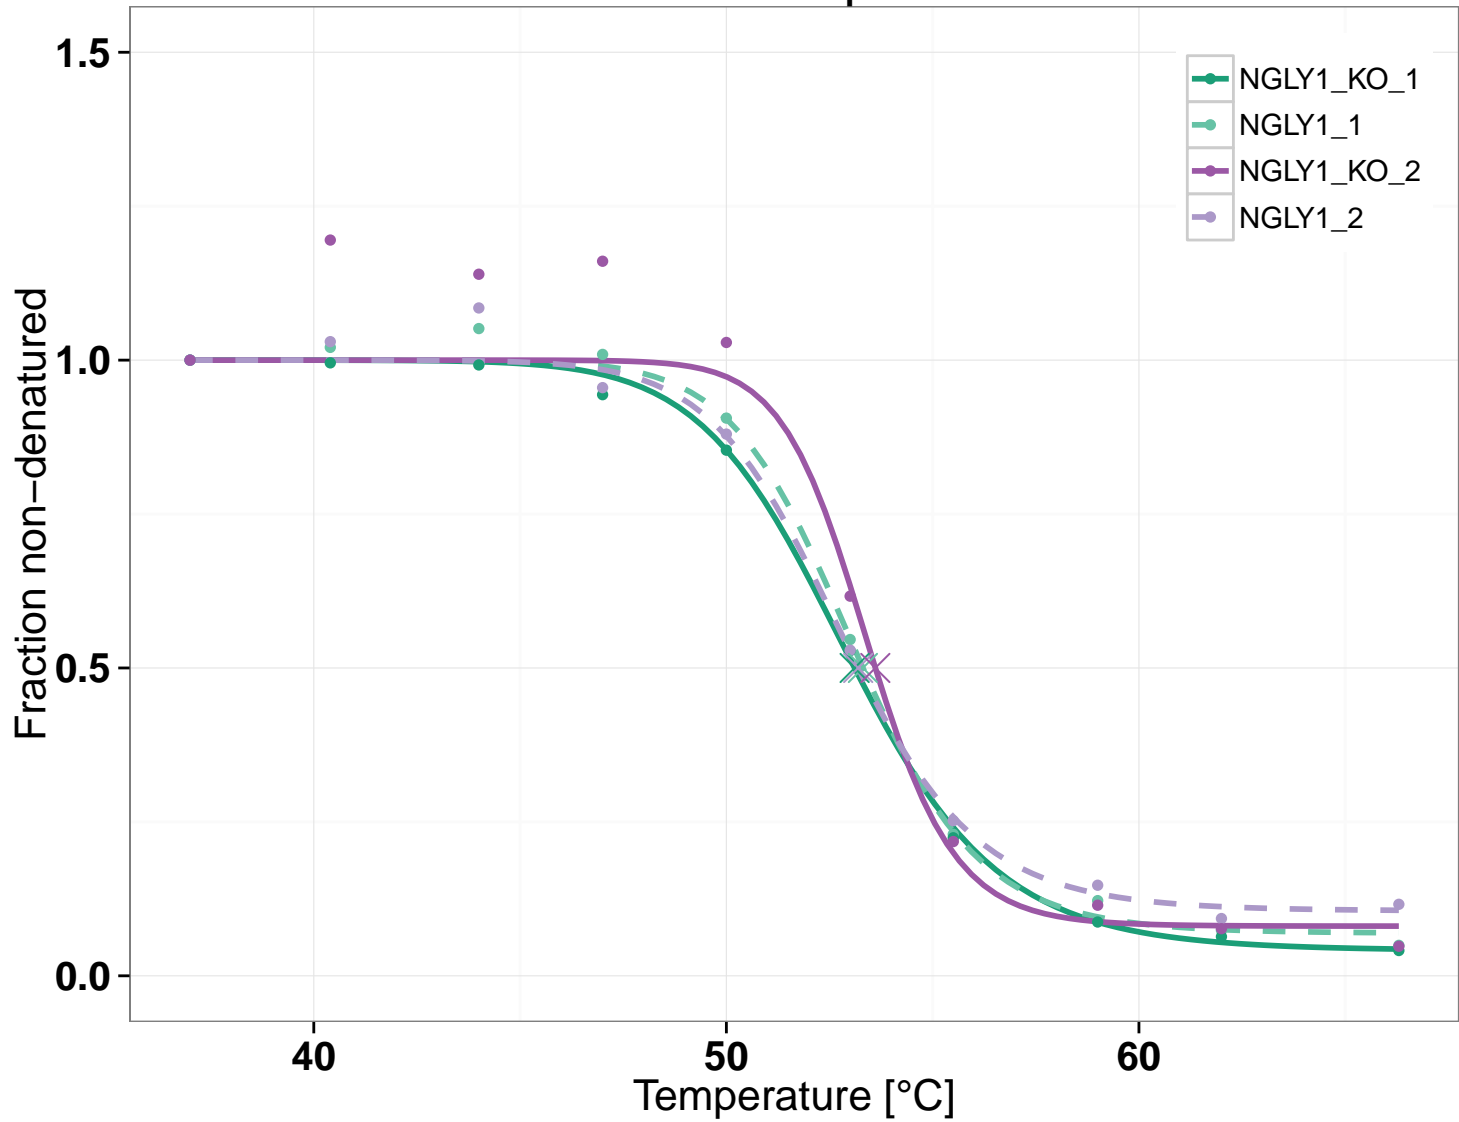

|            | meltPoint | slope | plateau | R2   |
|------------|-----------|-------|---------|------|
| NGLY1_KO_1 | 53.11     | -0.13 | 0.04    | 1    |
| NGLY1_1    | 53.31     | -0.15 | 0.07    | 1    |
| NGLY1_KO_2 | 53.61     | -0.22 | 0.08    | 0.96 |
| NGLY1_2    | 53.2      | -0.14 | 0.11    | 0.99 |

Supplement: Supplementary file 480 [file 1]

# IPI00027773.3|TMUB1

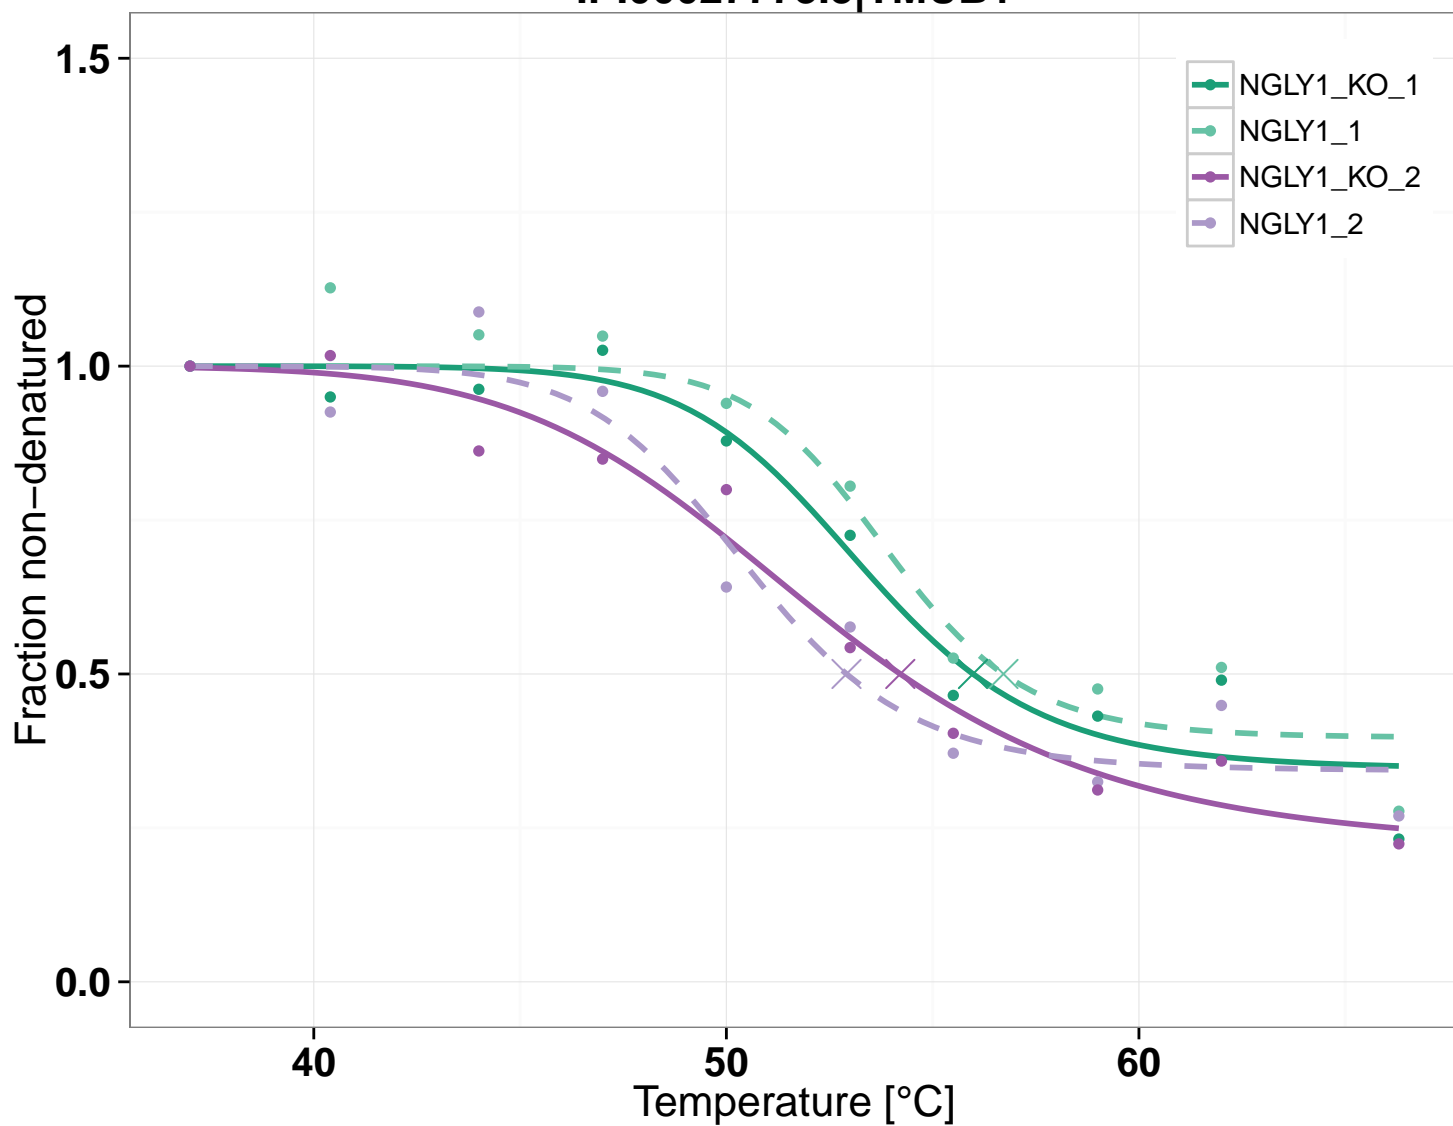

|            | meltPoint | slope  | plateau | R2   |
|------------|-----------|--------|---------|------|
| NGLY1_KO_1 | 55.98     | -0.076 | 0.35    | 0.94 |
| NGLY1_1    | 56.72     | -0.09  | 0.4     | 0.94 |
| NGLY1_KO_2 | 54.22     | -0.055 | 0.21    | 0.97 |
| NGLY1_2    | 52.91     | -0.084 | 0.34    | 0.94 |

Supplement: Supplementary file 481 [file 1]

IPI00855998.1|CENPF

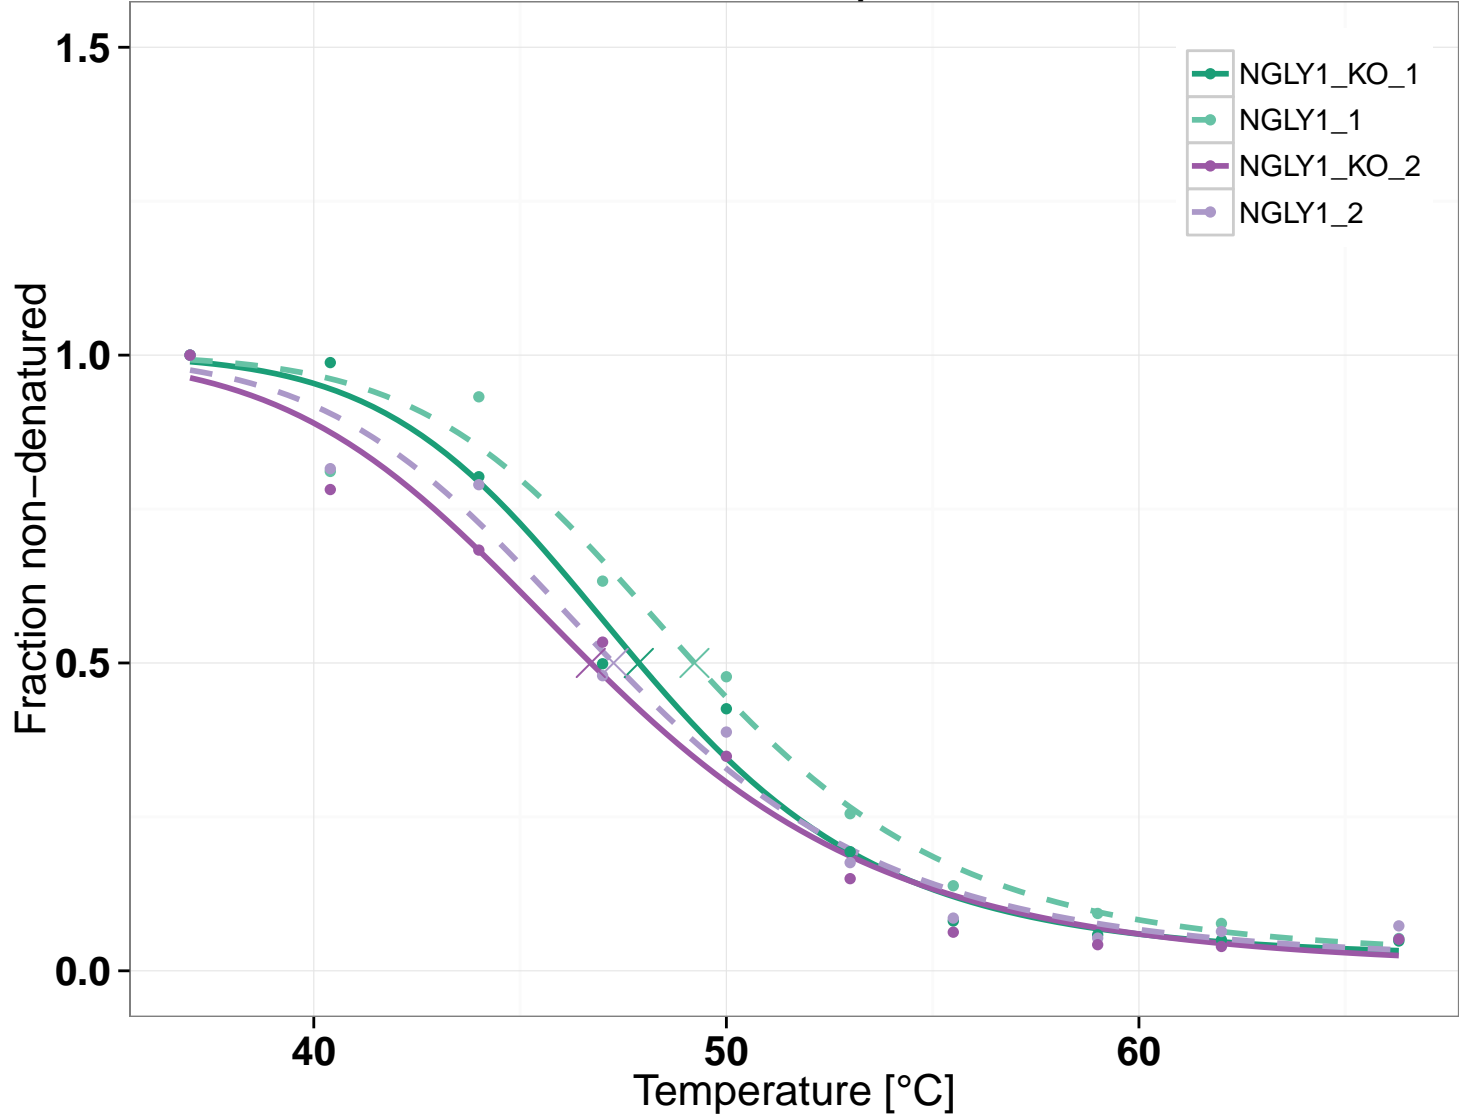

|            | meltPoint | slope  | plateau | R2   |
|------------|-----------|--------|---------|------|
| NGLY1_KO_1 | 47.88     | -0.081 | 0.02    | 0.99 |
| NGLY1_1    | 49.23     | -0.076 | 0.02    | 0.97 |
| NGLY1_KO_2 | 46.71     | -0.068 | 0       | 0.98 |
| NGLY1_2    | 47.27     | -0.072 | 0.01    | 0.98 |

Supplement: Supplementary file 482 [file 1]

# IPI00217874.2|RCOR2

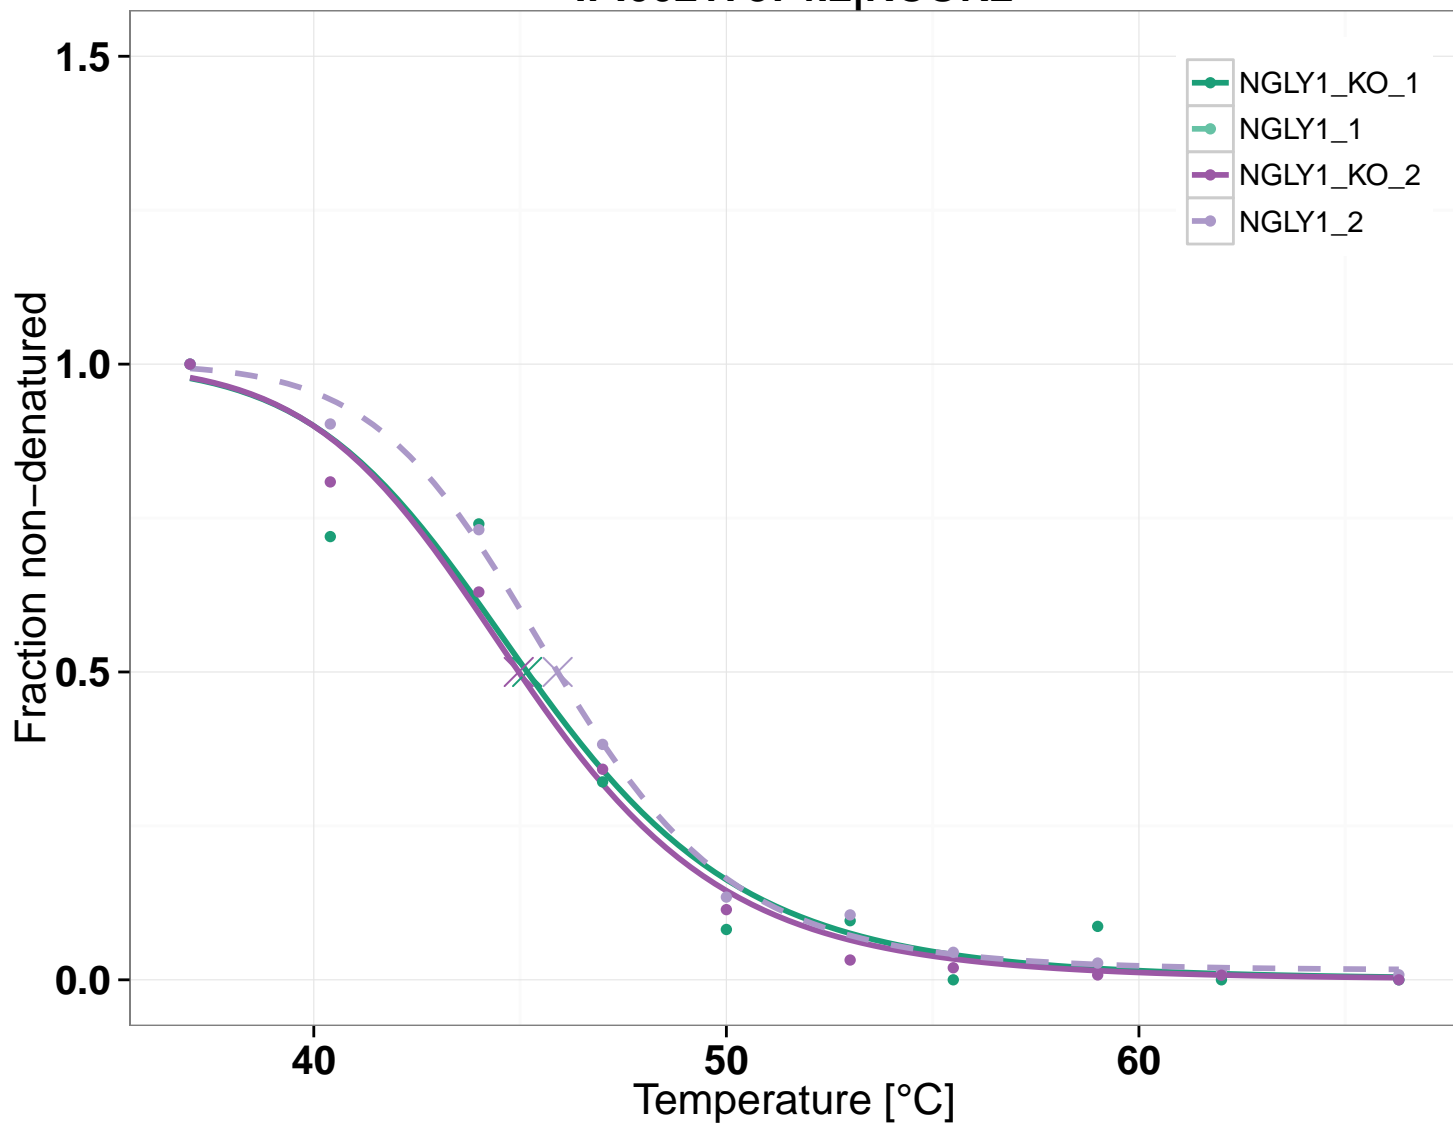

|            | meltPoint | slope  | plateau | R2   |
|------------|-----------|--------|---------|------|
| NGLY1_KO_1 | 45.17     | -0.095 | 0       | 0.95 |
| NGLY1_1    | -         | -      | -       | -    |
| NGLY1_KO_2 | 44.97     | -0.099 | 0       | 0.99 |
| NGLY1_2    | 45.91     | -0.11  | 0.02    | 1    |

Supplement: Supplementary file 483 [file 1]

IPI00219068.3|NAT12

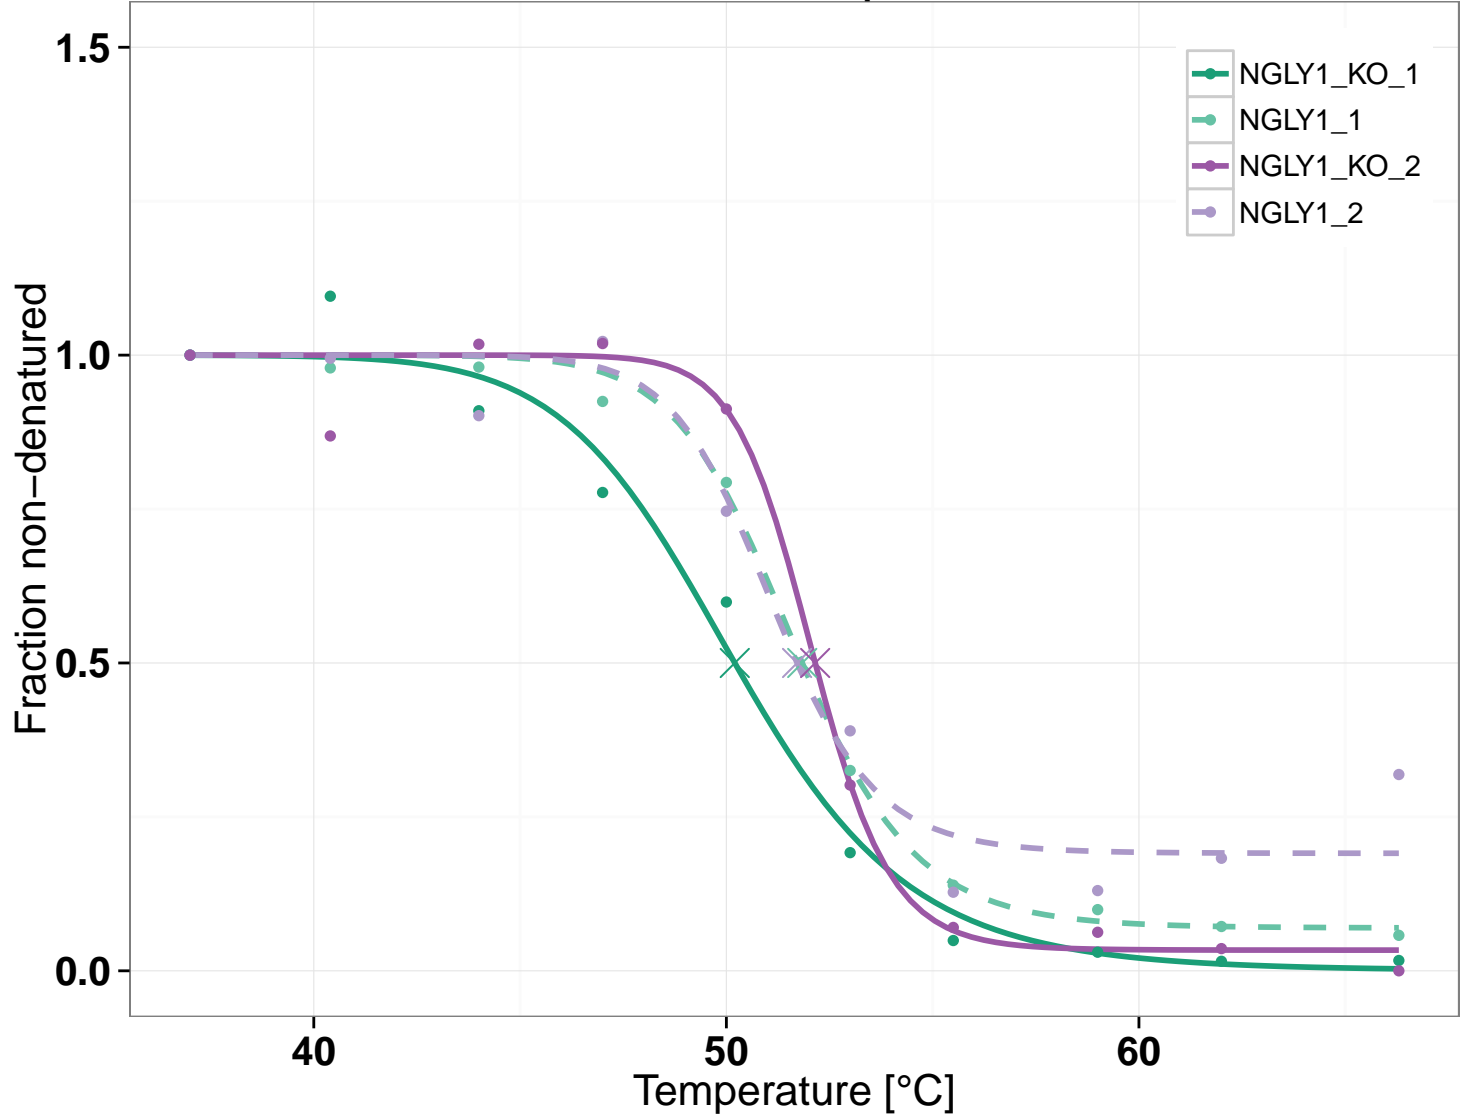

|            | meltPoint | slope | plateau | R2   |
|------------|-----------|-------|---------|------|
| NGLY1_KO_1 | 50.2      | -0.12 | 0       | 0.99 |
| NGLY1_1    | 51.84     | -0.16 | 0.07    | 1    |
| NGLY1_KO_2 | 52.15     | -0.26 | 0.03    | 0.99 |
| NGLY1_2    | 51.71     | -0.16 | 0.19    | 0.97 |

Supplement: Supplementary file 484 [file 1]

# IPI00413780.3|PKN3

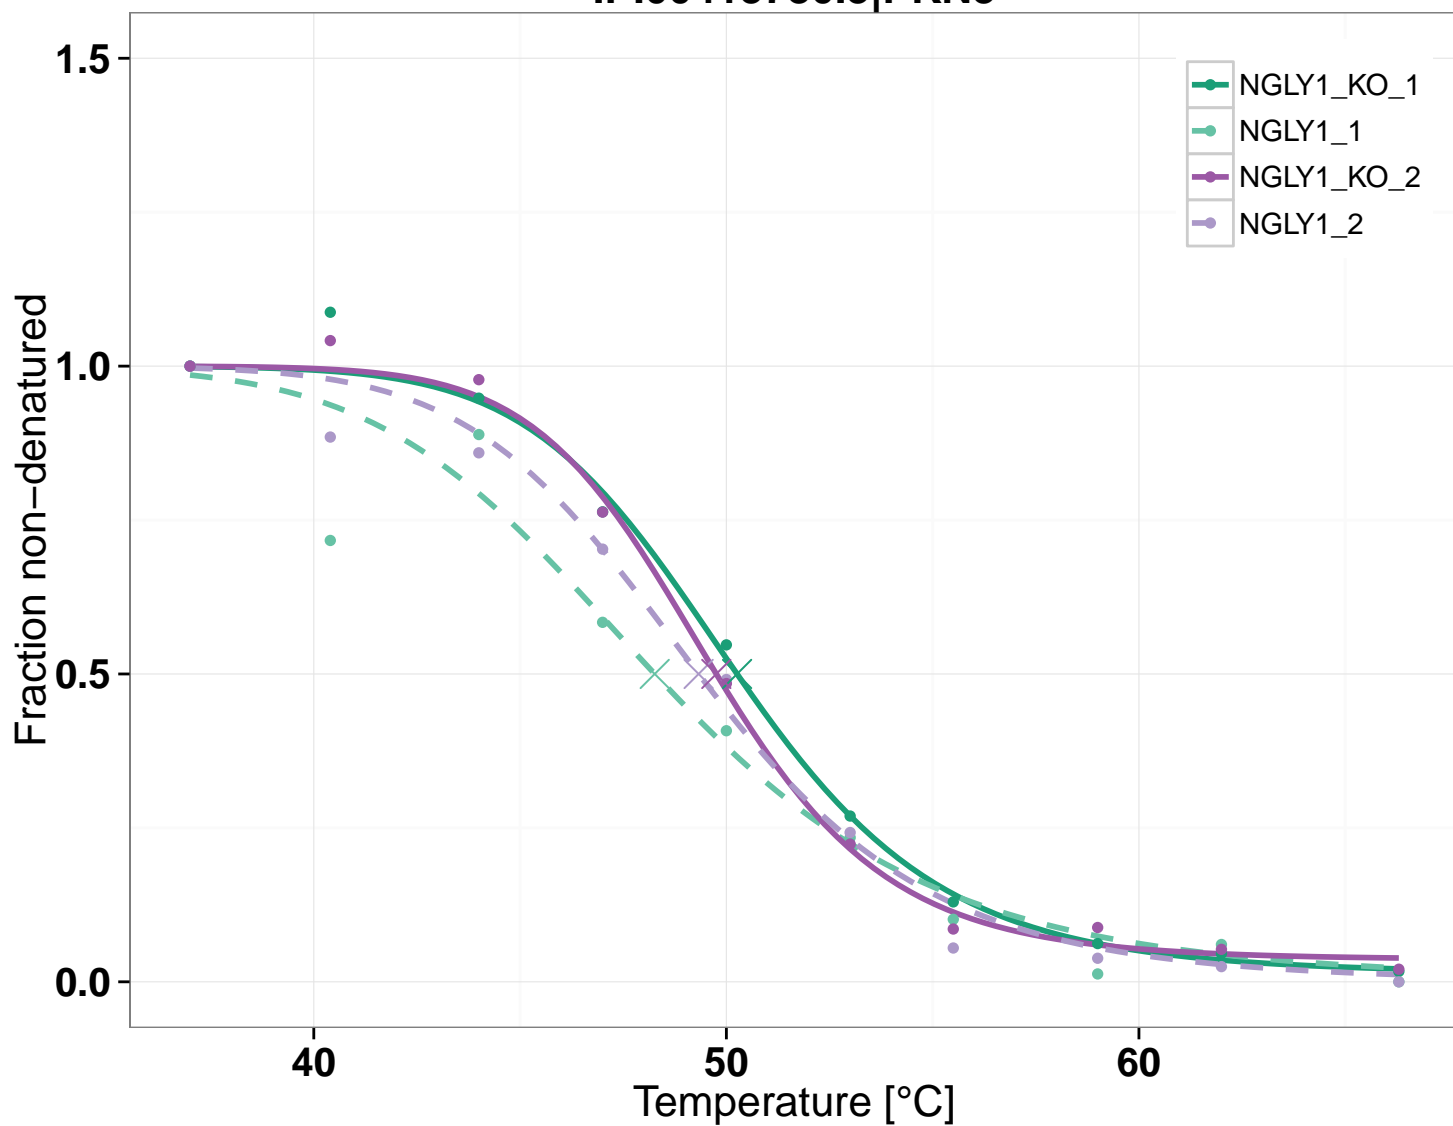

|            | meltPoint | slope  | plateau | R2   |
|------------|-----------|--------|---------|------|
| NGLY1_KO_1 | 50.26     | -0.098 | 0.01    | 0.99 |
| NGLY1_1    | 48.26     | -0.073 | 0       | 0.95 |
| NGLY1_KO_2 | 49.76     | -0.11  | 0.04    | 1    |
| NGLY1_2    | 49.33     | -0.089 | 0       | 0.99 |

Supplement: Supplementary file 485 [file 1]

# IPI00299719.1|TCIRG1

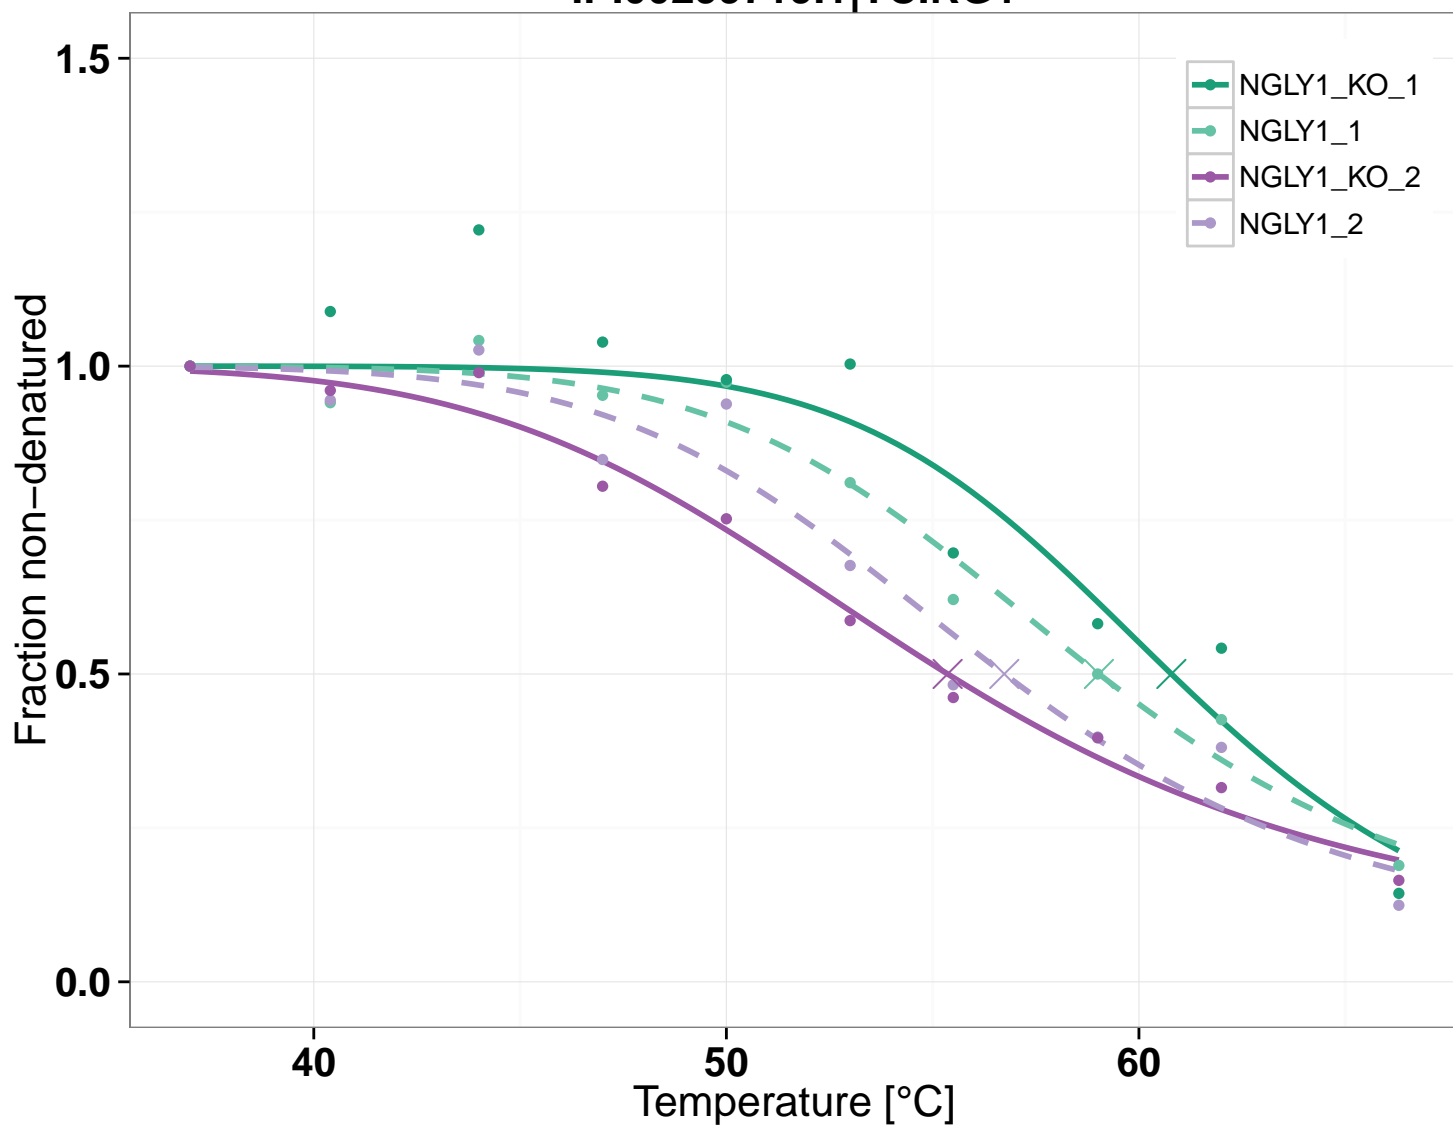

|            | meltPoint | slope  | plateau | R2   |
|------------|-----------|--------|---------|------|
| NGLY1_KO_1 | 60.79     | -0.066 | 0       | 0.89 |
| NGLY1_1    | 59.03     | -0.054 | 0.06    | 0.97 |
| NGLY1_KO_2 | 55.36     | -0.045 | 0.06    | 0.99 |
| NGLY1_2    | 56.74     | -0.053 | 0.05    | 0.95 |

Supplement: Supplementary file 486 [file 1]

IPI00290305.3|TP53RK

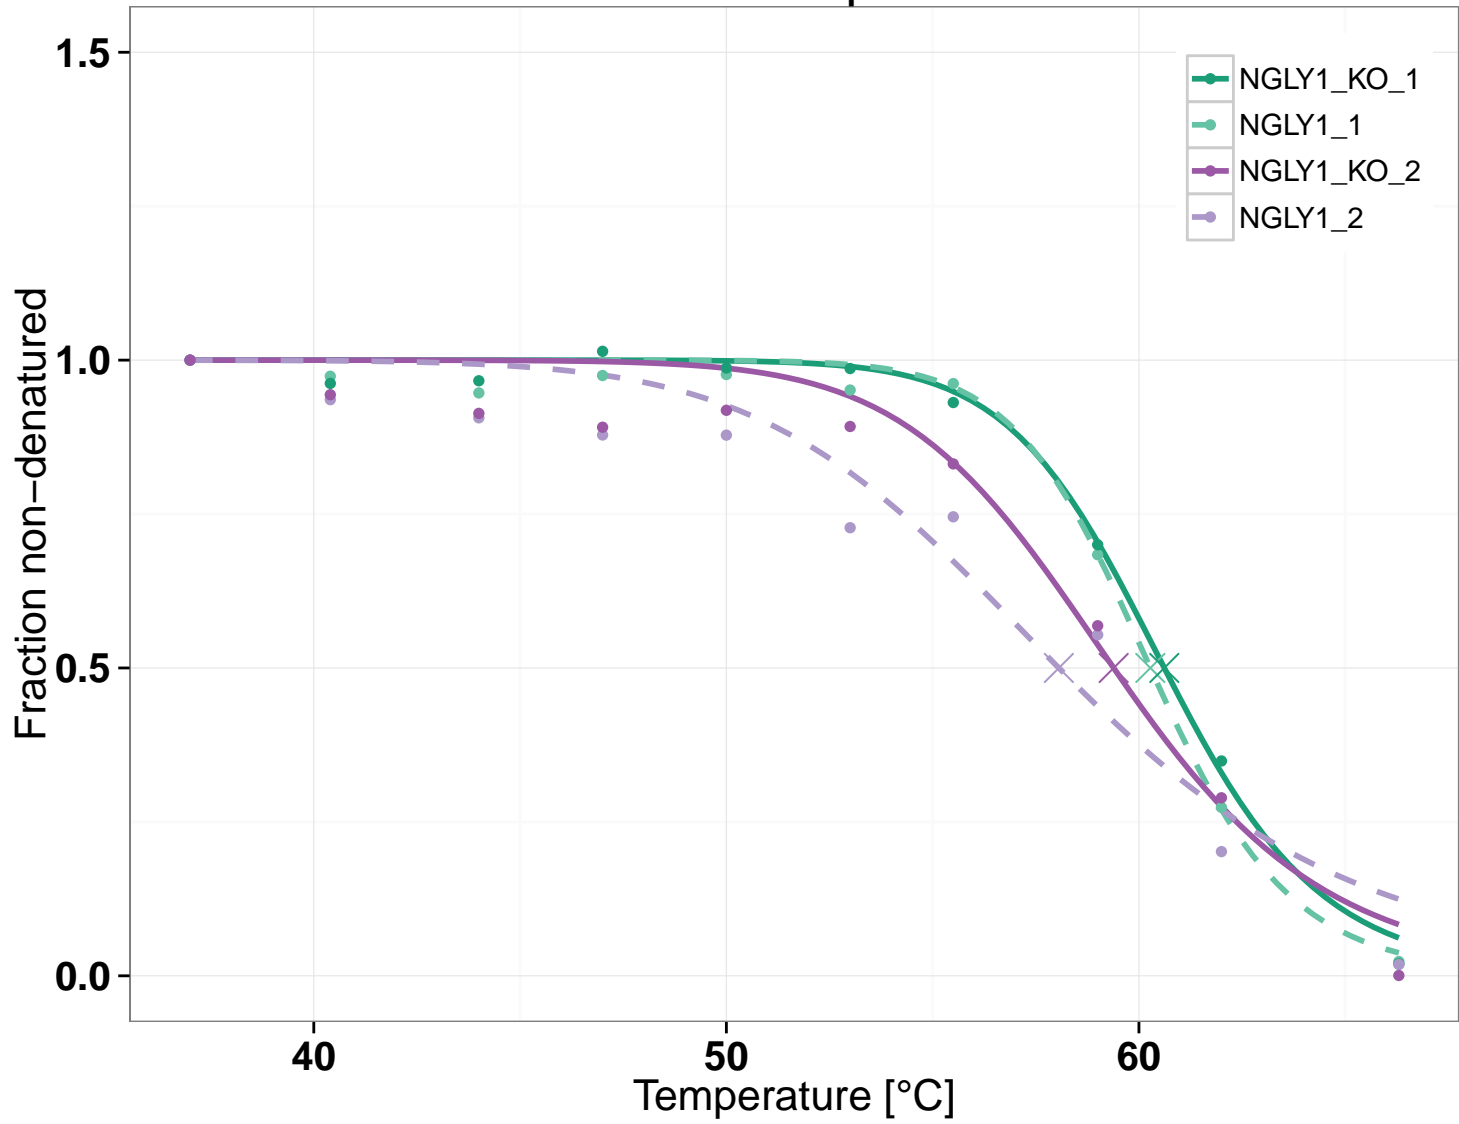

|            | meltPoint | slope  | plateau | R2   |
|------------|-----------|--------|---------|------|
| NGLY1_KO_1 | 60.61     | -0.13  | 0       | 0.99 |
| NGLY1_1    | 60.28     | -0.15  | 0       | 0.99 |
| NGLY1_KO_2 | 59.39     | -0.098 | 0       | 0.96 |
| NGLY1_2    | 58.06     | -0.069 | 0       | 0.93 |

Supplement: Supplementary file 487 [file 1]

IPI00007063.5|HDGFRP3

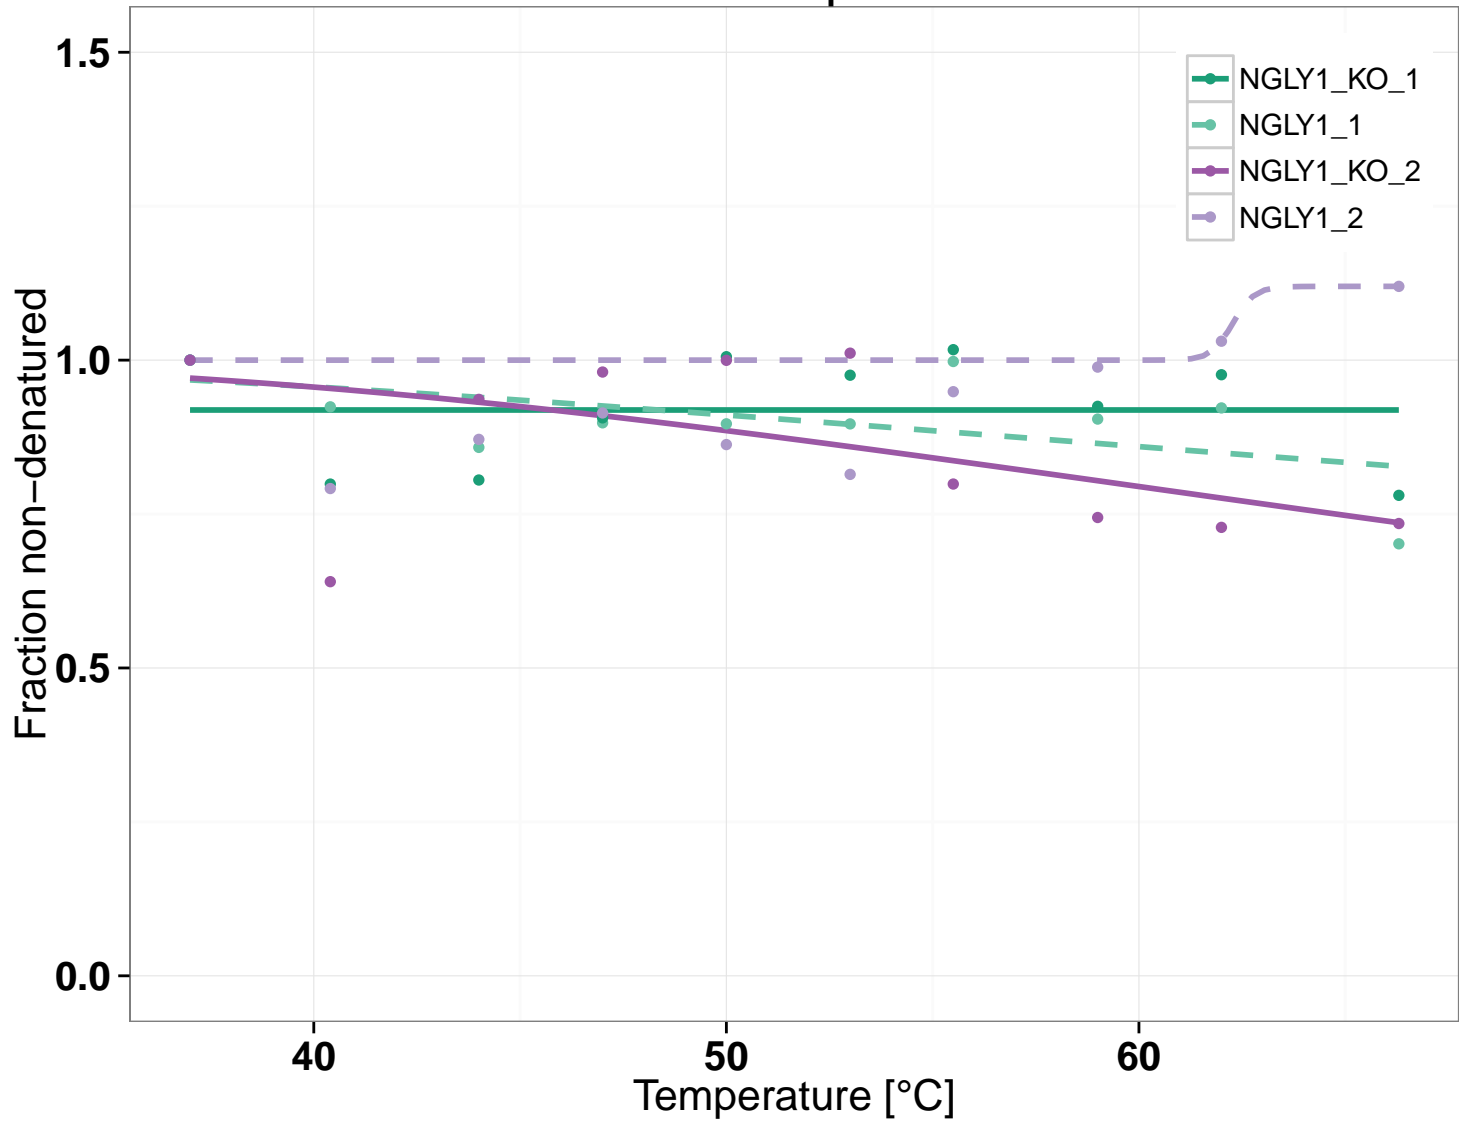

|            | meltPoint | slope   | plateau | R2    |
|------------|-----------|---------|---------|-------|
| NGLY1_KO_1 | -         | -       | 0.84    | 0     |
| NGLY1_1    | -         | -0.0052 | 0       | 0.26  |
| NGLY1_KO_2 | -         | -0.0094 | 0       | 0.18  |
| NGLY1_2    | -         | 0.12    | 1.12    | -0.29 |

Supplement: Supplementary file 488 [file 1]

# IPI00024282.1|RAB8B

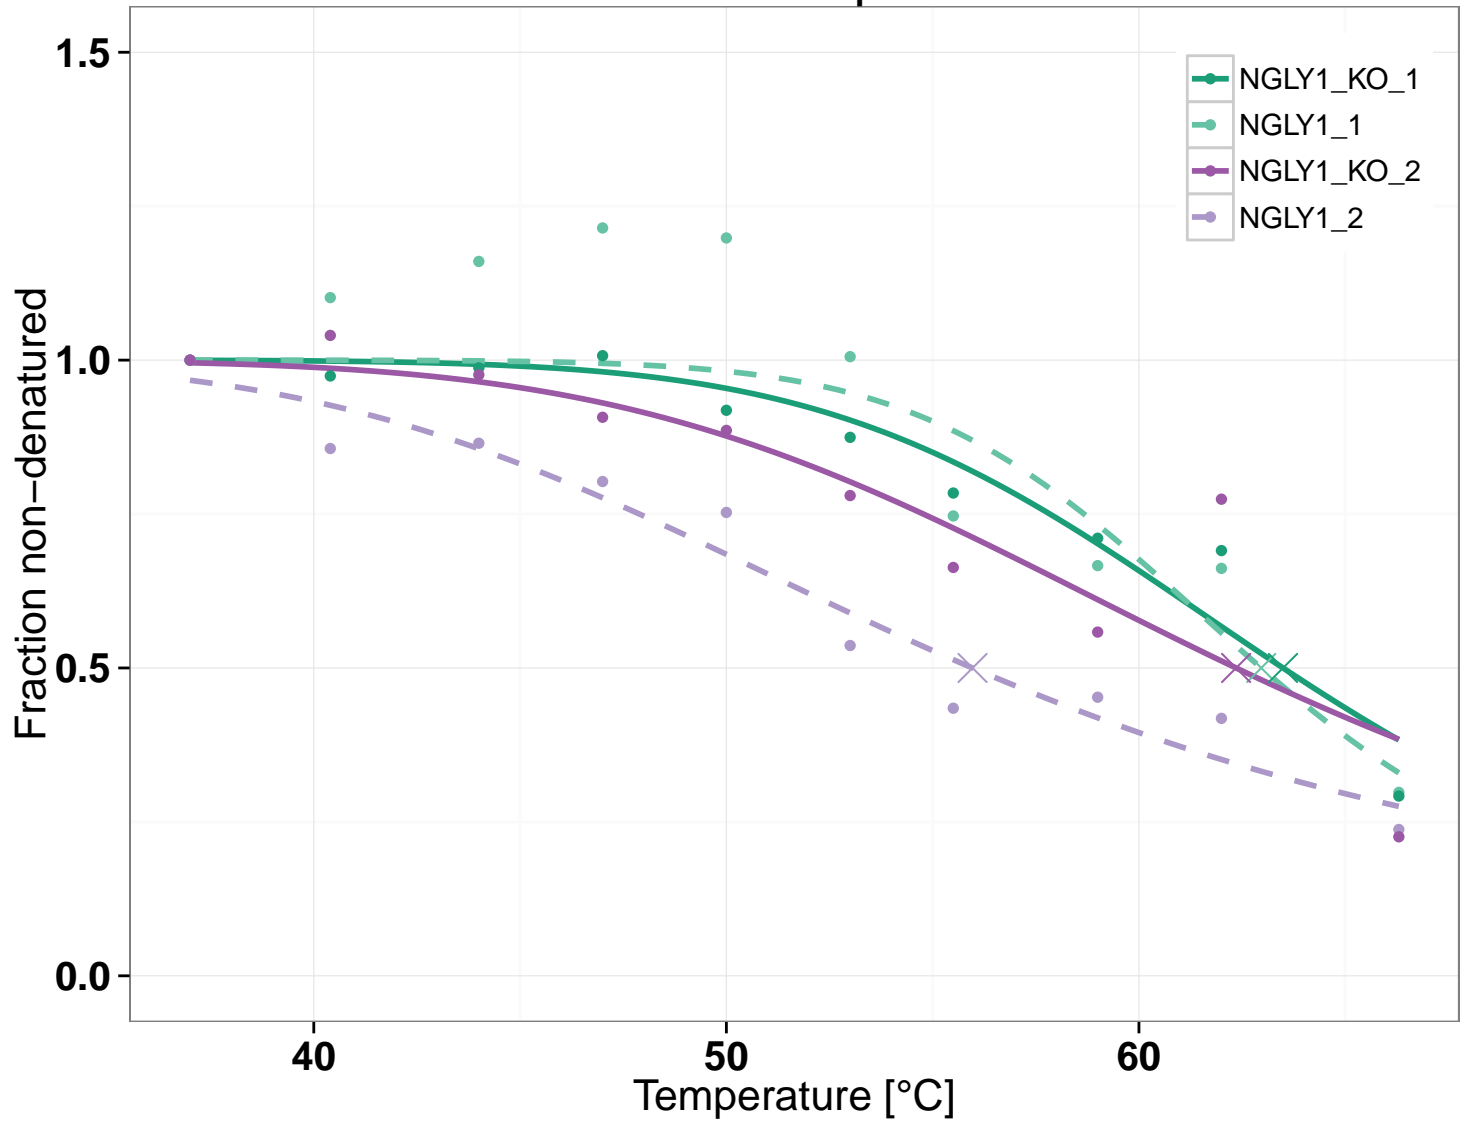

|            | meltPoint | slope  | plateau | R2   |
|------------|-----------|--------|---------|------|
| NGLY1_KO_1 | 63.49     | -0.046 | 0       | 0.93 |
| NGLY1_1    | 62.96     | -0.06  | 0.06    | 0.79 |
| NGLY1_KO_2 | 62.36     | -0.034 | 0       | 0.81 |
| NGLY1_2    | 55.97     | -0.032 | 0.04    | 0.95 |

Supplement: Supplementary file 489 [file 1]

IPI00025685.1|RWDD2B

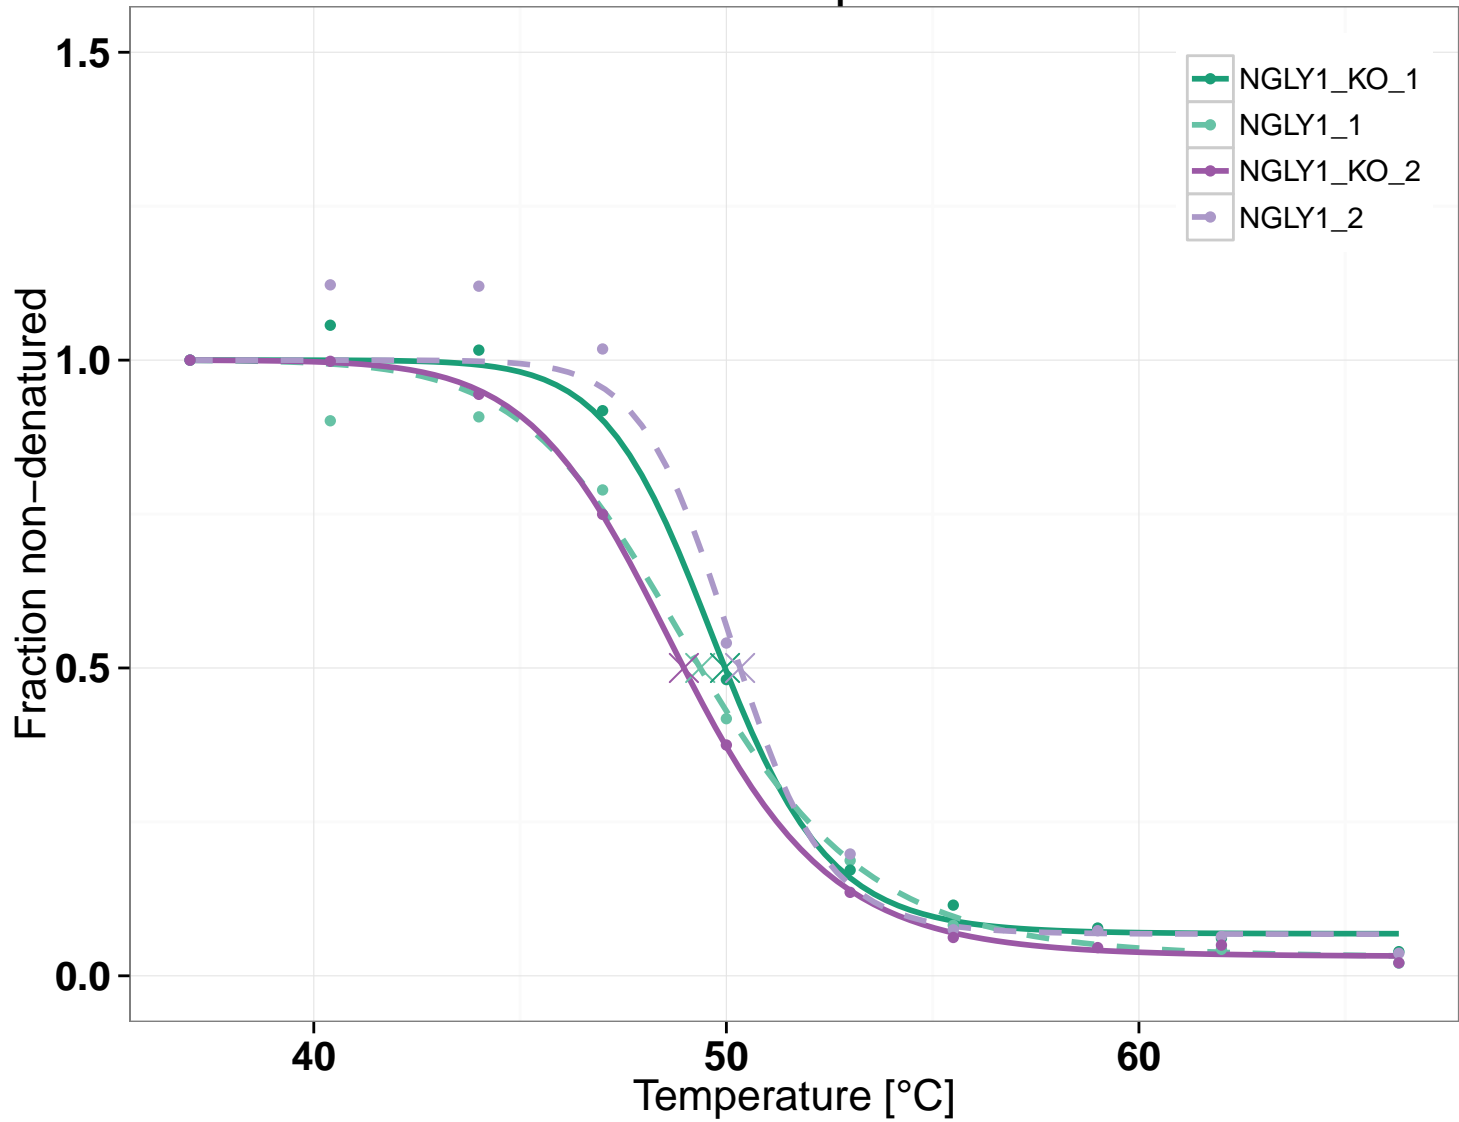

|            | meltPoint | slope | plateau | R2   |
|------------|-----------|-------|---------|------|
| NGLY1_KO_1 | 49.97     | -0.17 | 0.07    | 1    |
| NGLY1_1    | 49.37     | -0.11 | 0.03    | 0.99 |
| NGLY1_KO_2 | 48.97     | -0.13 | 0.03    | 1    |
| NGLY1_2    | 50.33     | -0.21 | 0.07    | 0.98 |

Supplement: Supplementary file 490 [file 1]

IPI00848002.2|LOC442245

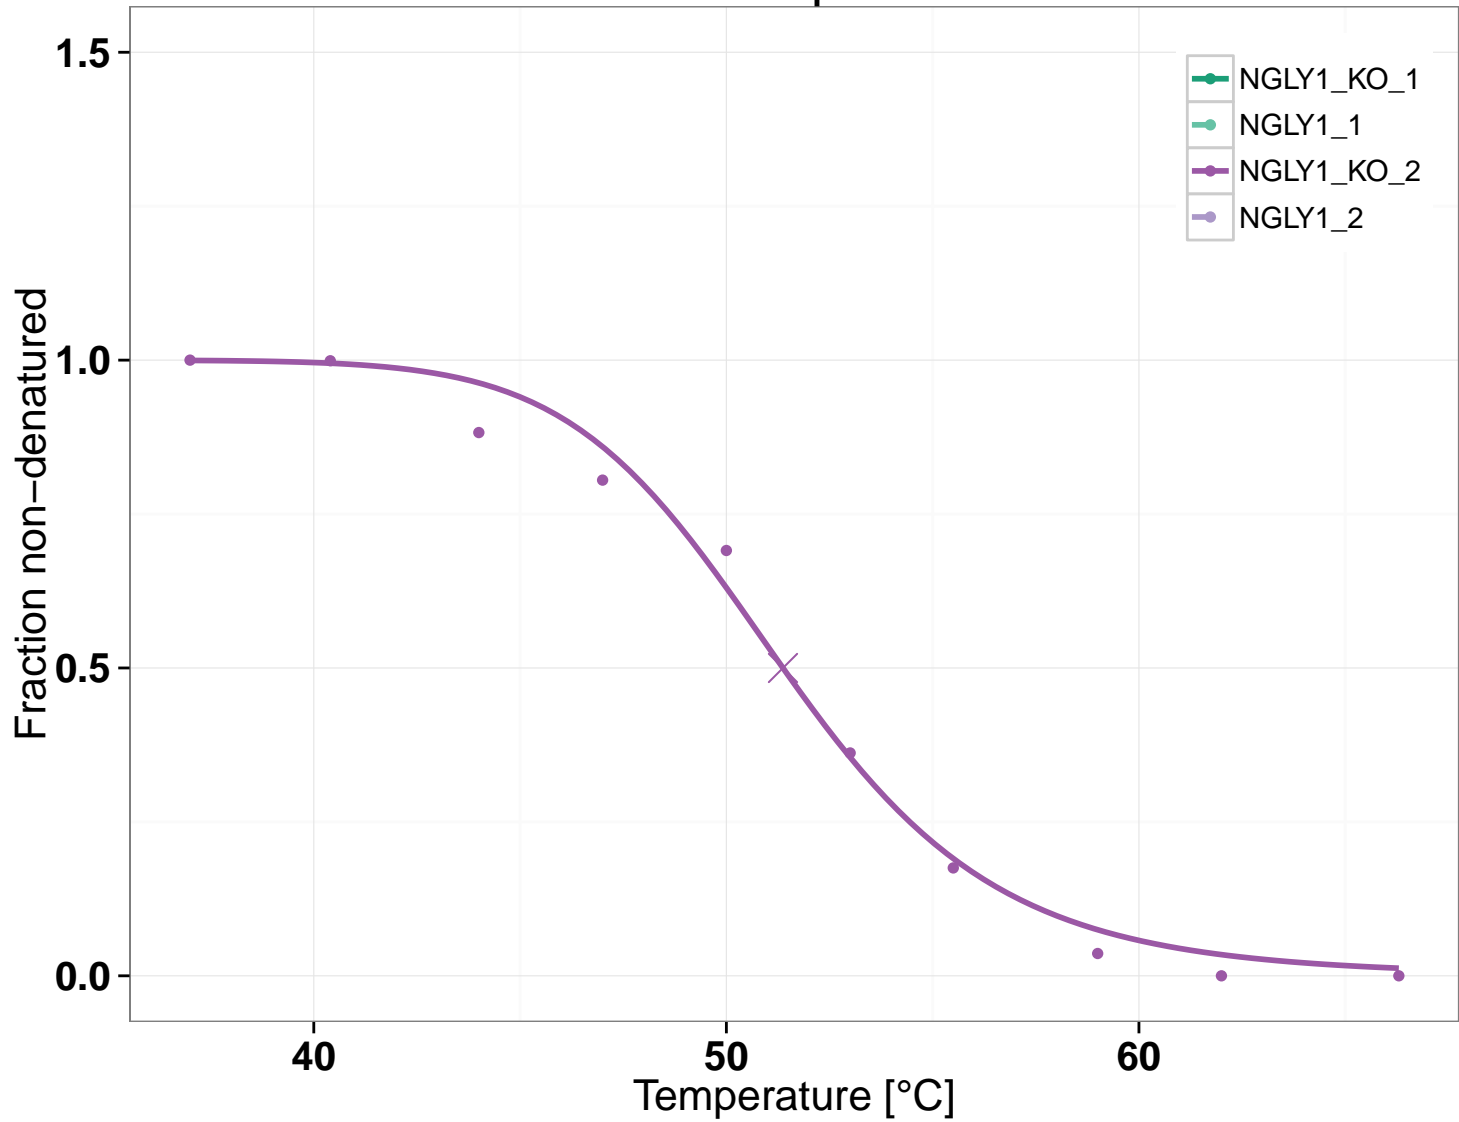

|            | meltPoint | slope  | plateau | R2   |
|------------|-----------|--------|---------|------|
| NGLY1_KO_1 | —         | —      | —       | —    |
| NGLY1_1    | —         | —      | —       | —    |
| NGLY1_KO_2 | 51.37     | -0.096 | 0       | 0.99 |
| NGLY1_2    | —         | —      | —       | —    |

Supplement: Supplementary file 491 [file 1]

IPI00001427.6|PDCD2

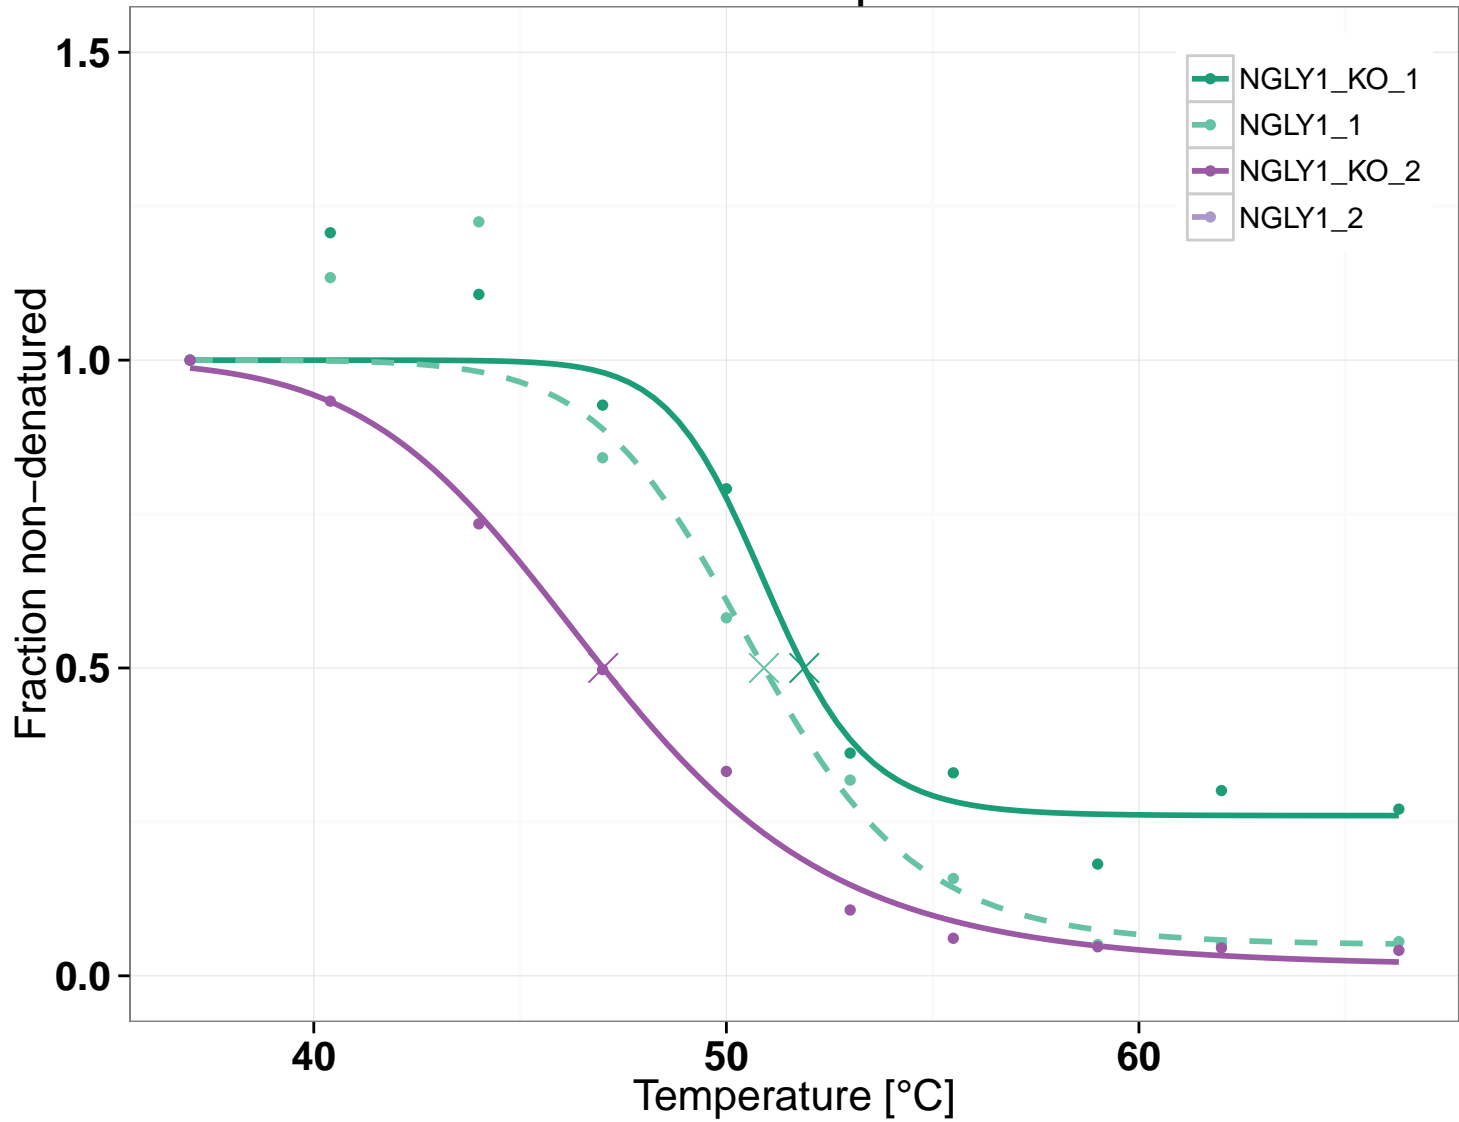

|            | meltPoint | slope  | plateau | R2   |
|------------|-----------|--------|---------|------|
| NGLY1_KO_1 | 51.89     | -0.15  | 0.26    | 0.95 |
| NGLY1_1    | 50.91     | -0.12  | 0.05    | 0.96 |
| NGLY1_KO_2 | 47.01     | -0.086 | 0.01    | 1    |
| NGLY1_2    | -         | -      | -       | -    |

Supplement: Supplementary file 492 [file 1]

IPI00009137.1|CPSF4

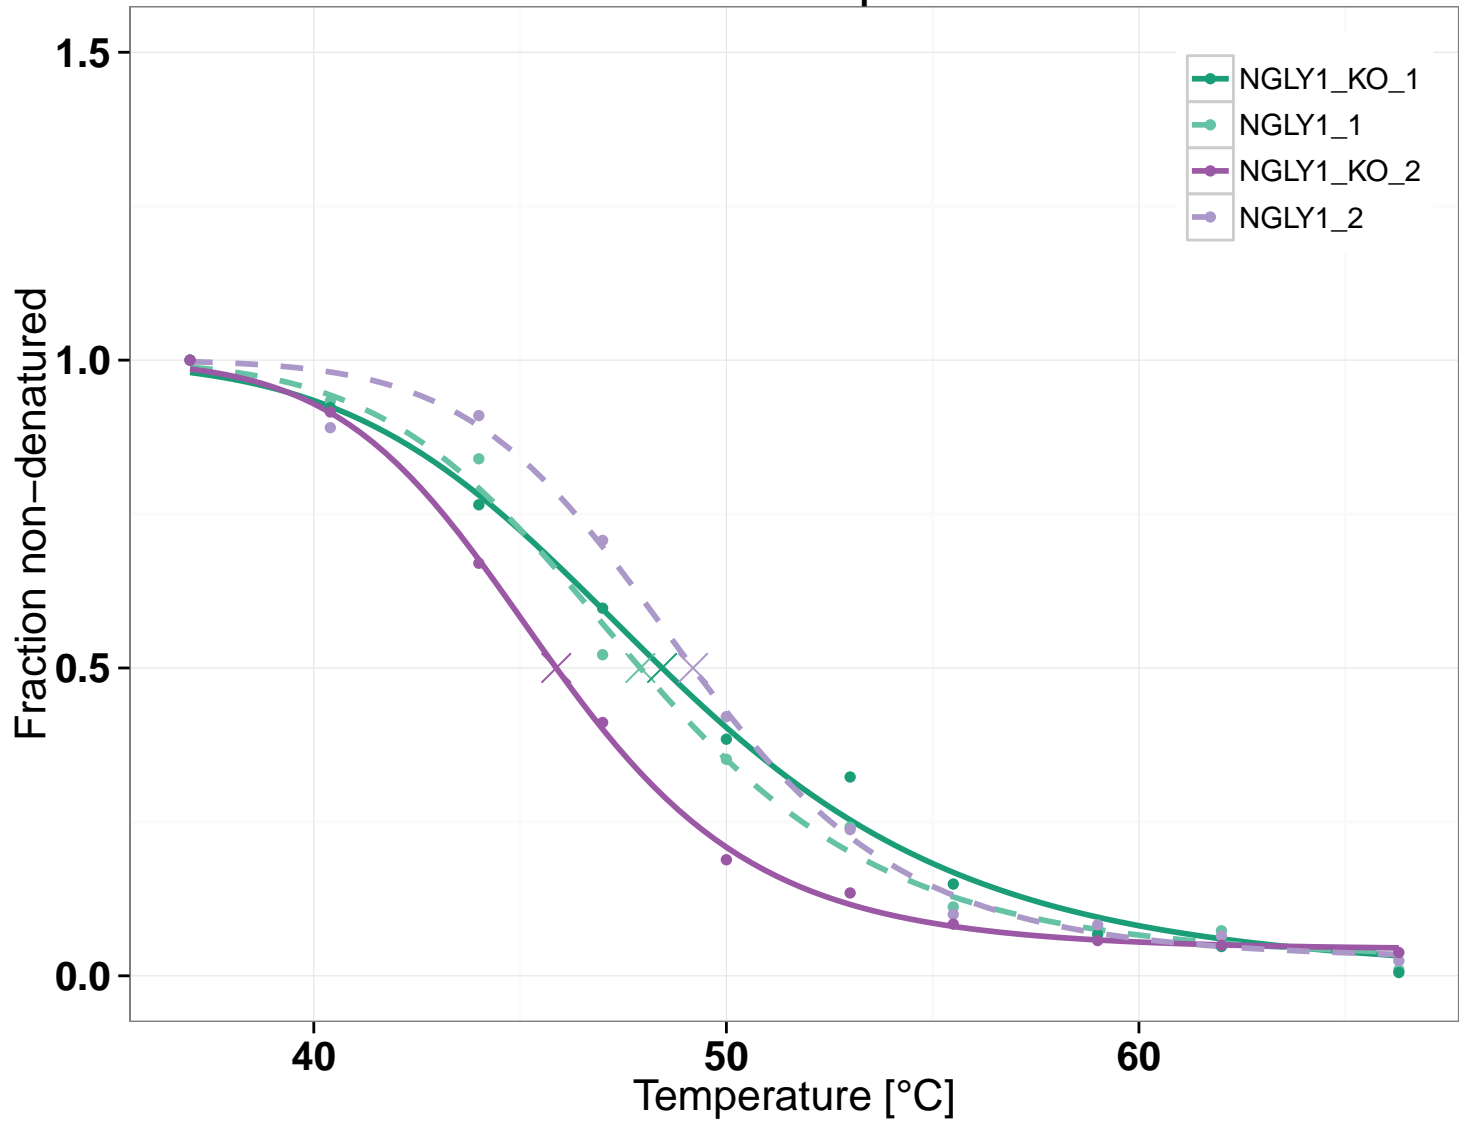

|            | meltPoint | slope  | plateau | R2   |
|------------|-----------|--------|---------|------|
| NGLY1_KO_1 | 48.44     | -0.067 | 0       | 0.99 |
| NGLY1_1    | 47.92     | -0.079 | 0.02    | 0.99 |
| NGLY1_KO_2 | 45.88     | -0.095 | 0.04    | 1    |
| NGLY1_2    | 49.19     | -0.092 | 0.03    | 0.99 |

Supplement: Supplementary file 493 [file 1]

IPI00888160.1|LOC728802

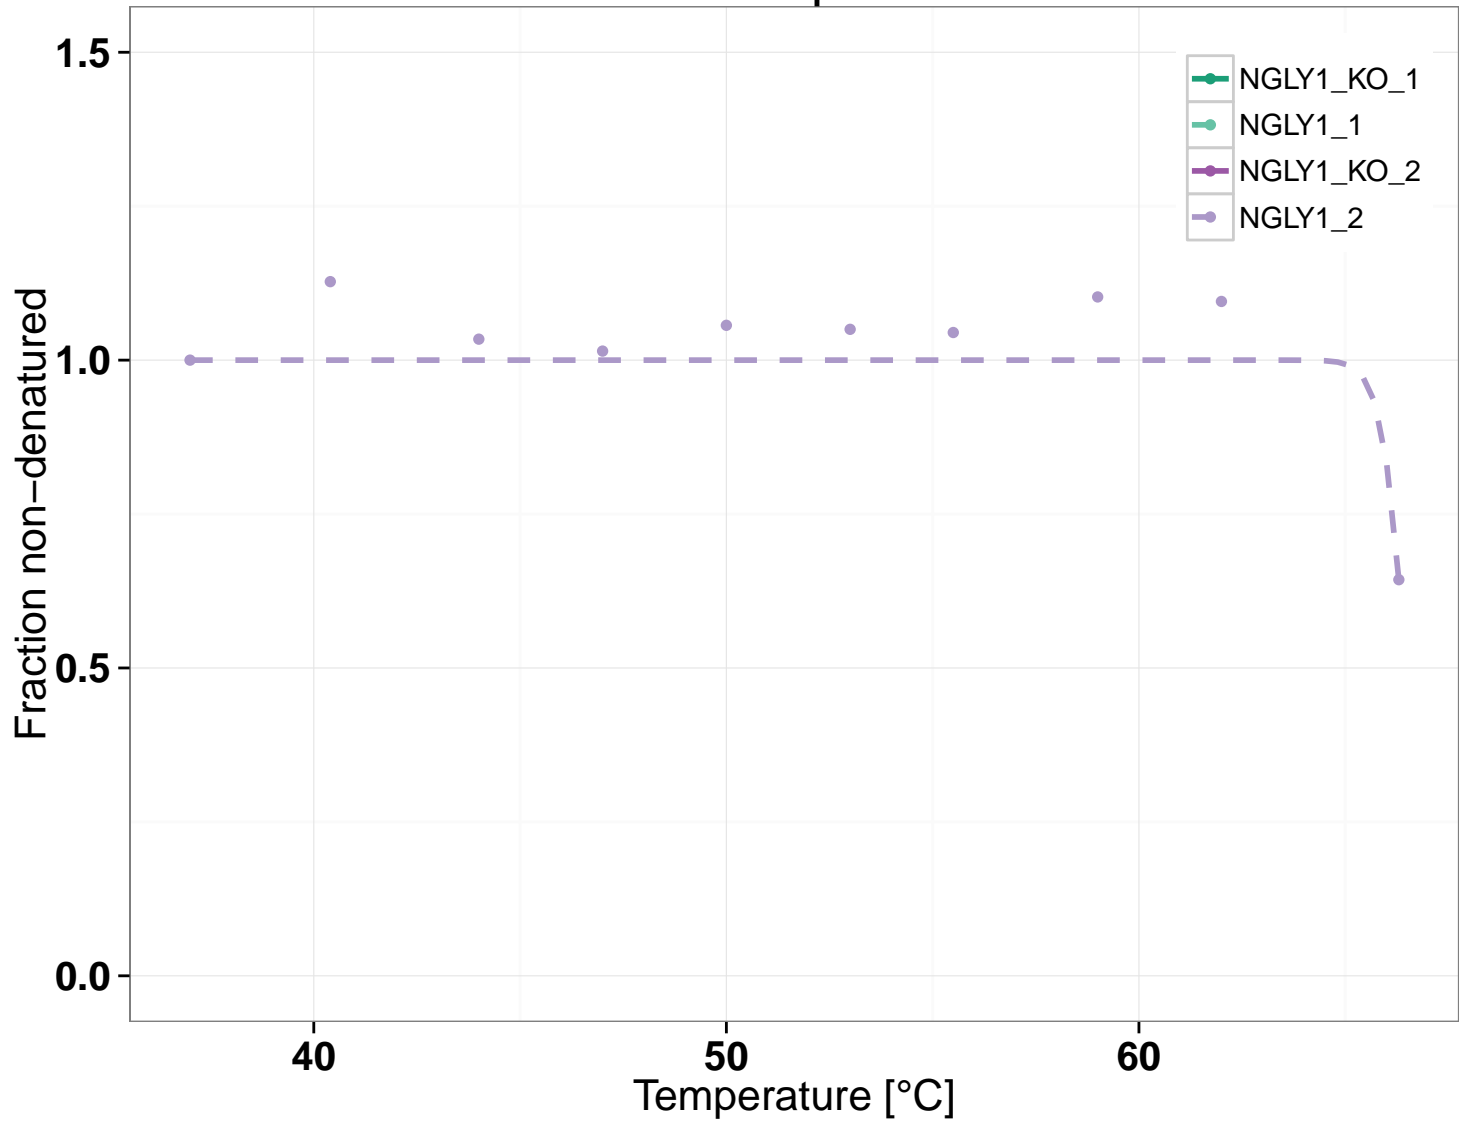

|            | meltPoint | slope | plateau | R2   |
|------------|-----------|-------|---------|------|
| NGLY1_KO_1 | -         | -     | -       | -    |
| NGLY1_1    | -         | -     | -       | -    |
| NGLY1_KO_2 | -         | -     | -       | -    |
| NGLY1_2    | -         | -     | 0       | 0.73 |

Supplement: Supplementary file 494 [file 1]

IPI00013769.1|ALPHA-ENOLASE, LUNG SPECIFIC.

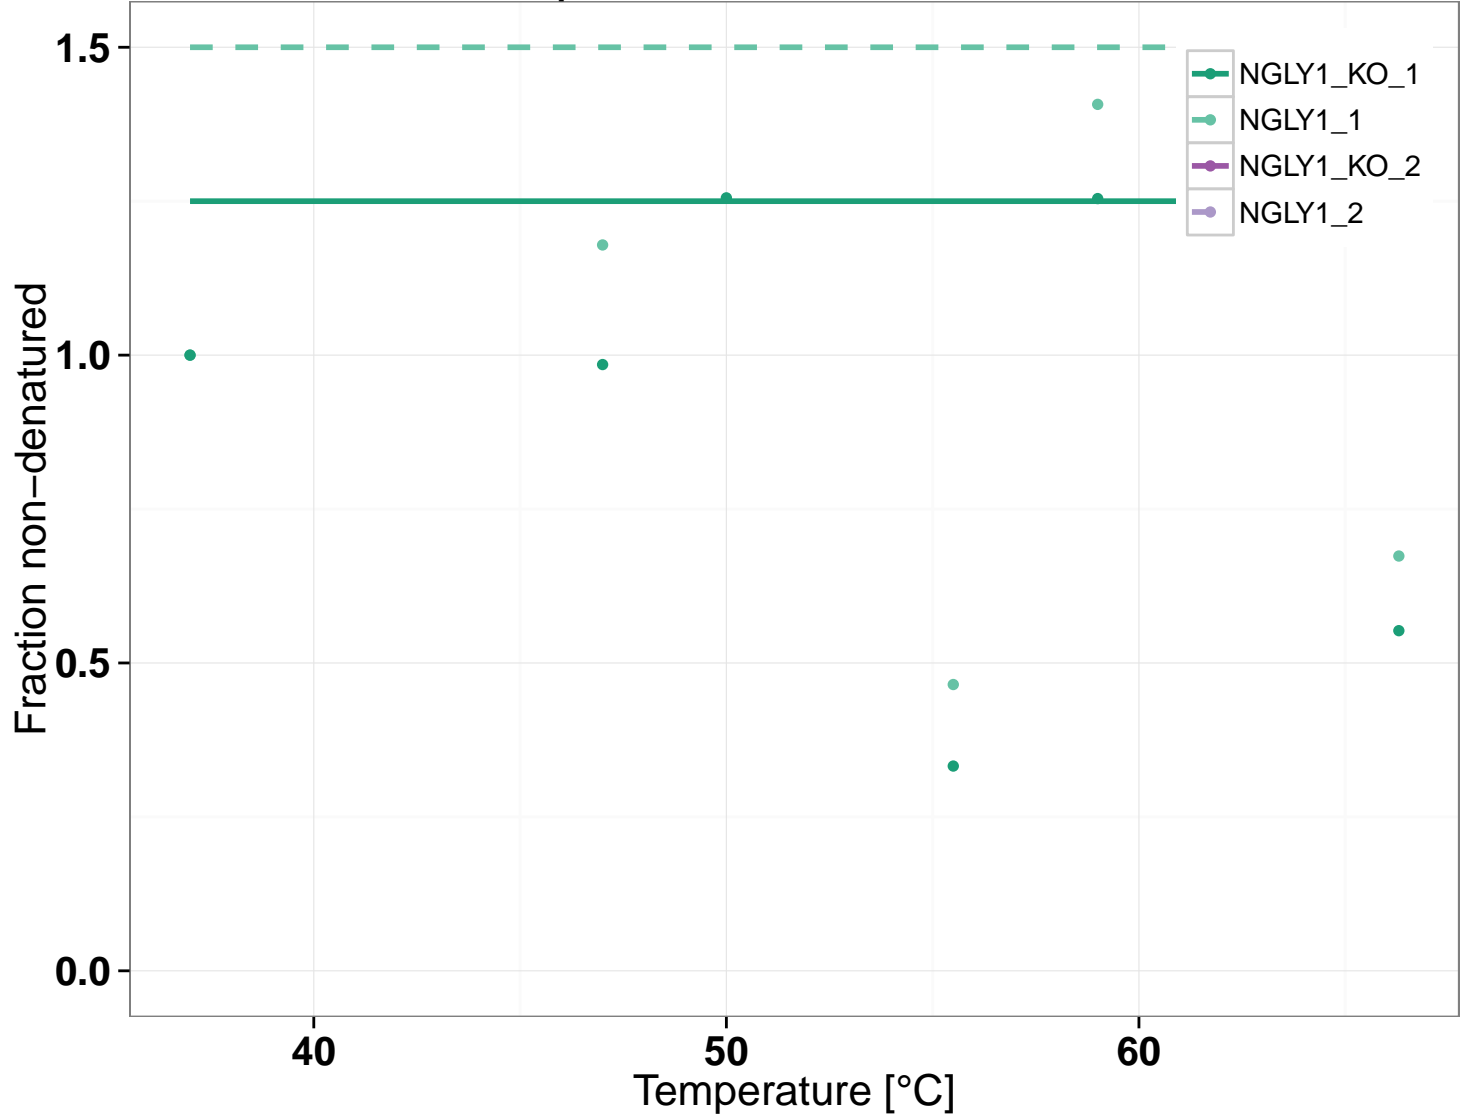

|            | meltPoint | slope | plateau | R2    |
|------------|-----------|-------|---------|-------|
| NGLY1_KO_1 | -         | -     | 1.5     | -0.21 |
| NGLY1_1    | -         | -     | 1.5     | -0.22 |
| NGLY1_KO_2 | -         | -     | -       | -     |
| NGLY1_2    | -         | -     | -       | -     |

Supplement: Supplementary file 495 [file 1]

# IPI00871254.1|SPATA7

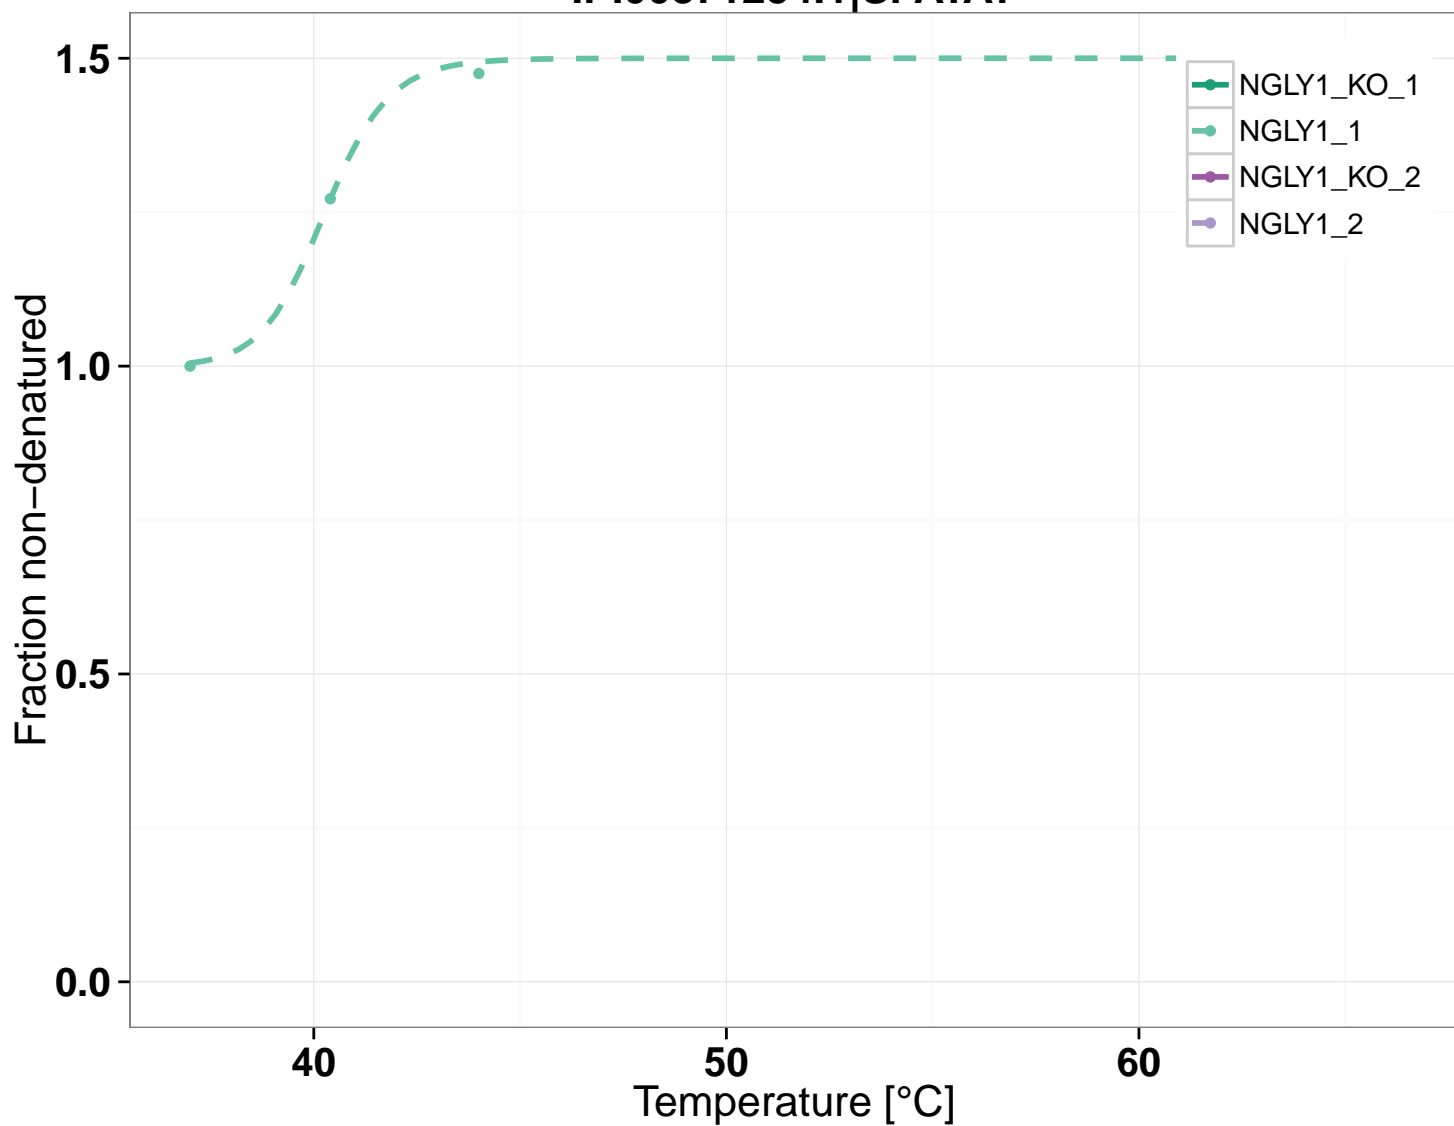

|            | meltPoint | slope | plateau | R2    |
|------------|-----------|-------|---------|-------|
| NGLY1_KO_1 | —         | —     | —       | —     |
| NGLY1_1    | —         | 0.16  | 1.5     | −0.79 |
| NGLY1_KO_2 | —         | —     | —       | —     |
| NGLY1_2    | —         | —     | —       | —     |

Supplement: Supplementary file 496 [file 1]

IPI00013862.7|DTYMK

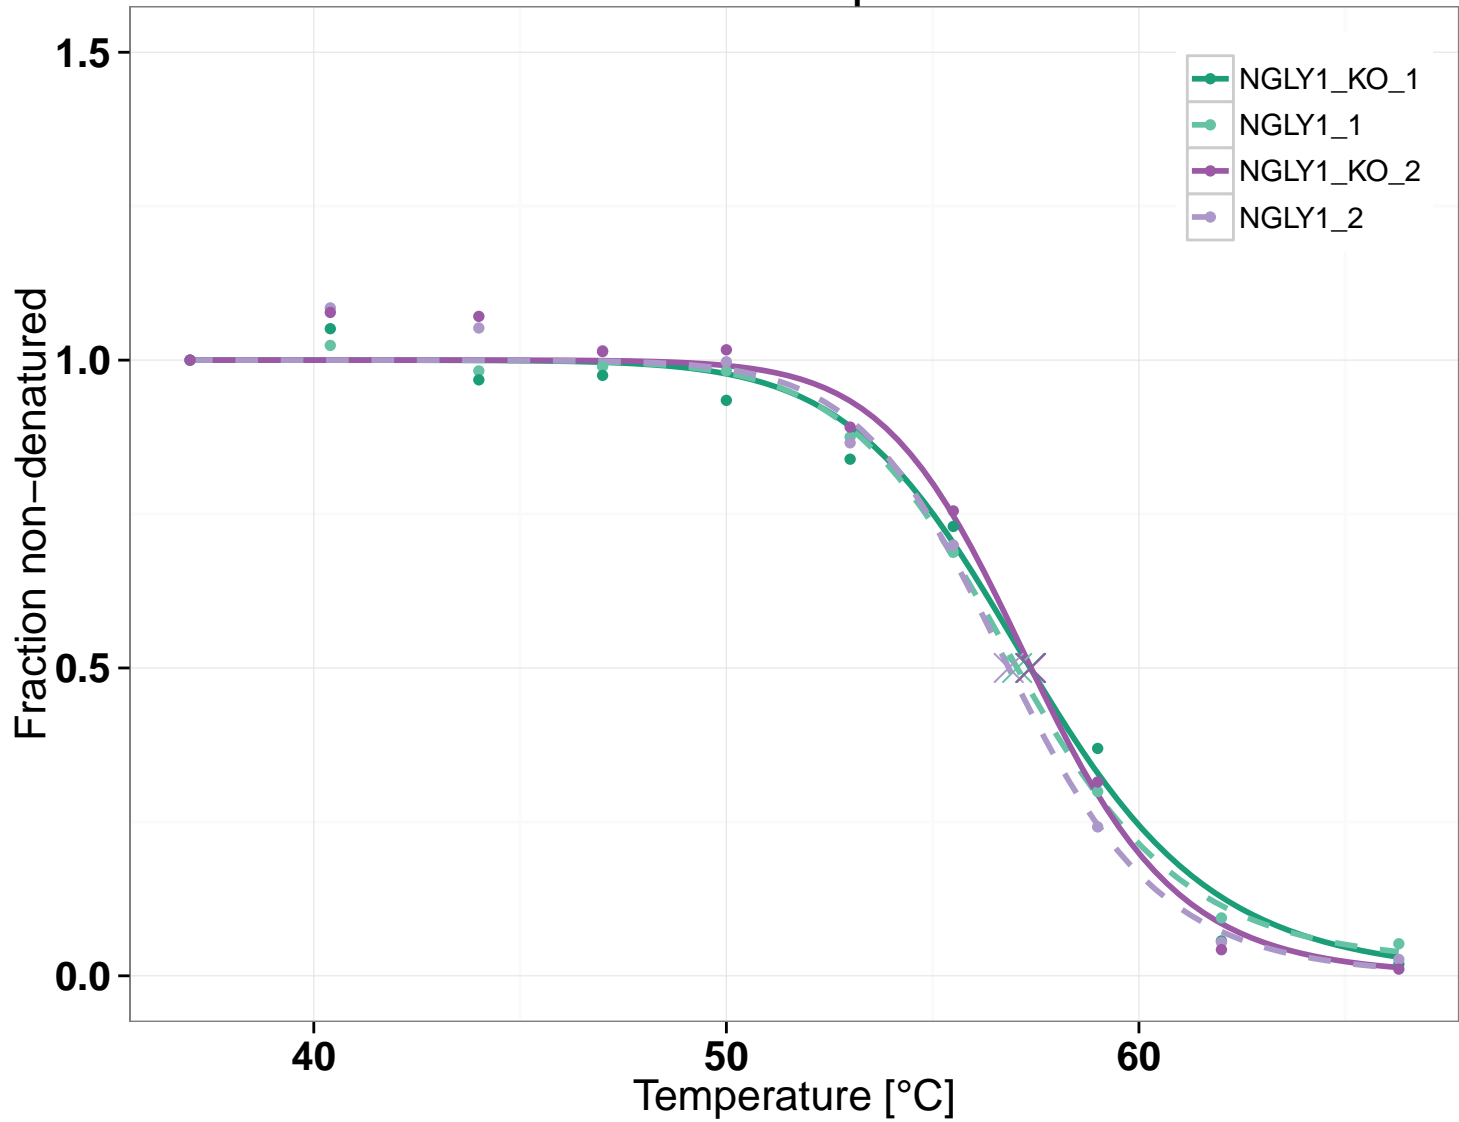

|            | meltPoint | slope | plateau | R2   |
|------------|-----------|-------|---------|------|
| NGLY1_KO_1 | 57.36     | -0.11 | 0       | 0.99 |
| NGLY1_1    | 57.05     | -0.12 | 0.02    | 1    |
| NGLY1_KO_2 | 57.39     | -0.14 | 0       | 0.99 |
| NGLY1_2    | 56.84     | -0.14 | 0       | 0.99 |

Supplement: Supplementary file 497 [file 1]

IPI00465373.2|CCBL2

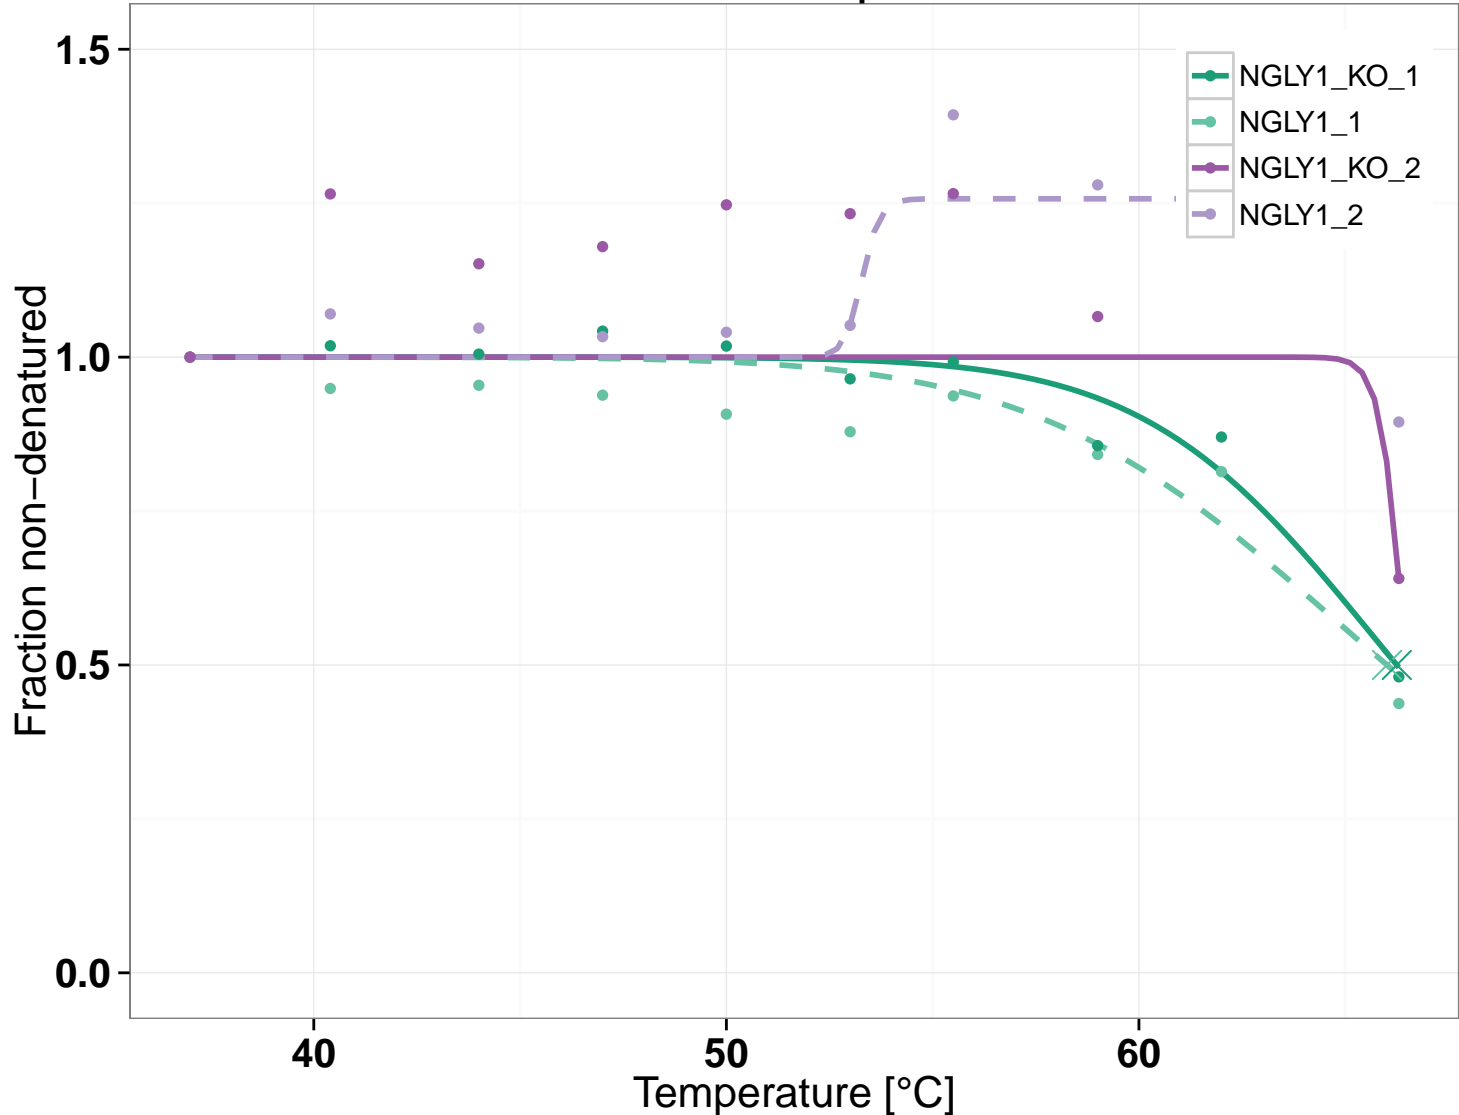

|            | meltPoint | slope  | plateau | R2    |
|------------|-----------|--------|---------|-------|
| NGLY1_KO_1 | 66.25     | -0.082 | 0       | 0.95  |
| NGLY1_1    | 66.01     | -0.058 | 0       | 0.85  |
| NGLY1_KO_2 | -         | -      | 0       | -0.23 |
| NGLY1_2    | -         | 0.3    | 1.26    | 0.34  |

Supplement: Supplementary file 498 [file 1]

IPI00043516.6|ZNF407

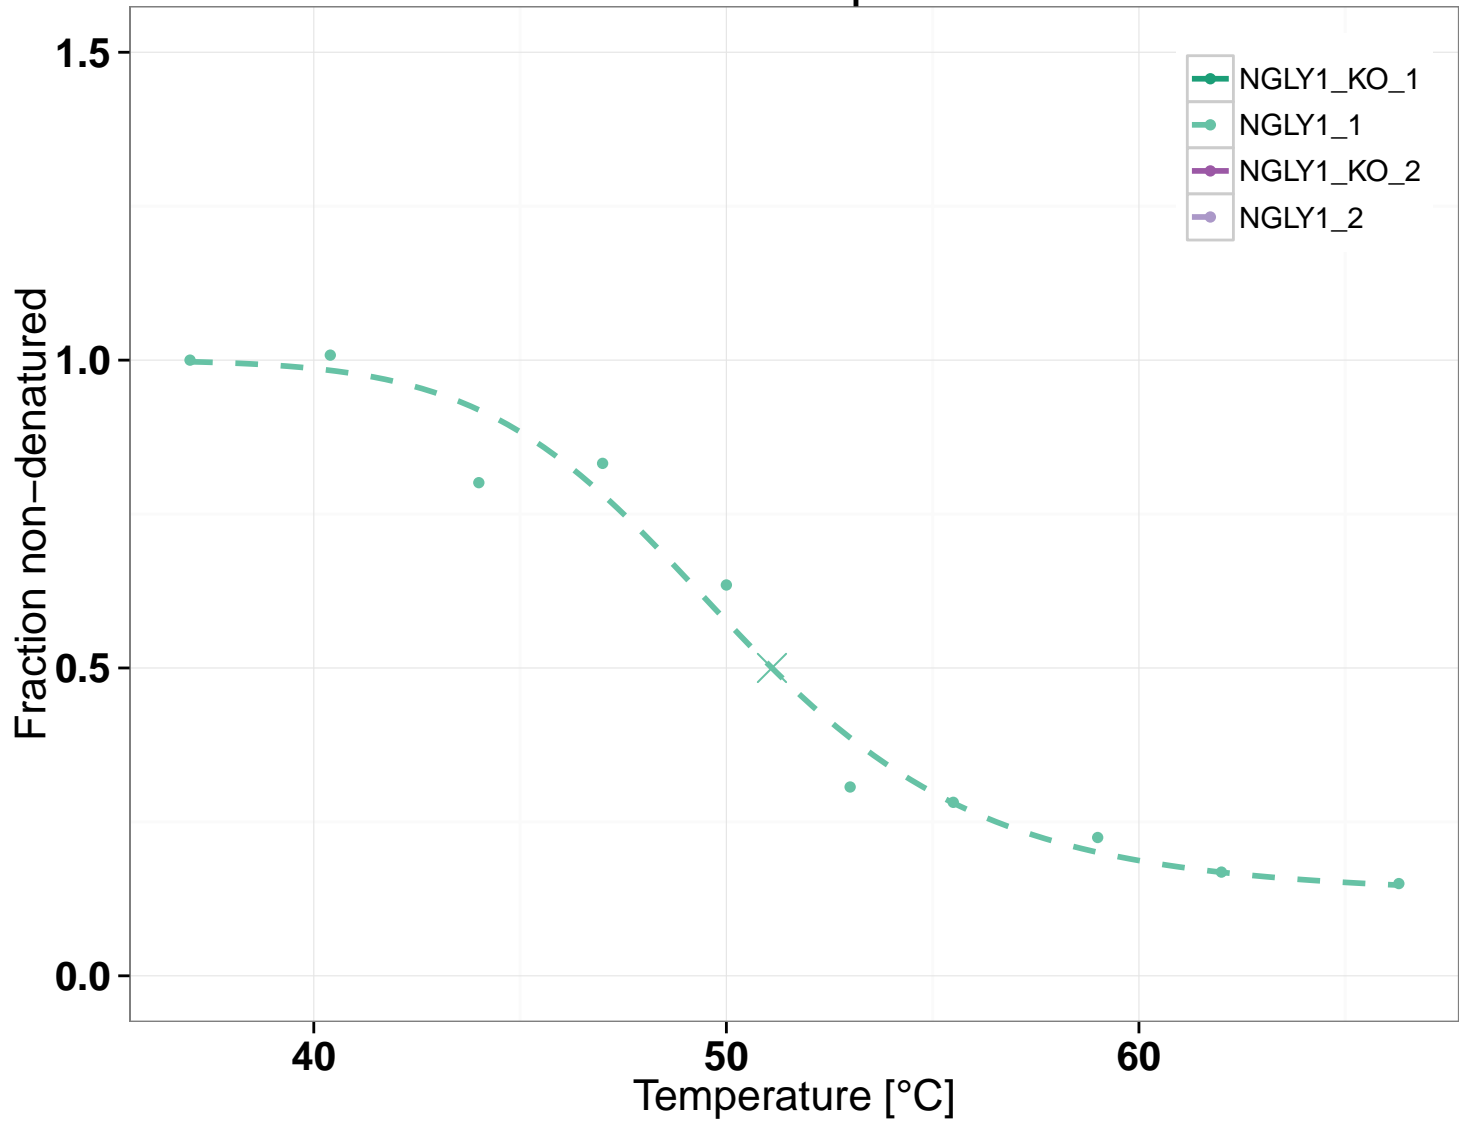

|            | meltPoint | slope  | plateau | R2   |
|------------|-----------|--------|---------|------|
| NGLY1_KO_1 | –         | –      | –       | –    |
| NGLY1_1    | 51.11     | –0.072 | 0.13    | 0.98 |
| NGLY1_KO_2 | –         | –      | –       | –    |
| NGLY1_2    | –         | –      | –       | –    |

Supplement: Supplementary file 499 [file 1]

IPI00005142.1|FGFR1

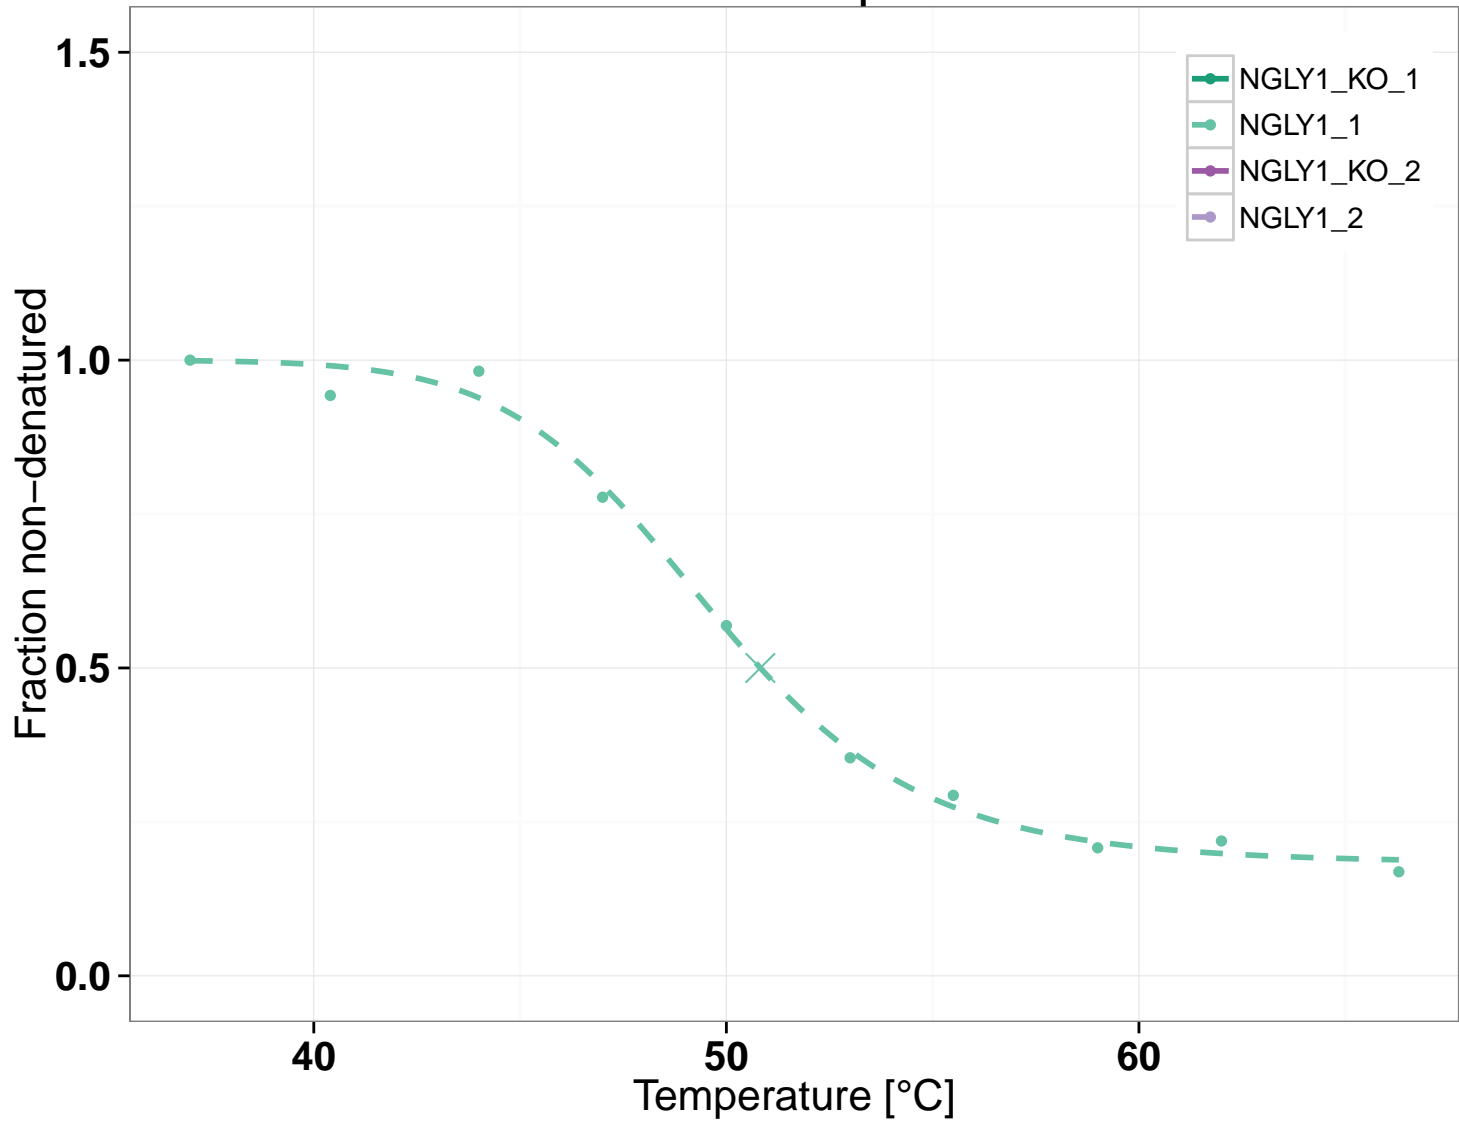

|            | meltPoint | slope  | plateau | R2   |
|------------|-----------|--------|---------|------|
| NGLY1_KO_1 | -         | -      | -       | -    |
| NGLY1_1    | 50.82     | -0.082 | 0.18    | 0.99 |
| NGLY1_KO_2 | -         | -      | -       | -    |
| NGLY1_2    | -         | -      | -       | -    |

Supplement: Supplementary file 500 [file 1]

IPI00018606.4|CSGLCA-T

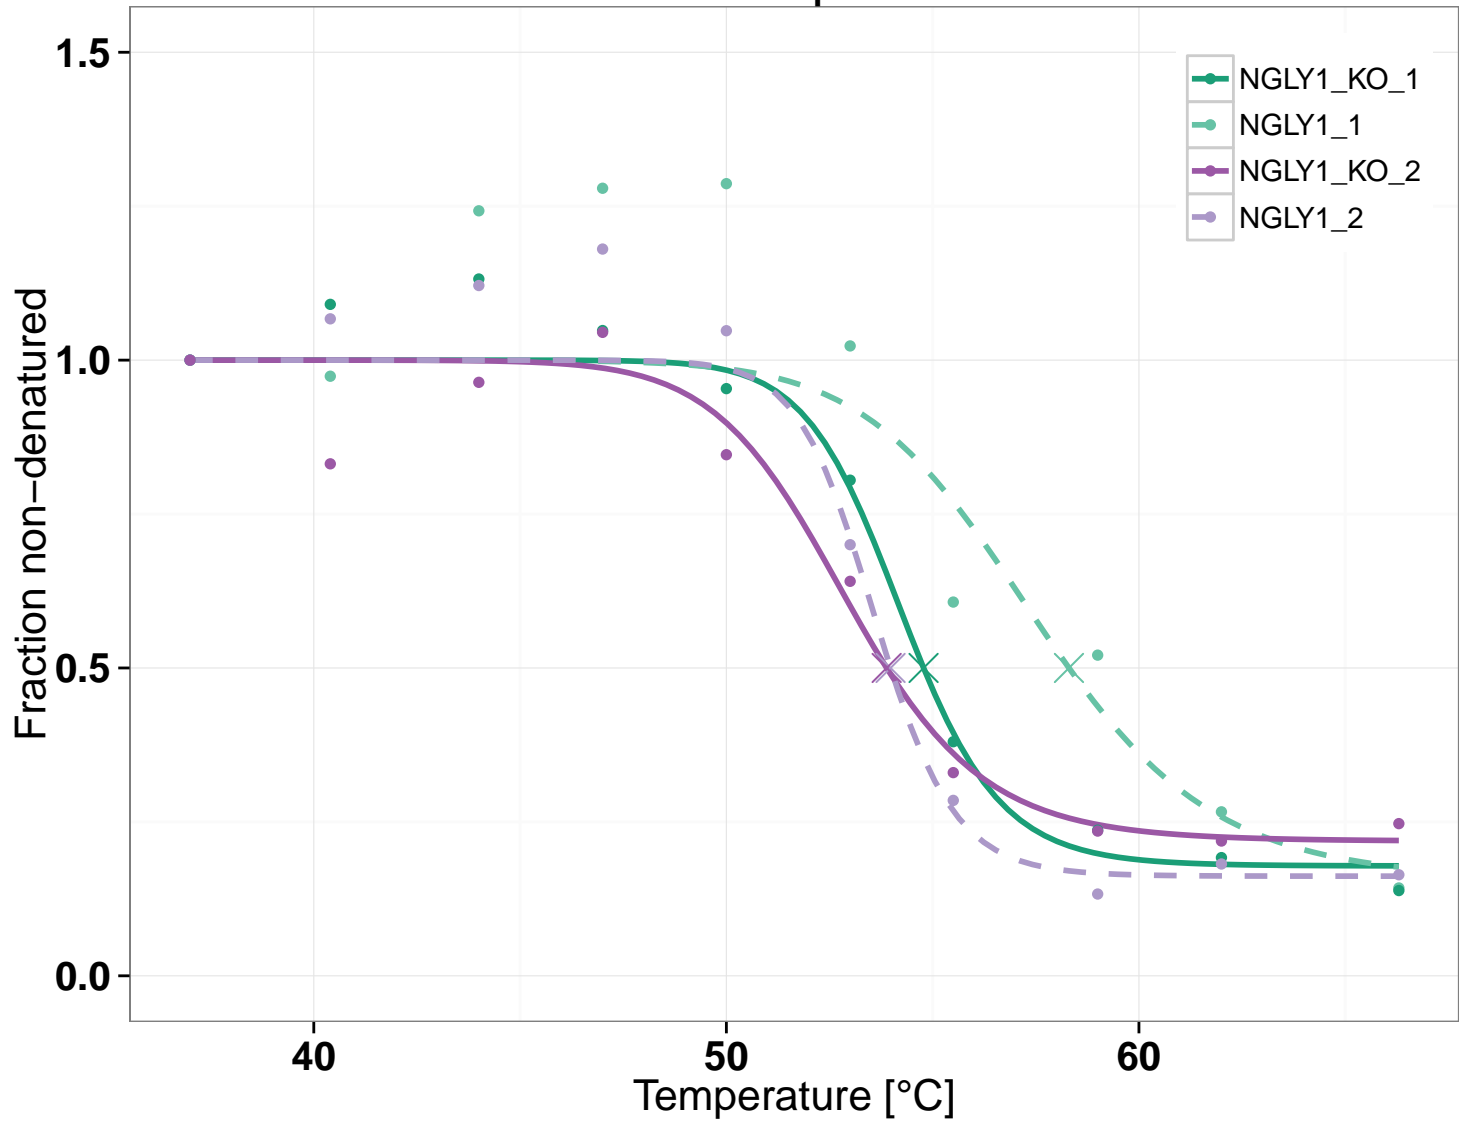

|            | meltPoint | slope | plateau | R2   |
|------------|-----------|-------|---------|------|
| NGLY1_KO_1 | 54.78     | -0.17 | 0.18    | 0.98 |
| NGLY1_1    | 58.3      | -0.1  | 0.15    | 0.83 |
| NGLY1_KO_2 | 53.89     | -0.12 | 0.22    | 0.96 |
| NGLY1_2    | 53.98     | -0.22 | 0.16    | 0.97 |

Supplement: Supplementary file 501 [file 1]
