# Supplementary material (part 6 of 85)
Source: publisher figshare collection journal article supplement (https://gsajournals.figshare.com/articles/dataset/_/12014913)

IPI00002232.2|TAOK1

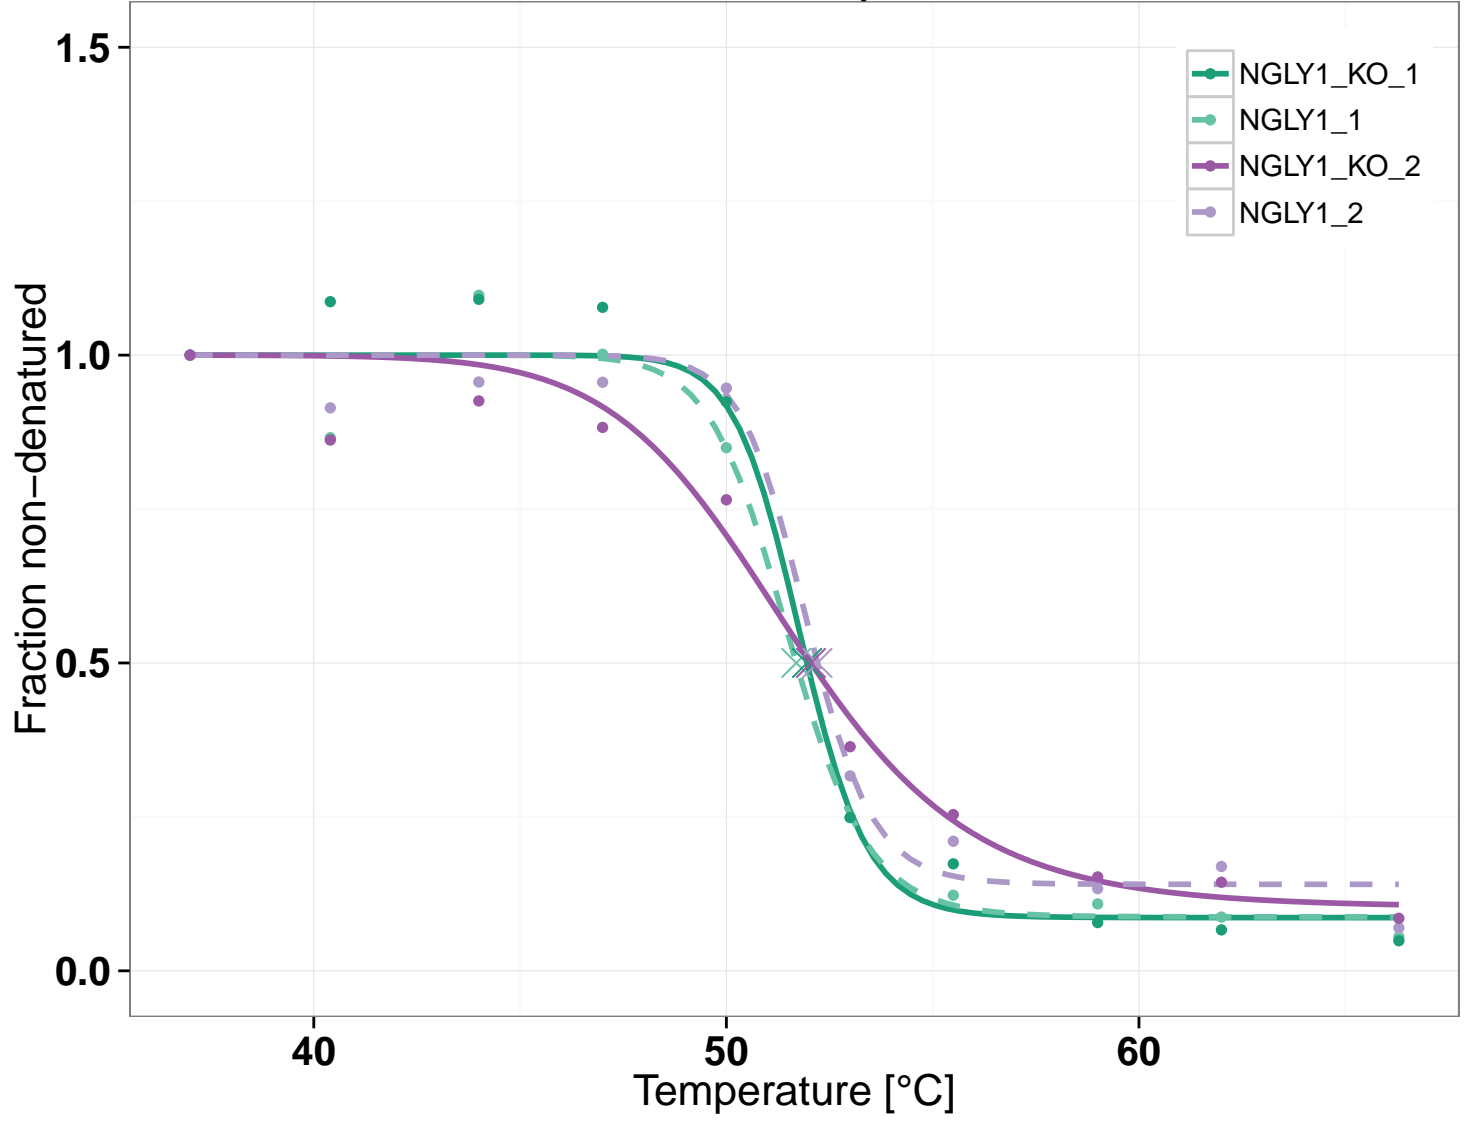

|            | meltPoint | slope | plateau | R2   |
|------------|-----------|-------|---------|------|
| NGLY1_KO_1 | 51.95     | -0.28 | 0.09    | 0.99 |
| NGLY1_1    | 51.69     | -0.24 | 0.09    | 0.98 |
| NGLY1_KO_2 | 52.05     | -0.1  | 0.1     | 0.98 |
| NGLY1_2    | 52.21     | -0.27 | 0.14    | 0.99 |

Supplement: Supplementary file 502 [file 1]

# IPI00025869.1|GLA

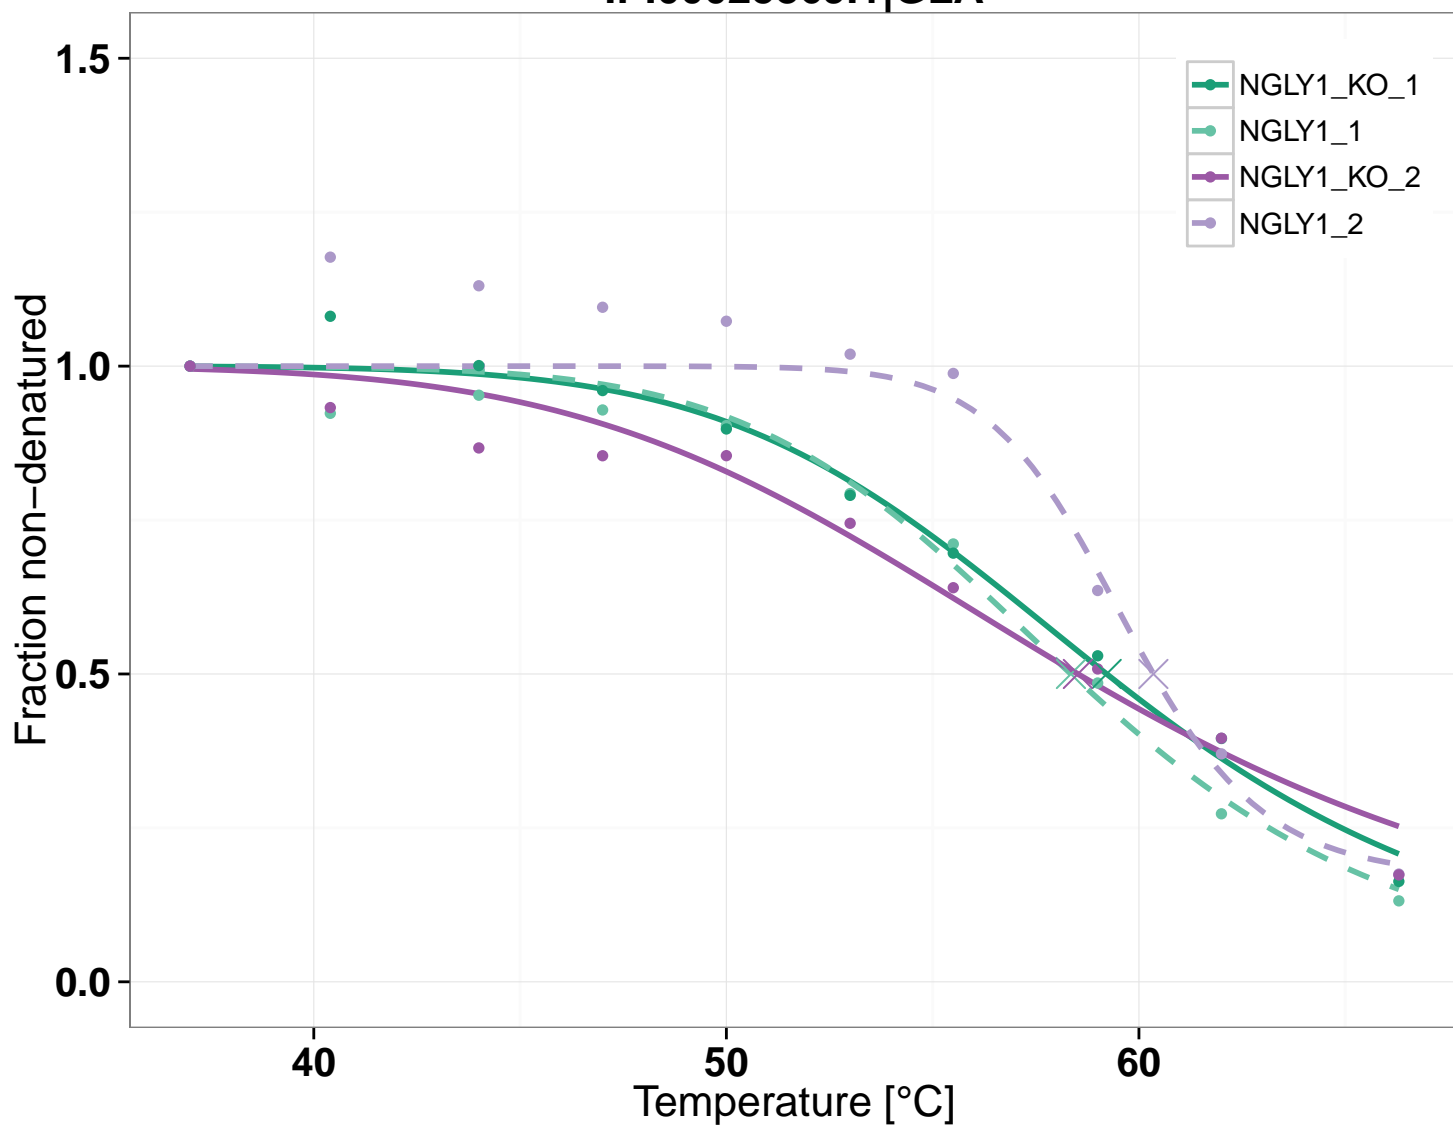

|            | meltPoint | slope  | plateau | R2   |
|------------|-----------|--------|---------|------|
| NGLY1_KO_1 | 59.22     | -0.054 | 0       | 0.99 |
| NGLY1_1    | 58.35     | -0.063 | 0       | 0.99 |
| NGLY1_KO_2 | 58.52     | -0.041 | 0       | 0.97 |
| NGLY1_2    | 60.35     | -0.13  | 0.17    | 0.94 |

Supplement: Supplementary file 503 [file 1]

IPI00465370.2|RNF219

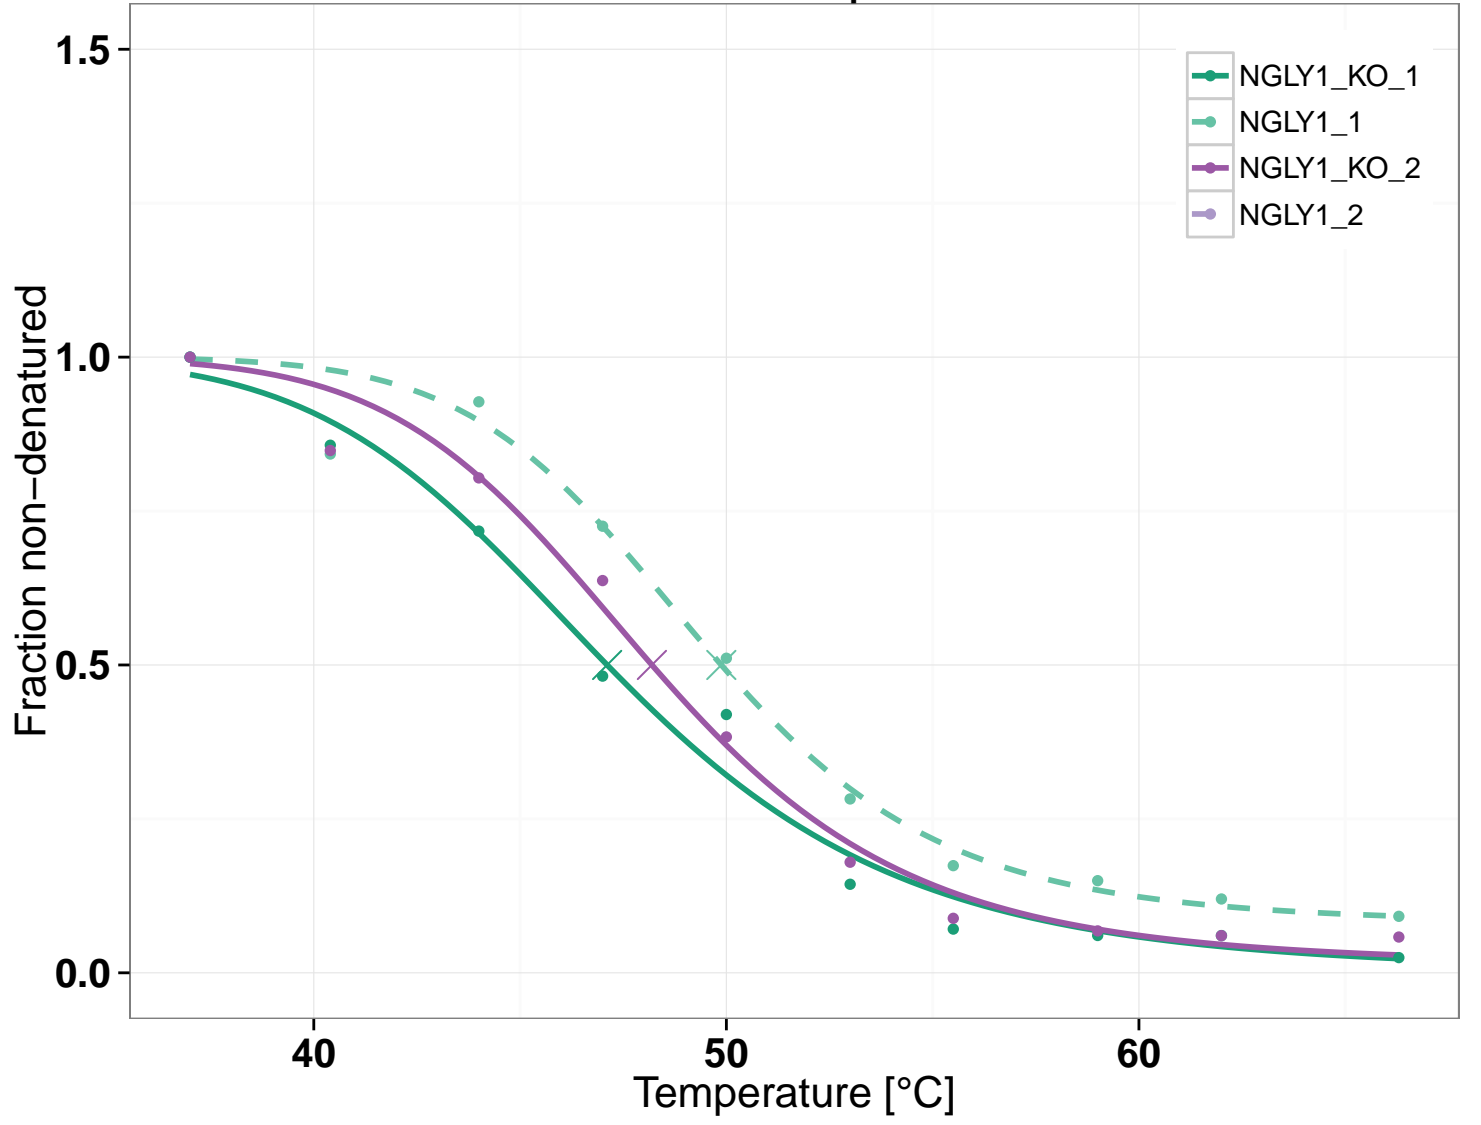

|            | meltPoint | slope  | plateau | R2   |
|------------|-----------|--------|---------|------|
| NGLY1_KO_1 | 47.11     | -0.07  | 0       | 0.99 |
| NGLY1_1    | 49.88     | -0.08  | 0.08    | 0.98 |
| NGLY1_KO_2 | 48.2      | -0.079 | 0.01    | 0.99 |
| NGLY1_2    | -         | -      | -       | -    |

Supplement: Supplementary file 504 [file 1]

IPI00003817.3|ARHGDIB

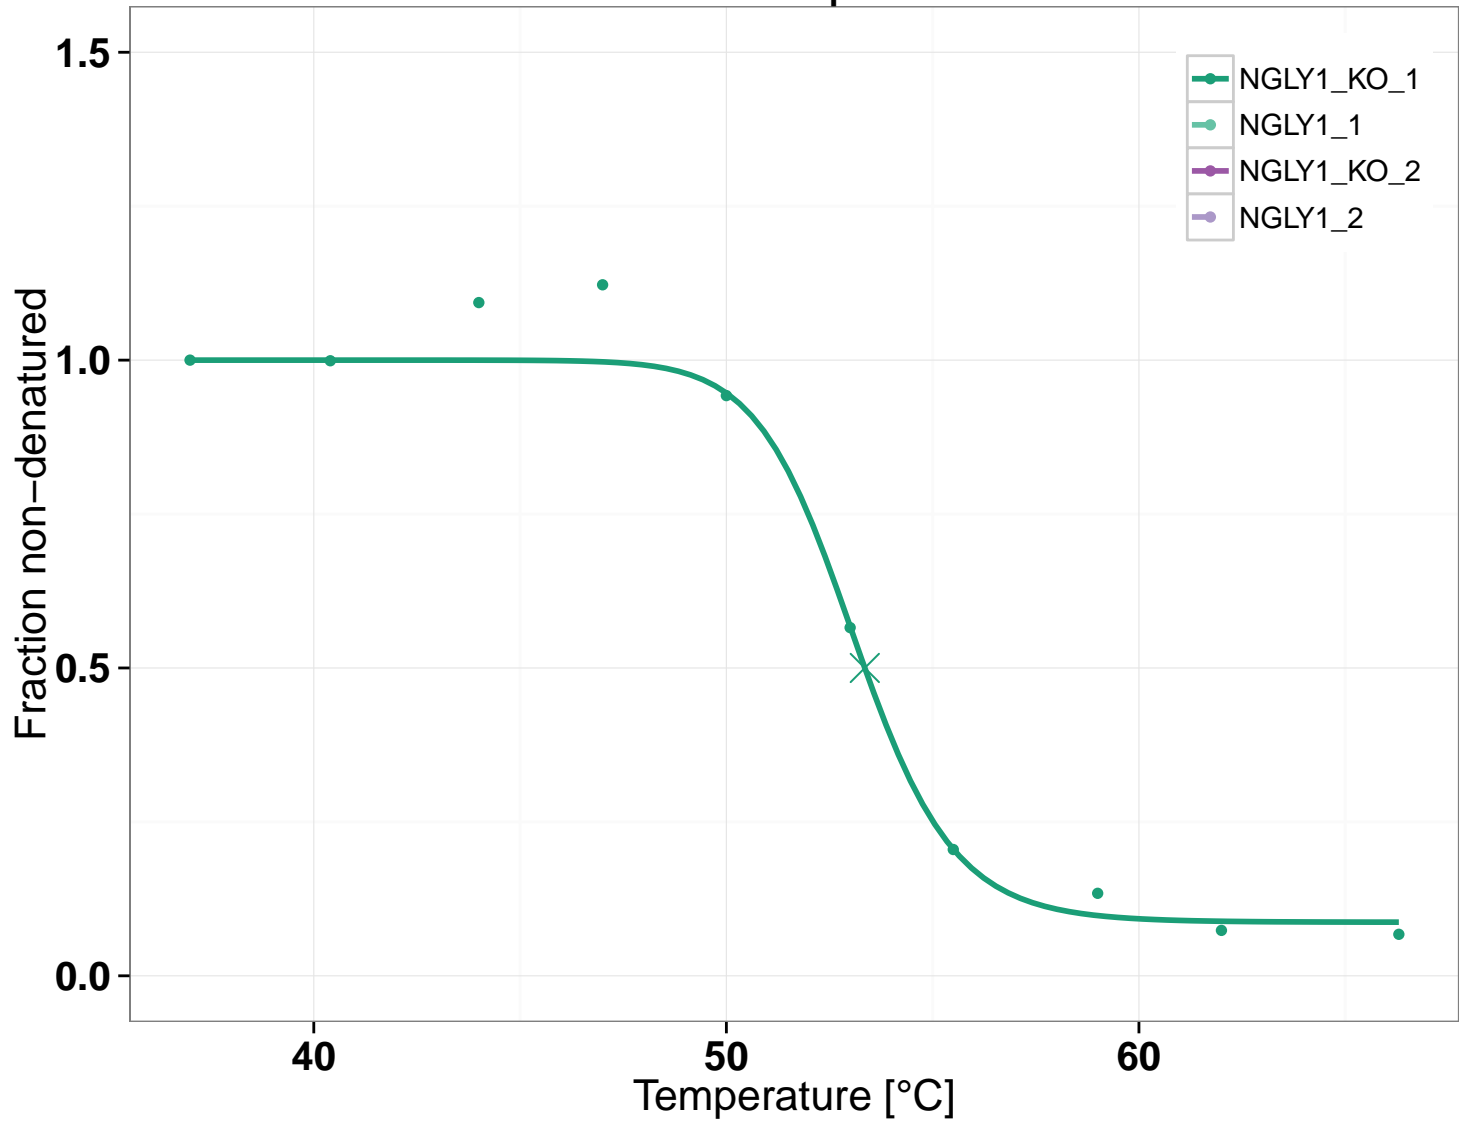

|            | meltPoint | slope | plateau | R2   |
|------------|-----------|-------|---------|------|
| NGLY1_KO_1 | 53.36     | -0.19 | 0.09    | 0.99 |
| NGLY1_1    | -         | -     | -       | -    |
| NGLY1_KO_2 | -         | -     | -       | -    |
| NGLY1_2    | -         | -     | -       | -    |

Supplement: Supplementary file 505 [file 1]

# IPI00335385.4|DCPS

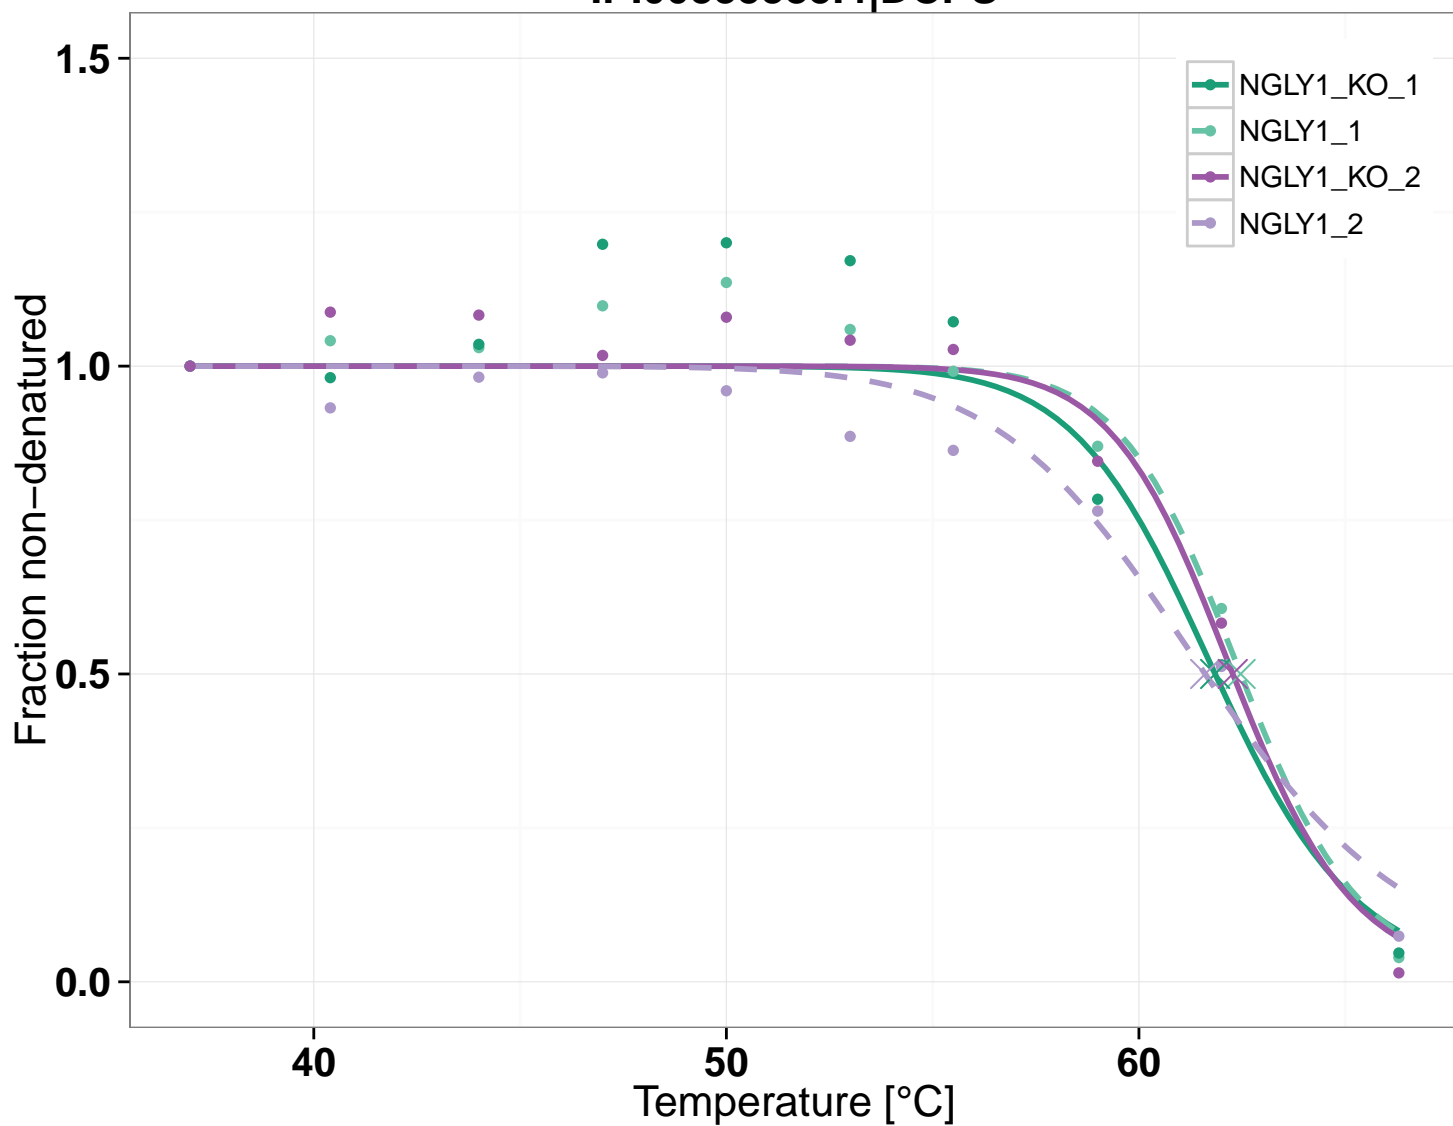

|            | meltPoint | slope  | plateau | R2   |
|------------|-----------|--------|---------|------|
| NGLY1_KO_1 | 61.85     | -0.15  | 0       | 0.9  |
| NGLY1_1    | 62.47     | -0.17  | 0       | 0.96 |
| NGLY1_KO_2 | 62.27     | -0.17  | 0       | 0.97 |
| NGLY1_2    | 61.6      | -0.099 | 0       | 0.96 |

Supplement: Supplementary file 506 [file 1]

IPI00031556.7|U2AF2

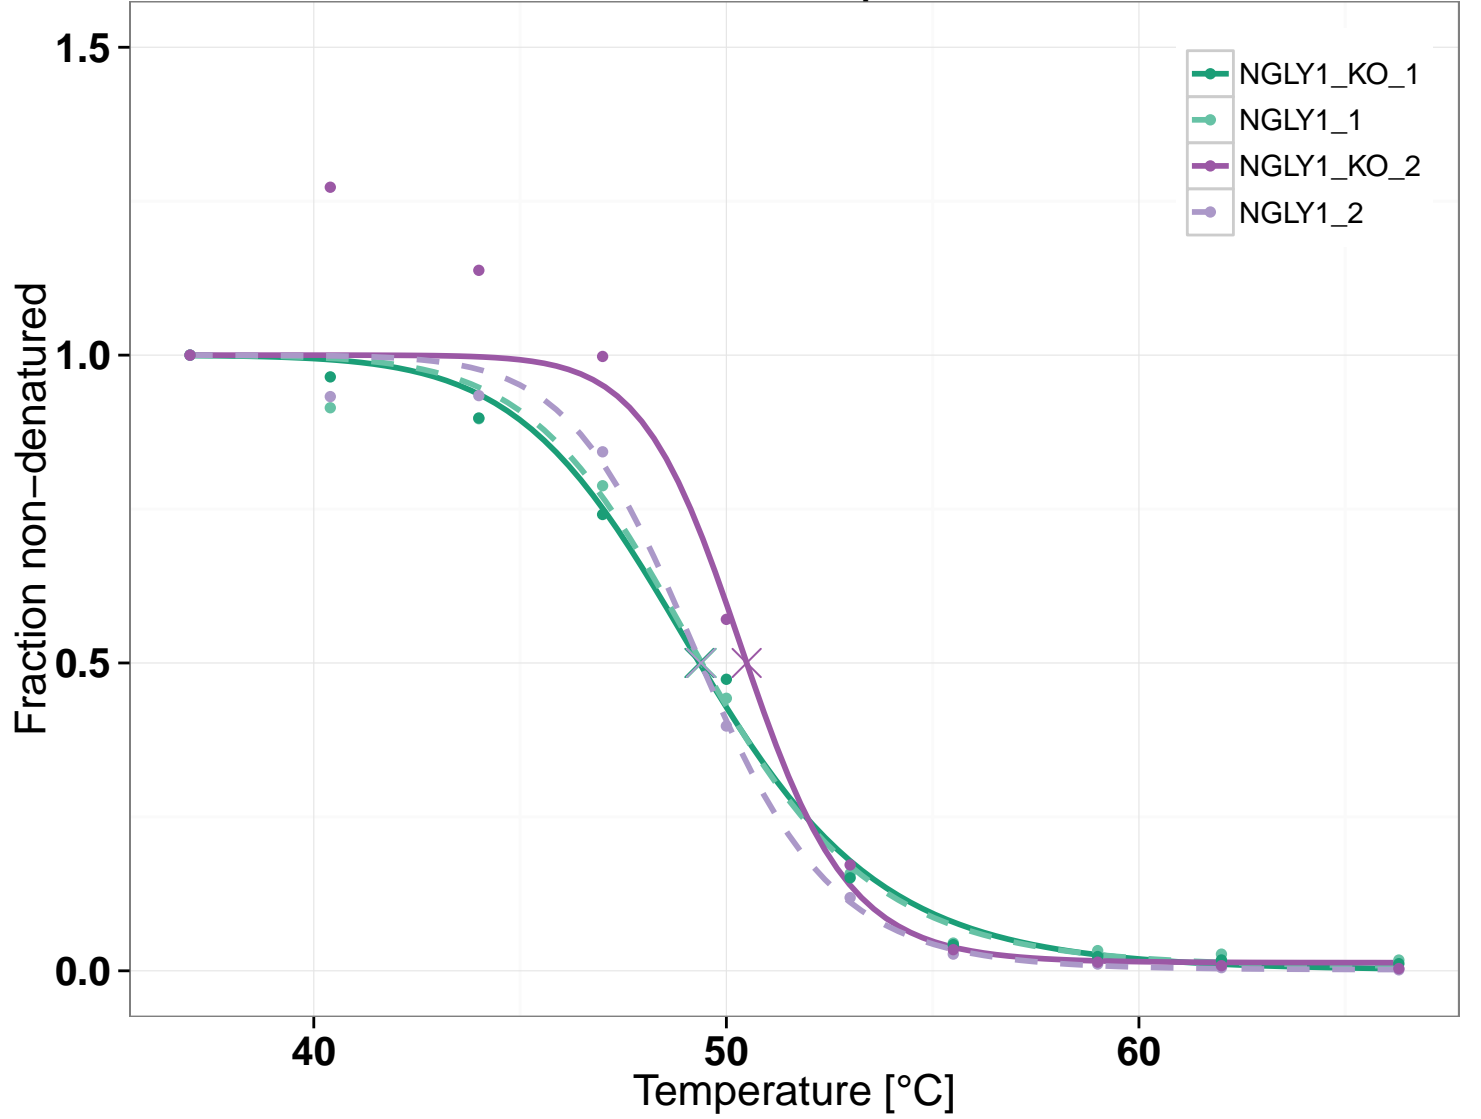

|            | meltPoint | slope | plateau | R2   |
|------------|-----------|-------|---------|------|
| NGLY1_KO_1 | 49.35     | -0.11 | 0       | 1    |
| NGLY1_1    | 49.4      | -0.12 | 0.01    | 0.99 |
| NGLY1_KO_2 | 50.49     | -0.2  | 0.01    | 0.96 |
| NGLY1_2    | 49.38     | -0.16 | 0       | 1    |

Supplement: Supplementary file 507 [file 1]

# IPI00017940.3|LMBRD2

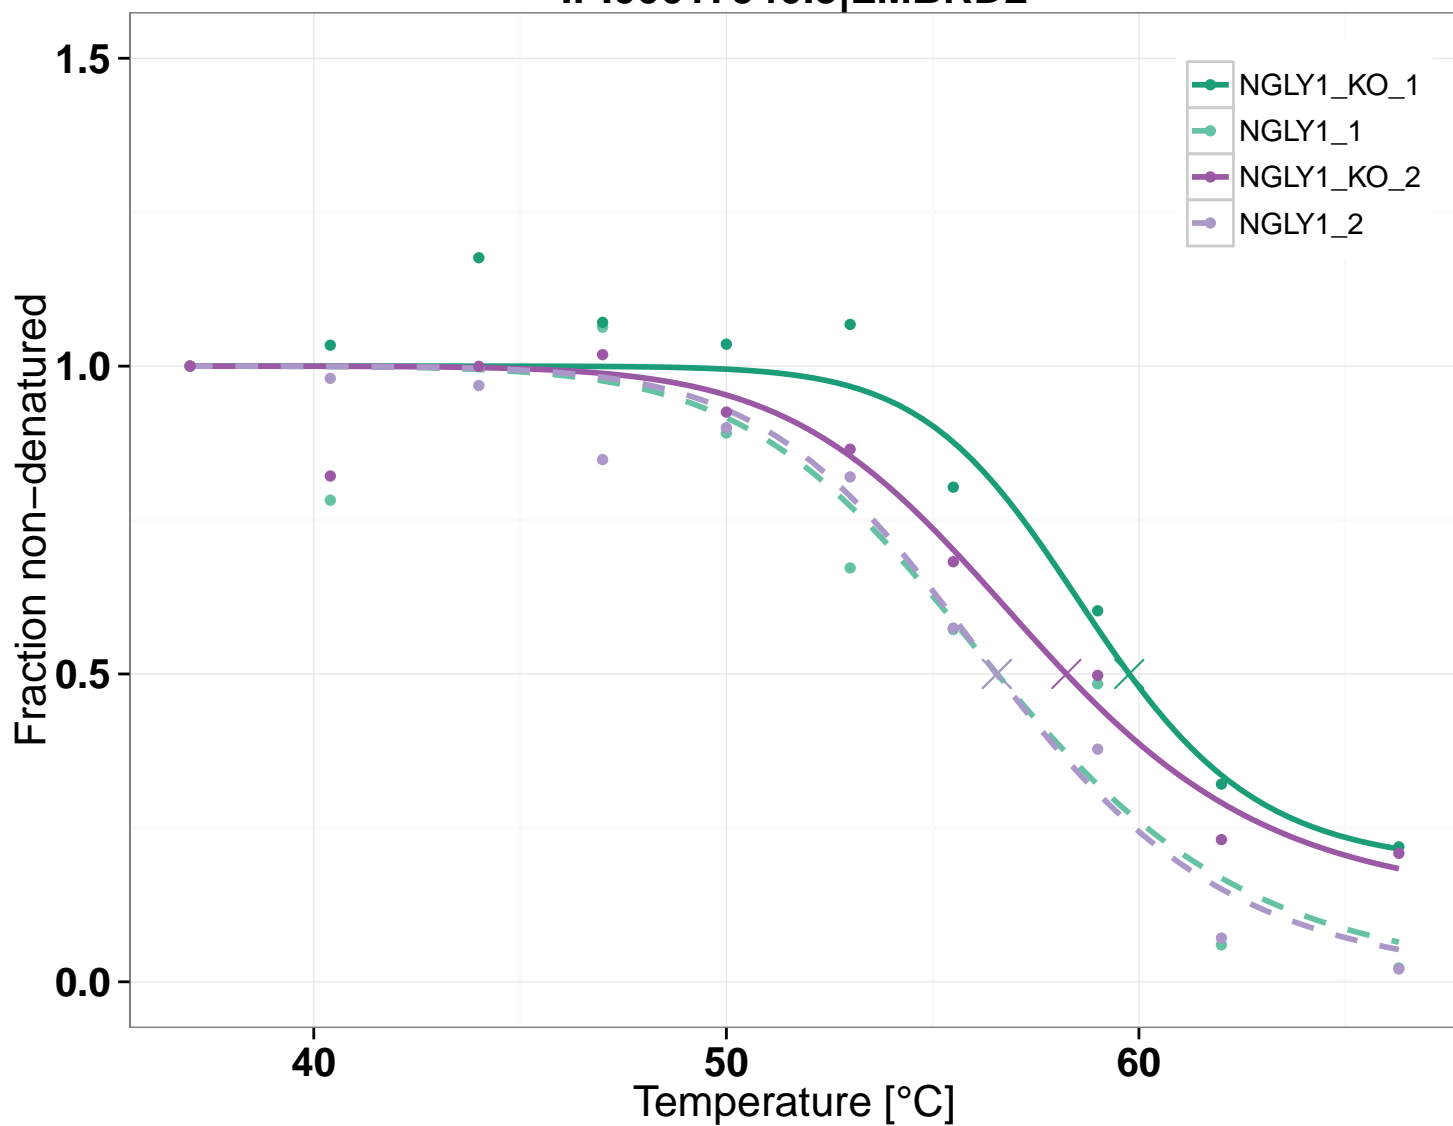

|            | meltPoint | slope  | plateau | R2   |
|------------|-----------|--------|---------|------|
| NGLY1_KO_1 | 59.77     | -0.1   | 0.19    | 0.95 |
| NGLY1_1    | 56.56     | -0.081 | 0       | 0.77 |
| NGLY1_KO_2 | 58.24     | -0.075 | 0.12    | 0.95 |
| NGLY1_2    | 56.55     | -0.088 | 0       | 0.97 |

Supplement: Supplementary file 508 [file 1]

IPI00651738.1|ADI1

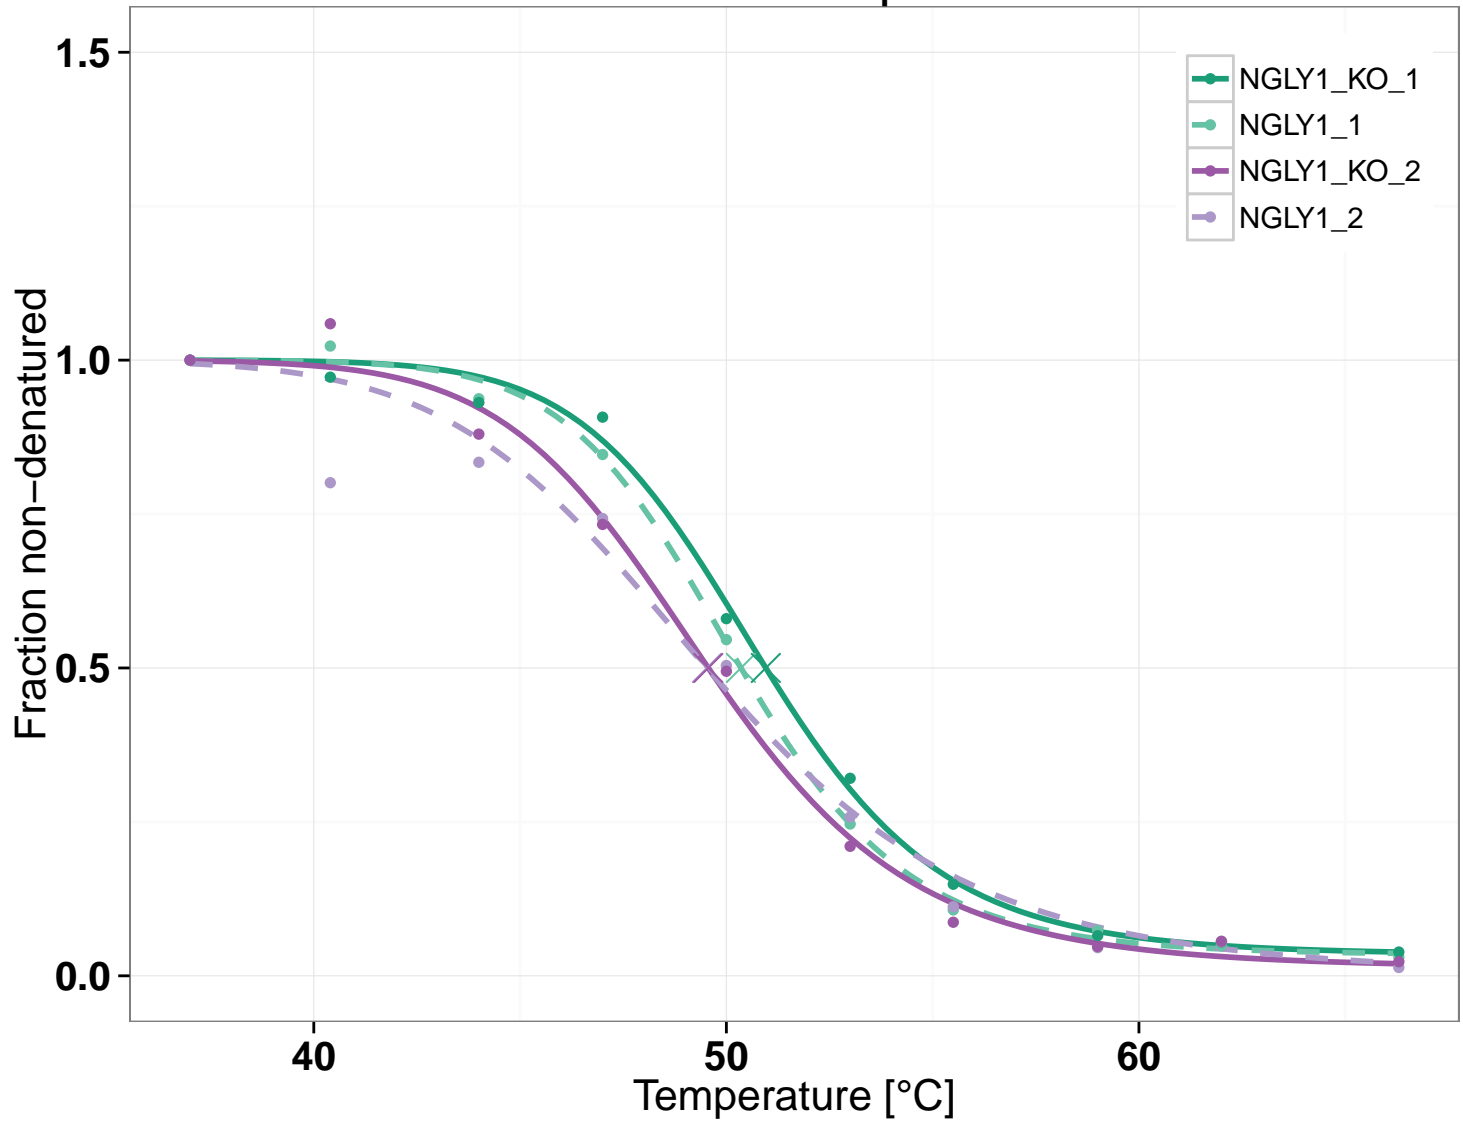

|            | meltPoint | slope  | plateau | R2   |
|------------|-----------|--------|---------|------|
| NGLY1_KO_1 | 50.96     | -0.11  | 0.03    | 1    |
| NGLY1_1    | 50.35     | -0.12  | 0.03    | 1    |
| NGLY1_KO_2 | 49.56     | -0.099 | 0.01    | 0.99 |
| NGLY1_2    | 49.53     | -0.078 | 0       | 0.97 |

Supplement: Supplementary file 509 [file 1]

IPI00029081.3|LIG3

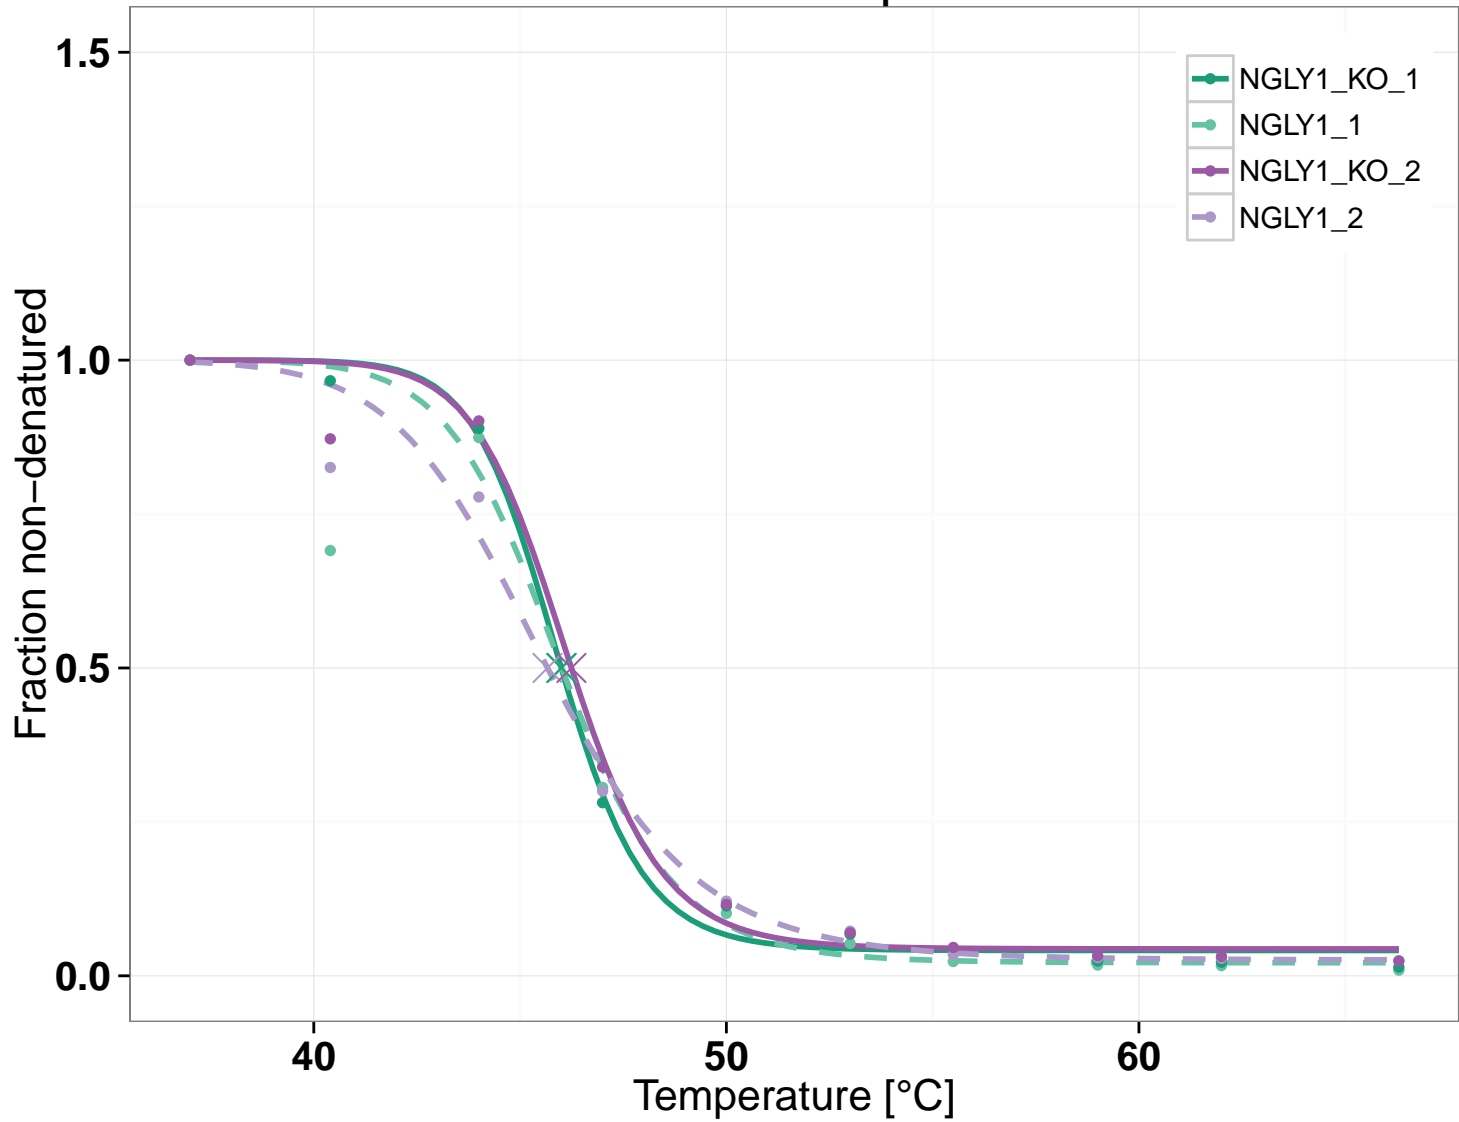

|            | meltPoint | slope | plateau | R2   |
|------------|-----------|-------|---------|------|
| NGLY1_KO_1 | 46        | -0.23 | 0.04    | 1    |
| NGLY1_1    | 46.01     | -0.18 | 0.02    | 0.93 |
| NGLY1_KO_2 | 46.24     | -0.21 | 0.04    | 0.99 |
| NGLY1_2    | 45.66     | -0.13 | 0.03    | 0.98 |

Supplement: Supplementary file 510 [file 1]

IPI00028883.1|NDUFB8

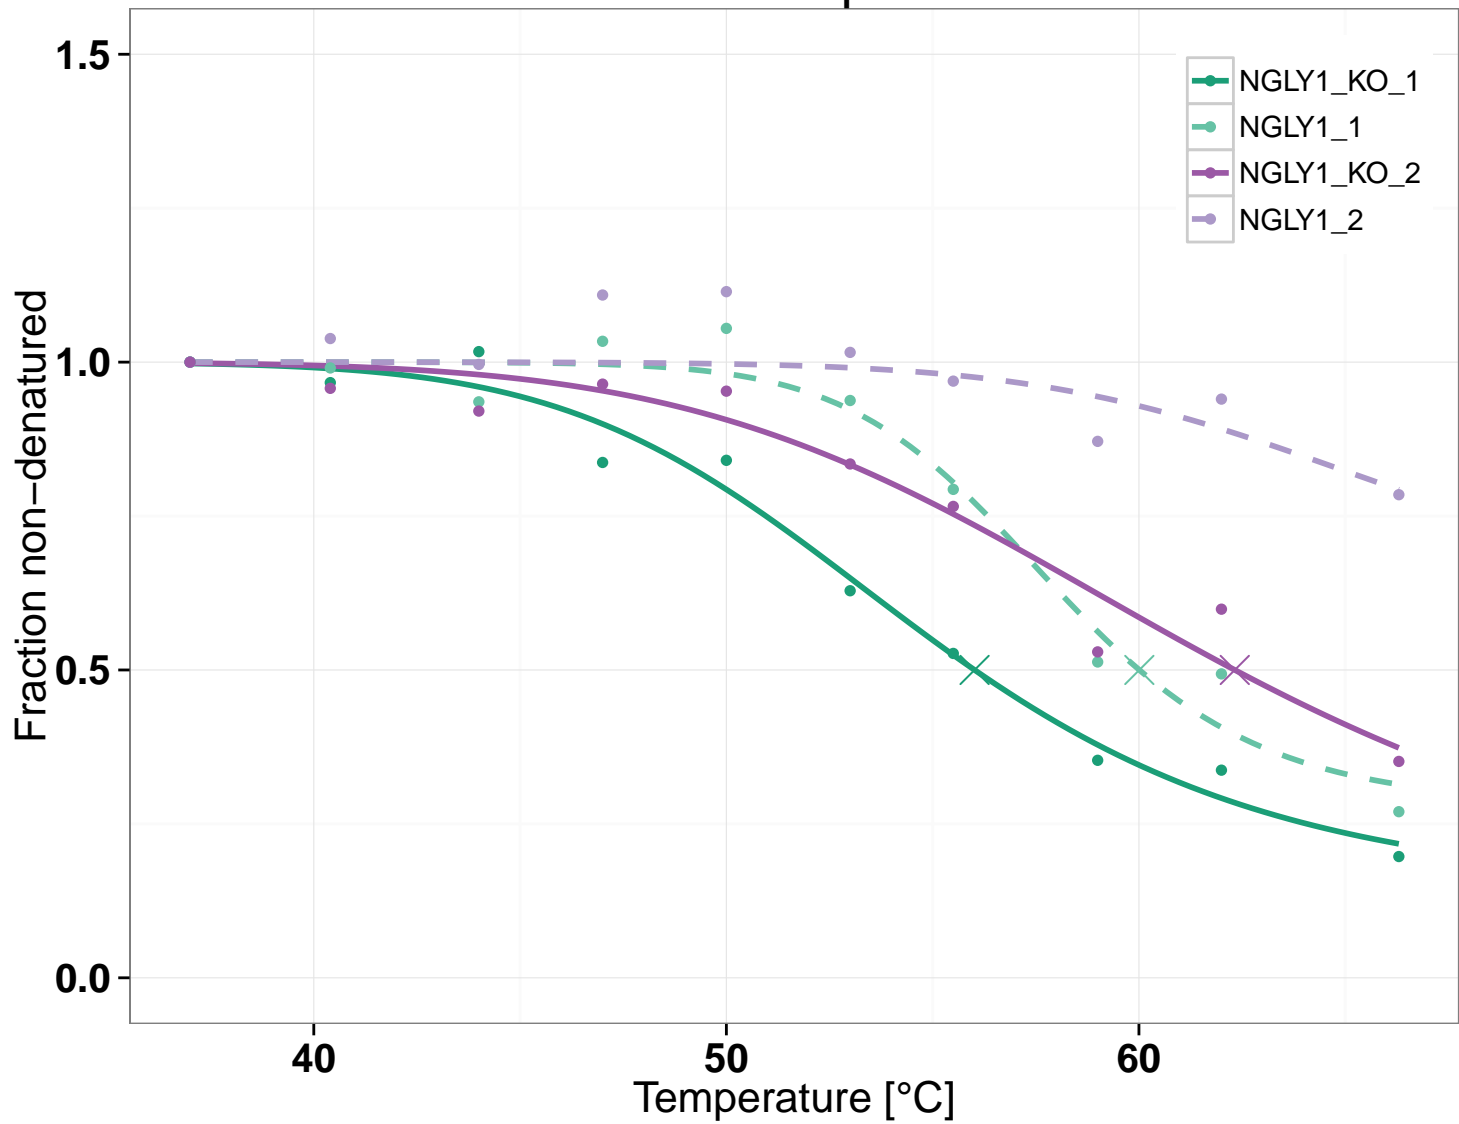

|            | meltPoint | slope  | plateau | R2   |
|------------|-----------|--------|---------|------|
| NGLY1_KO_1 | 56.02     | -0.051 | 0.13    | 0.98 |
| NGLY1_1    | 60.01     | -0.072 | 0.28    | 0.97 |
| NGLY1_KO_2 | 62.32     | -0.038 | 0.06    | 0.95 |
| NGLY1_2    | -         | -0.024 | 0.6     | 0.61 |

Supplement: Supplementary file 511 [file 1]

# IPI00014863.4|SGMS1

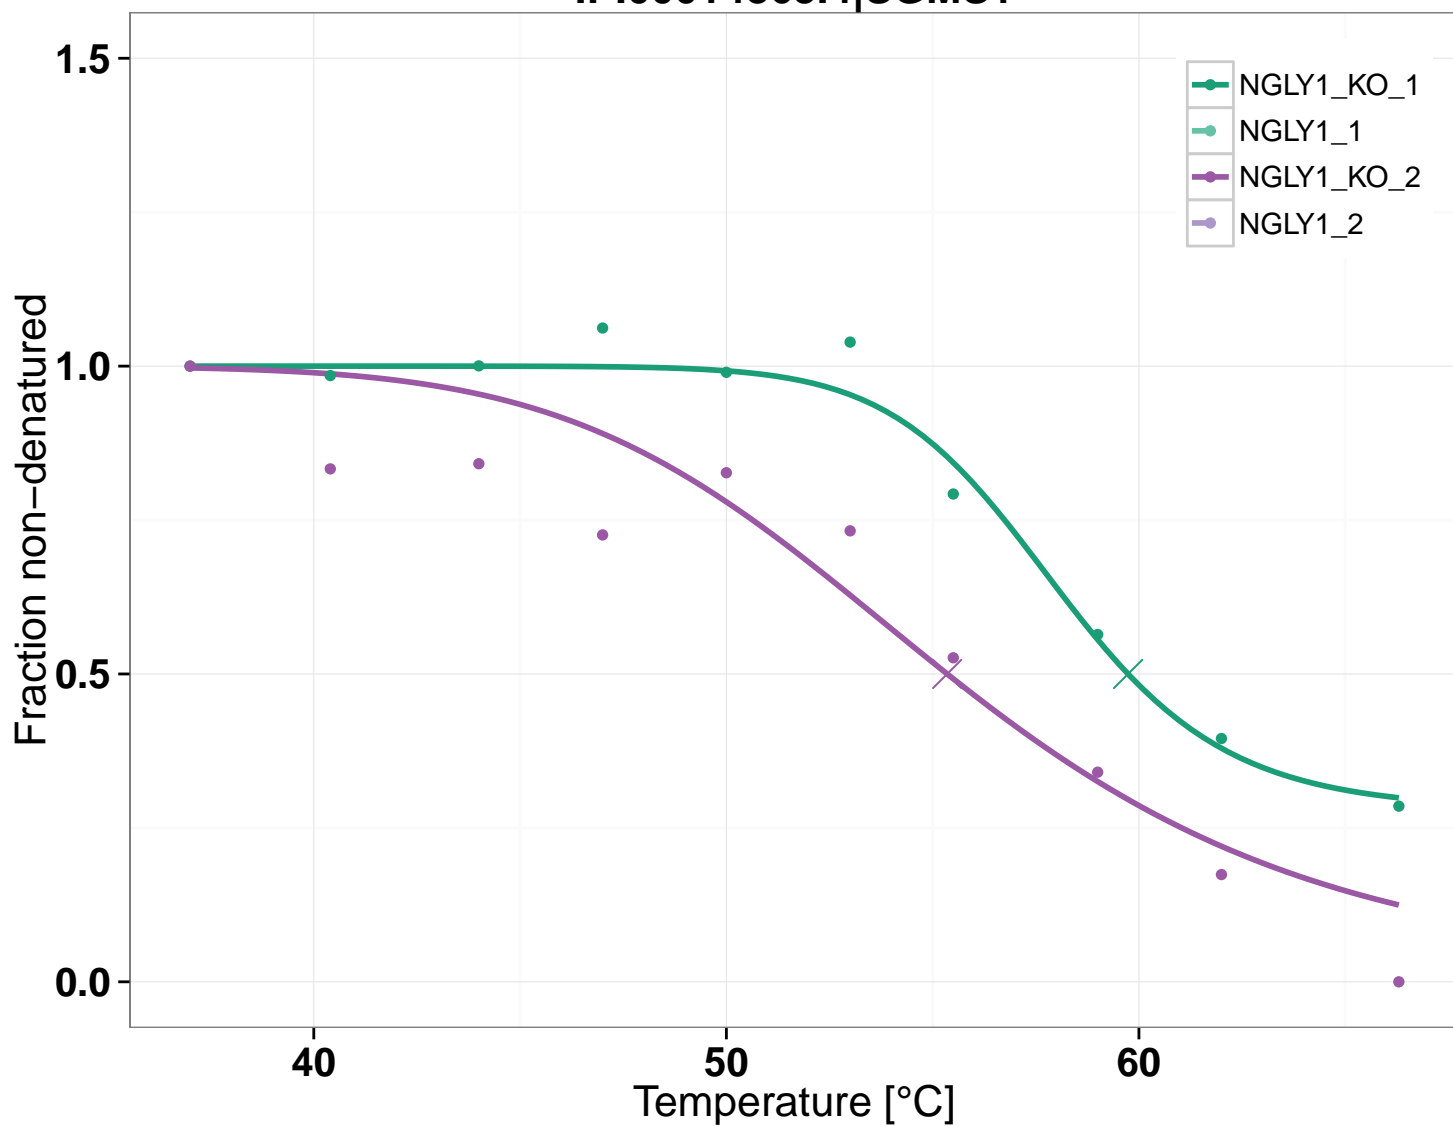

|            | meltPoint | slope  | plateau | R2   |
|------------|-----------|--------|---------|------|
| NGLY1_KO_1 | 59.74     | -0.088 | 0.28    | 0.98 |
| NGLY1_1    | -         | -      | -       | -    |
| NGLY1_KO_2 | 55.35     | -0.055 | 0       | 0.9  |
| NGLY1_2    | -         | -      | -       | -    |

Supplement: Supplementary file 512 [file 1]

IPI00395337.1|FIP1L1

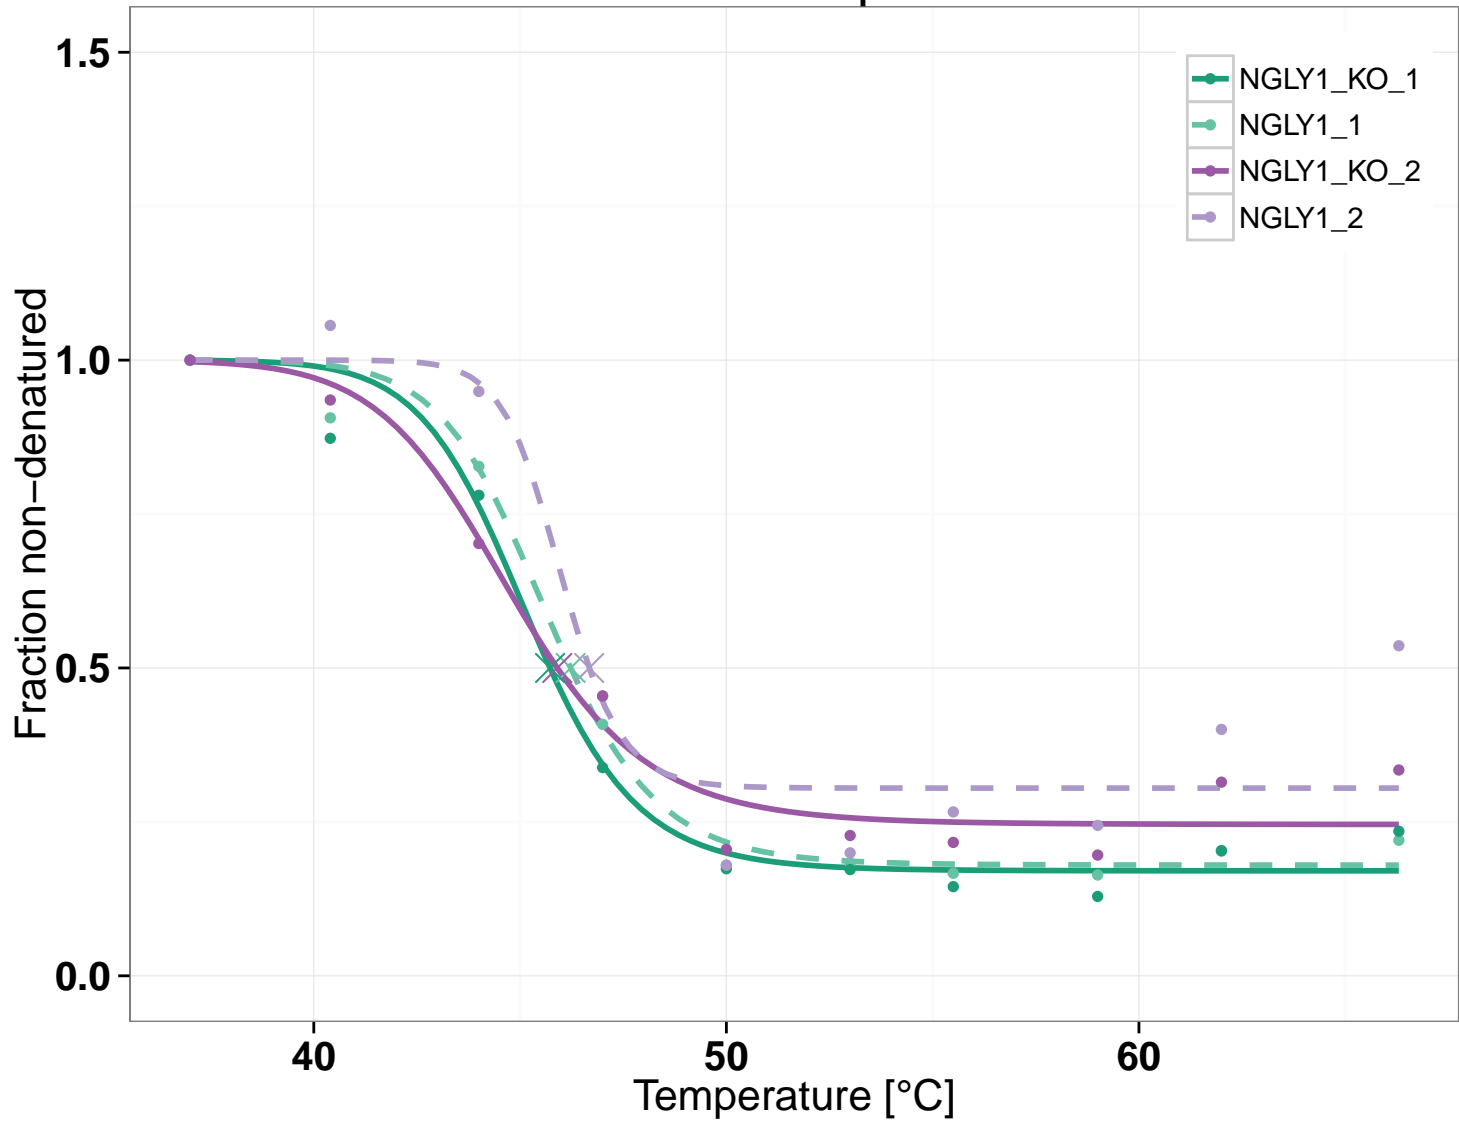

|            | meltPoint | slope | plateau | R2   |
|------------|-----------|-------|---------|------|
| NGLY1_KO_1 | 45.73     | -0.16 | 0.17    | 0.98 |
| NGLY1_1    | 46.23     | -0.16 | 0.18    | 0.99 |
| NGLY1_KO_2 | 45.9      | -0.12 | 0.25    | 0.97 |
| NGLY1_2    | 46.68     | -0.24 | 0.3     | 0.91 |

Supplement: Supplementary file 513 [file 1]

IPI00552881.1|FUND C2

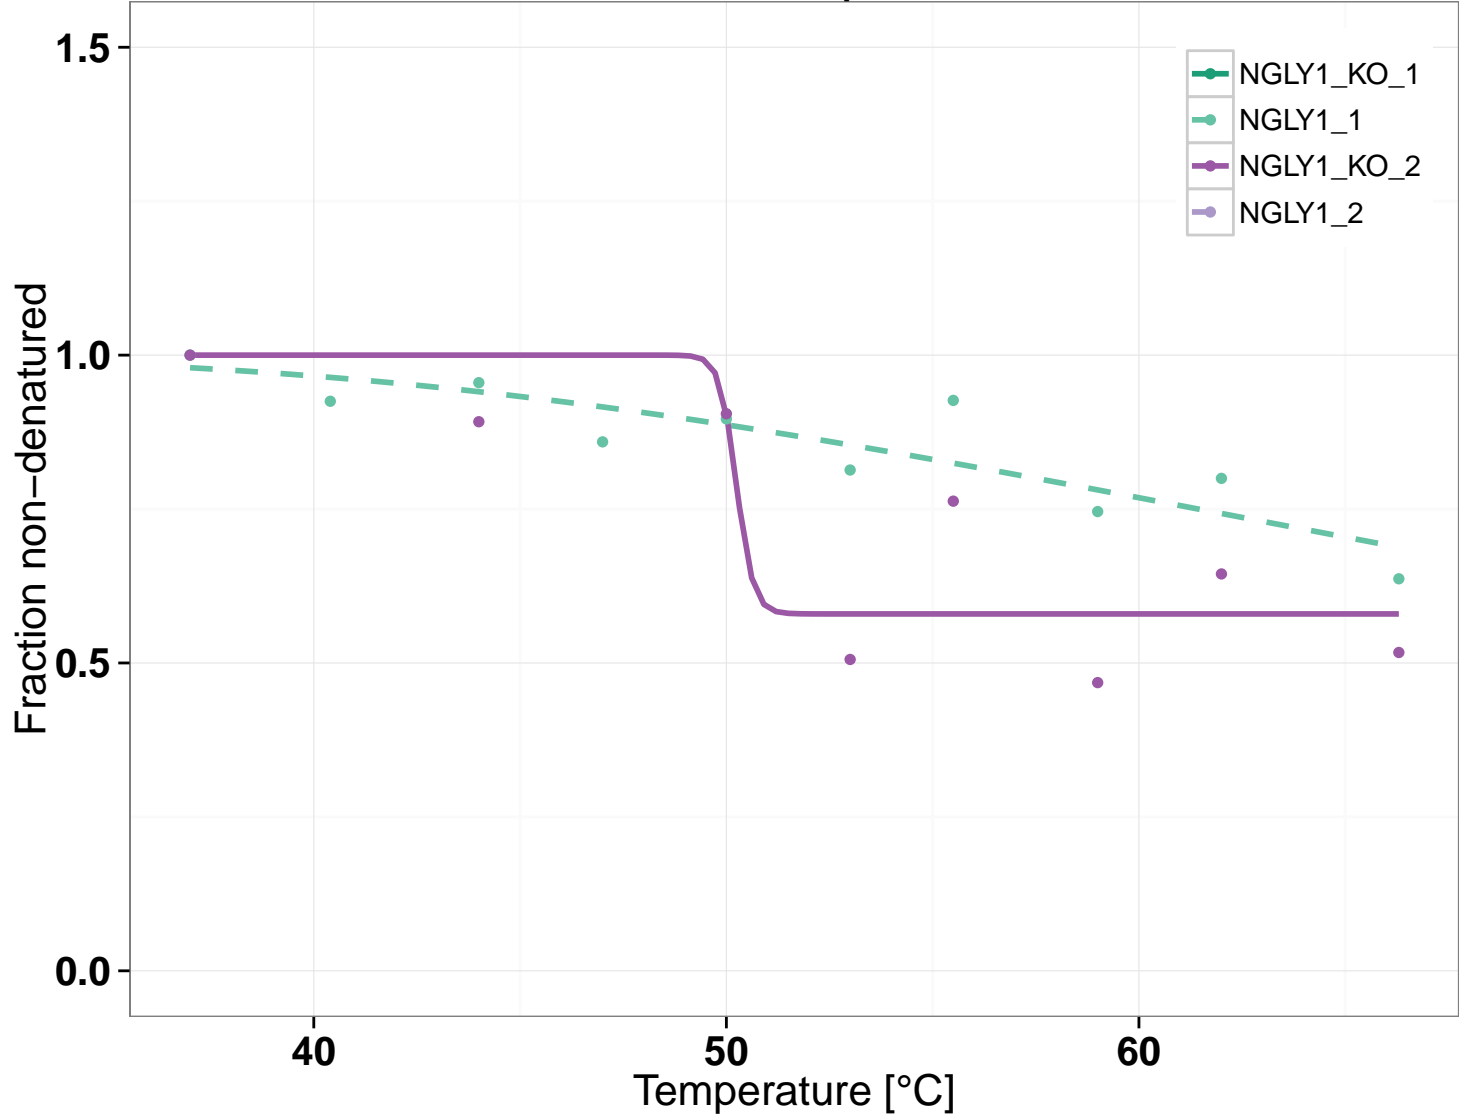

|            | meltPoint | slope  | plateau | R2   |
|------------|-----------|--------|---------|------|
| NGLY1_KO_1 | -         | -      | -       | -    |
| NGLY1_1    | -         | -0.013 | 0       | 0.77 |
| NGLY1_KO_2 | -         | -0.52  | 0.58    | 0.16 |
| NGLY1_2    | -         | -      | -       | -    |

Supplement: Supplementary file 514 [file 1]

# IPI00339277.1|SAMSN1

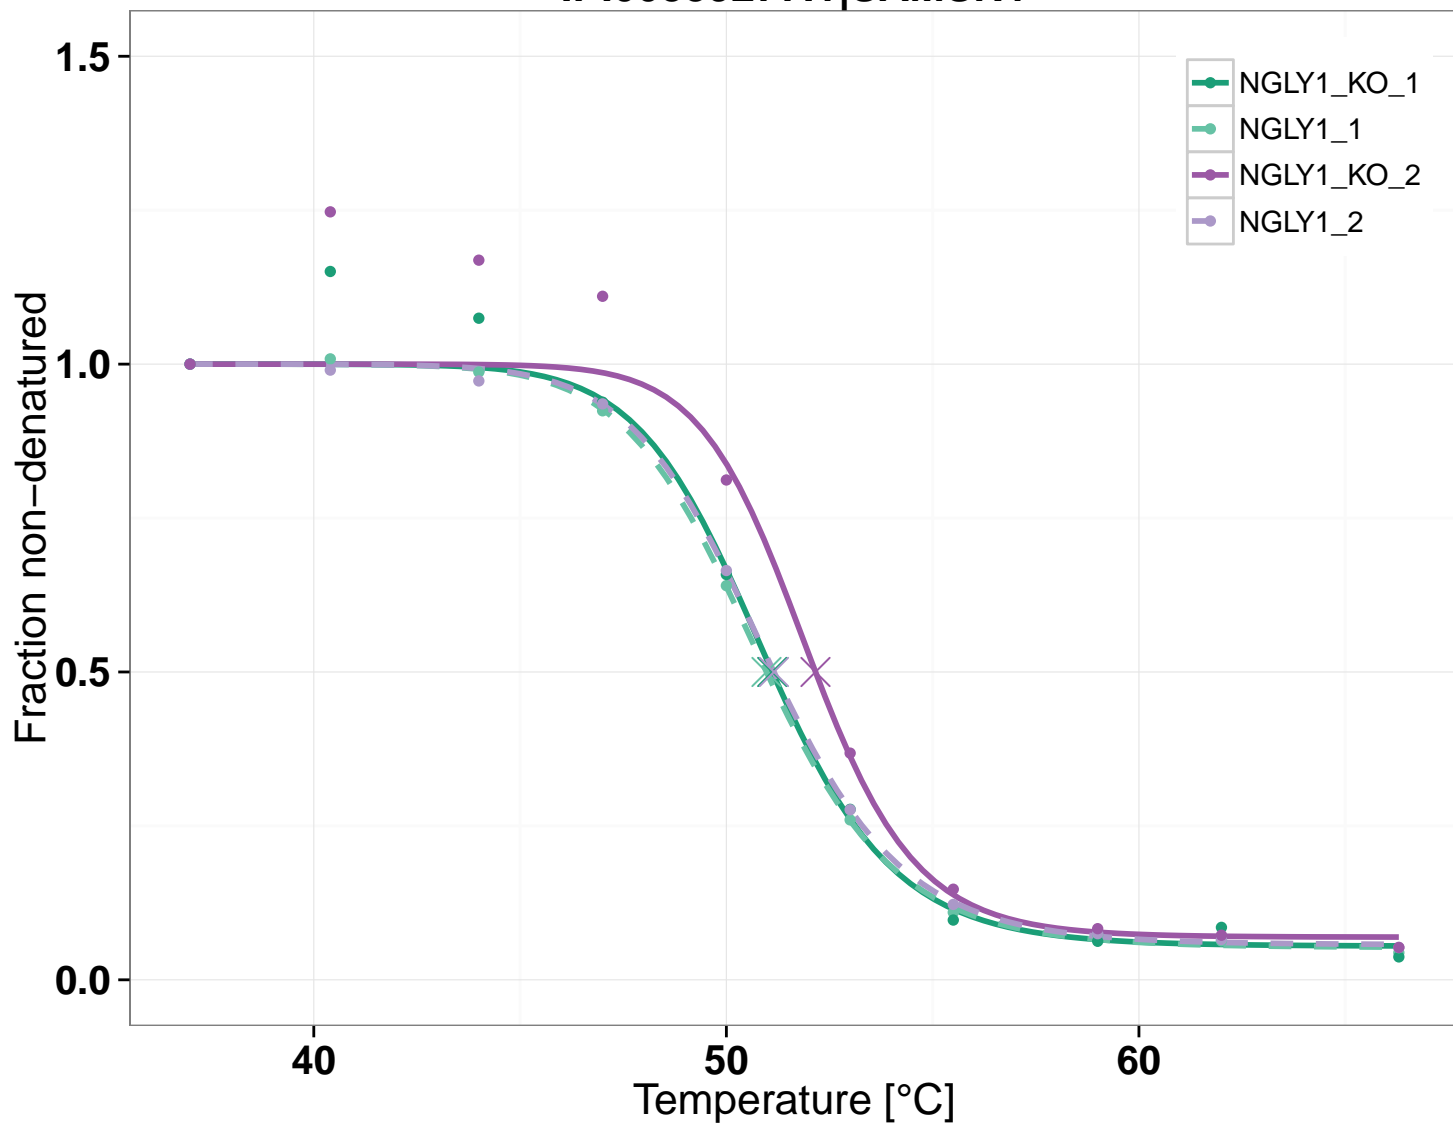

|            | meltPoint | slope | plateau | R2   |
|------------|-----------|-------|---------|------|
| NGLY1_KO_1 | 51.11     | -0.15 | 0.05    | 0.98 |
| NGLY1_1    | 50.97     | -0.14 | 0.05    | 1    |
| NGLY1_KO_2 | 52.16     | -0.18 | 0.07    | 0.95 |
| NGLY1_2    | 51.15     | -0.14 | 0.06    | 1    |

Supplement: Supplementary file 515 [file 1]

IPI00332493.6|PLEKHO2

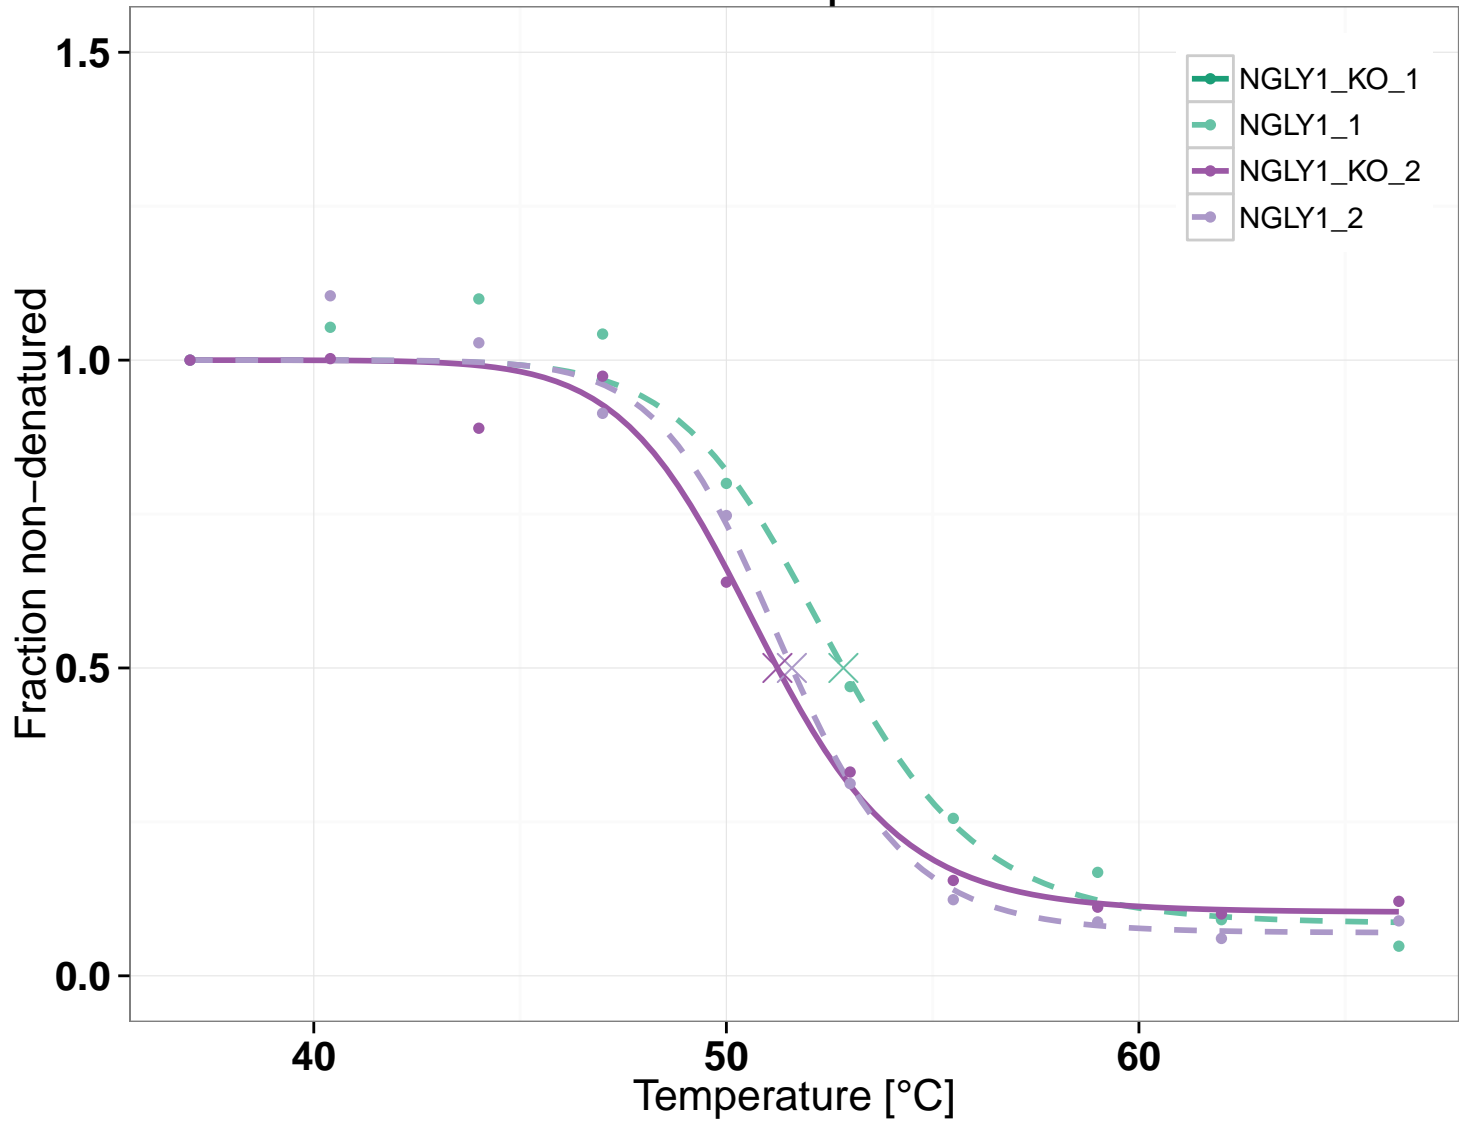

|            | meltPoint | slope | plateau | R2   |
|------------|-----------|-------|---------|------|
| NGLY1_KO_1 | -         | -     | -       | -    |
| NGLY1_1    | 52.84     | -0.12 | 0.08    | 0.99 |
| NGLY1_KO_2 | 51.24     | -0.13 | 0.1     | 0.99 |
| NGLY1_2    | 51.59     | -0.15 | 0.07    | 0.99 |

Supplement: Supplementary file 516 [file 1]

IPI00022265.3|CCDC22

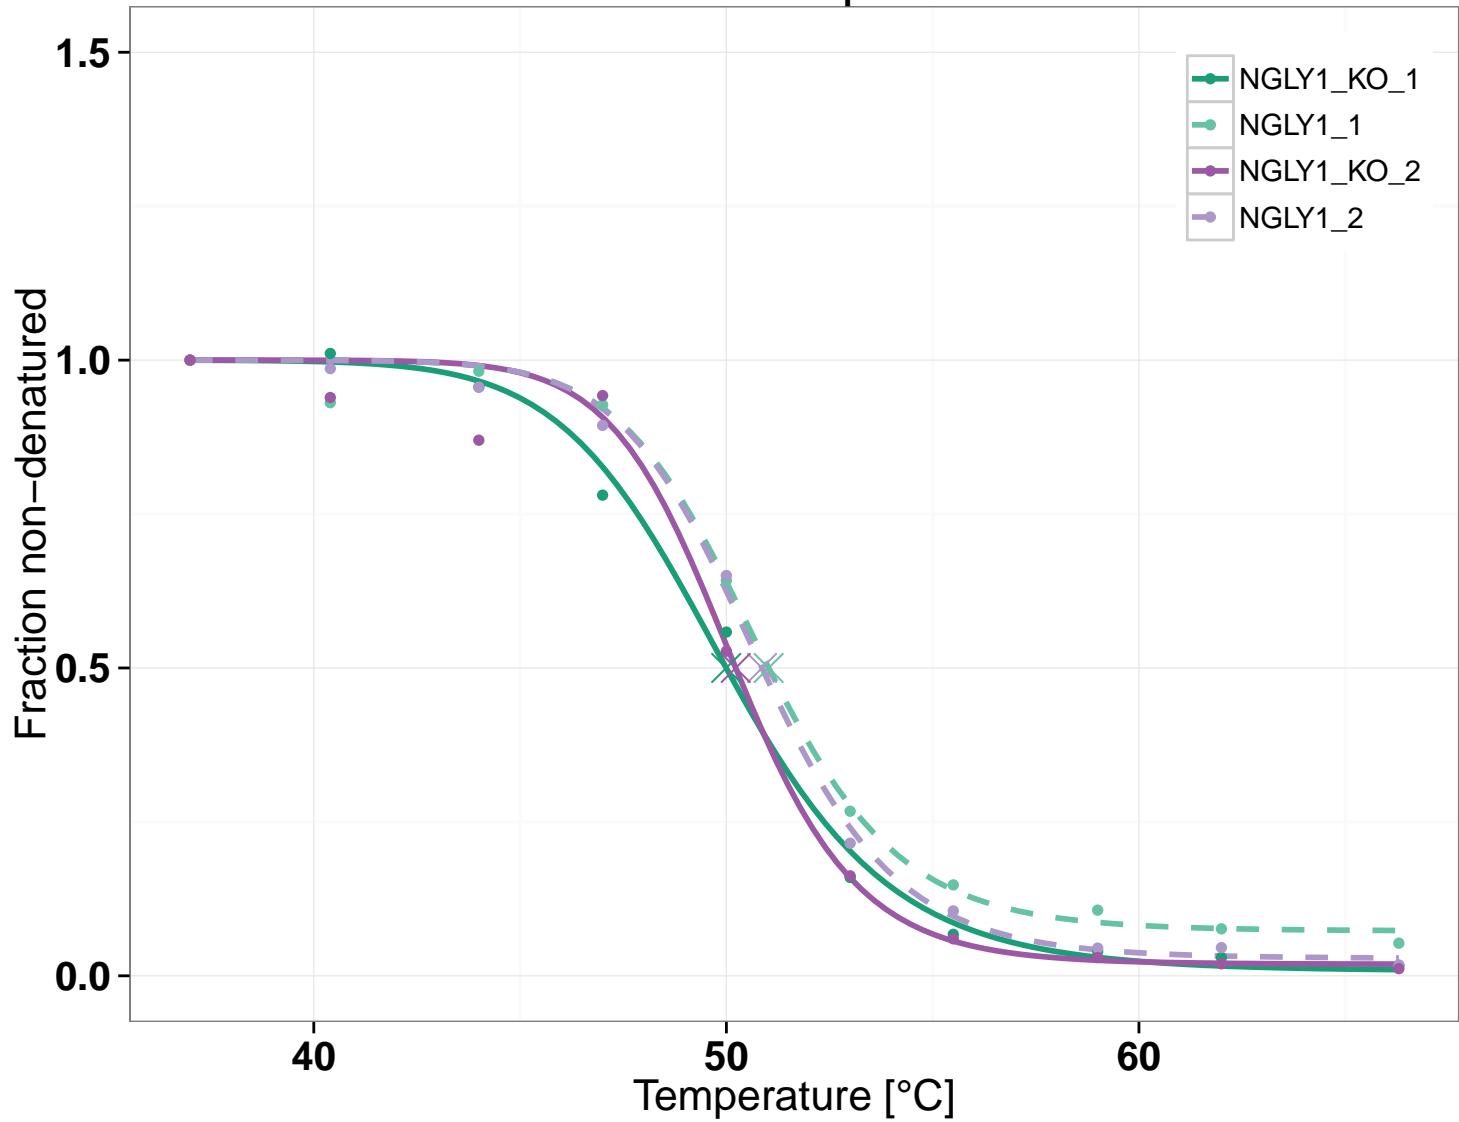

|            | meltPoint | slope | plateau | R2   |
|------------|-----------|-------|---------|------|
| NGLY1_KO_1 | 50        | -0.12 | 0.01    | 1    |
| NGLY1_1    | 51.03     | -0.14 | 0.07    | 1    |
| NGLY1_KO_2 | 50.23     | -0.16 | 0.02    | 0.99 |
| NGLY1_2    | 50.86     | -0.15 | 0.03    | 1    |

Supplement: Supplementary file 517 [file 1]

IPI00013079.2|EMILIN1

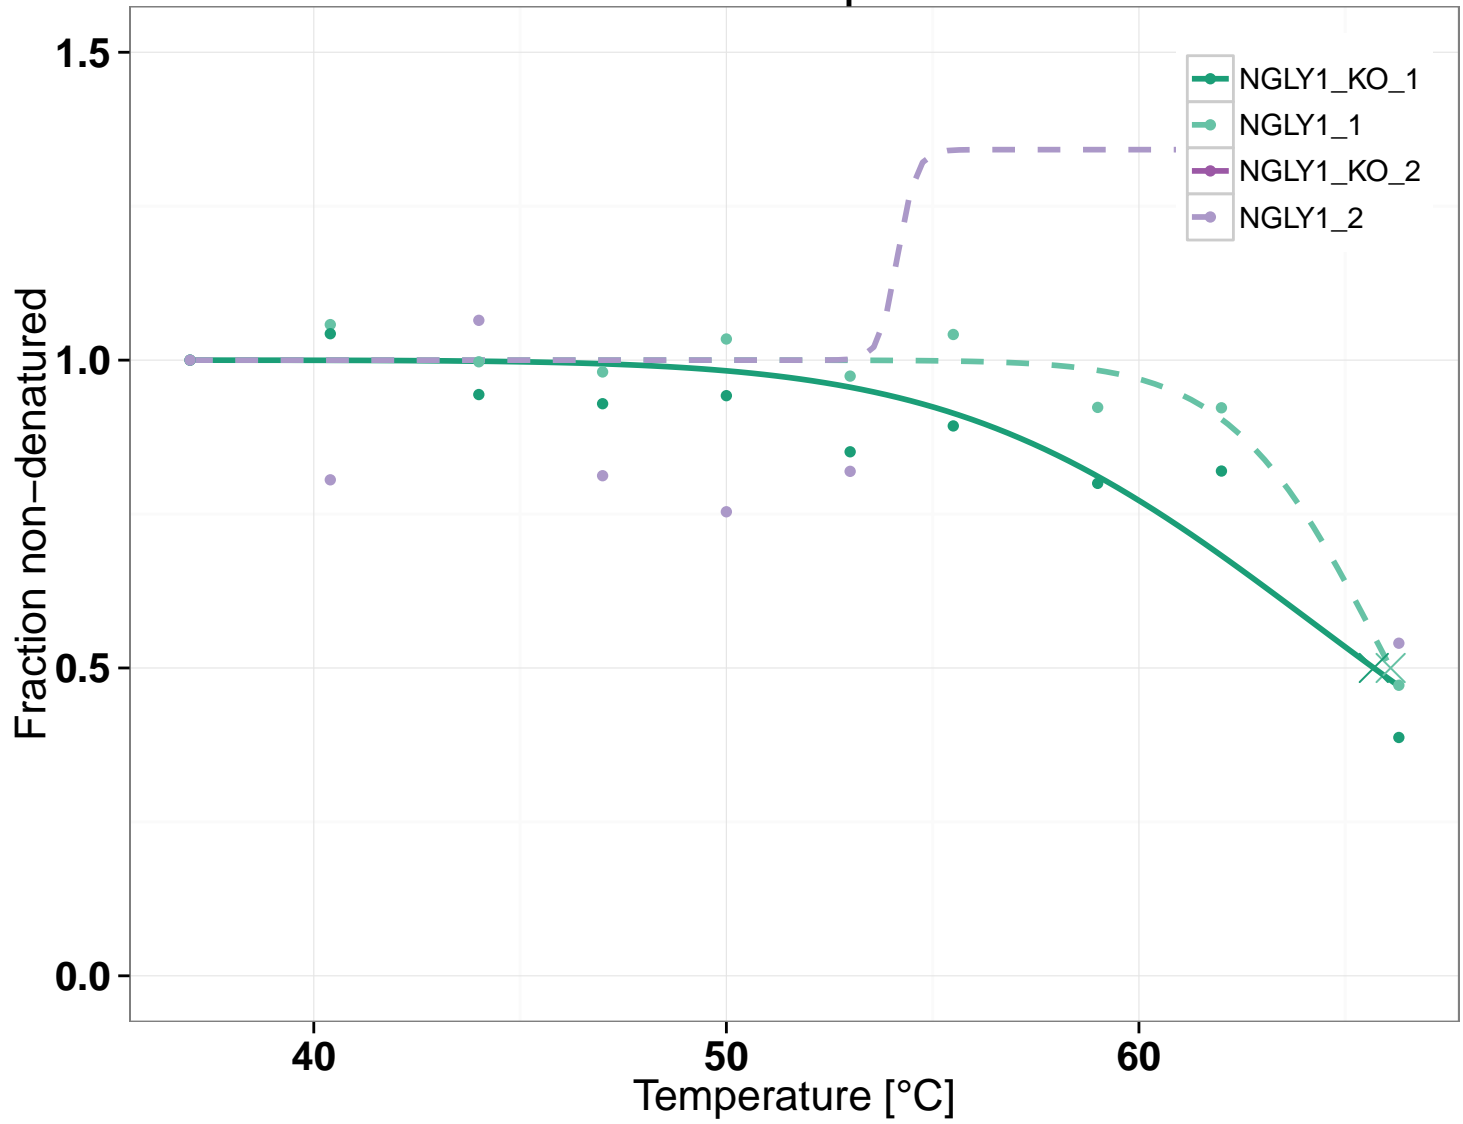

|            | meltPoint | slope | plateau | R2   |
|------------|-----------|-------|---------|------|
| NGLY1_KO_1 | 65.69     | -0.05 | 0       | 0.84 |
| NGLY1_1    | 66.1      | -0.13 | 0       | 0.96 |
| NGLY1_KO_2 | -         | -     | -       | -    |
| NGLY1_2    | -         | 0.39  | 1.34    | 0.29 |

Supplement: Supplementary file 518 [file 1]

IPI00152503.1|DTX3L

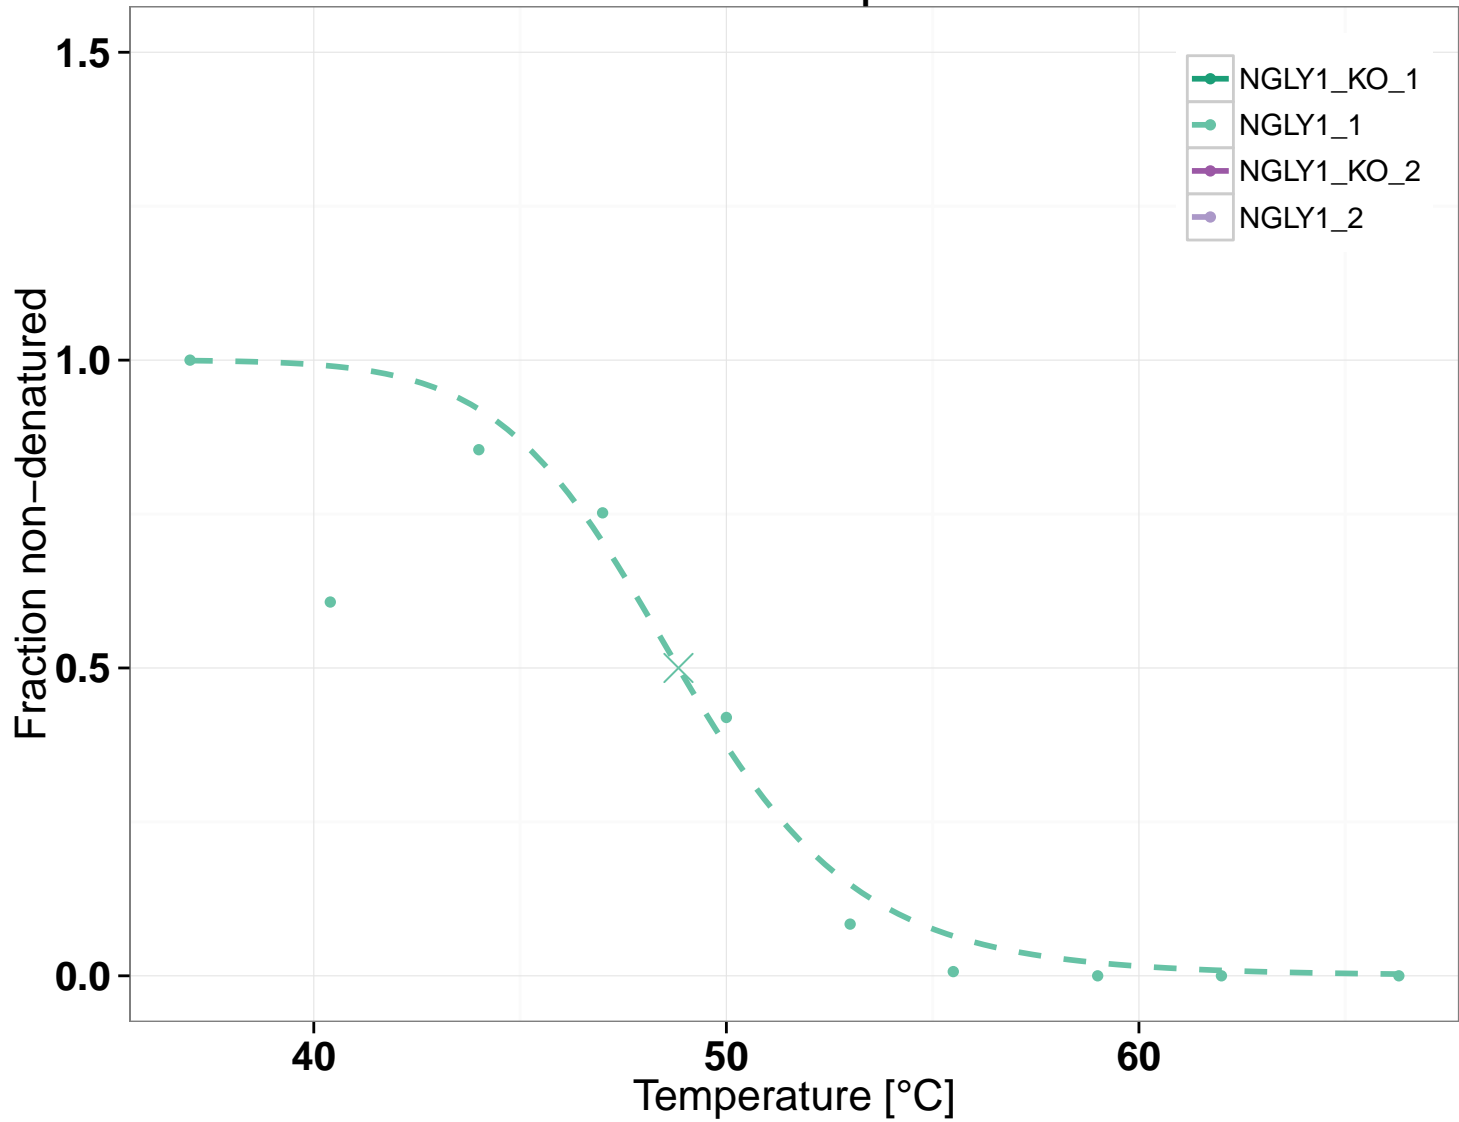

|            | meltPoint | slope | plateau | R2   |
|------------|-----------|-------|---------|------|
| NGLY1_KO_1 | -         | -     | -       | -    |
| NGLY1_1    | 48.84     | -0.11 | 0       | 0.89 |
| NGLY1_KO_2 | -         | -     | -       | -    |
| NGLY1_2    | -         | -     | -       | -    |

Supplement: Supplementary file 519 [file 1]

# IPI00022202.3|SLC25A3

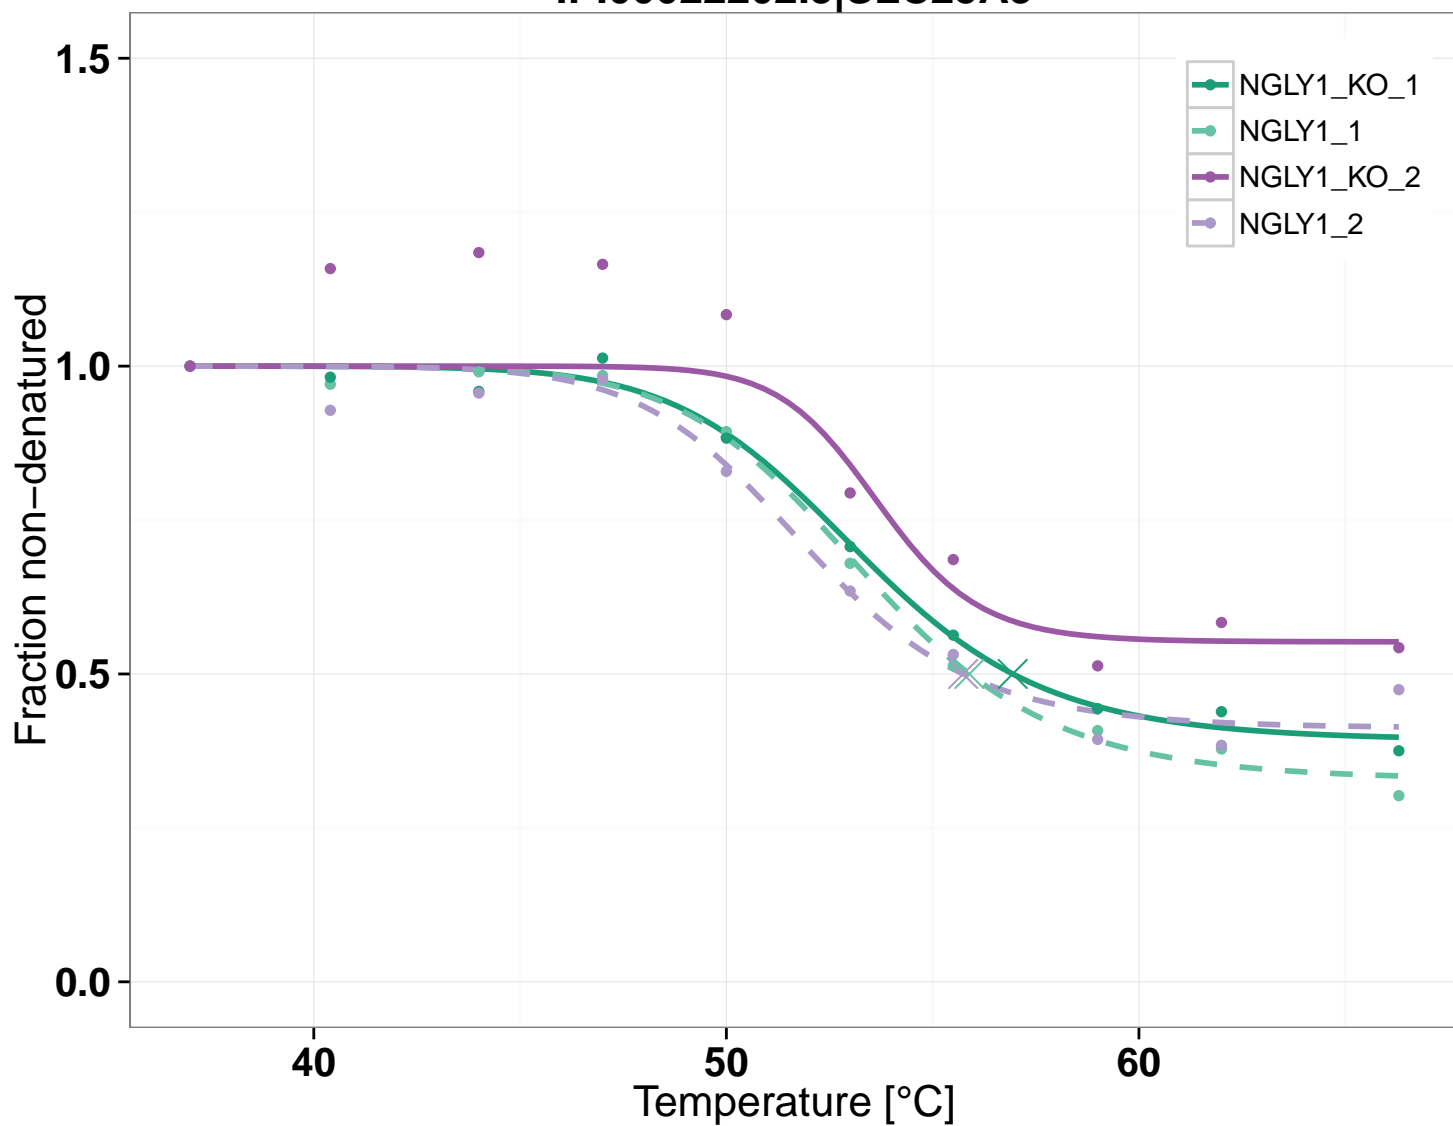

|            | meltPoint | slope  | plateau | R2   |
|------------|-----------|--------|---------|------|
| NGLY1_KO_1 | 56.94     | -0.068 | 0.39    | 0.99 |
| NGLY1_1    | 55.89     | -0.074 | 0.33    | 1    |
| NGLY1_KO_2 | -         | -0.092 | 0.55    | 0.85 |
| NGLY1_2    | 55.74     | -0.072 | 0.41    | 0.97 |

Supplement: Supplementary file 520 [file 1]

# IPI00549343.3|VAMP3

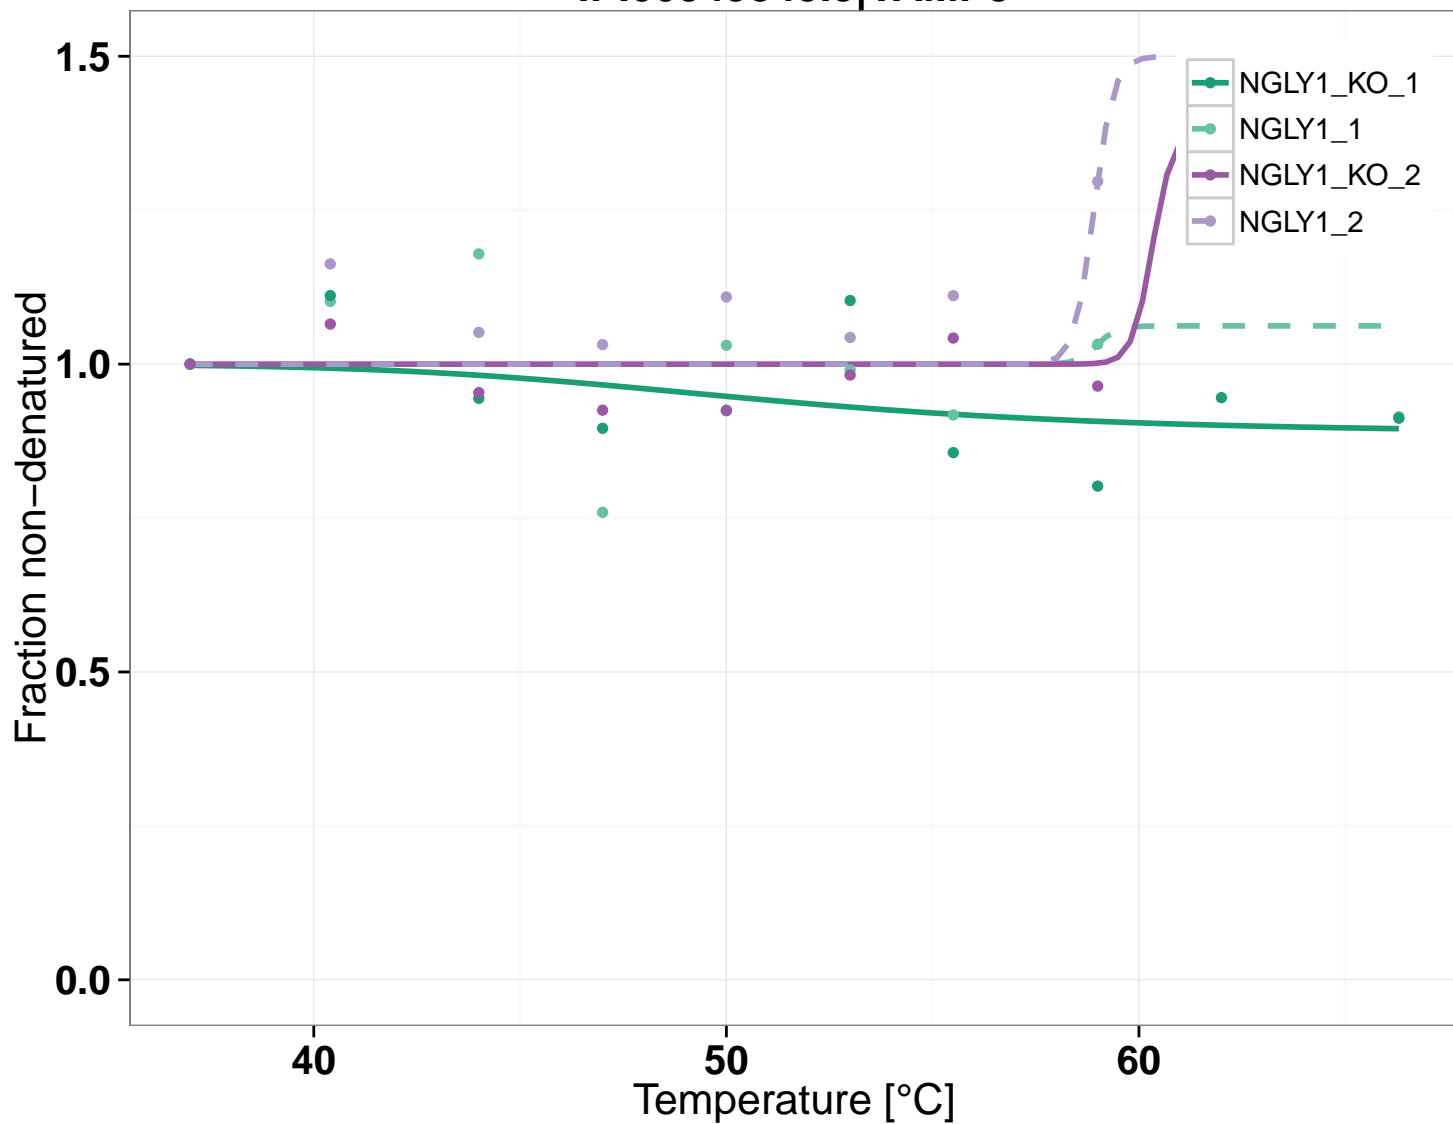

|            | meltPoint | slope   | plateau | R2   |
|------------|-----------|---------|---------|------|
| NGLY1_KO_1 | —         | -0.0063 | 0.89    | 0.23 |
| NGLY1_1    | —         | 0.066   | 1.06    | 0.04 |
| NGLY1_KO_2 | —         | 0.39    | 1.38    | 0.84 |
| NGLY1_2    | —         | 0.53    | 1.5     | 0.6  |

Supplement: Supplementary file 521 [file 1]

IPI00328840.9|THOC4

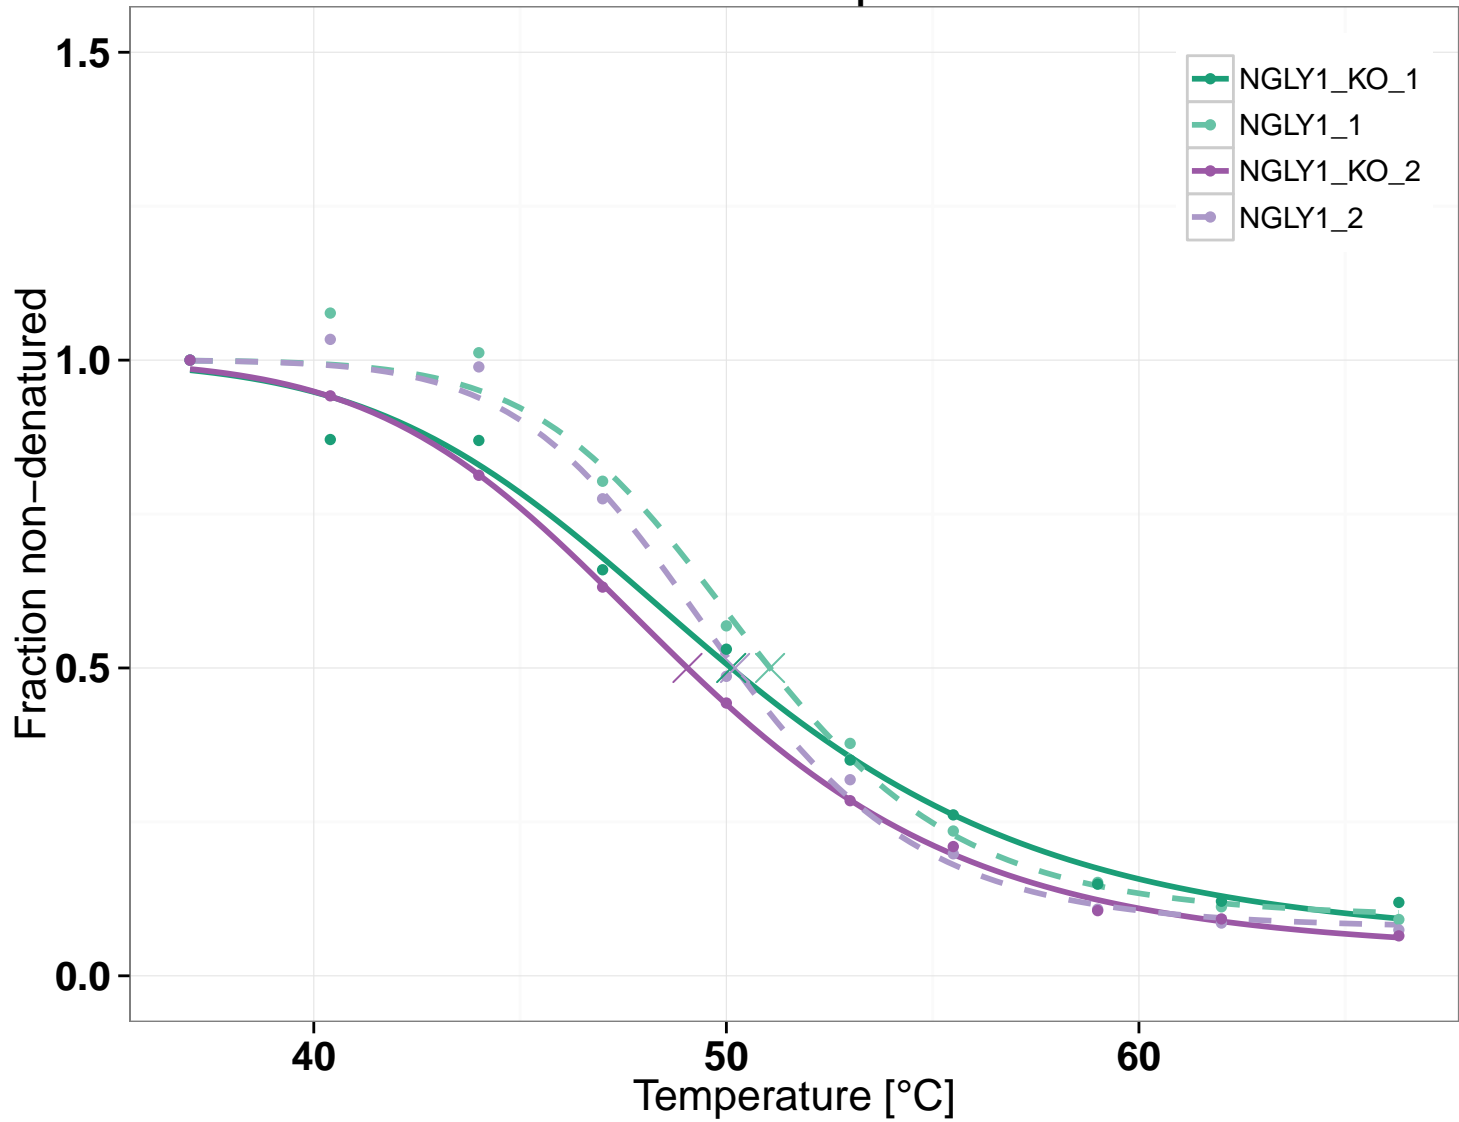

|            | meltPoint | slope  | plateau | R2   |
|------------|-----------|--------|---------|------|
| NGLY1_KO_1 | 50.12     | -0.058 | 0.05    | 0.99 |
| NGLY1_1    | 51.06     | -0.088 | 0.09    | 0.99 |
| NGLY1_KO_2 | 49.06     | -0.067 | 0.03    | 1    |
| NGLY1_2    | 50.21     | -0.094 | 0.08    | 1    |

Supplement: Supplementary file 522 [file 1]

# IPI00478157.2|CAMKV

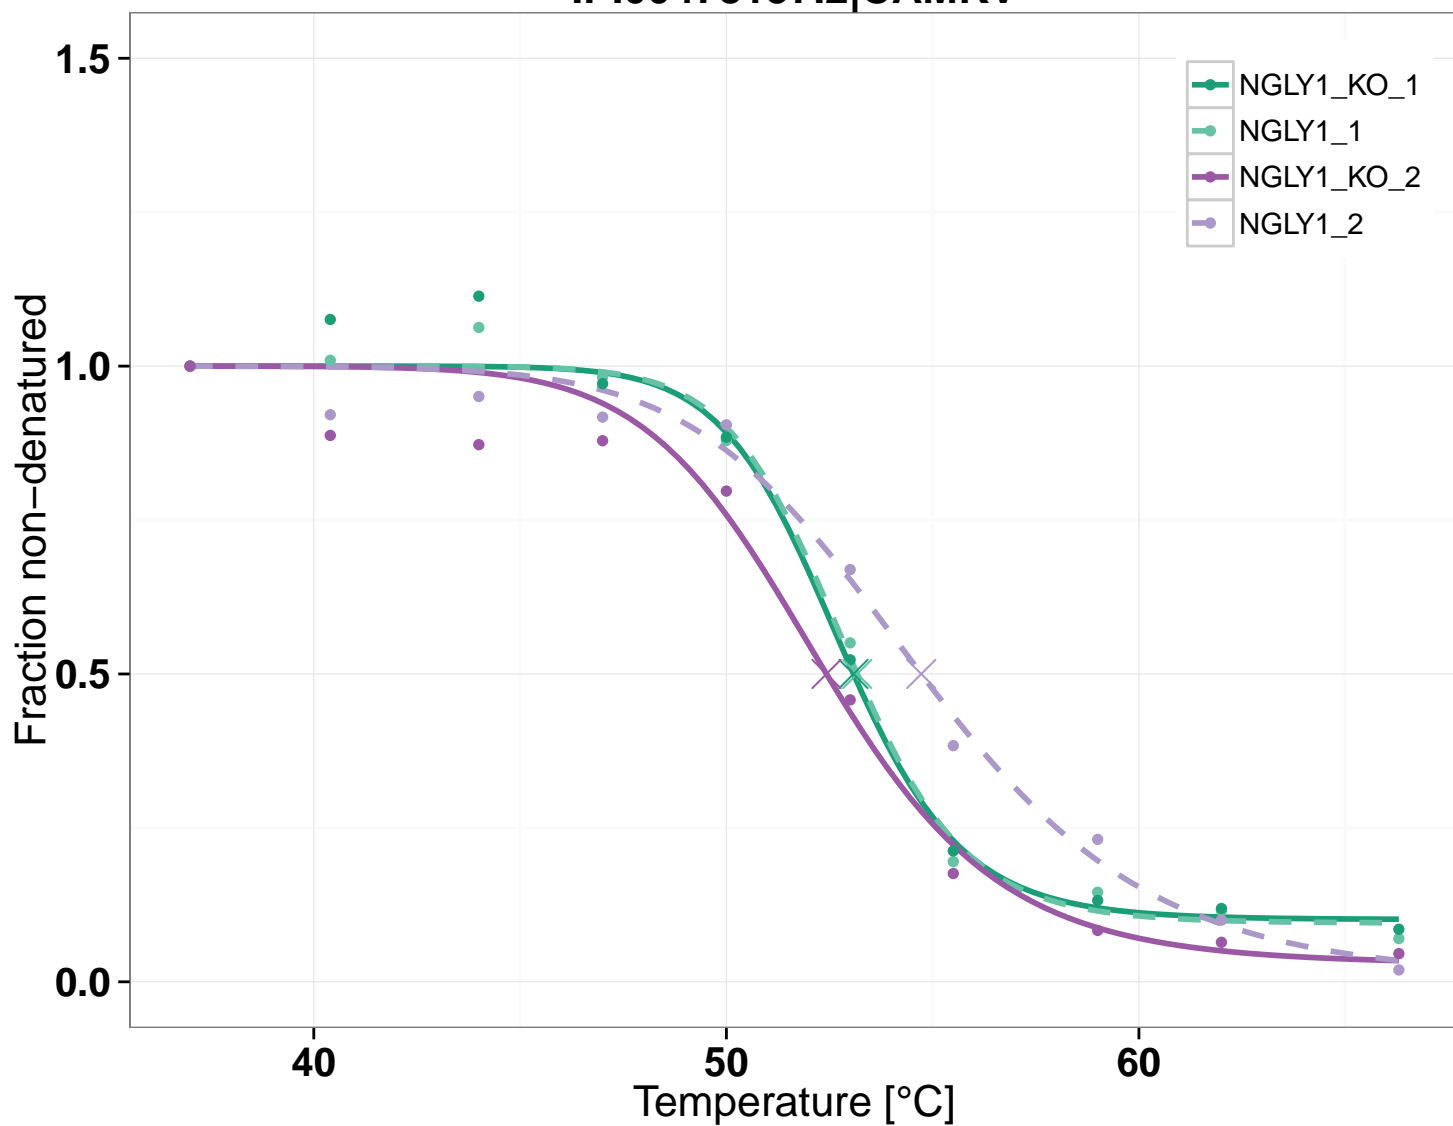

|            | meltPoint | slope | plateau | R2   |
|------------|-----------|-------|---------|------|
| NGLY1_KO_1 | 53.08     | -0.15 | 0.1     | 0.99 |
| NGLY1_1    | 53.17     | -0.16 | 0.1     | 0.99 |
| NGLY1_KO_2 | 52.43     | -0.11 | 0.03    | 0.98 |
| NGLY1_2    | 54.72     | -0.09 | 0       | 0.99 |

Supplement: Supplementary file 523 [file 1]

IPI00550477.2|GPATCH1

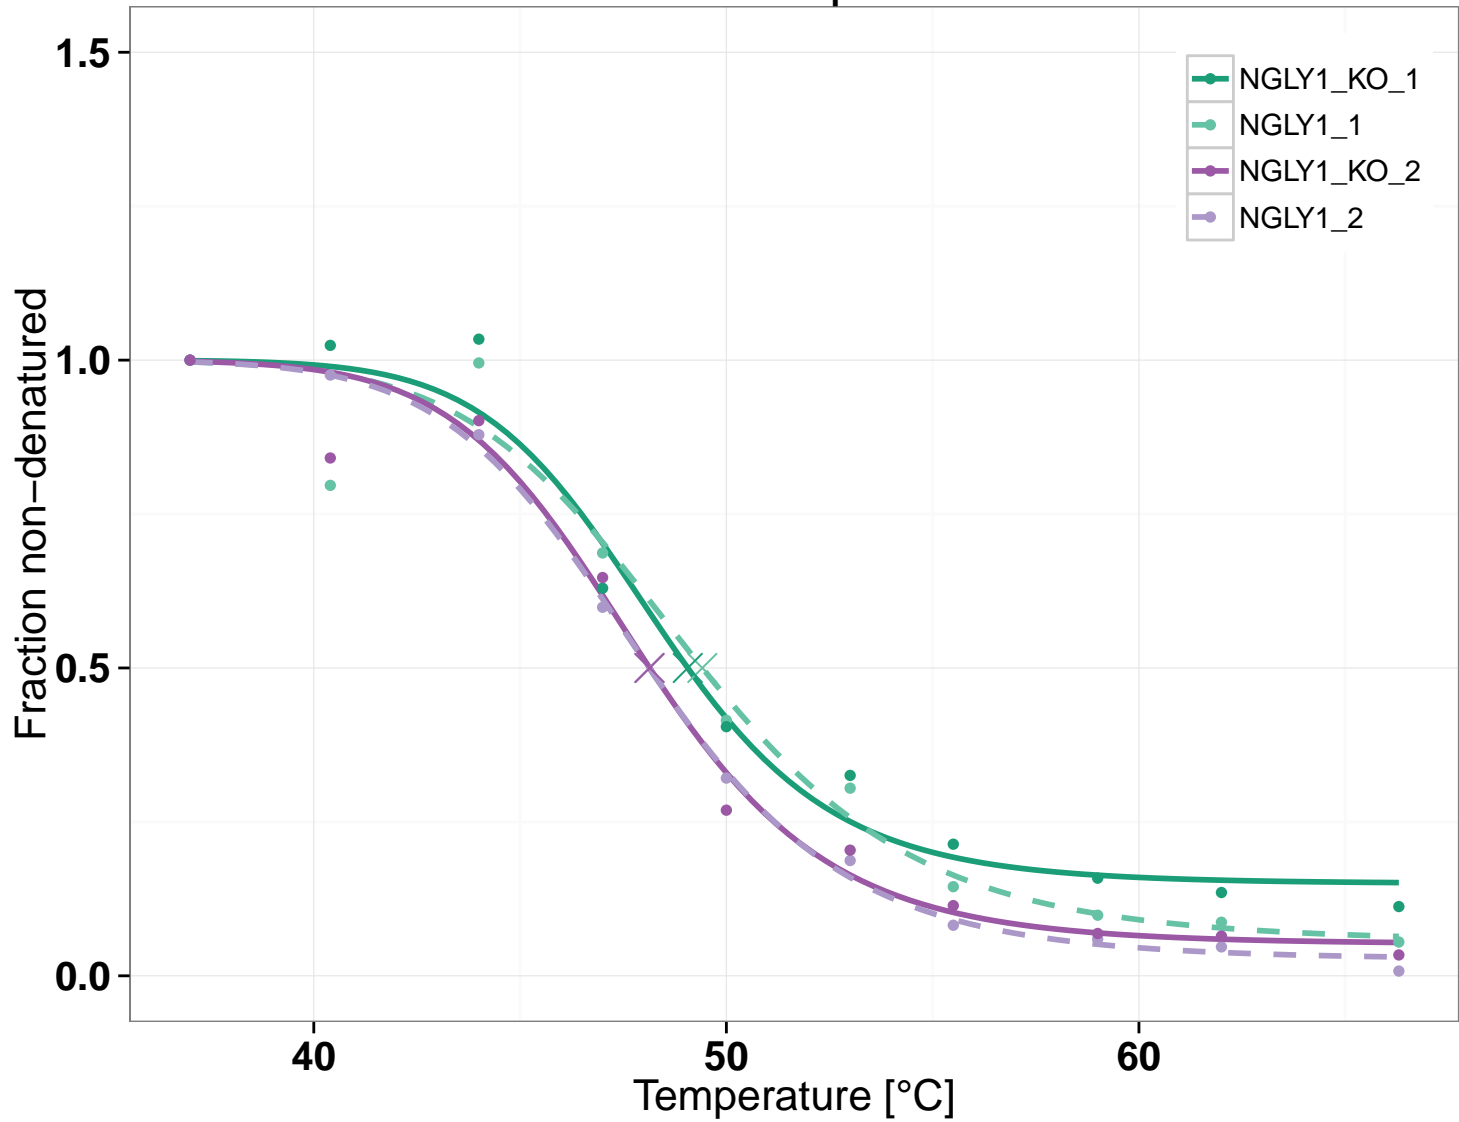

|            | meltPoint | slope  | plateau | R2   |
|------------|-----------|--------|---------|------|
| NGLY1_KO_1 | 49.06     | -0.1   | 0.15    | 0.98 |
| NGLY1_1    | 49.42     | -0.086 | 0.05    | 0.96 |
| NGLY1_KO_2 | 48.14     | -0.1   | 0.05    | 0.98 |
| NGLY1_2    | 48.13     | -0.1   | 0.03    | 1    |

Supplement: Supplementary file 524 [file 1]

IPI00889114.1|LOC650561

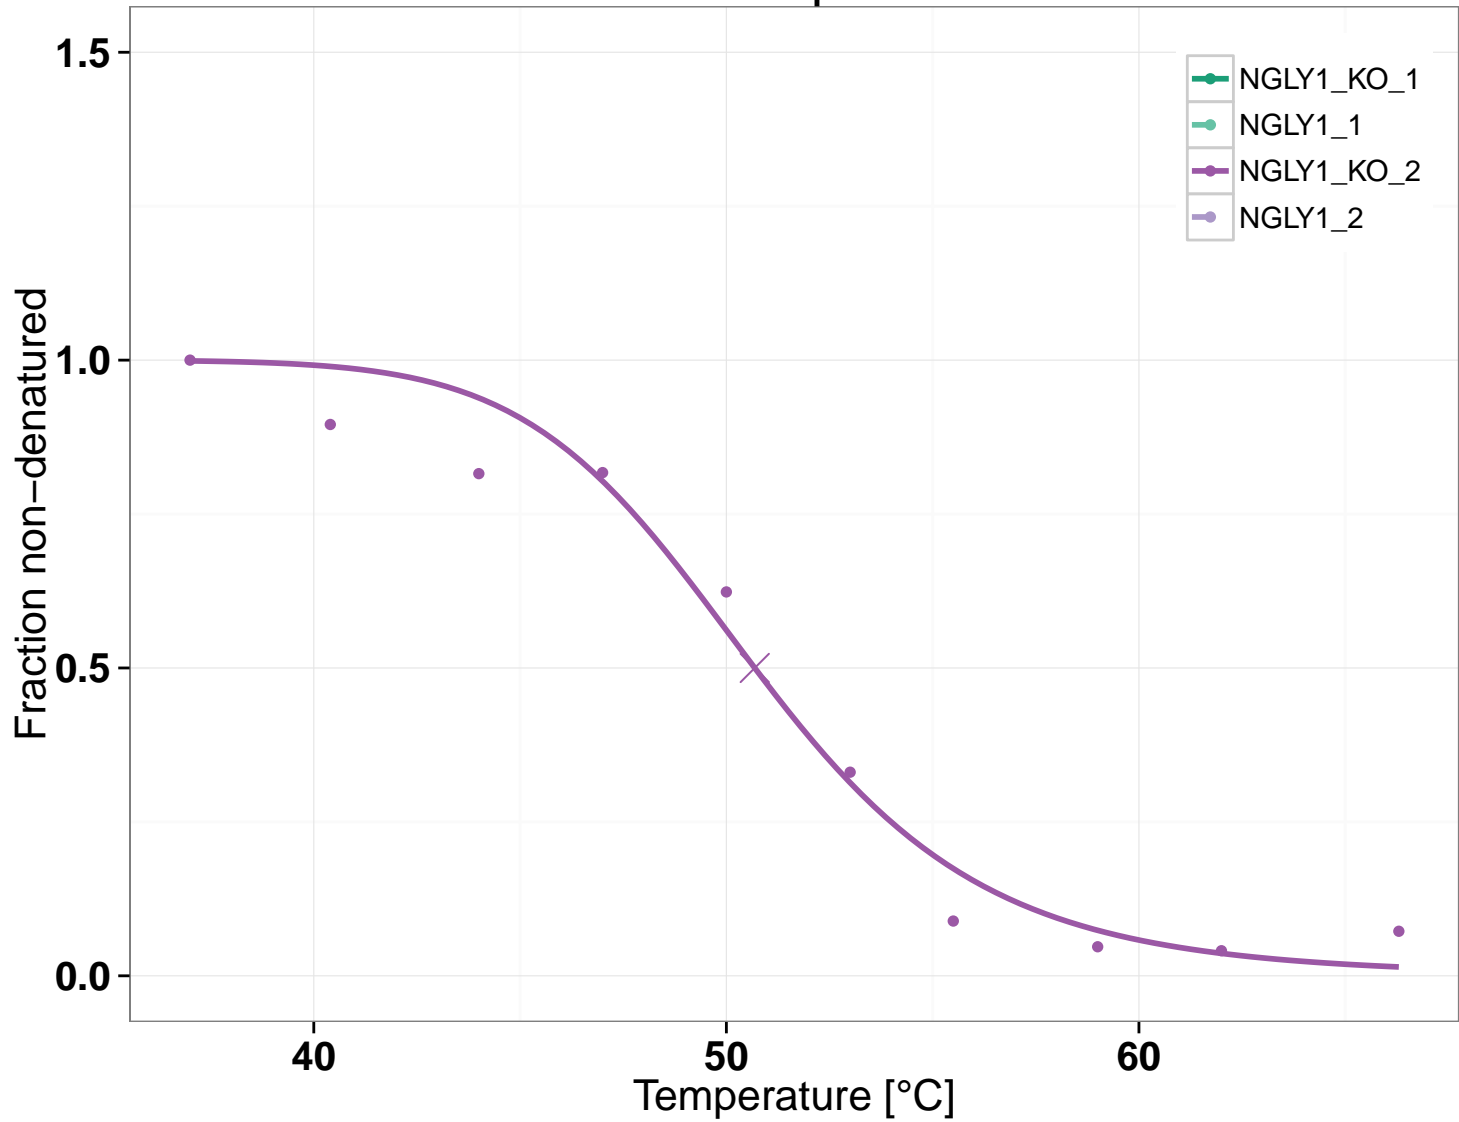

|            | meltPoint | slope | plateau | R2   |
|------------|-----------|-------|---------|------|
| NGLY1_KO_1 | —         | —     | —       | —    |
| NGLY1_1    | —         | —     | —       | —    |
| NGLY1_KO_2 | 50.69     | -0.09 | 0       | 0.97 |
| NGLY1_2    | —         | —     | —       | —    |

Supplement: Supplementary file 525 [file 1]

IPI00009049.1|SOX13

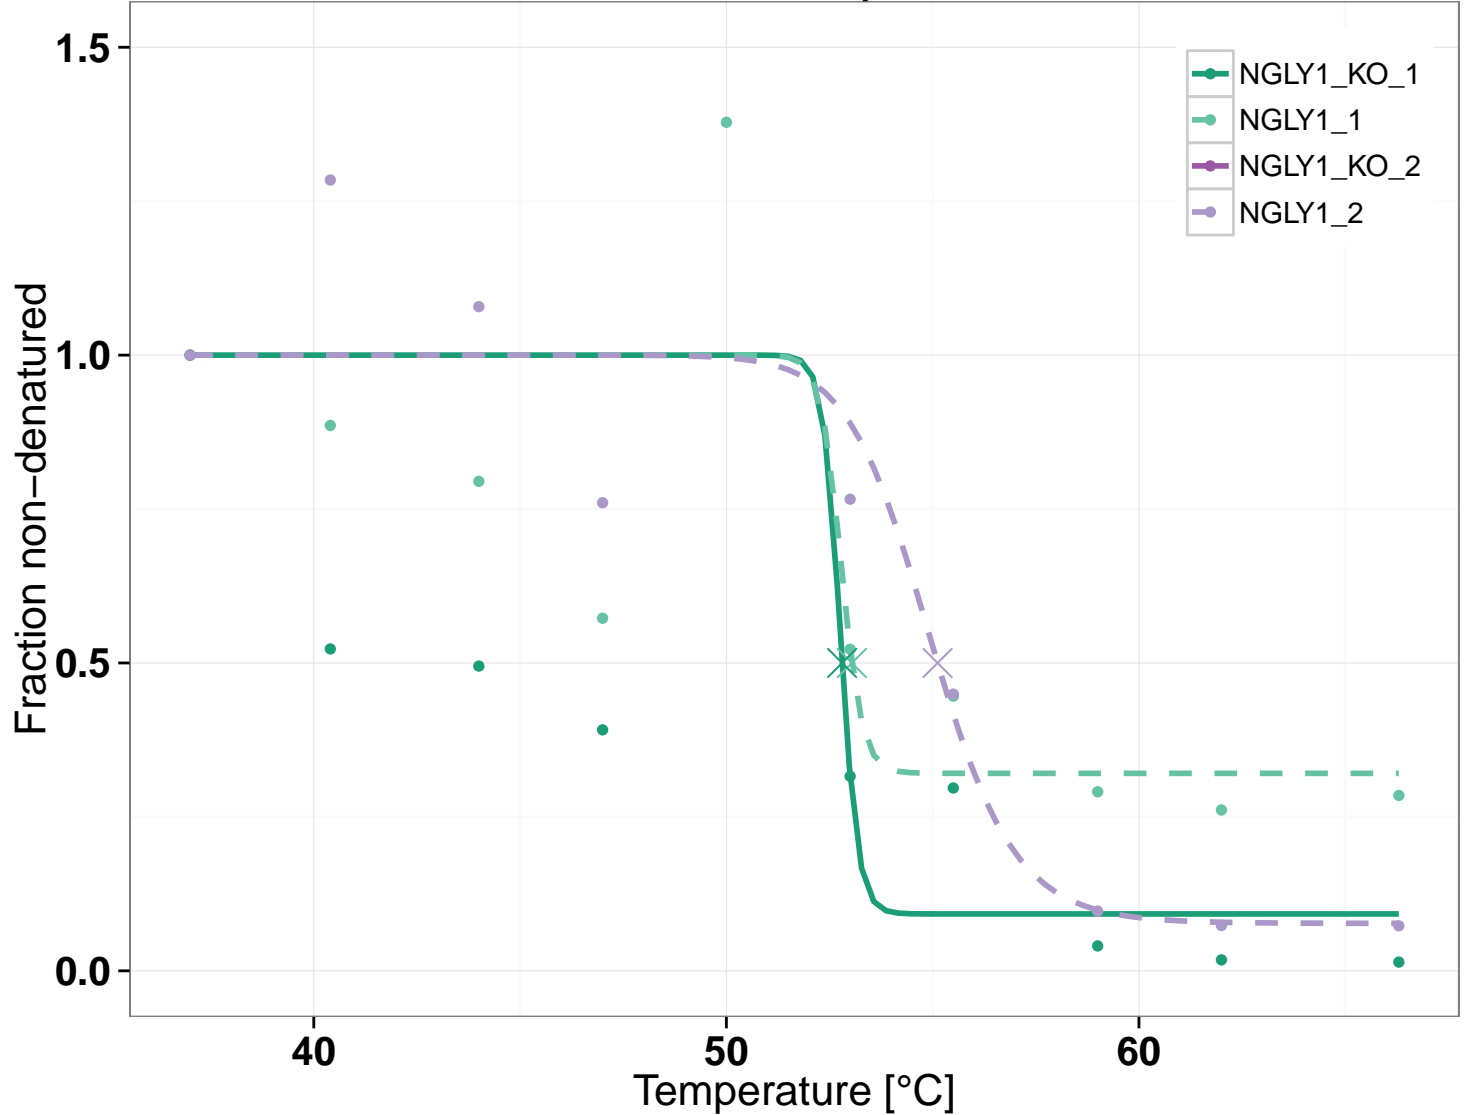

|            | meltPoint | slope | plateau | R2   |
|------------|-----------|-------|---------|------|
| NGLY1_KO_1 | 52.81     | -1.1  | 0.09    | 0.43 |
| NGLY1_1    | 53.04     | -0.67 | 0.32    | 0.67 |
| NGLY1_KO_2 | -         | -     | -       | -    |
| NGLY1_2    | 55.12     | -0.23 | 0.08    | 0.59 |

Supplement: Supplementary file 526 [file 1]

# IPI00099995.3|RFK

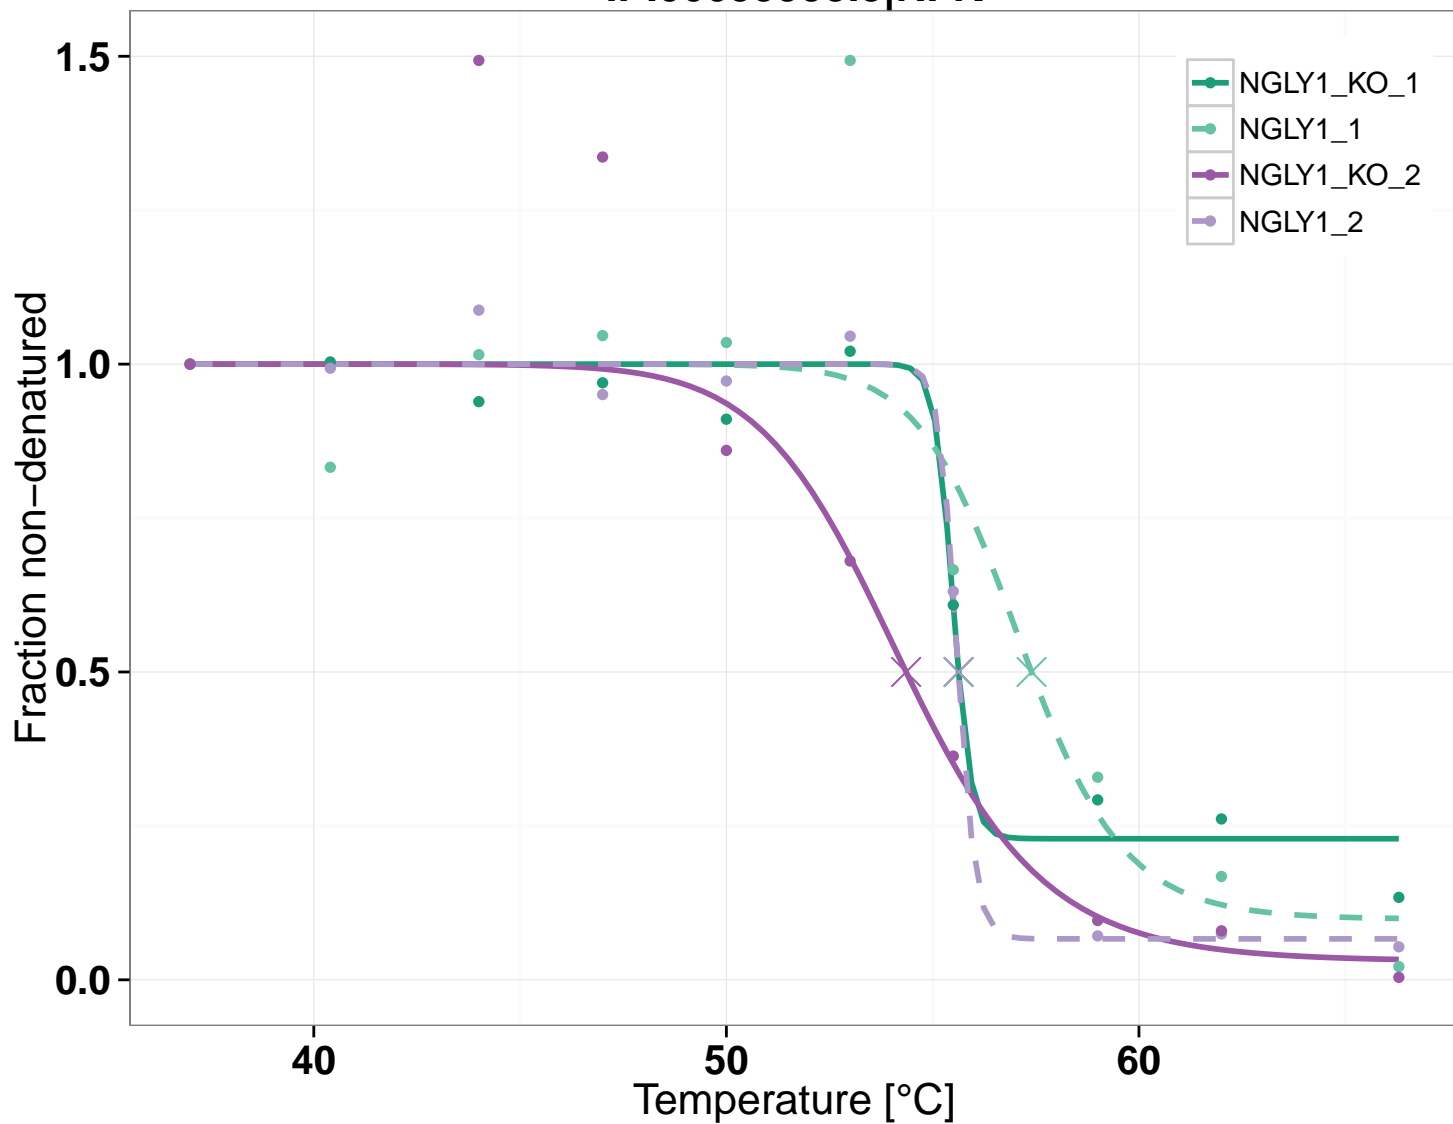

|            | meltPoint | slope | plateau | R2   |
|------------|-----------|-------|---------|------|
| NGLY1_KO_1 | 55.63     | -0.87 | 0.23    | 0.98 |
| NGLY1_1    | 57.4      | -0.18 | 0.1     | 0.83 |
| NGLY1_KO_2 | 54.36     | -0.14 | 0.03    | 0.65 |
| NGLY1_2    | 55.63     | -1    | 0.07    | 0.99 |

Supplement: Supplementary file 527 [file 1]

IPI00002324.6|MAT2B

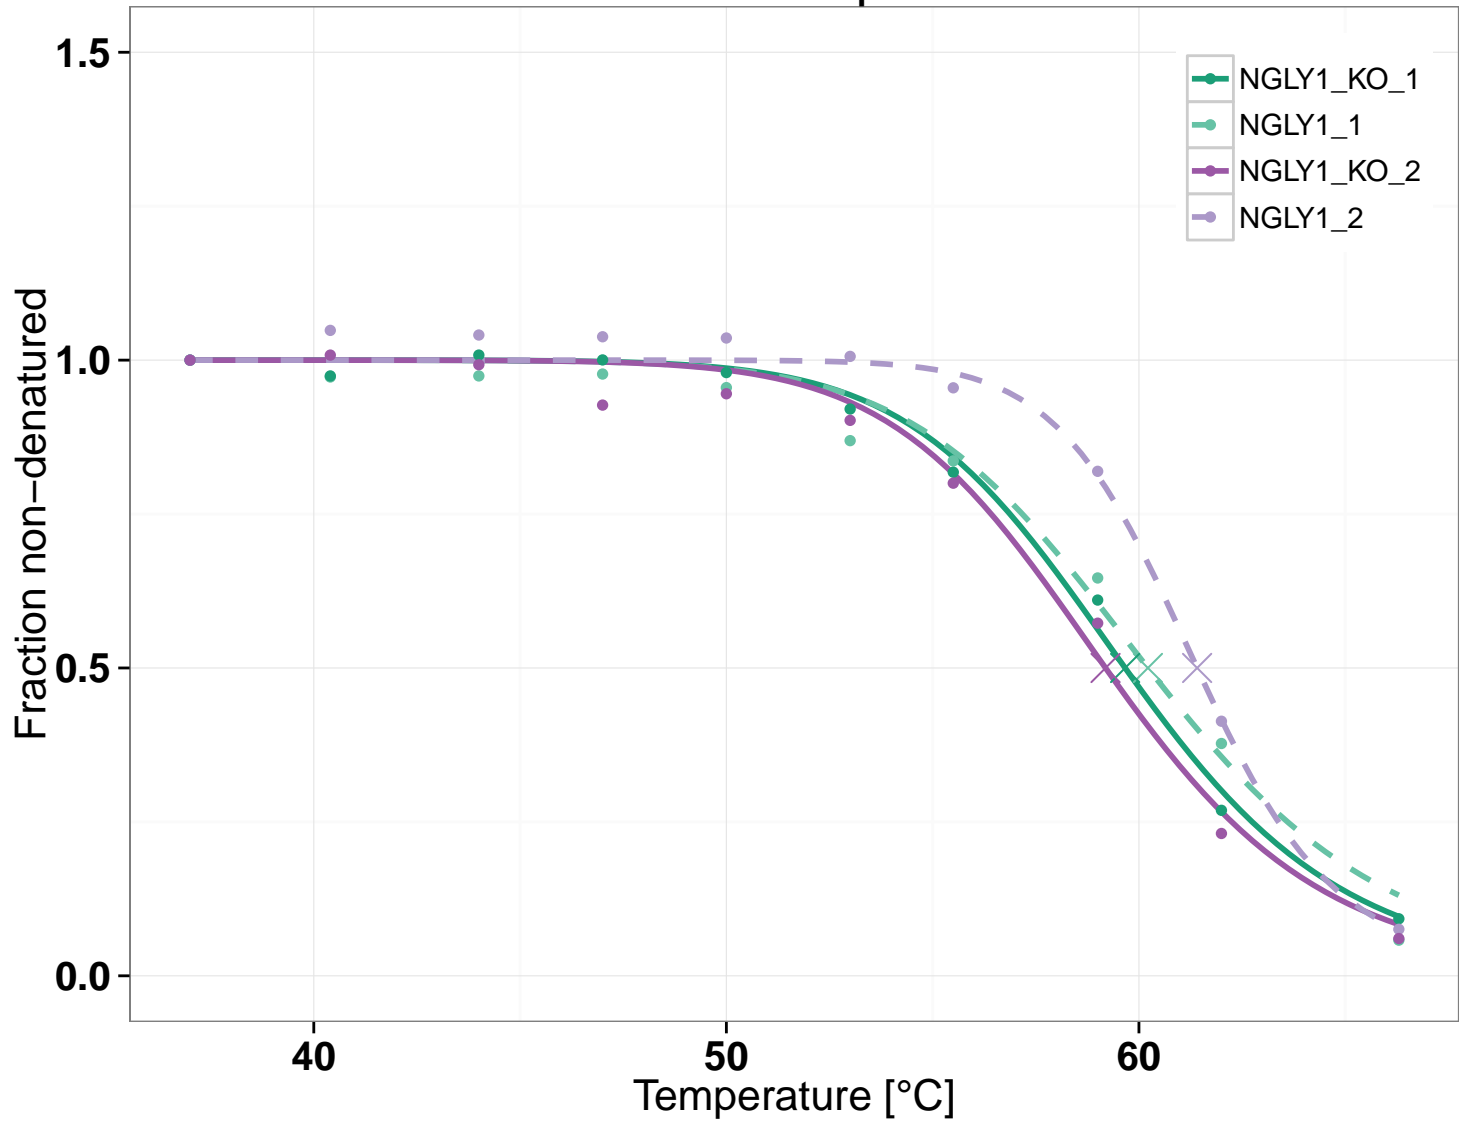

|            | meltPoint | slope  | plateau | R2   |
|------------|-----------|--------|---------|------|
| NGLY1_KO_1 | 59.67     | -0.095 | 0       | 0.99 |
| NGLY1_1    | 60.22     | -0.087 | 0       | 0.98 |
| NGLY1_KO_2 | 59.19     | -0.095 | 0       | 0.99 |
| NGLY1_2    | 61.41     | -0.15  | 0.01    | 0.99 |

Supplement: Supplementary file 528 [file 1]

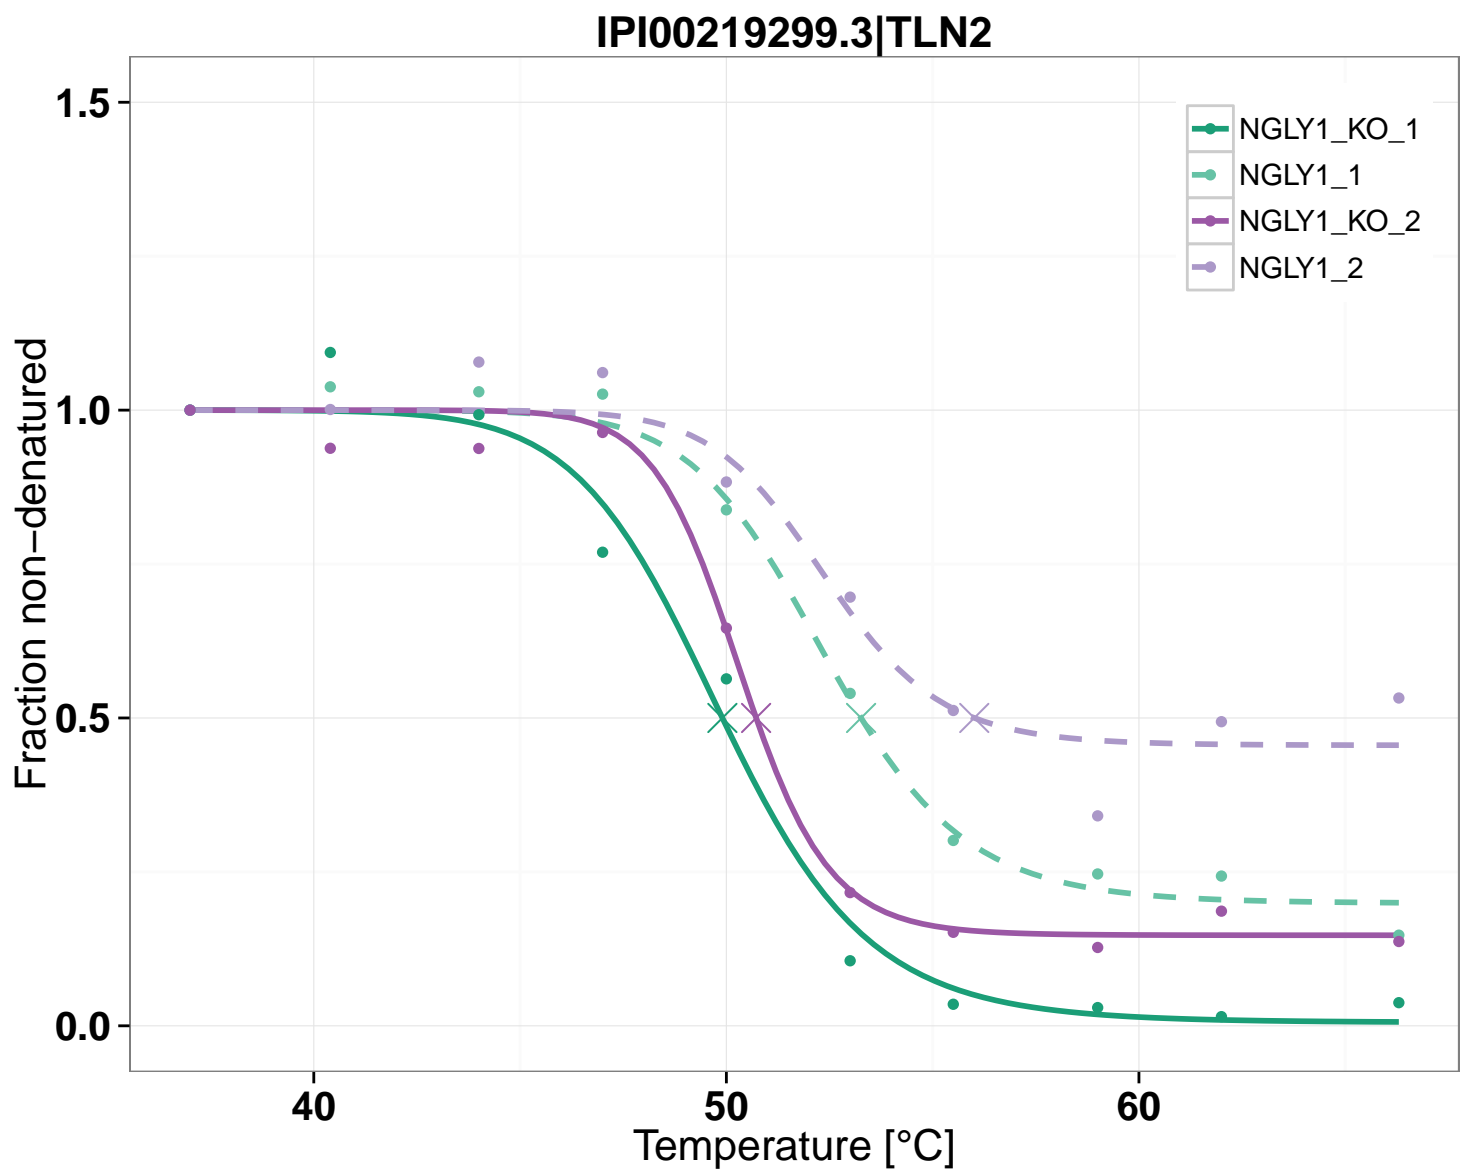

|            | meltPoint | slope  | plateau | R2   |
|------------|-----------|--------|---------|------|
| NGLY1_KO_1 | 49.9      | -0.14  | 0.01    | 0.99 |
| NGLY1_1    | 53.27     | -0.12  | 0.2     | 0.99 |
| NGLY1_KO_2 | 50.72     | -0.2   | 0.15    | 0.99 |
| NGLY1_2    | 56.01     | -0.098 | 0.46    | 0.95 |

Supplement: Supplementary file 529 [file 1]

IPI00011307.4|MTHFD2

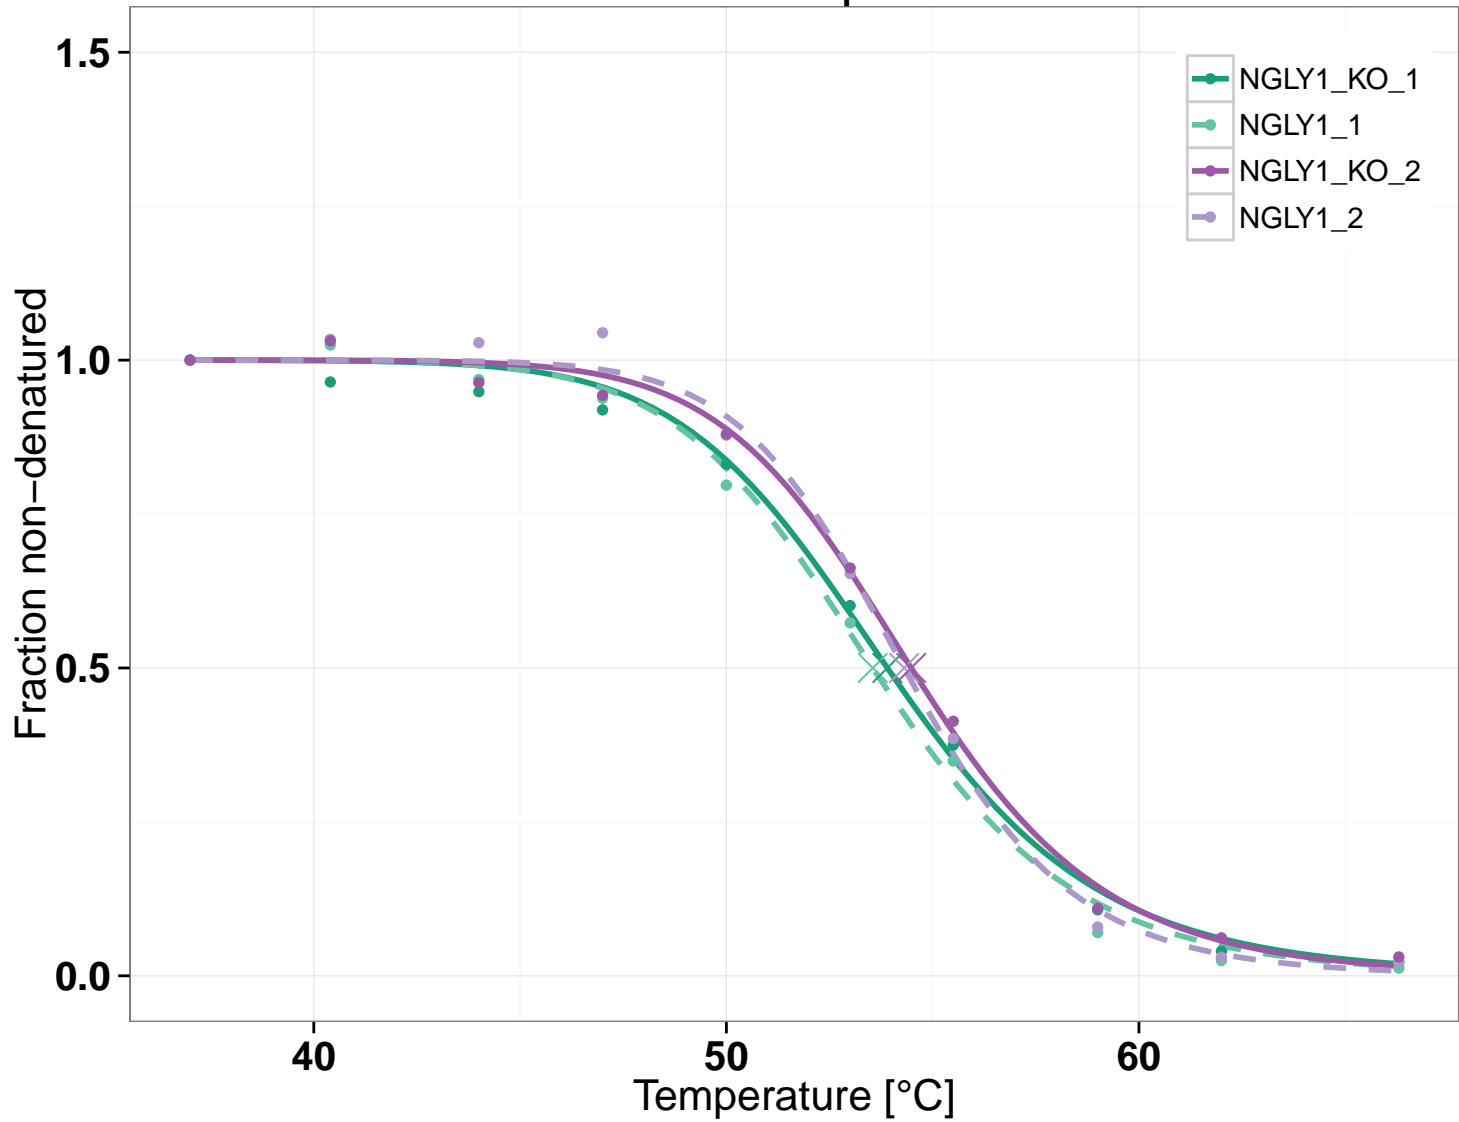

|            | meltPoint | slope  | plateau | R2 |
|------------|-----------|--------|---------|----|
| NGLY1_KO_1 | 53.9      | -0.098 | 0       | 1  |
| NGLY1_1    | 53.55     | -0.1   | 0       | 1  |
| NGLY1_KO_2 | 54.48     | -0.11  | 0       | 1  |
| NGLY1_2    | 54.31     | -0.12  | 0       | 1  |

Supplement: Supplementary file 530 [file 1]

IPI00102509.4|SLC38A5

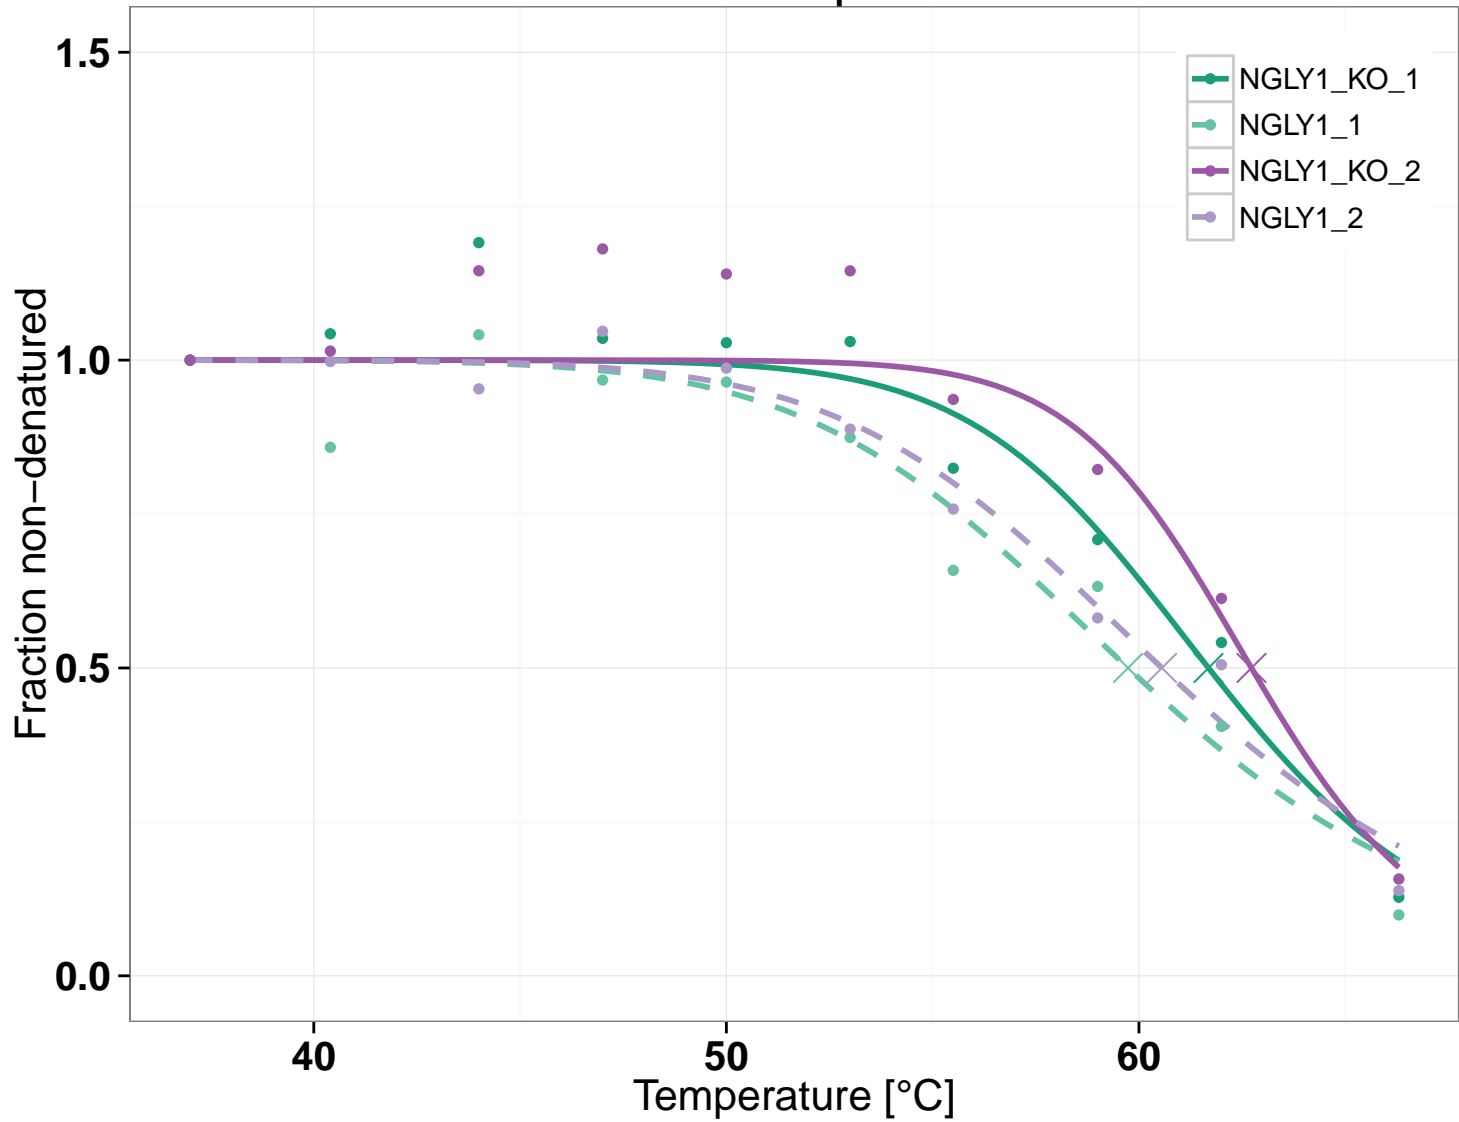

|            | meltPoint | slope  | plateau | R2   |
|------------|-----------|--------|---------|------|
| NGLY1_KO_1 | 61.69     | -0.086 | 0       | 0.93 |
| NGLY1_1    | 59.74     | -0.064 | 0       | 0.94 |
| NGLY1_KO_2 | 62.73     | -0.11  | 0       | 0.89 |
| NGLY1_2    | 60.56     | -0.064 | 0       | 0.97 |

Supplement: Supplementary file 531 [file 1]

IPI00176574.1|LOC284230

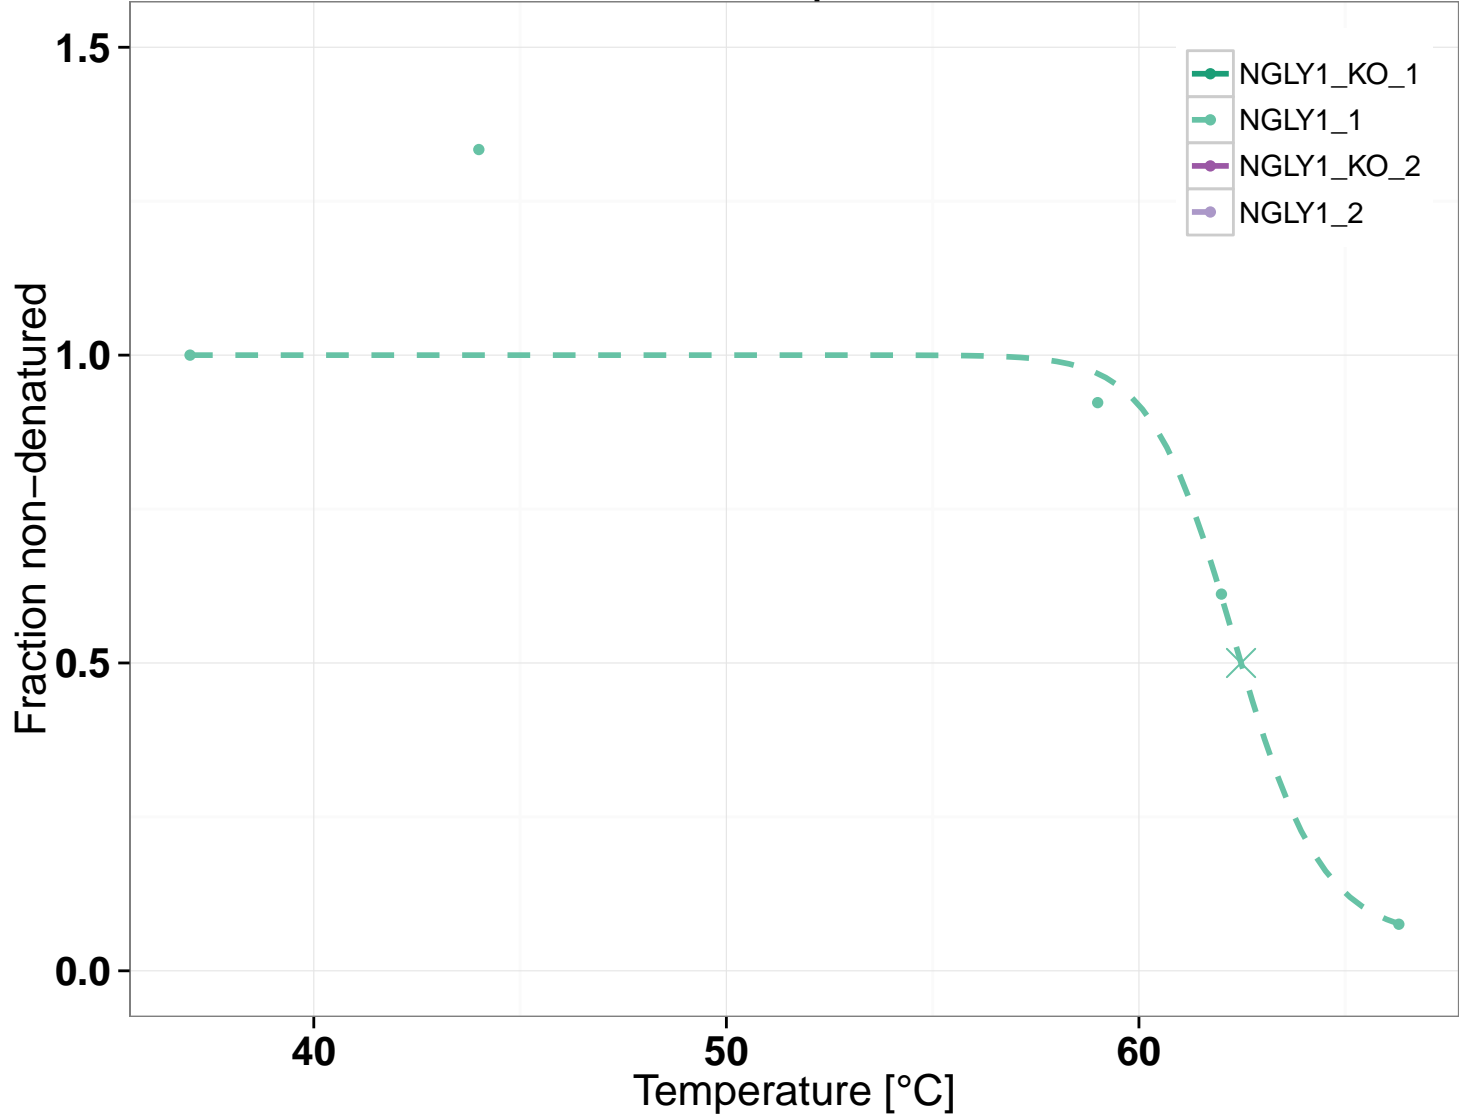

|            | meltPoint | slope | plateau | R2    |
|------------|-----------|-------|---------|-------|
| NGLY1_KO_1 | -         | -     | -       | -     |
| NGLY1_1    | 62.47     | -0.23 | 0.05    | -0.28 |
| NGLY1_KO_2 | -         | -     | -       | -     |
| NGLY1_2    | -         | -     | -       | -     |

Supplement: Supplementary file 532 [file 1]

IPI00060270.4|ZNF524

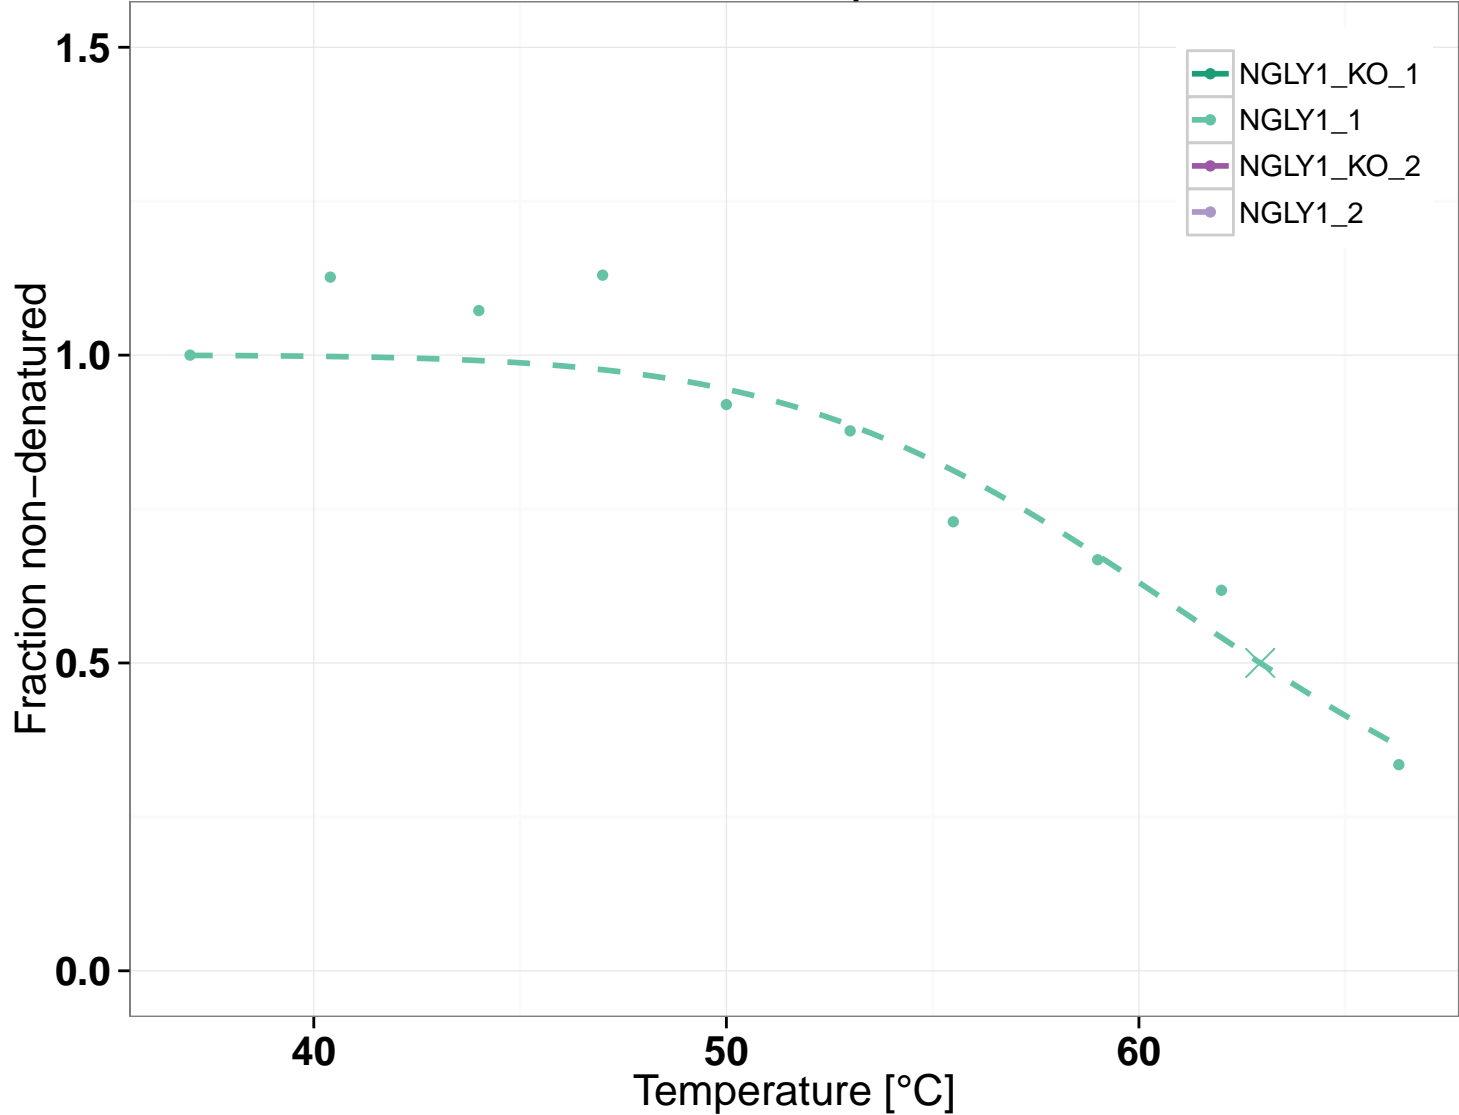

|            | meltPoint | slope  | plateau | R2  |
|------------|-----------|--------|---------|-----|
| NGLY1_KO_1 | -         | -      | -       | -   |
| NGLY1_1    | 62.94     | -0.045 | 0.01    | 0.9 |
| NGLY1_KO_2 | -         | -      | -       | -   |
| NGLY1_2    | -         | -      | -       | -   |

Supplement: Supplementary file 533 [file 1]

IPI00743772.2|COMMD7

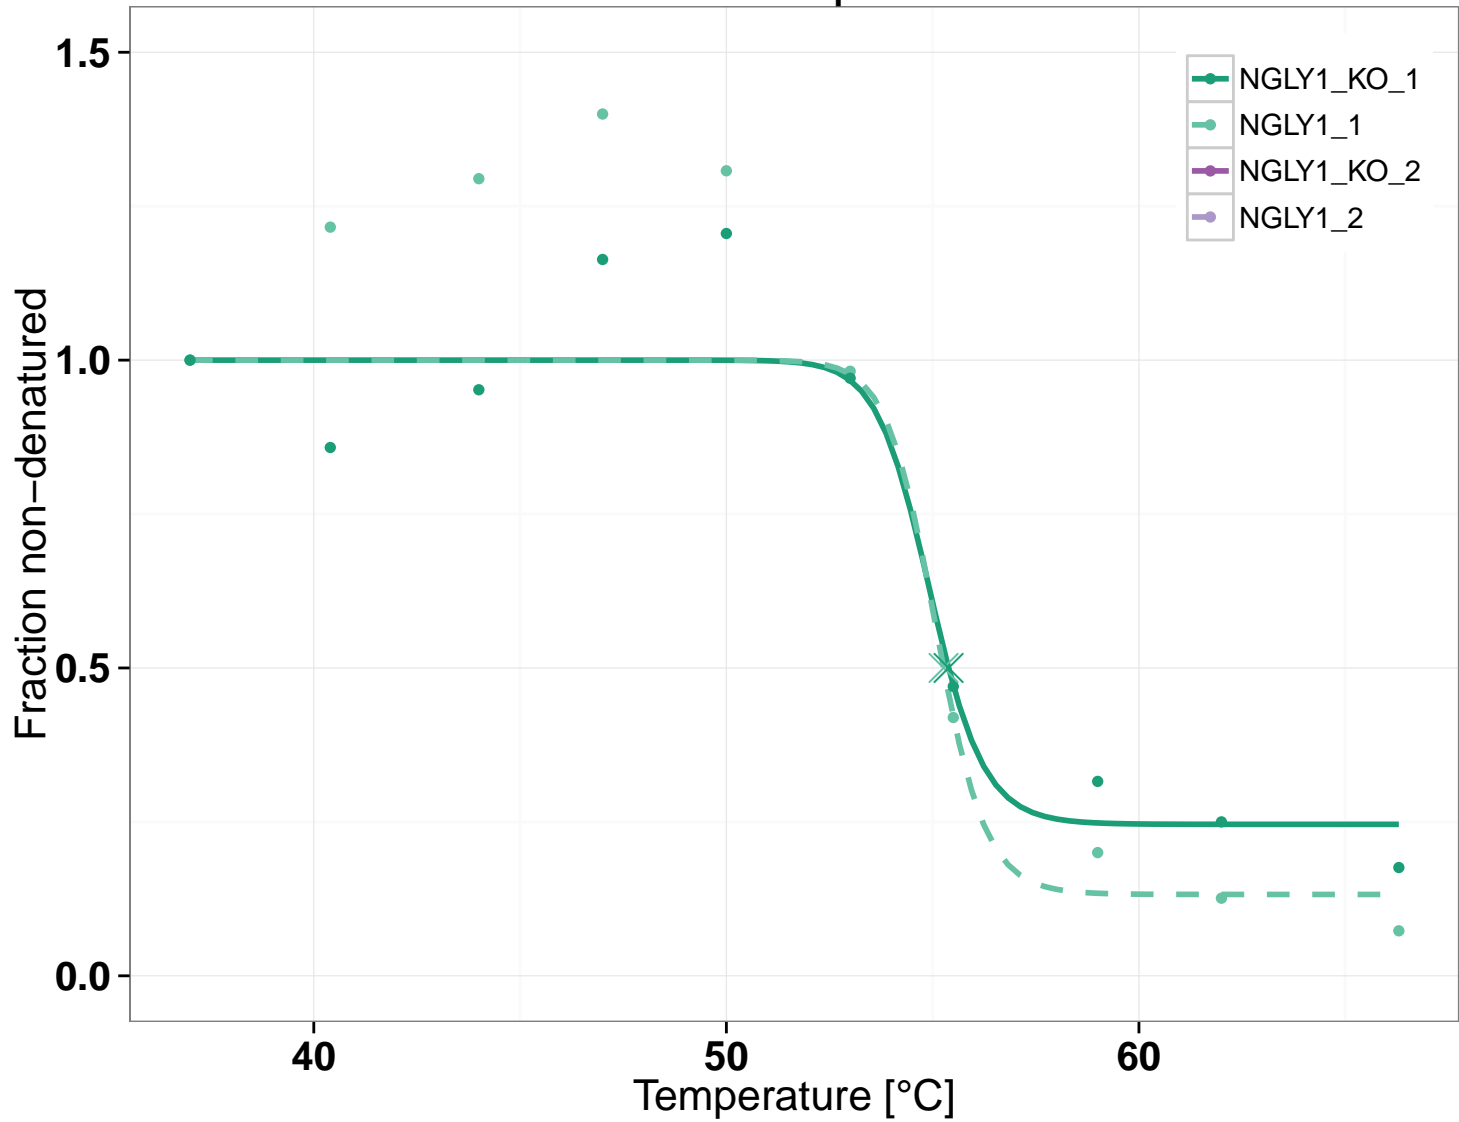

|            | meltPoint | slope | plateau | R2   |
|------------|-----------|-------|---------|------|
| NGLY1_KO_1 | 55.39     | -0.29 | 0.25    | 0.93 |
| NGLY1_1    | 55.26     | -0.36 | 0.13    | 0.85 |
| NGLY1_KO_2 | -         | -     | -       | -    |
| NGLY1_2    | -         | -     | -       | -    |

Supplement: Supplementary file 534 [file 1]

IPI00025273.1|GART

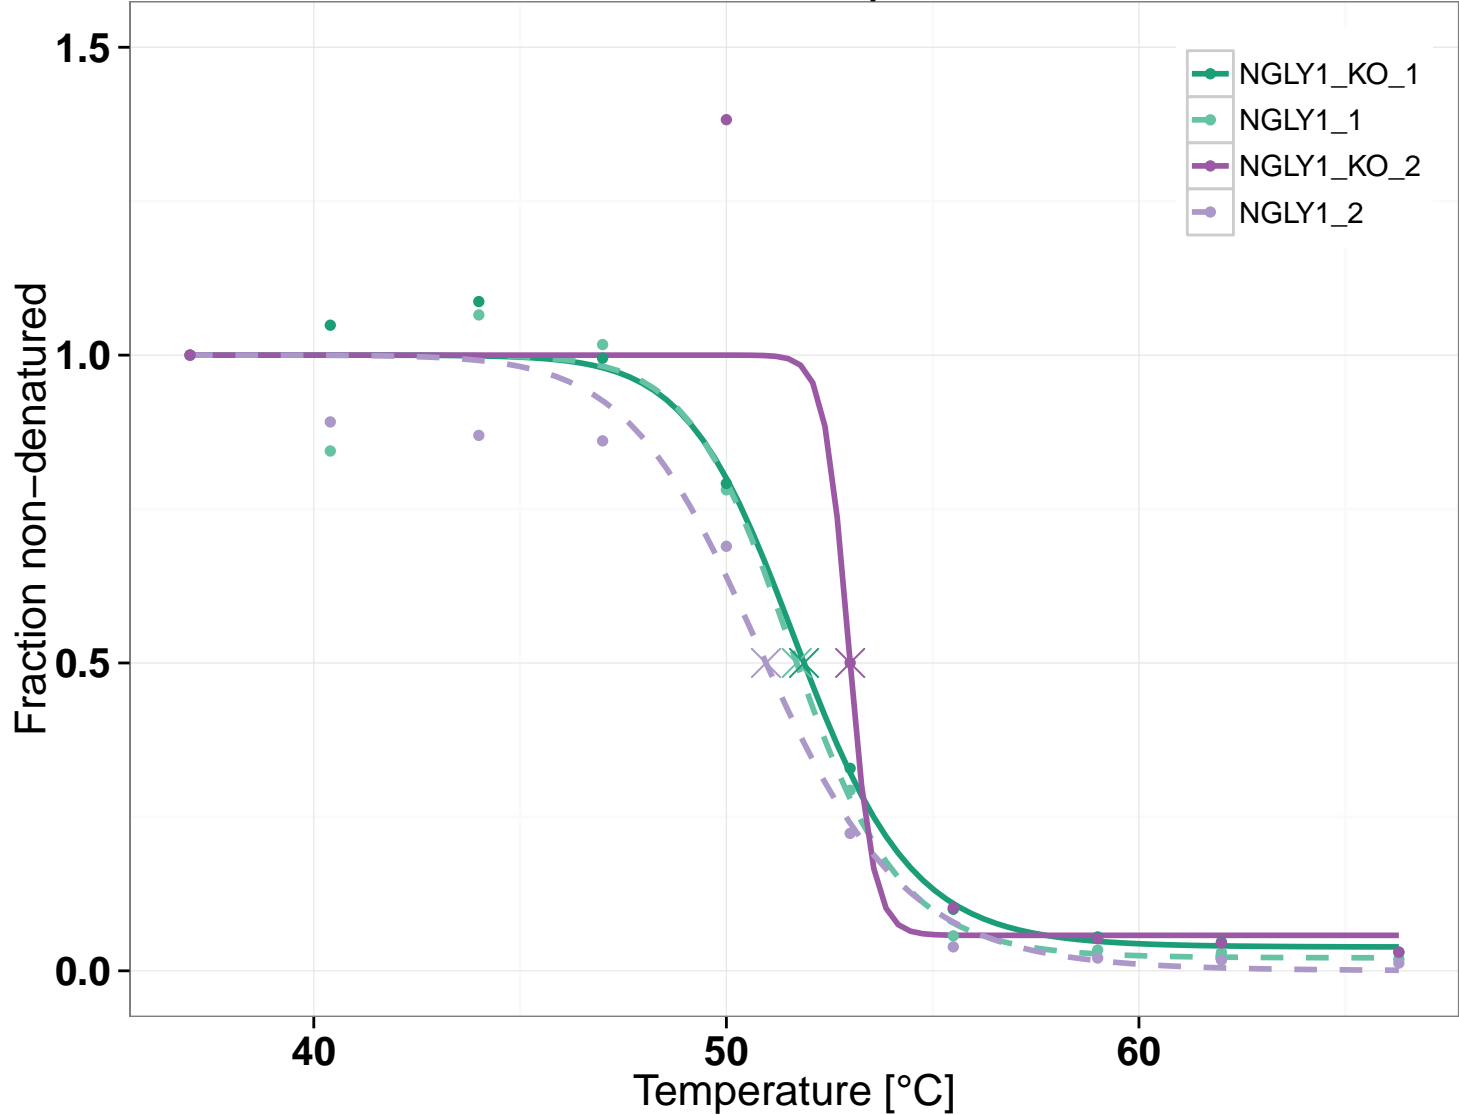

|            | meltPoint | slope | plateau | R2   |
|------------|-----------|-------|---------|------|
| NGLY1_KO_1 | 51.88     | -0.18 | 0.04    | 0.99 |
| NGLY1_1    | 51.71     | -0.19 | 0.02    | 0.98 |
| NGLY1_KO_2 | 53        | -0.8  | 0.06    | 0.59 |
| NGLY1_2    | 50.96     | -0.15 | 0       | 0.98 |

Supplement: Supplementary file 535 [file 1]

IPI00152269.3|WDR51B

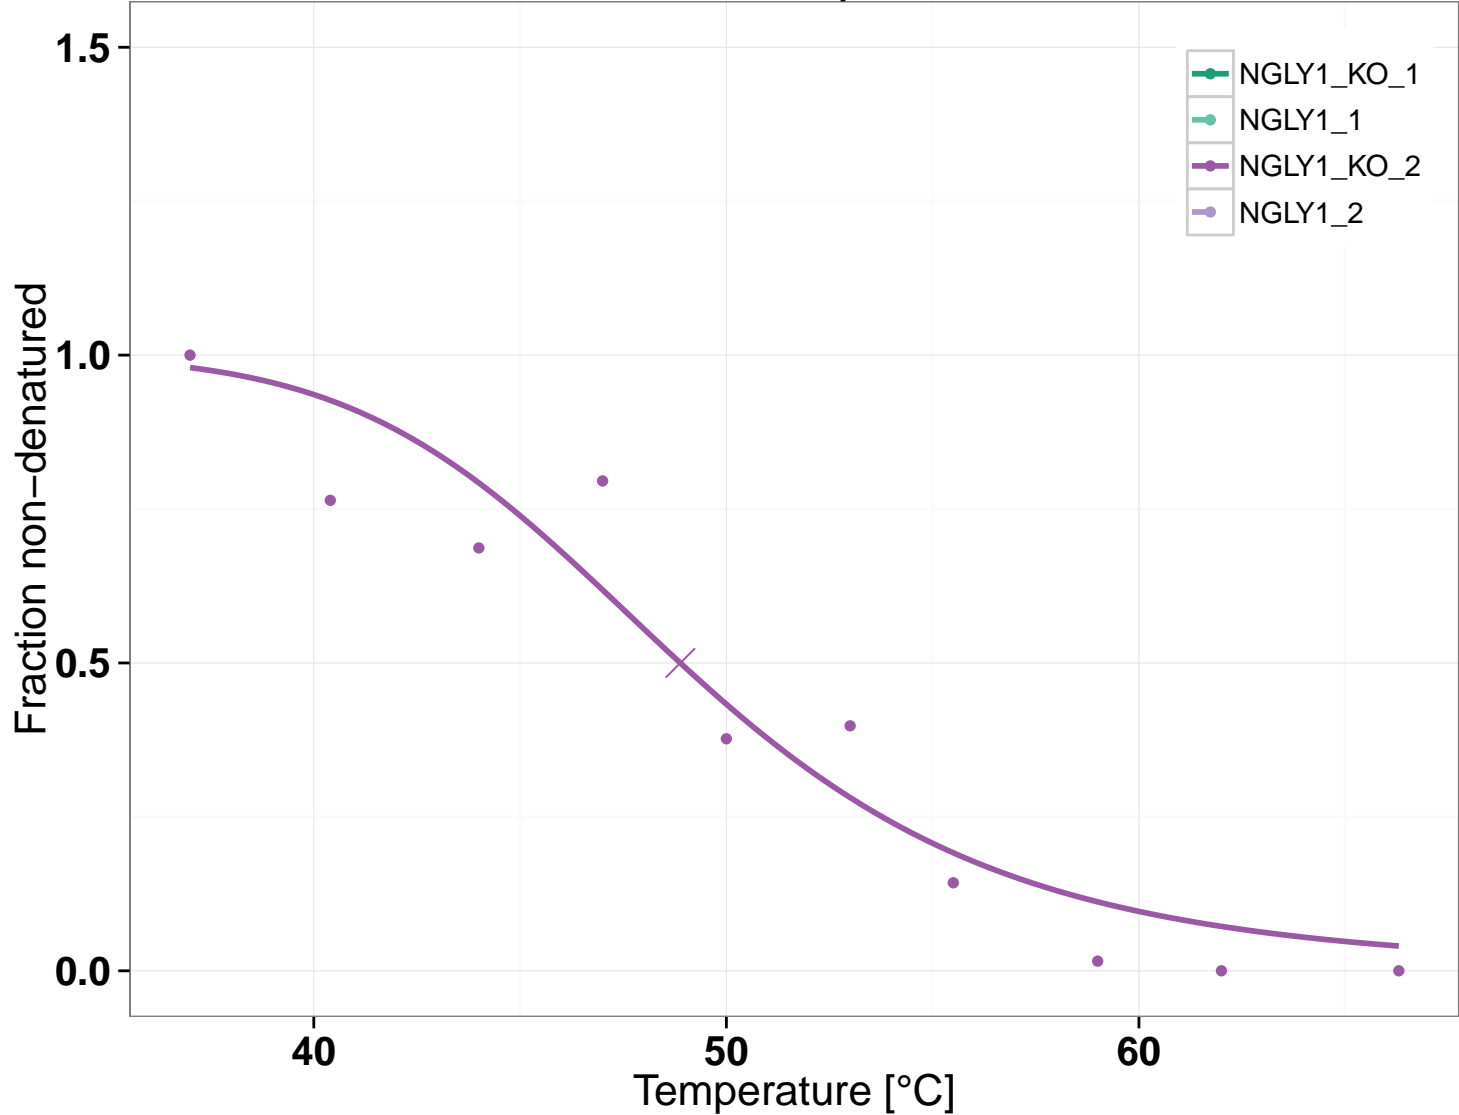

|            | meltPoint | slope  | plateau | R2   |
|------------|-----------|--------|---------|------|
| NGLY1_KO_1 | -         | -      | -       | -    |
| NGLY1_1    | -         | -      | -       | -    |
| NGLY1_KO_2 | 48.88     | -0.063 | 0       | 0.92 |
| NGLY1_2    | -         | -      | -       | -    |

Supplement: Supplementary file 536 [file 1]

# IPI00156649.4|DOK3

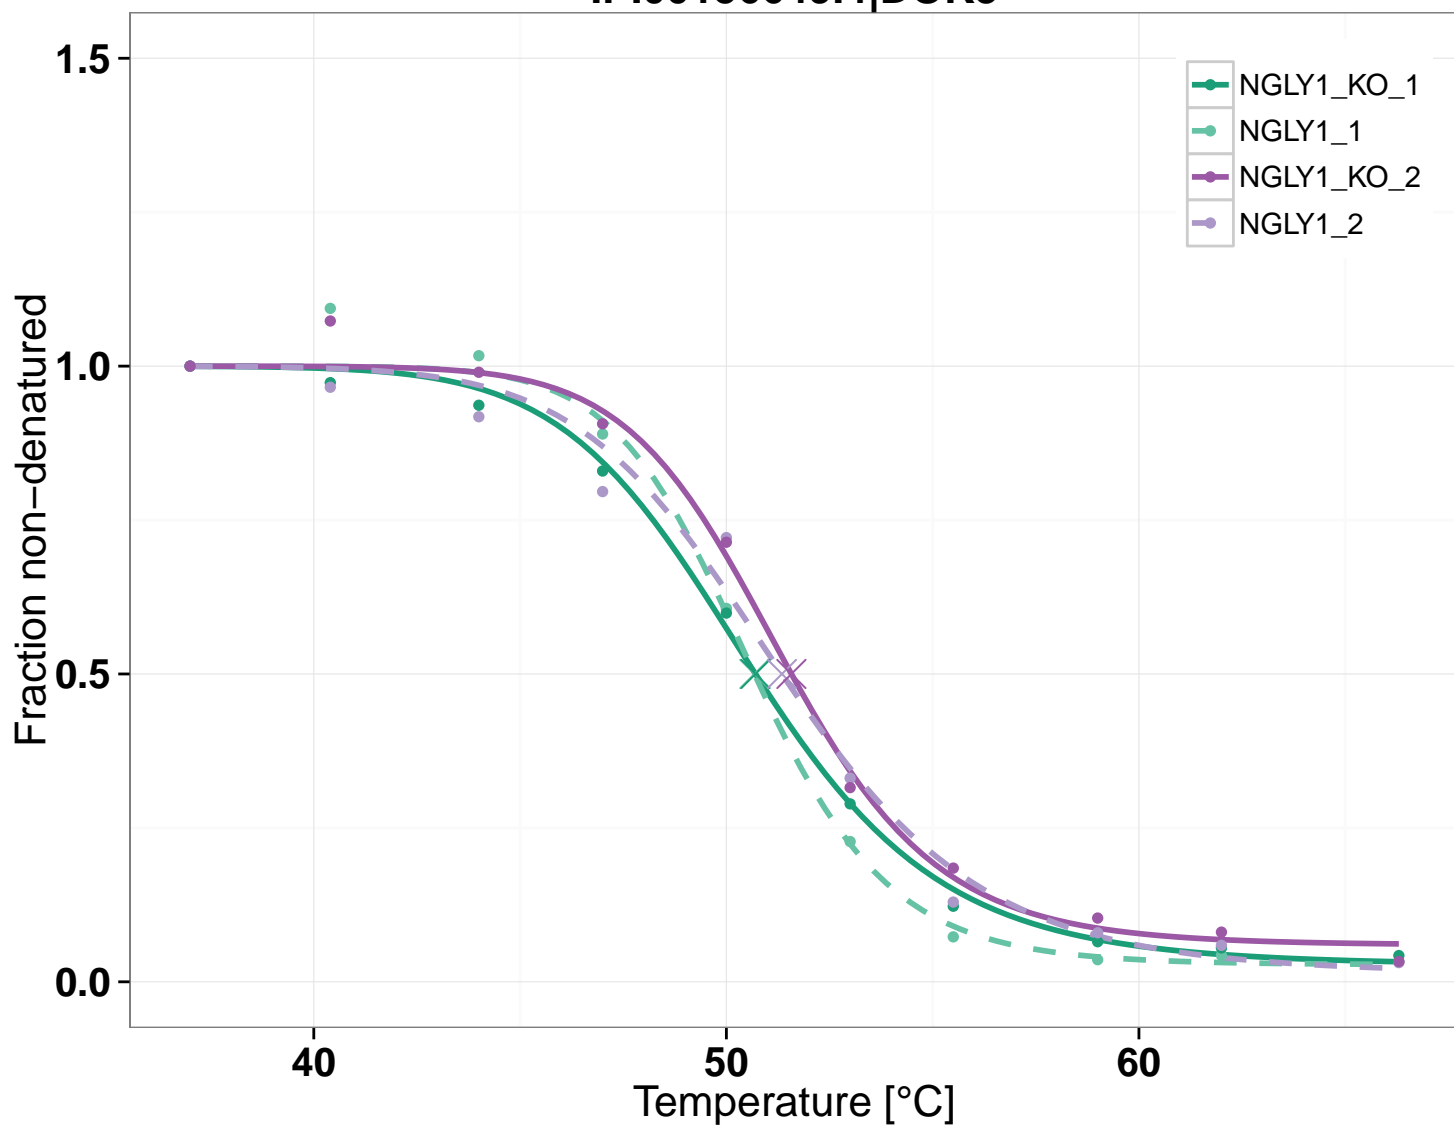

|            | meltPoint | slope | plateau | R2   |
|------------|-----------|-------|---------|------|
| NGLY1_KO_1 | 50.71     | -0.11 | 0.03    | 1    |
| NGLY1_1    | 50.68     | -0.15 | 0.03    | 0.99 |
| NGLY1_KO_2 | 51.58     | -0.12 | 0.06    | 0.99 |
| NGLY1_2    | 51.35     | -0.1  | 0.01    | 0.99 |

Supplement: Supplementary file 537 [file 1]

# IPI00024462.3|DHODH

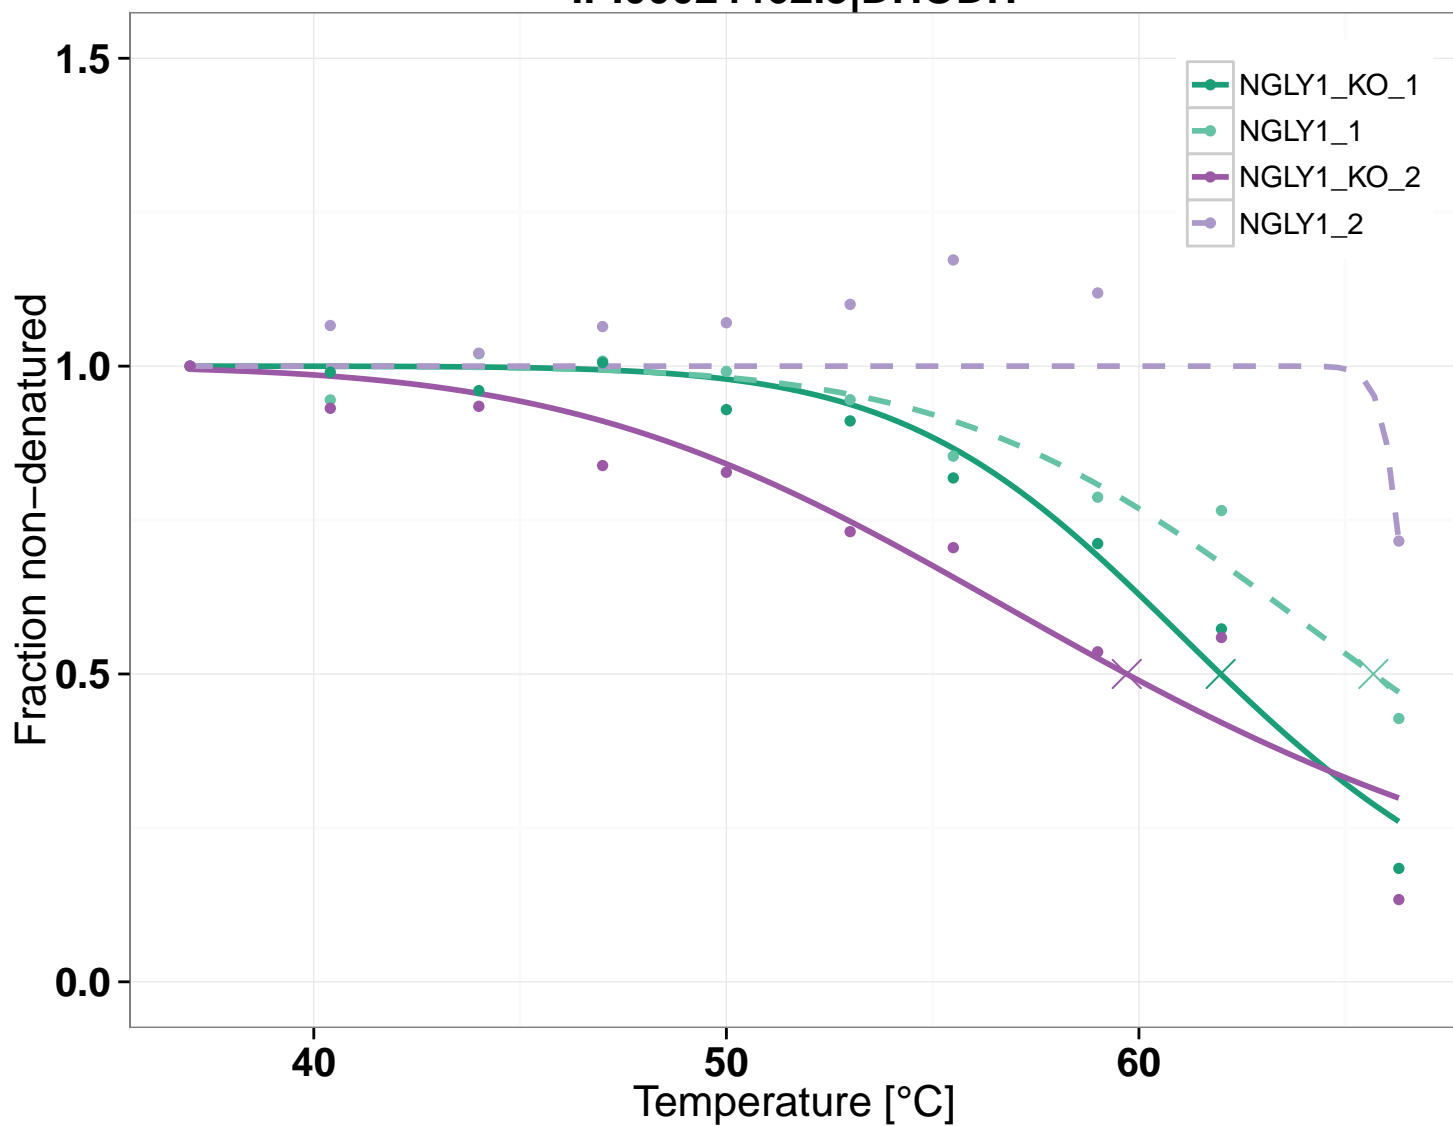

|            | meltPoint | slope  | plateau | R2   |
|------------|-----------|--------|---------|------|
| NGLY1_KO_1 | 61.98     | -0.066 | 0       | 0.97 |
| NGLY1_1    | 65.68     | -0.049 | 0       | 0.94 |
| NGLY1_KO_2 | 59.7      | -0.038 | 0       | 0.9  |
| NGLY1_2    | –         | –      | 0       | 0.28 |

Supplement: Supplementary file 538 [file 1]

IPI00909312.1|B4DKJ8\_HUMAN

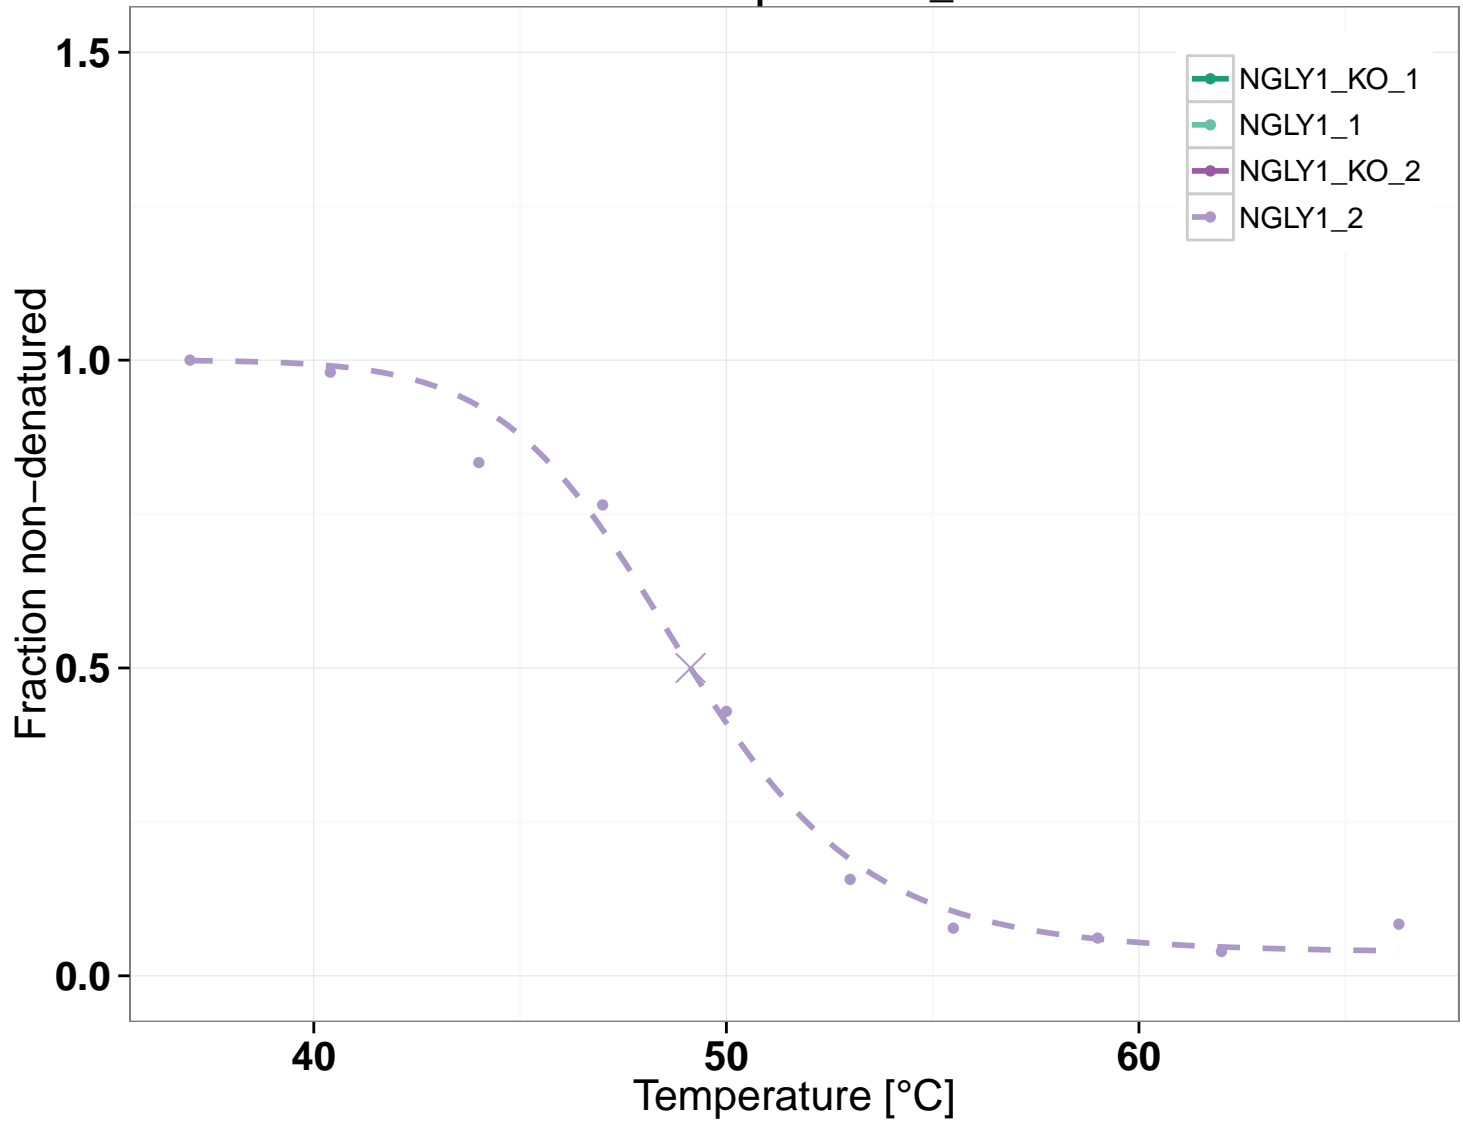

|            | meltPoint | slope | plateau | R2   |
|------------|-----------|-------|---------|------|
| NGLY1_KO_1 | -         | -     | -       | -    |
| NGLY1_1    | -         | -     | -       | -    |
| NGLY1_KO_2 | -         | -     | -       | -    |
| NGLY1_2    | 49.13     | -0.11 | 0.04    | 0.99 |

Supplement: Supplementary file 539 [file 1]

# IPI00041325.1|NHP2

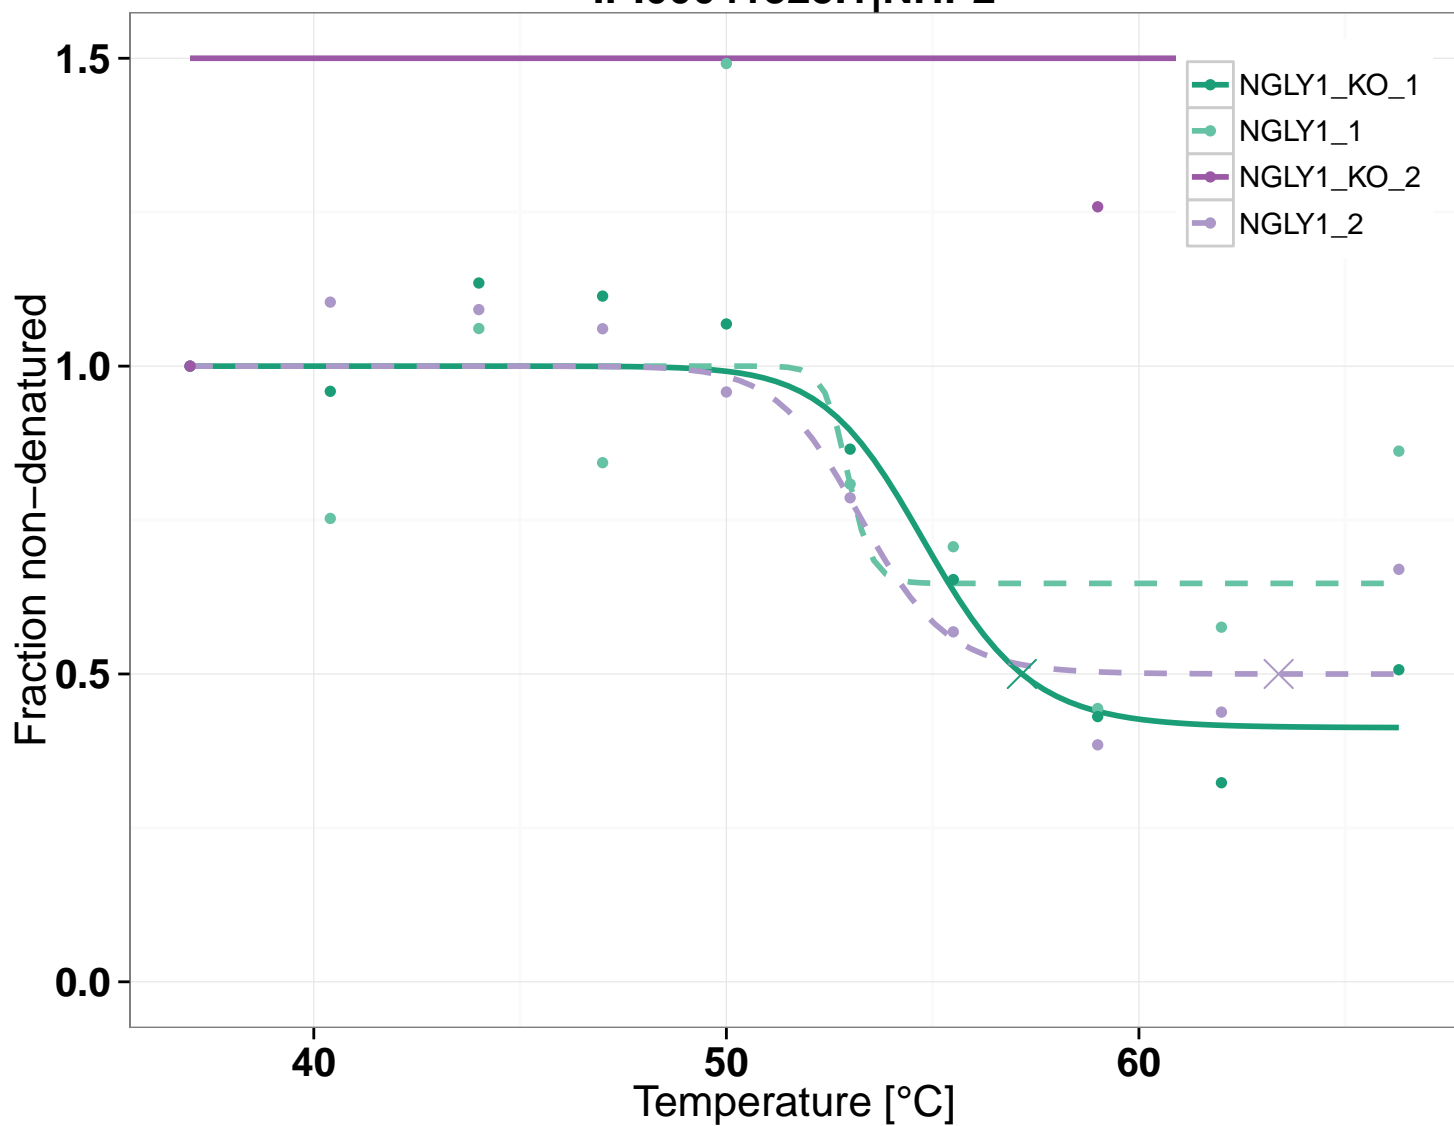

|            | meltPoint | slope | plateau | R2    |
|------------|-----------|-------|---------|-------|
| NGLY1_KO_1 | 57.16     | -0.12 | 0.41    | 0.93  |
| NGLY1_1    | -         | -0.31 | 0.65    | 0.43  |
| NGLY1_KO_2 | -         | -     | 1.5     | -1.28 |
| NGLY1_2    | 63.39     | -0.12 | 0.5     | 0.9   |

Supplement: Supplementary file 540 [file 1]

IPI00301434.4|BOLA2

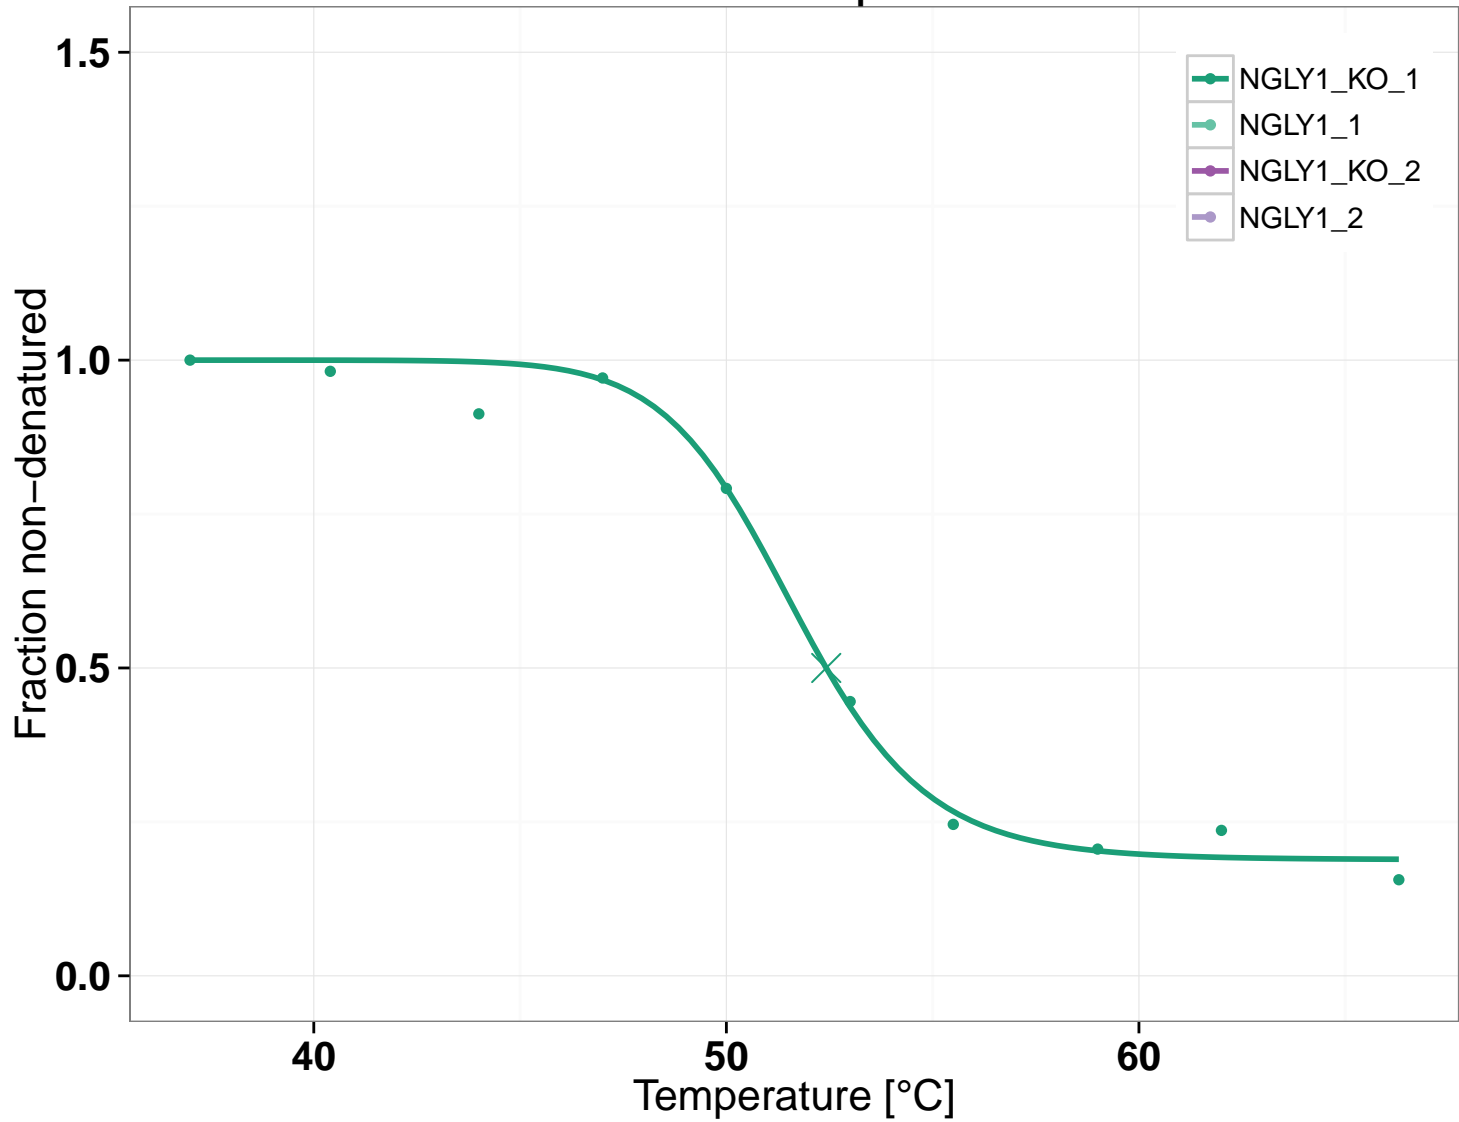

|            | meltPoint | slope | plateau | R2   |
|------------|-----------|-------|---------|------|
| NGLY1_KO_1 | 52.42     | -0.13 | 0.19    | 0.99 |
| NGLY1_1    | -         | -     | -       | -    |
| NGLY1_KO_2 | -         | -     | -       | -    |
| NGLY1_2    | -         | -     | -       | -    |

Supplement: Supplementary file 541 [file 1]

IPI00797253.1|EPB49

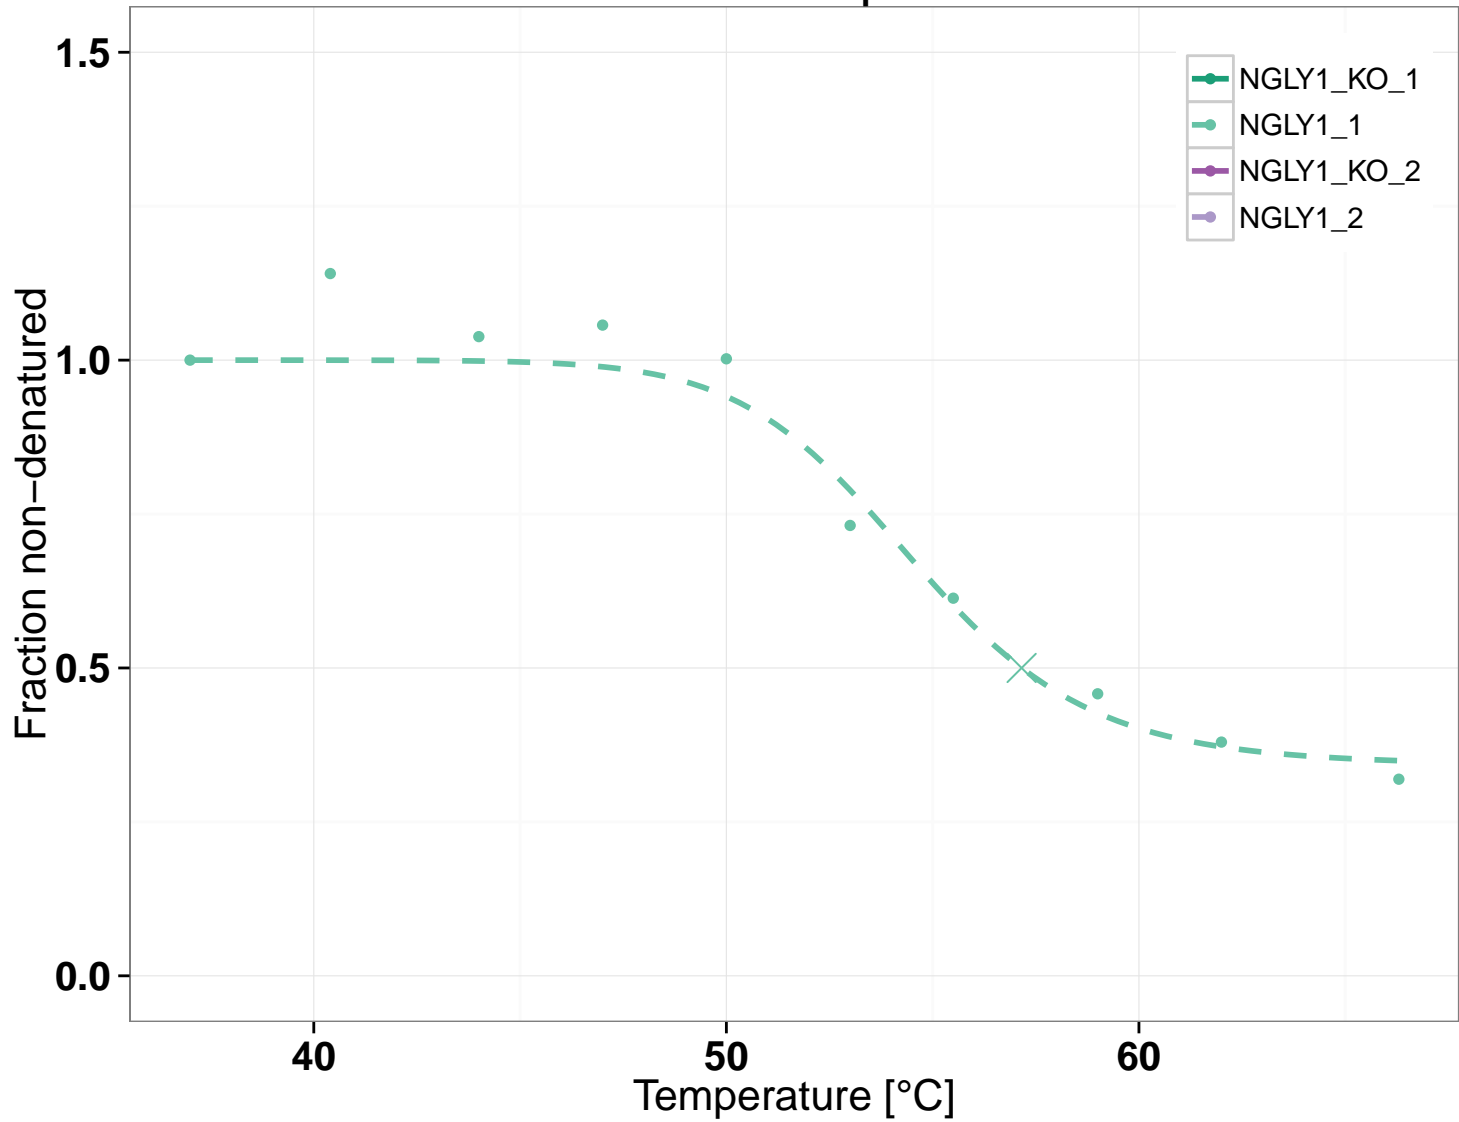

|            | meltPoint | slope  | plateau | R2   |
|------------|-----------|--------|---------|------|
| NGLY1_KO_1 | -         | -      | -       | -    |
| NGLY1_1    | 57.16     | -0.077 | 0.34    | 0.96 |
| NGLY1_KO_2 | -         | -      | -       | -    |
| NGLY1_2    | -         | -      | -       | -    |

Supplement: Supplementary file 542 [file 1]

IPI00106573.6|C20ORF7

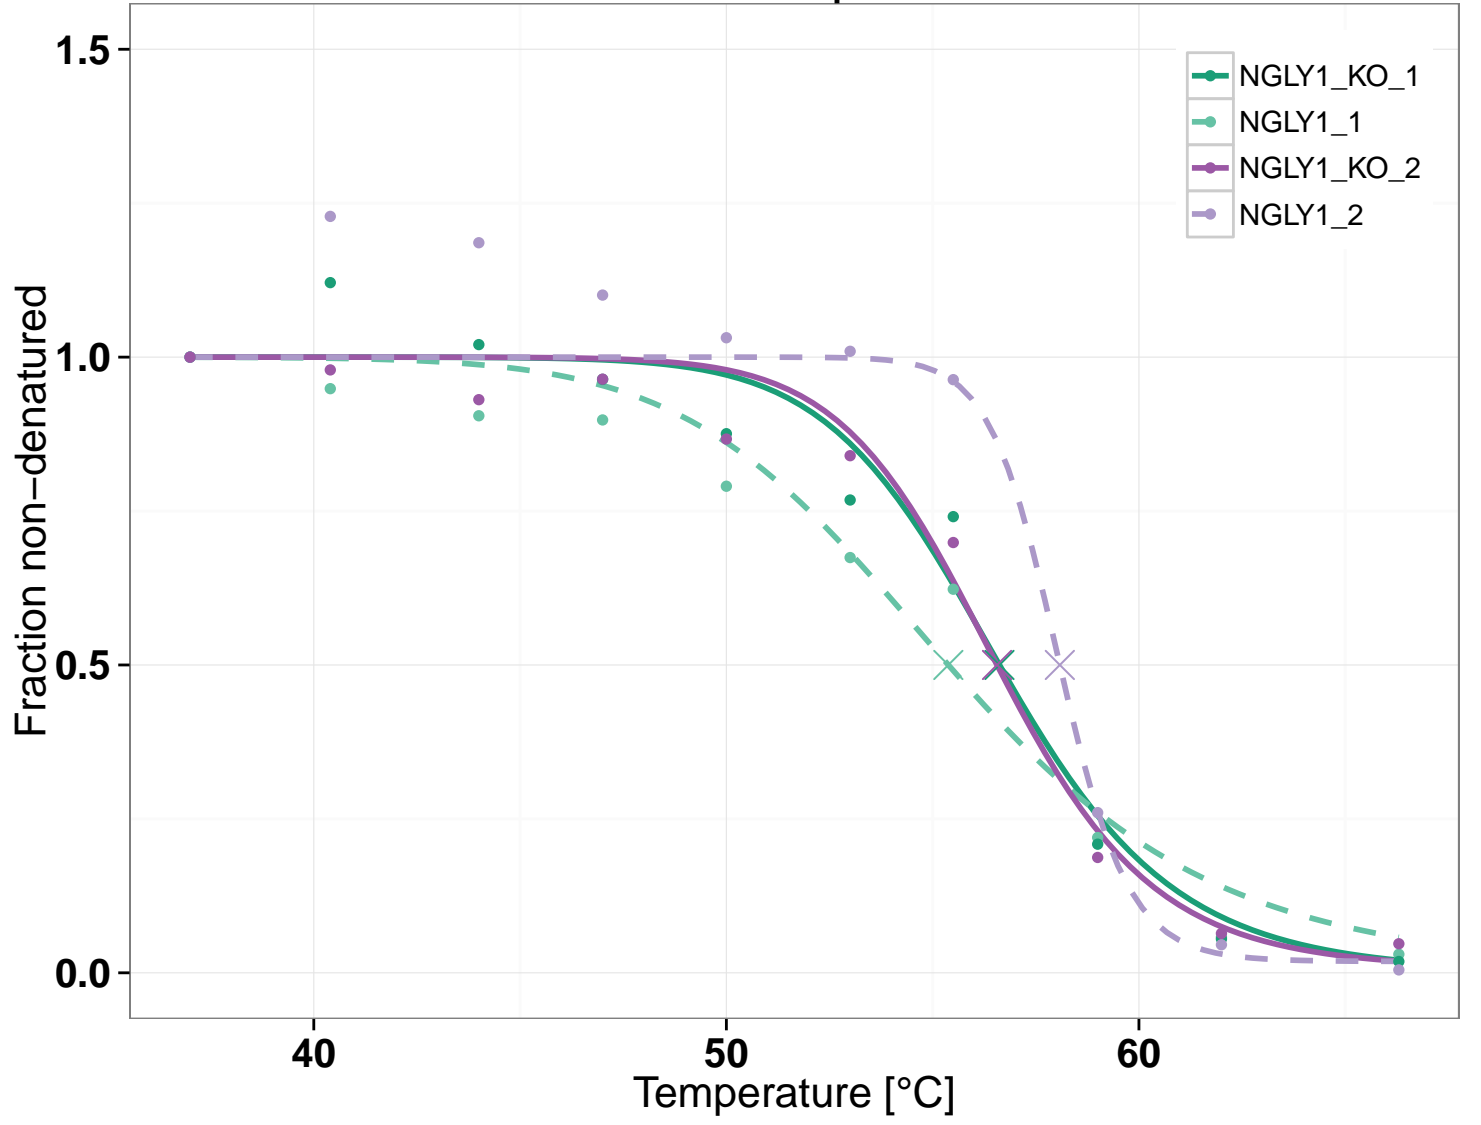

|            | meltPoint | slope  | plateau | R2   |
|------------|-----------|--------|---------|------|
| NGLY1_KO_1 | 56.62     | -0.12  | 0       | 0.97 |
| NGLY1_1    | 55.38     | -0.078 | 0       | 0.97 |
| NGLY1_KO_2 | 56.56     | -0.13  | 0.01    | 0.98 |
| NGLY1_2    | 58.08     | -0.29  | 0.02    | 0.95 |

Supplement: Supplementary file 543 [file 1]

IPI00879677.1|DIS3L

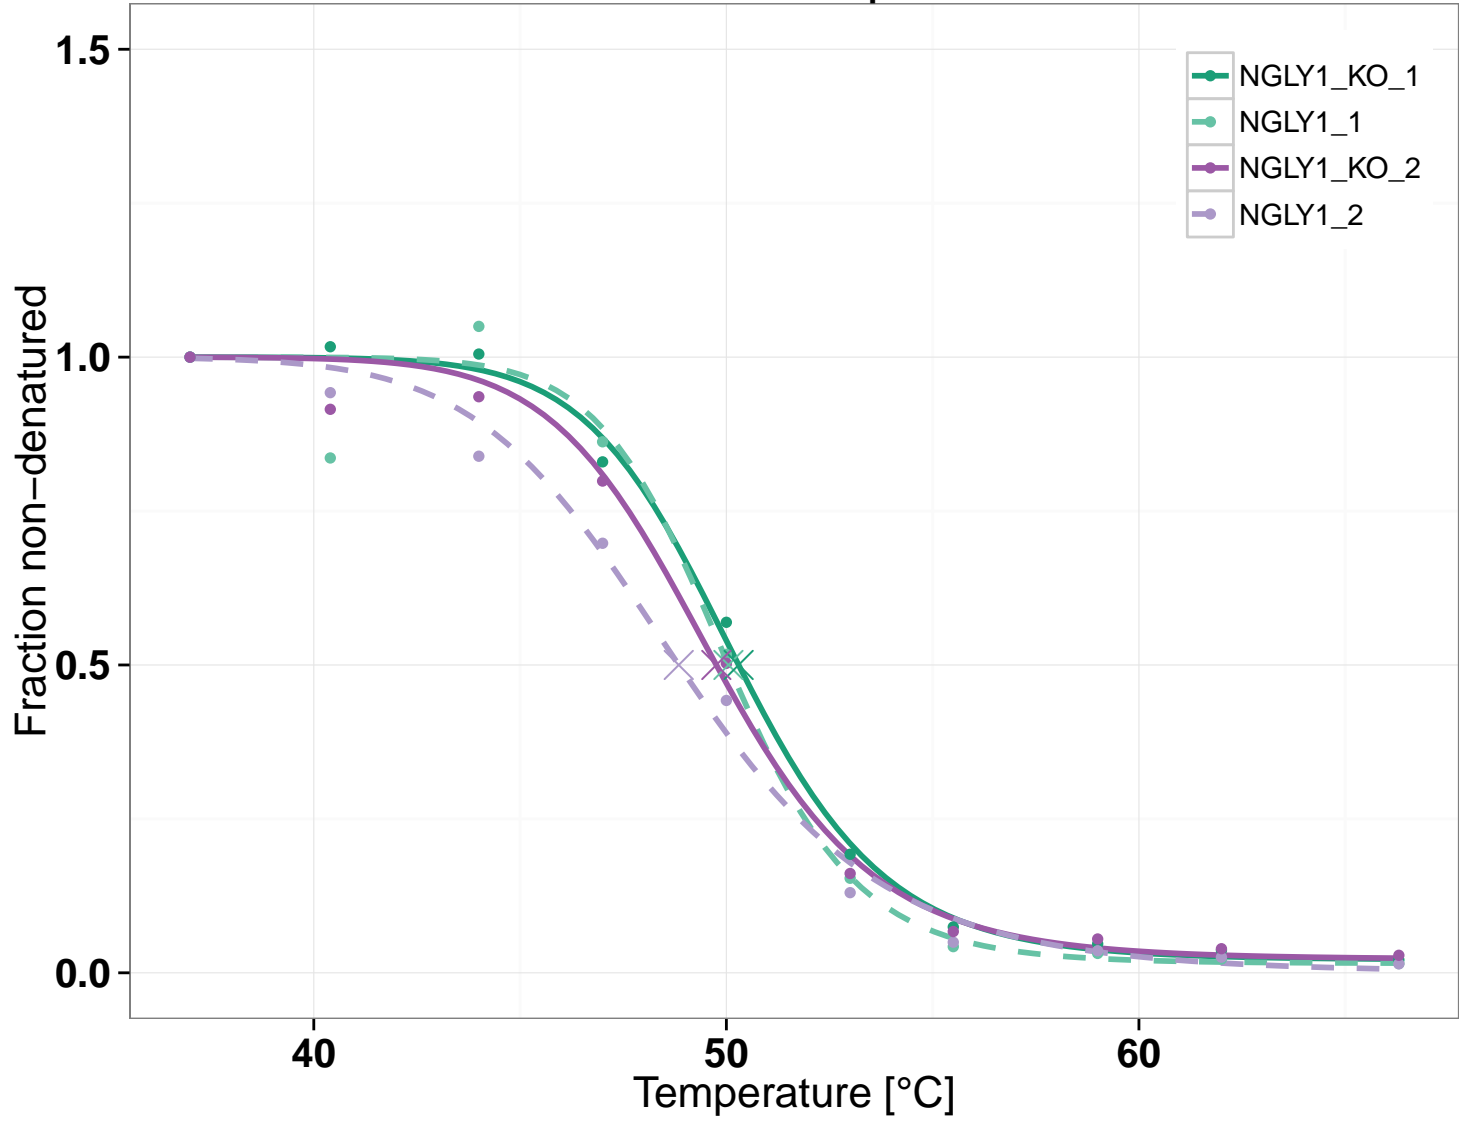

|            | meltPoint | slope | plateau | R2   |
|------------|-----------|-------|---------|------|
| NGLY1_KO_1 | 50.3      | -0.13 | 0.02    | 1    |
| NGLY1_1    | 50.05     | -0.16 | 0.02    | 0.98 |
| NGLY1_KO_2 | 49.76     | -0.12 | 0.02    | 0.99 |
| NGLY1_2    | 48.85     | -0.1  | 0       | 0.99 |

Supplement: Supplementary file 544 [file 1]

IPI00554632.2|FEZ2

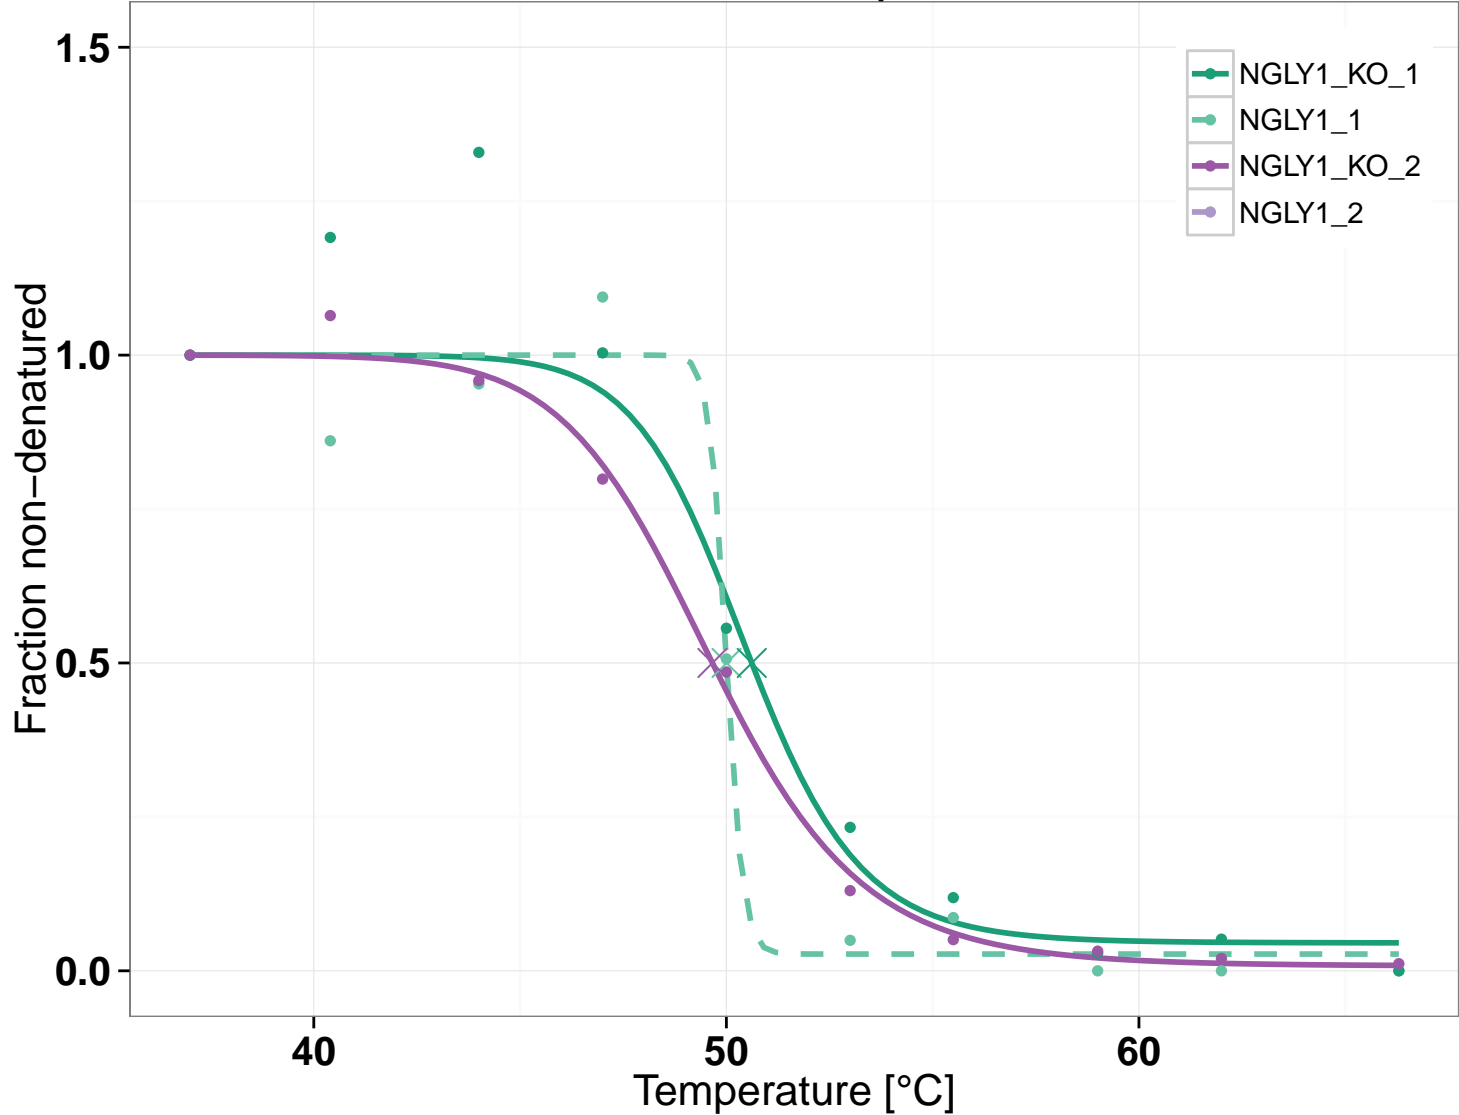

|            | meltPoint | slope | plateau | R2   |
|------------|-----------|-------|---------|------|
| NGLY1_KO_1 | 50.62     | -0.17 | 0.05    | 0.94 |
| NGLY1_1    | 50.01     | -1.2  | 0.03    | 0.98 |
| NGLY1_KO_2 | 49.66     | -0.14 | 0.01    | 1    |
| NGLY1_2    | -         | -     | -       | -    |

Supplement: Supplementary file 545 [file 1]

IPI00020539.1|PGPEP1

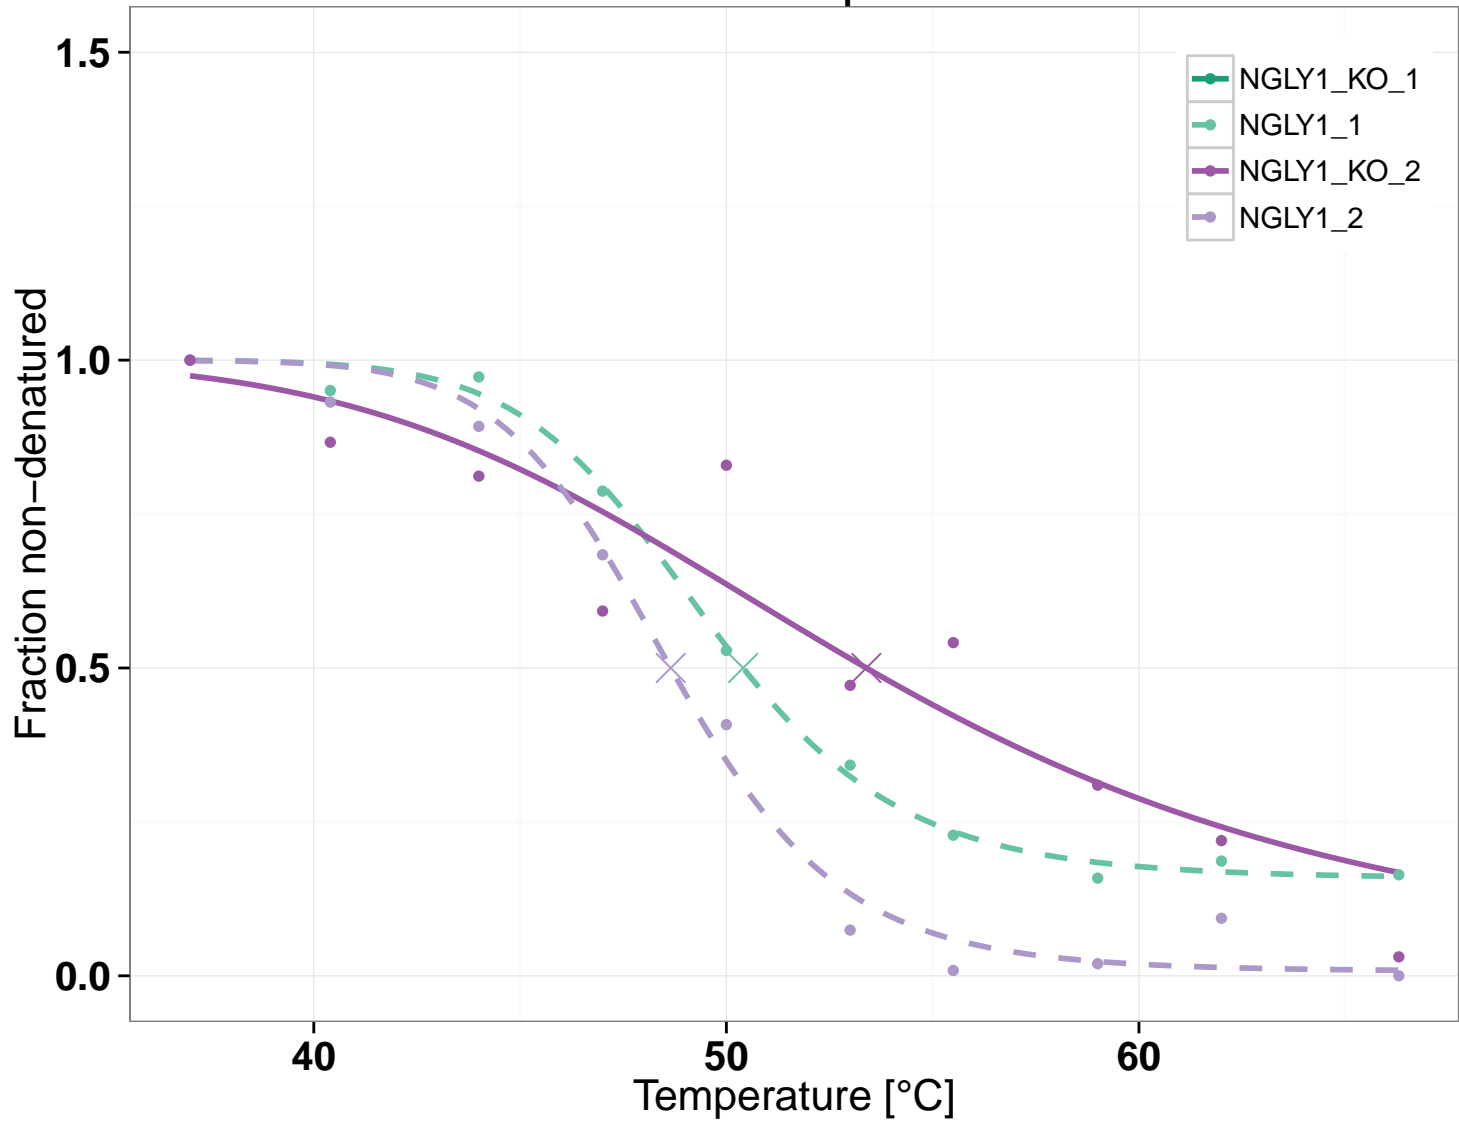

|            | meltPoint | slope  | plateau | R2   |
|------------|-----------|--------|---------|------|
| NGLY1_KO_1 | -         | -      | -       | -    |
| NGLY1_1    | 50.41     | -0.091 | 0.16    | 1    |
| NGLY1_KO_2 | 53.39     | -0.041 | 0       | 0.88 |
| NGLY1_2    | 48.65     | -0.12  | 0.01    | 0.99 |

Supplement: Supplementary file 546 [file 1]

IPI00014865.3|PCIF1

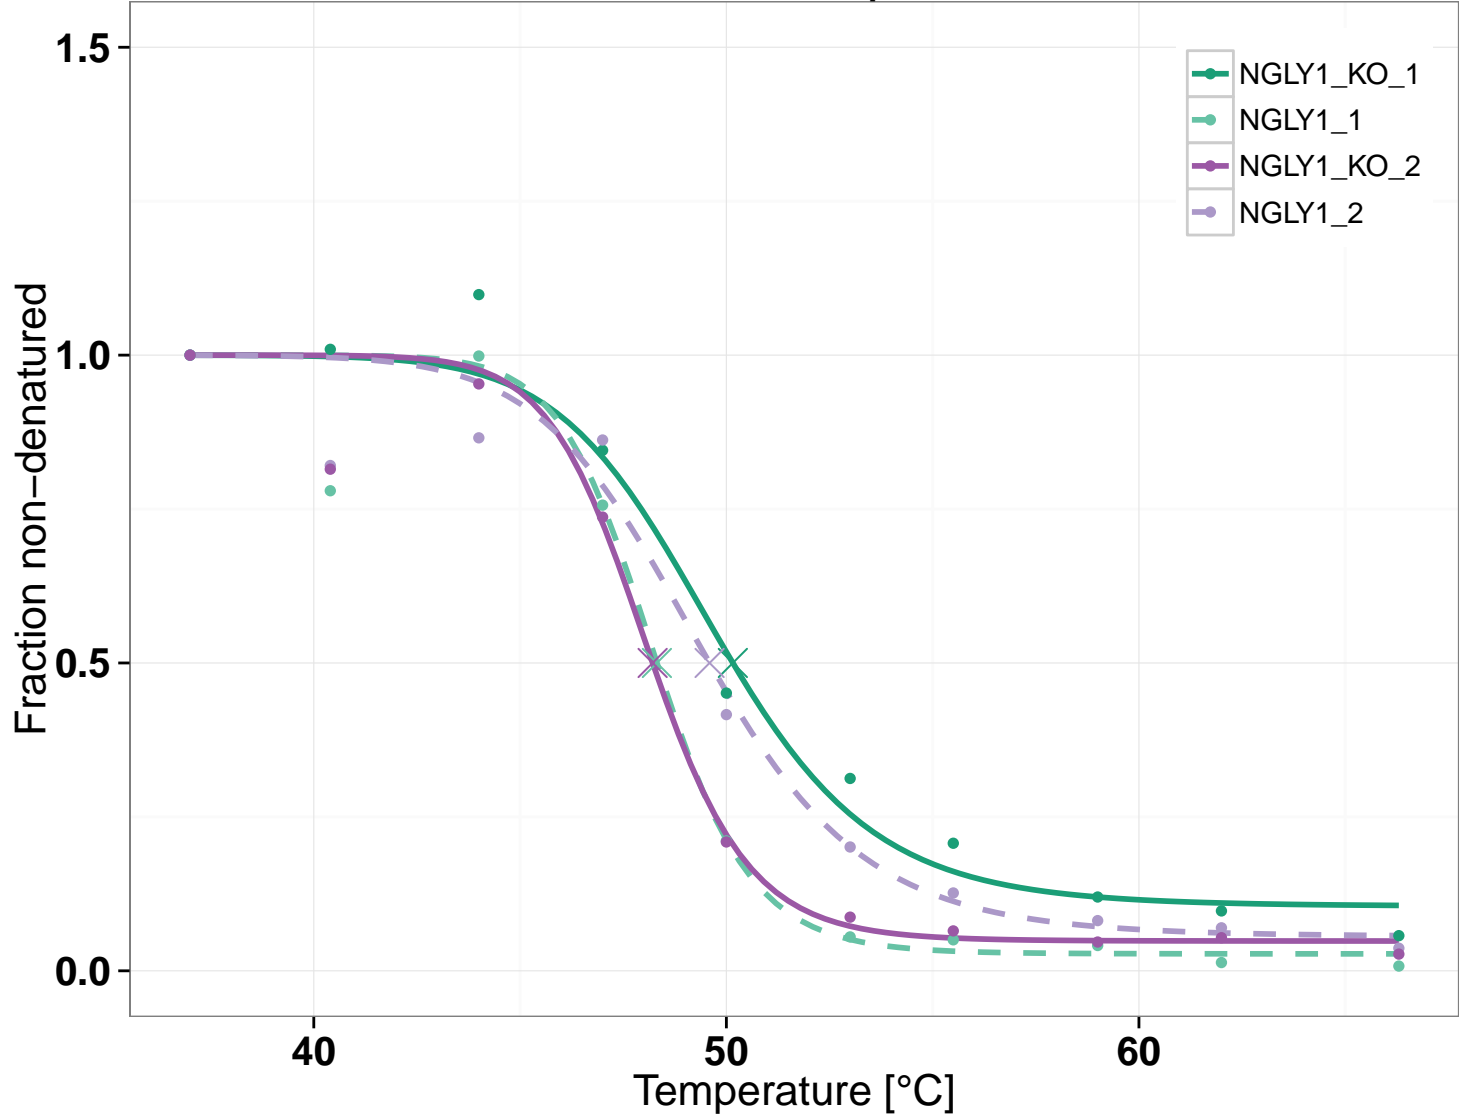

|            | meltPoint | slope | plateau | R2   |
|------------|-----------|-------|---------|------|
| NGLY1_KO_1 | 50.16     | -0.12 | 0.1     | 0.98 |
| NGLY1_1    | 48.32     | -0.21 | 0.03    | 0.97 |
| NGLY1_KO_2 | 48.21     | -0.2  | 0.05    | 0.98 |
| NGLY1_2    | 49.59     | -0.12 | 0.06    | 0.97 |

Supplement: Supplementary file 547 [file 1]

IPI00171664.2|NUP43

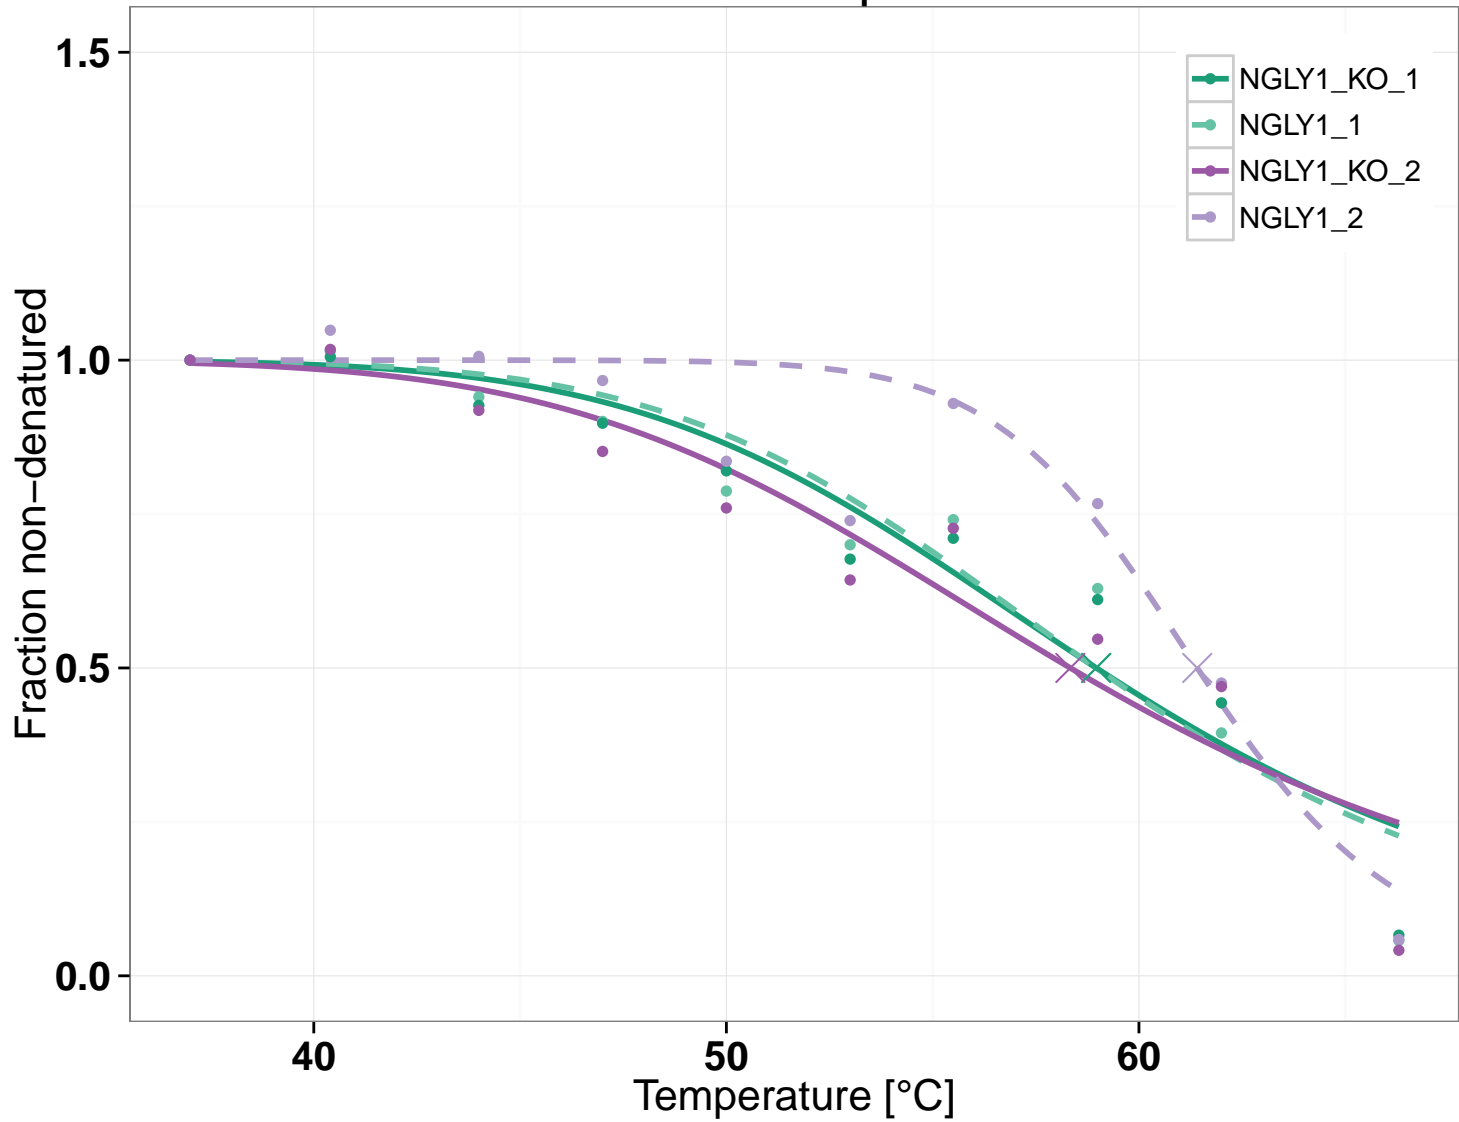

|            | meltPoint | slope  | plateau | R2   |
|------------|-----------|--------|---------|------|
| NGLY1_KO_1 | 58.97     | -0.045 | 0       | 0.92 |
| NGLY1_1    | 58.96     | -0.048 | 0       | 0.91 |
| NGLY1_KO_2 | 58.34     | -0.041 | 0       | 0.89 |
| NGLY1_2    | 61.41     | -0.1   | 0       | 0.89 |

Supplement: Supplementary file 548 [file 1]

IPI00060148.3|CCDC127

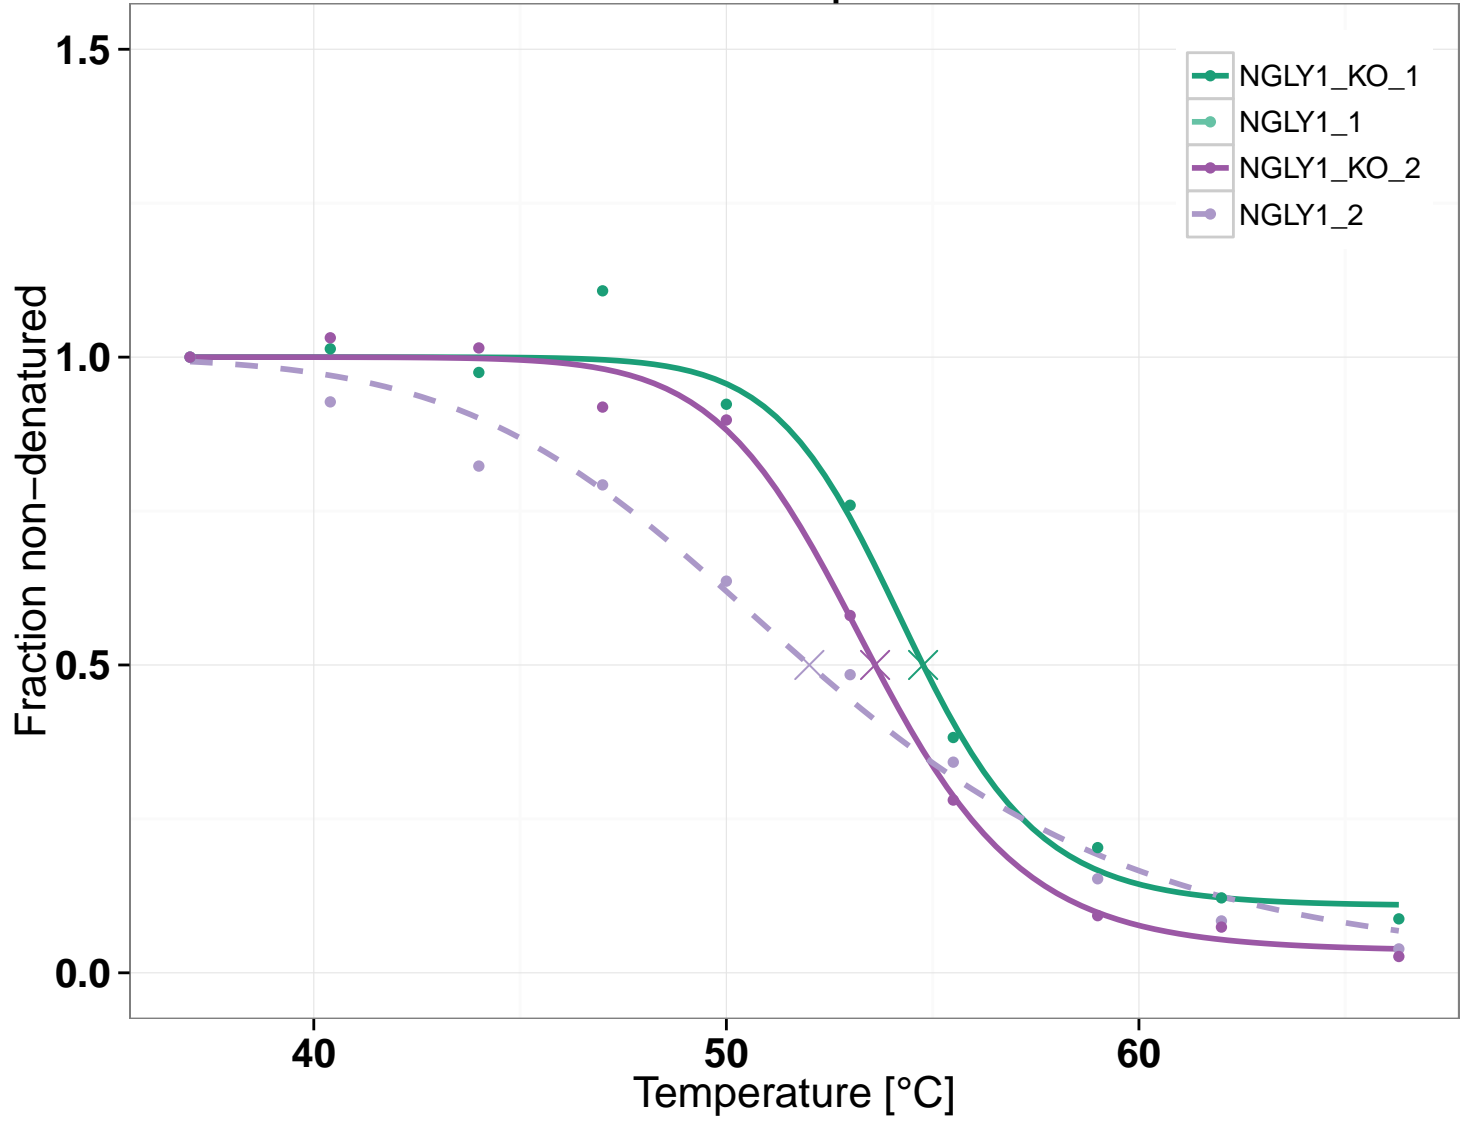

Supplement: Supplementary file 549 [file 1]

# IPI00025729.1|CAMLG

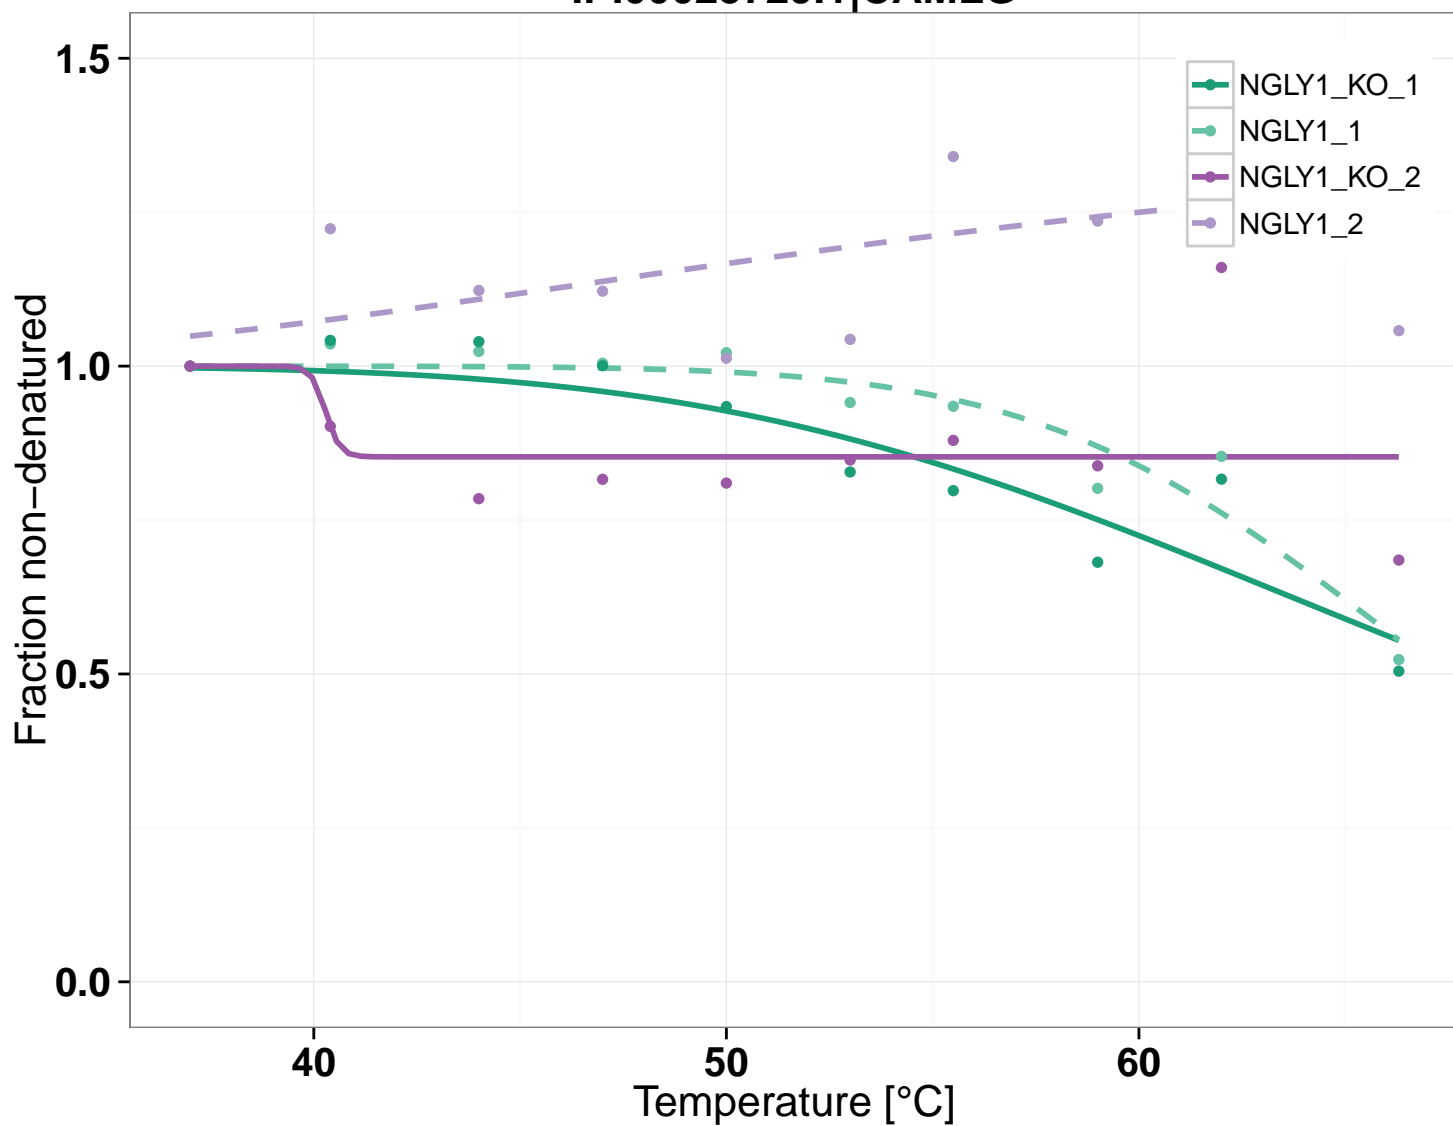

|            | meltPoint | slope  | plateau | R2   |
|------------|-----------|--------|---------|------|
| NGLY1_KO_1 | -         | -0.027 | 0       | 0.85 |
| NGLY1_1    | -         | -0.051 | 0       | 0.92 |
| NGLY1_KO_2 | -         | -0.22  | 0.85    | 0.13 |
| NGLY1_2    | -         | 0.0097 | 1.46    | 0.18 |

Supplement: Supplementary file 550 [file 1]

IPI00149044.8|ZNF280D

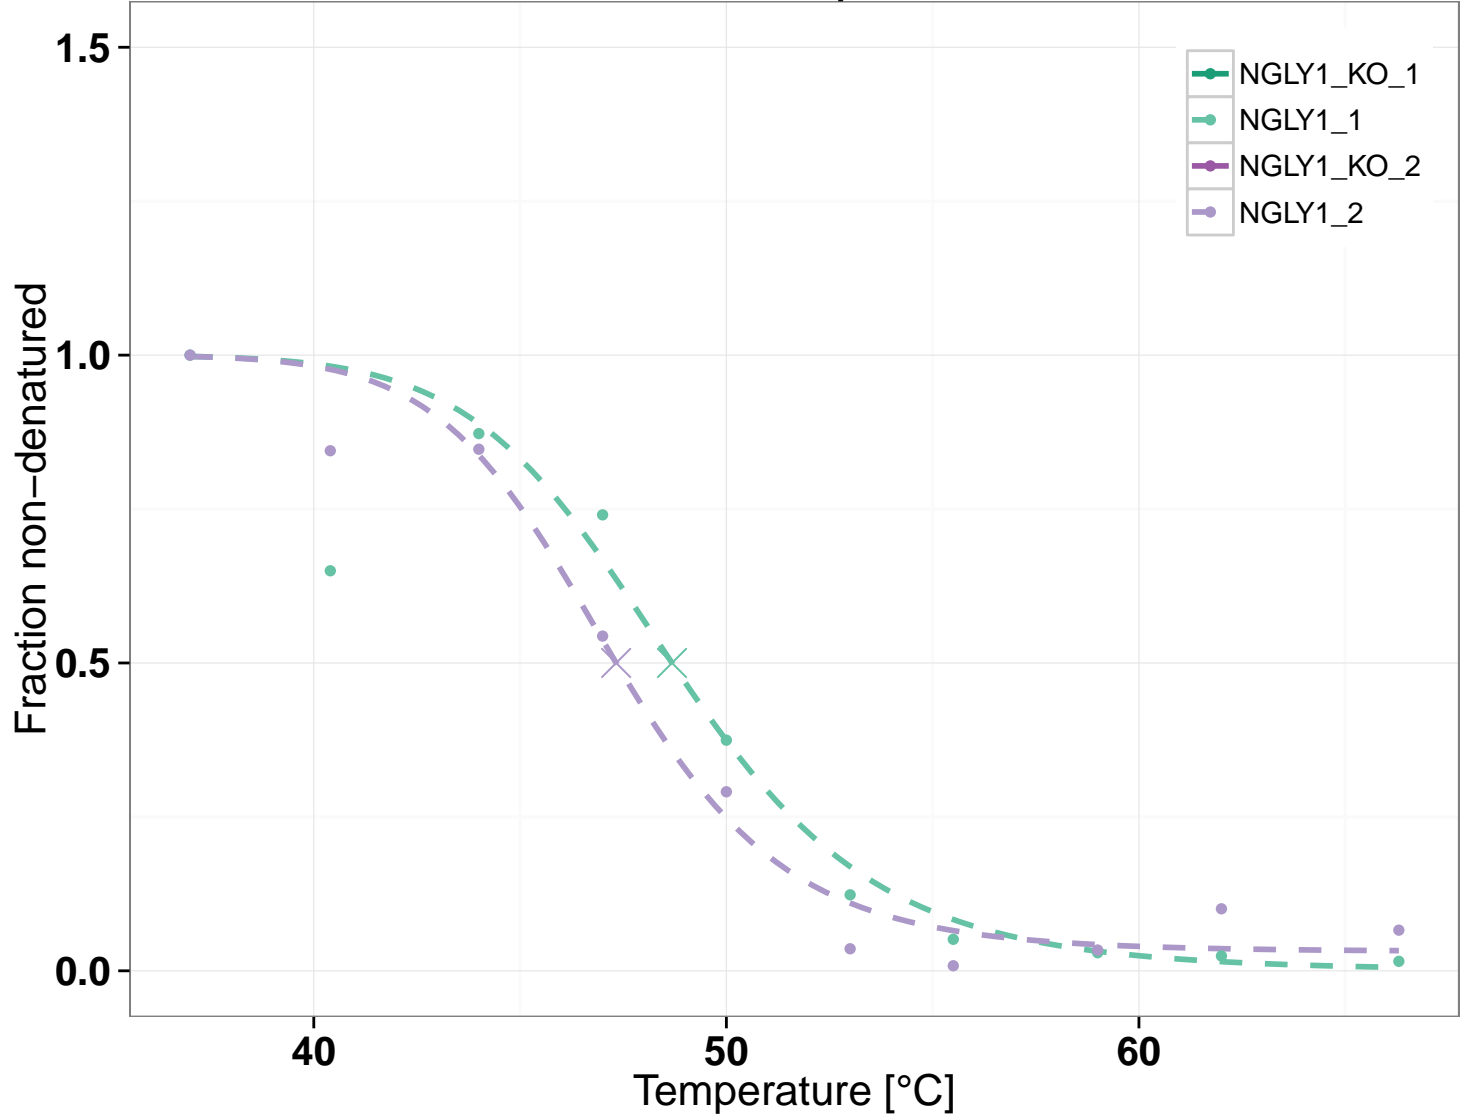

|            | meltPoint | slope | plateau | R2   |
|------------|-----------|-------|---------|------|
| NGLY1_KO_1 | –         | –     | –       | –    |
| NGLY1_1    | 48.68     | –0.1  | 0       | 0.91 |
| NGLY1_KO_2 | –         | –     | –       | –    |
| NGLY1_2    | 47.33     | –0.11 | 0.03    | 0.98 |

Supplement: Supplementary file 551 [file 1]

IPI00879459.1|STRN3

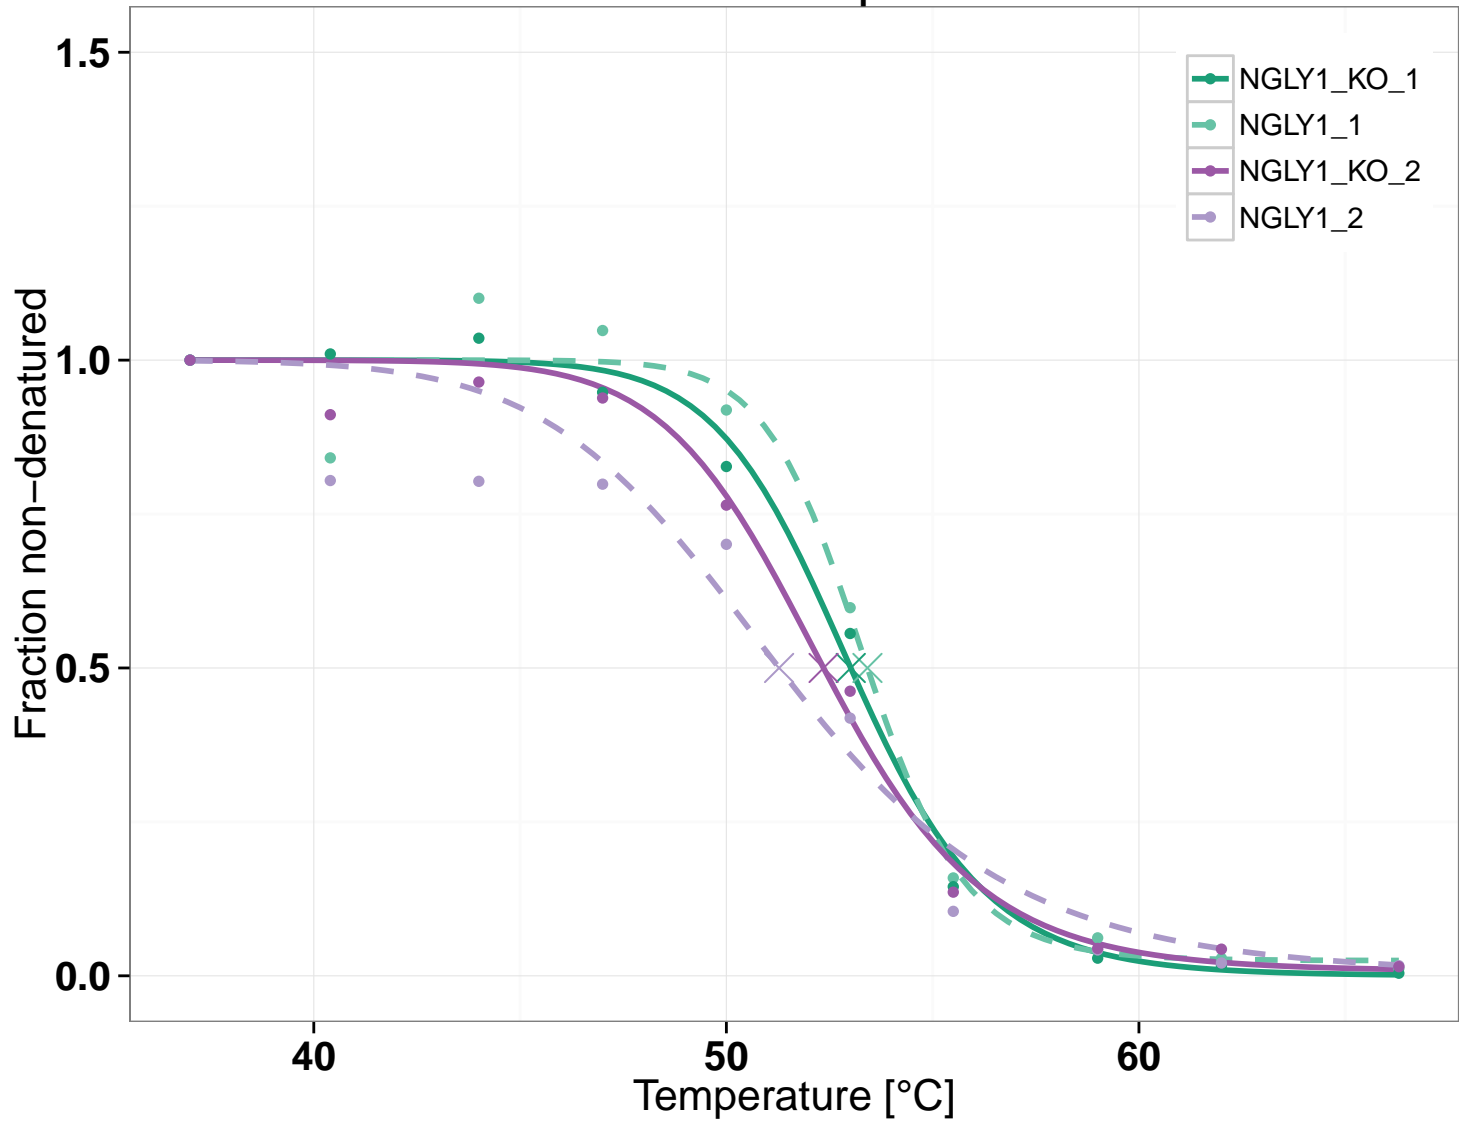

|            | meltPoint | slope  | plateau | R2   |
|------------|-----------|--------|---------|------|
| NGLY1_KO_1 | 53.02     | -0.15  | 0       | 0.99 |
| NGLY1_1    | 53.42     | -0.2   | 0.02    | 0.98 |
| NGLY1_KO_2 | 52.36     | -0.13  | 0.01    | 0.99 |
| NGLY1_2    | 51.28     | -0.088 | 0       | 0.94 |

Supplement: Supplementary file 552 [file 1]

# IPI00186721.2|GOPC

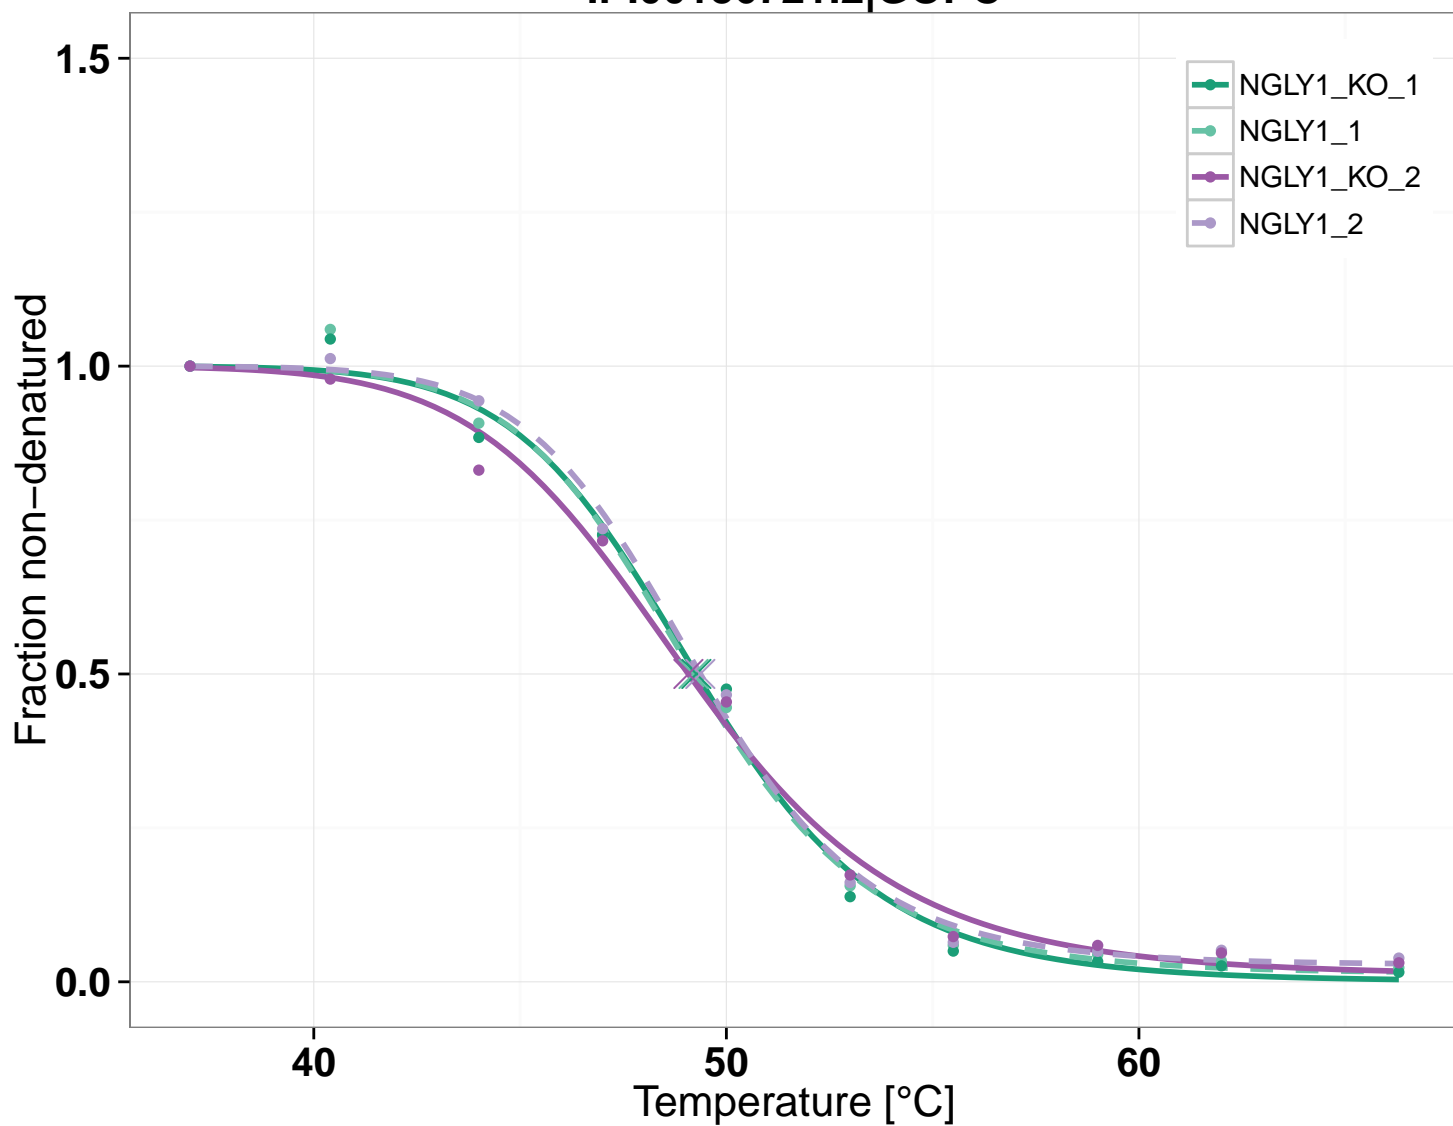

|            | meltPoint | slope  | plateau | R2   |
|------------|-----------|--------|---------|------|
| NGLY1_KO_1 | 49.27     | -0.11  | 0       | 0.99 |
| NGLY1_1    | 49.2      | -0.11  | 0.01    | 1    |
| NGLY1_KO_2 | 49.08     | -0.095 | 0.01    | 0.99 |
| NGLY1_2    | 49.37     | -0.12  | 0.03    | 1    |

Supplement: Supplementary file 553 [file 1]

# IPI00337741.4|APEH

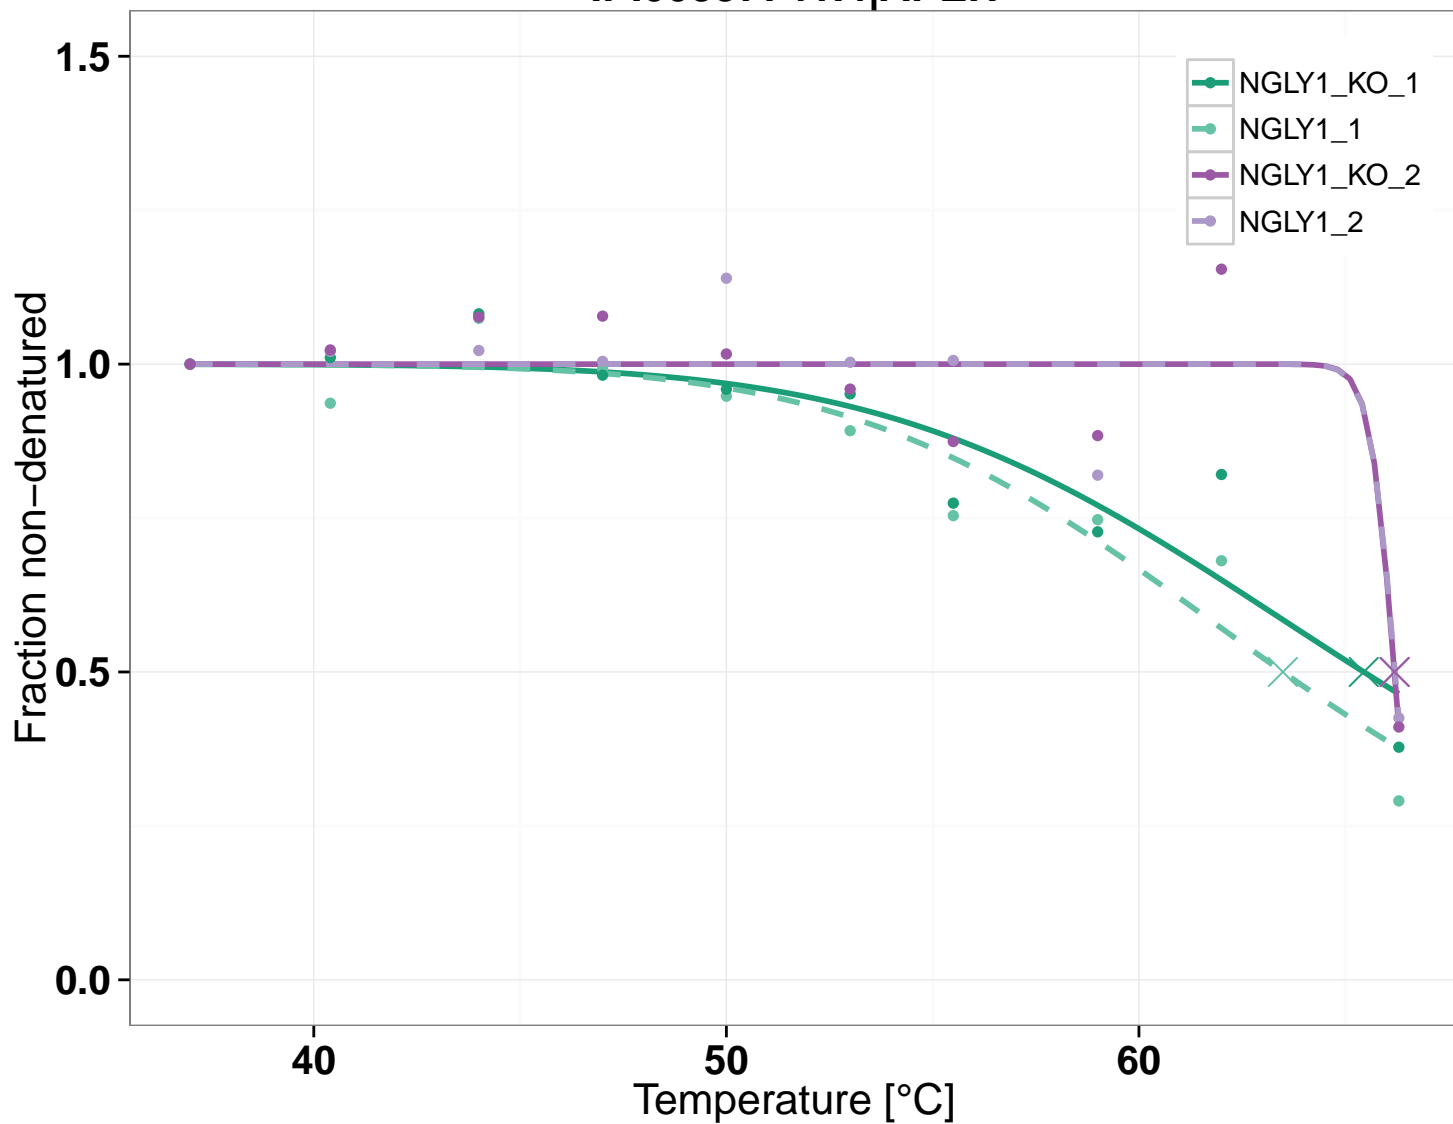

|            | meltPoint | slope  | plateau | R2   |
|------------|-----------|--------|---------|------|
| NGLY1_KO_1 | 65.45     | -0.044 | 0       | 0.85 |
| NGLY1_1    | 63.49     | -0.048 | 0       | 0.91 |
| NGLY1_KO_2 | 66.19     | -0.84  | 0       | 0.83 |
| NGLY1_2    | 66.21     | -0.82  | 0       | 0.77 |

Supplement: Supplementary file 554 [file 1]

IPI00029764.1|SF3A3

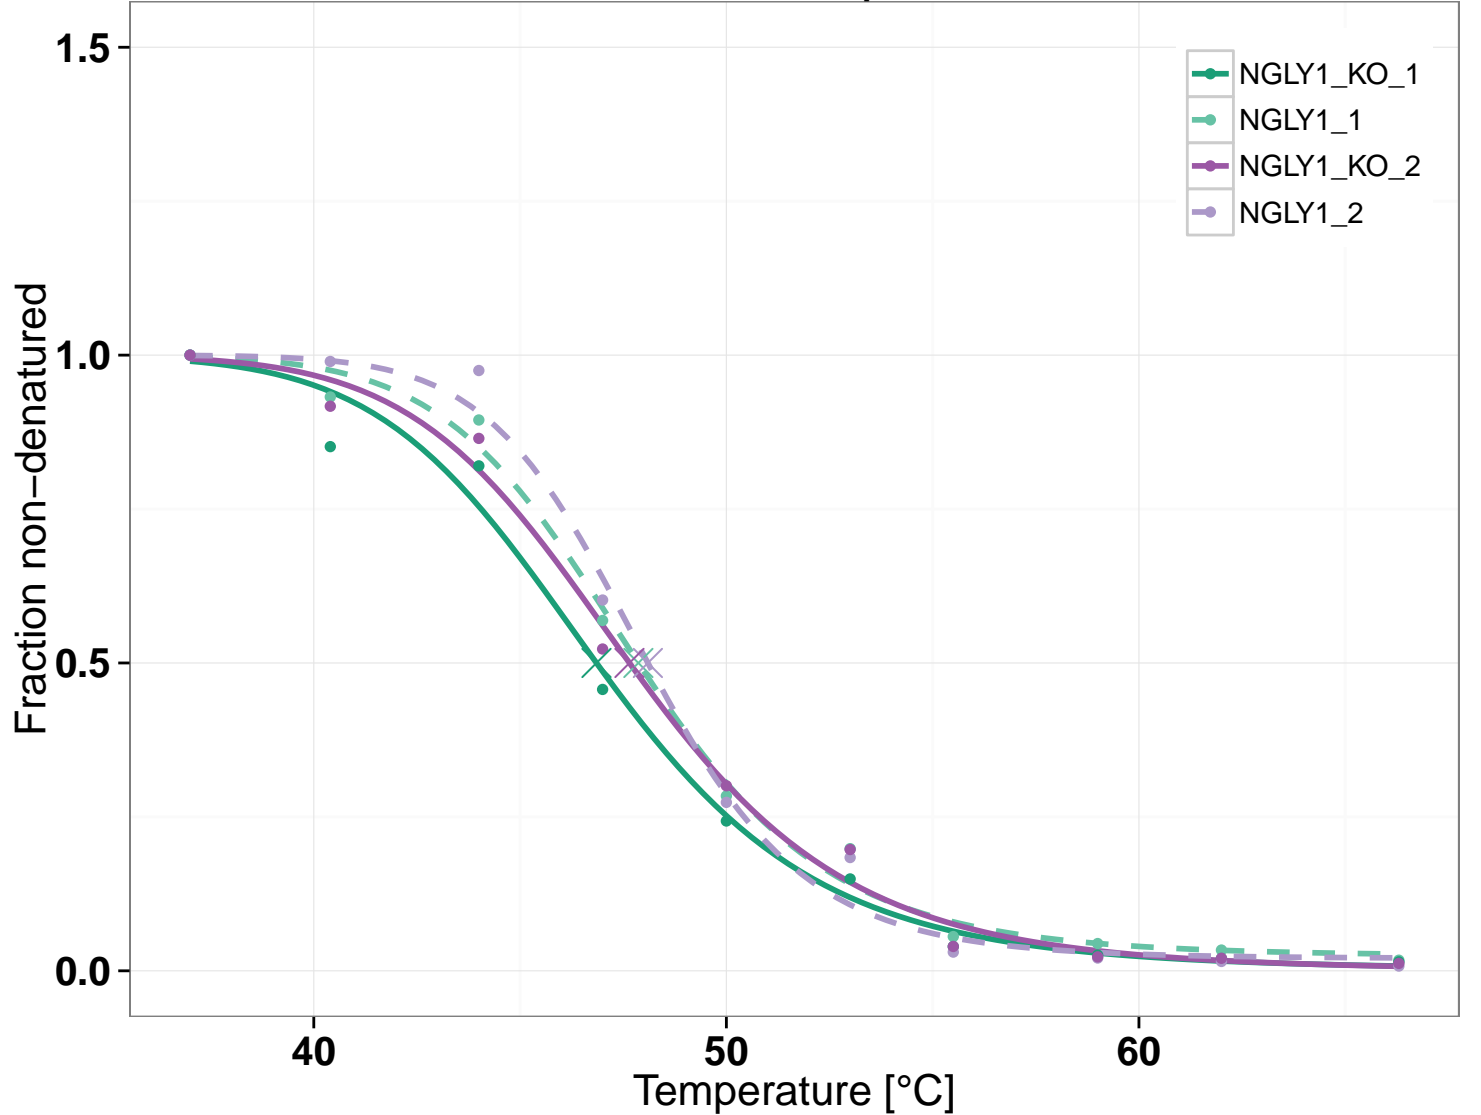

|            | meltPoint | slope  | plateau | R2   |
|------------|-----------|--------|---------|------|
| NGLY1_KO_1 | 46.85     | -0.094 | 0       | 0.99 |
| NGLY1_1    | 47.87     | -0.1   | 0.02    | 0.99 |
| NGLY1_KO_2 | 47.65     | -0.094 | 0       | 0.99 |
| NGLY1_2    | 48.1      | -0.13  | 0.02    | 0.99 |

Supplement: Supplementary file 555 [file 1]

IPI00646015.1|ACOT9

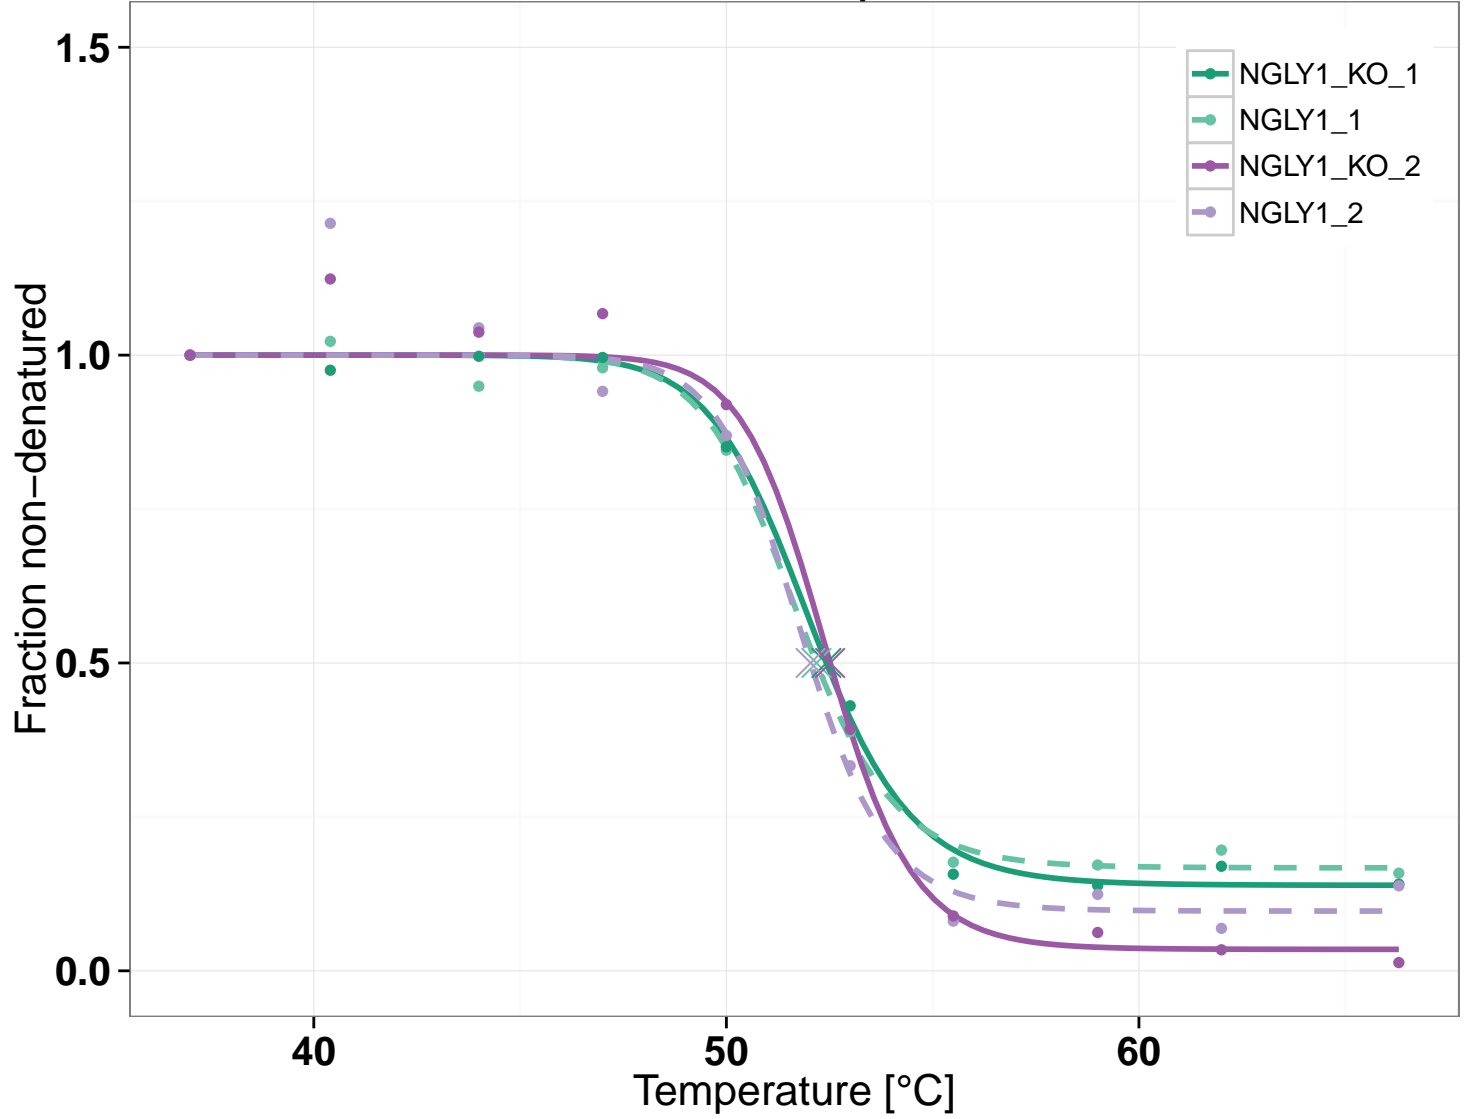

|            | meltPoint | slope | plateau | R2   |
|------------|-----------|-------|---------|------|
| NGLY1_KO_1 | 52.42     | -0.17 | 0.14    | 1    |
| NGLY1_1    | 52.18     | -0.18 | 0.17    | 1    |
| NGLY1_KO_2 | 52.52     | -0.23 | 0.03    | 0.99 |
| NGLY1_2    | 52.04     | -0.22 | 0.1     | 0.97 |

Supplement: Supplementary file 556 [file 1]

IPI00900366.1|KIAA0564

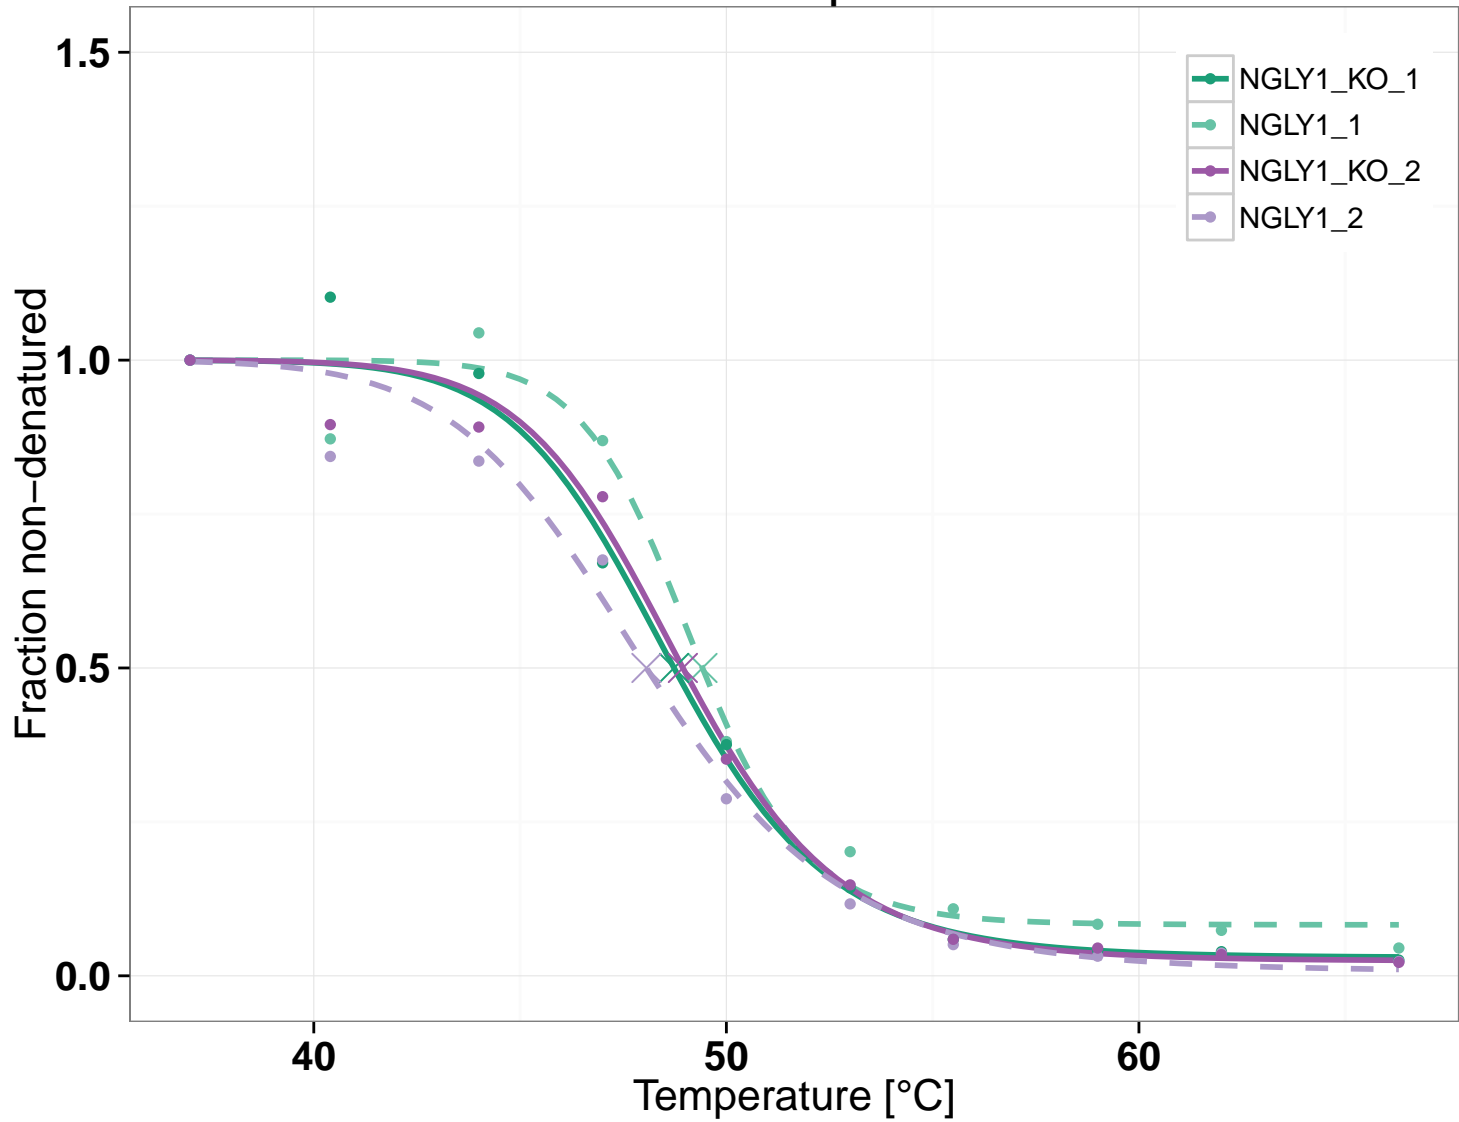

|            | meltPoint | slope | plateau | R2   |
|------------|-----------|-------|---------|------|
| NGLY1_KO_1 | 48.73     | -0.13 | 0.03    | 0.99 |
| NGLY1_1    | 49.42     | -0.17 | 0.08    | 0.98 |
| NGLY1_KO_2 | 48.95     | -0.13 | 0.02    | 0.99 |
| NGLY1_2    | 48.06     | -0.11 | 0.01    | 0.98 |

Supplement: Supplementary file 557 [file 1]

IPI00413930.3|ELOVL2

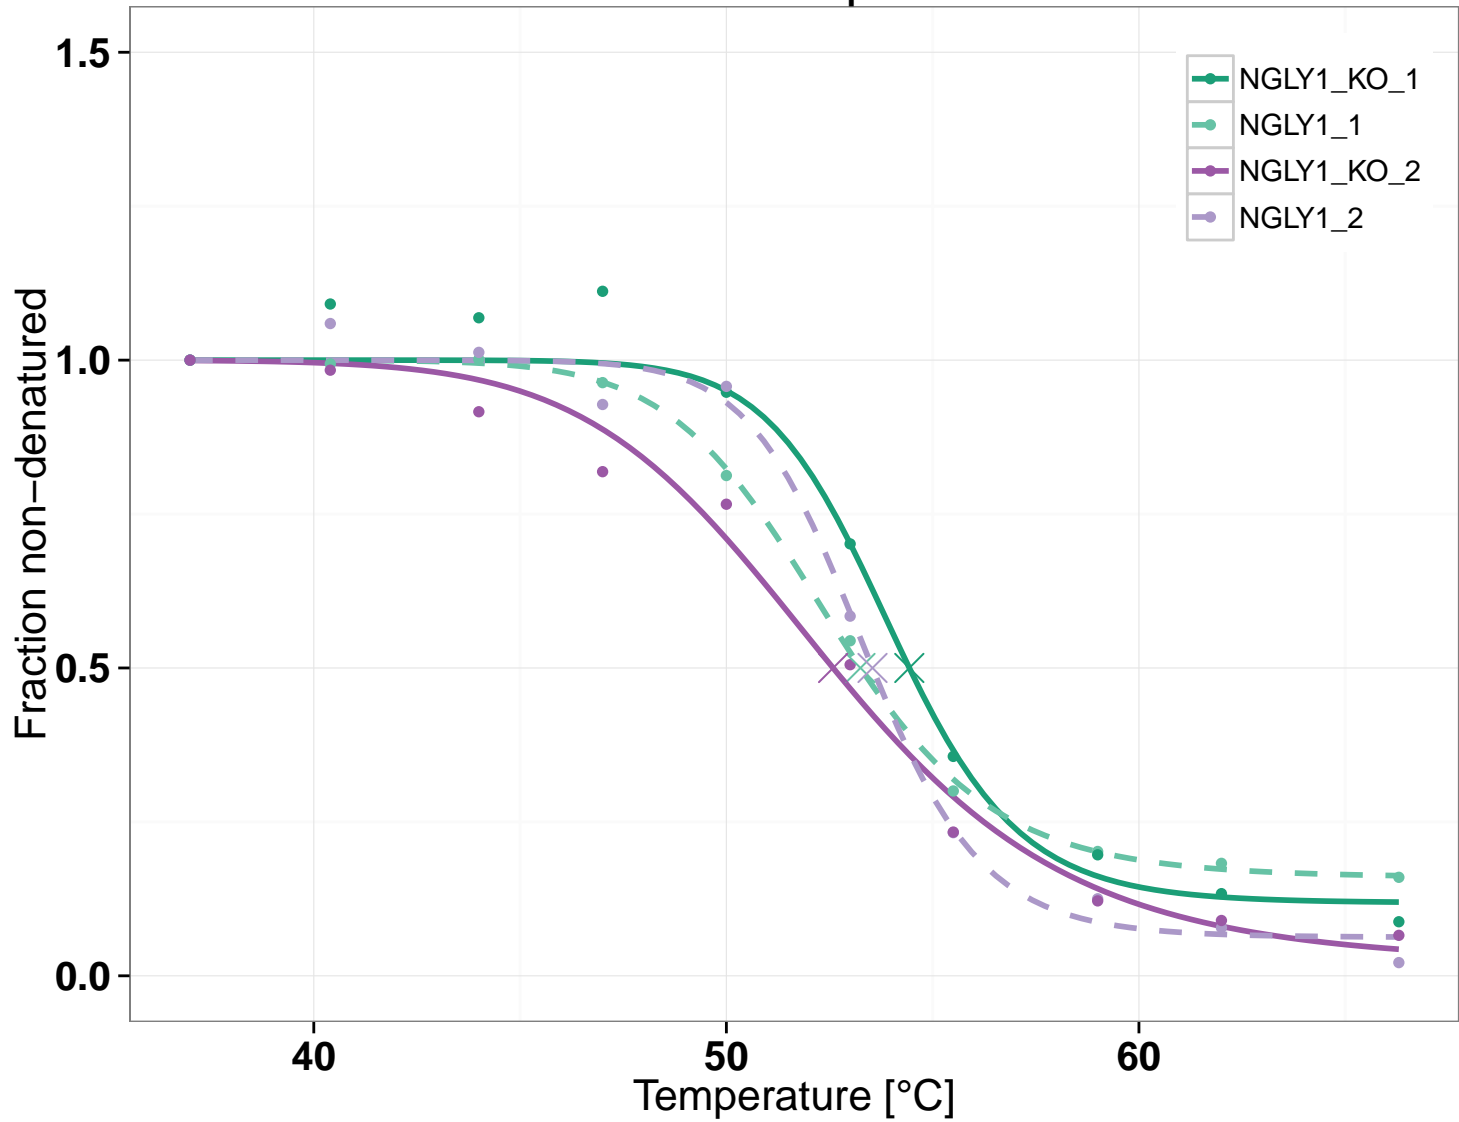

|            | meltPoint | slope  | plateau | R2   |
|------------|-----------|--------|---------|------|
| NGLY1_KO_1 | 54.43     | -0.14  | 0.12    | 0.98 |
| NGLY1_1    | 53.25     | -0.11  | 0.16    | 1    |
| NGLY1_KO_2 | 52.59     | -0.083 | 0.02    | 0.99 |
| NGLY1_2    | 53.54     | -0.17  | 0.06    | 0.99 |

Supplement: Supplementary file 558 [file 1]

IPI00873359.1|FBXW11

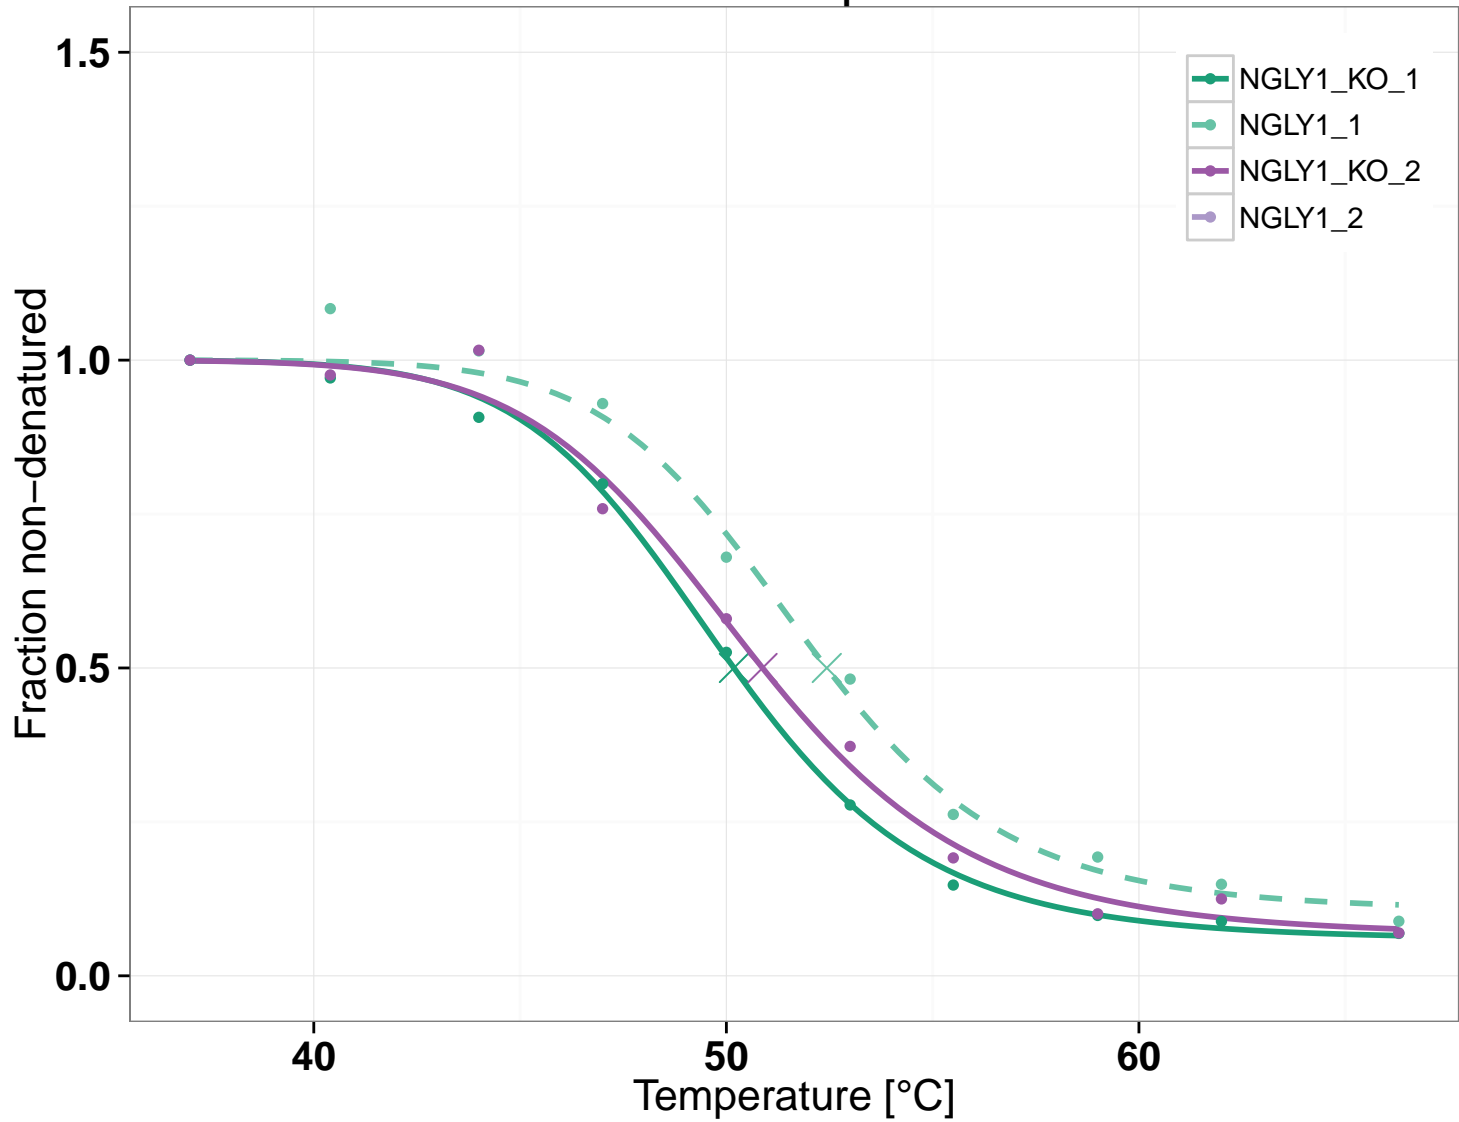

|            | meltPoint | slope  | plateau | R2   |
|------------|-----------|--------|---------|------|
| NGLY1_KO_1 | 50.18     | -0.096 | 0.06    | 1    |
| NGLY1_1    | 52.43     | -0.091 | 0.11    | 0.99 |
| NGLY1_KO_2 | 50.88     | -0.086 | 0.06    | 0.99 |
| NGLY1_2    | -         | -      | -       | -    |

Supplement: Supplementary file 559 [file 1]

IPI00430472.2|ASCC3

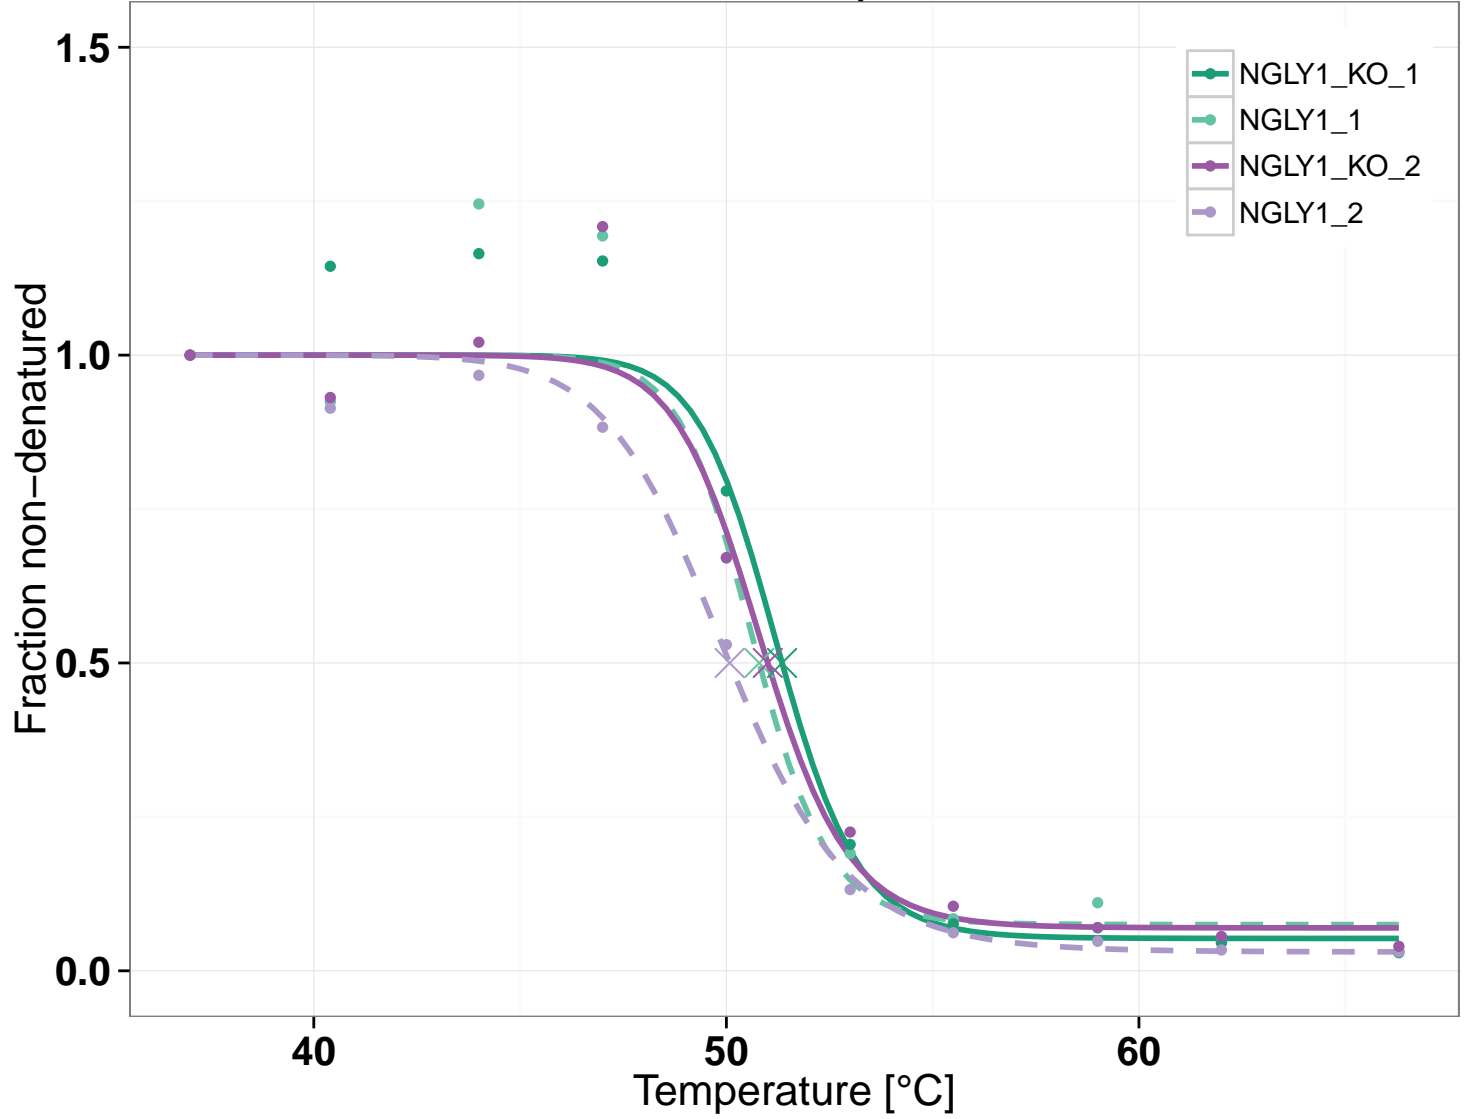

|            | meltPoint | slope | plateau | R2   |
|------------|-----------|-------|---------|------|
| NGLY1_KO_1 | 51.35     | -0.24 | 0.05    | 0.97 |
| NGLY1_1    | 50.8      | -0.25 | 0.08    | 0.95 |
| NGLY1_KO_2 | 51        | -0.22 | 0.07    | 0.97 |
| NGLY1_2    | 50.08     | -0.16 | 0.03    | 0.99 |

Supplement: Supplementary file 560 [file 1]

IPI00103483.1|COBRA1

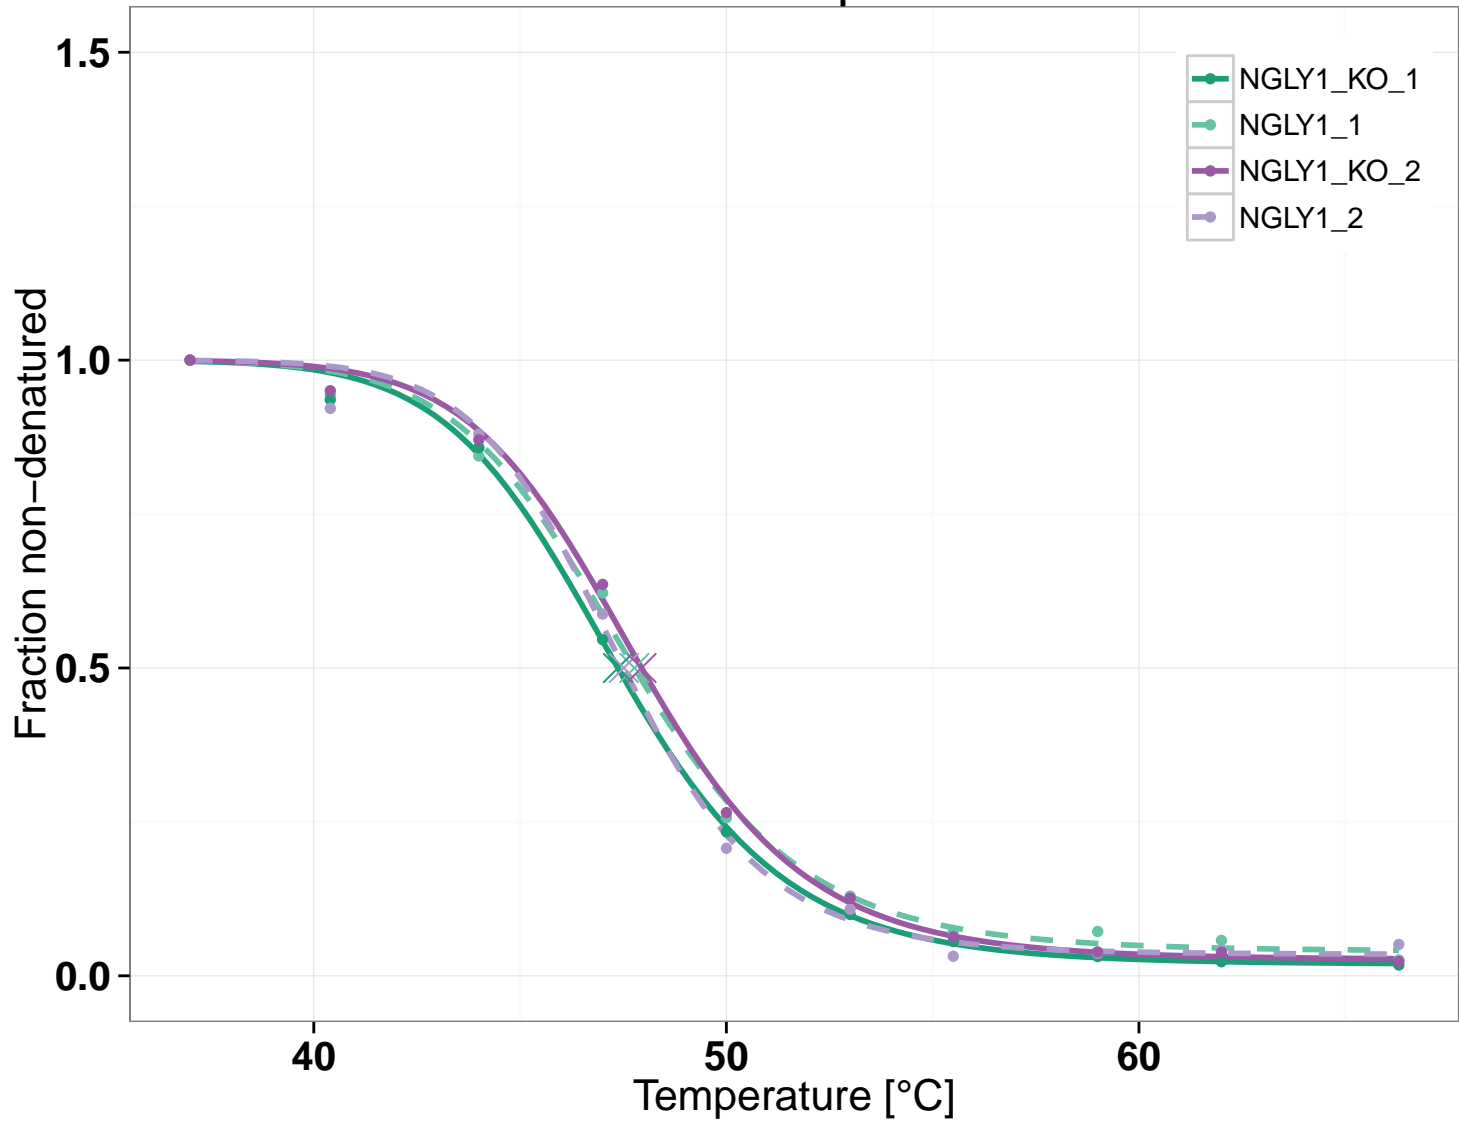

|            | meltPoint | slope | plateau | R2 |
|------------|-----------|-------|---------|----|
| NGLY1_KO_1 | 47.37     | -0.12 | 0.02    | 1  |
| NGLY1_1    | 47.77     | -0.11 | 0.04    | 1  |
| NGLY1_KO_2 | 47.94     | -0.12 | 0.03    | 1  |
| NGLY1_2    | 47.51     | -0.14 | 0.03    | 1  |

Supplement: Supplementary file 561 [file 1]

IPI00017376.2|SEC23B

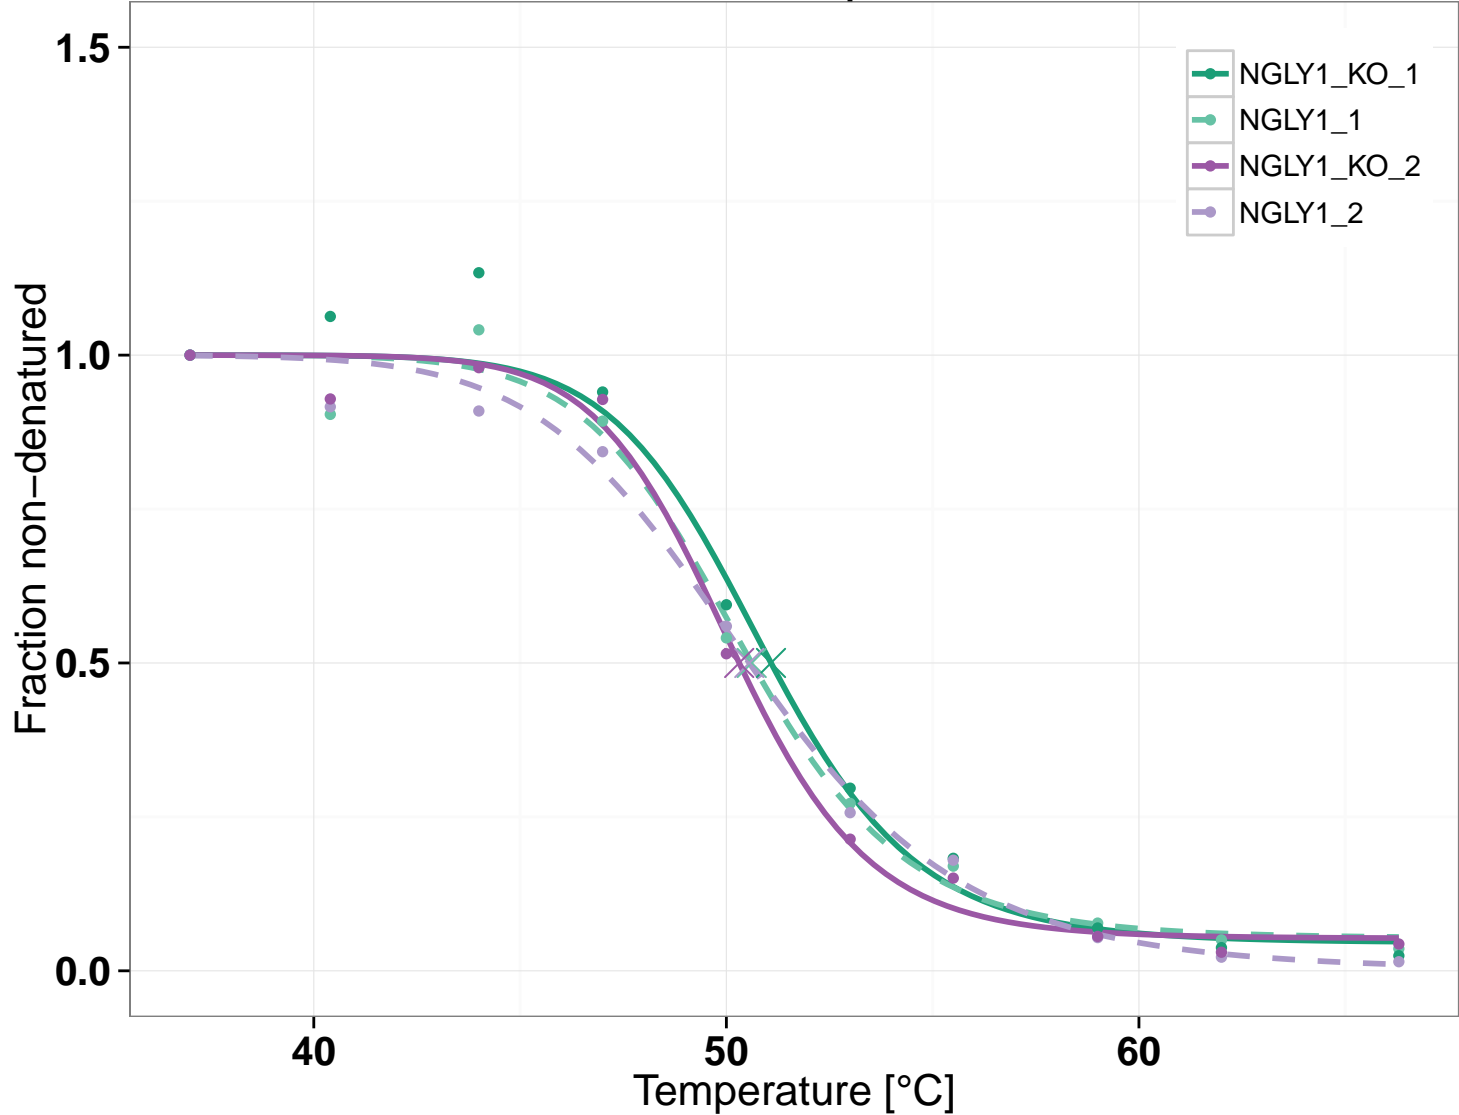

|            | meltPoint | slope  | plateau | R2   |
|------------|-----------|--------|---------|------|
| NGLY1_KO_1 | 51.08     | -0.13  | 0.05    | 0.98 |
| NGLY1_1    | 50.61     | -0.12  | 0.05    | 0.99 |
| NGLY1_KO_2 | 50.31     | -0.14  | 0.05    | 0.99 |
| NGLY1_2    | 50.56     | -0.097 | 0       | 0.99 |

Supplement: Supplementary file 562 [file 1]

IPI00051119.1|SIMILAR TO RIBOSOMAL PROTEIN S3A.

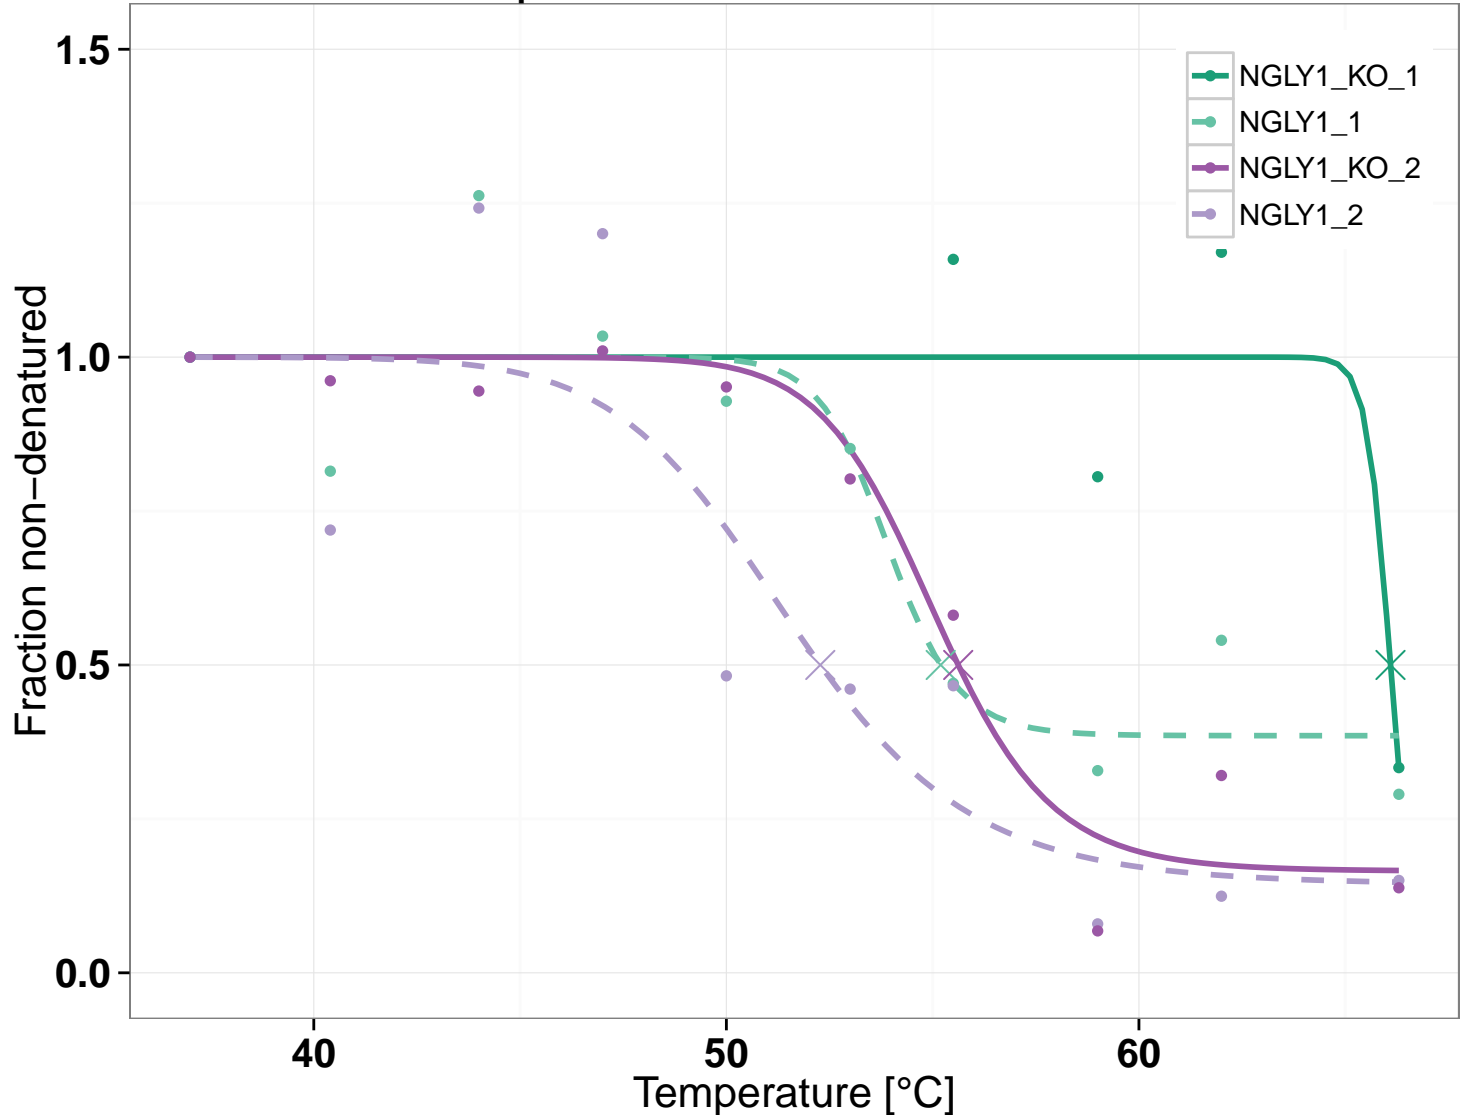

|            | meltPoint | slope  | plateau | R2    |
|------------|-----------|--------|---------|-------|
| NGLY1_KO_1 | 66.1      | -0.86  | 0       | -0.48 |
| NGLY1_1    | 55.2      | -0.18  | 0.39    | 0.85  |
| NGLY1_KO_2 | 55.62     | -0.15  | 0.17    | 0.95  |
| NGLY1_2    | 52.28     | -0.099 | 0.14    | 0.81  |

Supplement: Supplementary file 563 [file 1]

IPI00847241.2|LARP5

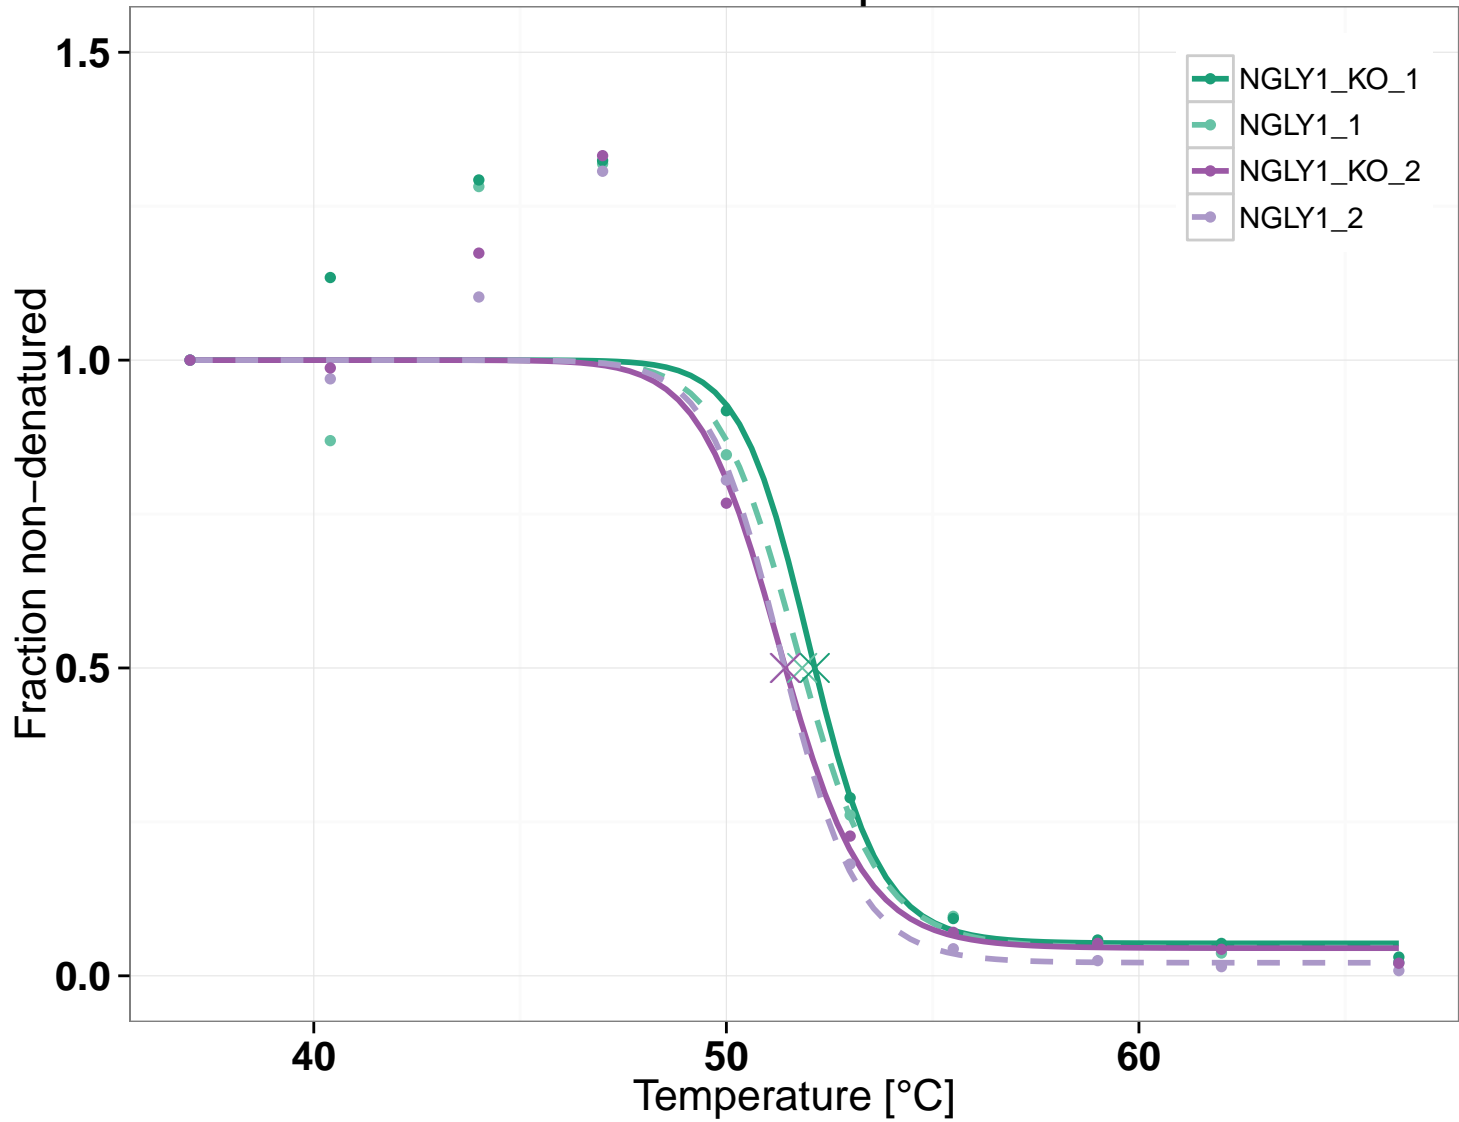

|            | meltPoint | slope | plateau | R2   |
|------------|-----------|-------|---------|------|
| NGLY1_KO_1 | 52.14     | -0.28 | 0.05    | 0.93 |
| NGLY1_1    | 51.84     | -0.24 | 0.05    | 0.92 |
| NGLY1_KO_2 | 51.43     | -0.24 | 0.04    | 0.94 |
| NGLY1_2    | 51.41     | -0.27 | 0.02    | 0.96 |

Supplement: Supplementary file 564 [file 1]

IPI00465123.6|KIAA0415

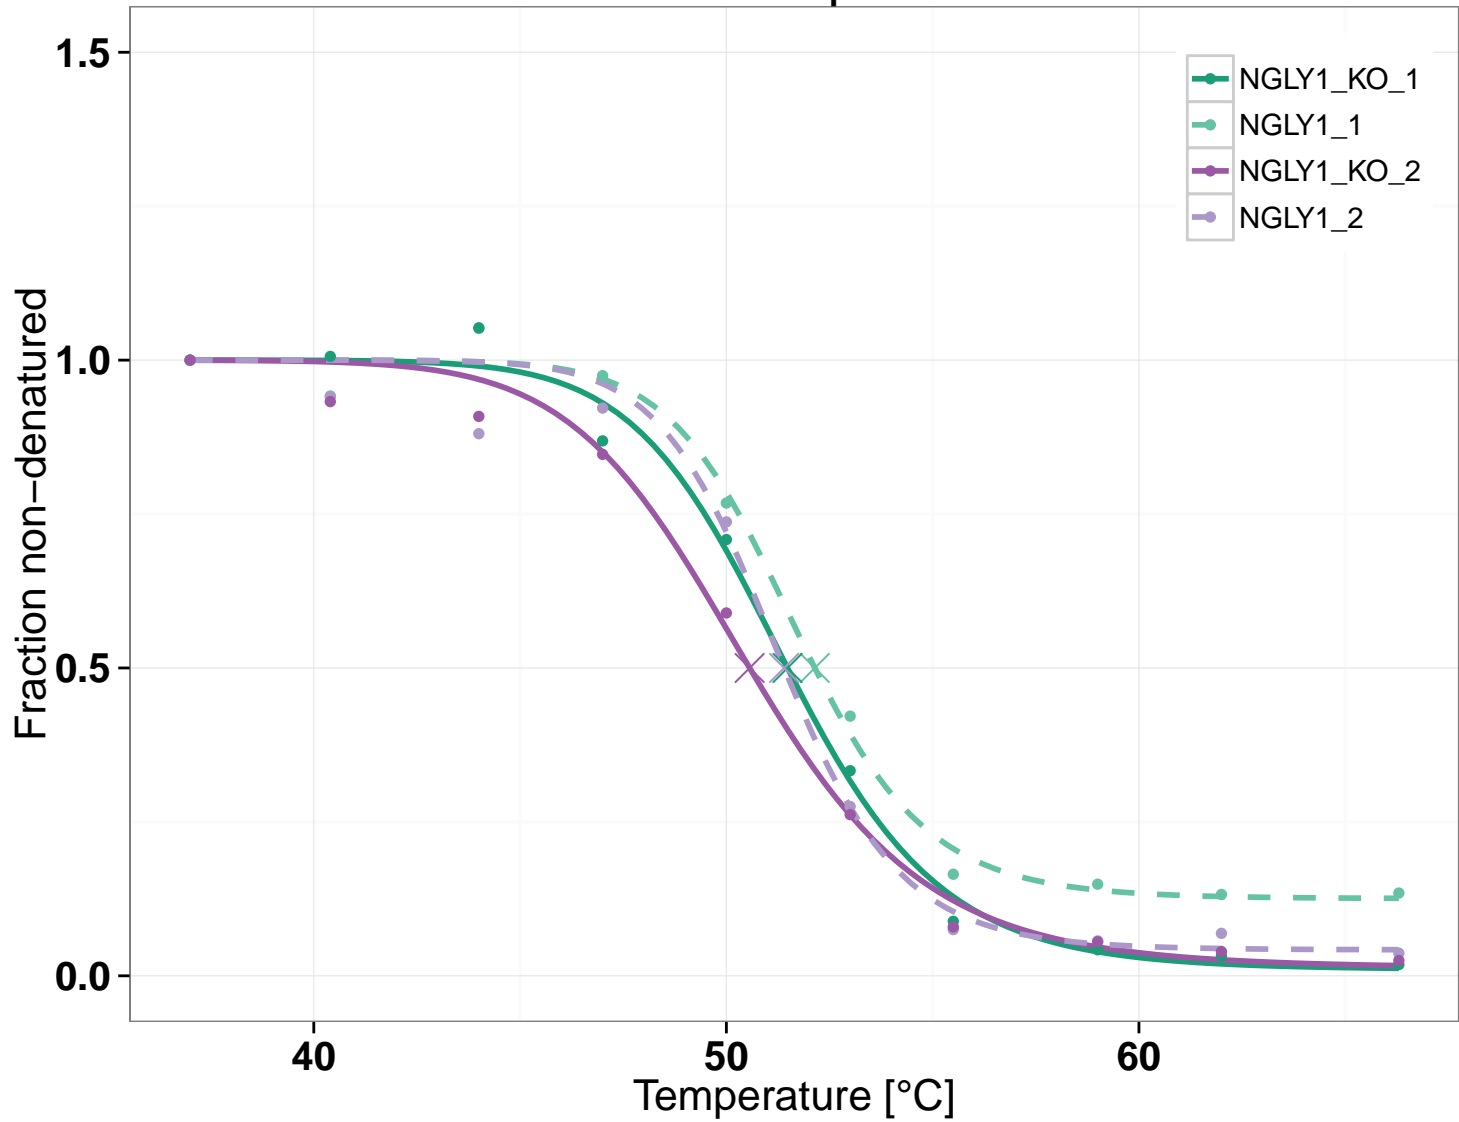

|            | meltPoint | slope | plateau | R2   |
|------------|-----------|-------|---------|------|
| NGLY1_KO_1 | 51.48     | -0.13 | 0.01    | 0.99 |
| NGLY1_1    | 52.14     | -0.14 | 0.13    | 0.99 |
| NGLY1_KO_2 | 50.56     | -0.11 | 0.01    | 0.99 |
| NGLY1_2    | 51.4      | -0.16 | 0.04    | 0.99 |

Supplement: Supplementary file 565 [file 1]

IPI00022317.3|C19ORF53

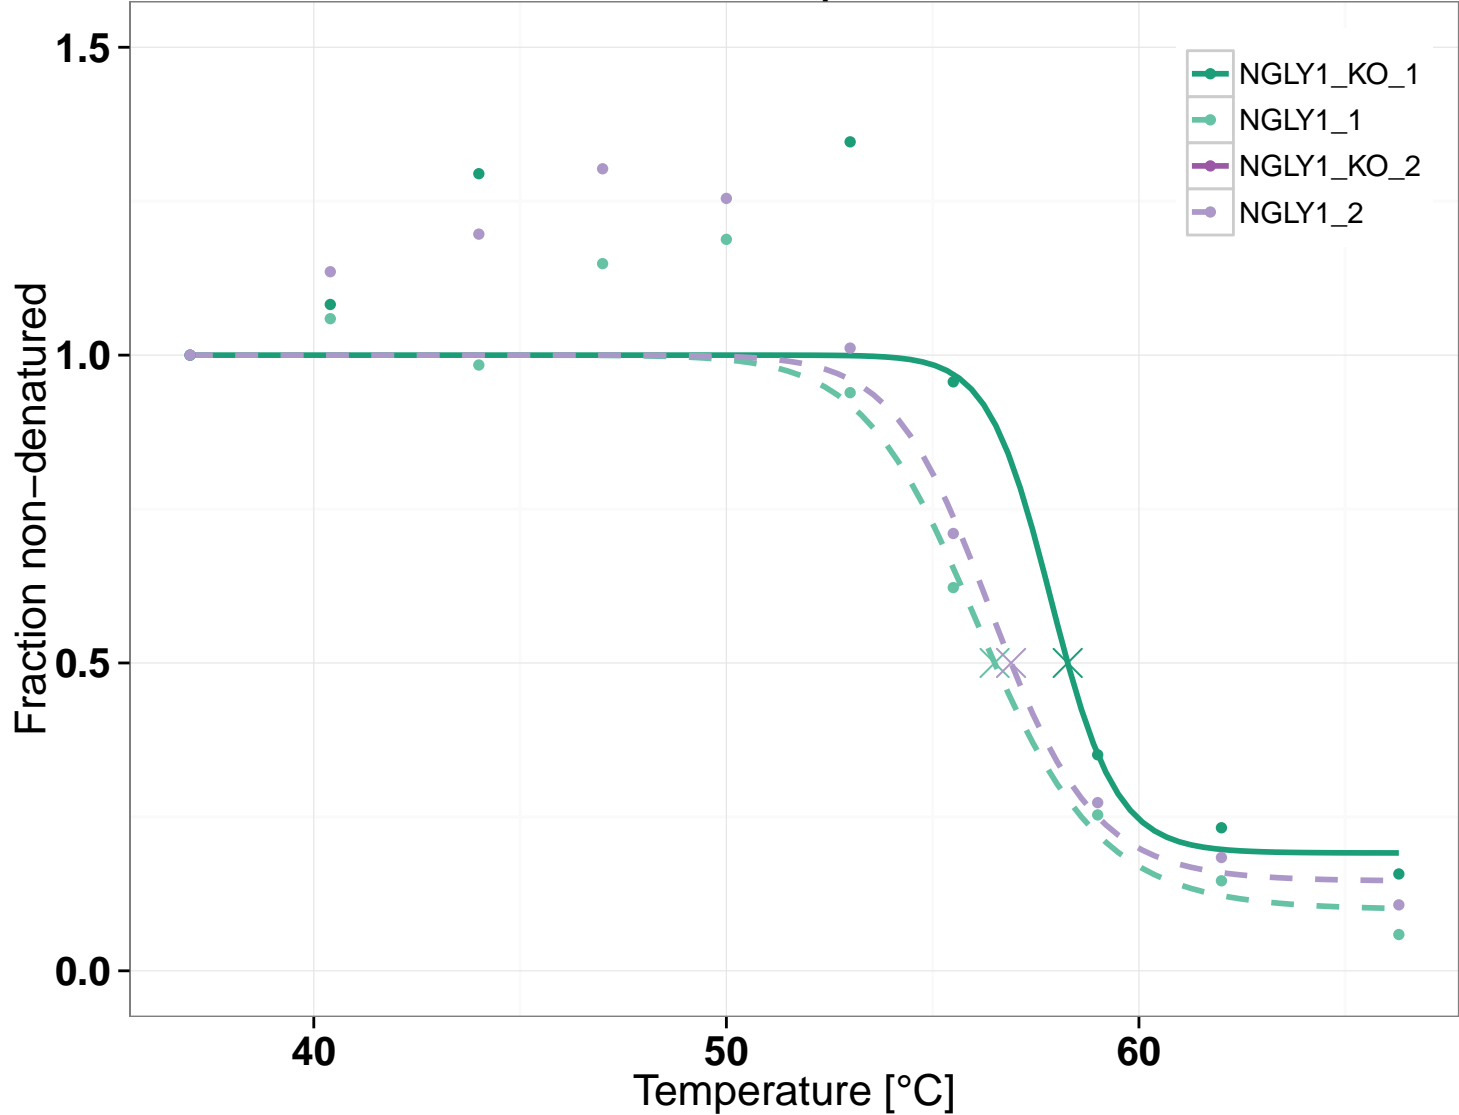

|            | meltPoint | slope | plateau | R2   |
|------------|-----------|-------|---------|------|
| NGLY1_KO_1 | 58.27     | -0.26 | 0.19    | 0.62 |
| NGLY1_1    | 56.5      | -0.16 | 0.1     | 0.96 |
| NGLY1_KO_2 | -         | -     | -       | -    |
| NGLY1_2    | 56.9      | -0.17 | 0.15    | 0.89 |

Supplement: Supplementary file 566 [file 1]

# IPI00647389.1|EPN1

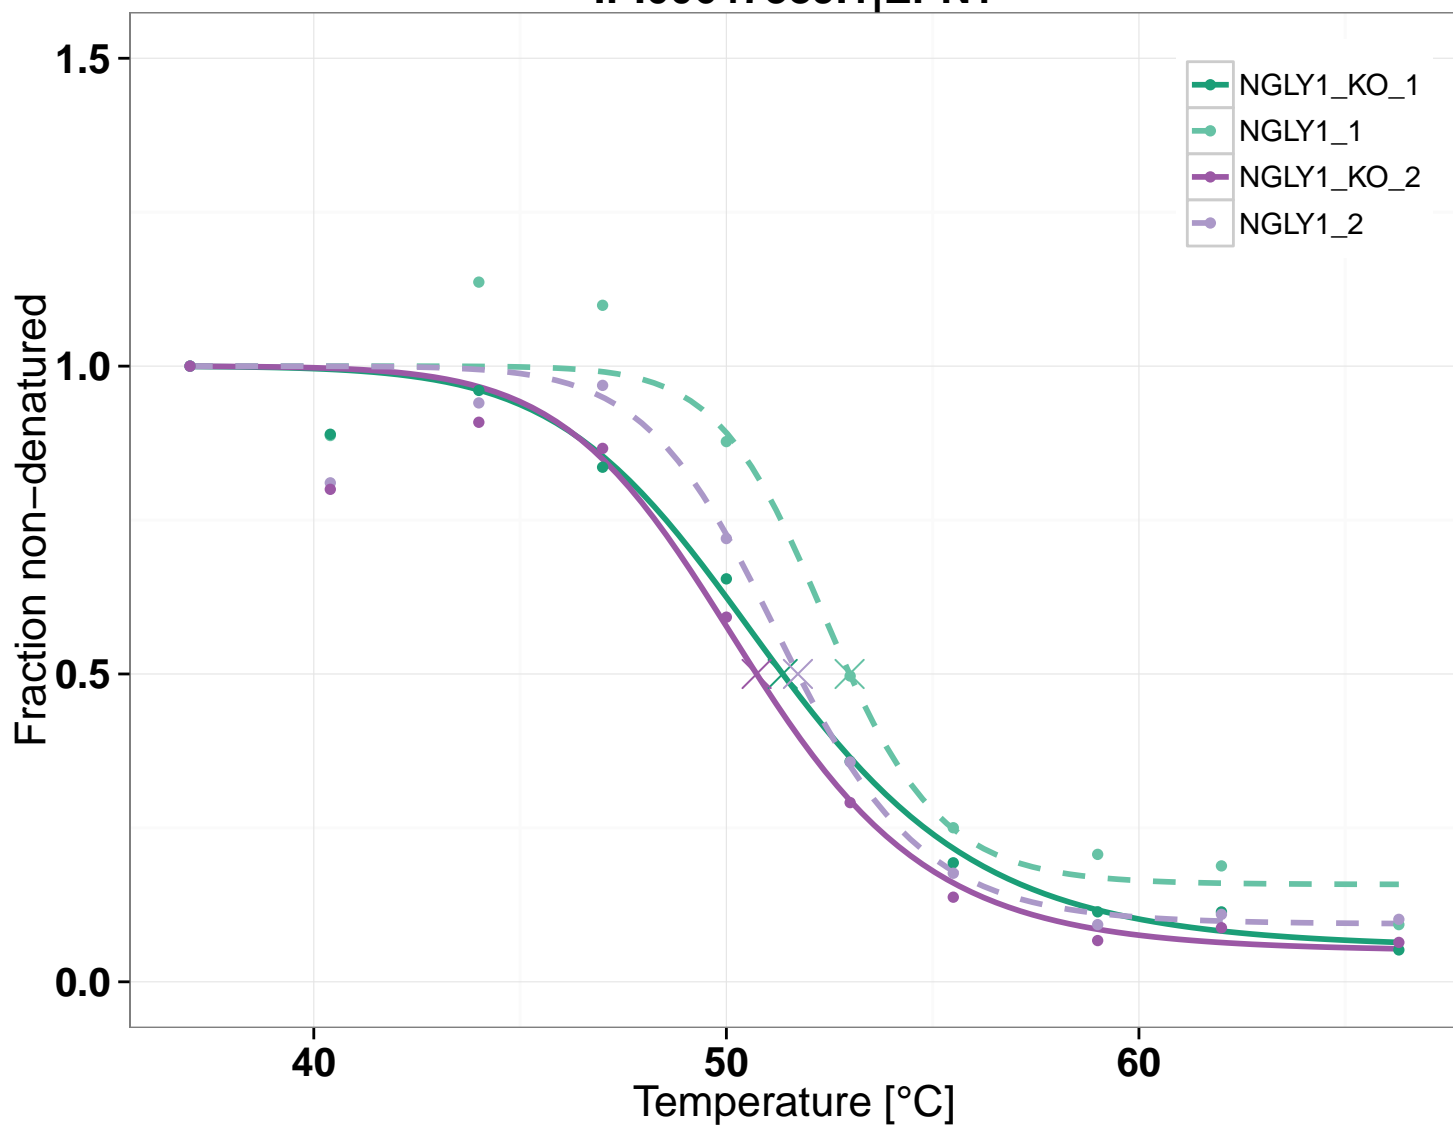

|            | meltPoint | slope  | plateau | R2   |
|------------|-----------|--------|---------|------|
| NGLY1_KO_1 | 51.37     | -0.092 | 0.05    | 0.99 |
| NGLY1_1    | 52.99     | -0.16  | 0.16    | 0.97 |
| NGLY1_KO_2 | 50.73     | -0.11  | 0.05    | 0.97 |
| NGLY1_2    | 51.73     | -0.13  | 0.09    | 0.97 |

Supplement: Supplementary file 567 [file 1]

IPI00182938.8|AHCYL1

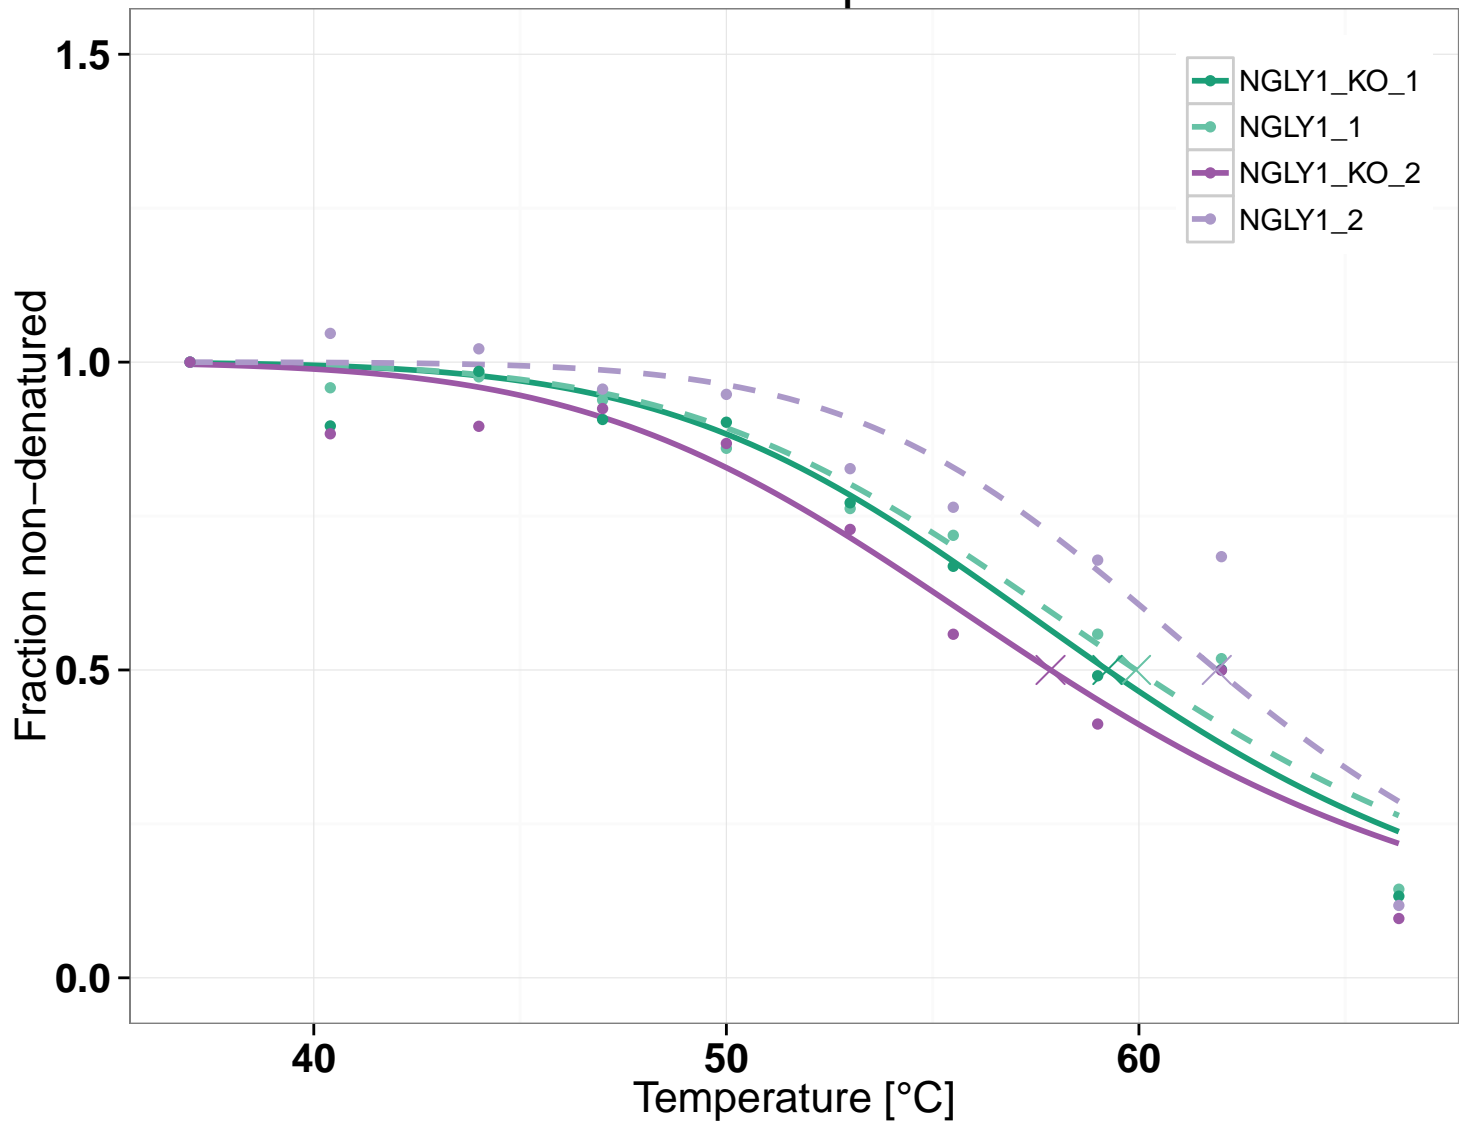

|            | meltPoint | slope  | plateau | R2   |
|------------|-----------|--------|---------|------|
| NGLY1_KO_1 | 59.24     | -0.048 | 0       | 0.95 |
| NGLY1_1    | 59.93     | -0.046 | 0       | 0.95 |
| NGLY1_KO_2 | 57.86     | -0.045 | 0       | 0.92 |
| NGLY1_2    | 61.89     | -0.057 | 0       | 0.88 |

Supplement: Supplementary file 568 [file 1]

# IPI00003949.1|UBE2N

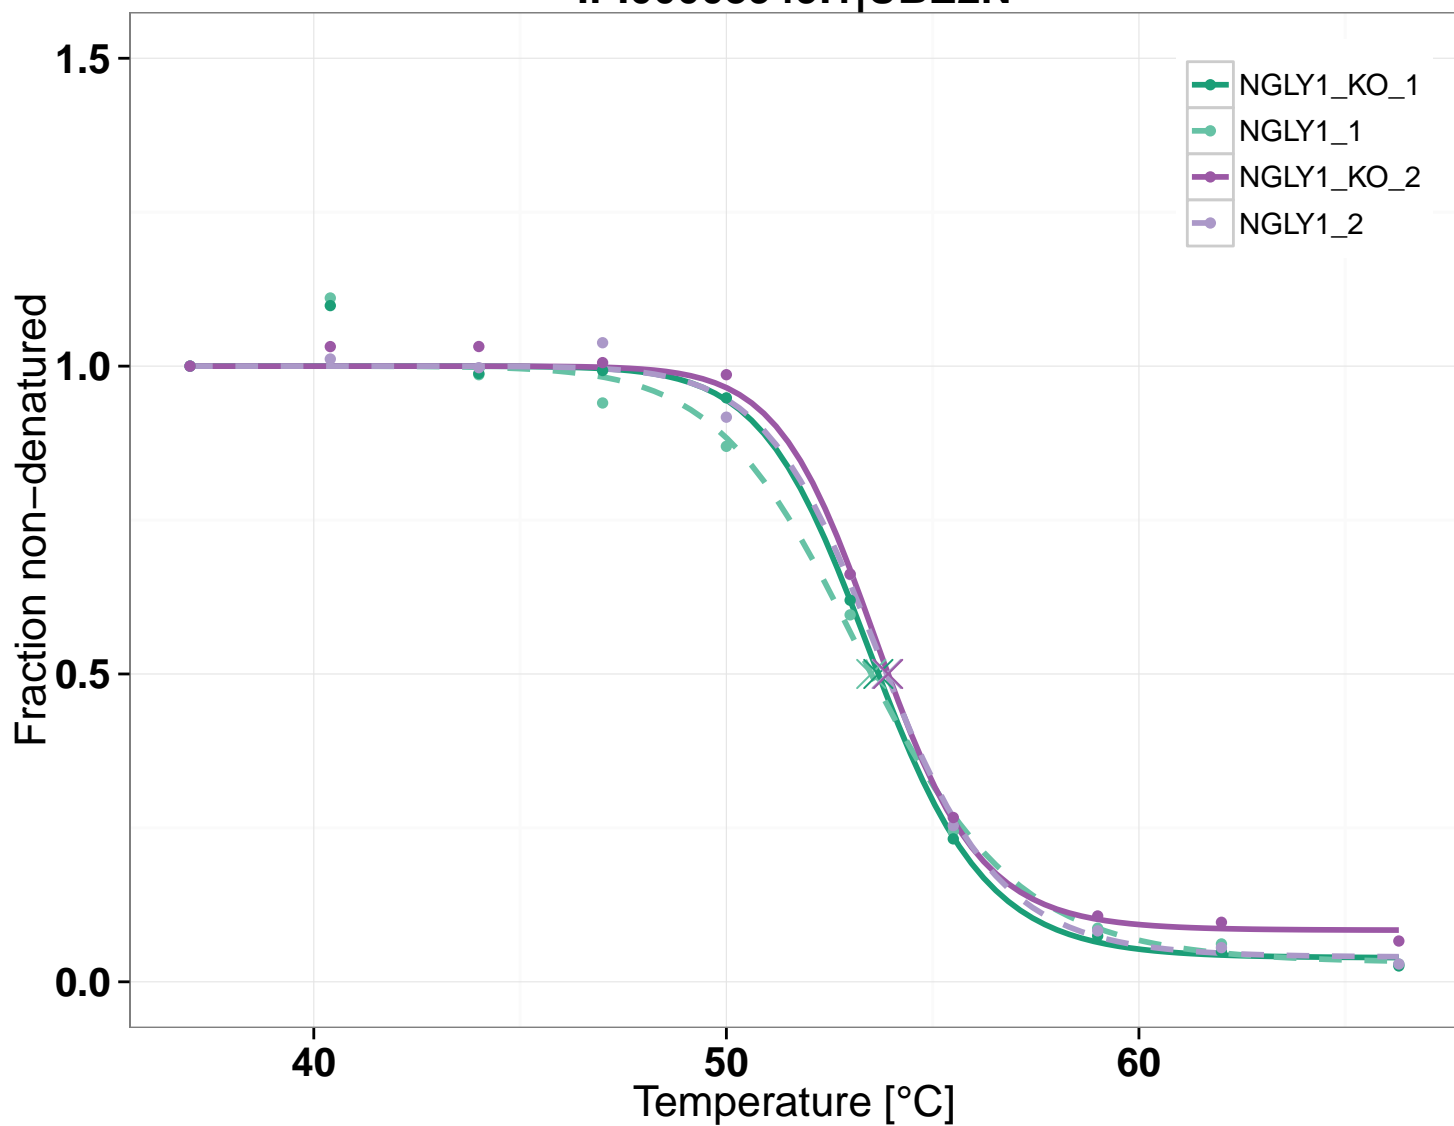

|            | meltPoint | slope | plateau | R2   |
|------------|-----------|-------|---------|------|
| NGLY1_KO_1 | 53.68     | -0.18 | 0.04    | 0.99 |
| NGLY1_1    | 53.51     | -0.13 | 0.03    | 0.99 |
| NGLY1_KO_2 | 53.92     | -0.19 | 0.08    | 1    |
| NGLY1_2    | 53.89     | -0.17 | 0.04    | 1    |

Supplement: Supplementary file 569 [file 1]

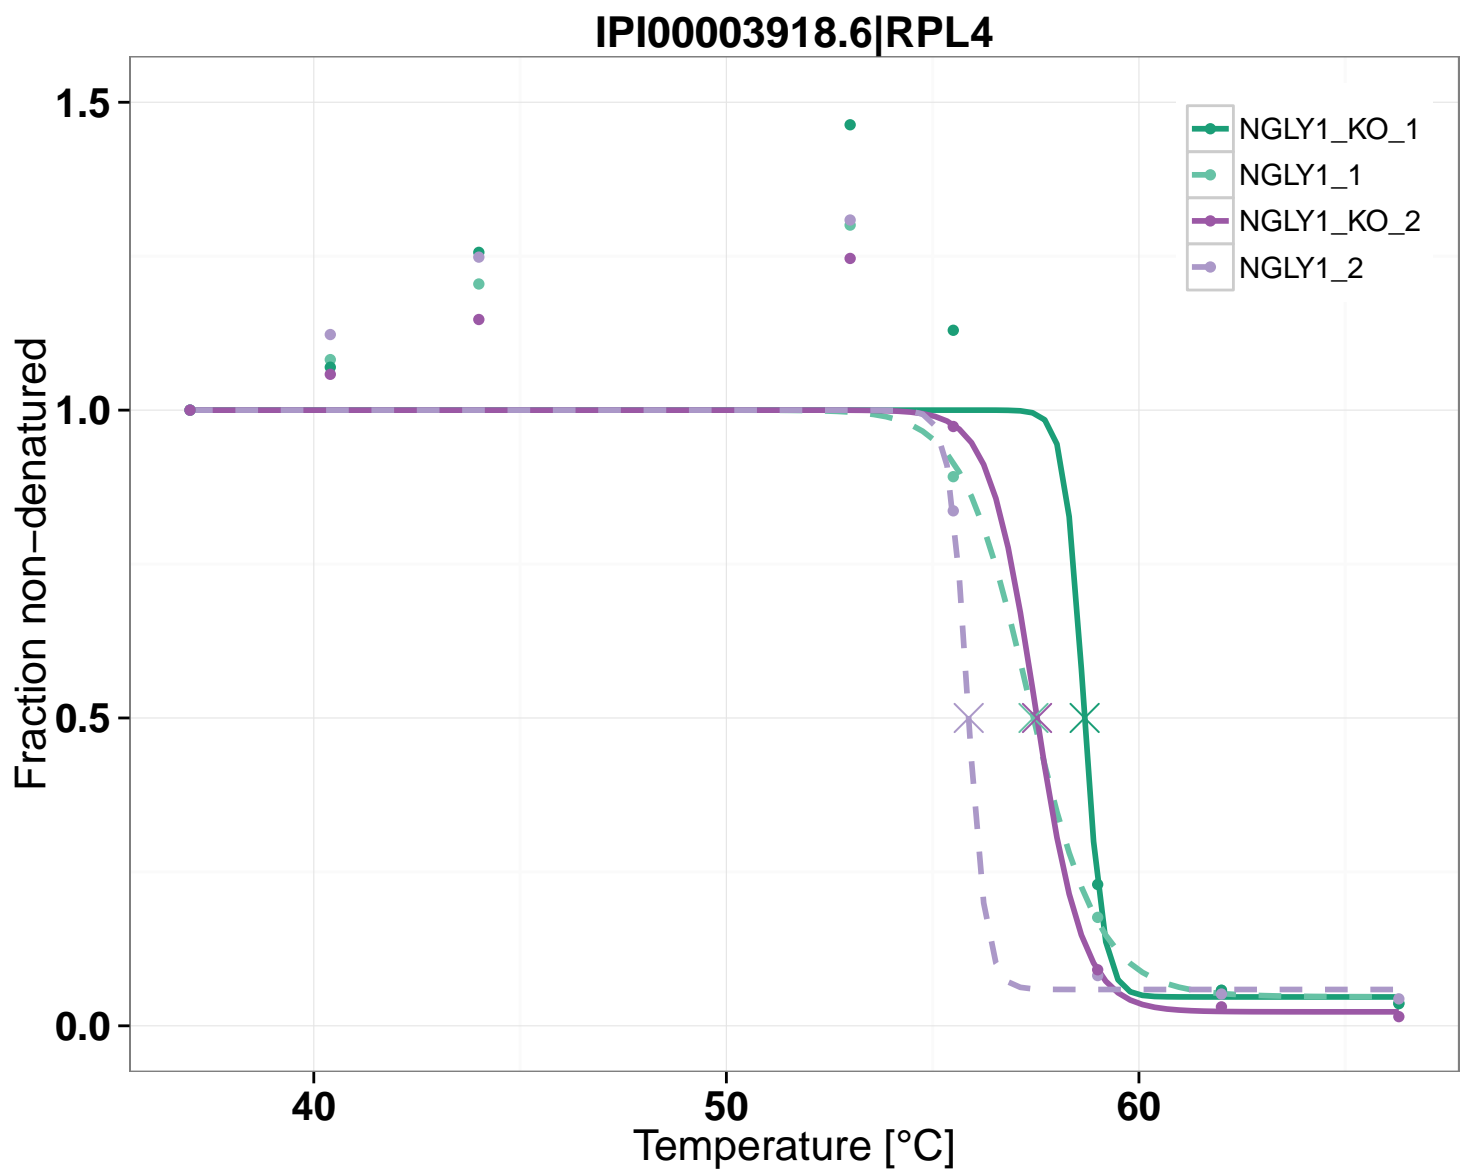

|            | meltPoint | slope | plateau | R2   |
|------------|-----------|-------|---------|------|
| NGLY1_KO_1 | 58.68     | -1    | 0.05    | 0.64 |
| NGLY1_1    | 57.44     | -0.29 | 0.05    | 0.76 |
| NGLY1_KO_2 | 57.53     | -0.44 | 0.02    | 0.81 |
| NGLY1_2    | 55.87     | -1.1  | 0.06    | 0.74 |

Supplement: Supplementary file 570 [file 1]

# IPI00003802.2|MAN2A1

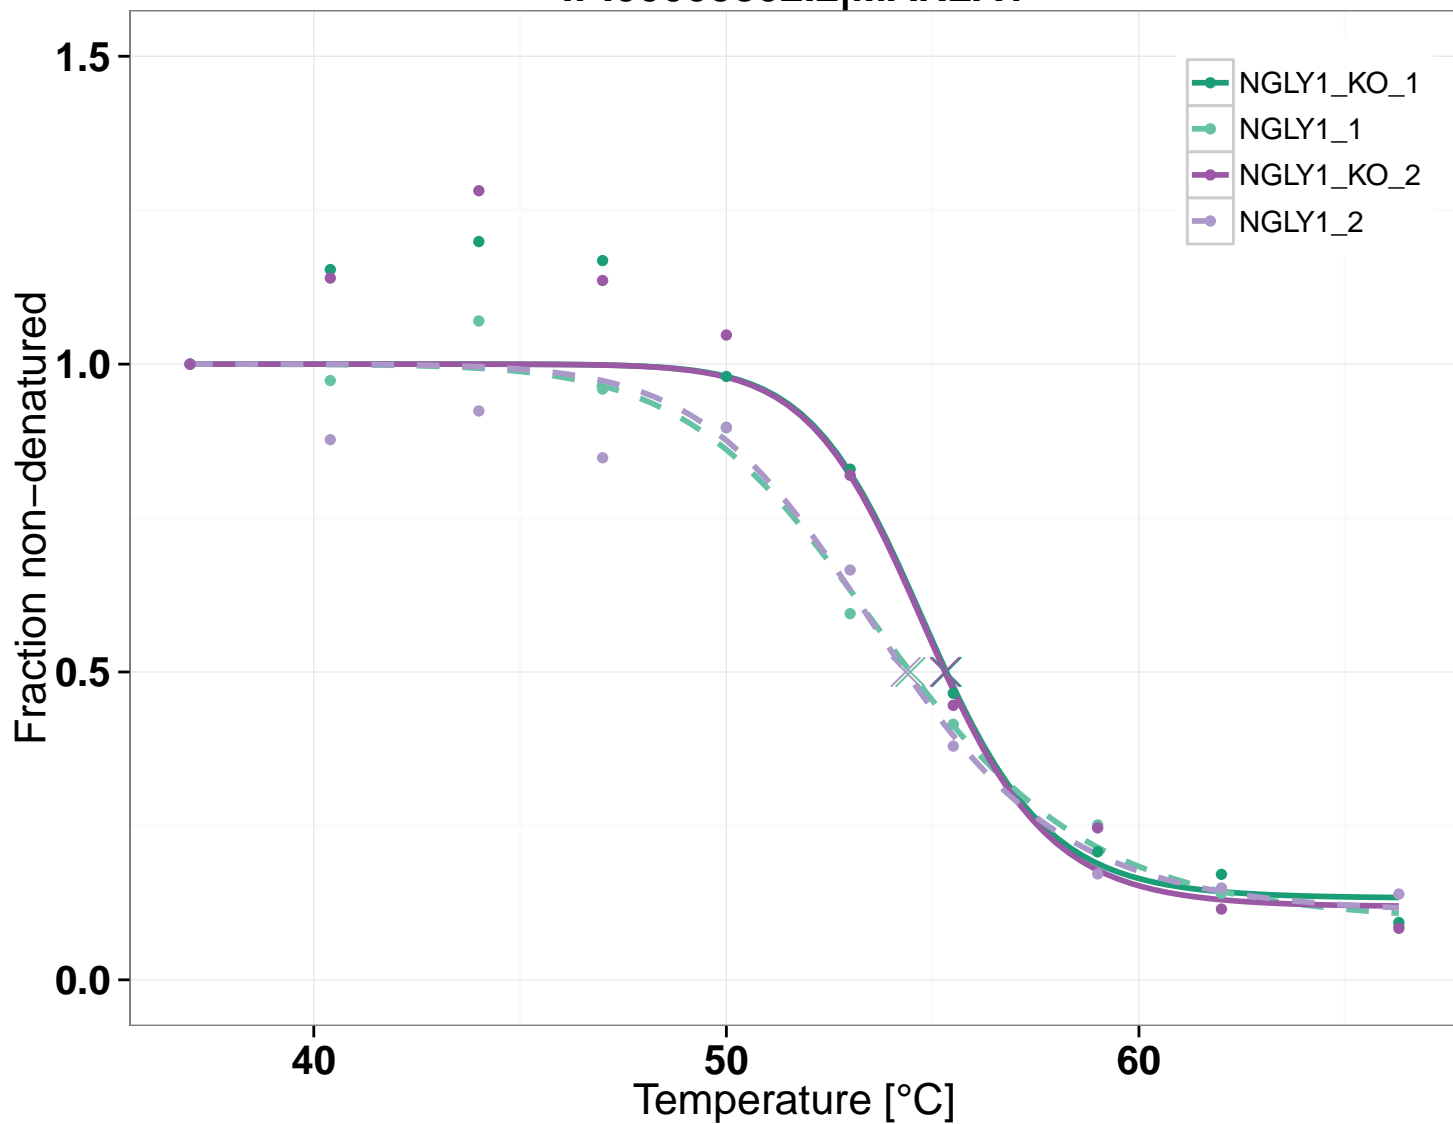

|            | meltPoint | slope  | plateau | R2   |
|------------|-----------|--------|---------|------|
| NGLY1_KO_1 | 55.33     | -0.15  | 0.13    | 0.95 |
| NGLY1_1    | 54.46     | -0.092 | 0.09    | 0.99 |
| NGLY1_KO_2 | 55.3      | -0.15  | 0.12    | 0.93 |
| NGLY1_2    | 54.35     | -0.1   | 0.11    | 0.97 |

Supplement: Supplementary file 571 [file 1]

IPI00470711.4|EFR3A

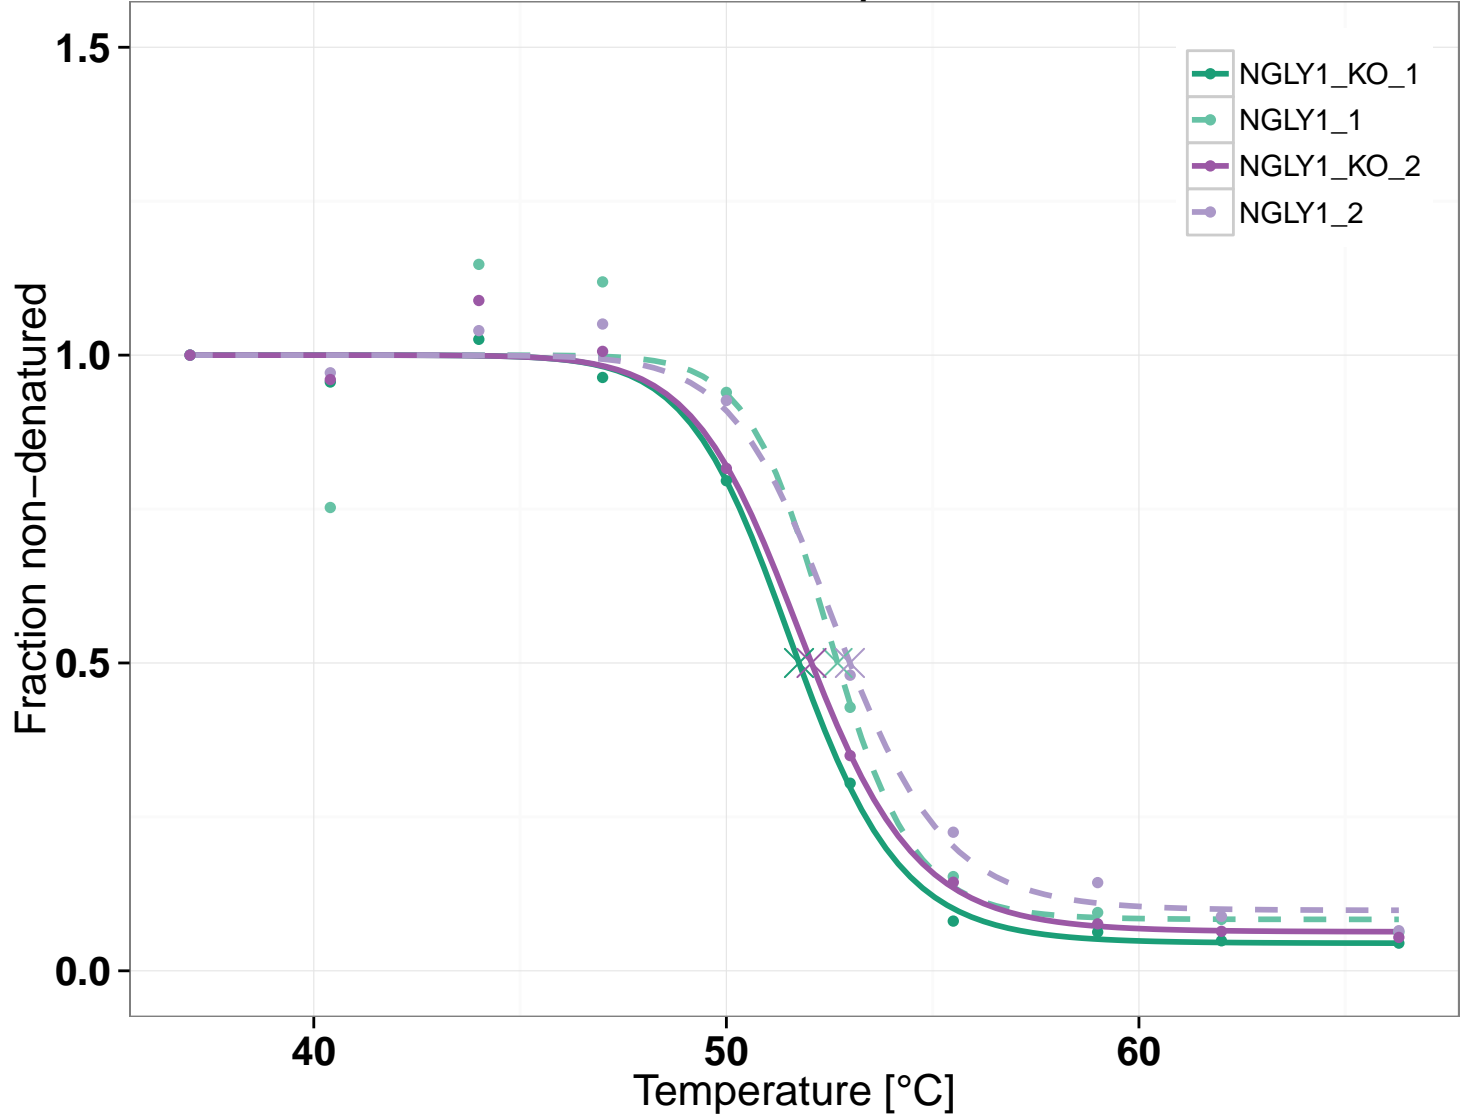

|            | meltPoint | slope | plateau | R2   |
|------------|-----------|-------|---------|------|
| NGLY1_KO_1 | 51.76     | -0.18 | 0.04    | 1    |
| NGLY1_1    | 52.7      | -0.23 | 0.08    | 0.95 |
| NGLY1_KO_2 | 52.06     | -0.17 | 0.06    | 0.99 |
| NGLY1_2    | 52.99     | -0.17 | 0.1     | 0.99 |

Supplement: Supplementary file 572 [file 1]

IPI00187011.4|ZC3H4

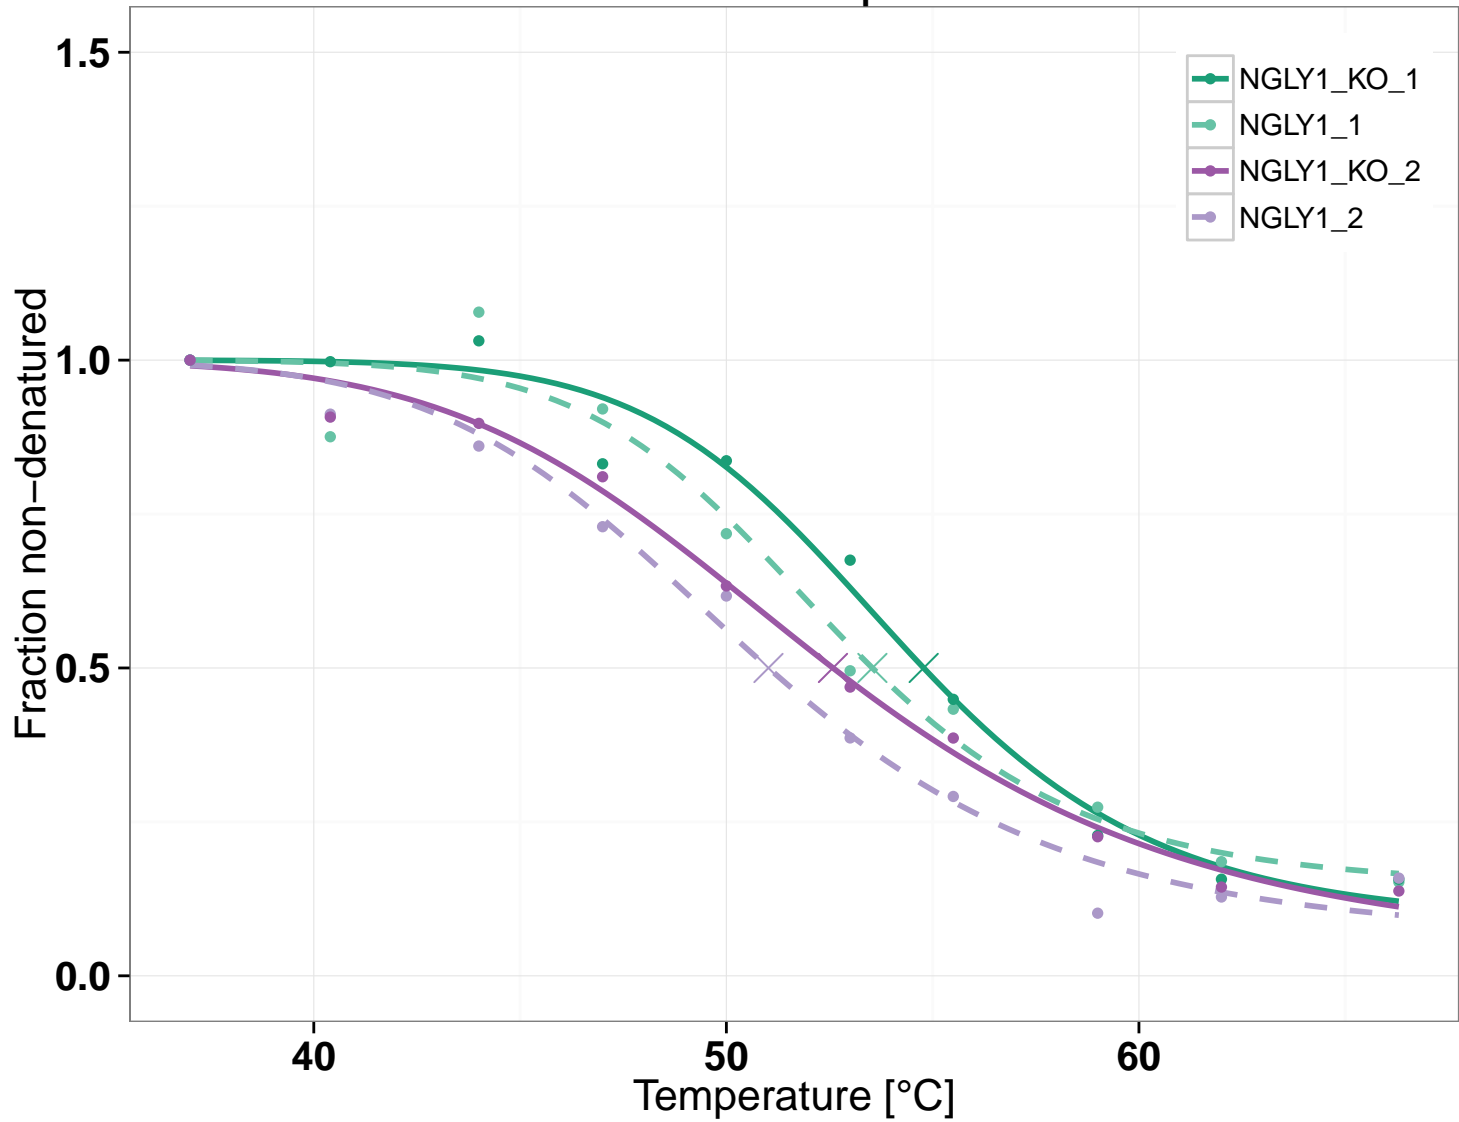

|            | meltPoint | slope  | plateau | R2   |
|------------|-----------|--------|---------|------|
| NGLY1_KO_1 | 54.78     | -0.074 | 0.08    | 0.98 |
| NGLY1_1    | 53.54     | -0.071 | 0.14    | 0.97 |
| NGLY1_KO_2 | 52.58     | -0.054 | 0.03    | 0.99 |
| NGLY1_2    | 51.02     | -0.062 | 0.06    | 0.98 |

Supplement: Supplementary file 573 [file 1]

# IPI00106698.1|PELO

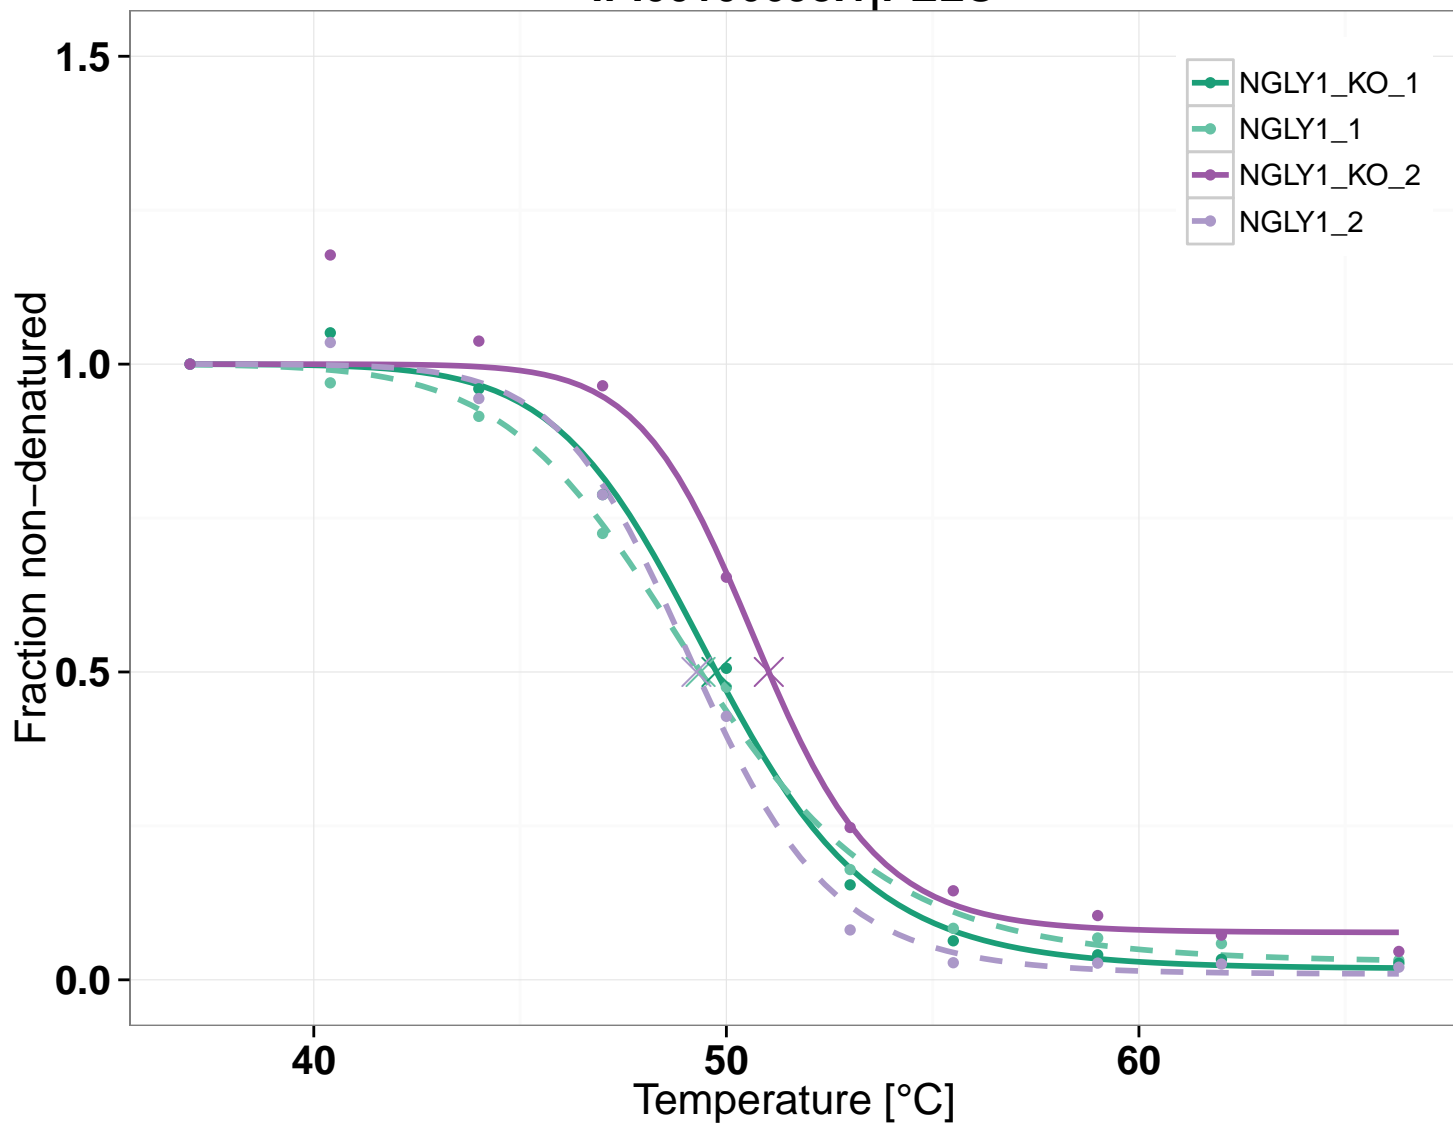

|            | meltPoint | slope | plateau | R2   |
|------------|-----------|-------|---------|------|
| NGLY1_KO_1 | 49.76     | -0.13 | 0.02    | 1    |
| NGLY1_1    | 49.38     | -0.1  | 0.03    | 1    |
| NGLY1_KO_2 | 51.03     | -0.16 | 0.08    | 0.98 |
| NGLY1_2    | 49.27     | -0.15 | 0.01    | 1    |

Supplement: Supplementary file 574 [file 1]

IPI00001835.3|ZBTB4

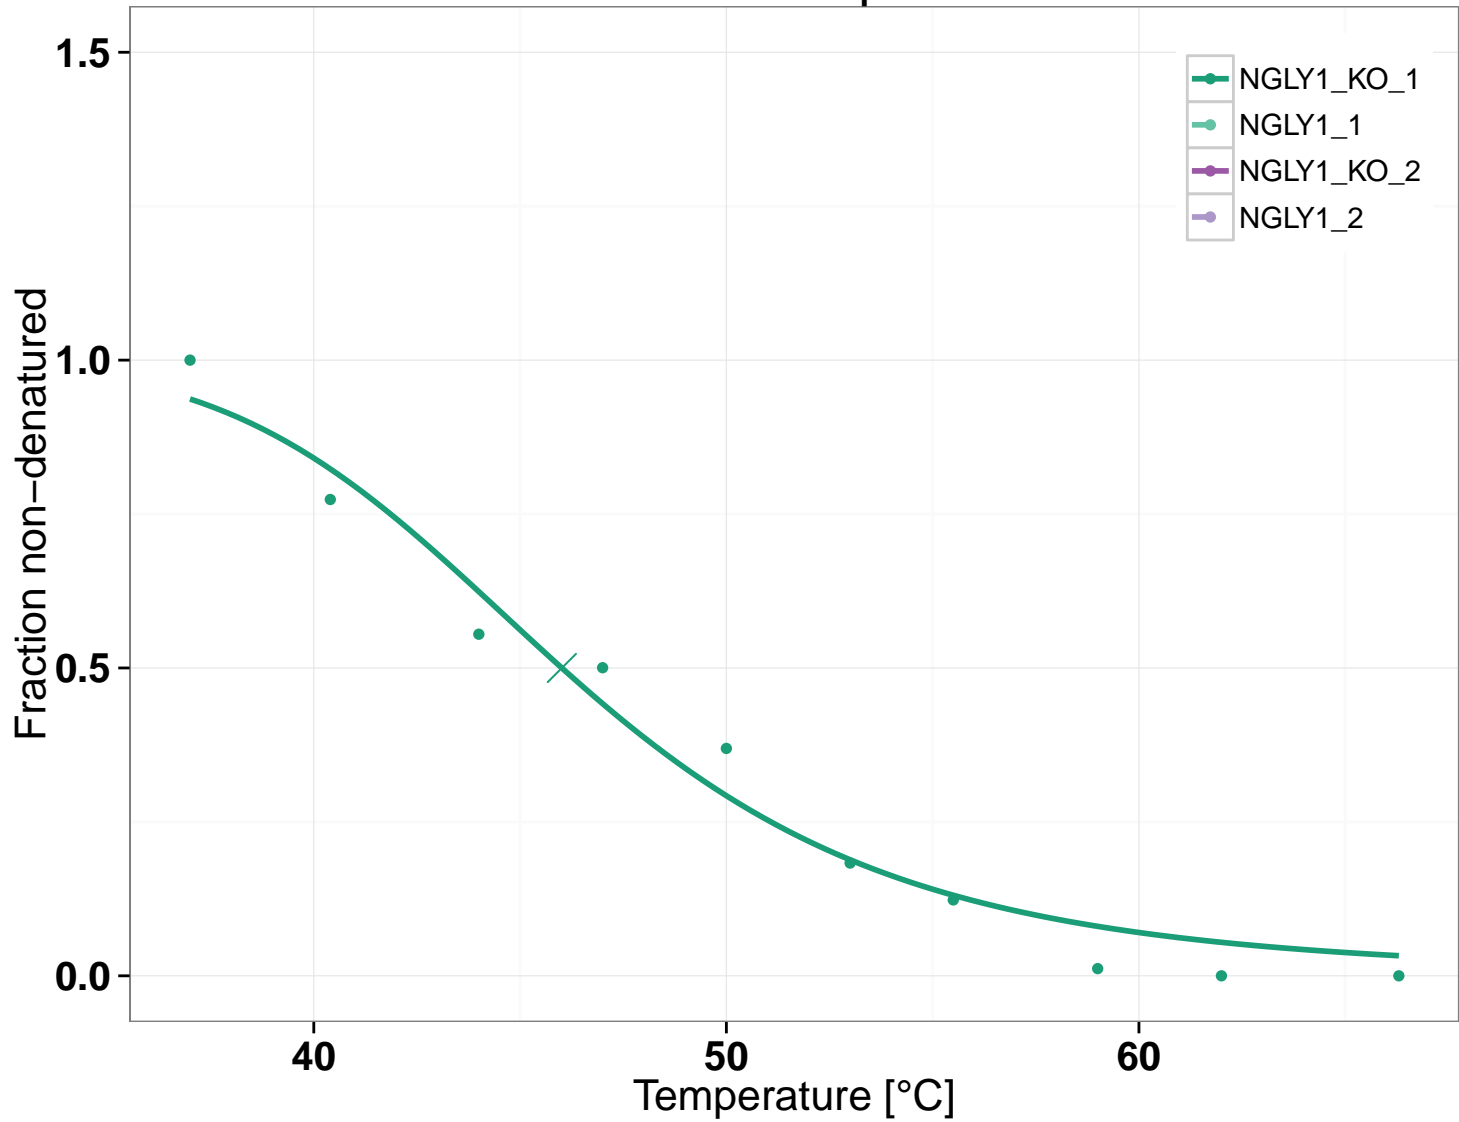

|            | meltPoint | slope  | plateau | R2   |
|------------|-----------|--------|---------|------|
| NGLY1_KO_1 | 46.01     | -0.062 | 0       | 0.97 |
| NGLY1_1    | -         | -      | -       | -    |
| NGLY1_KO_2 | -         | -      | -       | -    |
| NGLY1_2    | -         | -      | -       | -    |

Supplement: Supplementary file 575 [file 1]

# IPI00012866.2|AKT1

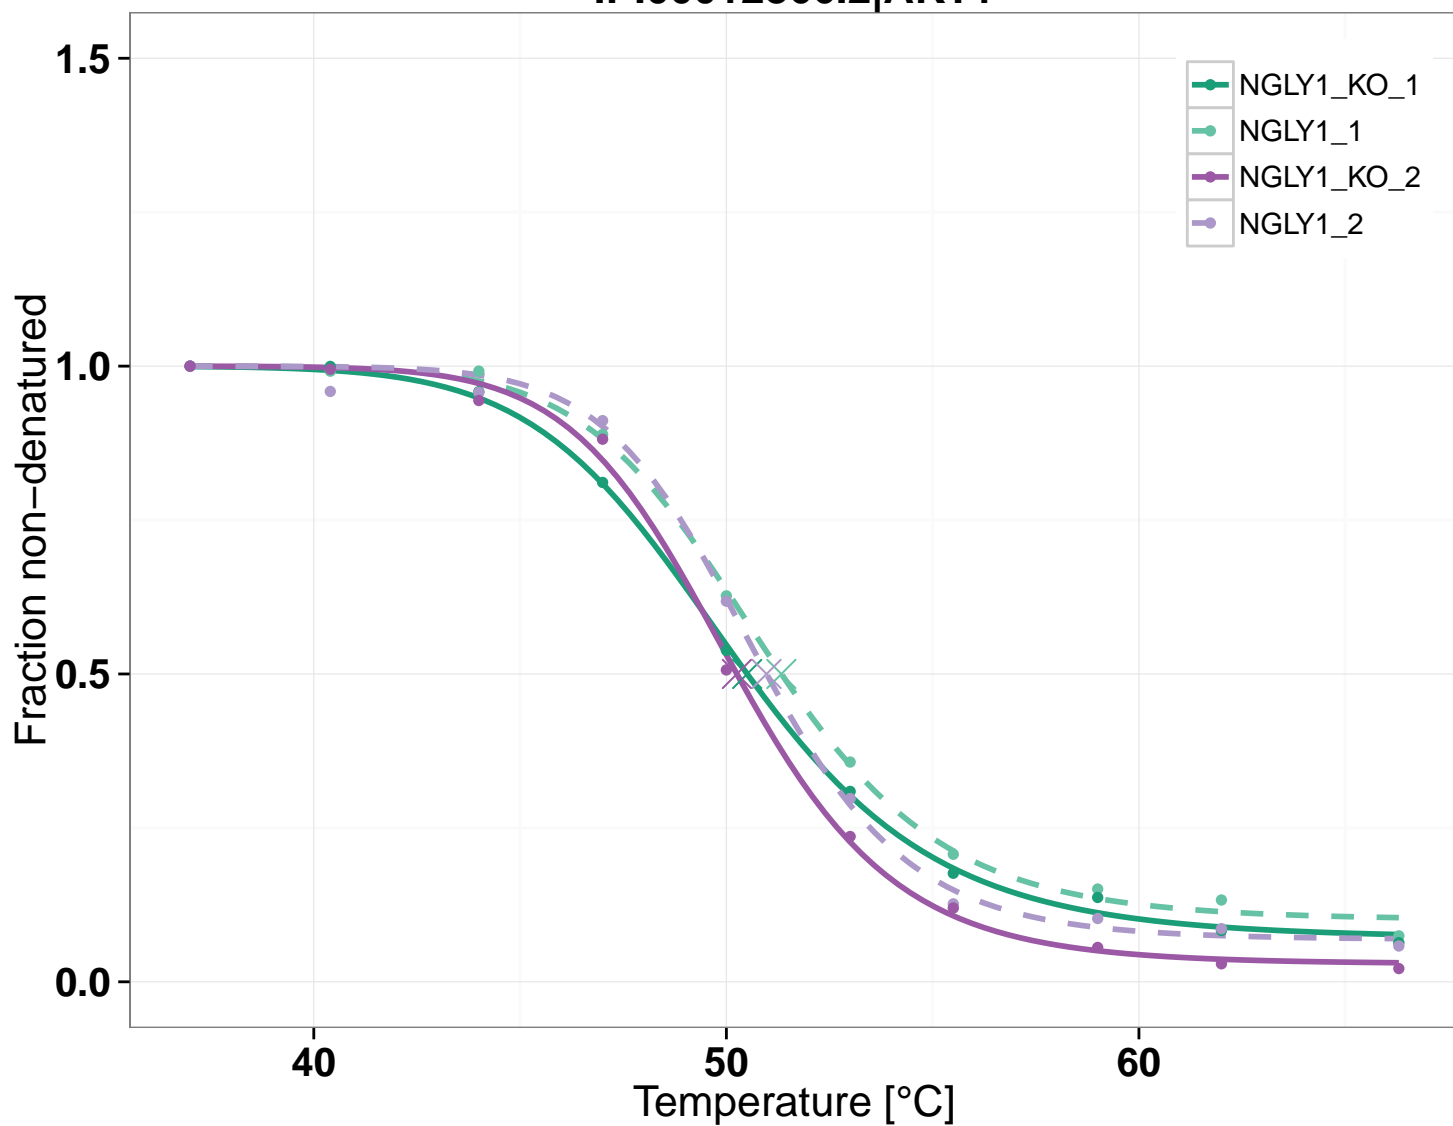

|            | meltPoint | slope  | plateau | R2 |
|------------|-----------|--------|---------|----|
| NGLY1_KO_1 | 50.51     | -0.095 | 0.07    | 1  |
| NGLY1_1    | 51.33     | -0.1   | 0.1     | 1  |
| NGLY1_KO_2 | 50.25     | -0.12  | 0.03    | 1  |
| NGLY1_2    | 50.97     | -0.13  | 0.07    | 1  |

Supplement: Supplementary file 576 [file 1]

IPI00830108.1|DNAJC2

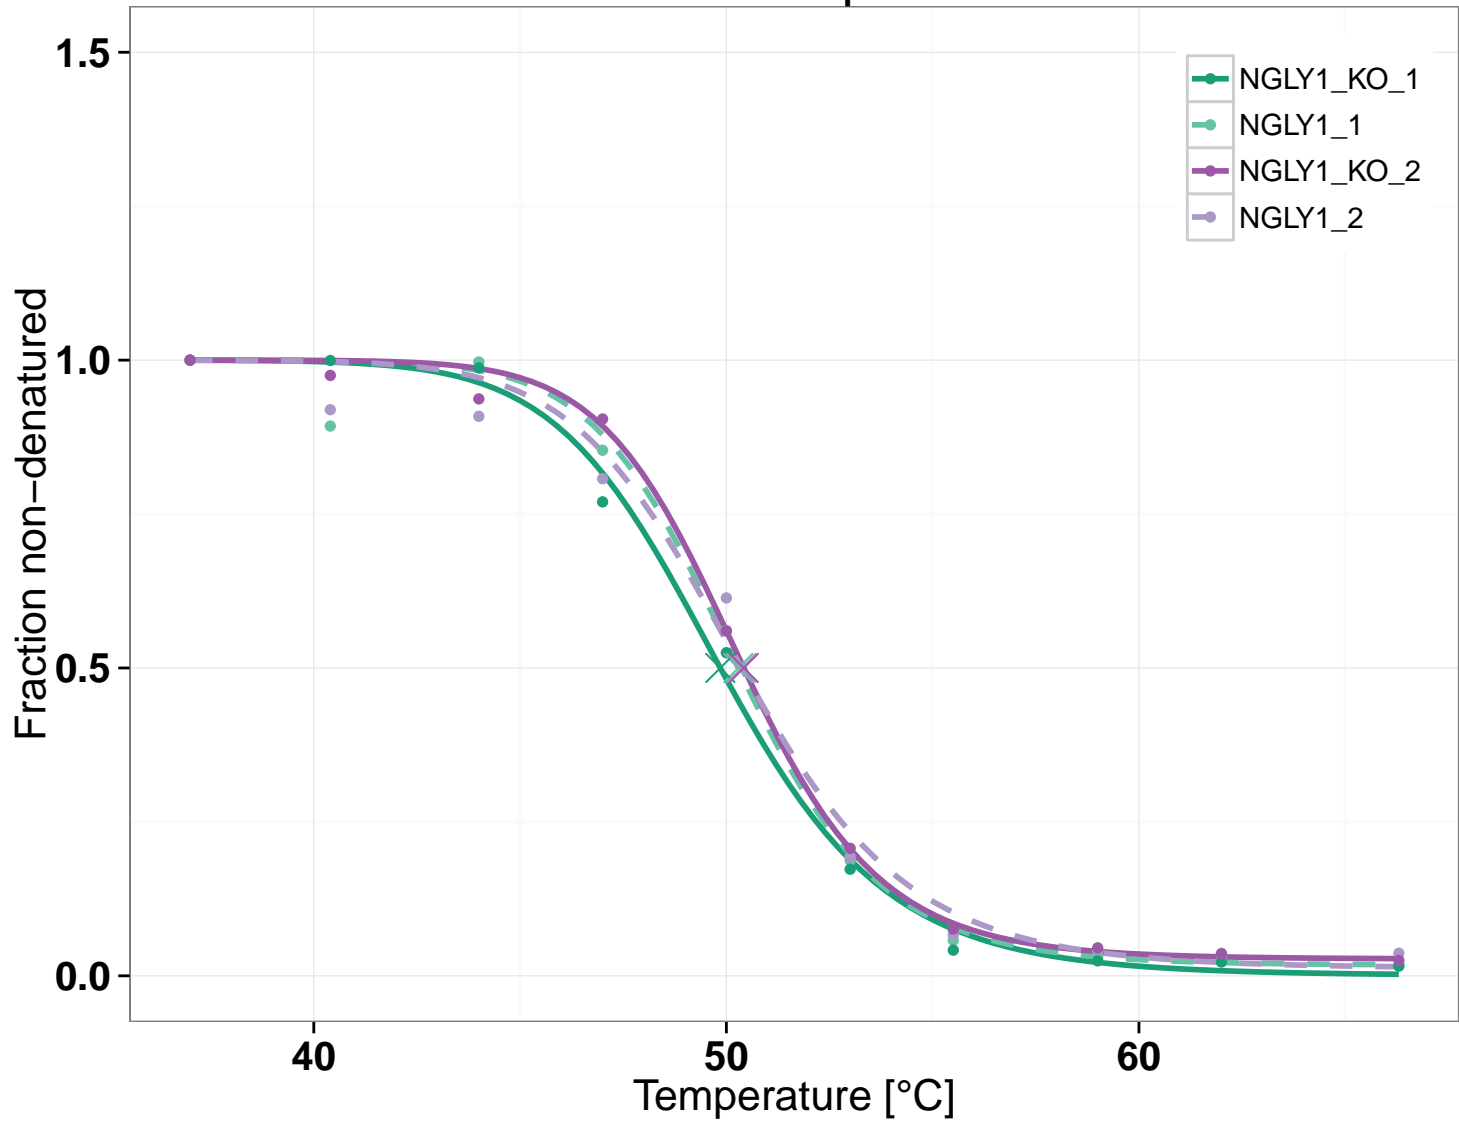

|            | meltPoint | slope | plateau | R2   |
|------------|-----------|-------|---------|------|
| NGLY1_KO_1 | 49.85     | -0.12 | 0       | 1    |
| NGLY1_1    | 50.29     | -0.14 | 0.02    | 0.99 |
| NGLY1_KO_2 | 50.42     | -0.14 | 0.03    | 1    |
| NGLY1_2    | 50.36     | -0.12 | 0.01    | 0.99 |

Supplement: Supplementary file 577 [file 1]

# IPI00165068.1|NRF1

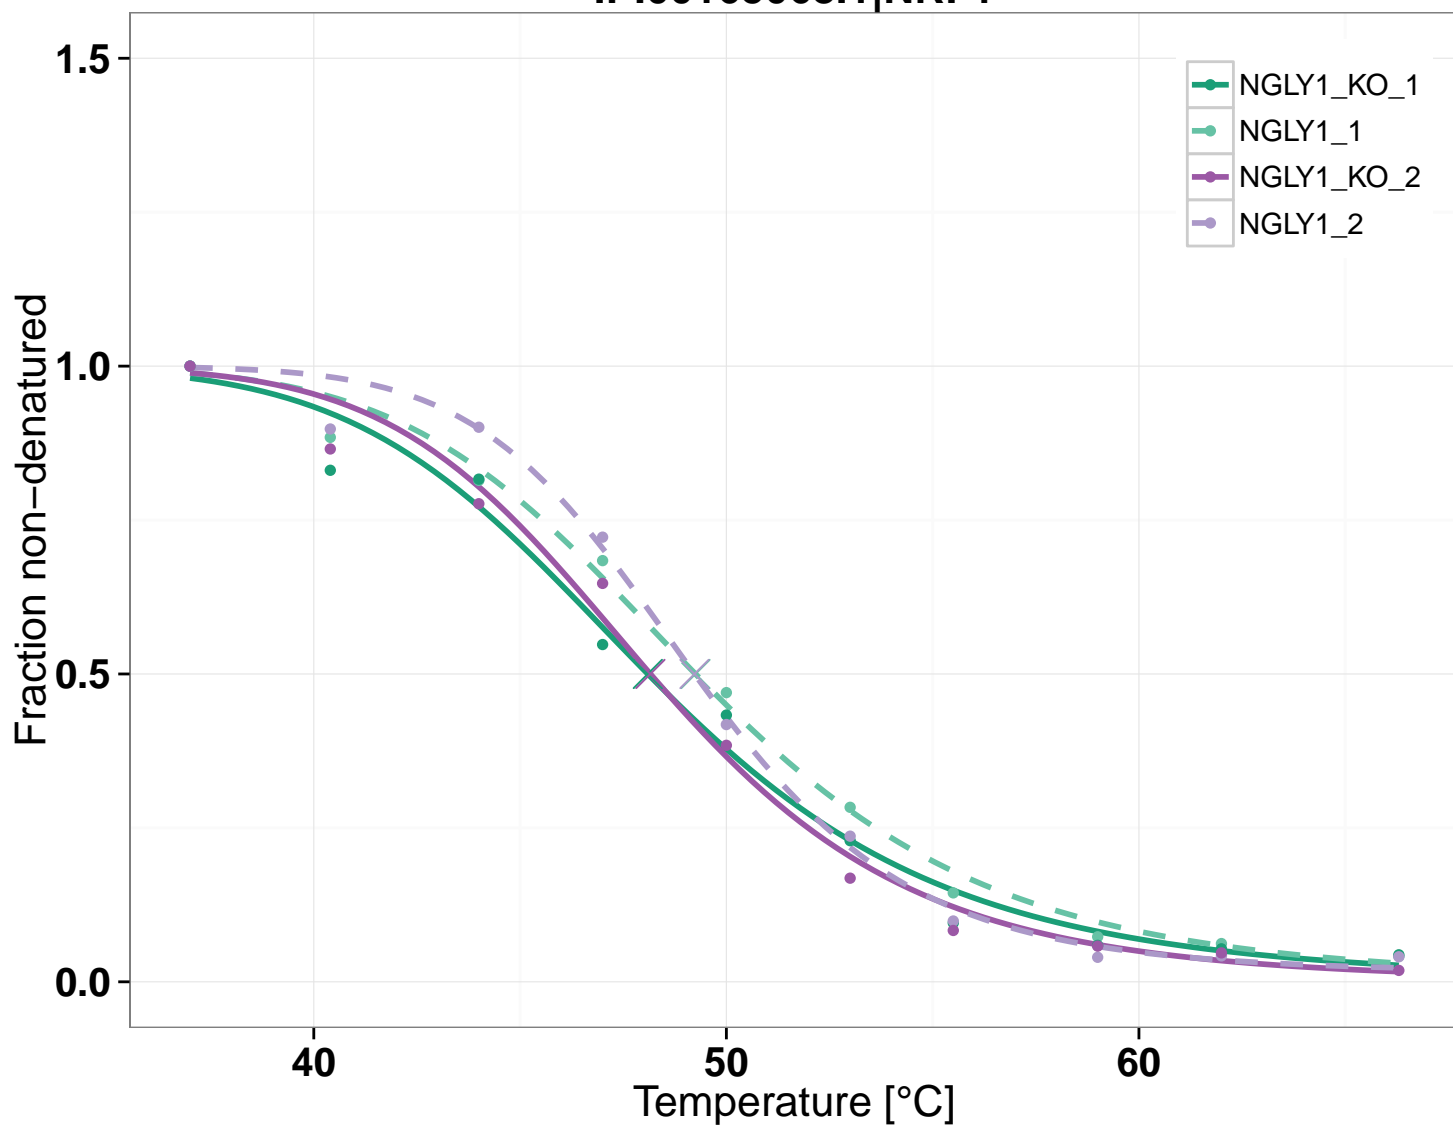

|            | meltPoint | slope  | plateau | R2   |
|------------|-----------|--------|---------|------|
| NGLY1_KO_1 | 48.1      | -0.07  | 0       | 0.98 |
| NGLY1_1    | 49.25     | -0.07  | 0       | 0.99 |
| NGLY1_KO_2 | 48.16     | -0.079 | 0       | 0.99 |
| NGLY1_2    | 49.23     | -0.094 | 0.01    | 0.99 |

Supplement: Supplementary file 578 [file 1]

IPI00304742.5|STK10

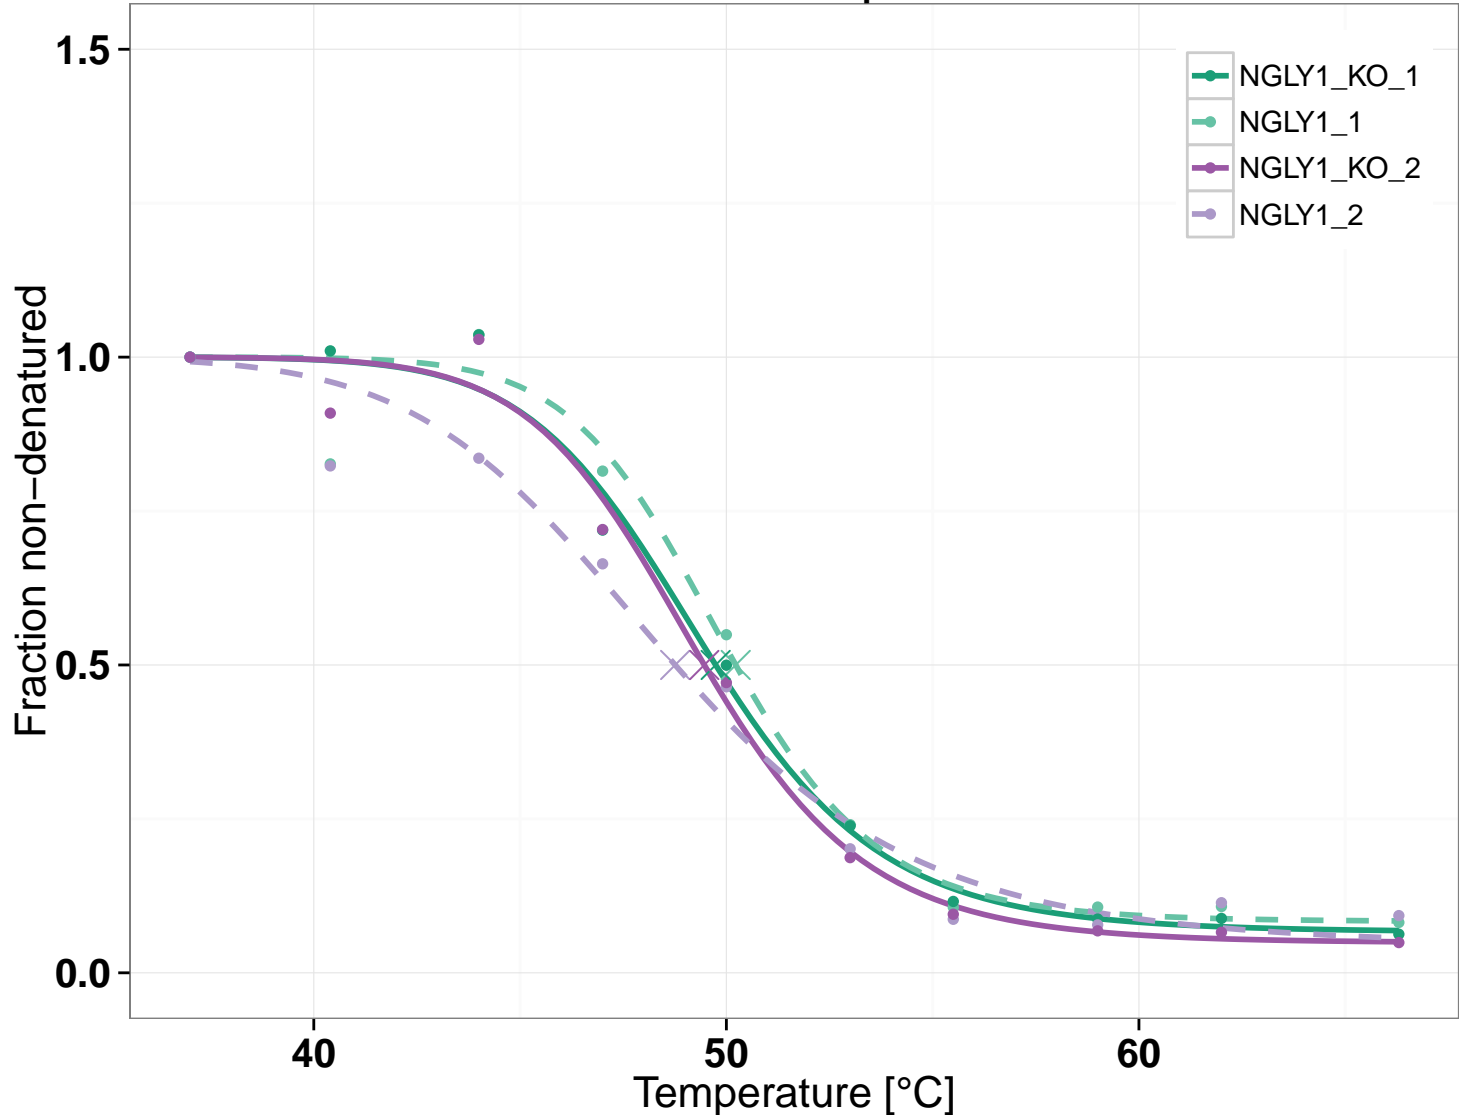

|            | meltPoint | slope  | plateau | R2   |
|------------|-----------|--------|---------|------|
| NGLY1_KO_1 | 49.74     | -0.11  | 0.07    | 0.99 |
| NGLY1_1    | 50.23     | -0.12  | 0.08    | 0.97 |
| NGLY1_KO_2 | 49.46     | -0.12  | 0.05    | 0.99 |
| NGLY1_2    | 48.76     | -0.079 | 0.04    | 0.97 |

Supplement: Supplementary file 579 [file 1]

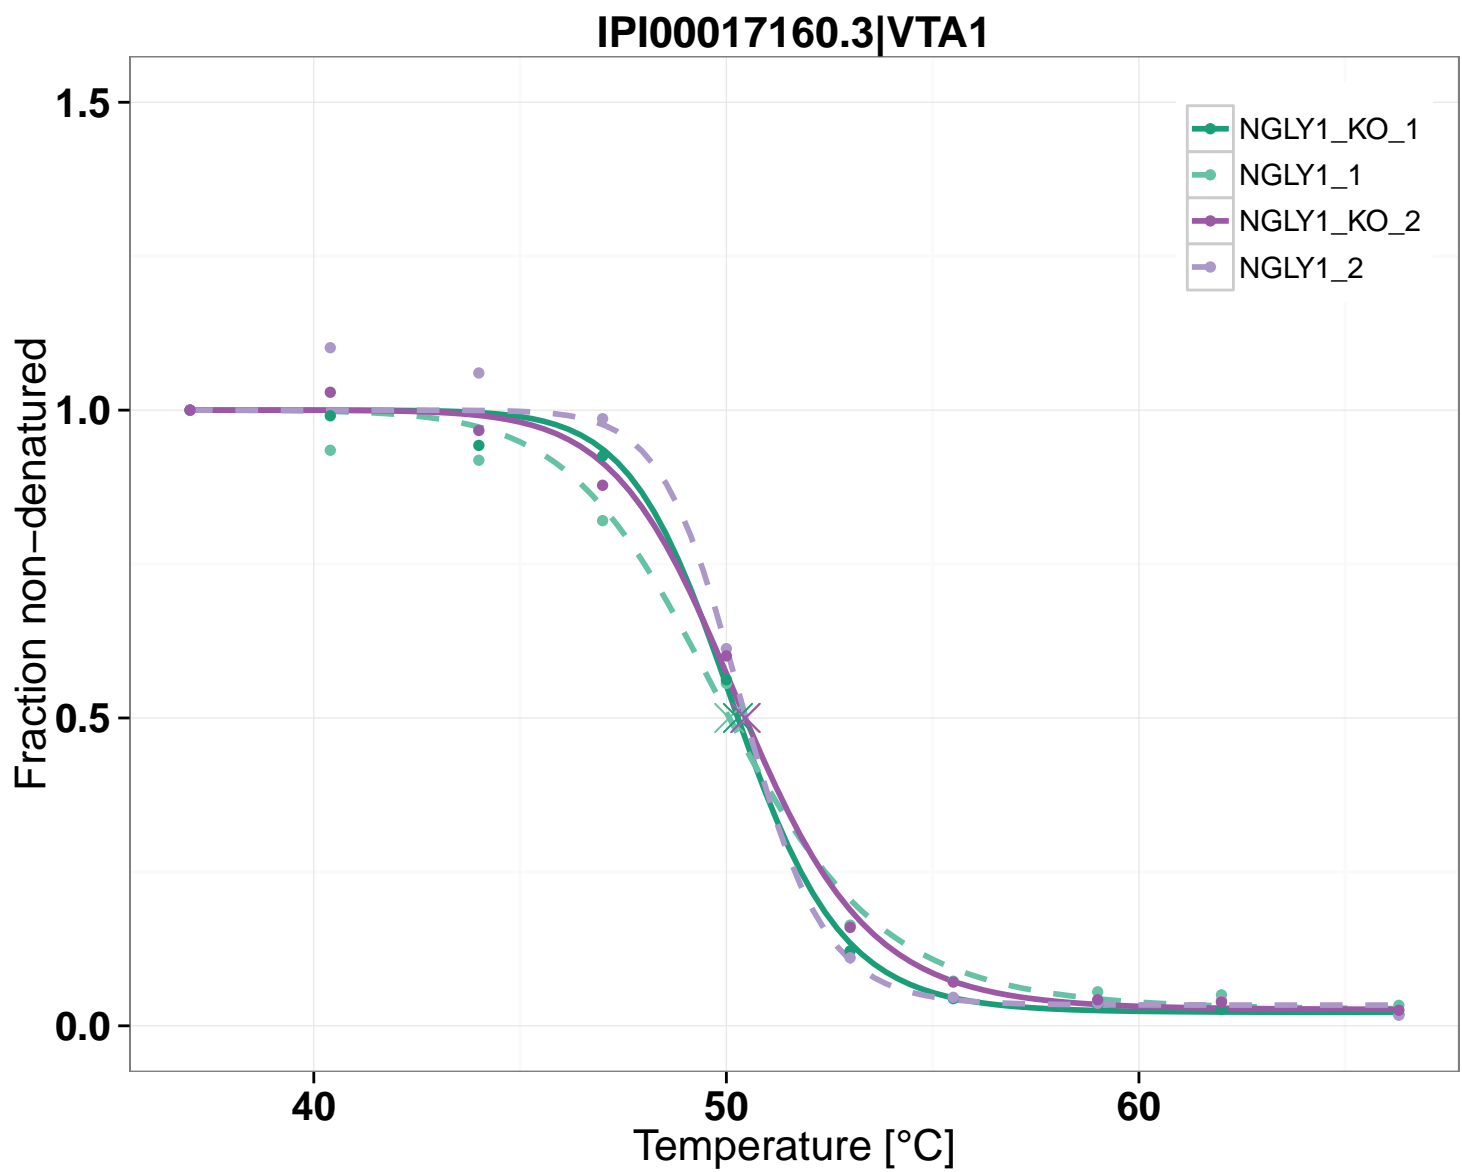

|            | meltPoint | slope | plateau | R2   |
|------------|-----------|-------|---------|------|
| NGLY1_KO_1 | 50.28     | -0.19 | 0.02    | 1    |
| NGLY1_1    | 50.07     | -0.13 | 0.03    | 0.99 |
| NGLY1_KO_2 | 50.46     | -0.16 | 0.03    | 1    |
| NGLY1_2    | 50.47     | -0.25 | 0.03    | 0.99 |

Supplement: Supplementary file 580 [file 1]

# IPI00016634.1|C20ORF11

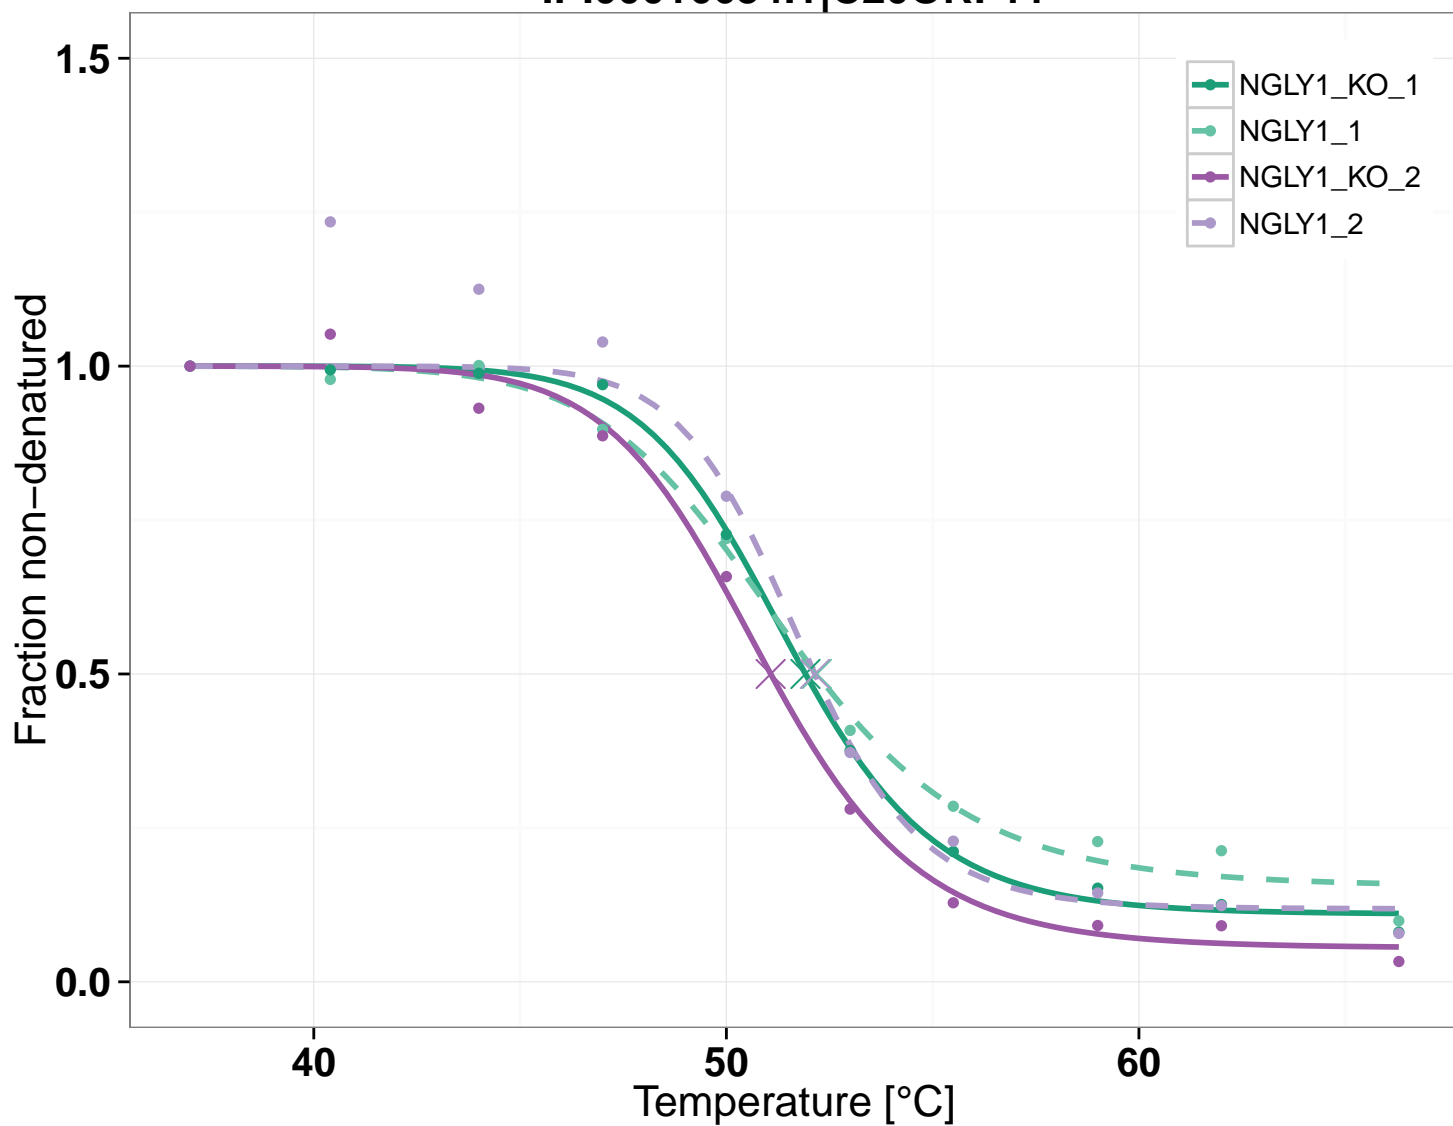

|            | meltPoint | slope  | plateau | R2   |
|------------|-----------|--------|---------|------|
| NGLY1_KO_1 | 51.92     | -0.13  | 0.11    | 1    |
| NGLY1_1    | 52.19     | -0.094 | 0.15    | 0.99 |
| NGLY1_KO_2 | 51.07     | -0.13  | 0.05    | 0.99 |
| NGLY1_2    | 52.15     | -0.15  | 0.12    | 0.96 |

Supplement: Supplementary file 581 [file 1]

IPI00300697.1|VPS11

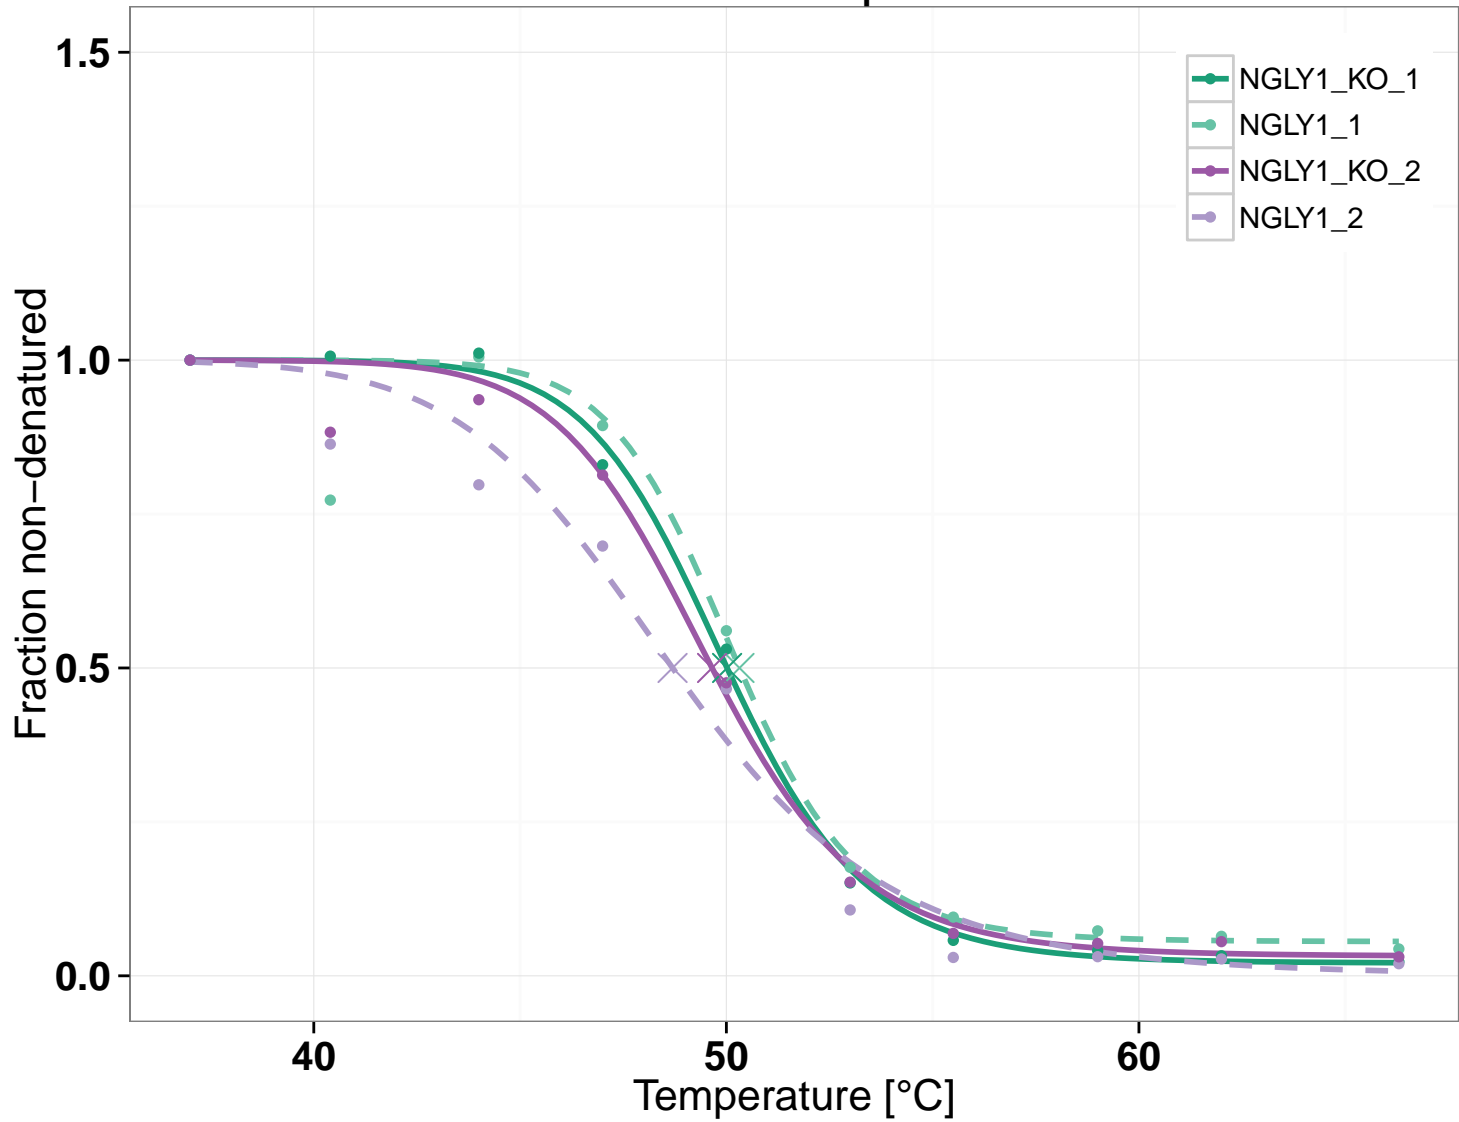

|            | meltPoint | slope  | plateau | R2   |
|------------|-----------|--------|---------|------|
| NGLY1_KO_1 | 50.02     | -0.14  | 0.02    | 1    |
| NGLY1_1    | 50.32     | -0.16  | 0.06    | 0.97 |
| NGLY1_KO_2 | 49.65     | -0.13  | 0.03    | 0.99 |
| NGLY1_2    | 48.7      | -0.095 | 0       | 0.97 |

Supplement: Supplementary file 582 [file 1]

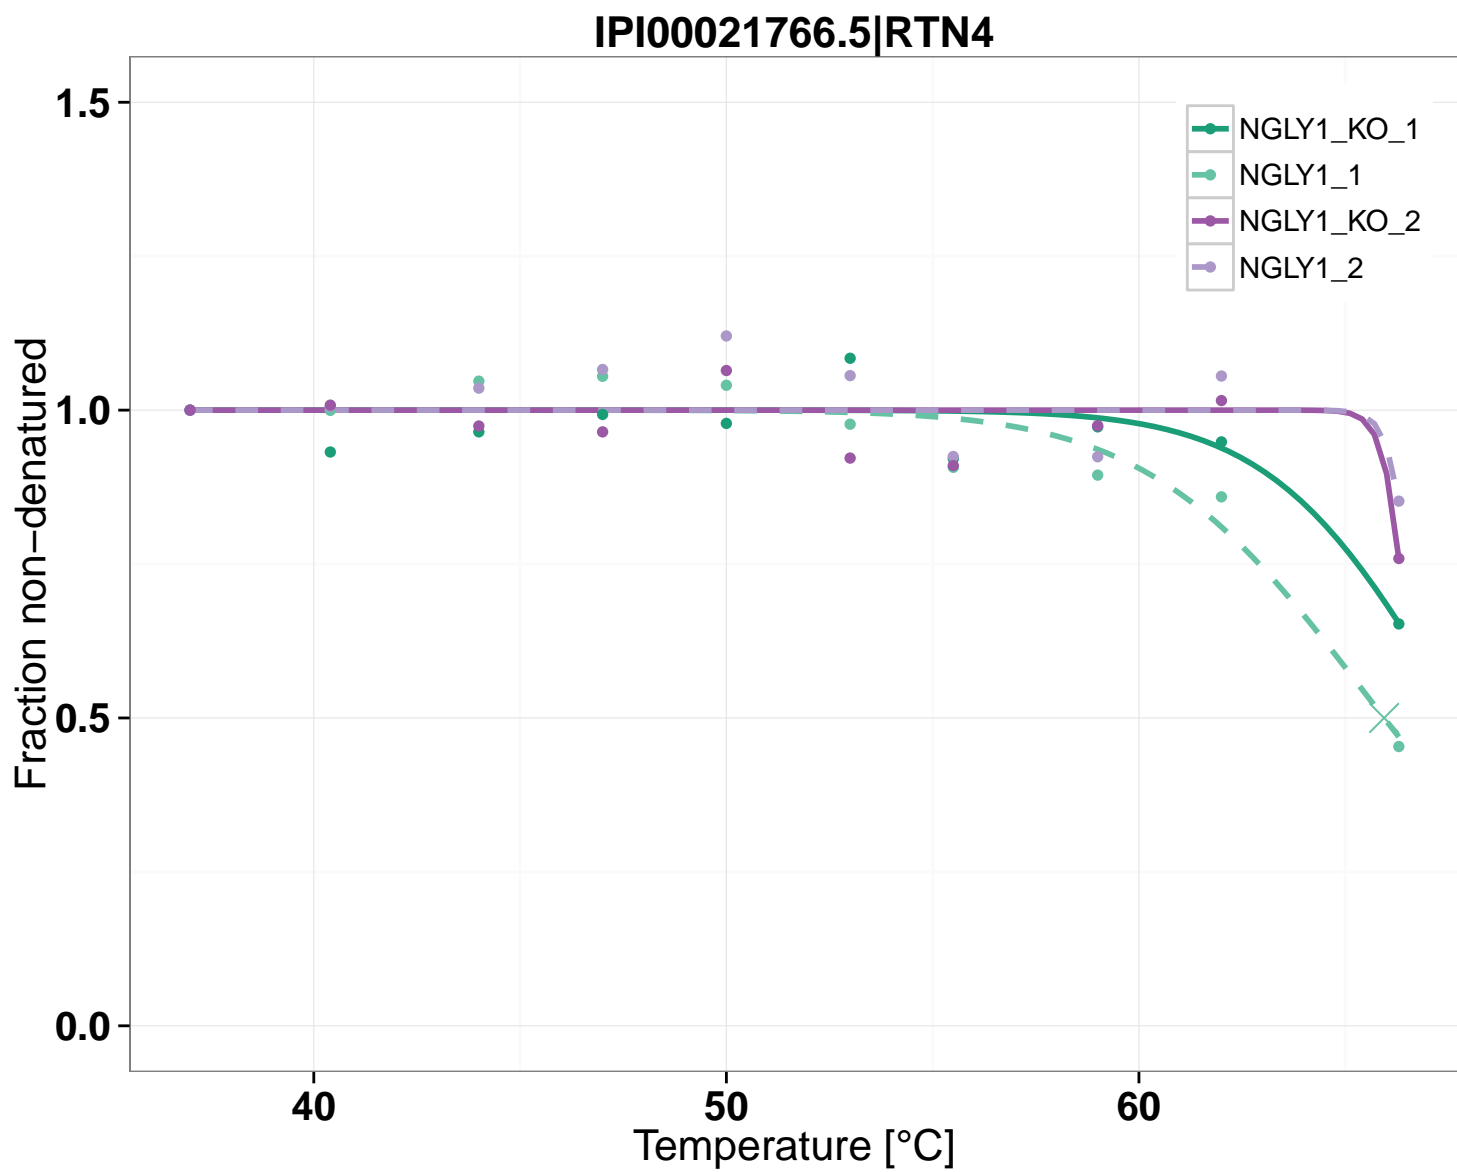

|            | meltPoint | slope  | plateau | R2   |
|------------|-----------|--------|---------|------|
| NGLY1_KO_1 | –         | –      | 0       | 0.82 |
| NGLY1_1    | 65.94     | –0.087 | 0       | 0.94 |
| NGLY1_KO_2 | –         | –      | 0       | 0.66 |
| NGLY1_2    | –         | –      | 0       | 0.36 |

Supplement: Supplementary file 583 [file 1]

IPI00015351.2|C1ORF128

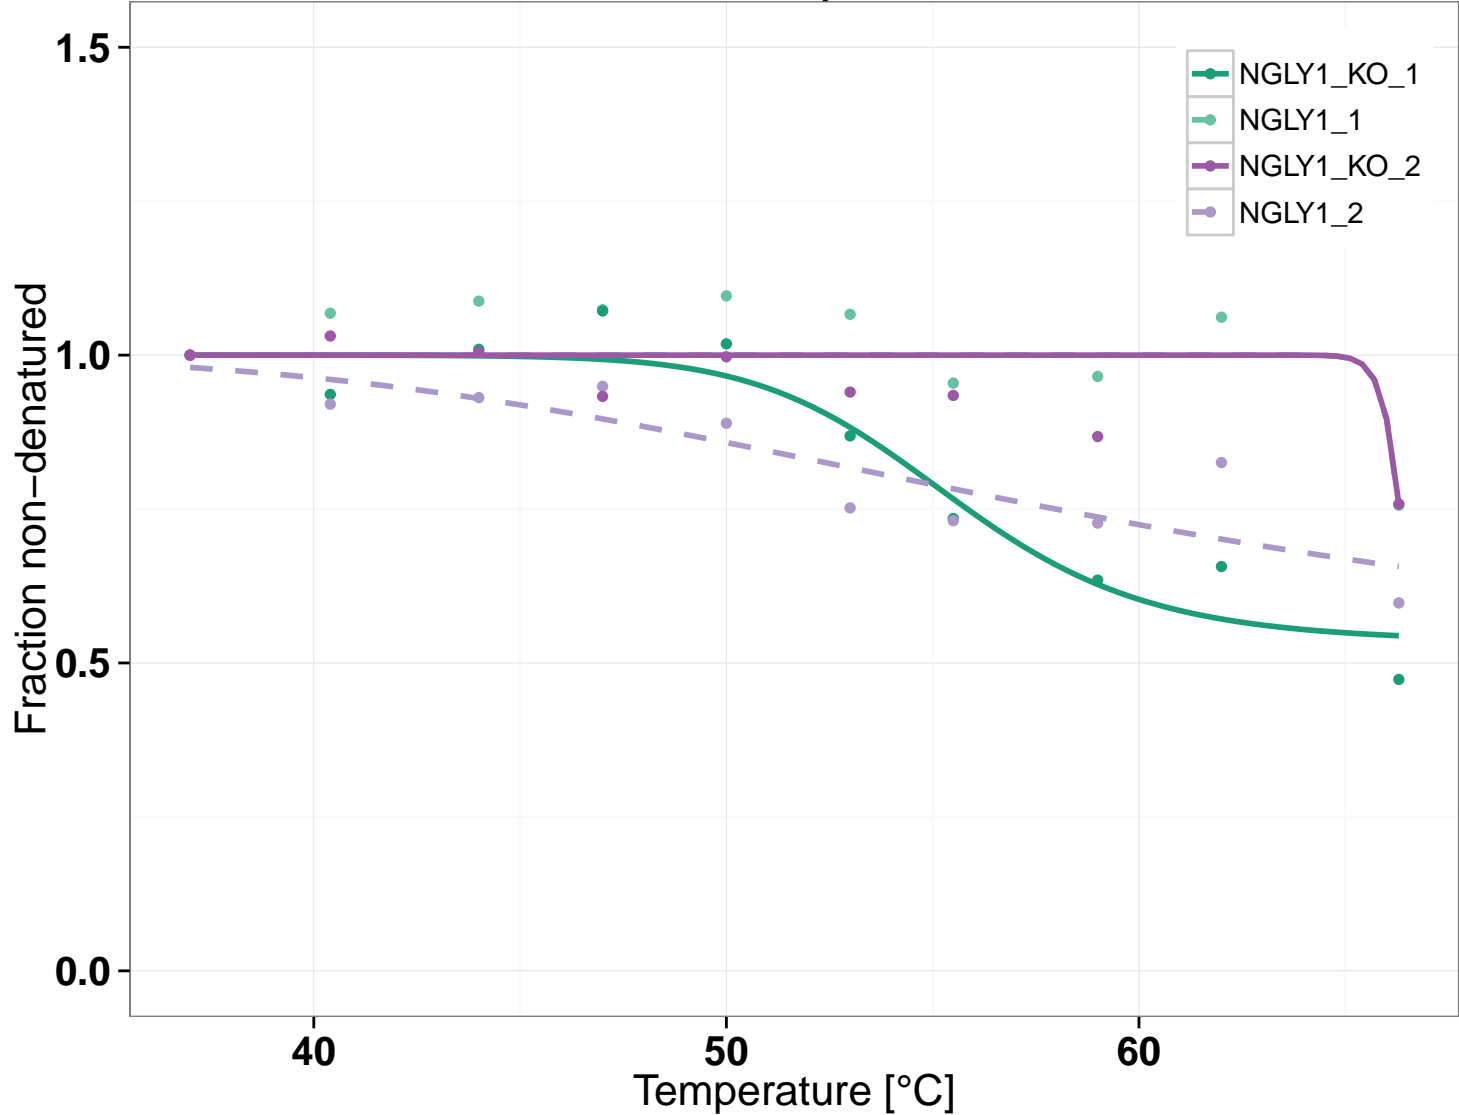

|            | meltPoint | slope  | plateau | R2   |
|------------|-----------|--------|---------|------|
| NGLY1_KO_1 | —         | -0.049 | 0.53    | 0.93 |
| NGLY1_1    | —         | —      | 0       | 0.6  |
| NGLY1_KO_2 | —         | —      | 0       | 0.4  |
| NGLY1_2    | —         | -0.014 | 0.44    | 0.78 |

Supplement: Supplementary file 584 [file 1]

IPI00900256.1|C2CD3

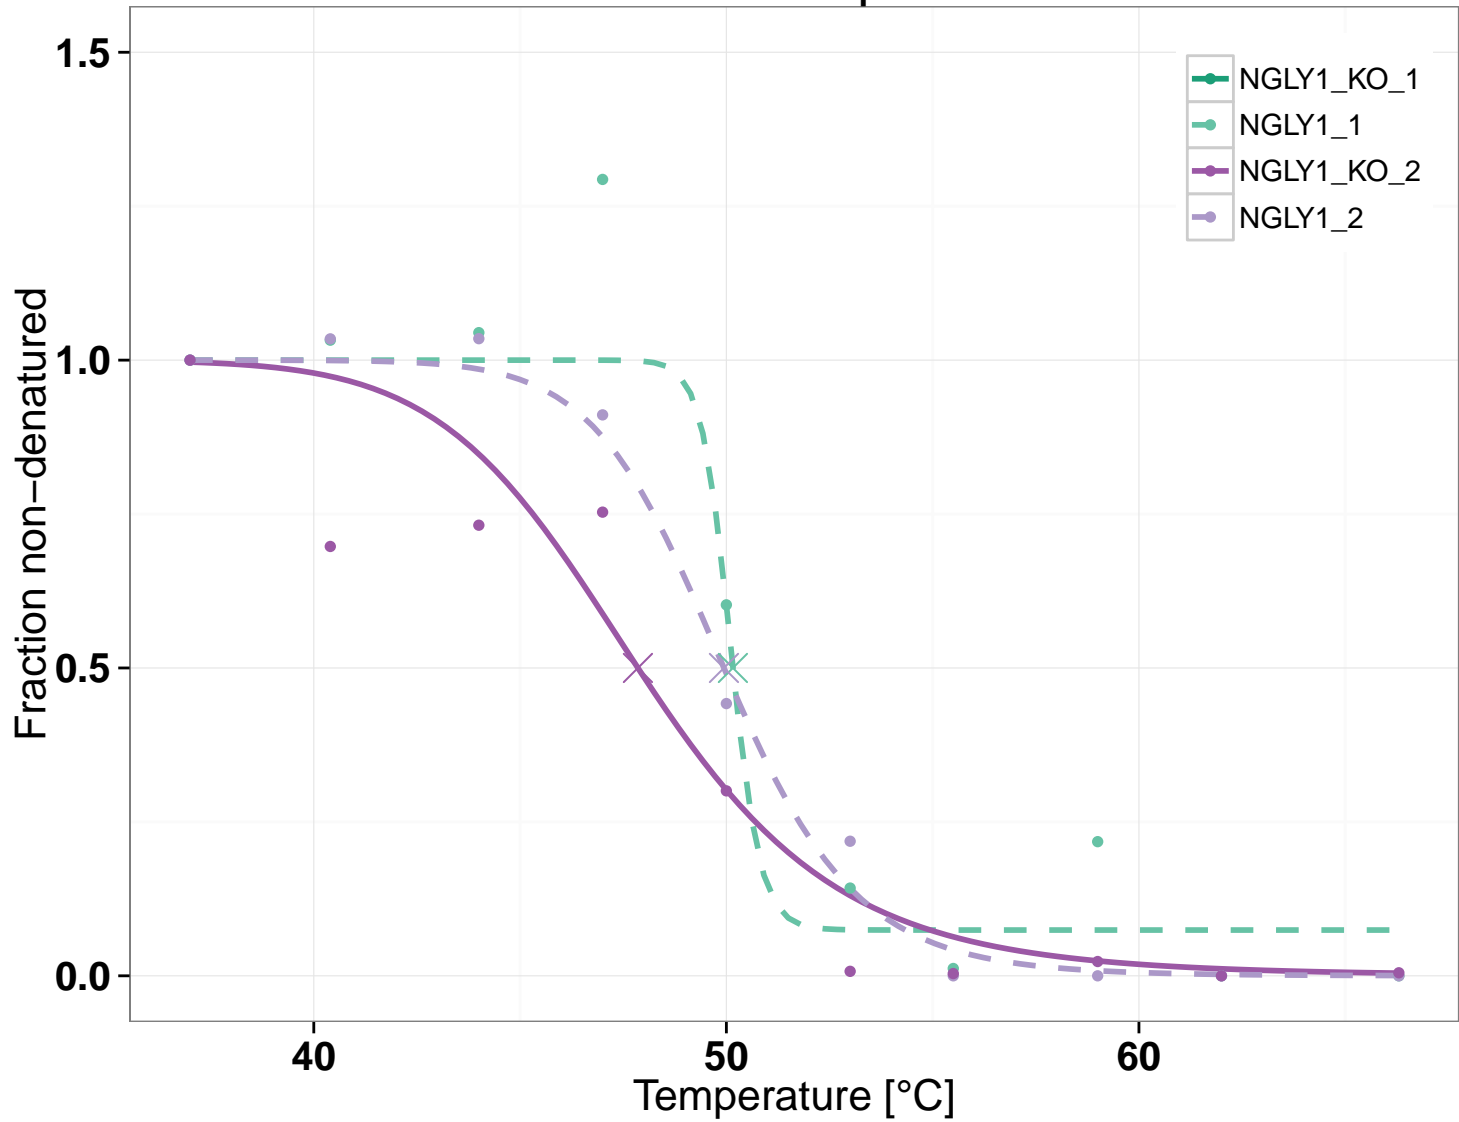

|            | meltPoint | slope | plateau | R2   |
|------------|-----------|-------|---------|------|
| NGLY1_KO_1 | -         | -     | -       | -    |
| NGLY1_1    | 50.16     | -0.65 | 0.07    | 0.95 |
| NGLY1_KO_2 | 47.86     | -0.1  | 0       | 0.91 |
| NGLY1_2    | 49.94     | -0.16 | 0       | 0.99 |

Supplement: Supplementary file 585 [file 1]

# IPI00015148.3|RAP1B

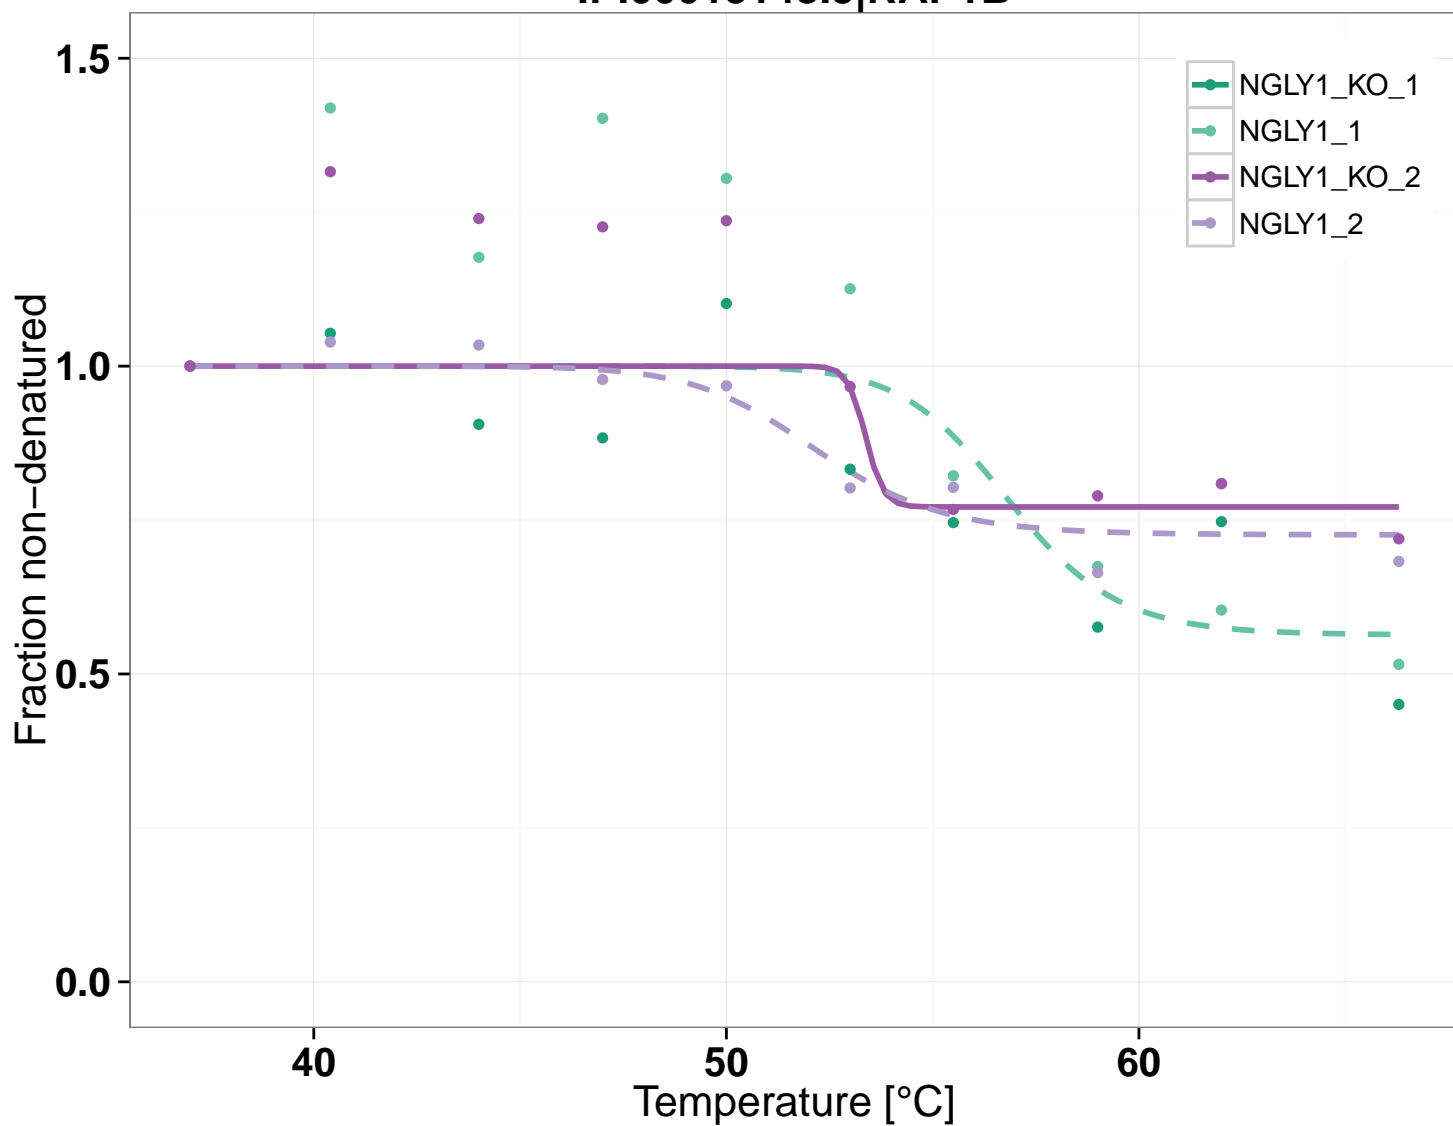

|            | meltPoint | slope  | plateau | R2   |
|------------|-----------|--------|---------|------|
| NGLY1_KO_1 | —         | —      | —       | —    |
| NGLY1_1    | —         | -0.083 | 0.56    | 0.51 |
| NGLY1_KO_2 | —         | -0.27  | 0.77    | 0.44 |
| NGLY1_2    | —         | -0.045 | 0.73    | 0.9  |

Supplement: Supplementary file 586 [file 1]

# IPI00023359.1|MCAT

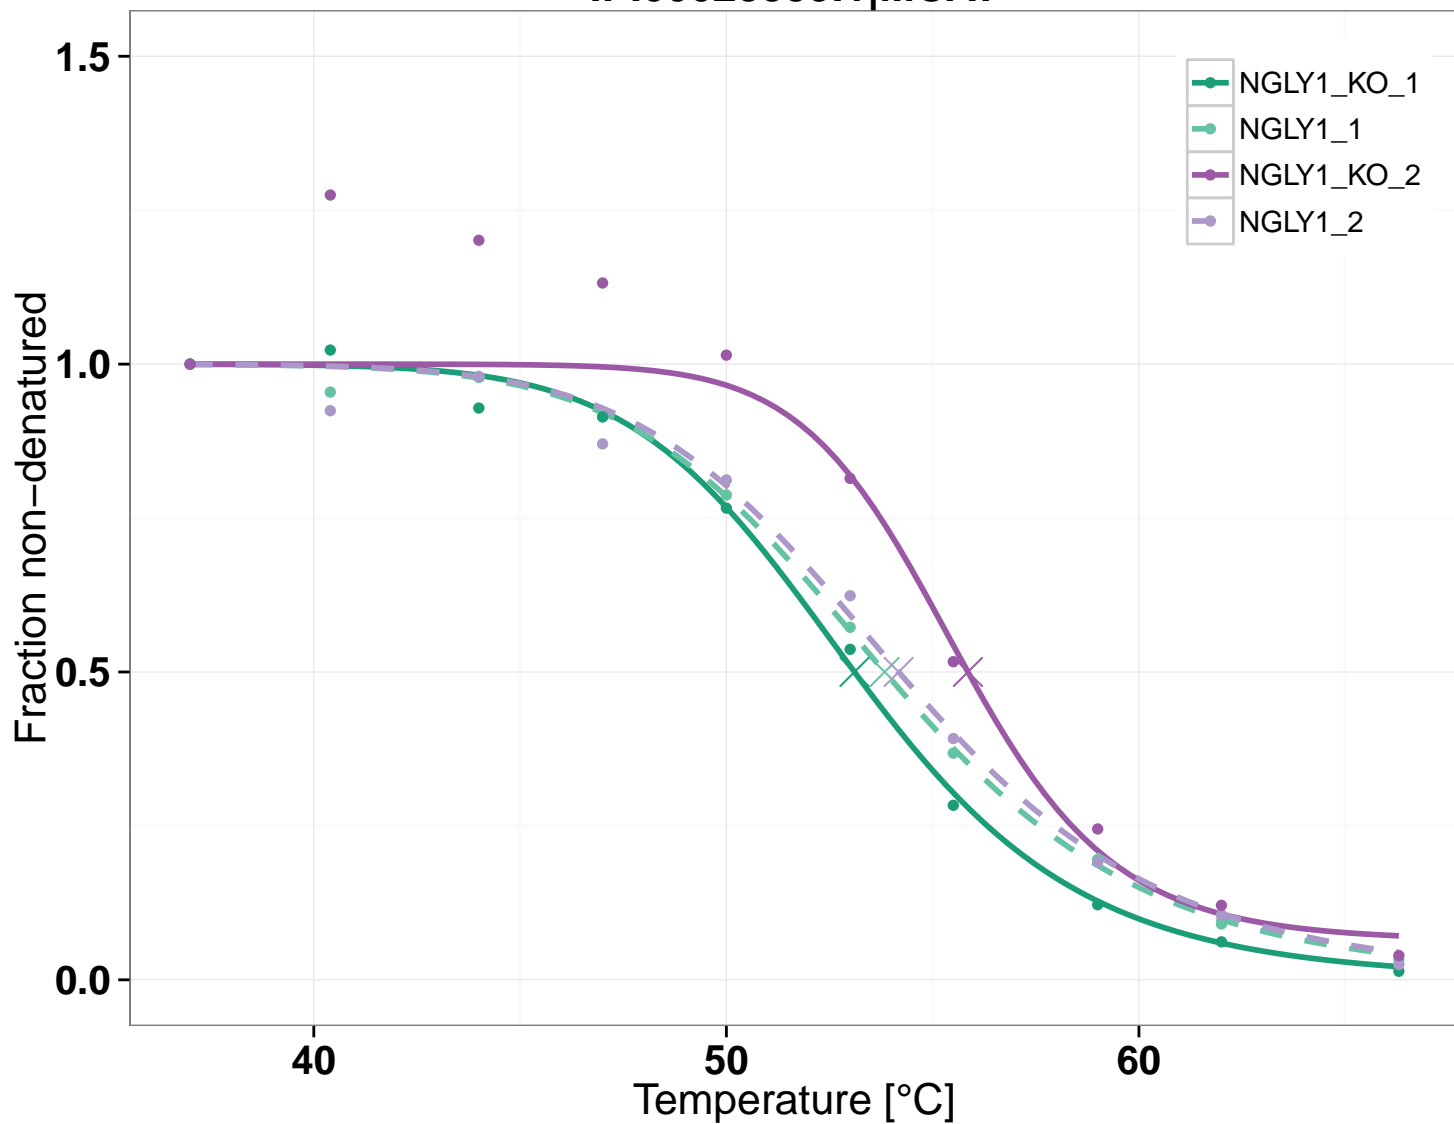

|            | meltPoint | slope  | plateau | R2   |
|------------|-----------|--------|---------|------|
| NGLY1_KO_1 | 53.11     | -0.091 | 0       | 1    |
| NGLY1_1    | 53.84     | -0.08  | 0       | 1    |
| NGLY1_KO_2 | 55.86     | -0.12  | 0.06    | 0.93 |
| NGLY1_2    | 54.18     | -0.079 | 0       | 0.99 |

Supplement: Supplementary file 587 [file 1]

IPI00893234.1|OBSL1

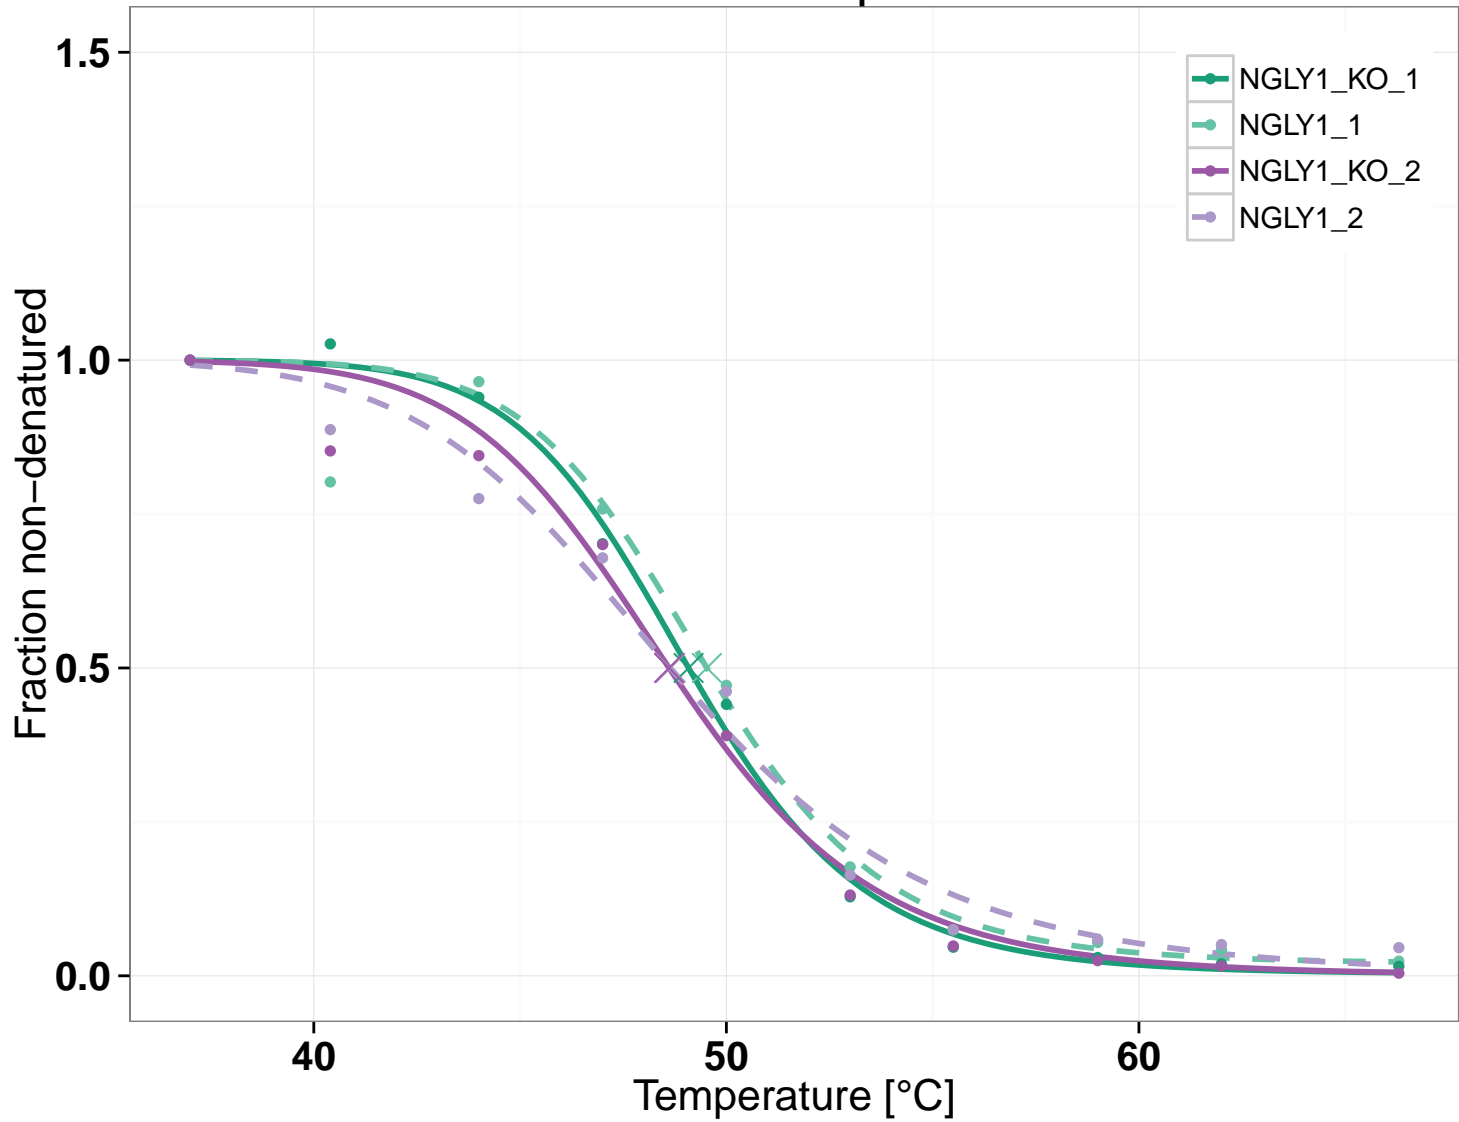

|            | meltPoint | slope | plateau | R2   |
|------------|-----------|-------|---------|------|
| NGLY1_KO_1 | 49.08     | -0.12 | 0       | 1    |
| NGLY1_1    | 49.53     | -0.11 | 0.02    | 0.97 |
| NGLY1_KO_2 | 48.61     | -0.1  | 0       | 0.98 |
| NGLY1_2    | 48.64     | -0.08 | 0       | 0.98 |

Supplement: Supplementary file 588 [file 1]

# IPI00789529.1|FAR2

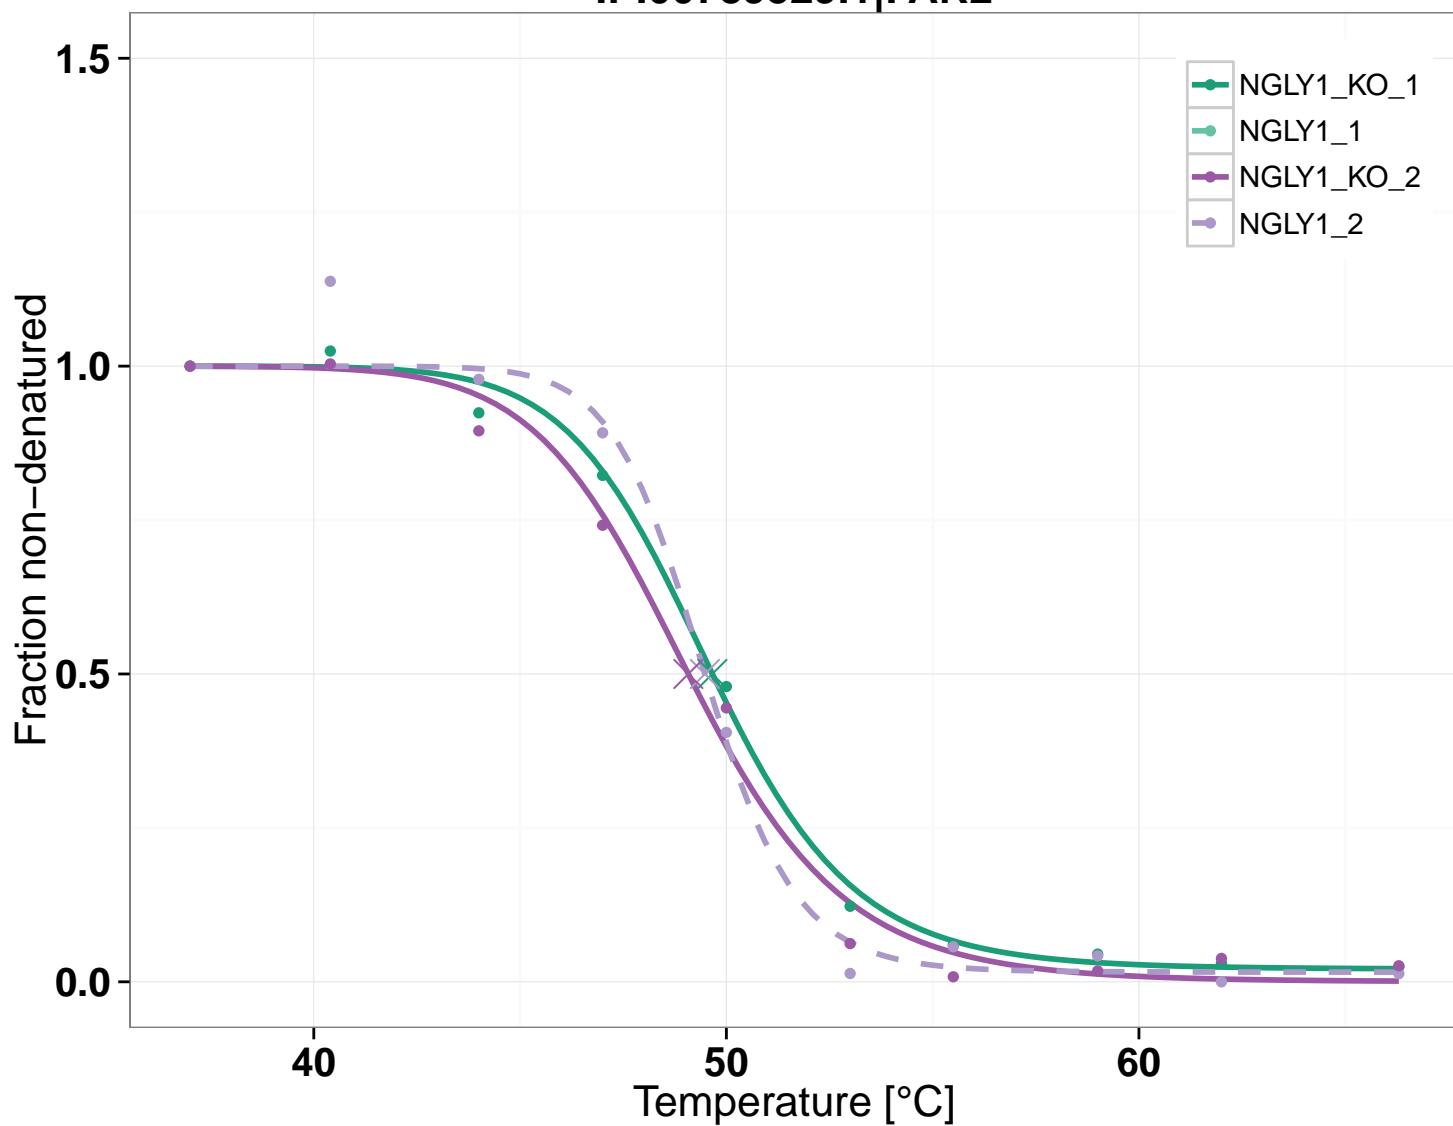

|            | meltPoint | slope | plateau | R2   |
|------------|-----------|-------|---------|------|
| NGLY1_KO_1 | 49.66     | -0.14 | 0.02    | 1    |
| NGLY1_1    | -         | -     | -       | -    |
| NGLY1_KO_2 | 49.08     | -0.13 | 0       | 0.99 |
| NGLY1_2    | 49.48     | -0.22 | 0.02    | 0.99 |

Supplement: Supplementary file 589 [file 1]

# IPI00006034.1|CRIP2

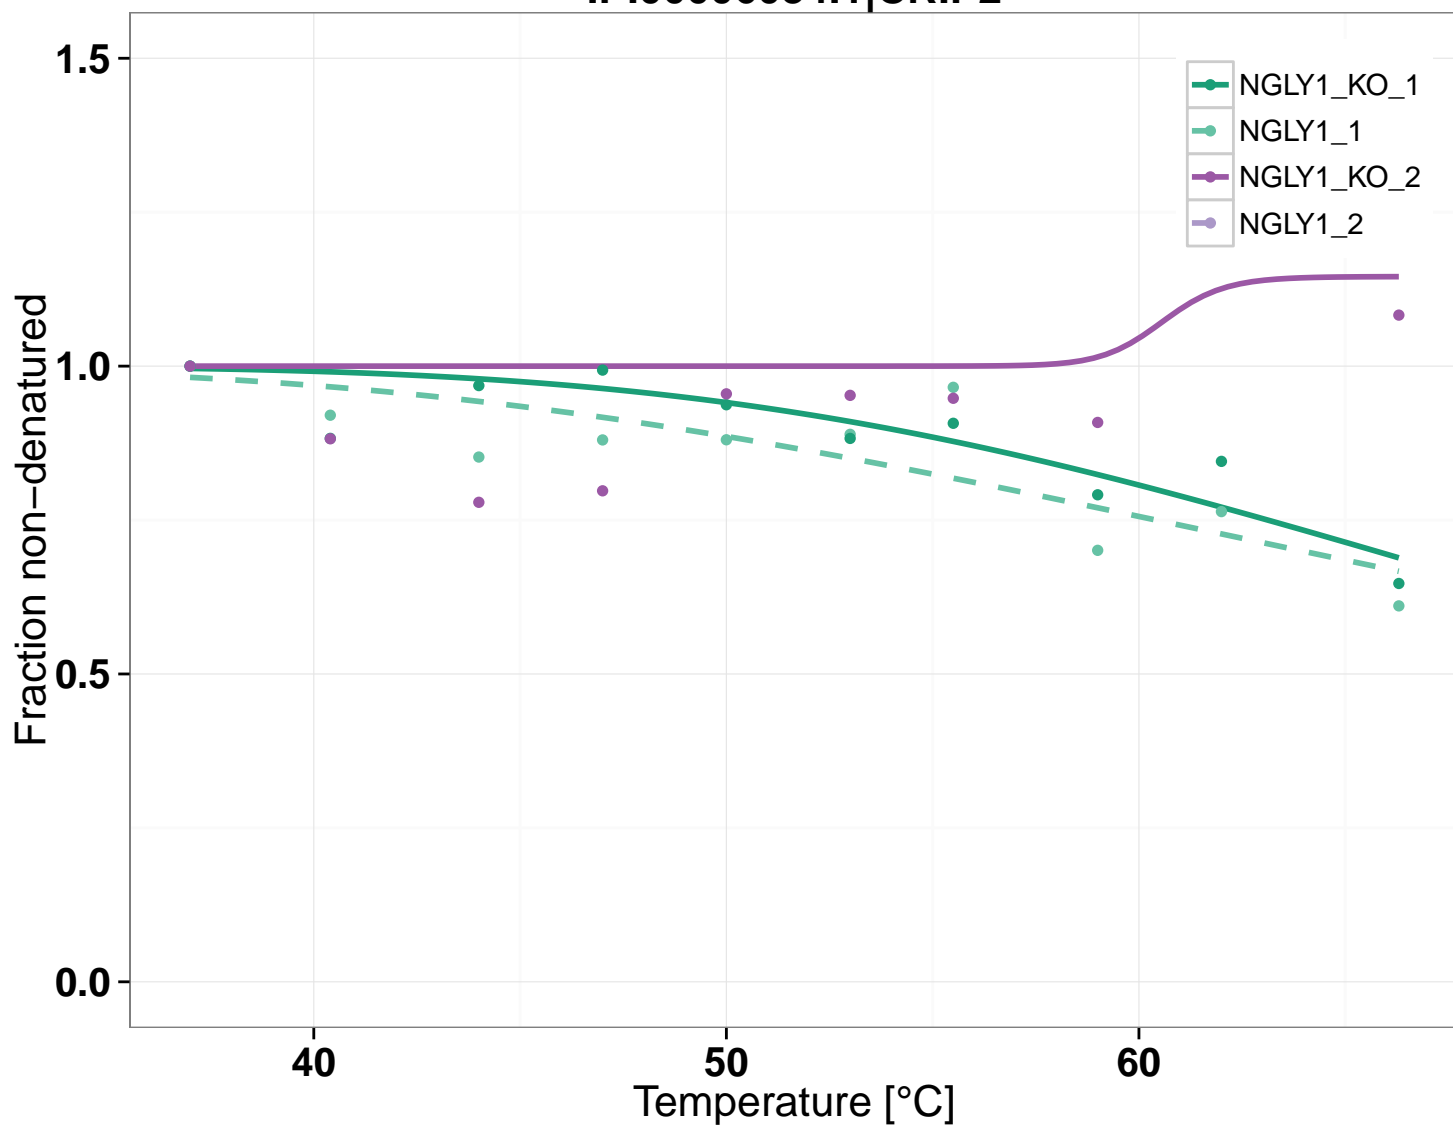

|            | meltPoint | slope  | plateau | R2   |
|------------|-----------|--------|---------|------|
| NGLY1_KO_1 | —         | —      | 0       | 0.78 |
| NGLY1_1    | —         | -0.014 | 0       | 0.66 |
| NGLY1_KO_2 | —         | 0.049  | 1.15    | 0.09 |
| NGLY1_2    | —         | —      | —       | —    |

Supplement: Supplementary file 590 [file 1]

IPI00100247.3|TXNDC13

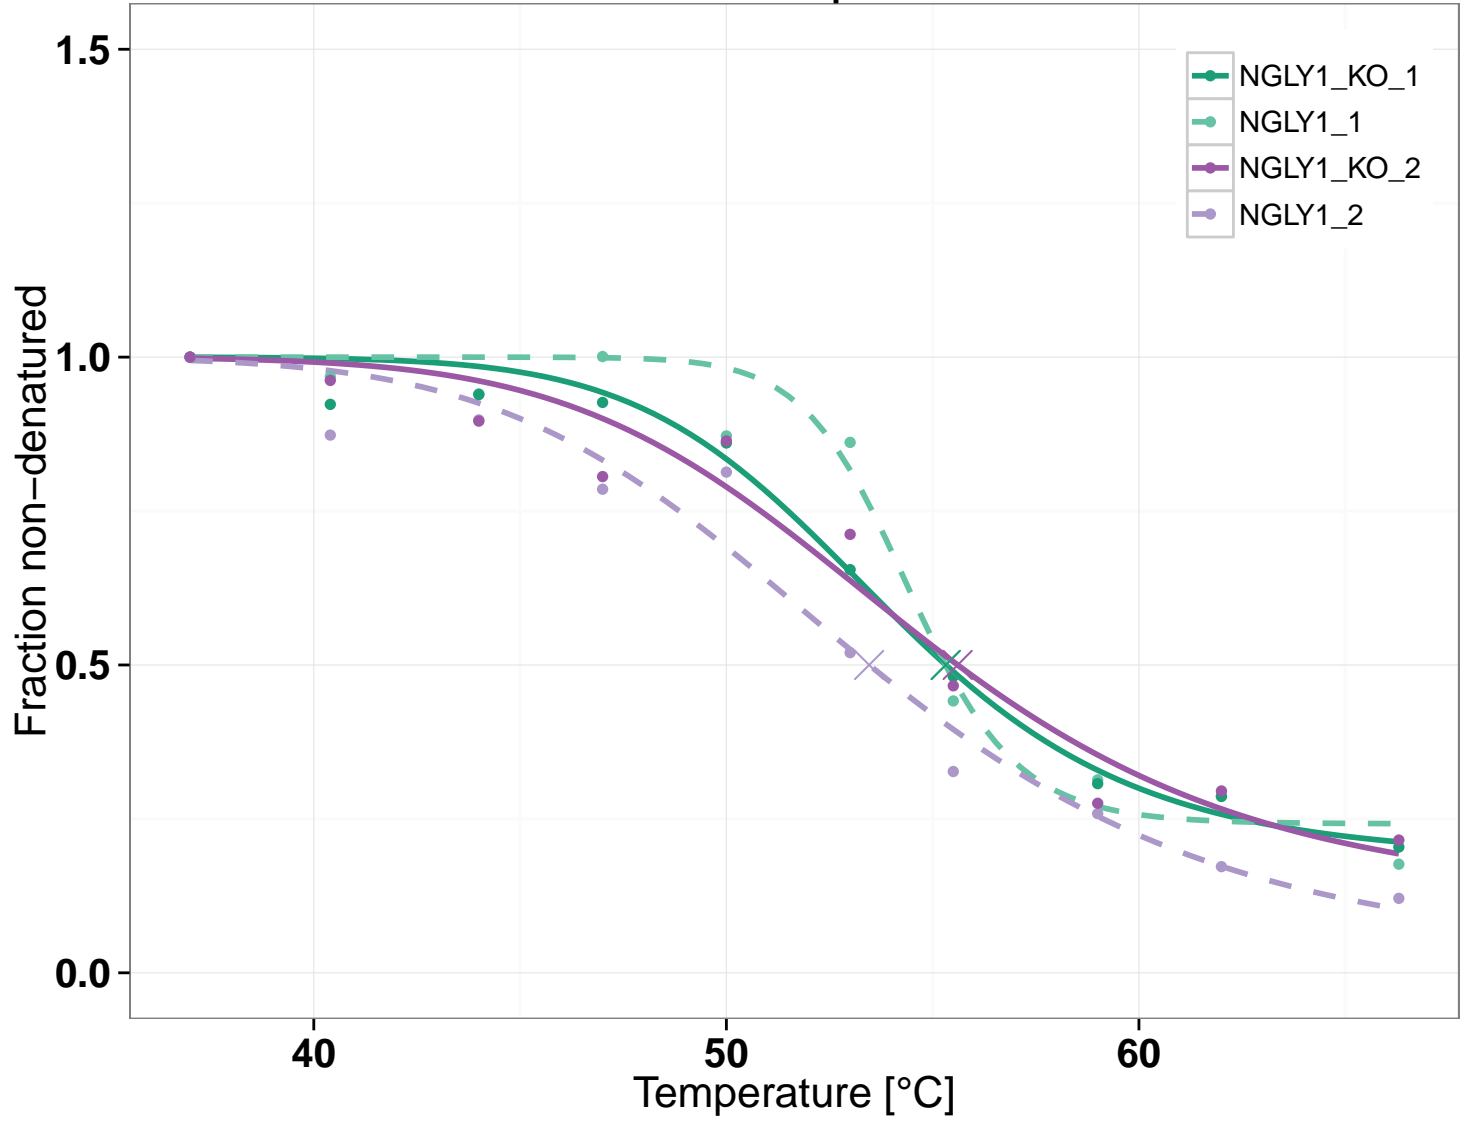

|            | meltPoint | slope  | plateau | R2   |
|------------|-----------|--------|---------|------|
| NGLY1_KO_1 | 55.32     | -0.068 | 0.18    | 0.99 |
| NGLY1_1    | 55.31     | -0.15  | 0.24    | 0.97 |
| NGLY1_KO_2 | 55.61     | -0.054 | 0.11    | 0.96 |
| NGLY1_2    | 53.46     | -0.056 | 0.01    | 0.97 |

Supplement: Supplementary file 591 [file 1]

IPI00022824.1|SH3GLB1

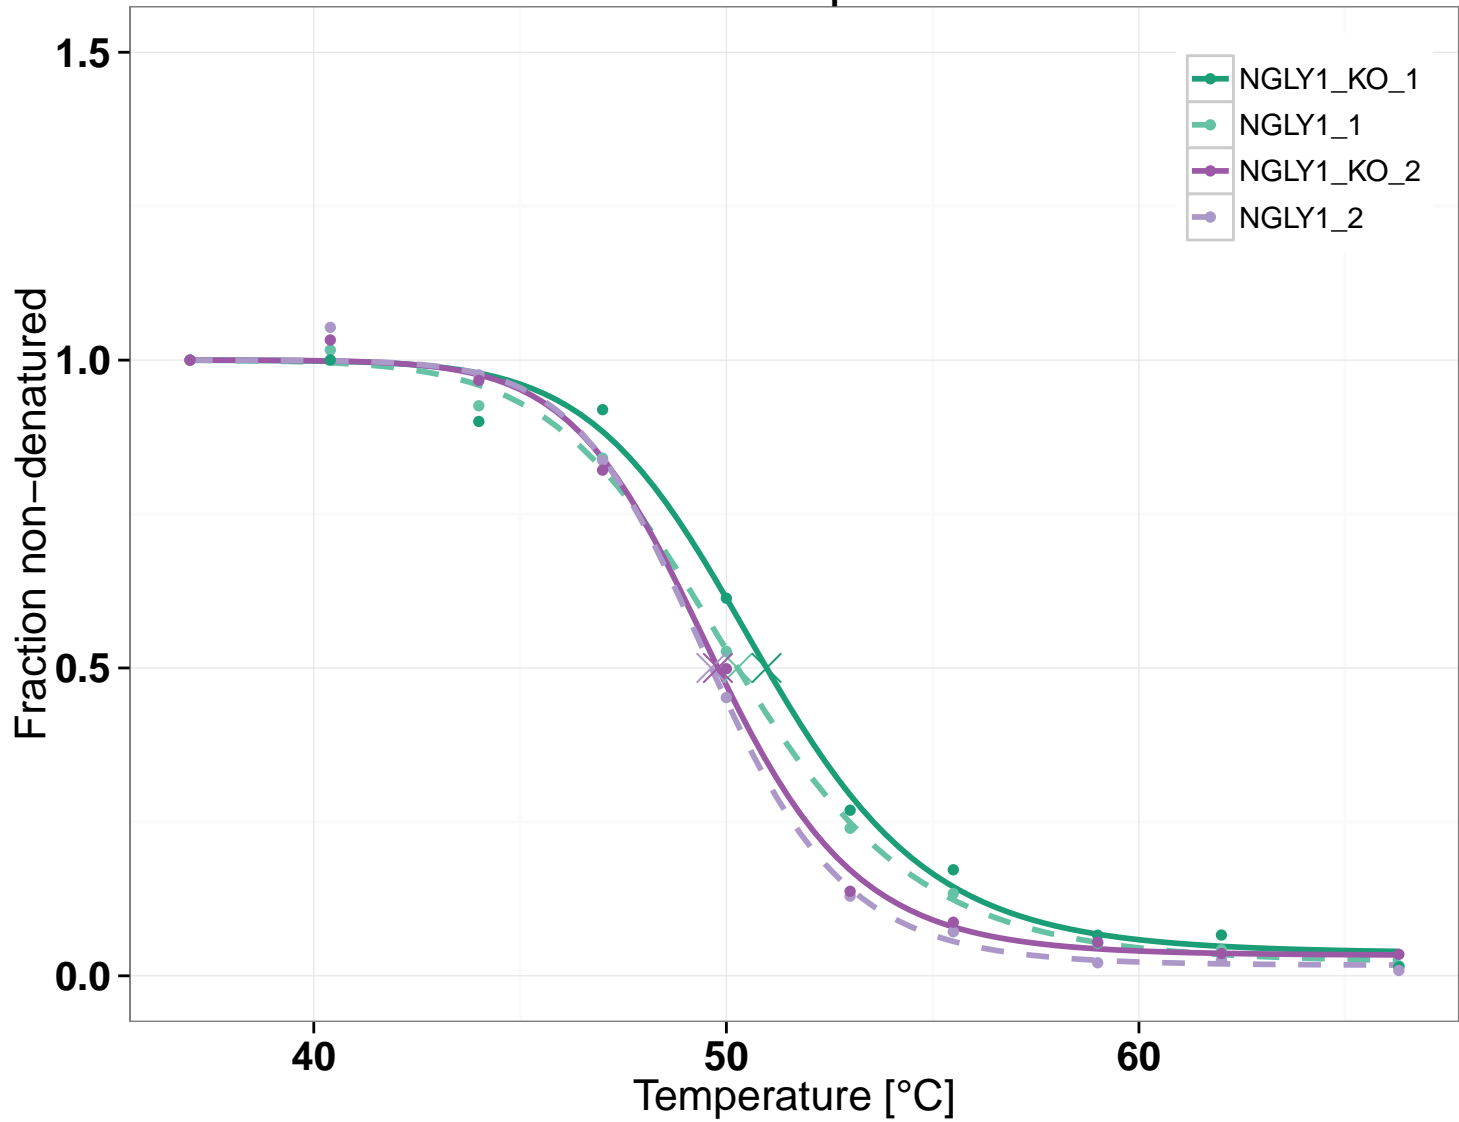

|            | meltPoint | slope | plateau | R2   |
|------------|-----------|-------|---------|------|
| NGLY1_KO_1 | 50.97     | -0.12 | 0.04    | 0.99 |
| NGLY1_1    | 50.27     | -0.11 | 0.02    | 1    |
| NGLY1_KO_2 | 49.8      | -0.14 | 0.03    | 1    |
| NGLY1_2    | 49.64     | -0.15 | 0.02    | 1    |

Supplement: Supplementary file 592 [file 1]

IPI00002807.1|ACCN1

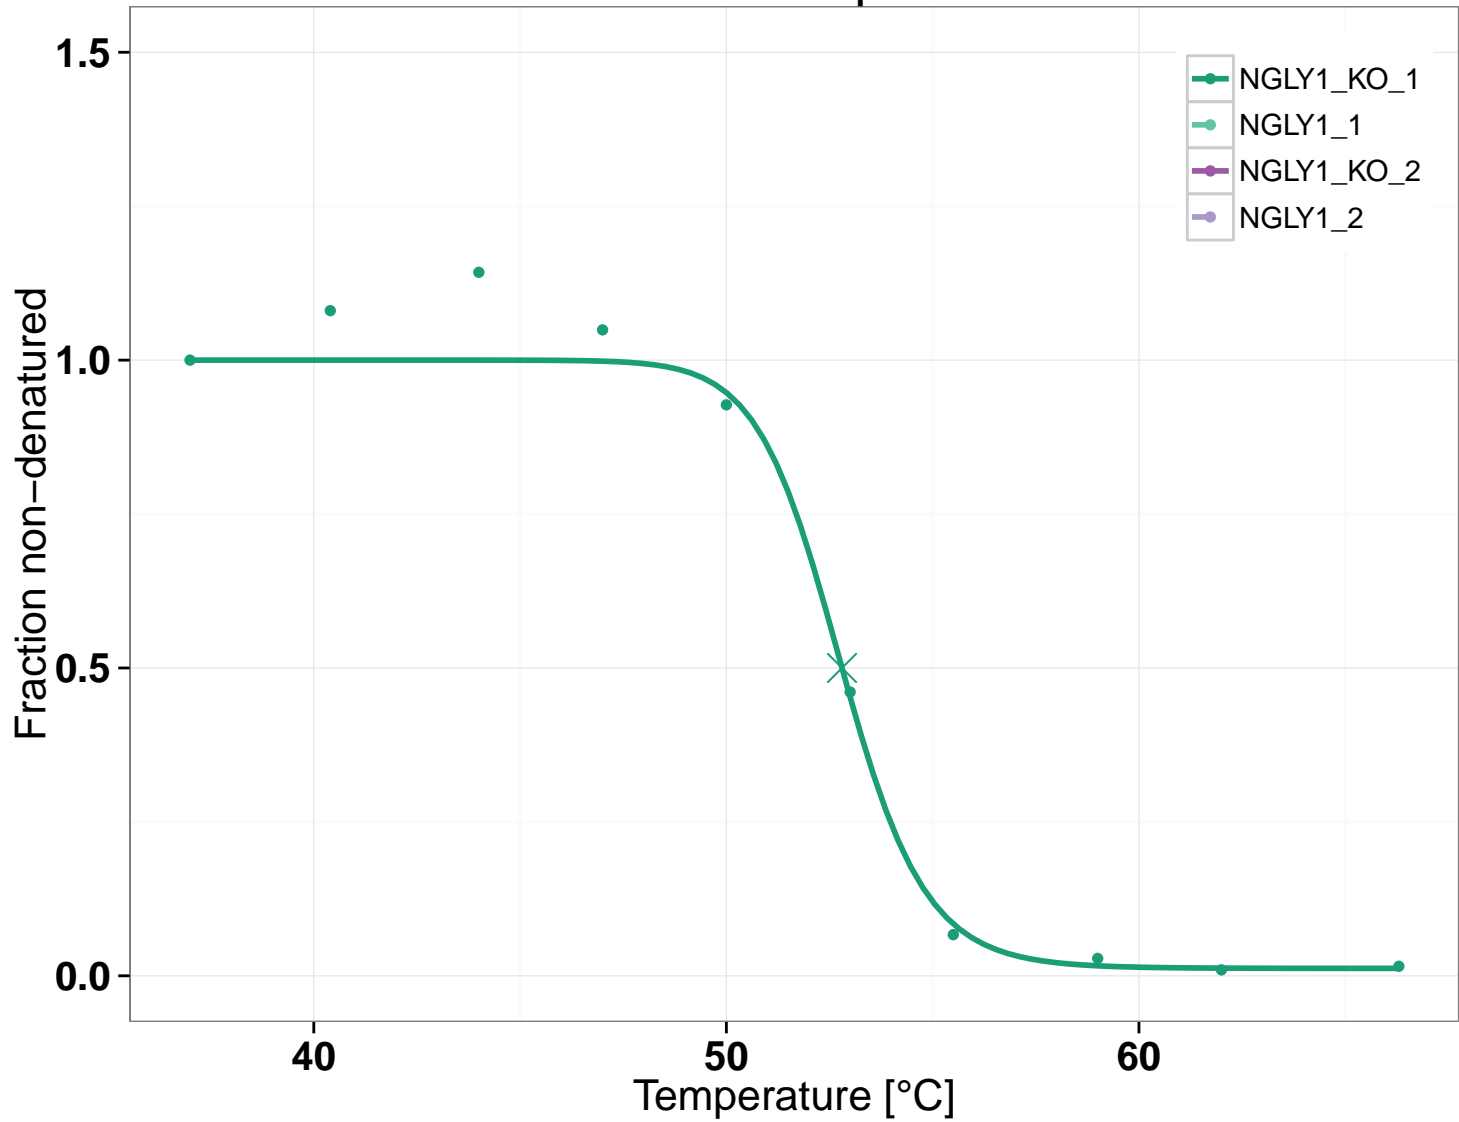

|            | meltPoint | slope | plateau | R2   |
|------------|-----------|-------|---------|------|
| NGLY1_KO_1 | 52.8      | -0.24 | 0.01    | 0.99 |
| NGLY1_1    | -         | -     | -       | -    |
| NGLY1_KO_2 | -         | -     | -       | -    |
| NGLY1_2    | -         | -     | -       | -    |

Supplement: Supplementary file 593 [file 1]

# IPI00382740.8|PGS1

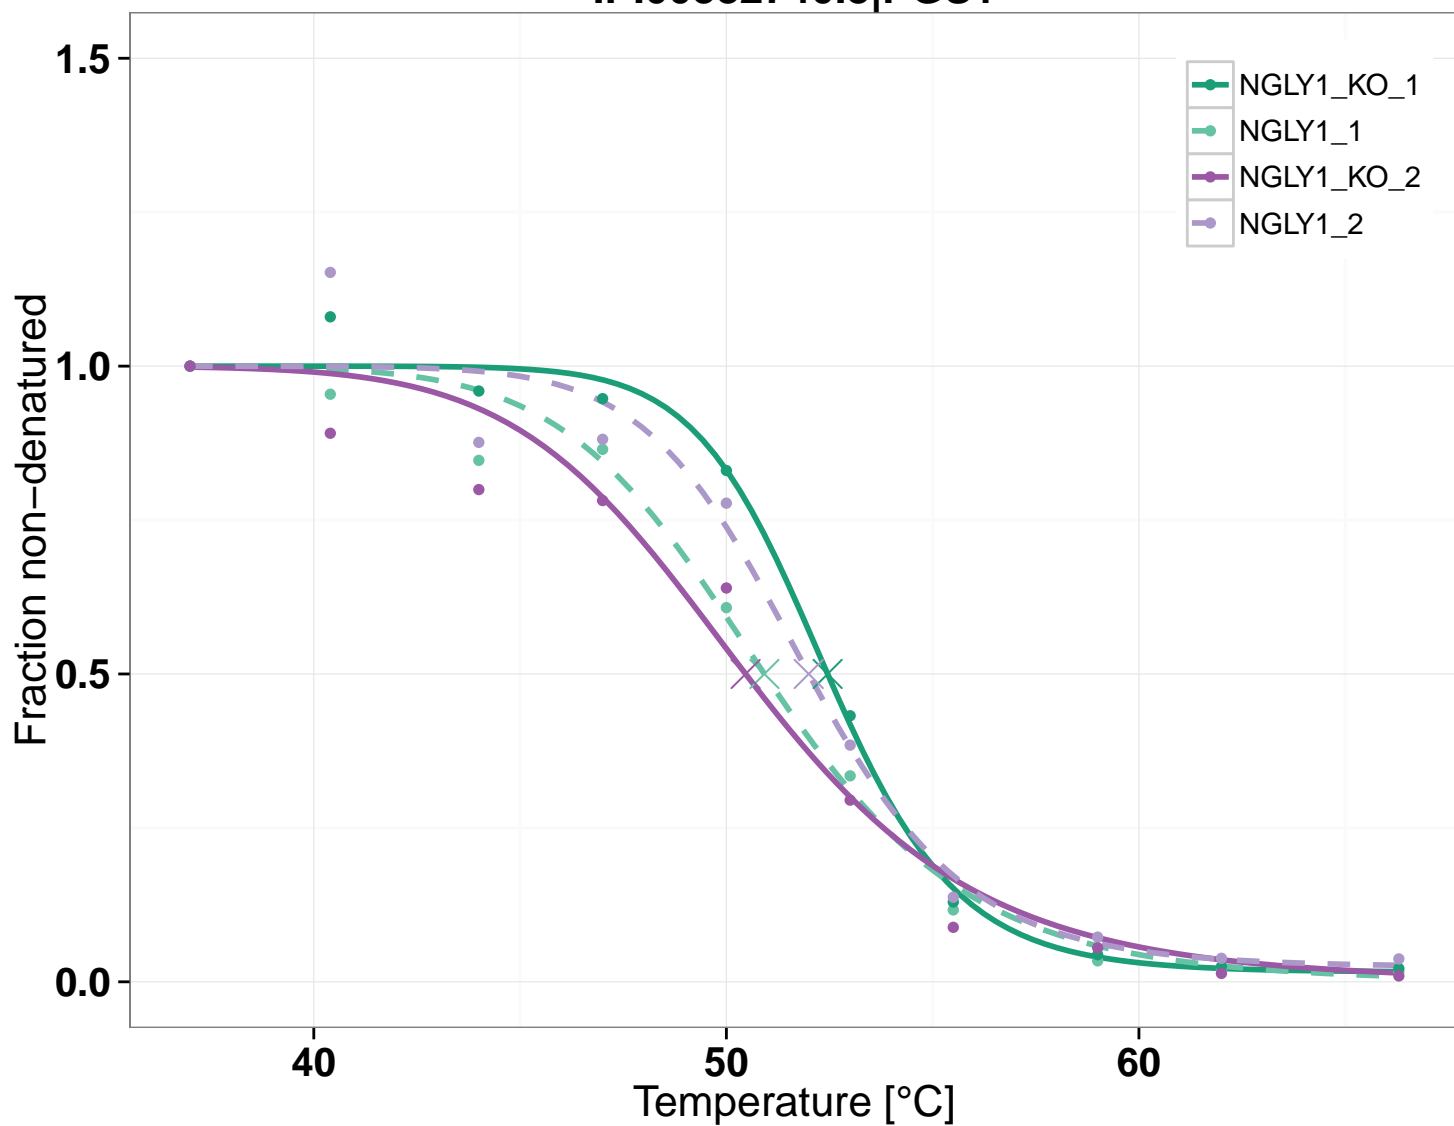

|            | meltPoint | slope  | plateau | R2   |
|------------|-----------|--------|---------|------|
| NGLY1_KO_1 | 52.45     | -0.15  | 0.02    | 0.99 |
| NGLY1_1    | 50.92     | -0.1   | 0       | 0.99 |
| NGLY1_KO_2 | 50.47     | -0.089 | 0       | 0.97 |
| NGLY1_2    | 52        | -0.13  | 0.02    | 0.98 |

Supplement: Supplementary file 594 [file 1]

IPI00789121.1|CNOT2

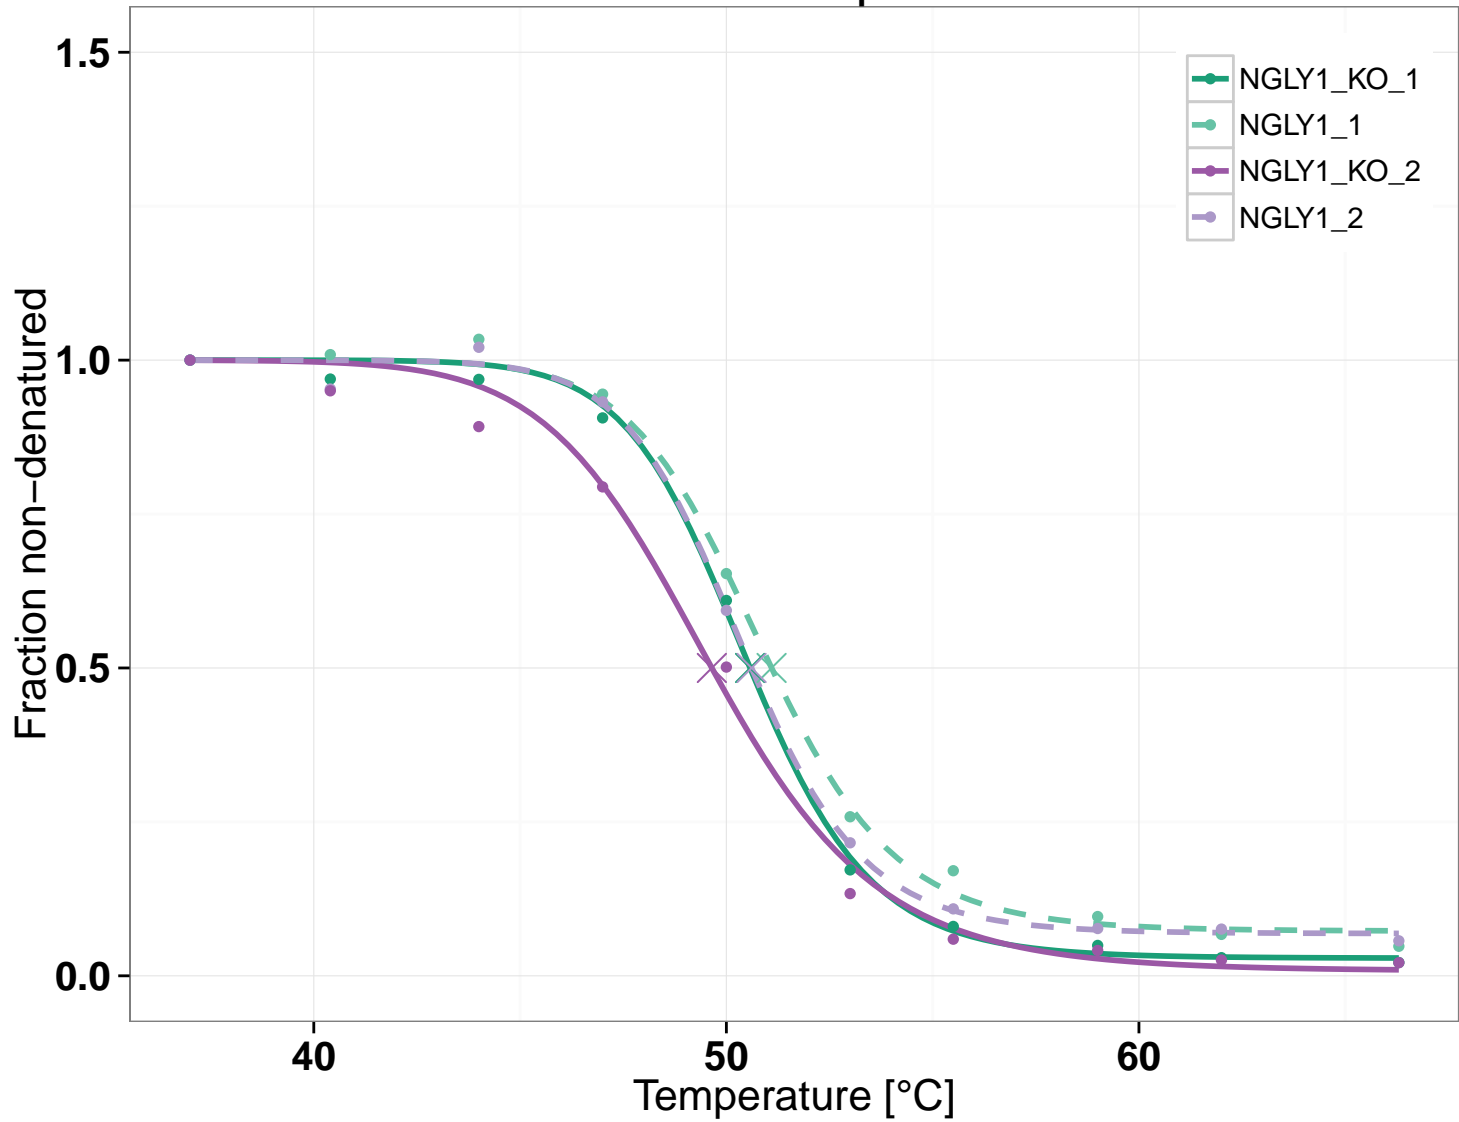

|            | meltPoint | slope | plateau | R2   |
|------------|-----------|-------|---------|------|
| NGLY1_KO_1 | 50.58     | -0.16 | 0.03    | 1    |
| NGLY1_1    | 51.1      | -0.14 | 0.07    | 1    |
| NGLY1_KO_2 | 49.65     | -0.12 | 0.01    | 0.99 |
| NGLY1_2    | 50.61     | -0.16 | 0.07    | 1    |

Supplement: Supplementary file 595 [file 1]

# IPI00395596.2|AES

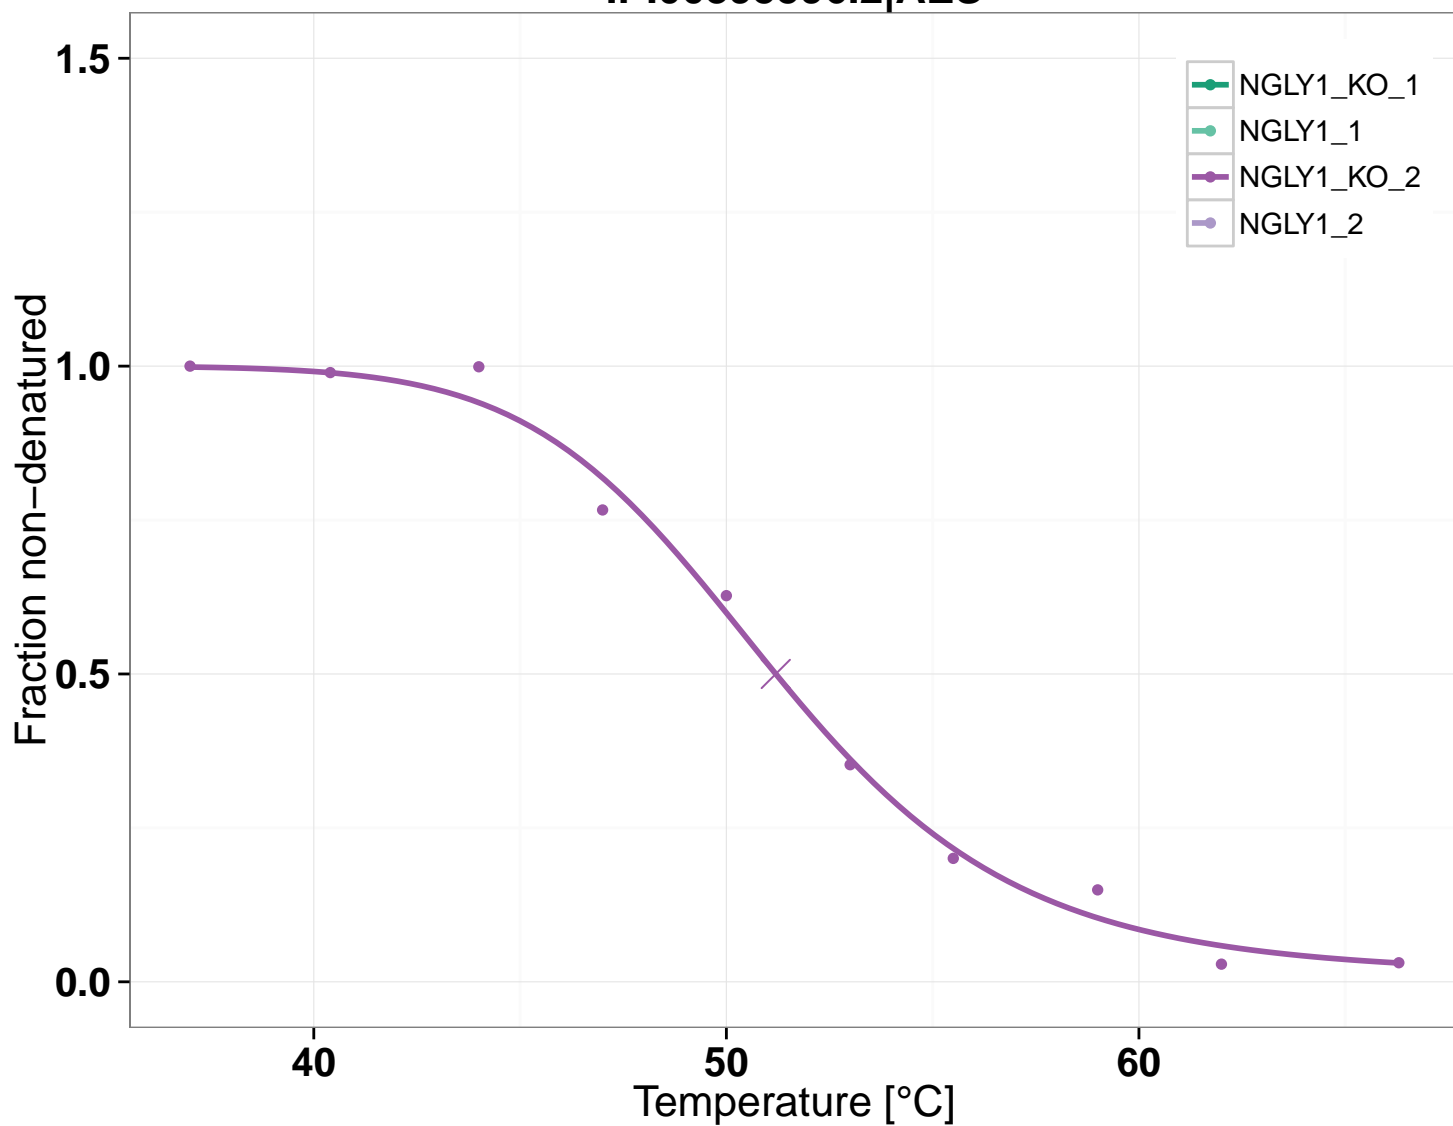

|            | meltPoint | slope  | plateau | R2   |
|------------|-----------|--------|---------|------|
| NGLY1_KO_1 | -         | -      | -       | -    |
| NGLY1_1    | -         | -      | -       | -    |
| NGLY1_KO_2 | 51.2      | -0.083 | 0.01    | 0.99 |
| NGLY1_2    | -         | -      | -       | -    |

Supplement: Supplementary file 596 [file 1]

# IPI00216965.1|GOSR2

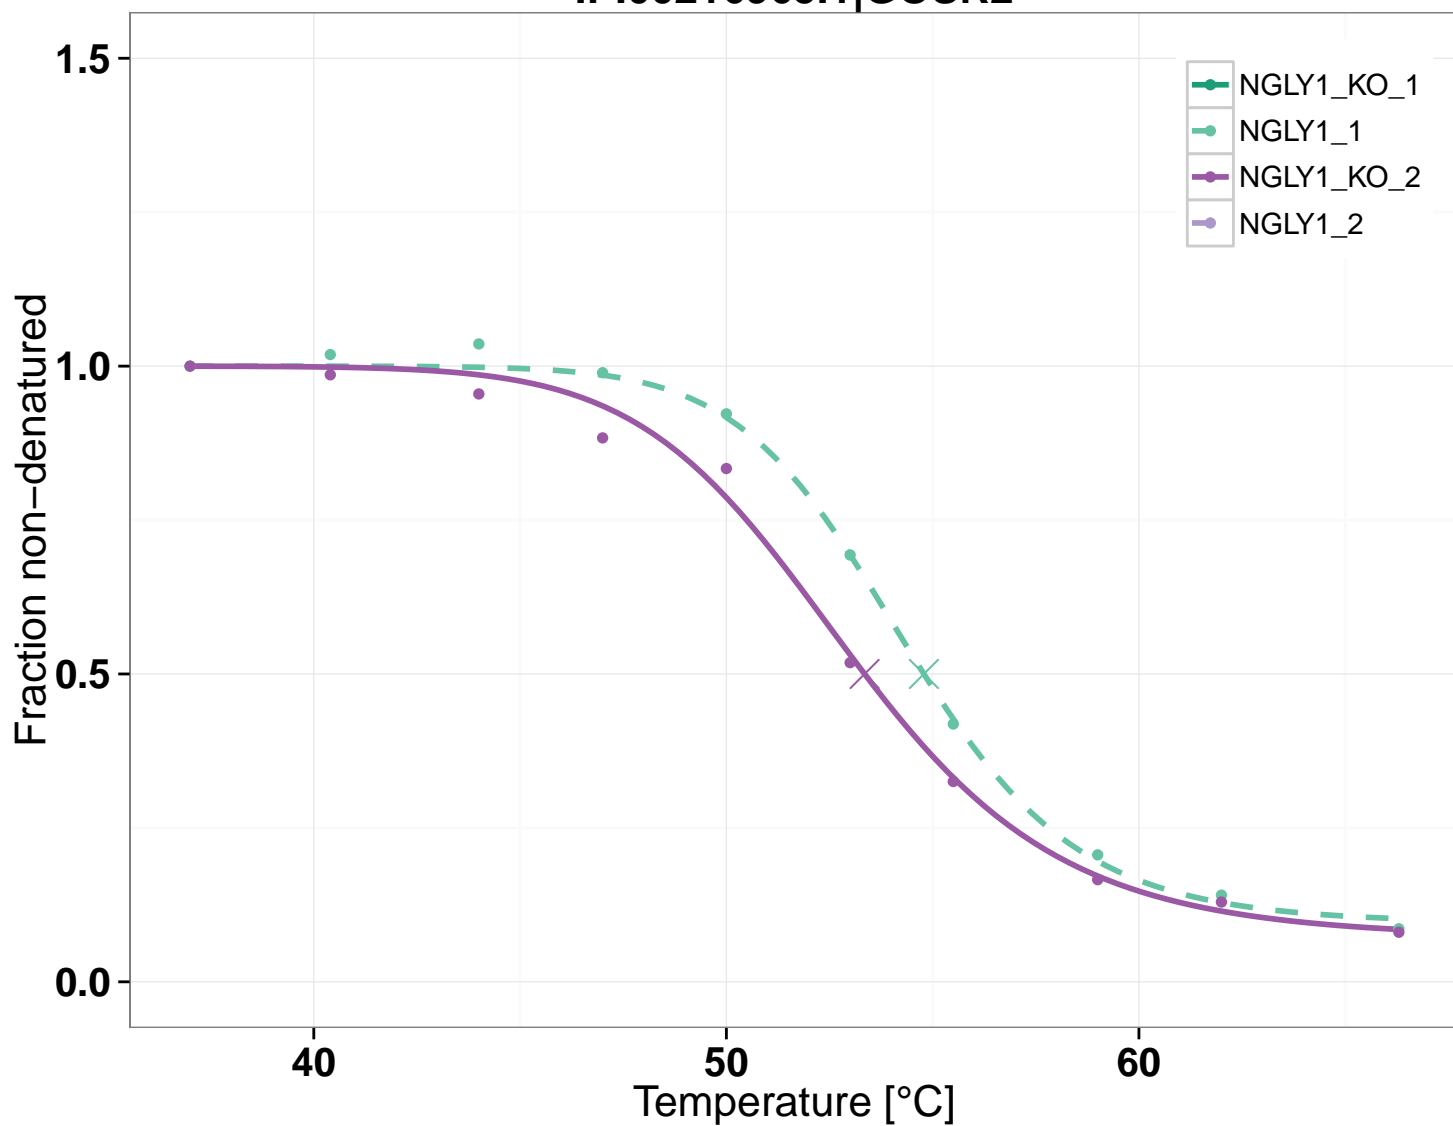

|            | meltPoint | slope  | plateau | R2 |
|------------|-----------|--------|---------|----|
| NGLY1_KO_1 | -         | -      | -       | -  |
| NGLY1_1    | 54.79     | -0.11  | 0.09    | 1  |
| NGLY1_KO_2 | 53.35     | -0.091 | 0.07    | 1  |
| NGLY1_2    | -         | -      | -       | -  |

Supplement: Supplementary file 597 [file 1]

# IPI00027763.2|SLC25A16

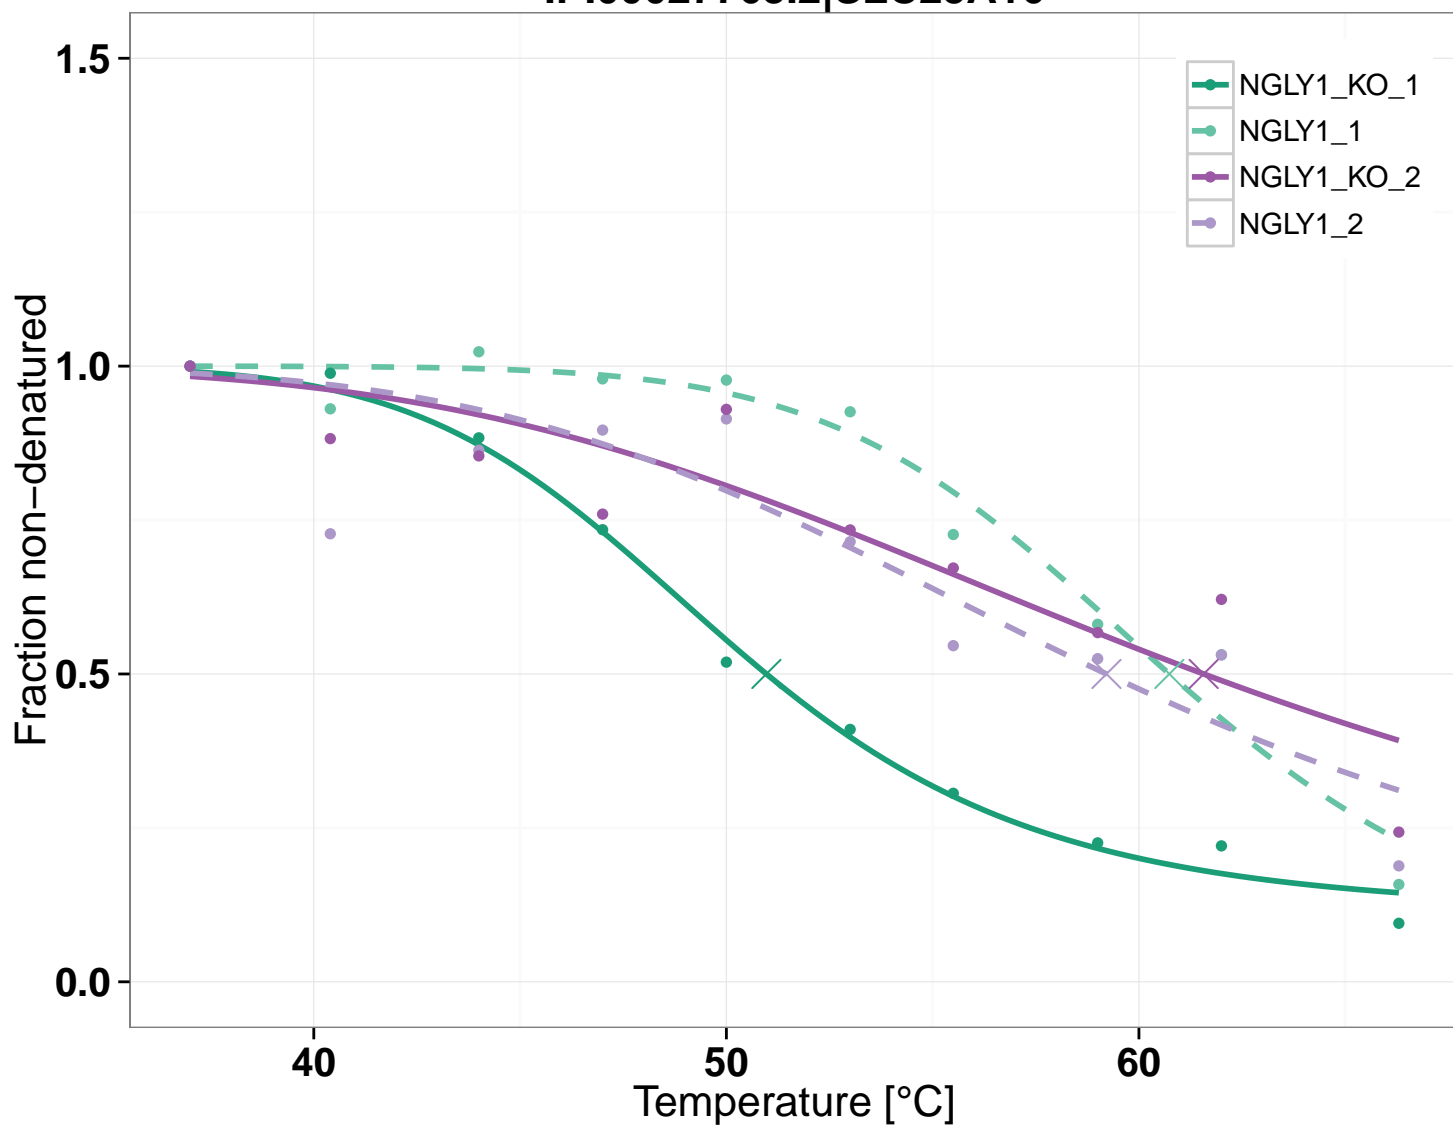

|            | meltPoint | slope  | plateau | R2   |
|------------|-----------|--------|---------|------|
| NGLY1_KO_1 | 50.97     | -0.06  | 0.11    | 0.99 |
| NGLY1_1    | 60.74     | -0.06  | 0       | 0.96 |
| NGLY1_KO_2 | 61.57     | -0.028 | 0       | 0.82 |
| NGLY1_2    | 59.21     | -0.034 | 0       | 0.8  |

Supplement: Supplementary file 598 [file 1]

IPI00020510.1|CISD1

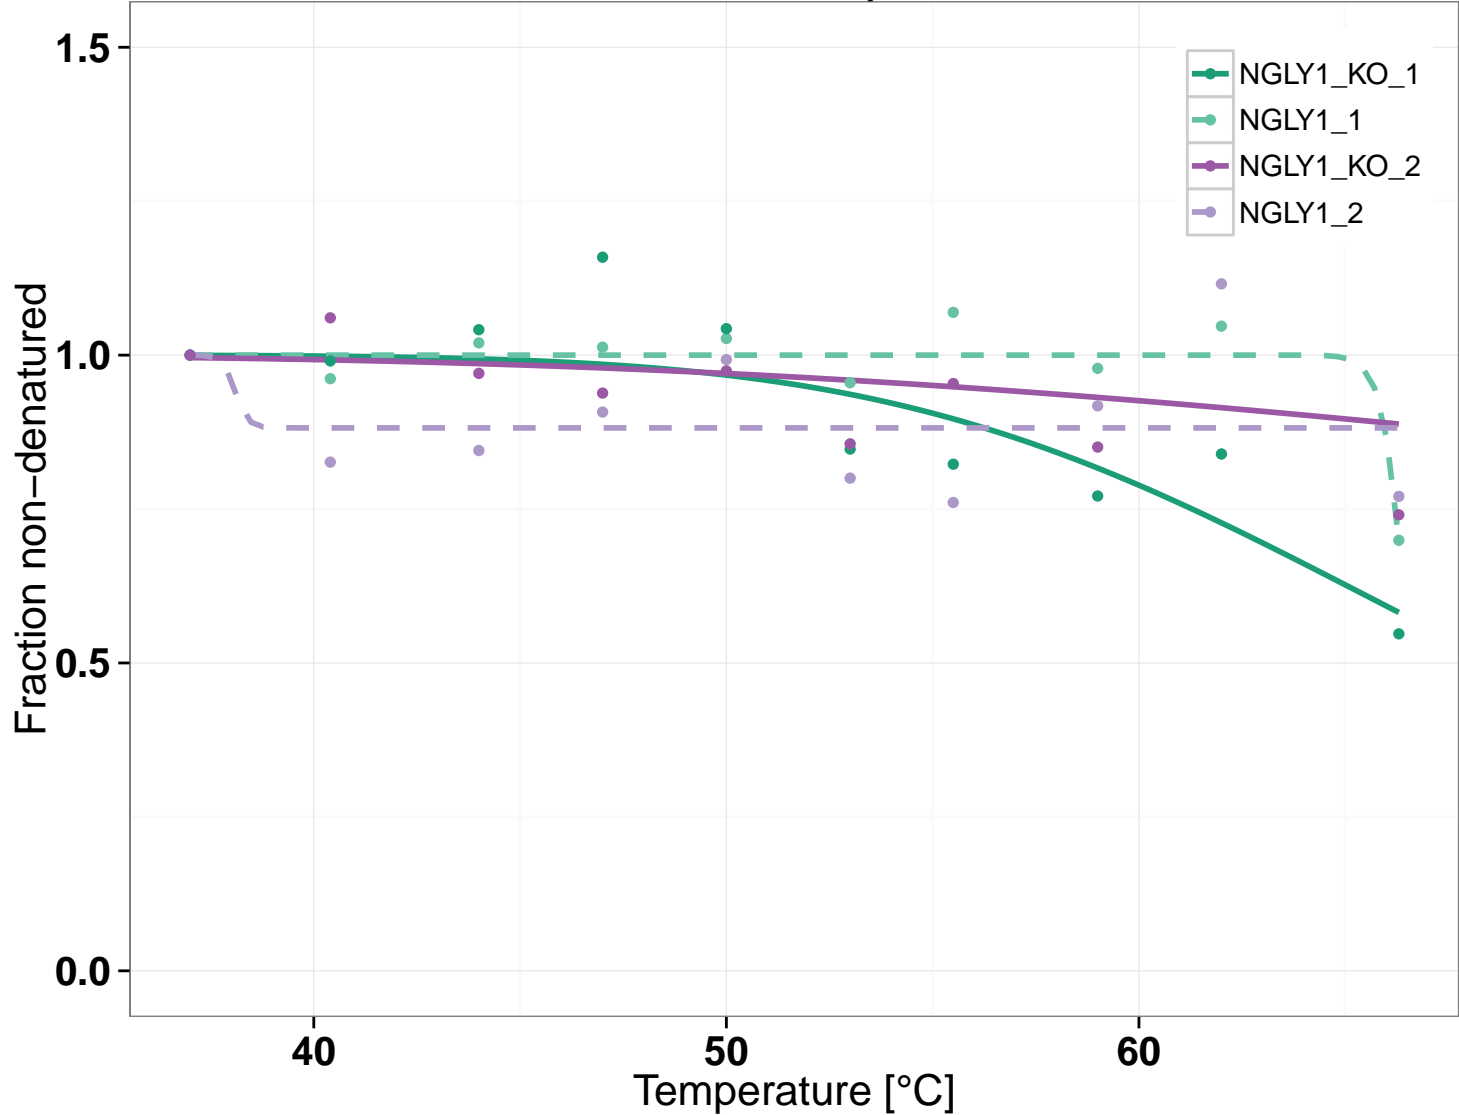

|            | meltPoint | slope  | plateau | R2   |
|------------|-----------|--------|---------|------|
| NGLY1_KO_1 | -         | -0.035 | 0       | 0.76 |
| NGLY1_1    | -         | -      | 0       | 0.87 |
| NGLY1_KO_2 | -         | -      | 0       | 0.08 |
| NGLY1_2    | -         | -0.19  | 0.88    | 0.1  |

Supplement: Supplementary file 599 [file 1]

IPI00168527.2|ARHGAP17

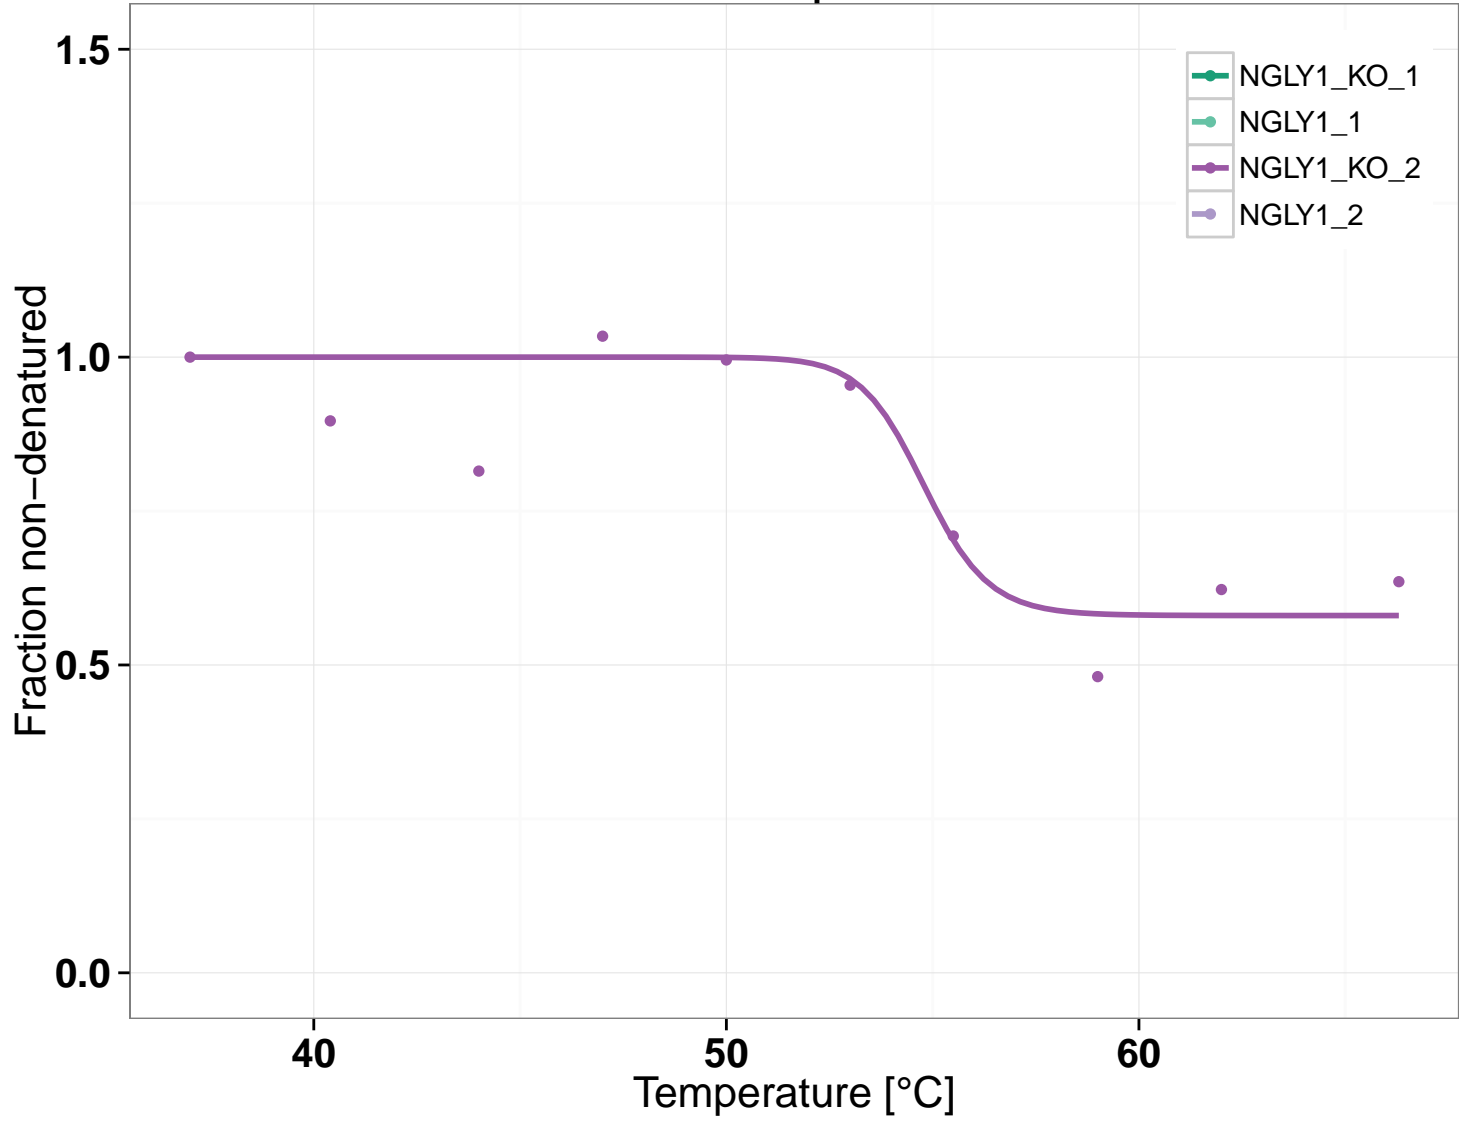

|            | meltPoint | slope | plateau | R2   |
|------------|-----------|-------|---------|------|
| NGLY1_KO_1 | —         | —     | —       | —    |
| NGLY1_1    | —         | —     | —       | —    |
| NGLY1_KO_2 | —         | -0.14 | 0.58    | 0.82 |
| NGLY1_2    | —         | —     | —       | —    |

Supplement: Supplementary file 600 [file 1]

# IPI00012593.1|DNMT3B

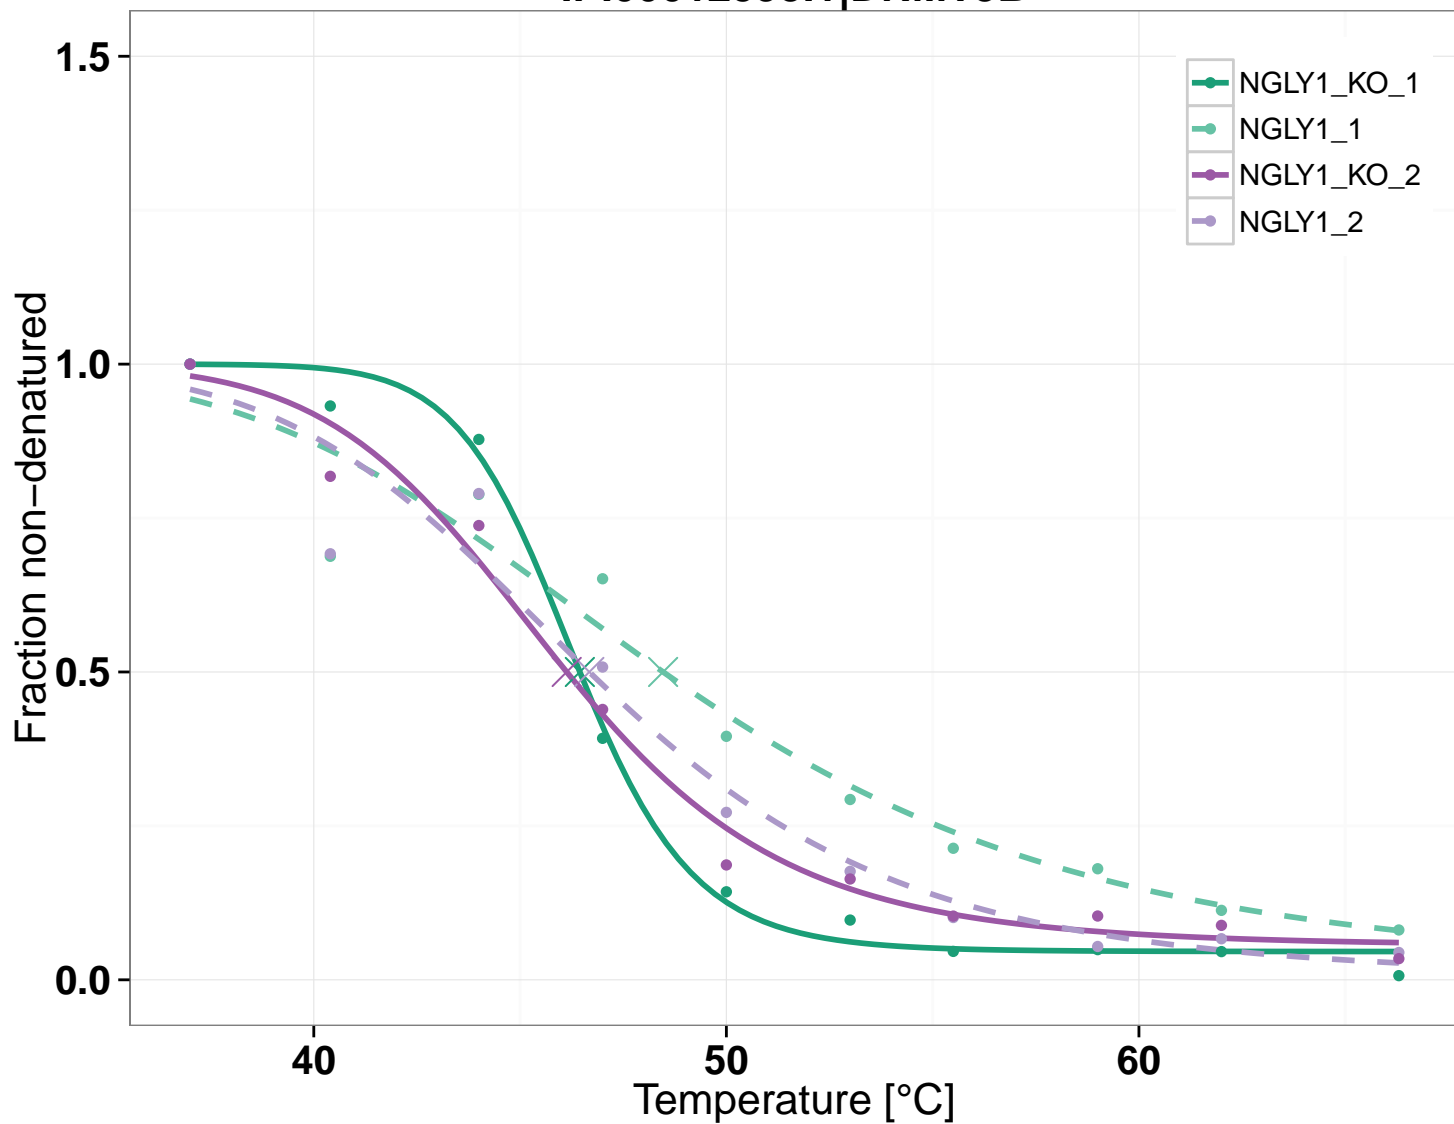

|            | meltPoint | slope  | plateau | R2   |
|------------|-----------|--------|---------|------|
| NGLY1_KO_1 | 46.45     | -0.17  | 0.05    | 1    |
| NGLY1_1    | 48.47     | -0.049 | 0       | 0.95 |
| NGLY1_KO_2 | 46.13     | -0.085 | 0.05    | 0.99 |
| NGLY1_2    | 46.68     | -0.066 | 0       | 0.96 |

Supplement: Supplementary file 601 [file 1]
