# Supplementary material (part 7 of 85)
Source: publisher figshare collection journal article supplement (https://gsajournals.figshare.com/articles/dataset/_/12014913)

# IPI00005826.1|HERC2

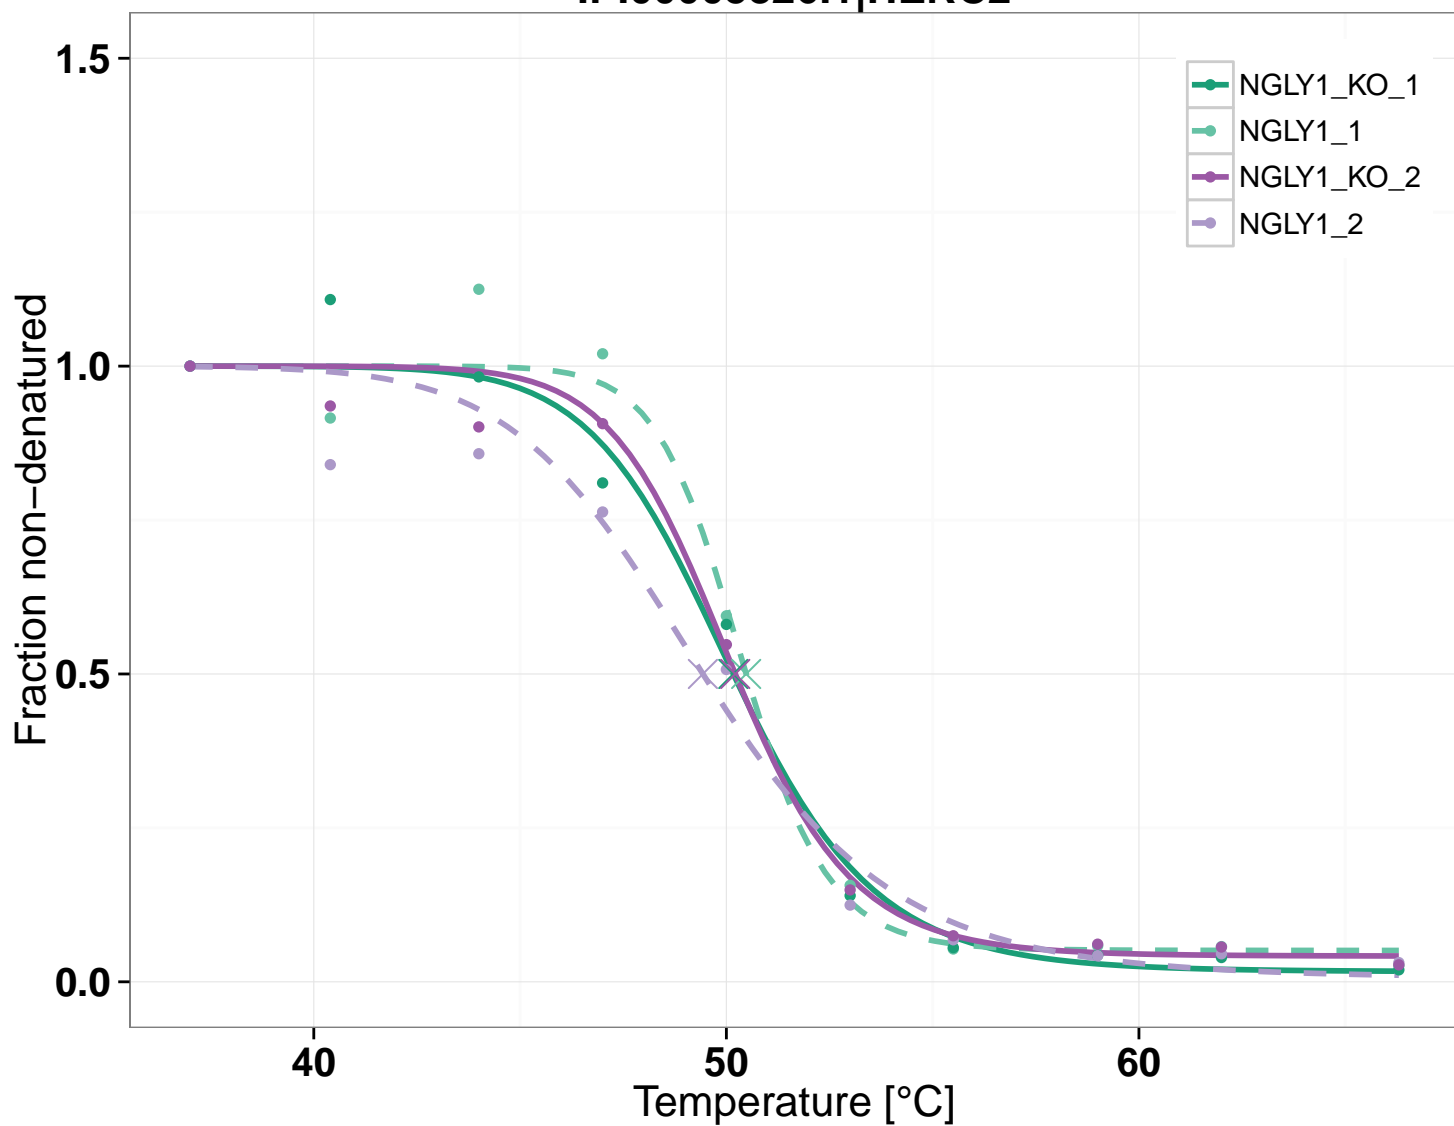

|            | meltPoint | slope | plateau | R2   |
|------------|-----------|-------|---------|------|
| NGLY1_KO_1 | 50.17     | -0.14 | 0.02    | 0.99 |
| NGLY1_1    | 50.48     | -0.23 | 0.05    | 0.99 |
| NGLY1_KO_2 | 50.22     | -0.16 | 0.04    | 0.99 |
| NGLY1_2    | 49.43     | -0.11 | 0.01    | 0.97 |

Supplement: Supplementary file 602 [file 1]

IPI00014264.5|ACAP2

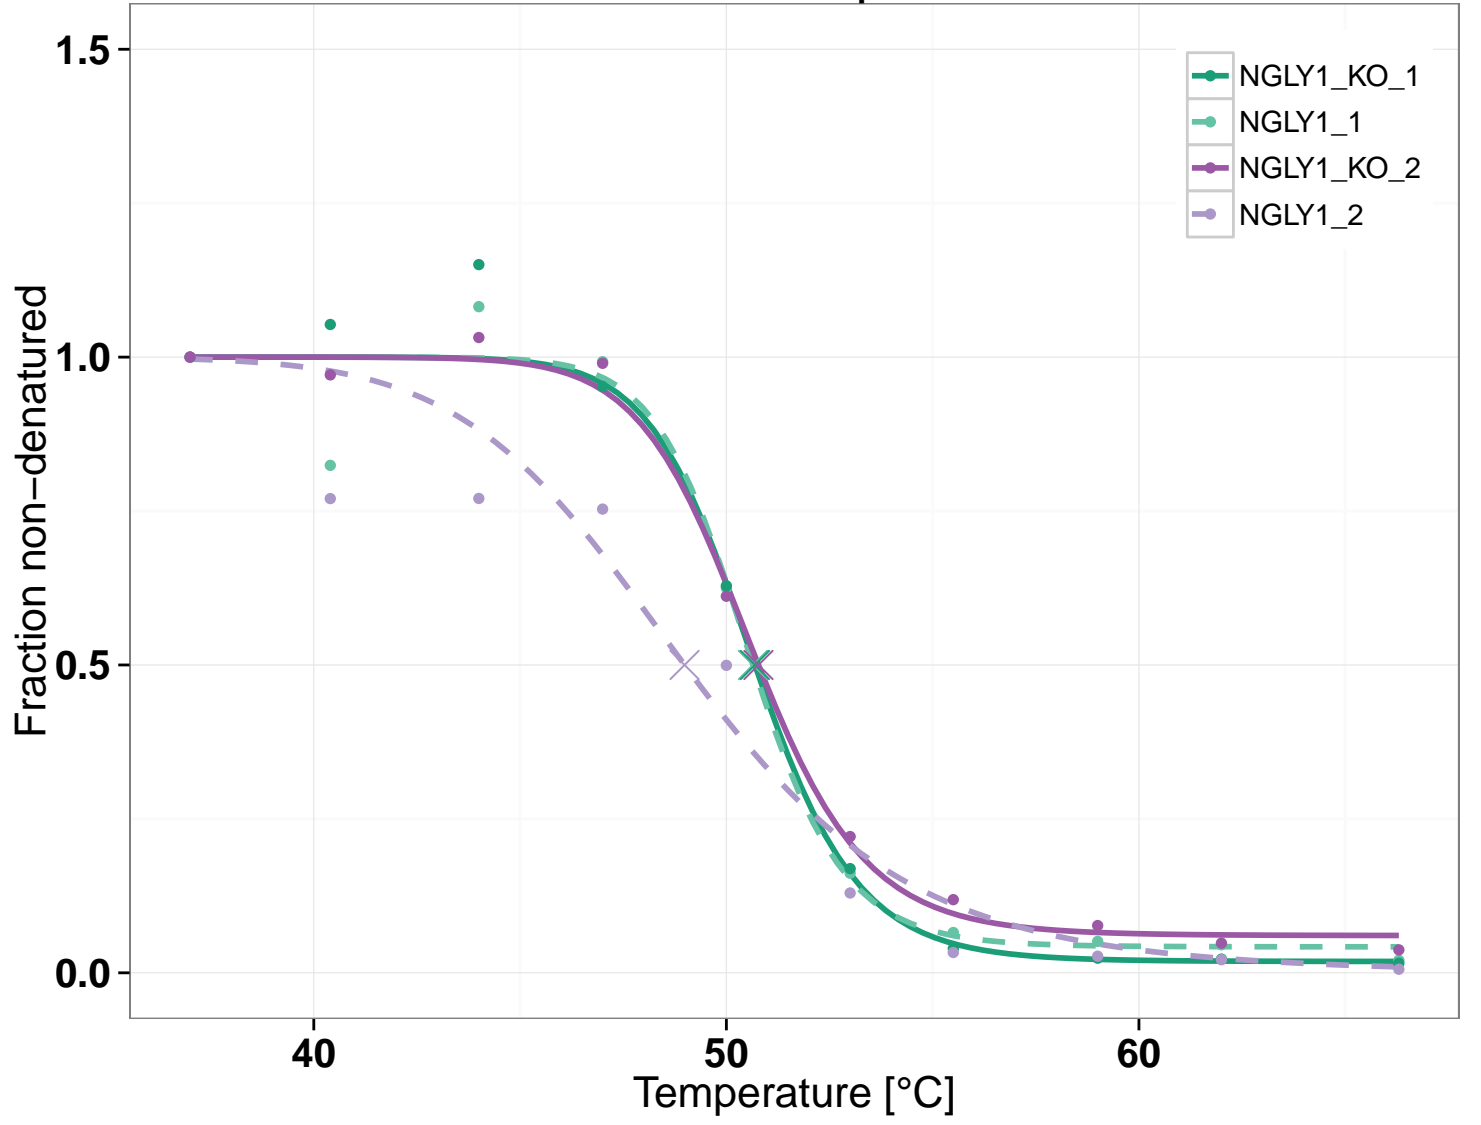

|            | meltPoint | slope  | plateau | R2   |
|------------|-----------|--------|---------|------|
| NGLY1_KO_1 | 50.69     | -0.19  | 0.02    | 0.99 |
| NGLY1_1    | 50.64     | -0.21  | 0.04    | 0.98 |
| NGLY1_KO_2 | 50.78     | -0.17  | 0.06    | 1    |
| NGLY1_2    | 48.99     | -0.092 | 0       | 0.94 |

Supplement: Supplementary file 603 [file 1]

IPI00423568.1|KRAS

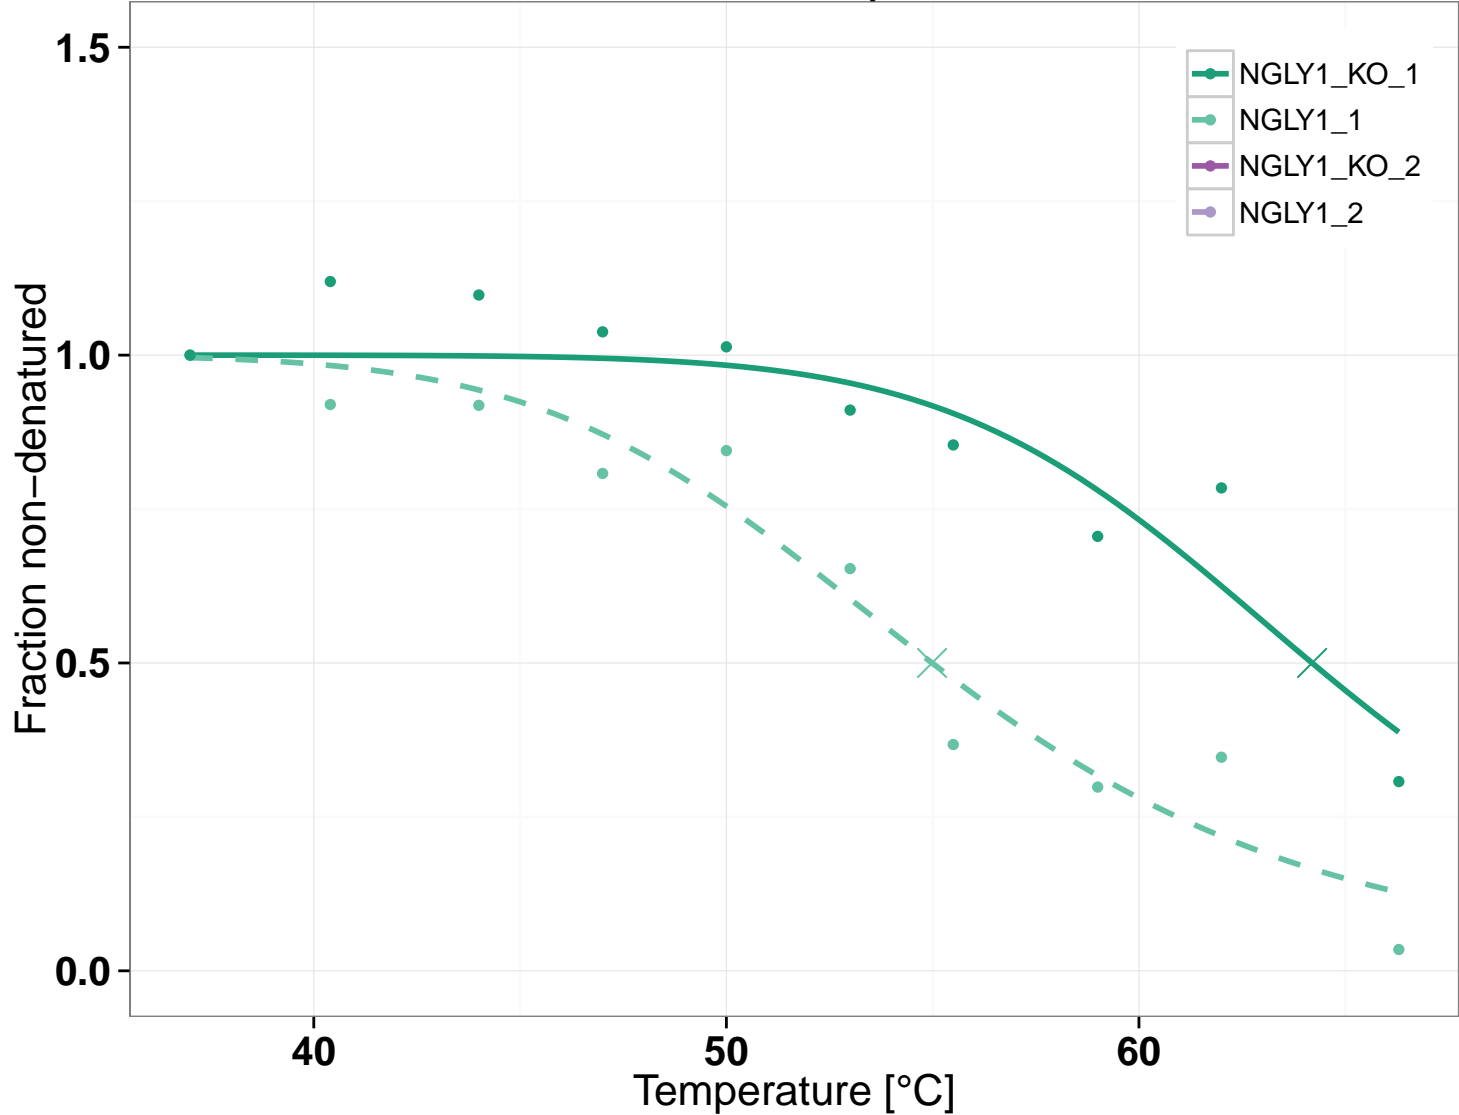

|            | meltPoint | slope  | plateau | R2   |
|------------|-----------|--------|---------|------|
| NGLY1_KO_1 | 64.2      | -0.057 | 0       | 0.87 |
| NGLY1_1    | 54.99     | -0.053 | 0       | 0.94 |
| NGLY1_KO_2 | -         | -      | -       | -    |
| NGLY1_2    | -         | -      | -       | -    |

Supplement: Supplementary file 604 [file 1]

# IPI00008601.3|GMEB1

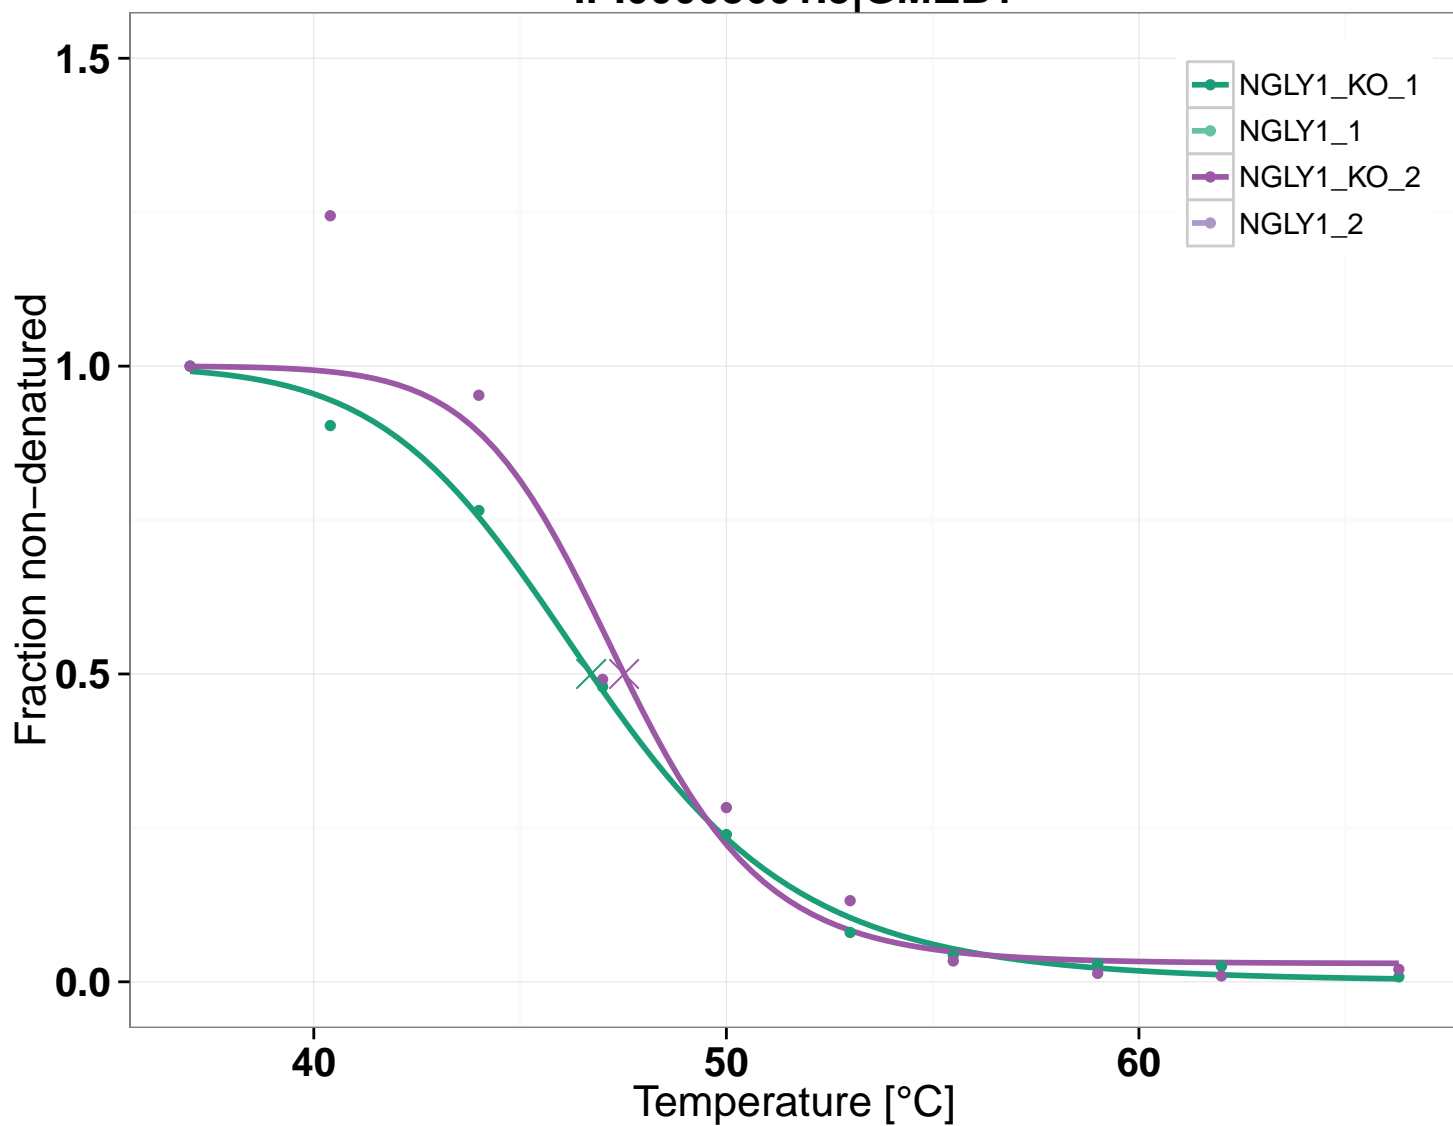

|            | meltPoint | slope  | plateau | R2   |
|------------|-----------|--------|---------|------|
| NGLY1_KO_1 | 46.72     | -0.098 | 0       | 1    |
| NGLY1_1    | -         | -      | -       | -    |
| NGLY1_KO_2 | 47.52     | -0.14  | 0.03    | 0.96 |
| NGLY1_2    | -         | -      | -       | -    |

Supplement: Supplementary file 605 [file 1]

# IPI00015164.4|ORC4L

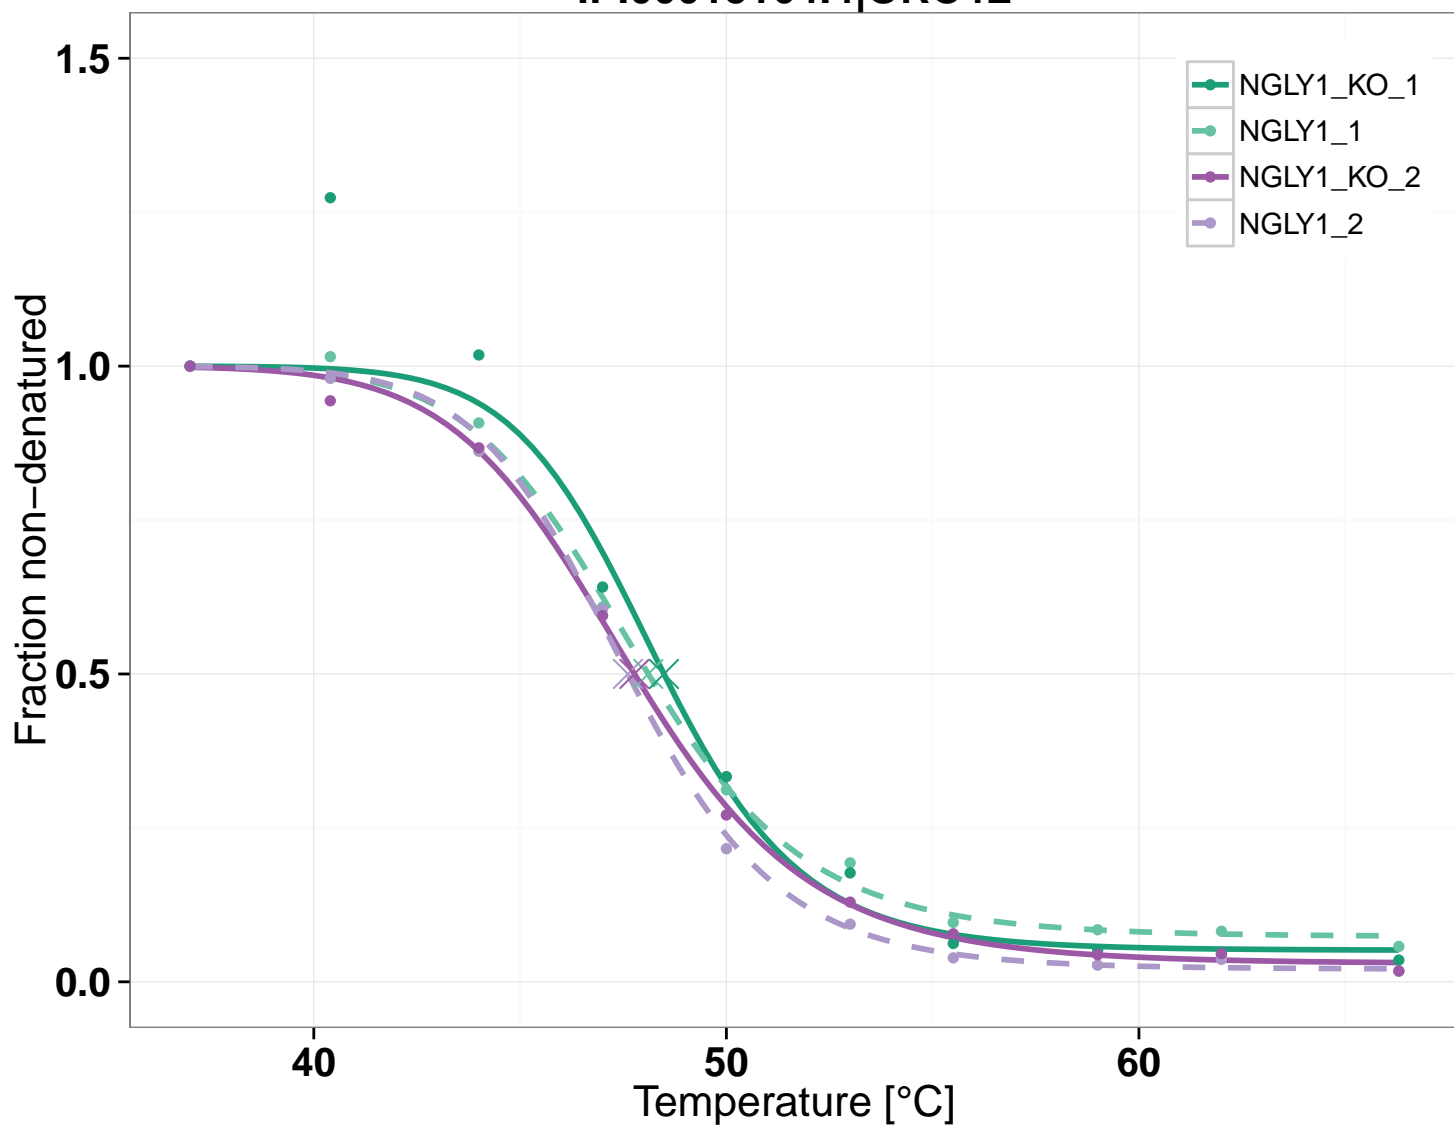

|            | meltPoint | slope | plateau | R2   |
|------------|-----------|-------|---------|------|
| NGLY1_KO_1 | 48.49     | -0.14 | 0.05    | 0.96 |
| NGLY1_1    | 48.11     | -0.11 | 0.07    | 1    |
| NGLY1_KO_2 | 47.77     | -0.11 | 0.03    | 1    |
| NGLY1_2    | 47.61     | -0.13 | 0.02    | 1    |

Supplement: Supplementary file 606 [file 1]

IPI00028109.1|DPY30

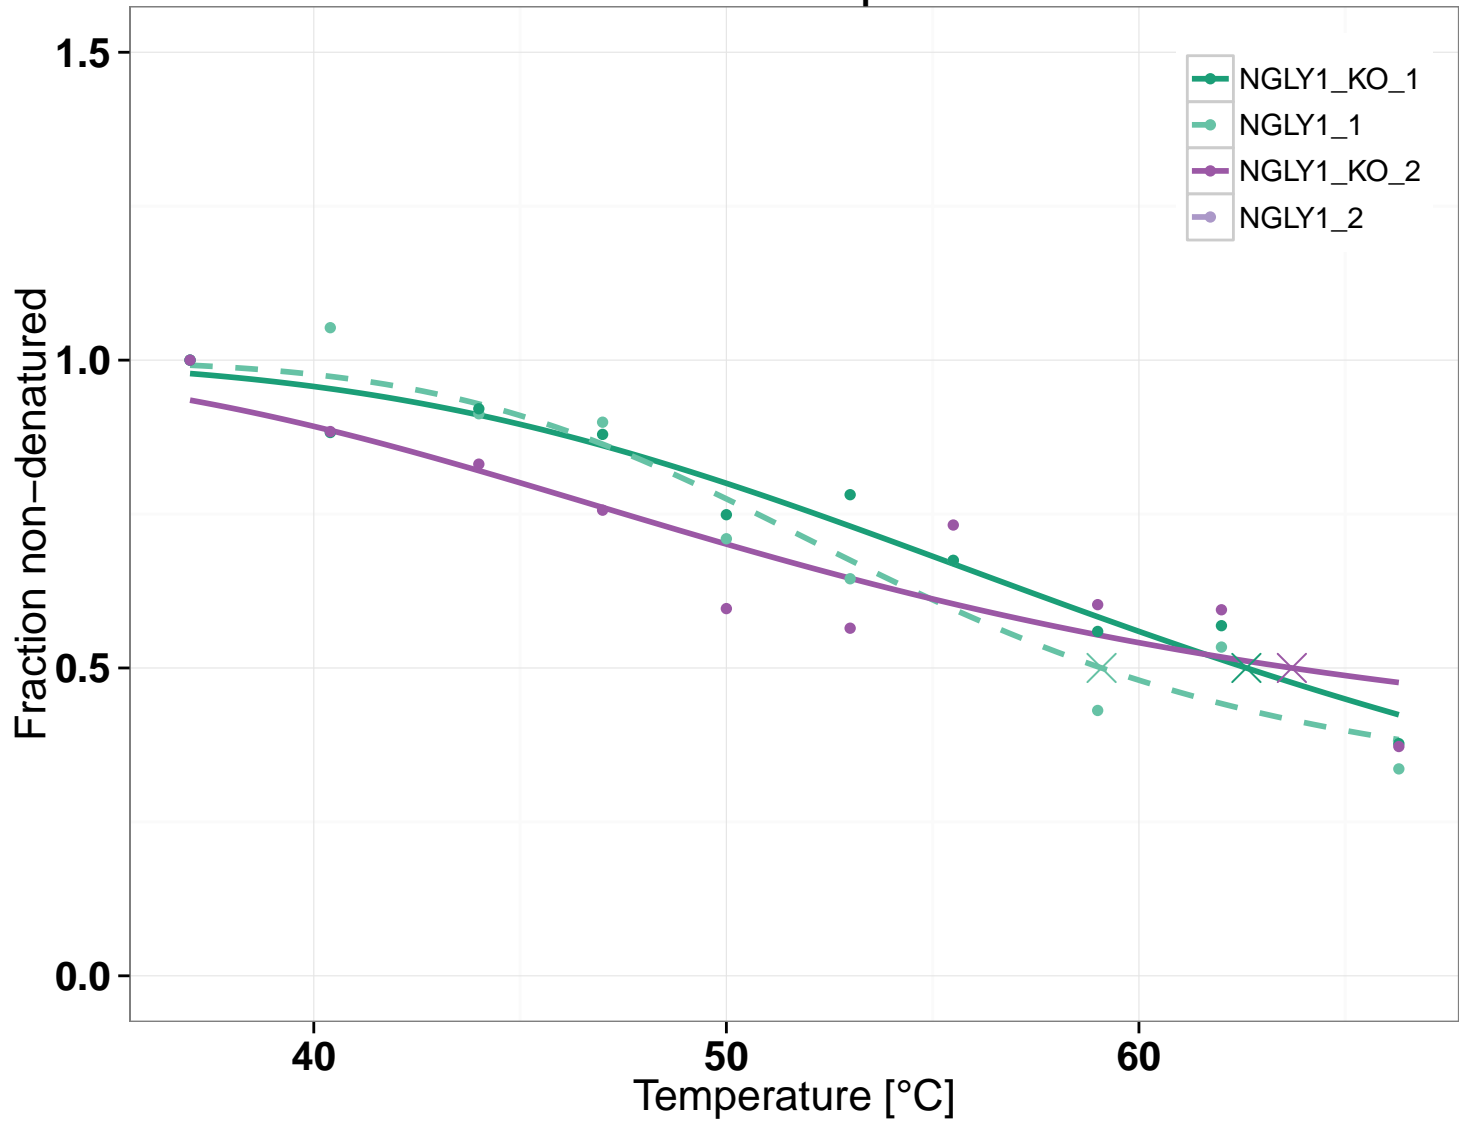

|            | meltPoint | slope  | plateau | R2   |
|------------|-----------|--------|---------|------|
| NGLY1_KO_1 | 62.6      | -0.025 | 0       | 0.95 |
| NGLY1_1    | 59.09     | -0.034 | 0.28    | 0.93 |
| NGLY1_KO_2 | 63.71     | -0.02  | 0.3     | 0.81 |
| NGLY1_2    | -         | -      | -       | -    |

Supplement: Supplementary file 607 [file 1]

# IPI00017381.1|RFC4

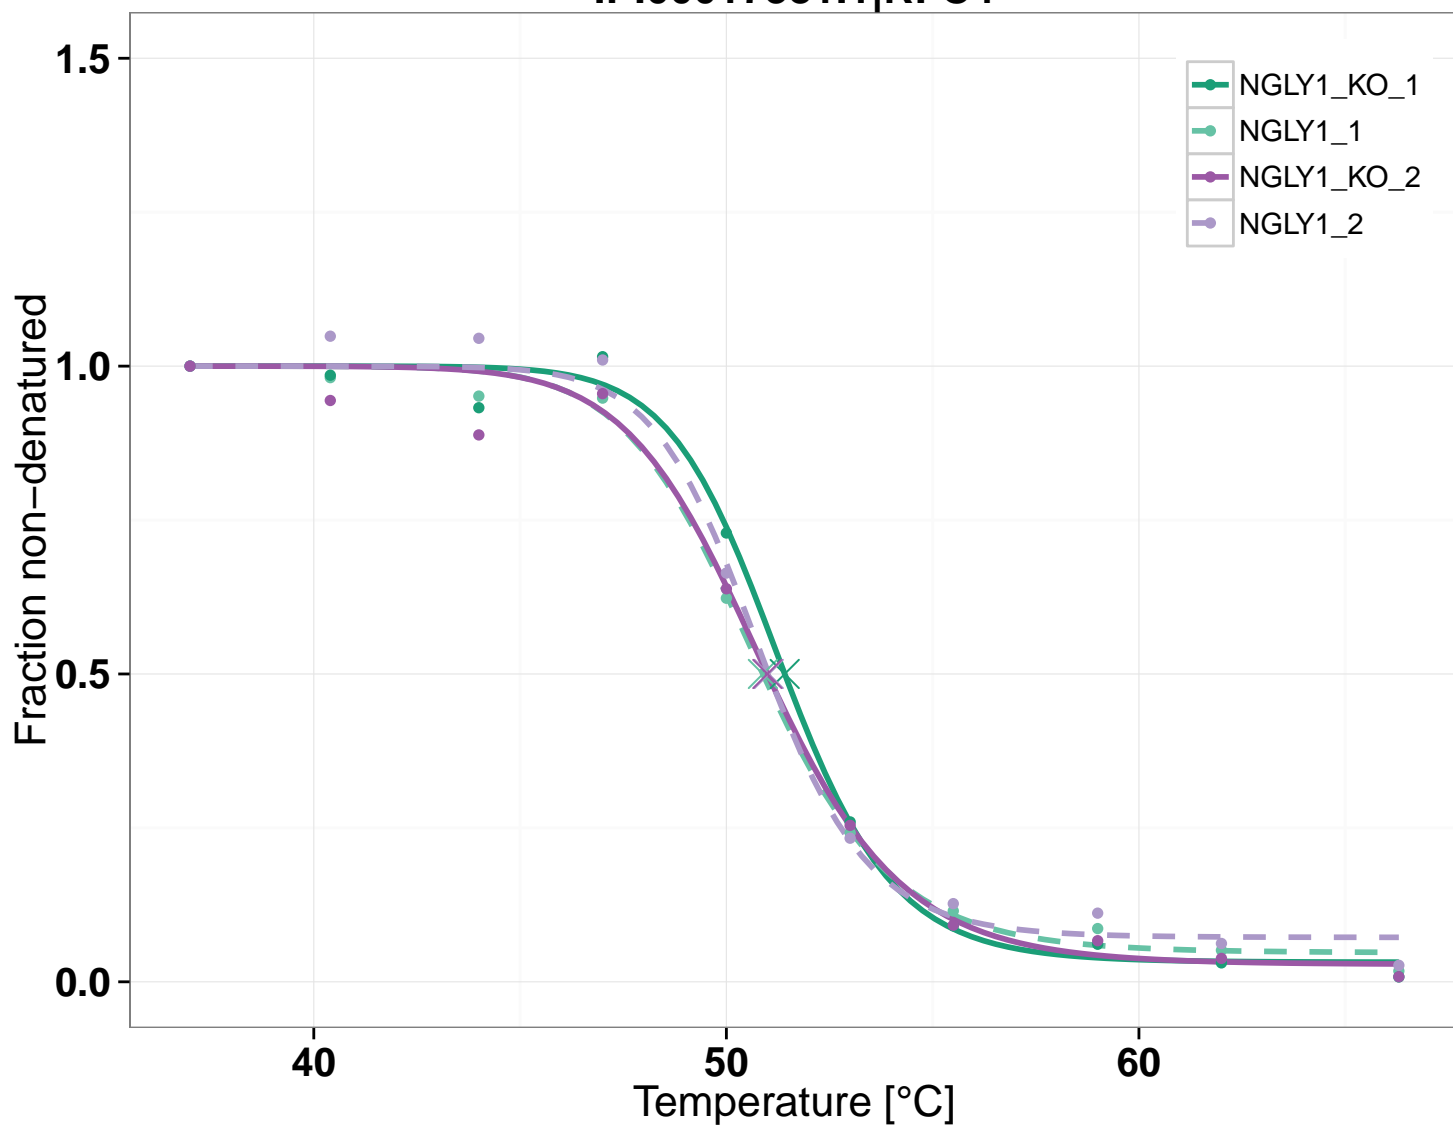

|            | meltPoint | slope | plateau | R2   |
|------------|-----------|-------|---------|------|
| NGLY1_KO_1 | 51.41     | -0.18 | 0.03    | 1    |
| NGLY1_1    | 50.89     | -0.15 | 0.05    | 1    |
| NGLY1_KO_2 | 50.99     | -0.14 | 0.03    | 0.99 |
| NGLY1_2    | 51.03     | -0.18 | 0.07    | 0.99 |

Supplement: Supplementary file 608 [file 1]

IPI00395800.2|FAM173B

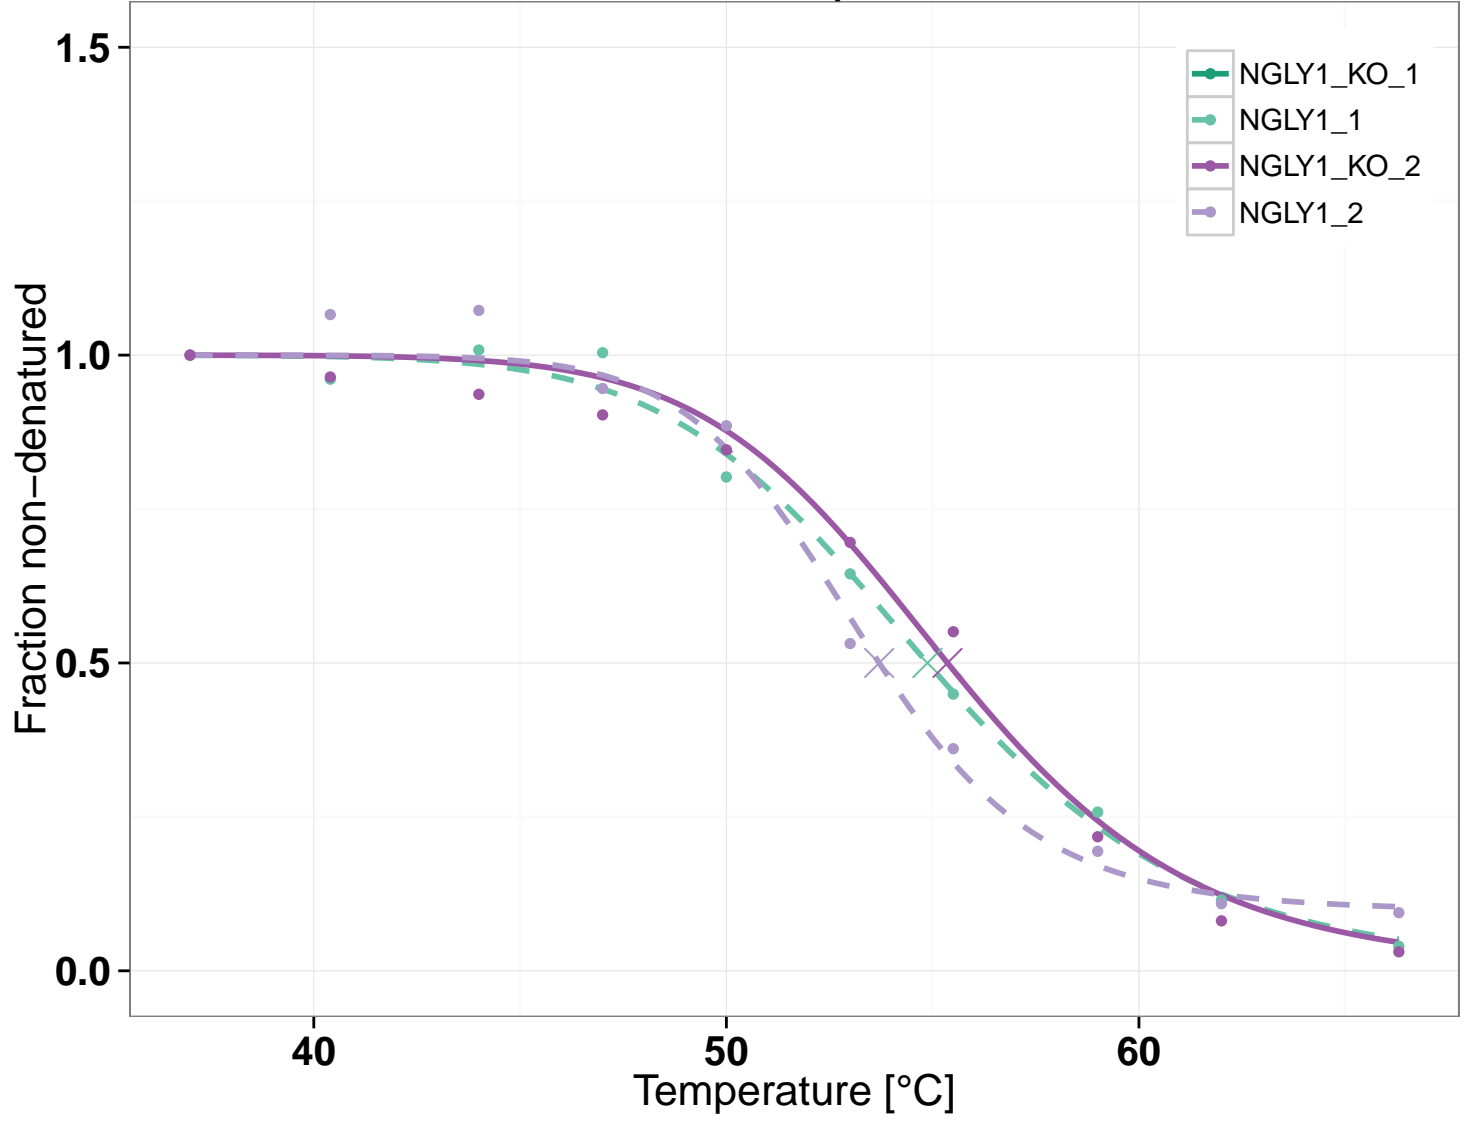

|            | meltPoint | slope  | plateau | R2   |
|------------|-----------|--------|---------|------|
| NGLY1_KO_1 | –         | –      | –       | –    |
| NGLY1_1    | 54.87     | –0.078 | 0       | 0.99 |
| NGLY1_KO_2 | 55.36     | –0.084 | 0       | 0.99 |
| NGLY1_2    | 53.7      | –0.11  | 0.1     | 0.99 |

Supplement: Supplementary file 609 [file 1]

# IPI00179046.3|TMC6

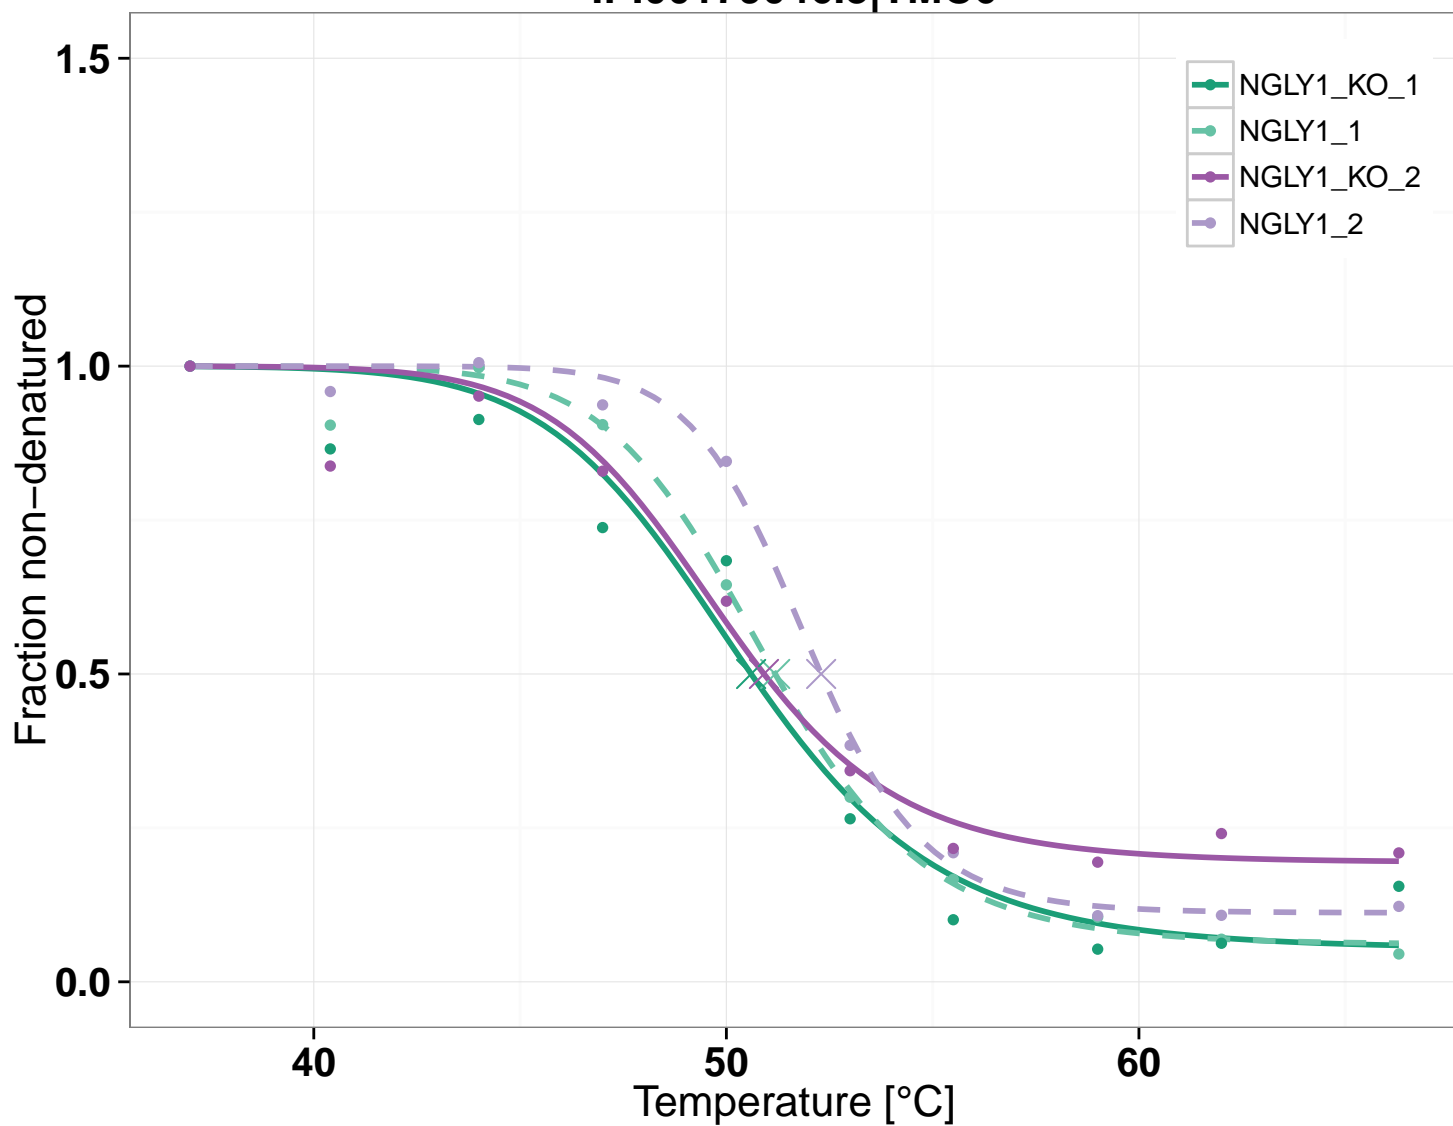

|            | meltPoint | slope  | plateau | R2   |
|------------|-----------|--------|---------|------|
| NGLY1_KO_1 | 50.6      | -0.099 | 0.05    | 0.96 |
| NGLY1_1    | 51.18     | -0.12  | 0.06    | 0.99 |
| NGLY1_KO_2 | 50.91     | -0.097 | 0.19    | 0.97 |
| NGLY1_2    | 52.3      | -0.16  | 0.11    | 1    |

Supplement: Supplementary file 610 [file 1]

IPI00879403.1|SETD5

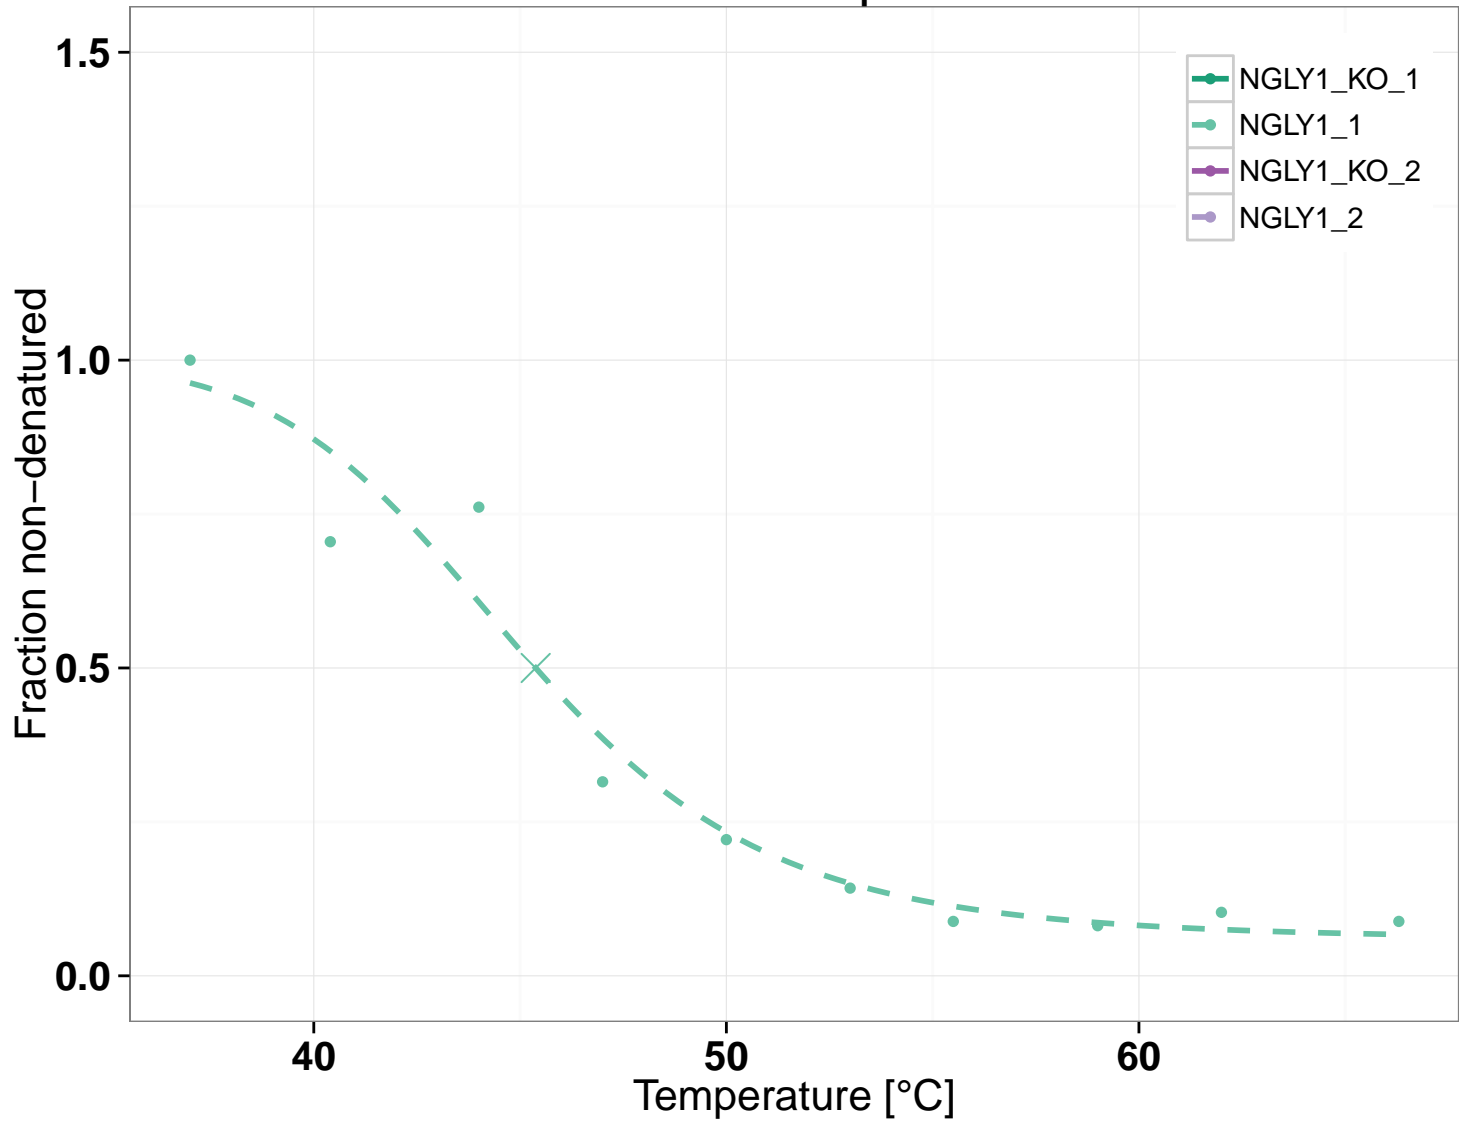

|            | meltPoint | slope  | plateau | R2   |
|------------|-----------|--------|---------|------|
| NGLY1_KO_1 | -         | -      | -       | -    |
| NGLY1_1    | 45.38     | -0.079 | 0.06    | 0.95 |
| NGLY1_KO_2 | -         | -      | -       | -    |
| NGLY1_2    | -         | -      | -       | -    |

Supplement: Supplementary file 611 [file 1]

IPI00003968.1|NDUFA9

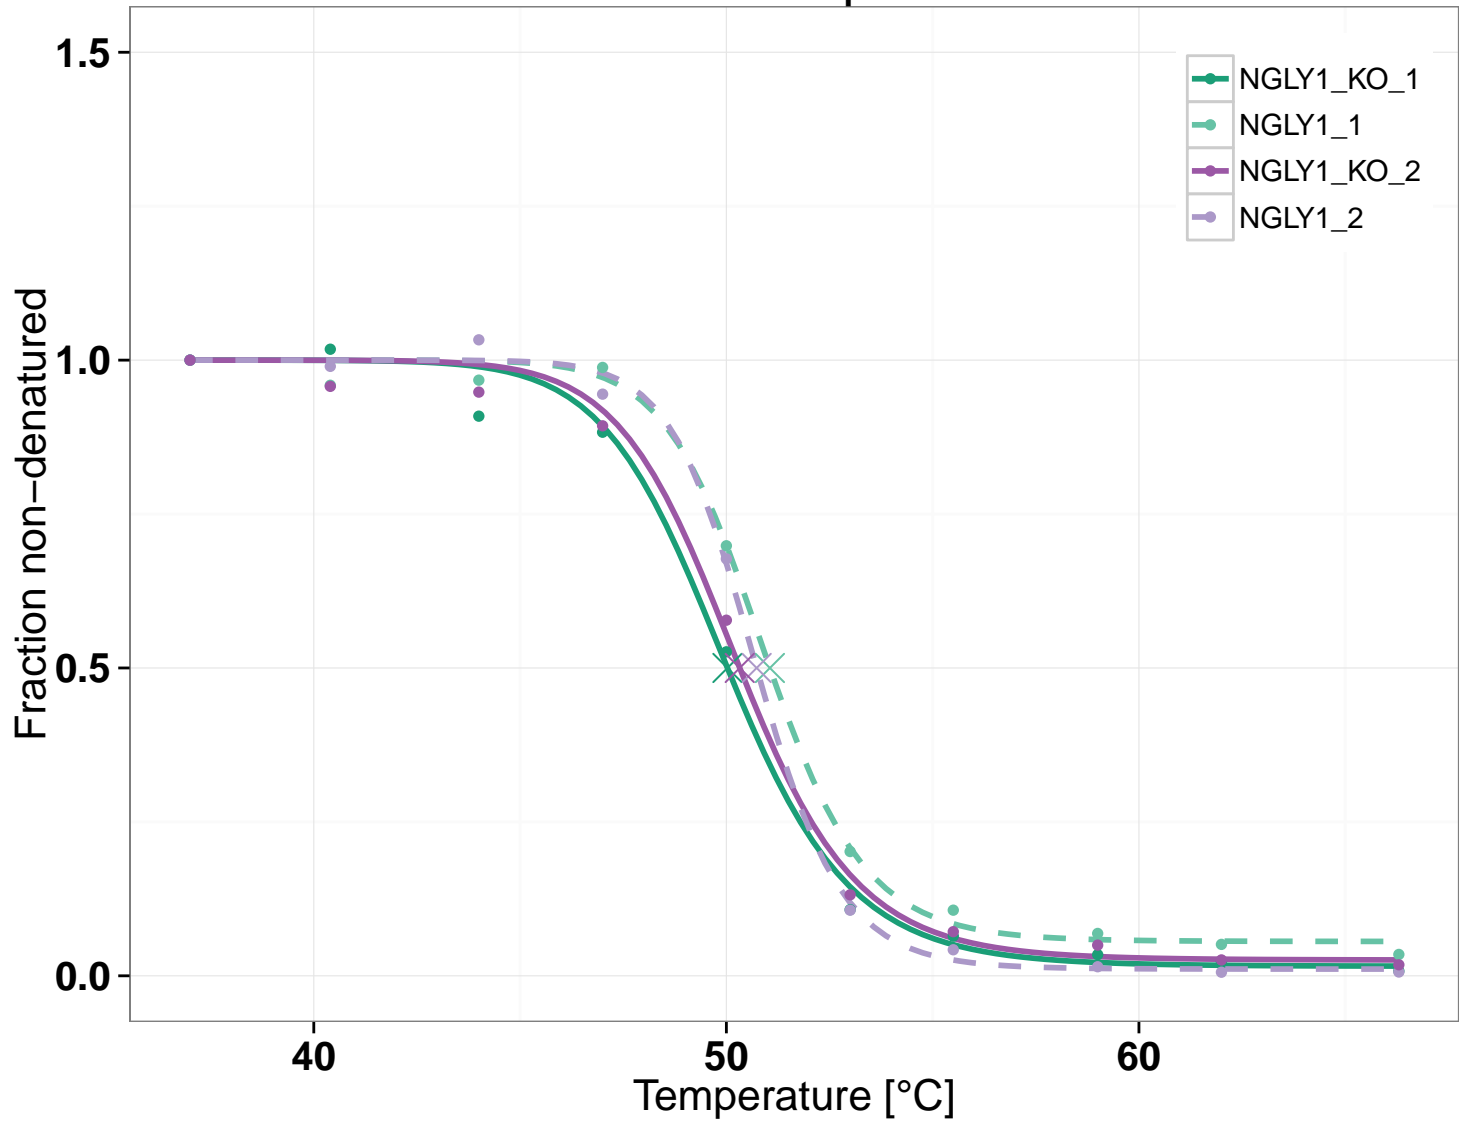

|            | meltPoint | slope | plateau | R2 |
|------------|-----------|-------|---------|----|
| NGLY1_KO_1 | 50.03     | -0.16 | 0.02    | 1  |
| NGLY1_1    | 51.06     | -0.19 | 0.06    | 1  |
| NGLY1_KO_2 | 50.32     | -0.17 | 0.03    | 1  |
| NGLY1_2    | 50.73     | -0.24 | 0.01    | 1  |

Supplement: Supplementary file 612 [file 1]

# IPI00219011.1|FUT4

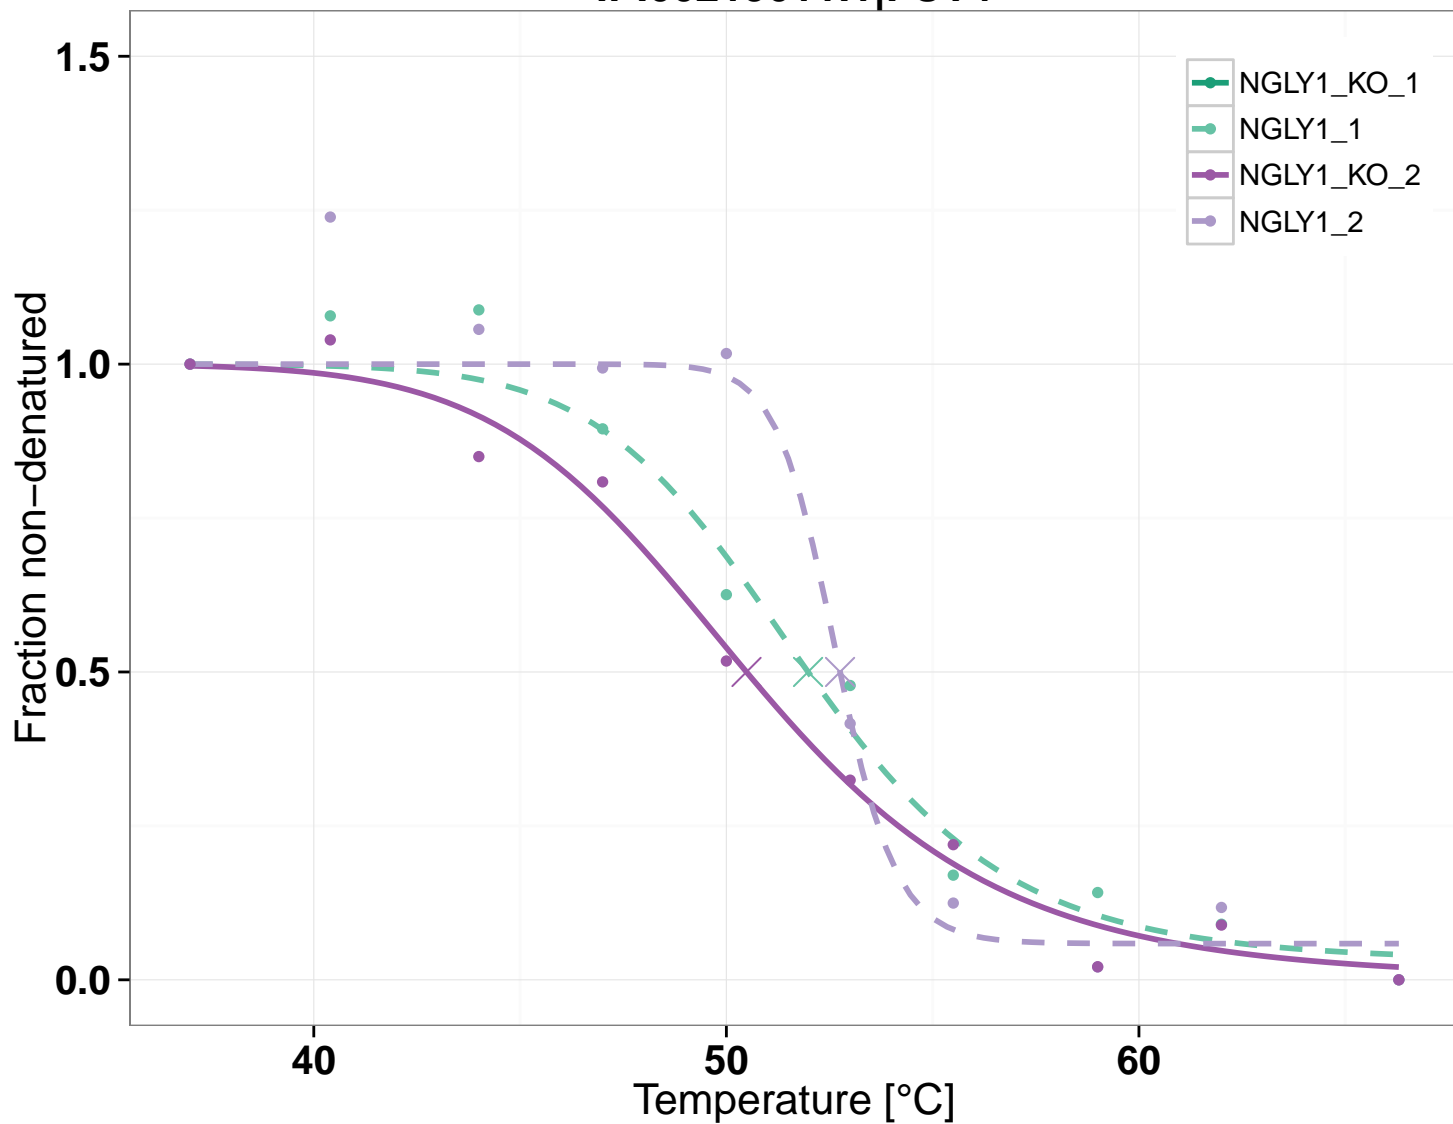

|            | meltPoint | slope  | plateau | R2   |
|------------|-----------|--------|---------|------|
| NGLY1_KO_1 | —         | —      | —       | —    |
| NGLY1_1    | 51.98     | -0.096 | 0.03    | 0.98 |
| NGLY1_KO_2 | 50.49     | -0.081 | 0       | 0.99 |
| NGLY1_2    | 52.76     | -0.32  | 0.06    | 0.97 |

Supplement: Supplementary file 613 [file 1]

IPI00015890.4|CCRN4L

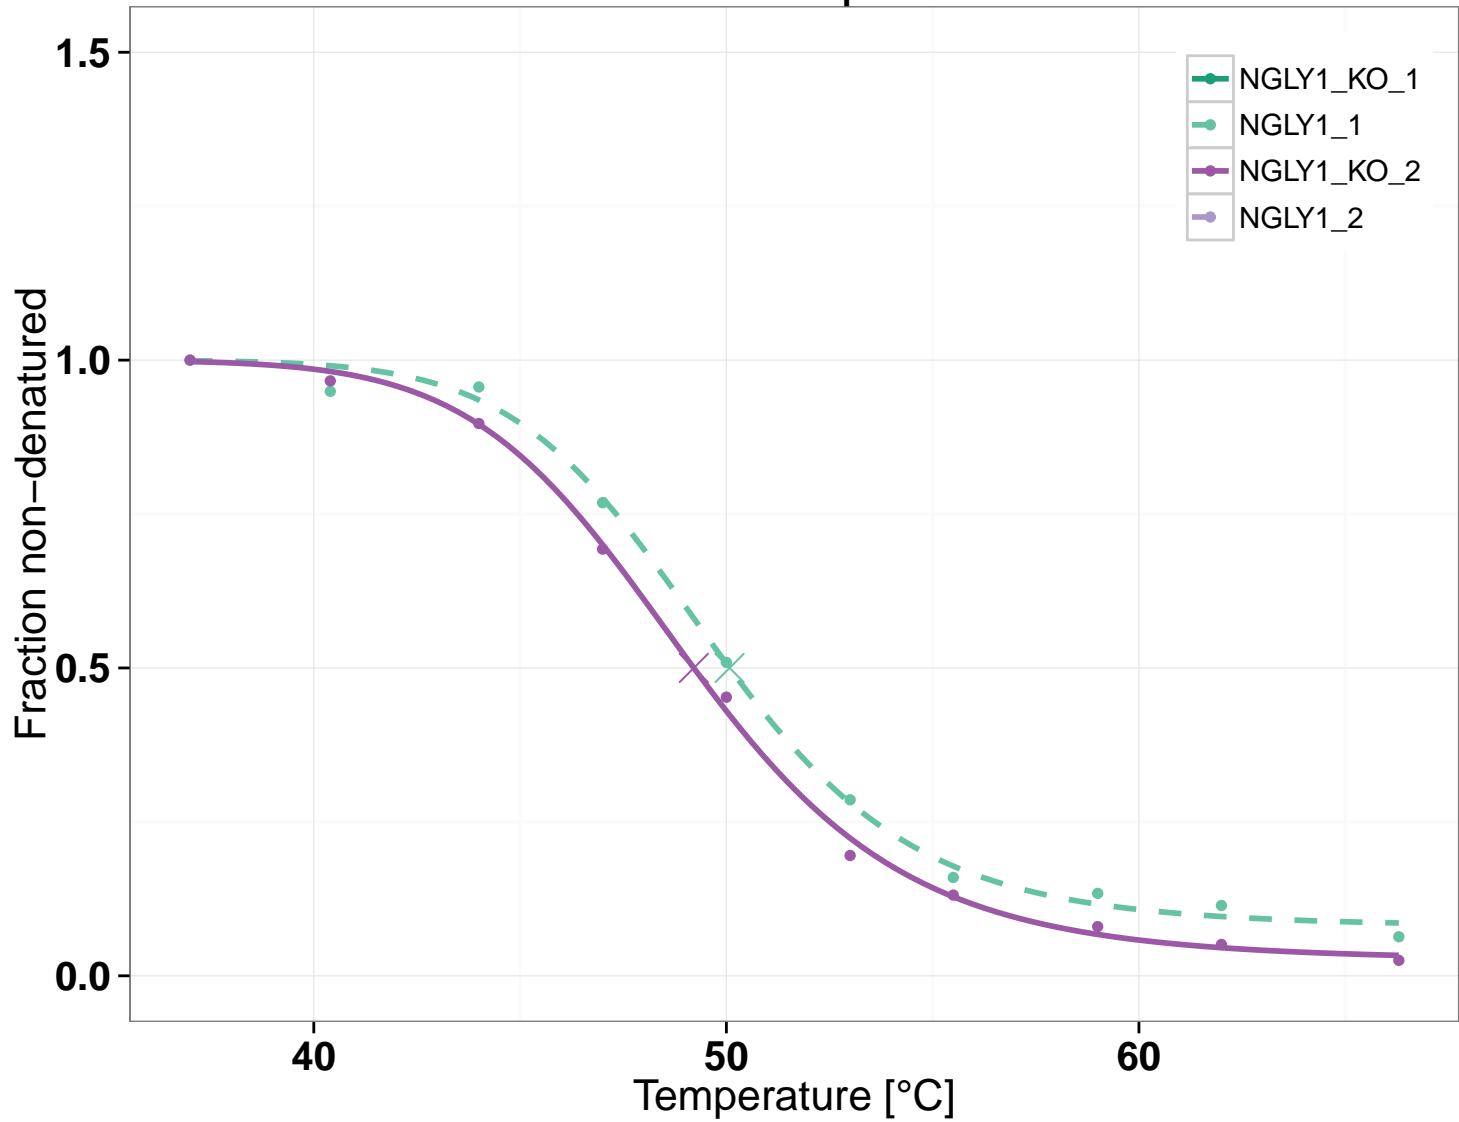

|            | meltPoint | slope  | plateau | R2 |
|------------|-----------|--------|---------|----|
| NGLY1_KO_1 | —         | —      | —       | —  |
| NGLY1_1    | 50.08     | -0.094 | 0.08    | 1  |
| NGLY1_KO_2 | 49.21     | -0.093 | 0.03    | 1  |
| NGLY1_2    | —         | —      | —       | —  |

Supplement: Supplementary file 614 [file 1]

# IPI00903328.2|AGFG1

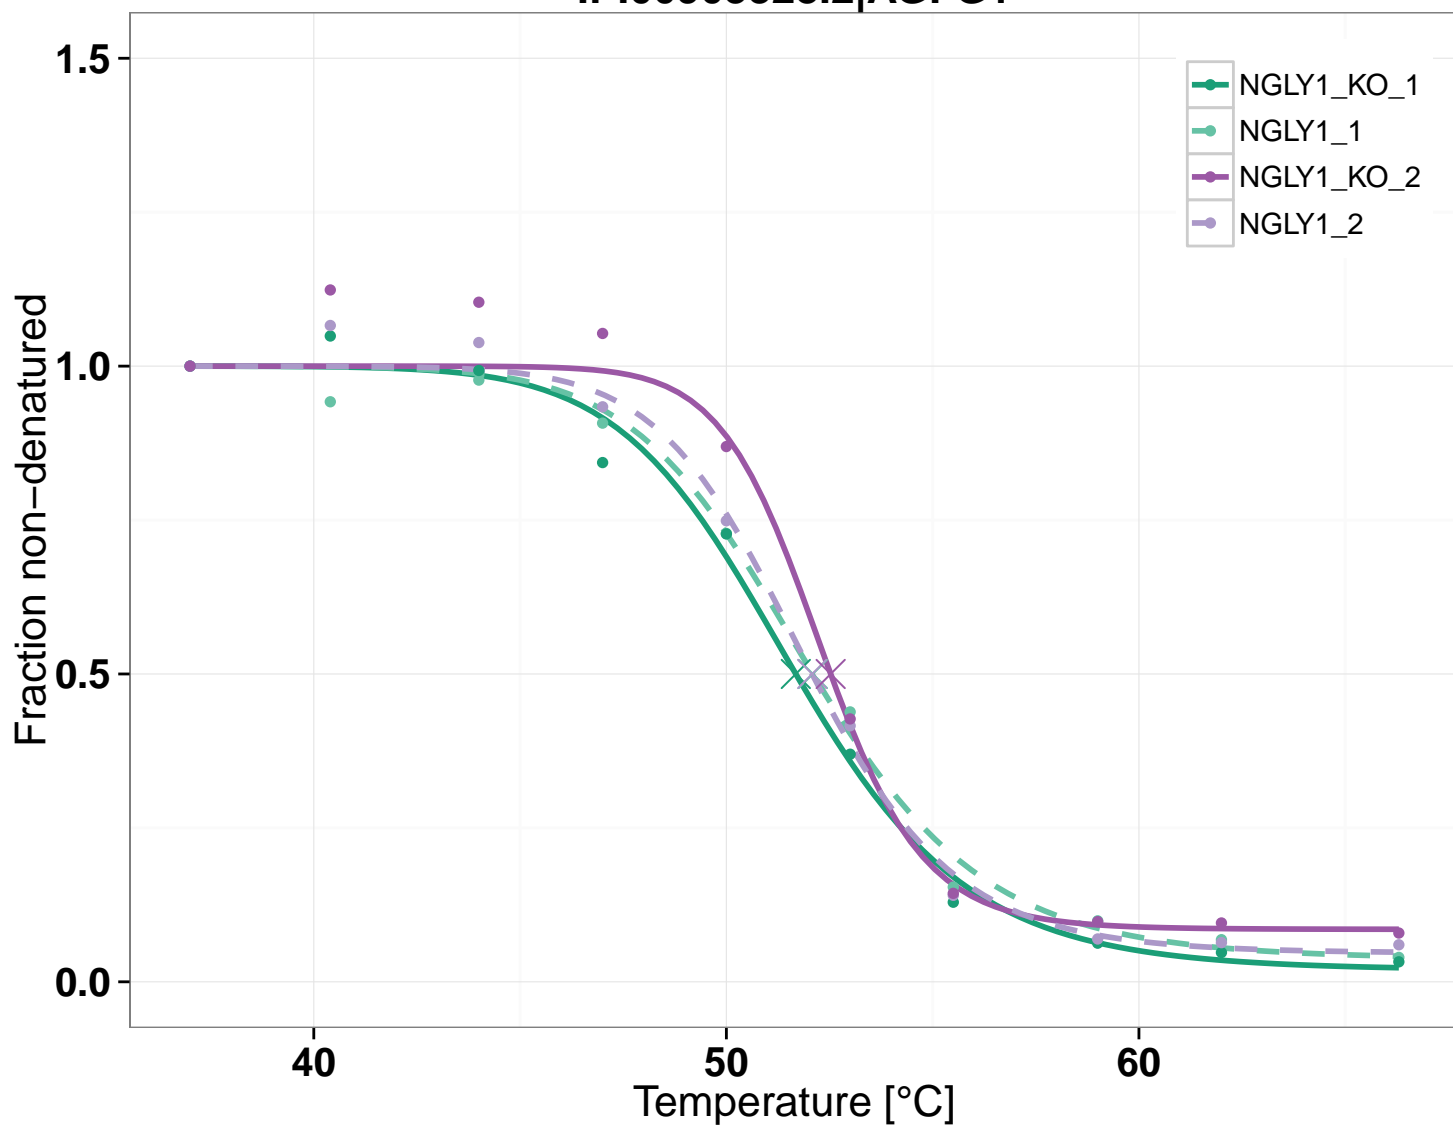

|            | meltPoint | slope | plateau | R2   |
|------------|-----------|-------|---------|------|
| NGLY1_KO_1 | 51.68     | -0.12 | 0.02    | 0.99 |
| NGLY1_1    | 52.1      | -0.11 | 0.04    | 0.99 |
| NGLY1_KO_2 | 52.53     | -0.19 | 0.09    | 0.98 |
| NGLY1_2    | 52.08     | -0.13 | 0.05    | 0.99 |

Supplement: Supplementary file 615 [file 1]

IPI00297593.4|USP34

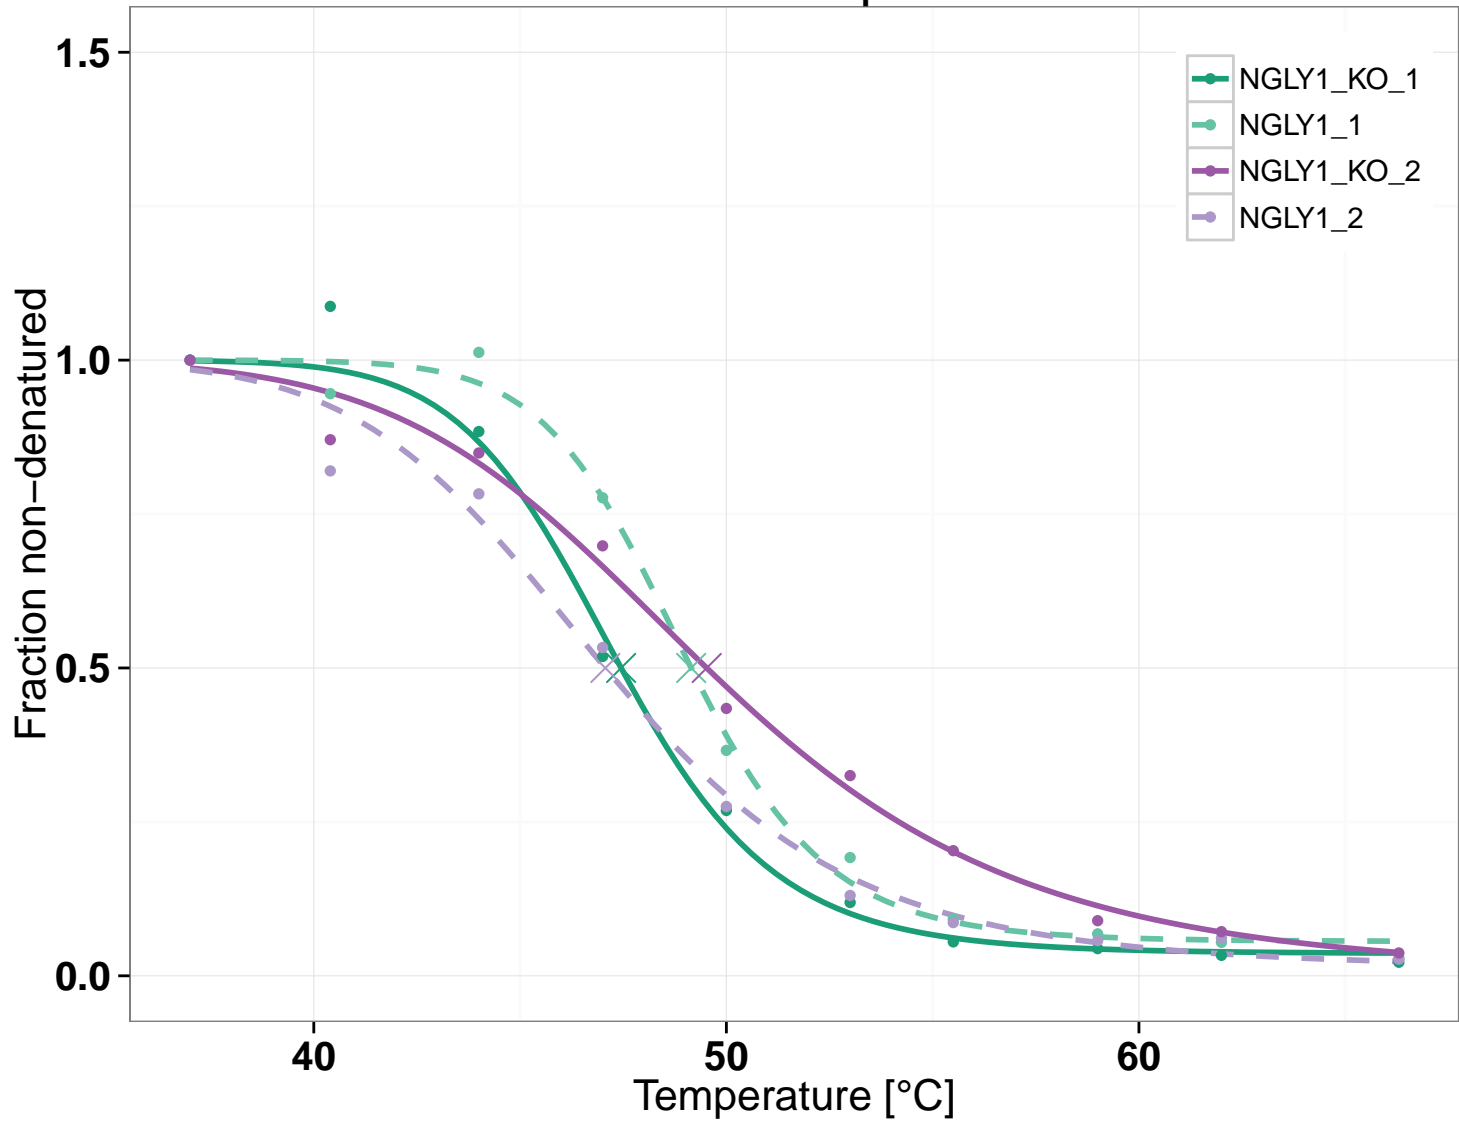

|            | meltPoint | slope  | plateau | R2   |
|------------|-----------|--------|---------|------|
| NGLY1_KO_1 | 47.45     | -0.13  | 0.04    | 0.99 |
| NGLY1_1    | 49.15     | -0.14  | 0.06    | 1    |
| NGLY1_KO_2 | 49.52     | -0.066 | 0       | 0.99 |
| NGLY1_2    | 47.07     | -0.082 | 0.01    | 0.99 |

Supplement: Supplementary file 616 [file 1]

IPI00394804.3|RINL

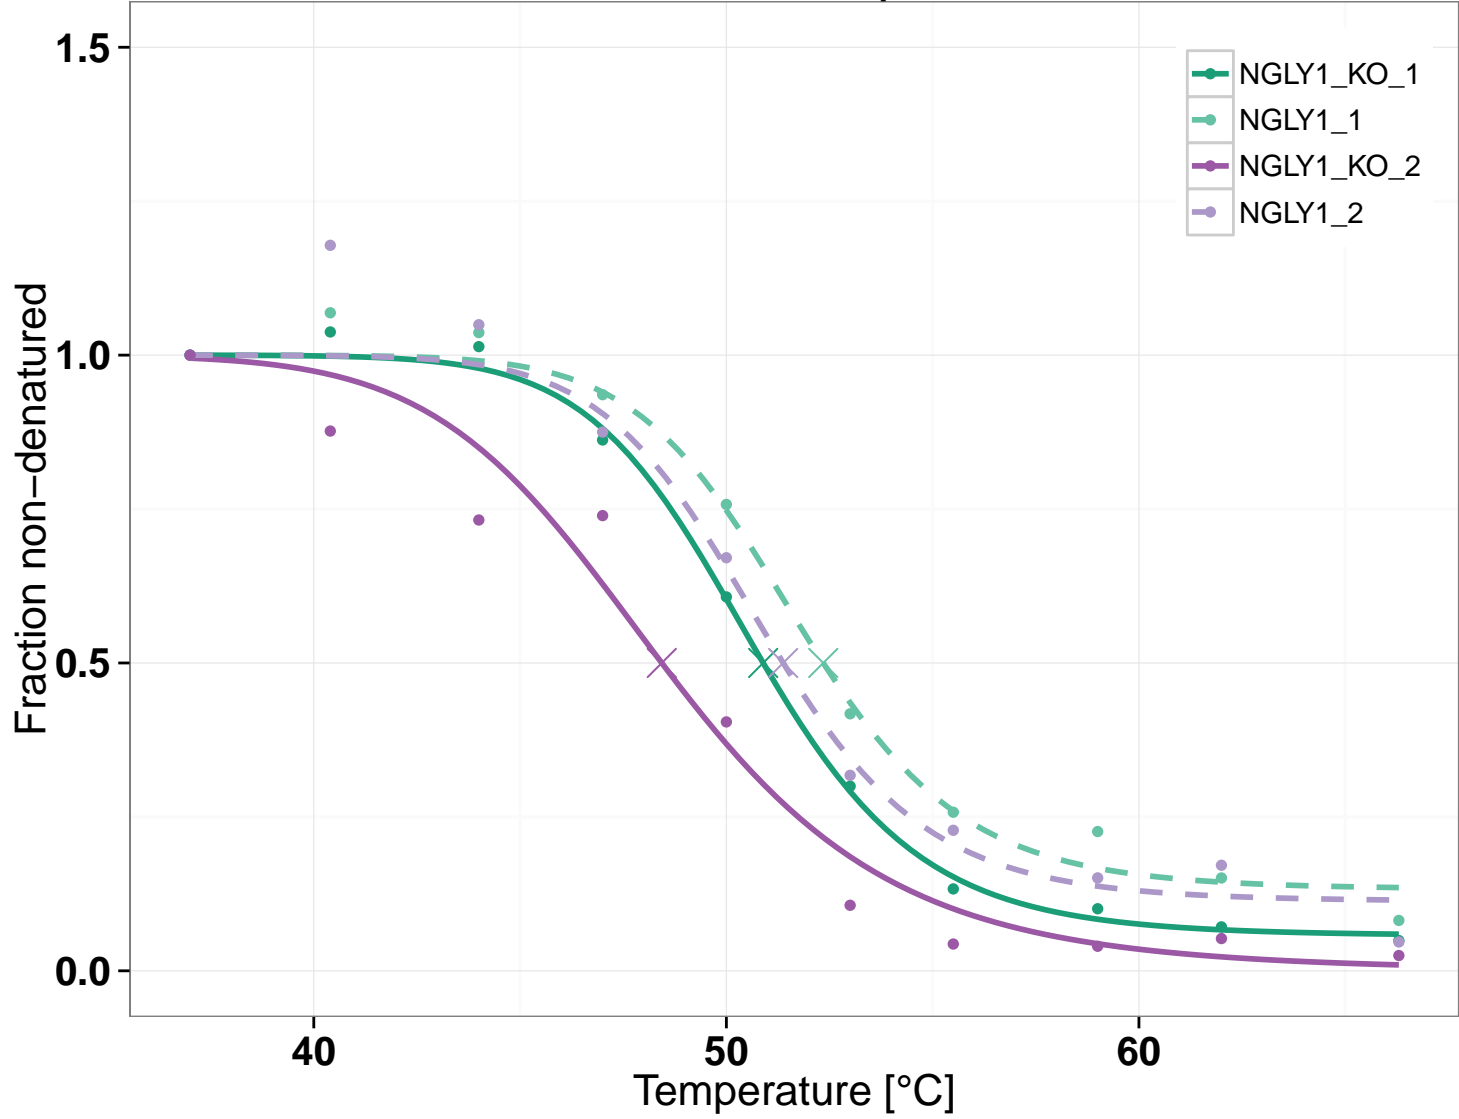

|            | meltPoint | slope | plateau | R2   |
|------------|-----------|-------|---------|------|
| NGLY1_KO_1 | 50.89     | -0.12 | 0.06    | 1    |
| NGLY1_1    | 52.35     | -0.11 | 0.13    | 0.99 |
| NGLY1_KO_2 | 48.43     | -0.09 | 0       | 0.97 |
| NGLY1_2    | 51.38     | -0.11 | 0.11    | 0.97 |

Supplement: Supplementary file 617 [file 1]

# IPI00221172.2|UBR7

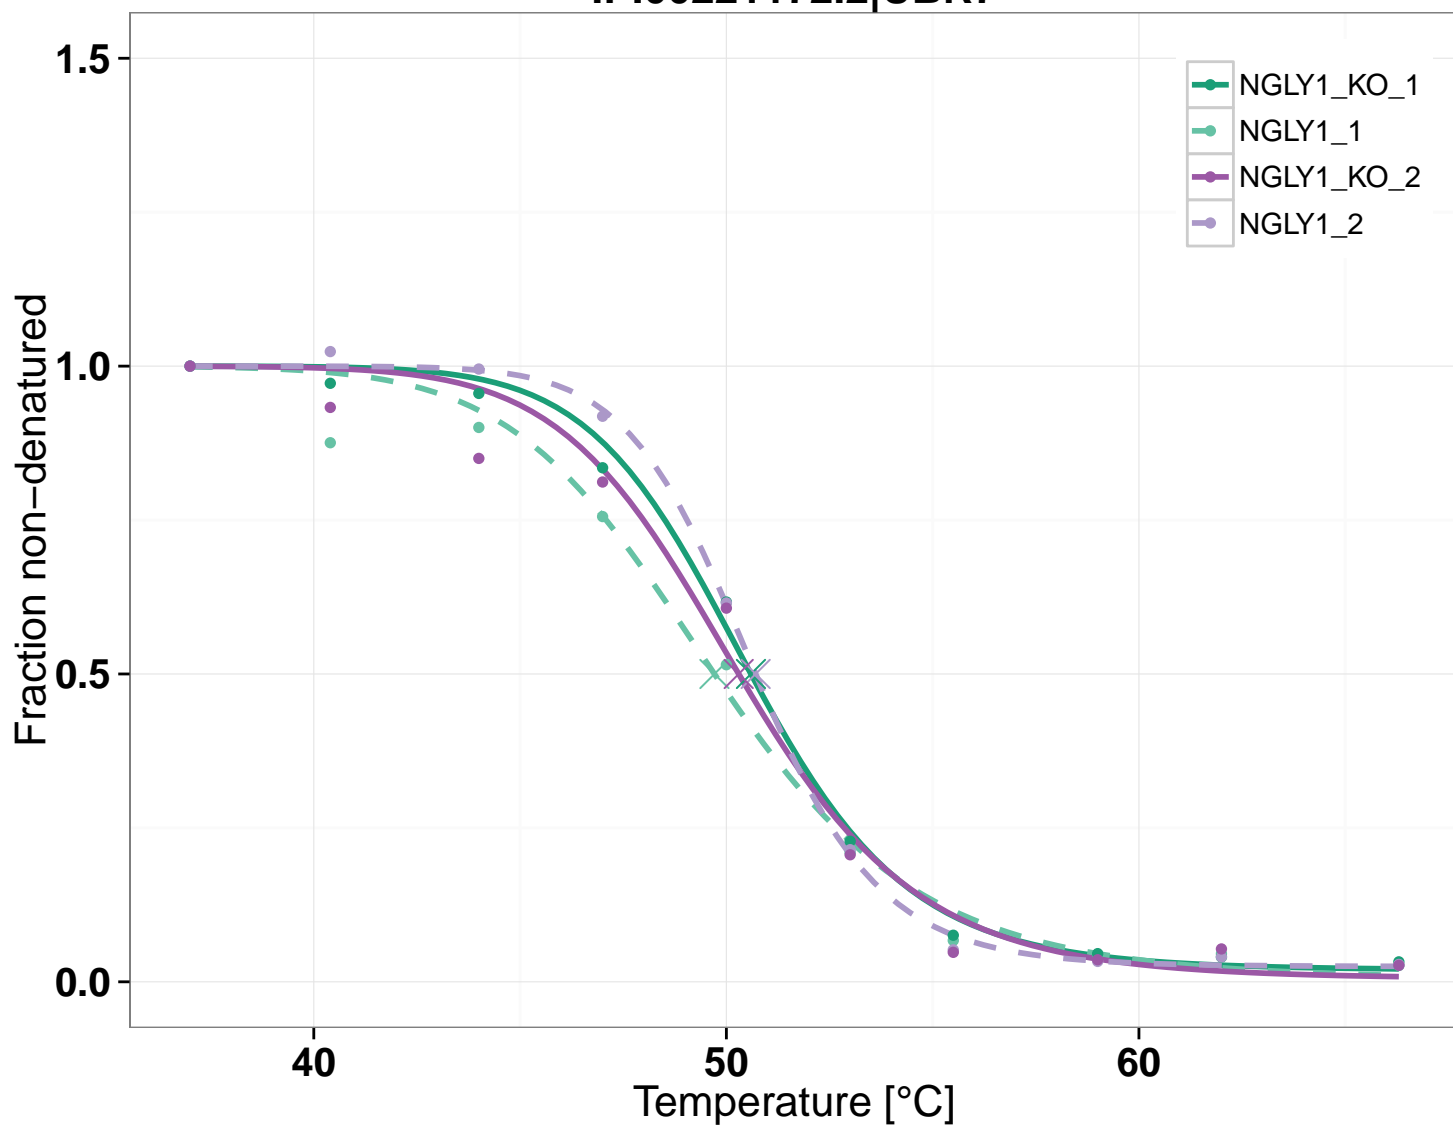

|            | meltPoint | slope | plateau | R2   |
|------------|-----------|-------|---------|------|
| NGLY1_KO_1 | 50.6      | -0.13 | 0.02    | 1    |
| NGLY1_1    | 49.71     | -0.1  | 0       | 0.99 |
| NGLY1_KO_2 | 50.3      | -0.11 | 0       | 0.98 |
| NGLY1_2    | 50.71     | -0.16 | 0.02    | 1    |

Supplement: Supplementary file 618 [file 1]

IPI00037401.4|MED16

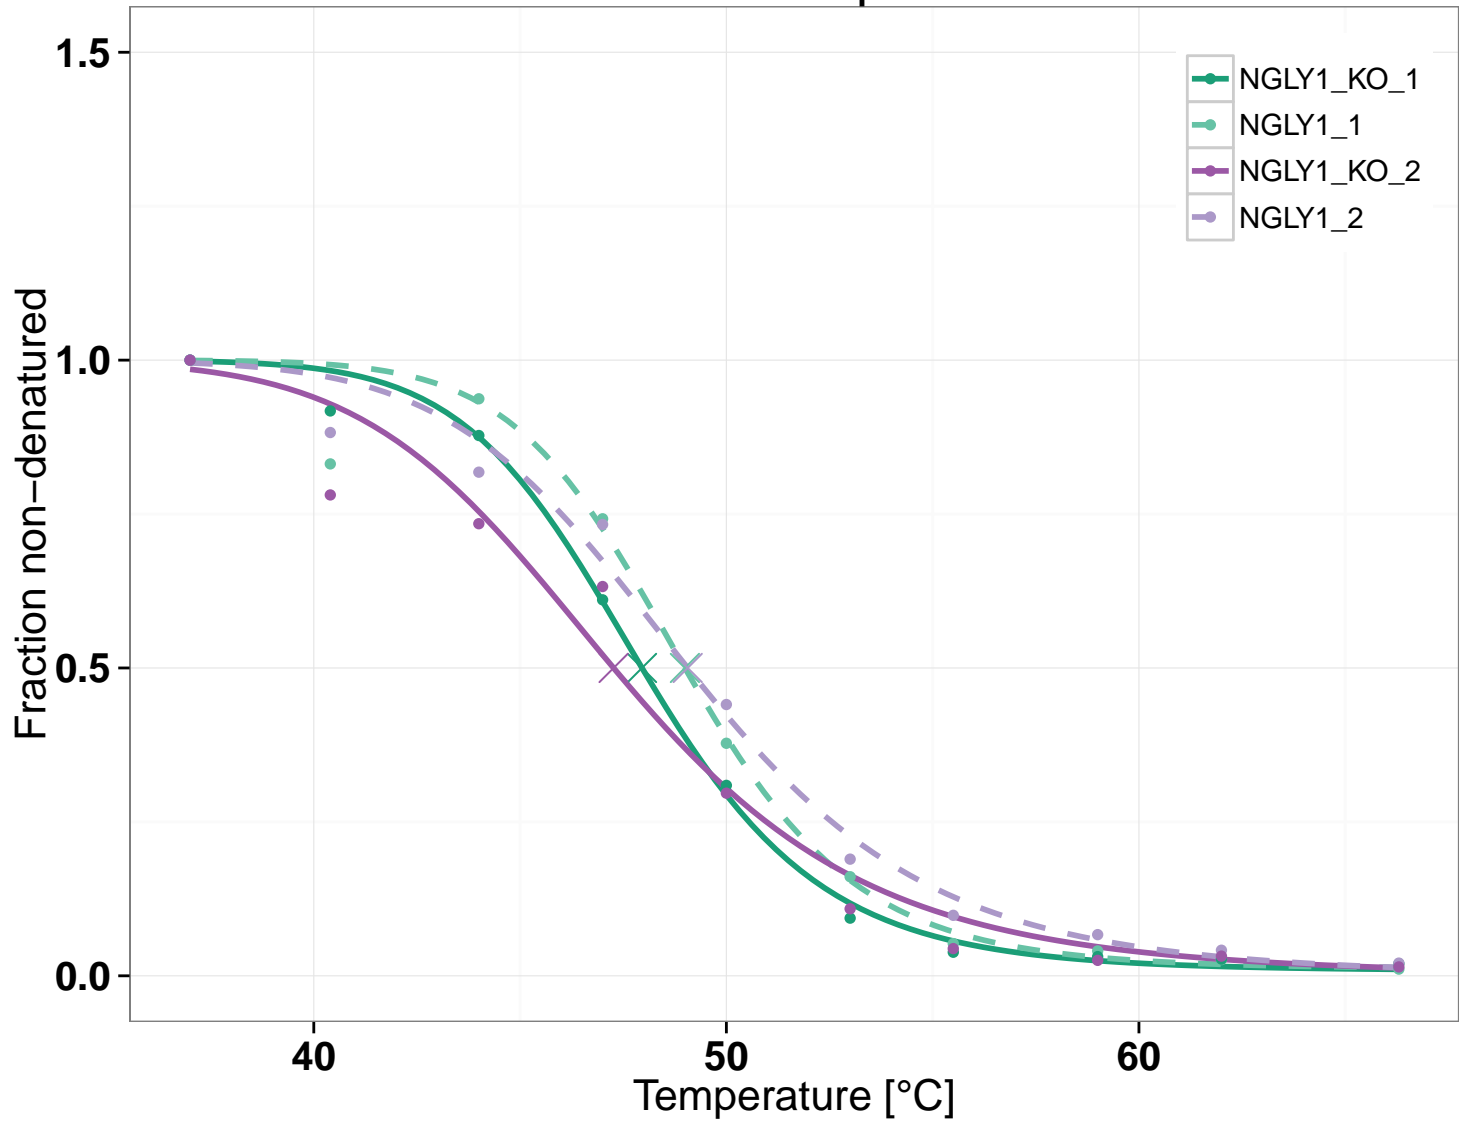

|            | meltPoint | slope  | plateau | R2   |
|------------|-----------|--------|---------|------|
| NGLY1_KO_1 | 47.96     | -0.11  | 0.01    | 1    |
| NGLY1_1    | 49        | -0.12  | 0.01    | 0.98 |
| NGLY1_KO_2 | 47.27     | -0.081 | 0       | 0.97 |
| NGLY1_2    | 49.06     | -0.085 | 0       | 0.99 |

Supplement: Supplementary file 619 [file 1]

# IPI00010796.1|P4HB

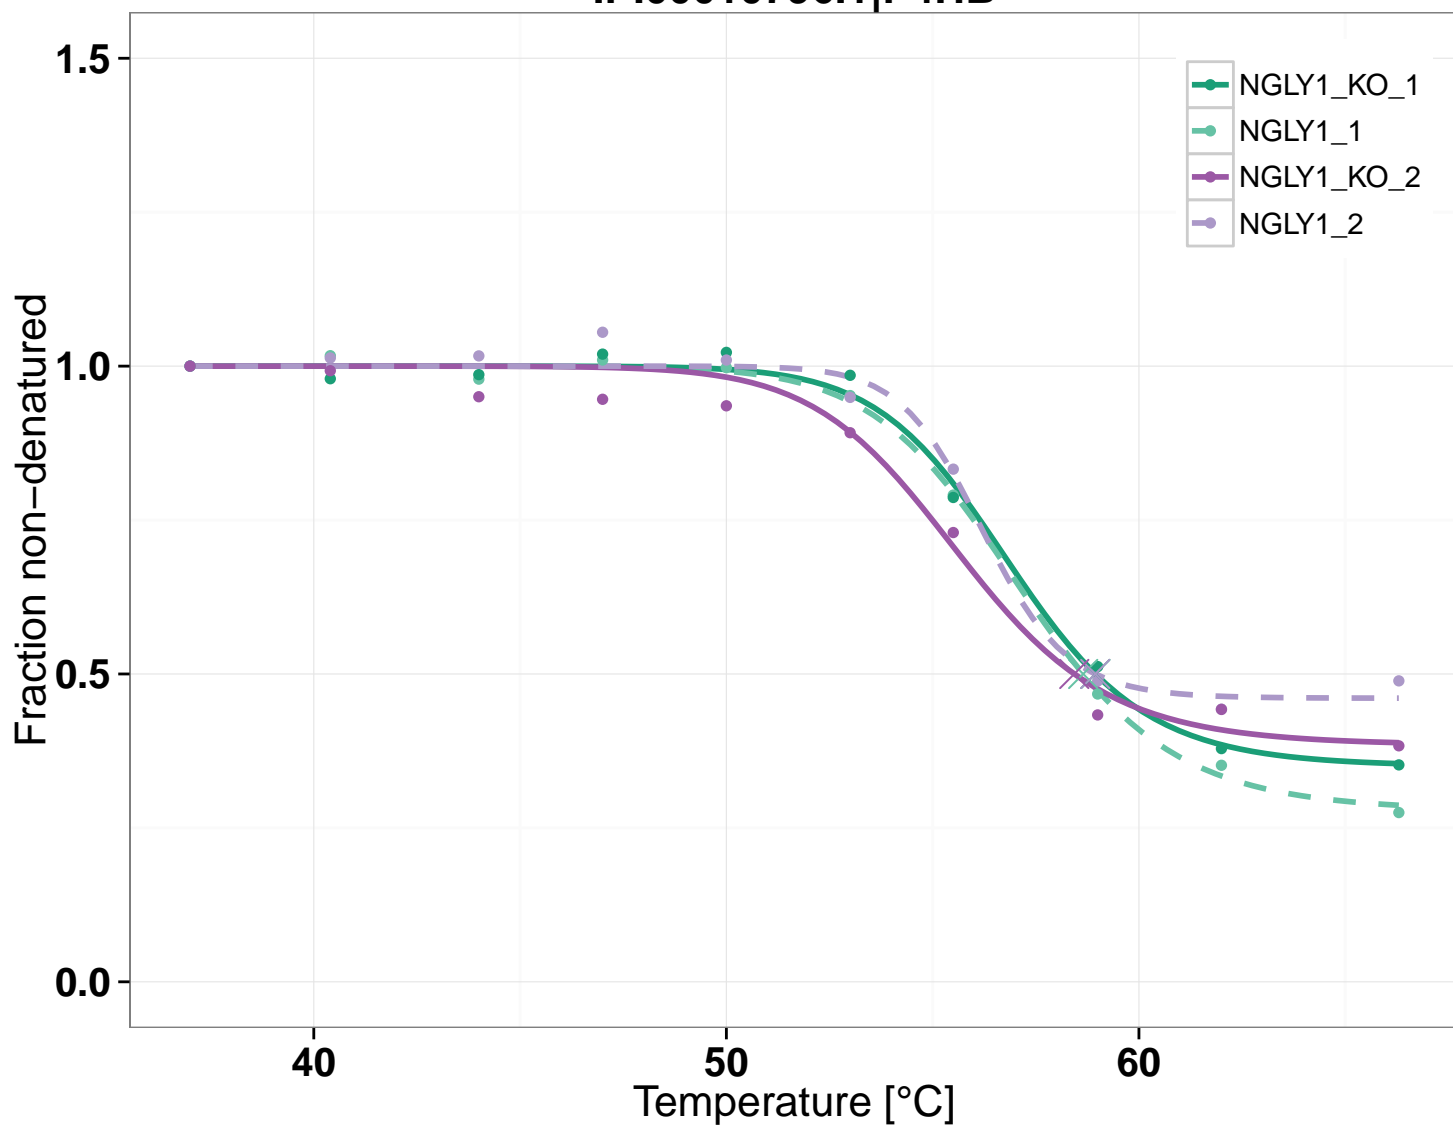

|            | meltPoint | slope  | plateau | R2   |
|------------|-----------|--------|---------|------|
| NGLY1_KO_1 | 58.94     | -0.1   | 0.35    | 0.99 |
| NGLY1_1    | 58.65     | -0.1   | 0.28    | 1    |
| NGLY1_KO_2 | 58.43     | -0.086 | 0.38    | 0.98 |
| NGLY1_2    | 58.94     | -0.13  | 0.46    | 0.99 |

Supplement: Supplementary file 620 [file 1]

IPI00411983.1|BLOC1S2

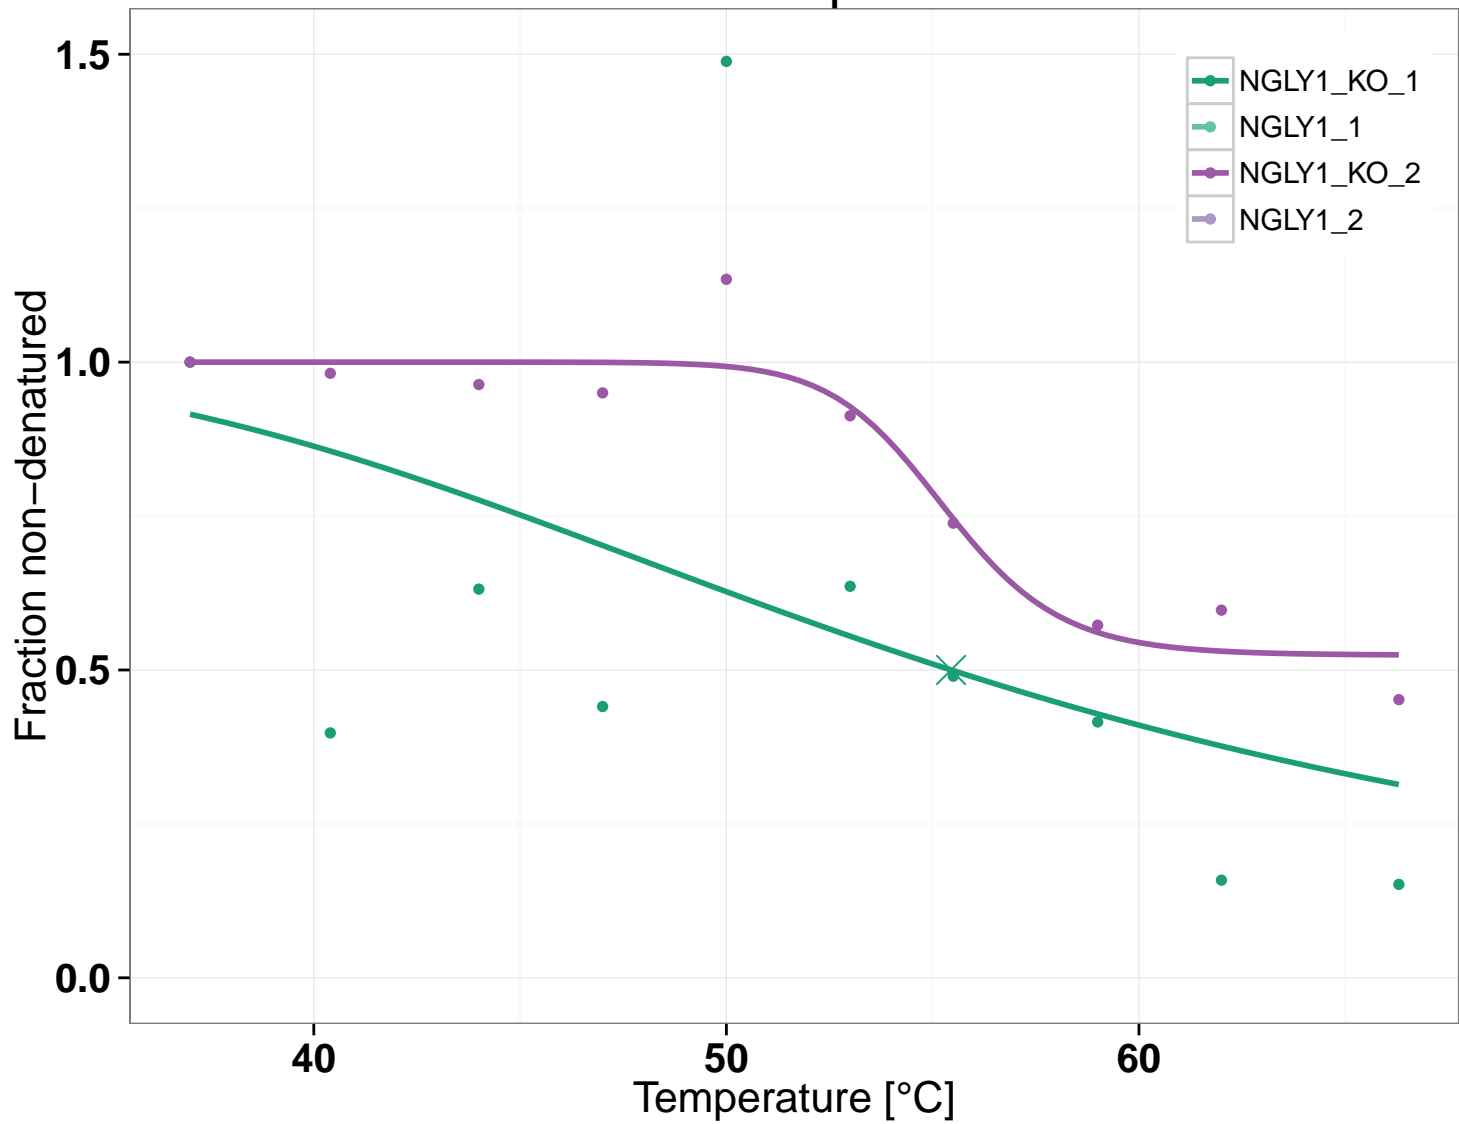

|            | meltPoint | slope  | plateau | R2   |
|------------|-----------|--------|---------|------|
| NGLY1_KO_1 | 55.45     | -0.025 | 0       | 0.23 |
| NGLY1_1    | -         | -      | -       | -    |
| NGLY1_KO_2 | -         | -0.085 | 0.52    | 0.92 |
| NGLY1_2    | -         | -      | -       | -    |

Supplement: Supplementary file 622 [file 1]

IPI00455983.1|MAD2L1BP

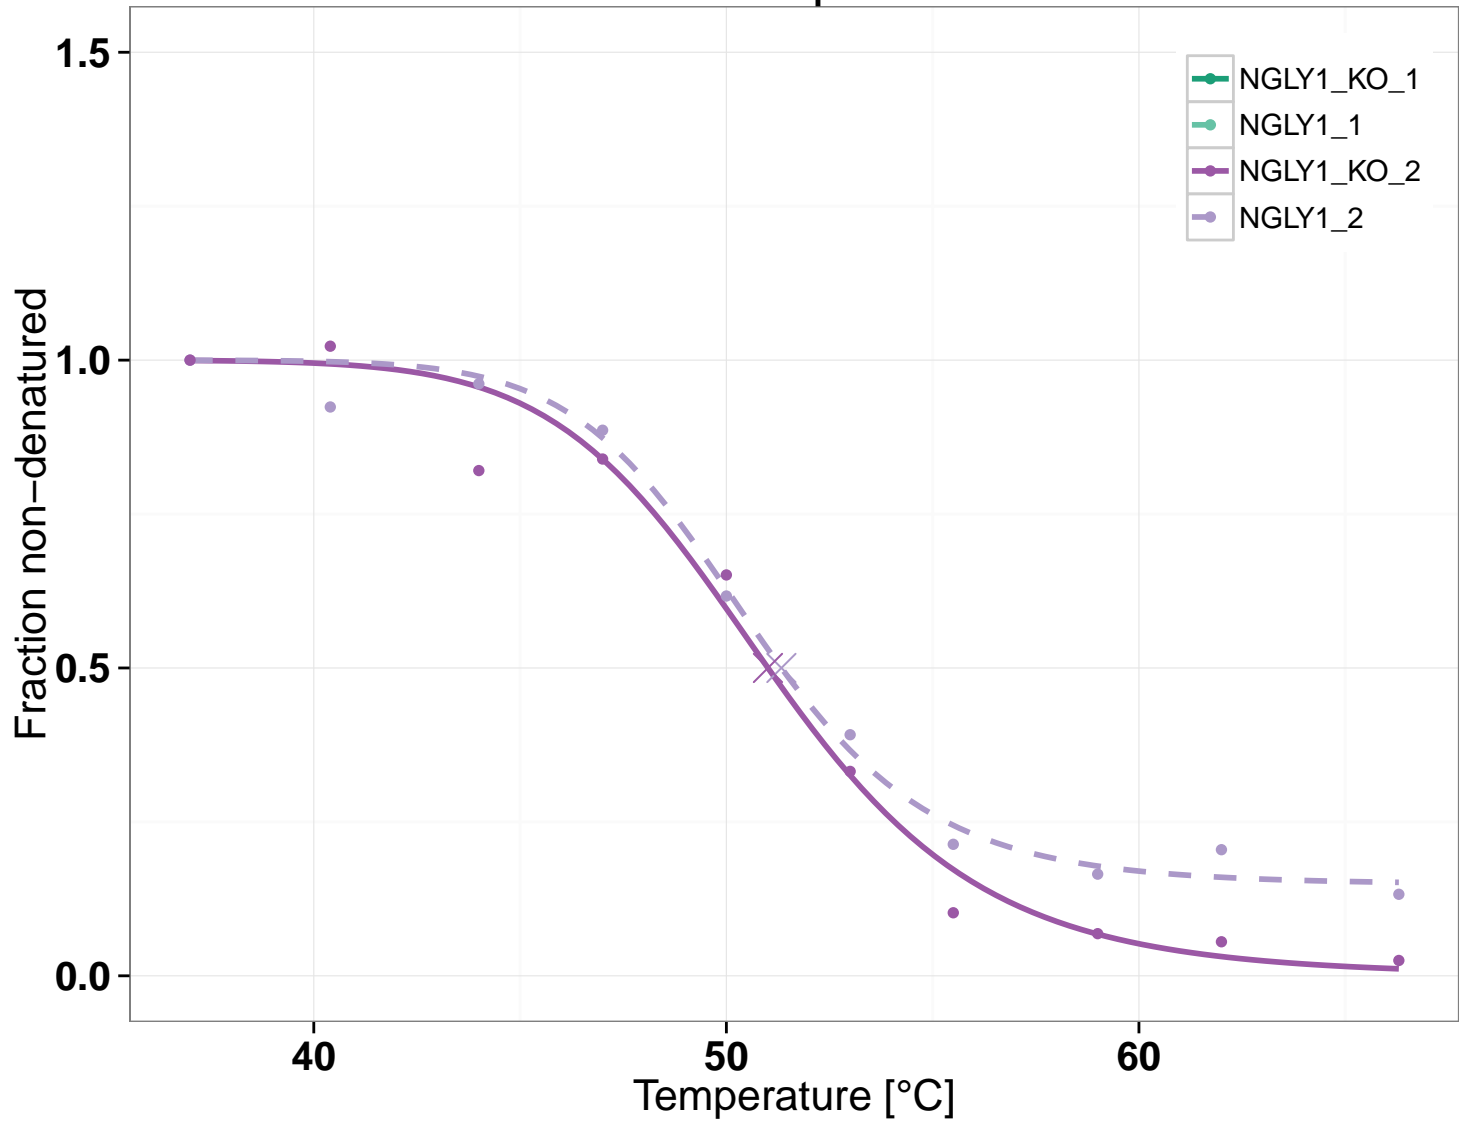

|            | meltPoint | slope  | plateau | R2   |
|------------|-----------|--------|---------|------|
| NGLY1_KO_1 | —         | —      | —       | —    |
| NGLY1_1    | —         | —      | —       | —    |
| NGLY1_KO_2 | 51.01     | -0.096 | 0       | 0.98 |
| NGLY1_2    | 51.33     | -0.098 | 0.15    | 0.99 |

Supplement: Supplementary file 623 [file 1]

IPI00334126.1|RALGPS2

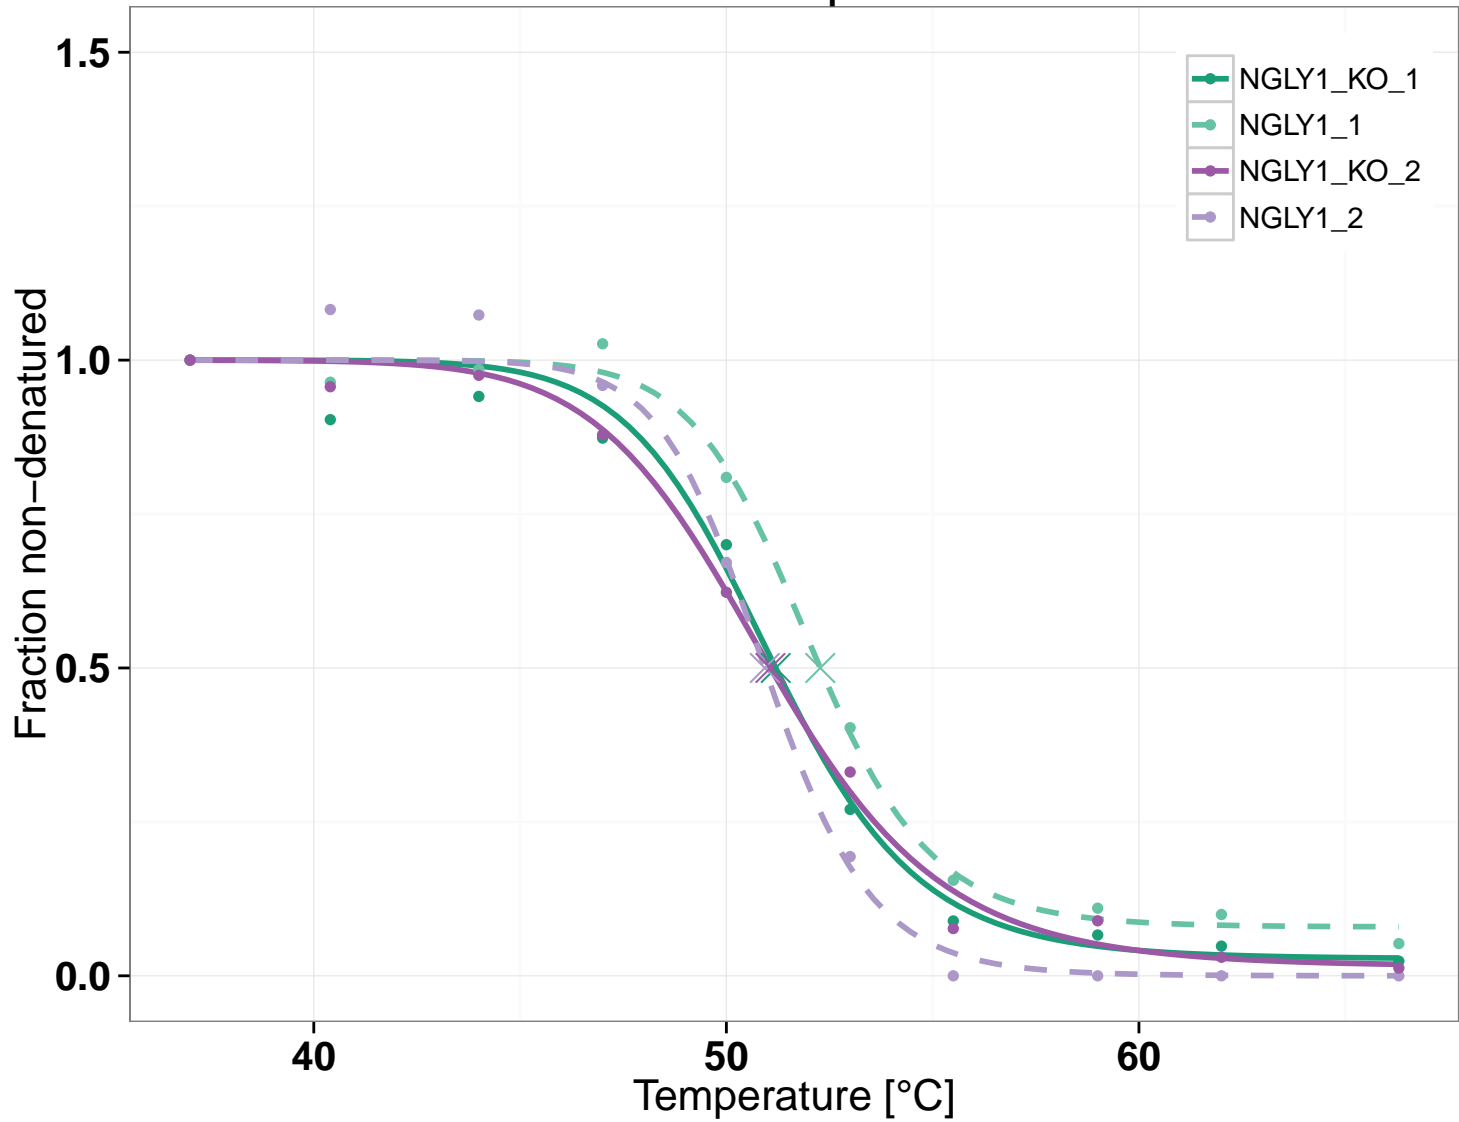

|            | meltPoint | slope | plateau | R2   |
|------------|-----------|-------|---------|------|
| NGLY1_KO_1 | 51.2      | -0.14 | 0.03    | 0.99 |
| NGLY1_1    | 52.28     | -0.16 | 0.08    | 1    |
| NGLY1_KO_2 | 51.07     | -0.12 | 0.01    | 1    |
| NGLY1_2    | 50.93     | -0.19 | 0       | 0.99 |

Supplement: Supplementary file 624 [file 1]

# IPI00010239.4|AMZ2

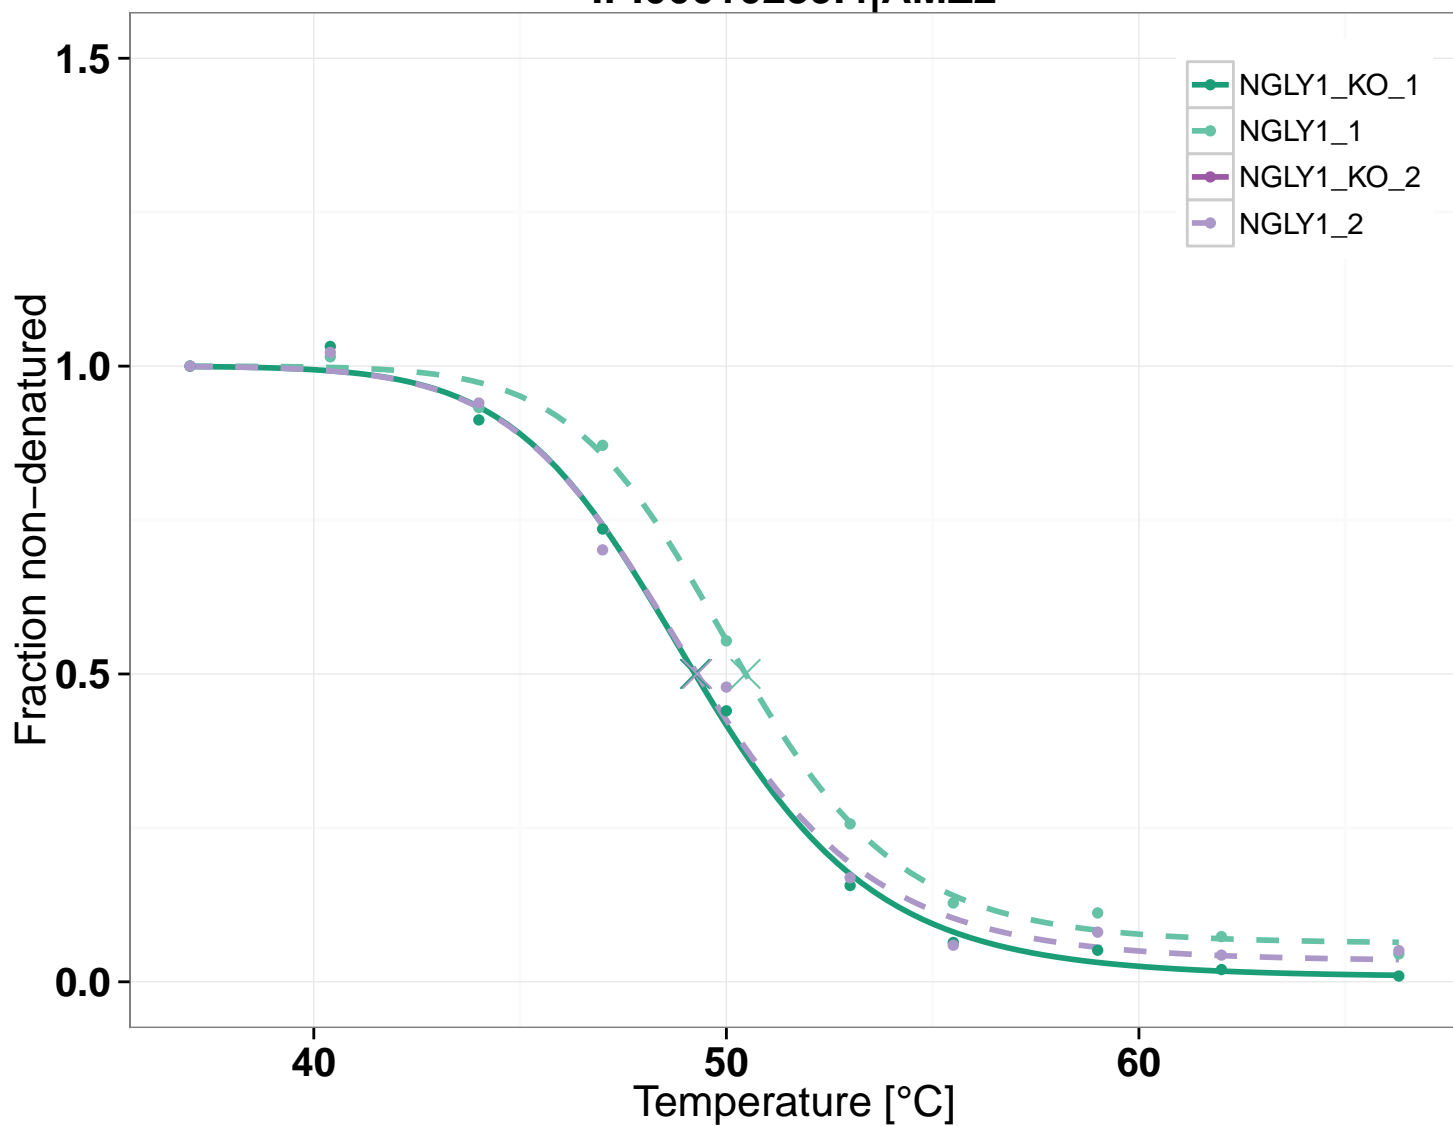

|            | meltPoint | slope | plateau | R2   |
|------------|-----------|-------|---------|------|
| NGLY1_KO_1 | 49.24     | -0.11 | 0.01    | 1    |
| NGLY1_1    | 50.47     | -0.12 | 0.06    | 1    |
| NGLY1_KO_2 | -         | -     | -       | -    |
| NGLY1_2    | 49.29     | -0.11 | 0.03    | 0.99 |

Supplement: Supplementary file 625 [file 1]

IPI00031131.4|C20ORF3

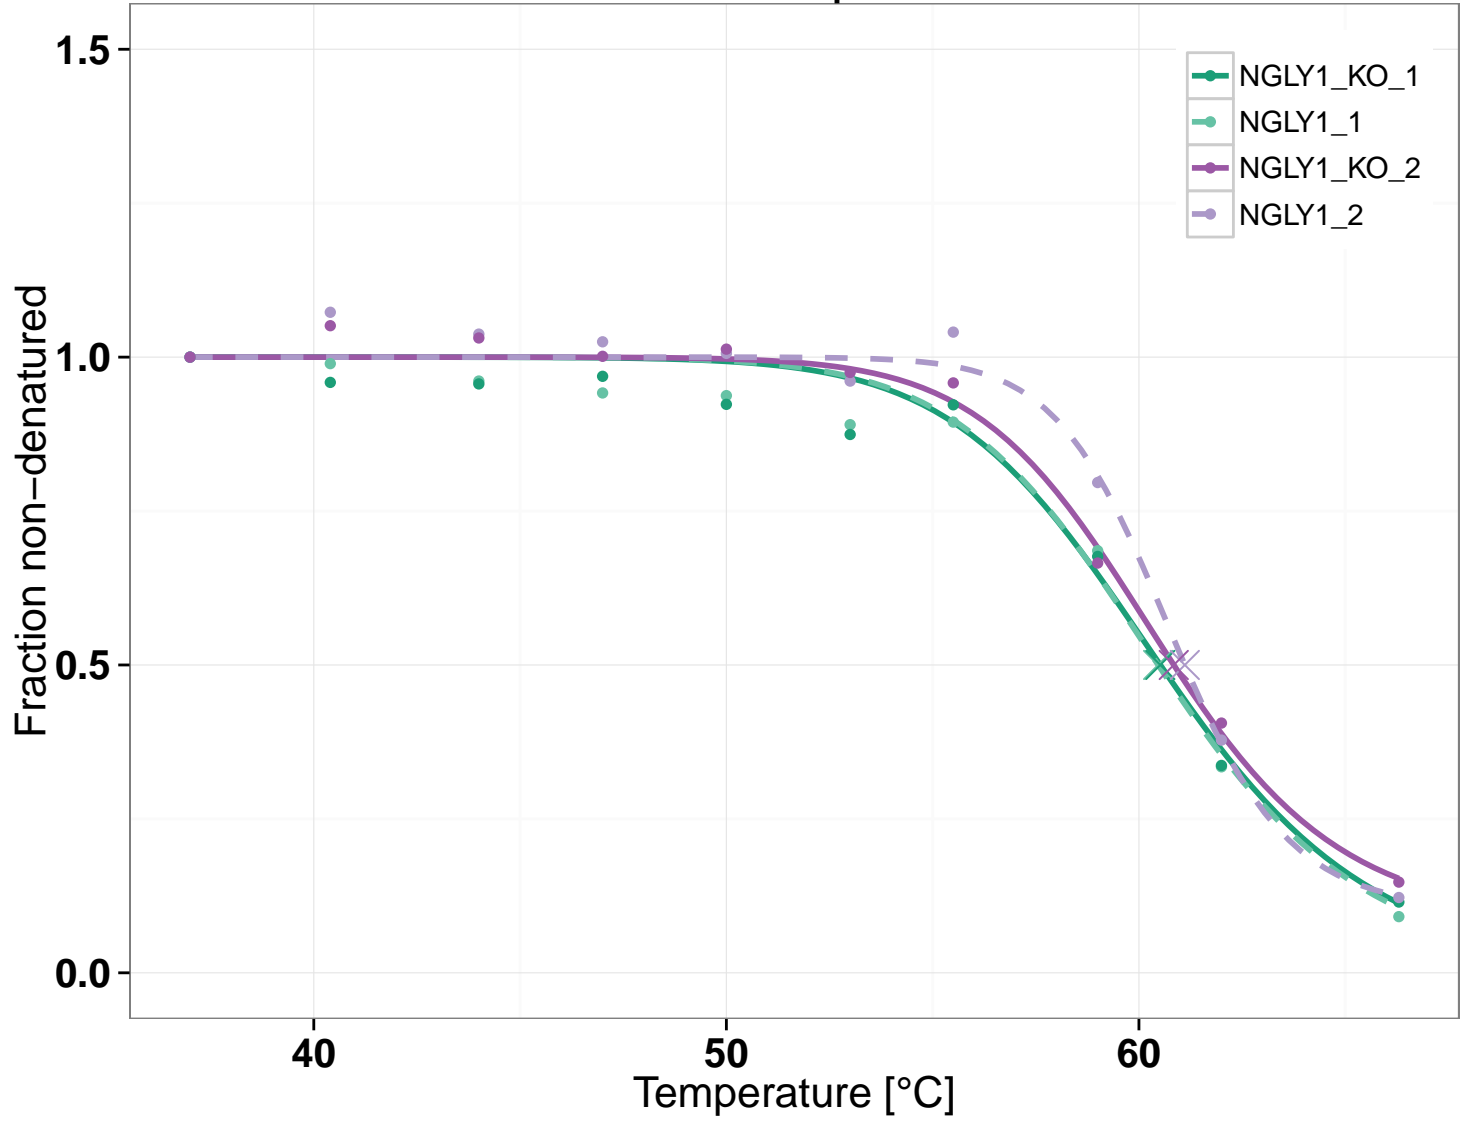

|            | meltPoint | slope  | plateau | R2   |
|------------|-----------|--------|---------|------|
| NGLY1_KO_1 | 60.52     | -0.098 | 0       | 0.98 |
| NGLY1_1    | 60.47     | -0.1   | 0       | 0.98 |
| NGLY1_KO_2 | 60.84     | -0.11  | 0.08    | 0.99 |
| NGLY1_2    | 61.11     | -0.16  | 0.1     | 0.99 |

Supplement: Supplementary file 626 [file 1]

IPI00031697.1|TMEM109

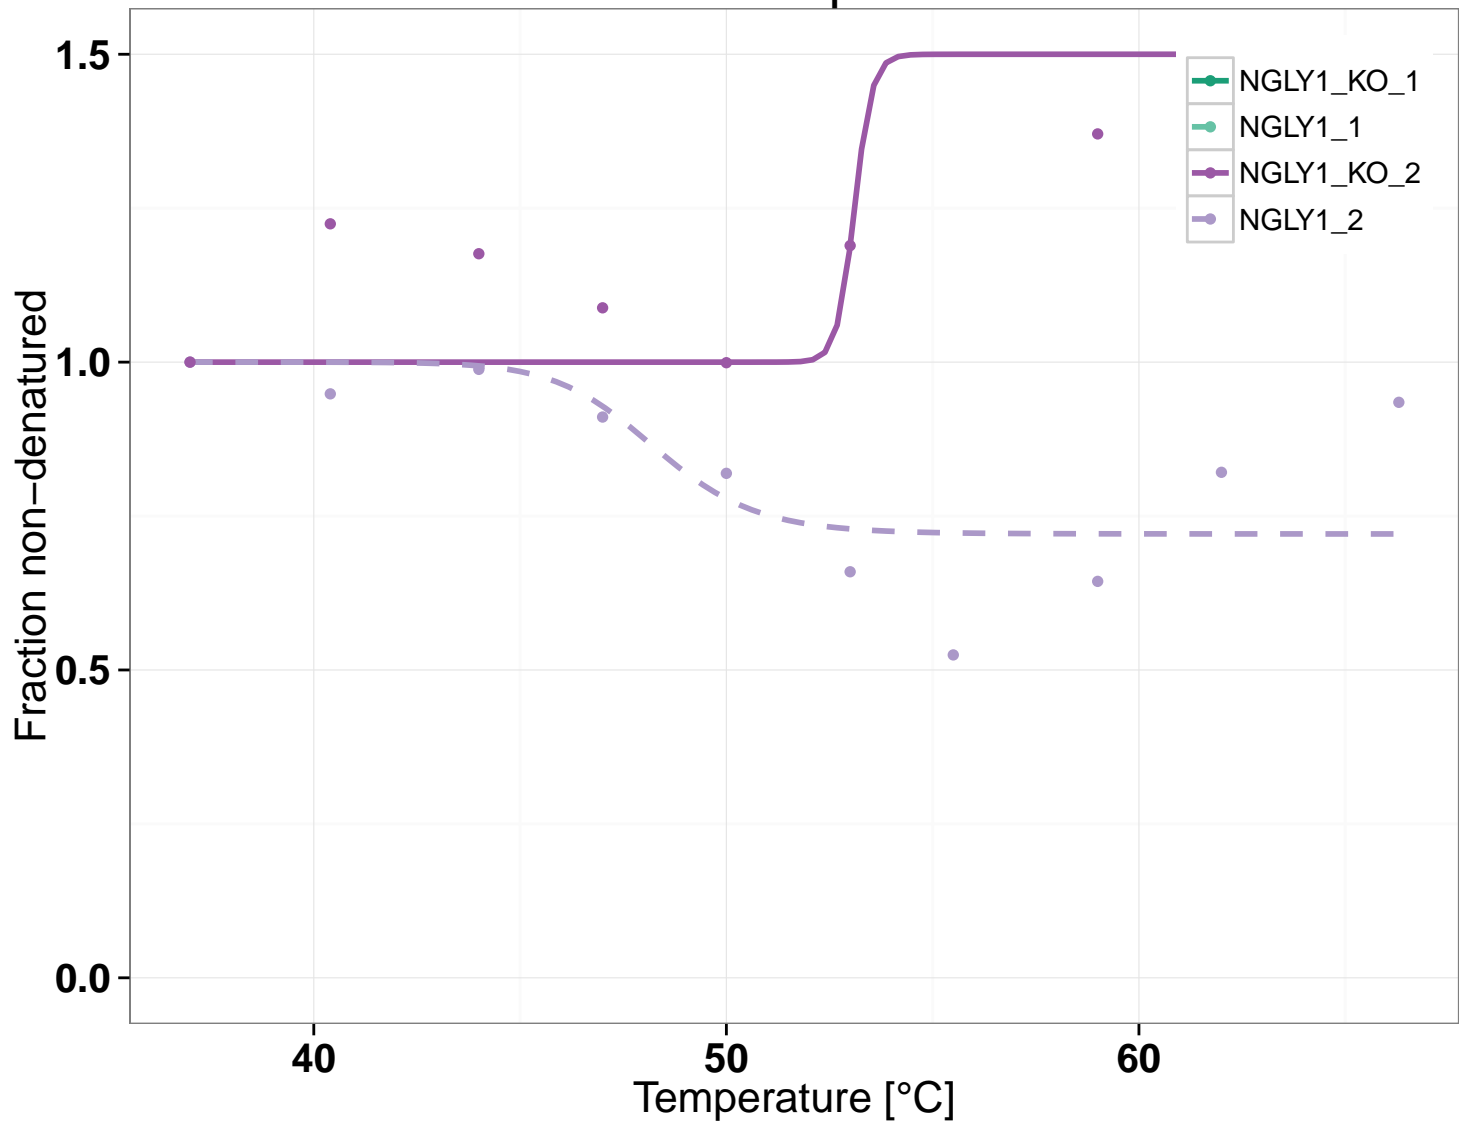

|            | meltPoint | slope  | plateau | R2   |
|------------|-----------|--------|---------|------|
| NGLY1_KO_1 | —         | —      | —       | —    |
| NGLY1_1    | —         | —      | —       | —    |
| NGLY1_KO_2 | —         | 0.59   | 1.5     | 0.24 |
| NGLY1_2    | —         | -0.057 | 0.72    | 0.54 |

Supplement: Supplementary file 627 [file 1]

# IPI00797771.1|C20ORF117

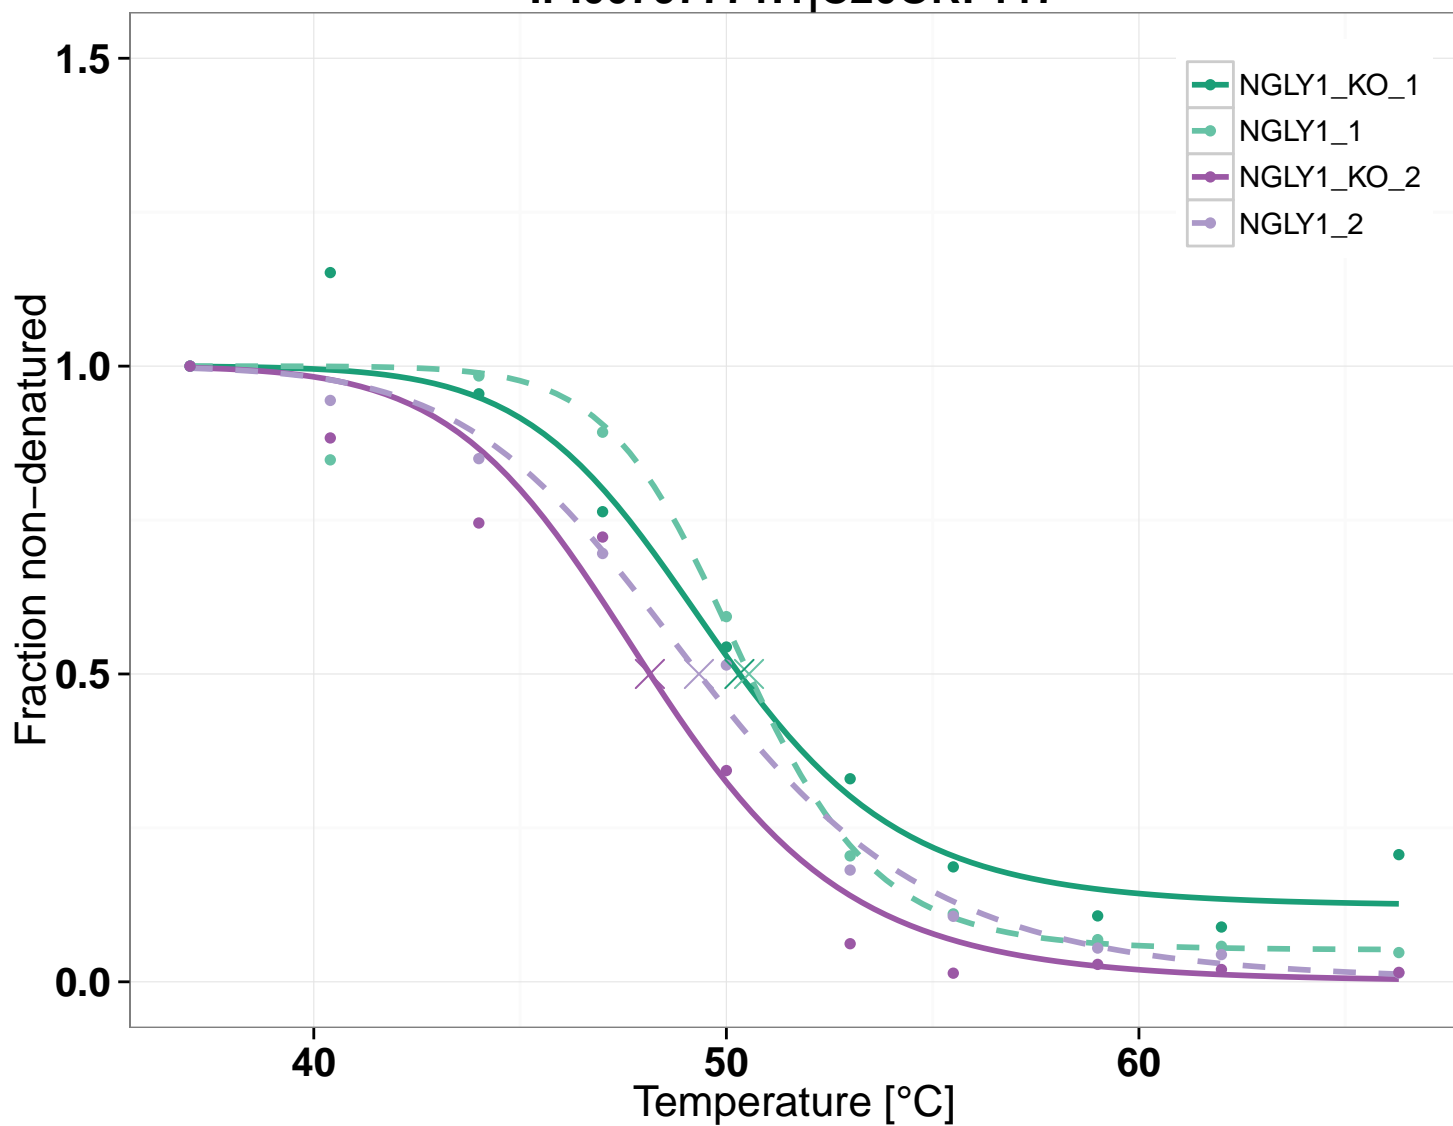

|            | meltPoint | slope  | plateau | R2   |
|------------|-----------|--------|---------|------|
| NGLY1_KO_1 | 50.32     | -0.096 | 0.12    | 0.97 |
| NGLY1_1    | 50.55     | -0.15  | 0.05    | 0.99 |
| NGLY1_KO_2 | 48.15     | -0.1   | 0       | 0.97 |
| NGLY1_2    | 49.34     | -0.088 | 0       | 0.99 |

Supplement: Supplementary file 628 [file 1]

IPI00478749.2|TXNDC11

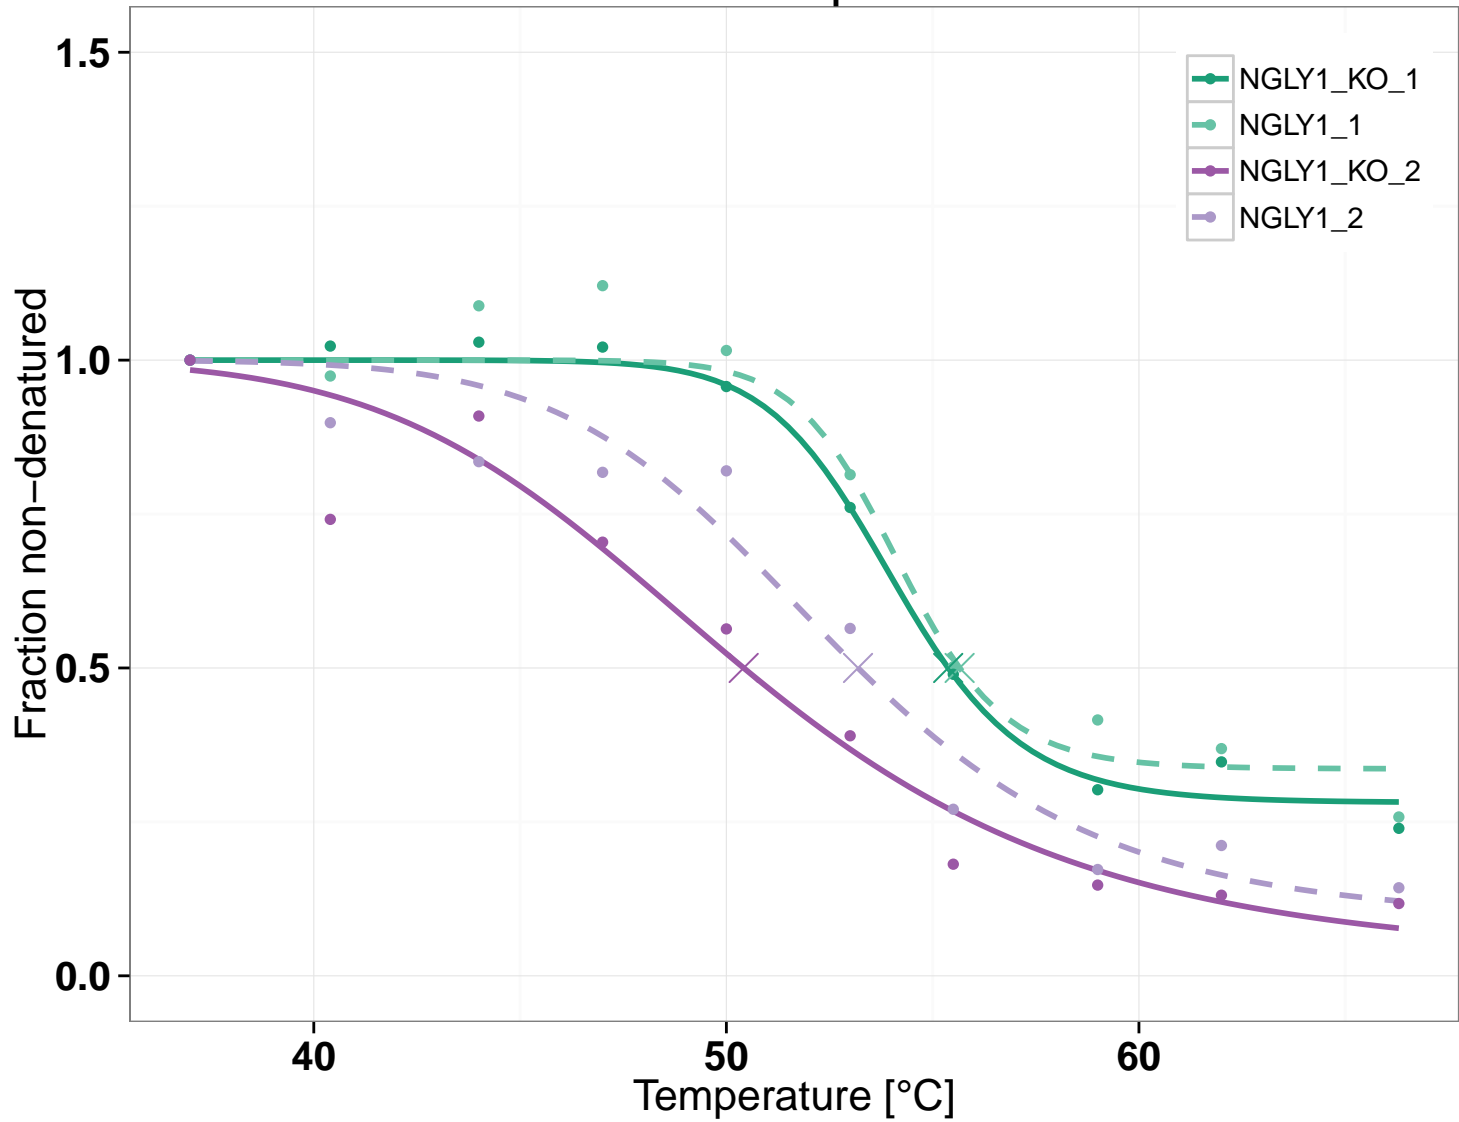

|            | meltPoint | slope  | plateau | R2   |
|------------|-----------|--------|---------|------|
| NGLY1_KO_1 | 55.38     | -0.12  | 0.28    | 0.99 |
| NGLY1_1    | 55.65     | -0.13  | 0.34    | 0.96 |
| NGLY1_KO_2 | 50.42     | -0.058 | 0.02    | 0.94 |
| NGLY1_2    | 53.19     | -0.069 | 0.09    | 0.95 |

Supplement: Supplementary file 629 [file 1]

IPI00167638.4|GTPBP10

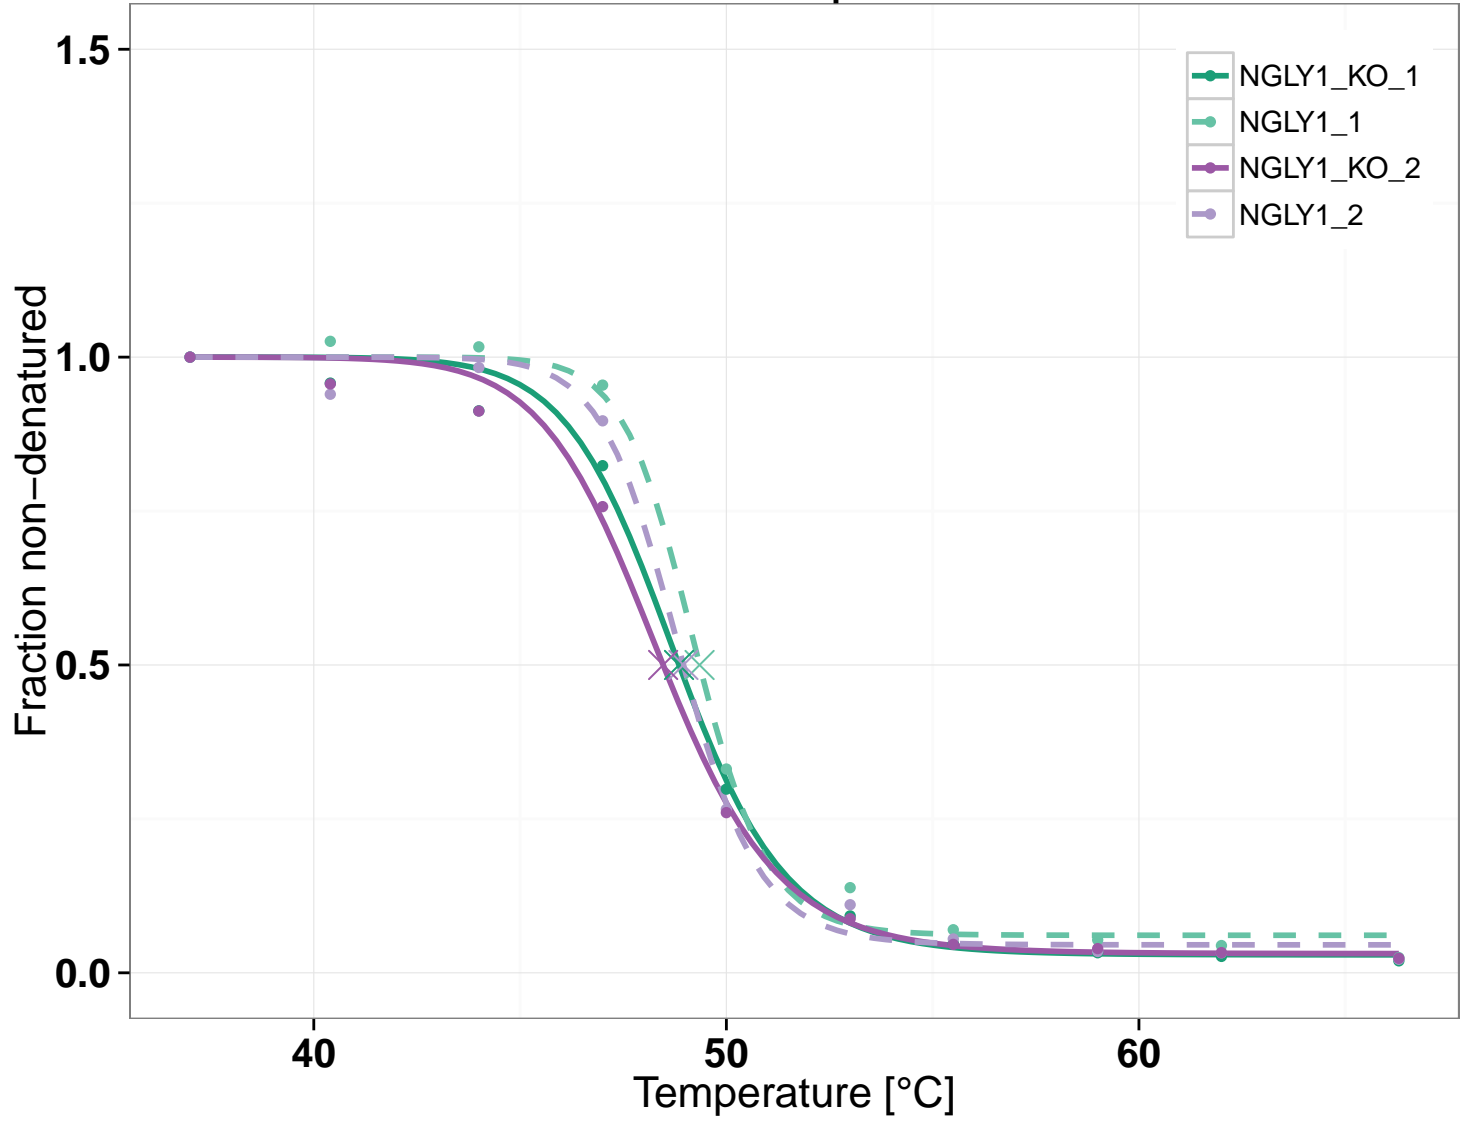

|            | meltPoint | slope | plateau | R2 |
|------------|-----------|-------|---------|----|
| NGLY1_KO_1 | 48.85     | -0.18 | 0.03    | 1  |
| NGLY1_1    | 49.35     | -0.27 | 0.06    | 1  |
| NGLY1_KO_2 | 48.47     | -0.17 | 0.03    | 1  |
| NGLY1_2    | 48.96     | -0.25 | 0.05    | 1  |

Supplement: Supplementary file 630 [file 1]

IPI00015285.7|PCYT2

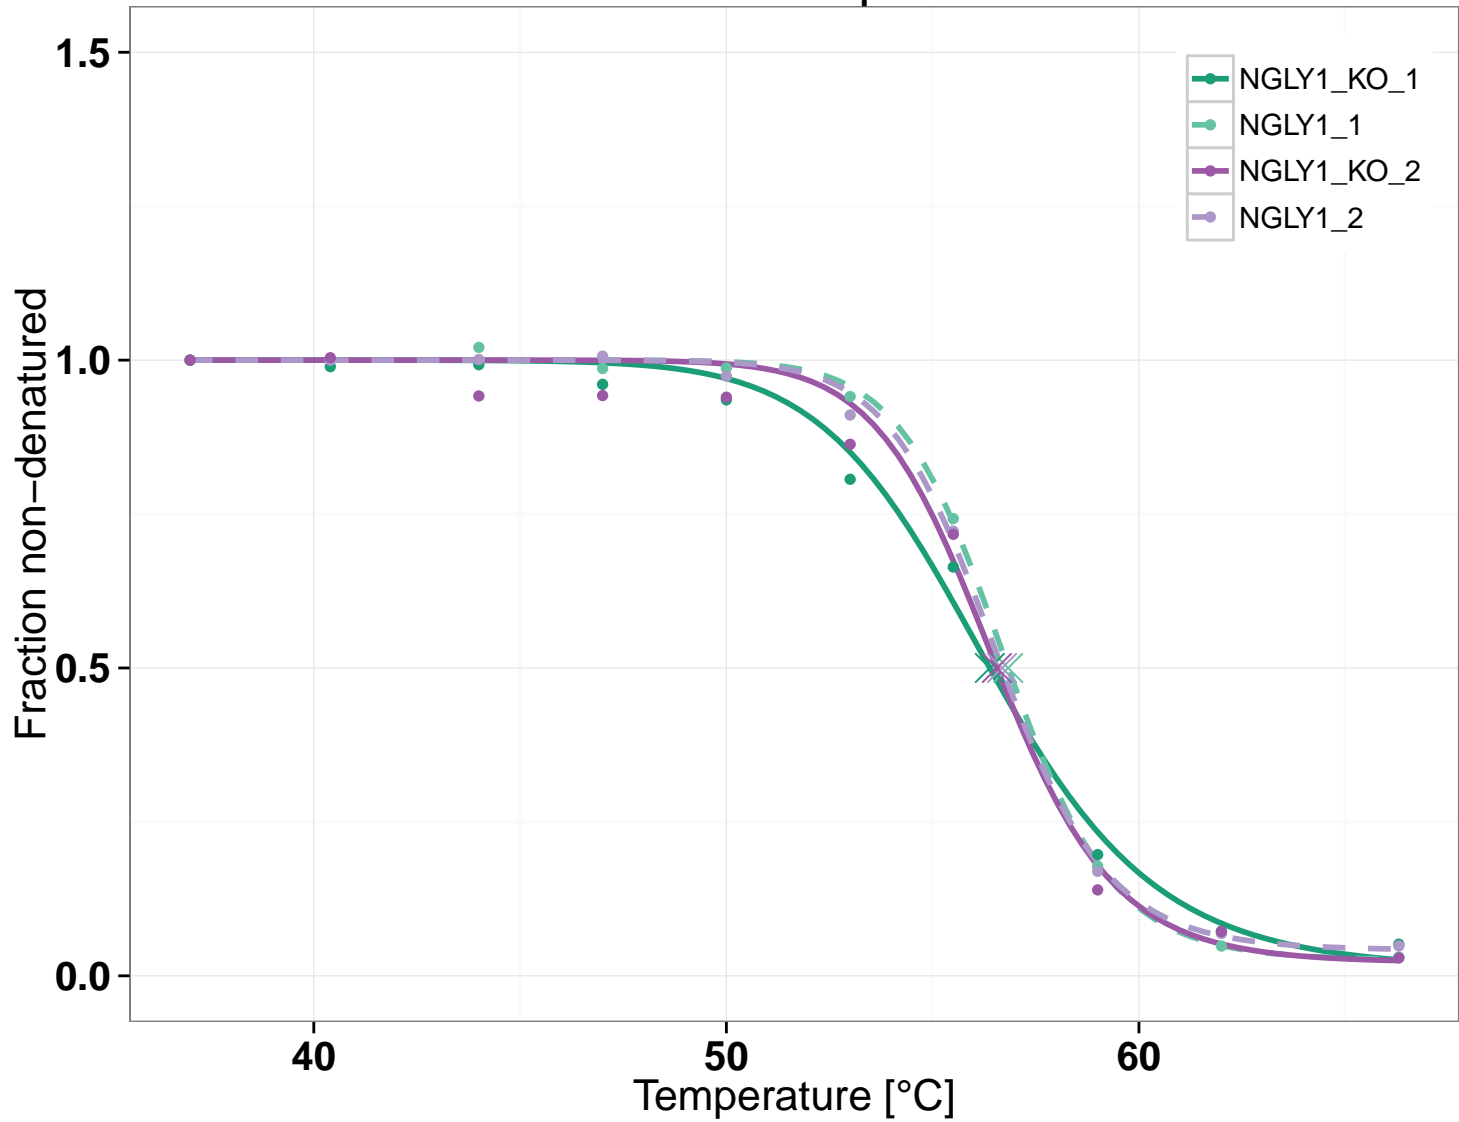

|            | meltPoint | slope | plateau | R2   |
|------------|-----------|-------|---------|------|
| NGLY1_KO_1 | 56.39     | -0.12 | 0.01    | 0.99 |
| NGLY1_1    | 56.83     | -0.19 | 0.03    | 1    |
| NGLY1_KO_2 | 56.56     | -0.17 | 0.02    | 0.99 |
| NGLY1_2    | 56.68     | -0.18 | 0.04    | 1    |

Supplement: Supplementary file 631 [file 1]

IPI00010420.2|SLC25A31

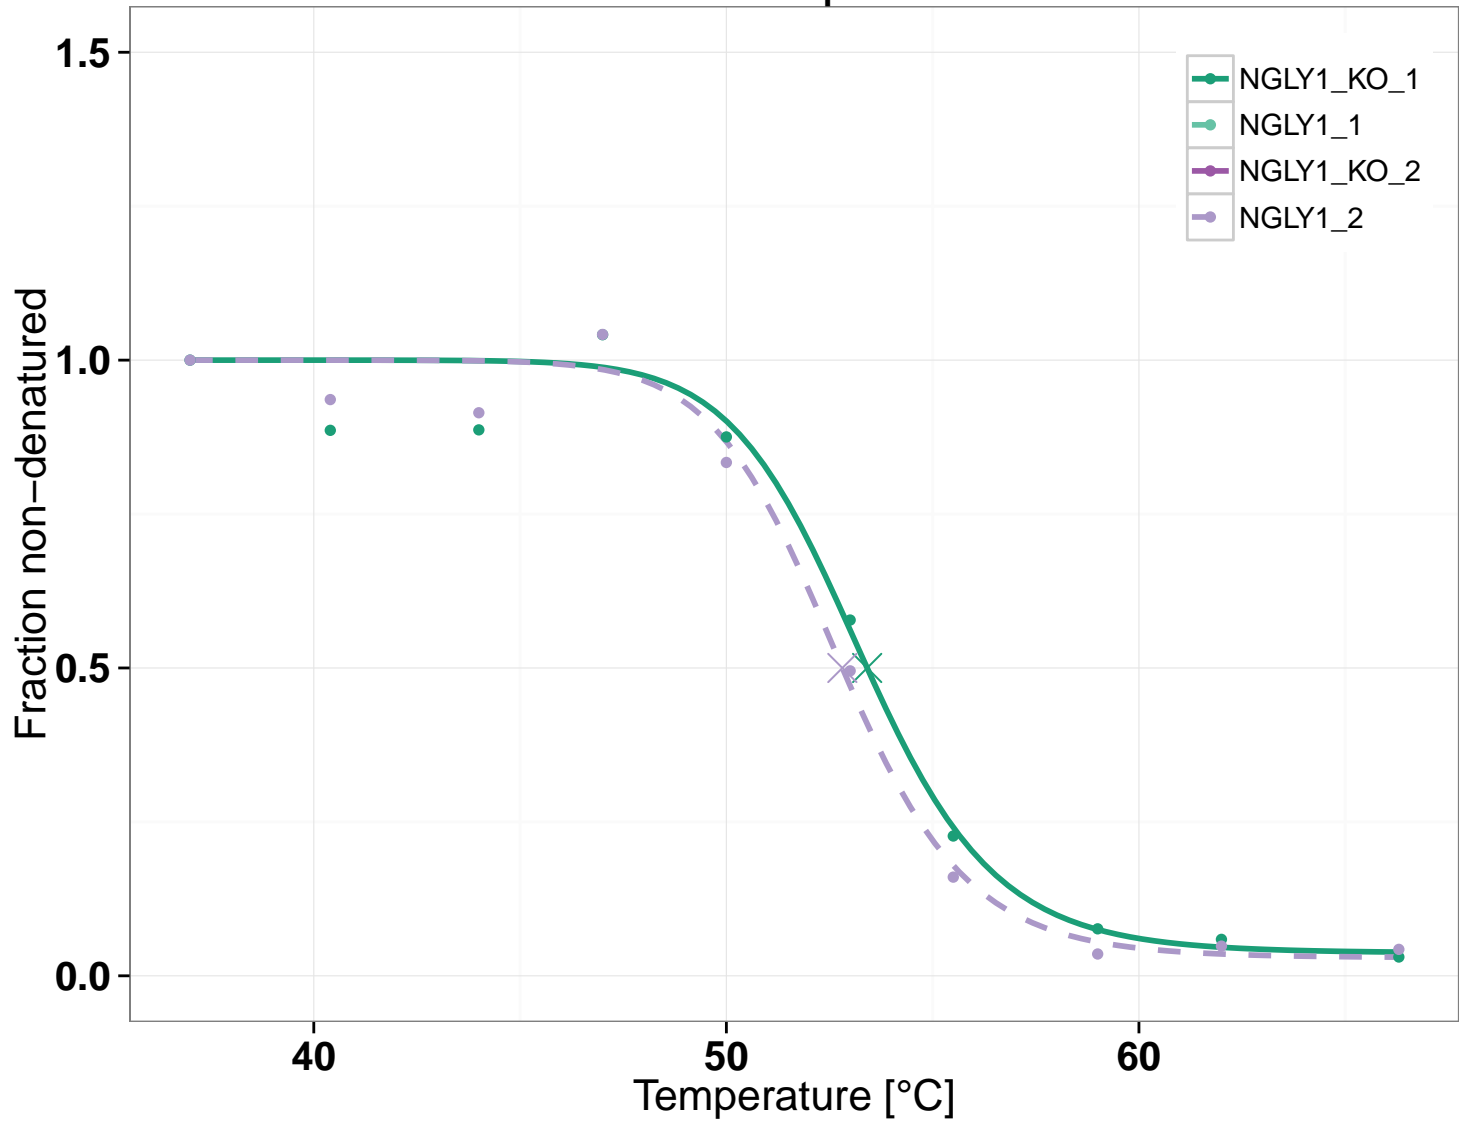

|            | meltPoint | slope | plateau | R2   |
|------------|-----------|-------|---------|------|
| NGLY1_KO_1 | 53.41     | -0.15 | 0.04    | 0.98 |
| NGLY1_1    | -         | -     | -       | -    |
| NGLY1_KO_2 | -         | -     | -       | -    |
| NGLY1_2    | 52.81     | -0.16 | 0.03    | 0.99 |

Supplement: Supplementary file 632 [file 1]

# IPI00100980.9|EHD2

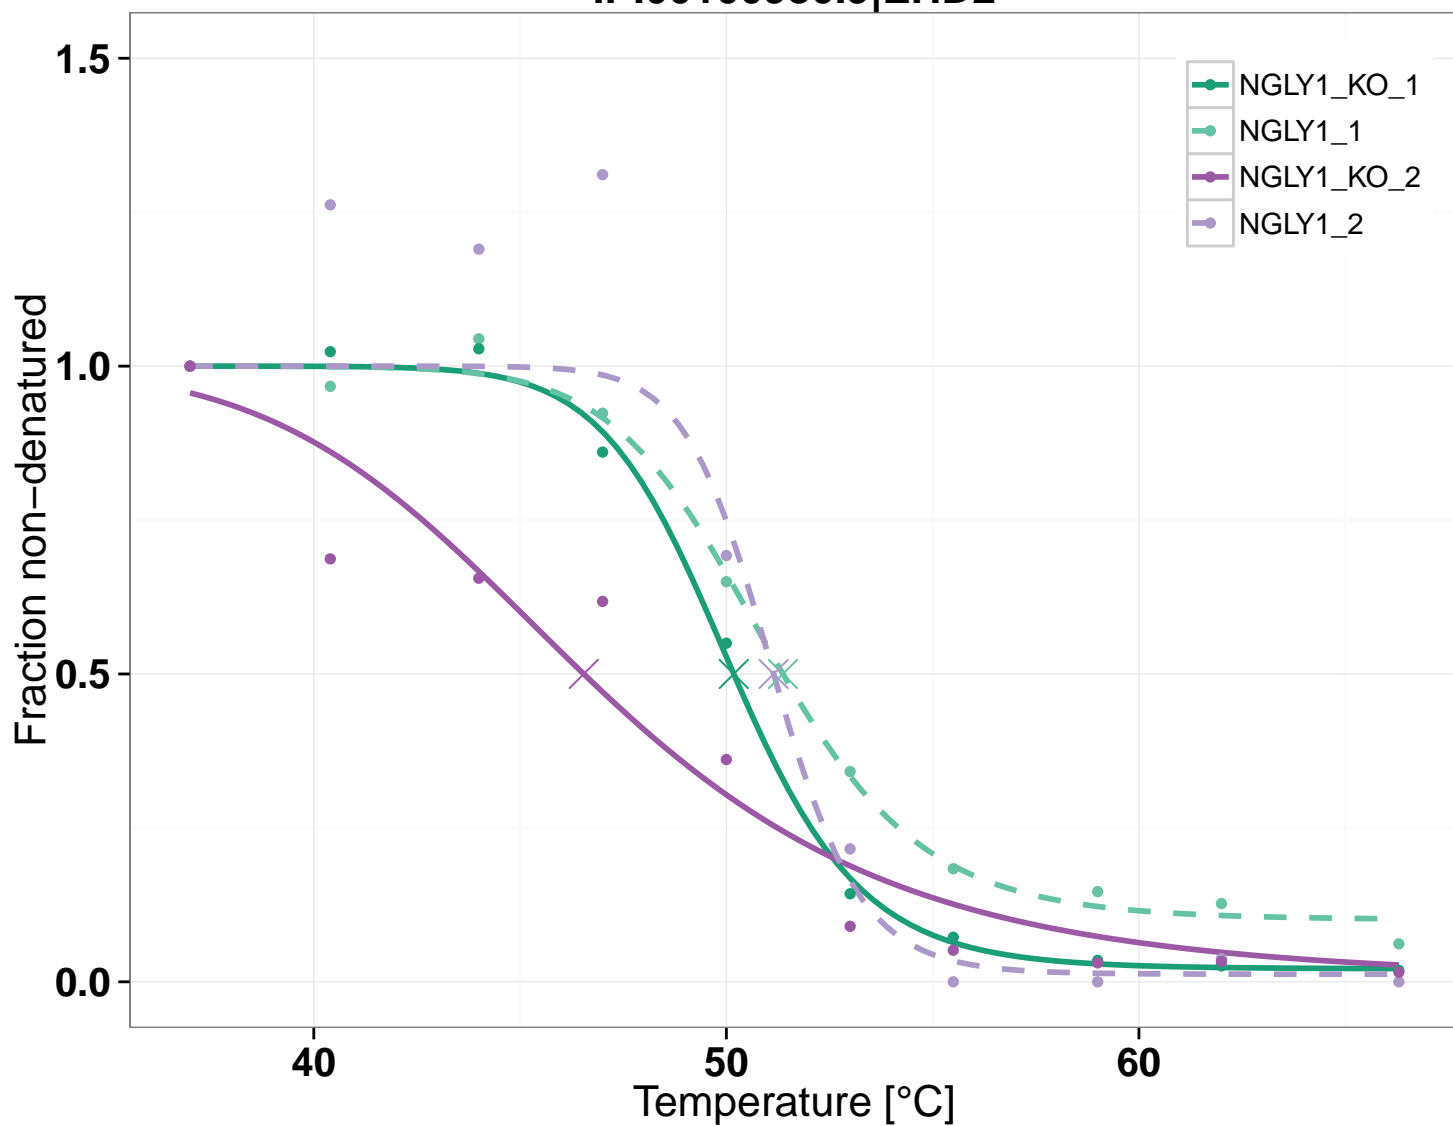

|            | meltPoint | slope  | plateau | R2   |
|------------|-----------|--------|---------|------|
| NGLY1_KO_1 | 50.18     | -0.16  | 0.02    | 1    |
| NGLY1_1    | 51.37     | -0.12  | 0.1     | 1    |
| NGLY1_KO_2 | 46.54     | -0.066 | 0       | 0.94 |
| NGLY1_2    | 51.15     | -0.23  | 0.01    | 0.93 |

Supplement: Supplementary file 633 [file 1]

IPI00787649.1|C7ORF28A

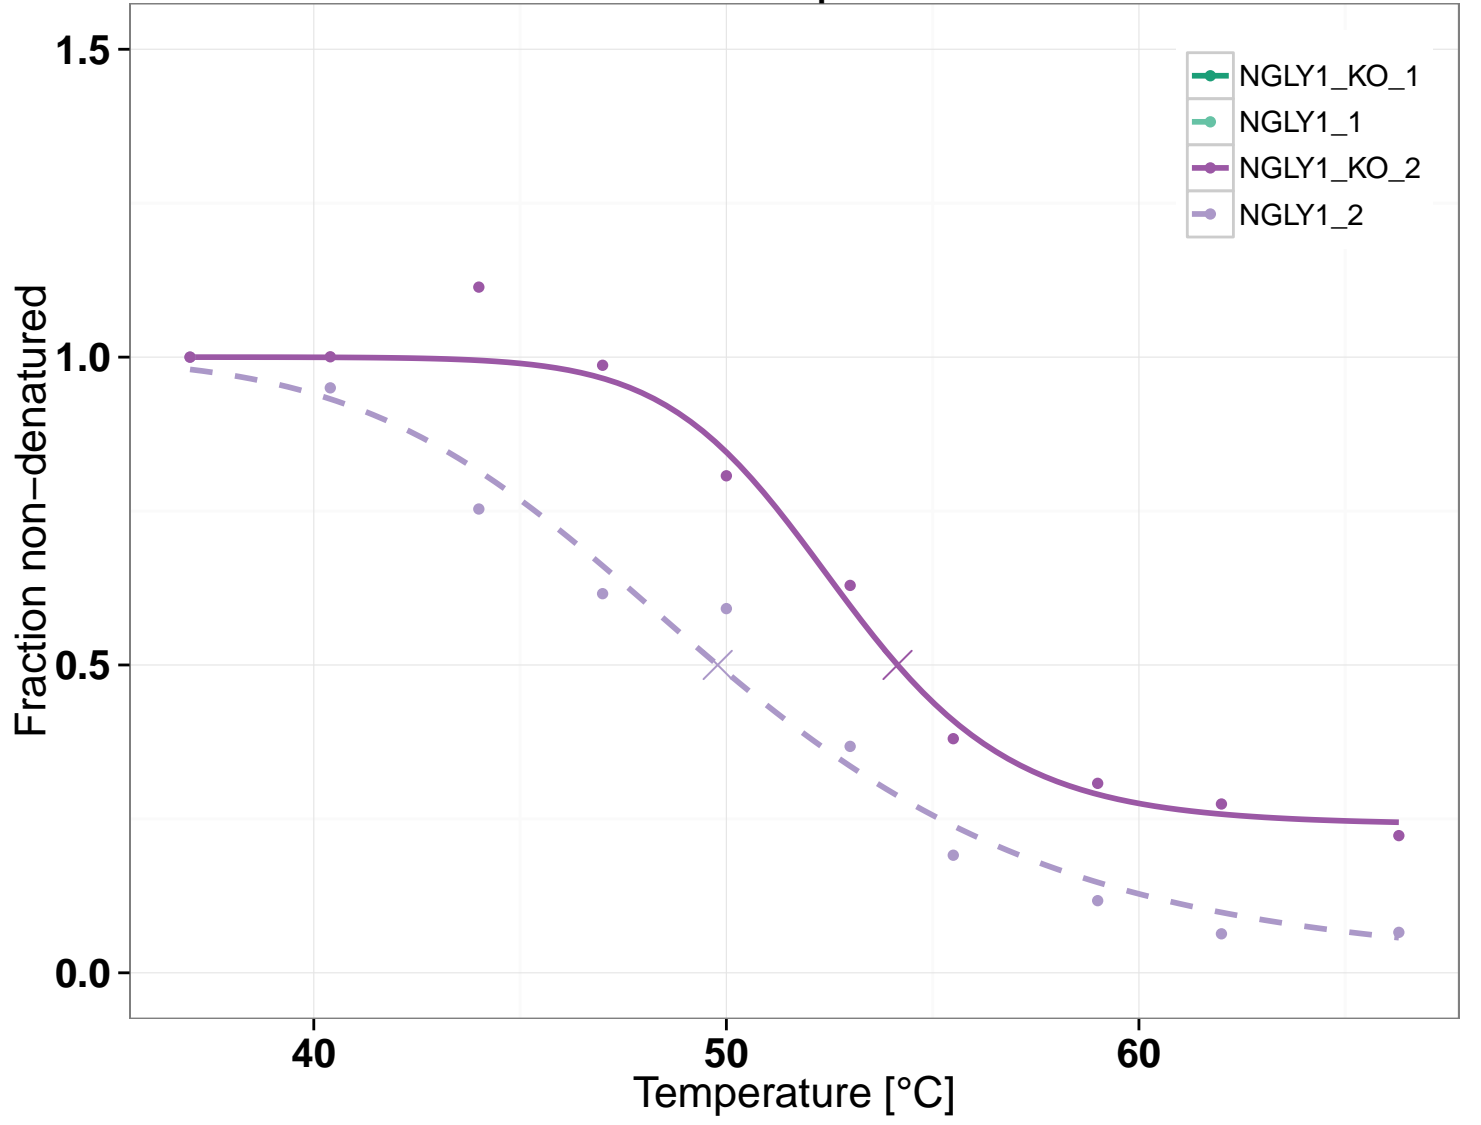

|            | meltPoint | slope  | plateau | R2   |
|------------|-----------|--------|---------|------|
| NGLY1_KO_1 | -         | -      | -       | -    |
| NGLY1_1    | -         | -      | -       | -    |
| NGLY1_KO_2 | 54.15     | -0.091 | 0.24    | 0.98 |
| NGLY1_2    | 49.79     | -0.058 | 0       | 0.98 |

Supplement: Supplementary file 634 [file 1]

# IPI00007146.3|GINS2

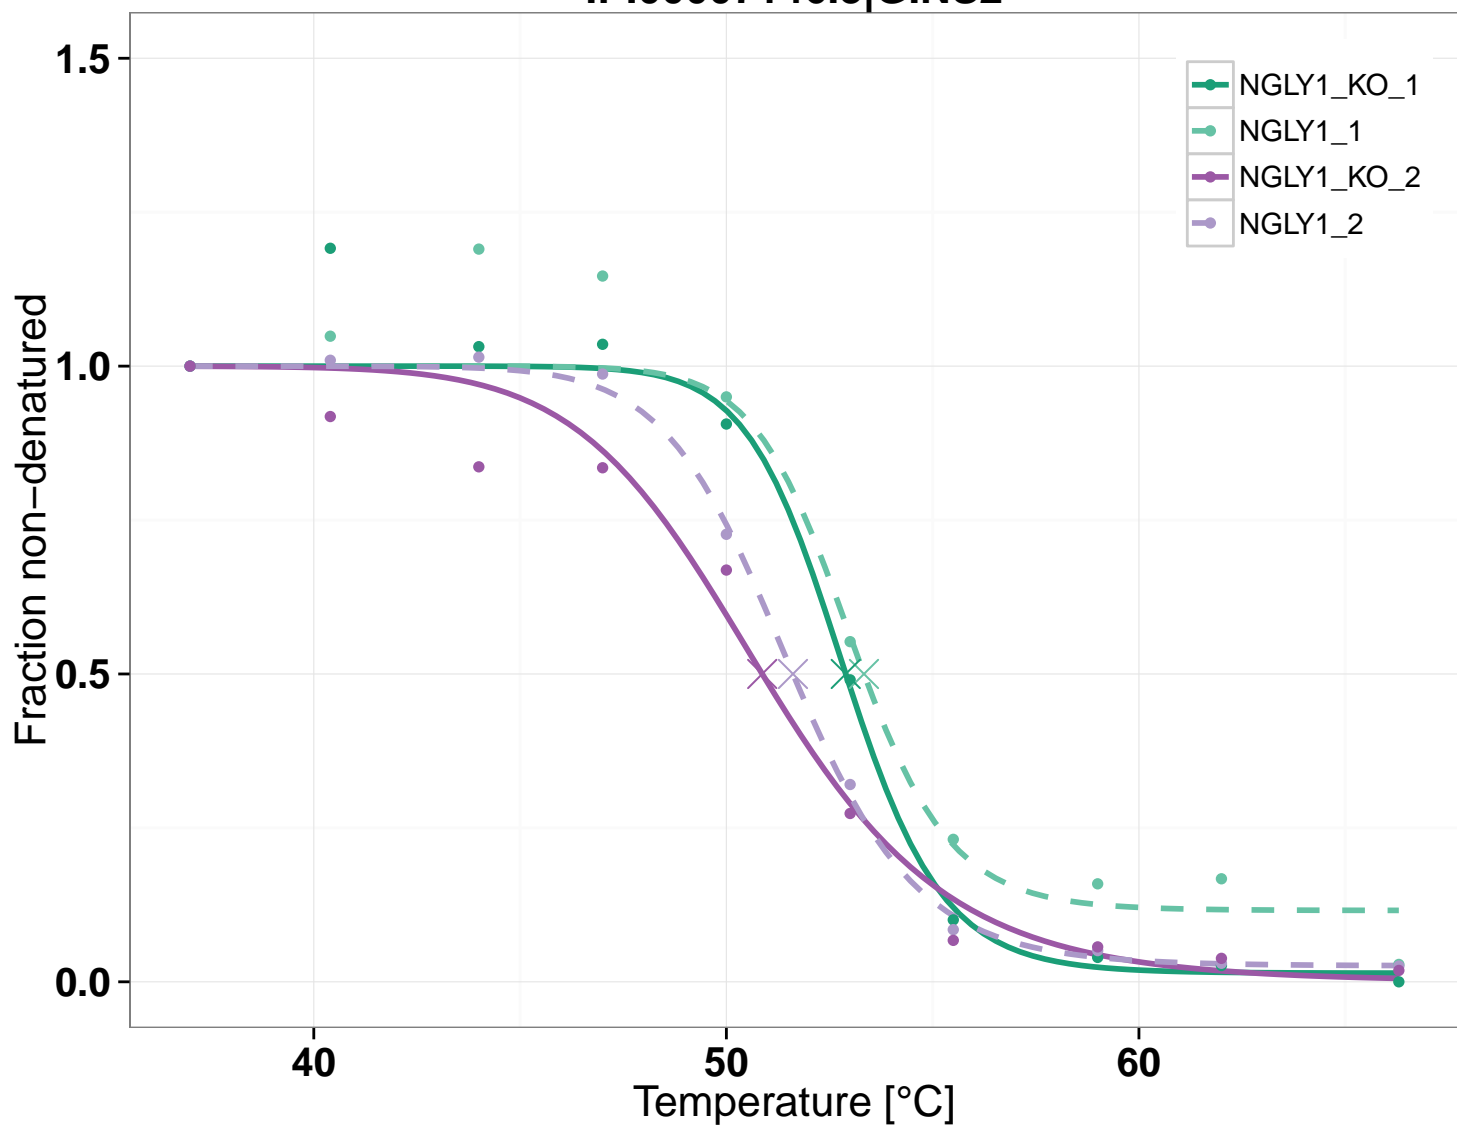

|            | meltPoint | slope | plateau | R2   |
|------------|-----------|-------|---------|------|
| NGLY1_KO_1 | 52.89     | -0.21 | 0.01    | 0.98 |
| NGLY1_1    | 53.34     | -0.19 | 0.12    | 0.96 |
| NGLY1_KO_2 | 50.87     | -0.11 | 0       | 0.98 |
| NGLY1_2    | 51.61     | -0.16 | 0.03    | 1    |

Supplement: Supplementary file 635 [file 1]

# IPI00019459.1|MAP3K7IP1

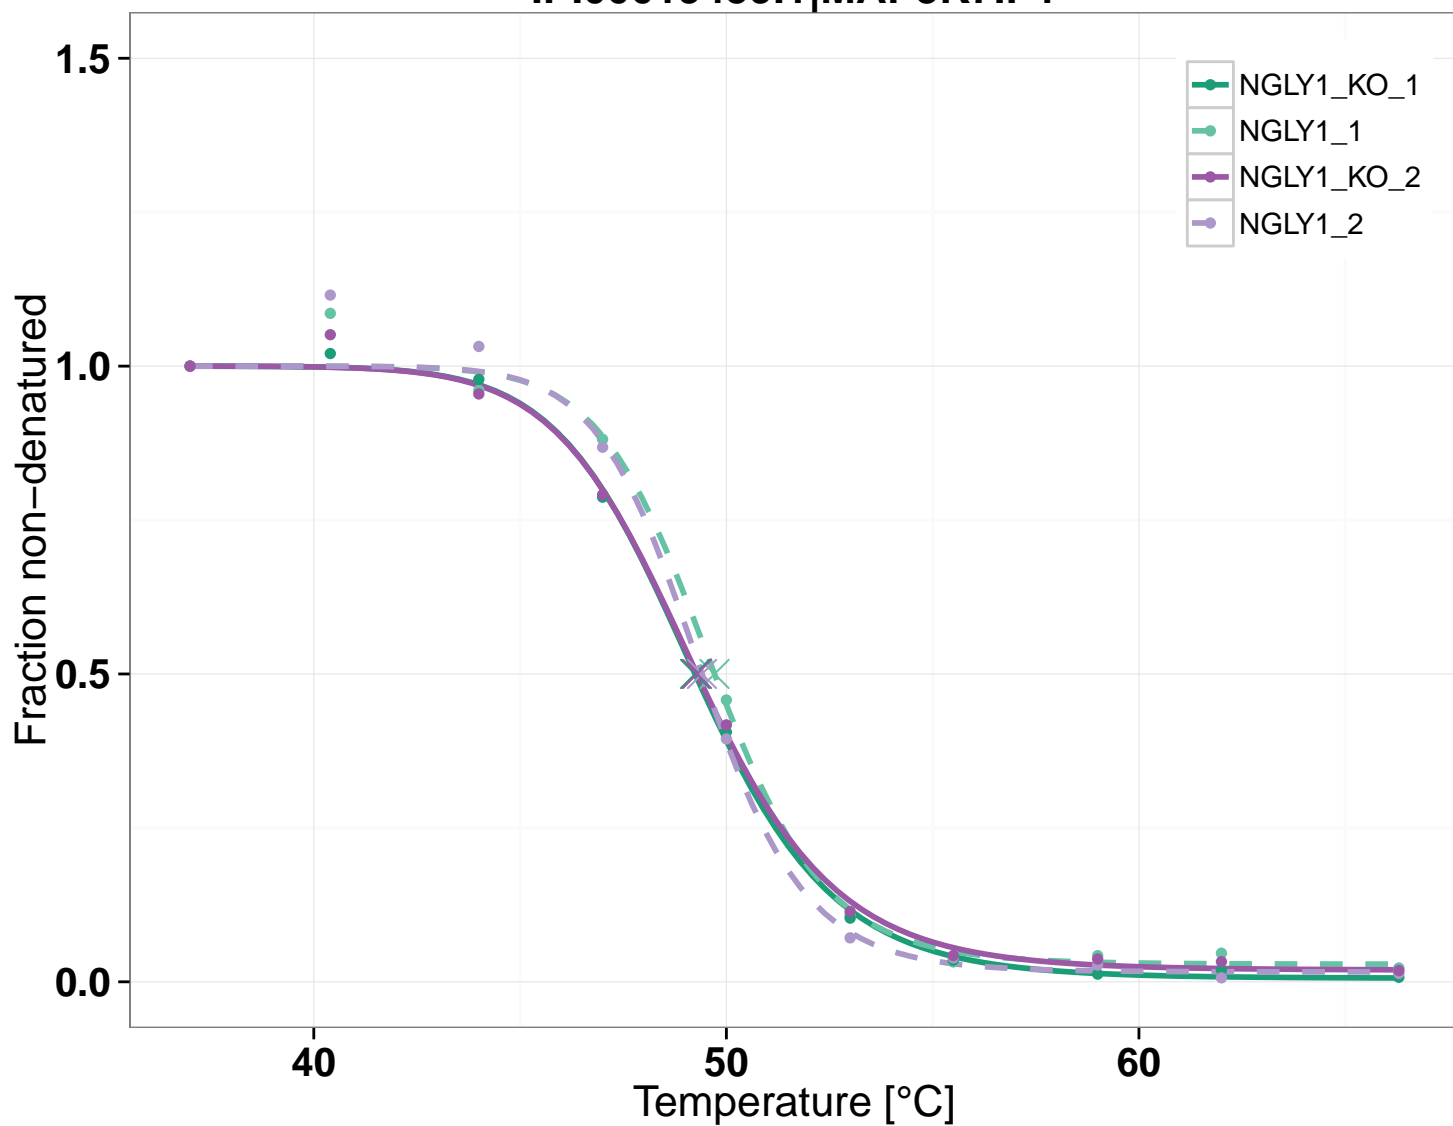

|            | meltPoint | slope | plateau | R2   |
|------------|-----------|-------|---------|------|
| NGLY1_KO_1 | 49.24     | -0.15 | 0.01    | 1    |
| NGLY1_1    | 49.71     | -0.18 | 0.03    | 1    |
| NGLY1_KO_2 | 49.29     | -0.14 | 0.02    | 1    |
| NGLY1_2    | 49.41     | -0.19 | 0.02    | 0.99 |

Supplement: Supplementary file 636 [file 1]

# IPI00026216.4|NPEPPS

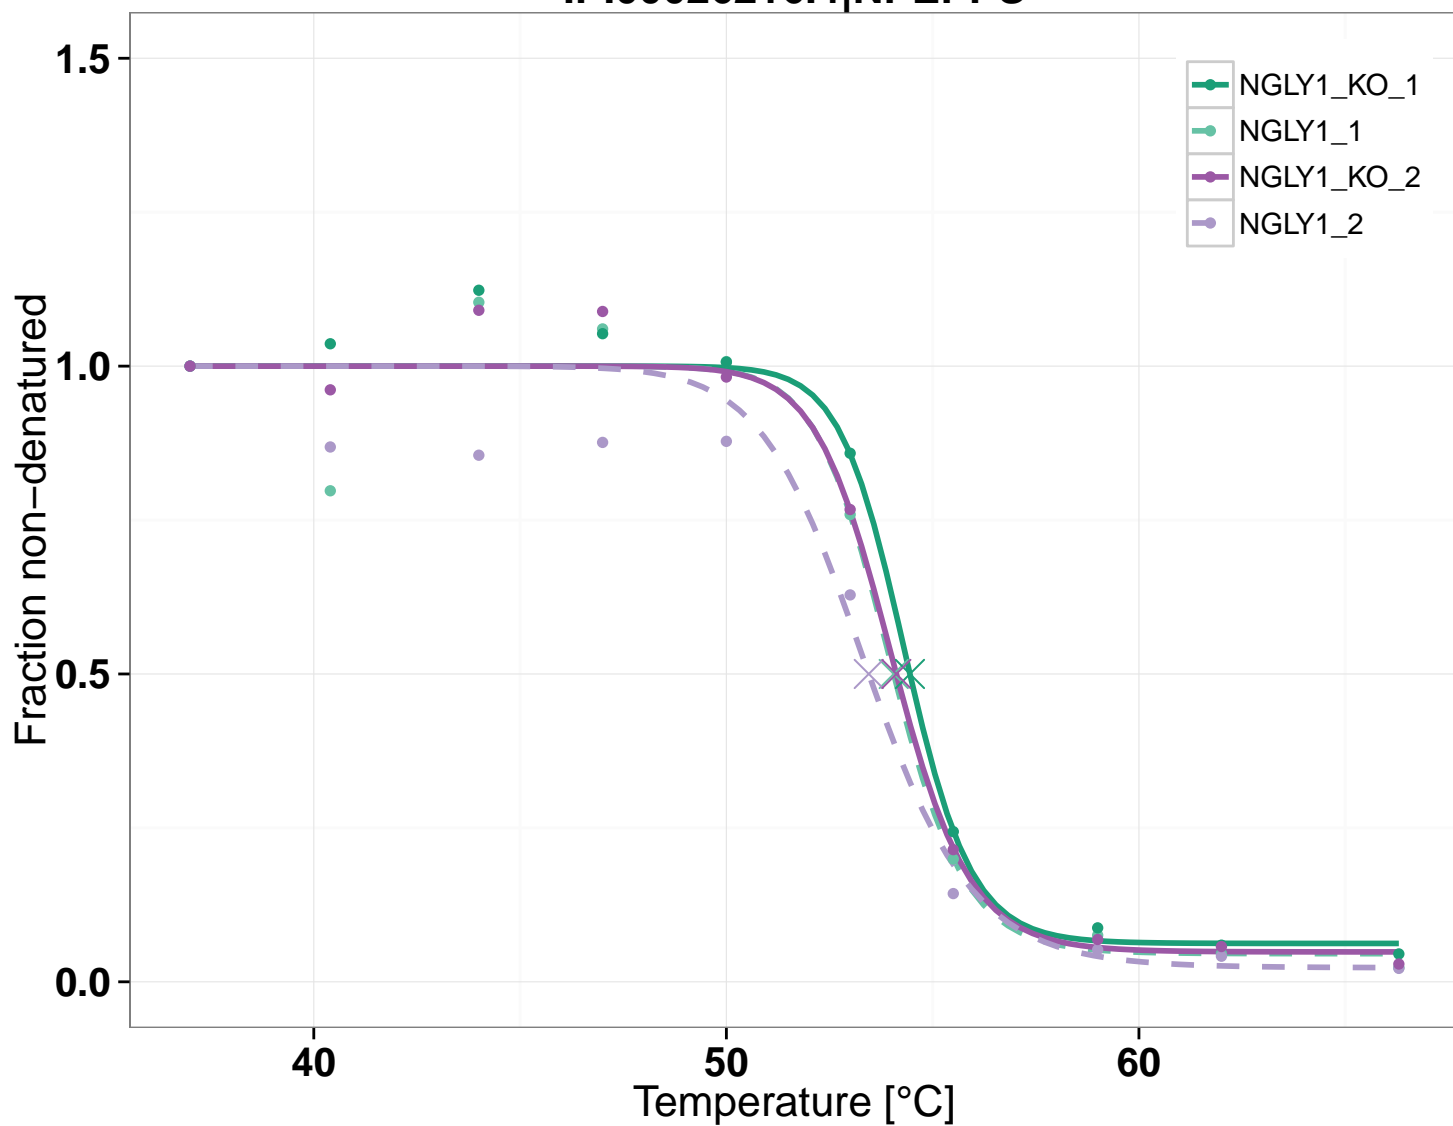

|            | meltPoint | slope | plateau | R2   |
|------------|-----------|-------|---------|------|
| NGLY1_KO_1 | 54.45     | -0.29 | 0.06    | 0.99 |
| NGLY1_1    | 54.06     | -0.26 | 0.05    | 0.97 |
| NGLY1_KO_2 | 54.12     | -0.26 | 0.05    | 0.99 |
| NGLY1_2    | 53.45     | -0.19 | 0.02    | 0.96 |

Supplement: Supplementary file 637 [file 1]

IPI00217375.3|ZBTB8OS

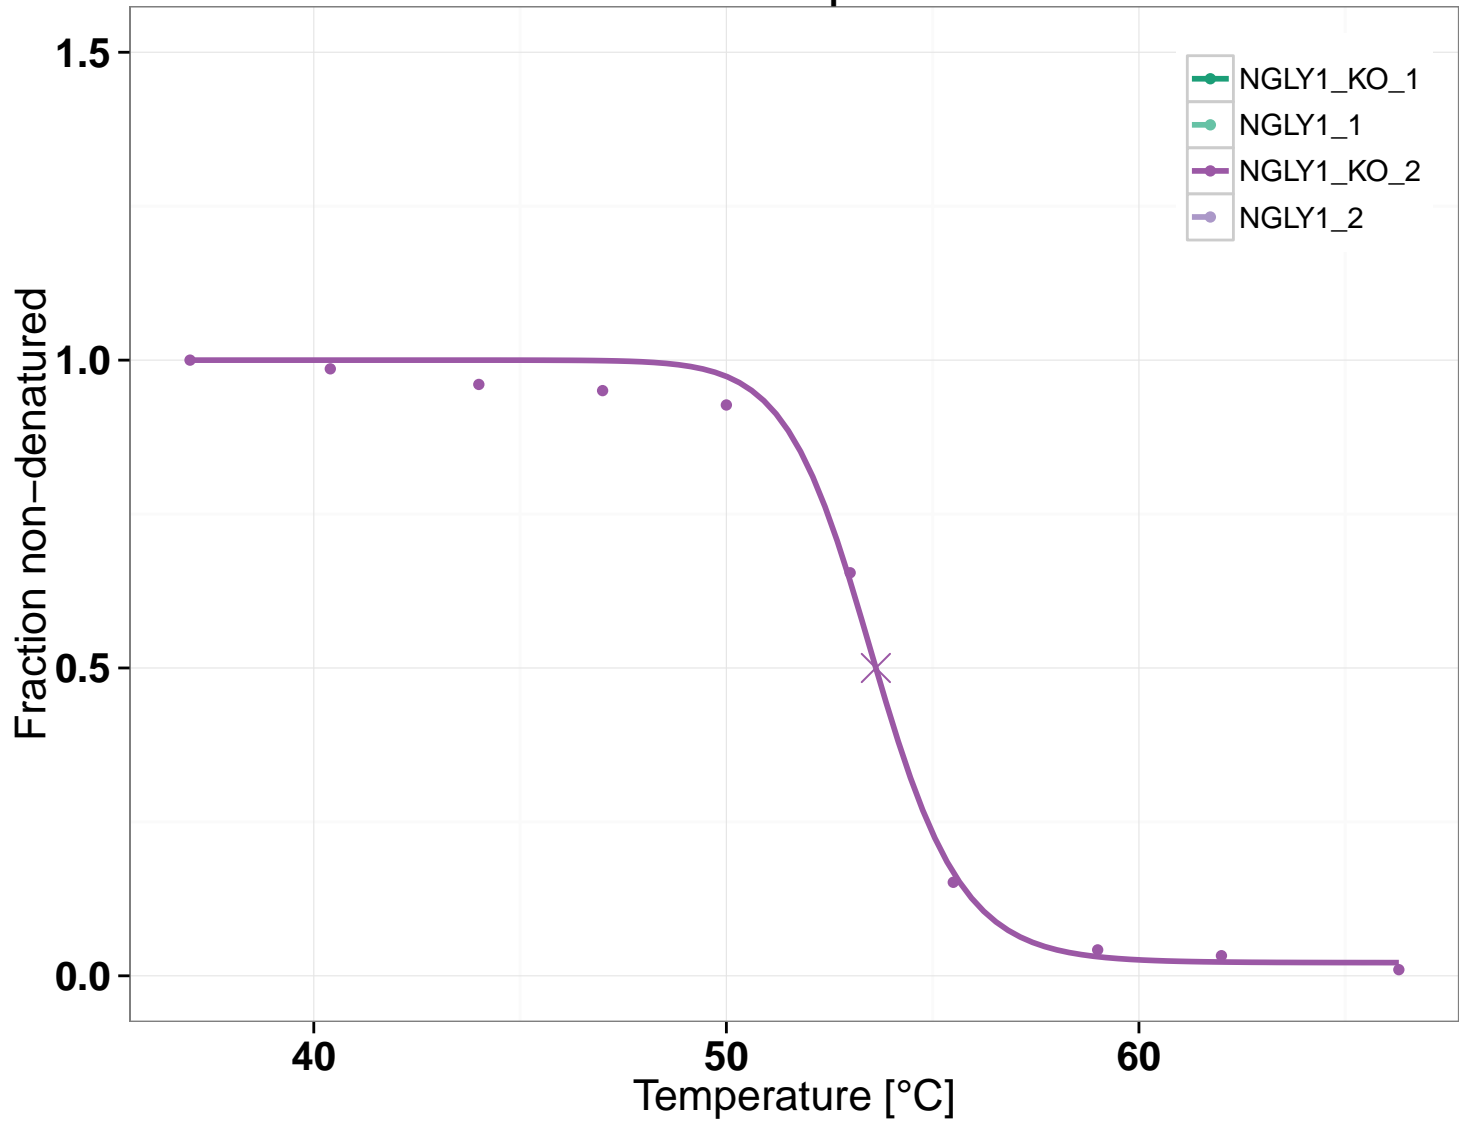

|            | meltPoint | slope | plateau | R2 |
|------------|-----------|-------|---------|----|
| NGLY1_KO_1 | -         | -     | -       | -  |
| NGLY1_1    | -         | -     | -       | -  |
| NGLY1_KO_2 | 53.62     | -0.23 | 0.02    | 1  |
| NGLY1_2    | -         | -     | -       | -  |

Supplement: Supplementary file 638 [file 1]

IPI00384734.1|BTN3A2

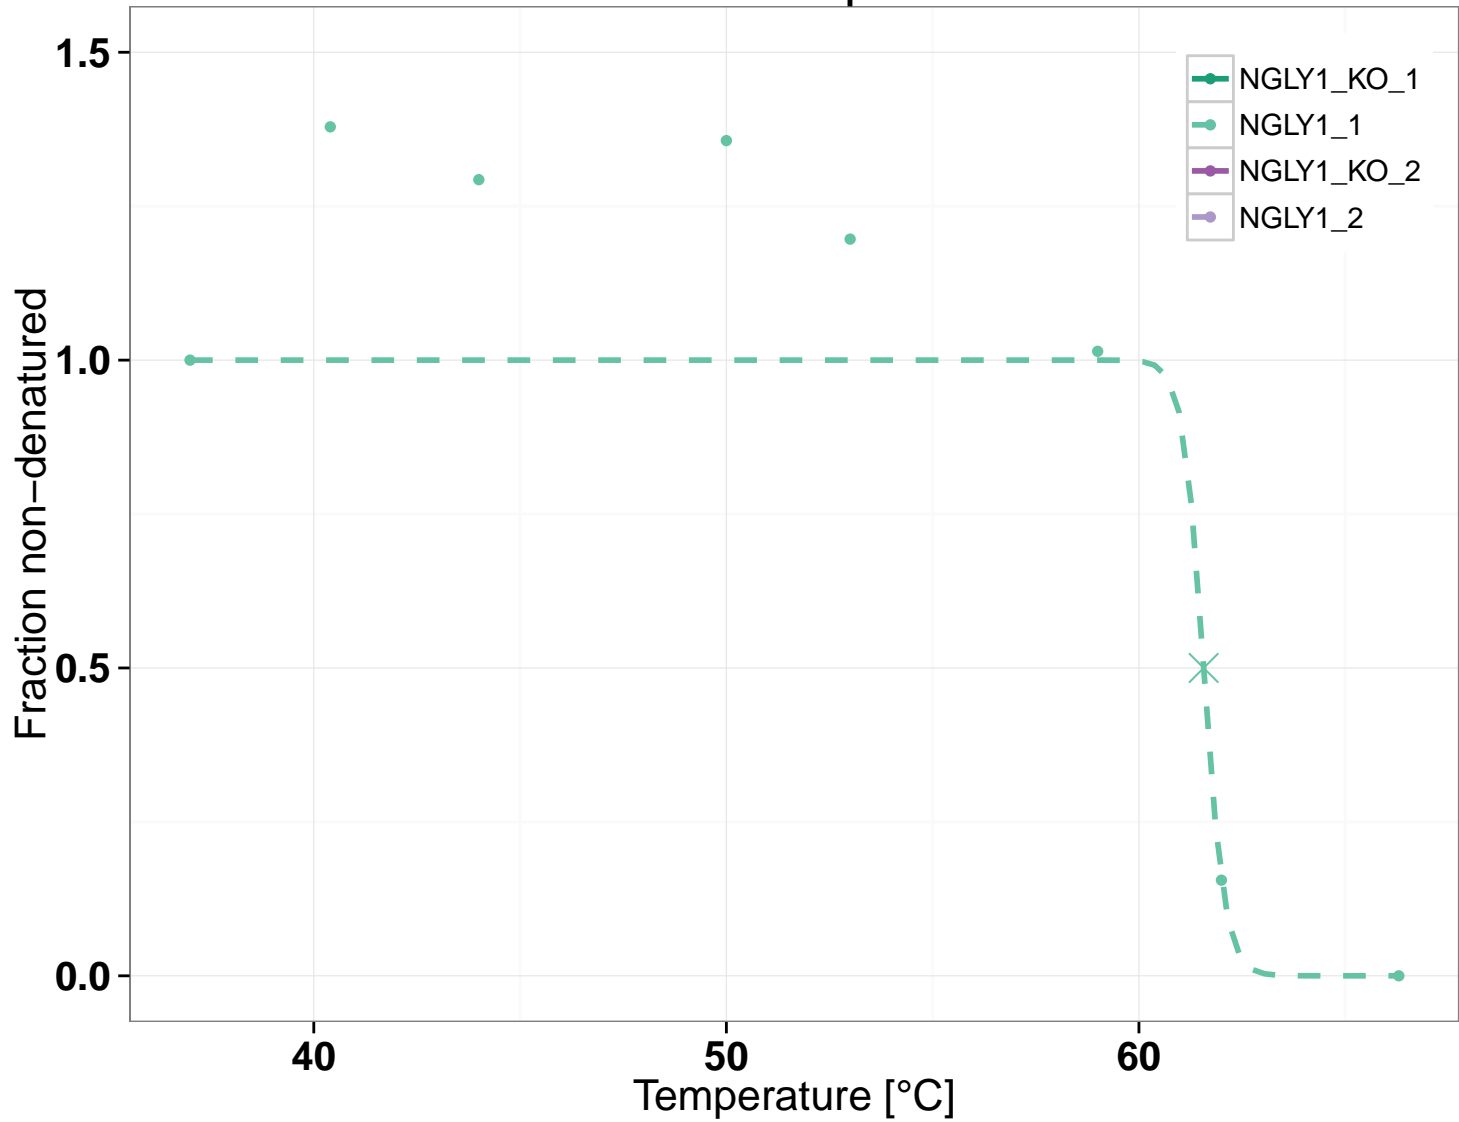

|            | meltPoint | slope | plateau | R2   |
|------------|-----------|-------|---------|------|
| NGLY1_KO_1 | -         | -     | -       | -    |
| NGLY1_1    | 61.57     | -0.99 | 0       | 0.29 |
| NGLY1_KO_2 | -         | -     | -       | -    |
| NGLY1_2    | -         | -     | -       | -    |

Supplement: Supplementary file 639 [file 1]

IPI00103335.1|GRIK5

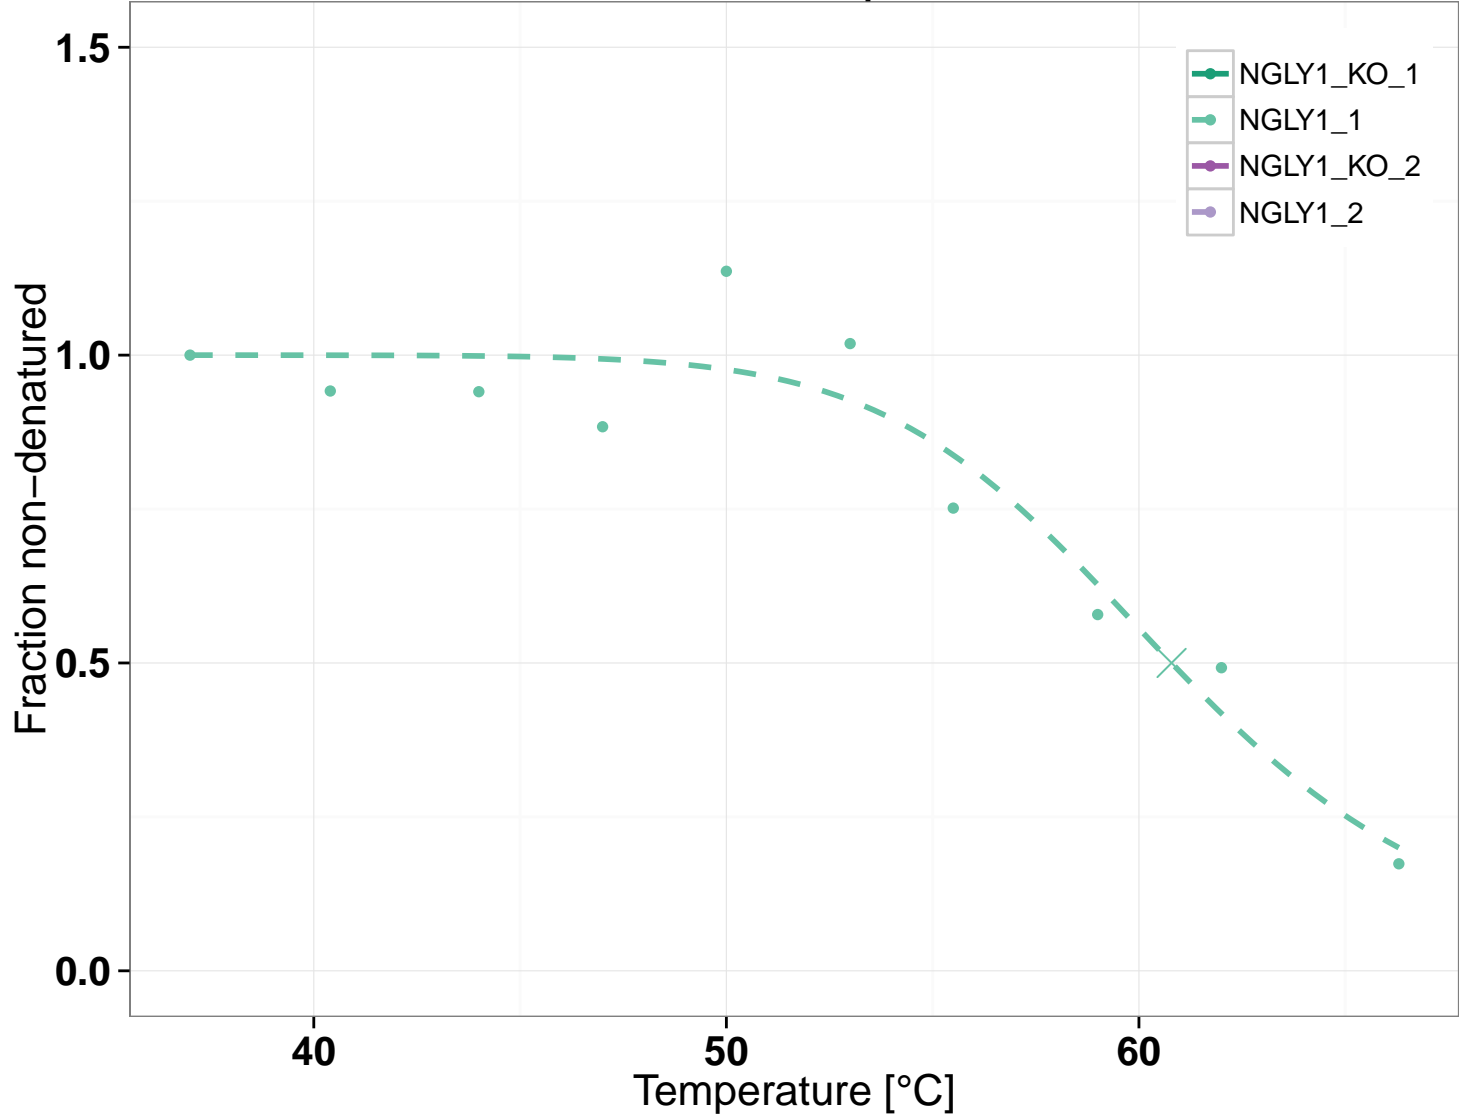

|            | meltPoint | slope  | plateau | R2   |
|------------|-----------|--------|---------|------|
| NGLY1_KO_1 | -         | -      | -       | -    |
| NGLY1_1    | 60.79     | -0.071 | 0.02    | 0.91 |
| NGLY1_KO_2 | -         | -      | -       | -    |
| NGLY1_2    | -         | -      | -       | -    |

Supplement: Supplementary file 640 [file 1]

IPI00293735.2|IKBKAP

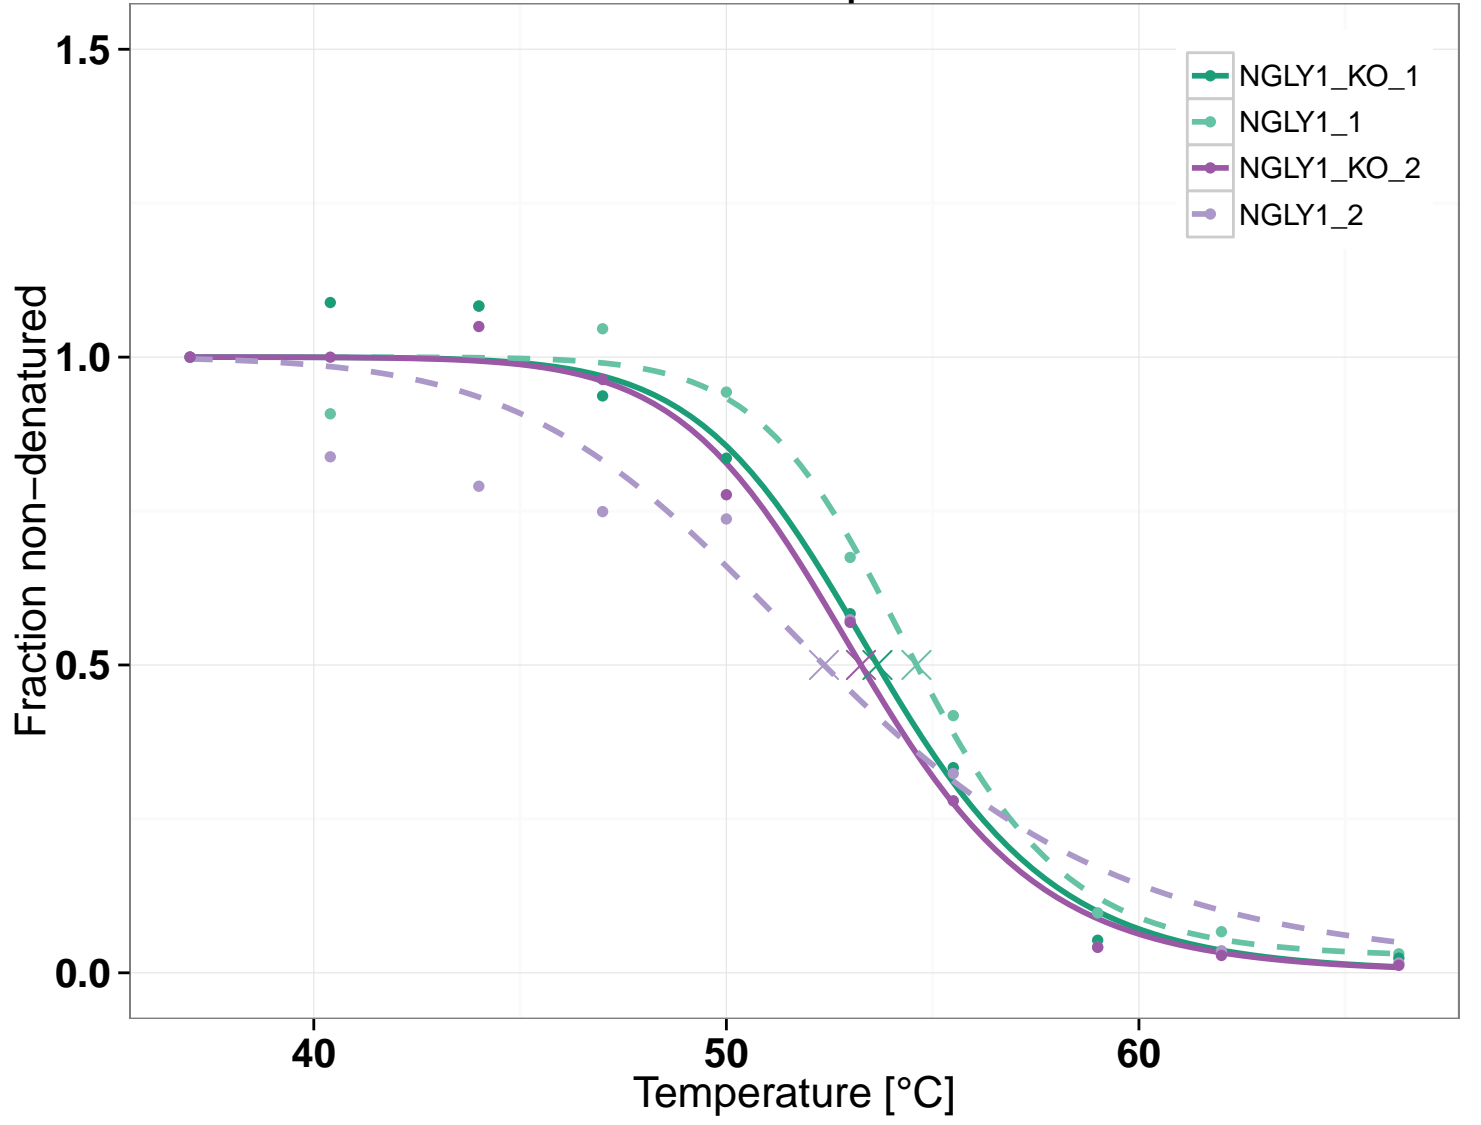

|            | meltPoint | slope  | plateau | R2   |
|------------|-----------|--------|---------|------|
| NGLY1_KO_1 | 53.66     | -0.11  | 0       | 0.99 |
| NGLY1_1    | 54.61     | -0.13  | 0.03    | 0.99 |
| NGLY1_KO_2 | 53.26     | -0.11  | 0       | 0.99 |
| NGLY1_2    | 52.37     | -0.068 | 0       | 0.93 |

Supplement: Supplementary file 641 [file 1]

IPI00165981.1|ZNFX1

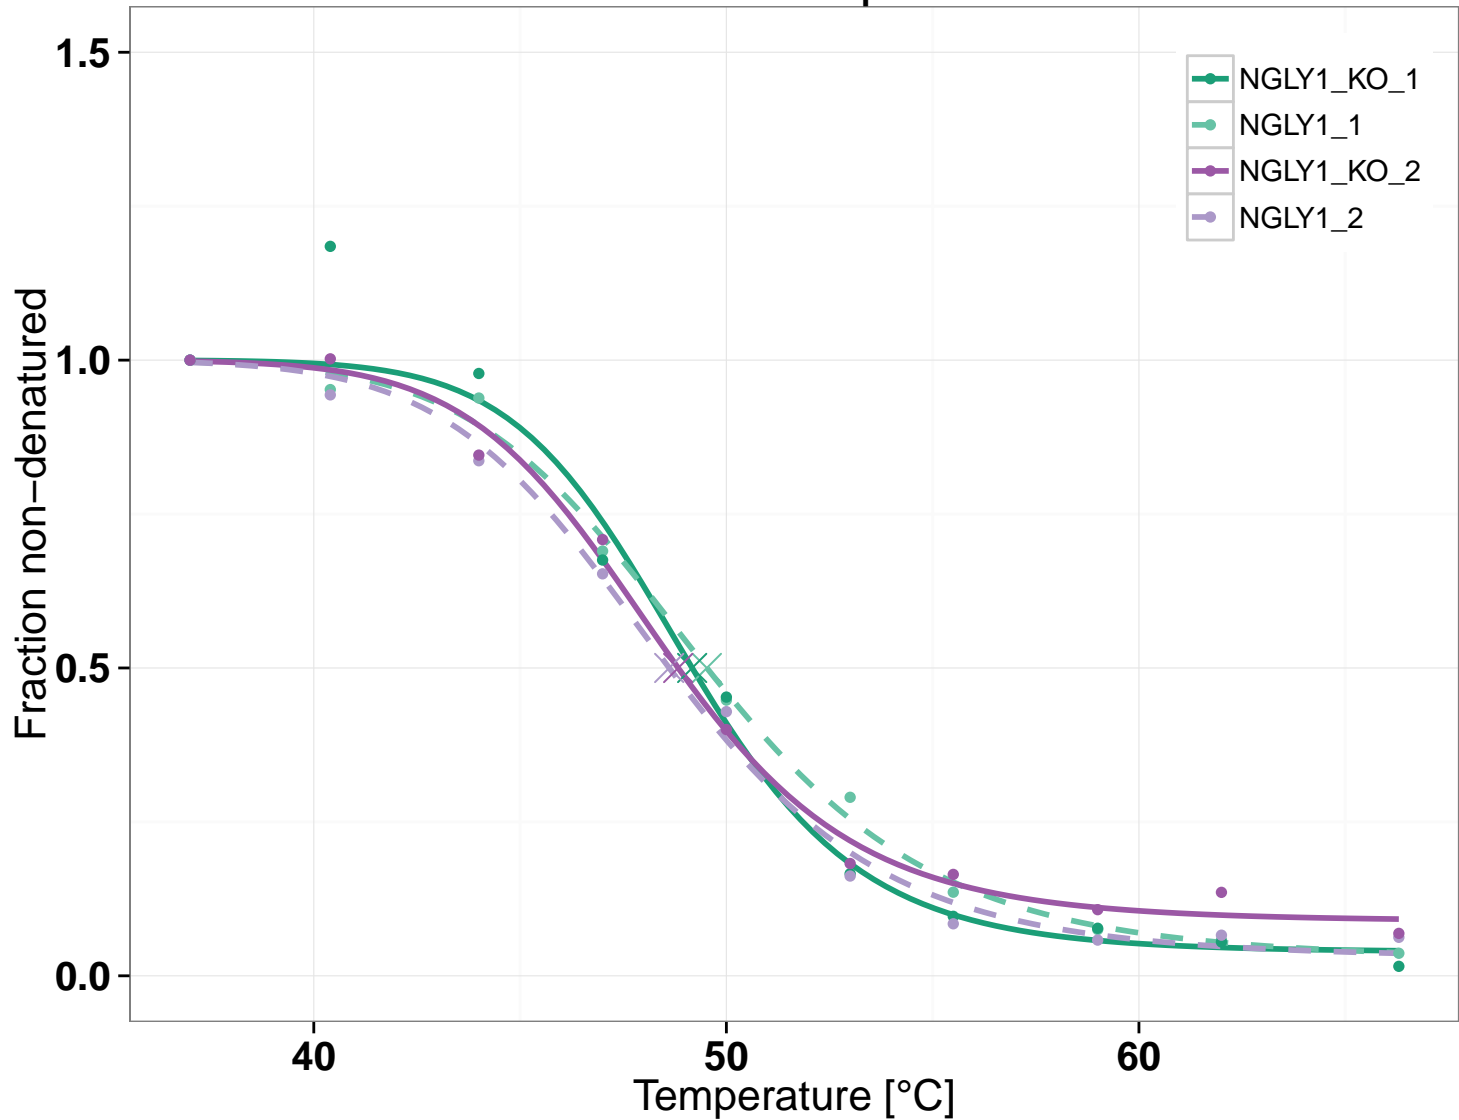

|            | meltPoint | slope  | plateau | R2   |
|------------|-----------|--------|---------|------|
| NGLY1_KO_1 | 49.17     | -0.11  | 0.04    | 0.98 |
| NGLY1_1    | 49.53     | -0.086 | 0.03    | 1    |
| NGLY1_KO_2 | 48.83     | -0.097 | 0.09    | 0.99 |
| NGLY1_2    | 48.61     | -0.091 | 0.03    | 0.99 |

Supplement: Supplementary file 642 [file 1]

# IPI00011250.3|UCHL3

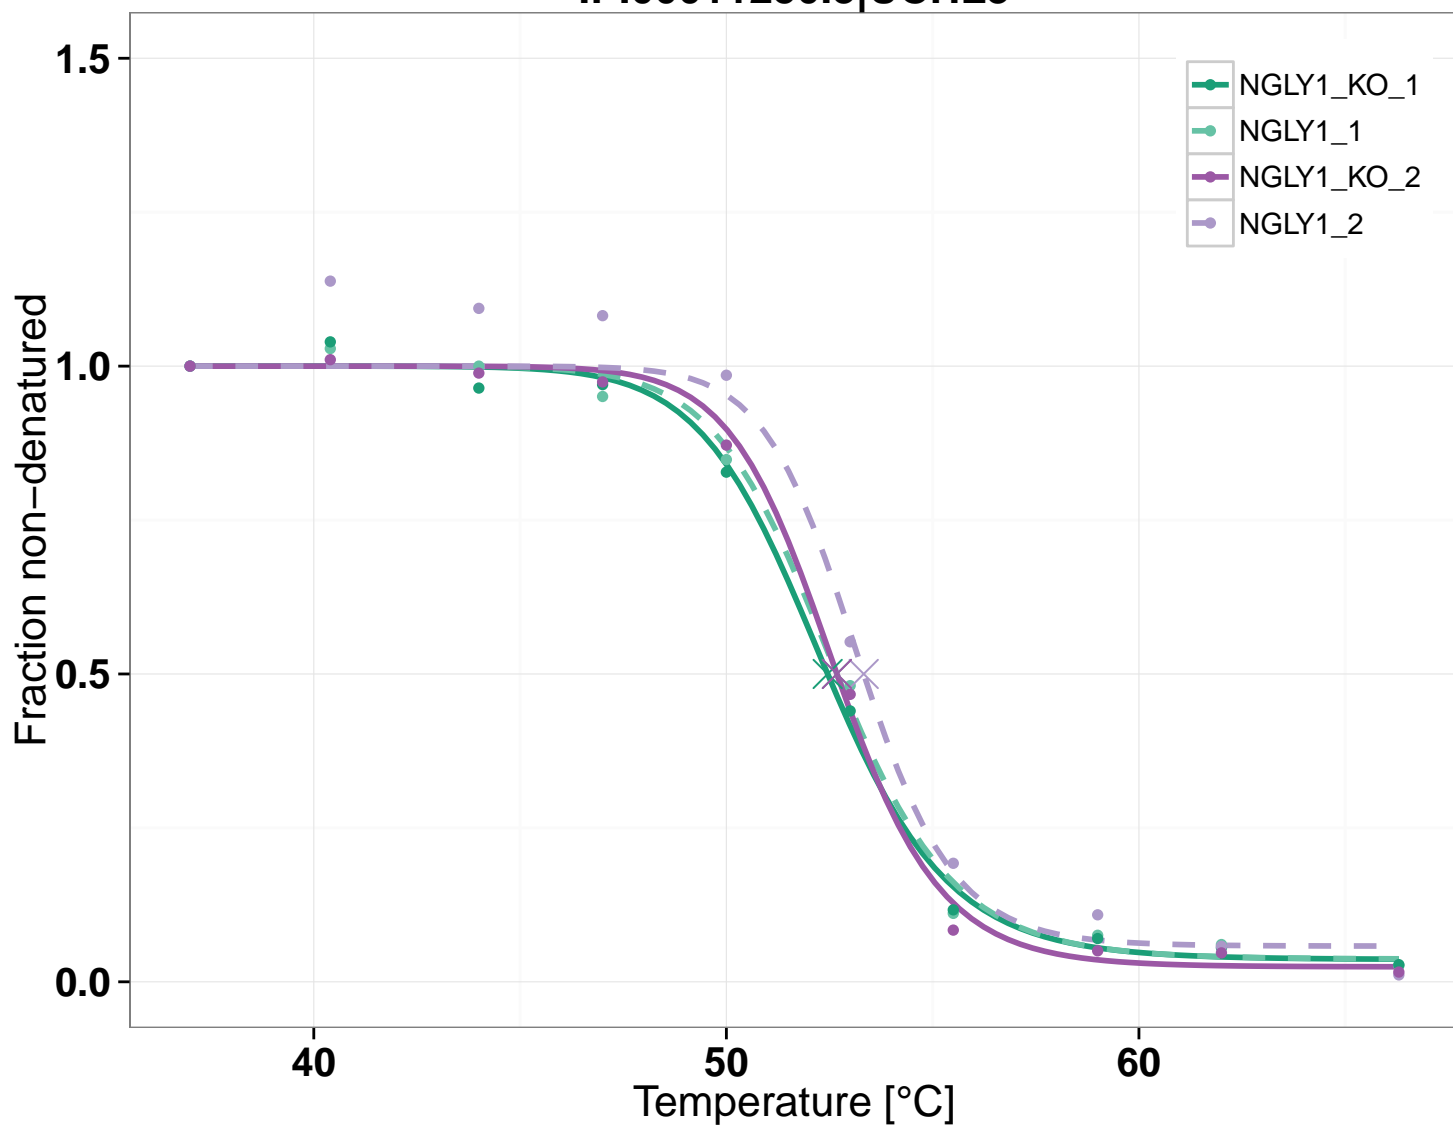

|            | meltPoint | slope | plateau | R2   |
|------------|-----------|-------|---------|------|
| NGLY1_KO_1 | 52.45     | -0.16 | 0.04    | 1    |
| NGLY1_1    | 52.68     | -0.17 | 0.04    | 1    |
| NGLY1_KO_2 | 52.68     | -0.19 | 0.02    | 1    |
| NGLY1_2    | 53.33     | -0.21 | 0.06    | 0.98 |

Supplement: Supplementary file 643 [file 1]

IPI00401194.5|ATXN7L3

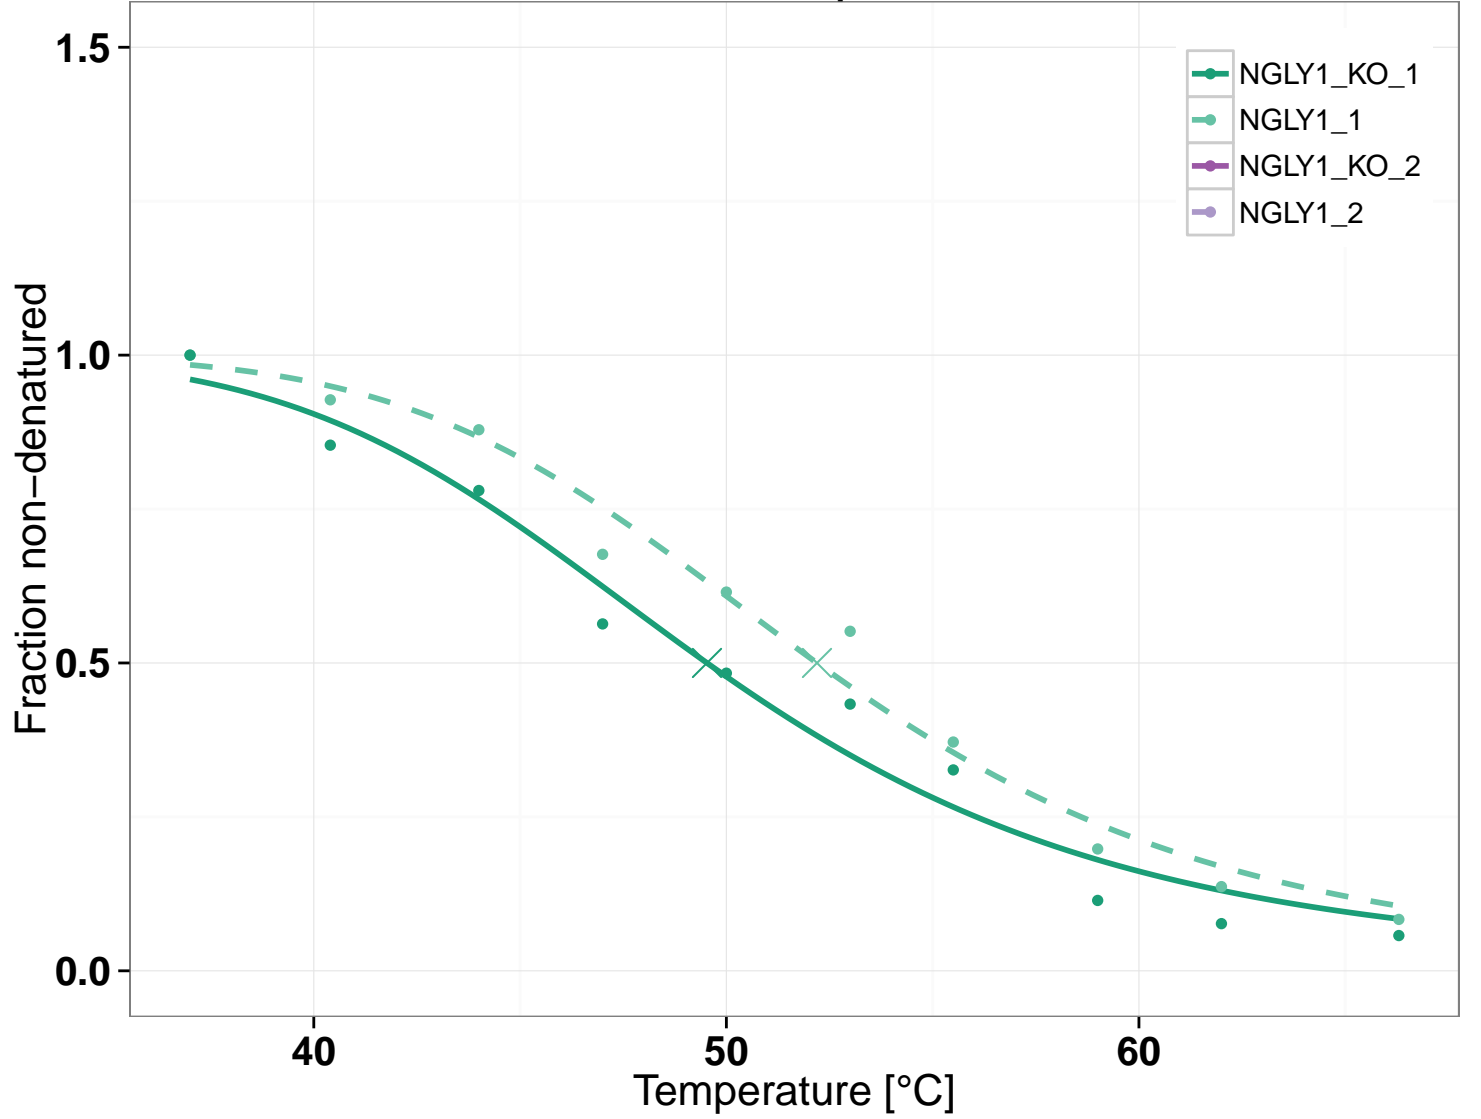

|            | meltPoint | slope | plateau | R2   |
|------------|-----------|-------|---------|------|
| NGLY1_KO_1 | 49.53     | -0.05 | 0       | 0.97 |
| NGLY1_1    | 52.2      | -0.05 | 0       | 0.98 |
| NGLY1_KO_2 | -         | -     | -       | -    |
| NGLY1_2    | -         | -     | -       | -    |

Supplement: Supplementary file 644 [file 1]

IPI00384276.3|PIM3

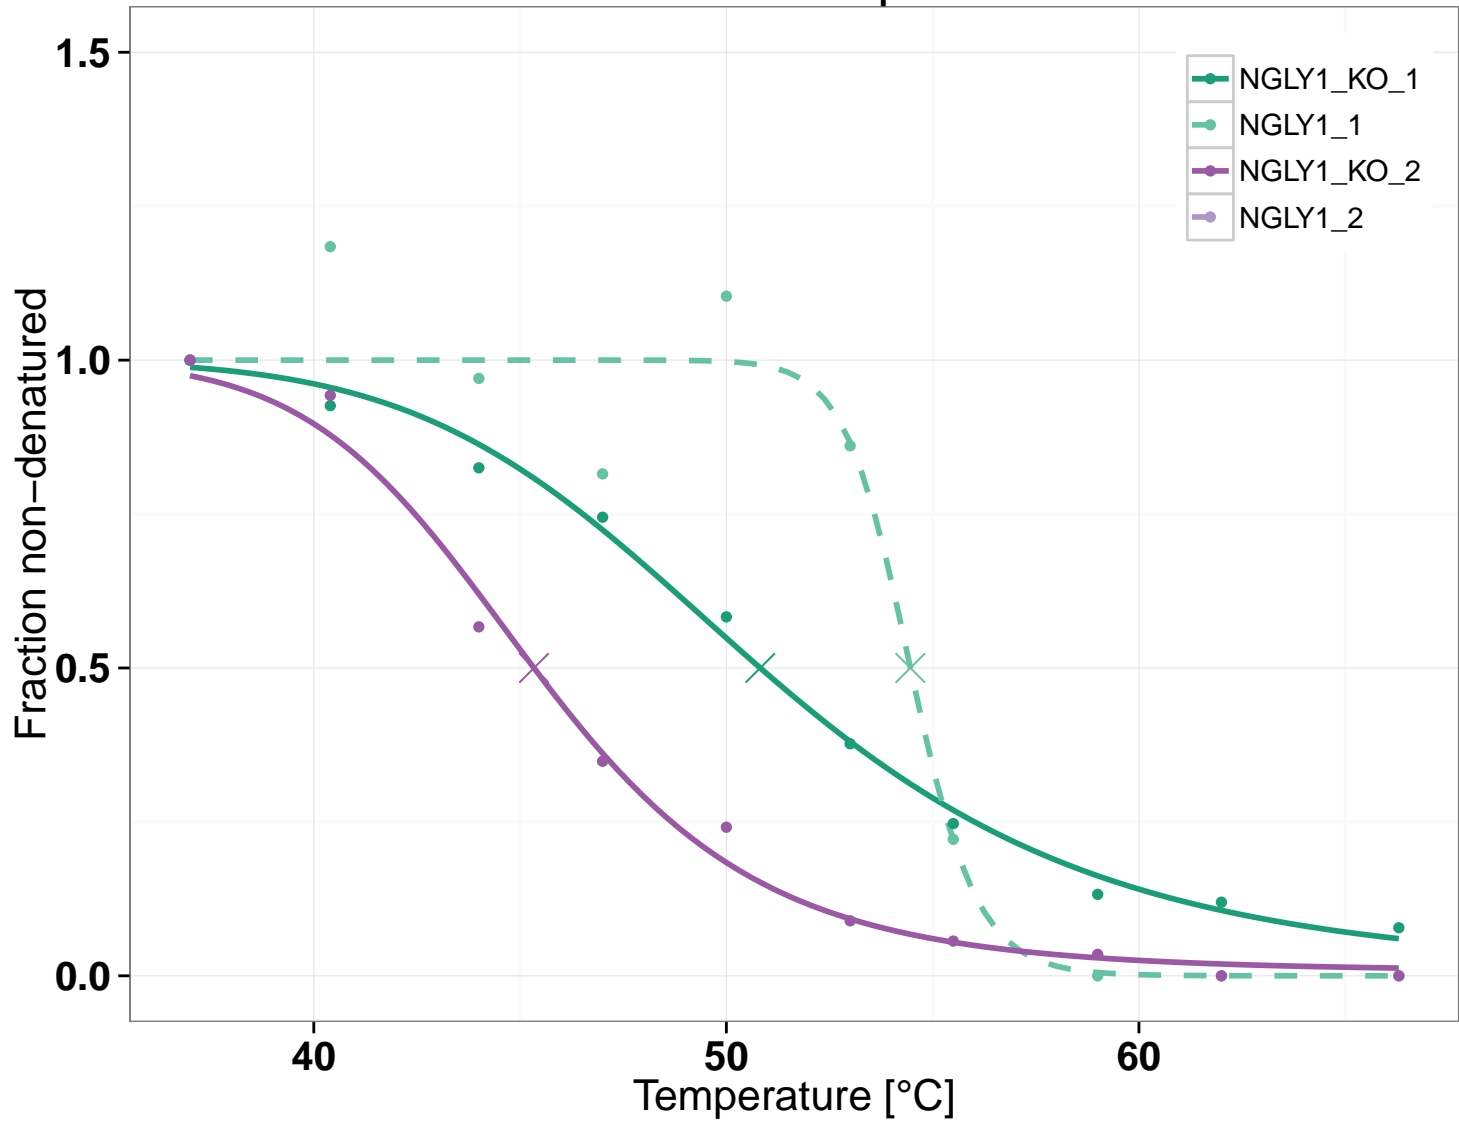

|            | meltPoint | slope | plateau | R2   |
|------------|-----------|-------|---------|------|
| NGLY1_KO_1 | 50.82     | -0.06 | 0       | 0.99 |
| NGLY1_1    | 54.46     | -0.31 | 0       | 0.96 |
| NGLY1_KO_2 | 45.34     | -0.09 | 0.01    | 0.99 |
| NGLY1_2    | -         | -     | -       | -    |

Supplement: Supplementary file 645 [file 1]

IPI00871176.1|NIPSNAP3A

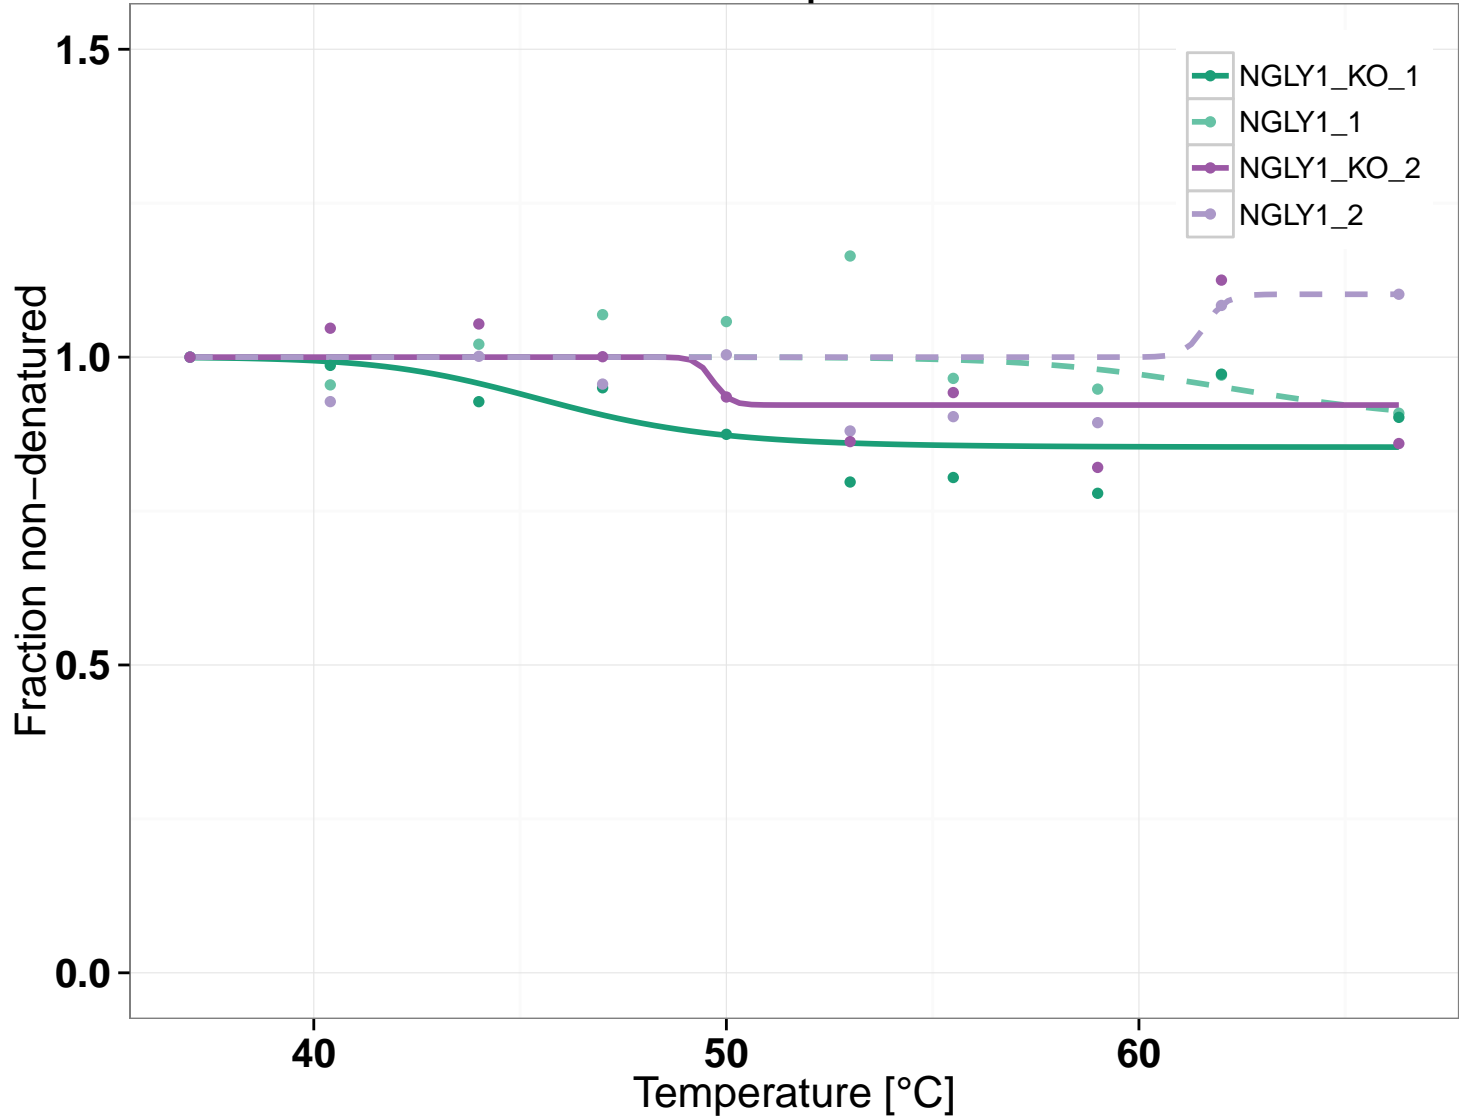

|            | meltPoint | slope  | plateau | R2   |
|------------|-----------|--------|---------|------|
| NGLY1_KO_1 | -         | -0.018 | 0.85    | 0.48 |
| NGLY1_1    | -         | -0.011 | 0.89    | 0.2  |
| NGLY1_KO_2 | -         | -0.098 | 0.92    | 0.26 |
| NGLY1_2    | -         | 0.1    | 1.1     | 0.21 |

Supplement: Supplementary file 646 [file 1]

IPI00002523.1|CCBL1

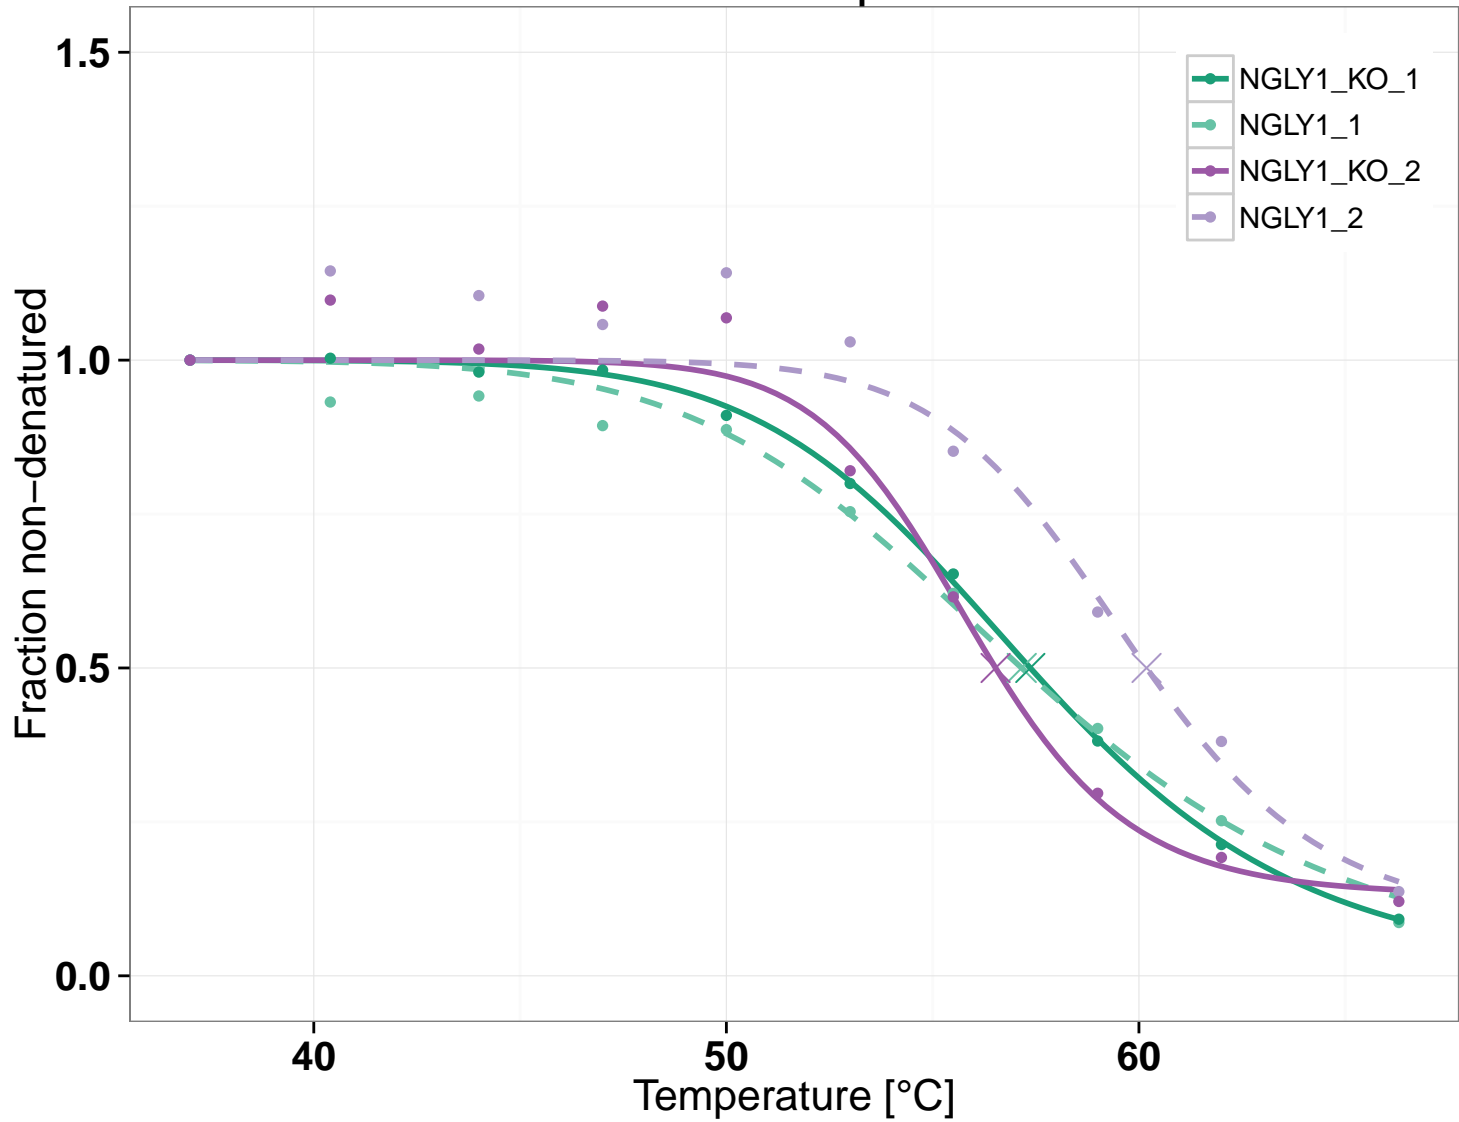

|            | meltPoint | slope  | plateau | R2   |
|------------|-----------|--------|---------|------|
| NGLY1_KO_1 | 57.37     | -0.075 | 0       | 1    |
| NGLY1_1    | 57.16     | -0.062 | 0       | 0.99 |
| NGLY1_KO_2 | 56.53     | -0.11  | 0.13    | 0.98 |
| NGLY1_2    | 60.18     | -0.098 | 0.08    | 0.94 |

Supplement: Supplementary file 647 [file 1]

# IPI00022314.1|SOD2

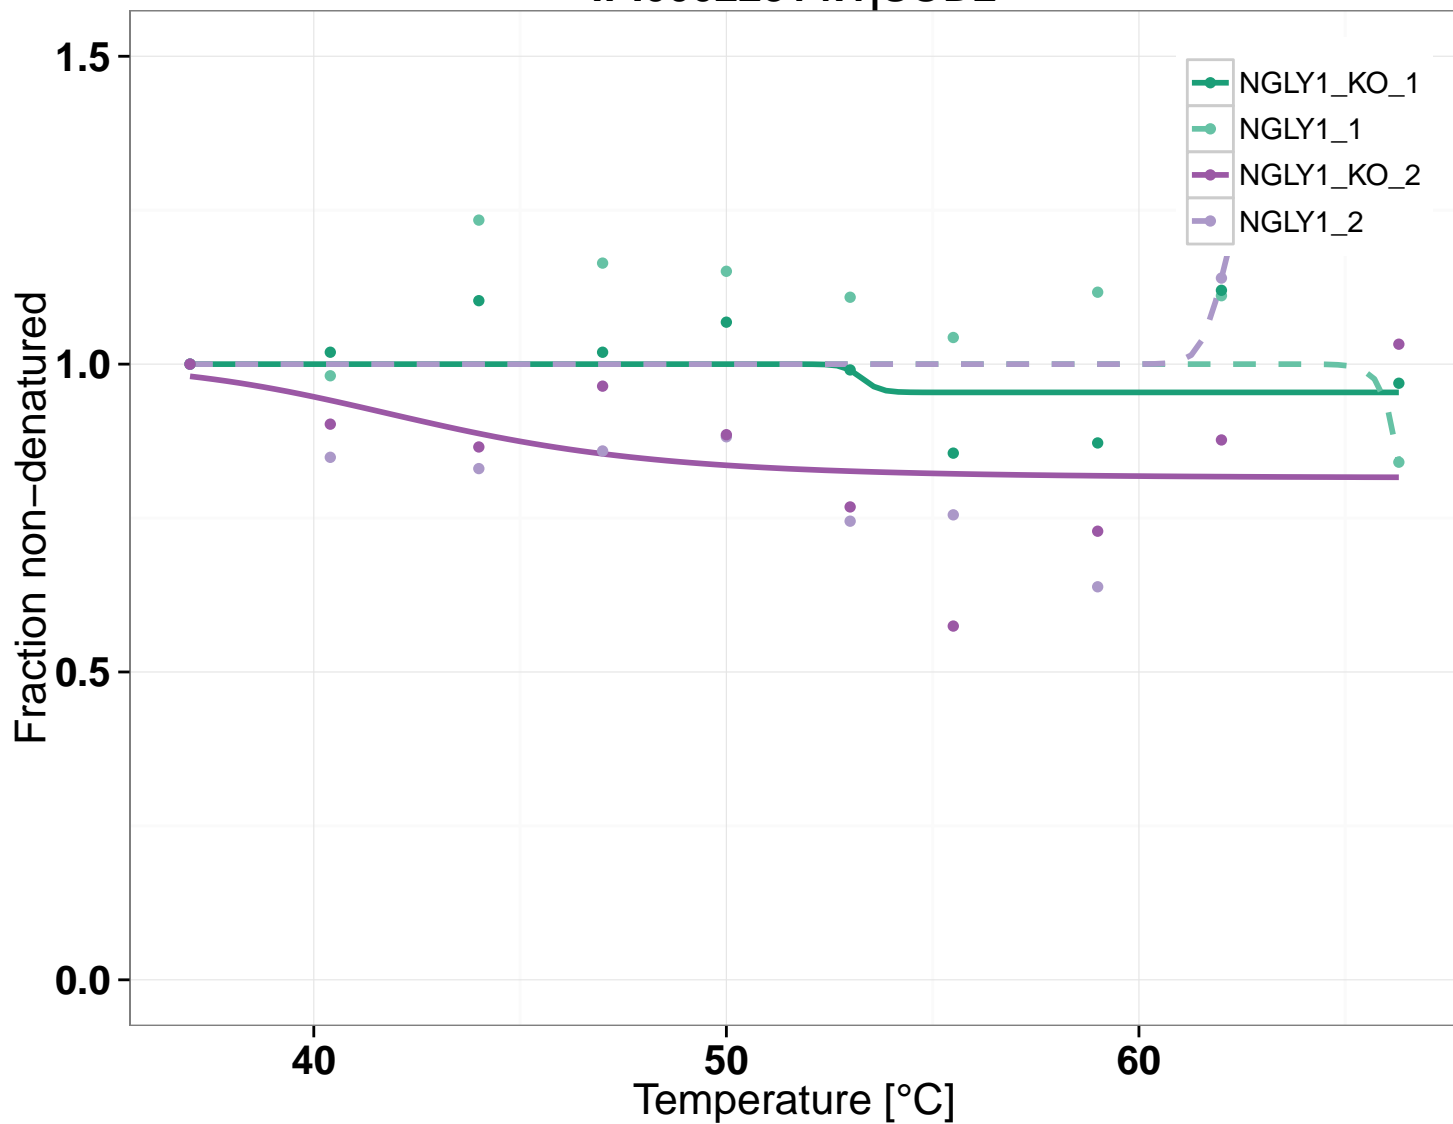

|            | meltPoint | slope  | plateau | R2    |
|------------|-----------|--------|---------|-------|
| NGLY1_KO_1 | -         | -0.054 | 0.95    | 0.12  |
| NGLY1_1    | -         | -      | 0       | -0.27 |
| NGLY1_KO_2 | -         | -0.016 | 0.81    | 0.18  |
| NGLY1_2    | -         | 0.28   | 1.28    | -0.01 |

Supplement: Supplementary file 648 [file 1]

IPI00642904.1|PABPC4

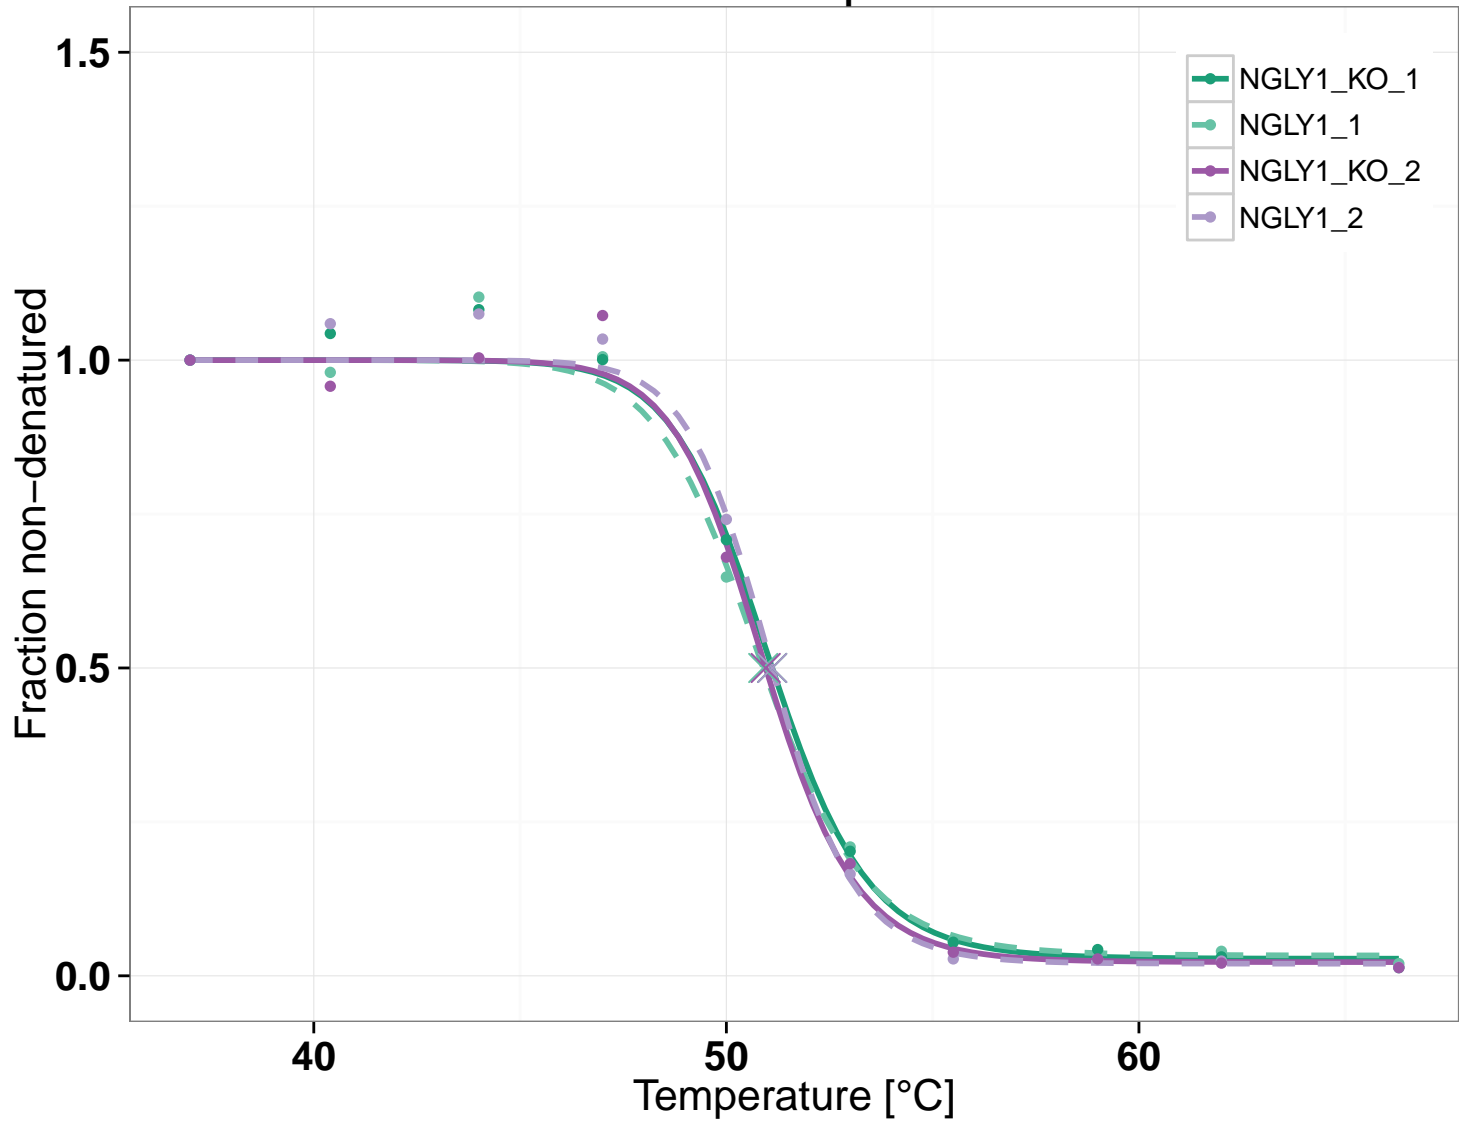

|            | meltPoint | slope | plateau | R2   |
|------------|-----------|-------|---------|------|
| NGLY1_KO_1 | 51.11     | -0.2  | 0.03    | 1    |
| NGLY1_1    | 50.89     | -0.19 | 0.03    | 0.99 |
| NGLY1_KO_2 | 50.95     | -0.22 | 0.02    | 0.99 |
| NGLY1_2    | 51.11     | -0.24 | 0.02    | 0.99 |

Supplement: Supplementary file 649 [file 1]

# IPI00470582.2|C10ORF118

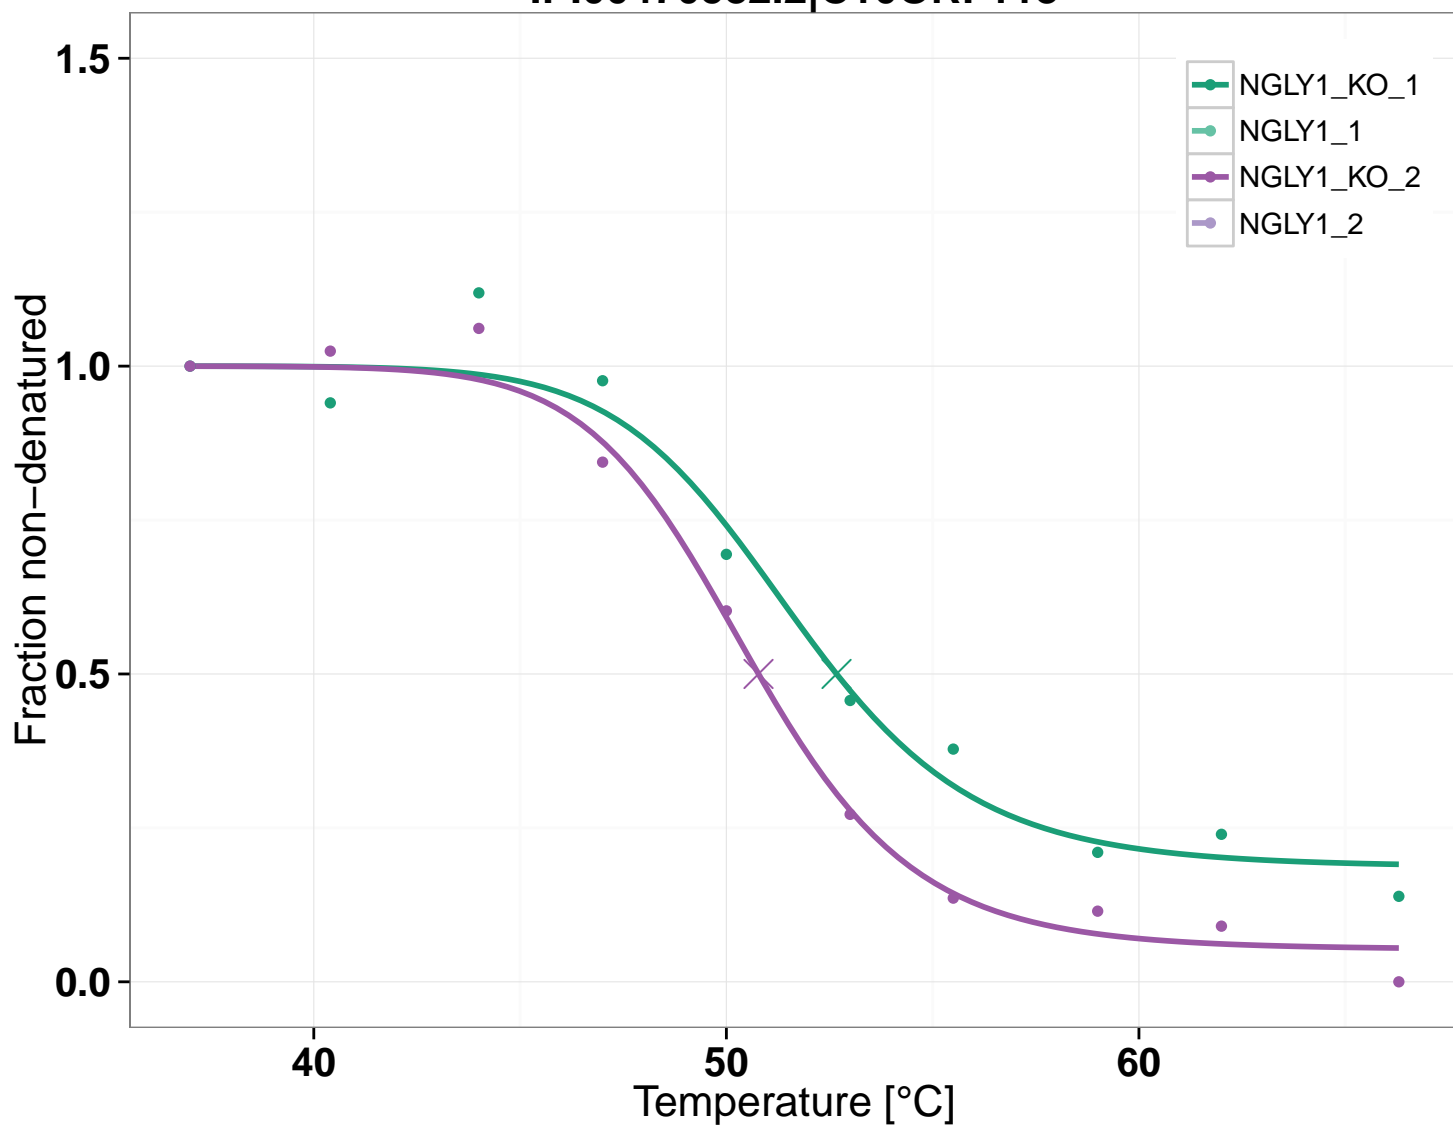

|            | meltPoint | slope  | plateau | R2   |
|------------|-----------|--------|---------|------|
| NGLY1_KO_1 | 52.67     | -0.093 | 0.19    | 0.97 |
| NGLY1_1    | -         | -      | -       | -    |
| NGLY1_KO_2 | 50.78     | -0.12  | 0.05    | 0.99 |
| NGLY1_2    | -         | -      | -       | -    |

Supplement: Supplementary file 650 [file 1]

IPI00477231.3|MGEA5

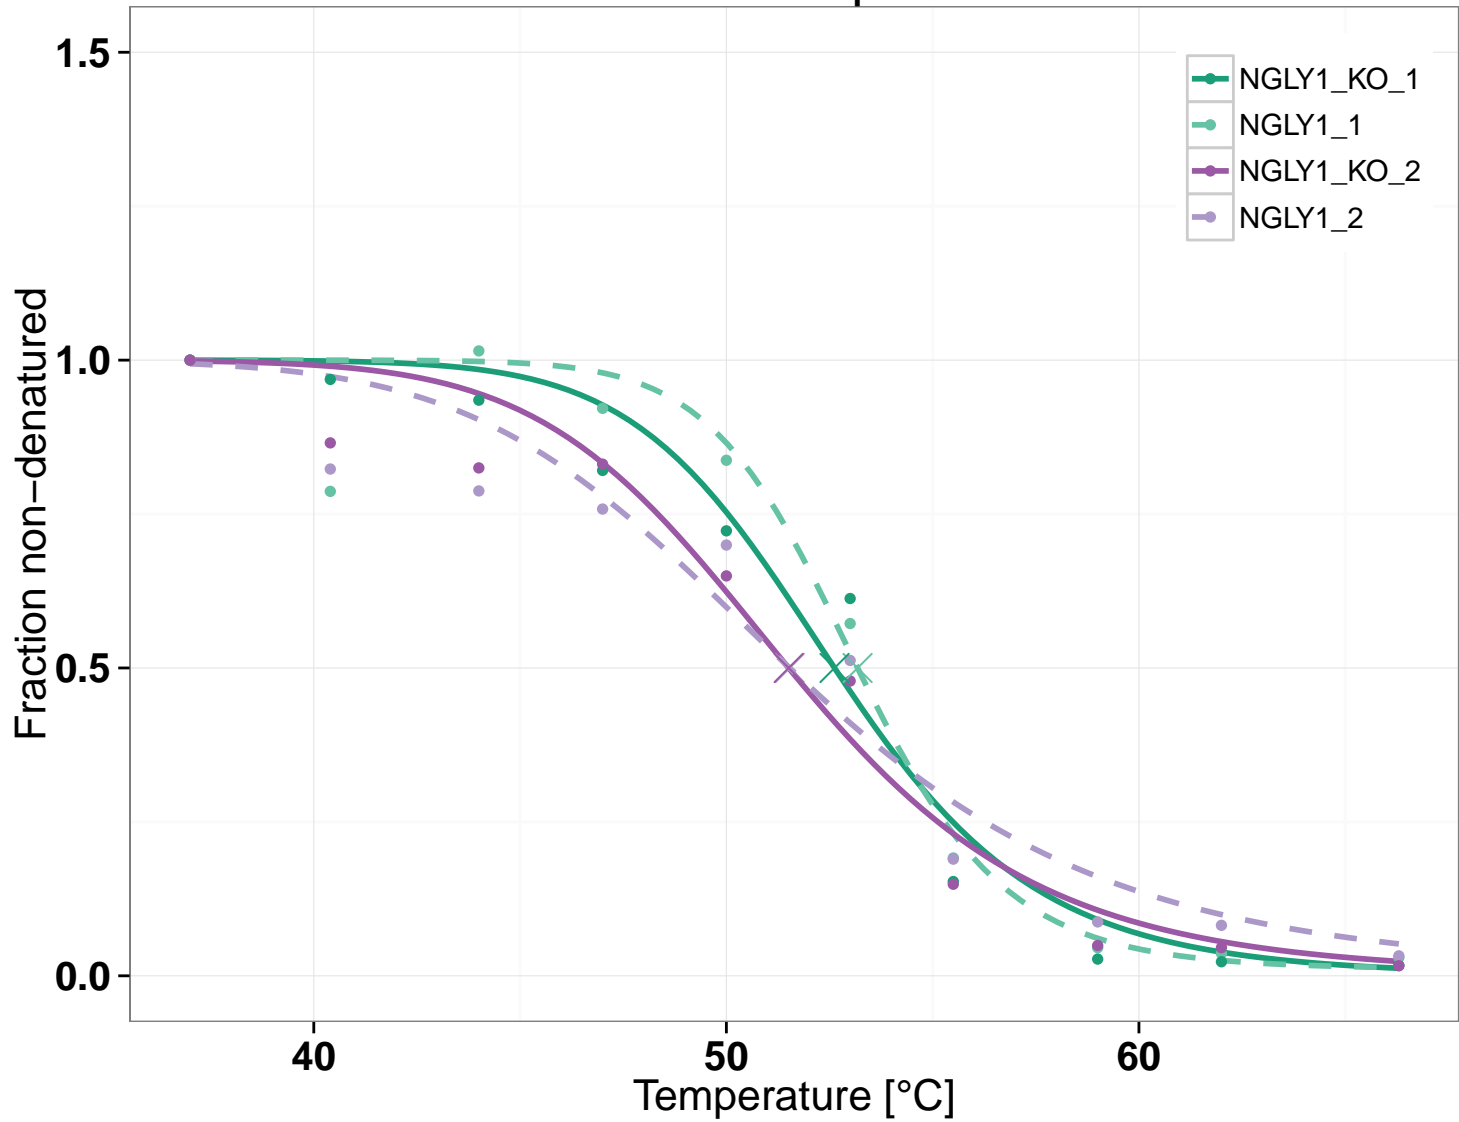

|            | meltPoint | slope  | plateau | R2   |
|------------|-----------|--------|---------|------|
| NGLY1_KO_1 | 52.62     | -0.1   | 0       | 0.97 |
| NGLY1_1    | 53.18     | -0.14  | 0.01    | 0.97 |
| NGLY1_KO_2 | 51.51     | -0.082 | 0       | 0.96 |
| NGLY1_2    | 51.53     | -0.065 | 0       | 0.94 |

Supplement: Supplementary file 651 [file 1]

# IPI00011090.3|FRMD8

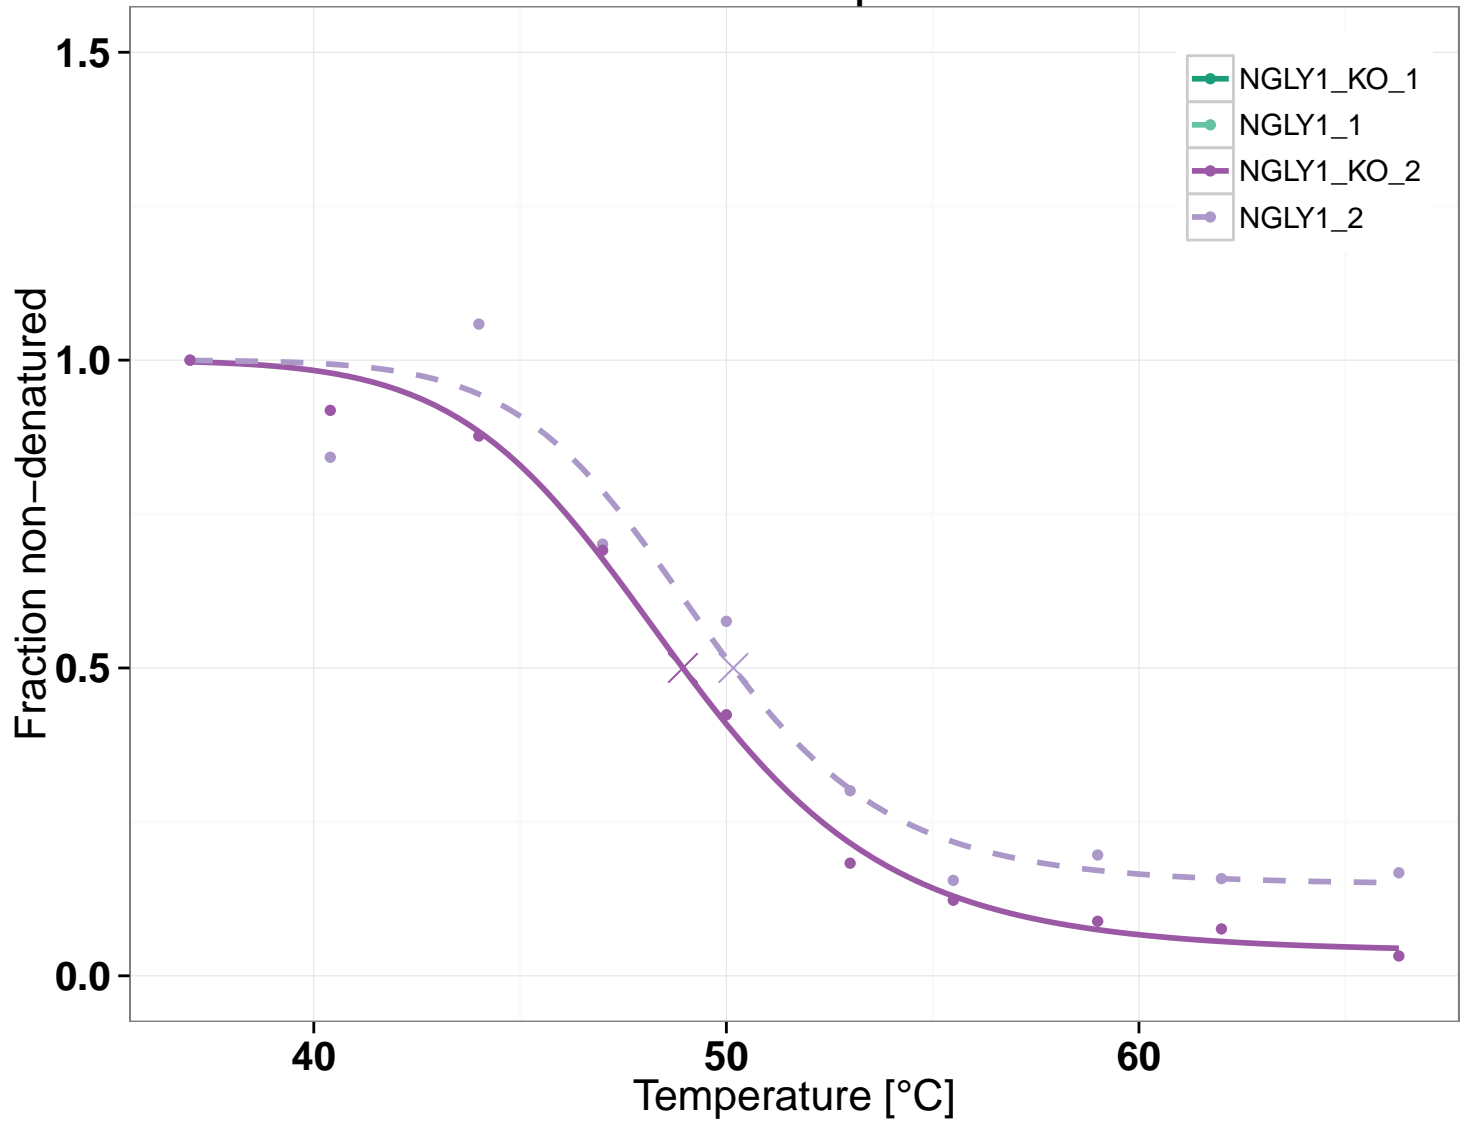

|            | meltPoint | slope  | plateau | R2   |
|------------|-----------|--------|---------|------|
| NGLY1_KO_1 | —         | —      | —       | —    |
| NGLY1_1    | —         | —      | —       | —    |
| NGLY1_KO_2 | 48.95     | -0.092 | 0.04    | 1    |
| NGLY1_2    | 50.17     | -0.095 | 0.15    | 0.96 |

Supplement: Supplementary file 652 [file 1]

# IPI00301489.3|UROD

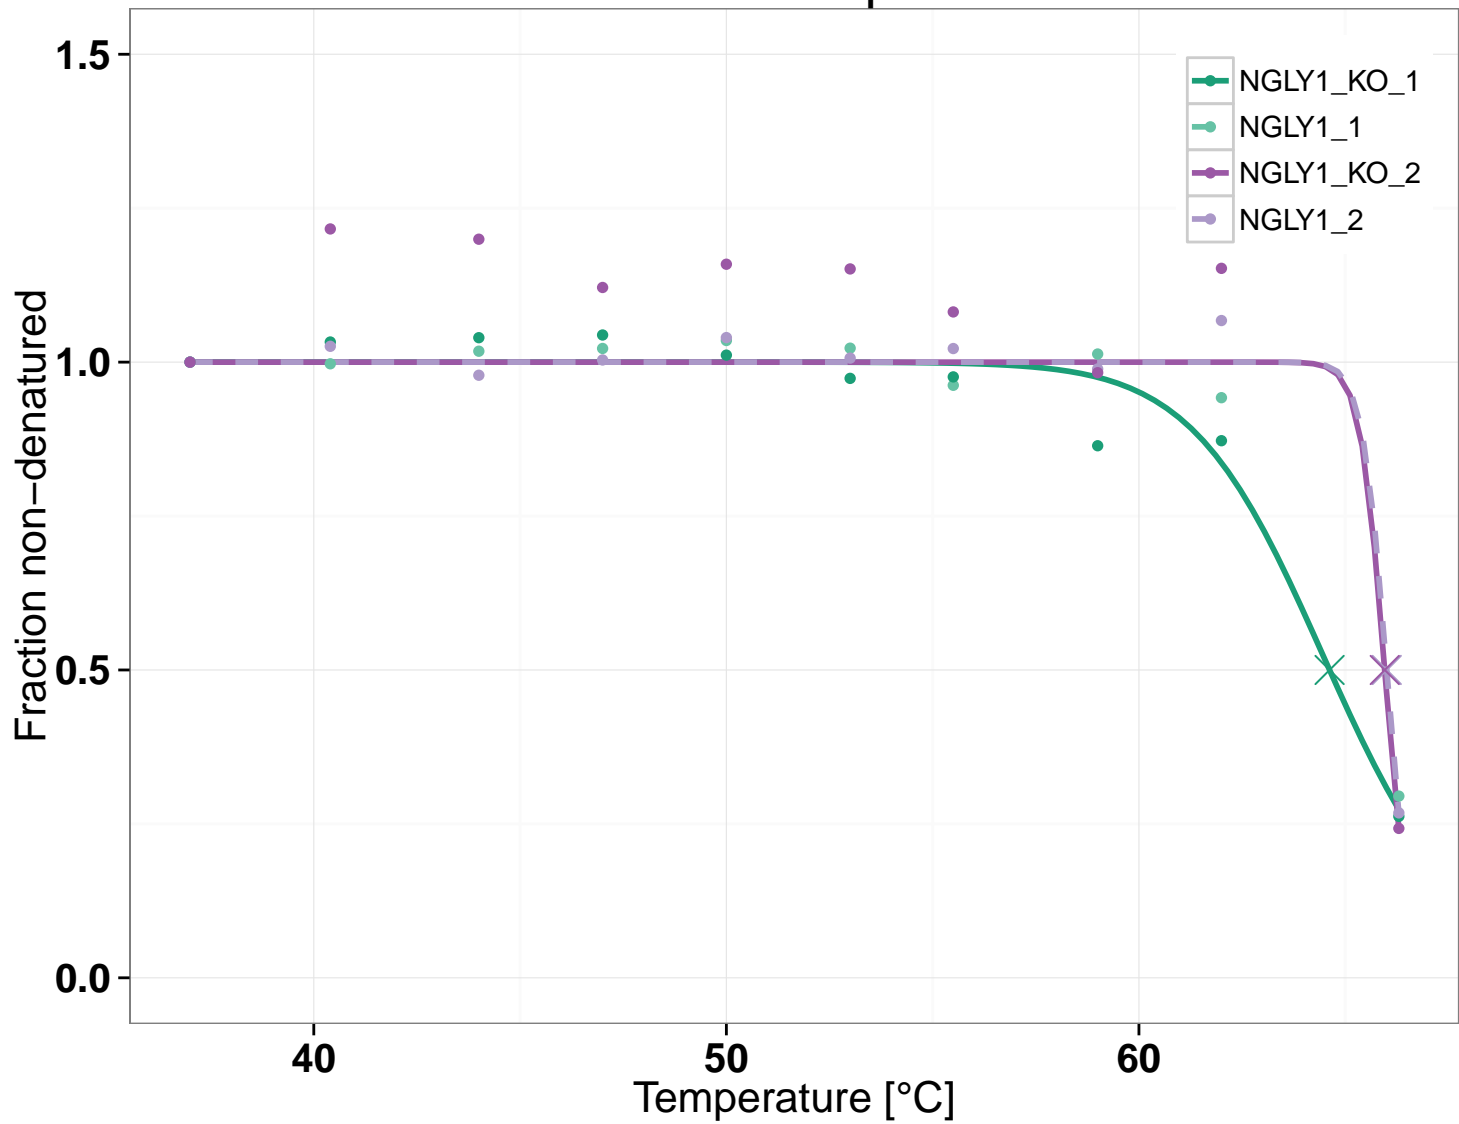

|            | meltPoint | slope | plateau | R2   |
|------------|-----------|-------|---------|------|
| NGLY1_KO_1 | 64.62     | -0.15 | 0       | 0.96 |
| NGLY1_1    | -         | -     | -       | -    |
| NGLY1_KO_2 | 65.96     | -0.84 | 0       | 0.76 |
| NGLY1_2    | 66.01     | -0.86 | 0       | 0.98 |

Supplement: Supplementary file 653 [file 1]

IPI00215966.3|RPP14

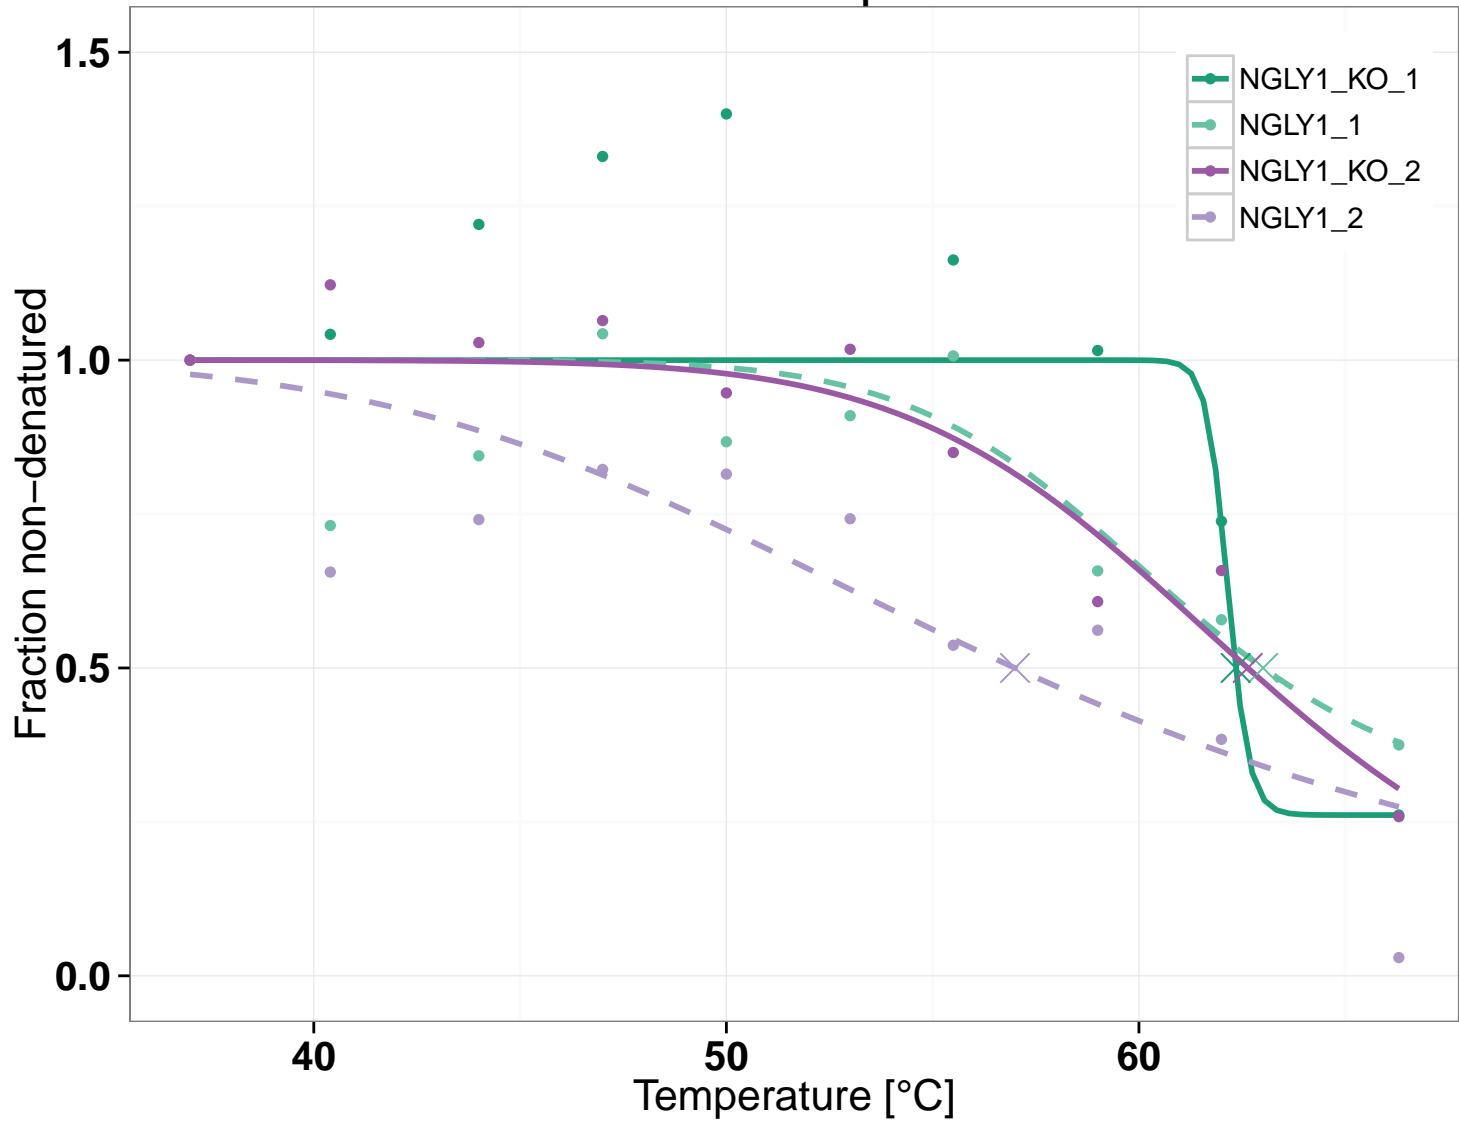

|            | meltPoint | slope  | plateau | R2   |
|------------|-----------|--------|---------|------|
| NGLY1_KO_1 | 62.35     | -0.72  | 0.26    | 0.47 |
| NGLY1_1    | 63.01     | -0.059 | 0.26    | 0.68 |
| NGLY1_KO_2 | 62.64     | -0.061 | 0       | 0.91 |
| NGLY1_2    | 57        | -0.033 | 0       | 0.7  |

Supplement: Supplementary file 654 [file 1]

# IPI00013957.1|SLC25A20

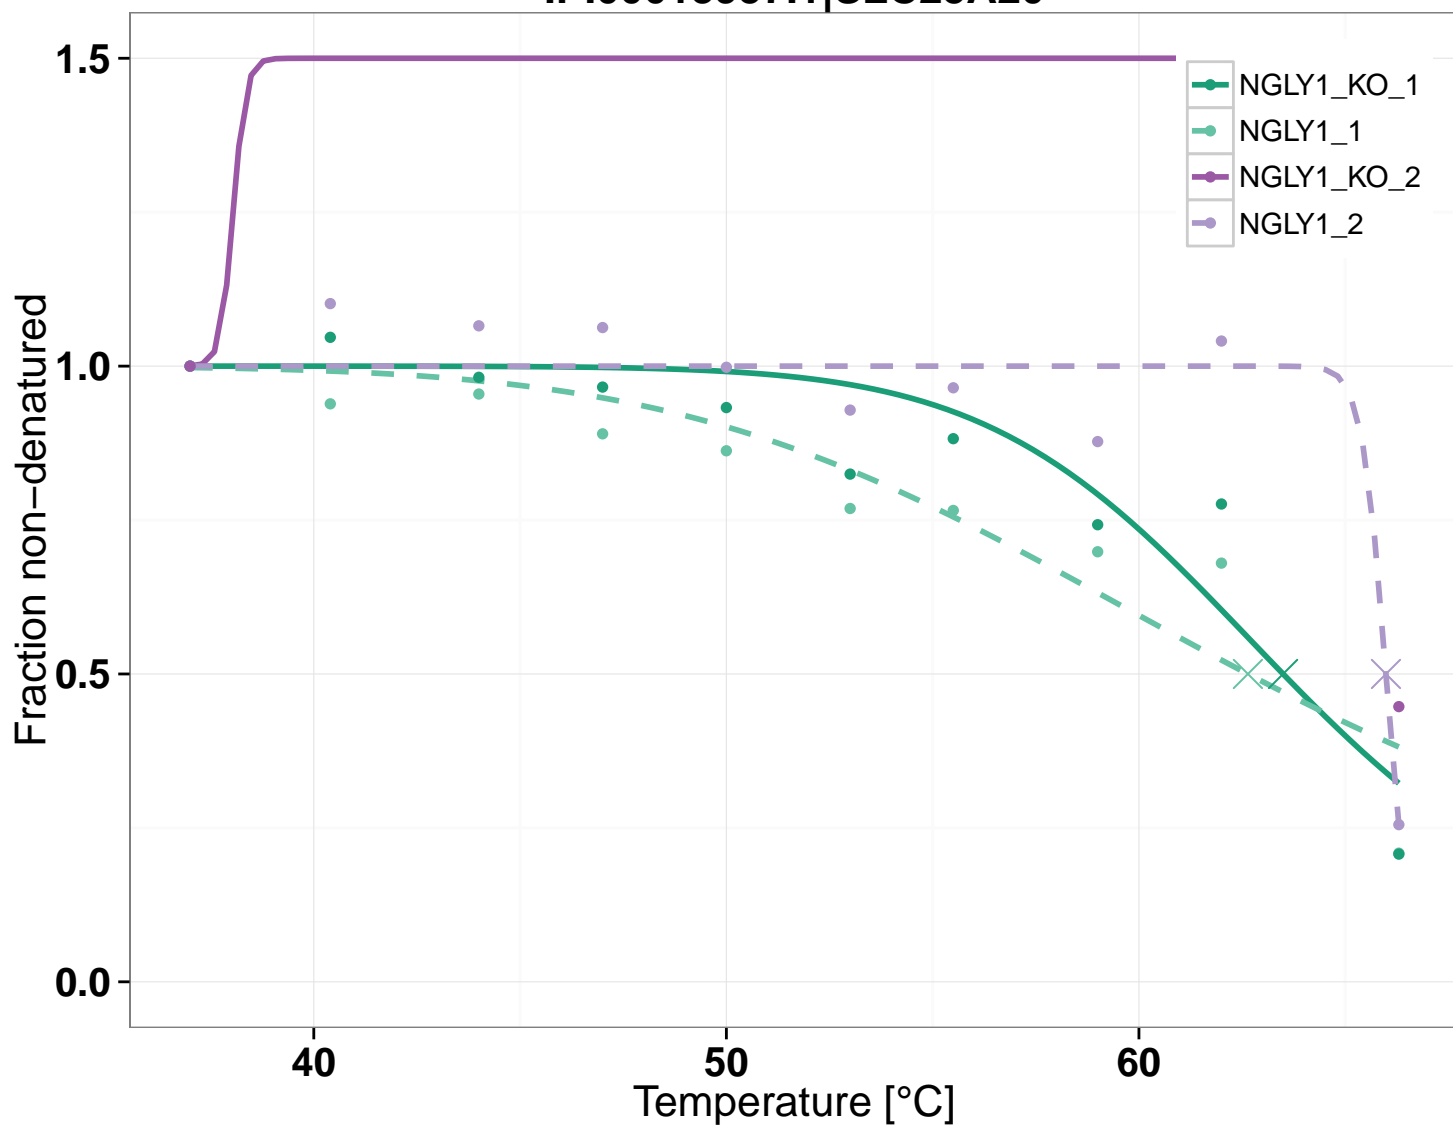

|            | meltPoint | slope  | plateau | R2    |
|------------|-----------|--------|---------|-------|
| NGLY1_KO_1 | 63.49     | -0.07  | 0       | 0.86  |
| NGLY1_1    | 62.64     | -0.037 | 0       | 0.85  |
| NGLY1_KO_2 | -         | 0.82   | 1.5     | -0.31 |
| NGLY1_2    | 65.99     | -0.86  | 0       | 0.92  |

Supplement: Supplementary file 655 [file 1]

# IPI00010414.4|PDLIM1

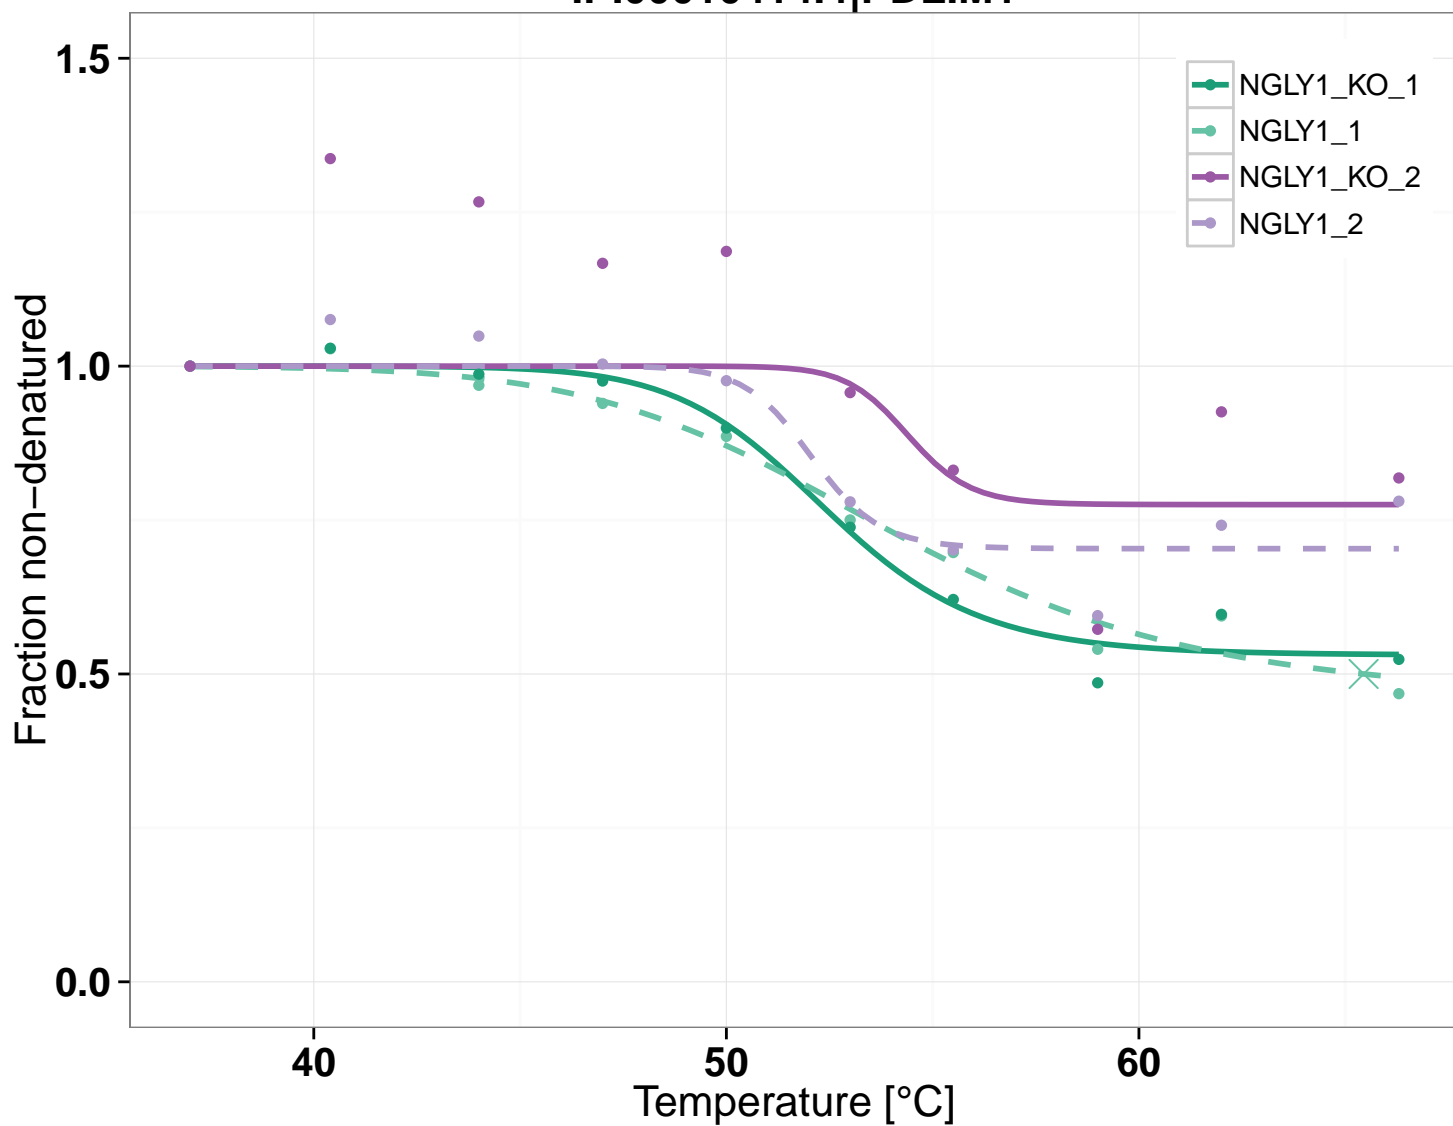

|            | meltPoint | slope  | plateau | R2   |
|------------|-----------|--------|---------|------|
| NGLY1_KO_1 | -         | -0.064 | 0.53    | 0.98 |
| NGLY1_1    | 65.45     | -0.036 | 0.46    | 0.98 |
| NGLY1_KO_2 | -         | -0.075 | 0.78    | 0.37 |
| NGLY1_2    | -         | -0.09  | 0.7     | 0.89 |

Supplement: Supplementary file 656 [file 1]

# IPI00022759.2|PGGT1B

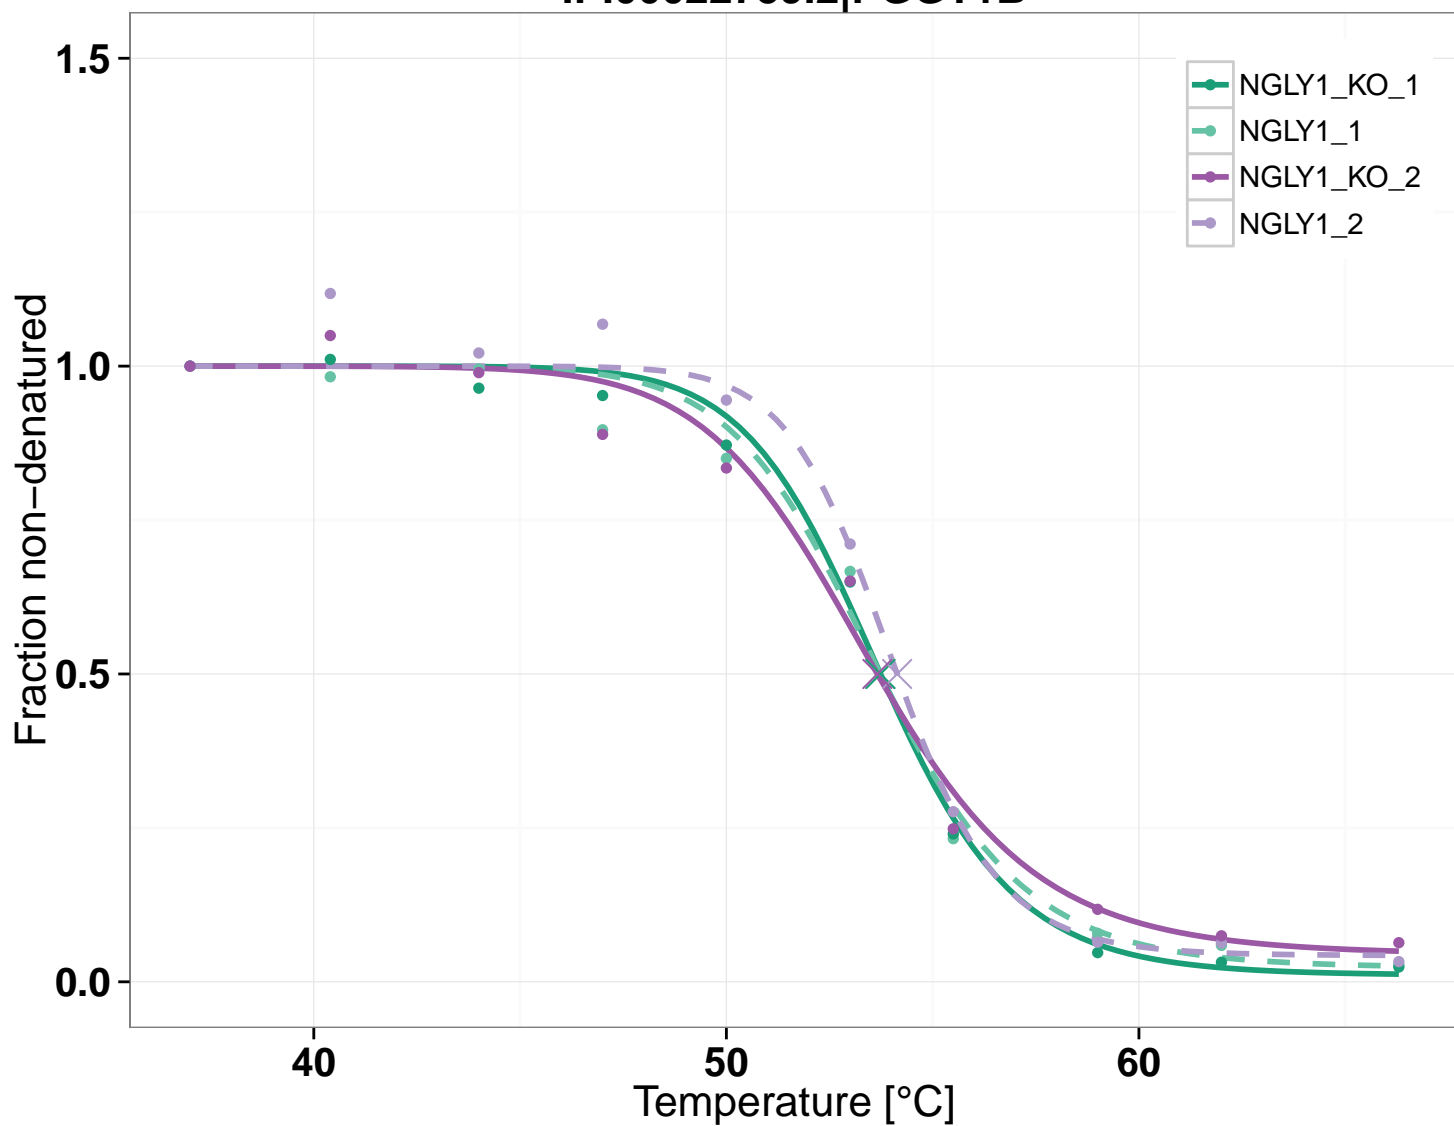

|            | meltPoint | slope | plateau | R2   |
|------------|-----------|-------|---------|------|
| NGLY1_KO_1 | 53.74     | -0.15 | 0.01    | 1    |
| NGLY1_1    | 53.73     | -0.14 | 0.02    | 0.99 |
| NGLY1_KO_2 | 53.66     | -0.12 | 0.04    | 0.99 |
| NGLY1_2    | 54.14     | -0.19 | 0.04    | 0.99 |

Supplement: Supplementary file 657 [file 1]

IPI00010539.1|SESN2

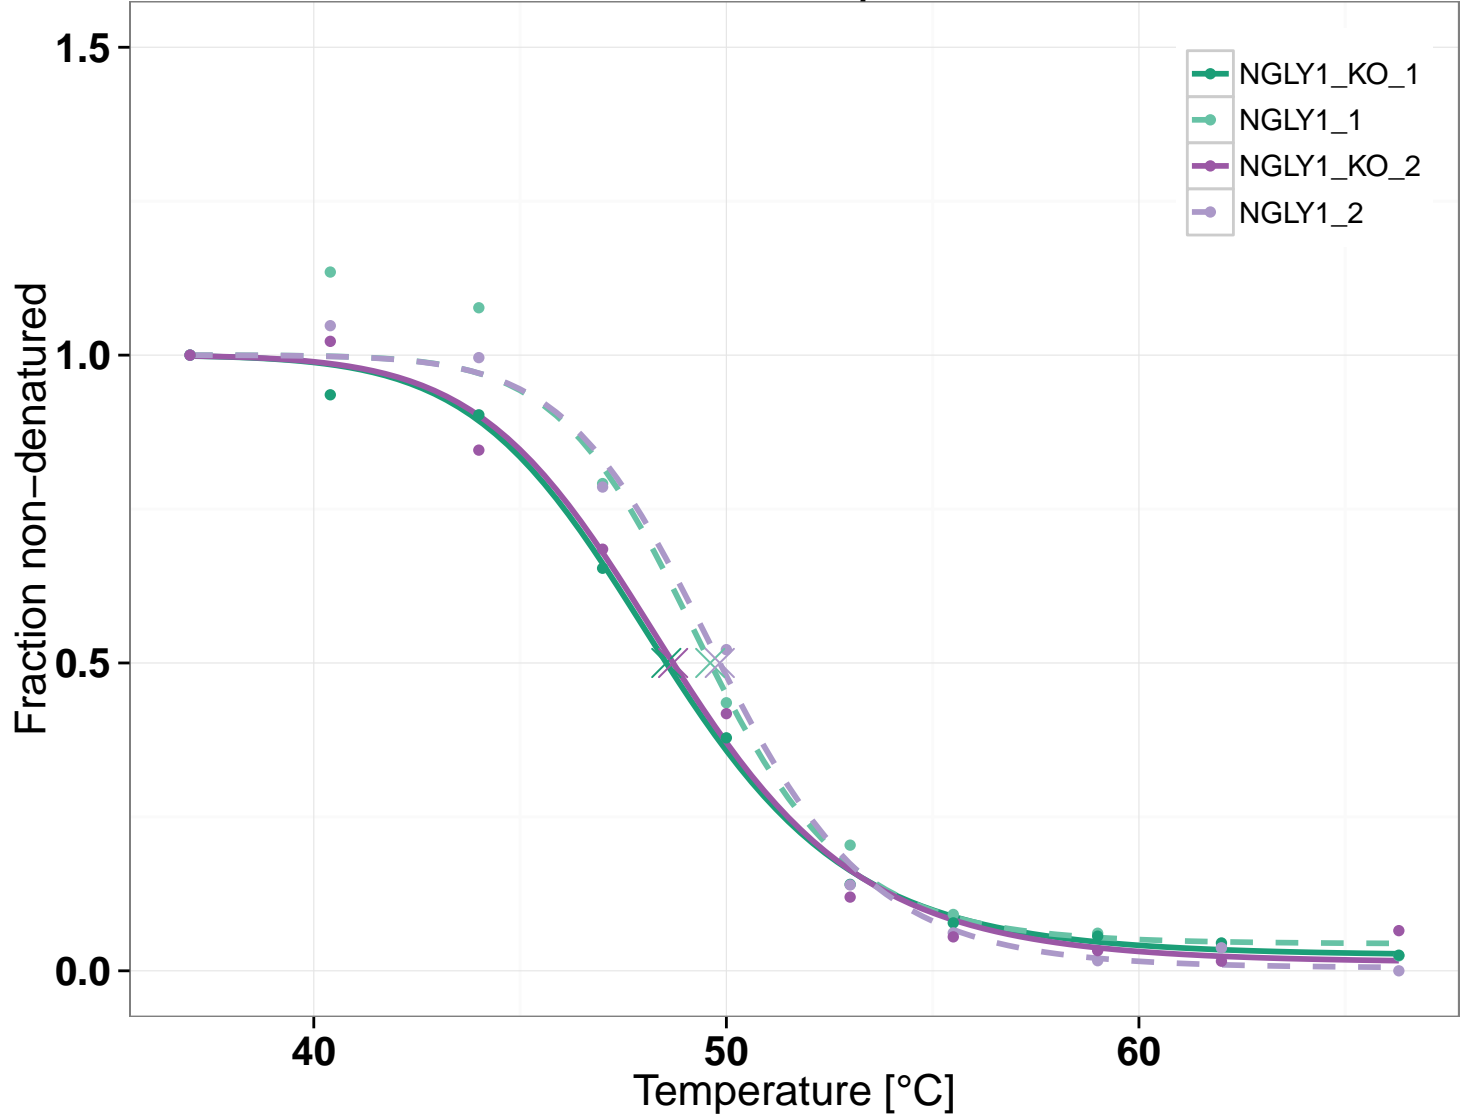

|            | meltPoint | slope | plateau | R2   |
|------------|-----------|-------|---------|------|
| NGLY1_KO_1 | 48.54     | -0.11 | 0.02    | 1    |
| NGLY1_1    | 49.61     | -0.14 | 0.04    | 0.98 |
| NGLY1_KO_2 | 48.71     | -0.11 | 0.01    | 0.99 |
| NGLY1_2    | 49.84     | -0.13 | 0       | 1    |

Supplement: Supplementary file 658 [file 1]

# IPI00604786.2|ZFP36L2

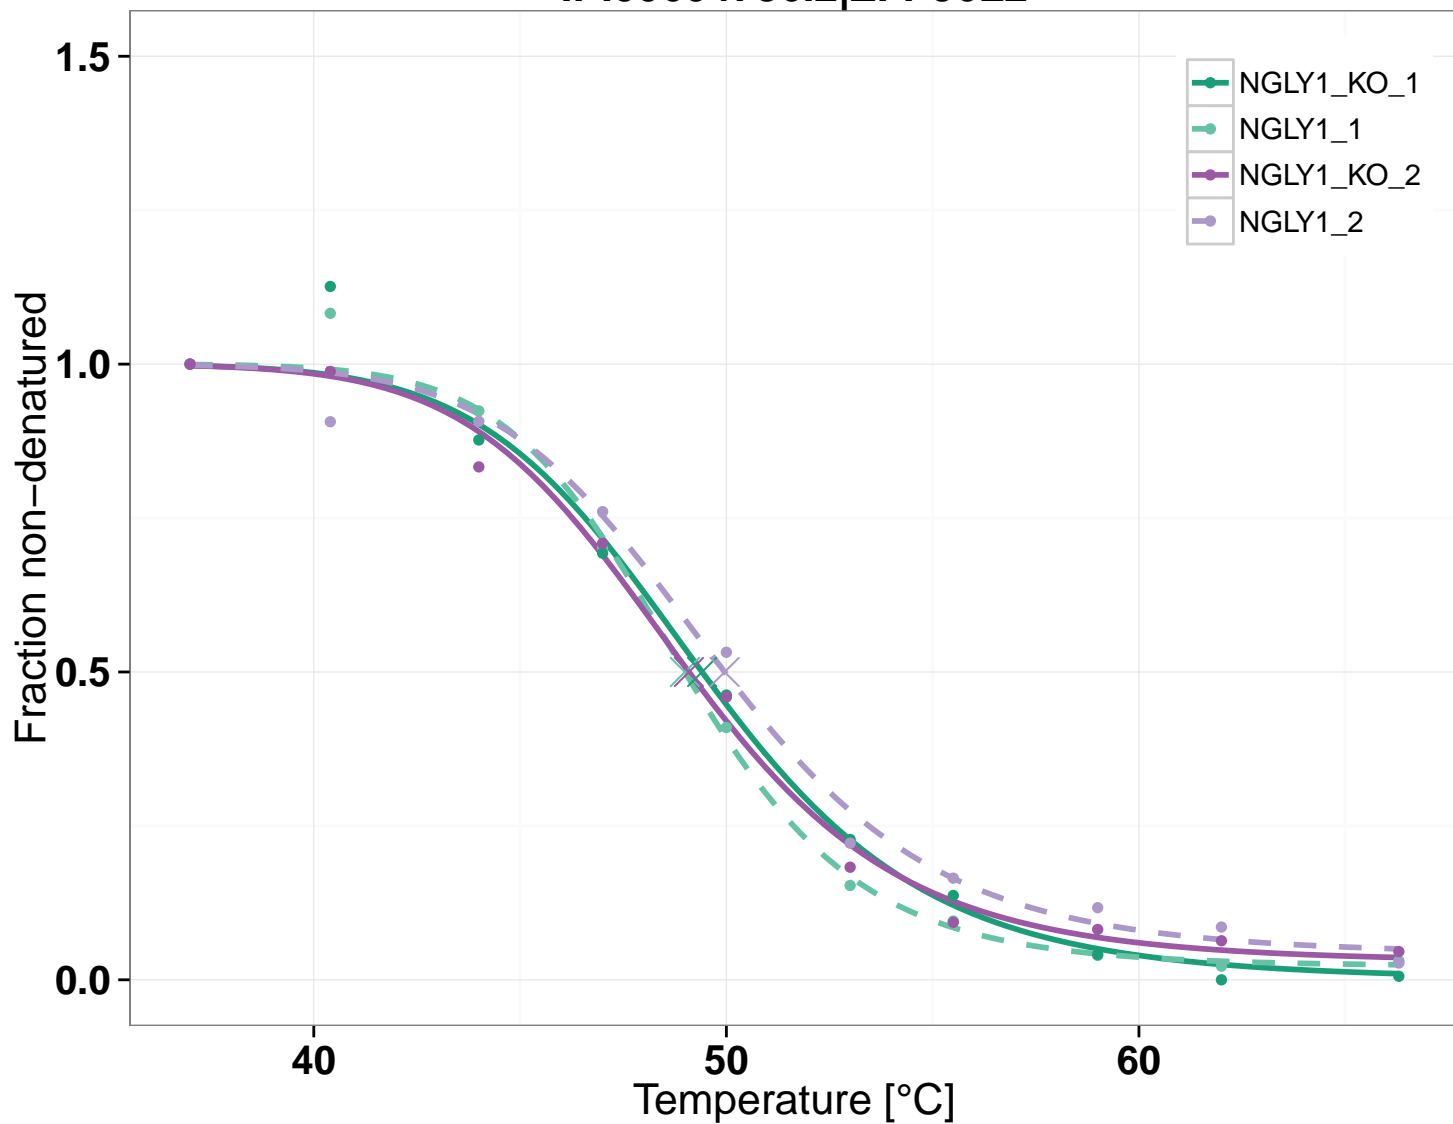

|            | meltPoint | slope  | plateau | R2   |
|------------|-----------|--------|---------|------|
| NGLY1_KO_1 | 49.41     | -0.093 | 0       | 0.99 |
| NGLY1_1    | 49        | -0.11  | 0.02    | 0.99 |
| NGLY1_KO_2 | 49.09     | -0.092 | 0.03    | 0.99 |
| NGLY1_2    | 49.96     | -0.089 | 0.04    | 0.99 |

Supplement: Supplementary file 659 [file 1]

# IPI00012382.3|SNRPA

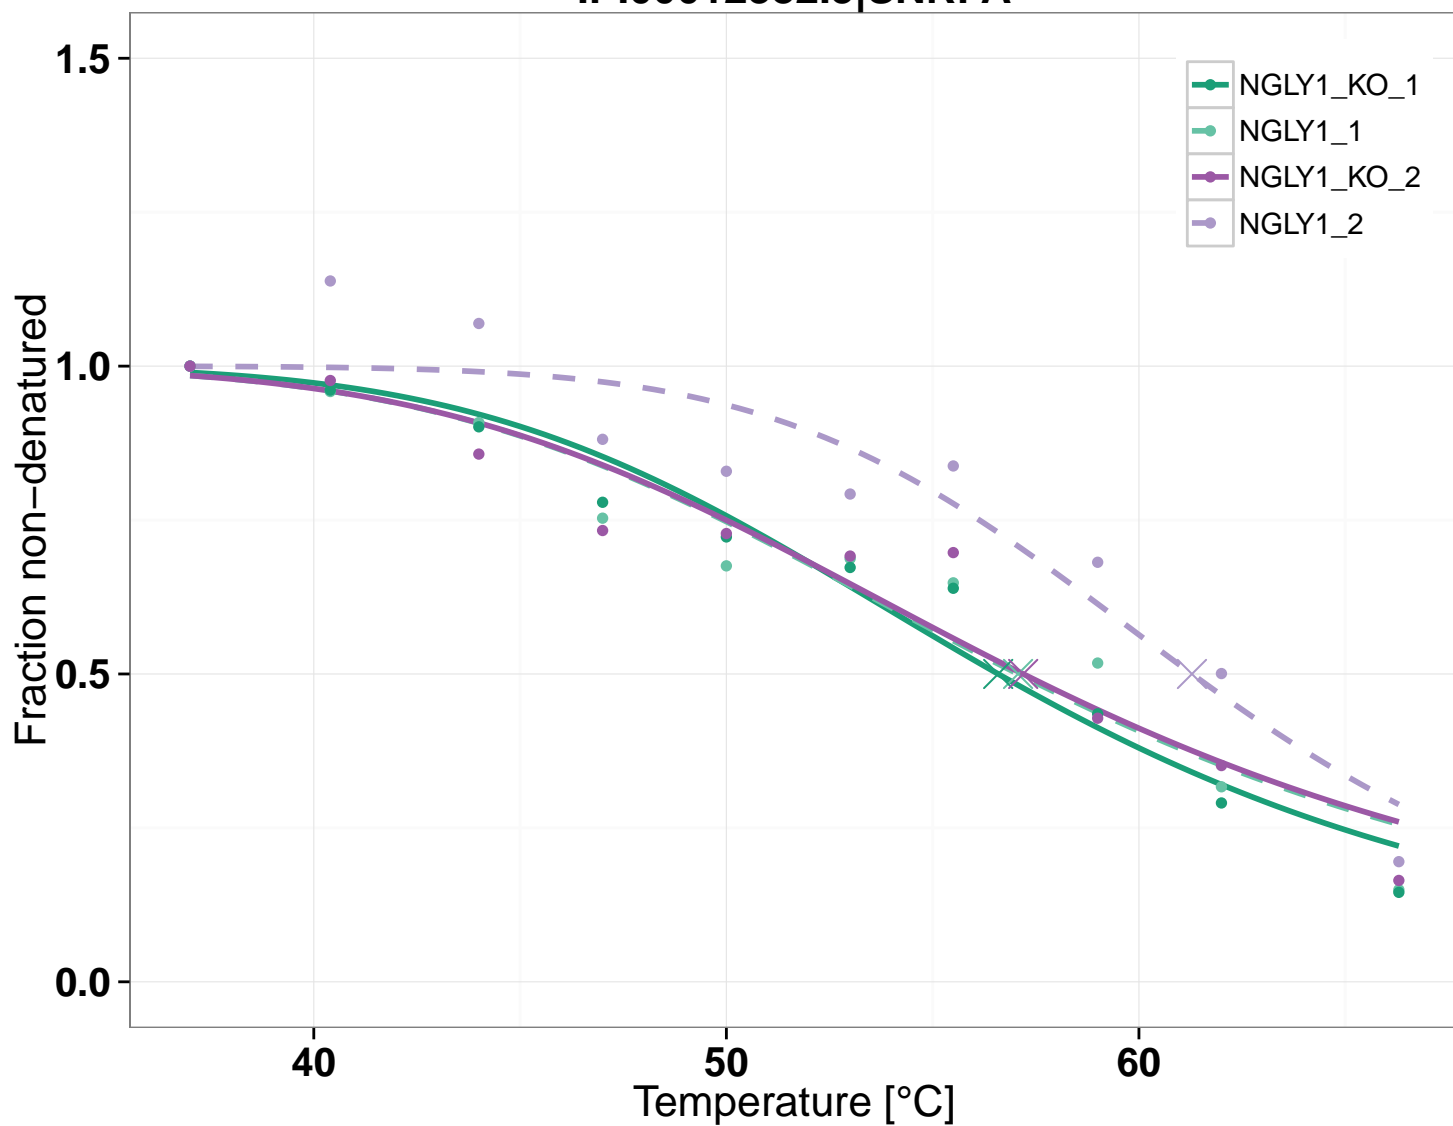

|            | meltPoint | slope  | plateau | R2   |
|------------|-----------|--------|---------|------|
| NGLY1_KO_1 | 56.59     | -0.04  | 0       | 0.97 |
| NGLY1_1    | 57.07     | -0.036 | 0       | 0.94 |
| NGLY1_KO_2 | 57.19     | -0.036 | 0       | 0.93 |
| NGLY1_2    | 61.29     | -0.05  | 0       | 0.9  |

Supplement: Supplementary file 660 [file 1]

IPI00020884.2|PLXNA3

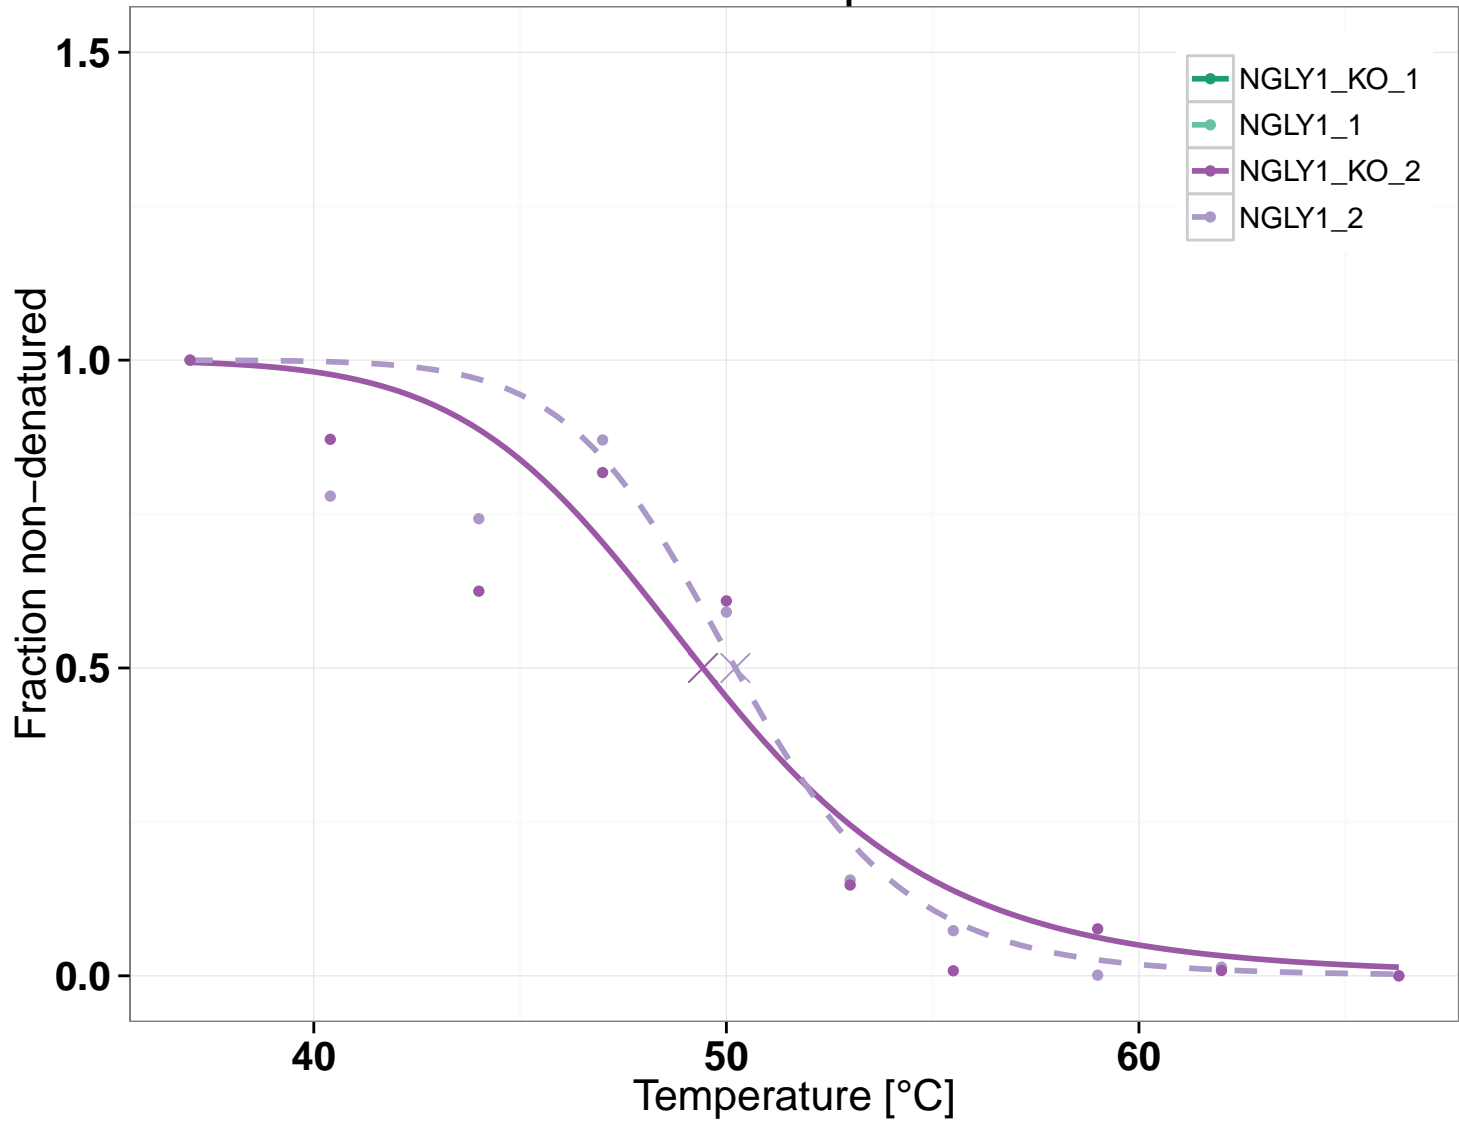

|            | meltPoint | slope  | plateau | R2   |
|------------|-----------|--------|---------|------|
| NGLY1_KO_1 | —         | —      | —       | —    |
| NGLY1_1    | —         | —      | —       | —    |
| NGLY1_KO_2 | 49.43     | -0.086 | 0       | 0.9  |
| NGLY1_2    | 50.22     | -0.12  | 0       | 0.93 |

Supplement: Supplementary file 661 [file 1]

IPI00063419.4|TMEM128

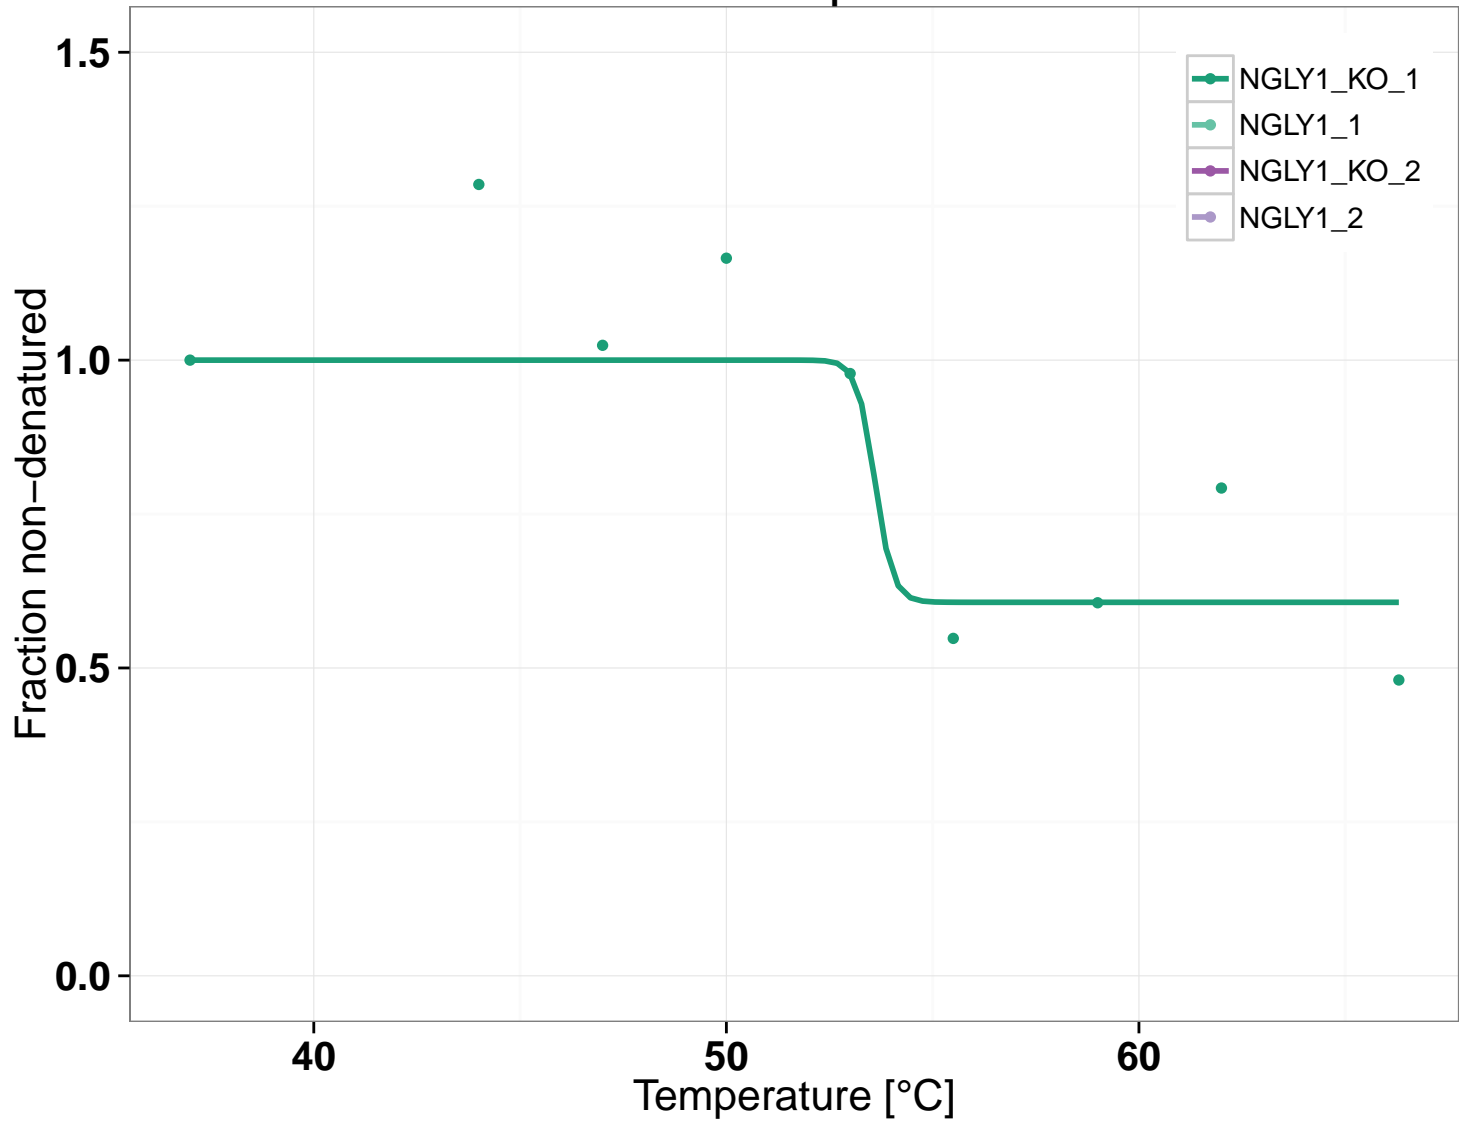

|            | meltPoint | slope | plateau | R2   |
|------------|-----------|-------|---------|------|
| NGLY1_KO_1 | —         | −0.46 | 0.61    | 0.53 |
| NGLY1_1    | —         | —     | —       | —    |
| NGLY1_KO_2 | —         | —     | —       | —    |
| NGLY1_2    | —         | —     | —       | —    |

Supplement: Supplementary file 662 [file 1]

IPI00296432.1|IWS1

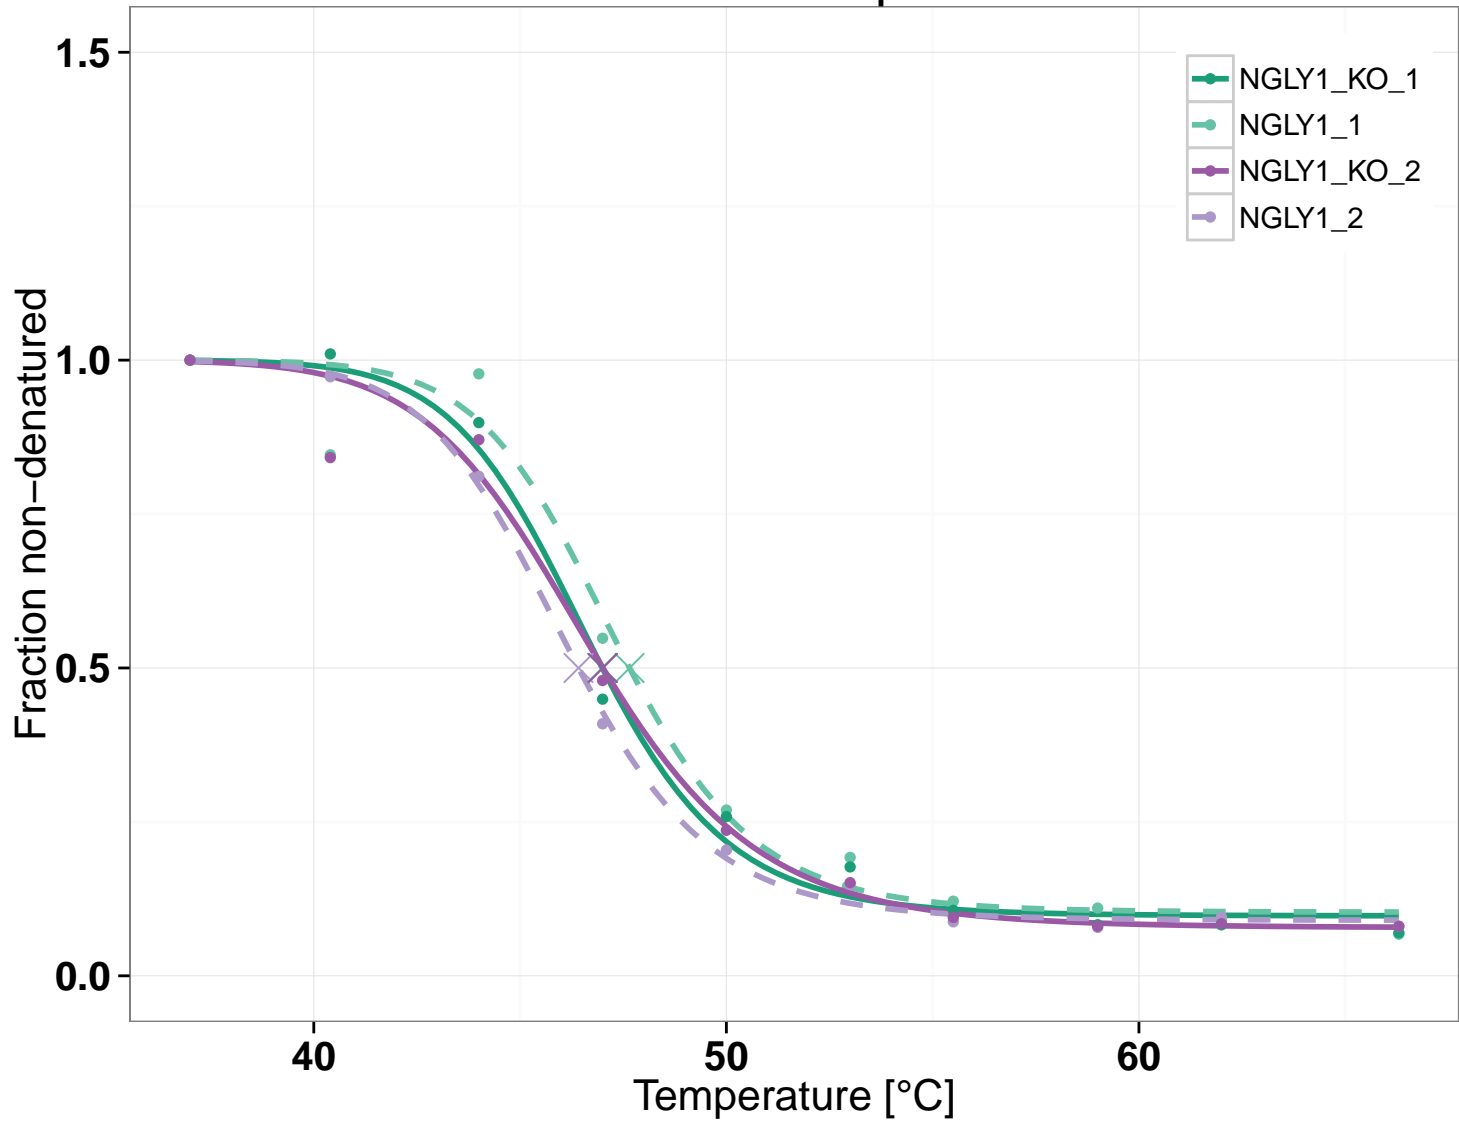

|            | meltPoint | slope | plateau | R2   |
|------------|-----------|-------|---------|------|
| NGLY1_KO_1 | 46.99     | -0.13 | 0.1     | 0.99 |
| NGLY1_1    | 47.65     | -0.13 | 0.1     | 0.98 |
| NGLY1_KO_2 | 47.01     | -0.11 | 0.08    | 0.98 |
| NGLY1_2    | 46.42     | -0.13 | 0.09    | 1    |

Supplement: Supplementary file 663 [file 1]

IPI00005210.2|CETN3

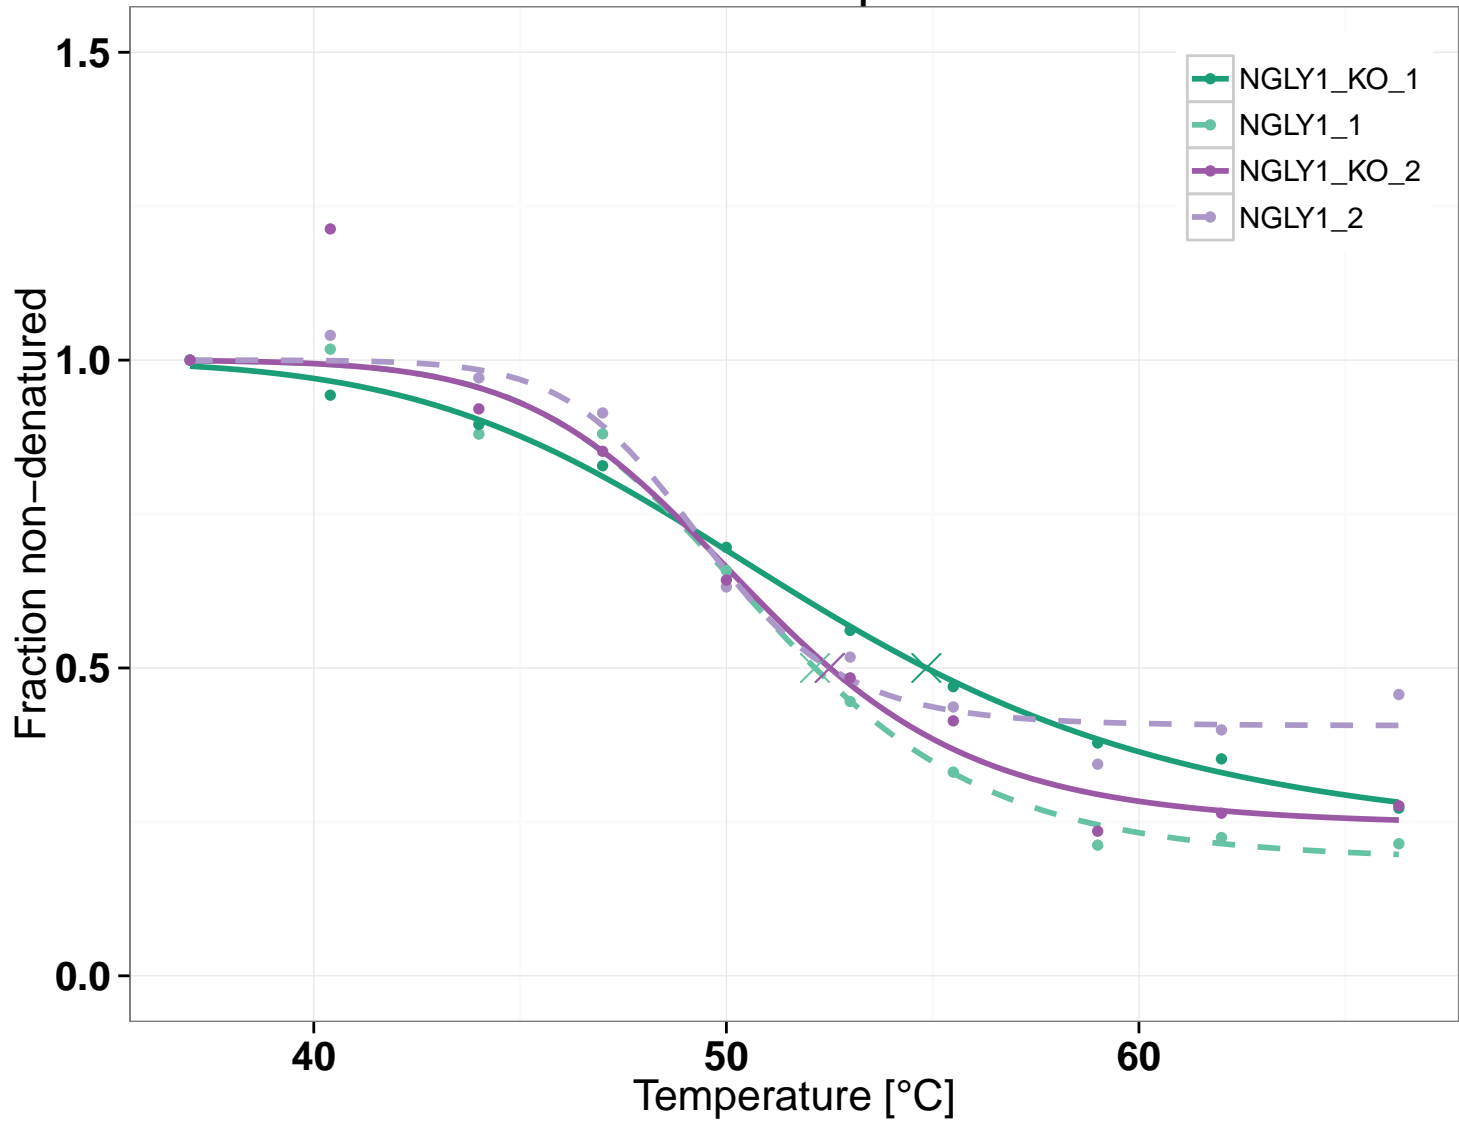

|            | meltPoint | slope  | plateau | R2   |
|------------|-----------|--------|---------|------|
| NGLY1_KO_1 | 54.85     | -0.042 | 0.21    | 1    |
| NGLY1_1    | 52.15     | -0.074 | 0.19    | 0.99 |
| NGLY1_KO_2 | 52.51     | -0.07  | 0.24    | 0.95 |
| NGLY1_2    | 52.5      | -0.087 | 0.41    | 0.98 |

Supplement: Supplementary file 664 [file 1]

# IPI00017184.2|EHD1

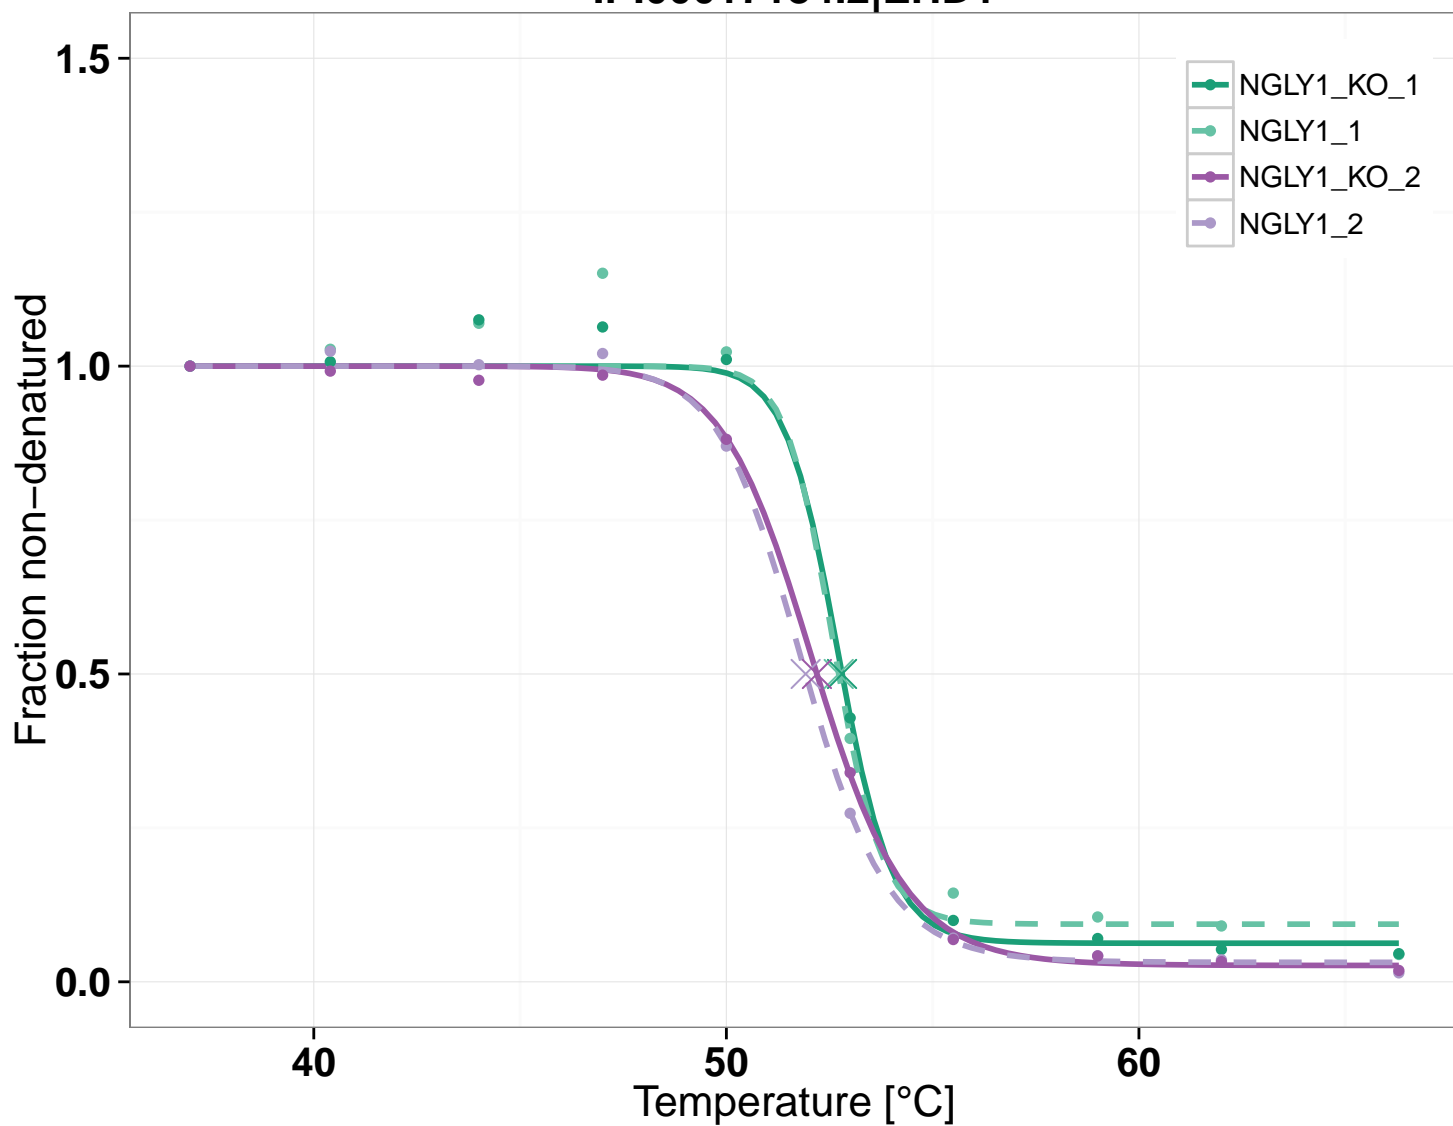

|            | meltPoint | slope | plateau | R2   |
|------------|-----------|-------|---------|------|
| NGLY1_KO_1 | 52.8      | -0.36 | 0.06    | 0.99 |
| NGLY1_1    | 52.72     | -0.39 | 0.09    | 0.98 |
| NGLY1_KO_2 | 52.19     | -0.22 | 0.03    | 1    |
| NGLY1_2    | 51.92     | -0.24 | 0.03    | 1    |

Supplement: Supplementary file 665 [file 1]

IPI00337574.4|ANKRD39

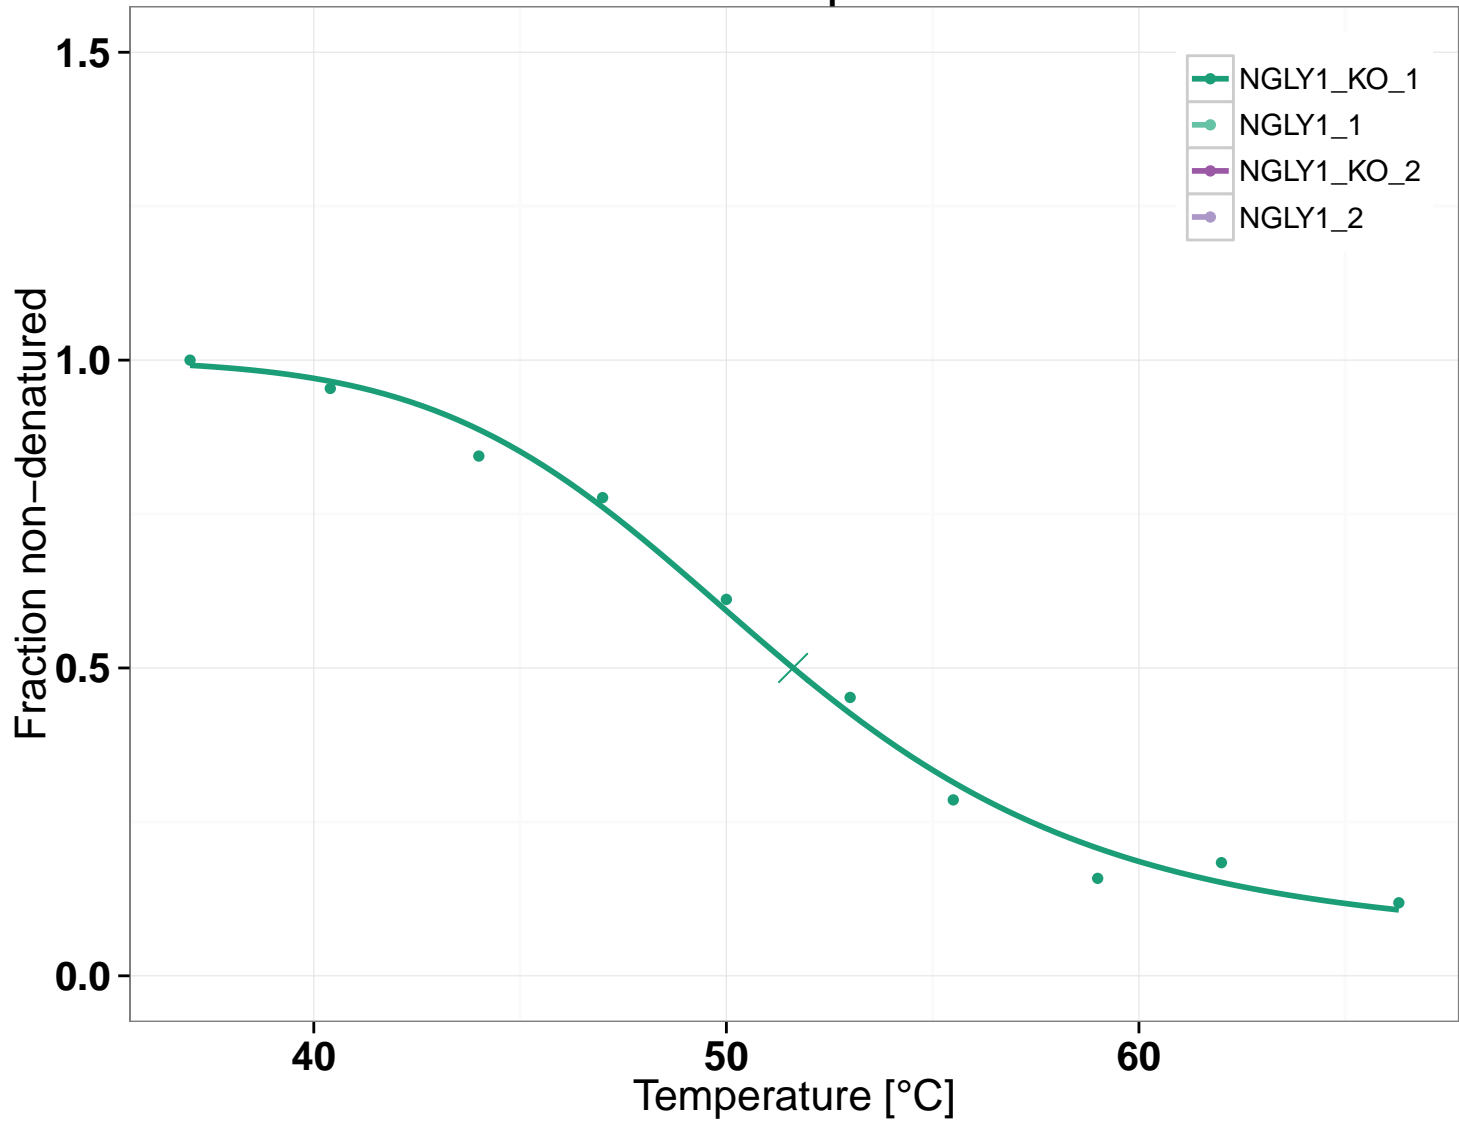

|            | meltPoint | slope  | plateau | R2   |
|------------|-----------|--------|---------|------|
| NGLY1_KO_1 | 51.62     | -0.059 | 0.05    | 0.99 |
| NGLY1_1    | -         | -      | -       | -    |
| NGLY1_KO_2 | -         | -      | -       | -    |
| NGLY1_2    | -         | -      | -       | -    |

Supplement: Supplementary file 666 [file 1]

IPI00604527.2|TARS2

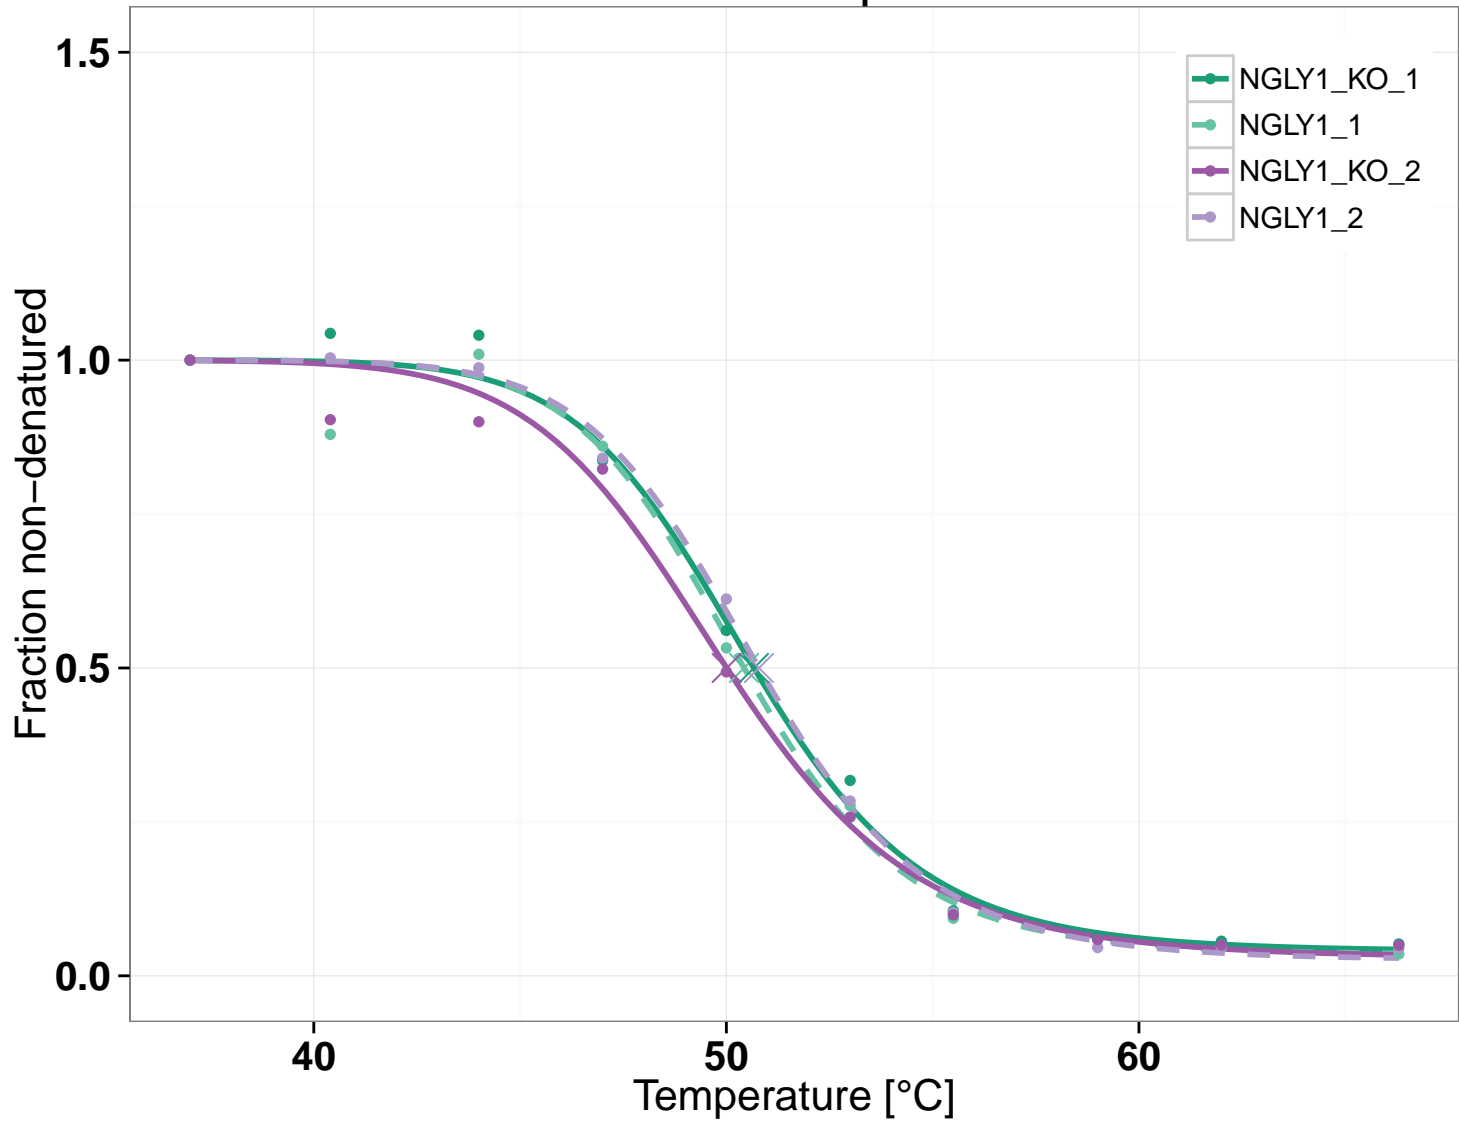

|            | meltPoint | slope | plateau | R2   |
|------------|-----------|-------|---------|------|
| NGLY1_KO_1 | 50.67     | -0.11 | 0.04    | 0.99 |
| NGLY1_1    | 50.43     | -0.12 | 0.03    | 0.99 |
| NGLY1_KO_2 | 50.01     | -0.1  | 0.03    | 0.99 |
| NGLY1_2    | 50.79     | -0.12 | 0.03    | 1    |

Supplement: Supplementary file 667 [file 1]

IPI00166933.1|C10ORF12

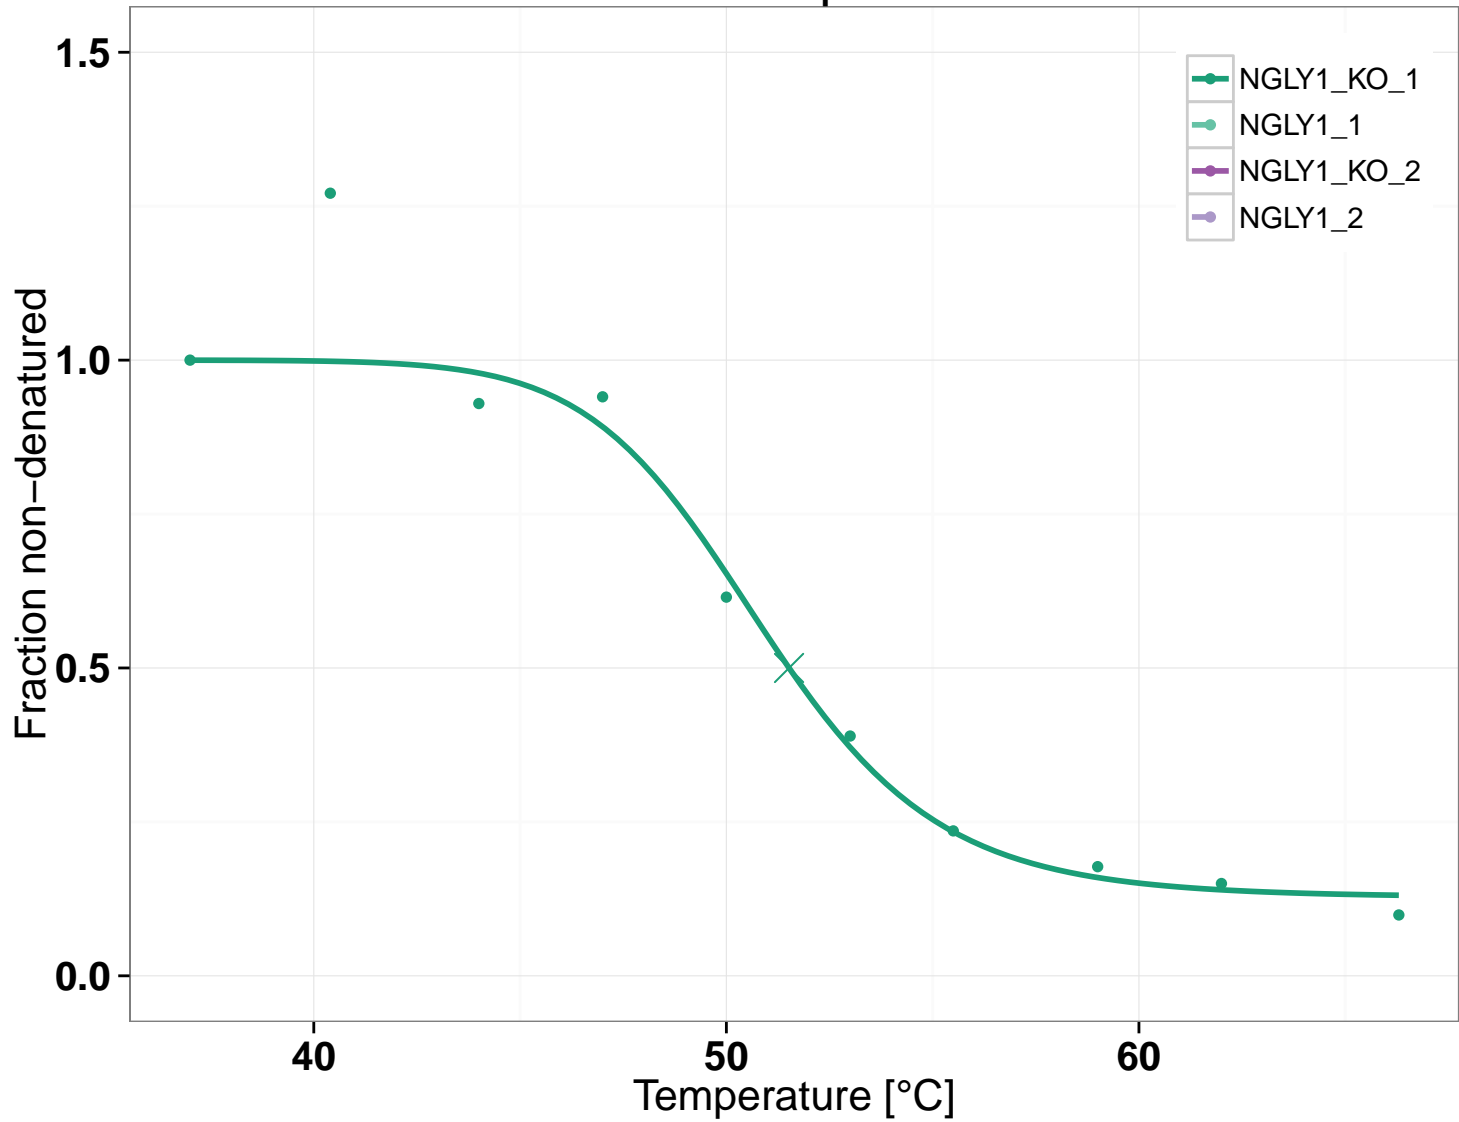

|            | meltPoint | slope | plateau | R2   |
|------------|-----------|-------|---------|------|
| NGLY1_KO_1 | 51.52     | -0.1  | 0.13    | 0.95 |
| NGLY1_1    | -         | -     | -       | -    |
| NGLY1_KO_2 | -         | -     | -       | -    |
| NGLY1_2    | -         | -     | -       | -    |

Supplement: Supplementary file 668 [file 1]

# IPI00643808.2|DTL

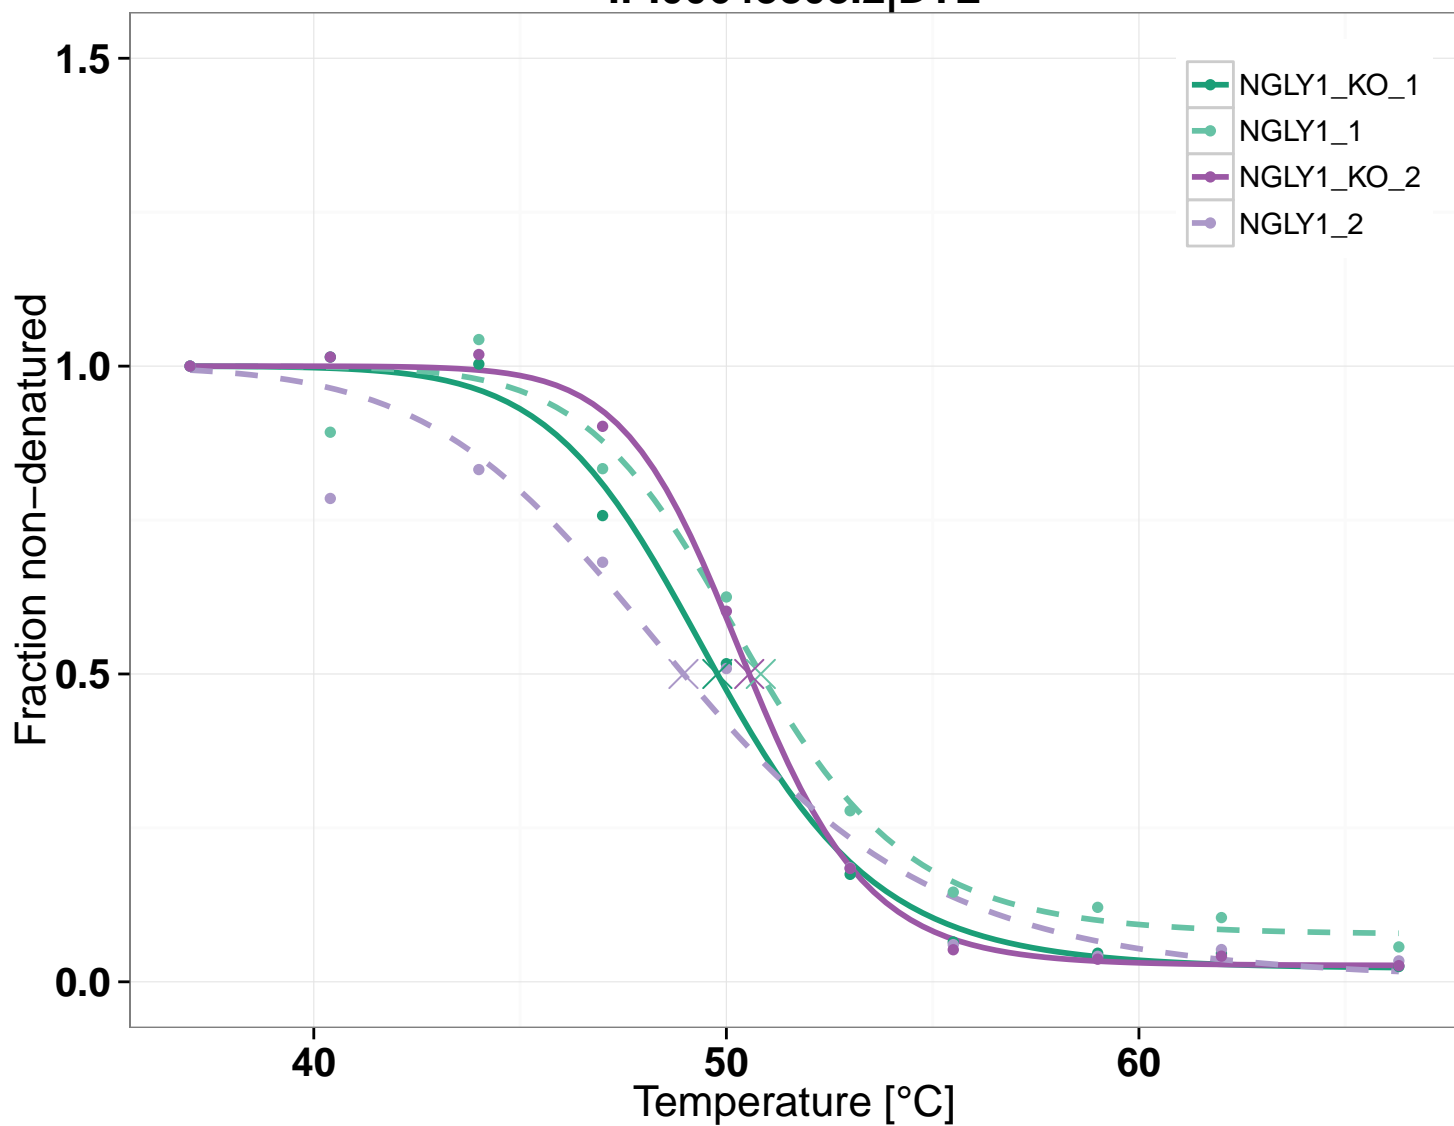

|            | meltPoint | slope  | plateau | R2   |
|------------|-----------|--------|---------|------|
| NGLY1_KO_1 | 49.78     | -0.12  | 0.02    | 1    |
| NGLY1_1    | 50.83     | -0.12  | 0.08    | 0.99 |
| NGLY1_KO_2 | 50.55     | -0.16  | 0.03    | 1    |
| NGLY1_2    | 48.96     | -0.081 | 0       | 0.96 |

Supplement: Supplementary file 669 [file 1]

IPI00011306.2|CCDC130

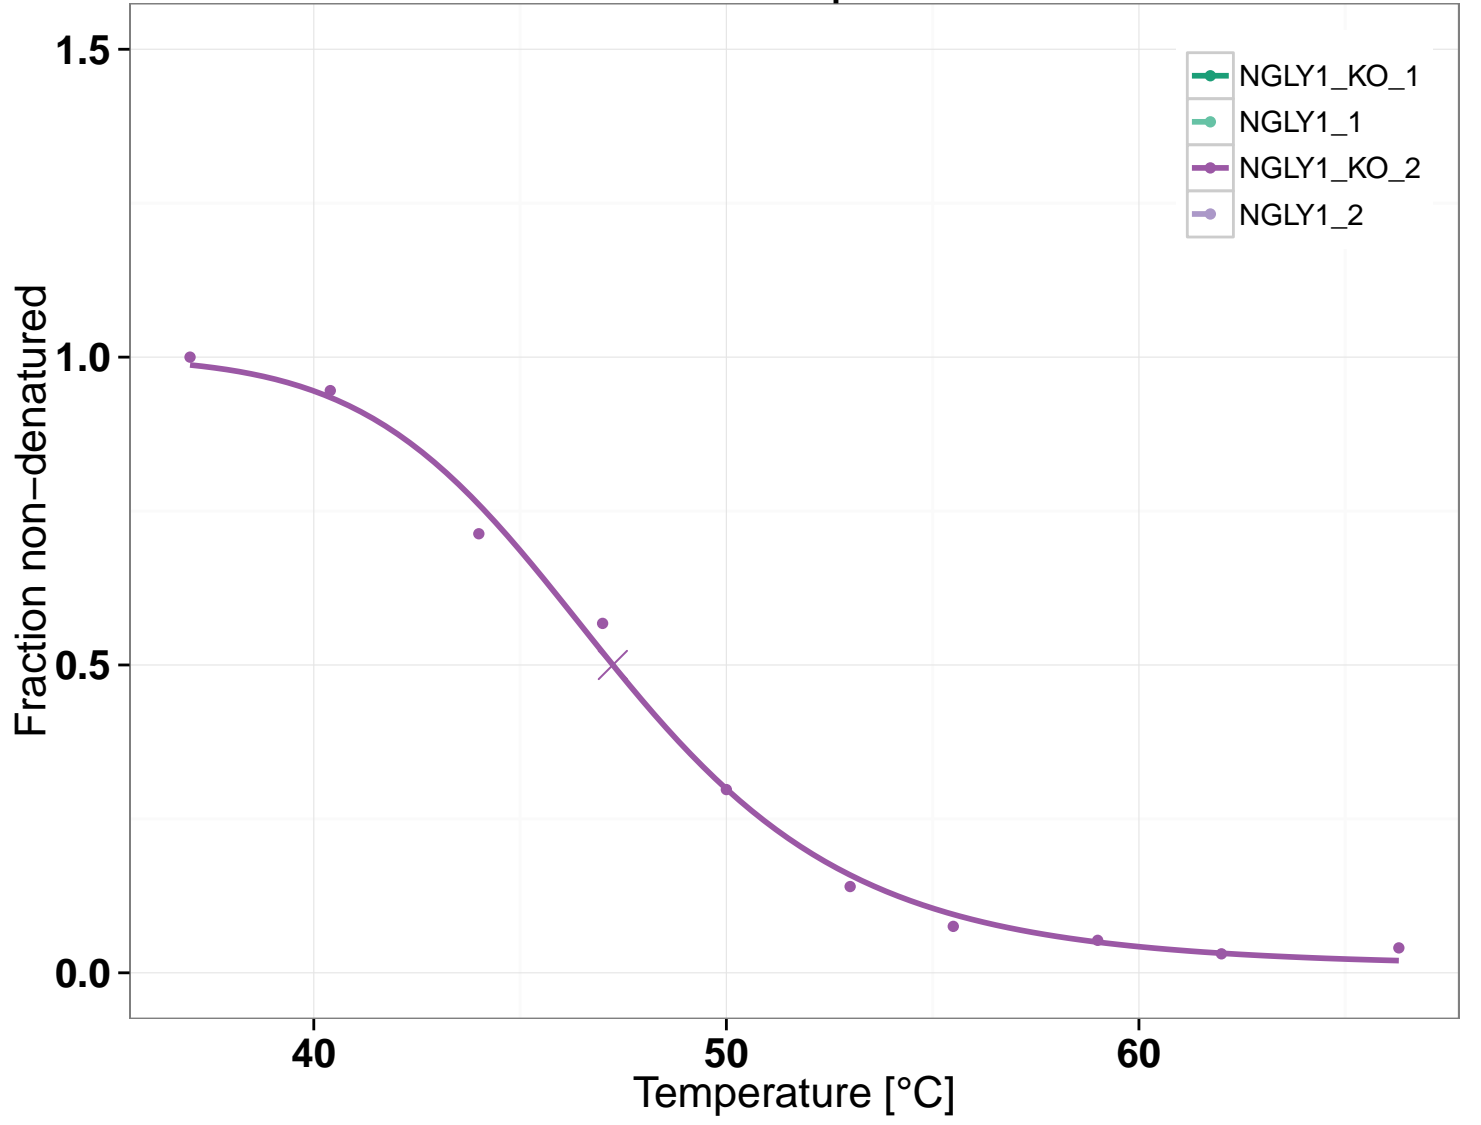

|            | meltPoint | slope  | plateau | R2 |
|------------|-----------|--------|---------|----|
| NGLY1_KO_1 | -         | -      | -       | -  |
| NGLY1_1    | -         | -      | -       | -  |
| NGLY1_KO_2 | 47.25     | -0.084 | 0.01    | 1  |
| NGLY1_2    | -         | -      | -       | -  |

Supplement: Supplementary file 670 [file 1]

IPI00016853.3|TMEM184B

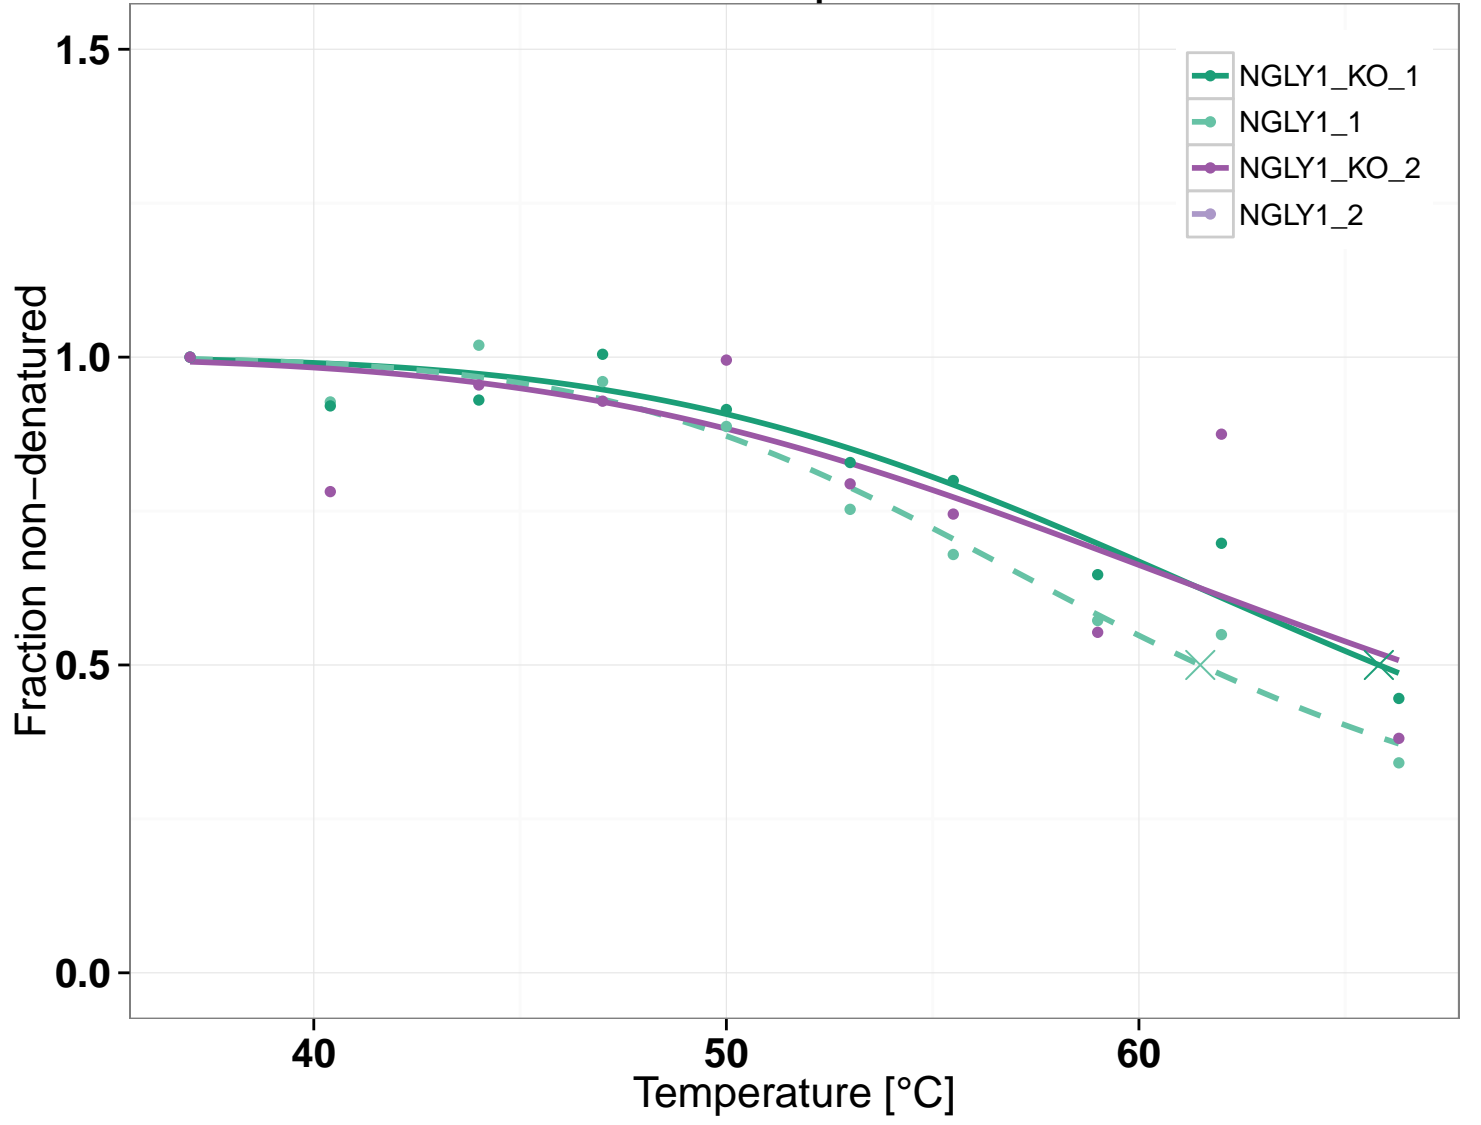

|            | meltPoint | slope  | plateau | R2   |
|------------|-----------|--------|---------|------|
| NGLY1_KO_1 | 65.82     | -0.029 | 0       | 0.92 |
| NGLY1_1    | 61.49     | -0.035 | 0.13    | 0.97 |
| NGLY1_KO_2 | -         | -0.025 | 0       | 0.57 |
| NGLY1_2    | -         | -      | -       | -    |

Supplement: Supplementary file 671 [file 1]

IPI00022543.4|PIGK

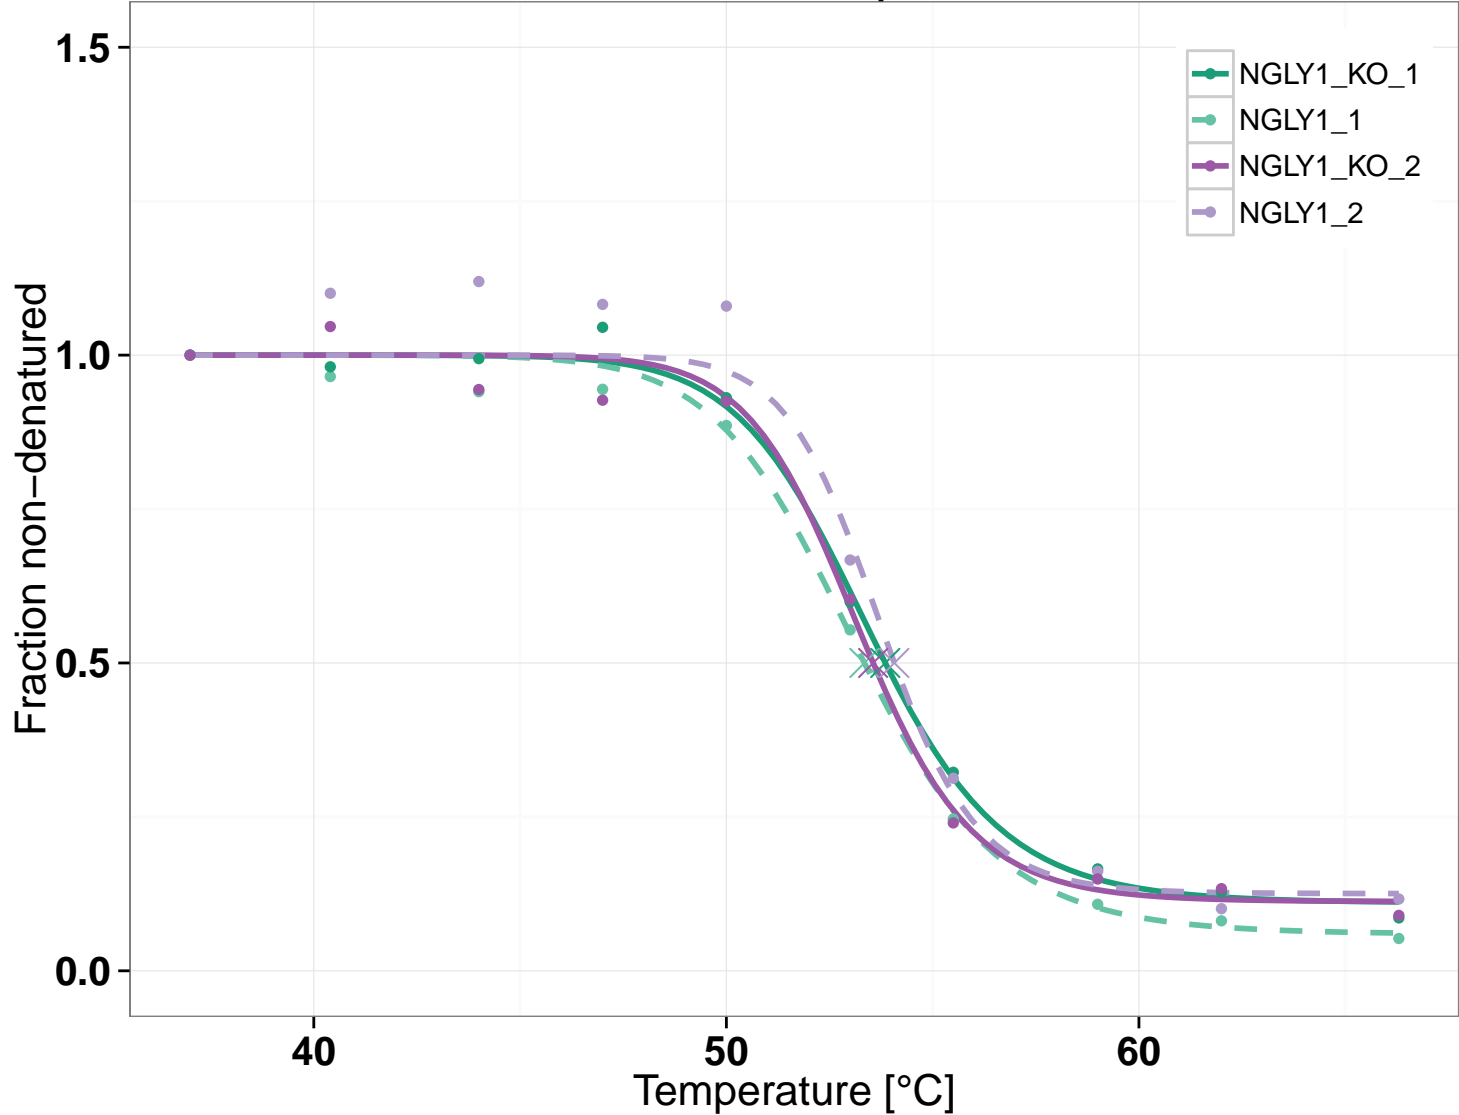

|            | meltPoint | slope | plateau | R2   |
|------------|-----------|-------|---------|------|
| NGLY1_KO_1 | 53.85     | -0.14 | 0.11    | 1    |
| NGLY1_1    | 53.35     | -0.14 | 0.06    | 1    |
| NGLY1_KO_2 | 53.56     | -0.16 | 0.11    | 0.99 |
| NGLY1_2    | 54.07     | -0.19 | 0.13    | 0.98 |

Supplement: Supplementary file 672 [file 1]

IPI00298851.4|CD151

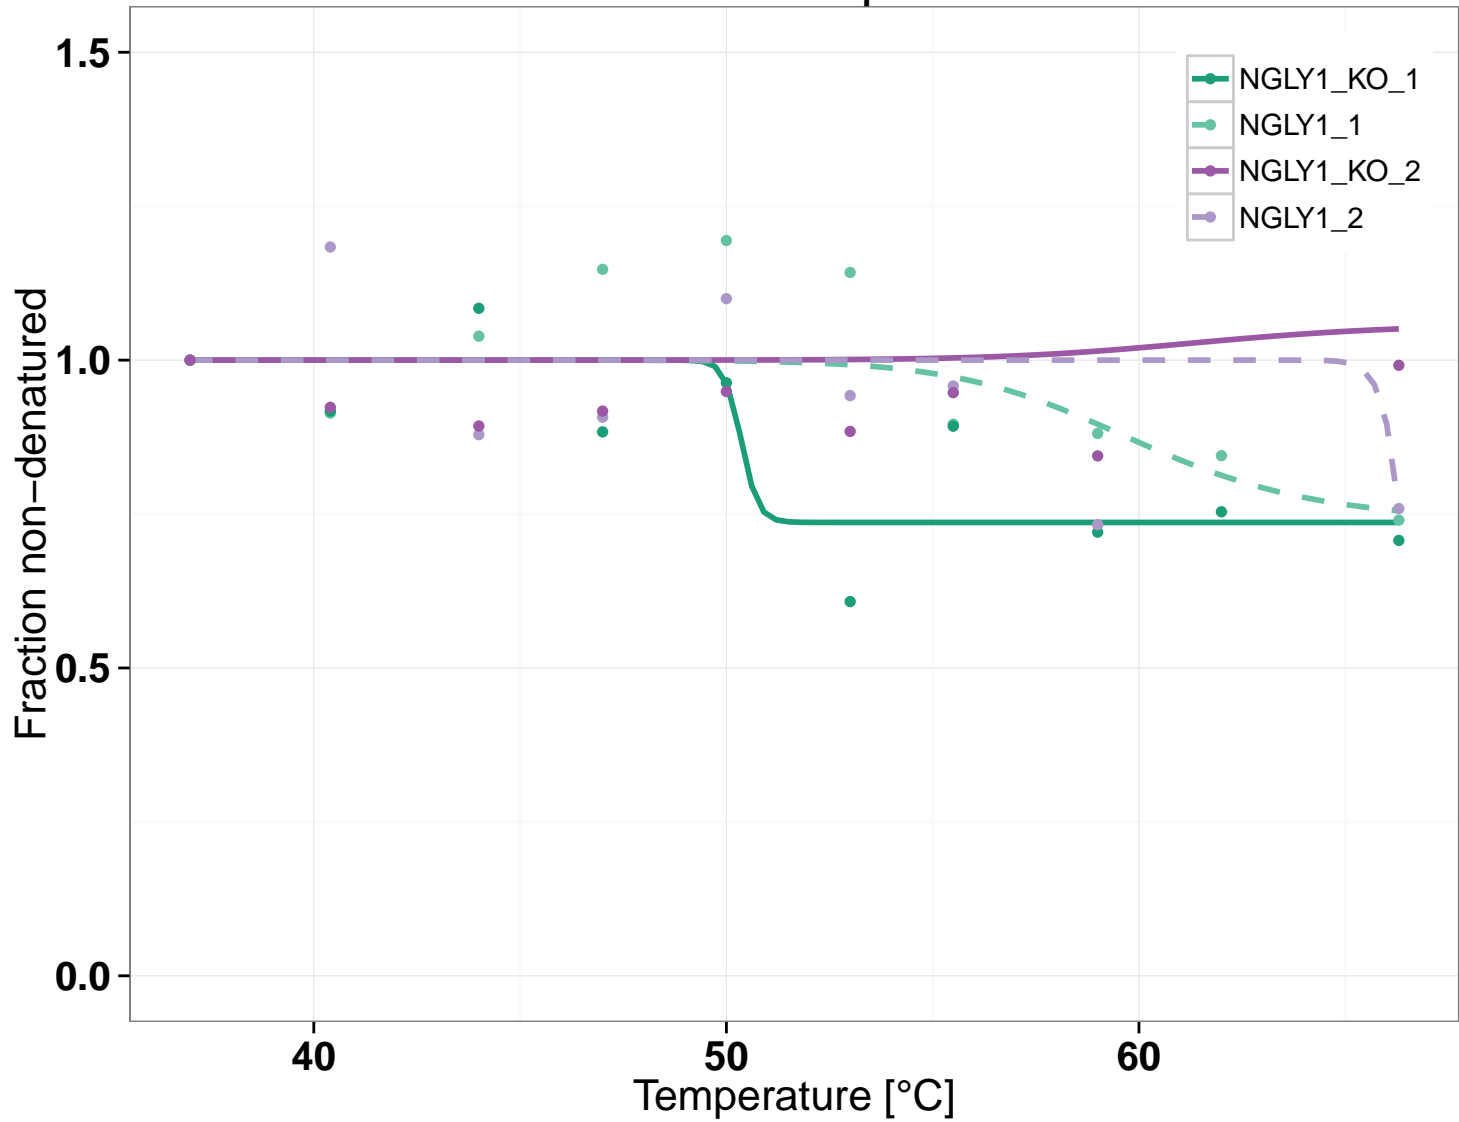

|            | meltPoint | slope  | plateau | R2    |
|------------|-----------|--------|---------|-------|
| NGLY1_KO_1 | —         | −0.33  | 0.74    | 0.65  |
| NGLY1_1    | —         | −0.03  | 0.74    | 0.51  |
| NGLY1_KO_2 | —         | 0.0061 | 1.06    | −0.16 |
| NGLY1_2    | —         | —      | 0       | 0.1   |

Supplement: Supplementary file 673 [file 1]

# IPI00009243.2|LEPR

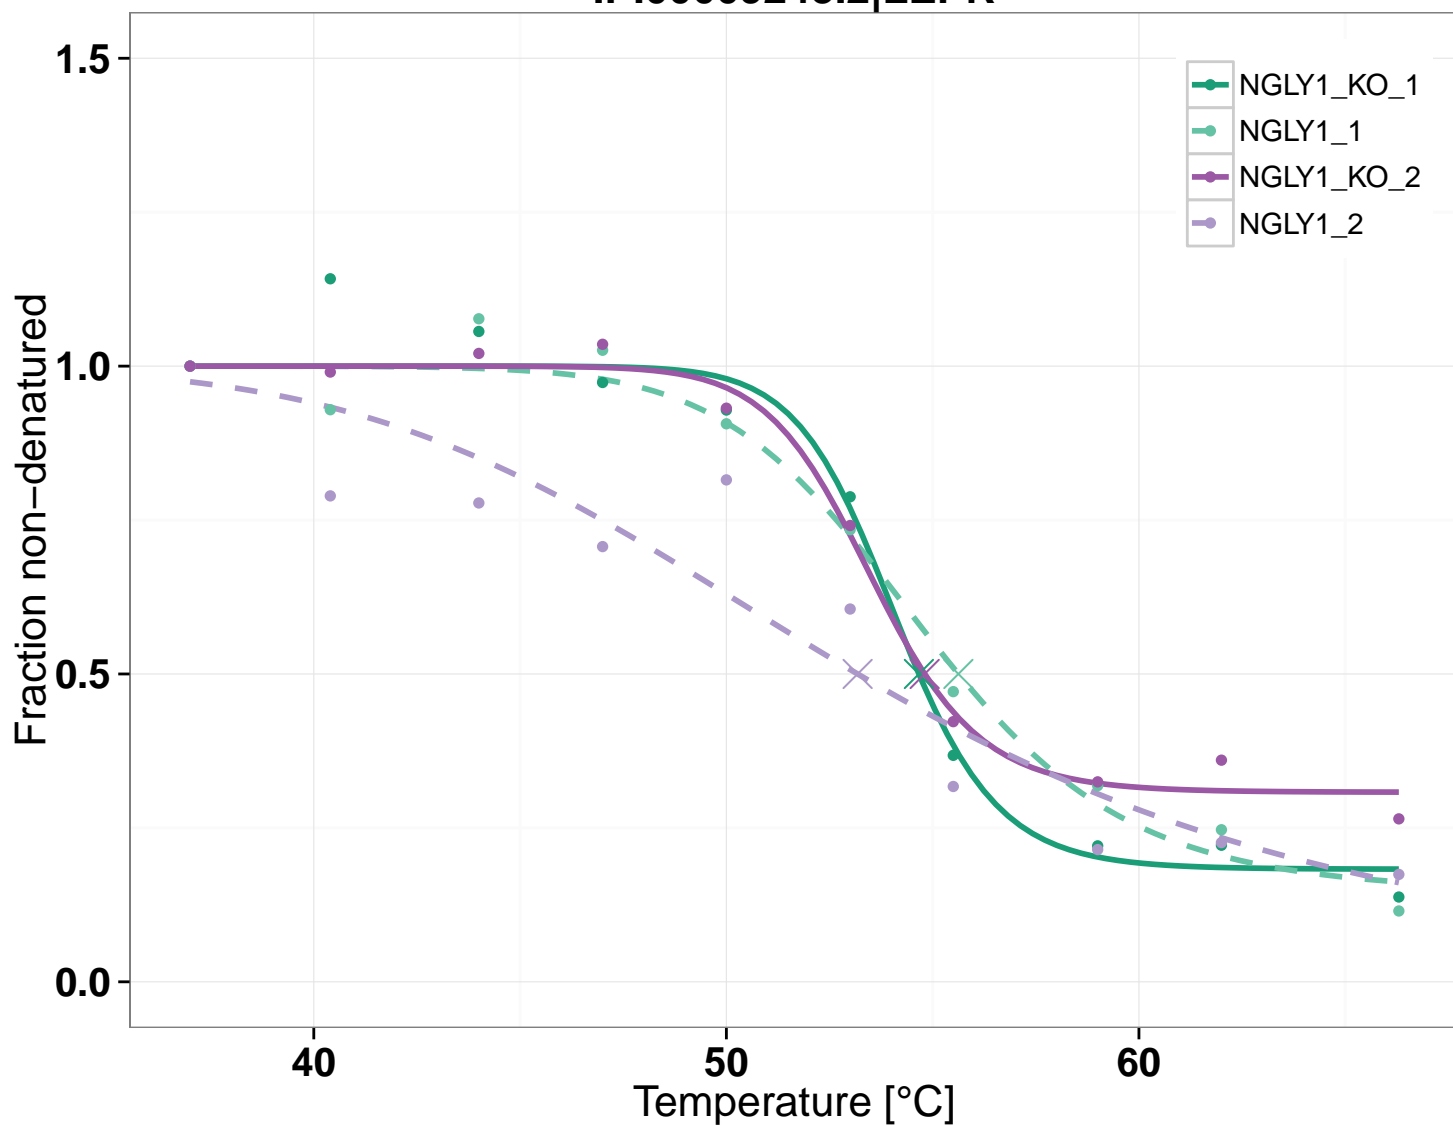

|            | meltPoint | slope  | plateau | R2   |
|------------|-----------|--------|---------|------|
| NGLY1_KO_1 | 54.67     | -0.17  | 0.18    | 0.98 |
| NGLY1_1    | 55.62     | -0.087 | 0.14    | 0.98 |
| NGLY1_KO_2 | 54.81     | -0.13  | 0.31    | 0.99 |
| NGLY1_2    | 53.18     | -0.041 | 0       | 0.89 |

Supplement: Supplementary file 674 [file 1]

IPI00024157.1|FKBP3

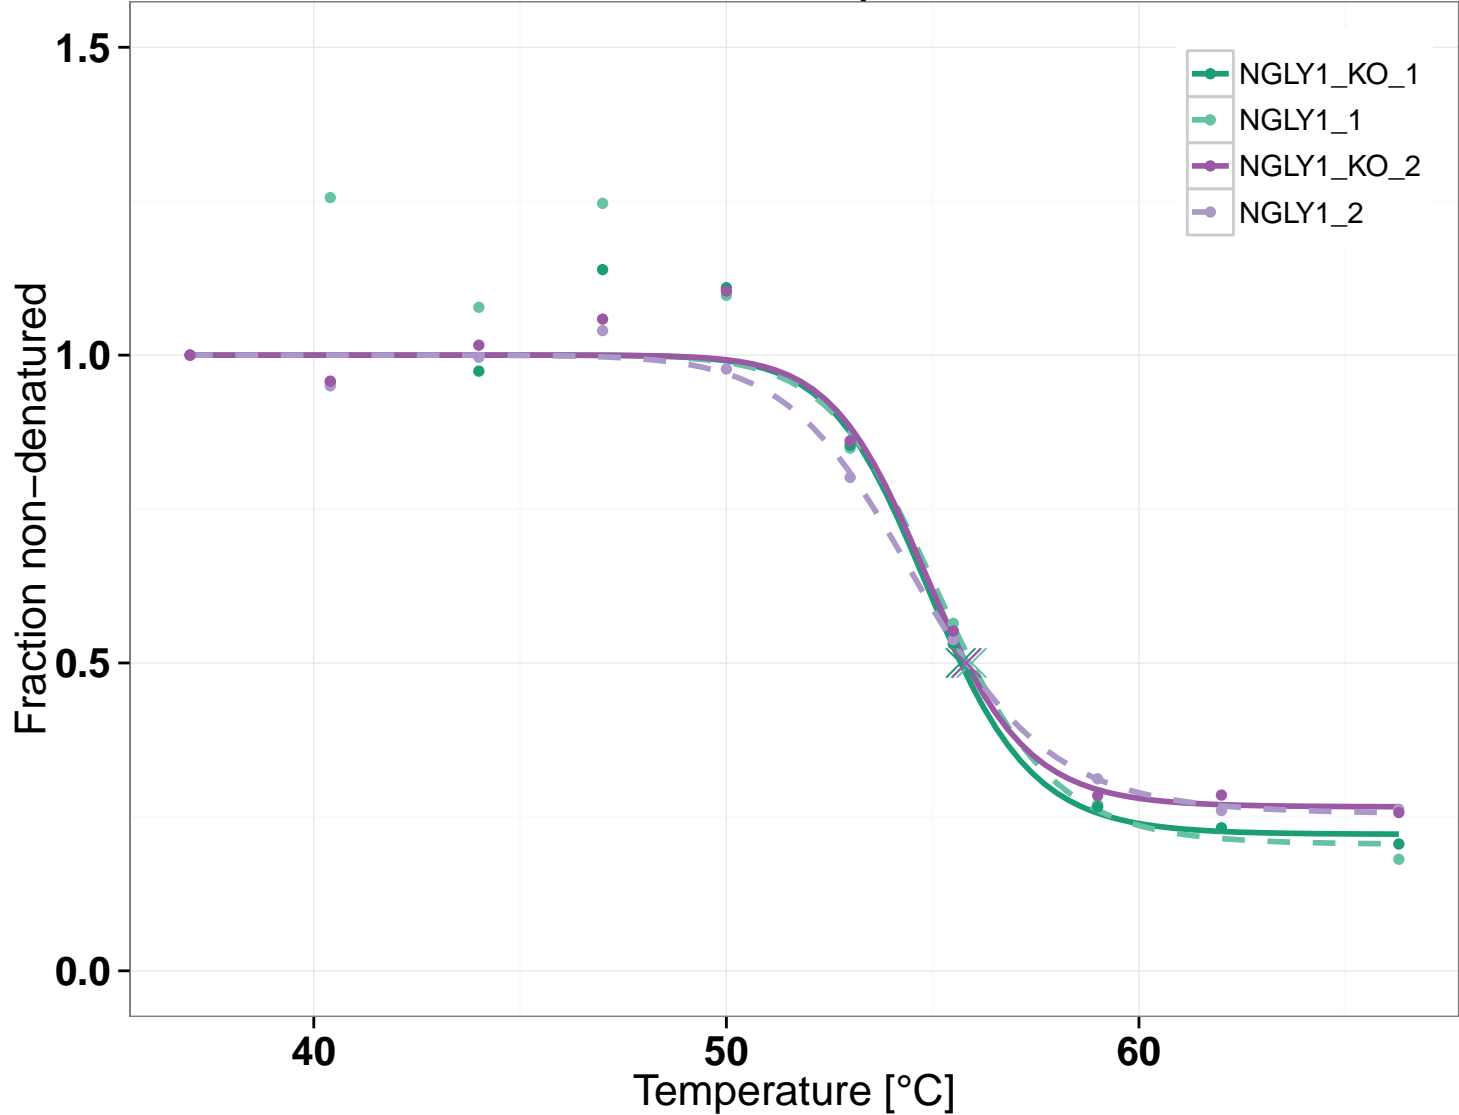

|            | meltPoint | slope | plateau | R2   |
|------------|-----------|-------|---------|------|
| NGLY1_KO_1 | 55.68     | -0.16 | 0.22    | 0.97 |
| NGLY1_1    | 55.94     | -0.15 | 0.21    | 0.91 |
| NGLY1_KO_2 | 55.81     | -0.16 | 0.27    | 0.98 |
| NGLY1_2    | 55.83     | -0.12 | 0.26    | 1    |

Supplement: Supplementary file 675 [file 1]

# IPI00015077.1|EIF1

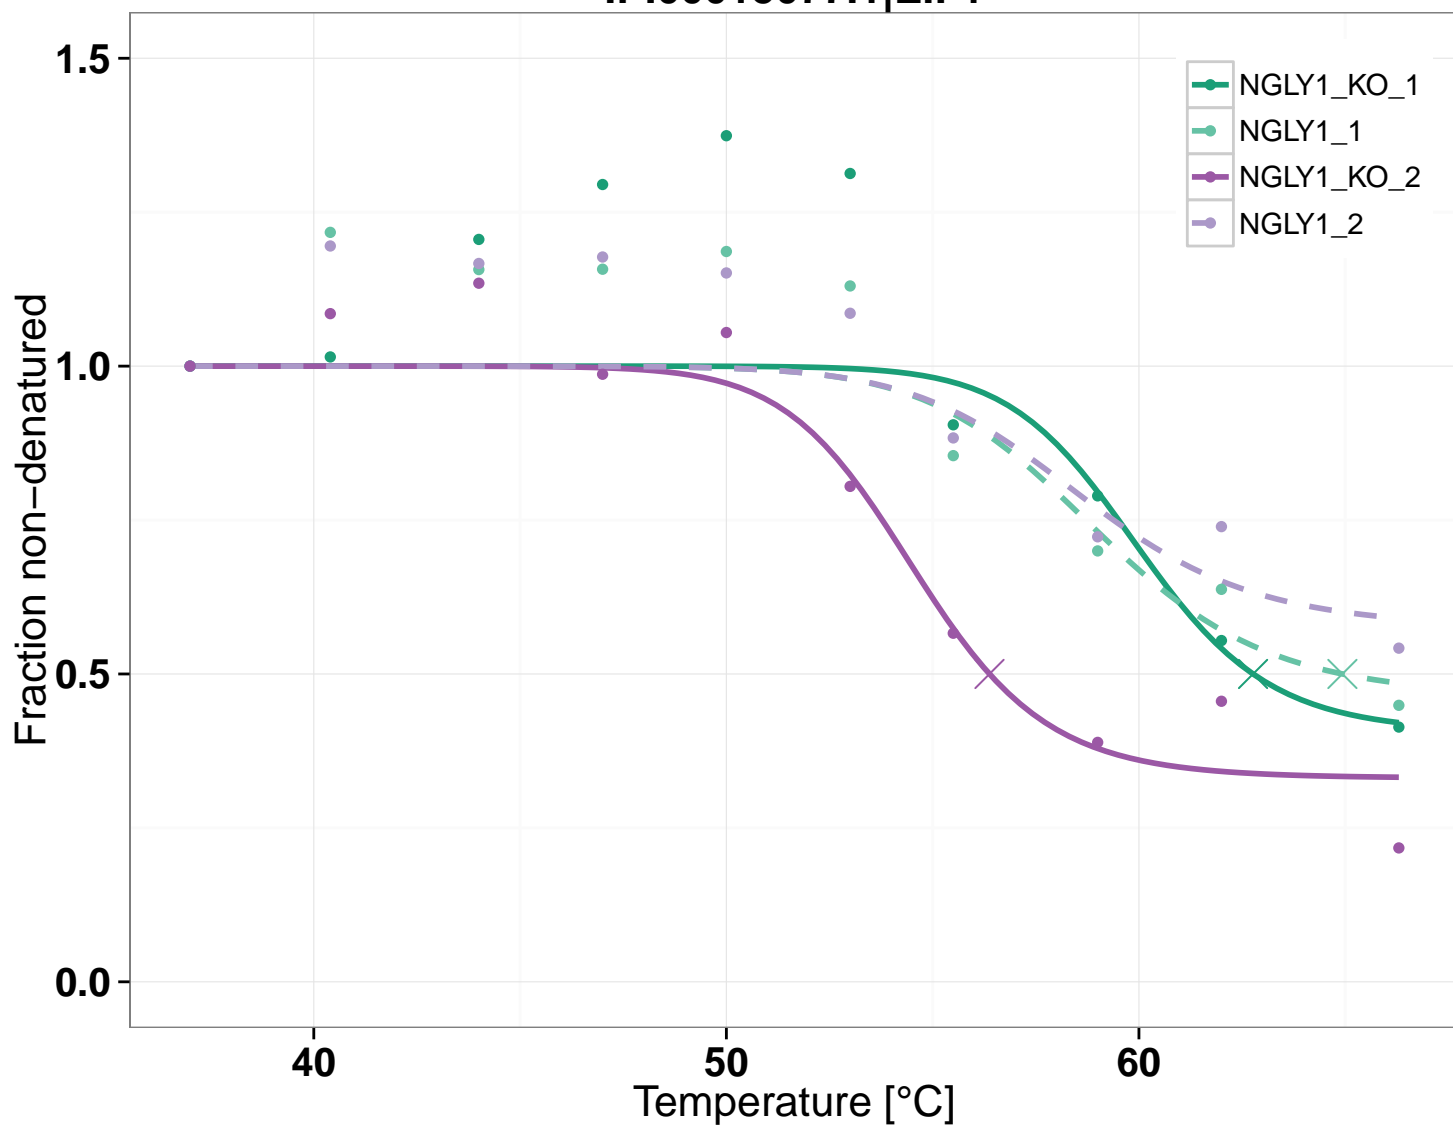

|            | meltPoint | slope  | plateau | R2   |
|------------|-----------|--------|---------|------|
| NGLY1_KO_1 | 62.77     | -0.094 | 0.4     | 0.61 |
| NGLY1_1    | 64.93     | -0.065 | 0.46    | 0.75 |
| NGLY1_KO_2 | 56.38     | -0.11  | 0.33    | 0.94 |
| NGLY1_2    | -         | -0.051 | 0.57    | 0.7  |

Supplement: Supplementary file 676 [file 1]

# IPI00793181.1|SELS

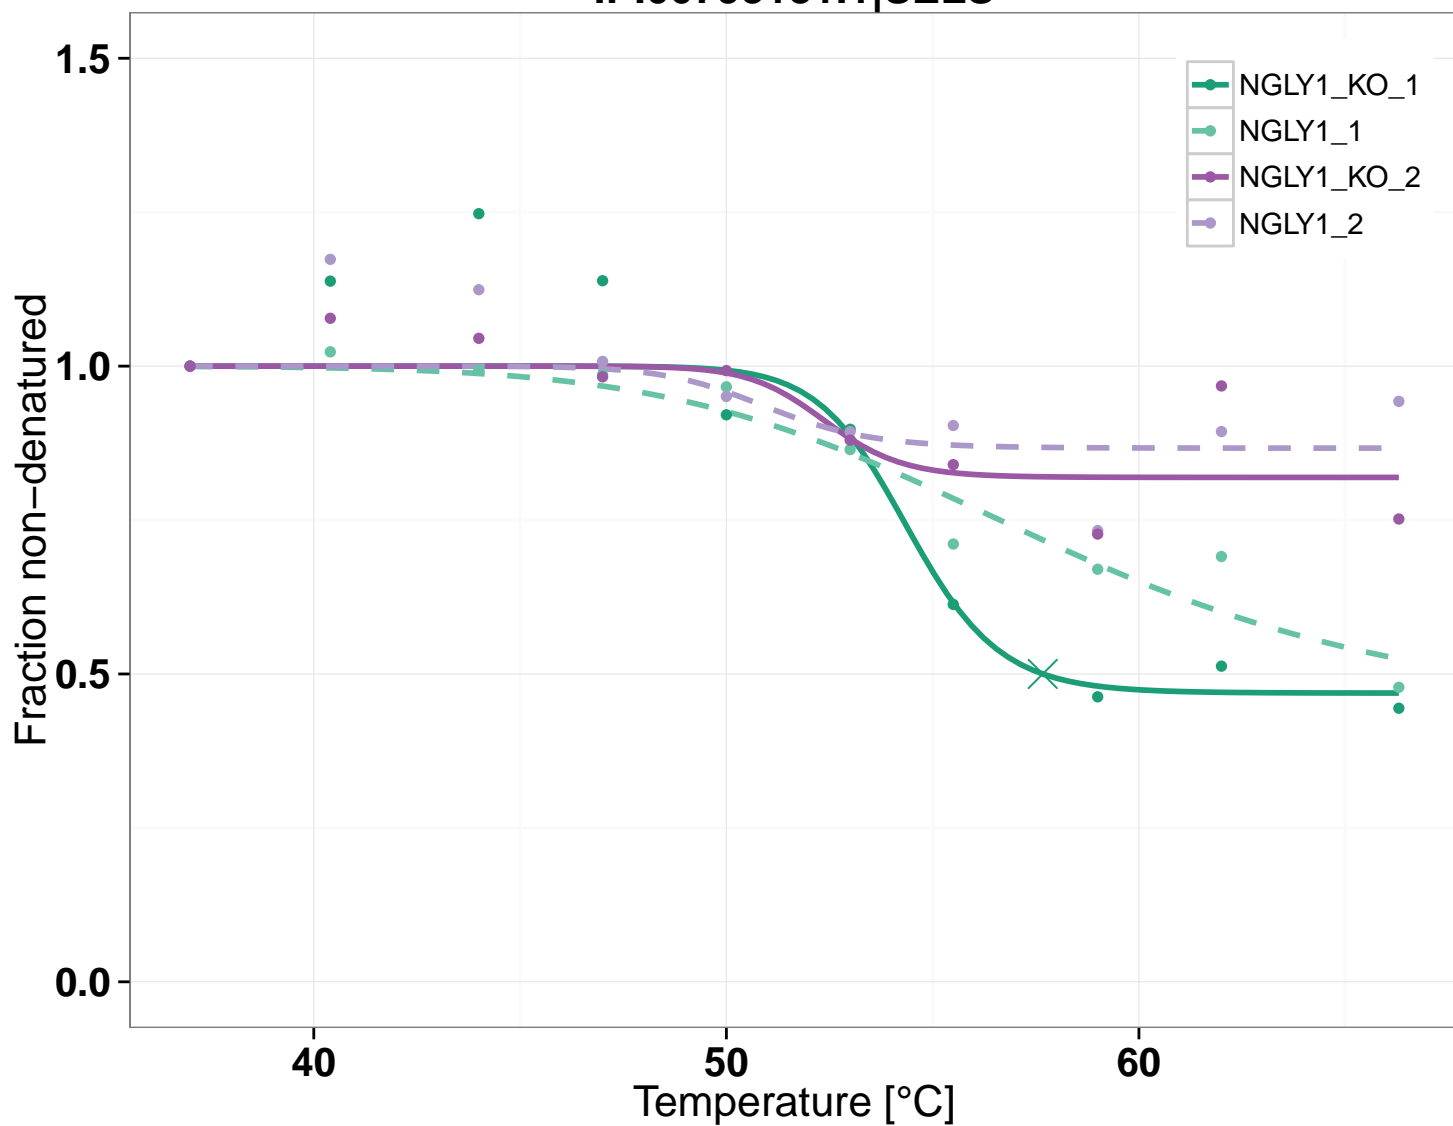

|            | meltPoint | slope  | plateau | R2   |
|------------|-----------|--------|---------|------|
| NGLY1_KO_1 | 57.67     | -0.12  | 0.47    | 0.87 |
| NGLY1_1    | -         | -0.031 | 0.42    | 0.94 |
| NGLY1_KO_2 | -         | -0.049 | 0.82    | 0.67 |
| NGLY1_2    | -         | -0.026 | 0.87    | 0.49 |

Supplement: Supplementary file 677 [file 1]

IPI00059242.3|SYAP1

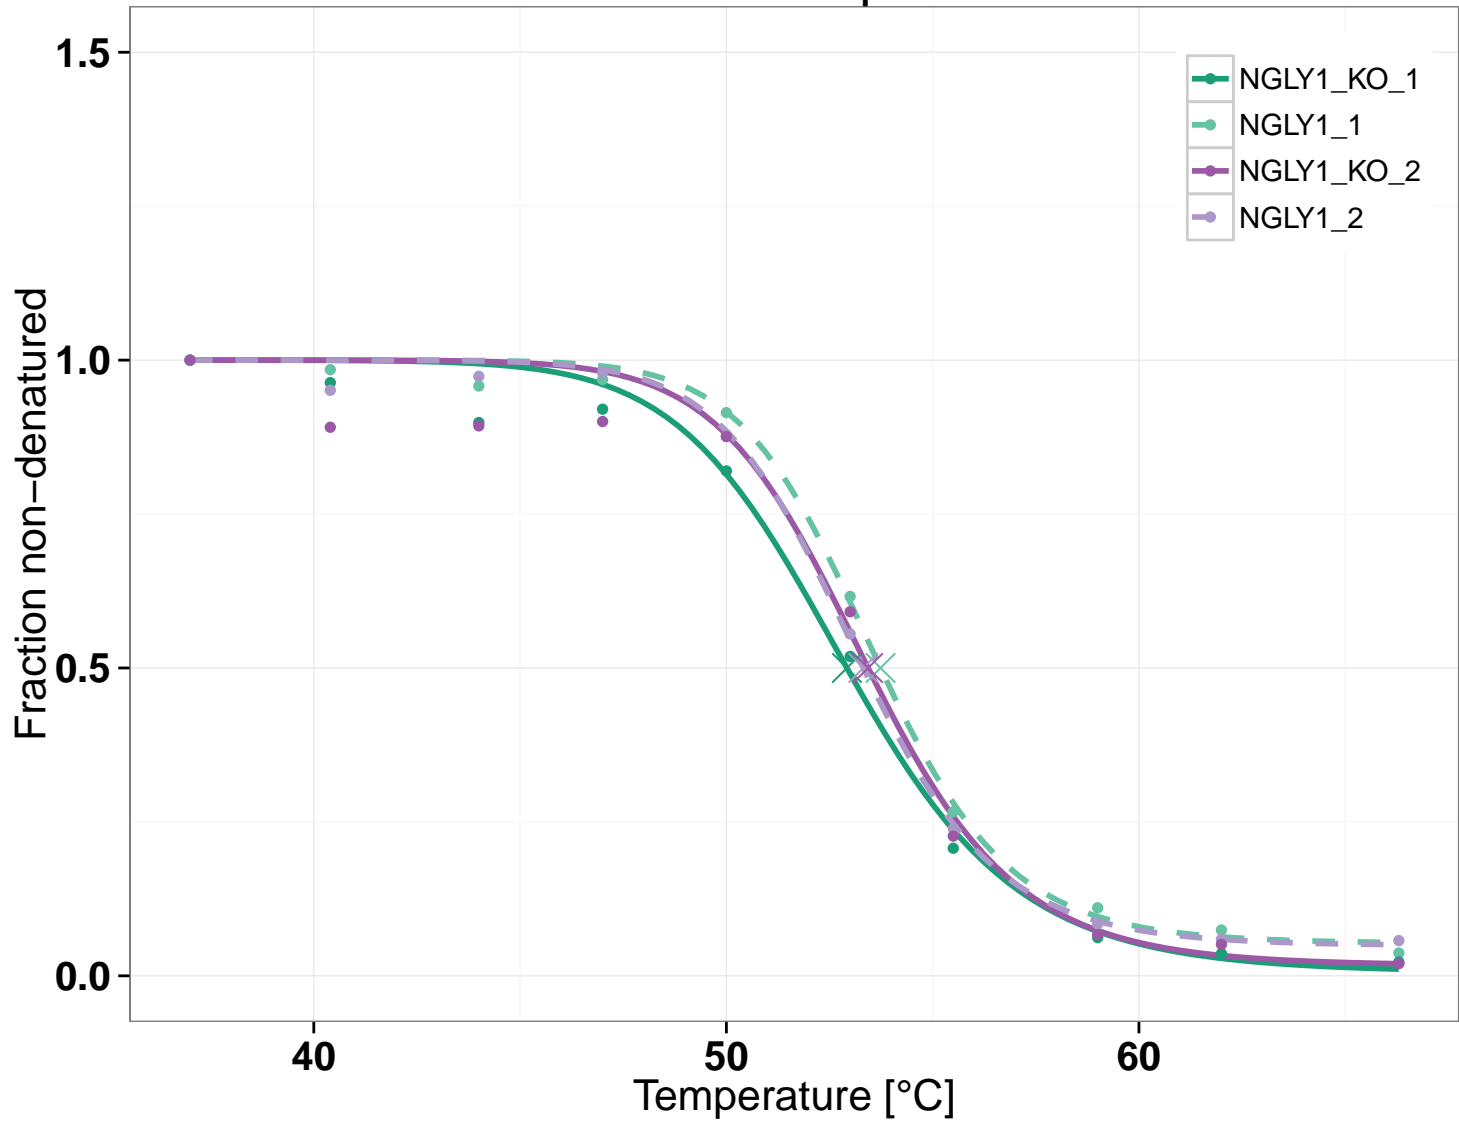

|            | meltPoint | slope | plateau | R2   |
|------------|-----------|-------|---------|------|
| NGLY1_KO_1 | 52.92     | -0.12 | 0.01    | 0.99 |
| NGLY1_1    | 53.74     | -0.15 | 0.05    | 1    |
| NGLY1_KO_2 | 53.43     | -0.14 | 0.02    | 0.98 |
| NGLY1_2    | 53.32     | -0.14 | 0.05    | 1    |

Supplement: Supplementary file 678 [file 1]

# IPI00008991.1|DR1

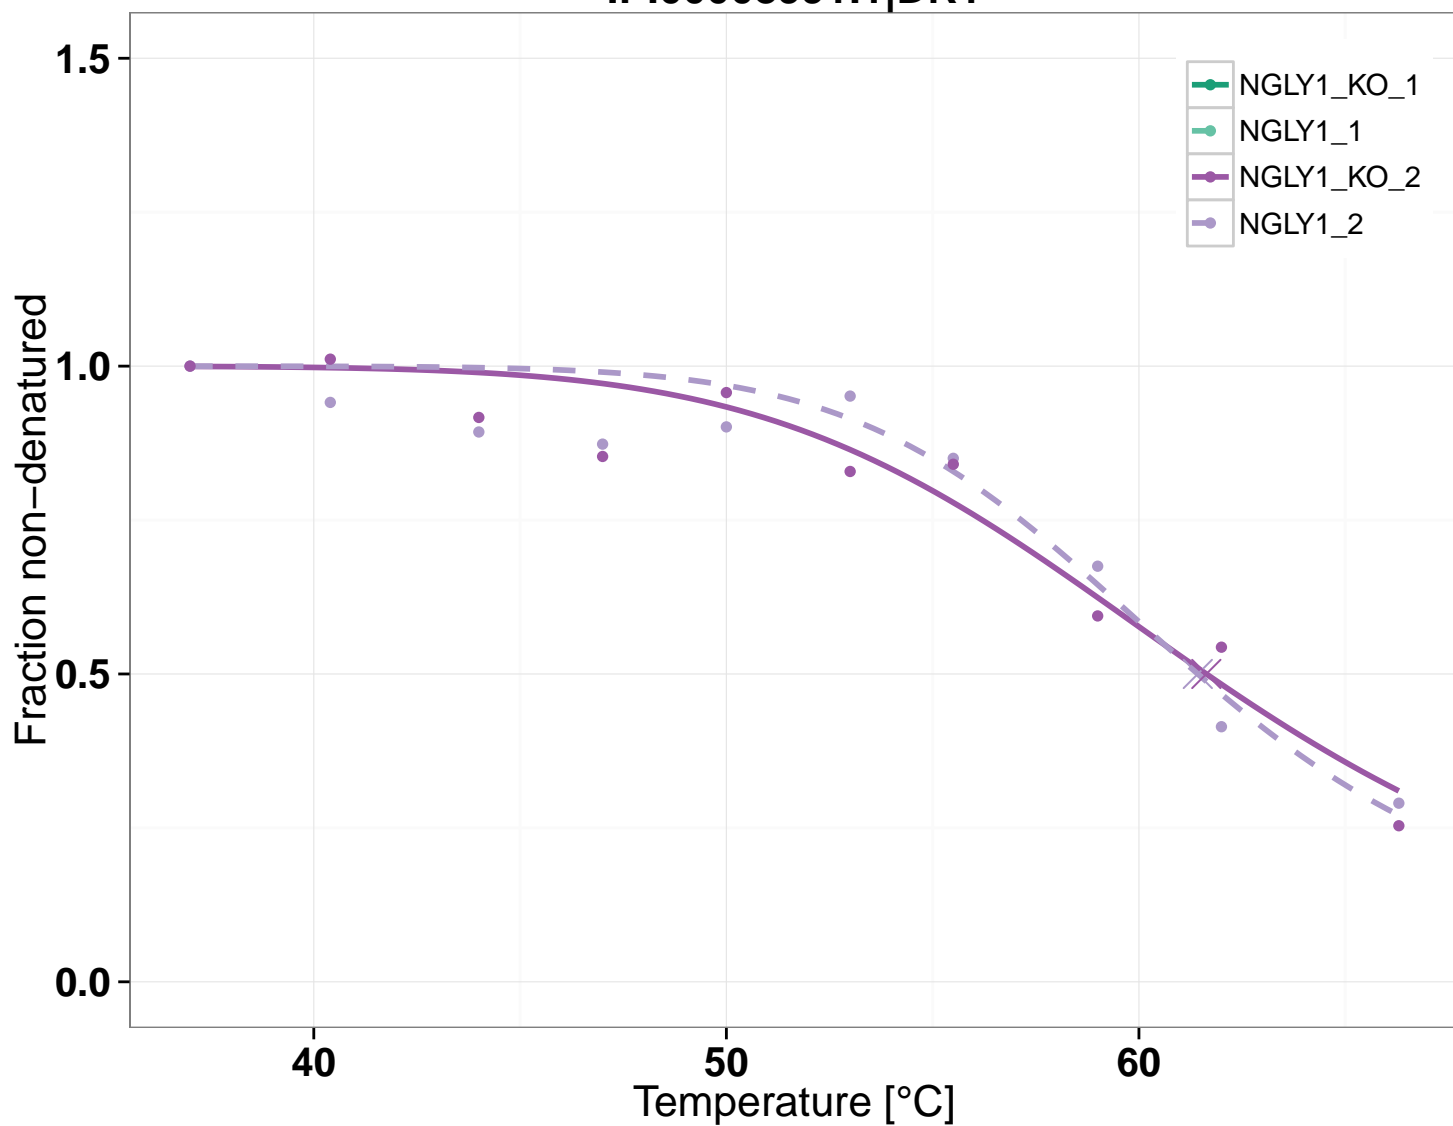

|            | meltPoint | slope  | plateau | R2   |
|------------|-----------|--------|---------|------|
| NGLY1_KO_1 | —         | —      | —       | —    |
| NGLY1_1    | —         | —      | —       | —    |
| NGLY1_KO_2 | 61.63     | -0.048 | 0       | 0.94 |
| NGLY1_2    | 61.43     | -0.06  | 0.06    | 0.93 |

Supplement: Supplementary file 679 [file 1]

IPI00877767.1|14 KDA PROTEIN.

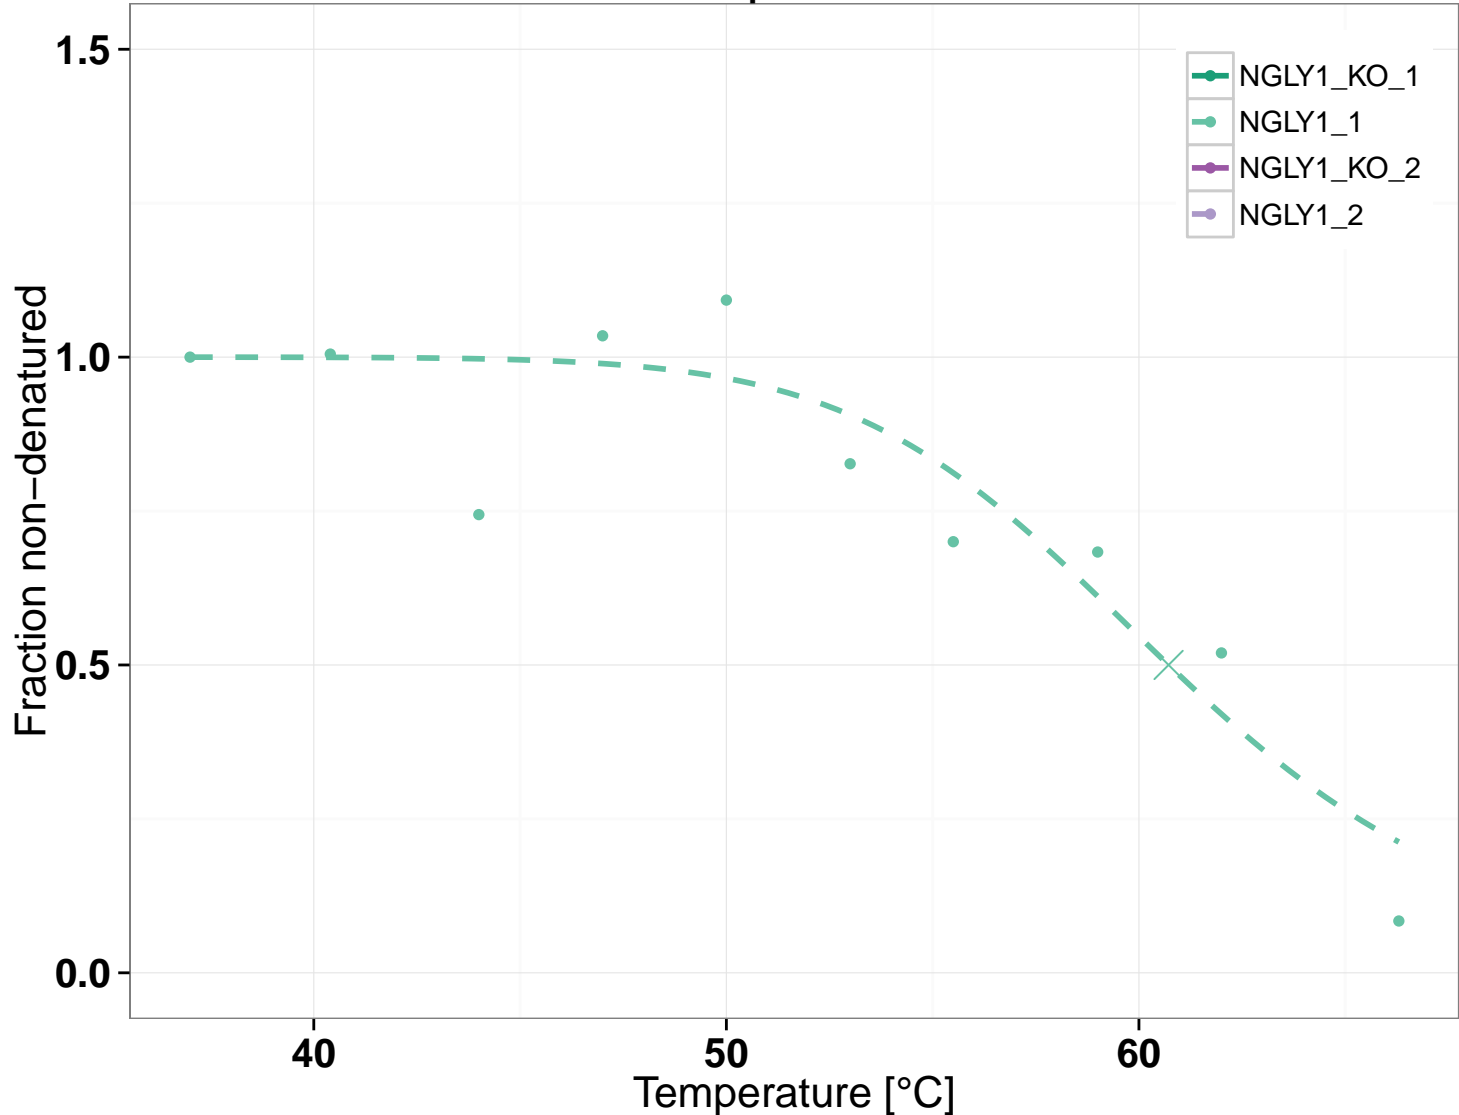

|            | meltPoint | slope  | plateau | R2   |
|------------|-----------|--------|---------|------|
| NGLY1_KO_1 | -         | -      | -       | -    |
| NGLY1_1    | 60.72     | -0.065 | 0       | 0.84 |
| NGLY1_KO_2 | -         | -      | -       | -    |
| NGLY1_2    | -         | -      | -       | -    |

Supplement: Supplementary file 680 [file 1]

IPI00329528.11|VPRBP

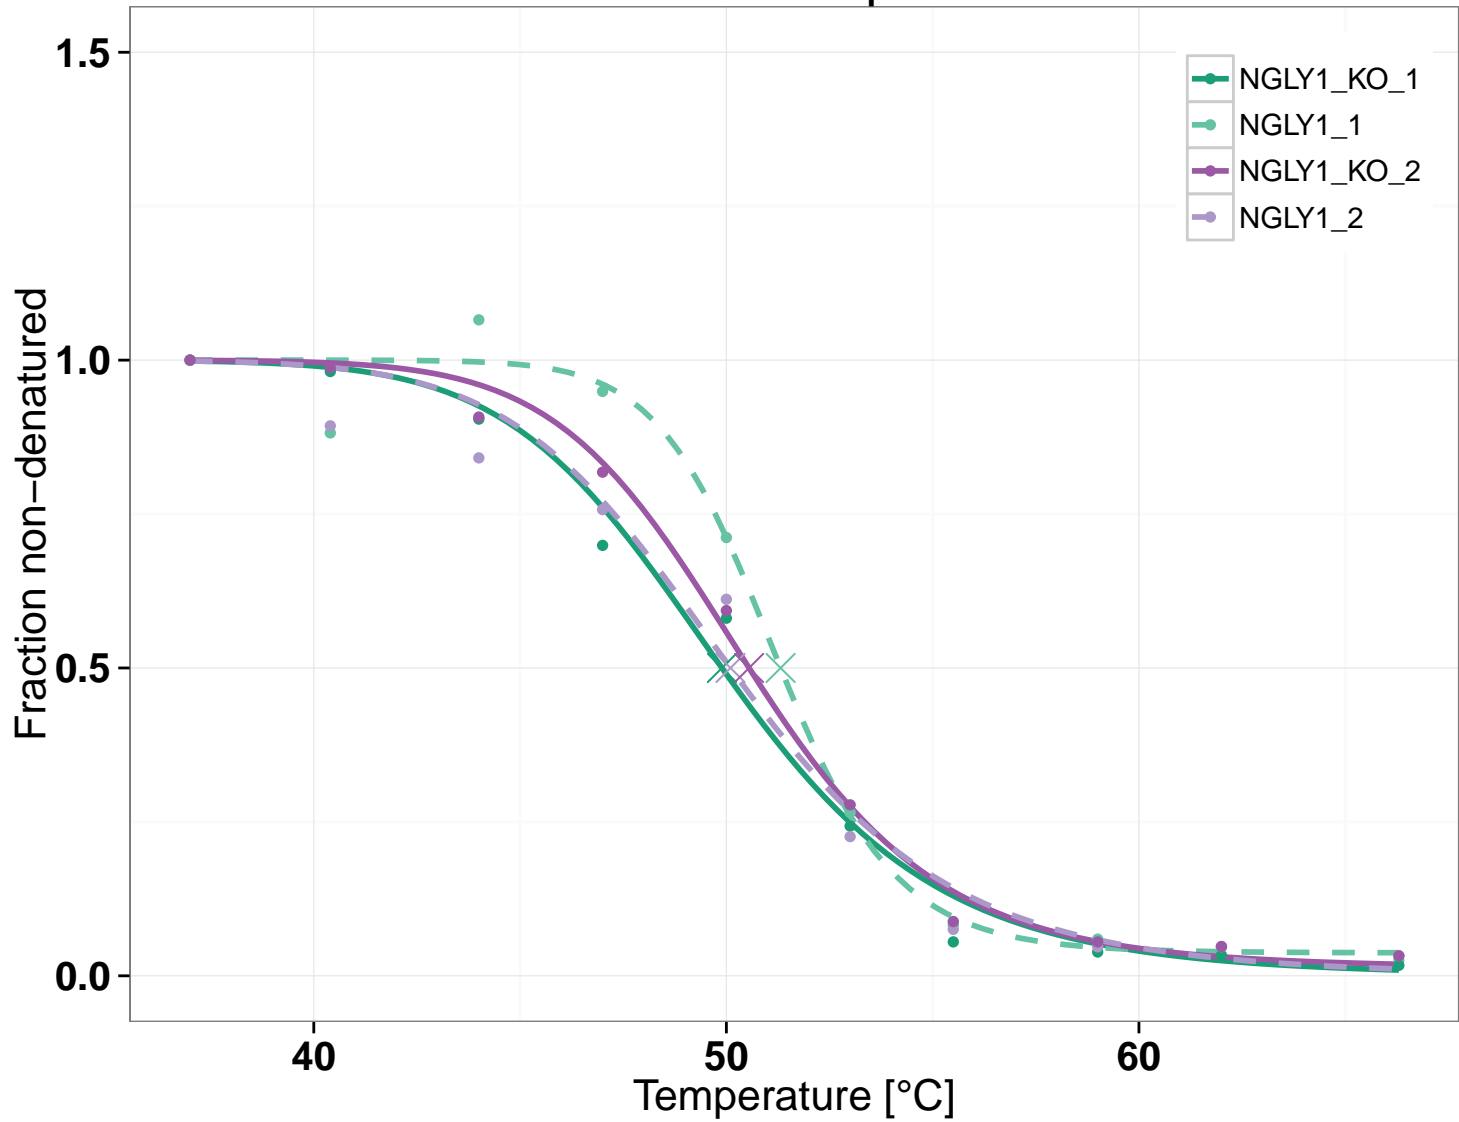

|            | meltPoint | slope  | plateau | R2   |
|------------|-----------|--------|---------|------|
| NGLY1_KO_1 | 49.89     | -0.095 | 0       | 0.99 |
| NGLY1_1    | 51.32     | -0.17  | 0.04    | 0.99 |
| NGLY1_KO_2 | 50.55     | -0.11  | 0.01    | 1    |
| NGLY1_2    | 50.1      | -0.093 | 0       | 0.98 |

Supplement: Supplementary file 681 [file 1]

# IPI00216048.9|PITPNA

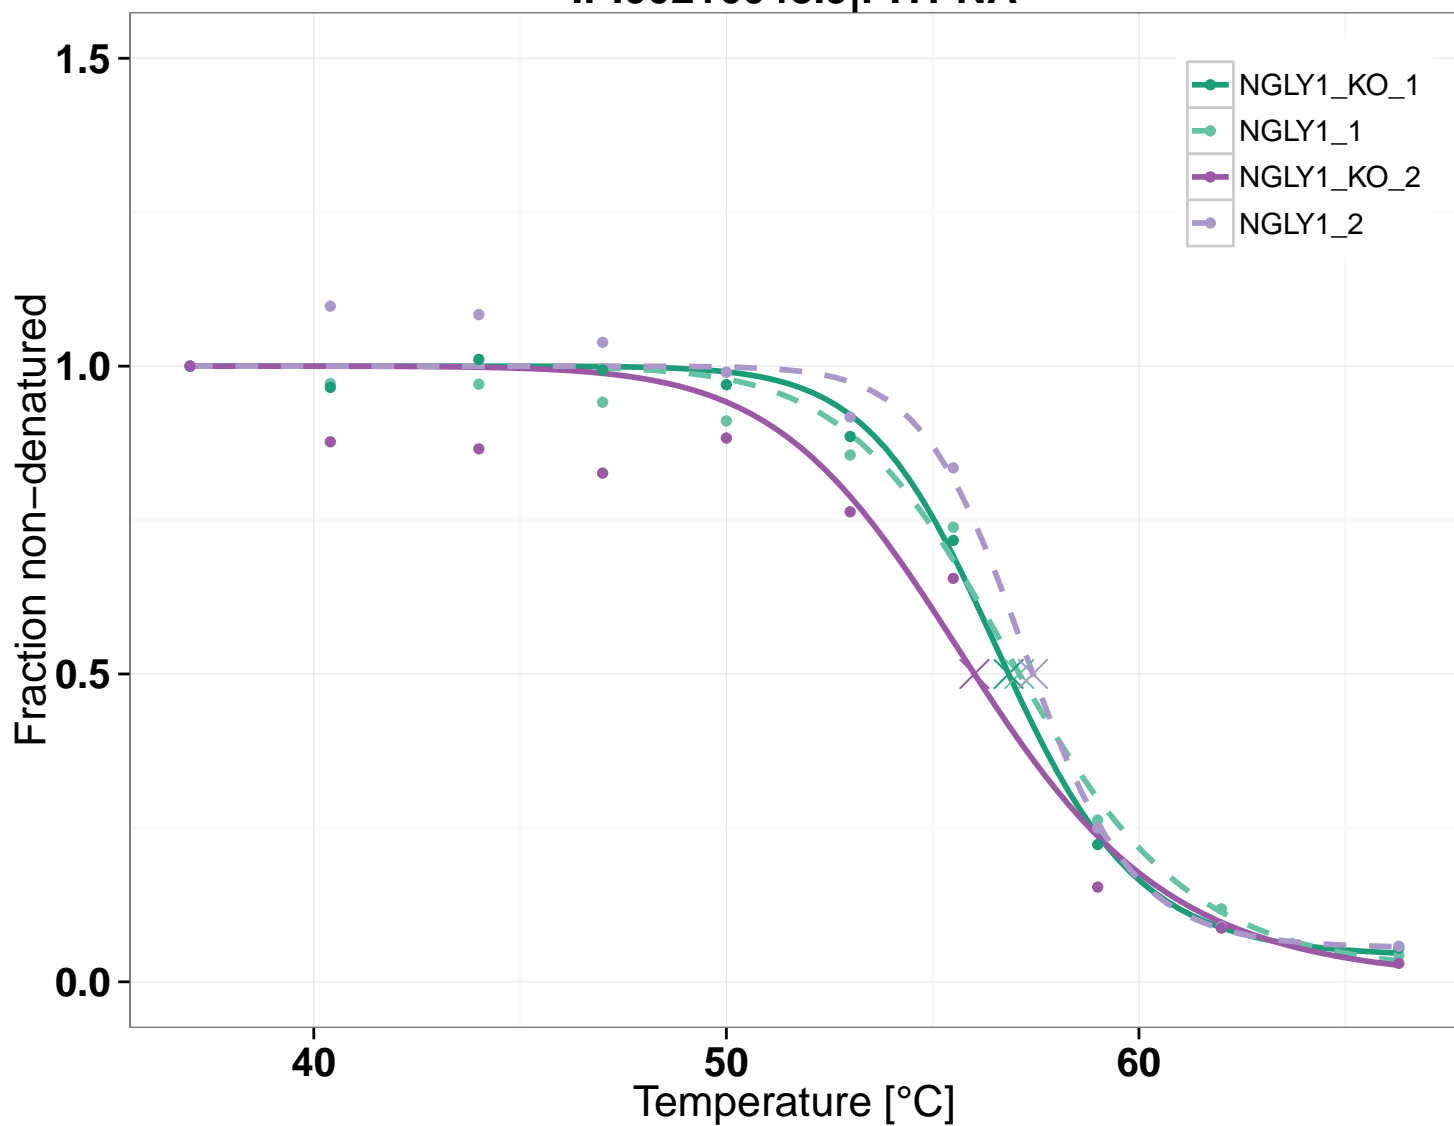

|            | meltPoint | slope | plateau | R2   |
|------------|-----------|-------|---------|------|
| NGLY1_KO_1 | 56.84     | -0.15 | 0.04    | 1    |
| NGLY1_1    | 57.1      | -0.12 | 0.01    | 0.99 |
| NGLY1_KO_2 | 56.01     | -0.1  | 0       | 0.94 |
| NGLY1_2    | 57.43     | -0.18 | 0.05    | 0.99 |

Supplement: Supplementary file 682 [file 1]

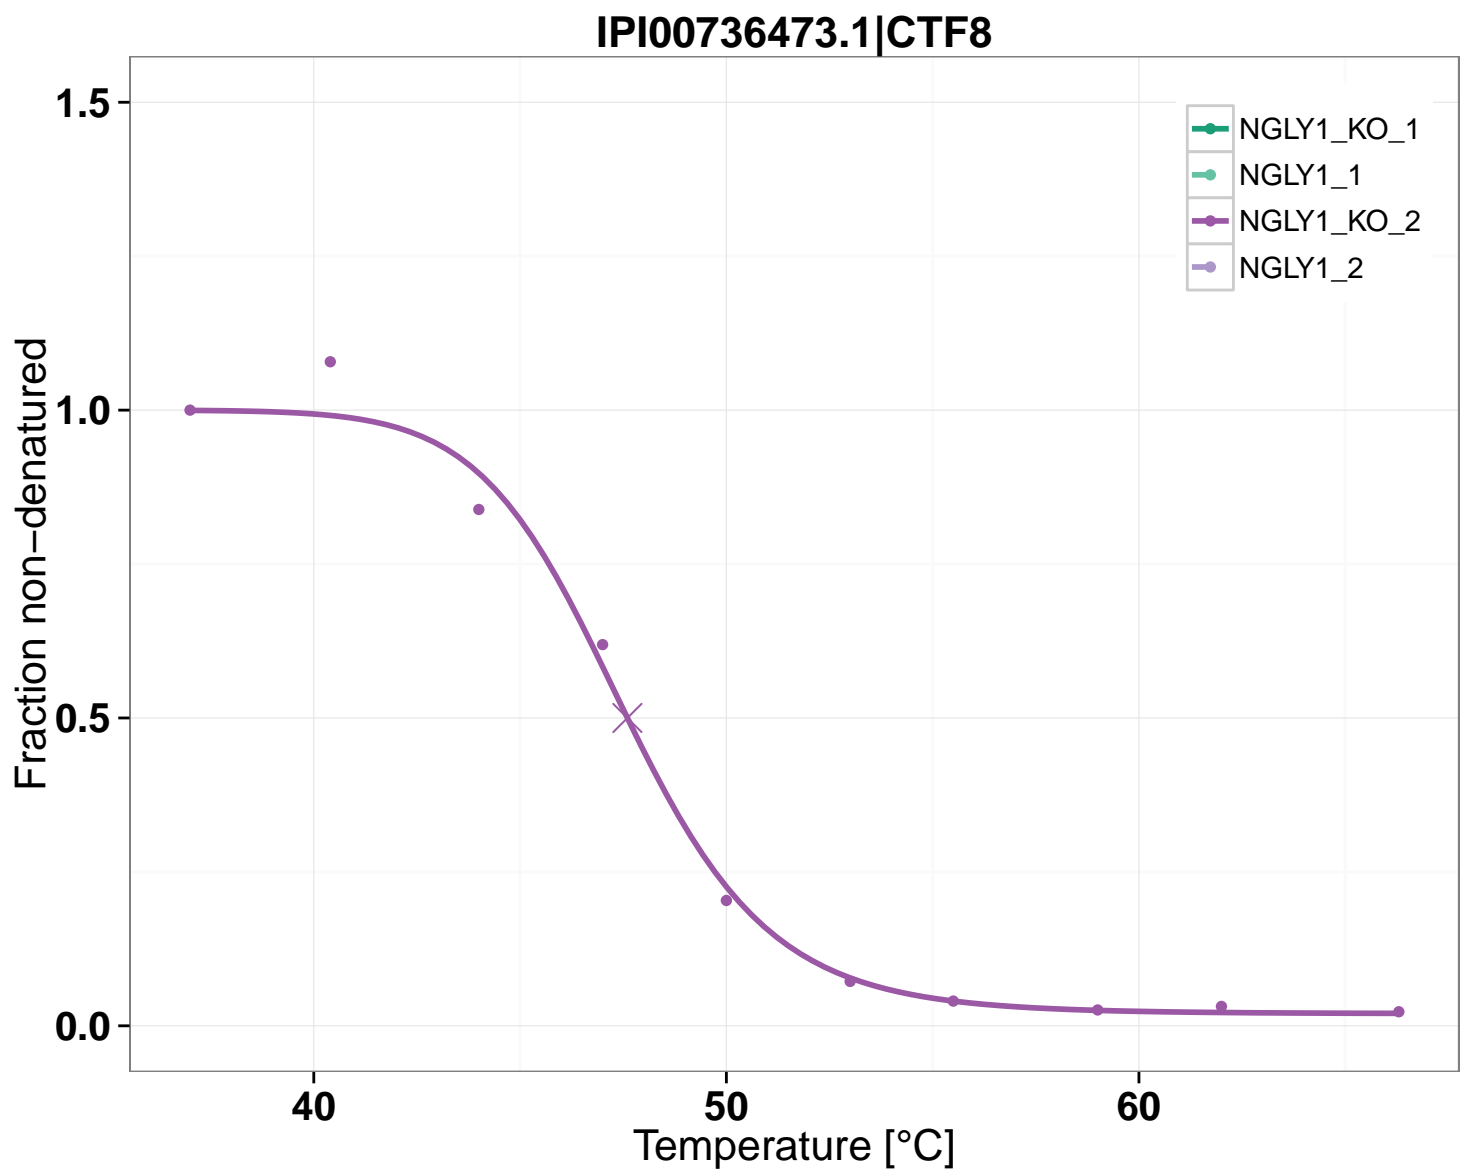

|            | meltPoint | slope | plateau | R2   |
|------------|-----------|-------|---------|------|
| NGLY1_KO_1 | —         | —     | —       | —    |
| NGLY1_1    | —         | —     | —       | —    |
| NGLY1_KO_2 | 47.6      | -0.14 | 0.02    | 0.99 |
| NGLY1_2    | —         | —     | —       | —    |

Supplement: Supplementary file 683 [file 1]

# IPI00790937.2|NMD3

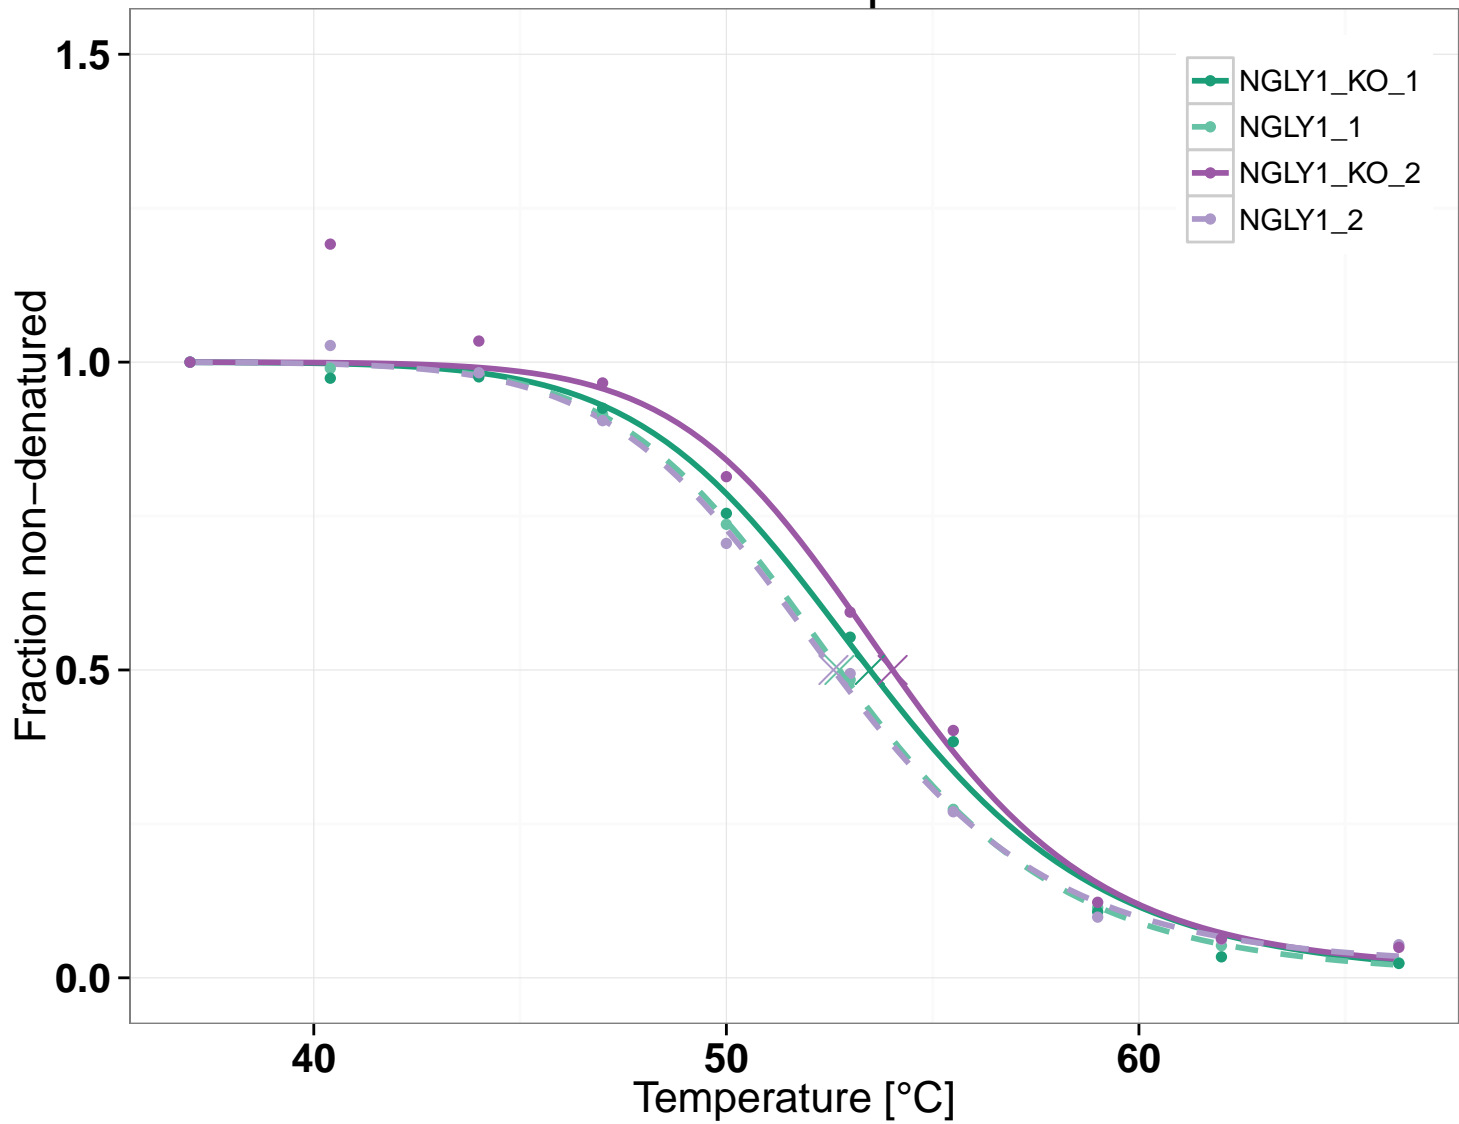

|            | meltPoint | slope  | plateau | R2   |
|------------|-----------|--------|---------|------|
| NGLY1_KO_1 | 53.48     | -0.089 | 0       | 1    |
| NGLY1_1    | 52.74     | -0.092 | 0       | 1    |
| NGLY1_KO_2 | 54.03     | -0.096 | 0.01    | 0.98 |
| NGLY1_2    | 52.6      | -0.091 | 0.02    | 1    |

Supplement: Supplementary file 684 [file 1]

IPI00028520.2|NDUFV1

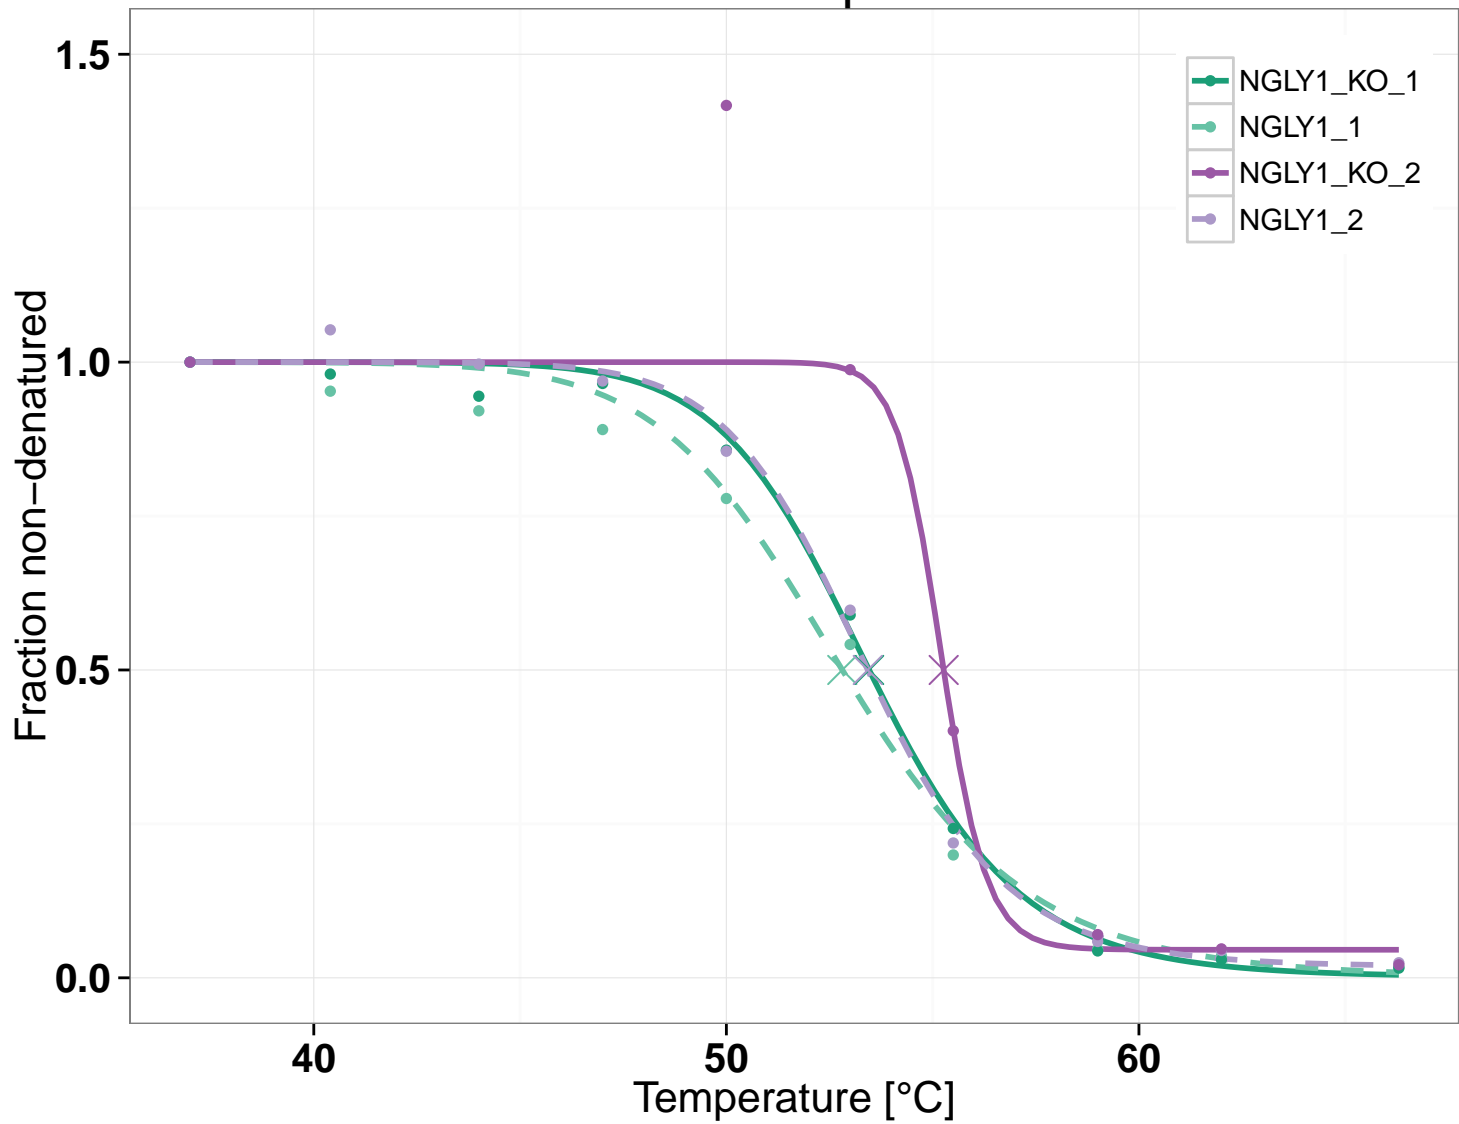

|            | meltPoint | slope | plateau | R2   |
|------------|-----------|-------|---------|------|
| NGLY1_KO_1 | 53.46     | -0.14 | 0       | 1    |
| NGLY1_1    | 52.81     | -0.11 | 0       | 0.99 |
| NGLY1_KO_2 | 55.27     | -0.44 | 0.05    | 0.67 |
| NGLY1_2    | 53.43     | -0.14 | 0.02    | 1    |

Supplement: Supplementary file 685 [file 1]

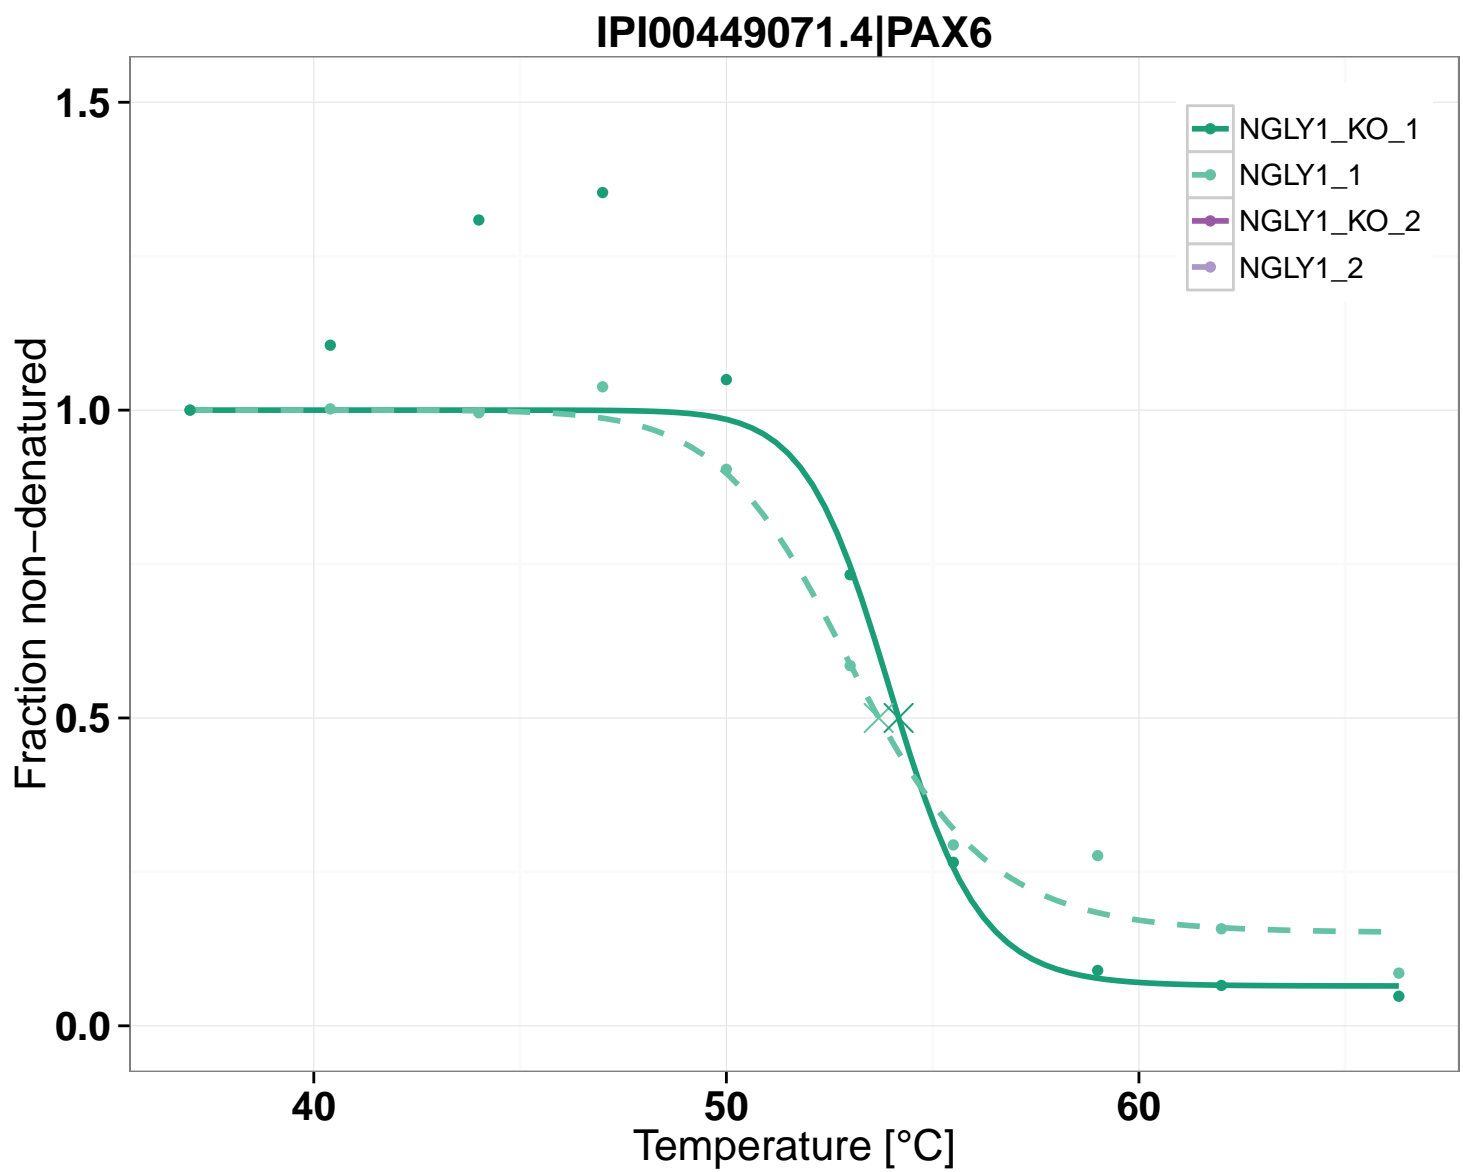

|            | meltPoint | slope | plateau | R2   |
|------------|-----------|-------|---------|------|
| NGLY1_KO_1 | 54.18     | -0.22 | 0.06    | 0.91 |
| NGLY1_1    | 53.69     | -0.13 | 0.15    | 0.99 |
| NGLY1_KO_2 | -         | -     | -       | -    |
| NGLY1_2    | -         | -     | -       | -    |

Supplement: Supplementary file 686 [file 1]

IPI00002230.4|AADACL1

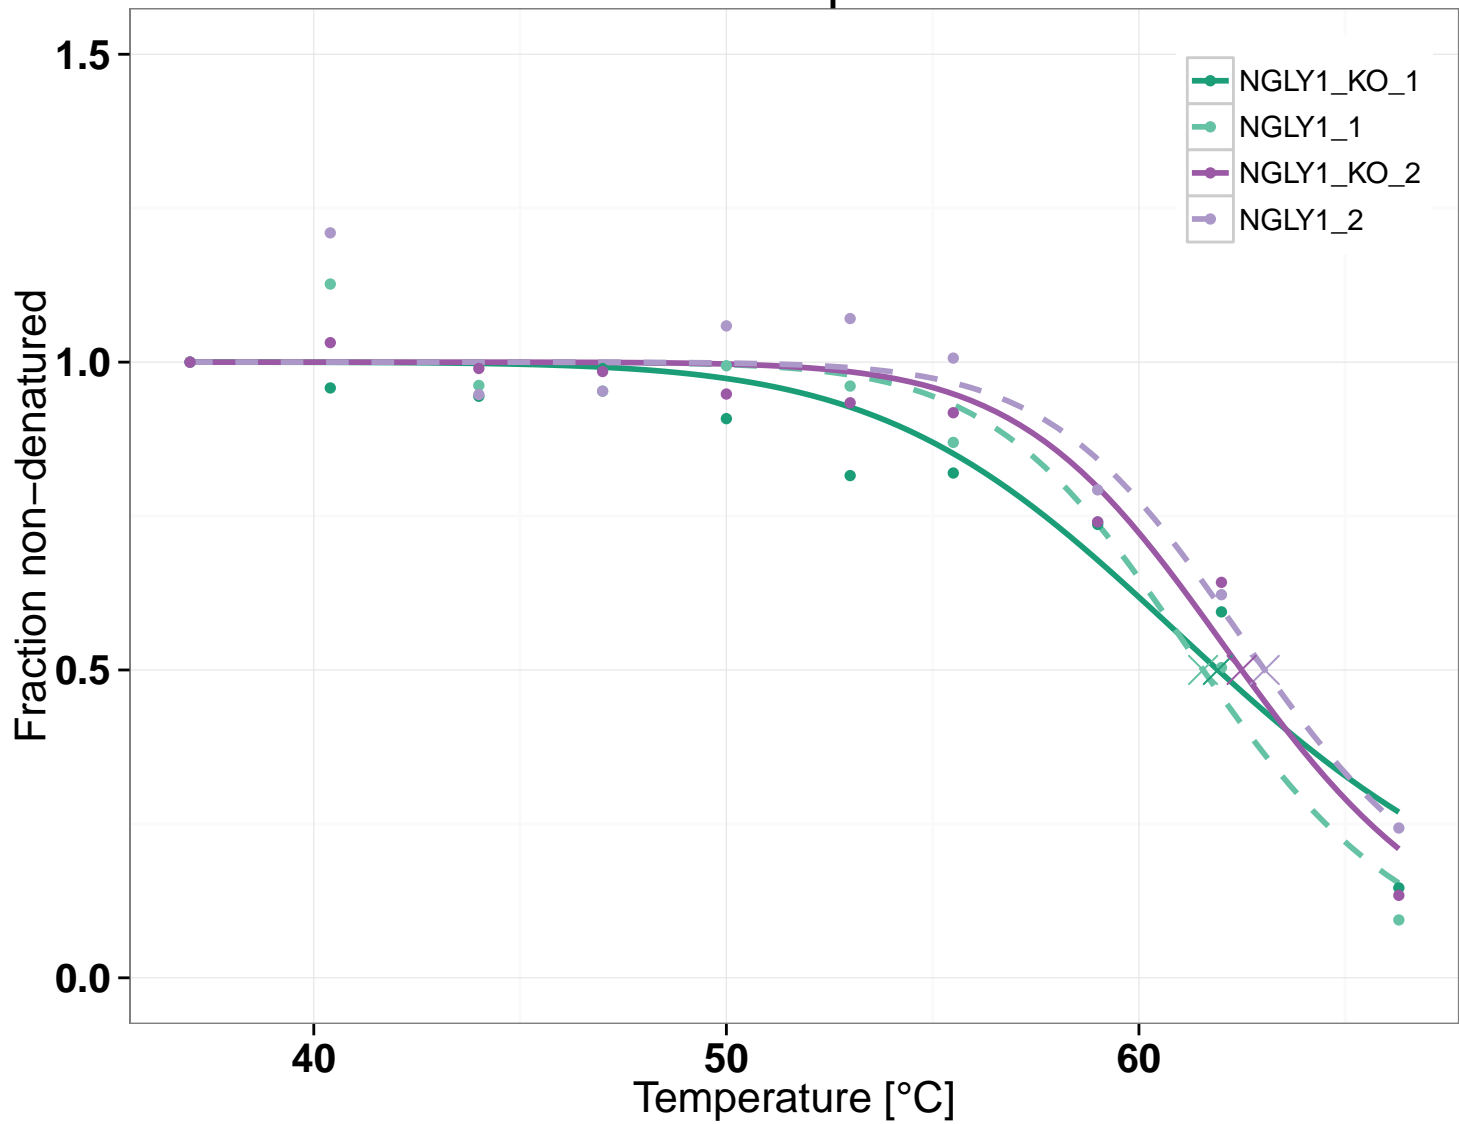

|            | meltPoint | slope  | plateau | R2   |
|------------|-----------|--------|---------|------|
| NGLY1_KO_1 | 61.91     | -0.062 | 0       | 0.92 |
| NGLY1_1    | 61.55     | -0.097 | 0       | 0.97 |
| NGLY1_KO_2 | 62.49     | -0.093 | 0       | 0.96 |
| NGLY1_2    | 63.05     | -0.096 | 0.05    | 0.91 |

Supplement: Supplementary file 687 [file 1]

IPI00556634.1|ZBTB17

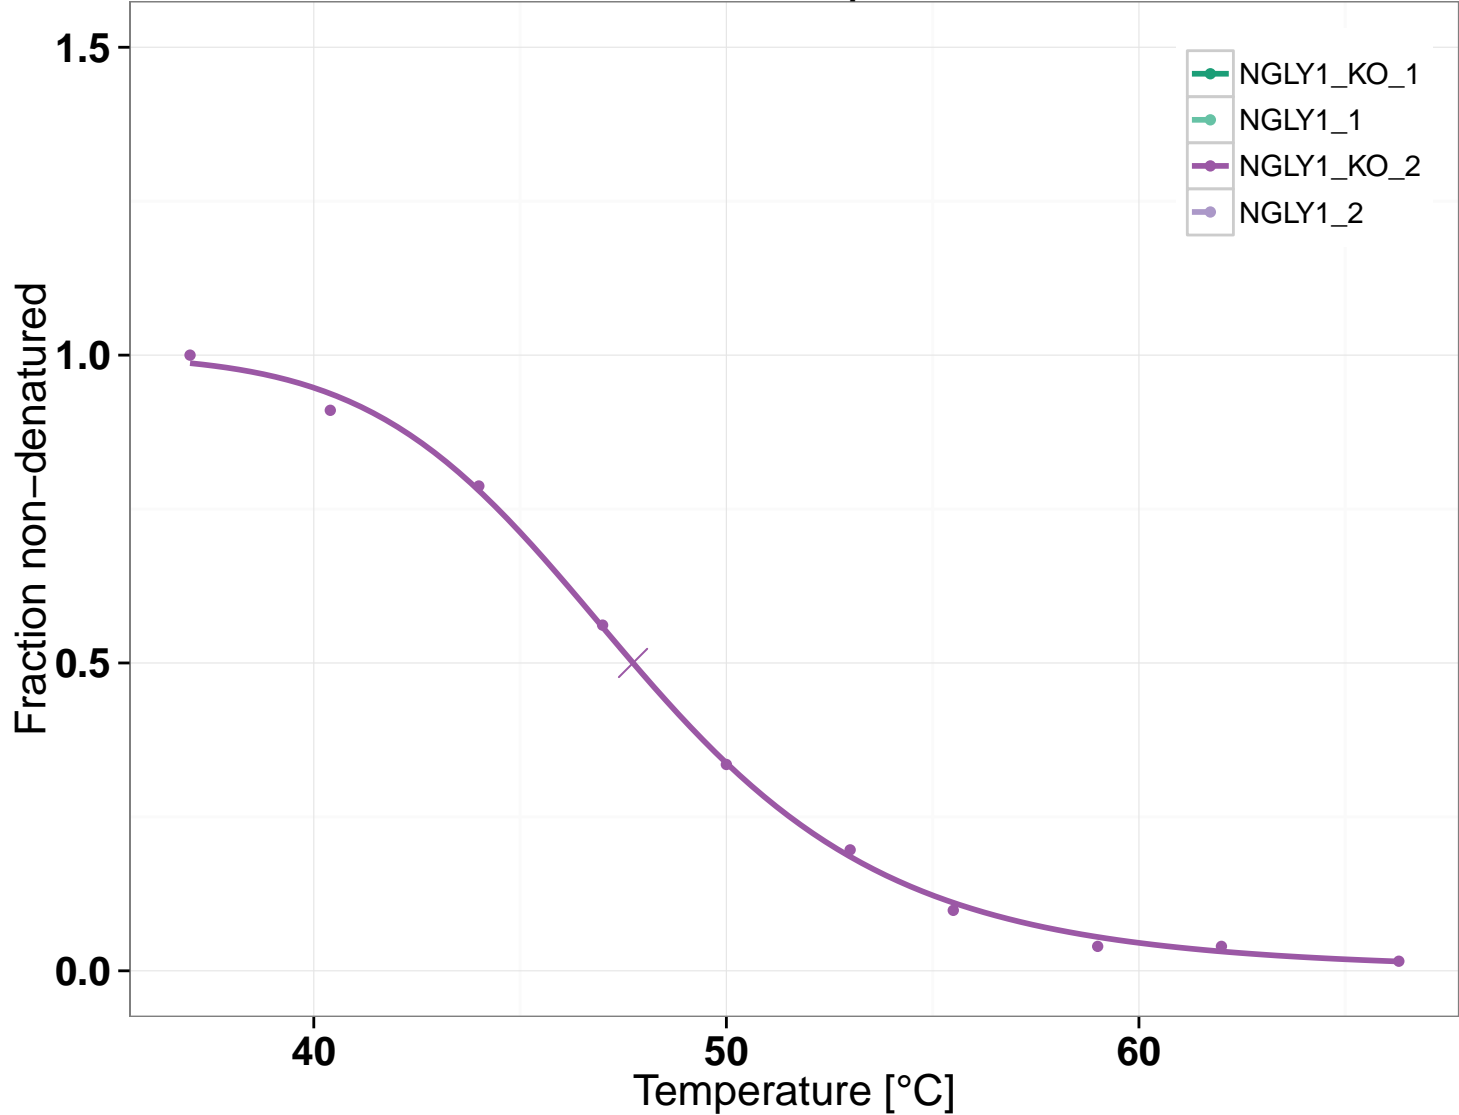

|            | meltPoint | slope  | plateau | R2 |
|------------|-----------|--------|---------|----|
| NGLY1_KO_1 | —         | —      | —       | —  |
| NGLY1_1    | —         | —      | —       | —  |
| NGLY1_KO_2 | 47.74     | -0.079 | 0       | 1  |
| NGLY1_2    | —         | —      | —       | —  |

Supplement: Supplementary file 688 [file 1]

# IPI00032206.2|PDLIM4

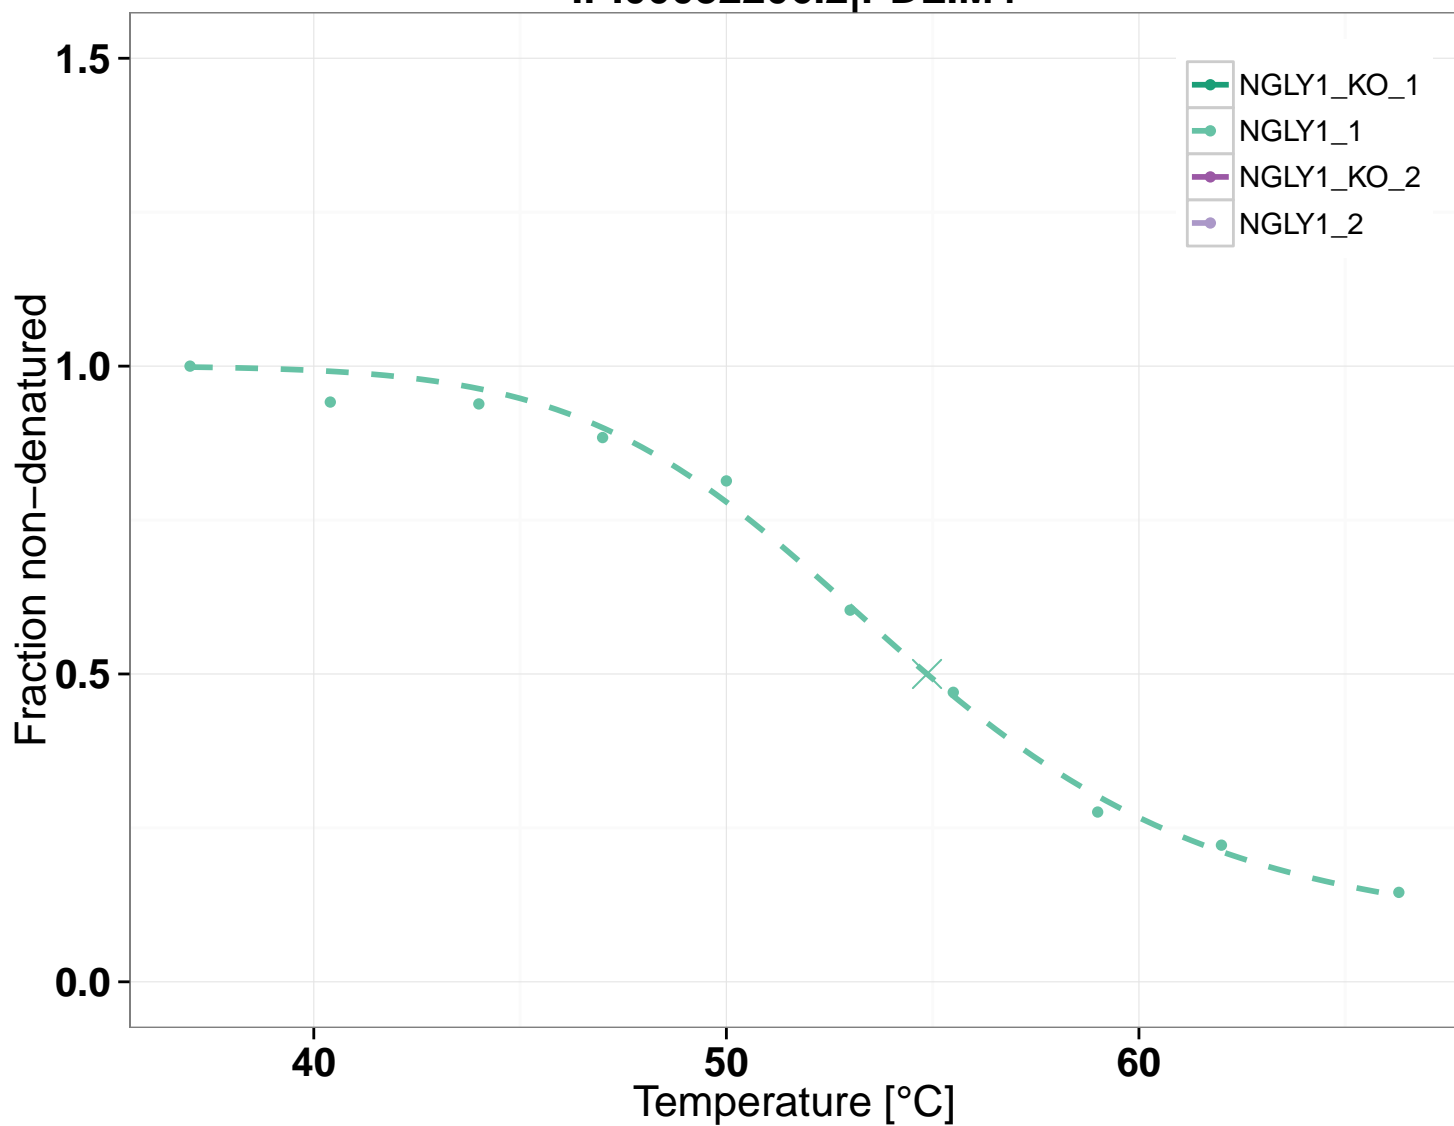

|            | meltPoint | slope | plateau | R2   |
|------------|-----------|-------|---------|------|
| NGLY1_KO_1 | —         | —     | —       | —    |
| NGLY1_1    | 54.86     | -0.06 | 0.07    | 0.99 |
| NGLY1_KO_2 | —         | —     | —       | —    |
| NGLY1_2    | —         | —     | —       | —    |

Supplement: Supplementary file 689 [file 1]

IPI00010460.1|AIP

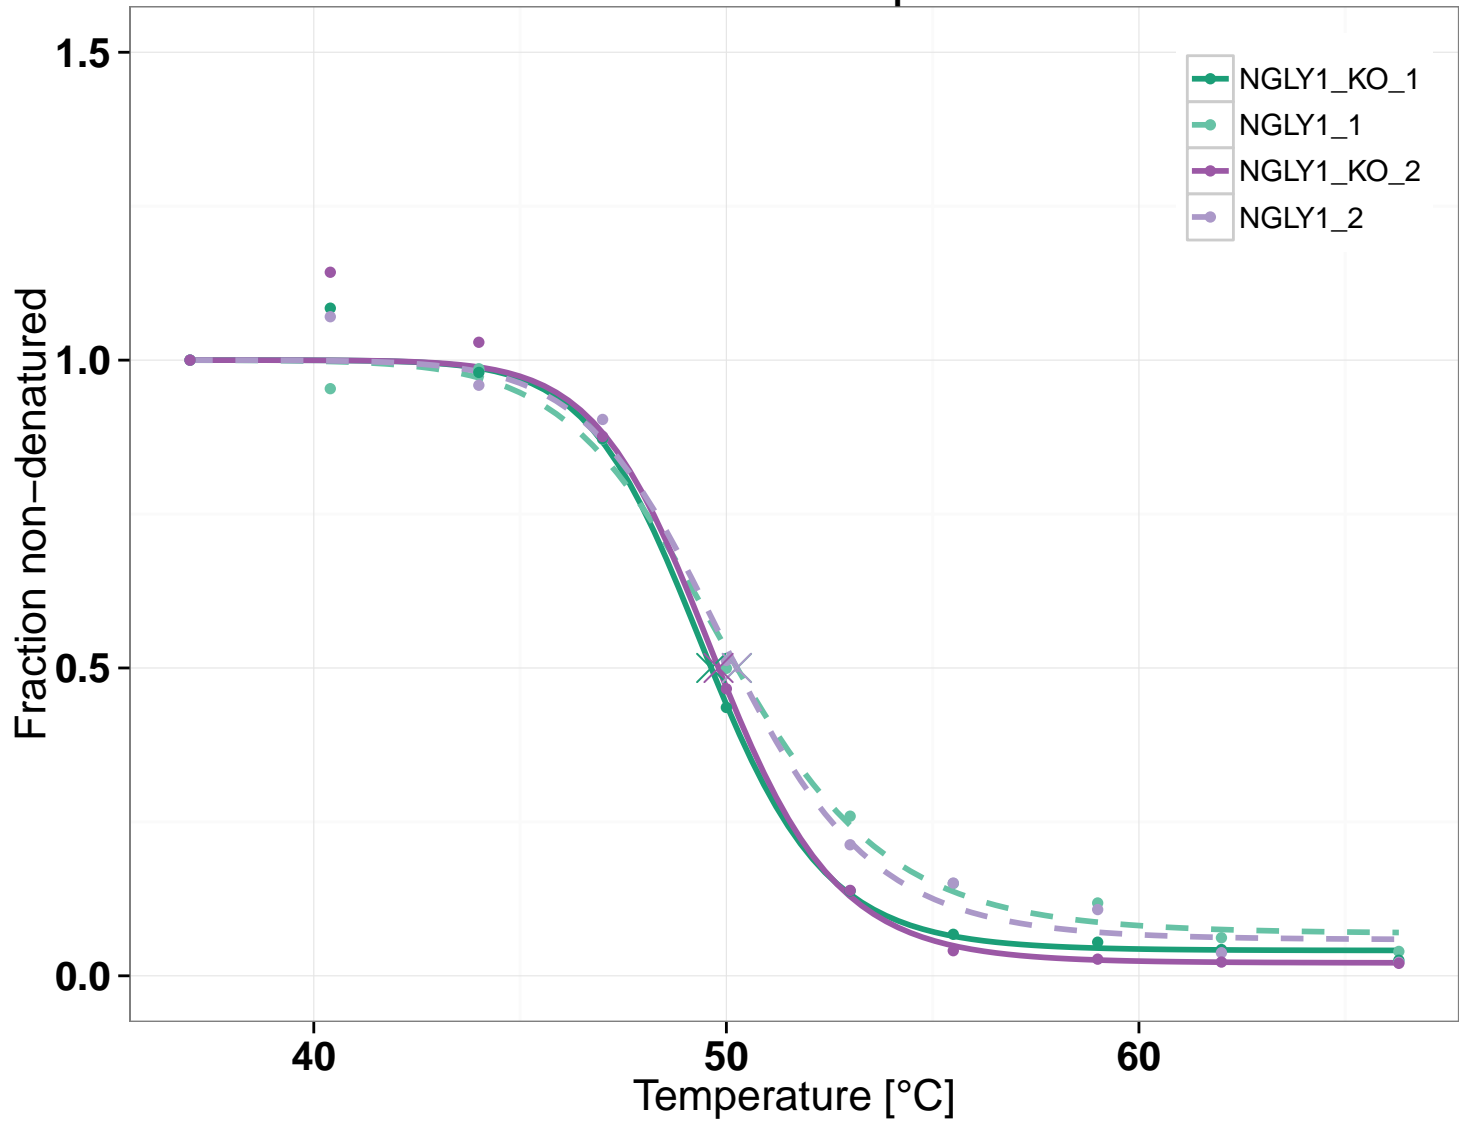

|            | meltPoint | slope | plateau | R2   |
|------------|-----------|-------|---------|------|
| NGLY1_KO_1 | 49.63     | -0.17 | 0.04    | 1    |
| NGLY1_1    | 50.26     | -0.12 | 0.07    | 1    |
| NGLY1_KO_2 | 49.81     | -0.17 | 0.02    | 0.99 |
| NGLY1_2    | 50.25     | -0.13 | 0.06    | 0.99 |

Supplement: Supplementary file 690 [file 1]

# IPI00020035.4|NIPSNAP3B

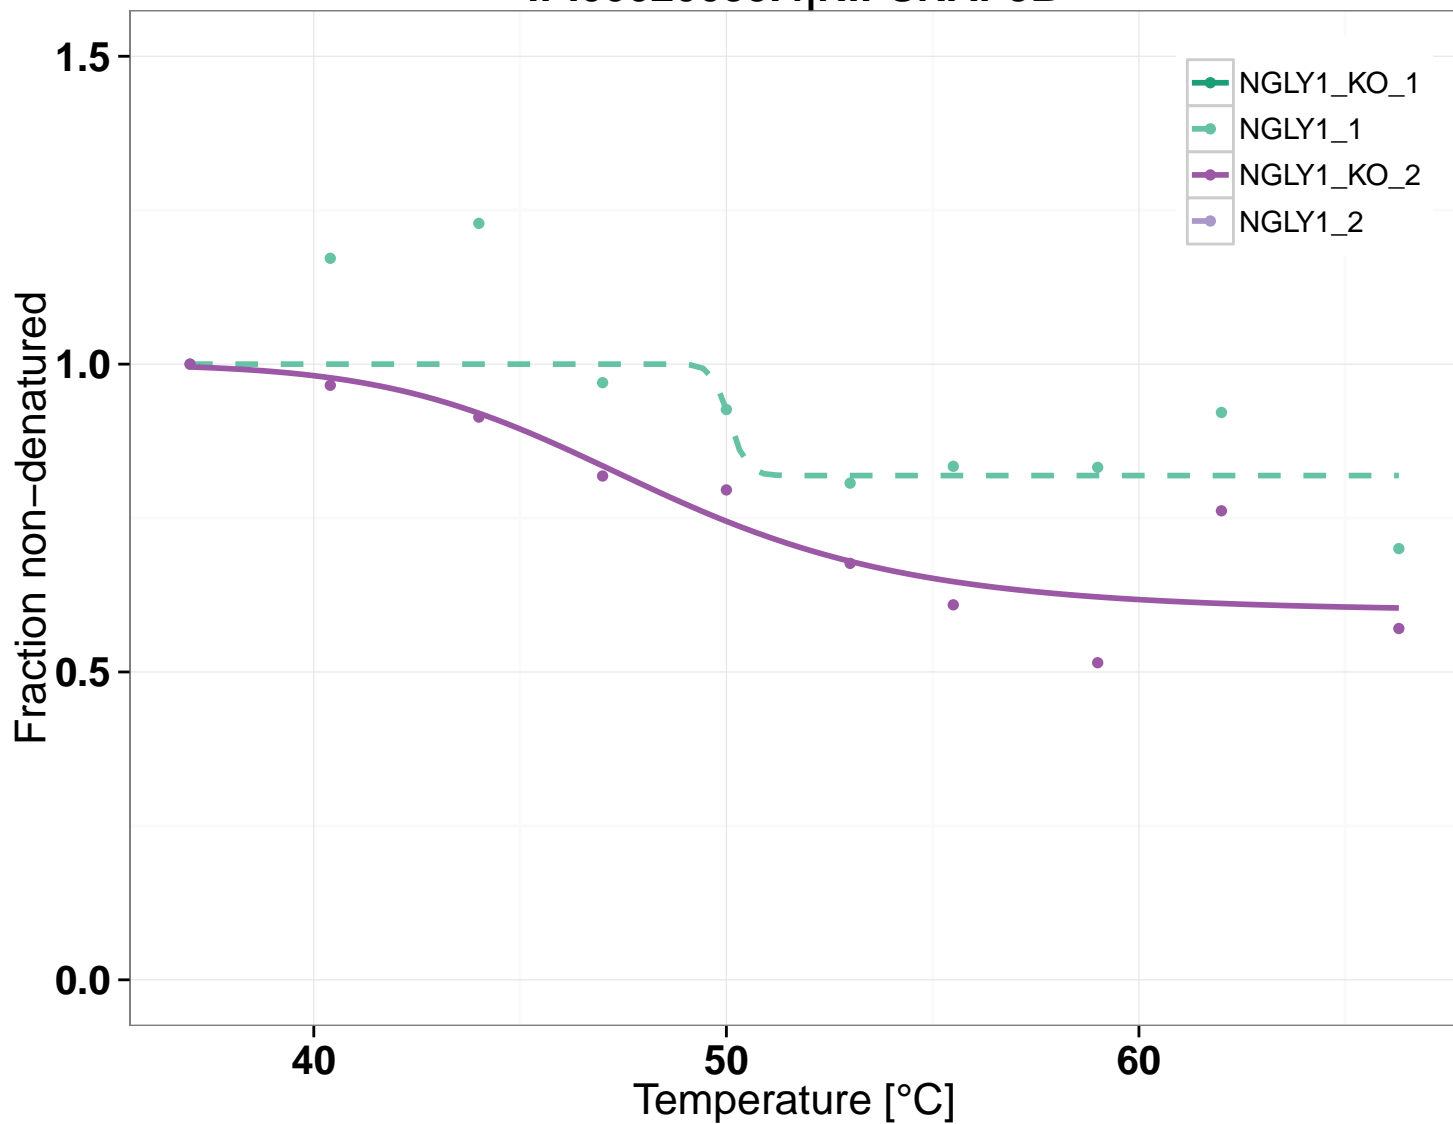

|            | meltPoint | slope  | plateau | R2   |
|------------|-----------|--------|---------|------|
| NGLY1_KO_1 | -         | -      | -       | -    |
| NGLY1_1    | -         | -0.23  | 0.82    | 0.55 |
| NGLY1_KO_2 | -         | -0.032 | 0.6     | 0.84 |
| NGLY1_2    | -         | -      | -       | -    |

Supplement: Supplementary file 691 [file 1]

IPI00022832.1|BRP44

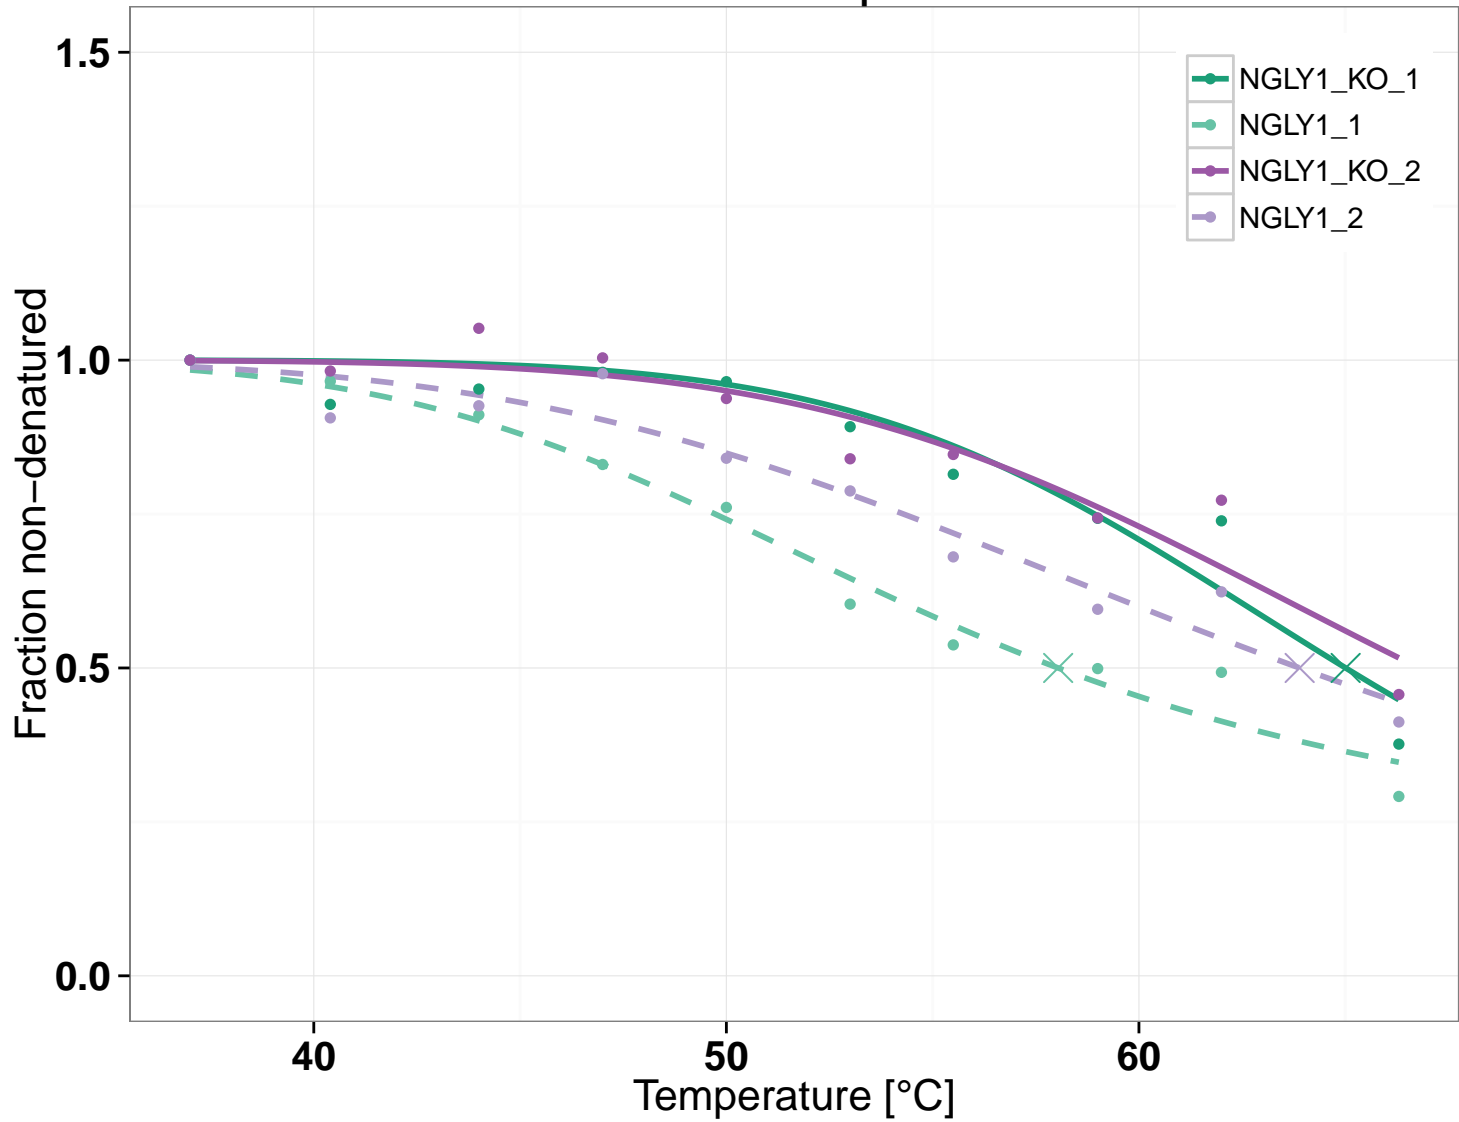

|            | meltPoint | slope  | plateau | R2   |
|------------|-----------|--------|---------|------|
| NGLY1_KO_1 | 65.01     | -0.042 | 0       | 0.91 |
| NGLY1_1    | 58.04     | -0.032 | 0.19    | 0.97 |
| NGLY1_KO_2 | -         | -0.035 | 0       | 0.91 |
| NGLY1_2    | 63.9      | -0.027 | 0       | 0.94 |

Supplement: Supplementary file 692 [file 1]

# IPI00020599.1|CALR

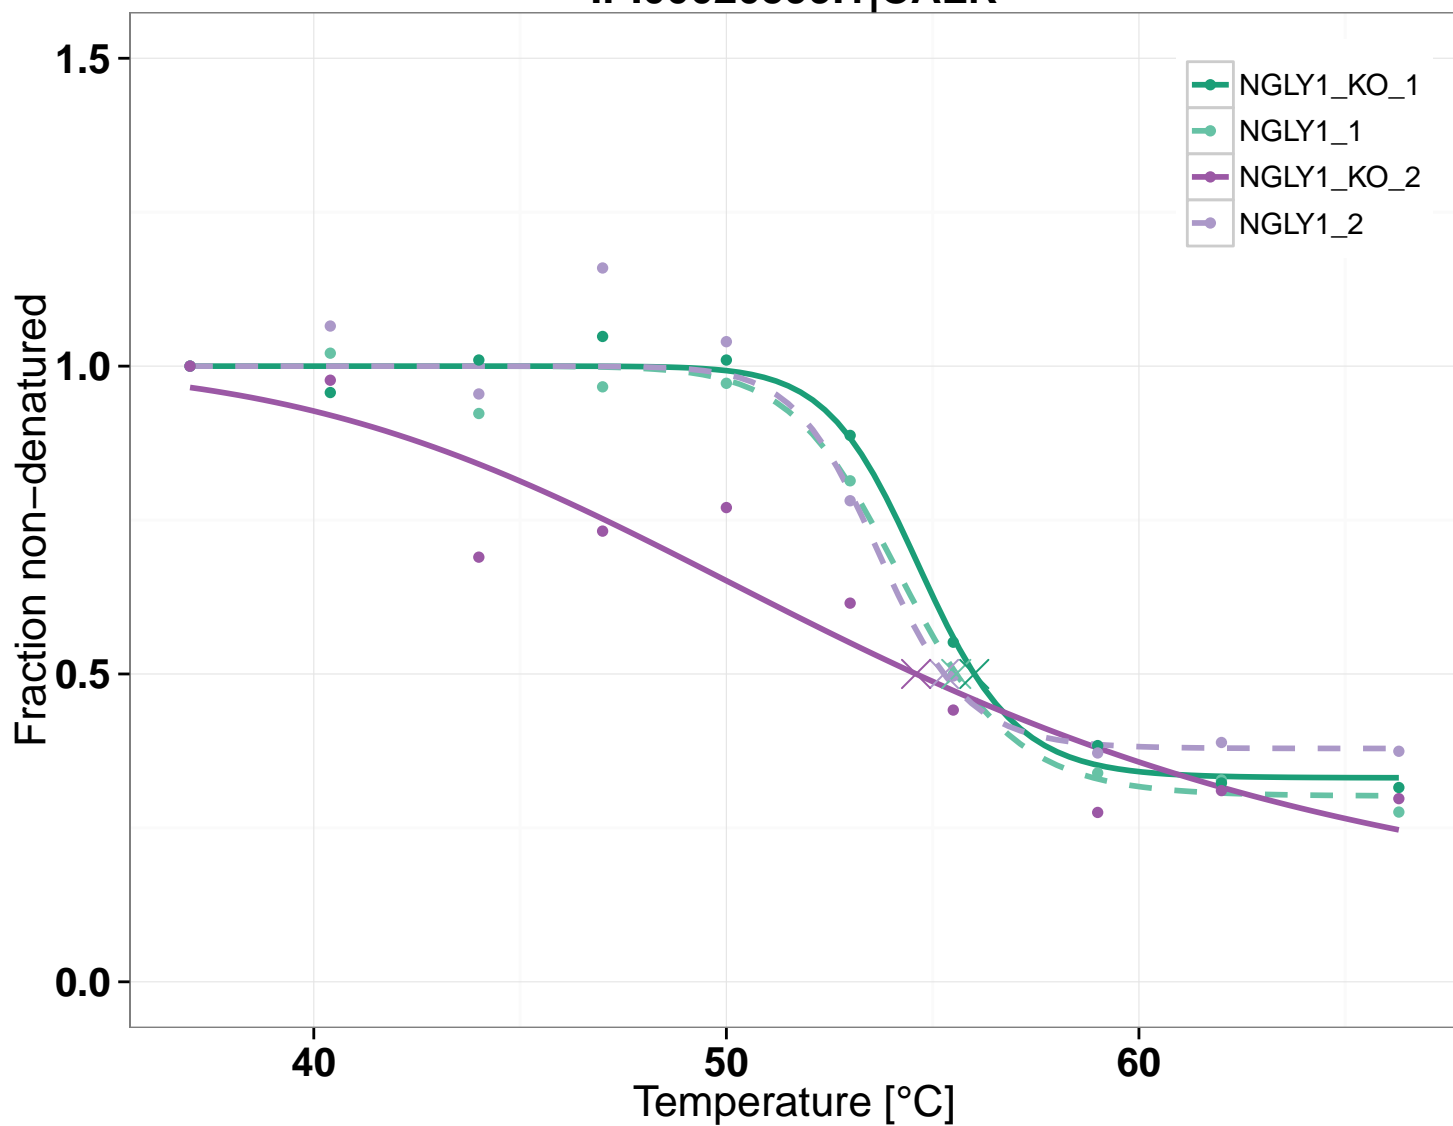

|            | meltPoint | slope  | plateau | R2   |
|------------|-----------|--------|---------|------|
| NGLY1_KO_1 | 56.01     | -0.15  | 0.33    | 0.99 |
| NGLY1_1    | 55.57     | -0.13  | 0.3     | 0.99 |
| NGLY1_KO_2 | 54.6      | -0.034 | 0.06    | 0.91 |
| NGLY1_2    | 55.28     | -0.15  | 0.38    | 0.96 |

Supplement: Supplementary file 693 [file 1]

# IPI00748935.1|ELP4

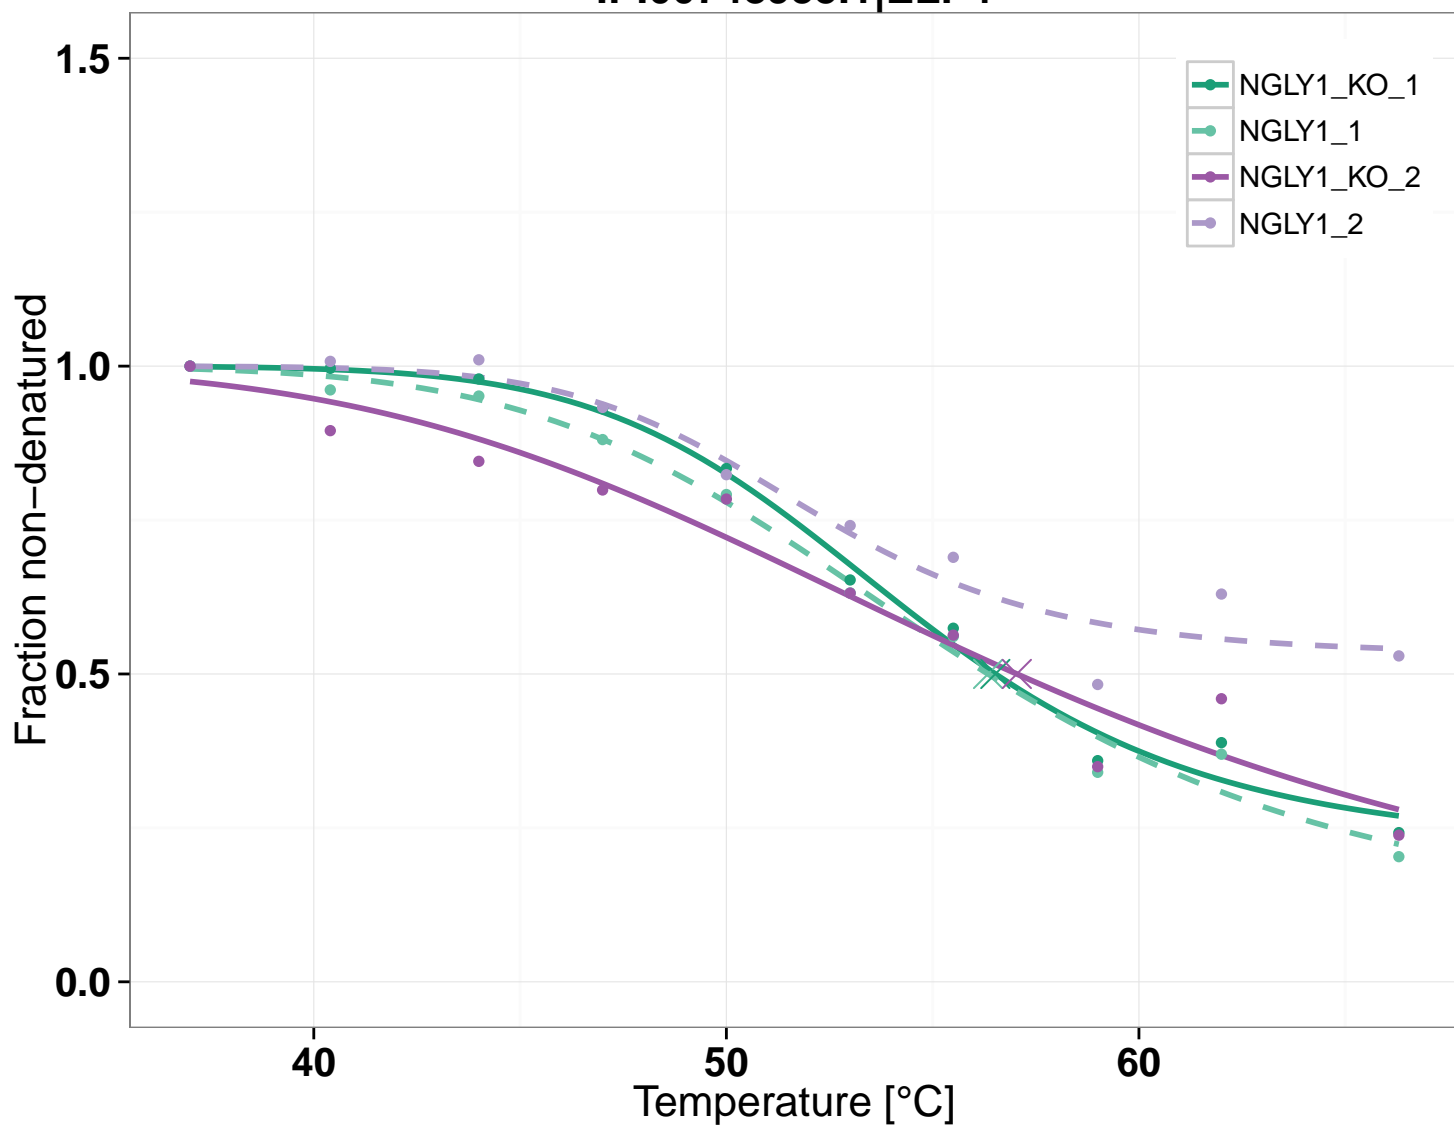

|            | meltPoint | slope  | plateau | R2   |
|------------|-----------|--------|---------|------|
| NGLY1_KO_1 | 56.52     | -0.053 | 0.22    | 0.99 |
| NGLY1_1    | 56.34     | -0.046 | 0.09    | 0.99 |
| NGLY1_KO_2 | 57.04     | -0.032 | 0       | 0.95 |
| NGLY1_2    | -         | -0.04  | 0.53    | 0.95 |

Supplement: Supplementary file 694 [file 1]

# IPI00025426.2|PZP

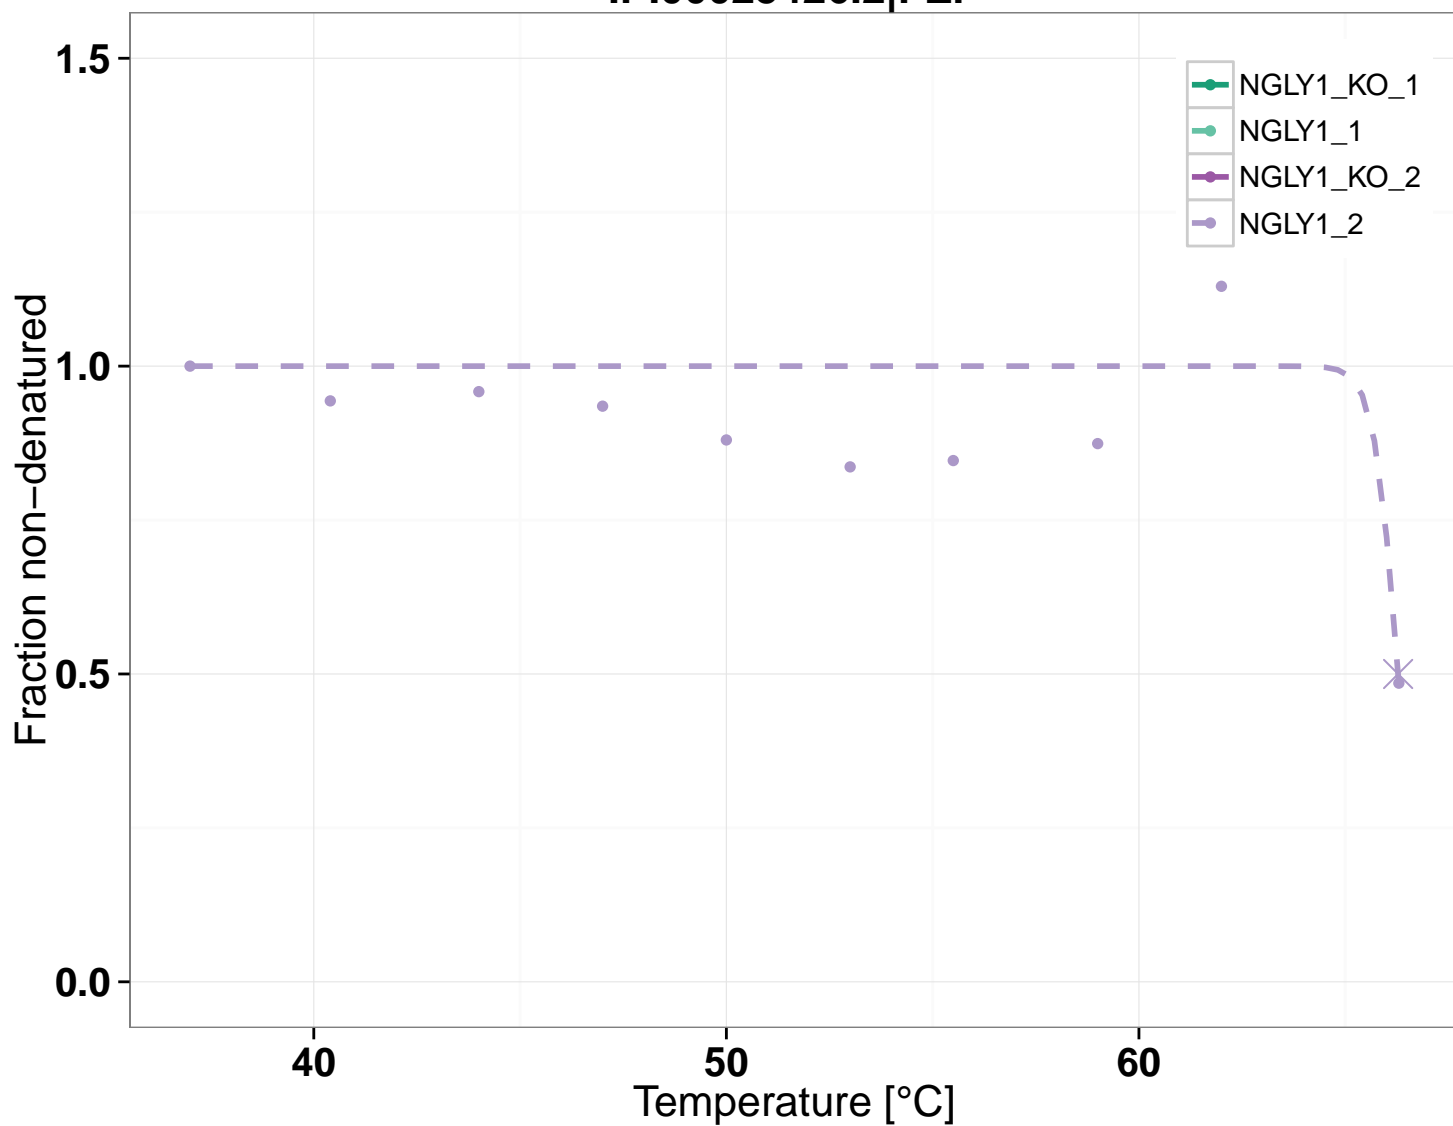

|            | meltPoint | slope | plateau | R2   |
|------------|-----------|-------|---------|------|
| NGLY1_KO_1 | —         | —     | —       | —    |
| NGLY1_1    | —         | —     | —       | —    |
| NGLY1_KO_2 | —         | —     | —       | —    |
| NGLY1_2    | 66.28     | -0.85 | 0       | 0.57 |

Supplement: Supplementary file 695 [file 1]

# IPI00409717.1|EIF4A2

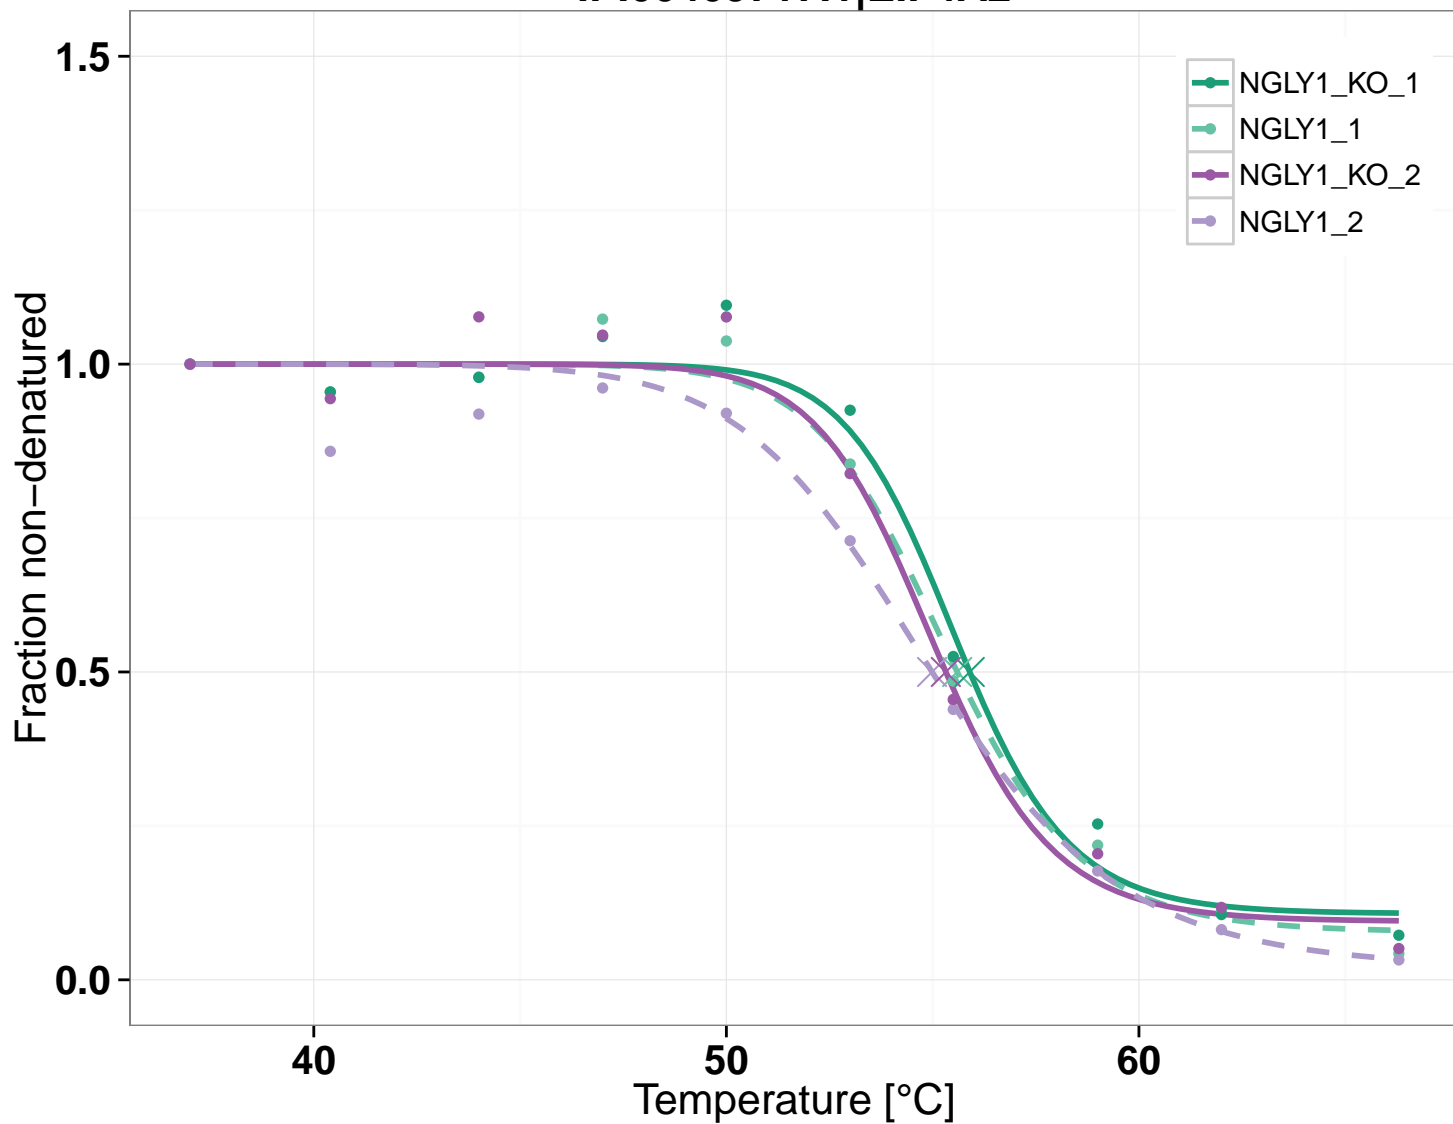

|            | meltPoint | slope | plateau | R2   |
|------------|-----------|-------|---------|------|
| NGLY1_KO_1 | 55.9      | -0.16 | 0.11    | 0.98 |
| NGLY1_1    | 55.6      | -0.14 | 0.08    | 0.99 |
| NGLY1_KO_2 | 55.32     | -0.16 | 0.09    | 0.98 |
| NGLY1_2    | 54.99     | -0.11 | 0.02    | 0.98 |

Supplement: Supplementary file 696 [file 1]

IPI00847579.1|RPS12

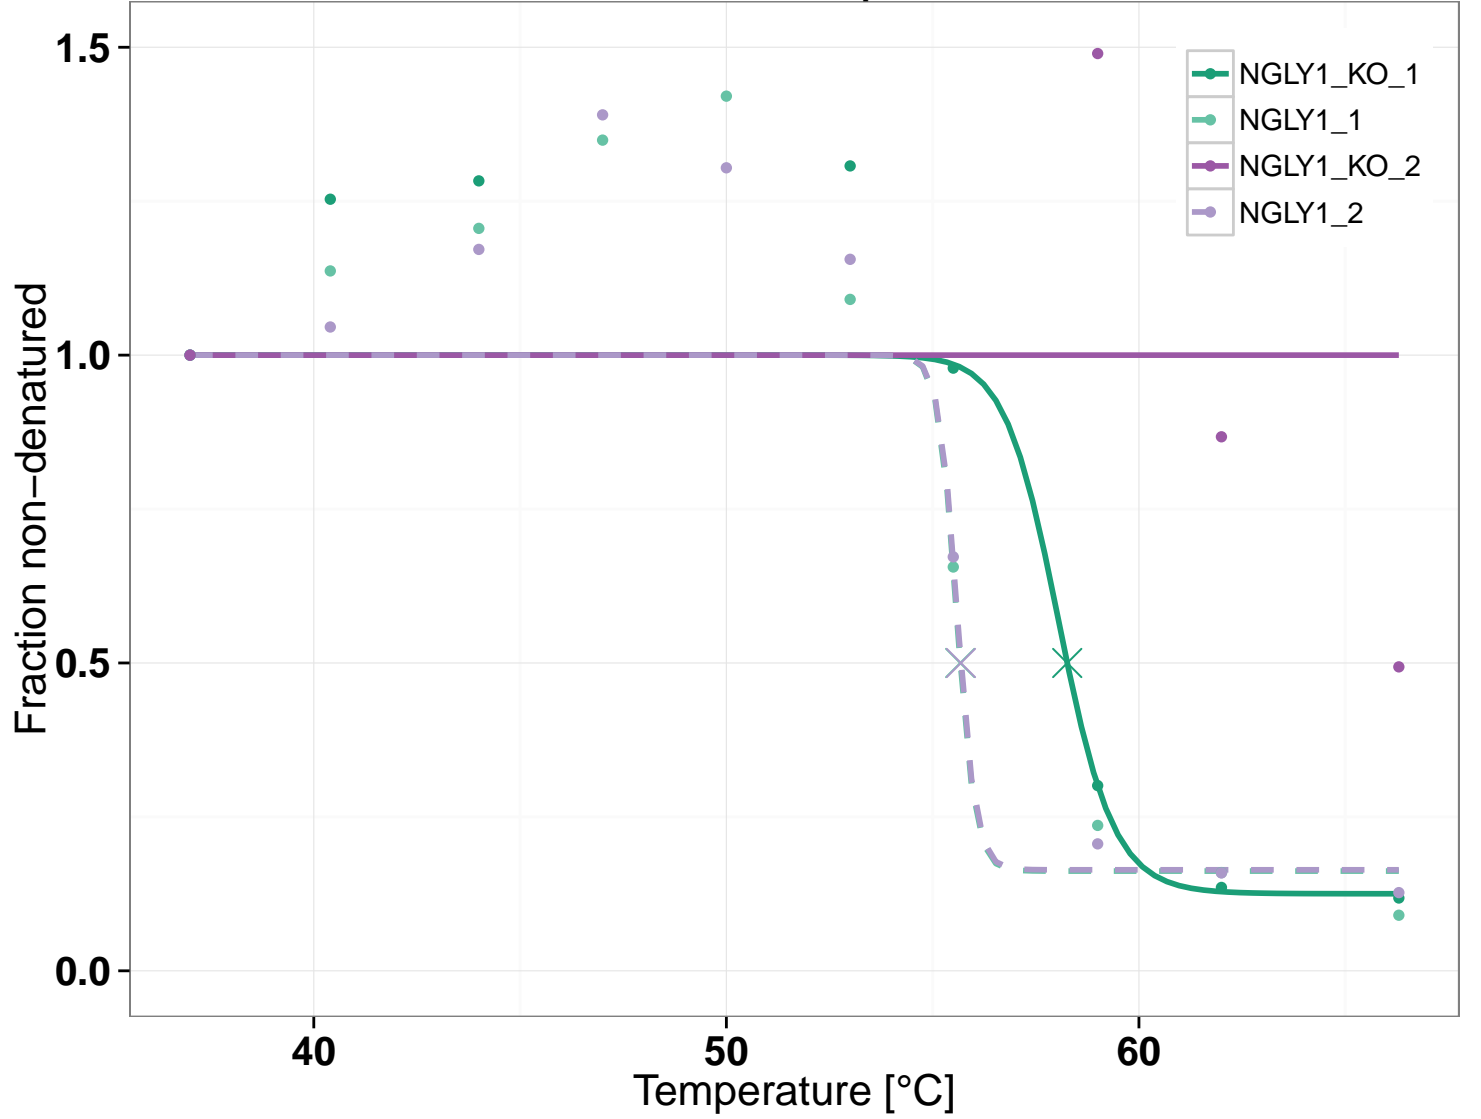

|            | meltPoint | slope | plateau | R2    |
|------------|-----------|-------|---------|-------|
| NGLY1_KO_1 | 58.26     | -0.33 | 0.13    | 0.69  |
| NGLY1_1    | 55.67     | -0.94 | 0.16    | 0.84  |
| NGLY1_KO_2 | -         | -     | 0.38    | -1.29 |
| NGLY1_2    | 55.69     | -0.94 | 0.16    | 0.86  |

Supplement: Supplementary file 697 [file 1]

IPI00032848.1|CCDC53

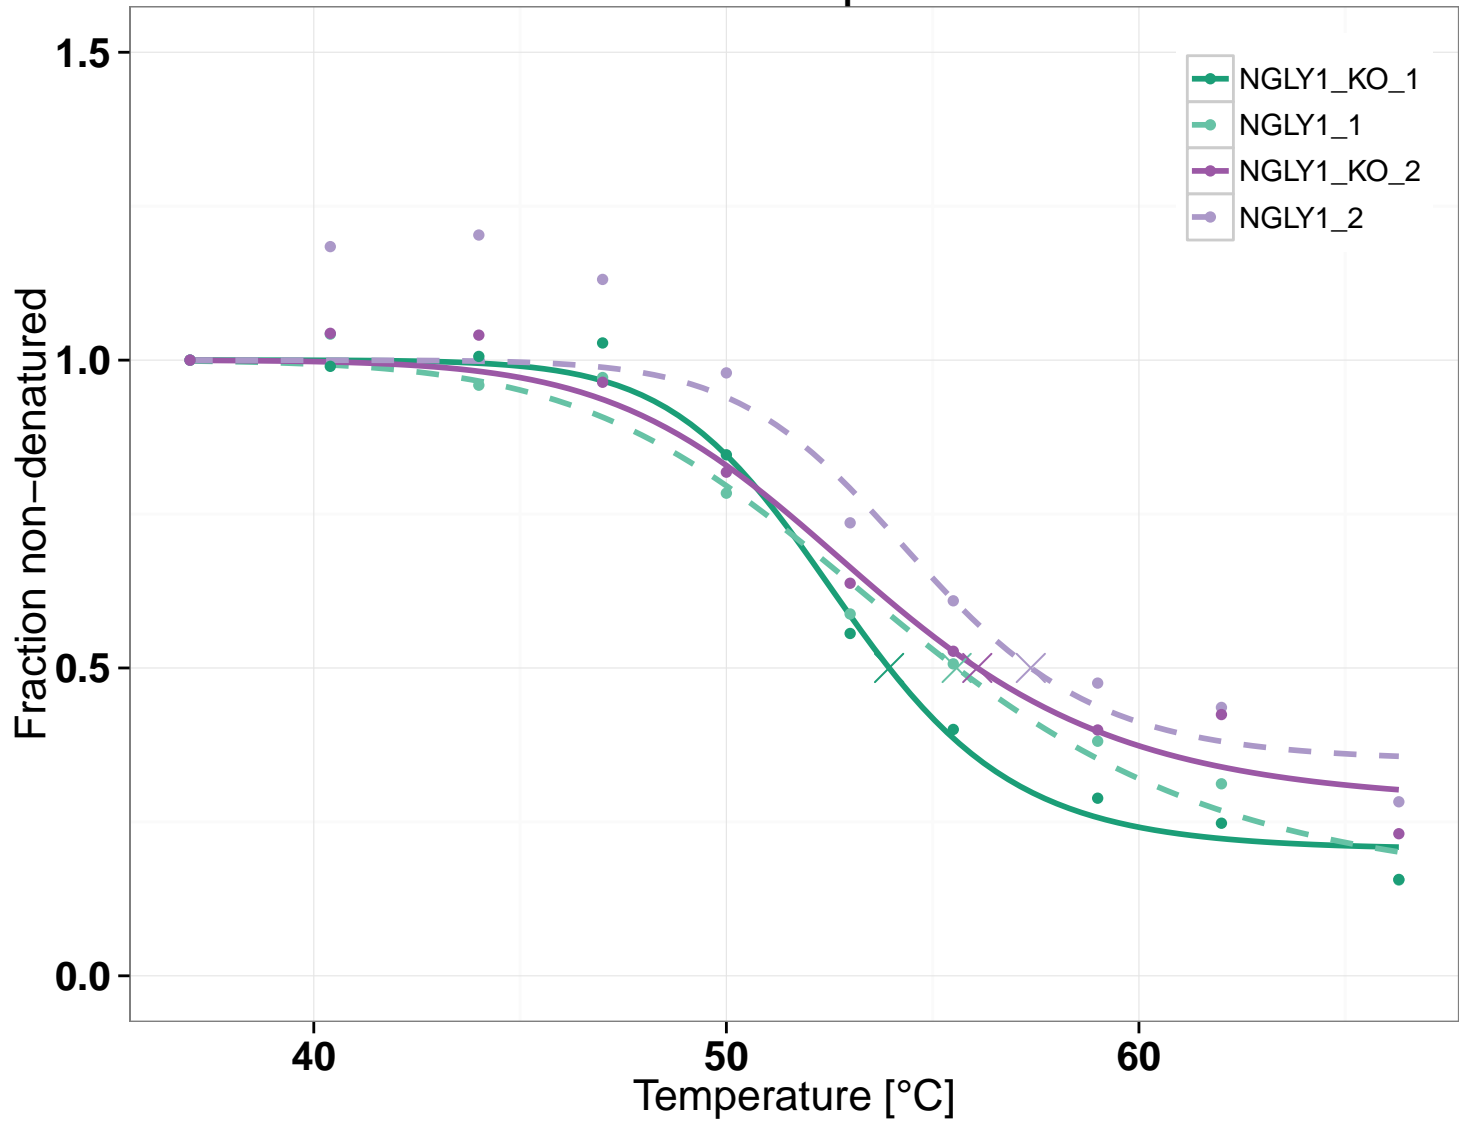

|            | meltPoint | slope  | plateau | R2   |
|------------|-----------|--------|---------|------|
| NGLY1_KO_1 | 53.94     | -0.096 | 0.2     | 0.99 |
| NGLY1_1    | 55.58     | -0.056 | 0.13    | 0.98 |
| NGLY1_KO_2 | 56.08     | -0.059 | 0.28    | 0.98 |
| NGLY1_2    | 57.38     | -0.074 | 0.35    | 0.89 |

Supplement: Supplementary file 698 [file 1]

# IPI00401285.1|DNLZ

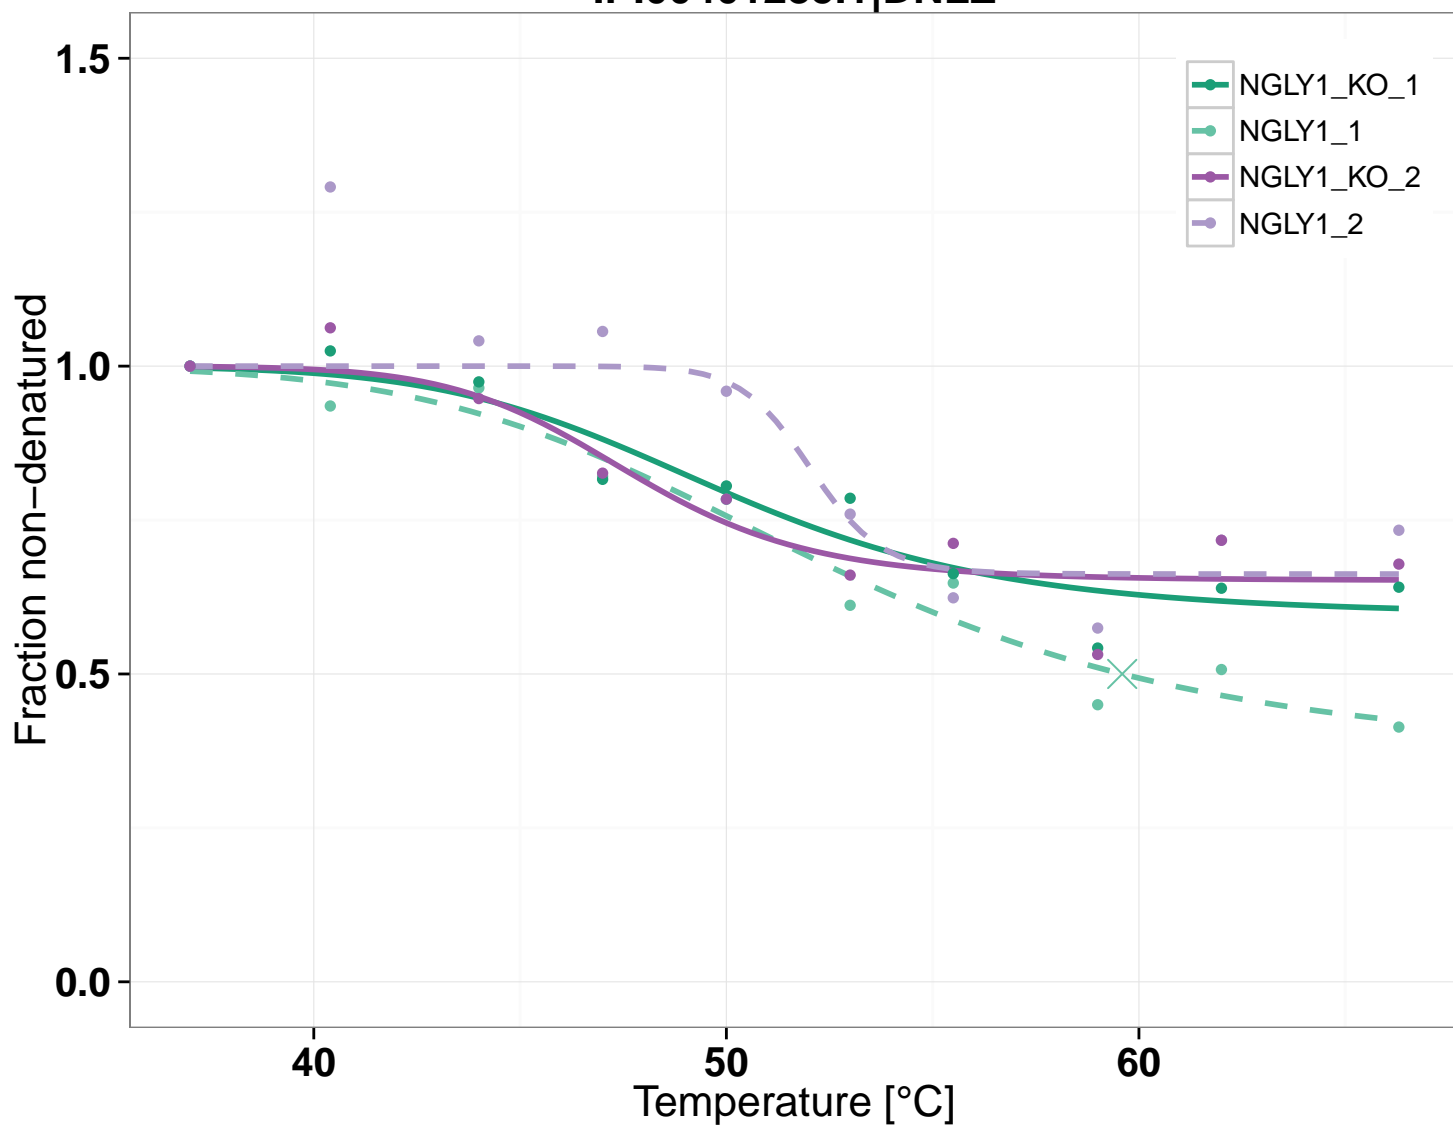

|            | meltPoint | slope  | plateau | R2   |
|------------|-----------|--------|---------|------|
| NGLY1_KO_1 | –         | –0.03  | 0.59    | 0.92 |
| NGLY1_1    | 59.6      | –0.033 | 0.36    | 0.96 |
| NGLY1_KO_2 | –         | –0.04  | 0.65    | 0.88 |
| NGLY1_2    | –         | –0.098 | 0.66    | 0.77 |

Supplement: Supplementary file 699 [file 1]

IPI00747787.2|NCAPD3

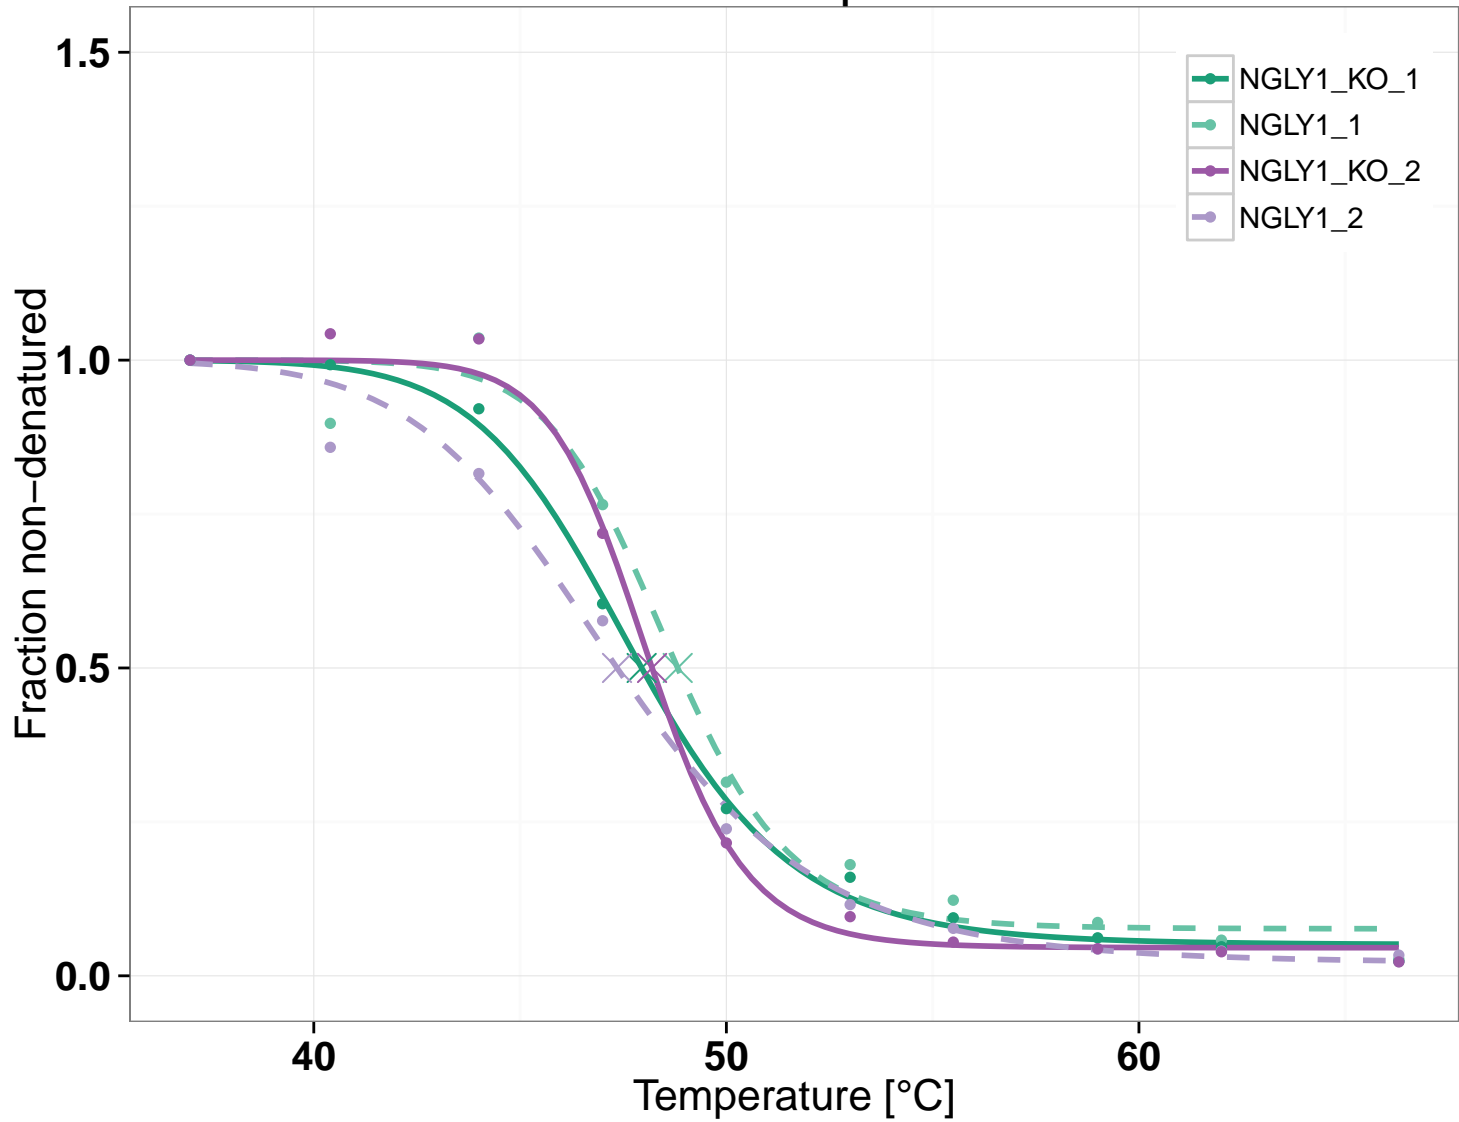

|            | meltPoint | slope | plateau | R2   |
|------------|-----------|-------|---------|------|
| NGLY1_KO_1 | 47.95     | -0.12 | 0.05    | 1    |
| NGLY1_1    | 48.82     | -0.16 | 0.08    | 0.99 |
| NGLY1_KO_2 | 48.2      | -0.2  | 0.05    | 1    |
| NGLY1_2    | 47.35     | -0.1  | 0.02    | 0.99 |

Supplement: Supplementary file 700 [file 1]

# IPI00031653.8|BRMS1L

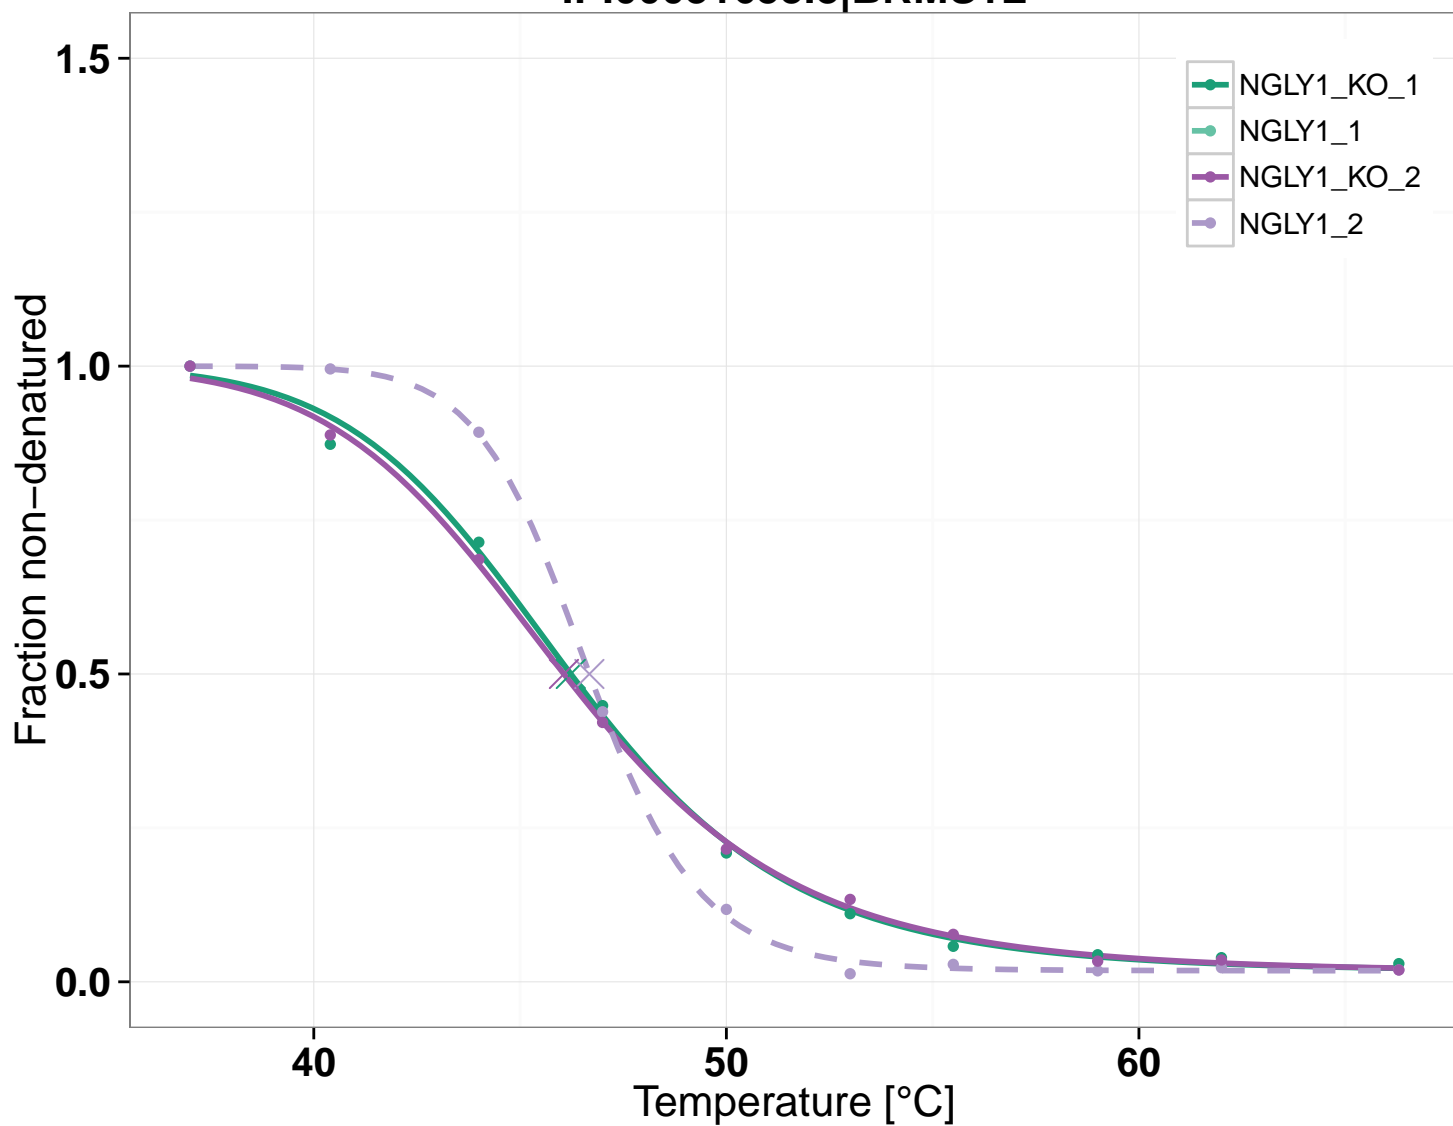

|            | meltPoint | slope  | plateau | R2 |
|------------|-----------|--------|---------|----|
| NGLY1_KO_1 | 46.23     | -0.091 | 0.02    | 1  |
| NGLY1_1    | -         | -      | -       | -  |
| NGLY1_KO_2 | 46.06     | -0.087 | 0.02    | 1  |
| NGLY1_2    | 46.68     | -0.18  | 0.02    | 1  |

Supplement: Supplementary file 701 [file 1]

IPI00060141.3|ZBTB9

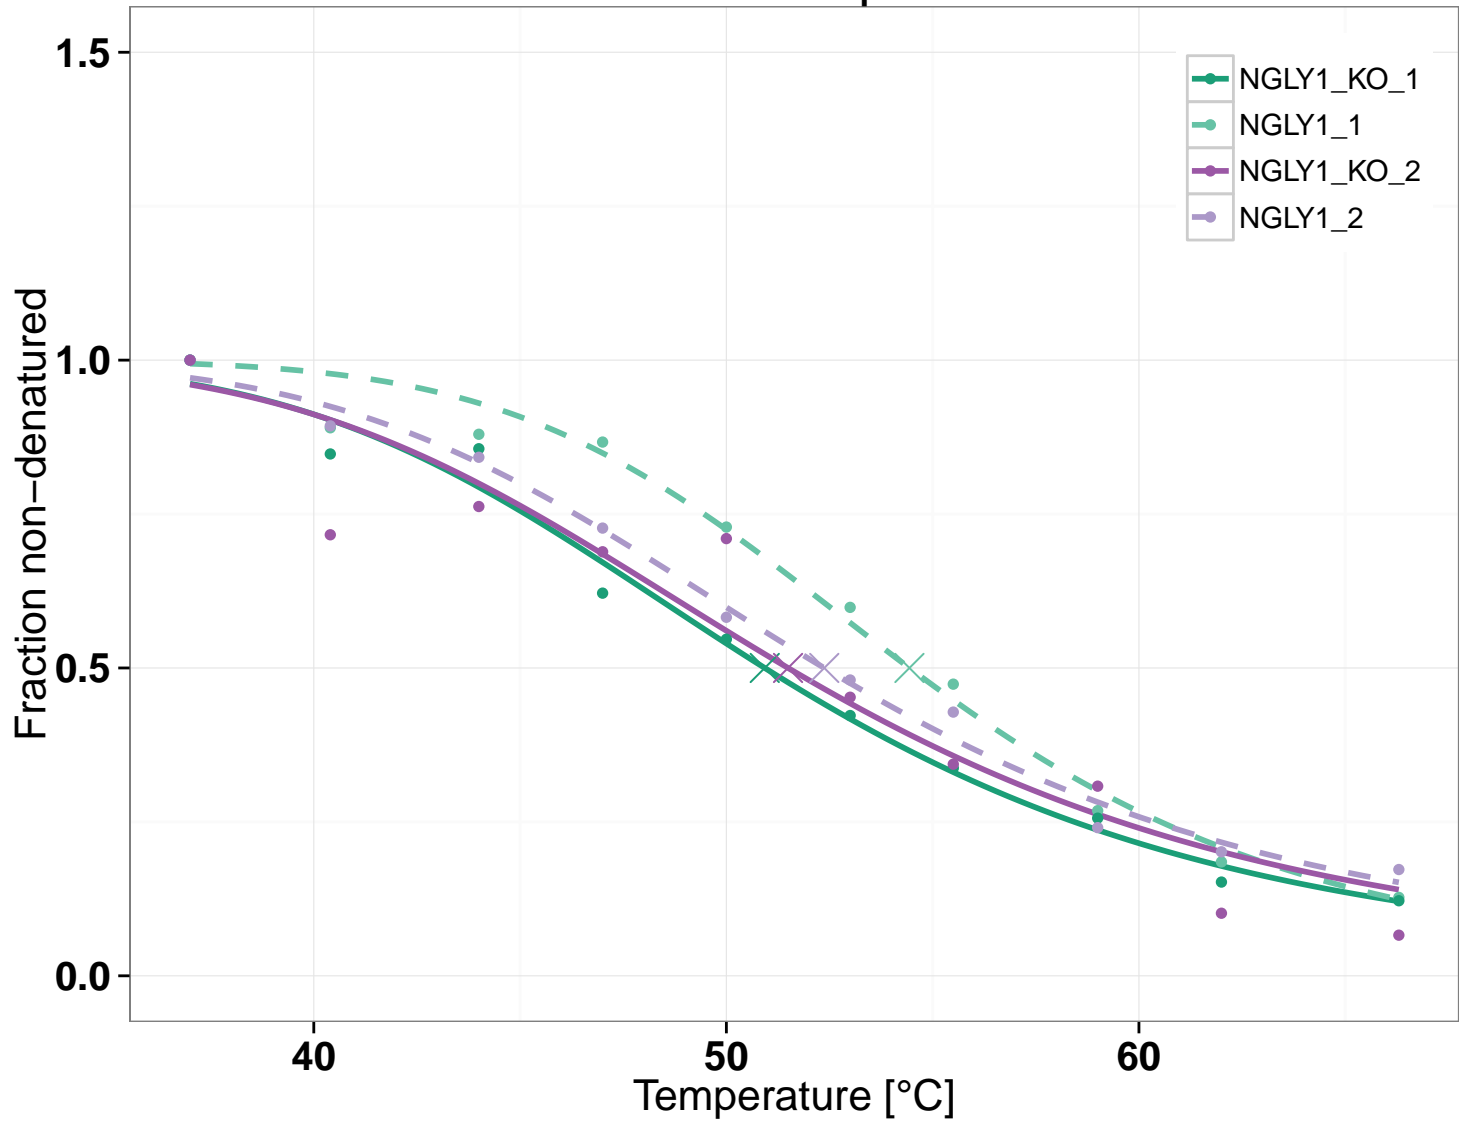

|            | meltPoint | slope  | plateau | R2   |
|------------|-----------|--------|---------|------|
| NGLY1_KO_1 | 50.93     | -0.044 | 0       | 0.99 |
| NGLY1_1    | 54.44     | -0.052 | 0       | 0.99 |
| NGLY1_KO_2 | 51.49     | -0.042 | 0       | 0.91 |
| NGLY1_2    | 52.37     | -0.043 | 0.01    | 0.99 |

Supplement: Supplementary file 702 [file 1]
