# Supplementary material (part 8 of 85)
Source: publisher figshare collection journal article supplement (https://gsajournals.figshare.com/articles/dataset/_/12014913)

IPI00010219.1|SPC25

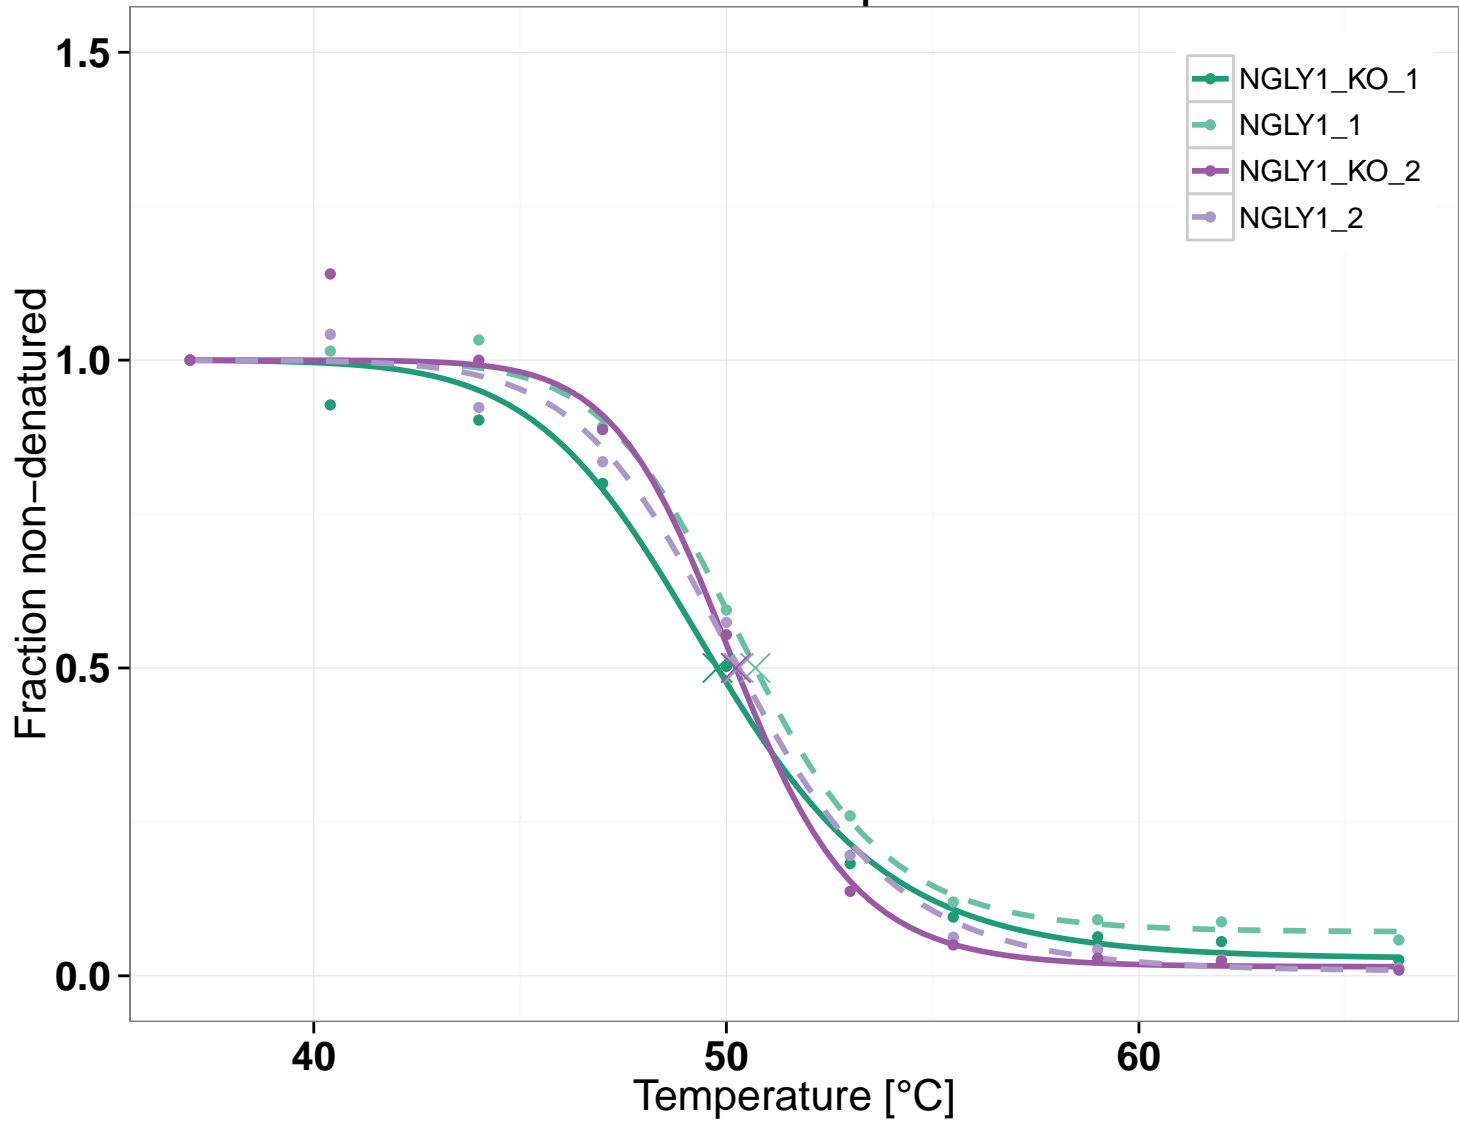

|            | meltPoint | slope | plateau | R2   |
|------------|-----------|-------|---------|------|
| NGLY1_KO_1 | 49.78     | -0.11 | 0.03    | 0.99 |
| NGLY1_1    | 50.7      | -0.14 | 0.07    | 1    |
| NGLY1_KO_2 | 50.23     | -0.17 | 0.01    | 0.99 |
| NGLY1_2    | 50.3      | -0.13 | 0.01    | 1    |

Supplement: Supplementary file 703 [file 1]

# IPI00294536.2|STRAP

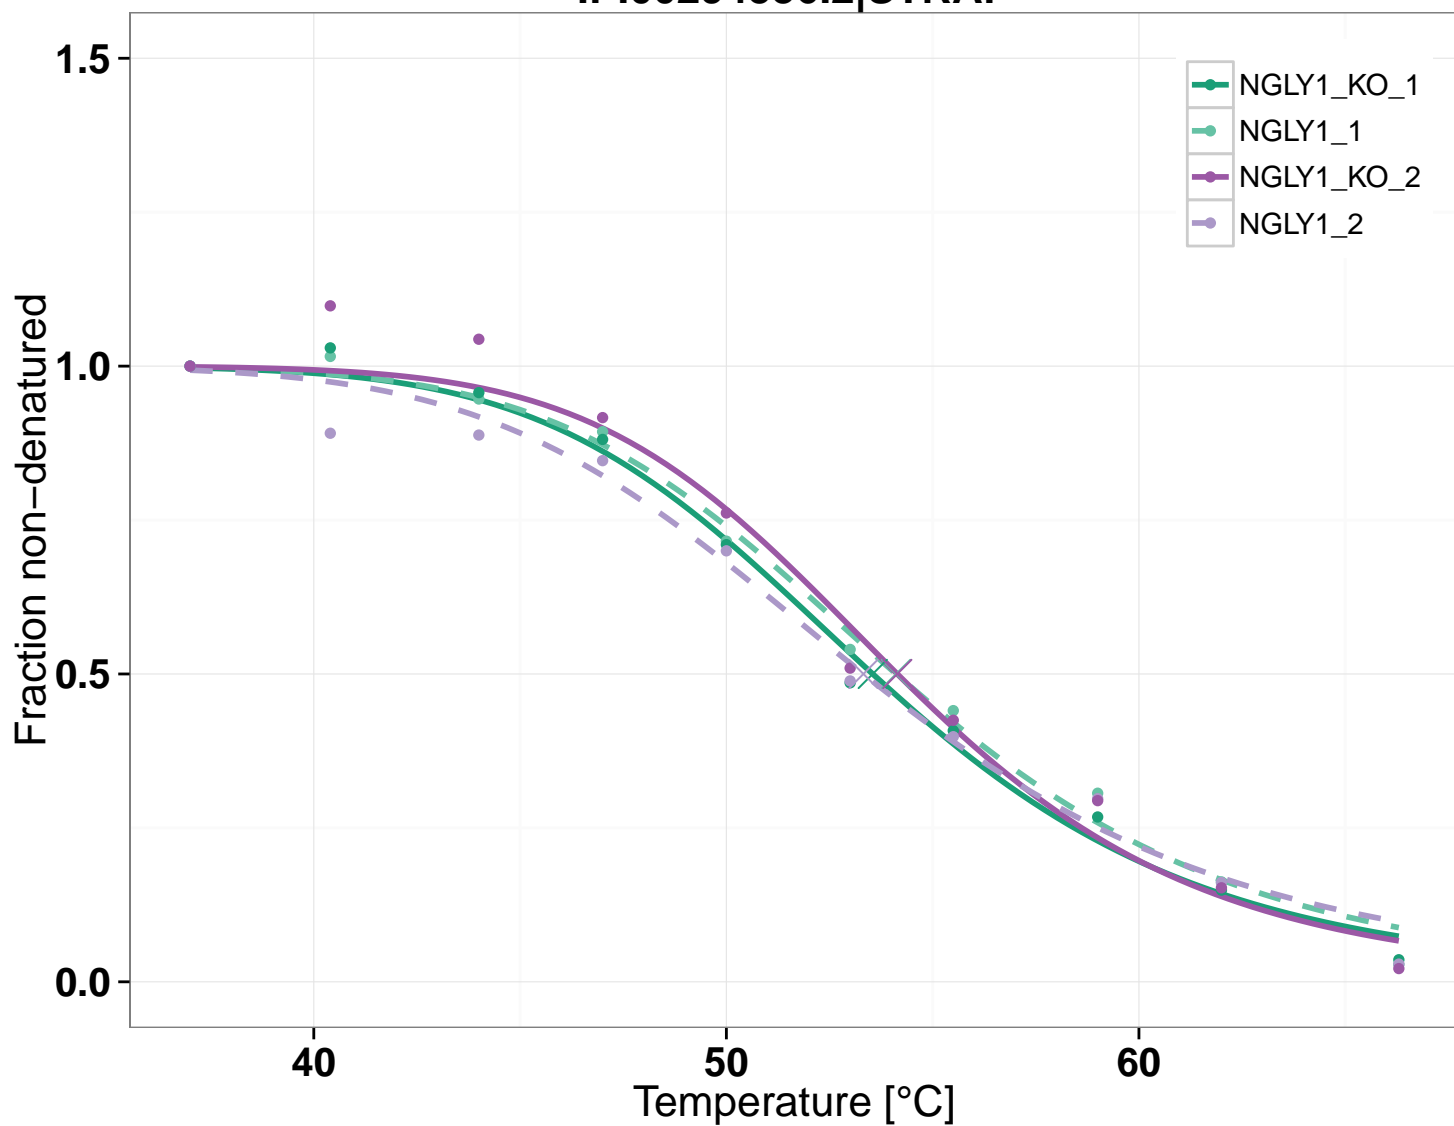

|            | meltPoint | slope  | plateau | R2   |
|------------|-----------|--------|---------|------|
| NGLY1_KO_1 | 53.55     | -0.063 | 0       | 0.99 |
| NGLY1_1    | 54.11     | -0.06  | 0       | 0.99 |
| NGLY1_KO_2 | 54.14     | -0.068 | 0       | 0.98 |
| NGLY1_2    | 53.32     | -0.055 | 0       | 0.98 |

Supplement: Supplementary file 704 [file 1]

# IPI00910923.1|MAPK7

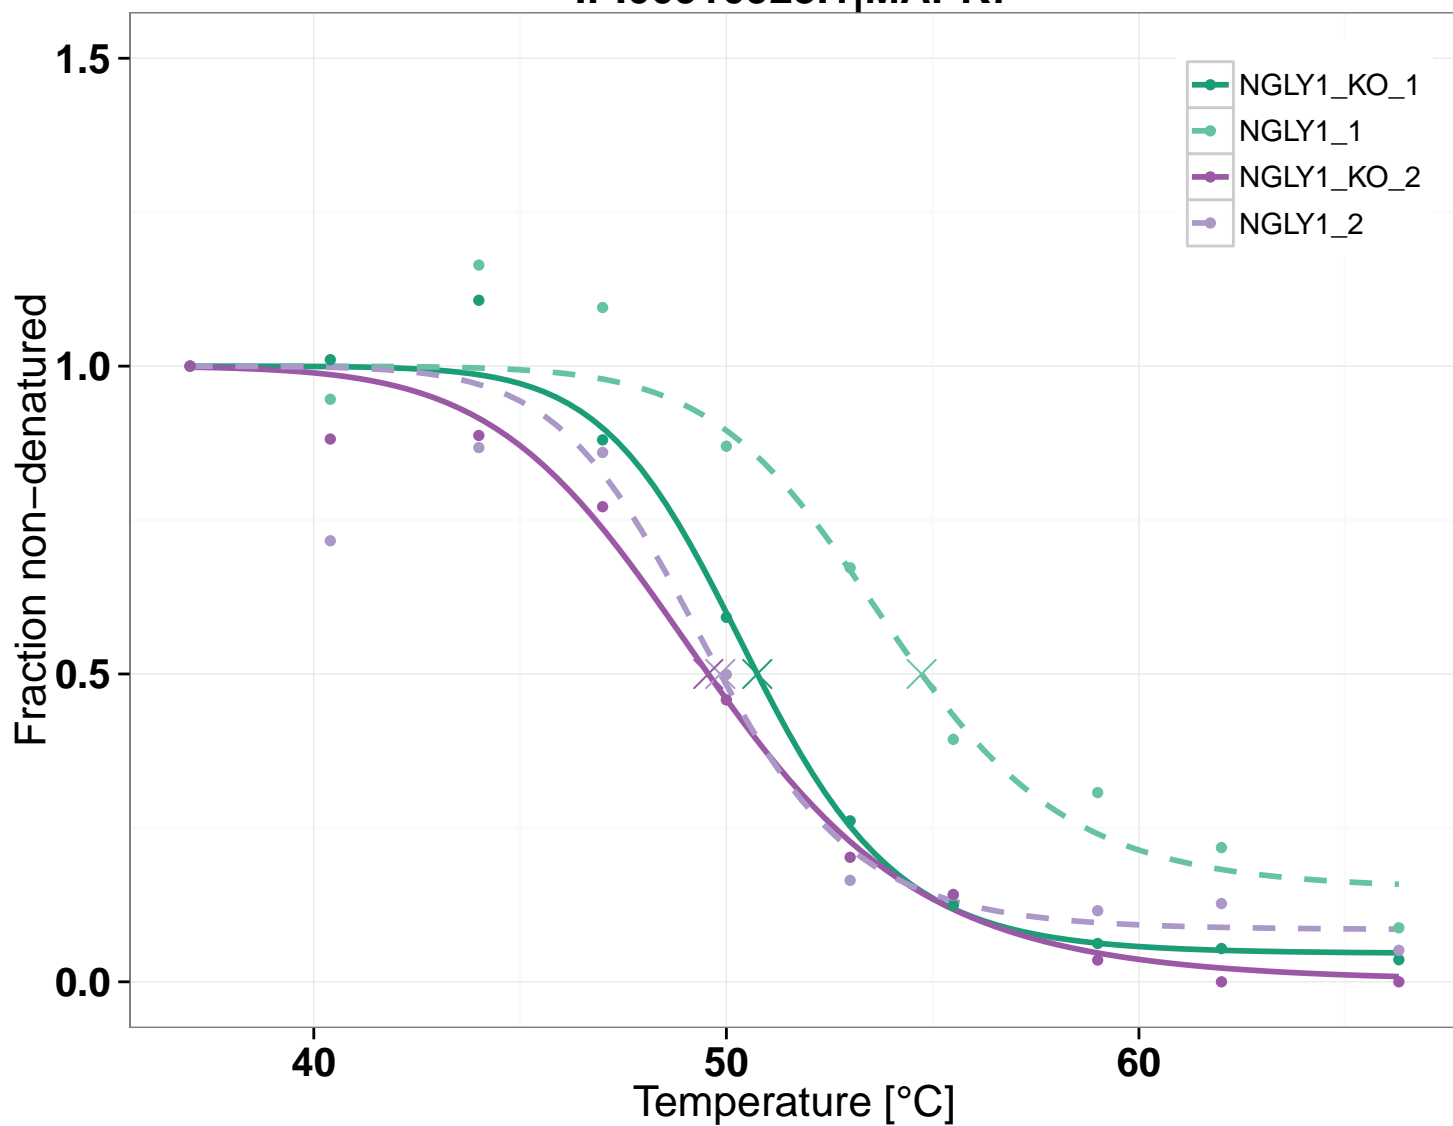

|            | meltPoint | slope  | plateau | R2   |
|------------|-----------|--------|---------|------|
| NGLY1_KO_1 | 50.75     | -0.13  | 0.05    | 0.99 |
| NGLY1_1    | 54.73     | -0.099 | 0.15    | 0.96 |
| NGLY1_KO_2 | 49.56     | -0.096 | 0       | 0.99 |
| NGLY1_2    | 49.85     | -0.13  | 0.08    | 0.92 |

Supplement: Supplementary file 705 [file 1]

# IPI00872596.1|CRCP

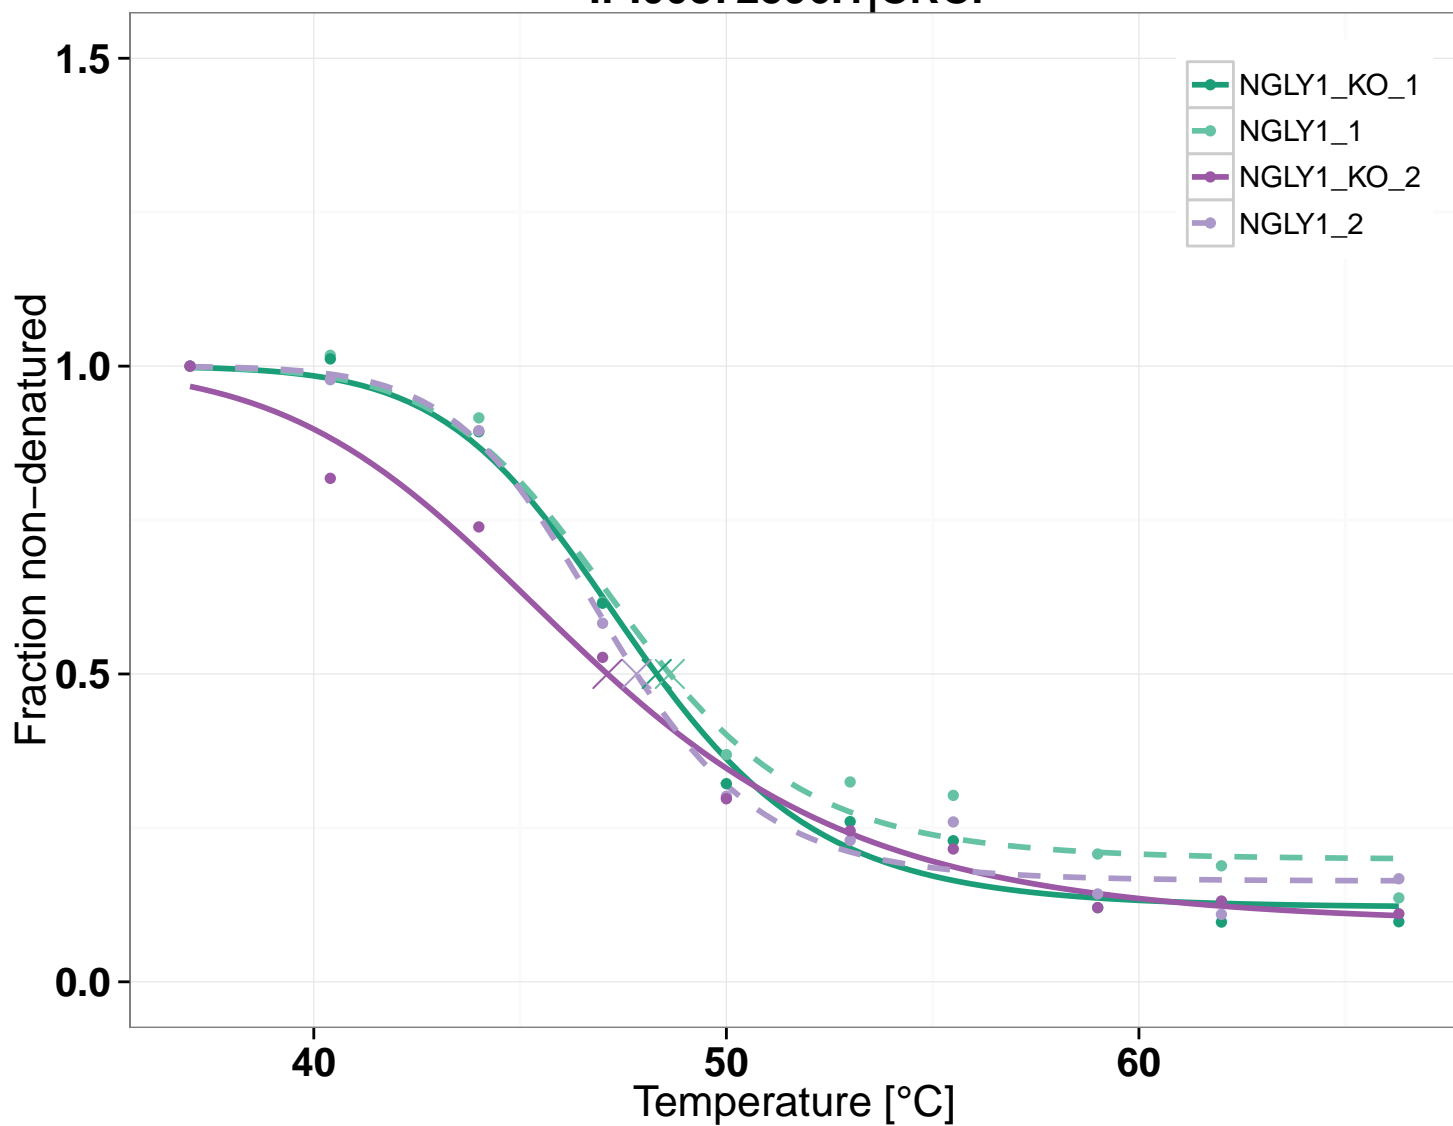

|            | meltPoint | slope  | plateau | R2   |
|------------|-----------|--------|---------|------|
| NGLY1_KO_1 | 48.31     | -0.097 | 0.12    | 0.99 |
| NGLY1_1    | 48.63     | -0.092 | 0.2     | 0.99 |
| NGLY1_KO_2 | 47.12     | -0.065 | 0.09    | 0.99 |
| NGLY1_2    | 47.82     | -0.11  | 0.16    | 0.99 |

Supplement: Supplementary file 706 [file 1]

IPI00002570.1|EIF4EBP2

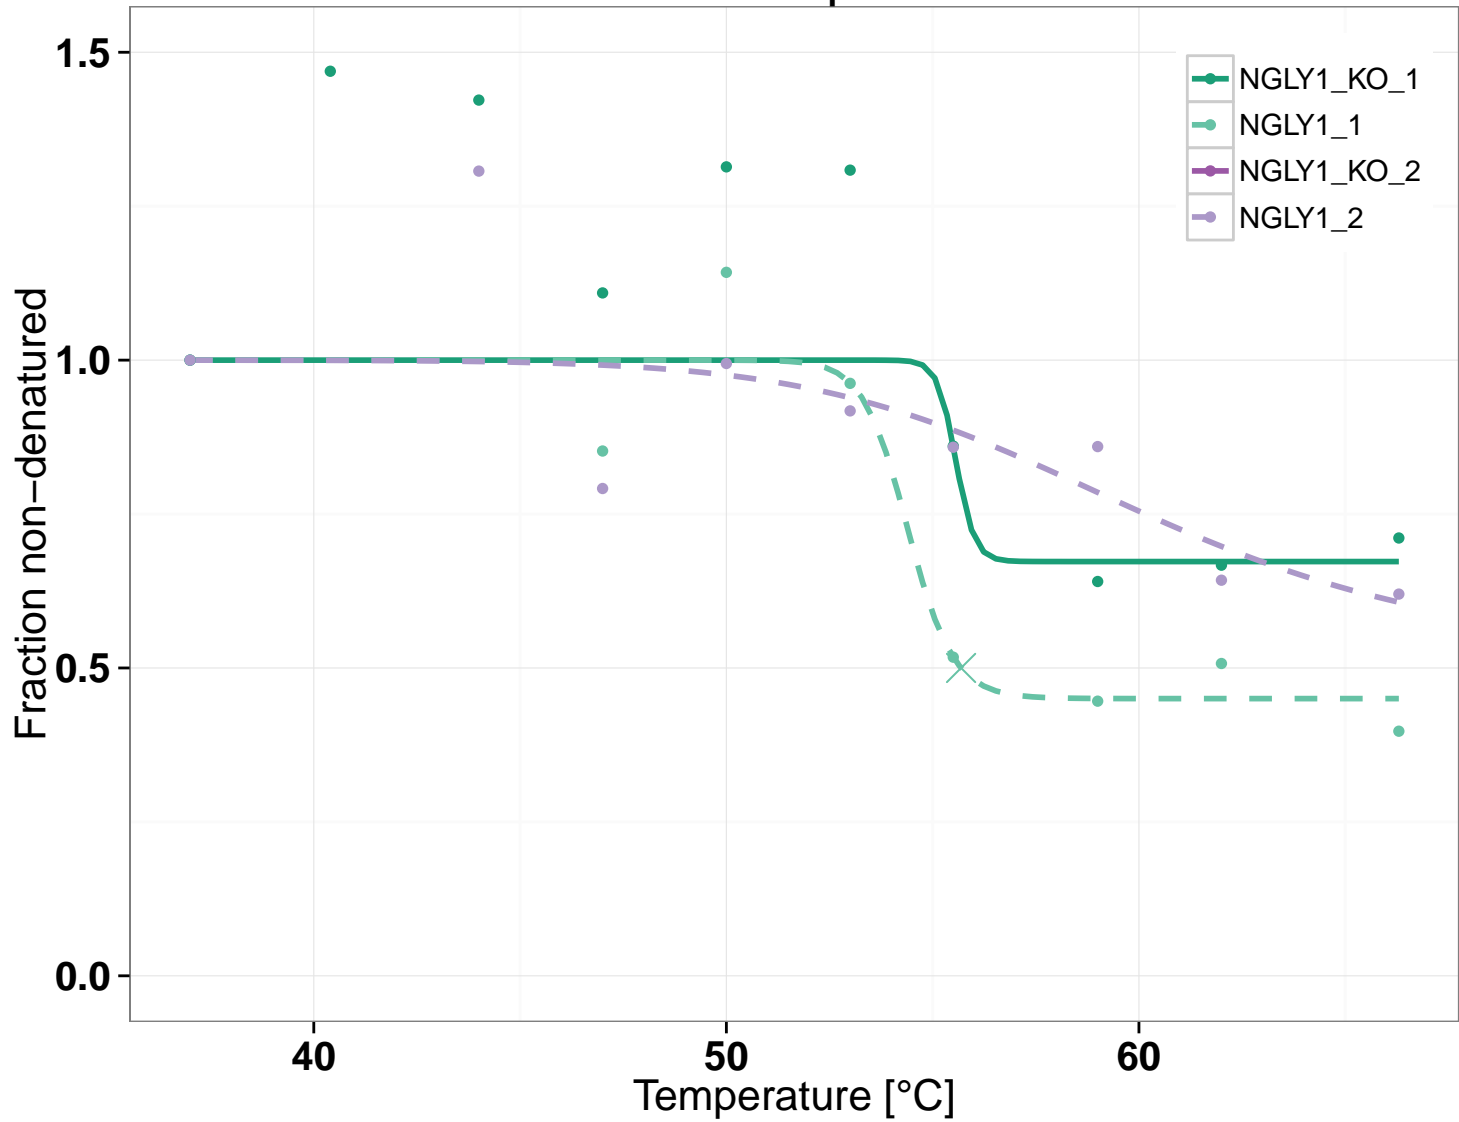

|            | meltPoint | slope  | plateau | R2   |
|------------|-----------|--------|---------|------|
| NGLY1_KO_1 | -         | -0.37  | 0.67    | 0.34 |
| NGLY1_1    | 55.69     | -0.25  | 0.45    | 0.3  |
| NGLY1_KO_2 | -         | -      | -       | -    |
| NGLY1_2    | -         | -0.031 | 0.51    | 0.21 |

Supplement: Supplementary file 707 [file 1]

IPI00008998.3|PTPLAD1

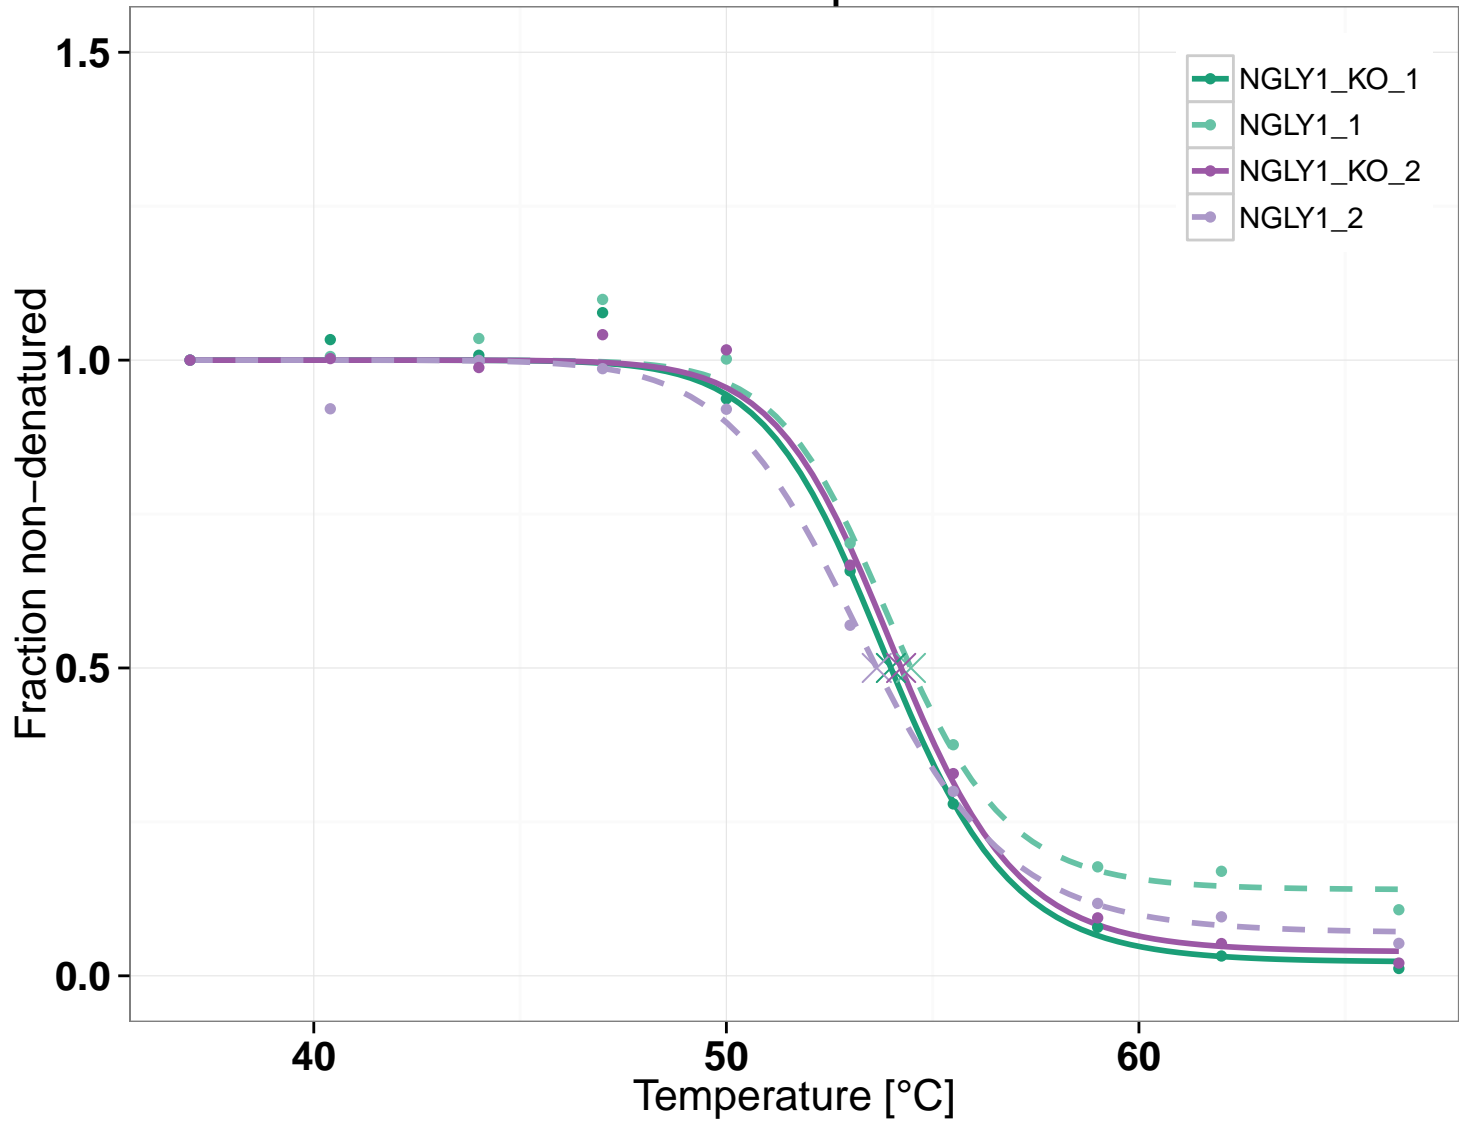

|            | meltPoint | slope | plateau | R2   |
|------------|-----------|-------|---------|------|
| NGLY1_KO_1 | 53.99     | -0.16 | 0.02    | 1    |
| NGLY1_1    | 54.47     | -0.15 | 0.14    | 0.99 |
| NGLY1_KO_2 | 54.24     | -0.16 | 0.04    | 1    |
| NGLY1_2    | 53.65     | -0.14 | 0.07    | 1    |

Supplement: Supplementary file 708 [file 1]

IPI00005745.1|SPTLC1

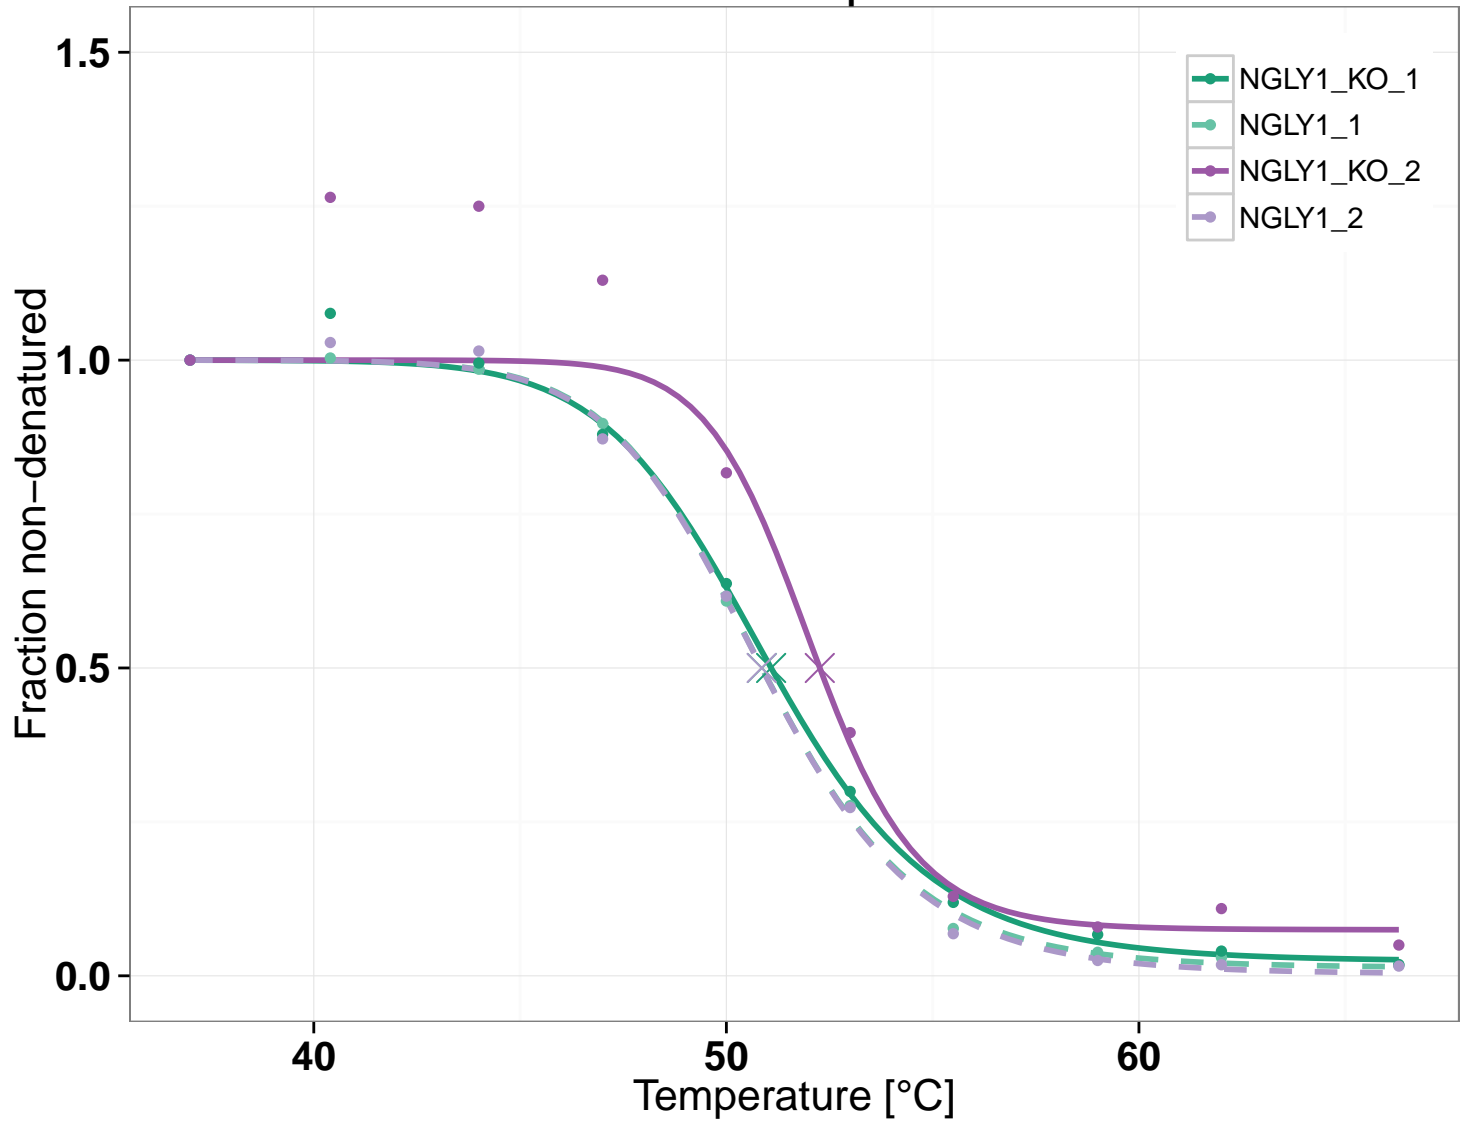

|            | meltPoint | slope | plateau | R2   |
|------------|-----------|-------|---------|------|
| NGLY1_KO_1 | 51.08     | -0.12 | 0.02    | 1    |
| NGLY1_1    | 50.86     | -0.13 | 0.01    | 1    |
| NGLY1_KO_2 | 52.26     | -0.18 | 0.07    | 0.94 |
| NGLY1_2    | 50.85     | -0.13 | 0       | 1    |

Supplement: Supplementary file 709 [file 1]

IPI00012899.1|IL2RG

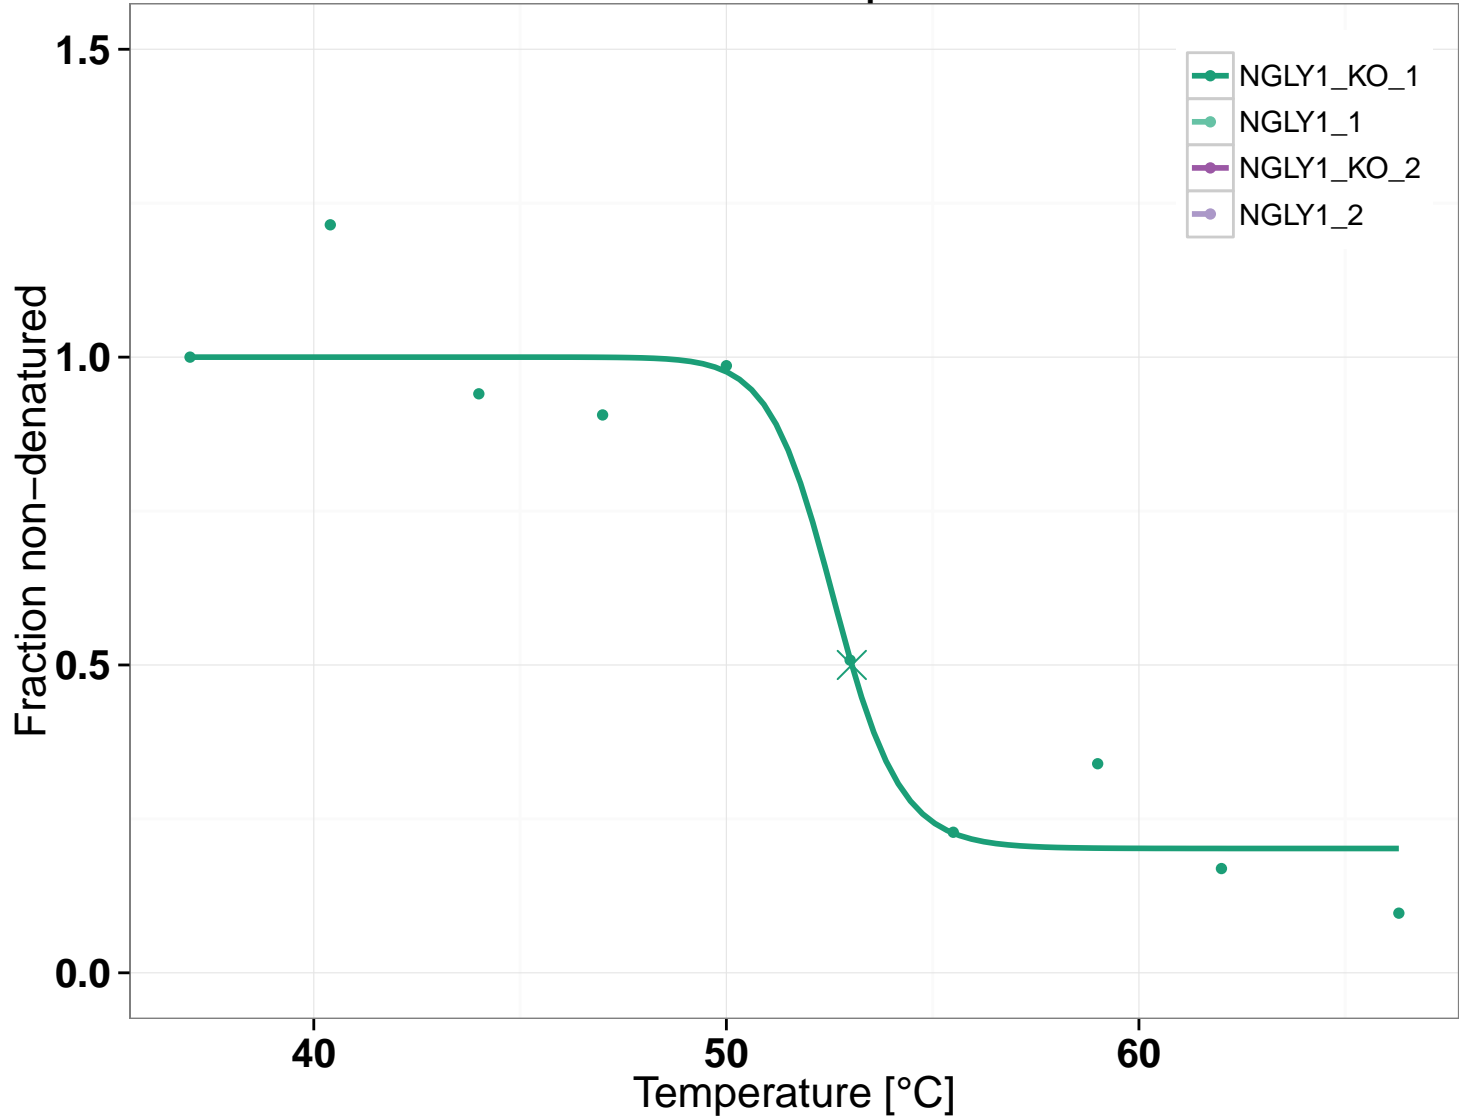

|            | meltPoint | slope | plateau | R2   |
|------------|-----------|-------|---------|------|
| NGLY1_KO_1 | 53.04     | -0.25 | 0.2     | 0.94 |
| NGLY1_1    | -         | -     | -       | -    |
| NGLY1_KO_2 | -         | -     | -       | -    |
| NGLY1_2    | -         | -     | -       | -    |

Supplement: Supplementary file 710 [file 1]

# IPI00020985.3|EP300

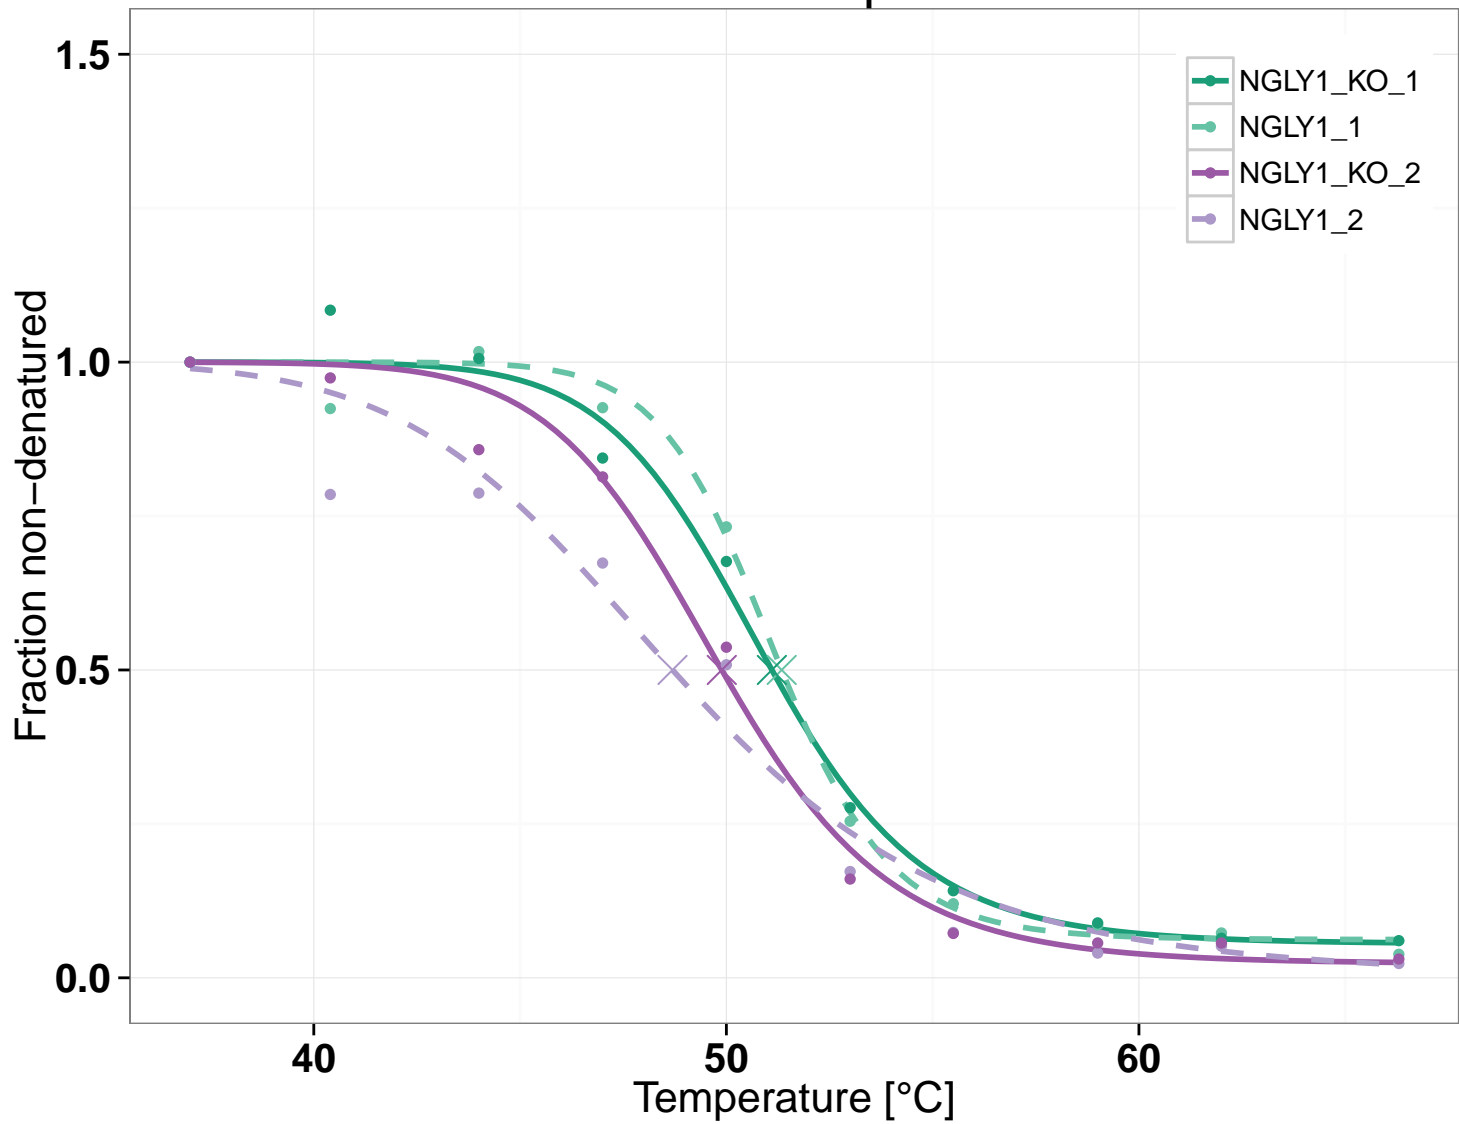

|            | meltPoint | slope  | plateau | R2   |
|------------|-----------|--------|---------|------|
| NGLY1_KO_1 | 51.1      | -0.12  | 0.05    | 0.99 |
| NGLY1_1    | 51.34     | -0.17  | 0.06    | 0.99 |
| NGLY1_KO_2 | 49.89     | -0.12  | 0.02    | 0.99 |
| NGLY1_2    | 48.69     | -0.075 | 0       | 0.96 |

Supplement: Supplementary file 711 [file 1]

IPI00329373.3|C19ORF70

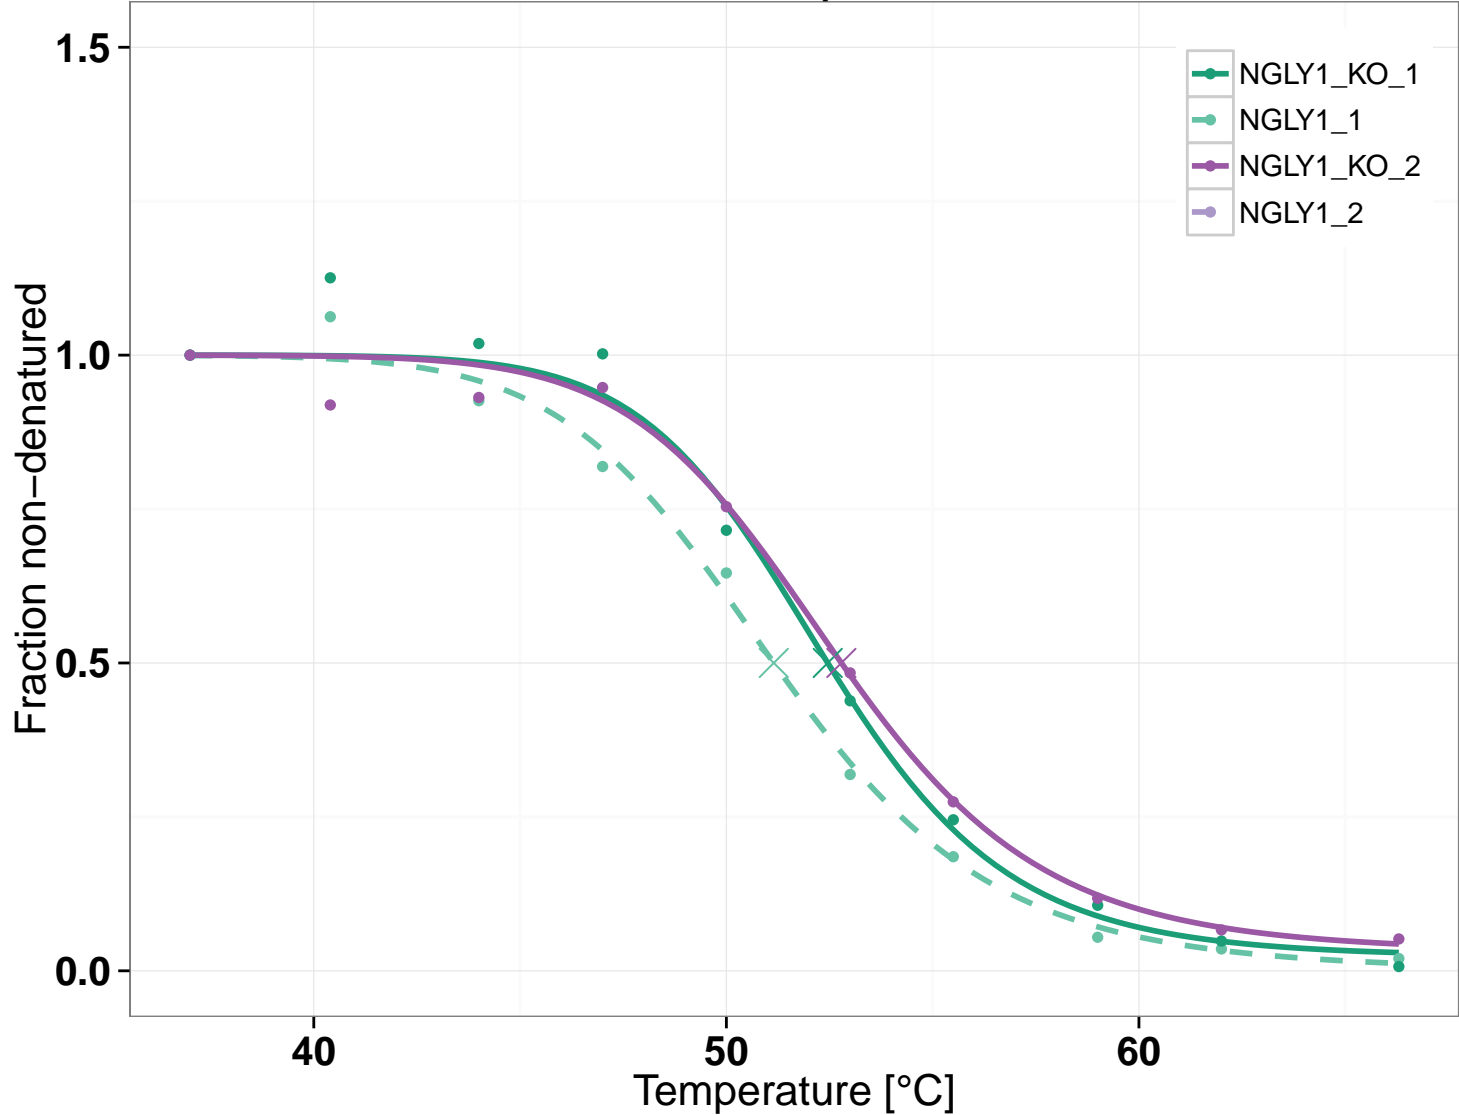

|            | meltPoint | slope  | plateau | R2   |
|------------|-----------|--------|---------|------|
| NGLY1_KO_1 | 52.46     | -0.11  | 0.02    | 0.99 |
| NGLY1_1    | 51.15     | -0.095 | 0       | 0.99 |
| NGLY1_KO_2 | 52.79     | -0.097 | 0.03    | 0.99 |
| NGLY1_2    | -         | -      | -       | -    |

Supplement: Supplementary file 712 [file 1]

IPI00888841.1|LOC100132177

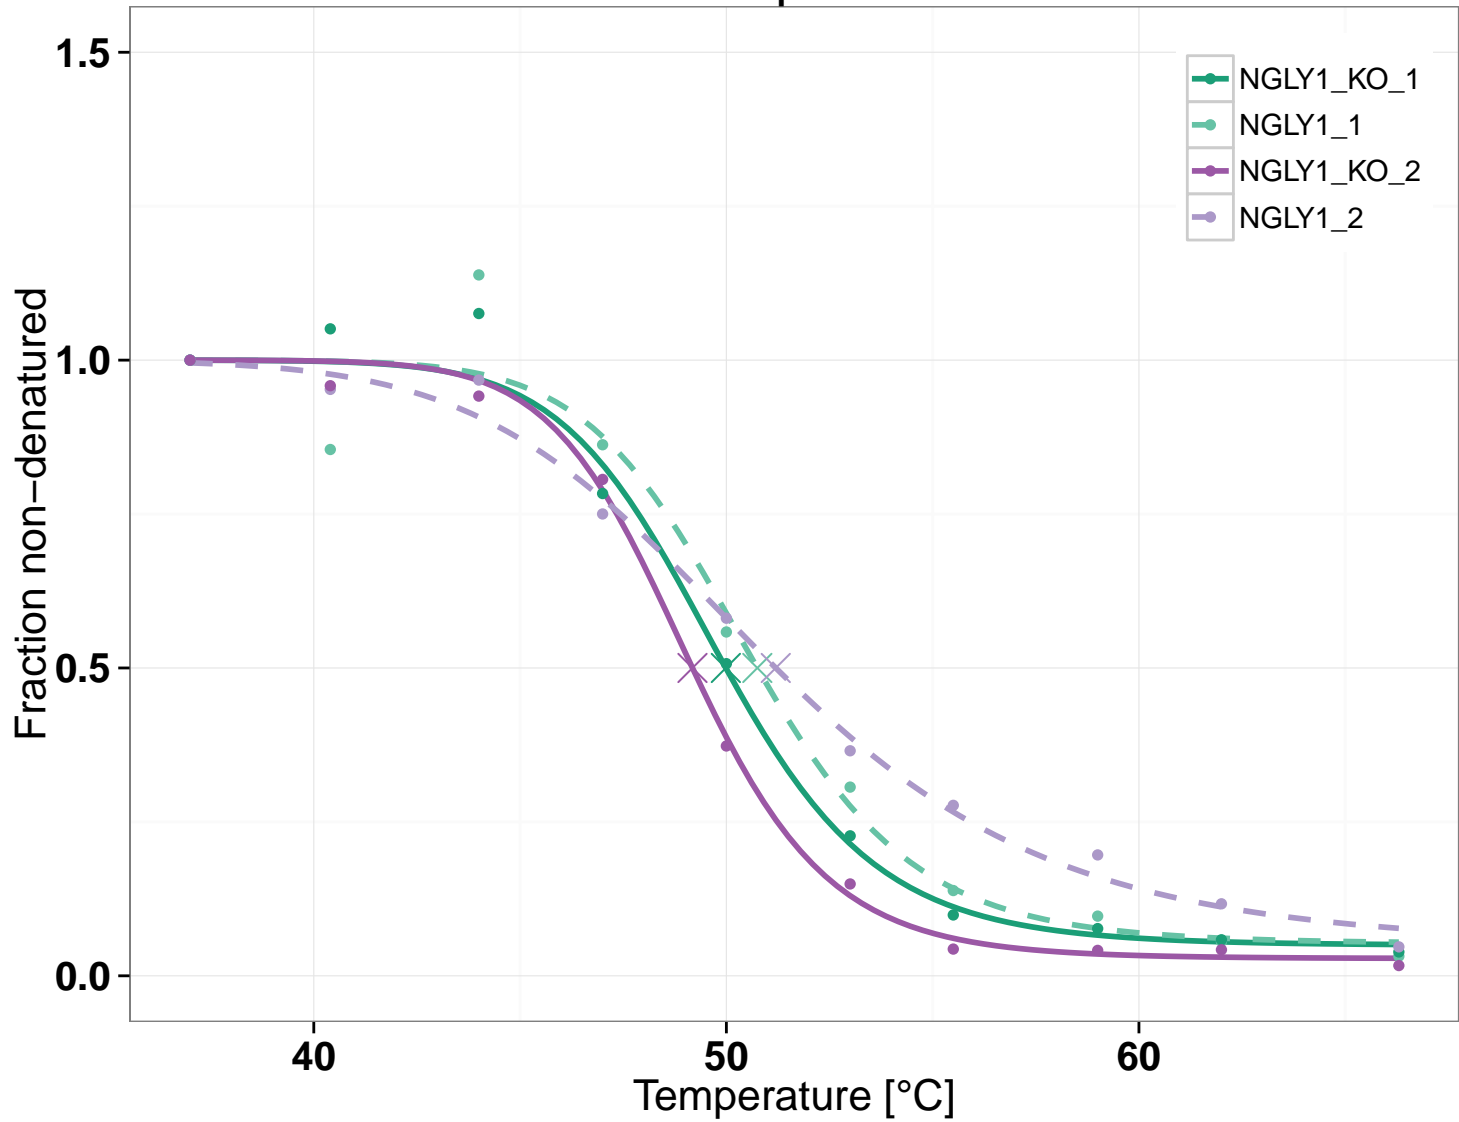

|            | meltPoint | slope  | plateau | R2   |
|------------|-----------|--------|---------|------|
| NGLY1_KO_1 | 49.99     | -0.12  | 0.05    | 0.99 |
| NGLY1_1    | 50.75     | -0.12  | 0.05    | 0.97 |
| NGLY1_KO_2 | 49.18     | -0.14  | 0.03    | 1    |
| NGLY1_2    | 51.2      | -0.069 | 0.04    | 0.99 |

Supplement: Supplementary file 713 [file 1]

IPI00414179.1|RASSF2

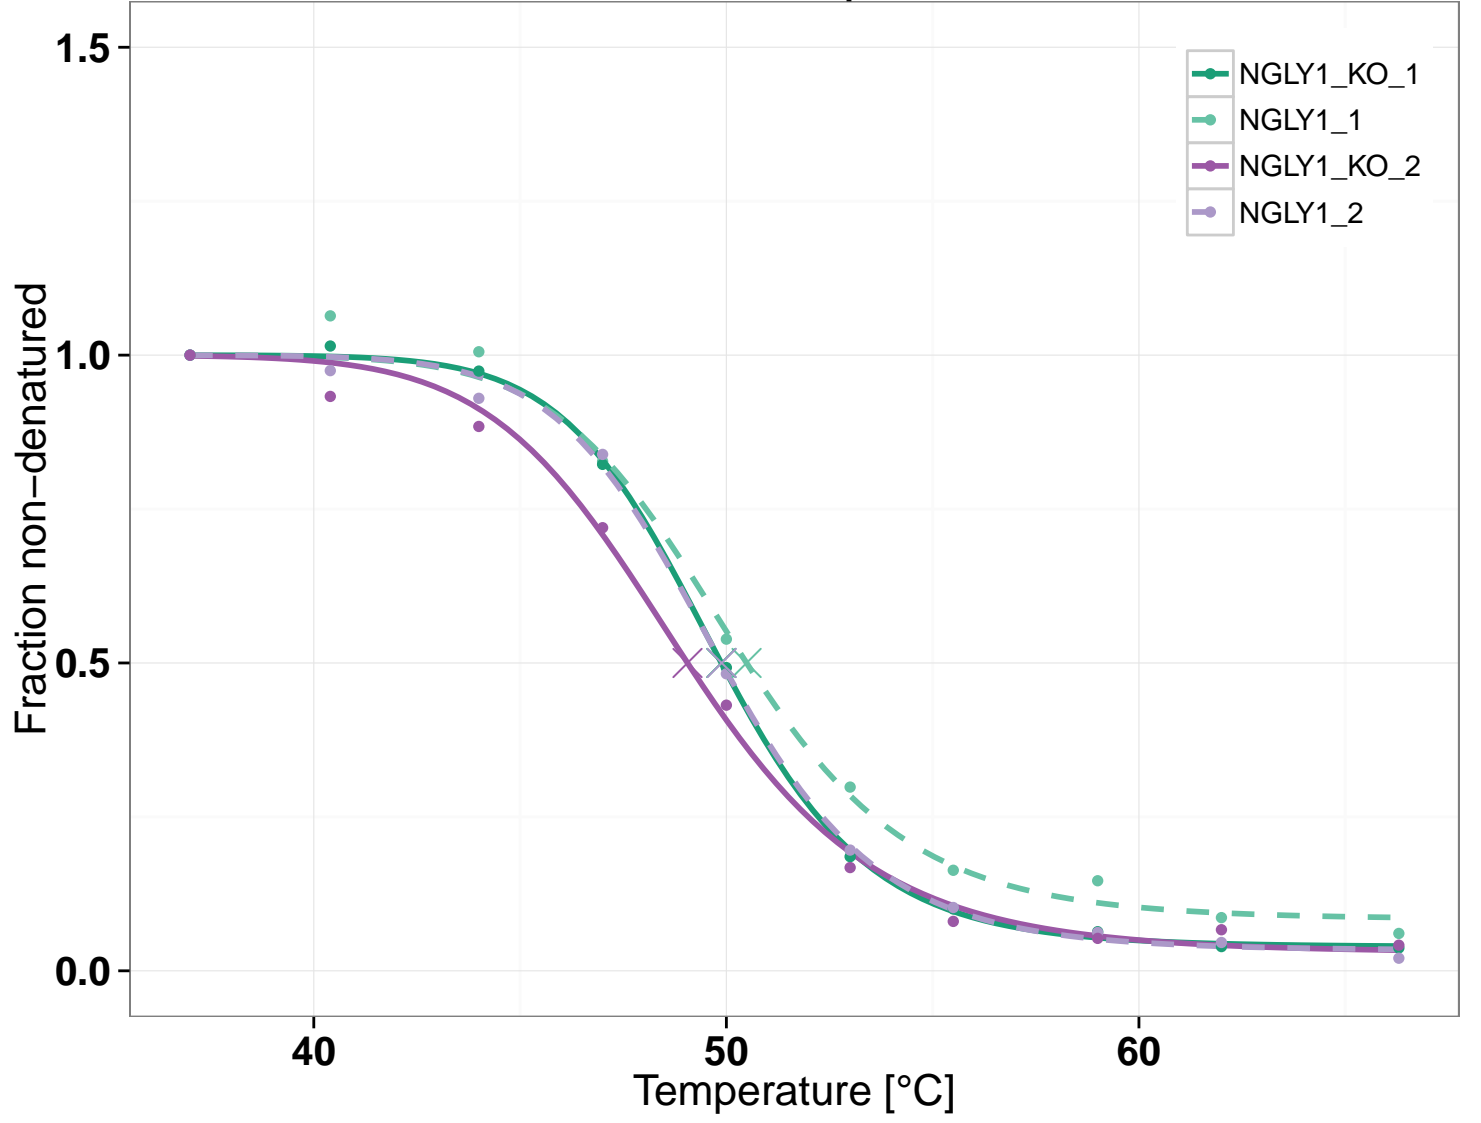

|            | meltPoint | slope | plateau | R2   |
|------------|-----------|-------|---------|------|
| NGLY1_KO_1 | 49.88     | -0.13 | 0.04    | 1    |
| NGLY1_1    | 50.49     | -0.11 | 0.08    | 0.99 |
| NGLY1_KO_2 | 49.06     | -0.1  | 0.03    | 1    |
| NGLY1_2    | 49.89     | -0.12 | 0.03    | 1    |

Supplement: Supplementary file 714 [file 1]

# IPI00022664.3|RABGGTA

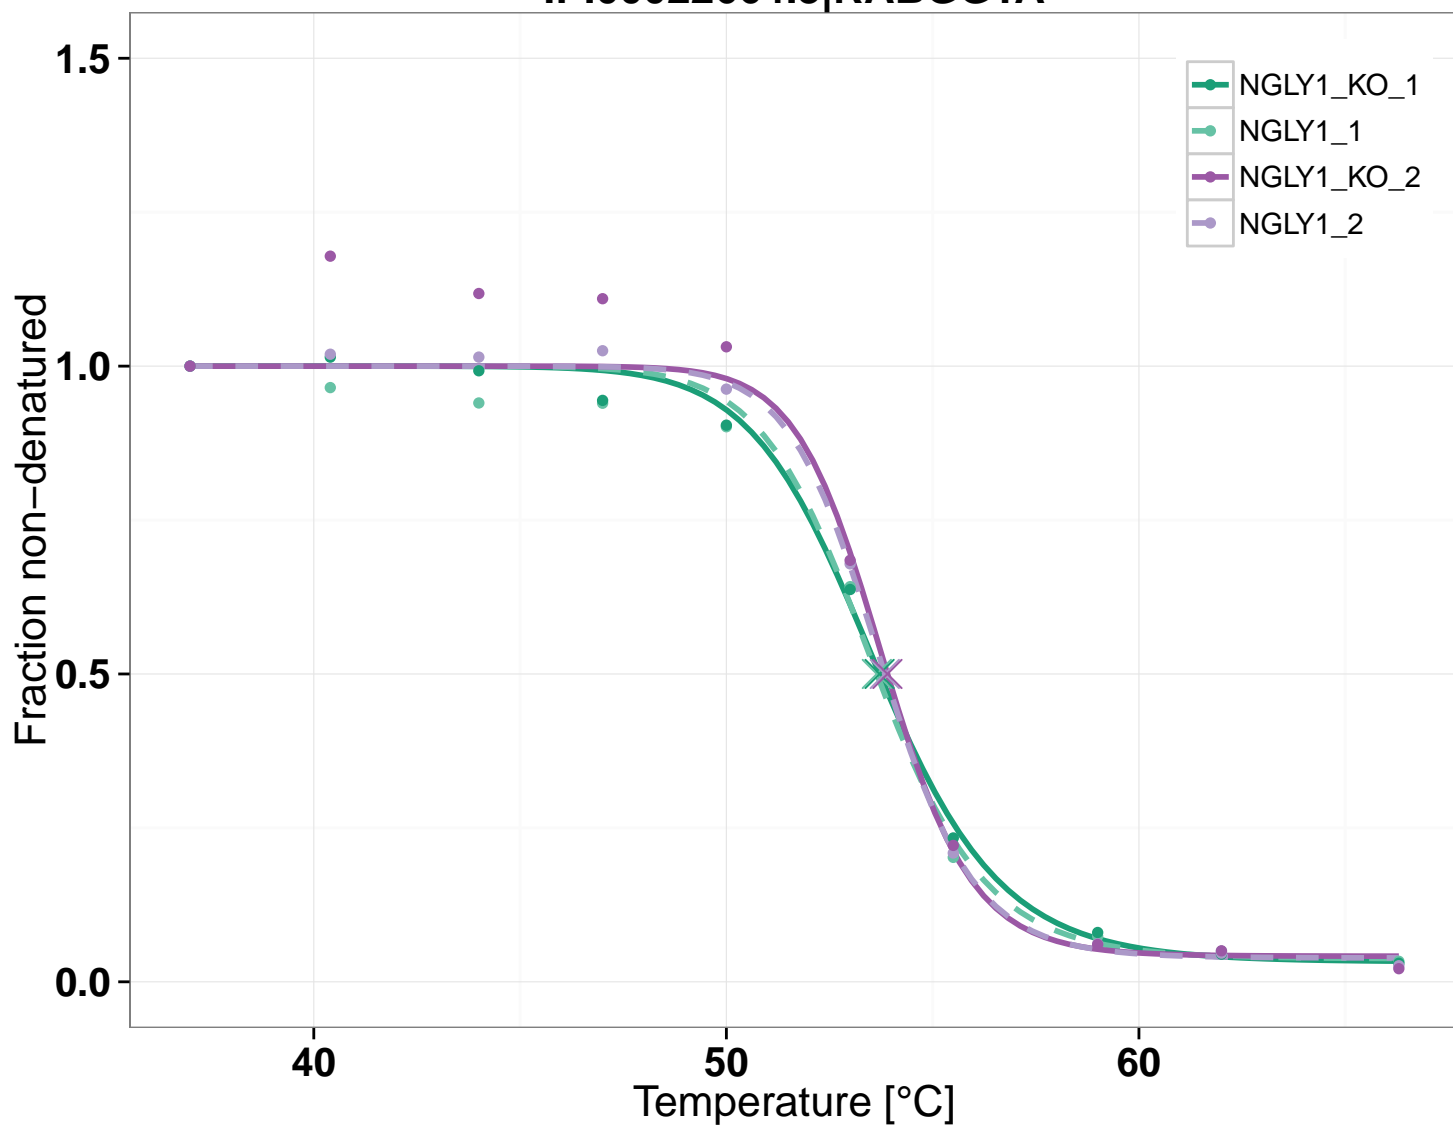

|            | meltPoint | slope | plateau | R2   |
|------------|-----------|-------|---------|------|
| NGLY1_KO_1 | 53.71     | -0.16 | 0.03    | 1    |
| NGLY1_1    | 53.65     | -0.18 | 0.04    | 0.99 |
| NGLY1_KO_2 | 53.9      | -0.22 | 0.04    | 0.97 |
| NGLY1_2    | 53.84     | -0.21 | 0.04    | 1    |

Supplement: Supplementary file 715 [file 1]

IPI00305822.1|PRR11

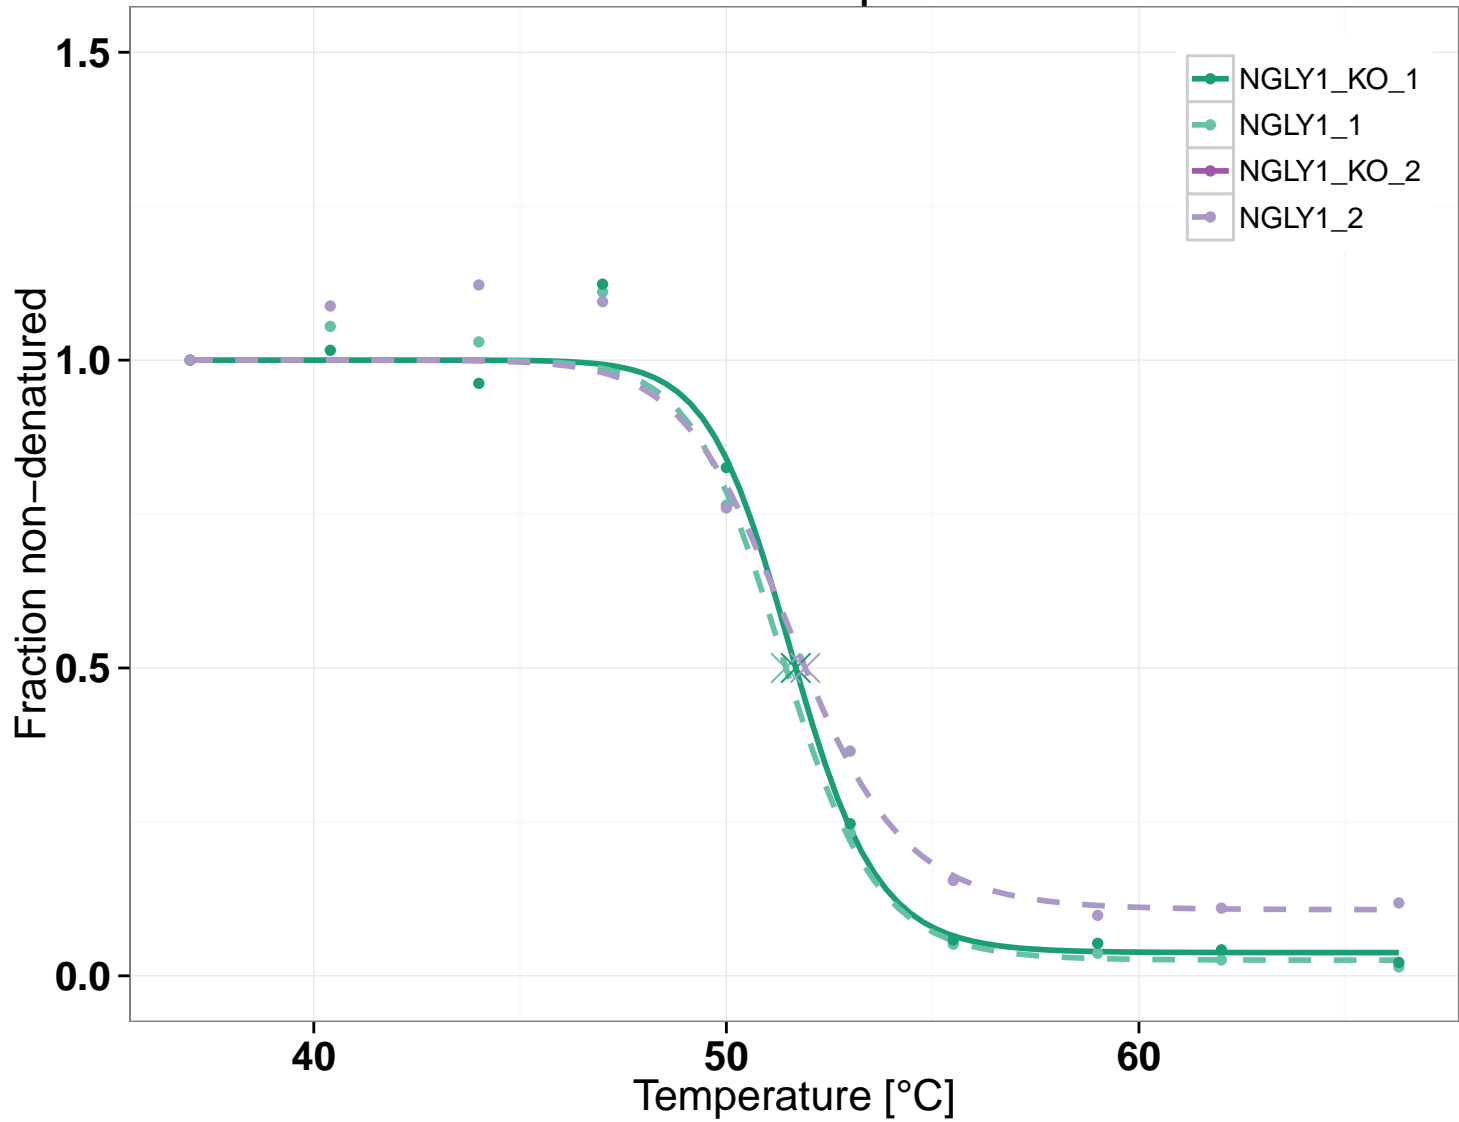

|            | meltPoint | slope | plateau | R2   |
|------------|-----------|-------|---------|------|
| NGLY1_KO_1 | 51.68     | -0.24 | 0.04    | 0.99 |
| NGLY1_1    | 51.44     | -0.22 | 0.03    | 0.99 |
| NGLY1_KO_2 | -         | -     | -       | -    |
| NGLY1_2    | 51.91     | -0.17 | 0.11    | 0.98 |

Supplement: Supplementary file 716 [file 1]

IPI00914561.1|HRC

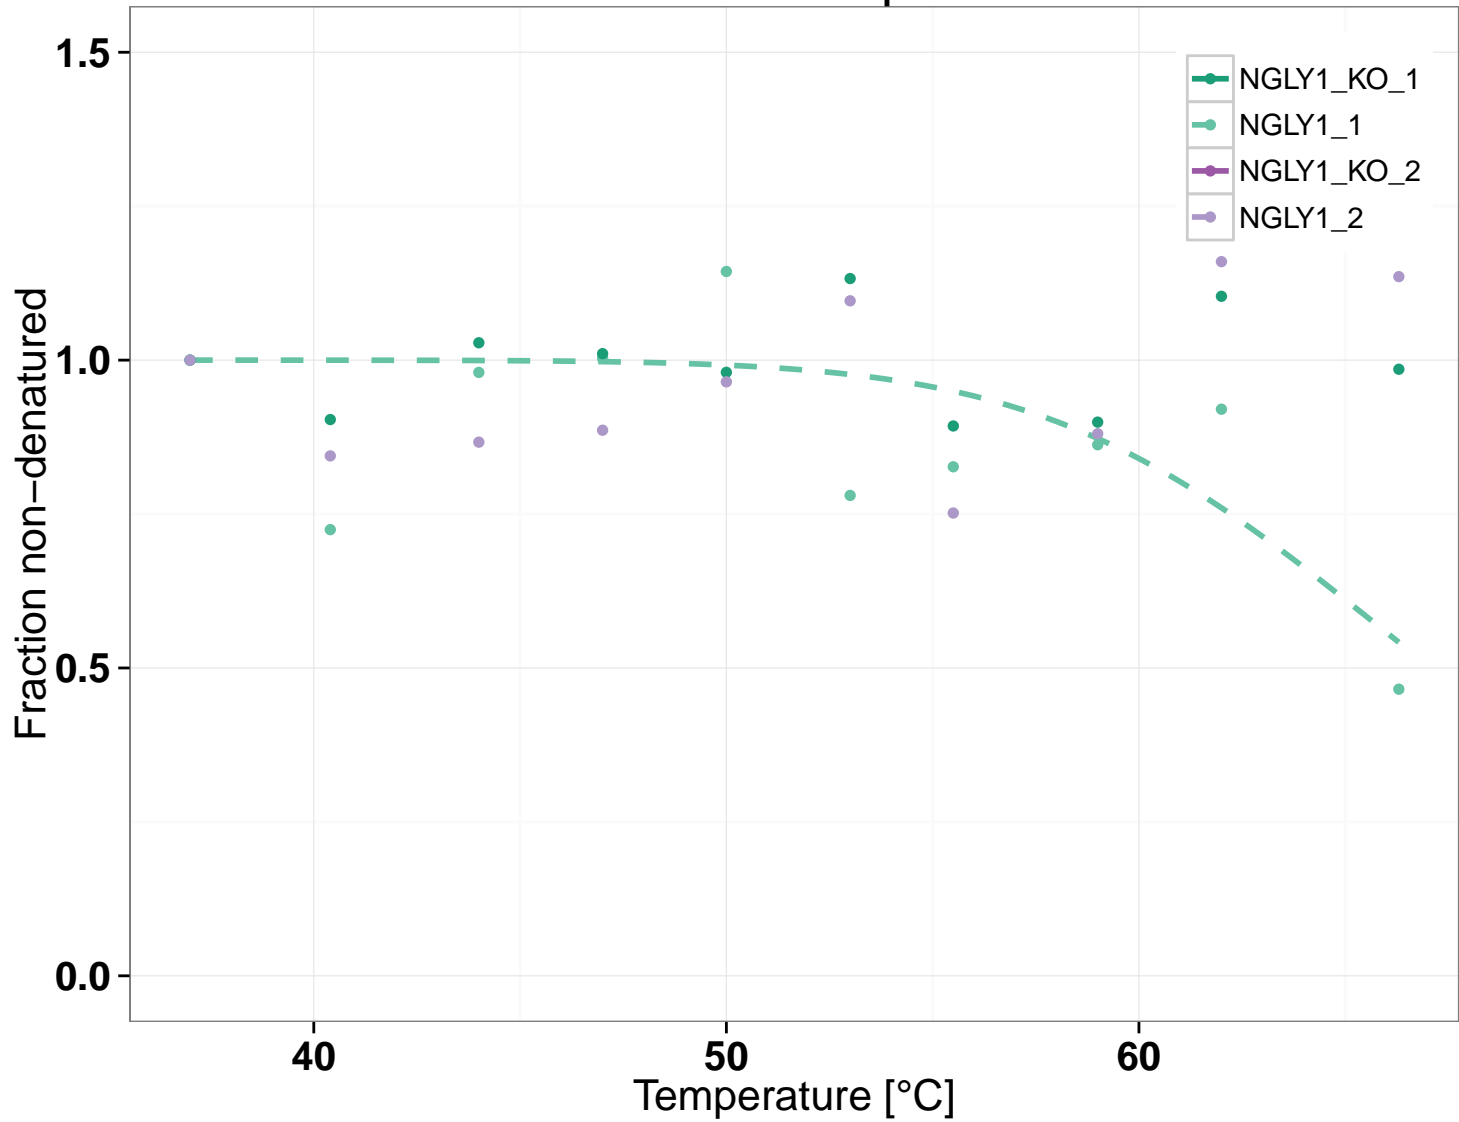

|            | meltPoint | slope  | plateau | R2   |
|------------|-----------|--------|---------|------|
| NGLY1_KO_1 | -         | -      | -       | -    |
| NGLY1_1    | -         | -0.053 | 0       | 0.42 |
| NGLY1_KO_2 | -         | -      | -       | -    |
| NGLY1_2    | -         | -      | -       | -    |

Supplement: Supplementary file 717 [file 1]

# IPI00021389.1|CCS

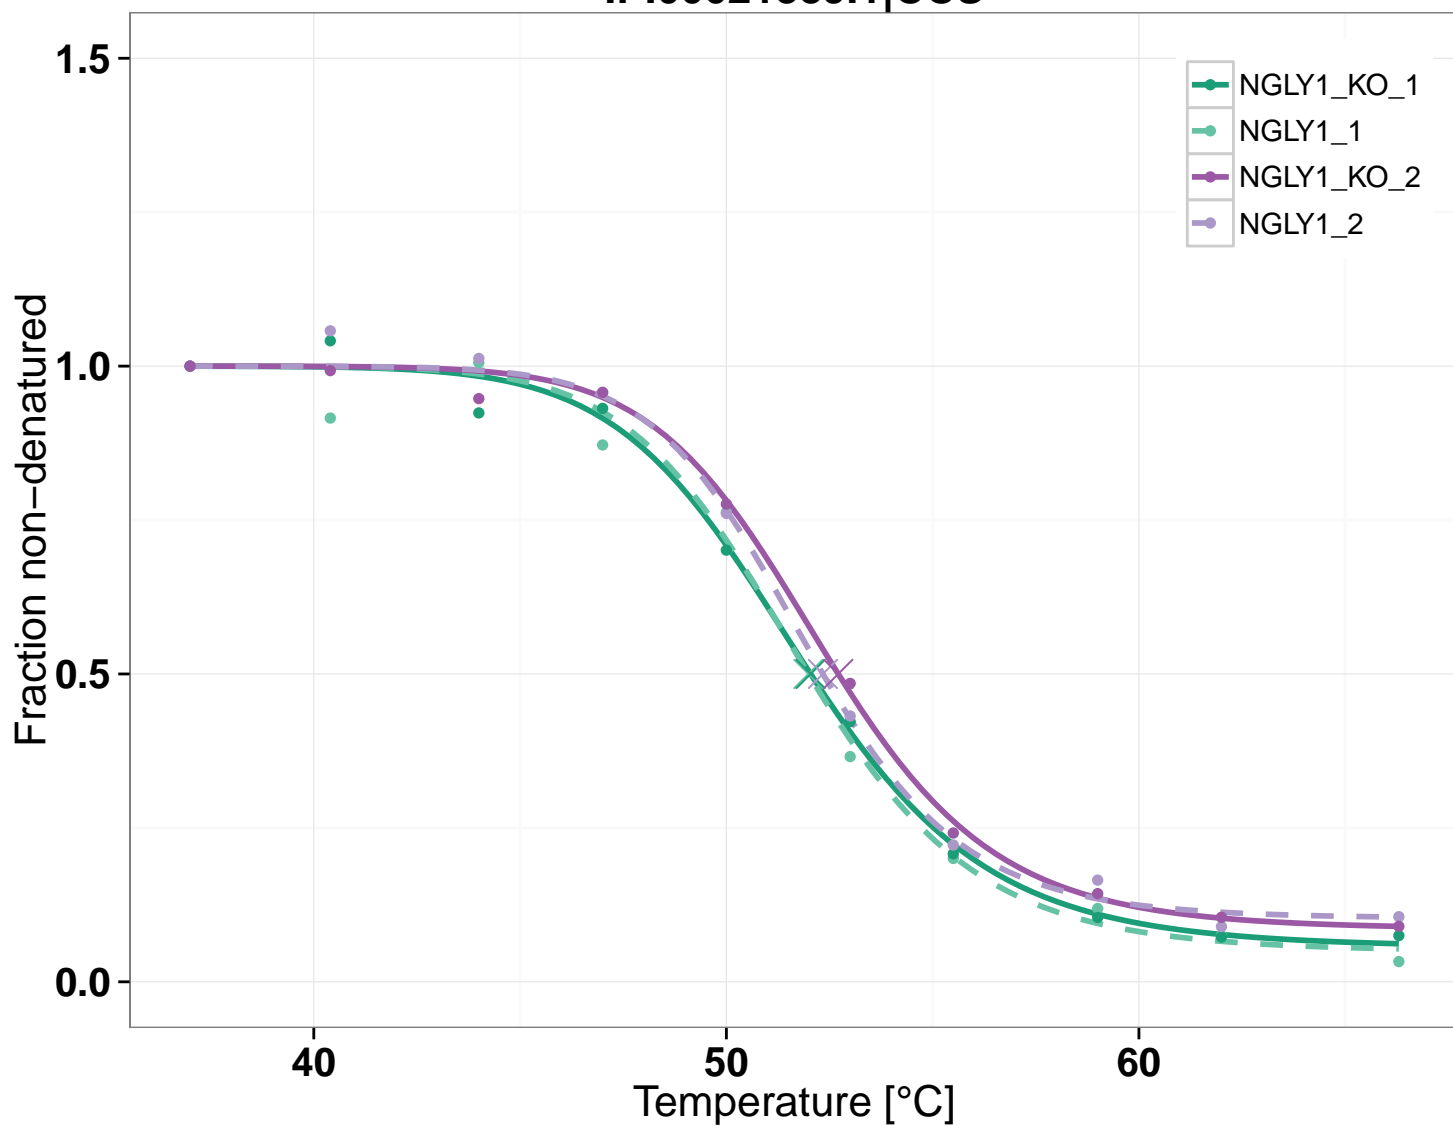

|            | meltPoint | slope | plateau | R2   |
|------------|-----------|-------|---------|------|
| NGLY1_KO_1 | 52.04     | -0.1  | 0.06    | 1    |
| NGLY1_1    | 51.99     | -0.11 | 0.05    | 0.99 |
| NGLY1_KO_2 | 52.71     | -0.11 | 0.09    | 1    |
| NGLY1_2    | 52.34     | -0.12 | 0.1     | 1    |

Supplement: Supplementary file 718 [file 1]

IPI00845329.1|PPP2R3B

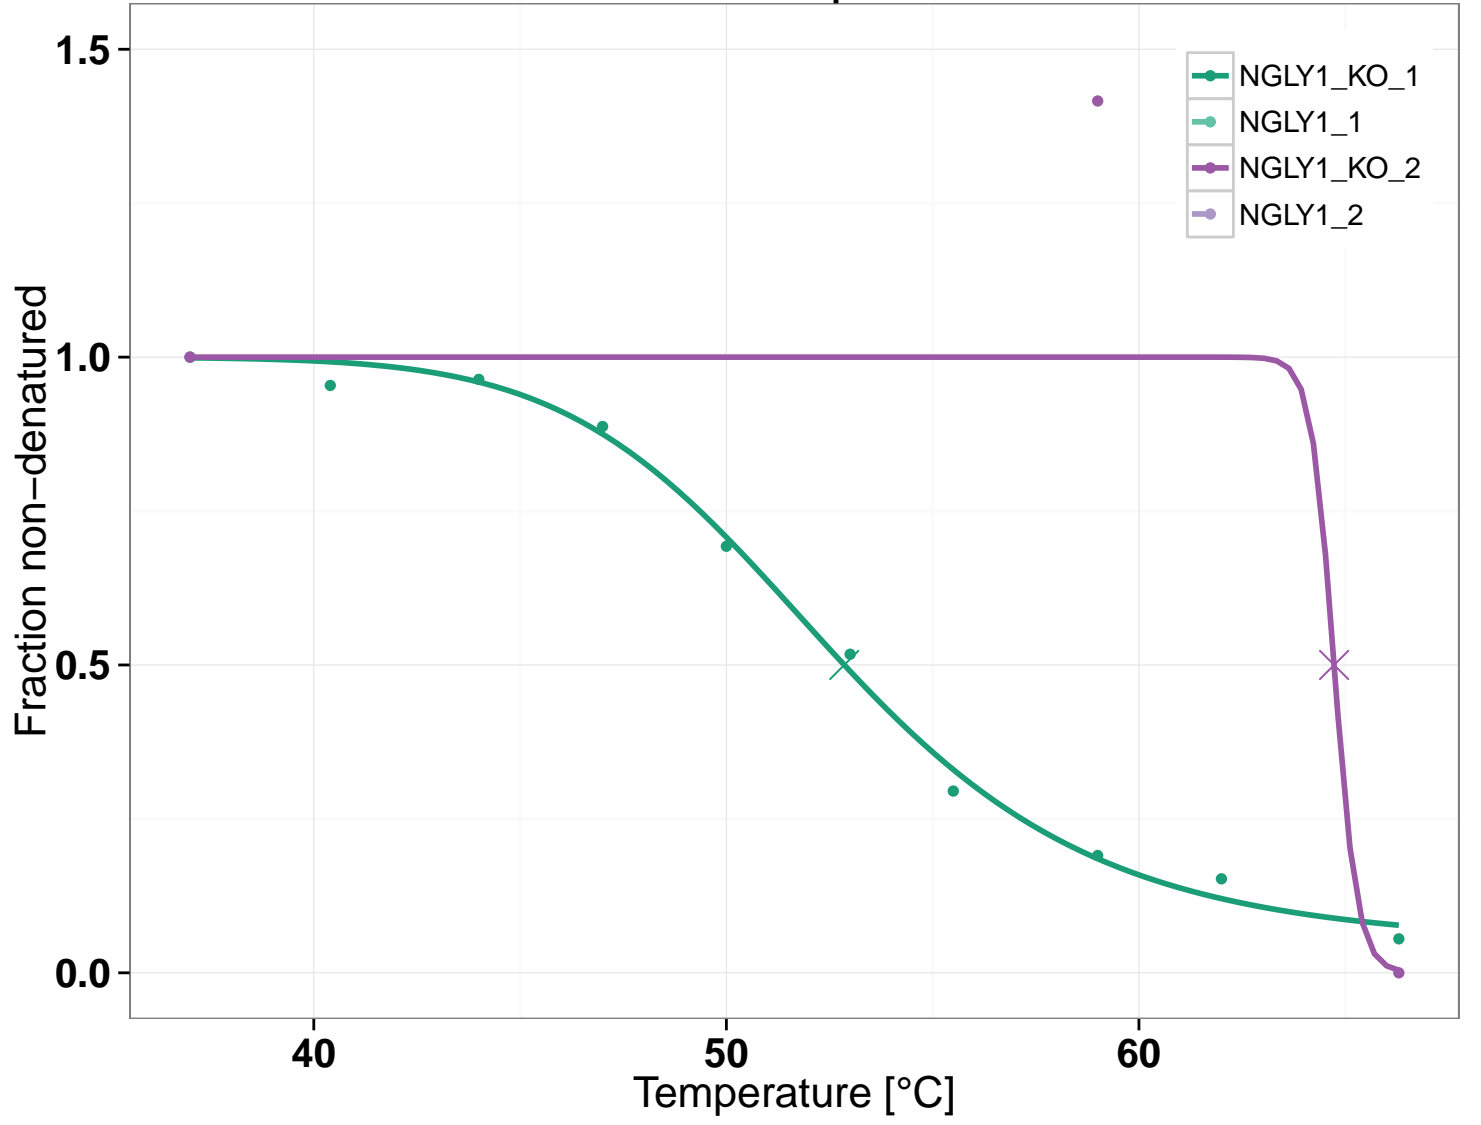

|            | meltPoint | slope  | plateau | R2    |
|------------|-----------|--------|---------|-------|
| NGLY1_KO_1 | 52.86     | -0.074 | 0.04    | 1     |
| NGLY1_1    | -         | -      | -       | -     |
| NGLY1_KO_2 | 64.73     | -0.9   | 0       | -0.41 |
| NGLY1_2    | -         | -      | -       | -     |

Supplement: Supplementary file 719 [file 1]

IPI00387159.3|ING3

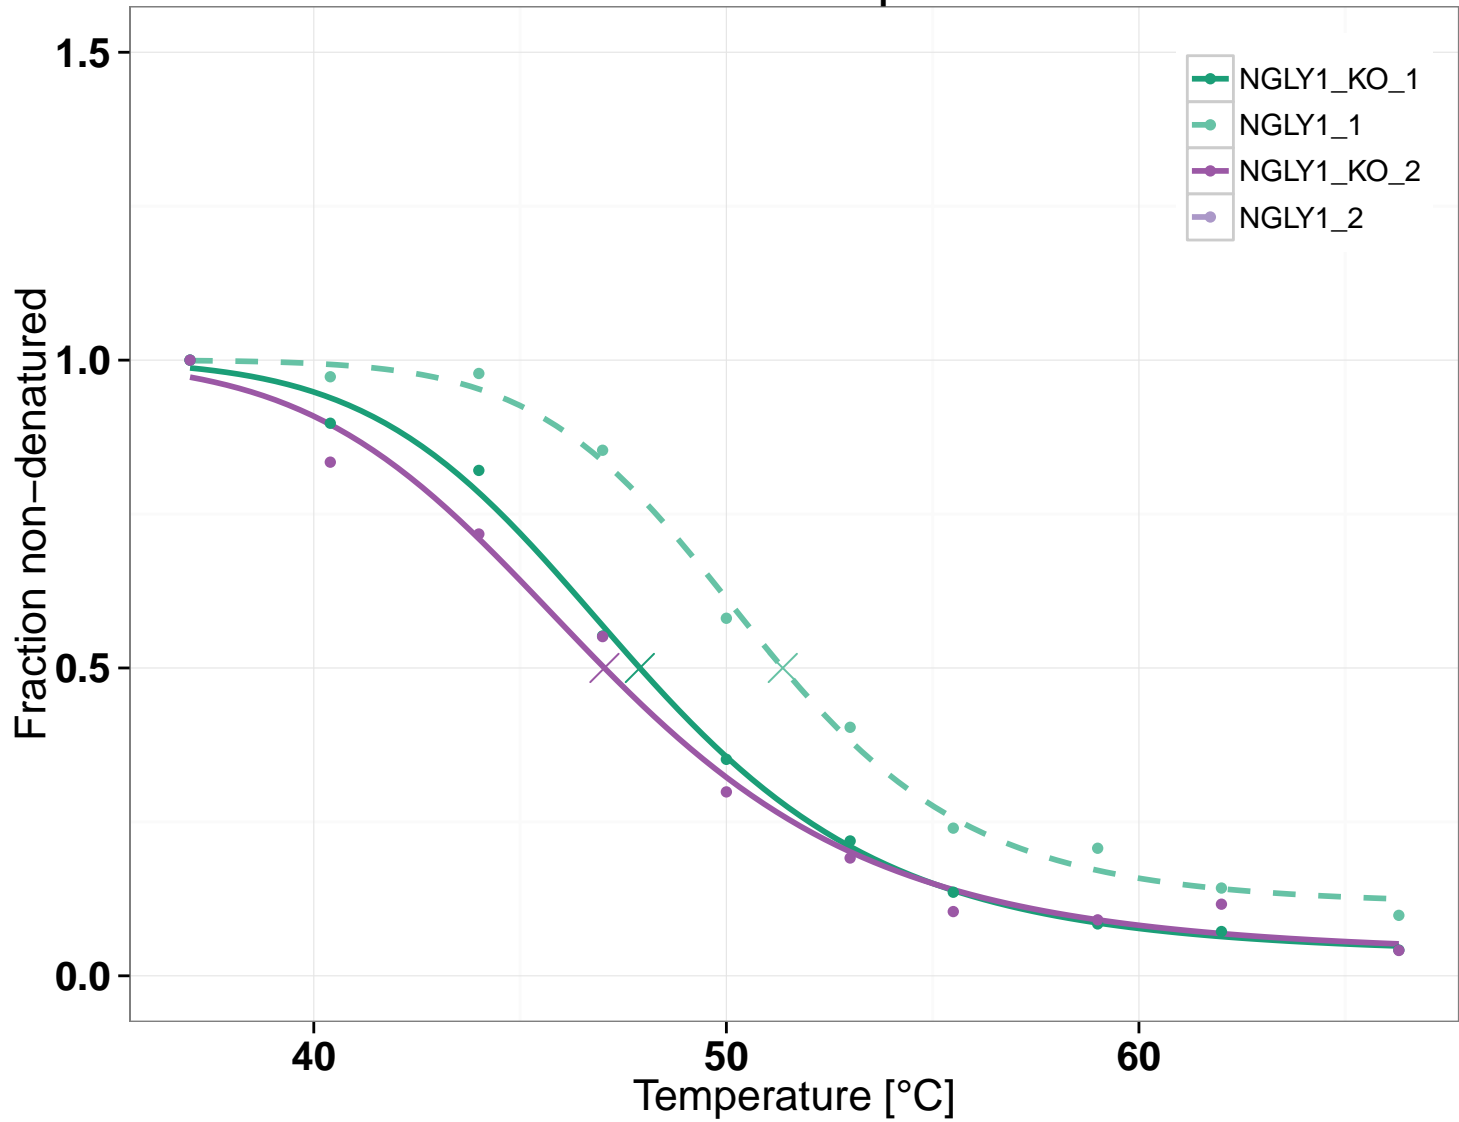

|            | meltPoint | slope  | plateau | R2   |
|------------|-----------|--------|---------|------|
| NGLY1_KO_1 | 47.9      | -0.077 | 0.03    | 1    |
| NGLY1_1    | 51.37     | -0.084 | 0.12    | 1    |
| NGLY1_KO_2 | 47.04     | -0.07  | 0.03    | 0.99 |
| NGLY1_2    | -         | -      | -       | -    |

Supplement: Supplementary file 720 [file 1]

# IPI00292812.6|TMED8

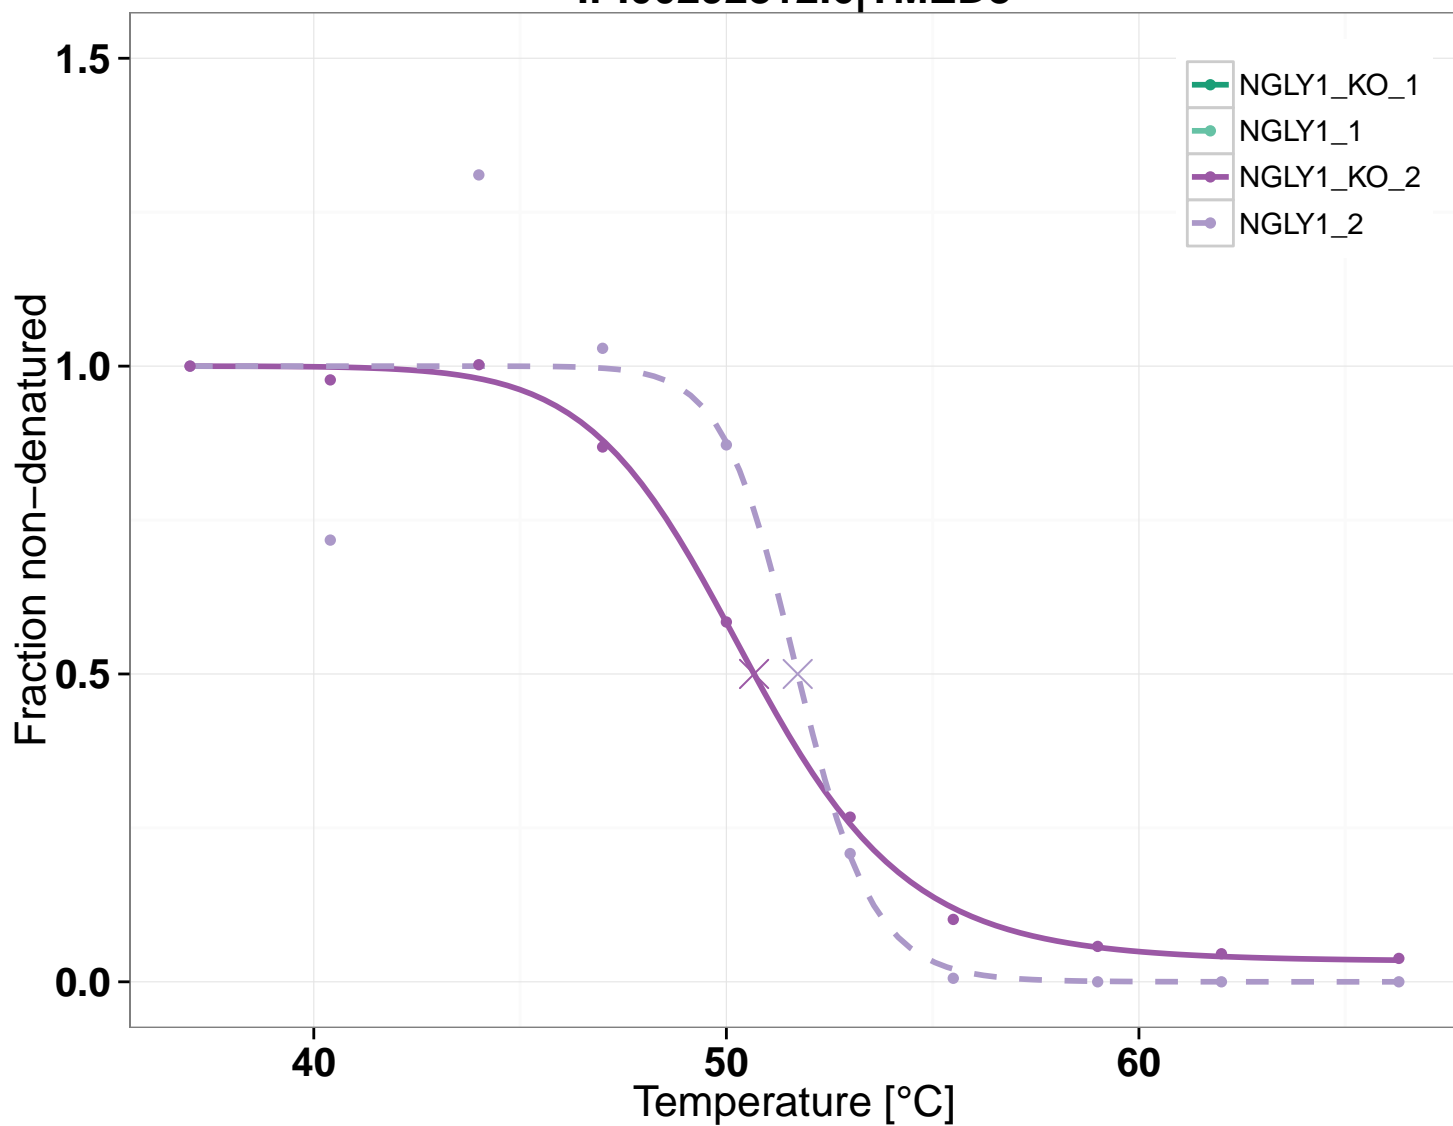

|            | meltPoint | slope | plateau | R2   |
|------------|-----------|-------|---------|------|
| NGLY1_KO_1 | —         | —     | —       | —    |
| NGLY1_1    | —         | —     | —       | —    |
| NGLY1_KO_2 | 50.67     | -0.12 | 0.03    | 1    |
| NGLY1_2    | 51.73     | -0.27 | 0       | 0.93 |

Supplement: Supplementary file 721 [file 1]

# IPI00027430.1|SPN

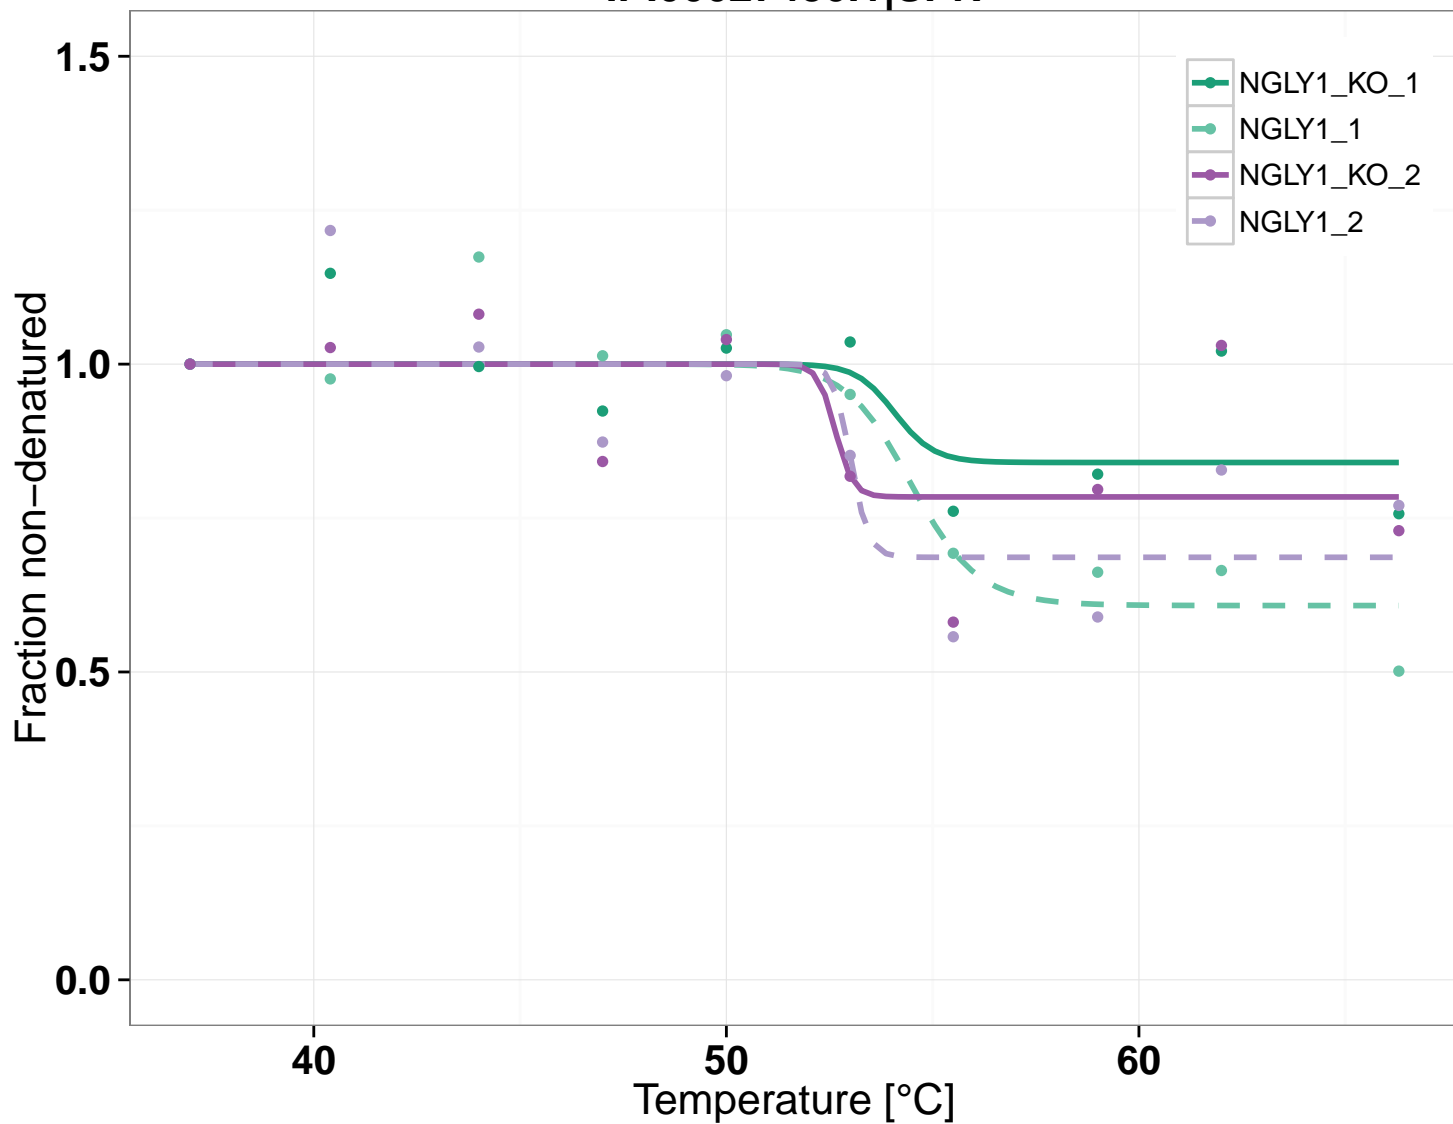

|            | meltPoint | slope  | plateau | R2   |
|------------|-----------|--------|---------|------|
| NGLY1_KO_1 | -         | -0.085 | 0.84    | 0.48 |
| NGLY1_1    | -         | -0.12  | 0.61    | 0.88 |
| NGLY1_KO_2 | -         | -0.26  | 0.78    | 0.44 |
| NGLY1_2    | -         | -0.37  | 0.69    | 0.68 |

Supplement: Supplementary file 722 [file 1]

# IPI00240793.1|ATP11B

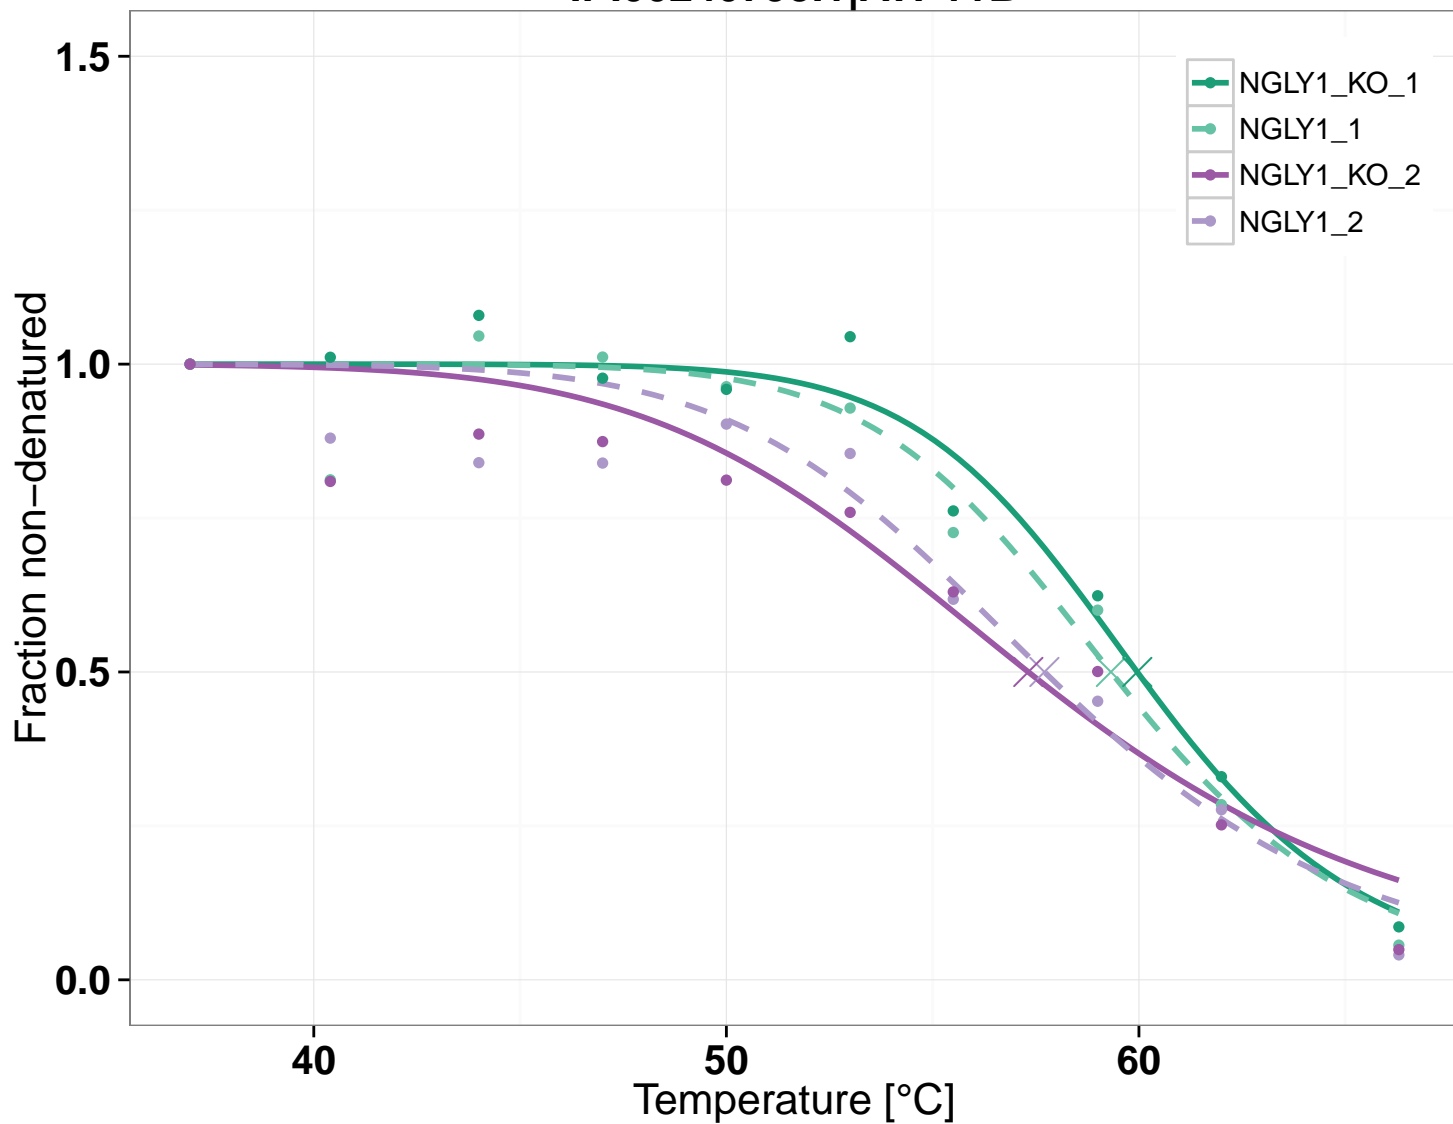

|            | meltPoint | slope  | plateau | R2   |
|------------|-----------|--------|---------|------|
| NGLY1_KO_1 | 59.96     | -0.092 | 0       | 0.97 |
| NGLY1_1    | 59.32     | -0.085 | 0       | 0.95 |
| NGLY1_KO_2 | 57.32     | -0.054 | 0       | 0.92 |
| NGLY1_2    | 57.71     | -0.066 | 0       | 0.93 |

Supplement: Supplementary file 723 [file 1]

IPI00902770.1|C7ORF10

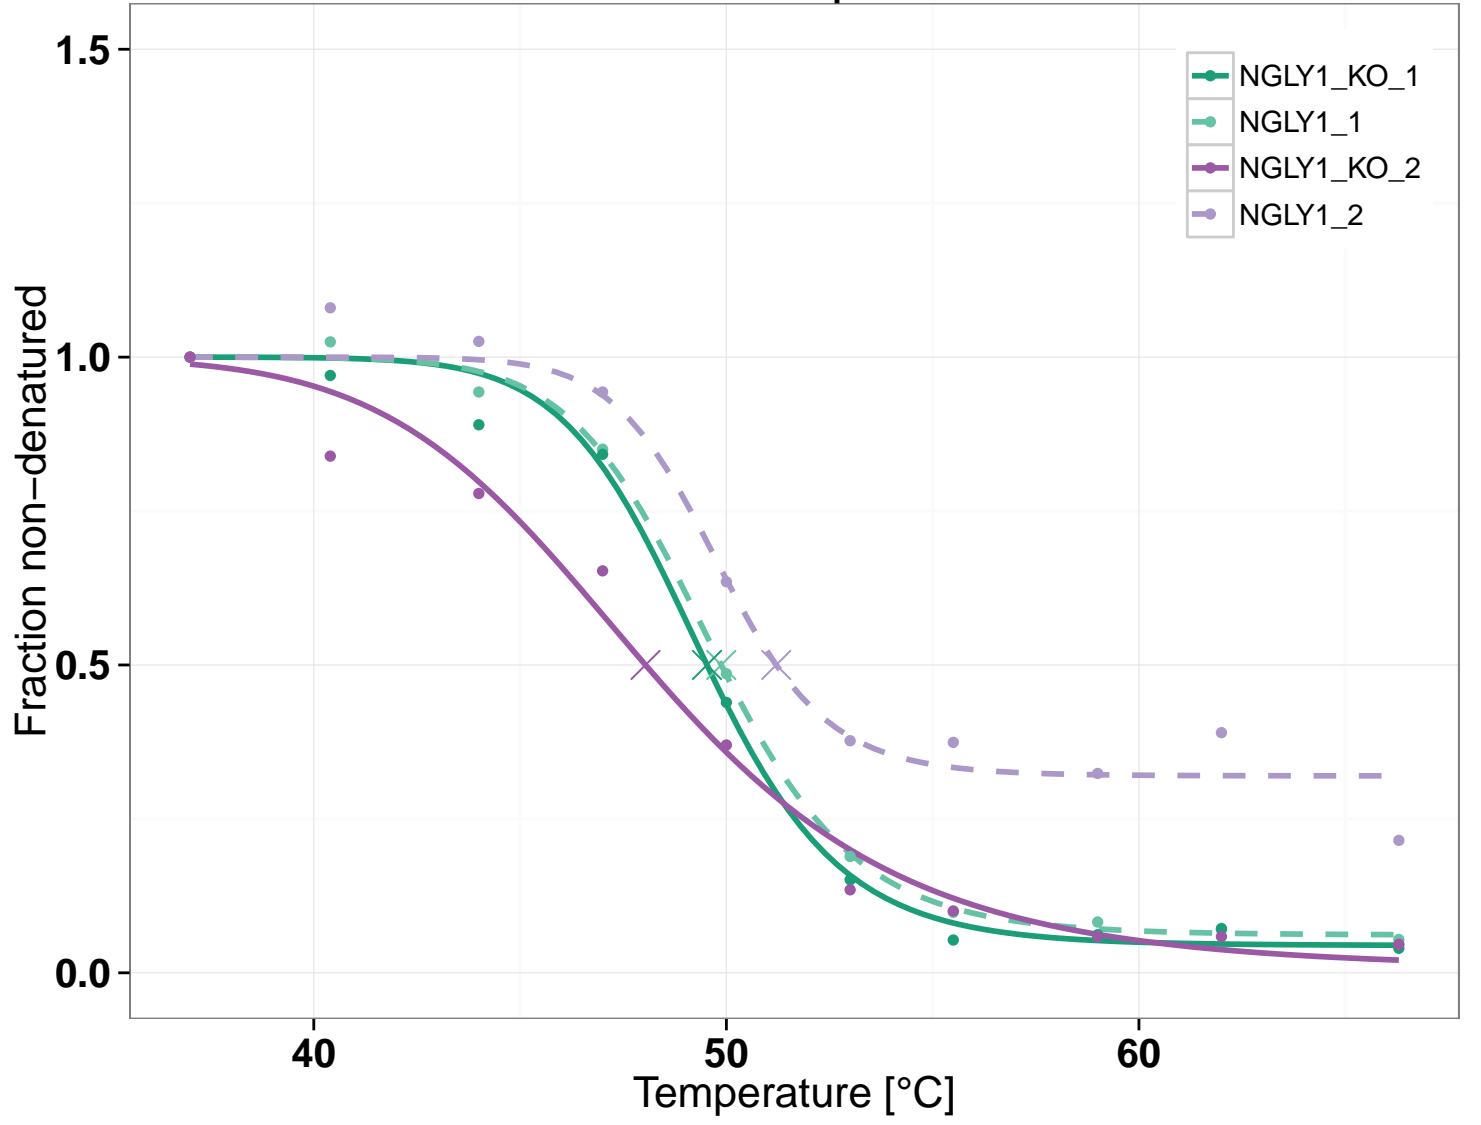

|            | meltPoint | slope  | plateau | R2   |
|------------|-----------|--------|---------|------|
| NGLY1_KO_1 | 49.53     | -0.14  | 0.04    | 0.99 |
| NGLY1_1    | 49.88     | -0.14  | 0.06    | 1    |
| NGLY1_KO_2 | 48.04     | -0.079 | 0       | 0.98 |
| NGLY1_2    | 51.21     | -0.13  | 0.32    | 0.98 |

Supplement: Supplementary file 724 [file 1]

IPI00333215.1|TCEA1

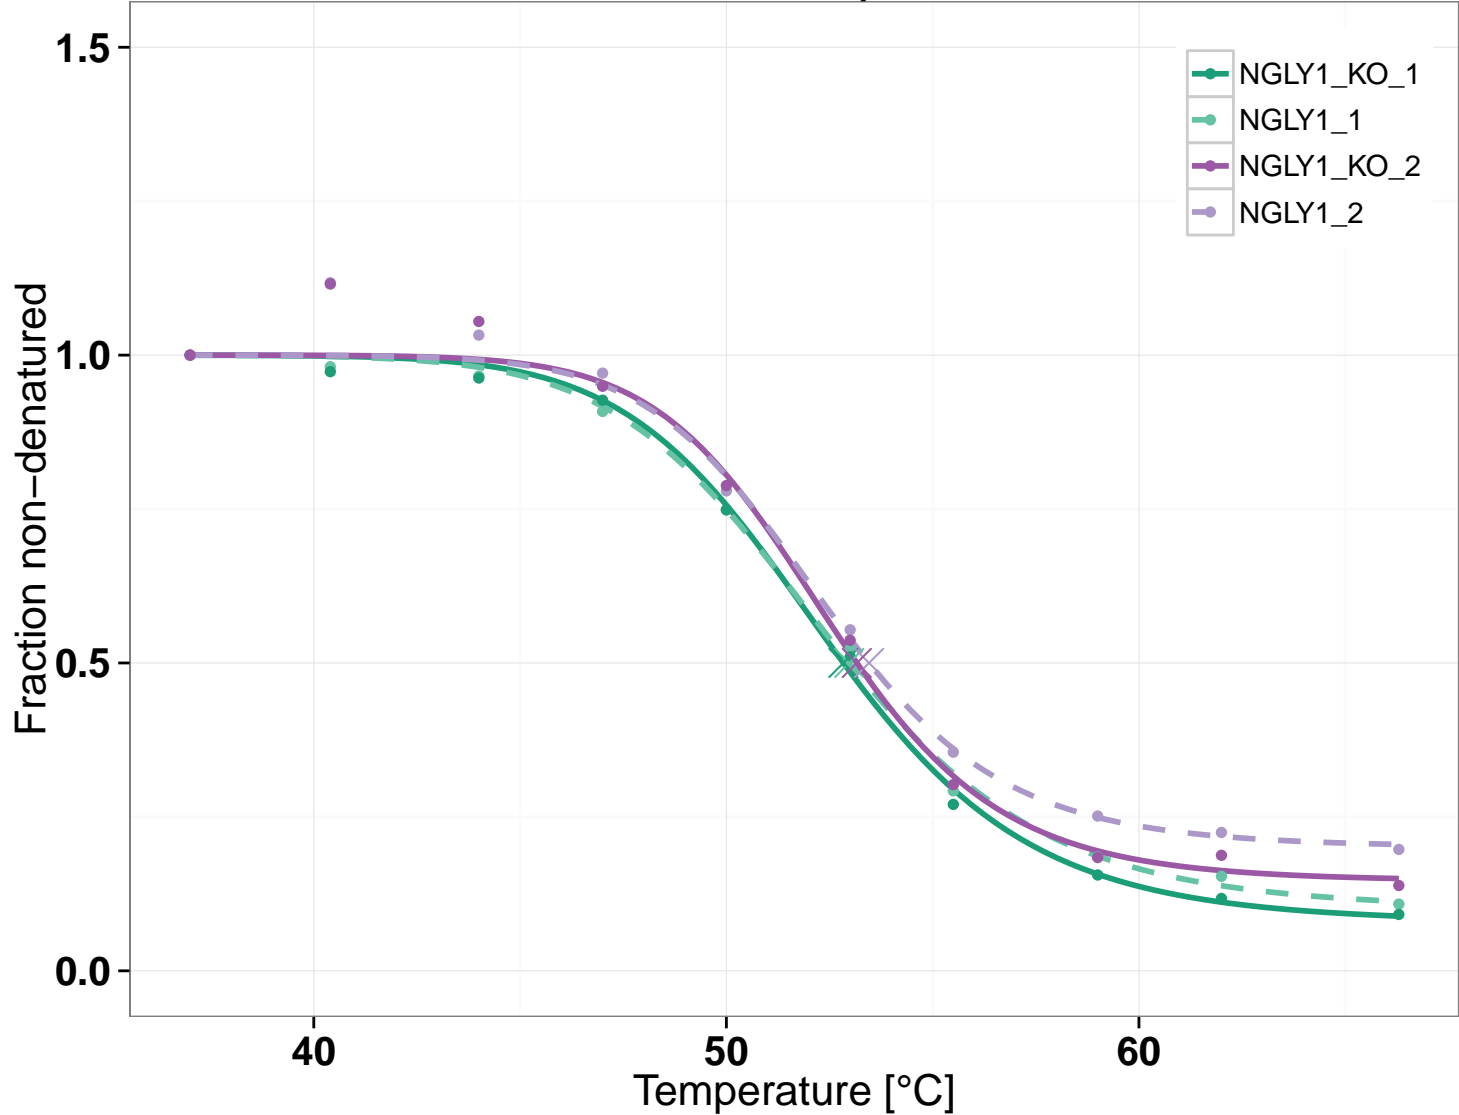

|            | meltPoint | slope  | plateau | R2   |
|------------|-----------|--------|---------|------|
| NGLY1_KO_1 | 52.84     | -0.094 | 0.08    | 1    |
| NGLY1_1    | 52.98     | -0.087 | 0.1     | 1    |
| NGLY1_KO_2 | 53.16     | -0.1   | 0.15    | 0.99 |
| NGLY1_2    | 53.46     | -0.093 | 0.2     | 0.99 |

Supplement: Supplementary file 725 [file 1]

IPI00165092.3|YARS2

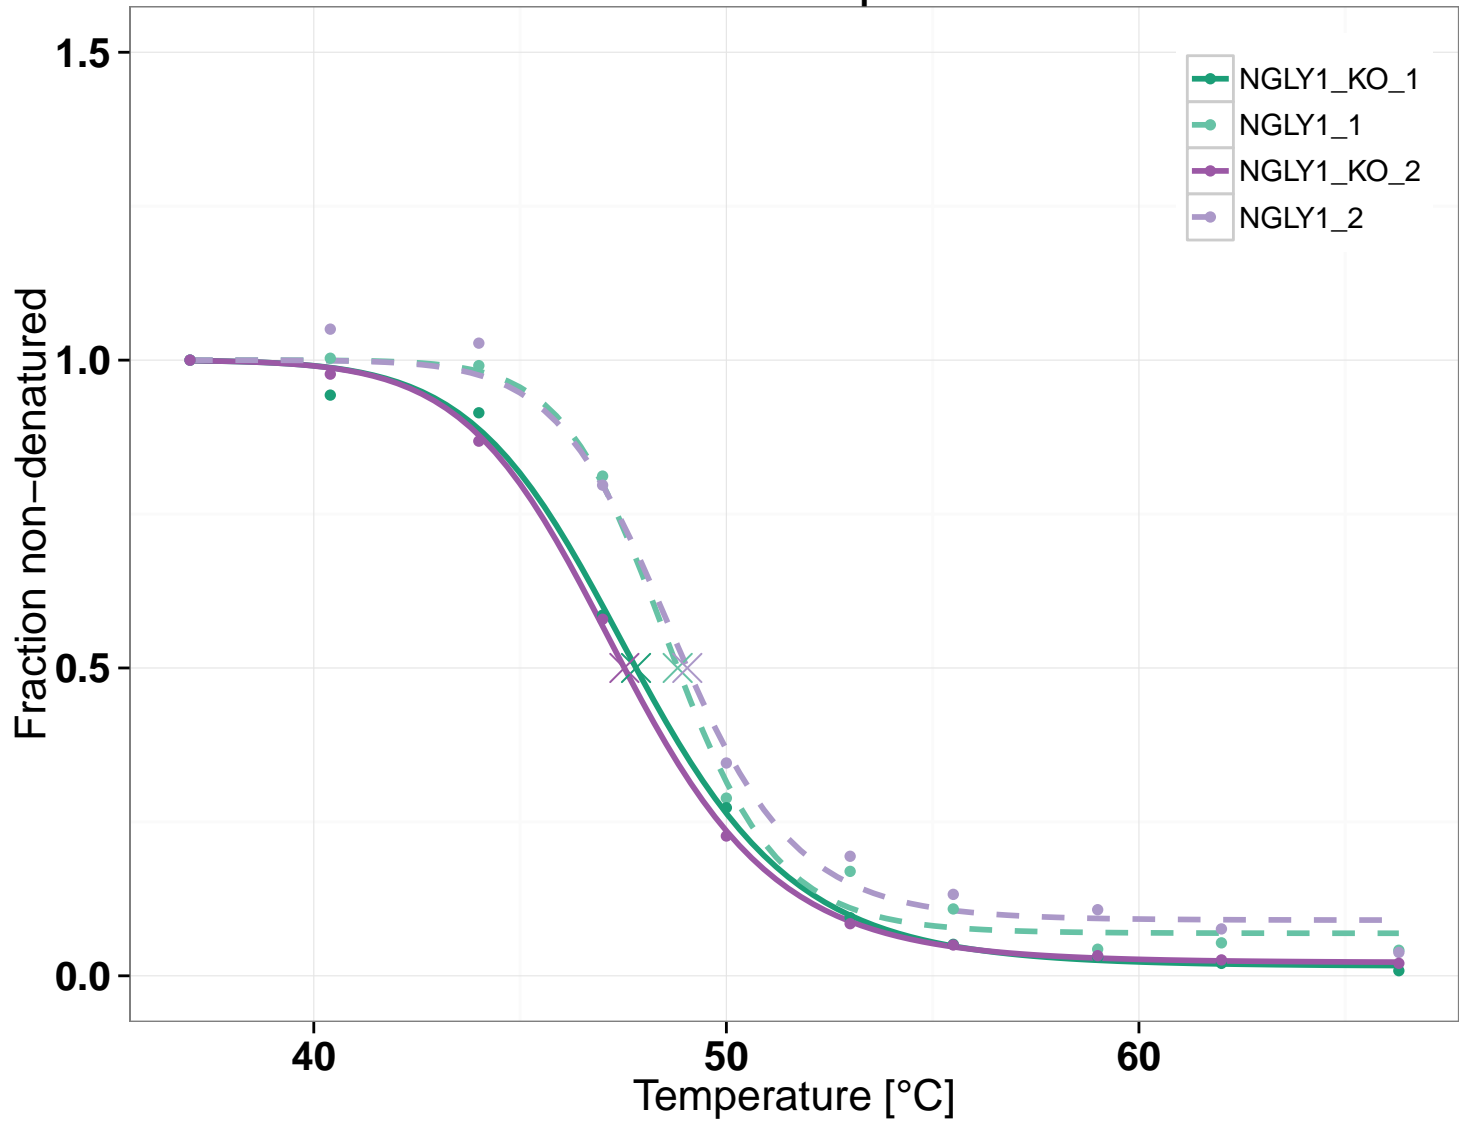

|            | meltPoint | slope | plateau | R2   |
|------------|-----------|-------|---------|------|
| NGLY1_KO_1 | 47.81     | -0.13 | 0.02    | 1    |
| NGLY1_1    | 48.82     | -0.18 | 0.07    | 1    |
| NGLY1_KO_2 | 47.53     | -0.13 | 0.02    | 1    |
| NGLY1_2    | 49.05     | -0.16 | 0.09    | 0.99 |

Supplement: Supplementary file 726 [file 1]

# IPI00479809.1|RNF121

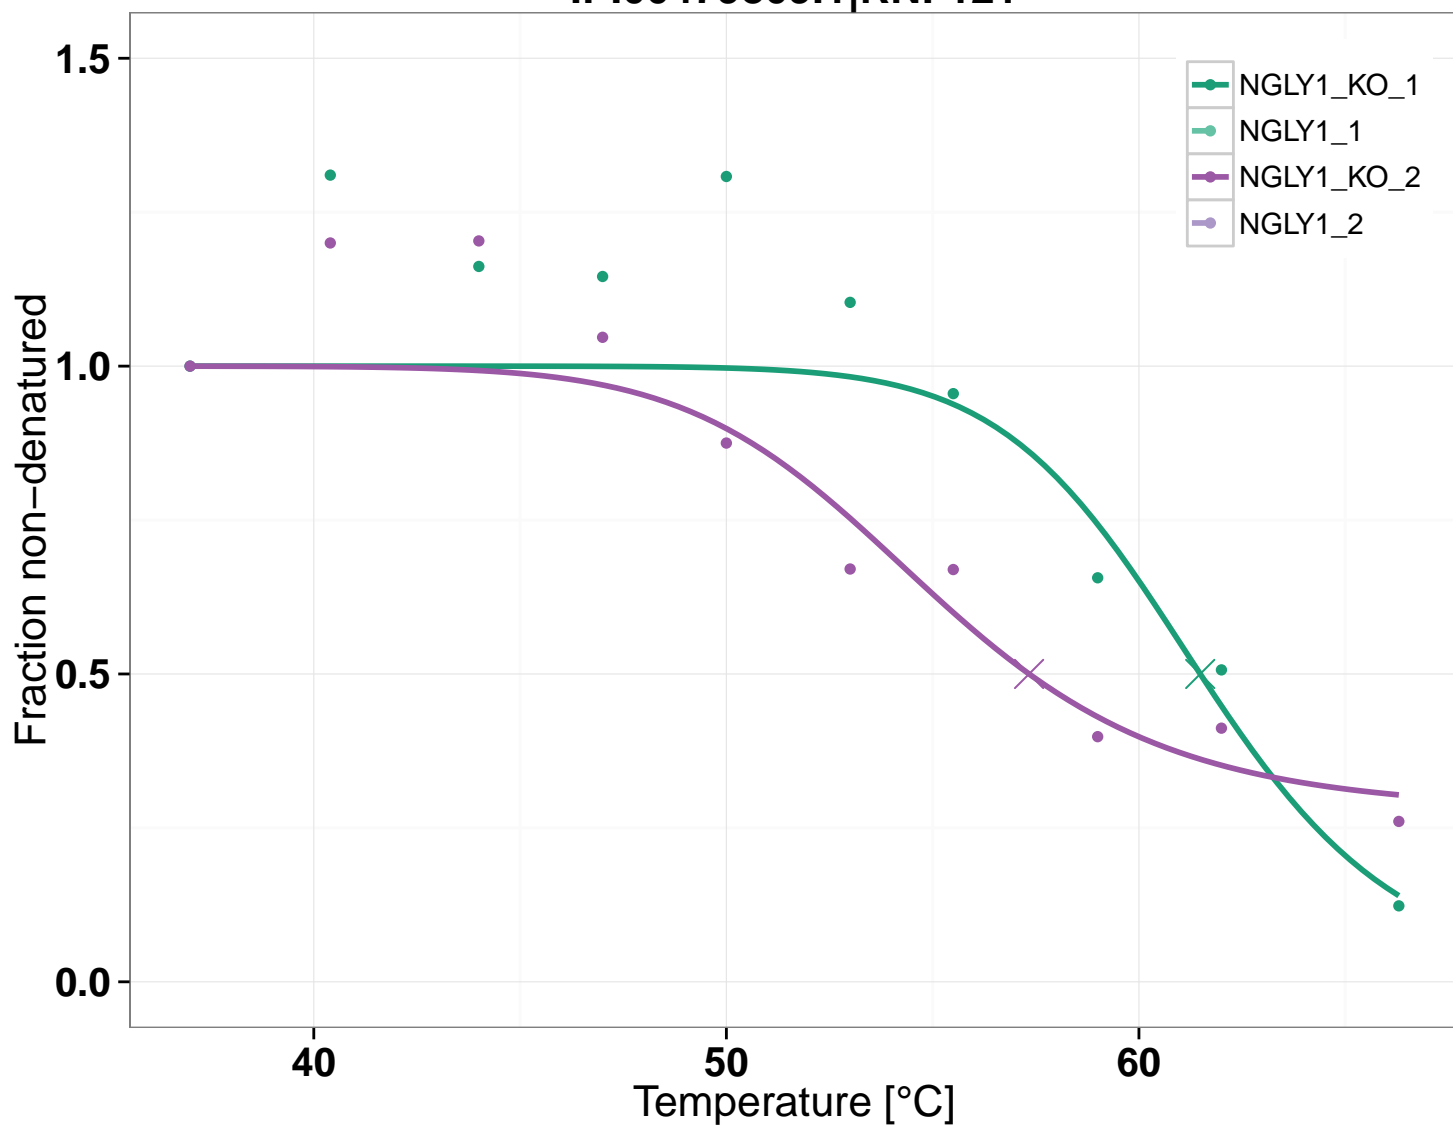

|            | meltPoint | slope  | plateau | R2  |
|------------|-----------|--------|---------|-----|
| NGLY1_KO_1 | 61.49     | -0.1   | 0       | 0.8 |
| NGLY1_1    | -         | -      | -       | -   |
| NGLY1_KO_2 | 57.34     | -0.062 | 0.28    | 0.9 |
| NGLY1_2    | -         | -      | -       | -   |

Supplement: Supplementary file 727 [file 1]

IPI00218922.5|SEC63

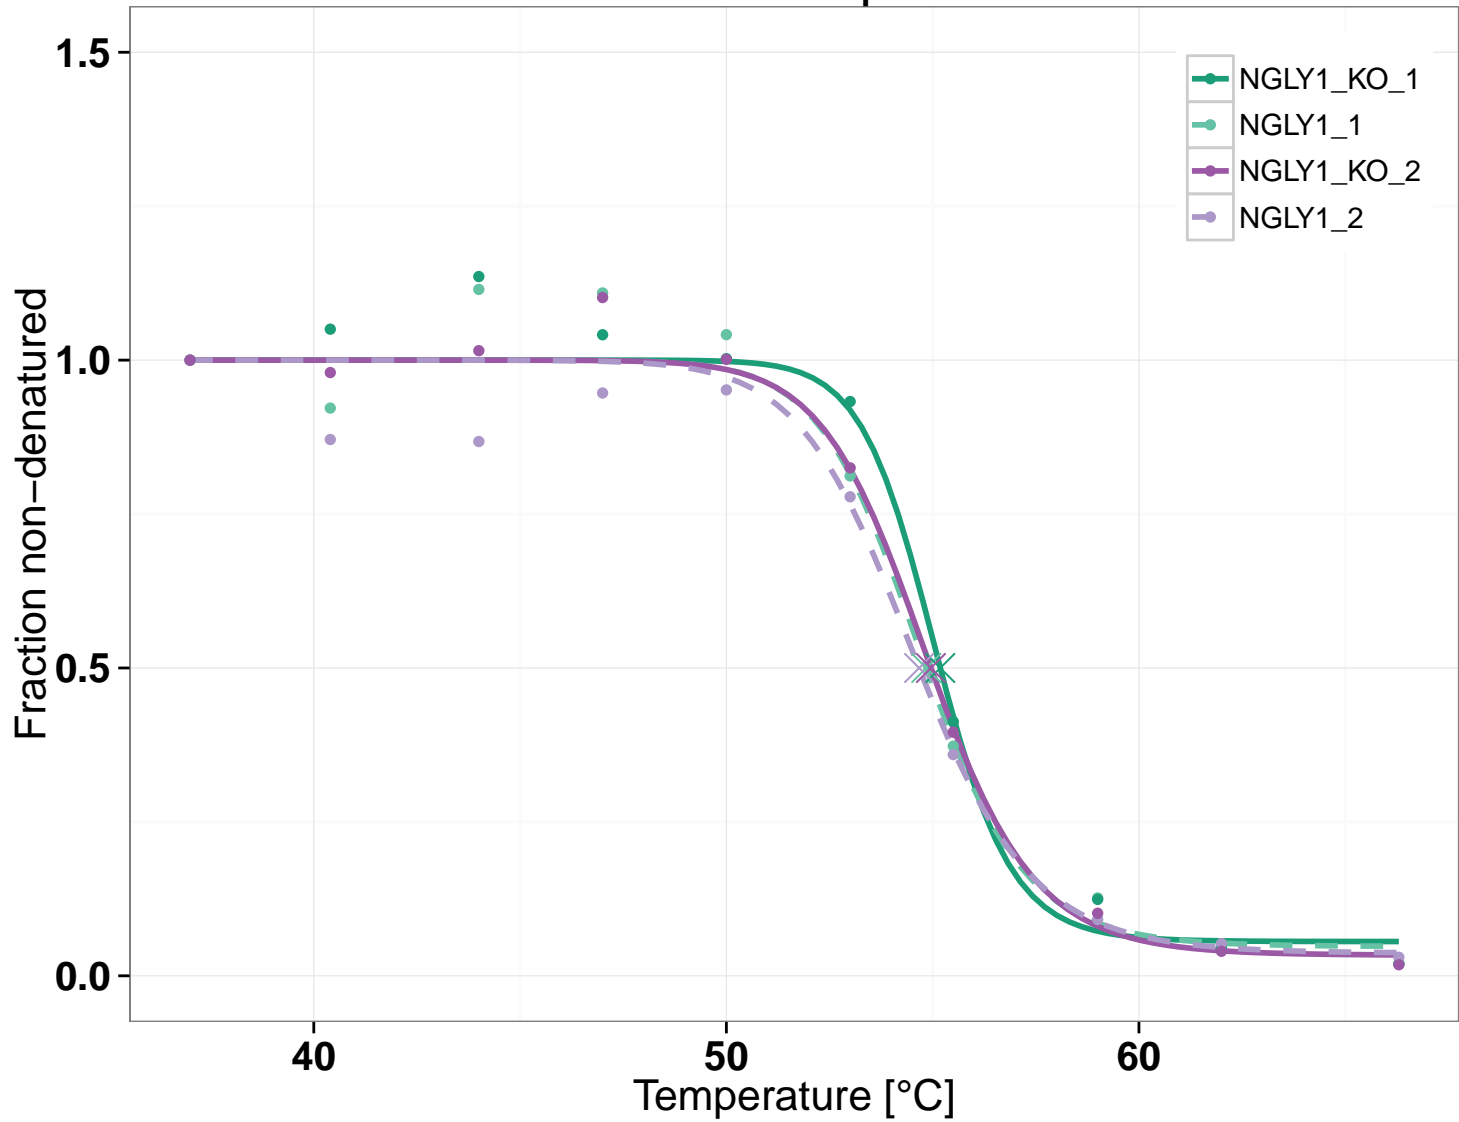

|            | meltPoint | slope | plateau | R2   |
|------------|-----------|-------|---------|------|
| NGLY1_KO_1 | 55.19     | -0.26 | 0.06    | 0.99 |
| NGLY1_1    | 54.85     | -0.19 | 0.05    | 0.98 |
| NGLY1_KO_2 | 54.96     | -0.19 | 0.03    | 0.99 |
| NGLY1_2    | 54.67     | -0.17 | 0.04    | 0.98 |

Supplement: Supplementary file 728 [file 1]

# IPI00376196.2|C10ORF28

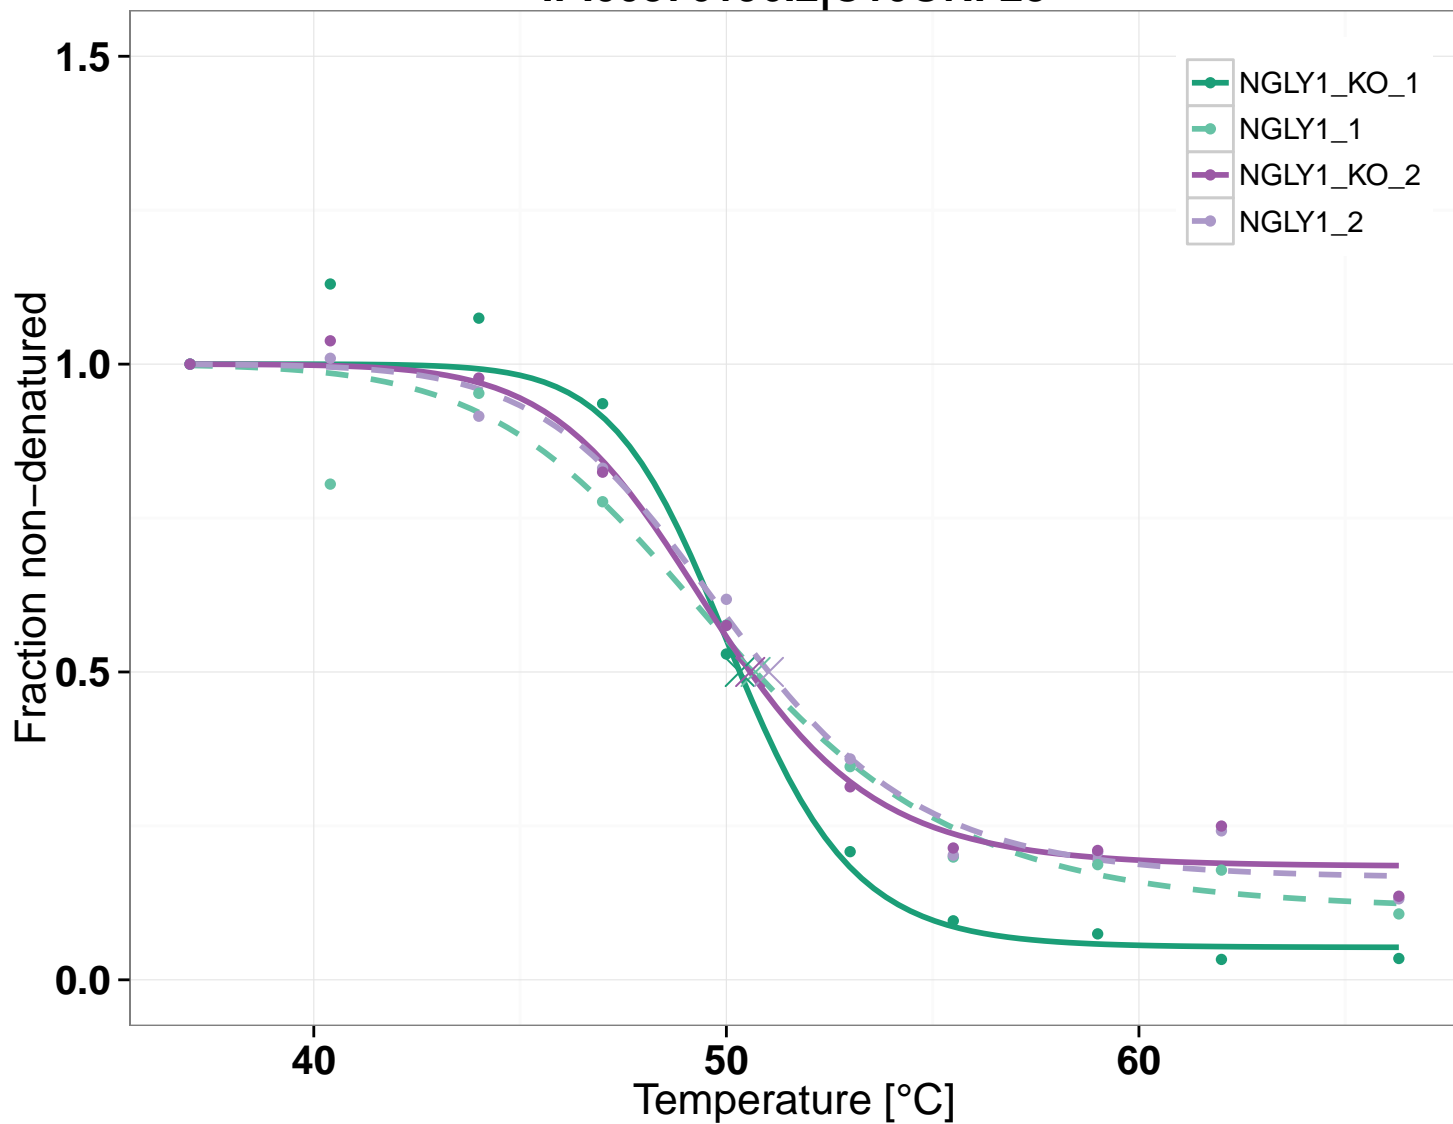

|            | meltPoint | slope  | plateau | R2   |
|------------|-----------|--------|---------|------|
| NGLY1_KO_1 | 50.33     | -0.16  | 0.05    | 0.99 |
| NGLY1_1    | 50.71     | -0.078 | 0.11    | 0.97 |
| NGLY1_KO_2 | 50.58     | -0.1   | 0.18    | 0.99 |
| NGLY1_2    | 51.03     | -0.091 | 0.16    | 0.99 |

Supplement: Supplementary file 729 [file 1]

# IPI00411291.1|PEX1

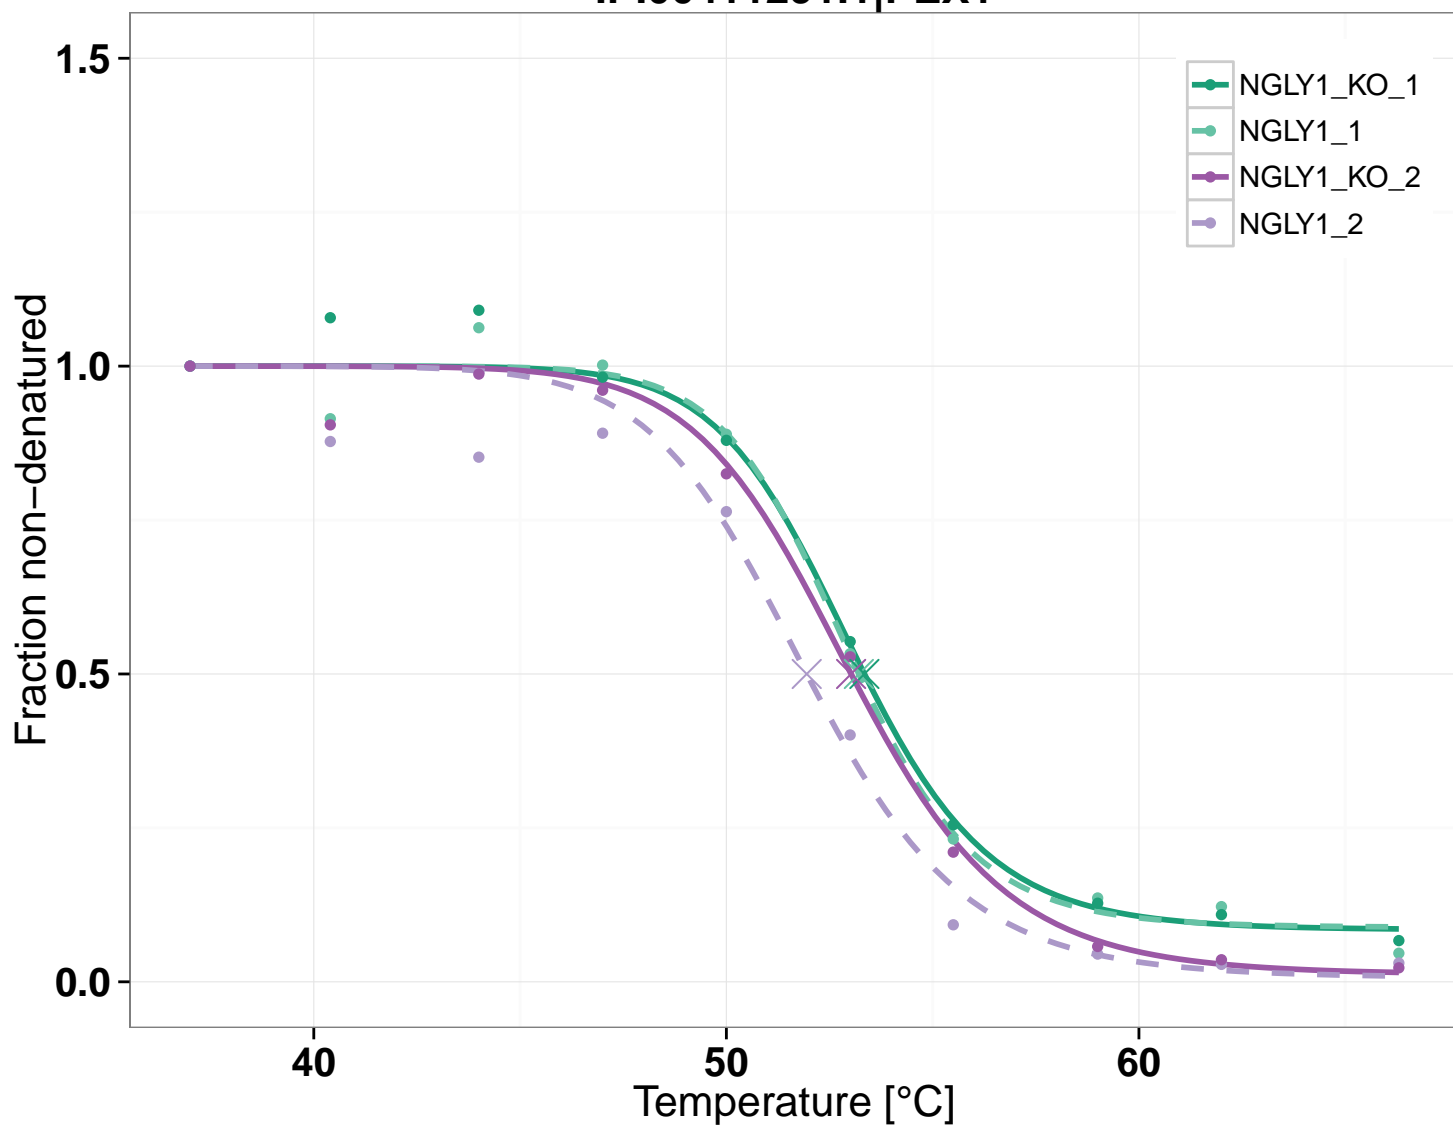

|            | meltPoint | slope | plateau | R2   |
|------------|-----------|-------|---------|------|
| NGLY1_KO_1 | 53.35     | -0.14 | 0.08    | 0.99 |
| NGLY1_1    | 53.21     | -0.15 | 0.09    | 0.99 |
| NGLY1_KO_2 | 53.02     | -0.13 | 0.01    | 0.99 |
| NGLY1_2    | 51.95     | -0.13 | 0.01    | 0.97 |

Supplement: Supplementary file 730 [file 1]

# IPI00295585.2|CGGBP1

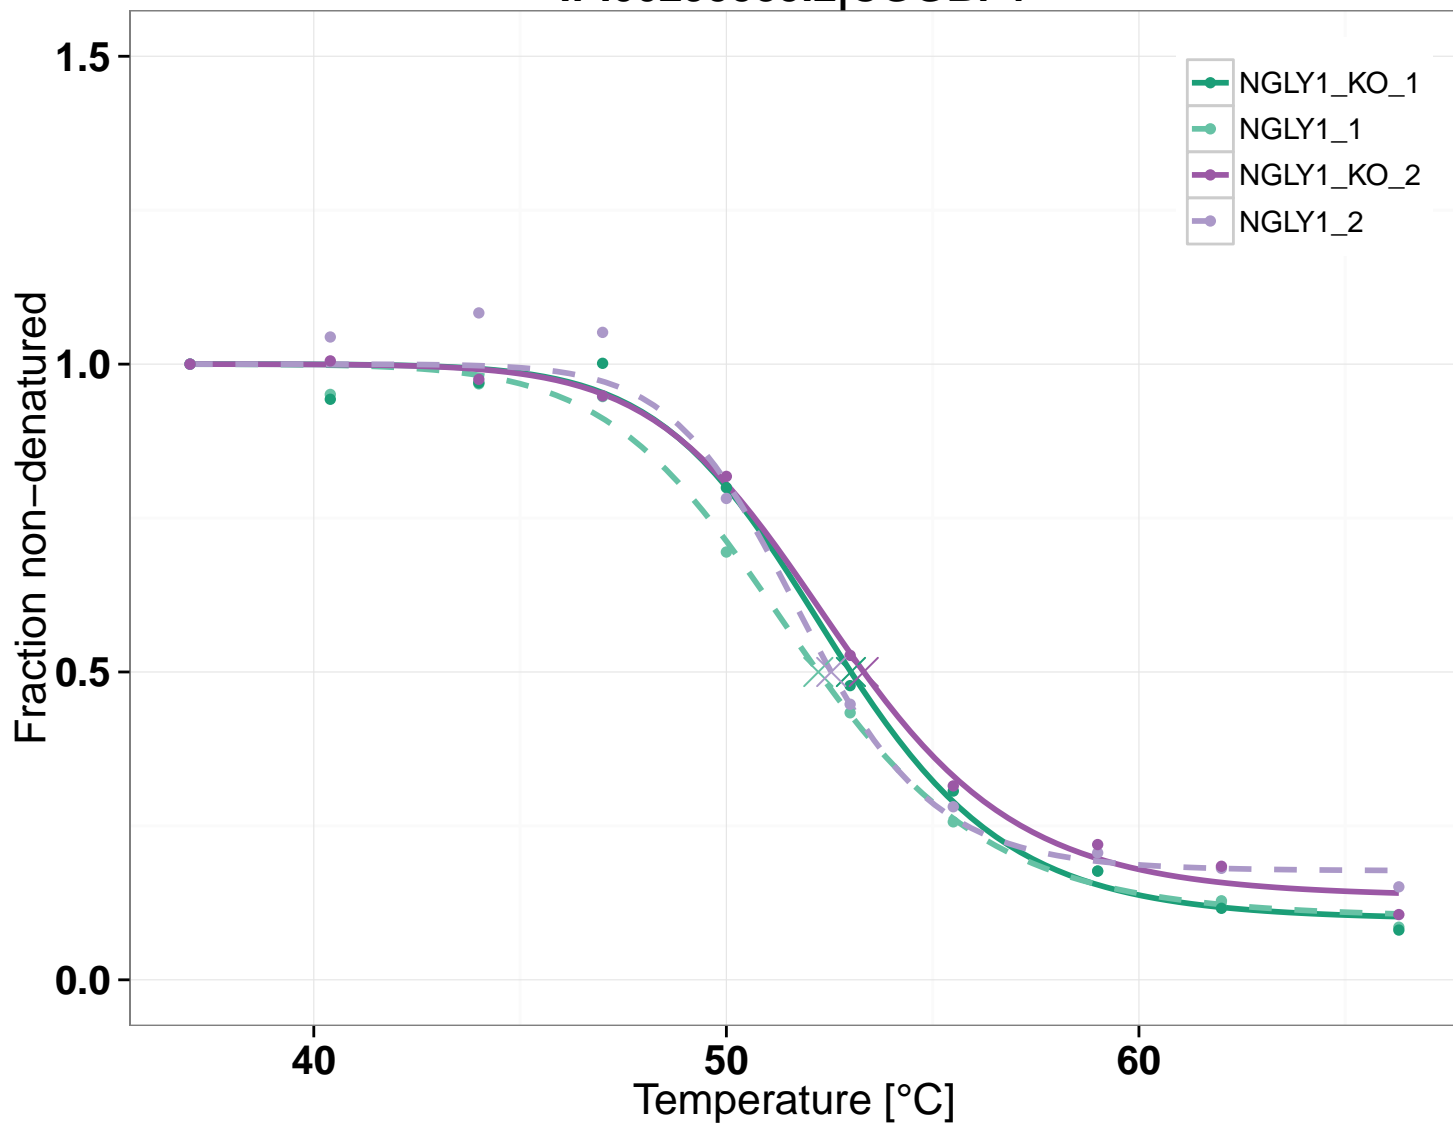

|            | meltPoint | slope  | plateau | R2   |
|------------|-----------|--------|---------|------|
| NGLY1_KO_1 | 53.02     | -0.11  | 0.1     | 0.99 |
| NGLY1_1    | 52.23     | -0.097 | 0.1     | 1    |
| NGLY1_KO_2 | 53.33     | -0.098 | 0.13    | 1    |
| NGLY1_2    | 52.54     | -0.13  | 0.18    | 0.99 |

Supplement: Supplementary file 731 [file 1]

# IPI00298928.1|SHOC2

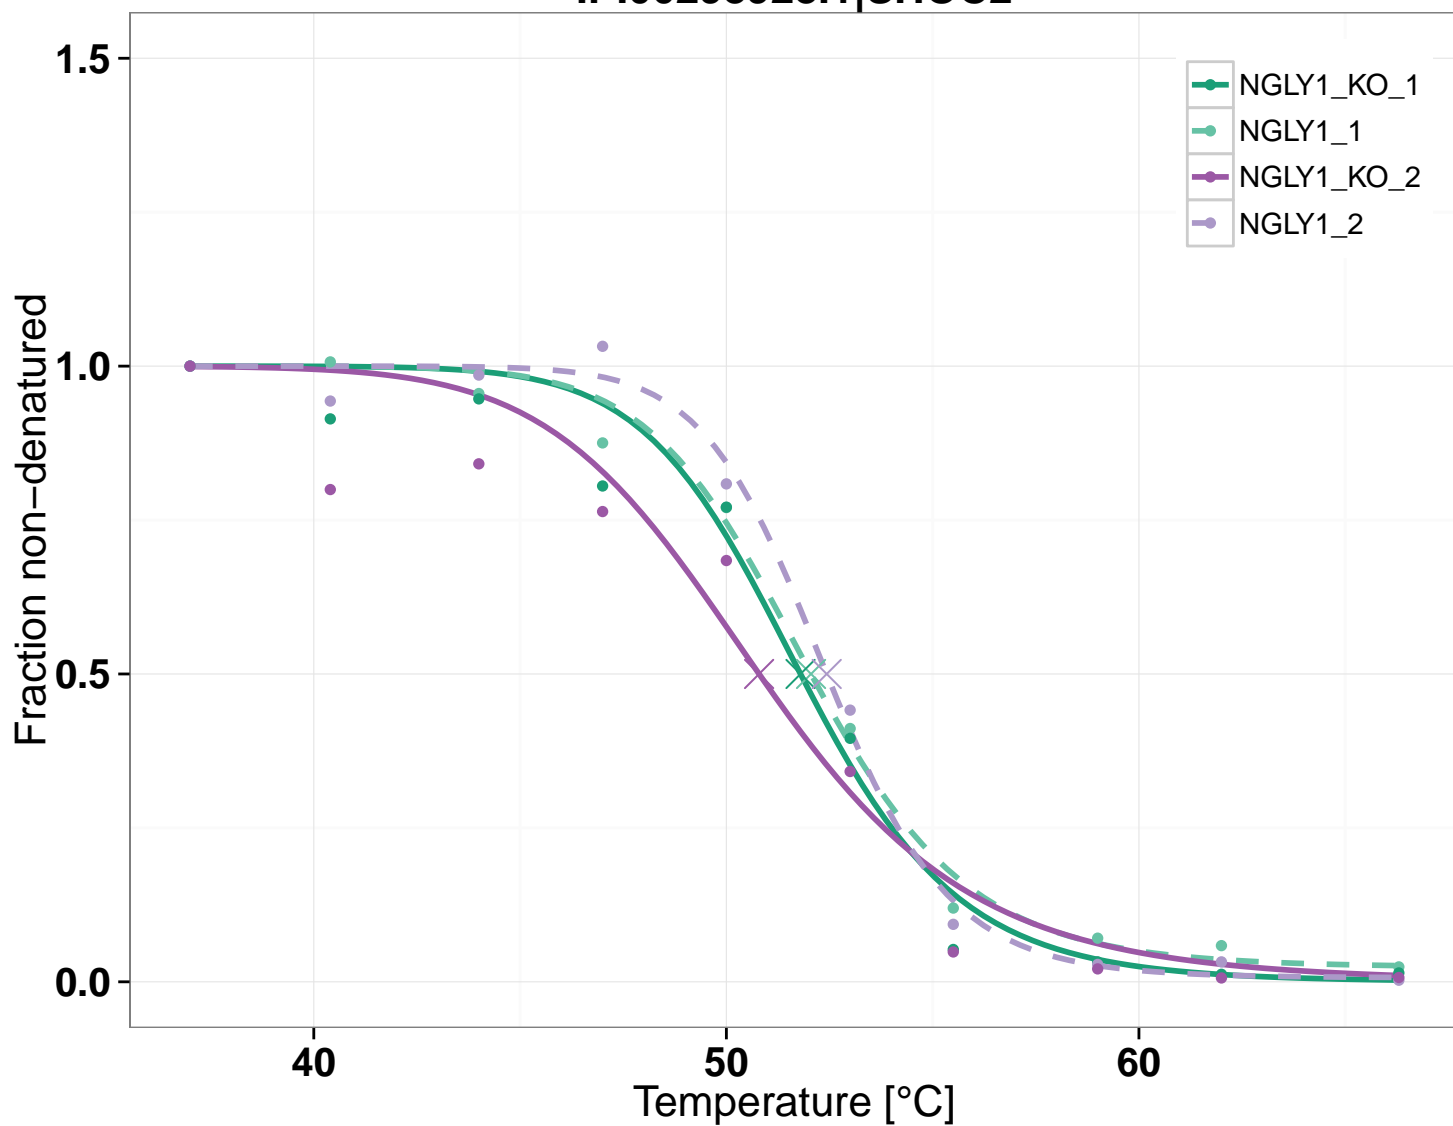

|            | meltPoint | slope  | plateau | R2   |
|------------|-----------|--------|---------|------|
| NGLY1_KO_1 | 51.8      | -0.13  | 0       | 0.98 |
| NGLY1_1    | 52.05     | -0.13  | 0.02    | 0.99 |
| NGLY1_KO_2 | 50.79     | -0.097 | 0       | 0.94 |
| NGLY1_2    | 52.43     | -0.17  | 0.01    | 0.99 |

Supplement: Supplementary file 732 [file 1]

IPI00909569.1|HDAC7

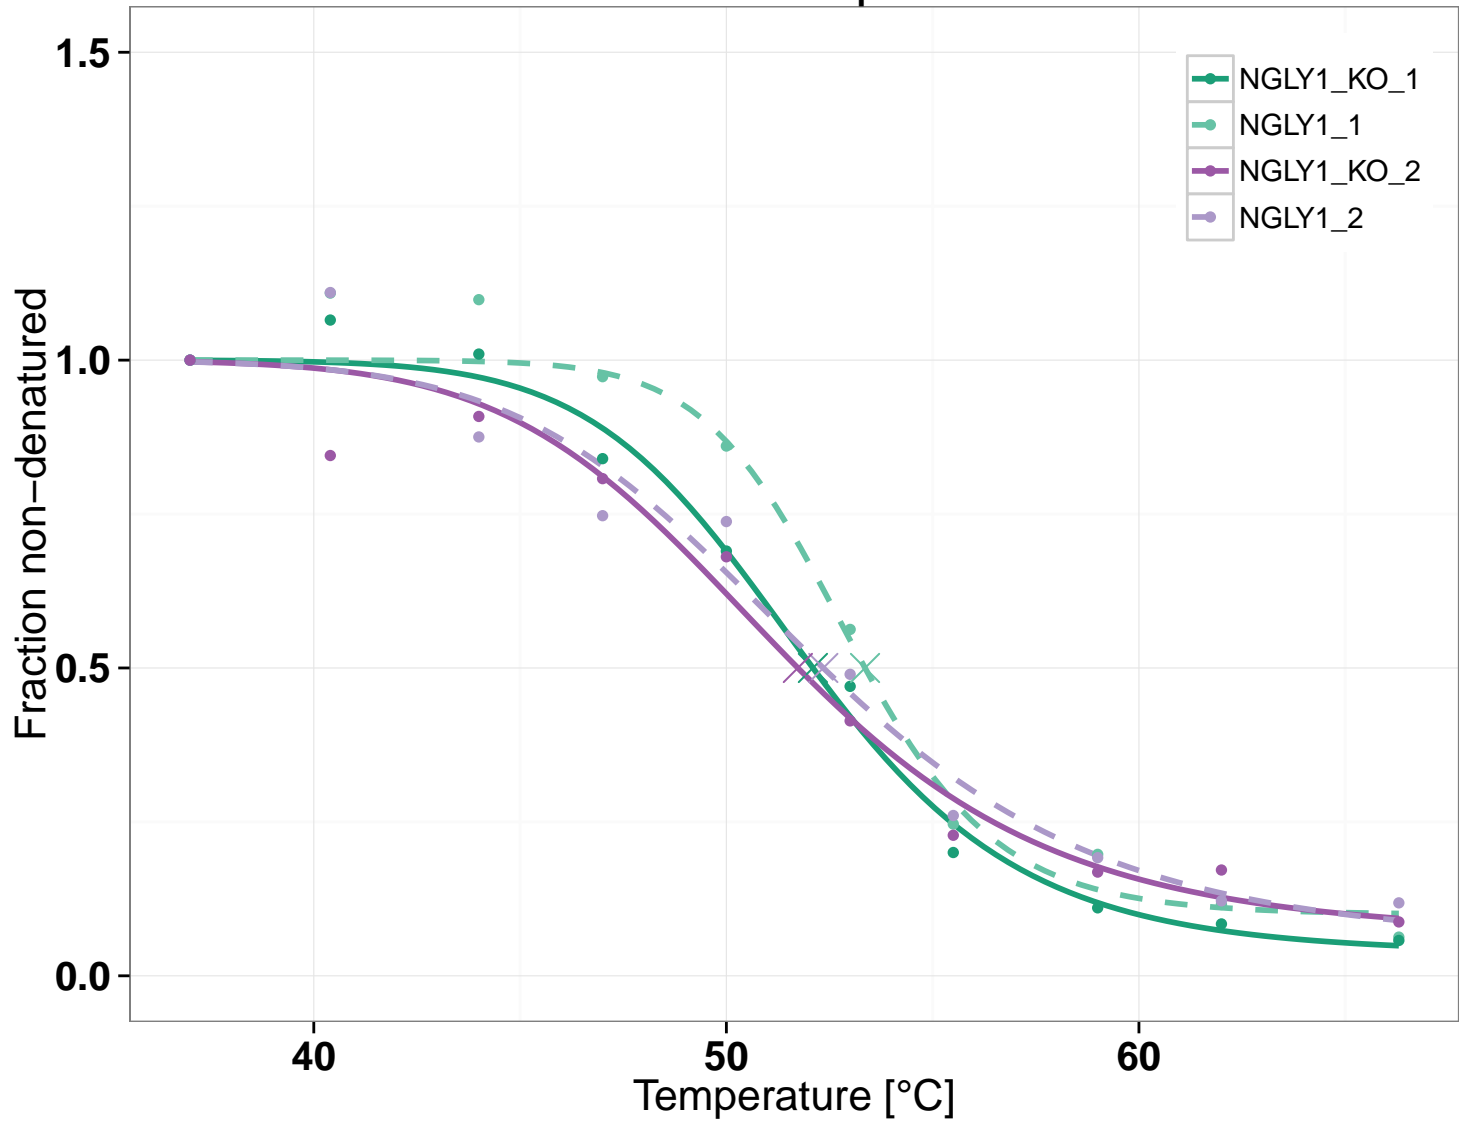

|            | meltPoint | slope  | plateau | R2   |
|------------|-----------|--------|---------|------|
| NGLY1_KO_1 | 52.1      | -0.092 | 0.04    | 0.99 |
| NGLY1_1    | 53.36     | -0.13  | 0.1     | 0.98 |
| NGLY1_KO_2 | 51.73     | -0.07  | 0.06    | 0.97 |
| NGLY1_2    | 52.35     | -0.067 | 0.05    | 0.97 |

Supplement: Supplementary file 733 [file 1]

IPI00394796.4|TDRD1

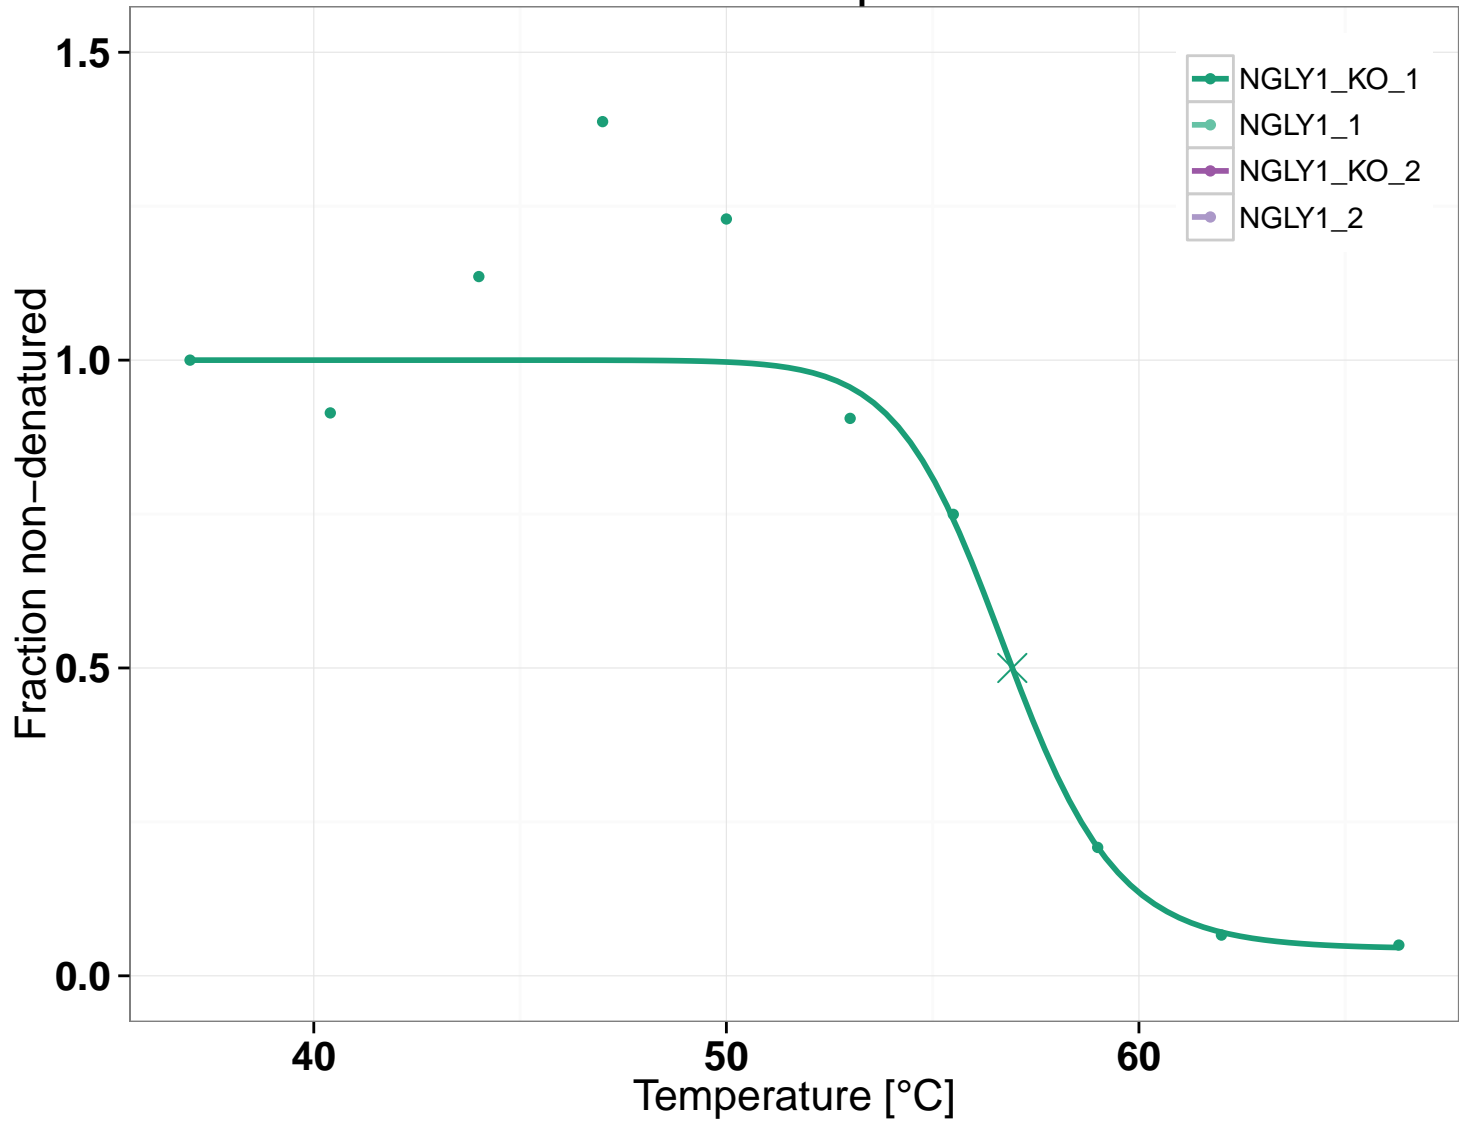

|            | meltPoint | slope | plateau | R2   |
|------------|-----------|-------|---------|------|
| NGLY1_KO_1 | 56.93     | -0.18 | 0.04    | 0.89 |
| NGLY1_1    | -         | -     | -       | -    |
| NGLY1_KO_2 | -         | -     | -       | -    |
| NGLY1_2    | -         | -     | -       | -    |

Supplement: Supplementary file 734 [file 1]

IPI00026970.4|SUPT16H

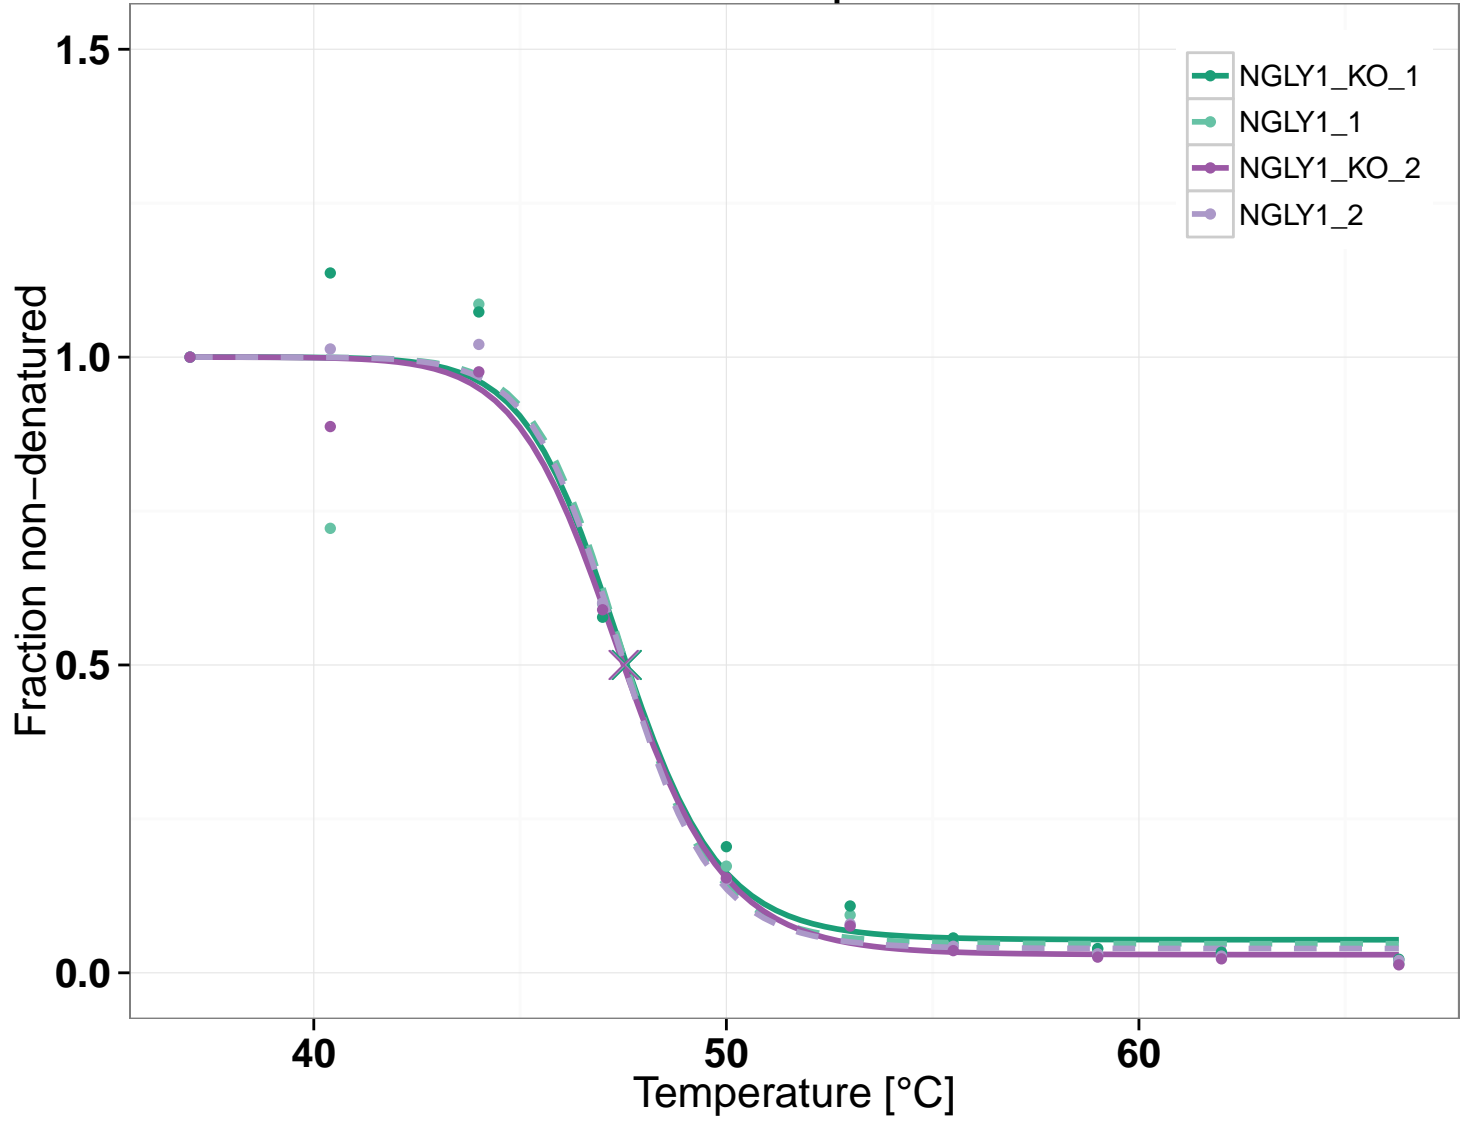

|            | meltPoint | slope | plateau | R2   |
|------------|-----------|-------|---------|------|
| NGLY1_KO_1 | 47.59     | -0.2  | 0.05    | 0.98 |
| NGLY1_1    | 47.58     | -0.22 | 0.05    | 0.94 |
| NGLY1_KO_2 | 47.51     | -0.19 | 0.03    | 0.99 |
| NGLY1_2    | 47.53     | -0.22 | 0.04    | 1    |

Supplement: Supplementary file 735 [file 1]

# IPI00163505.2|RBM39

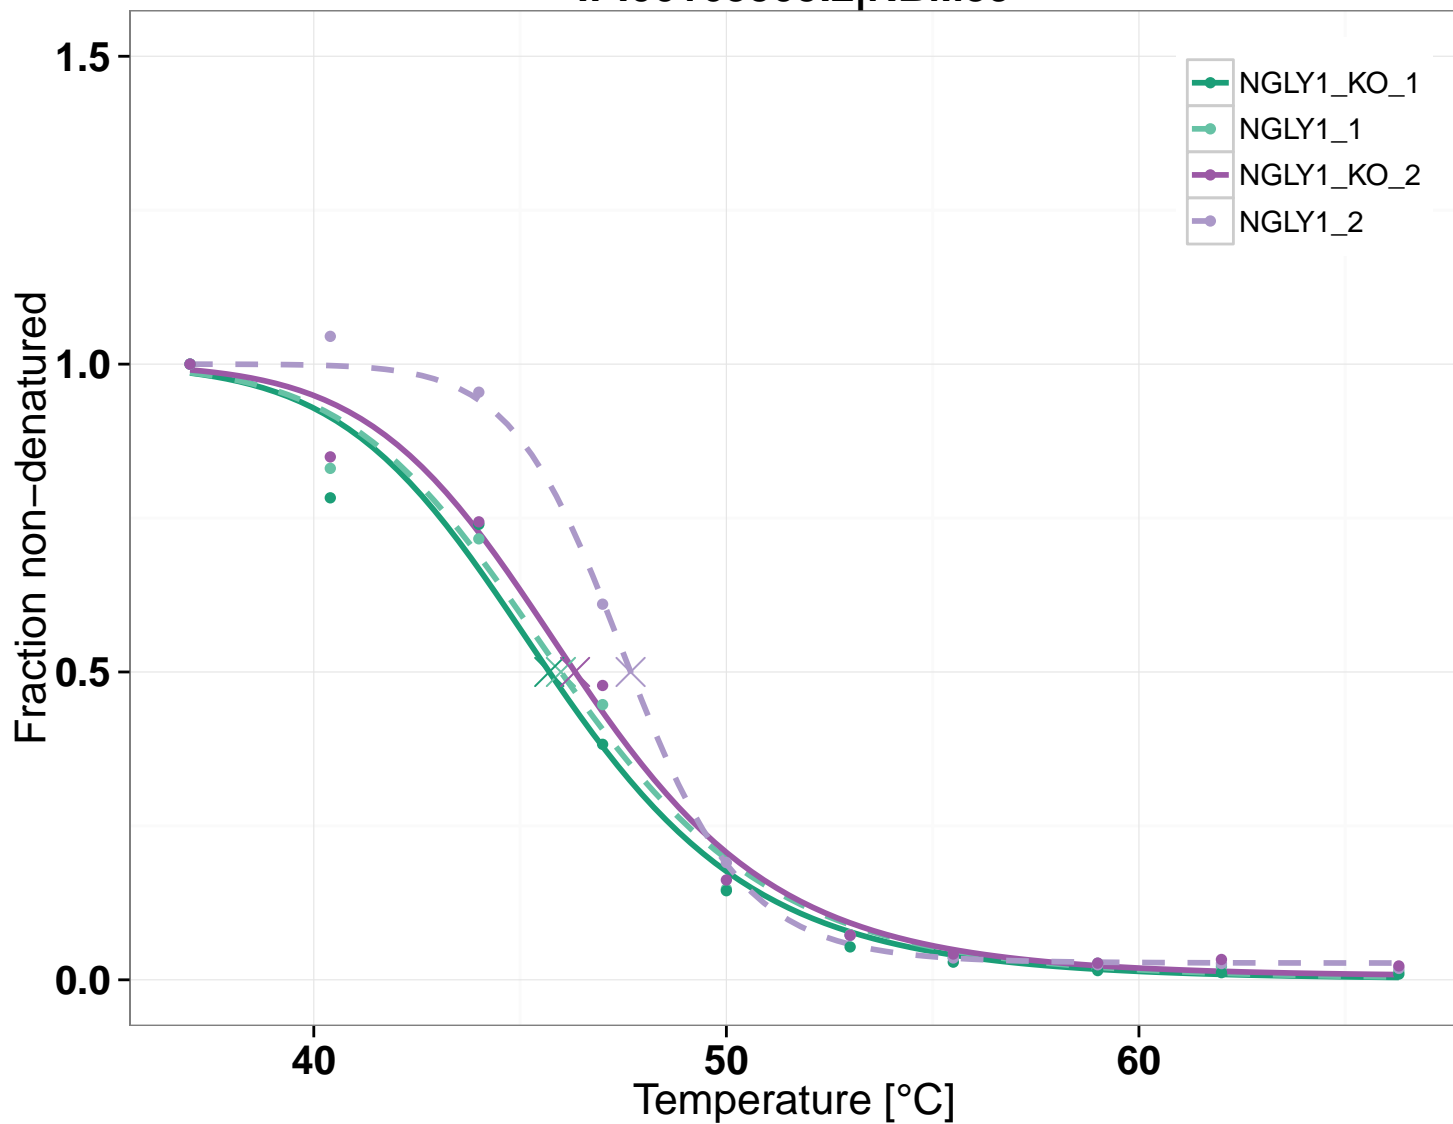

|            | meltPoint | slope  | plateau | R2   |
|------------|-----------|--------|---------|------|
| NGLY1_KO_1 | 45.71     | -0.099 | 0       | 0.98 |
| NGLY1_1    | 45.99     | -0.097 | 0       | 0.99 |
| NGLY1_KO_2 | 46.33     | -0.1   | 0       | 0.99 |
| NGLY1_2    | 47.68     | -0.17  | 0.03    | 1    |

Supplement: Supplementary file 736 [file 1]

# IPI00168209.3|DTWD2

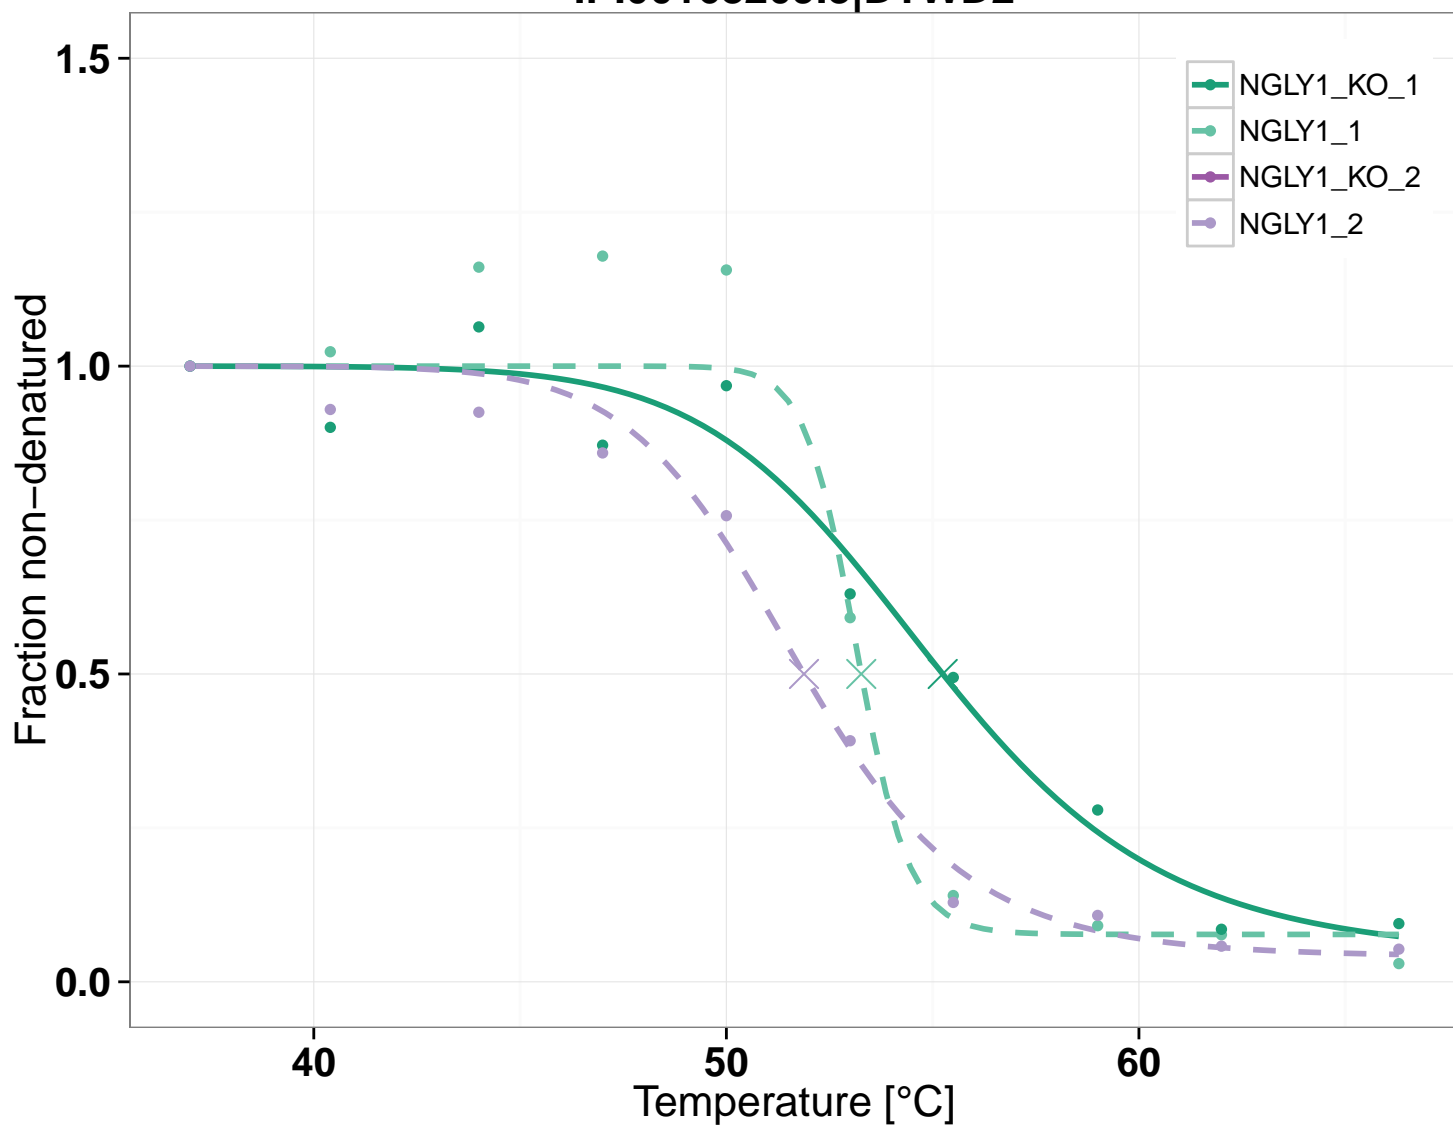

|            | meltPoint | slope  | plateau | R2   |
|------------|-----------|--------|---------|------|
| NGLY1_KO_1 | 55.24     | -0.086 | 0.04    | 0.97 |
| NGLY1_1    | 53.27     | -0.37  | 0.08    | 0.96 |
| NGLY1_KO_2 | -         | -      | -       | -    |
| NGLY1_2    | 51.88     | -0.12  | 0.04    | 0.99 |

Supplement: Supplementary file 737 [file 1]

# IPI00304187.8|RBM28

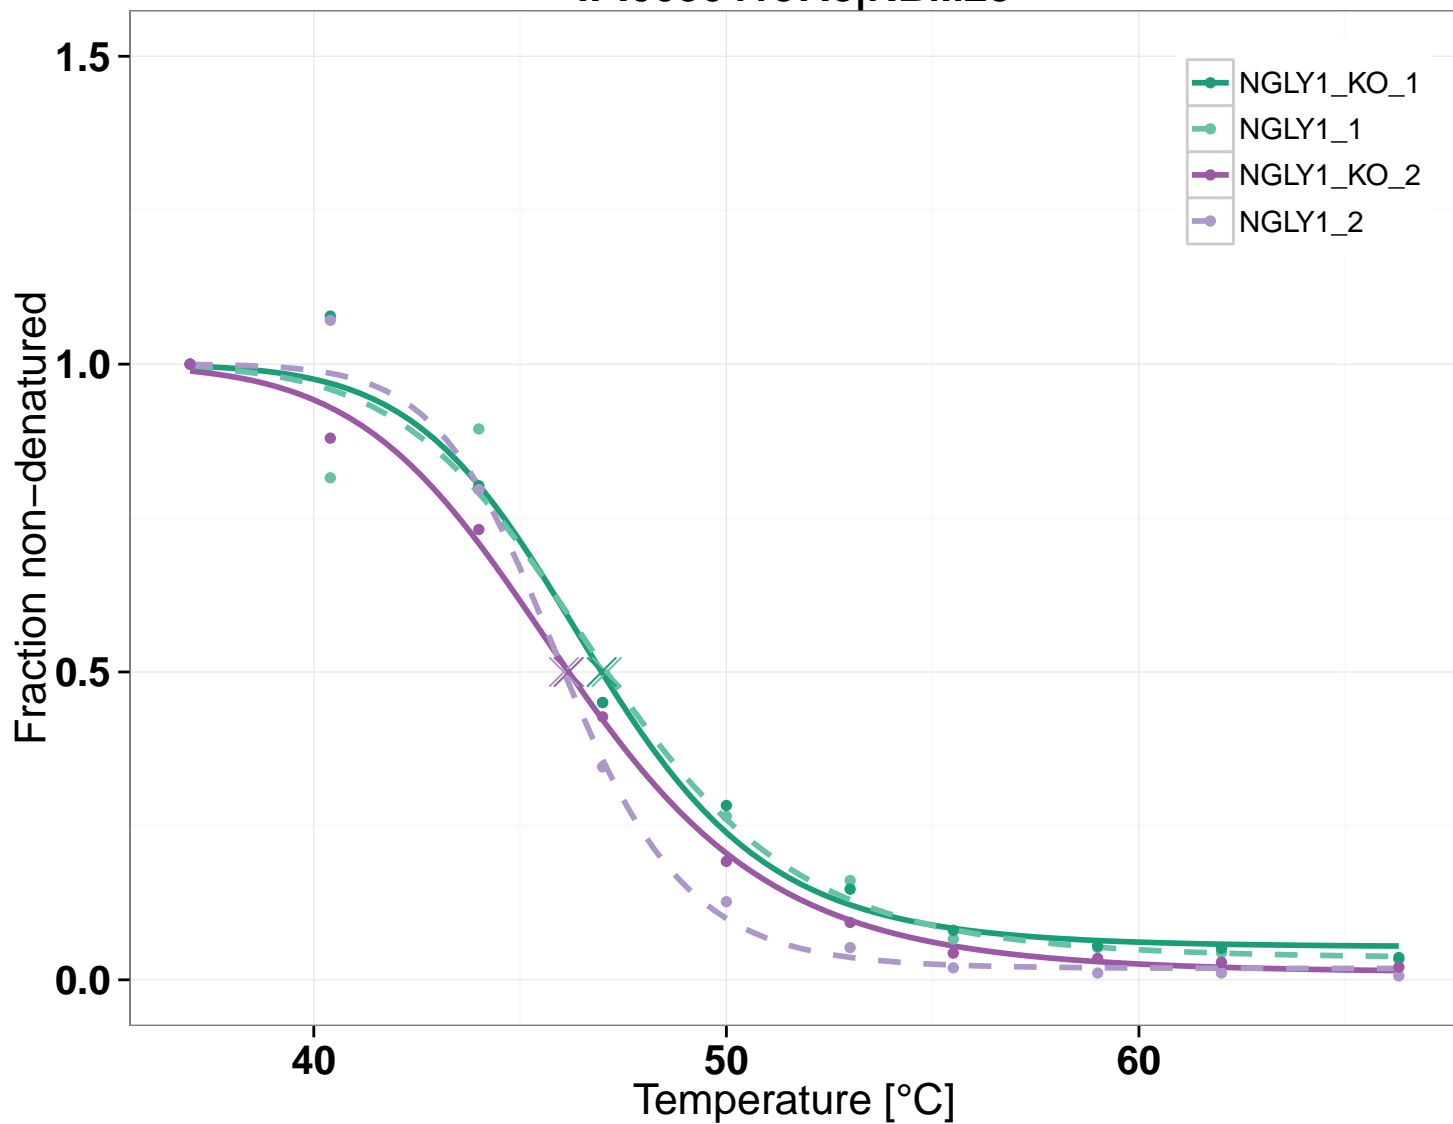

|            | meltPoint | slope  | plateau | R2   |
|------------|-----------|--------|---------|------|
| NGLY1_KO_1 | 46.98     | -0.11  | 0.05    | 0.99 |
| NGLY1_1    | 47.1      | -0.1   | 0.03    | 0.97 |
| NGLY1_KO_2 | 46.18     | -0.098 | 0.01    | 1    |
| NGLY1_2    | 46.06     | -0.16  | 0.02    | 0.99 |

Supplement: Supplementary file 738 [file 1]

IPI00883870.1|SEPT9

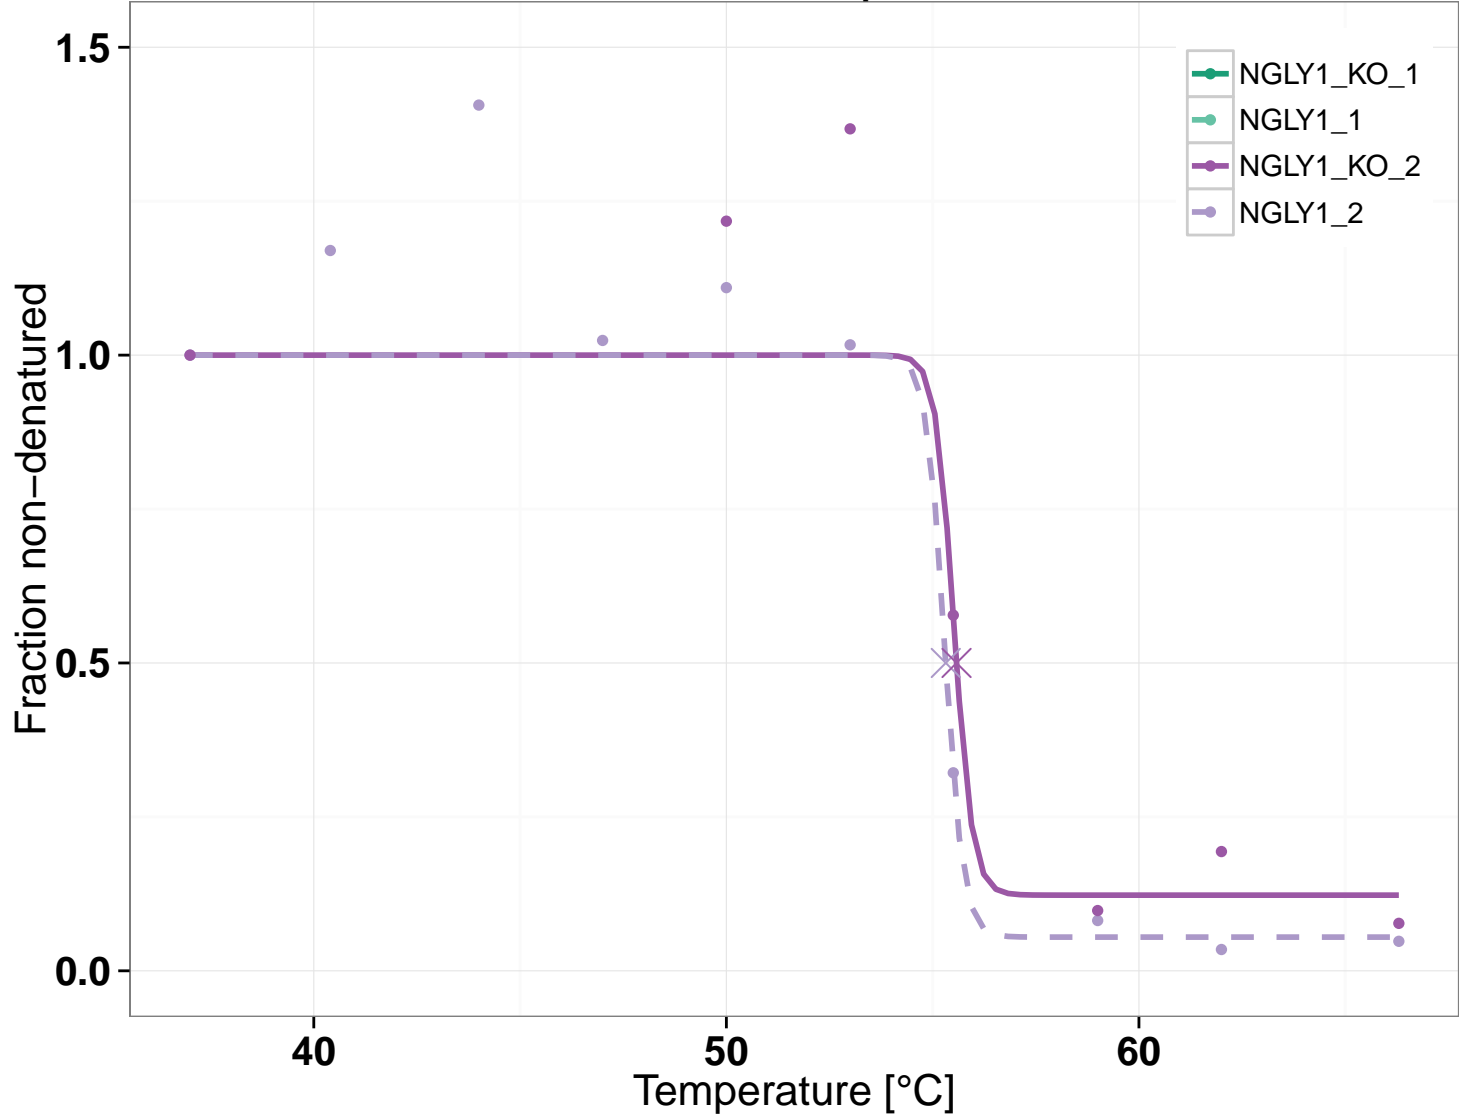

|            | meltPoint | slope | plateau | R2   |
|------------|-----------|-------|---------|------|
| NGLY1_KO_1 | -         | -     | -       | -    |
| NGLY1_1    | -         | -     | -       | -    |
| NGLY1_KO_2 | 55.58     | -0.99 | 0.12    | 0.55 |
| NGLY1_2    | 55.32     | -1.1  | 0.05    | 0.92 |

Supplement: Supplementary file 739 [file 1]

# IPI00871843.1|TGM2

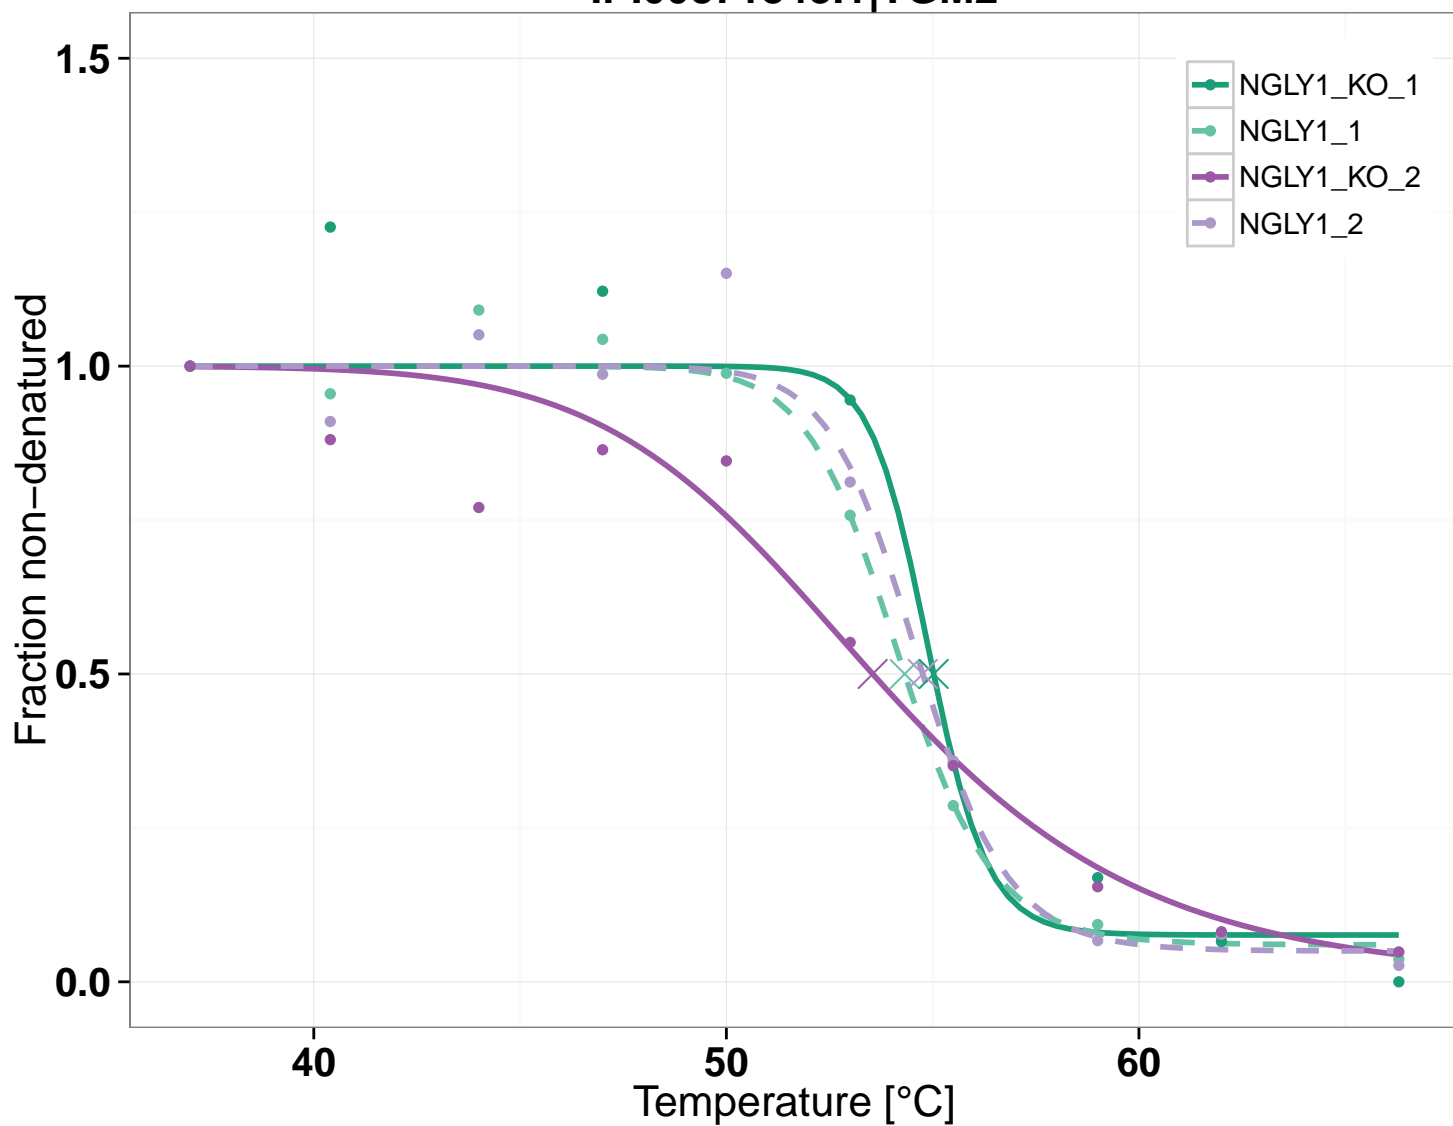

|            | meltPoint | slope  | plateau | R2   |
|------------|-----------|--------|---------|------|
| NGLY1_KO_1 | 55.03     | -0.33  | 0.08    | 0.81 |
| NGLY1_1    | 54.32     | -0.21  | 0.06    | 0.99 |
| NGLY1_KO_2 | 53.55     | -0.076 | 0       | 0.95 |
| NGLY1_2    | 54.76     | -0.22  | 0.05    | 0.98 |

Supplement: Supplementary file 740 [file 1]

# IPI00298520.3|ARCN1

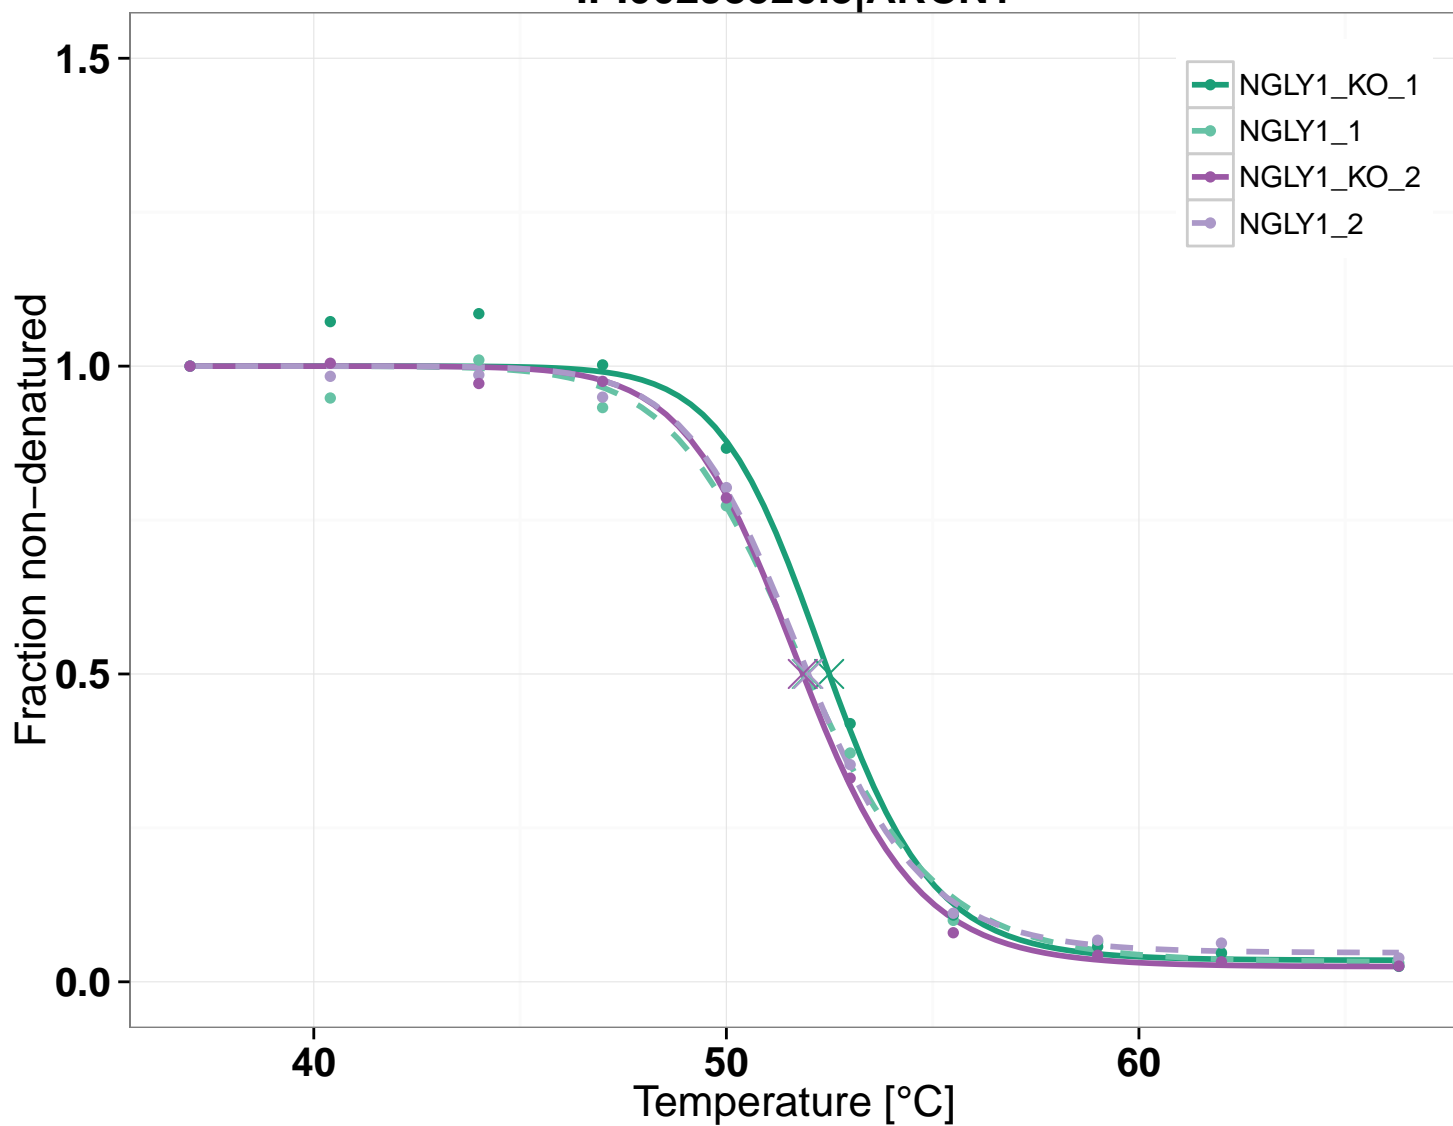

|            | meltPoint | slope | plateau | R2   |
|------------|-----------|-------|---------|------|
| NGLY1_KO_1 | 52.49     | -0.19 | 0.03    | 0.99 |
| NGLY1_1    | 51.95     | -0.15 | 0.03    | 1    |
| NGLY1_KO_2 | 51.85     | -0.17 | 0.02    | 1    |
| NGLY1_2    | 51.99     | -0.16 | 0.05    | 1    |

Supplement: Supplementary file 741 [file 1]

# IPI00383640.3|SIRT6

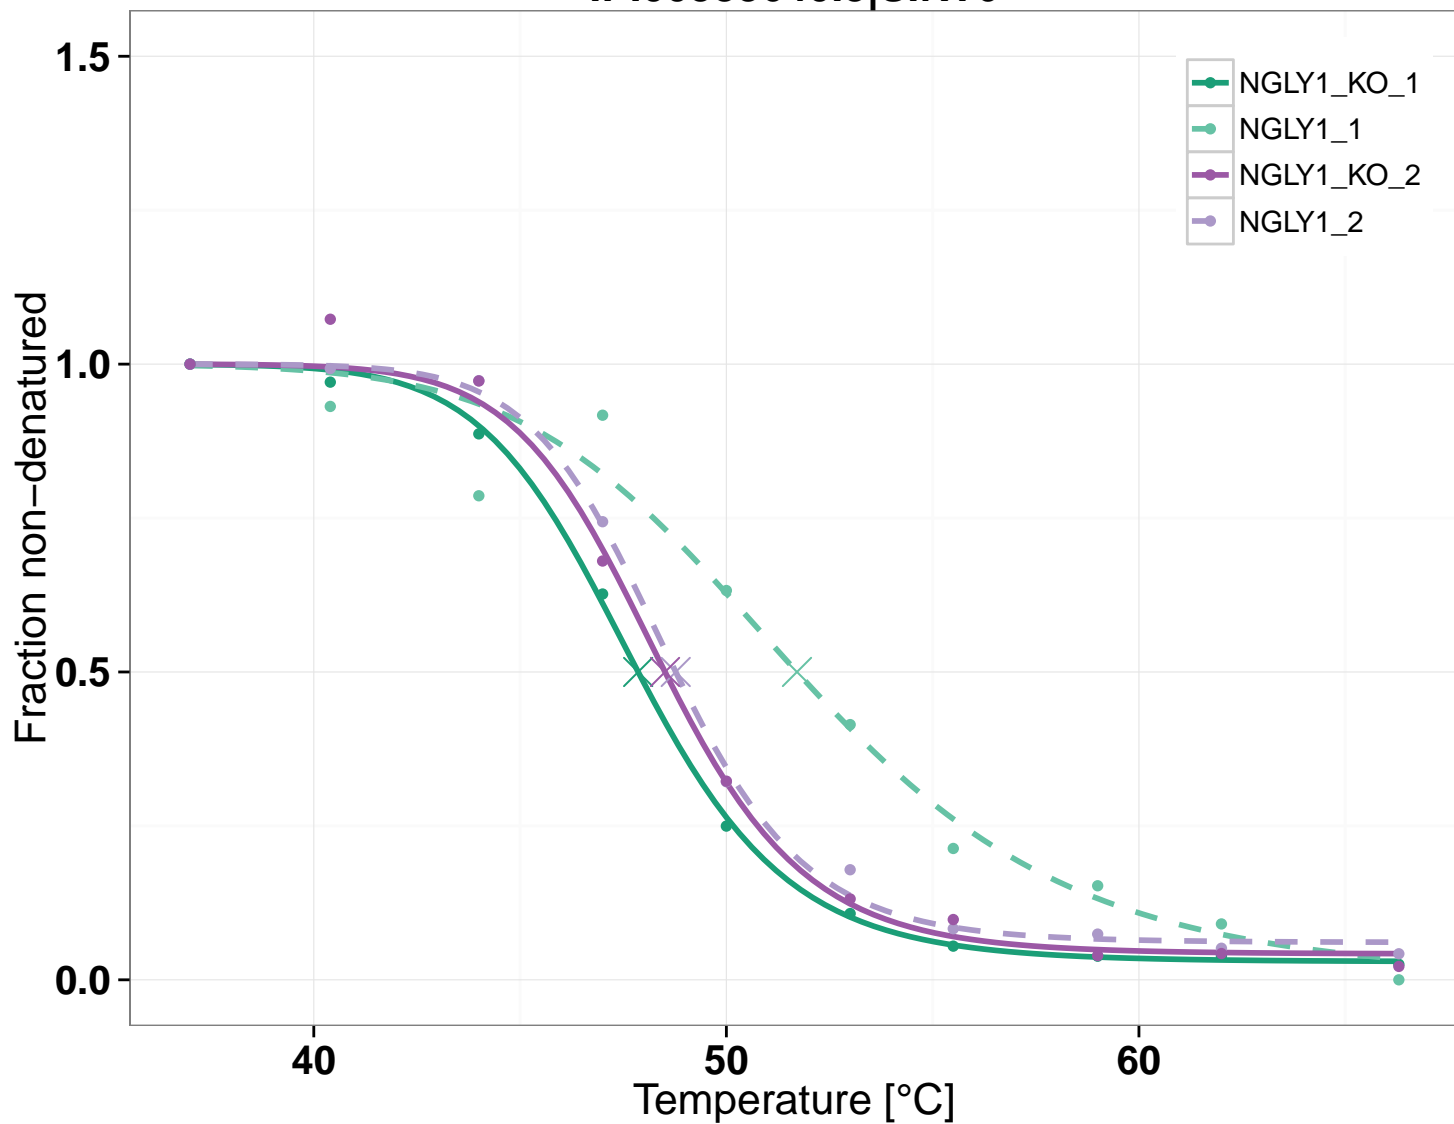

|            | meltPoint | slope  | plateau | R2   |
|------------|-----------|--------|---------|------|
| NGLY1_KO_1 | 47.86     | -0.13  | 0.03    | 1    |
| NGLY1_1    | 51.71     | -0.075 | 0       | 0.97 |
| NGLY1_KO_2 | 48.51     | -0.14  | 0.04    | 0.99 |
| NGLY1_2    | 48.77     | -0.14  | 0.06    | 1    |

Supplement: Supplementary file 742 [file 1]

IPI00215790.6|RPL38

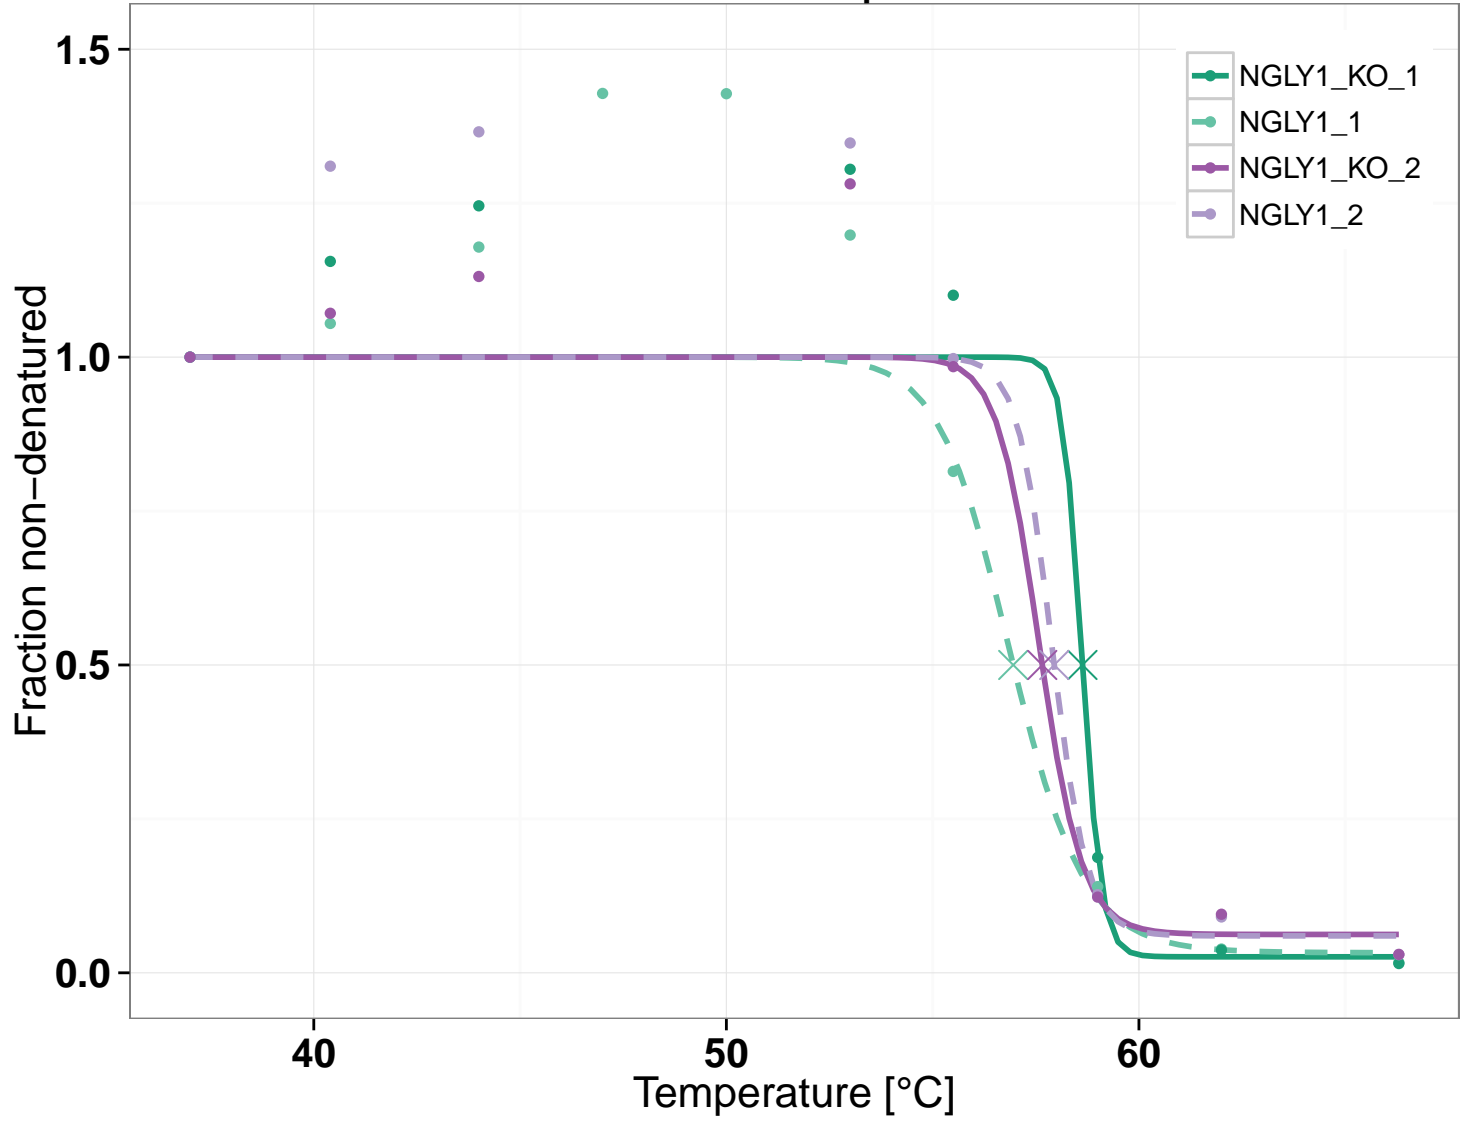

|            | meltPoint | slope | plateau | R2   |
|------------|-----------|-------|---------|------|
| NGLY1_KO_1 | 58.63     | -1    | 0.03    | 0.7  |
| NGLY1_1    | 56.95     | -0.27 | 0.03    | 0.84 |
| NGLY1_KO_2 | 57.66     | -0.45 | 0.06    | 0.78 |
| NGLY1_2    | 57.95     | -0.56 | 0.06    | 0.71 |

Supplement: Supplementary file 743 [file 1]

IPI00478787.3|RAB18

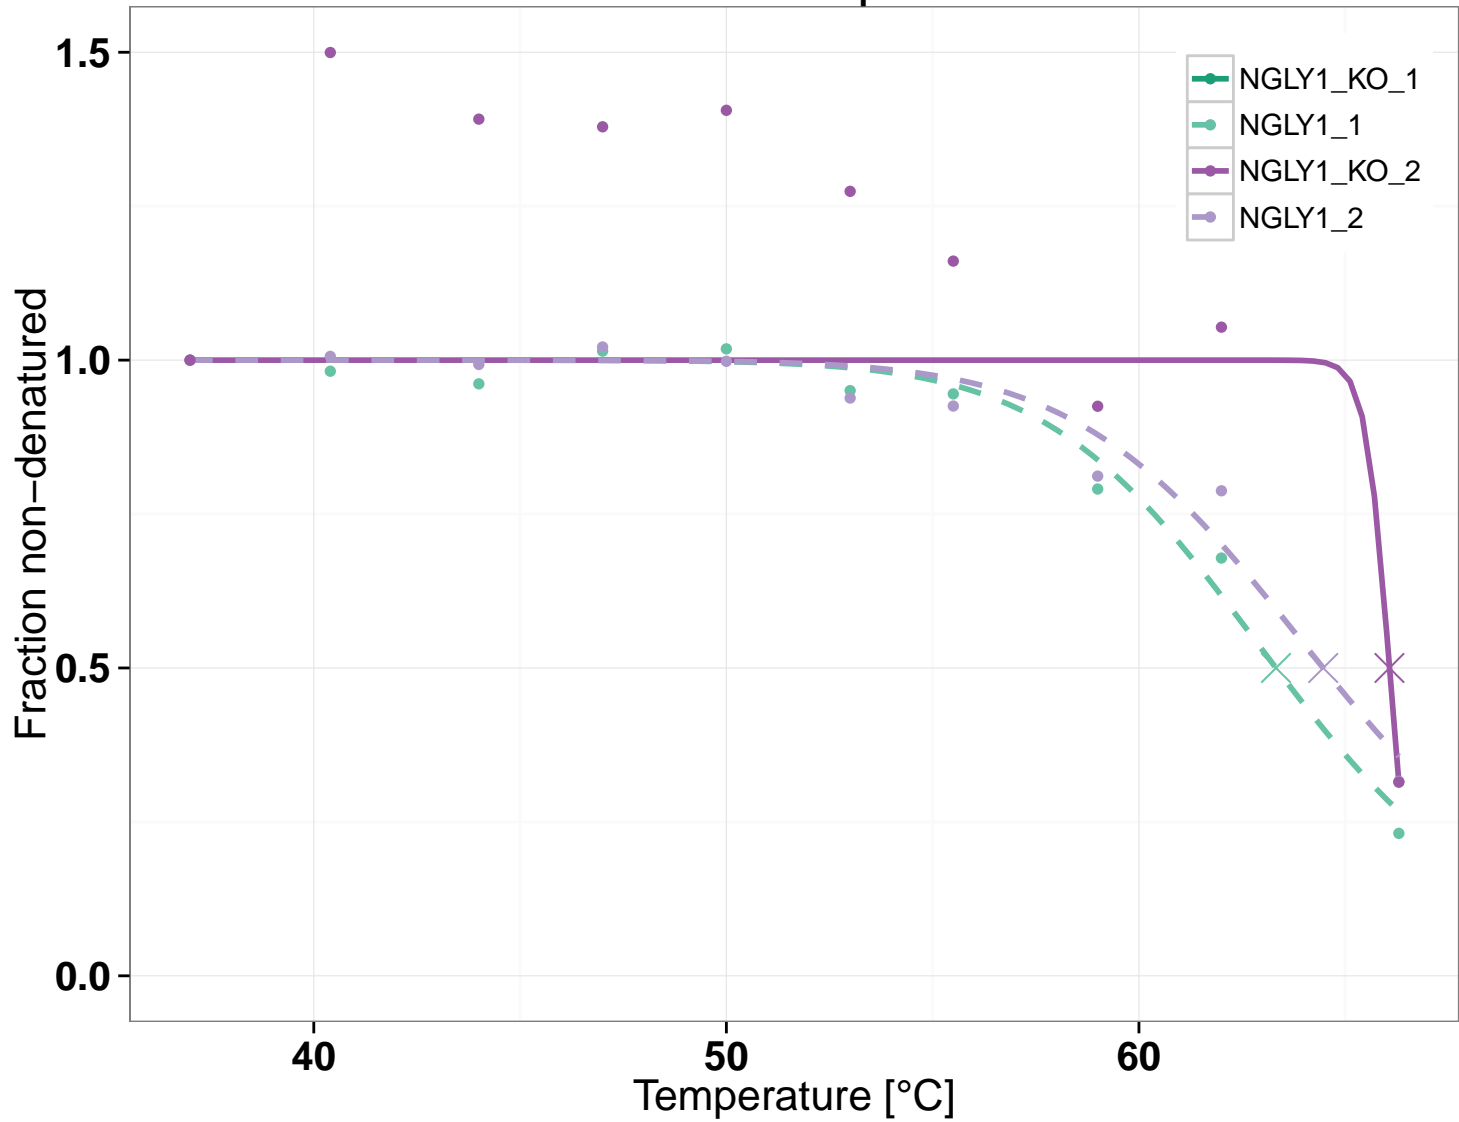

|            | meltPoint | slope  | plateau | R2   |
|------------|-----------|--------|---------|------|
| NGLY1_KO_1 | -         | -      | -       | -    |
| NGLY1_1    | 63.32     | -0.089 | 0       | 0.98 |
| NGLY1_KO_2 | 66.07     | -0.86  | 0       | 0.25 |
| NGLY1_2    | 64.47     | -0.084 | 0       | 0.95 |

Supplement: Supplementary file 744 [file 1]

IPI00433491.2|SLC30A6

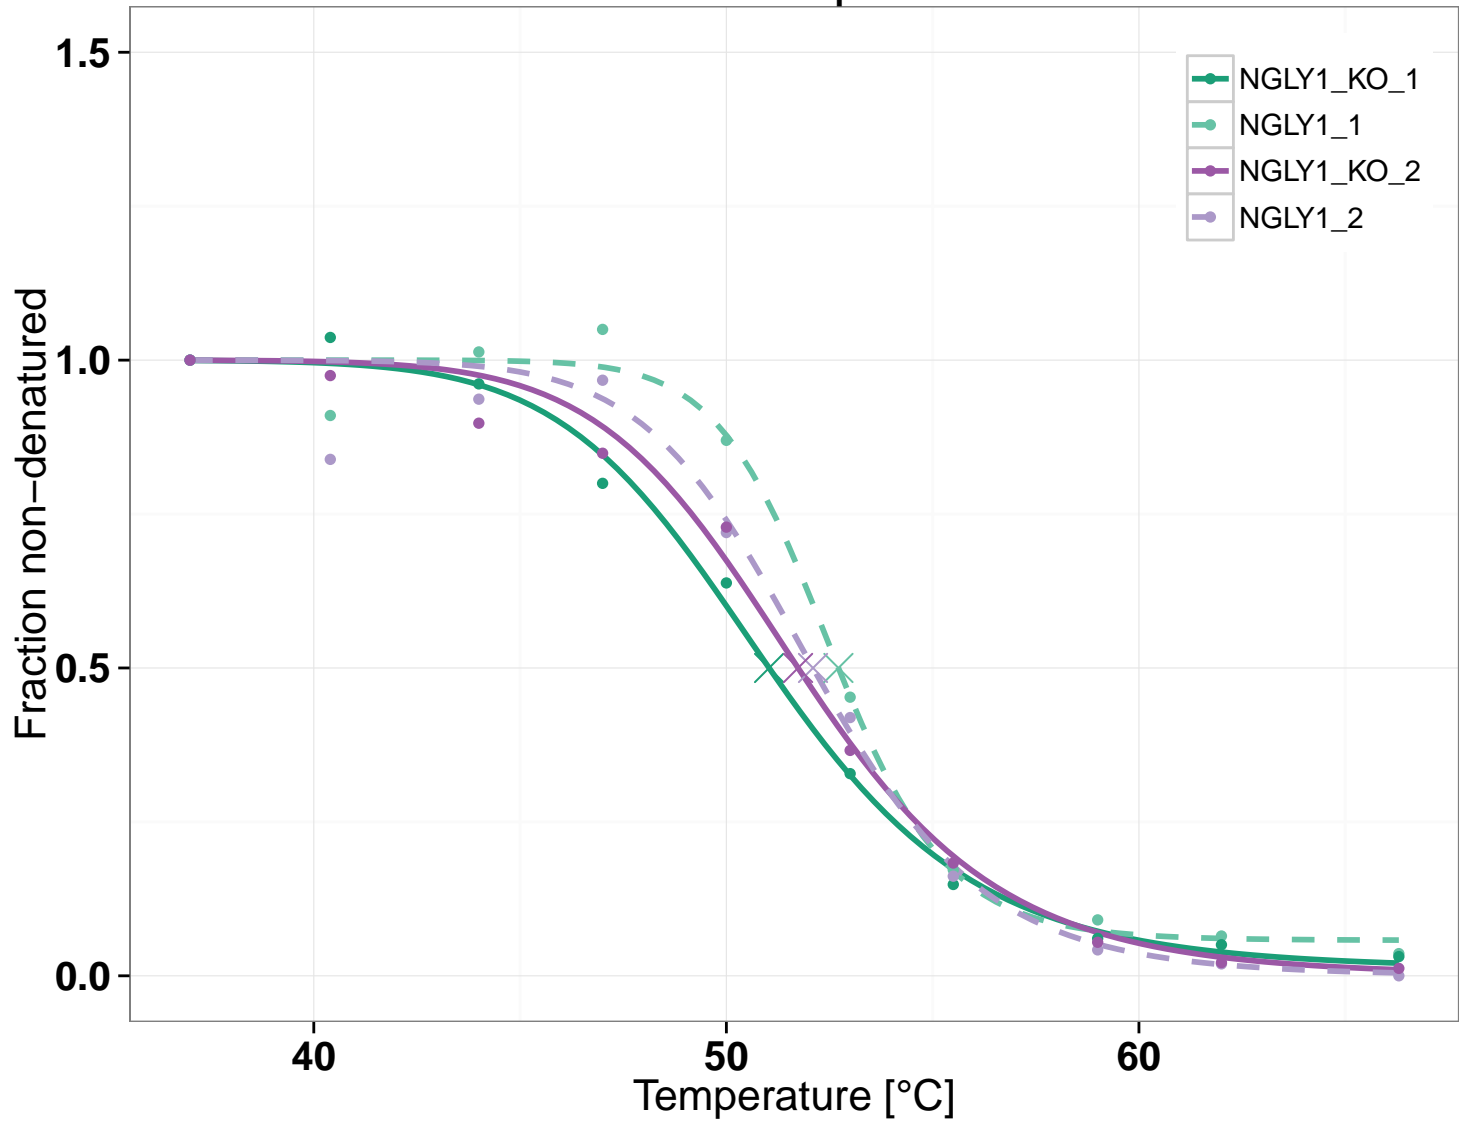

|            | meltPoint | slope  | plateau | R2   |
|------------|-----------|--------|---------|------|
| NGLY1_KO_1 | 51.04     | -0.098 | 0.01    | 1    |
| NGLY1_1    | 52.72     | -0.17  | 0.06    | 0.99 |
| NGLY1_KO_2 | 51.74     | -0.1   | 0       | 0.99 |
| NGLY1_2    | 52.1      | -0.12  | 0       | 0.98 |

Supplement: Supplementary file 745 [file 1]

# IPI00790455.1|DCXR

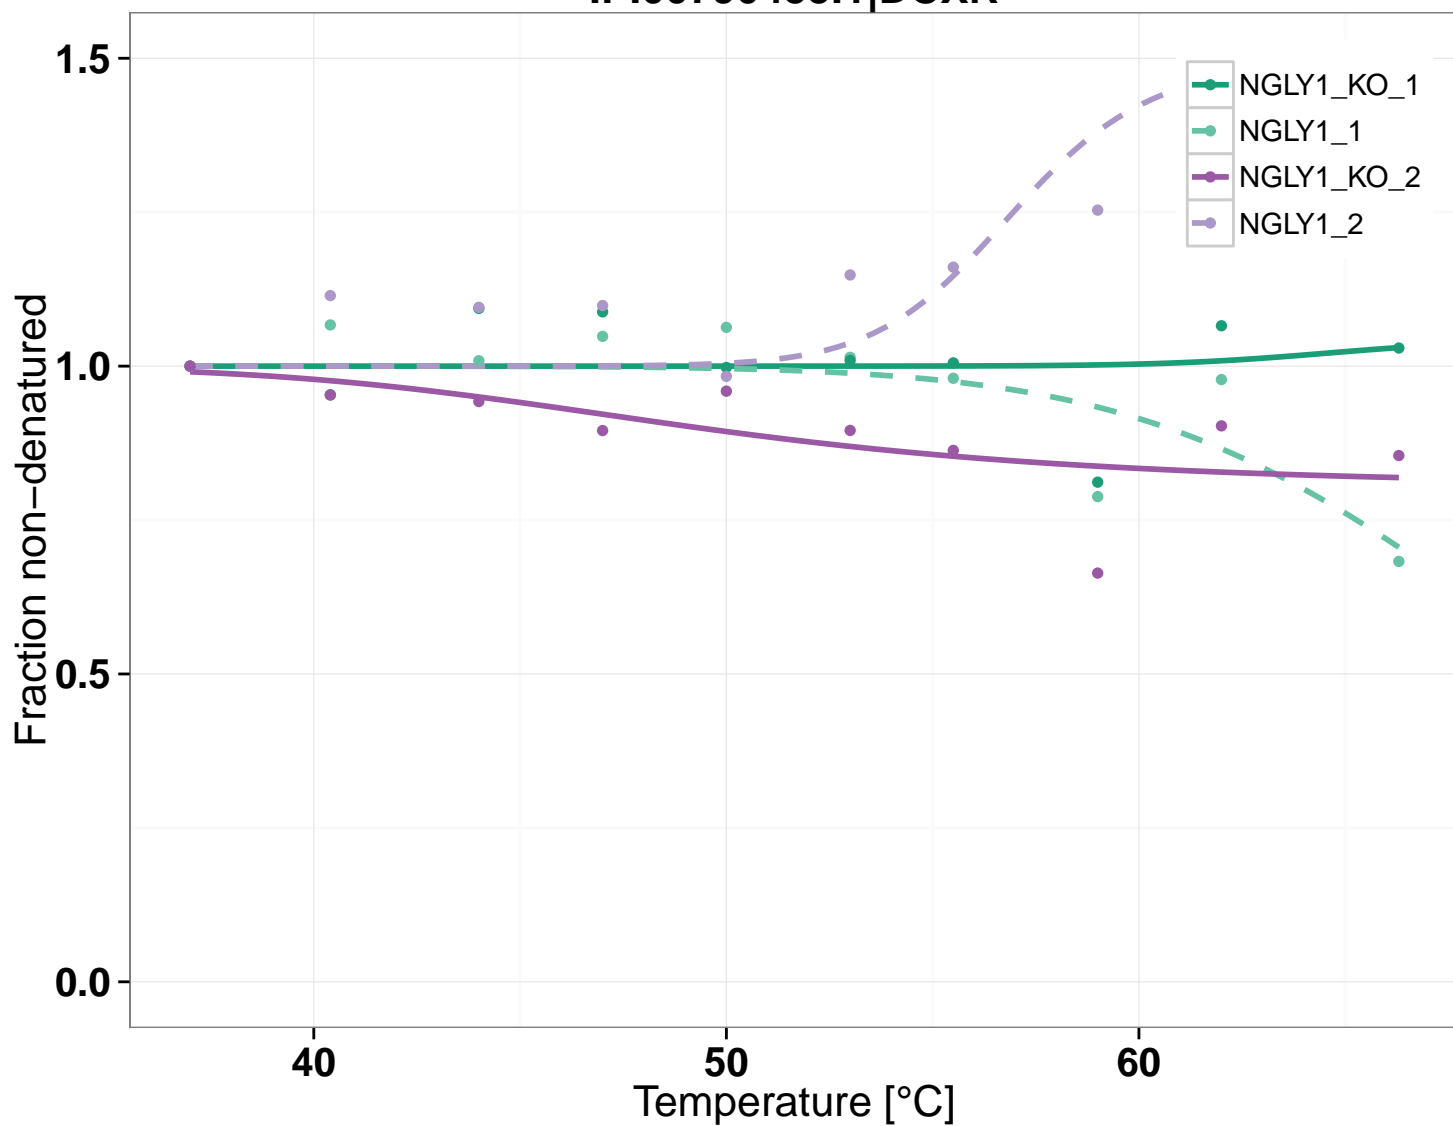

|            | meltPoint | slope   | plateau | R2   |
|------------|-----------|---------|---------|------|
| NGLY1_KO_1 | –         | 0.0055  | 1.05    | 0.02 |
| NGLY1_1    | –         | –       | 0       | 0.68 |
| NGLY1_KO_2 | –         | –0.0097 | 0.8     | 0.43 |
| NGLY1_2    | –         | 0.074   | 1.5     | 0.49 |

Supplement: Supplementary file 746 [file 1]

IPI00027146.1|GLUD2

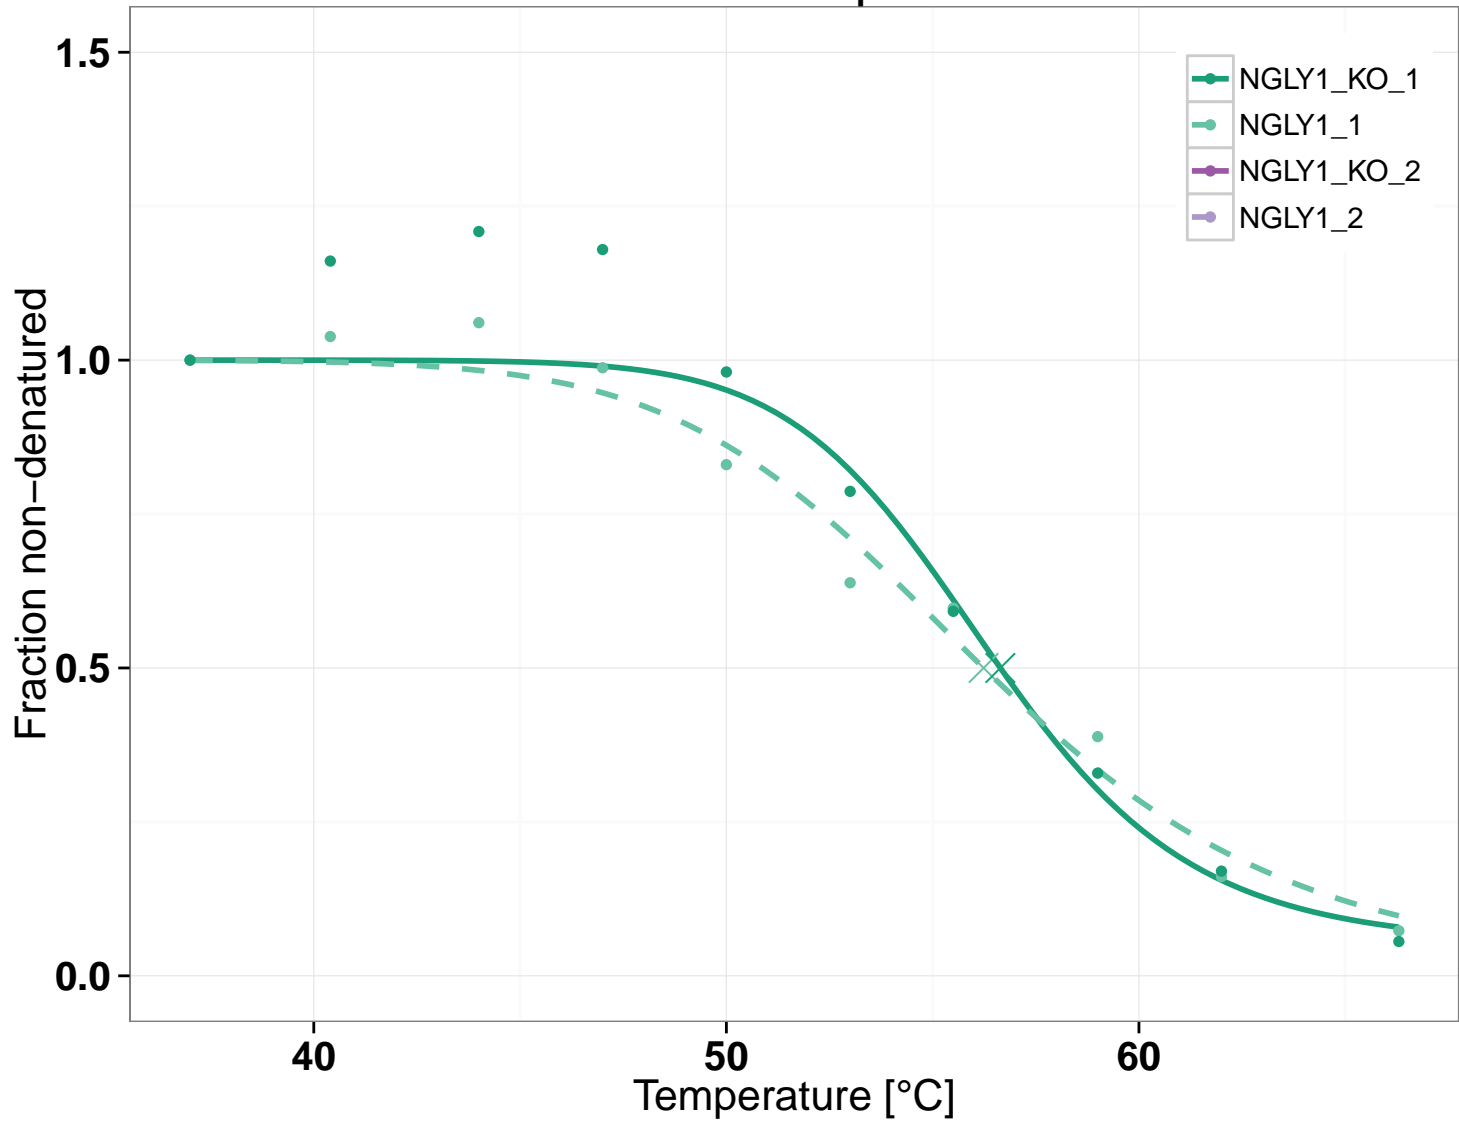

|            | meltPoint | slope  | plateau | R2   |
|------------|-----------|--------|---------|------|
| NGLY1_KO_1 | 56.64     | -0.097 | 0.05    | 0.94 |
| NGLY1_1    | 56.24     | -0.066 | 0       | 0.98 |
| NGLY1_KO_2 | -         | -      | -       | -    |
| NGLY1_2    | -         | -      | -       | -    |

Supplement: Supplementary file 747 [file 1]

IPI00167002.3|ELF1

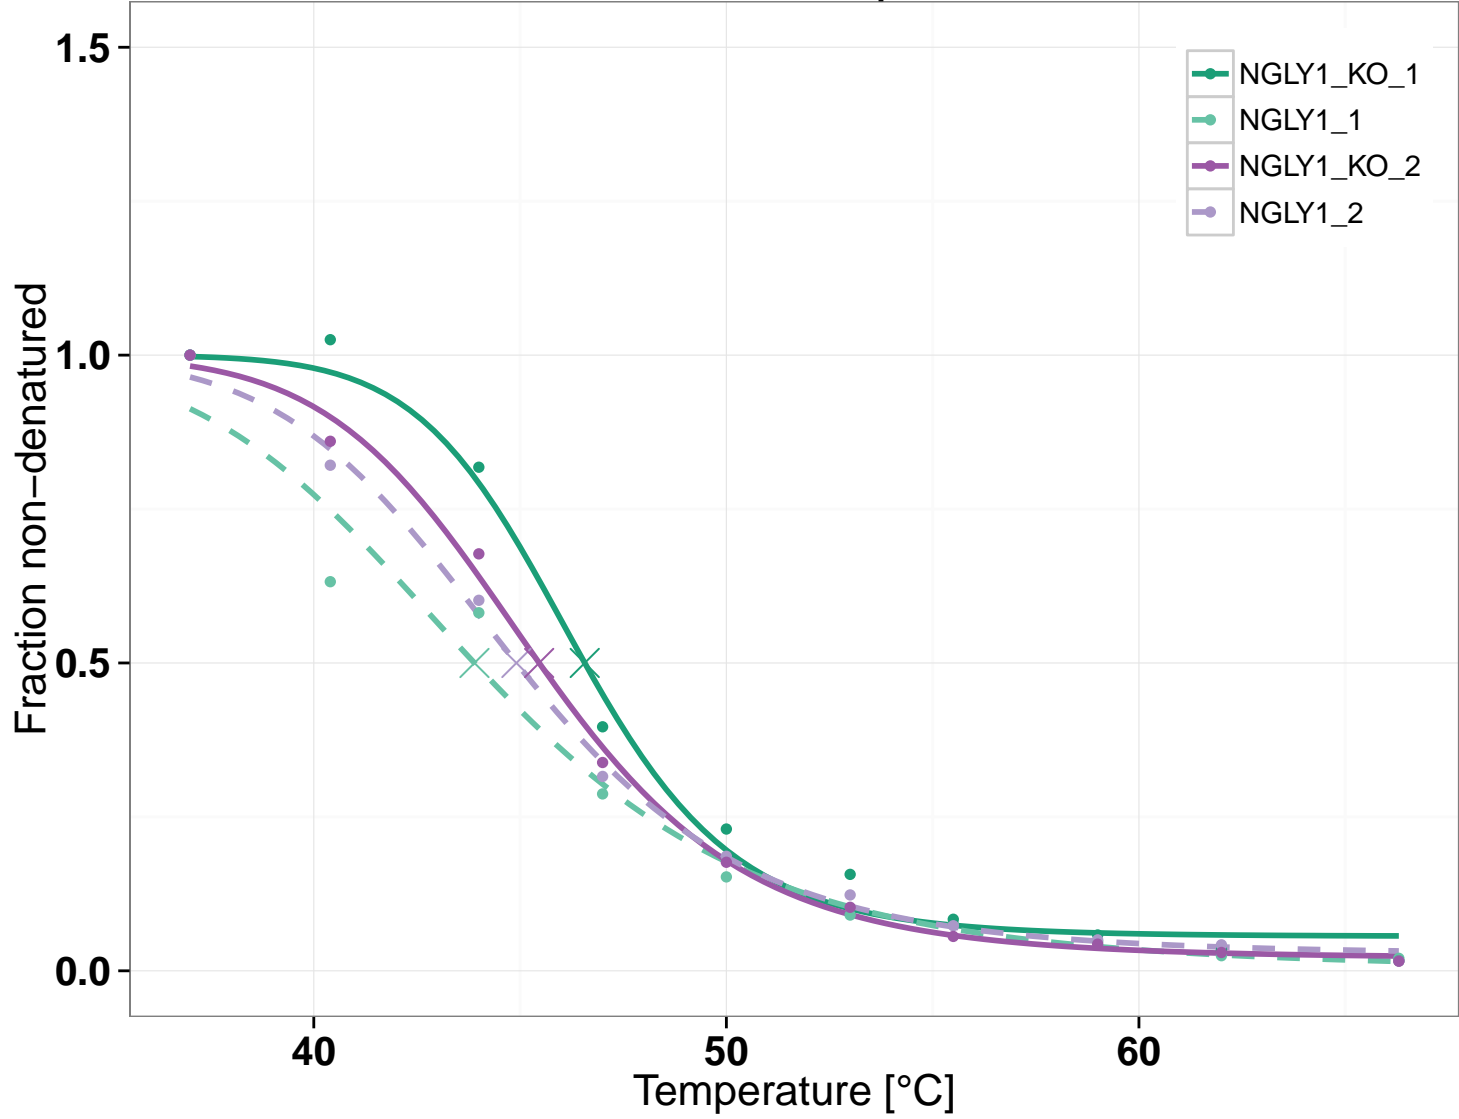

|            | meltPoint | slope  | plateau | R2   |
|------------|-----------|--------|---------|------|
| NGLY1_KO_1 | 46.57     | -0.12  | 0.06    | 0.99 |
| NGLY1_1    | 43.89     | -0.074 | 0       | 0.97 |
| NGLY1_KO_2 | 45.46     | -0.097 | 0.02    | 1    |
| NGLY1_2    | 44.91     | -0.086 | 0.03    | 1    |

Supplement: Supplementary file 748 [file 1]

# IPI00024317.1|GCDH

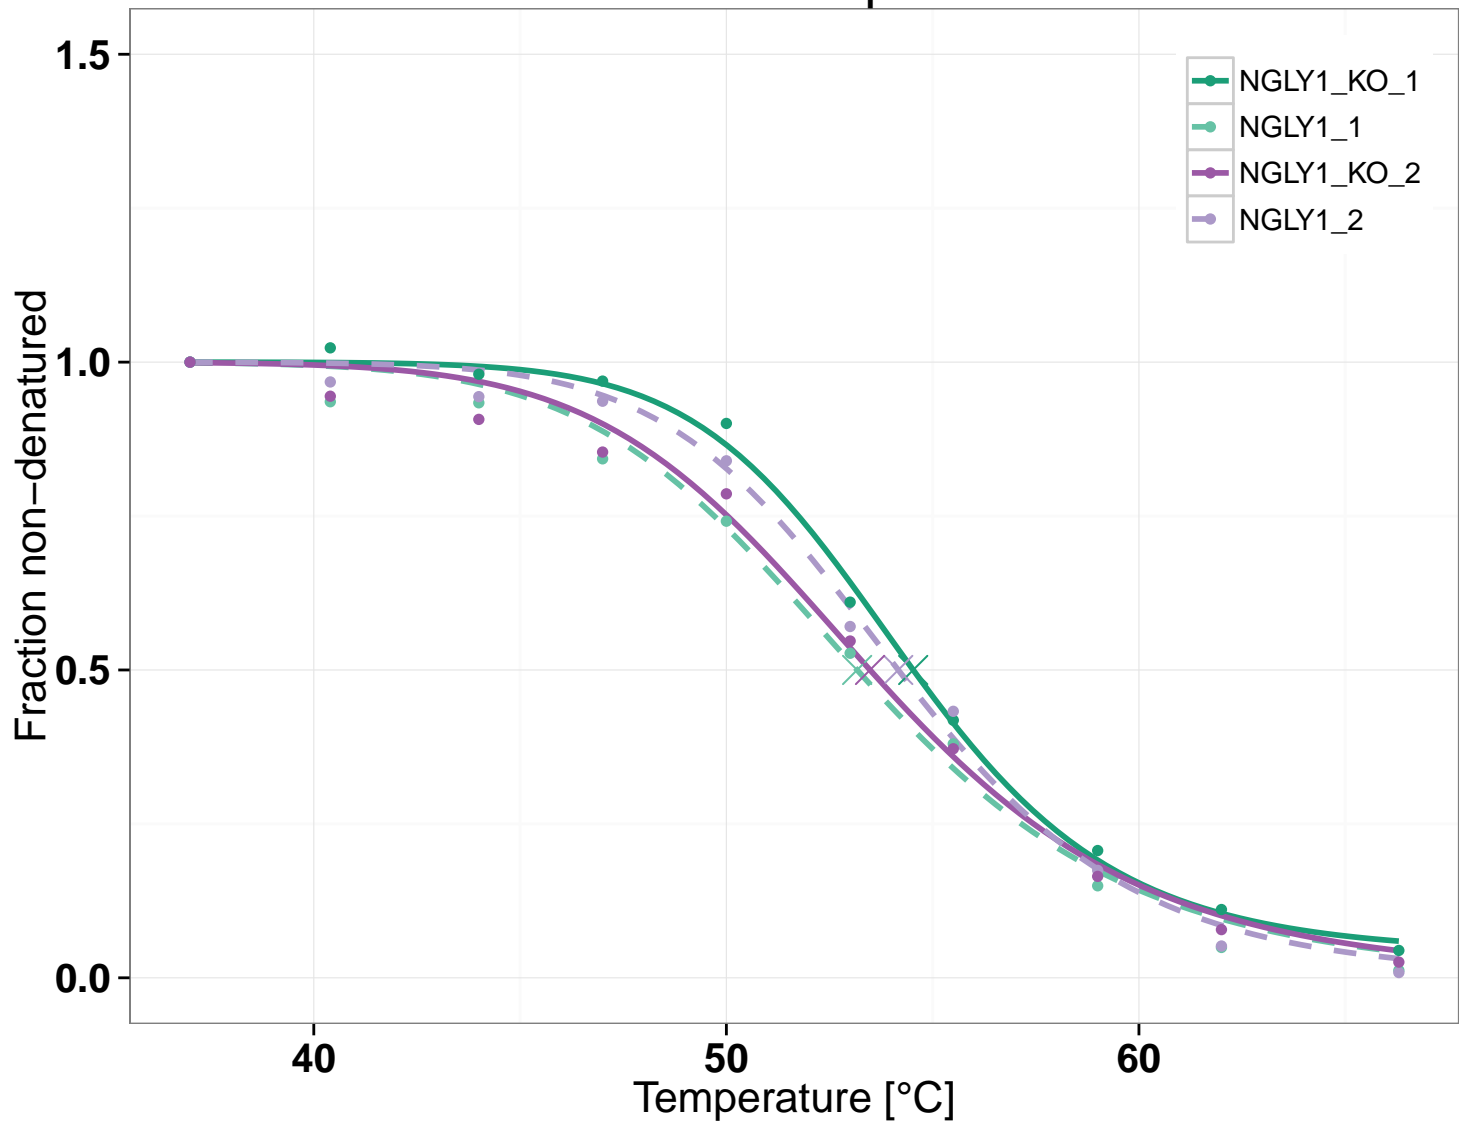

|            | meltPoint | slope  | plateau | R2   |
|------------|-----------|--------|---------|------|
| NGLY1_KO_1 | 54.53     | -0.094 | 0.04    | 1    |
| NGLY1_1    | 53.17     | -0.075 | 0       | 0.99 |
| NGLY1_KO_2 | 53.48     | -0.076 | 0       | 0.99 |
| NGLY1_2    | 54.17     | -0.088 | 0       | 0.99 |

Supplement: Supplementary file 749 [file 1]

# IPI00022597.1|UBE2M

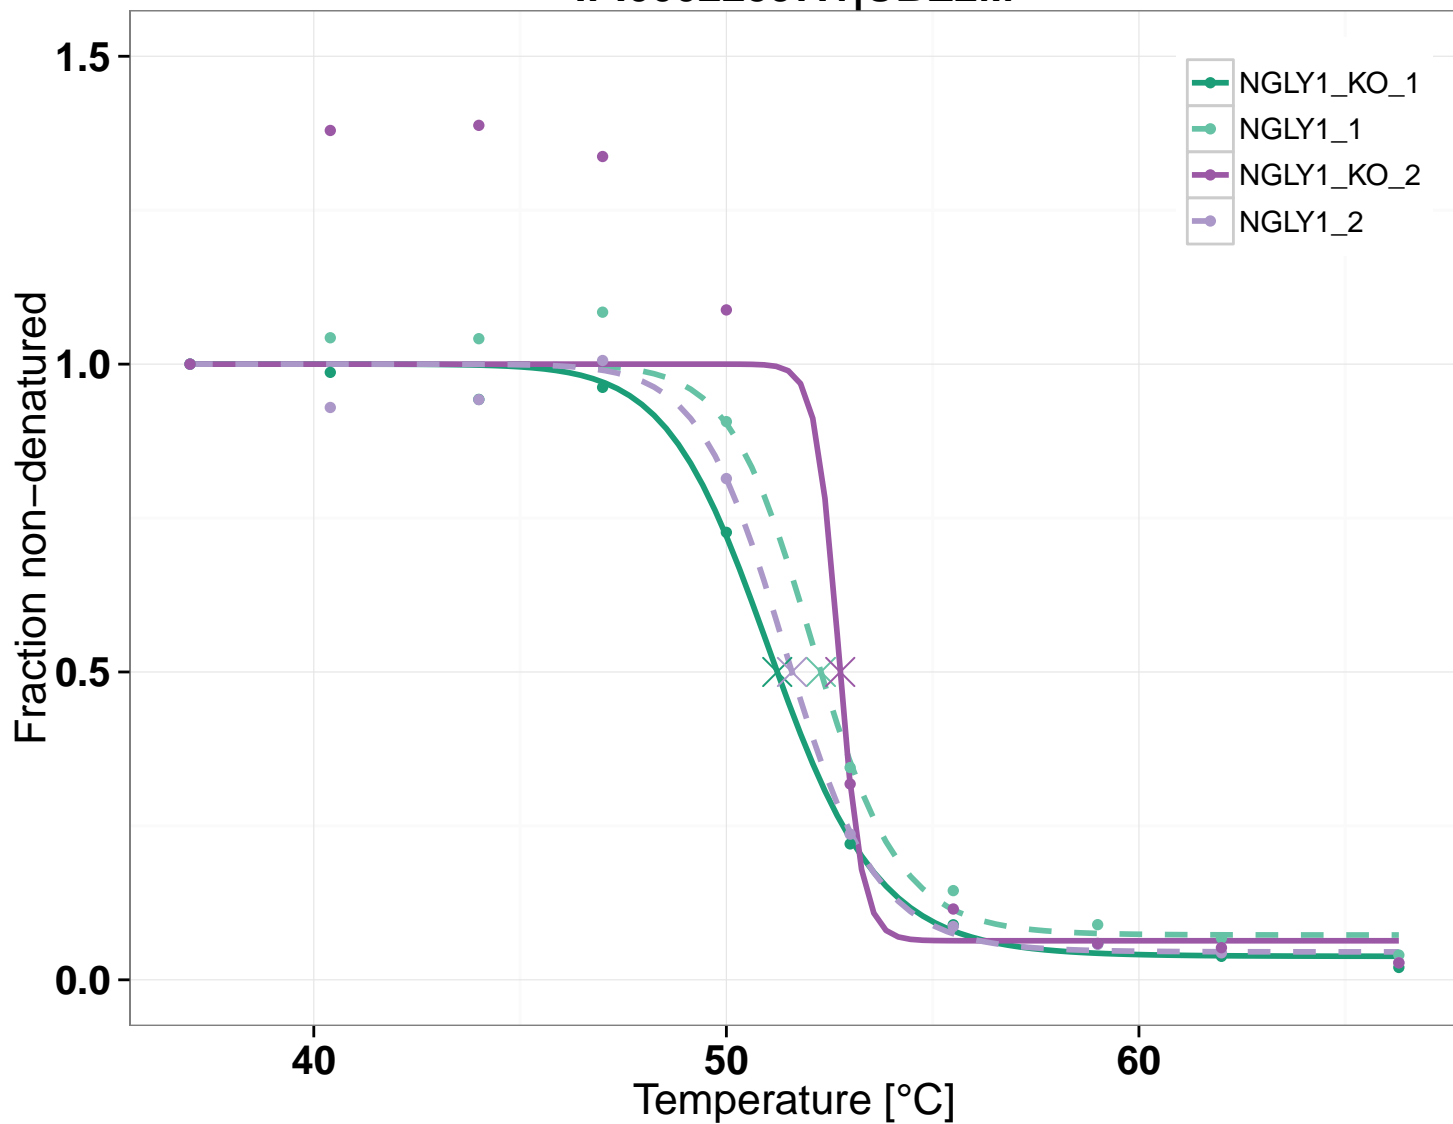

|            | meltPoint | slope | plateau | R2   |
|------------|-----------|-------|---------|------|
| NGLY1_KO_1 | 51.23     | -0.19 | 0.04    | 1    |
| NGLY1_1    | 52.29     | -0.23 | 0.07    | 0.99 |
| NGLY1_KO_2 | 52.76     | -0.83 | 0.06    | 0.87 |
| NGLY1_2    | 51.59     | -0.22 | 0.05    | 1    |

Supplement: Supplementary file 750 [file 1]

IPI00297212.5|KIAA1274

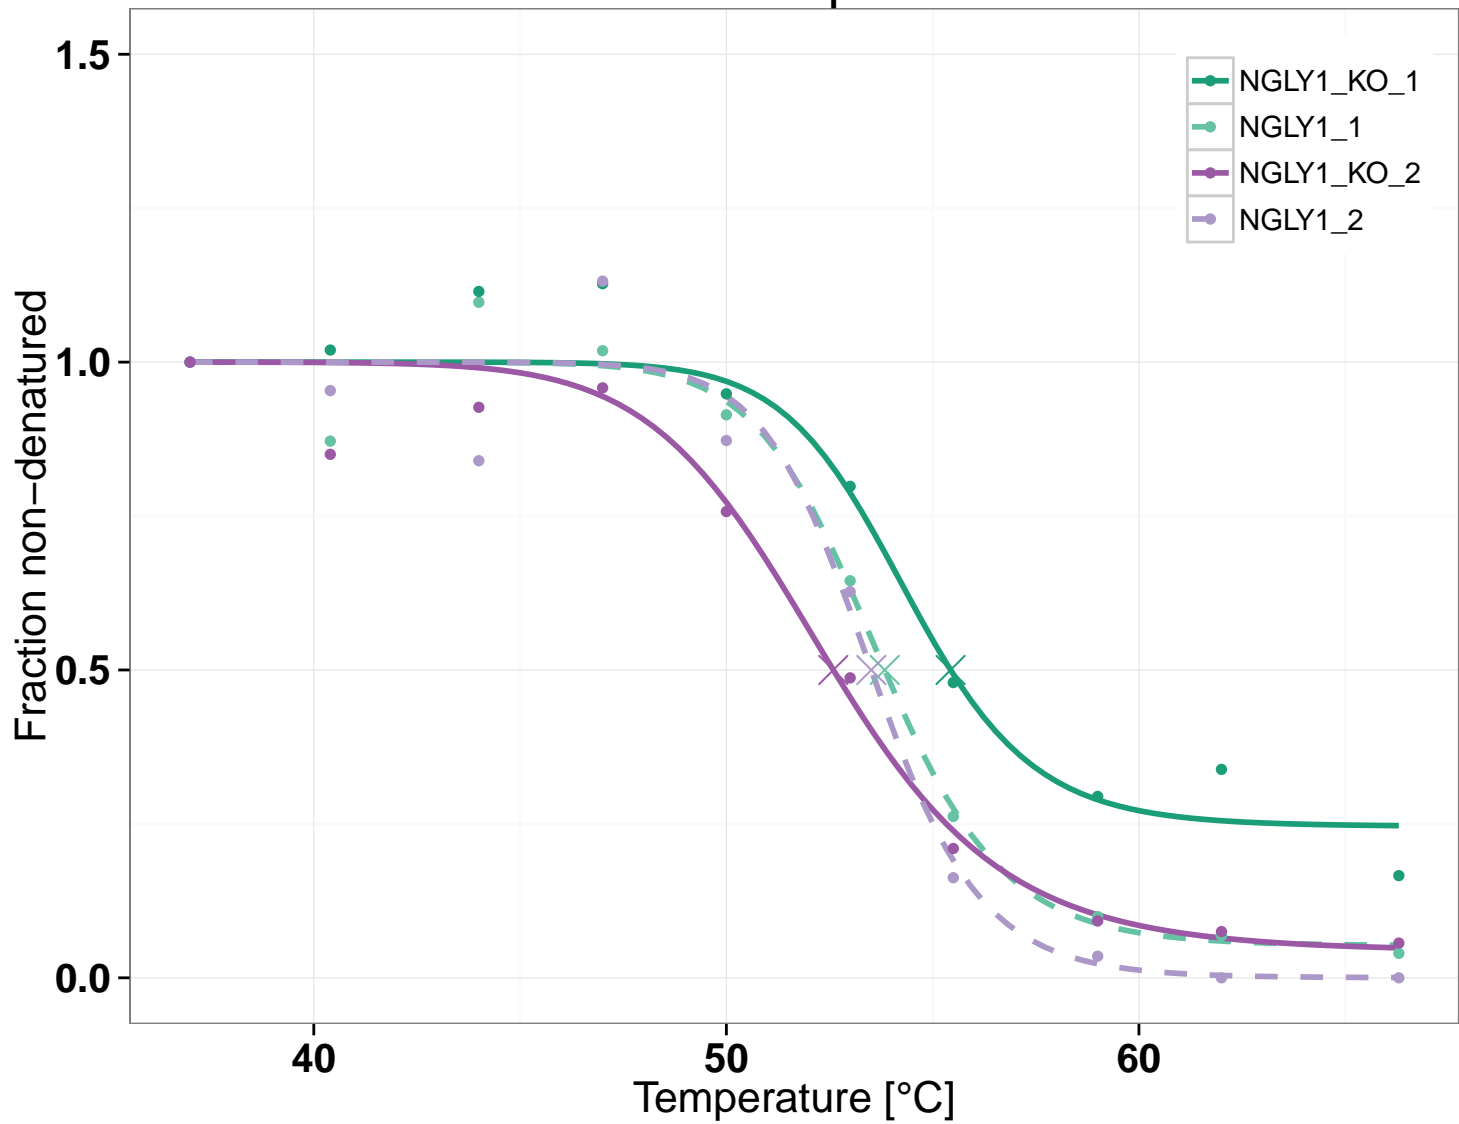

|            | meltPoint | slope | plateau | R2   |
|------------|-----------|-------|---------|------|
| NGLY1_KO_1 | 55.43     | -0.12 | 0.25    | 0.96 |
| NGLY1_1    | 53.84     | -0.16 | 0.05    | 0.98 |
| NGLY1_KO_2 | 52.59     | -0.11 | 0.04    | 0.98 |
| NGLY1_2    | 53.51     | -0.19 | 0       | 0.97 |

Supplement: Supplementary file 751 [file 1]

IPI00001738.4|NUP88

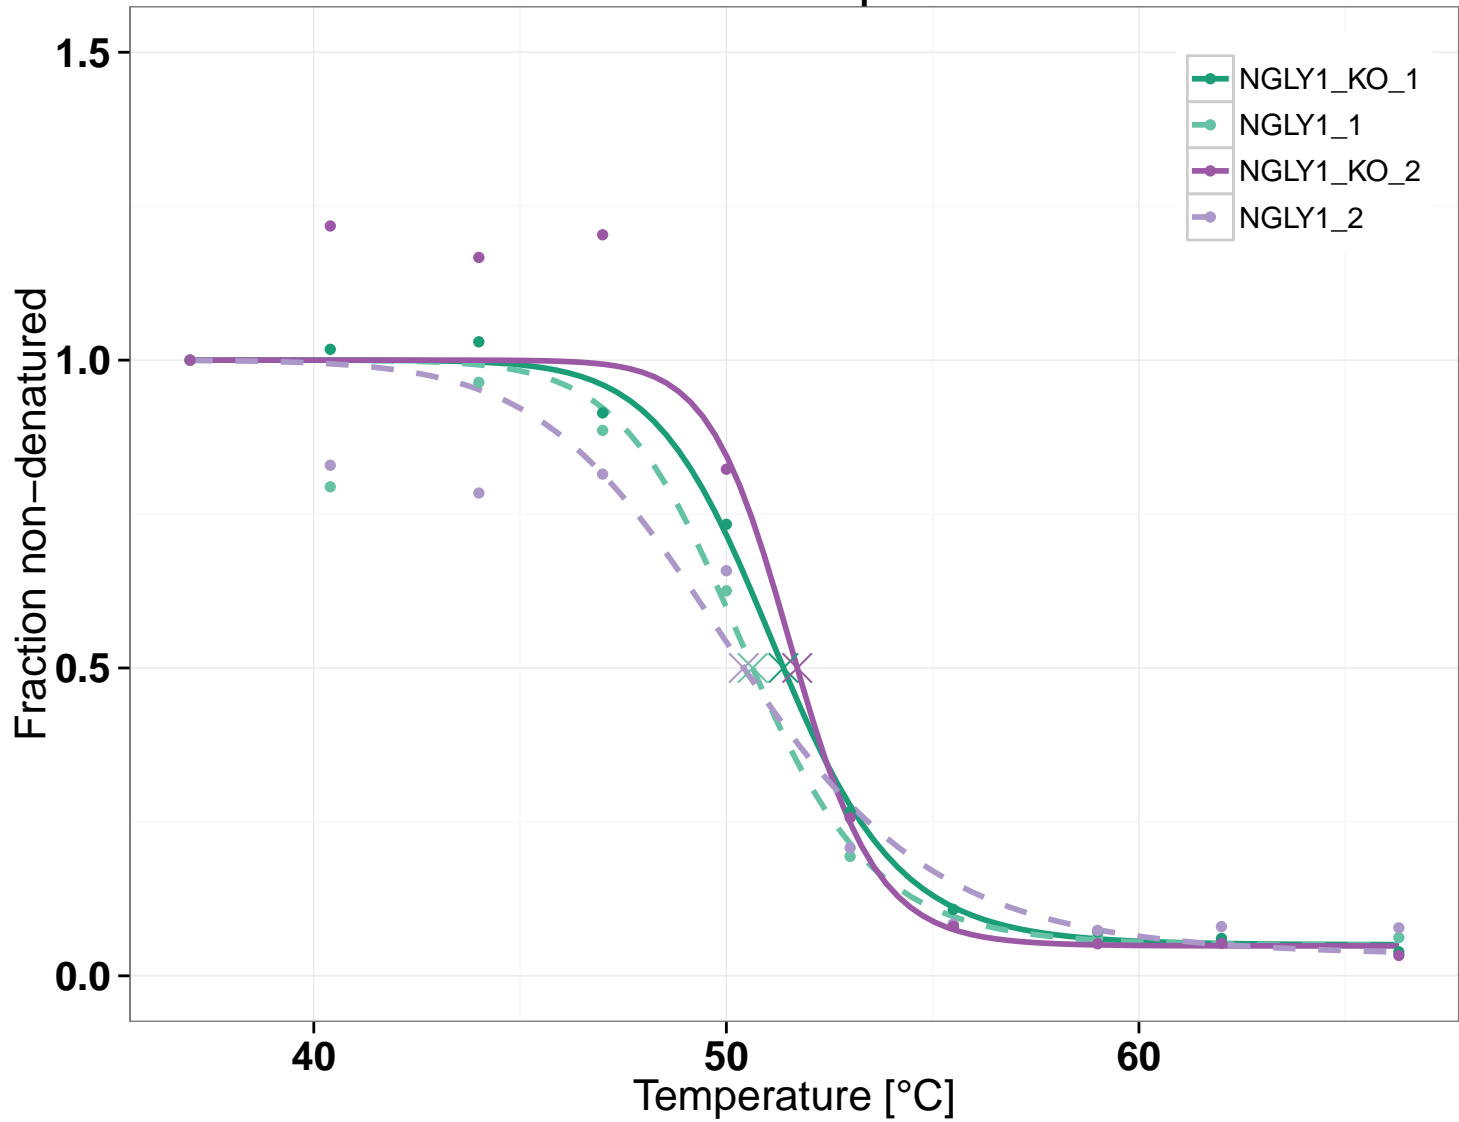

|            | meltPoint | slope | plateau | R2   |
|------------|-----------|-------|---------|------|
| NGLY1_KO_1 | 51.38     | -0.16 | 0.05    | 1    |
| NGLY1_1    | 50.64     | -0.15 | 0.05    | 0.97 |
| NGLY1_KO_2 | 51.72     | -0.23 | 0.05    | 0.95 |
| NGLY1_2    | 50.42     | -0.1  | 0.03    | 0.94 |

Supplement: Supplementary file 752 [file 1]

IPI00400765.2|KIAA1632

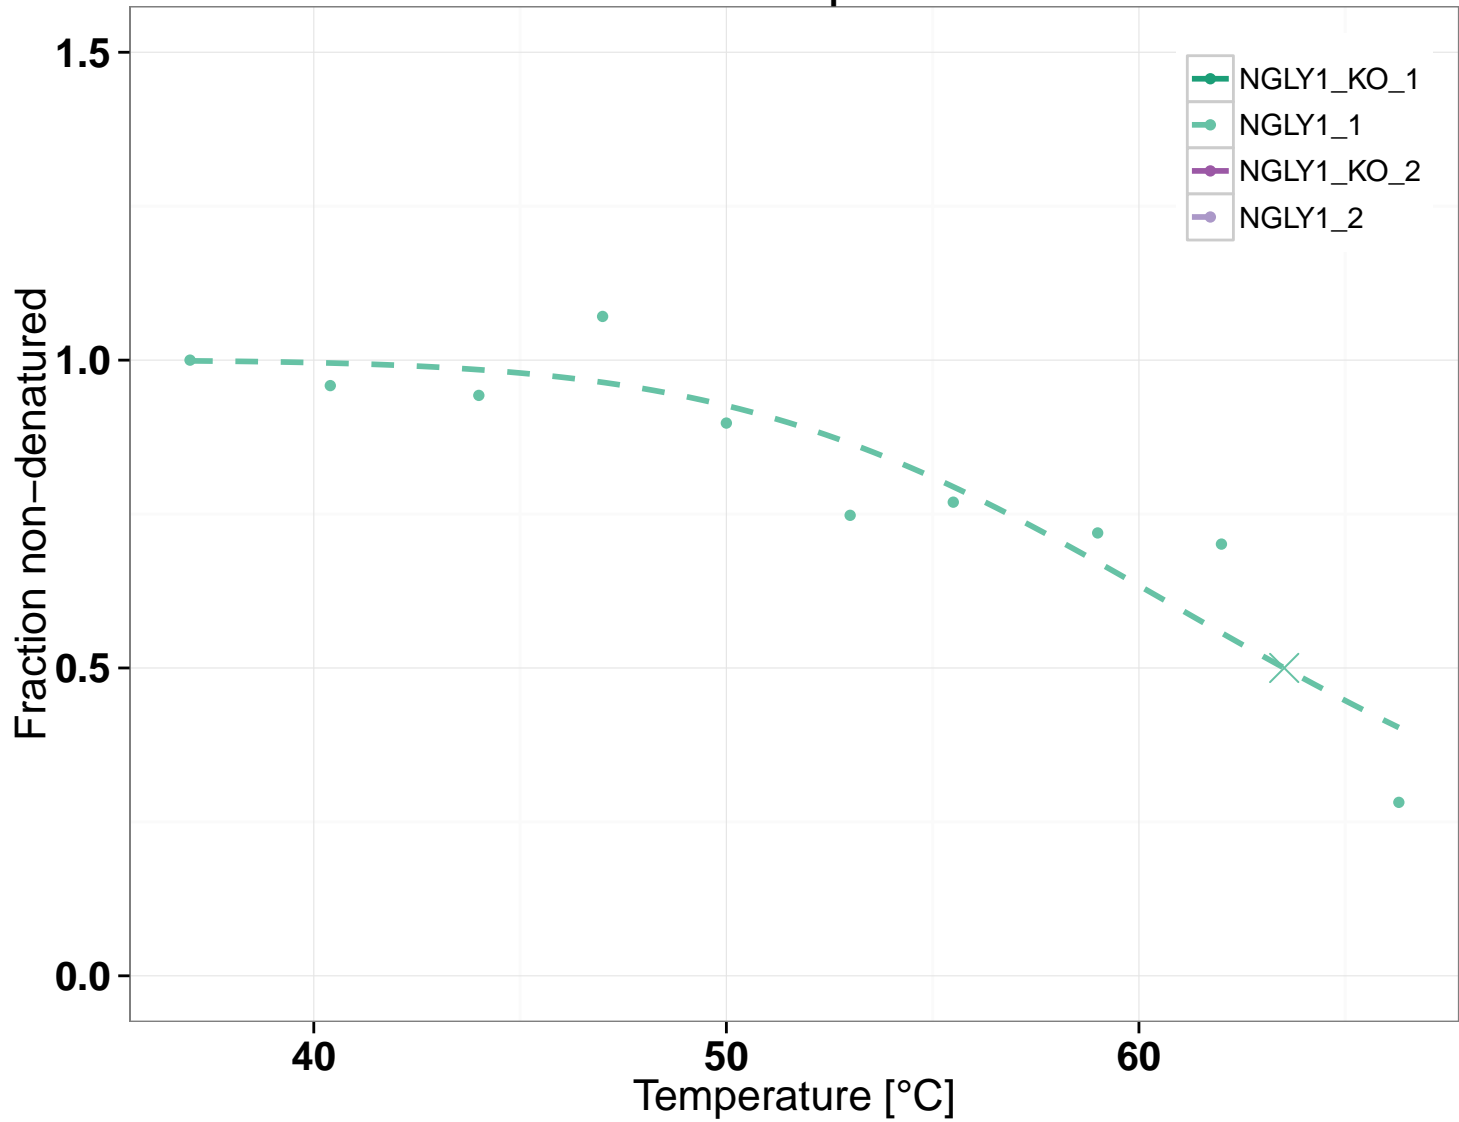

|            | meltPoint | slope  | plateau | R2   |
|------------|-----------|--------|---------|------|
| NGLY1_KO_1 | -         | -      | -       | -    |
| NGLY1_1    | 63.52     | -0.038 | 0       | 0.85 |
| NGLY1_KO_2 | -         | -      | -       | -    |
| NGLY1_2    | -         | -      | -       | -    |

Supplement: Supplementary file 753 [file 1]

IPI00513805.3|MRPS18A

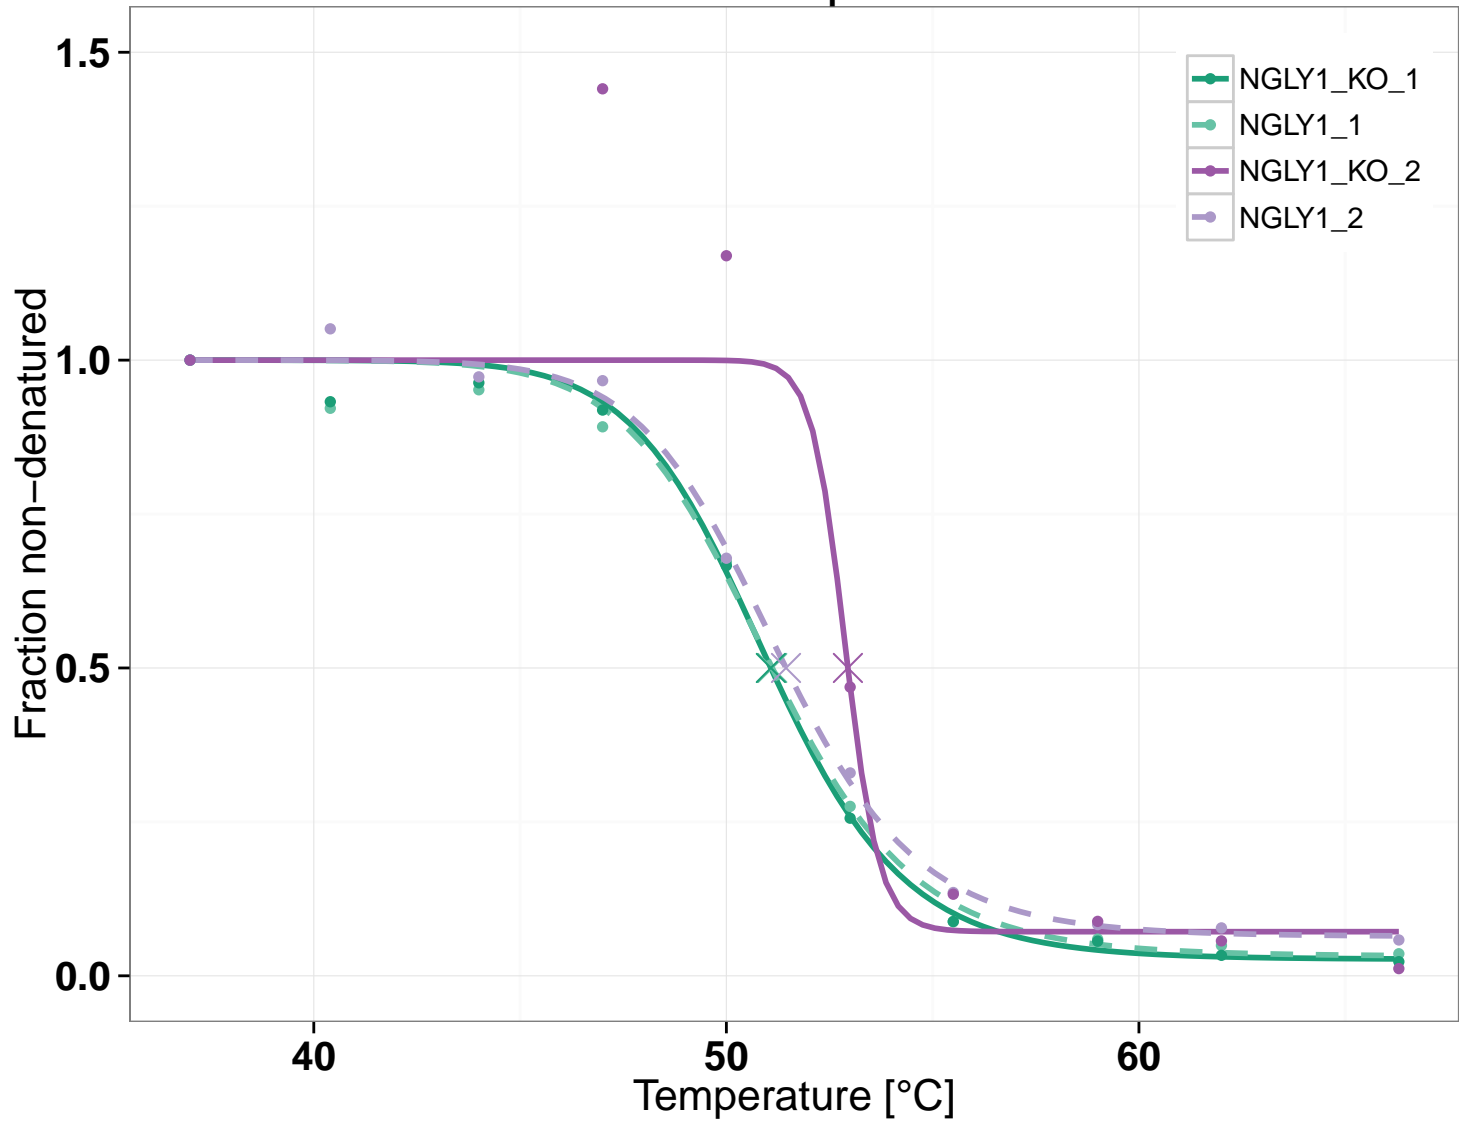

|            | meltPoint | slope | plateau | R2   |
|------------|-----------|-------|---------|------|
| NGLY1_KO_1 | 51.08     | -0.15 | 0.03    | 1    |
| NGLY1_1    | 51.11     | -0.14 | 0.03    | 0.99 |
| NGLY1_KO_2 | 52.95     | -0.57 | 0.07    | 0.76 |
| NGLY1_2    | 51.45     | -0.14 | 0.06    | 1    |

Supplement: Supplementary file 754 [file 1]

# IPI00019548.1|SMAD2

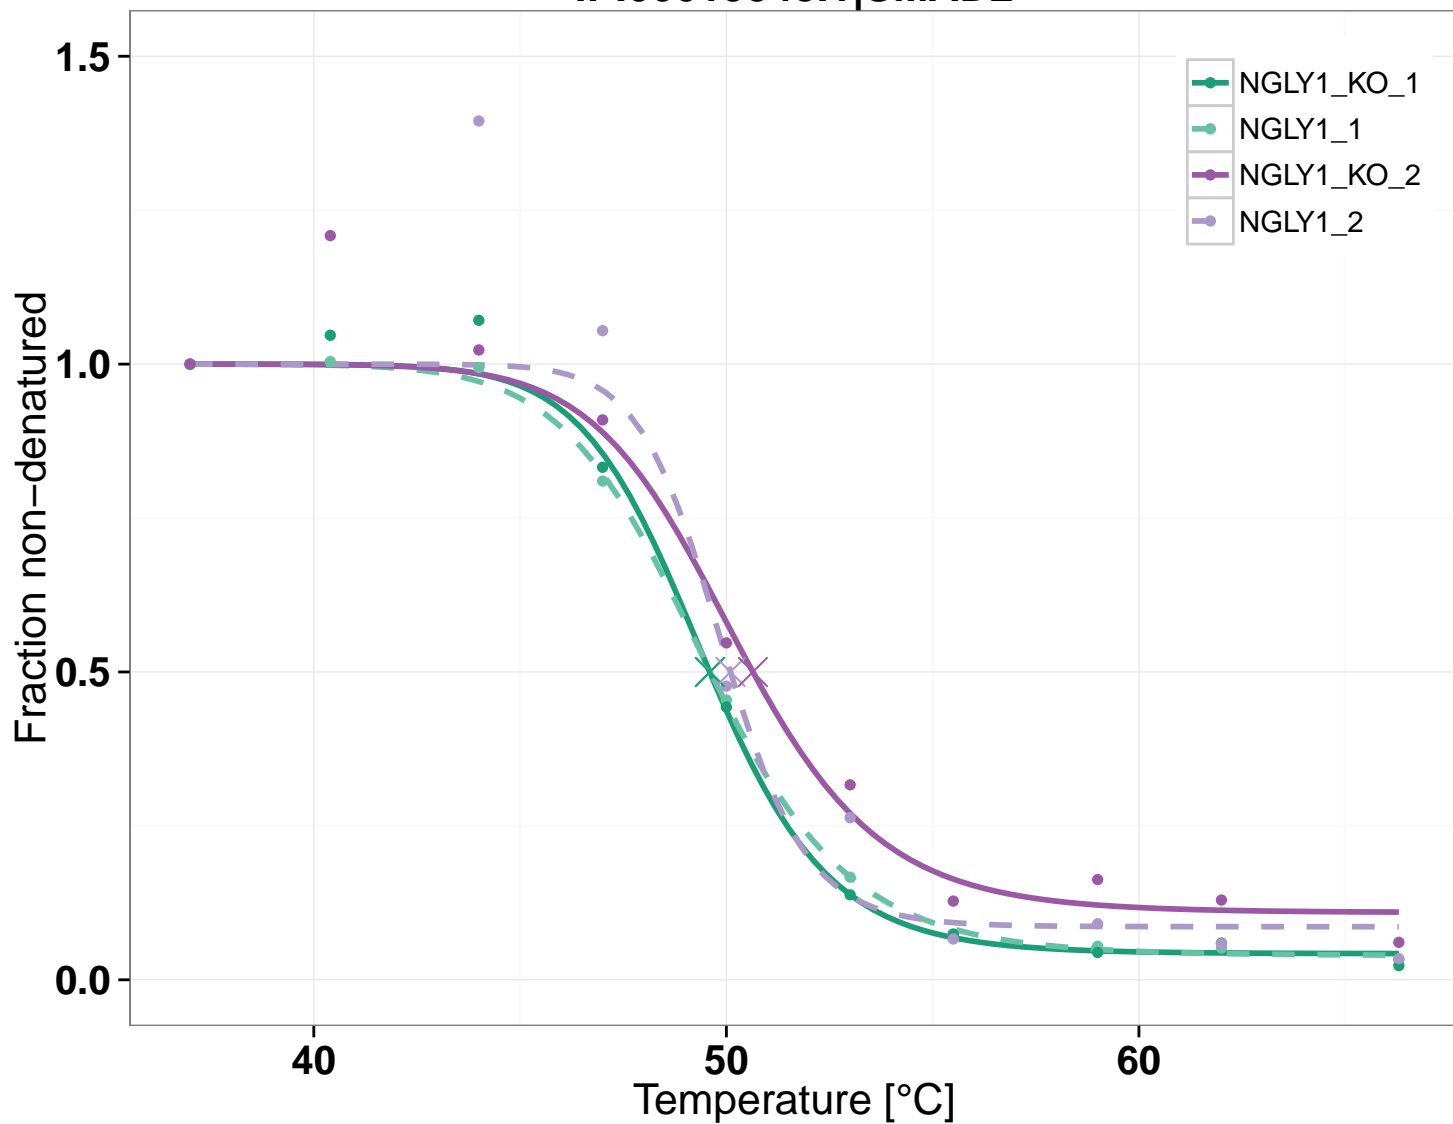

|            | meltPoint | slope | plateau | R2   |
|------------|-----------|-------|---------|------|
| NGLY1_KO_1 | 49.6      | -0.16 | 0.04    | 0.99 |
| NGLY1_1    | 49.61     | -0.14 | 0.04    | 1    |
| NGLY1_KO_2 | 50.64     | -0.13 | 0.11    | 0.97 |
| NGLY1_2    | 50.1      | -0.22 | 0.09    | 0.86 |

Supplement: Supplementary file 755 [file 1]

# IPI00026813.1|FNTA

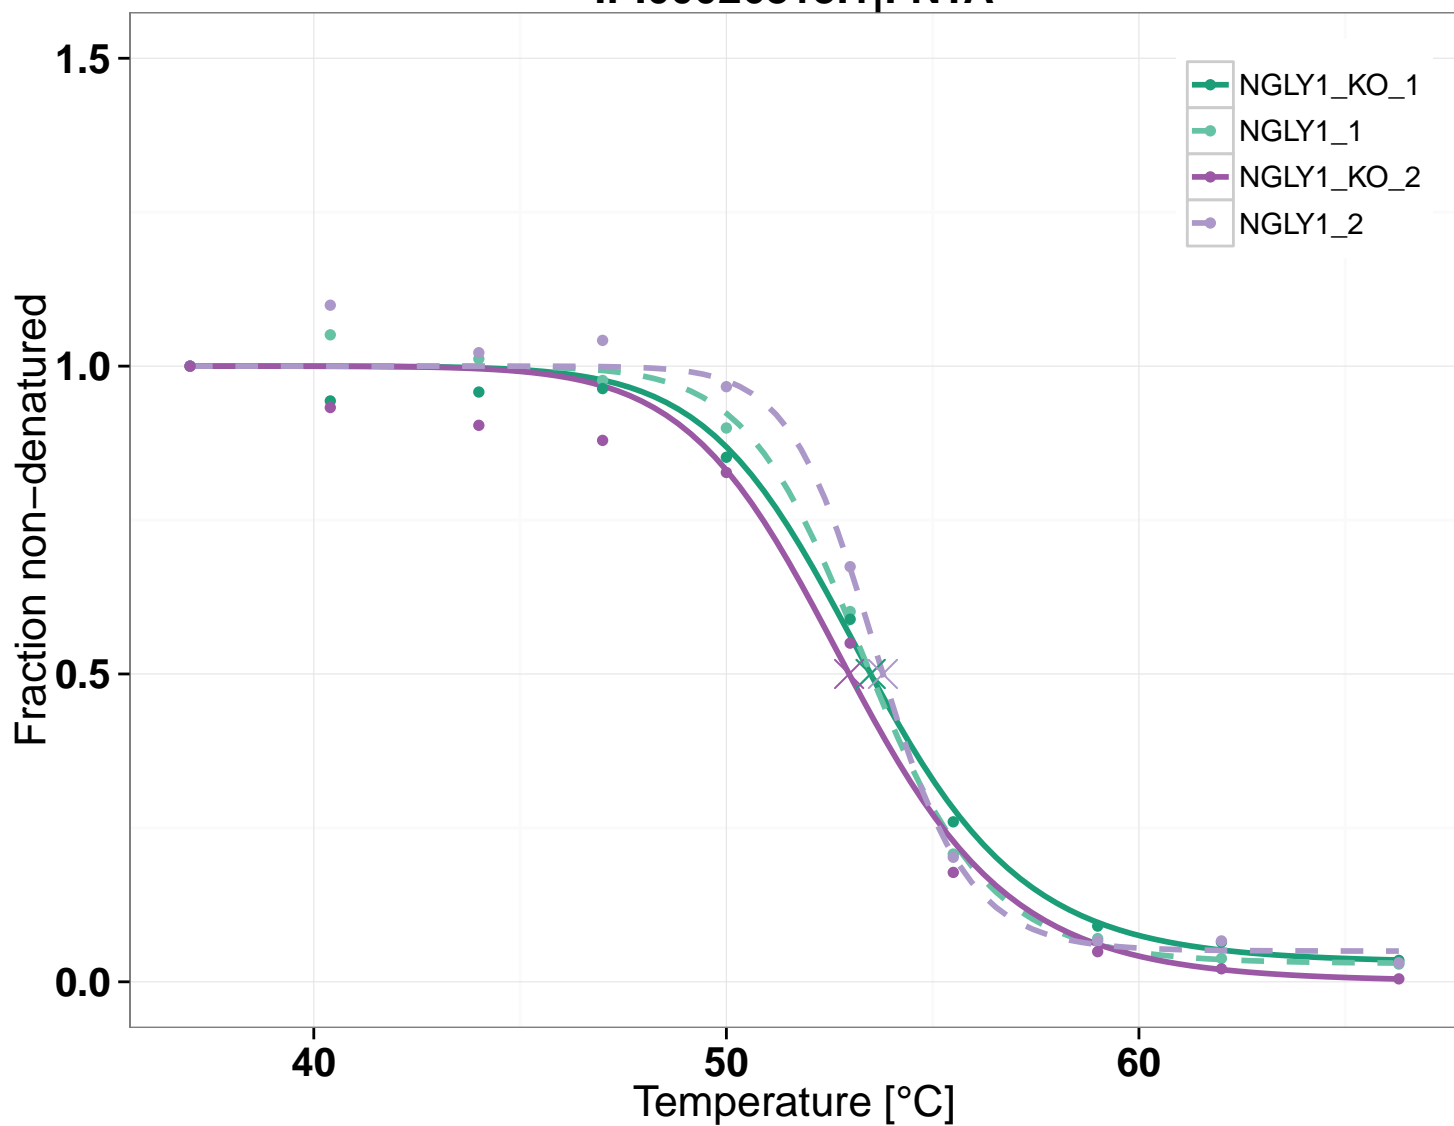

|            | meltPoint | slope | plateau | R2   |
|------------|-----------|-------|---------|------|
| NGLY1_KO_1 | 53.5      | -0.13 | 0.03    | 1    |
| NGLY1_1    | 53.5      | -0.16 | 0.03    | 1    |
| NGLY1_KO_2 | 52.98     | -0.13 | 0       | 0.98 |
| NGLY1_2    | 53.79     | -0.22 | 0.05    | 0.99 |

Supplement: Supplementary file 756 [file 1]

# IPI00005573.3|NT5C

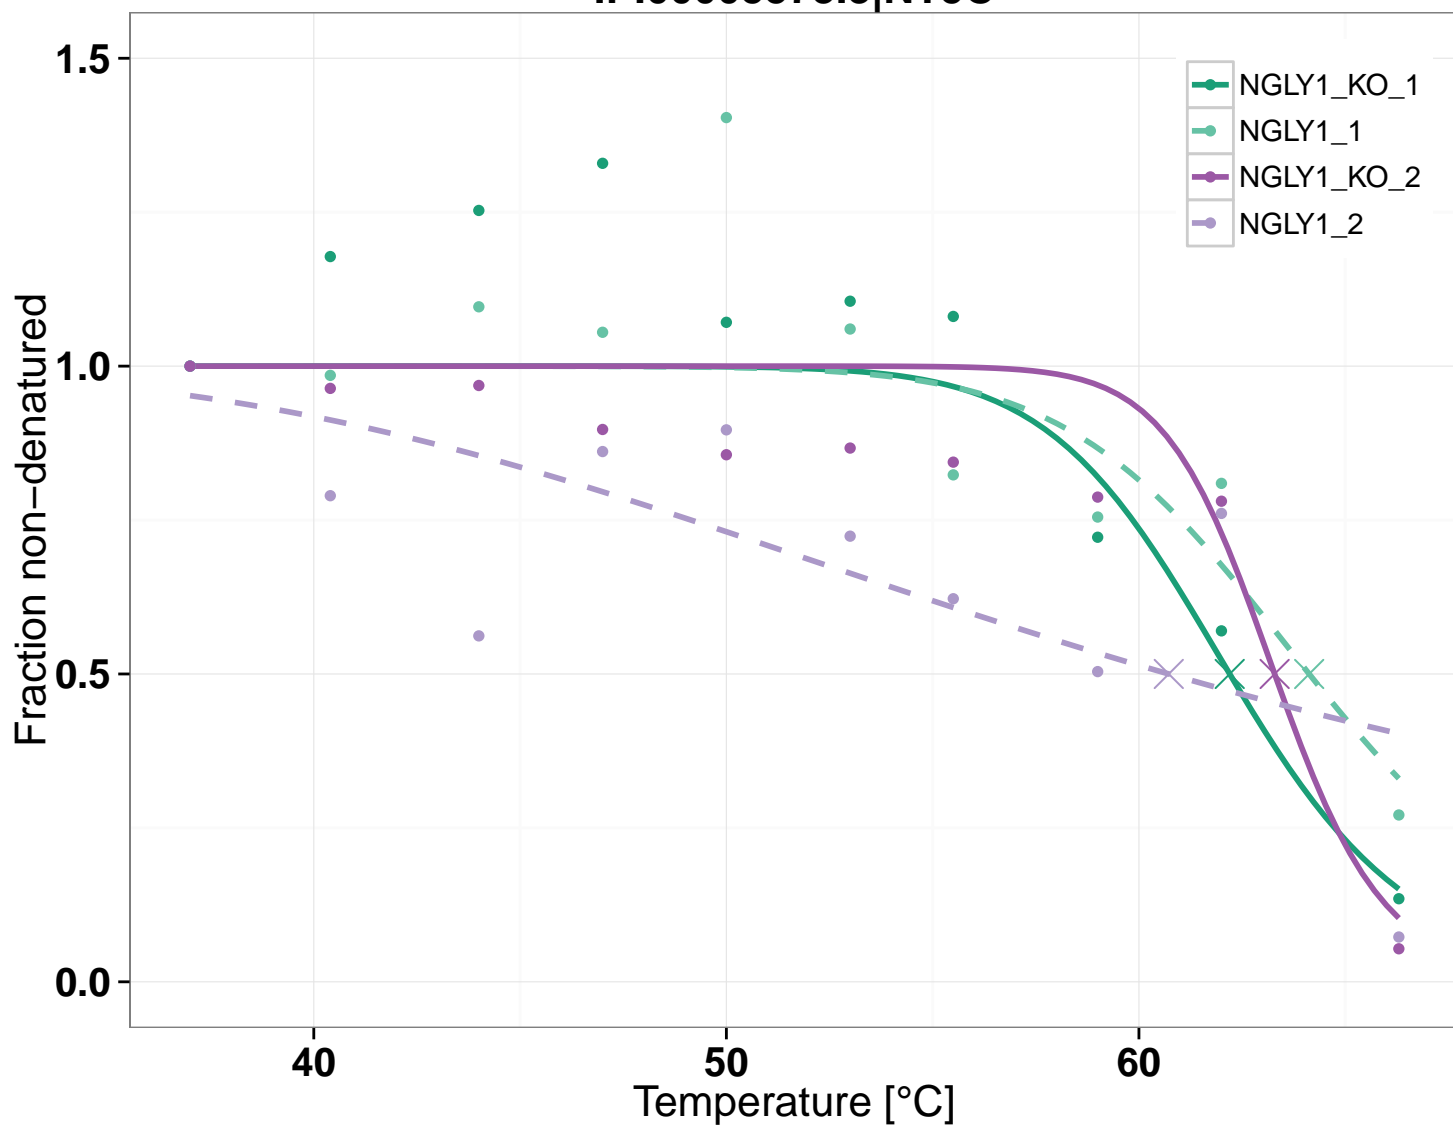

|            | meltPoint | slope  | plateau | R2   |
|------------|-----------|--------|---------|------|
| NGLY1_KO_1 | 62.2      | -0.11  | 0       | 0.8  |
| NGLY1_1    | 64.13     | -0.085 | 0       | 0.7  |
| NGLY1_KO_2 | 63.29     | -0.19  | 0       | 0.83 |
| NGLY1_2    | 60.72     | -0.023 | 0       | 0.47 |

Supplement: Supplementary file 757 [file 1]

IPI00645793.3|TAF1

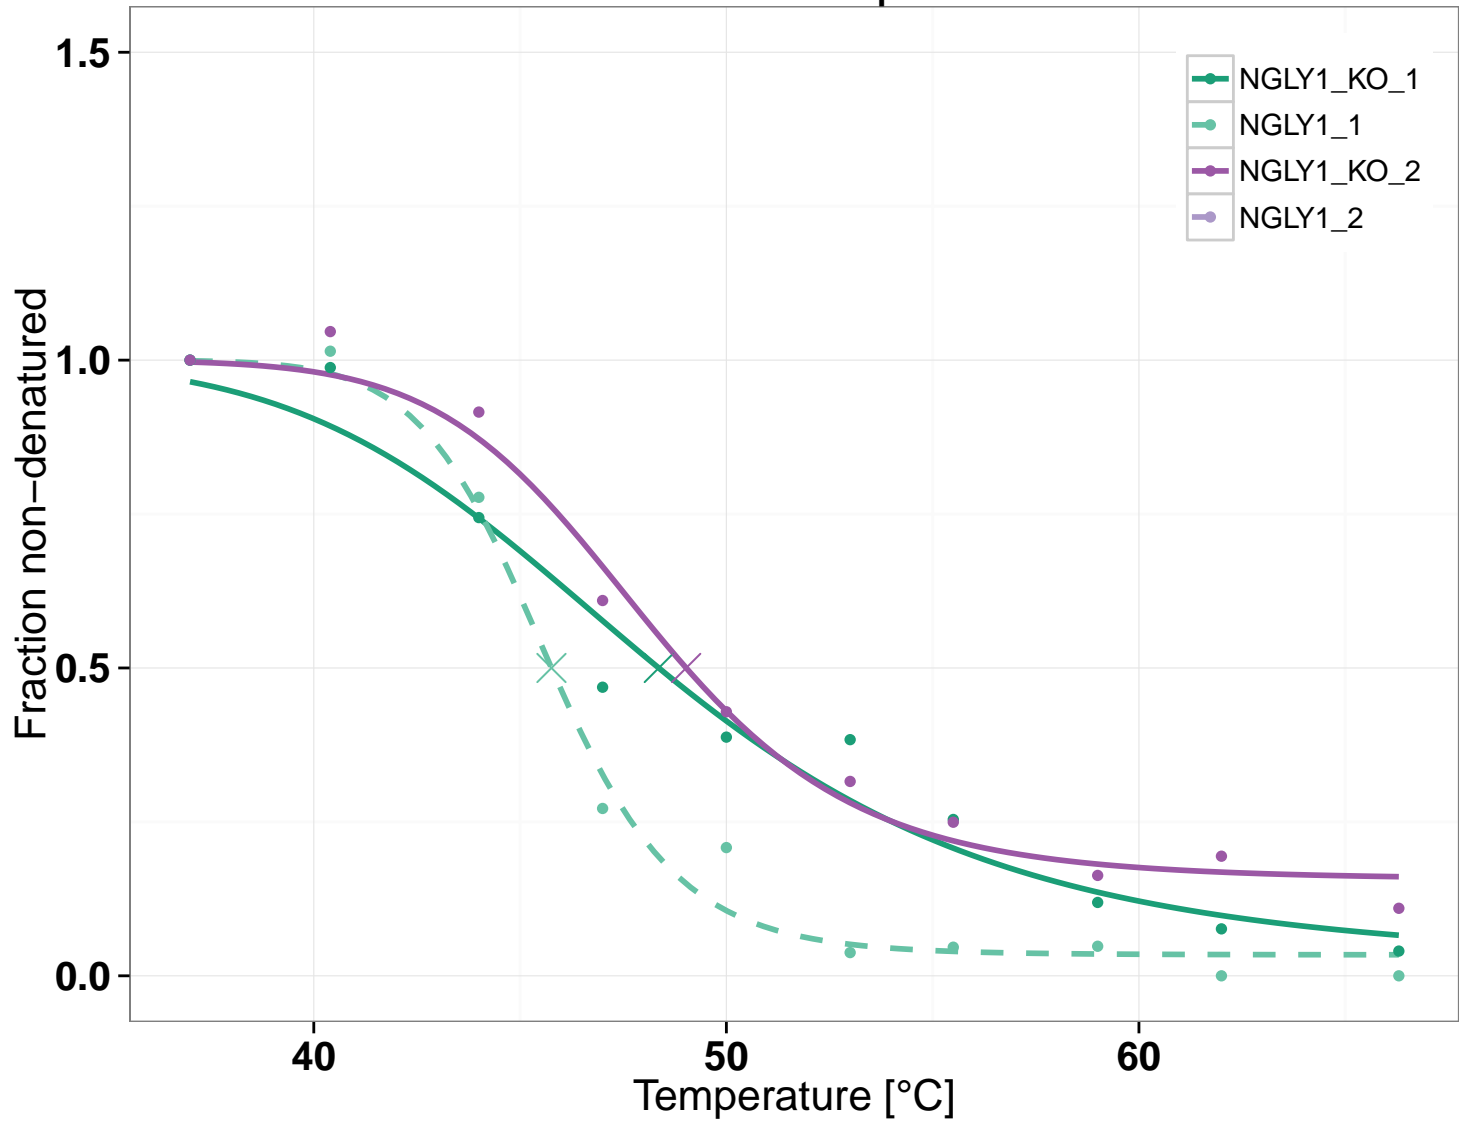

|            | meltPoint | slope  | plateau | R2   |
|------------|-----------|--------|---------|------|
| NGLY1_KO_1 | 48.36     | -0.057 | 0.02    | 0.97 |
| NGLY1_1    | 45.76     | -0.15  | 0.03    | 0.99 |
| NGLY1_KO_2 | 49.03     | -0.083 | 0.16    | 0.99 |
| NGLY1_2    | -         | -      | -       | -    |

Supplement: Supplementary file 758 [file 1]

IPI00816067.2|CLCN5

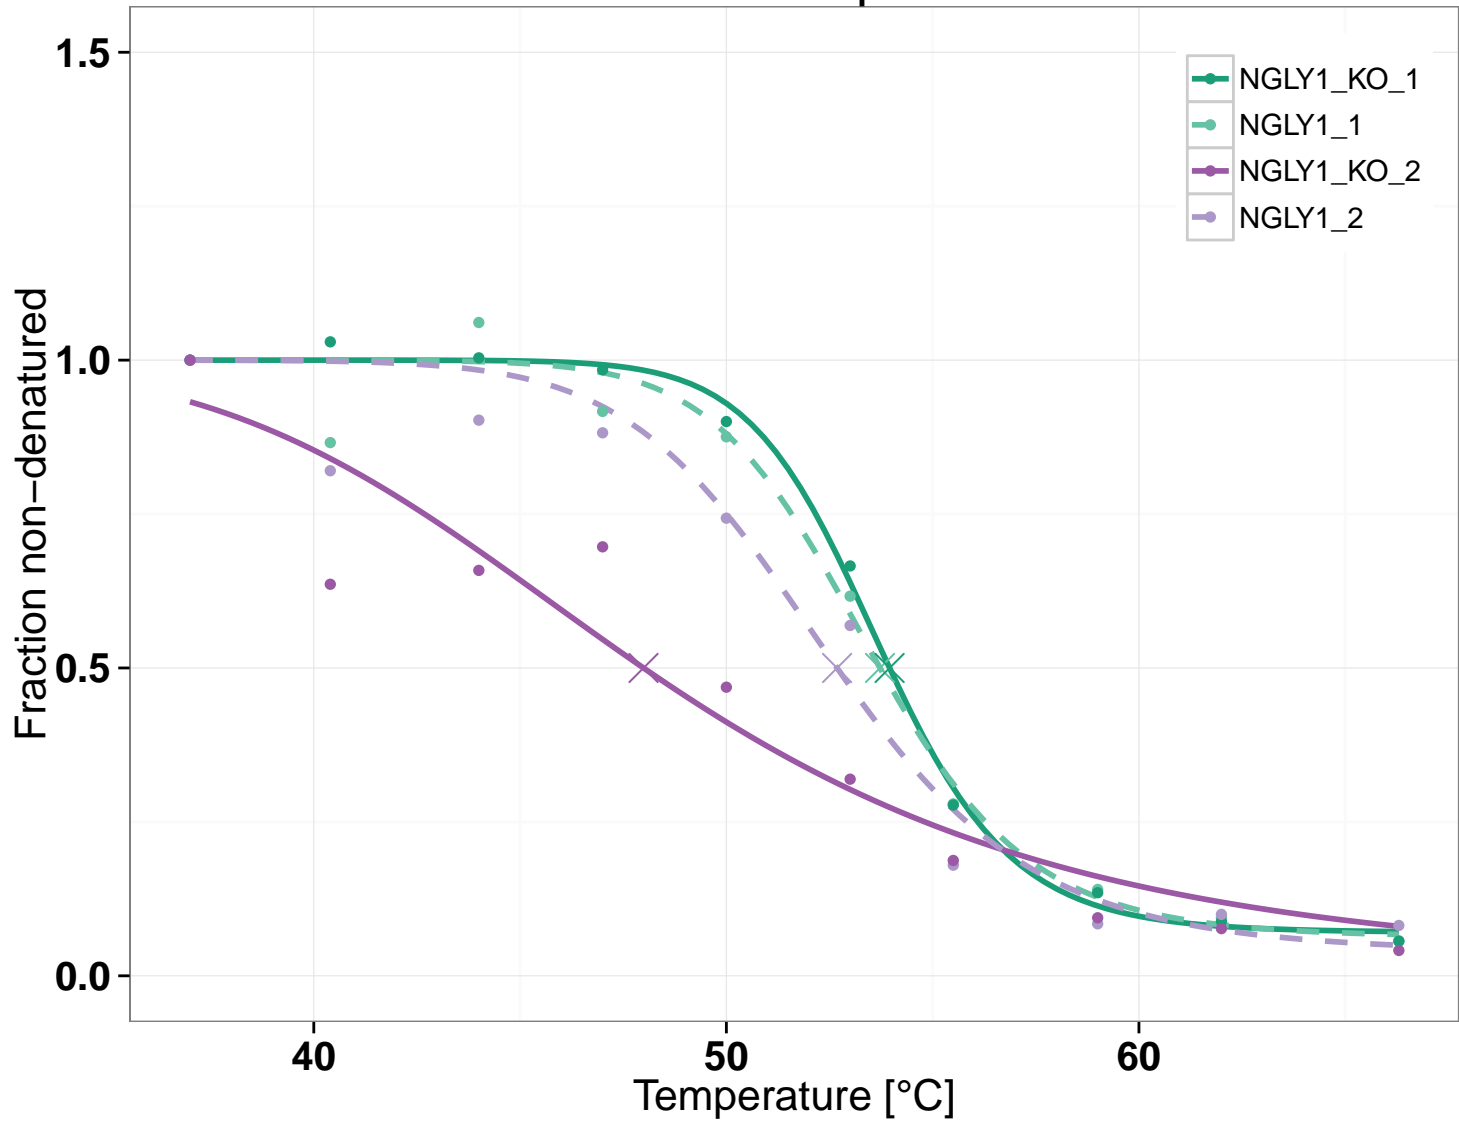

|            | meltPoint | slope  | plateau | R2   |
|------------|-----------|--------|---------|------|
| NGLY1_KO_1 | 53.96     | -0.15  | 0.07    | 1    |
| NGLY1_1    | 53.72     | -0.12  | 0.06    | 0.98 |
| NGLY1_KO_2 | 47.99     | -0.048 | 0       | 0.91 |
| NGLY1_2    | 52.68     | -0.098 | 0.04    | 0.95 |

Supplement: Supplementary file 759 [file 1]

# IPI00008800.3|MAZ

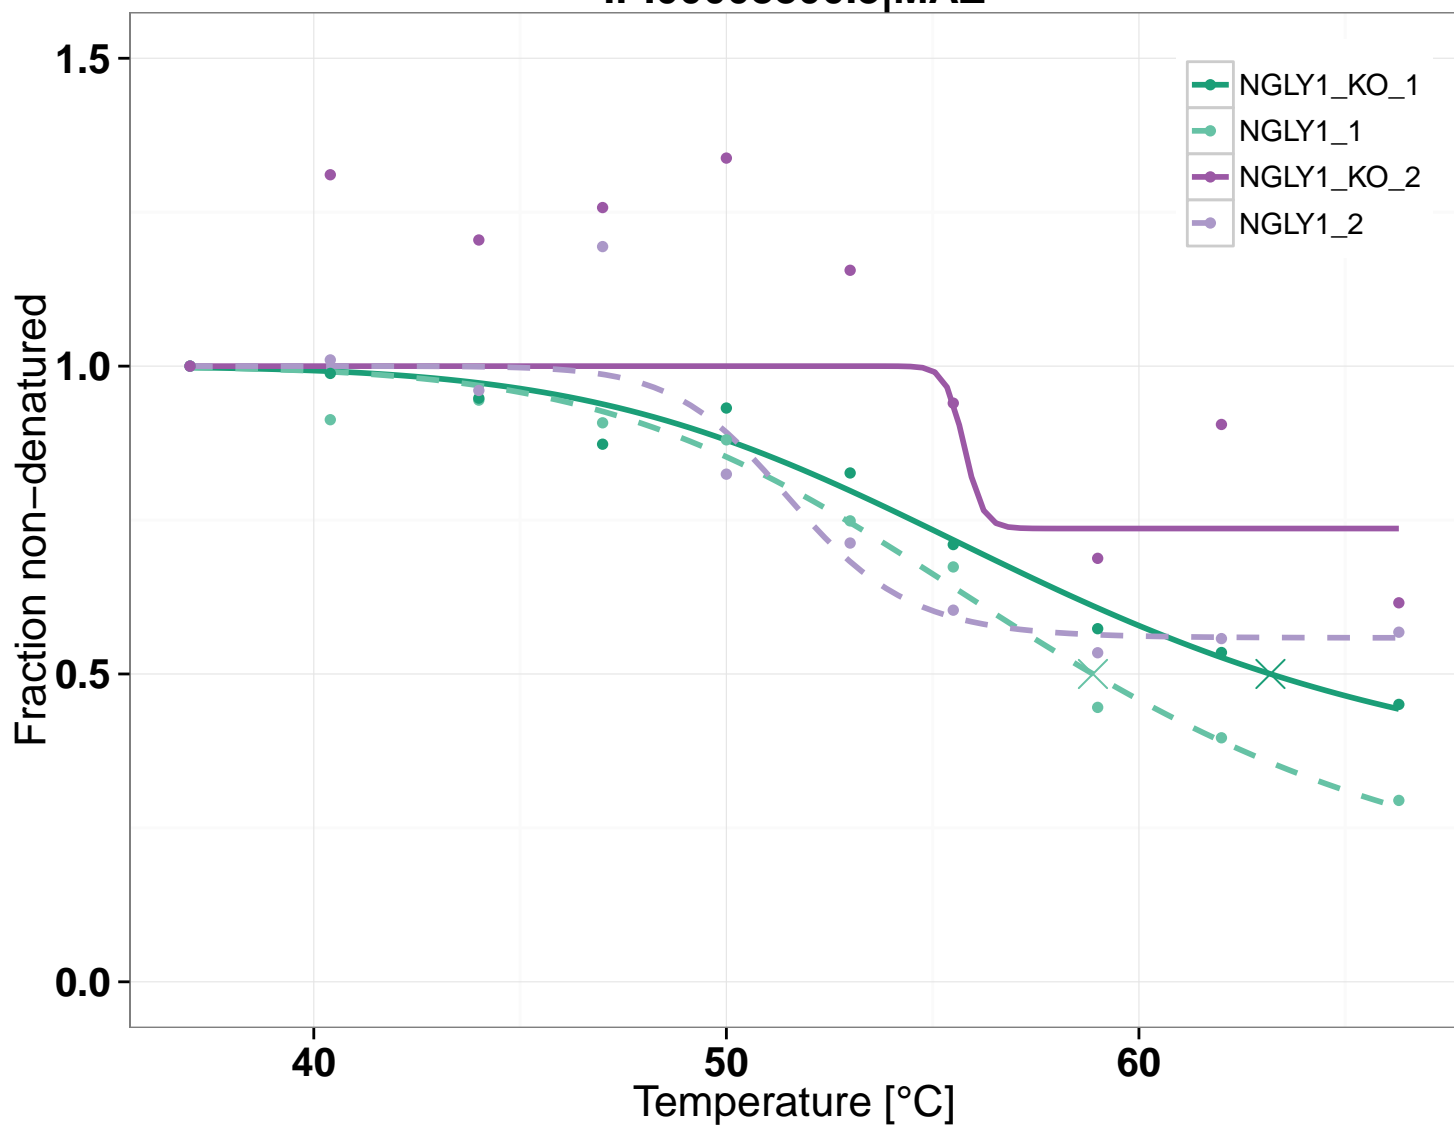

|            | meltPoint | slope  | plateau | R2   |
|------------|-----------|--------|---------|------|
| NGLY1_KO_1 | 63.19     | -0.033 | 0.3     | 0.97 |
| NGLY1_1    | 58.89     | -0.043 | 0.11    | 0.98 |
| NGLY1_KO_2 | -         | -0.3   | 0.74    | 0.33 |
| NGLY1_2    | -         | -0.076 | 0.56    | 0.9  |

Supplement: Supplementary file 760 [file 1]

IPI00002792.1|B4GALT7

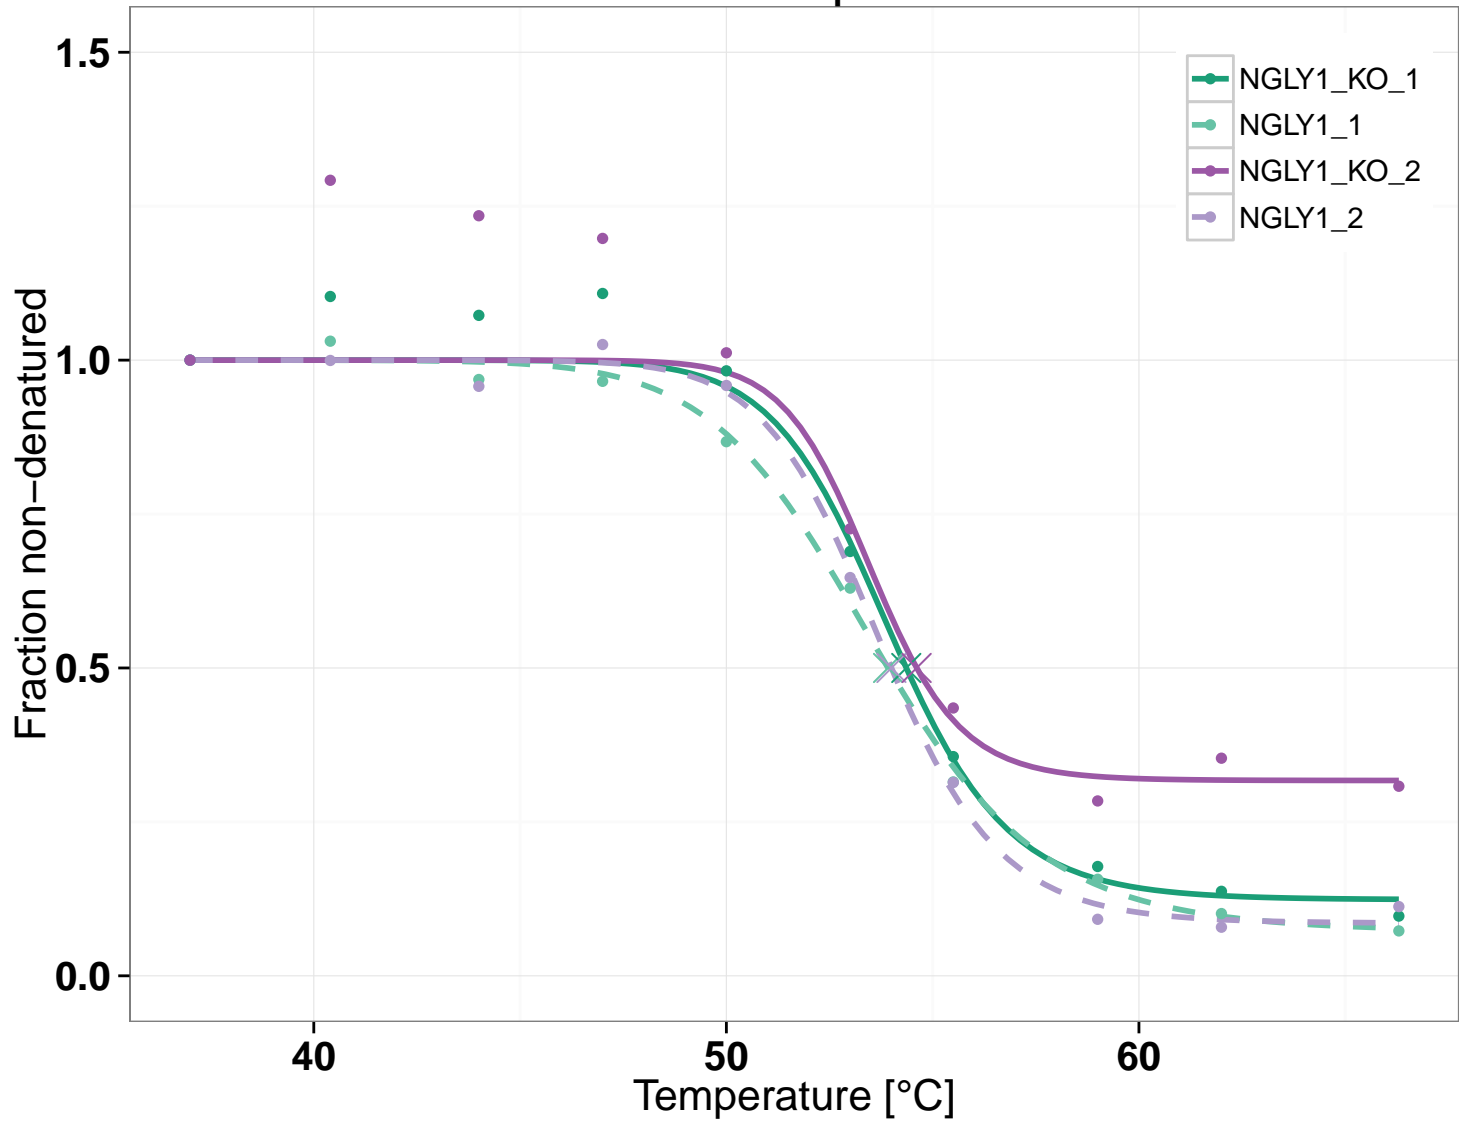

|            | meltPoint | slope | plateau | R2   |
|------------|-----------|-------|---------|------|
| NGLY1_KO_1 | 54.36     | -0.15 | 0.12    | 0.98 |
| NGLY1_1    | 53.92     | -0.12 | 0.07    | 1    |
| NGLY1_KO_2 | 54.61     | -0.16 | 0.32    | 0.88 |
| NGLY1_2    | 54        | -0.16 | 0.09    | 1    |

Supplement: Supplementary file 761 [file 1]

# IPI00304721.6|CPXM1

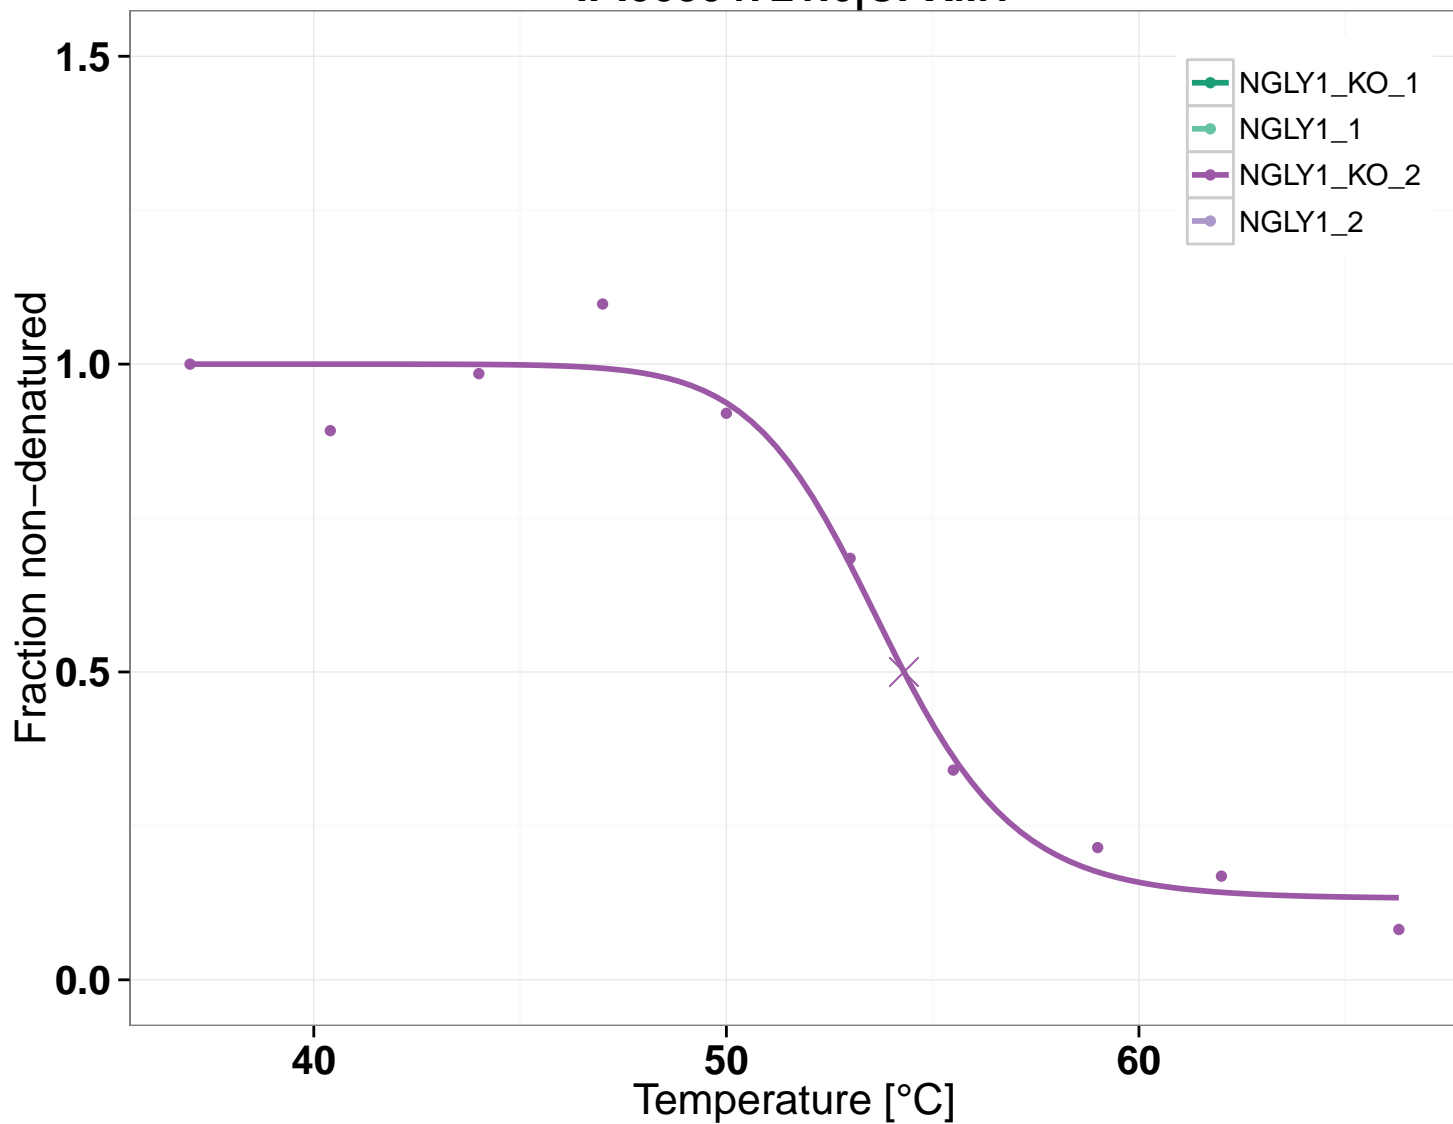

|            | meltPoint | slope | plateau | R2   |
|------------|-----------|-------|---------|------|
| NGLY1_KO_1 | —         | —     | —       | —    |
| NGLY1_1    | —         | —     | —       | —    |
| NGLY1_KO_2 | 54.3      | -0.14 | 0.13    | 0.98 |
| NGLY1_2    | —         | —     | —       | —    |

Supplement: Supplementary file 762 [file 1]

IPI00016408.3|C9ORF6

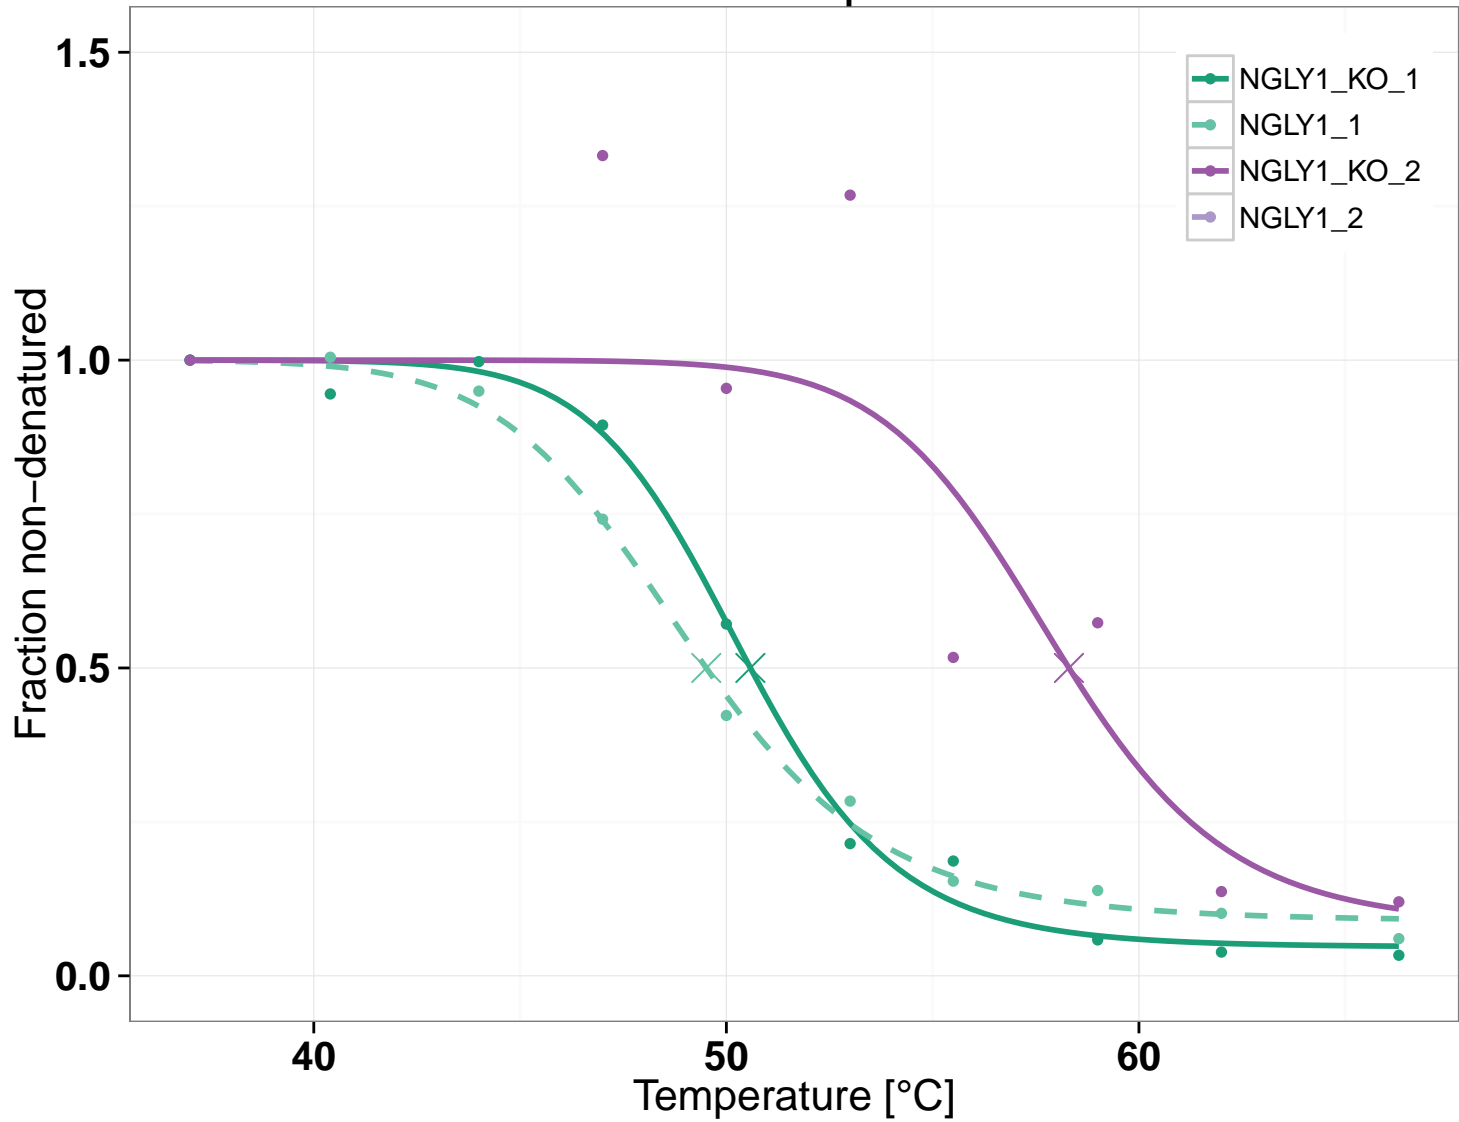

|            | meltPoint | slope  | plateau | R2   |
|------------|-----------|--------|---------|------|
| NGLY1_KO_1 | 50.58     | -0.13  | 0.05    | 0.99 |
| NGLY1_1    | 49.51     | -0.098 | 0.09    | 1    |
| NGLY1_KO_2 | 58.3      | -0.11  | 0.08    | 0.51 |
| NGLY1_2    | -         | -      | -       | -    |

Supplement: Supplementary file 763 [file 1]

# IPI00020063.4|SLC35C1

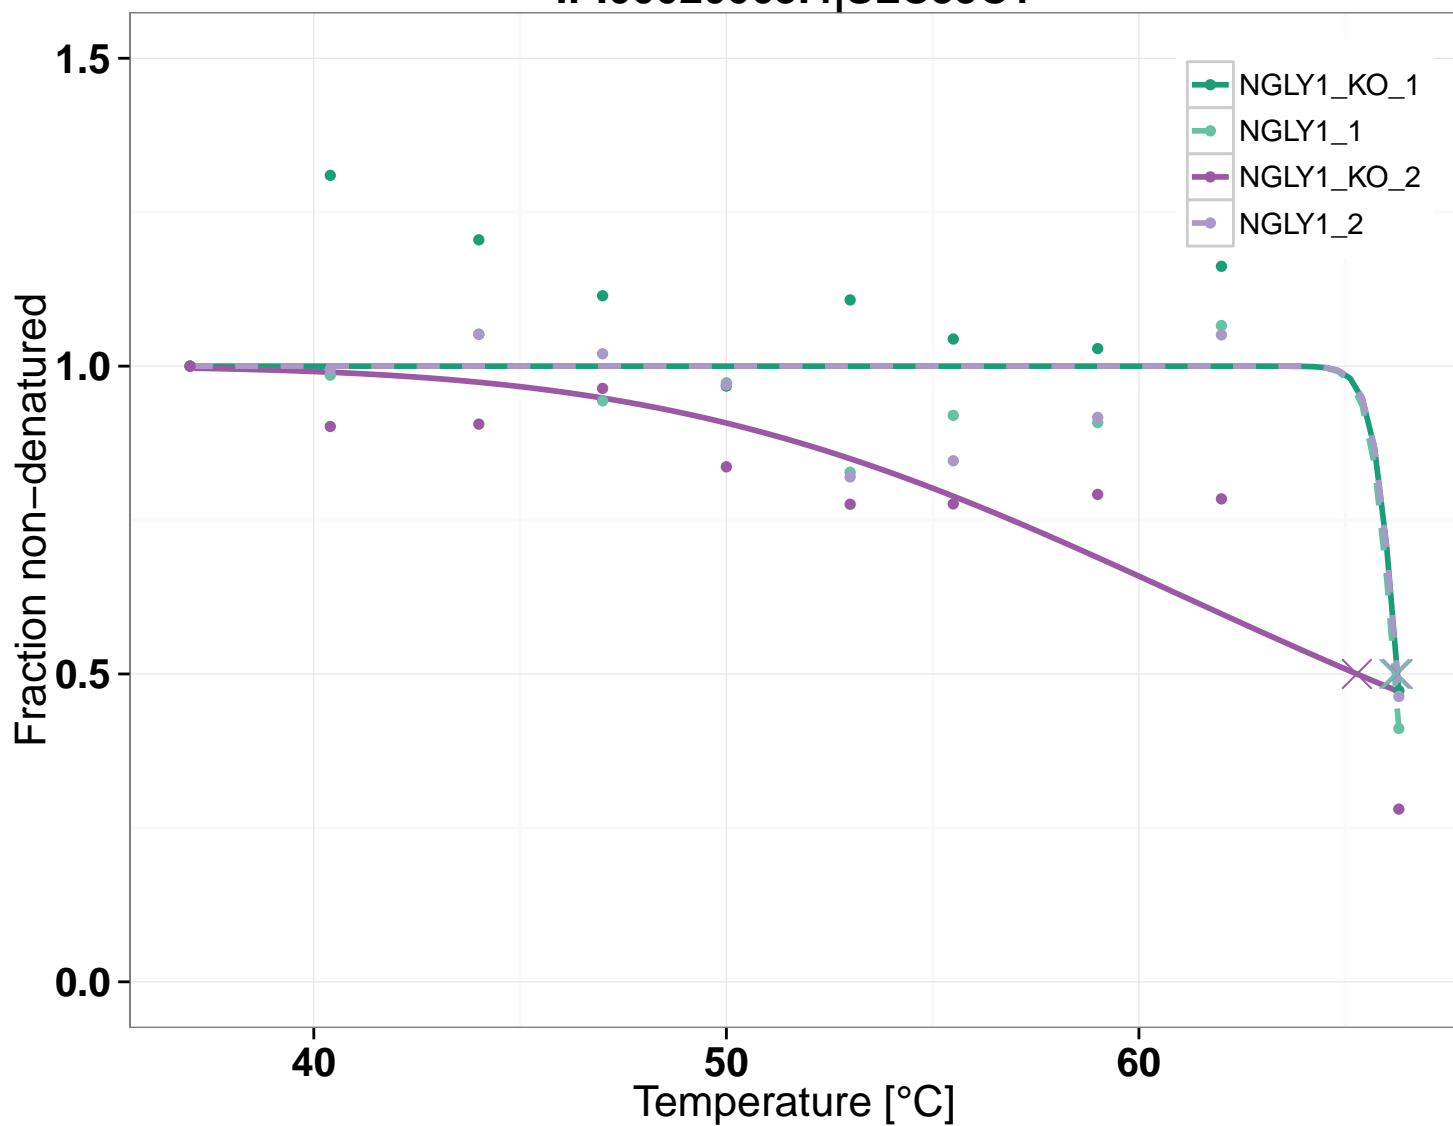

|            | meltPoint | slope  | plateau | R2   |
|------------|-----------|--------|---------|------|
| NGLY1_KO_1 | 66.27     | -0.84  | 0       | 0.58 |
| NGLY1_1    | 66.19     | -0.85  | 0       | 0.83 |
| NGLY1_KO_2 | 65.28     | -0.031 | 0       | 0.71 |
| NGLY1_2    | 66.26     | -0.85  | 0       | 0.75 |

Supplement: Supplementary file 764 [file 1]

IPI00299413.1|GABPA

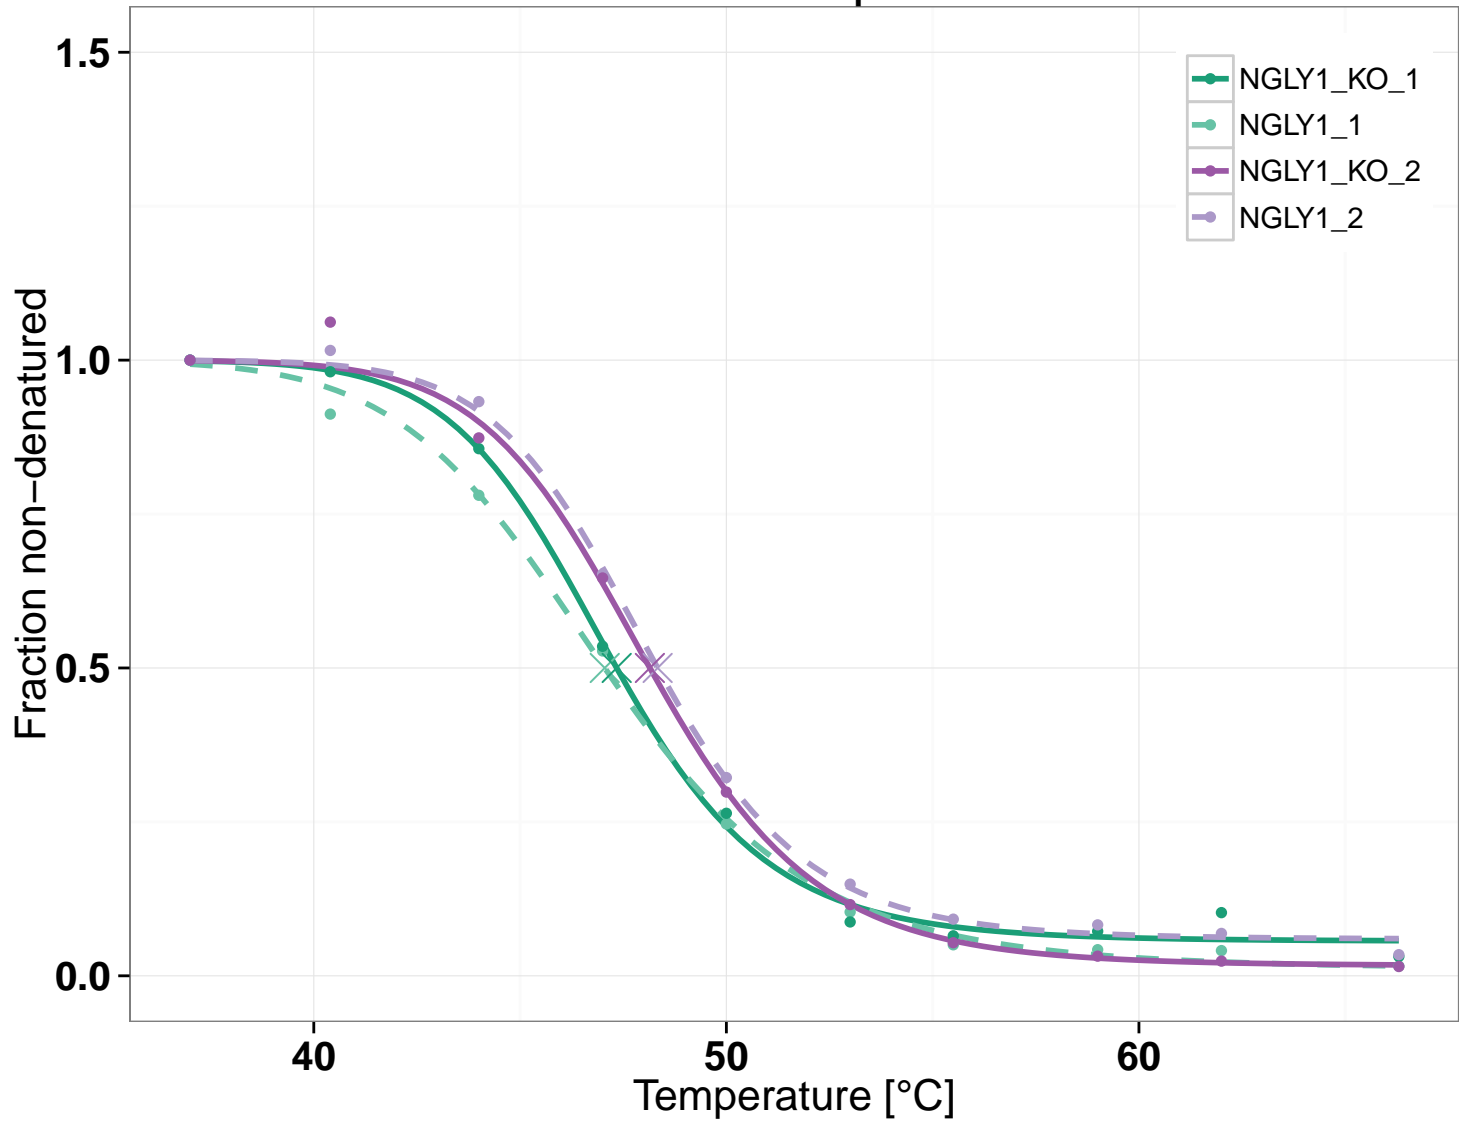

|            | meltPoint | slope  | plateau | R2 |
|------------|-----------|--------|---------|----|
| NGLY1_KO_1 | 47.34     | -0.12  | 0.06    | 1  |
| NGLY1_1    | 47.05     | -0.099 | 0.01    | 1  |
| NGLY1_KO_2 | 48.15     | -0.12  | 0.02    | 1  |
| NGLY1_2    | 48.33     | -0.12  | 0.06    | 1  |

Supplement: Supplementary file 765 [file 1]

IPI00002511.2|ATF6

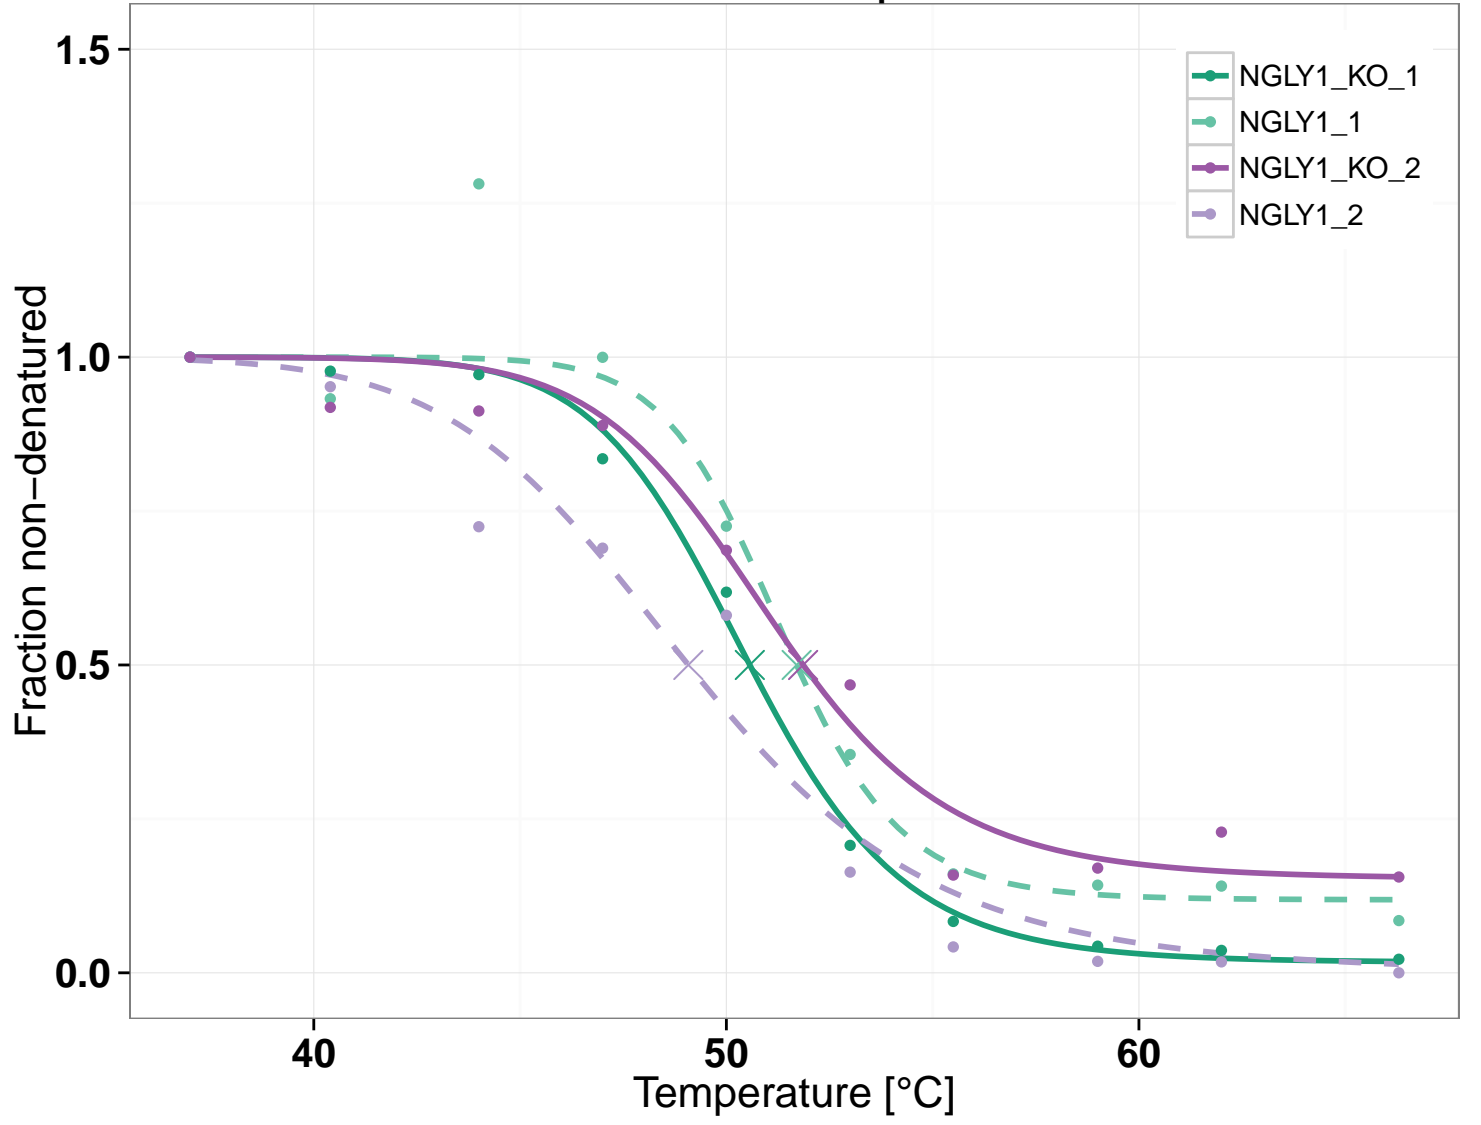

|            | meltPoint | slope  | plateau | R2   |
|------------|-----------|--------|---------|------|
| NGLY1_KO_1 | 50.57     | -0.13  | 0.02    | 1    |
| NGLY1_1    | 51.7      | -0.15  | 0.12    | 0.95 |
| NGLY1_KO_2 | 51.86     | -0.099 | 0.15    | 0.97 |
| NGLY1_2    | 49.08     | -0.085 | 0       | 0.96 |

Supplement: Supplementary file 766 [file 1]

# IPI00329142.1|ERICH1

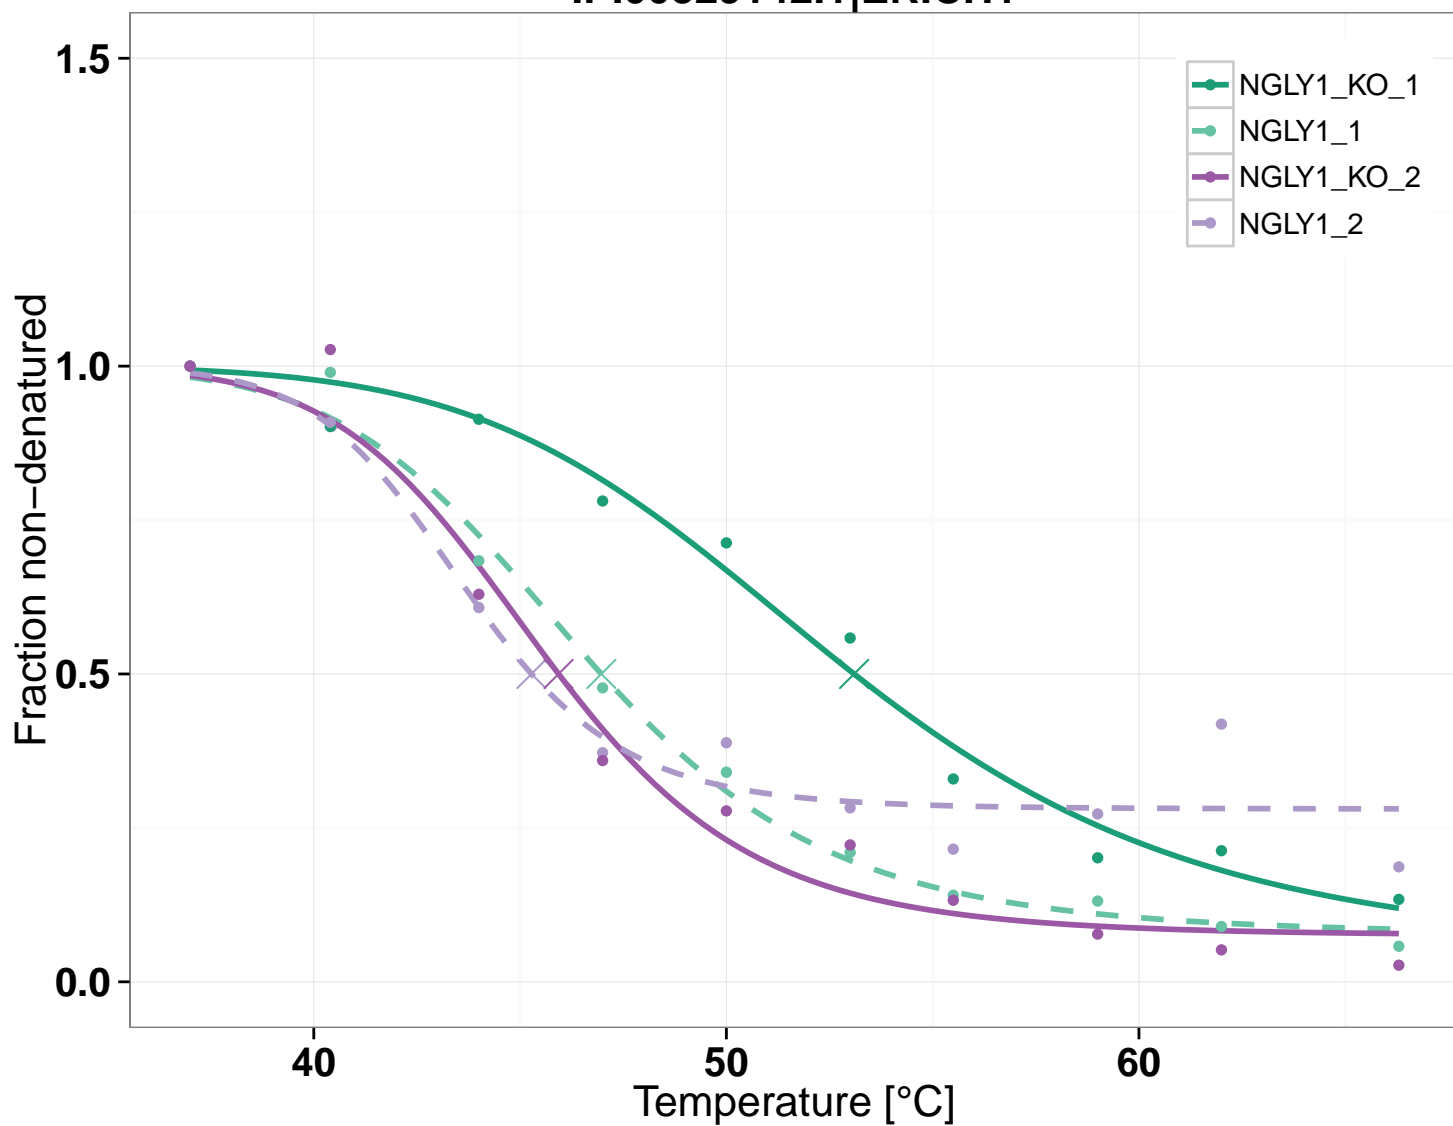

|            | meltPoint | slope  | plateau | R2   |
|------------|-----------|--------|---------|------|
| NGLY1_KO_1 | 53.1      | -0.055 | 0.04    | 0.98 |
| NGLY1_1    | 46.97     | -0.078 | 0.08    | 0.99 |
| NGLY1_KO_2 | 45.93     | -0.092 | 0.07    | 0.98 |
| NGLY1_2    | 45.28     | -0.096 | 0.28    | 0.95 |

Supplement: Supplementary file 767 [file 1]

# IPI00329646.4|PCBD2

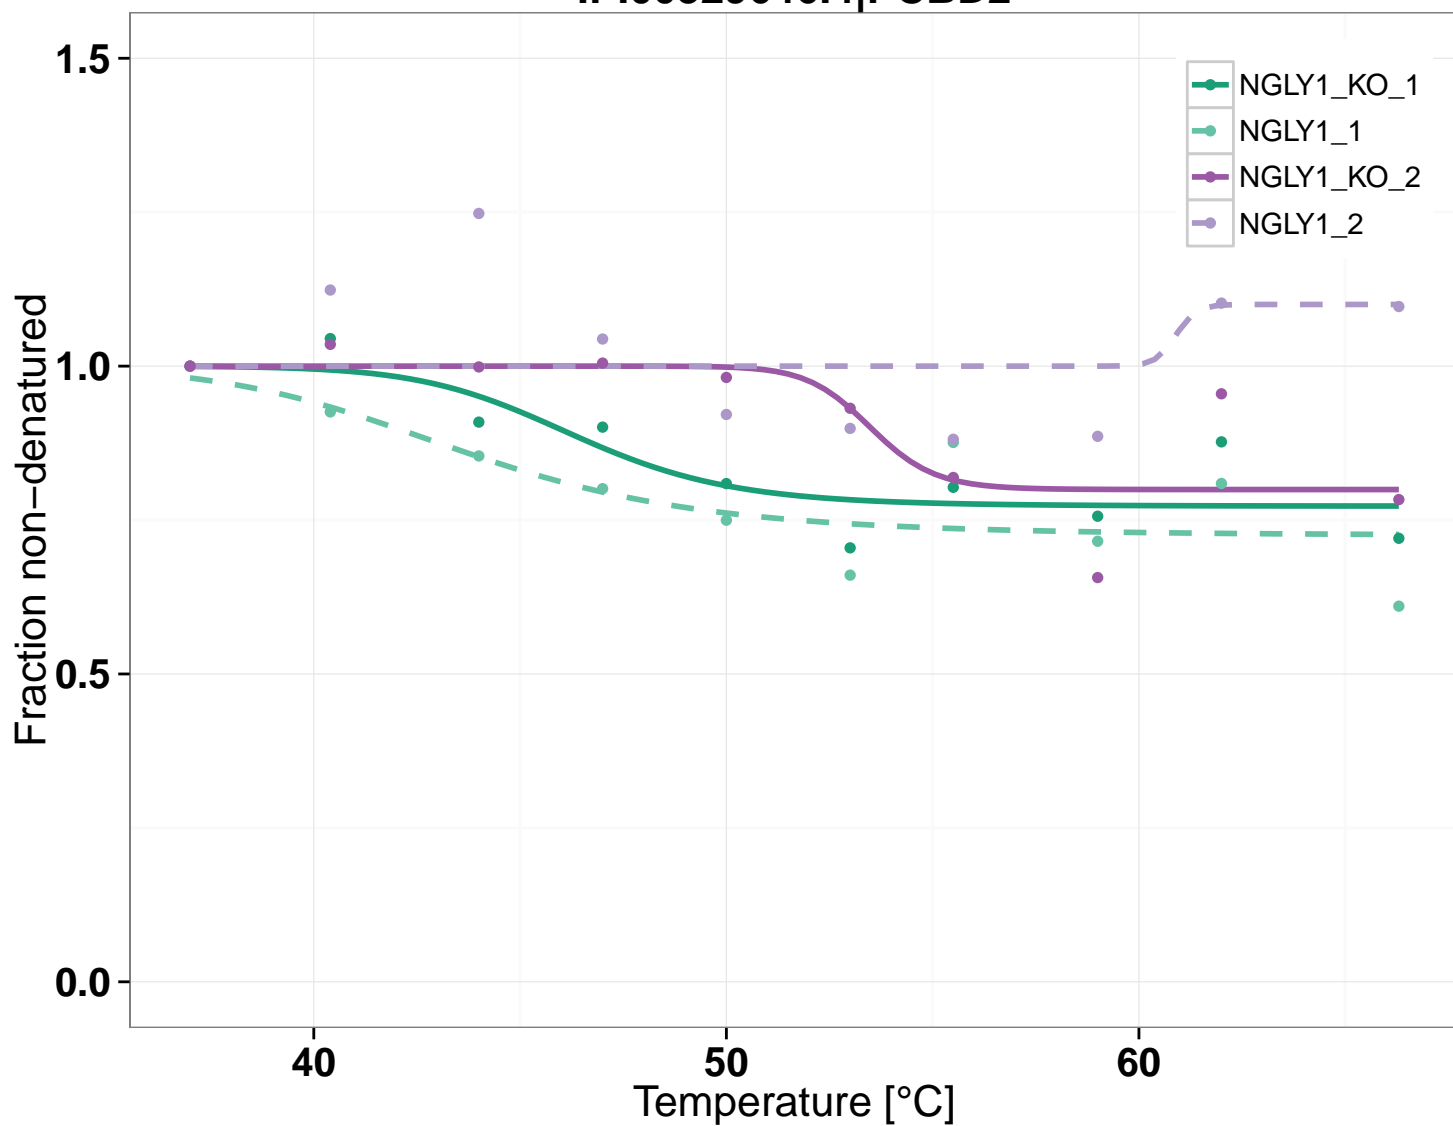

|            | meltPoint | slope  | plateau | R2   |
|------------|-----------|--------|---------|------|
| NGLY1_KO_1 | —         | -0.03  | 0.77    | 0.78 |
| NGLY1_1    | —         | -0.023 | 0.72    | 0.63 |
| NGLY1_KO_2 | —         | -0.065 | 0.8     | 0.66 |
| NGLY1_2    | —         | 0.1    | 1.1     | 0.11 |

Supplement: Supplementary file 768 [file 1]

IPI00010400.1|PLCB3

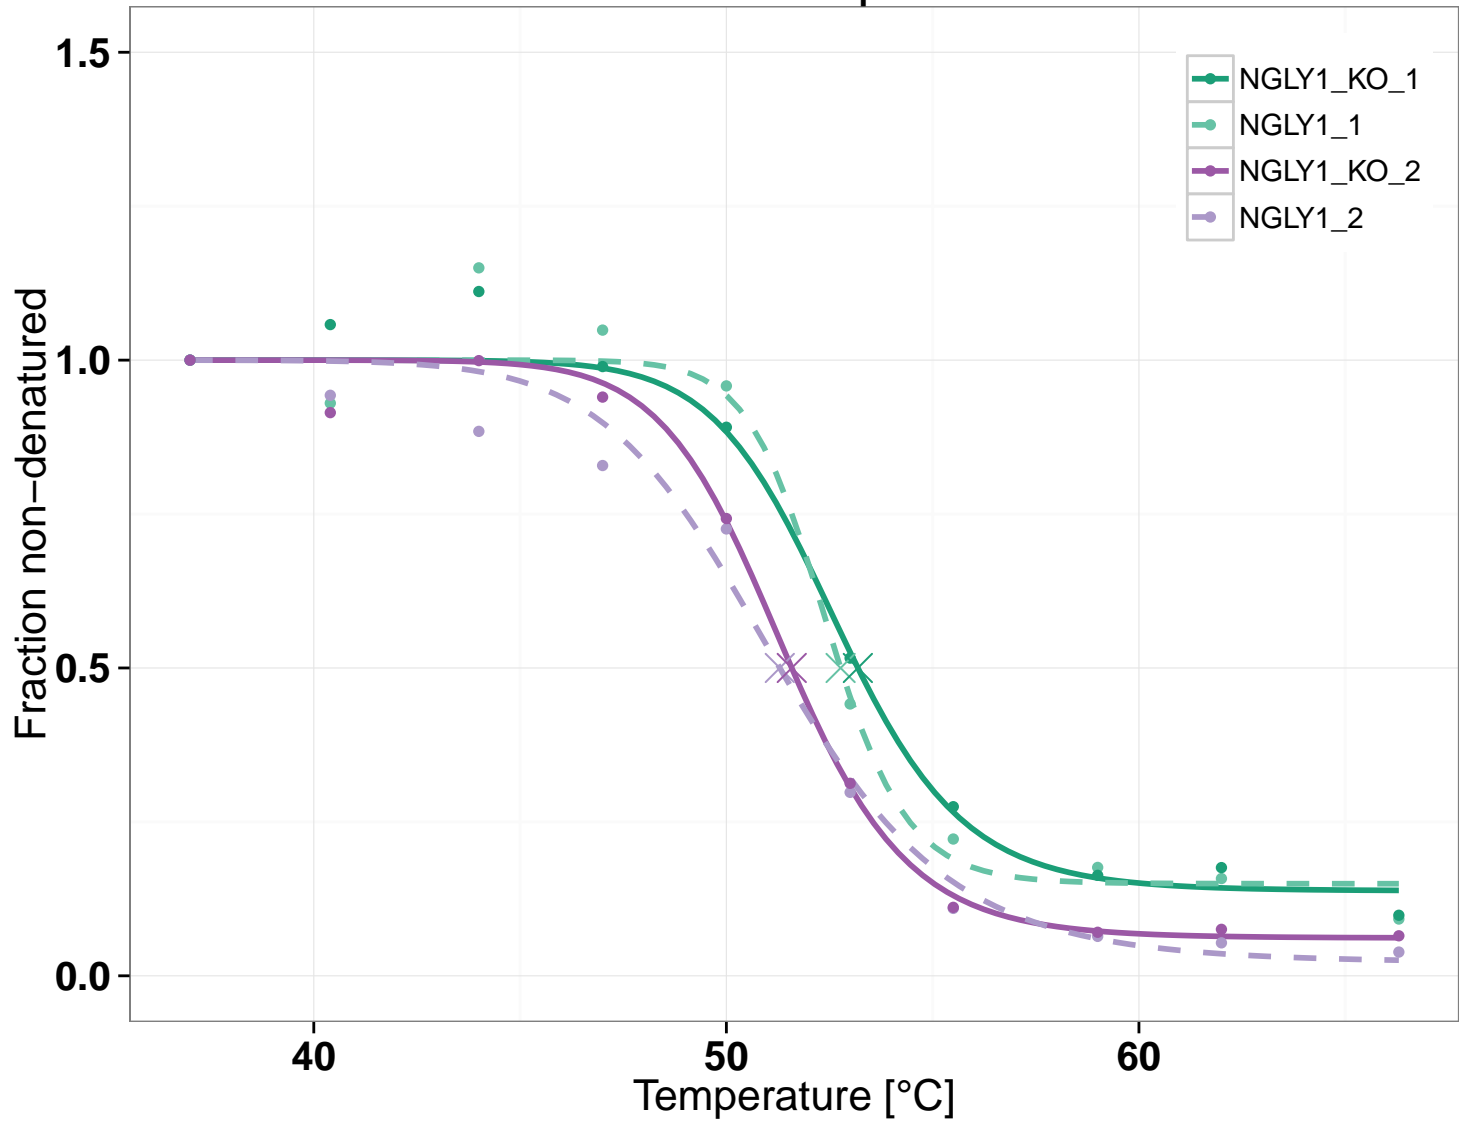

|            | meltPoint | slope | plateau | R2   |
|------------|-----------|-------|---------|------|
| NGLY1_KO_1 | 53.19     | -0.14 | 0.14    | 0.99 |
| NGLY1_1    | 52.77     | -0.22 | 0.15    | 0.98 |
| NGLY1_KO_2 | 51.58     | -0.16 | 0.06    | 0.99 |
| NGLY1_2    | 51.29     | -0.12 | 0.02    | 0.98 |

Supplement: Supplementary file 769 [file 1]

IPI00794248.1|47 KDA PROTEIN.

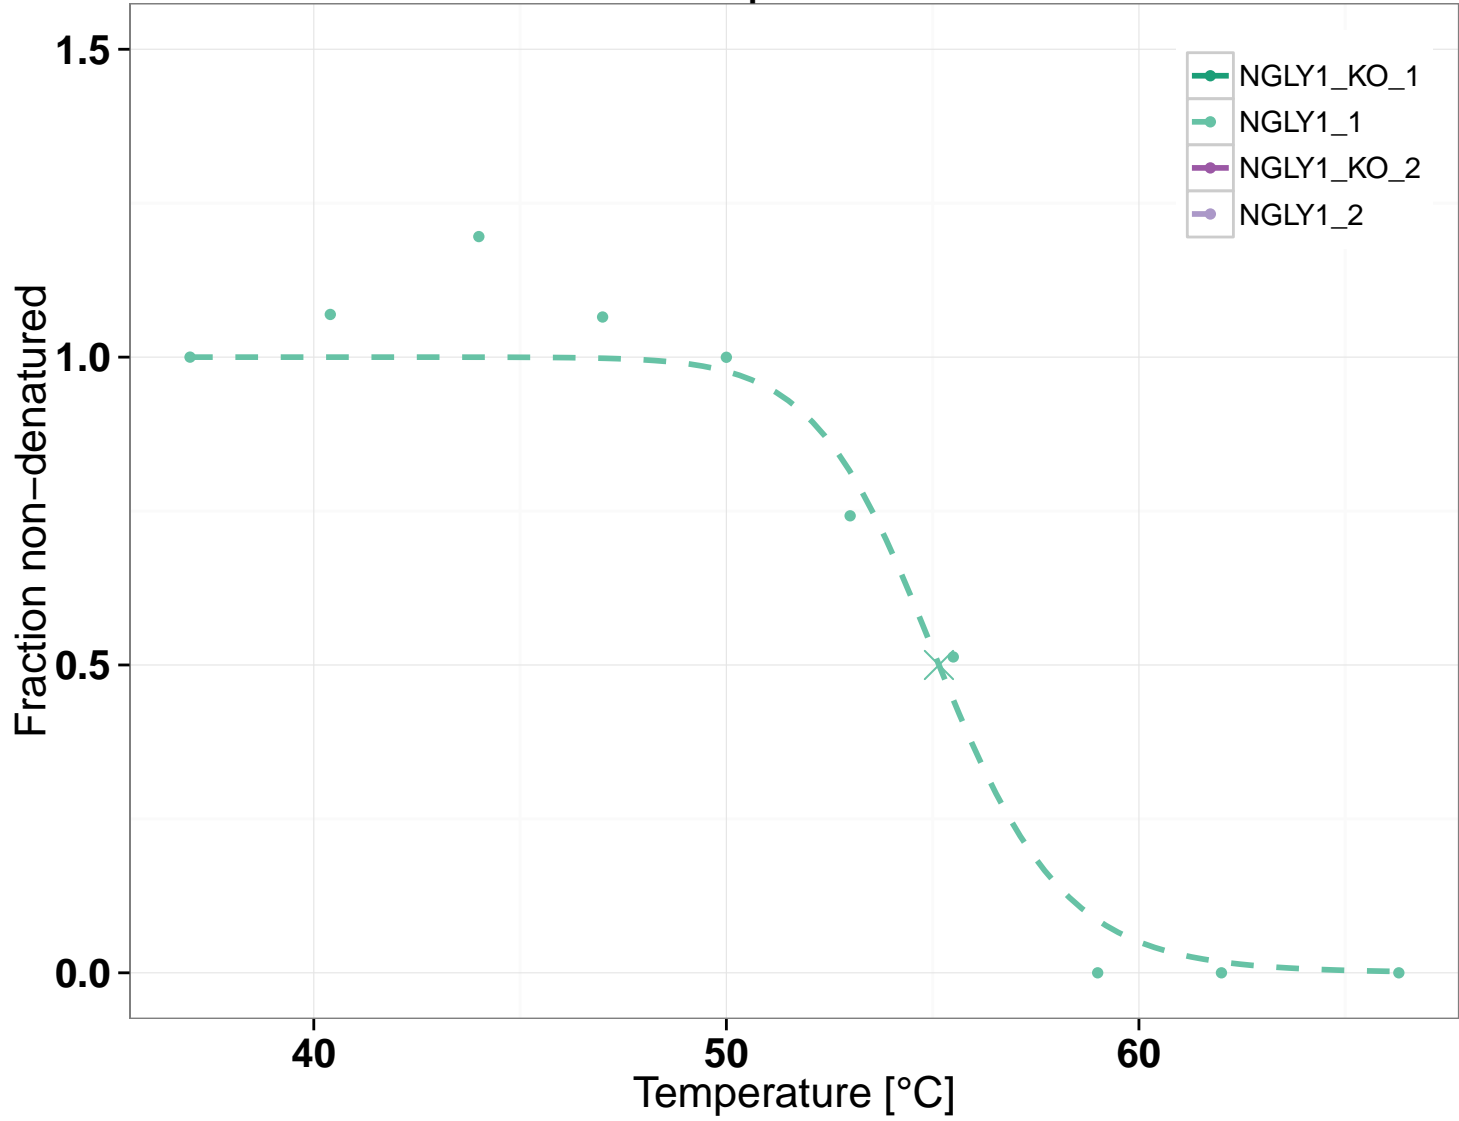

|            | meltPoint | slope | plateau | R2   |
|------------|-----------|-------|---------|------|
| NGLY1_KO_1 | -         | -     | -       | -    |
| NGLY1_1    | 55.15     | -0.17 | 0       | 0.97 |
| NGLY1_KO_2 | -         | -     | -       | -    |
| NGLY1_2    | -         | -     | -       | -    |

Supplement: Supplementary file 770 [file 1]

# IPI00305212.5|COMMD9

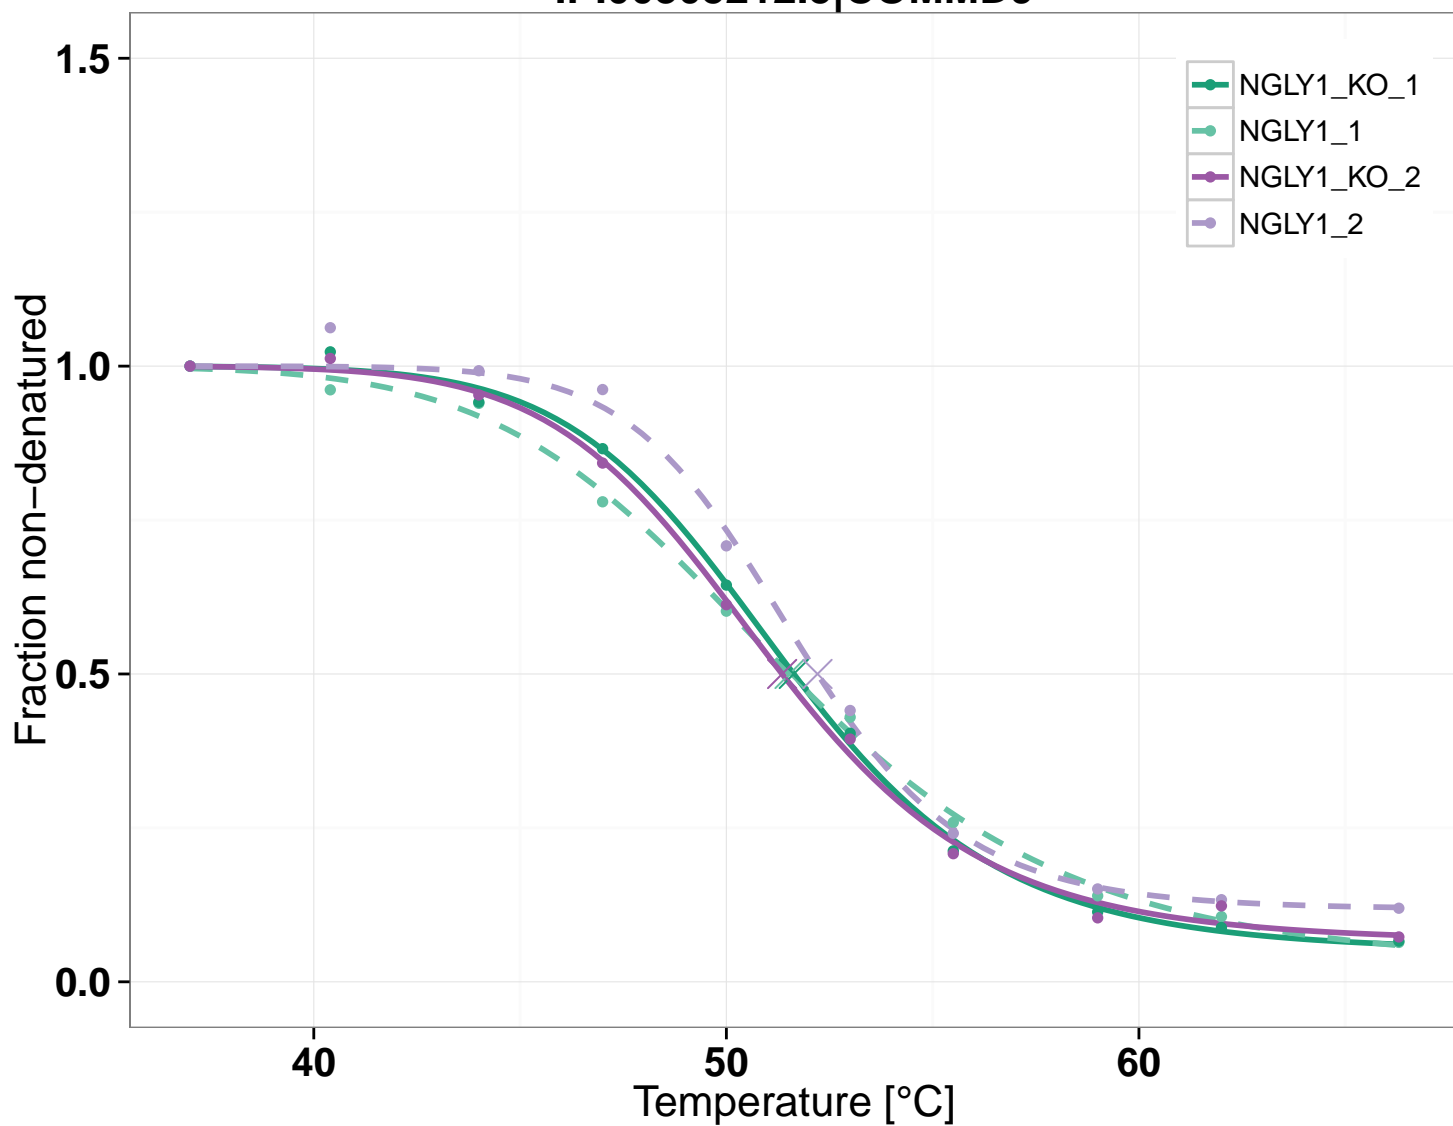

|            | meltPoint | slope  | plateau | R2 |
|------------|-----------|--------|---------|----|
| NGLY1_KO_1 | 51.63     | -0.091 | 0.05    | 1  |
| NGLY1_1    | 51.53     | -0.07  | 0.02    | 1  |
| NGLY1_KO_2 | 51.35     | -0.089 | 0.06    | 1  |
| NGLY1_2    | 52.21     | -0.11  | 0.12    | 1  |

Supplement: Supplementary file 771 [file 1]

IPI00005791.1|NDC80

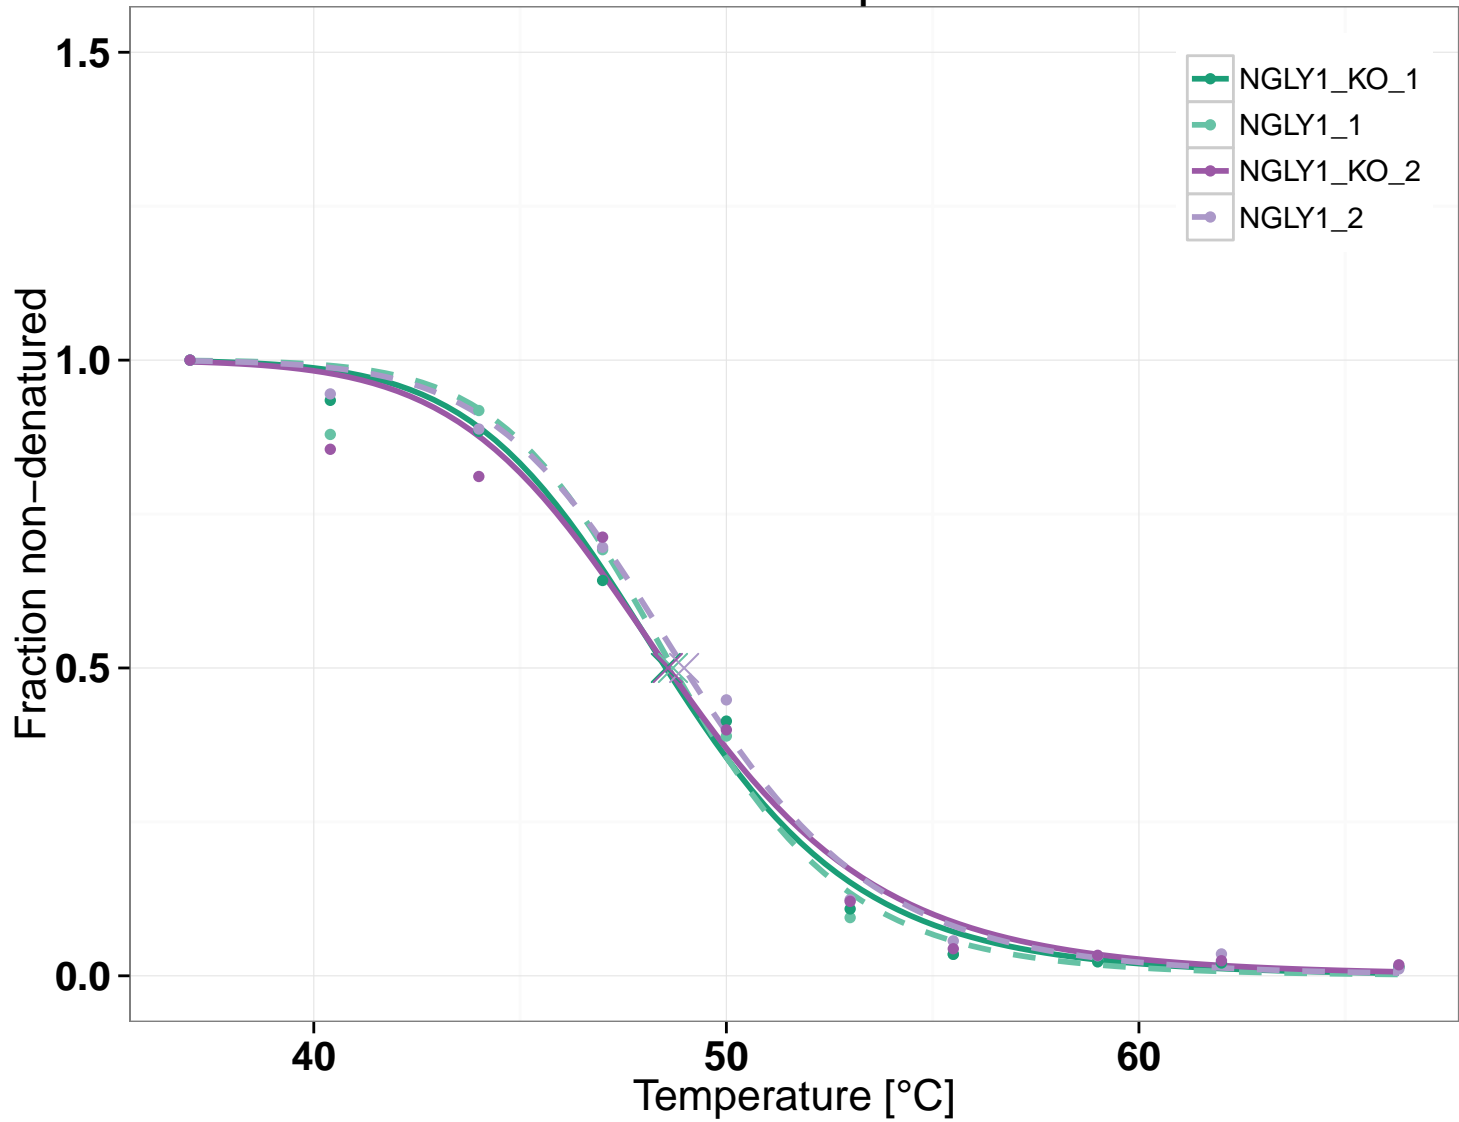

|            | meltPoint | slope  | plateau | R2   |
|------------|-----------|--------|---------|------|
| NGLY1_KO_1 | 48.53     | -0.11  | 0       | 0.99 |
| NGLY1_1    | 48.71     | -0.12  | 0       | 0.99 |
| NGLY1_KO_2 | 48.58     | -0.098 | 0       | 0.98 |
| NGLY1_2    | 48.98     | -0.11  | 0       | 0.99 |

Supplement: Supplementary file 772 [file 1]

# IPI00374657.2|VAPA

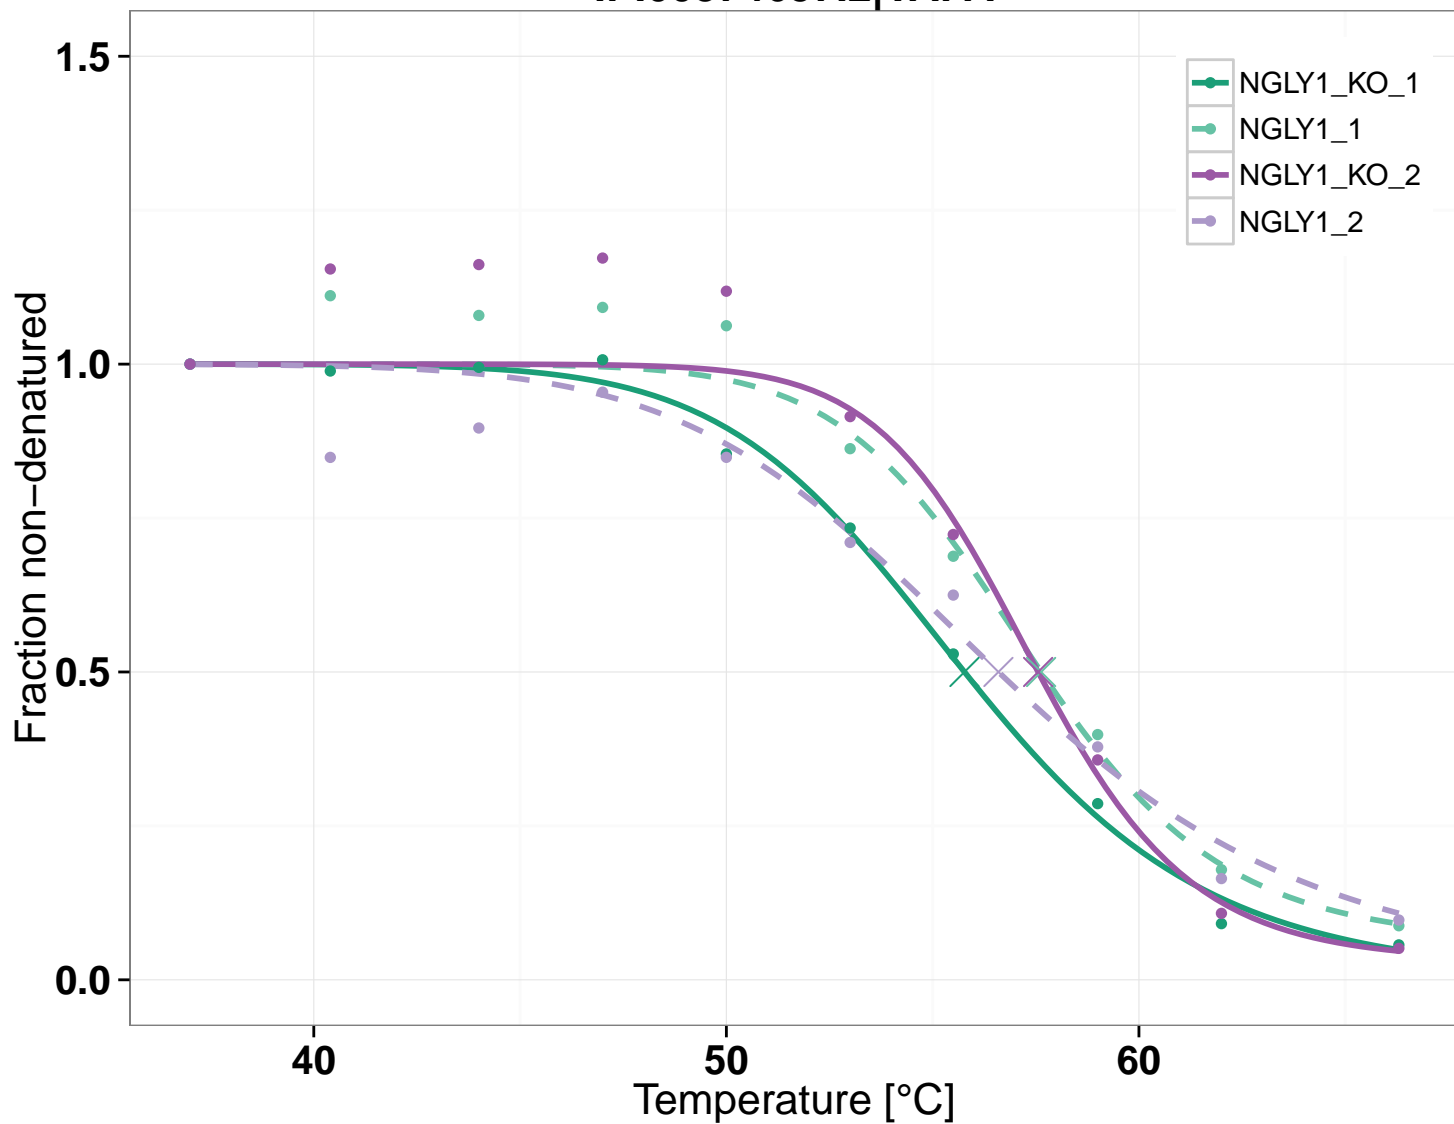

|            | meltPoint | slope  | plateau | R2   |
|------------|-----------|--------|---------|------|
| NGLY1_KO_1 | 55.77     | -0.085 | 0       | 1    |
| NGLY1_1    | 57.63     | -0.1   | 0.06    | 0.97 |
| NGLY1_KO_2 | 57.56     | -0.13  | 0.03    | 0.94 |
| NGLY1_2    | 56.59     | -0.065 | 0       | 0.96 |

Supplement: Supplementary file 773 [file 1]

# IPI00177381.8|CWC22

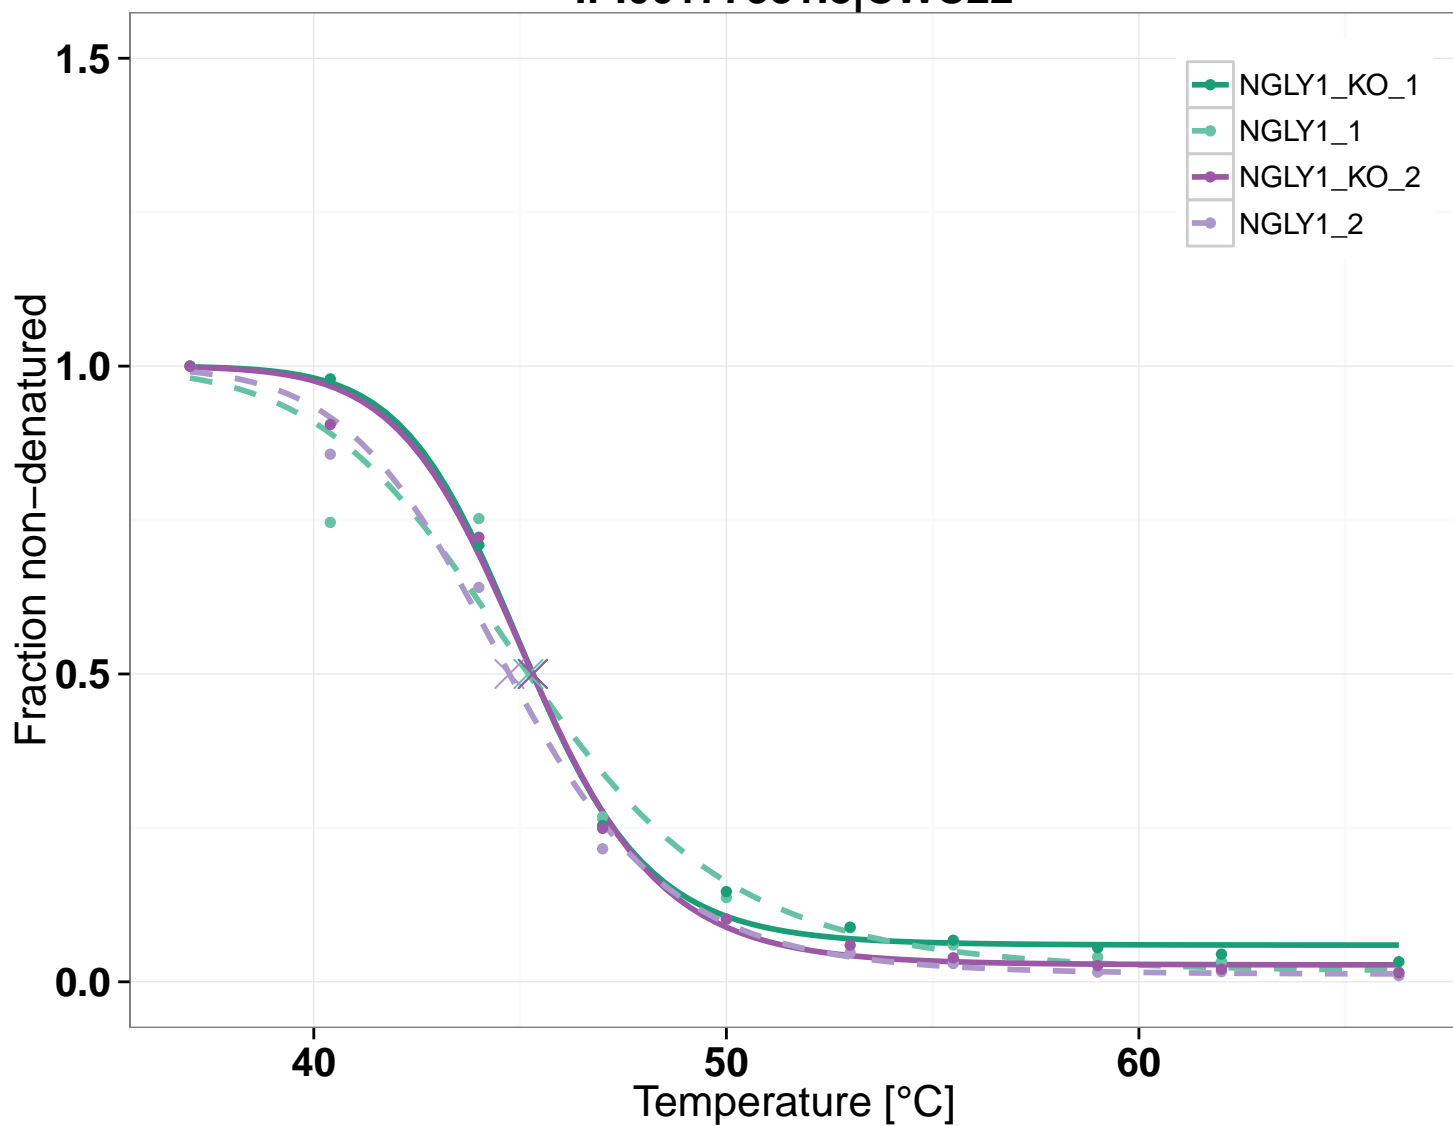

|            | meltPoint | slope  | plateau | R2   |
|------------|-----------|--------|---------|------|
| NGLY1_KO_1 | 45.31     | -0.16  | 0.06    | 1    |
| NGLY1_1    | 45.2      | -0.098 | 0.02    | 0.96 |
| NGLY1_KO_2 | 45.31     | -0.15  | 0.03    | 1    |
| NGLY1_2    | 44.74     | -0.13  | 0.01    | 0.99 |

Supplement: Supplementary file 774 [file 1]

IPI00176776.2|C11ORF85

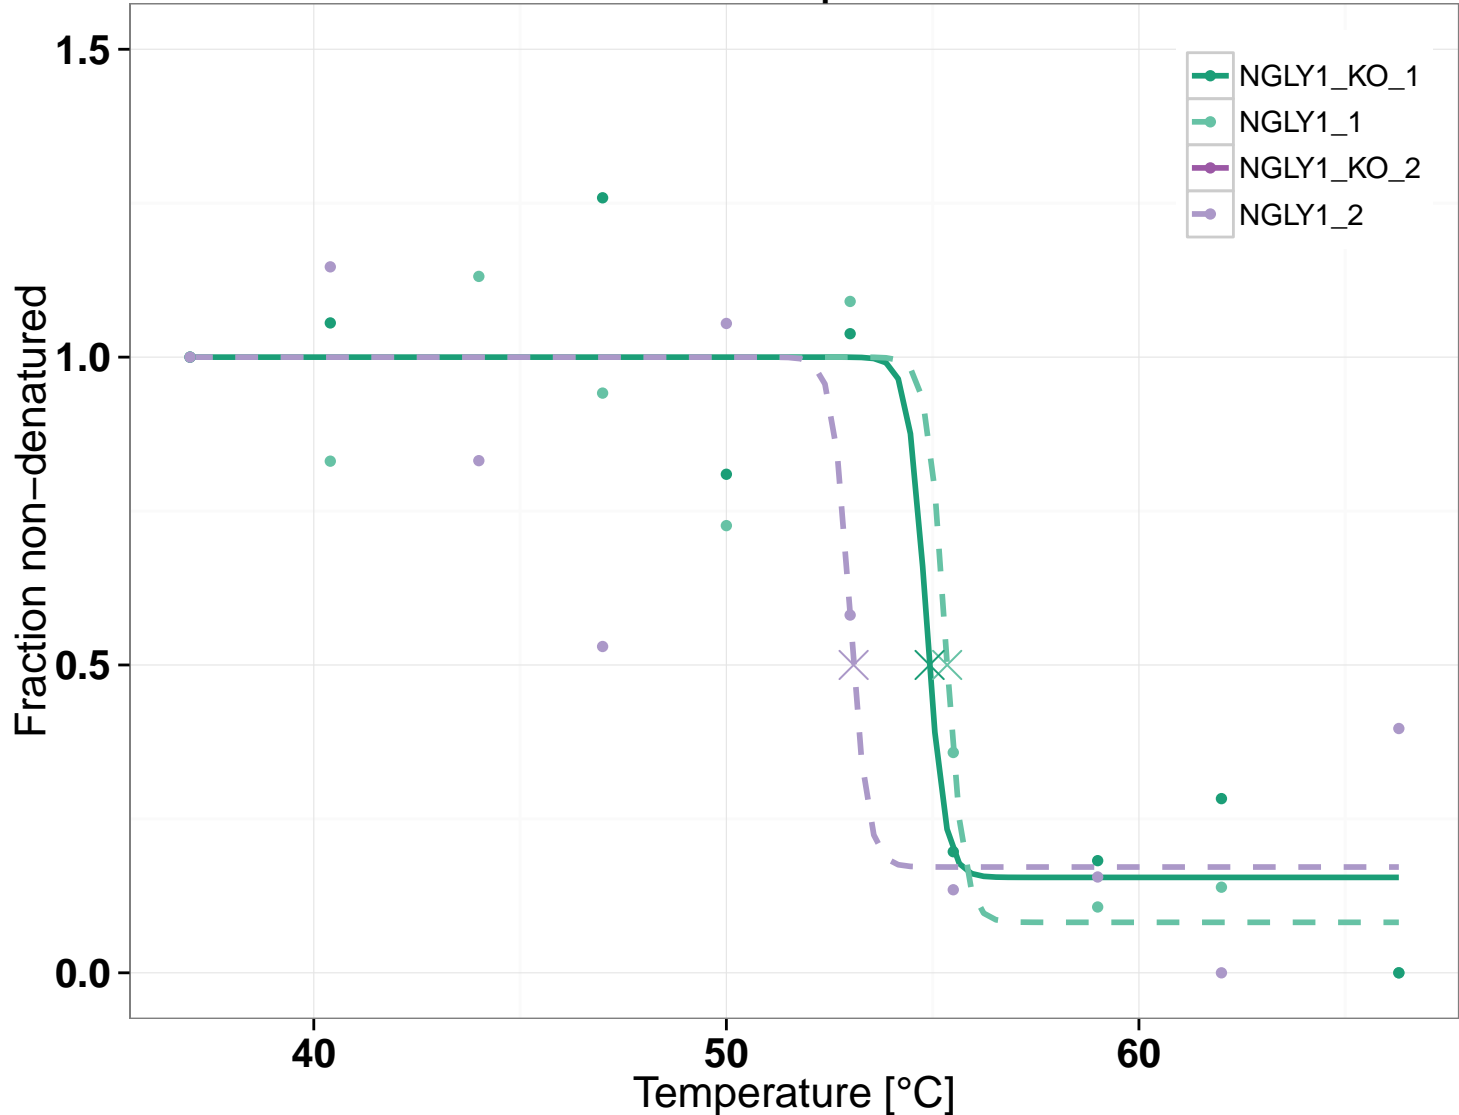

|            | meltPoint | slope | plateau | R2   |
|------------|-----------|-------|---------|------|
| NGLY1_KO_1 | 54.93     | -0.96 | 0.15    | 0.81 |
| NGLY1_1    | 55.35     | -1    | 0.08    | 0.92 |
| NGLY1_KO_2 | -         | -     | -       | -    |
| NGLY1_2    | 53.08     | -0.98 | 0.17    | 0.77 |

Supplement: Supplementary file 775 [file 1]

# IPI00030911.2|VAMP8

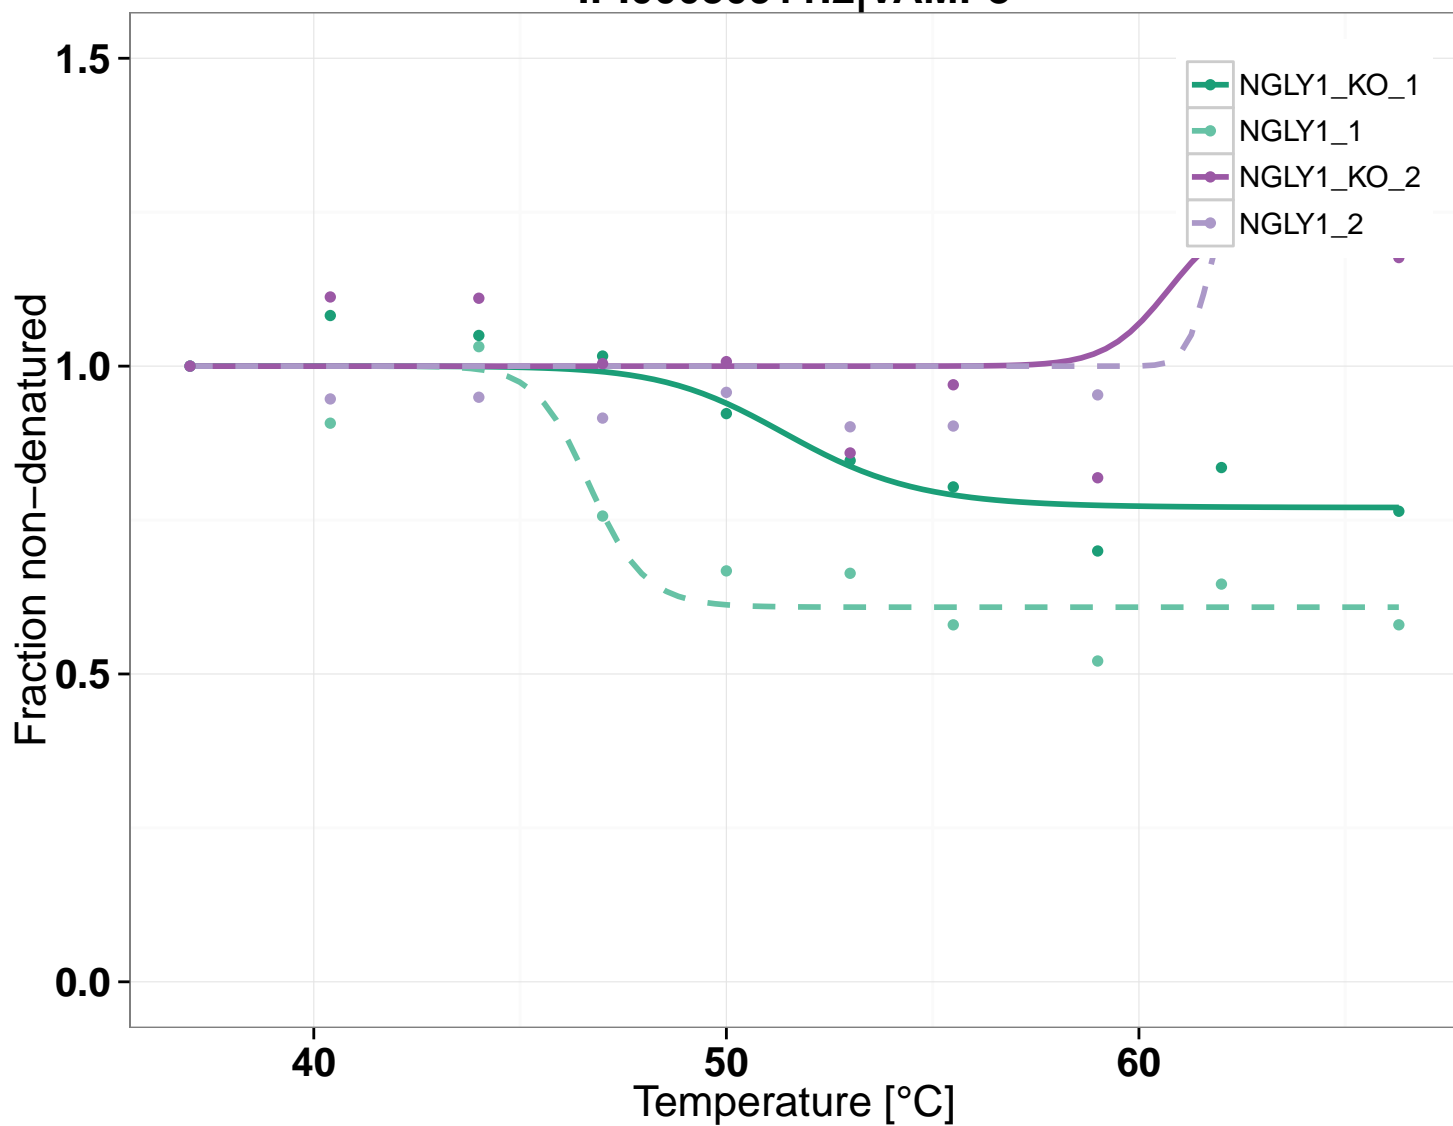

|            | meltPoint | slope  | plateau | R2   |
|------------|-----------|--------|---------|------|
| NGLY1_KO_1 | –         | –0.037 | 0.77    | 0.87 |
| NGLY1_1    | –         | –0.15  | 0.61    | 0.91 |
| NGLY1_KO_2 | –         | 0.083  | 1.26    | 0.47 |
| NGLY1_2    | –         | 0.27   | 1.28    | 0.78 |

Supplement: Supplementary file 776 [file 1]

# IPI00296526.6|NAGK

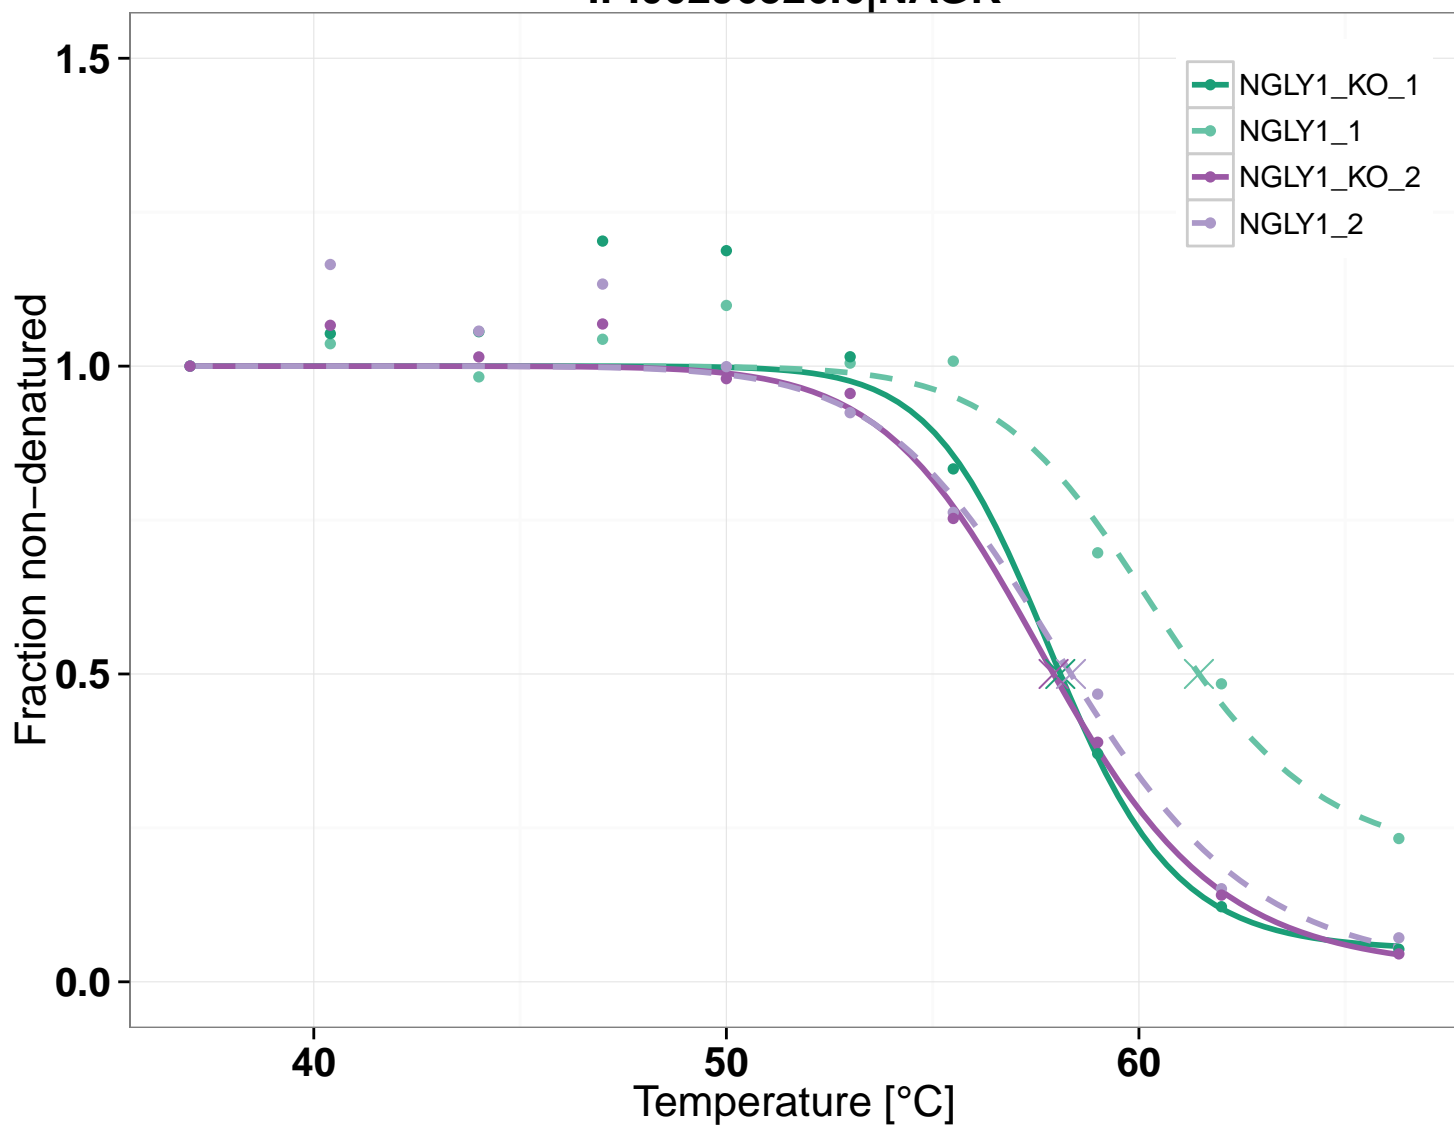

|            | meltPoint | slope | plateau | R2   |
|------------|-----------|-------|---------|------|
| NGLY1_KO_1 | 58.09     | -0.16 | 0.05    | 0.95 |
| NGLY1_1    | 61.45     | -0.1  | 0.19    | 0.97 |
| NGLY1_KO_2 | 57.93     | -0.12 | 0.02    | 0.99 |
| NGLY1_2    | 58.35     | -0.11 | 0.01    | 0.96 |

Supplement: Supplementary file 777 [file 1]

# IPI00292376.4|GMIP

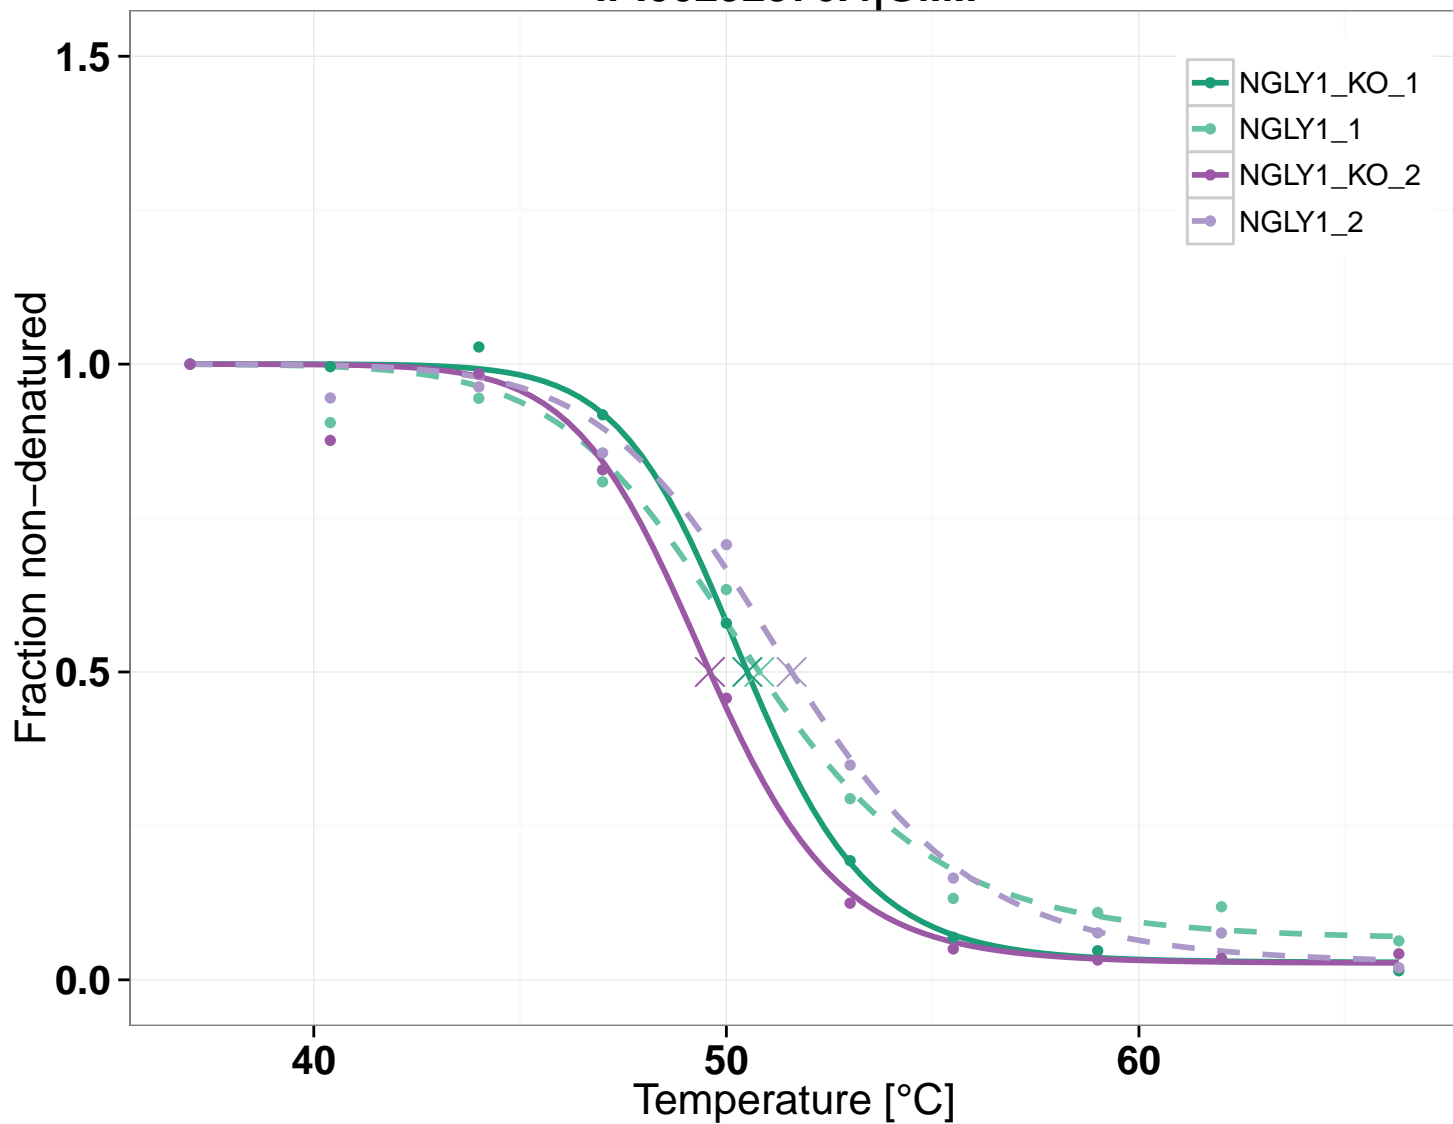

Supplement: Supplementary file 778 [file 1]

# IPI00178750.3|NIP30

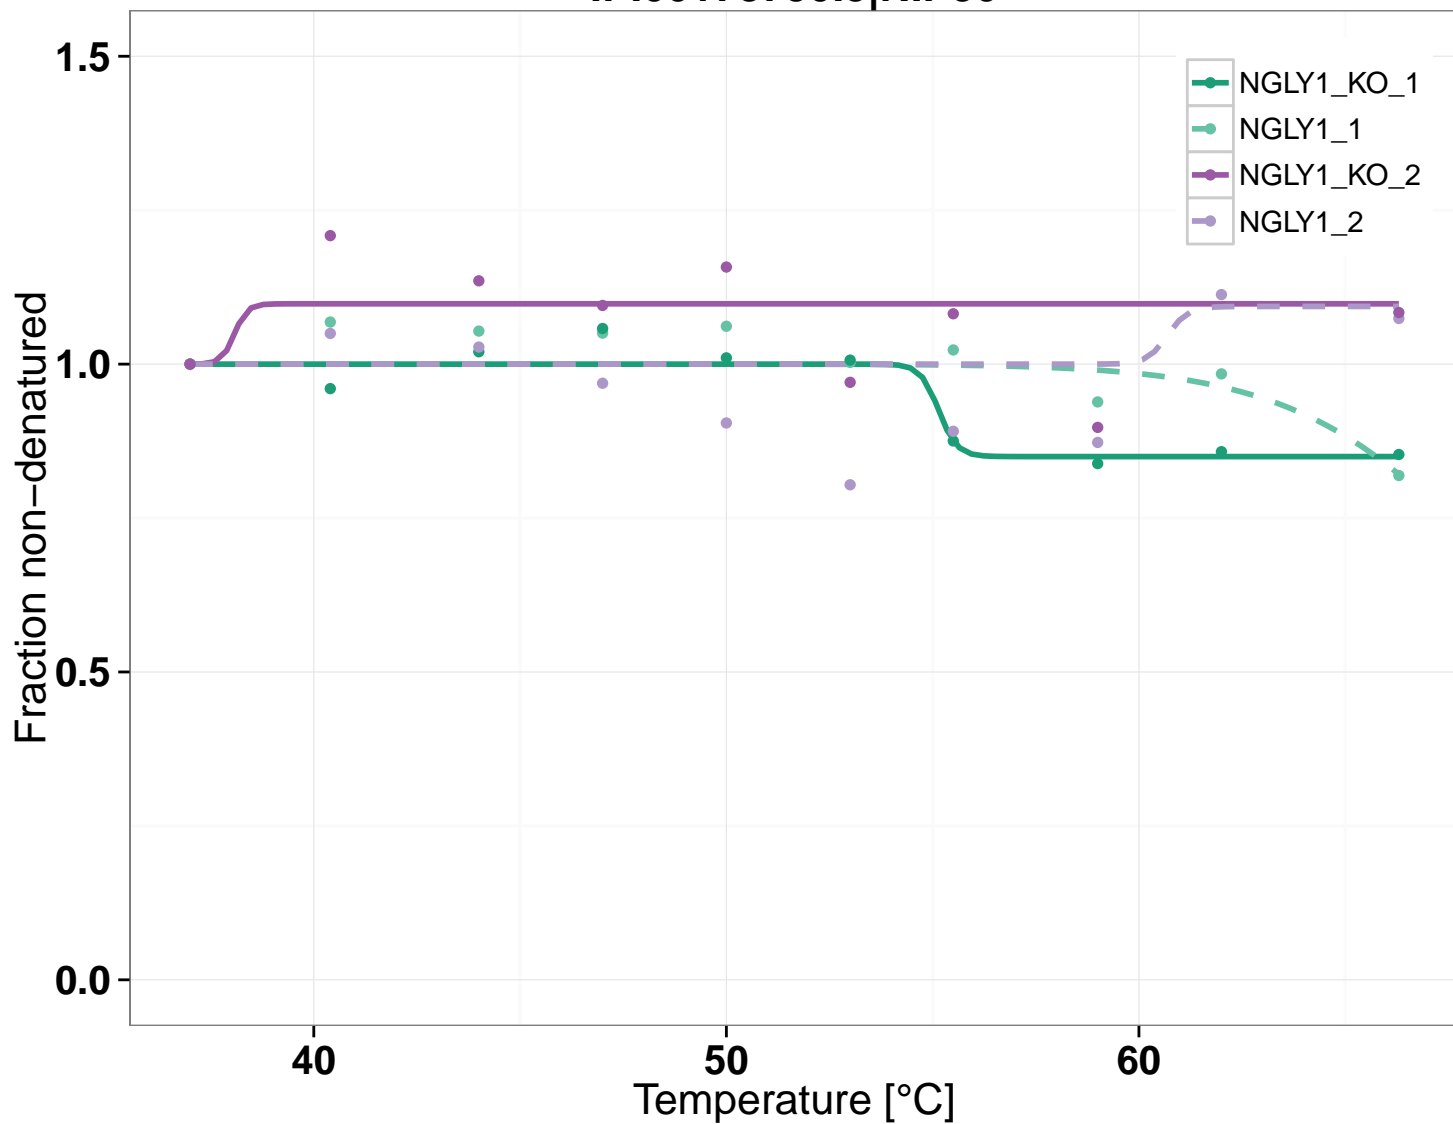

|            | meltPoint | slope | plateau | R2   |
|------------|-----------|-------|---------|------|
| NGLY1_KO_1 | -         | -0.17 | 0.85    | 0.91 |
| NGLY1_1    | -         | -     | 0       | 0.66 |
| NGLY1_KO_2 | -         | 0.16  | 1.1     | 0.08 |
| NGLY1_2    | -         | 0.095 | 1.09    | 0.1  |

Supplement: Supplementary file 779 [file 1]

IPI00008727.1|ATP5G3

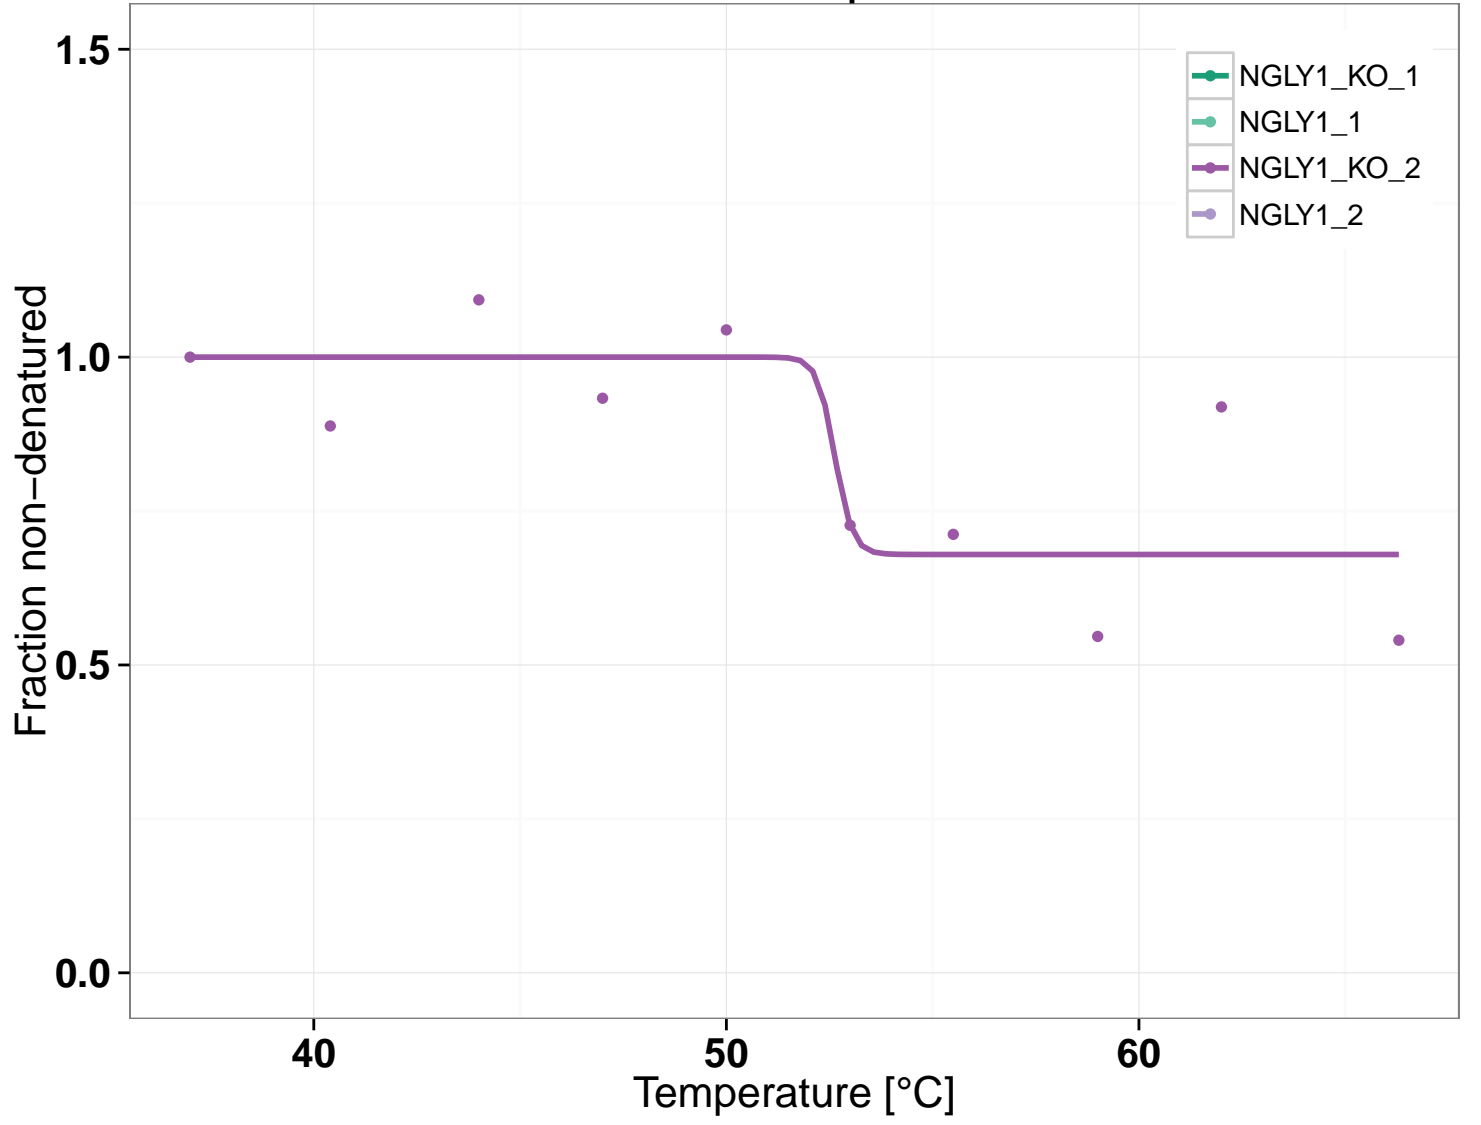

|            | meltPoint | slope | plateau | R2   |
|------------|-----------|-------|---------|------|
| NGLY1_KO_1 | —         | —     | —       | —    |
| NGLY1_1    | —         | —     | —       | —    |
| NGLY1_KO_2 | —         | -0.38 | 0.68    | 0.65 |
| NGLY1_2    | —         | —     | —       | —    |

Supplement: Supplementary file 780 [file 1]

# IPI00384873.1|TNFRSF10B

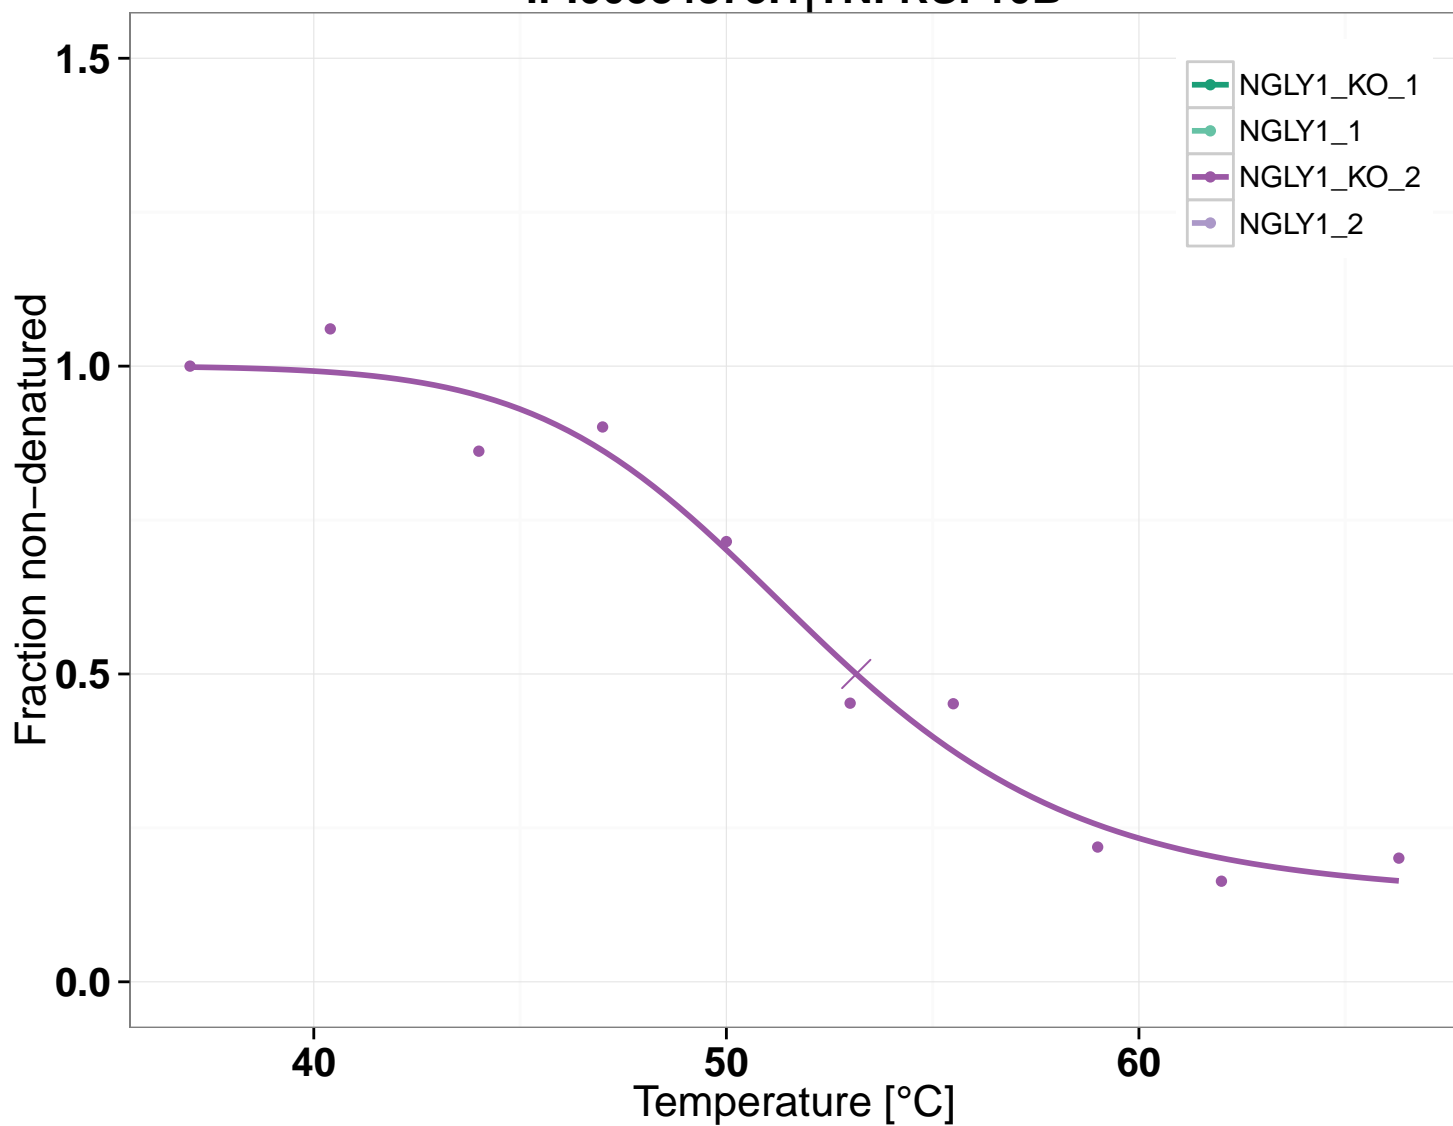

|            | meltPoint | slope  | plateau | R2   |
|------------|-----------|--------|---------|------|
| NGLY1_KO_1 | —         | —      | —       | —    |
| NGLY1_1    | —         | —      | —       | —    |
| NGLY1_KO_2 | 53.15     | -0.065 | 0.13    | 0.97 |
| NGLY1_2    | —         | —      | —       | —    |

Supplement: Supplementary file 781 [file 1]

# IPI00176571.4|ZMIZ1

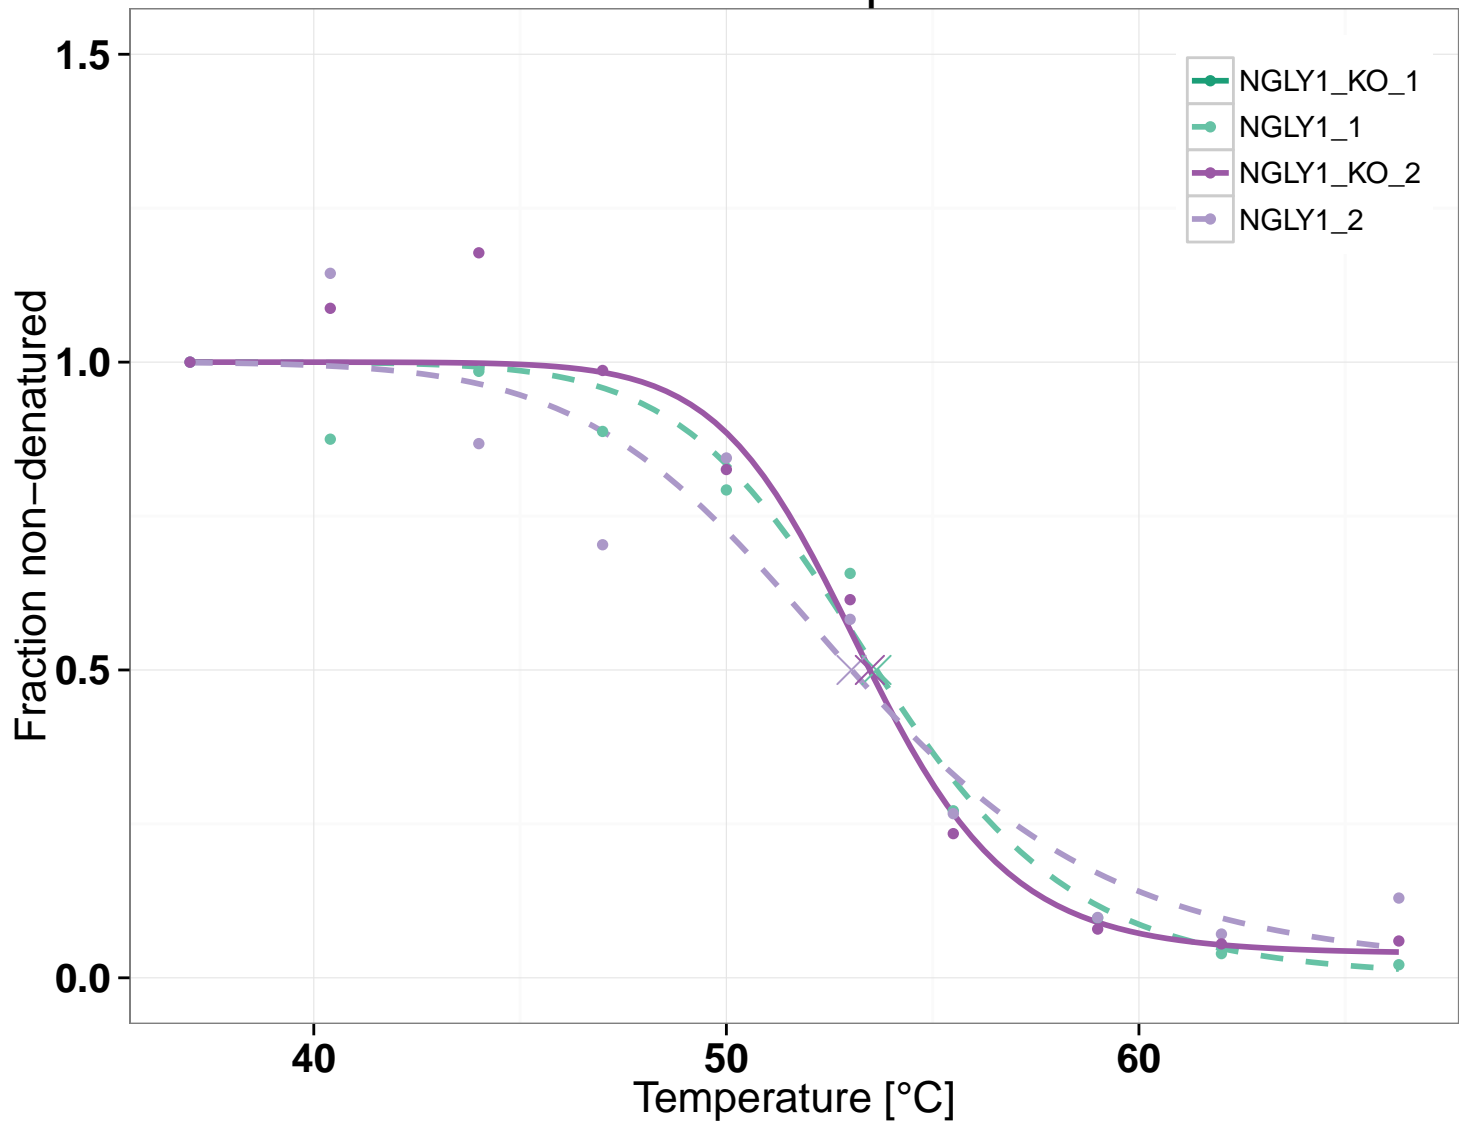

|            | meltPoint | slope  | plateau | R2   |
|------------|-----------|--------|---------|------|
| NGLY1_KO_1 | -         | -      | -       | -    |
| NGLY1_1    | 53.64     | -0.1   | 0       | 0.98 |
| NGLY1_KO_2 | 53.48     | -0.14  | 0.04    | 0.98 |
| NGLY1_2    | 53.03     | -0.077 | 0.01    | 0.93 |

Supplement: Supplementary file 782 [file 1]

# IPI00012690.1|SLC25A21

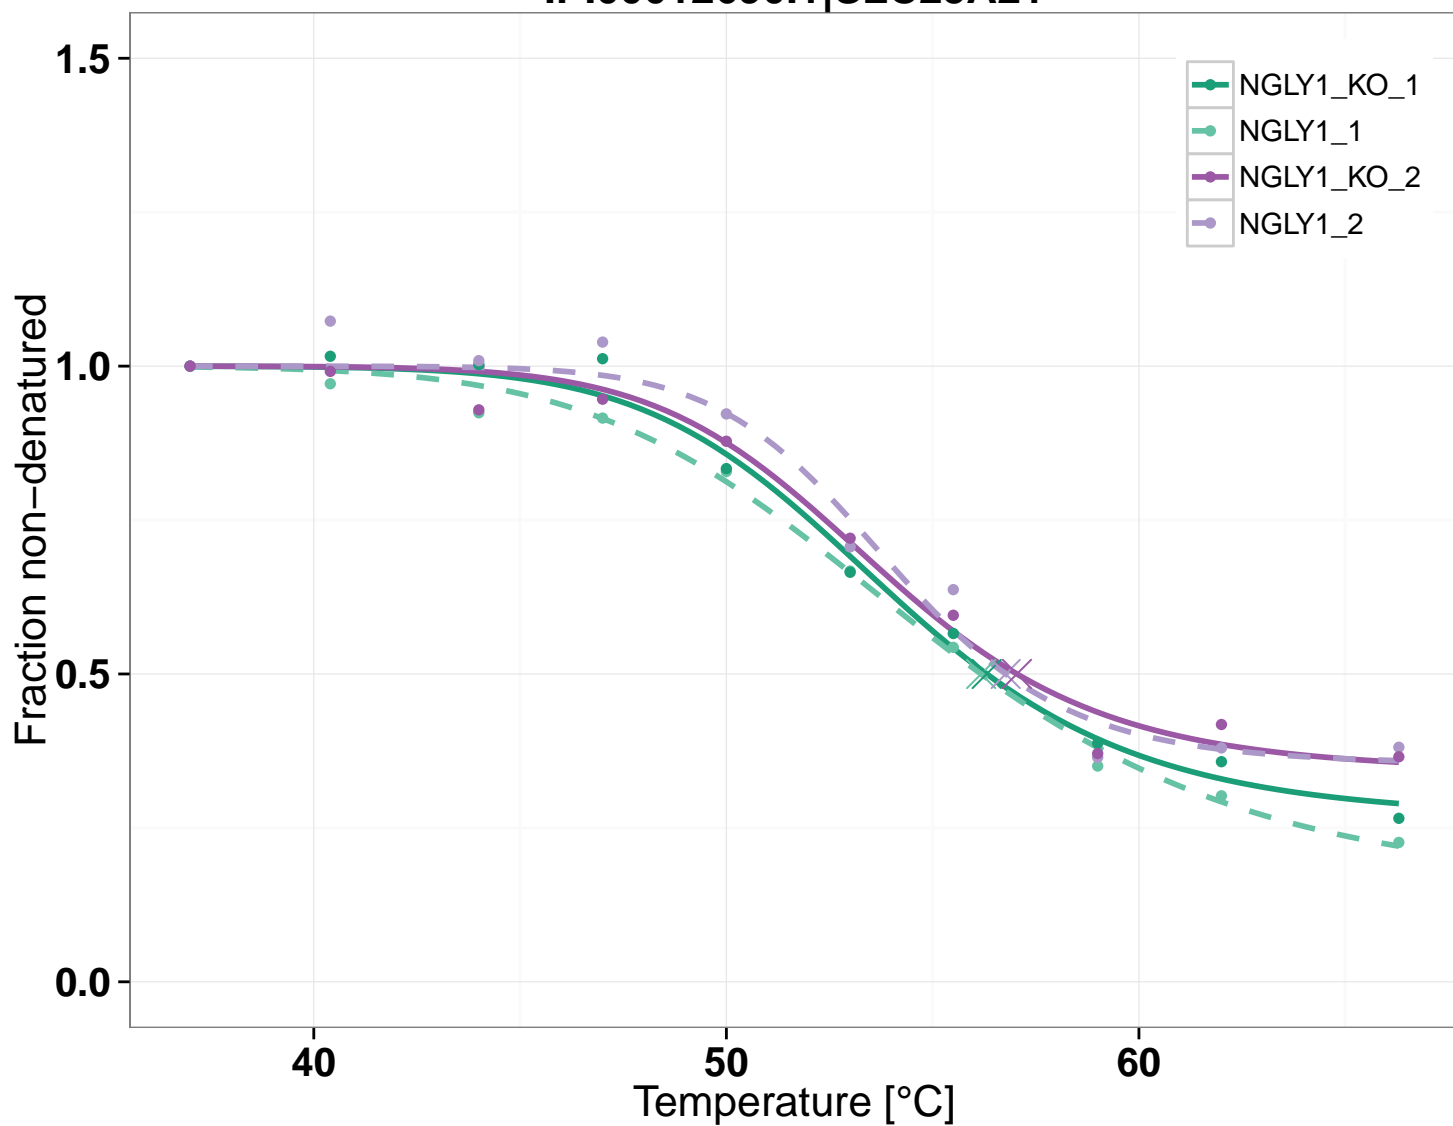

|            | meltPoint | slope  | plateau | R2   |
|------------|-----------|--------|---------|------|
| NGLY1_KO_1 | 56.31     | -0.062 | 0.26    | 0.99 |
| NGLY1_1    | 56.18     | -0.053 | 0.14    | 1    |
| NGLY1_KO_2 | 57.04     | -0.061 | 0.34    | 0.98 |
| NGLY1_2    | 56.77     | -0.076 | 0.35    | 0.98 |

Supplement: Supplementary file 783 [file 1]

IPI00792208.1|ESRRA

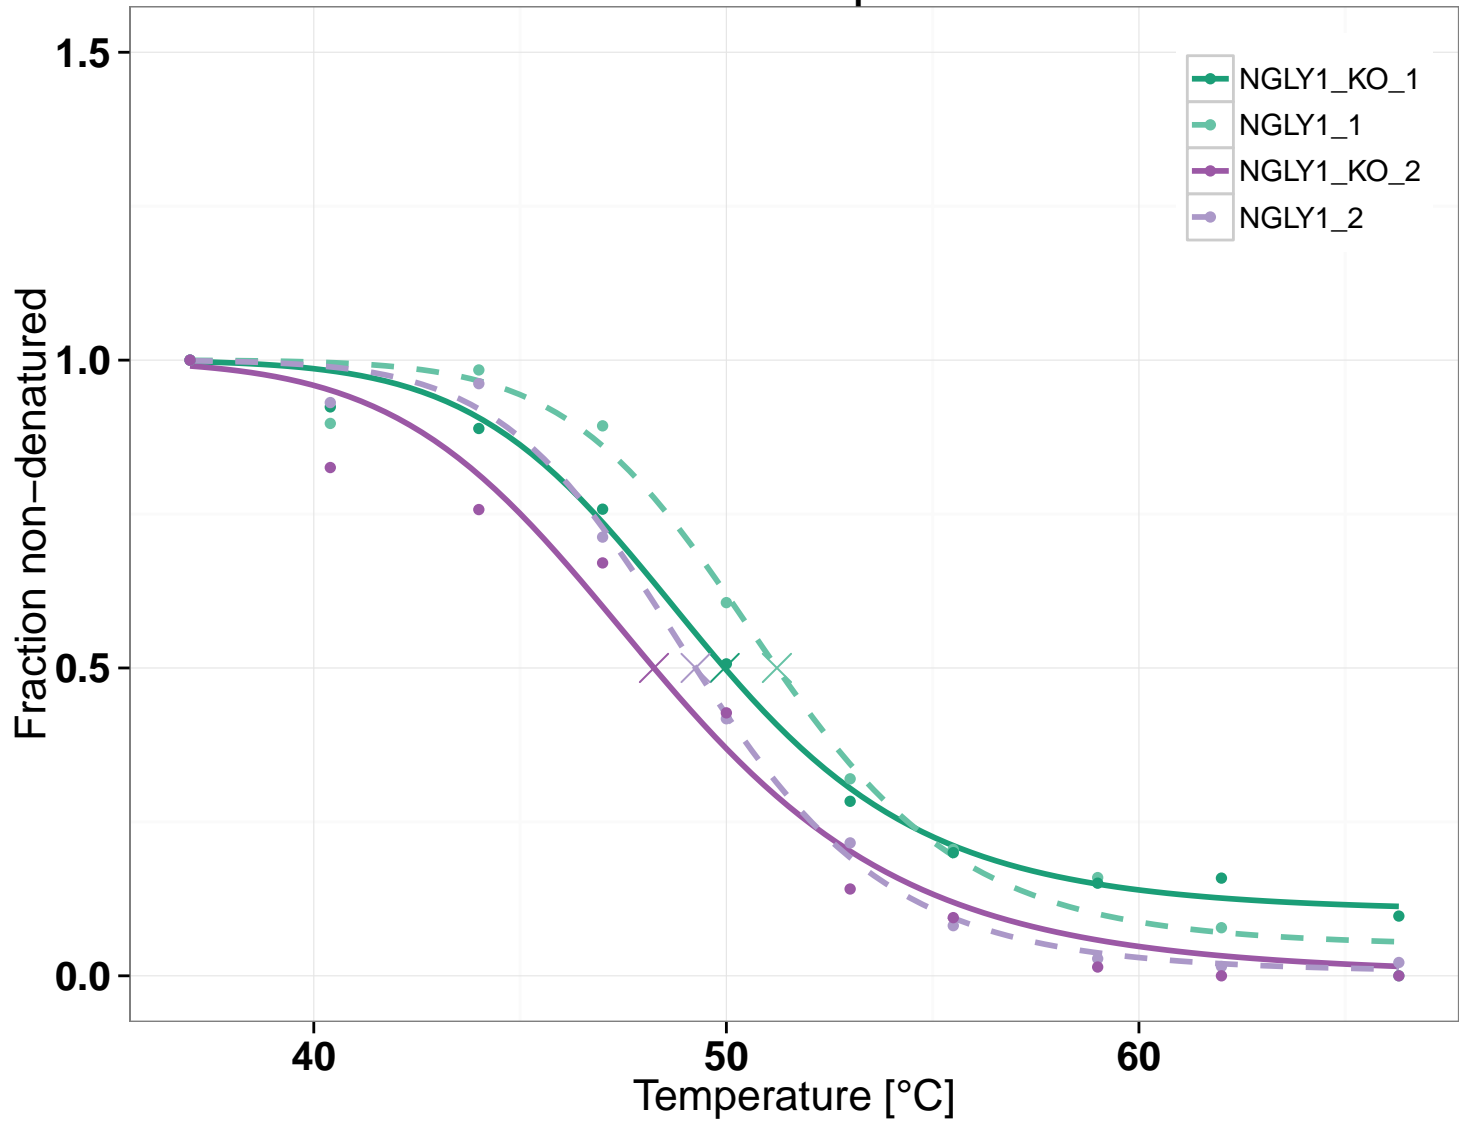

|            | meltPoint | slope  | plateau | R2   |
|------------|-----------|--------|---------|------|
| NGLY1_KO_1 | 49.96     | -0.082 | 0.1     | 0.99 |
| NGLY1_1    | 51.23     | -0.098 | 0.05    | 0.99 |
| NGLY1_KO_2 | 48.25     | -0.081 | 0       | 0.97 |
| NGLY1_2    | 49.25     | -0.11  | 0.01    | 1    |

Supplement: Supplementary file 784 [file 1]

IPI00294840.6|AIM1

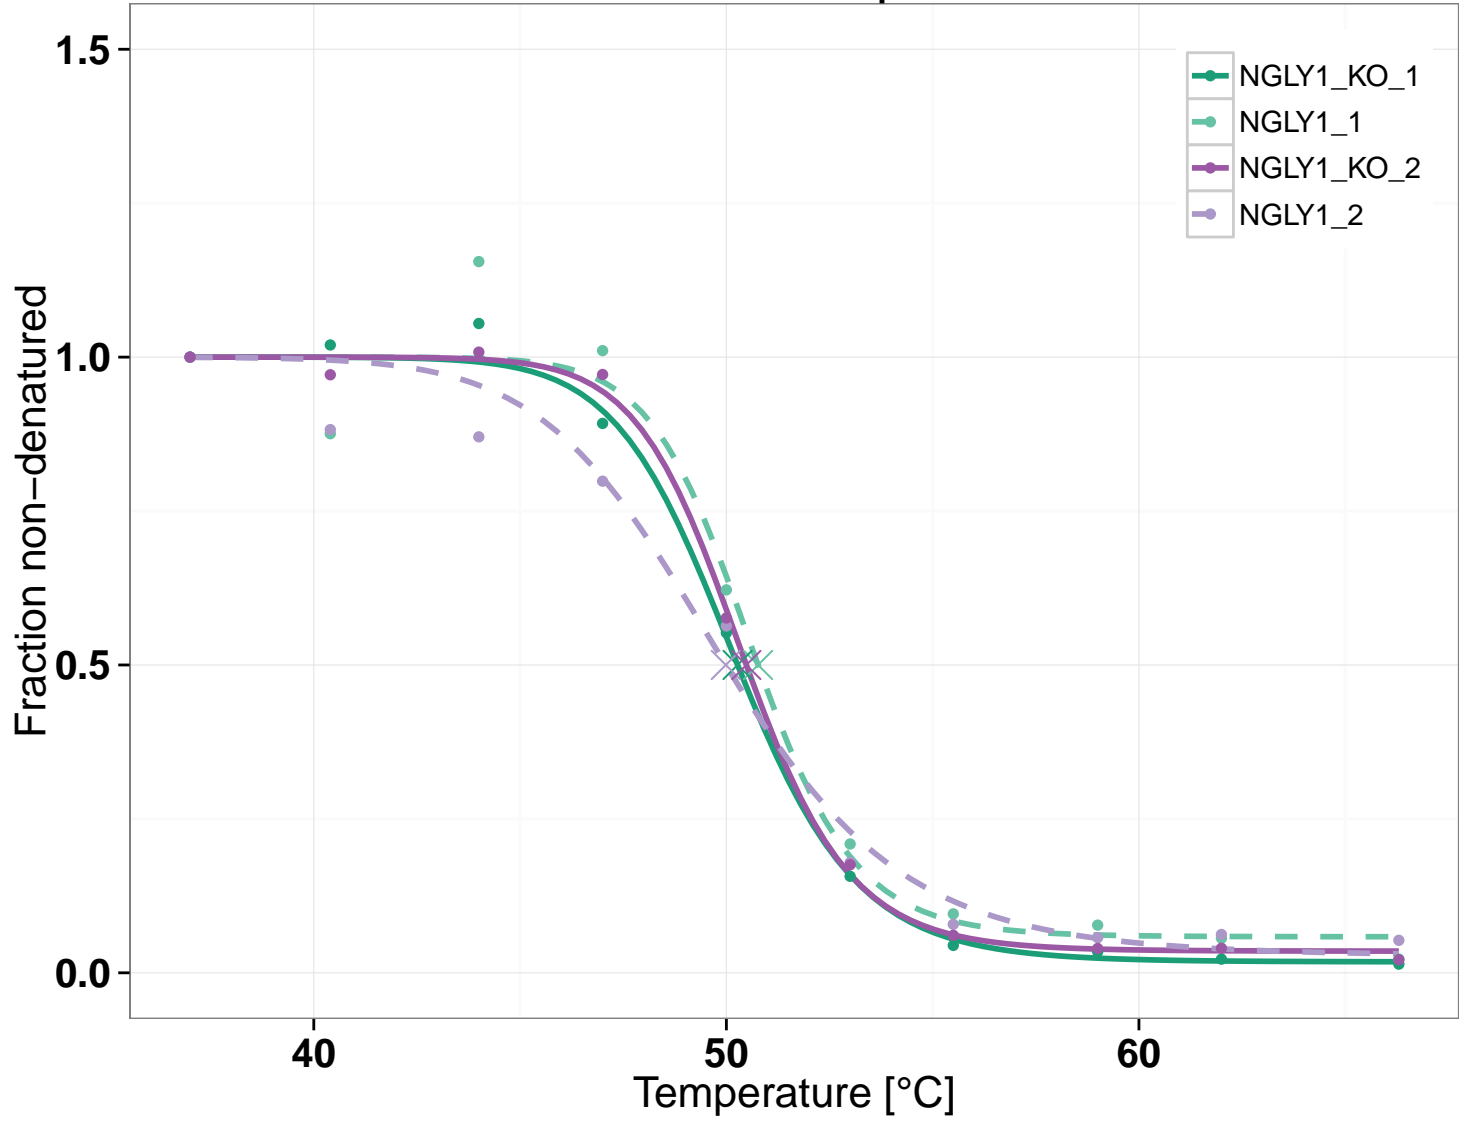

|            | meltPoint | slope | plateau | R2   |
|------------|-----------|-------|---------|------|
| NGLY1_KO_1 | 50.27     | -0.17 | 0.02    | 1    |
| NGLY1_1    | 50.77     | -0.19 | 0.06    | 0.98 |
| NGLY1_KO_2 | 50.48     | -0.19 | 0.04    | 1    |
| NGLY1_2    | 49.99     | -0.11 | 0.03    | 0.98 |

Supplement: Supplementary file 785 [file 1]

IPI00064162.4|VCPIP1

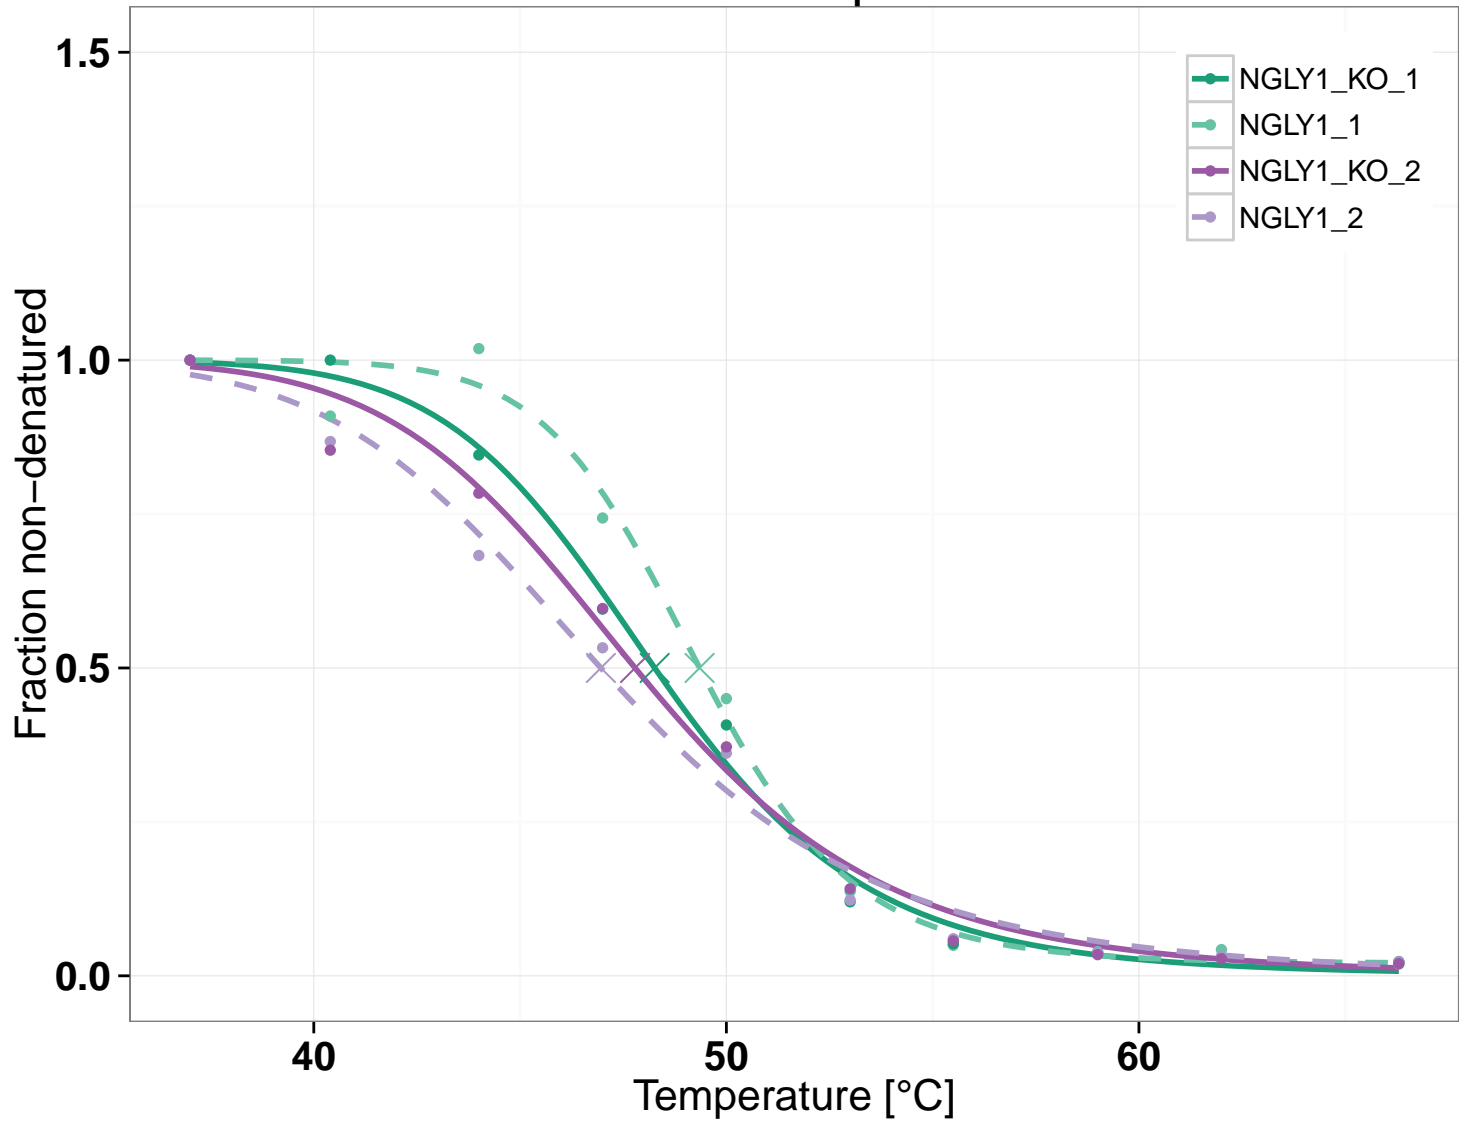

|            | meltPoint | slope  | plateau | R2   |
|------------|-----------|--------|---------|------|
| NGLY1_KO_1 | 48.26     | -0.097 | 0       | 0.99 |
| NGLY1_1    | 49.35     | -0.13  | 0.02    | 0.99 |
| NGLY1_KO_2 | 47.79     | -0.083 | 0       | 0.99 |
| NGLY1_2    | 46.96     | -0.075 | 0       | 0.99 |

Supplement: Supplementary file 786 [file 1]

IPI00018111.1|TAF7

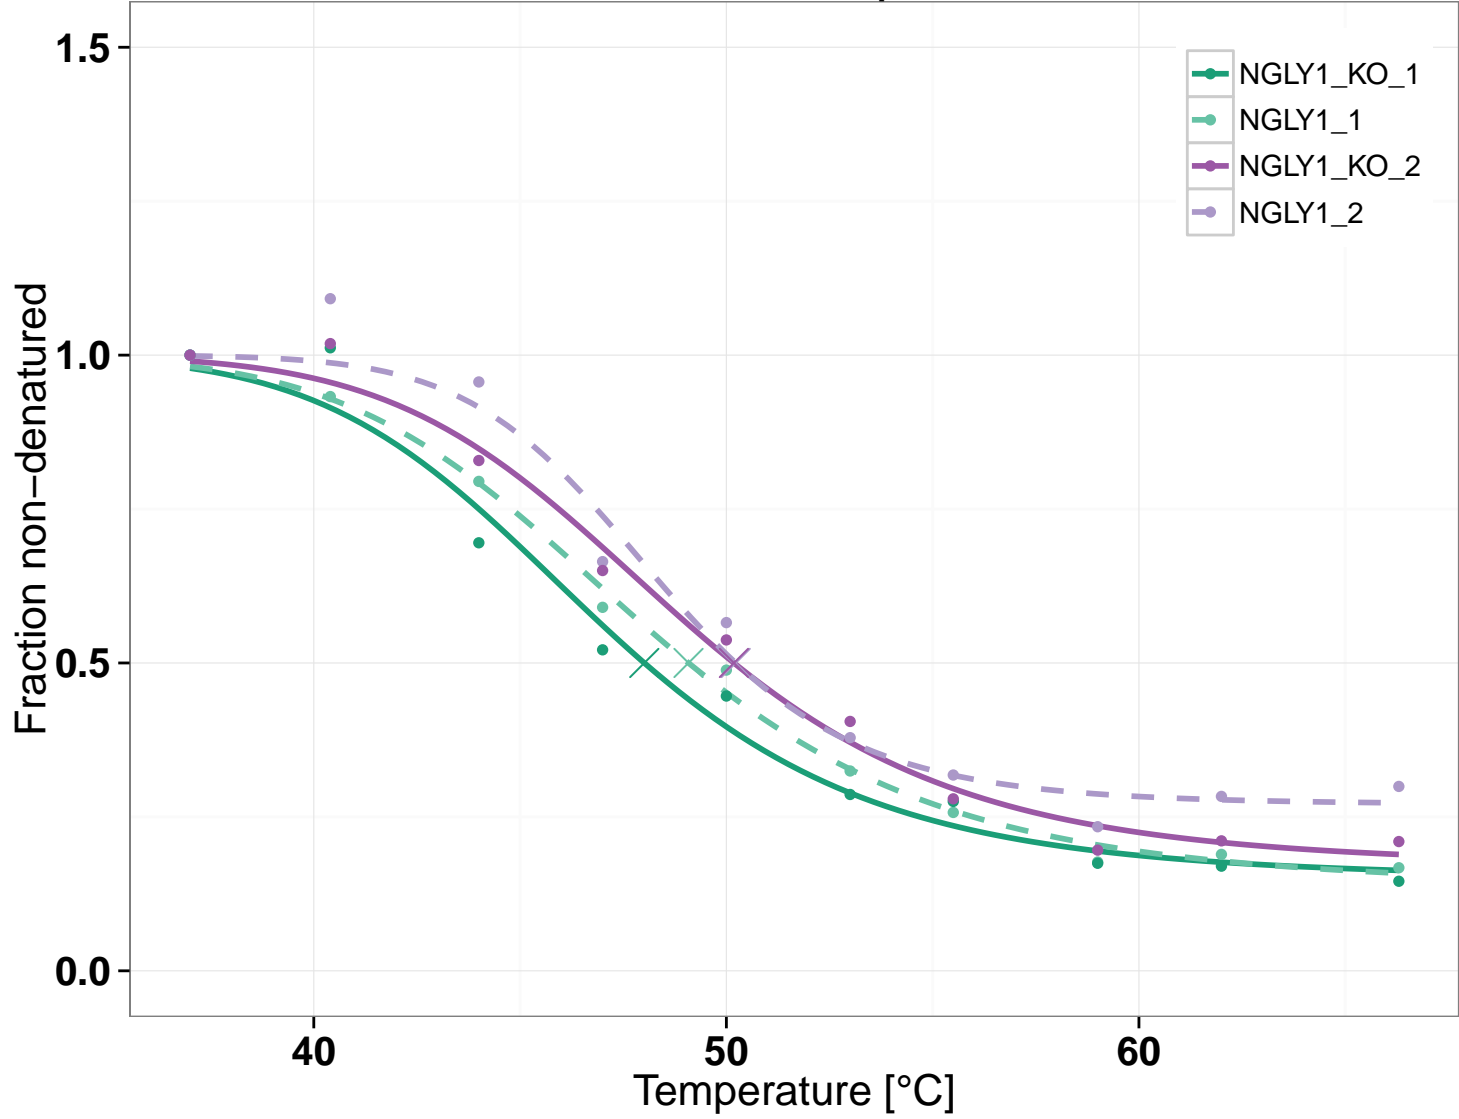

|            | meltPoint | slope  | plateau | R2   |
|------------|-----------|--------|---------|------|
| NGLY1_KO_1 | 48.01     | -0.064 | 0.15    | 0.98 |
| NGLY1_1    | 49.08     | -0.06  | 0.14    | 1    |
| NGLY1_KO_2 | 50.18     | -0.061 | 0.17    | 0.99 |
| NGLY1_2    | 50.23     | -0.079 | 0.27    | 0.98 |

Supplement: Supplementary file 788 [file 1]

IPI00737299.1|LOC391370

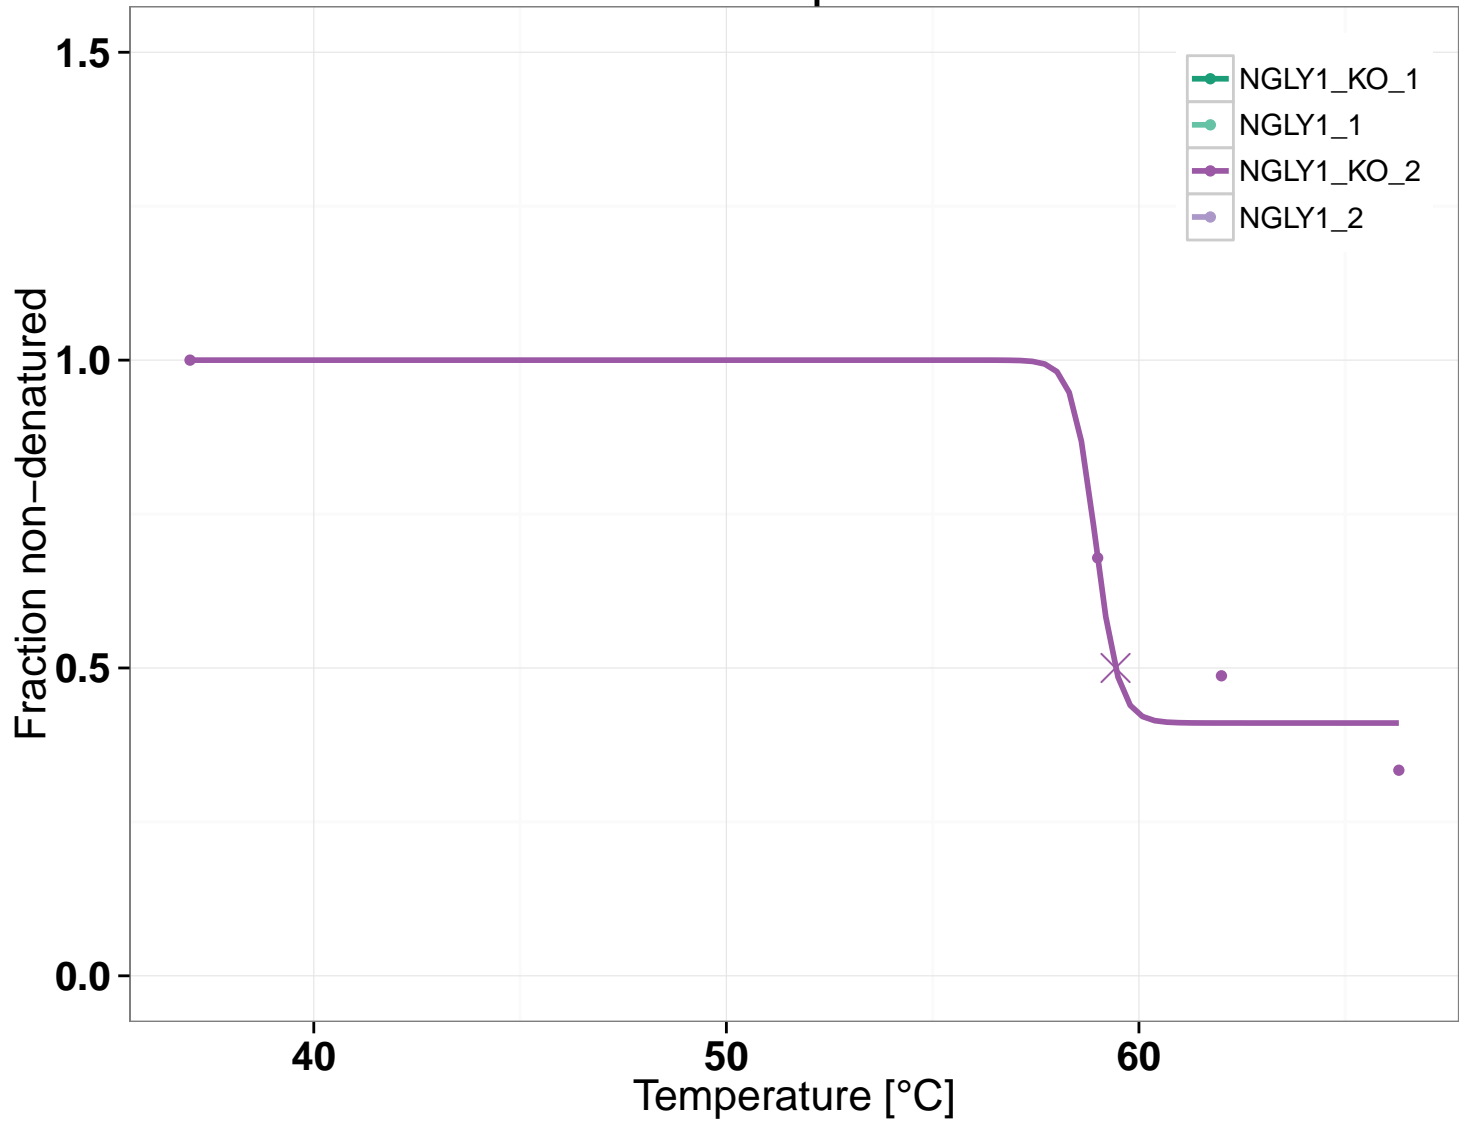

|            | meltPoint | slope | plateau | R2    |
|------------|-----------|-------|---------|-------|
| NGLY1_KO_1 | —         | —     | —       | —     |
| NGLY1_1    | —         | —     | —       | —     |
| NGLY1_KO_2 | 59.43     | -0.53 | 0.41    | -0.55 |
| NGLY1_2    | —         | —     | —       | —     |

Supplement: Supplementary file 789 [file 1]

IPI00166611.1|TTL

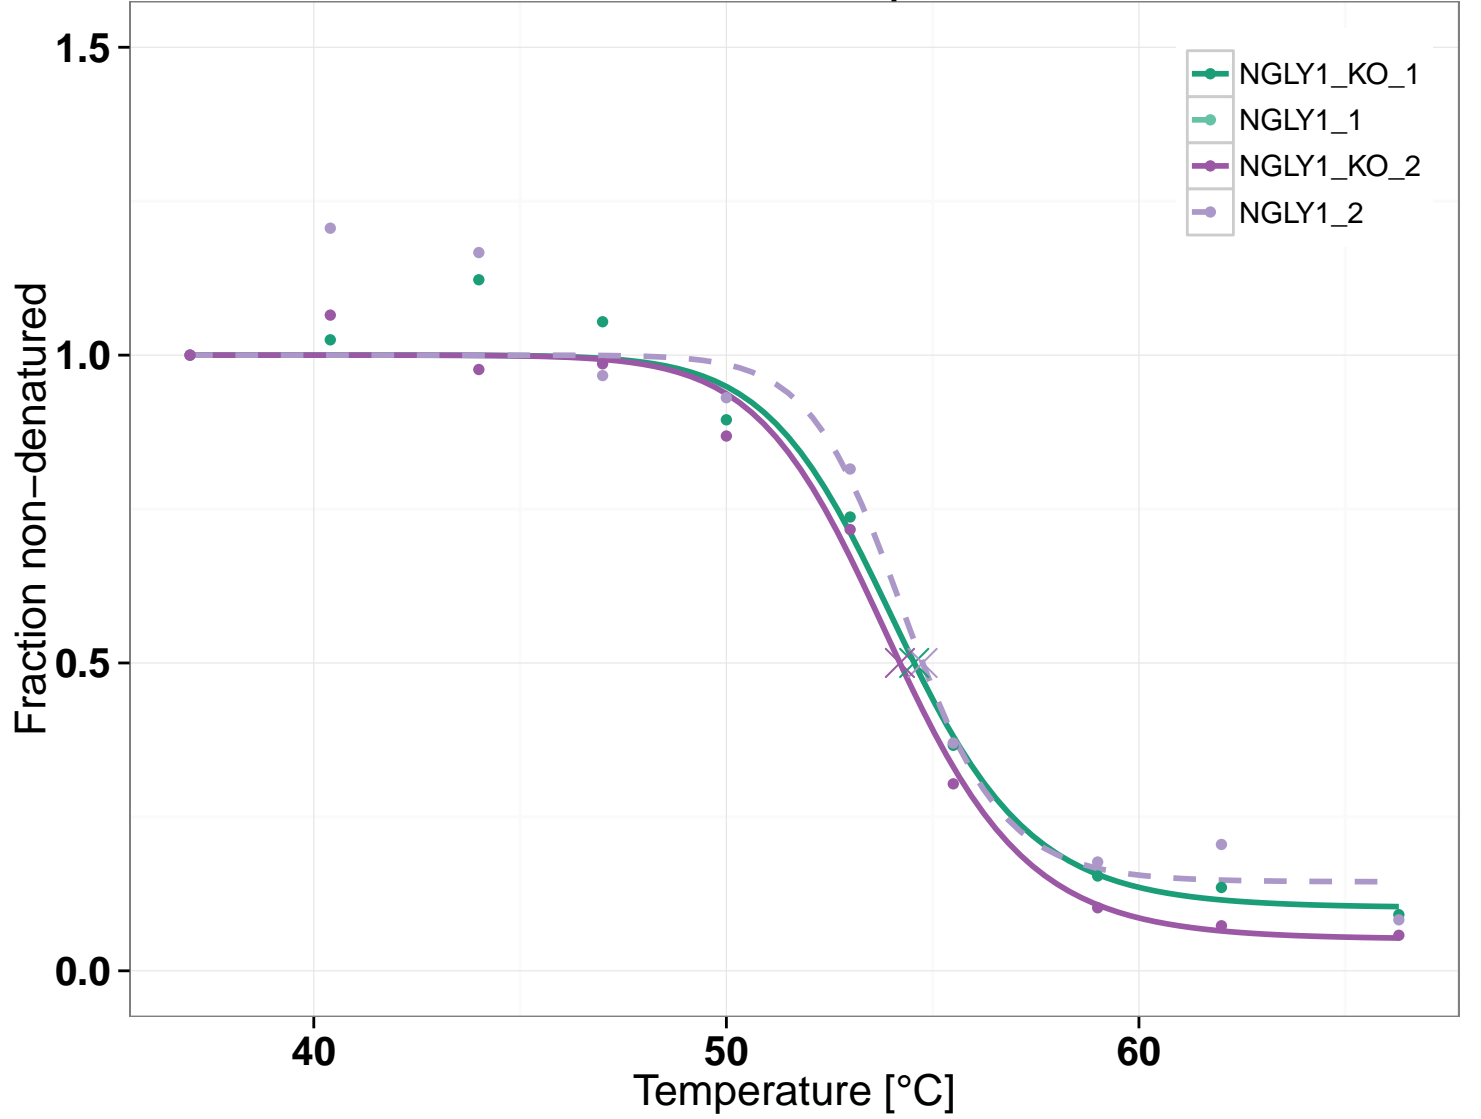

|            | meltPoint | slope | plateau | R2   |
|------------|-----------|-------|---------|------|
| NGLY1_KO_1 | 54.55     | -0.14 | 0.1     | 0.99 |
| NGLY1_1    | -         | -     | -       | -    |
| NGLY1_KO_2 | 54.21     | -0.14 | 0.05    | 0.99 |
| NGLY1_2    | 54.76     | -0.18 | 0.14    | 0.95 |

Supplement: Supplementary file 790 [file 1]

# IPI00000643.1|BAG2

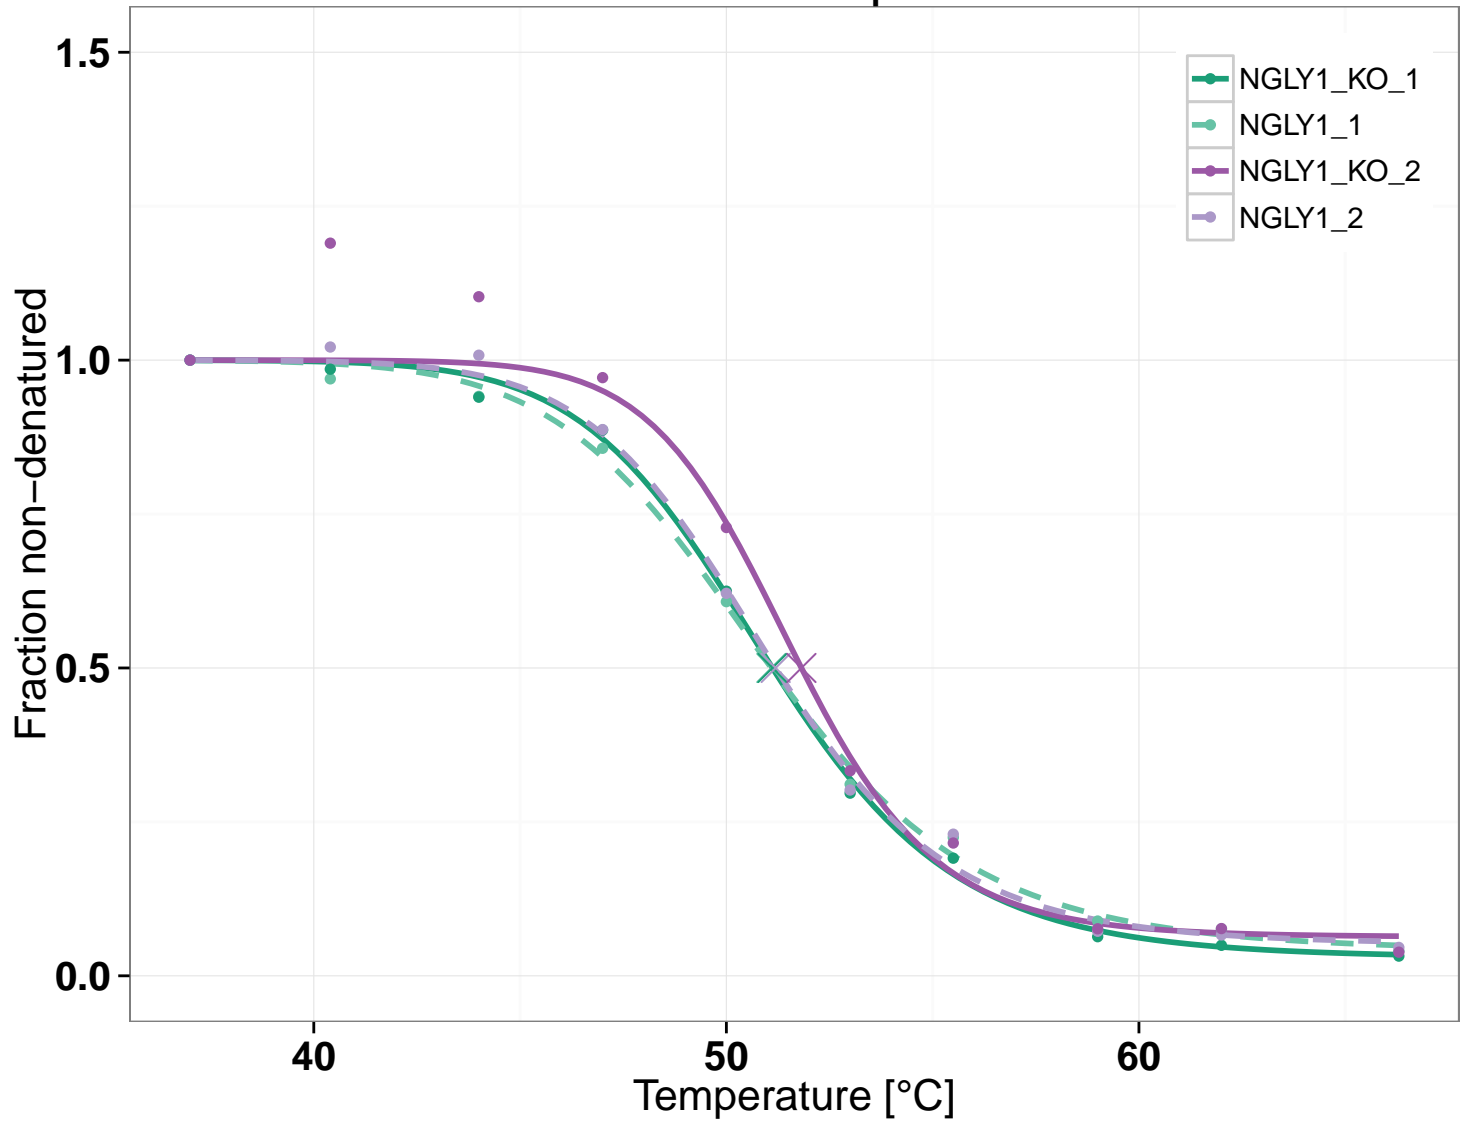

|            | meltPoint | slope  | plateau | R2   |
|------------|-----------|--------|---------|------|
| NGLY1_KO_1 | 51.12     | -0.11  | 0.03    | 1    |
| NGLY1_1    | 51.09     | -0.094 | 0.04    | 1    |
| NGLY1_KO_2 | 51.82     | -0.13  | 0.06    | 0.97 |
| NGLY1_2    | 51.2      | -0.11  | 0.05    | 1    |

Supplement: Supplementary file 791 [file 1]

IPI00893199.2|COX7A2L

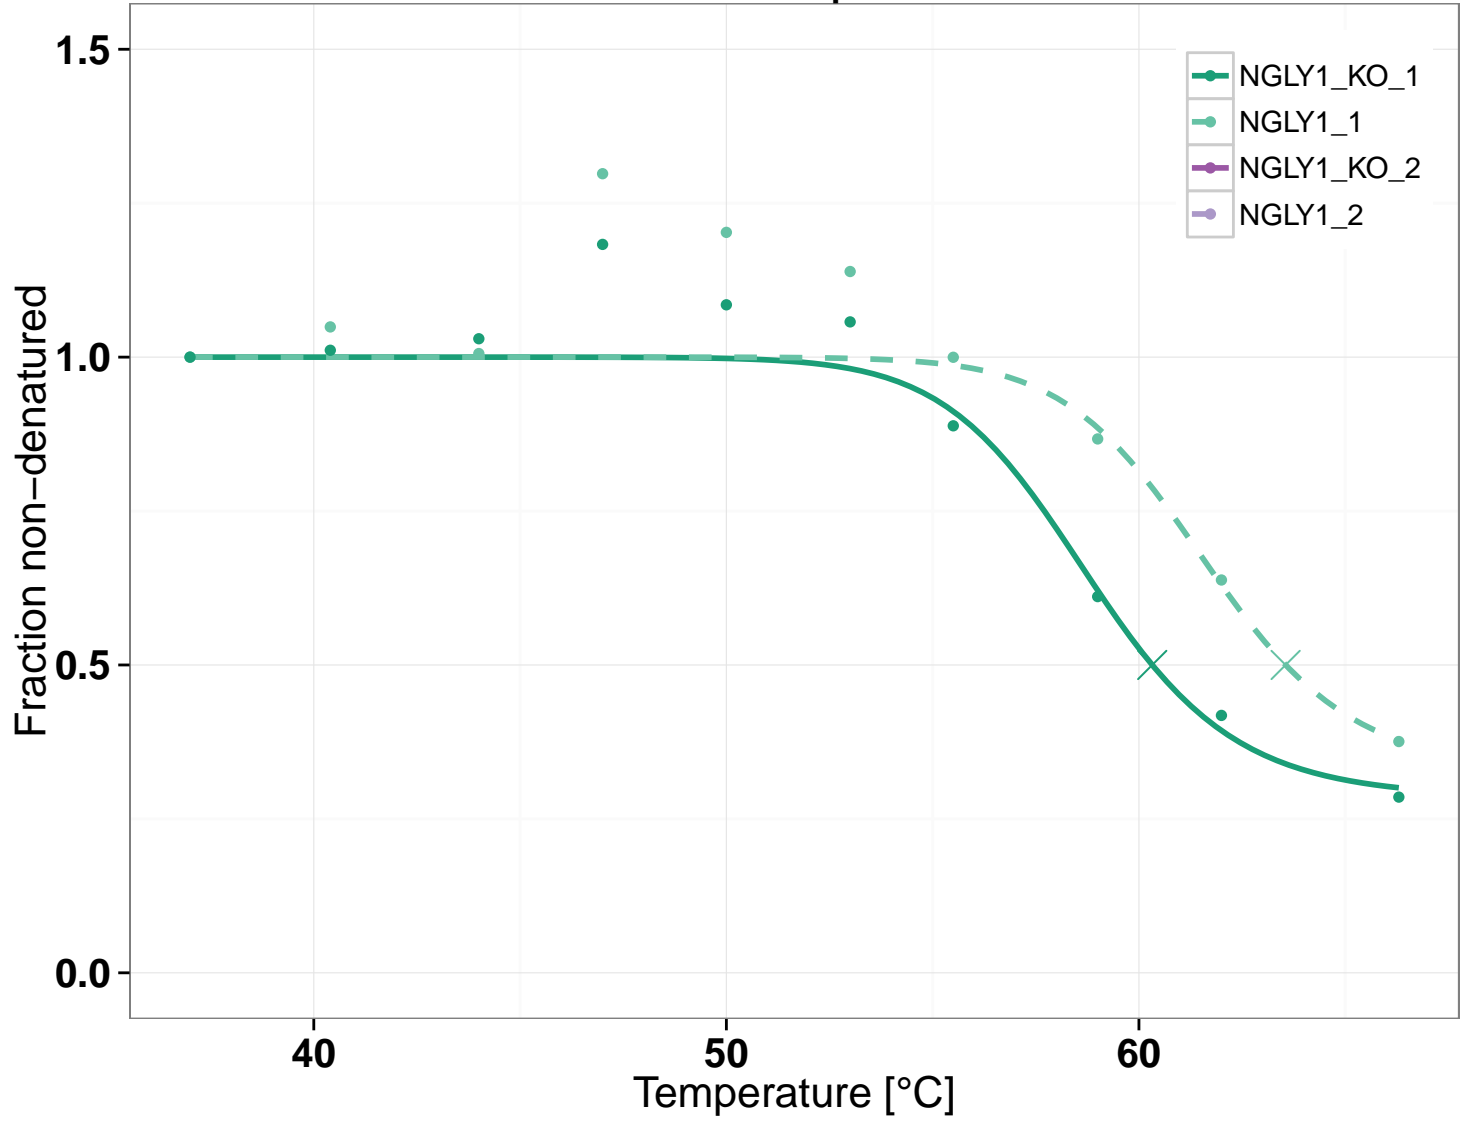

|            | meltPoint | slope  | plateau | R2   |
|------------|-----------|--------|---------|------|
| NGLY1_KO_1 | 60.32     | -0.1   | 0.28    | 0.94 |
| NGLY1_1    | 63.56     | -0.097 | 0.32    | 0.77 |
| NGLY1_KO_2 | -         | -      | -       | -    |
| NGLY1_2    | -         | -      | -       | -    |

Supplement: Supplementary file 792 [file 1]

# IPI00060200.3|GALM

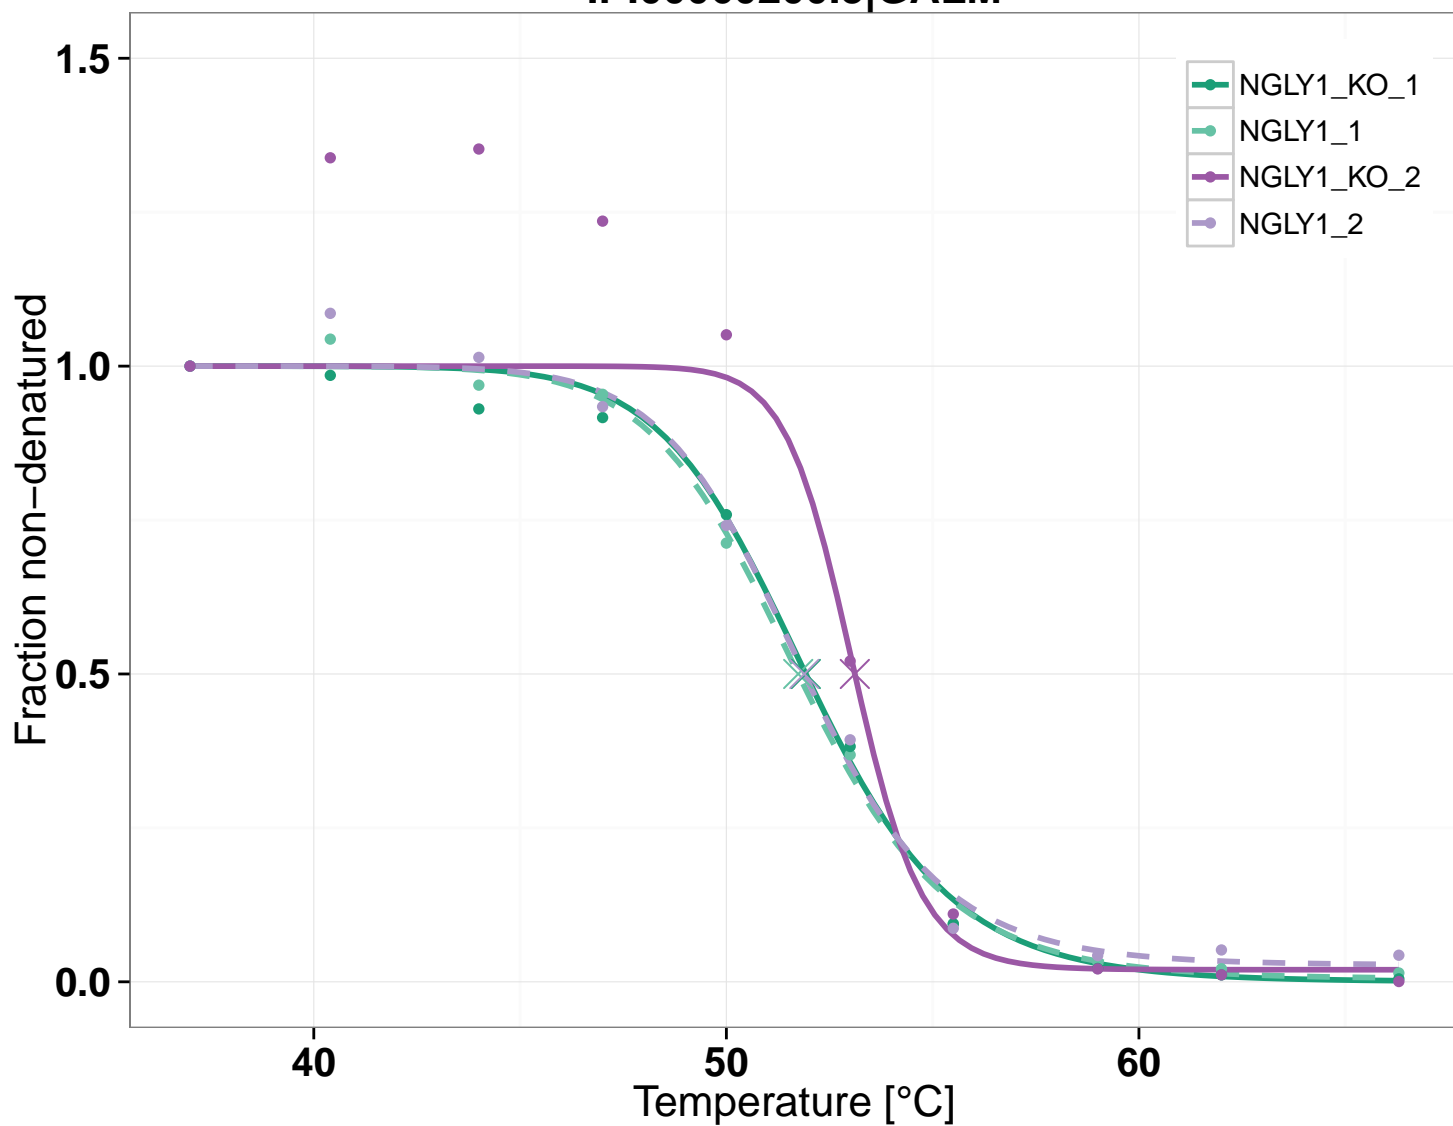

|            | meltPoint | slope | plateau | R2   |
|------------|-----------|-------|---------|------|
| NGLY1_KO_1 | 51.93     | -0.14 | 0       | 1    |
| NGLY1_1    | 51.74     | -0.14 | 0       | 1    |
| NGLY1_KO_2 | 53.11     | -0.3  | 0.02    | 0.9  |
| NGLY1_2    | 51.89     | -0.14 | 0.03    | 0.99 |

Supplement: Supplementary file 793 [file 1]

# IPI00294455.1|UGT8

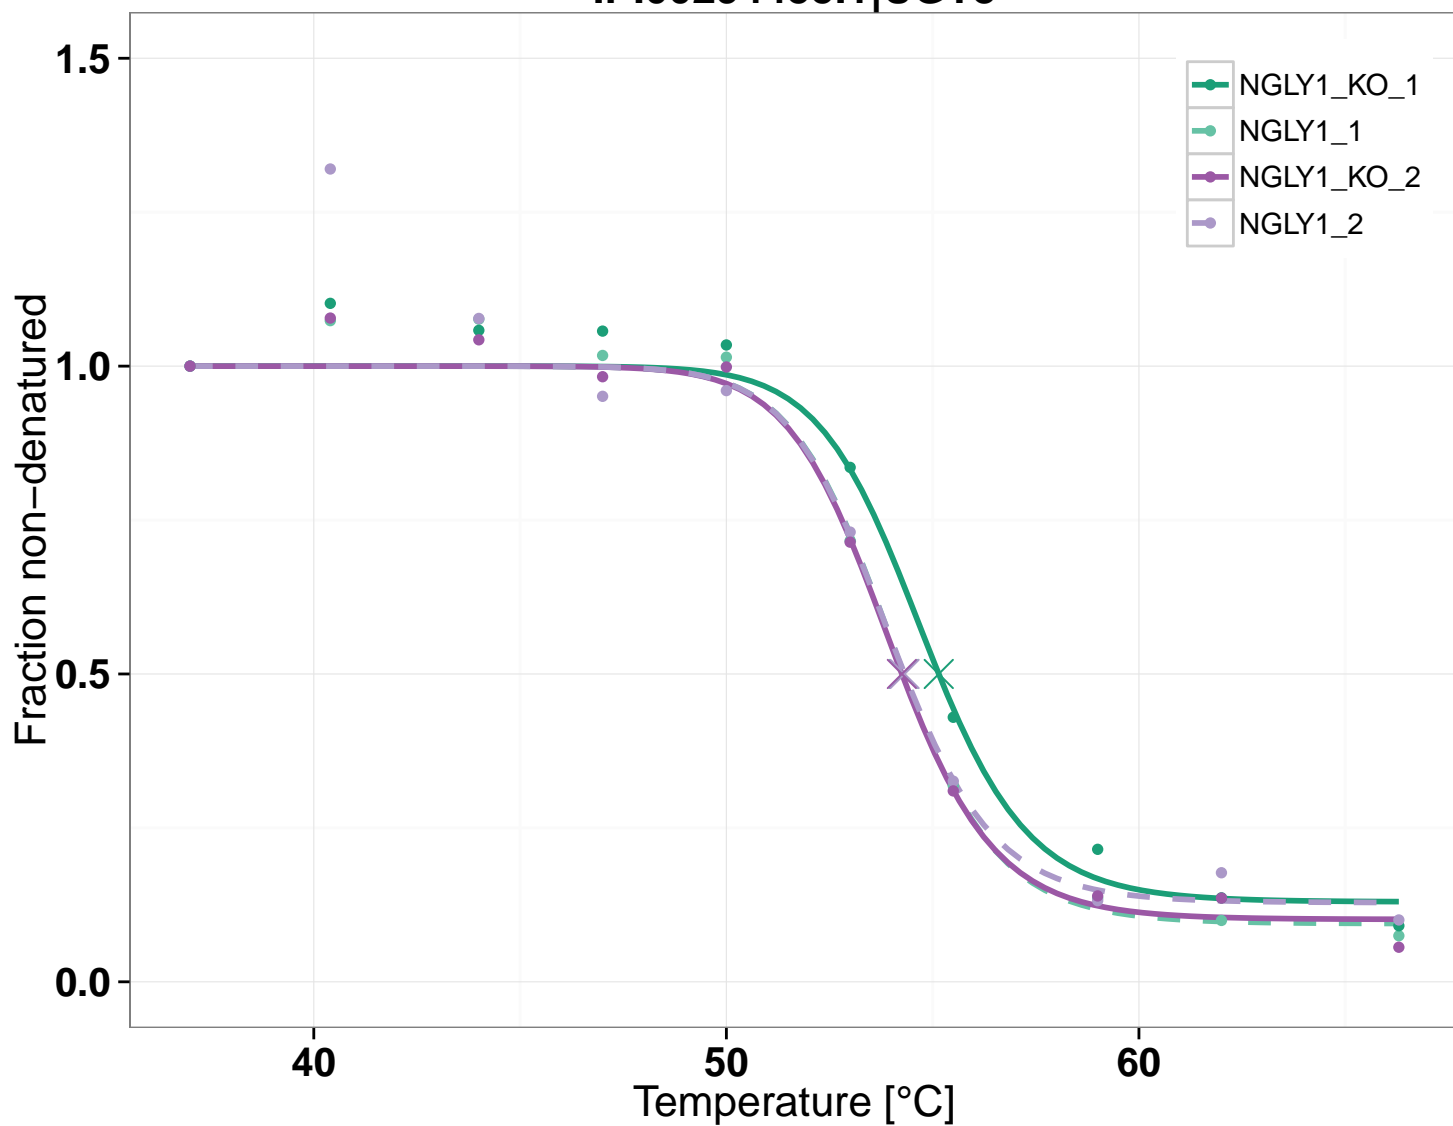

|            | meltPoint | slope | plateau | R2   |
|------------|-----------|-------|---------|------|
| NGLY1_KO_1 | 55.15     | -0.17 | 0.13    | 0.99 |
| NGLY1_1    | 54.3      | -0.18 | 0.09    | 0.99 |
| NGLY1_KO_2 | 54.25     | -0.18 | 0.1     | 0.99 |
| NGLY1_2    | 54.32     | -0.18 | 0.13    | 0.94 |

Supplement: Supplementary file 794 [file 1]

IPI00306354.3|PLEKHA1

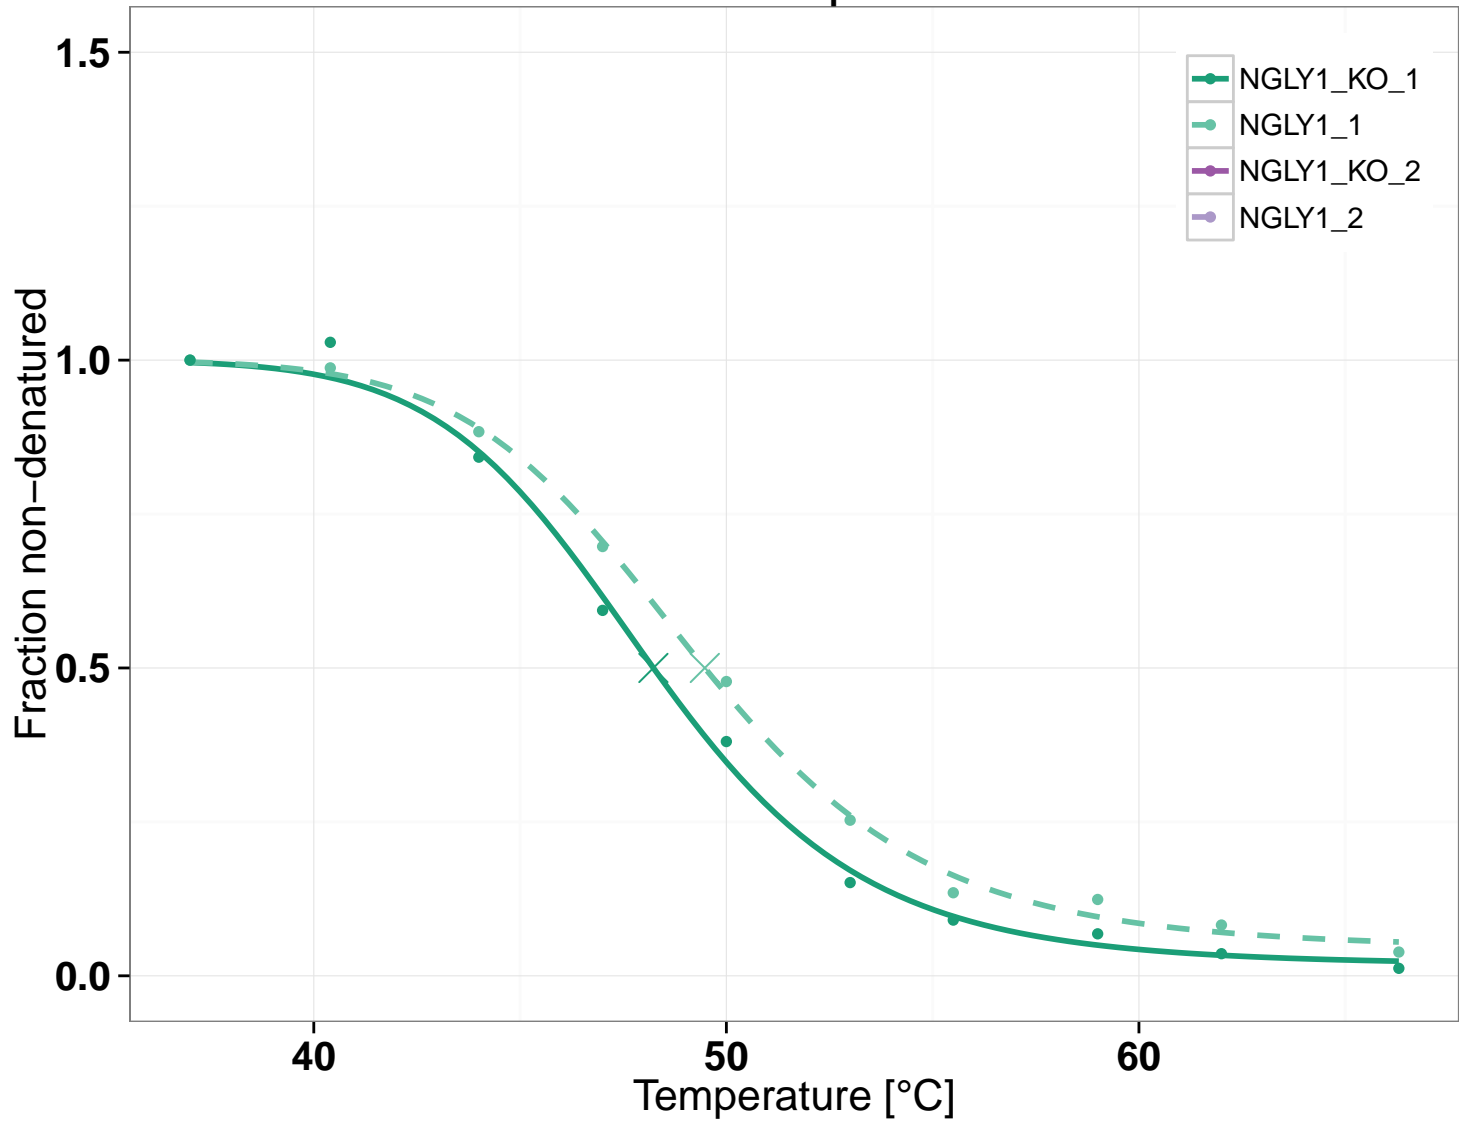

|            | meltPoint | slope  | plateau | R2 |
|------------|-----------|--------|---------|----|
| NGLY1_KO_1 | 48.23     | -0.095 | 0.02    | 1  |
| NGLY1_1    | 49.48     | -0.085 | 0.04    | 1  |
| NGLY1_KO_2 | -         | -      | -       | -  |
| NGLY1_2    | -         | -      | -       | -  |

Supplement: Supplementary file 795 [file 1]

IPI00869339.4|ZNF187

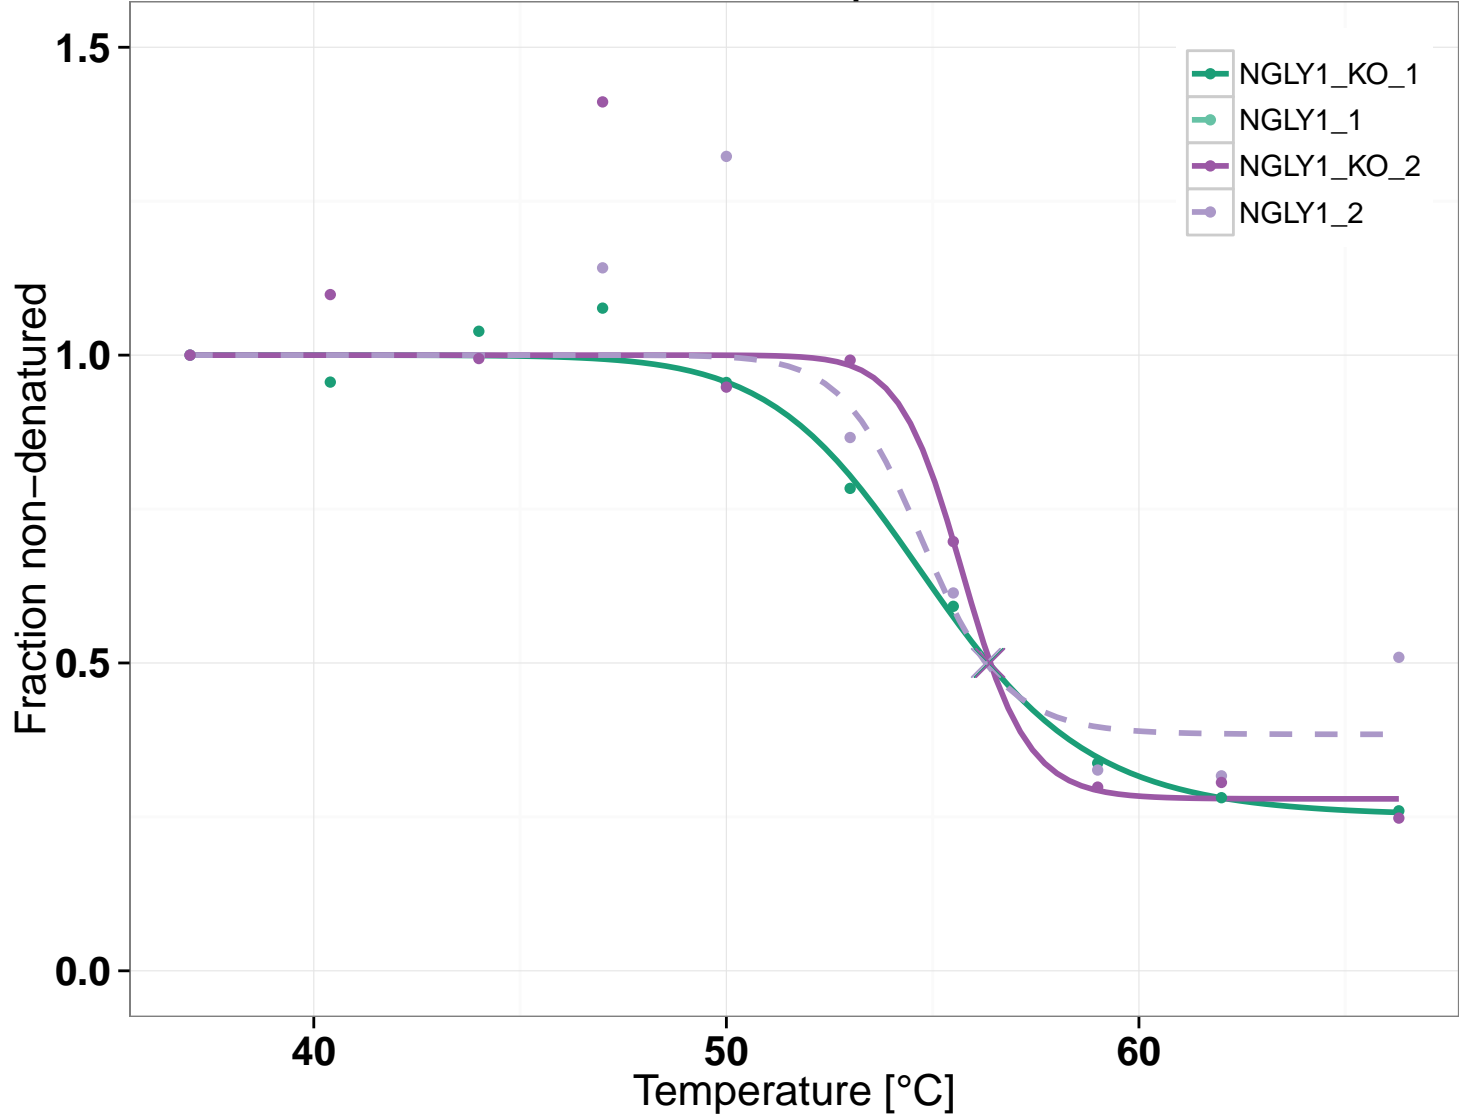

|            | meltPoint | slope  | plateau | R2   |
|------------|-----------|--------|---------|------|
| NGLY1_KO_1 | 56.36     | -0.096 | 0.25    | 0.99 |
| NGLY1_1    | -         | -      | -       | -    |
| NGLY1_KO_2 | 56.4      | -0.23  | 0.28    | 0.87 |
| NGLY1_2    | 56.29     | -0.15  | 0.38    | 0.56 |

Supplement: Supplementary file 796 [file 1]

IPI00477982.1|RPS6KA1

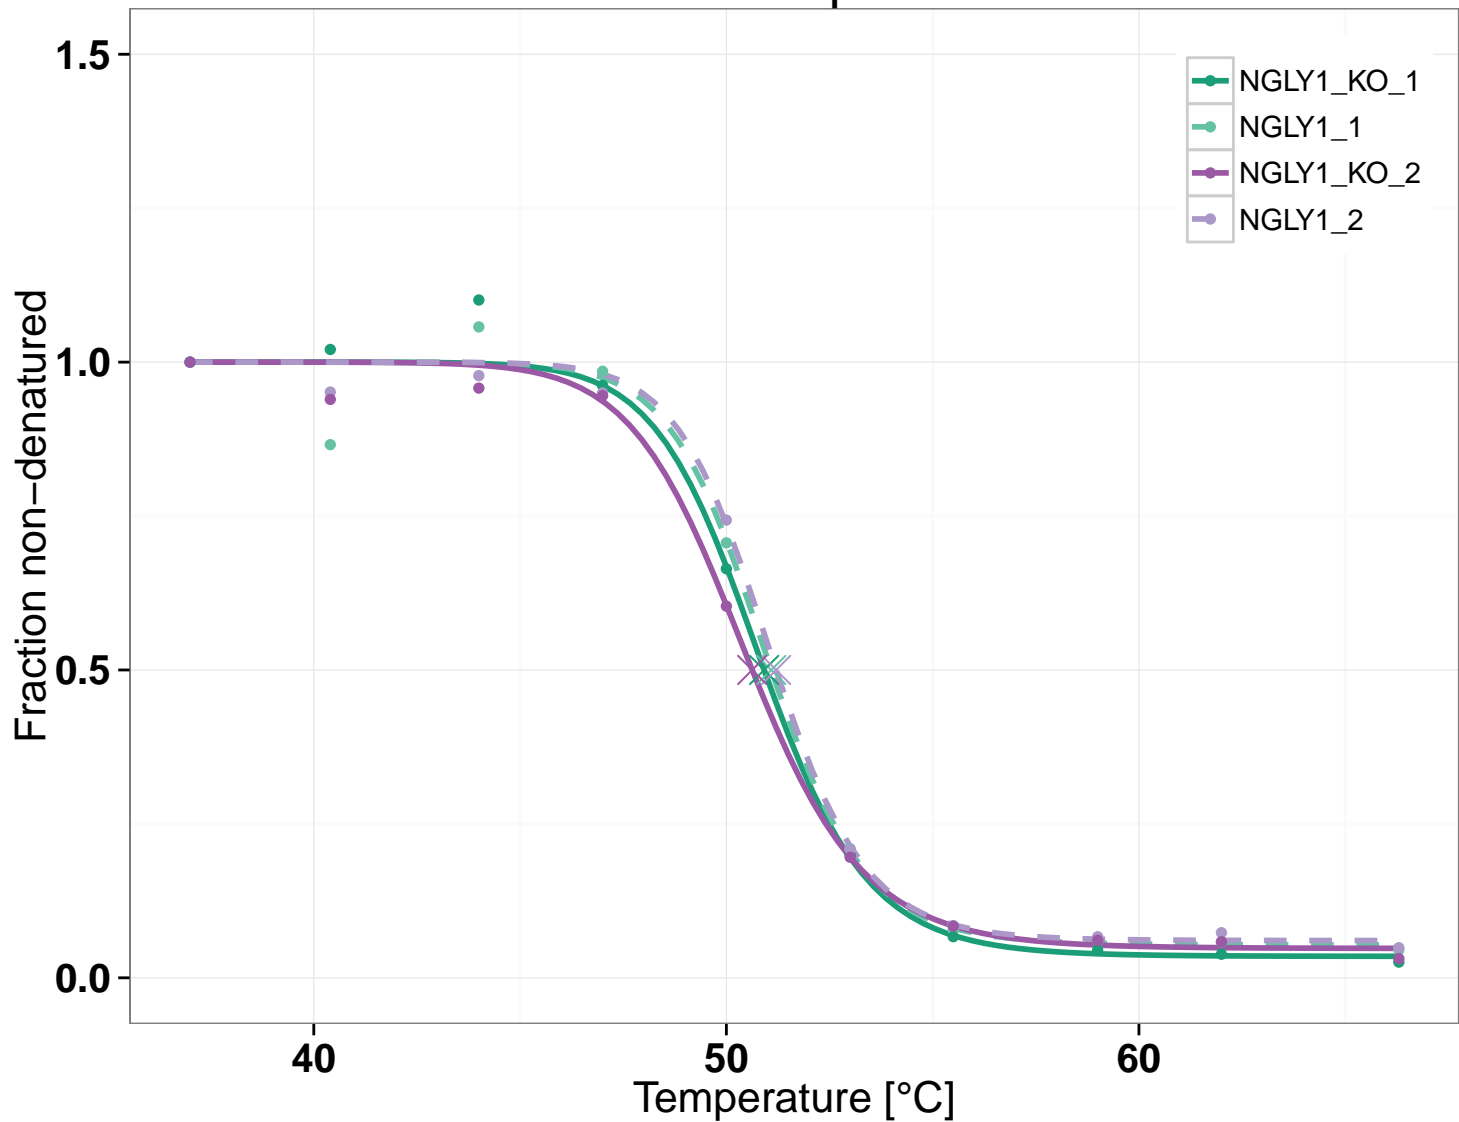

|            | meltPoint | slope | plateau | R2   |
|------------|-----------|-------|---------|------|
| NGLY1_KO_1 | 50.92     | -0.19 | 0.03    | 0.99 |
| NGLY1_1    | 51.09     | -0.2  | 0.05    | 0.99 |
| NGLY1_KO_2 | 50.63     | -0.17 | 0.05    | 1    |
| NGLY1_2    | 51.21     | -0.21 | 0.06    | 1    |

Supplement: Supplementary file 798 [file 1]

IPI00400875.2|USP6NL

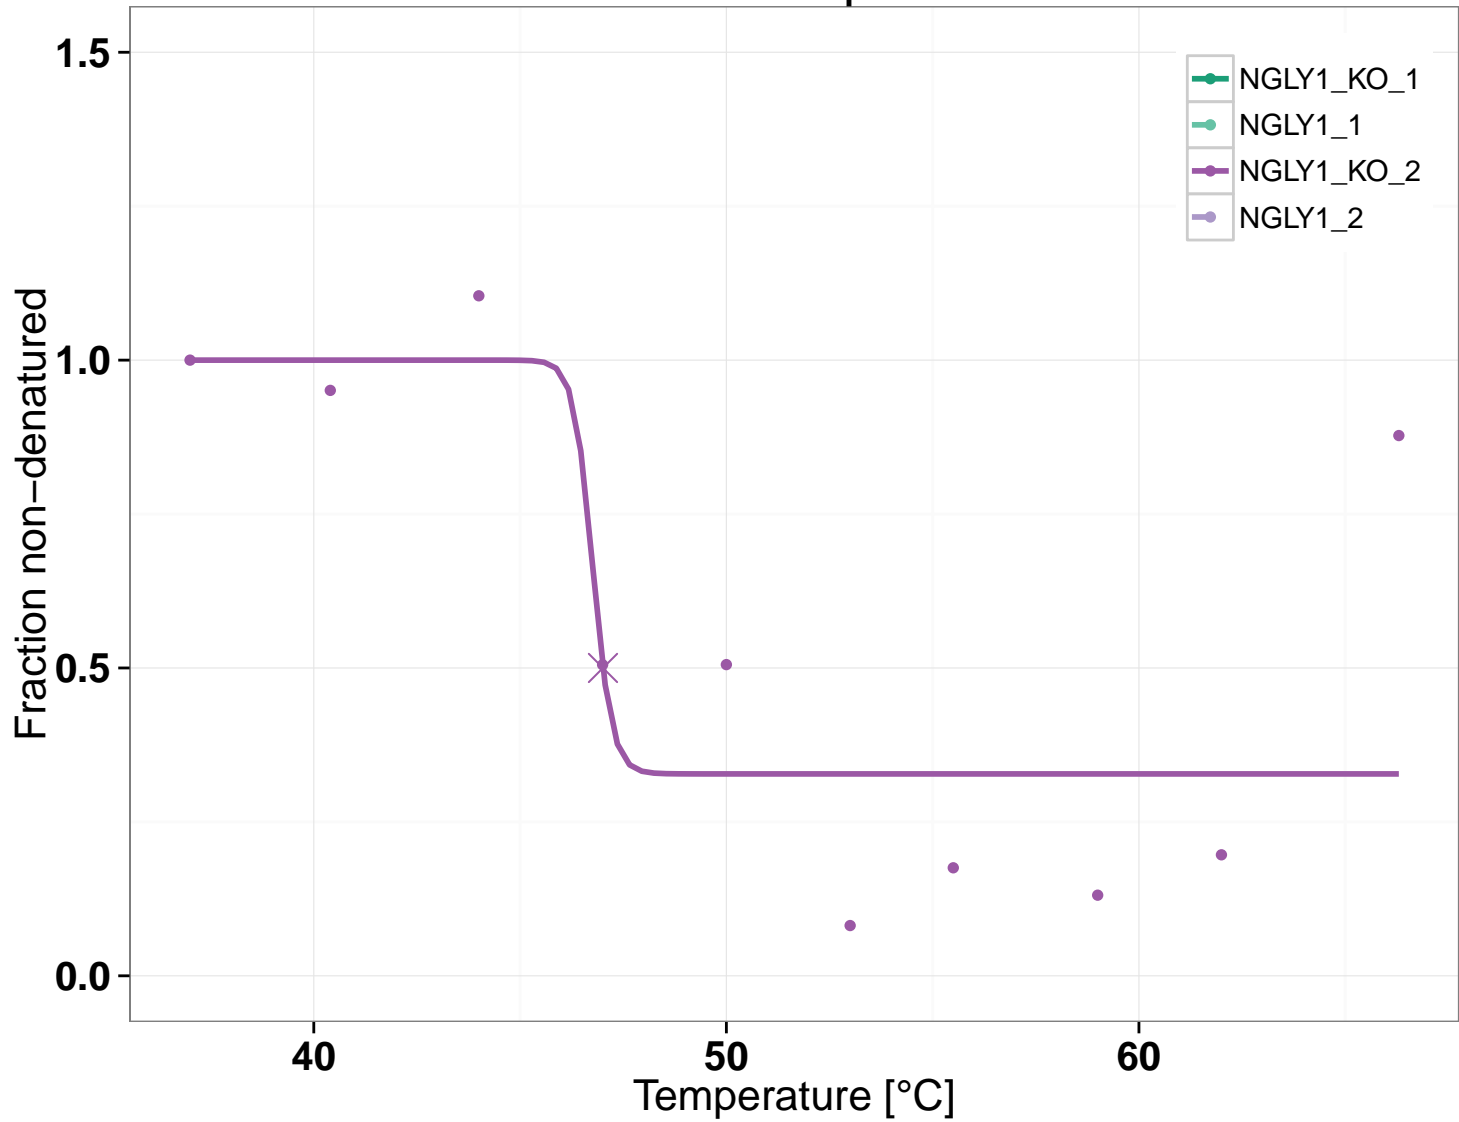

|            | meltPoint | slope | plateau | R2   |
|------------|-----------|-------|---------|------|
| NGLY1_KO_1 | —         | —     | —       | —    |
| NGLY1_1    | —         | —     | —       | —    |
| NGLY1_KO_2 | 47.01     | -0.73 | 0.33    | 0.66 |
| NGLY1_2    | —         | —     | —       | —    |

Supplement: Supplementary file 799 [file 1]

# IPI00100463.1|CUEDC2

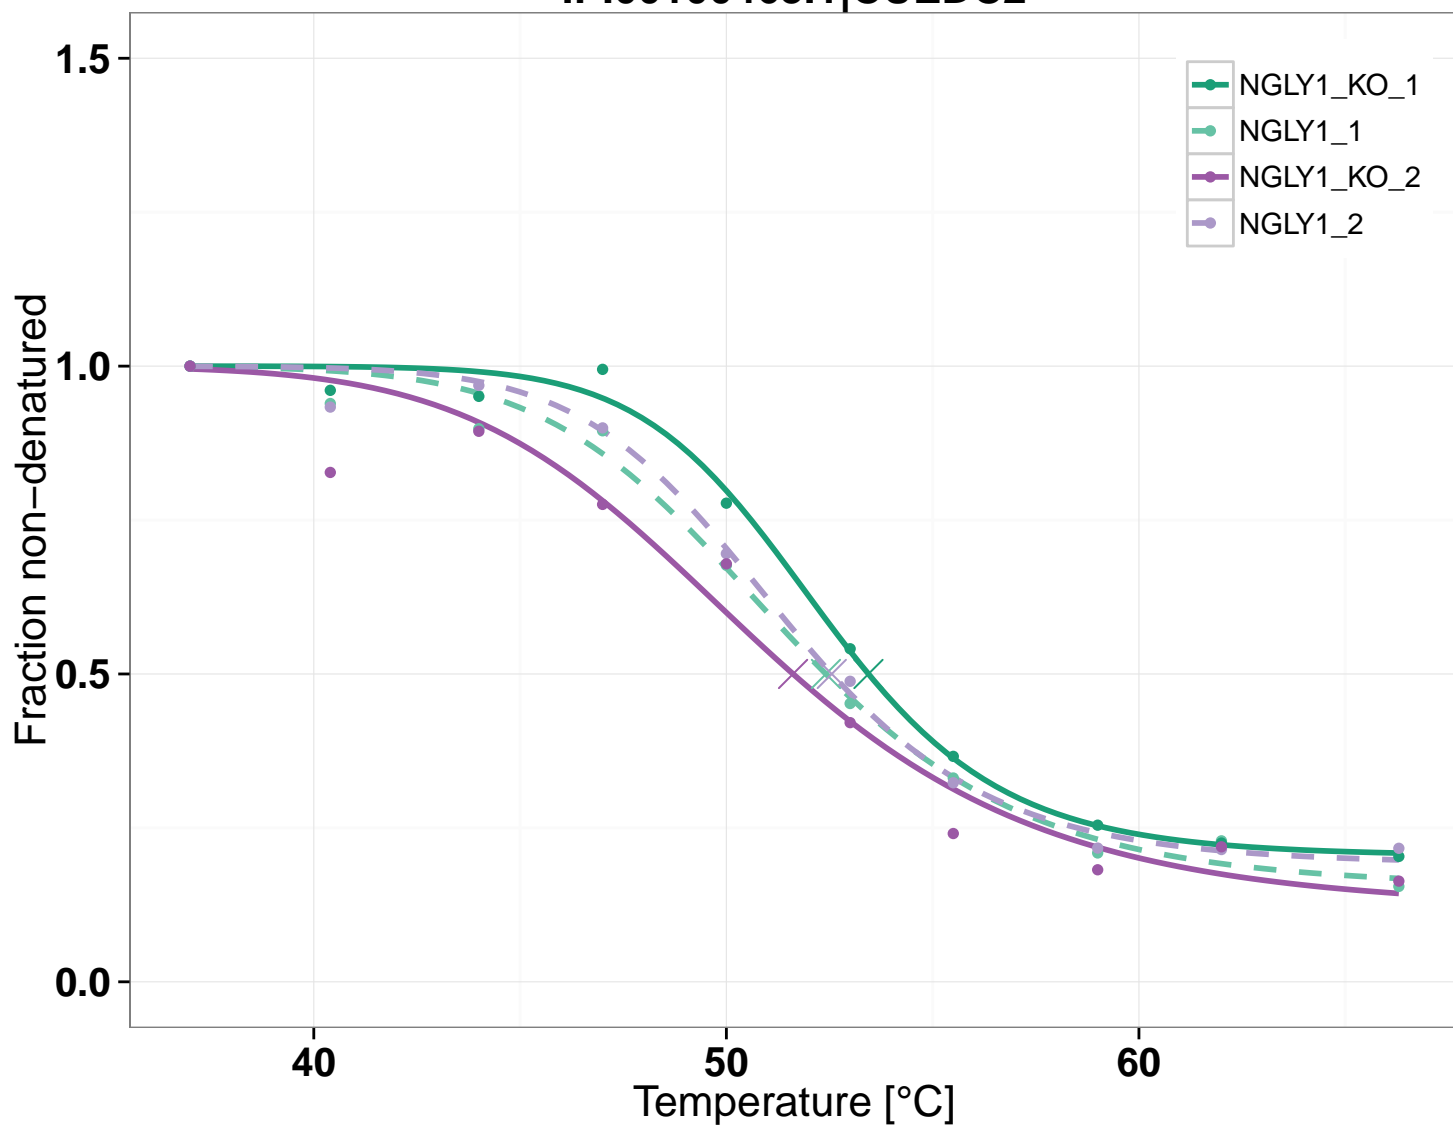

|            | meltPoint | slope  | plateau | R2   |
|------------|-----------|--------|---------|------|
| NGLY1_KO_1 | 53.44     | -0.091 | 0.2     | 0.99 |
| NGLY1_1    | 52.41     | -0.073 | 0.15    | 0.99 |
| NGLY1_KO_2 | 51.62     | -0.064 | 0.11    | 0.96 |
| NGLY1_2    | 52.55     | -0.082 | 0.19    | 0.99 |

Supplement: Supplementary file 800 [file 1]

IPI00305166.2|SDHA

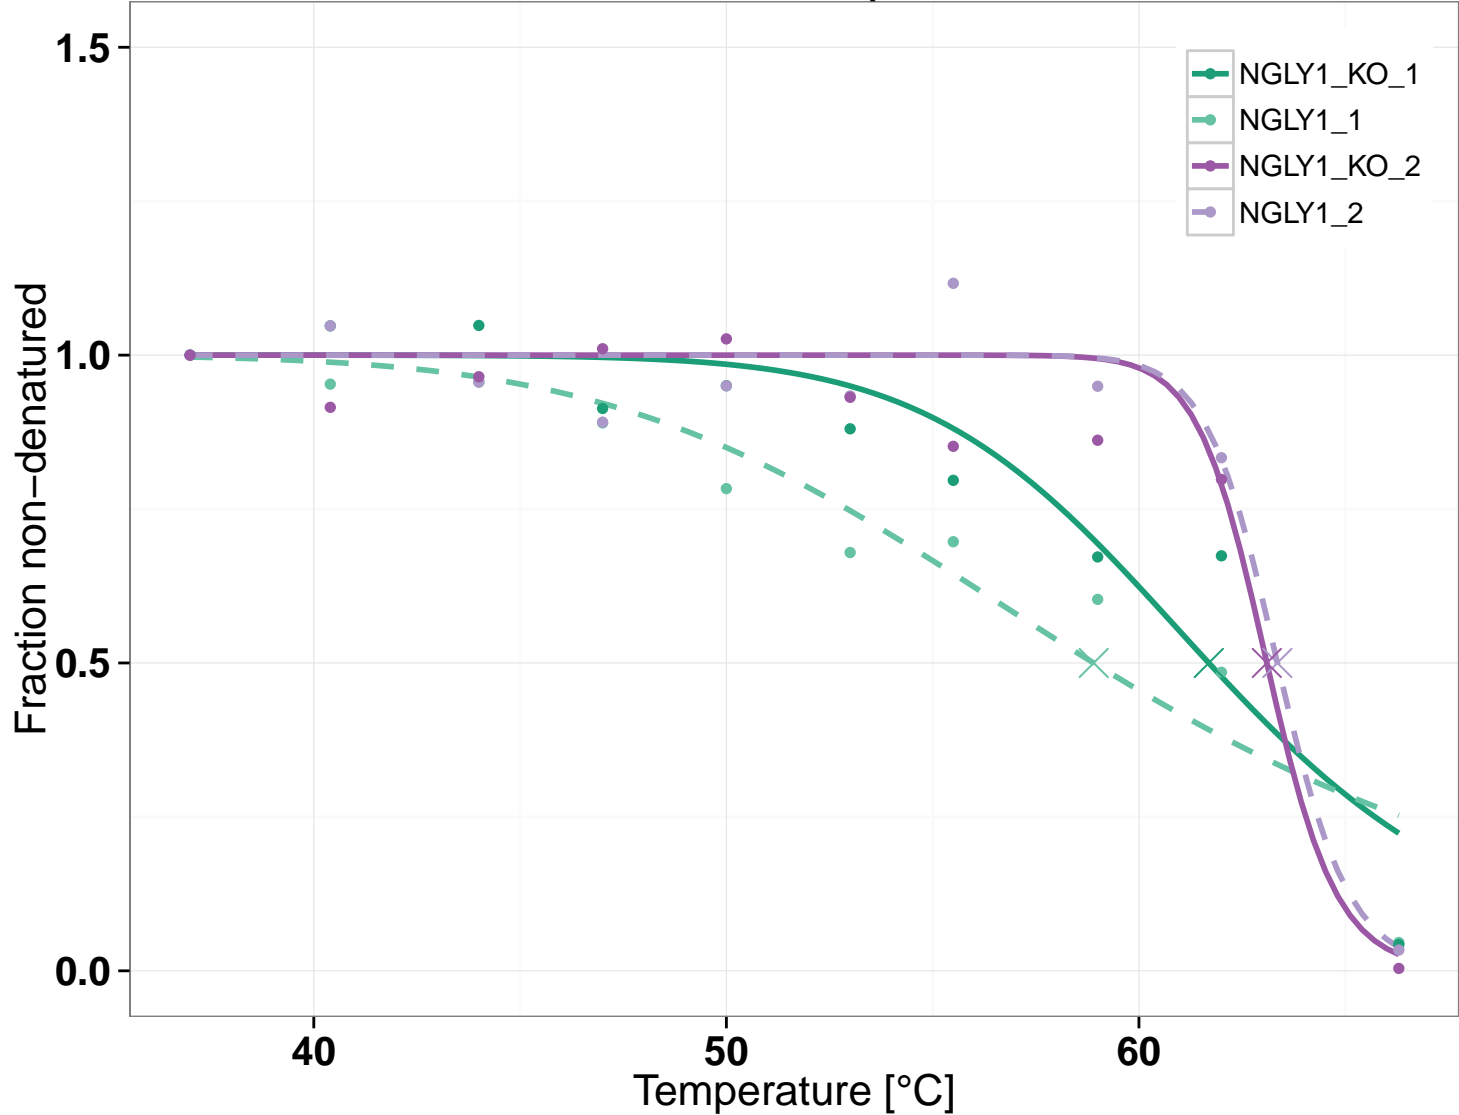

|            | meltPoint | slope  | plateau | R2   |
|------------|-----------|--------|---------|------|
| NGLY1_KO_1 | 61.69     | -0.074 | 0       | 0.88 |
| NGLY1_1    | 58.9      | -0.043 | 0       | 0.89 |
| NGLY1_KO_2 | 63.1      | -0.3   | 0       | 0.93 |
| NGLY1_2    | 63.36     | -0.29  | 0       | 0.95 |

Supplement: Supplementary file 801 [file 1]

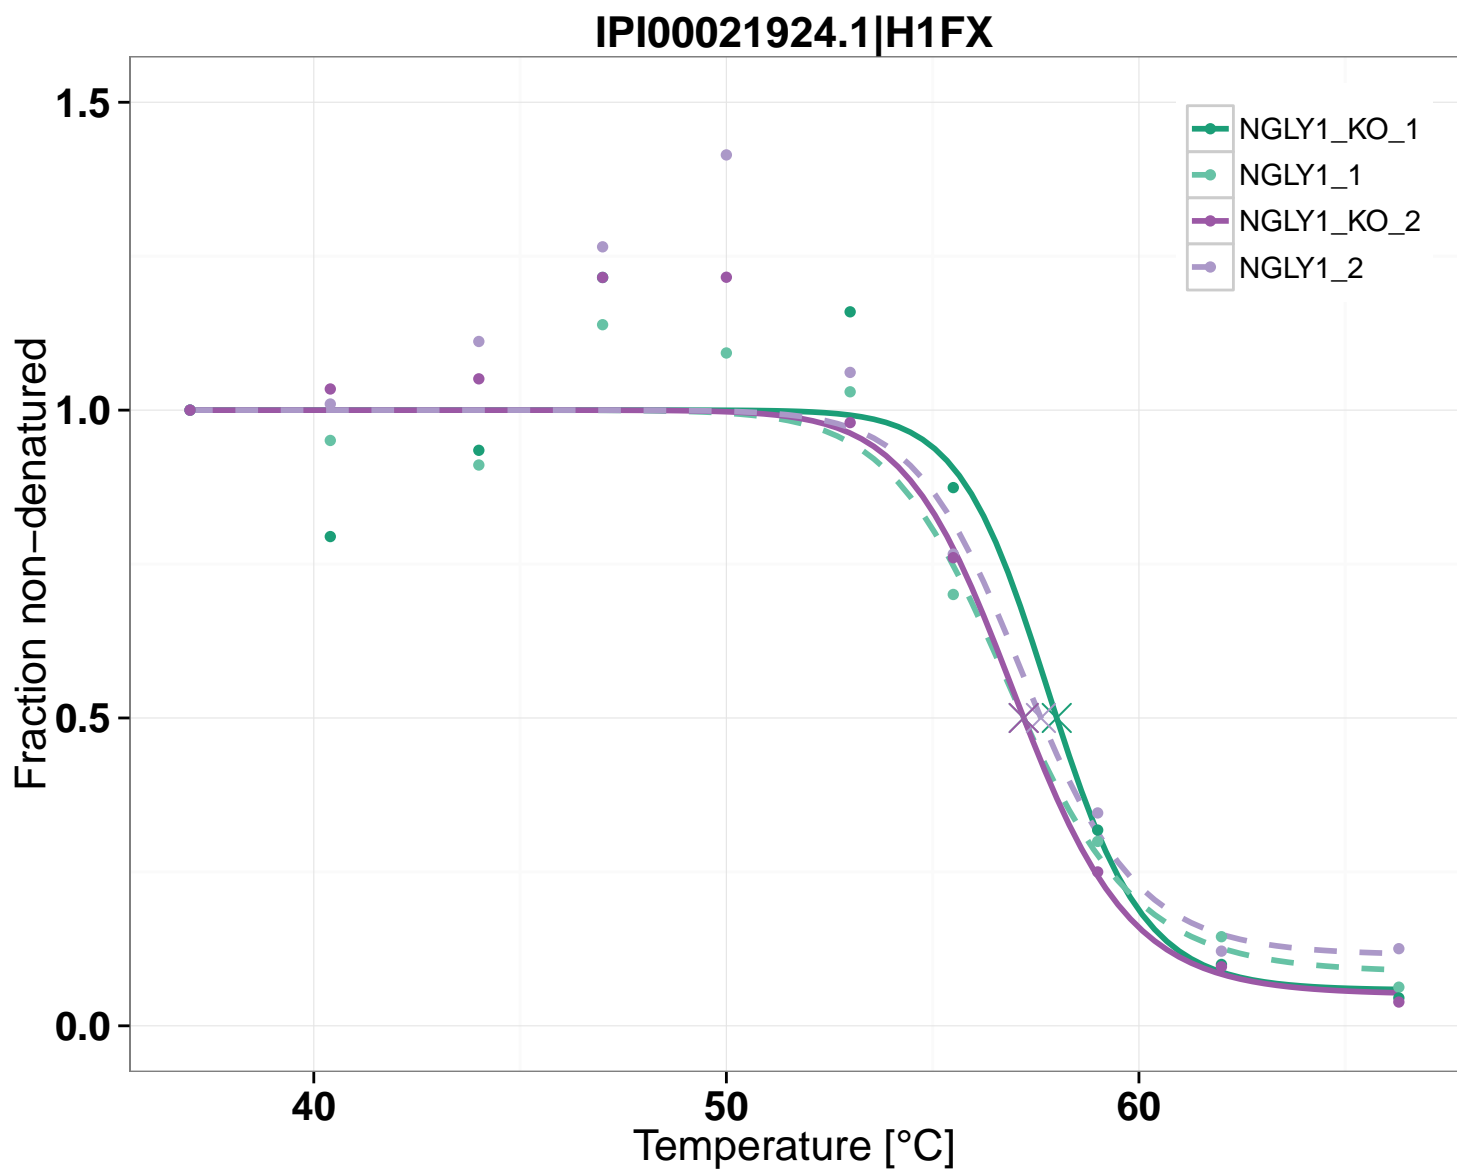

|            | meltPoint | slope | plateau | R2   |
|------------|-----------|-------|---------|------|
| NGLY1_KO_1 | 58.01     | -0.21 | 0.06    | 0.78 |
| NGLY1_1    | 57.2      | -0.15 | 0.09    | 0.97 |
| NGLY1_KO_2 | 57.21     | -0.17 | 0.05    | 0.95 |
| NGLY1_2    | 57.62     | -0.16 | 0.11    | 0.86 |

Supplement: Supplementary file 802 [file 1]

# IPI00180454.4|UTP11L

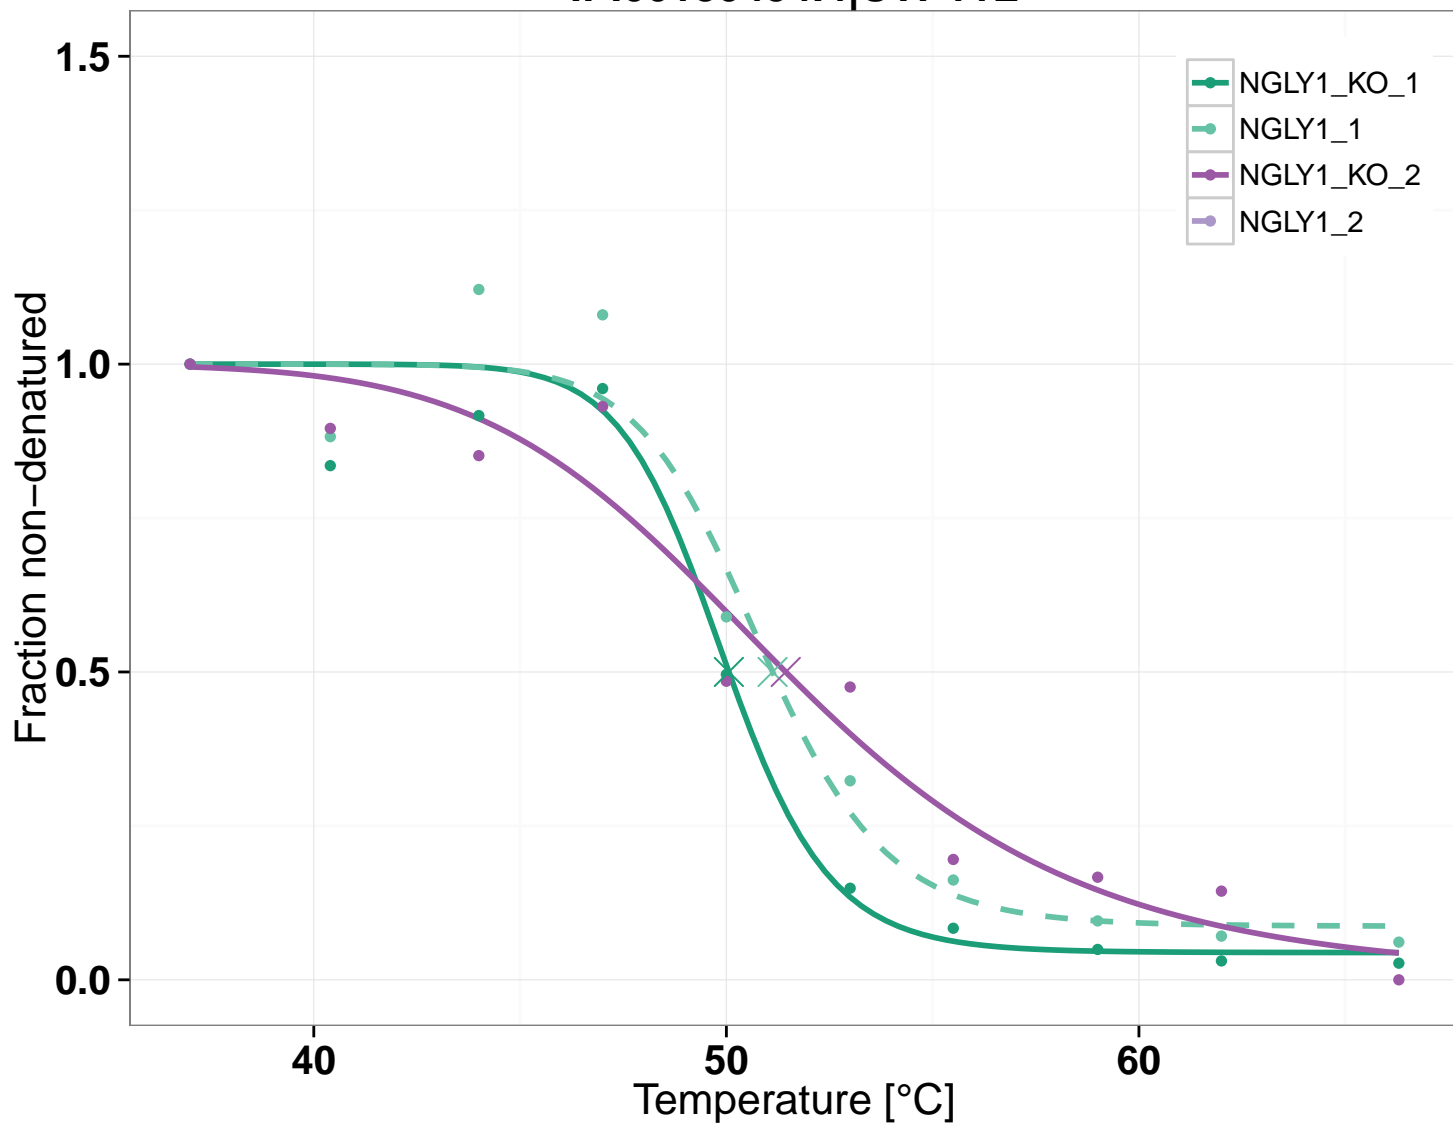

|            | meltPoint | slope  | plateau | R2   |
|------------|-----------|--------|---------|------|
| NGLY1_KO_1 | 50.06     | -0.19  | 0.04    | 0.98 |
| NGLY1_1    | 51.12     | -0.15  | 0.09    | 0.97 |
| NGLY1_KO_2 | 51.44     | -0.068 | 0       | 0.95 |
| NGLY1_2    | —         | —      | —       | —    |

Supplement: Supplementary file 803 [file 1]

IPI00060569.1|ABHD12

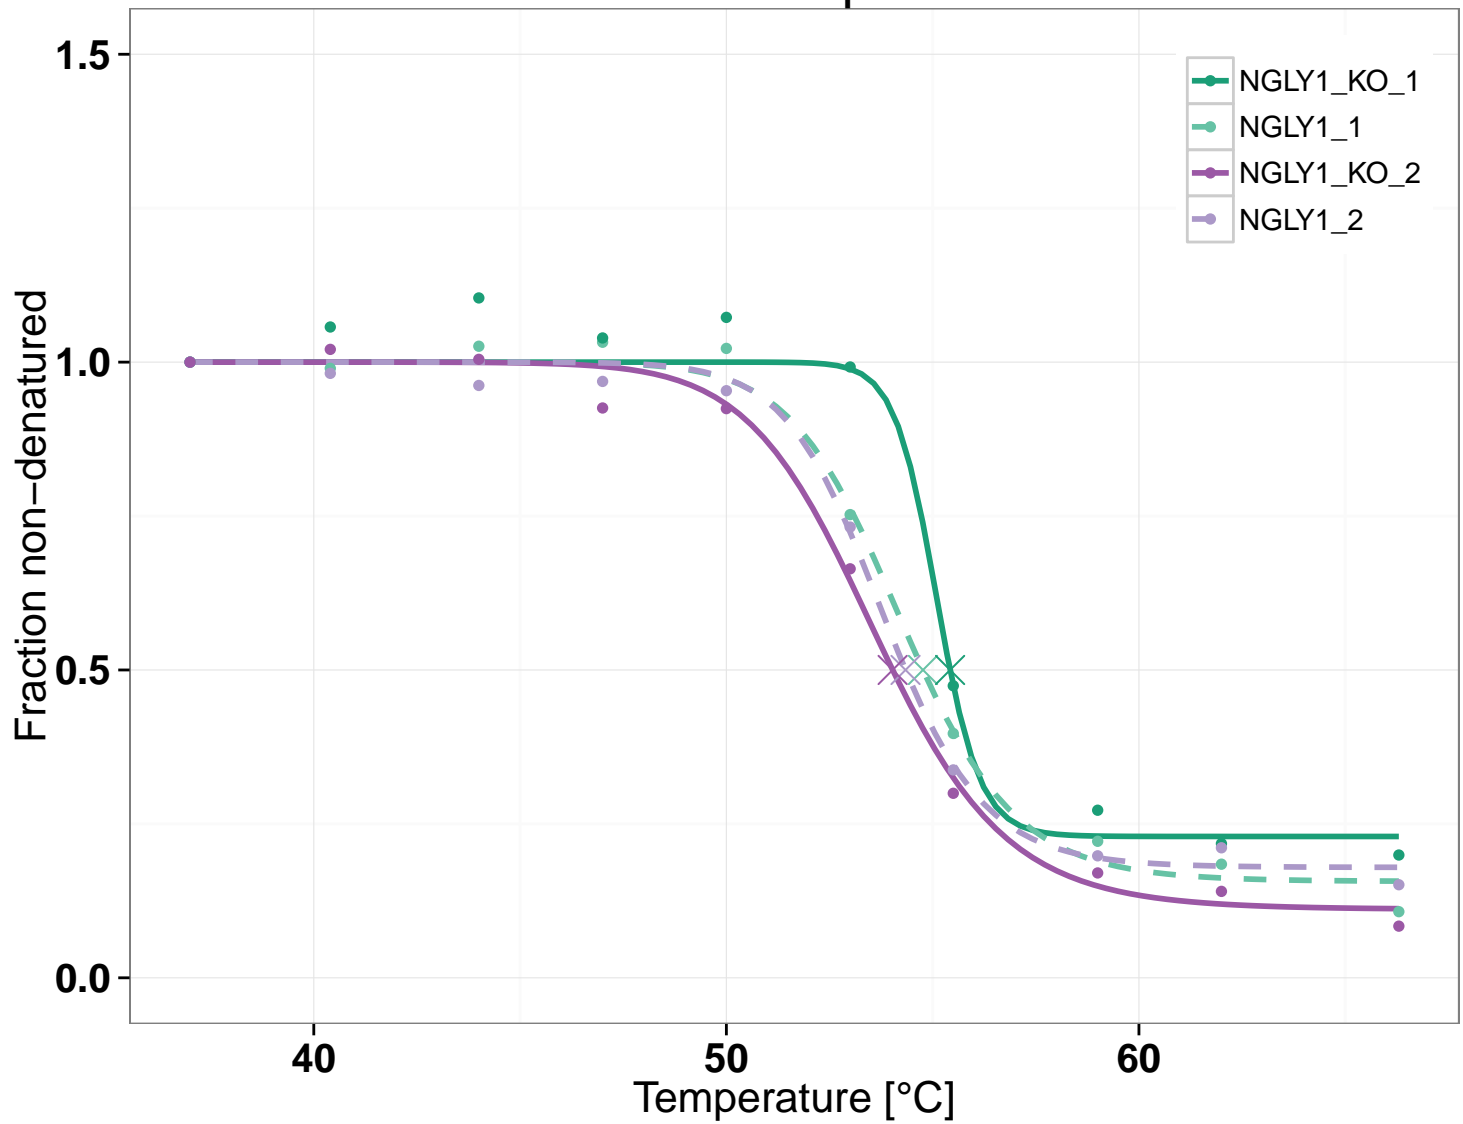

|            | meltPoint | slope | plateau | R2   |
|------------|-----------|-------|---------|------|
| NGLY1_KO_1 | 55.42     | -0.37 | 0.23    | 0.98 |
| NGLY1_1    | 54.77     | -0.16 | 0.16    | 0.99 |
| NGLY1_KO_2 | 54.03     | -0.14 | 0.11    | 0.99 |
| NGLY1_2    | 54.34     | -0.17 | 0.18    | 1    |

Supplement: Supplementary file 804 [file 1]
