# Supplementary material (part 9 of 85)
Source: publisher figshare collection journal article supplement (https://gsajournals.figshare.com/articles/dataset/_/12014913)

IPI00306406.4|RIOK2

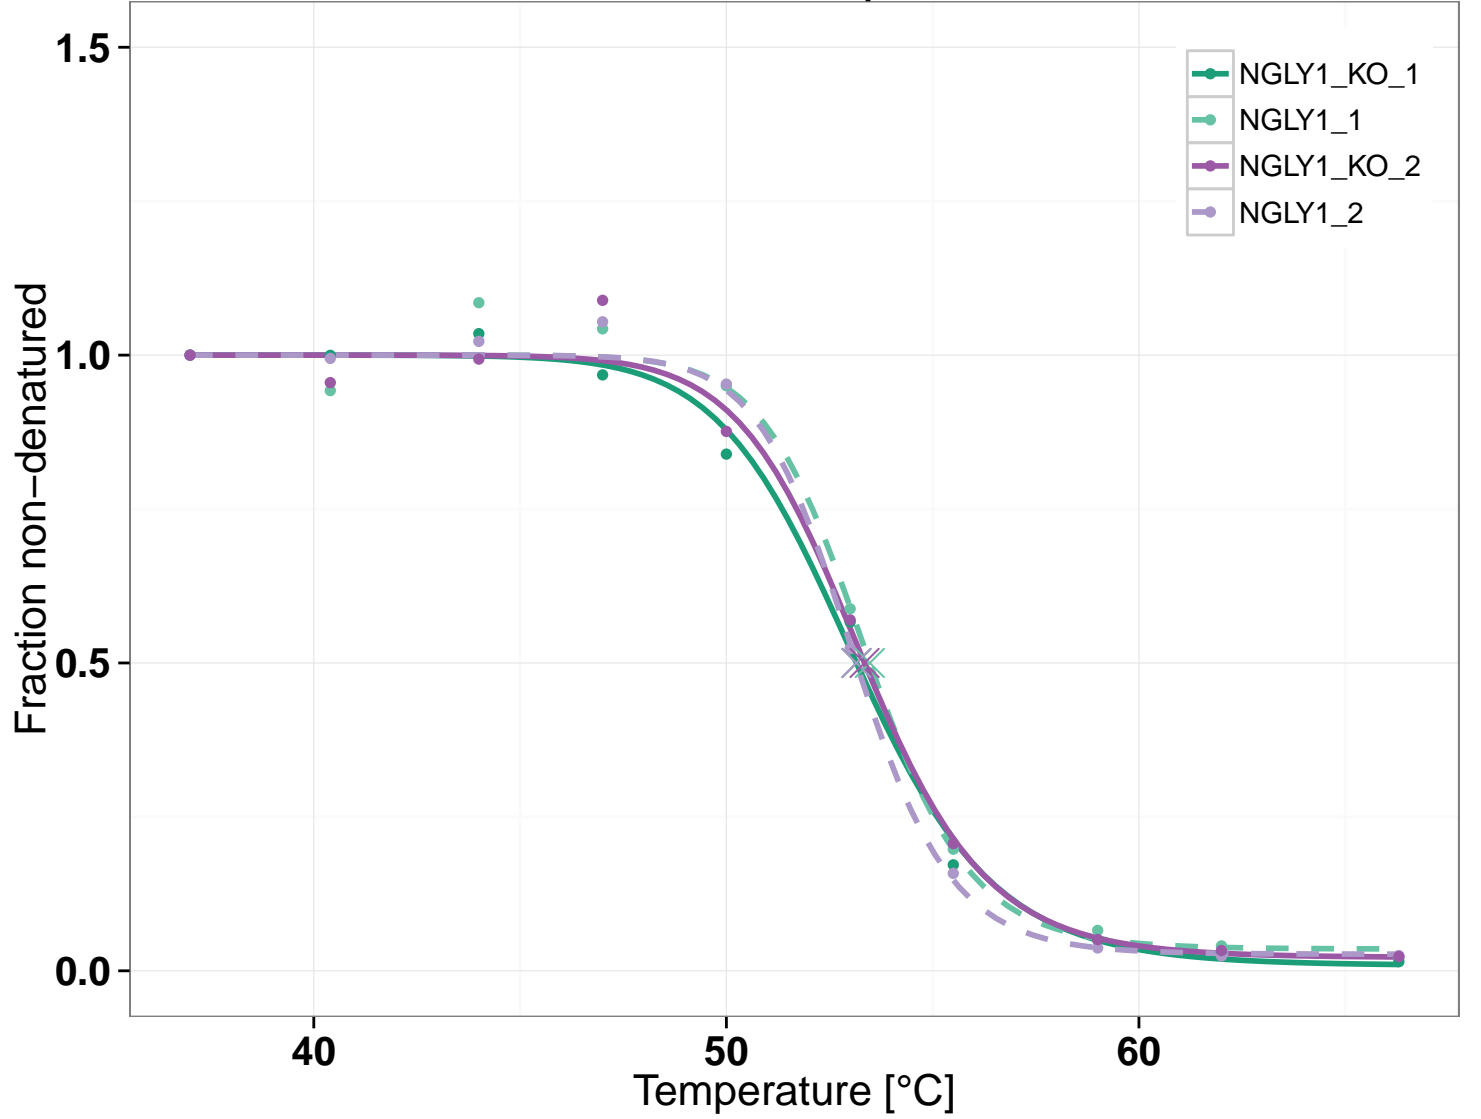

|            | meltPoint | slope | plateau | R2   |
|------------|-----------|-------|---------|------|
| NGLY1_KO_1 | 53.15     | -0.15 | 0.01    | 1    |
| NGLY1_1    | 53.48     | -0.19 | 0.04    | 0.99 |
| NGLY1_KO_2 | 53.35     | -0.16 | 0.02    | 0.99 |
| NGLY1_2    | 53.15     | -0.21 | 0.03    | 1    |

Supplement: Supplementary file 805 [file 1]

# IPI00029227.5|LOC93622

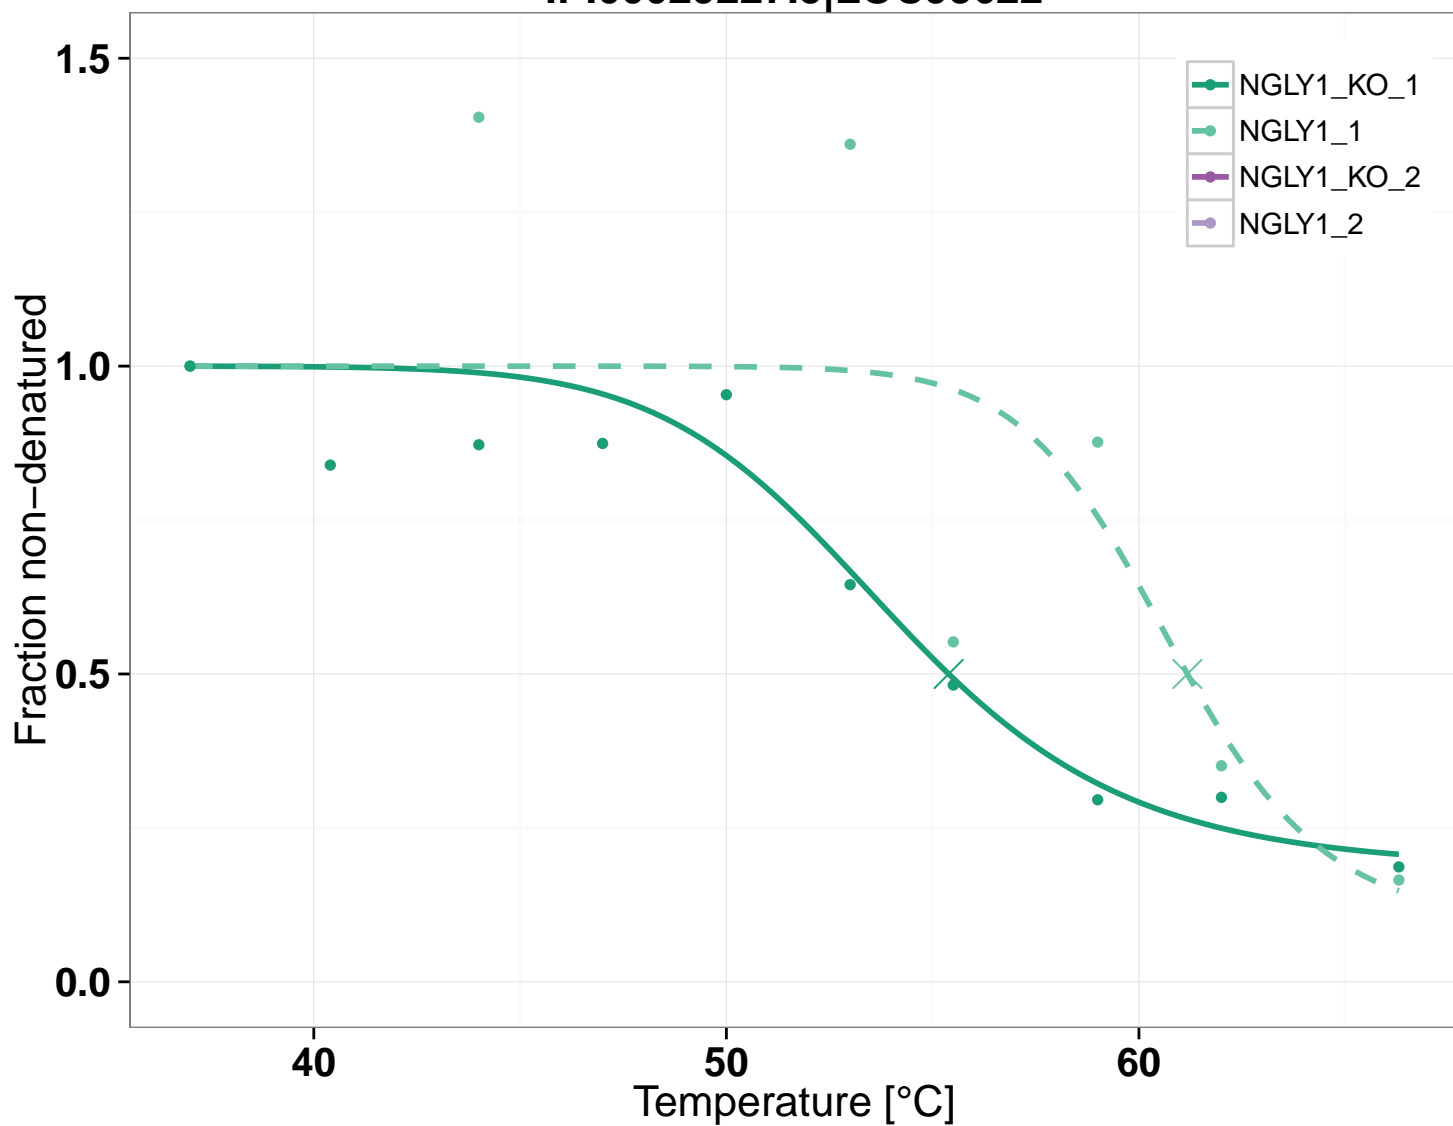

Supplement: Supplementary file 806 [file 1]

IPI00385342.3|AP1S2

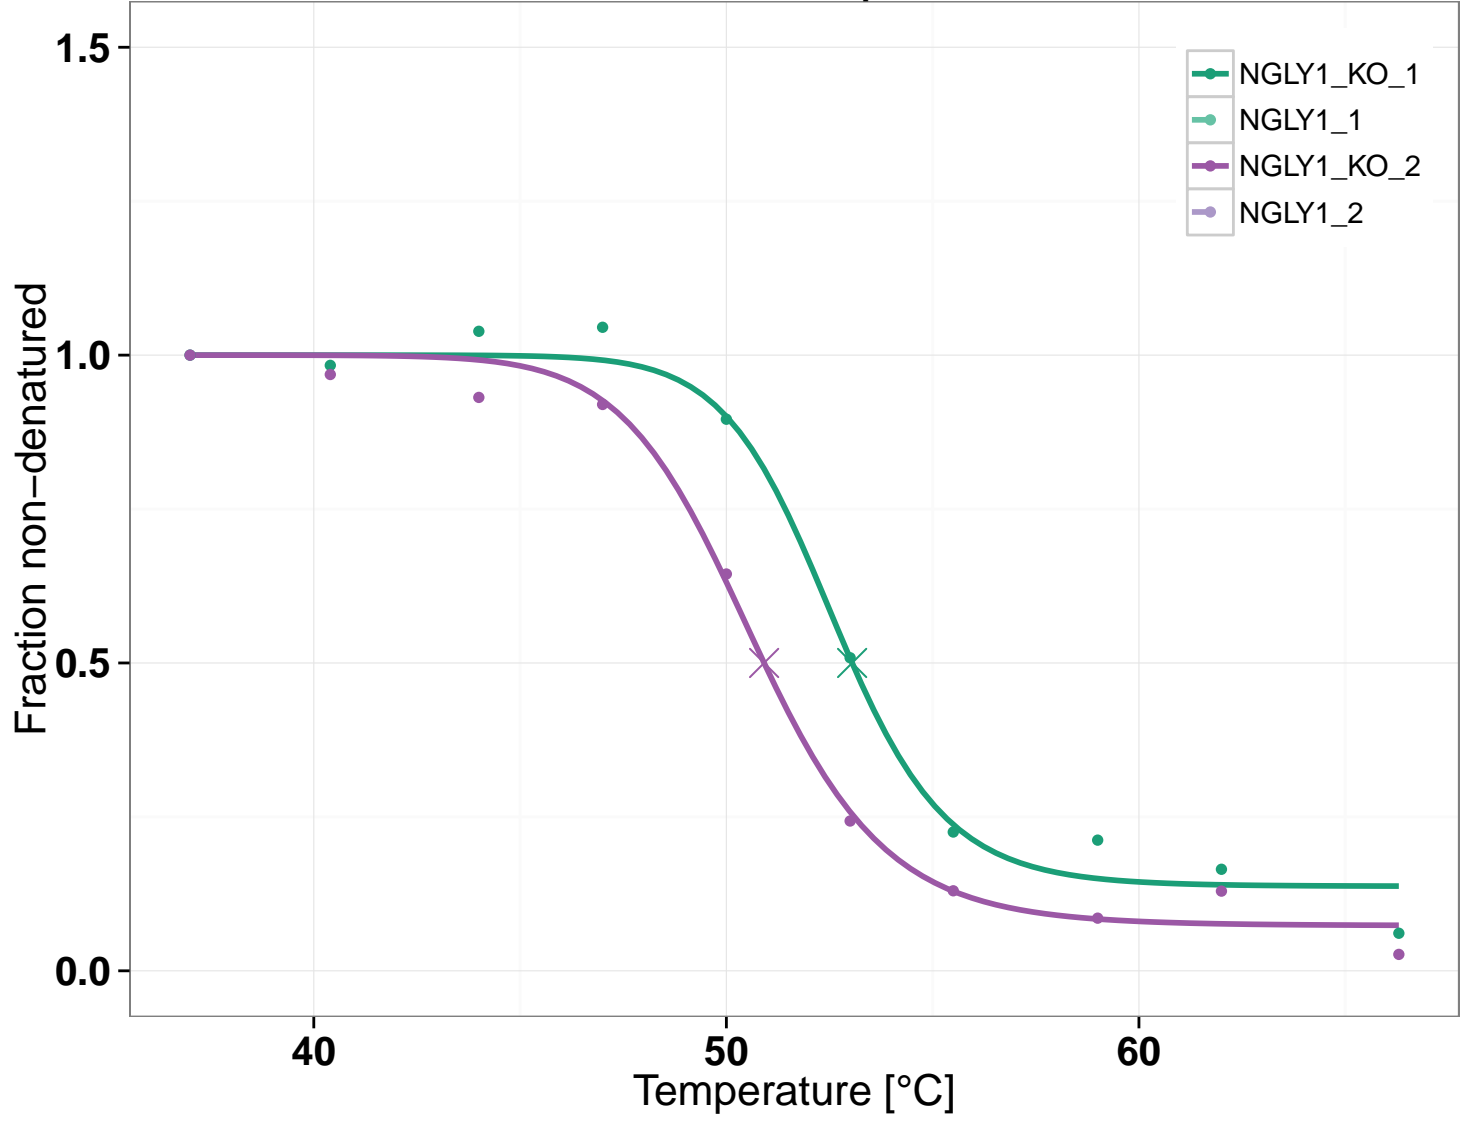

|            | meltPoint | slope | plateau | R2   |
|------------|-----------|-------|---------|------|
| NGLY1_KO_1 | 53.05     | -0.16 | 0.14    | 0.99 |
| NGLY1_1    | -         | -     | -       | -    |
| NGLY1_KO_2 | 50.91     | -0.14 | 0.07    | 0.99 |
| NGLY1_2    | -         | -     | -       | -    |

Supplement: Supplementary file 807 [file 1]

IPI00013313.3|TRIOBP

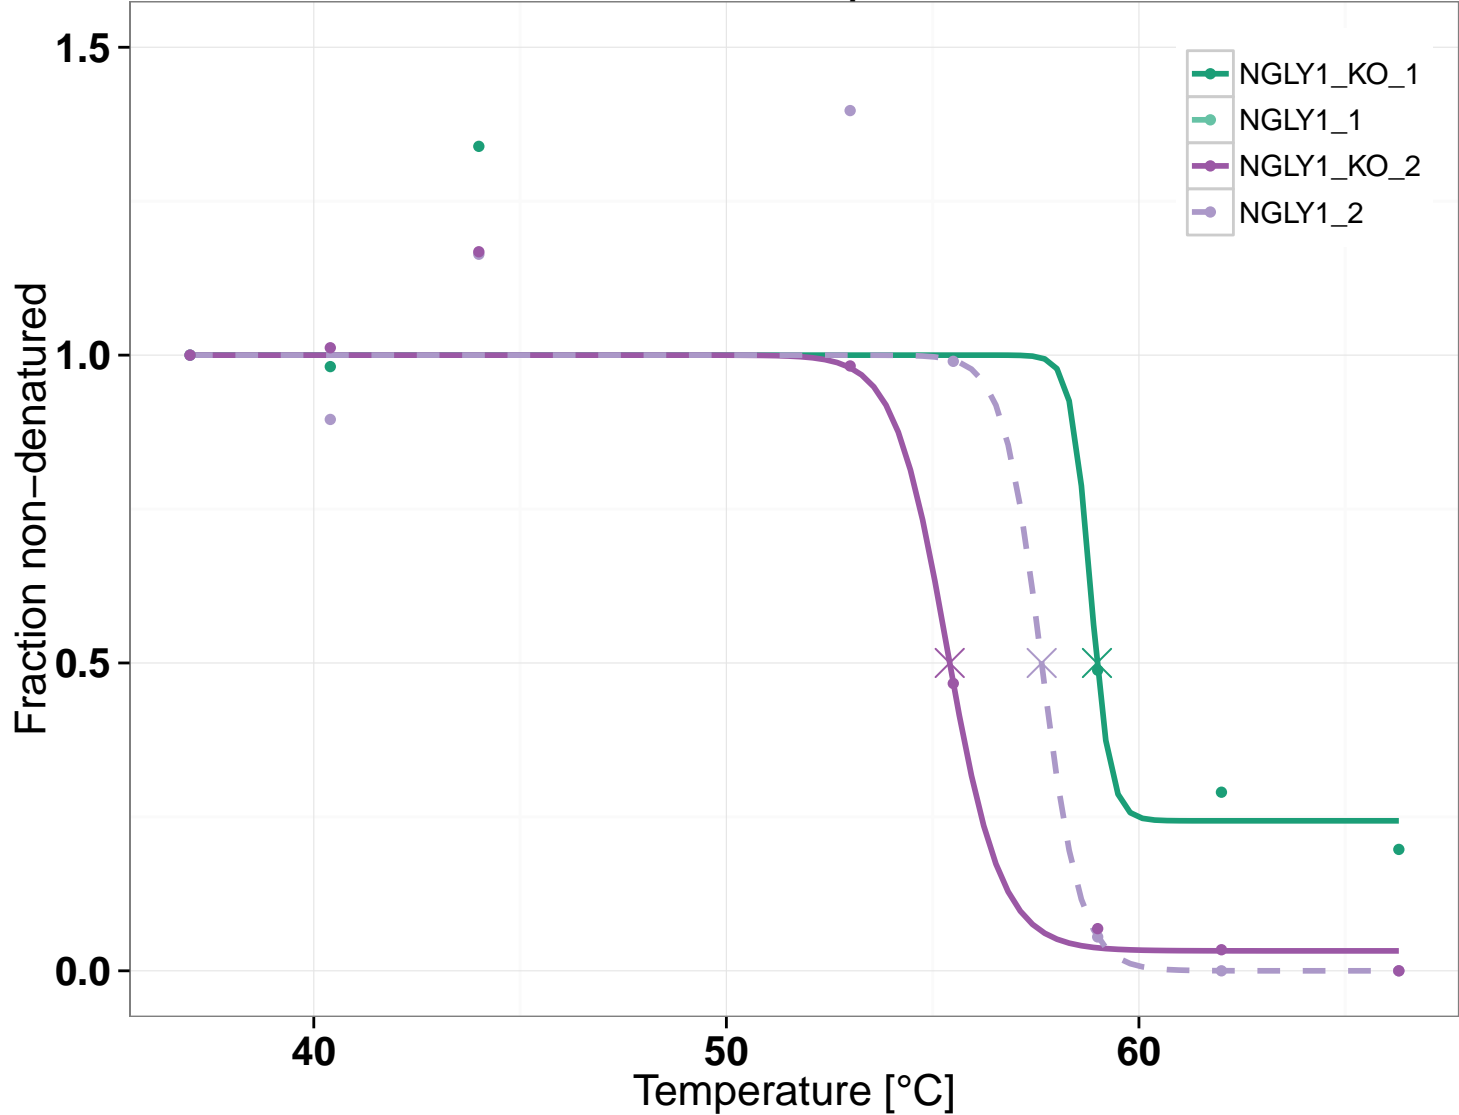

|            | meltPoint | slope | plateau | R2   |
|------------|-----------|-------|---------|------|
| NGLY1_KO_1 | 58.98     | -0.8  | 0.24    | 0.22 |
| NGLY1_1    | -         | -     | -       | -    |
| NGLY1_KO_2 | 55.41     | -0.38 | 0.03    | 0.79 |
| NGLY1_2    | 57.64     | -0.54 | 0       | 0.71 |

Supplement: Supplementary file 808 [file 1]

IPI00010427.1|TMEM93

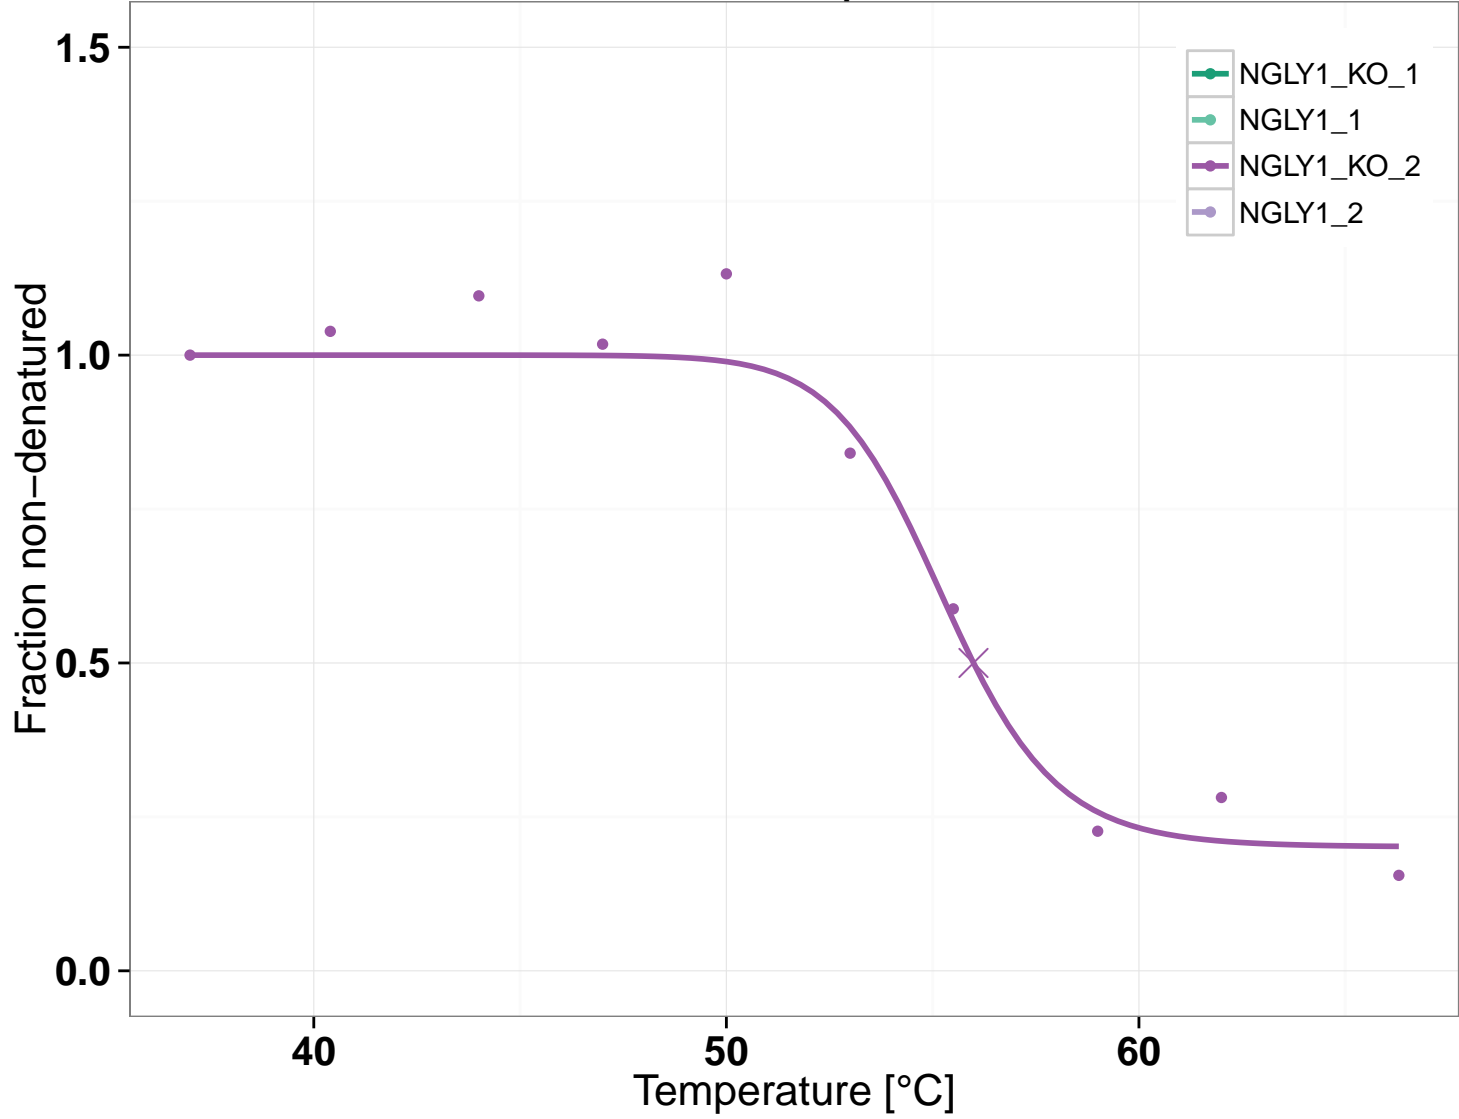

|            | meltPoint | slope | plateau | R2   |
|------------|-----------|-------|---------|------|
| NGLY1_KO_1 | —         | —     | —       | —    |
| NGLY1_1    | —         | —     | —       | —    |
| NGLY1_KO_2 | 55.99     | -0.15 | 0.2     | 0.97 |
| NGLY1_2    | —         | —     | —       | —    |

Supplement: Supplementary file 809 [file 1]

IPI00019941.1|C20ORF29

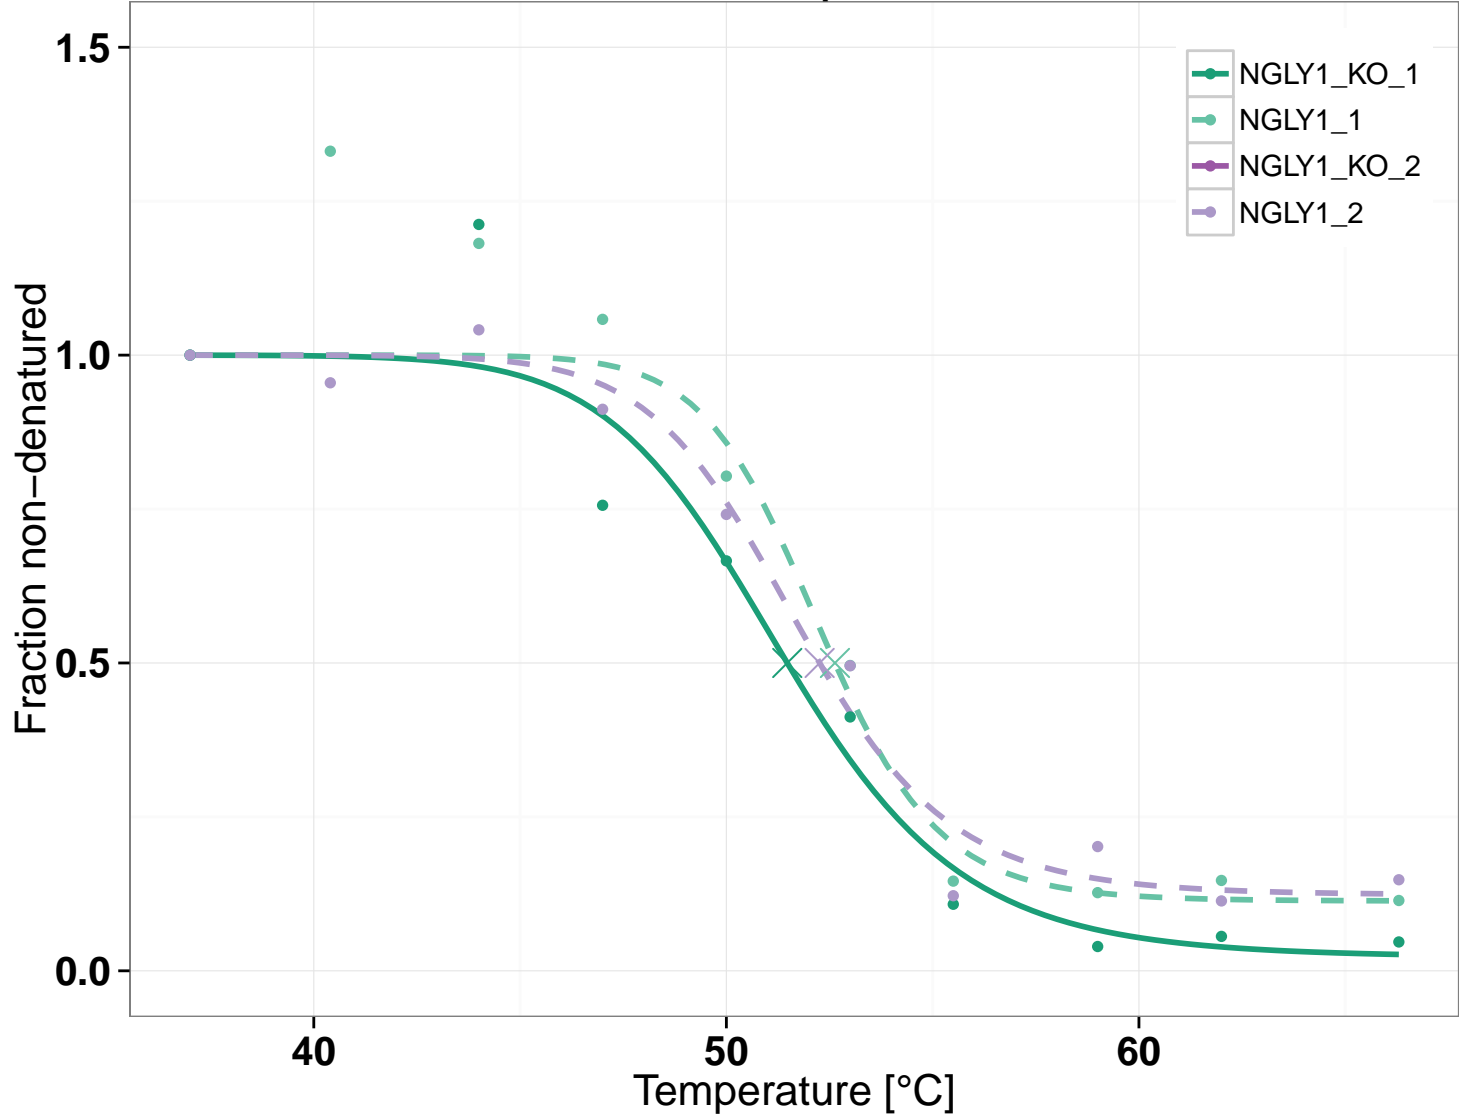

|            | meltPoint | slope | plateau | R2   |
|------------|-----------|-------|---------|------|
| NGLY1_KO_1 | 51.48     | -0.11 | 0.02    | 0.79 |
| NGLY1_1    | 52.63     | -0.16 | 0.11    | 0.93 |
| NGLY1_KO_2 | -         | -     | -       | -    |
| NGLY1_2    | 52.26     | -0.12 | 0.12    | 0.98 |

Supplement: Supplementary file 810 [file 1]

IPI00069817.2|BAZ1B

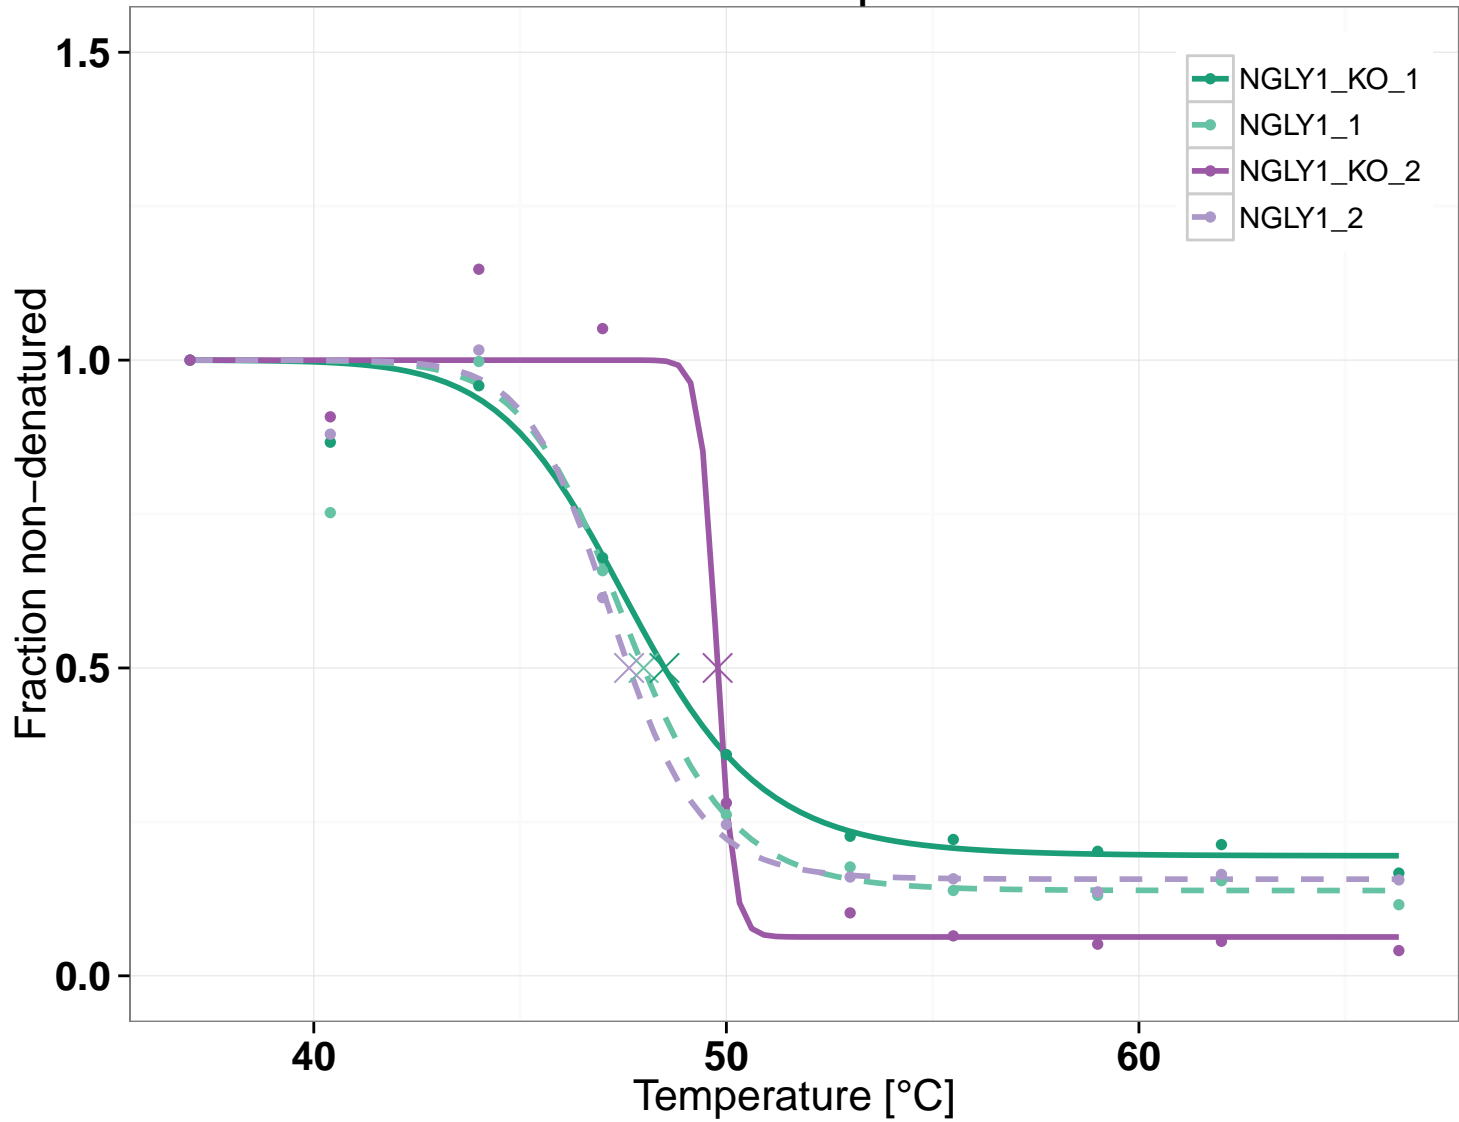

|            | meltPoint | slope | plateau | R2   |
|------------|-----------|-------|---------|------|
| NGLY1_KO_1 | 48.5      | -0.12 | 0.19    | 0.98 |
| NGLY1_1    | 47.99     | -0.17 | 0.14    | 0.95 |
| NGLY1_KO_2 | 49.79     | -1.2  | 0.06    | 0.98 |
| NGLY1_2    | 47.64     | -0.2  | 0.16    | 0.99 |

Supplement: Supplementary file 811 [file 1]

IPI00023958.1|MPV17

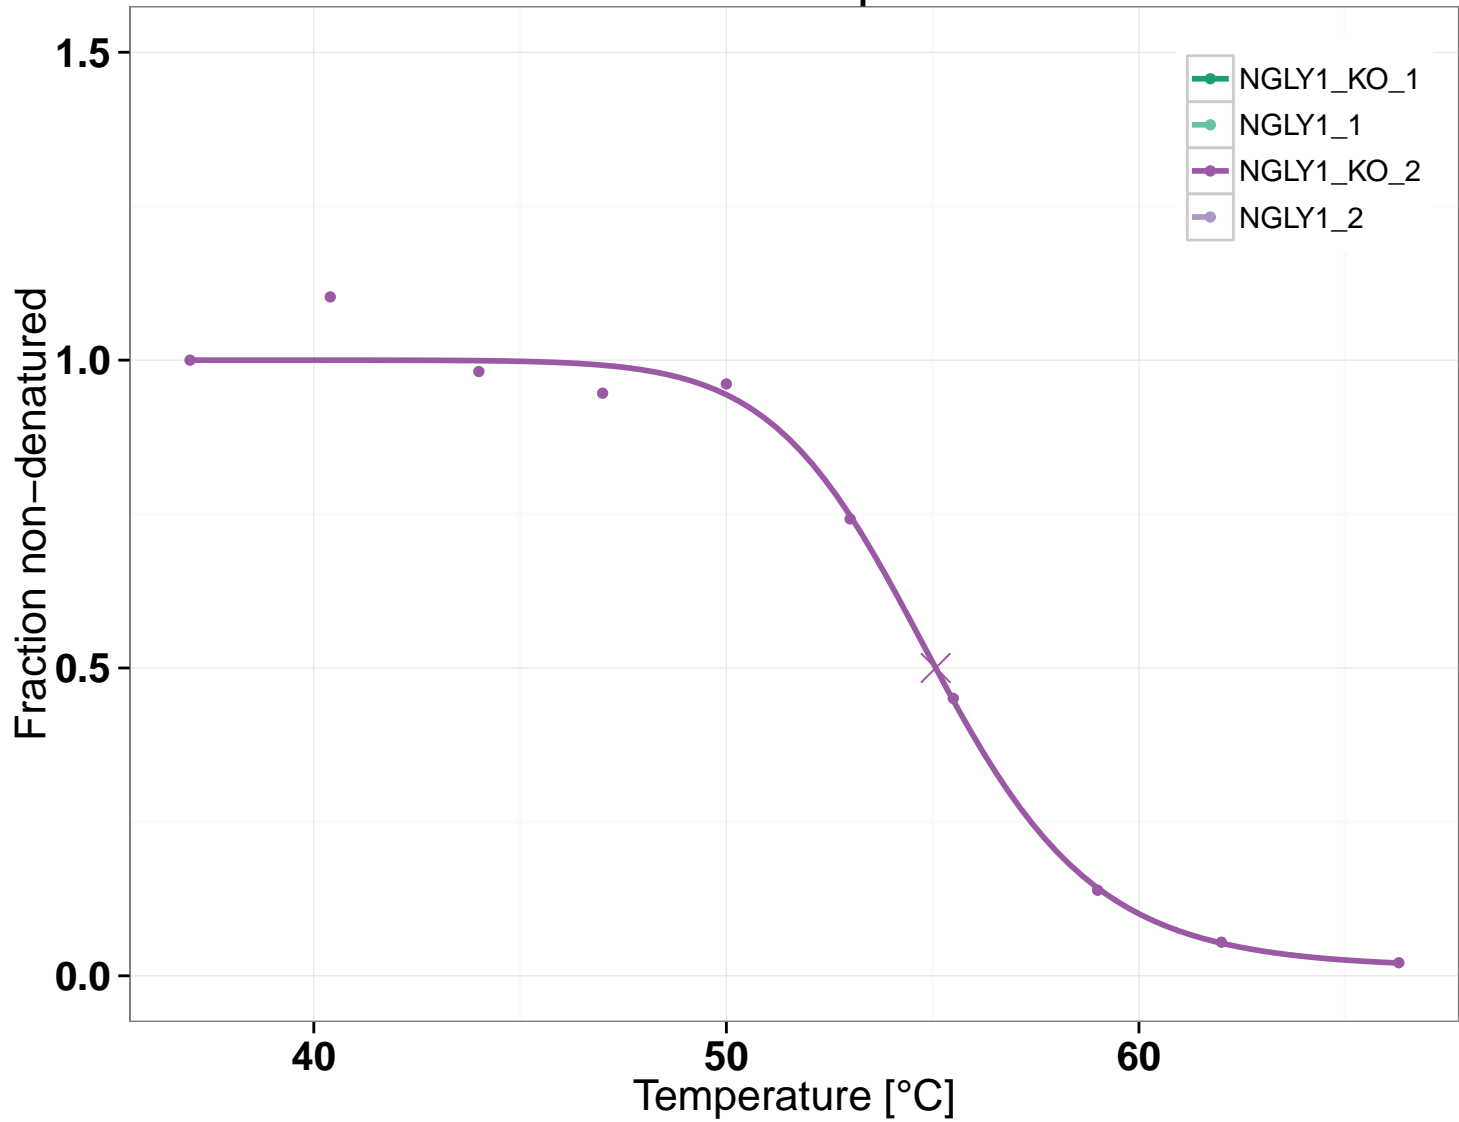

|            | meltPoint | slope | plateau | R2   |
|------------|-----------|-------|---------|------|
| NGLY1_KO_1 | -         | -     | -       | -    |
| NGLY1_1    | -         | -     | -       | -    |
| NGLY1_KO_2 | 55.07     | -0.13 | 0.01    | 0.99 |
| NGLY1_2    | -         | -     | -       | -    |

Supplement: Supplementary file 812 [file 1]

IPI00216560.3|CDH23

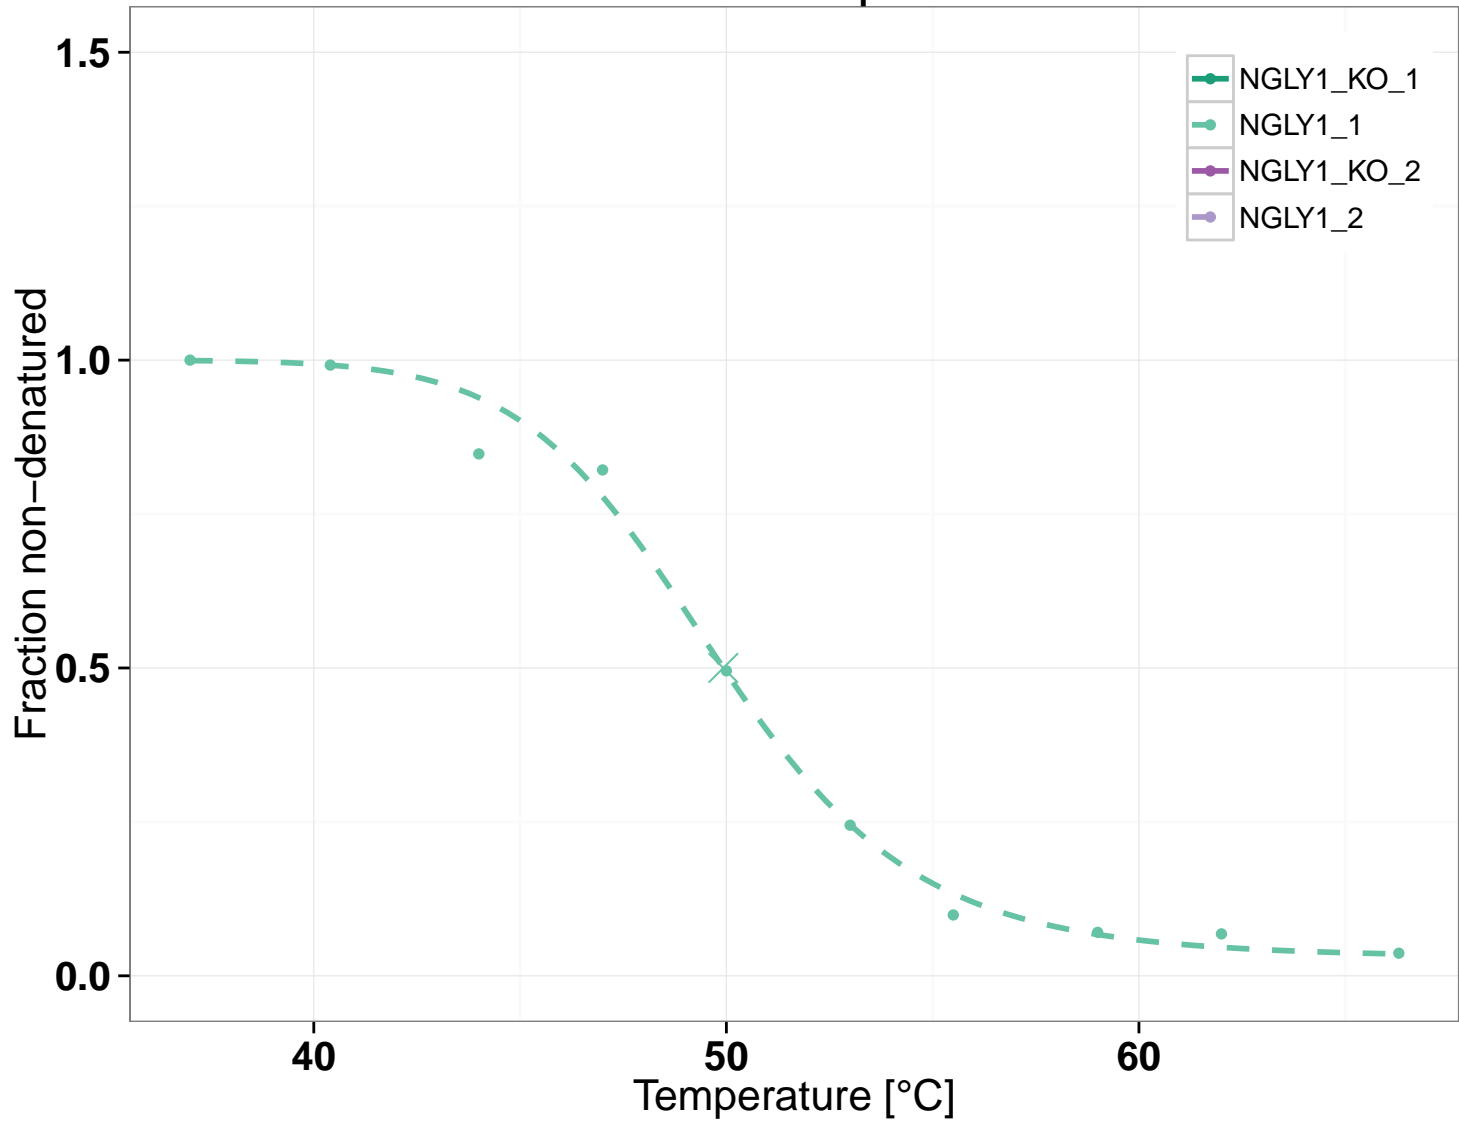

|            | meltPoint | slope | plateau | R2   |
|------------|-----------|-------|---------|------|
| NGLY1_KO_1 | —         | —     | —       | —    |
| NGLY1_1    | 49.93     | -0.1  | 0.03    | 0.99 |
| NGLY1_KO_2 | —         | —     | —       | —    |
| NGLY1_2    | —         | —     | —       | —    |

Supplement: Supplementary file 813 [file 1]

IPI00029054.1|NT5C2

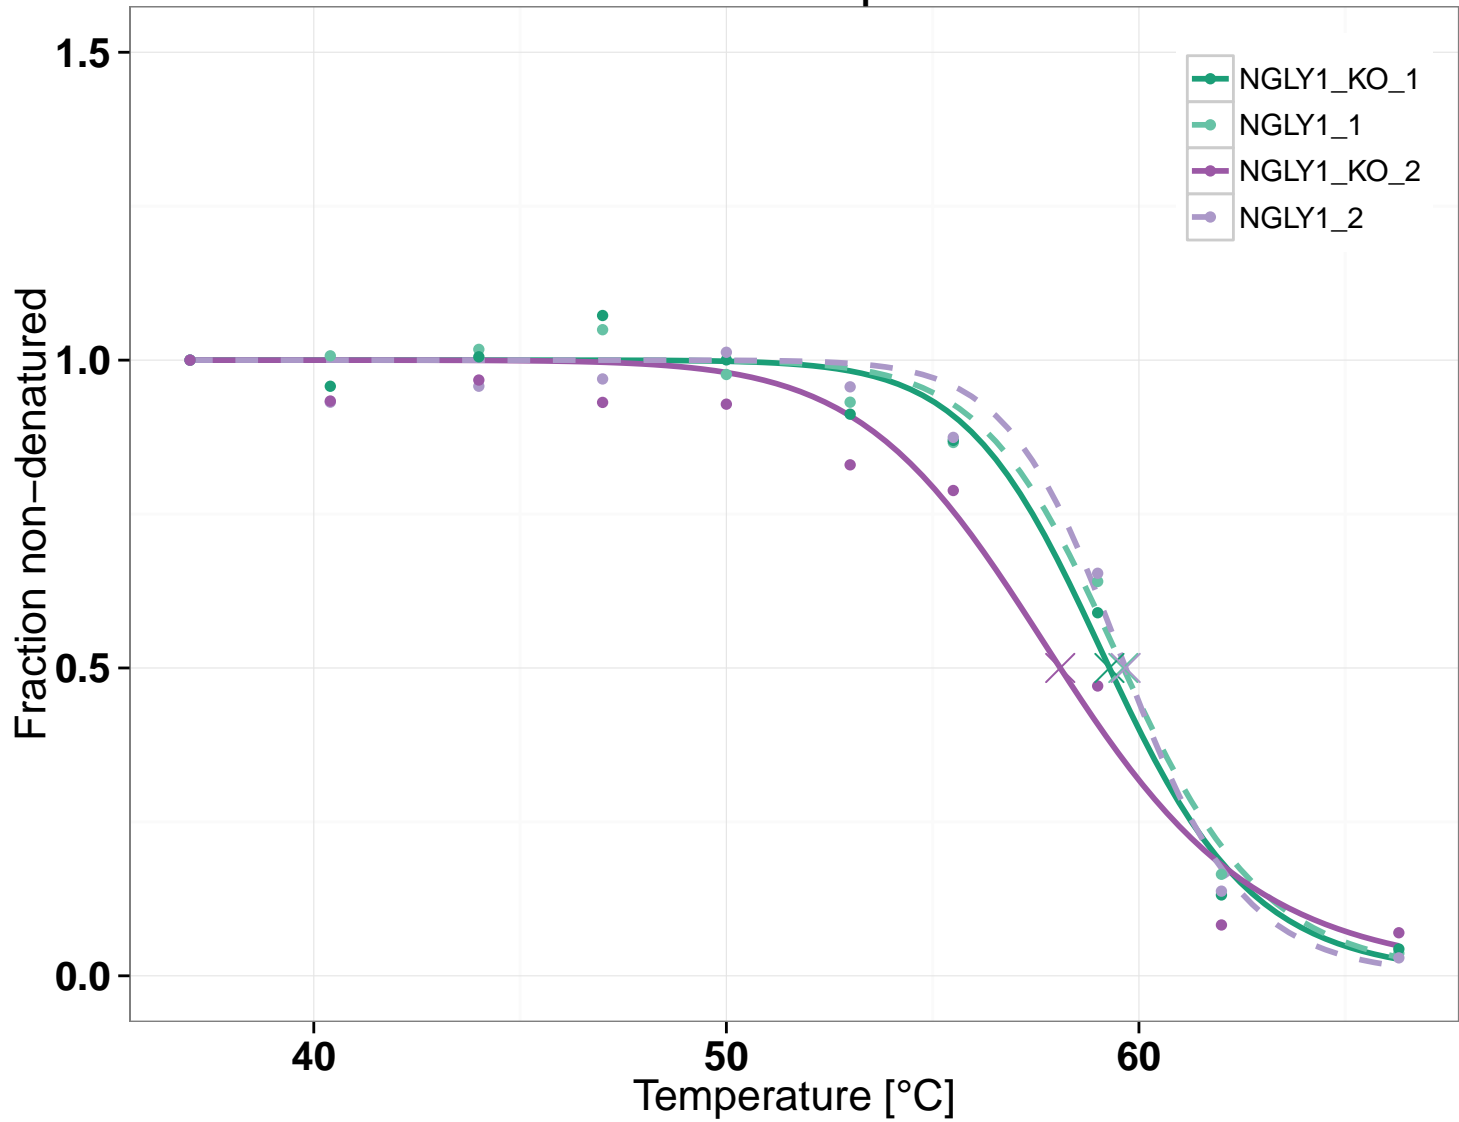

|            | meltPoint | slope | plateau | R2   |
|------------|-----------|-------|---------|------|
| NGLY1_KO_1 | 59.29     | -0.14 | 0       | 0.99 |
| NGLY1_1    | 59.62     | -0.14 | 0       | 0.99 |
| NGLY1_KO_2 | 58.09     | -0.1  | 0       | 0.97 |
| NGLY1_2    | 59.68     | -0.17 | 0       | 0.98 |

Supplement: Supplementary file 814 [file 1]

IPI00002171.3|GPR172A

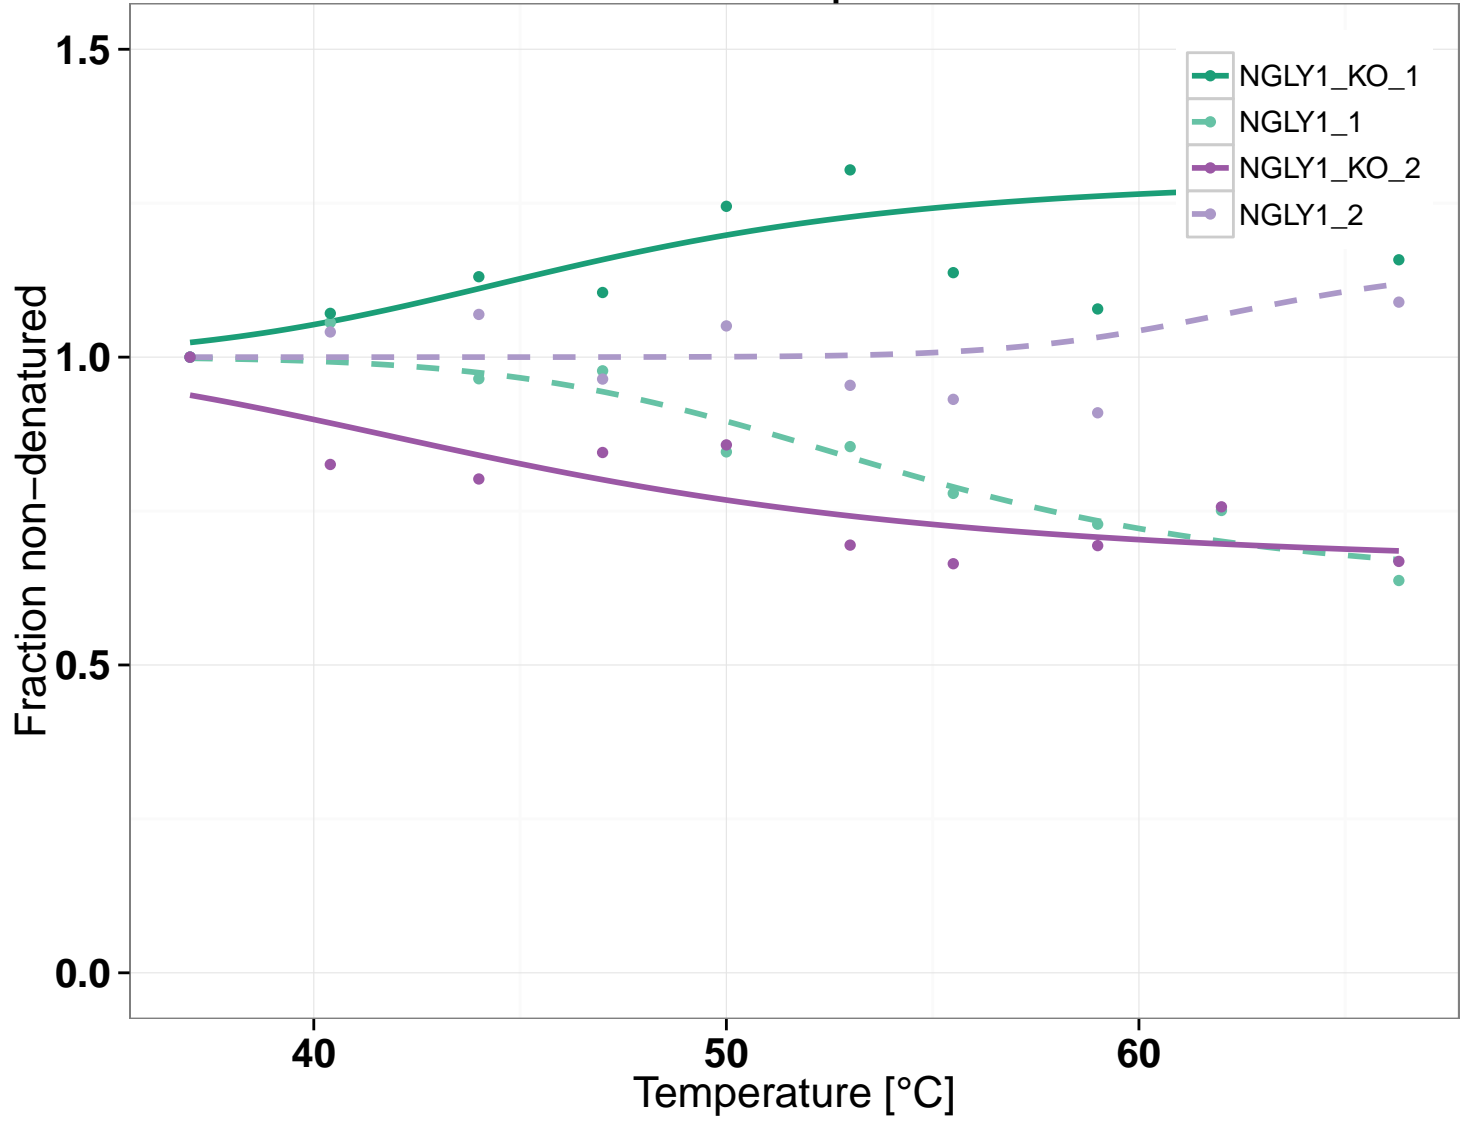

|            | meltPoint | slope  | plateau | R2   |
|------------|-----------|--------|---------|------|
| NGLY1_KO_1 | —         | 0.016  | 1.29    | 0.31 |
| NGLY1_1    | —         | -0.02  | 0.63    | 0.93 |
| NGLY1_KO_2 | —         | -0.015 | 0.65    | 0.71 |
| NGLY1_2    | —         | 0.014  | 1.16    | 0.25 |

Supplement: Supplementary file 815 [file 1]

# IPI00015505.7|HPS6

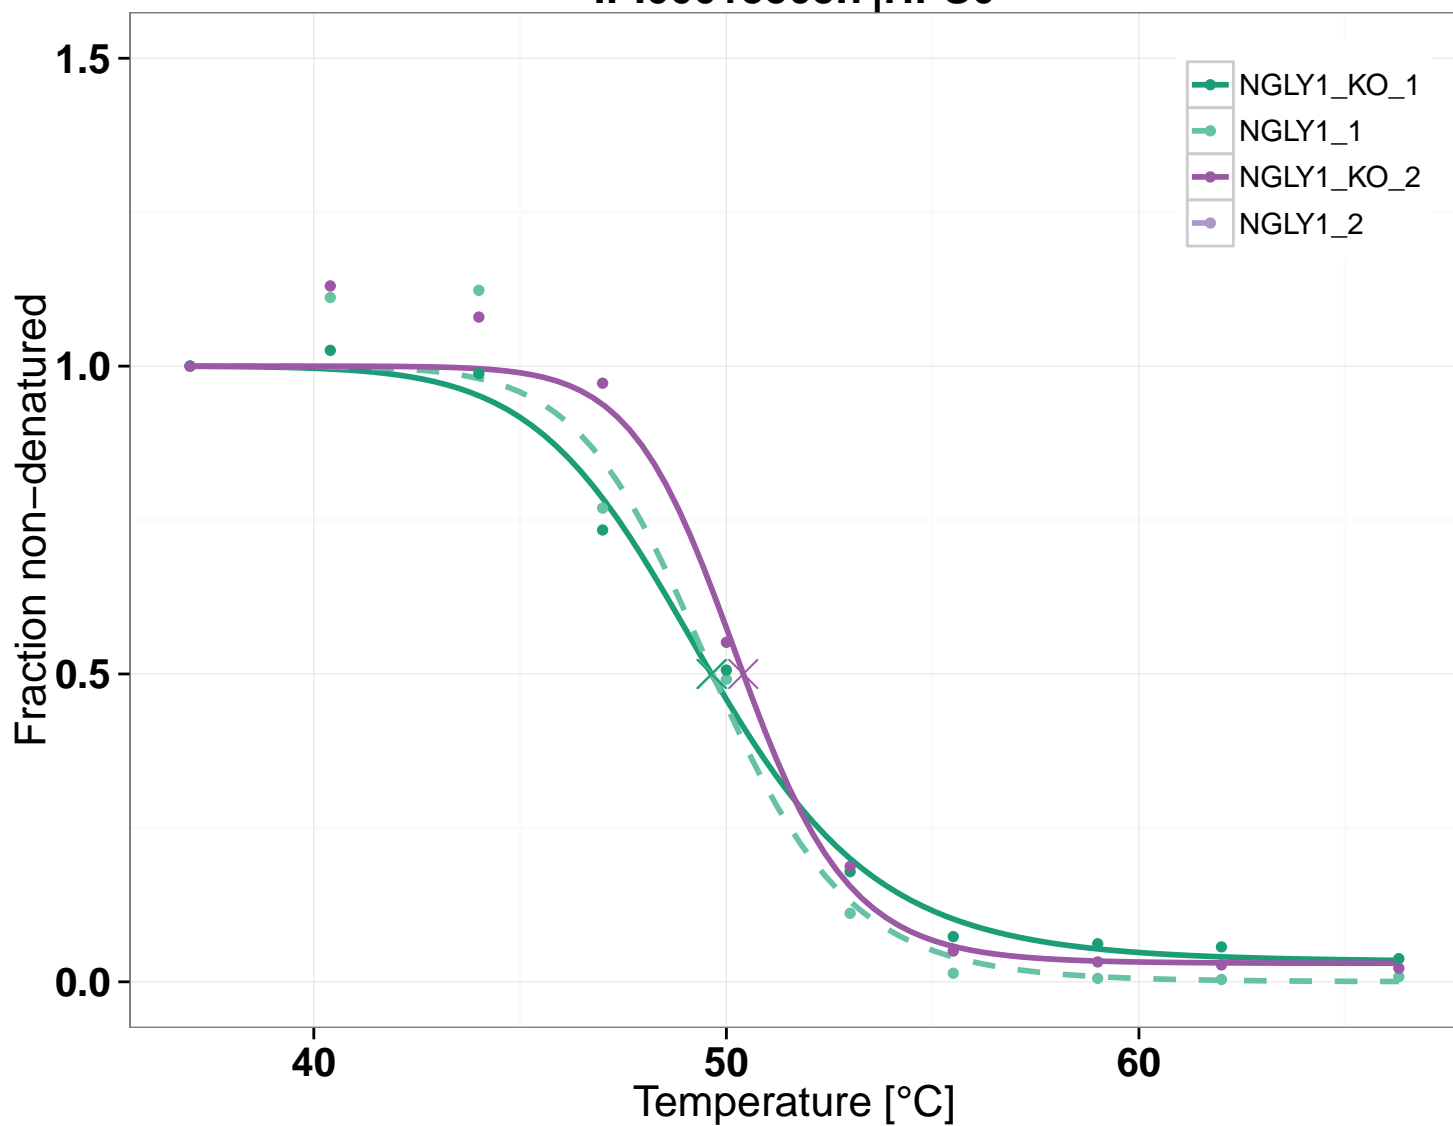

|            | meltPoint | slope | plateau | R2   |
|------------|-----------|-------|---------|------|
| NGLY1_KO_1 | 49.64     | -0.12 | 0.03    | 0.99 |
| NGLY1_1    | 49.67     | -0.15 | 0       | 0.98 |
| NGLY1_KO_2 | 50.41     | -0.18 | 0.03    | 0.99 |
| NGLY1_2    | -         | -     | -       | -    |

Supplement: Supplementary file 816 [file 1]

IPI00024919.3|PRDX3

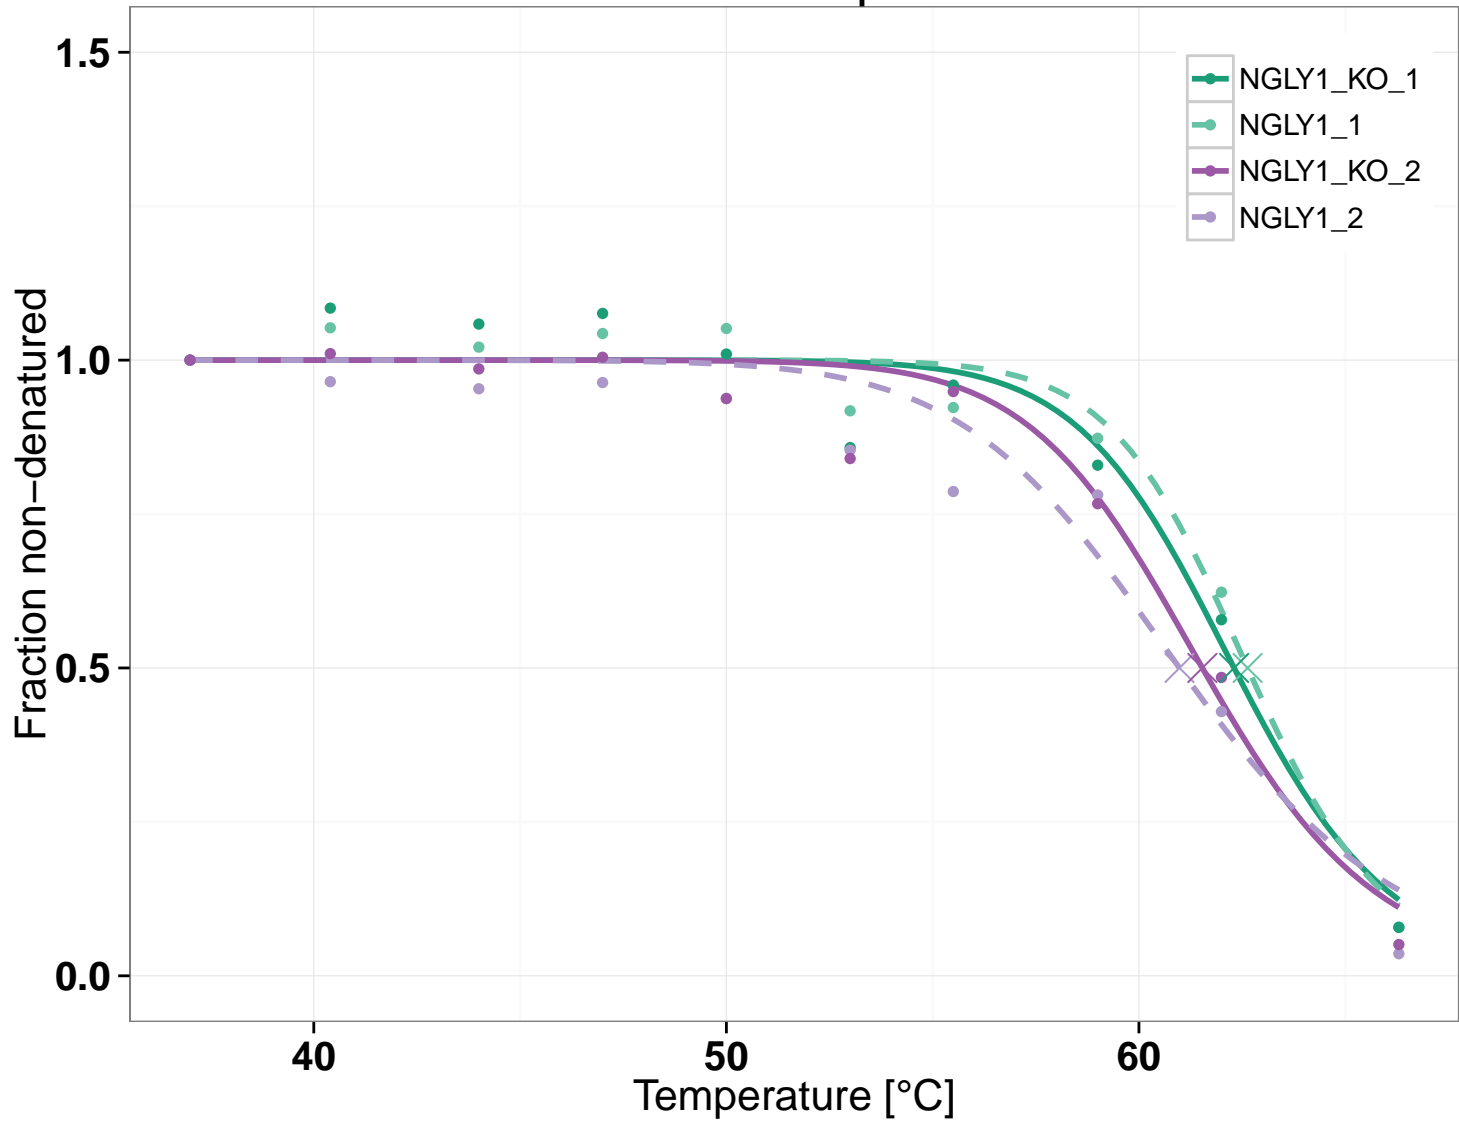

|            | meltPoint | slope  | plateau | R2   |
|------------|-----------|--------|---------|------|
| NGLY1_KO_1 | 62.31     | -0.13  | 0       | 0.95 |
| NGLY1_1    | 62.63     | -0.15  | 0       | 0.97 |
| NGLY1_KO_2 | 61.54     | -0.12  | 0       | 0.96 |
| NGLY1_2    | 60.98     | -0.094 | 0       | 0.93 |

Supplement: Supplementary file 817 [file 1]

# IPI00787650.2|ATRX

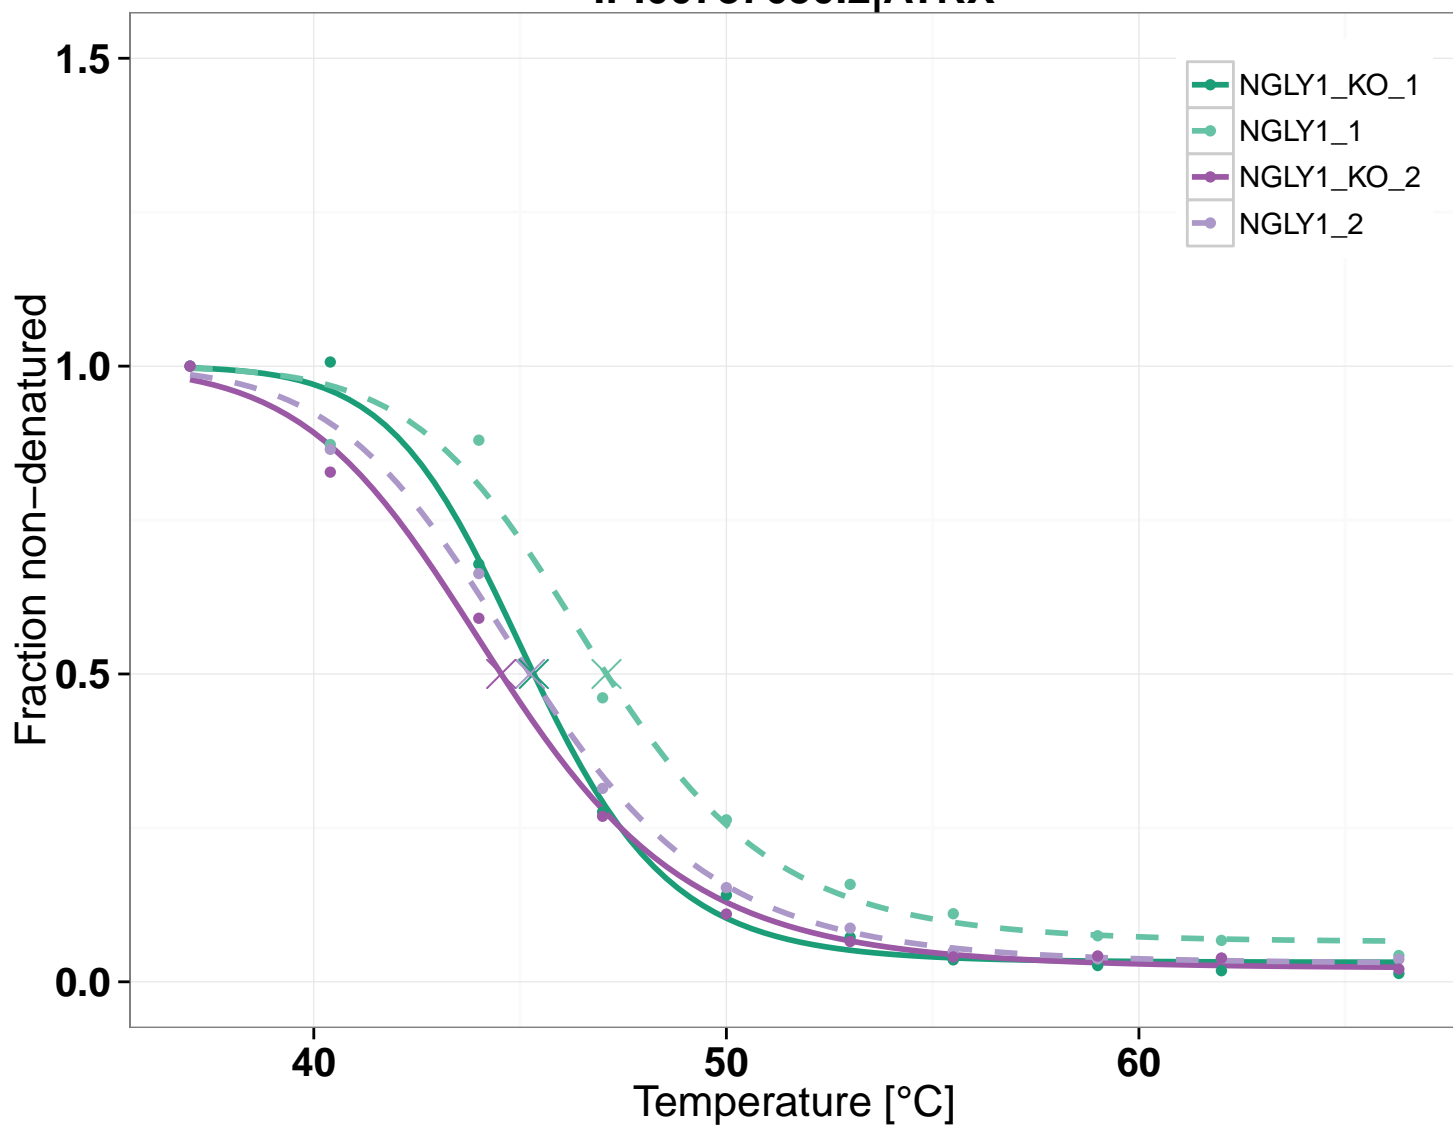

|            | meltPoint | slope | plateau | R2   |
|------------|-----------|-------|---------|------|
| NGLY1_KO_1 | 45.33     | -0.14 | 0.03    | 1    |
| NGLY1_1    | 47.09     | -0.11 | 0.06    | 0.99 |
| NGLY1_KO_2 | 44.54     | -0.1  | 0.02    | 1    |
| NGLY1_2    | 45.24     | -0.11 | 0.03    | 1    |

Supplement: Supplementary file 818 [file 1]

# IPI00411384.2|AMPD3

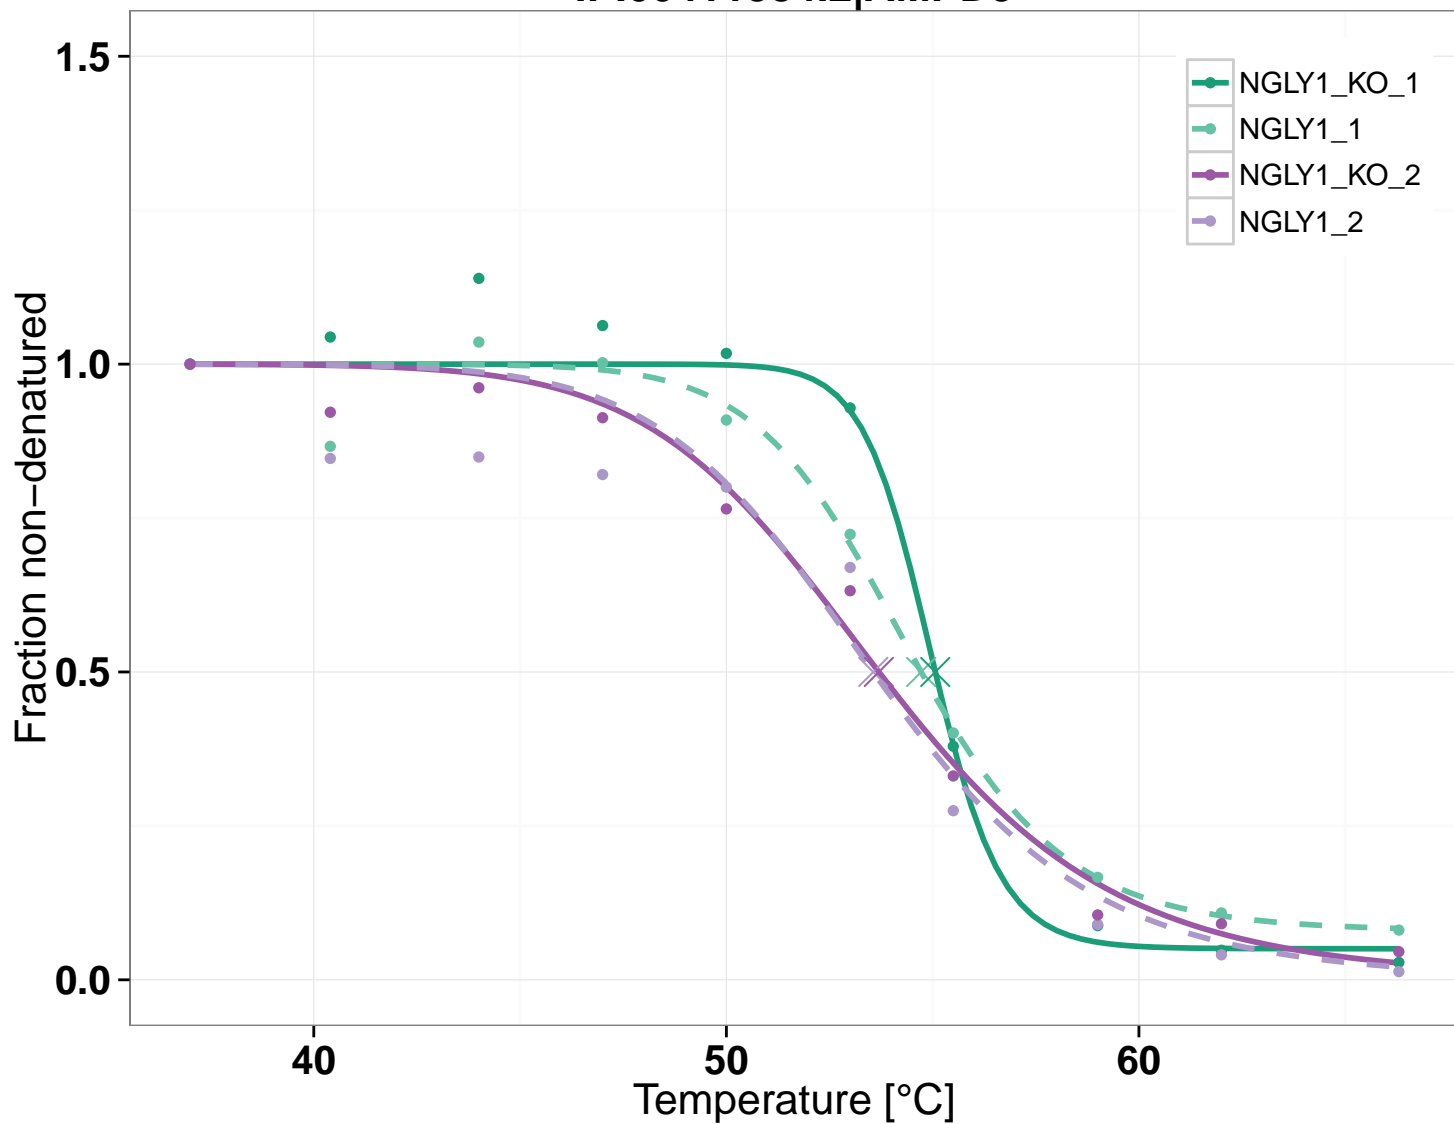

|            | meltPoint | slope  | plateau | R2   |
|------------|-----------|--------|---------|------|
| NGLY1_KO_1 | 55.06     | -0.28  | 0.05    | 0.99 |
| NGLY1_1    | 54.72     | -0.12  | 0.08    | 0.99 |
| NGLY1_KO_2 | 53.7      | -0.088 | 0       | 0.99 |
| NGLY1_2    | 53.56     | -0.095 | 0       | 0.94 |

Supplement: Supplementary file 819 [file 1]

# IPI00646105.3|PYCRL

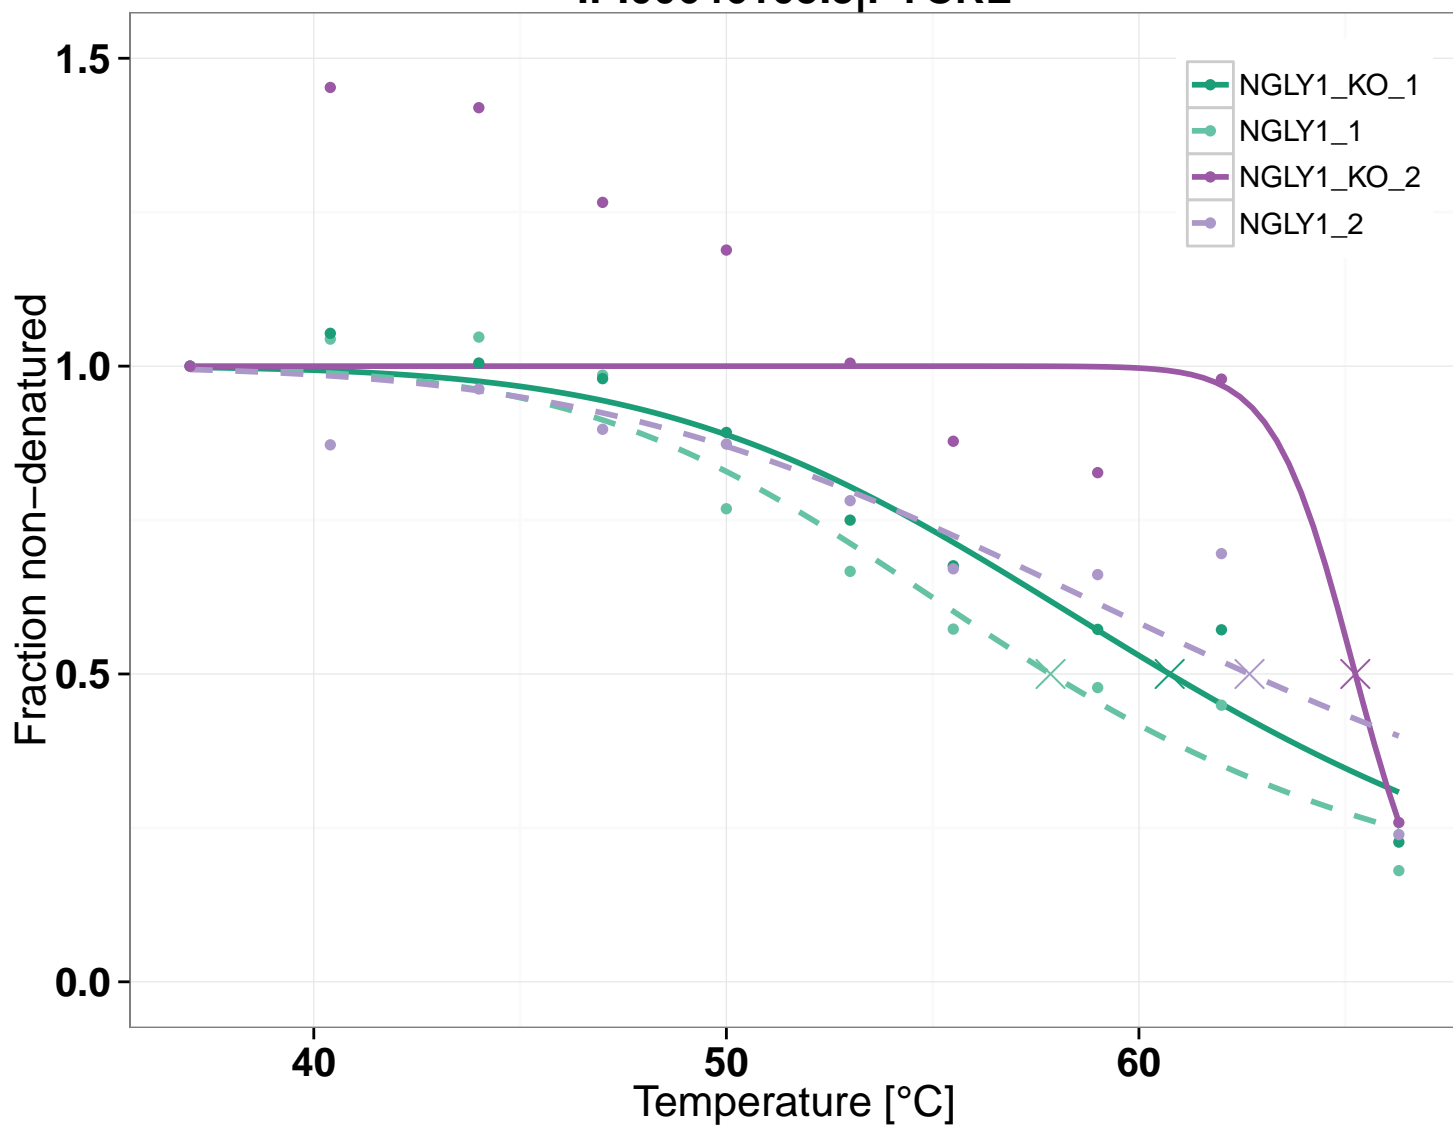

|            | meltPoint | slope  | plateau | R2   |
|------------|-----------|--------|---------|------|
| NGLY1_KO_1 | 60.75     | -0.041 | 0       | 0.95 |
| NGLY1_1    | 57.86     | -0.045 | 0.09    | 0.95 |
| NGLY1_KO_2 | 65.24     | -0.25  | 0       | 0.5  |
| NGLY1_2    | 62.68     | -0.032 | 0       | 0.83 |

Supplement: Supplementary file 820 [file 1]

IPI00465259.2|SLC15A4

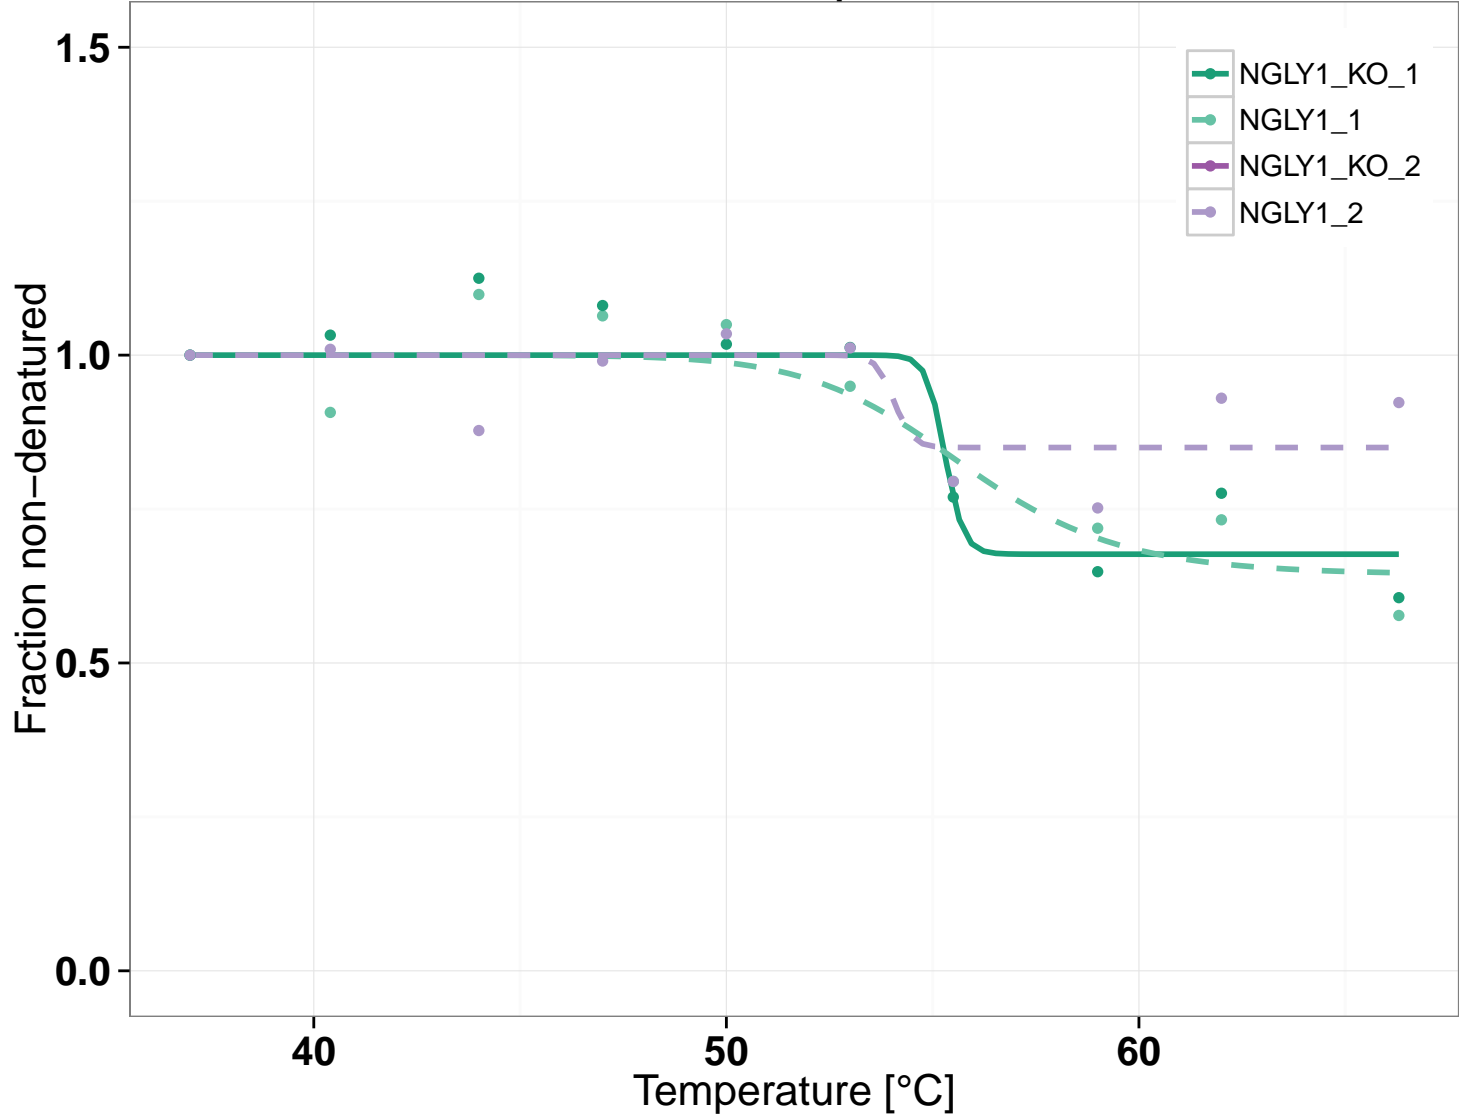

|            | meltPoint | slope  | plateau | R2   |
|------------|-----------|--------|---------|------|
| NGLY1_KO_1 | -         | -0.37  | 0.68    | 0.88 |
| NGLY1_1    | -         | -0.047 | 0.64    | 0.86 |
| NGLY1_KO_2 | -         | -      | -       | -    |
| NGLY1_2    | -         | -0.17  | 0.85    | 0.52 |

Supplement: Supplementary file 821 [file 1]

IPI00645310.1|CPNE2

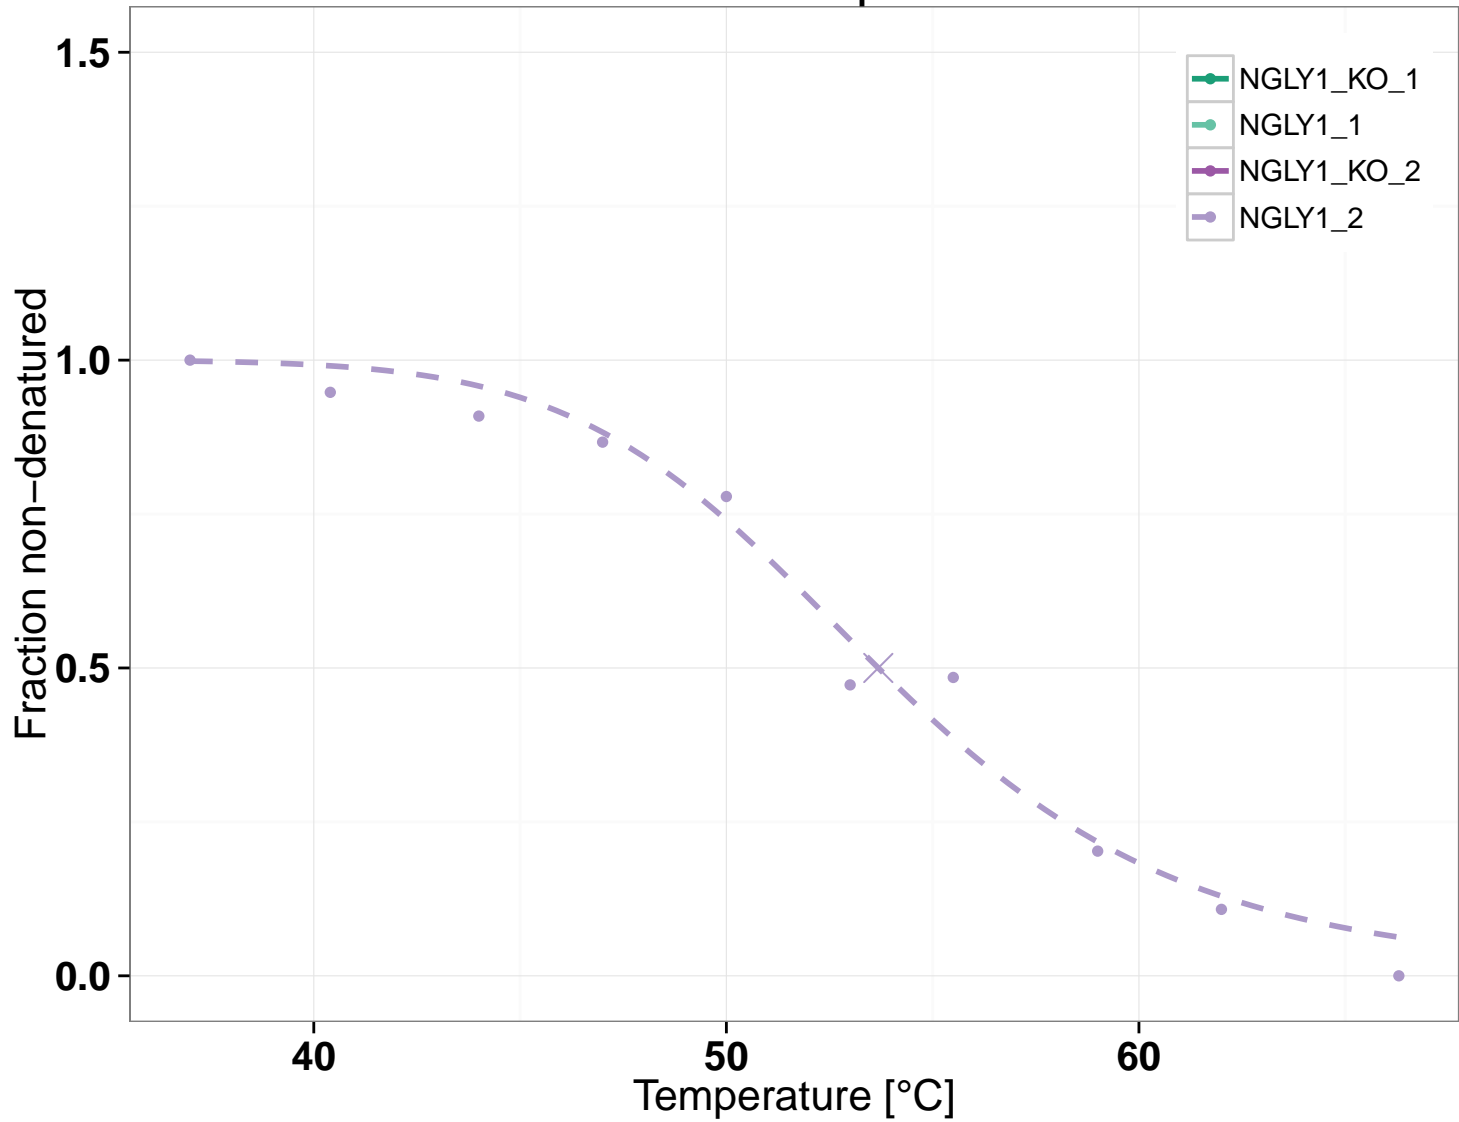

|            | meltPoint | slope  | plateau | R2   |
|------------|-----------|--------|---------|------|
| NGLY1_KO_1 | -         | -      | -       | -    |
| NGLY1_1    | -         | -      | -       | -    |
| NGLY1_KO_2 | -         | -      | -       | -    |
| NGLY1_2    | 53.68     | -0.067 | 0       | 0.98 |

Supplement: Supplementary file 822 [file 1]

IPI00328939.2|DTWD1

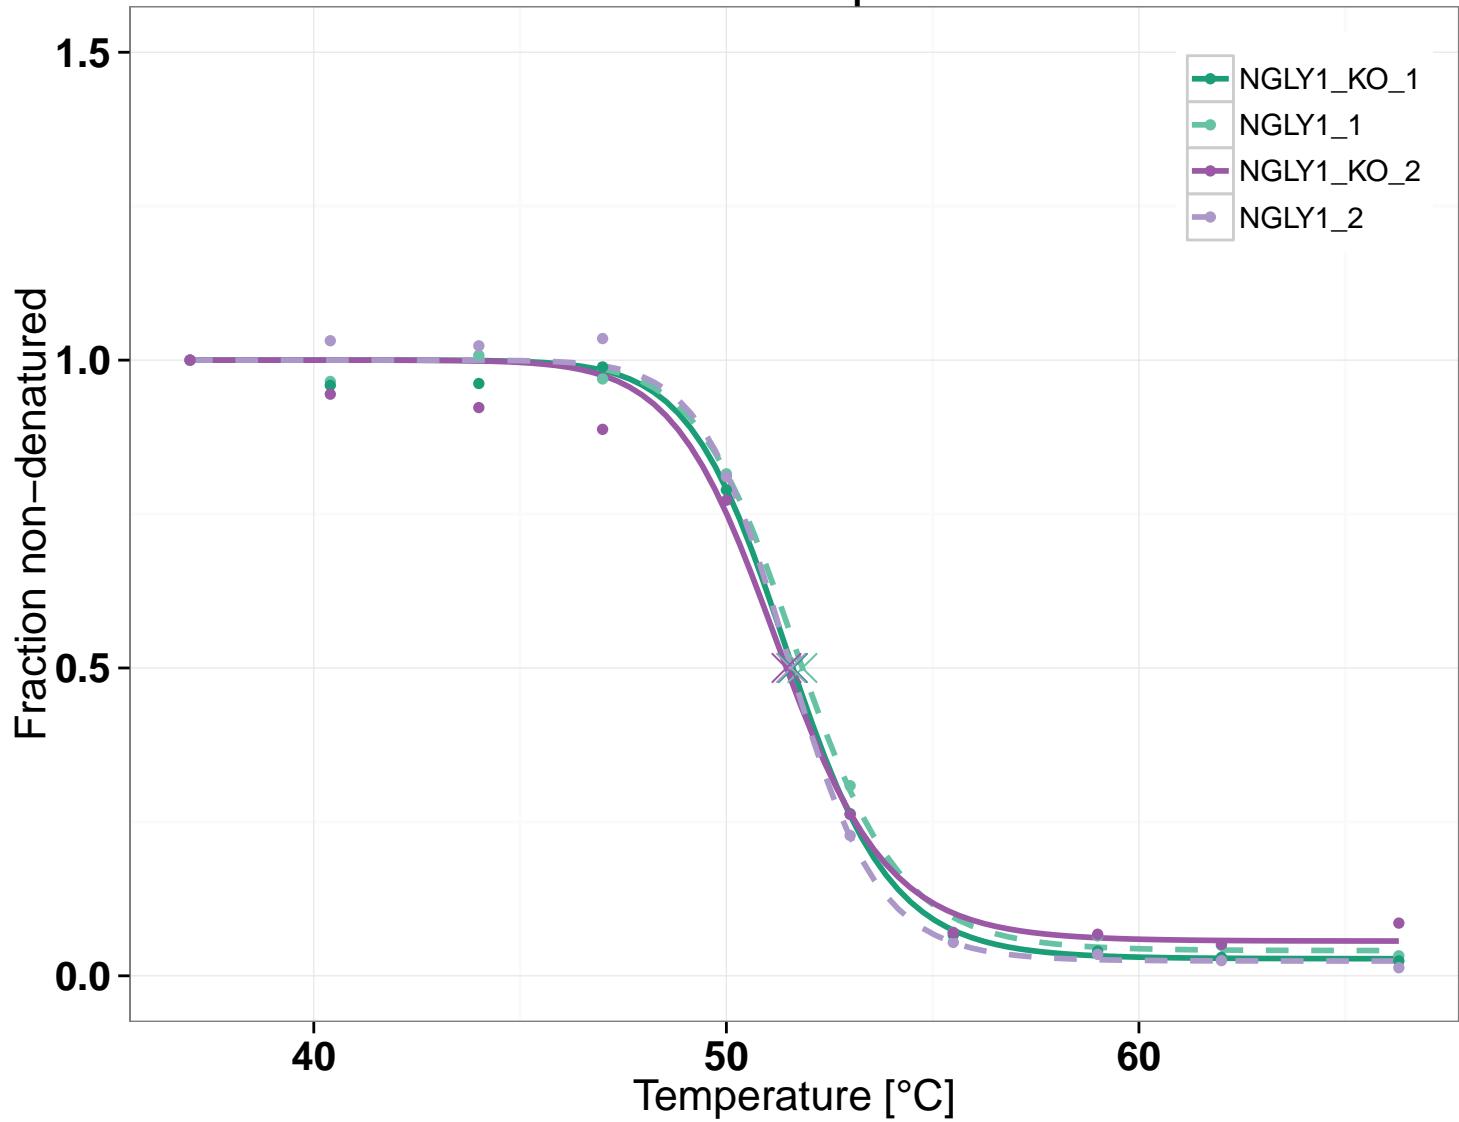

|            | meltPoint | slope | plateau | R2   |
|------------|-----------|-------|---------|------|
| NGLY1_KO_1 | 51.61     | -0.2  | 0.03    | 1    |
| NGLY1_1    | 51.84     | -0.19 | 0.04    | 1    |
| NGLY1_KO_2 | 51.46     | -0.18 | 0.06    | 0.99 |
| NGLY1_2    | 51.57     | -0.23 | 0.02    | 1    |

Supplement: Supplementary file 823 [file 1]

# IPI00013829.1|TRIAP1

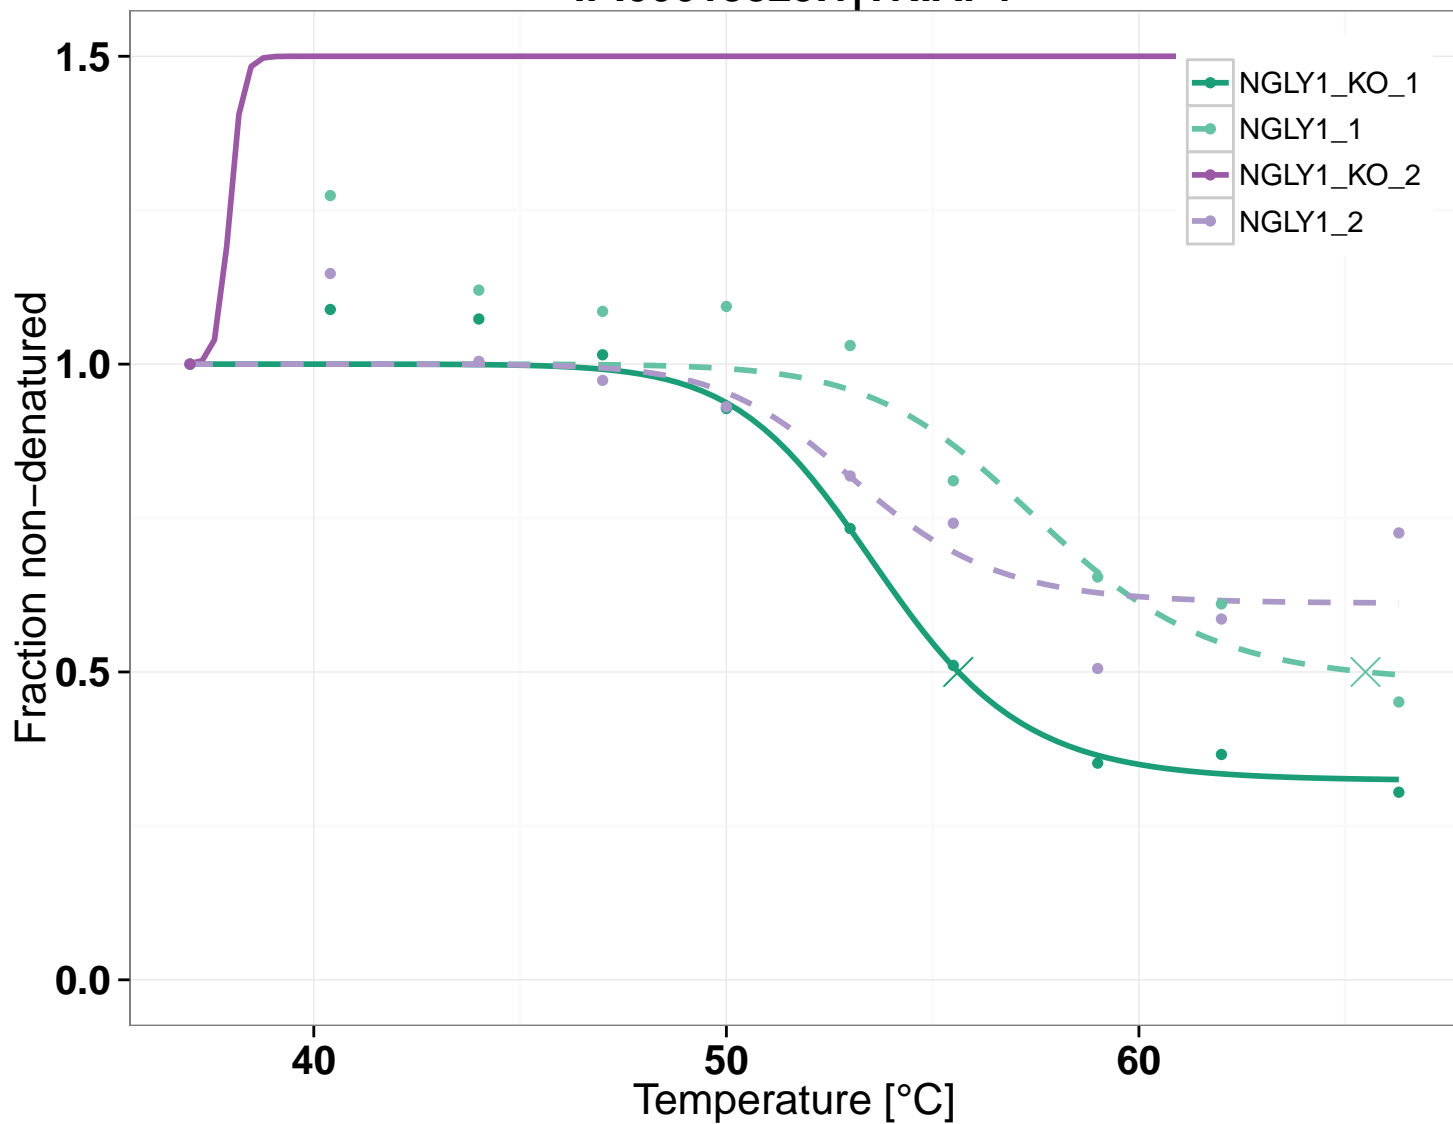

|            | meltPoint | slope  | plateau | R2   |
|------------|-----------|--------|---------|------|
| NGLY1_KO_1 | 55.62     | -0.097 | 0.32    | 0.98 |
| NGLY1_1    | 65.49     | -0.063 | 0.48    | 0.81 |
| NGLY1_KO_2 | -         | 0.82   | 1.5     | -1.5 |
| NGLY1_2    | -         | -0.057 | 0.61    | 0.86 |

Supplement: Supplementary file 824 [file 1]

IPI00220373.5|IDE

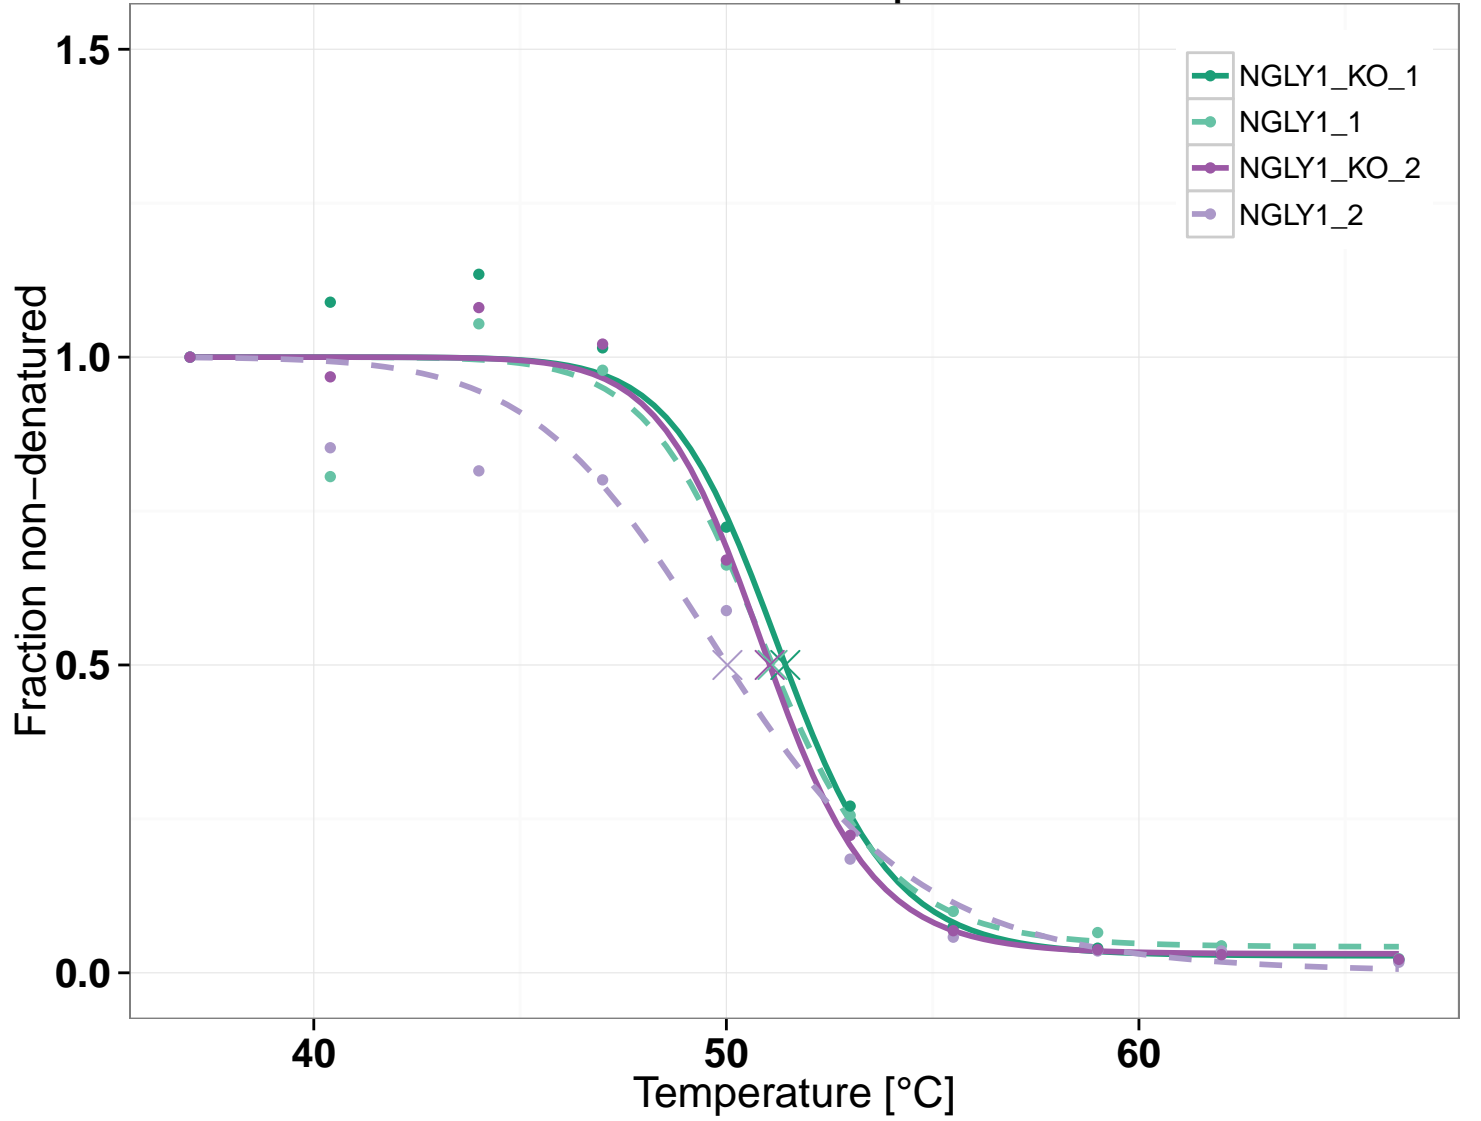

|            | meltPoint | slope | plateau | R2   |
|------------|-----------|-------|---------|------|
| NGLY1_KO_1 | 51.43     | -0.18 | 0.03    | 0.99 |
| NGLY1_1    | 51.12     | -0.16 | 0.04    | 0.98 |
| NGLY1_KO_2 | 51.05     | -0.19 | 0.03    | 0.99 |
| NGLY1_2    | 50.03     | -0.1  | 0       | 0.97 |

Supplement: Supplementary file 825 [file 1]

IPI00401051.3|ZCCHC4

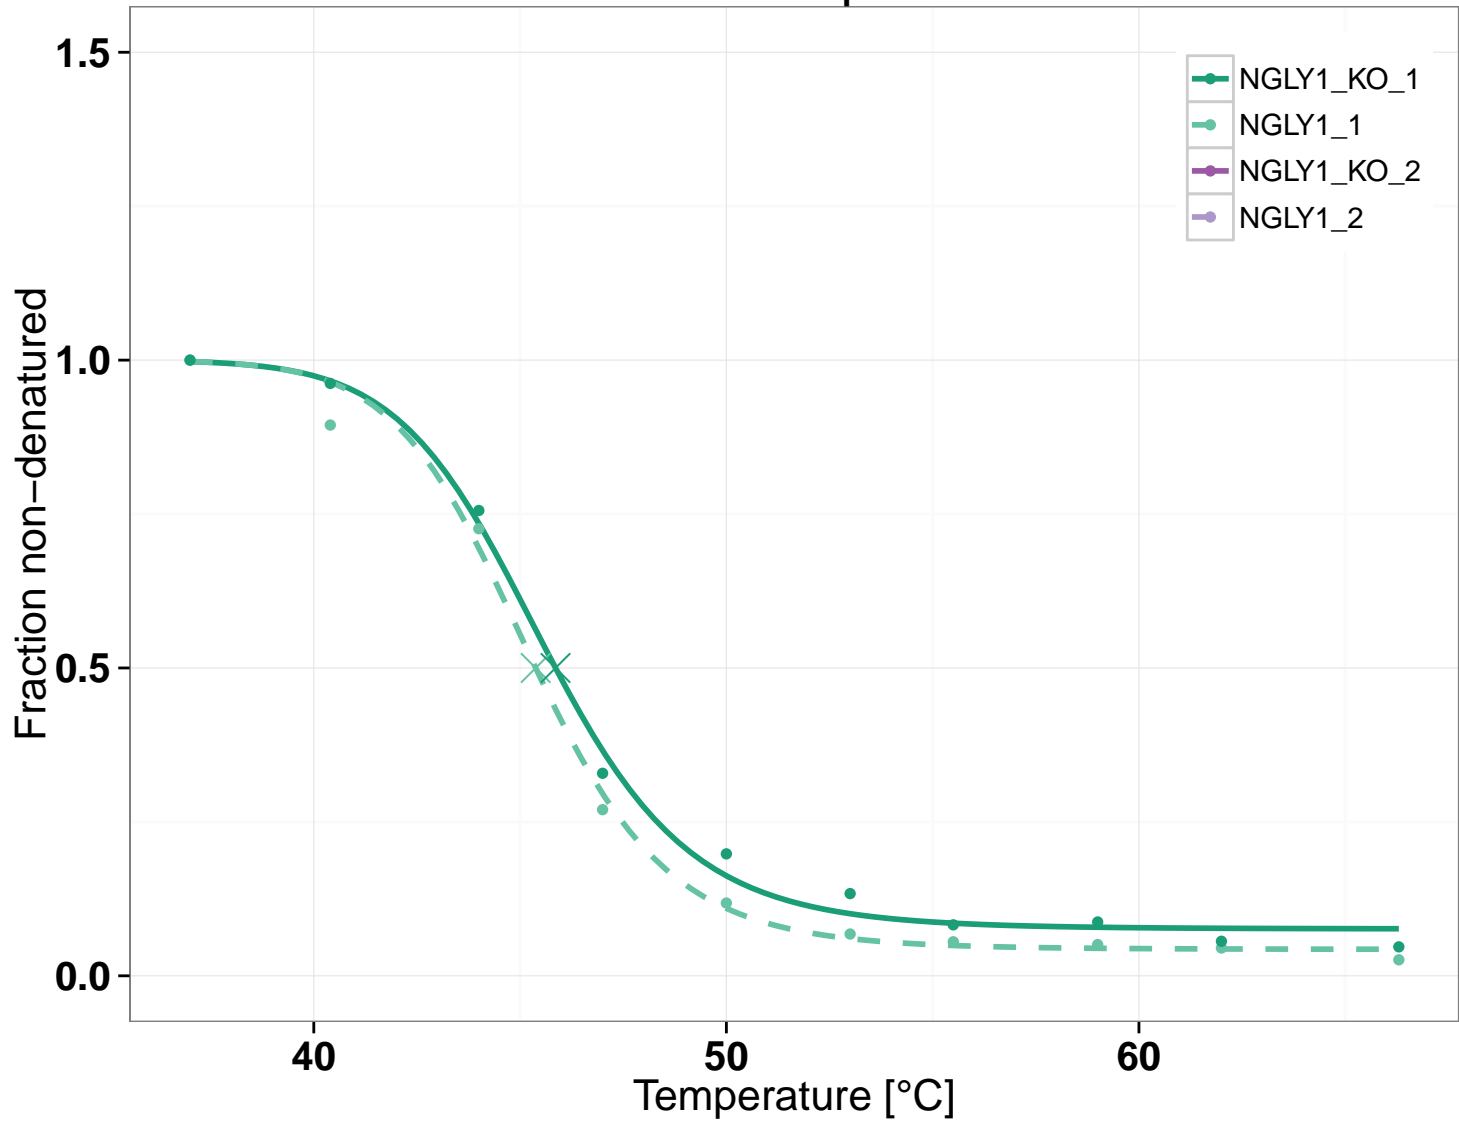

|            | meltPoint | slope | plateau | R2   |
|------------|-----------|-------|---------|------|
| NGLY1_KO_1 | 45.86     | -0.13 | 0.08    | 1    |
| NGLY1_1    | 45.38     | -0.14 | 0.04    | 0.99 |
| NGLY1_KO_2 | -         | -     | -       | -    |
| NGLY1_2    | -         | -     | -       | -    |

Supplement: Supplementary file 826 [file 1]

IPI00911112.1|FUT10

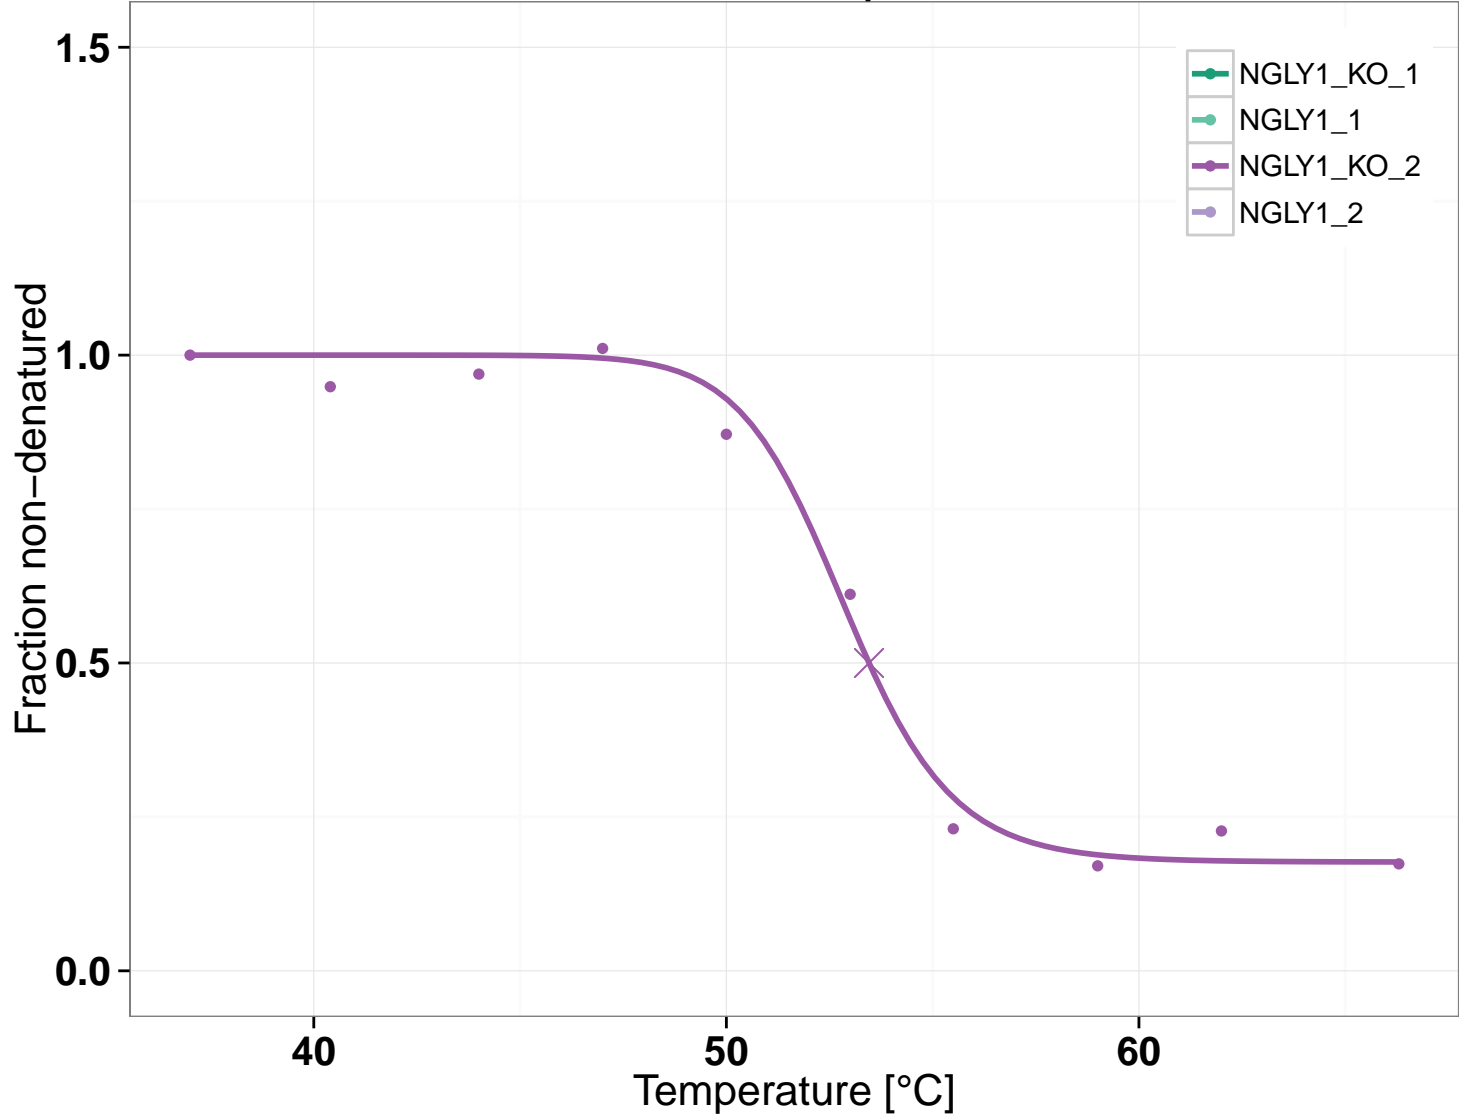

|            | meltPoint | slope | plateau | R2   |
|------------|-----------|-------|---------|------|
| NGLY1_KO_1 | —         | —     | —       | —    |
| NGLY1_1    | —         | —     | —       | —    |
| NGLY1_KO_2 | 53.46     | -0.16 | 0.18    | 0.99 |
| NGLY1_2    | —         | —     | —       | —    |

Supplement: Supplementary file 827 [file 1]

# IPI00011609.4|UBE3A

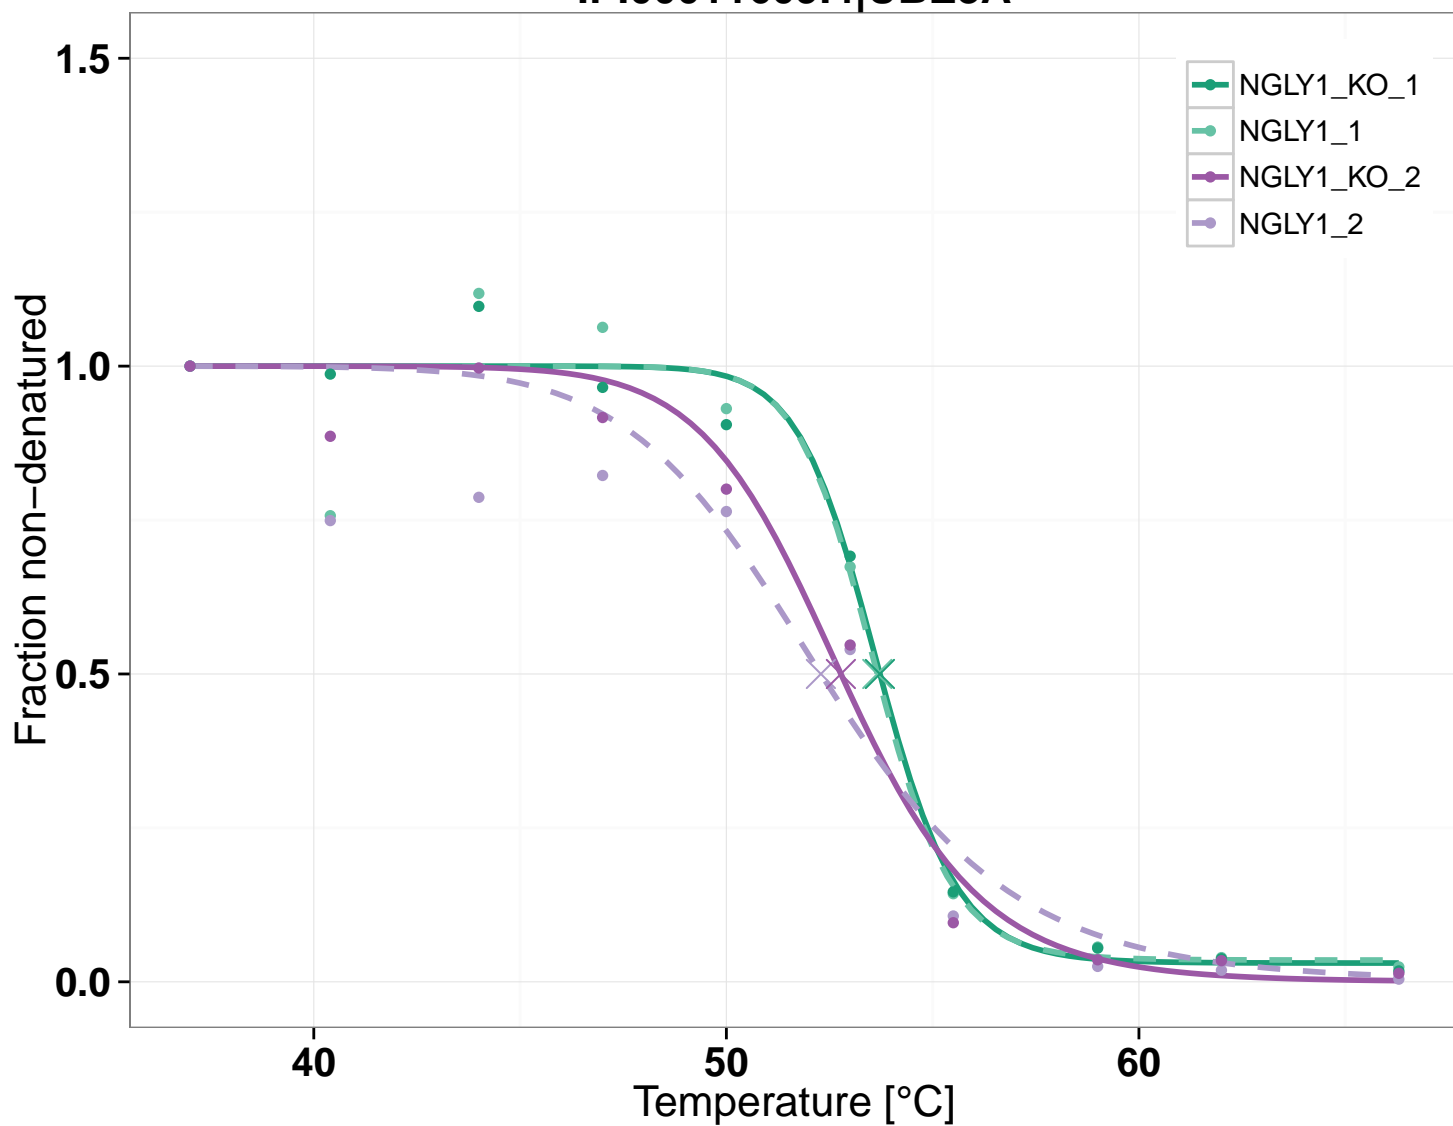

|            | meltPoint | slope | plateau | R2   |
|------------|-----------|-------|---------|------|
| NGLY1_KO_1 | 53.72     | -0.25 | 0.03    | 0.99 |
| NGLY1_1    | 53.66     | -0.26 | 0.04    | 0.96 |
| NGLY1_KO_2 | 52.78     | -0.15 | 0       | 0.98 |
| NGLY1_2    | 52.29     | -0.11 | 0       | 0.9  |

Supplement: Supplementary file 828 [file 1]

IPI00375205.1|GALNT10

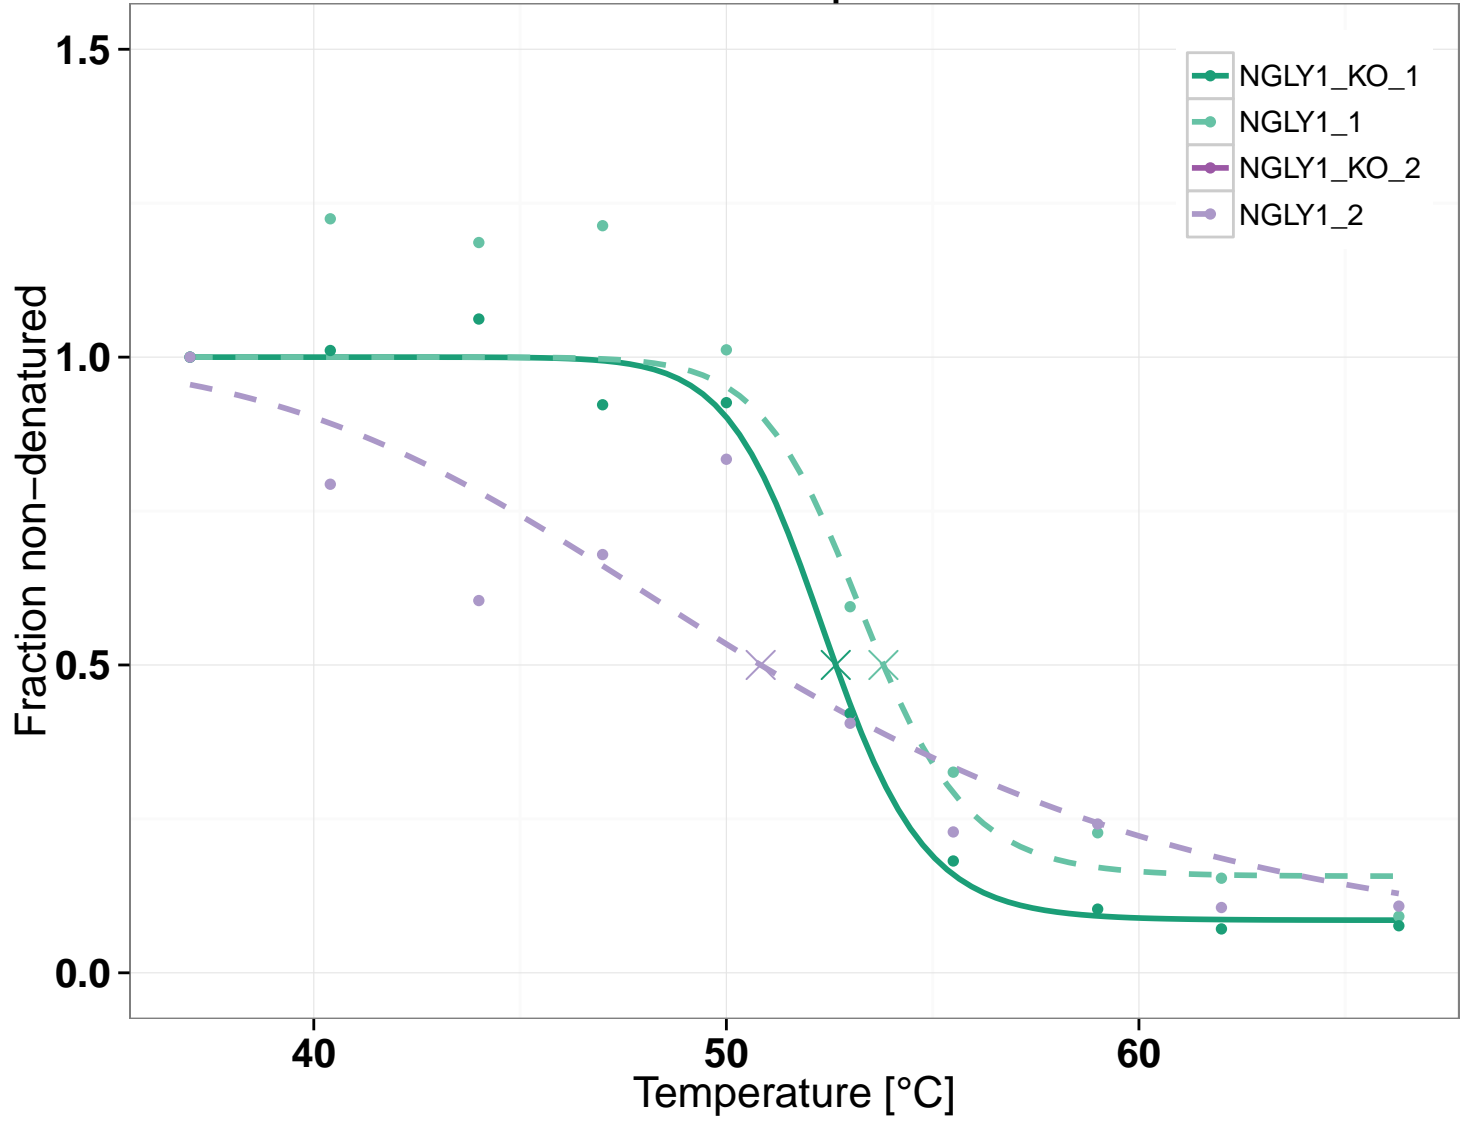

|            | meltPoint | slope  | plateau | R2   |
|------------|-----------|--------|---------|------|
| NGLY1_KO_1 | 52.65     | -0.19  | 0.09    | 0.99 |
| NGLY1_1    | 53.81     | -0.17  | 0.16    | 0.93 |
| NGLY1_KO_2 | -         | -      | -       | -    |
| NGLY1_2    | 50.83     | -0.043 | 0       | 0.84 |

Supplement: Supplementary file 829 [file 1]

# IPI00328318.7|AGL

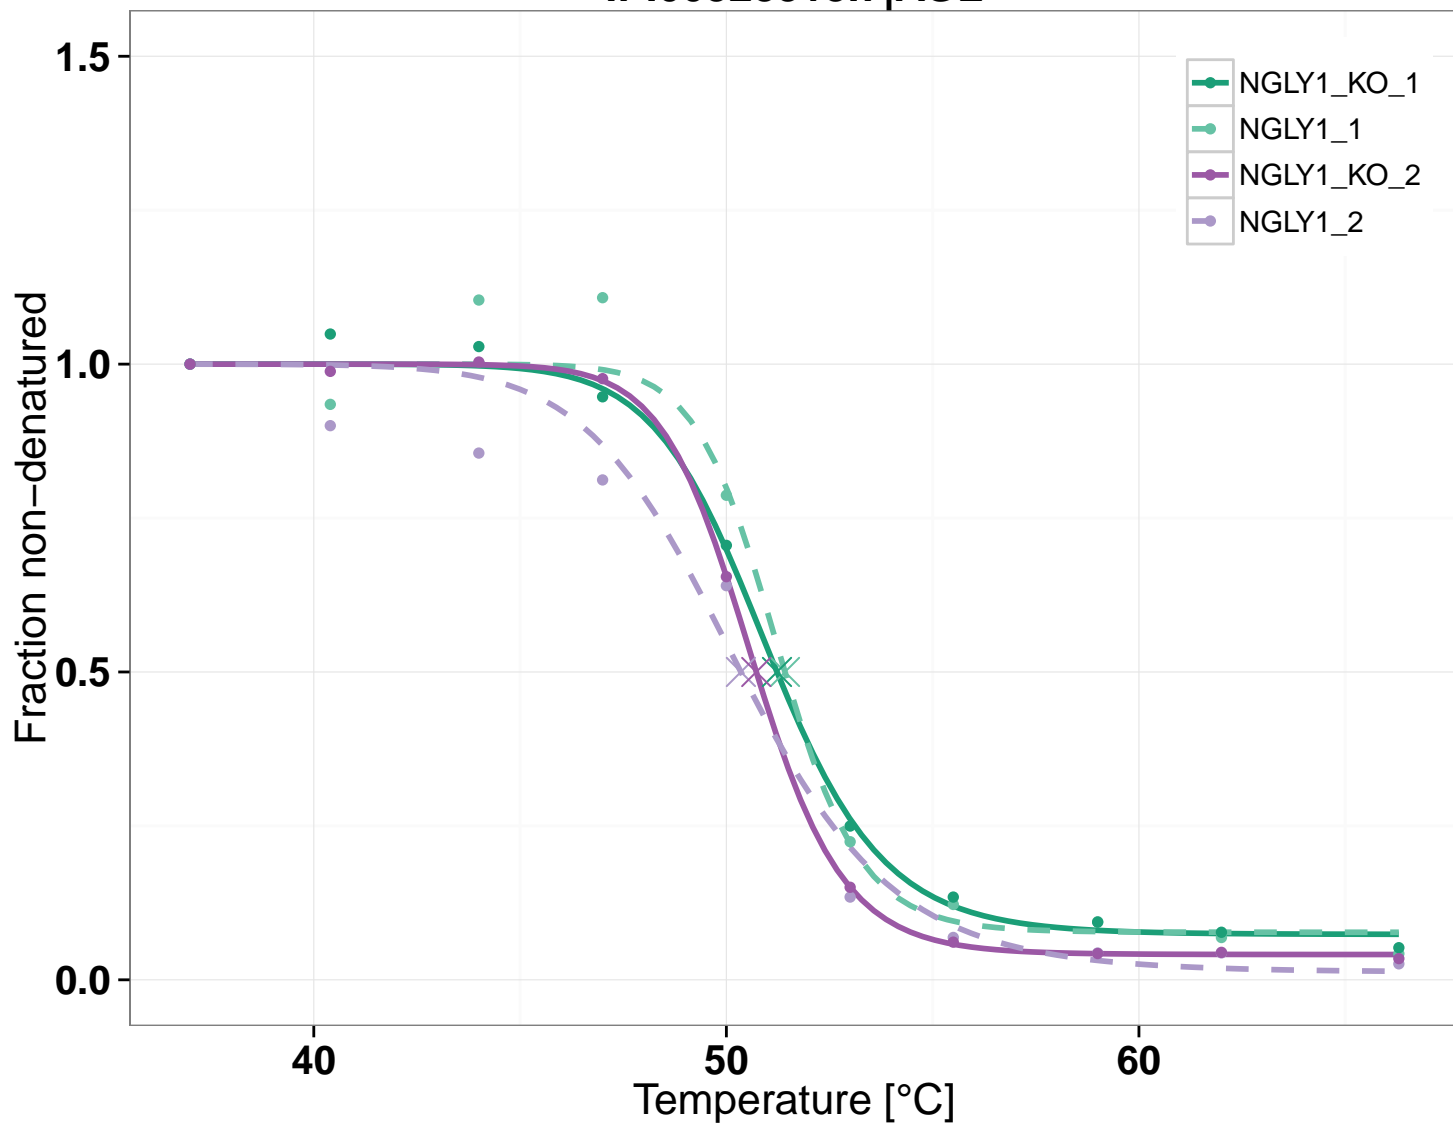

|            | meltPoint | slope | plateau | R2   |
|------------|-----------|-------|---------|------|
| NGLY1_KO_1 | 51.23     | -0.17 | 0.07    | 1    |
| NGLY1_1    | 51.42     | -0.23 | 0.08    | 0.98 |
| NGLY1_KO_2 | 50.72     | -0.22 | 0.04    | 1    |
| NGLY1_2    | 50.35     | -0.13 | 0.01    | 0.97 |

Supplement: Supplementary file 830 [file 1]

# IPI00910363.1|EML3

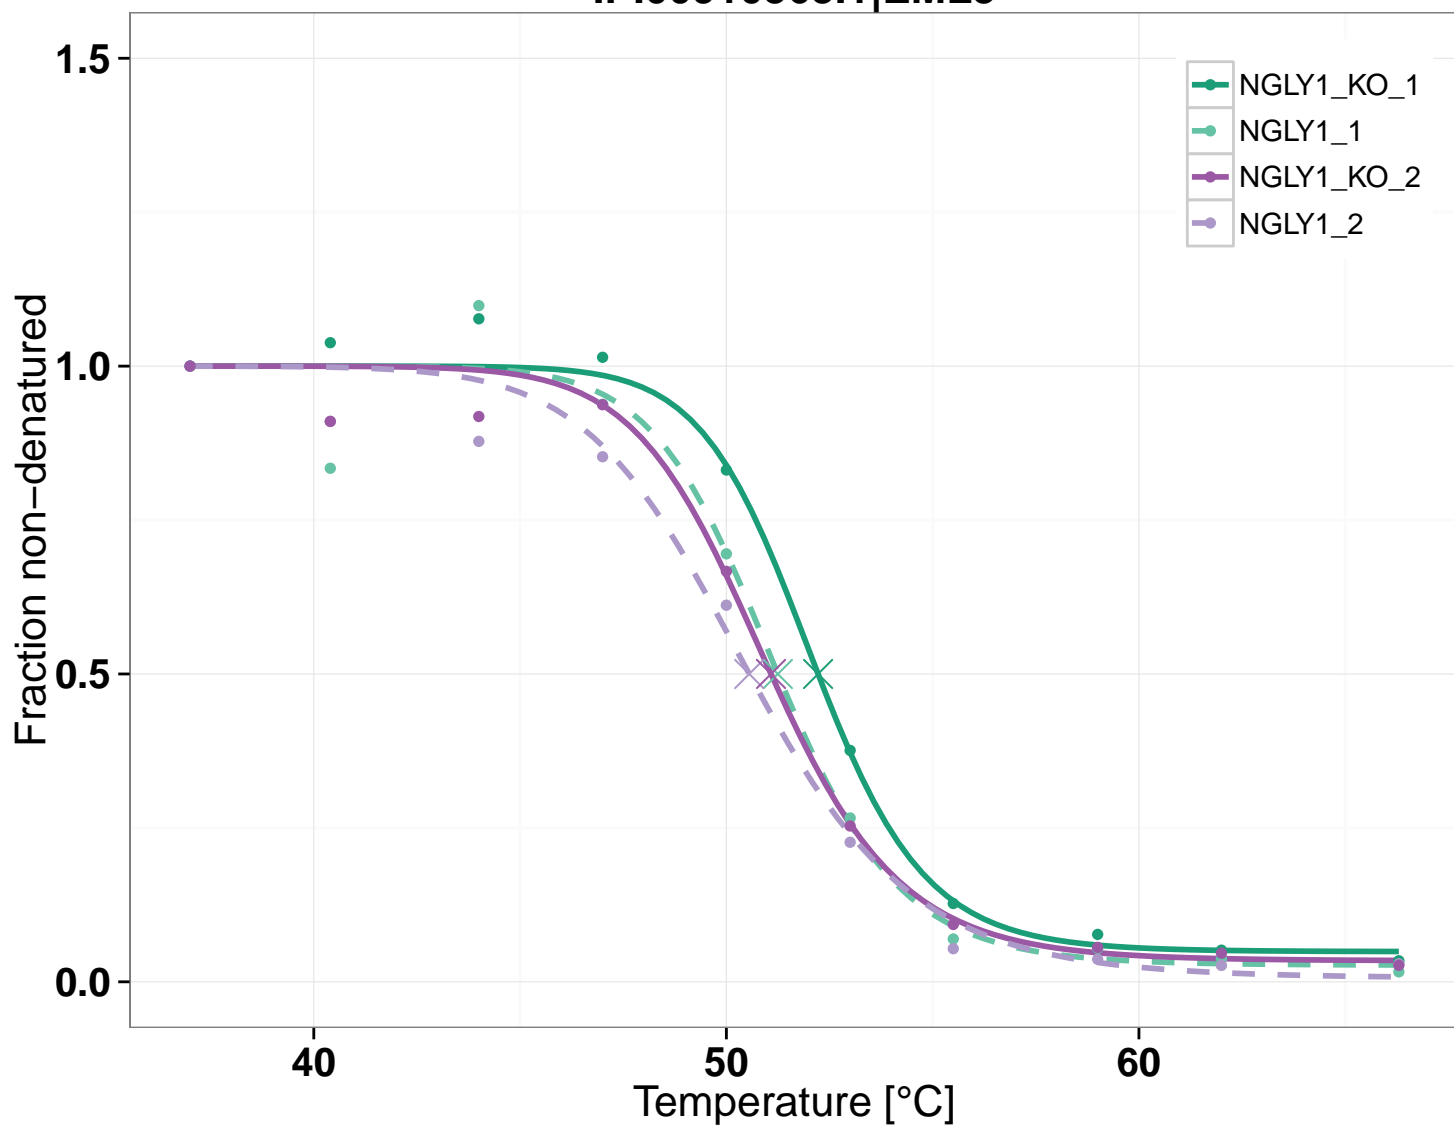

|            | meltPoint | slope | plateau | R2   |
|------------|-----------|-------|---------|------|
| NGLY1_KO_1 | 52.22     | -0.18 | 0.05    | 1    |
| NGLY1_1    | 51.25     | -0.16 | 0.03    | 0.98 |
| NGLY1_KO_2 | 51.08     | -0.15 | 0.03    | 0.99 |
| NGLY1_2    | 50.55     | -0.13 | 0.01    | 0.99 |

Supplement: Supplementary file 831 [file 1]

# IPI00738052.3|A4D1I1\_HUMAN

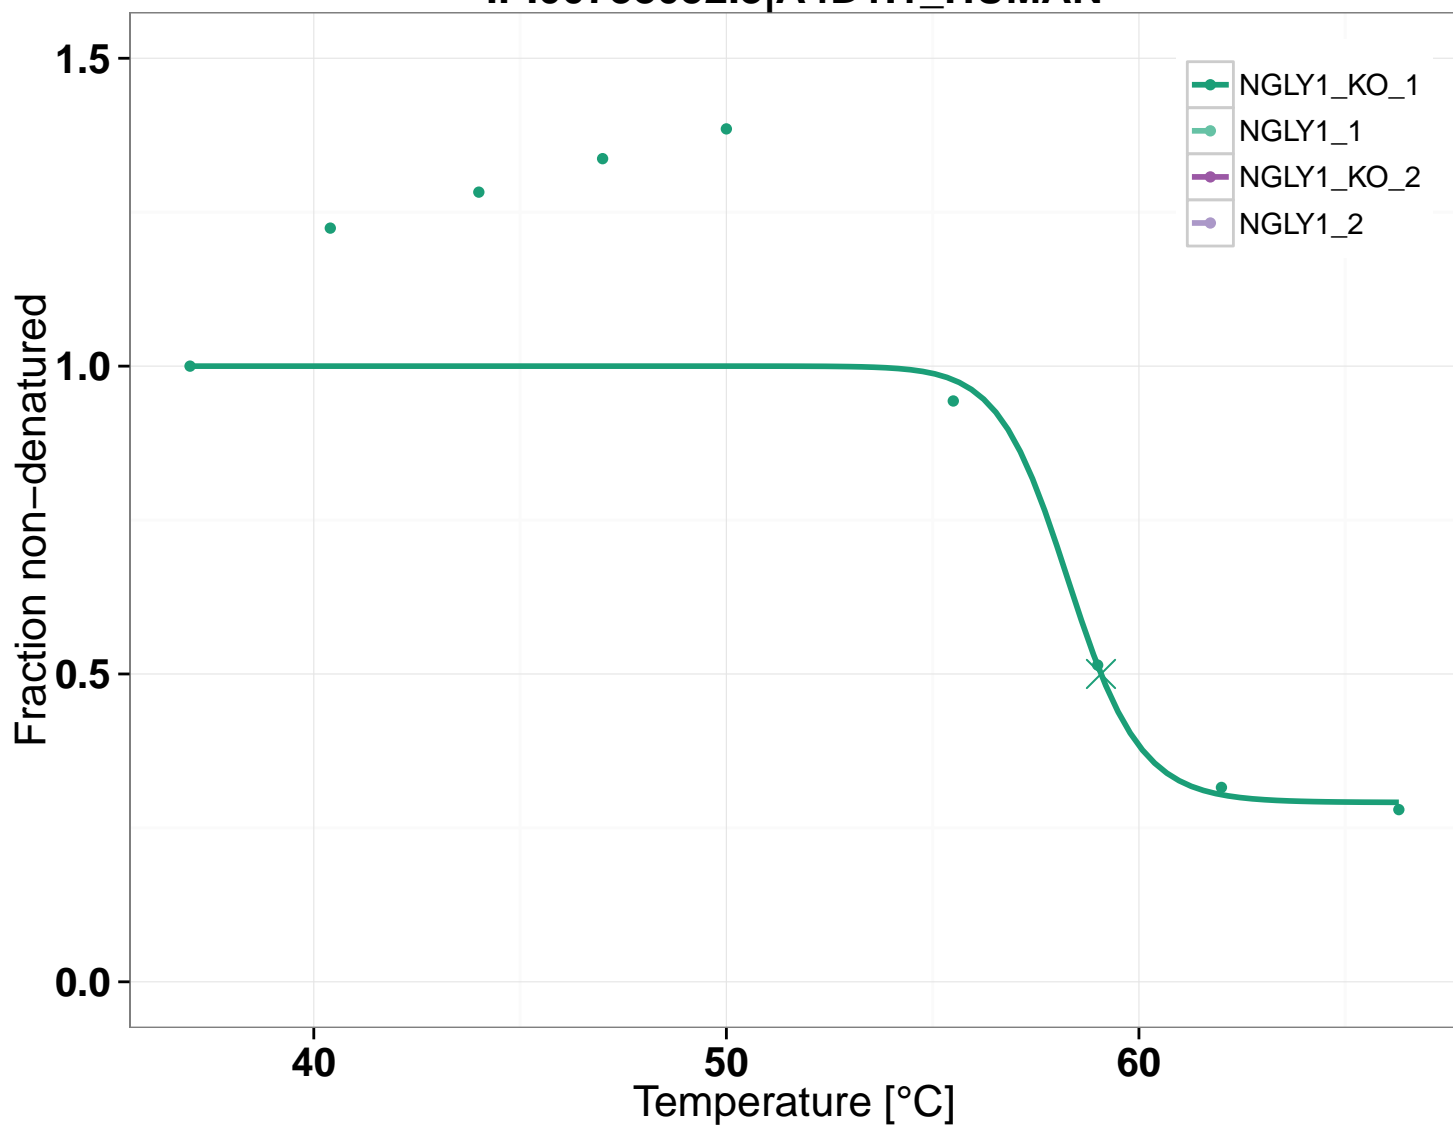

|            | meltPoint | slope | plateau | R2   |
|------------|-----------|-------|---------|------|
| NGLY1_KO_1 | 59.08     | -0.21 | 0.29    | 0.62 |
| NGLY1_1    | -         | -     | -       | -    |
| NGLY1_KO_2 | -         | -     | -       | -    |
| NGLY1_2    | -         | -     | -       | -    |

Supplement: Supplementary file 832 [file 1]

# IPI00902464.1|B3KSW2\_HUMAN

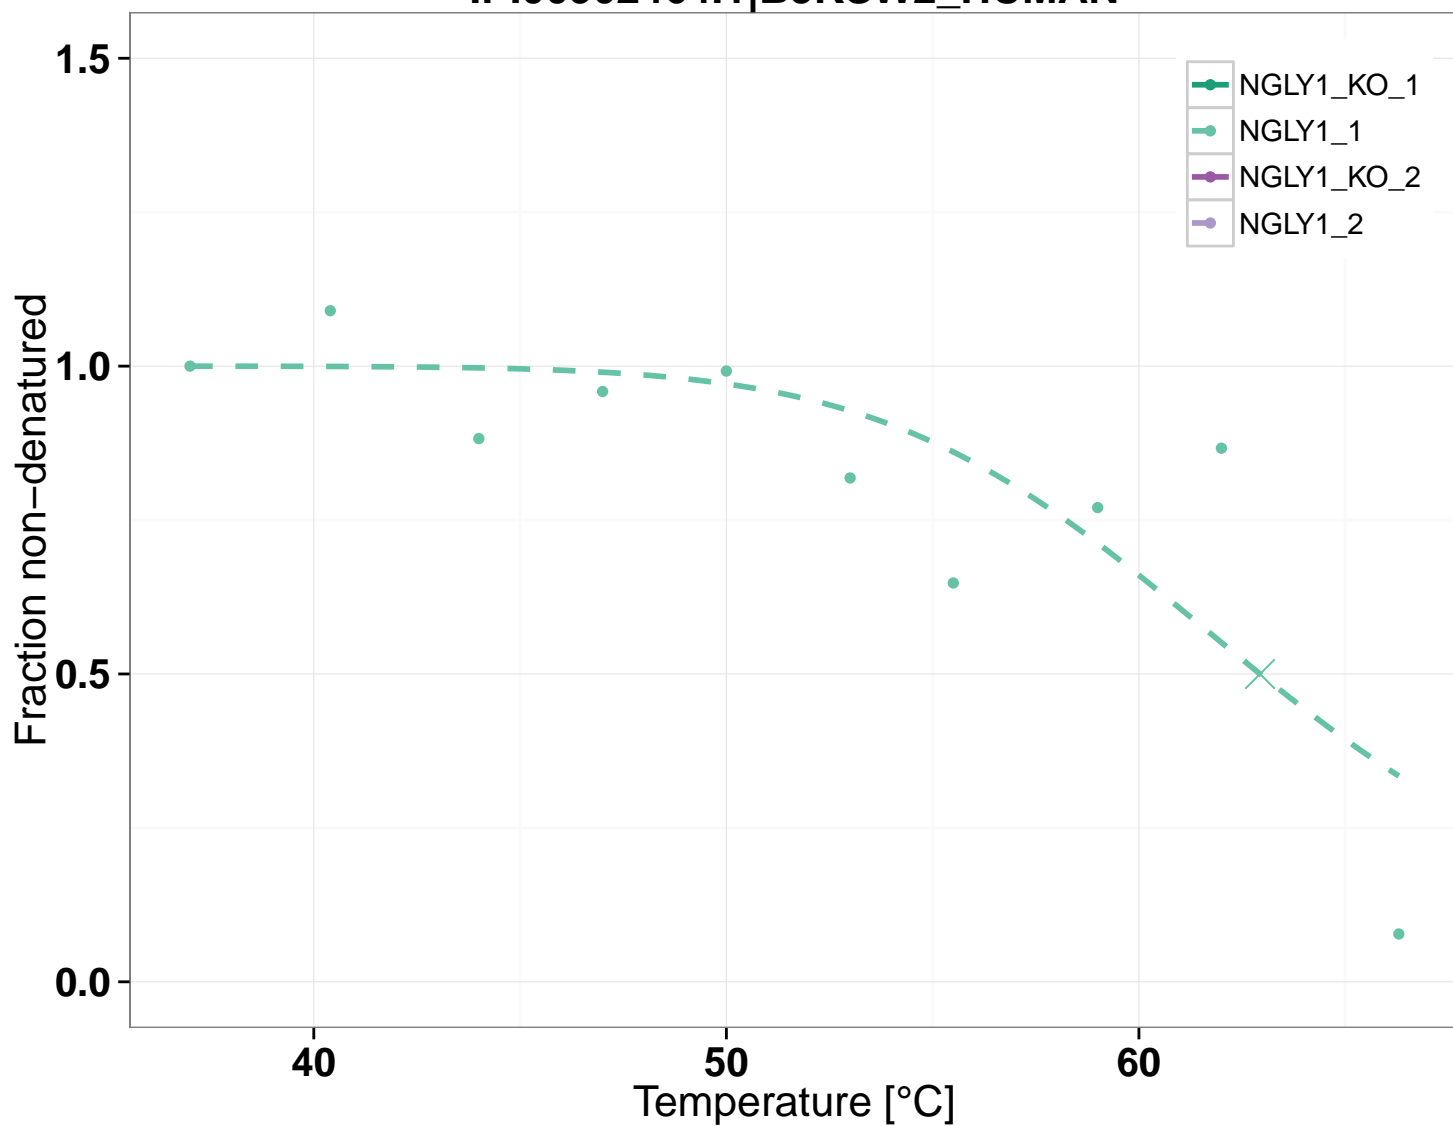

|            | meltPoint | slope  | plateau | R2   |
|------------|-----------|--------|---------|------|
| NGLY1_KO_1 | -         | -      | -       | -    |
| NGLY1_1    | 62.94     | -0.055 | 0       | 0.66 |
| NGLY1_KO_2 | -         | -      | -       | -    |
| NGLY1_2    | -         | -      | -       | -    |

Supplement: Supplementary file 833 [file 1]

# IPI00554488.2|PRKAR1B

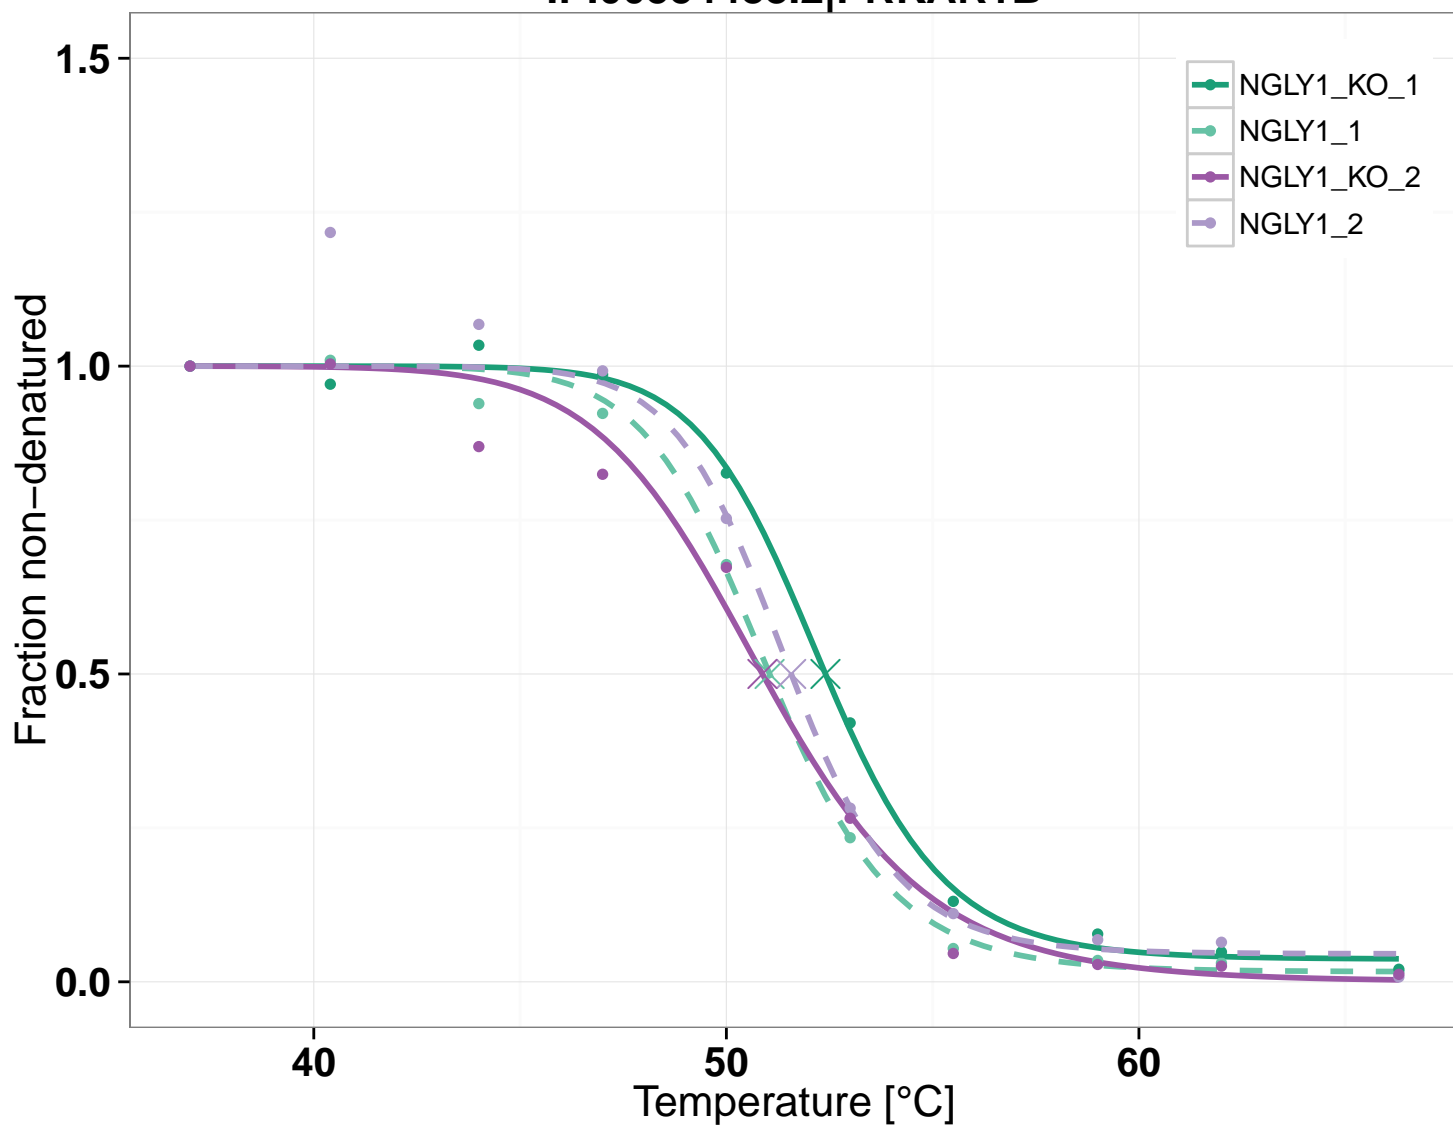

|            | meltPoint | slope | plateau | R2   |
|------------|-----------|-------|---------|------|
| NGLY1_KO_1 | 52.4      | -0.16 | 0.04    | 1    |
| NGLY1_1    | 51.05     | -0.16 | 0.02    | 1    |
| NGLY1_KO_2 | 50.87     | -0.12 | 0       | 0.99 |
| NGLY1_2    | 51.57     | -0.17 | 0.05    | 0.98 |

Supplement: Supplementary file 834 [file 1]

IPI00871438.1|USP32

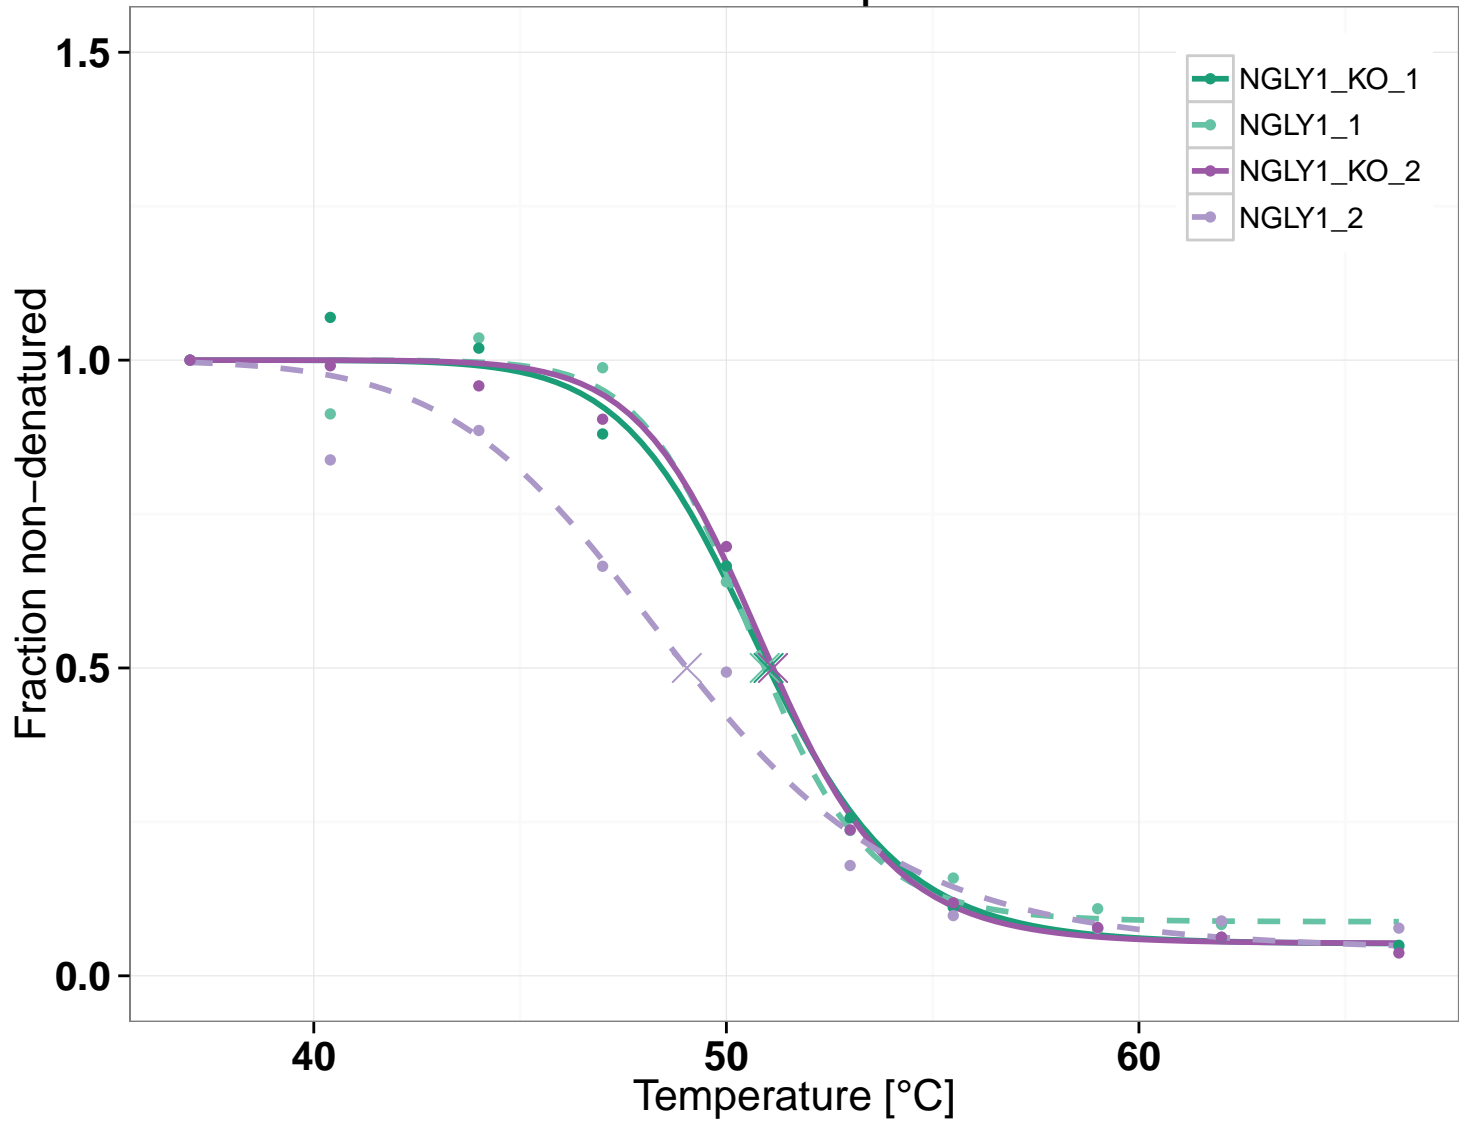

|            | meltPoint | slope  | plateau | R2   |
|------------|-----------|--------|---------|------|
| NGLY1_KO_1 | 51.02     | -0.14  | 0.05    | 1    |
| NGLY1_1    | 50.93     | -0.17  | 0.09    | 0.99 |
| NGLY1_KO_2 | 51.13     | -0.15  | 0.05    | 1    |
| NGLY1_2    | 49.04     | -0.087 | 0.04    | 0.98 |

Supplement: Supplementary file 835 [file 1]

IPI00103510.1|RXFP2

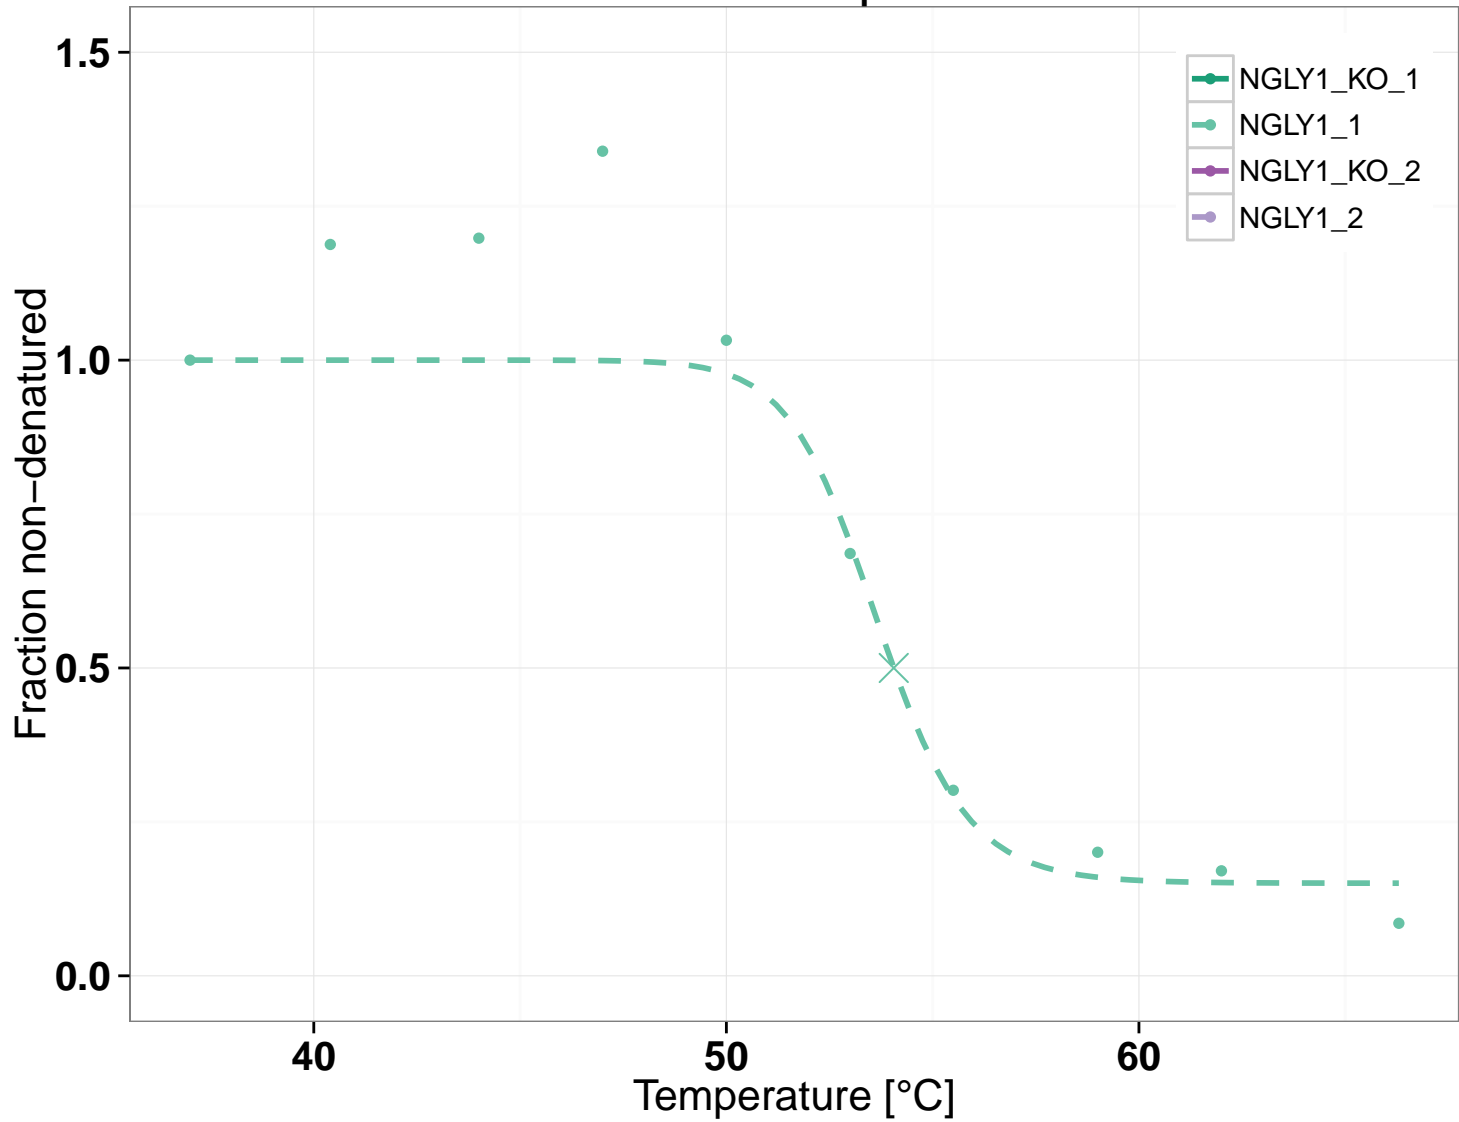

|            | meltPoint | slope | plateau | R2   |
|------------|-----------|-------|---------|------|
| NGLY1_KO_1 | -         | -     | -       | -    |
| NGLY1_1    | 54.06     | -0.2  | 0.15    | 0.91 |
| NGLY1_KO_2 | -         | -     | -       | -    |
| NGLY1_2    | -         | -     | -       | -    |

Supplement: Supplementary file 836 [file 1]

IPI00444329.1|BCKDHA

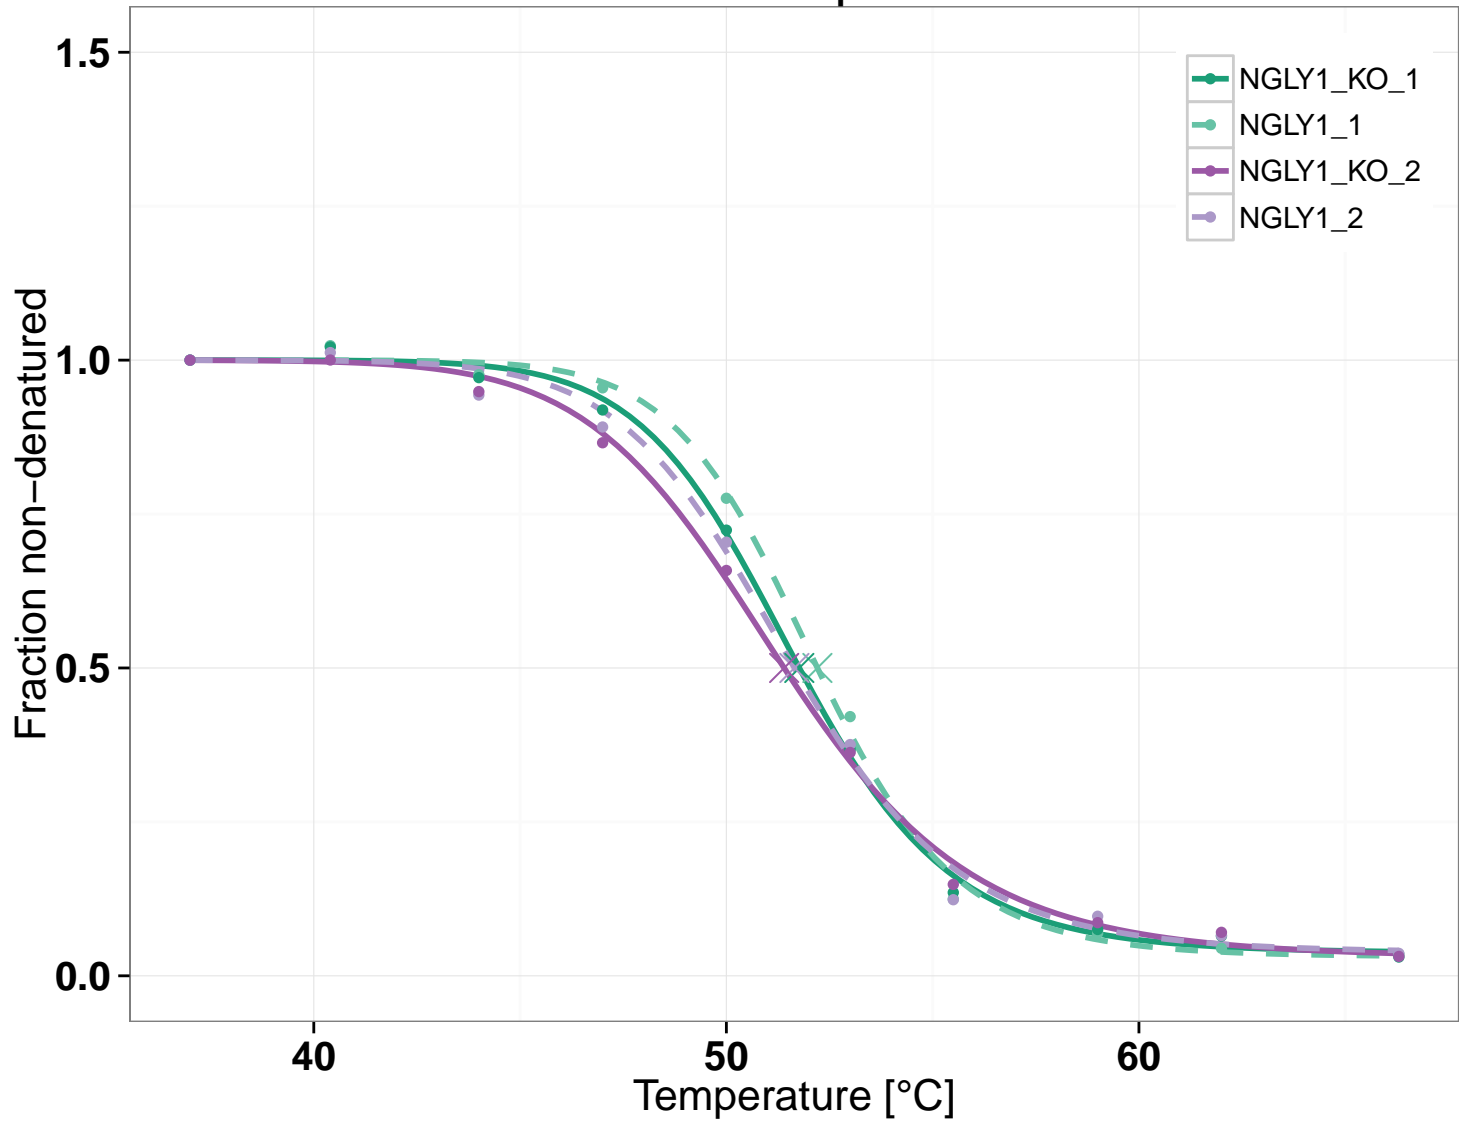

|            | meltPoint | slope | plateau | R2 |
|------------|-----------|-------|---------|----|
| NGLY1_KO_1 | 51.77     | -0.13 | 0.04    | 1  |
| NGLY1_1    | 52.21     | -0.14 | 0.03    | 1  |
| NGLY1_KO_2 | 51.4      | -0.1  | 0.03    | 1  |
| NGLY1_2    | 51.65     | -0.12 | 0.04    | 1  |

Supplement: Supplementary file 837 [file 1]

# IPI00217686.3|FTSJ3

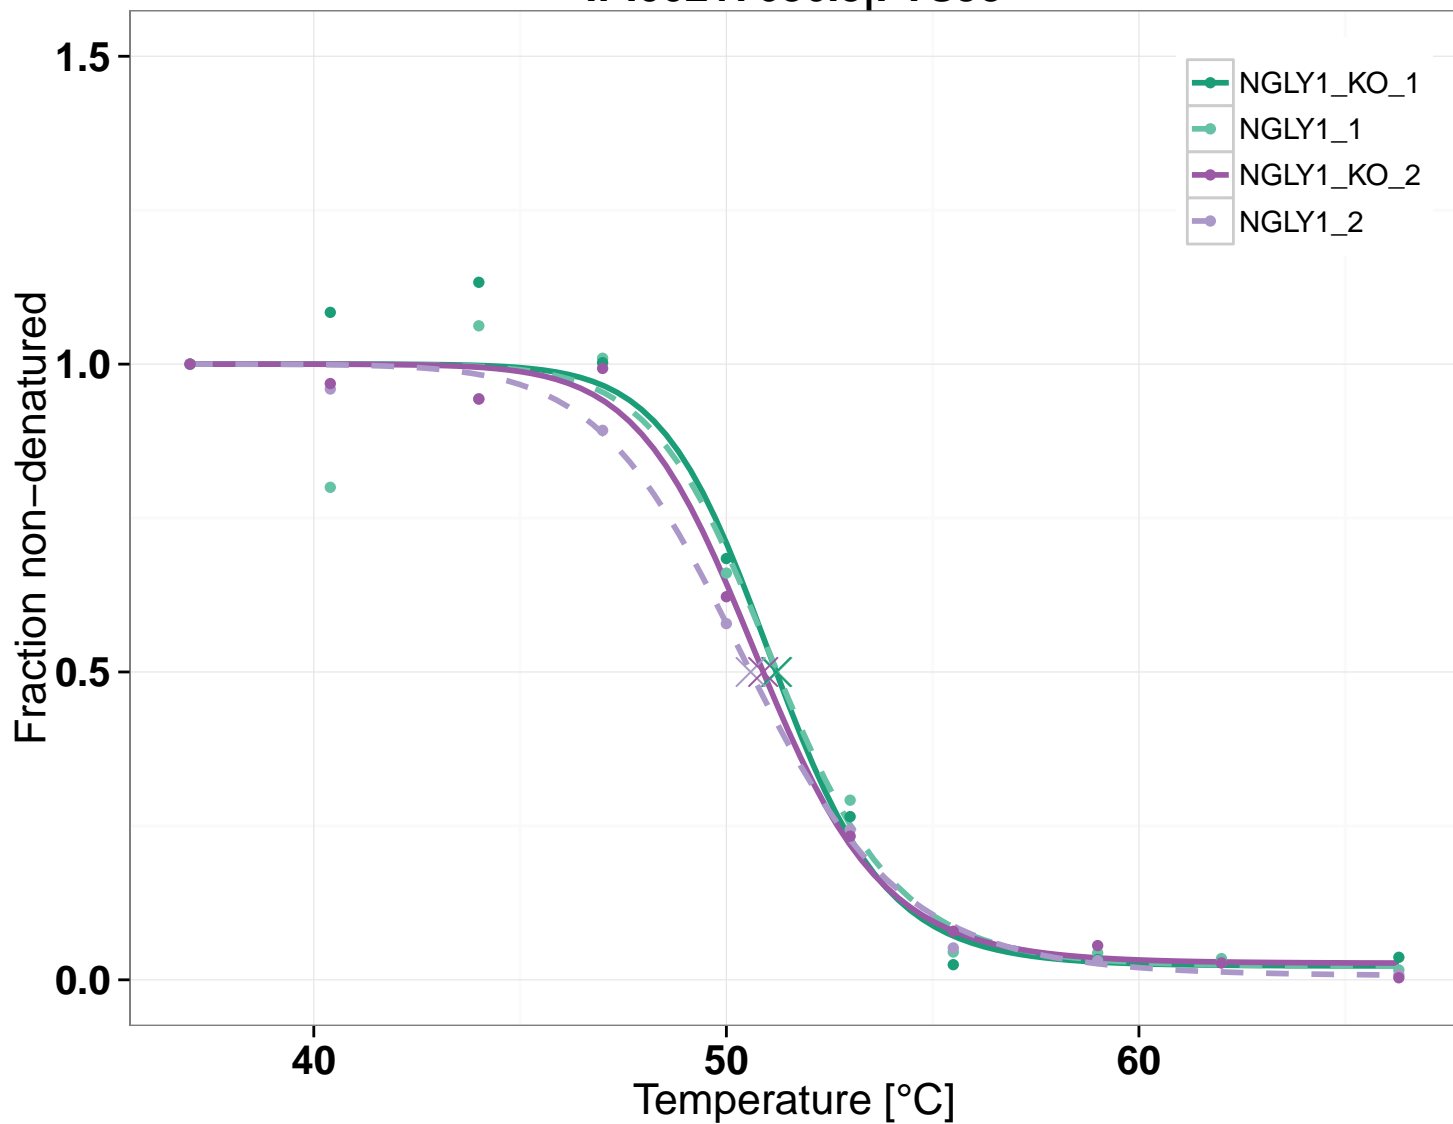

|            | meltPoint | slope | plateau | R2   |
|------------|-----------|-------|---------|------|
| NGLY1_KO_1 | 51.21     | -0.18 | 0.02    | 0.99 |
| NGLY1_1    | 51.23     | -0.16 | 0.02    | 0.97 |
| NGLY1_KO_2 | 50.89     | -0.16 | 0.03    | 1    |
| NGLY1_2    | 50.59     | -0.13 | 0.01    | 1    |

Supplement: Supplementary file 838 [file 1]

IPI00418931.1|FLJ45139

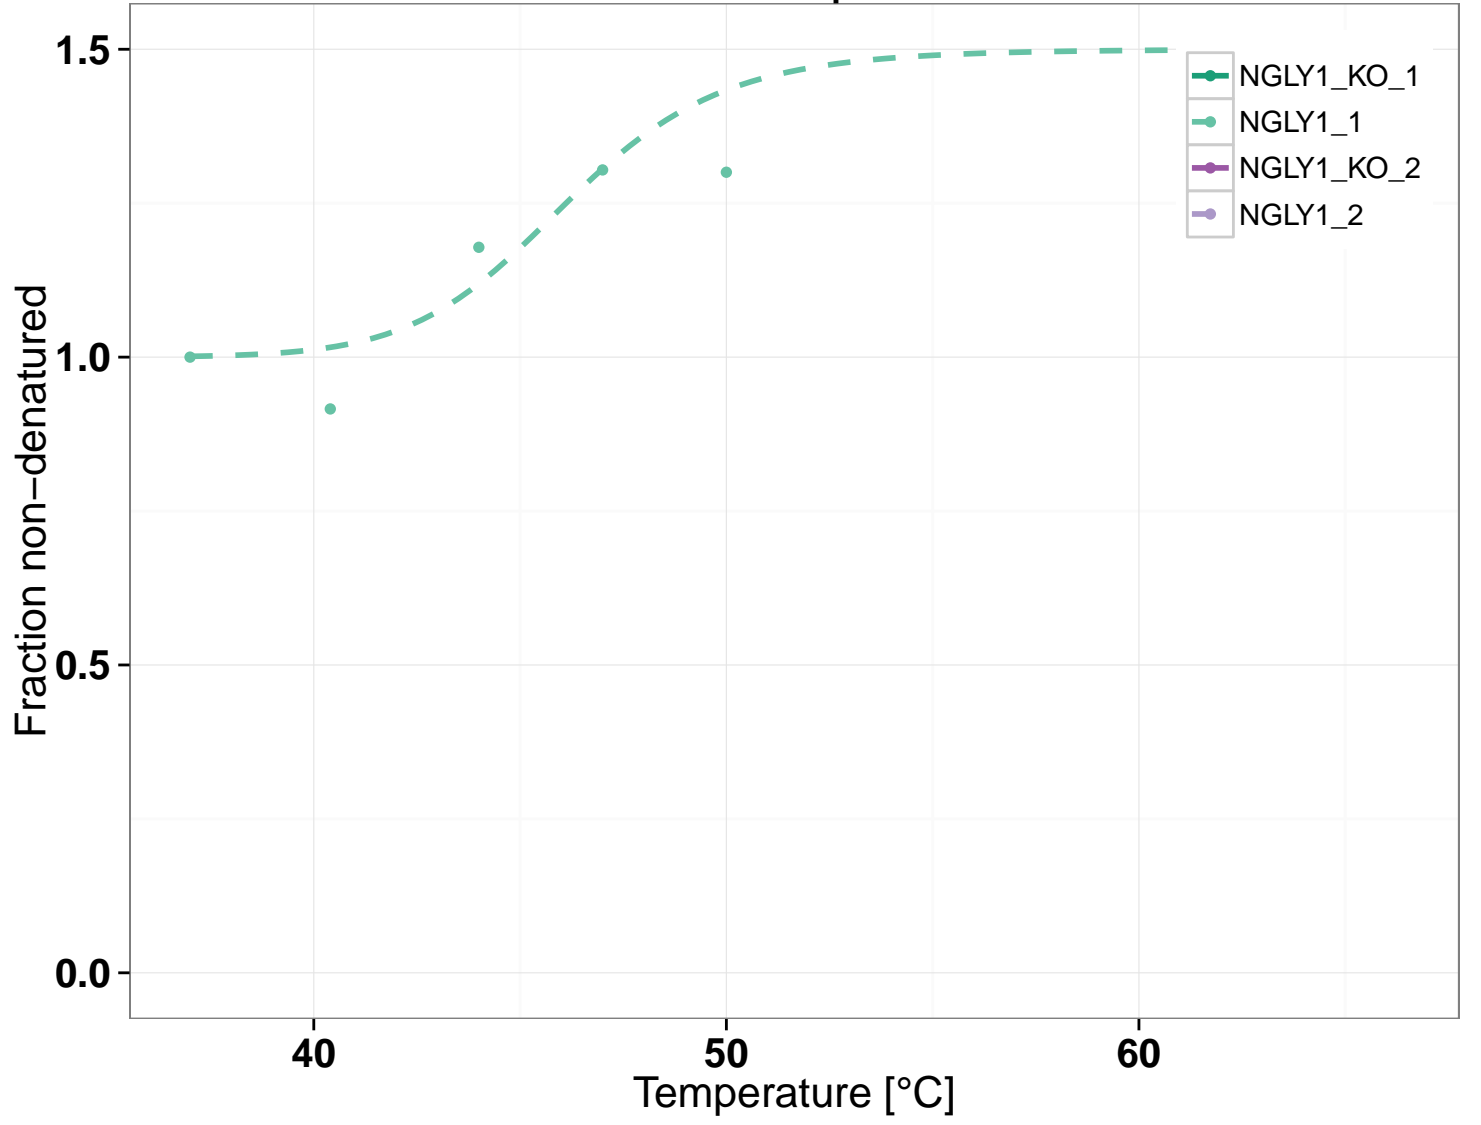

|            | meltPoint | slope | plateau | R2  |
|------------|-----------|-------|---------|-----|
| NGLY1_KO_1 | -         | -     | -       | -   |
| NGLY1_1    | -         | 0.066 | 1.5     | 0.7 |
| NGLY1_KO_2 | -         | -     | -       | -   |
| NGLY1_2    | -         | -     | -       | -   |

Supplement: Supplementary file 839 [file 1]

# IPI00019904.2|ADD2

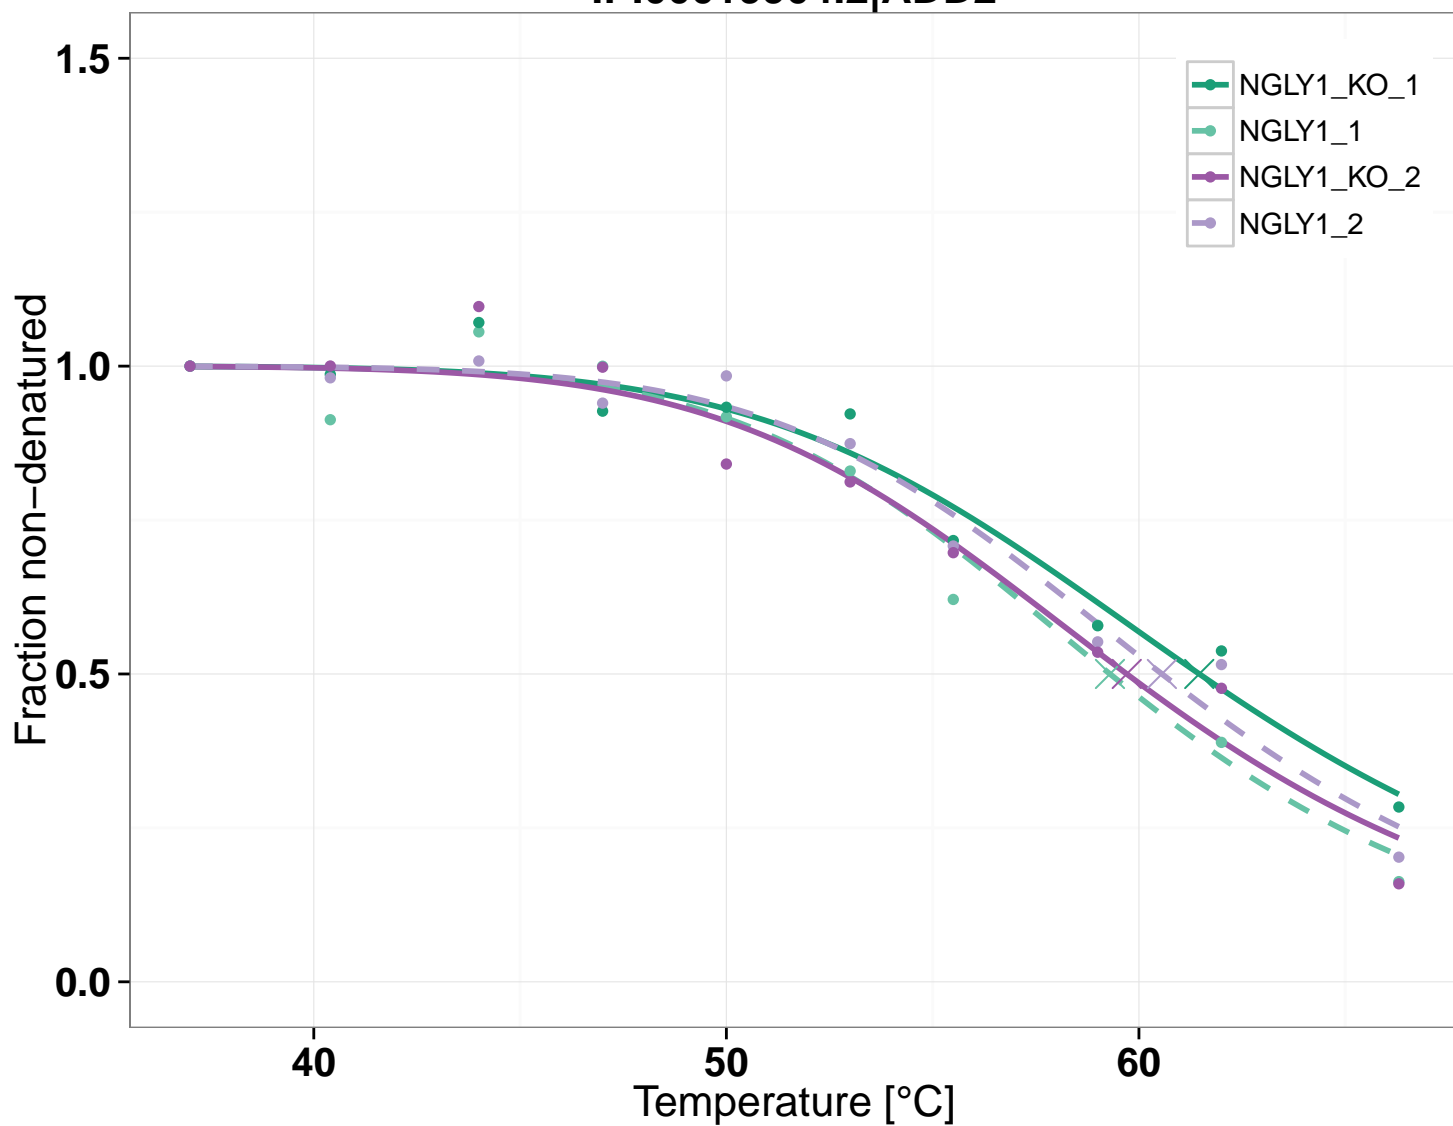

|            | meltPoint | slope  | plateau | R2   |
|------------|-----------|--------|---------|------|
| NGLY1_KO_1 | 61.46     | -0.047 | 0       | 0.96 |
| NGLY1_1    | 59.3      | -0.055 | 0       | 0.97 |
| NGLY1_KO_2 | 59.7      | -0.051 | 0       | 0.96 |
| NGLY1_2    | 60.56     | -0.053 | 0       | 0.97 |

Supplement: Supplementary file 840 [file 1]

IPI00550948.4|TNFAIP8L2

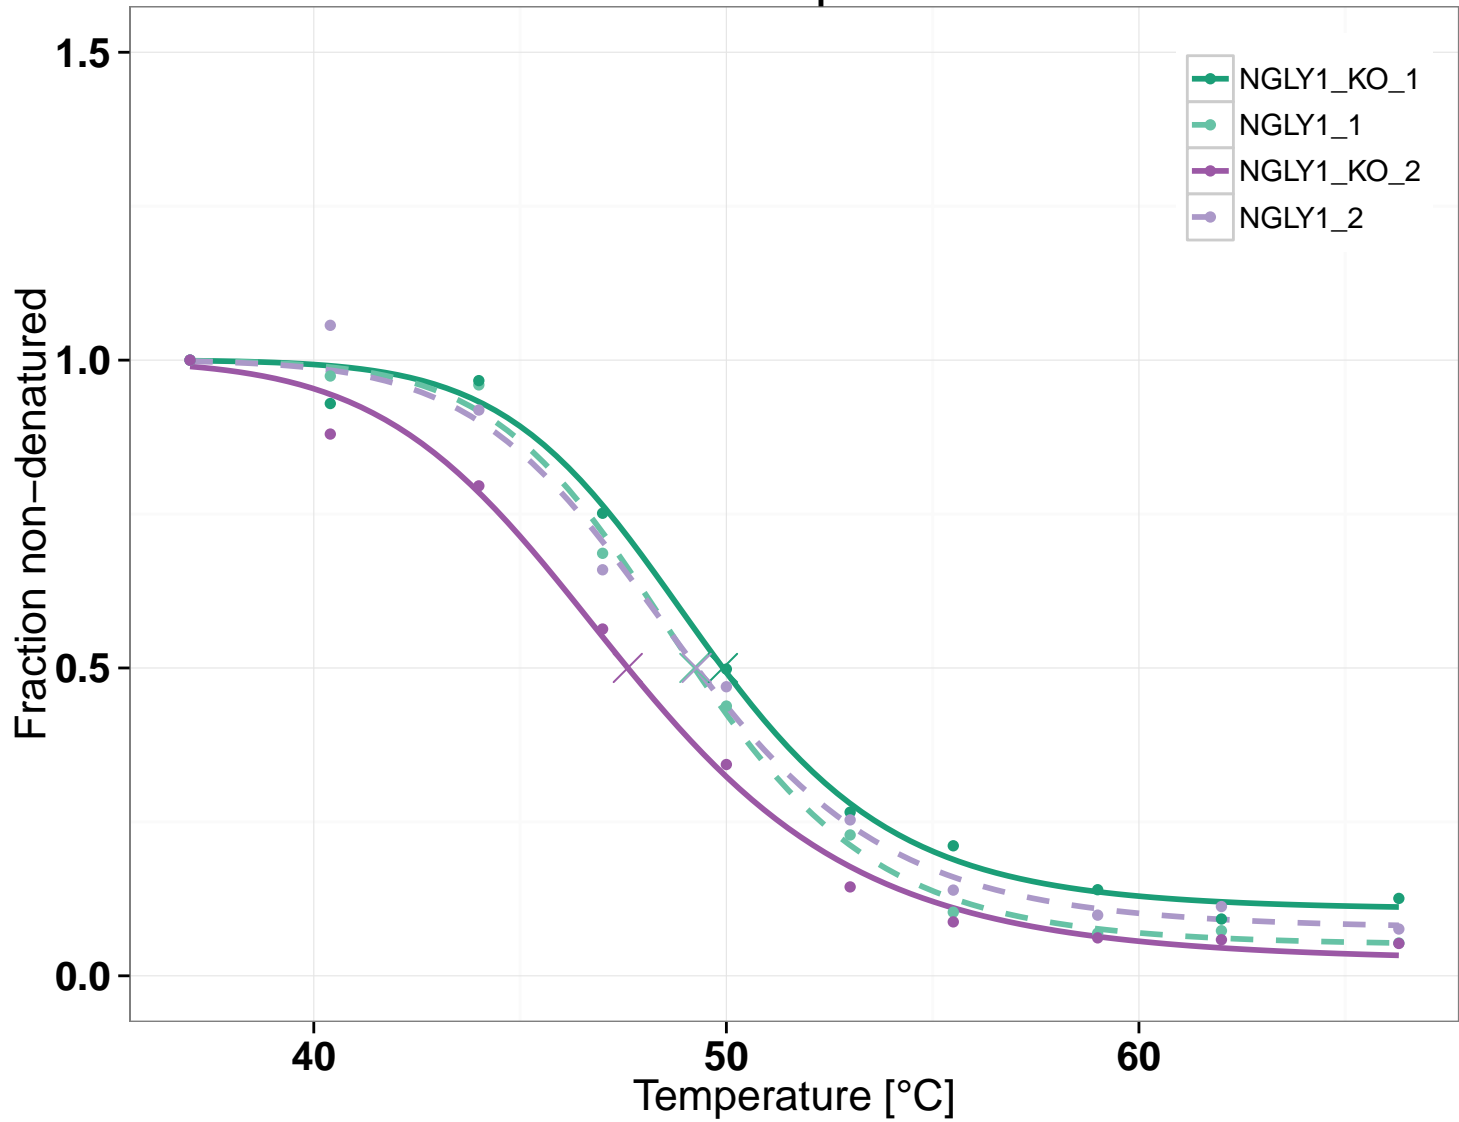

|            | meltPoint | slope  | plateau | R2   |
|------------|-----------|--------|---------|------|
| NGLY1_KO_1 | 49.92     | -0.094 | 0.11    | 0.99 |
| NGLY1_1    | 49.22     | -0.1   | 0.05    | 1    |
| NGLY1_KO_2 | 47.61     | -0.084 | 0.02    | 0.99 |
| NGLY1_2    | 49.28     | -0.092 | 0.08    | 0.99 |

Supplement: Supplementary file 841 [file 1]

IPI00304493.5|SRFBP1

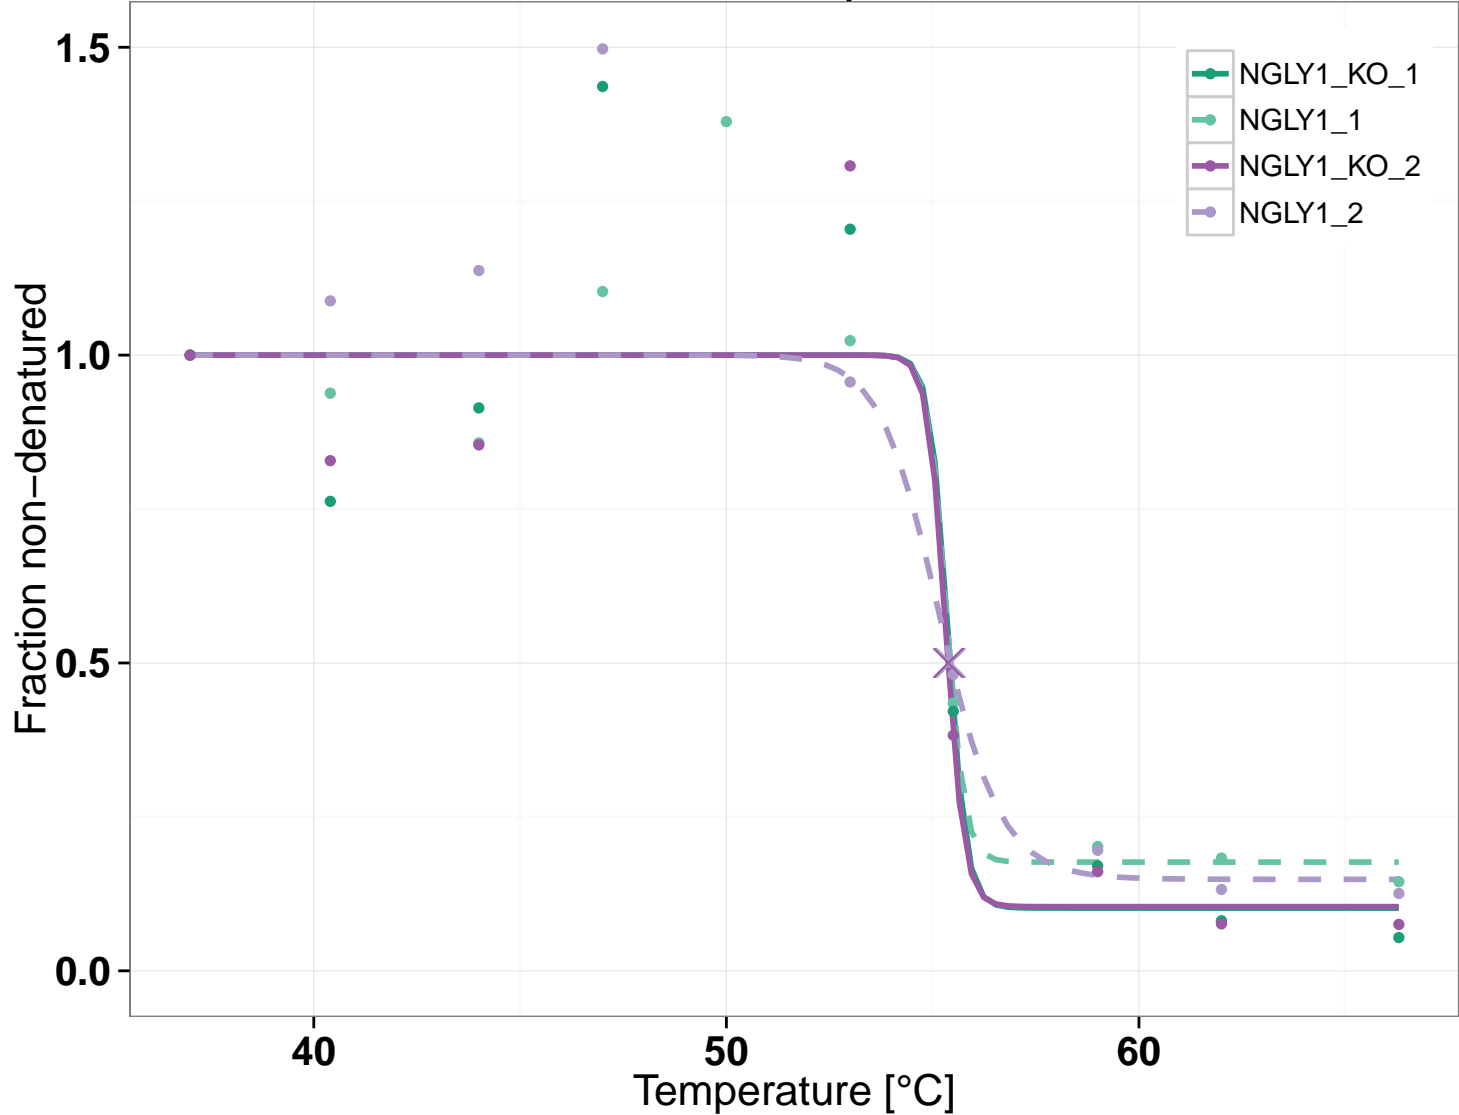

|            | meltPoint | slope | plateau | R2   |
|------------|-----------|-------|---------|------|
| NGLY1_KO_1 | 55.42     | -1    | 0.1     | 0.66 |
| NGLY1_1    | 55.42     | -0.93 | 0.18    | 0.9  |
| NGLY1_KO_2 | 55.37     | -1    | 0.1     | 0.64 |
| NGLY1_2    | 55.44     | -0.29 | 0.15    | 0.75 |

Supplement: Supplementary file 842 [file 1]

IPI00386760.2|TMEM48

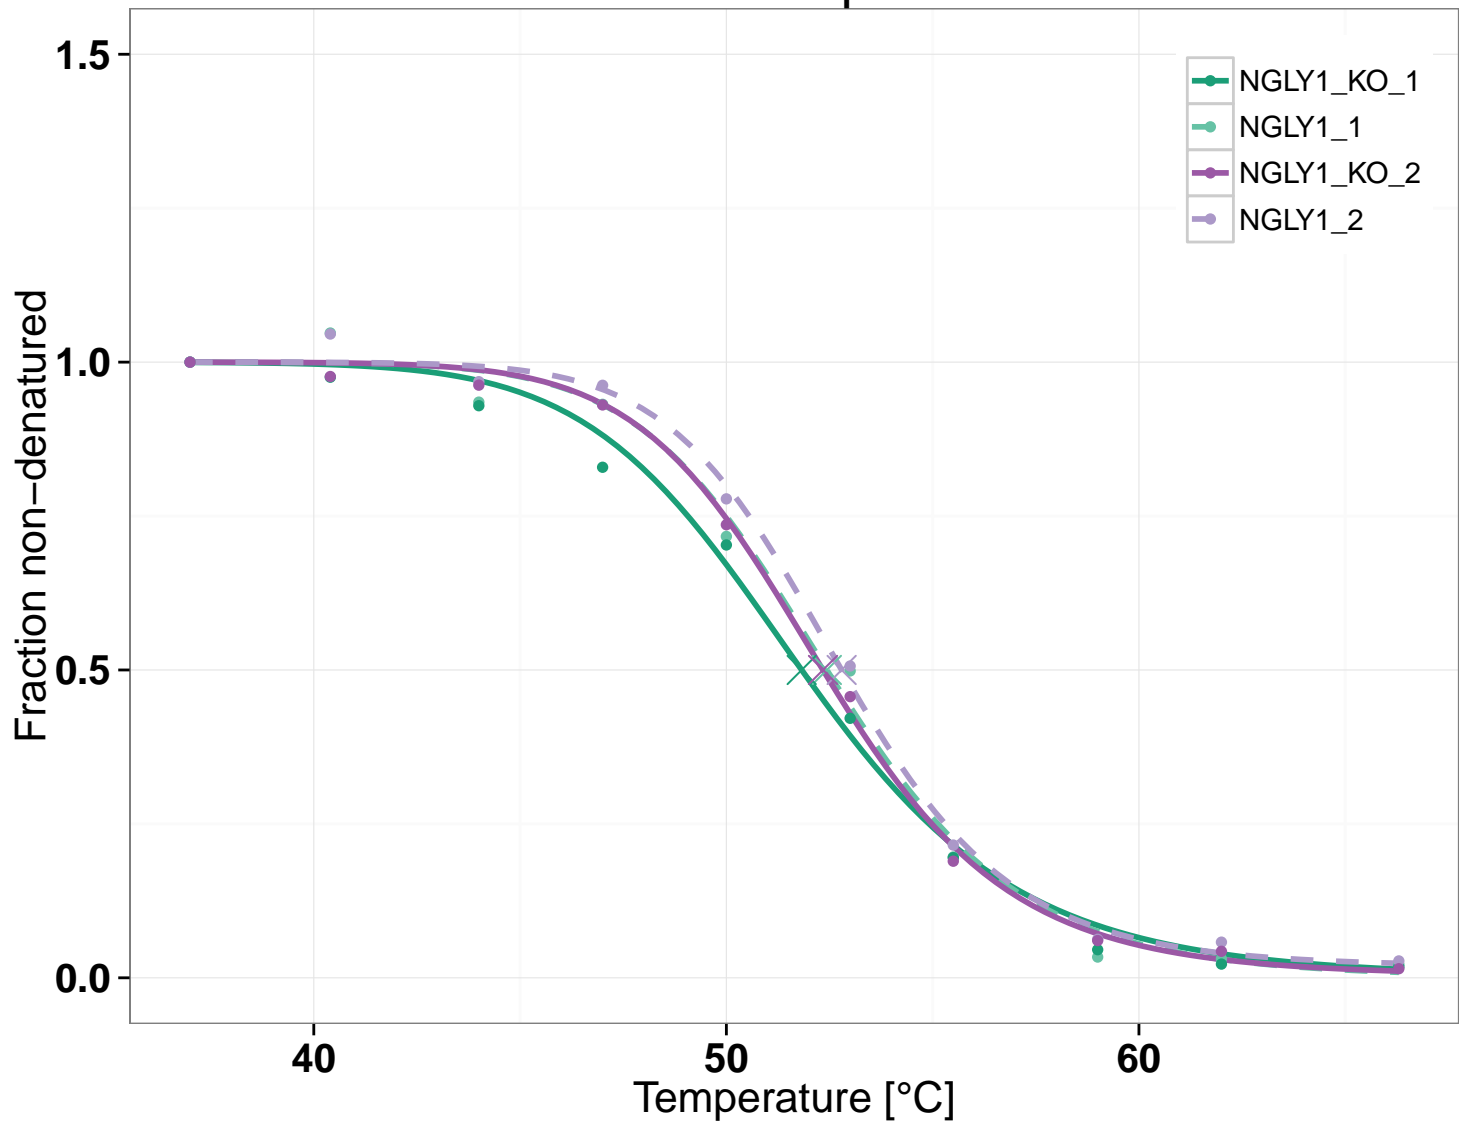

|            | meltPoint | slope  | plateau | R2   |
|------------|-----------|--------|---------|------|
| NGLY1_KO_1 | 51.83     | -0.095 | 0       | 0.99 |
| NGLY1_1    | 52.44     | -0.11  | 0       | 0.99 |
| NGLY1_KO_2 | 52.34     | -0.11  | 0       | 1    |
| NGLY1_2    | 52.79     | -0.12  | 0.02    | 1    |

Supplement: Supplementary file 843 [file 1]

# IPI00021785.2|COX5B

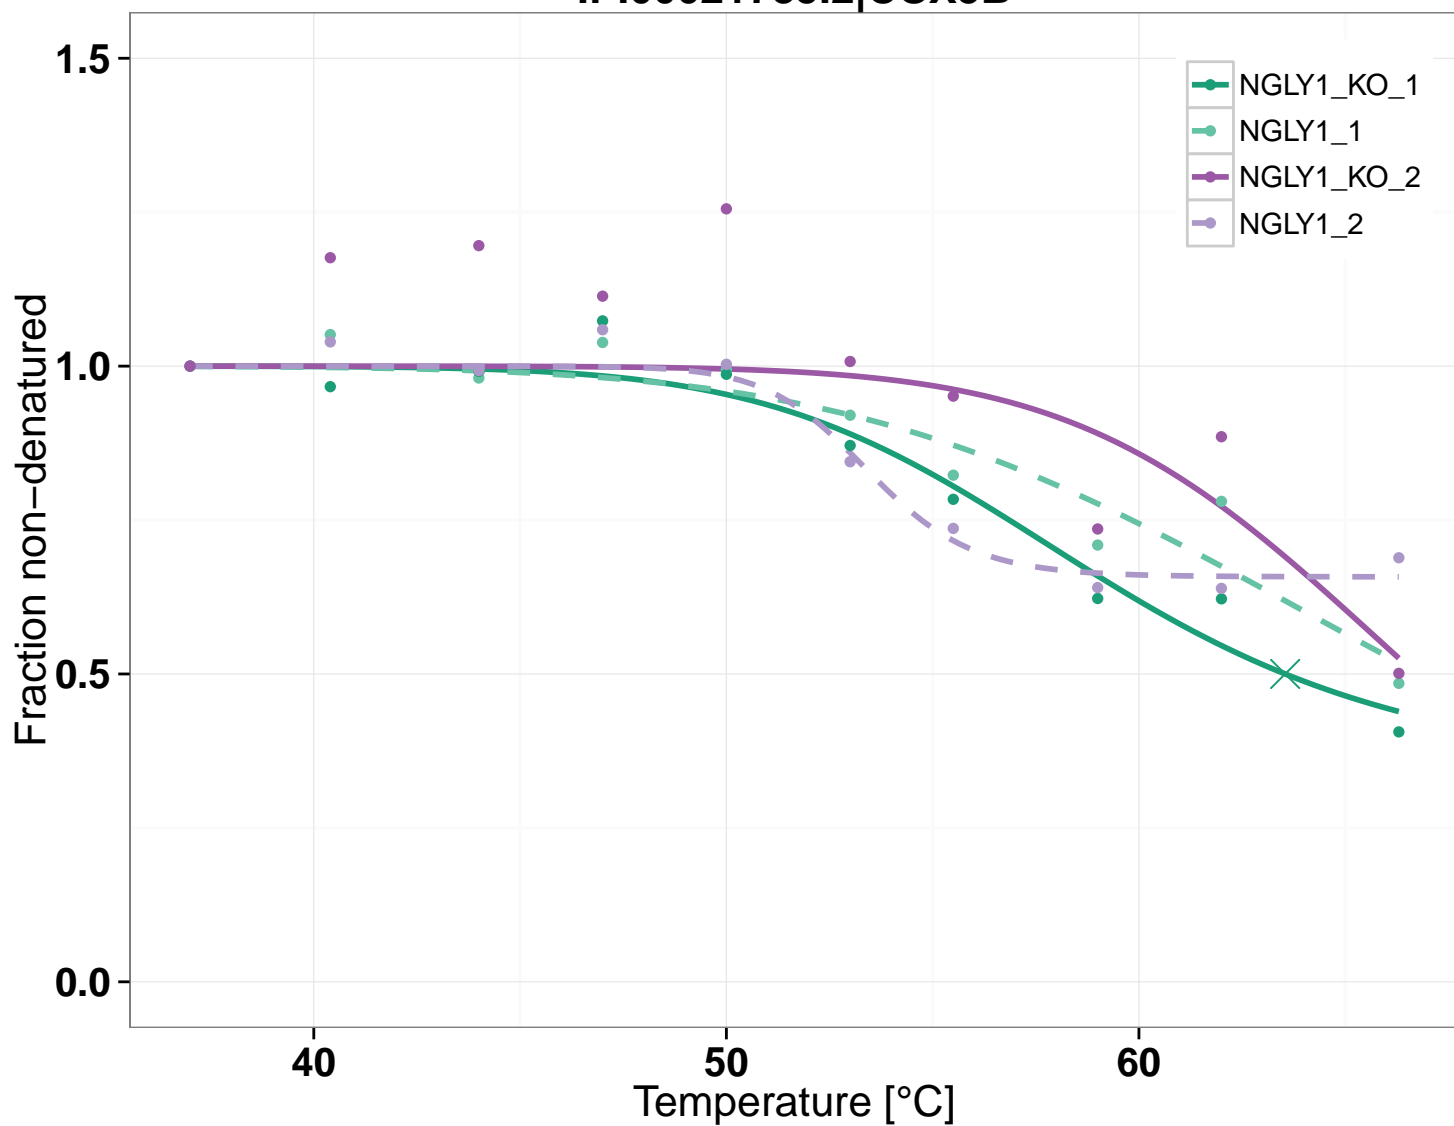

|            | meltPoint | slope  | plateau | R2   |
|------------|-----------|--------|---------|------|
| NGLY1_KO_1 | 63.54     | -0.043 | 0.33    | 0.96 |
| NGLY1_1    | -         | -0.037 | 0       | 0.91 |
| NGLY1_KO_2 | -         | -0.061 | 0       | 0.61 |
| NGLY1_2    | -         | -0.068 | 0.66    | 0.97 |

Supplement: Supplementary file 844 [file 1]

IPI00251989.2|POLR1E

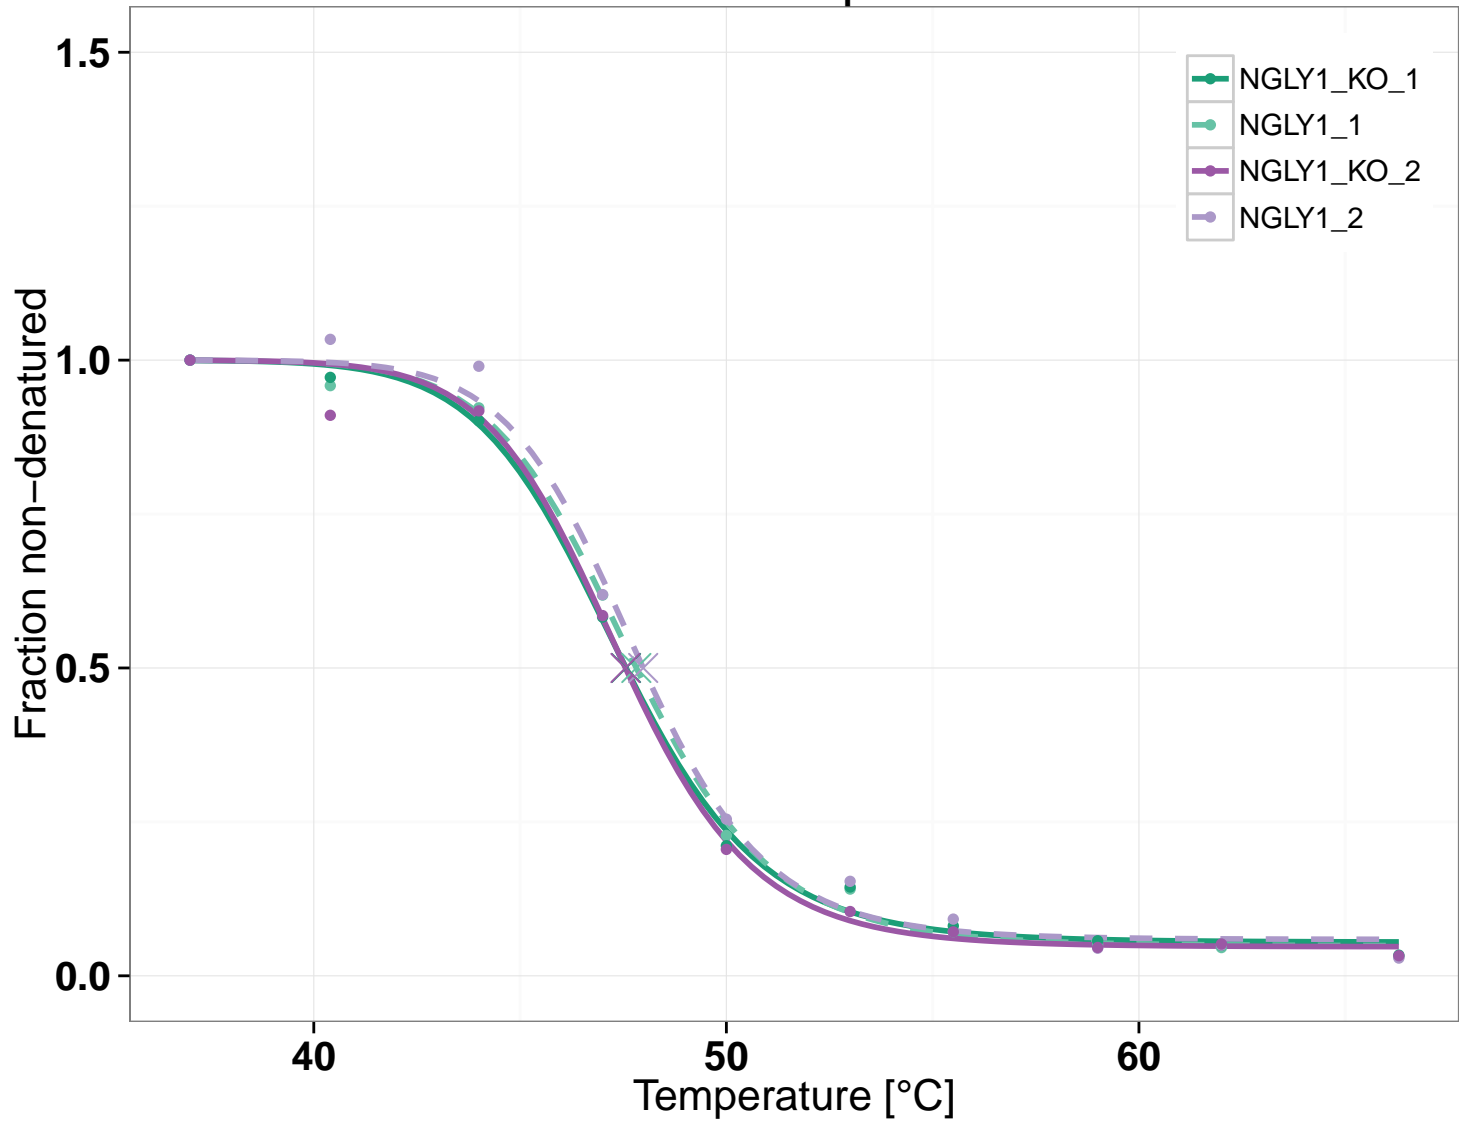

|            | meltPoint | slope | plateau | R2   |
|------------|-----------|-------|---------|------|
| NGLY1_KO_1 | 47.57     | -0.14 | 0.05    | 1    |
| NGLY1_1    | 47.82     | -0.14 | 0.05    | 1    |
| NGLY1_KO_2 | 47.55     | -0.15 | 0.05    | 0.99 |
| NGLY1_2    | 47.98     | -0.15 | 0.06    | 0.99 |

Supplement: Supplementary file 845 [file 1]

IPI00410616.2|NEIL2

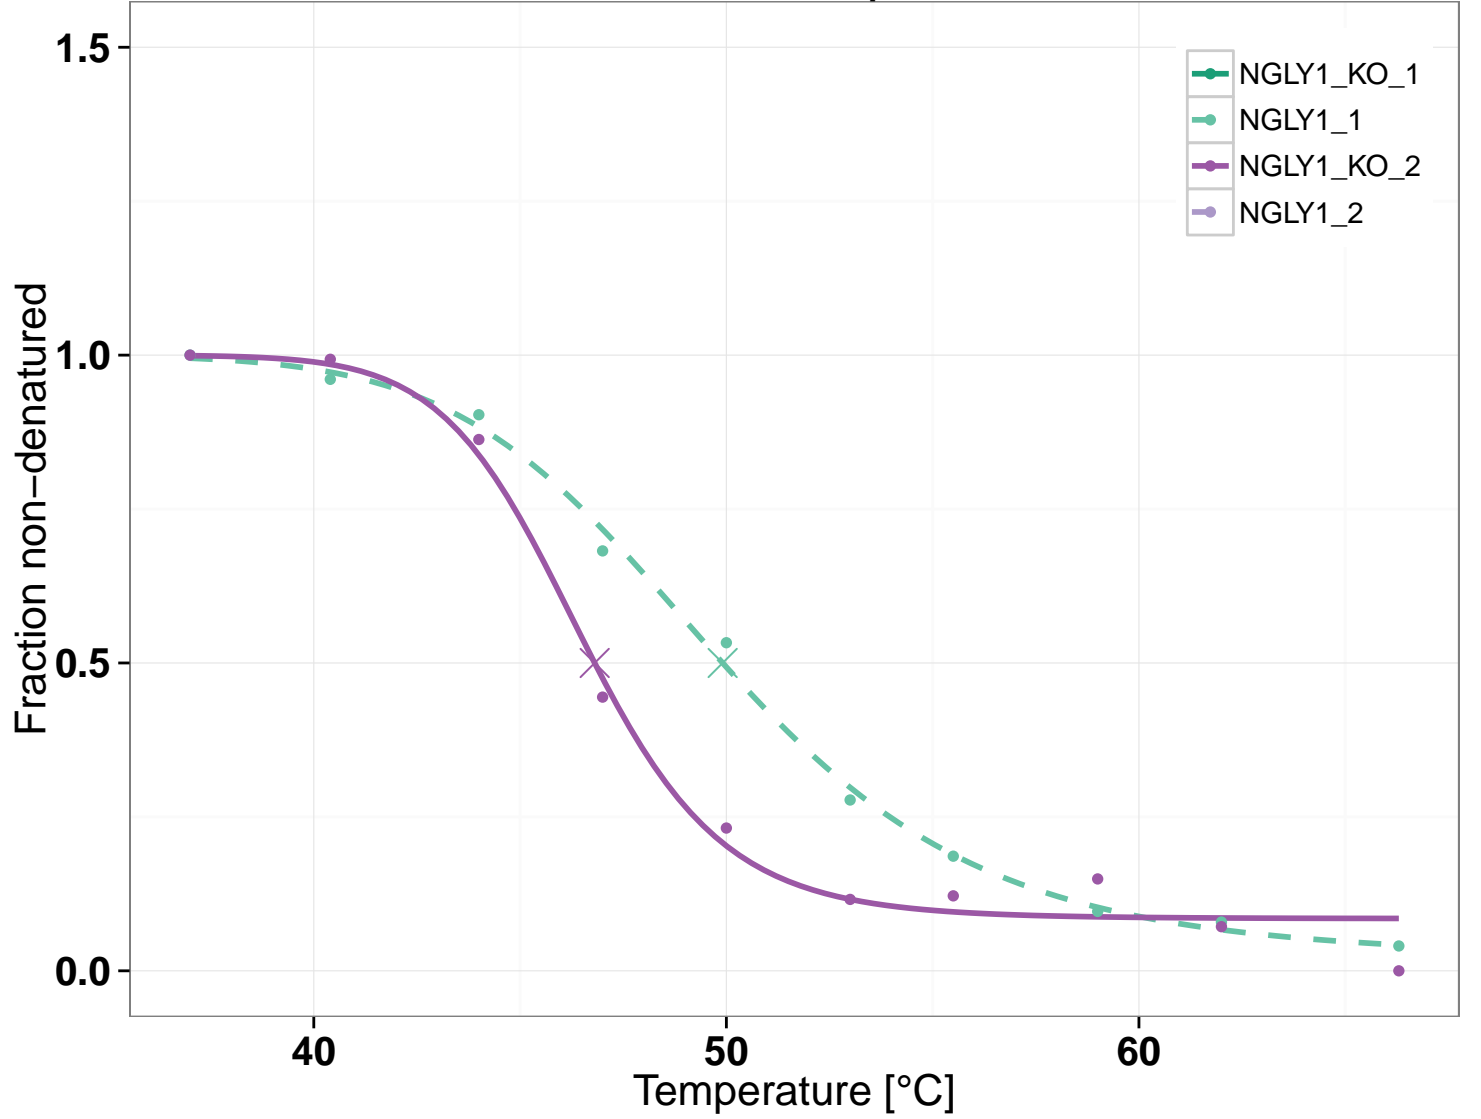

|            | meltPoint | slope  | plateau | R2   |
|------------|-----------|--------|---------|------|
| NGLY1_KO_1 | -         | -      | -       | -    |
| NGLY1_1    | 49.91     | -0.076 | 0.02    | 1    |
| NGLY1_KO_2 | 46.81     | -0.13  | 0.08    | 0.99 |
| NGLY1_2    | -         | -      | -       | -    |

Supplement: Supplementary file 846 [file 1]

IPI00142487.2|KIAA1804

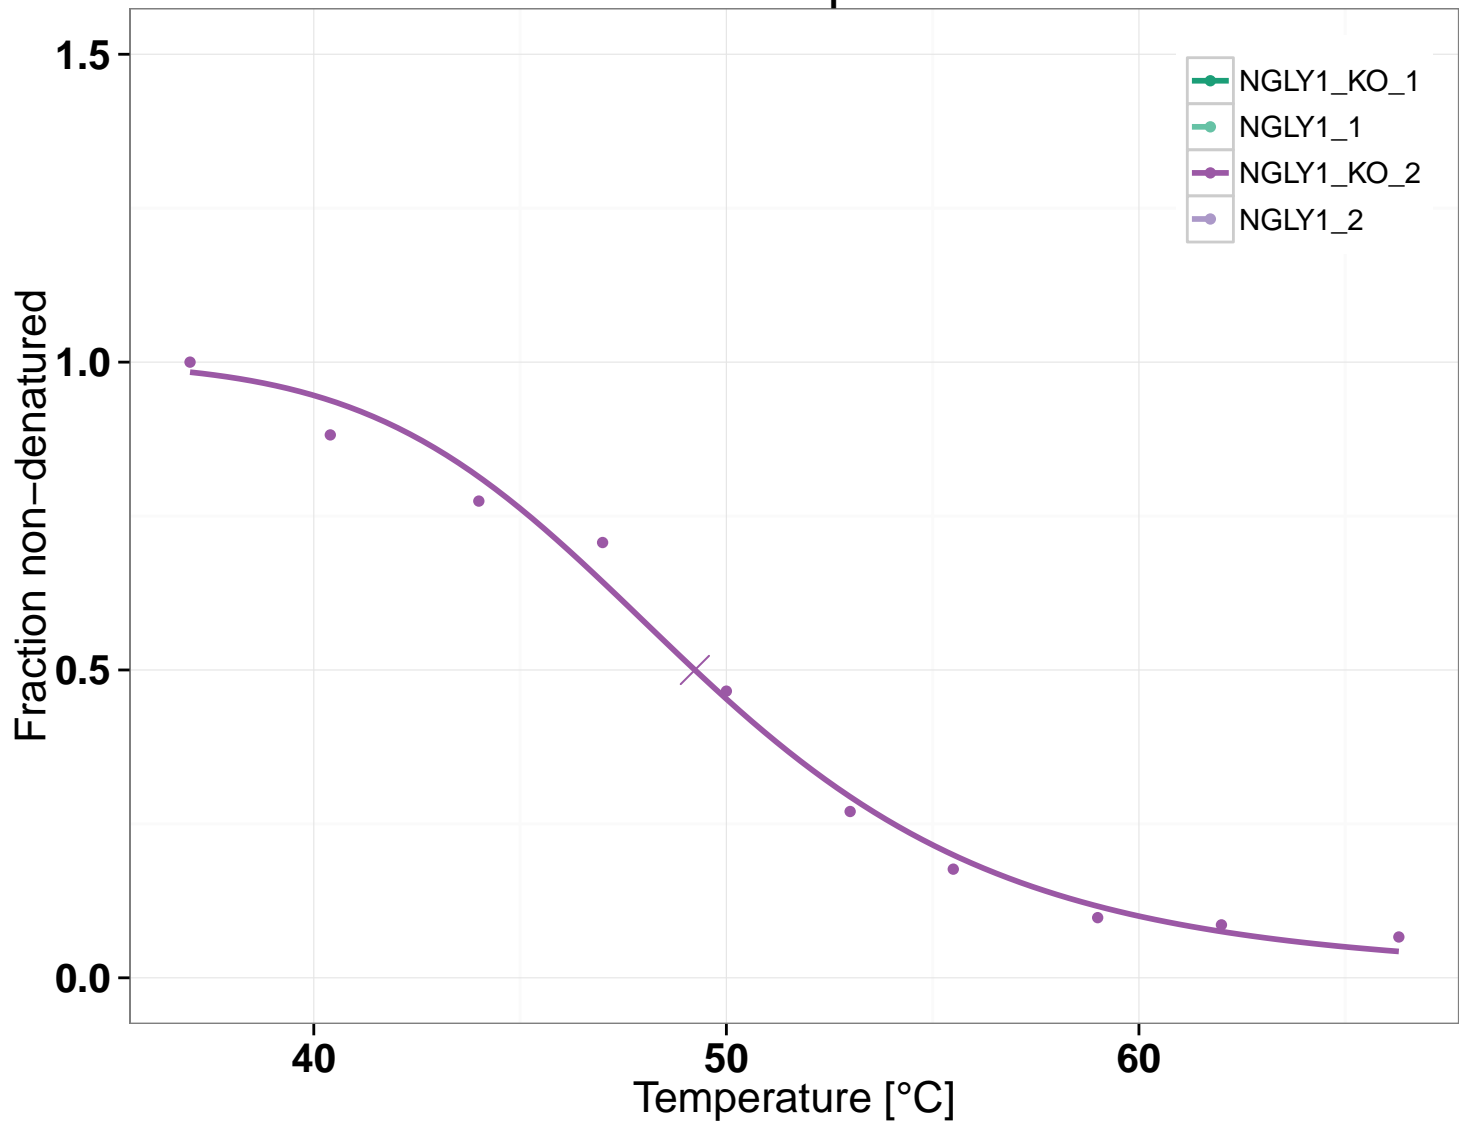

|            | meltPoint | slope  | plateau | R2   |
|------------|-----------|--------|---------|------|
| NGLY1_KO_1 | —         | —      | —       | —    |
| NGLY1_1    | —         | —      | —       | —    |
| NGLY1_KO_2 | 49.24     | -0.064 | 0       | 0.99 |
| NGLY1_2    | —         | —      | —       | —    |

Supplement: Supplementary file 847 [file 1]

IPI00853158.2|PRUNE2

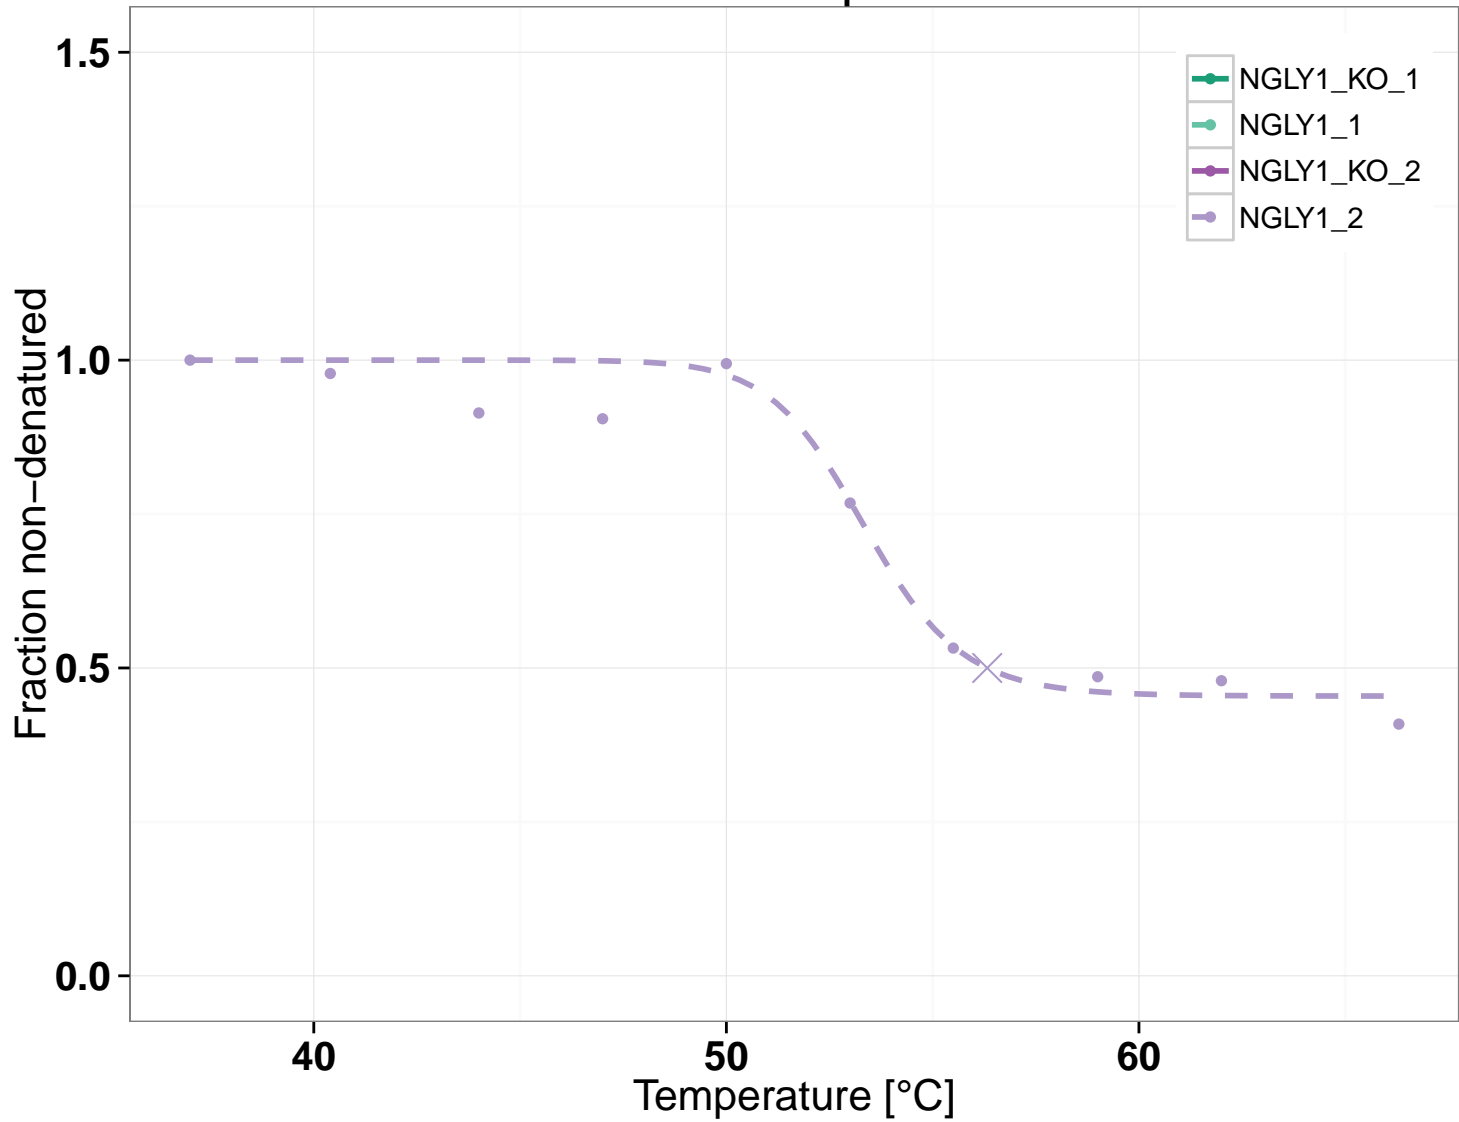

|            | meltPoint | slope | plateau | R2   |
|------------|-----------|-------|---------|------|
| NGLY1_KO_1 | —         | —     | —       | —    |
| NGLY1_1    | —         | —     | —       | —    |
| NGLY1_KO_2 | —         | —     | —       | —    |
| NGLY1_2    | 56.32     | −0.12 | 0.45    | 0.96 |

Supplement: Supplementary file 848 [file 1]

# IPI00719051.3|EXOC5

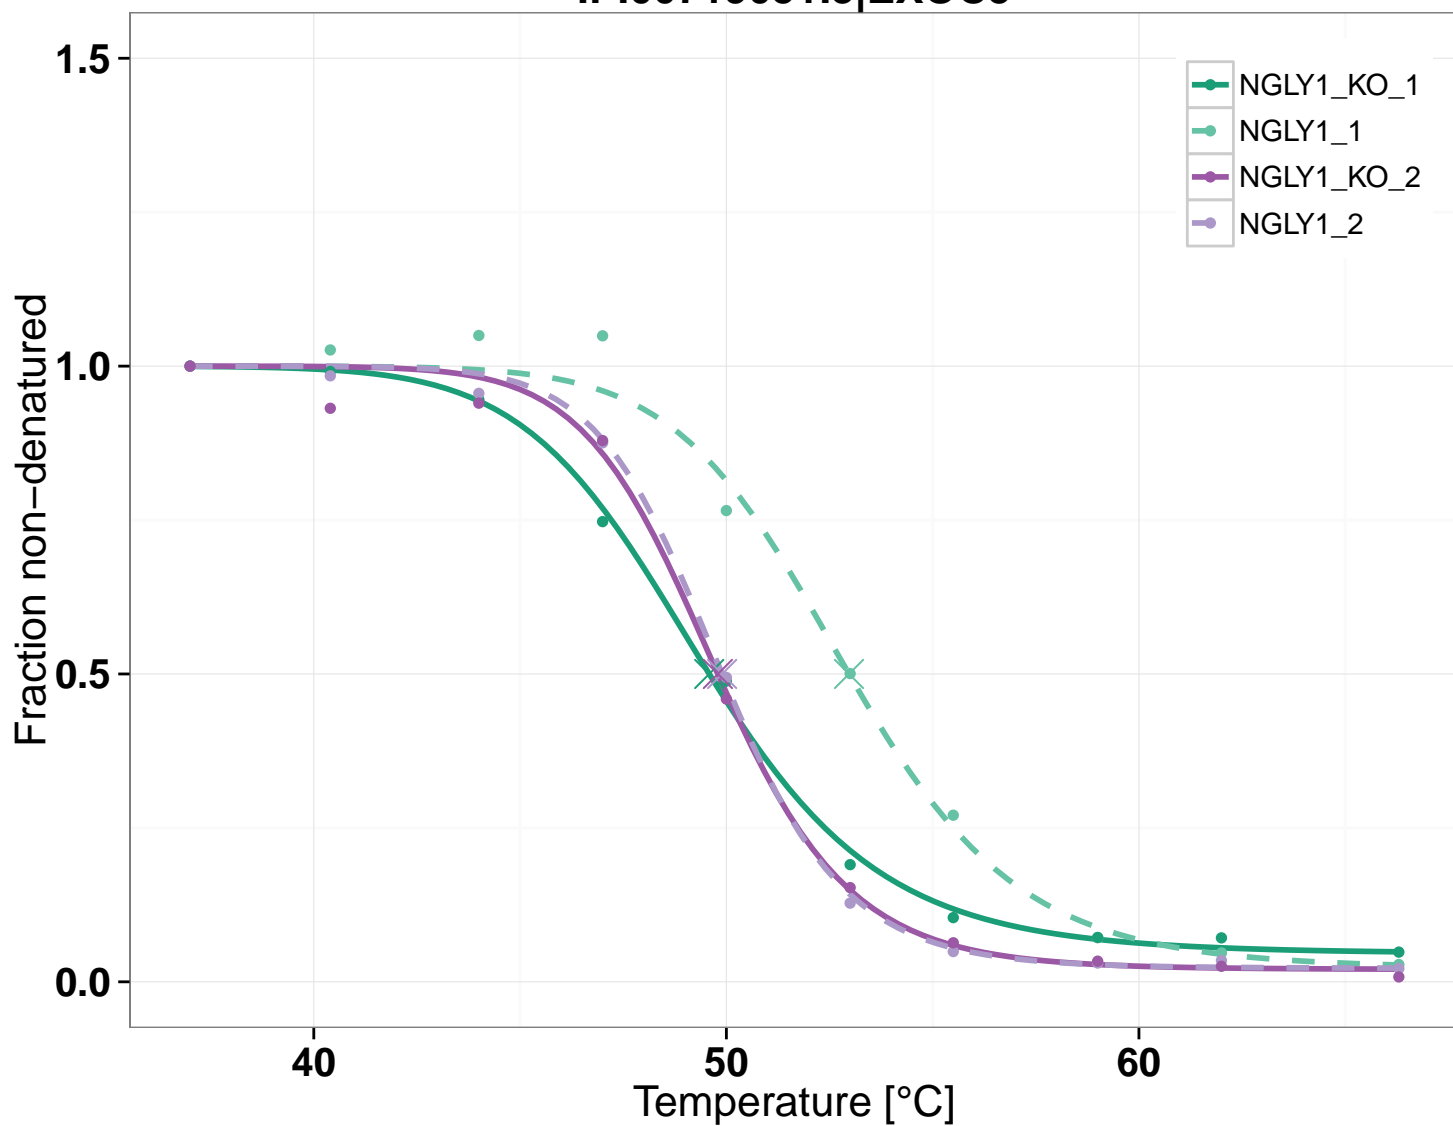

|            | meltPoint | slope | plateau | R2   |
|------------|-----------|-------|---------|------|
| NGLY1_KO_1 | 49.59     | -0.11 | 0.05    | 1    |
| NGLY1_1    | 52.97     | -0.12 | 0.02    | 0.99 |
| NGLY1_KO_2 | 49.79     | -0.15 | 0.02    | 1    |
| NGLY1_2    | 49.9      | -0.16 | 0.02    | 1    |

Supplement: Supplementary file 849 [file 1]

IPI00008845.3|ZNF639

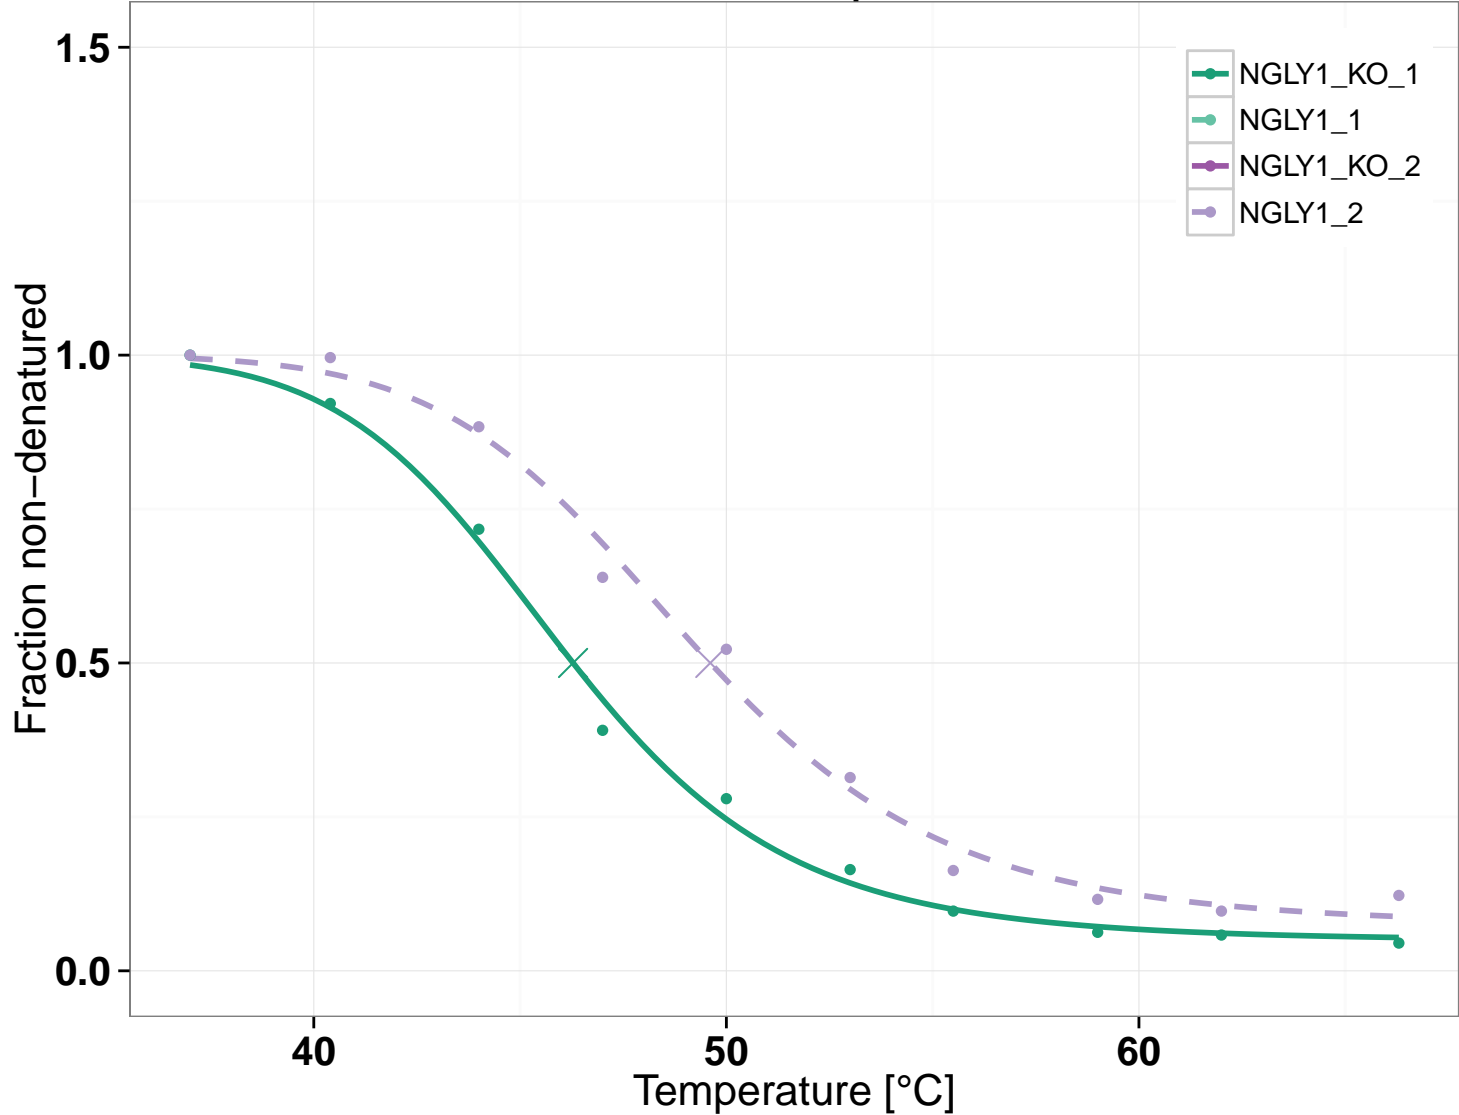

|            | meltPoint | slope  | plateau | R2   |
|------------|-----------|--------|---------|------|
| NGLY1_KO_1 | 46.28     | -0.088 | 0.05    | 1    |
| NGLY1_1    | -         | -      | -       | -    |
| NGLY1_KO_2 | -         | -      | -       | -    |
| NGLY1_2    | 49.61     | -0.076 | 0.07    | 0.99 |

Supplement: Supplementary file 850 [file 1]

IPI00063273.1|PPP1R16A

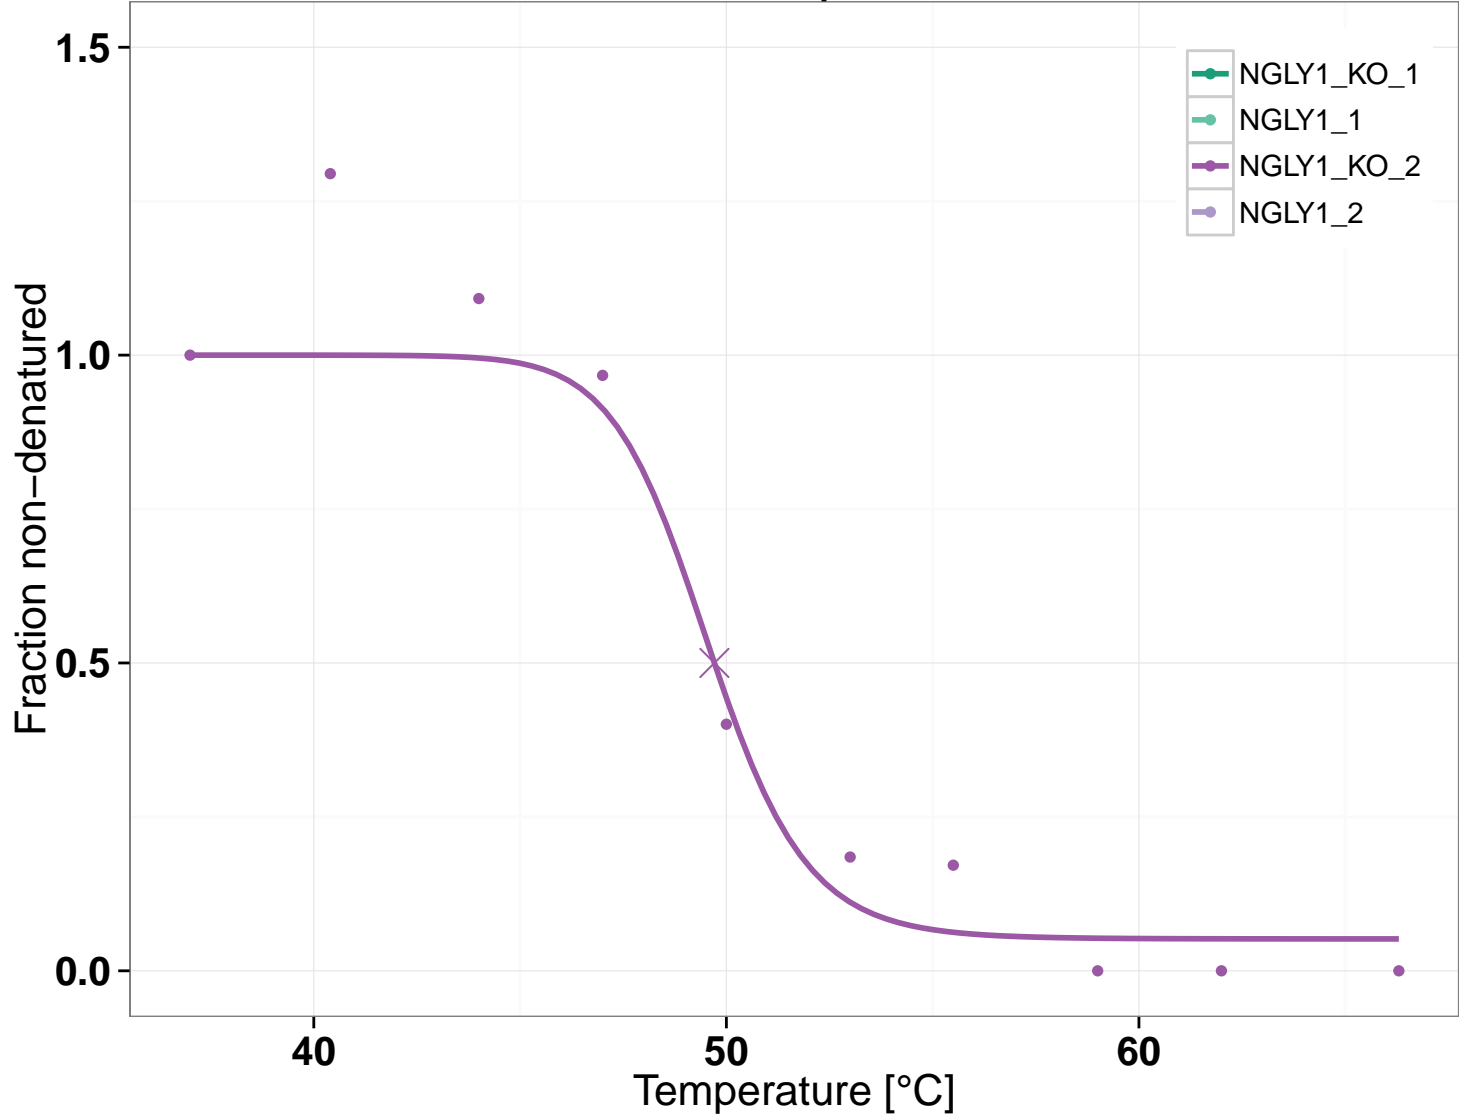

|            | meltPoint | slope | plateau | R2   |
|------------|-----------|-------|---------|------|
| NGLY1_KO_1 | —         | —     | —       | —    |
| NGLY1_1    | —         | —     | —       | —    |
| NGLY1_KO_2 | 49.71     | -0.2  | 0.05    | 0.95 |
| NGLY1_2    | —         | —     | —       | —    |

Supplement: Supplementary file 851 [file 1]

IPI00873957.1|FAM152A

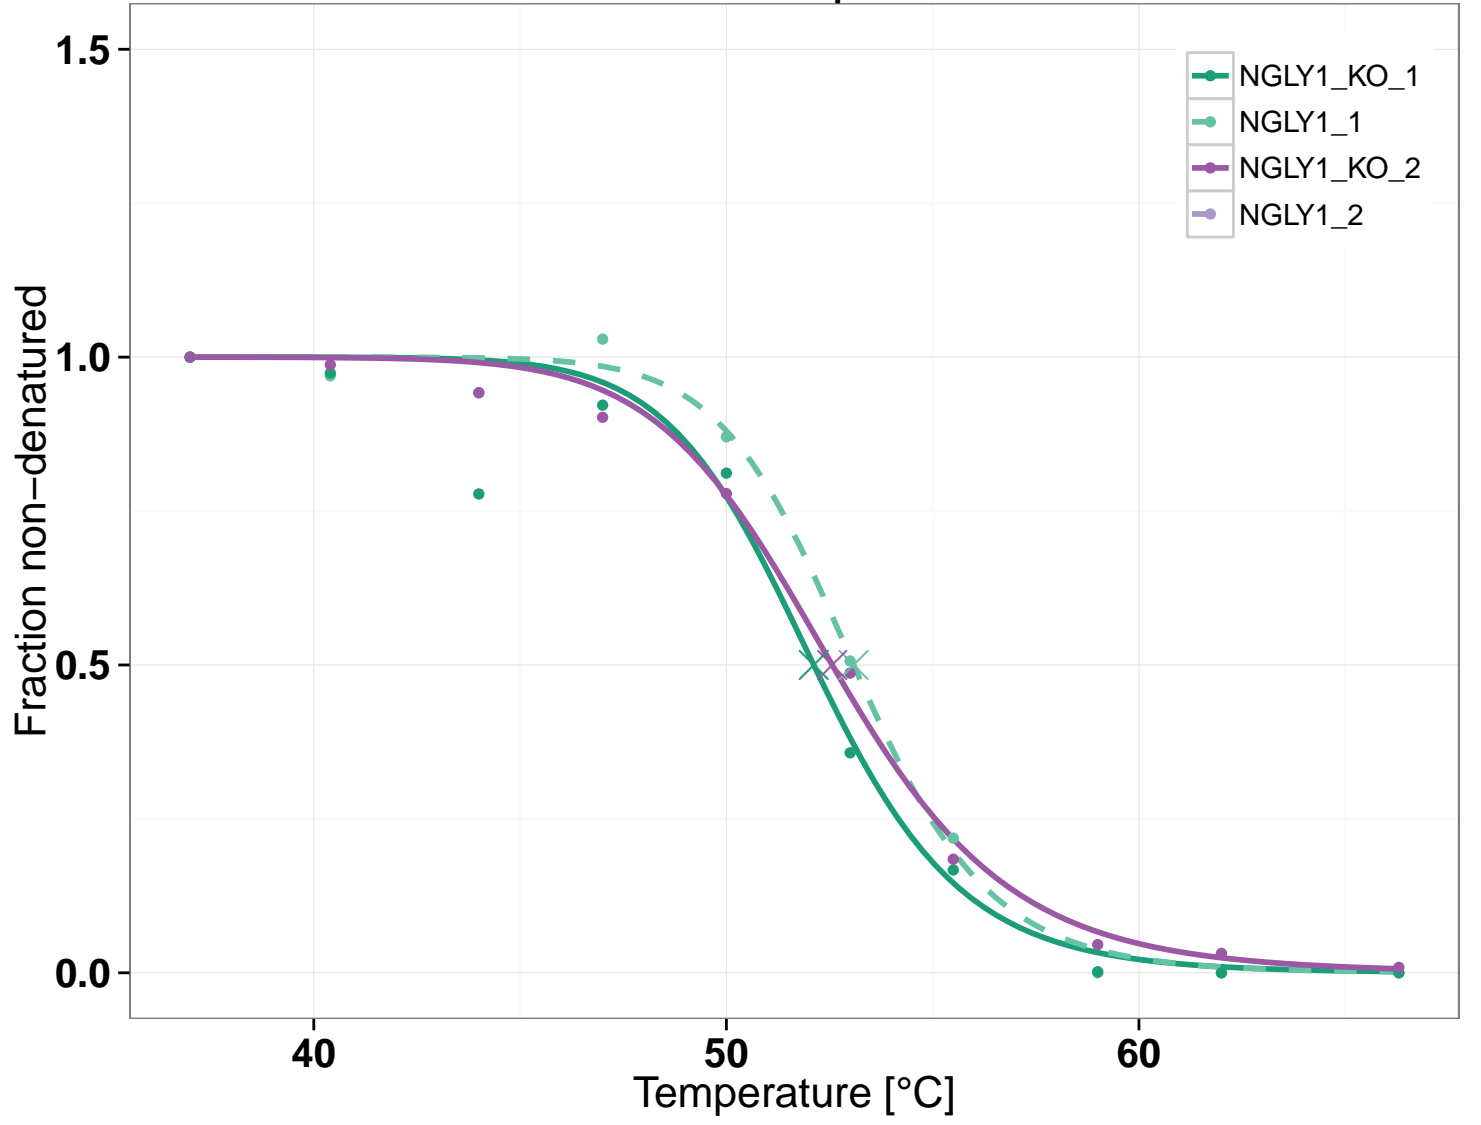

|            | meltPoint | slope | plateau | R2   |
|------------|-----------|-------|---------|------|
| NGLY1_KO_1 | 52.12     | -0.14 | 0       | 0.97 |
| NGLY1_1    | 53.08     | -0.15 | 0       | 1    |
| NGLY1_KO_2 | 52.57     | -0.12 | 0       | 1    |
| NGLY1_2    | -         | -     | -       | -    |

Supplement: Supplementary file 852 [file 1]

# IPI00398364.3|PPFIA3

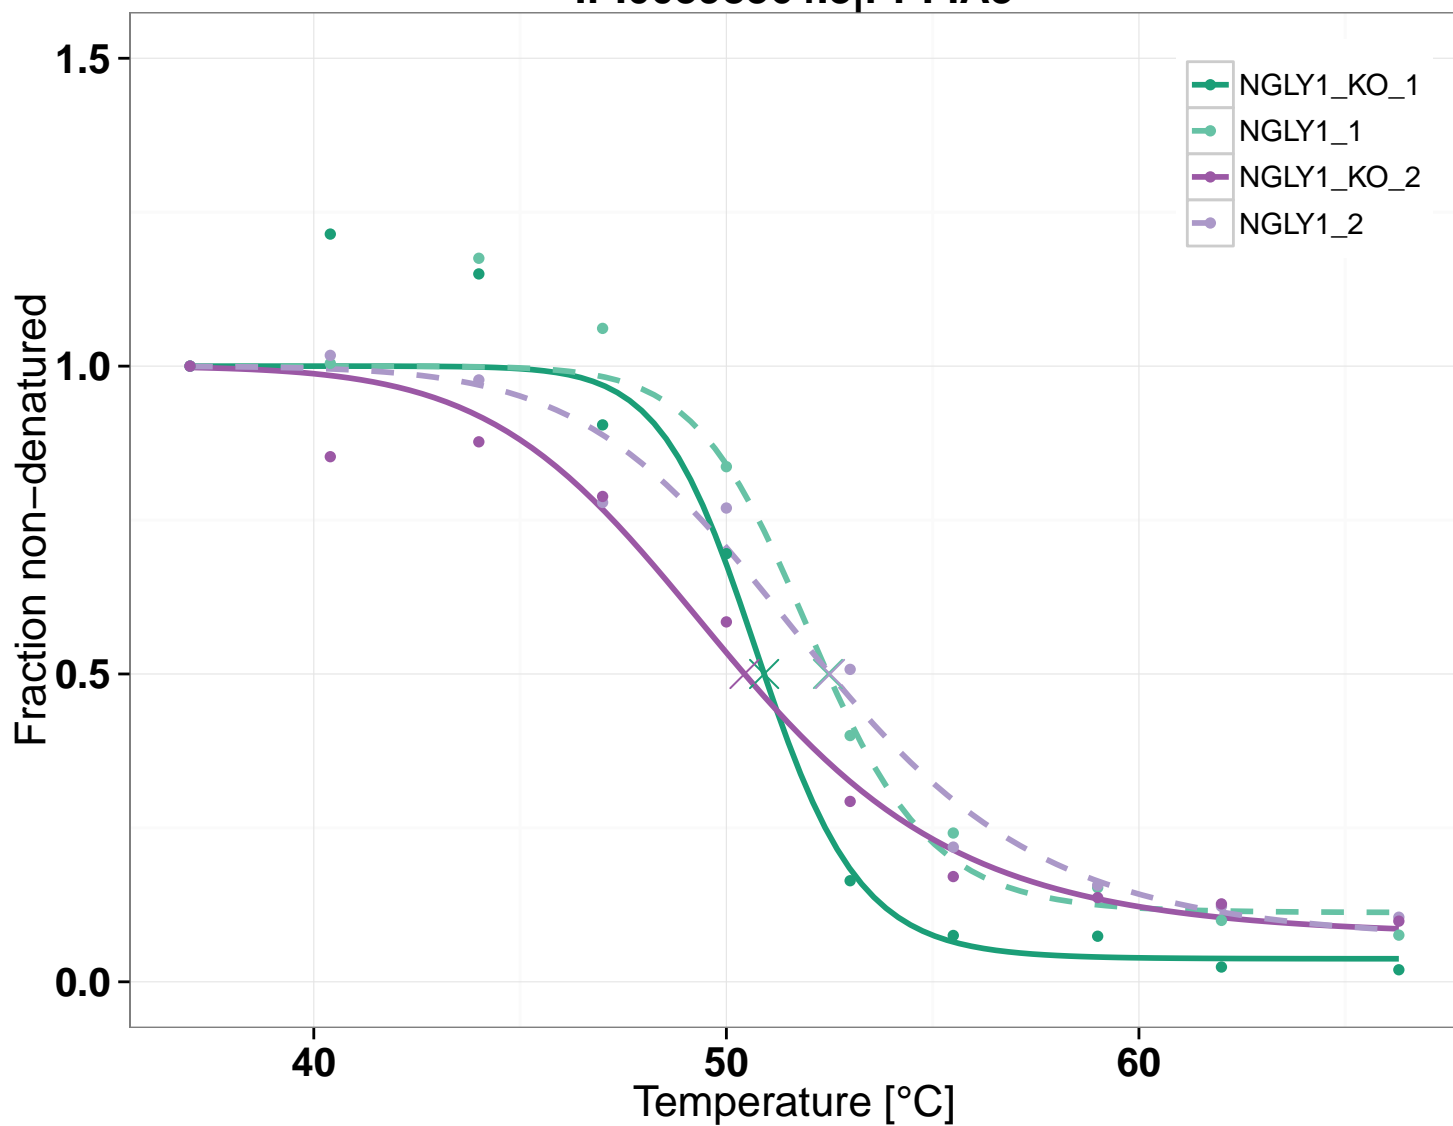

|            | meltPoint | slope  | plateau | R2   |
|------------|-----------|--------|---------|------|
| NGLY1_KO_1 | 50.92     | -0.2   | 0.04    | 0.97 |
| NGLY1_1    | 52.46     | -0.16  | 0.11    | 0.98 |
| NGLY1_KO_2 | 50.44     | -0.081 | 0.07    | 0.98 |
| NGLY1_2    | 52.51     | -0.083 | 0.07    | 0.98 |

Supplement: Supplementary file 853 [file 1]

# IPI00219383.3|NDUFB3

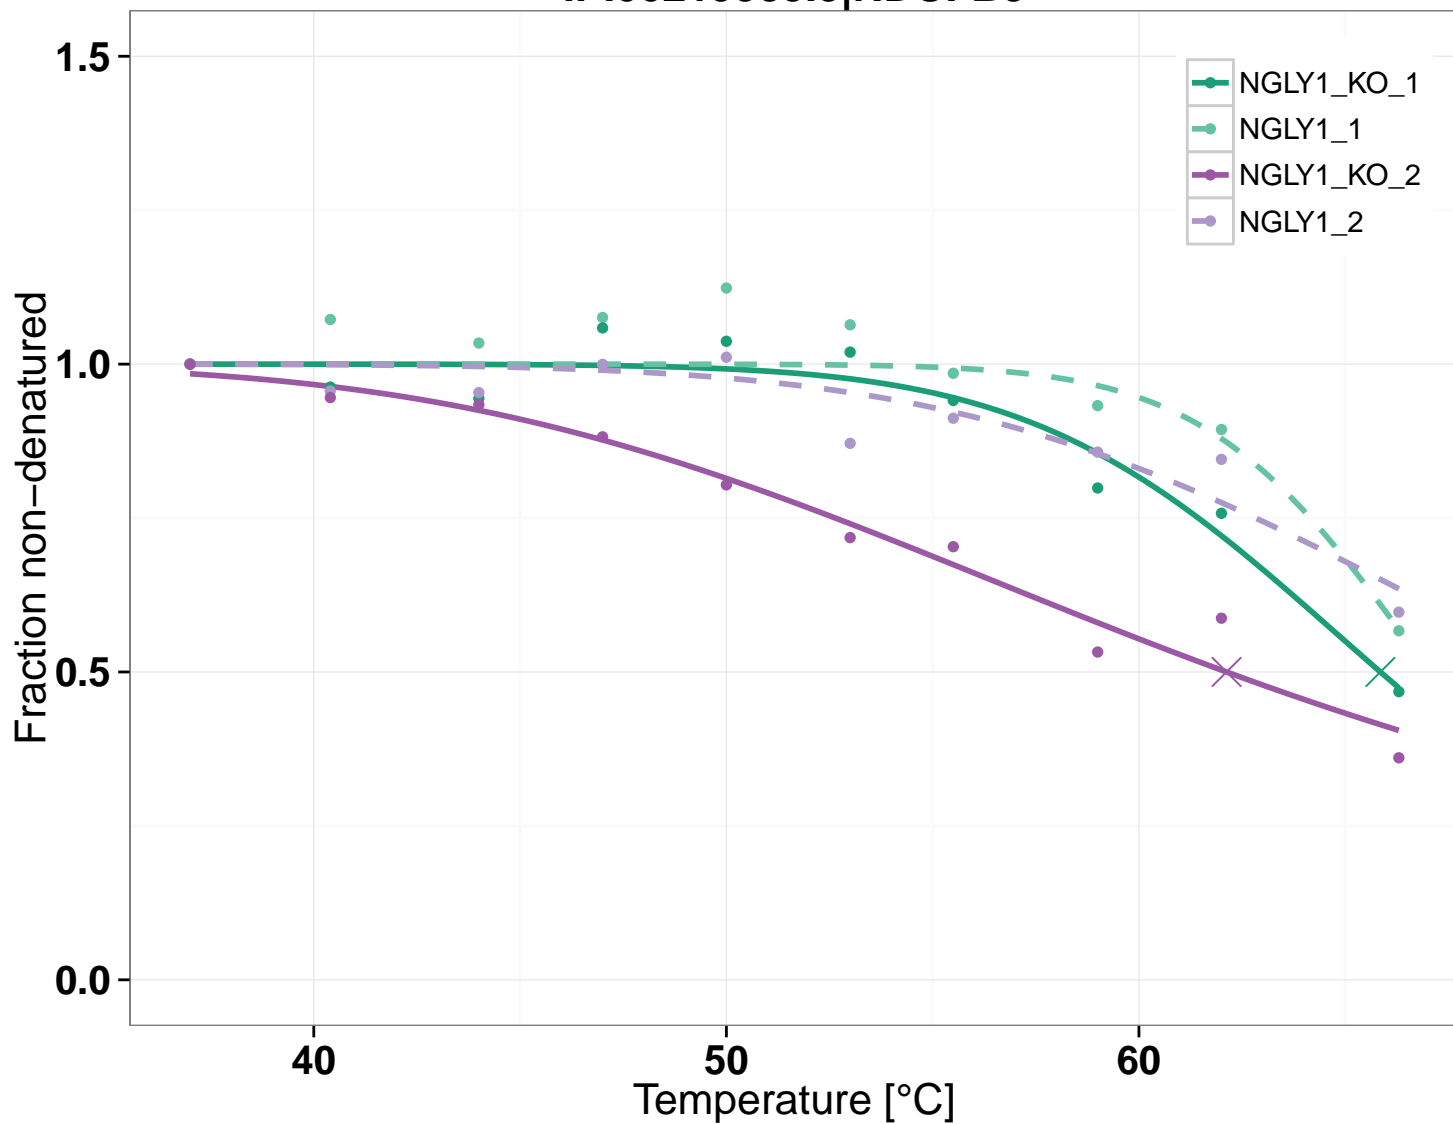

|            | meltPoint | slope  | plateau | R2   |
|------------|-----------|--------|---------|------|
| NGLY1_KO_1 | 65.85     | -0.059 | 0       | 0.94 |
| NGLY1_1    | -         | -      | 0       | 0.86 |
| NGLY1_KO_2 | 62.12     | -0.027 | 0       | 0.96 |
| NGLY1_2    | -         | -      | 0       | 0.87 |

Supplement: Supplementary file 854 [file 1]

IPI00051808.4|PSMB11

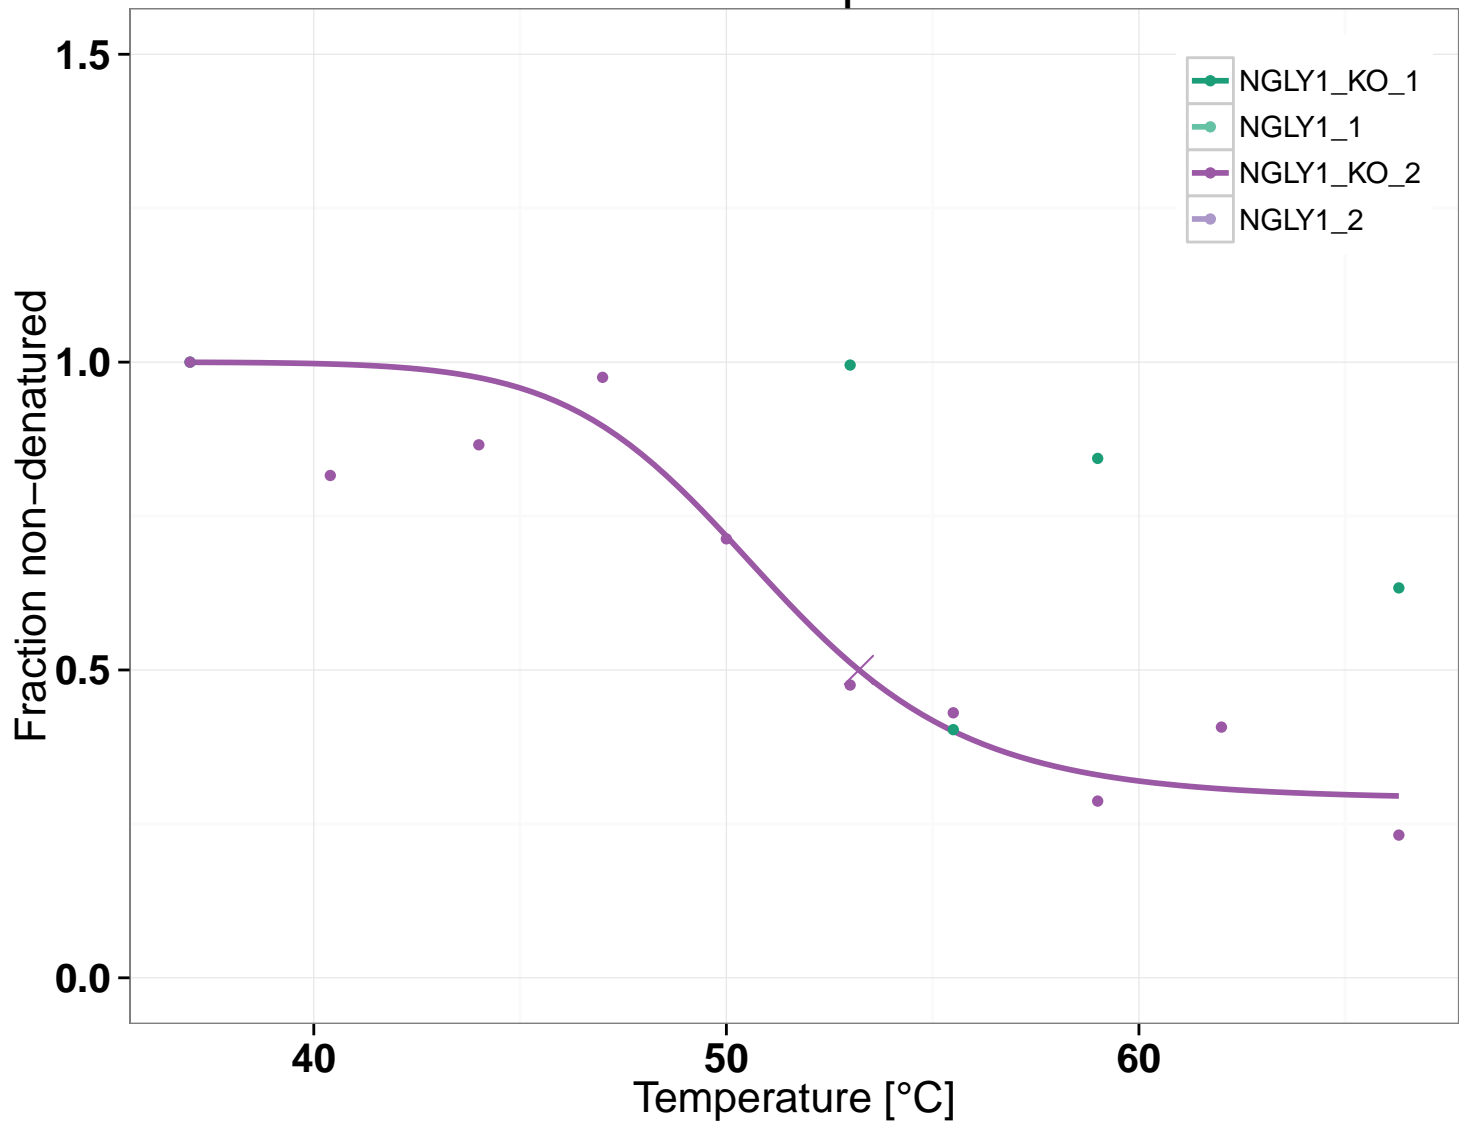

|            | meltPoint | slope  | plateau | R2   |
|------------|-----------|--------|---------|------|
| NGLY1_KO_1 | —         | —      | —       | —    |
| NGLY1_1    | —         | —      | —       | —    |
| NGLY1_KO_2 | 53.21     | -0.073 | 0.29    | 0.91 |
| NGLY1_2    | —         | —      | —       | —    |

Supplement: Supplementary file 855 [file 1]

# IPI00884185.1|PCMTD2

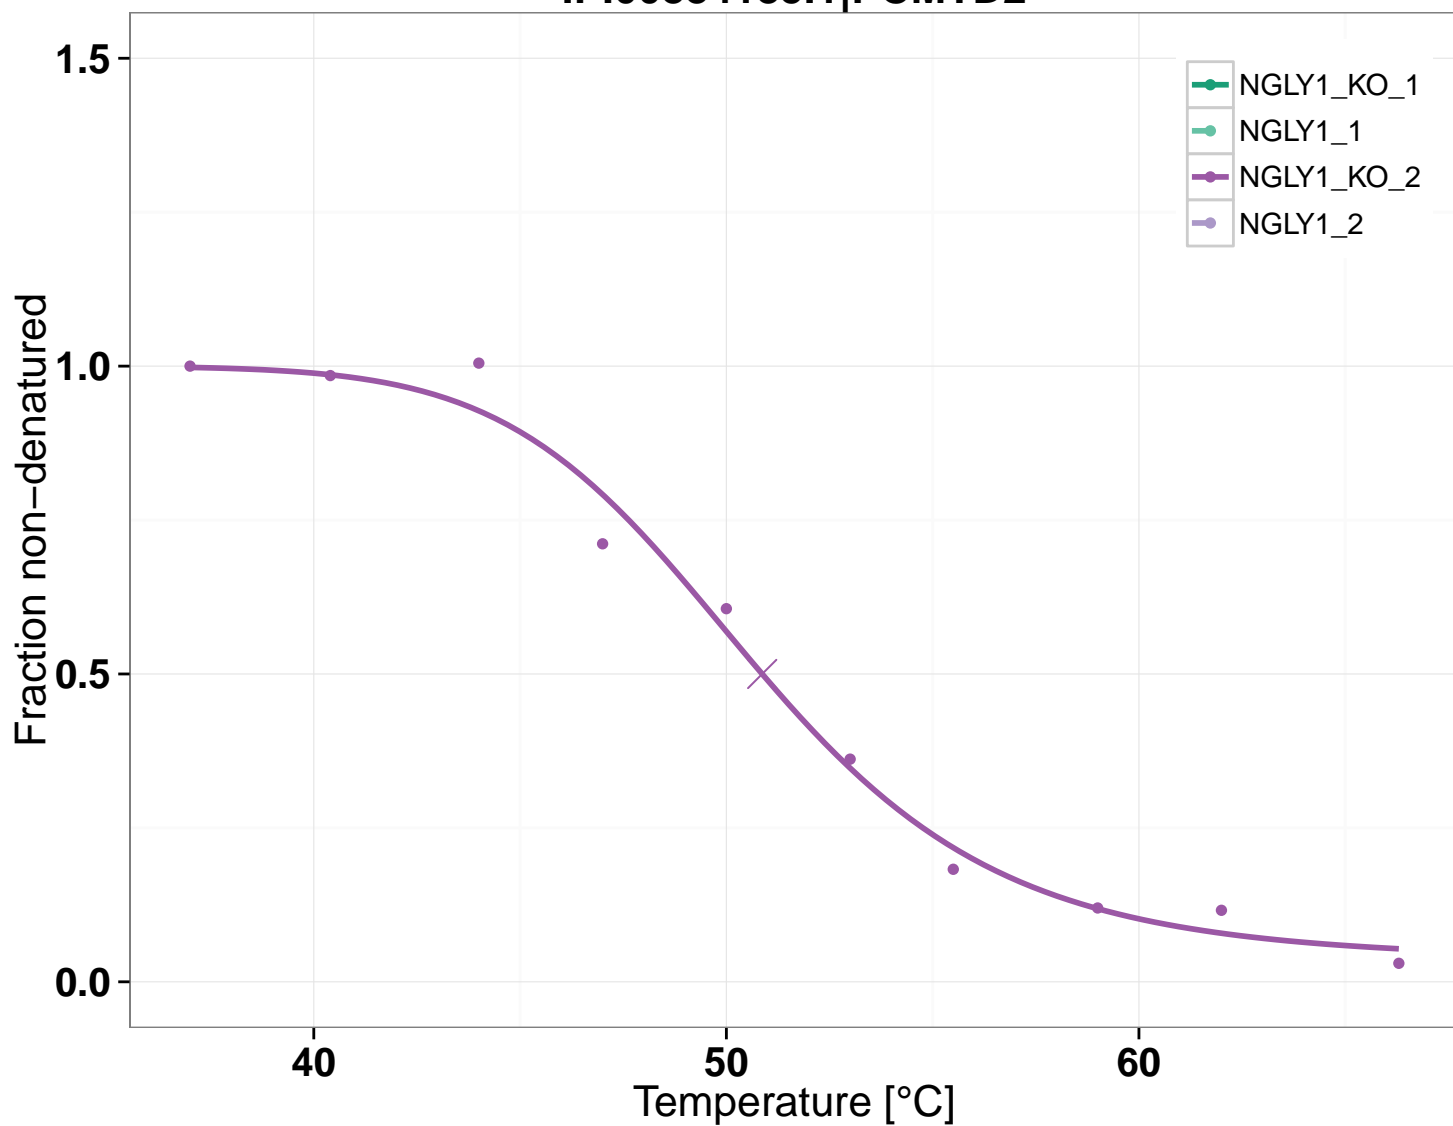

|            | meltPoint | slope | plateau | R2   |
|------------|-----------|-------|---------|------|
| NGLY1_KO_1 | —         | —     | —       | —    |
| NGLY1_1    | —         | —     | —       | —    |
| NGLY1_KO_2 | 50.87     | -0.08 | 0.03    | 0.99 |
| NGLY1_2    | —         | —     | —       | —    |

Supplement: Supplementary file 856 [file 1]

IPI00010142.1|UBE2G2

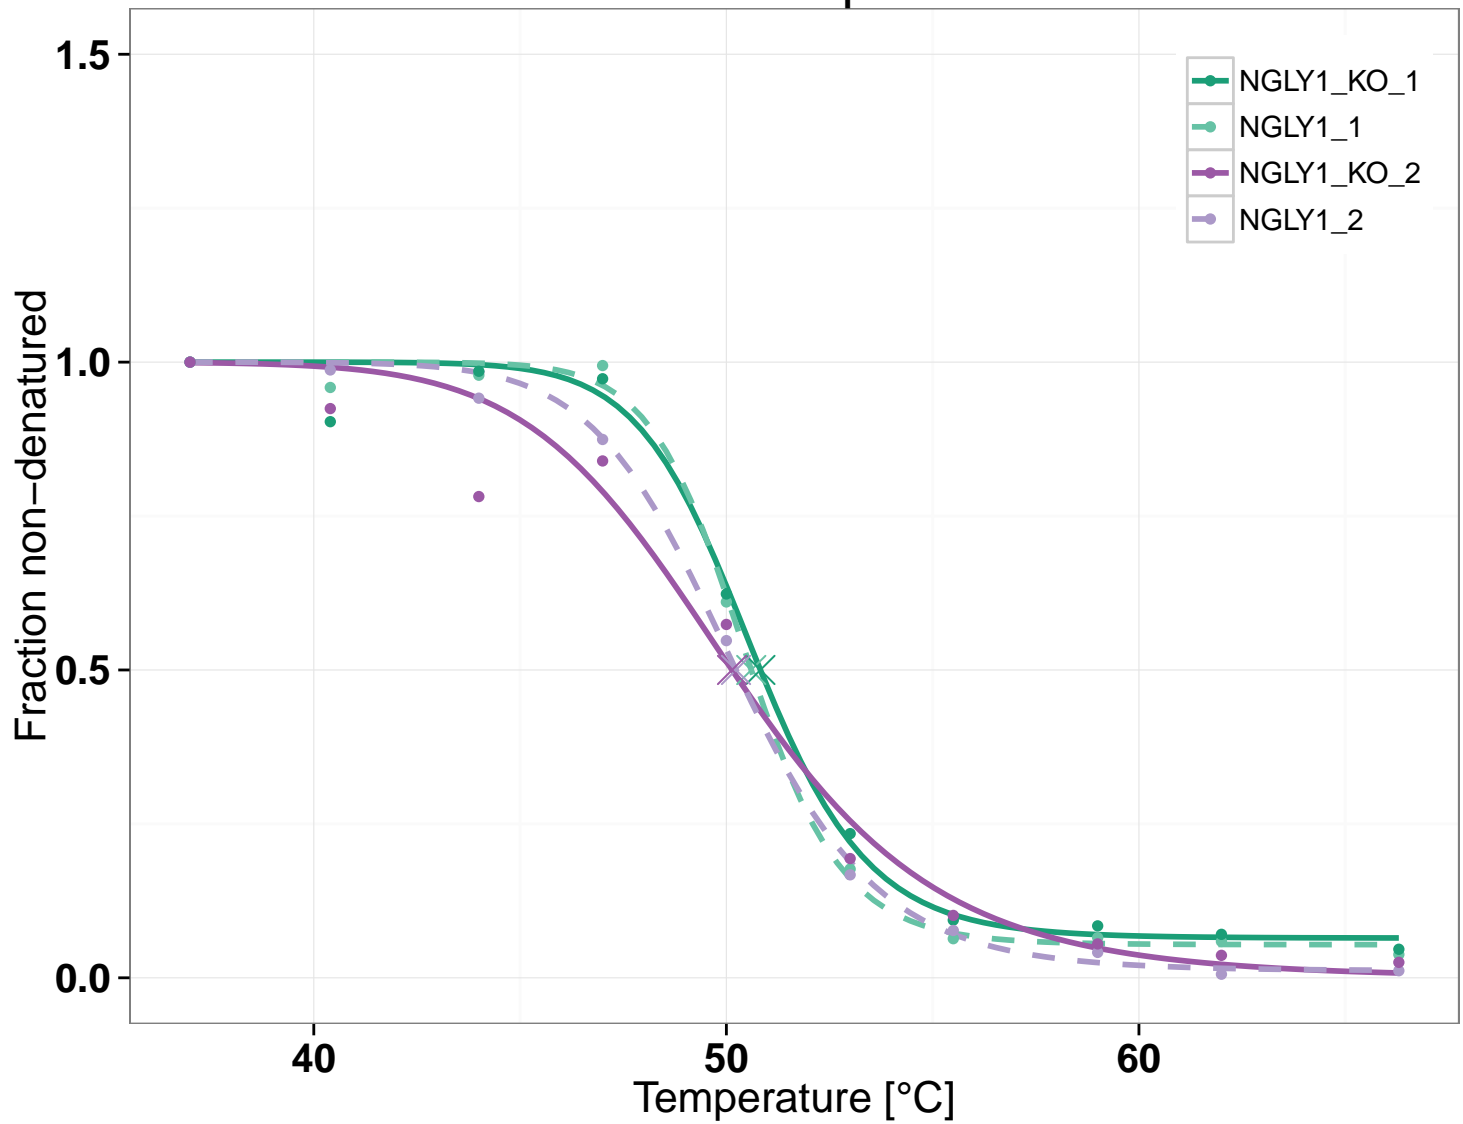

|            | meltPoint | slope | plateau | R2   |
|------------|-----------|-------|---------|------|
| NGLY1_KO_1 | 50.83     | -0.17 | 0.06    | 0.99 |
| NGLY1_1    | 50.6      | -0.2  | 0.05    | 1    |
| NGLY1_KO_2 | 50.14     | -0.1  | 0       | 0.97 |
| NGLY1_2    | 50.23     | -0.14 | 0.01    | 1    |

Supplement: Supplementary file 857 [file 1]

IPI00238469.6|CEP97

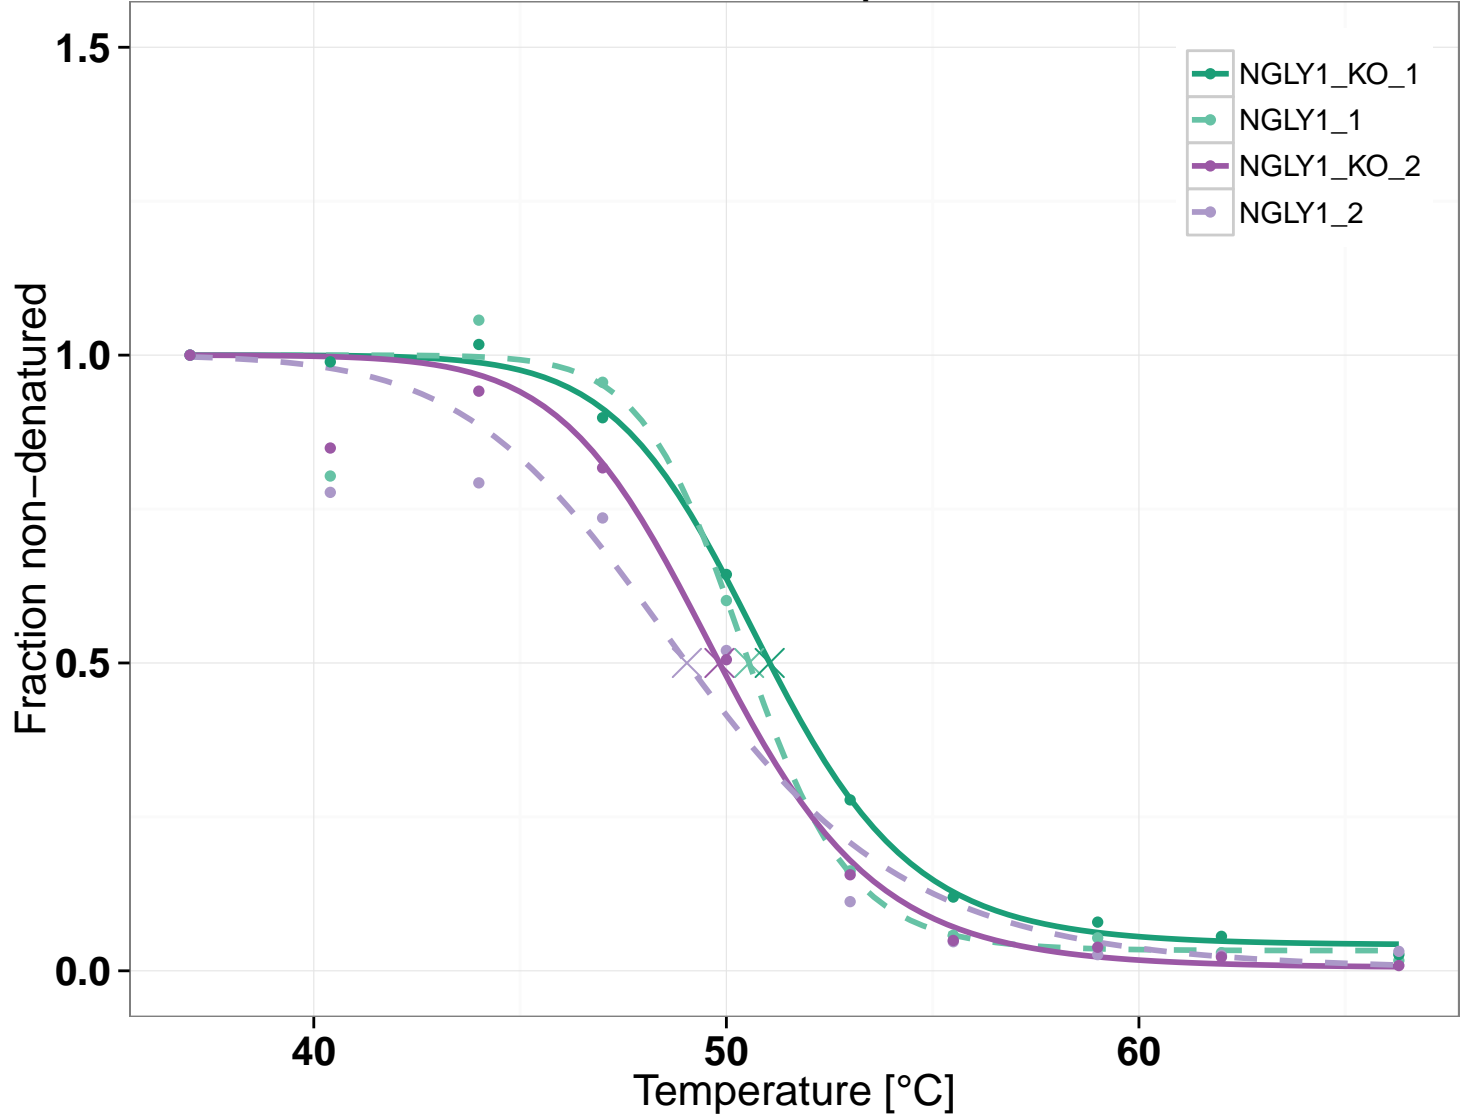

Supplement: Supplementary file 858 [file 1]

# IPI00016560.3|ASB6

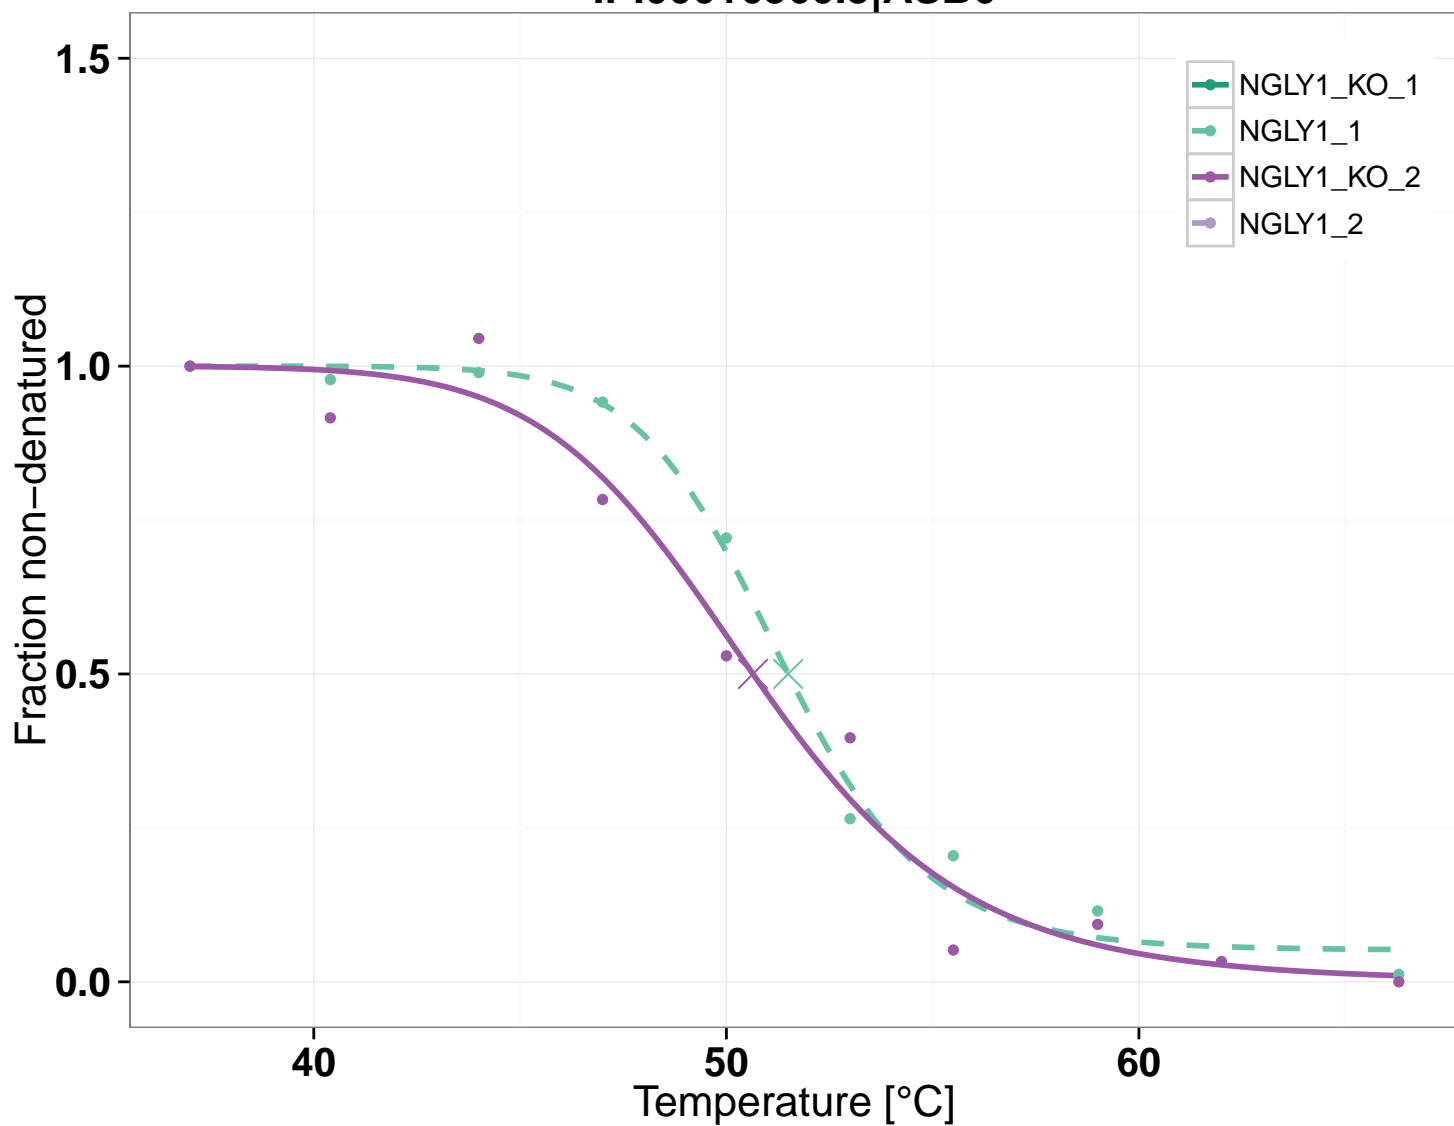

|            | meltPoint | slope  | plateau | R2   |
|------------|-----------|--------|---------|------|
| NGLY1_KO_1 | —         | —      | —       | —    |
| NGLY1_1    | 51.5      | -0.14  | 0.05    | 0.99 |
| NGLY1_KO_2 | 50.65     | -0.097 | 0       | 0.98 |
| NGLY1_2    | —         | —      | —       | —    |

Supplement: Supplementary file 859 [file 1]

IPI00007797.3|FABP5

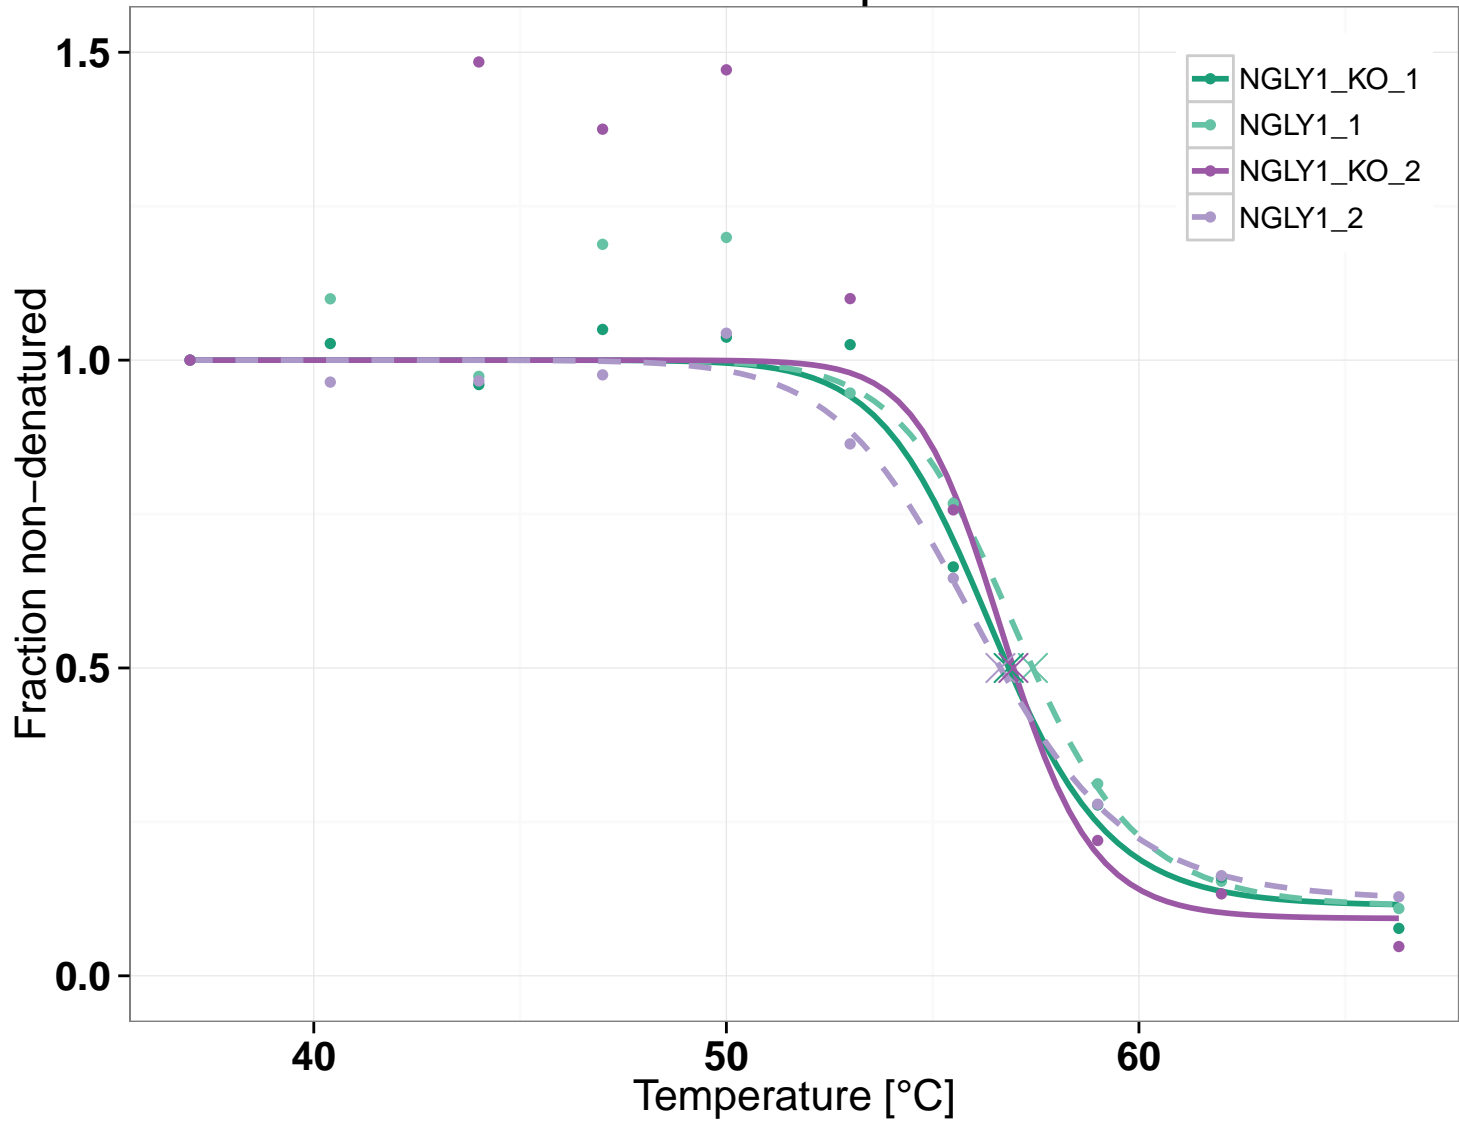

|            | meltPoint | slope | plateau | R2   |
|------------|-----------|-------|---------|------|
| NGLY1_KO_1 | 56.84     | -0.16 | 0.11    | 0.99 |
| NGLY1_1    | 57.43     | -0.15 | 0.11    | 0.95 |
| NGLY1_KO_2 | 56.96     | -0.21 | 0.09    | 0.68 |
| NGLY1_2    | 56.64     | -0.12 | 0.12    | 0.99 |

Supplement: Supplementary file 860 [file 1]

# IPI00410608.3|MBNL2

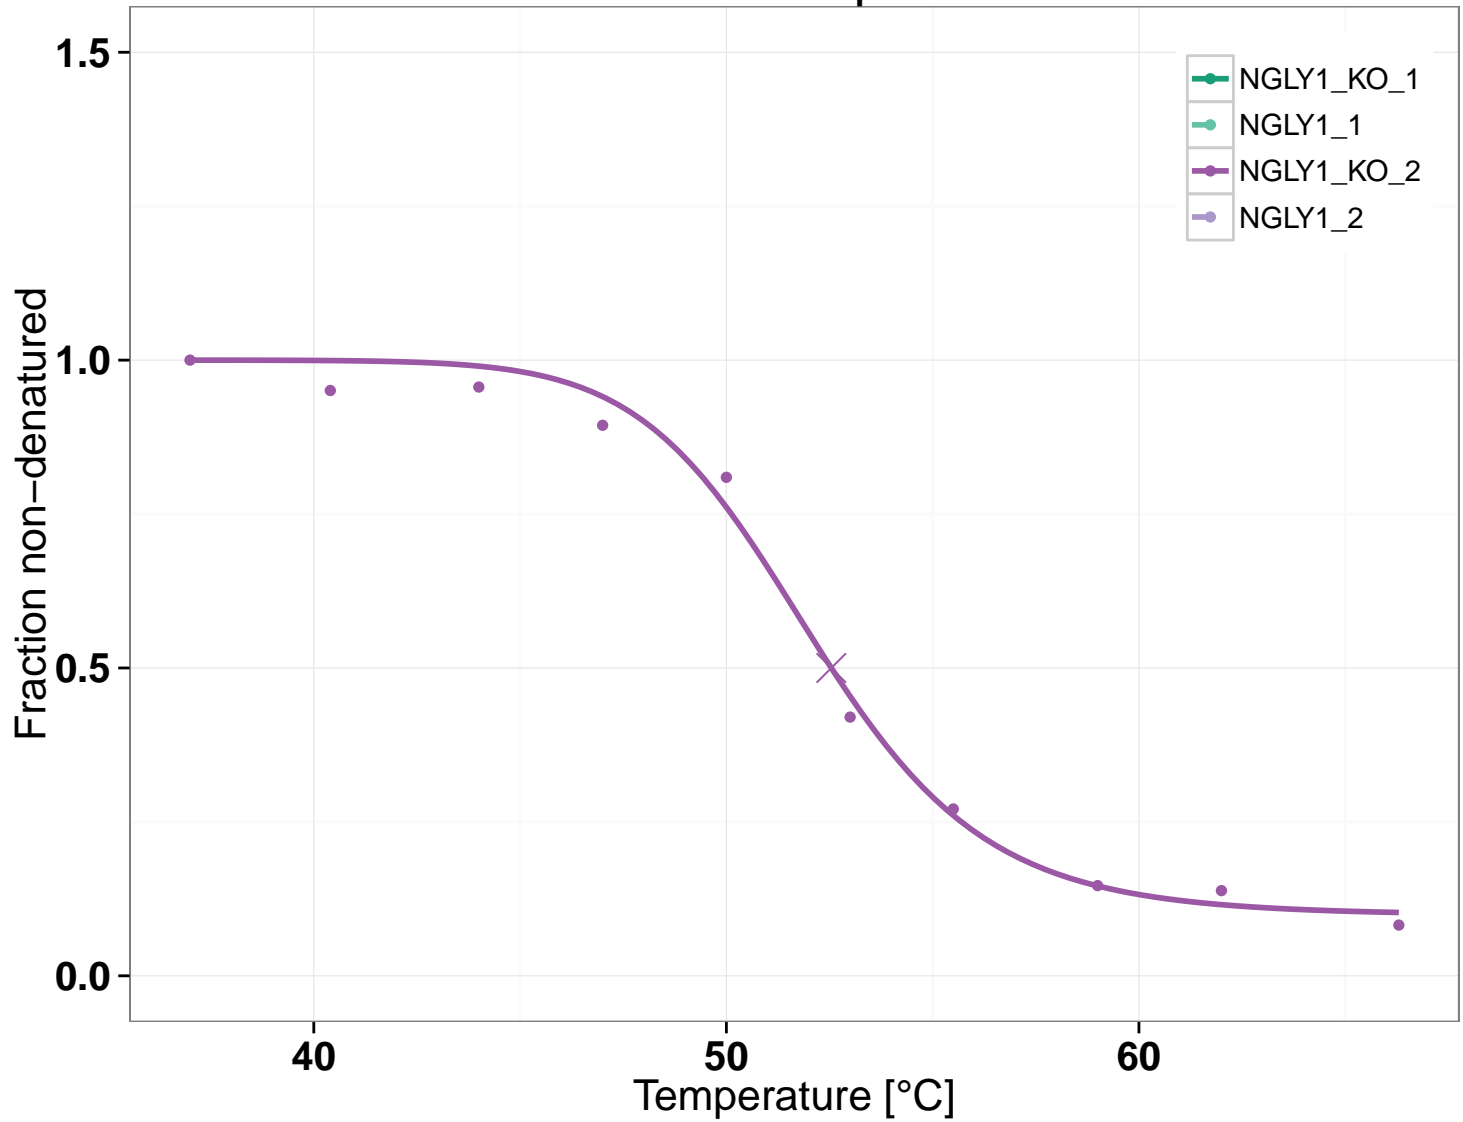

|            | meltPoint | slope | plateau | R2   |
|------------|-----------|-------|---------|------|
| NGLY1_KO_1 | —         | —     | —       | —    |
| NGLY1_1    | —         | —     | —       | —    |
| NGLY1_KO_2 | 52.54     | -0.11 | 0.1     | 0.99 |
| NGLY1_2    | —         | —     | —       | —    |

Supplement: Supplementary file 861 [file 1]

# IPI00329115.2|C10ORF47

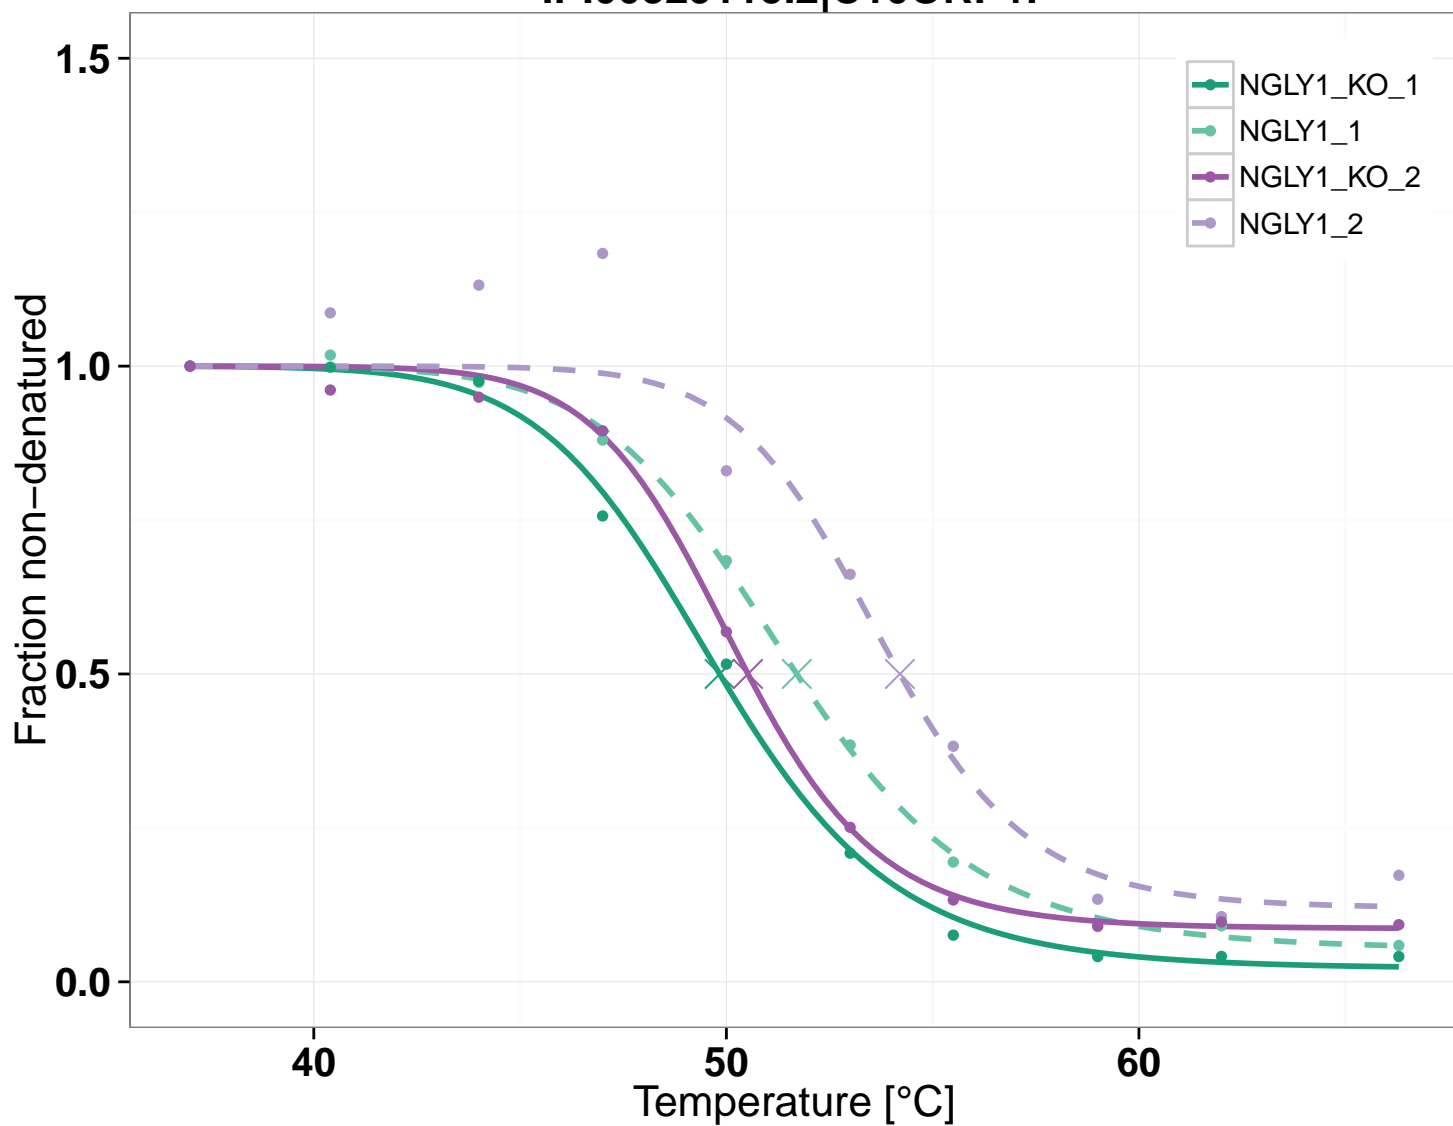

|            | meltPoint | slope | plateau | R2   |
|------------|-----------|-------|---------|------|
| NGLY1_KO_1 | 49.84     | -0.11 | 0.02    | 1    |
| NGLY1_1    | 51.71     | -0.1  | 0.05    | 1    |
| NGLY1_KO_2 | 50.52     | -0.13 | 0.09    | 1    |
| NGLY1_2    | 54.21     | -0.12 | 0.12    | 0.96 |

Supplement: Supplementary file 862 [file 1]

IPI00828091.1|ANKRD26

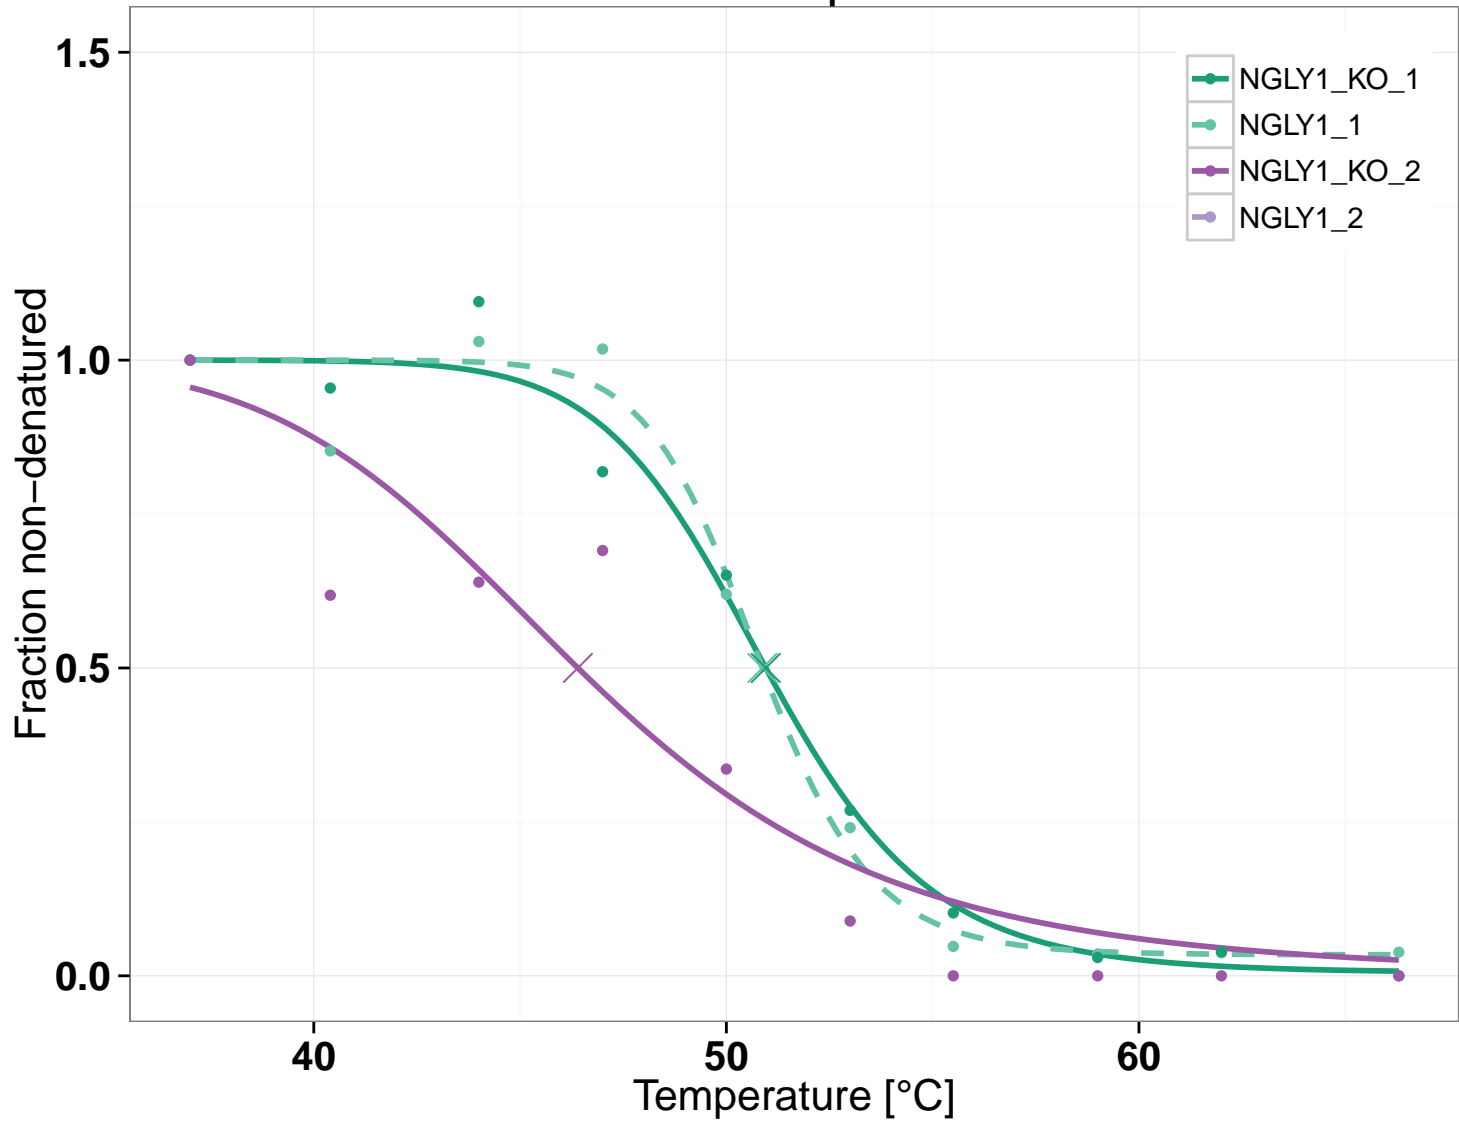

|            | meltPoint | slope  | plateau | R2   |
|------------|-----------|--------|---------|------|
| NGLY1_KO_1 | 50.95     | -0.12  | 0       | 0.99 |
| NGLY1_1    | 50.87     | -0.18  | 0.03    | 0.98 |
| NGLY1_KO_2 | 46.4      | -0.067 | 0       | 0.88 |
| NGLY1_2    | -         | -      | -       | -    |

Supplement: Supplementary file 863 [file 1]

# IPI00101299.3|C1GALT1C1

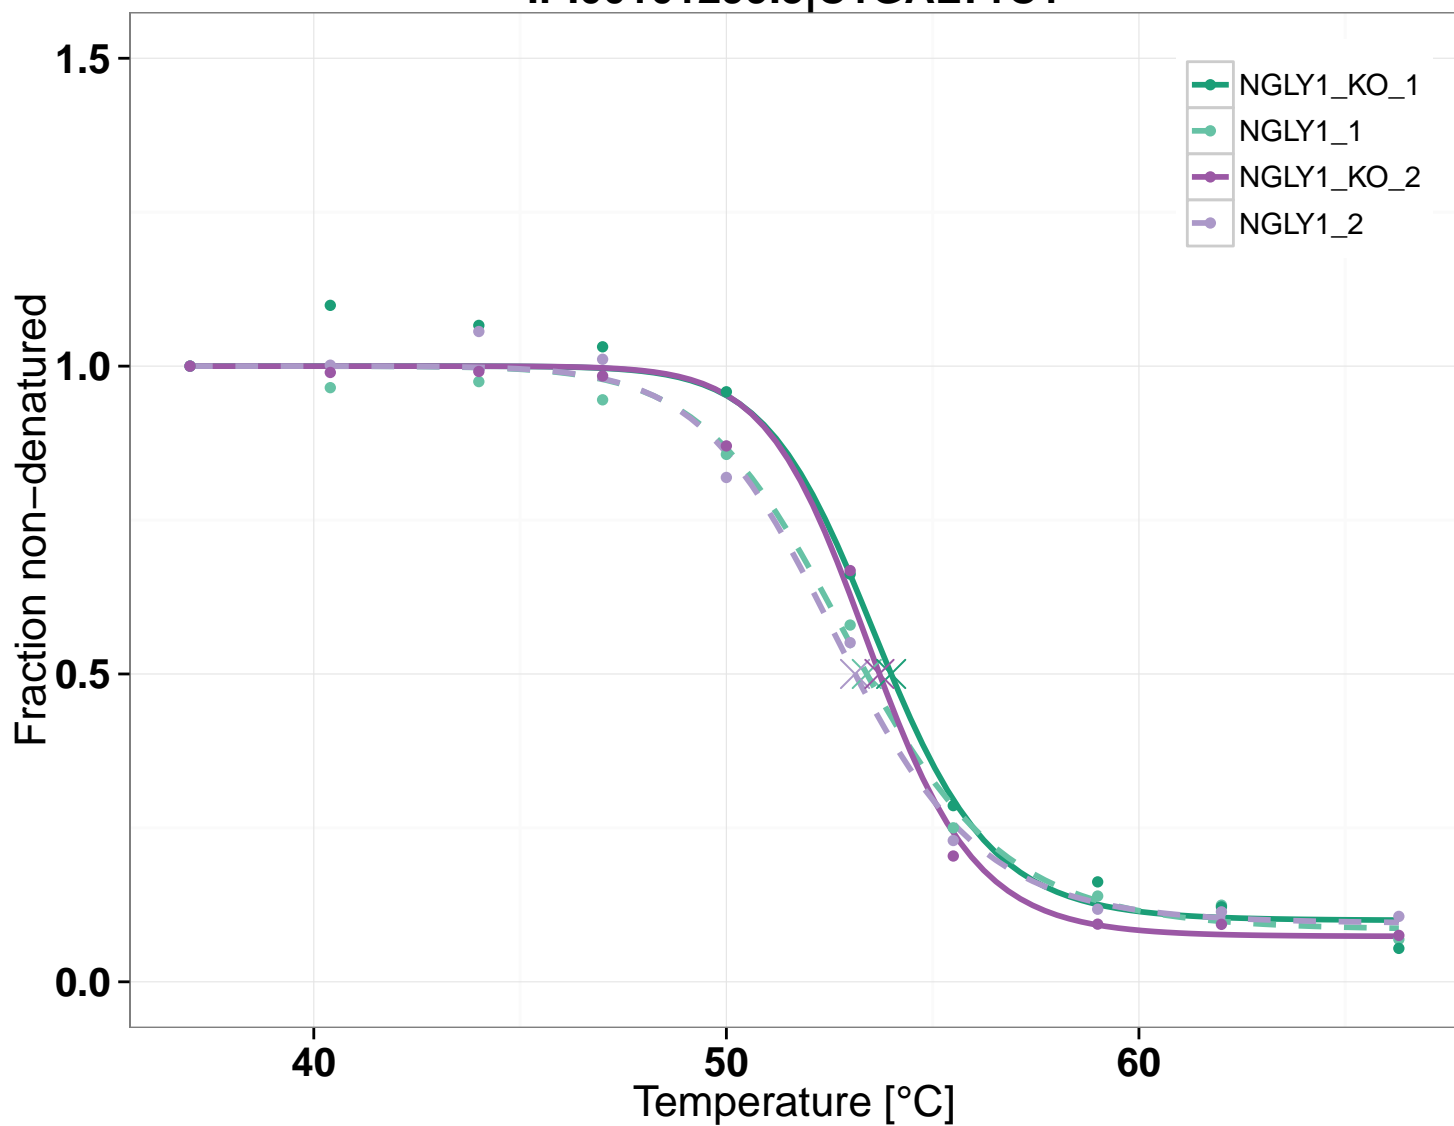

|            | meltPoint | slope | plateau | R2   |
|------------|-----------|-------|---------|------|
| NGLY1_KO_1 | 53.99     | -0.16 | 0.1     | 0.99 |
| NGLY1_1    | 53.4      | -0.13 | 0.08    | 1    |
| NGLY1_KO_2 | 53.71     | -0.18 | 0.07    | 0.99 |
| NGLY1_2    | 53.12     | -0.13 | 0.09    | 0.99 |

Supplement: Supplementary file 864 [file 1]

IPI00004506.3|KCTD5

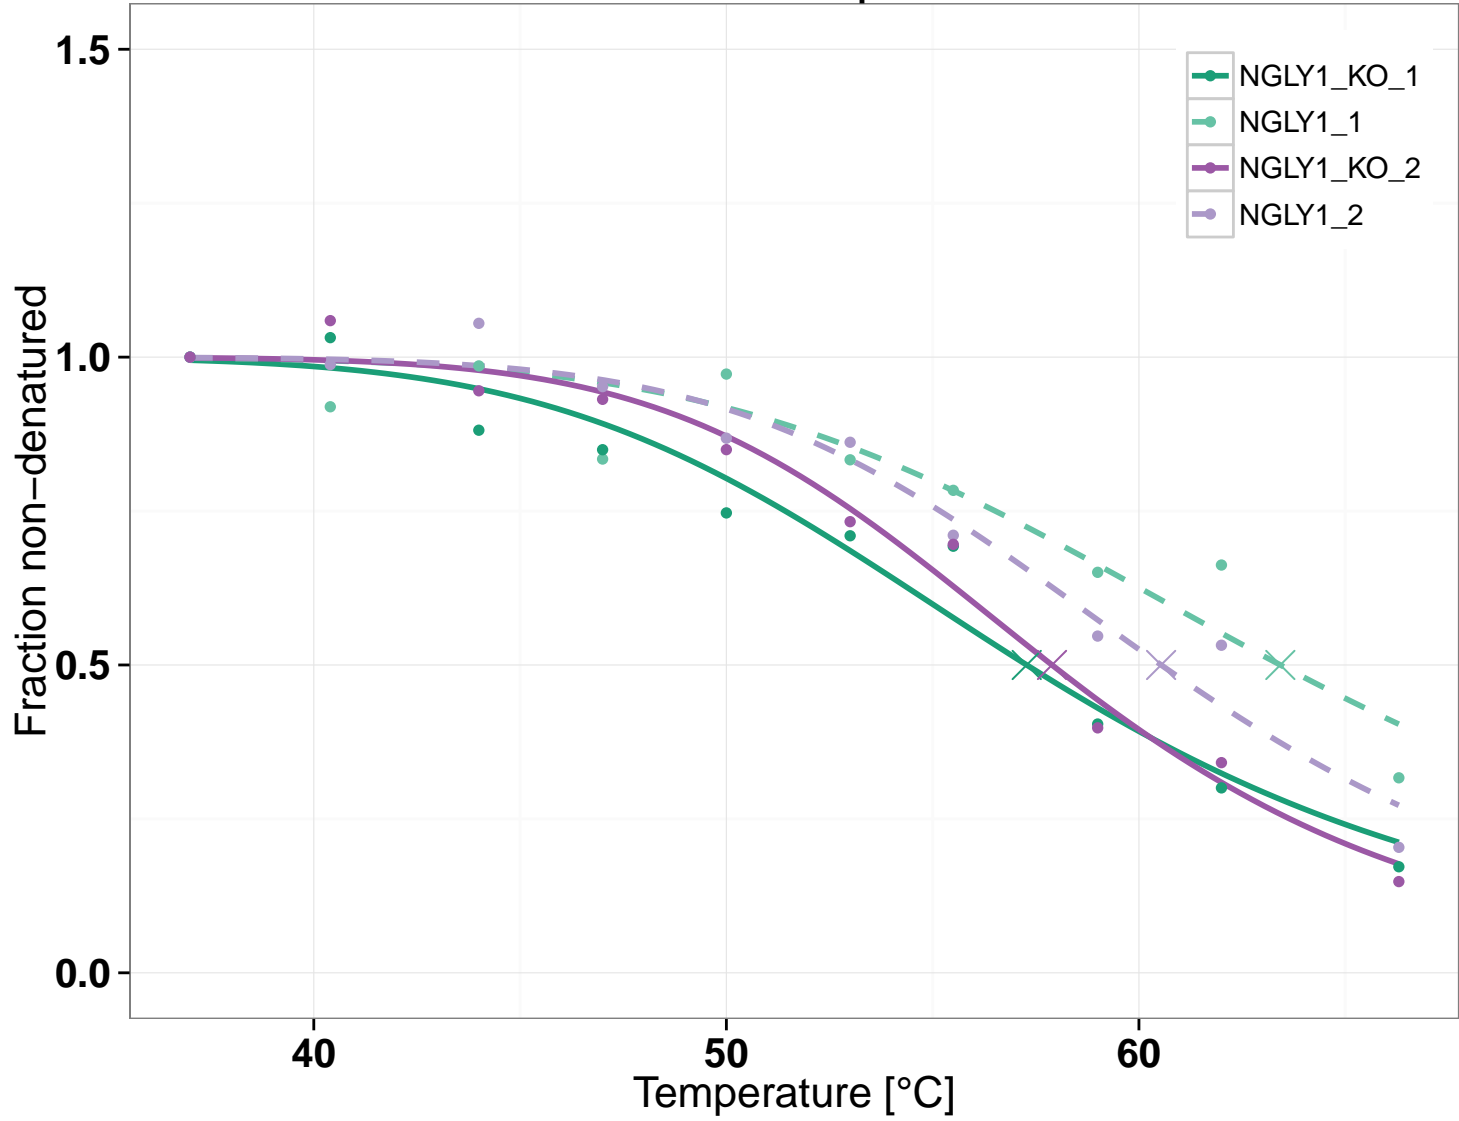

|            | meltPoint | slope  | plateau | R2   |
|------------|-----------|--------|---------|------|
| NGLY1_KO_1 | 57.28     | -0.044 | 0       | 0.96 |
| NGLY1_1    | 63.43     | -0.037 | 0       | 0.89 |
| NGLY1_KO_2 | 57.89     | -0.054 | 0       | 0.98 |
| NGLY1_2    | 60.54     | -0.048 | 0       | 0.96 |

Supplement: Supplementary file 865 [file 1]

IPI00301460.2|SLC37A3

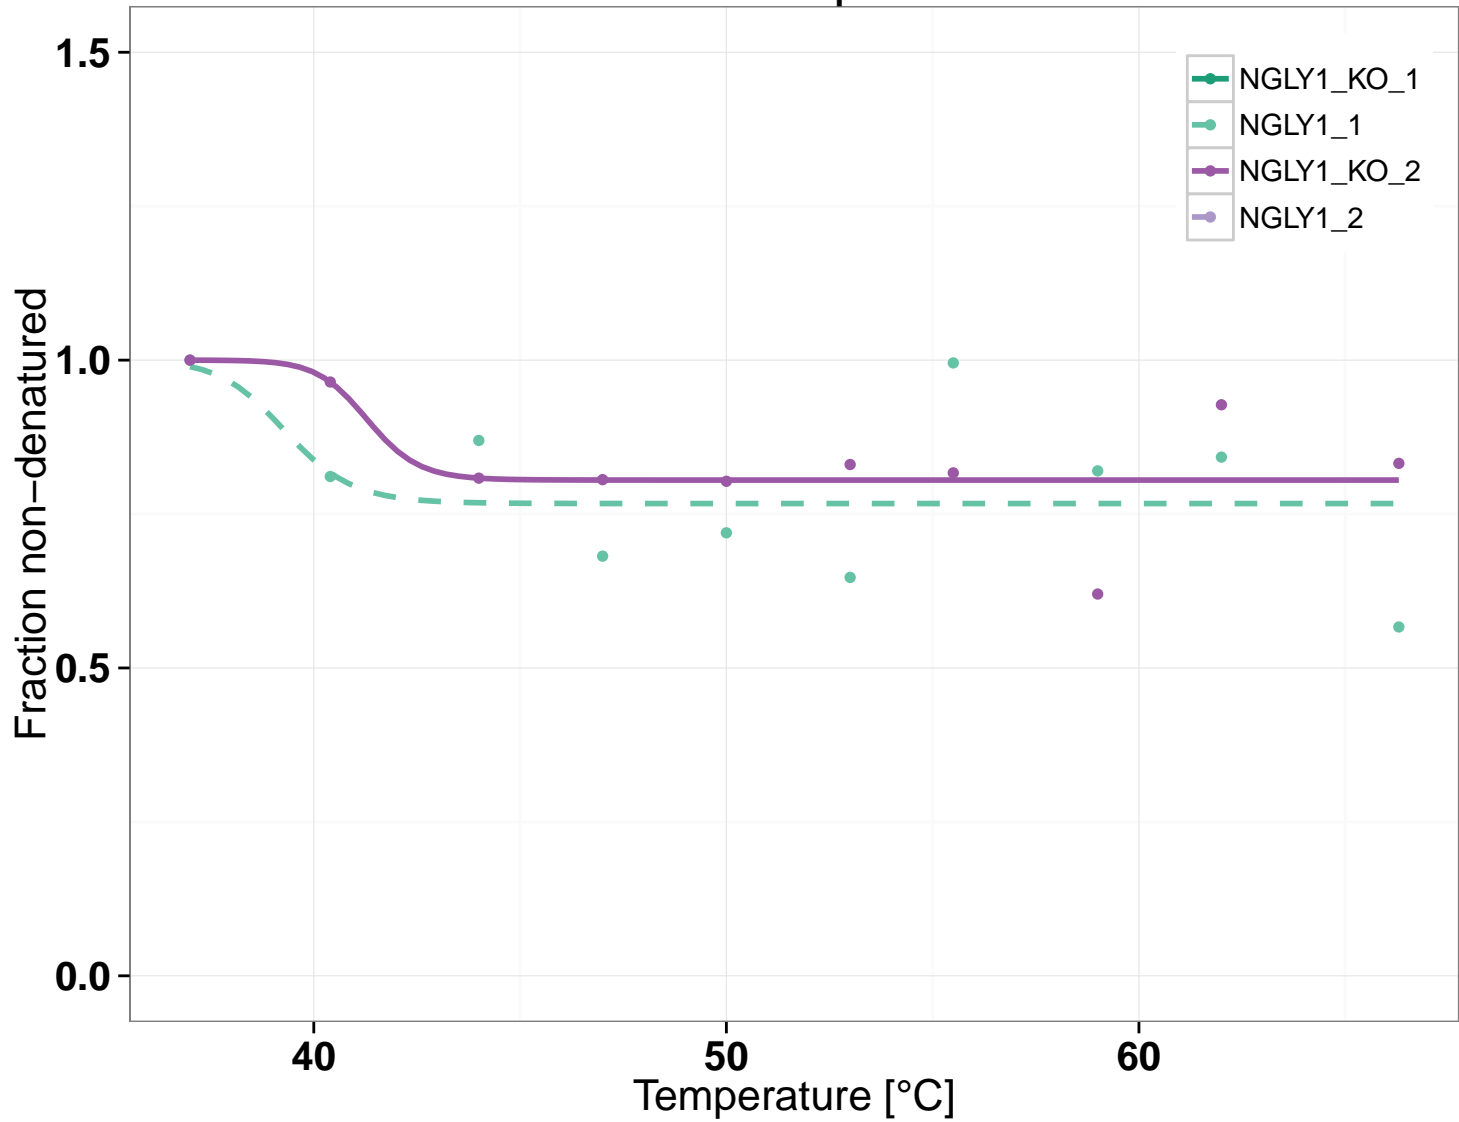

|            | meltPoint | slope  | plateau | R2   |
|------------|-----------|--------|---------|------|
| NGLY1_KO_1 | -         | -      | -       | -    |
| NGLY1_1    | -         | -0.072 | 0.77    | 0.26 |
| NGLY1_KO_2 | -         | -0.079 | 0.81    | 0.5  |
| NGLY1_2    | -         | -      | -       | -    |

Supplement: Supplementary file 866 [file 1]

IPI00005670.6|CDC123

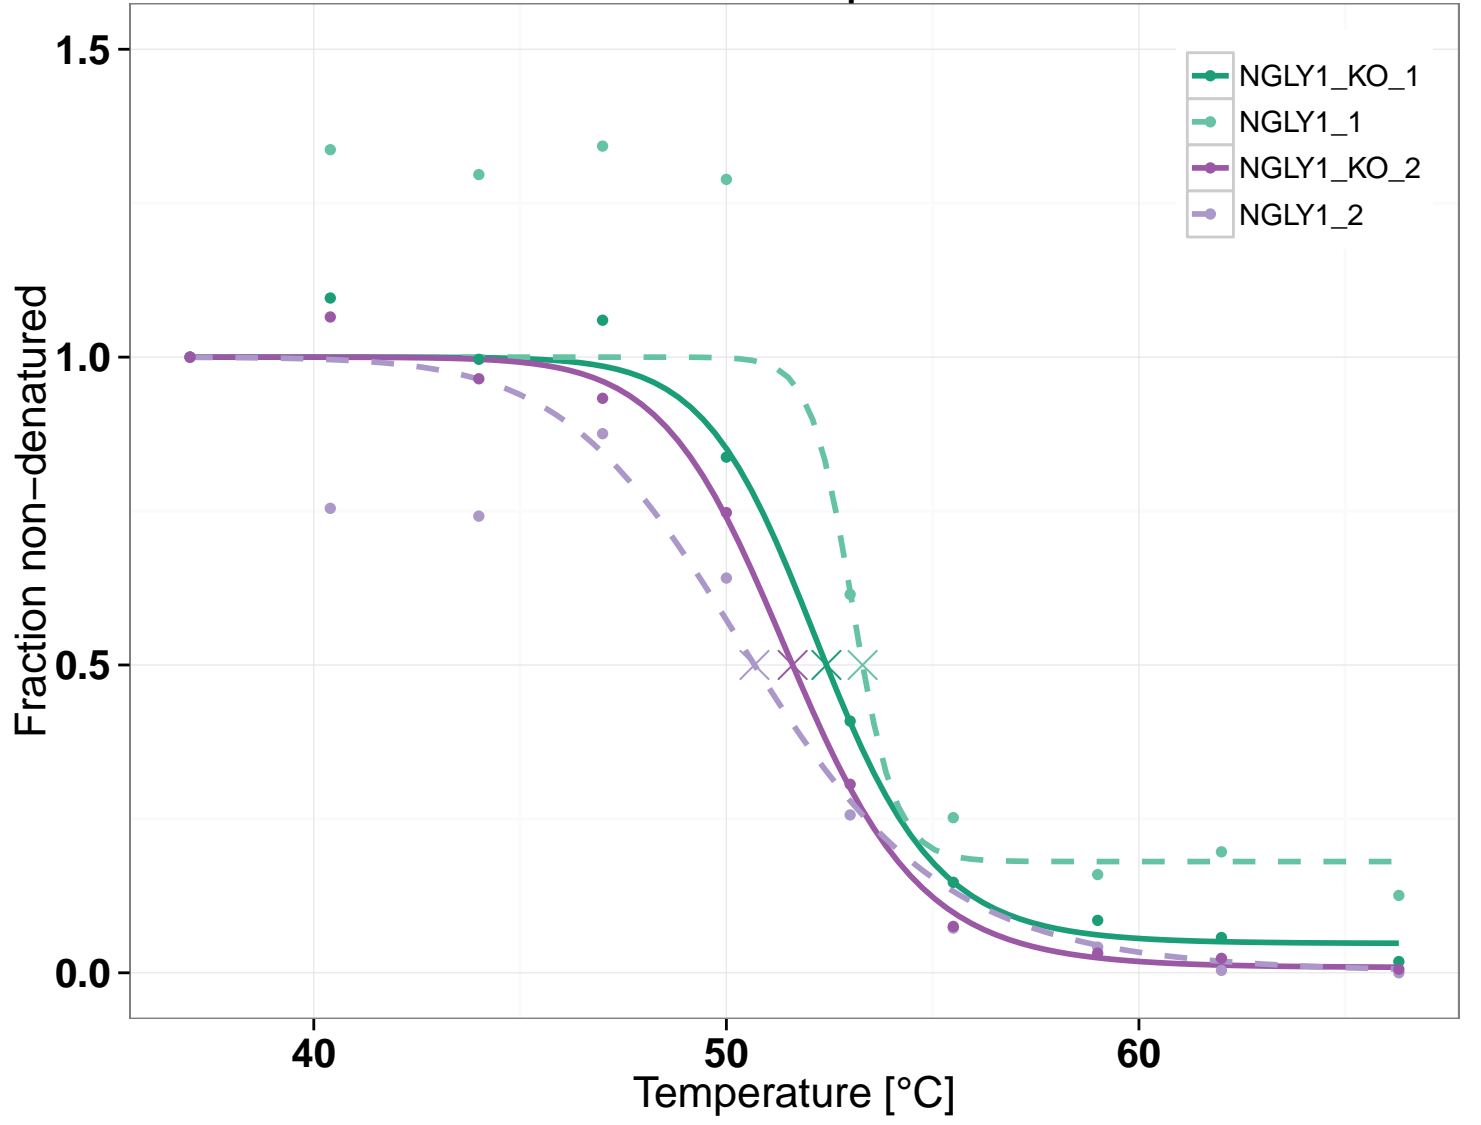

|            | meltPoint | slope | plateau | R2   |
|------------|-----------|-------|---------|------|
| NGLY1_KO_1 | 52.42     | -0.17 | 0.05    | 0.99 |
| NGLY1_1    | 53.3      | -0.4  | 0.18    | 0.85 |
| NGLY1_KO_2 | 51.61     | -0.16 | 0.01    | 1    |
| NGLY1_2    | 50.68     | -0.11 | 0       | 0.92 |

Supplement: Supplementary file 867 [file 1]

IPI00289581.7|TADA2L

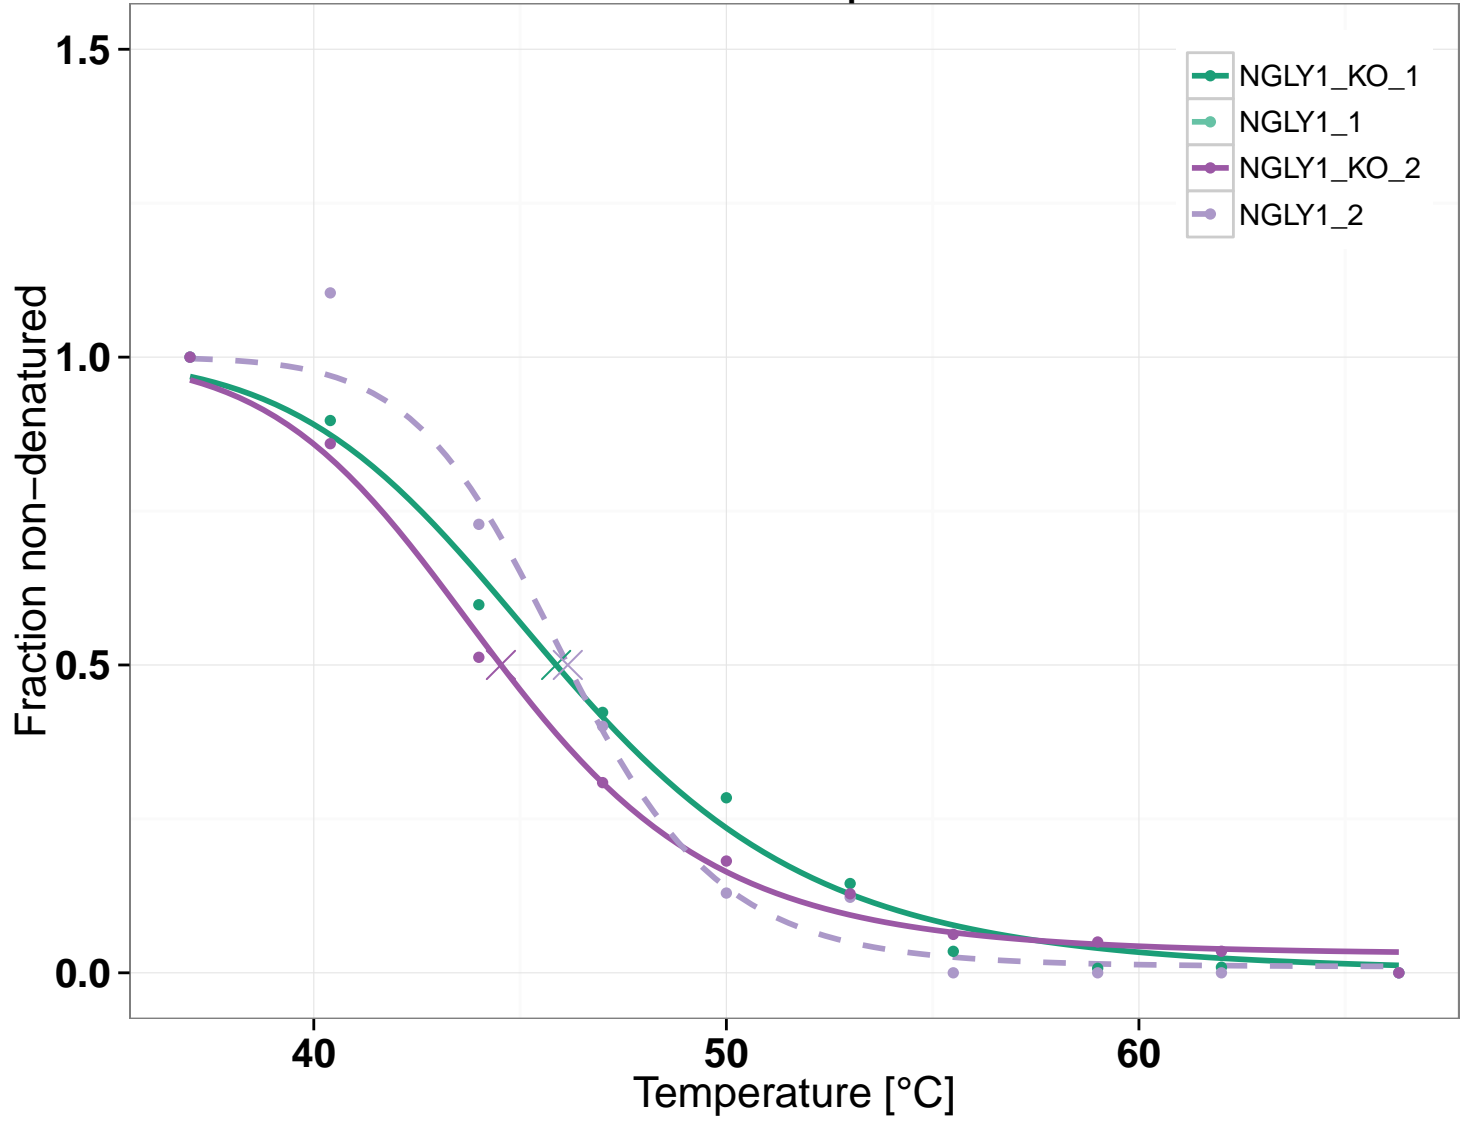

|            | meltPoint | slope  | plateau | R2   |
|------------|-----------|--------|---------|------|
| NGLY1_KO_1 | 45.87     | -0.079 | 0       | 0.99 |
| NGLY1_1    | -         | -      | -       | -    |
| NGLY1_KO_2 | 44.54     | -0.09  | 0.03    | 1    |
| NGLY1_2    | 46.16     | -0.13  | 0.01    | 0.98 |

Supplement: Supplementary file 868 [file 1]

IPI00022277.3|CCDC56

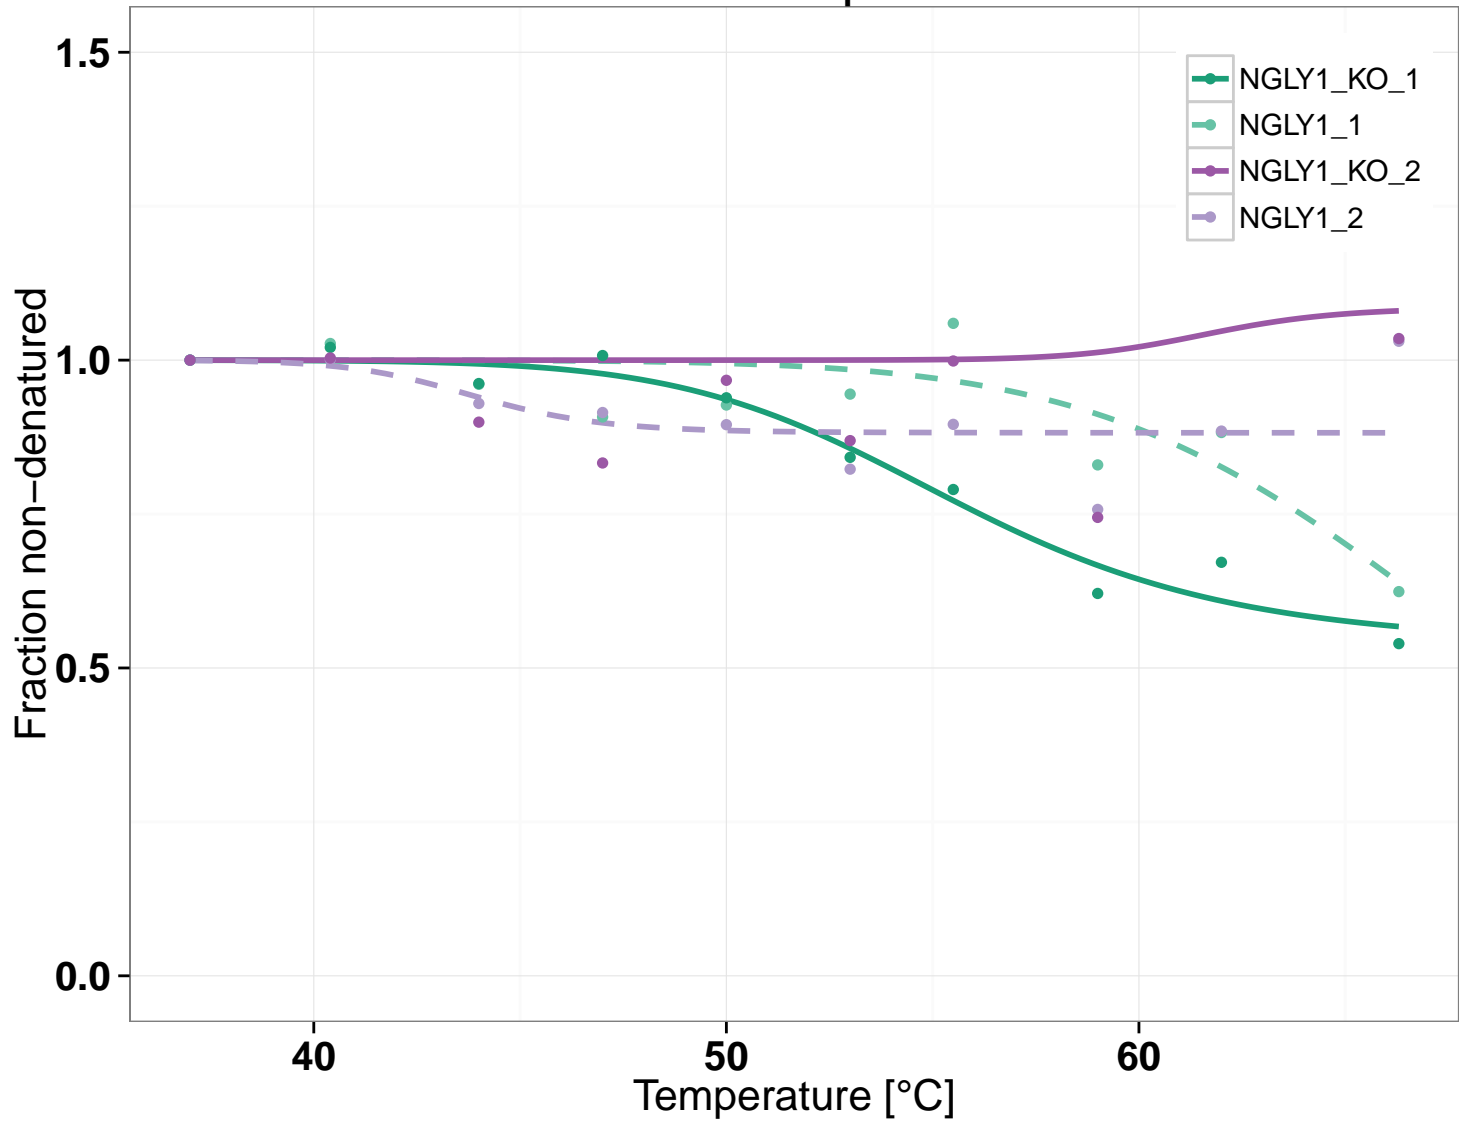

|            | meltPoint | slope  | plateau | R2    |
|------------|-----------|--------|---------|-------|
| NGLY1_KO_1 | —         | −0.035 | 0.54    | 0.97  |
| NGLY1_1    | —         | —      | 0       | 0.74  |
| NGLY1_KO_2 | —         | 0.013  | 1.09    | −0.08 |
| NGLY1_2    | —         | −0.019 | 0.88    | 0.34  |

Supplement: Supplementary file 869 [file 1]

IPI00657967.2|PHACTR4

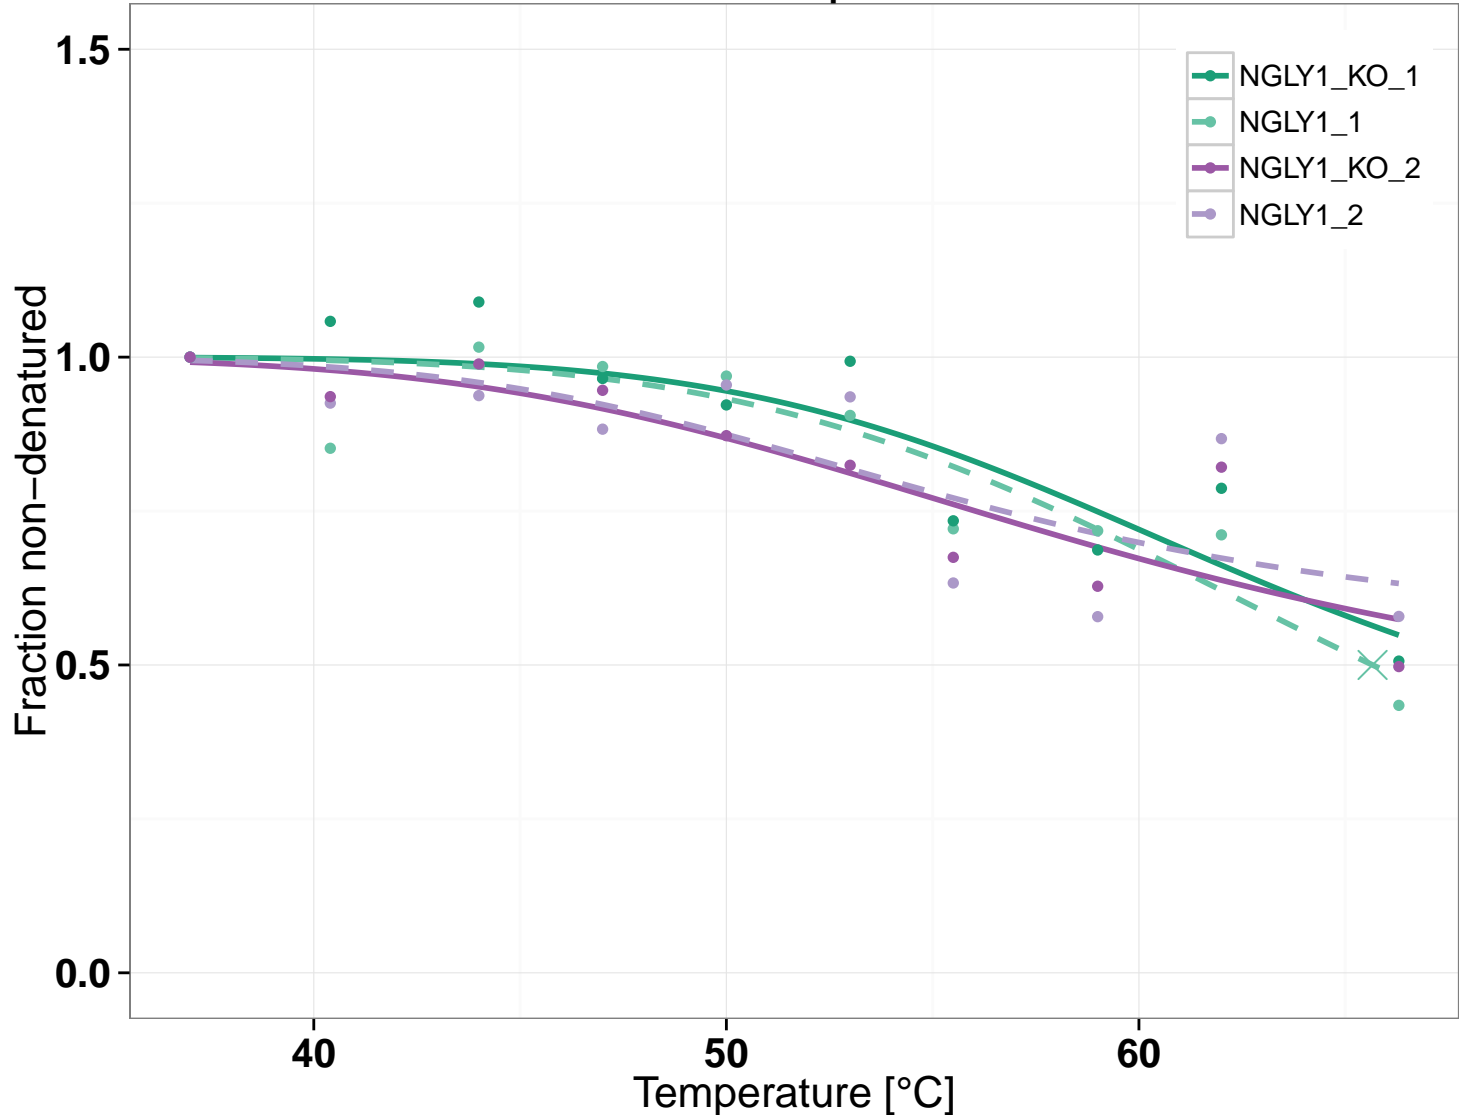

|            | meltPoint | slope  | plateau | R2   |
|------------|-----------|--------|---------|------|
| NGLY1_KO_1 | -         | -0.029 | 0.28    | 0.82 |
| NGLY1_1    | 65.66     | -0.034 | 0       | 0.86 |
| NGLY1_KO_2 | -         | -0.02  | 0.38    | 0.78 |
| NGLY1_2    | -         | -0.019 | 0.55    | 0.58 |

Supplement: Supplementary file 870 [file 1]

# IPI00031388.1|PIK3CB

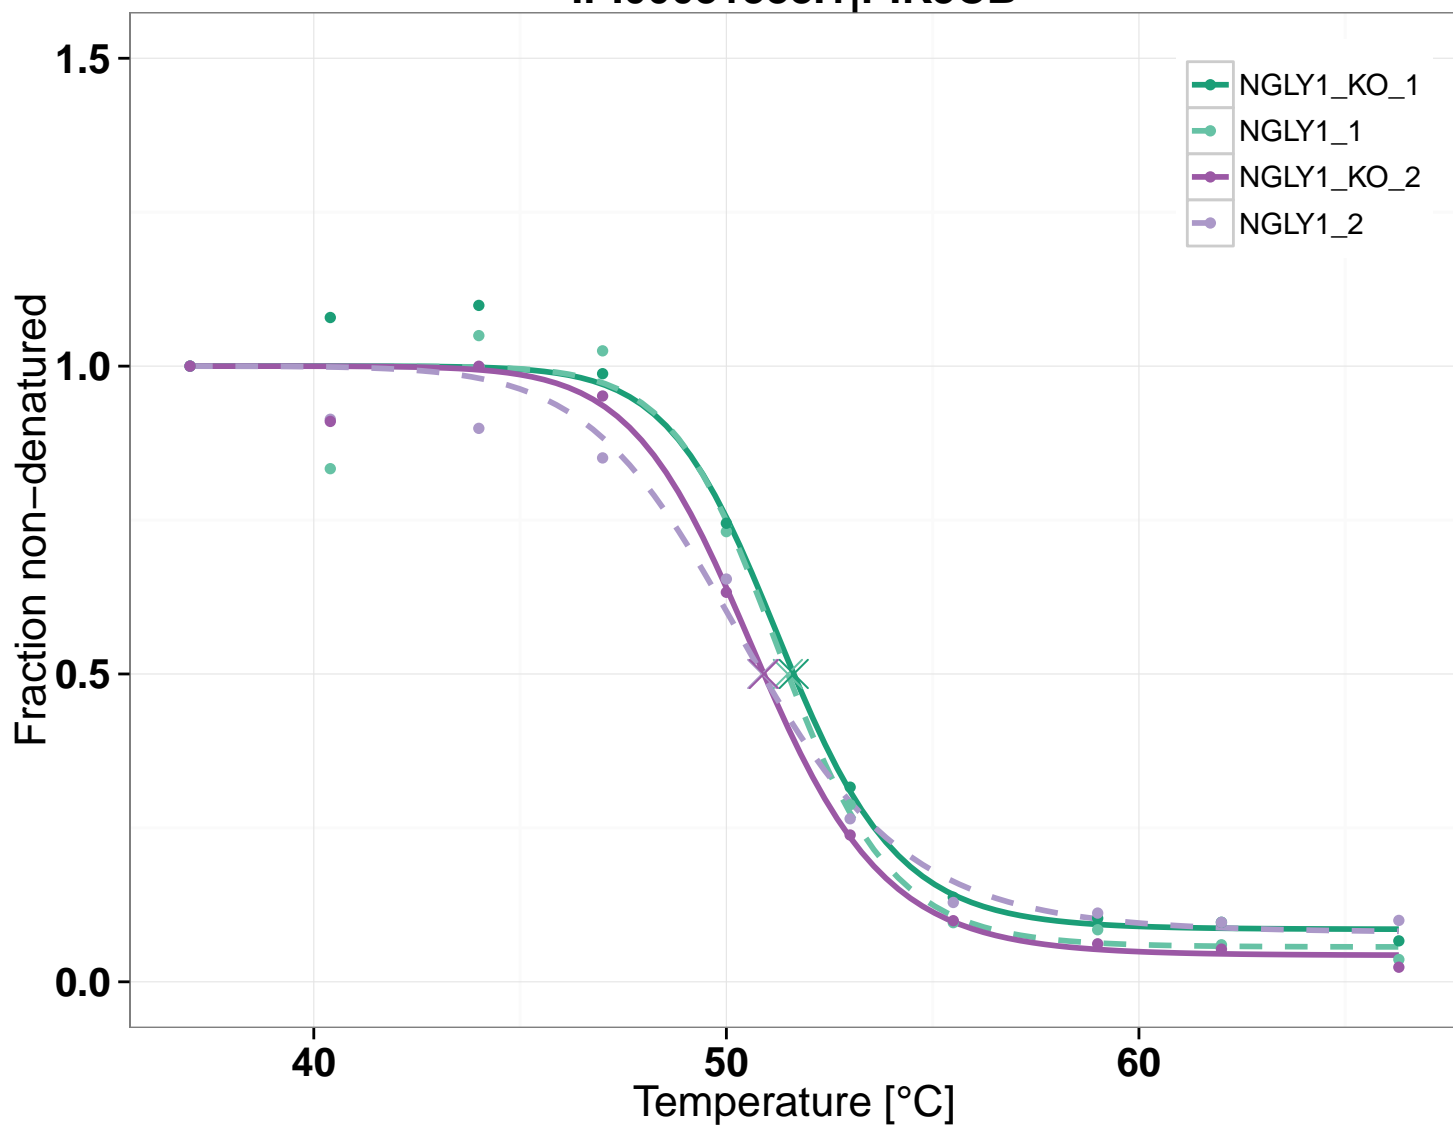

|            | meltPoint | slope | plateau | R2   |
|------------|-----------|-------|---------|------|
| NGLY1_KO_1 | 51.63     | -0.16 | 0.09    | 0.99 |
| NGLY1_1    | 51.49     | -0.18 | 0.06    | 0.98 |
| NGLY1_KO_2 | 50.91     | -0.16 | 0.04    | 0.99 |
| NGLY1_2    | 50.87     | -0.12 | 0.08    | 0.99 |

Supplement: Supplementary file 871 [file 1]

IPI00444646.4|AP1GBP1

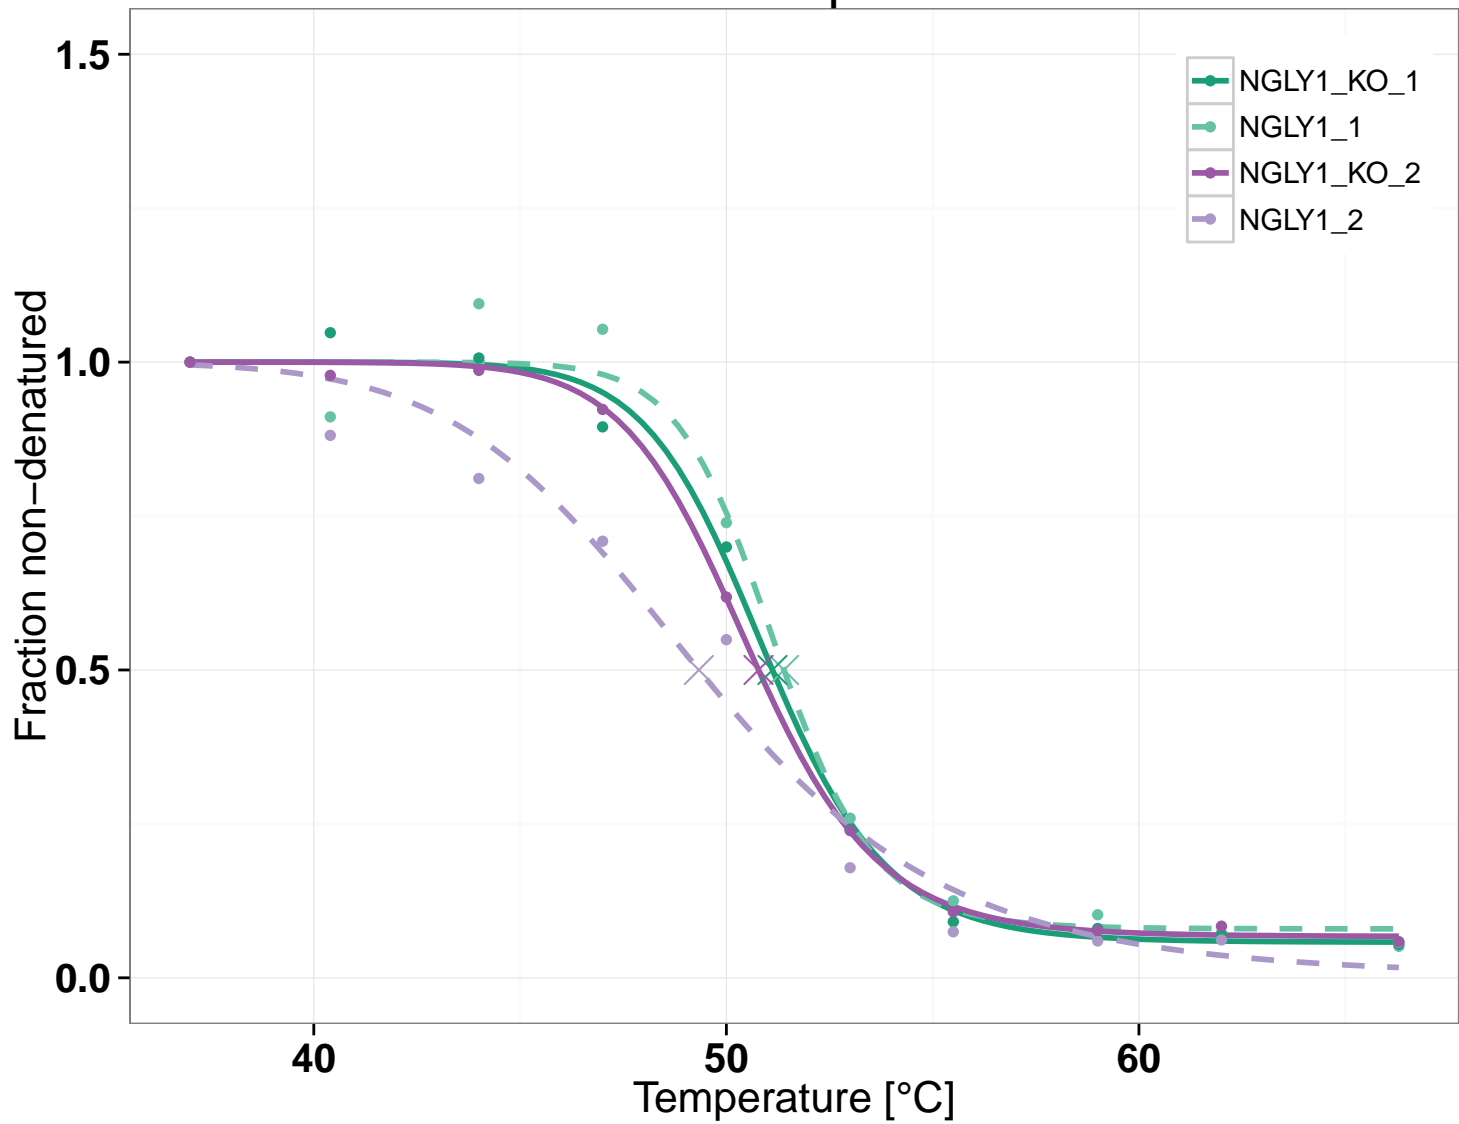

|            | meltPoint | slope  | plateau | R2   |
|------------|-----------|--------|---------|------|
| NGLY1_KO_1 | 51.12     | -0.16  | 0.06    | 1    |
| NGLY1_1    | 51.4      | -0.19  | 0.08    | 0.99 |
| NGLY1_KO_2 | 50.78     | -0.15  | 0.07    | 1    |
| NGLY1_2    | 49.33     | -0.083 | 0       | 0.97 |

Supplement: Supplementary file 872 [file 1]

# IPI00165073.8|SMYD3

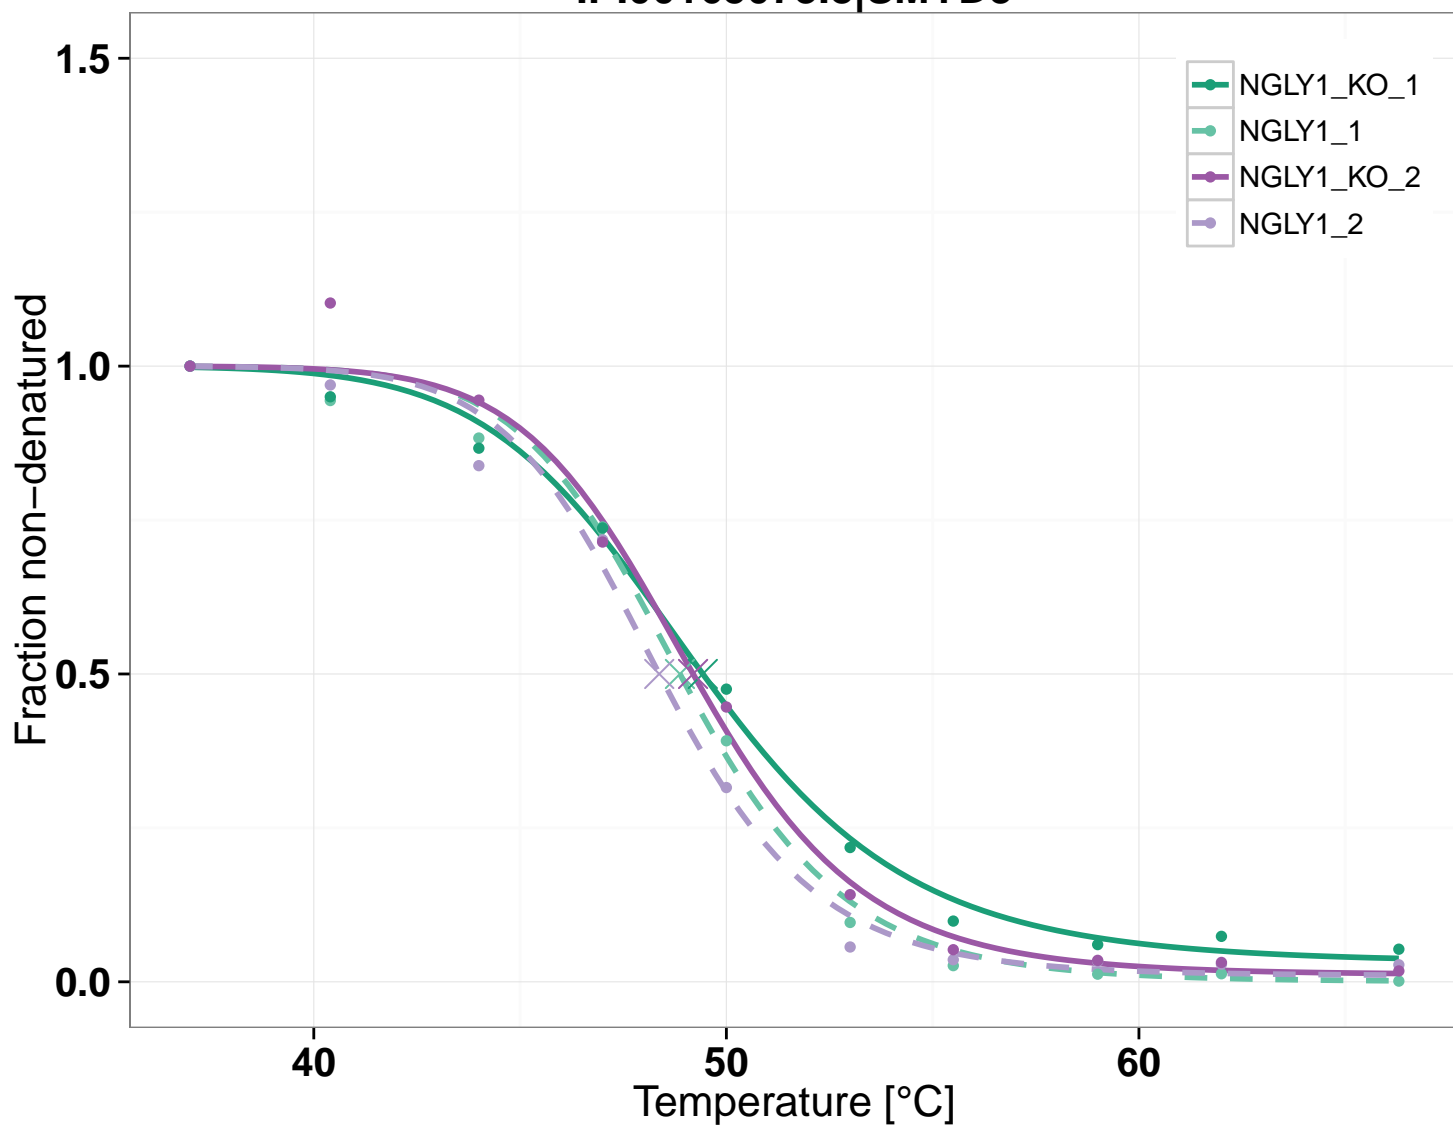

|            | meltPoint | slope  | plateau | R2   |
|------------|-----------|--------|---------|------|
| NGLY1_KO_1 | 49.43     | -0.094 | 0.03    | 1    |
| NGLY1_1    | 48.87     | -0.13  | 0       | 1    |
| NGLY1_KO_2 | 49.19     | -0.12  | 0.01    | 0.99 |
| NGLY1_2    | 48.37     | -0.13  | 0.01    | 0.99 |

Supplement: Supplementary file 873 [file 1]

# IPI00218848.5|ATP5I

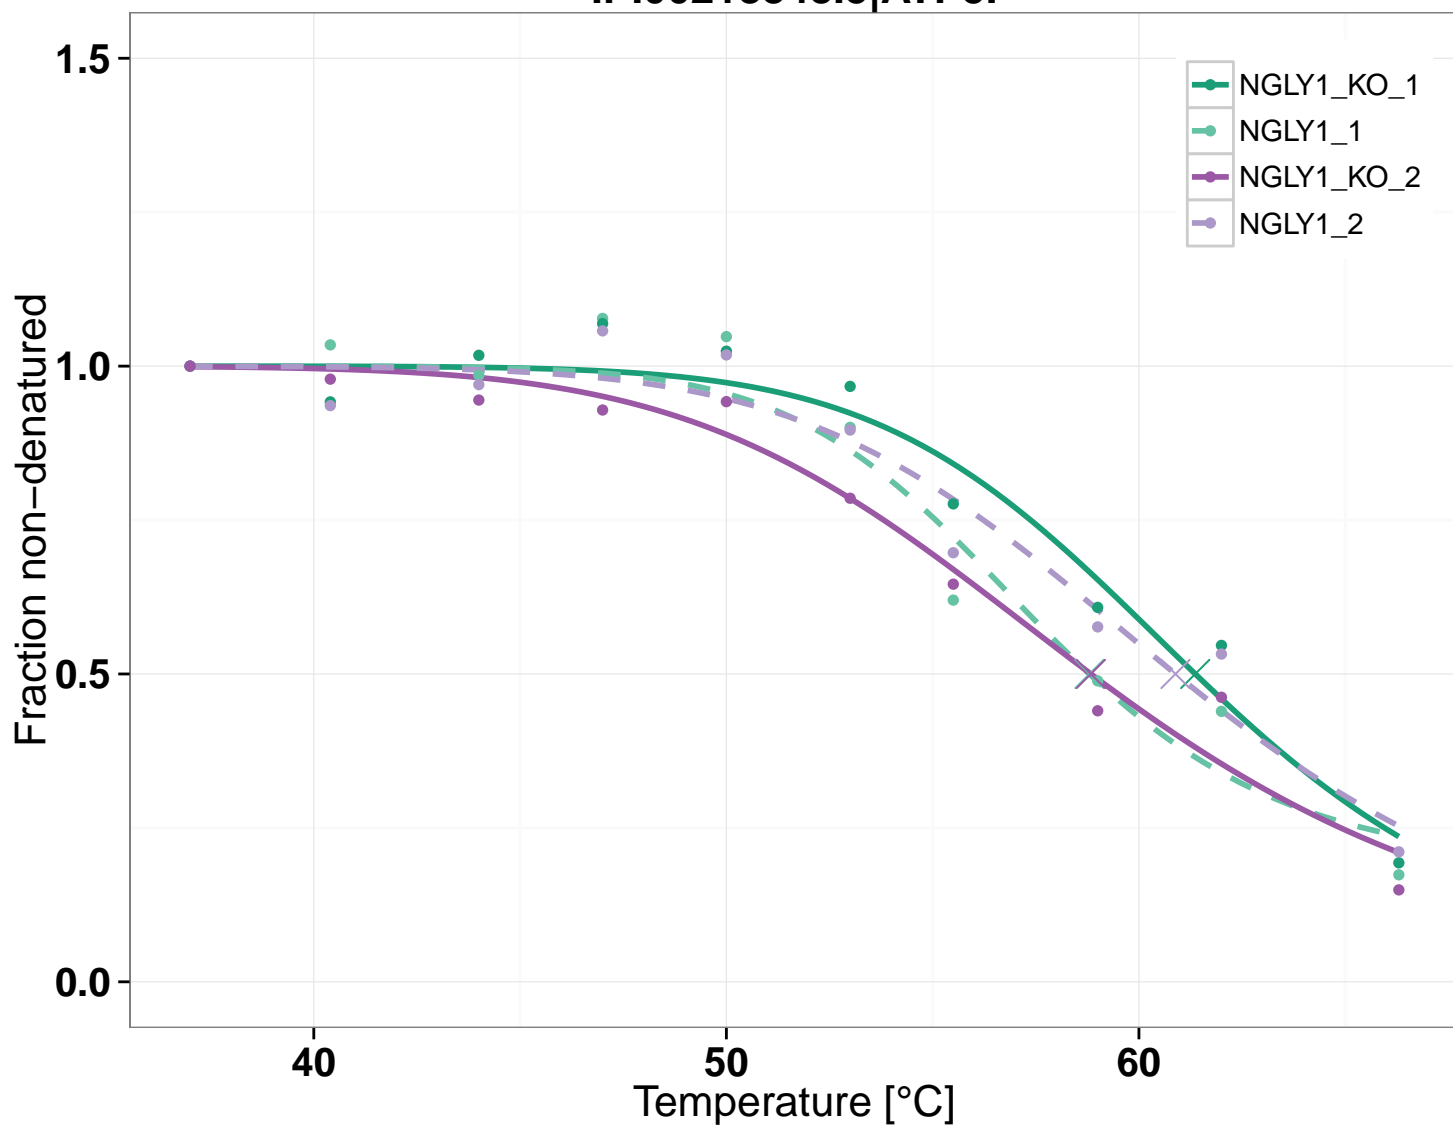

|            | meltPoint | slope  | plateau | R2   |
|------------|-----------|--------|---------|------|
| NGLY1_KO_1 | 61.36     | -0.065 | 0       | 0.96 |
| NGLY1_1    | 58.8      | -0.069 | 0.18    | 0.95 |
| NGLY1_KO_2 | 58.84     | -0.051 | 0       | 0.97 |
| NGLY1_2    | 60.89     | -0.056 | 0       | 0.95 |

Supplement: Supplementary file 874 [file 1]

IPI00001546.1|TIMM8B

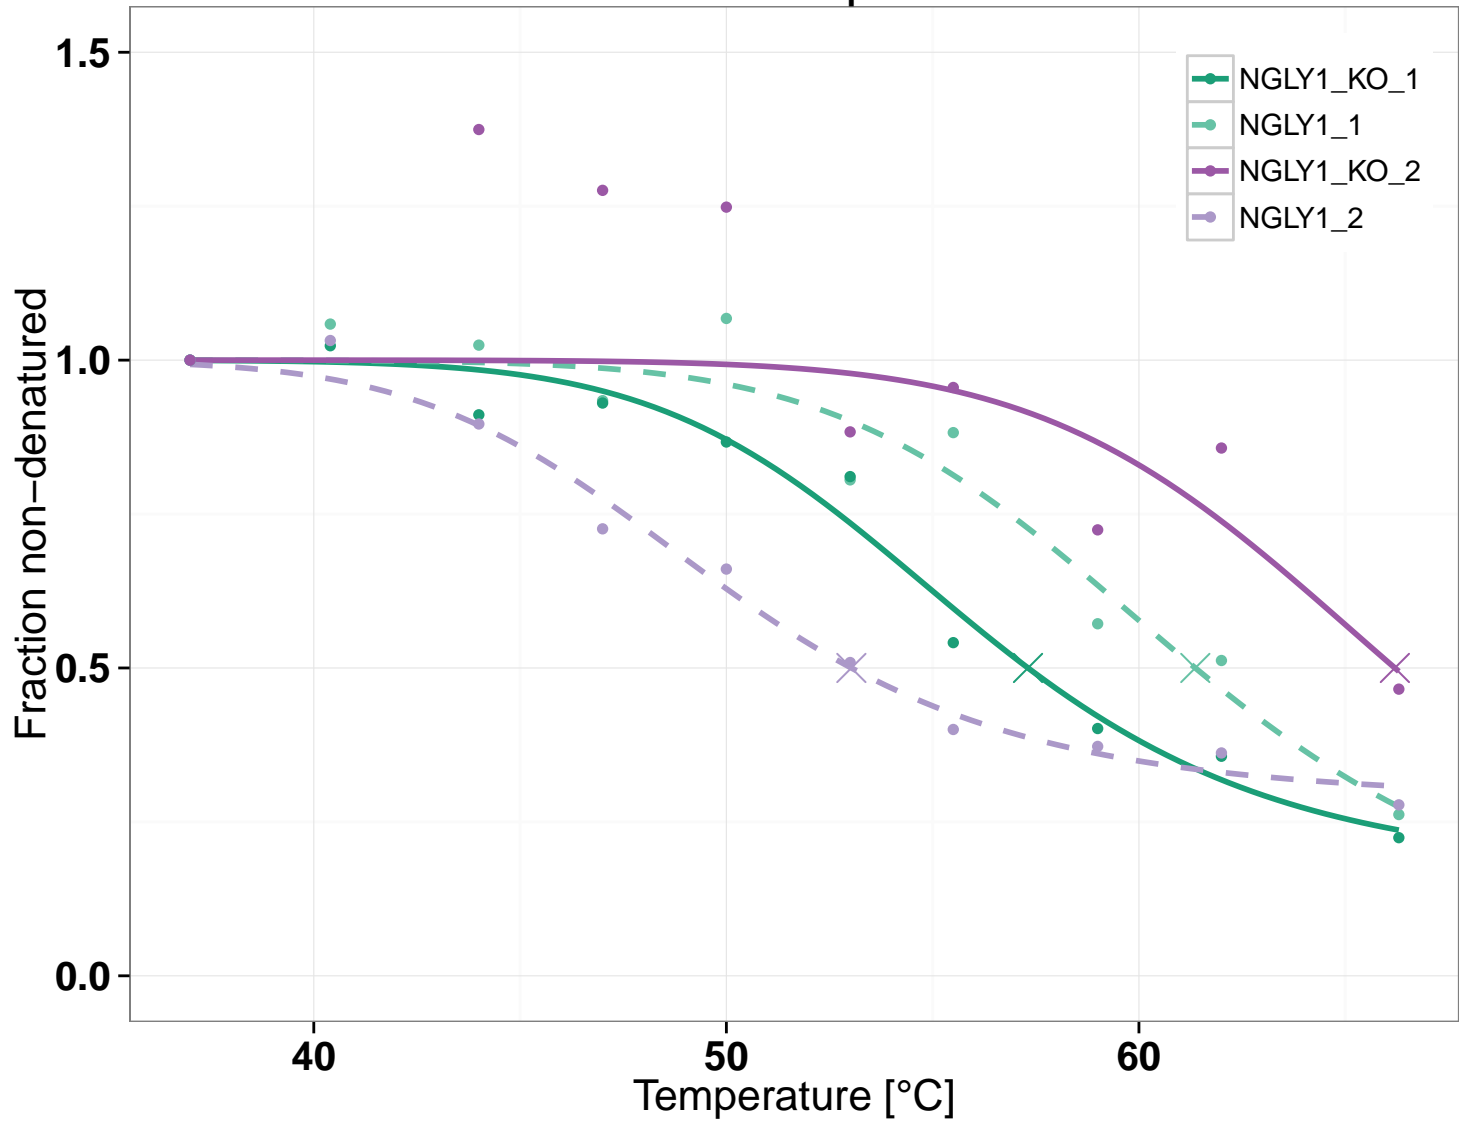

|            | meltPoint | slope  | plateau | R2   |
|------------|-----------|--------|---------|------|
| NGLY1_KO_1 | 57.31     | -0.056 | 0.16    | 0.98 |
| NGLY1_1    | 61.37     | -0.057 | 0.05    | 0.94 |
| NGLY1_KO_2 | 66.2      | -0.059 | 0       | 0.28 |
| NGLY1_2    | 53.03     | -0.05  | 0.28    | 0.99 |

Supplement: Supplementary file 875 [file 1]

IPI00005270.8|KDELC1

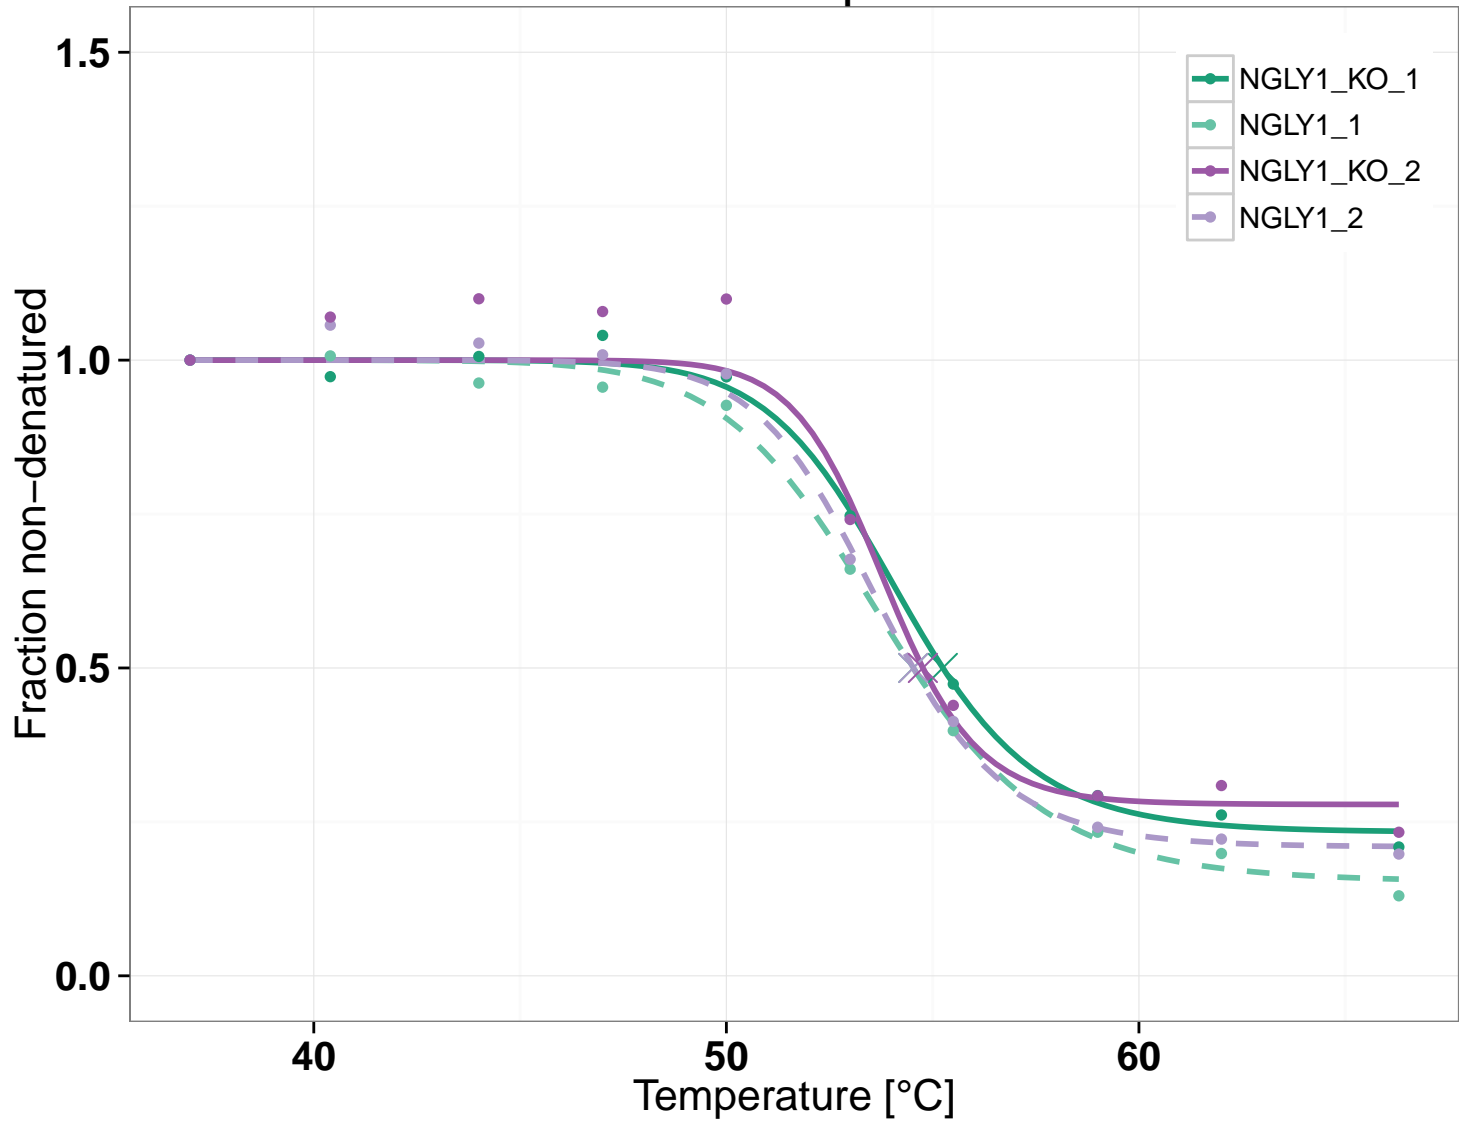

|            | meltPoint | slope | plateau | R2   |
|------------|-----------|-------|---------|------|
| NGLY1_KO_1 | 55.25     | -0.12 | 0.23    | 1    |
| NGLY1_1    | 54.53     | -0.11 | 0.15    | 1    |
| NGLY1_KO_2 | 54.76     | -0.16 | 0.28    | 0.97 |
| NGLY1_2    | 54.53     | -0.13 | 0.21    | 1    |

Supplement: Supplementary file 876 [file 1]

# IPI00038378.5|ENOPH1

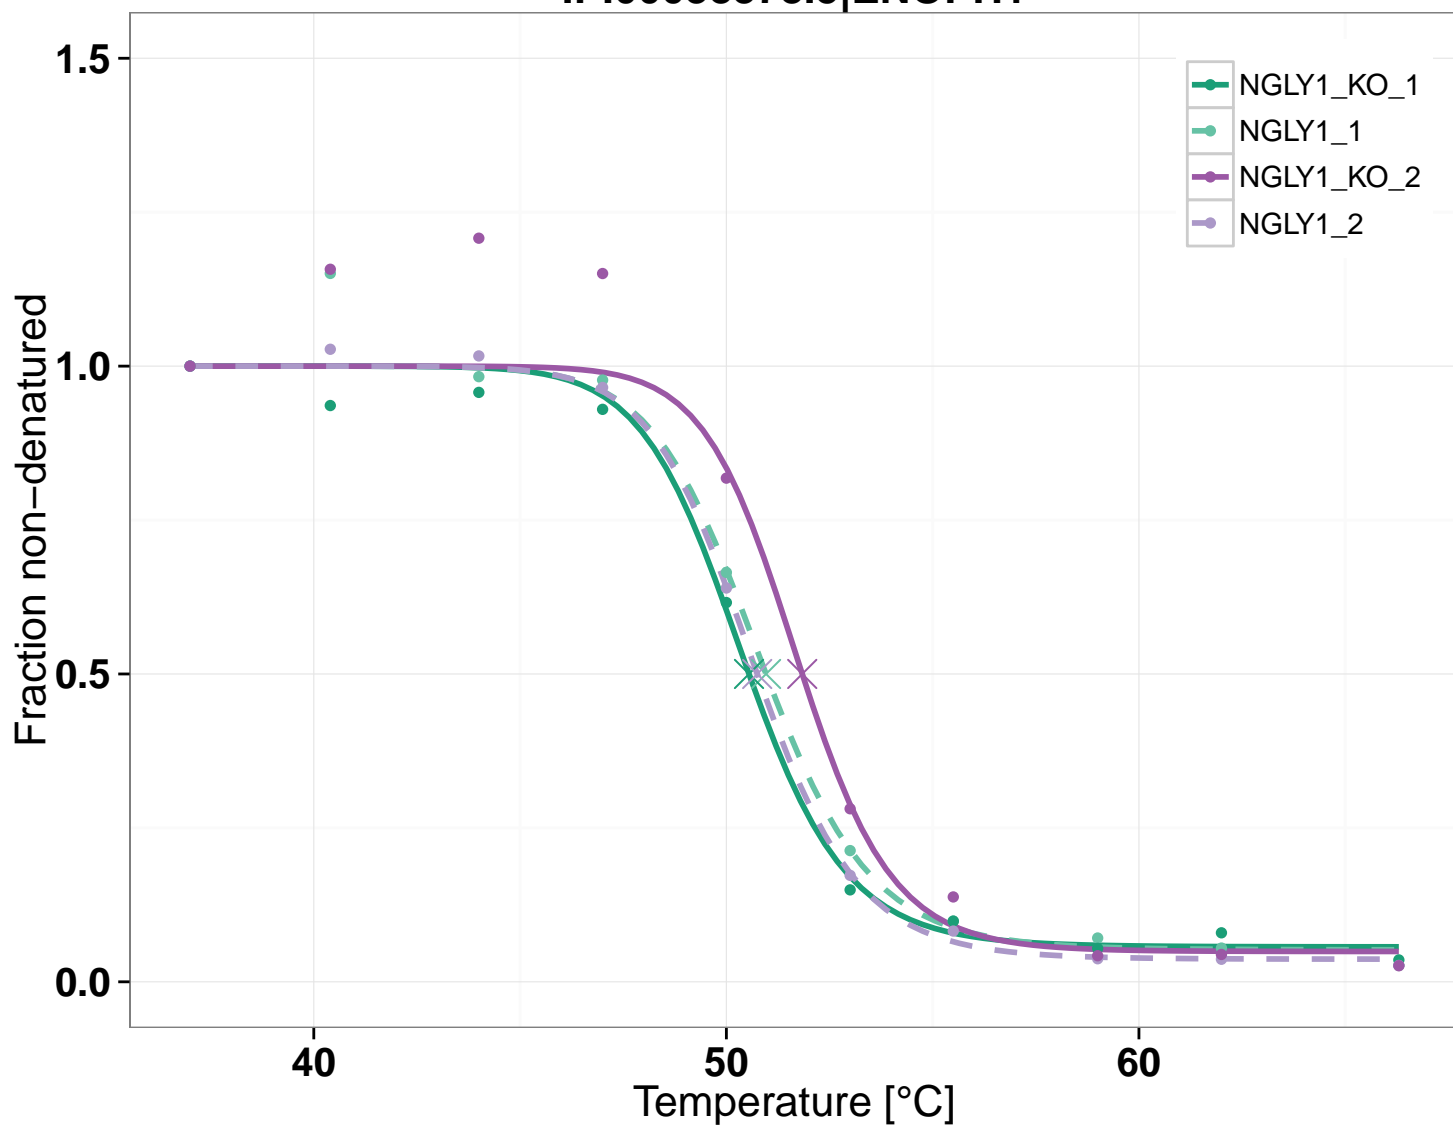

|            | meltPoint | slope | plateau | R2   |
|------------|-----------|-------|---------|------|
| NGLY1_KO_1 | 50.55     | -0.19 | 0.06    | 1    |
| NGLY1_1    | 50.96     | -0.18 | 0.05    | 0.99 |
| NGLY1_KO_2 | 51.84     | -0.21 | 0.05    | 0.96 |
| NGLY1_2    | 50.75     | -0.19 | 0.04    | 1    |

Supplement: Supplementary file 877 [file 1]

# IPI00020127.1|RPA1

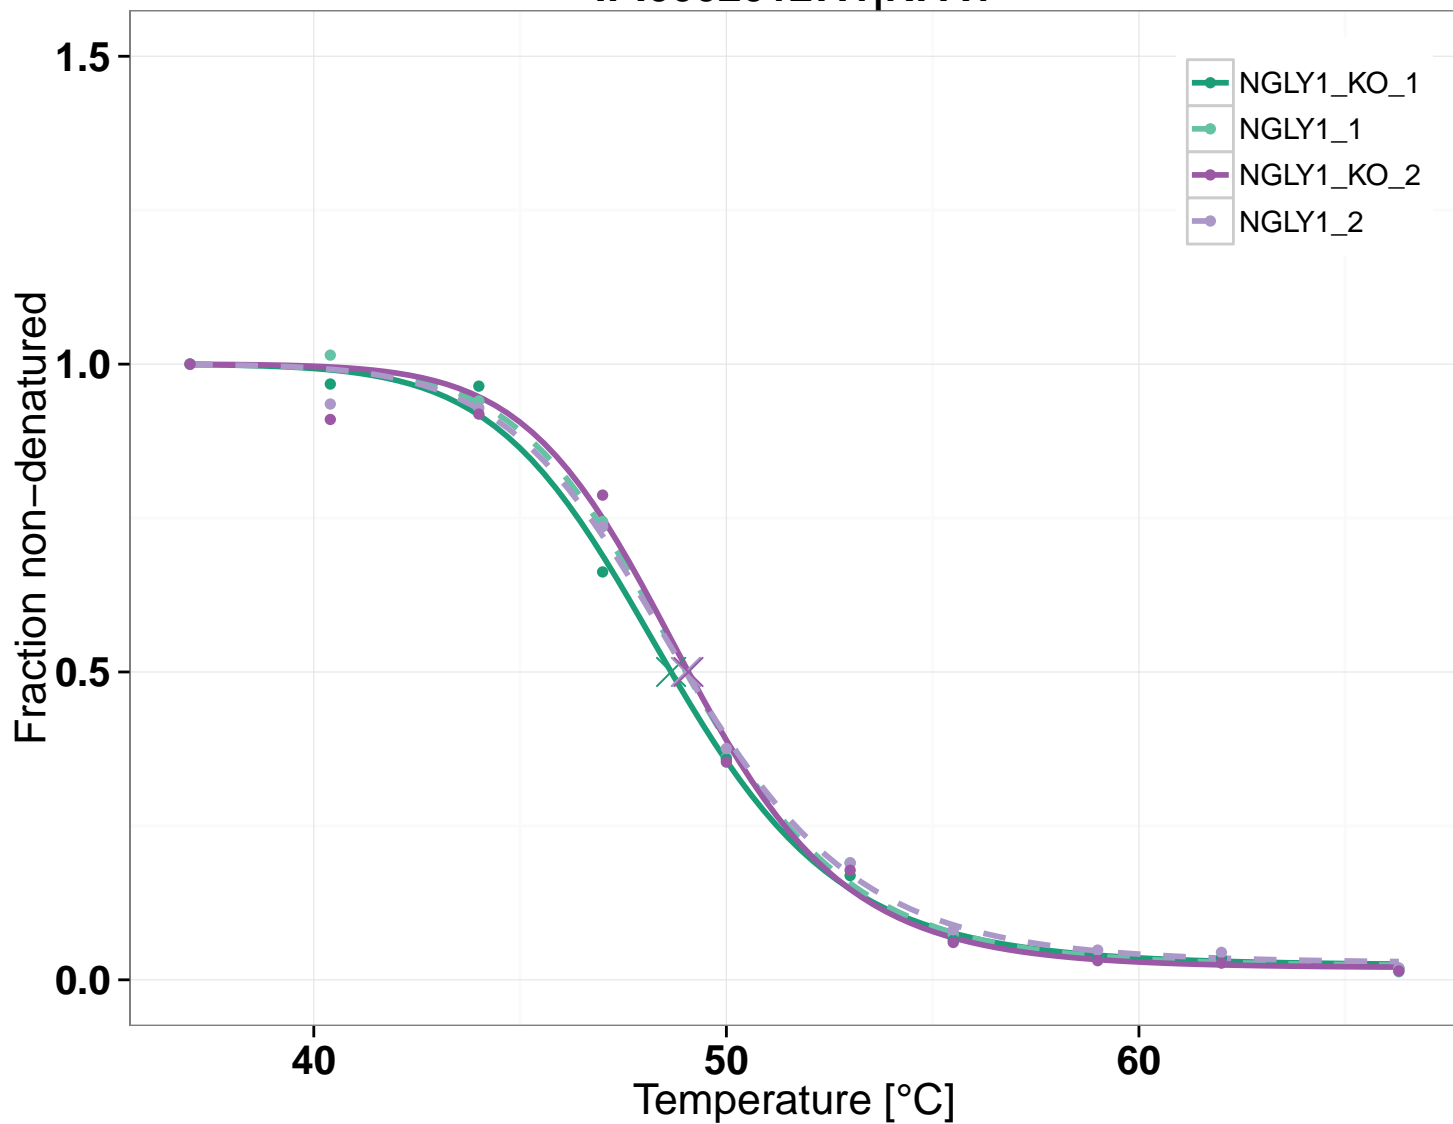

|            | meltPoint | slope | plateau | R2   |
|------------|-----------|-------|---------|------|
| NGLY1_KO_1 | 48.66     | -0.12 | 0.02    | 1    |
| NGLY1_1    | 49.02     | -0.12 | 0.02    | 1    |
| NGLY1_KO_2 | 49.08     | -0.13 | 0.02    | 0.99 |
| NGLY1_2    | 49.02     | -0.11 | 0.03    | 1    |

Supplement: Supplementary file 878 [file 1]

# IPI00012837.1|KIF5B

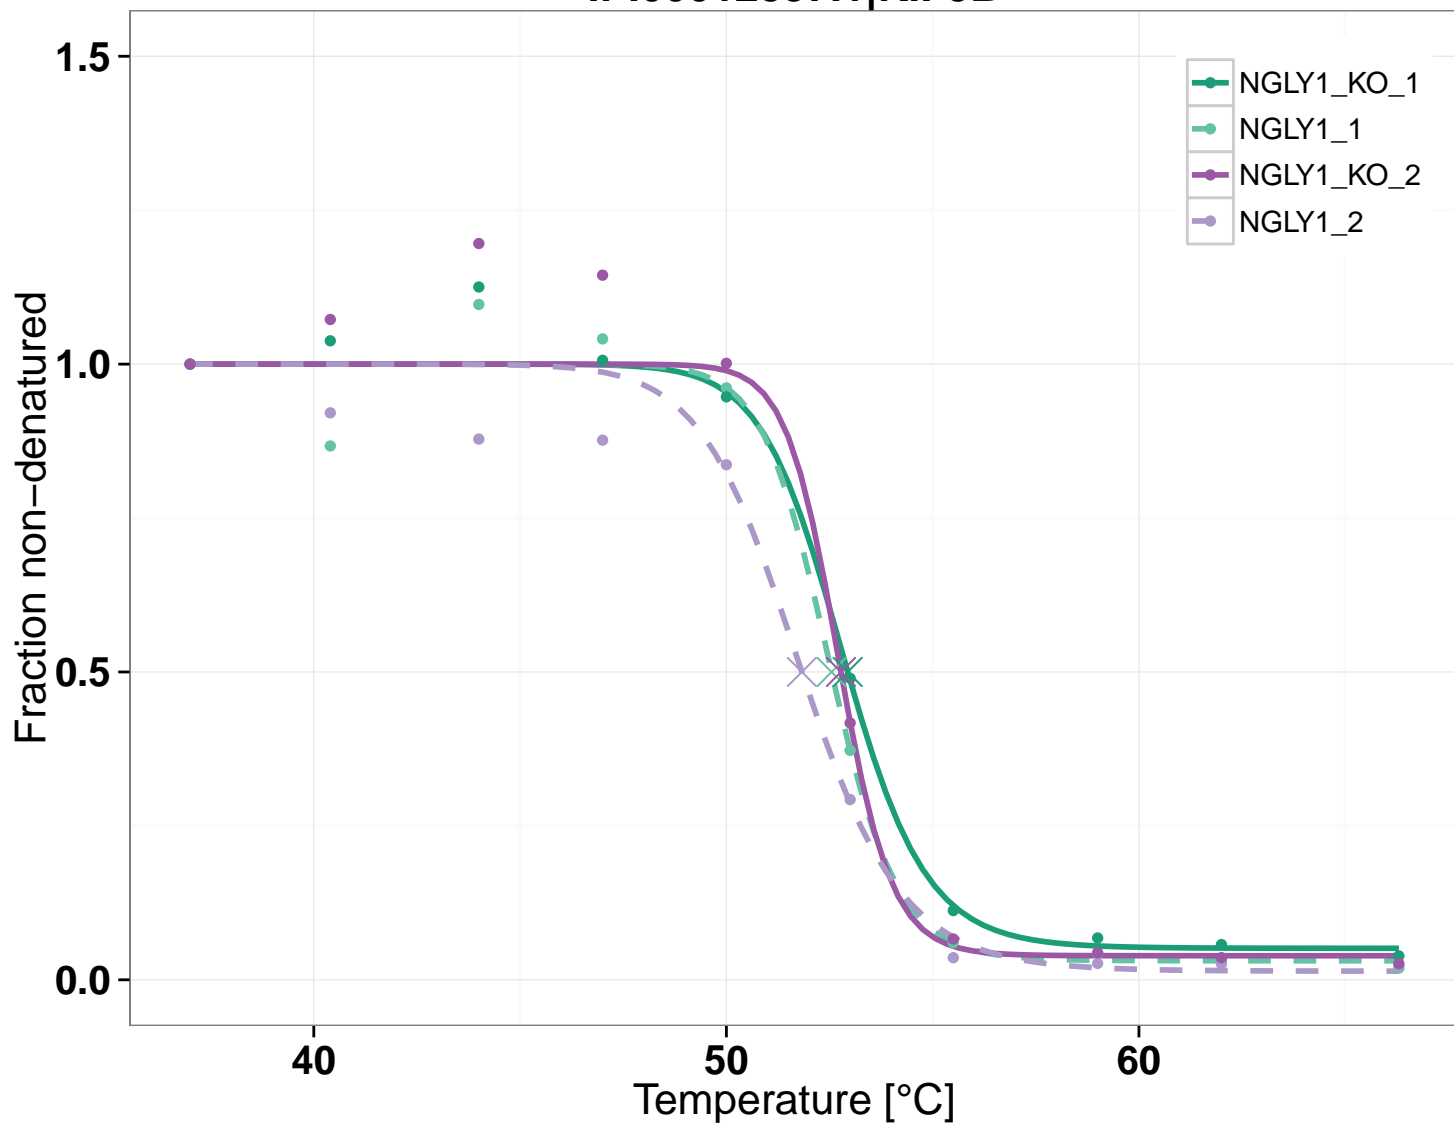

|            | meltPoint | slope | plateau | R2   |
|------------|-----------|-------|---------|------|
| NGLY1_KO_1 | 52.94     | -0.24 | 0.05    | 0.99 |
| NGLY1_1    | 52.55     | -0.3  | 0.03    | 0.99 |
| NGLY1_KO_2 | 52.78     | -0.38 | 0.04    | 0.97 |
| NGLY1_2    | 51.83     | -0.2  | 0.01    | 0.98 |

Supplement: Supplementary file 879 [file 1]

IPI00658145.3|C7ORF27

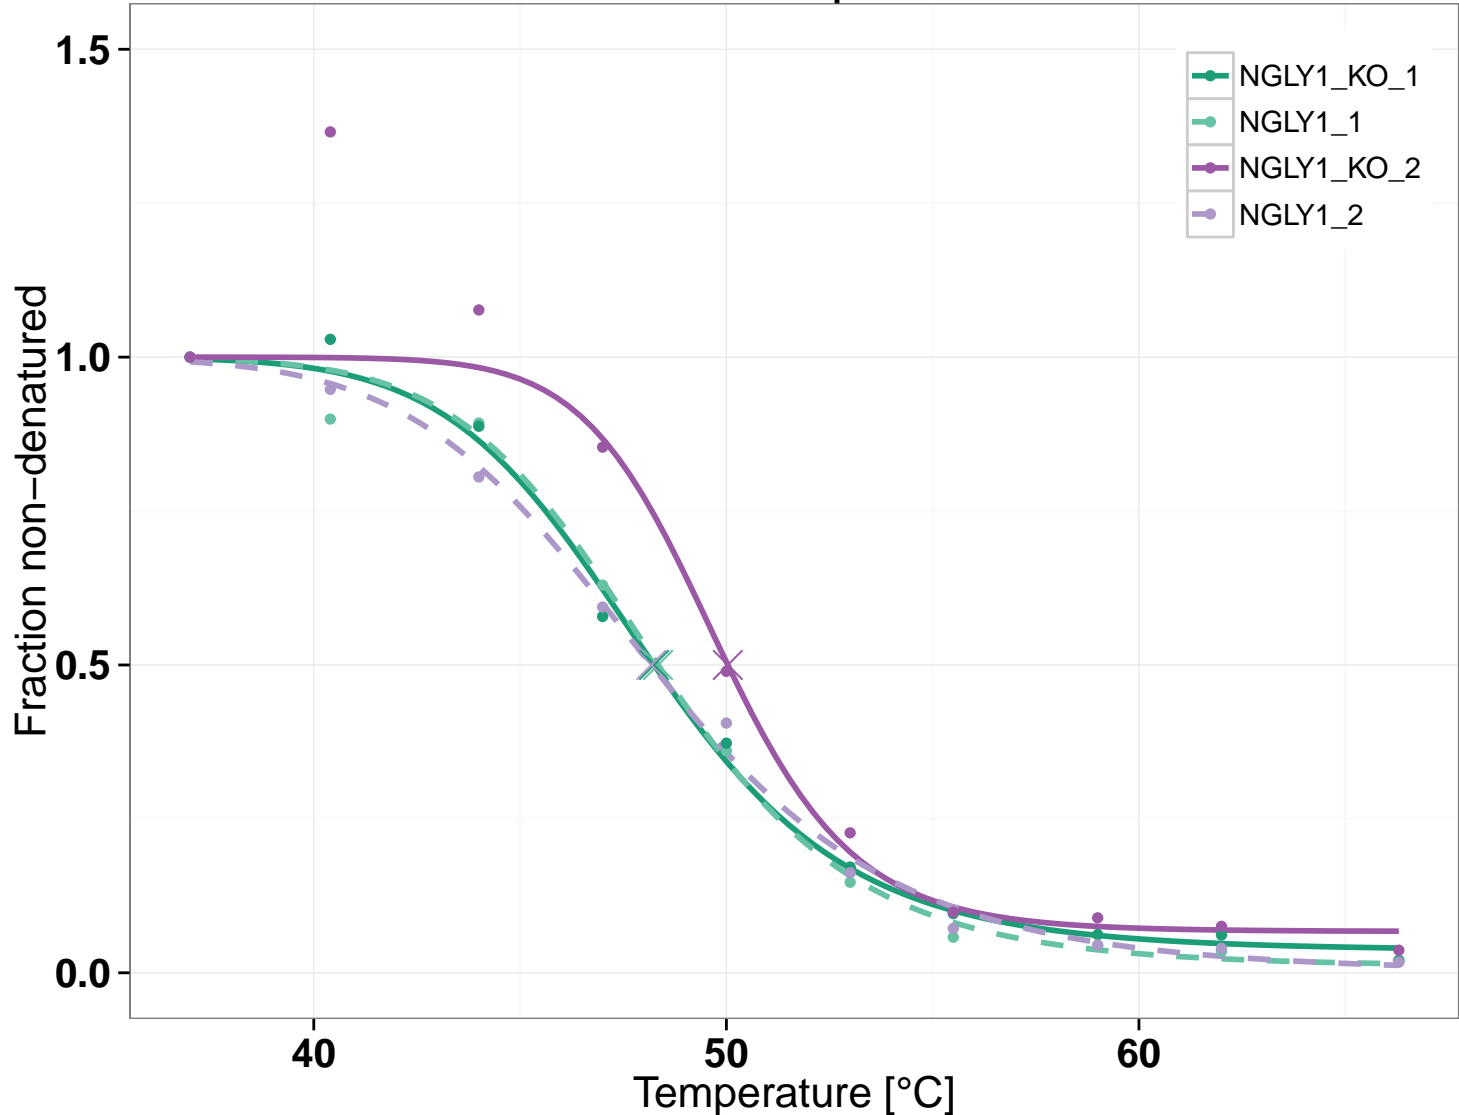

|            | meltPoint | slope  | plateau | R2   |
|------------|-----------|--------|---------|------|
| NGLY1_KO_1 | 48.25     | -0.099 | 0.04    | 1    |
| NGLY1_1    | 48.34     | -0.1   | 0.01    | 0.99 |
| NGLY1_KO_2 | 50.03     | -0.14  | 0.07    | 0.94 |
| NGLY1_2    | 48.18     | -0.085 | 0       | 1    |

Supplement: Supplementary file 880 [file 1]

IPI00847831.1|OTUD3

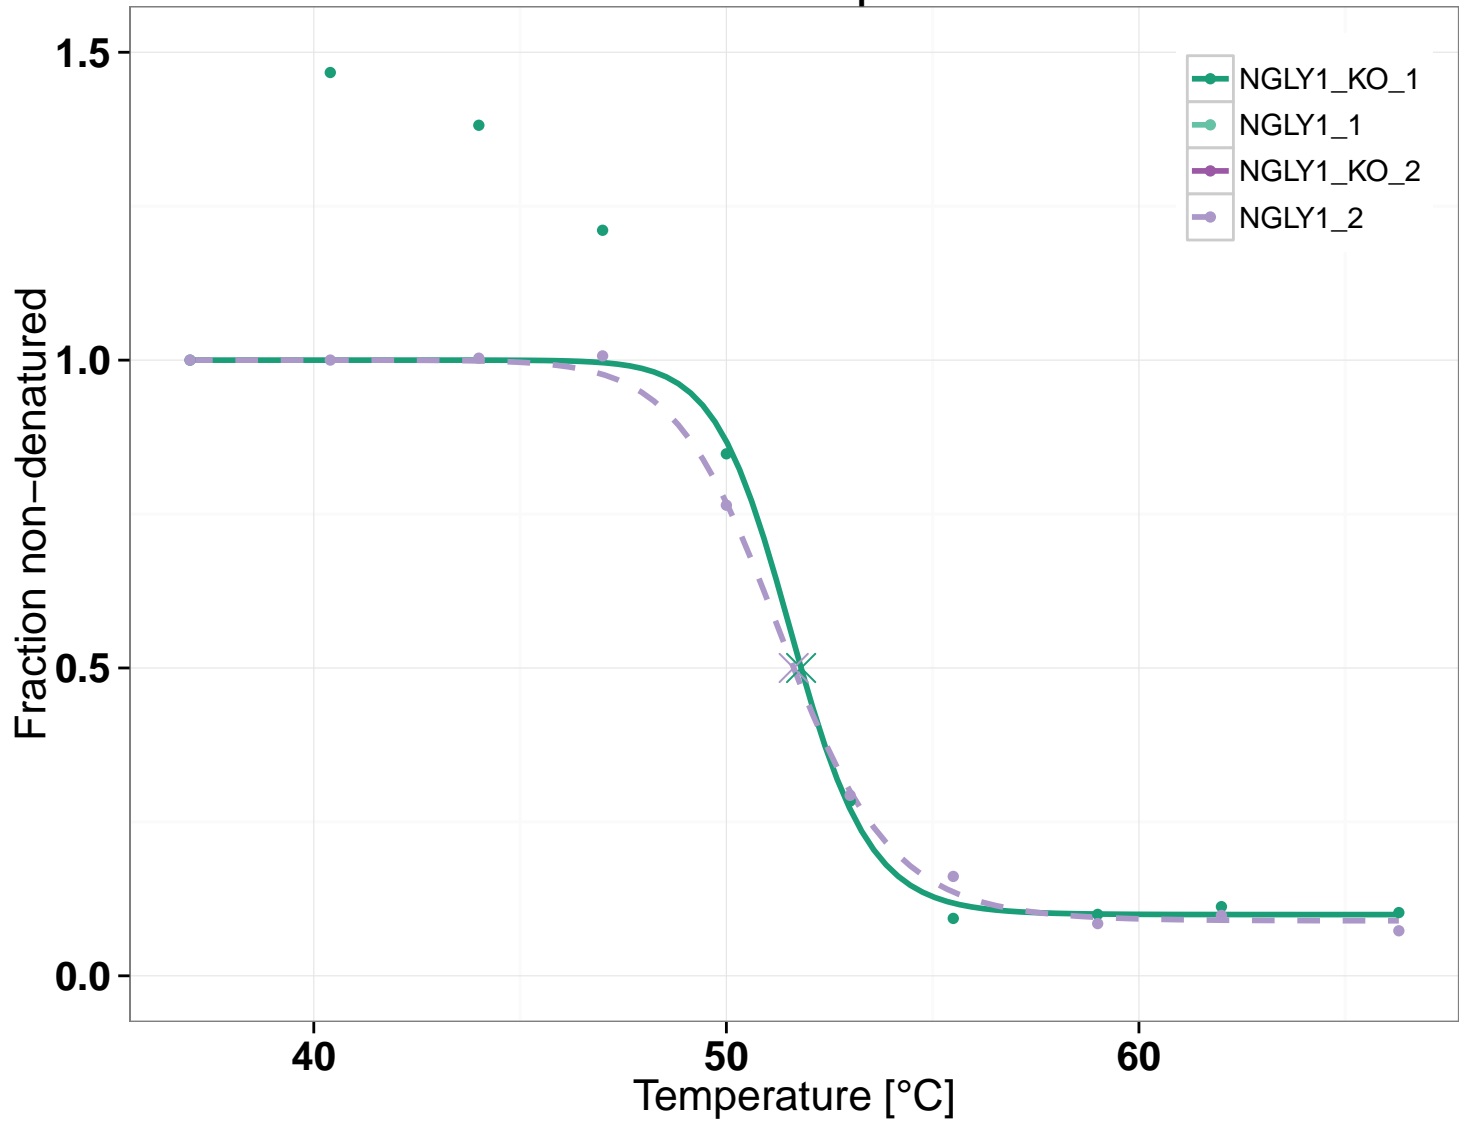

|            | meltPoint | slope | plateau | R2   |
|------------|-----------|-------|---------|------|
| NGLY1_KO_1 | 51.81     | -0.24 | 0.1     | 0.86 |
| NGLY1_1    | -         | -     | -       | -    |
| NGLY1_KO_2 | -         | -     | -       | -    |
| NGLY1_2    | 51.63     | -0.17 | 0.09    | 1    |

Supplement: Supplementary file 881 [file 1]

IPI00294158.1|BLVRA

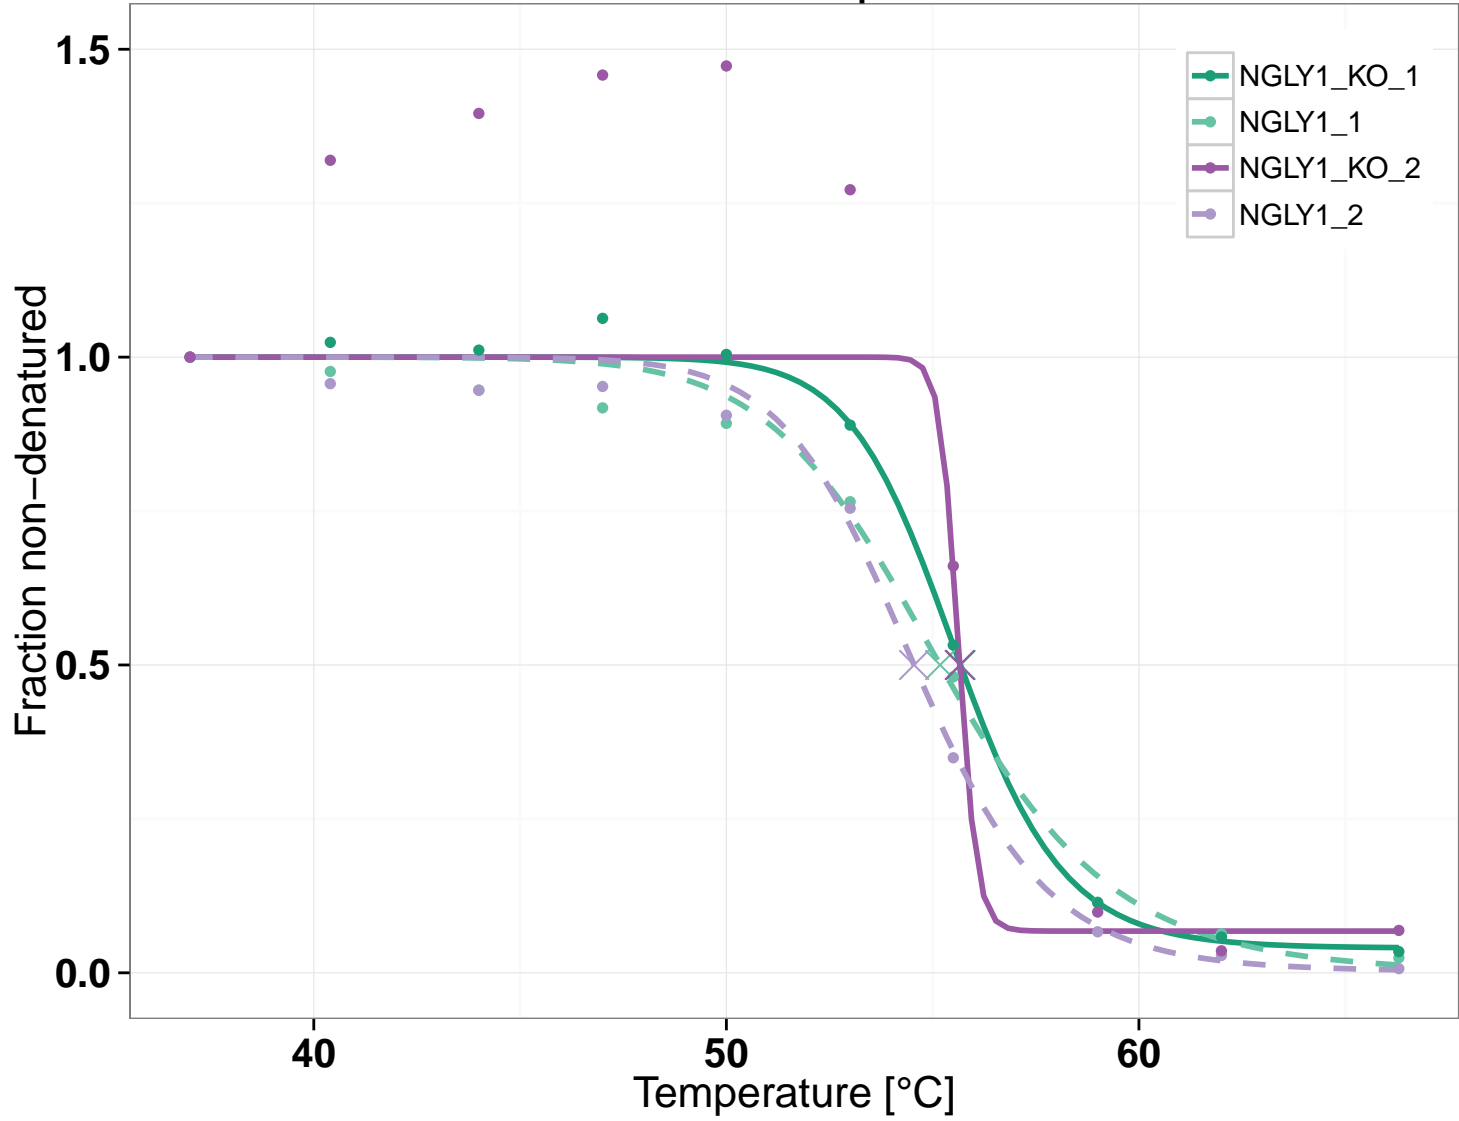

|            | meltPoint | slope | plateau | R2   |
|------------|-----------|-------|---------|------|
| NGLY1_KO_1 | 55.67     | -0.18 | 0.04    | 1    |
| NGLY1_1    | 55.18     | -0.12 | 0       | 0.99 |
| NGLY1_KO_2 | 55.66     | -1    | 0.07    | 0.77 |
| NGLY1_2    | 54.55     | -0.15 | 0       | 0.99 |

Supplement: Supplementary file 882 [file 1]

IPI00015866.2|ARL2BP

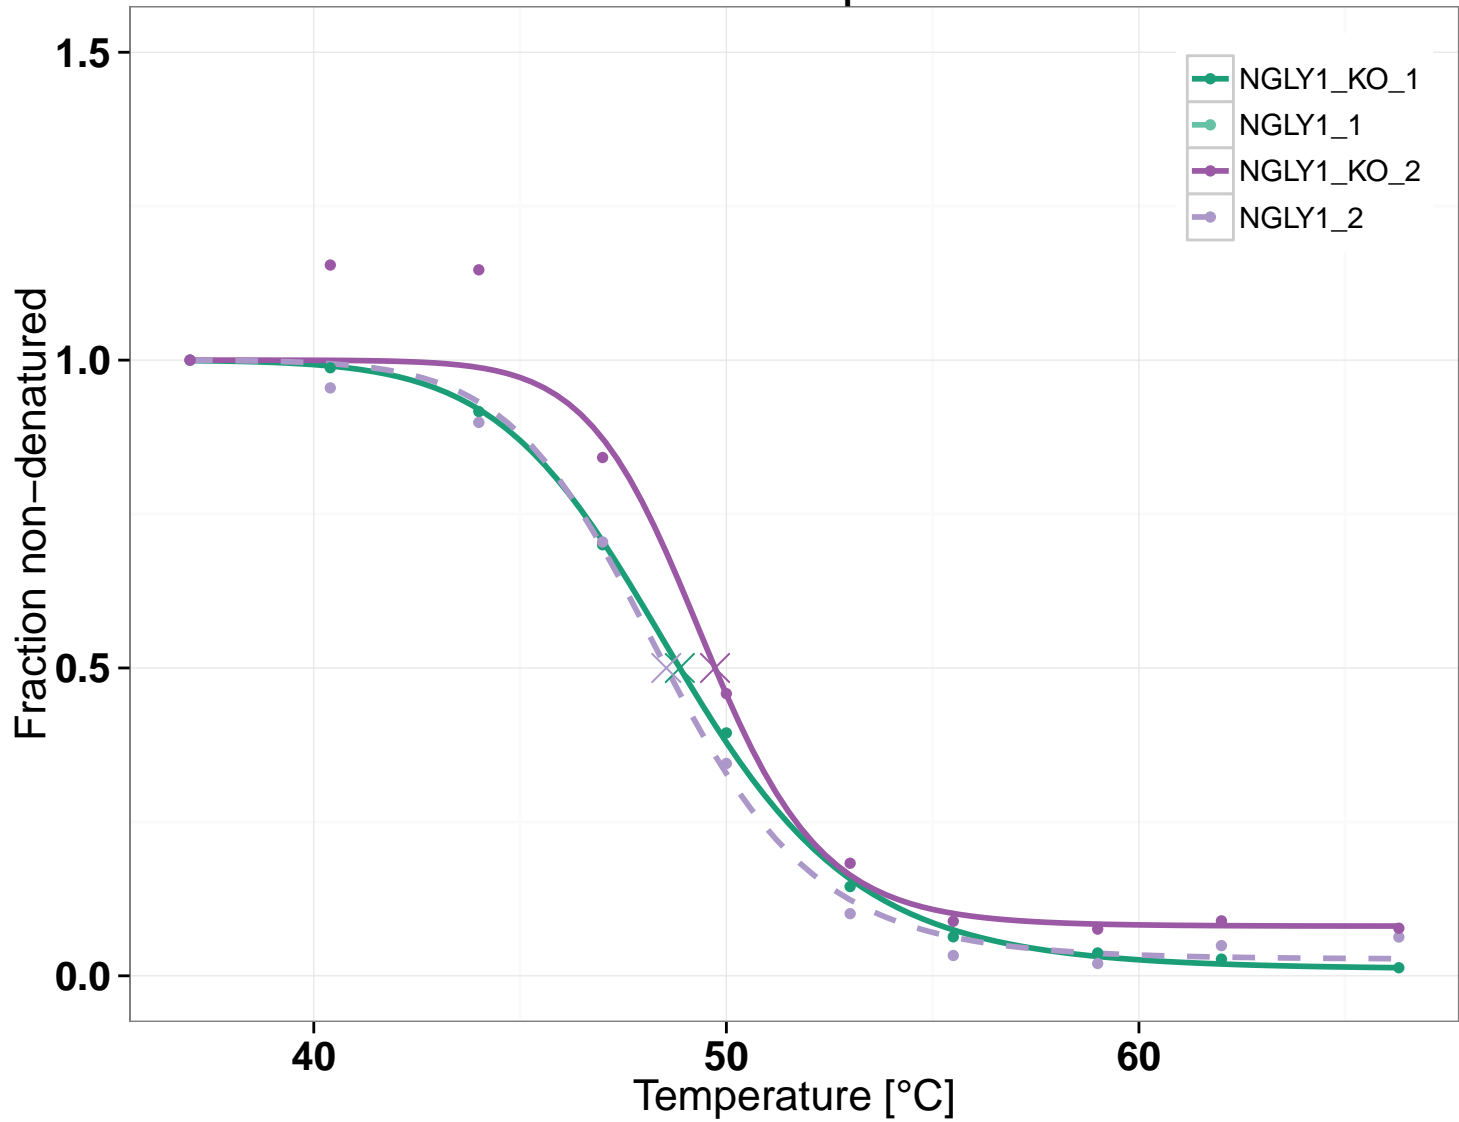

|            | meltPoint | slope | plateau | R2   |
|------------|-----------|-------|---------|------|
| NGLY1_KO_1 | 48.87     | -0.11 | 0.01    | 1    |
| NGLY1_1    | -         | -     | -       | -    |
| NGLY1_KO_2 | 49.72     | -0.16 | 0.08    | 0.97 |
| NGLY1_2    | 48.54     | -0.13 | 0.03    | 1    |

Supplement: Supplementary file 883 [file 1]

IPI00644529.1|ZNF615

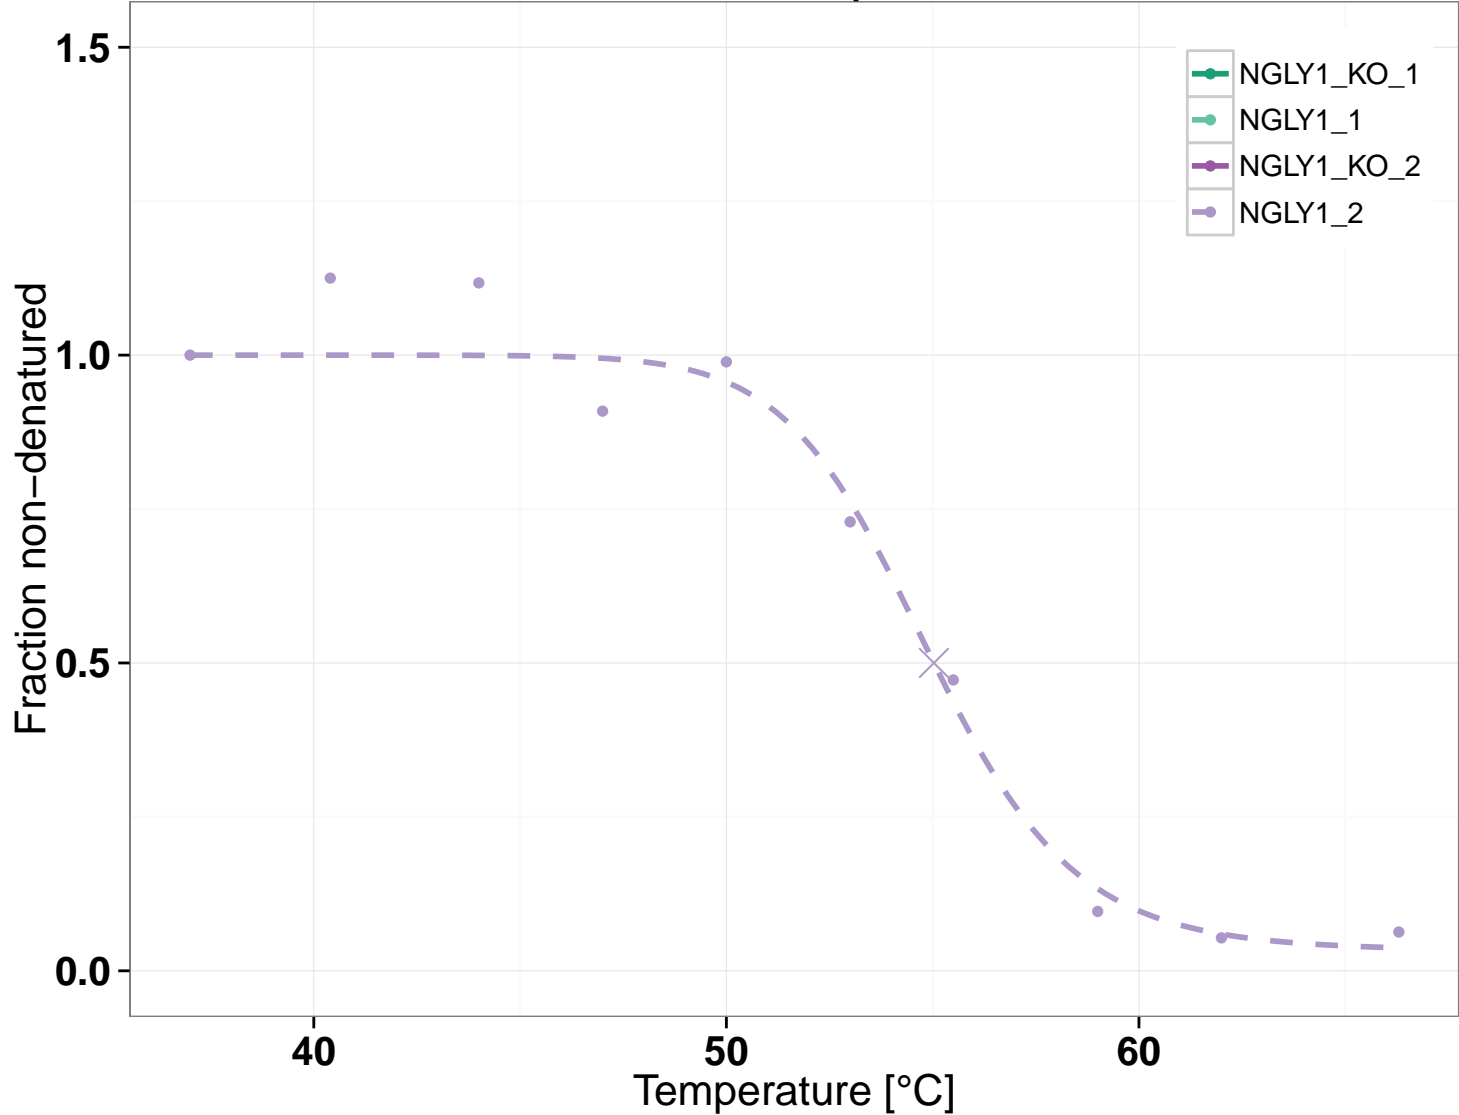

|            | meltPoint | slope | plateau | R2   |
|------------|-----------|-------|---------|------|
| NGLY1_KO_1 | -         | -     | -       | -    |
| NGLY1_1    | -         | -     | -       | -    |
| NGLY1_KO_2 | -         | -     | -       | -    |
| NGLY1_2    | 55.03     | -0.14 | 0.03    | 0.98 |

Supplement: Supplementary file 884 [file 1]

IPI00027120.1|CDC34

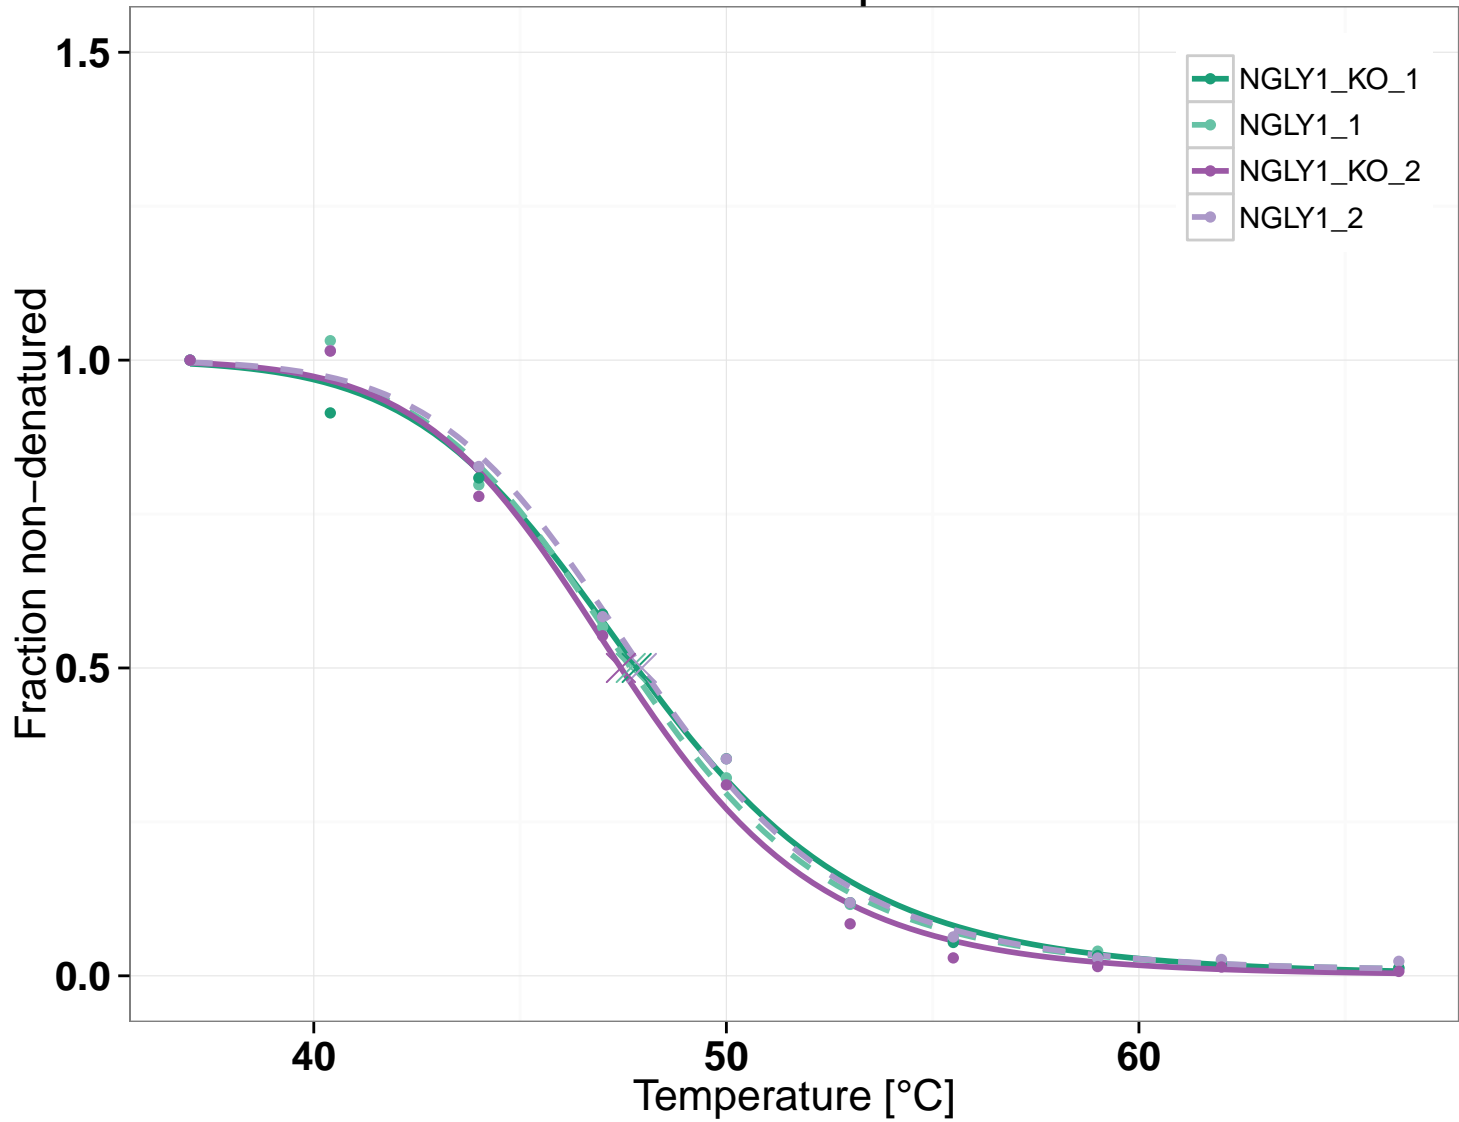

|            | meltPoint | slope  | plateau | R2 |
|------------|-----------|--------|---------|----|
| NGLY1_KO_1 | 47.83     | -0.093 | 0       | 1  |
| NGLY1_1    | 47.68     | -0.1   | 0.01    | 1  |
| NGLY1_KO_2 | 47.44     | -0.1   | 0       | 1  |
| NGLY1_2    | 47.95     | -0.1   | 0.01    | 1  |

Supplement: Supplementary file 885 [file 1]

# IPI00011604.1|GCSH

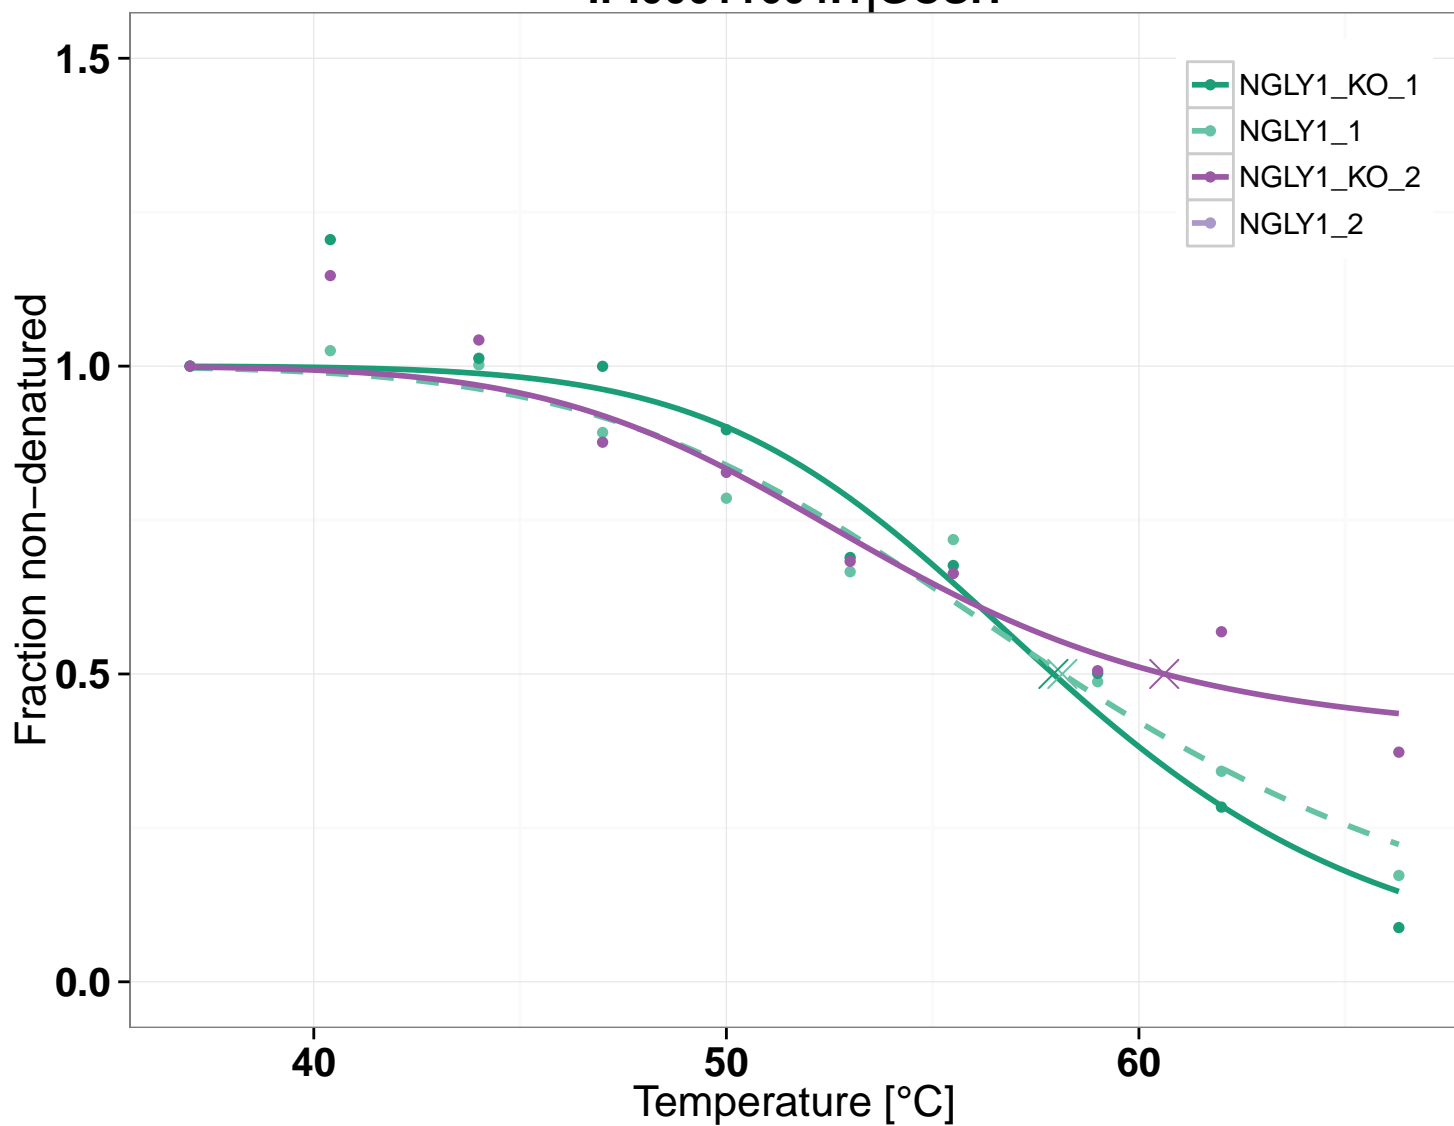

|            | meltPoint | slope  | plateau | R2   |
|------------|-----------|--------|---------|------|
| NGLY1_KO_1 | 57.93     | -0.061 | 0       | 0.95 |
| NGLY1_1    | 58.14     | -0.045 | 0       | 0.97 |
| NGLY1_KO_2 | 60.61     | -0.039 | 0.39    | 0.92 |
| NGLY1_2    | —         | —      | —       | —    |

Supplement: Supplementary file 886 [file 1]

IPI00028031.2|ACADVL

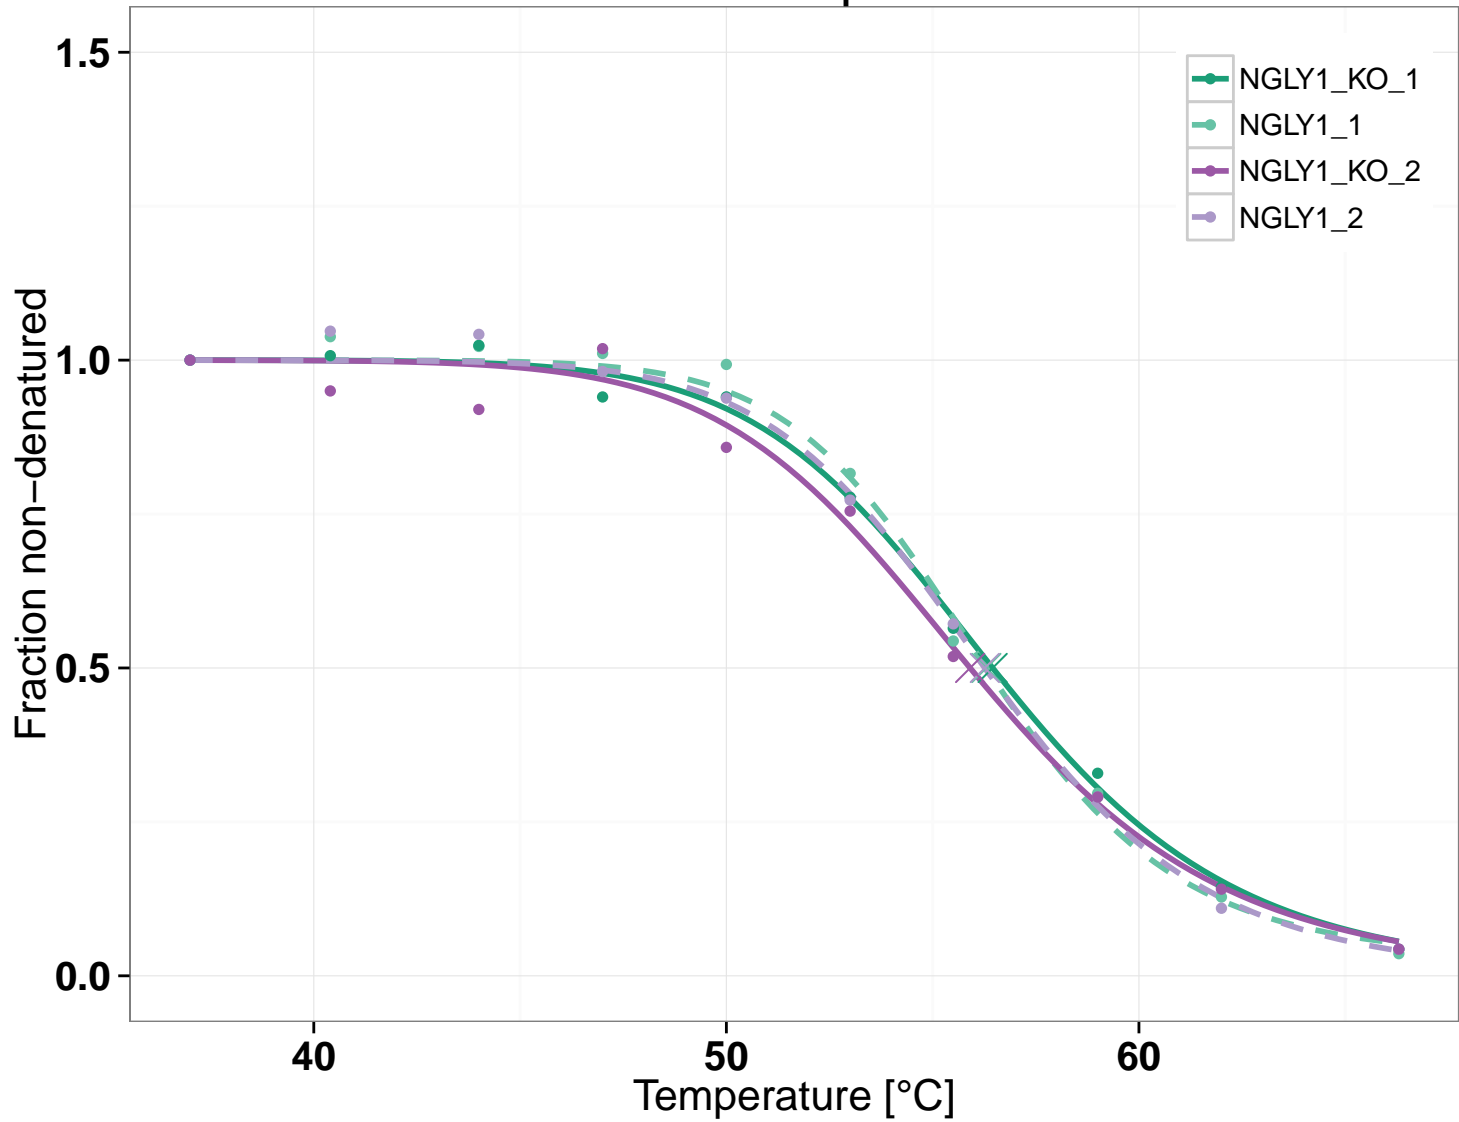

|            | meltPoint | slope  | plateau | R2   |
|------------|-----------|--------|---------|------|
| NGLY1_KO_1 | 56.45     | -0.085 | 0       | 1    |
| NGLY1_1    | 56.3      | -0.1   | 0.03    | 1    |
| NGLY1_KO_2 | 55.91     | -0.082 | 0       | 0.99 |
| NGLY1_2    | 56.26     | -0.094 | 0       | 1    |

Supplement: Supplementary file 887 [file 1]

IPI00299193.1|SYNJ2BP

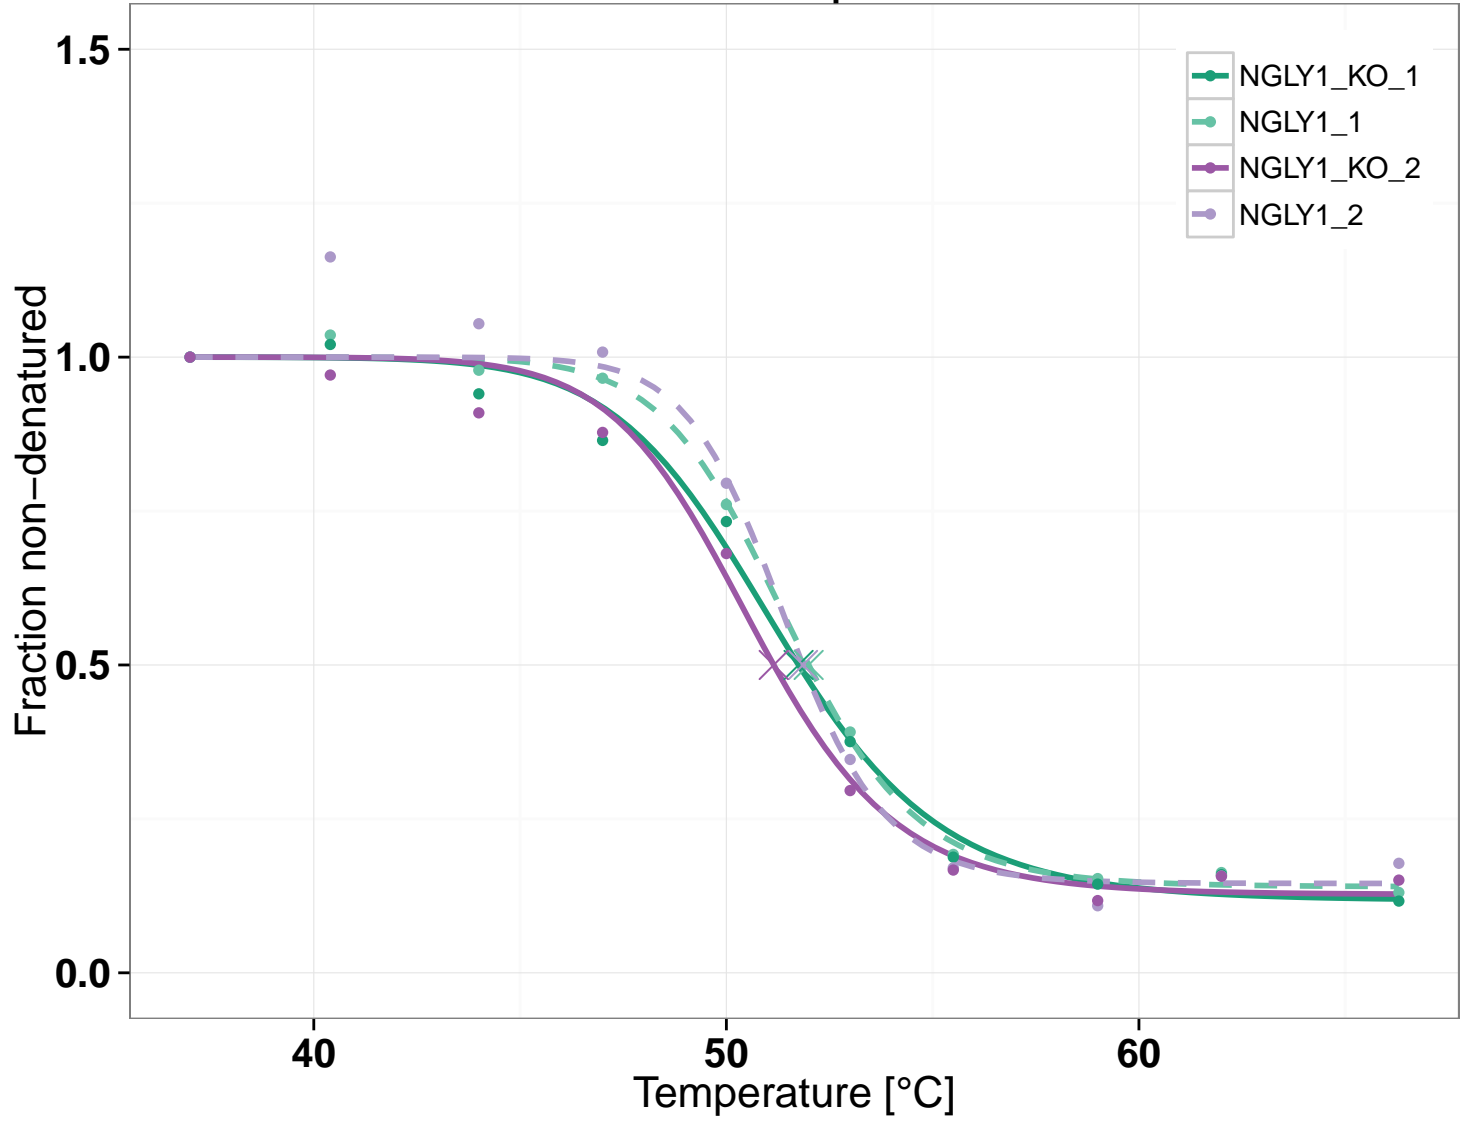

|            | meltPoint | slope | plateau | R2   |
|------------|-----------|-------|---------|------|
| NGLY1_KO_1 | 51.75     | -0.11 | 0.12    | 0.99 |
| NGLY1_1    | 51.99     | -0.14 | 0.14    | 1    |
| NGLY1_KO_2 | 51.15     | -0.13 | 0.13    | 0.99 |
| NGLY1_2    | 51.86     | -0.18 | 0.15    | 0.98 |

Supplement: Supplementary file 888 [file 1]

# IPI00300094.6|LSG1

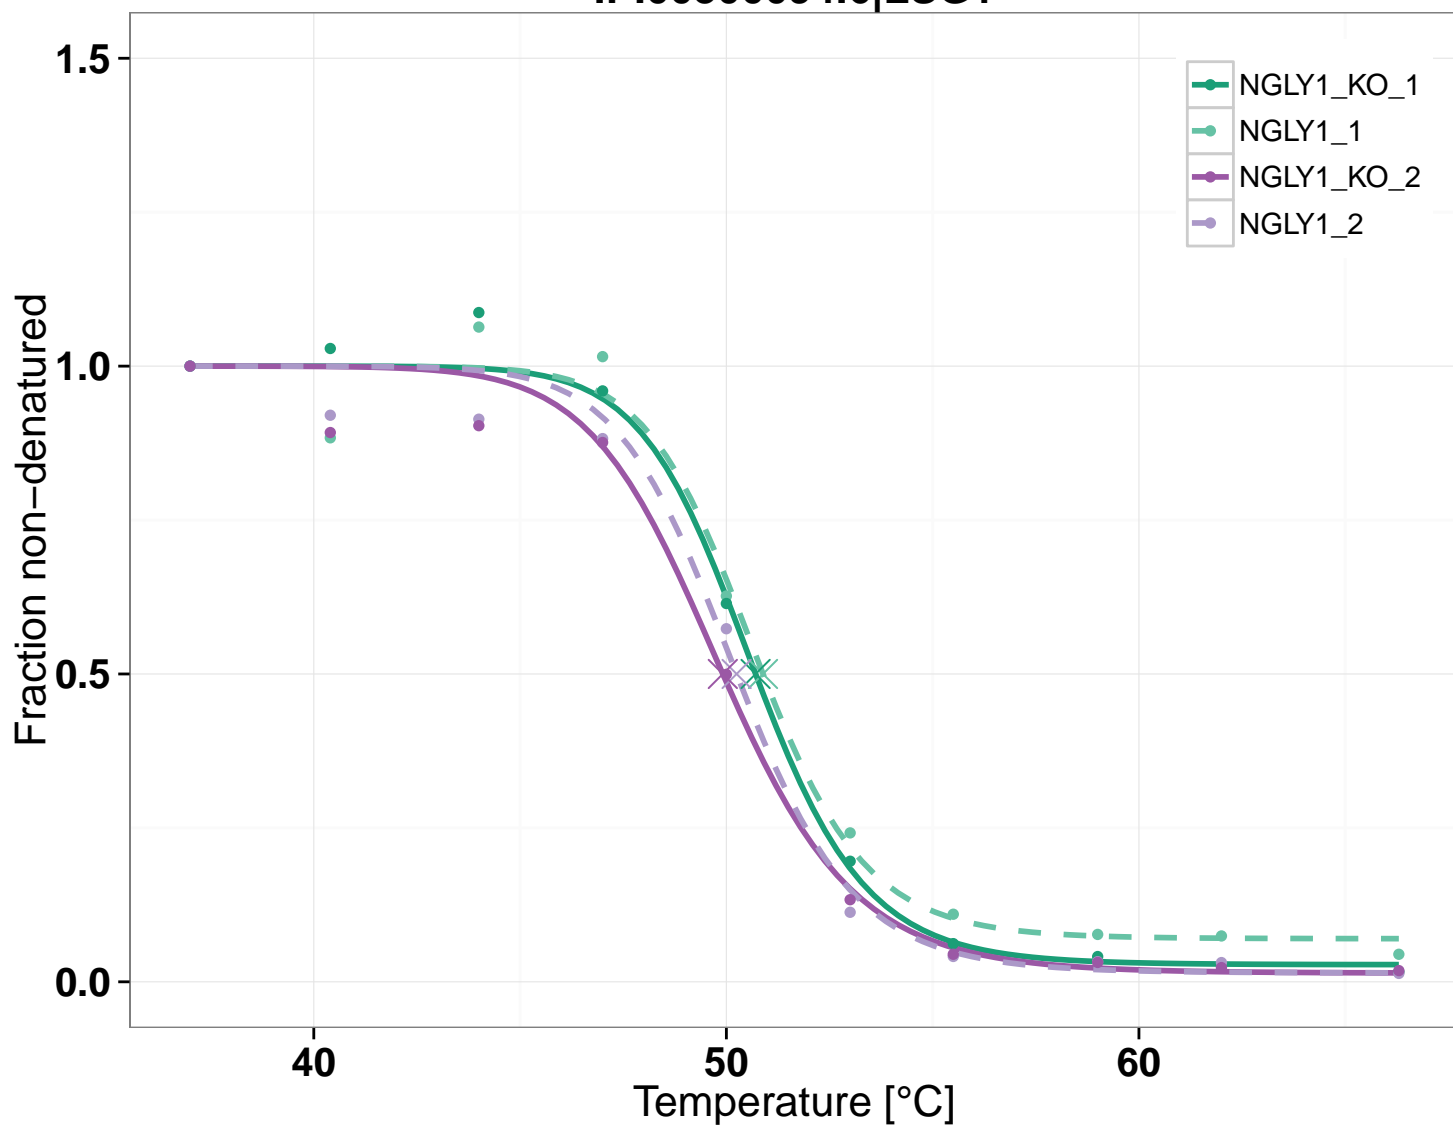

|            | meltPoint | slope | plateau | R2   |
|------------|-----------|-------|---------|------|
| NGLY1_KO_1 | 50.71     | -0.18 | 0.03    | 1    |
| NGLY1_1    | 50.89     | -0.17 | 0.07    | 0.99 |
| NGLY1_KO_2 | 49.91     | -0.15 | 0.01    | 0.99 |
| NGLY1_2    | 50.25     | -0.17 | 0.01    | 0.99 |

Supplement: Supplementary file 889 [file 1]

IPI00645702.1|CTPS2

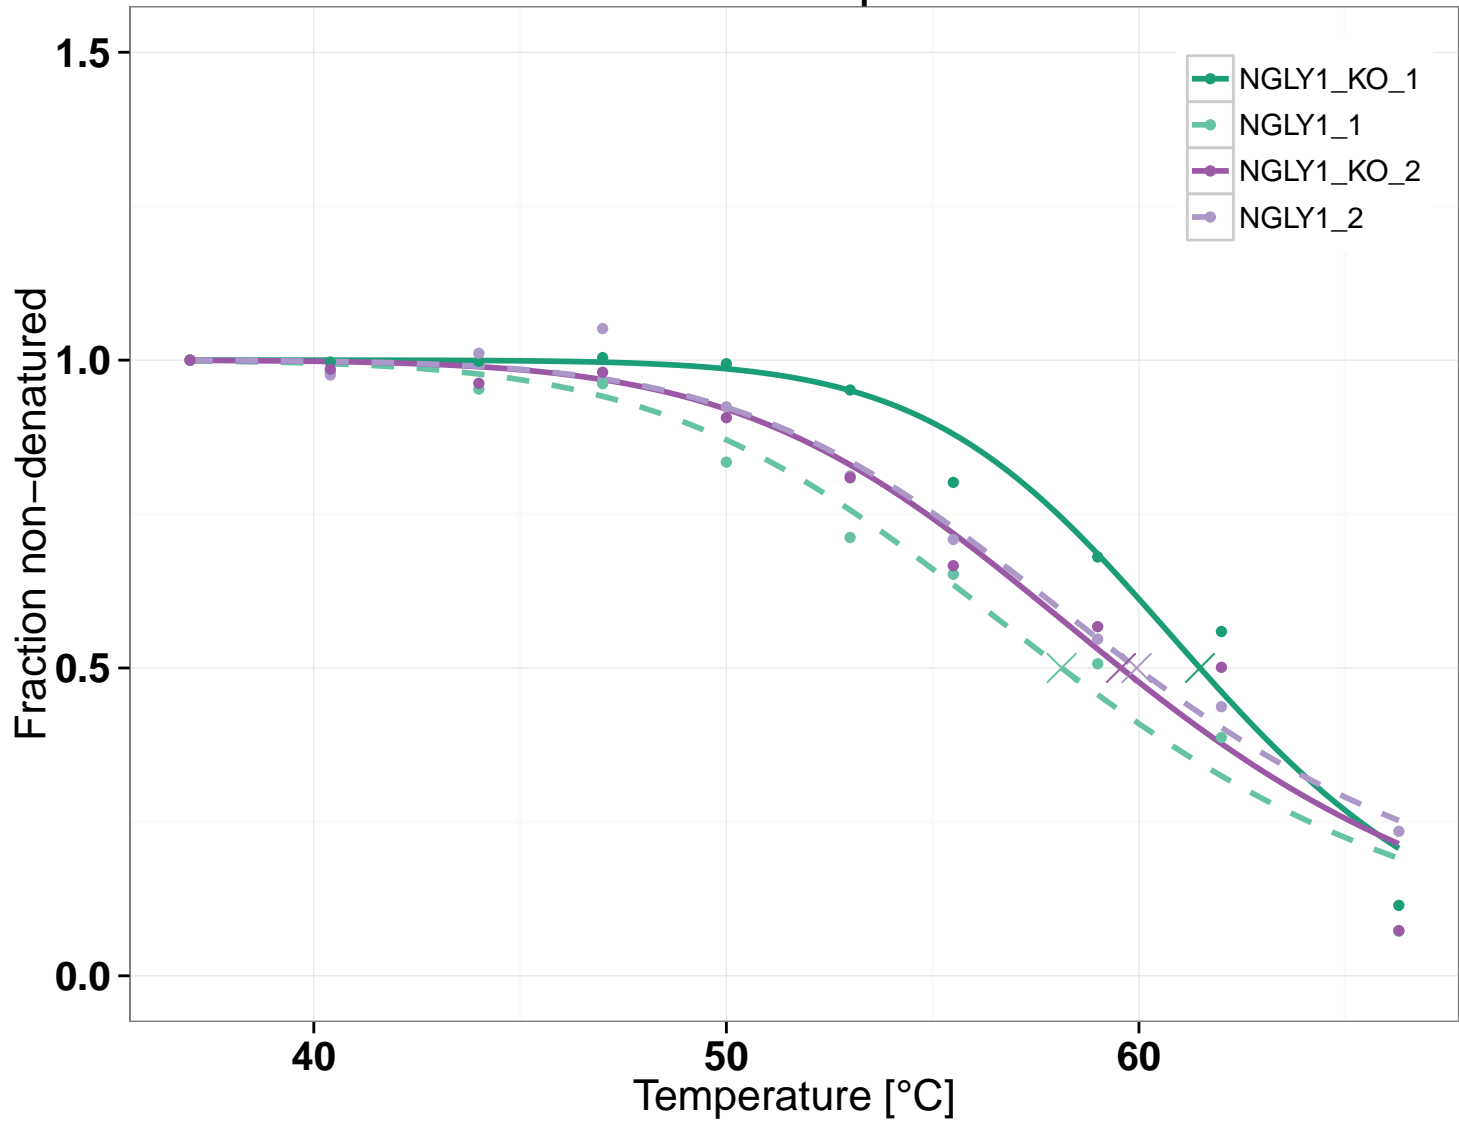

|            | meltPoint | slope  | plateau | R2   |
|------------|-----------|--------|---------|------|
| NGLY1_KO_1 | 61.48     | -0.076 | 0       | 0.97 |
| NGLY1_1    | 58.13     | -0.052 | 0       | 0.97 |
| NGLY1_KO_2 | 59.57     | -0.055 | 0       | 0.95 |
| NGLY1_2    | 59.94     | -0.053 | 0.06    | 0.99 |

Supplement: Supplementary file 890 [file 1]

IPI00549666.1|GRPEL2

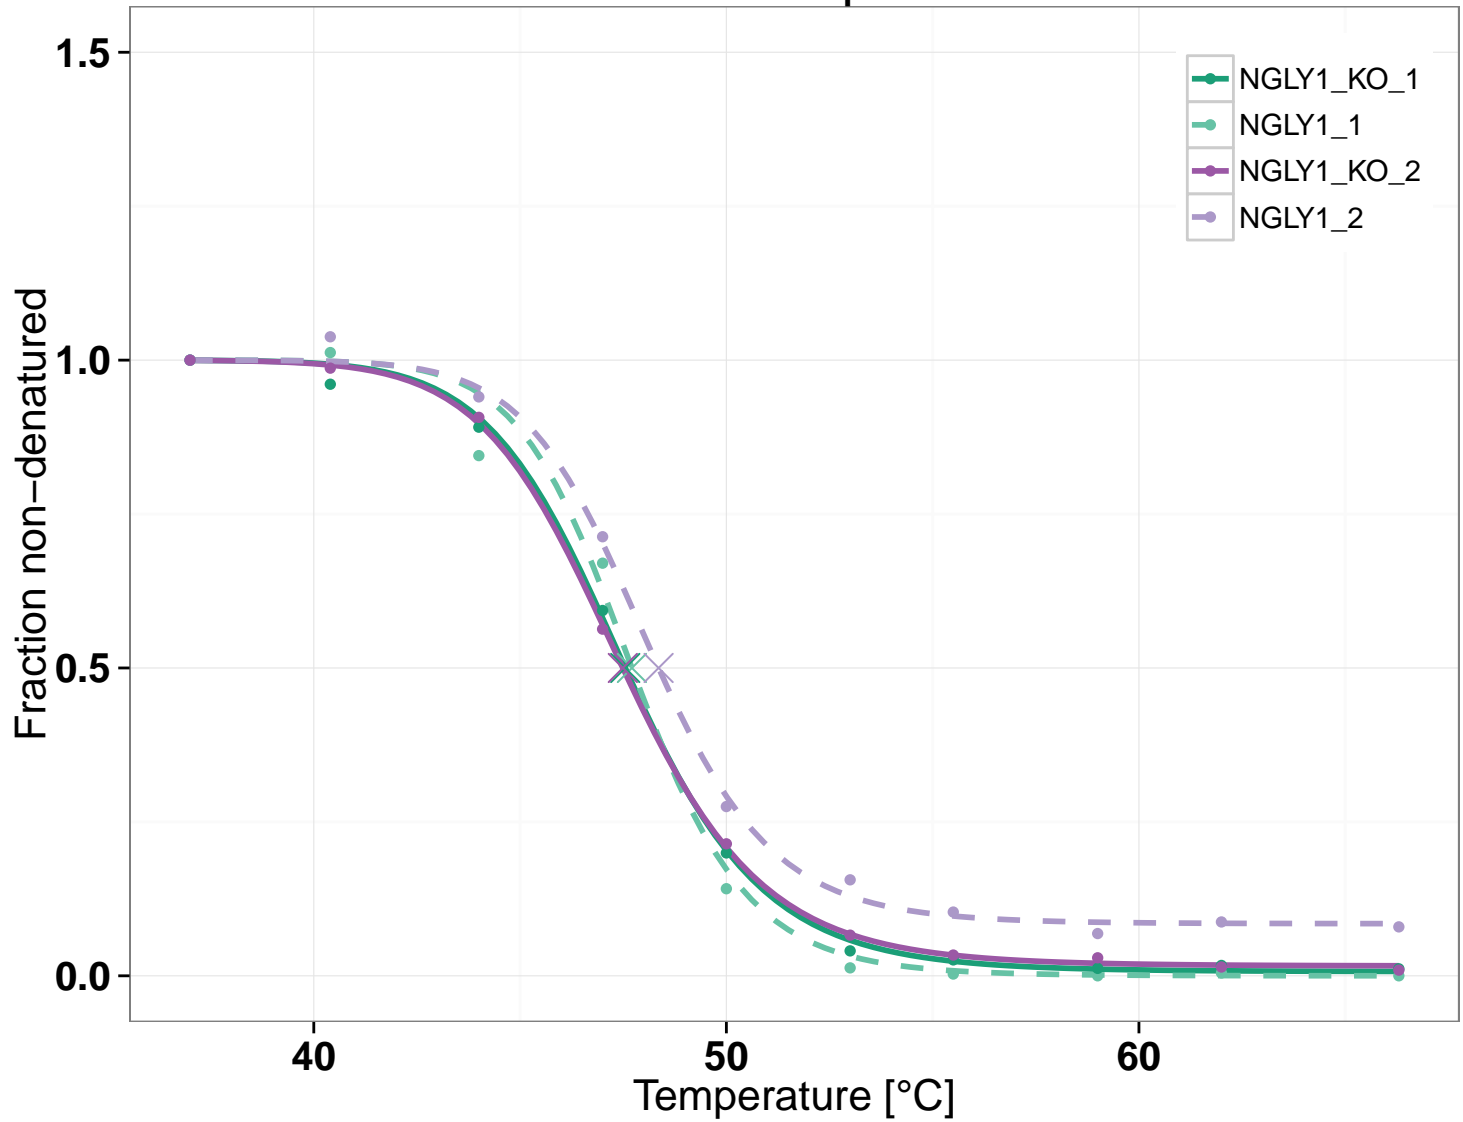

|            | meltPoint | slope | plateau | R2   |
|------------|-----------|-------|---------|------|
| NGLY1_KO_1 | 47.55     | -0.15 | 0.01    | 1    |
| NGLY1_1    | 47.71     | -0.18 | 0       | 0.99 |
| NGLY1_KO_2 | 47.49     | -0.14 | 0.02    | 1    |
| NGLY1_2    | 48.36     | -0.15 | 0.08    | 1    |

Supplement: Supplementary file 891 [file 1]

IPI00005836.2|PIAS2

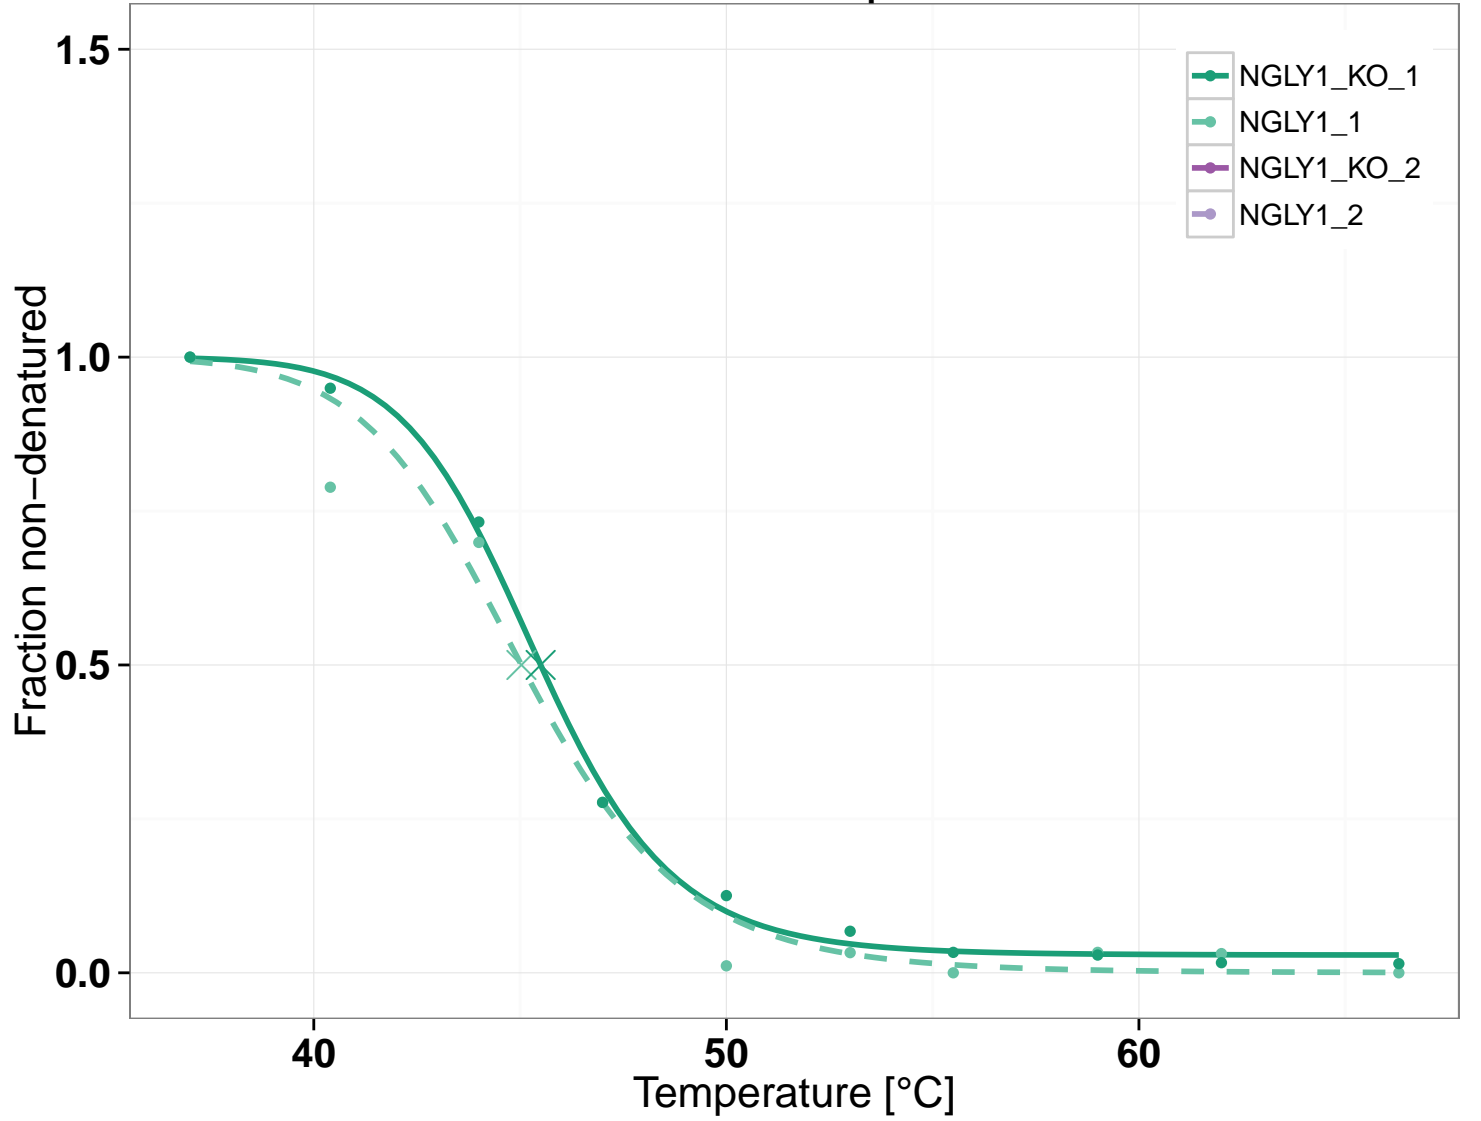

|            | meltPoint | slope | plateau | R2   |
|------------|-----------|-------|---------|------|
| NGLY1_KO_1 | 45.5      | -0.15 | 0.03    | 1    |
| NGLY1_1    | 45.03     | -0.13 | 0       | 0.98 |
| NGLY1_KO_2 | -         | -     | -       | -    |
| NGLY1_2    | -         | -     | -       | -    |

Supplement: Supplementary file 892 [file 1]

# IPI00006108.3|MAML1

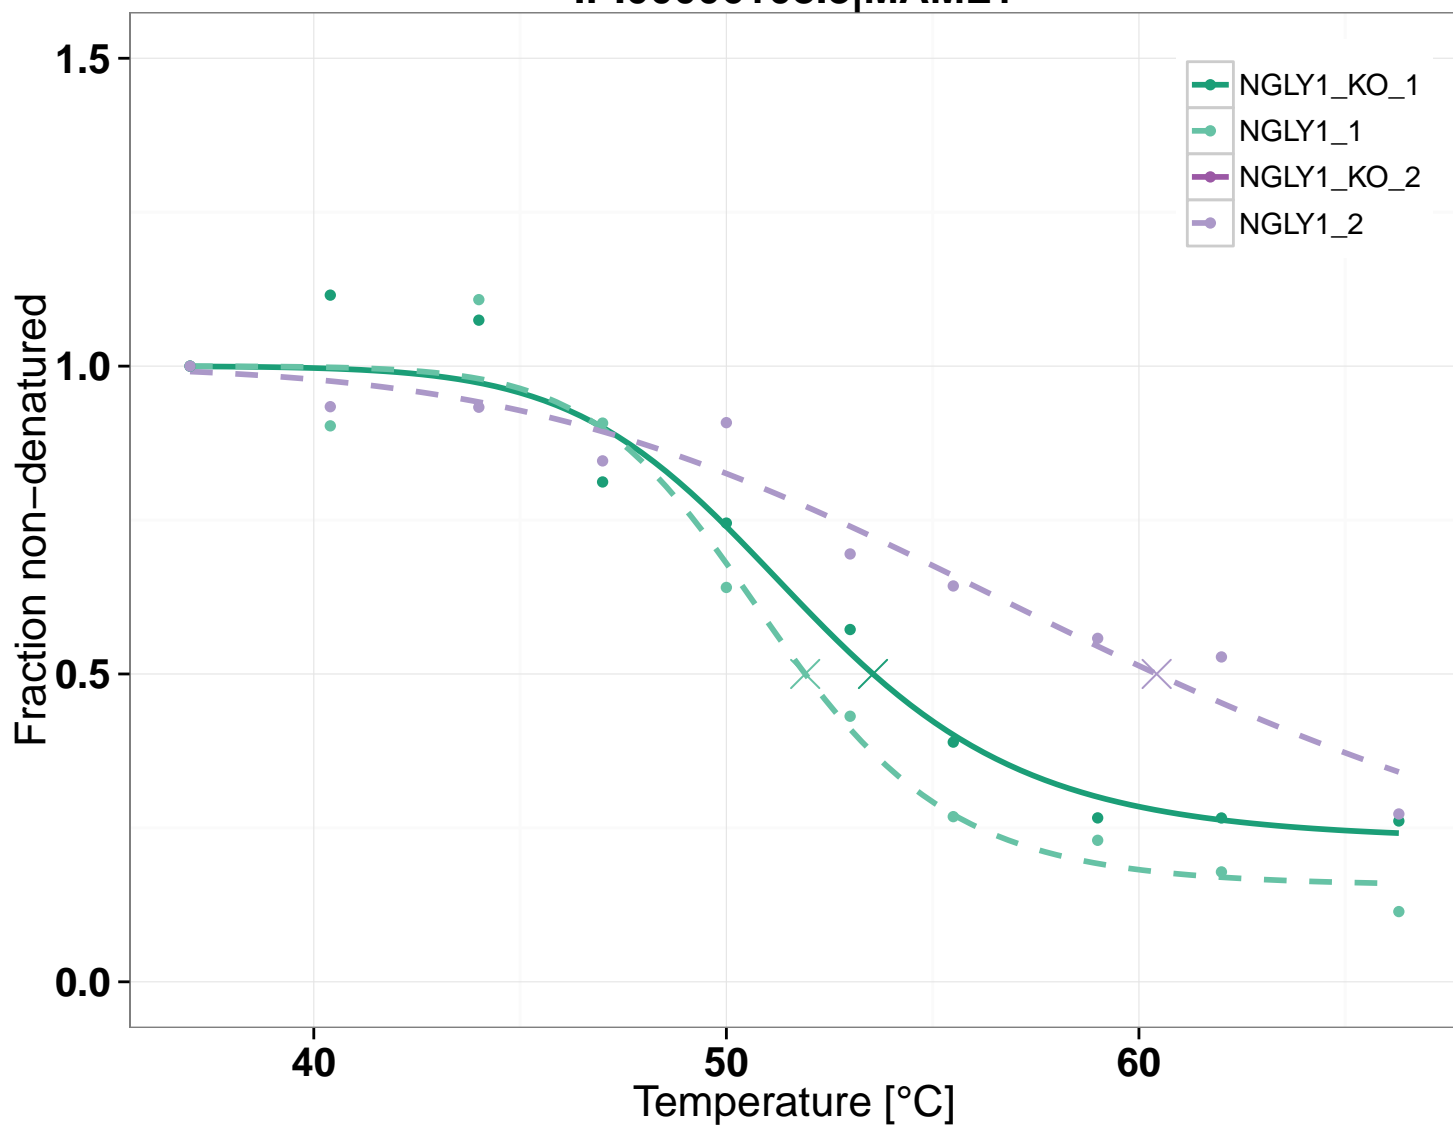

|            | meltPoint | slope  | plateau | R2   |
|------------|-----------|--------|---------|------|
| NGLY1_KO_1 | 53.55     | -0.07  | 0.23    | 0.97 |
| NGLY1_1    | 51.91     | -0.096 | 0.16    | 0.98 |
| NGLY1_KO_2 | -         | -      | -       | -    |
| NGLY1_2    | 60.43     | -0.033 | 0       | 0.95 |

Supplement: Supplementary file 893 [file 1]

# IPI00908931.1|PDCD5

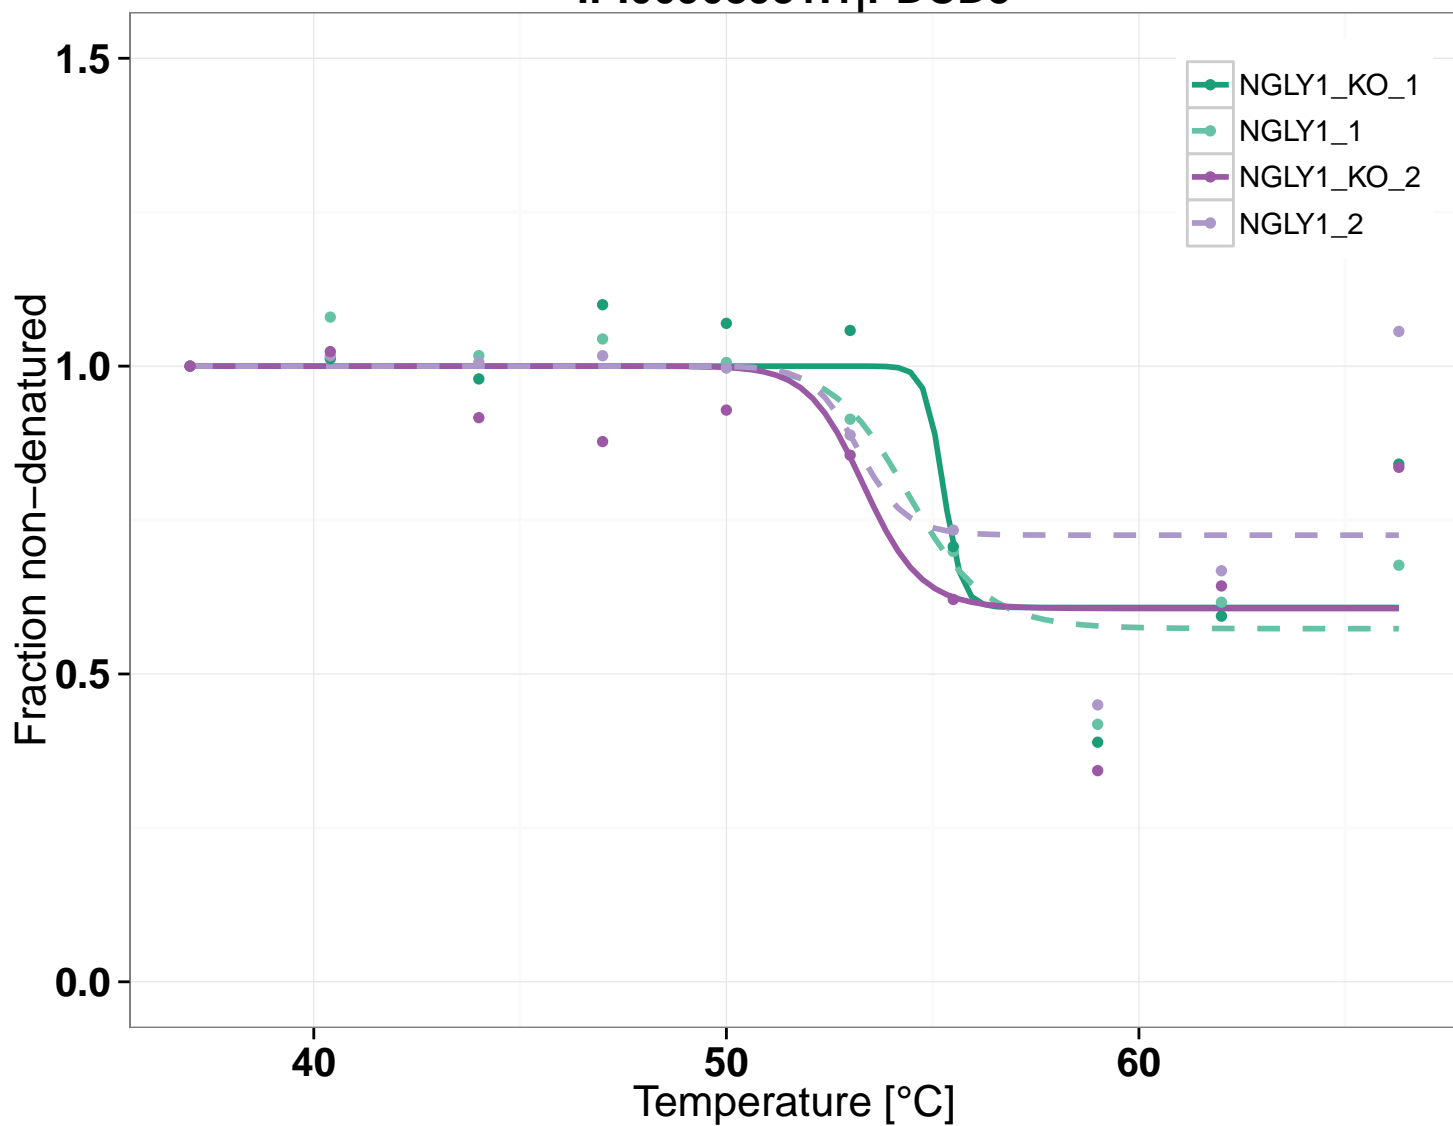

|            | meltPoint | slope | plateau | R2   |
|------------|-----------|-------|---------|------|
| NGLY1_KO_1 | —         | −0.44 | 0.61    | 0.76 |
| NGLY1_1    | —         | −0.12 | 0.57    | 0.9  |
| NGLY1_KO_2 | —         | −0.14 | 0.61    | 0.62 |
| NGLY1_2    | —         | −0.12 | 0.73    | 0.48 |

Supplement: Supplementary file 894 [file 1]

# IPI00032955.1|RNF114

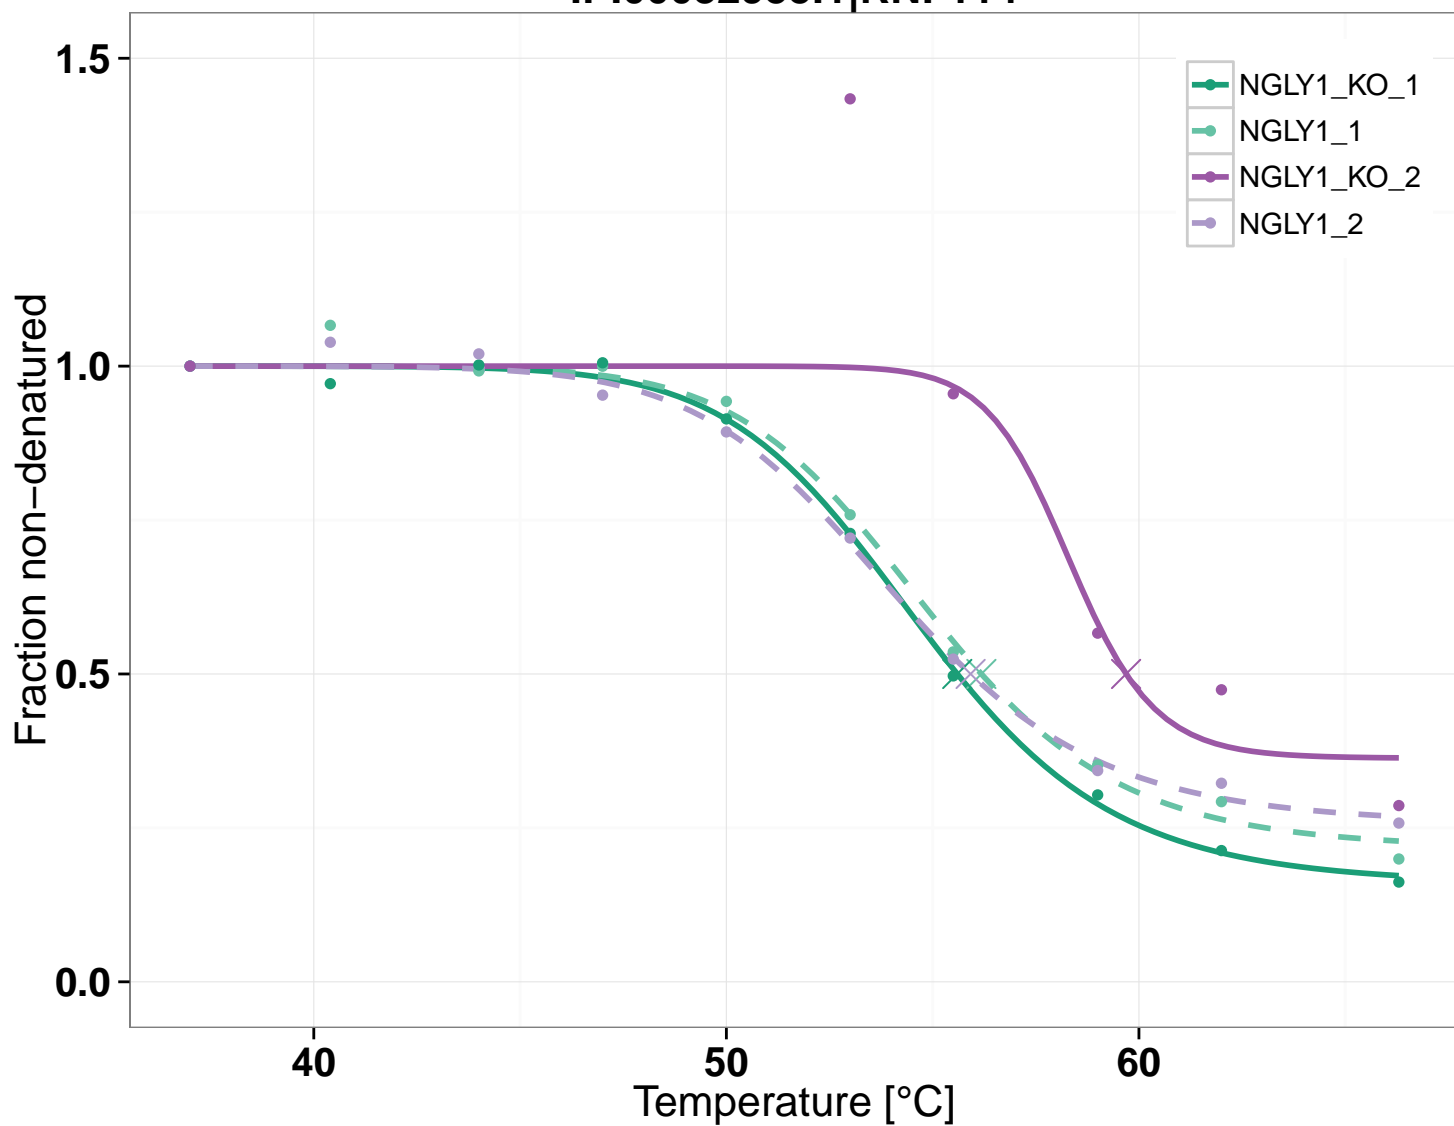

|            | meltPoint | slope  | plateau | R2   |
|------------|-----------|--------|---------|------|
| NGLY1_KO_1 | 55.6      | -0.09  | 0.16    | 1    |
| NGLY1_1    | 56.18     | -0.085 | 0.22    | 0.99 |
| NGLY1_KO_2 | 59.69     | -0.16  | 0.36    | 0.08 |
| NGLY1_2    | 55.92     | -0.076 | 0.26    | 1    |

Supplement: Supplementary file 895 [file 1]

IPI00057035.3|TRMT61B

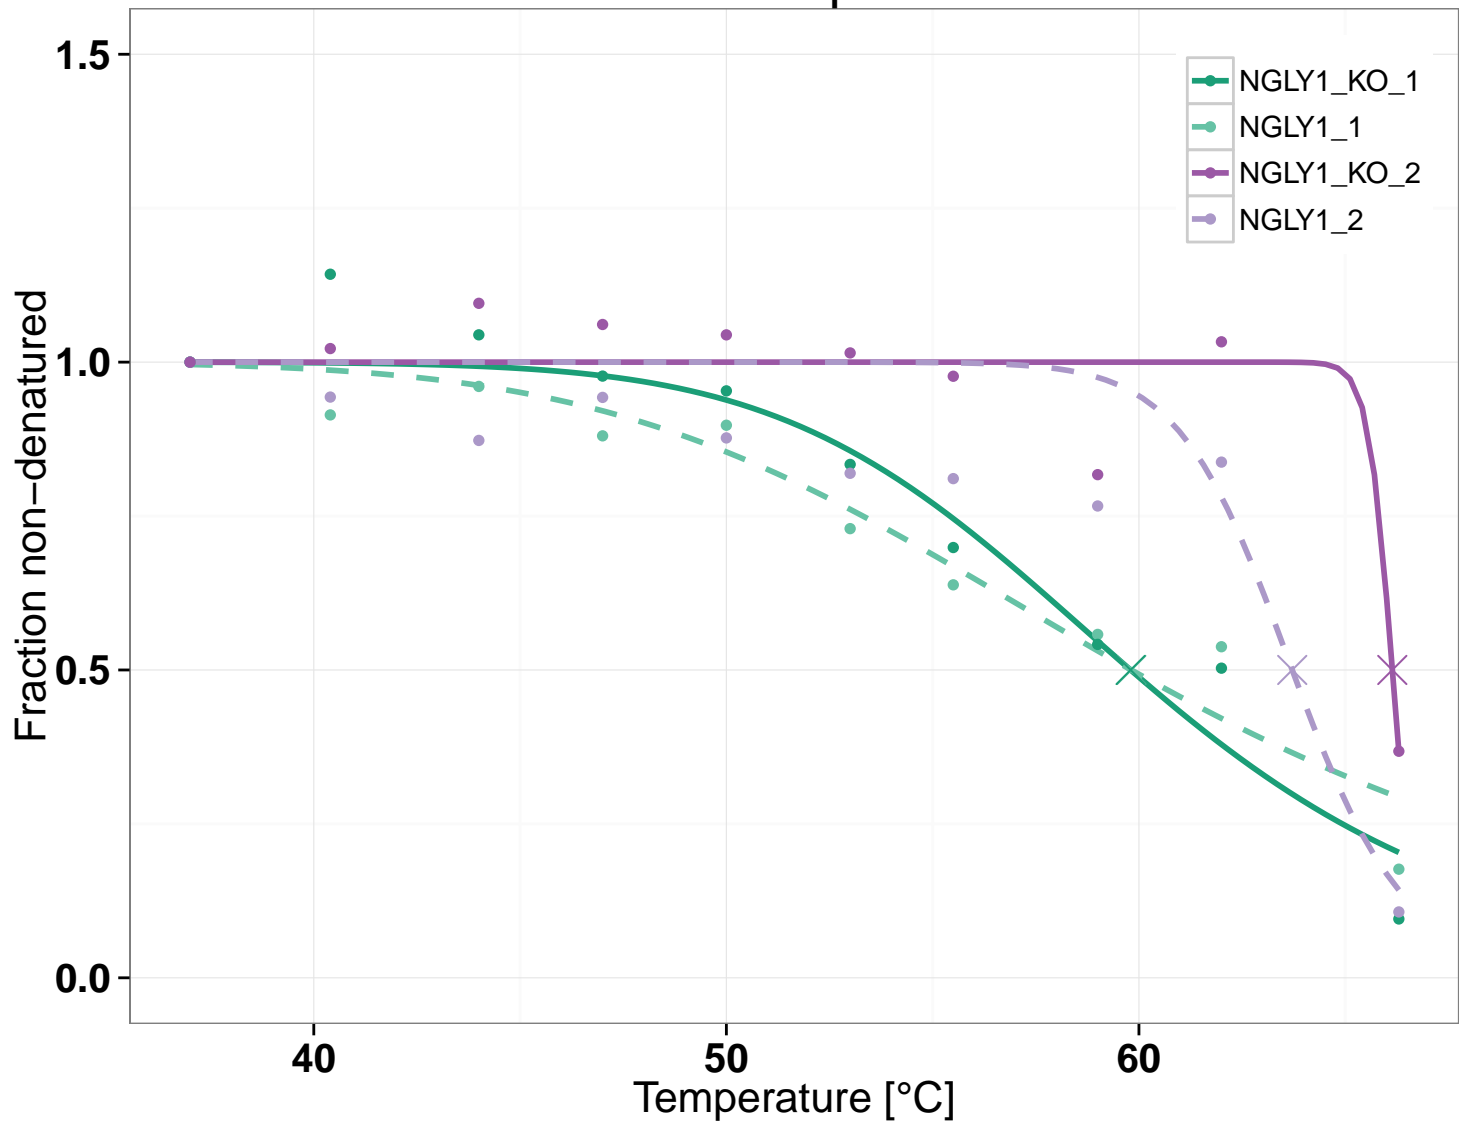

|            | meltPoint | slope  | plateau | R2   |
|------------|-----------|--------|---------|------|
| NGLY1_KO_1 | 59.8      | -0.059 | 0       | 0.94 |
| NGLY1_1    | 59.82     | -0.039 | 0       | 0.93 |
| NGLY1_KO_2 | 66.14     | -0.86  | 0       | 0.88 |
| NGLY1_2    | 63.72     | -0.18  | 0       | 0.73 |

Supplement: Supplementary file 896 [file 1]

# IPI00893699.1|C1D

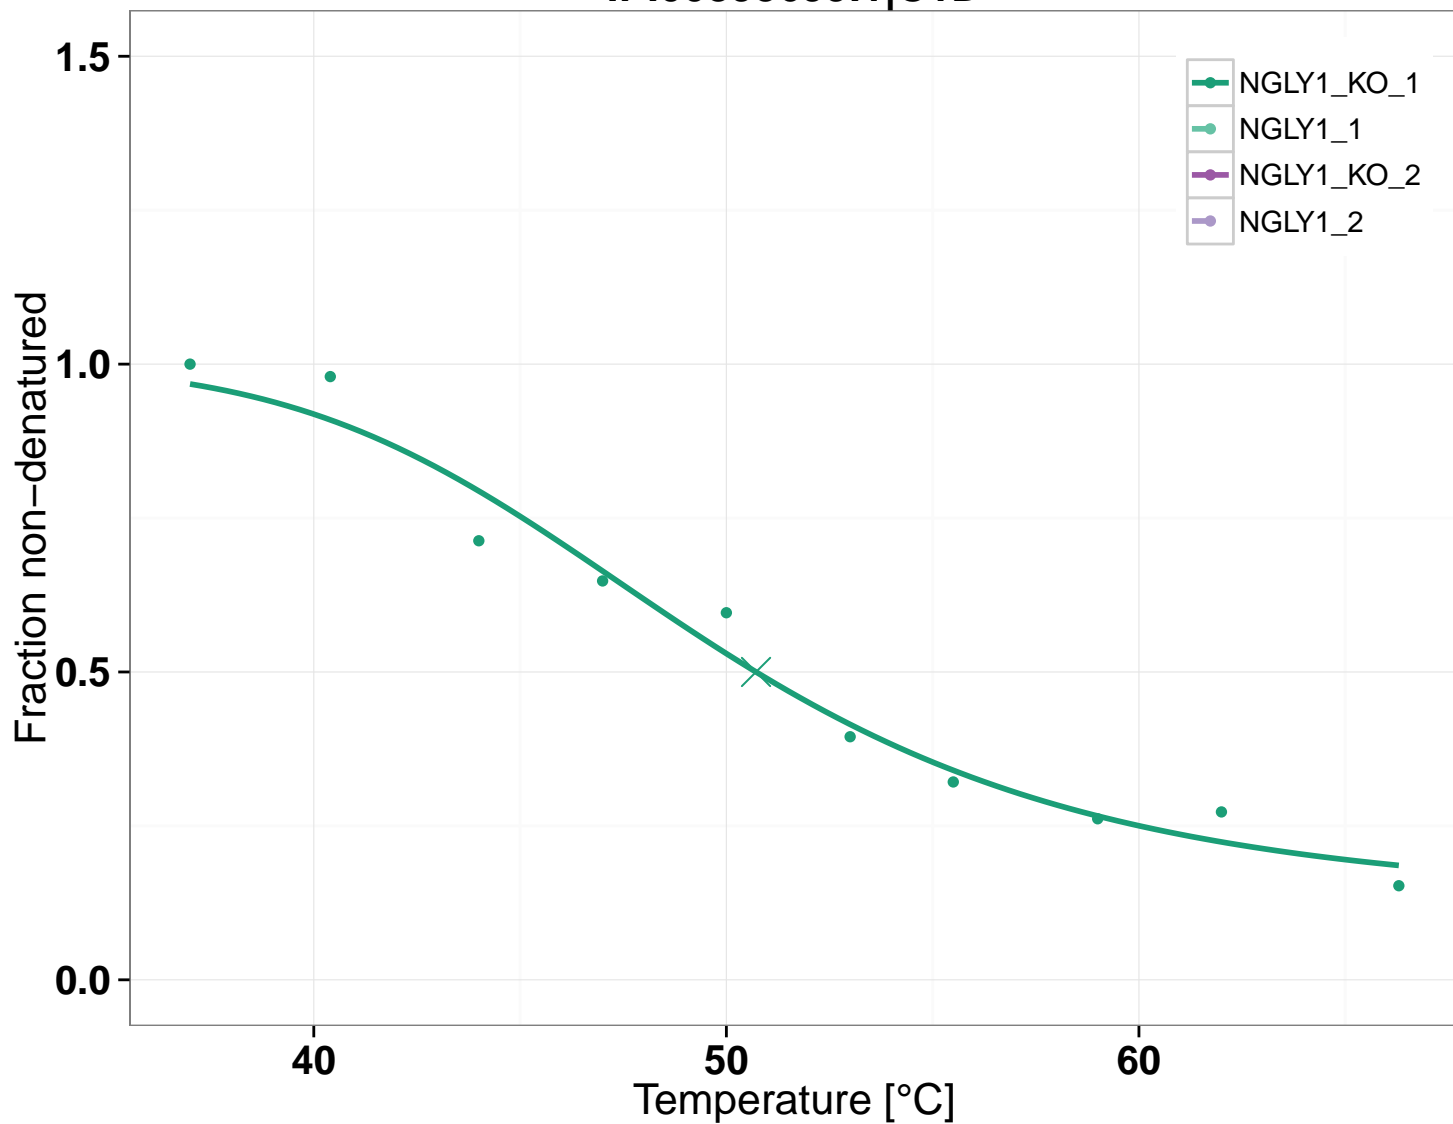

|            | meltPoint | slope  | plateau | R2   |
|------------|-----------|--------|---------|------|
| NGLY1_KO_1 | 50.72     | -0.046 | 0.12    | 0.97 |
| NGLY1_1    | -         | -      | -       | -    |
| NGLY1_KO_2 | -         | -      | -       | -    |
| NGLY1_2    | -         | -      | -       | -    |

Supplement: Supplementary file 897 [file 1]

IPI00004114.1|RNASE6

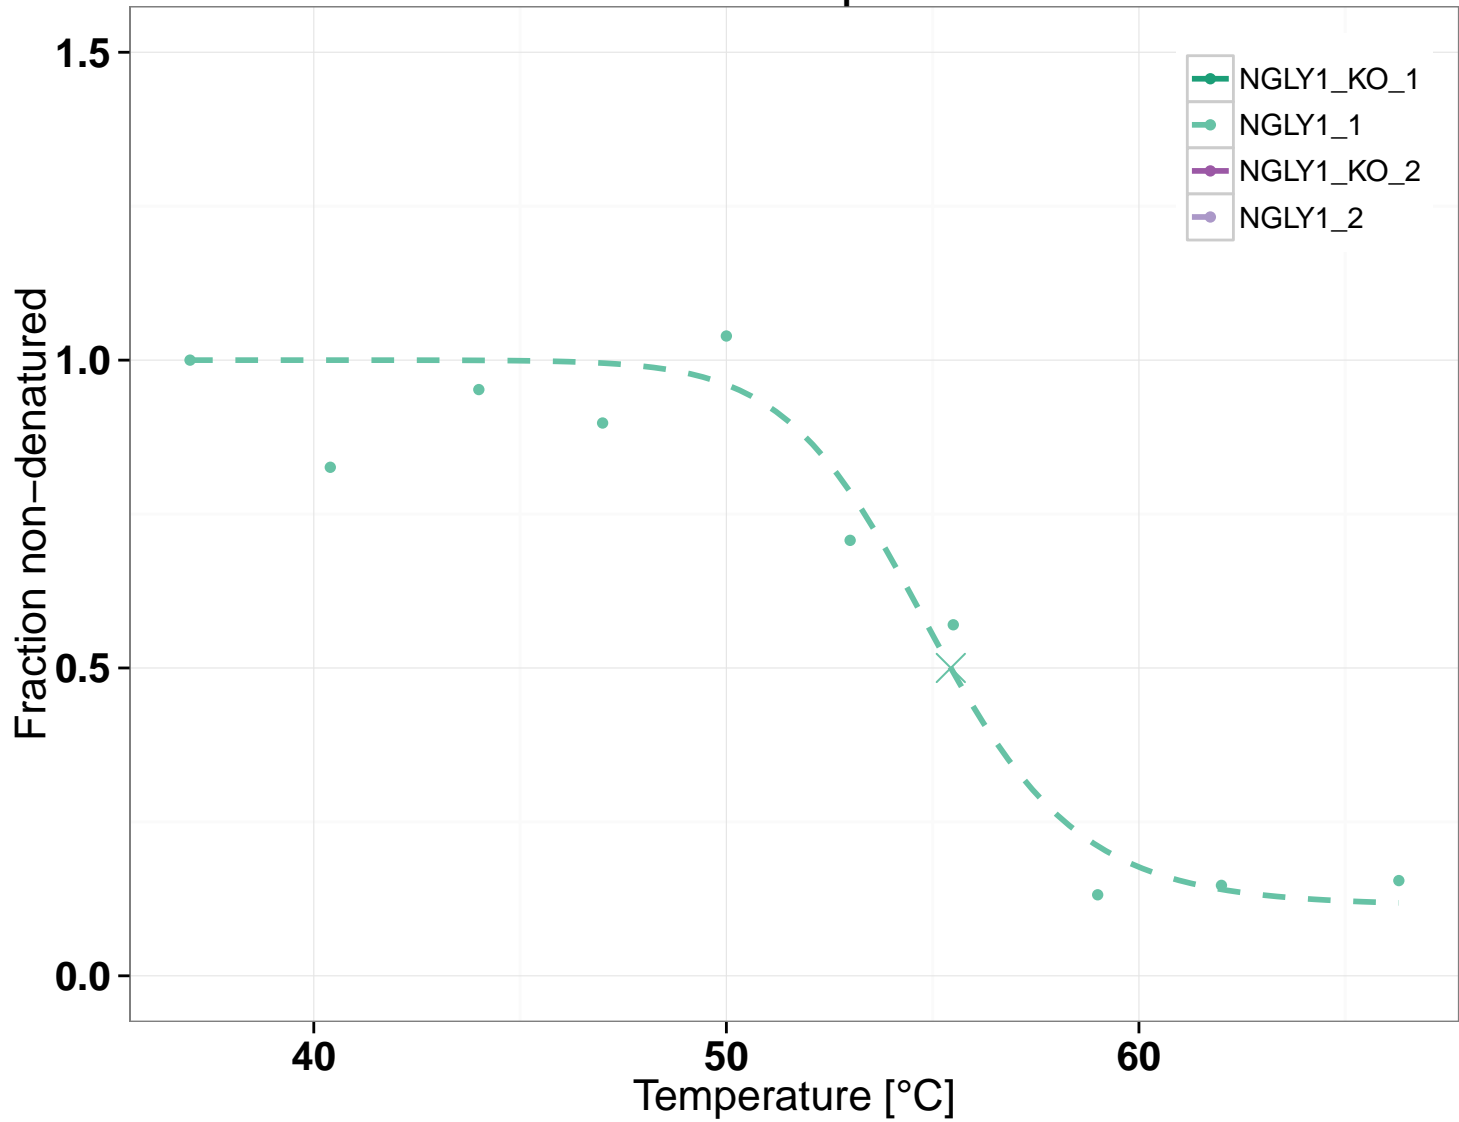

|            | meltPoint | slope | plateau | R2   |
|------------|-----------|-------|---------|------|
| NGLY1_KO_1 | –         | –     | –       | –    |
| NGLY1_1    | 55.44     | –0.12 | 0.11    | 0.94 |
| NGLY1_KO_2 | –         | –     | –       | –    |
| NGLY1_2    | –         | –     | –       | –    |

Supplement: Supplementary file 898 [file 1]

# IPI00004461.2|DGUOK

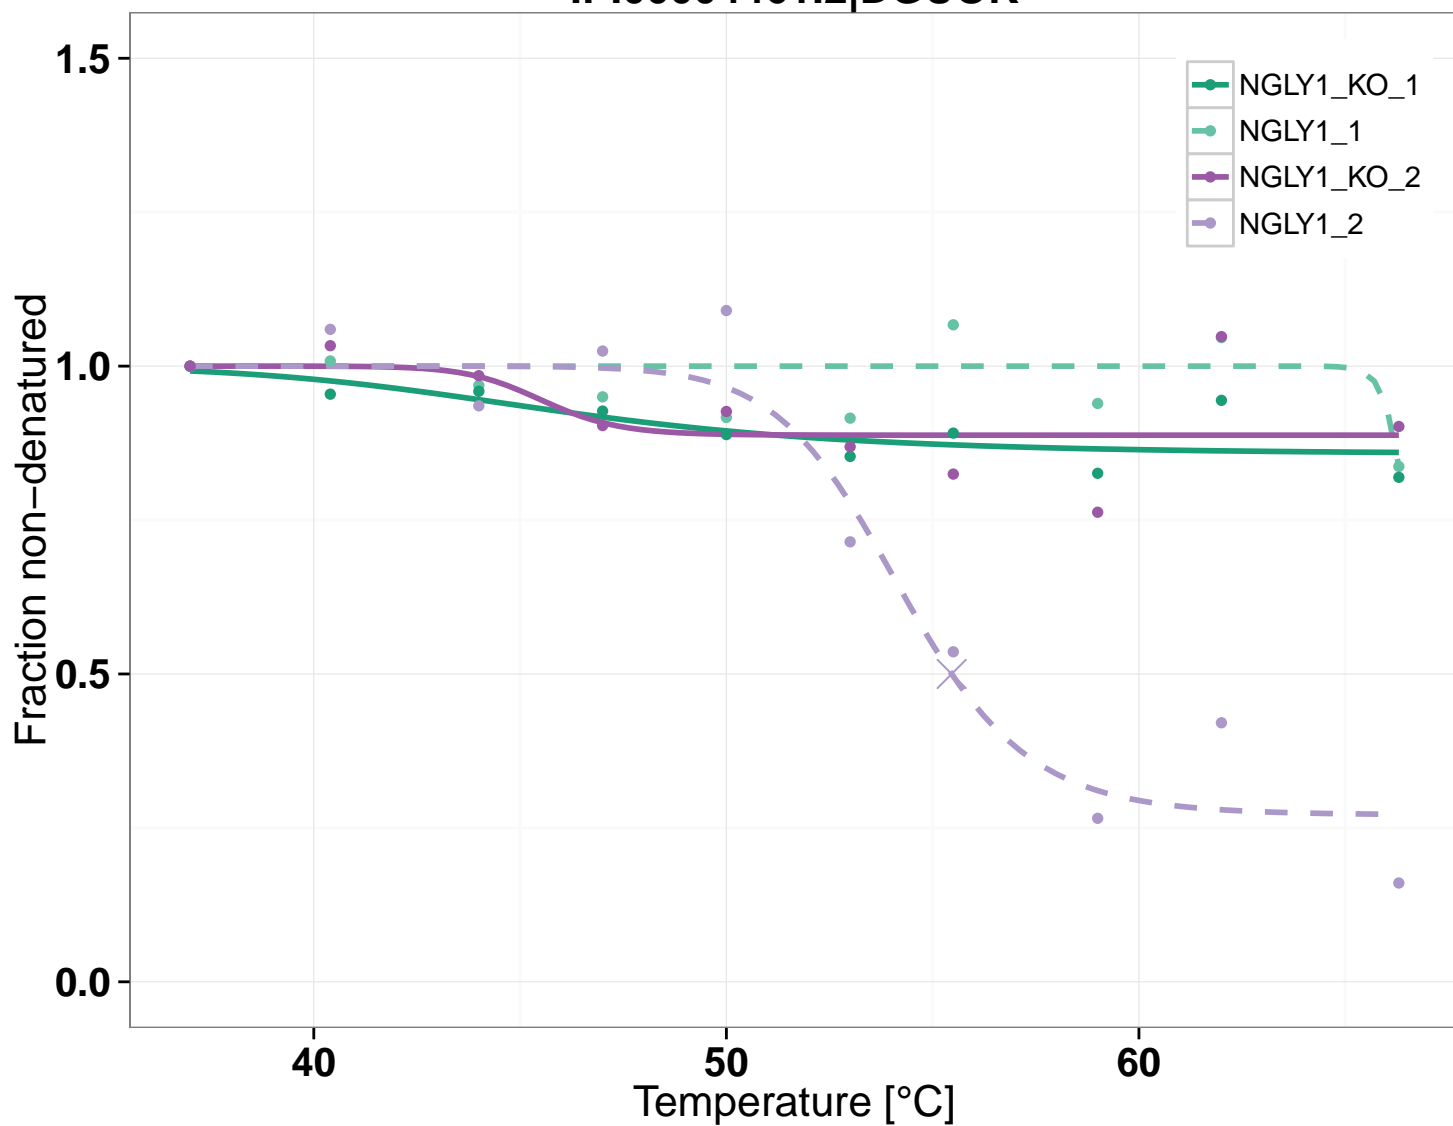

|            | meltPoint | slope   | plateau | R2   |
|------------|-----------|---------|---------|------|
| NGLY1_KO_1 | –         | –0.0097 | 0.86    | 0.64 |
| NGLY1_1    | –         | –       | 0       | 0.34 |
| NGLY1_KO_2 | –         | –0.03   | 0.89    | 0.37 |
| NGLY1_2    | 55.46     | –0.12   | 0.27    | 0.94 |

Supplement: Supplementary file 899 [file 1]

# IPI00296635.5|GBE1

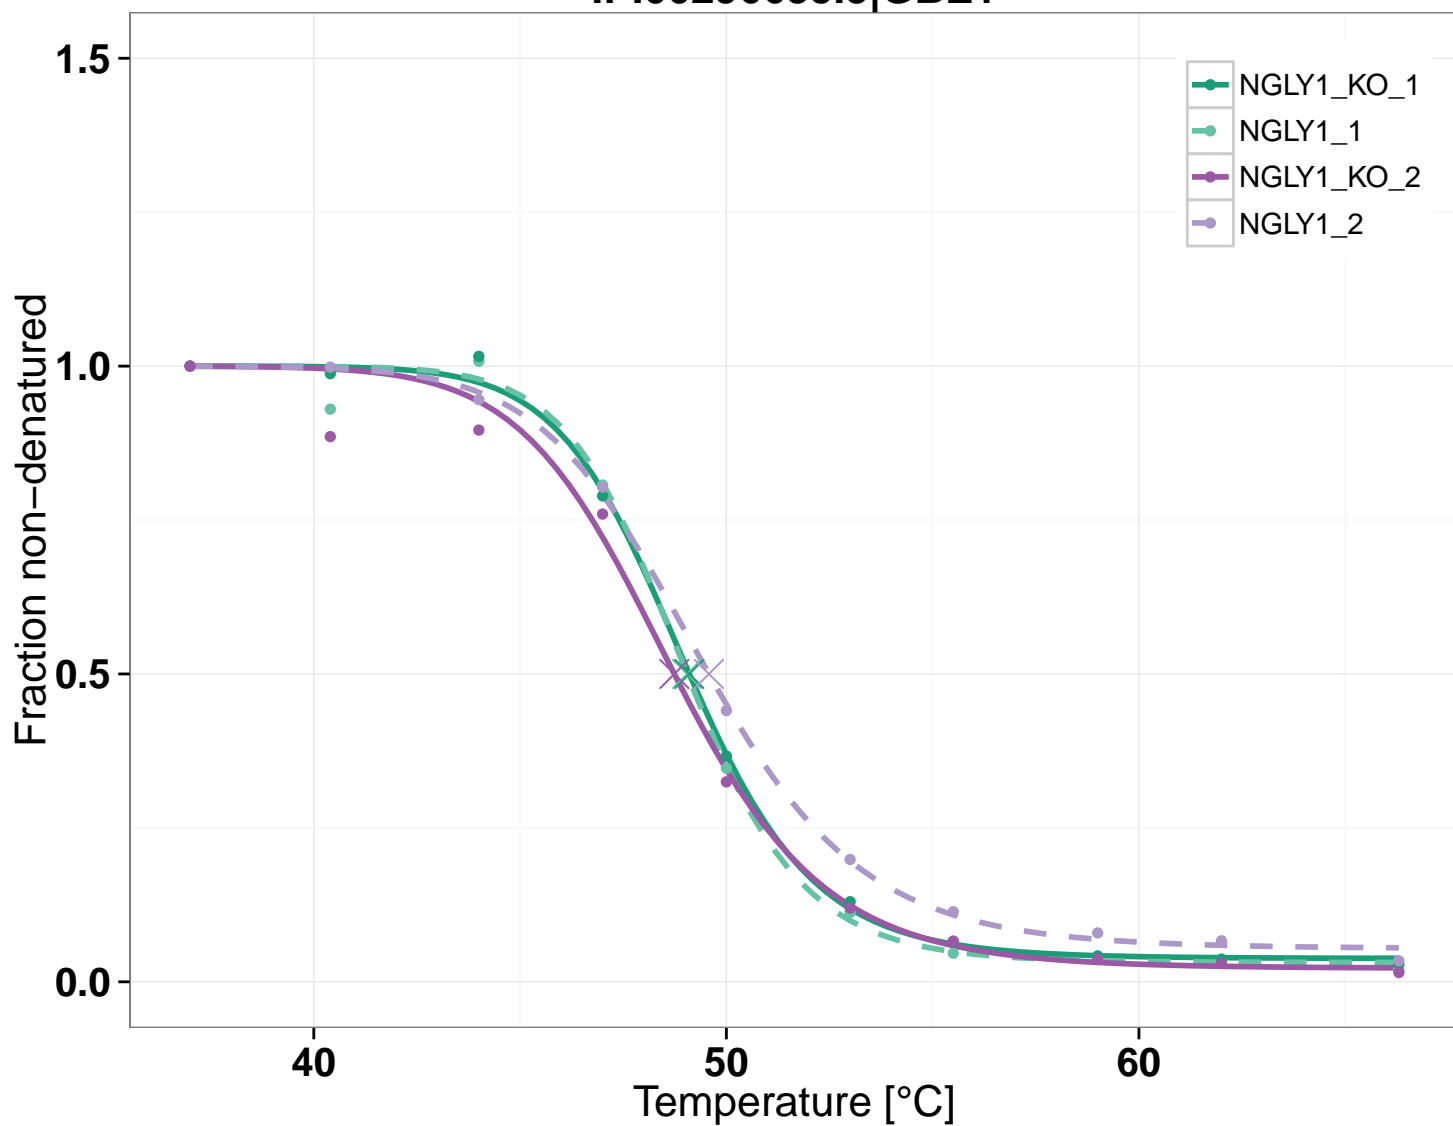

|            | meltPoint | slope | plateau | R2   |
|------------|-----------|-------|---------|------|
| NGLY1_KO_1 | 49.1      | -0.16 | 0.04    | 1    |
| NGLY1_1    | 49.05     | -0.17 | 0.03    | 1    |
| NGLY1_KO_2 | 48.74     | -0.13 | 0.02    | 0.99 |
| NGLY1_2    | 49.58     | -0.12 | 0.05    | 1    |

Supplement: Supplementary file 900 [file 1]

IPI00220484.3|HMGN4

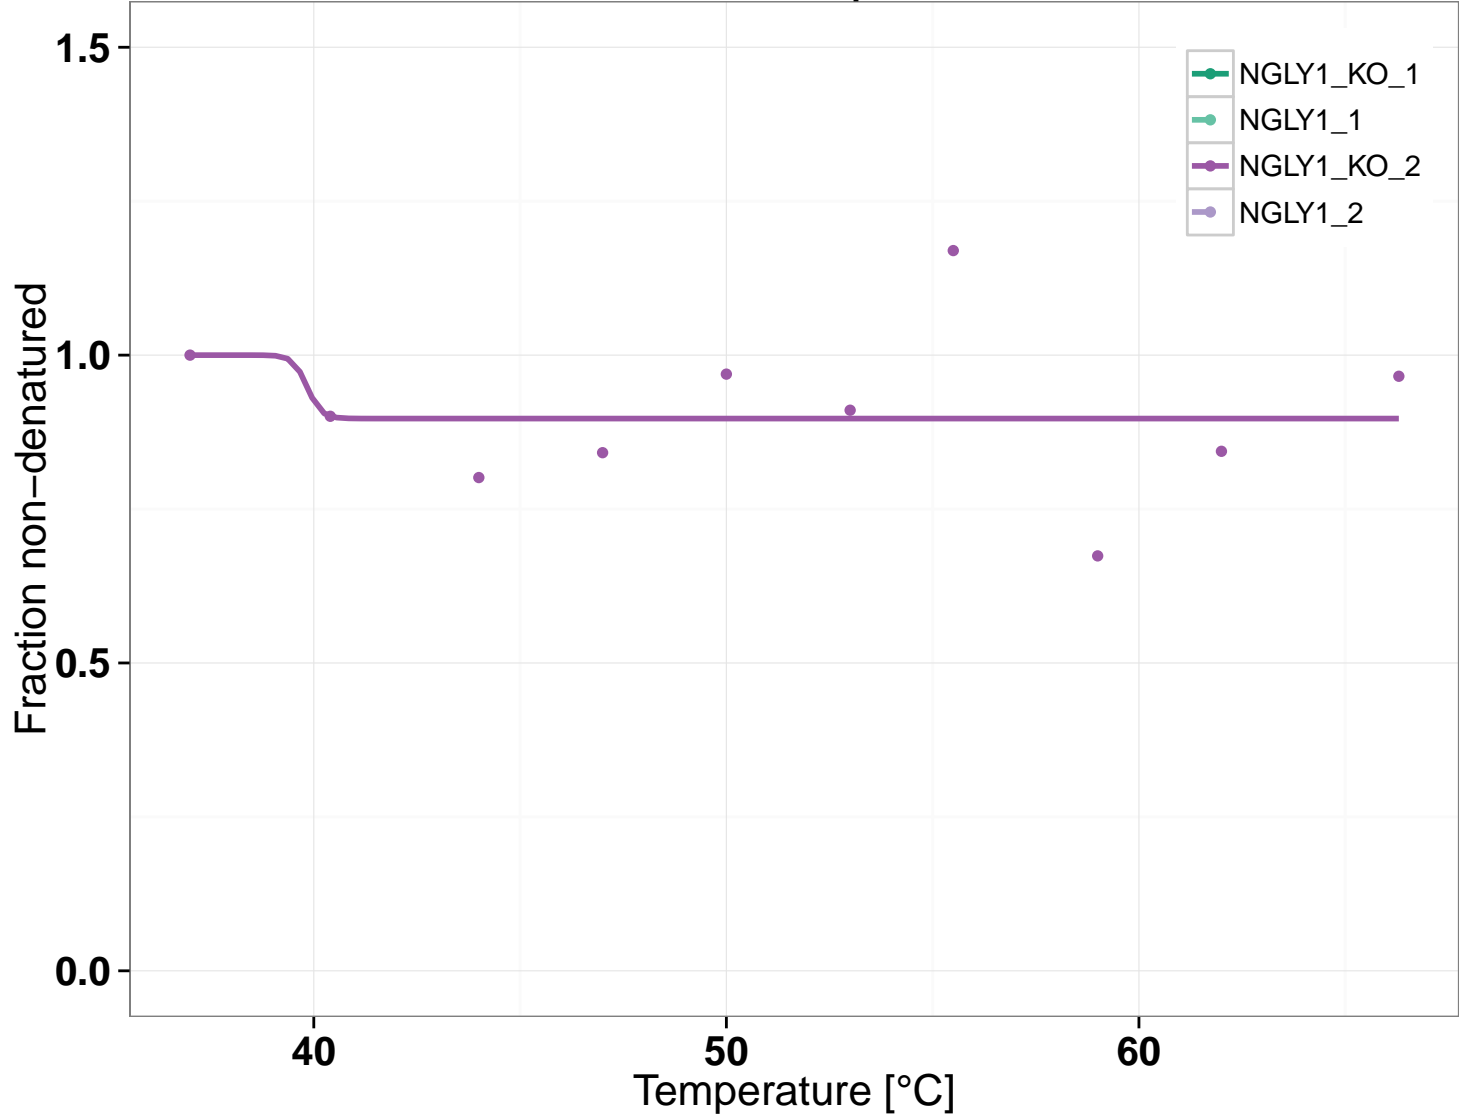

|            | meltPoint | slope | plateau | R2   |
|------------|-----------|-------|---------|------|
| NGLY1_KO_1 | —         | —     | —       | —    |
| NGLY1_1    | —         | —     | —       | —    |
| NGLY1_KO_2 | —         | -0.15 | 0.9     | 0.06 |
| NGLY1_2    | —         | —     | —       | —    |

Supplement: Supplementary file 901 [file 1]

IPI00879848.1|12 KDA PROTEIN.

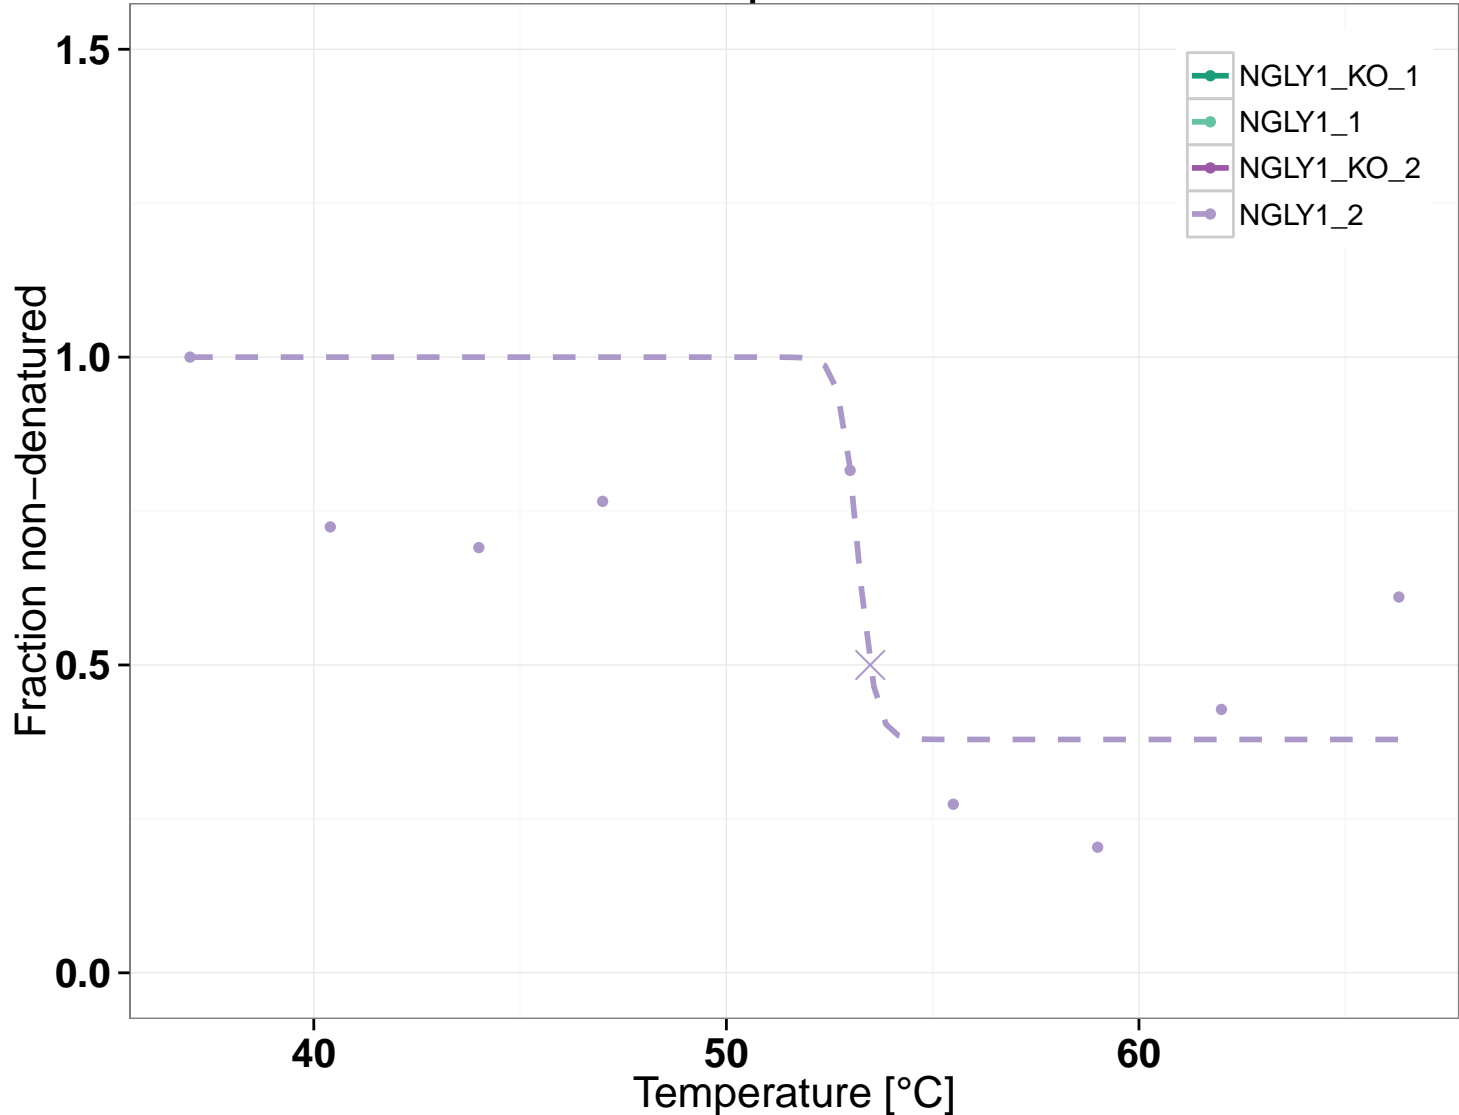

|            | meltPoint | slope | plateau | R2   |
|------------|-----------|-------|---------|------|
| NGLY1_KO_1 | -         | -     | -       | -    |
| NGLY1_1    | -         | -     | -       | -    |
| NGLY1_KO_2 | -         | -     | -       | -    |
| NGLY1_2    | 53.49     | -0.73 | 0.38    | 0.54 |

Supplement: Supplementary file 902 [file 1]

IPI00015836.1|APPL1

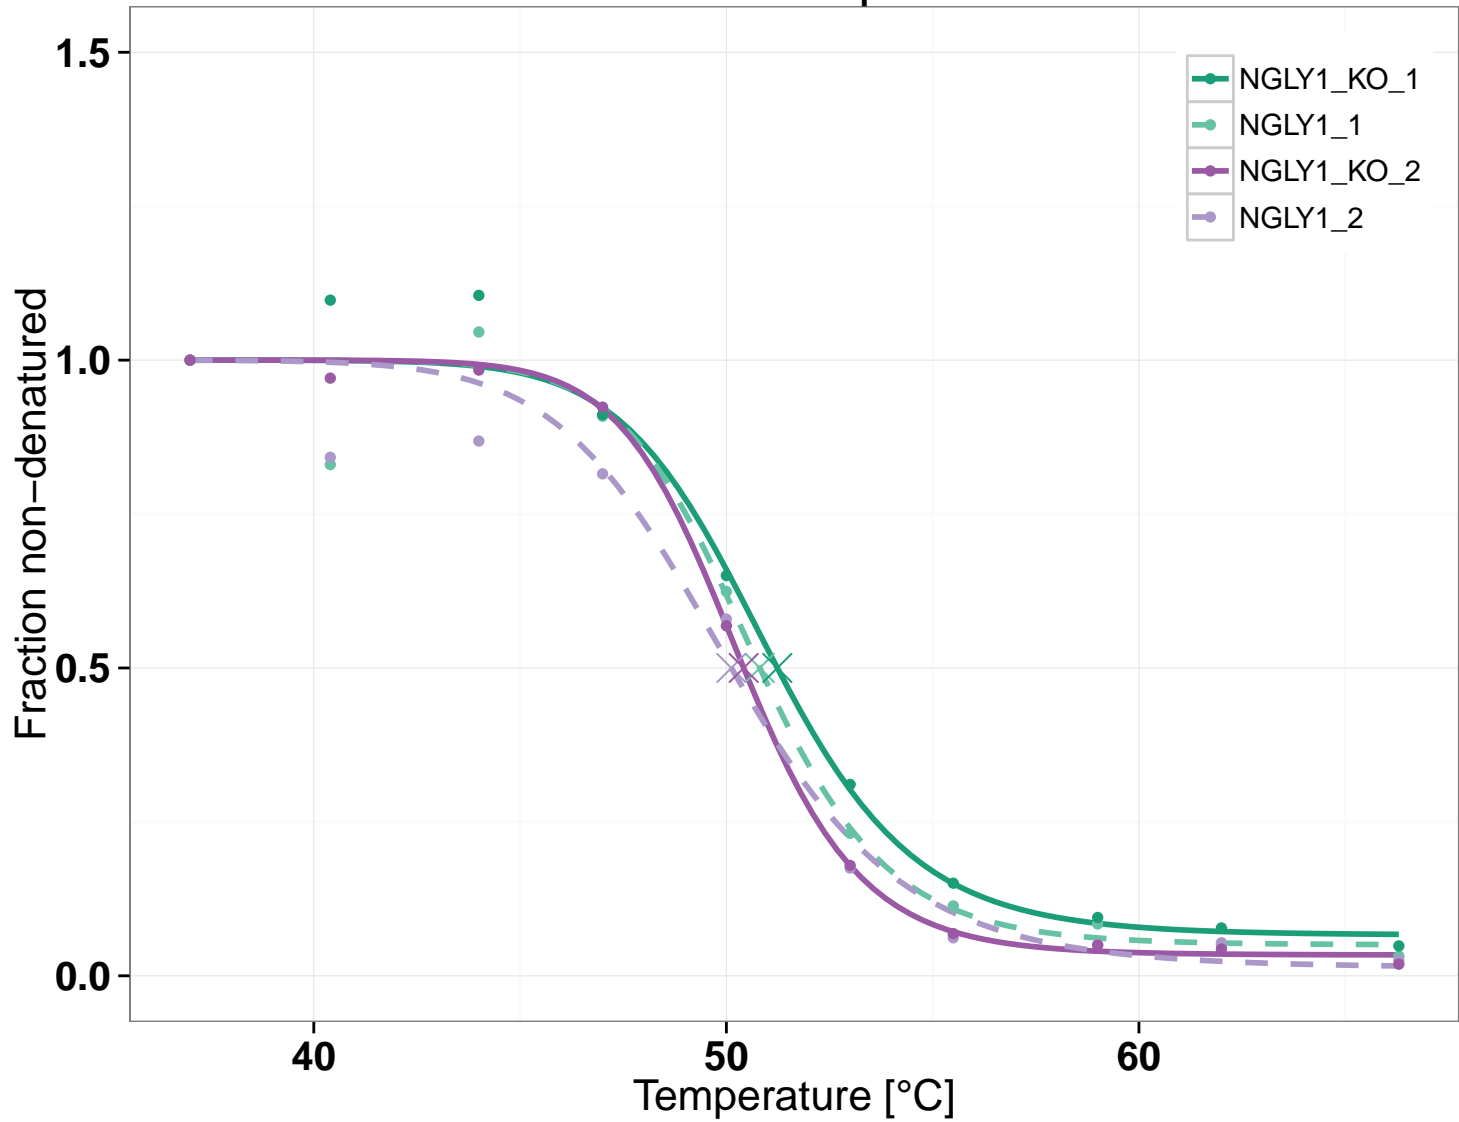

|            | meltPoint | slope | plateau | R2   |
|------------|-----------|-------|---------|------|
| NGLY1_KO_1 | 51.24     | -0.13 | 0.07    | 0.99 |
| NGLY1_1    | 50.81     | -0.15 | 0.05    | 0.98 |
| NGLY1_KO_2 | 50.42     | -0.16 | 0.03    | 1    |
| NGLY1_2    | 50.12     | -0.12 | 0.01    | 0.97 |

Supplement: Supplementary file 903 [file 1]

# IPI00026627.4|RP2

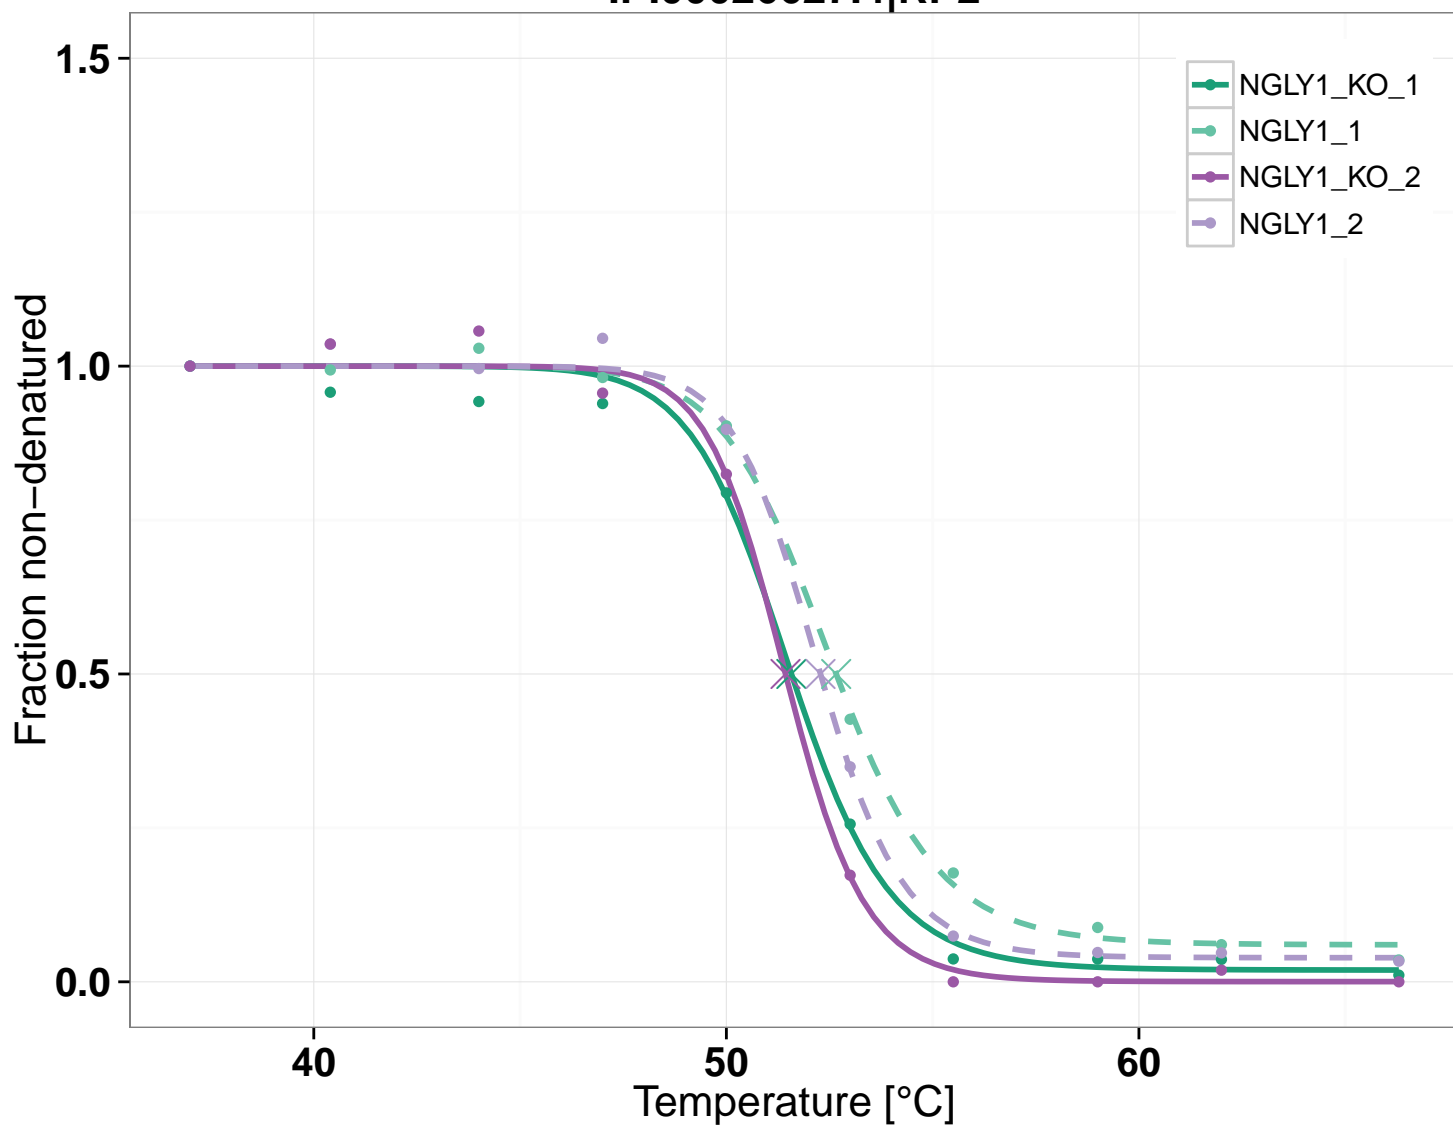

|            | meltPoint | slope | plateau | R2 |
|------------|-----------|-------|---------|----|
| NGLY1_KO_1 | 51.58     | -0.2  | 0.02    | 1  |
| NGLY1_1    | 52.66     | -0.18 | 0.06    | 1  |
| NGLY1_KO_2 | 51.43     | -0.26 | 0       | 1  |
| NGLY1_2    | 52.28     | -0.23 | 0.04    | 1  |

Supplement: Supplementary file 904 [file 1]
