# Supplementary material (part 10 of 85)
Source: publisher figshare collection journal article supplement (https://gsajournals.figshare.com/articles/dataset/_/12014913)

IPI00844563.1|C9ORF80

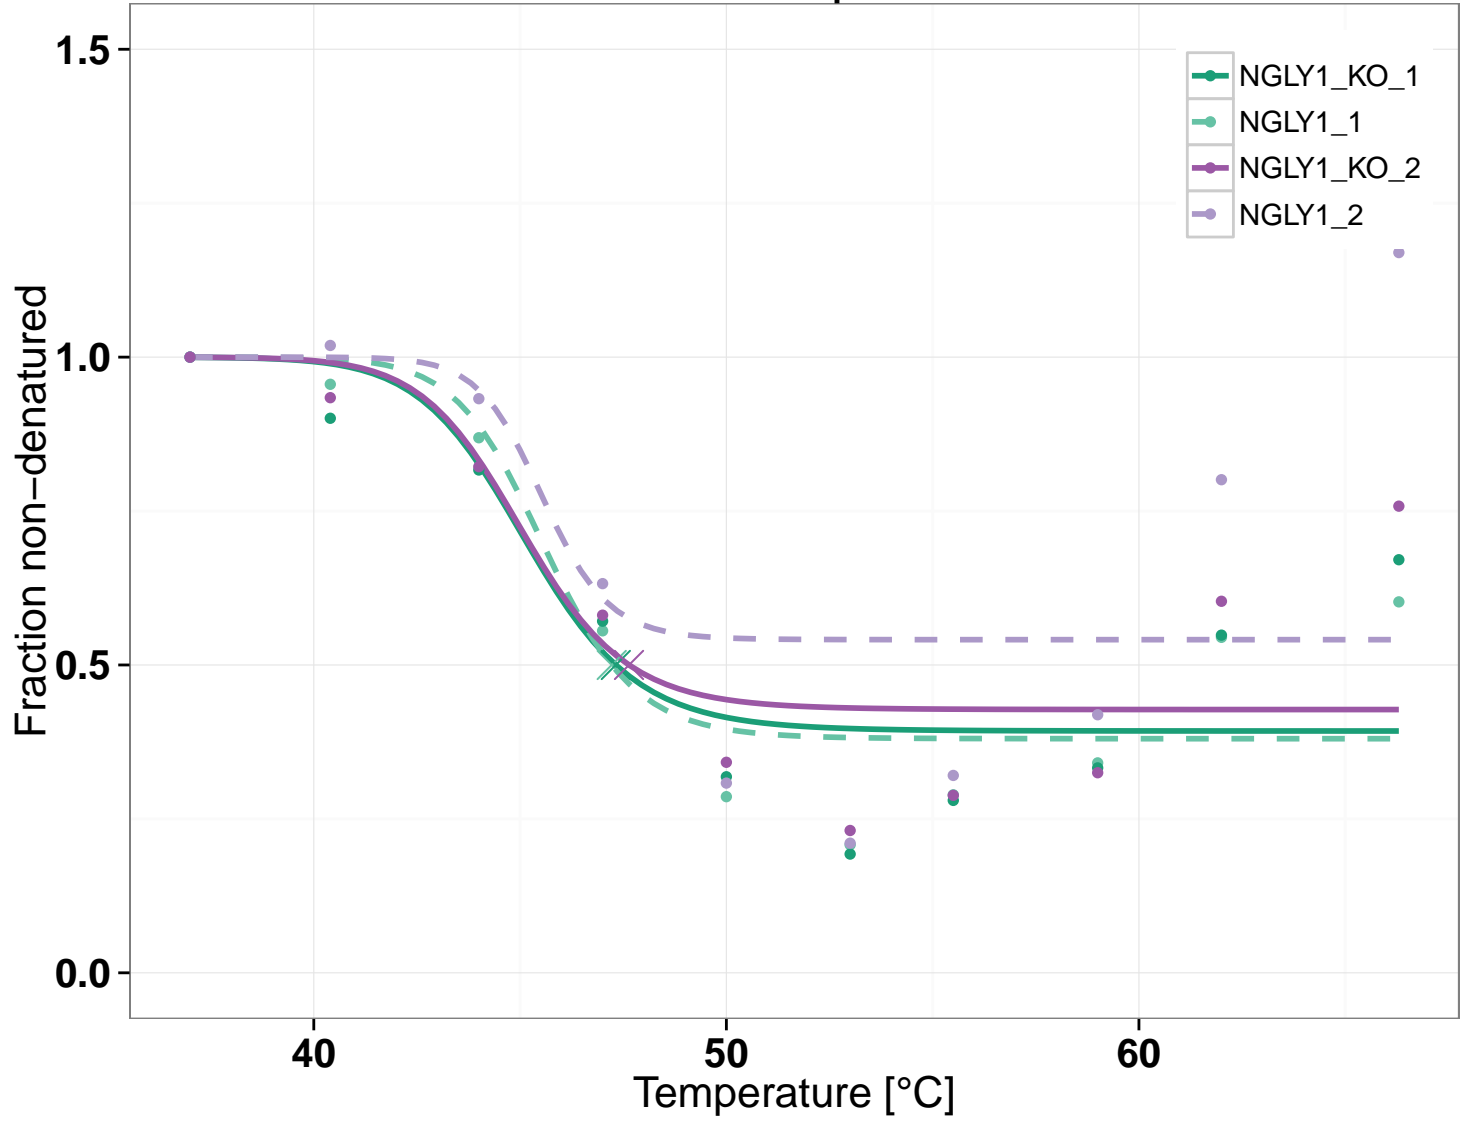

|            | meltPoint | slope | plateau | R2   |
|------------|-----------|-------|---------|------|
| NGLY1_KO_1 | 47.32     | -0.11 | 0.39    | 0.75 |
| NGLY1_1    | 47.22     | -0.14 | 0.38    | 0.83 |
| NGLY1_KO_2 | 47.64     | -0.11 | 0.43    | 0.69 |
| NGLY1_2    | -         | -0.14 | 0.54    | 0.37 |

Supplement: Supplementary file 905 [file 1]

# IPI00003965.5|USP7

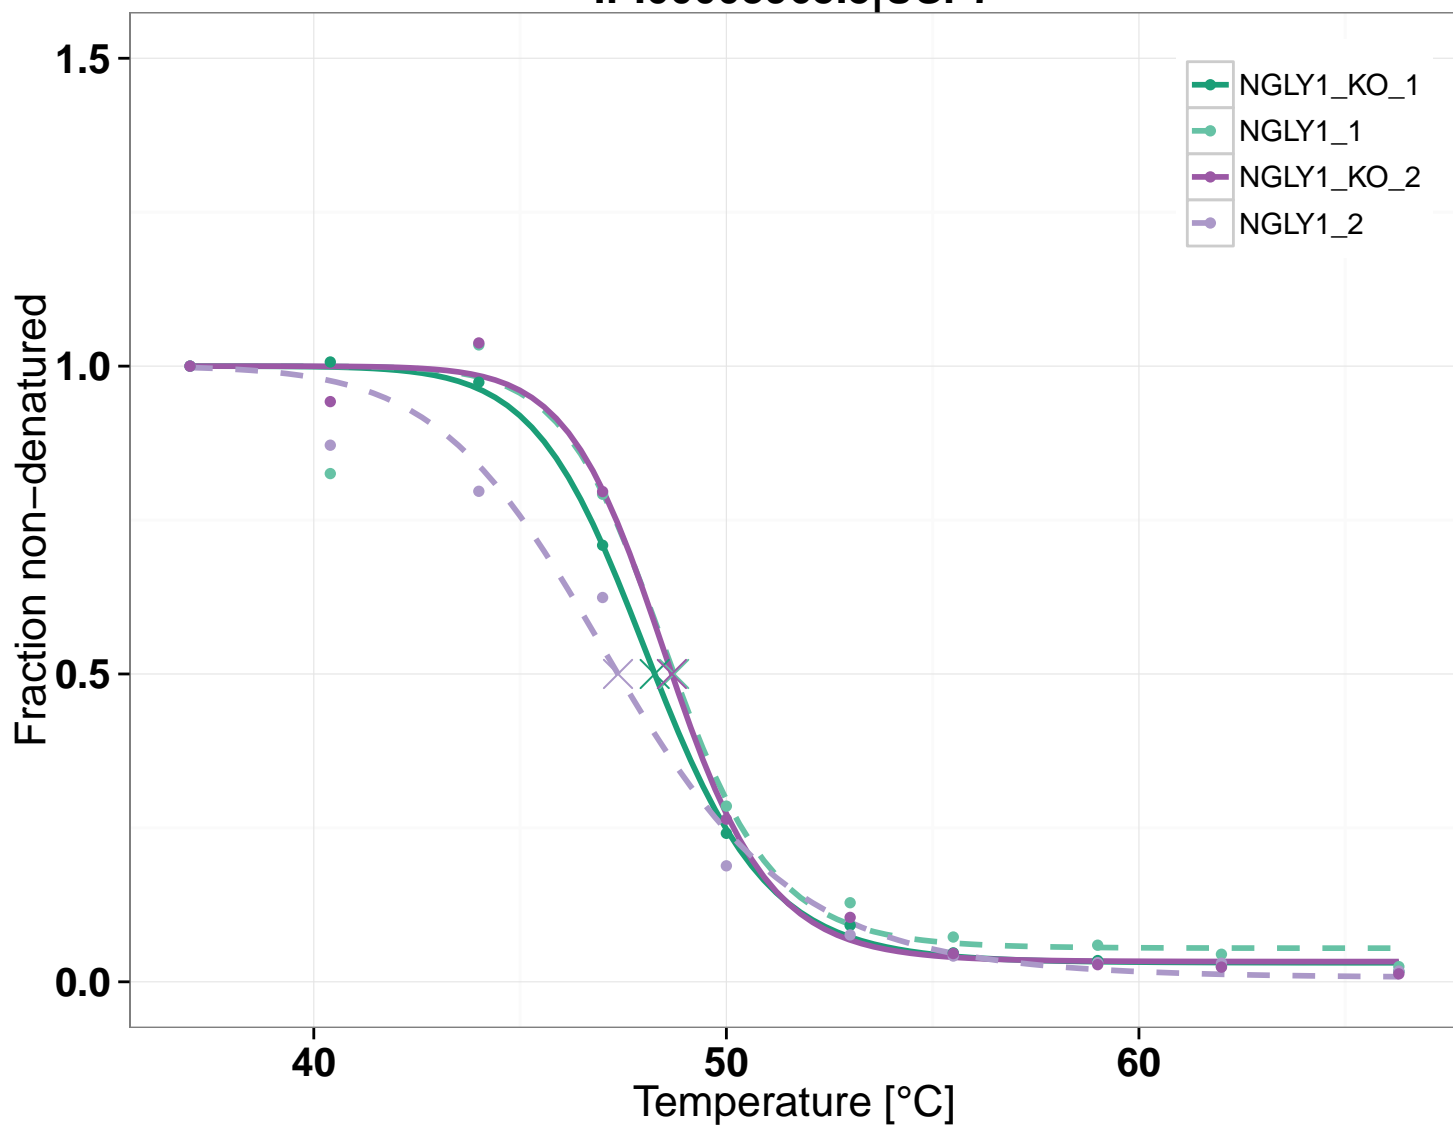

|            | meltPoint | slope | plateau | R2   |
|------------|-----------|-------|---------|------|
| NGLY1_KO_1 | 48.26     | -0.17 | 0.03    | 1    |
| NGLY1_1    | 48.73     | -0.19 | 0.05    | 0.98 |
| NGLY1_KO_2 | 48.68     | -0.2  | 0.03    | 1    |
| NGLY1_2    | 47.37     | -0.11 | 0.01    | 0.98 |

Supplement: Supplementary file 906 [file 1]

IPI00009997.1|B3GNT1

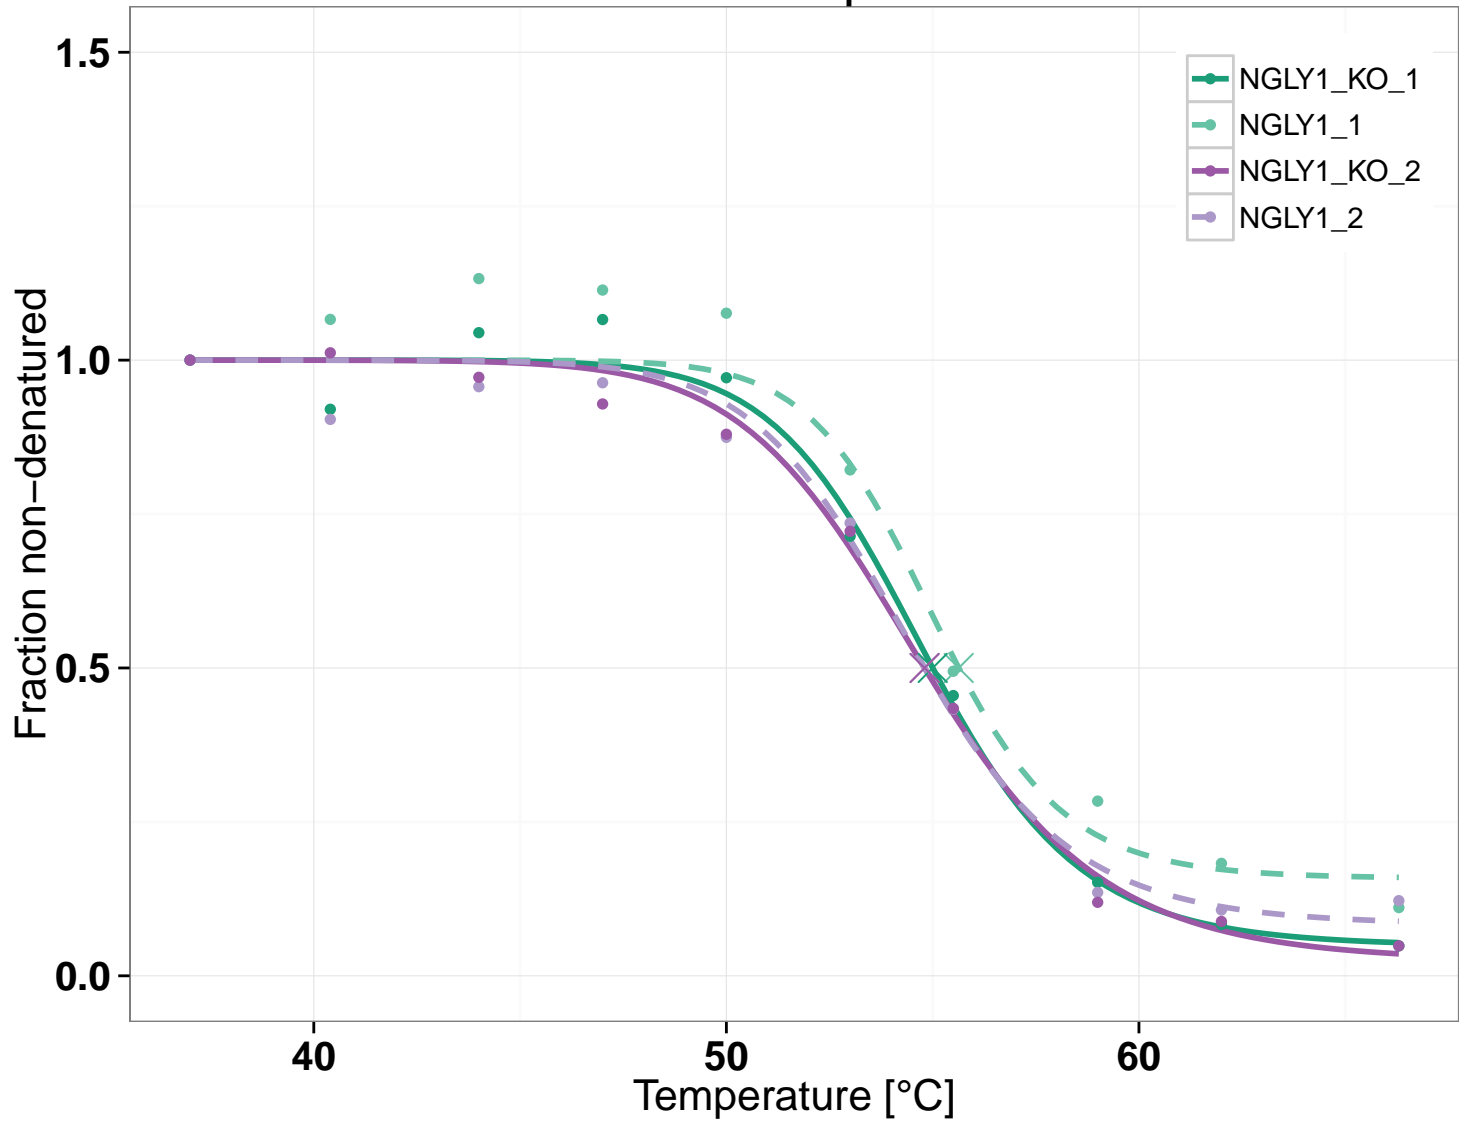

|            | meltPoint | slope | plateau | R2   |
|------------|-----------|-------|---------|------|
| NGLY1_KO_1 | 55        | -0.13 | 0.05    | 0.99 |
| NGLY1_1    | 55.63     | -0.14 | 0.16    | 0.97 |
| NGLY1_KO_2 | 54.8      | -0.11 | 0.02    | 0.99 |
| NGLY1_2    | 54.81     | -0.12 | 0.08    | 0.99 |

Supplement: Supplementary file 907 [file 1]

IPI00028383.3|FAM173A

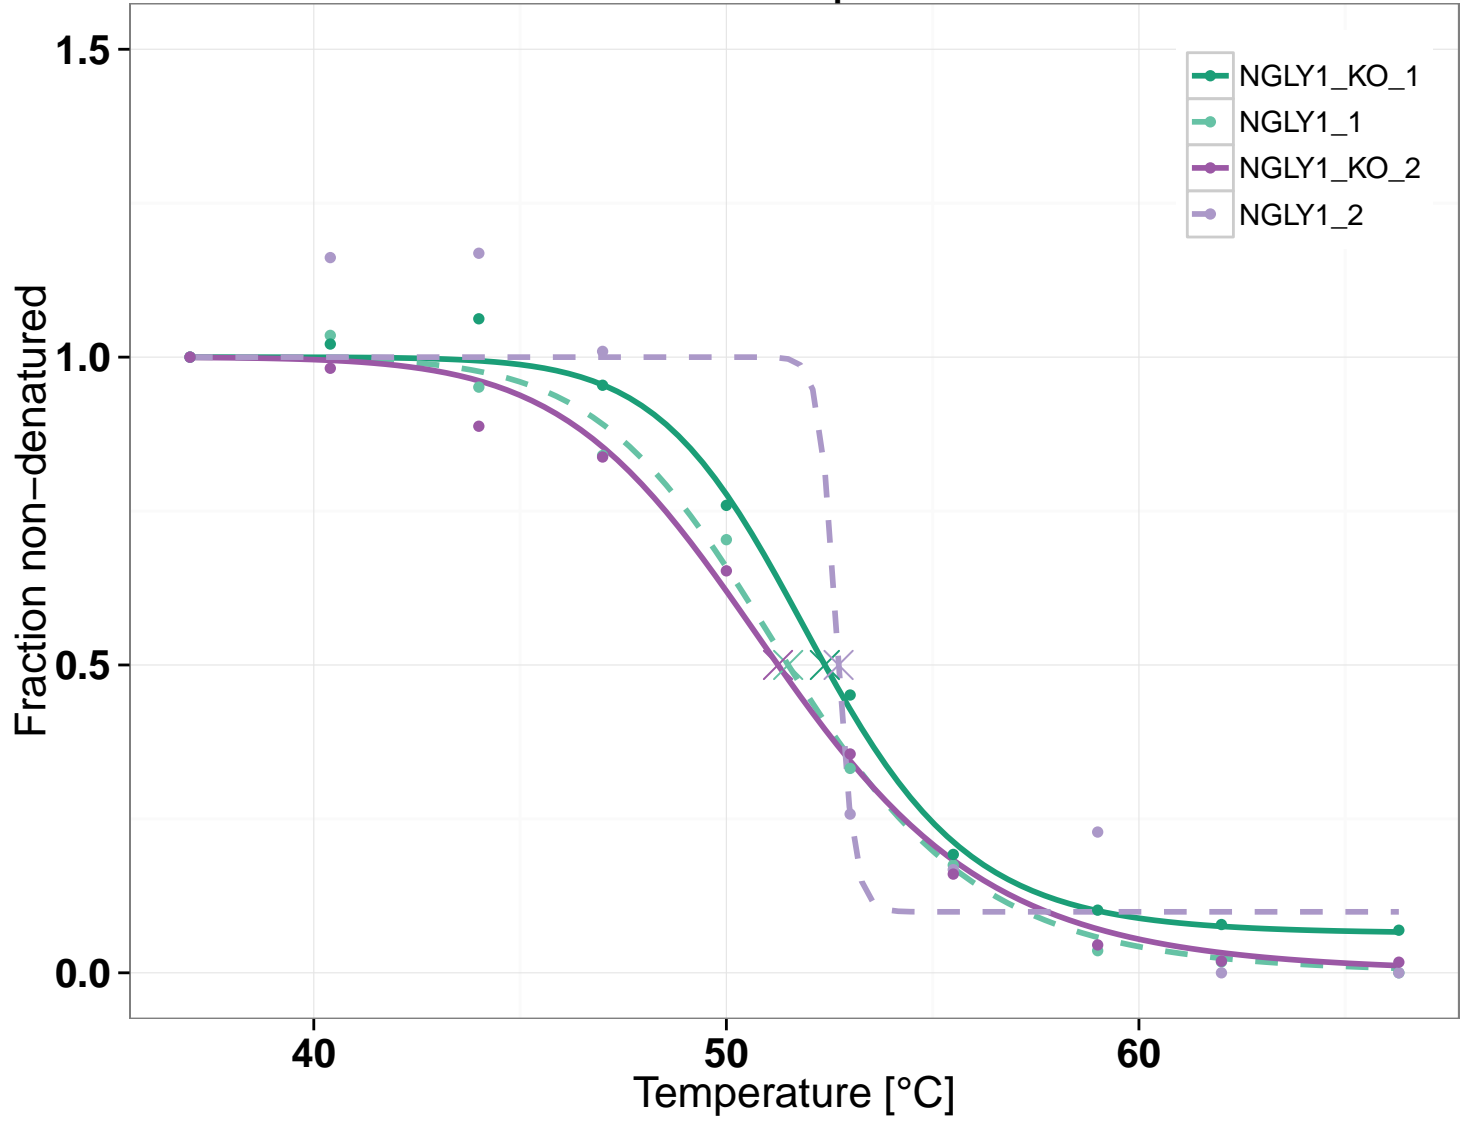

|            | meltPoint | slope  | plateau | R2   |
|------------|-----------|--------|---------|------|
| NGLY1_KO_1 | 52.39     | -0.12  | 0.06    | 1    |
| NGLY1_1    | 51.5      | -0.11  | 0       | 1    |
| NGLY1_KO_2 | 51.25     | -0.096 | 0       | 0.99 |
| NGLY1_2    | 52.72     | -1.1   | 0.1     | 0.87 |

Supplement: Supplementary file 908 [file 1]

IPI00027212.1|INSRR

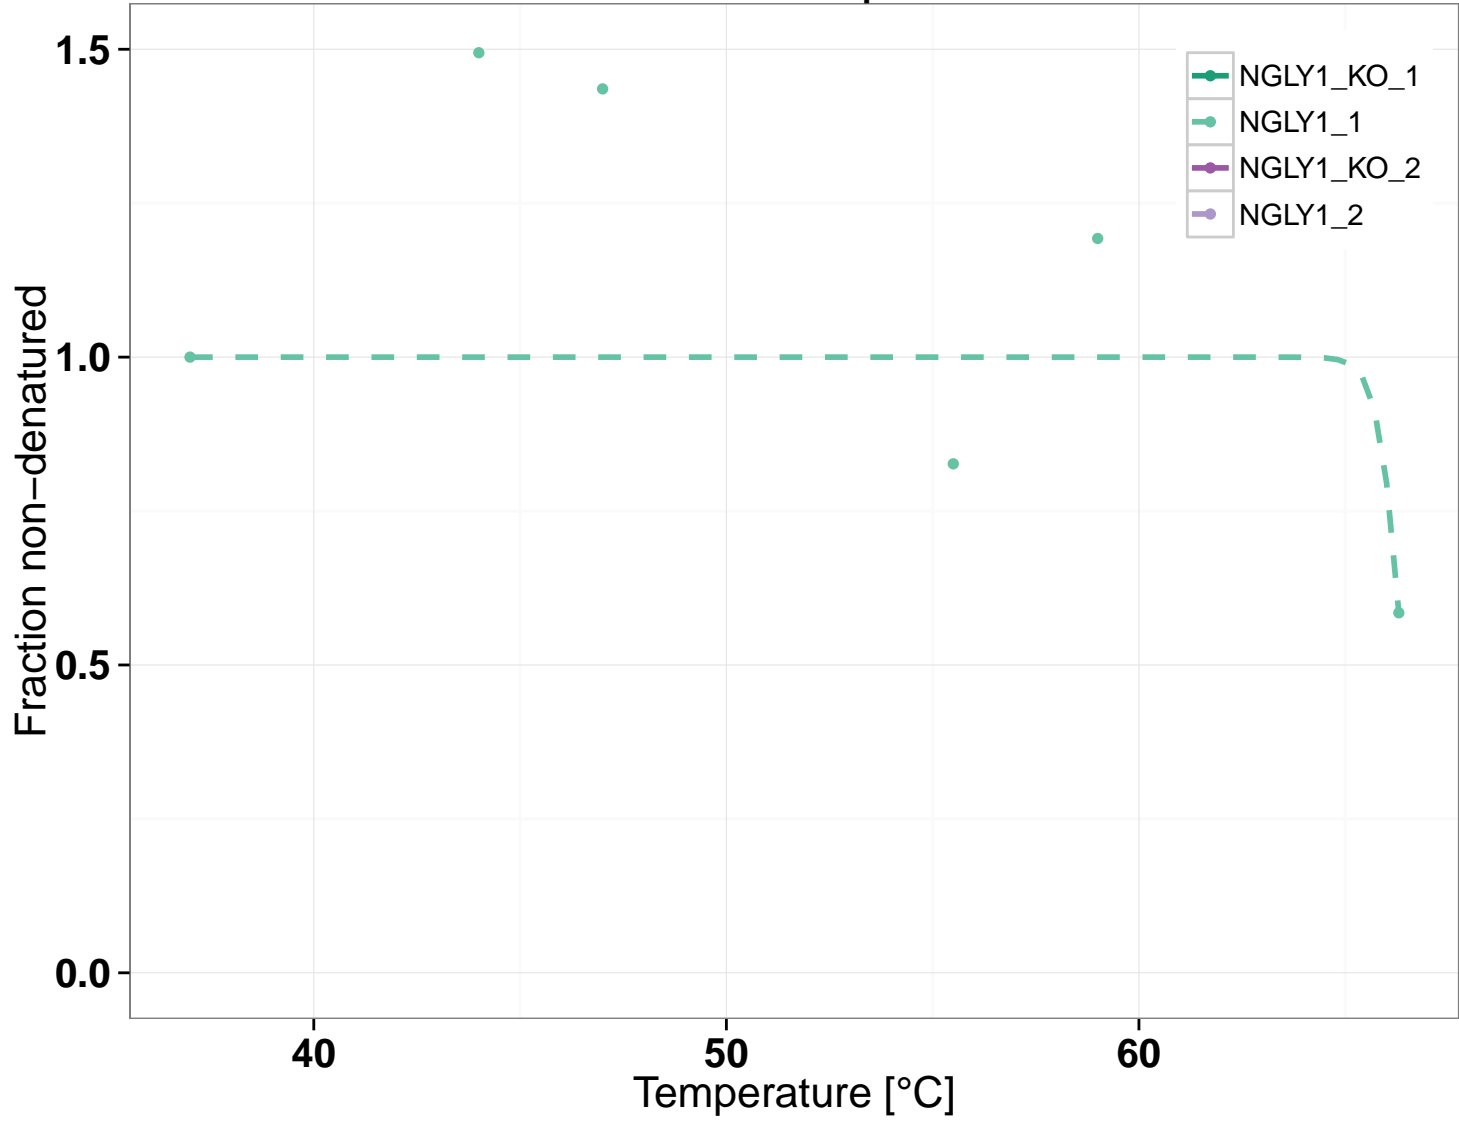

|            | meltPoint | slope | plateau | R2    |
|------------|-----------|-------|---------|-------|
| NGLY1_KO_1 | -         | -     | -       | -     |
| NGLY1_1    | -         | -     | 0       | -0.47 |
| NGLY1_KO_2 | -         | -     | -       | -     |
| NGLY1_2    | -         | -     | -       | -     |

Supplement: Supplementary file 909 [file 1]

IPI00784114.2|RASA3

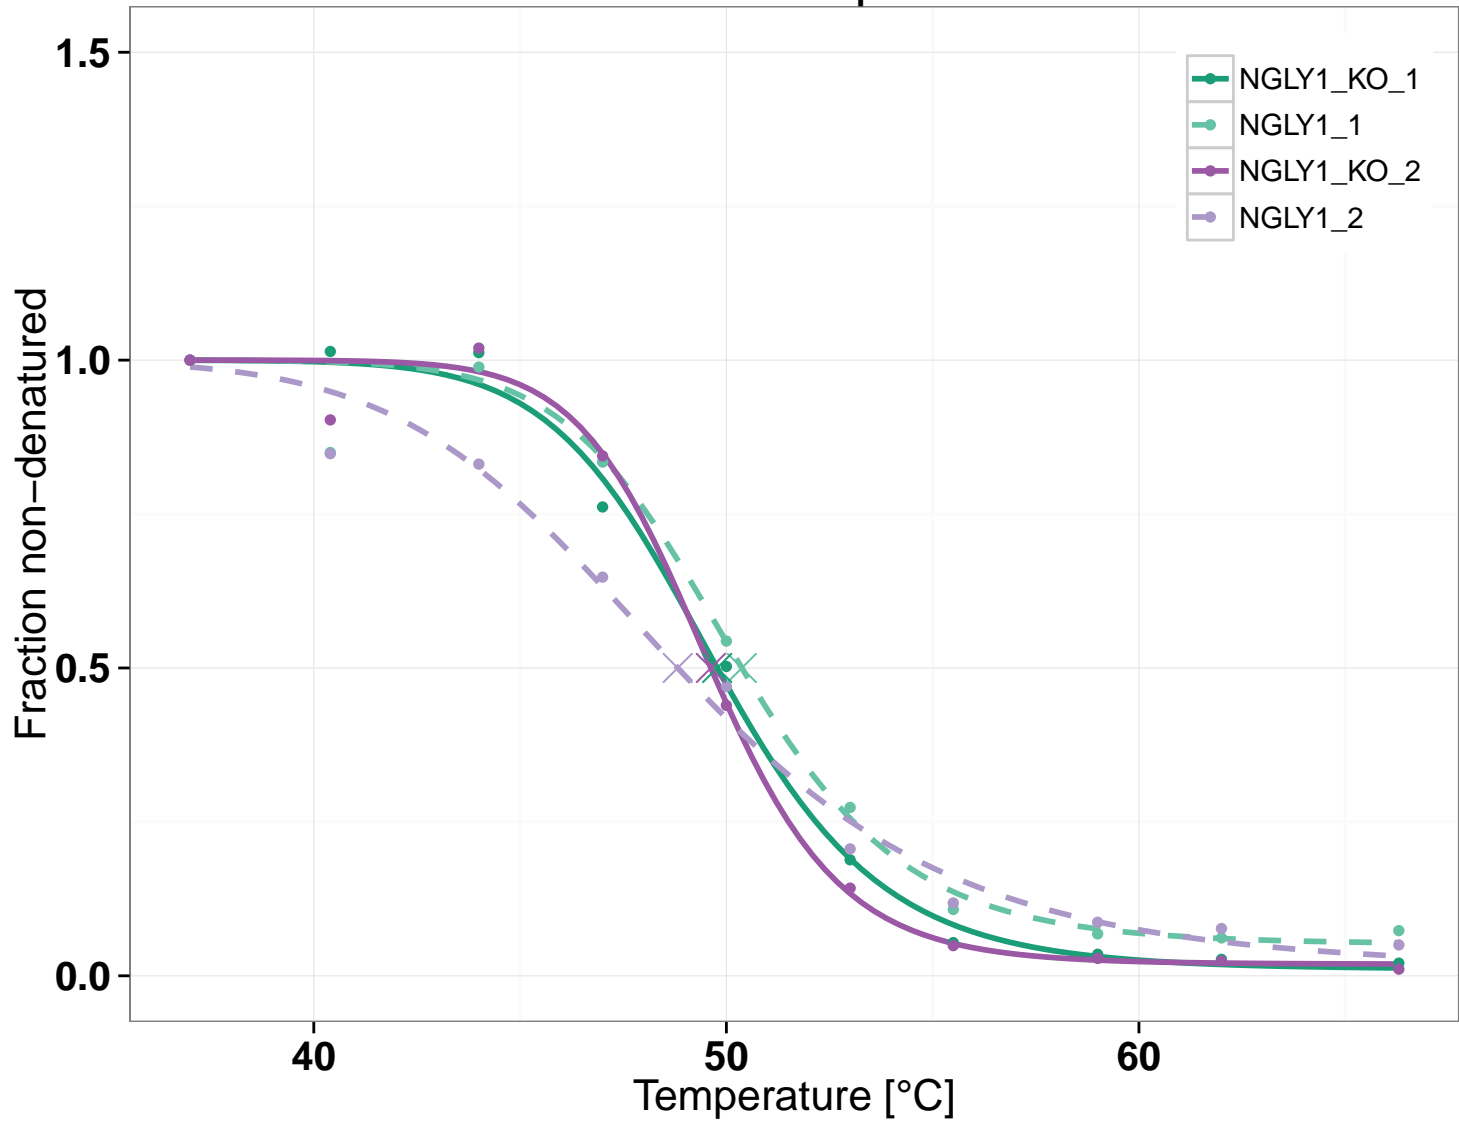

|            | meltPoint | slope  | plateau | R2   |
|------------|-----------|--------|---------|------|
| NGLY1_KO_1 | 49.78     | -0.12  | 0.01    | 1    |
| NGLY1_1    | 50.38     | -0.11  | 0.05    | 0.98 |
| NGLY1_KO_2 | 49.62     | -0.15  | 0.02    | 0.99 |
| NGLY1_2    | 48.82     | -0.073 | 0.01    | 0.99 |

Supplement: Supplementary file 910 [file 1]

IPI00000656.2|KIAA0892

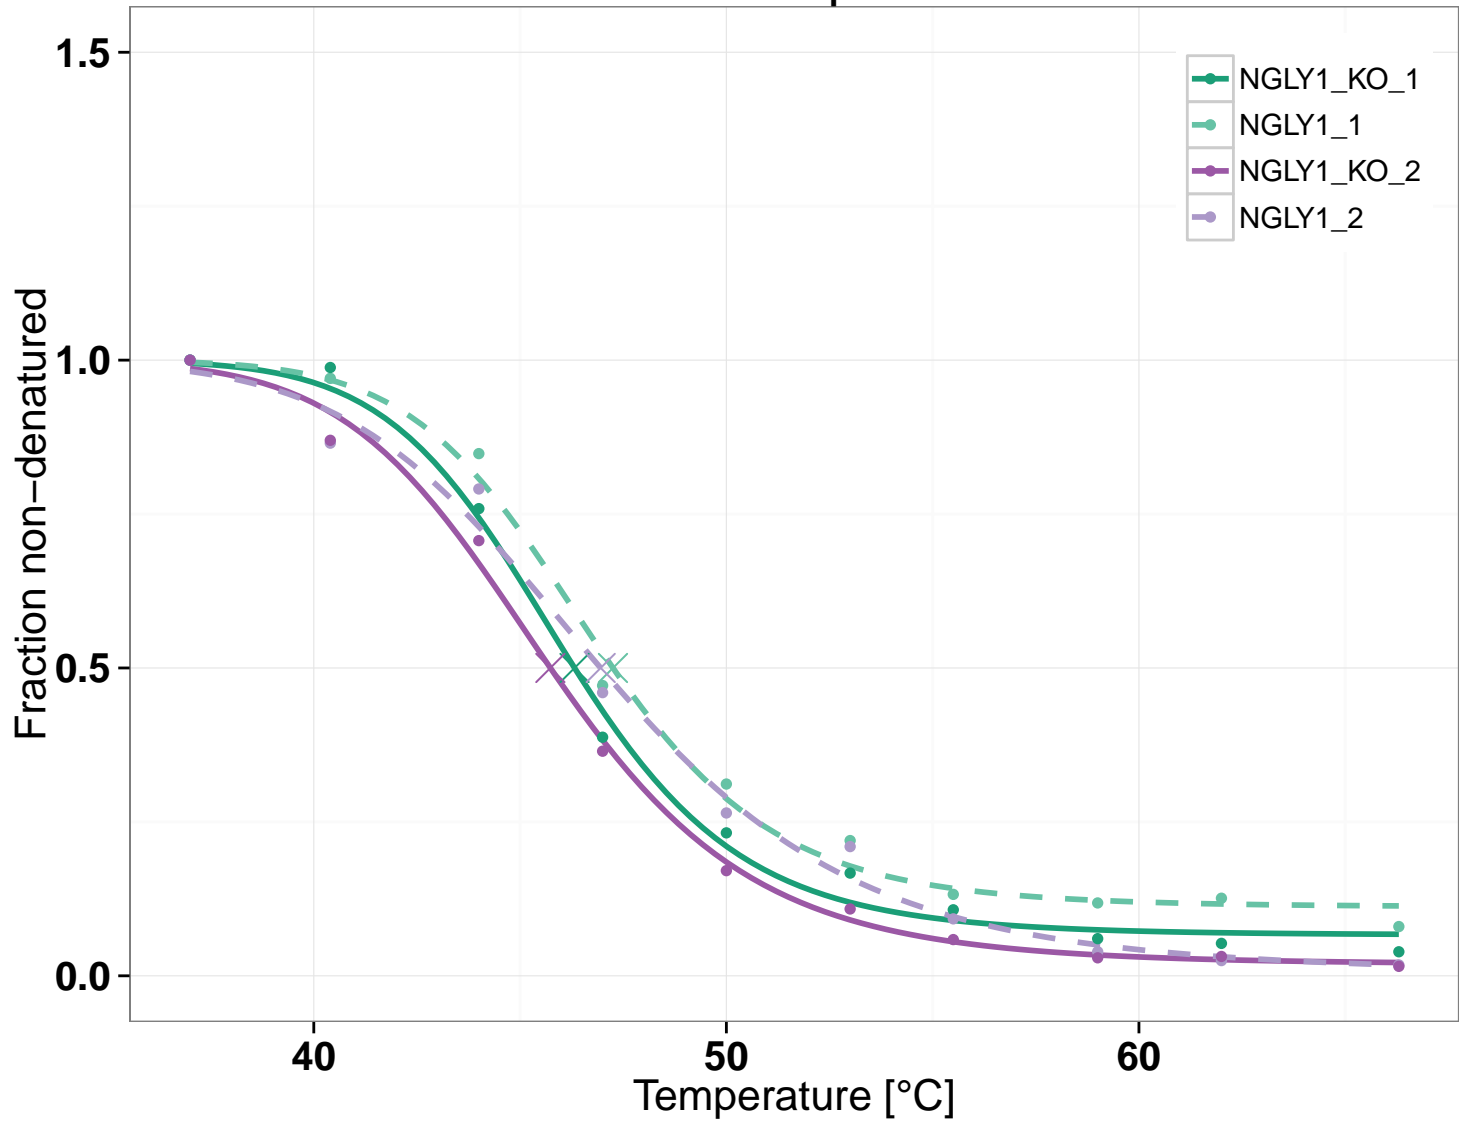

|            | meltPoint | slope  | plateau | R2   |
|------------|-----------|--------|---------|------|
| NGLY1_KO_1 | 46.32     | -0.11  | 0.07    | 0.99 |
| NGLY1_1    | 47.25     | -0.1   | 0.11    | 0.99 |
| NGLY1_KO_2 | 45.73     | -0.099 | 0.02    | 1    |
| NGLY1_2    | 46.95     | -0.08  | 0       | 0.99 |

Supplement: Supplementary file 911 [file 1]

IPI00867503.1|C17ORF71

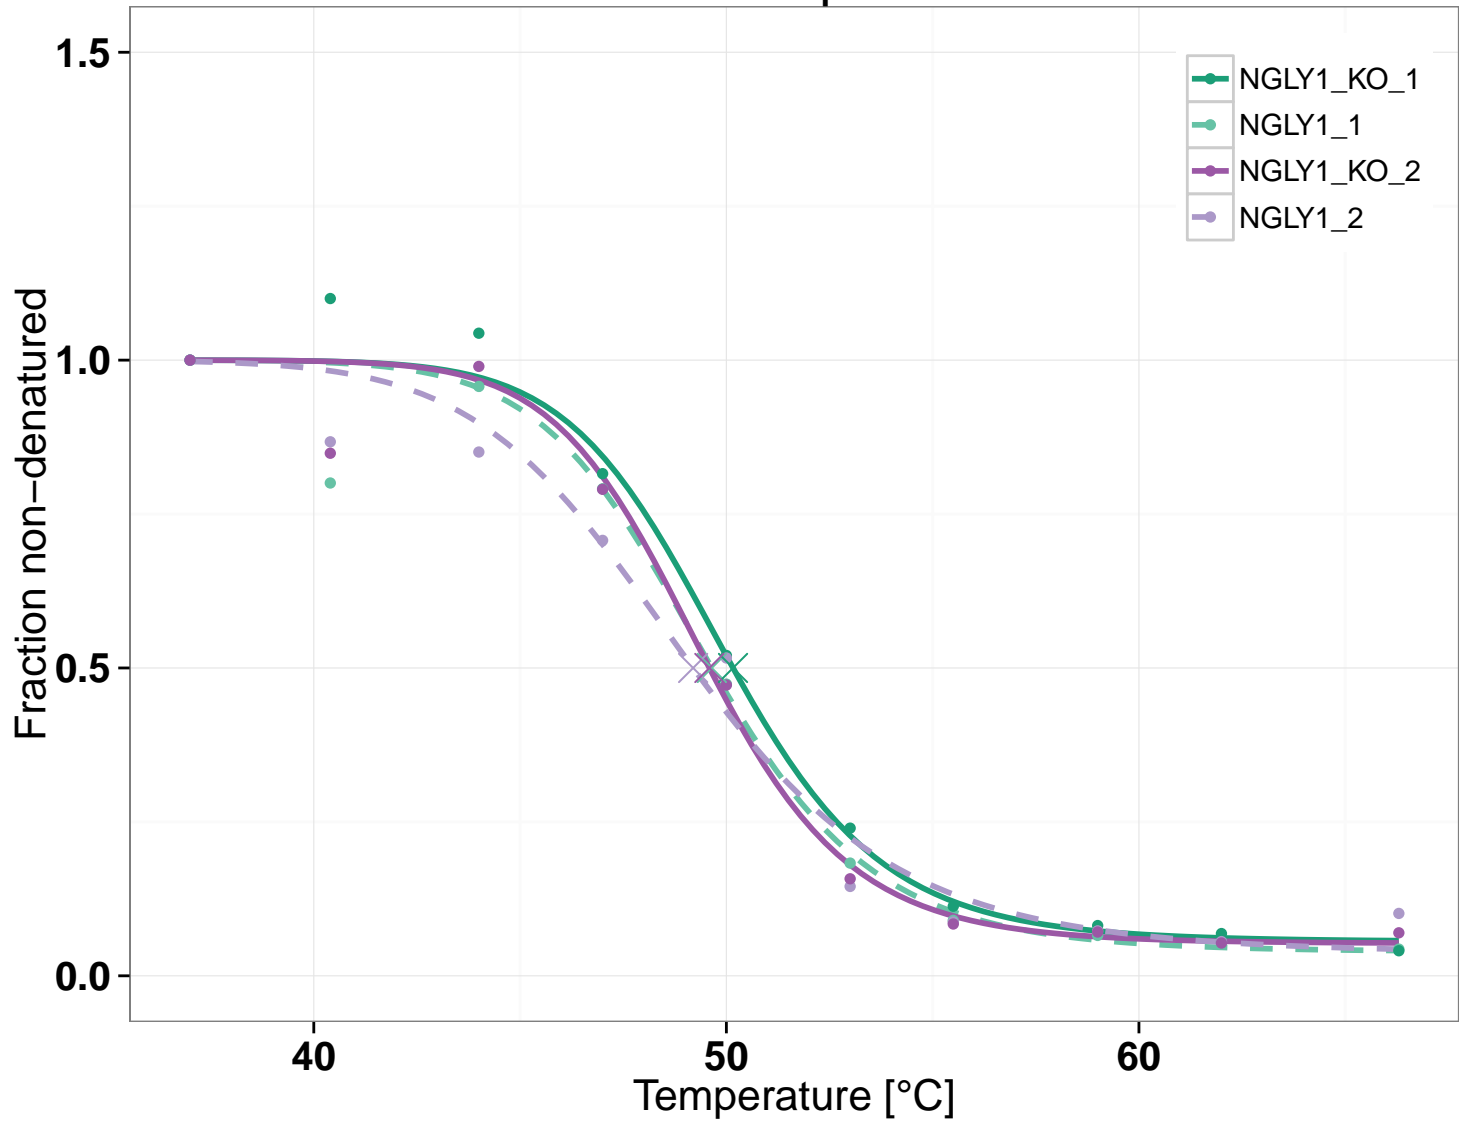

|            | meltPoint | slope  | plateau | R2   |
|------------|-----------|--------|---------|------|
| NGLY1_KO_1 | 50.16     | -0.12  | 0.06    | 0.99 |
| NGLY1_1    | 49.65     | -0.12  | 0.04    | 0.97 |
| NGLY1_KO_2 | 49.59     | -0.13  | 0.05    | 0.98 |
| NGLY1_2    | 49.19     | -0.093 | 0.04    | 0.97 |

Supplement: Supplementary file 912 [file 1]

IPI00005858.1|LATS1

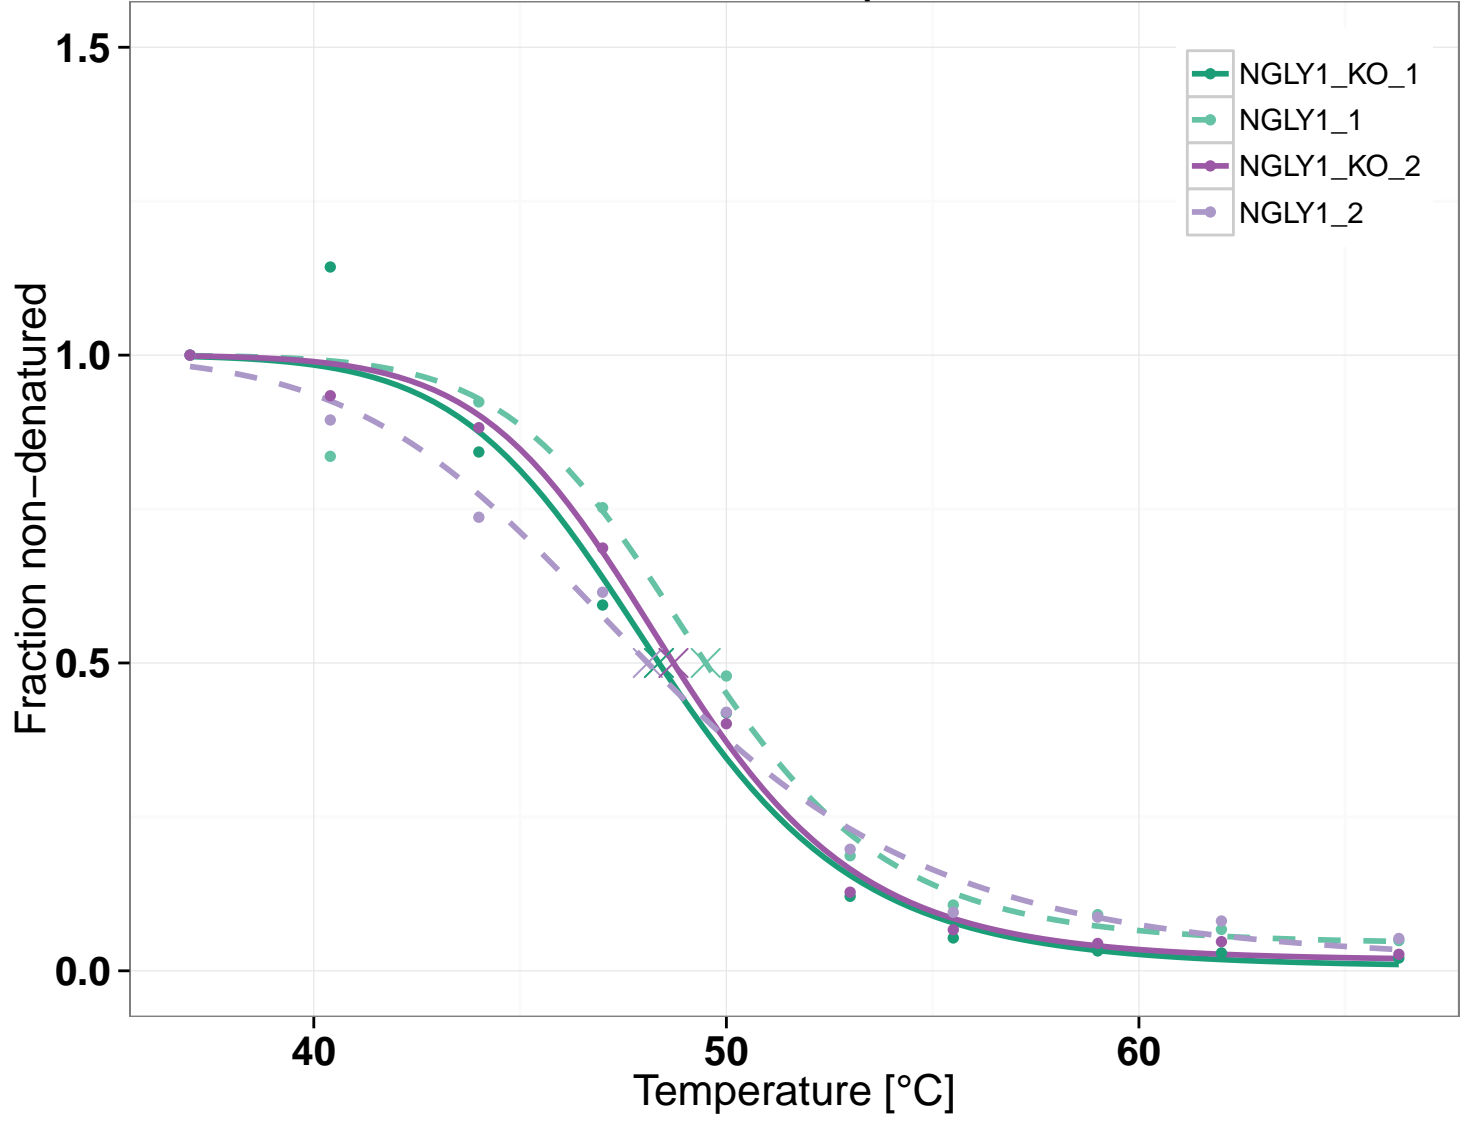

|            | meltPoint | slope | plateau | R2   |
|------------|-----------|-------|---------|------|
| NGLY1_KO_1 | 48.37     | -0.1  | 0.01    | 0.98 |
| NGLY1_1    | 49.5      | -0.1  | 0.04    | 0.98 |
| NGLY1_KO_2 | 48.72     | -0.11 | 0.02    | 1    |
| NGLY1_2    | 48.1      | -0.07 | 0.01    | 0.99 |

Supplement: Supplementary file 913 [file 1]

IPI00294842.3|MAP4K5

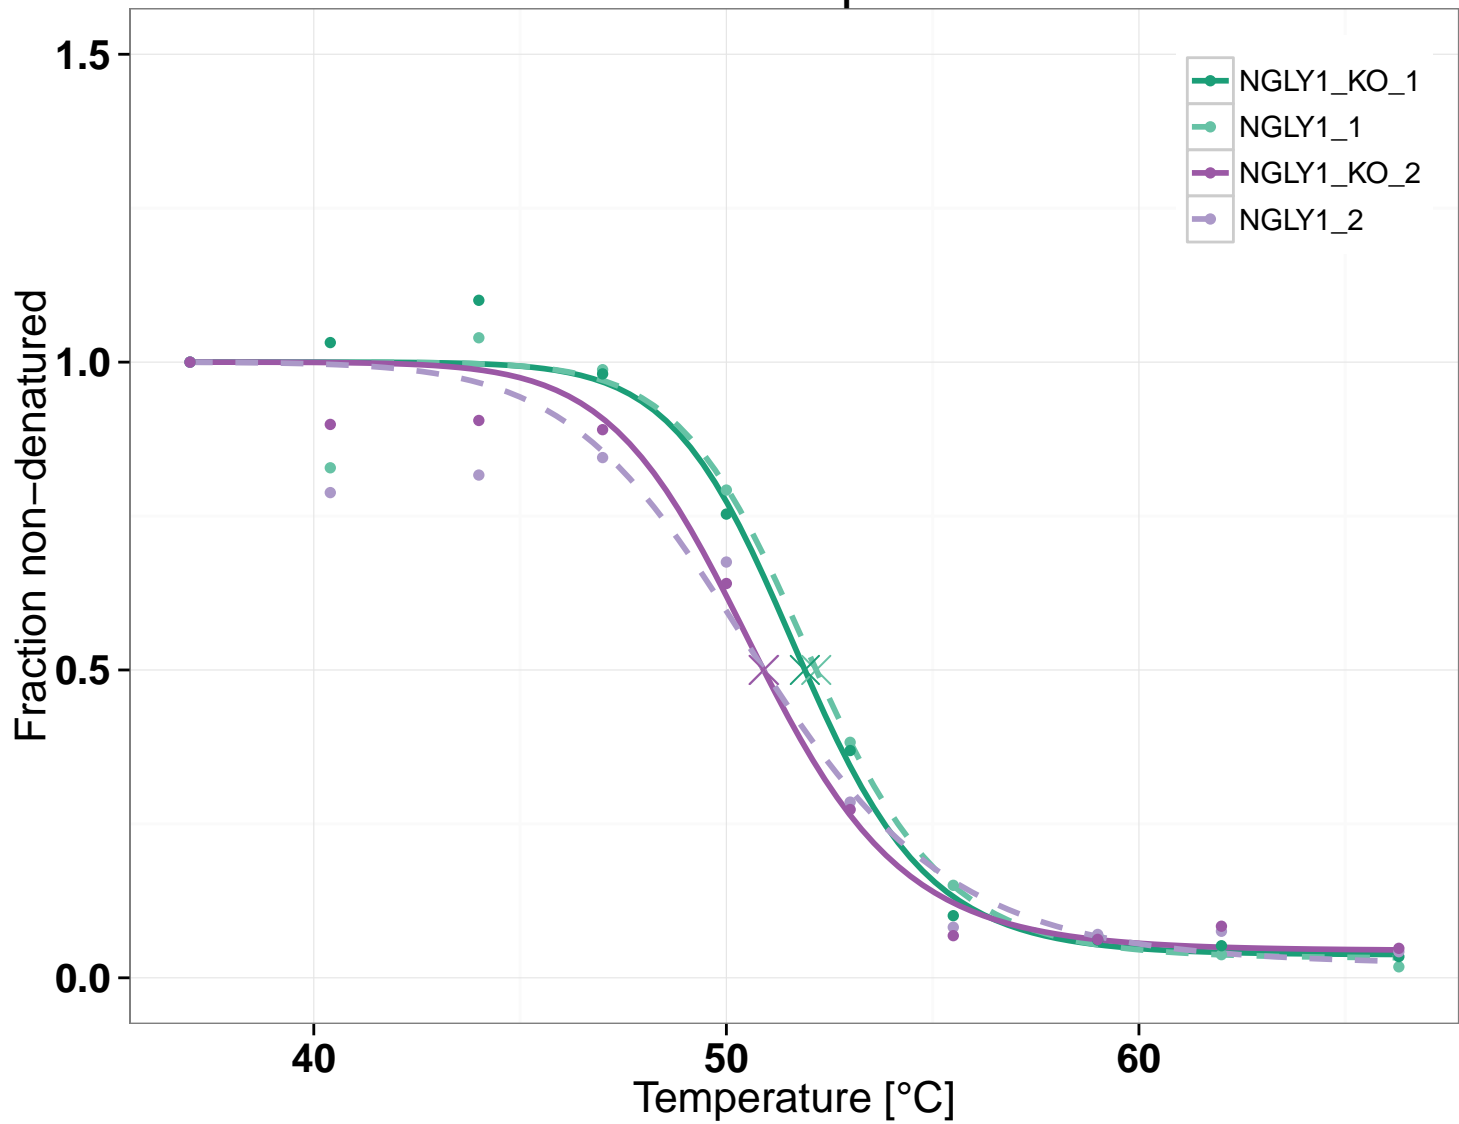

|            | meltPoint | slope | plateau | R2   |
|------------|-----------|-------|---------|------|
| NGLY1_KO_1 | 51.9      | -0.15 | 0.04    | 0.99 |
| NGLY1_1    | 52.18     | -0.15 | 0.03    | 0.98 |
| NGLY1_KO_2 | 50.9      | -0.13 | 0.04    | 0.99 |
| NGLY1_2    | 50.92     | -0.1  | 0.02    | 0.94 |

Supplement: Supplementary file 914 [file 1]

# IPI00291022.3|DEM1

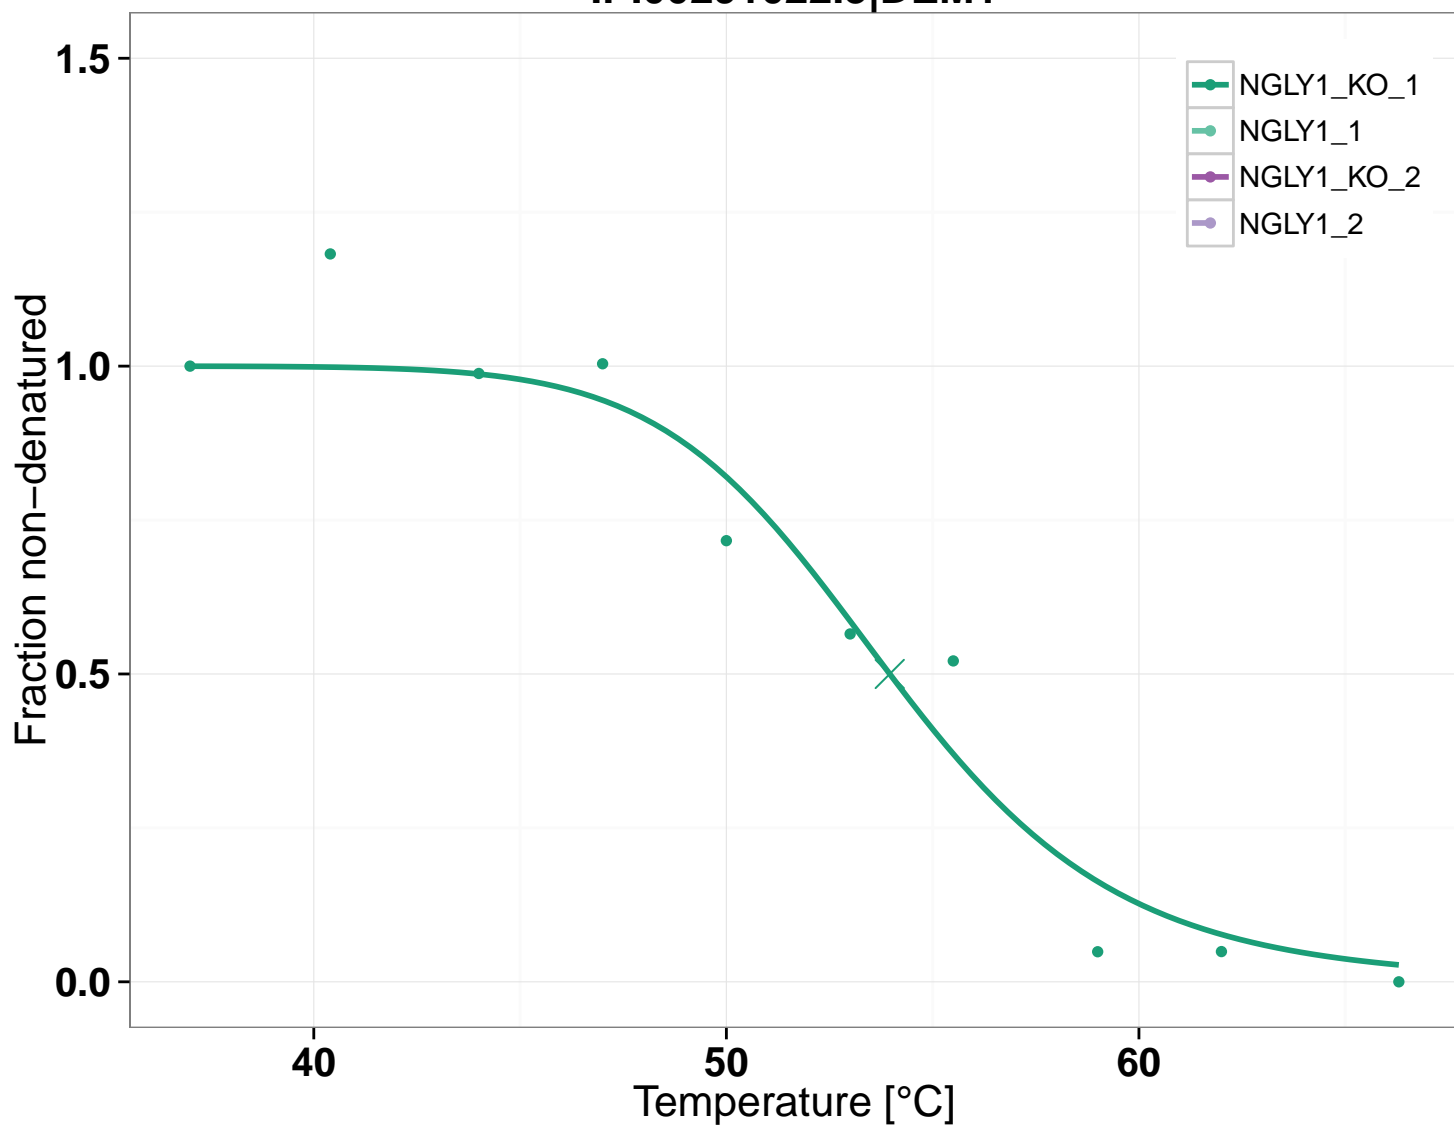

|            | meltPoint | slope | plateau | R2   |
|------------|-----------|-------|---------|------|
| NGLY1_KO_1 | 53.96     | -0.09 | 0       | 0.95 |
| NGLY1_1    | -         | -     | -       | -    |
| NGLY1_KO_2 | -         | -     | -       | -    |
| NGLY1_2    | -         | -     | -       | -    |

Supplement: Supplementary file 915 [file 1]

# IPI00024804.3|ATP2A1

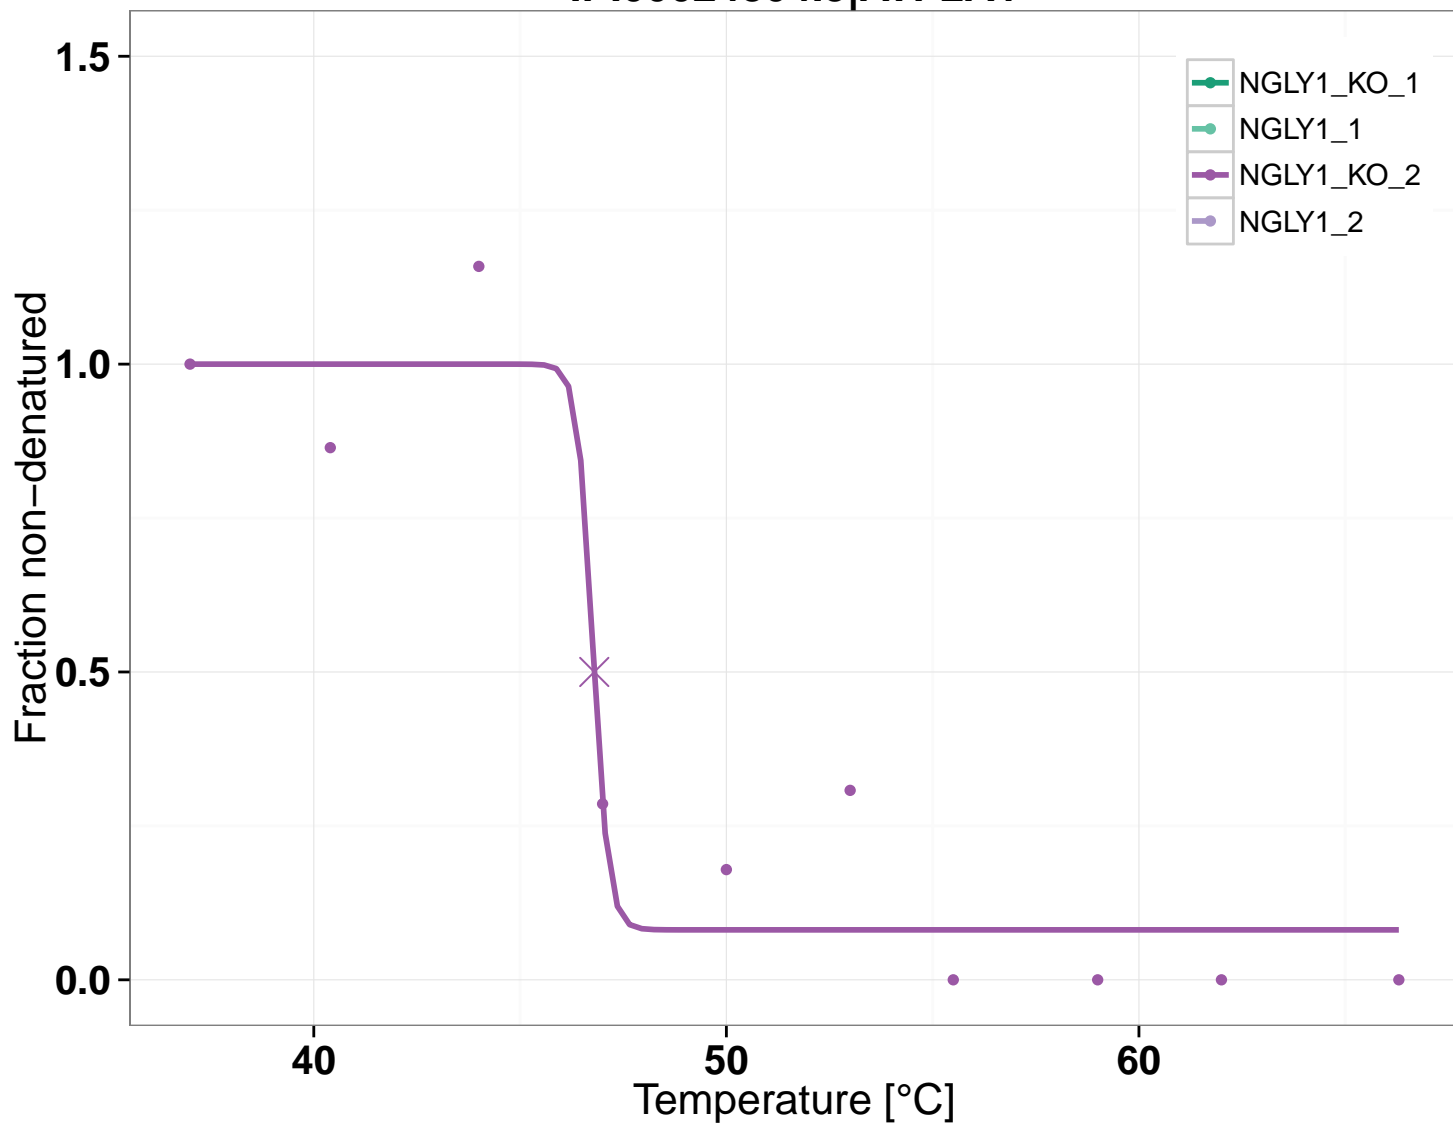

|            | meltPoint | slope | plateau | R2   |
|------------|-----------|-------|---------|------|
| NGLY1_KO_1 | —         | —     | —       | —    |
| NGLY1_1    | —         | —     | —       | —    |
| NGLY1_KO_2 | 46.8      | -1.2  | 0.08    | 0.93 |
| NGLY1_2    | —         | —     | —       | —    |

Supplement: Supplementary file 916 [file 1]

IPI00457115.1|PAQR3

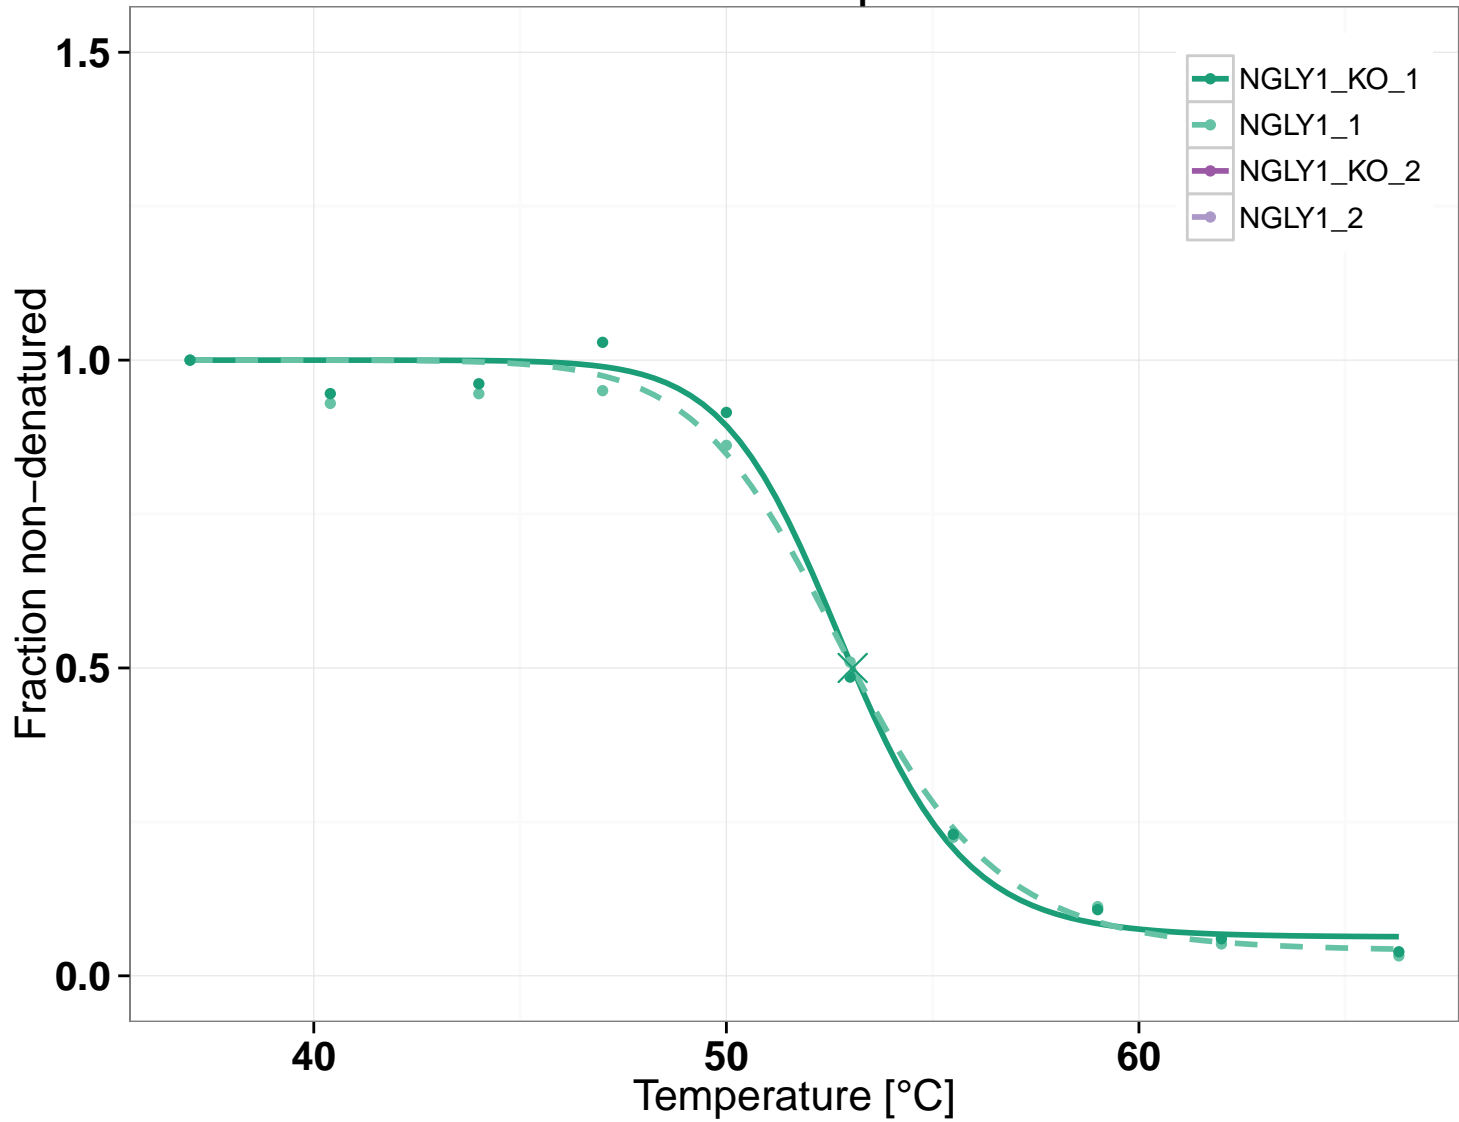

|            | meltPoint | slope | plateau | R2   |
|------------|-----------|-------|---------|------|
| NGLY1_KO_1 | 53.06     | -0.16 | 0.06    | 0.99 |
| NGLY1_1    | 53.07     | -0.13 | 0.04    | 0.99 |
| NGLY1_KO_2 | -         | -     | -       | -    |
| NGLY1_2    | -         | -     | -       | -    |

Supplement: Supplementary file 917 [file 1]

IPI00100748.4|HSPBP1

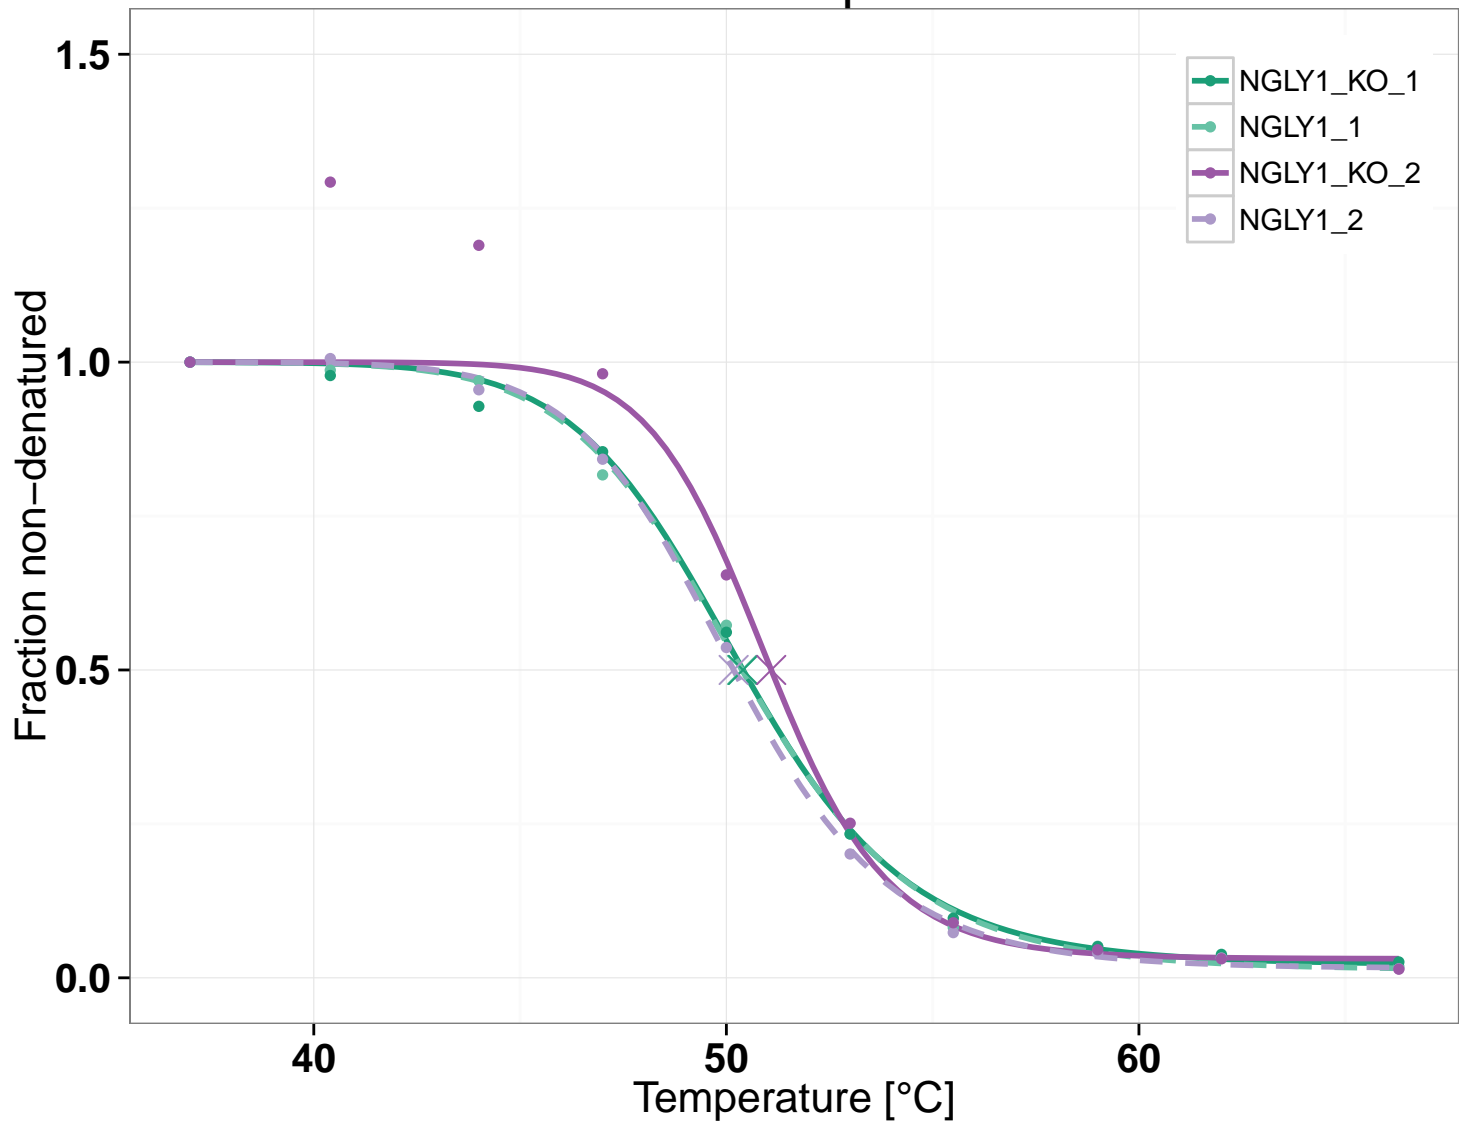

|            | meltPoint | slope | plateau | R2   |
|------------|-----------|-------|---------|------|
| NGLY1_KO_1 | 50.4      | -0.12 | 0.02    | 1    |
| NGLY1_1    | 50.38     | -0.12 | 0.01    | 1    |
| NGLY1_KO_2 | 51.09     | -0.17 | 0.03    | 0.95 |
| NGLY1_2    | 50.18     | -0.13 | 0.01    | 1    |

Supplement: Supplementary file 918 [file 1]

# IPI00018840.6|TRIP4

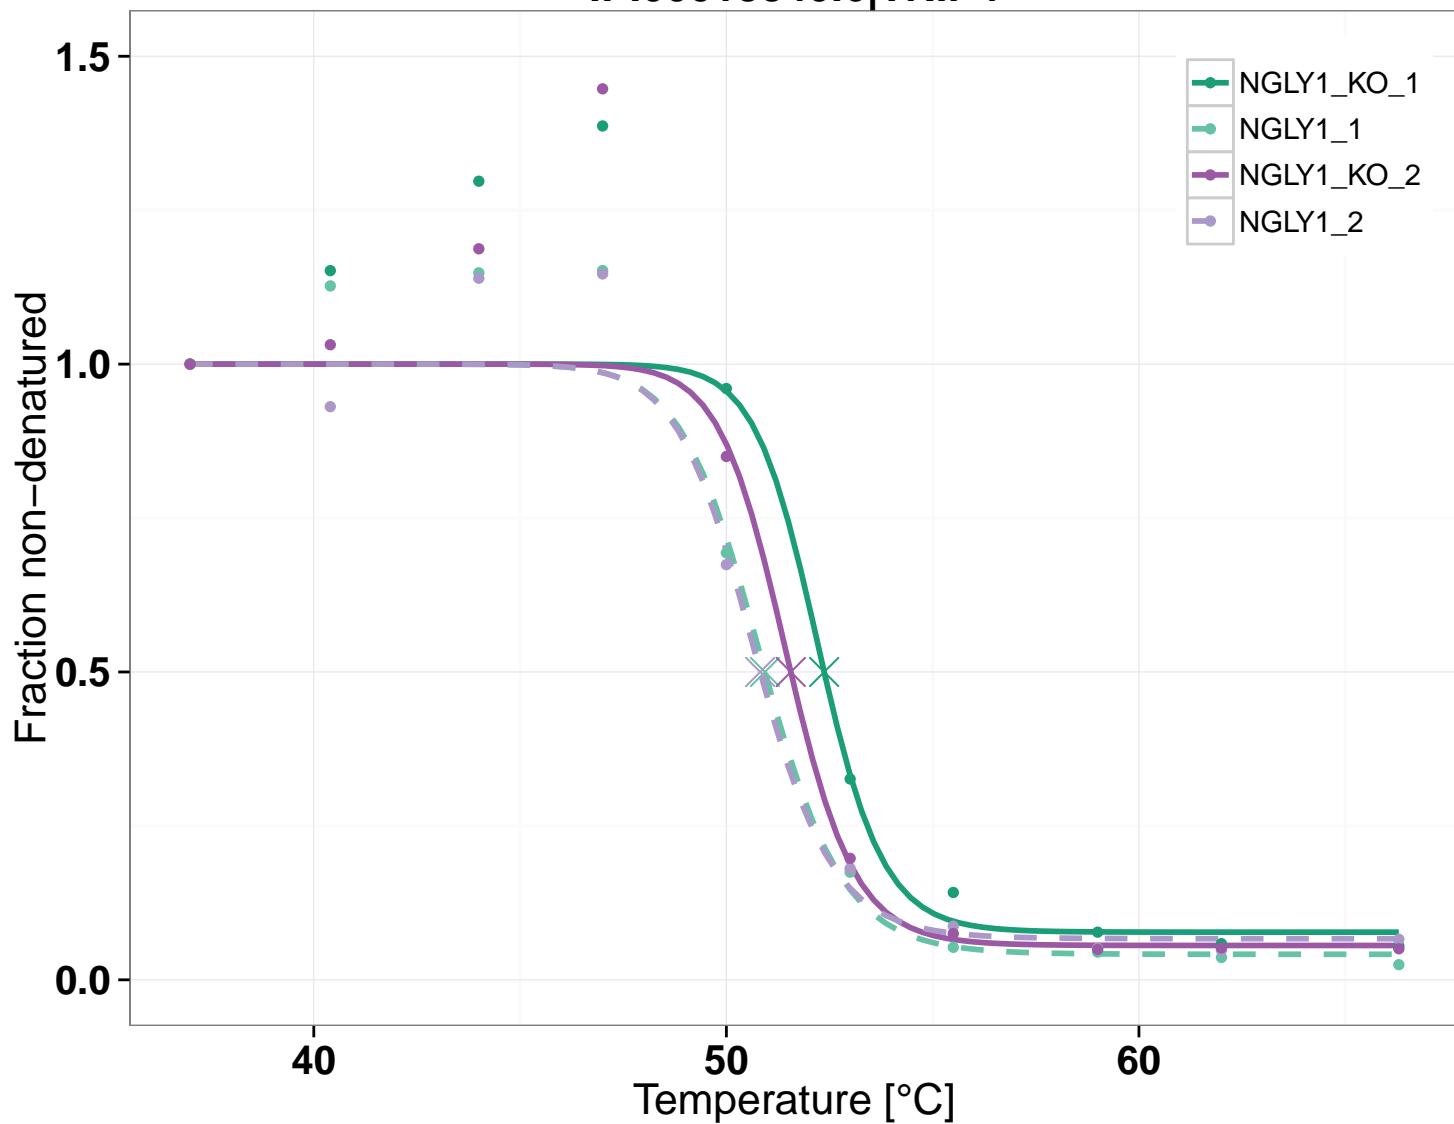

|            | meltPoint | slope | plateau | R2   |
|------------|-----------|-------|---------|------|
| NGLY1_KO_1 | 52.37     | -0.3  | 0.08    | 0.91 |
| NGLY1_1    | 50.93     | -0.24 | 0.04    | 0.97 |
| NGLY1_KO_2 | 51.56     | -0.29 | 0.06    | 0.92 |
| NGLY1_2    | 50.82     | -0.25 | 0.07    | 0.98 |

Supplement: Supplementary file 919 [file 1]

# IPI00298883.7|AZI1

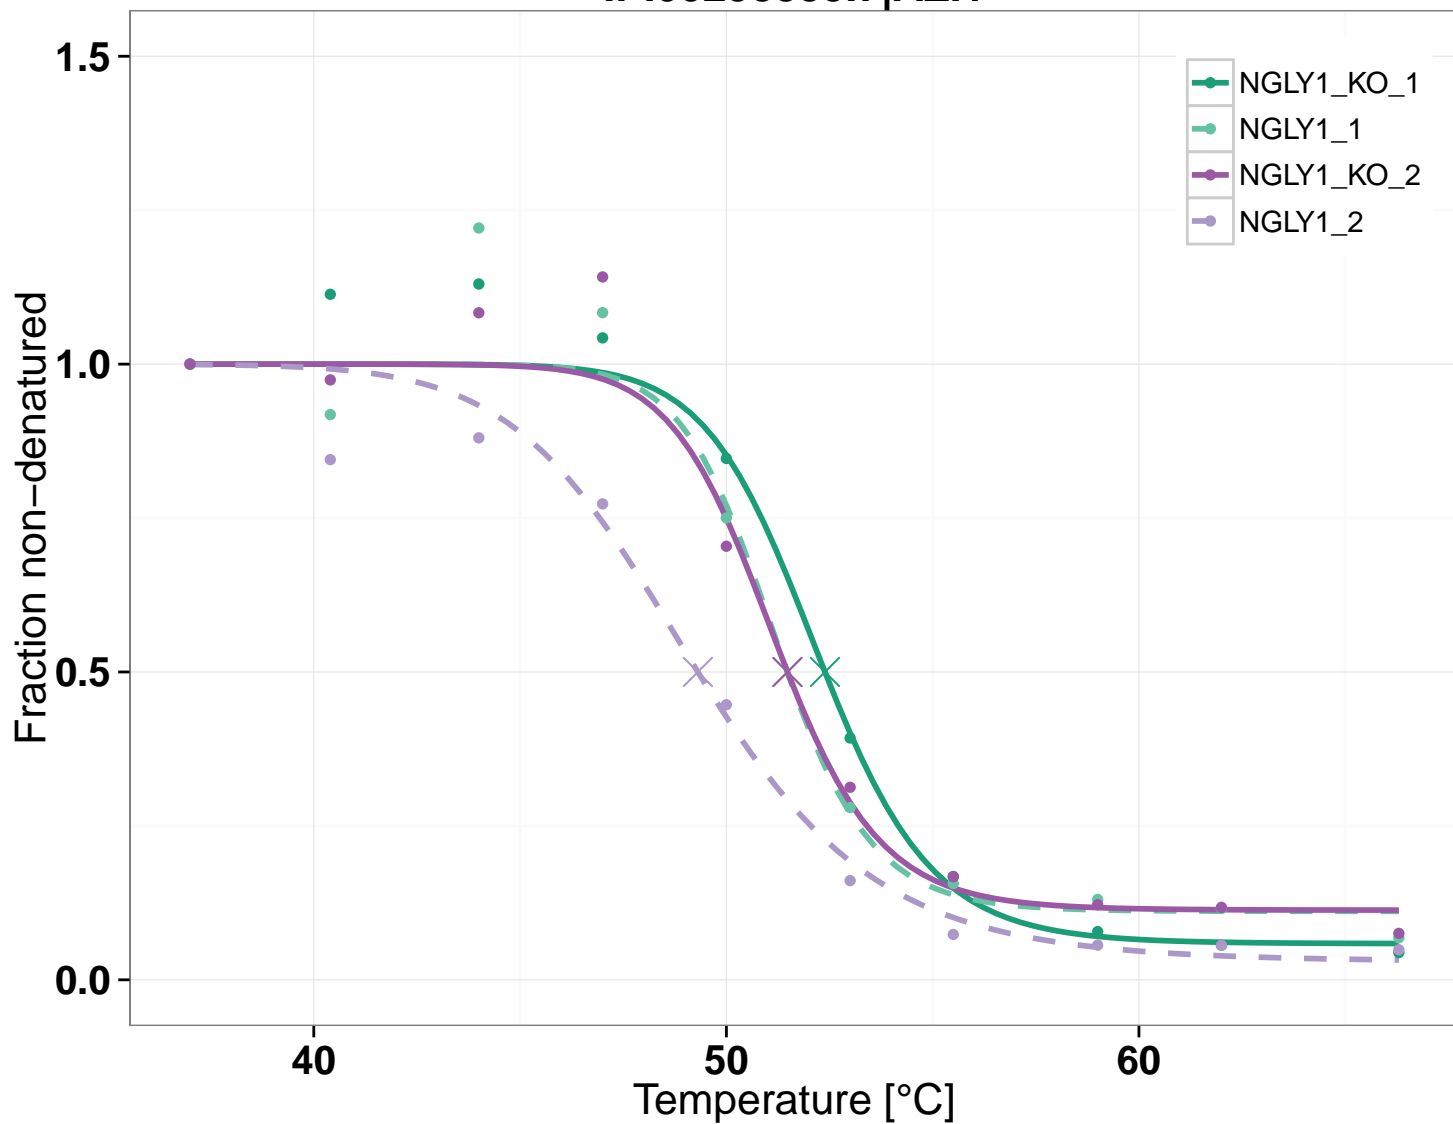

|            | meltPoint | slope | plateau | R2   |
|------------|-----------|-------|---------|------|
| NGLY1_KO_1 | 52.39     | -0.17 | 0.06    | 0.98 |
| NGLY1_1    | 51.48     | -0.19 | 0.11    | 0.96 |
| NGLY1_KO_2 | 51.48     | -0.18 | 0.11    | 0.98 |
| NGLY1_2    | 49.31     | -0.11 | 0.03    | 0.98 |

Supplement: Supplementary file 920 [file 1]

# IPI00879760.1|WDR91

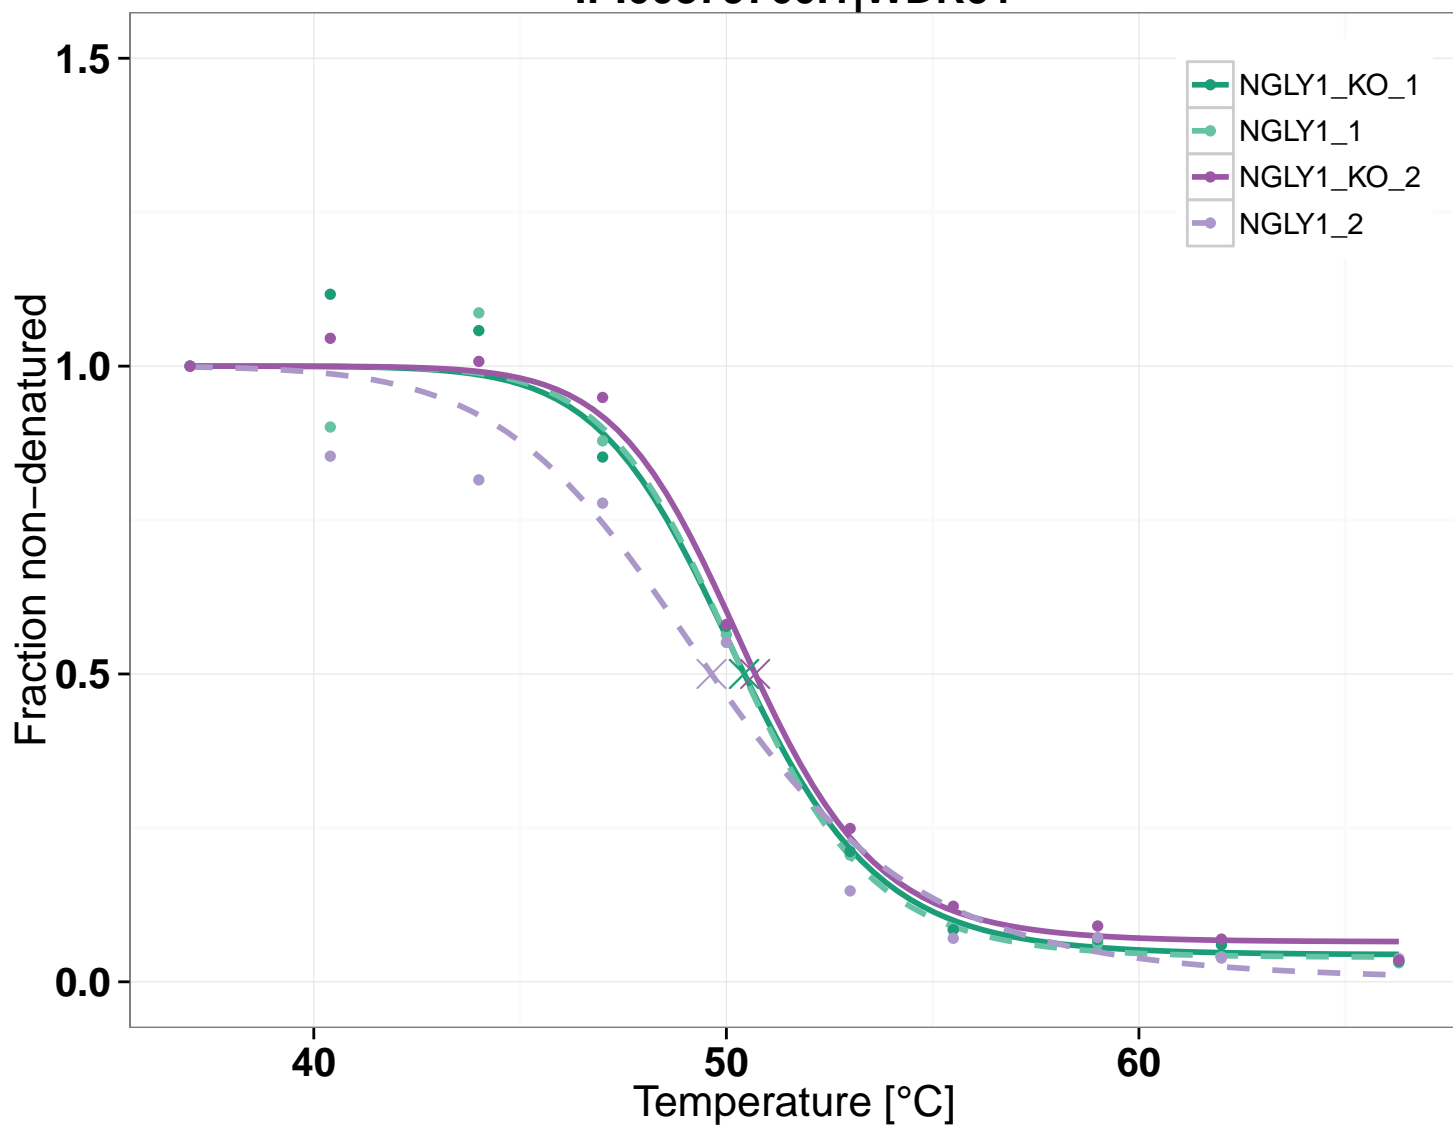

|            | meltPoint | slope  | plateau | R2   |
|------------|-----------|--------|---------|------|
| NGLY1_KO_1 | 50.43     | -0.14  | 0.04    | 0.99 |
| NGLY1_1    | 50.42     | -0.15  | 0.04    | 0.99 |
| NGLY1_KO_2 | 50.7      | -0.15  | 0.06    | 1    |
| NGLY1_2    | 49.64     | -0.097 | 0       | 0.97 |

Supplement: Supplementary file 921 [file 1]

IPI00011698.4|SAP18

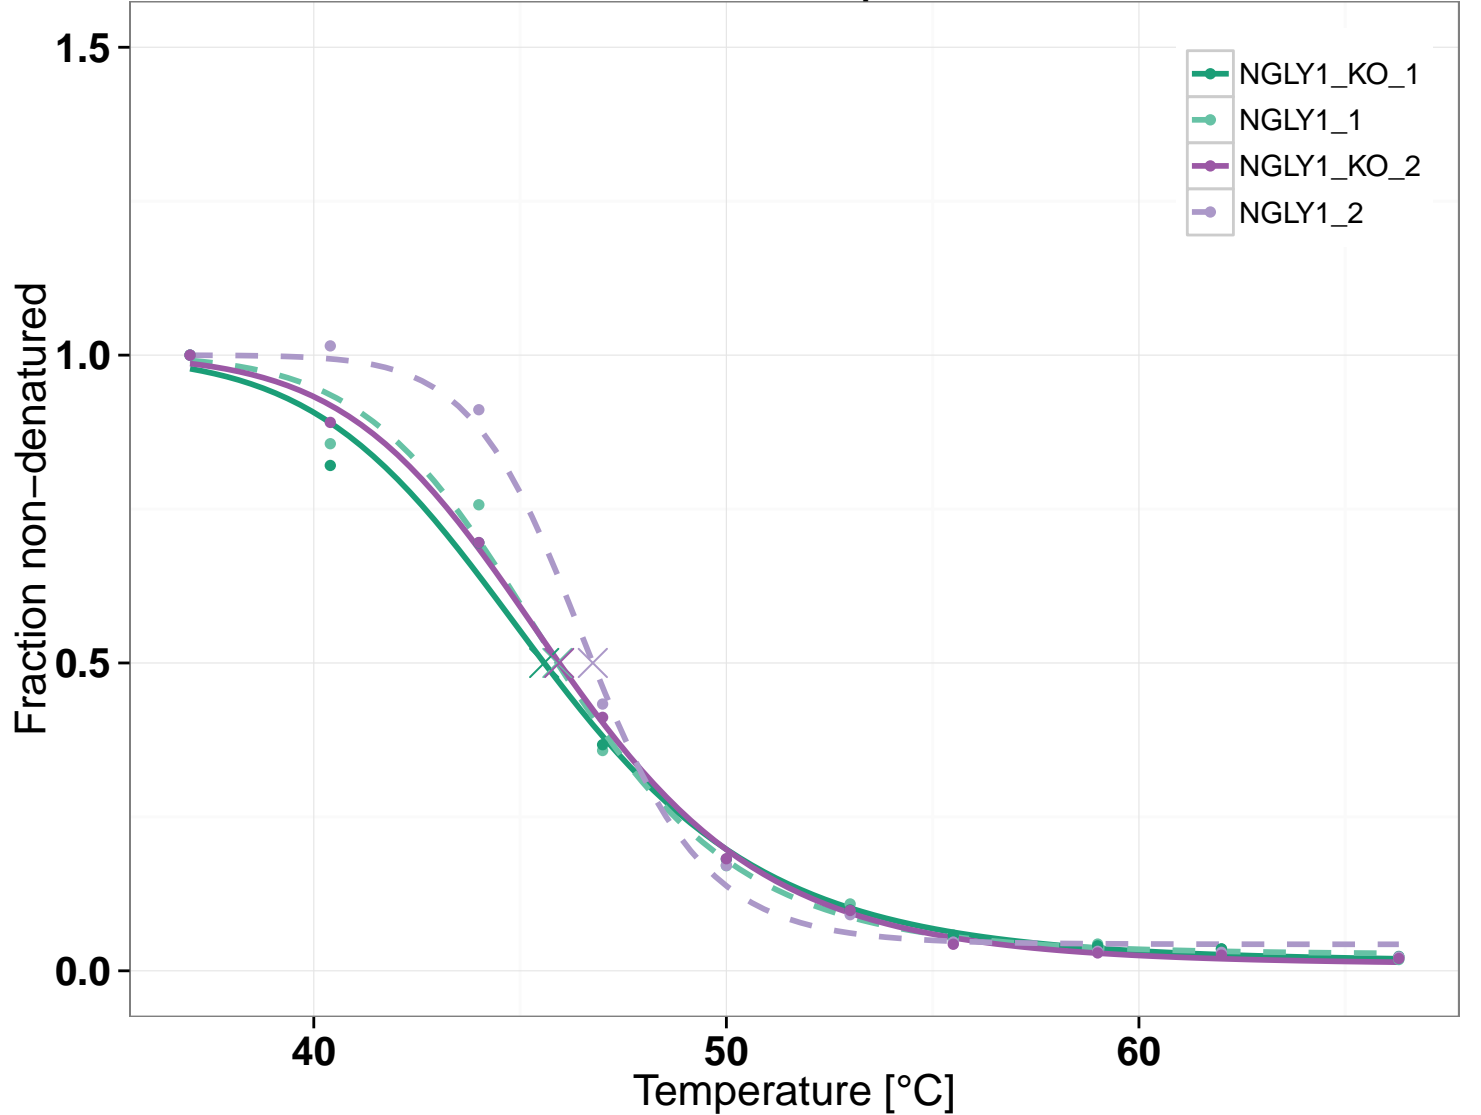

|            | meltPoint | slope  | plateau | R2   |
|------------|-----------|--------|---------|------|
| NGLY1_KO_1 | 45.58     | -0.09  | 0.01    | 0.99 |
| NGLY1_1    | 45.9      | -0.11  | 0.03    | 0.99 |
| NGLY1_KO_2 | 45.95     | -0.097 | 0.01    | 1    |
| NGLY1_2    | 46.76     | -0.17  | 0.04    | 1    |

Supplement: Supplementary file 922 [file 1]

IPI00402618.4|ZNF275

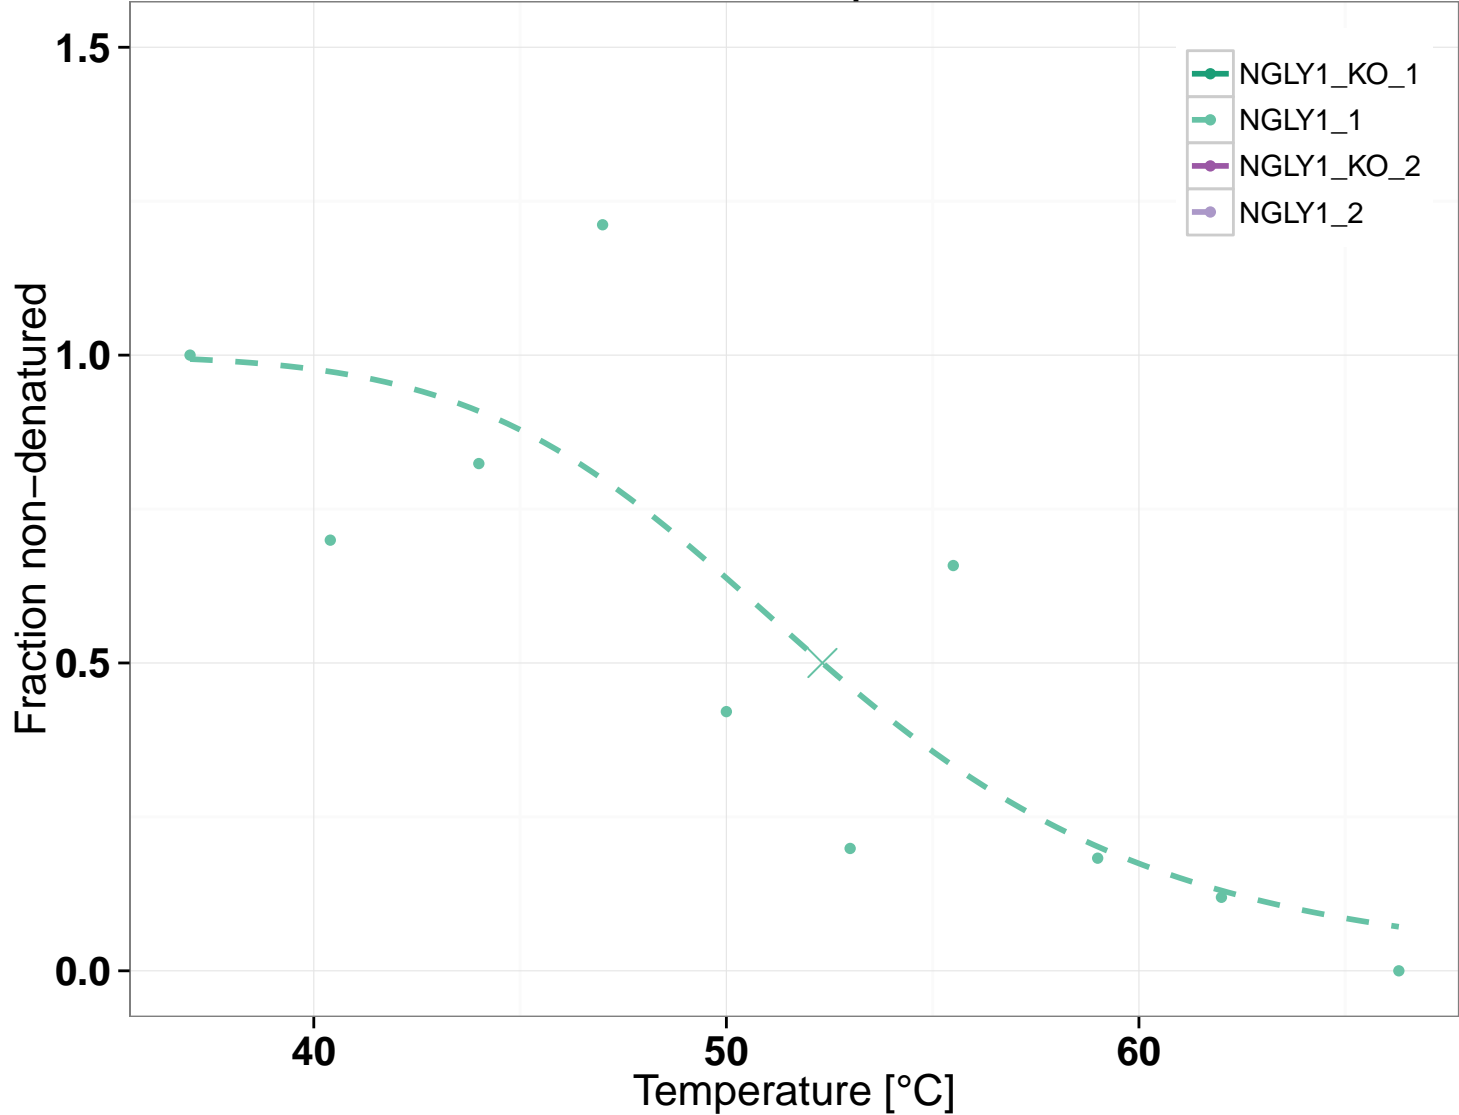

|            | meltPoint | slope | plateau | R2   |
|------------|-----------|-------|---------|------|
| NGLY1_KO_1 | -         | -     | -       | -    |
| NGLY1_1    | 52.33     | -0.06 | 0       | 0.68 |
| NGLY1_KO_2 | -         | -     | -       | -    |
| NGLY1_2    | -         | -     | -       | -    |

Supplement: Supplementary file 923 [file 1]

IPI00291751.6|C2ORF47

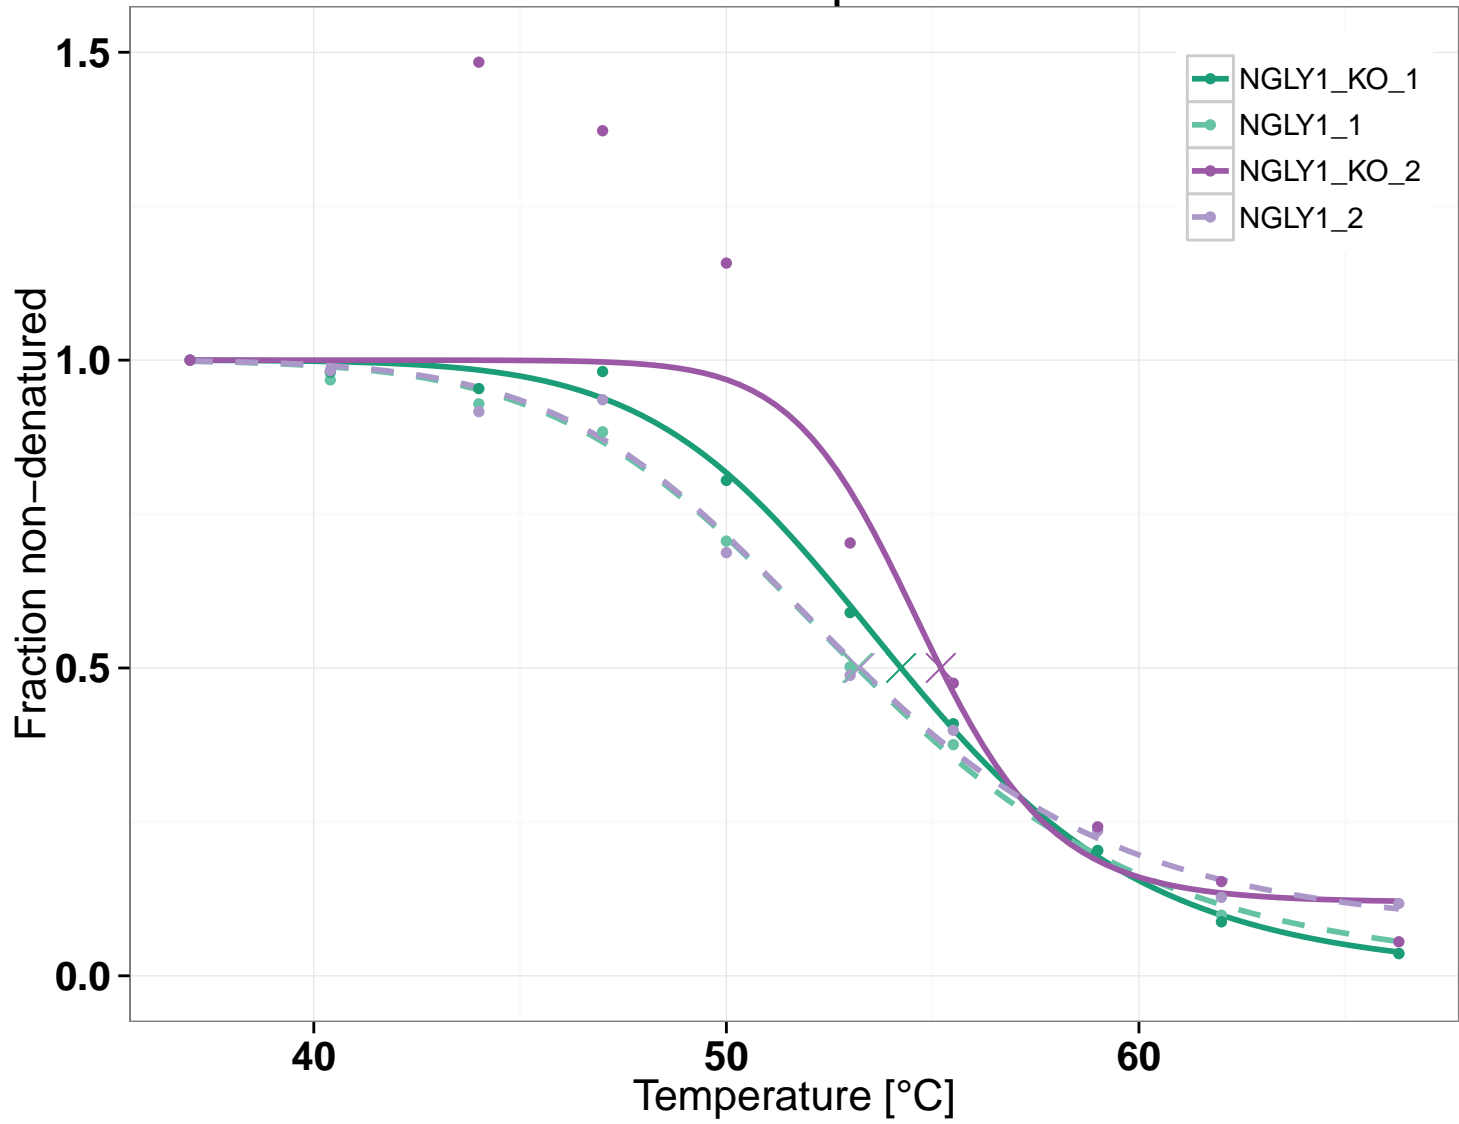

|            | meltPoint | slope  | plateau | R2   |
|------------|-----------|--------|---------|------|
| NGLY1_KO_1 | 54.23     | -0.083 | 0       | 1    |
| NGLY1_1    | 53.17     | -0.069 | 0       | 1    |
| NGLY1_KO_2 | 55.2      | -0.14  | 0.12    | 0.73 |
| NGLY1_2    | 53.23     | -0.068 | 0.07    | 0.99 |

Supplement: Supplementary file 924 [file 1]

IPI00146380.1|C9ORF21

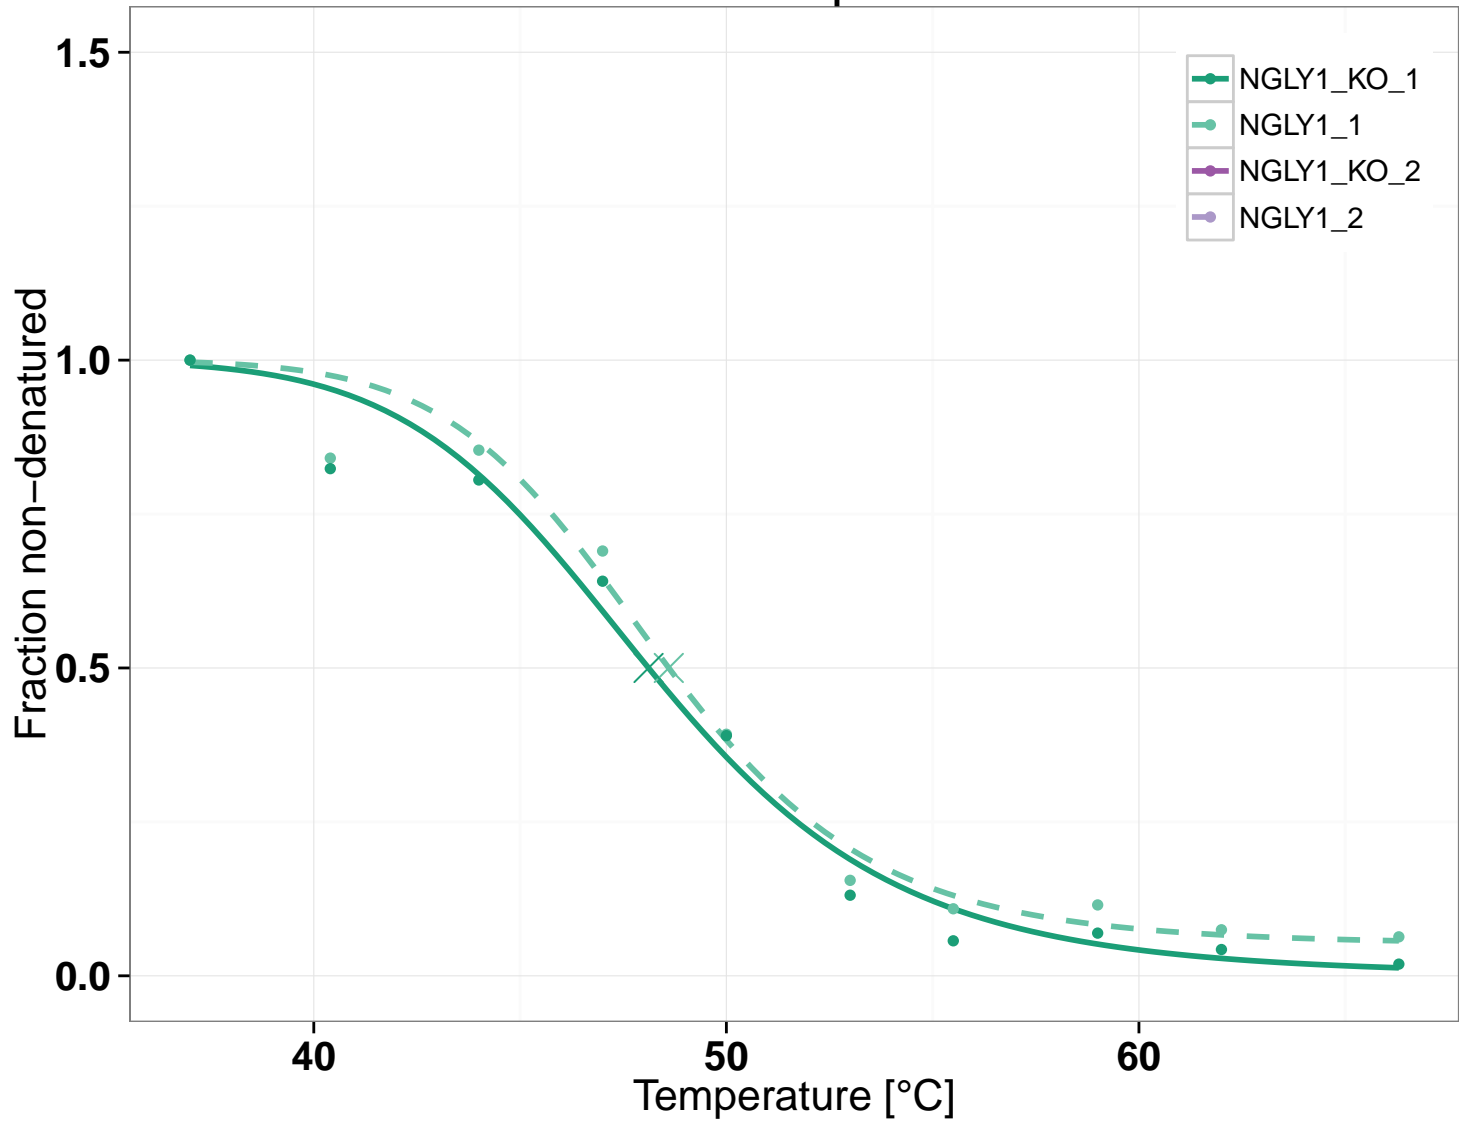

|            | meltPoint | slope  | plateau | R2   |
|------------|-----------|--------|---------|------|
| NGLY1_KO_1 | 48.11     | -0.083 | 0       | 0.98 |
| NGLY1_1    | 48.6      | -0.092 | 0.05    | 0.98 |
| NGLY1_KO_2 | -         | -      | -       | -    |
| NGLY1_2    | -         | -      | -       | -    |

Supplement: Supplementary file 925 [file 1]

IPI00220102.1|DNAJB2

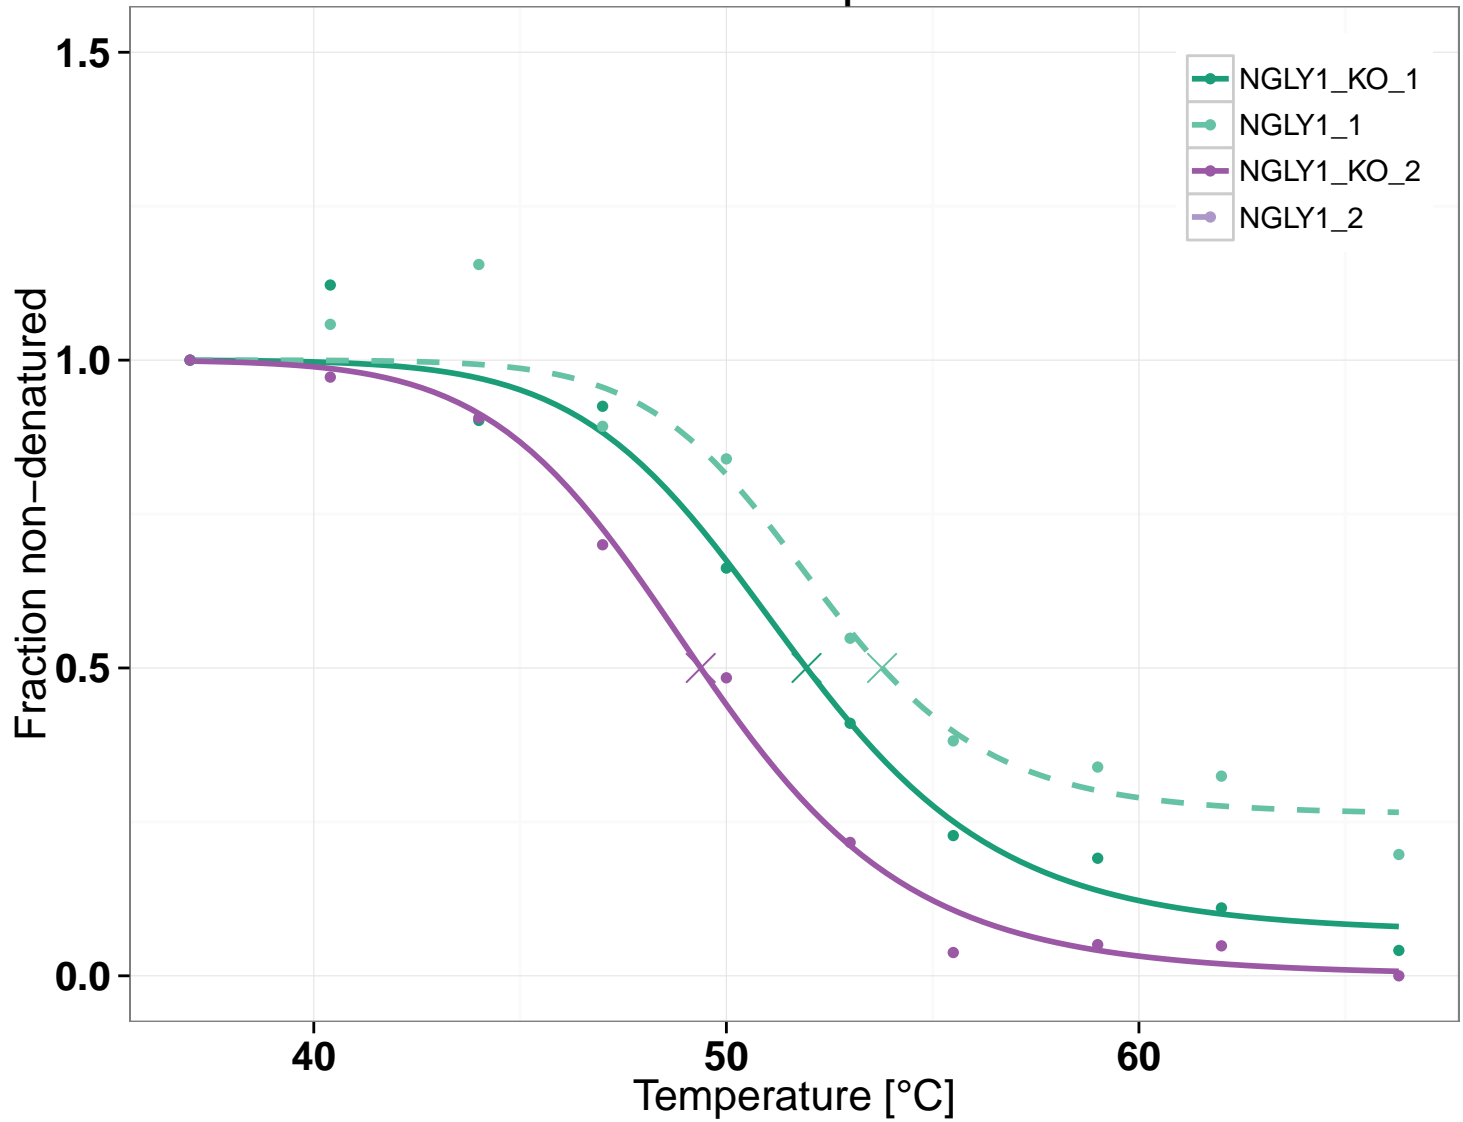

|            | meltPoint | slope  | plateau | R2   |
|------------|-----------|--------|---------|------|
| NGLY1_KO_1 | 51.94     | -0.091 | 0.07    | 0.98 |
| NGLY1_1    | 53.77     | -0.089 | 0.26    | 0.96 |
| NGLY1_KO_2 | 49.38     | -0.099 | 0       | 0.99 |
| NGLY1_2    | -         | -      | -       | -    |

Supplement: Supplementary file 926 [file 1]

IPI00302028.1|CDC37L1

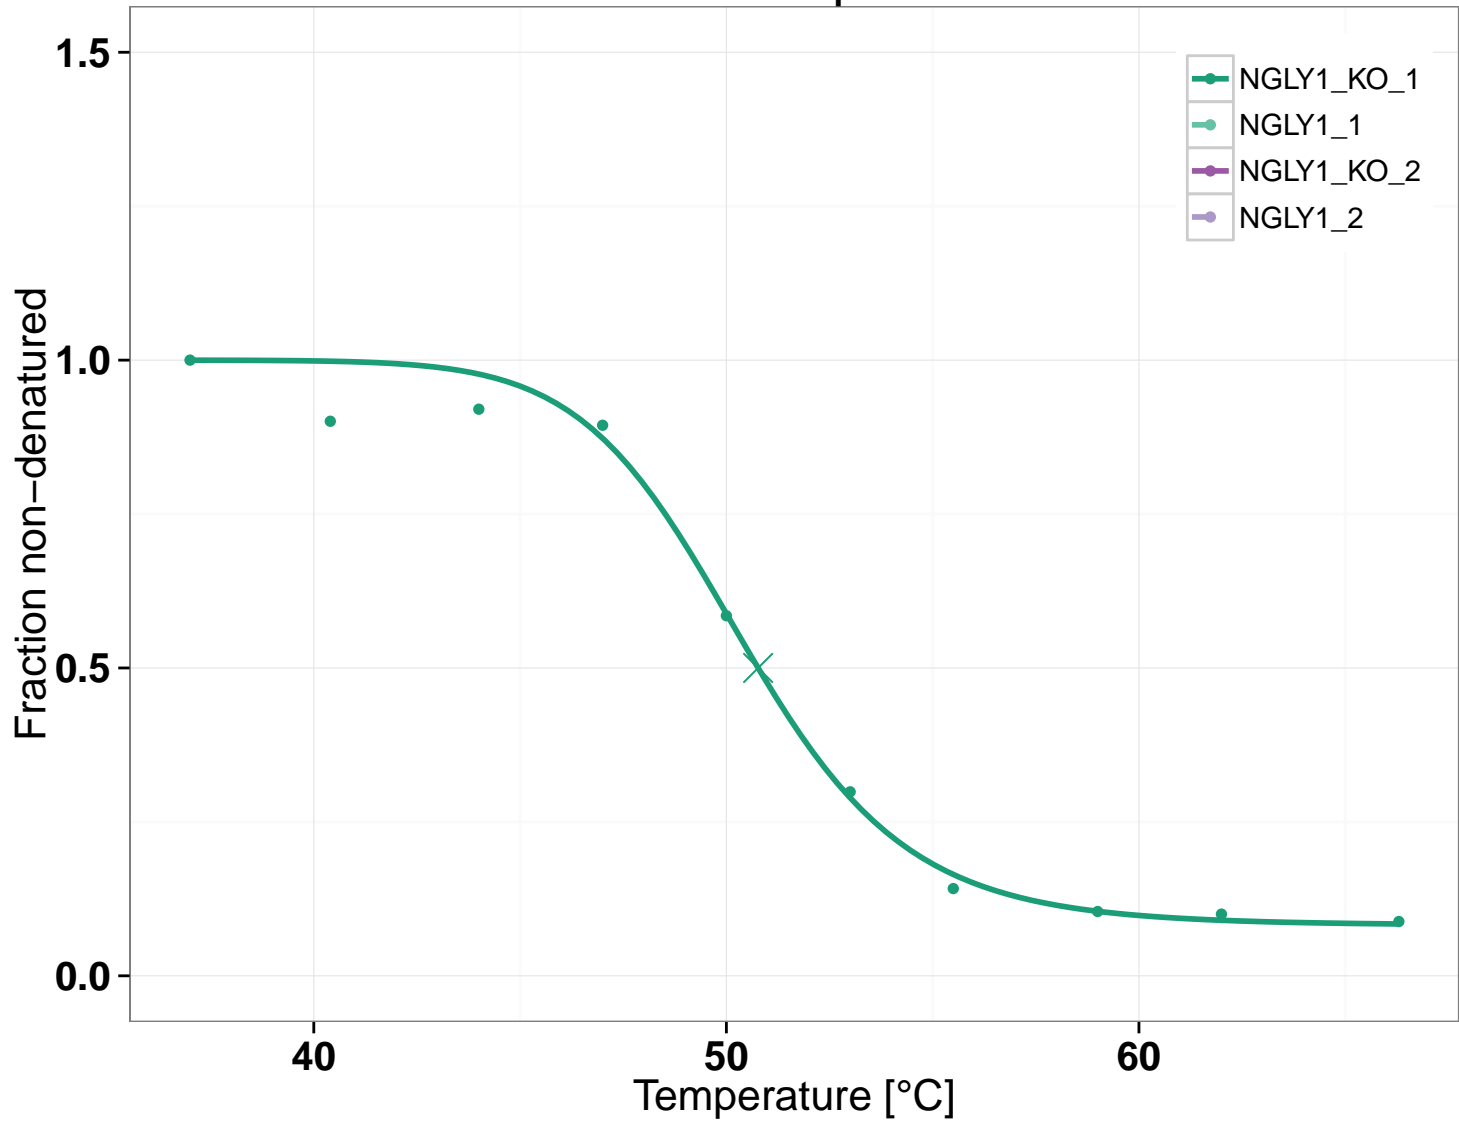

|            | meltPoint | slope | plateau | R2   |
|------------|-----------|-------|---------|------|
| NGLY1_KO_1 | 50.77     | -0.12 | 0.08    | 0.99 |
| NGLY1_1    | -         | -     | -       | -    |
| NGLY1_KO_2 | -         | -     | -       | -    |
| NGLY1_2    | -         | -     | -       | -    |

Supplement: Supplementary file 927 [file 1]

IPI00218052.5|WDFY3

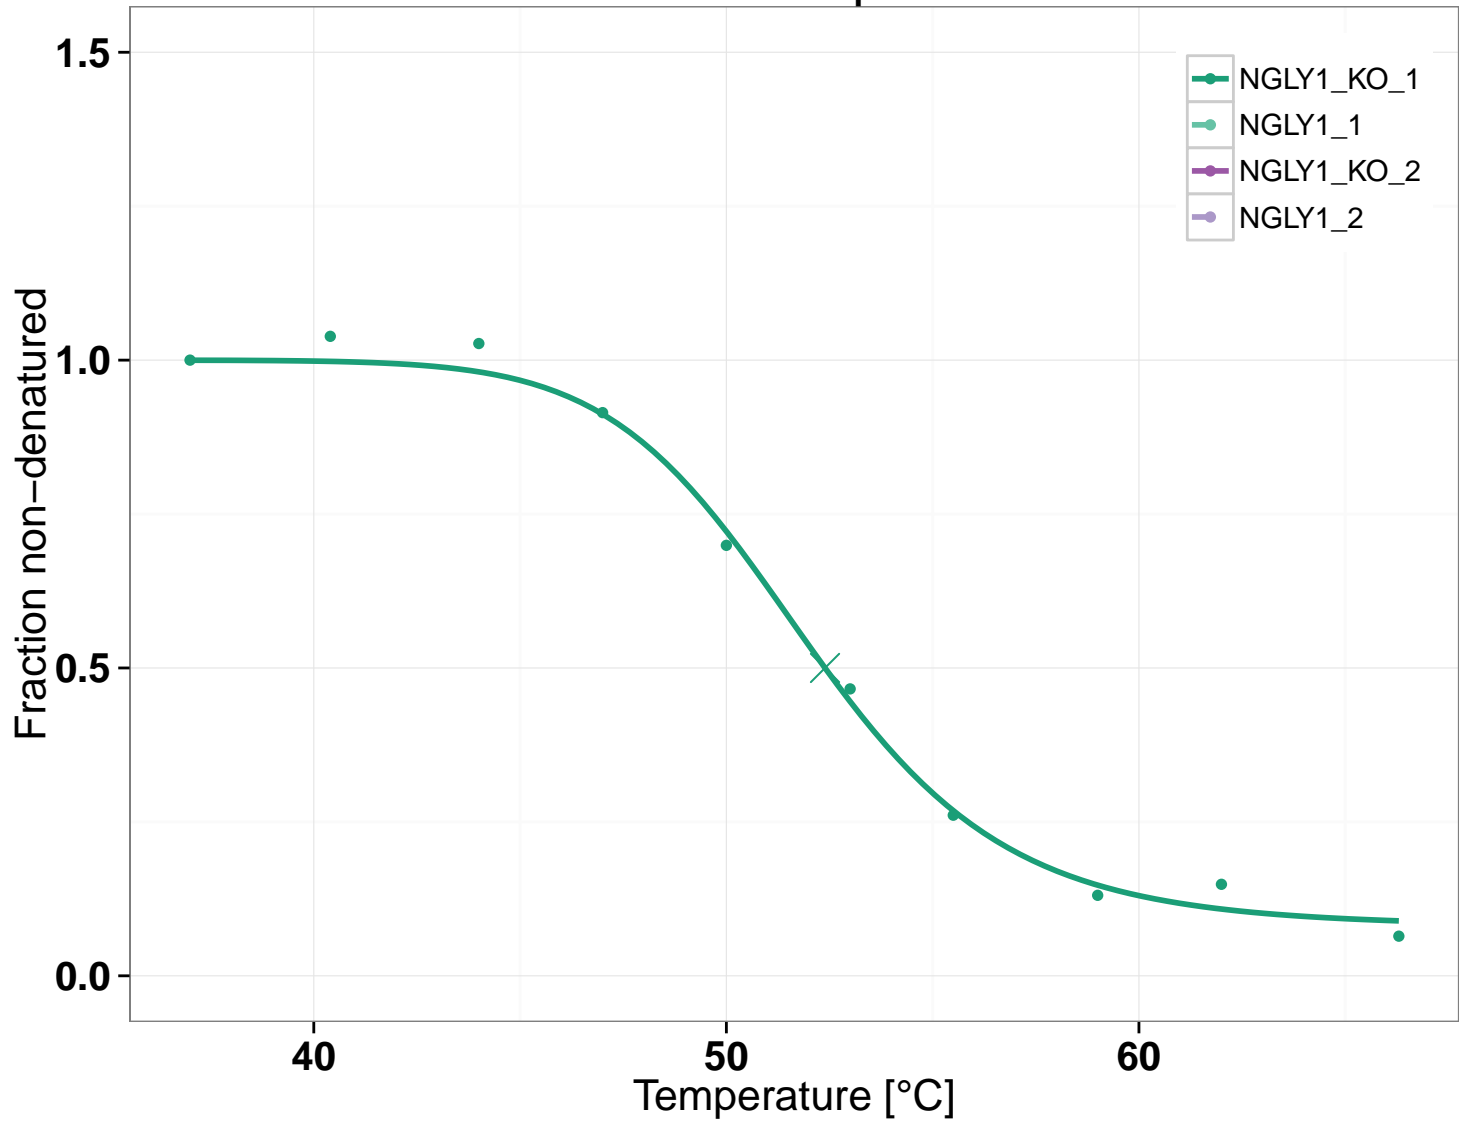

|            | meltPoint | slope  | plateau | R2 |
|------------|-----------|--------|---------|----|
| NGLY1_KO_1 | 52.39     | -0.095 | 0.08    | 1  |
| NGLY1_1    | -         | -      | -       | -  |
| NGLY1_KO_2 | -         | -      | -       | -  |
| NGLY1_2    | -         | -      | -       | -  |

Supplement: Supplementary file 928 [file 1]

# IPI00024623.3|ACADSB

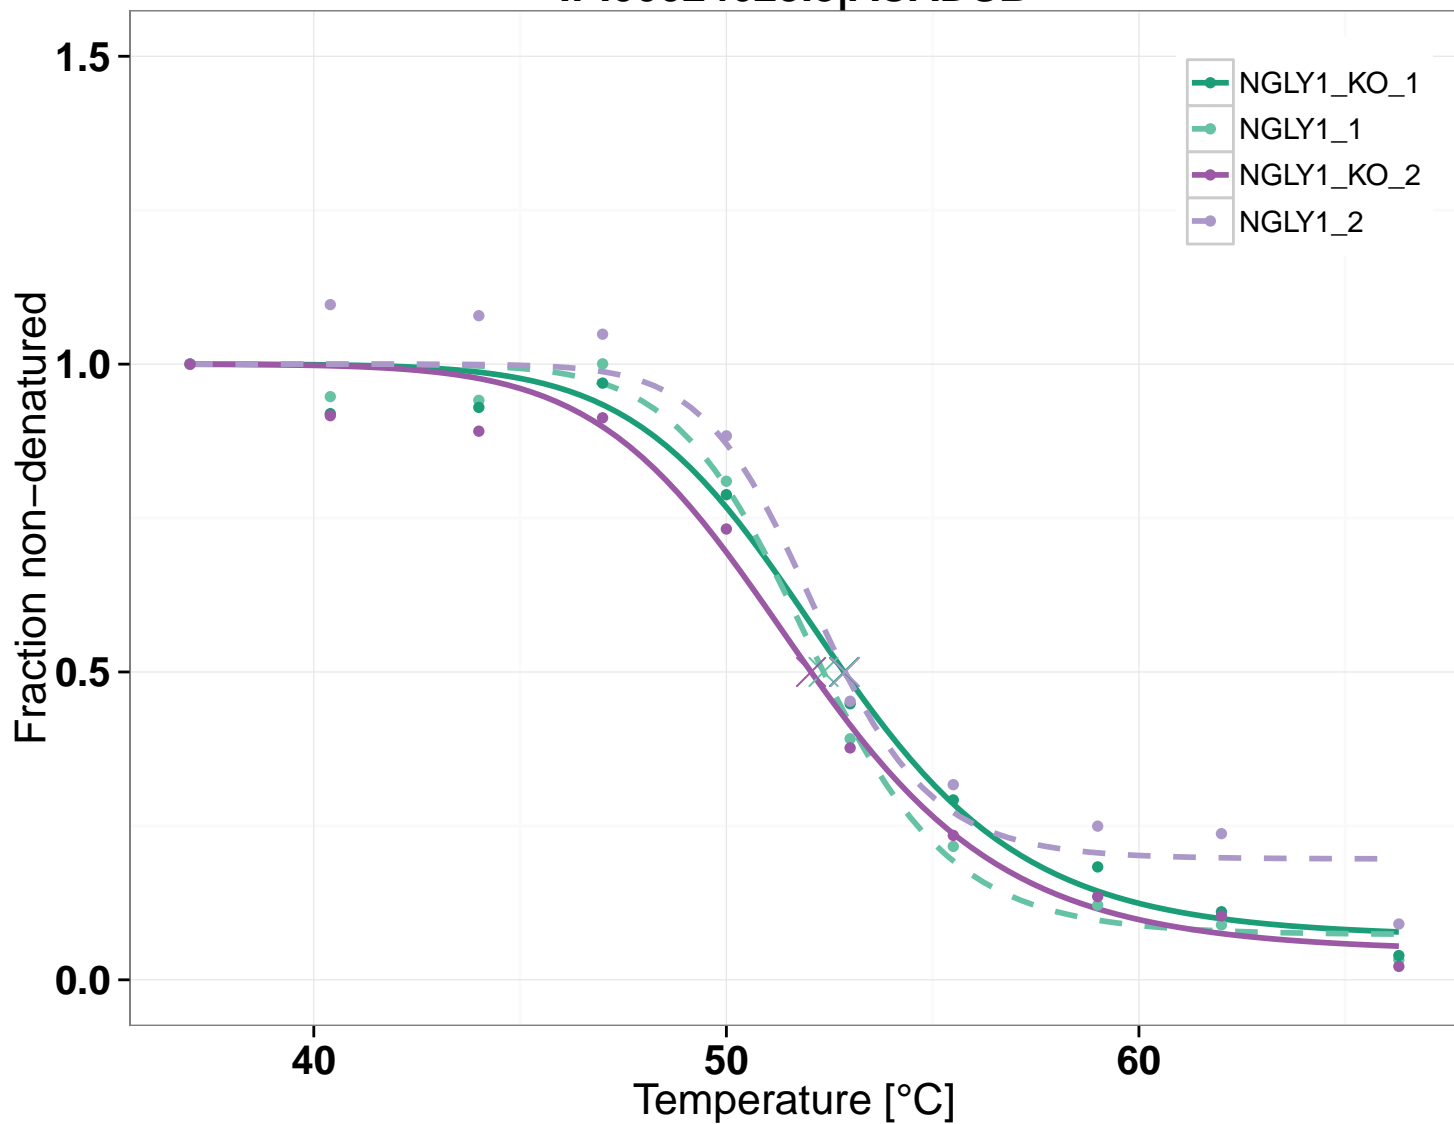

|            | meltPoint | slope  | plateau | R2   |
|------------|-----------|--------|---------|------|
| NGLY1_KO_1 | 52.85     | -0.099 | 0.07    | 0.99 |
| NGLY1_1    | 52.36     | -0.14  | 0.07    | 0.99 |
| NGLY1_KO_2 | 52.05     | -0.097 | 0.04    | 0.99 |
| NGLY1_2    | 52.88     | -0.15  | 0.2     | 0.98 |

Supplement: Supplementary file 929 [file 1]

IPI00064848.2|B3GALT6

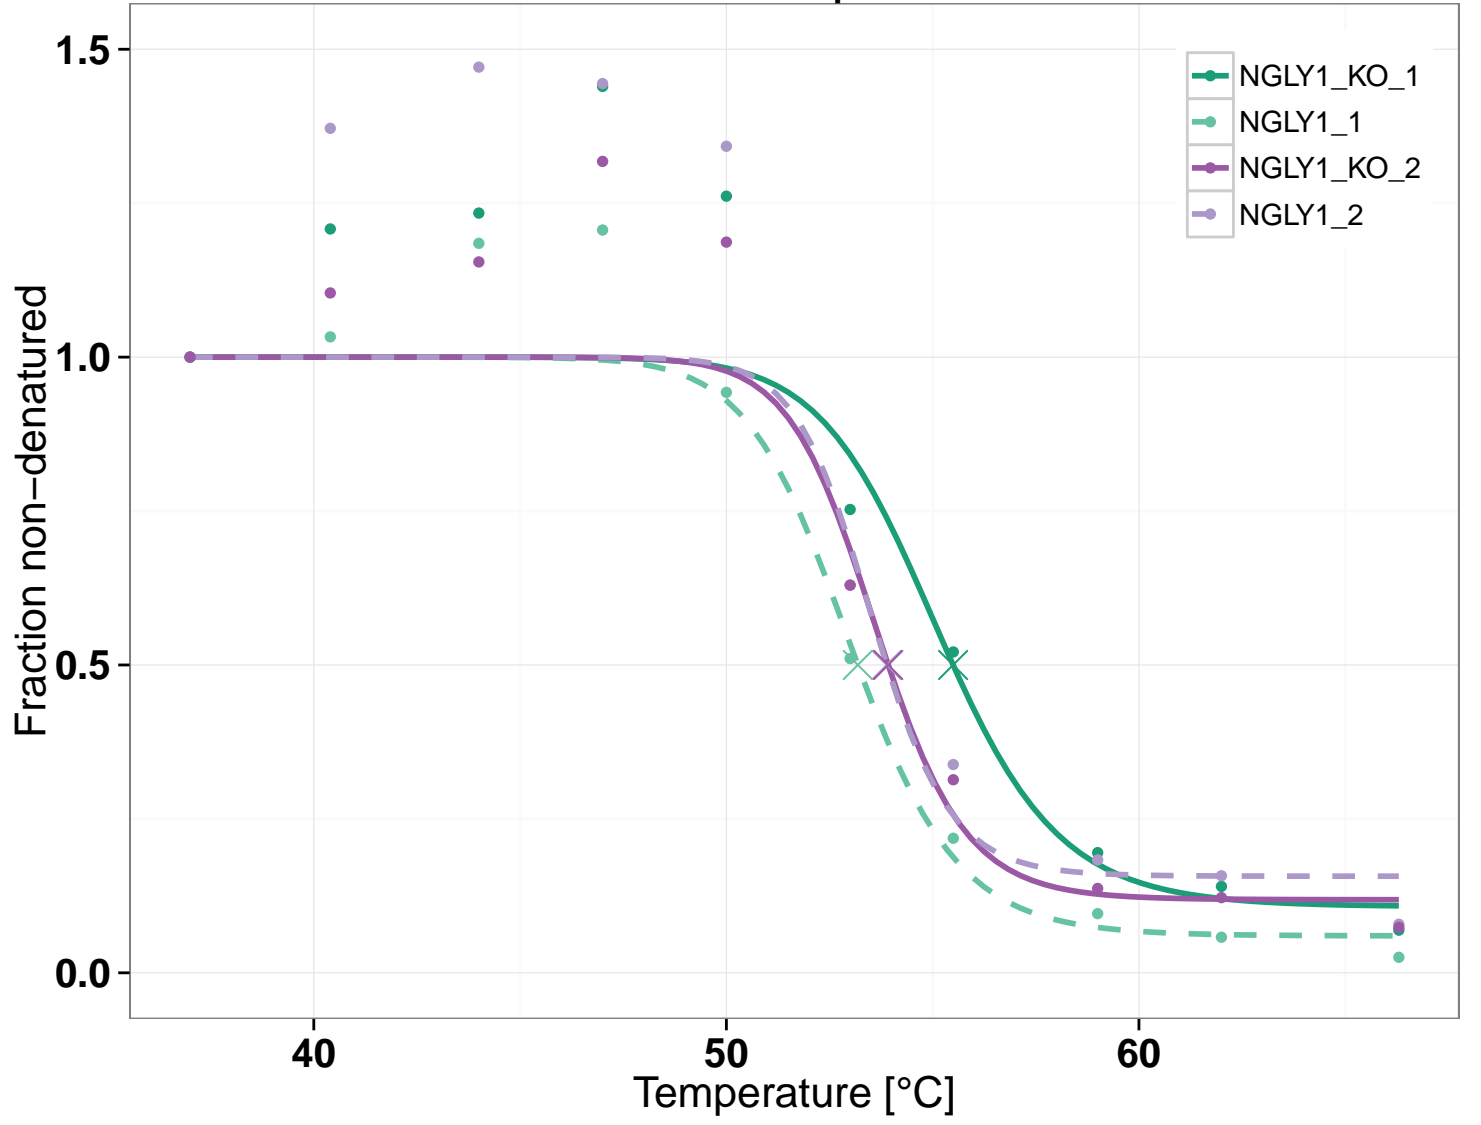

|            | meltPoint | slope | plateau | R2   |
|------------|-----------|-------|---------|------|
| NGLY1_KO_1 | 55.5      | -0.15 | 0.11    | 0.84 |
| NGLY1_1    | 53.19     | -0.18 | 0.06    | 0.96 |
| NGLY1_KO_2 | 53.92     | -0.21 | 0.12    | 0.92 |
| NGLY1_2    | 53.89     | -0.22 | 0.16    | 0.77 |

Supplement: Supplementary file 930 [file 1]

IPI00018627.3|NAT13

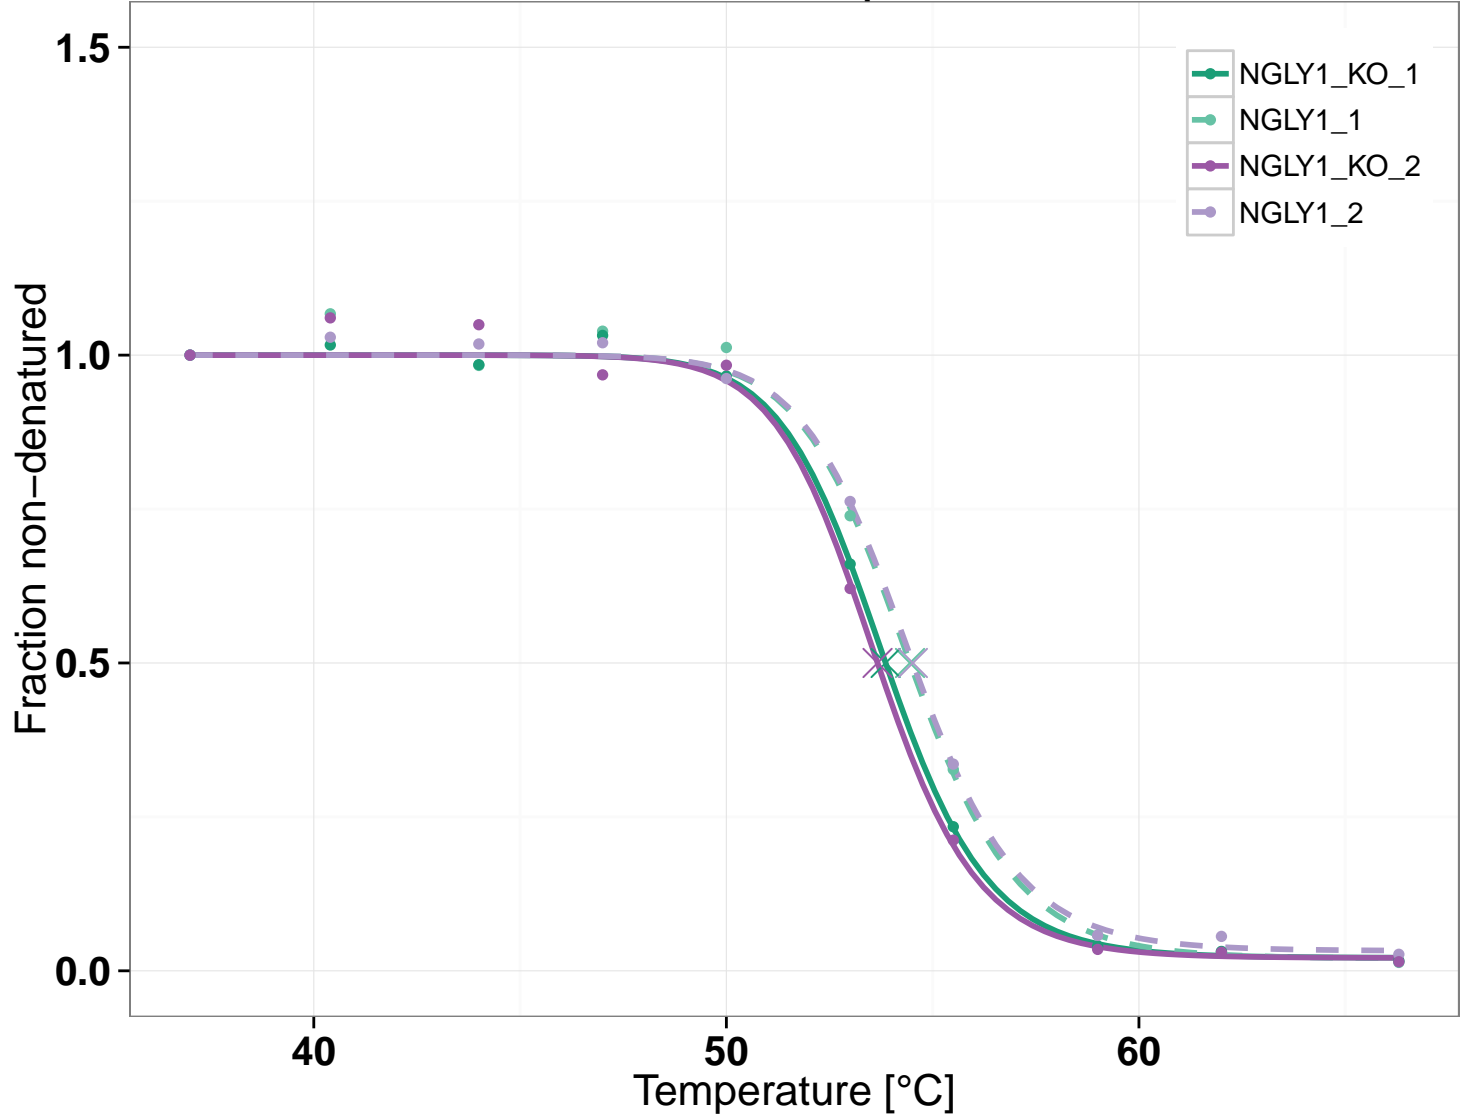

|            | meltPoint | slope | plateau | R2 |
|------------|-----------|-------|---------|----|
| NGLY1_KO_1 | 53.86     | -0.19 | 0.02    | 1  |
| NGLY1_1    | 54.45     | -0.19 | 0.02    | 1  |
| NGLY1_KO_2 | 53.66     | -0.2  | 0.02    | 1  |
| NGLY1_2    | 54.52     | -0.18 | 0.03    | 1  |

Supplement: Supplementary file 931 [file 1]

IPI00375552.3|ANTXR2

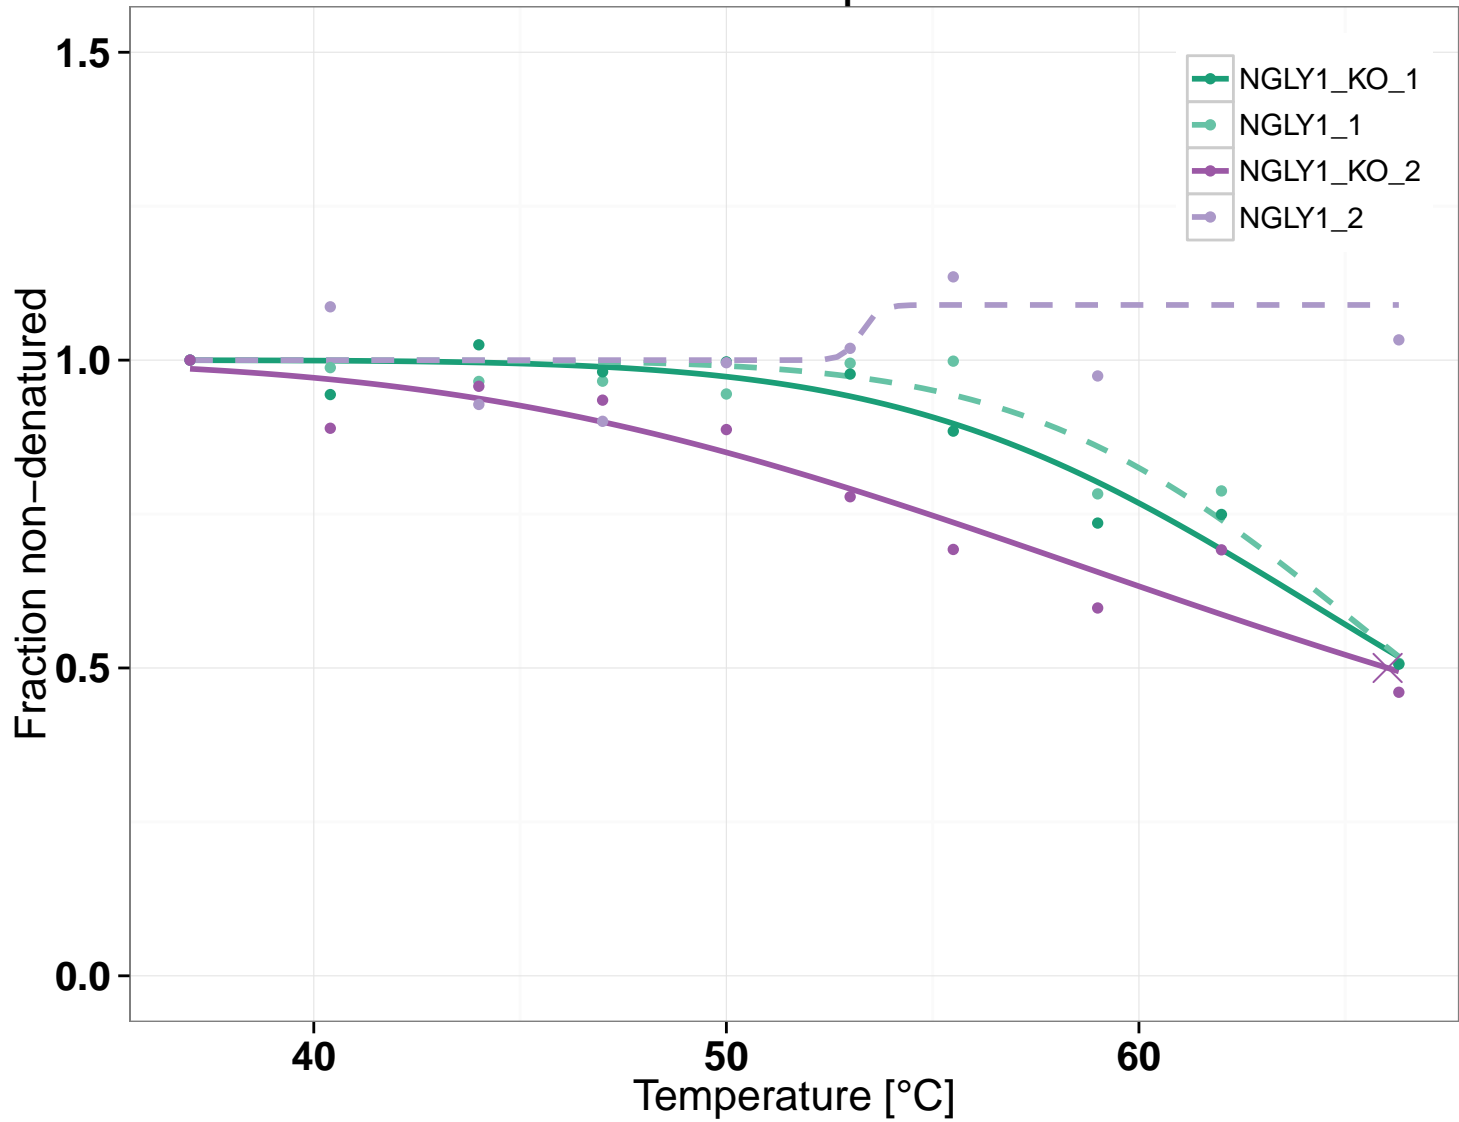

|            | meltPoint | slope  | plateau | R2   |
|------------|-----------|--------|---------|------|
| NGLY1_KO_1 | -         | -0.041 | 0.03    | 0.95 |
| NGLY1_1    | -         | -0.054 | 0       | 0.93 |
| NGLY1_KO_2 | 66.03     | -0.023 | 0       | 0.9  |
| NGLY1_2    | -         | 0.11   | 1.09    | 0.3  |

Supplement: Supplementary file 932 [file 1]

IPI00790743.1|RPL36AL

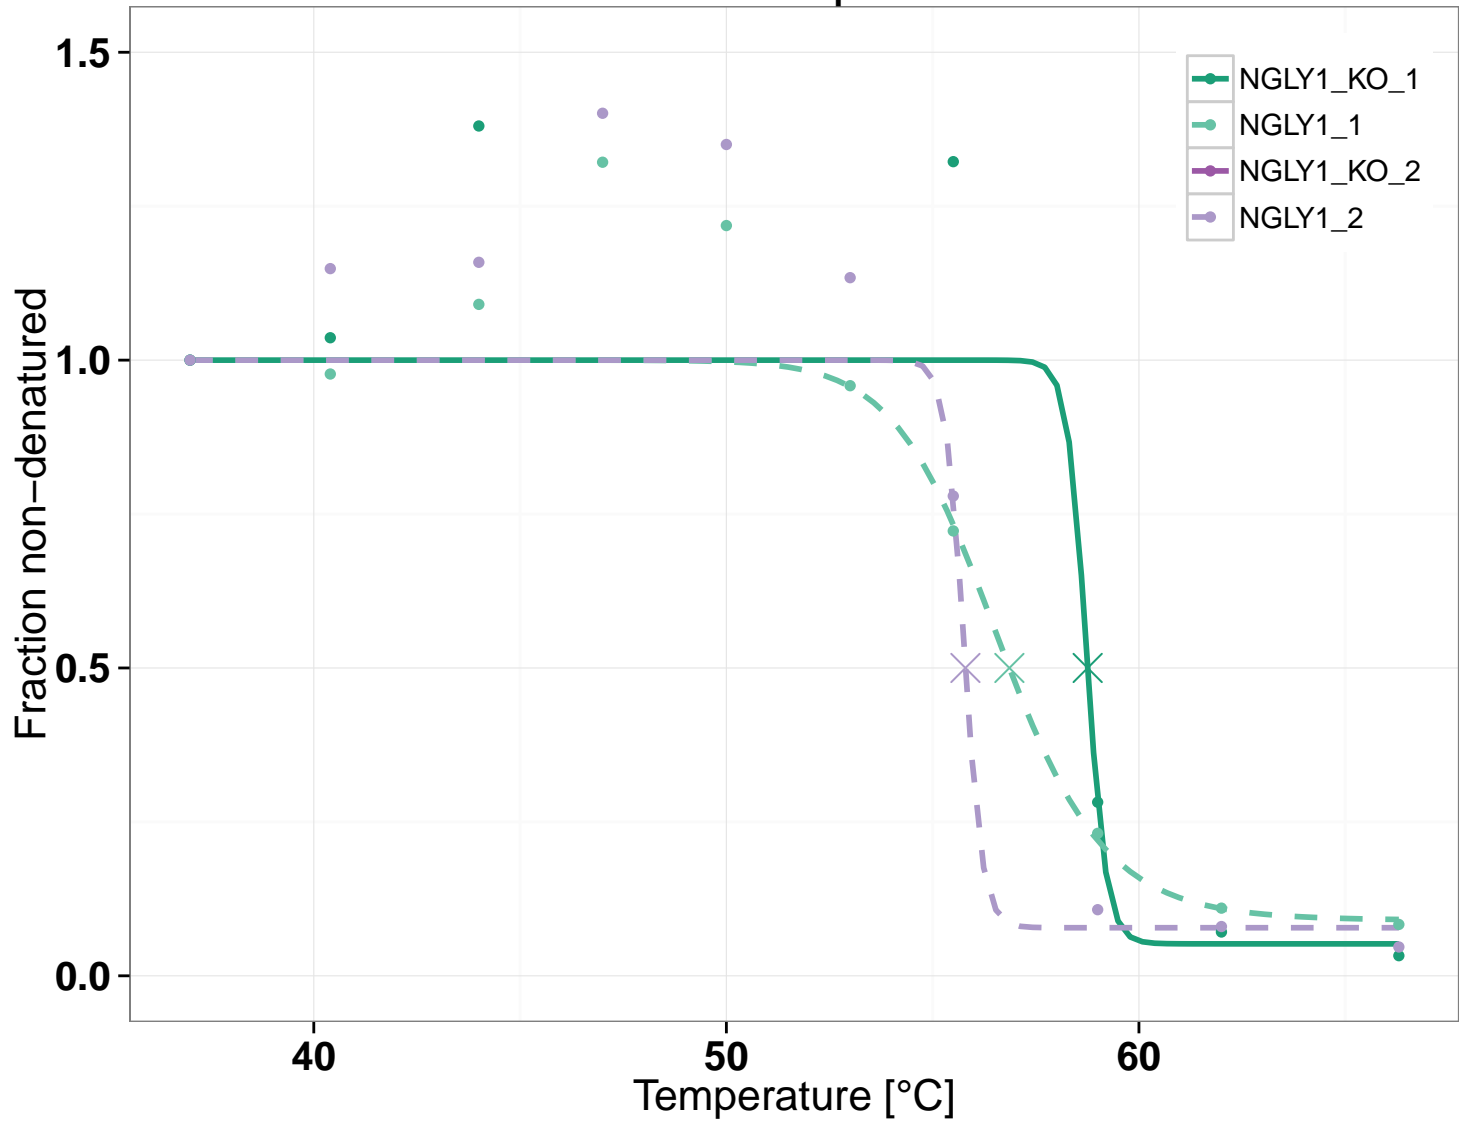

|            | meltPoint | slope | plateau | R2   |
|------------|-----------|-------|---------|------|
| NGLY1_KO_1 | 58.76     | -1    | 0.05    | 0.54 |
| NGLY1_1    | 56.86     | -0.18 | 0.09    | 0.92 |
| NGLY1_KO_2 | -         | -     | -       | -    |
| NGLY1_2    | 55.79     | -1    | 0.08    | 0.87 |

Supplement: Supplementary file 933 [file 1]

# IPI00792838.1|C19ORF42

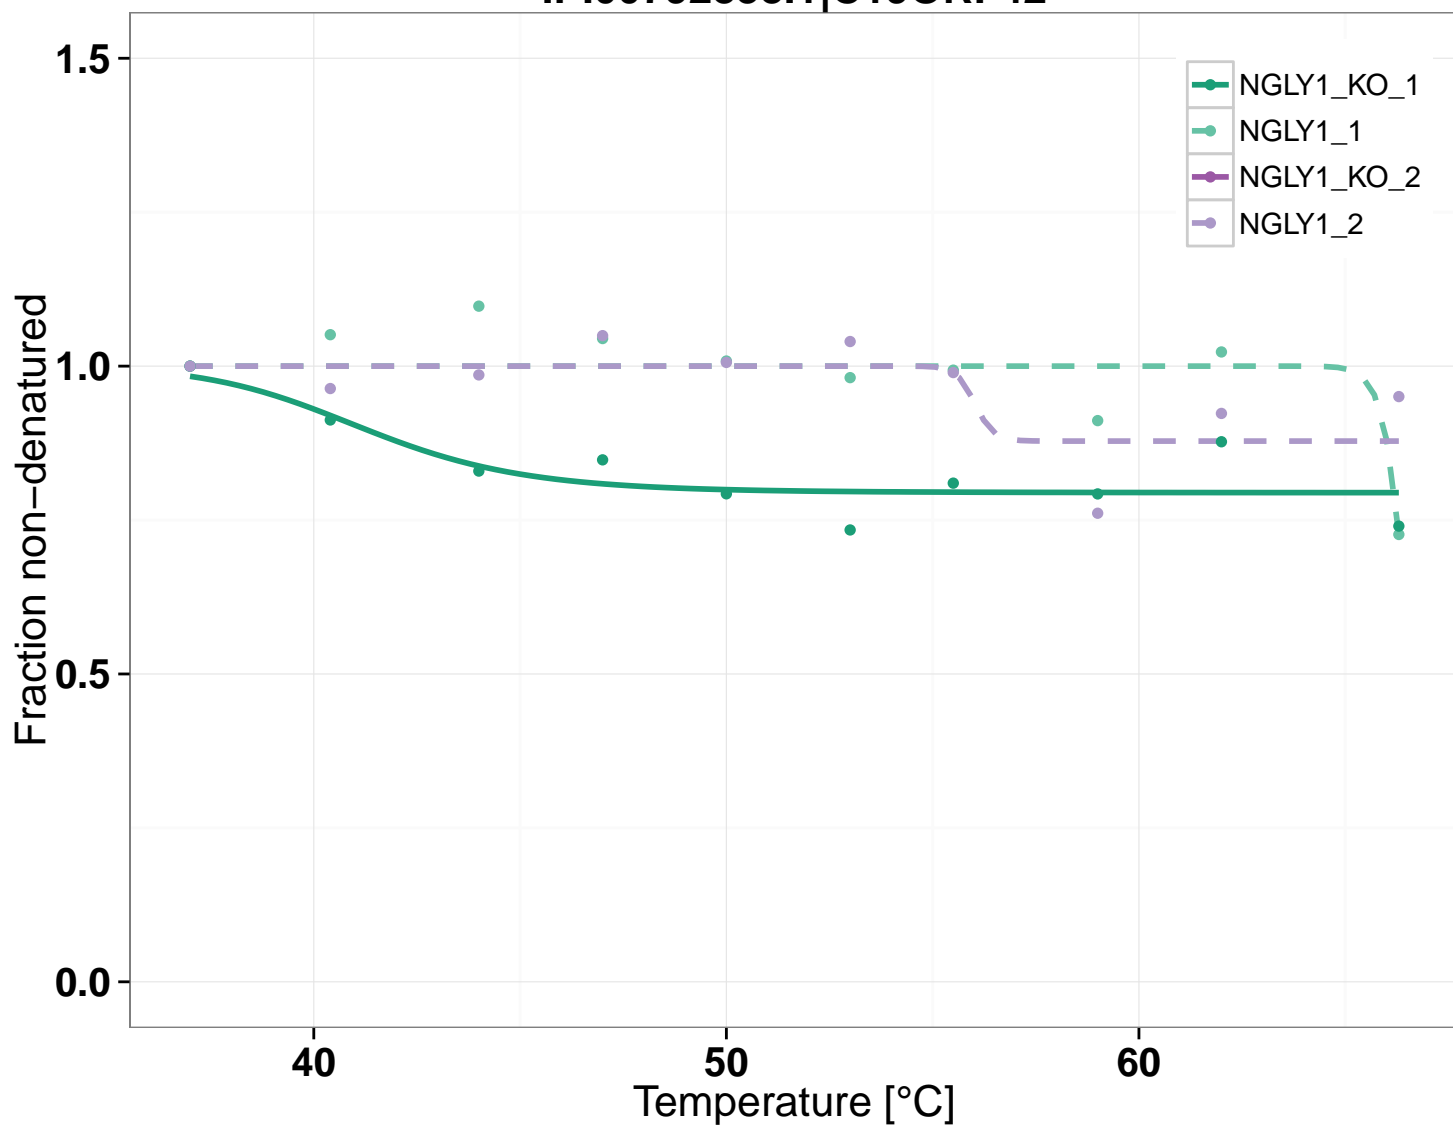

|            | meltPoint | slope  | plateau | R2   |
|------------|-----------|--------|---------|------|
| NGLY1_KO_1 | —         | -0.027 | 0.79    | 0.73 |
| NGLY1_1    | —         | —      | 0       | 0.76 |
| NGLY1_KO_2 | —         | —      | —       | —    |
| NGLY1_2    | —         | -0.14  | 0.88    | 0.56 |

Supplement: Supplementary file 934 [file 1]

# IPI00177968.2|SCARB1

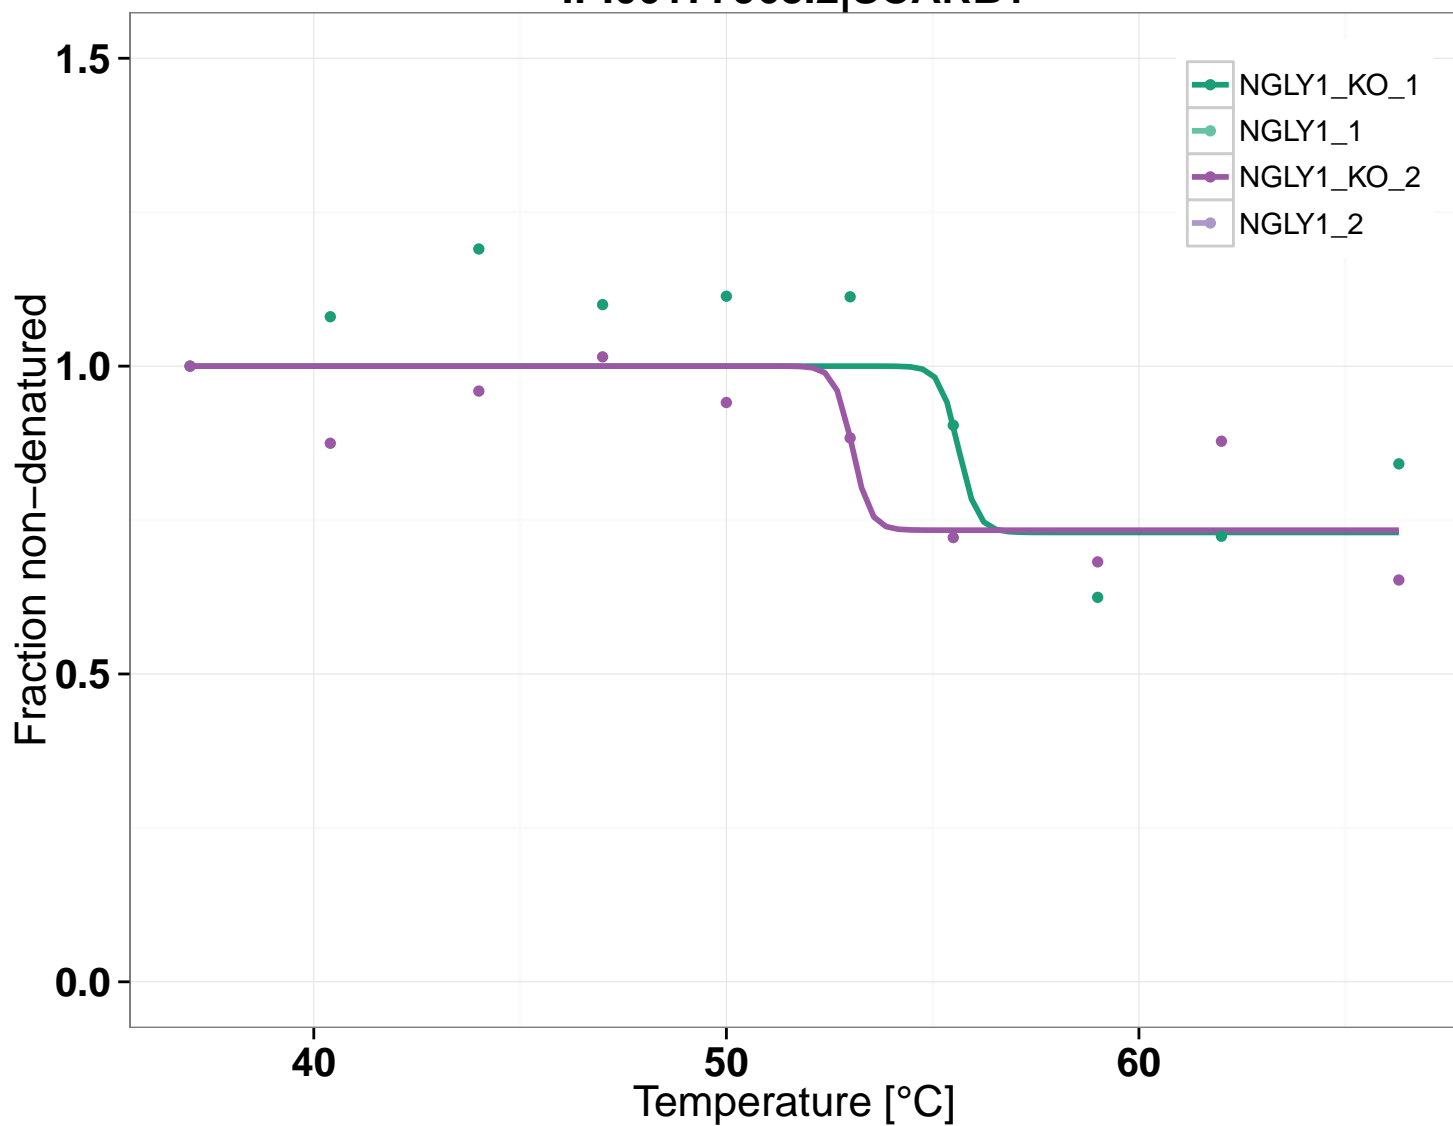

|            | meltPoint | slope | plateau | R2   |
|------------|-----------|-------|---------|------|
| NGLY1_KO_1 | —         | −0.3  | 0.73    | 0.68 |
| NGLY1_1    | —         | —     | —       | —    |
| NGLY1_KO_2 | —         | −0.31 | 0.73    | 0.67 |
| NGLY1_2    | —         | —     | —       | —    |

Supplement: Supplementary file 935 [file 1]

IPI00328306.9|ZC3H11A

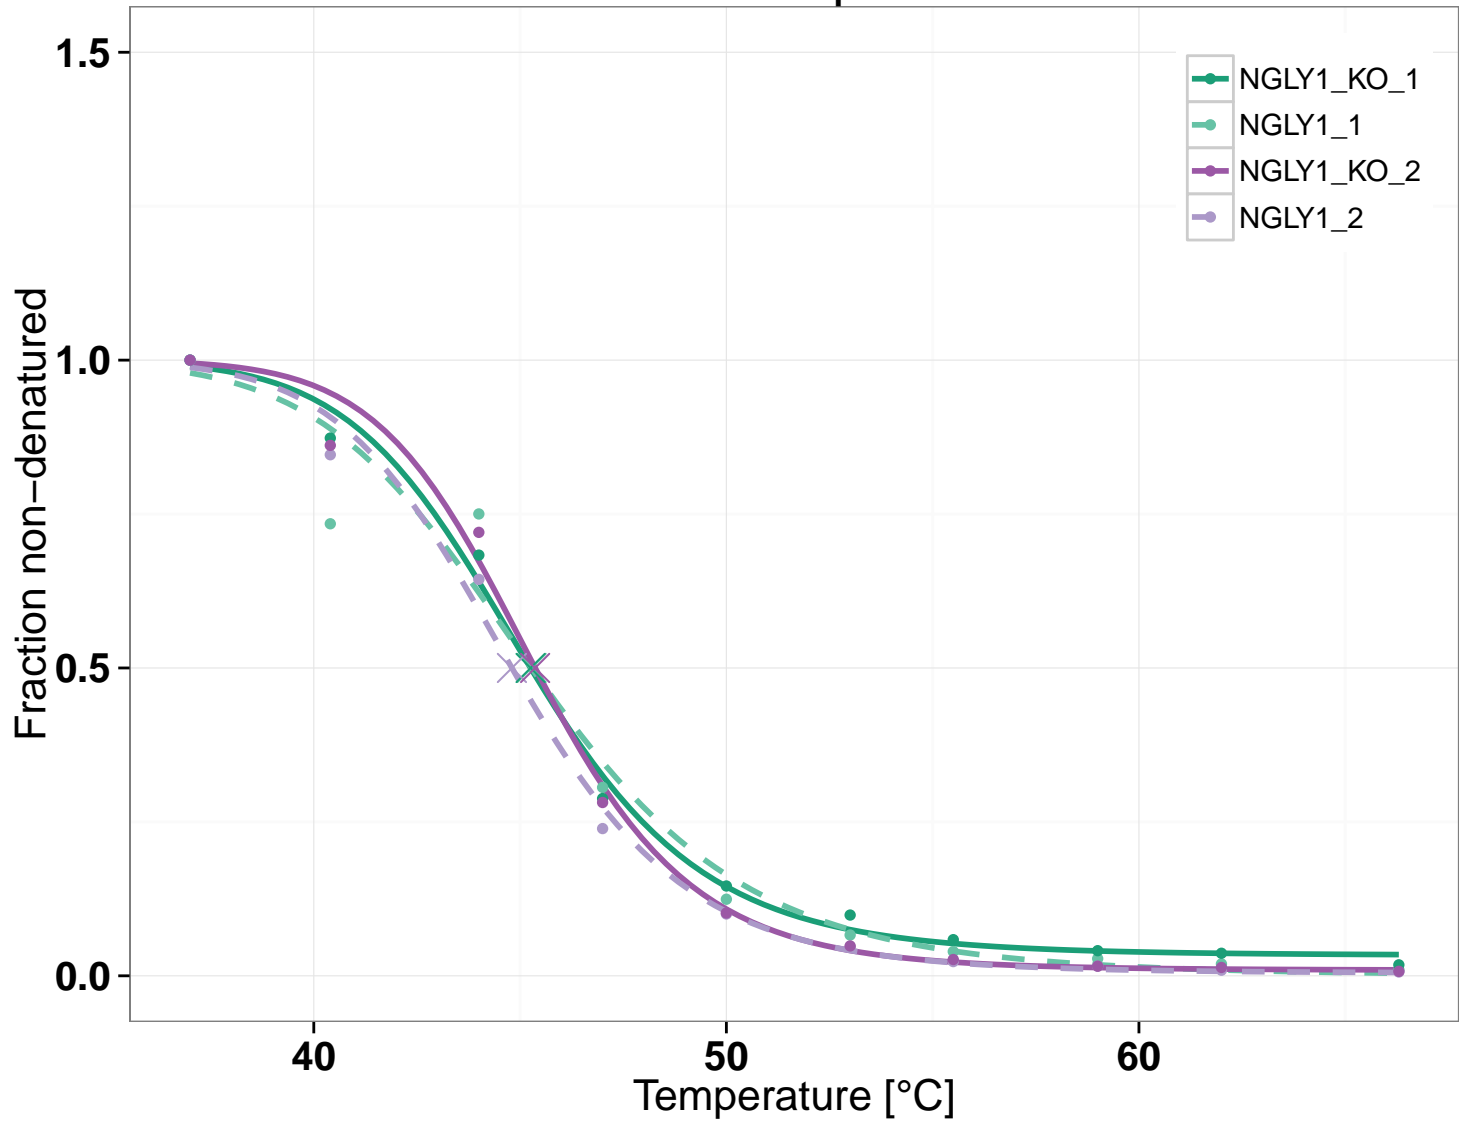

|            | meltPoint | slope  | plateau | R2   |
|------------|-----------|--------|---------|------|
| NGLY1_KO_1 | 45.25     | -0.11  | 0.03    | 0.99 |
| NGLY1_1    | 45.28     | -0.096 | 0       | 0.97 |
| NGLY1_KO_2 | 45.37     | -0.13  | 0.01    | 0.99 |
| NGLY1_2    | 44.8      | -0.12  | 0       | 0.99 |

Supplement: Supplementary file 936 [file 1]

IPI00552956.2|ANKRD20A4

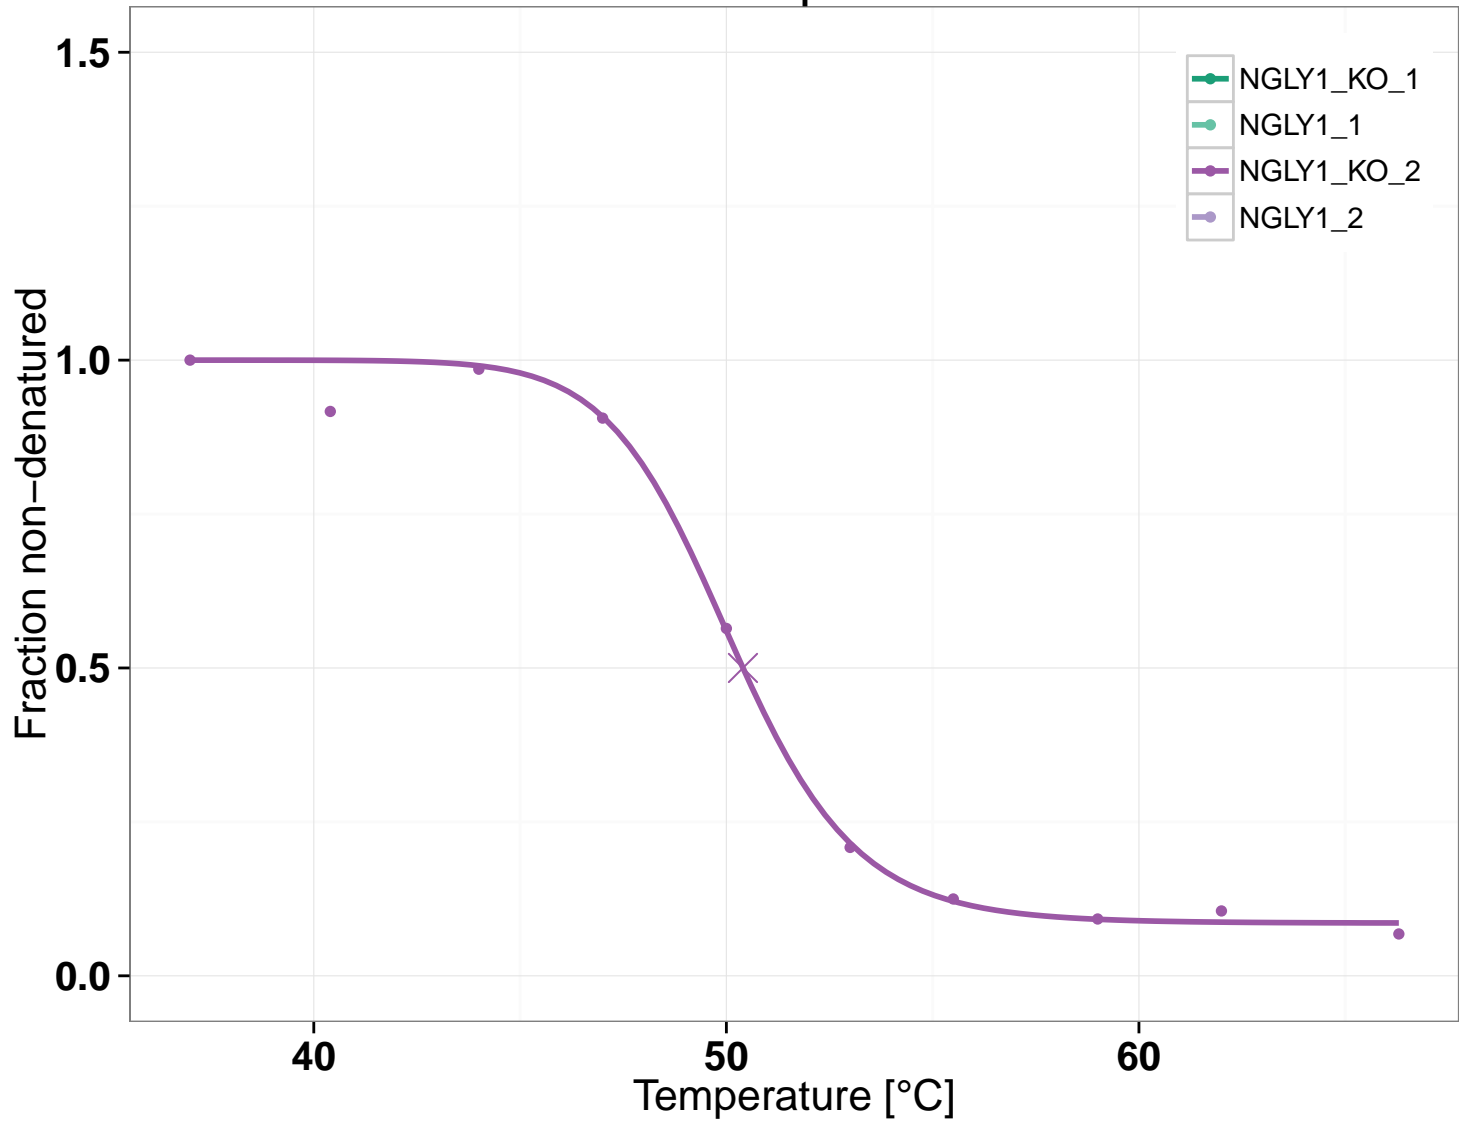

|            | meltPoint | slope | plateau | R2 |
|------------|-----------|-------|---------|----|
| NGLY1_KO_1 | —         | —     | —       | —  |
| NGLY1_1    | —         | —     | —       | —  |
| NGLY1_KO_2 | 50.4      | -0.15 | 0.09    | 1  |
| NGLY1_2    | —         | —     | —       | —  |

Supplement: Supplementary file 937 [file 1]

# IPI00472164.2|WASF2

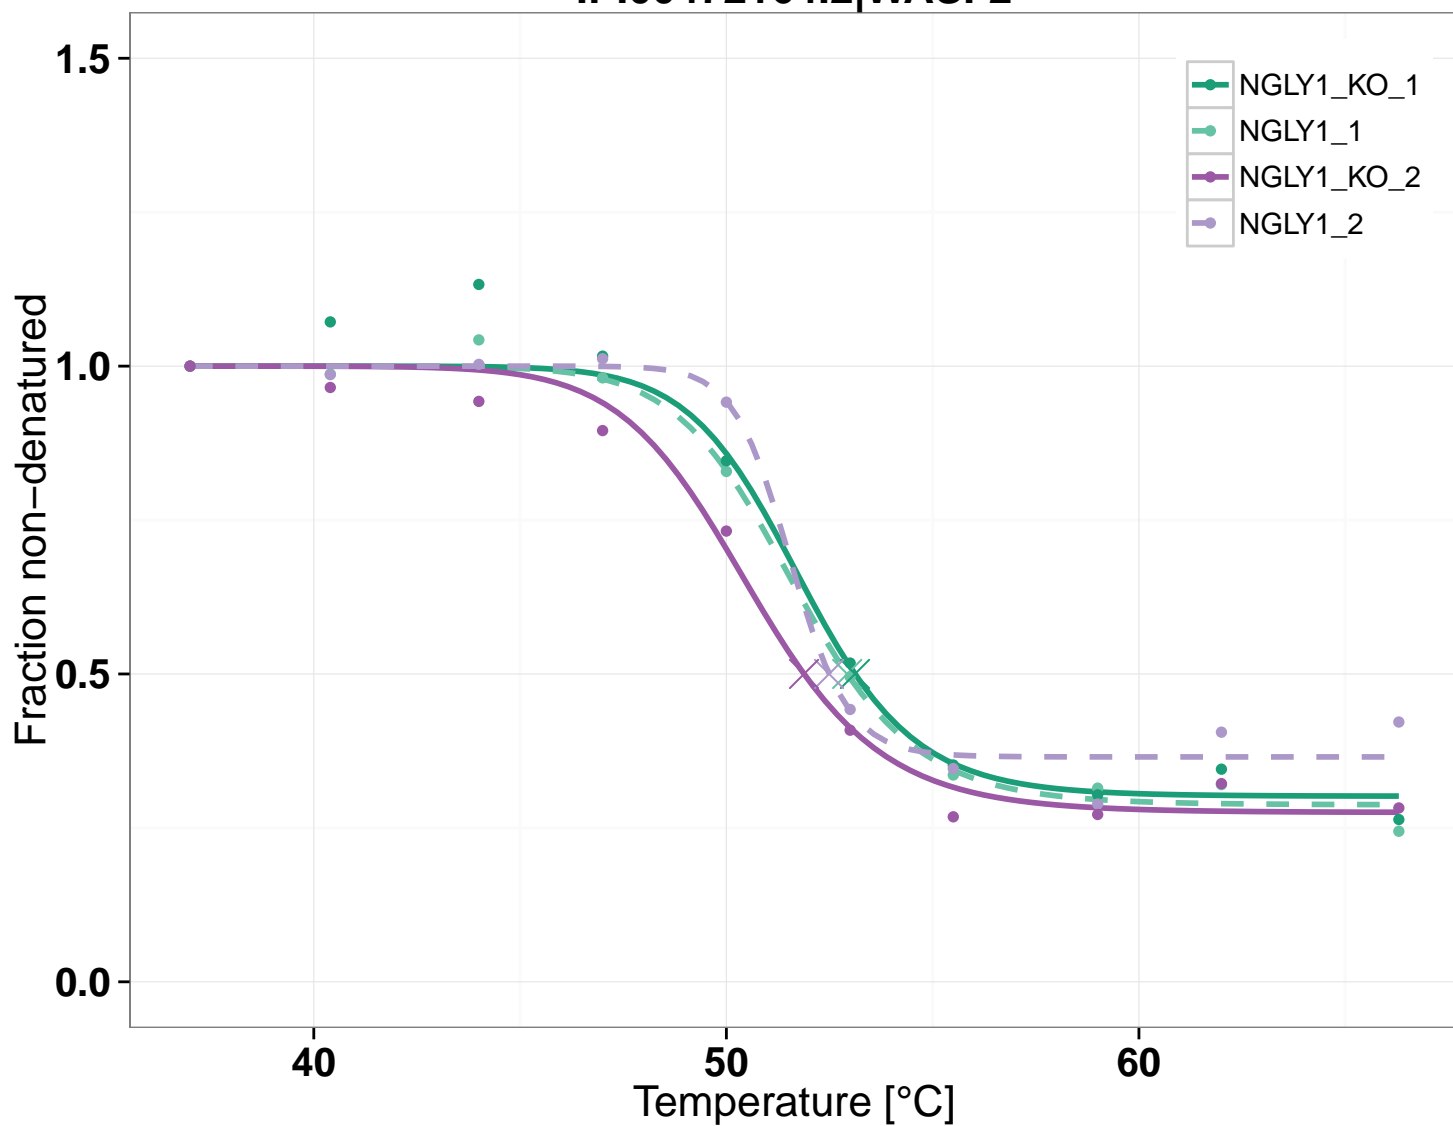

|            | meltPoint | slope | plateau | R2   |
|------------|-----------|-------|---------|------|
| NGLY1_KO_1 | 53.12     | -0.13 | 0.3     | 0.98 |
| NGLY1_1    | 52.93     | -0.12 | 0.29    | 0.99 |
| NGLY1_KO_2 | 51.88     | -0.11 | 0.28    | 0.99 |
| NGLY1_2    | 52.49     | -0.23 | 0.37    | 0.99 |

Supplement: Supplementary file 938 [file 1]

IPI00007752.1|TUBB2C

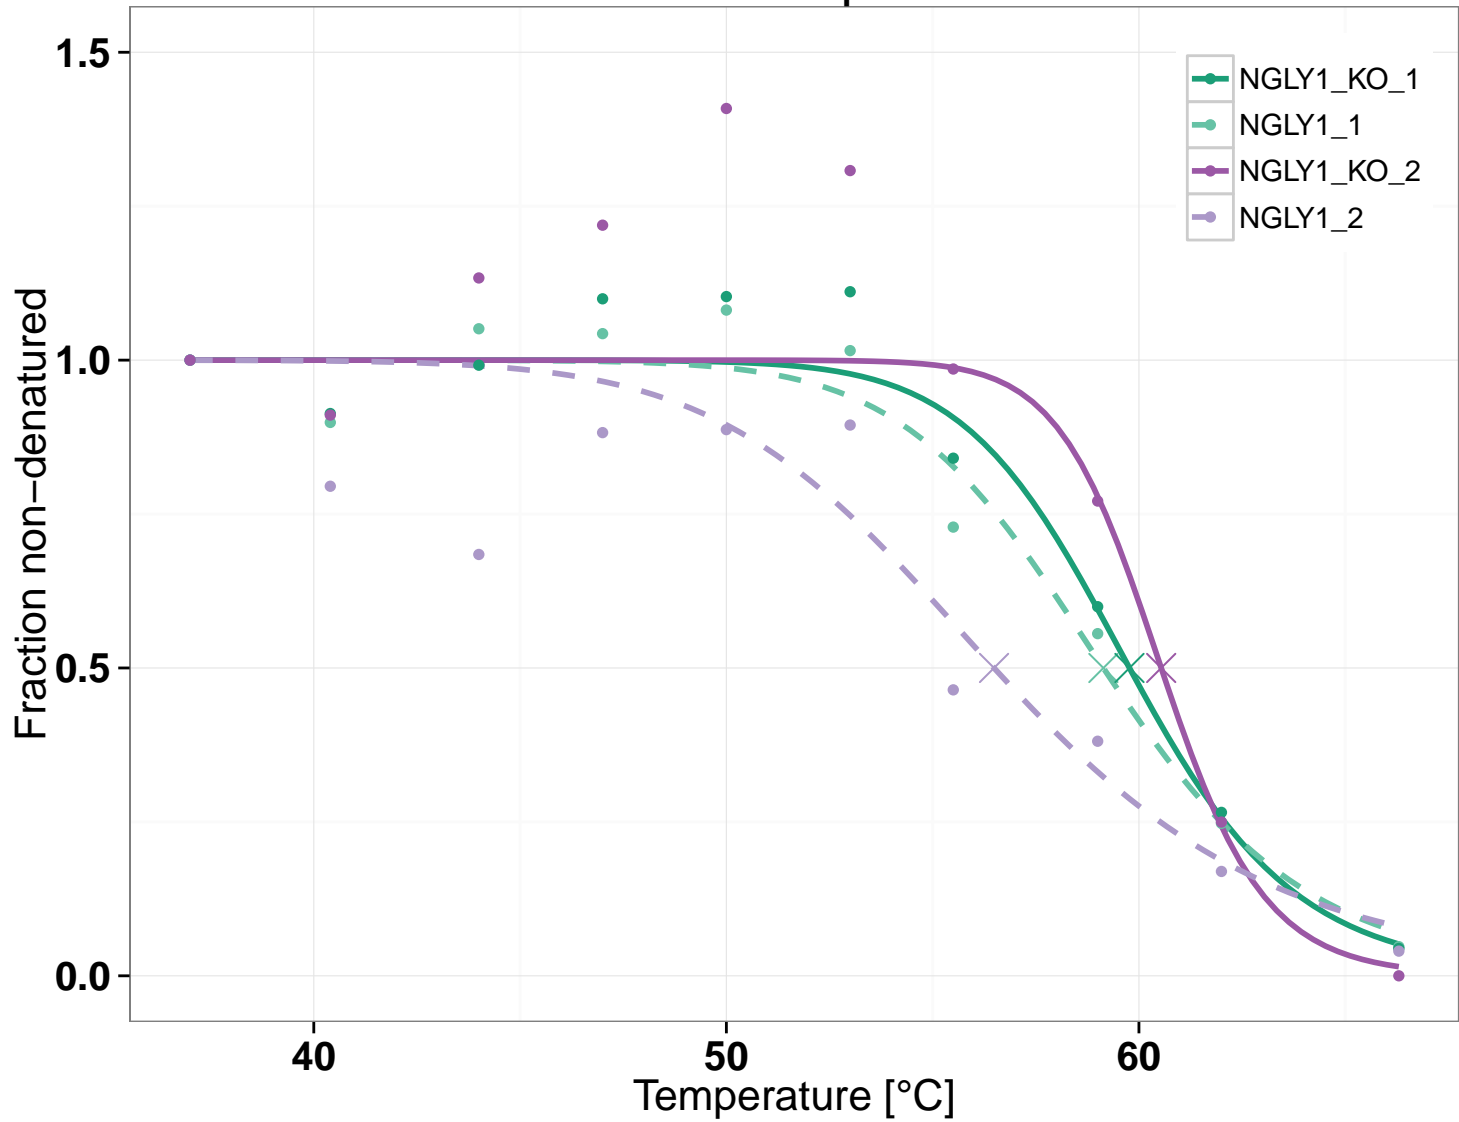

|            | meltPoint | slope  | plateau | R2   |
|------------|-----------|--------|---------|------|
| NGLY1_KO_1 | 59.77     | -0.12  | 0       | 0.96 |
| NGLY1_1    | 59.14     | -0.1   | 0       | 0.97 |
| NGLY1_KO_2 | 60.54     | -0.2   | 0       | 0.82 |
| NGLY1_2    | 56.49     | -0.074 | 0       | 0.82 |

Supplement: Supplementary file 939 [file 1]

# IPI00025807.2|SP3

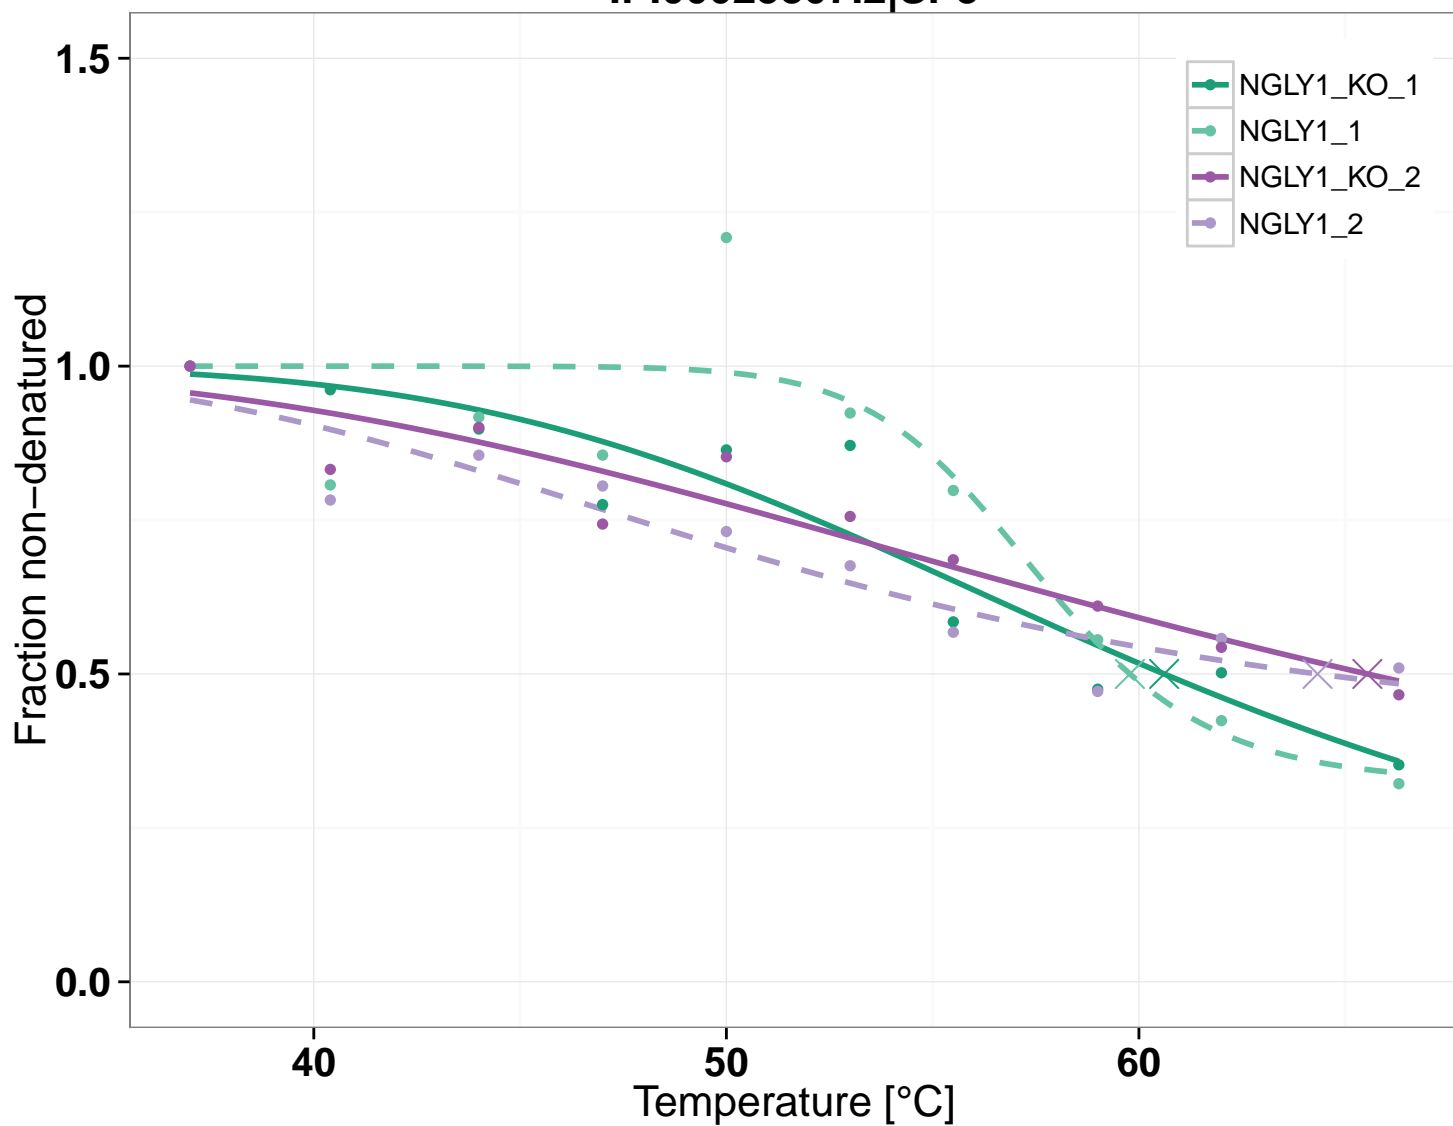

|            | meltPoint | slope  | plateau | R2   |
|------------|-----------|--------|---------|------|
| NGLY1_KO_1 | 60.61     | -0.03  | 0       | 0.9  |
| NGLY1_1    | 59.78     | -0.082 | 0.32    | 0.83 |
| NGLY1_KO_2 | 65.54     | -0.019 | 0       | 0.9  |
| NGLY1_2    | 64.33     | -0.021 | 0.35    | 0.88 |

Supplement: Supplementary file 940 [file 1]

# IPI00552141.2|GCOM1

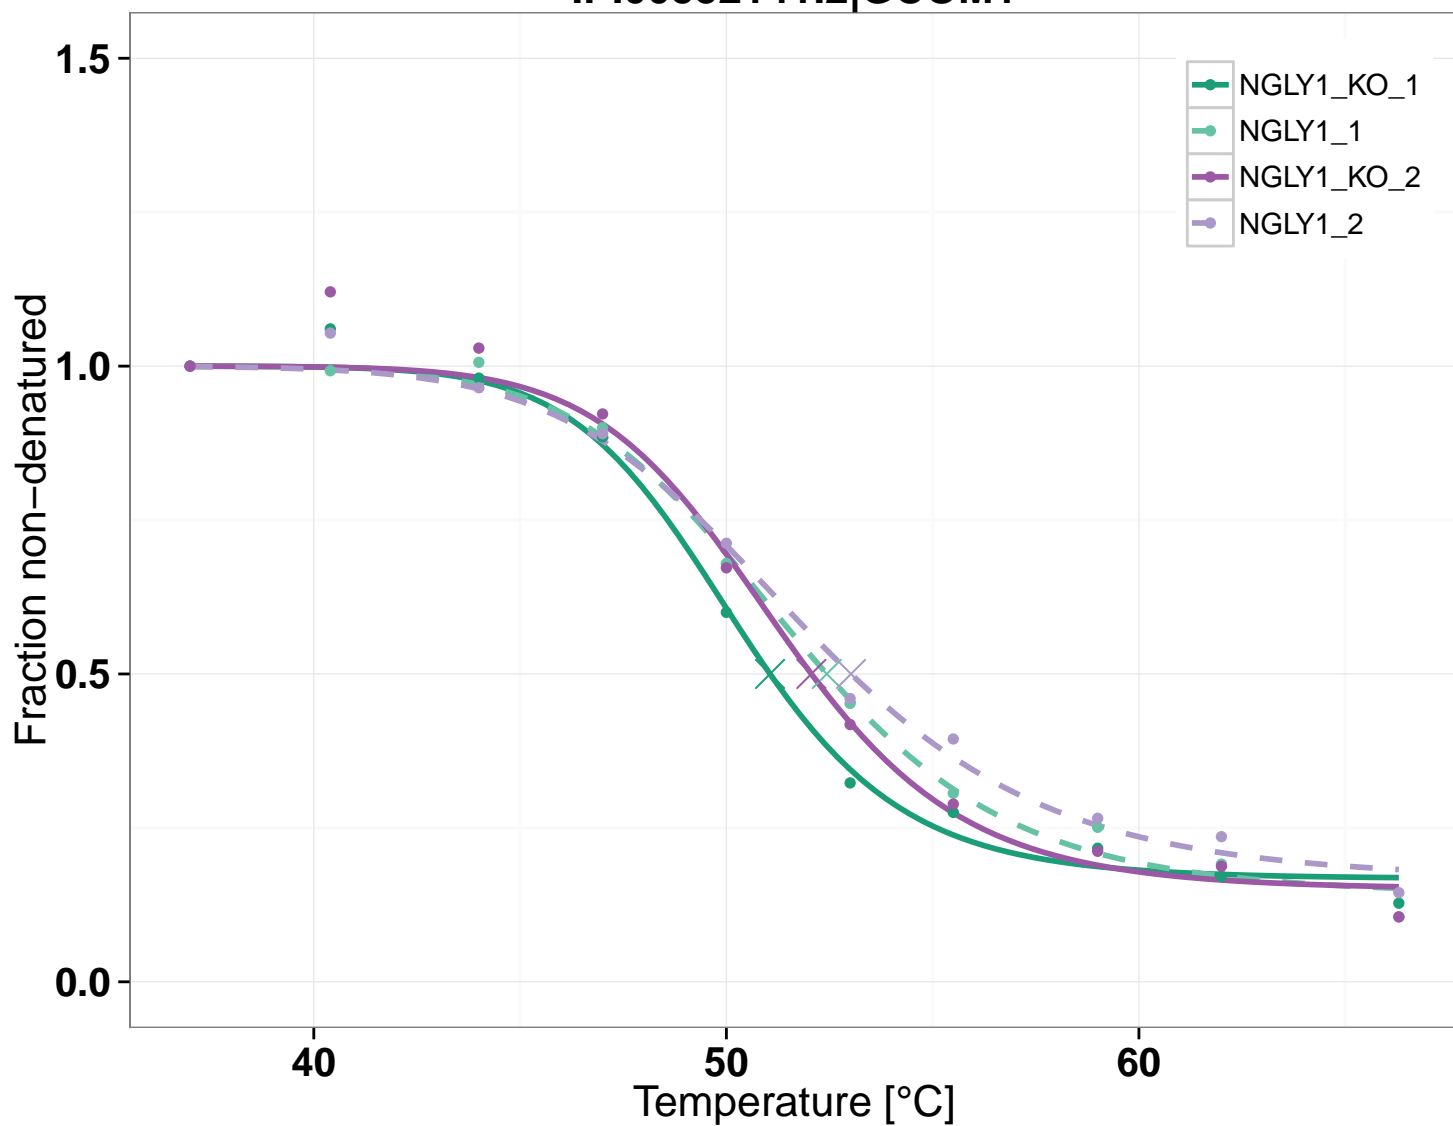

|            | meltPoint | slope  | plateau | R2   |
|------------|-----------|--------|---------|------|
| NGLY1_KO_1 | 51.06     | -0.1   | 0.17    | 0.99 |
| NGLY1_1    | 52.43     | -0.082 | 0.14    | 0.99 |
| NGLY1_KO_2 | 52.06     | -0.096 | 0.15    | 0.98 |
| NGLY1_2    | 53.02     | -0.071 | 0.16    | 0.99 |

Supplement: Supplementary file 941 [file 1]

IPI00290314.7|WRNIP1

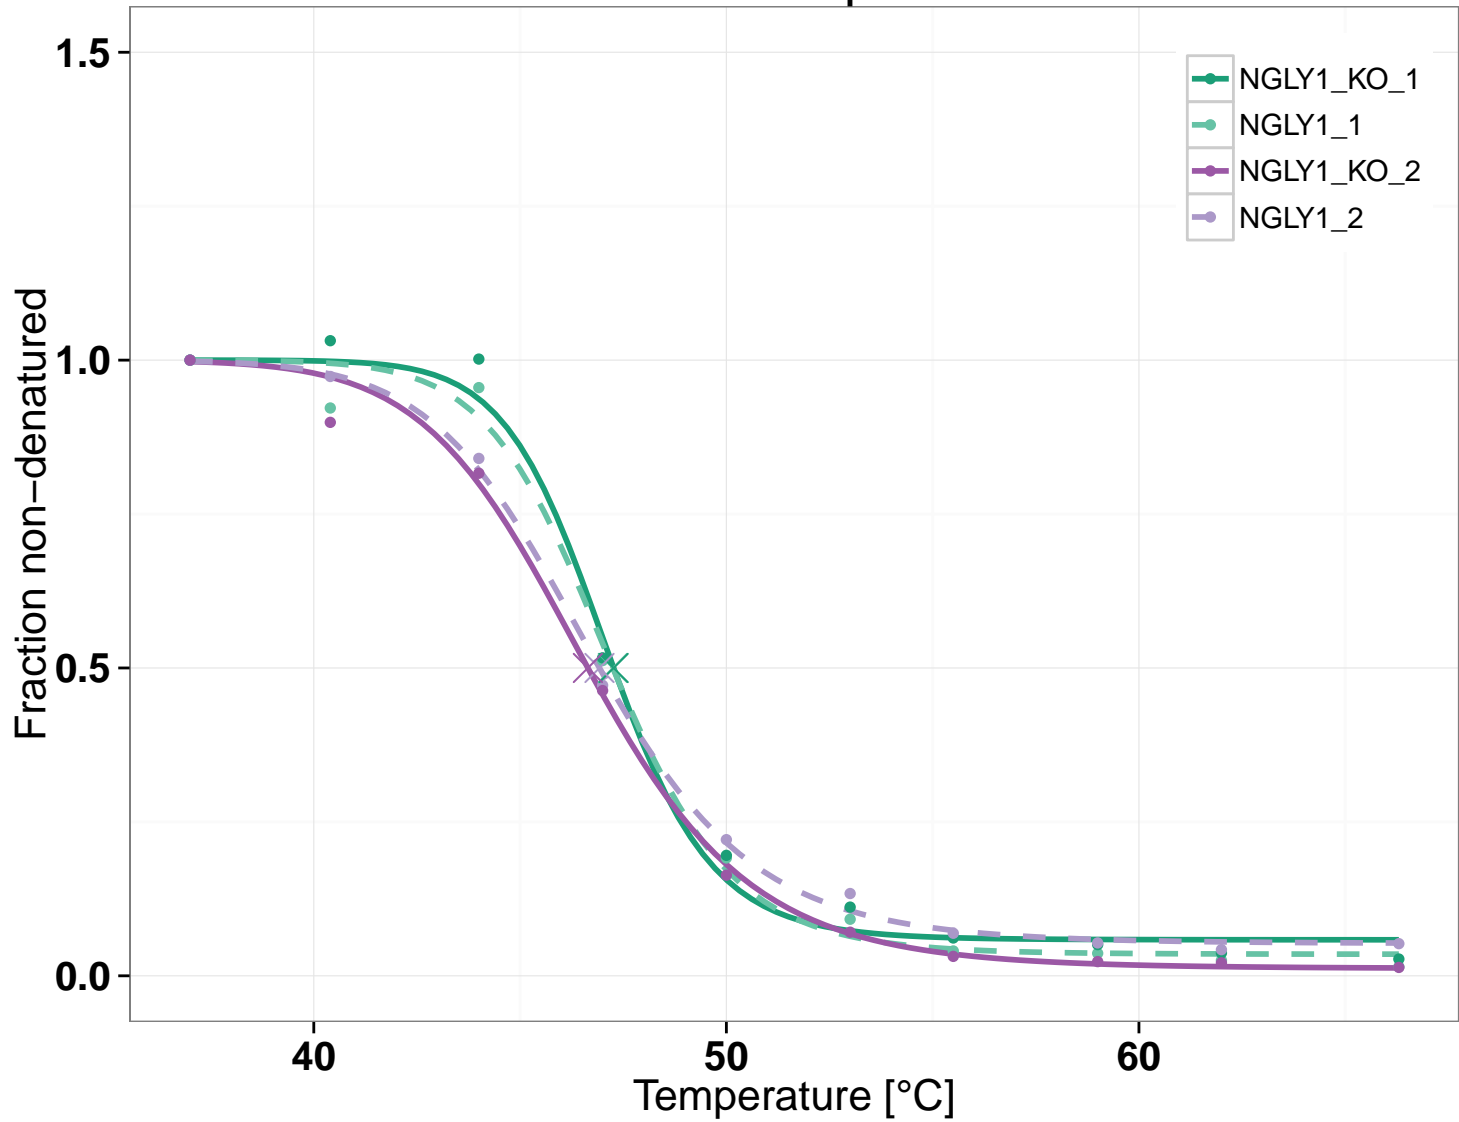

|            | meltPoint | slope | plateau | R2   |
|------------|-----------|-------|---------|------|
| NGLY1_KO_1 | 47.27     | -0.19 | 0.06    | 0.99 |
| NGLY1_1    | 47.25     | -0.16 | 0.04    | 0.99 |
| NGLY1_KO_2 | 46.64     | -0.12 | 0.01    | 1    |
| NGLY1_2    | 46.92     | -0.12 | 0.05    | 1    |

Supplement: Supplementary file 942 [file 1]

# IPI00013905.1|PRKAB2

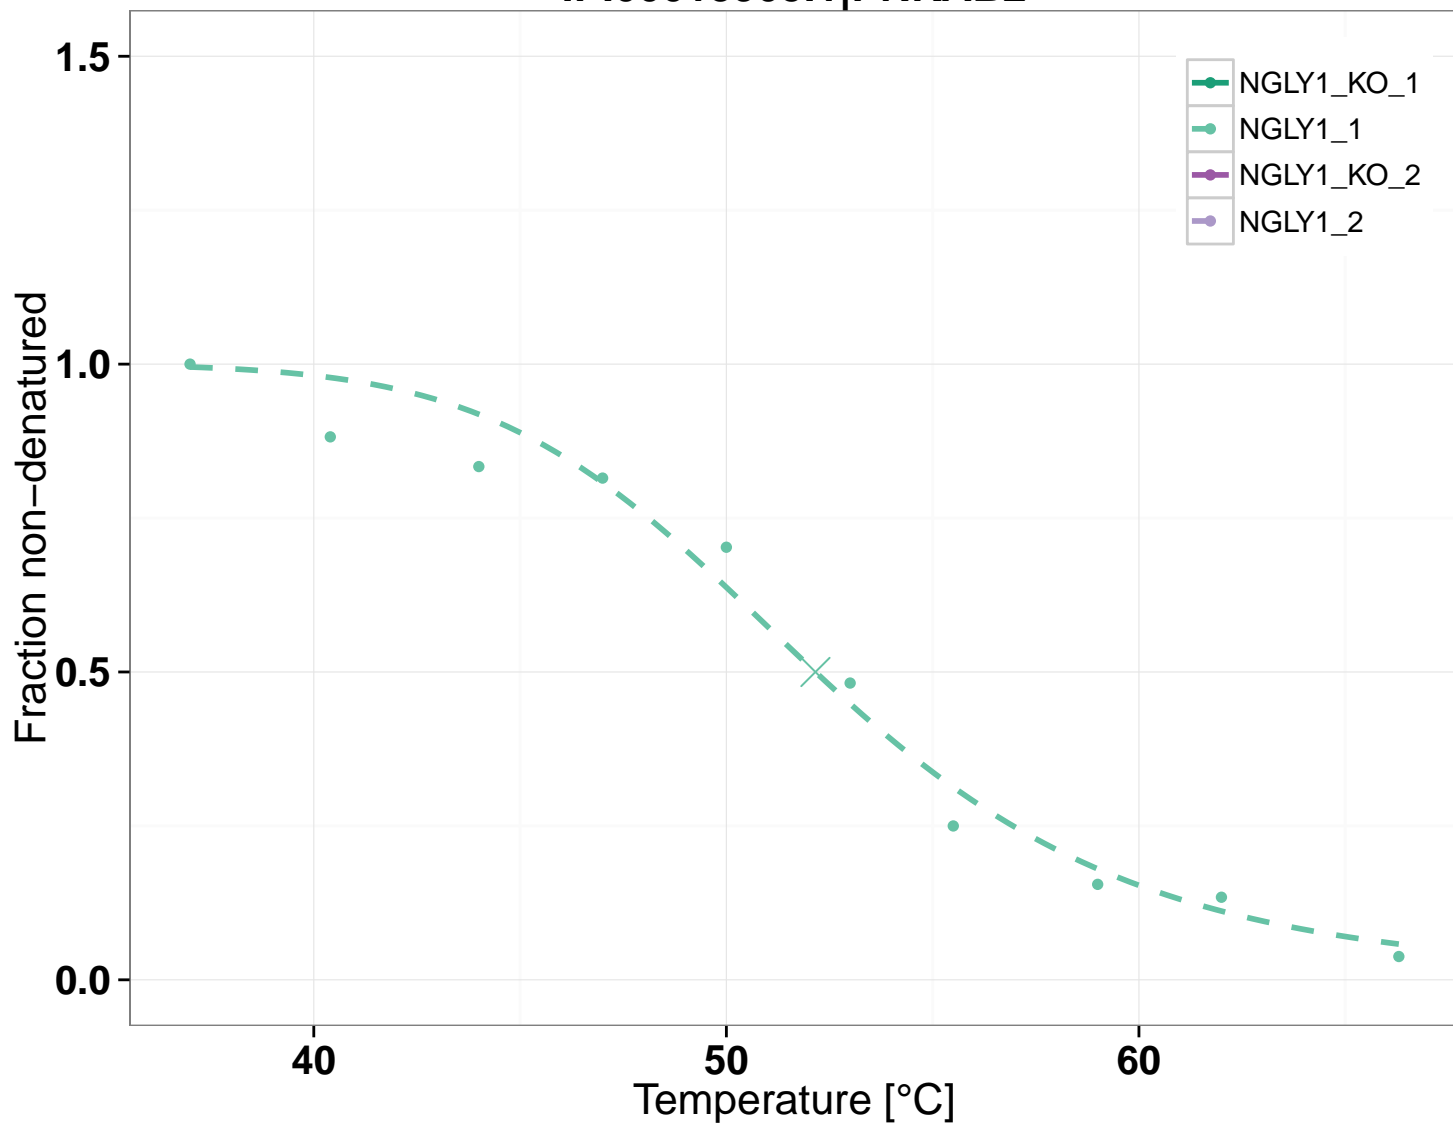

|            | meltPoint | slope  | plateau | R2   |
|------------|-----------|--------|---------|------|
| NGLY1_KO_1 | —         | —      | —       | —    |
| NGLY1_1    | 52.16     | -0.064 | 0       | 0.98 |
| NGLY1_KO_2 | —         | —      | —       | —    |
| NGLY1_2    | —         | —      | —       | —    |

Supplement: Supplementary file 943 [file 1]

IPI00443909.1|CNPY2

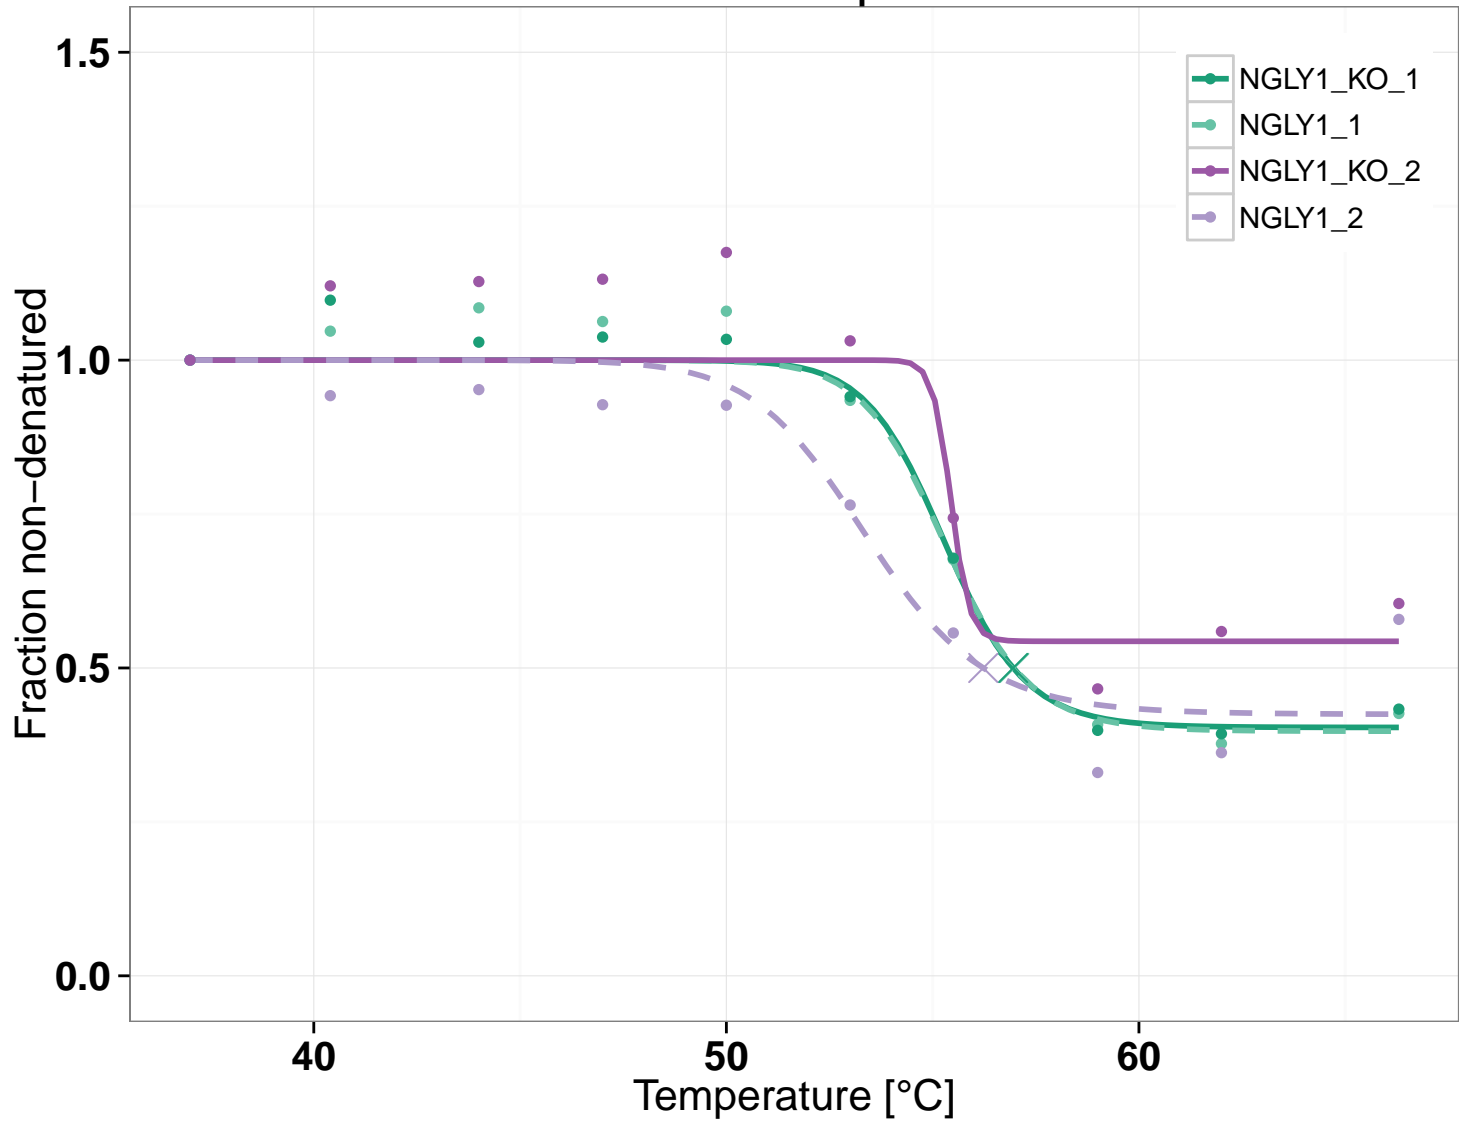

|            | meltPoint | slope | plateau | R2   |
|------------|-----------|-------|---------|------|
| NGLY1_KO_1 | 56.95     | -0.15 | 0.4     | 0.98 |
| NGLY1_1    | 56.98     | -0.15 | 0.4     | 0.97 |
| NGLY1_KO_2 | -         | -0.51 | 0.54    | 0.87 |
| NGLY1_2    | 56.23     | -0.1  | 0.42    | 0.91 |

Supplement: Supplementary file 944 [file 1]

IPI00395813.1|ZNF687

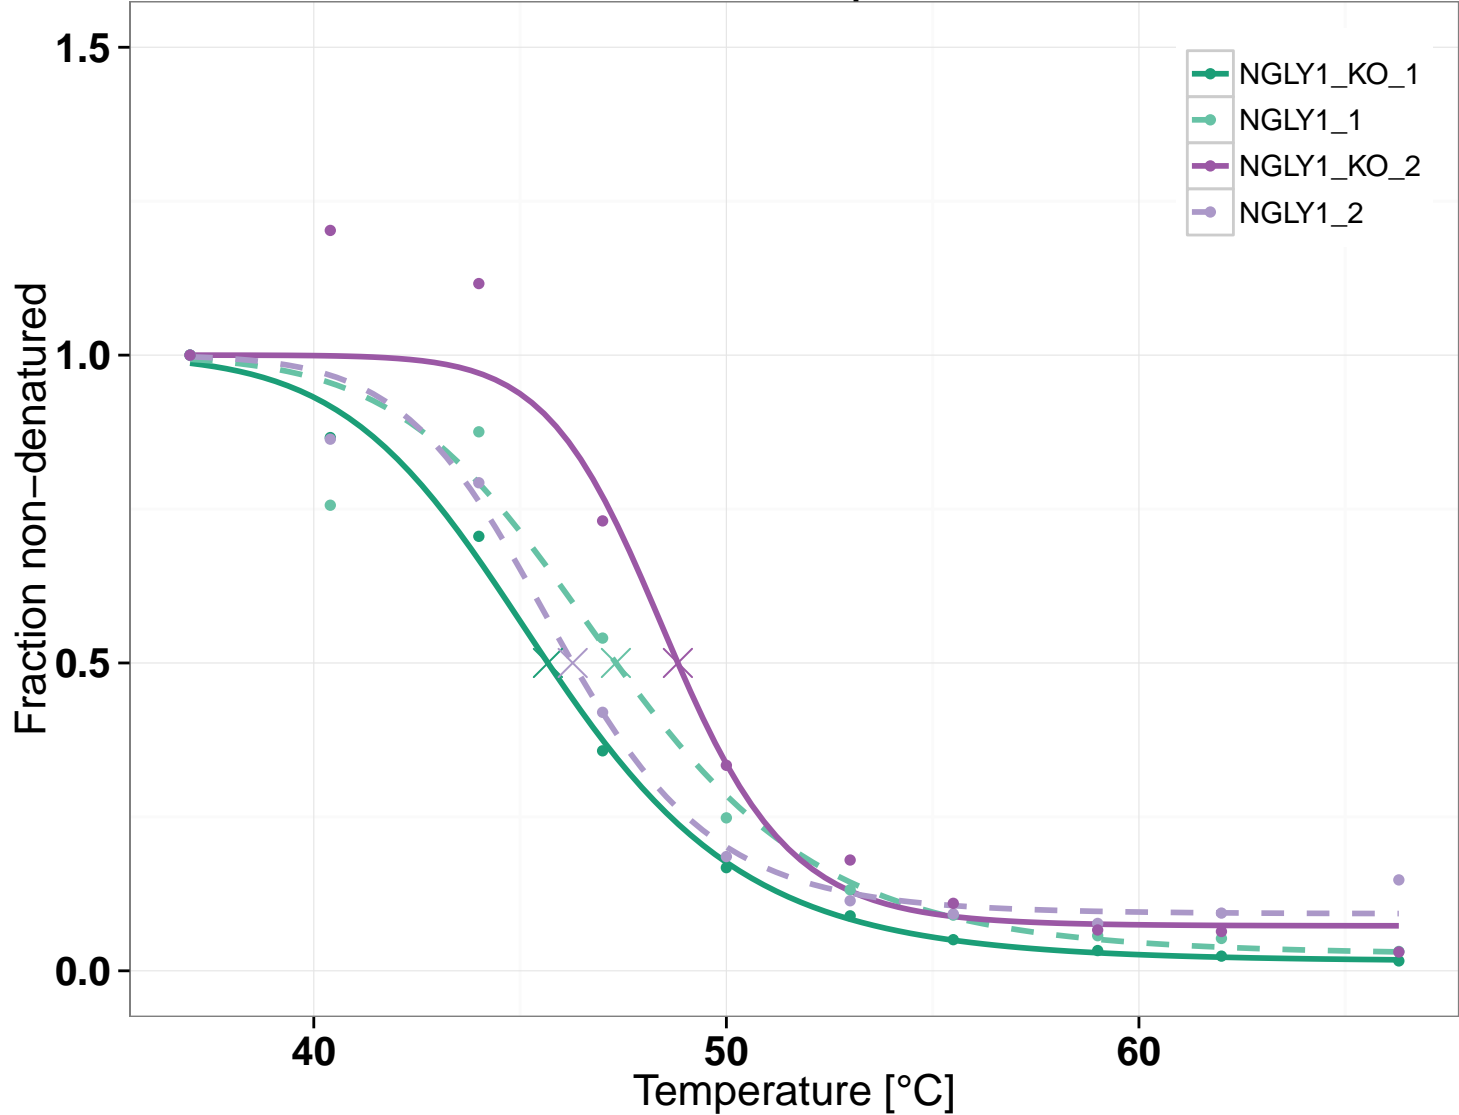

|            | meltPoint | slope  | plateau | R2   |
|------------|-----------|--------|---------|------|
| NGLY1_KO_1 | 45.67     | -0.1   | 0.01    | 1    |
| NGLY1_1    | 47.32     | -0.094 | 0.03    | 0.96 |
| NGLY1_KO_2 | 48.83     | -0.16  | 0.07    | 0.97 |
| NGLY1_2    | 46.28     | -0.12  | 0.09    | 0.99 |

Supplement: Supplementary file 945 [file 1]

# IPI00021888.5|SLC39A7

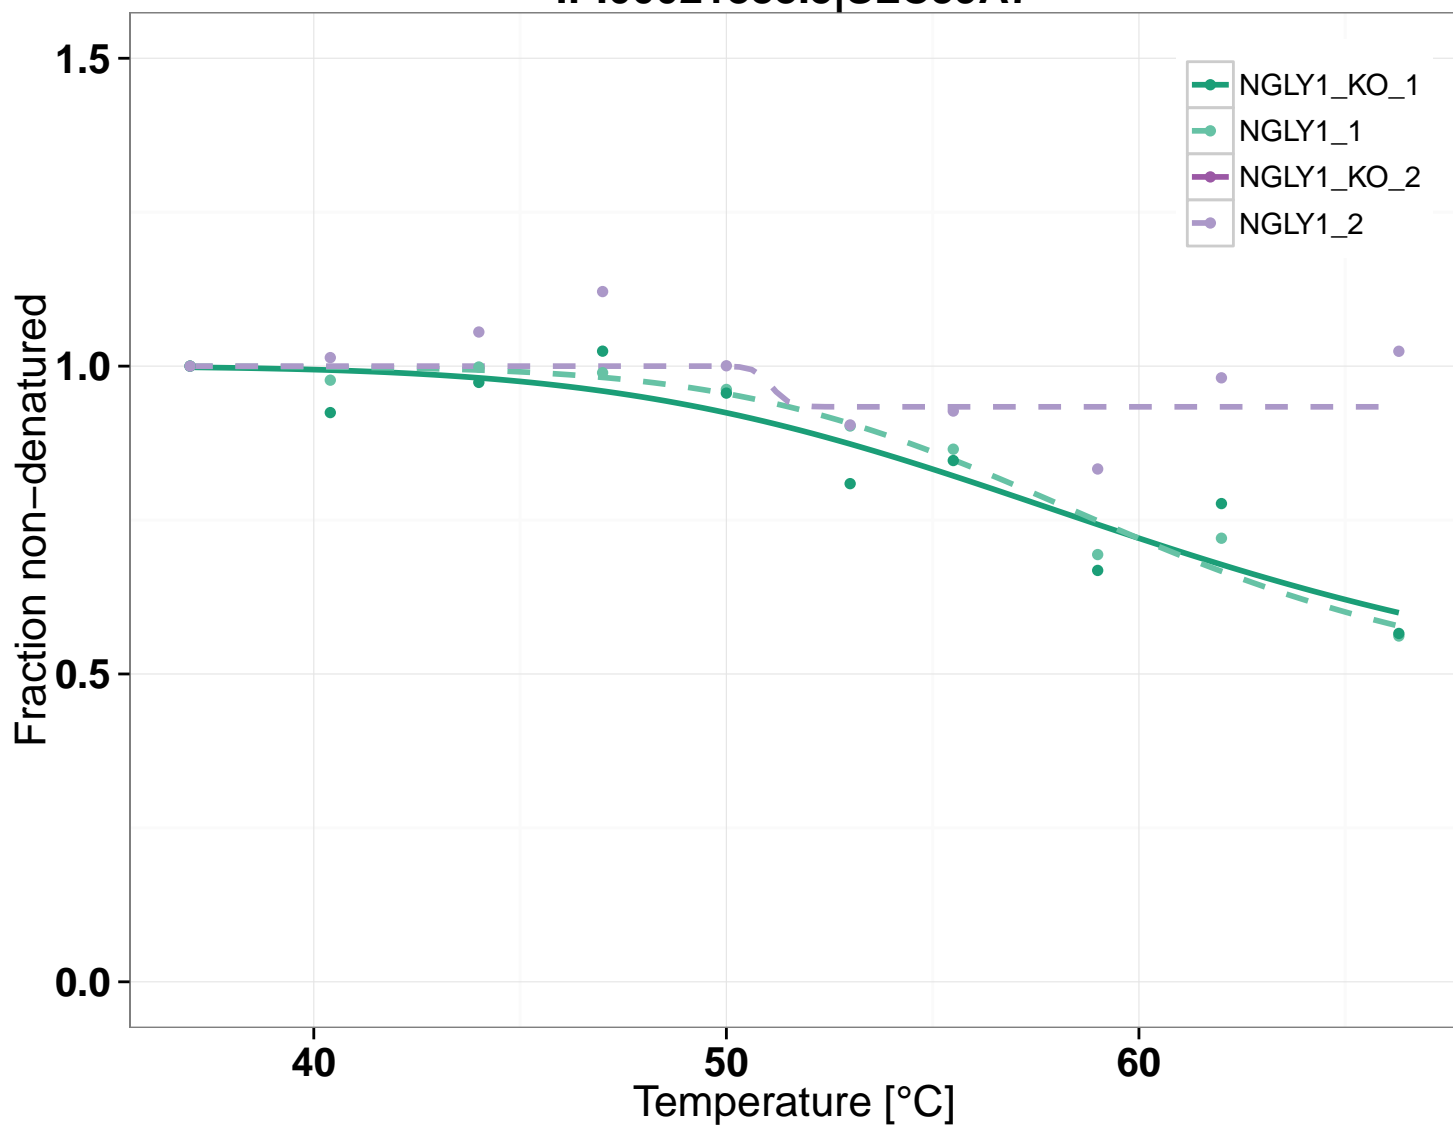

|            | meltPoint | slope  | plateau | R2   |
|------------|-----------|--------|---------|------|
| NGLY1_KO_1 | —         | -0.023 | 0.41    | 0.85 |
| NGLY1_1    | —         | -0.029 | 0.45    | 0.97 |
| NGLY1_KO_2 | —         | —      | —       | —    |
| NGLY1_2    | —         | -0.081 | 0.93    | 0.34 |

Supplement: Supplementary file 946 [file 1]

# IPI00012989.2|MAN2B1

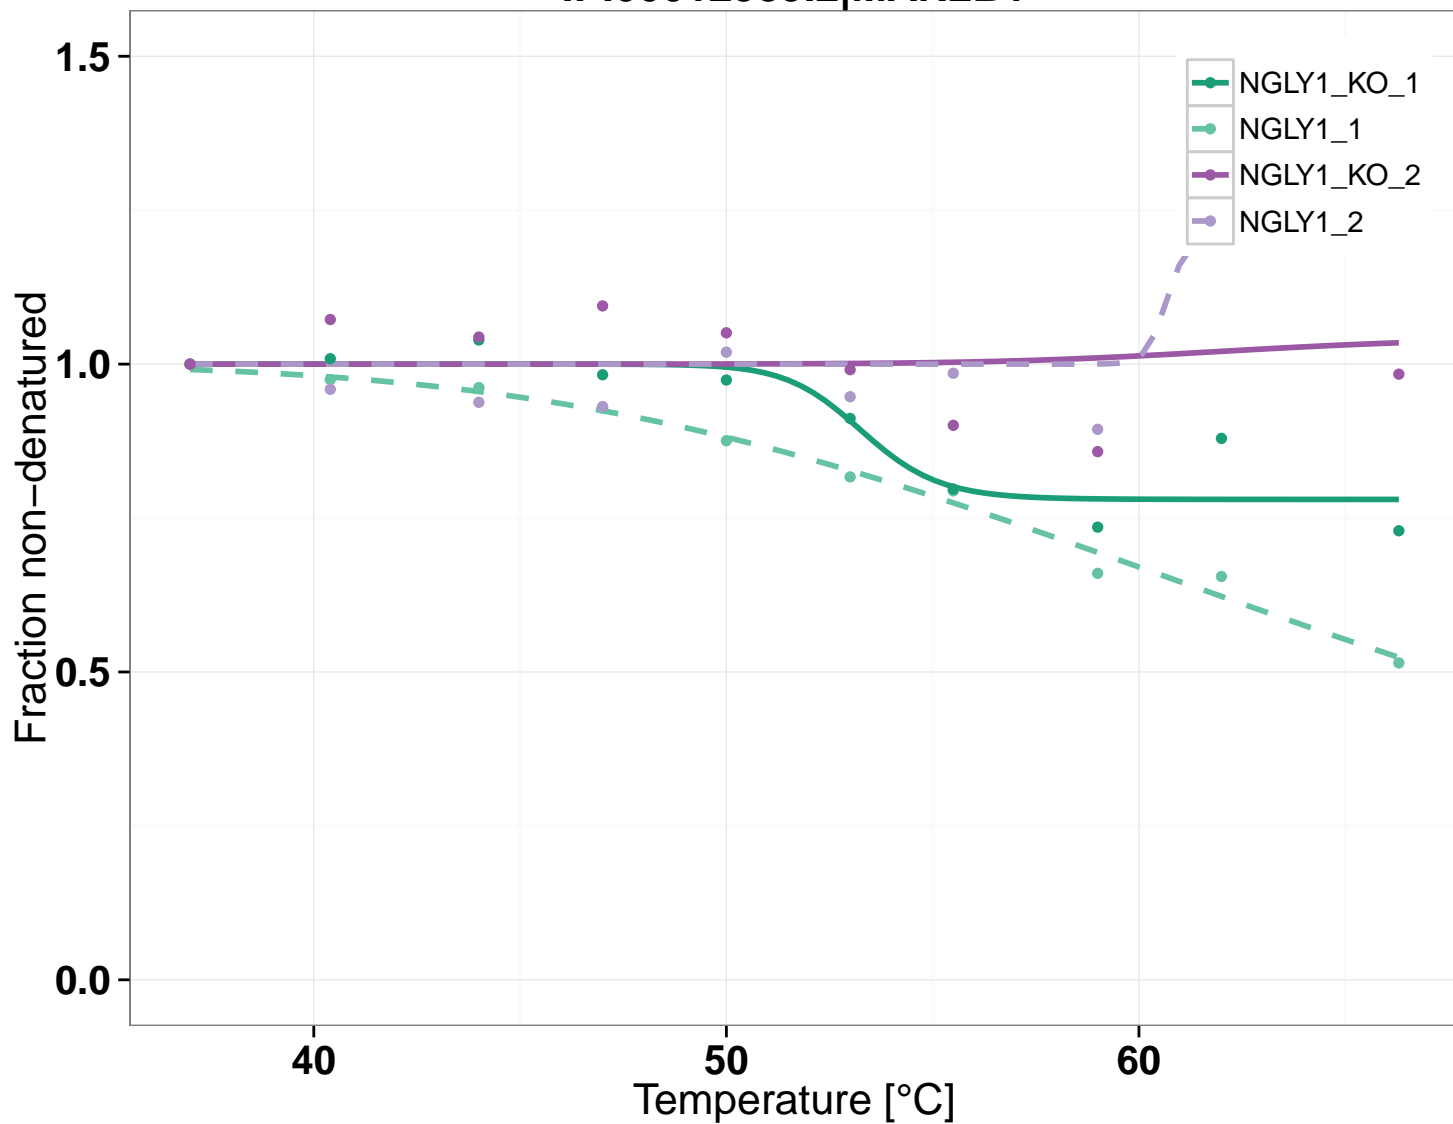

|            | meltPoint | slope  | plateau | R2    |
|------------|-----------|--------|---------|-------|
| NGLY1_KO_1 | –         | –0.059 | 0.78    | 0.86  |
| NGLY1_1    | –         | –0.024 | 0       | 0.99  |
| NGLY1_KO_2 | –         | 0.0038 | 1.04    | –0.02 |
| NGLY1_2    | –         | 0.21   | 1.21    | 0.77  |

Supplement: Supplementary file 947 [file 1]

IPI00020470.4|GLT8D1

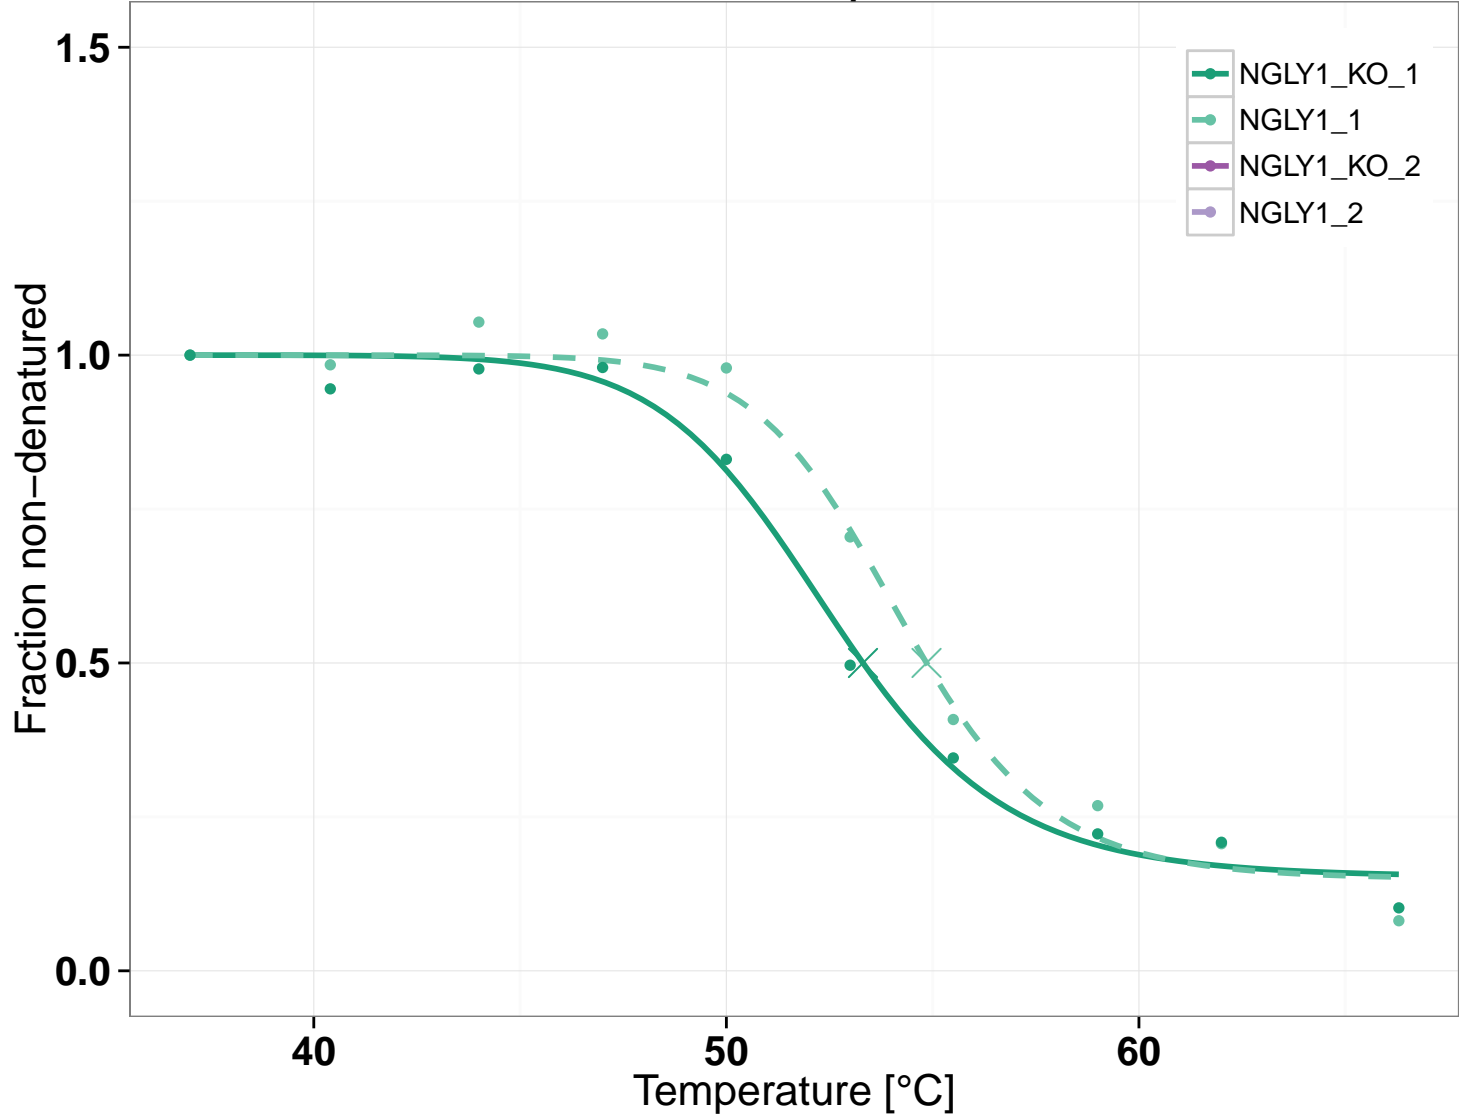

|            | meltPoint | slope | plateau | R2   |
|------------|-----------|-------|---------|------|
| NGLY1_KO_1 | 53.31     | -0.1  | 0.15    | 0.99 |
| NGLY1_1    | 54.85     | -0.12 | 0.15    | 0.99 |
| NGLY1_KO_2 | -         | -     | -       | -    |
| NGLY1_2    | -         | -     | -       | -    |

Supplement: Supplementary file 948 [file 1]

IPI00014171.1|HERPUD1

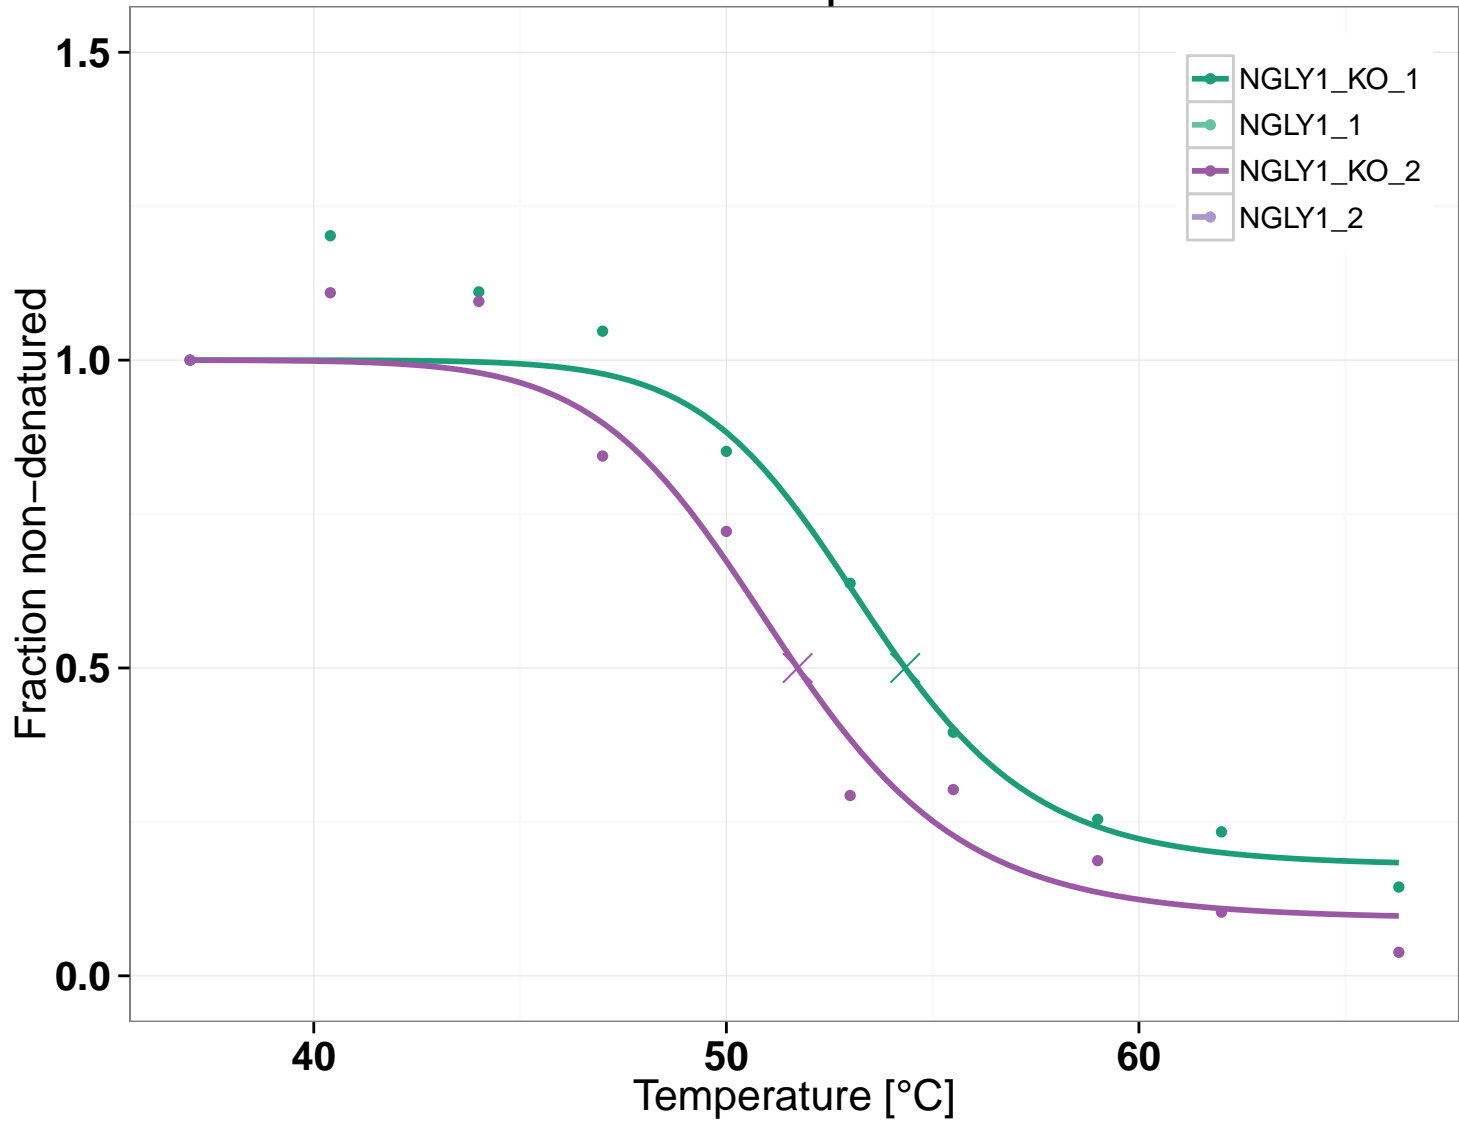

|            | meltPoint | slope | plateau | R2   |
|------------|-----------|-------|---------|------|
| NGLY1_KO_1 | 54.33     | -0.1  | 0.18    | 0.96 |
| NGLY1_1    | -         | -     | -       | -    |
| NGLY1_KO_2 | 51.73     | -0.1  | 0.09    | 0.97 |
| NGLY1_2    | -         | -     | -       | -    |

Supplement: Supplementary file 949 [file 1]

IPI00645303.1|SNX27

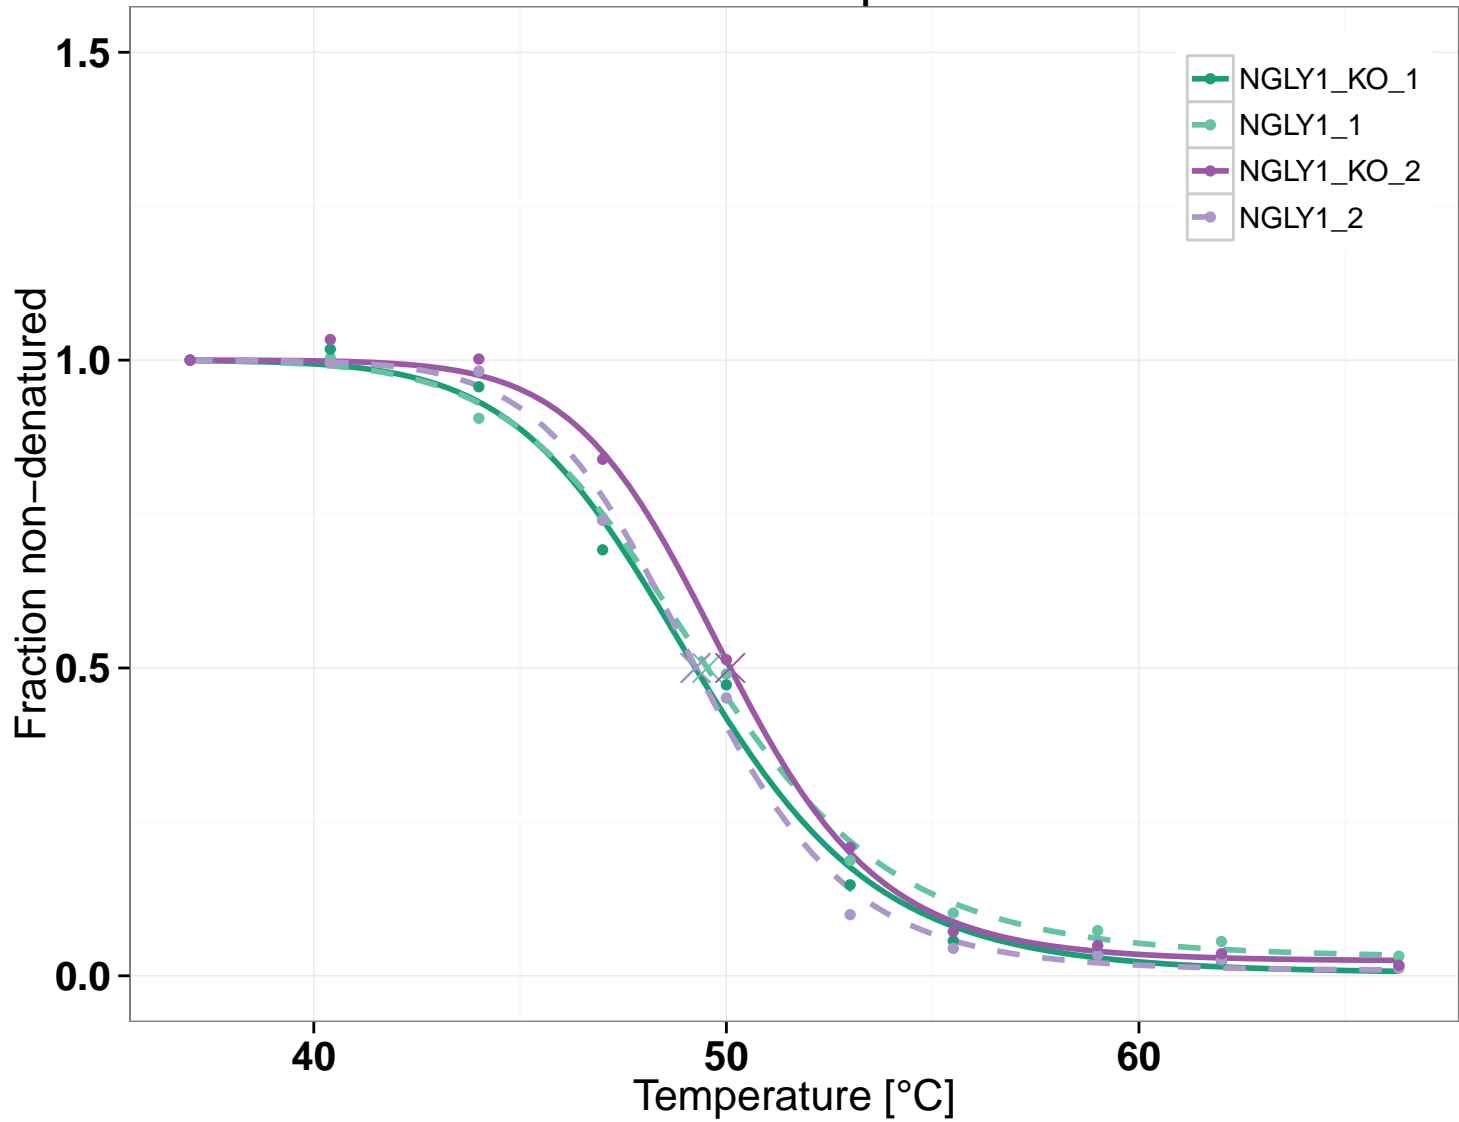

|            | meltPoint | slope | plateau | R2 |
|------------|-----------|-------|---------|----|
| NGLY1_KO_1 | 49.25     | -0.11 | 0       | 1  |
| NGLY1_1    | 49.54     | -0.1  | 0.03    | 1  |
| NGLY1_KO_2 | 50.09     | -0.13 | 0.02    | 1  |
| NGLY1_2    | 49.26     | -0.13 | 0.01    | 1  |

Supplement: Supplementary file 950 [file 1]

IPI00024706.3|SNX25

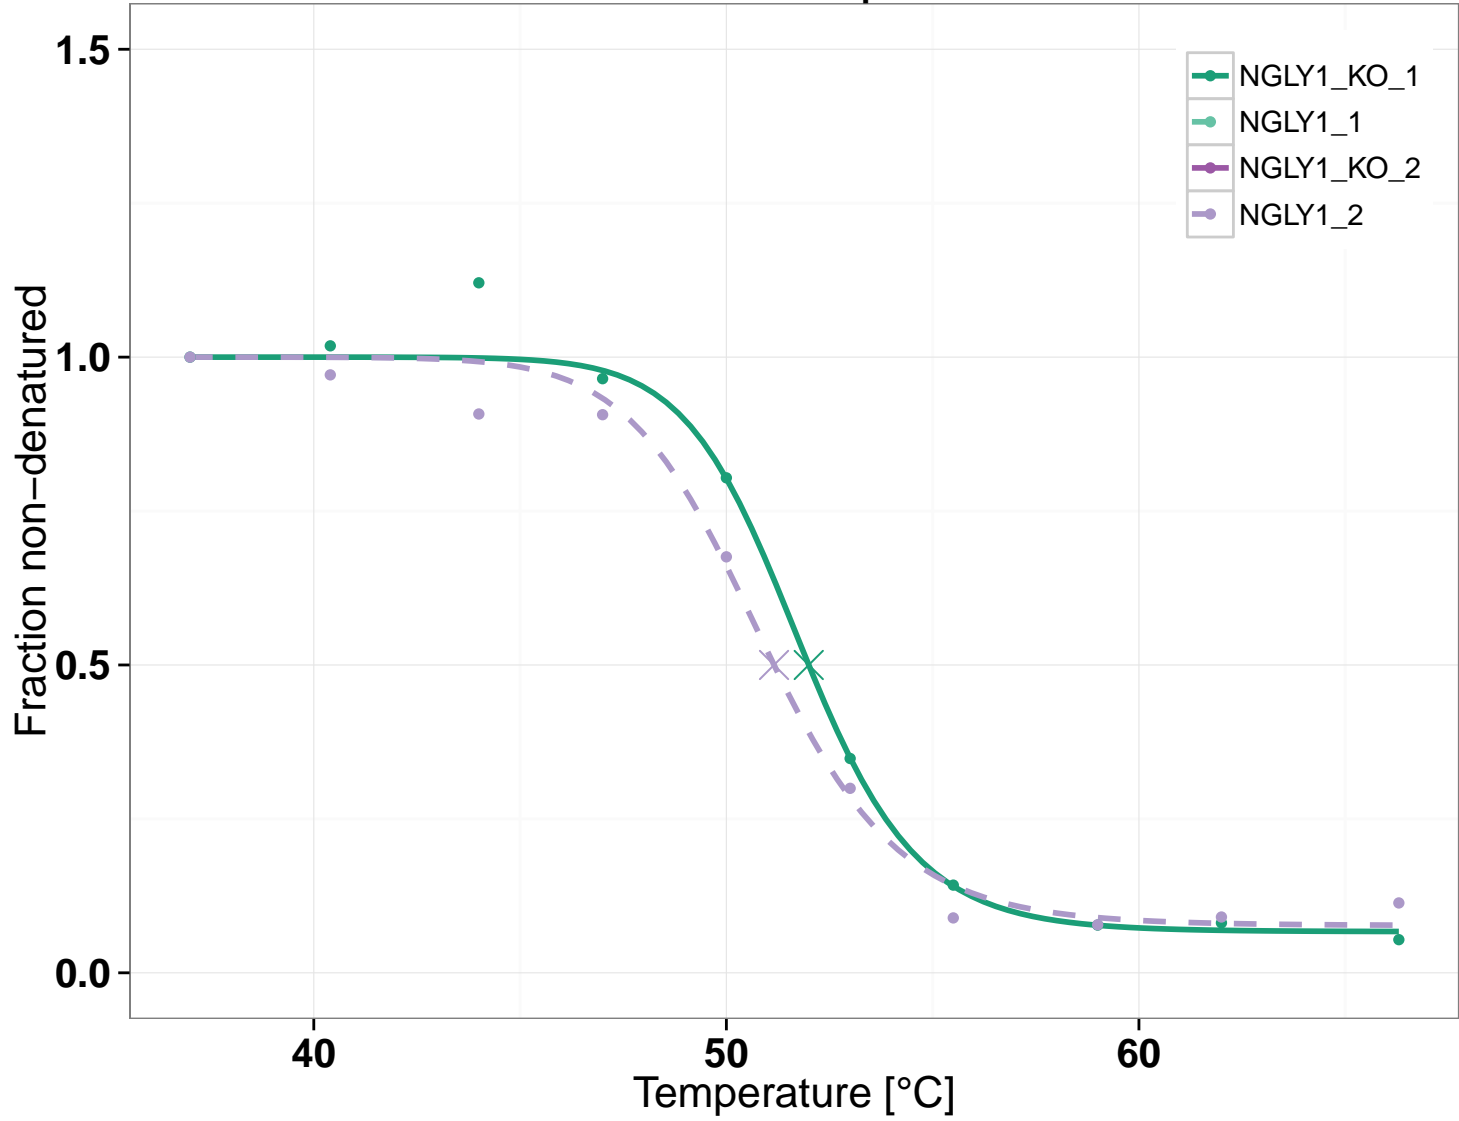

|            | meltPoint | slope | plateau | R2   |
|------------|-----------|-------|---------|------|
| NGLY1_KO_1 | 52        | -0.17 | 0.07    | 0.99 |
| NGLY1_1    | -         | -     | -       | -    |
| NGLY1_KO_2 | -         | -     | -       | -    |
| NGLY1_2    | 51.16     | -0.14 | 0.08    | 0.99 |

Supplement: Supplementary file 951 [file 1]

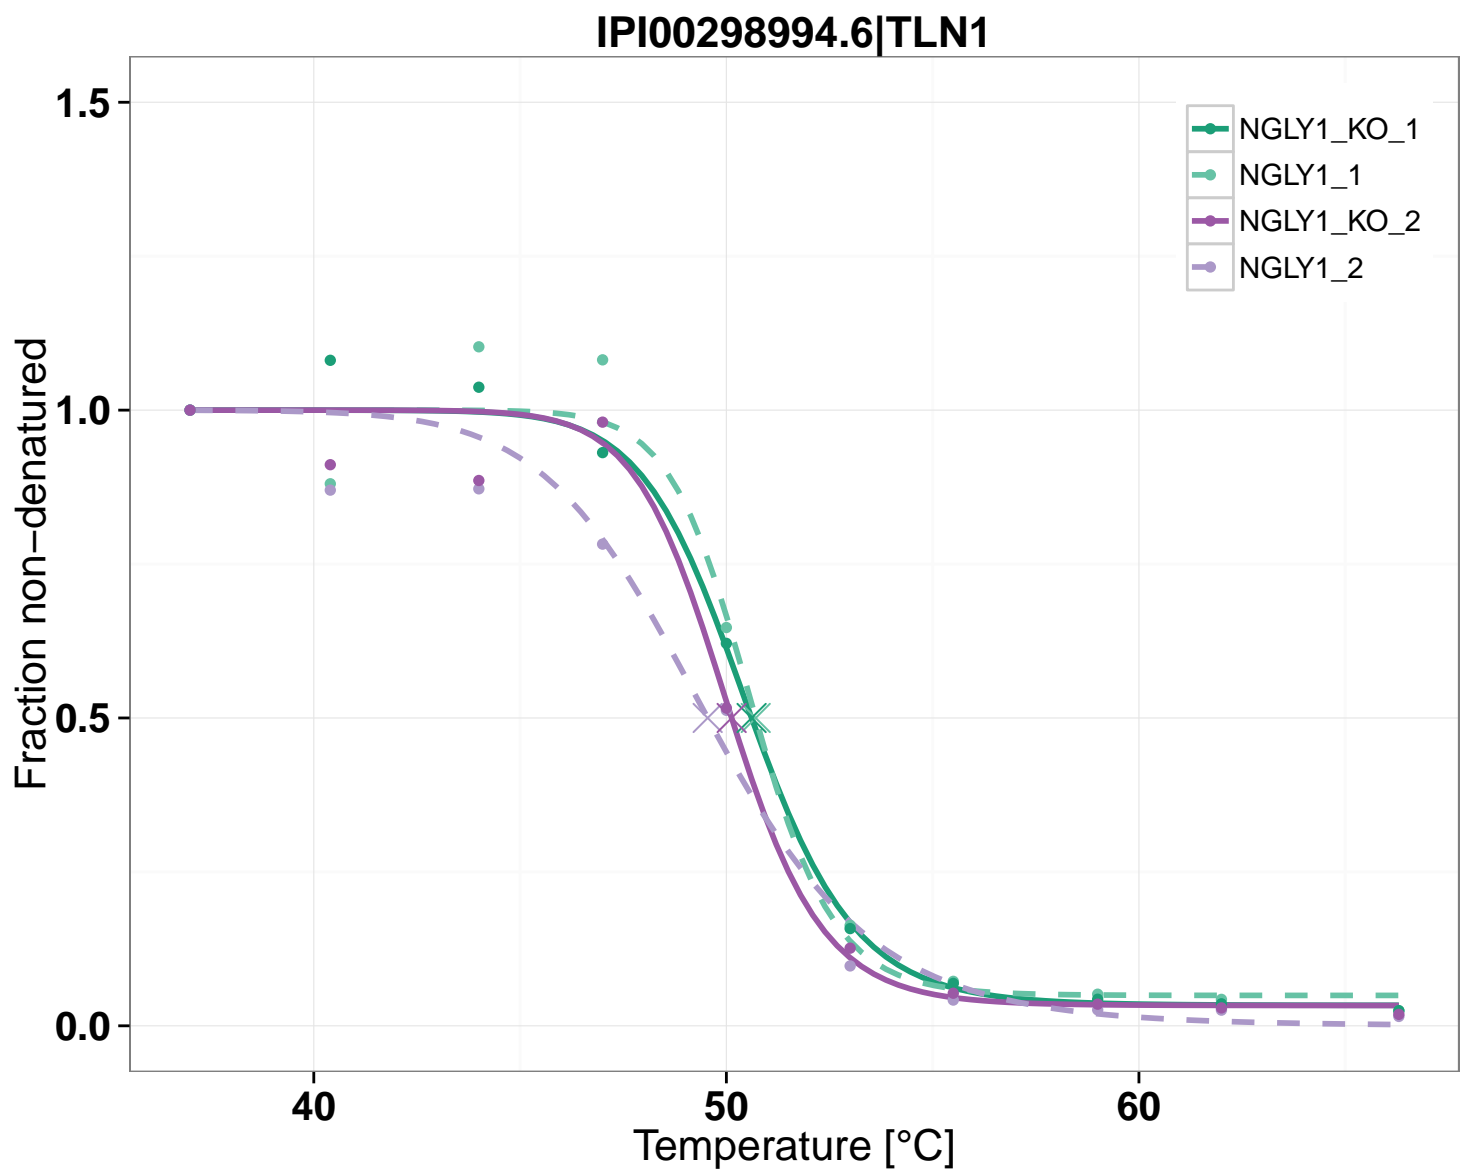

|            | meltPoint | slope | plateau | R2   |
|------------|-----------|-------|---------|------|
| NGLY1_KO_1 | 50.61     | -0.19 | 0.03    | 1    |
| NGLY1_1    | 50.71     | -0.24 | 0.05    | 0.98 |
| NGLY1_KO_2 | 50.13     | -0.21 | 0.03    | 0.99 |
| NGLY1_2    | 49.55     | -0.12 | 0       | 0.98 |

Supplement: Supplementary file 952 [file 1]

# IPI00216008.4|G6PD

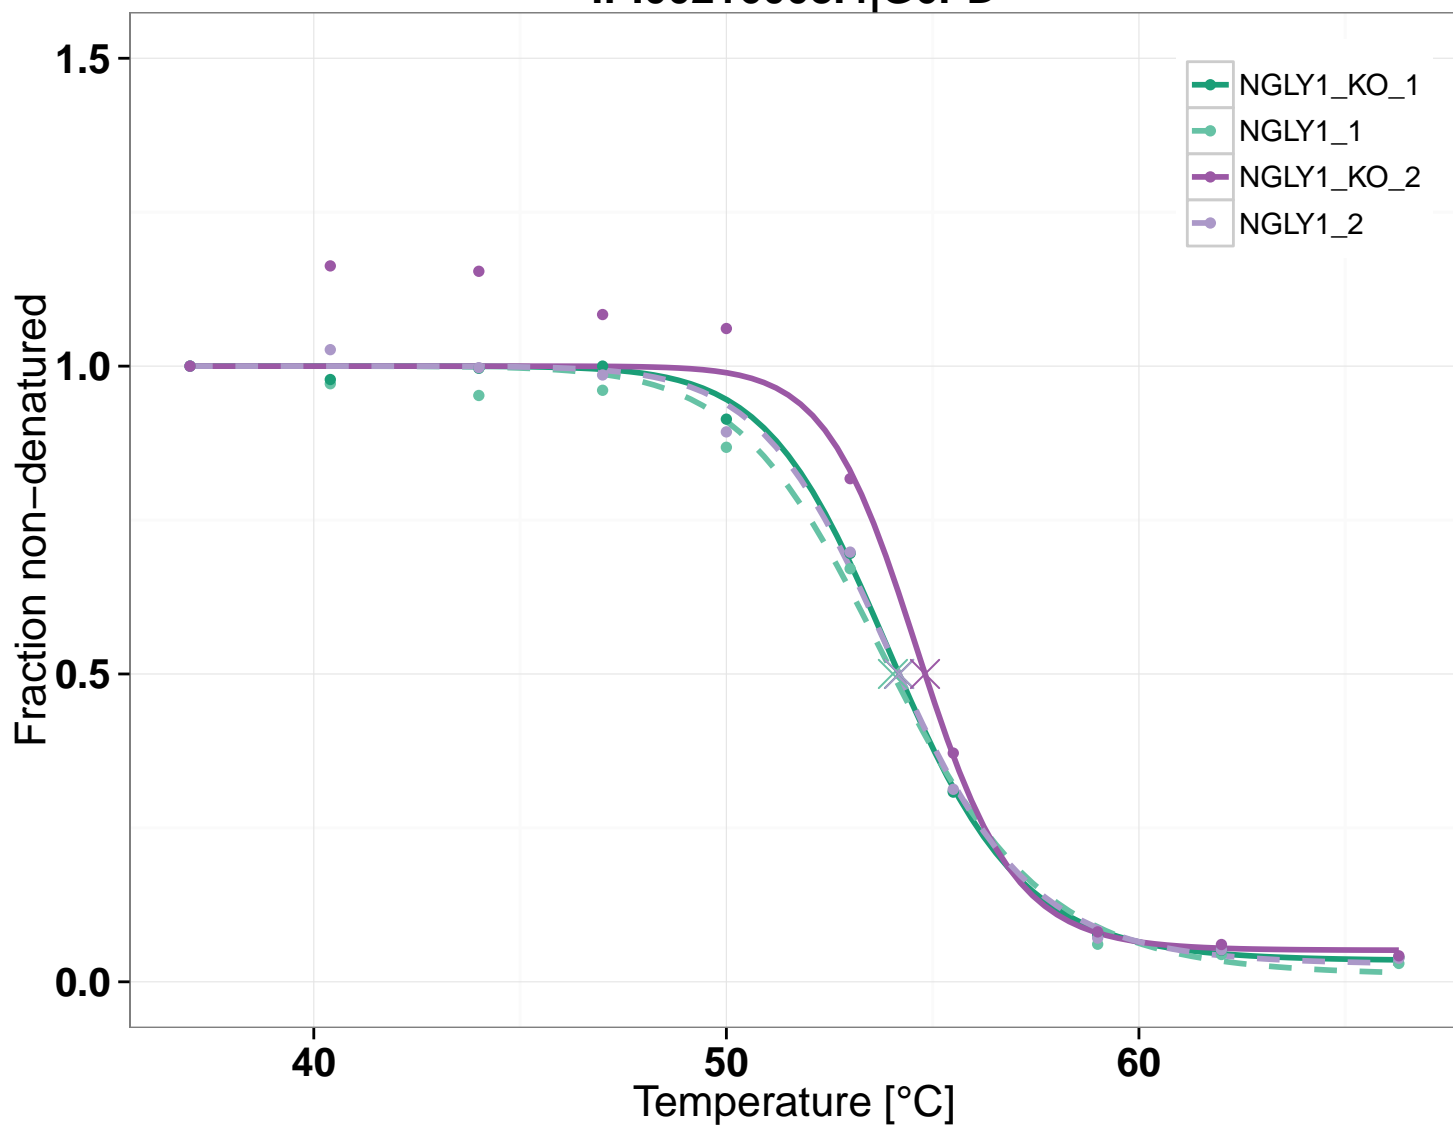

|            | meltPoint | slope | plateau | R2   |
|------------|-----------|-------|---------|------|
| NGLY1_KO_1 | 54.19     | -0.16 | 0.03    | 1    |
| NGLY1_1    | 54.04     | -0.13 | 0.01    | 1    |
| NGLY1_KO_2 | 54.82     | -0.21 | 0.05    | 0.97 |
| NGLY1_2    | 54.19     | -0.15 | 0.03    | 1    |

Supplement: Supplementary file 953 [file 1]

IPI00884061.2|LOC552889

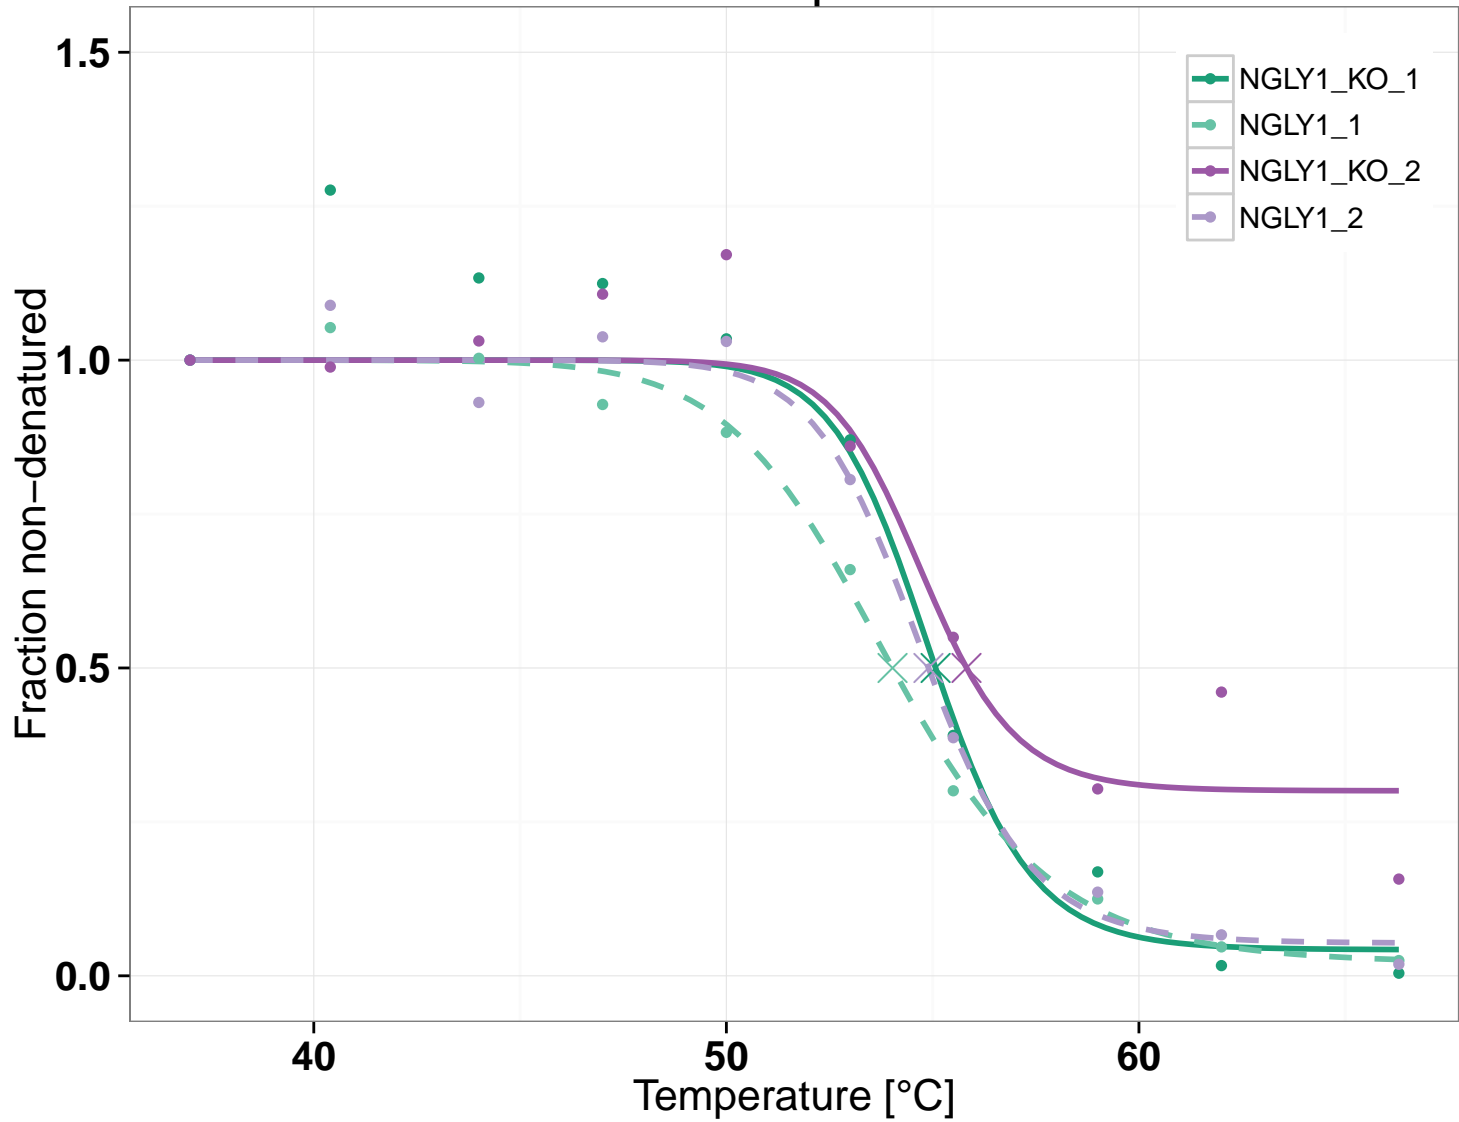

|            | meltPoint | slope | plateau | R2   |
|------------|-----------|-------|---------|------|
| NGLY1_KO_1 | 55.07     | -0.2  | 0.04    | 0.95 |
| NGLY1_1    | 54.03     | -0.12 | 0.02    | 0.99 |
| NGLY1_KO_2 | 55.82     | -0.16 | 0.3     | 0.92 |
| NGLY1_2    | 54.9      | -0.18 | 0.05    | 0.99 |

Supplement: Supplementary file 954 [file 1]

IPI00910610.1|UBE2F

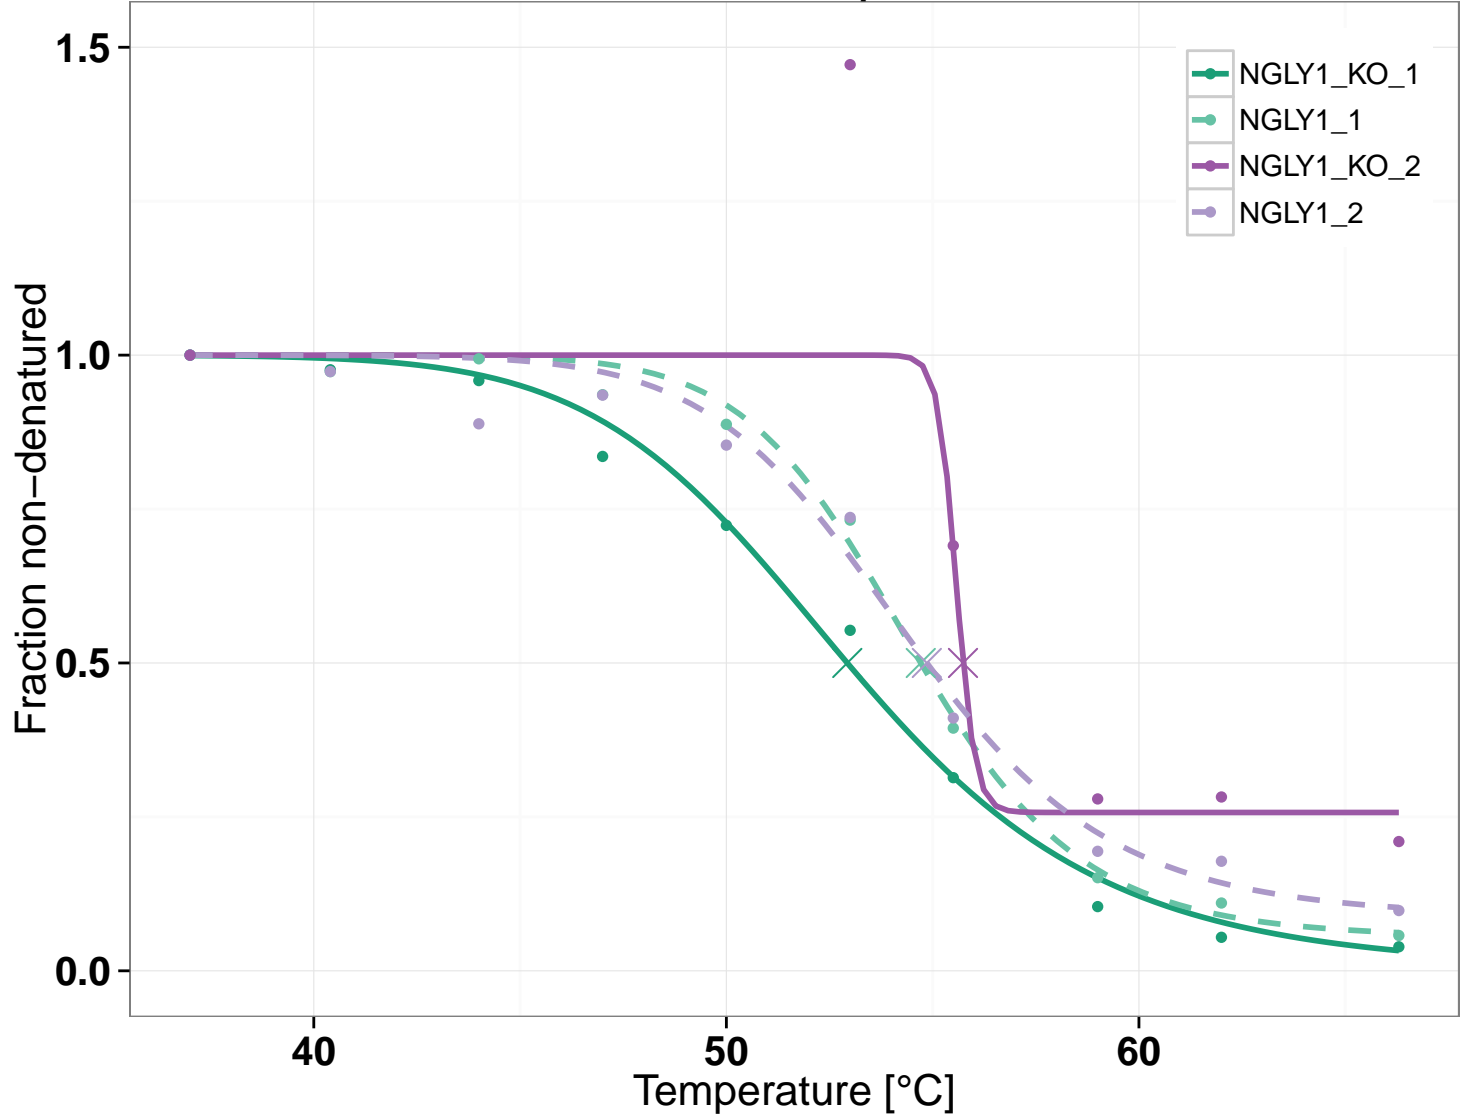

|            | meltPoint | slope  | plateau | R2   |
|------------|-----------|--------|---------|------|
| NGLY1_KO_1 | 52.93     | -0.08  | 0       | 0.99 |
| NGLY1_1    | 54.71     | -0.12  | 0.05    | 1    |
| NGLY1_KO_2 | 55.74     | -0.84  | 0.26    | 0.18 |
| NGLY1_2    | 54.86     | -0.094 | 0.09    | 0.98 |

Supplement: Supplementary file 956 [file 1]

IPI00024619.5|C16ORF61

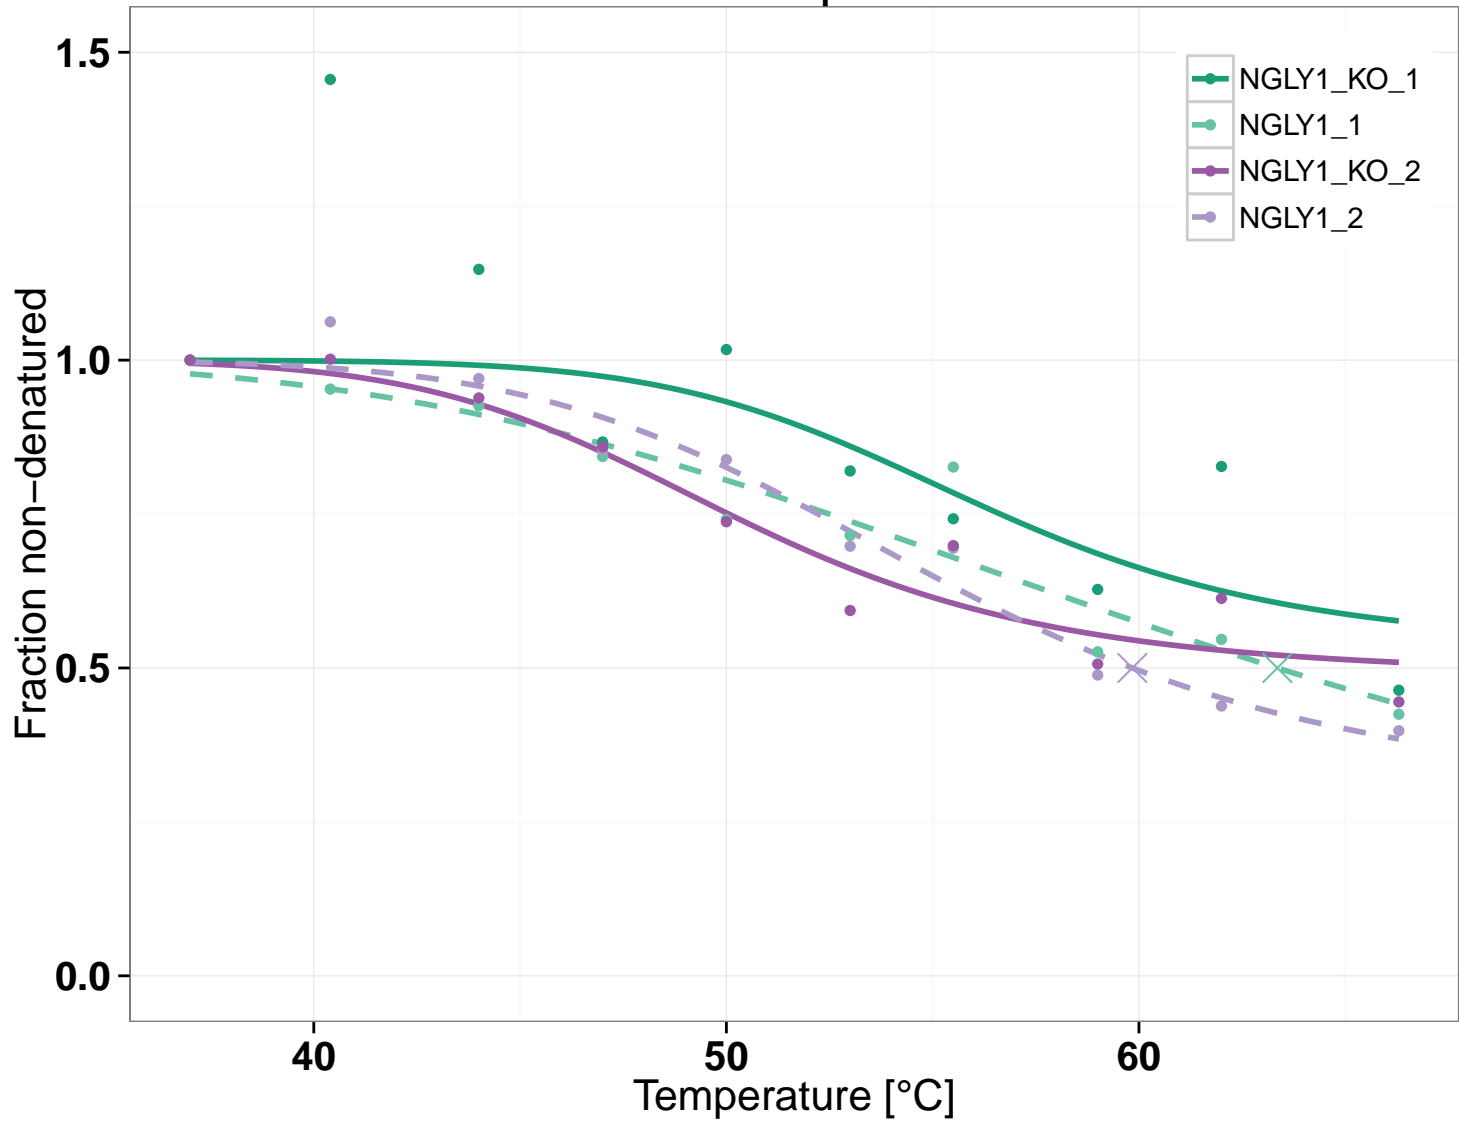

|            | meltPoint | slope  | plateau | R2   |
|------------|-----------|--------|---------|------|
| NGLY1_KO_1 | -         | -0.031 | 0.53    | 0.55 |
| NGLY1_1    | 63.36     | -0.024 | 0       | 0.91 |
| NGLY1_KO_2 | -         | -0.033 | 0.49    | 0.92 |
| NGLY1_2    | 59.84     | -0.036 | 0.29    | 0.97 |

Supplement: Supplementary file 957 [file 1]

# IPI00873851.1|GALK2

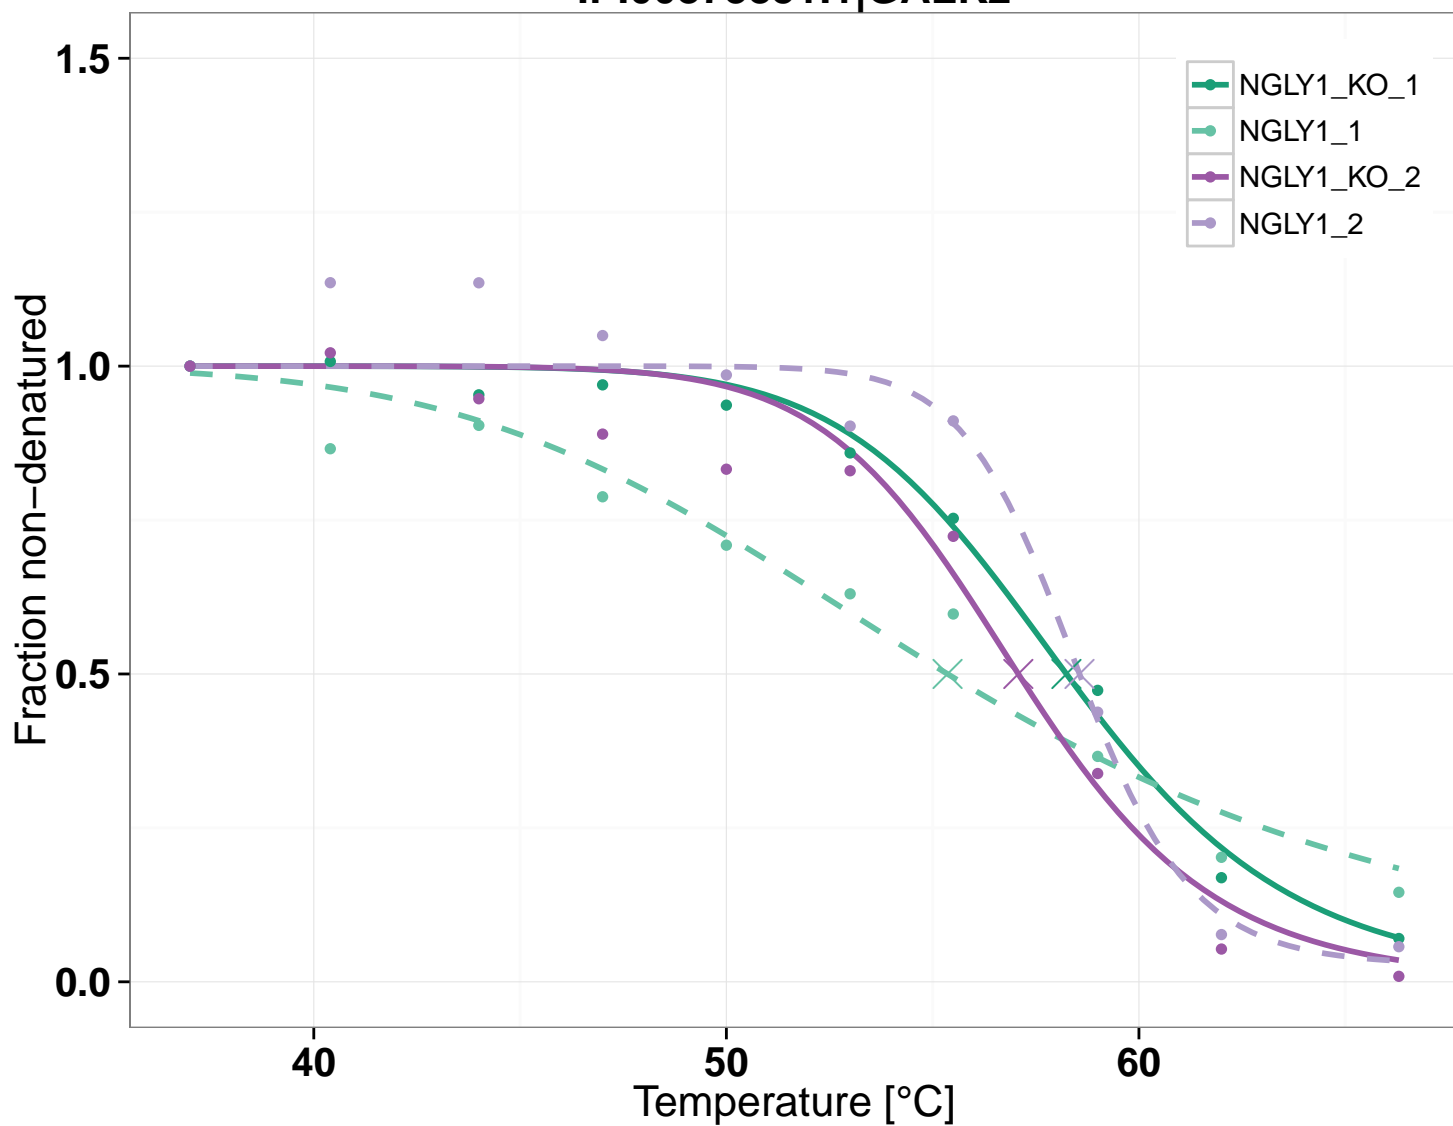

|            | meltPoint | slope  | plateau | R2   |
|------------|-----------|--------|---------|------|
| NGLY1_KO_1 | 58.24     | -0.091 | 0       | 0.99 |
| NGLY1_1    | 55.36     | -0.043 | 0       | 0.96 |
| NGLY1_KO_2 | 57.08     | -0.11  | 0       | 0.97 |
| NGLY1_2    | 58.56     | -0.17  | 0.03    | 0.97 |

Supplement: Supplementary file 958 [file 1]

# IPI00019502.3|MYH9

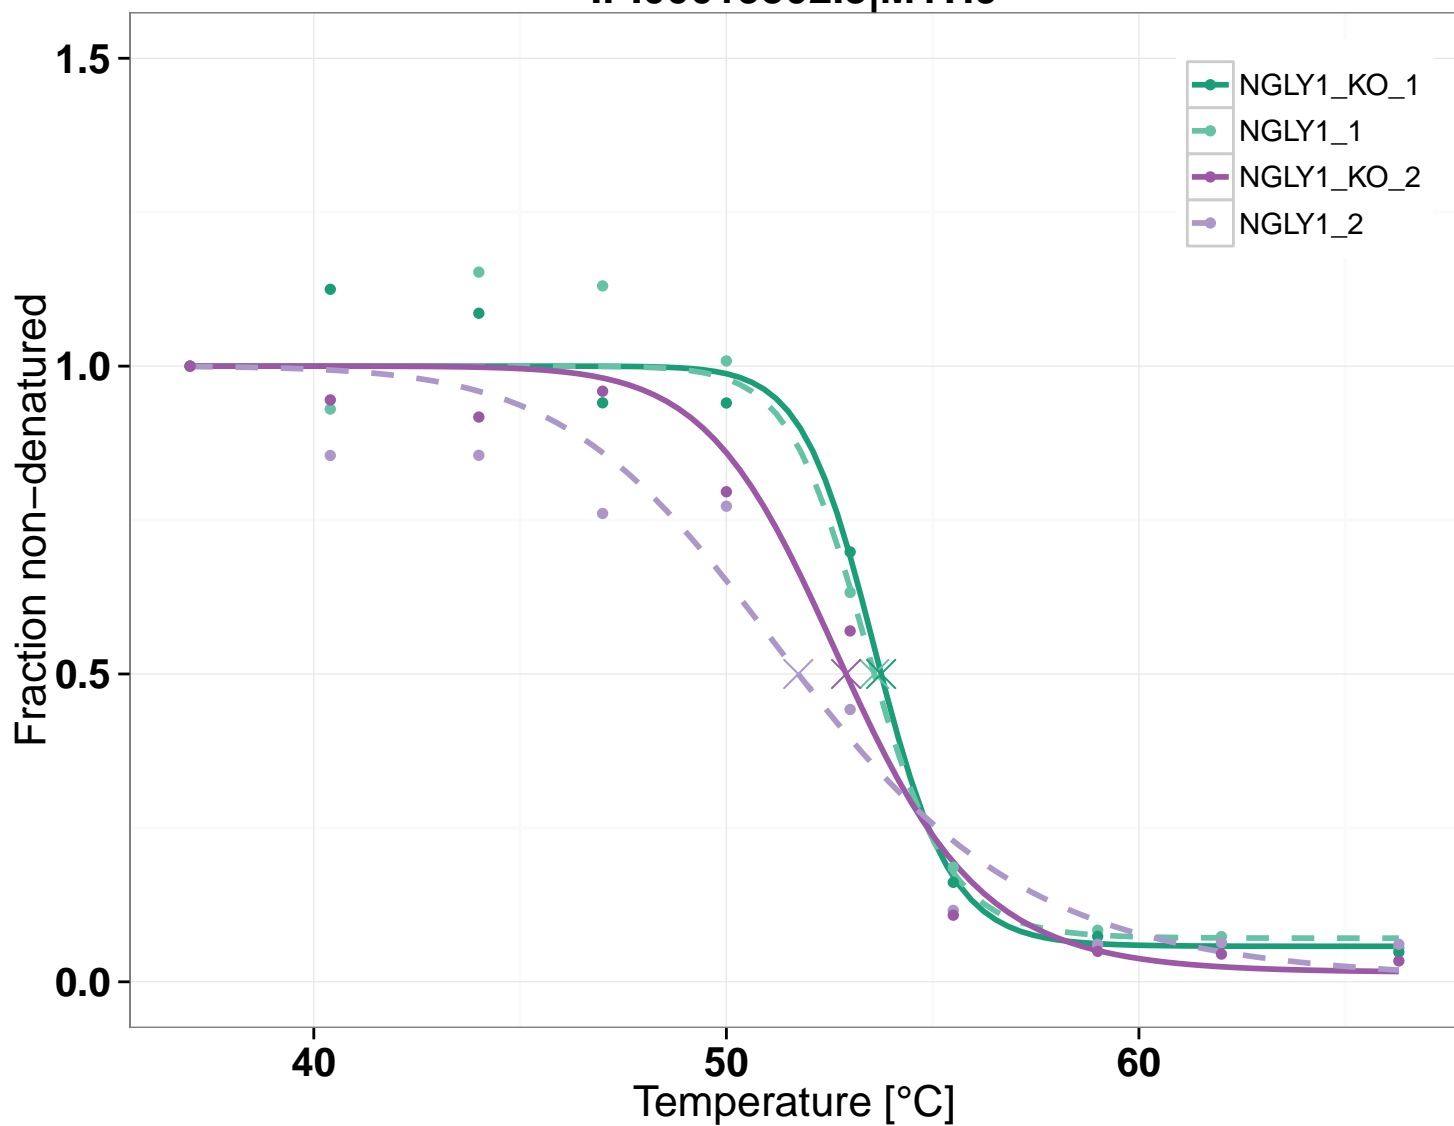

|            | meltPoint | slope  | plateau | R2   |
|------------|-----------|--------|---------|------|
| NGLY1_KO_1 | 53.75     | -0.26  | 0.06    | 0.99 |
| NGLY1_1    | 53.59     | -0.24  | 0.07    | 0.98 |
| NGLY1_KO_2 | 52.9      | -0.15  | 0.02    | 0.98 |
| NGLY1_2    | 51.74     | -0.088 | 0       | 0.95 |

Supplement: Supplementary file 959 [file 1]

# IPI00304082.8|ISOC1

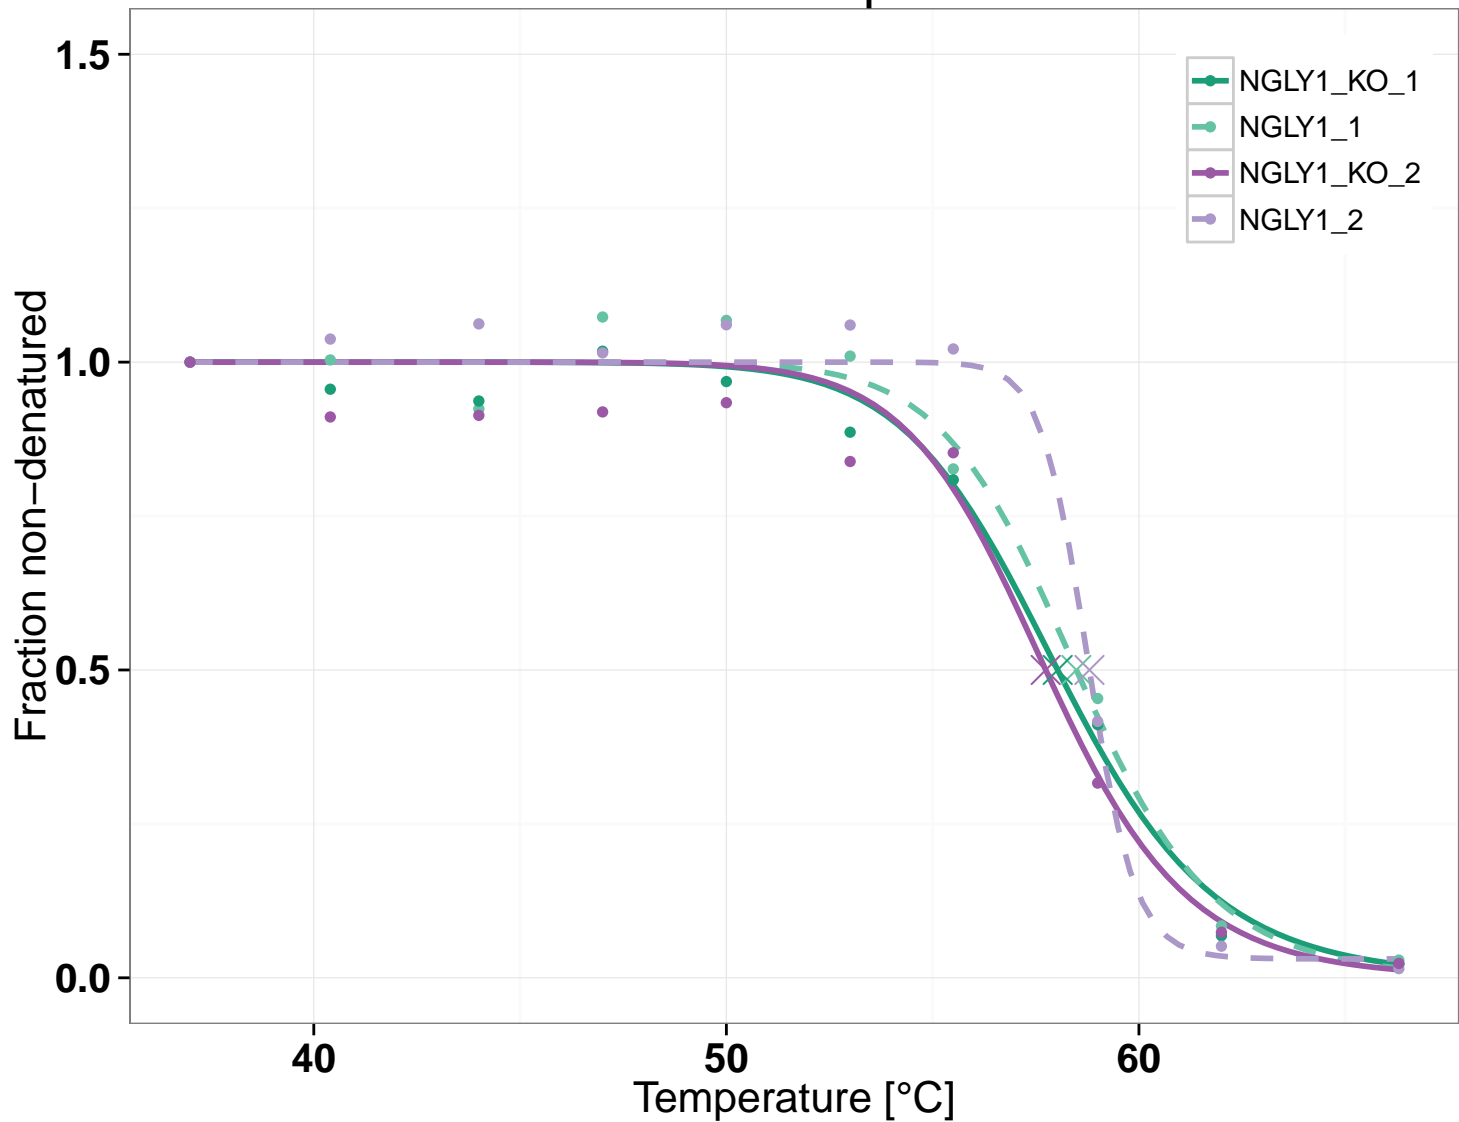

|            | meltPoint | slope | plateau | R2   |
|------------|-----------|-------|---------|------|
| NGLY1_KO_1 | 58.03     | -0.13 | 0       | 0.99 |
| NGLY1_1    | 58.48     | -0.15 | 0       | 0.99 |
| NGLY1_KO_2 | 57.74     | -0.15 | 0       | 0.97 |
| NGLY1_2    | 58.8      | -0.42 | 0.03    | 0.99 |

Supplement: Supplementary file 960 [file 1]

IPI00167822.3|WDSUB1

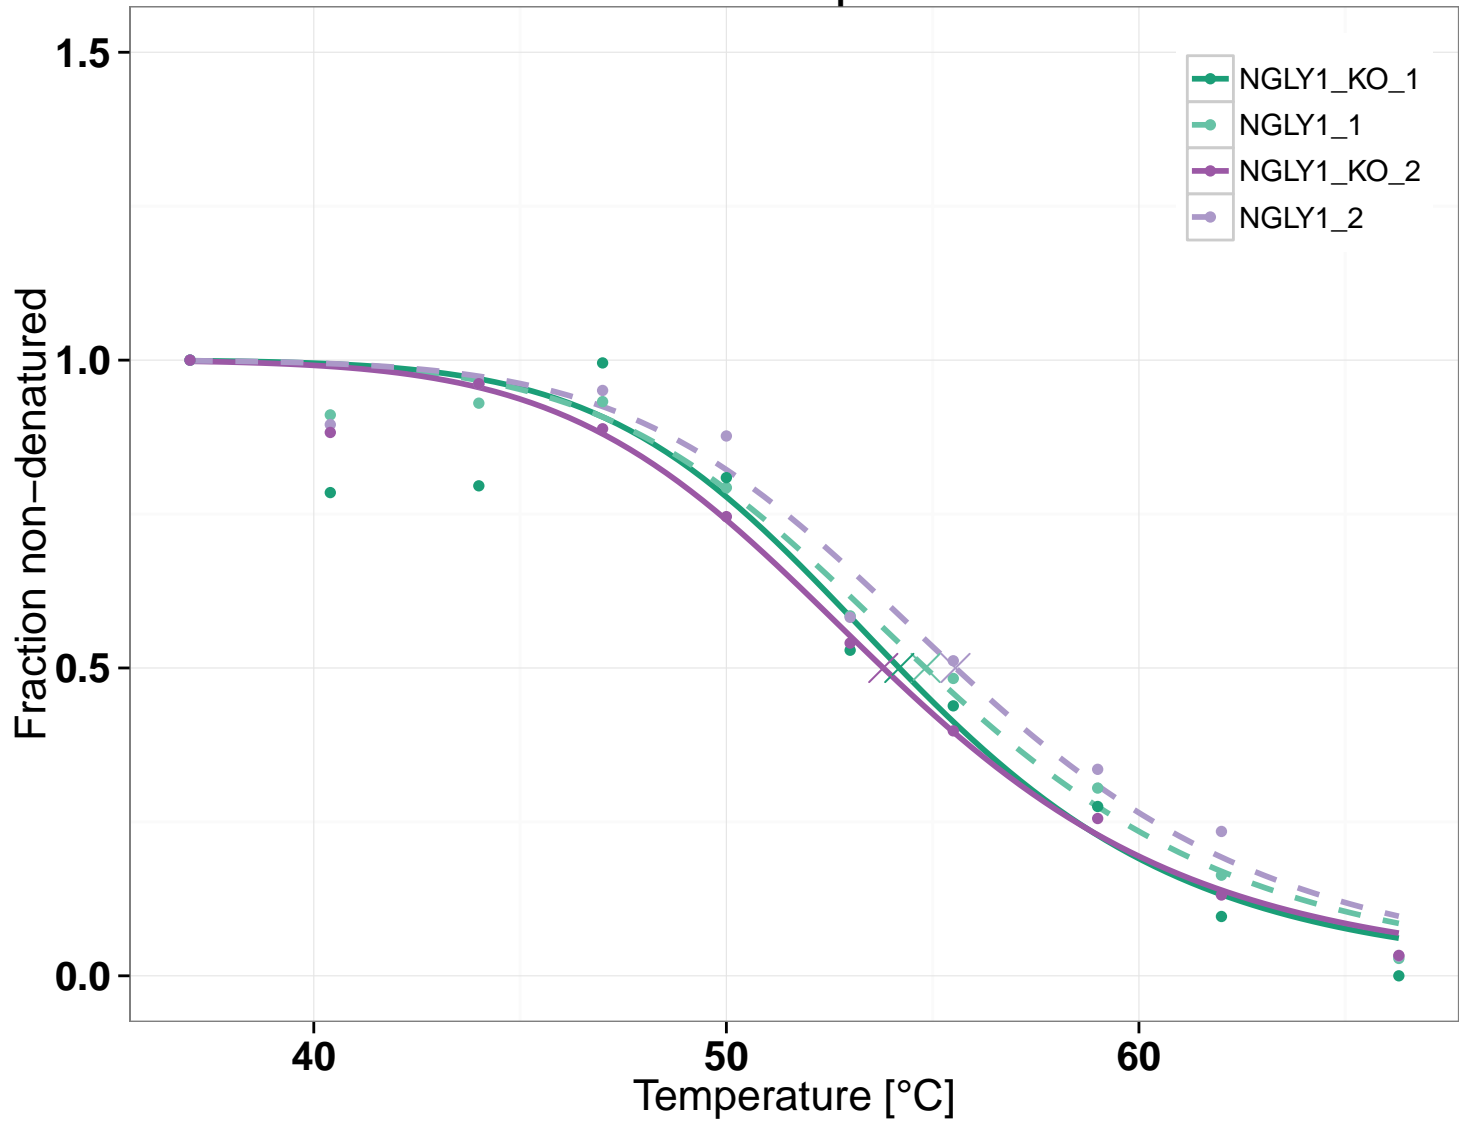

|            | meltPoint | slope  | plateau | R2   |
|------------|-----------|--------|---------|------|
| NGLY1_KO_1 | 54.19     | -0.07  | 0       | 0.92 |
| NGLY1_1    | 54.83     | -0.064 | 0       | 0.99 |
| NGLY1_KO_2 | 53.8      | -0.065 | 0       | 0.99 |
| NGLY1_2    | 55.55     | -0.063 | 0       | 0.98 |

Supplement: Supplementary file 961 [file 1]

IPI00478899.1|ANGEL2

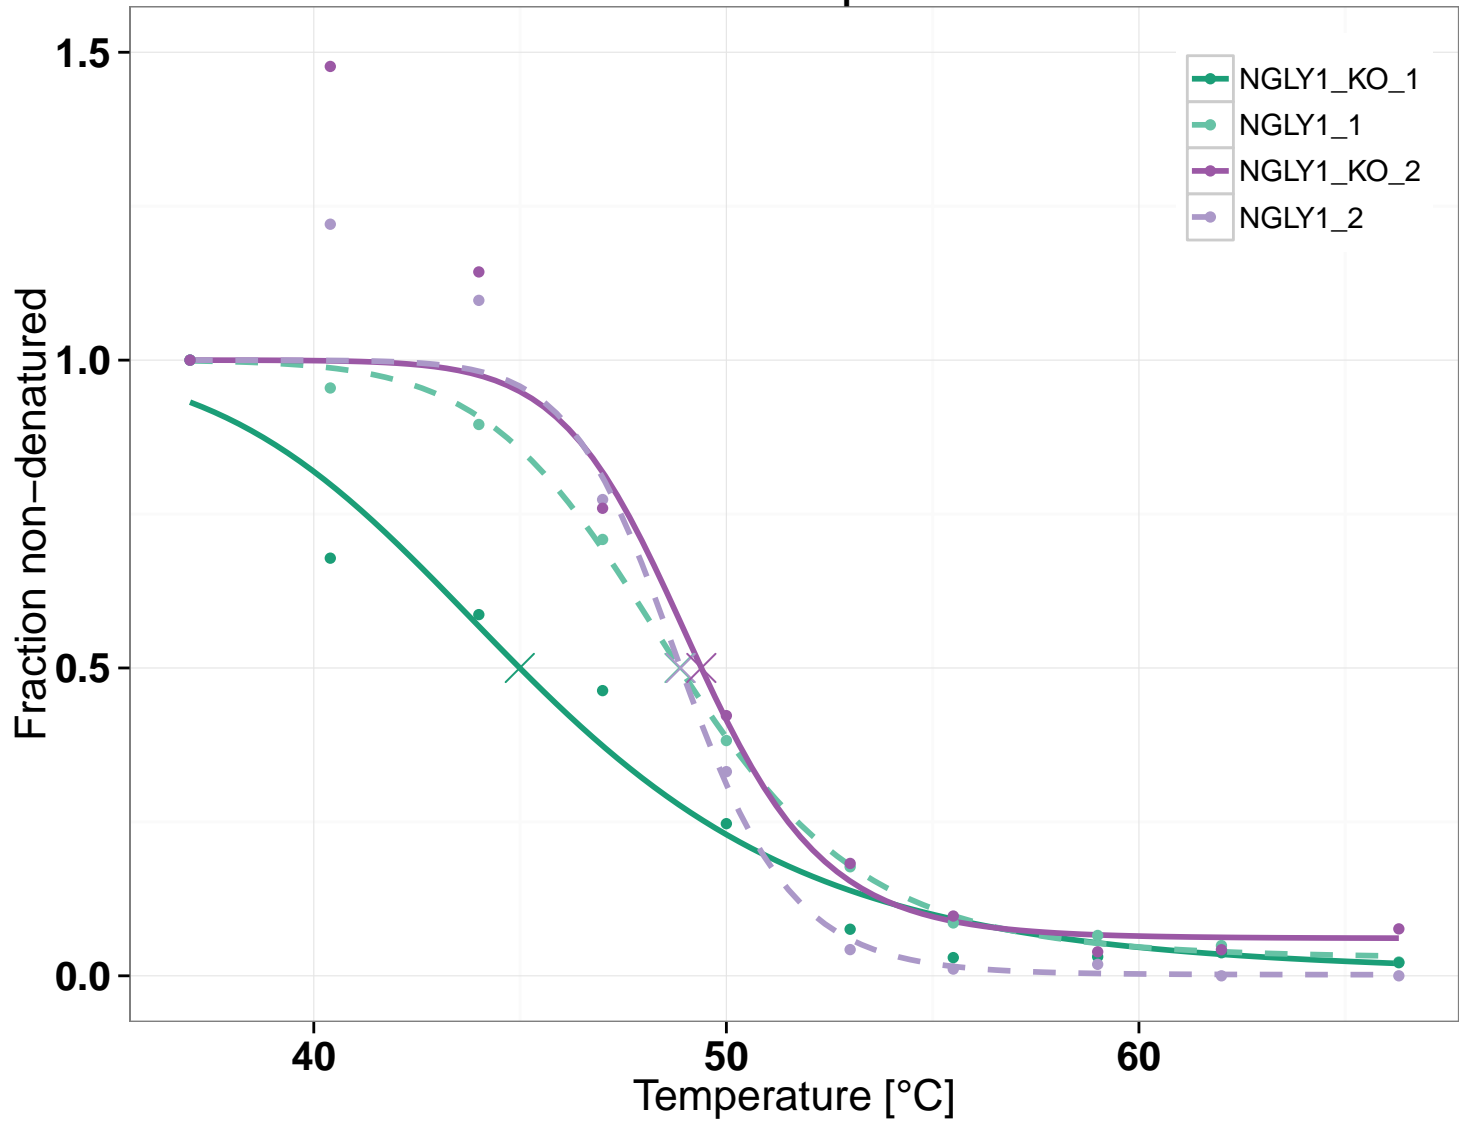

|            | meltPoint | slope  | plateau | R2   |
|------------|-----------|--------|---------|------|
| NGLY1_KO_1 | 44.99     | -0.069 | 0       | 0.97 |
| NGLY1_1    | 48.86     | -0.11  | 0.03    | 1    |
| NGLY1_KO_2 | 49.39     | -0.15  | 0.06    | 0.9  |
| NGLY1_2    | 48.89     | -0.18  | 0       | 0.97 |

Supplement: Supplementary file 962 [file 1]

IPI00002657.1|CPNE7

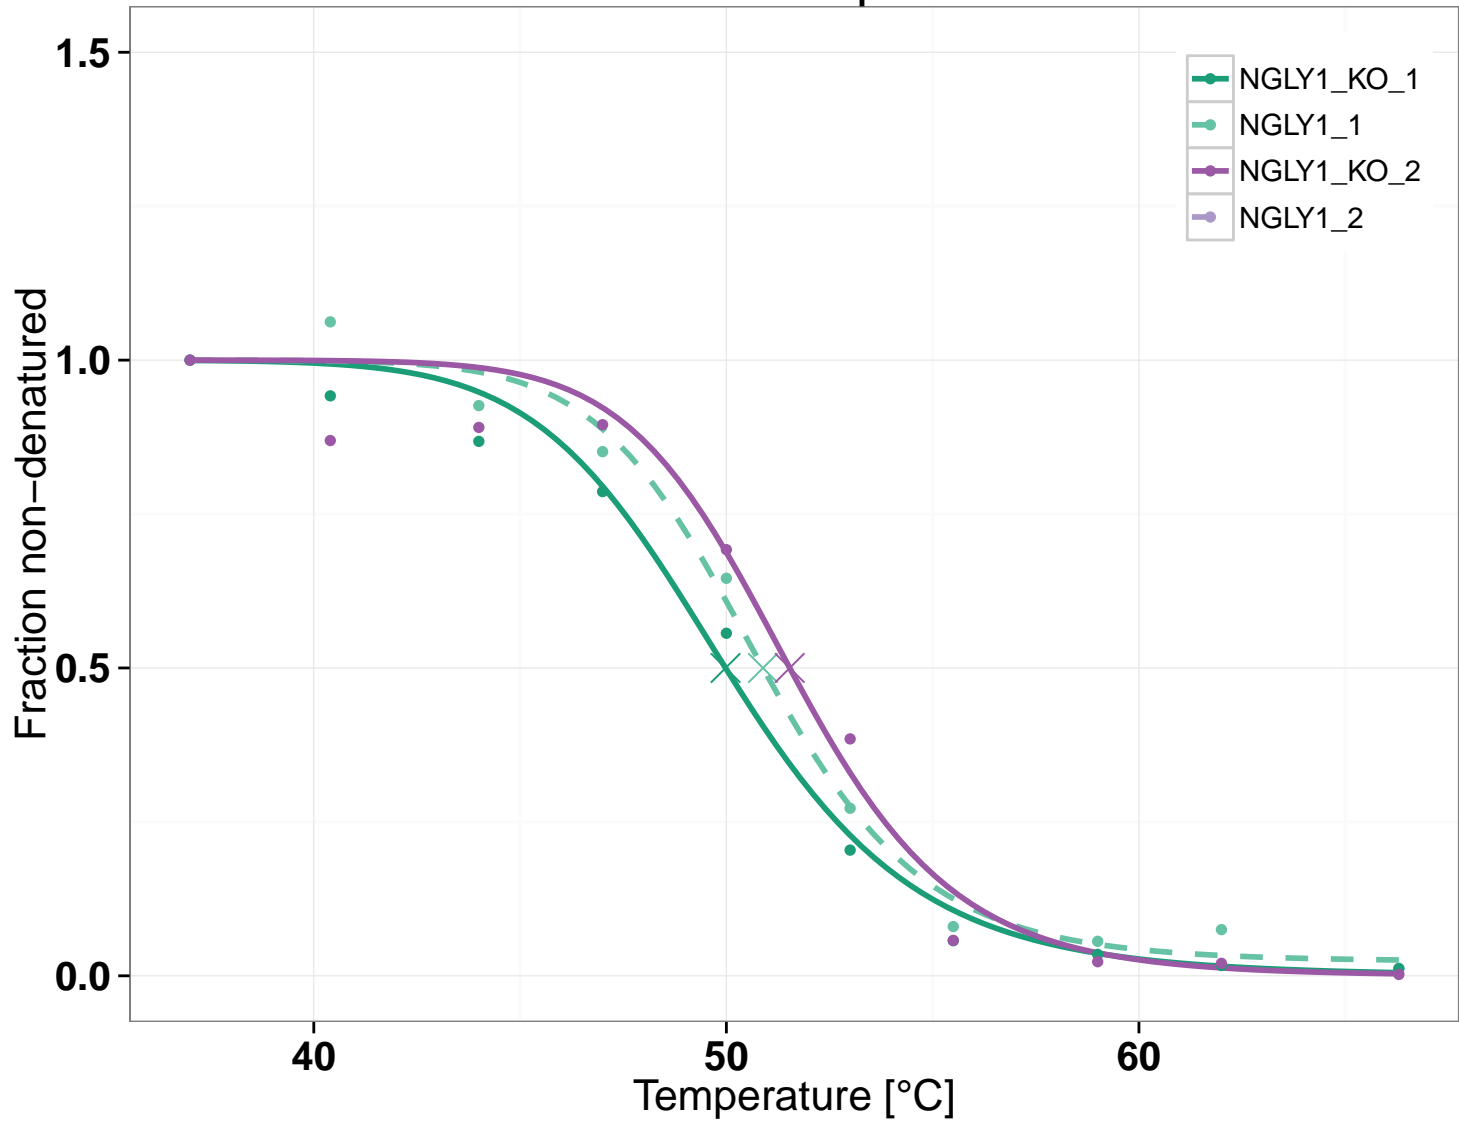

|            | meltPoint | slope | plateau | R2   |
|------------|-----------|-------|---------|------|
| NGLY1_KO_1 | 49.98     | -0.11 | 0       | 0.99 |
| NGLY1_1    | 50.89     | -0.12 | 0.02    | 0.99 |
| NGLY1_KO_2 | 51.54     | -0.13 | 0       | 0.98 |
| NGLY1_2    | -         | -     | -       | -    |

Supplement: Supplementary file 963 [file 1]

IPI00030252.1|FANCE

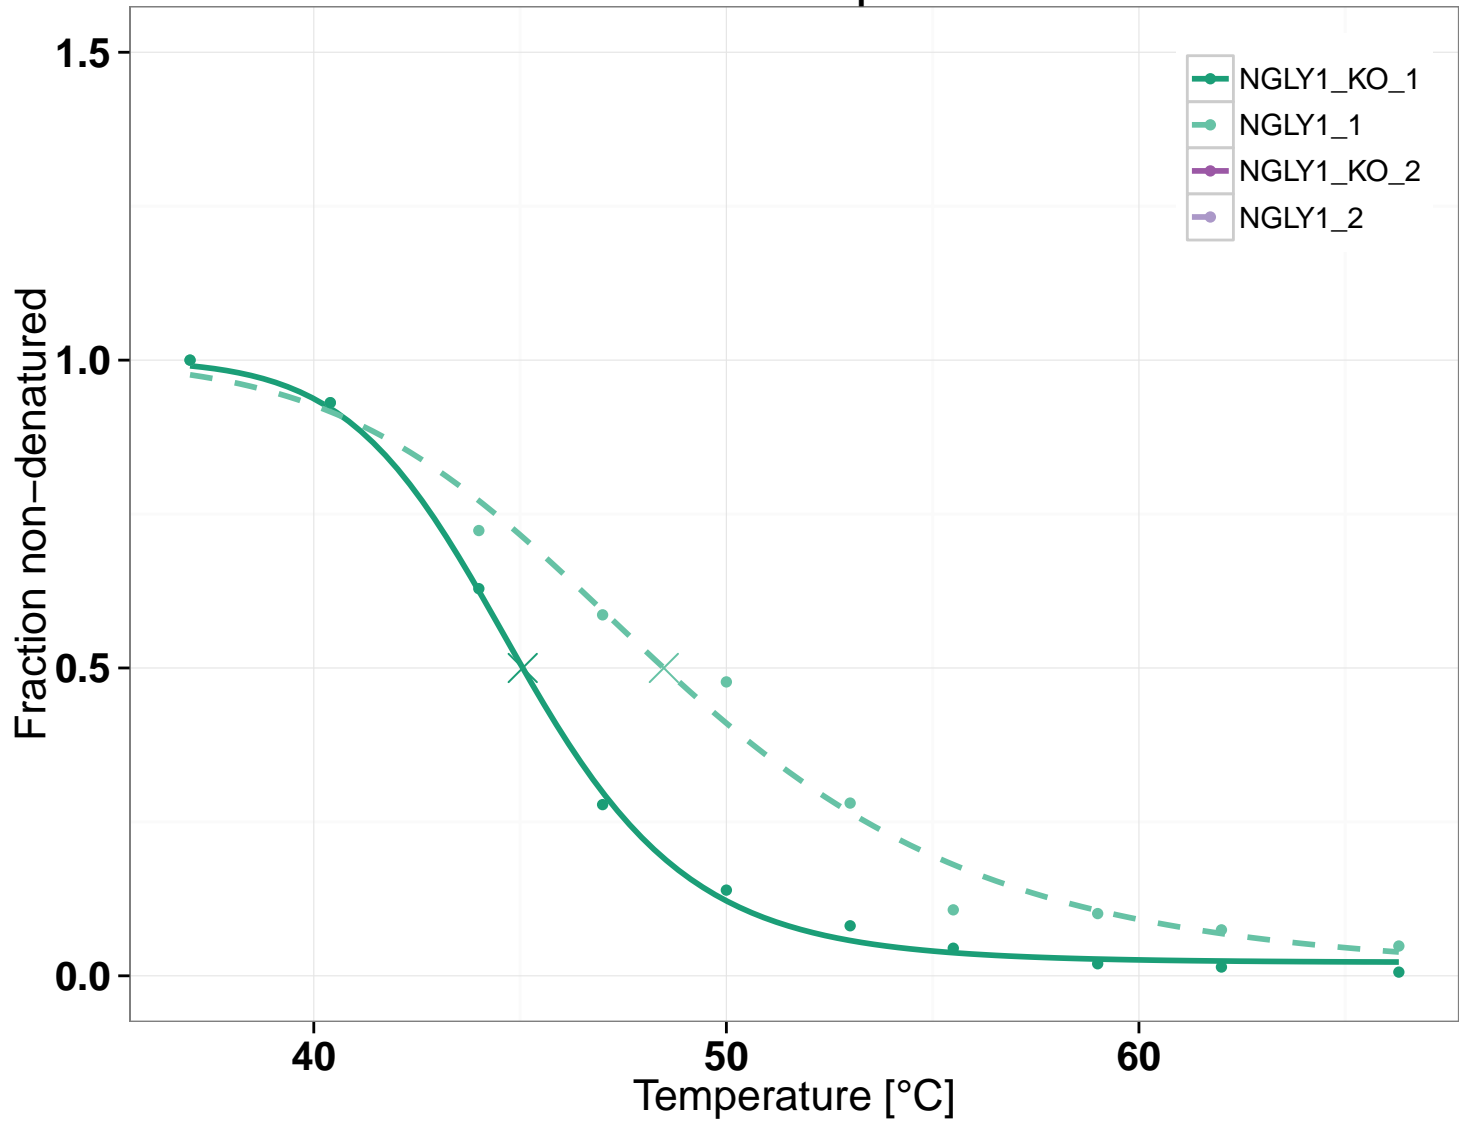

|            | meltPoint | slope  | plateau | R2   |
|------------|-----------|--------|---------|------|
| NGLY1_KO_1 | 45.06     | -0.12  | 0.02    | 1    |
| NGLY1_1    | 48.48     | -0.063 | 0       | 0.99 |
| NGLY1_KO_2 | -         | -      | -       | -    |
| NGLY1_2    | -         | -      | -       | -    |

Supplement: Supplementary file 964 [file 1]

IPI00908697.2|CCDC115

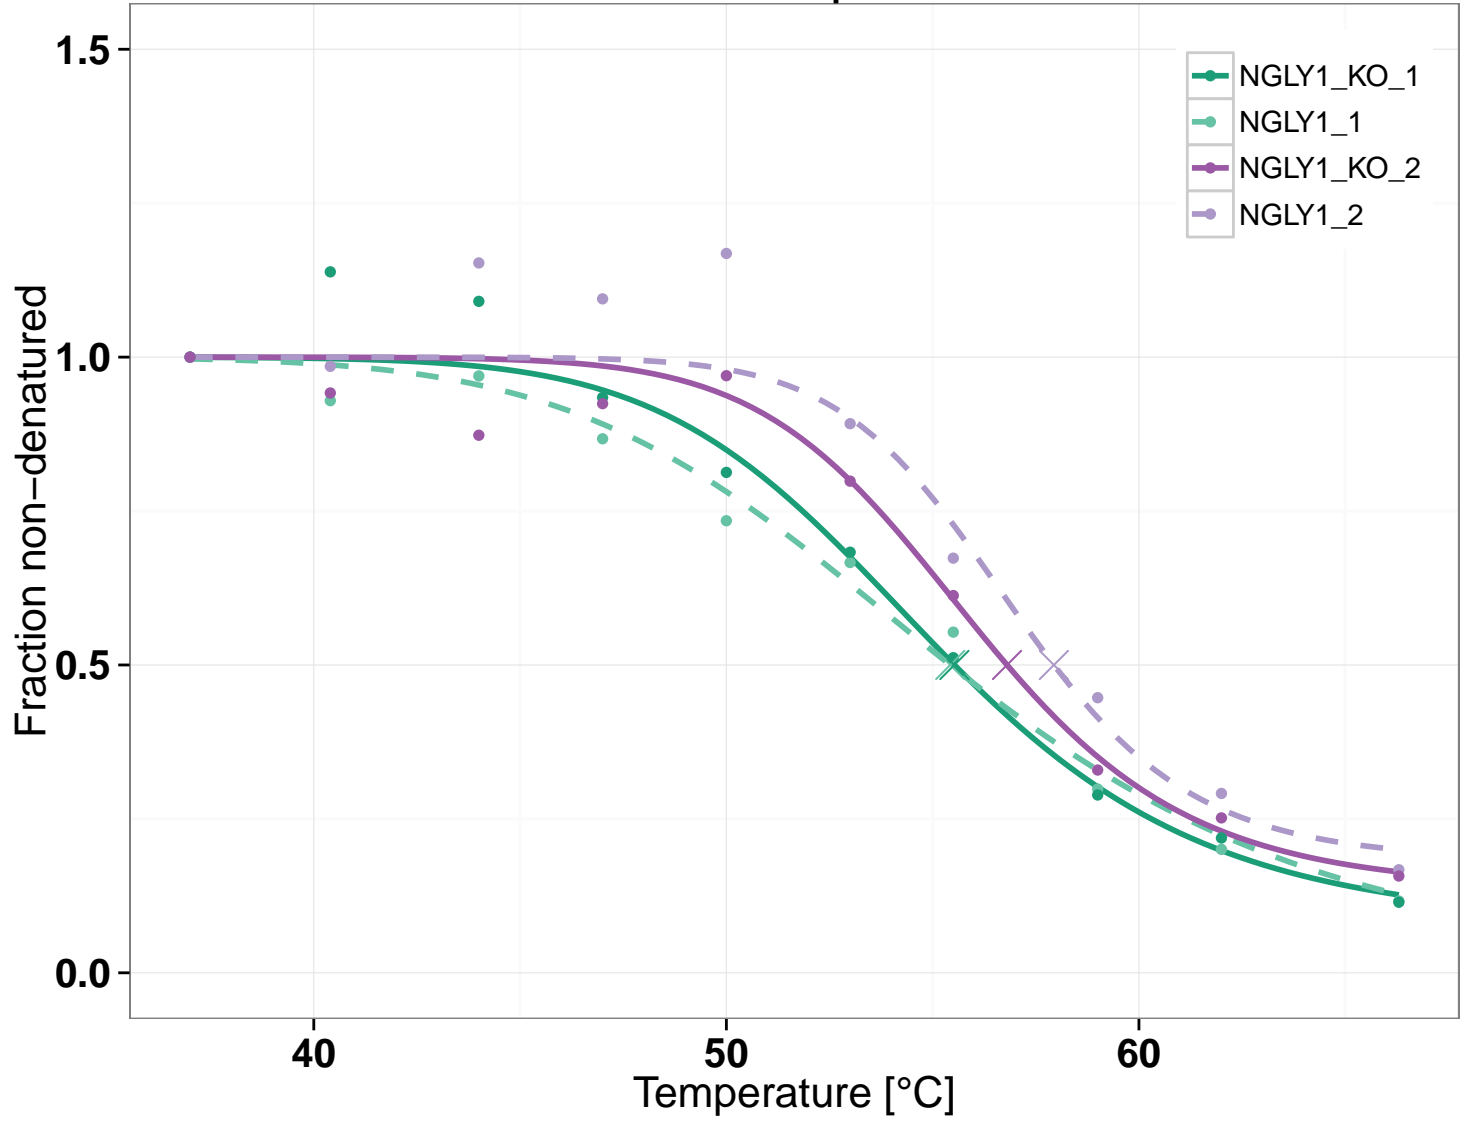

|            | meltPoint | slope  | plateau | R2   |
|------------|-----------|--------|---------|------|
| NGLY1_KO_1 | 55.53     | -0.07  | 0.07    | 0.97 |
| NGLY1_1    | 55.43     | -0.054 | 0       | 0.99 |
| NGLY1_KO_2 | 56.8      | -0.083 | 0.13    | 0.97 |
| NGLY1_2    | 57.94     | -0.096 | 0.18    | 0.94 |

Supplement: Supplementary file 965 [file 1]

IPI00788055.3|LOC728944

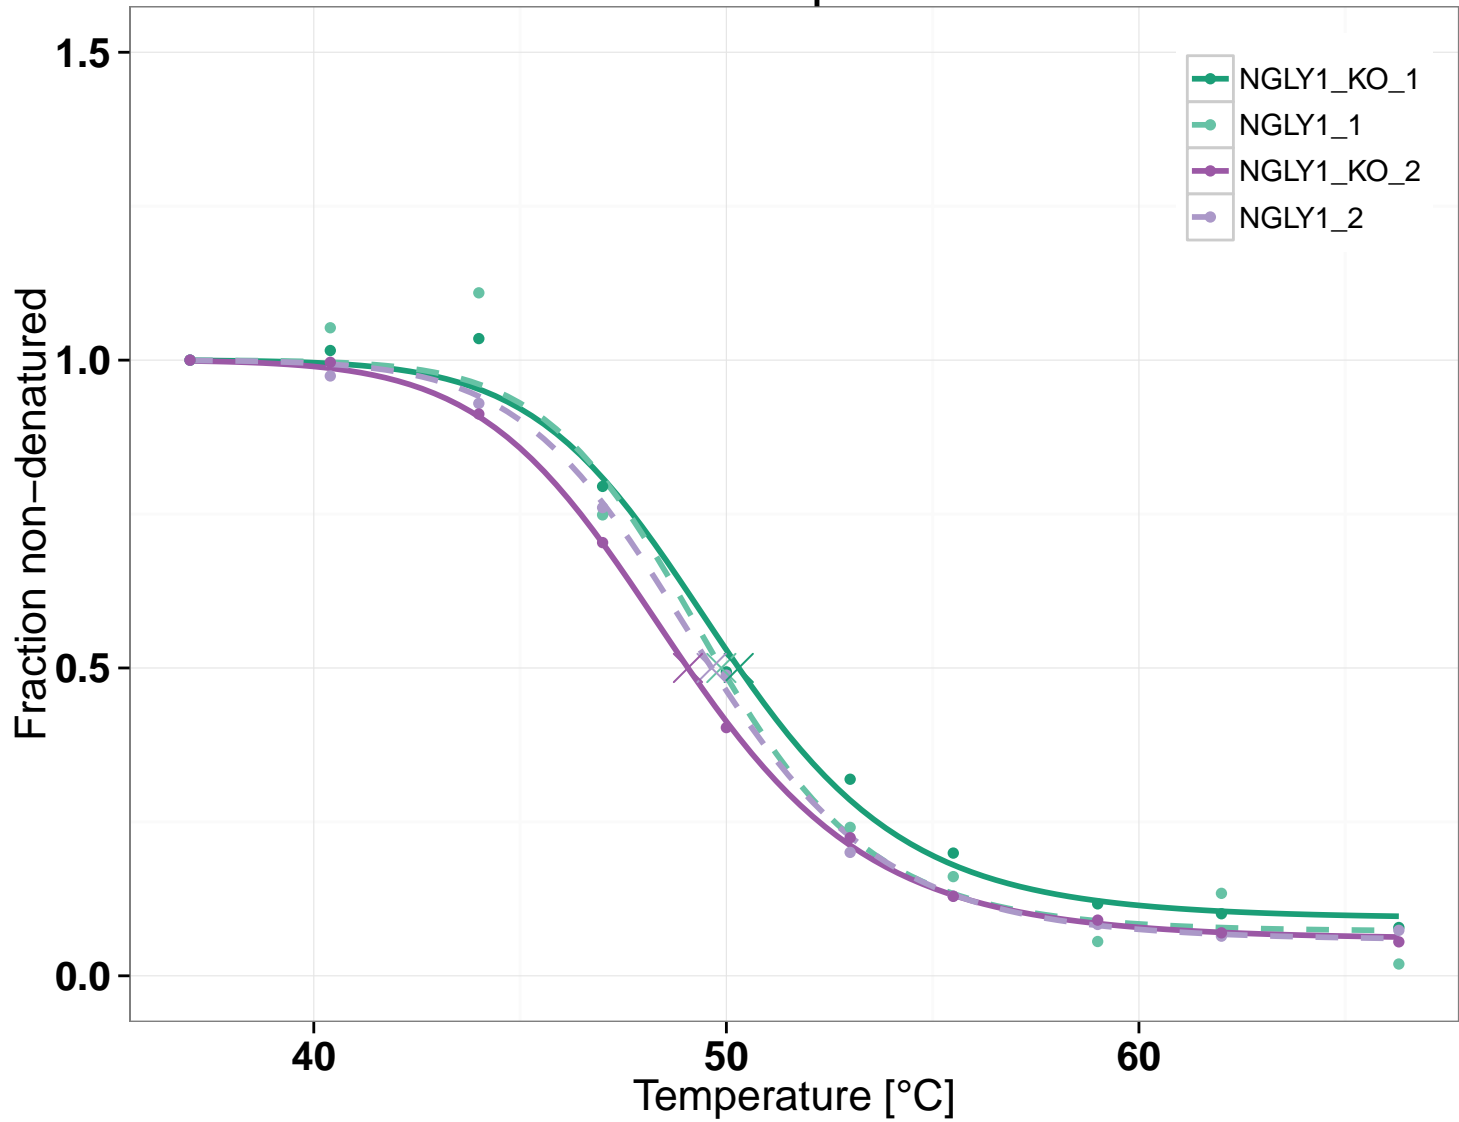

|            | meltPoint | slope | plateau | R2   |
|------------|-----------|-------|---------|------|
| NGLY1_KO_1 | 50.3      | -0.1  | 0.09    | 0.99 |
| NGLY1_1    | 49.88     | -0.12 | 0.07    | 0.98 |
| NGLY1_KO_2 | 49.07     | -0.1  | 0.06    | 1    |
| NGLY1_2    | 49.64     | -0.11 | 0.06    | 1    |

Supplement: Supplementary file 966 [file 1]

IPI00062469.2|TMEM49

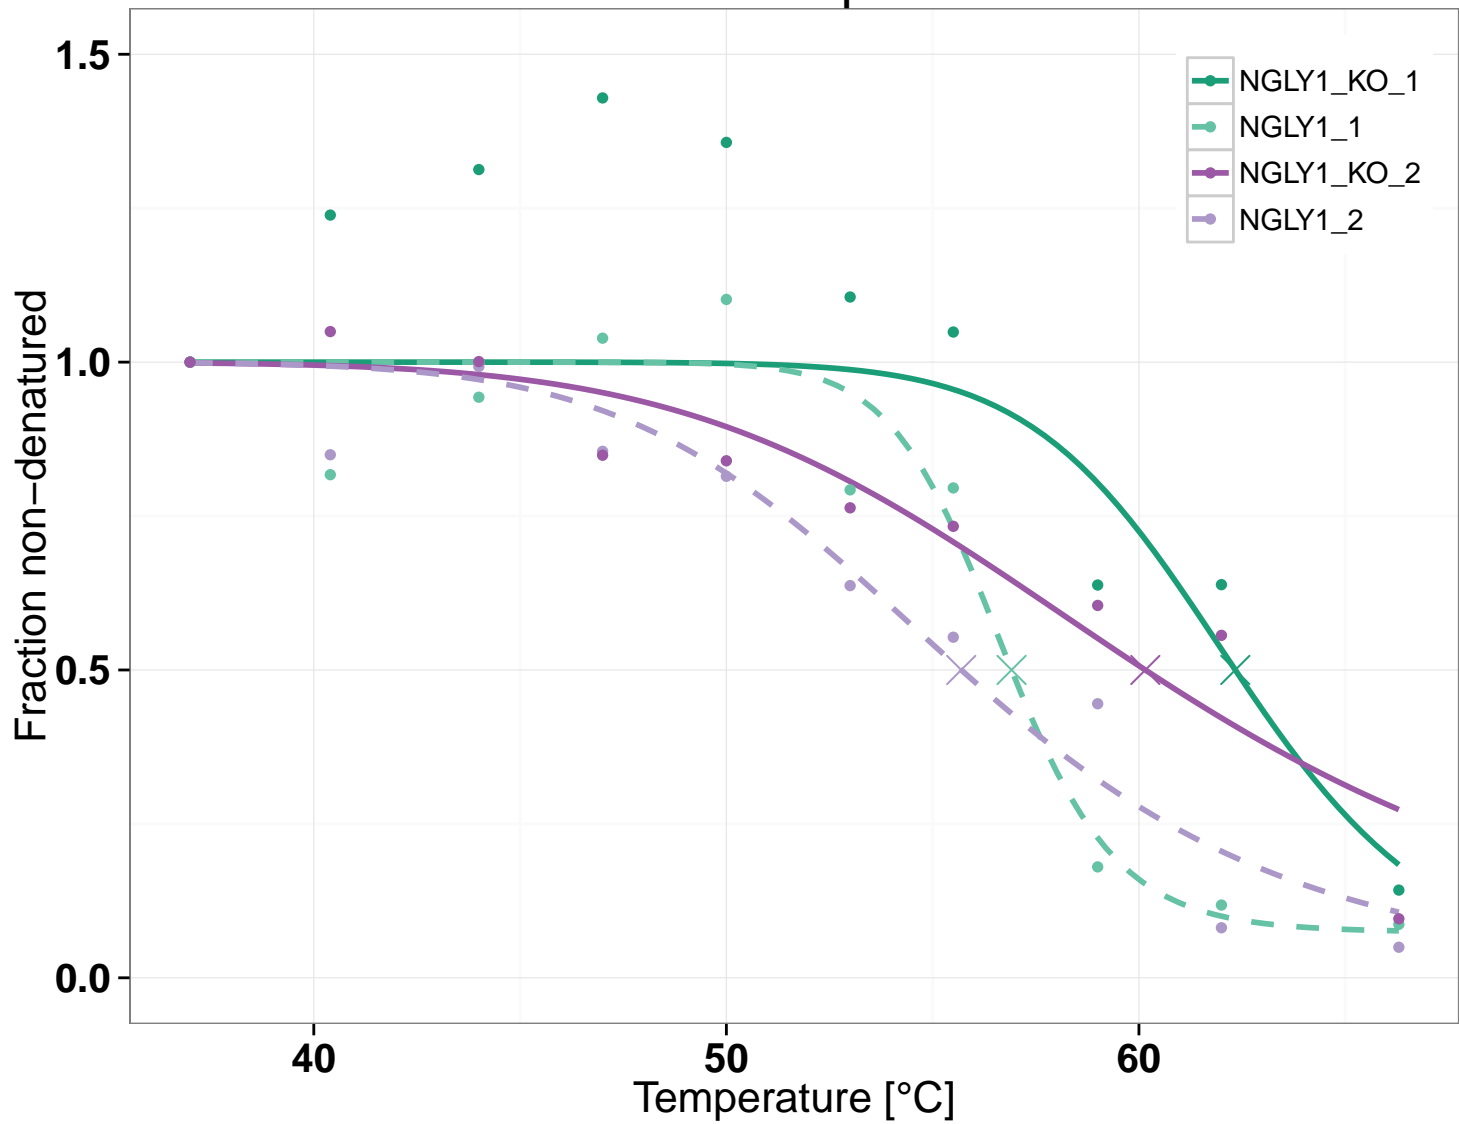

|            | meltPoint | slope  | plateau | R2   |
|------------|-----------|--------|---------|------|
| NGLY1_KO_1 | 62.34     | -0.1   | 0       | 0.64 |
| NGLY1_1    | 56.91     | -0.17  | 0.07    | 0.94 |
| NGLY1_KO_2 | 60.16     | -0.045 | 0       | 0.9  |
| NGLY1_2    | 55.69     | -0.061 | 0       | 0.94 |

Supplement: Supplementary file 967 [file 1]

# IPI00005683.1|EDEM1

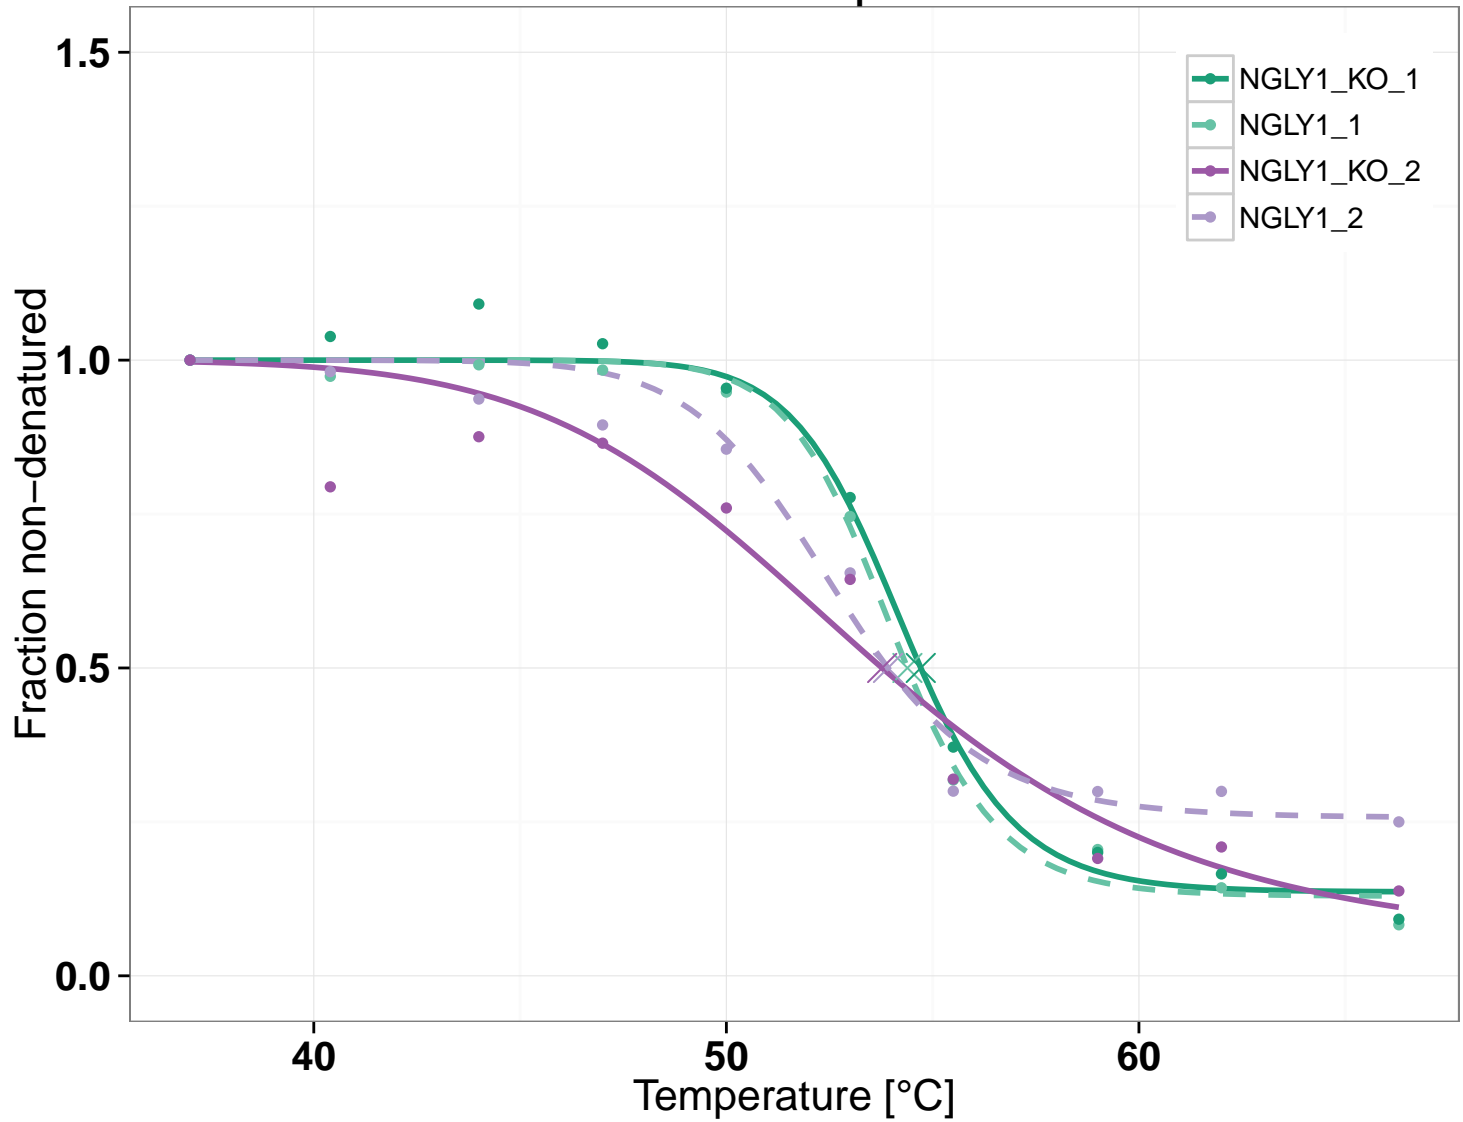

|            | meltPoint | slope | plateau | R2   |
|------------|-----------|-------|---------|------|
| NGLY1_KO_1 | 54.71     | -0.16 | 0.14    | 0.99 |
| NGLY1_1    | 54.39     | -0.17 | 0.13    | 0.99 |
| NGLY1_KO_2 | 53.78     | -0.06 | 0.04    | 0.93 |
| NGLY1_2    | 53.92     | -0.11 | 0.26    | 0.97 |

Supplement: Supplementary file 968 [file 1]

IPI00829652.1|RBM16

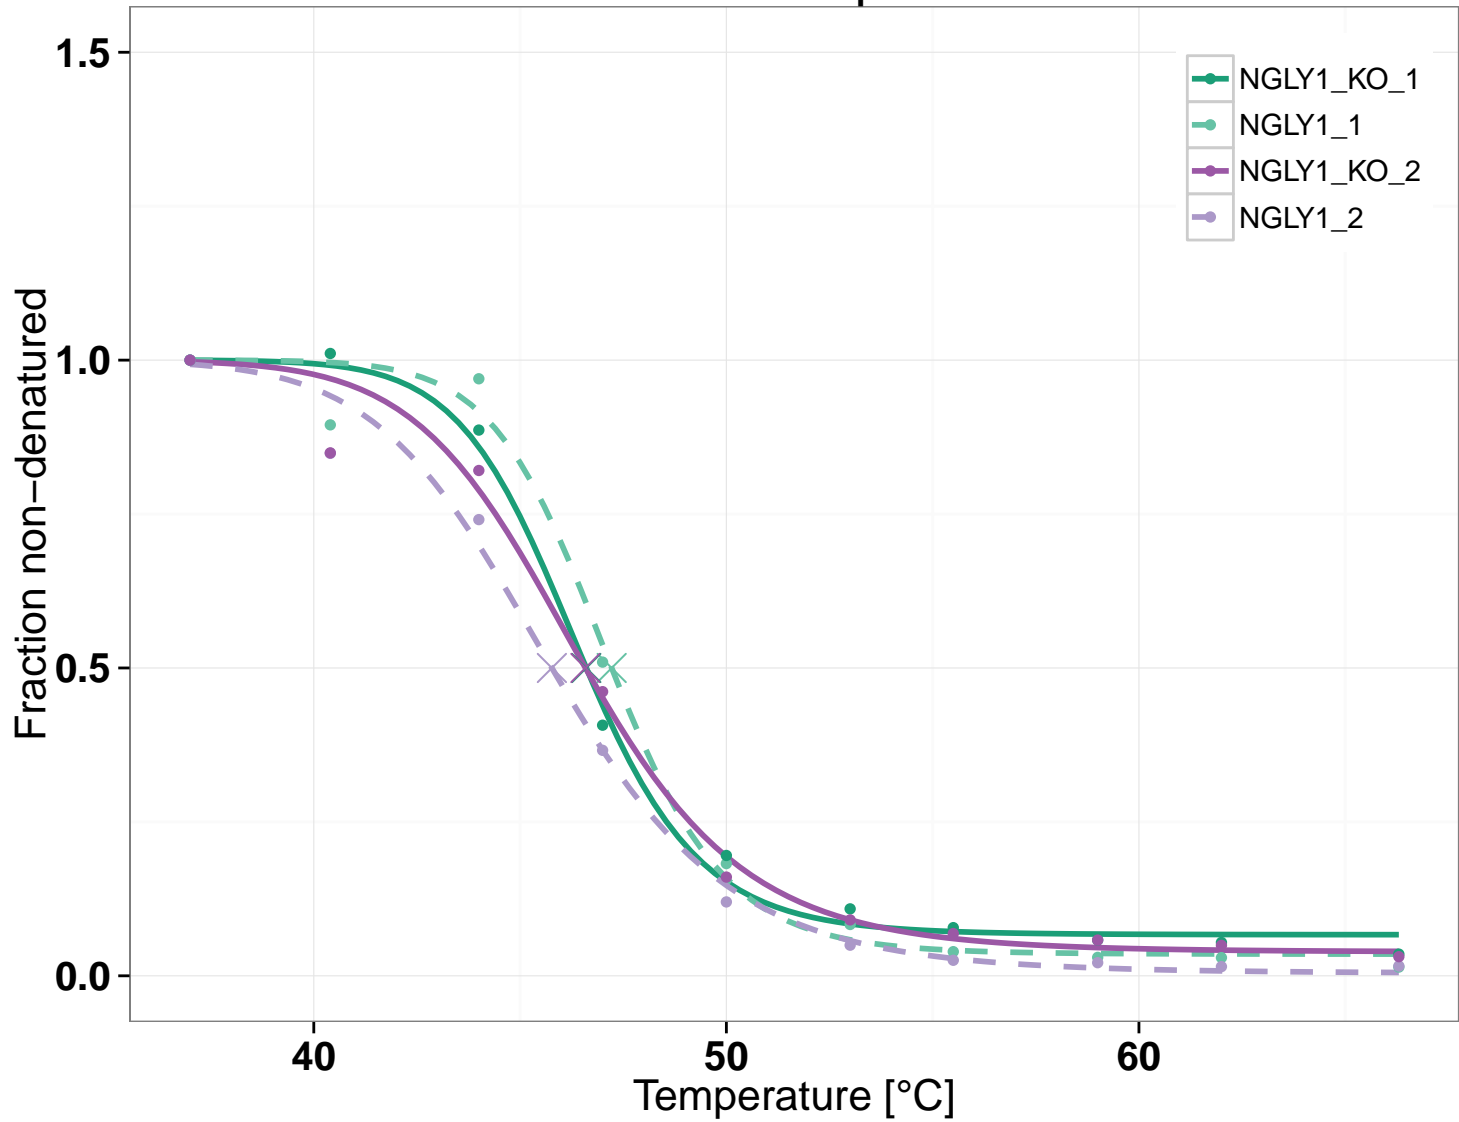

|            | meltPoint | slope | plateau | R2   |
|------------|-----------|-------|---------|------|
| NGLY1_KO_1 | 46.6      | -0.16 | 0.07    | 1    |
| NGLY1_1    | 47.22     | -0.17 | 0.04    | 0.99 |
| NGLY1_KO_2 | 46.58     | -0.12 | 0.04    | 0.99 |
| NGLY1_2    | 45.77     | -0.12 | 0       | 0.99 |

Supplement: Supplementary file 969 [file 1]

IPI00029521.5|SCYL1BP1

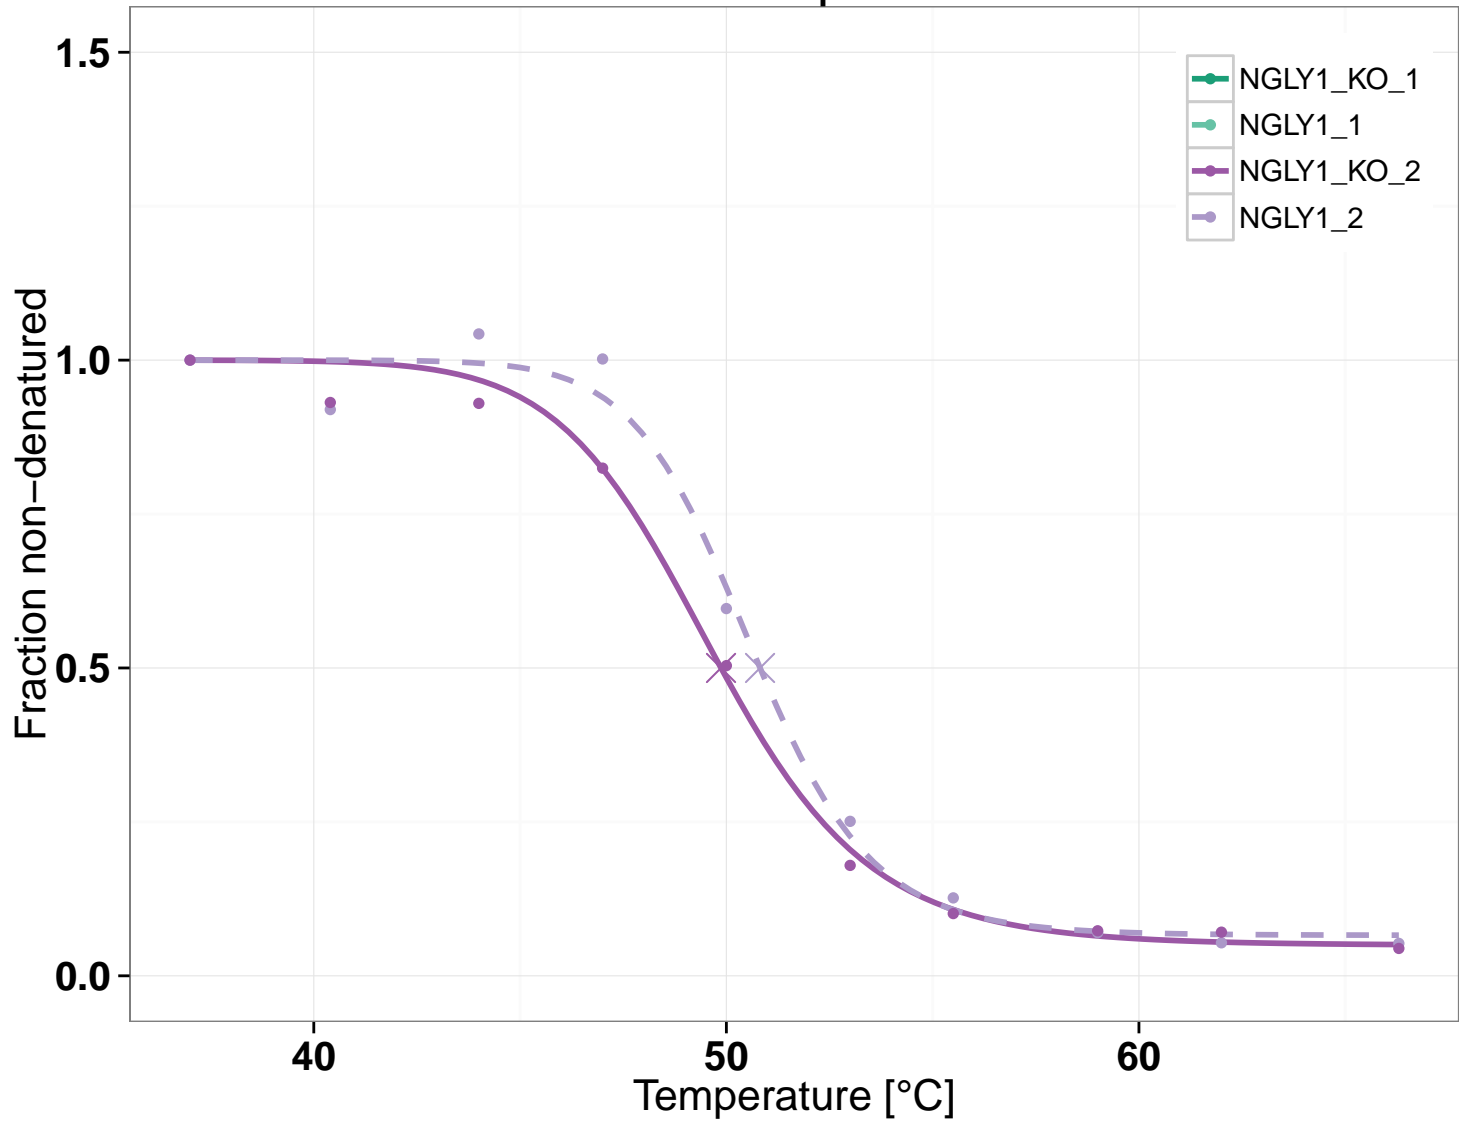

|            | meltPoint | slope | plateau | R2   |
|------------|-----------|-------|---------|------|
| NGLY1_KO_1 | -         | -     | -       | -    |
| NGLY1_1    | -         | -     | -       | -    |
| NGLY1_KO_2 | 49.87     | -0.13 | 0.05    | 1    |
| NGLY1_2    | 50.82     | -0.16 | 0.07    | 0.99 |

Supplement: Supplementary file 970 [file 1]

IPI00477957.3|CLYBL

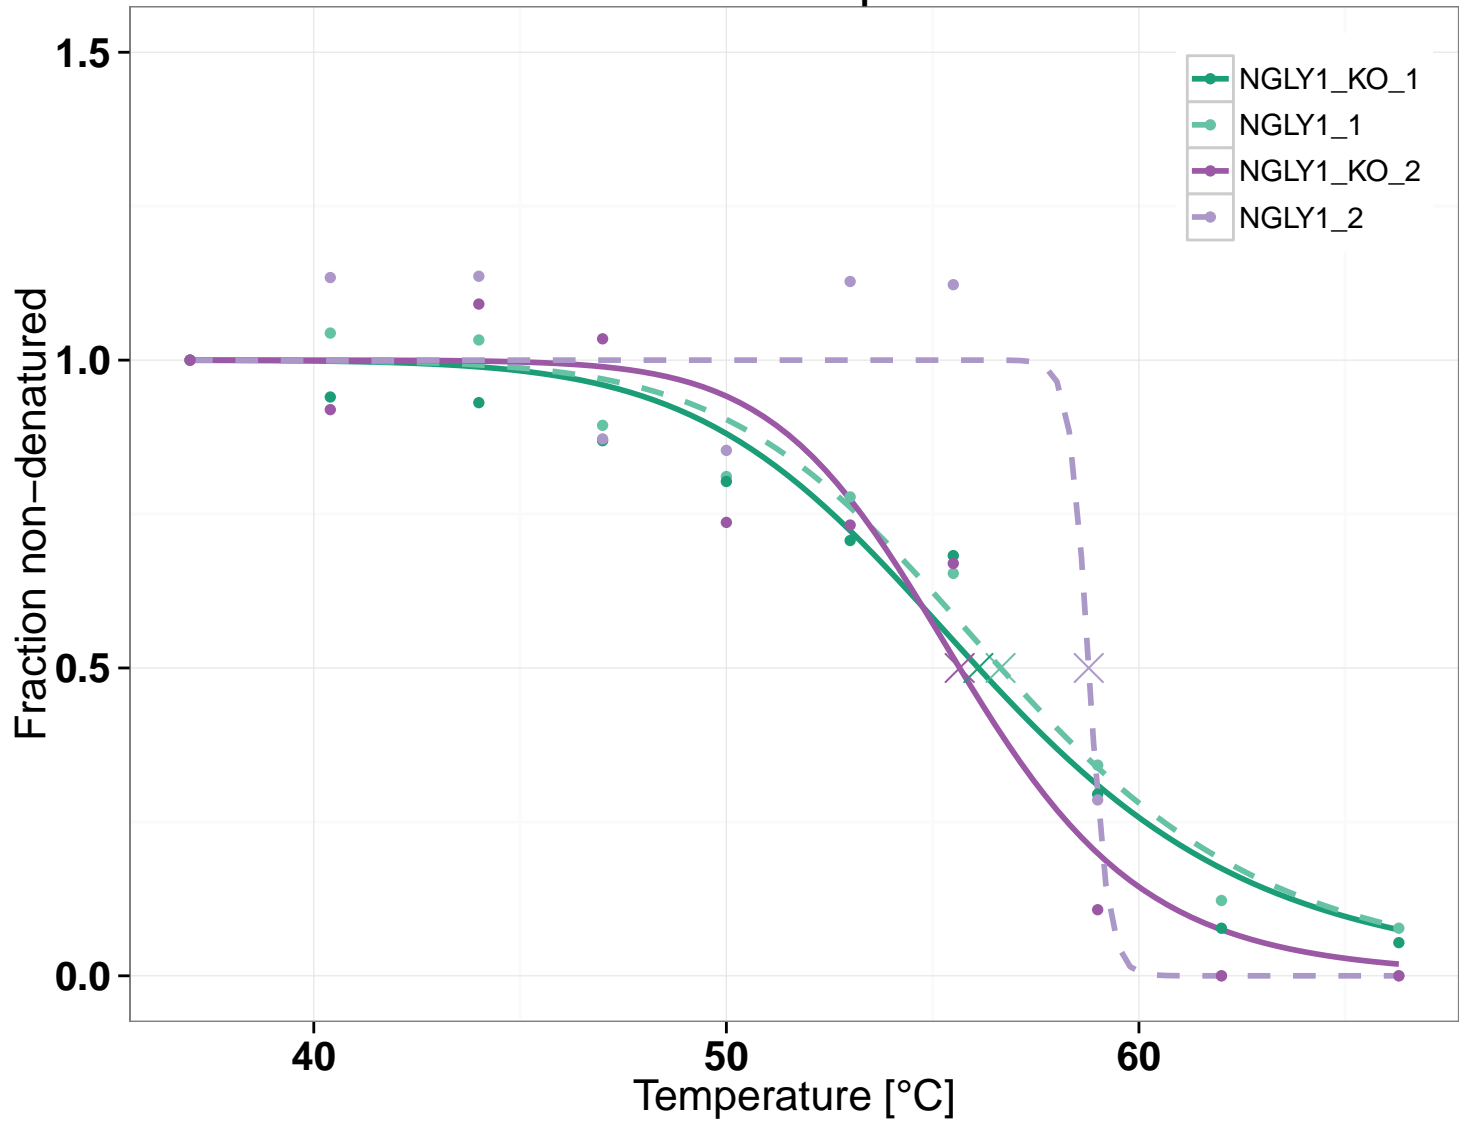

|            | meltPoint | slope  | plateau | R2   |
|------------|-----------|--------|---------|------|
| NGLY1_KO_1 | 56.11     | -0.074 | 0       | 0.96 |
| NGLY1_1    | 56.65     | -0.075 | 0       | 0.98 |
| NGLY1_KO_2 | 55.65     | -0.11  | 0       | 0.94 |
| NGLY1_2    | 58.78     | -1.1   | 0       | 0.95 |

Supplement: Supplementary file 971 [file 1]

# IPI00794806.1|PPM2C

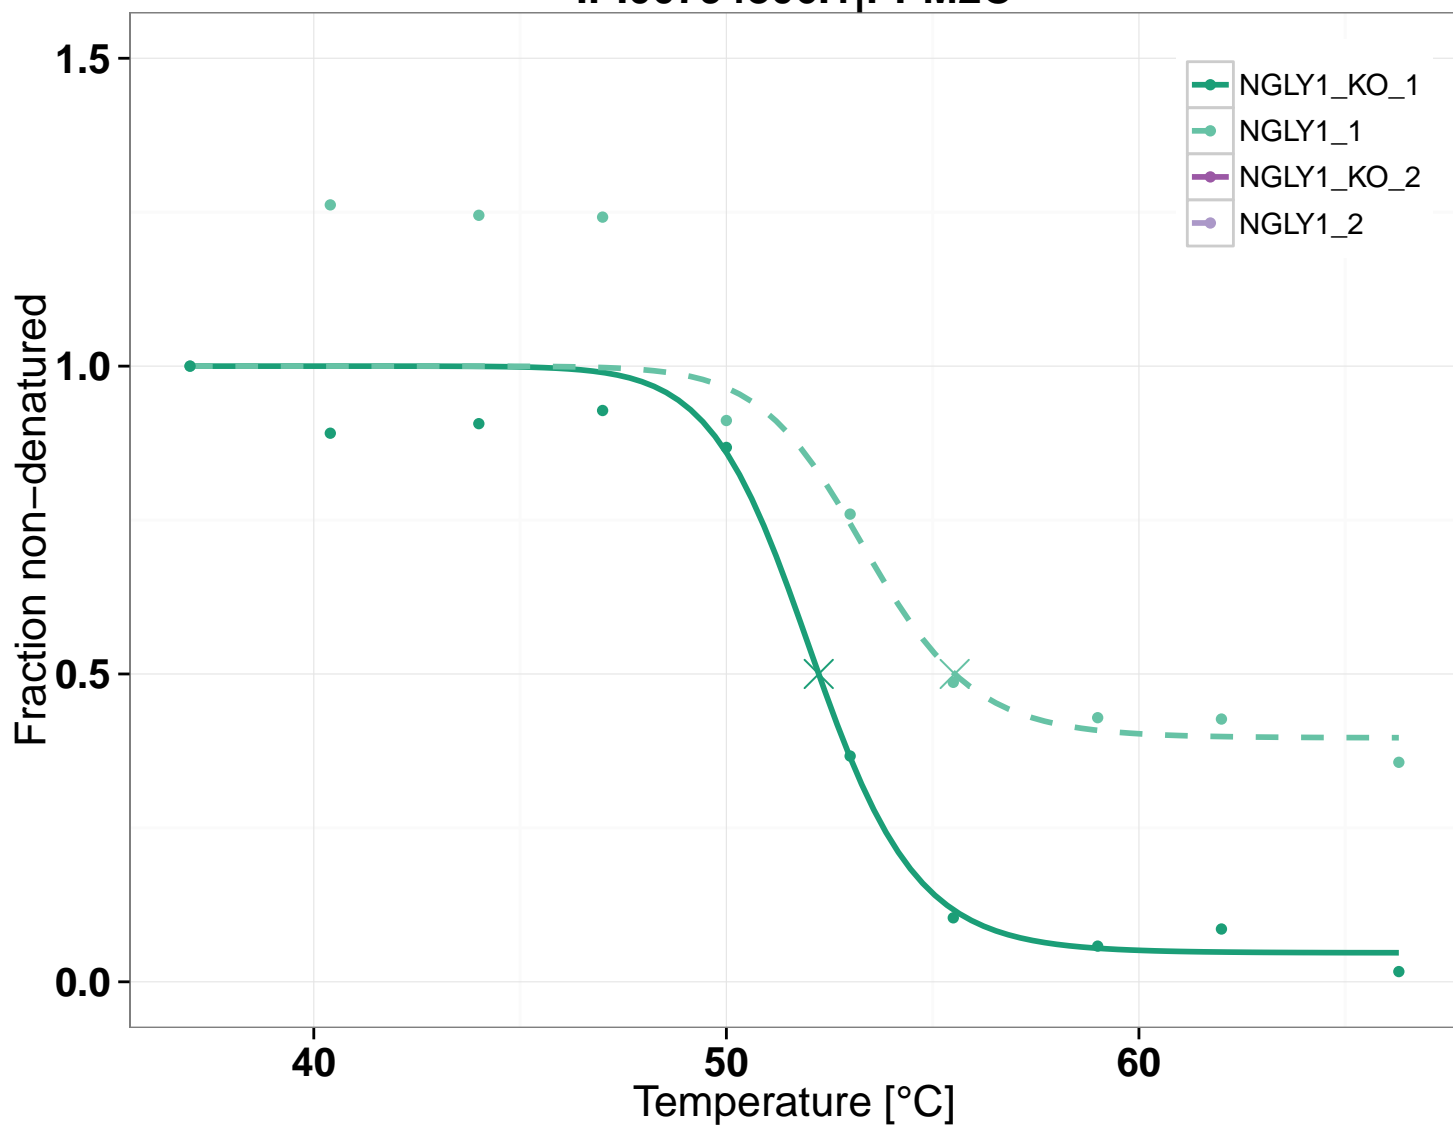

|            | meltPoint | slope | plateau | R2   |
|------------|-----------|-------|---------|------|
| NGLY1_KO_1 | 52.24     | -0.19 | 0.05    | 0.98 |
| NGLY1_1    | 55.53     | -0.12 | 0.4     | 0.84 |
| NGLY1_KO_2 | -         | -     | -       | -    |
| NGLY1_2    | -         | -     | -       | -    |

Supplement: Supplementary file 972 [file 1]

IPI00033030.2|ADRM1

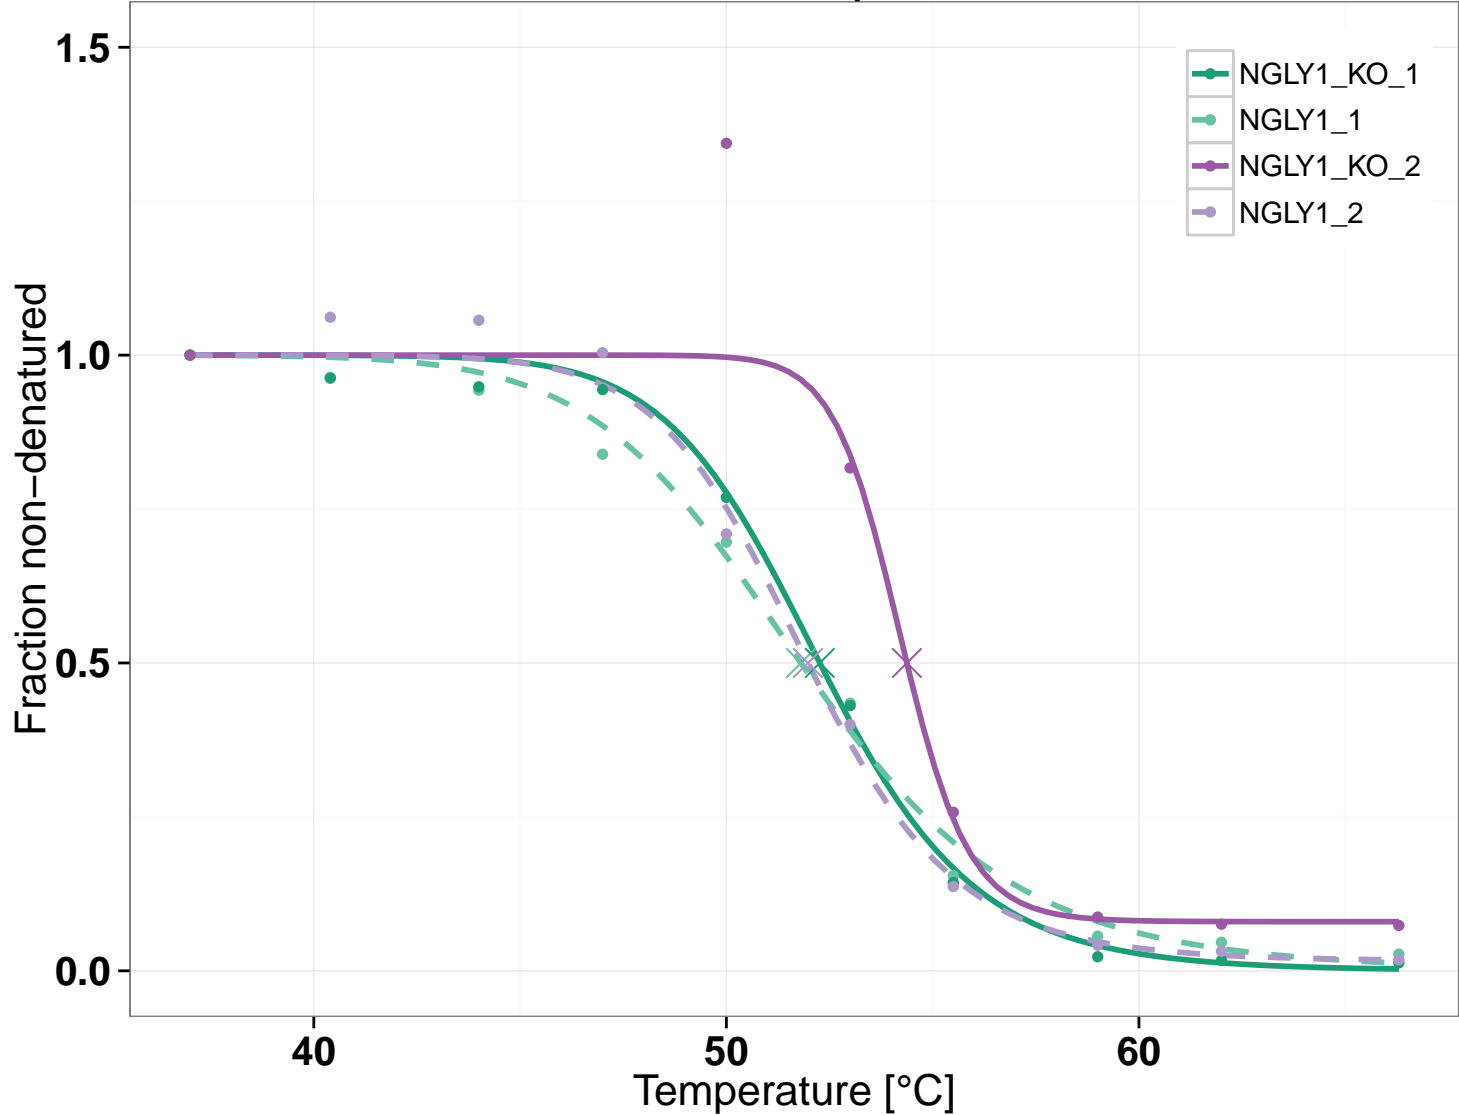

|            | meltPoint | slope  | plateau | R2   |
|------------|-----------|--------|---------|------|
| NGLY1_KO_1 | 52.26     | -0.13  | 0       | 1    |
| NGLY1_1    | 51.81     | -0.097 | 0       | 0.99 |
| NGLY1_KO_2 | 54.37     | -0.28  | 0.08    | 0.62 |
| NGLY1_2    | 51.98     | -0.14  | 0.02    | 0.99 |

Supplement: Supplementary file 973 [file 1]

IPI00016839.1|GTF2H4

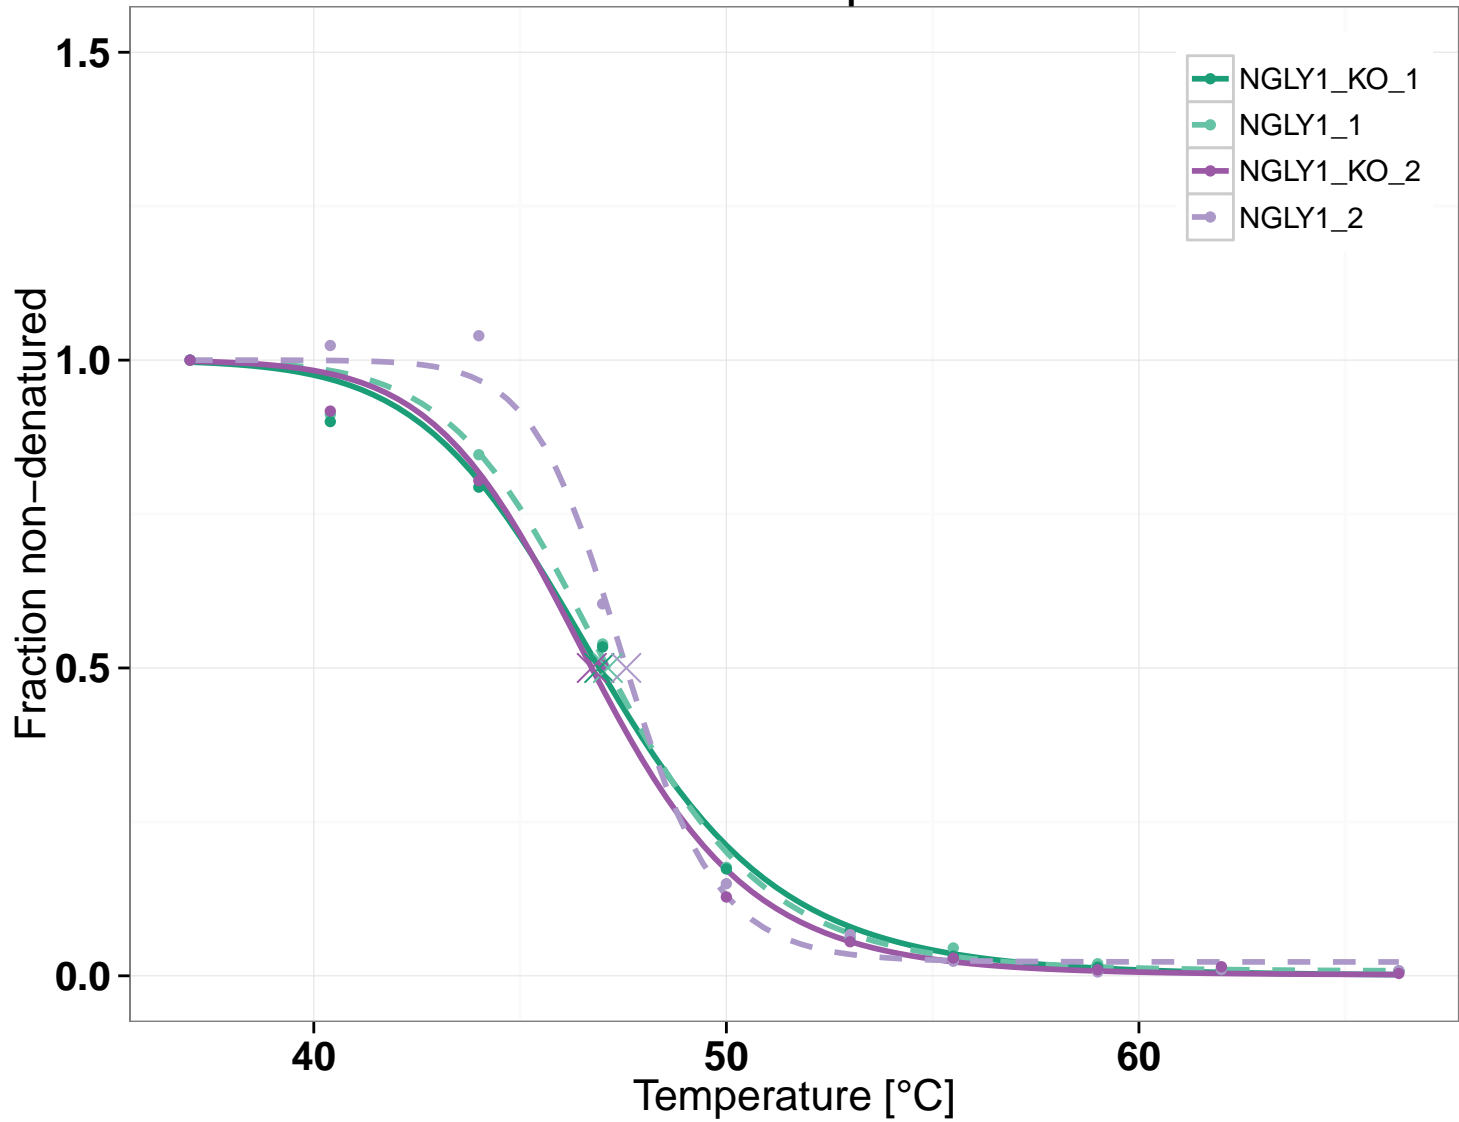

|            | meltPoint | slope | plateau | R2   |
|------------|-----------|-------|---------|------|
| NGLY1_KO_1 | 46.92     | -0.11 | 0       | 0.99 |
| NGLY1_1    | 47.13     | -0.13 | 0.01    | 1    |
| NGLY1_KO_2 | 46.74     | -0.13 | 0       | 1    |
| NGLY1_2    | 47.57     | -0.22 | 0.02    | 1    |

Supplement: Supplementary file 974 [file 1]

IPI00646899.1|RPL10

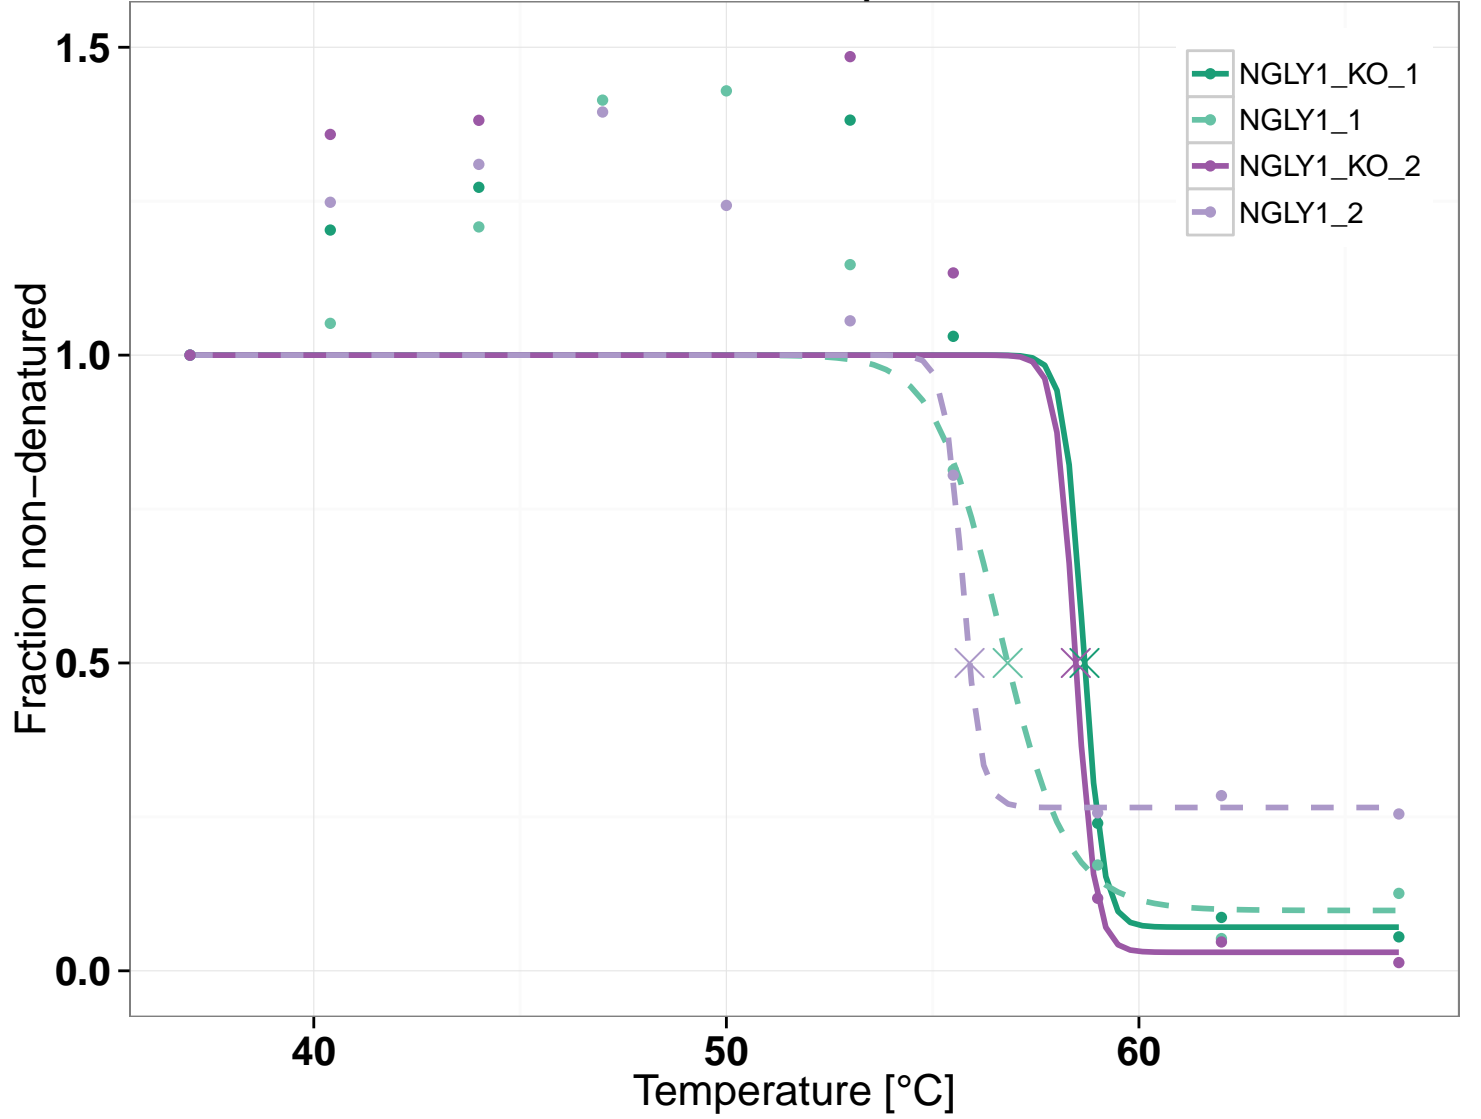

|            | meltPoint | slope | plateau | R2   |
|------------|-----------|-------|---------|------|
| NGLY1_KO_1 | 58.68     | -0.99 | 0.07    | 0.67 |
| NGLY1_1    | 56.82     | -0.28 | 0.1     | 0.83 |
| NGLY1_KO_2 | 58.47     | -1    | 0.03    | 0.57 |
| NGLY1_2    | 55.9      | -0.82 | 0.27    | 0.8  |

Supplement: Supplementary file 975 [file 1]

IPI00790333.1|LOC100127983

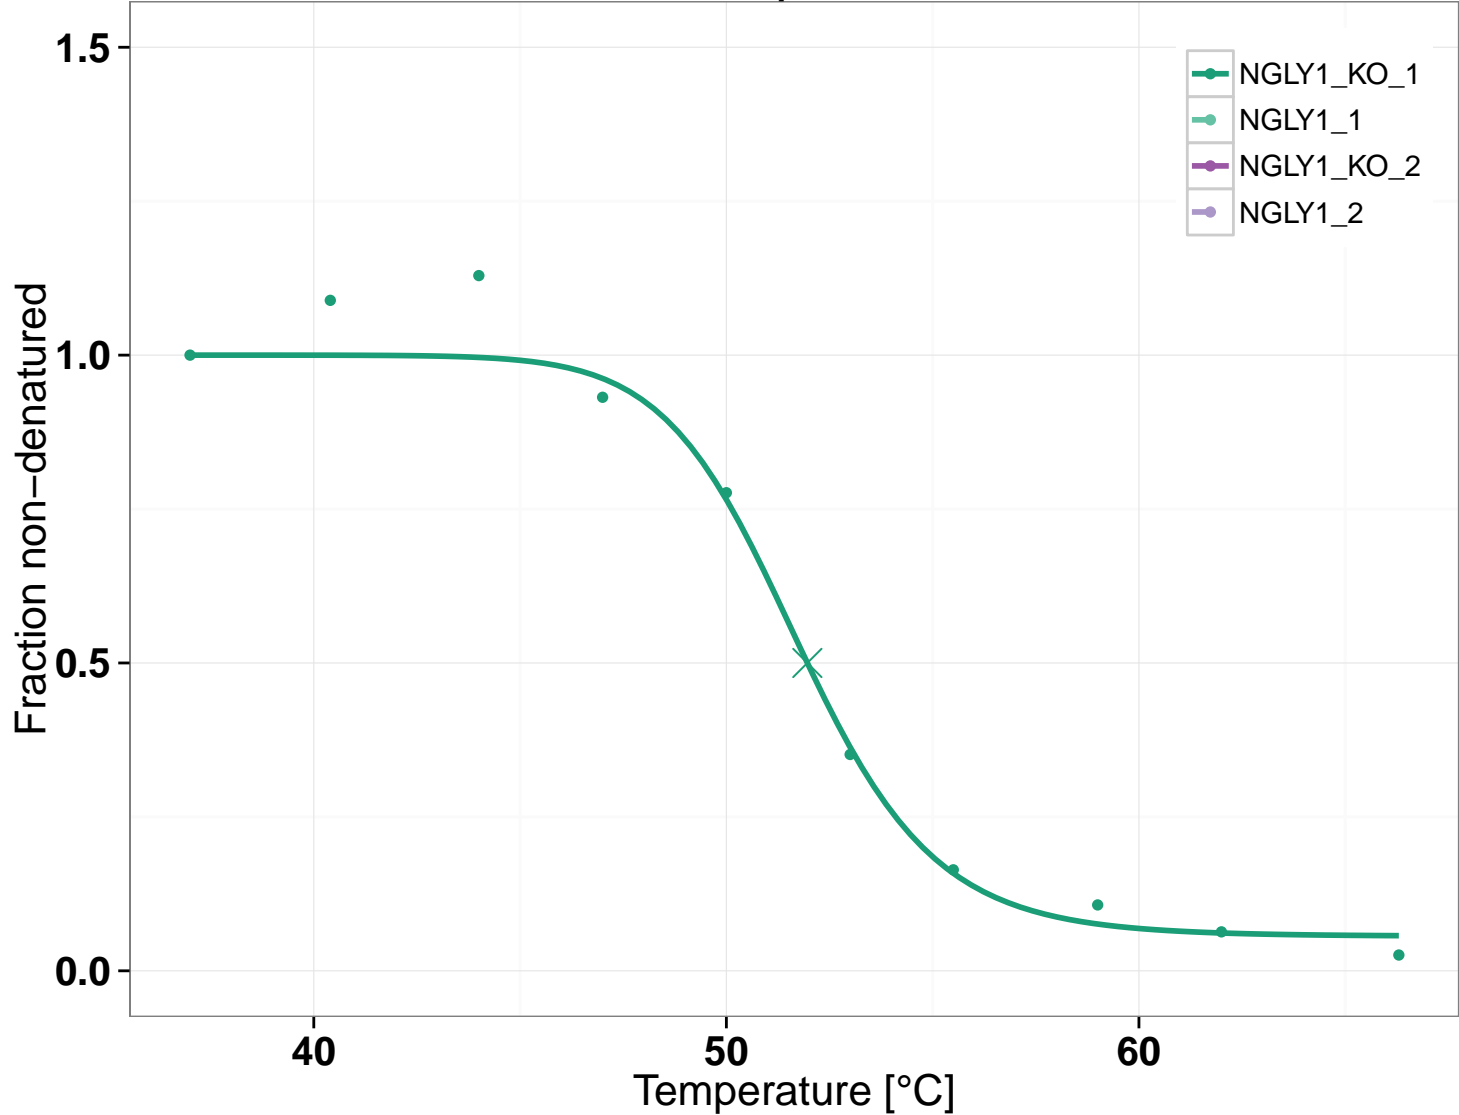

|            | meltPoint | slope | plateau | R2   |
|------------|-----------|-------|---------|------|
| NGLY1_KO_1 | 51.96     | -0.14 | 0.06    | 0.99 |
| NGLY1_1    | -         | -     | -       | -    |
| NGLY1_KO_2 | -         | -     | -       | -    |
| NGLY1_2    | -         | -     | -       | -    |

Supplement: Supplementary file 976 [file 1]

IPI00008829.1|POLE2

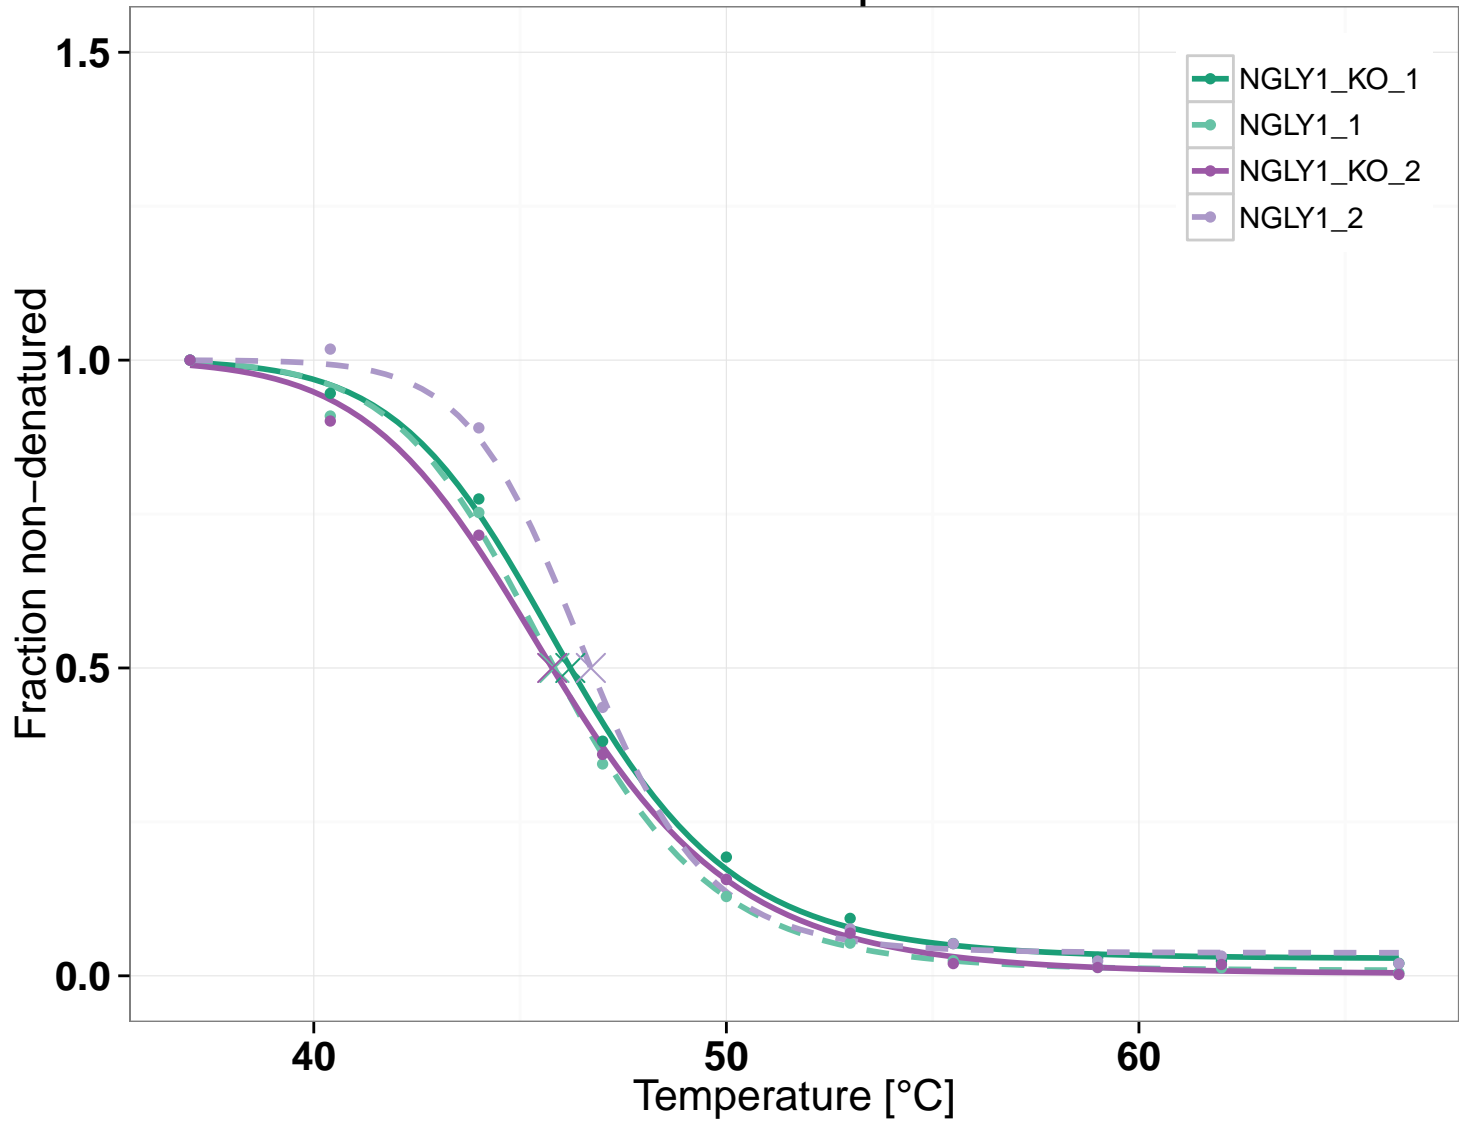

|            | meltPoint | slope | plateau | R2 |
|------------|-----------|-------|---------|----|
| NGLY1_KO_1 | 46.22     | -0.12 | 0.03    | 1  |
| NGLY1_1    | 45.83     | -0.13 | 0.01    | 1  |
| NGLY1_KO_2 | 45.78     | -0.11 | 0       | 1  |
| NGLY1_2    | 46.72     | -0.17 | 0.04    | 1  |

Supplement: Supplementary file 977 [file 1]

# IPI00297235.6|CCPG1

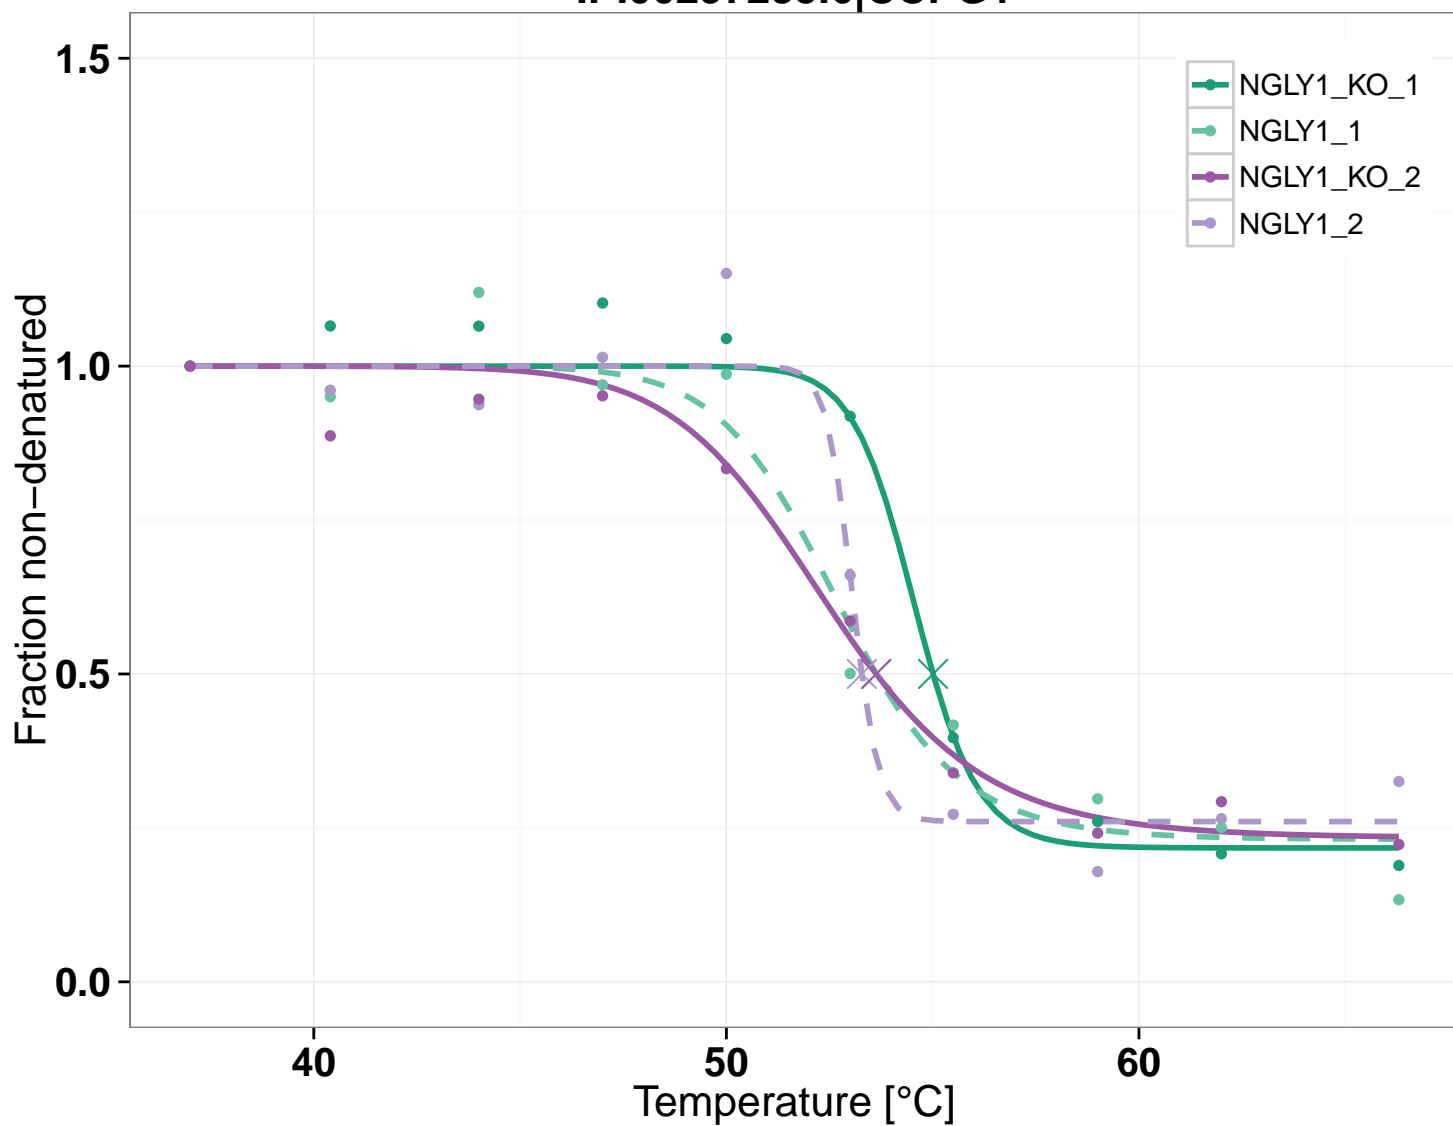

|            | meltPoint | slope | plateau | R2   |
|------------|-----------|-------|---------|------|
| NGLY1_KO_1 | 55.01     | -0.26 | 0.22    | 0.98 |
| NGLY1_1    | 53.64     | -0.13 | 0.23    | 0.96 |
| NGLY1_KO_2 | 53.63     | -0.1  | 0.23    | 0.98 |
| NGLY1_2    | 53.28     | -0.59 | 0.26    | 0.97 |

Supplement: Supplementary file 978 [file 1]

# IPI00217405.1|UBR1

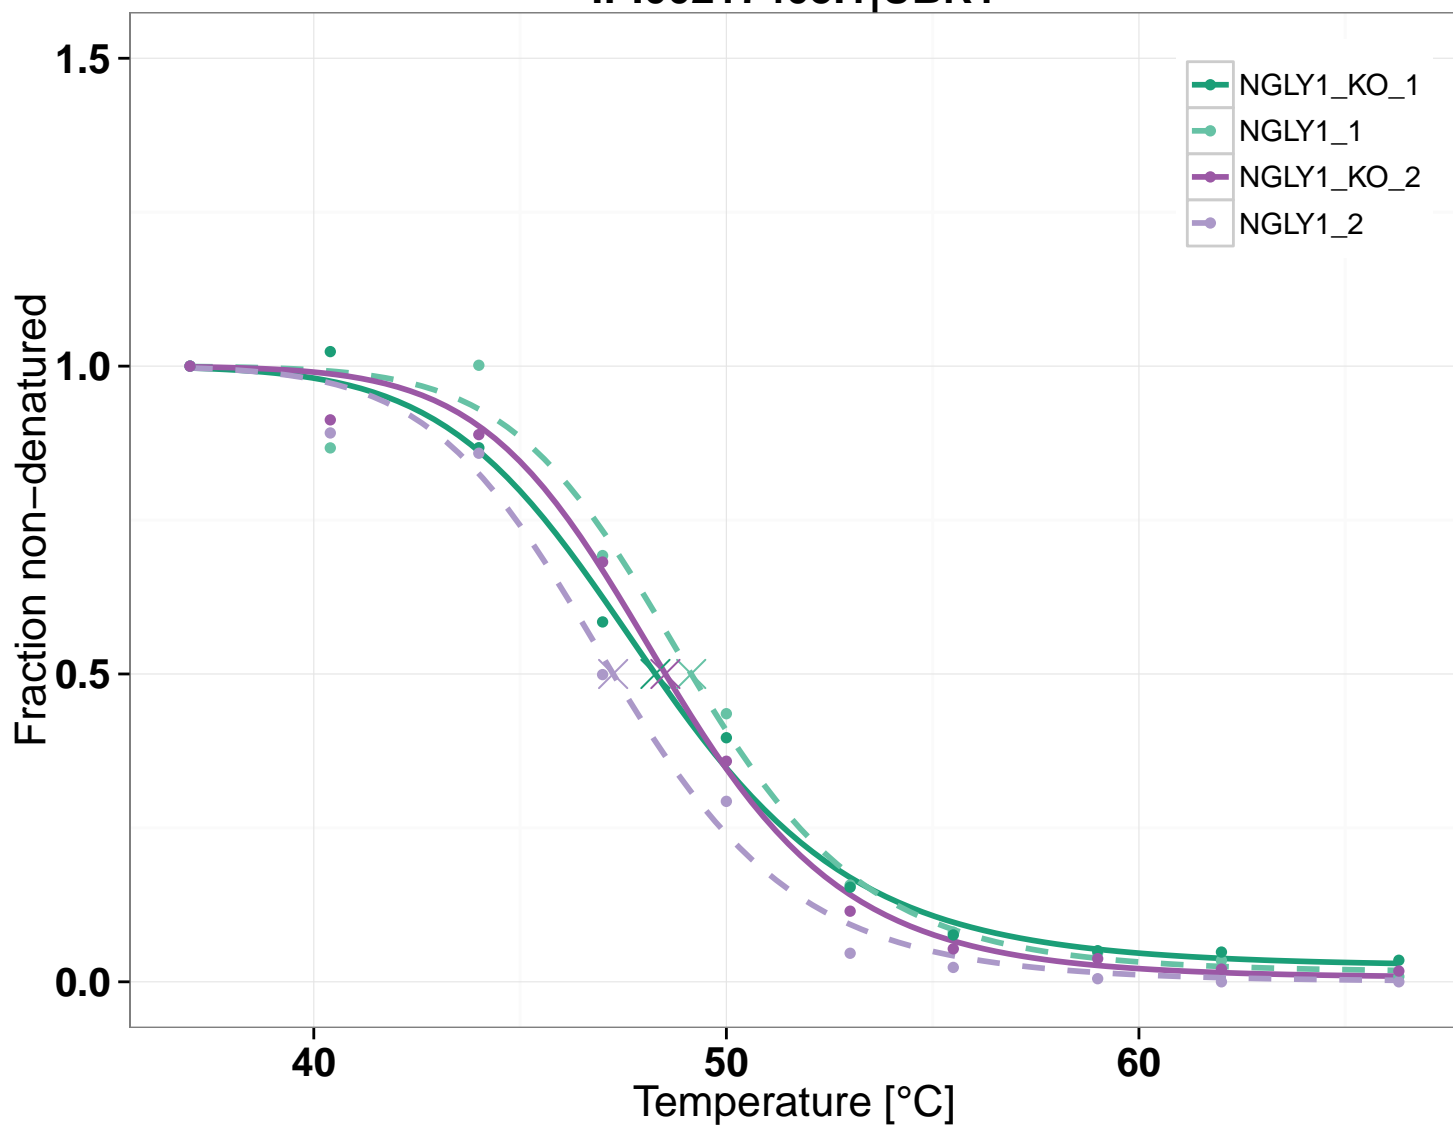

|            | meltPoint | slope  | plateau | R2   |
|------------|-----------|--------|---------|------|
| NGLY1_KO_1 | 48.28     | -0.098 | 0.02    | 1    |
| NGLY1_1    | 49.15     | -0.11  | 0.02    | 0.99 |
| NGLY1_KO_2 | 48.52     | -0.11  | 0.01    | 1    |
| NGLY1_2    | 47.26     | -0.11  | 0       | 0.99 |

Supplement: Supplementary file 979 [file 1]

# IPI00026829.1|DHPS

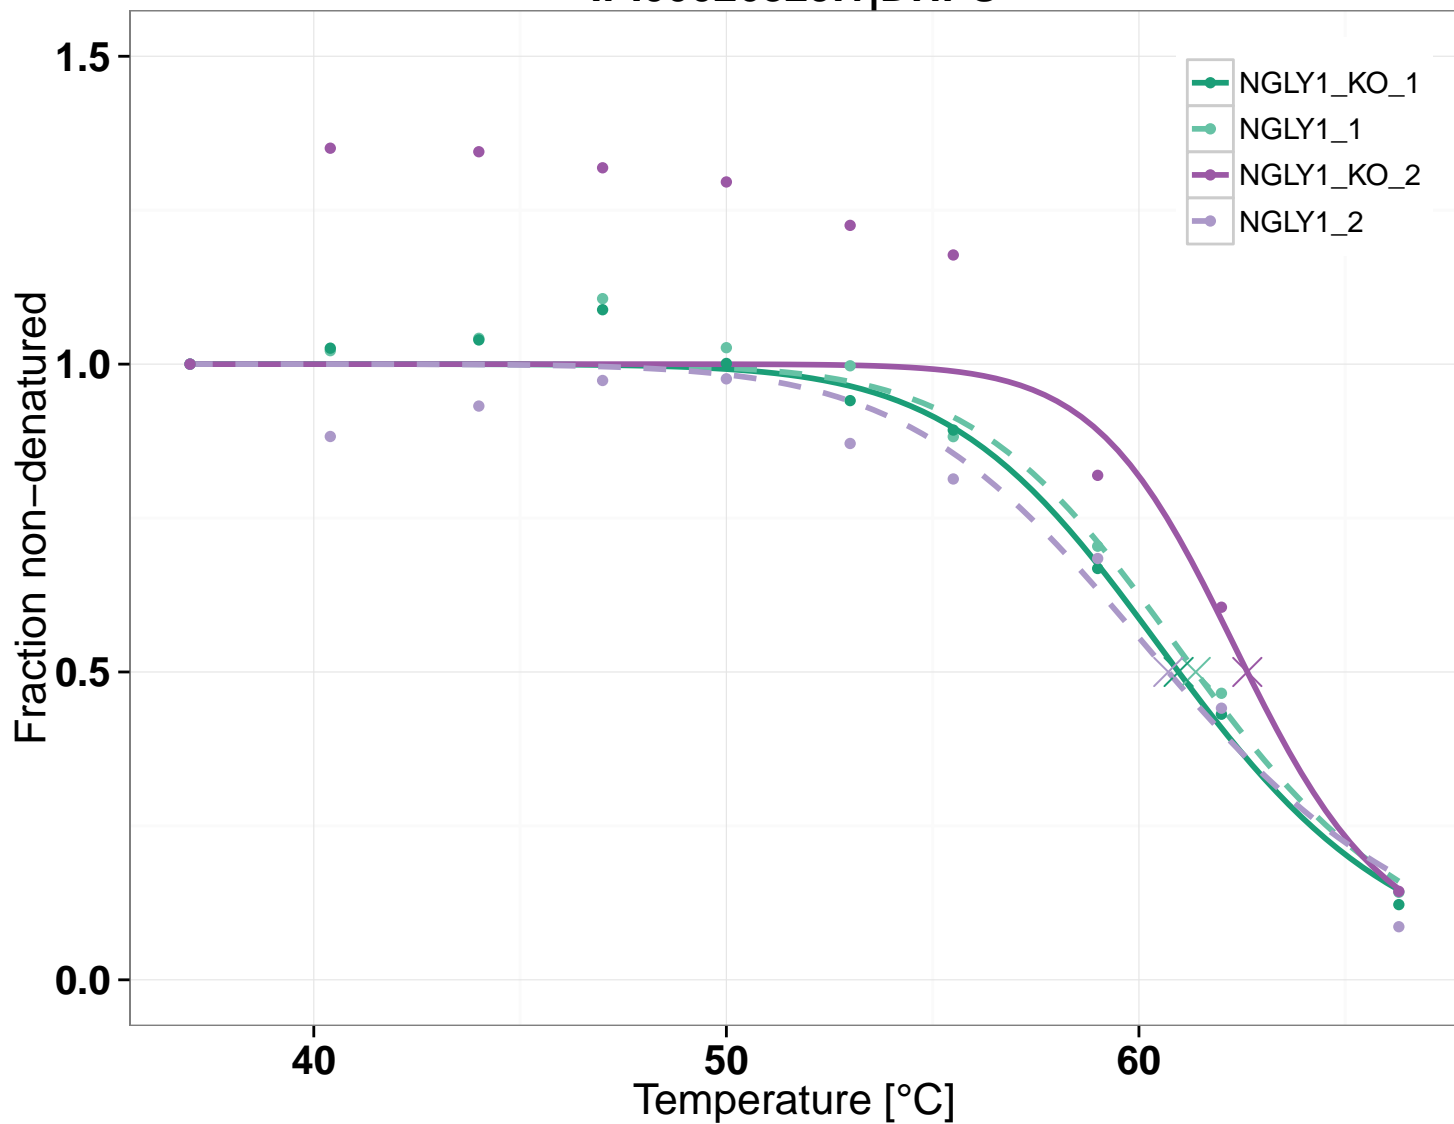

|            | meltPoint | slope  | plateau | R2   |
|------------|-----------|--------|---------|------|
| NGLY1_KO_1 | 60.96     | -0.091 | 0       | 0.99 |
| NGLY1_1    | 61.38     | -0.092 | 0       | 0.98 |
| NGLY1_KO_2 | 62.63     | -0.14  | 0.03    | 0.63 |
| NGLY1_2    | 60.71     | -0.079 | 0       | 0.95 |

Supplement: Supplementary file 980 [file 1]

IPI00001726.4|USP35

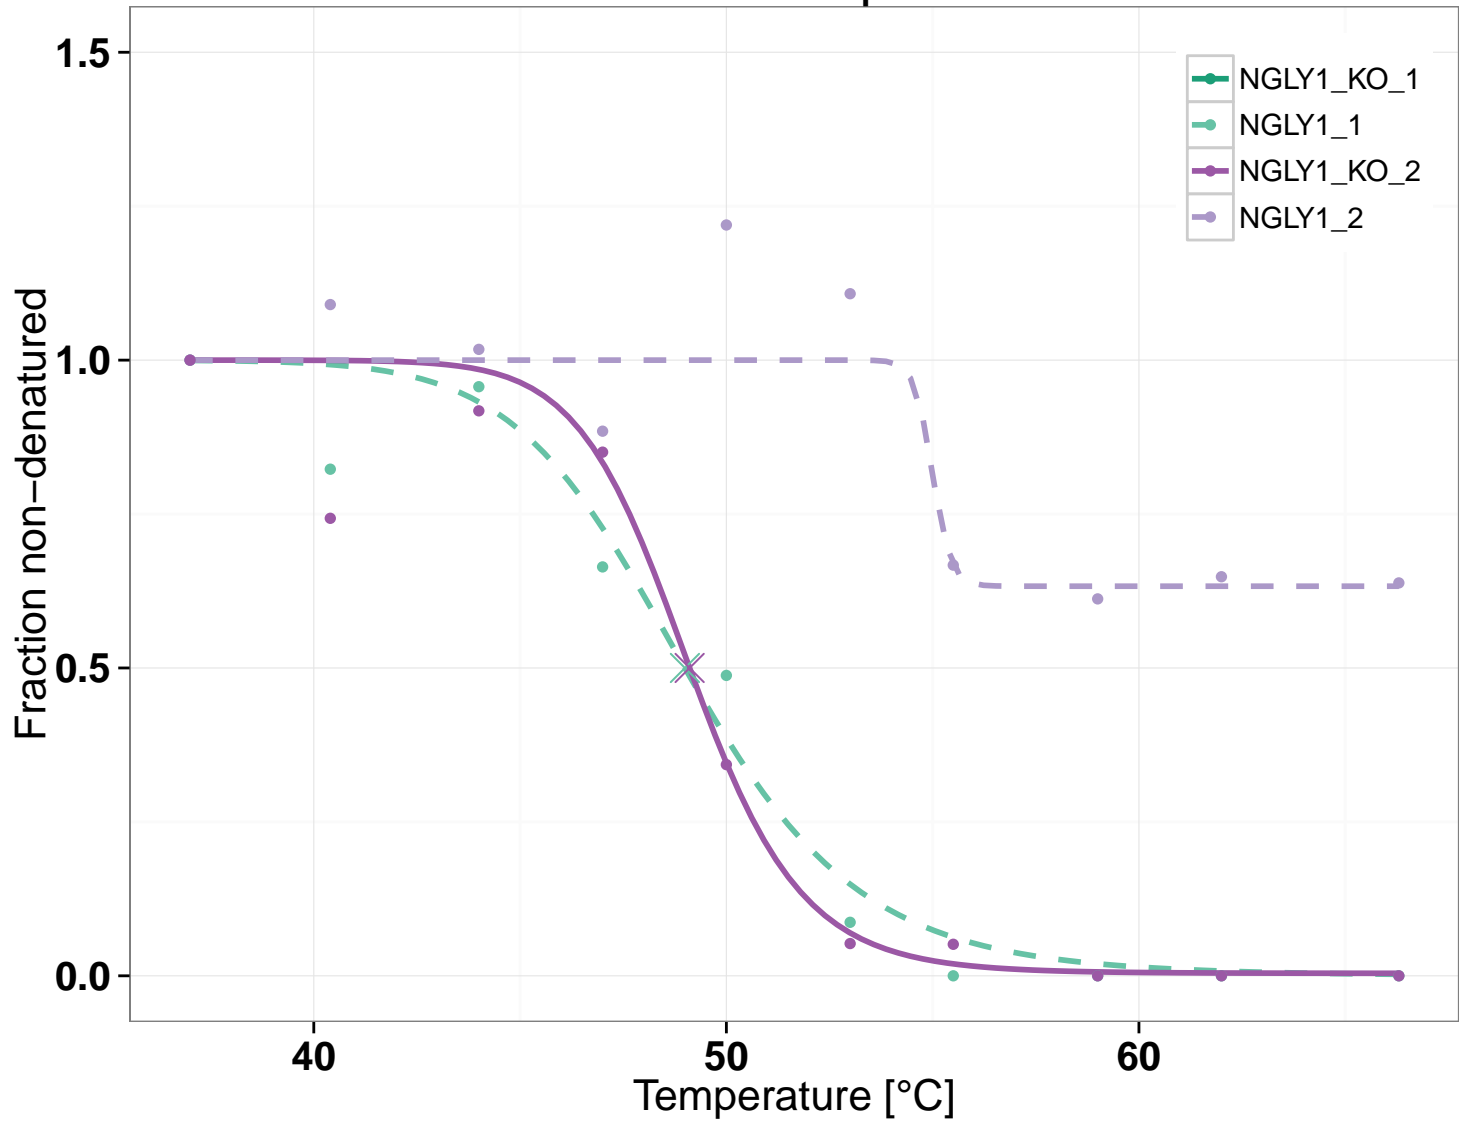

|            | meltPoint | slope | plateau | R2   |
|------------|-----------|-------|---------|------|
| NGLY1_KO_1 | -         | -     | -       | -    |
| NGLY1_1    | 49        | -0.12 | 0       | 0.97 |
| NGLY1_KO_2 | 49.11     | -0.18 | 0       | 0.96 |
| NGLY1_2    | -         | -0.42 | 0.63    | 0.83 |

Supplement: Supplementary file 981 [file 1]

IPI00003565.1|PSMD10

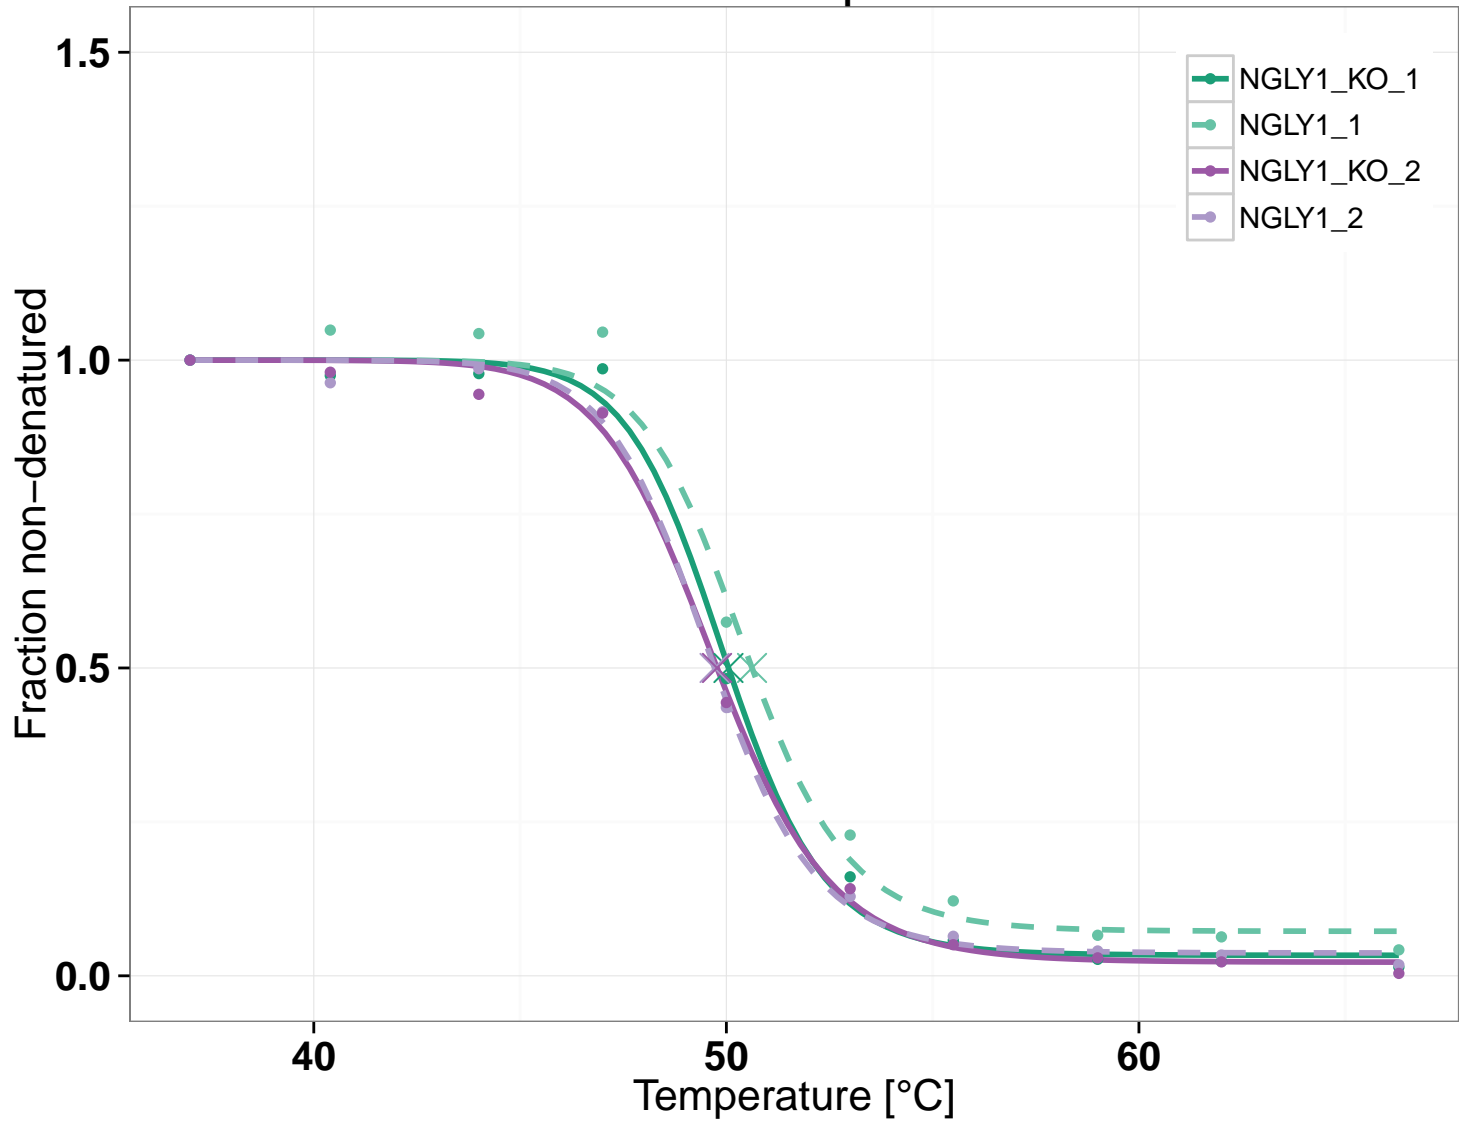

|            | meltPoint | slope | plateau | R2   |
|------------|-----------|-------|---------|------|
| NGLY1_KO_1 | 50.05     | -0.2  | 0.03    | 1    |
| NGLY1_1    | 50.62     | -0.18 | 0.07    | 0.99 |
| NGLY1_KO_2 | 49.77     | -0.17 | 0.02    | 1    |
| NGLY1_2    | 49.71     | -0.19 | 0.04    | 1    |

Supplement: Supplementary file 982 [file 1]

# IPI00021983.1|NCSTN

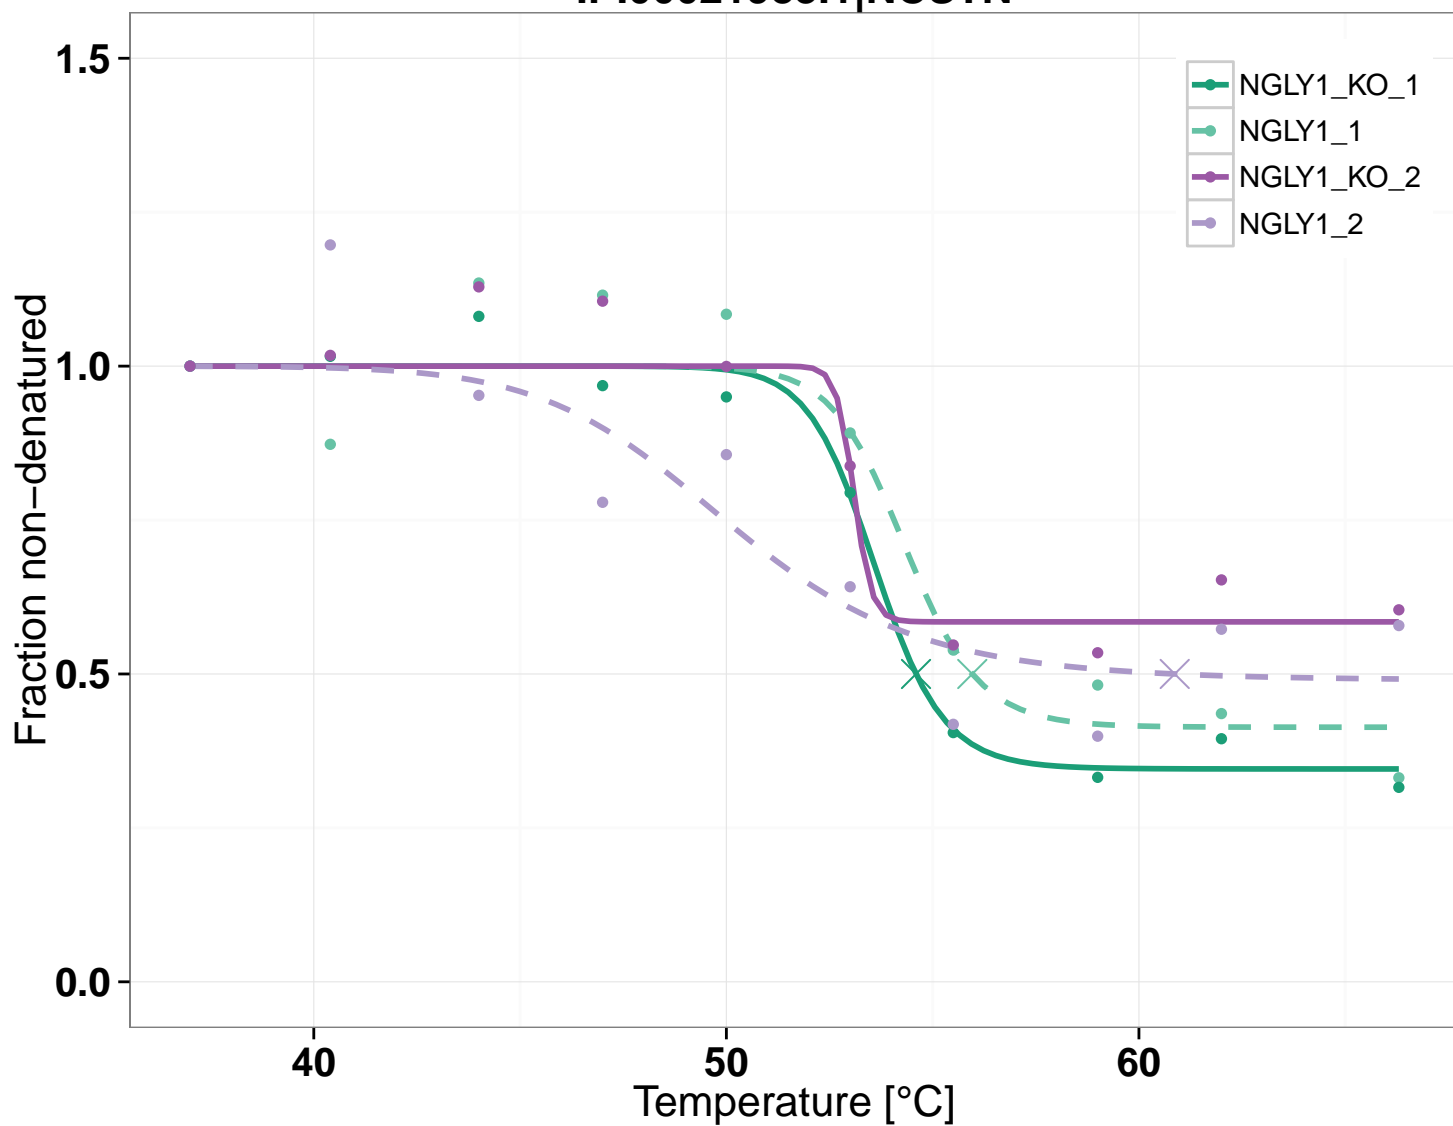

|            | meltPoint | slope  | plateau | R2   |
|------------|-----------|--------|---------|------|
| NGLY1_KO_1 | 54.6      | -0.2   | 0.35    | 0.99 |
| NGLY1_1    | 55.96     | -0.16  | 0.41    | 0.92 |
| NGLY1_KO_2 | -         | -0.49  | 0.58    | 0.93 |
| NGLY1_2    | 60.87     | -0.056 | 0.49    | 0.82 |

Supplement: Supplementary file 983 [file 1]

# IPI00644311.2|ZNF646

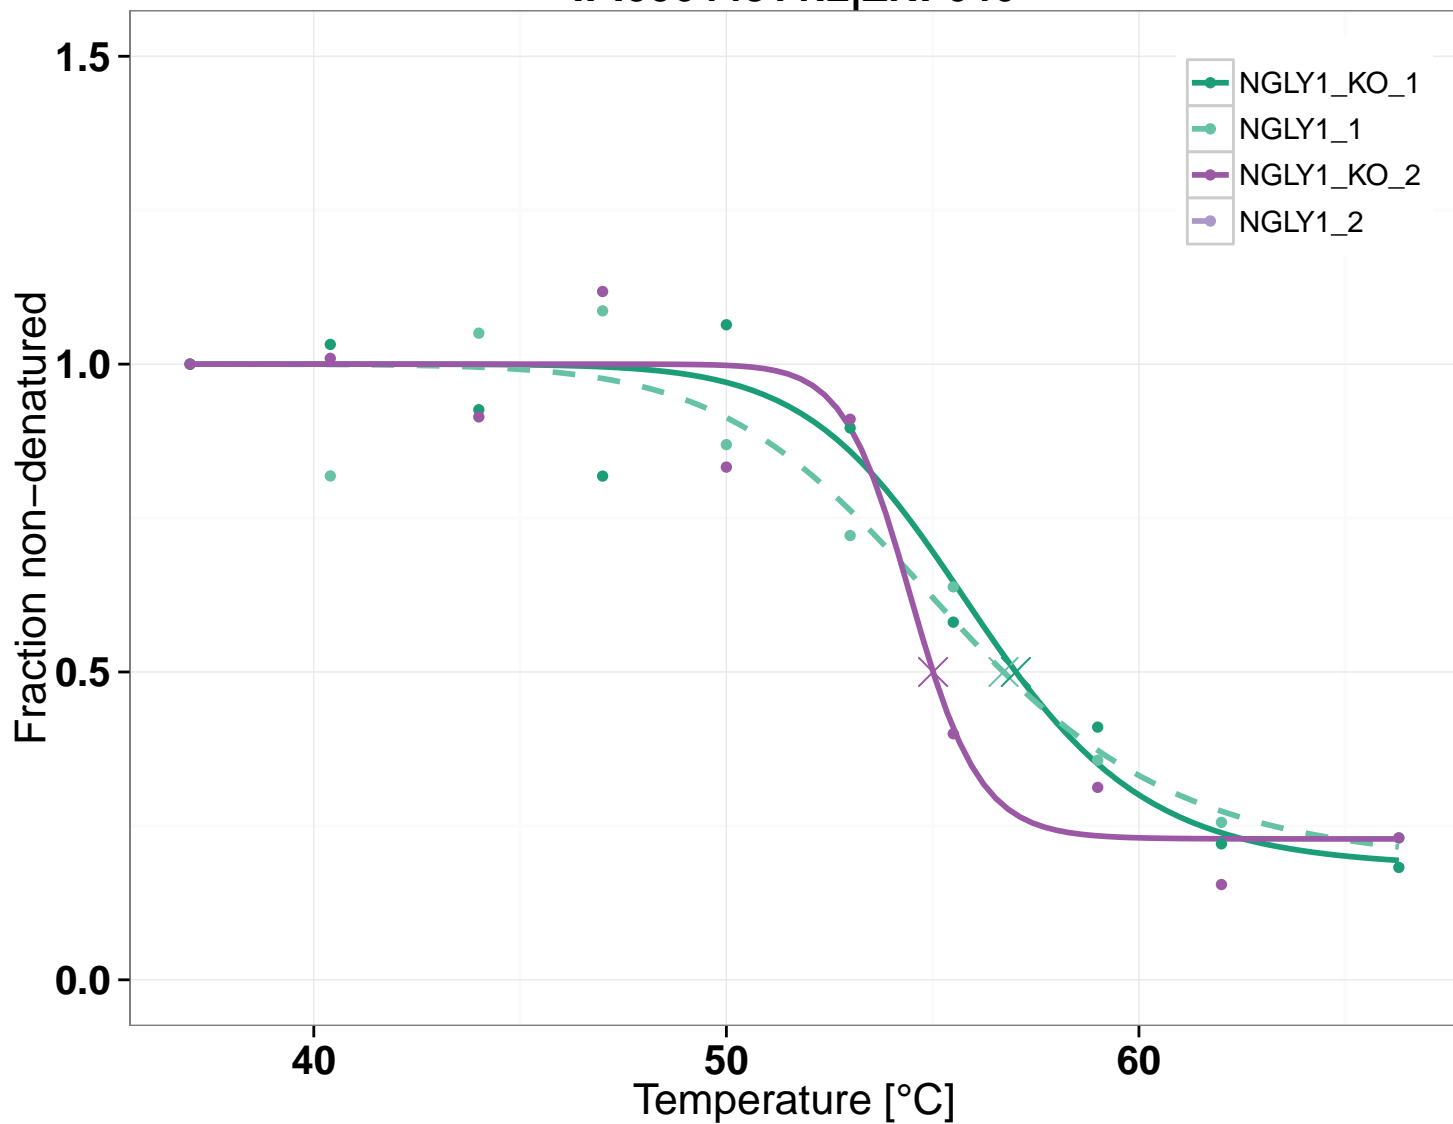

|            | meltPoint | slope  | plateau | R2   |
|------------|-----------|--------|---------|------|
| NGLY1_KO_1 | 57.02     | -0.099 | 0.18    | 0.95 |
| NGLY1_1    | 56.72     | -0.073 | 0.19    | 0.94 |
| NGLY1_KO_2 | 55.01     | -0.23  | 0.23    | 0.95 |
| NGLY1_2    | -         | -      | -       | -    |

Supplement: Supplementary file 984 [file 1]

IPI00471978.3|C2CD2

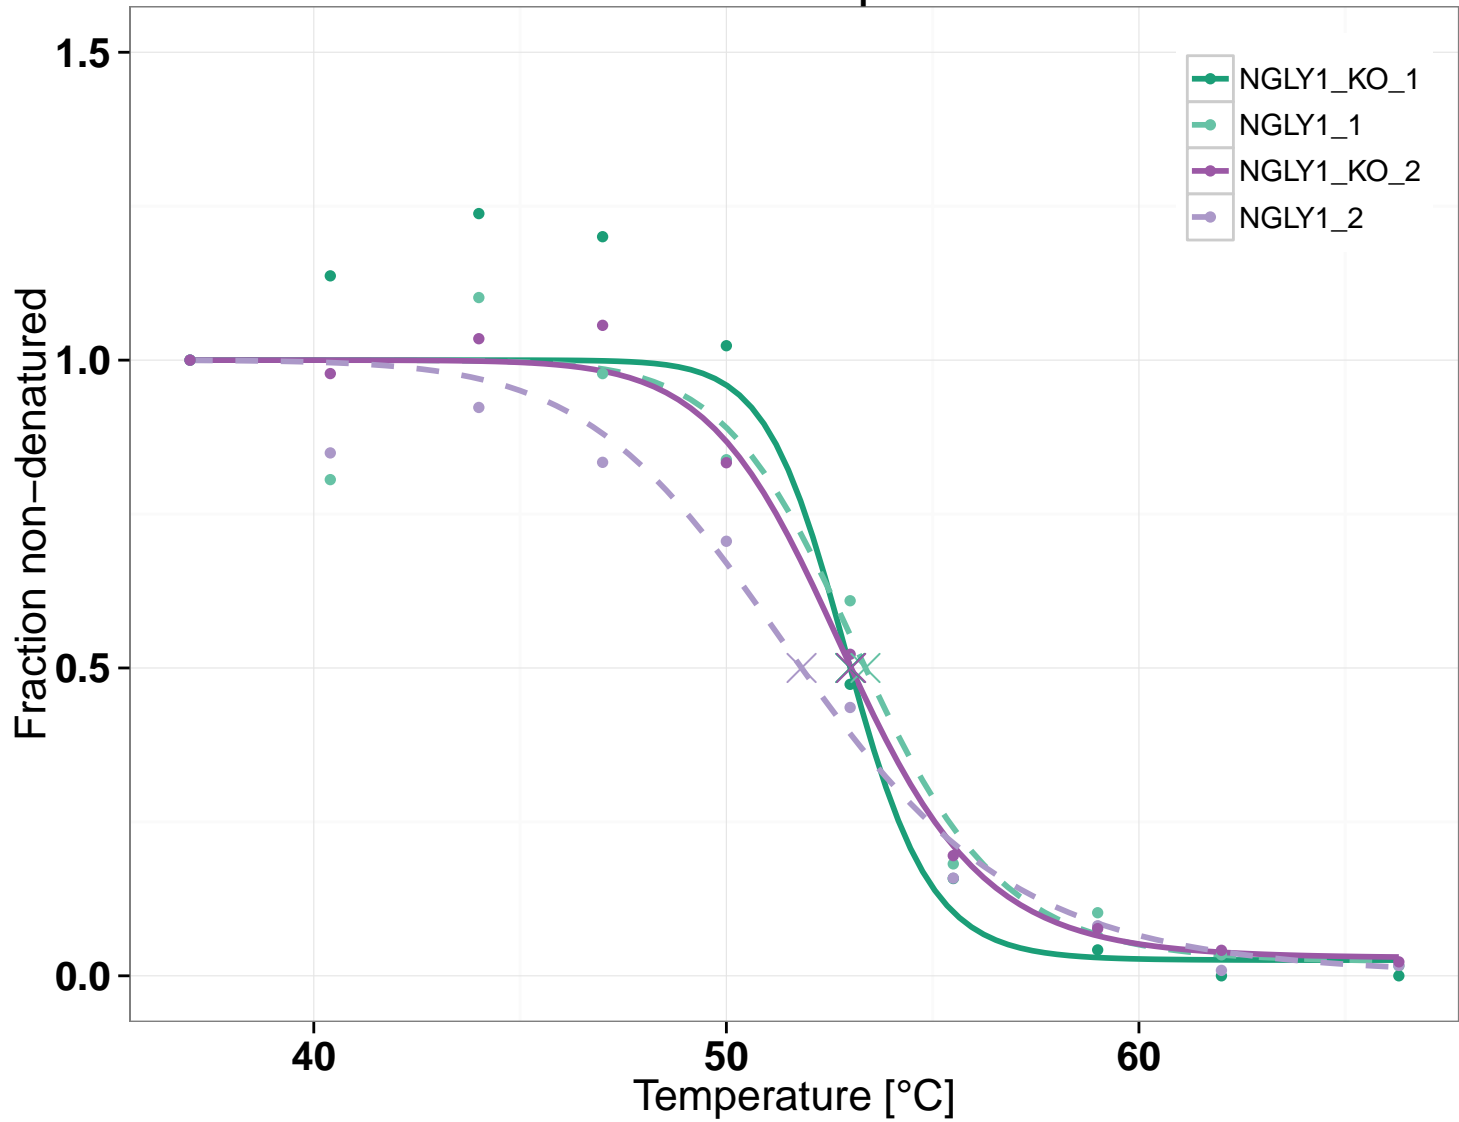

|            | meltPoint | slope  | plateau | R2   |
|------------|-----------|--------|---------|------|
| NGLY1_KO_1 | 53        | -0.24  | 0.03    | 0.95 |
| NGLY1_1    | 53.37     | -0.14  | 0.02    | 0.97 |
| NGLY1_KO_2 | 53.03     | -0.15  | 0.03    | 0.99 |
| NGLY1_2    | 51.82     | -0.095 | 0       | 0.98 |

Supplement: Supplementary file 985 [file 1]

IPI00879716.1|NAPRT1

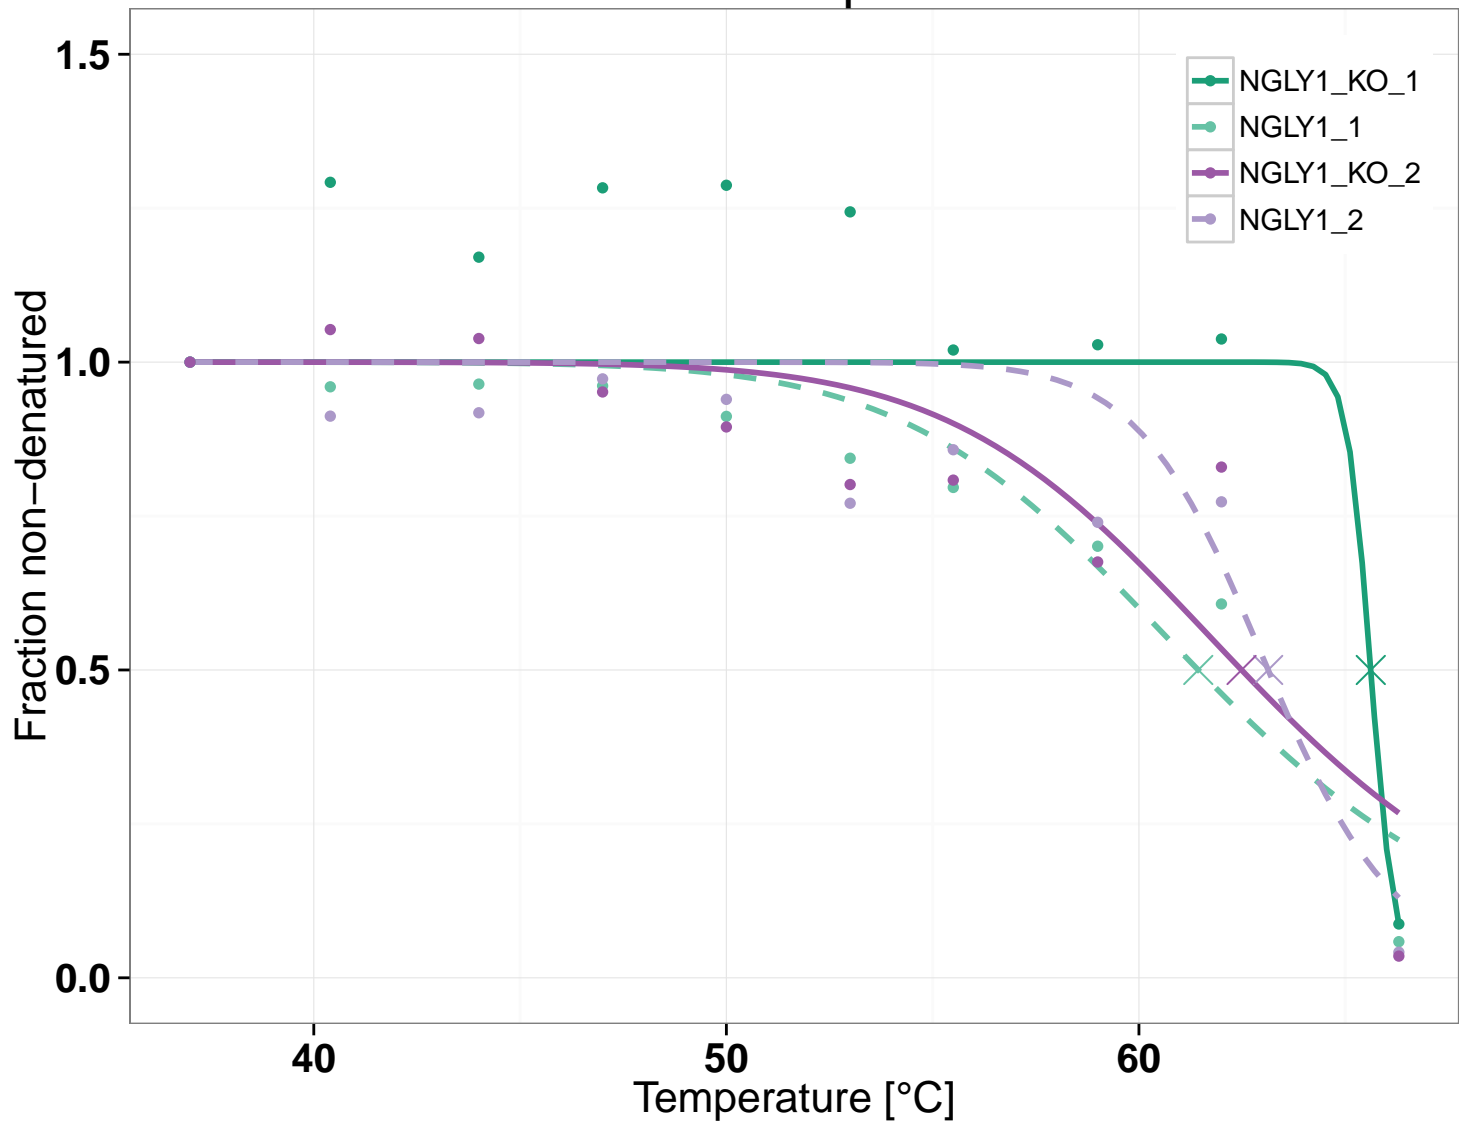

|            | meltPoint | slope  | plateau | R2   |
|------------|-----------|--------|---------|------|
| NGLY1_KO_1 | 65.62     | -0.87  | 0       | 0.71 |
| NGLY1_1    | 61.44     | -0.07  | 0       | 0.9  |
| NGLY1_KO_2 | 62.49     | -0.071 | 0       | 0.76 |
| NGLY1_2    | 63.13     | -0.16  | 0       | 0.79 |

Supplement: Supplementary file 986 [file 1]

IPI00013706.5|LOC642393

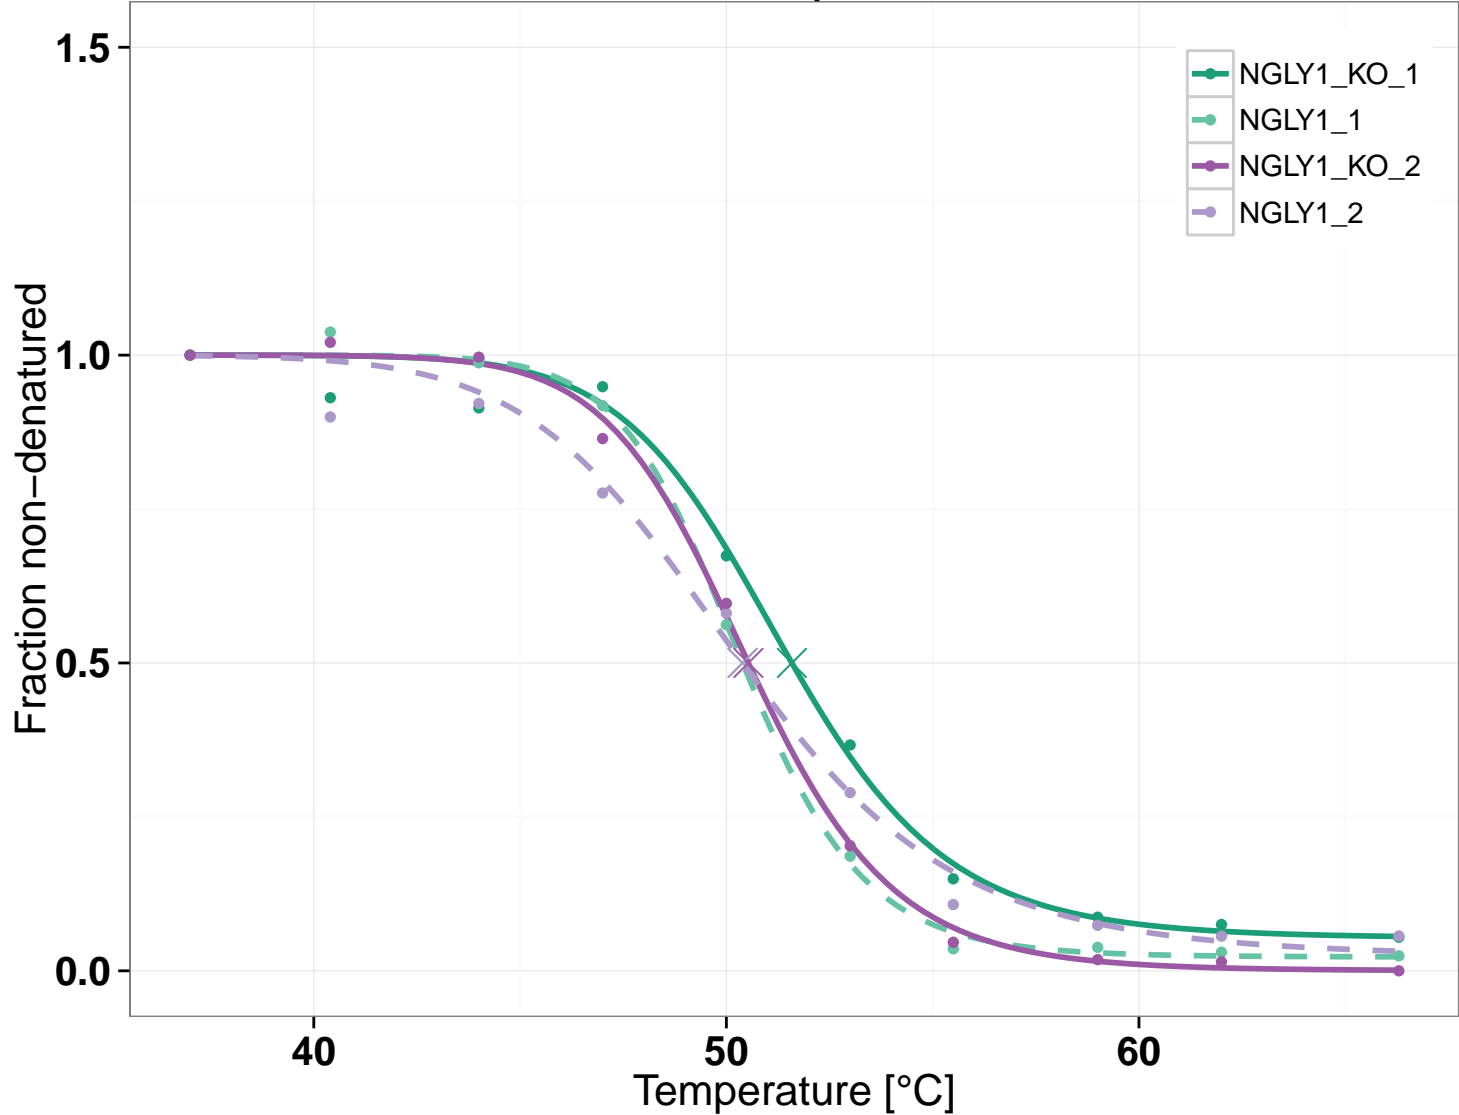

|            | meltPoint | slope  | plateau | R2   |
|------------|-----------|--------|---------|------|
| NGLY1_KO_1 | 51.59     | -0.12  | 0.05    | 0.99 |
| NGLY1_1    | 50.4      | -0.16  | 0.02    | 1    |
| NGLY1_KO_2 | 50.53     | -0.14  | 0       | 1    |
| NGLY1_2    | 50.39     | -0.094 | 0.02    | 0.99 |

Supplement: Supplementary file 987 [file 1]

IPI00294049.2|PDE8B

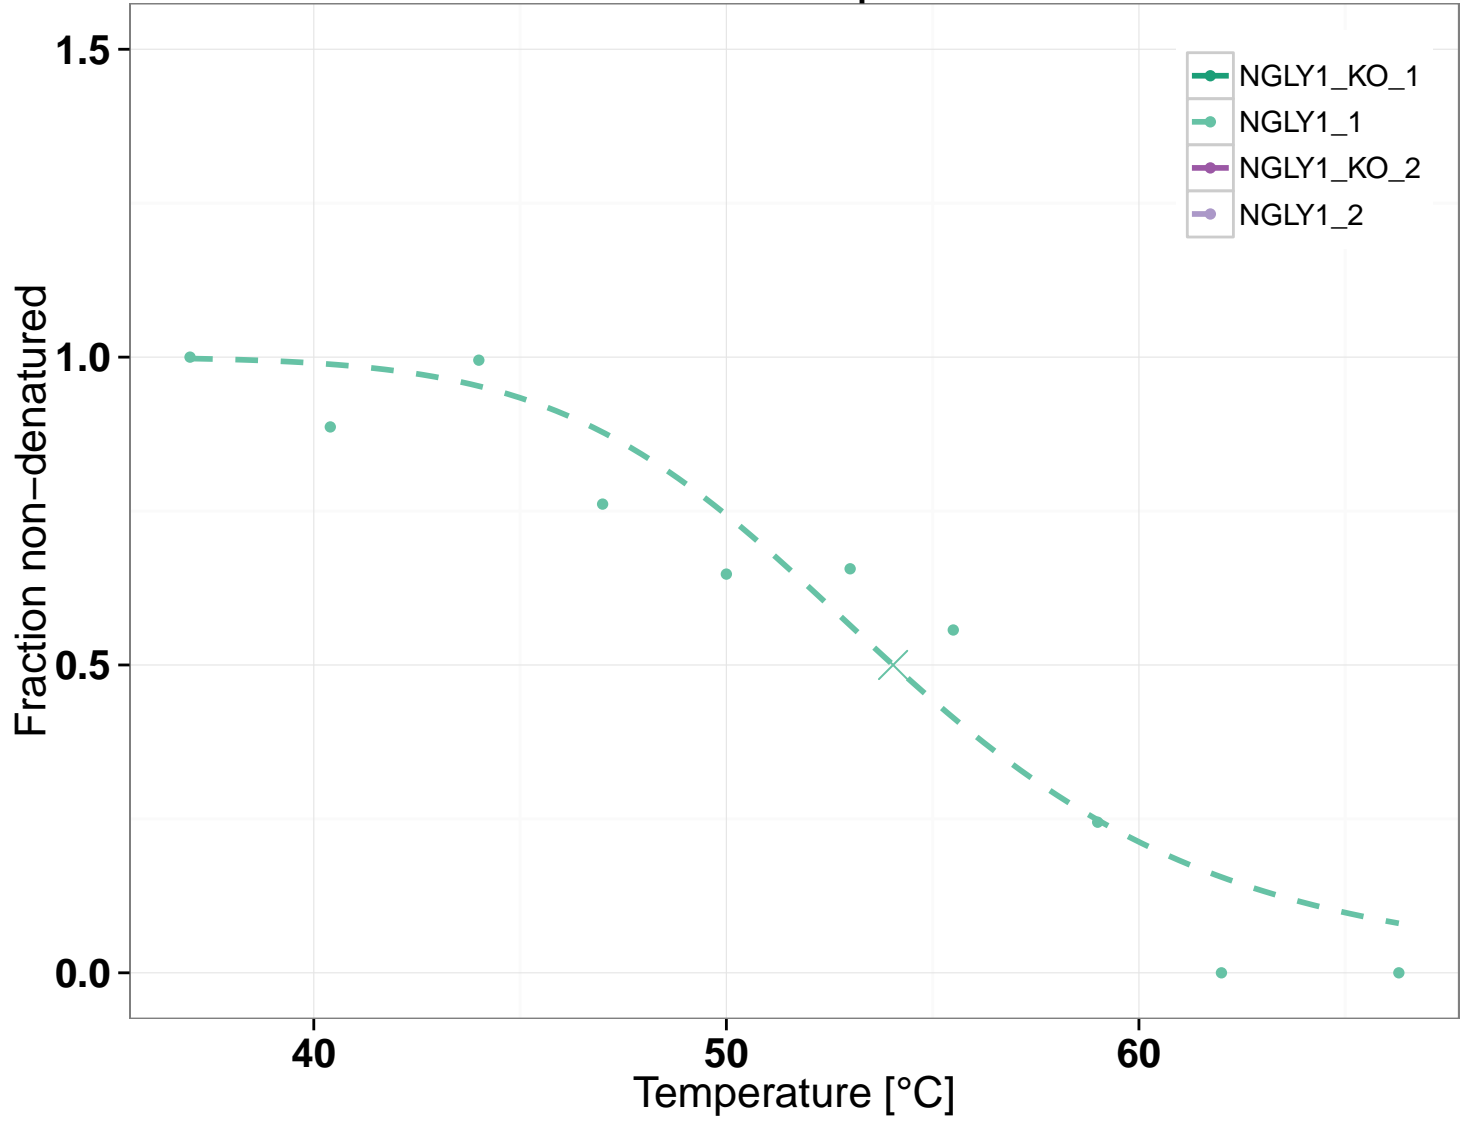

|            | meltPoint | slope  | plateau | R2   |
|------------|-----------|--------|---------|------|
| NGLY1_KO_1 | -         | -      | -       | -    |
| NGLY1_1    | 54.04     | -0.062 | 0       | 0.93 |
| NGLY1_KO_2 | -         | -      | -       | -    |
| NGLY1_2    | -         | -      | -       | -    |

Supplement: Supplementary file 988 [file 1]

IPI00009544.3|RALBP1

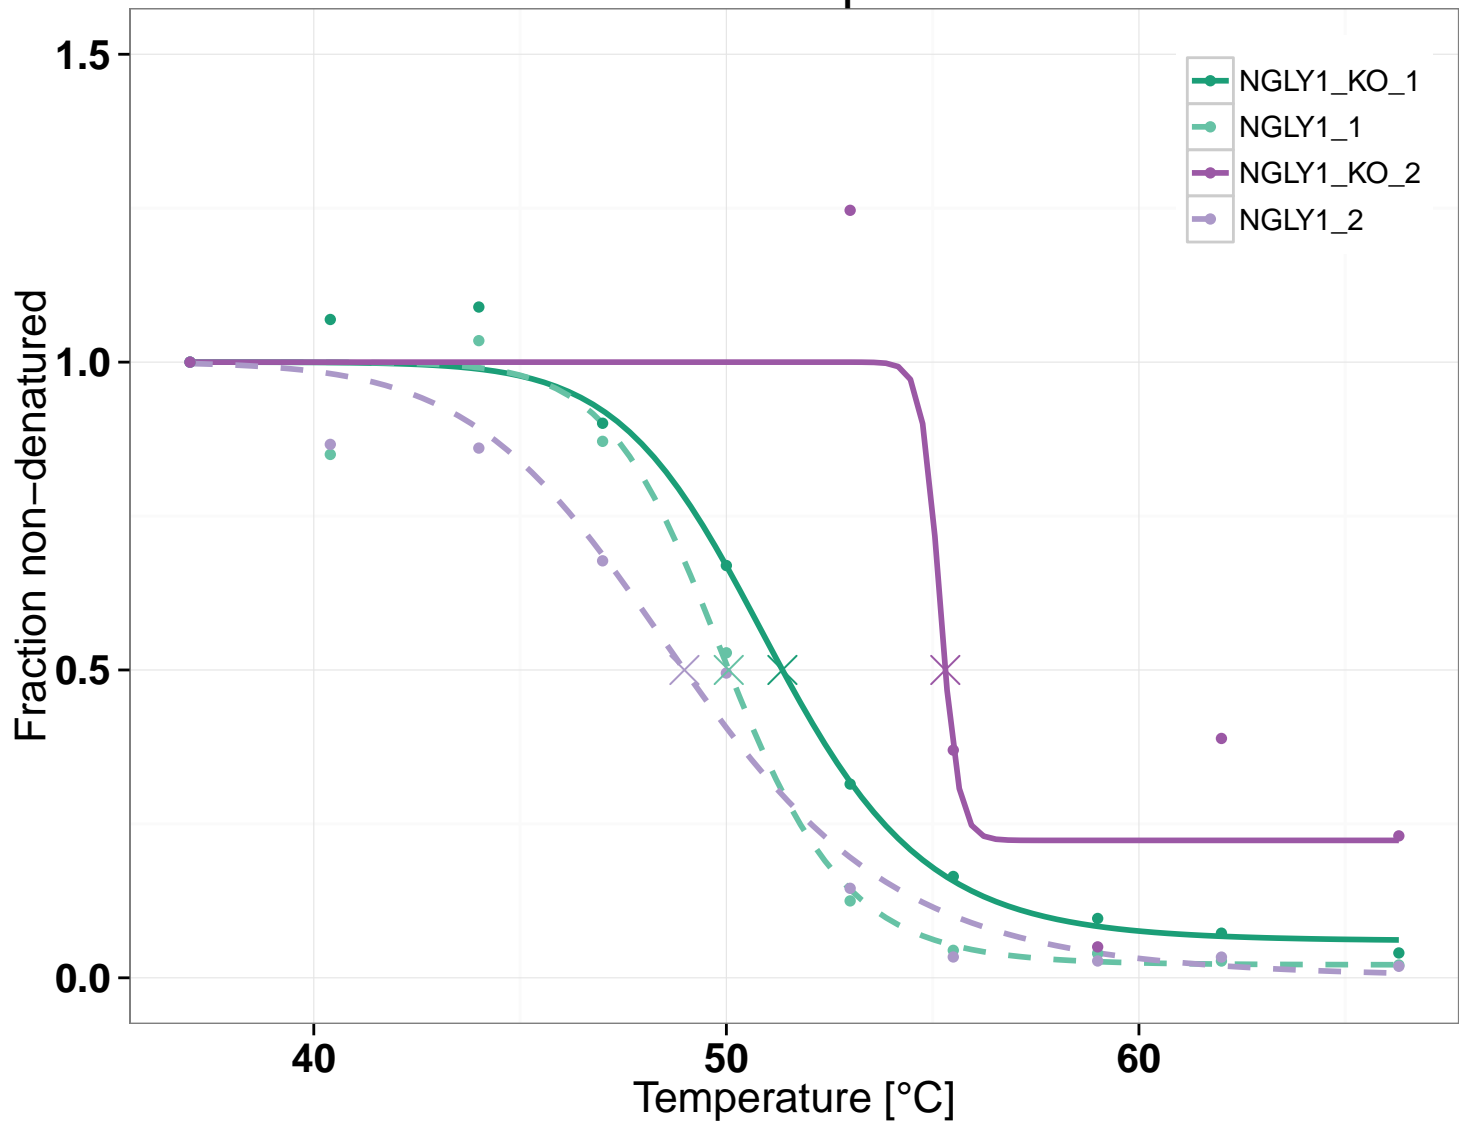

|            | meltPoint | slope  | plateau | R2    |
|------------|-----------|--------|---------|-------|
| NGLY1_KO_1 | 51.36     | -0.13  | 0.06    | 0.99  |
| NGLY1_1    | 50.06     | -0.17  | 0.02    | 0.99  |
| NGLY1_KO_2 | 55.31     | -0.88  | 0.22    | -0.42 |
| NGLY1_2    | 48.98     | -0.096 | 0       | 0.98  |

Supplement: Supplementary file 989 [file 1]

IPI00006589.1|ZBTB39

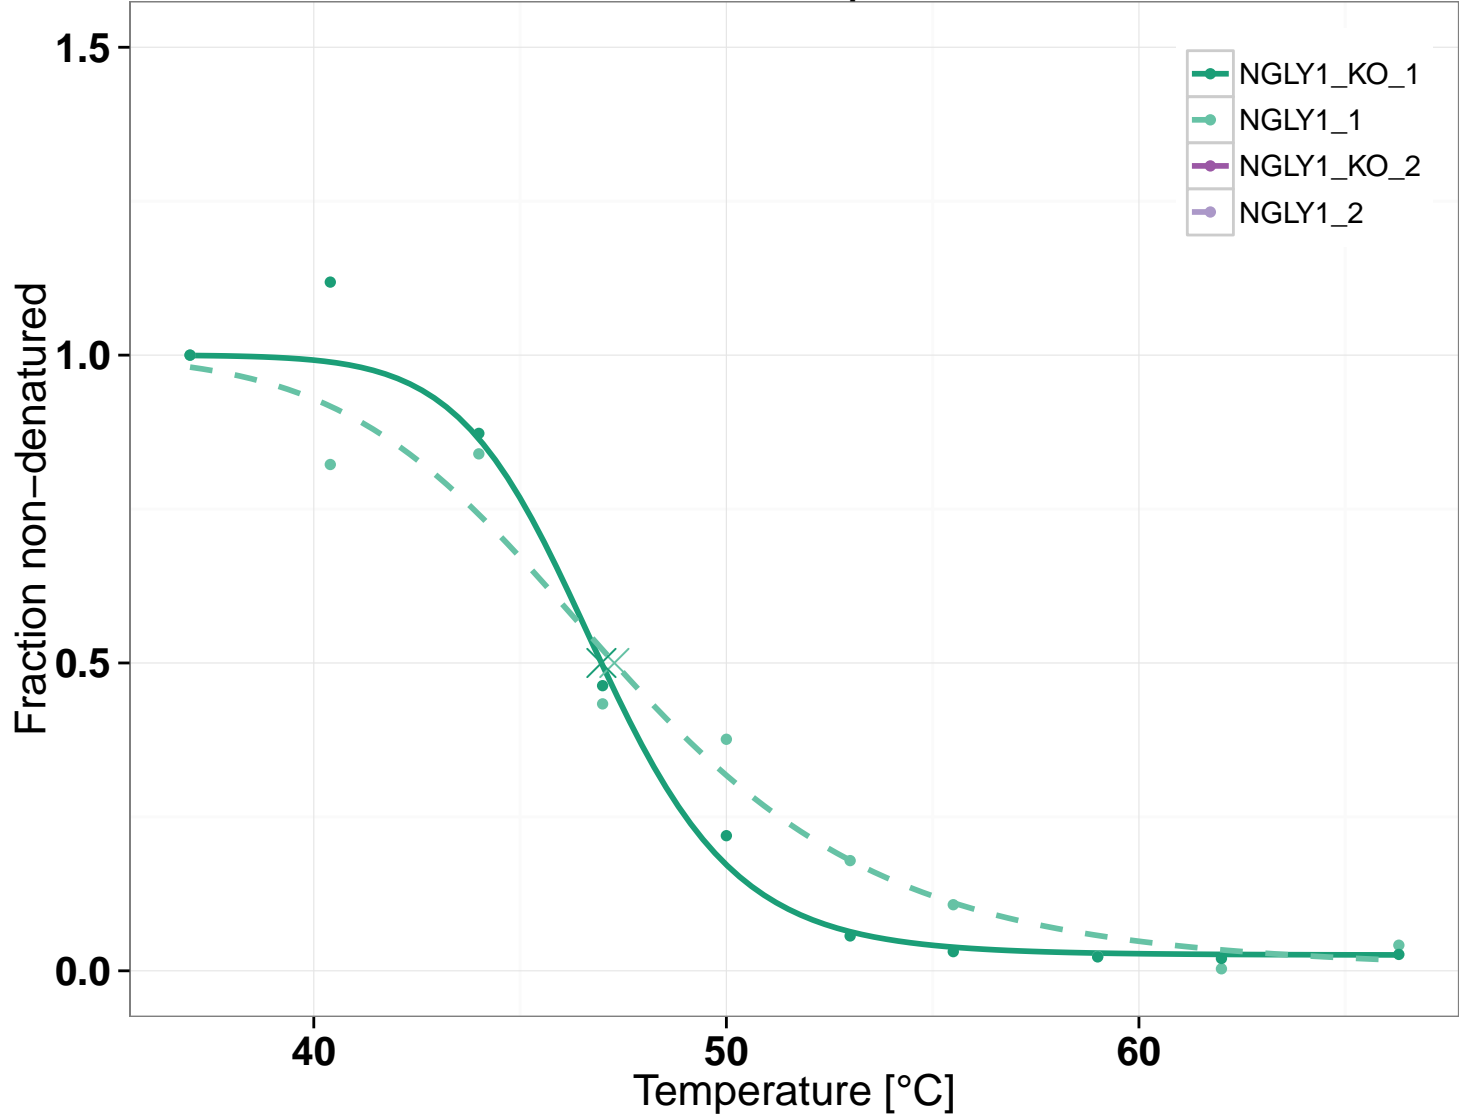

|            | meltPoint | slope  | plateau | R2   |
|------------|-----------|--------|---------|------|
| NGLY1_KO_1 | 46.97     | -0.15  | 0.03    | 0.99 |
| NGLY1_1    | 47.29     | -0.076 | 0       | 0.97 |
| NGLY1_KO_2 | -         | -      | -       | -    |
| NGLY1_2    | -         | -      | -       | -    |

Supplement: Supplementary file 990 [file 1]

# IPI00033907.1|ANAPC1

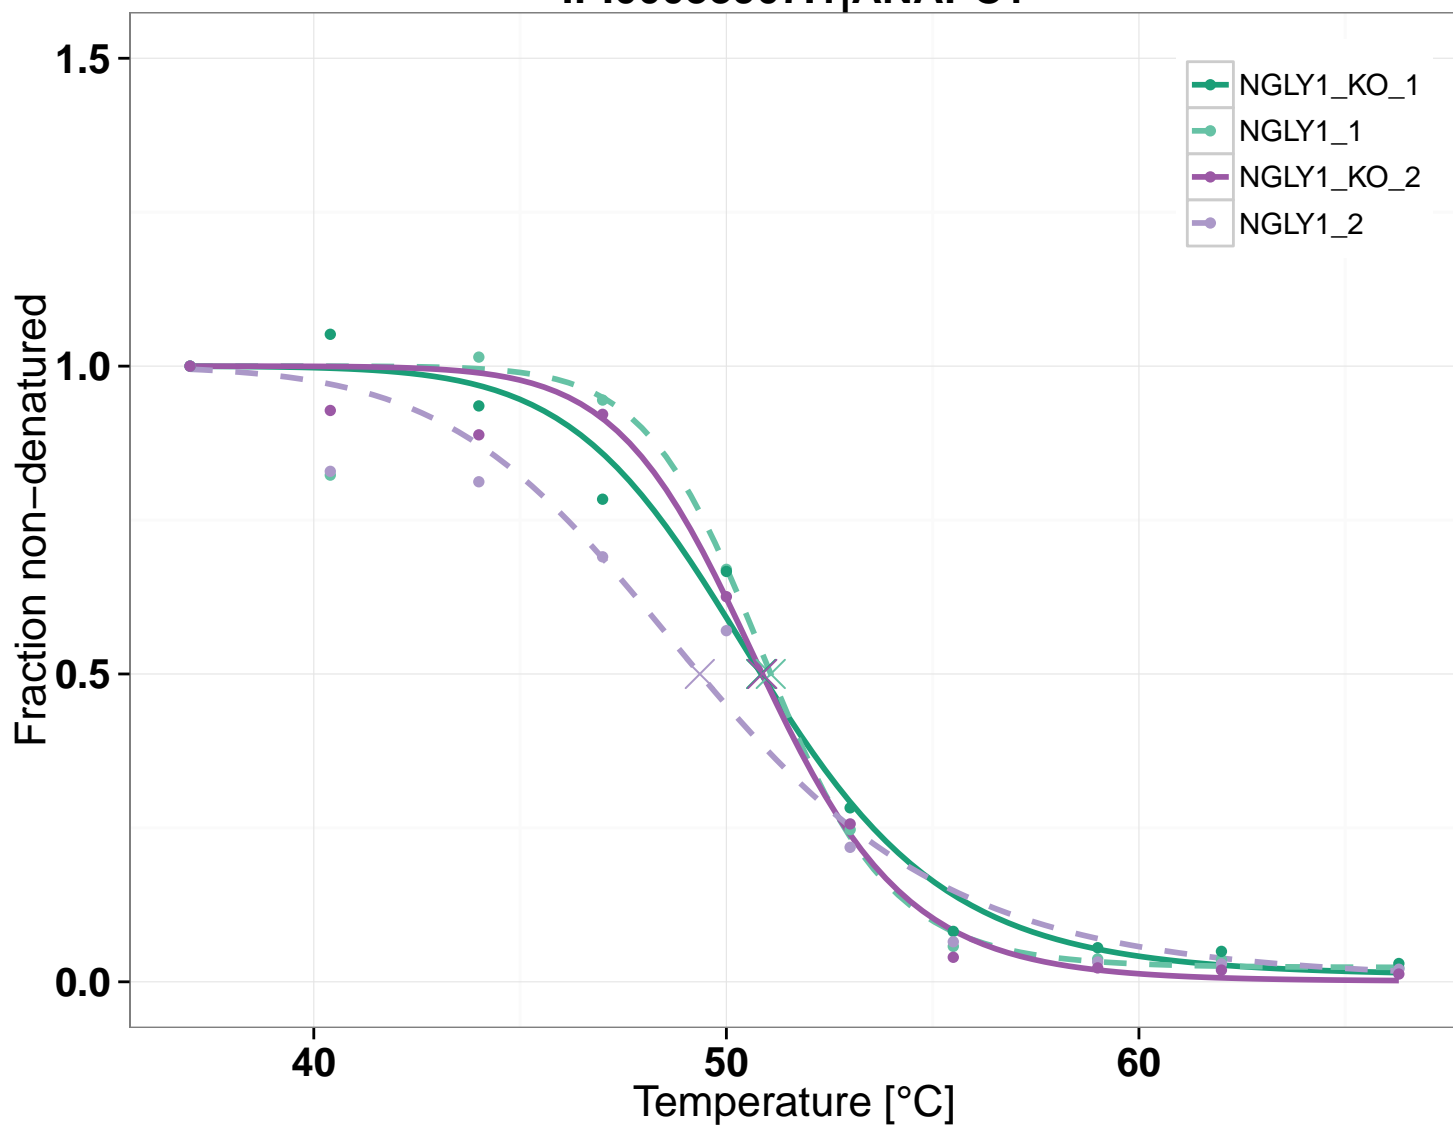

|            | meltPoint | slope  | plateau | R2   |
|------------|-----------|--------|---------|------|
| NGLY1_KO_1 | 50.84     | -0.11  | 0.01    | 0.99 |
| NGLY1_1    | 51.08     | -0.16  | 0.02    | 0.98 |
| NGLY1_KO_2 | 50.87     | -0.14  | 0       | 0.99 |
| NGLY1_2    | 49.36     | -0.081 | 0       | 0.97 |

Supplement: Supplementary file 991 [file 1]

# IPI00154910.4|UBASH3B

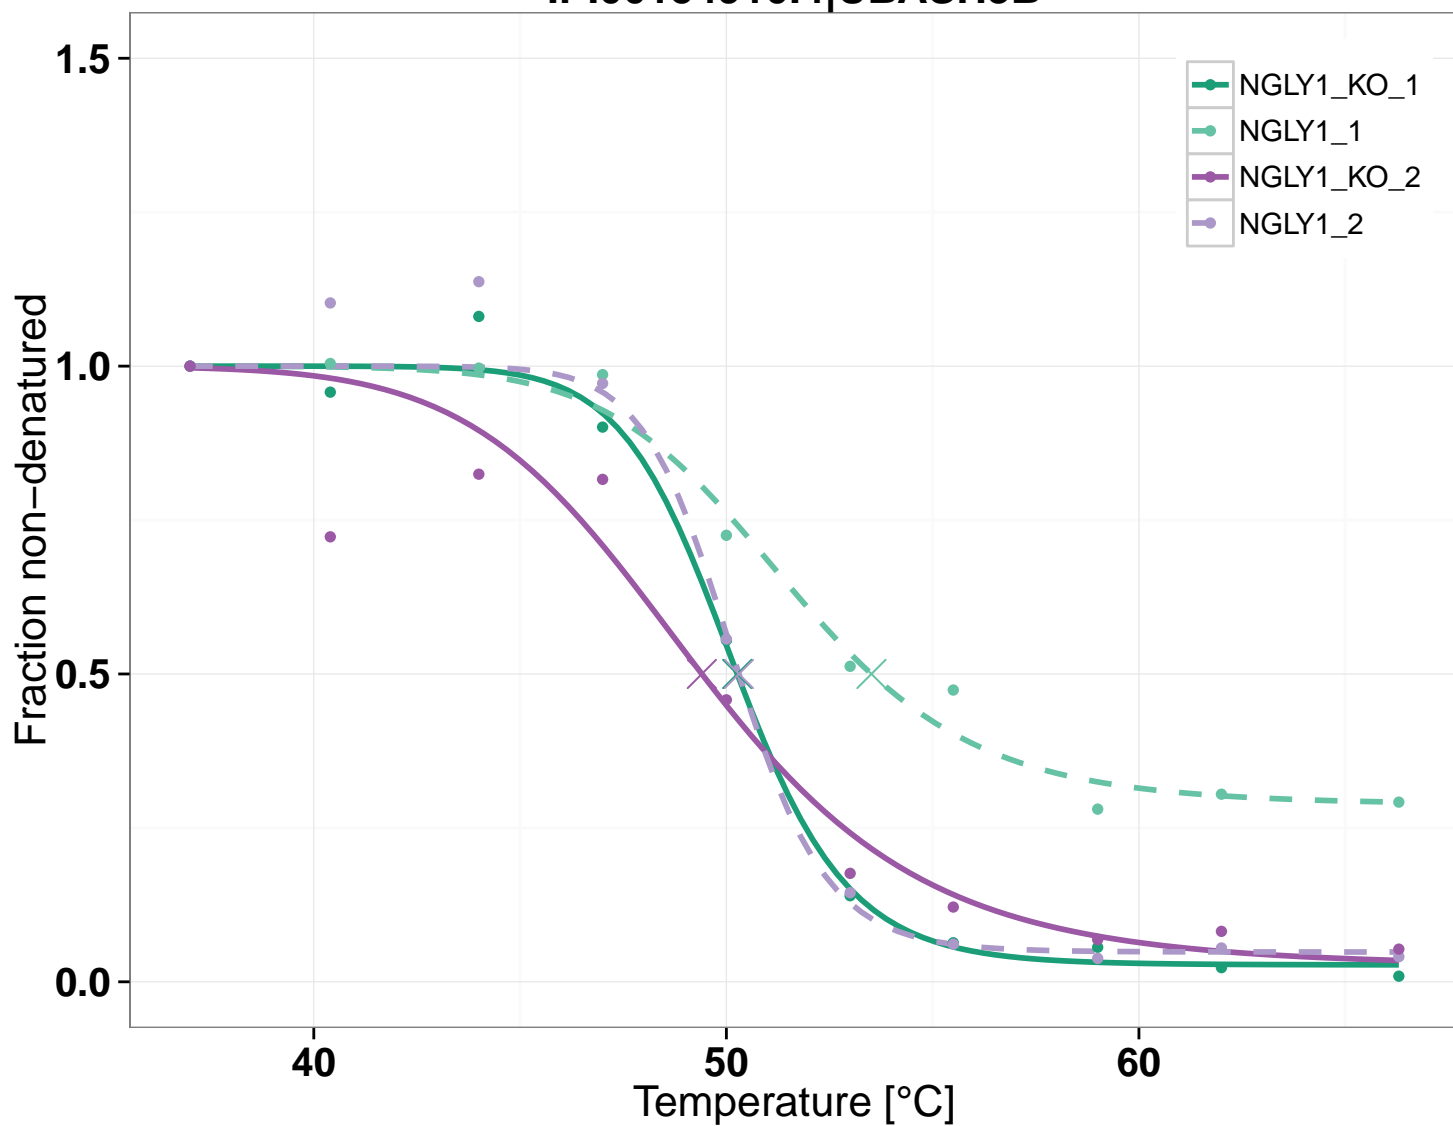

|            | meltPoint | slope  | plateau | R2   |
|------------|-----------|--------|---------|------|
| NGLY1_KO_1 | 50.26     | -0.18  | 0.03    | 0.99 |
| NGLY1_1    | 53.52     | -0.08  | 0.29    | 0.99 |
| NGLY1_KO_2 | 49.41     | -0.089 | 0.02    | 0.93 |
| NGLY1_2    | 50.3      | -0.21  | 0.05    | 0.99 |

Supplement: Supplementary file 992 [file 1]

IPI00016513.5|RAB10

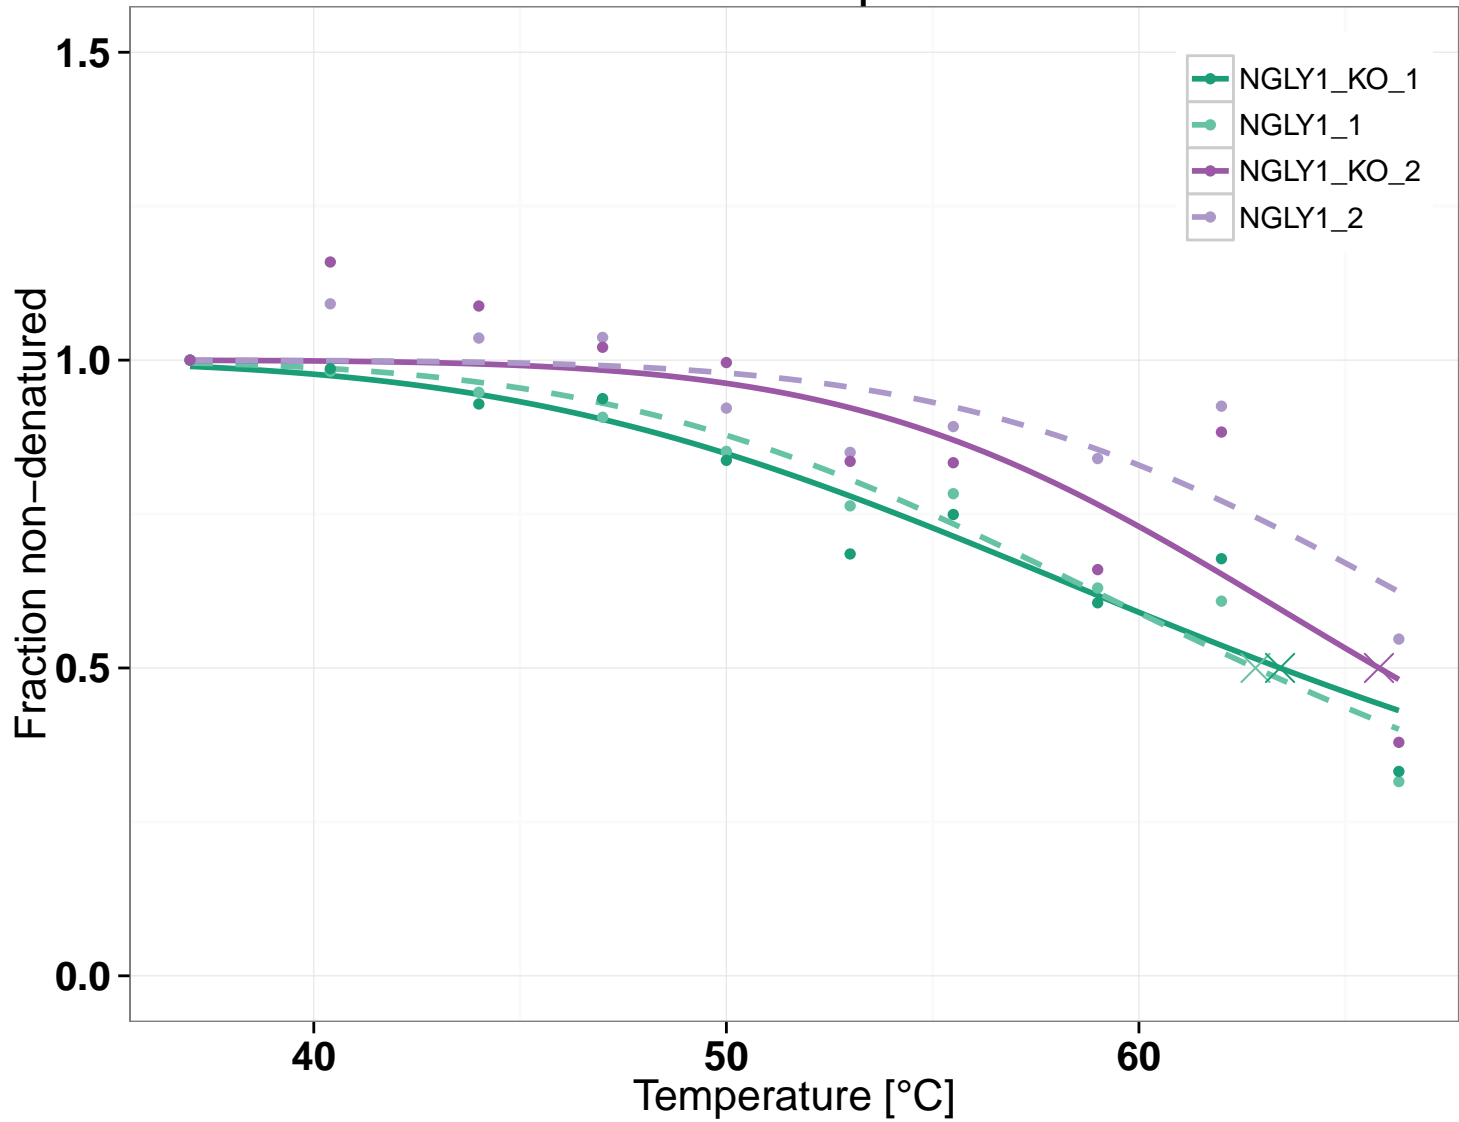

|            | meltPoint | slope  | plateau | R2   |
|------------|-----------|--------|---------|------|
| NGLY1_KO_1 | 63.42     | -0.028 | 0       | 0.89 |
| NGLY1_1    | 62.83     | -0.033 | 0       | 0.95 |
| NGLY1_KO_2 | 65.82     | -0.04  | 0       | 0.74 |
| NGLY1_2    | -         | -      | 0       | 0.73 |

Supplement: Supplementary file 993 [file 1]

# IPI00333010.8|CHERP

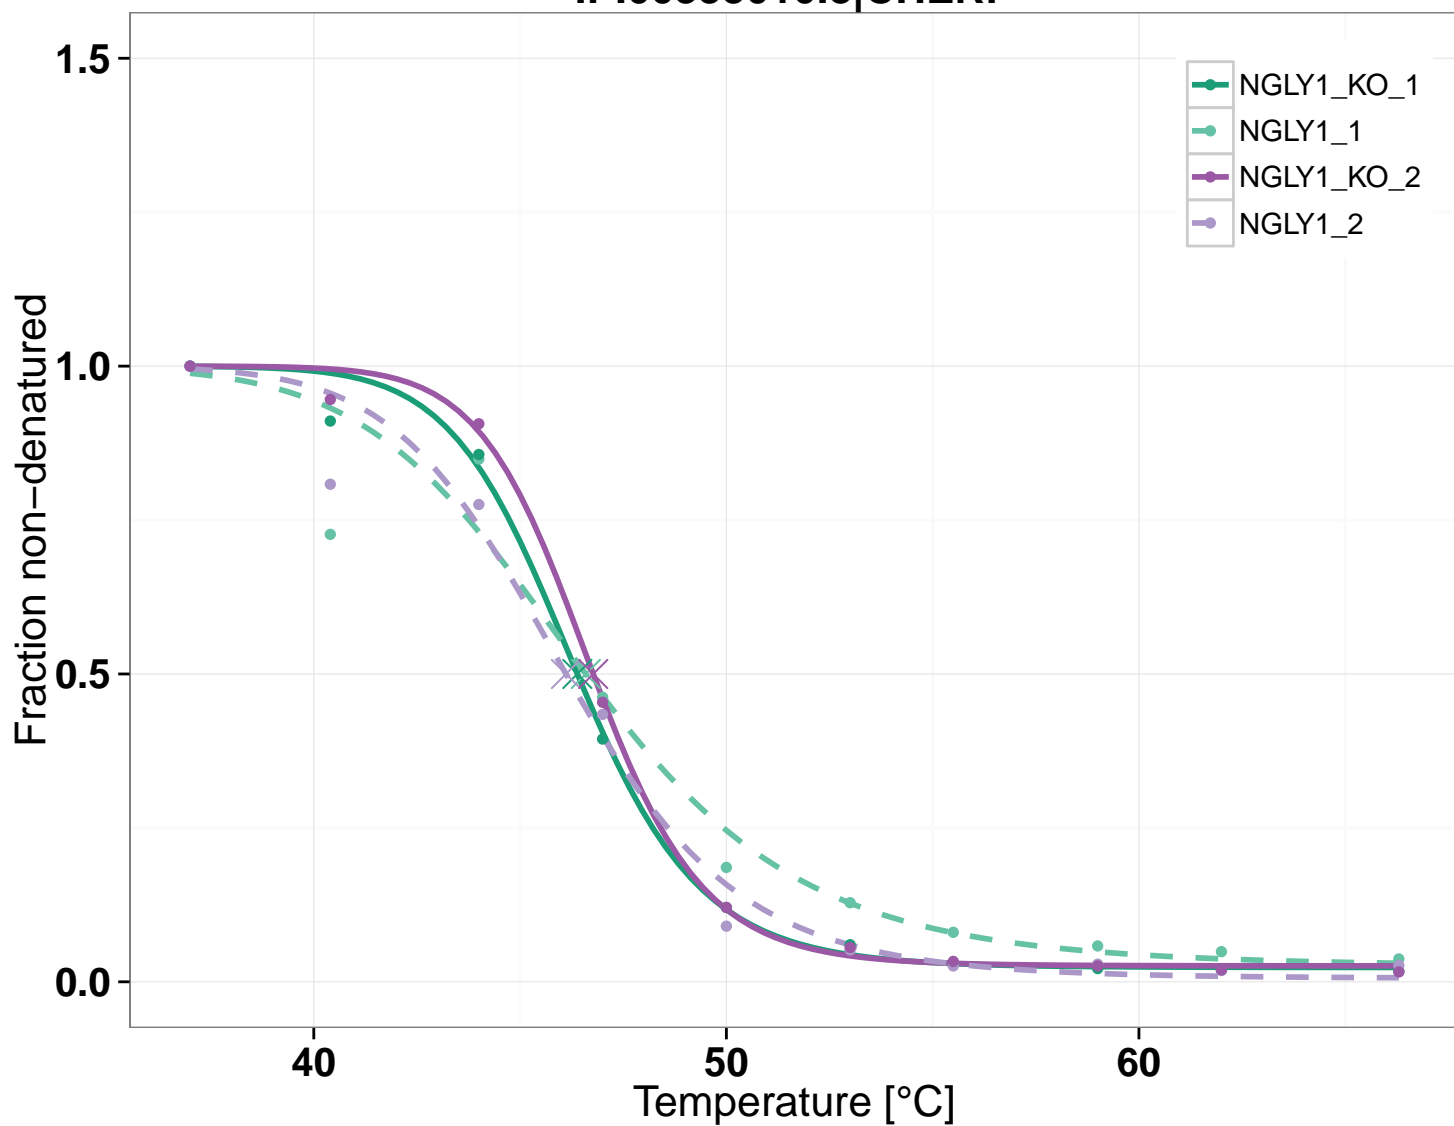

|            | meltPoint | slope  | plateau | R2   |
|------------|-----------|--------|---------|------|
| NGLY1_KO_1 | 46.39     | -0.16  | 0.02    | 1    |
| NGLY1_1    | 46.59     | -0.092 | 0.02    | 0.95 |
| NGLY1_KO_2 | 46.77     | -0.18  | 0.03    | 1    |
| NGLY1_2    | 46.11     | -0.12  | 0.01    | 0.98 |

Supplement: Supplementary file 994 [file 1]

# IPI00166785.2|MMGT1

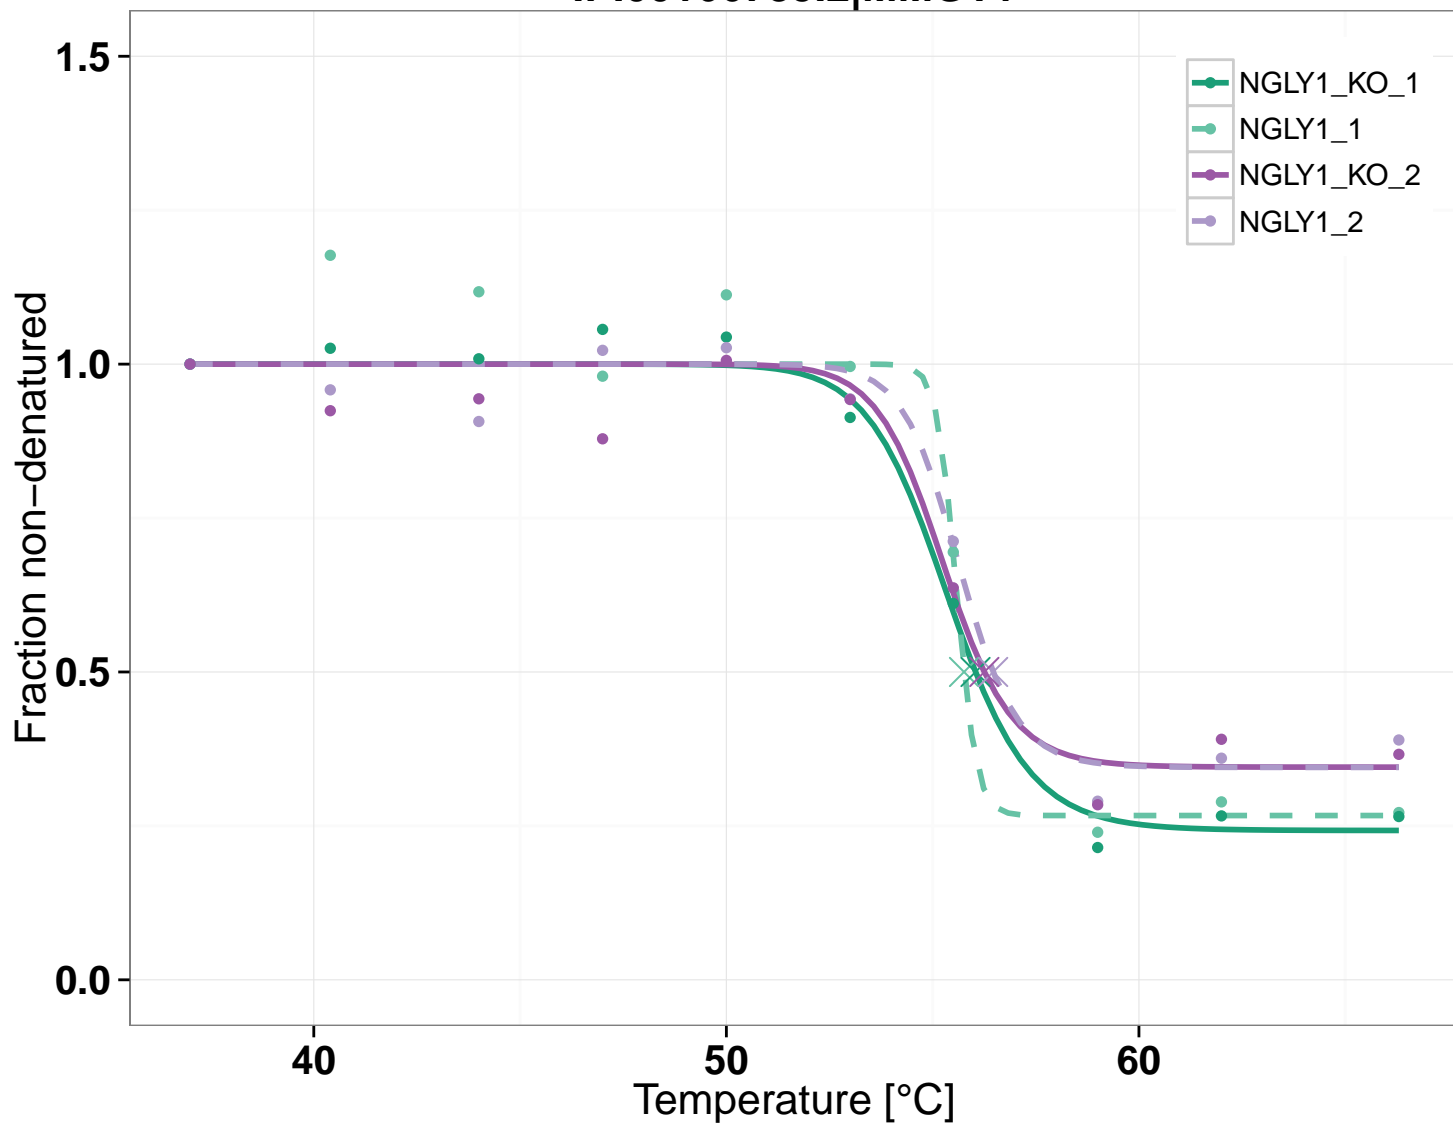

|            | meltPoint | slope | plateau | R2   |
|------------|-----------|-------|---------|------|
| NGLY1_KO_1 | 56.04     | -0.19 | 0.24    | 0.99 |
| NGLY1_1    | 55.76     | -0.78 | 0.27    | 0.95 |
| NGLY1_KO_2 | 56.25     | -0.2  | 0.35    | 0.96 |
| NGLY1_2    | 56.47     | -0.24 | 0.35    | 0.98 |

Supplement: Supplementary file 995 [file 1]

IPI00004392.2|NUDT1

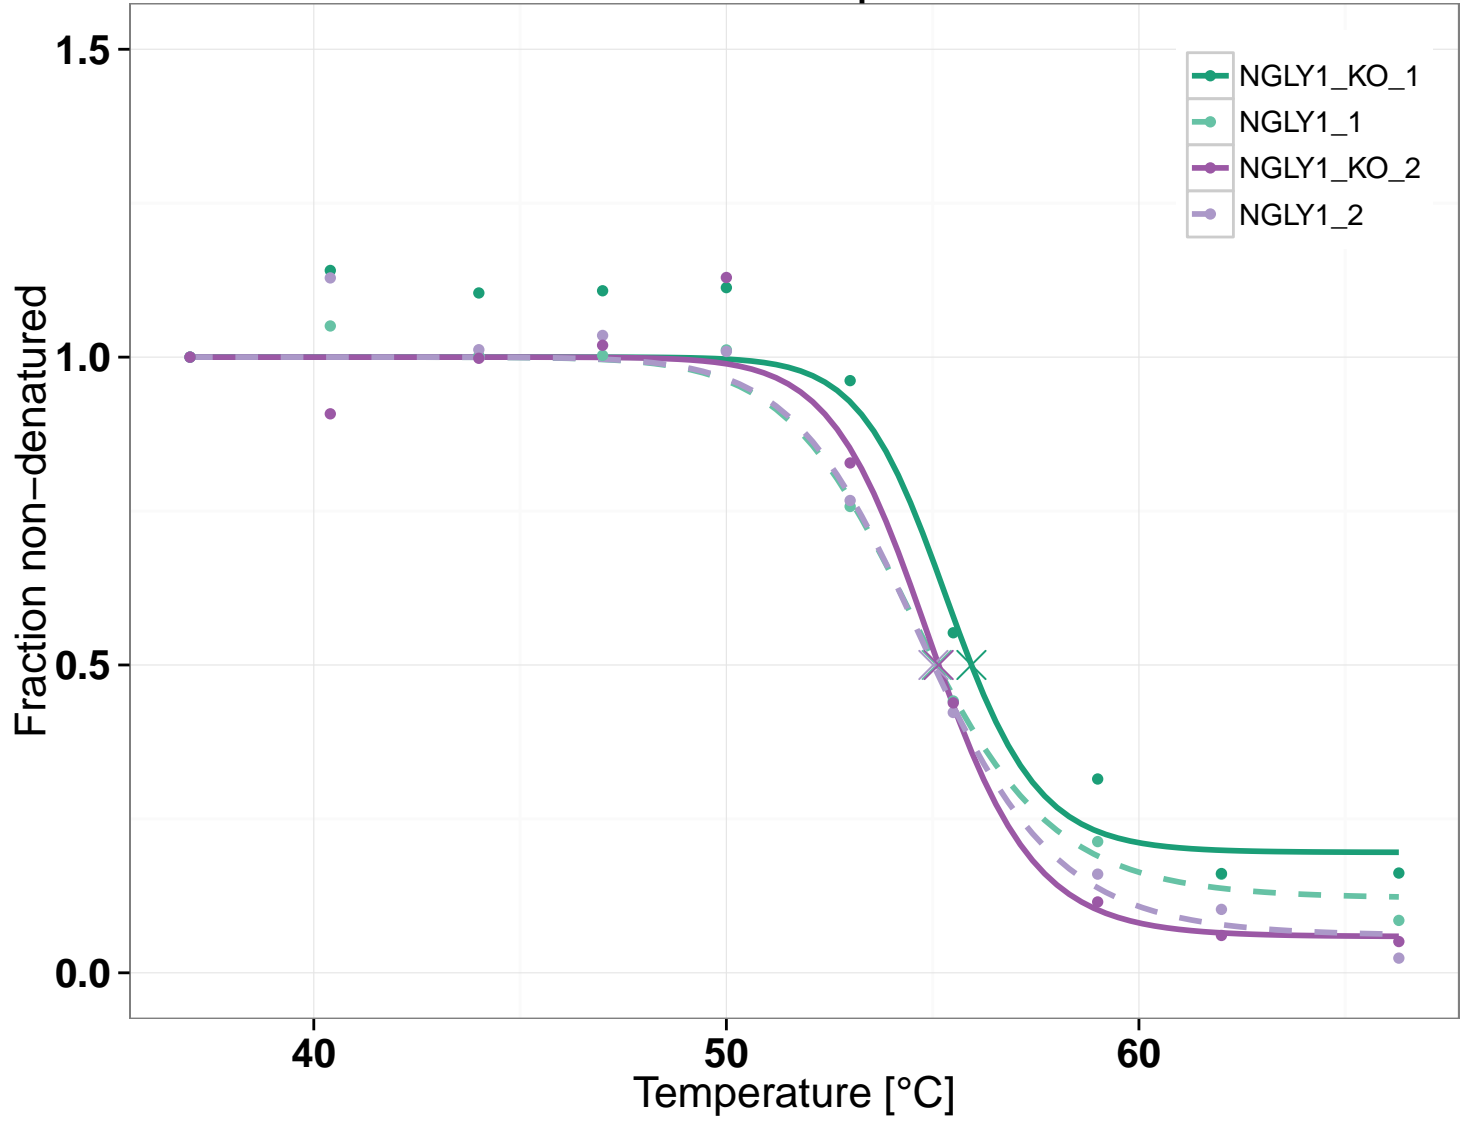

|            | meltPoint | slope | plateau | R2   |
|------------|-----------|-------|---------|------|
| NGLY1_KO_1 | 55.94     | -0.19 | 0.2     | 0.96 |
| NGLY1_1    | 55.1      | -0.13 | 0.12    | 0.99 |
| NGLY1_KO_2 | 55.15     | -0.19 | 0.06    | 0.98 |
| NGLY1_2    | 55.02     | -0.15 | 0.06    | 0.99 |

Supplement: Supplementary file 996 [file 1]

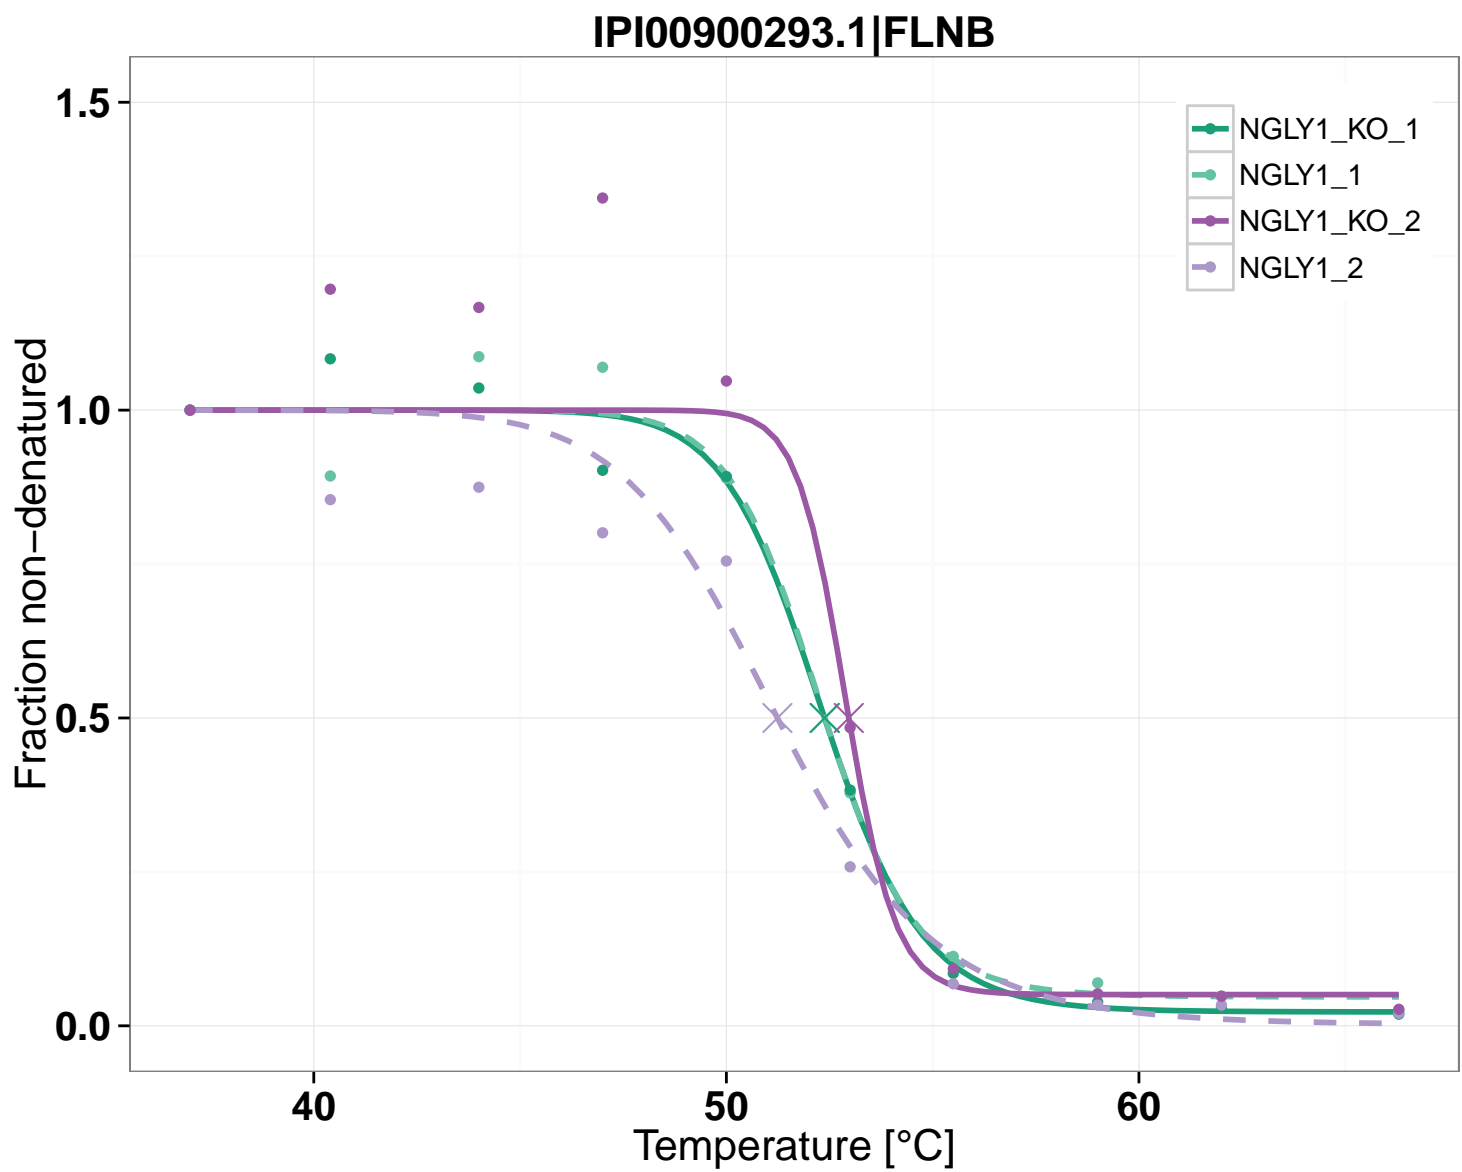

|            | meltPoint | slope | plateau | R2   |
|------------|-----------|-------|---------|------|
| NGLY1_KO_1 | 52.38     | -0.2  | 0.02    | 0.99 |
| NGLY1_1    | 52.39     | -0.21 | 0.05    | 0.99 |
| NGLY1_KO_2 | 52.97     | -0.4  | 0.05    | 0.93 |
| NGLY1_2    | 51.24     | -0.13 | 0       | 0.96 |

Supplement: Supplementary file 997 [file 1]

# IPI00024284.5|HSPG2

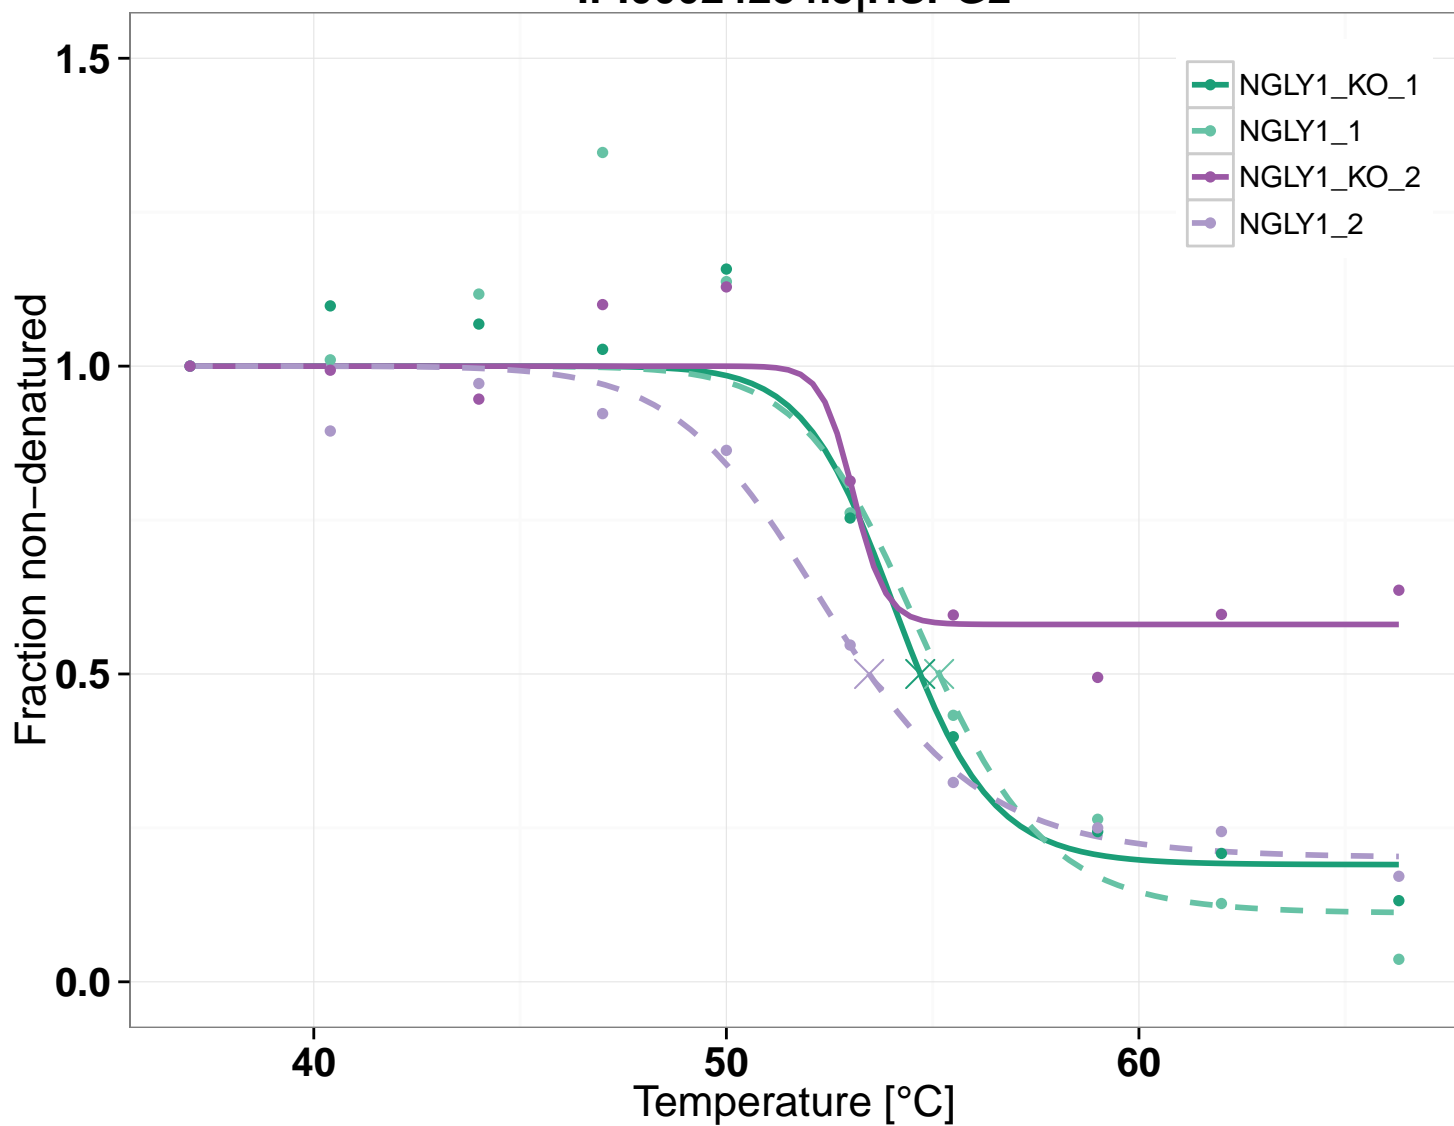

|            | meltPoint | slope | plateau | R2   |
|------------|-----------|-------|---------|------|
| NGLY1_KO_1 | 54.7      | -0.18 | 0.19    | 0.97 |
| NGLY1_1    | 55.16     | -0.15 | 0.11    | 0.91 |
| NGLY1_KO_2 | -         | -0.27 | 0.58    | 0.92 |
| NGLY1_2    | 53.46     | -0.11 | 0.2     | 0.98 |

Supplement: Supplementary file 998 [file 1]

IPI00737871.2|KIAA0754

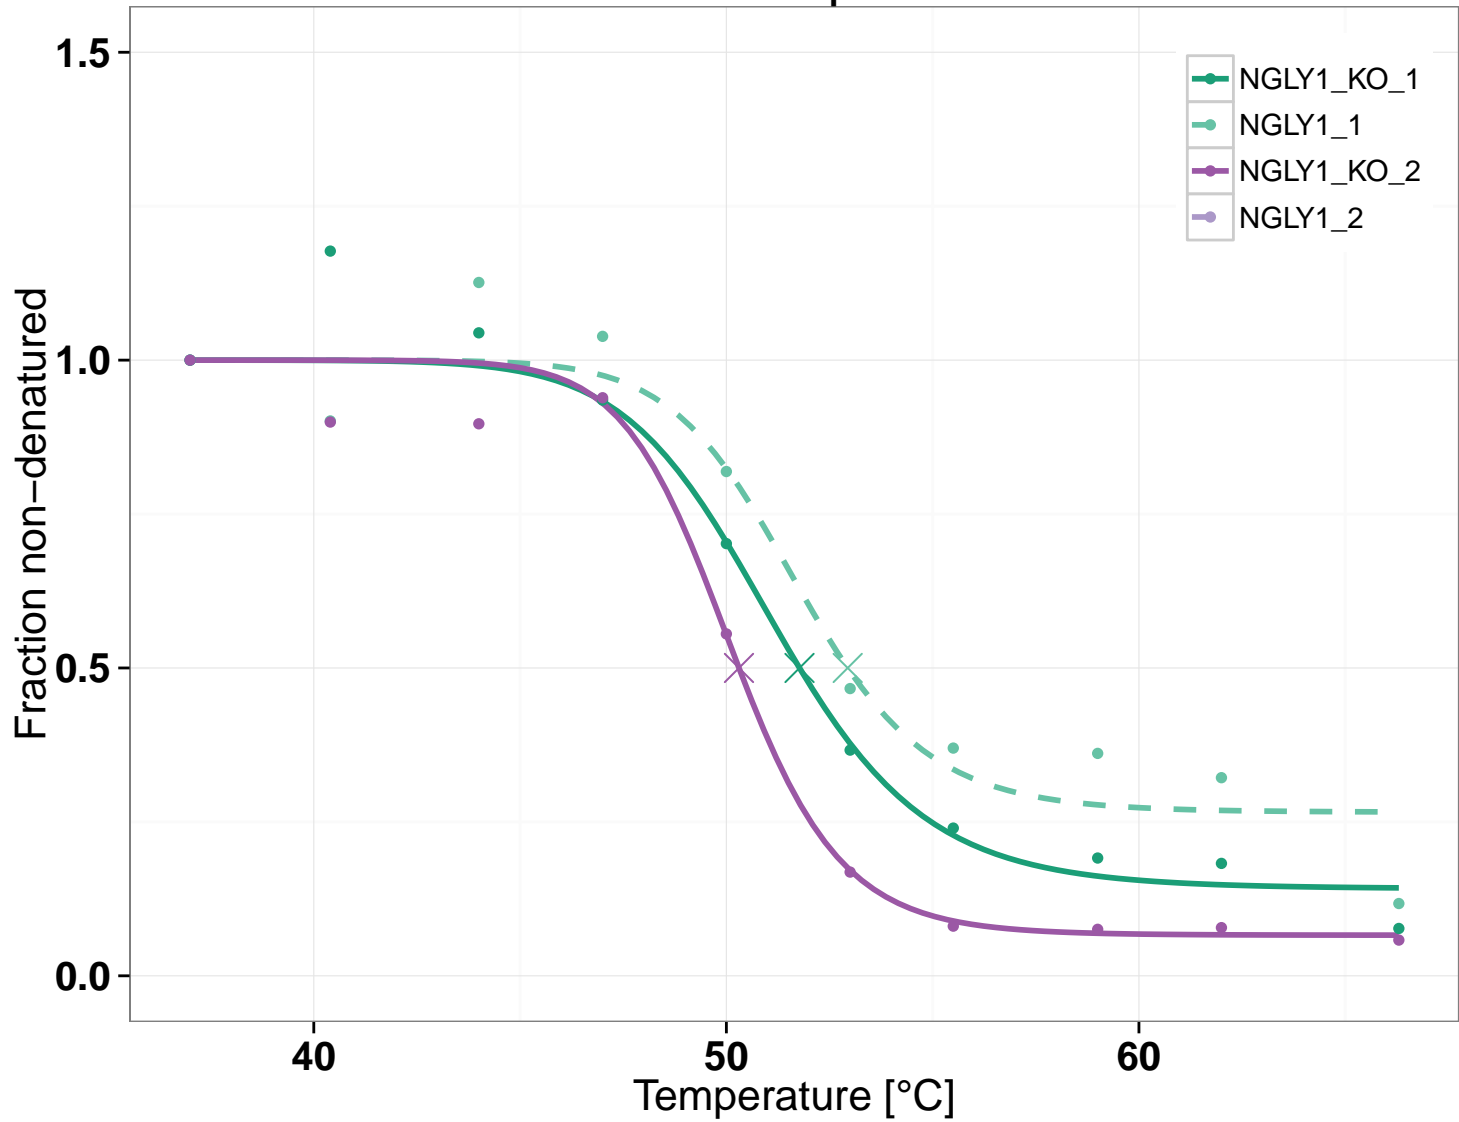

|            | meltPoint | slope | plateau | R2   |
|------------|-----------|-------|---------|------|
| NGLY1_KO_1 | 51.77     | -0.12 | 0.14    | 0.97 |
| NGLY1_1    | 52.94     | -0.12 | 0.27    | 0.95 |
| NGLY1_KO_2 | 50.31     | -0.18 | 0.07    | 0.99 |
| NGLY1_2    | -         | -     | -       | -    |

Supplement: Supplementary file 999 [file 1]

IPI00031822.1|SLC5A6

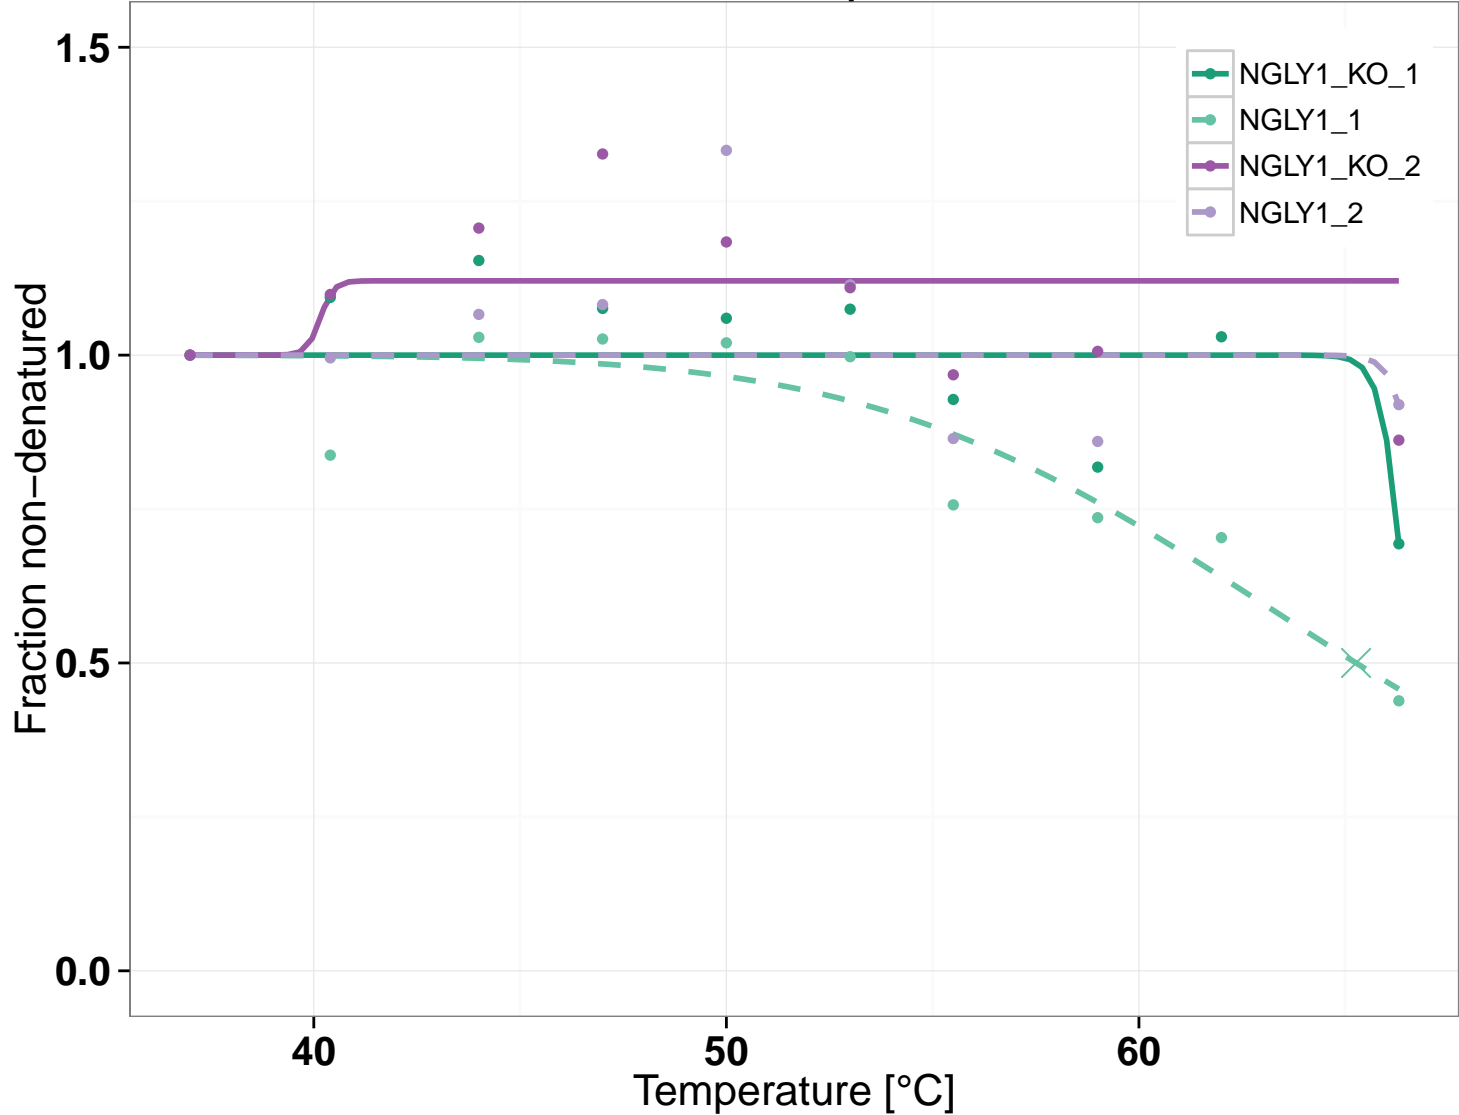

|            | meltPoint | slope  | plateau | R2    |
|------------|-----------|--------|---------|-------|
| NGLY1_KO_1 | -         | -      | 0       | 0.52  |
| NGLY1_1    | 65.26     | -0.043 | 0       | 0.84  |
| NGLY1_KO_2 | -         | 0.19   | 1.12    | 0.06  |
| NGLY1_2    | -         | -      | 0       | -0.06 |

Supplement: Supplementary file 1000 [file 1]

# IPI00008495.4|ND4

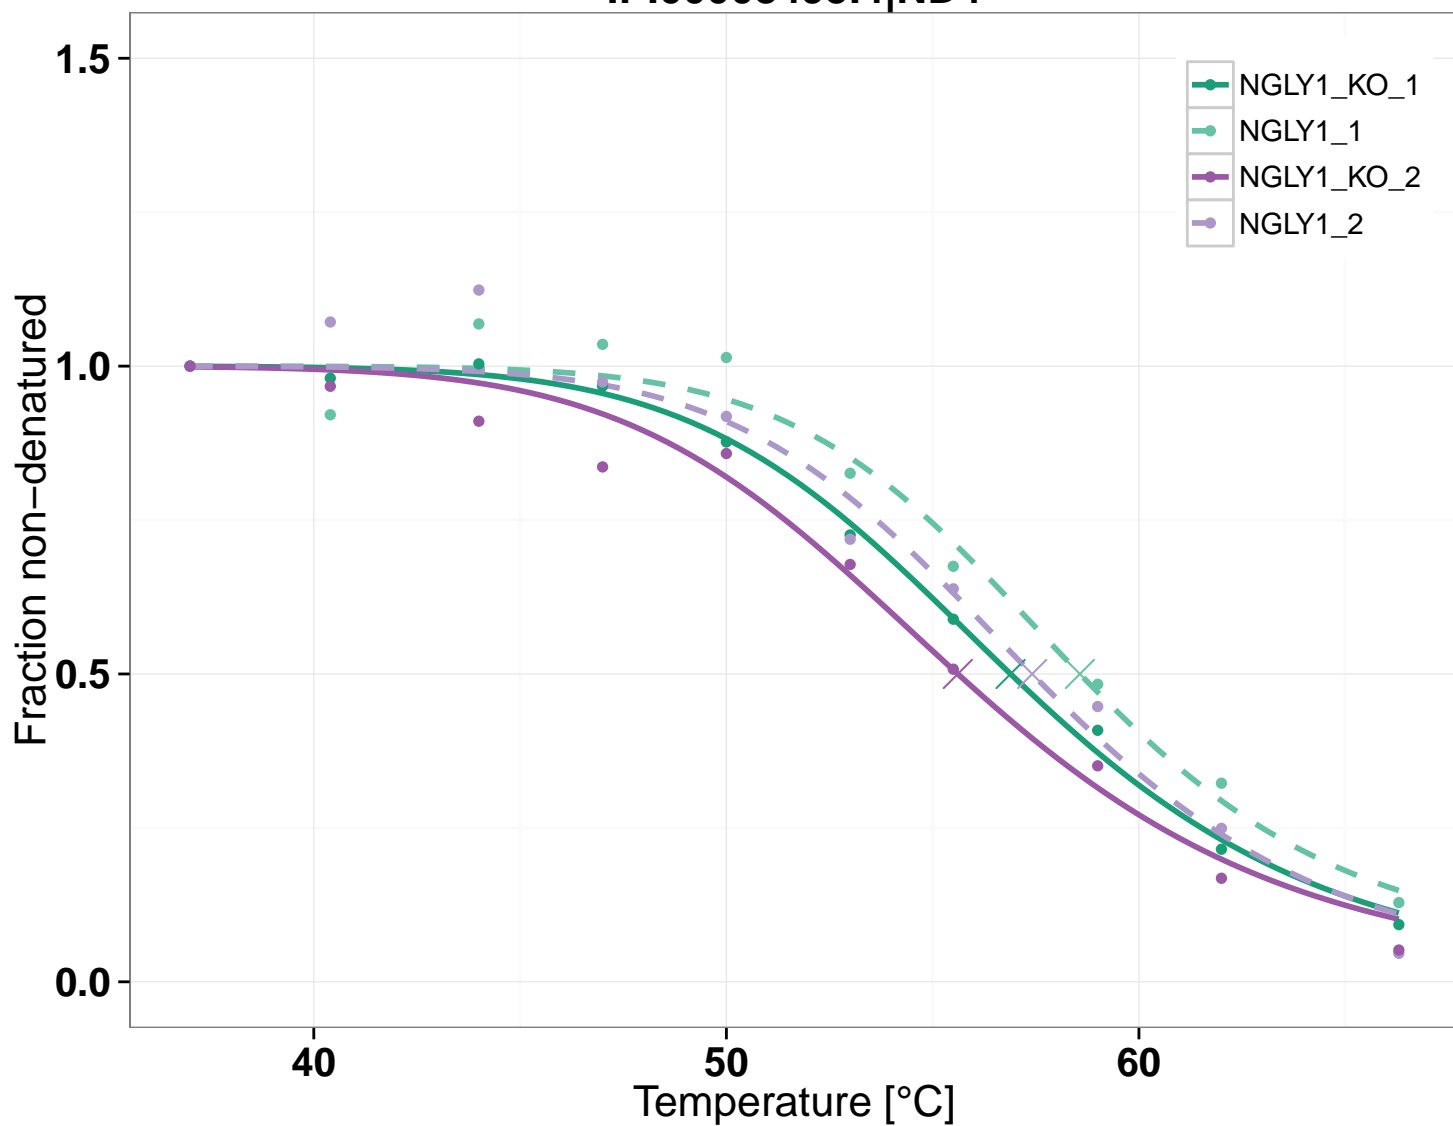

|            | meltPoint | slope  | plateau | R2   |
|------------|-----------|--------|---------|------|
| NGLY1_KO_1 | 56.89     | -0.065 | 0       | 1    |
| NGLY1_1    | 58.57     | -0.071 | 0.04    | 0.98 |
| NGLY1_KO_2 | 55.61     | -0.062 | 0       | 0.98 |
| NGLY1_2    | 57.41     | -0.069 | 0       | 0.97 |

Supplement: Supplementary file 1001 [file 1]

IPI00792423.1|MED24

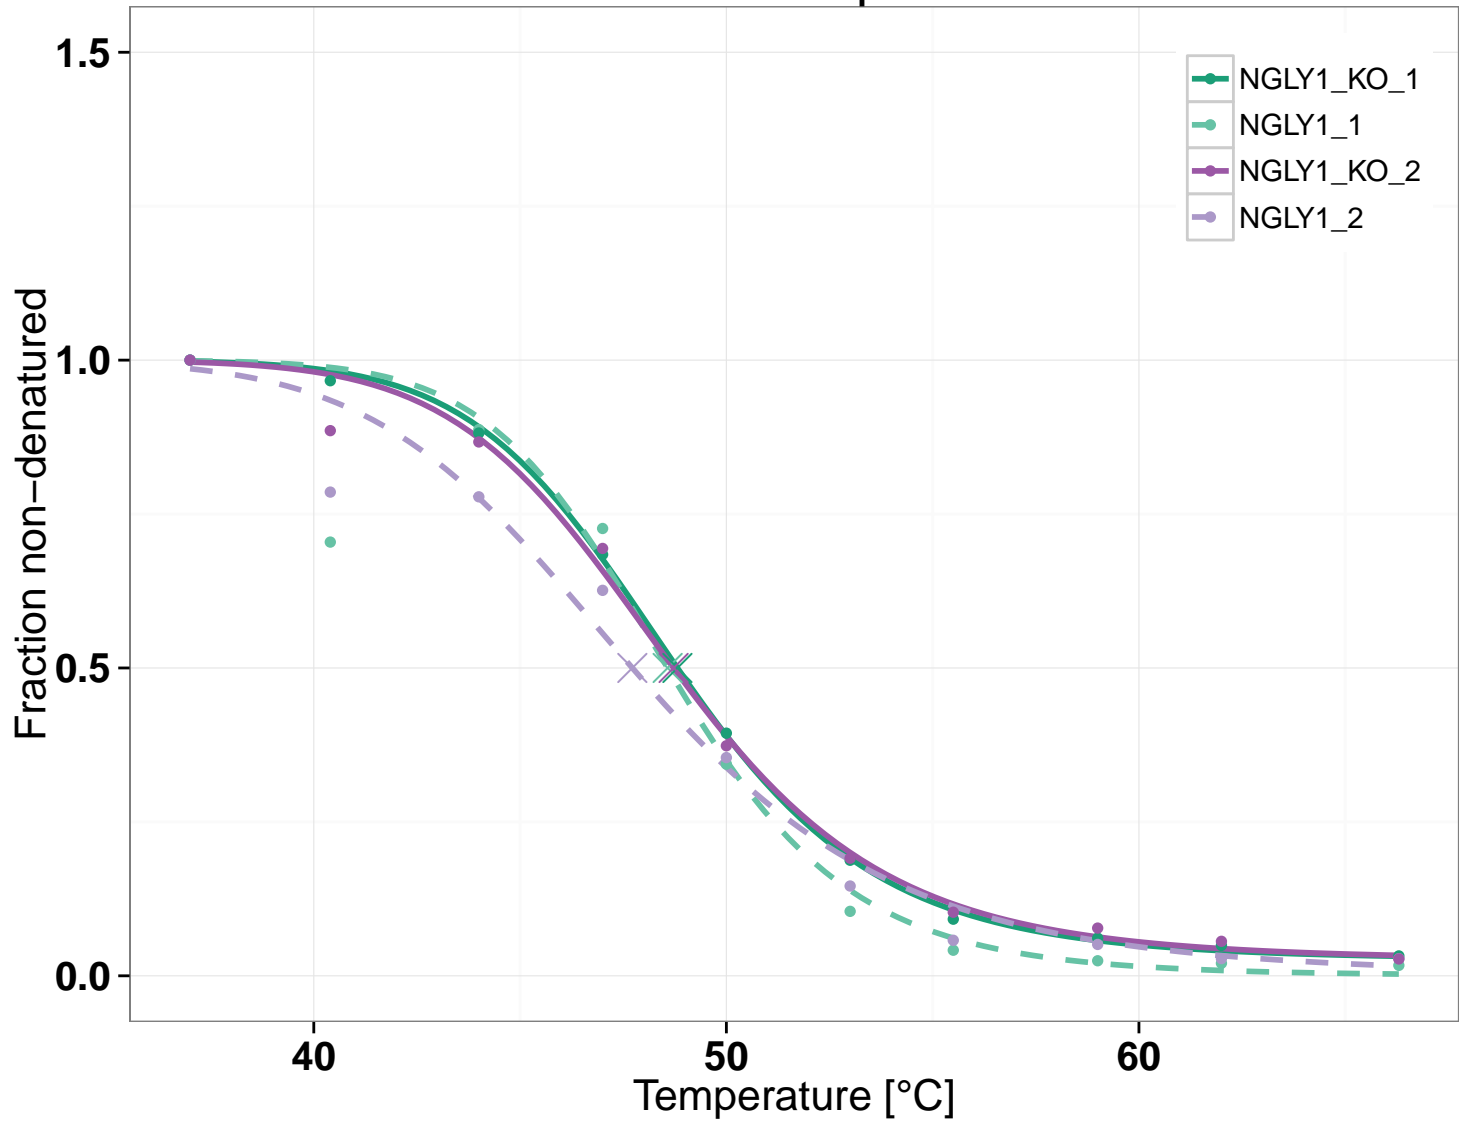

|            | meltPoint | slope  | plateau | R2   |
|------------|-----------|--------|---------|------|
| NGLY1_KO_1 | 48.81     | -0.099 | 0.03    | 1    |
| NGLY1_1    | 48.58     | -0.11  | 0       | 0.94 |
| NGLY1_KO_2 | 48.72     | -0.093 | 0.03    | 0.99 |
| NGLY1_2    | 47.72     | -0.078 | 0       | 0.97 |

Supplement: Supplementary file 1002 [file 1]

IPI00027728.1|SLC7A1

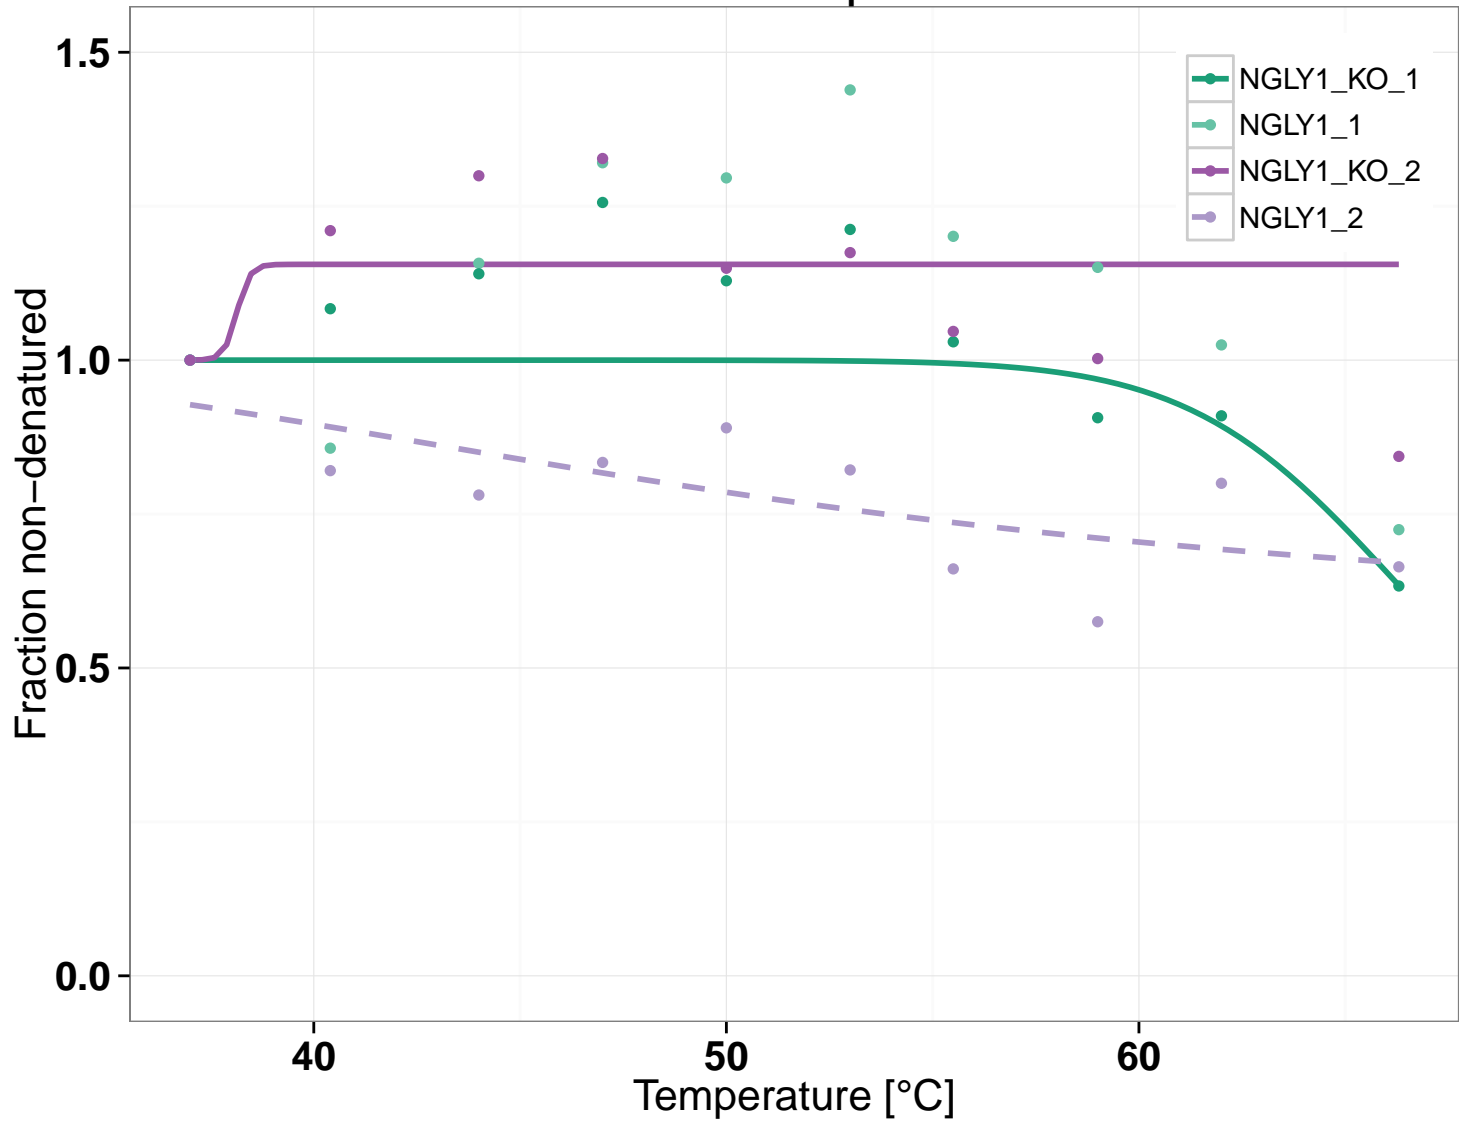

|            | meltPoint | slope  | plateau | R2   |
|------------|-----------|--------|---------|------|
| NGLY1_KO_1 | —         | -0.073 | 0.22    | 0.46 |
| NGLY1_1    | —         | —      | —       | —    |
| NGLY1_KO_2 | —         | 0.25   | 1.16    | 0.09 |
| NGLY1_2    | —         | -0.011 | 0.55    | 0.51 |

Supplement: Supplementary file 1003 [file 1]

IPI00016633.3|FBXO5

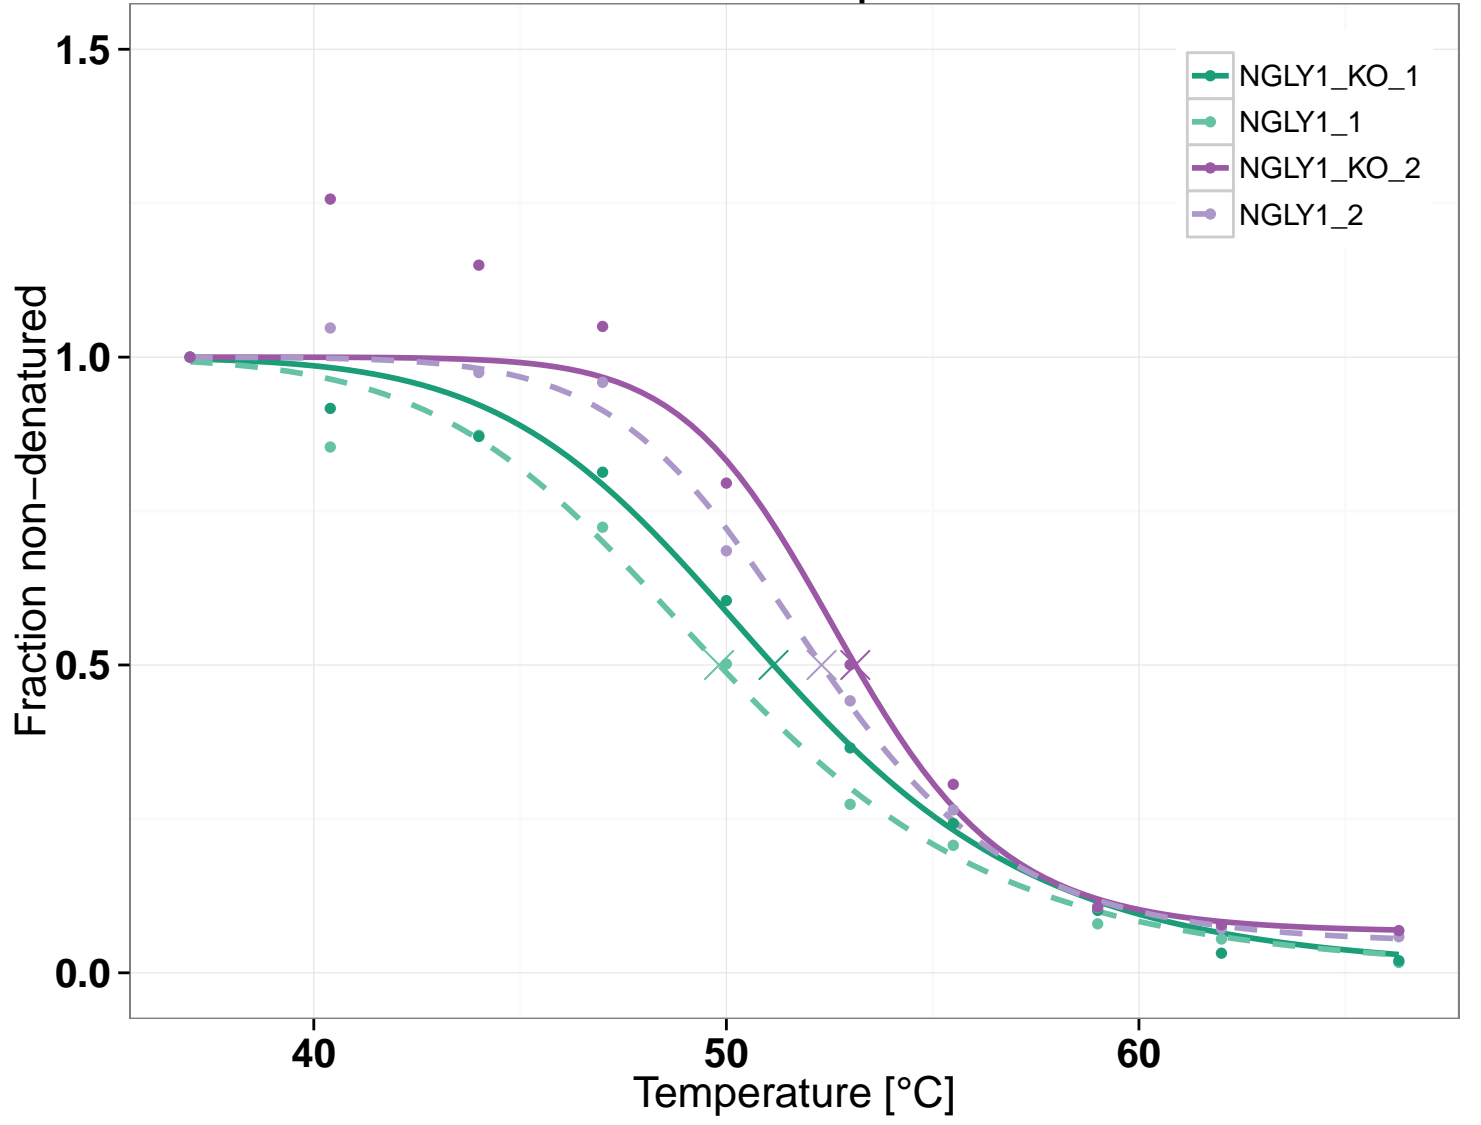

|            | meltPoint | slope  | plateau | R2   |
|------------|-----------|--------|---------|------|
| NGLY1_KO_1 | 51.14     | -0.076 | 0       | 0.99 |
| NGLY1_1    | 49.82     | -0.072 | 0       | 0.99 |
| NGLY1_KO_2 | 53.13     | -0.12  | 0.07    | 0.95 |
| NGLY1_2    | 52.31     | -0.099 | 0.05    | 1    |

Supplement: Supplementary file 1004 [file 1]

# IPI00788707.1|PRKAB1

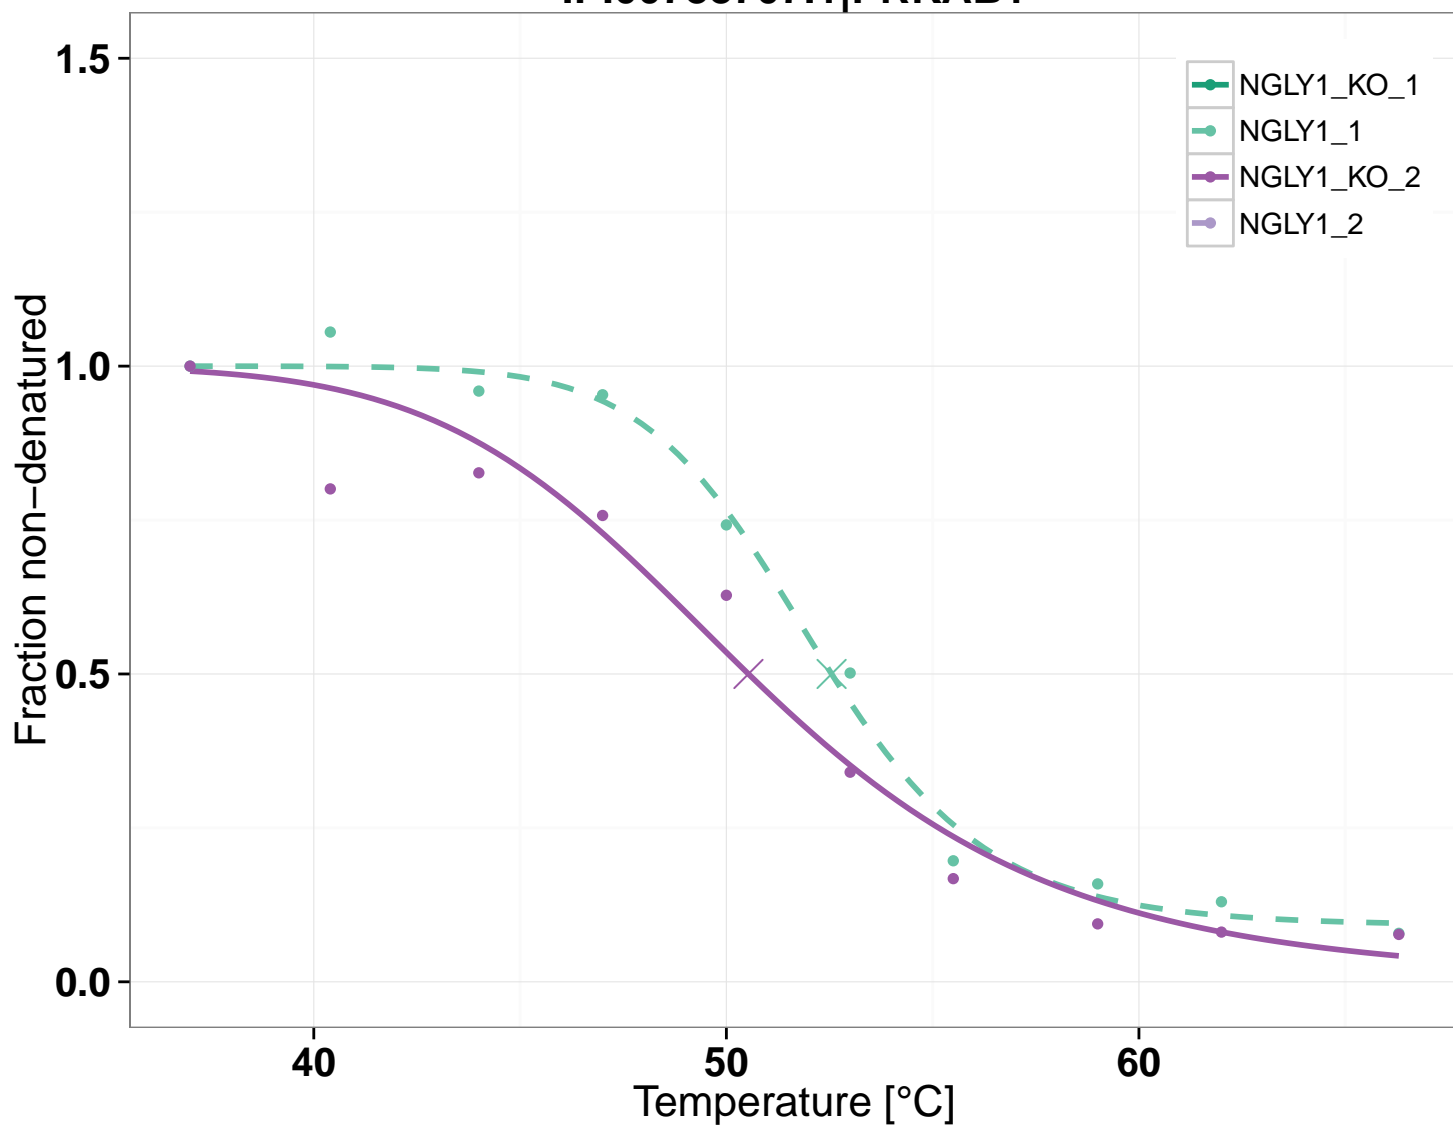

|            | meltPoint | slope  | plateau | R2   |
|------------|-----------|--------|---------|------|
| NGLY1_KO_1 | —         | —      | —       | —    |
| NGLY1_1    | 52.55     | -0.11  | 0.09    | 0.99 |
| NGLY1_KO_2 | 50.54     | -0.066 | 0       | 0.96 |
| NGLY1_2    | —         | —      | —       | —    |

Supplement: Supplementary file 1005 [file 1]
