# Supplementary material (part 11 of 85)
Source: publisher figshare collection journal article supplement (https://gsajournals.figshare.com/articles/dataset/_/12014913)

IPI00305703.3|PRSS21

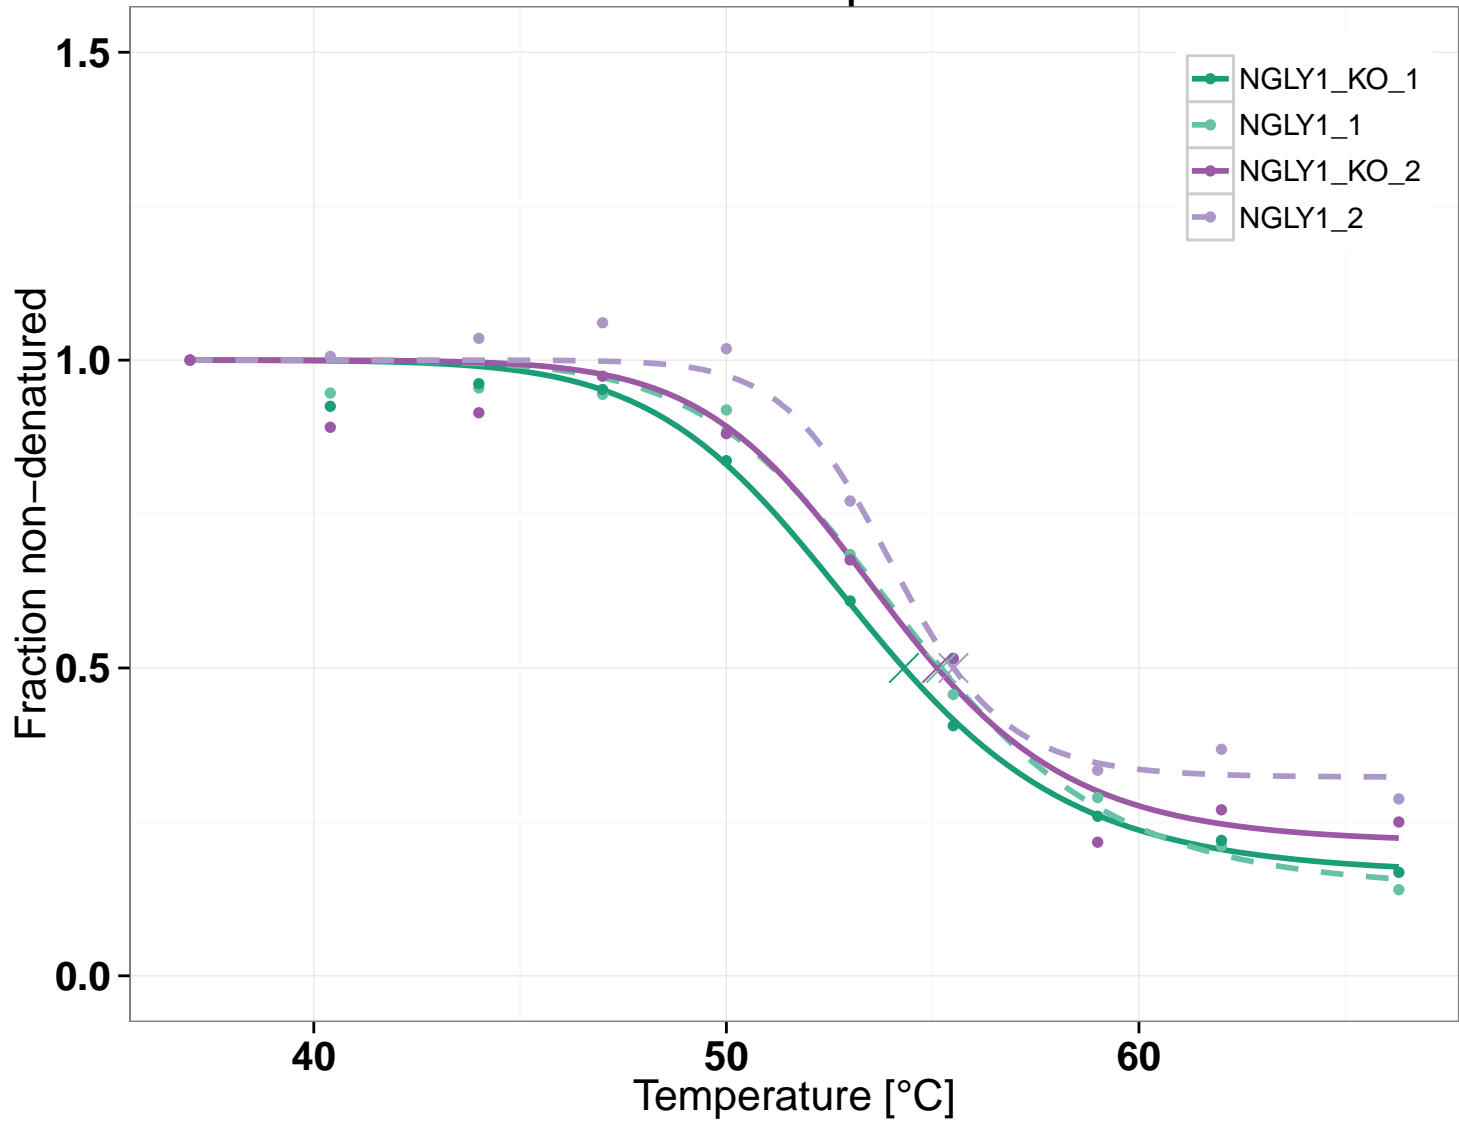

|            | meltPoint | slope  | plateau | R2   |
|------------|-----------|--------|---------|------|
| NGLY1_KO_1 | 54.3      | -0.083 | 0.16    | 0.99 |
| NGLY1_1    | 55.21     | -0.086 | 0.14    | 0.99 |
| NGLY1_KO_2 | 55.11     | -0.088 | 0.22    | 0.97 |
| NGLY1_2    | 55.5      | -0.13  | 0.32    | 0.99 |

Supplement: Supplementary file 1006 [file 1]

IPI00170924.2|HINT3

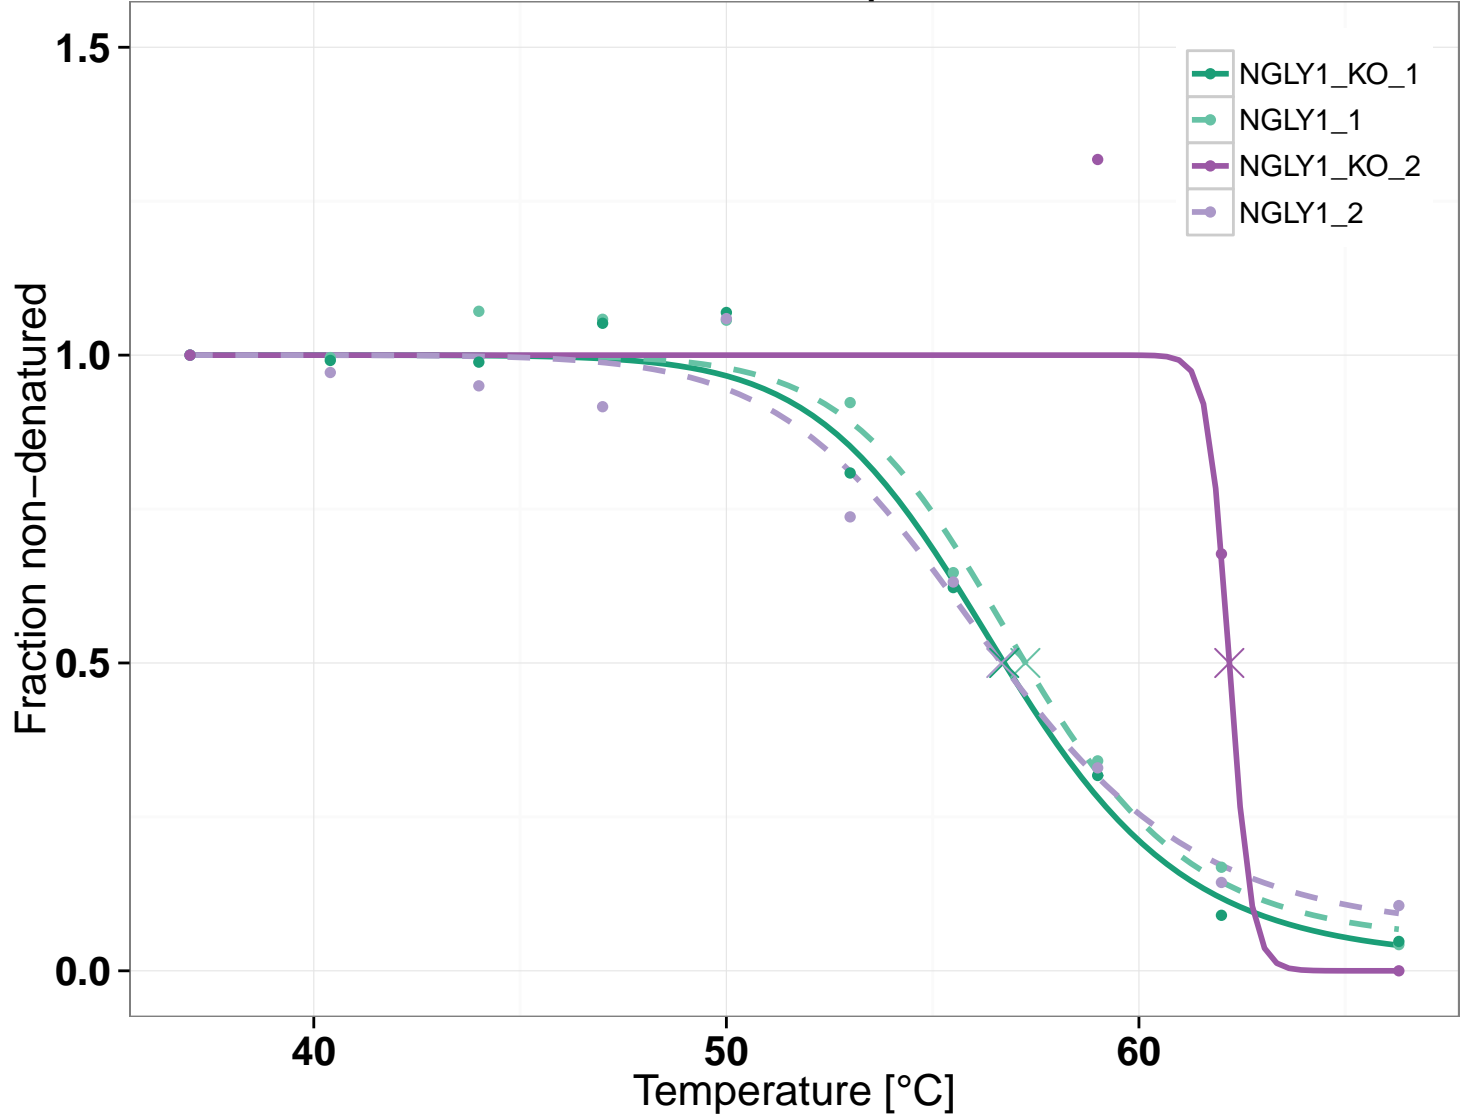

|            | meltPoint | slope  | plateau | R2    |
|------------|-----------|--------|---------|-------|
| NGLY1_KO_1 | 56.73     | -0.11  | 0.02    | 0.99  |
| NGLY1_1    | 57.25     | -0.11  | 0.05    | 0.99  |
| NGLY1_KO_2 | 62.19     | -0.97  | 0       | -0.99 |
| NGLY1_2    | 56.66     | -0.092 | 0.06    | 0.98  |

Supplement: Supplementary file 1007 [file 1]

# IPI00106506.2|ECSIT

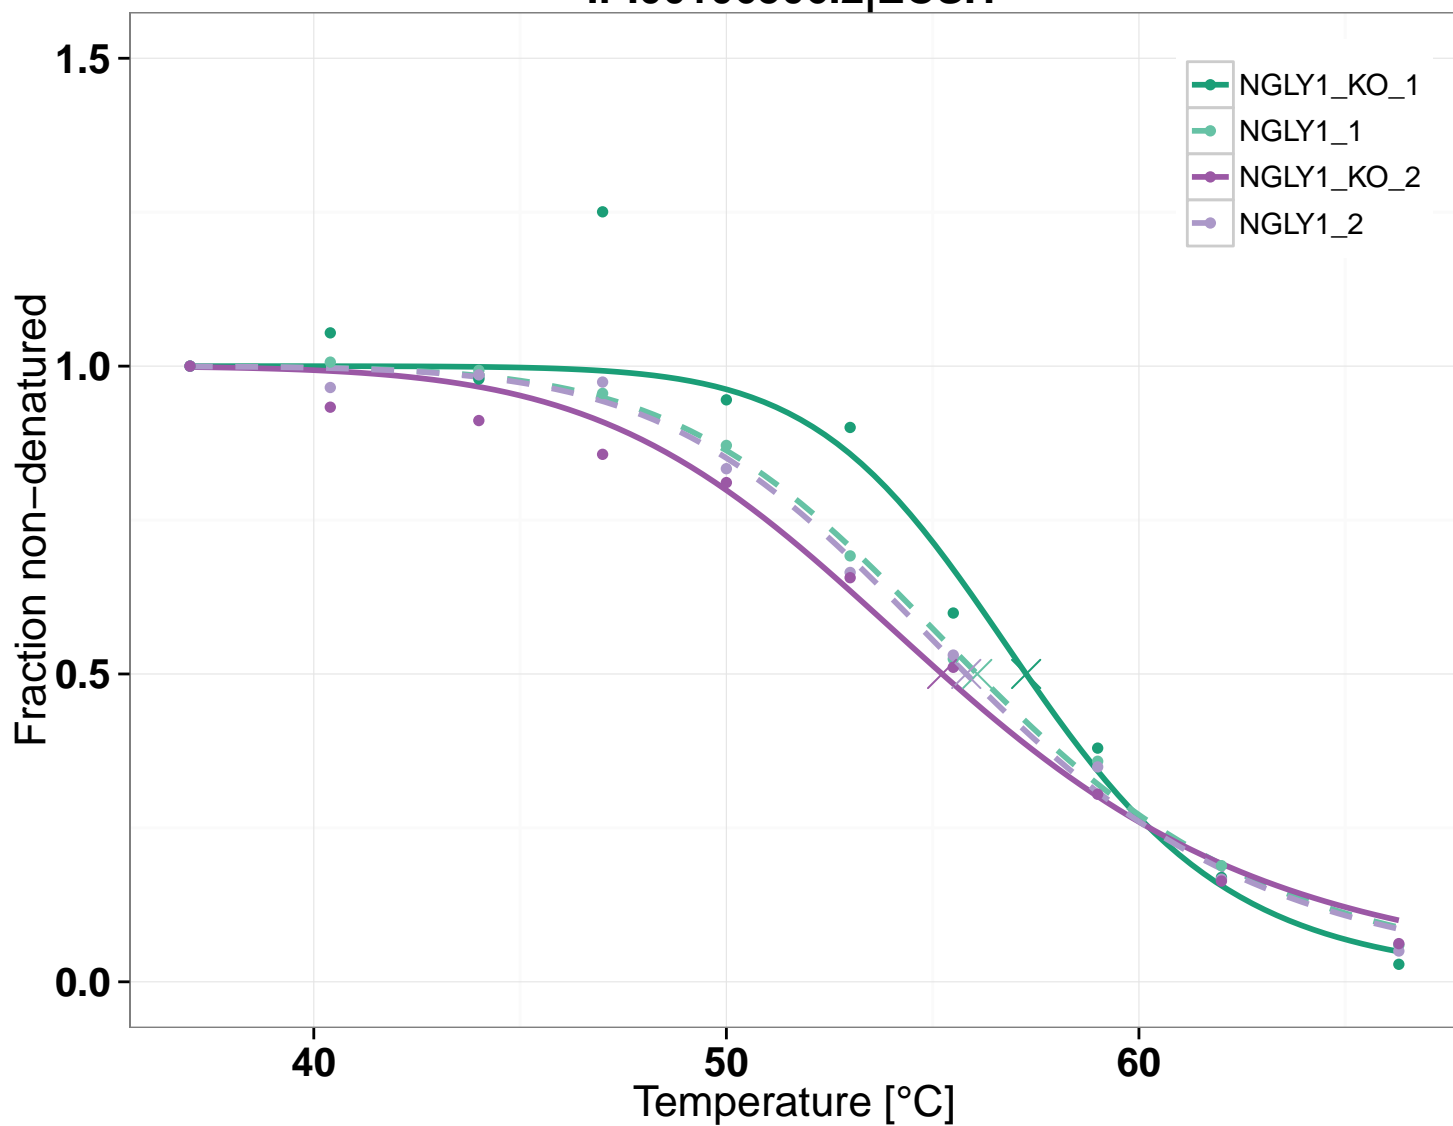

|            | meltPoint | slope  | plateau | R2   |
|------------|-----------|--------|---------|------|
| NGLY1_KO_1 | 57.27     | -0.098 | 0       | 0.95 |
| NGLY1_1    | 56.08     | -0.069 | 0       | 1    |
| NGLY1_KO_2 | 55.23     | -0.061 | 0       | 0.99 |
| NGLY1_2    | 55.82     | -0.068 | 0       | 0.99 |

Supplement: Supplementary file 1008 [file 1]

# IPI00413961.3|PTK2

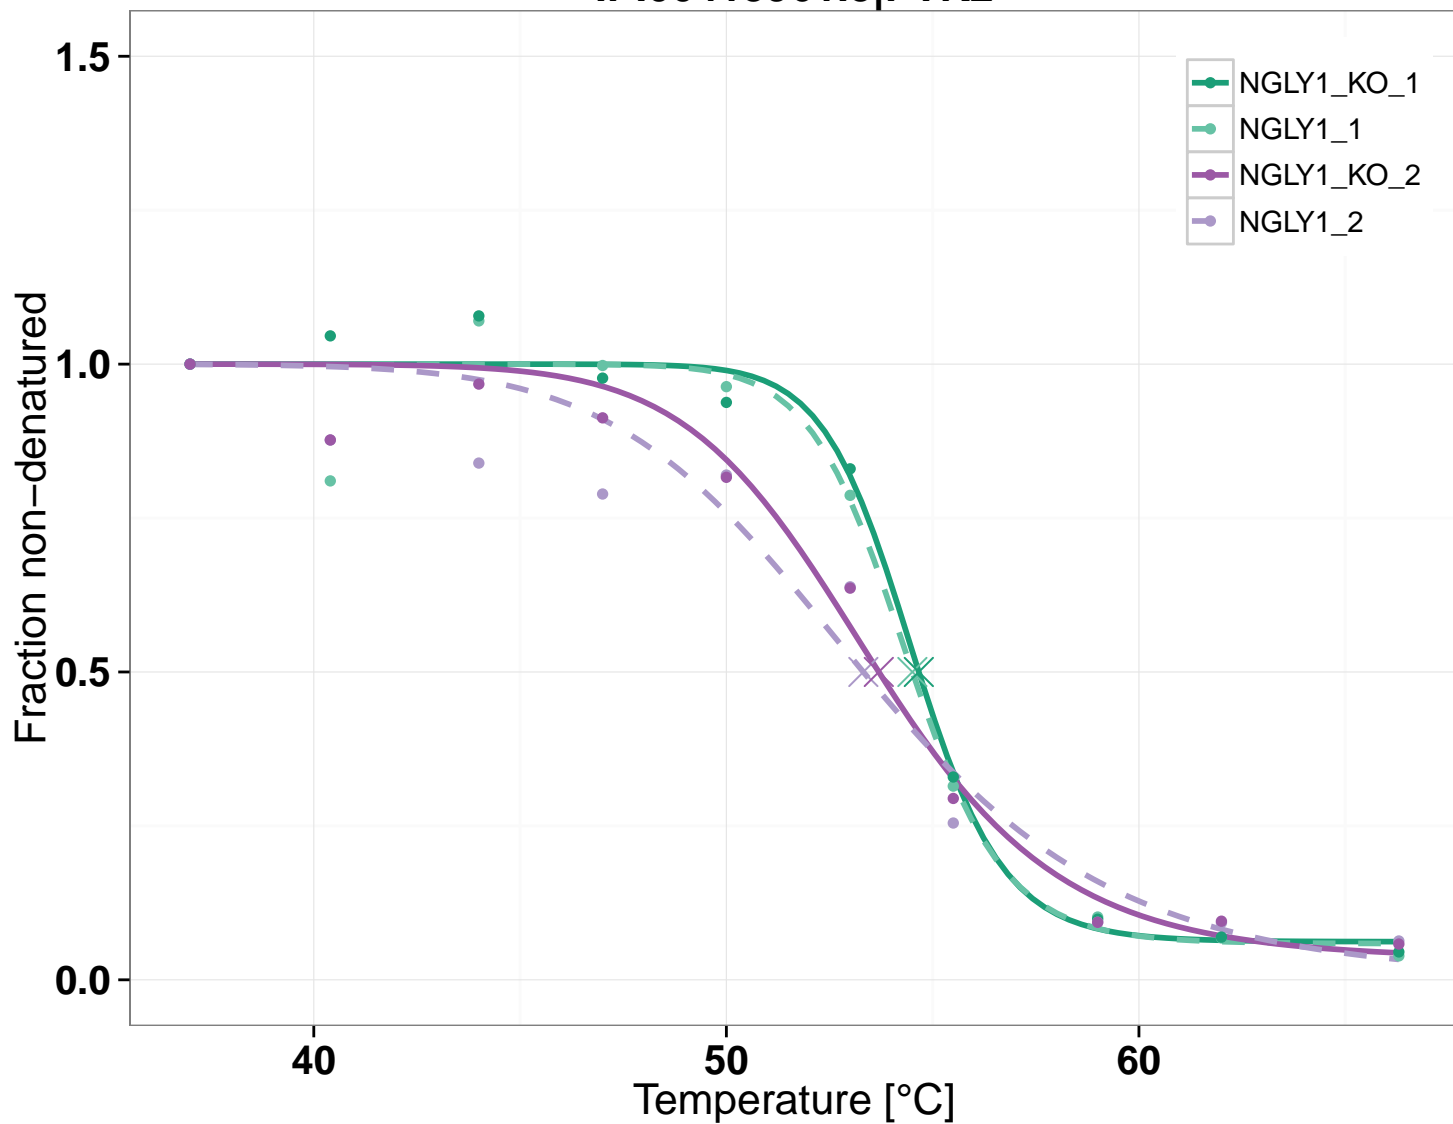

|            | meltPoint | slope  | plateau | R2   |
|------------|-----------|--------|---------|------|
| NGLY1_KO_1 | 54.66     | -0.21  | 0.06    | 0.99 |
| NGLY1_1    | 54.51     | -0.2   | 0.06    | 0.97 |
| NGLY1_KO_2 | 53.69     | -0.11  | 0.03    | 0.98 |
| NGLY1_2    | 53.32     | -0.082 | 0       | 0.94 |

Supplement: Supplementary file 1009 [file 1]

IPI00910030.1|PLEKHA5

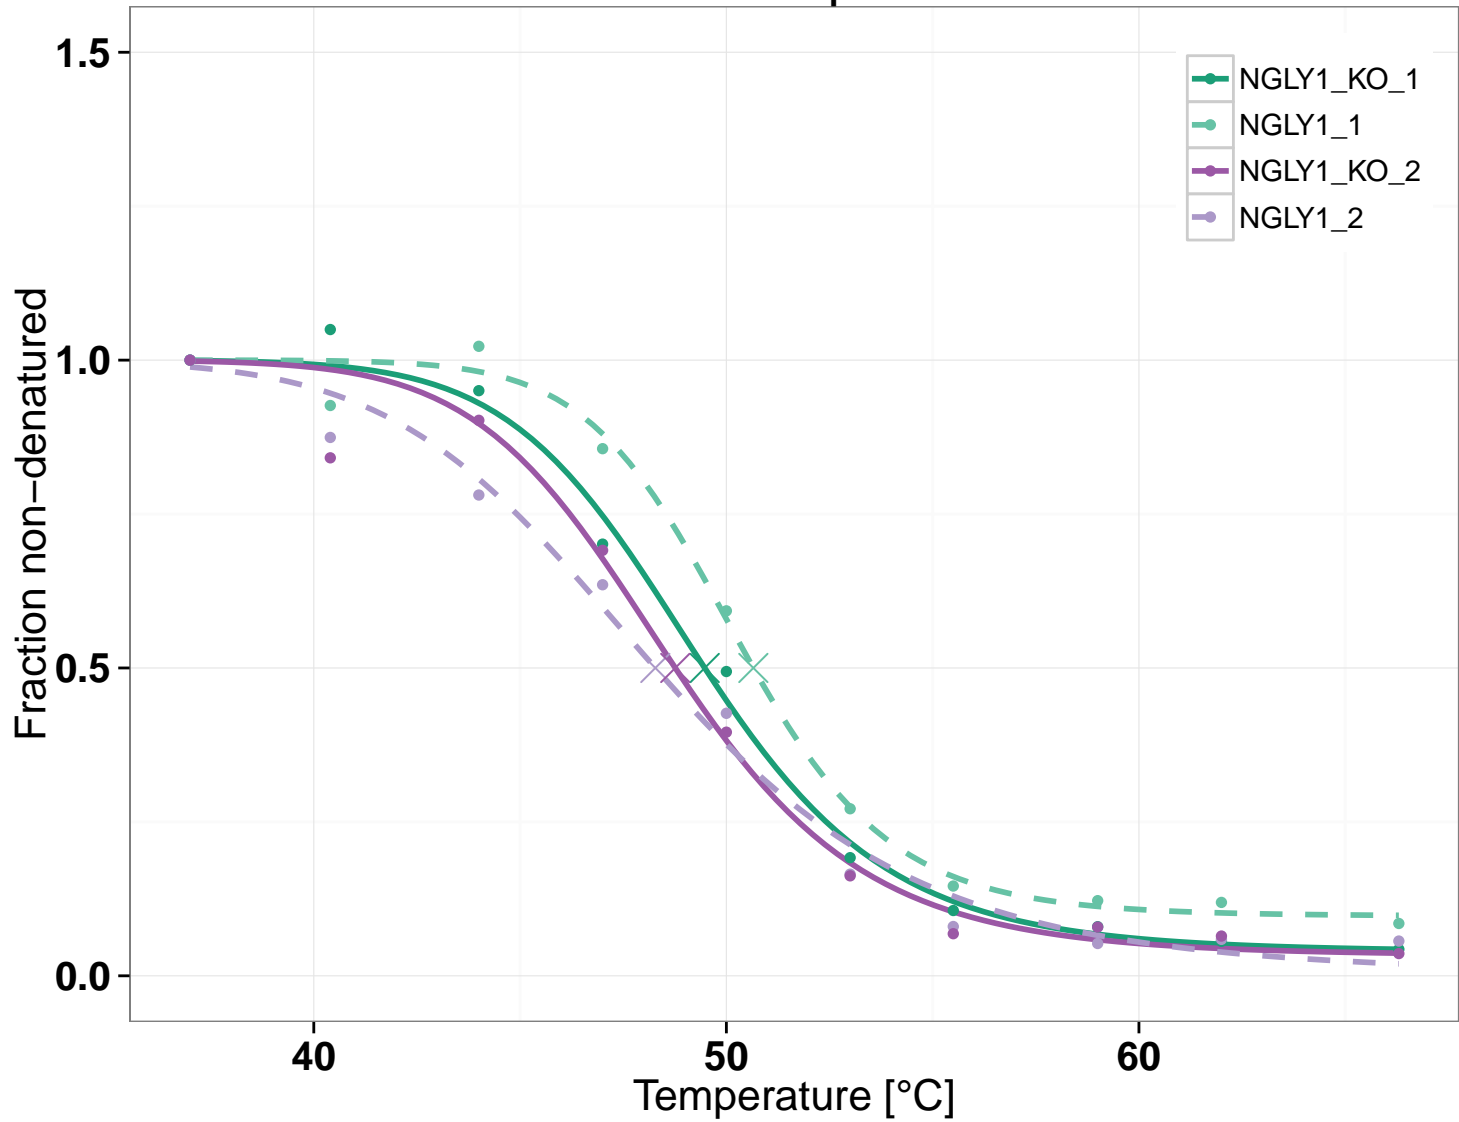

|            | meltPoint | slope  | plateau | R2   |
|------------|-----------|--------|---------|------|
| NGLY1_KO_1 | 49.48     | -0.1   | 0.04    | 0.99 |
| NGLY1_1    | 50.65     | -0.12  | 0.1     | 0.99 |
| NGLY1_KO_2 | 48.76     | -0.1   | 0.03    | 0.98 |
| NGLY1_2    | 48.28     | -0.078 | 0       | 0.99 |

Supplement: Supplementary file 1010 [file 1]

# IPI00168603.1|CHDH

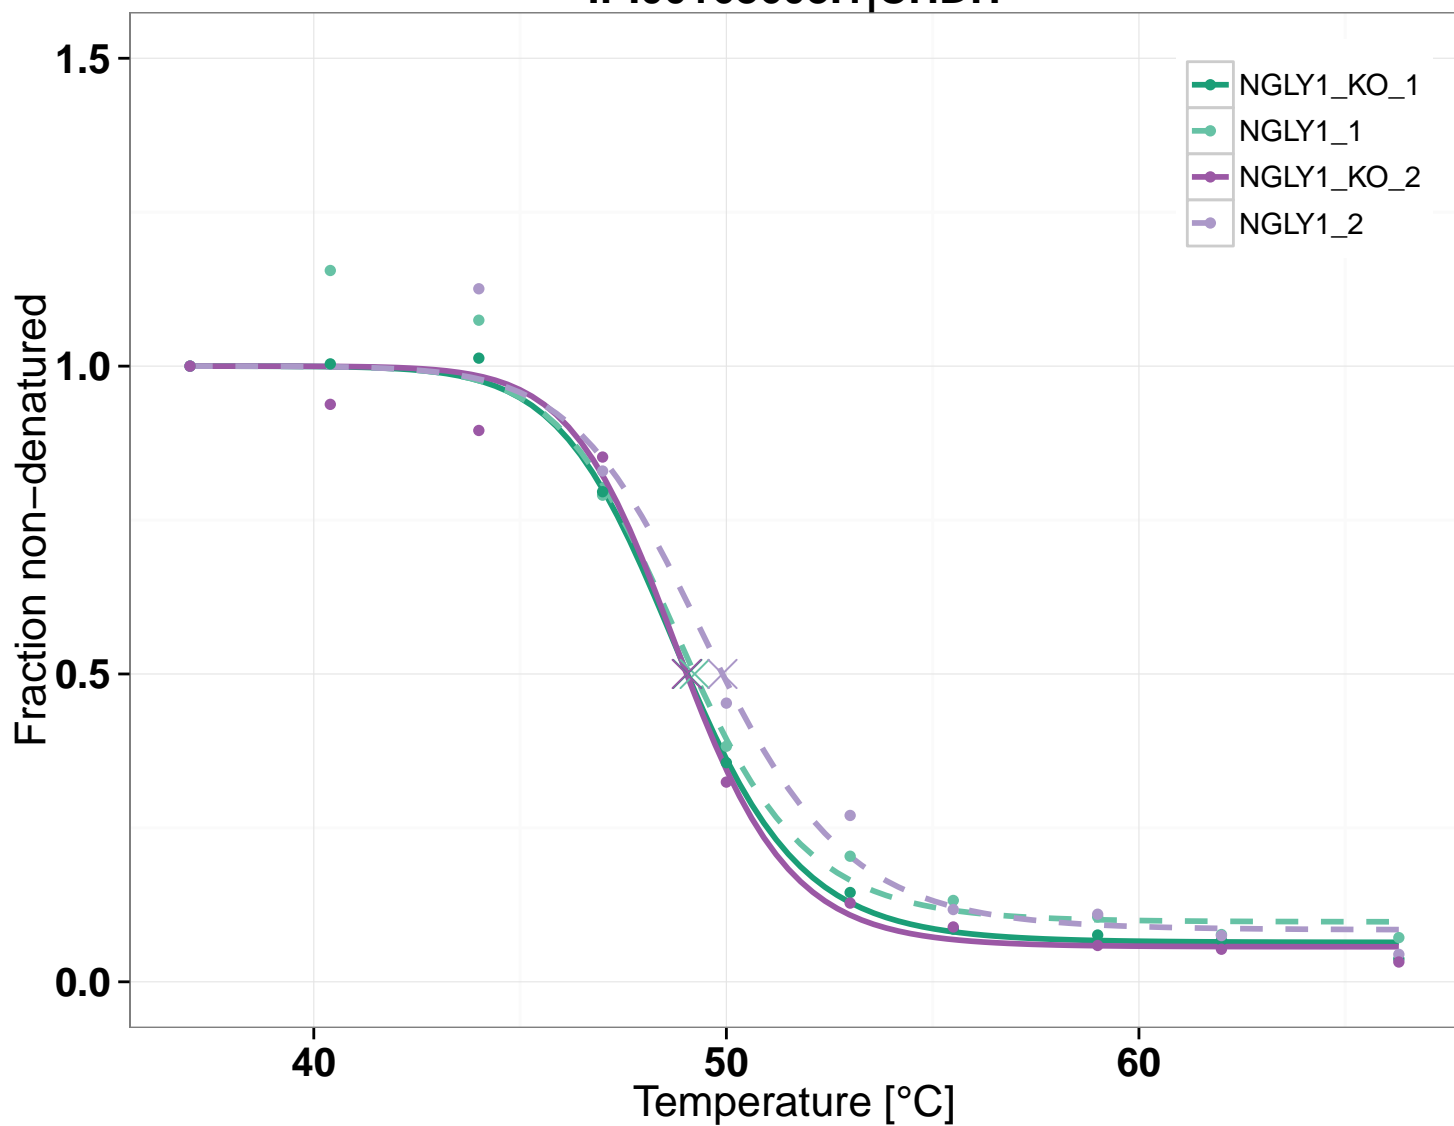

|            | meltPoint | slope | plateau | R2   |
|------------|-----------|-------|---------|------|
| NGLY1_KO_1 | 49.05     | -0.16 | 0.06    | 1    |
| NGLY1_1    | 49.23     | -0.15 | 0.1     | 0.98 |
| NGLY1_KO_2 | 49.04     | -0.18 | 0.06    | 0.99 |
| NGLY1_2    | 49.91     | -0.14 | 0.08    | 0.87 |

Supplement: Supplementary file 1011 [file 1]

# IPI00018235.3|PEF1

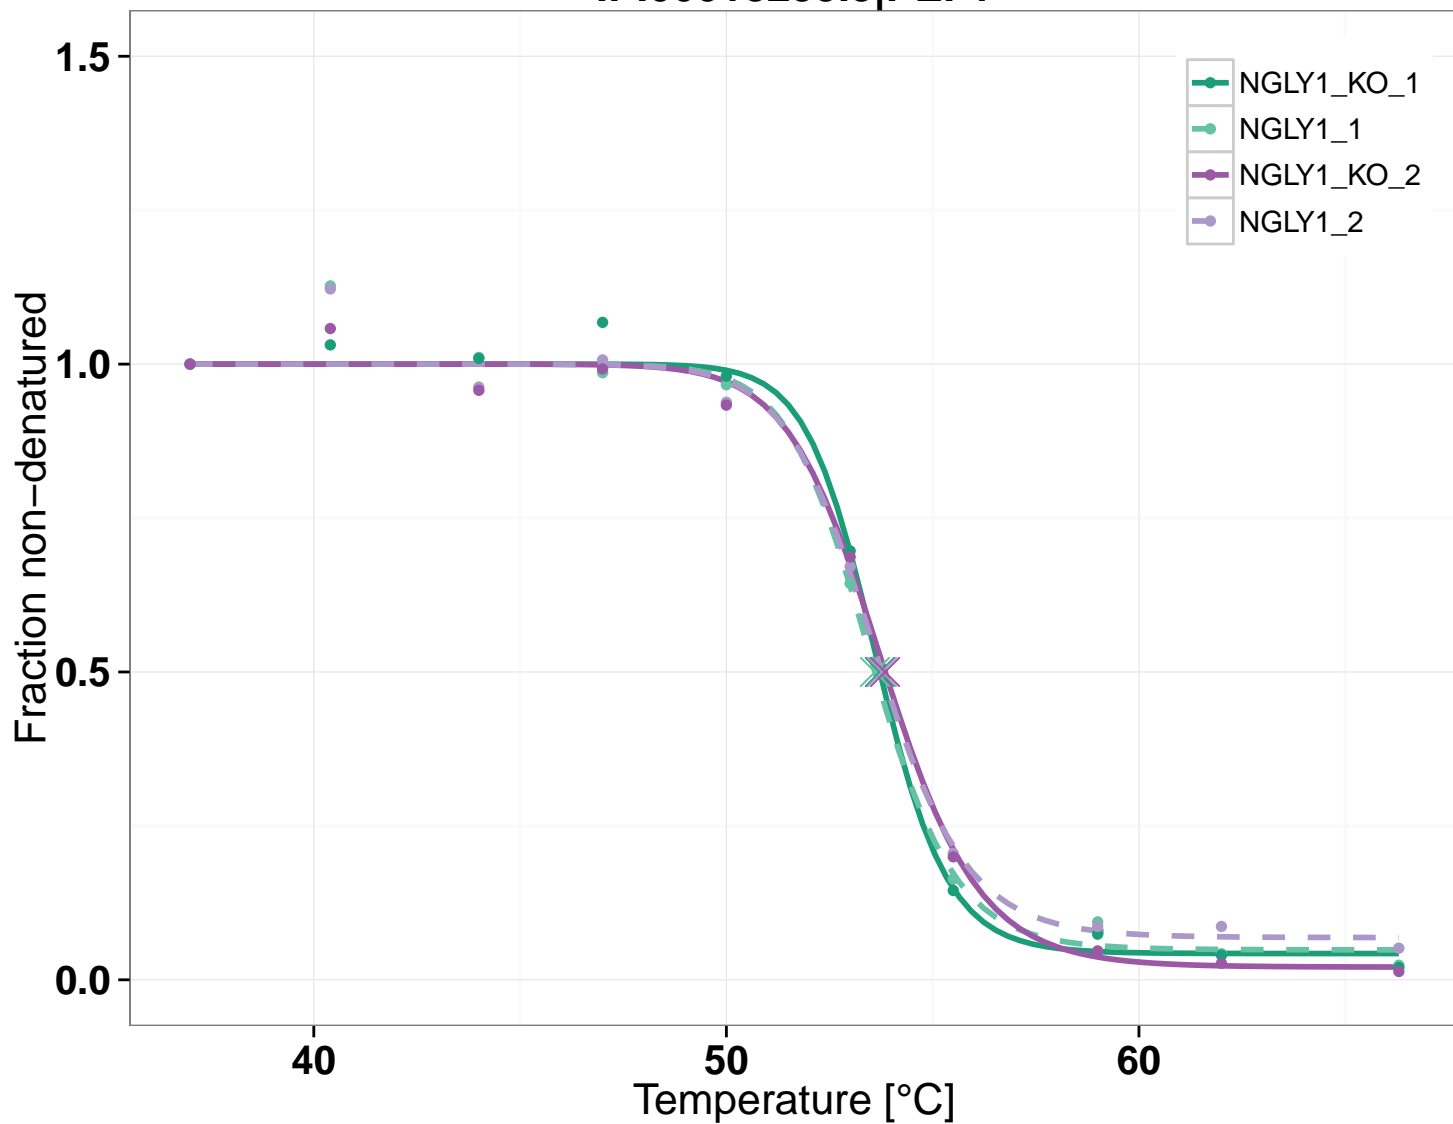

|            | meltPoint | slope | plateau | R2   |
|------------|-----------|-------|---------|------|
| NGLY1_KO_1 | 53.72     | -0.28 | 0.04    | 1    |
| NGLY1_1    | 53.6      | -0.23 | 0.05    | 0.99 |
| NGLY1_KO_2 | 53.85     | -0.21 | 0.02    | 1    |
| NGLY1_2    | 53.77     | -0.21 | 0.07    | 0.99 |

Supplement: Supplementary file 1012 [file 1]

IPI00550032.1|RPL15

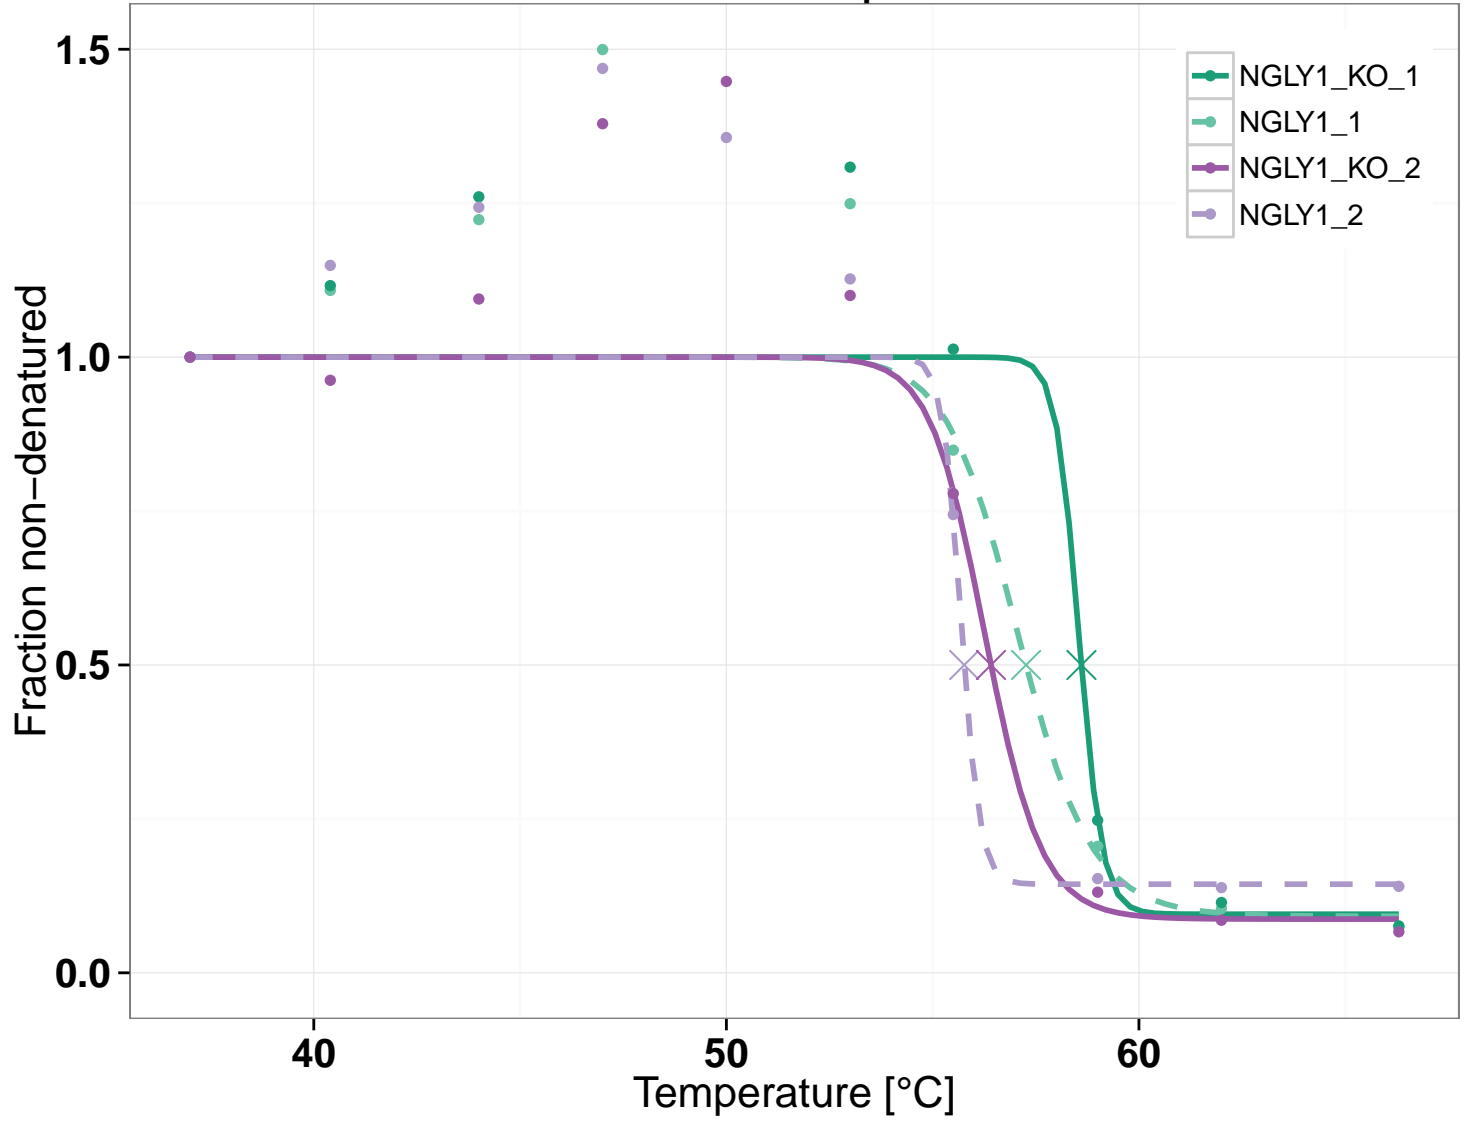

|            | meltPoint | slope | plateau | R2   |
|------------|-----------|-------|---------|------|
| NGLY1_KO_1 | 58.61     | -0.8  | 0.1     | 0.71 |
| NGLY1_1    | 57.26     | -0.26 | 0.09    | 0.76 |
| NGLY1_KO_2 | 56.41     | -0.34 | 0.09    | 0.85 |
| NGLY1_2    | 55.77     | -0.96 | 0.14    | 0.82 |

Supplement: Supplementary file 1013 [file 1]

IPI00419643.1|LCLAT1

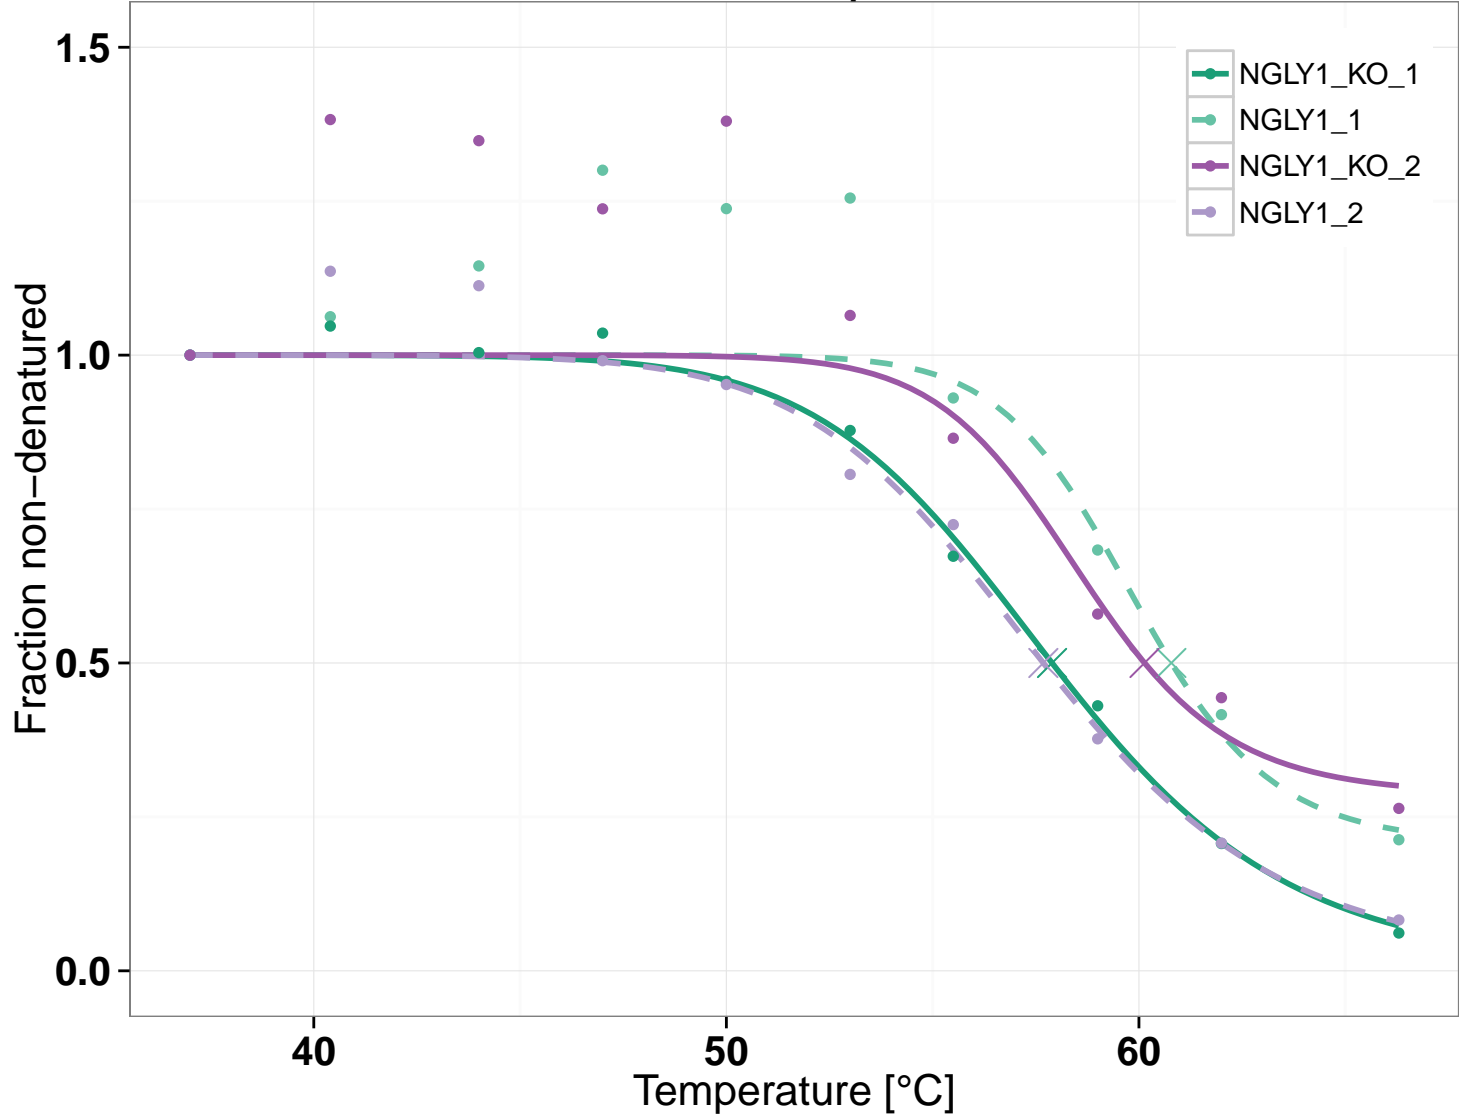

|            | meltPoint | slope  | plateau | R2   |
|------------|-----------|--------|---------|------|
| NGLY1_KO_1 | 57.89     | -0.087 | 0       | 1    |
| NGLY1_1    | 60.79     | -0.12  | 0.21    | 0.8  |
| NGLY1_KO_2 | 60.14     | -0.1   | 0.29    | 0.68 |
| NGLY1_2    | 57.68     | -0.086 | 0.01    | 0.97 |

Supplement: Supplementary file 1014 [file 1]

IPI00301428.7|ATP5SL

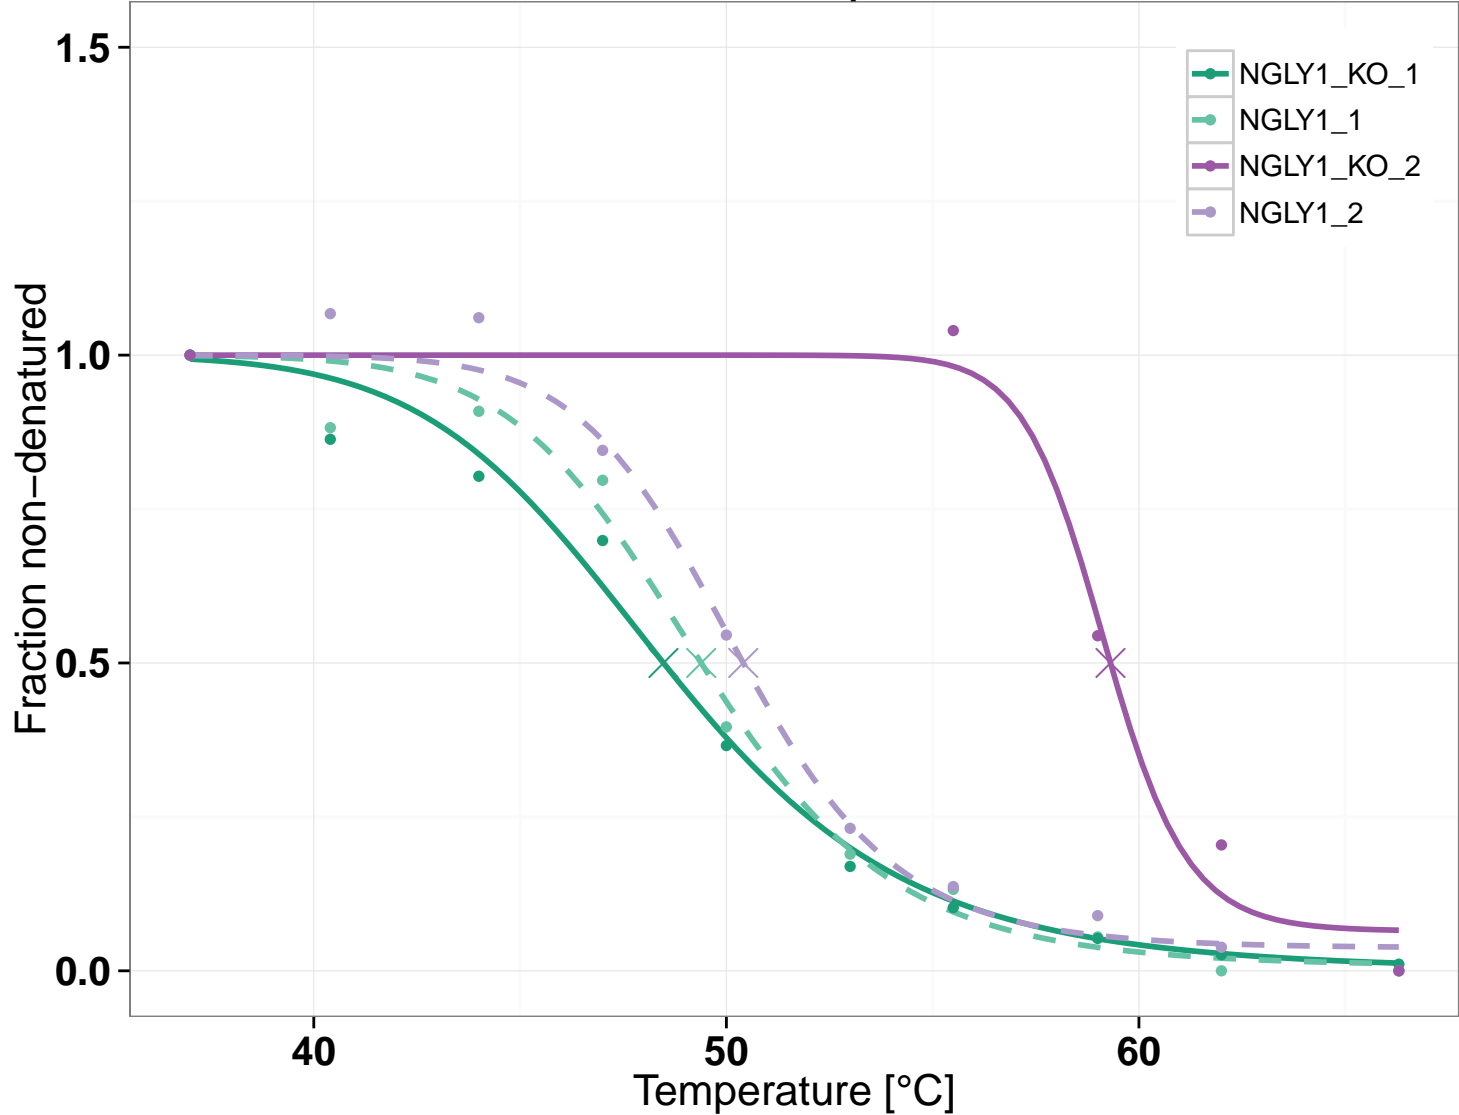

|            | meltPoint | slope  | plateau | R2   |
|------------|-----------|--------|---------|------|
| NGLY1_KO_1 | 48.48     | -0.085 | 0       | 0.99 |
| NGLY1_1    | 49.39     | -0.11  | 0.01    | 0.99 |
| NGLY1_KO_2 | 59.31     | -0.23  | 0.06    | -0.5 |
| NGLY1_2    | 50.41     | -0.12  | 0.04    | 0.99 |

Supplement: Supplementary file 1015 [file 1]

# IPI00872107.1|ILF2

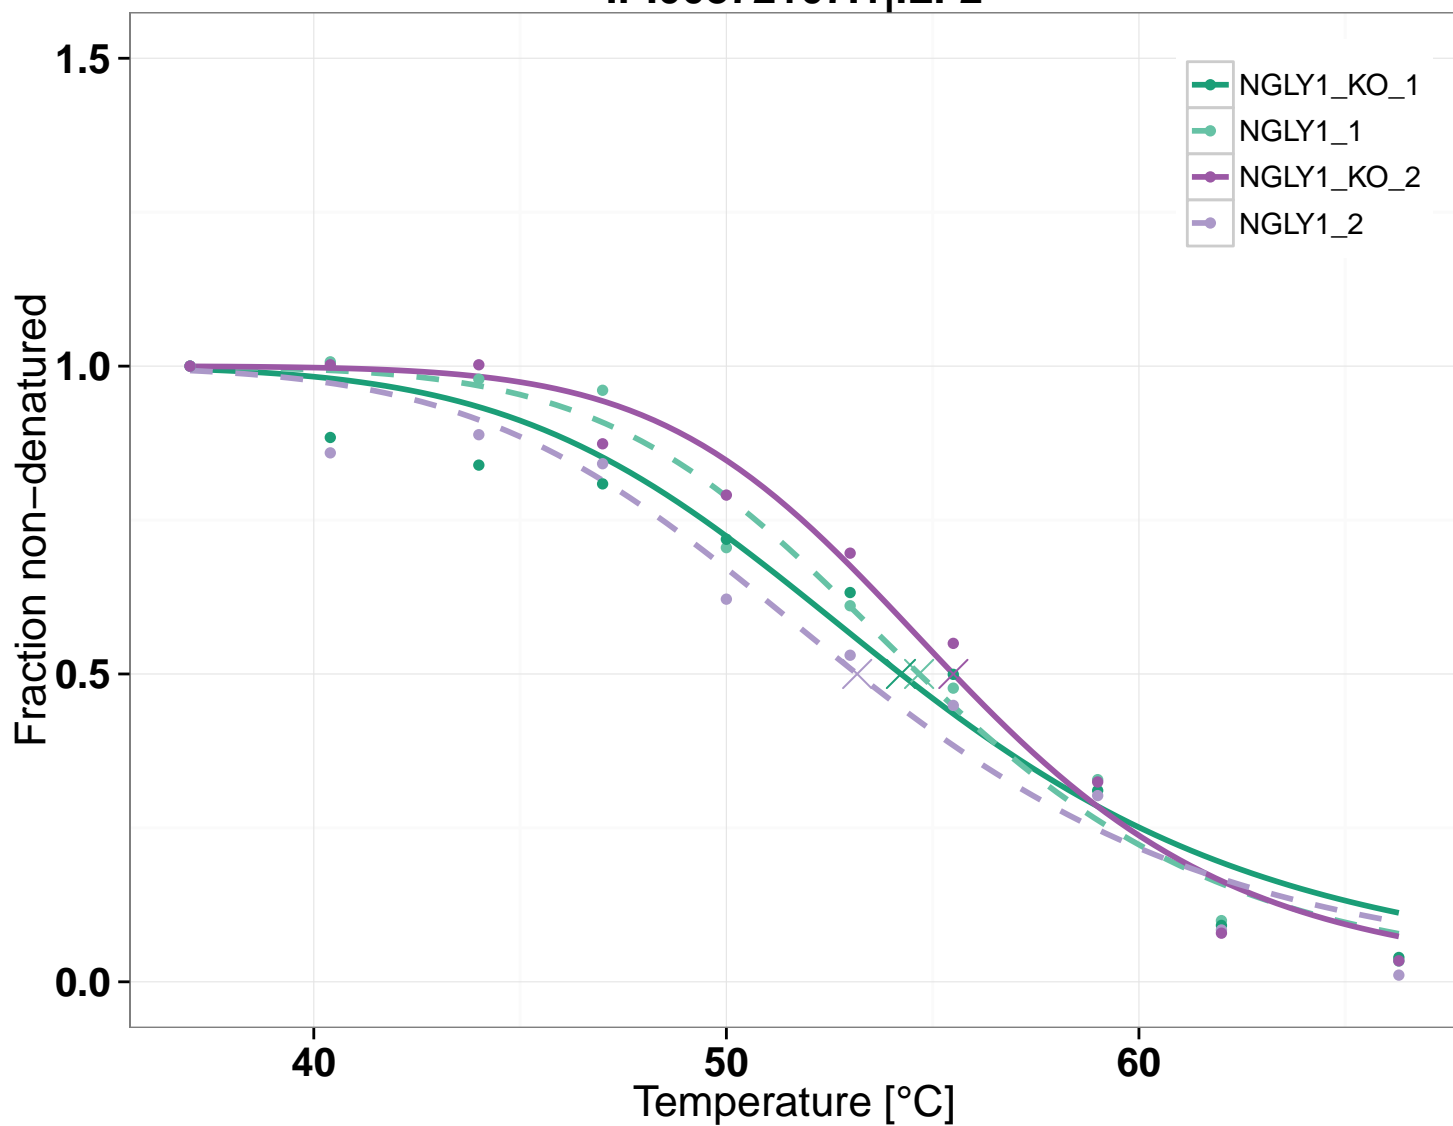

|            | meltPoint | slope  | plateau | R2   |
|------------|-----------|--------|---------|------|
| NGLY1_KO_1 | 54.23     | -0.054 | 0       | 0.96 |
| NGLY1_1    | 54.67     | -0.066 | 0       | 0.98 |
| NGLY1_KO_2 | 55.5      | -0.071 | 0       | 0.98 |
| NGLY1_2    | 53.17     | -0.055 | 0       | 0.96 |

Supplement: Supplementary file 1016 [file 1]

IPI00796204.1|CRELD2

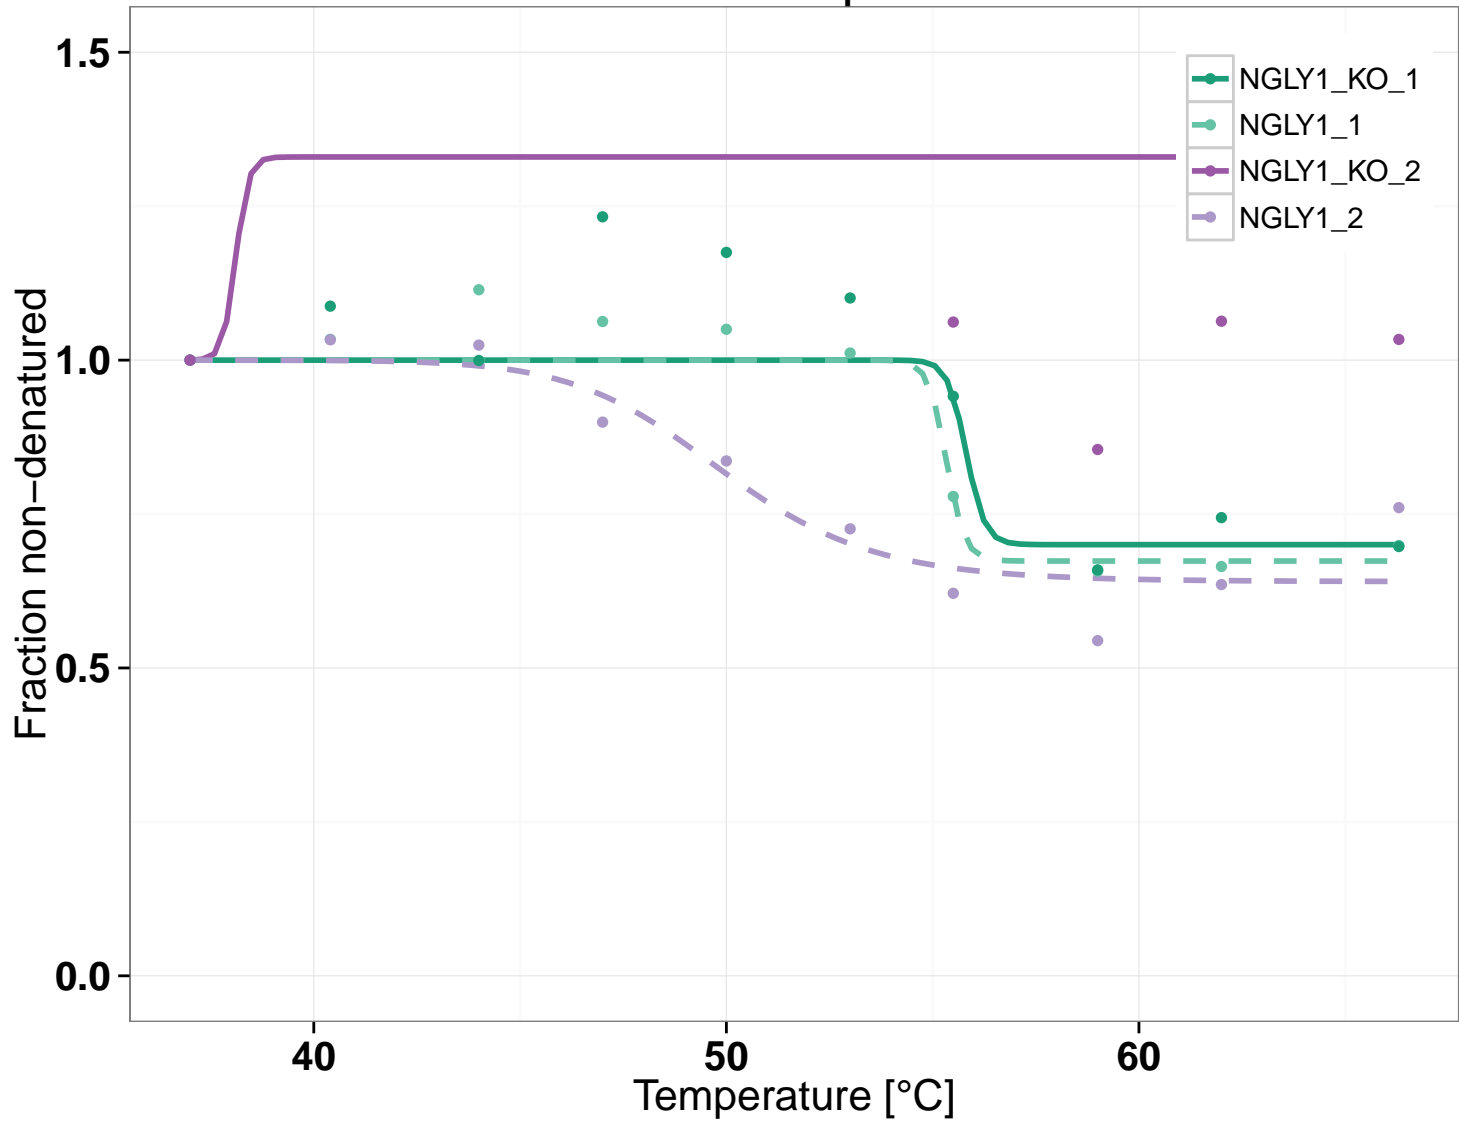

|            | meltPoint | slope  | plateau | R2   |
|------------|-----------|--------|---------|------|
| NGLY1_KO_1 | —         | -0.34  | 0.7     | 0.71 |
| NGLY1_1    | —         | -0.37  | 0.67    | 0.93 |
| NGLY1_KO_2 | —         | 0.54   | 1.33    | 0.11 |
| NGLY1_2    | —         | -0.049 | 0.64    | 0.89 |

Supplement: Supplementary file 1017 [file 1]

IPI00290272.2|POLA2

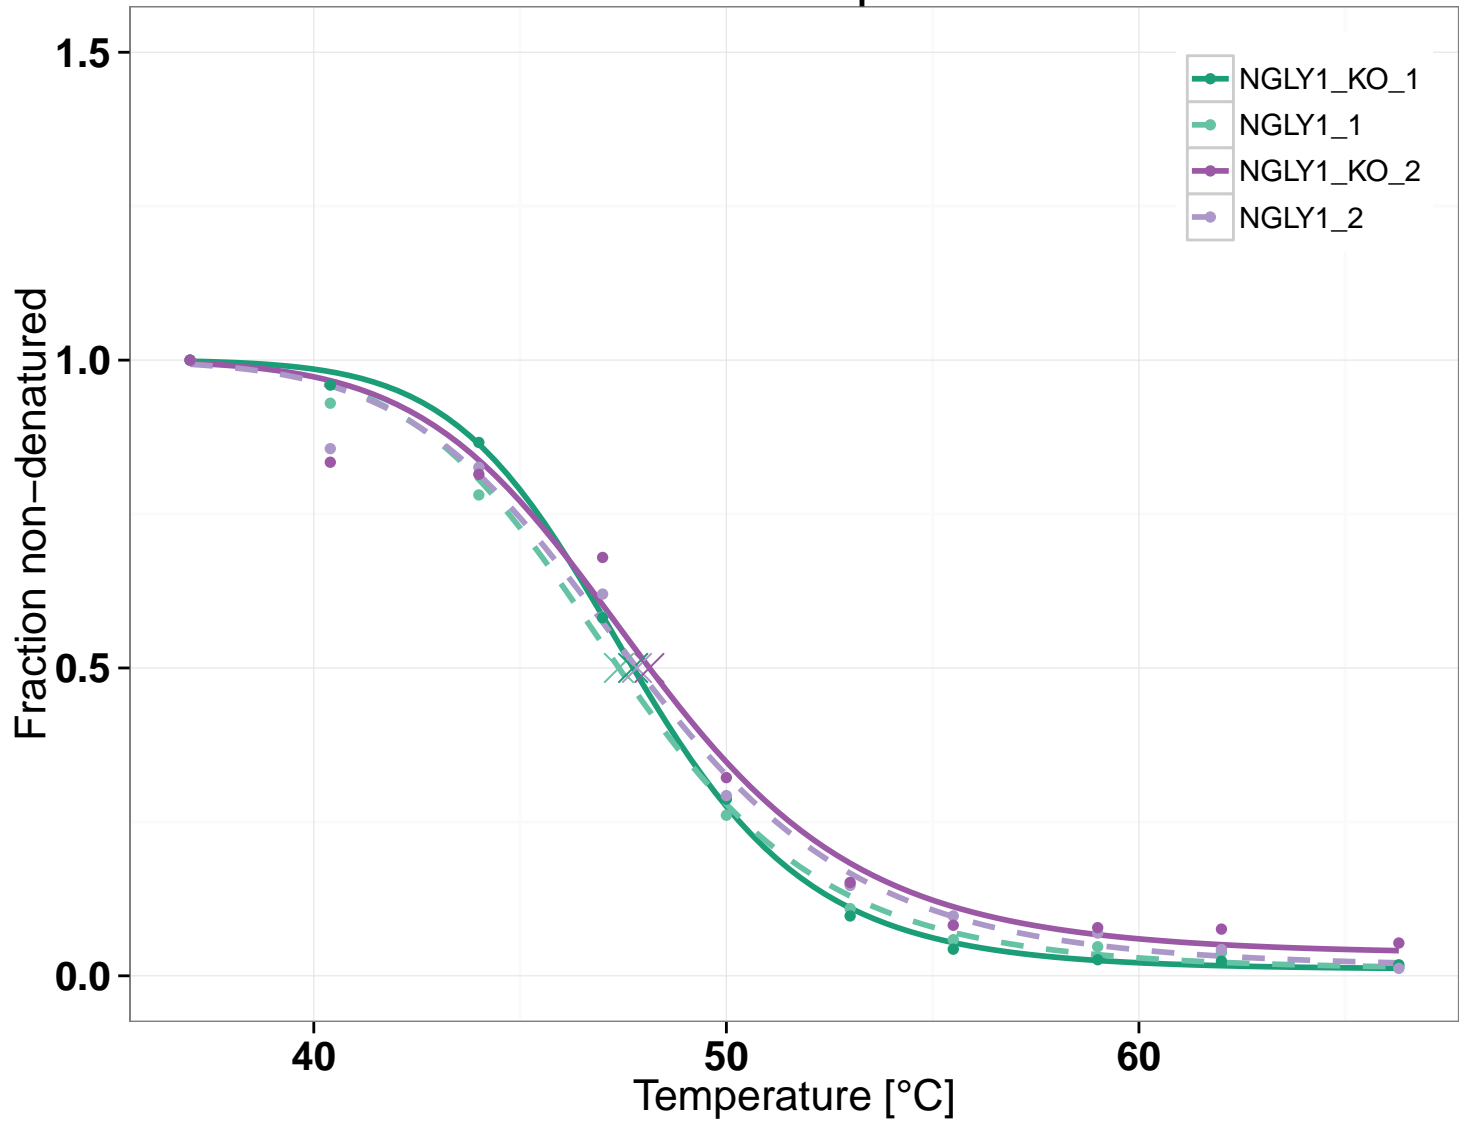

|            | meltPoint | slope  | plateau | R2   |
|------------|-----------|--------|---------|------|
| NGLY1_KO_1 | 47.74     | -0.11  | 0.01    | 1    |
| NGLY1_1    | 47.4      | -0.098 | 0.01    | 1    |
| NGLY1_KO_2 | 48.13     | -0.091 | 0.03    | 0.98 |
| NGLY1_2    | 47.83     | -0.09  | 0.01    | 0.99 |

Supplement: Supplementary file 1018 [file 1]

IPI00477155.3|GTPBP4

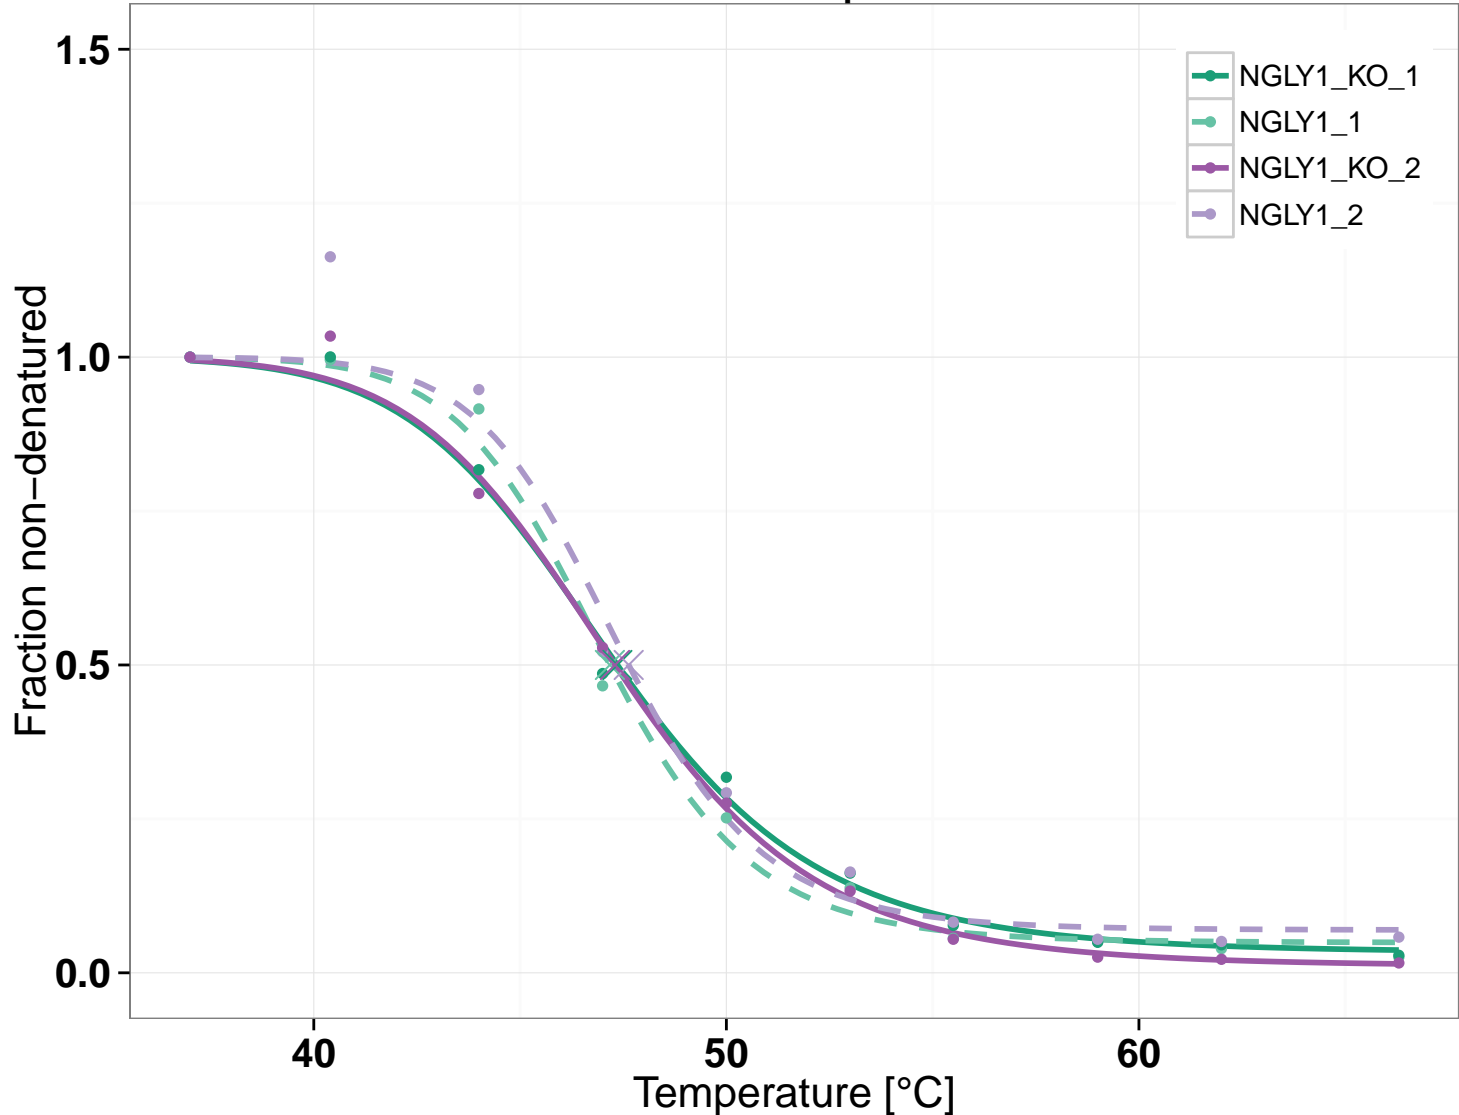

|            | meltPoint | slope  | plateau | R2   |
|------------|-----------|--------|---------|------|
| NGLY1_KO_1 | 47.36     | -0.096 | 0.03    | 1    |
| NGLY1_1    | 47.18     | -0.13  | 0.05    | 0.99 |
| NGLY1_KO_2 | 47.3      | -0.1   | 0.01    | 1    |
| NGLY1_2    | 47.63     | -0.13  | 0.07    | 0.98 |

Supplement: Supplementary file 1019 [file 1]

IPI00029002.1|SFT2D2

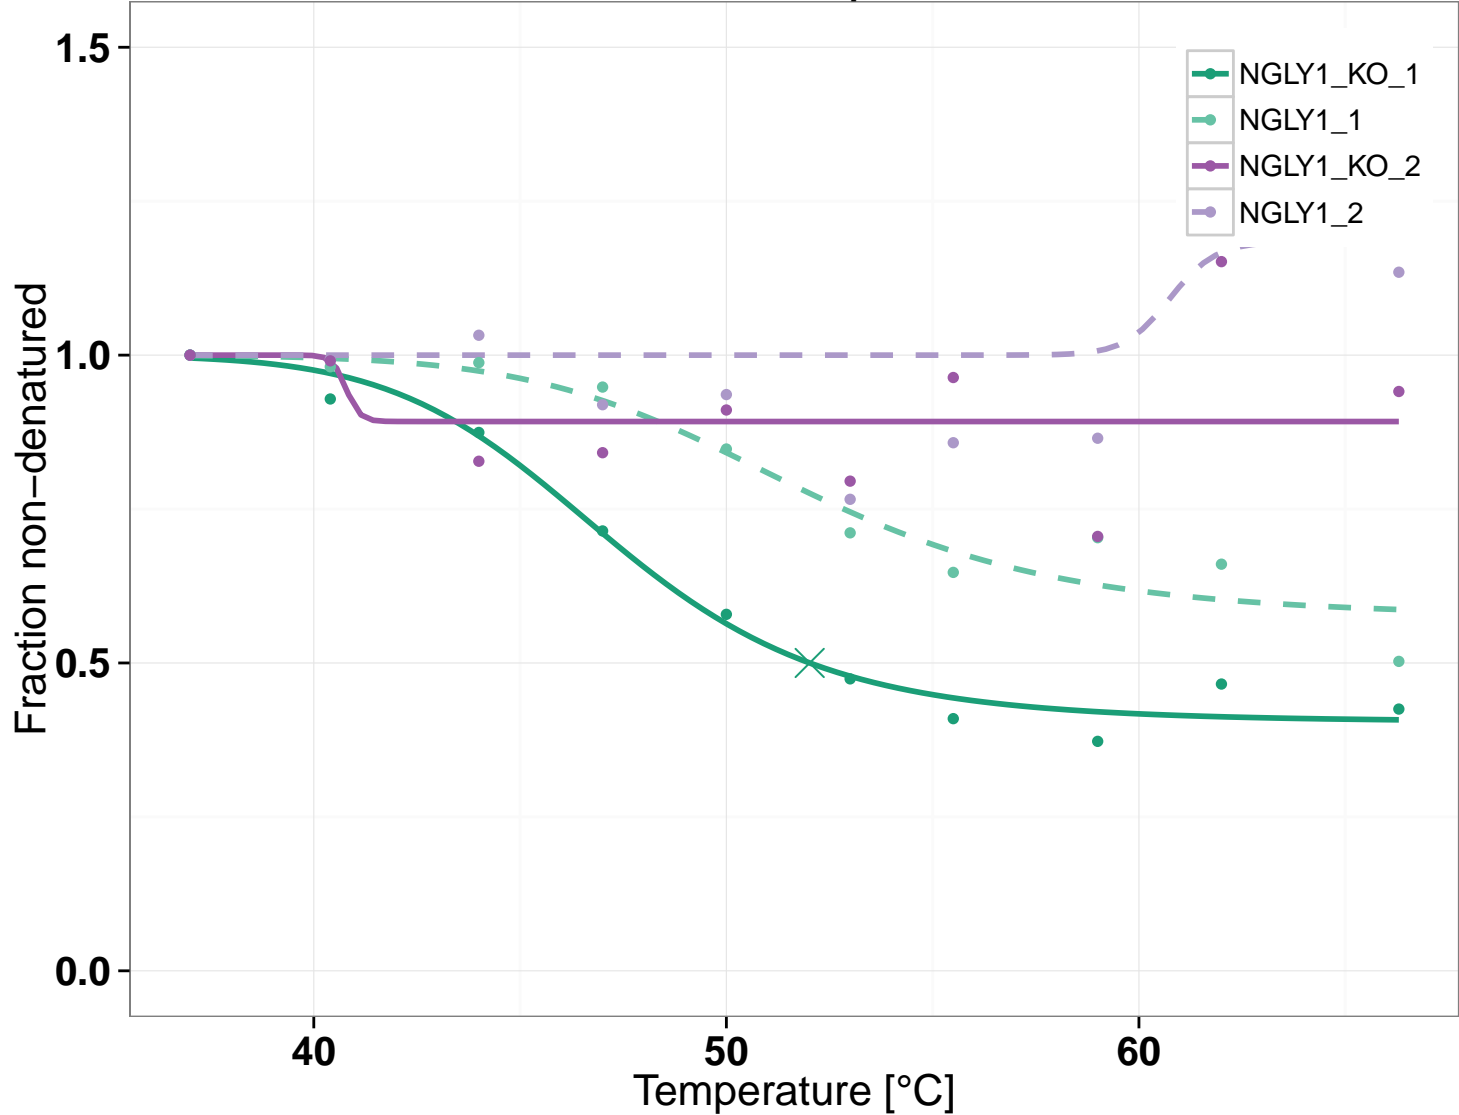

|            | meltPoint | slope  | plateau | R2   |
|------------|-----------|--------|---------|------|
| NGLY1_KO_1 | 52.02     | -0.056 | 0.4     | 0.98 |
| NGLY1_1    | -         | -0.033 | 0.57    | 0.93 |
| NGLY1_KO_2 | -         | -0.17  | 0.89    | 0.12 |
| NGLY1_2    | -         | 0.084  | 1.19    | 0.32 |

Supplement: Supplementary file 1020 [file 1]

# IPI00100468.4|ZNHIT6

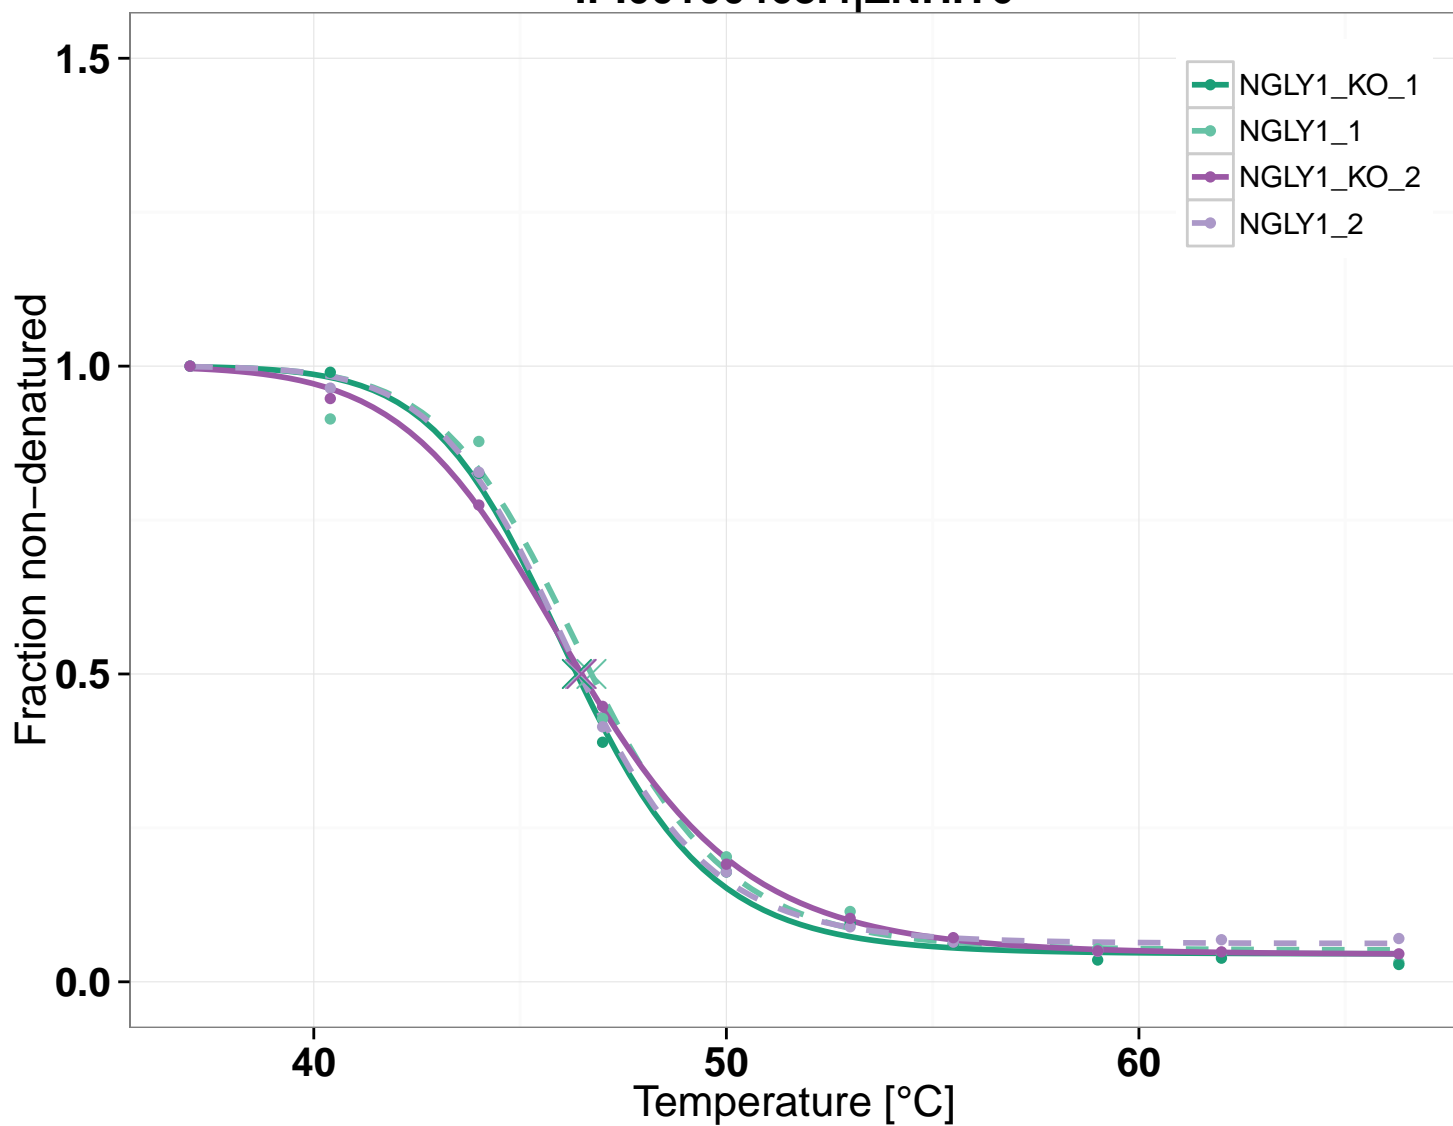

|            | meltPoint | slope | plateau | R2   |
|------------|-----------|-------|---------|------|
| NGLY1_KO_1 | 46.38     | -0.14 | 0.05    | 1    |
| NGLY1_1    | 46.73     | -0.14 | 0.05    | 0.99 |
| NGLY1_KO_2 | 46.49     | -0.11 | 0.04    | 1    |
| NGLY1_2    | 46.45     | -0.14 | 0.06    | 1    |

Supplement: Supplementary file 1021 [file 1]

# IPI00018120.1|DAP3

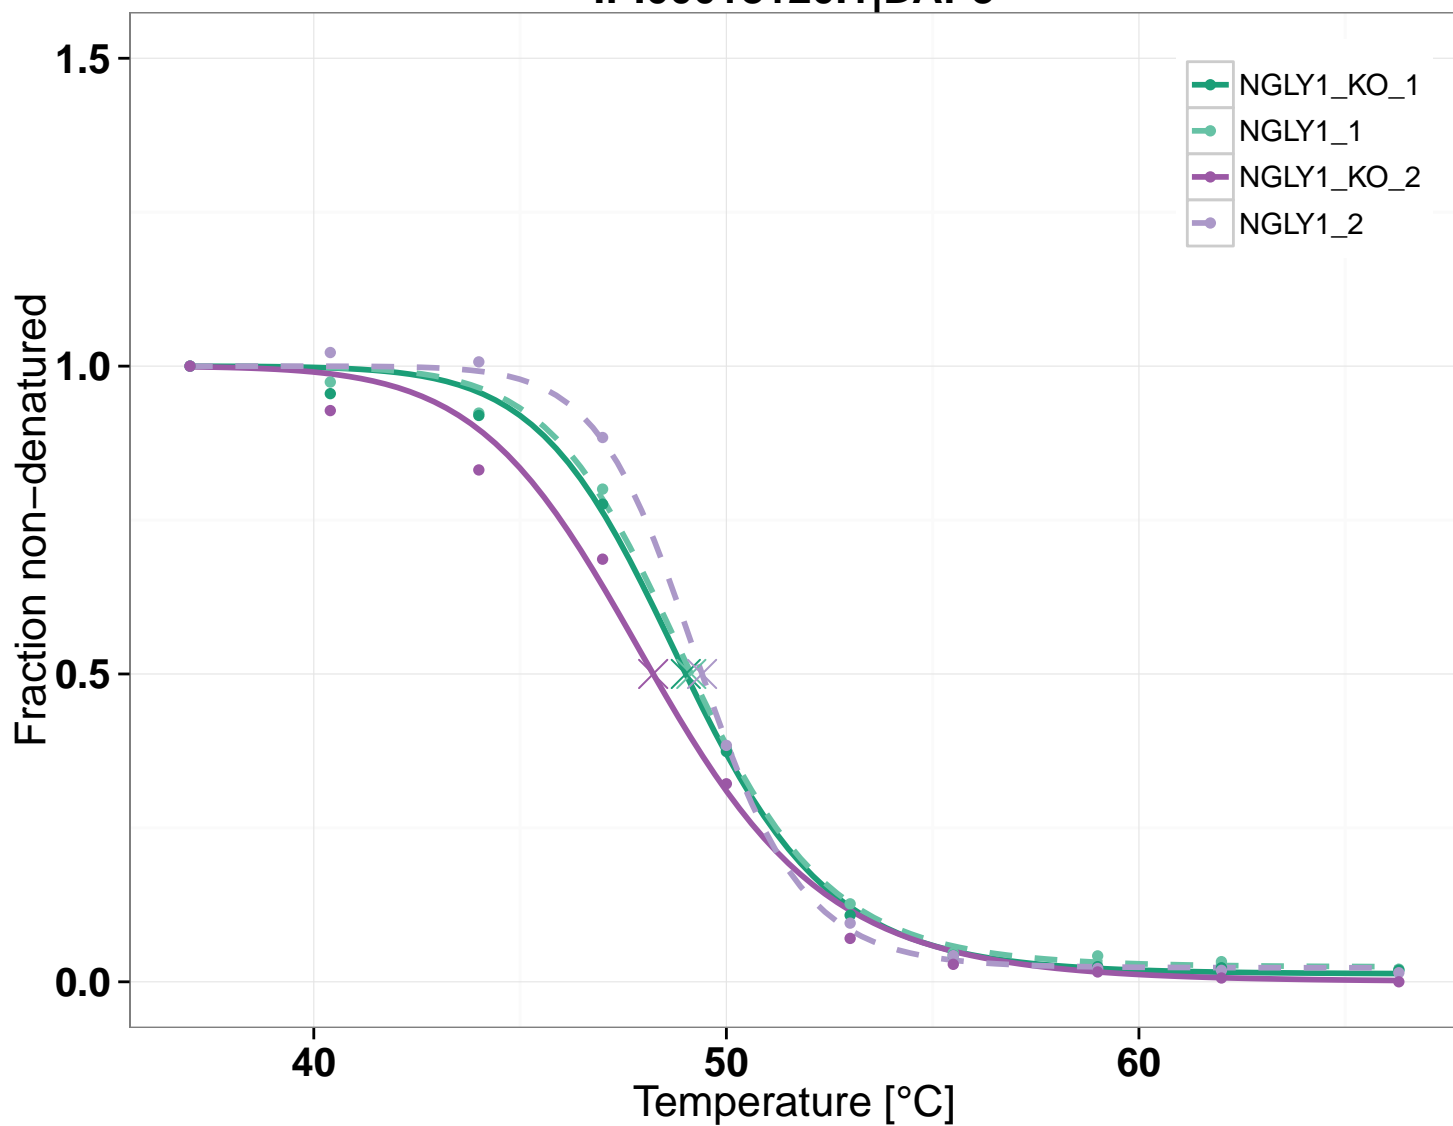

|            | meltPoint | slope | plateau | R2   |
|------------|-----------|-------|---------|------|
| NGLY1_KO_1 | 49.02     | -0.14 | 0.01    | 1    |
| NGLY1_1    | 49.15     | -0.14 | 0.02    | 1    |
| NGLY1_KO_2 | 48.23     | -0.12 | 0       | 0.99 |
| NGLY1_2    | 49.41     | -0.2  | 0.02    | 1    |

Supplement: Supplementary file 1022 [file 1]

IPI00146447.3|LOC203547

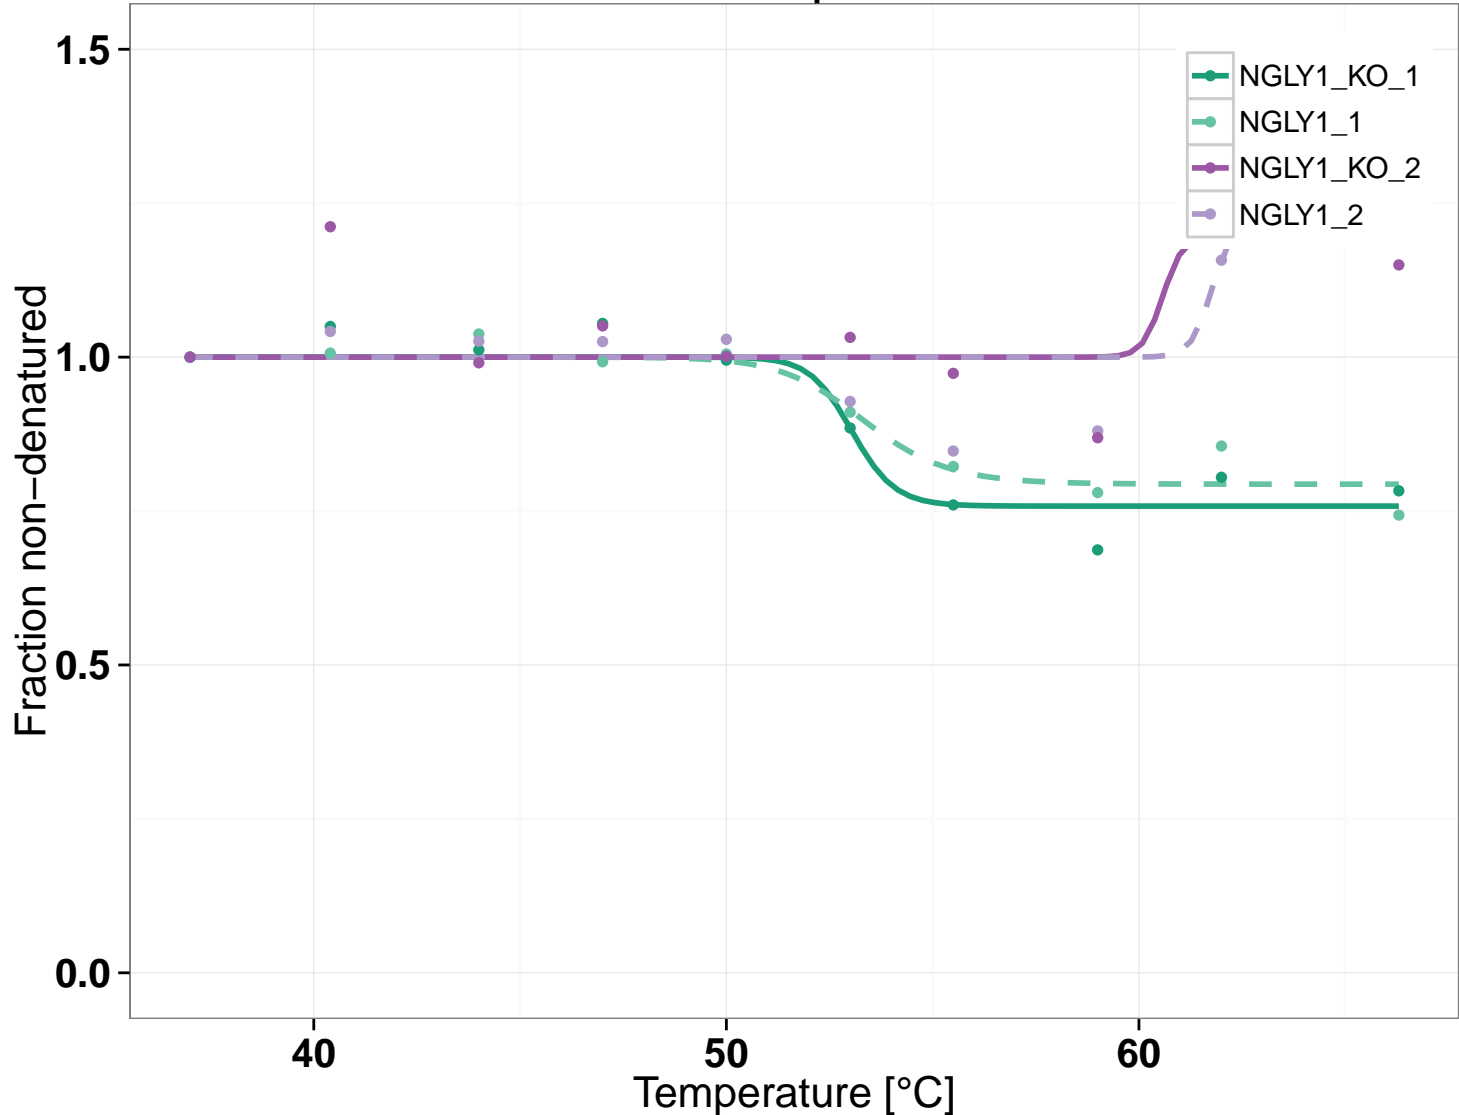

|            | meltPoint | slope  | plateau | R2   |
|------------|-----------|--------|---------|------|
| NGLY1_KO_1 | -         | -0.12  | 0.76    | 0.92 |
| NGLY1_1    | -         | -0.051 | 0.79    | 0.92 |
| NGLY1_KO_2 | -         | 0.2    | 1.2     | 0.42 |
| NGLY1_2    | -         | 0.22   | 1.22    | 0.61 |

Supplement: Supplementary file 1023 [file 1]

# IPI00303136.4|DGKD

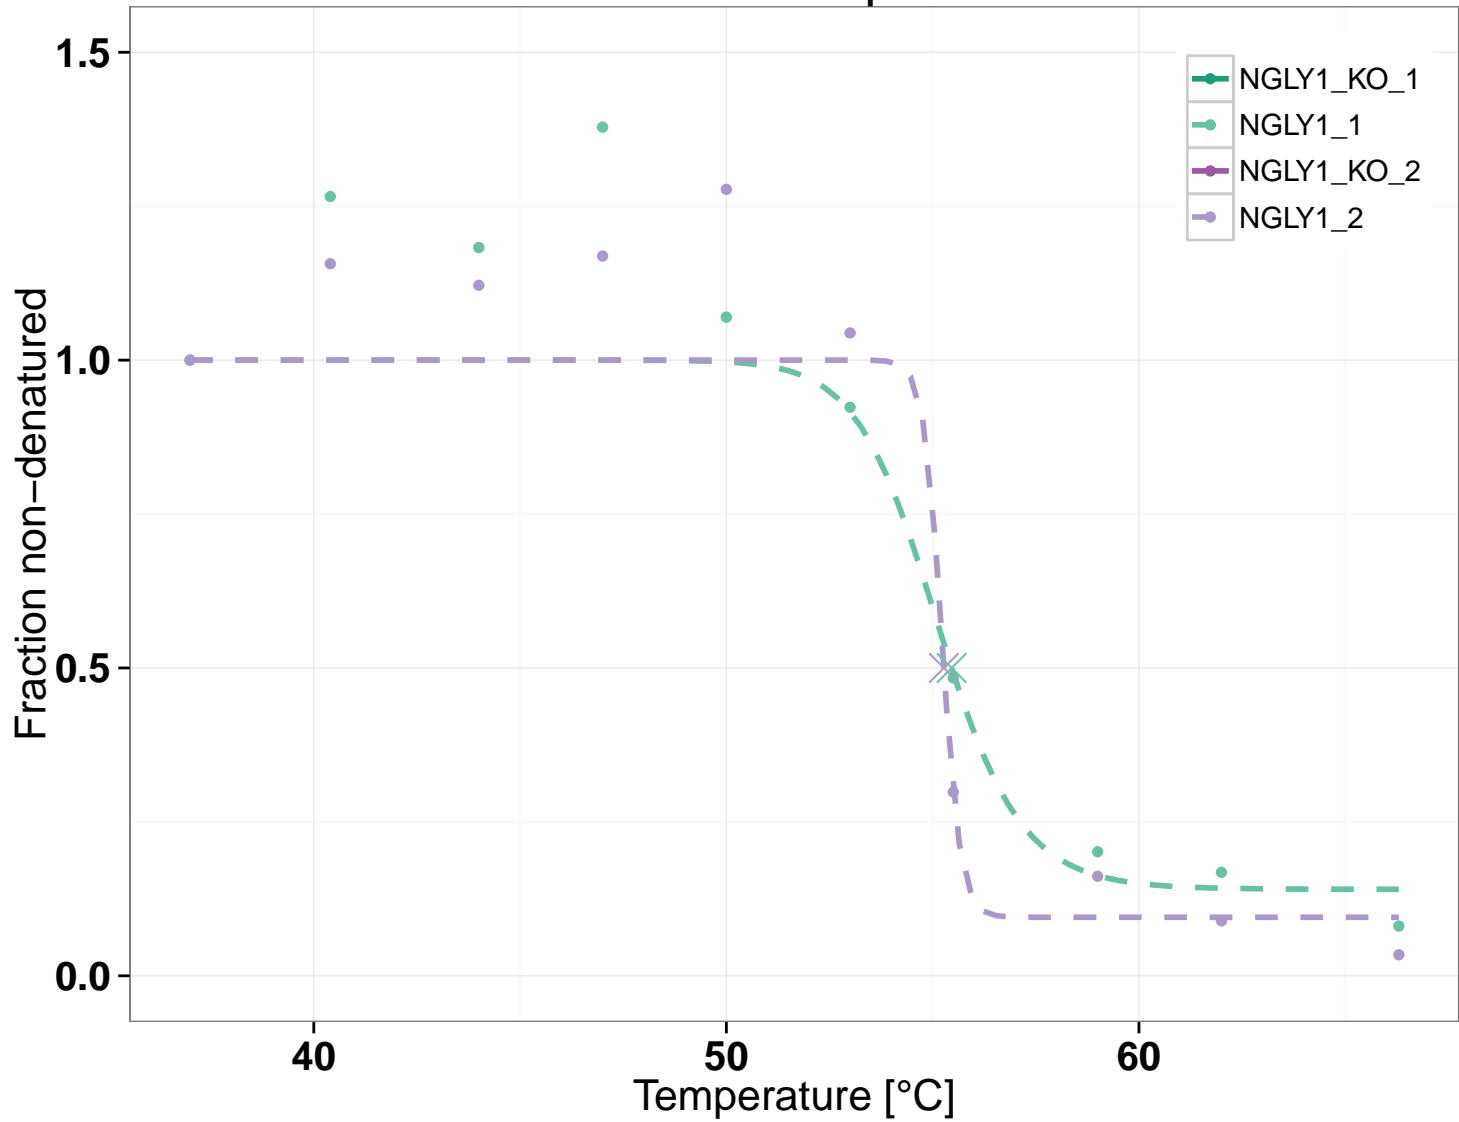

|            | meltPoint | slope | plateau | R2   |
|------------|-----------|-------|---------|------|
| NGLY1_KO_1 | -         | -     | -       | -    |
| NGLY1_1    | 55.46     | -0.22 | 0.14    | 0.88 |
| NGLY1_KO_2 | -         | -     | -       | -    |
| NGLY1_2    | 55.27     | -1    | 0.1     | 0.94 |

Supplement: Supplementary file 1024 [file 1]

IPI00006378.3|CCDC72

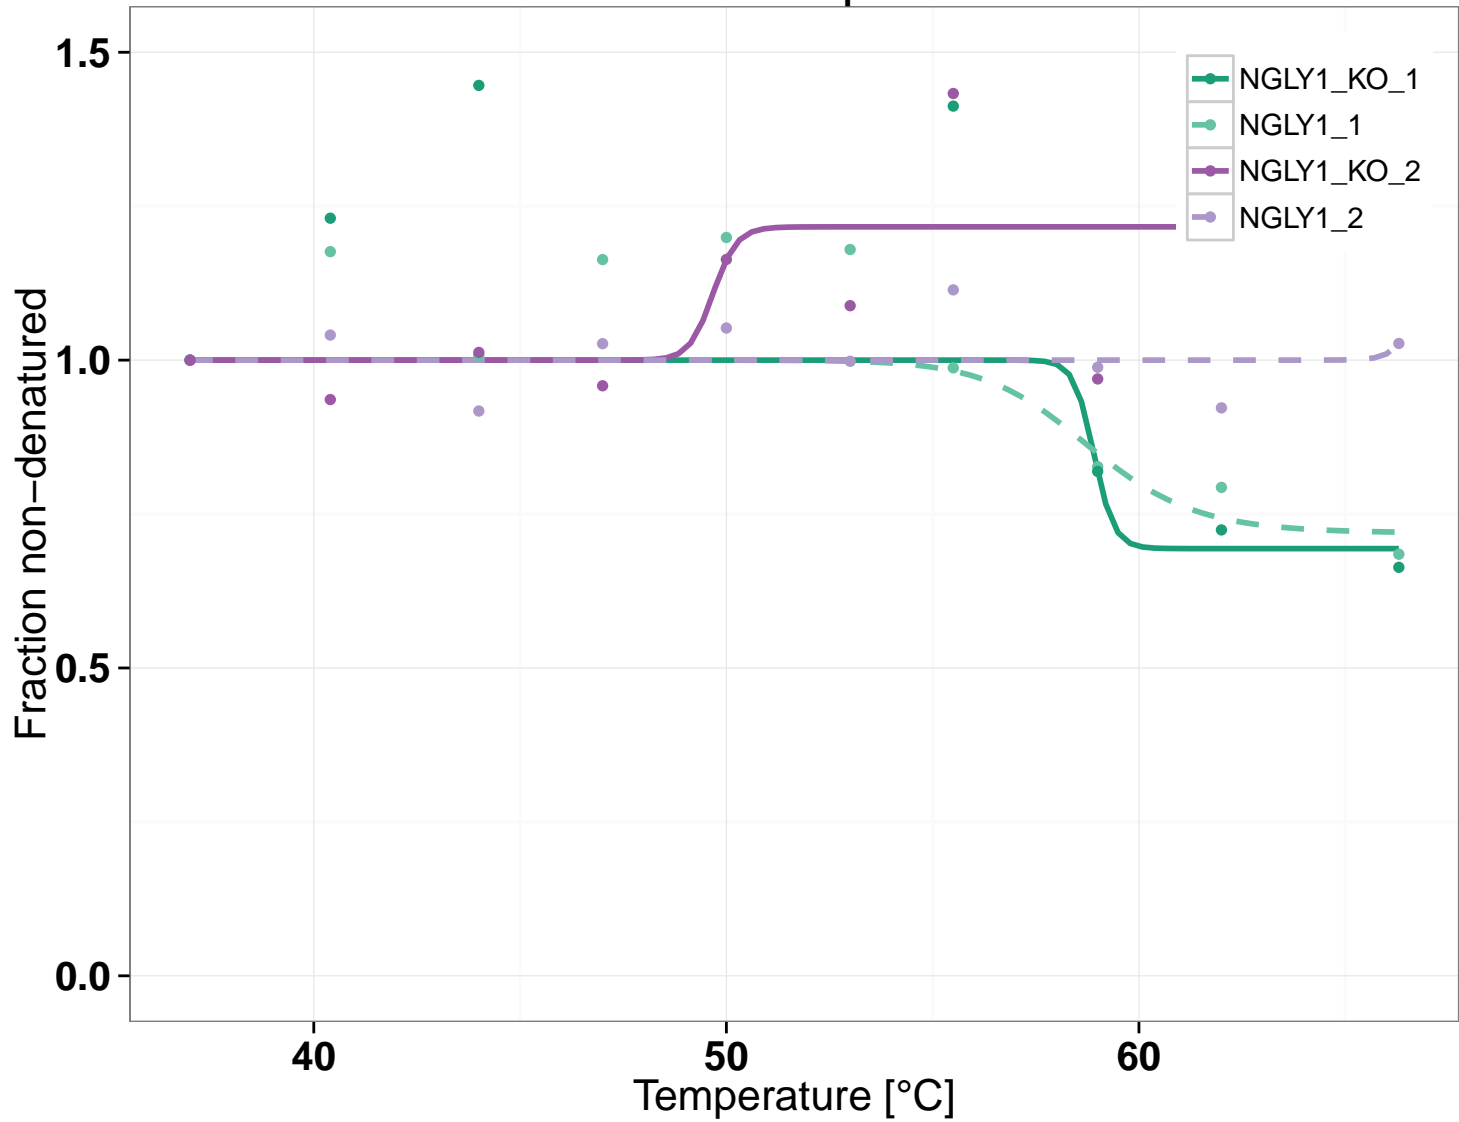

|            | meltPoint | slope  | plateau | R2    |
|------------|-----------|--------|---------|-------|
| NGLY1_KO_1 | -         | -0.32  | 0.69    | -0.18 |
| NGLY1_1    | -         | -0.055 | 0.72    | 0.55  |
| NGLY1_KO_2 | -         | 0.19   | 1.22    | 0.47  |
| NGLY1_2    | -         | -      | 1.5     | 0     |

Supplement: Supplementary file 1025 [file 1]

# IPI00384689.3|PDXDC1

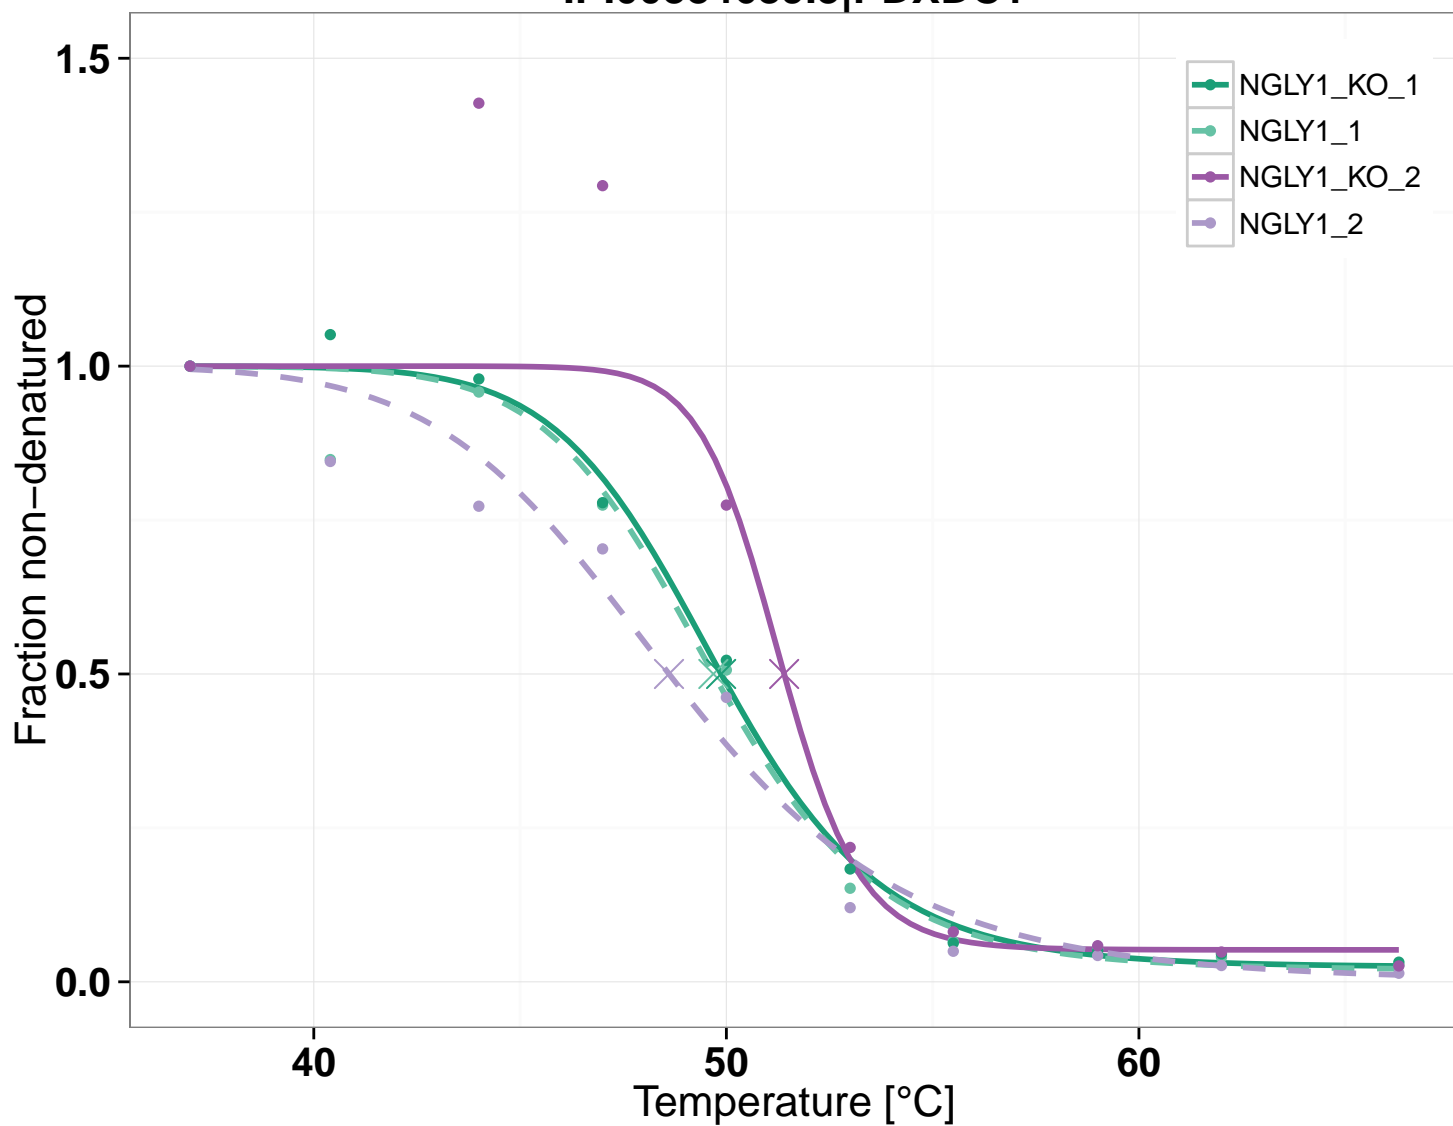

|            | meltPoint | slope  | plateau | R2   |
|------------|-----------|--------|---------|------|
| NGLY1_KO_1 | 49.87     | -0.12  | 0.02    | 1    |
| NGLY1_1    | 49.68     | -0.12  | 0.02    | 0.98 |
| NGLY1_KO_2 | 51.4      | -0.24  | 0.05    | 0.84 |
| NGLY1_2    | 48.61     | -0.088 | 0       | 0.97 |

Supplement: Supplementary file 1026 [file 1]

IPI00300341.5|TCEB1

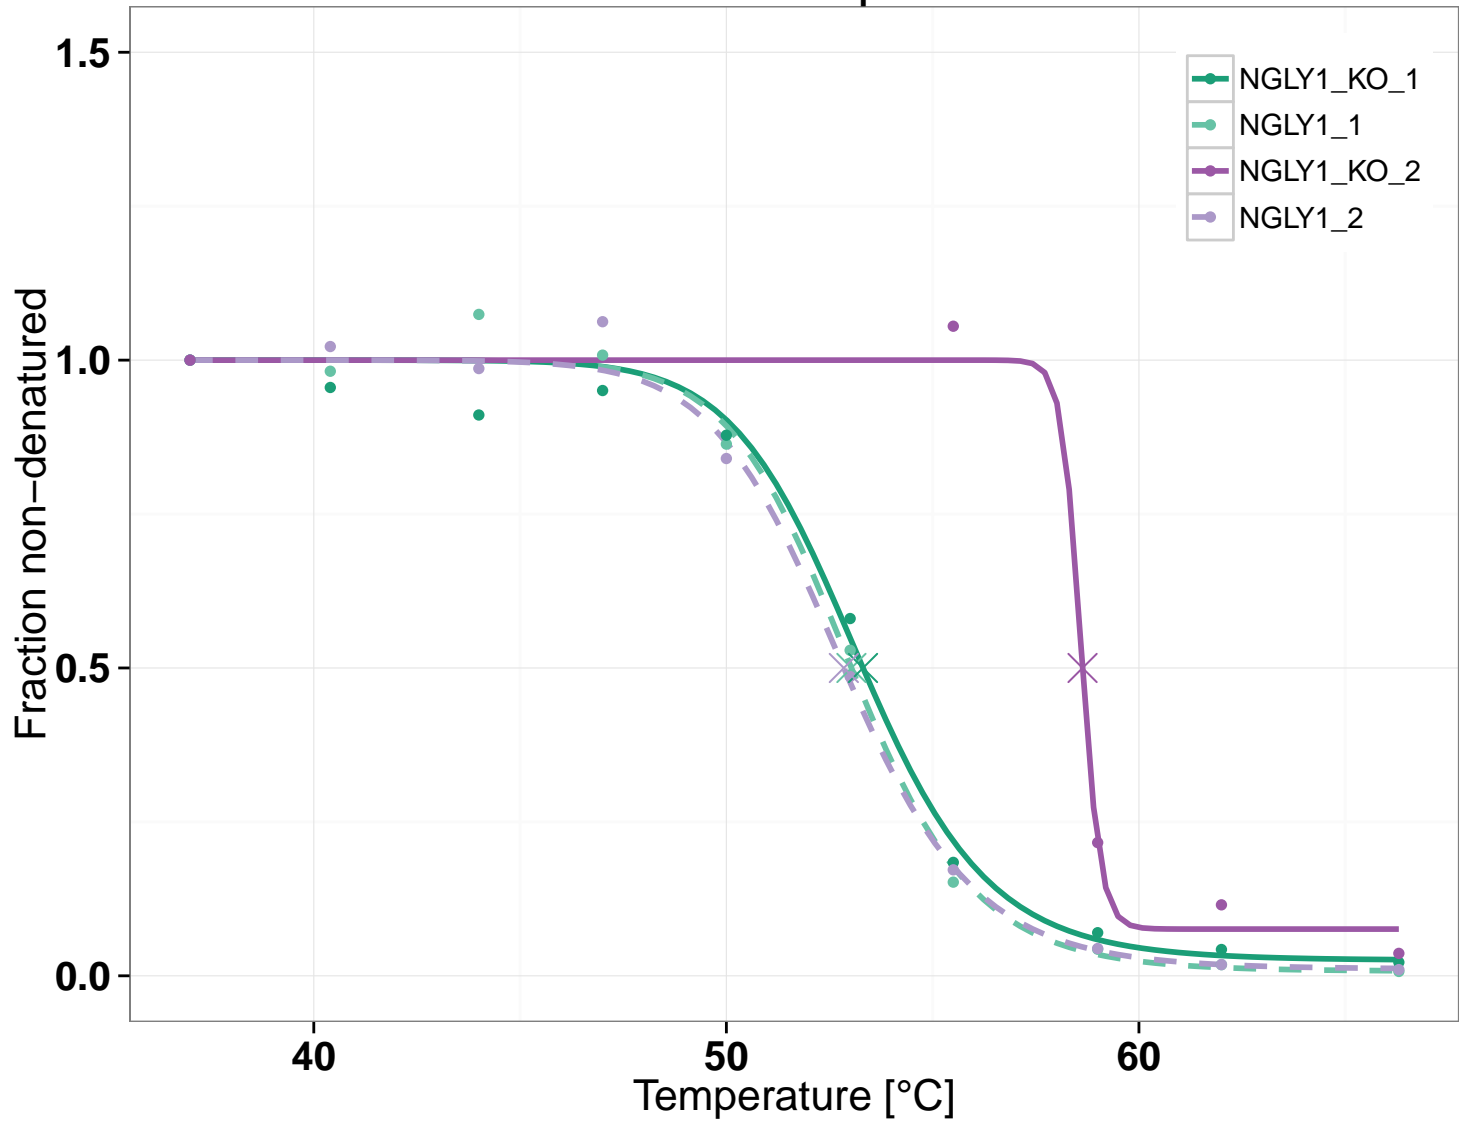

|            | meltPoint | slope | plateau | R2    |
|------------|-----------|-------|---------|-------|
| NGLY1_KO_1 | 53.31     | -0.16 | 0.03    | 0.99  |
| NGLY1_1    | 53.03     | -0.17 | 0.01    | 1     |
| NGLY1_KO_2 | 58.63     | -0.99 | 0.08    | -0.59 |
| NGLY1_2    | 52.85     | -0.16 | 0.01    | 1     |

Supplement: Supplementary file 1027 [file 1]

IPI00181373.4|C2ORF60

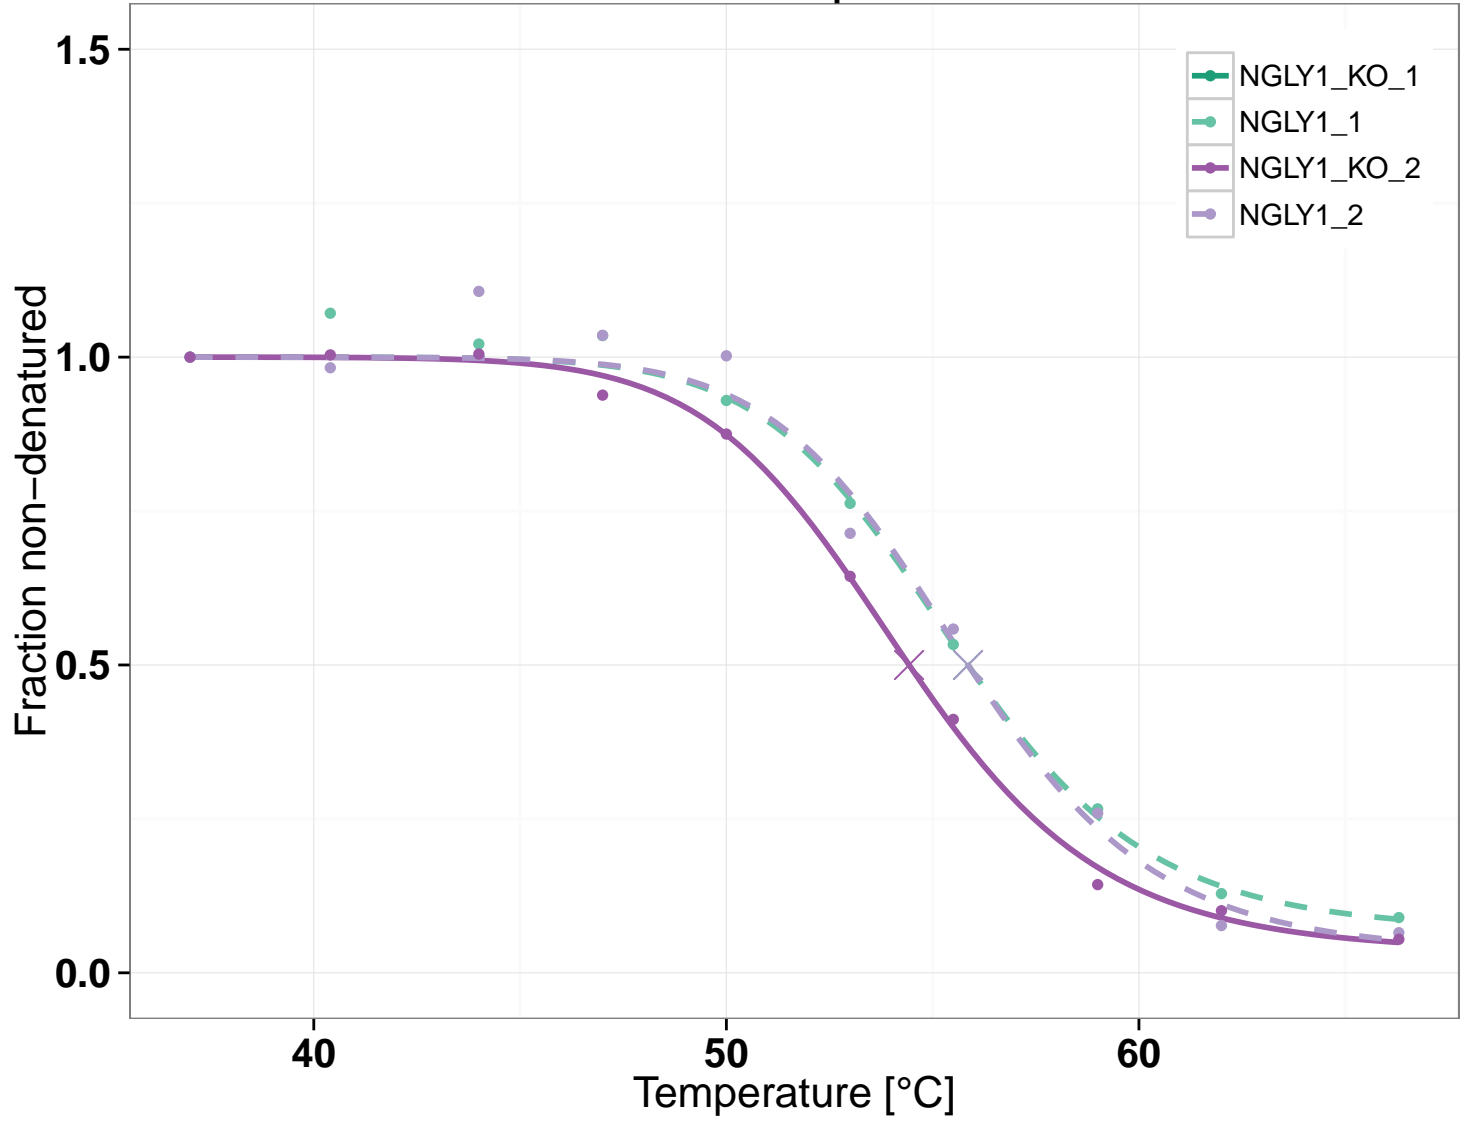

|            | meltPoint | slope  | plateau | R2   |
|------------|-----------|--------|---------|------|
| NGLY1_KO_1 | –         | –      | –       | –    |
| NGLY1_1    | 55.86     | –0.099 | 0.07    | 0.99 |
| NGLY1_KO_2 | 54.43     | –0.1   | 0.03    | 1    |
| NGLY1_2    | 55.86     | –0.1   | 0.03    | 0.98 |

Supplement: Supplementary file 1028 [file 1]

IPI00553153.1|ATPIF1

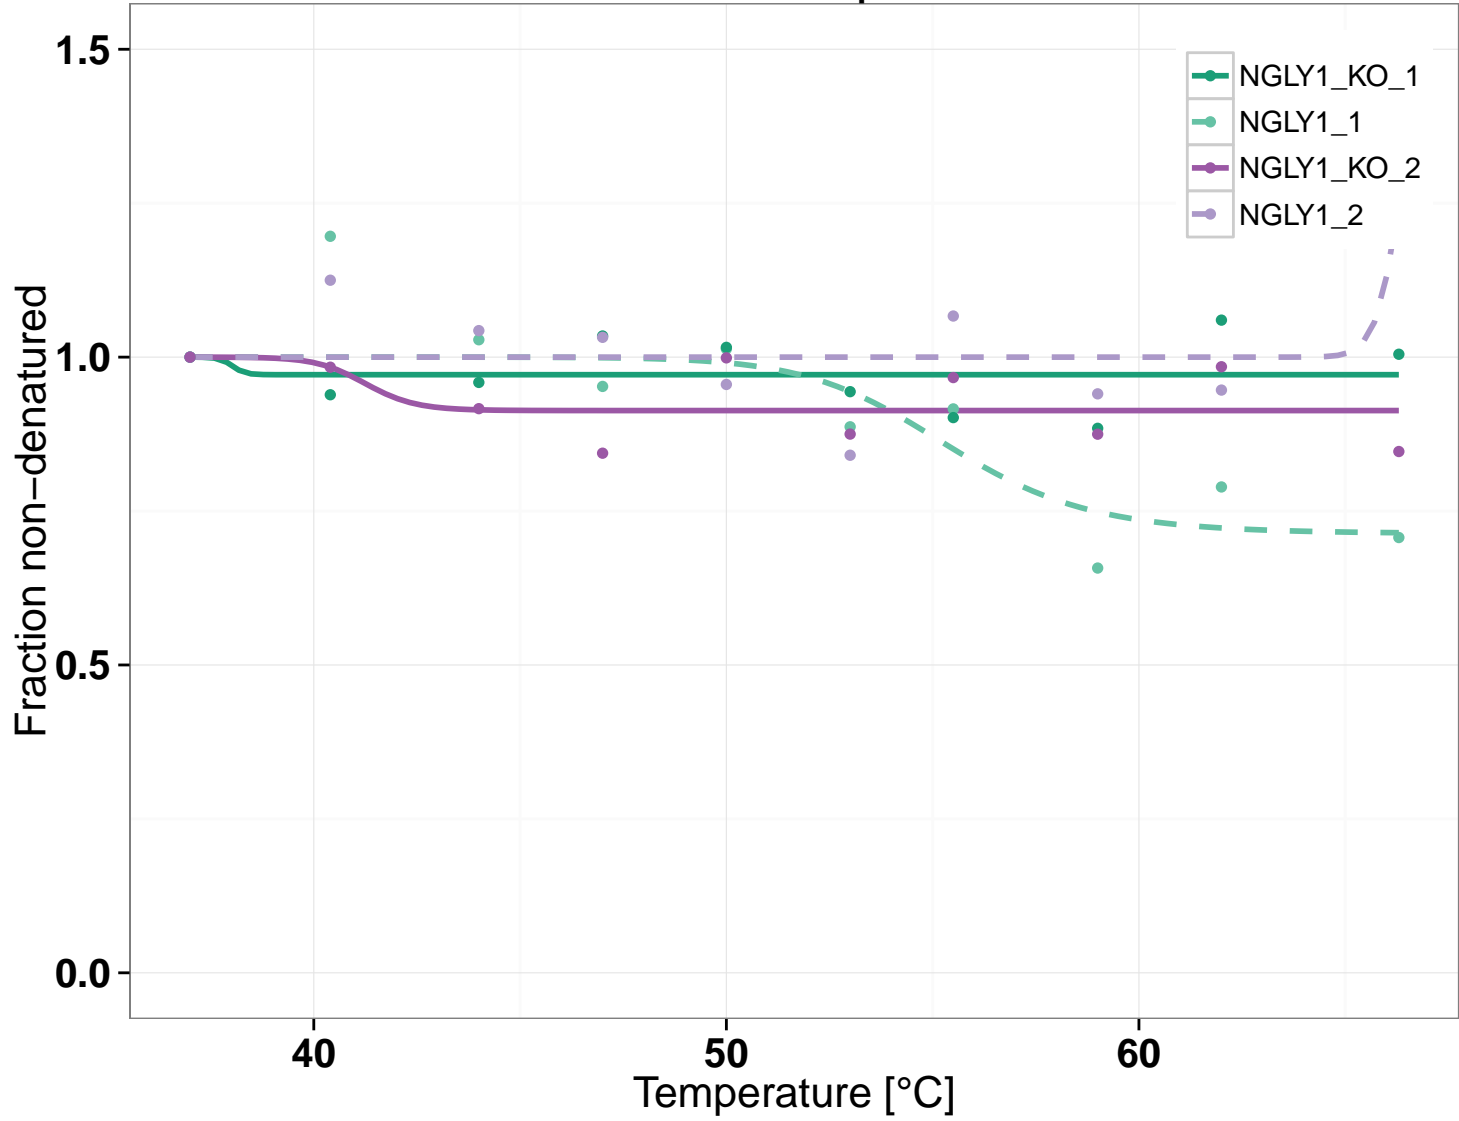

|            | meltPoint | slope  | plateau | R2   |
|------------|-----------|--------|---------|------|
| NGLY1_KO_1 | -         | -0.047 | 0.97    | 0.02 |
| NGLY1_1    | -         | -0.041 | 0.71    | 0.74 |
| NGLY1_KO_2 | -         | -0.036 | 0.91    | 0.27 |
| NGLY1_2    | -         | 0.43   | 1.5     | 0.5  |

Supplement: Supplementary file 1029 [file 1]

IPI00552653.2|FGF13

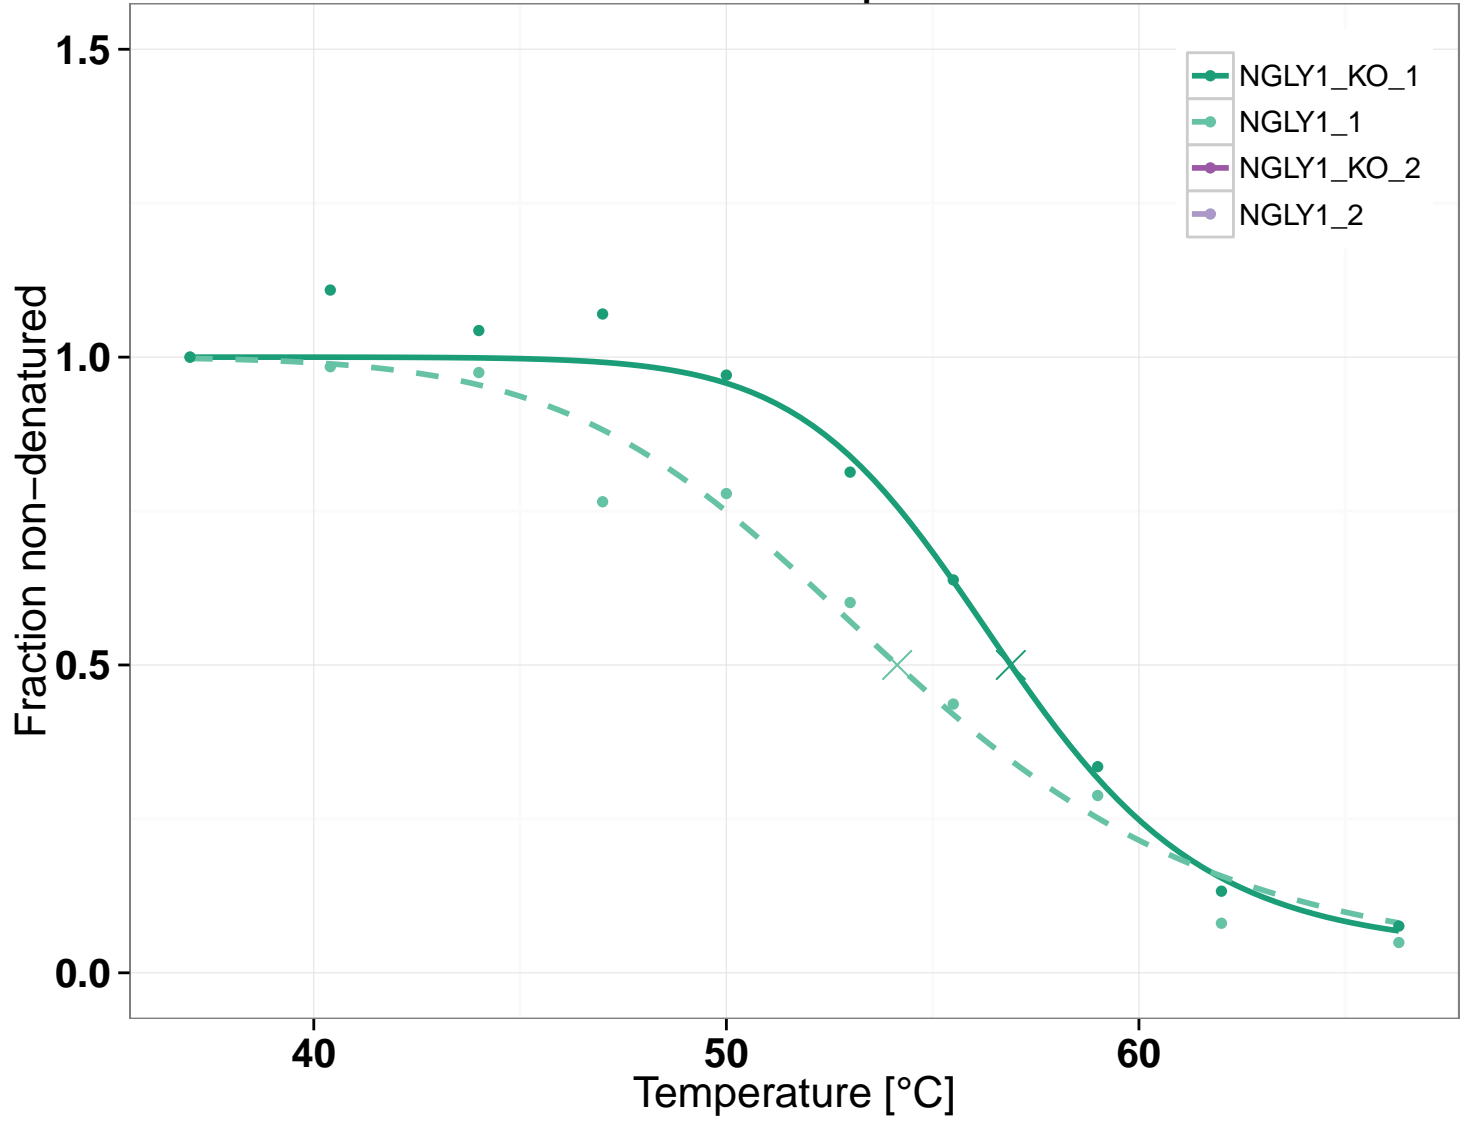

|            | meltPoint | slope  | plateau | R2   |
|------------|-----------|--------|---------|------|
| NGLY1_KO_1 | 56.89     | -0.098 | 0.03    | 0.98 |
| NGLY1_1    | 54.14     | -0.063 | 0       | 0.98 |
| NGLY1_KO_2 | -         | -      | -       | -    |
| NGLY1_2    | -         | -      | -       | -    |

Supplement: Supplementary file 1030 [file 1]

IPI00470597.4|UBE3B

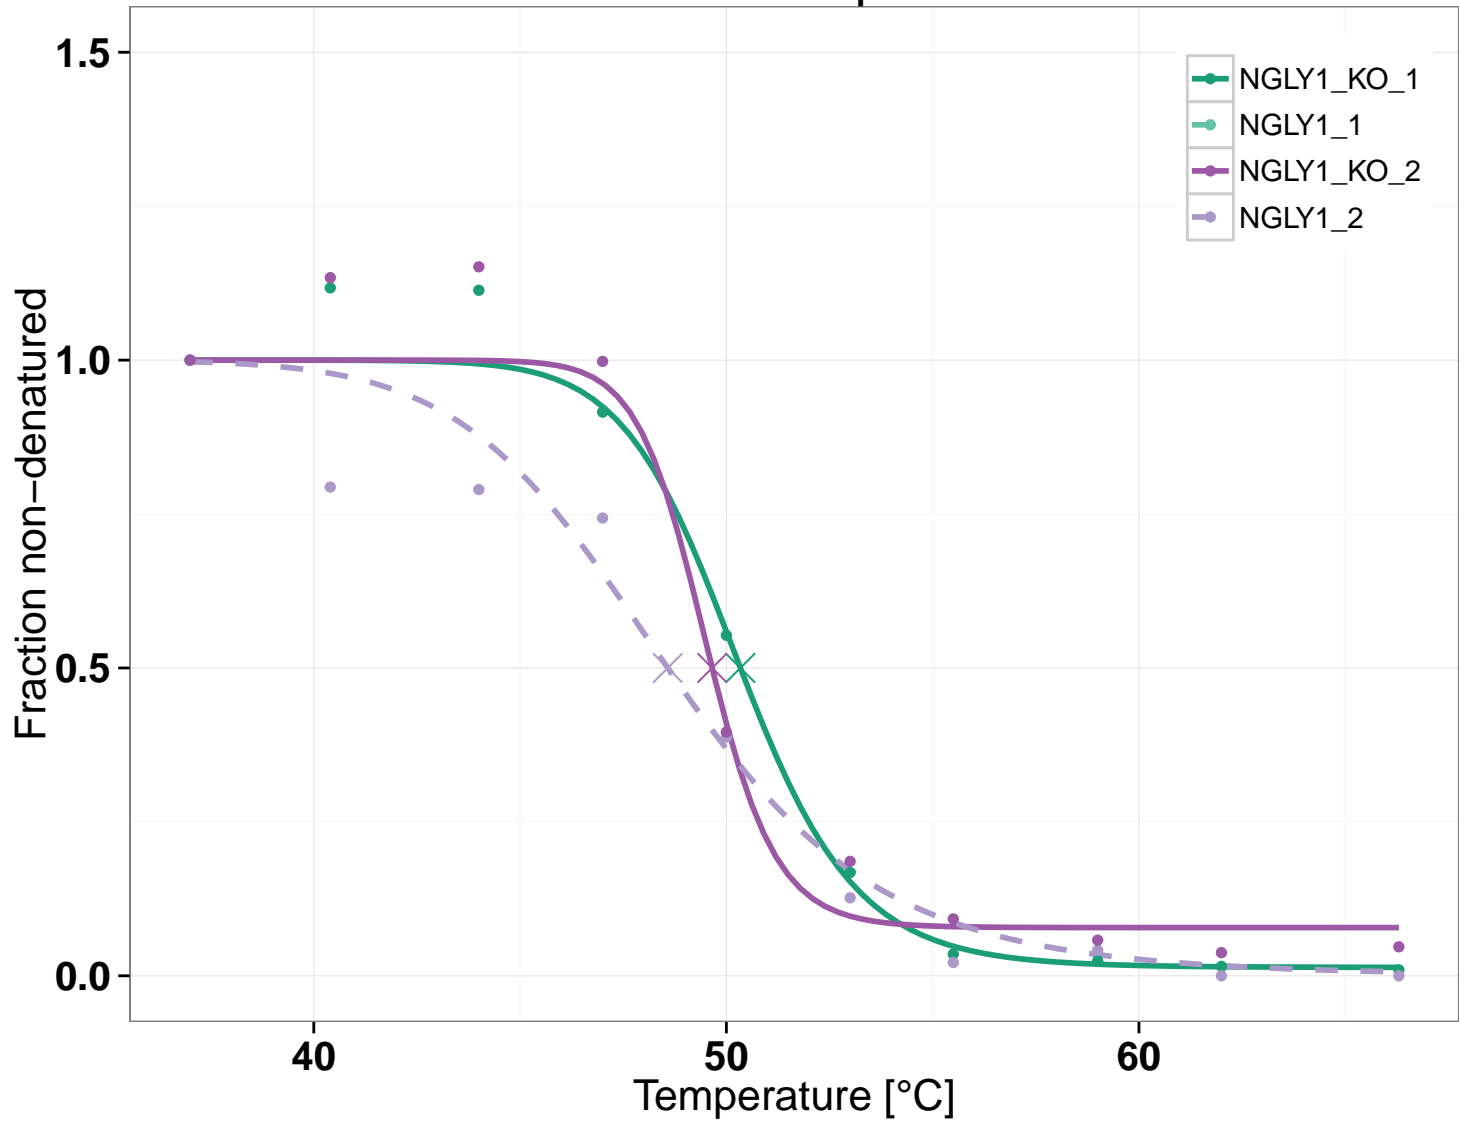

|            | meltPoint | slope  | plateau | R2   |
|------------|-----------|--------|---------|------|
| NGLY1_KO_1 | 50.34     | -0.17  | 0.01    | 0.99 |
| NGLY1_1    | -         | -      | -       | -    |
| NGLY1_KO_2 | 49.66     | -0.28  | 0.08    | 0.98 |
| NGLY1_2    | 48.58     | -0.098 | 0       | 0.96 |

Supplement: Supplementary file 1031 [file 1]

# IPI00642798.1|SC65

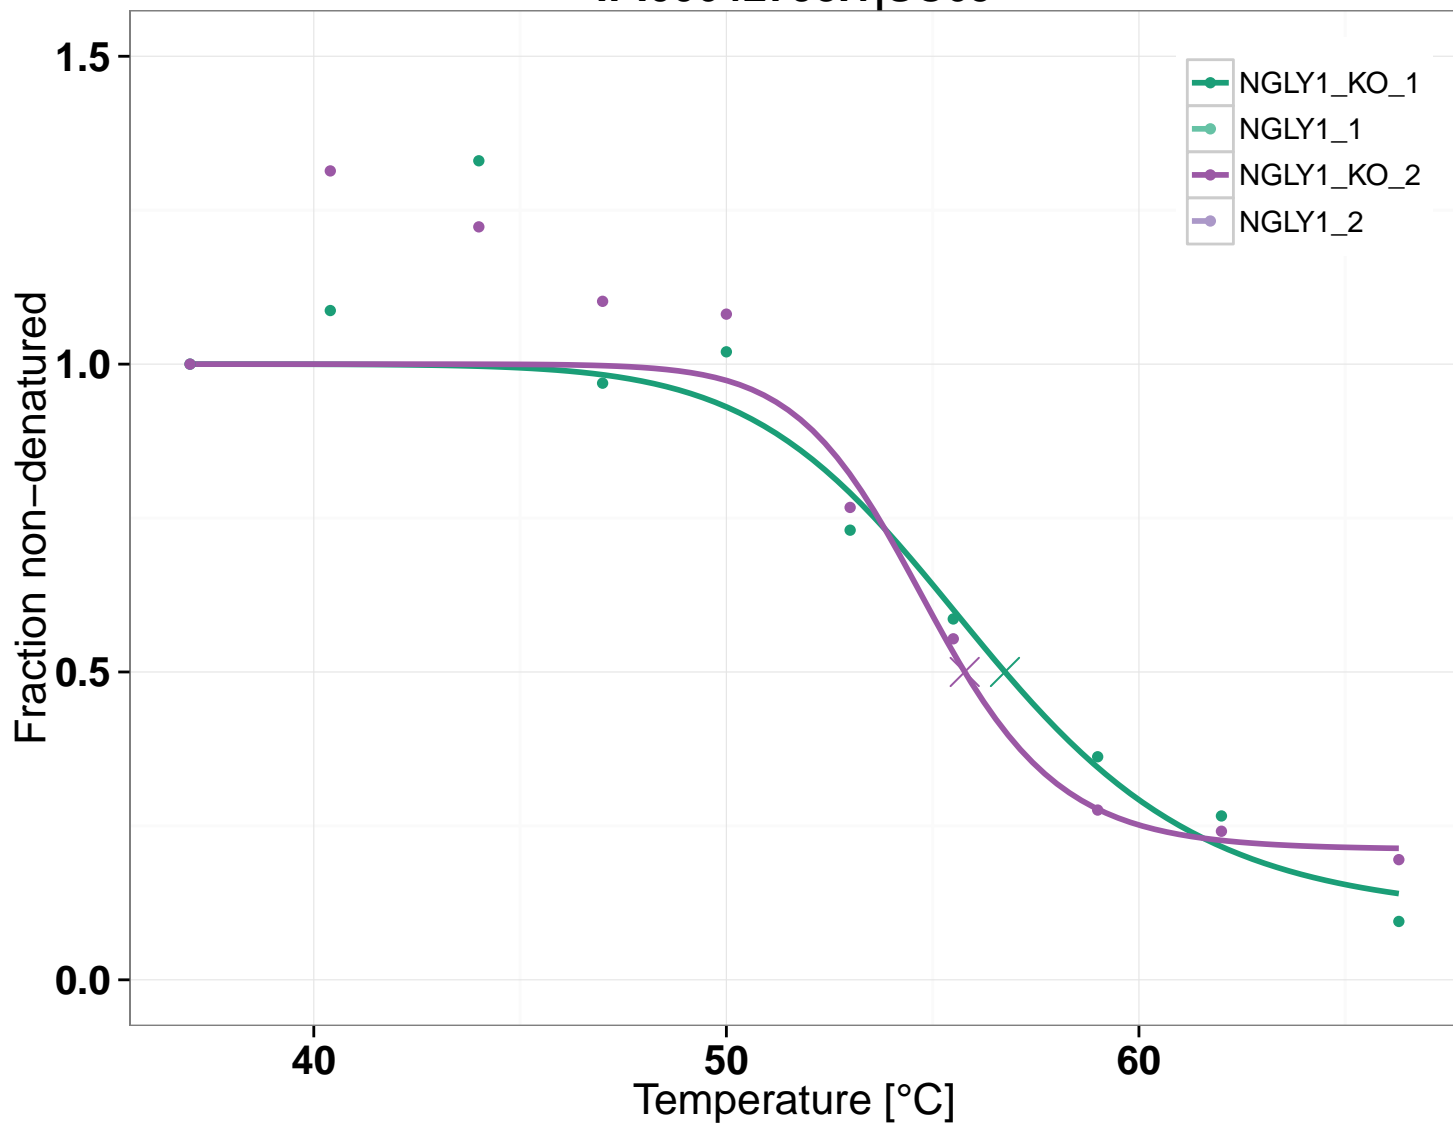

|            | meltPoint | slope  | plateau | R2   |
|------------|-----------|--------|---------|------|
| NGLY1_KO_1 | 56.75     | -0.082 | 0.1     | 0.91 |
| NGLY1_1    | -         | -      | -       | -    |
| NGLY1_KO_2 | 55.78     | -0.12  | 0.21    | 0.89 |
| NGLY1_2    | -         | -      | -       | -    |

Supplement: Supplementary file 1032 [file 1]

IPI00873960.1|MADD

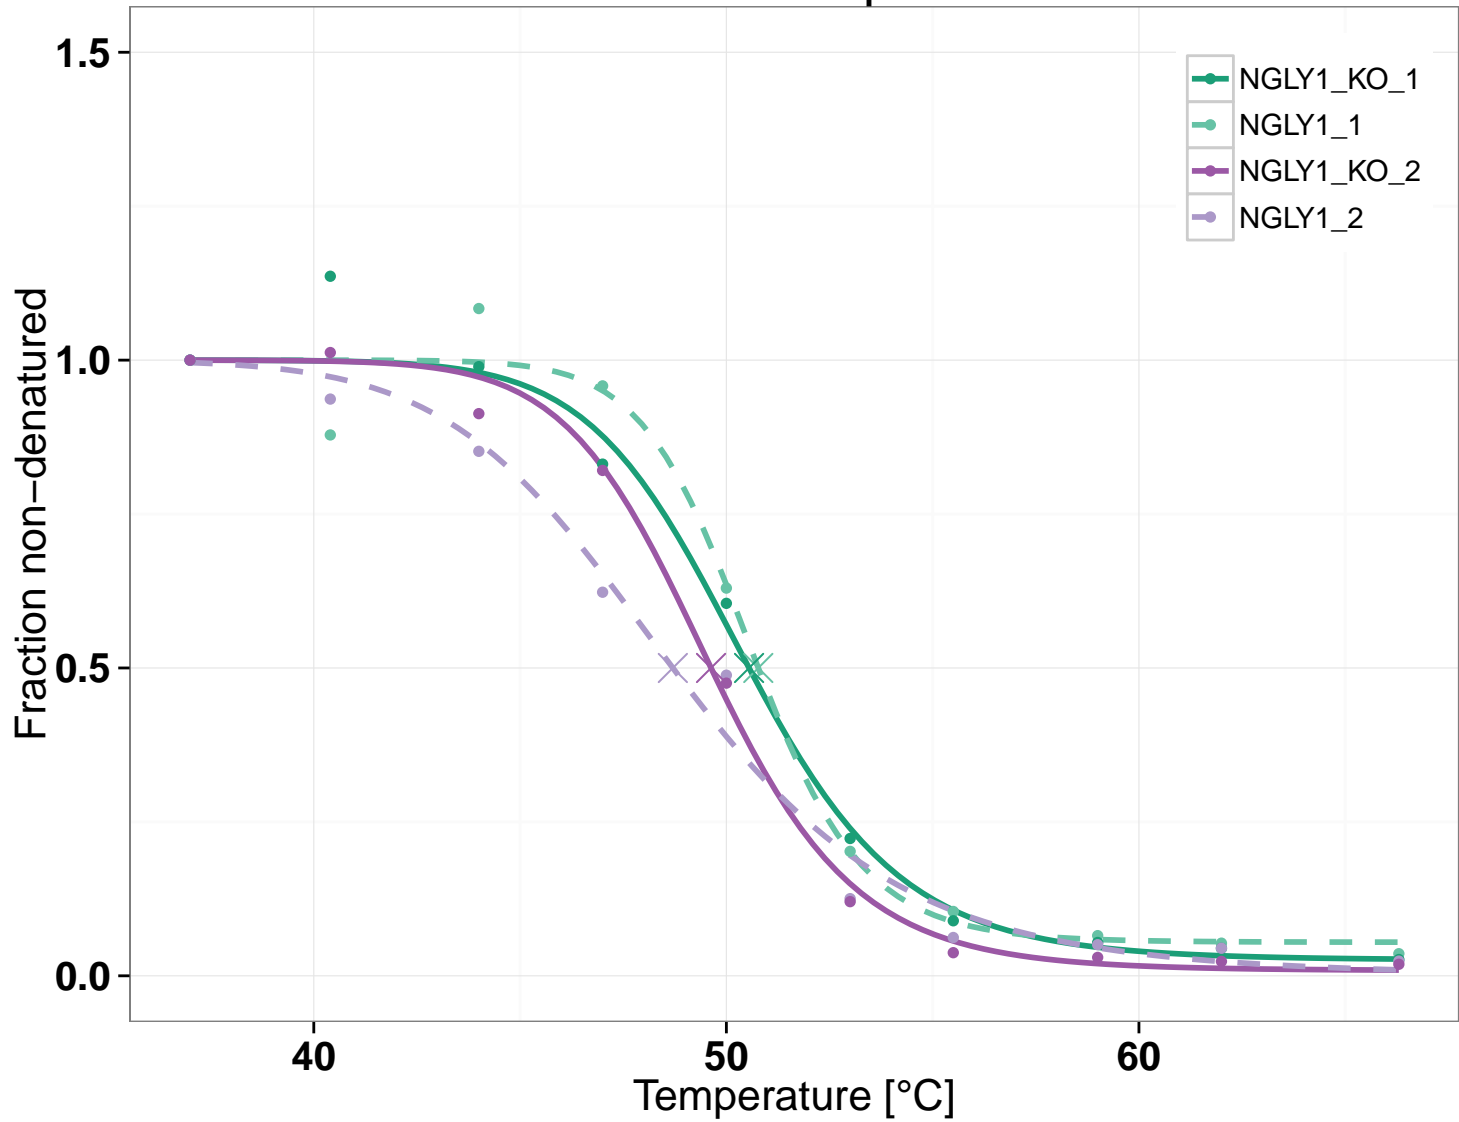

|            | meltPoint | slope  | plateau | R2   |
|------------|-----------|--------|---------|------|
| NGLY1_KO_1 | 50.55     | -0.13  | 0.03    | 0.99 |
| NGLY1_1    | 50.77     | -0.18  | 0.05    | 0.99 |
| NGLY1_KO_2 | 49.63     | -0.14  | 0.01    | 1    |
| NGLY1_2    | 48.7      | -0.091 | 0       | 0.99 |

Supplement: Supplementary file 1033 [file 1]

IPI00856042.1|LRRC58

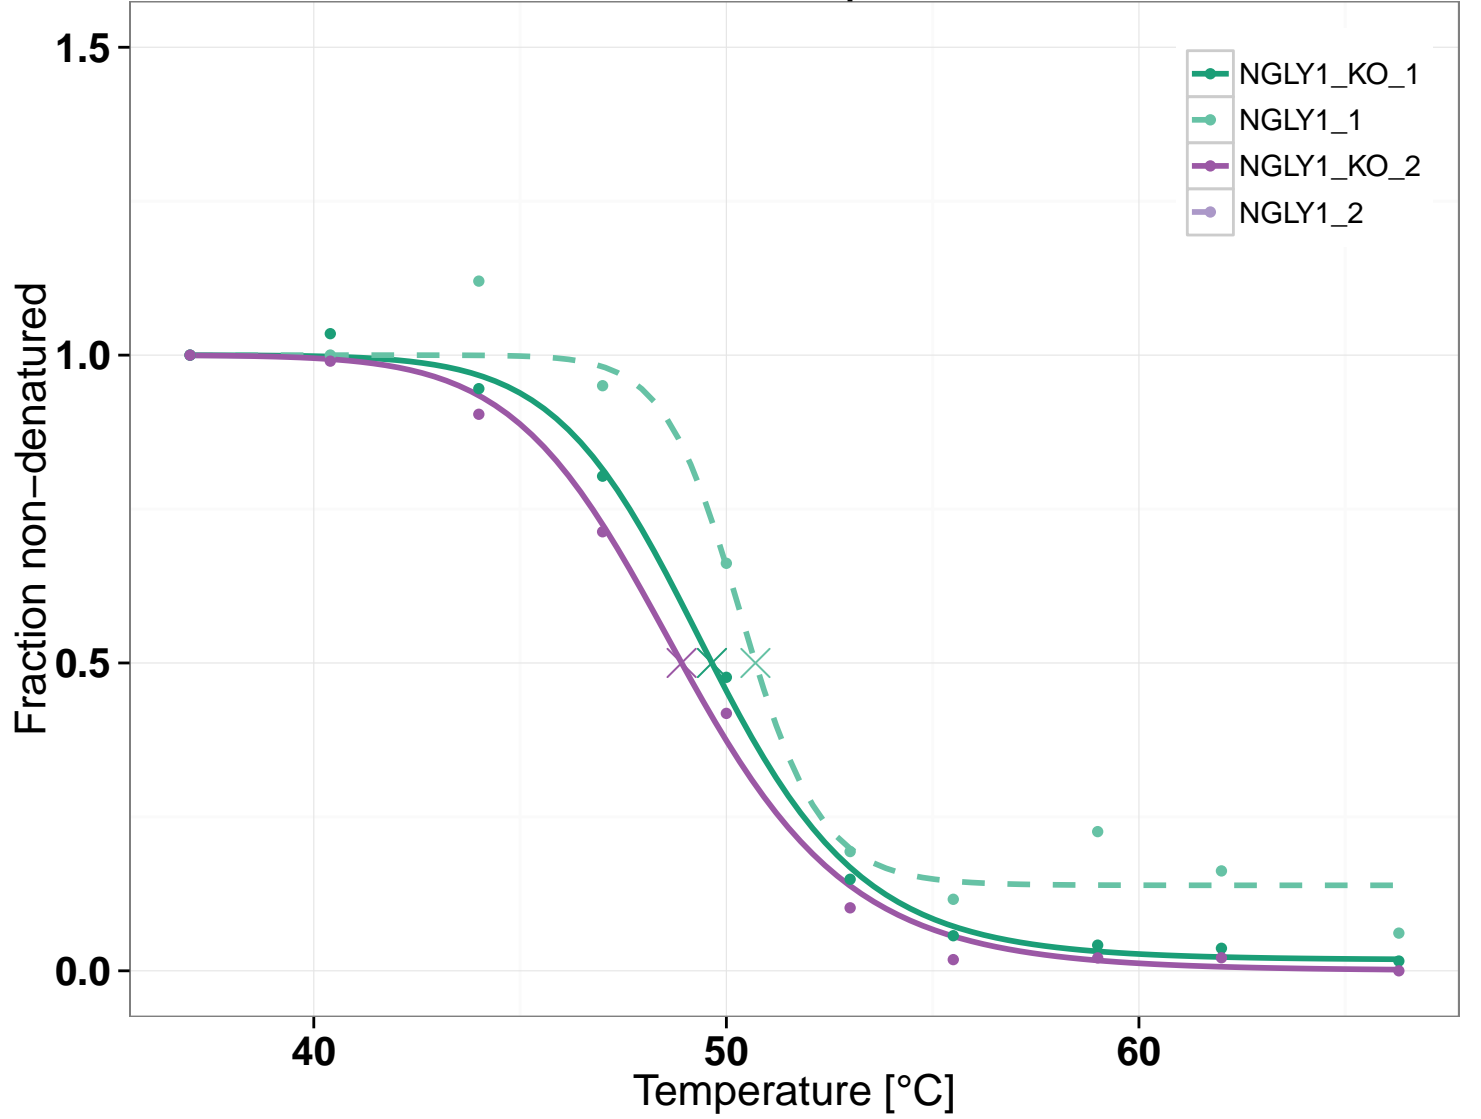

|            | meltPoint | slope | plateau | R2   |
|------------|-----------|-------|---------|------|
| NGLY1_KO_1 | 49.65     | -0.13 | 0.02    | 1    |
| NGLY1_1    | 50.7      | -0.23 | 0.14    | 0.98 |
| NGLY1_KO_2 | 48.92     | -0.12 | 0       | 1    |
| NGLY1_2    | -         | -     | -       | -    |

Supplement: Supplementary file 1034 [file 1]

IPI00449049.5|PARP1

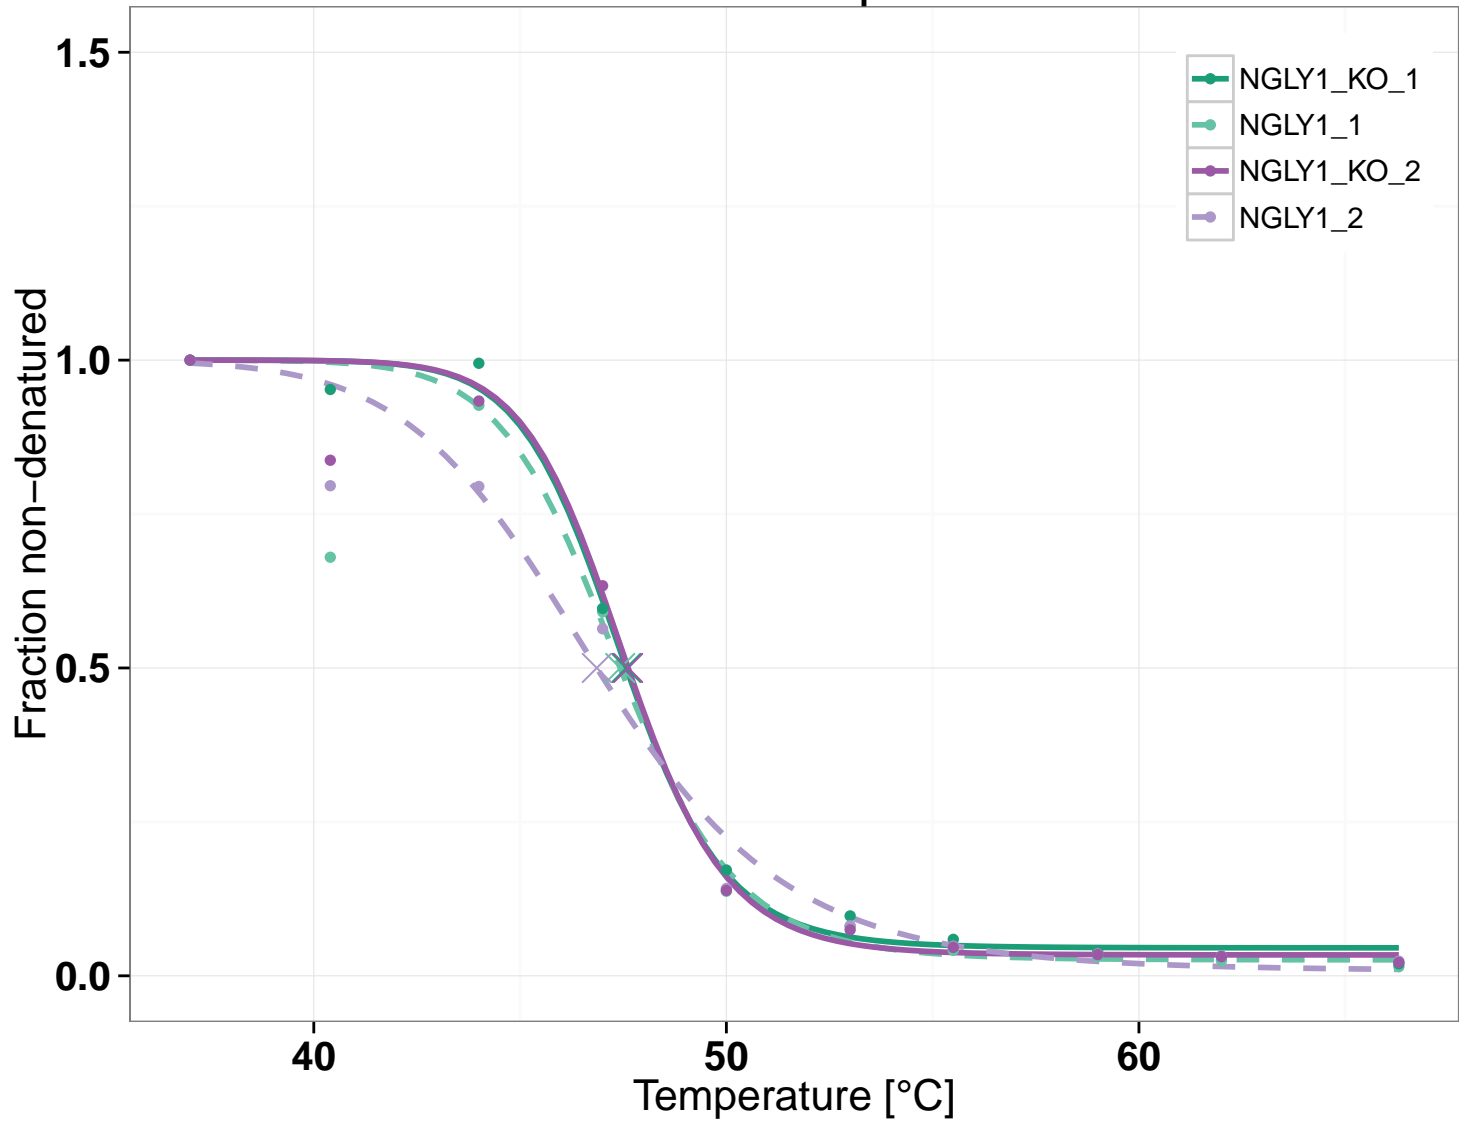

|            | meltPoint | slope | plateau | R2   |
|------------|-----------|-------|---------|------|
| NGLY1_KO_1 | 47.57     | -0.19 | 0.05    | 1    |
| NGLY1_1    | 47.43     | -0.17 | 0.03    | 0.93 |
| NGLY1_KO_2 | 47.62     | -0.2  | 0.03    | 0.98 |
| NGLY1_2    | 46.86     | -0.11 | 0.01    | 0.97 |

Supplement: Supplementary file 1035 [file 1]

IPI00895844.1|DNM3

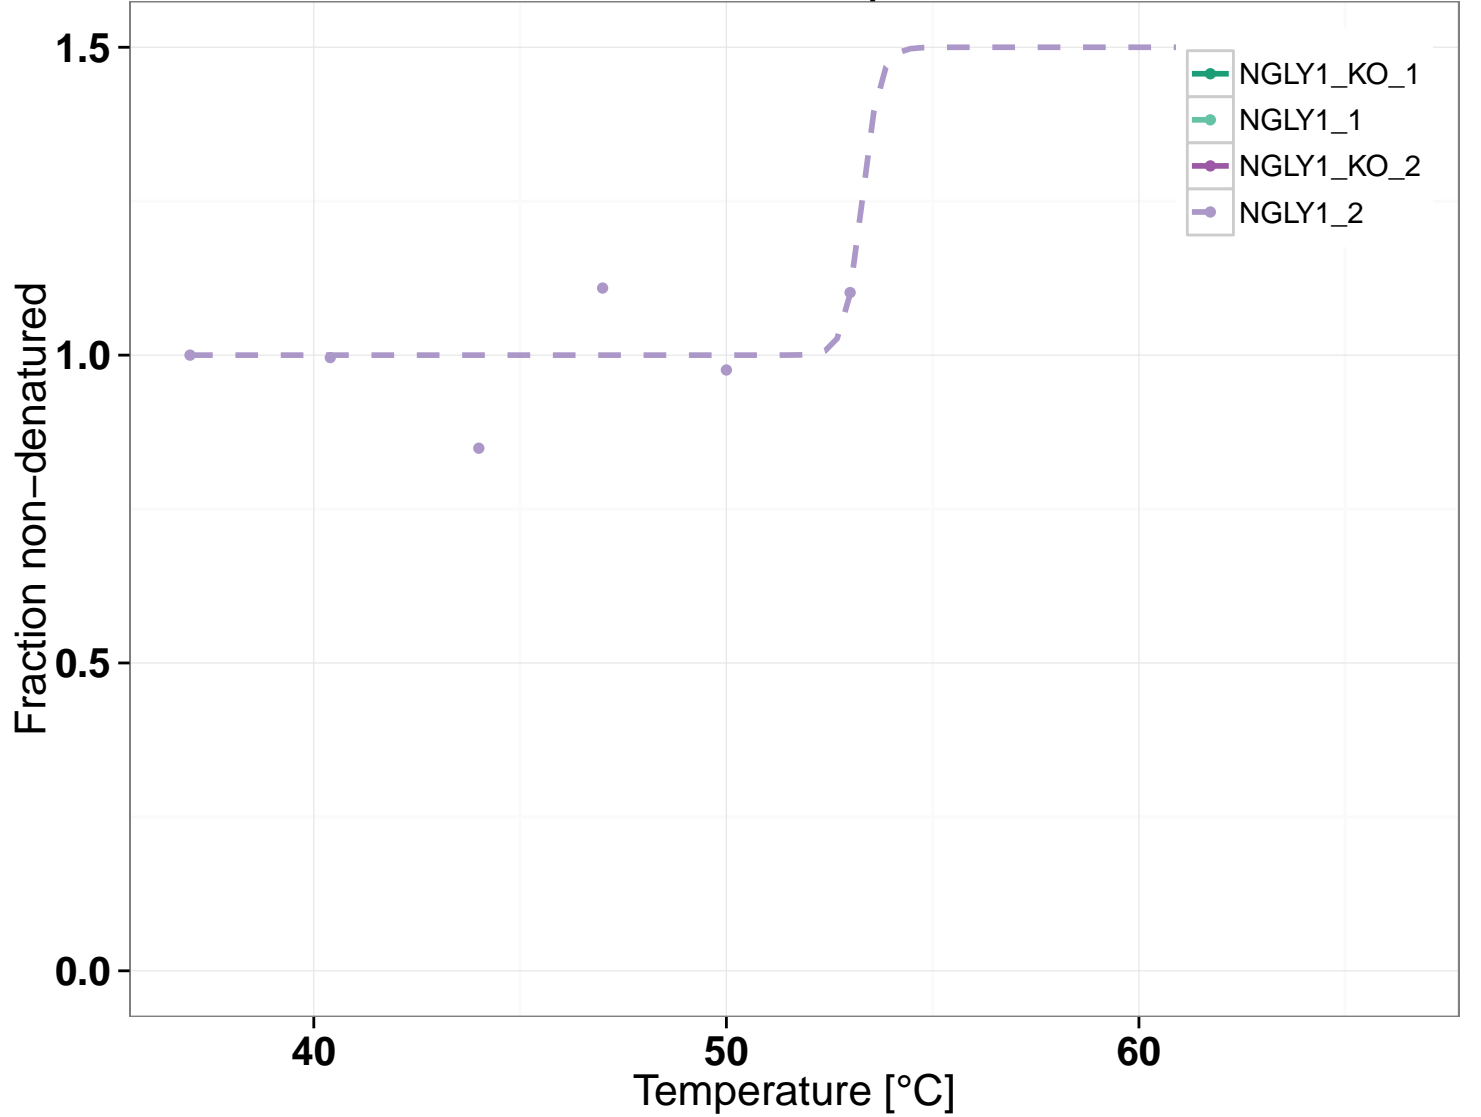

|            | meltPoint | slope | plateau | R2   |
|------------|-----------|-------|---------|------|
| NGLY1_KO_1 | —         | —     | —       | —    |
| NGLY1_1    | —         | —     | —       | —    |
| NGLY1_KO_2 | —         | —     | —       | —    |
| NGLY1_2    | —         | 0.59  | 1.5     | 0.04 |

Supplement: Supplementary file 1036 [file 1]

IPI00218463.3|MAGMAS

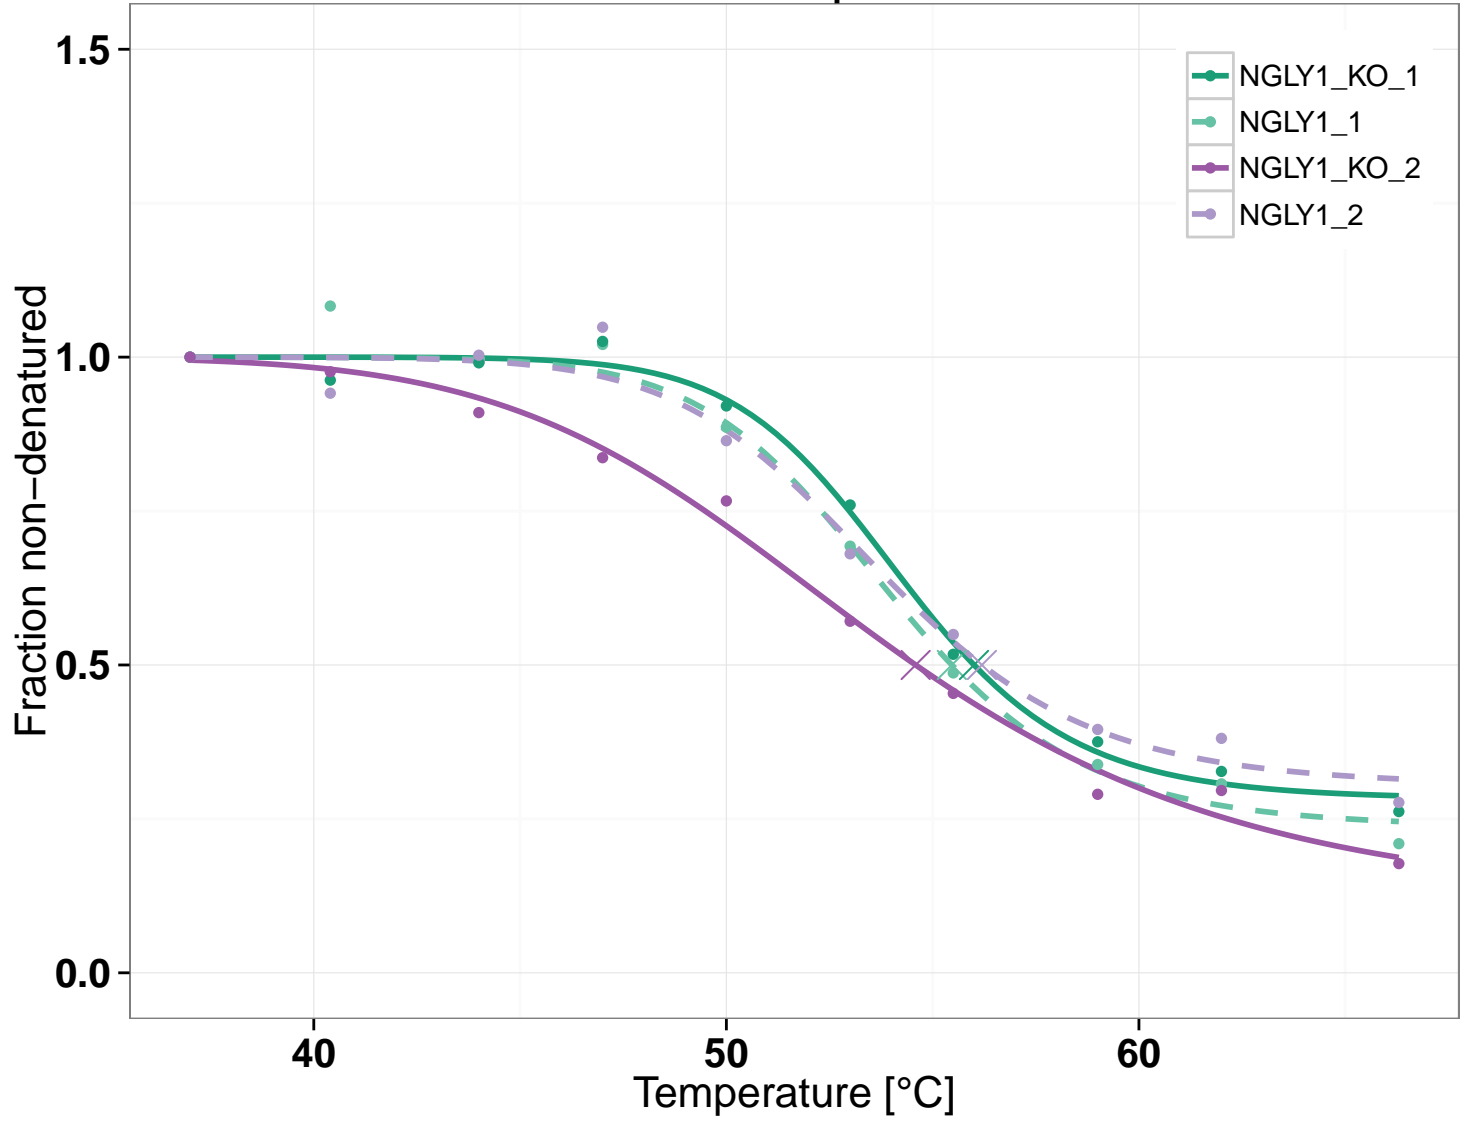

|            | meltPoint | slope  | plateau | R2   |
|------------|-----------|--------|---------|------|
| NGLY1_KO_1 | 56        | -0.088 | 0.28    | 0.99 |
| NGLY1_1    | 55.47     | -0.082 | 0.24    | 0.99 |
| NGLY1_KO_2 | 54.59     | -0.05  | 0.1     | 0.99 |
| NGLY1_2    | 56.19     | -0.069 | 0.3     | 0.98 |

Supplement: Supplementary file 1037 [file 1]

# IPI00215918.3|ARF4

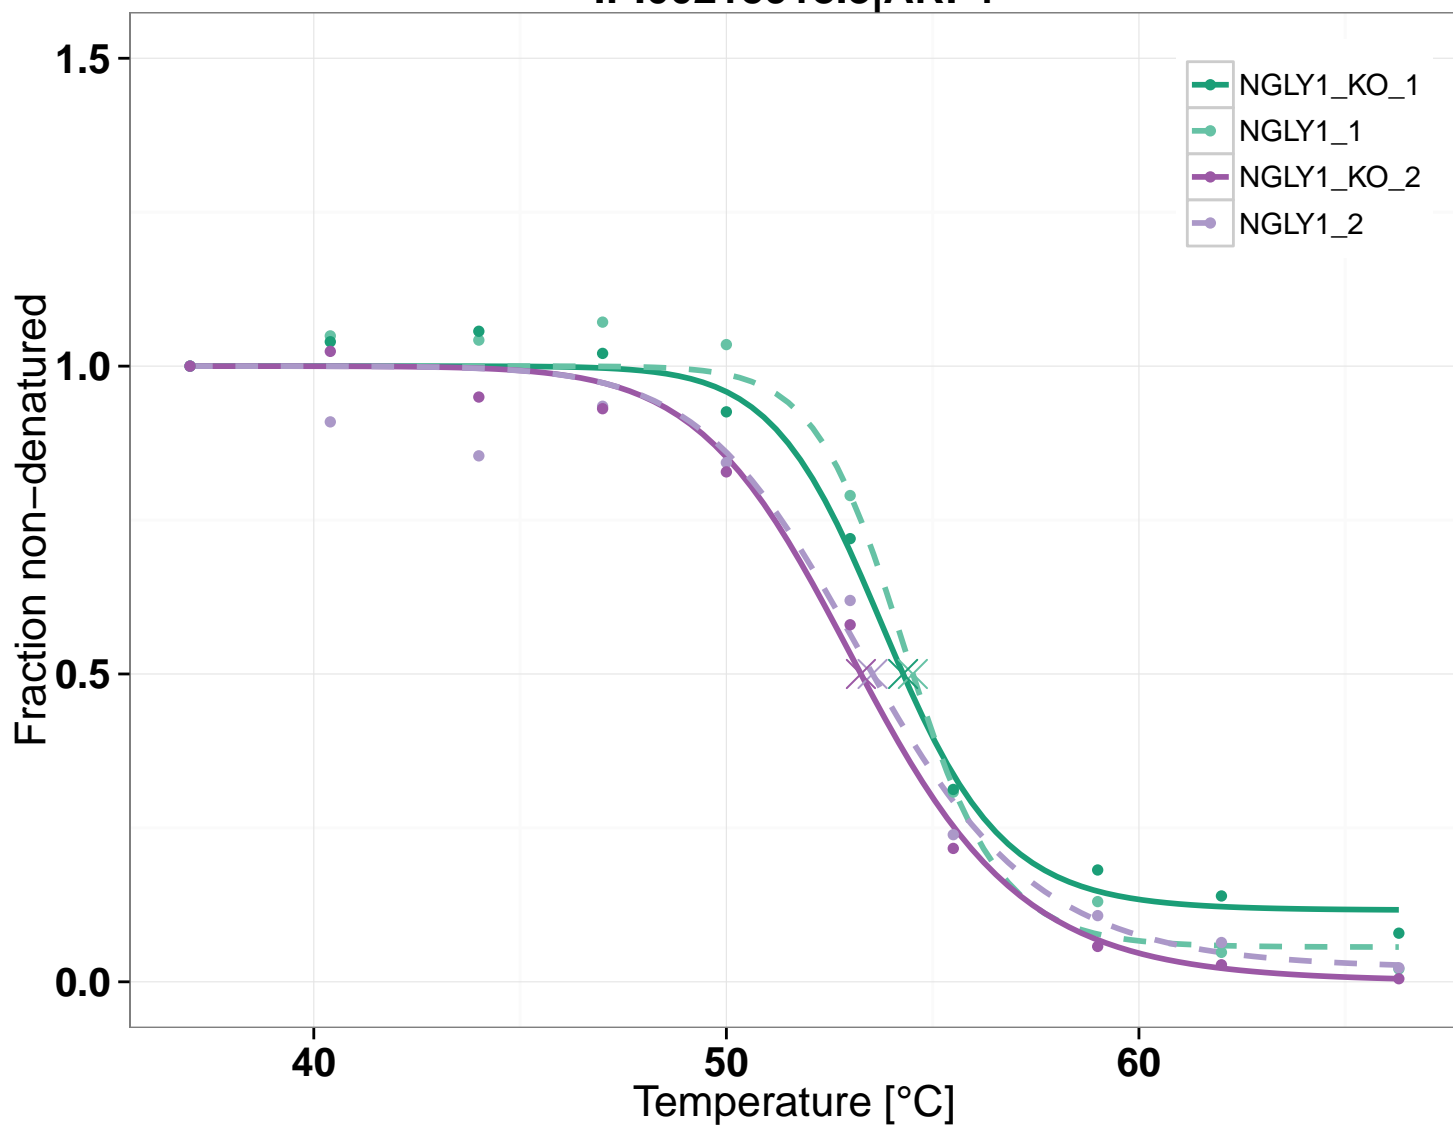

|            | meltPoint | slope | plateau | R2   |
|------------|-----------|-------|---------|------|
| NGLY1_KO_1 | 54.28     | -0.16 | 0.12    | 0.99 |
| NGLY1_1    | 54.52     | -0.21 | 0.06    | 0.99 |
| NGLY1_KO_2 | 53.26     | -0.13 | 0       | 0.99 |
| NGLY1_2    | 53.54     | -0.12 | 0.02    | 0.98 |

Supplement: Supplementary file 1038 [file 1]

IPI00020124.1|PI4K2A

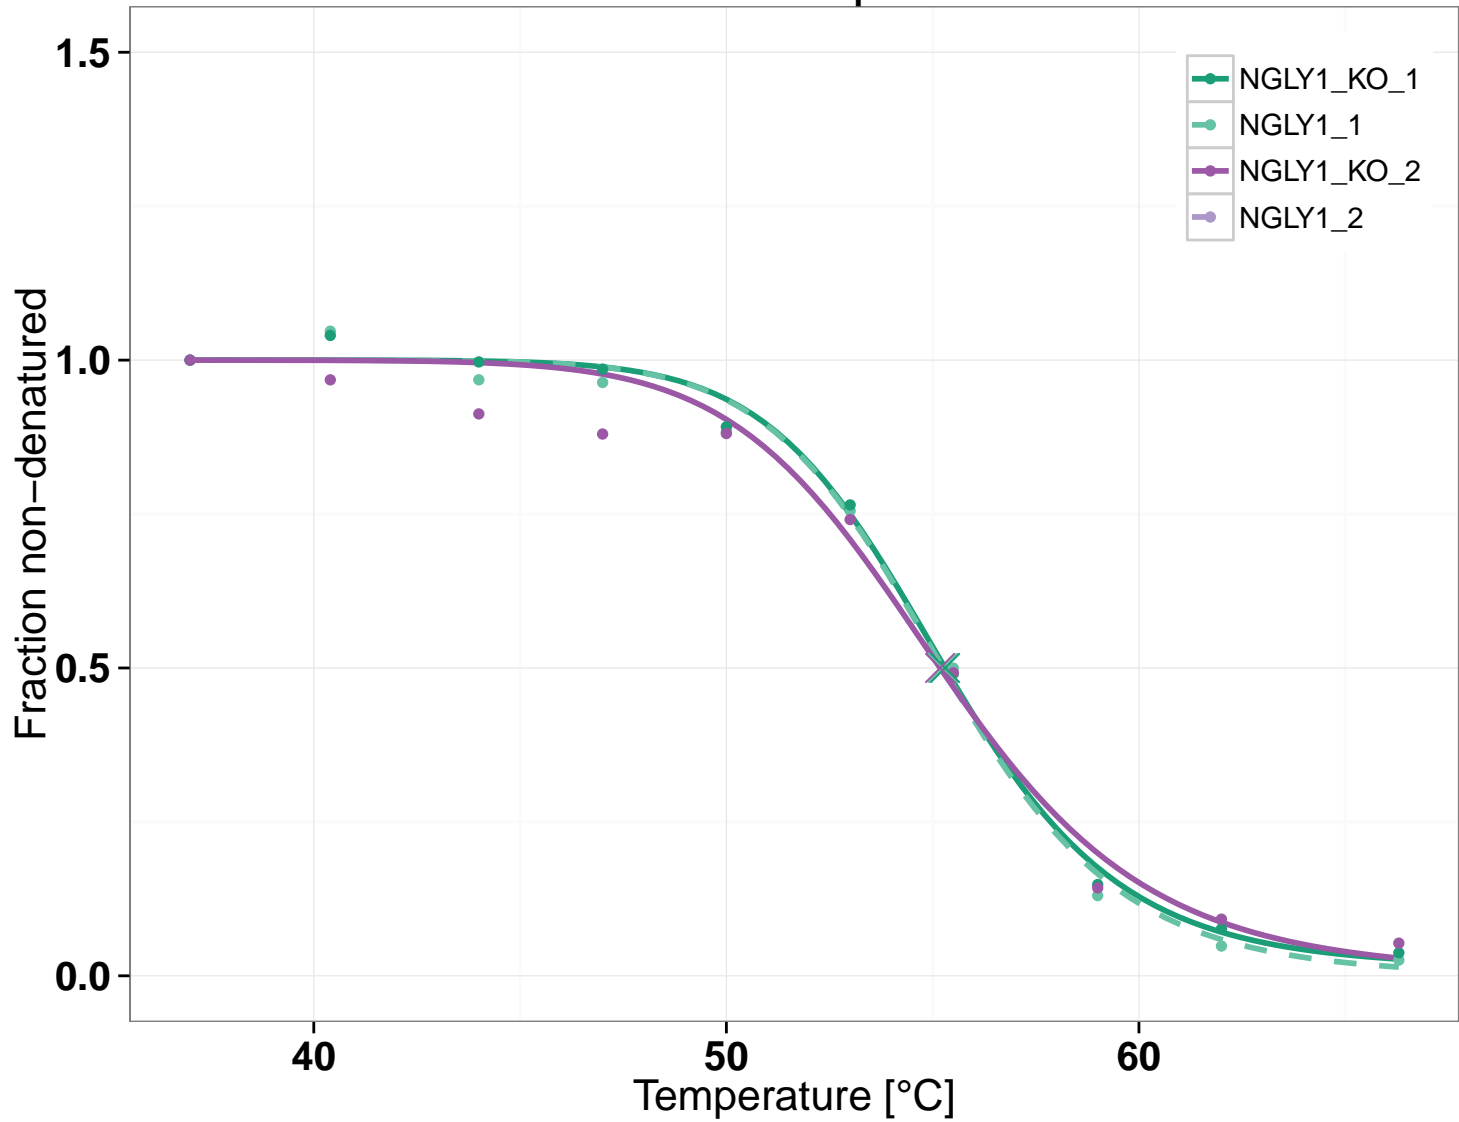

|            | meltPoint | slope  | plateau | R2   |
|------------|-----------|--------|---------|------|
| NGLY1_KO_1 | 55.3      | -0.11  | 0.01    | 1    |
| NGLY1_1    | 55.25     | -0.12  | 0       | 0.99 |
| NGLY1_KO_2 | 55.18     | -0.099 | 0       | 0.98 |
| NGLY1_2    | -         | -      | -       | -    |

Supplement: Supplementary file 1039 [file 1]

# IPI00305305.3|SIPA1

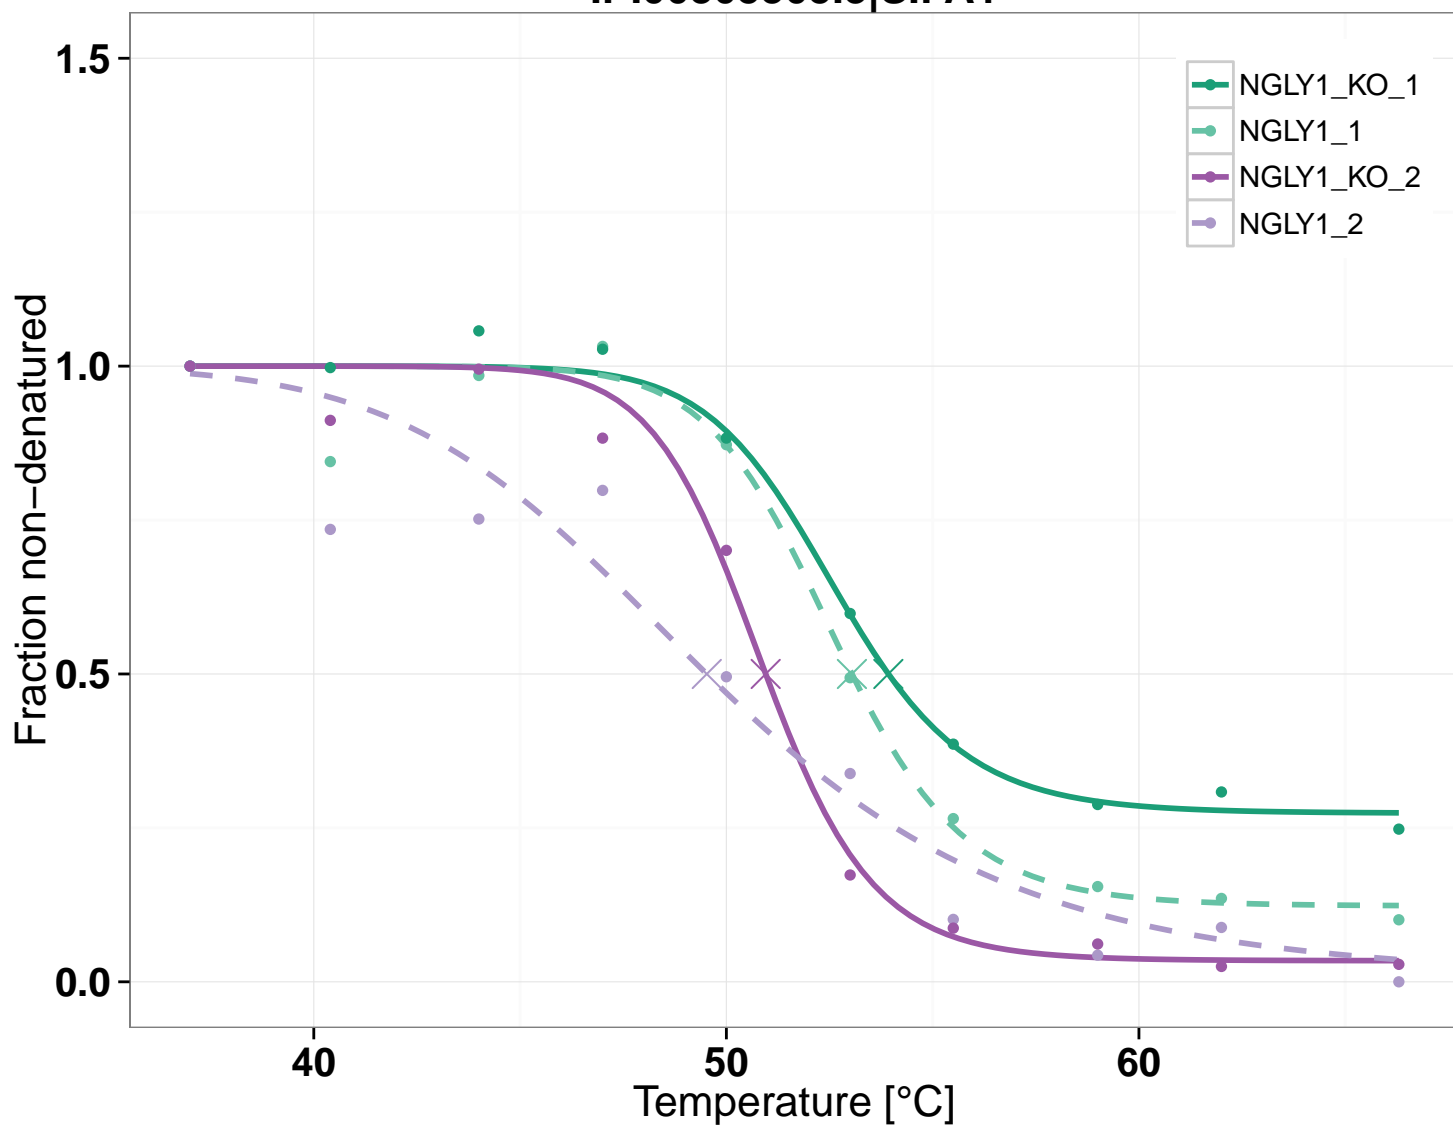

|            | meltPoint | slope  | plateau | R2   |
|------------|-----------|--------|---------|------|
| NGLY1_KO_1 | 53.93     | -0.12  | 0.27    | 0.99 |
| NGLY1_1    | 53.04     | -0.14  | 0.12    | 0.98 |
| NGLY1_KO_2 | 50.95     | -0.18  | 0.03    | 0.99 |
| NGLY1_2    | 49.53     | -0.067 | 0       | 0.93 |

Supplement: Supplementary file 1040 [file 1]

# IPI00444204.1|RALB

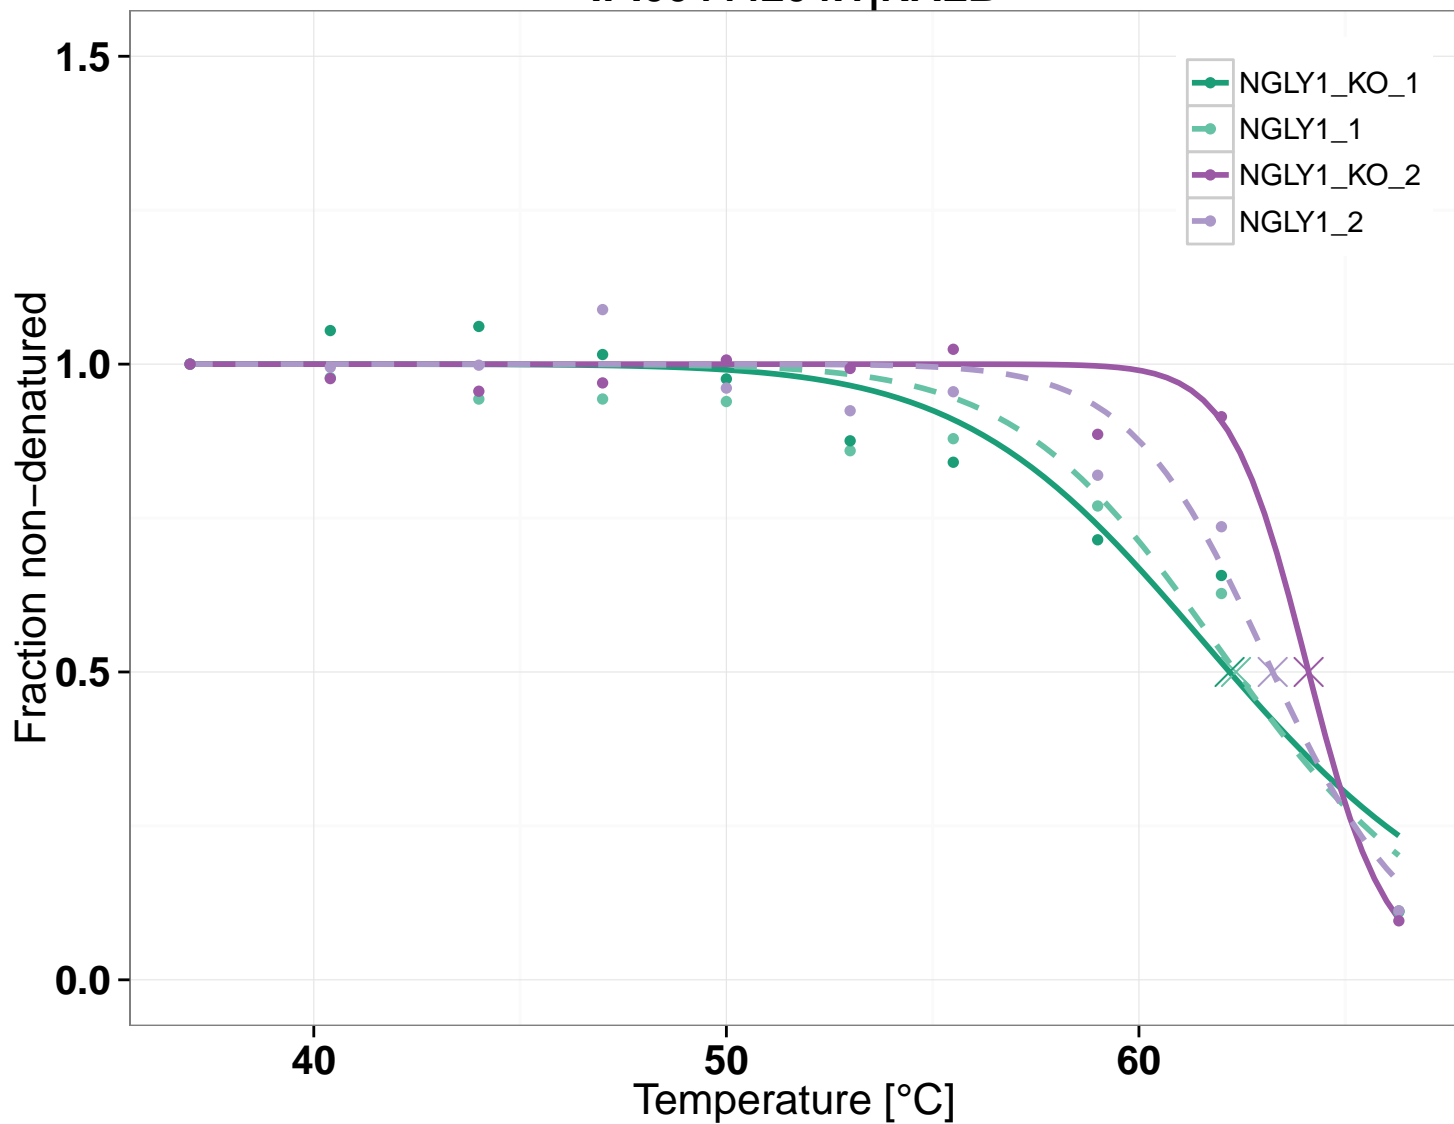

|            | meltPoint | slope  | plateau | R2   |
|------------|-----------|--------|---------|------|
| NGLY1_KO_1 | 62.2      | -0.078 | 0       | 0.93 |
| NGLY1_1    | 62.35     | -0.093 | 0       | 0.93 |
| NGLY1_KO_2 | 64.11     | -0.26  | 0       | 0.98 |
| NGLY1_2    | 63.24     | -0.14  | 0       | 0.95 |

Supplement: Supplementary file 1041 [file 1]

IPI00061525.3|GNPNAT1

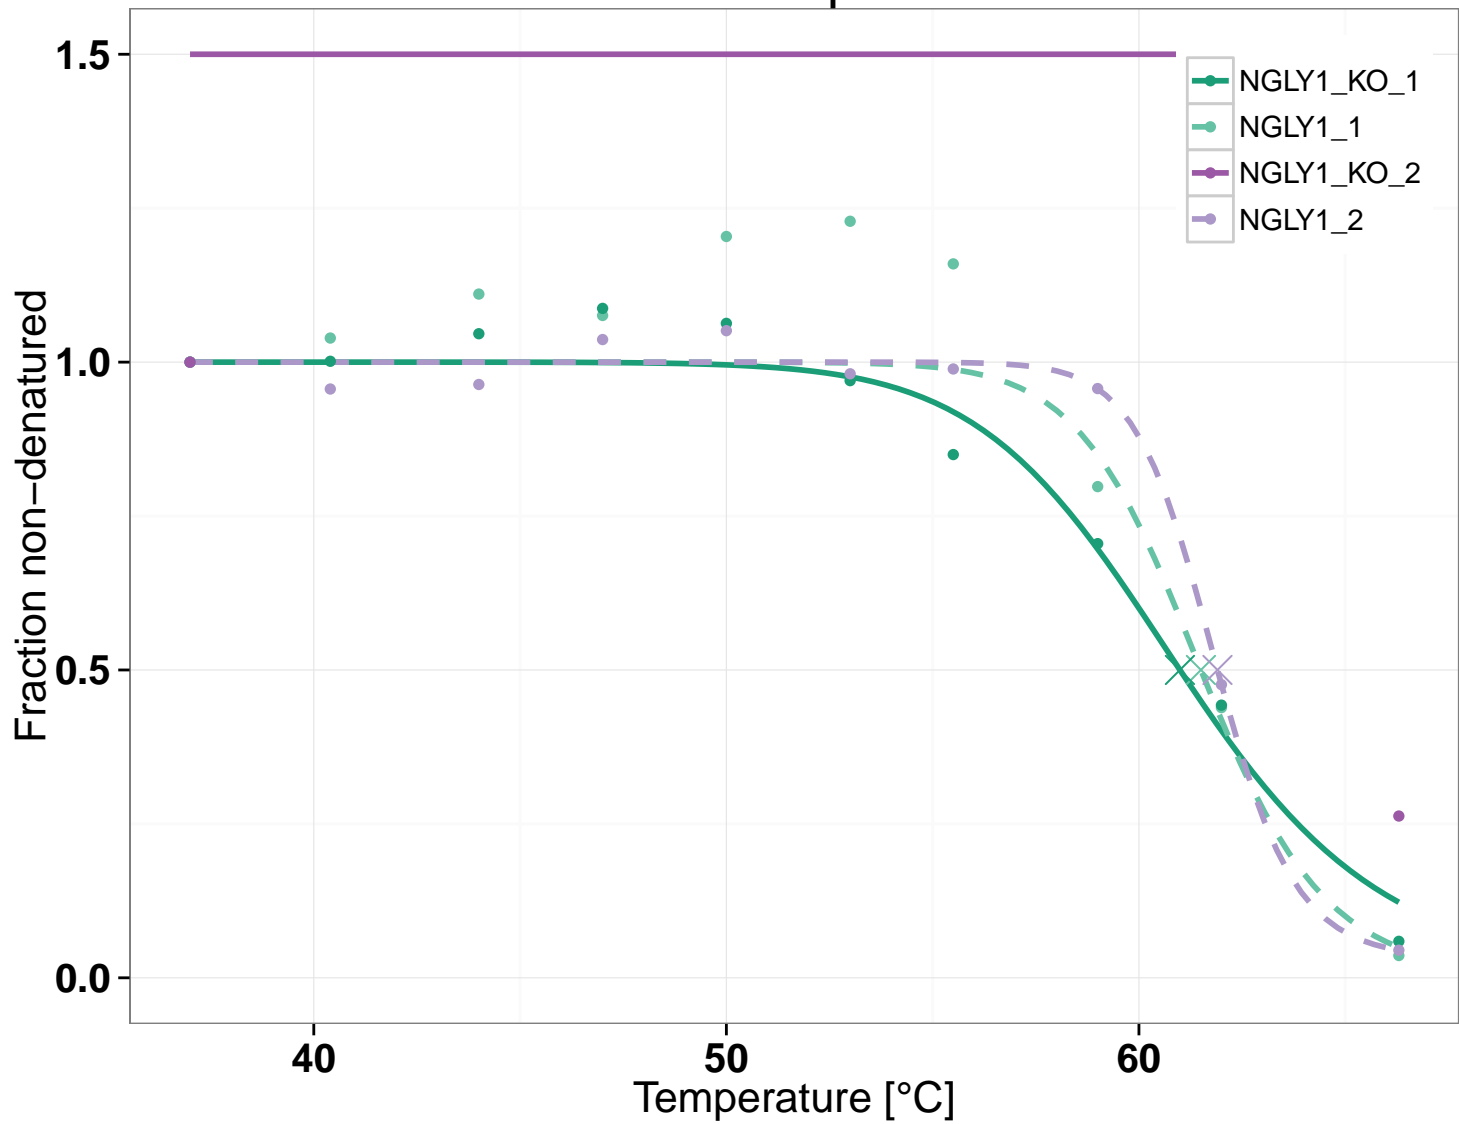

|            | meltPoint | slope | plateau | R2    |
|------------|-----------|-------|---------|-------|
| NGLY1_KO_1 | 60.99     | -0.1  | 0       | 0.98  |
| NGLY1_1    | 61.5      | -0.17 | 0       | 0.89  |
| NGLY1_KO_2 | -         | -     | 1.5     | -1.73 |
| NGLY1_2    | 61.9      | -0.25 | 0.03    | 0.99  |

Supplement: Supplementary file 1042 [file 1]

IPI00292168.3|ASF1A

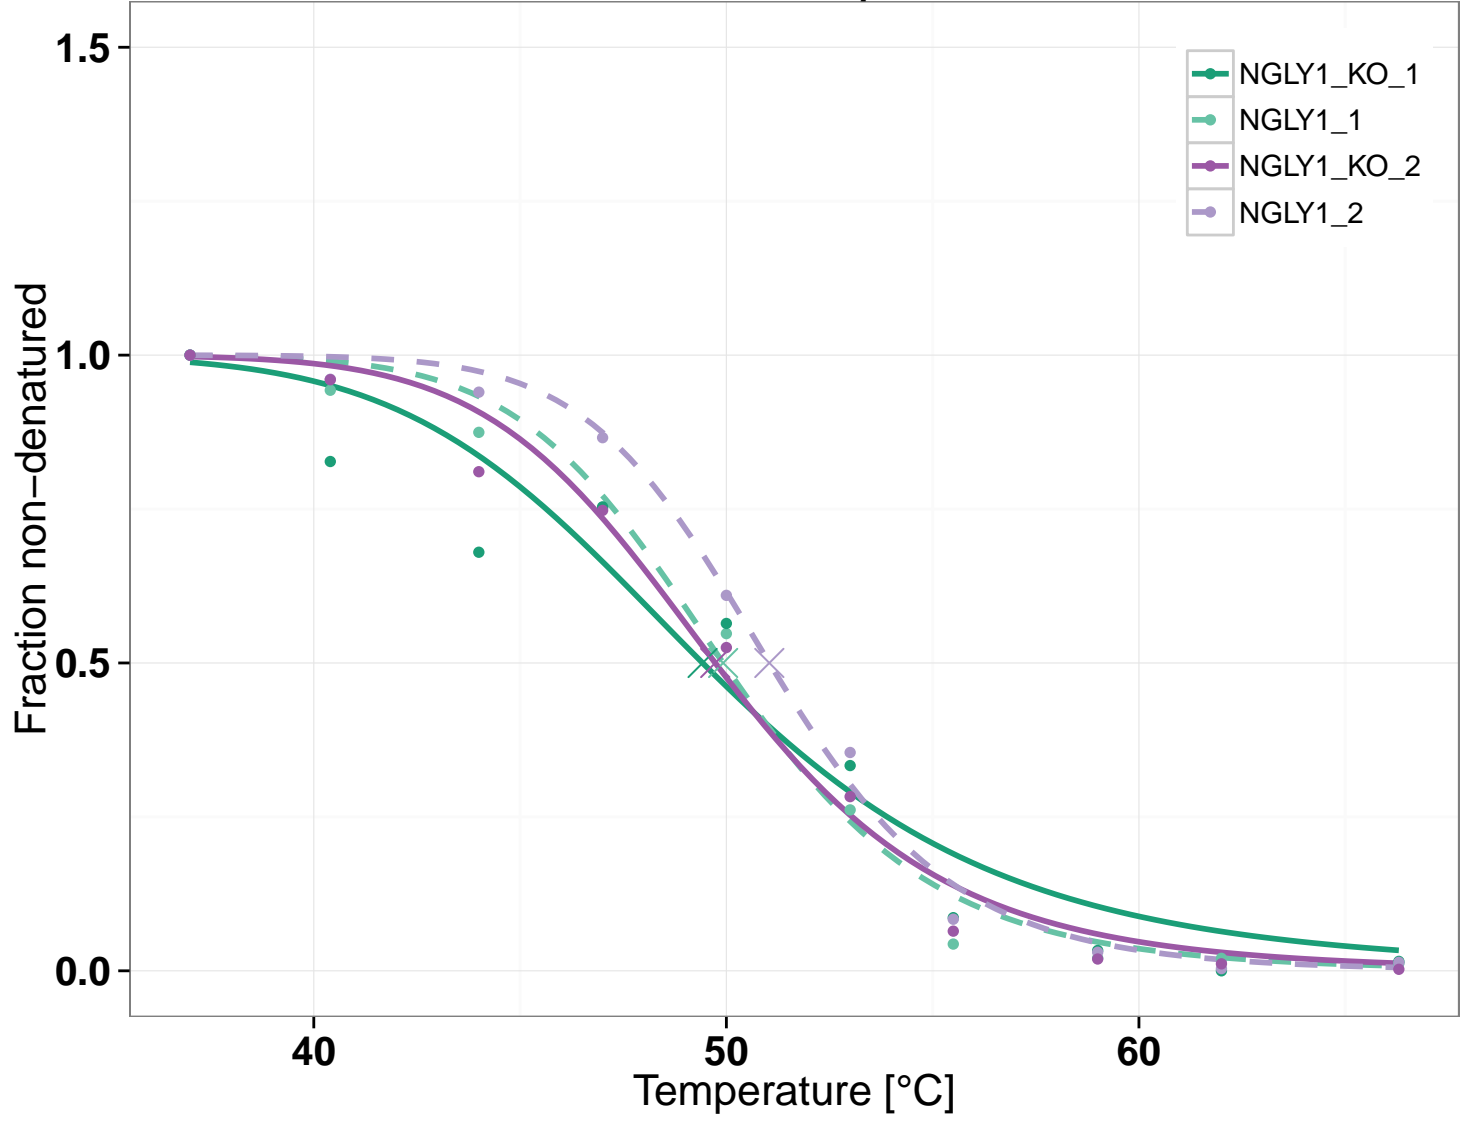

|            | meltPoint | slope  | plateau | R2   |
|------------|-----------|--------|---------|------|
| NGLY1_KO_1 | 49.42     | -0.068 | 0       | 0.94 |
| NGLY1_1    | 49.92     | -0.099 | 0       | 0.99 |
| NGLY1_KO_2 | 49.73     | -0.089 | 0       | 0.99 |
| NGLY1_2    | 51.04     | -0.11  | 0       | 0.99 |

Supplement: Supplementary file 1043 [file 1]

IPI00103149.4|FAM33A

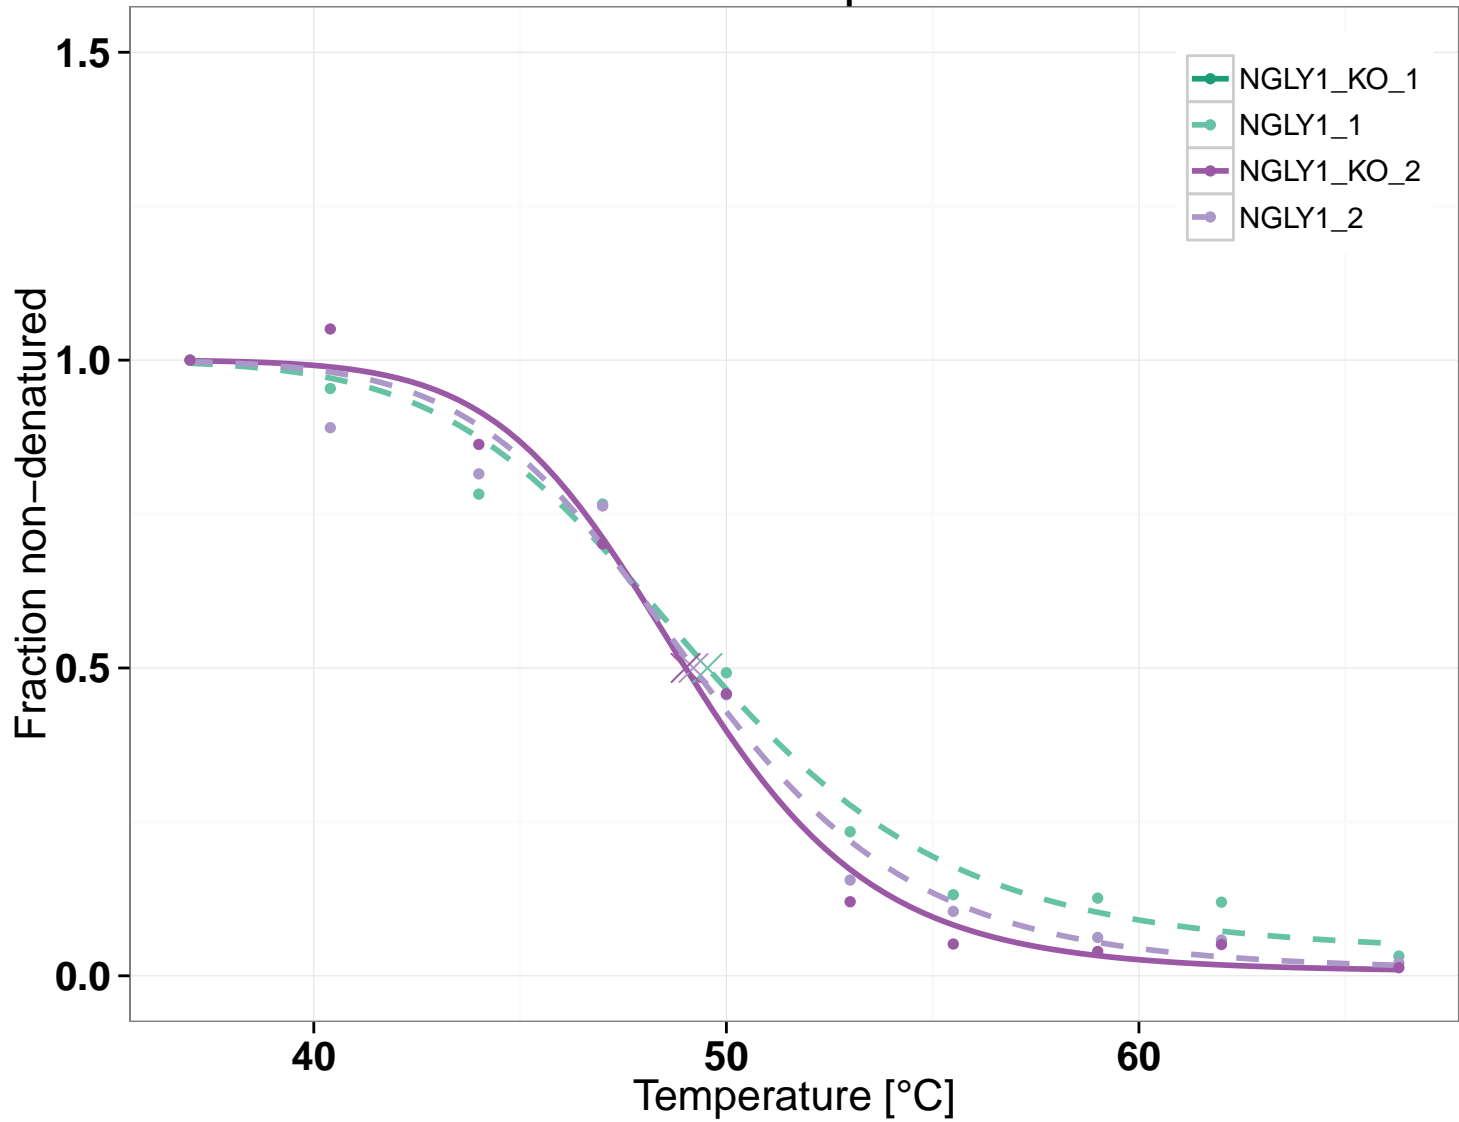

|            | meltPoint | slope  | plateau | R2   |
|------------|-----------|--------|---------|------|
| NGLY1_KO_1 | —         | —      | —       | —    |
| NGLY1_1    | 49.54     | -0.078 | 0.04    | 0.98 |
| NGLY1_KO_2 | 49.01     | -0.11  | 0.01    | 0.99 |
| NGLY1_2    | 49.2      | -0.092 | 0.01    | 0.98 |

Supplement: Supplementary file 1044 [file 1]

IPI00093253.3|RAD51AP1

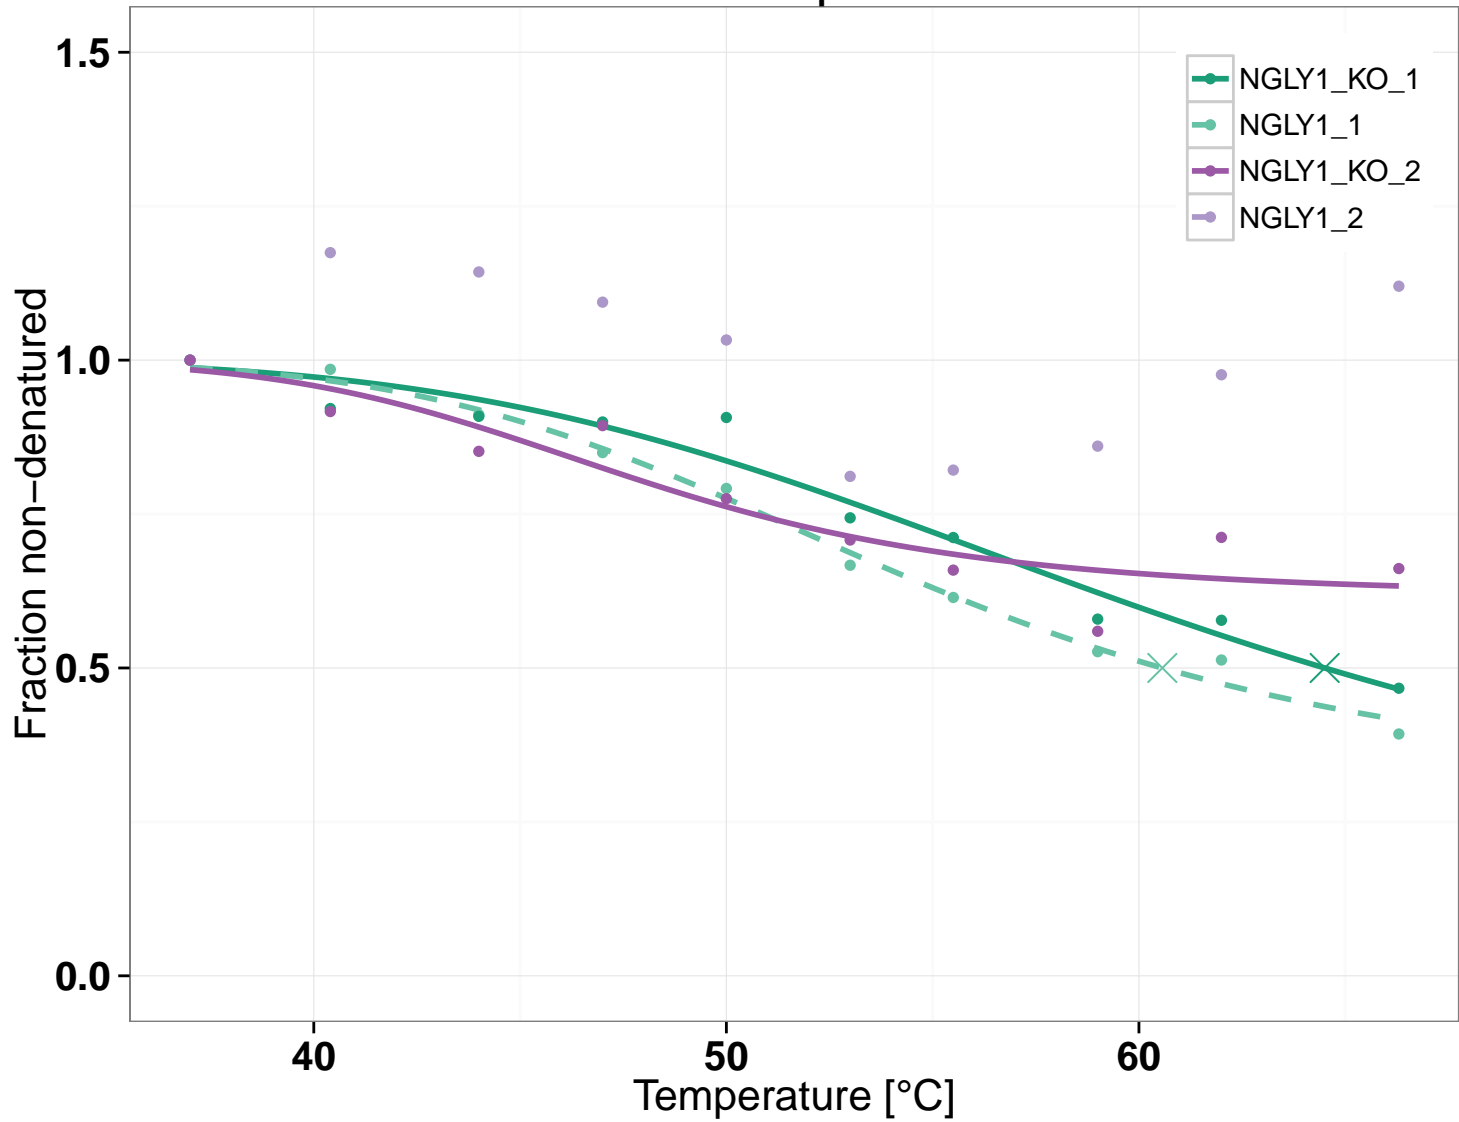

|            | meltPoint | slope  | plateau | R2   |
|------------|-----------|--------|---------|------|
| NGLY1_KO_1 | 64.5      | -0.025 | 0.13    | 0.96 |
| NGLY1_1    | 60.57     | -0.03  | 0.29    | 0.99 |
| NGLY1_KO_2 | -         | -0.023 | 0.62    | 0.86 |
| NGLY1_2    | -         | -      | -       | -    |

Supplement: Supplementary file 1045 [file 1]

# IPI00784013.1|JAK1

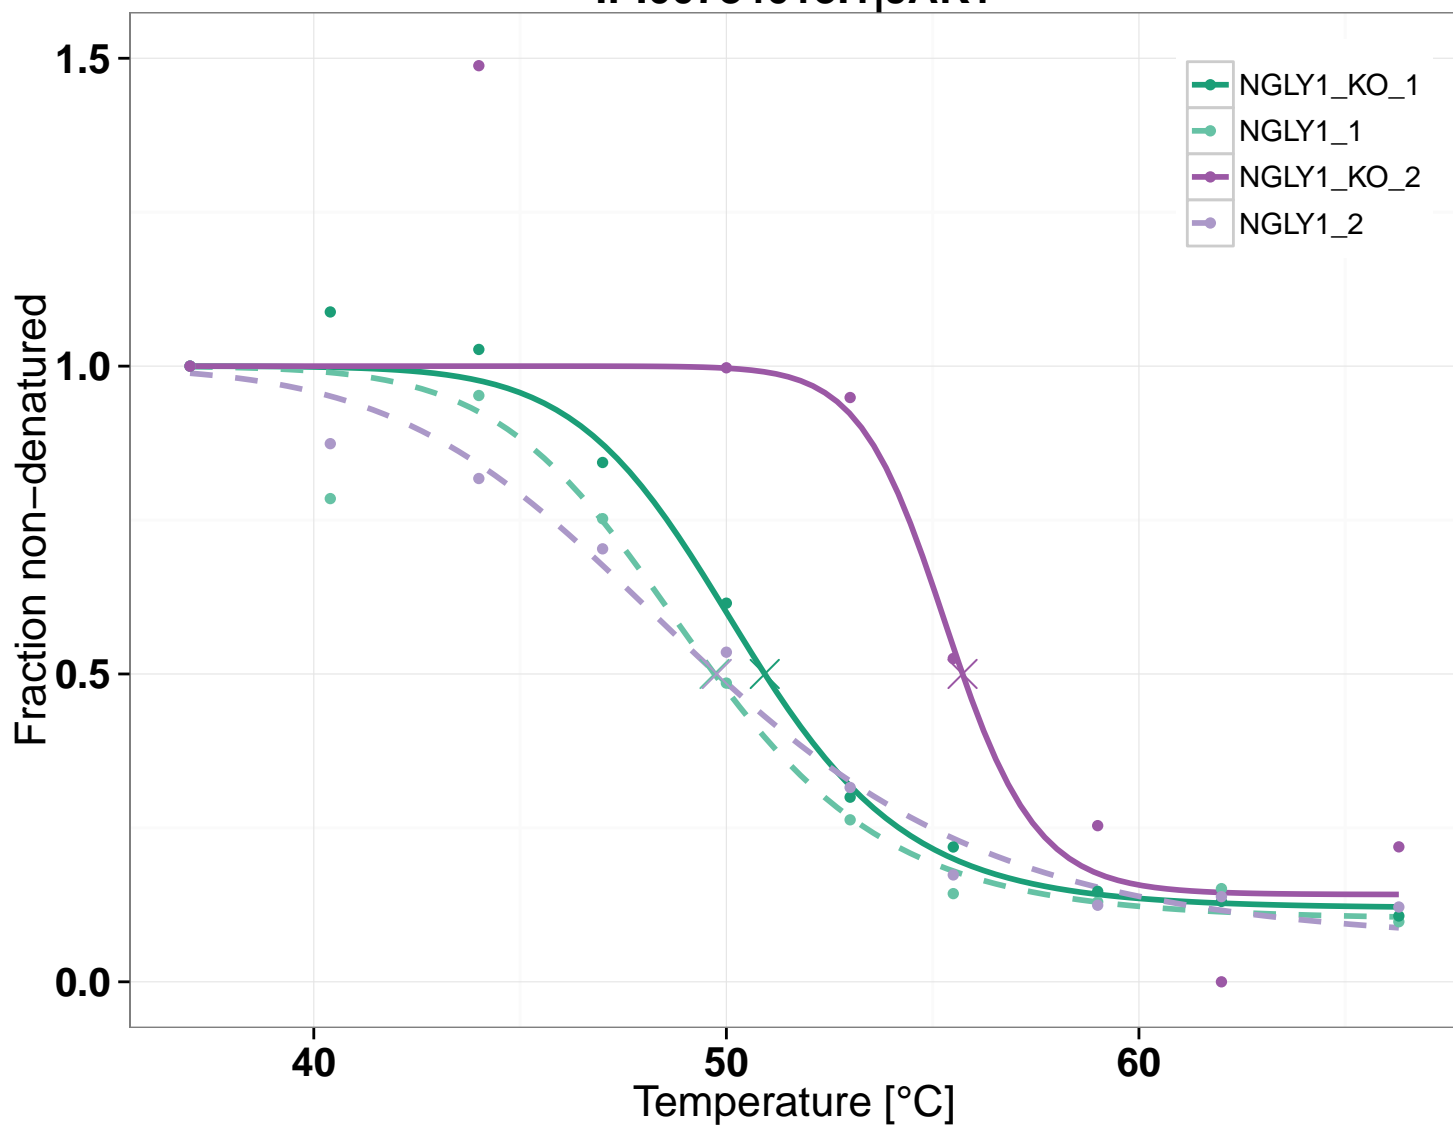

|            | meltPoint | slope  | plateau | R2   |
|------------|-----------|--------|---------|------|
| NGLY1_KO_1 | 50.93     | -0.11  | 0.12    | 0.99 |
| NGLY1_1    | 49.71     | -0.095 | 0.1     | 0.96 |
| NGLY1_KO_2 | 55.72     | -0.2   | 0.14    | 0.53 |
| NGLY1_2    | 49.77     | -0.065 | 0.06    | 0.99 |

Supplement: Supplementary file 1046 [file 1]

IPI00165639.4|SAMD8

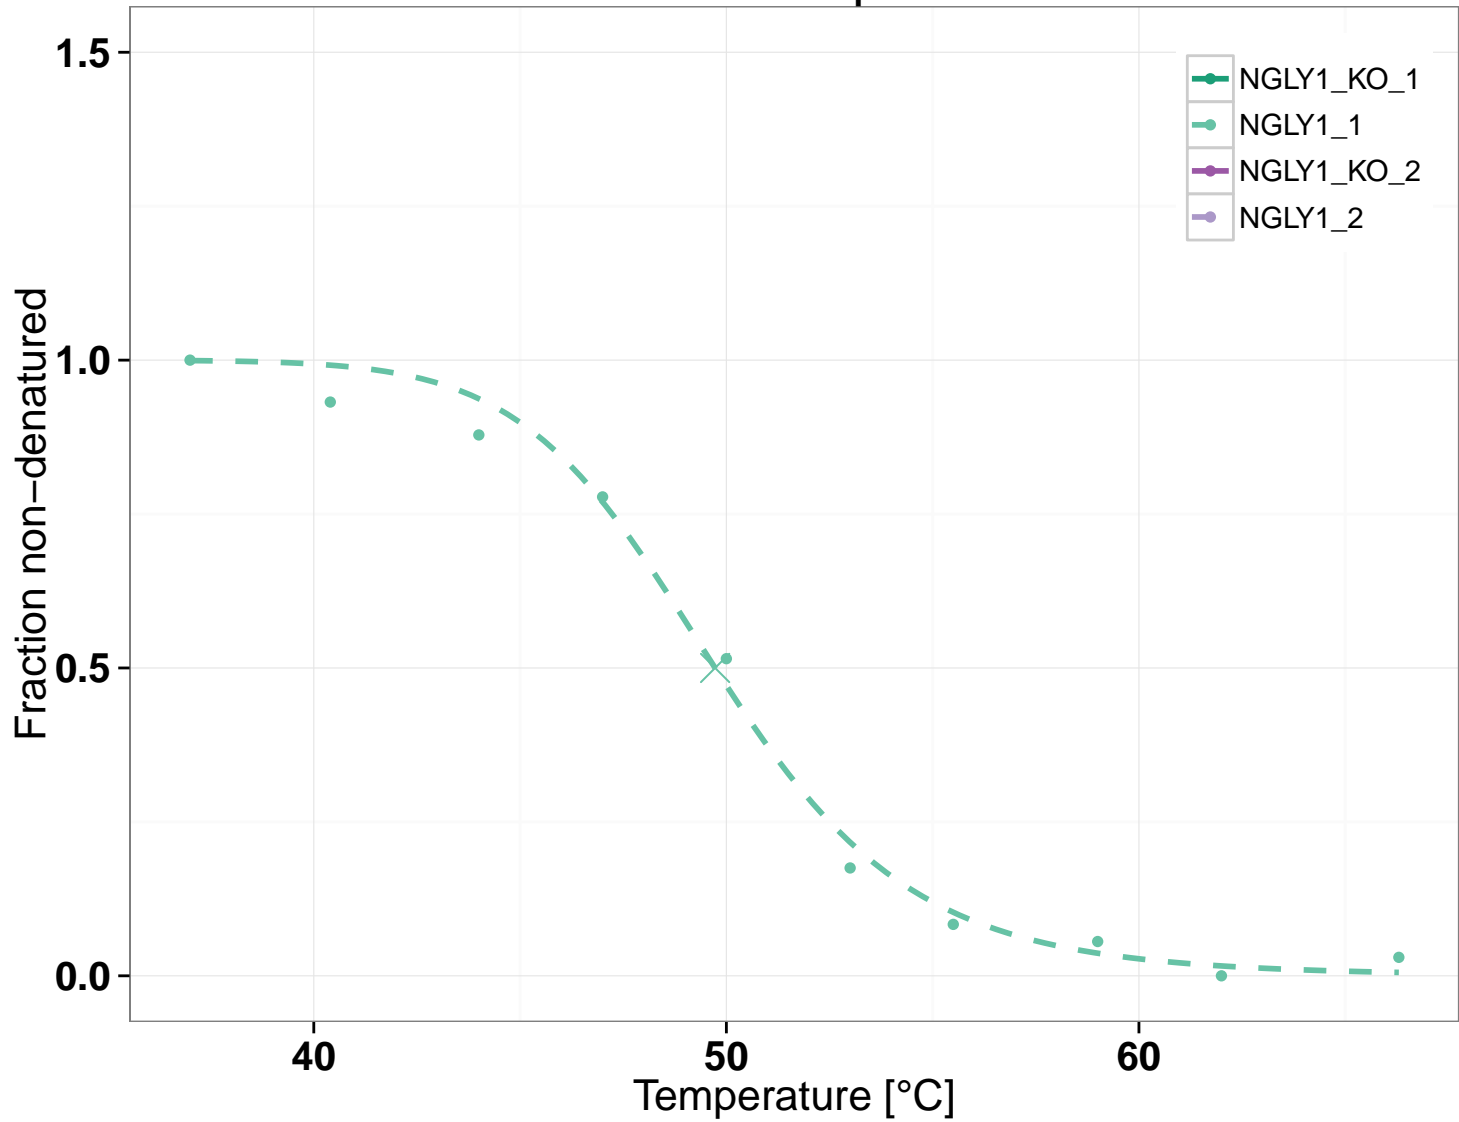

|            | meltPoint | slope | plateau | R2   |
|------------|-----------|-------|---------|------|
| NGLY1_KO_1 | -         | -     | -       | -    |
| NGLY1_1    | 49.73     | -0.11 | 0       | 0.99 |
| NGLY1_KO_2 | -         | -     | -       | -    |
| NGLY1_2    | -         | -     | -       | -    |

Supplement: Supplementary file 1047 [file 1]

IPI00887749.1|LOC100133930

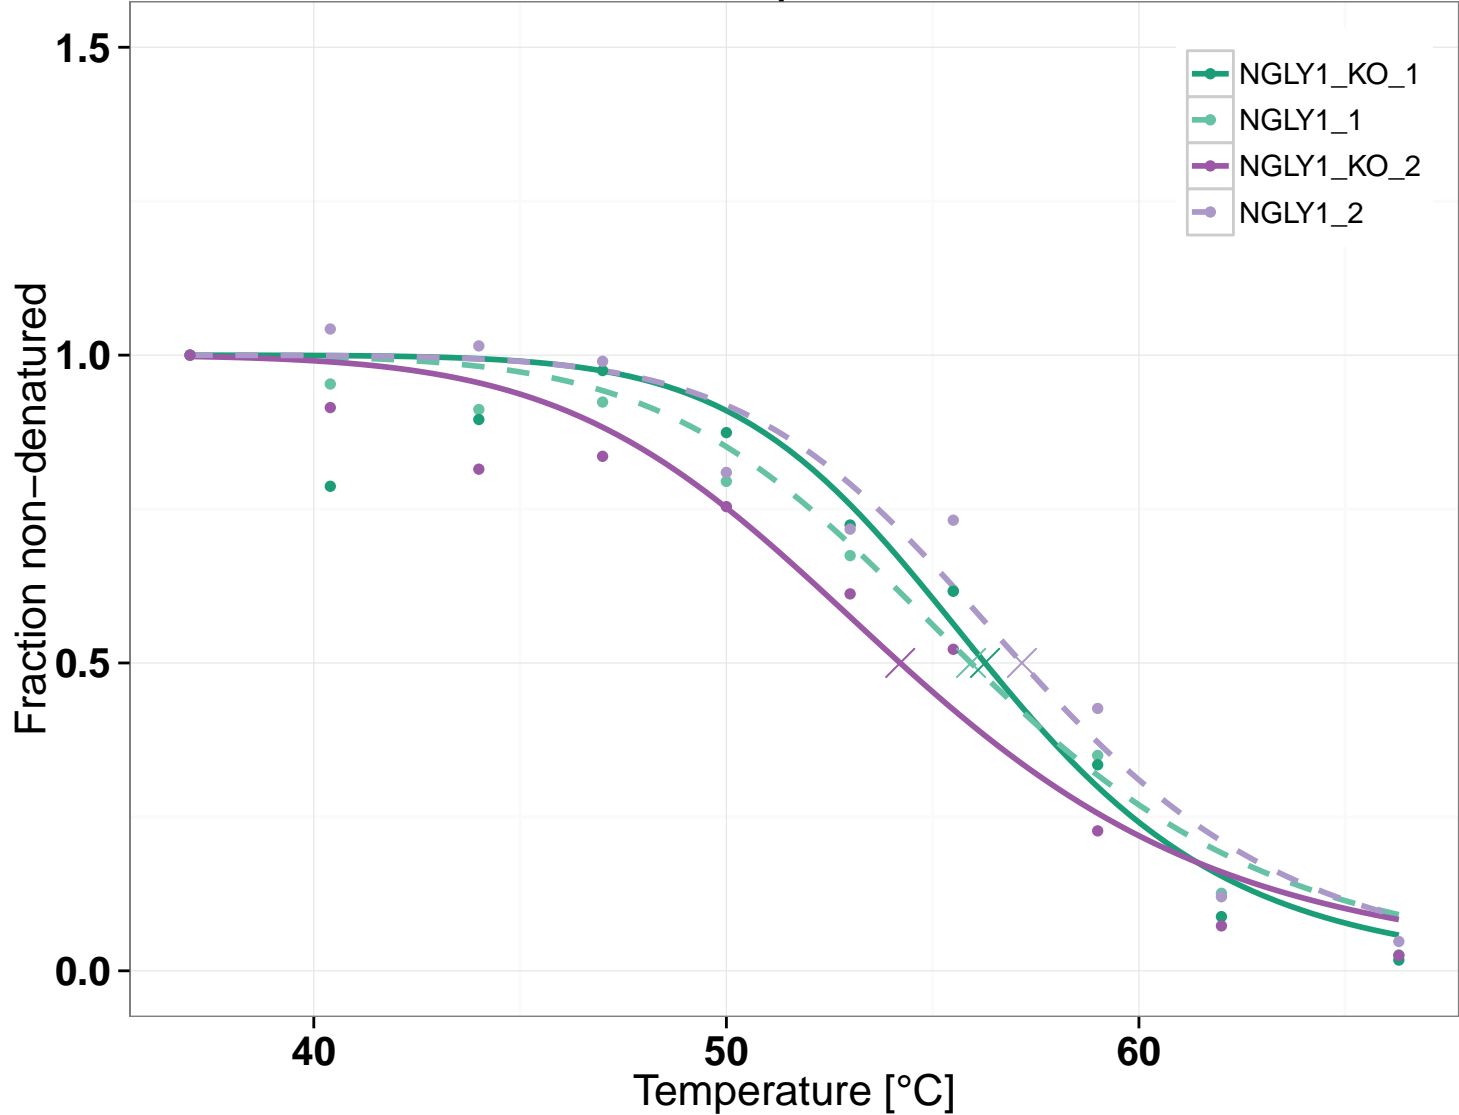

|            | meltPoint | slope  | plateau | R2   |
|------------|-----------|--------|---------|------|
| NGLY1_KO_1 | 56.27     | -0.083 | 0       | 0.94 |
| NGLY1_1    | 55.93     | -0.067 | 0       | 0.98 |
| NGLY1_KO_2 | 54.21     | -0.062 | 0       | 0.96 |
| NGLY1_2    | 57.16     | -0.075 | 0       | 0.96 |

Supplement: Supplementary file 1049 [file 1]

# IPI00783750.1|TNIP1

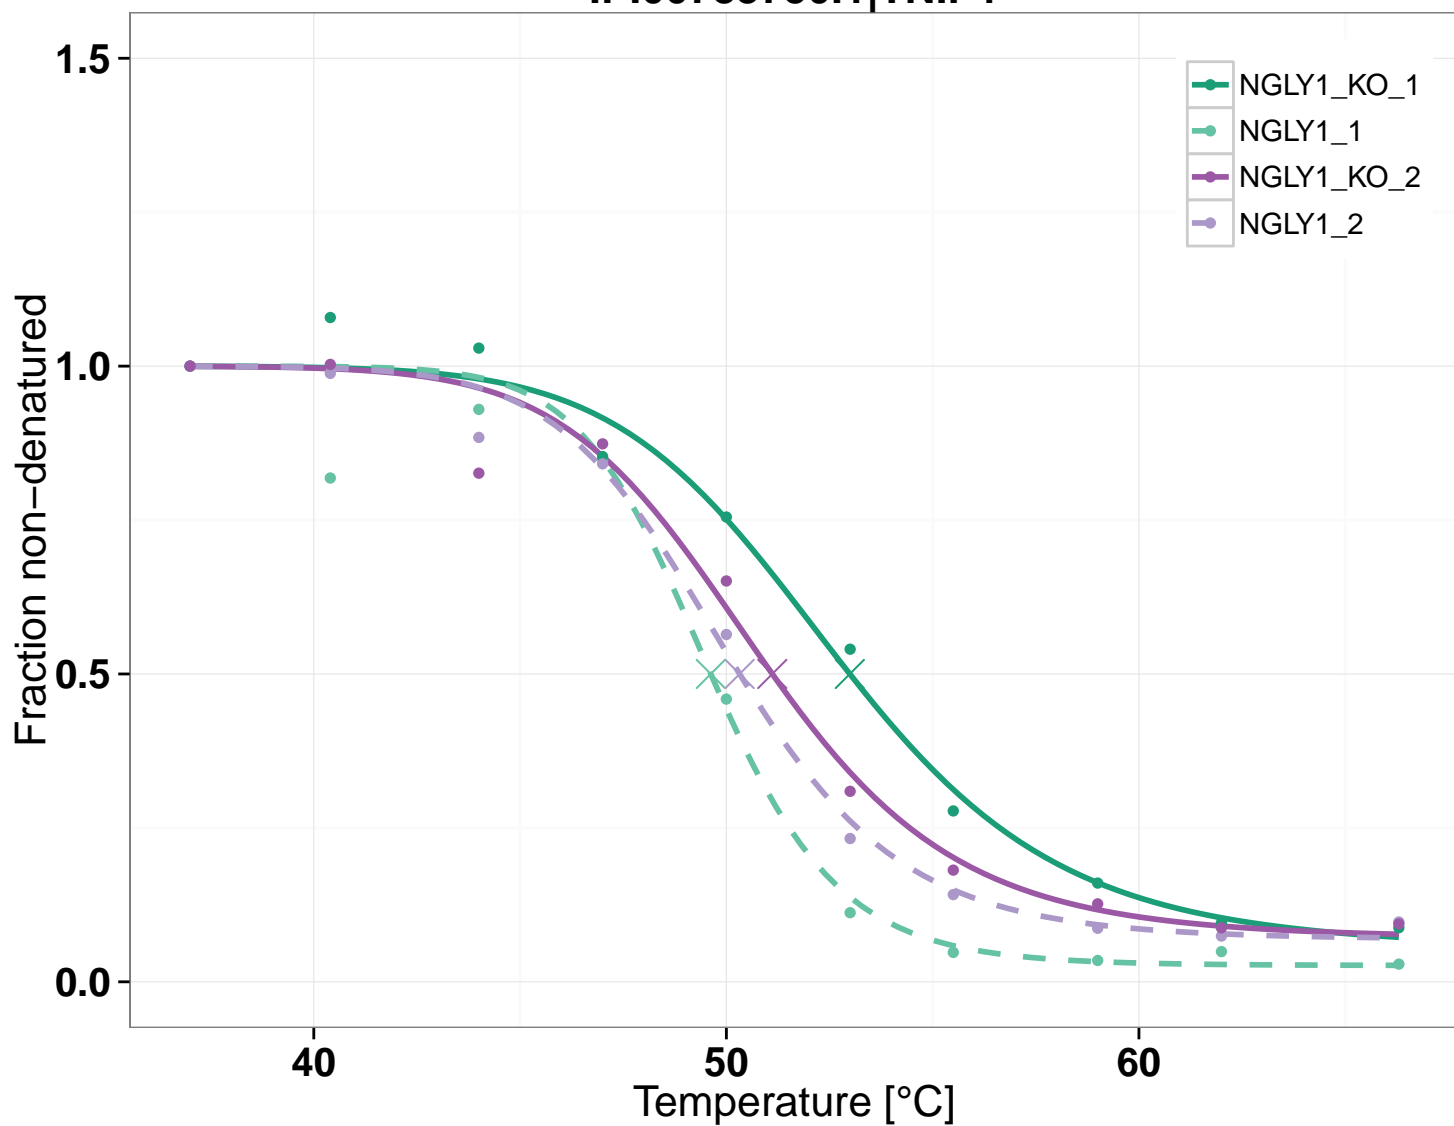

|            | meltPoint | slope  | plateau | R2   |
|------------|-----------|--------|---------|------|
| NGLY1_KO_1 | 52.99     | -0.087 | 0.05    | 0.99 |
| NGLY1_1    | 49.62     | -0.15  | 0.03    | 0.98 |
| NGLY1_KO_2 | 51.11     | -0.097 | 0.07    | 0.98 |
| NGLY1_2    | 50.32     | -0.11  | 0.07    | 0.99 |

Supplement: Supplementary file 1050 [file 1]

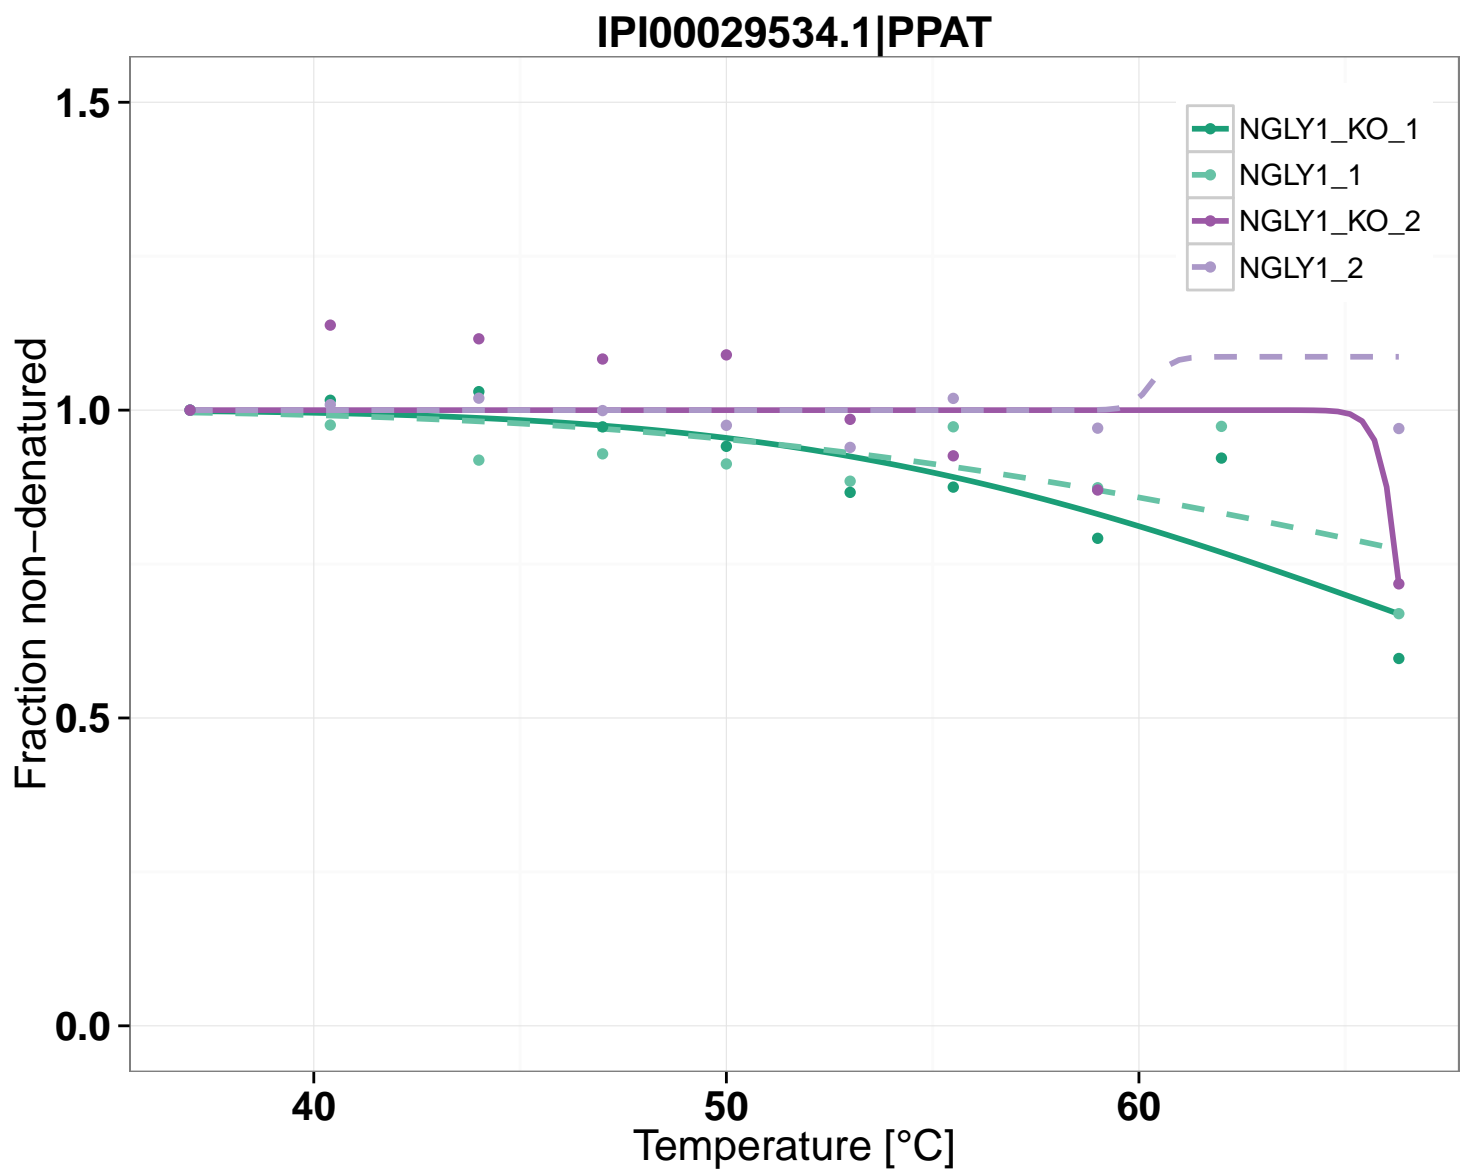

|            | meltPoint | slope | plateau | R2   |
|------------|-----------|-------|---------|------|
| NGLY1_KO_1 | –         | –     | 0       | 0.76 |
| NGLY1_1    | –         | –     | 0       | 0.45 |
| NGLY1_KO_2 | –         | –     | 0       | 0.36 |
| NGLY1_2    | –         | 0.089 | 1.09    | 0.29 |

Supplement: Supplementary file 1051 [file 1]

IPI00019276.1|UBXN6

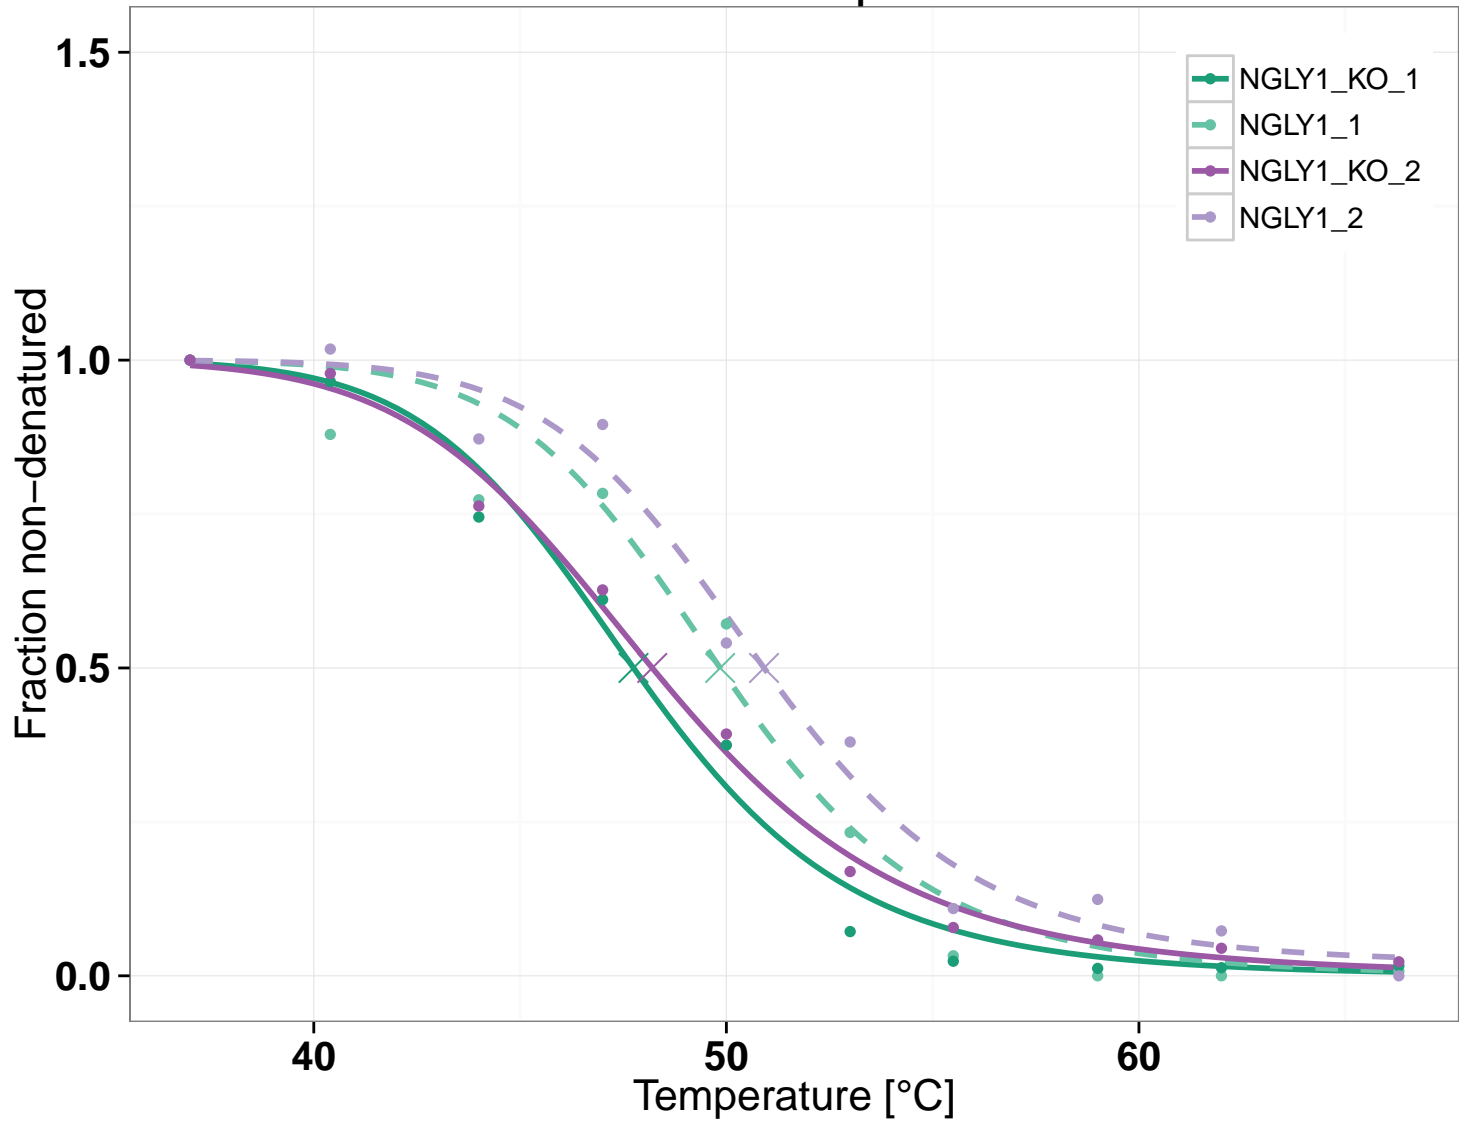

|            | meltPoint | slope  | plateau | R2   |
|------------|-----------|--------|---------|------|
| NGLY1_KO_1 | 47.75     | -0.096 | 0       | 0.99 |
| NGLY1_1    | 49.85     | -0.098 | 0       | 0.96 |
| NGLY1_KO_2 | 48.2      | -0.083 | 0       | 0.99 |
| NGLY1_2    | 50.91     | -0.094 | 0.02    | 0.98 |

Supplement: Supplementary file 1052 [file 1]

IPI00644180.1|LOC729012

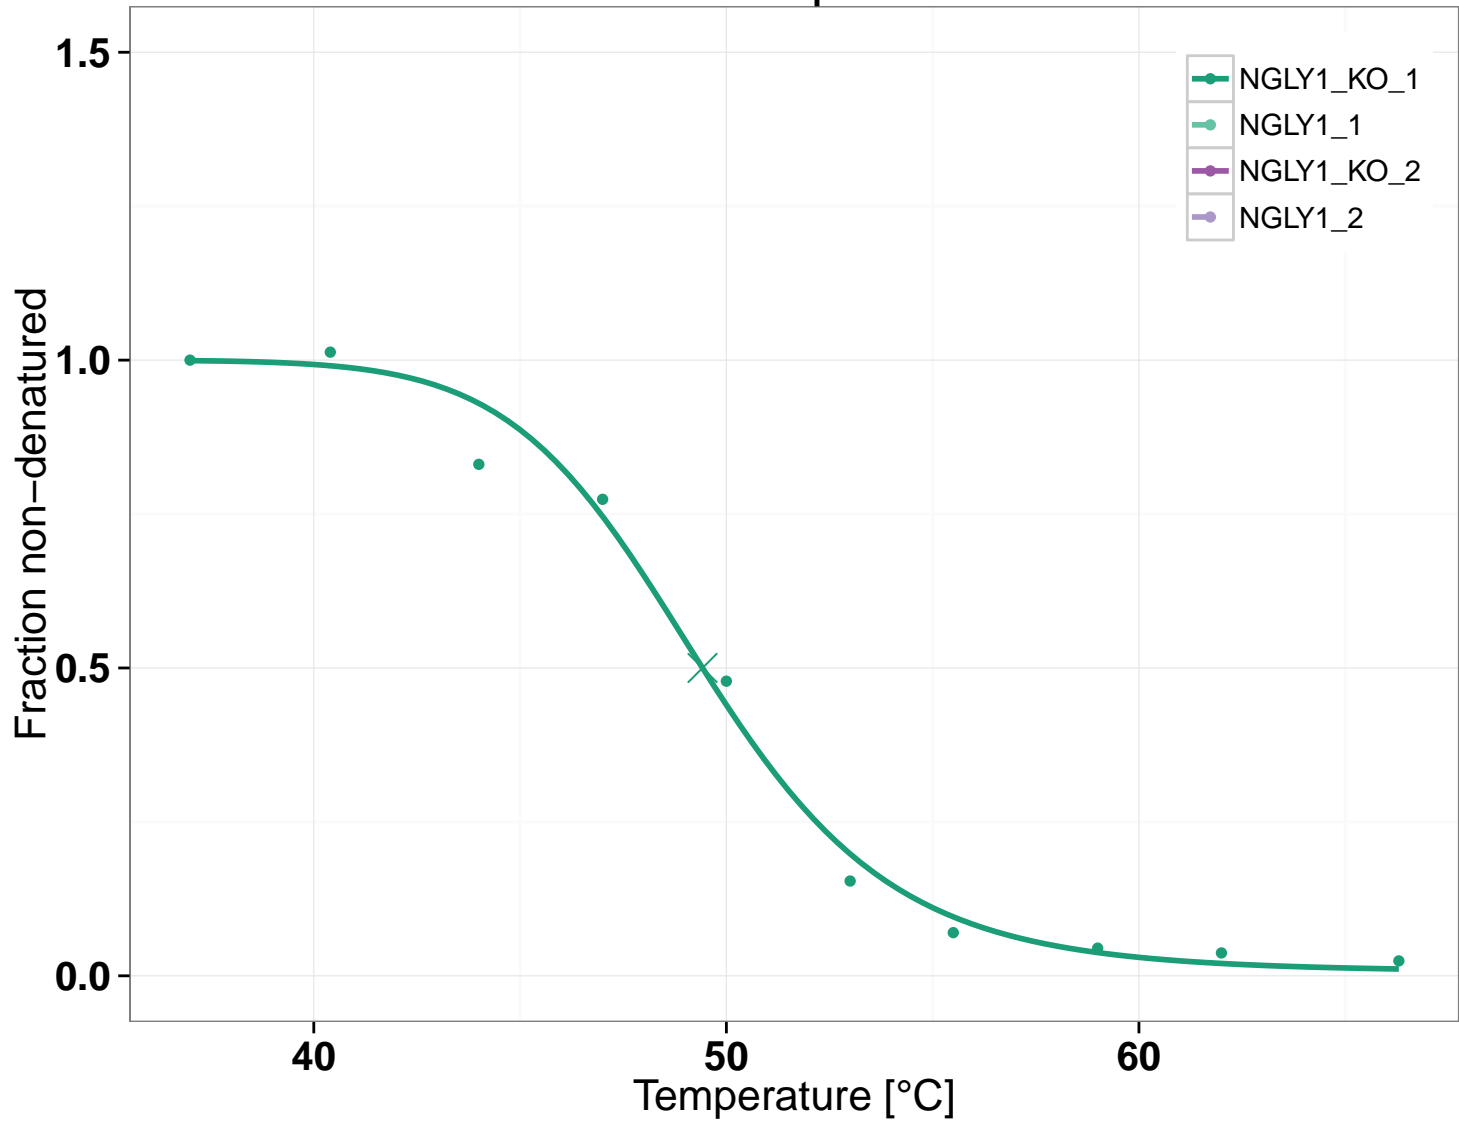

|            | meltPoint | slope | plateau | R2   |
|------------|-----------|-------|---------|------|
| NGLY1_KO_1 | 49.42     | -0.11 | 0.01    | 0.99 |
| NGLY1_1    | -         | -     | -       | -    |
| NGLY1_KO_2 | -         | -     | -       | -    |
| NGLY1_2    | -         | -     | -       | -    |

Supplement: Supplementary file 1053 [file 1]

IPI00028516.1|KIAA0513

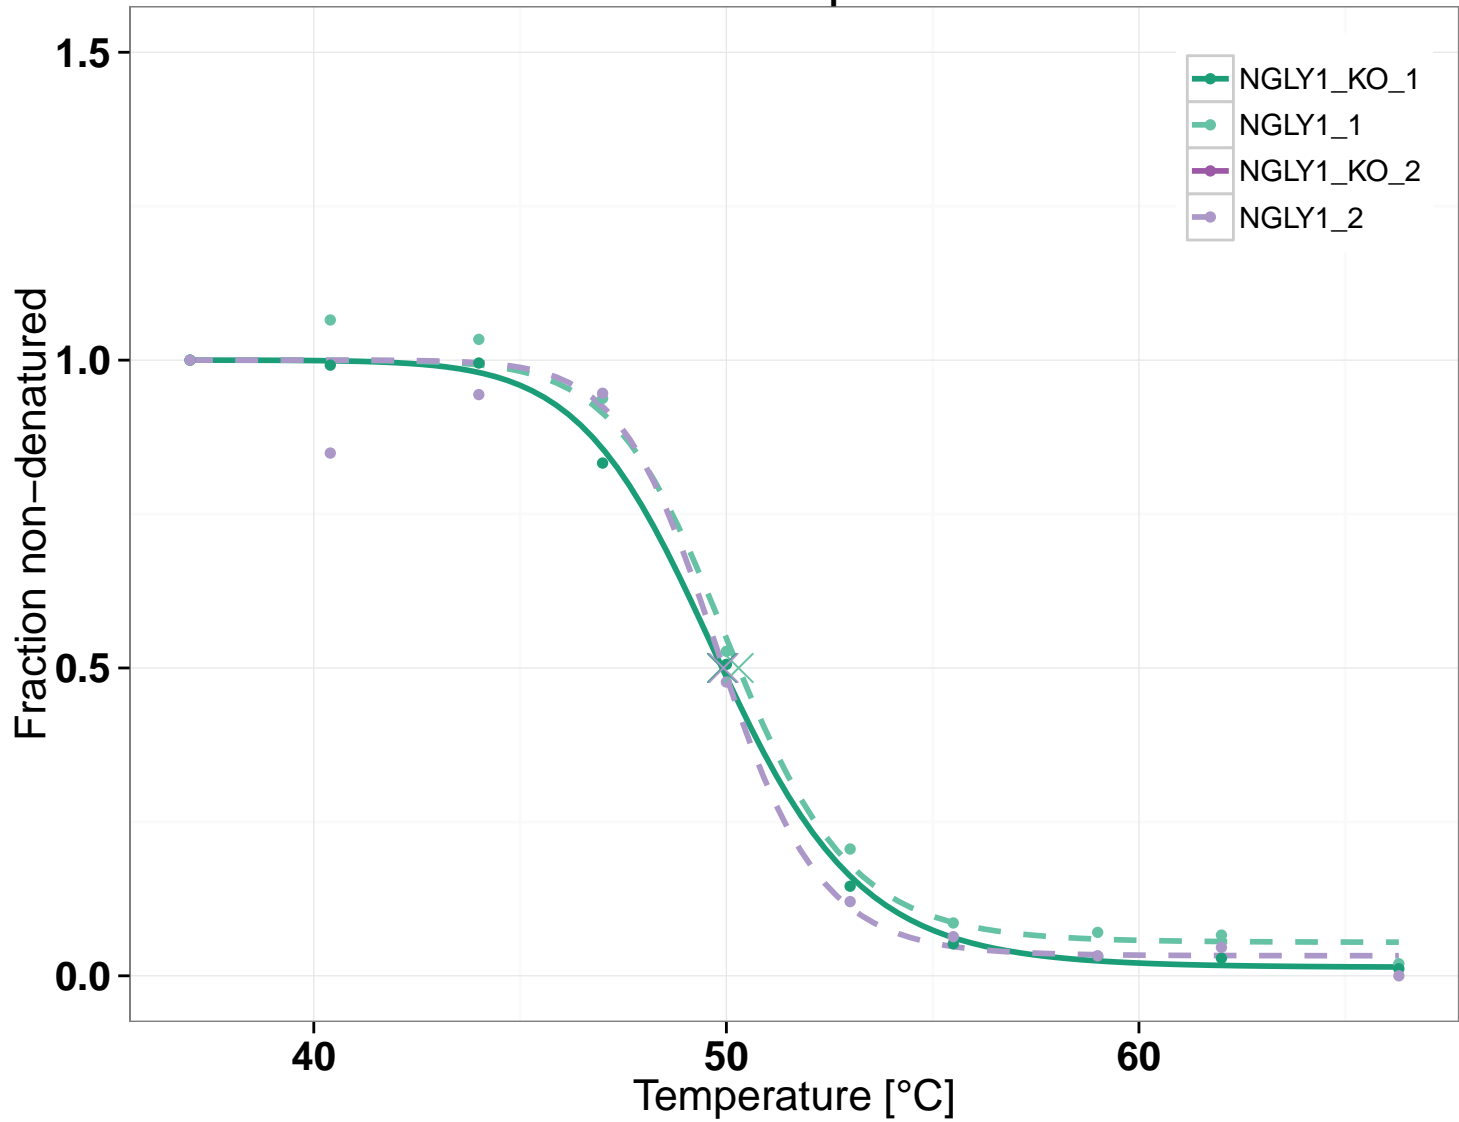

|            | meltPoint | slope | plateau | R2   |
|------------|-----------|-------|---------|------|
| NGLY1_KO_1 | 49.9      | -0.14 | 0.01    | 1    |
| NGLY1_1    | 50.3      | -0.16 | 0.05    | 1    |
| NGLY1_KO_2 | -         | -     | -       | -    |
| NGLY1_2    | 49.93     | -0.2  | 0.03    | 0.98 |

Supplement: Supplementary file 1054 [file 1]

# IPI00477112.3|SLC39A11

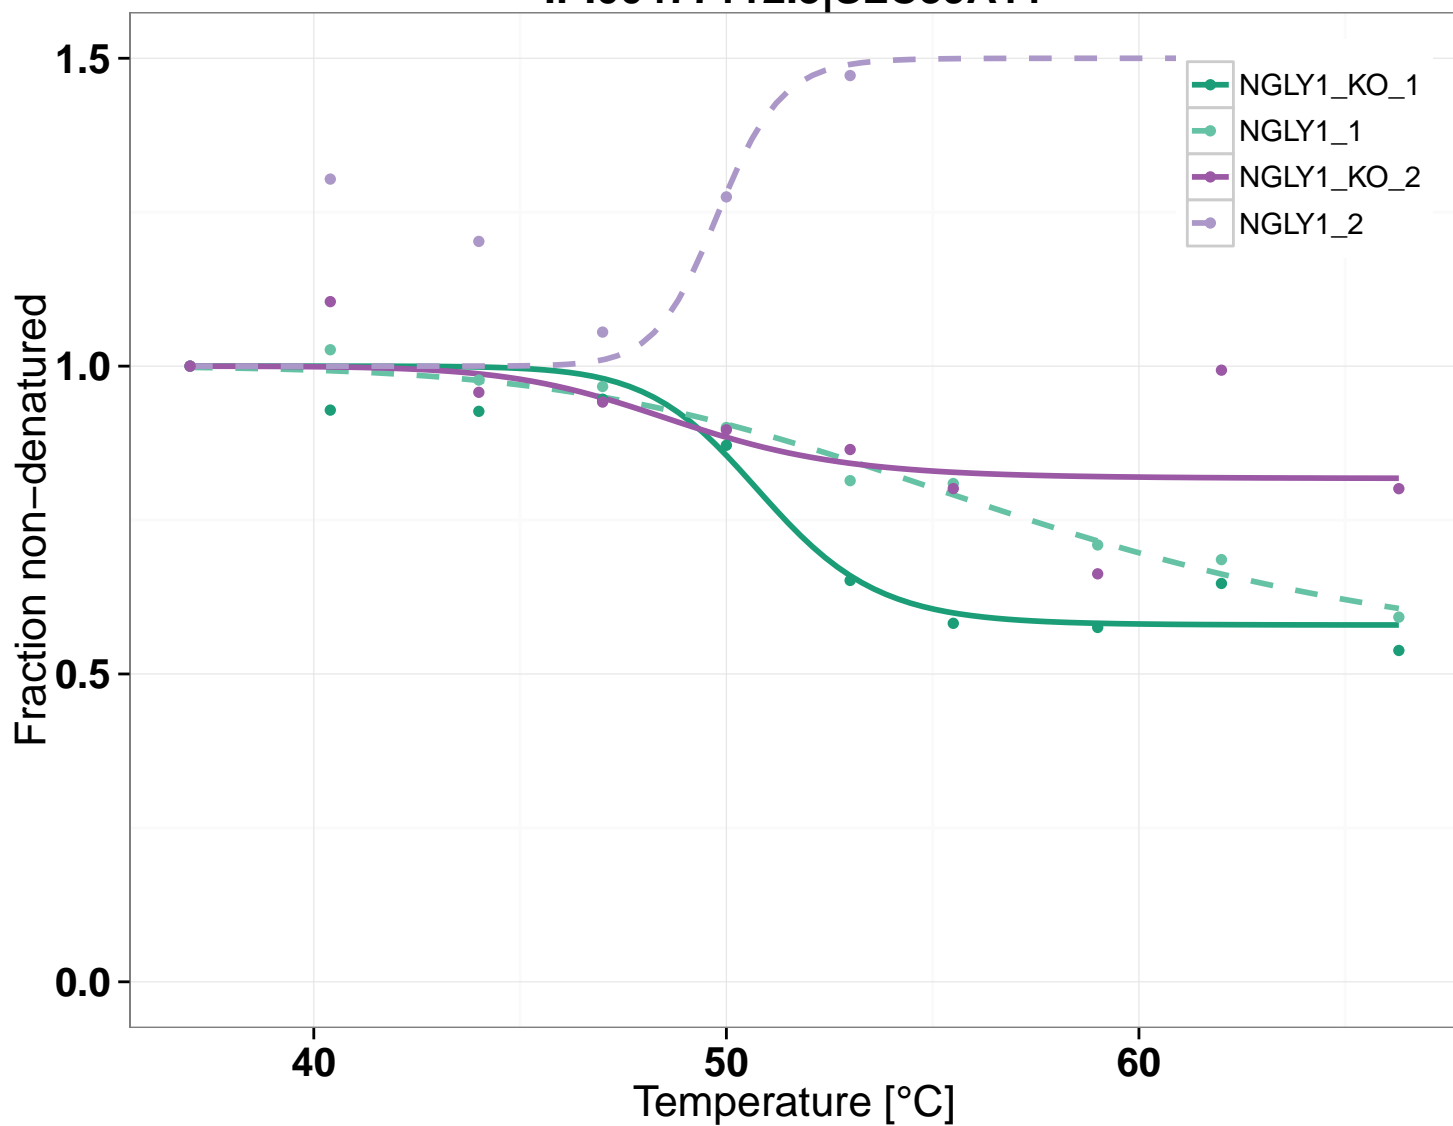

|            | meltPoint | slope  | plateau | R2   |
|------------|-----------|--------|---------|------|
| NGLY1_KO_1 | —         | −0.075 | 0.58    | 0.94 |
| NGLY1_1    | —         | −0.022 | 0.51    | 0.98 |
| NGLY1_KO_2 | —         | −0.022 | 0.82    | 0.51 |
| NGLY1_2    | —         | 0.16   | 1.5     | 0.03 |

Supplement: Supplementary file 1055 [file 1]

IPI00737920.3|SIMILAR TO DYNEIN HEAVY CHAIN, PUTATIVE.

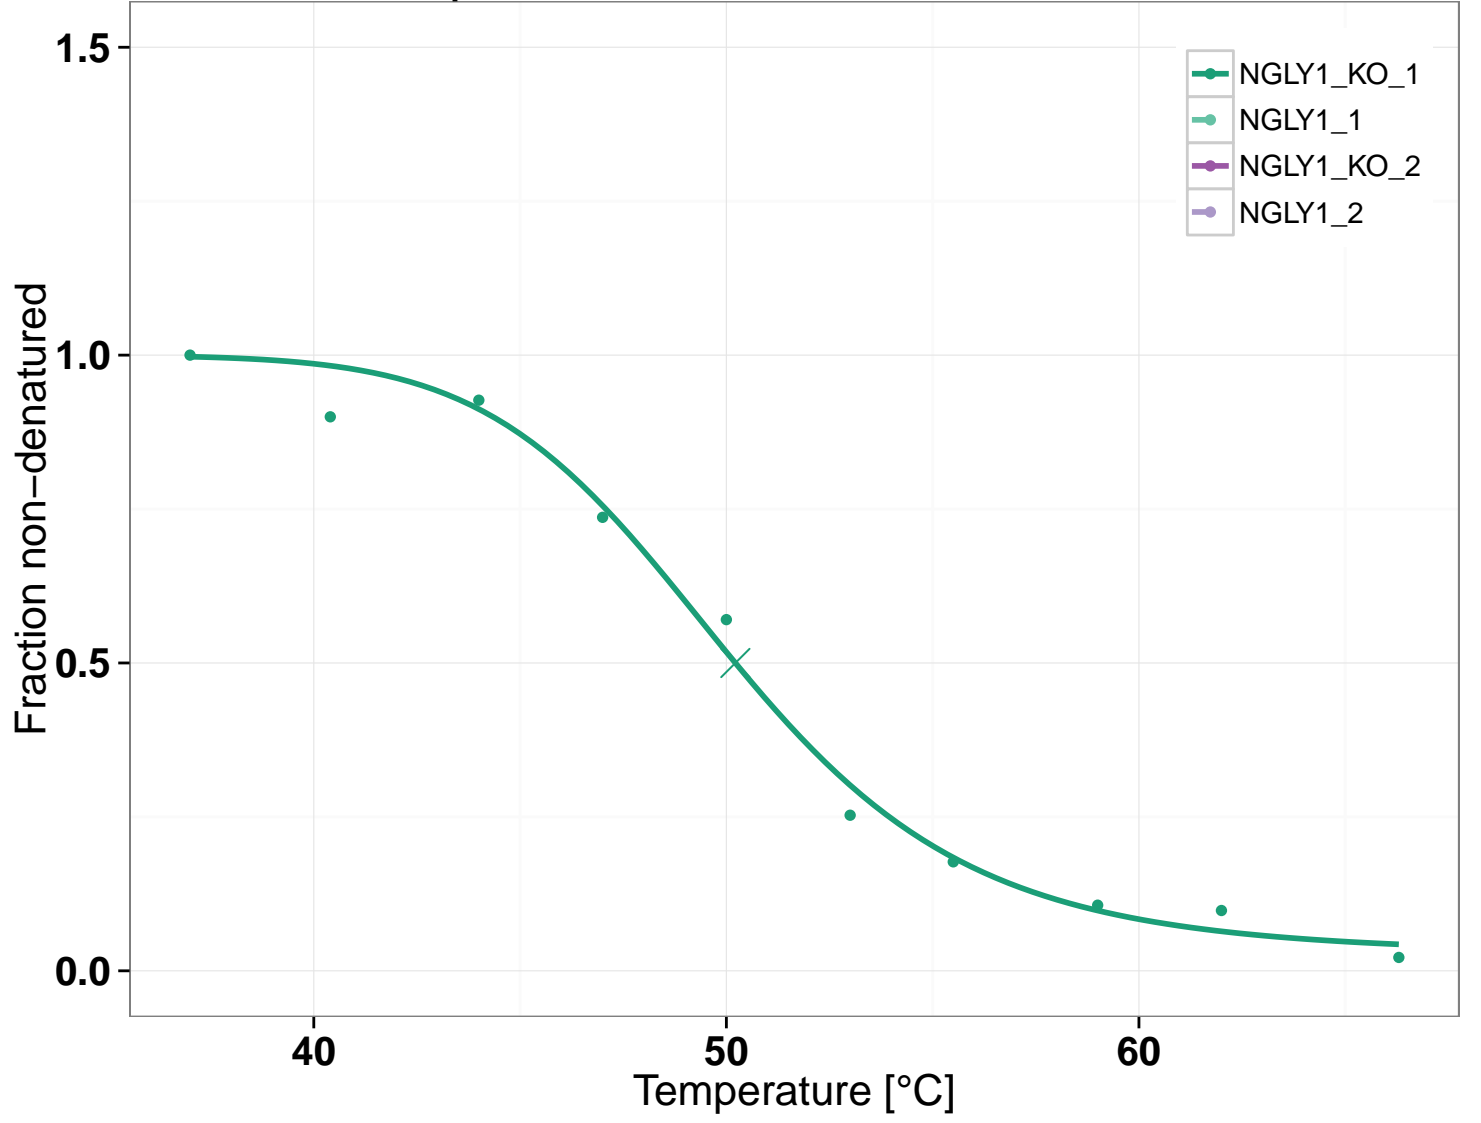

|            | meltPoint | slope  | plateau | R2   |
|------------|-----------|--------|---------|------|
| NGLY1_KO_1 | 50.22     | -0.083 | 0.03    | 0.99 |
| NGLY1_1    | -         | -      | -       | -    |
| NGLY1_KO_2 | -         | -      | -       | -    |
| NGLY1_2    | -         | -      | -       | -    |

Supplement: Supplementary file 1056 [file 1]

IPI00171527.10|MAPK1IP1L

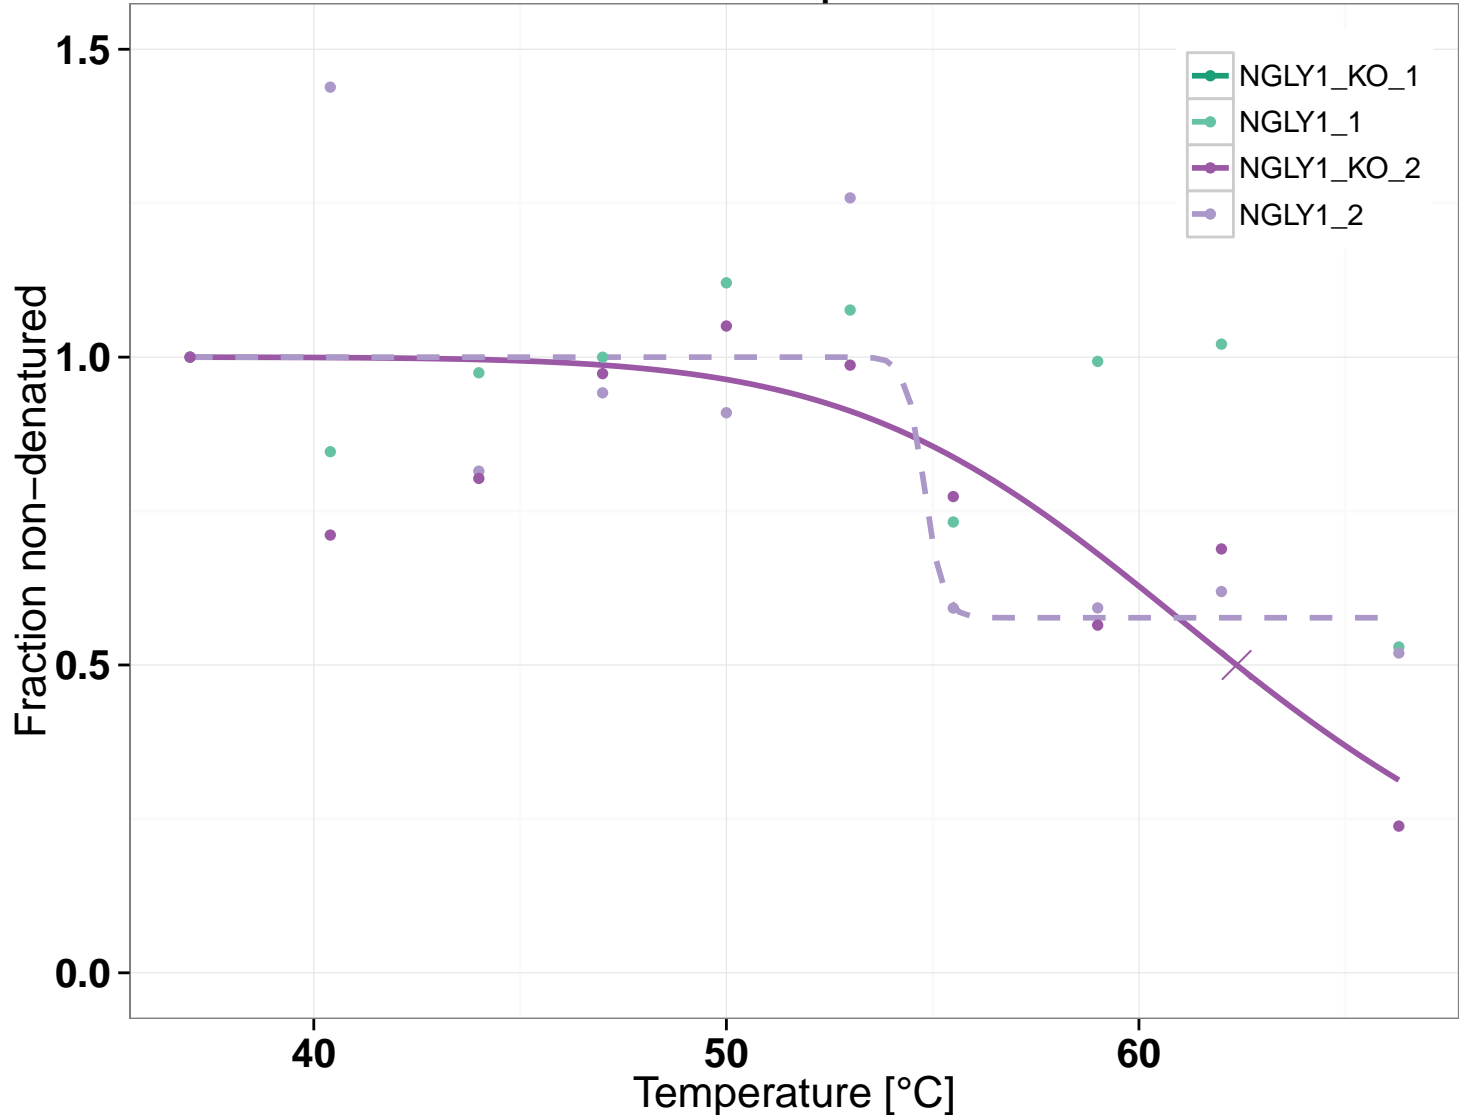

|            | meltPoint | slope  | plateau | R2   |
|------------|-----------|--------|---------|------|
| NGLY1_KO_1 | -         | -      | -       | -    |
| NGLY1_1    | -         | -      | -       | -    |
| NGLY1_KO_2 | 62.37     | -0.054 | 0       | 0.67 |
| NGLY1_2    | -         | -0.48  | 0.58    | 0.63 |

Supplement: Supplementary file 1057 [file 1]

# IPI00059434.2|OBFC2A

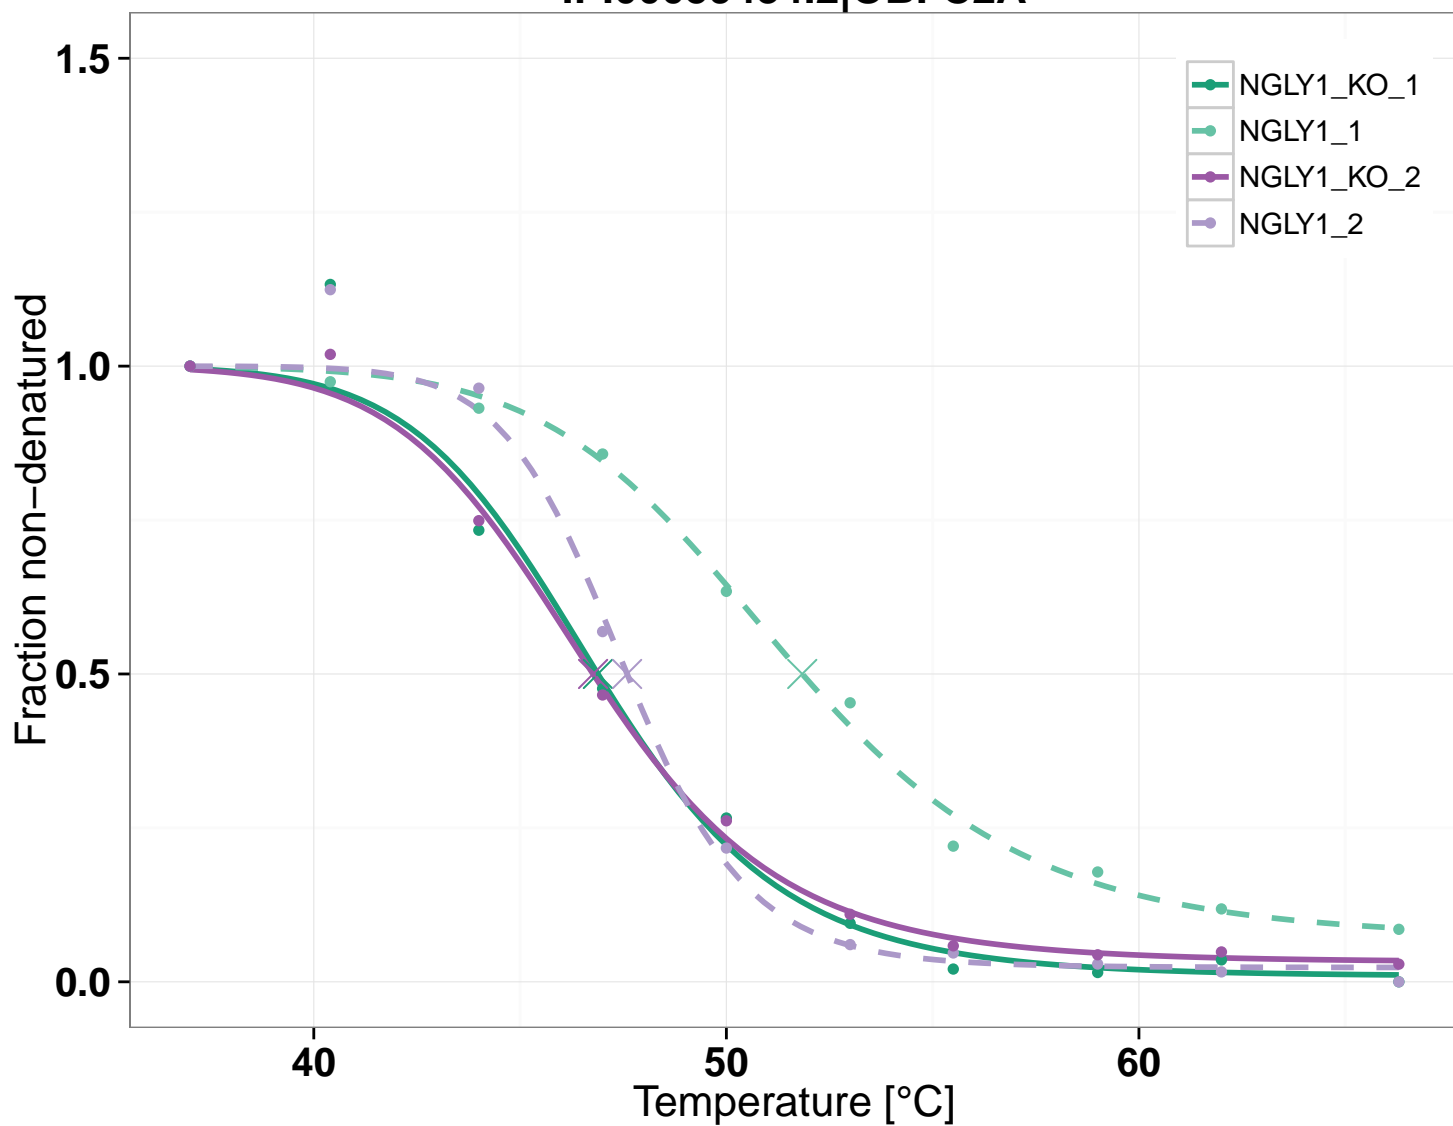

|            | meltPoint | slope  | plateau | R2   |
|------------|-----------|--------|---------|------|
| NGLY1_KO_1 | 46.89     | -0.11  | 0.01    | 0.98 |
| NGLY1_1    | 51.84     | -0.079 | 0.07    | 1    |
| NGLY1_KO_2 | 46.77     | -0.1   | 0.03    | 1    |
| NGLY1_2    | 47.59     | -0.16  | 0.02    | 0.99 |

Supplement: Supplementary file 1058 [file 1]

IPI00382389.2|MFSD11

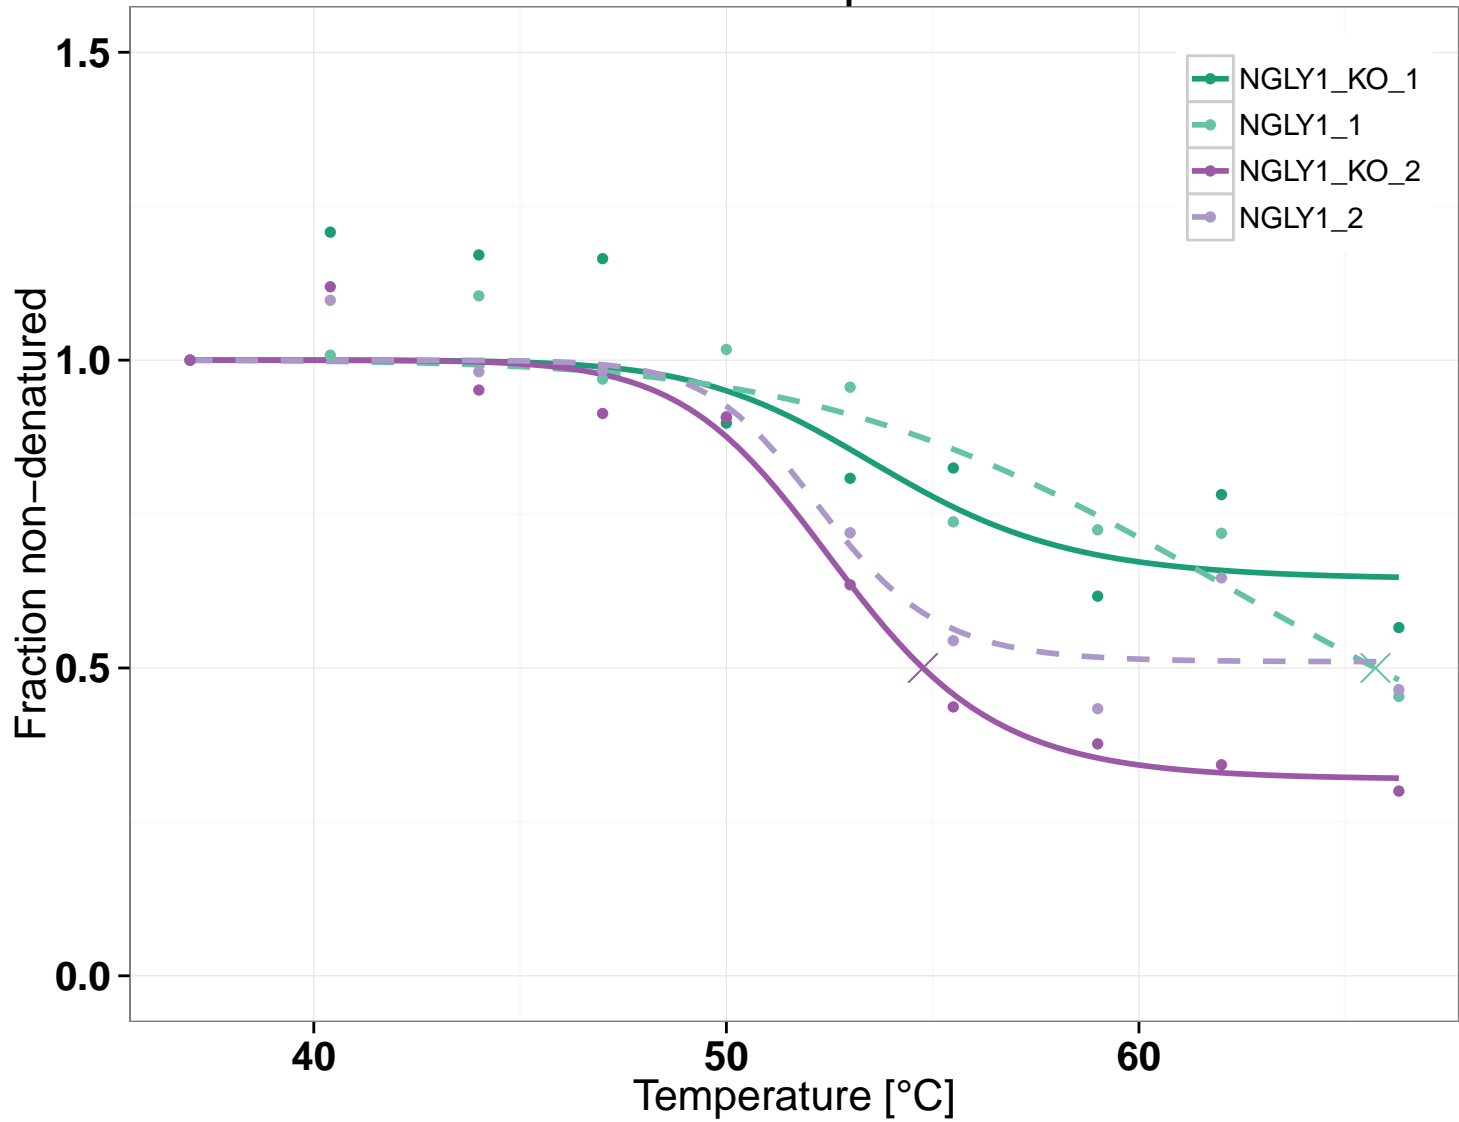

|            | meltPoint | slope  | plateau | R2   |
|------------|-----------|--------|---------|------|
| NGLY1_KO_1 | –         | –0.039 | 0.64    | 0.7  |
| NGLY1_1    | 65.73     | –0.038 | 0.08    | 0.89 |
| NGLY1_KO_2 | 54.76     | –0.089 | 0.32    | 0.97 |
| NGLY1_2    | –         | –0.087 | 0.51    | 0.93 |

Supplement: Supplementary file 1059 [file 1]

# IPI00384670.2|GGA1

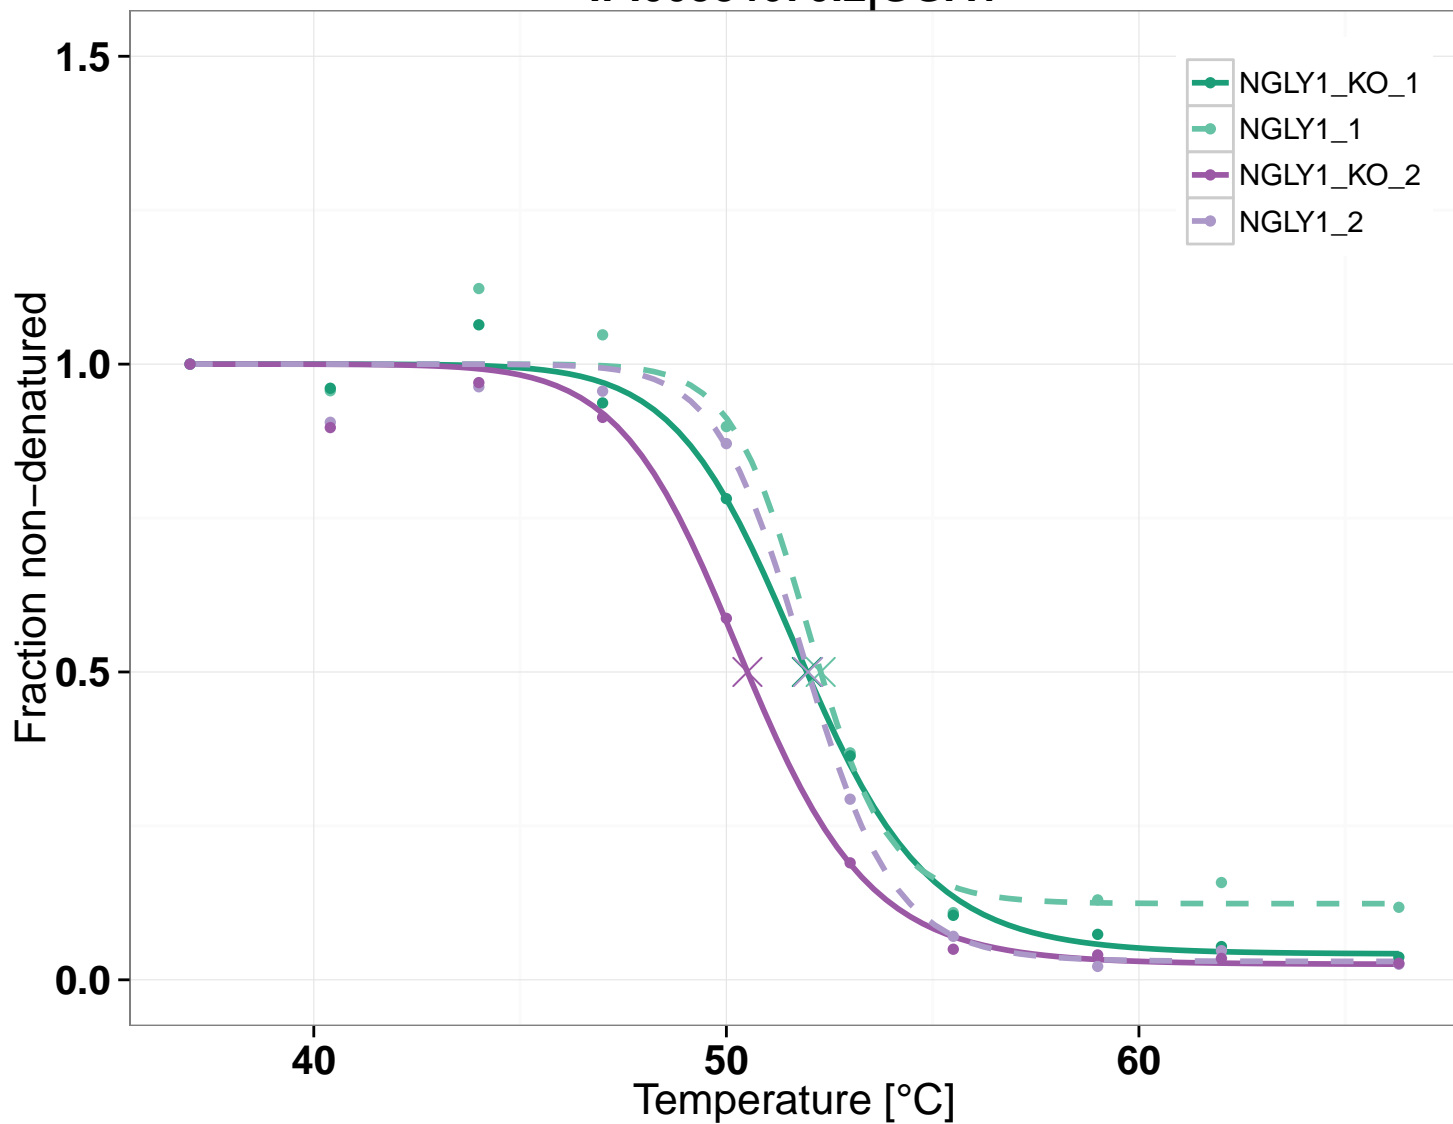

|            | meltPoint | slope | plateau | R2   |
|------------|-----------|-------|---------|------|
| NGLY1_KO_1 | 51.95     | -0.16 | 0.04    | 1    |
| NGLY1_1    | 52.29     | -0.23 | 0.12    | 0.99 |
| NGLY1_KO_2 | 50.51     | -0.16 | 0.03    | 0.99 |
| NGLY1_2    | 51.98     | -0.22 | 0.03    | 0.99 |

Supplement: Supplementary file 1060 [file 1]

IPI00789455.3|KATNAL1

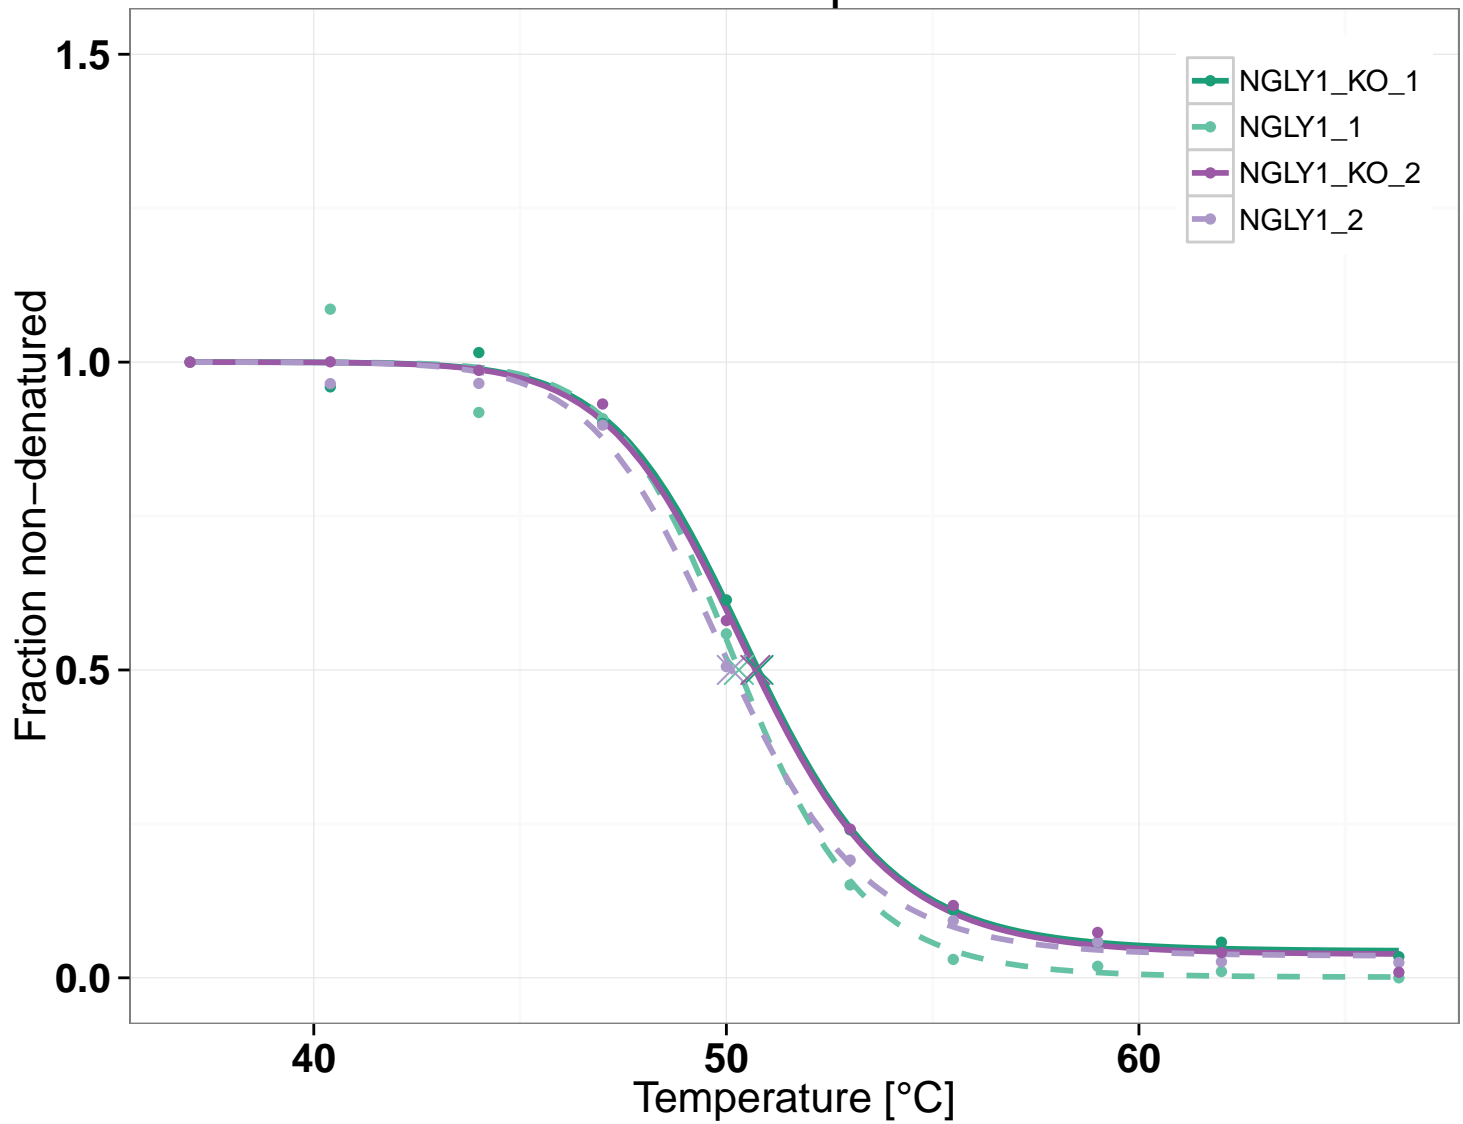

|            | meltPoint | slope | plateau | R2   |
|------------|-----------|-------|---------|------|
| NGLY1_KO_1 | 50.78     | -0.14 | 0.04    | 1    |
| NGLY1_1    | 50.3      | -0.16 | 0       | 0.99 |
| NGLY1_KO_2 | 50.7      | -0.14 | 0.04    | 1    |
| NGLY1_2    | 50.13     | -0.15 | 0.04    | 1    |

Supplement: Supplementary file 1061 [file 1]

IPI00003168.1|PRPSAP2

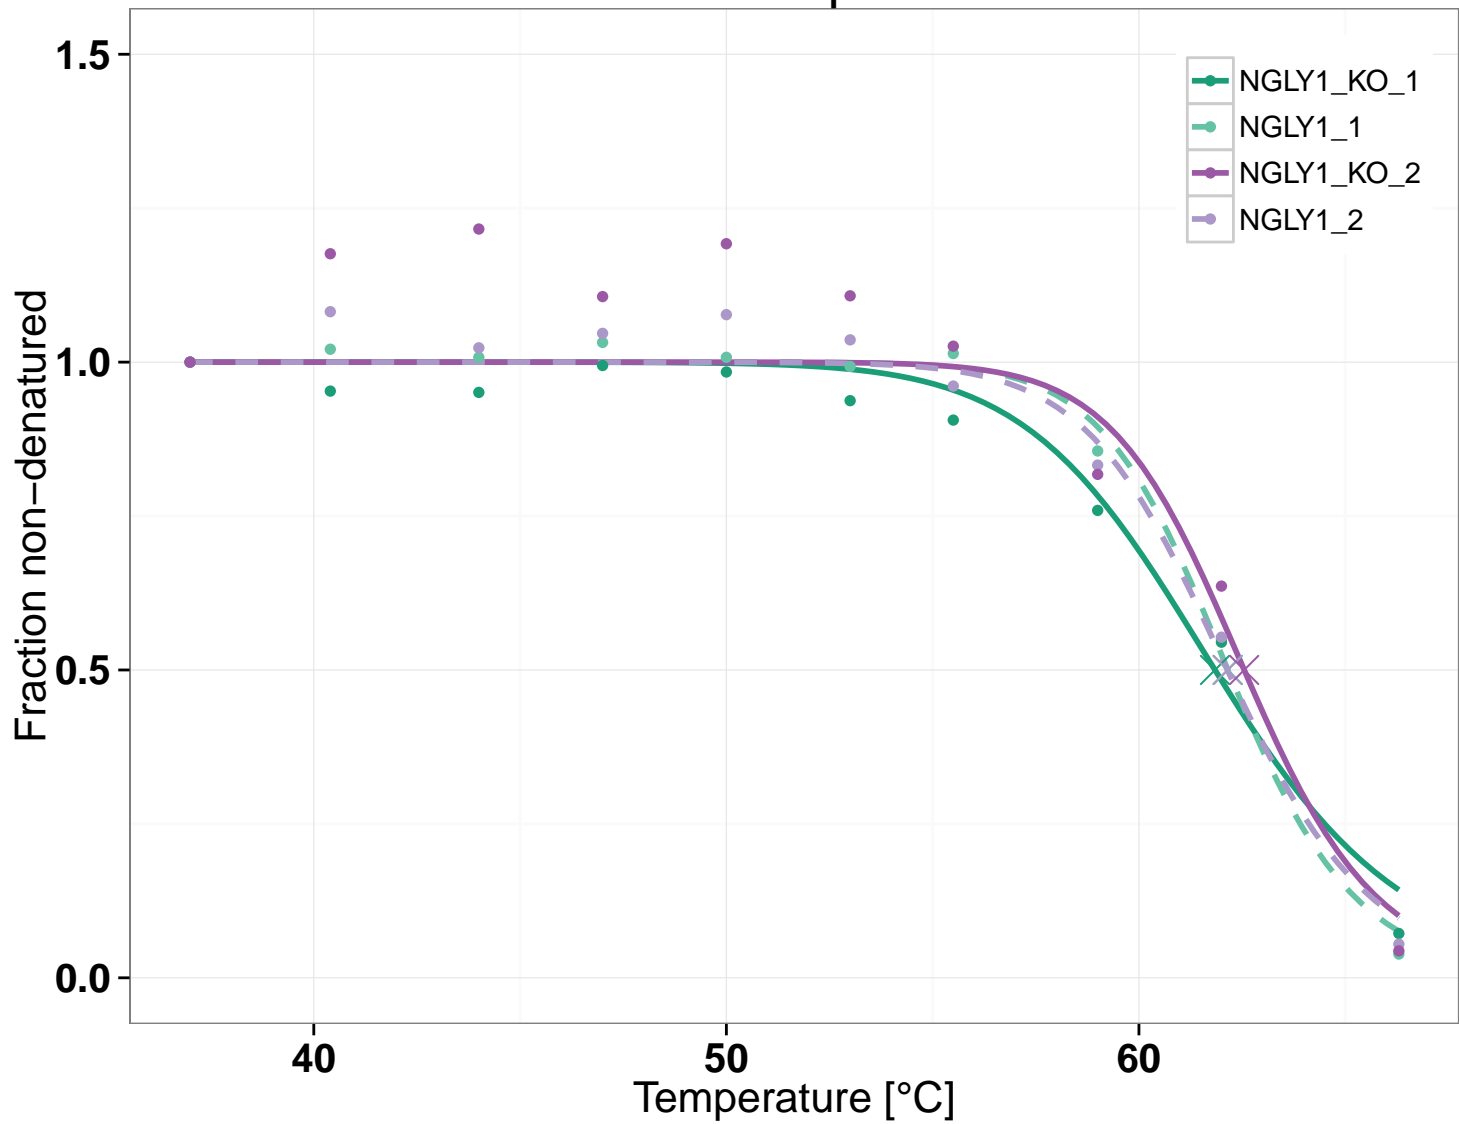

|            | meltPoint | slope | plateau | R2   |
|------------|-----------|-------|---------|------|
| NGLY1_KO_1 | 61.84     | -0.11 | 0       | 0.98 |
| NGLY1_1    | 62.16     | -0.16 | 0       | 0.99 |
| NGLY1_KO_2 | 62.55     | -0.15 | 0       | 0.87 |
| NGLY1_2    | 62.14     | -0.14 | 0       | 0.98 |

Supplement: Supplementary file 1062 [file 1]

IPI00018284.5|PITPNC1

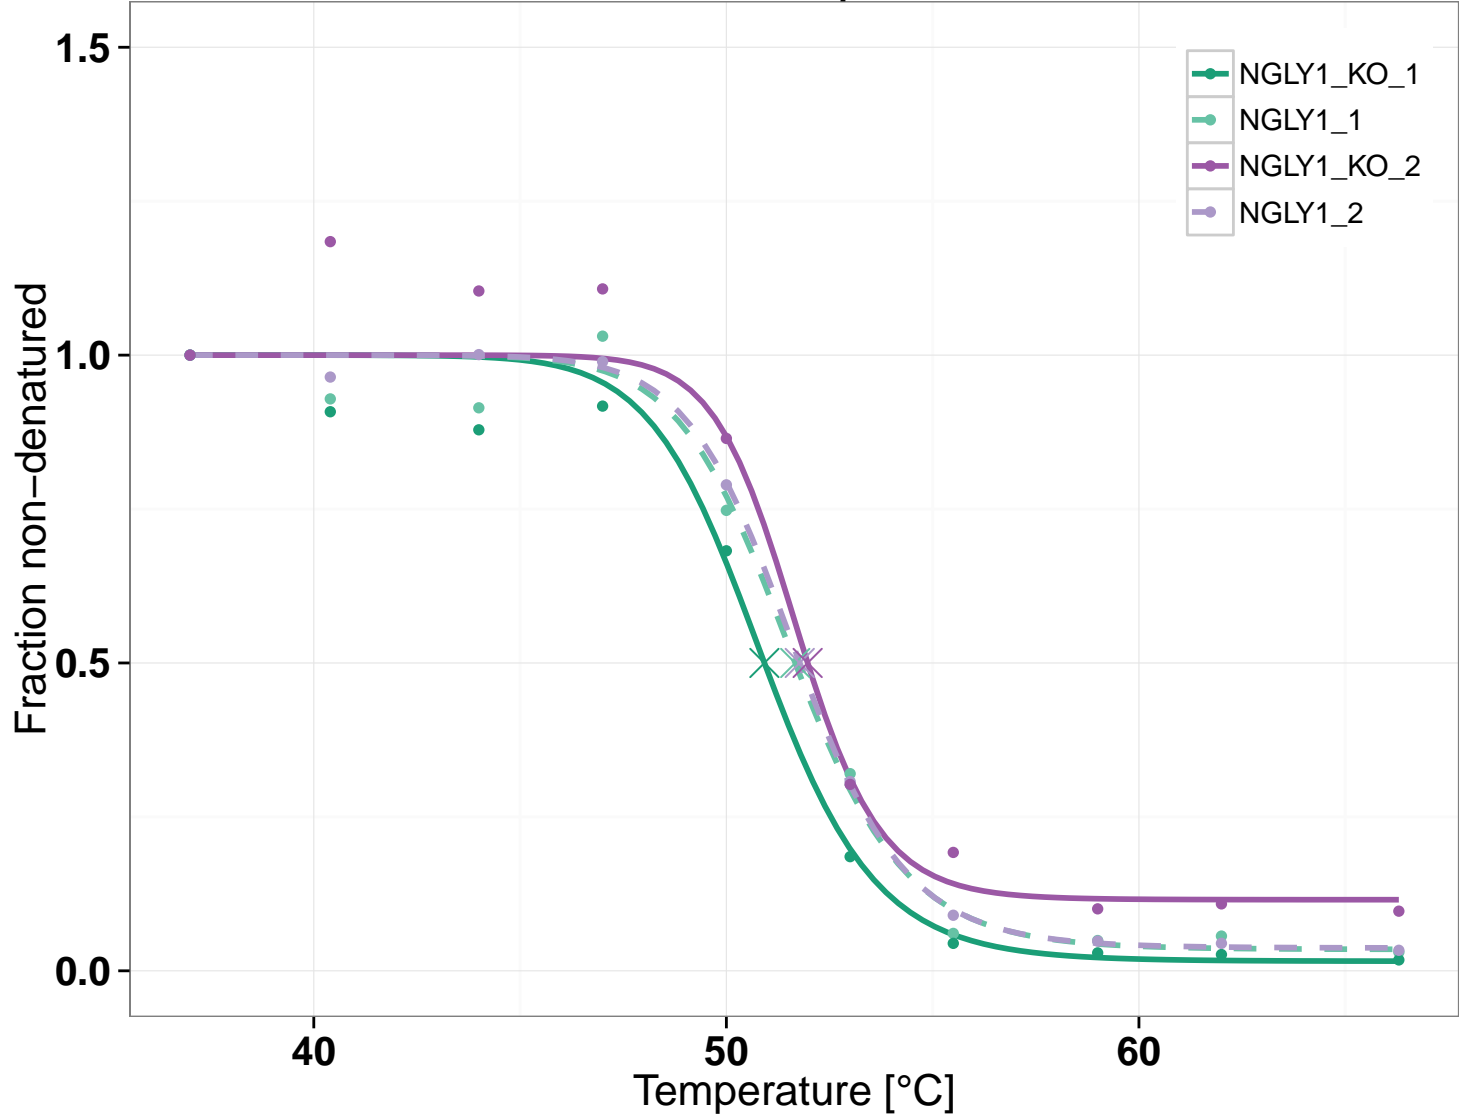

|            | meltPoint | slope | plateau | R2   |
|------------|-----------|-------|---------|------|
| NGLY1_KO_1 | 50.92     | -0.18 | 0.02    | 0.99 |
| NGLY1_1    | 51.67     | -0.17 | 0.03    | 0.99 |
| NGLY1_KO_2 | 51.97     | -0.22 | 0.12    | 0.97 |
| NGLY1_2    | 51.78     | -0.18 | 0.04    | 1    |

Supplement: Supplementary file 1063 [file 1]

# IPI00291607.2|ITPR3

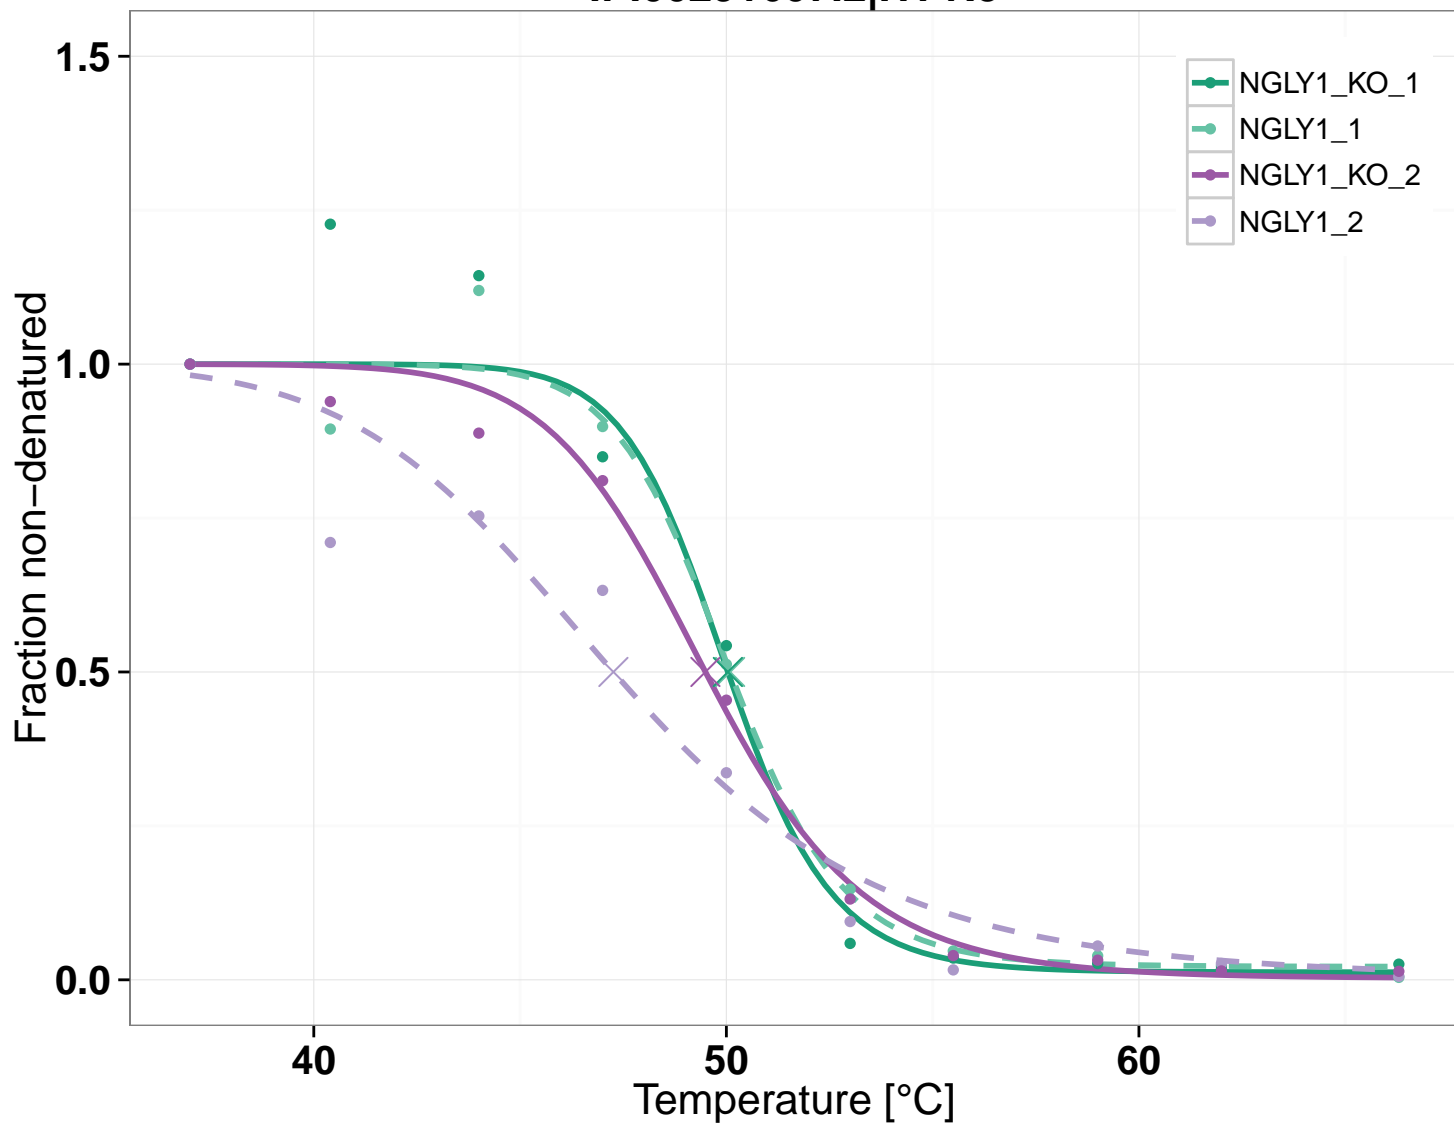

|            | meltPoint | slope  | plateau | R2   |
|------------|-----------|--------|---------|------|
| NGLY1_KO_1 | 50.04     | -0.19  | 0.01    | 0.97 |
| NGLY1_1    | 50.09     | -0.18  | 0.02    | 0.99 |
| NGLY1_KO_2 | 49.49     | -0.13  | 0       | 0.99 |
| NGLY1_2    | 47.26     | -0.078 | 0       | 0.94 |

Supplement: Supplementary file 1064 [file 1]

IPI00872208.2|LOC27320

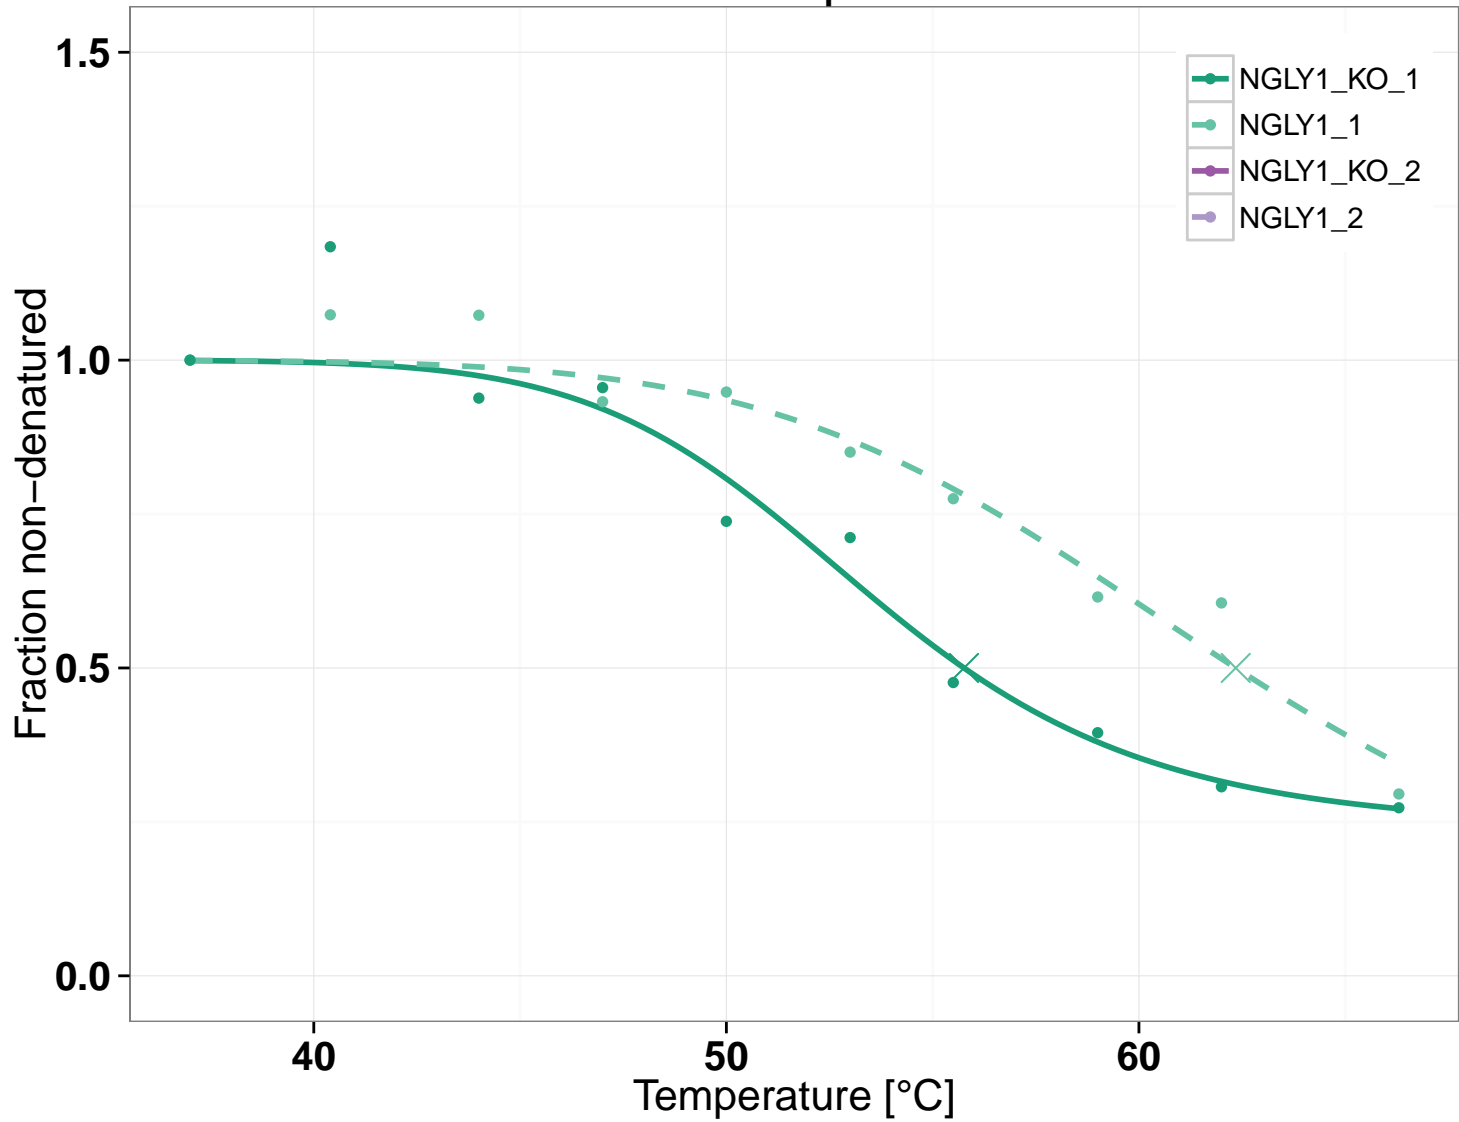

|            | meltPoint | slope  | plateau | R2   |
|------------|-----------|--------|---------|------|
| NGLY1_KO_1 | 55.76     | -0.057 | 0.24    | 0.95 |
| NGLY1_1    | 62.35     | -0.045 | 0       | 0.95 |
| NGLY1_KO_2 | -         | -      | -       | -    |
| NGLY1_2    | -         | -      | -       | -    |

Supplement: Supplementary file 1065 [file 1]

# IPI00005651.3|IPO13

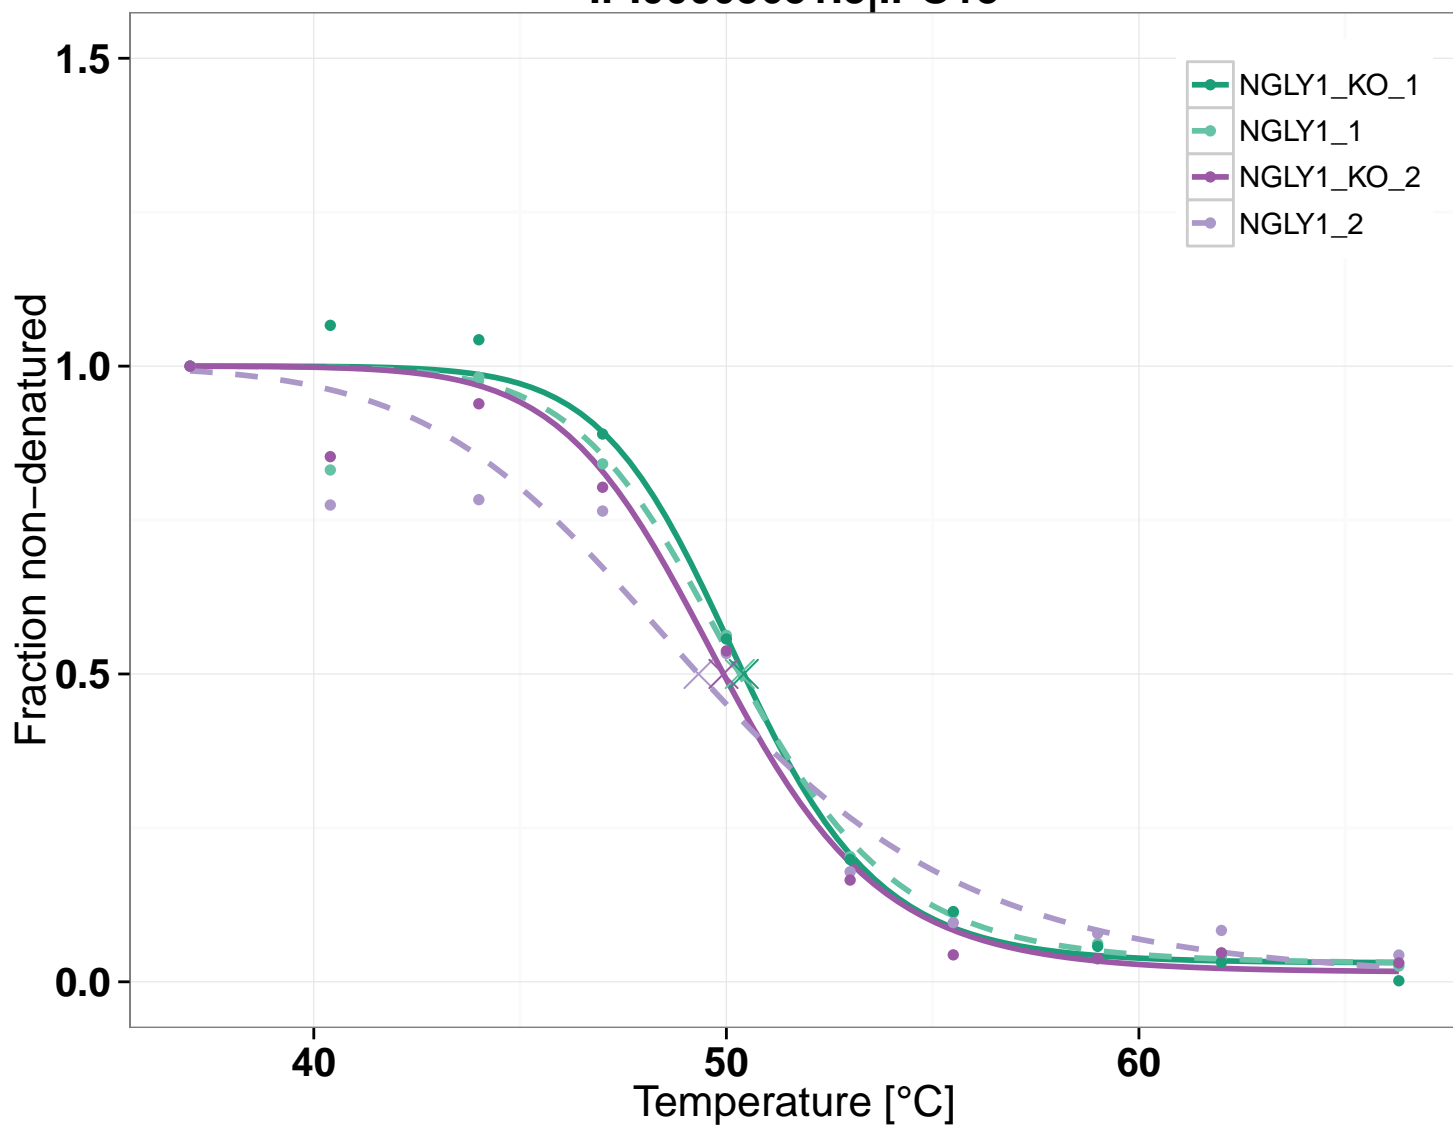

|            | meltPoint | slope  | plateau | R2   |
|------------|-----------|--------|---------|------|
| NGLY1_KO_1 | 50.42     | -0.14  | 0.03    | 1    |
| NGLY1_1    | 50.32     | -0.12  | 0.03    | 0.98 |
| NGLY1_KO_2 | 49.93     | -0.13  | 0.02    | 0.98 |
| NGLY1_2    | 49.32     | -0.075 | 0       | 0.94 |

Supplement: Supplementary file 1066 [file 1]

# IPI00093057.6|CPOX

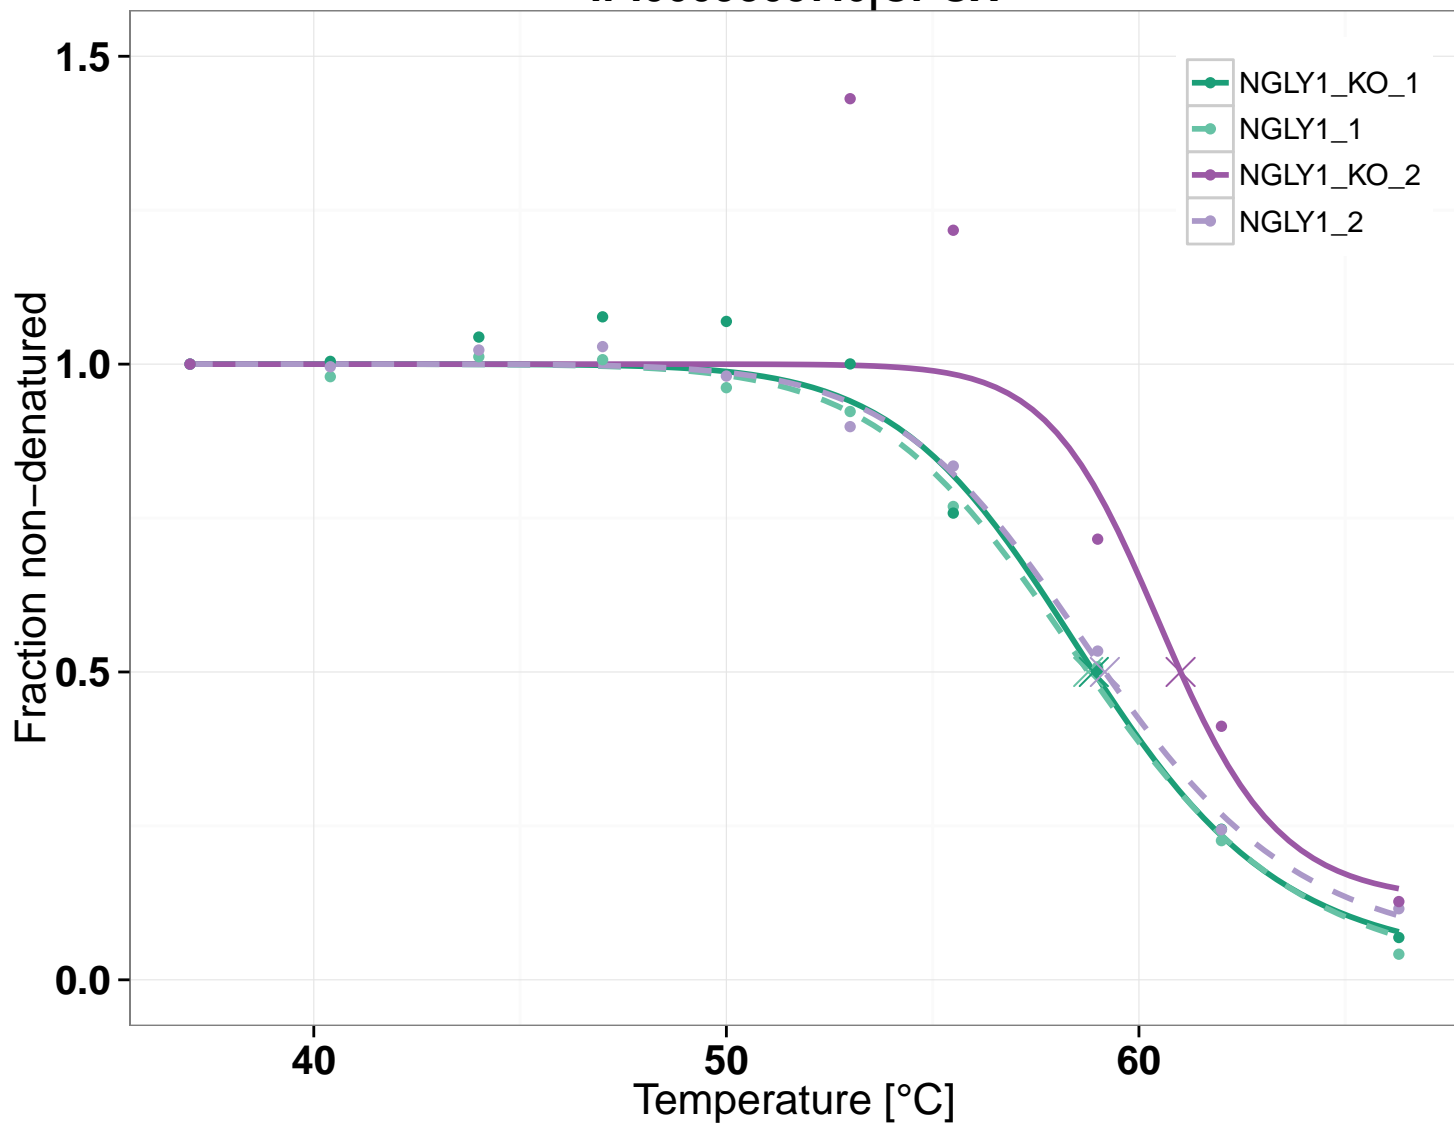

|            | meltPoint | slope  | plateau | R2   |
|------------|-----------|--------|---------|------|
| NGLY1_KO_1 | 58.91     | -0.1   | 0.02    | 0.98 |
| NGLY1_1    | 58.77     | -0.097 | 0       | 1    |
| NGLY1_KO_2 | 61.01     | -0.16  | 0.13    | 0.32 |
| NGLY1_2    | 59.17     | -0.097 | 0.04    | 1    |

Supplement: Supplementary file 1067 [file 1]

IPI00025295.2|ENTPD6

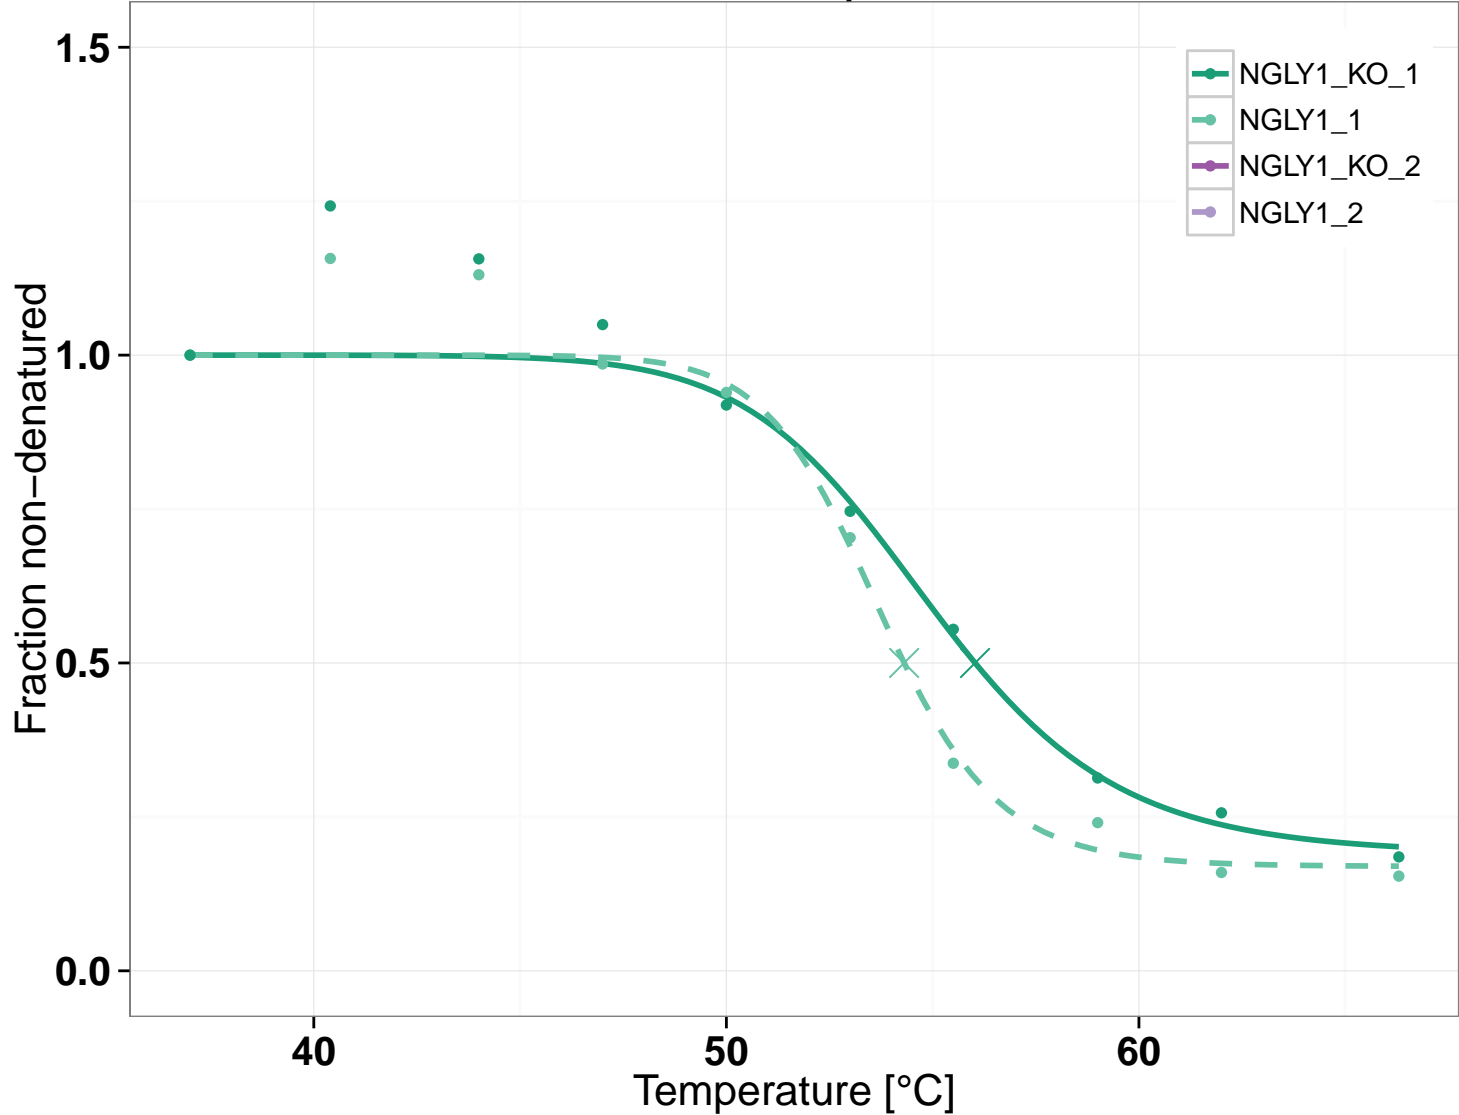

|            | meltPoint | slope | plateau | R2   |
|------------|-----------|-------|---------|------|
| NGLY1_KO_1 | 56.03     | -0.09 | 0.19    | 0.94 |
| NGLY1_1    | 54.31     | -0.15 | 0.17    | 0.97 |
| NGLY1_KO_2 | -         | -     | -       | -    |
| NGLY1_2    | -         | -     | -       | -    |

Supplement: Supplementary file 1068 [file 1]

IPI00152377.1|STT3B

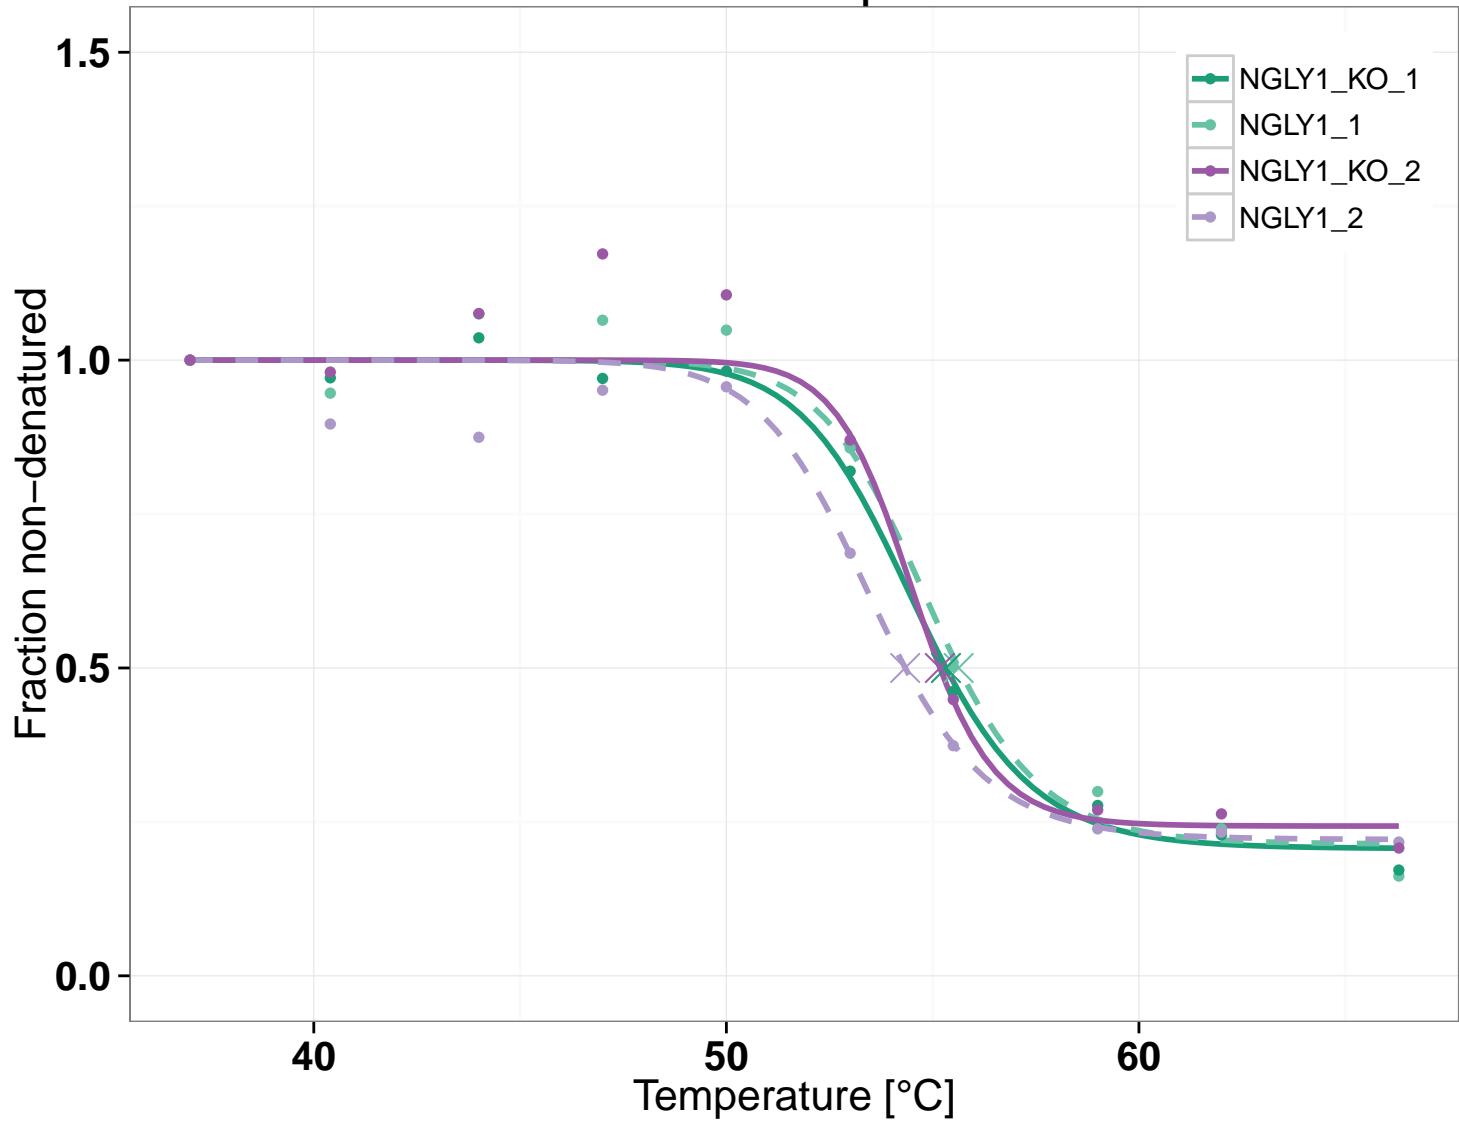

|            | meltPoint | slope | plateau | R2   |
|------------|-----------|-------|---------|------|
| NGLY1_KO_1 | 55.32     | -0.14 | 0.21    | 1    |
| NGLY1_1    | 55.63     | -0.15 | 0.21    | 0.98 |
| NGLY1_KO_2 | 55.18     | -0.2  | 0.24    | 0.96 |
| NGLY1_2    | 54.33     | -0.14 | 0.22    | 0.97 |

Supplement: Supplementary file 1069 [file 1]

IPI00302652.3|MED27

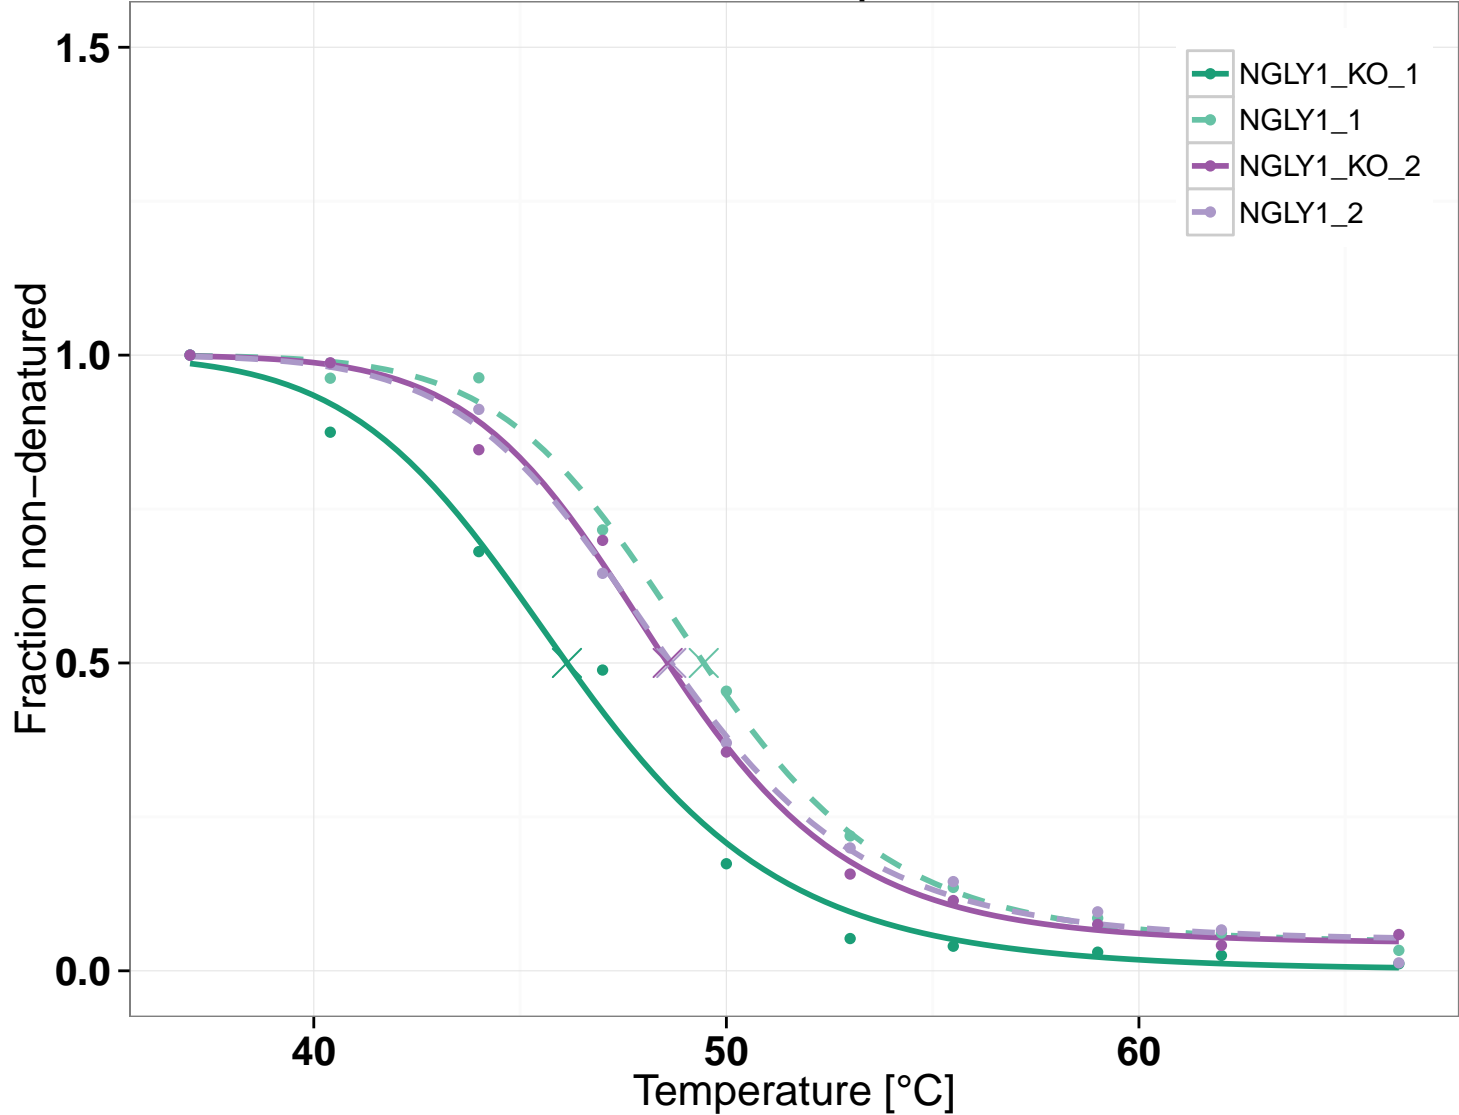

|            | meltPoint | slope  | plateau | R2   |
|------------|-----------|--------|---------|------|
| NGLY1_KO_1 | 46.14     | -0.095 | 0       | 0.99 |
| NGLY1_1    | 49.45     | -0.1   | 0.04    | 1    |
| NGLY1_KO_2 | 48.58     | -0.1   | 0.04    | 1    |
| NGLY1_2    | 48.67     | -0.097 | 0.05    | 1    |

Supplement: Supplementary file 1070 [file 1]

IPI00024166.3|MRAS

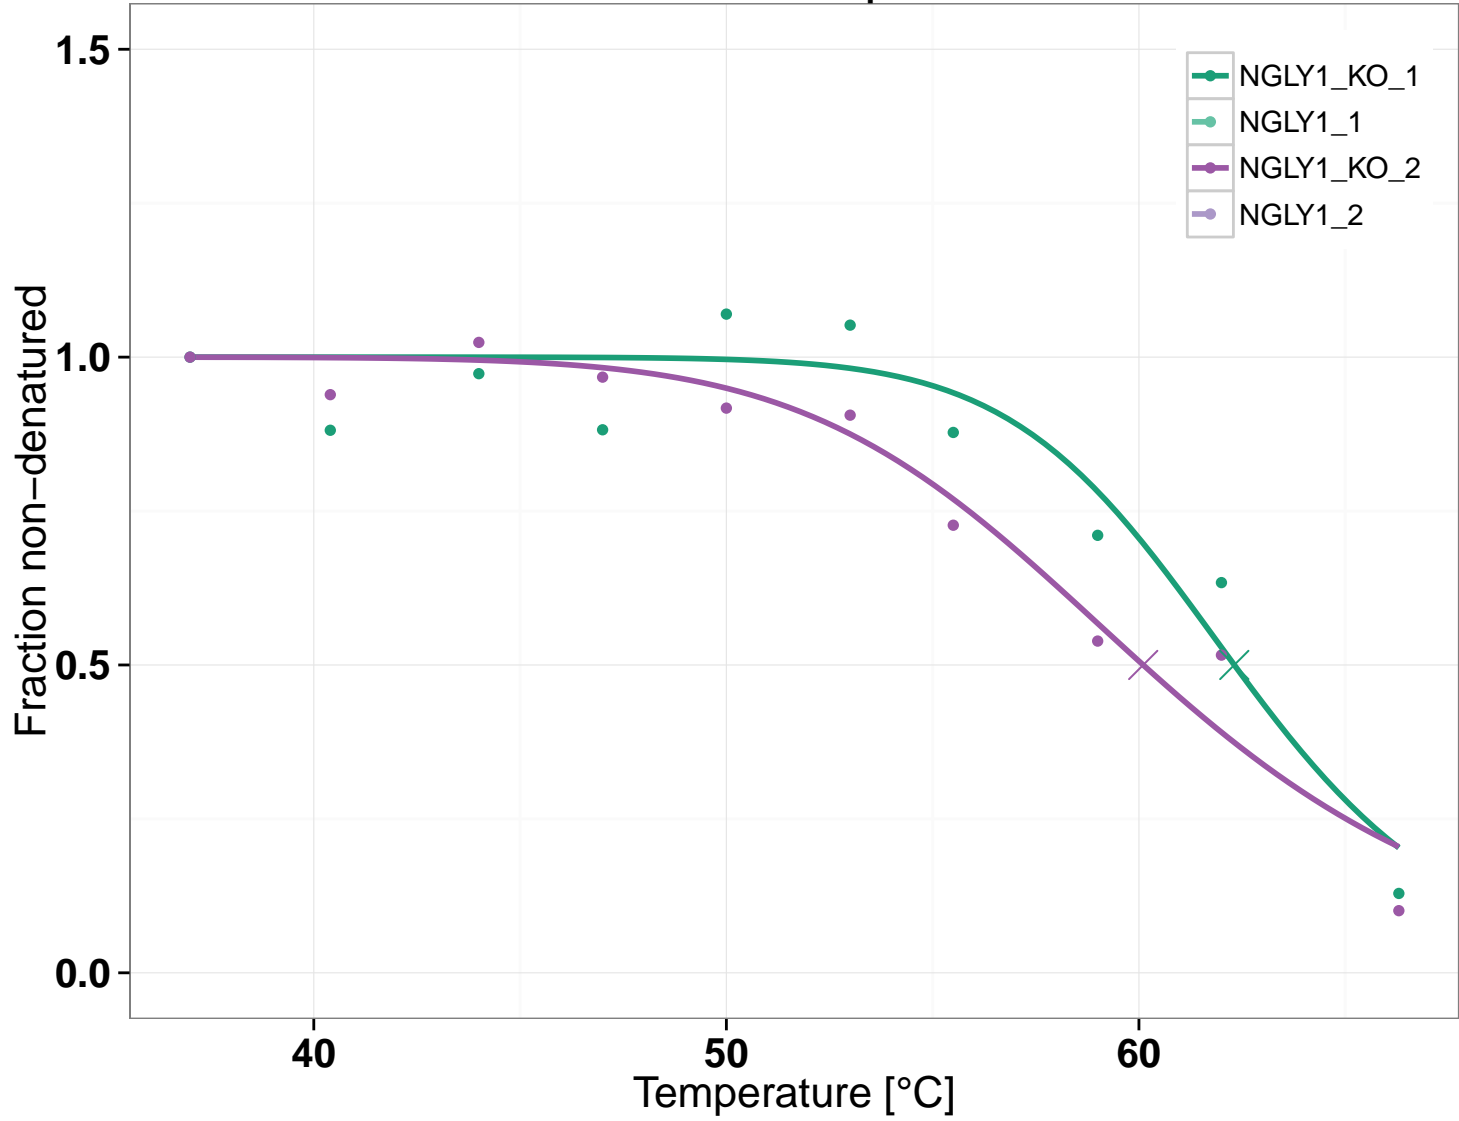

|            | meltPoint | slope  | plateau | R2   |
|------------|-----------|--------|---------|------|
| NGLY1_KO_1 | 62.31     | -0.092 | 0       | 0.91 |
| NGLY1_1    | -         | -      | -       | -    |
| NGLY1_KO_2 | 60.1      | -0.062 | 0       | 0.95 |
| NGLY1_2    | -         | -      | -       | -    |

Supplement: Supplementary file 1071 [file 1]

IPI00030099.2|ADCY9

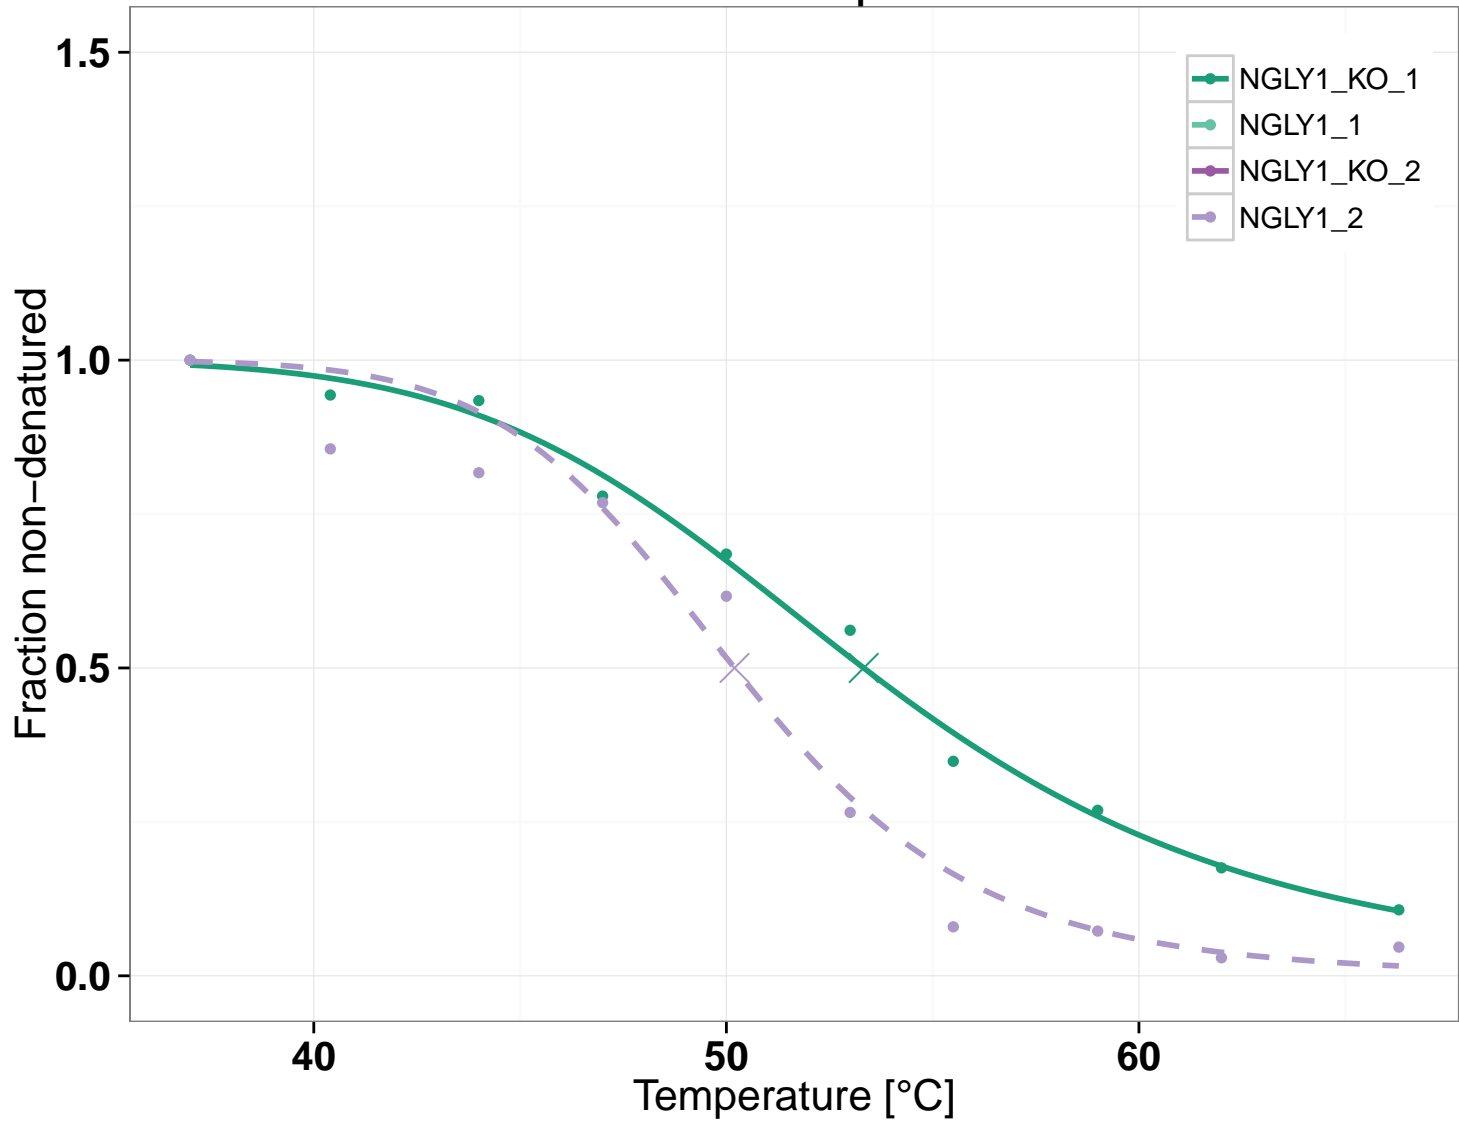

|            | meltPoint | slope  | plateau | R2   |
|------------|-----------|--------|---------|------|
| NGLY1_KO_1 | 53.33     | -0.053 | 0       | 0.99 |
| NGLY1_1    | -         | -      | -       | -    |
| NGLY1_KO_2 | -         | -      | -       | -    |
| NGLY1_2    | 50.2      | -0.086 | 0       | 0.97 |

Supplement: Supplementary file 1072 [file 1]

IPI00012336.2|ZFX

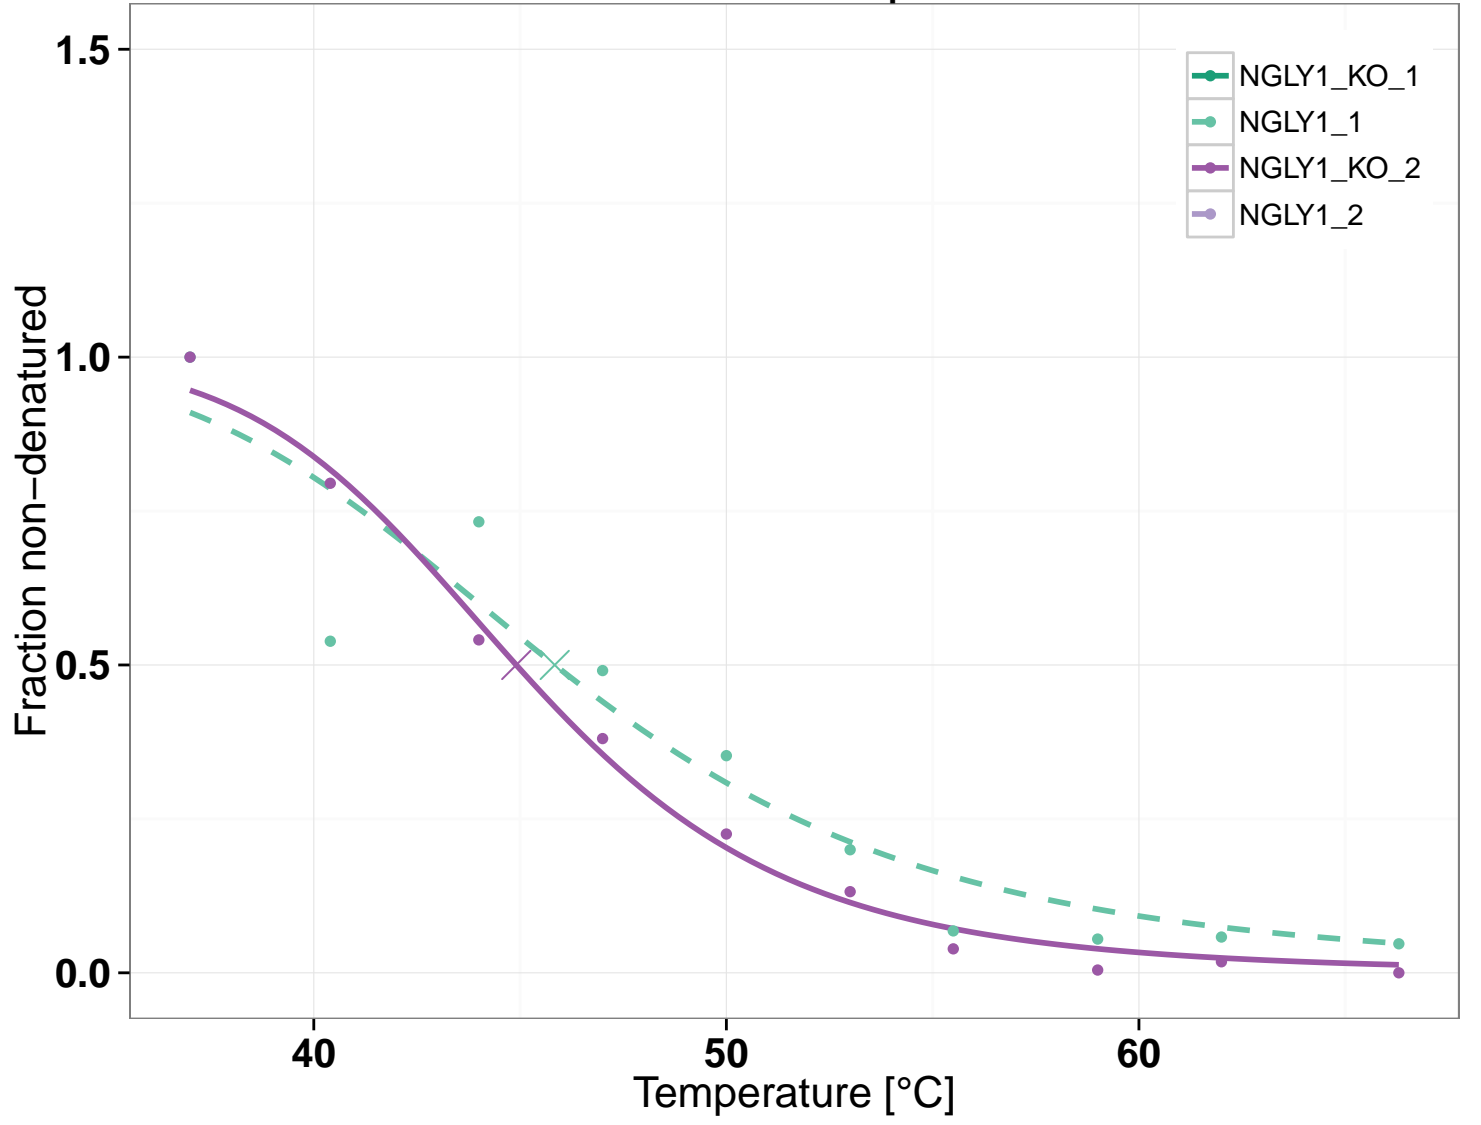

|            | meltPoint | slope  | plateau | R2   |
|------------|-----------|--------|---------|------|
| NGLY1_KO_1 | -         | -      | -       | -    |
| NGLY1_1    | 45.84     | -0.055 | 0       | 0.9  |
| NGLY1_KO_2 | 44.91     | -0.076 | 0       | 0.99 |
| NGLY1_2    | -         | -      | -       | -    |

Supplement: Supplementary file 1073 [file 1]

# IPI00479732.1|SLC43A1

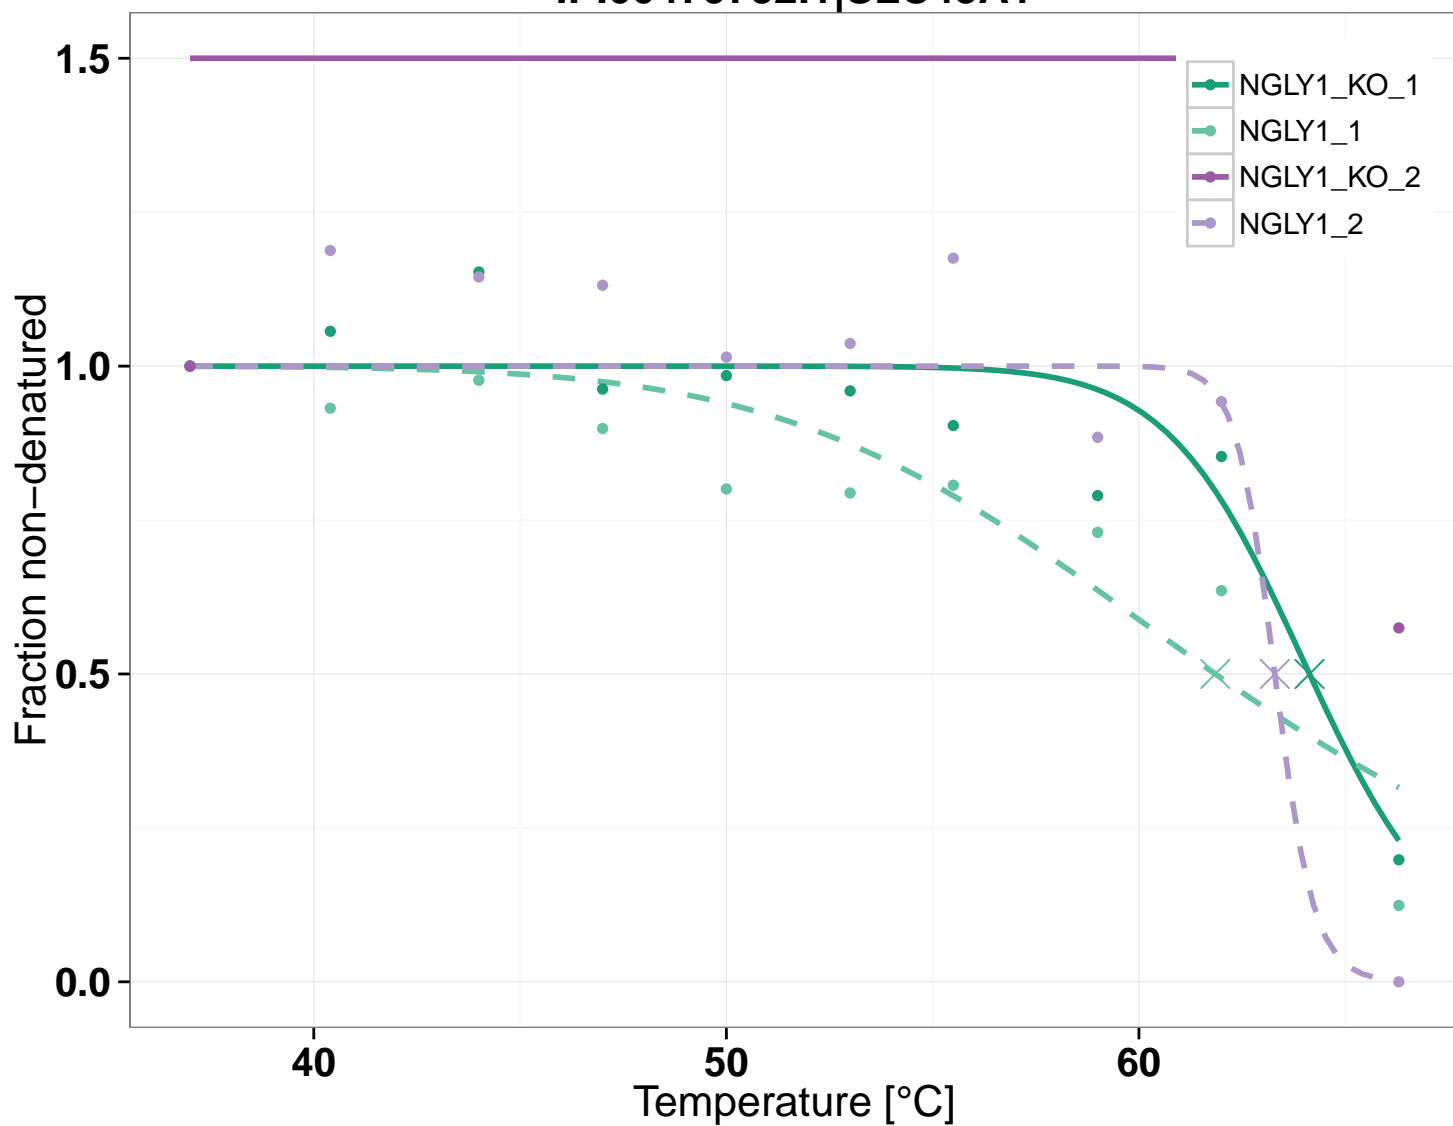

|            | meltPoint | slope  | plateau | R2    |
|------------|-----------|--------|---------|-------|
| NGLY1_KO_1 | 64.13     | -0.15  | 0       | 0.88  |
| NGLY1_1    | 61.85     | -0.048 | 0       | 0.82  |
| NGLY1_KO_2 | -         | -      | 1.5     | -0.97 |
| NGLY1_2    | 63.29     | -0.53  | 0       | 0.89  |

Supplement: Supplementary file 1074 [file 1]

IPI00377116.1|ZNF445

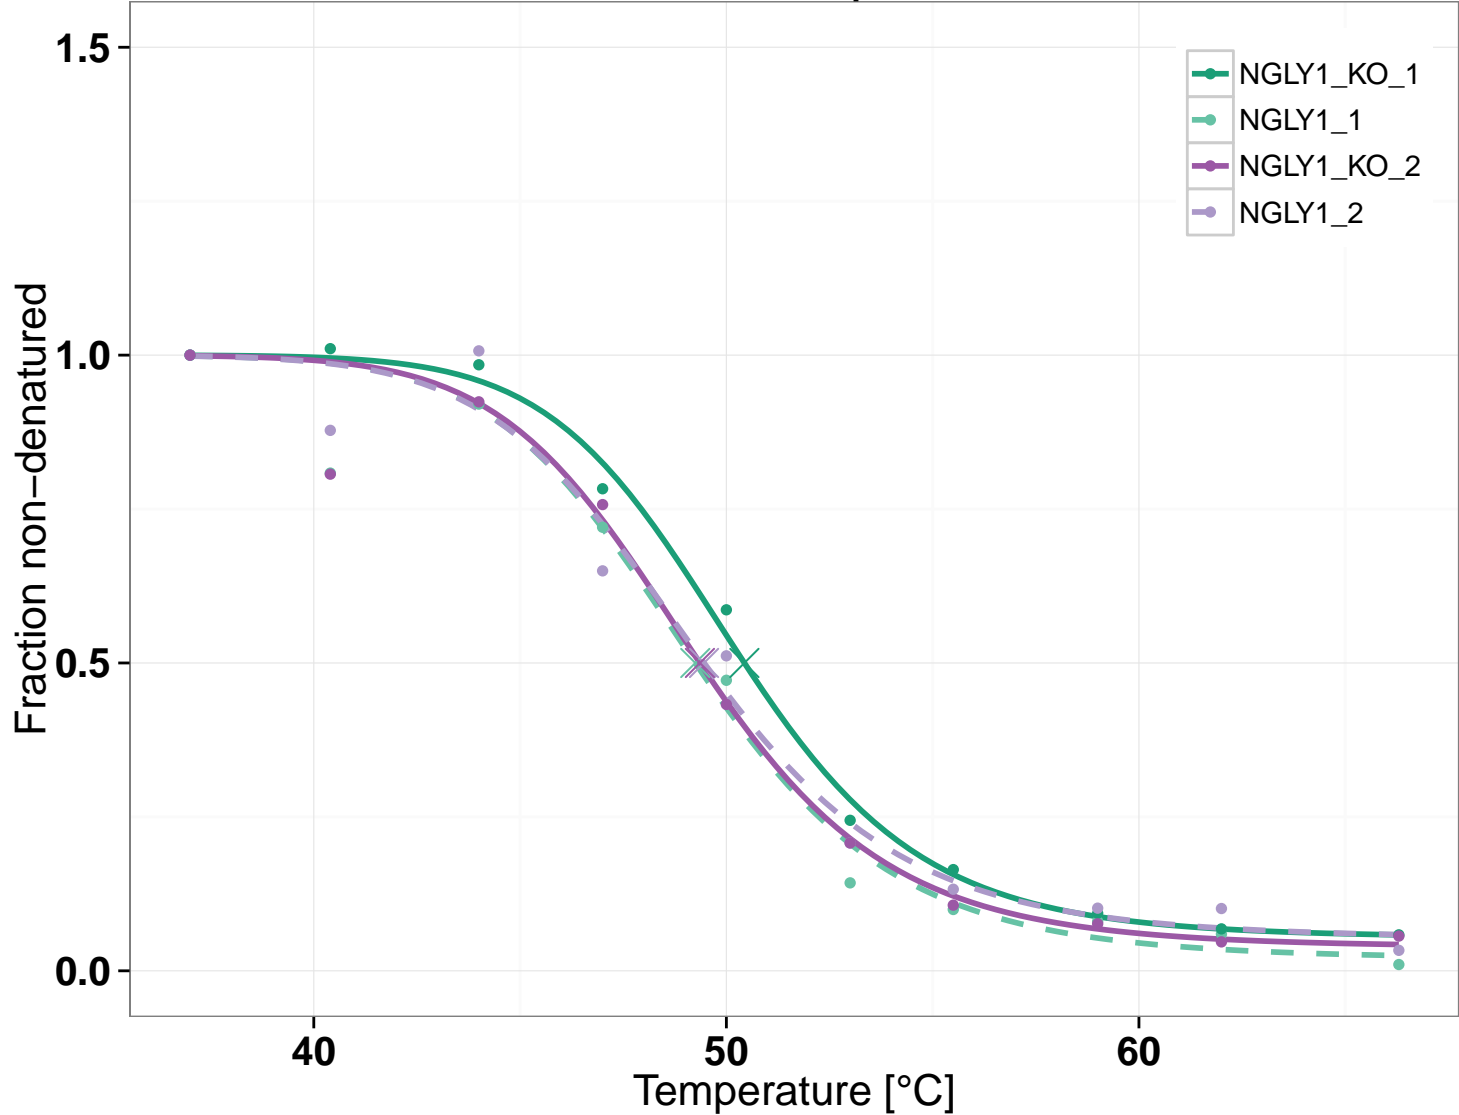

|            | meltPoint | slope  | plateau | R2   |
|------------|-----------|--------|---------|------|
| NGLY1_KO_1 | 50.44     | -0.1   | 0.05    | 1    |
| NGLY1_1    | 49.25     | -0.1   | 0.02    | 0.97 |
| NGLY1_KO_2 | 49.36     | -0.1   | 0.04    | 0.98 |
| NGLY1_2    | 49.46     | -0.094 | 0.05    | 0.98 |

Supplement: Supplementary file 1075 [file 1]

IPI00290571.3|FBXO30

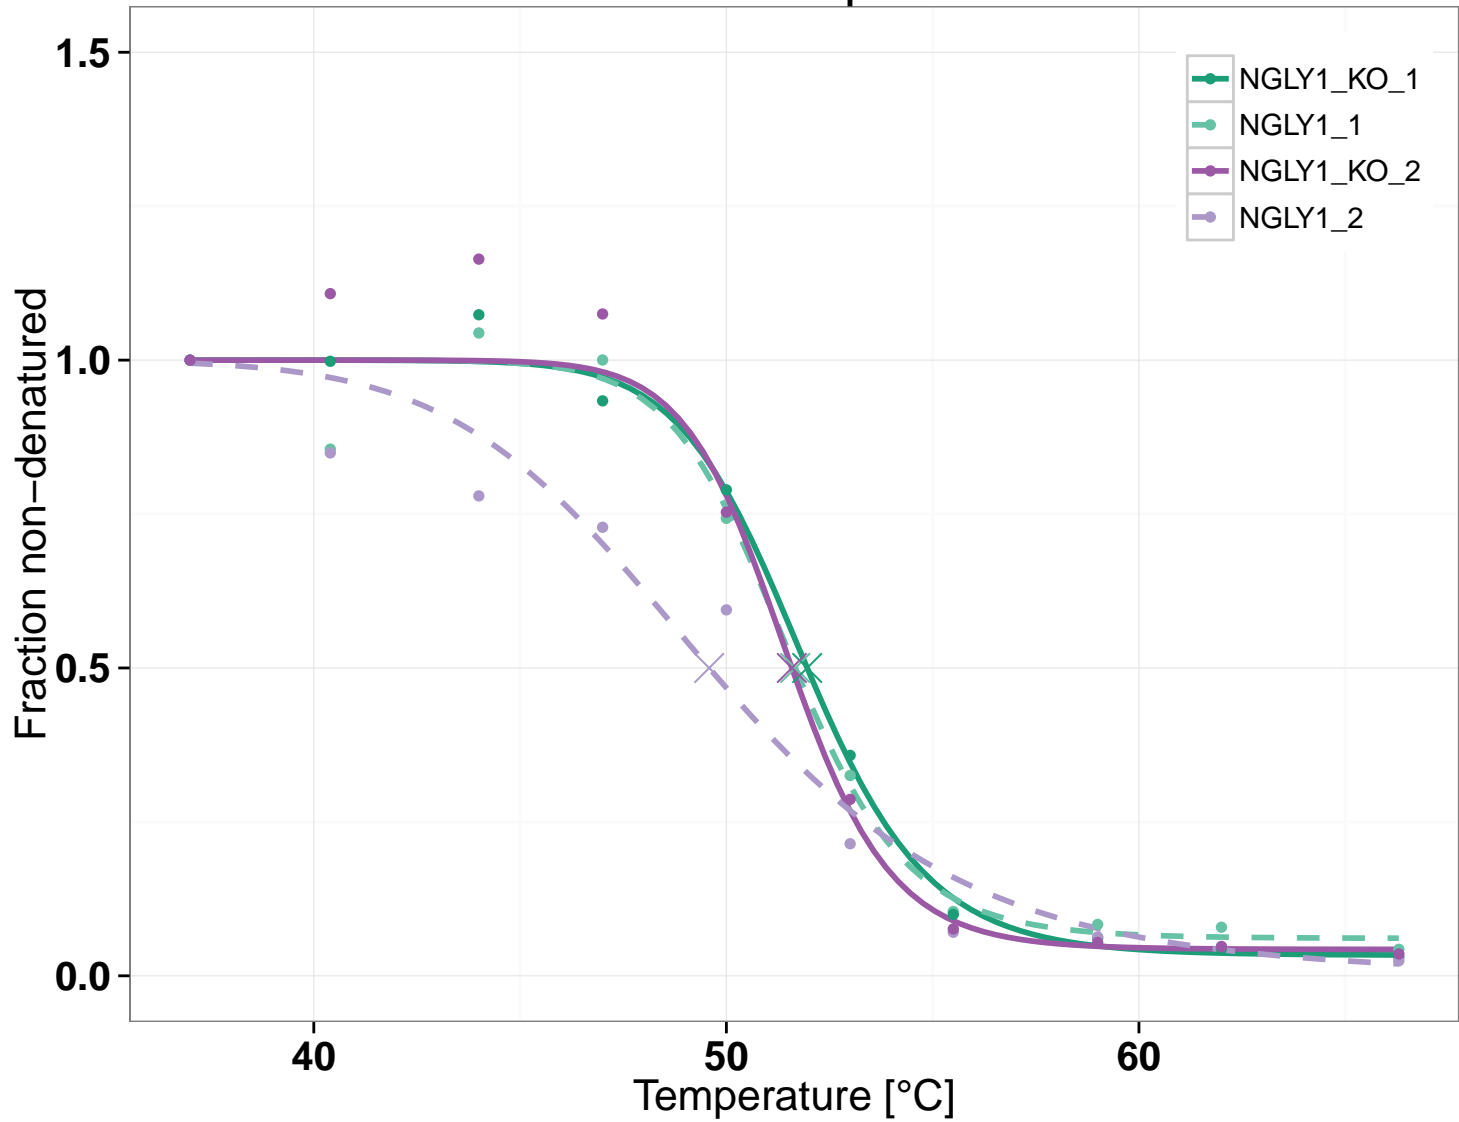

|            | meltPoint | slope | plateau | R2   |
|------------|-----------|-------|---------|------|
| NGLY1_KO_1 | 51.96     | -0.16 | 0.03    | 1    |
| NGLY1_1    | 51.67     | -0.16 | 0.06    | 0.99 |
| NGLY1_KO_2 | 51.59     | -0.19 | 0.04    | 0.98 |
| NGLY1_2    | 49.58     | -0.08 | 0       | 0.96 |

Supplement: Supplementary file 1076 [file 1]

# IPI00791698.1|NRM

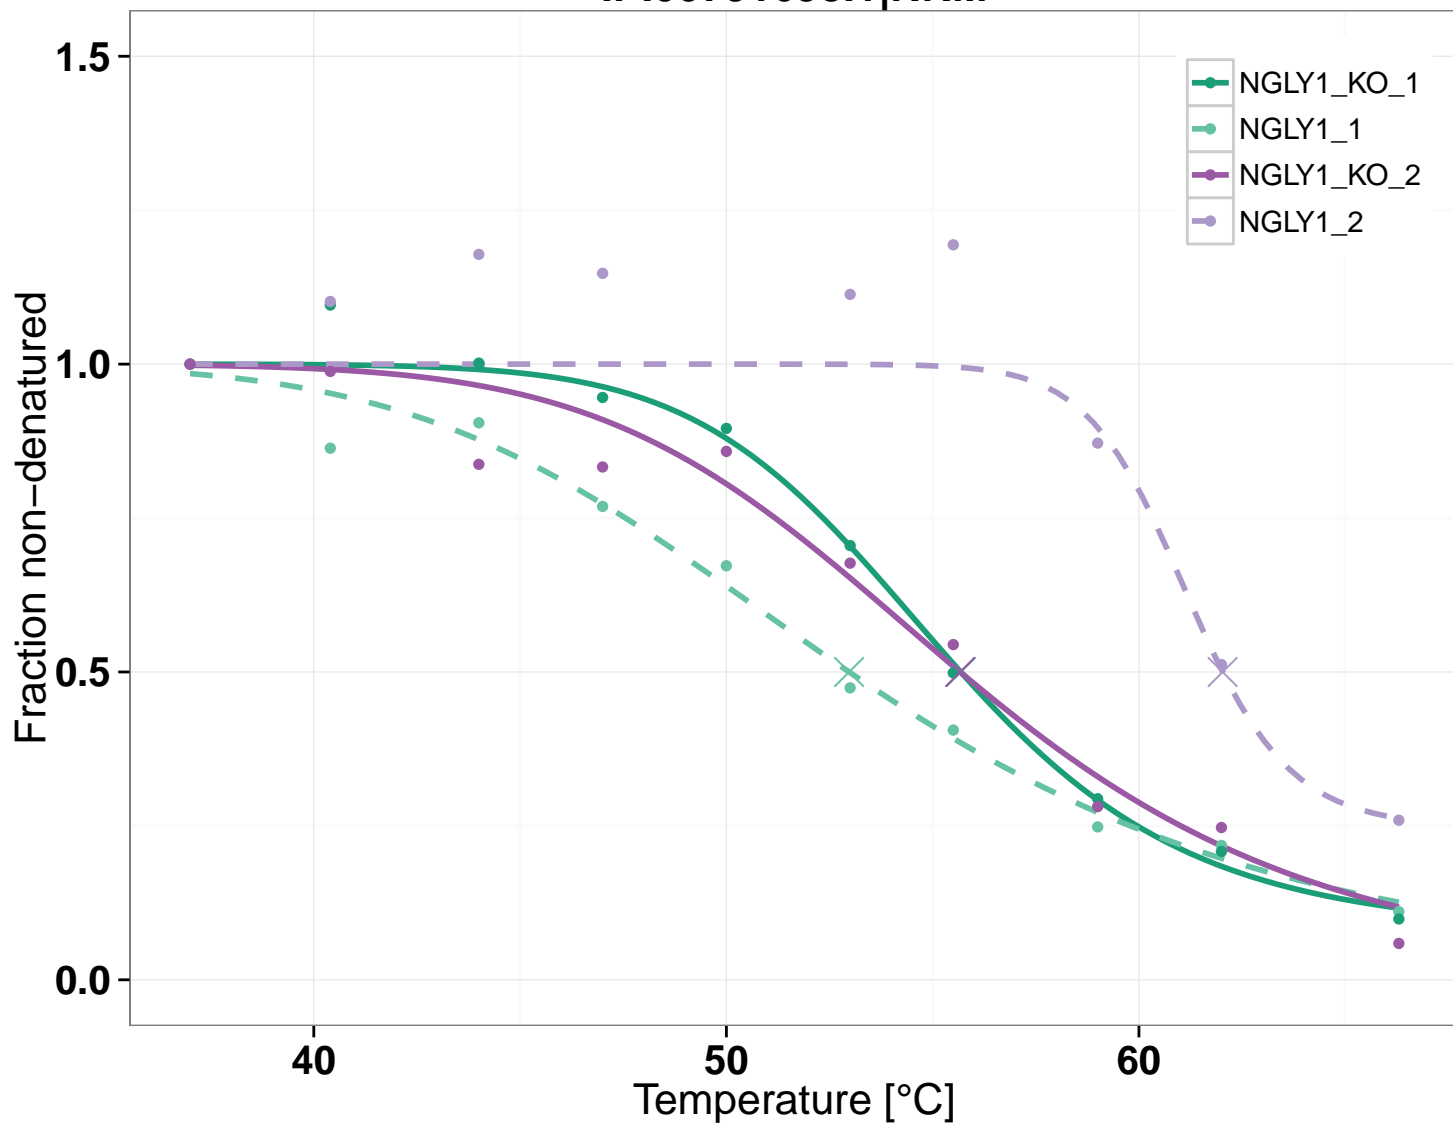

|            | meltPoint | slope  | plateau | R2   |
|------------|-----------|--------|---------|------|
| NGLY1_KO_1 | 55.68     | -0.078 | 0.08    | 0.99 |
| NGLY1_1    | 52.98     | -0.047 | 0       | 0.99 |
| NGLY1_KO_2 | 55.67     | -0.058 | 0       | 0.97 |
| NGLY1_2    | 62.03     | -0.15  | 0.25    | 0.67 |

Supplement: Supplementary file 1077 [file 1]

# IPI00303753.5|C1ORF163

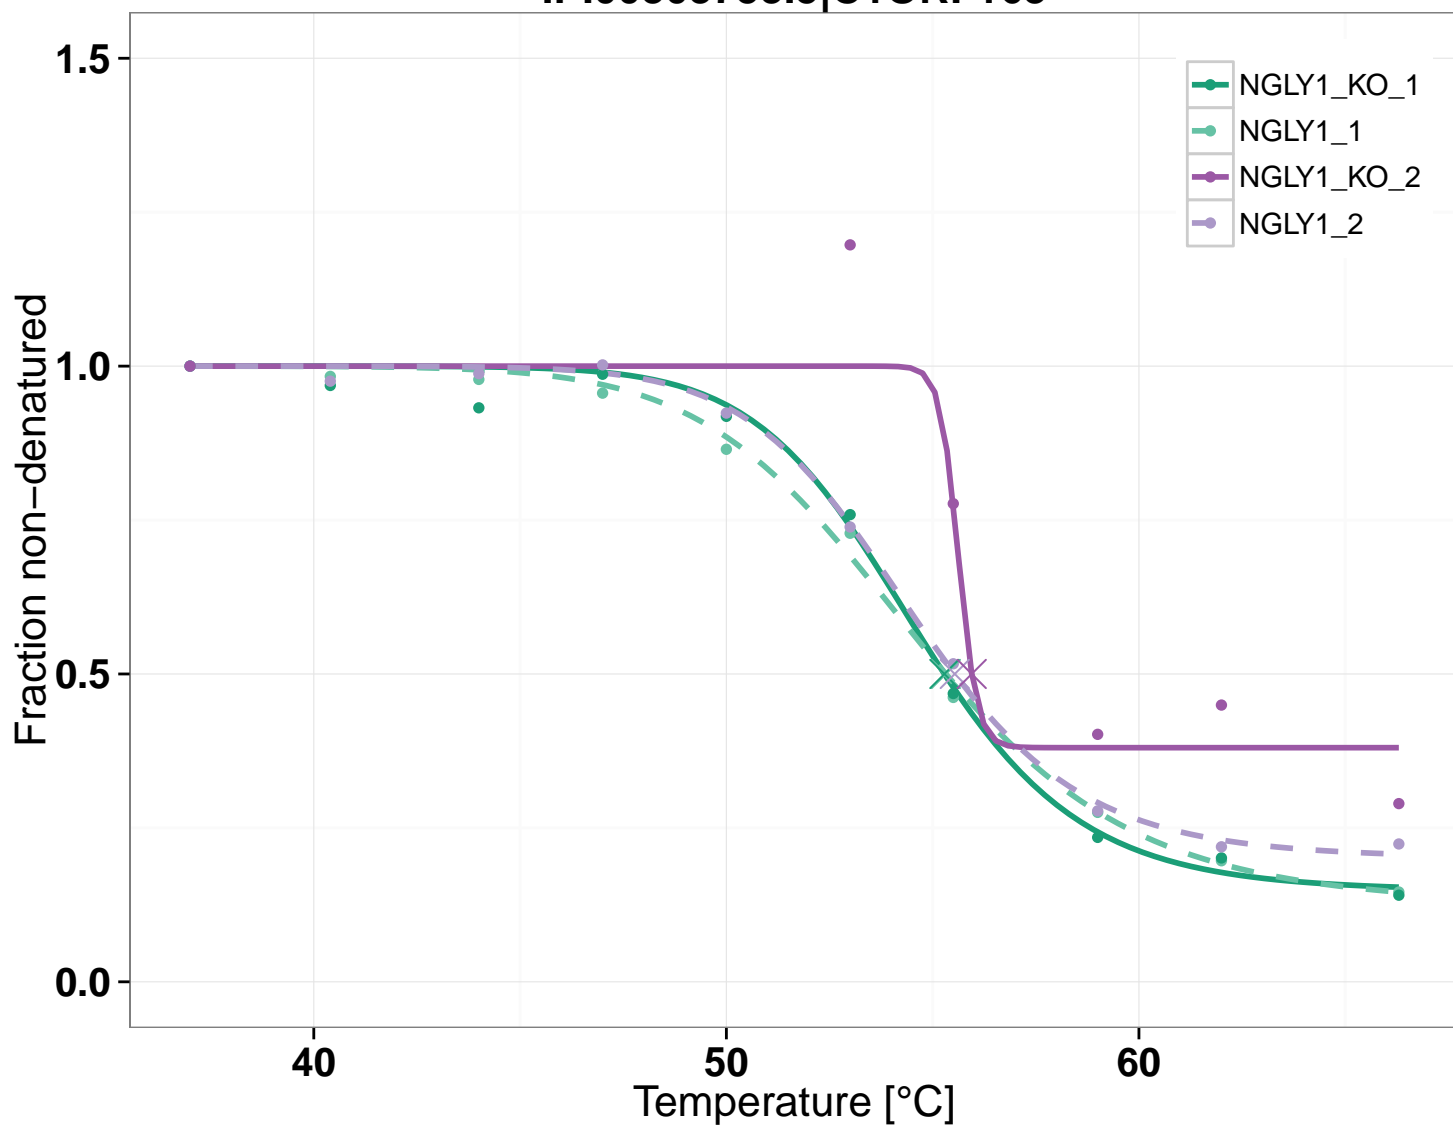

|            | meltPoint | slope  | plateau | R2   |
|------------|-----------|--------|---------|------|
| NGLY1_KO_1 | 55.28     | -0.11  | 0.15    | 0.99 |
| NGLY1_1    | 55.32     | -0.084 | 0.12    | 1    |
| NGLY1_KO_2 | 55.95     | -0.7   | 0.38    | 0.46 |
| NGLY1_2    | 55.54     | -0.099 | 0.2     | 1    |

Supplement: Supplementary file 1078 [file 1]

IPI00376346.5|MTERFD2

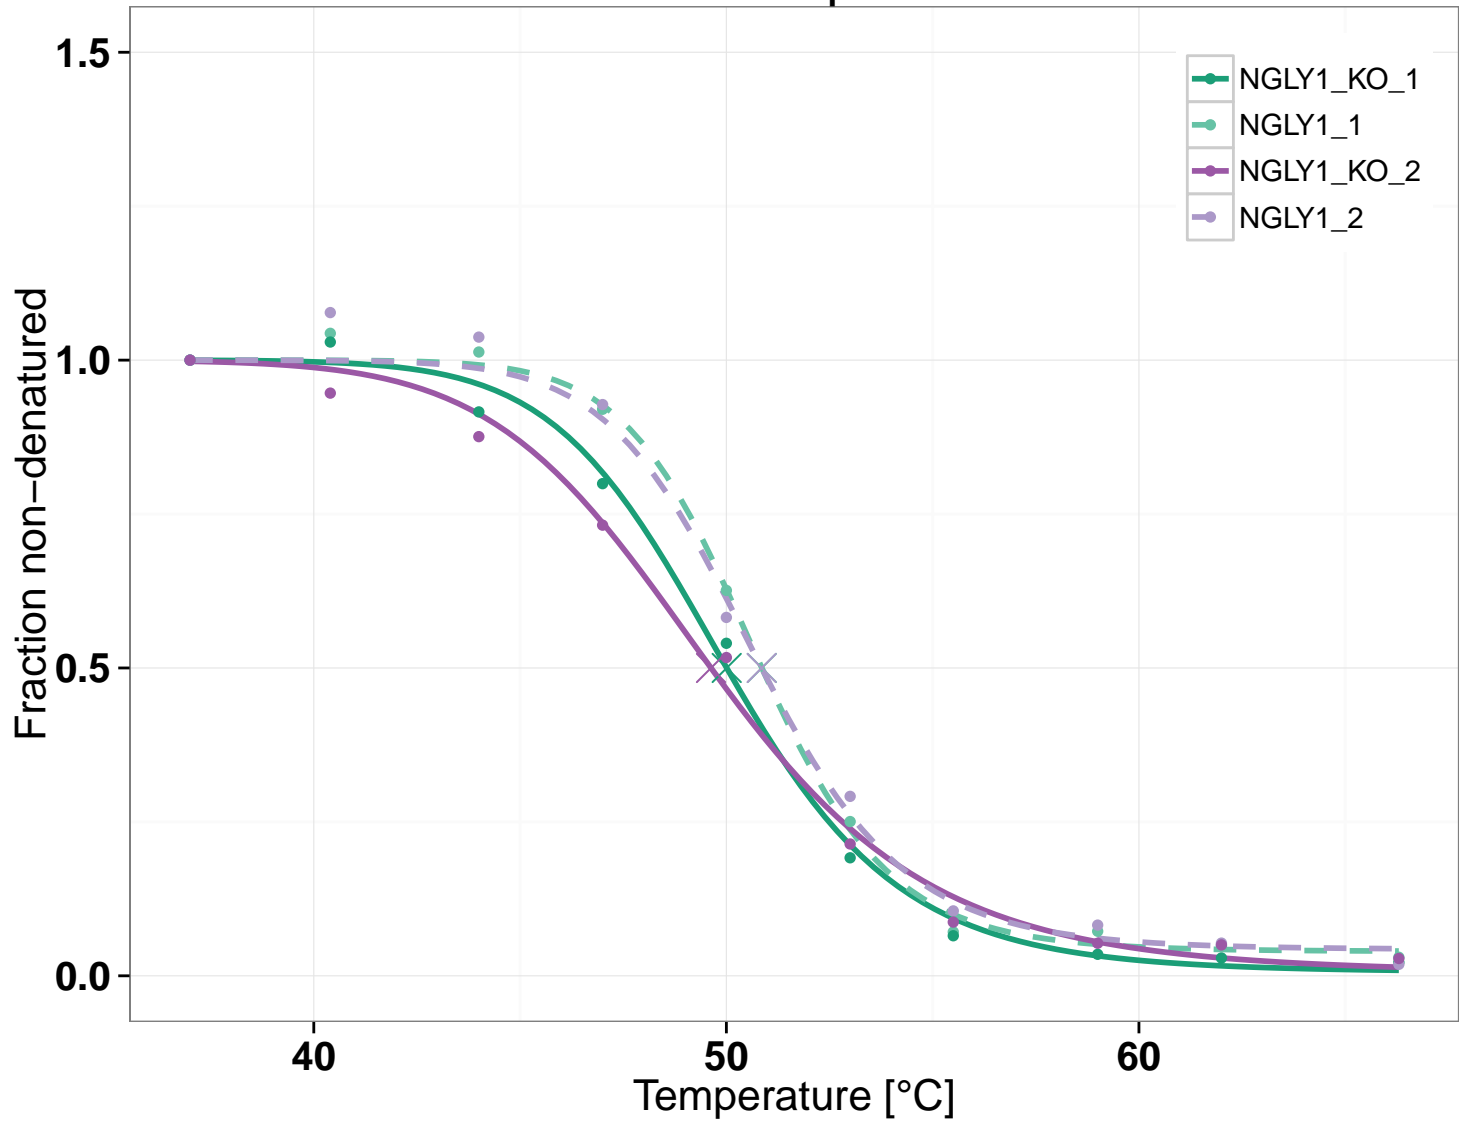

|            | meltPoint | slope  | plateau | R2   |
|------------|-----------|--------|---------|------|
| NGLY1_KO_1 | 50.01     | -0.12  | 0.01    | 1    |
| NGLY1_1    | 50.86     | -0.15  | 0.04    | 1    |
| NGLY1_KO_2 | 49.63     | -0.093 | 0       | 0.99 |
| NGLY1_2    | 50.86     | -0.13  | 0.04    | 0.99 |

Supplement: Supplementary file 1079 [file 1]

IPI00514477.1|C1ORF38

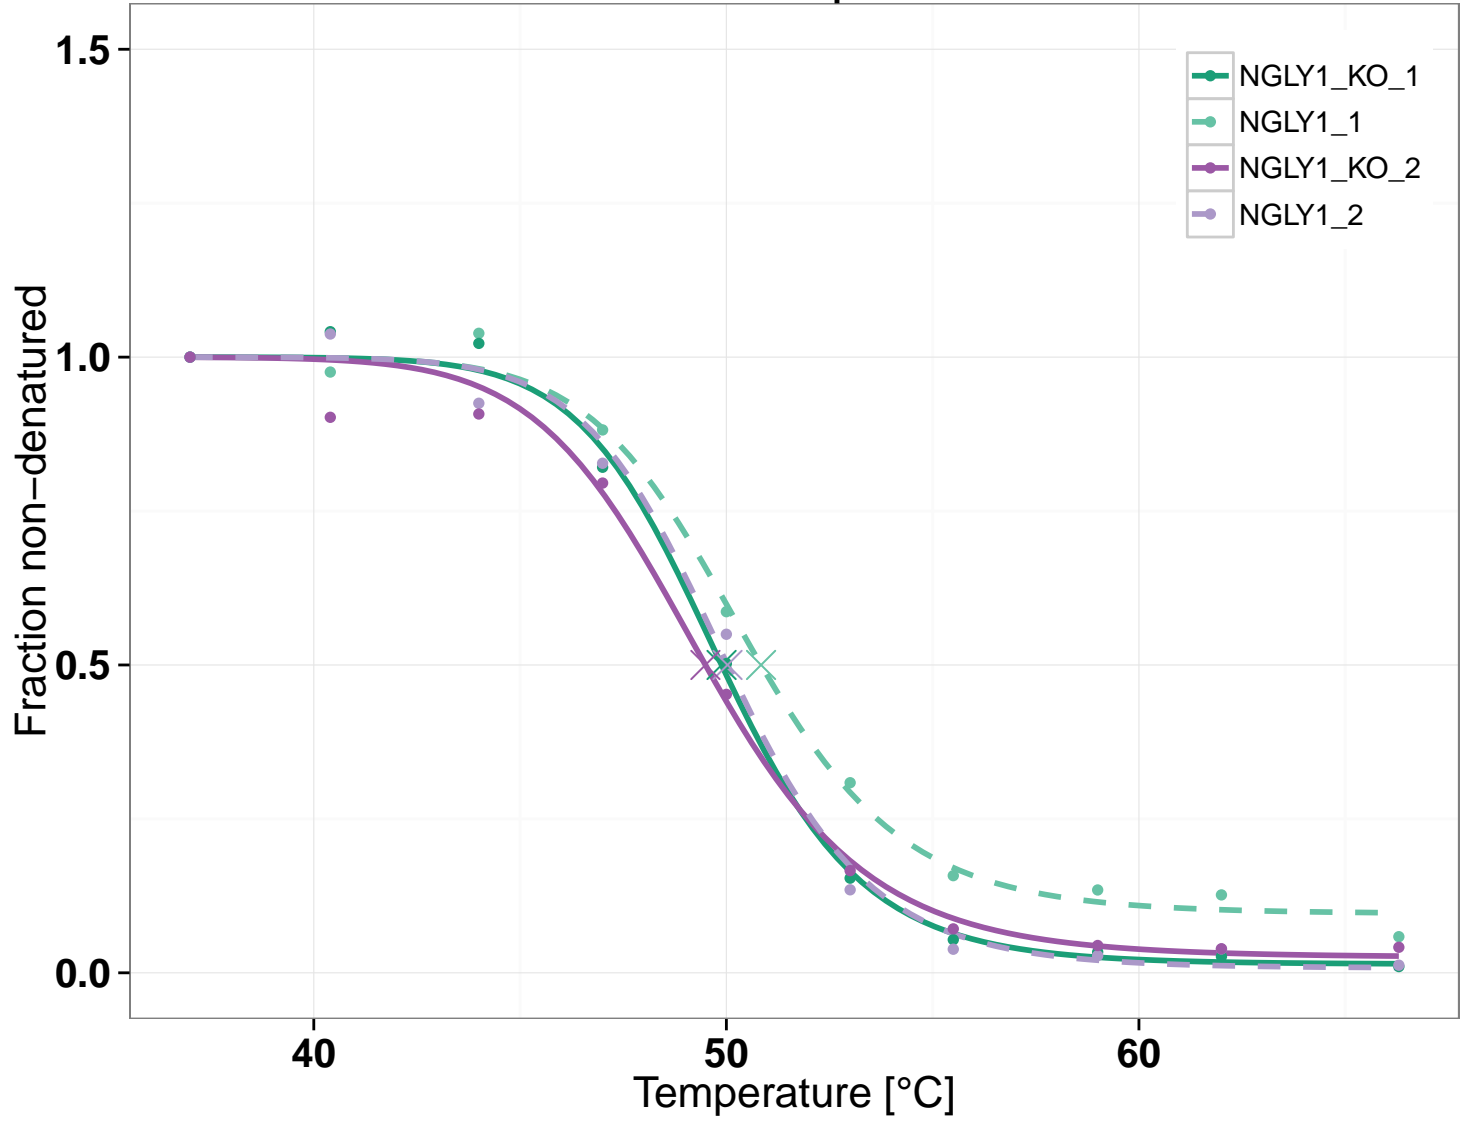

|            | meltPoint | slope | plateau | R2   |
|------------|-----------|-------|---------|------|
| NGLY1_KO_1 | 49.88     | -0.14 | 0.01    | 1    |
| NGLY1_1    | 50.84     | -0.12 | 0.1     | 1    |
| NGLY1_KO_2 | 49.49     | -0.12 | 0.03    | 0.99 |
| NGLY1_2    | 50.03     | -0.14 | 0.01    | 0.99 |

Supplement: Supplementary file 1080 [file 1]

IPI00783299.2|C10ORF88

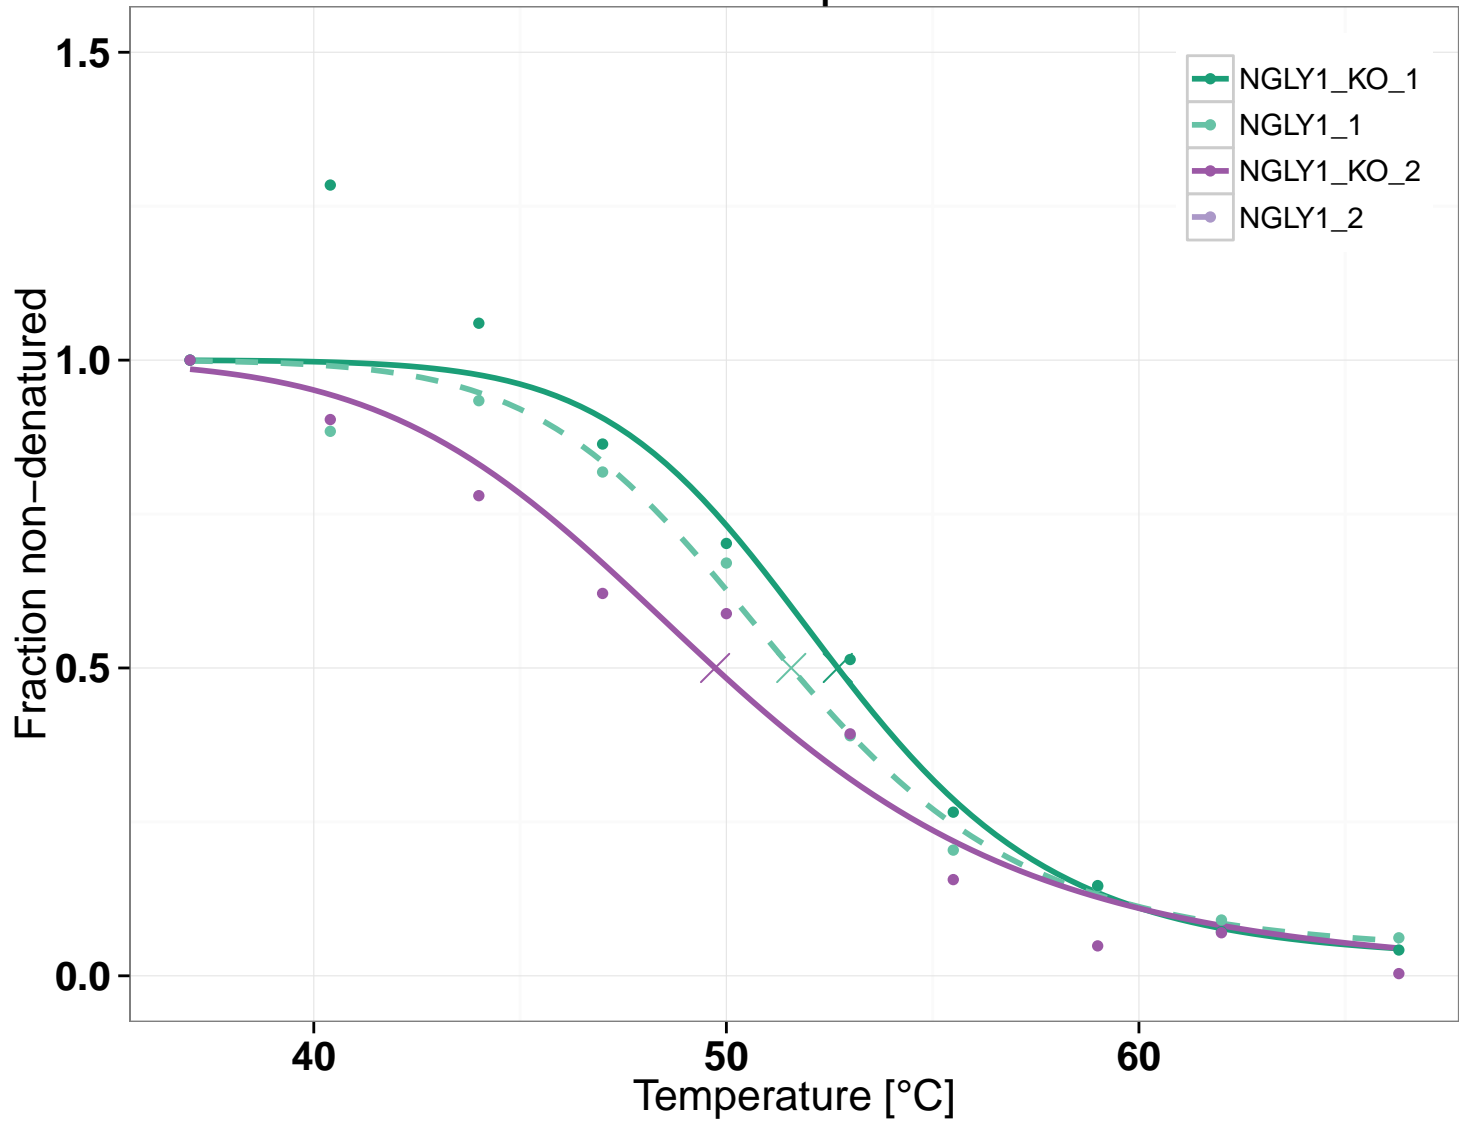

|            | meltPoint | slope  | plateau | R2   |
|------------|-----------|--------|---------|------|
| NGLY1_KO_1 | 52.7      | -0.089 | 0.03    | 0.95 |
| NGLY1_1    | 51.57     | -0.081 | 0.04    | 0.99 |
| NGLY1_KO_2 | 49.73     | -0.063 | 0       | 0.97 |
| NGLY1_2    | -         | -      | -       | -    |

Supplement: Supplementary file 1081 [file 1]

# IPI00005769.1|FANCG

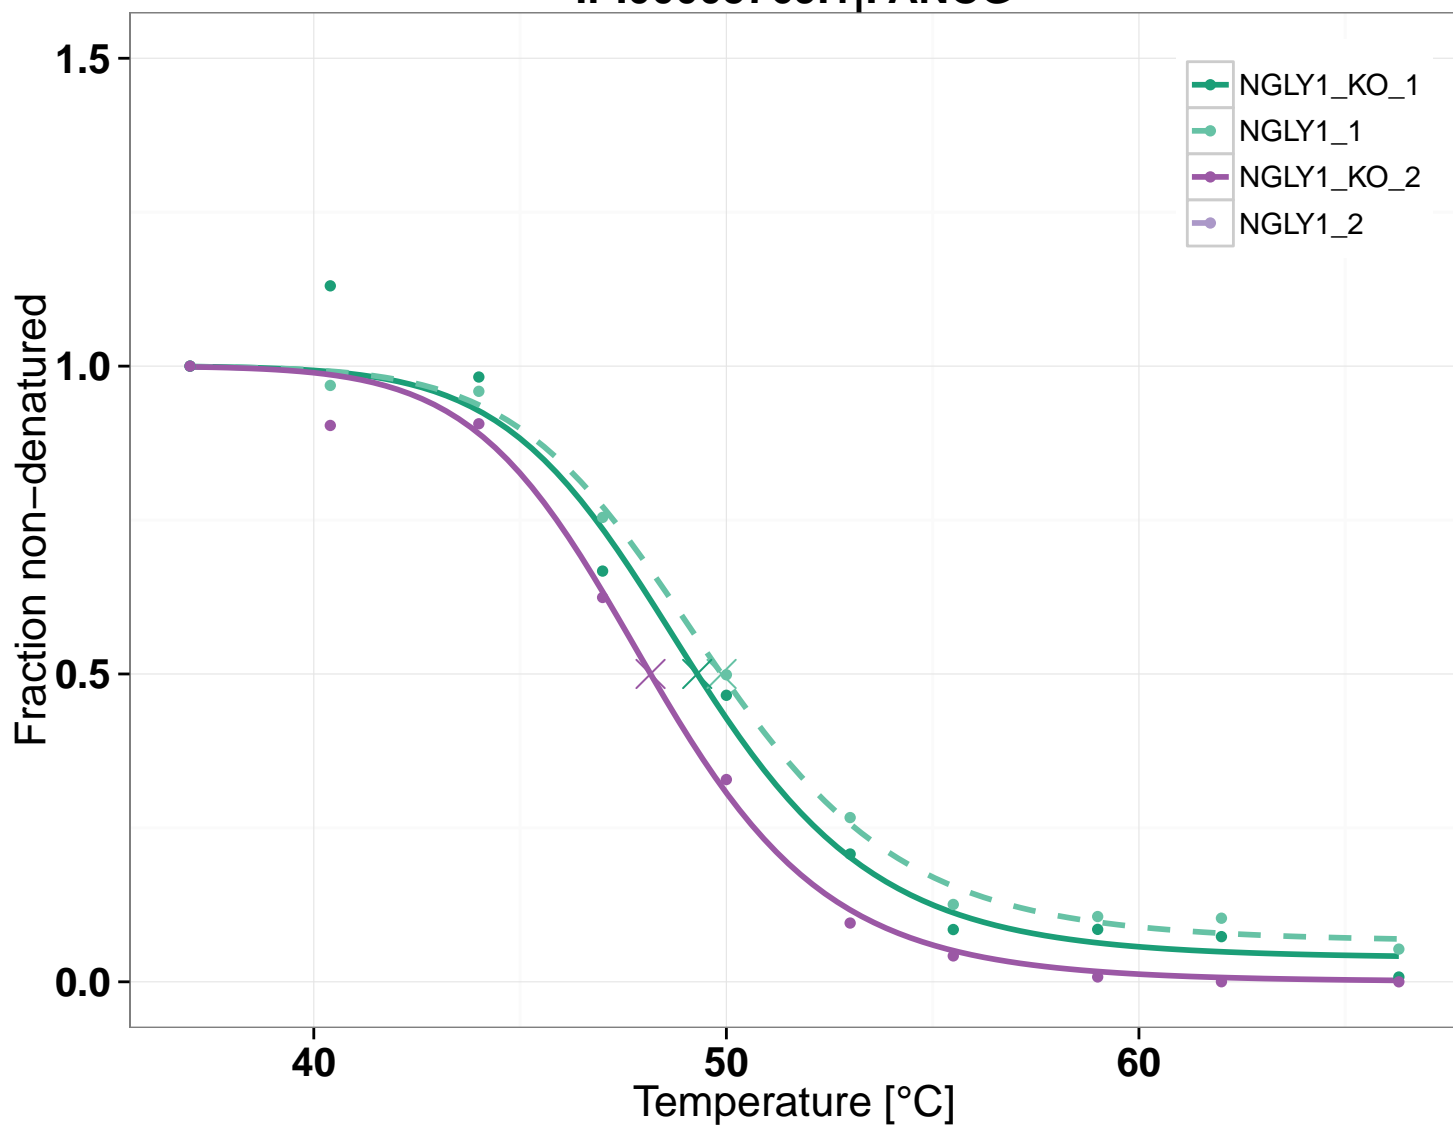

|            | meltPoint | slope  | plateau | R2   |
|------------|-----------|--------|---------|------|
| NGLY1_KO_1 | 49.29     | -0.11  | 0.04    | 0.98 |
| NGLY1_1    | 49.88     | -0.099 | 0.06    | 1    |
| NGLY1_KO_2 | 48.16     | -0.12  | 0       | 0.99 |
| NGLY1_2    | -         | -      | -       | -    |

Supplement: Supplementary file 1082 [file 1]

# IPI00021333.1|NEK4

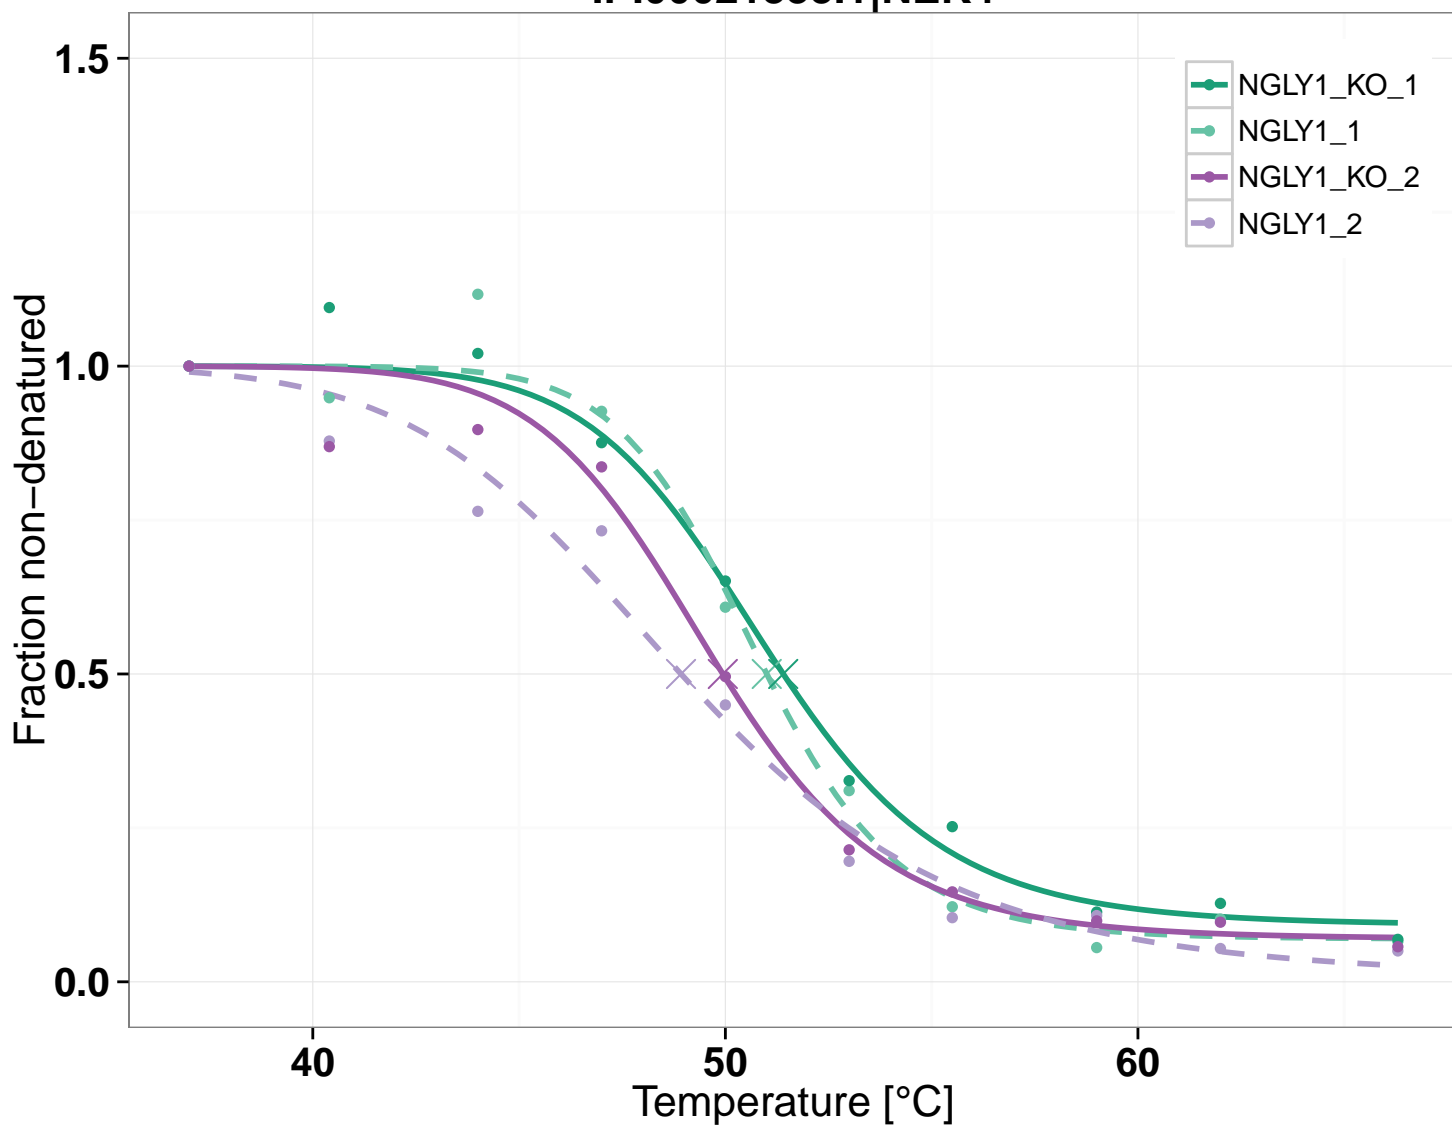

|            | meltPoint | slope  | plateau | R2   |
|------------|-----------|--------|---------|------|
| NGLY1_KO_1 | 51.4      | -0.1   | 0.09    | 0.99 |
| NGLY1_1    | 51        | -0.14  | 0.07    | 0.99 |
| NGLY1_KO_2 | 49.94     | -0.11  | 0.07    | 0.98 |
| NGLY1_2    | 48.93     | -0.075 | 0       | 0.98 |

Supplement: Supplementary file 1083 [file 1]

# IPI00029266.1|SNRPE

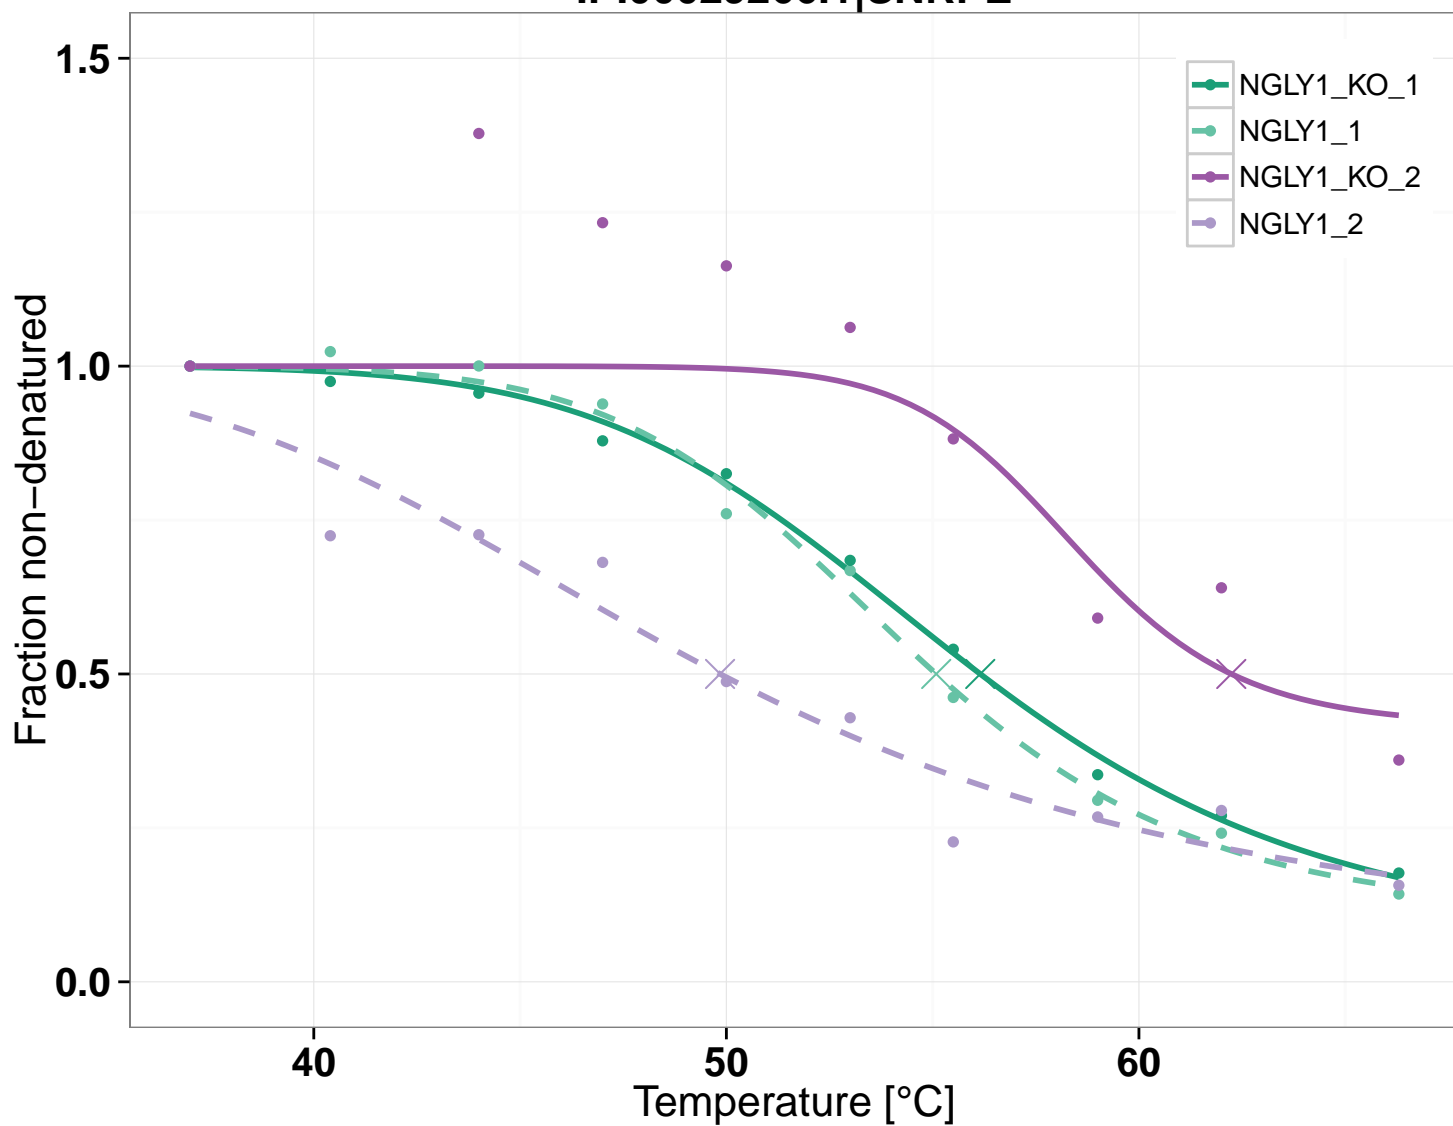

|            | meltPoint | slope  | plateau | R2   |
|------------|-----------|--------|---------|------|
| NGLY1_KO_1 | 56.15     | -0.053 | 0.05    | 1    |
| NGLY1_1    | 55.09     | -0.064 | 0.1     | 0.99 |
| NGLY1_KO_2 | 62.24     | -0.073 | 0.41    | 0.56 |
| NGLY1_2    | 49.85     | -0.038 | 0.05    | 0.94 |

Supplement: Supplementary file 1084 [file 1]

# IPI00030915.1|USP8

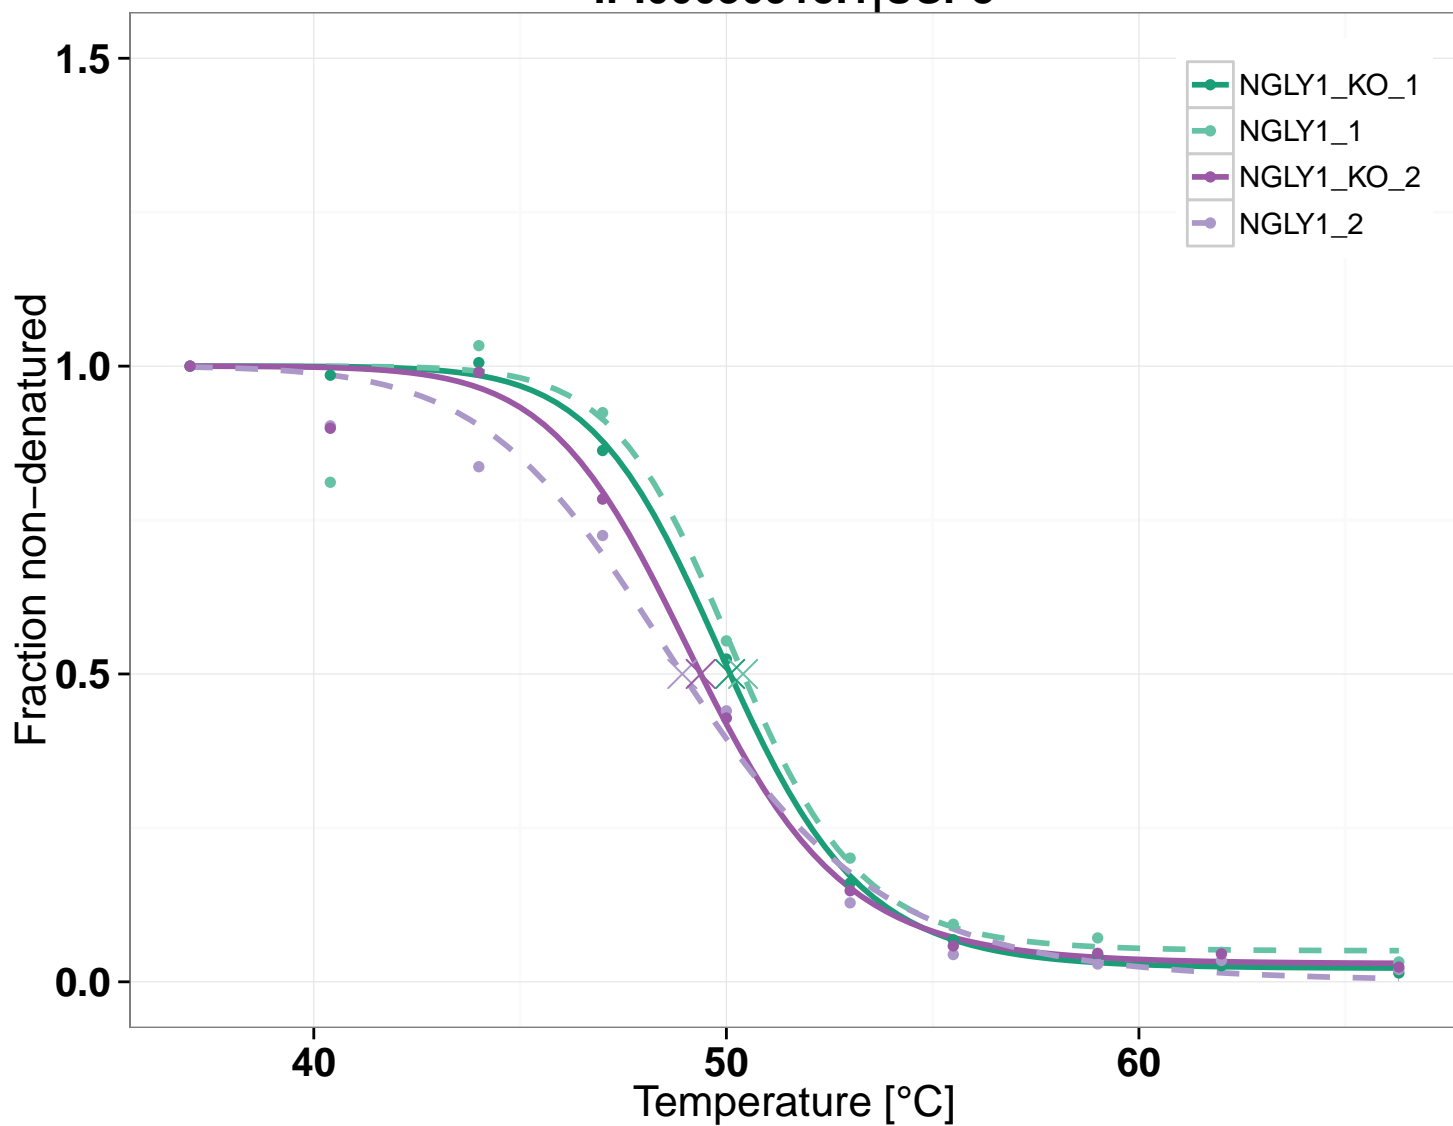

|            | meltPoint | slope | plateau | R2   |
|------------|-----------|-------|---------|------|
| NGLY1_KO_1 | 50.09     | -0.15 | 0.02    | 1    |
| NGLY1_1    | 50.4      | -0.16 | 0.05    | 0.98 |
| NGLY1_KO_2 | 49.38     | -0.14 | 0.03    | 0.99 |
| NGLY1_2    | 48.93     | -0.1  | 0       | 0.99 |

Supplement: Supplementary file 1085 [file 1]

# IPI00217357.2|CCAR1

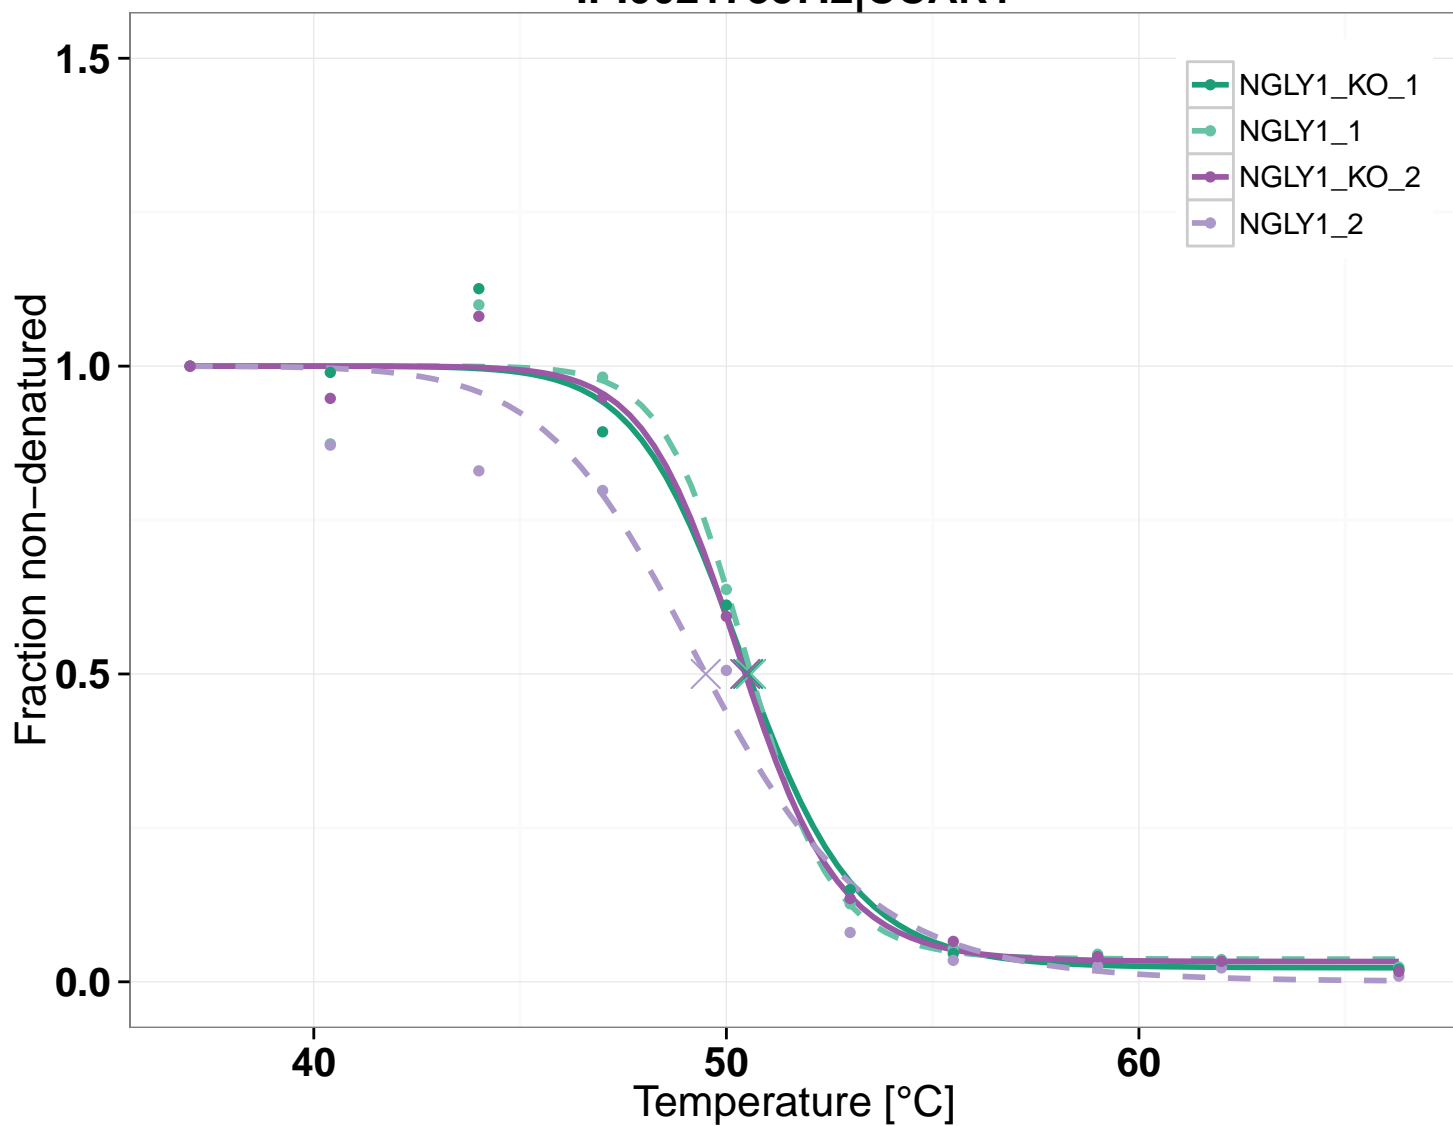

|            | meltPoint | slope | plateau | R2   |
|------------|-----------|-------|---------|------|
| NGLY1_KO_1 | 50.53     | -0.18 | 0.02    | 0.99 |
| NGLY1_1    | 50.6      | -0.23 | 0.04    | 0.99 |
| NGLY1_KO_2 | 50.46     | -0.2  | 0.03    | 0.99 |
| NGLY1_2    | 49.5      | -0.13 | 0       | 0.97 |

Supplement: Supplementary file 1086 [file 1]

# IPI00847535.1|PRG2

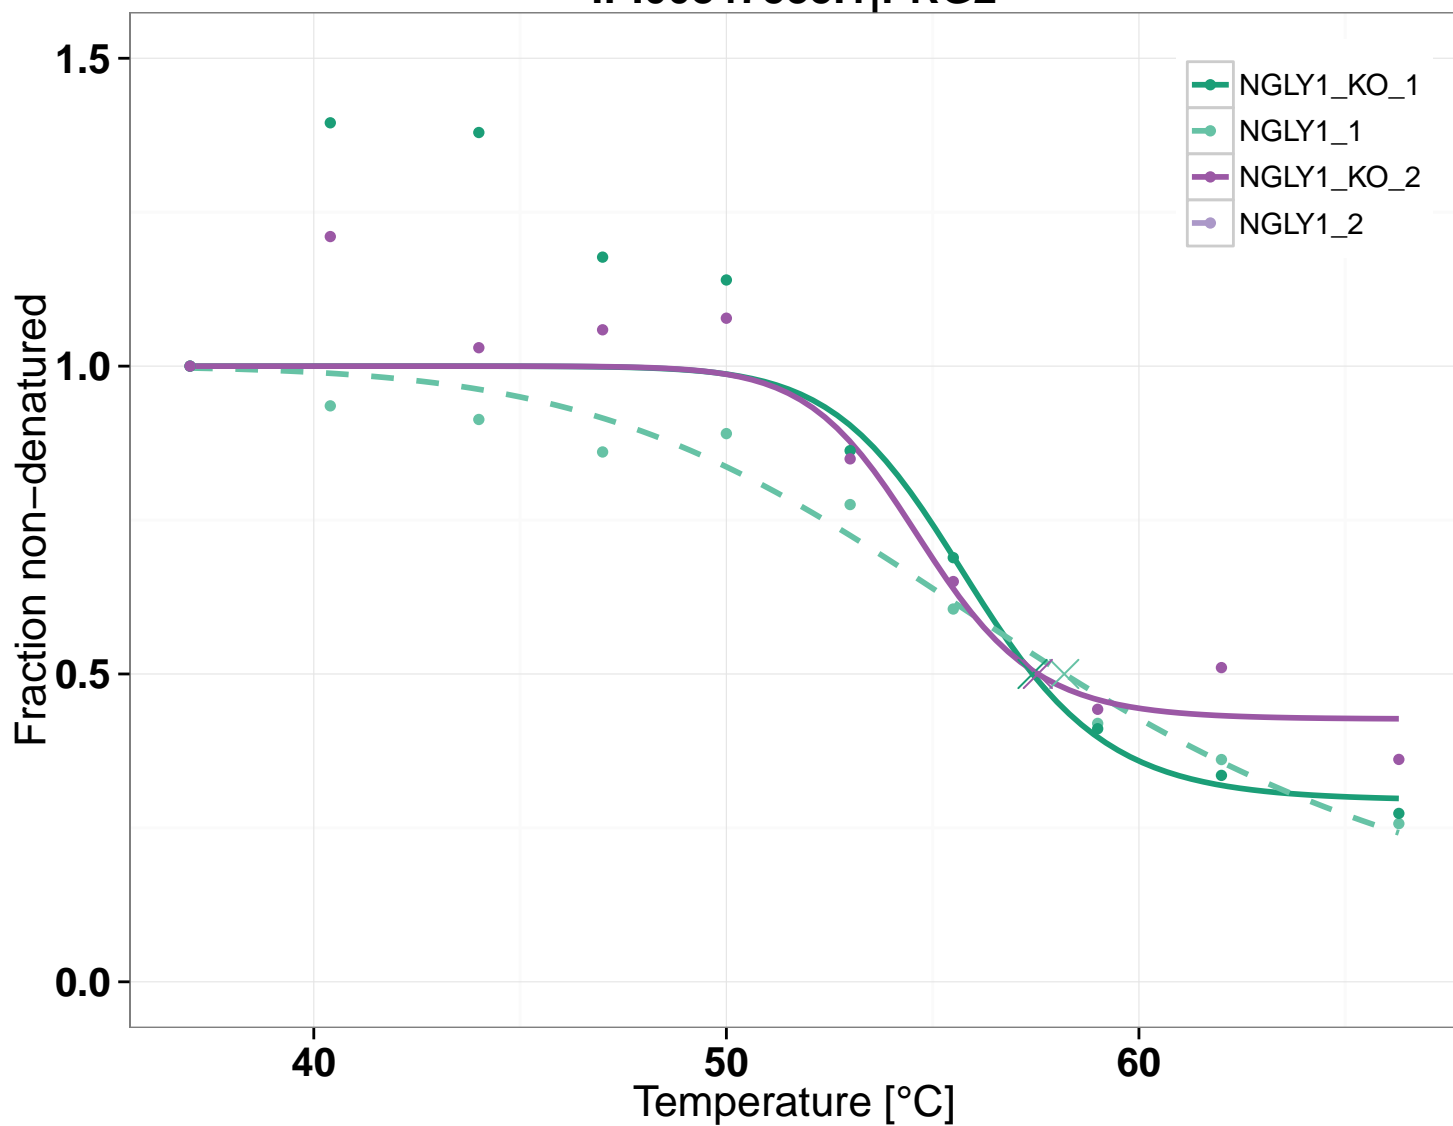

|            | meltPoint | slope  | plateau | R2   |
|------------|-----------|--------|---------|------|
| NGLY1_KO_1 | 57.42     | -0.11  | 0.29    | 0.78 |
| NGLY1_1    | 58.19     | -0.044 | 0.04    | 0.98 |
| NGLY1_KO_2 | 57.55     | -0.1   | 0.43    | 0.92 |
| NGLY1_2    | -         | -      | -       | -    |

Supplement: Supplementary file 1087 [file 1]

IPI00464979.4|SUCLA2

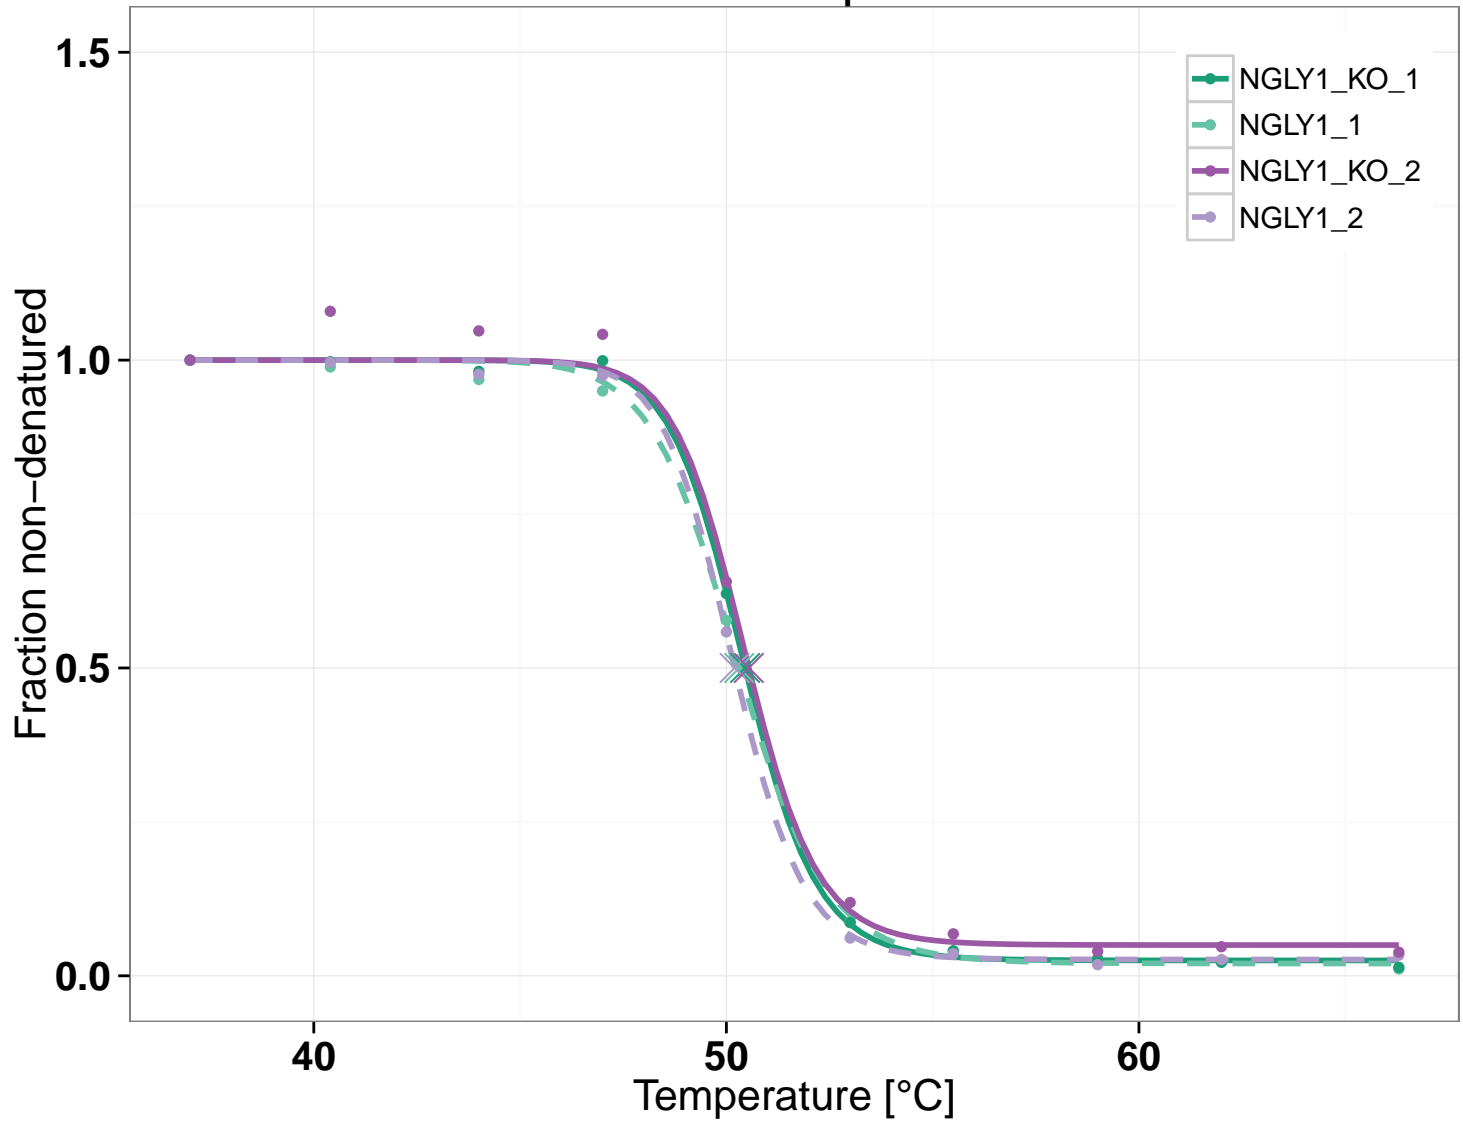

|            | meltpoint | slope | plateau | R2   |
|------------|-----------|-------|---------|------|
| NGLY1_KO_1 | 50.45     | -0.27 | 0.02    | 1    |
| NGLY1_1    | 50.31     | -0.23 | 0.02    | 1    |
| NGLY1_KO_2 | 50.54     | -0.27 | 0.05    | 0.99 |
| NGLY1_2    | 50.2      | -0.29 | 0.03    | 1    |

Supplement: Supplementary file 1088 [file 1]

# IPI00658128.1|STIM2

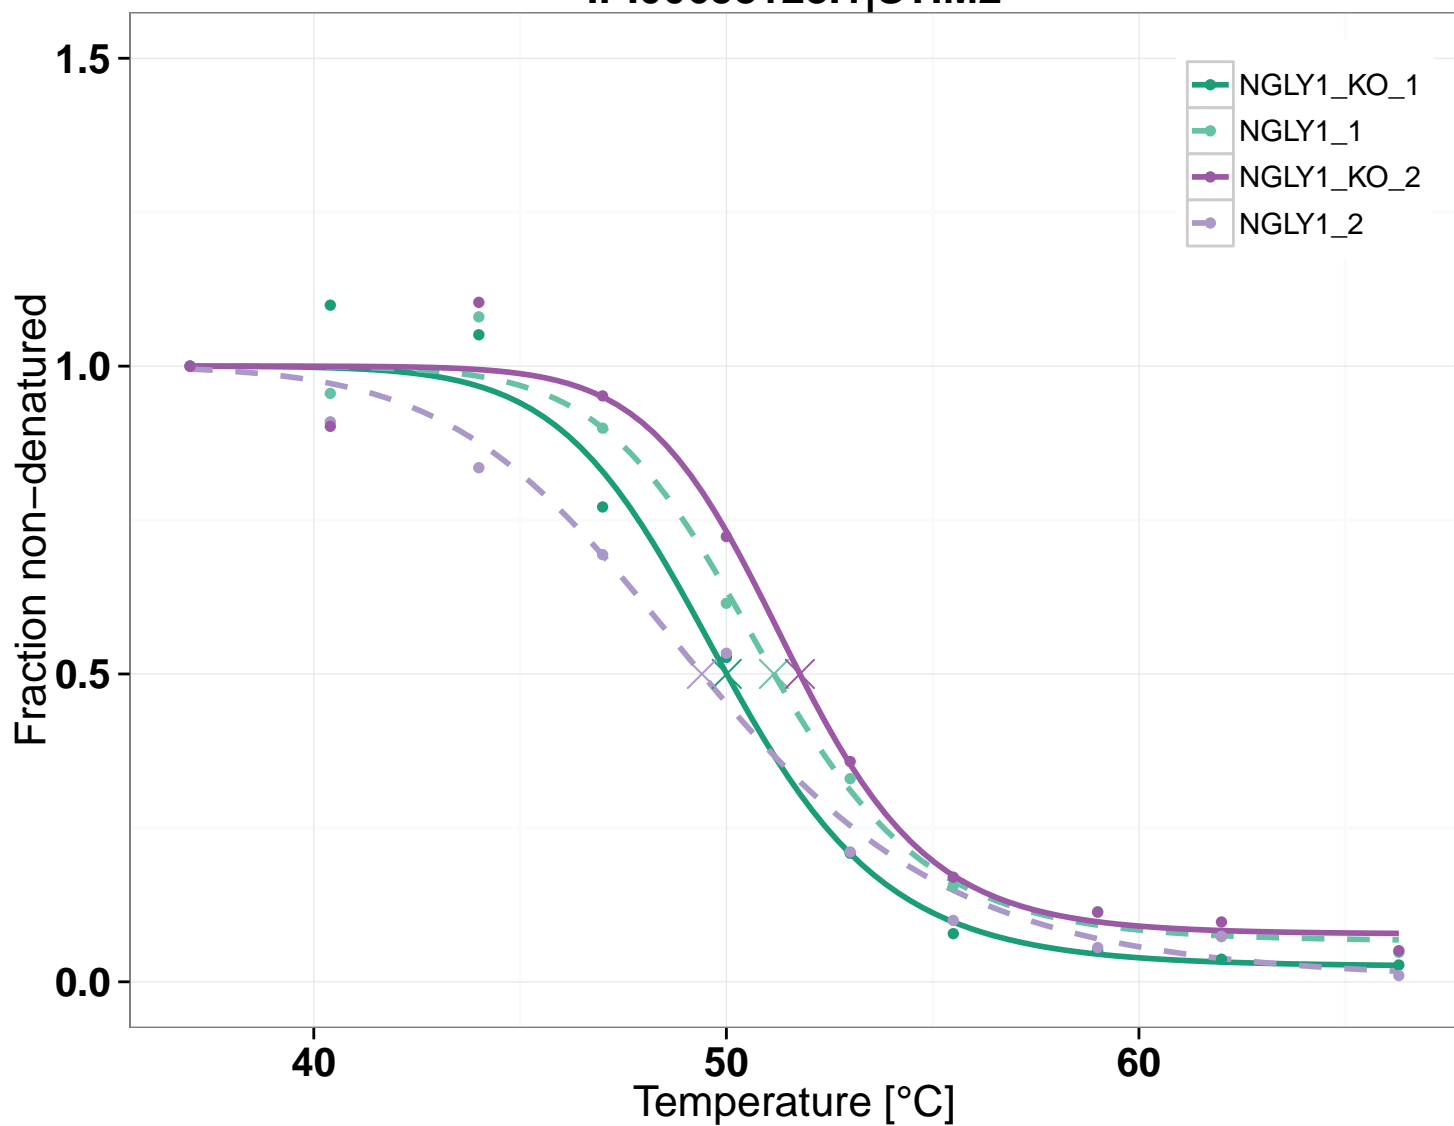

|            | meltPoint | slope  | plateau | R2   |
|------------|-----------|--------|---------|------|
| NGLY1_KO_1 | 50.01     | -0.12  | 0.02    | 0.99 |
| NGLY1_1    | 51.15     | -0.12  | 0.07    | 0.99 |
| NGLY1_KO_2 | 51.78     | -0.13  | 0.08    | 0.99 |
| NGLY1_2    | 49.41     | -0.082 | 0       | 0.99 |

Supplement: Supplementary file 1089 [file 1]

IPI00289328.2|LOC100131062

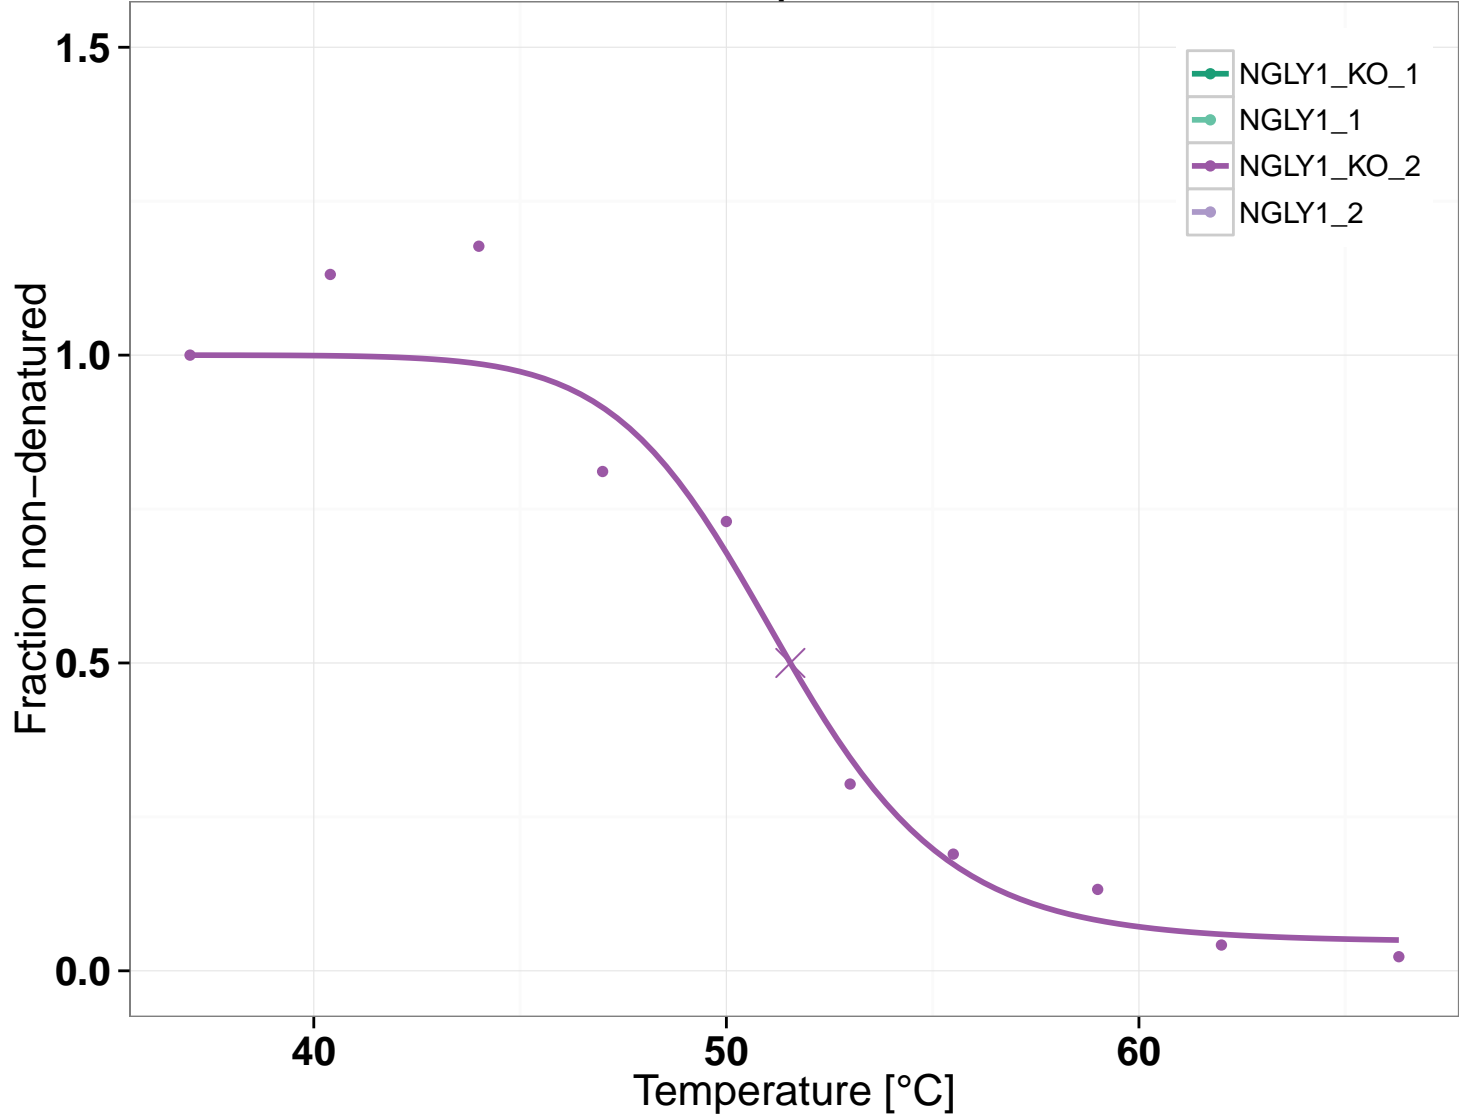

|            | meltPoint | slope | plateau | R2   |
|------------|-----------|-------|---------|------|
| NGLY1_KO_1 | —         | —     | —       | —    |
| NGLY1_1    | —         | —     | —       | —    |
| NGLY1_KO_2 | 51.55     | -0.12 | 0.05    | 0.96 |
| NGLY1_2    | —         | —     | —       | —    |

Supplement: Supplementary file 1090 [file 1]

# IPI00018768.1|TSN

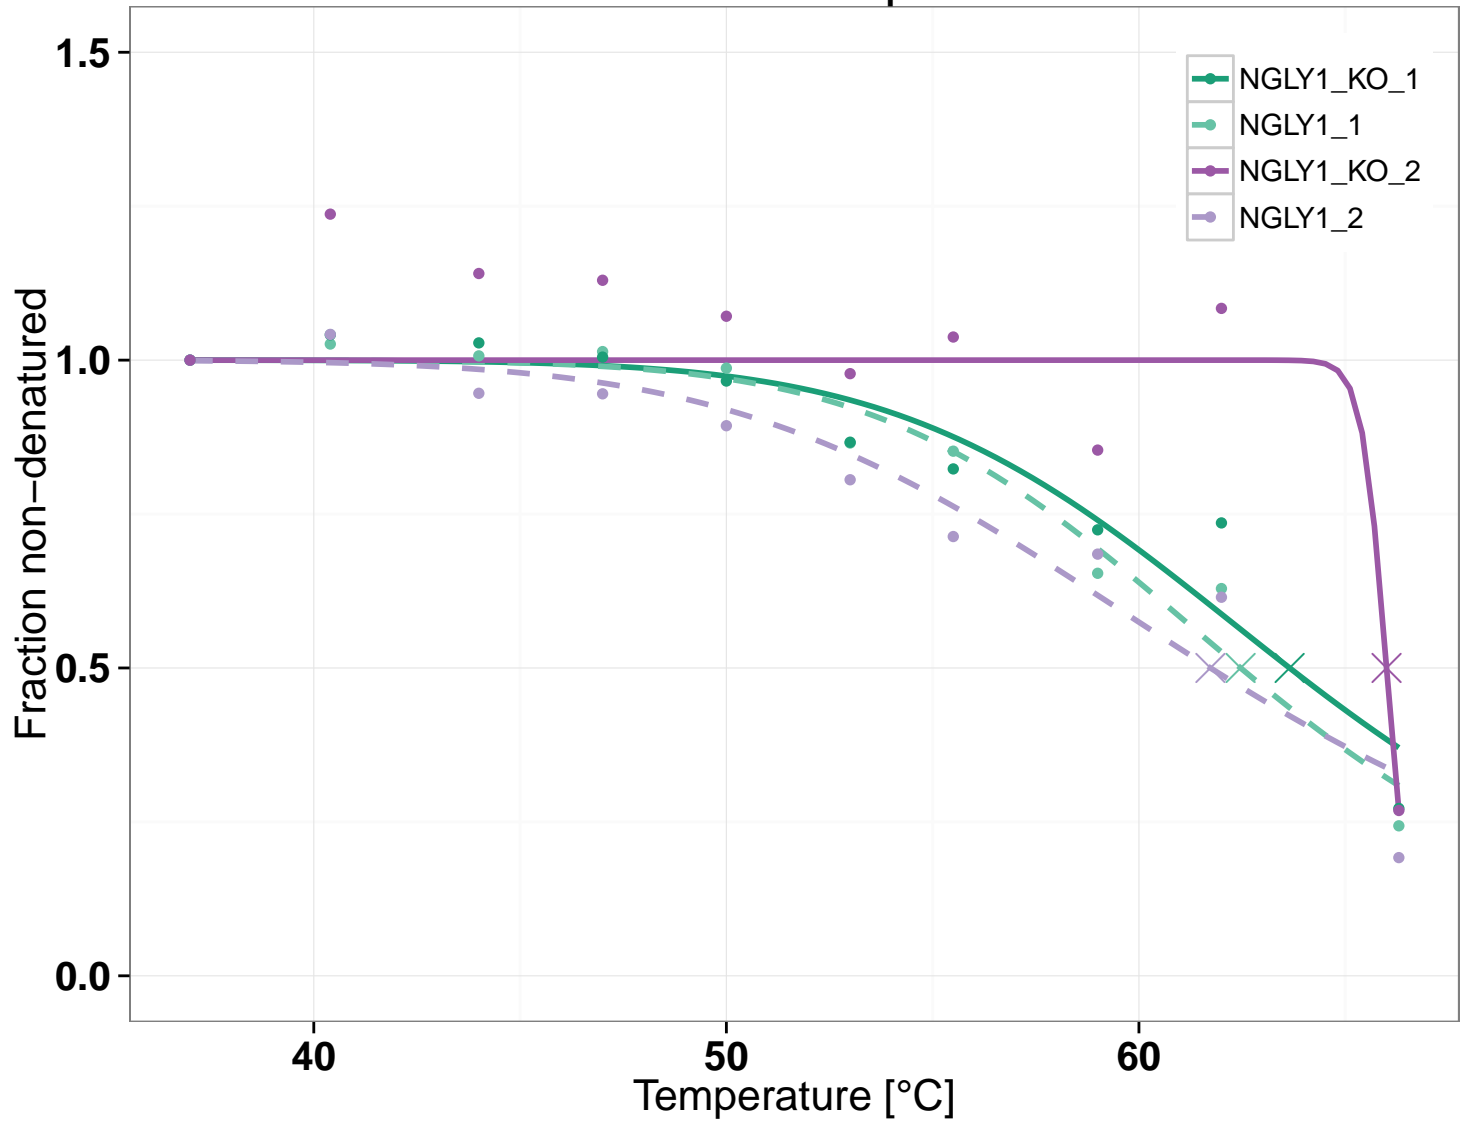

|            | meltPoint | slope  | plateau | R2   |
|------------|-----------|--------|---------|------|
| NGLY1_KO_1 | 63.65     | -0.053 | 0       | 0.91 |
| NGLY1_1    | 62.46     | -0.057 | 0       | 0.96 |
| NGLY1_KO_2 | 66        | -0.84  | 0       | 0.81 |
| NGLY1_2    | 61.73     | -0.044 | 0       | 0.92 |

Supplement: Supplementary file 1091 [file 1]

IPI00333693.3|WAC

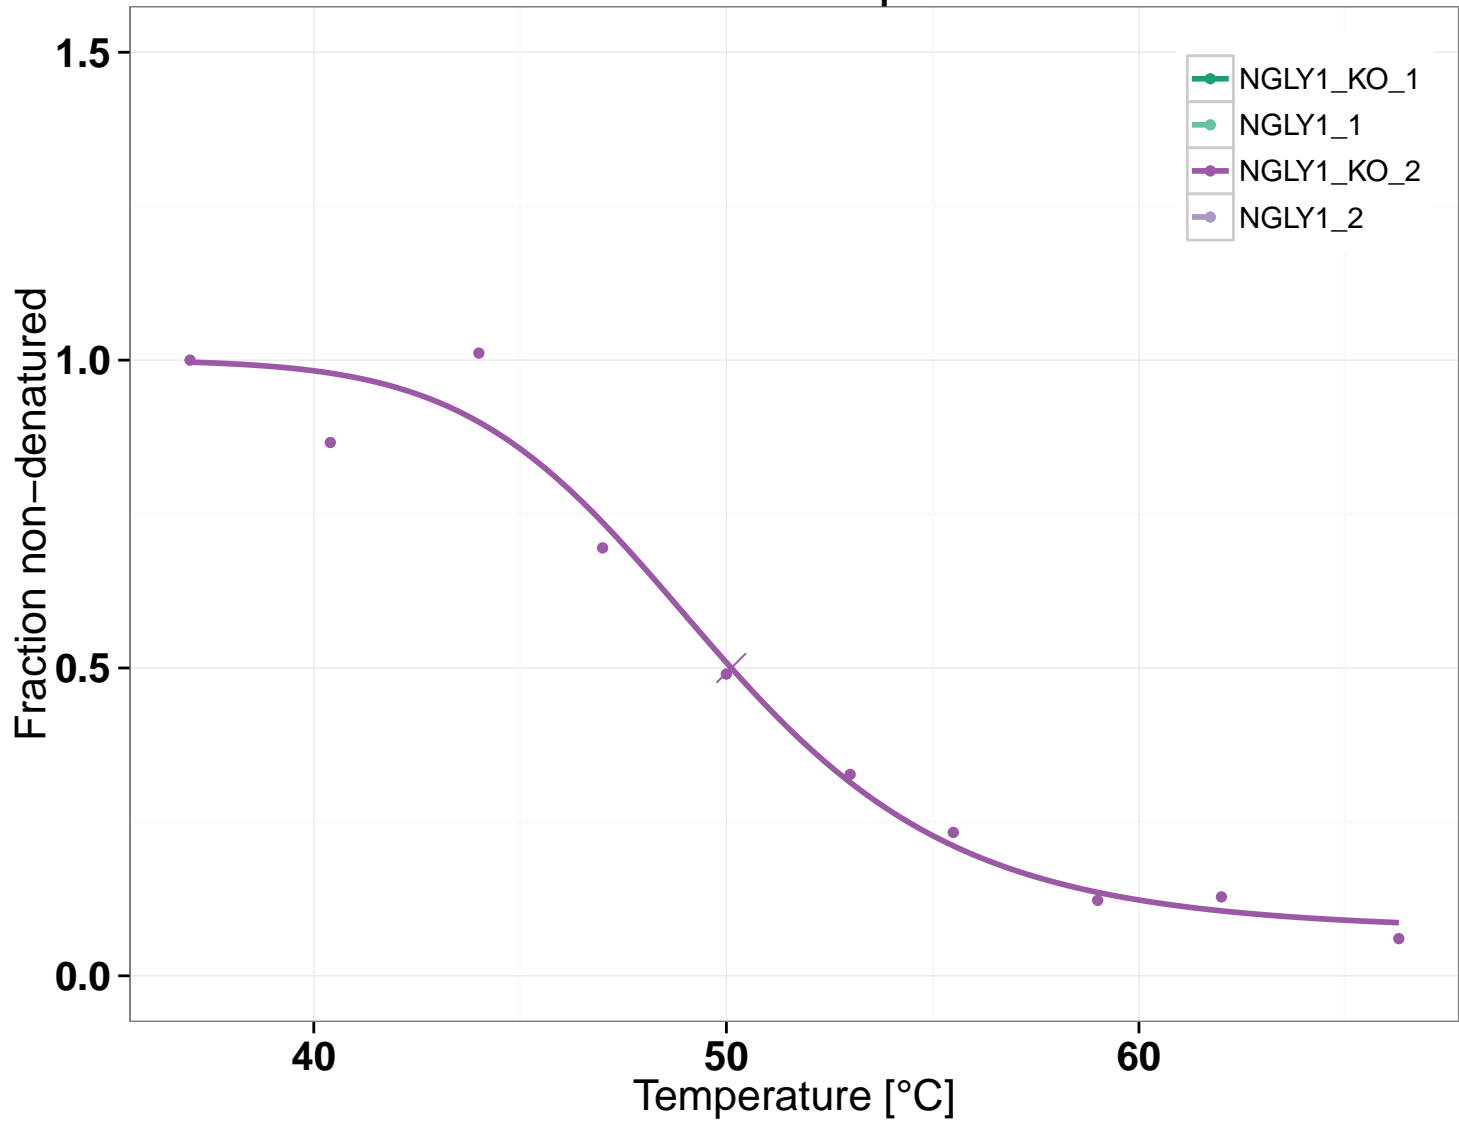

|            | meltPoint | slope  | plateau | R2   |
|------------|-----------|--------|---------|------|
| NGLY1_KO_1 | —         | —      | —       | —    |
| NGLY1_1    | —         | —      | —       | —    |
| NGLY1_KO_2 | 50.12     | -0.078 | 0.07    | 0.98 |
| NGLY1_2    | —         | —      | —       | —    |

Supplement: Supplementary file 1092 [file 1]

IPI00876972.1|INCENP

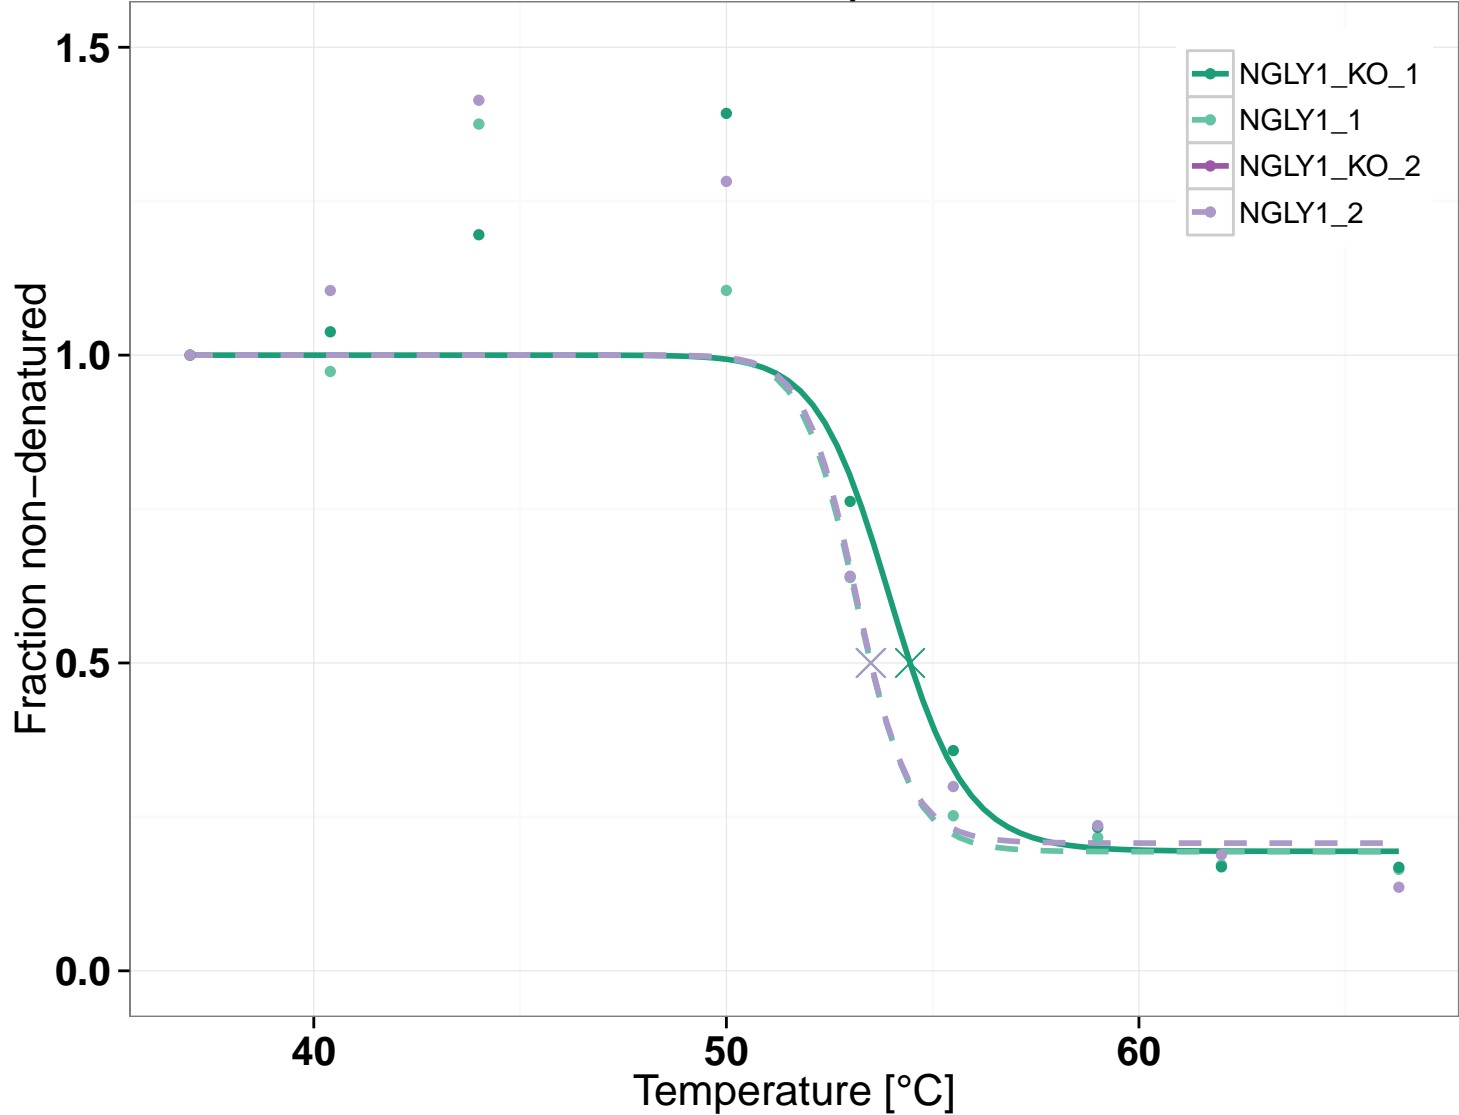

|            | meltPoint | slope | plateau | R2   |
|------------|-----------|-------|---------|------|
| NGLY1_KO_1 | 54.45     | -0.22 | 0.19    | 0.8  |
| NGLY1_1    | 53.5      | -0.3  | 0.19    | 0.73 |
| NGLY1_KO_2 | -         | -     | -       | -    |
| NGLY1_2    | 53.51     | -0.31 | 0.21    | 0.76 |

Supplement: Supplementary file 1093 [file 1]

IPI00241860.4|MIPEP

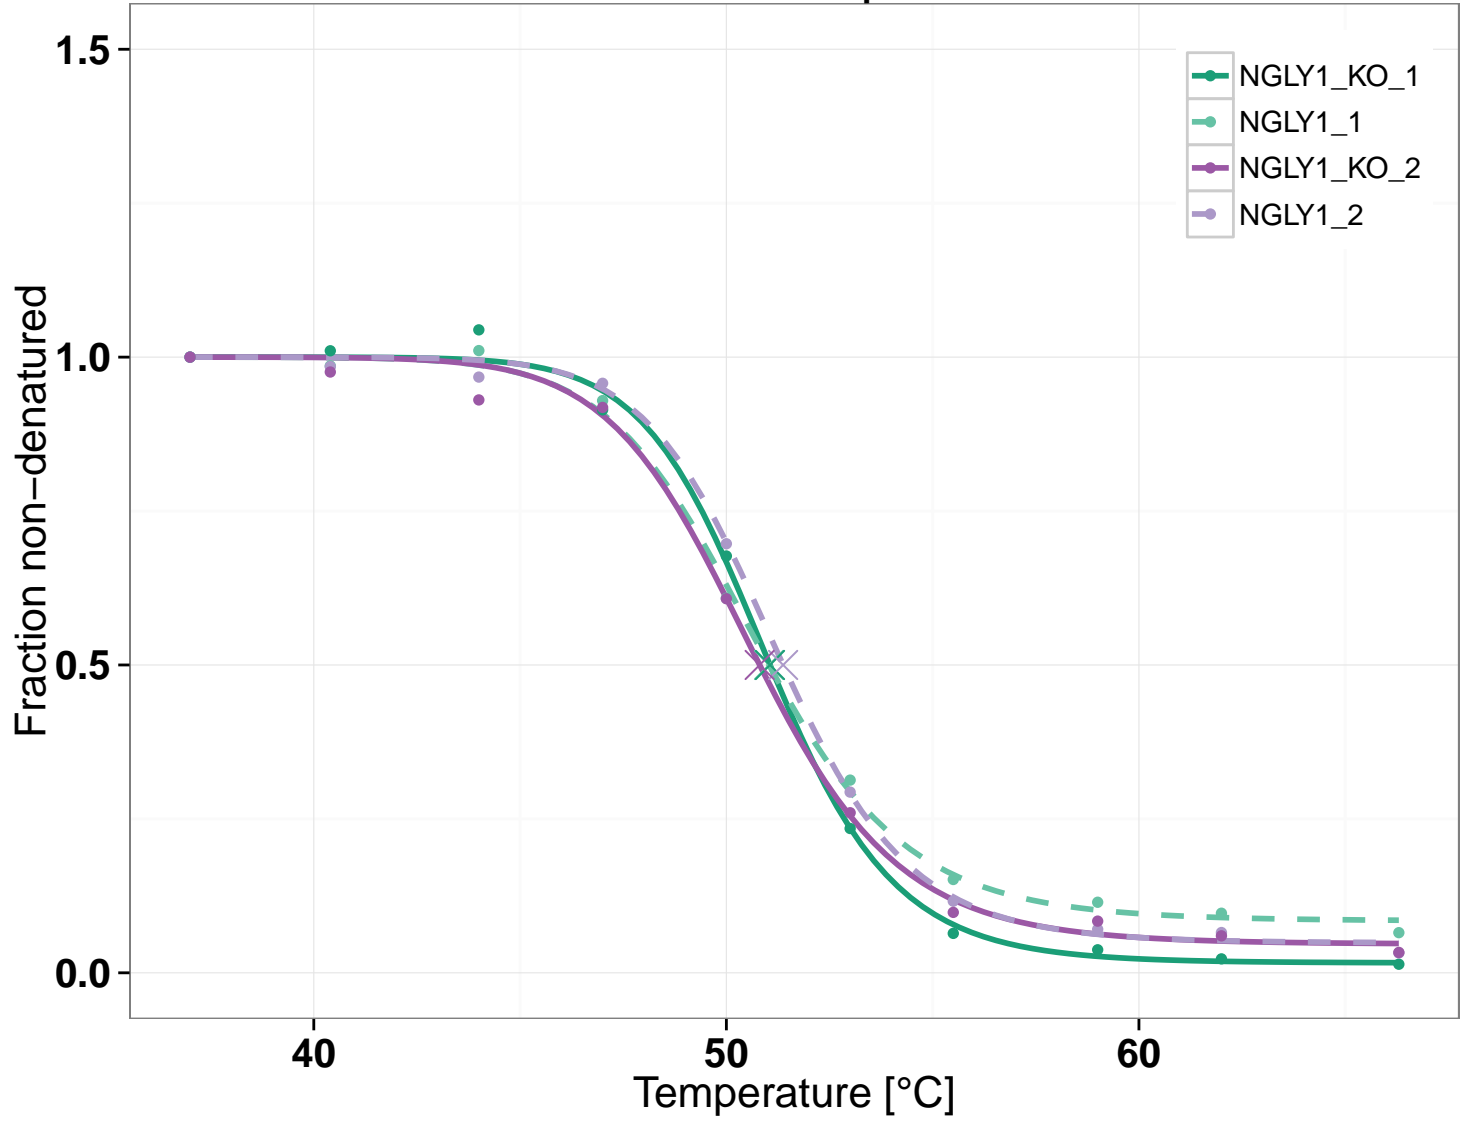

|            | meltPoint | slope | plateau | R2 |
|------------|-----------|-------|---------|----|
| NGLY1_KO_1 | 51.06     | -0.16 | 0.02    | 1  |
| NGLY1_1    | 51.03     | -0.13 | 0.08    | 1  |
| NGLY1_KO_2 | 50.81     | -0.14 | 0.05    | 1  |
| NGLY1_2    | 51.38     | -0.15 | 0.05    | 1  |

Supplement: Supplementary file 1094 [file 1]

# IPI00795199.1|FAM171A1

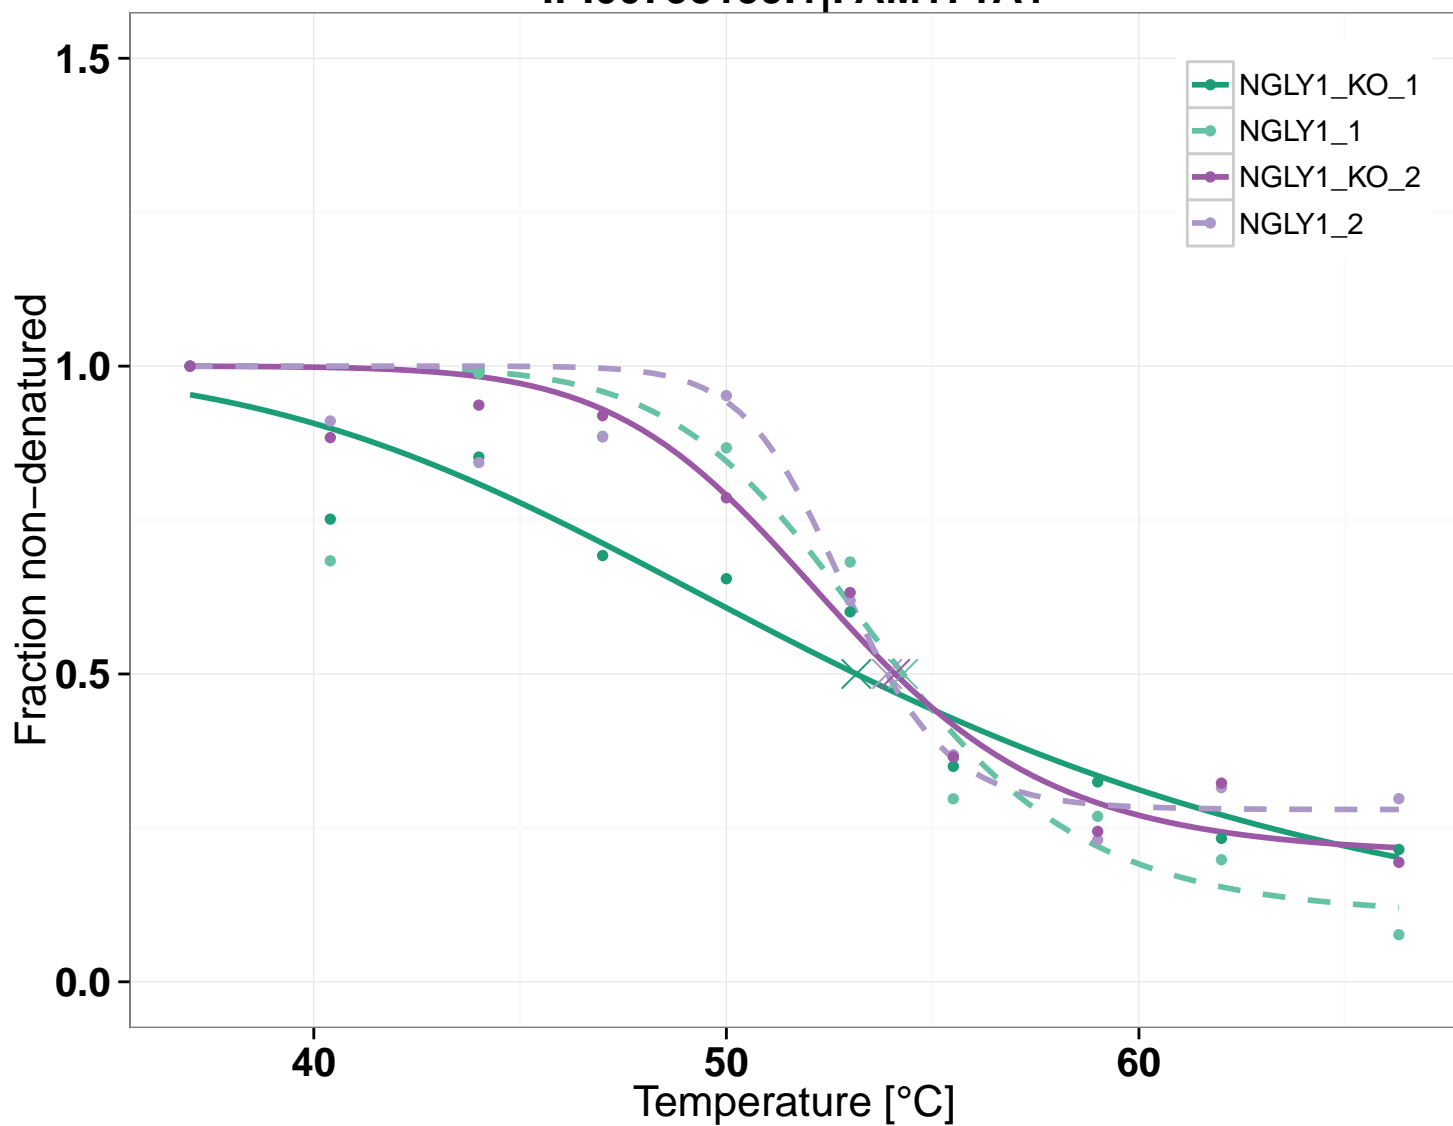

|            | meltPoint | slope  | plateau | R2   |
|------------|-----------|--------|---------|------|
| NGLY1_KO_1 | 53.15     | -0.035 | 0       | 0.93 |
| NGLY1_1    | 54.28     | -0.09  | 0.11    | 0.89 |
| NGLY1_KO_2 | 54.09     | -0.074 | 0.2     | 0.97 |
| NGLY1_2    | 53.9      | -0.15  | 0.28    | 0.94 |

Supplement: Supplementary file 1095 [file 1]

IPI00101163.5|MTERFD1

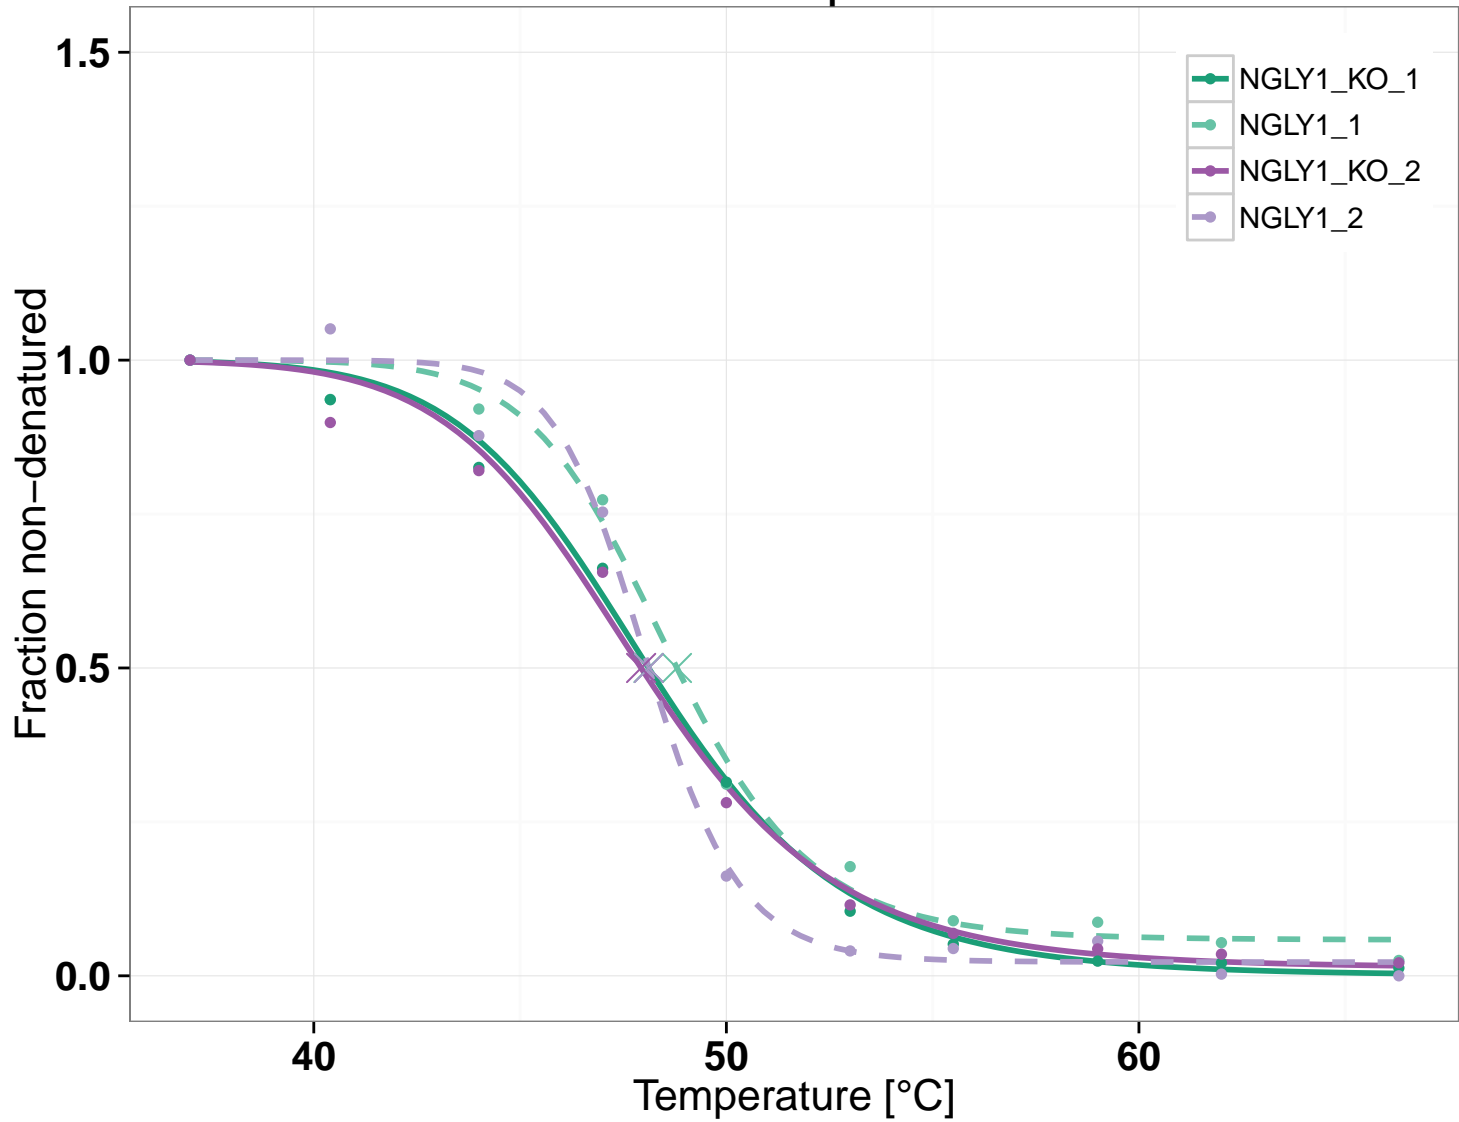

|            | meltPoint | slope | plateau | R2   |
|------------|-----------|-------|---------|------|
| NGLY1_KO_1 | 48.12     | -0.11 | 0       | 1    |
| NGLY1_1    | 48.8      | -0.14 | 0.06    | 0.99 |
| NGLY1_KO_2 | 47.93     | -0.1  | 0.01    | 0.99 |
| NGLY1_2    | 48.12     | -0.22 | 0.02    | 0.99 |

Supplement: Supplementary file 1096 [file 1]

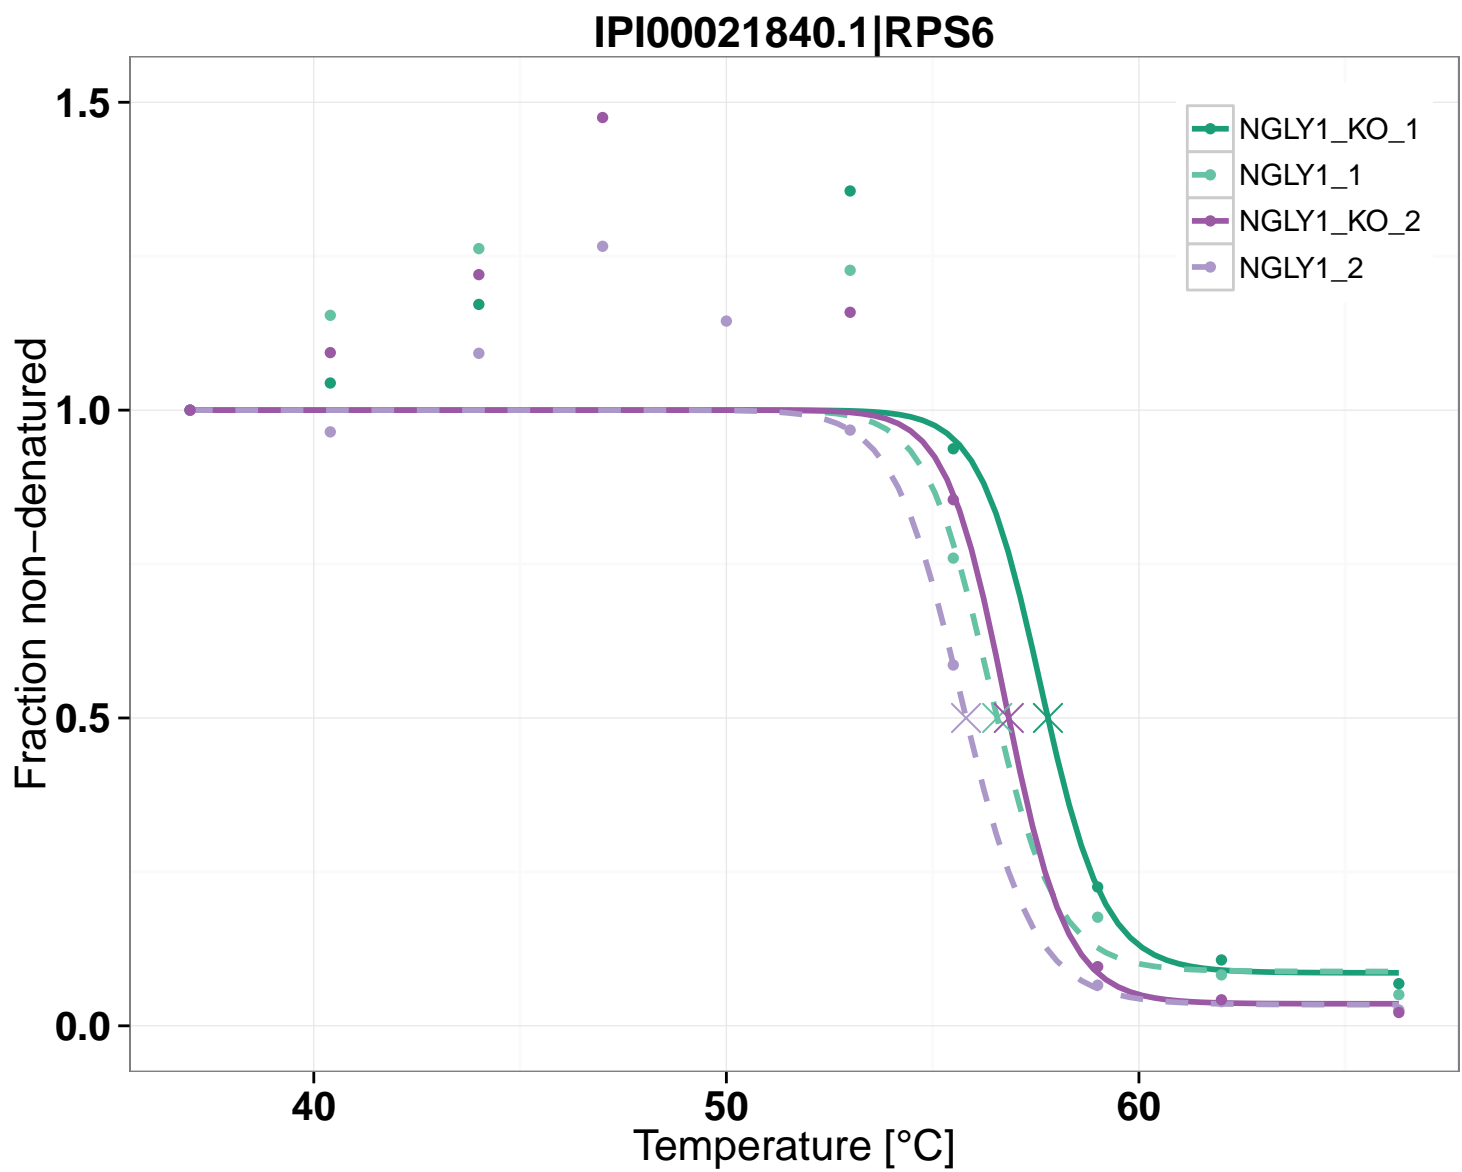

|            | meltPoint | slope | plateau | R2   |
|------------|-----------|-------|---------|------|
| NGLY1_KO_1 | 57.79     | -0.3  | 0.09    | 0.72 |
| NGLY1_1    | 56.56     | -0.29 | 0.09    | 0.75 |
| NGLY1_KO_2 | 56.85     | -0.33 | 0.04    | 0.81 |
| NGLY1_2    | 55.81     | -0.28 | 0.03    | 0.95 |

Supplement: Supplementary file 1097 [file 1]

IPI00418290.1|MRPL14

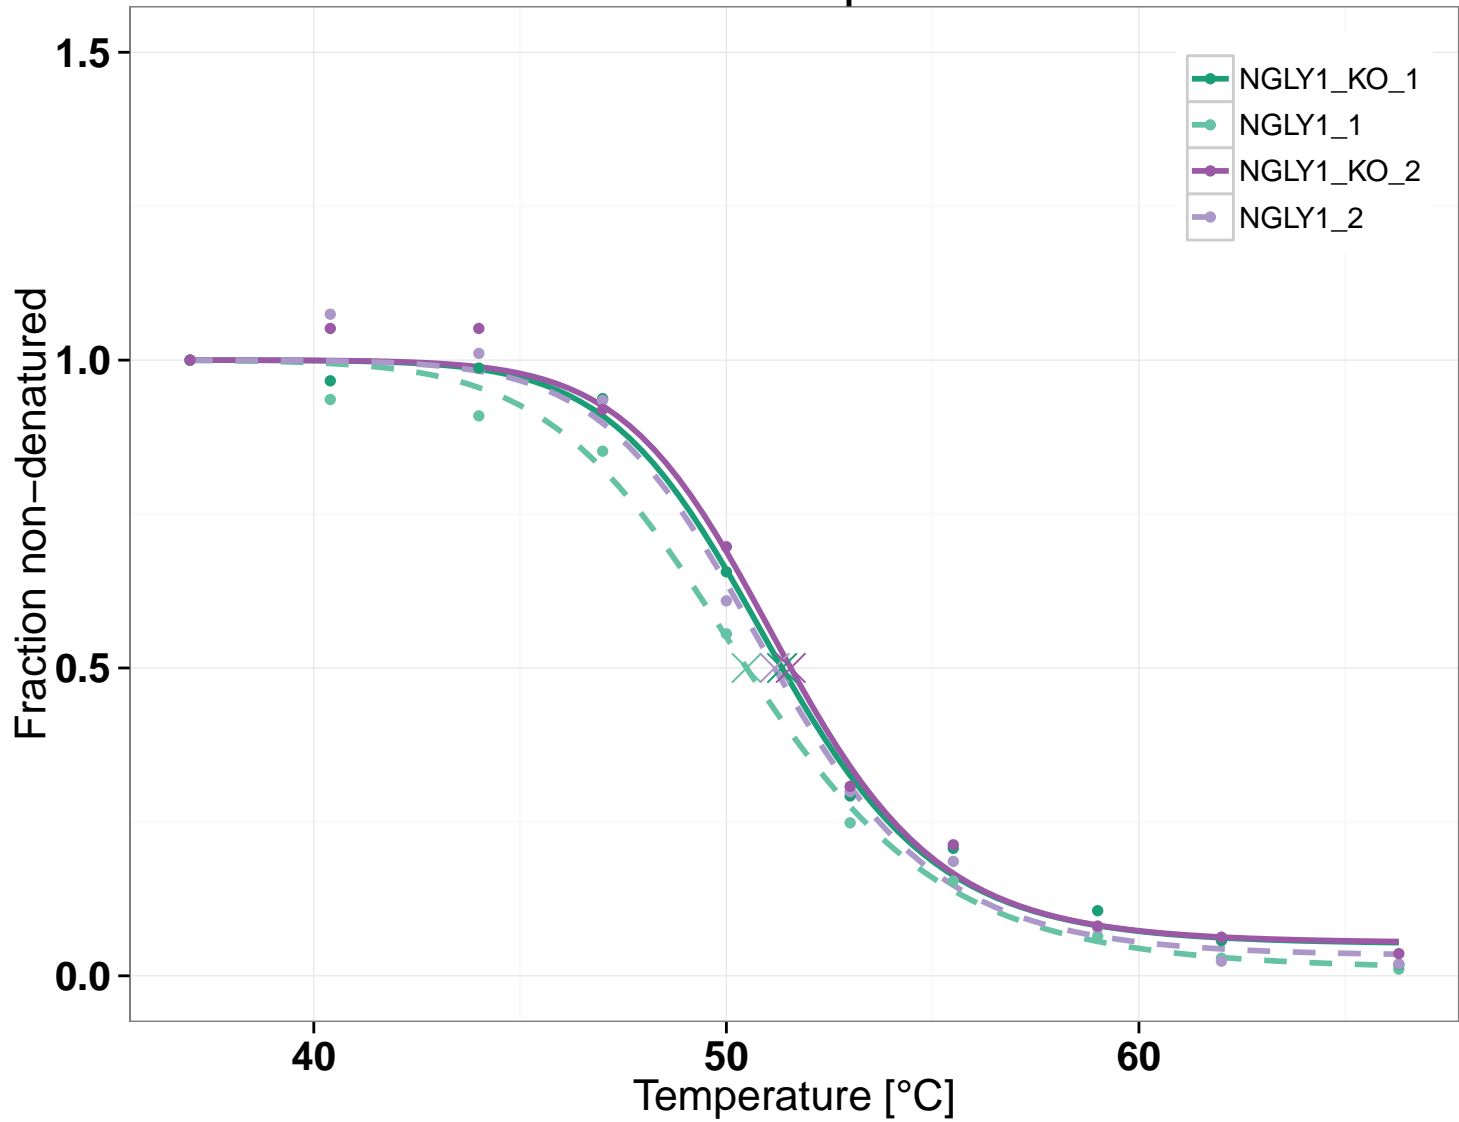

|            | meltPoint | slope | plateau | R2   |
|------------|-----------|-------|---------|------|
| NGLY1_KO_1 | 51.35     | -0.12 | 0.05    | 1    |
| NGLY1_1    | 50.49     | -0.1  | 0.01    | 1    |
| NGLY1_KO_2 | 51.56     | -0.12 | 0.05    | 0.99 |
| NGLY1_2    | 51.17     | -0.12 | 0.03    | 0.99 |

Supplement: Supplementary file 1098 [file 1]

# IPI00219675.1|RAC1

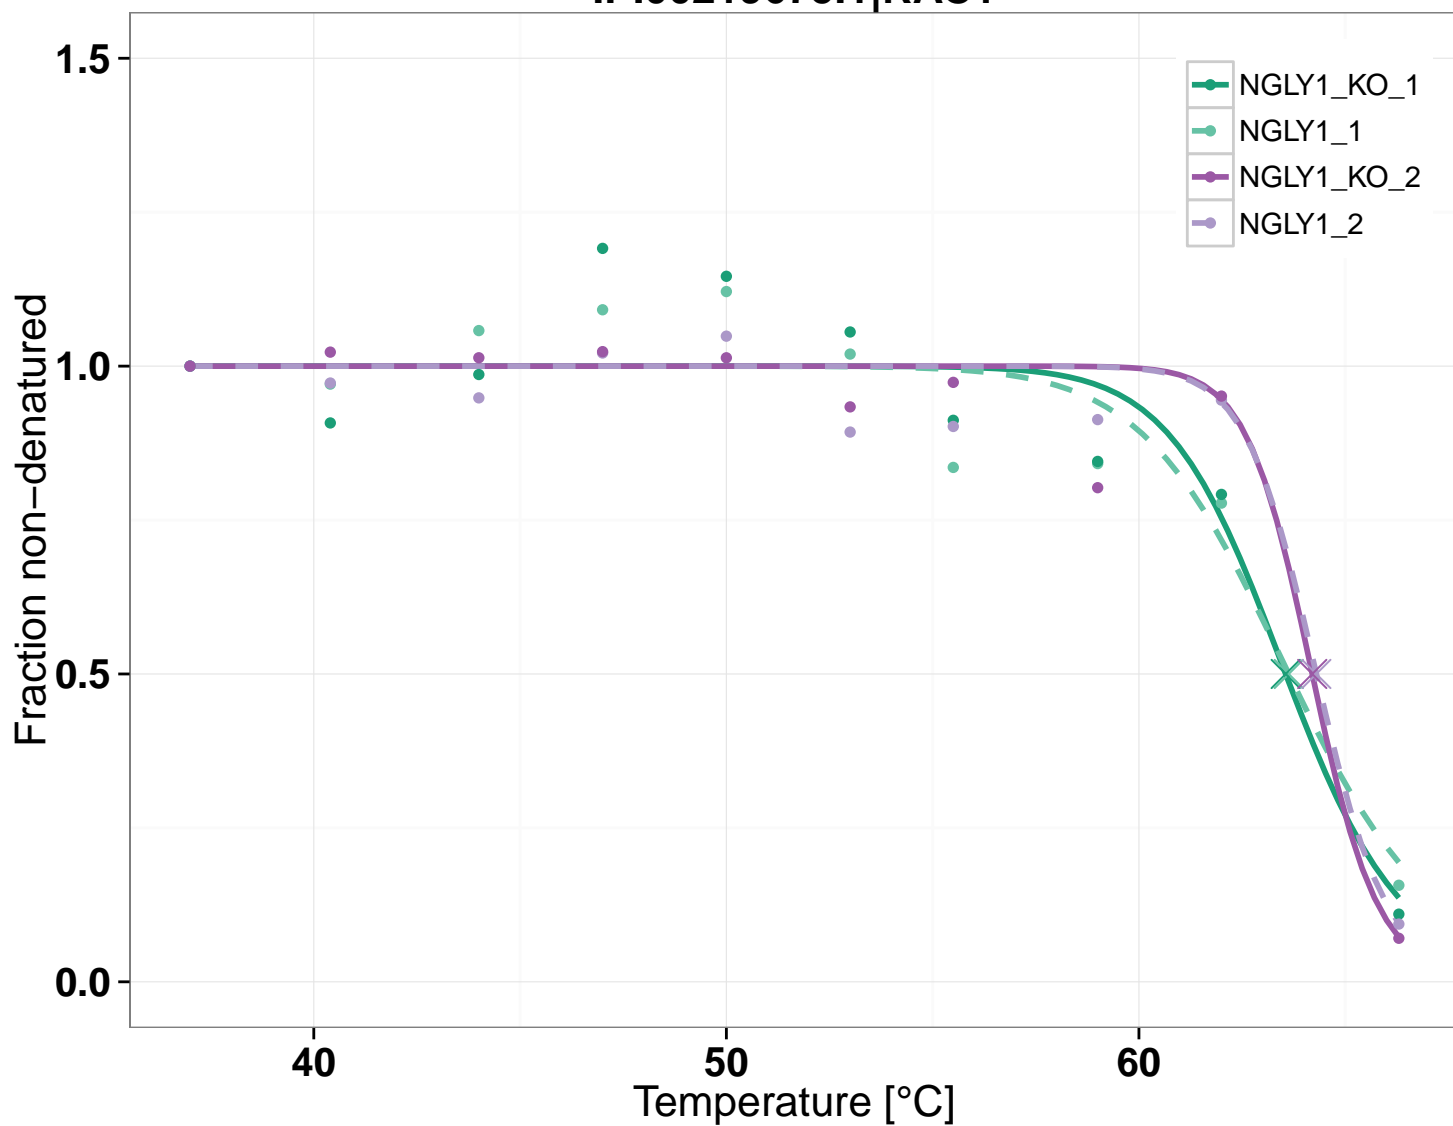

|            | meltPoint | slope | plateau | R2   |
|------------|-----------|-------|---------|------|
| NGLY1_KO_1 | 63.56     | -0.18 | 0       | 0.89 |
| NGLY1_1    | 63.63     | -0.14 | 0       | 0.9  |
| NGLY1_KO_2 | 64.2      | -0.31 | 0       | 0.94 |
| NGLY1_2    | 64.3      | -0.29 | 0       | 0.95 |

Supplement: Supplementary file 1099 [file 1]

IPI00180675.4|TUBA1A

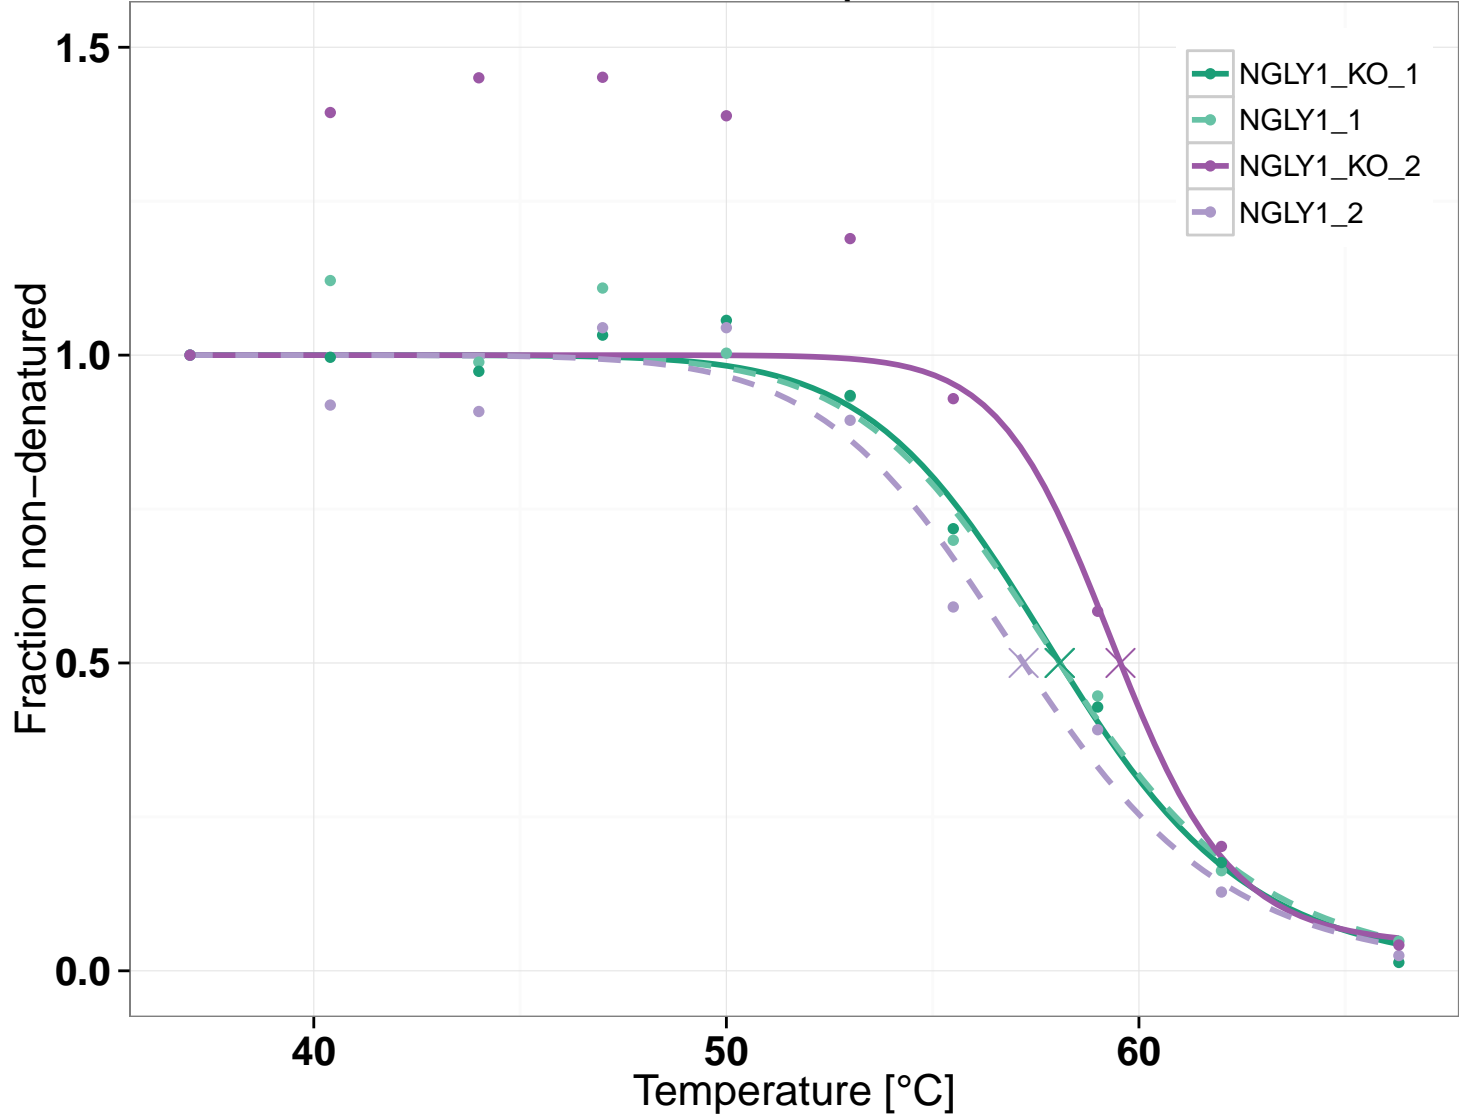

|            | meltPoint | slope | plateau | R2   |
|------------|-----------|-------|---------|------|
| NGLY1_KO_1 | 58.08     | -0.11 | 0       | 0.99 |
| NGLY1_1    | 58.07     | -0.1  | 0       | 0.98 |
| NGLY1_KO_2 | 59.55     | -0.17 | 0.04    | 0.7  |
| NGLY1_2    | 57.2      | -0.1  | 0       | 0.97 |

Supplement: Supplementary file 1100 [file 1]

# IPI00099550.1|UBQLN1

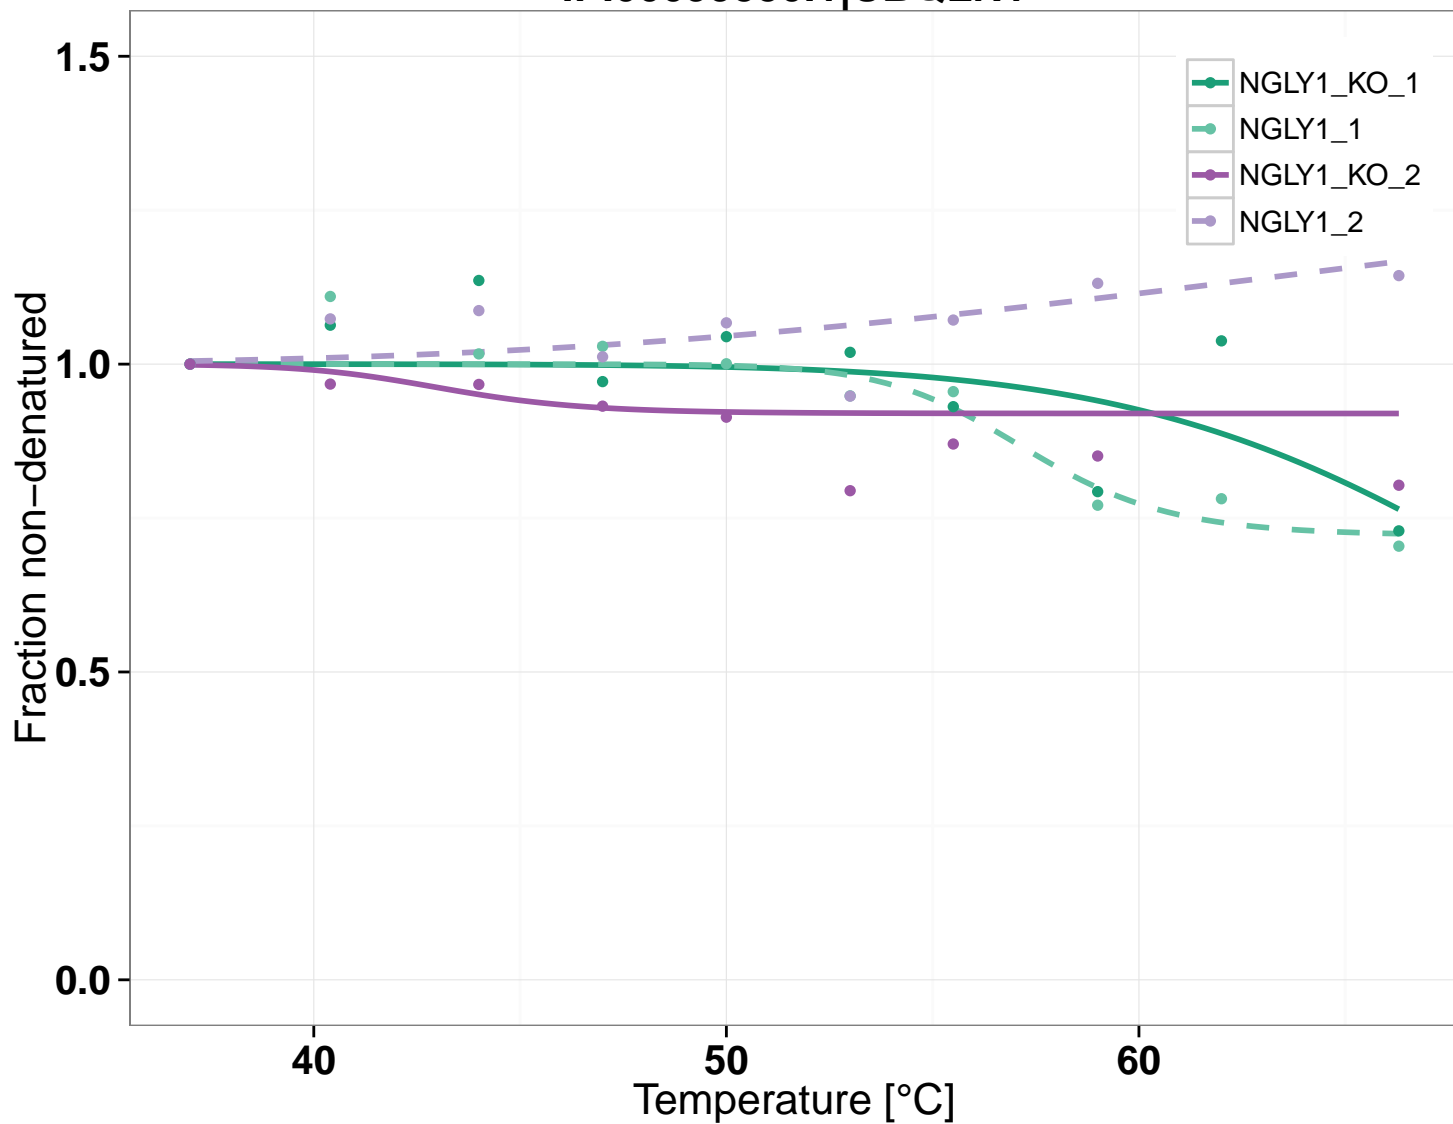

|            | meltPoint | slope  | plateau | R2   |
|------------|-----------|--------|---------|------|
| NGLY1_KO_1 | –         | –      | 0       | 0.47 |
| NGLY1_1    | –         | –0.04  | 0.72    | 0.89 |
| NGLY1_KO_2 | –         | –0.012 | 0.92    | 0.04 |
| NGLY1_2    | –         | 0.0083 | 1.5     | 0.42 |

Supplement: Supplementary file 1101 [file 1]

IPI00102291.2|FAM126A

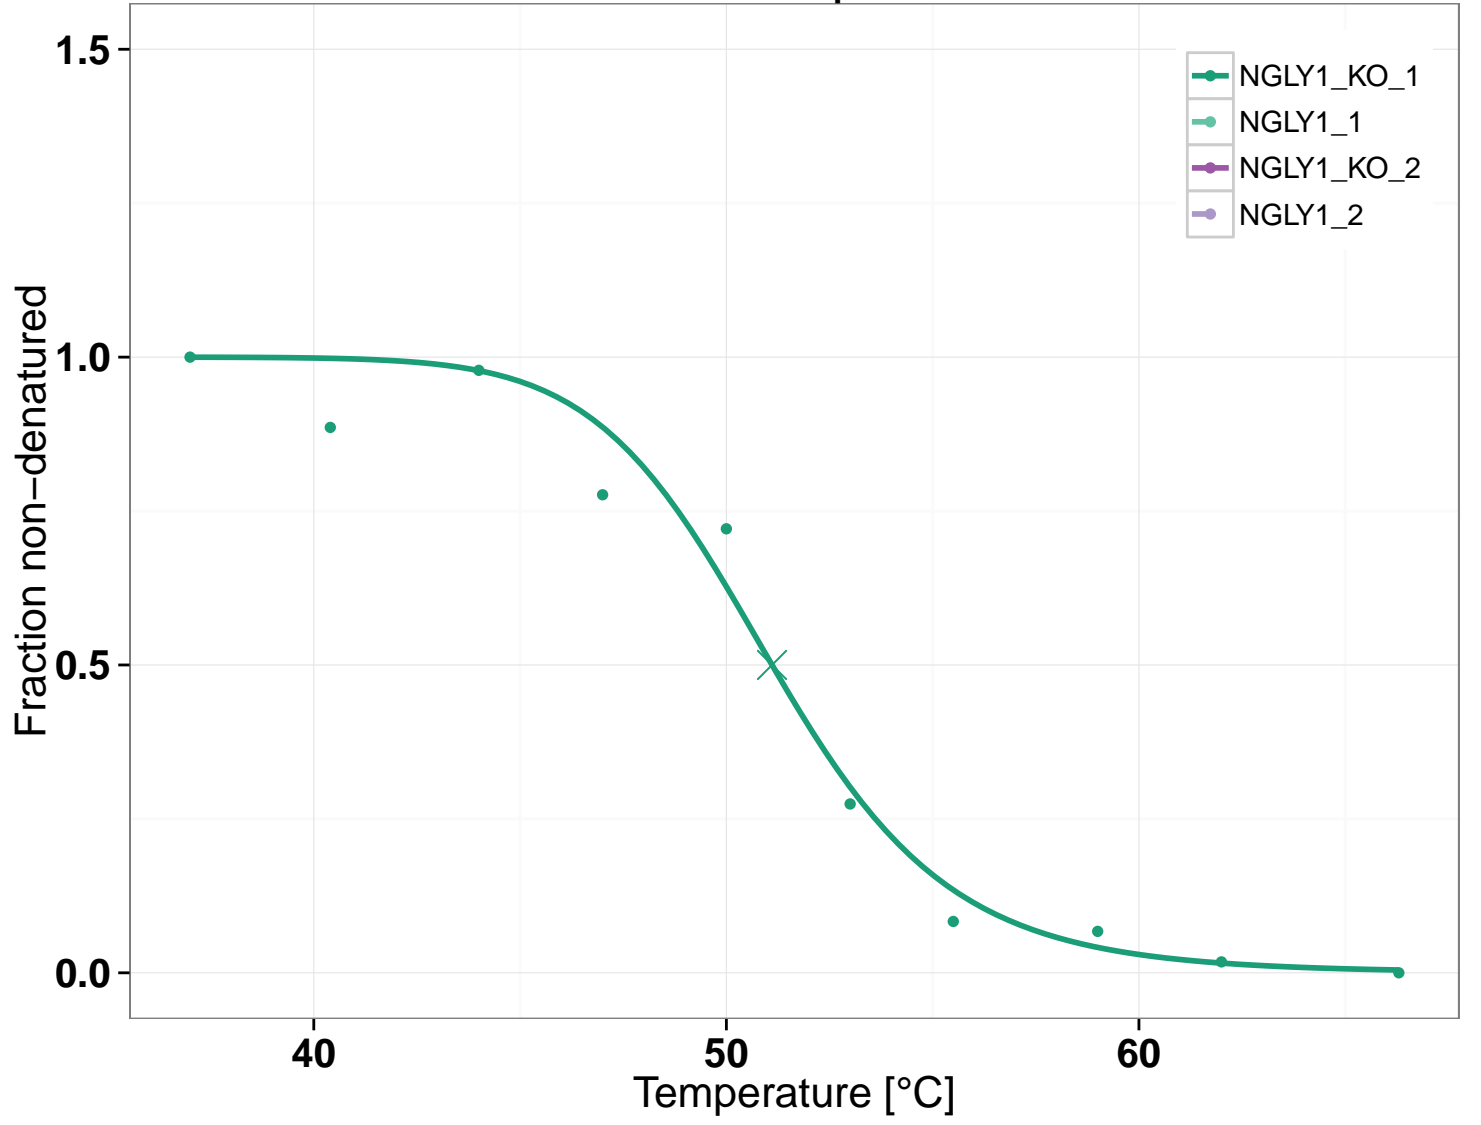

|            | meltPoint | slope | plateau | R2   |
|------------|-----------|-------|---------|------|
| NGLY1_KO_1 | 51.11     | -0.12 | 0       | 0.98 |
| NGLY1_1    | -         | -     | -       | -    |
| NGLY1_KO_2 | -         | -     | -       | -    |
| NGLY1_2    | -         | -     | -       | -    |

Supplement: Supplementary file 1102 [file 1]

# IPI00020356.4|MAP1A

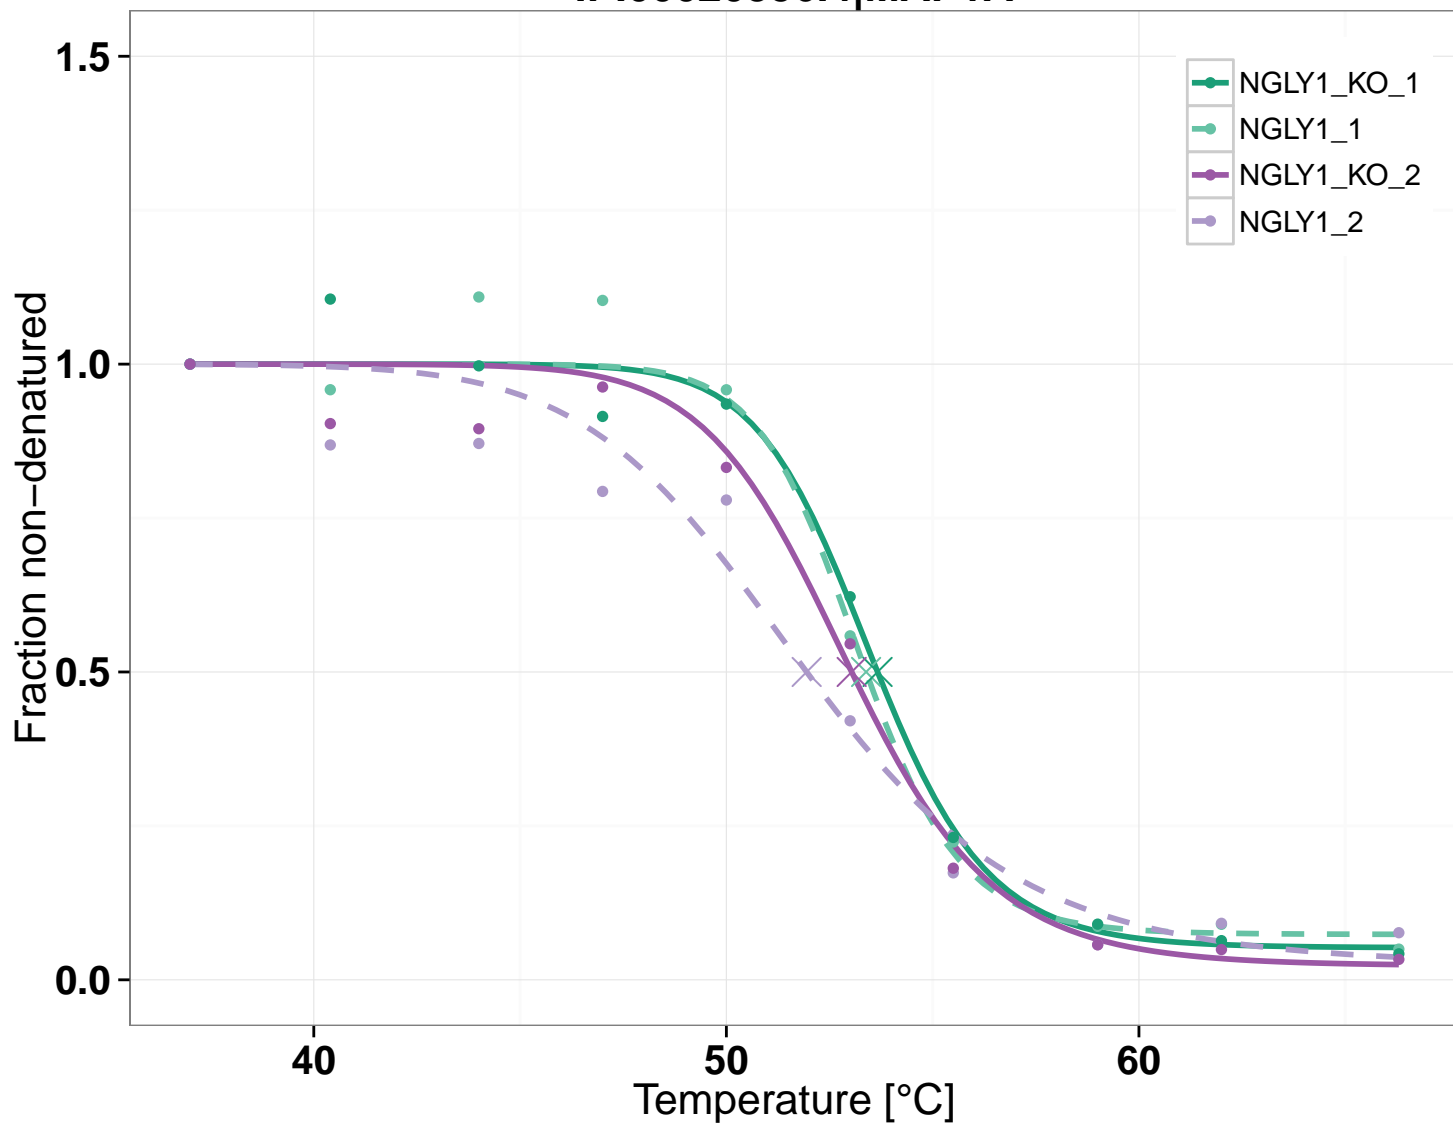

|            | meltPoint | slope  | plateau | R2   |
|------------|-----------|--------|---------|------|
| NGLY1_KO_1 | 53.67     | -0.17  | 0.05    | 0.99 |
| NGLY1_1    | 53.39     | -0.19  | 0.07    | 0.99 |
| NGLY1_KO_2 | 53.04     | -0.14  | 0.02    | 0.98 |
| NGLY1_2    | 51.95     | -0.092 | 0.02    | 0.96 |

Supplement: Supplementary file 1103 [file 1]

IPI00022348.2|PML

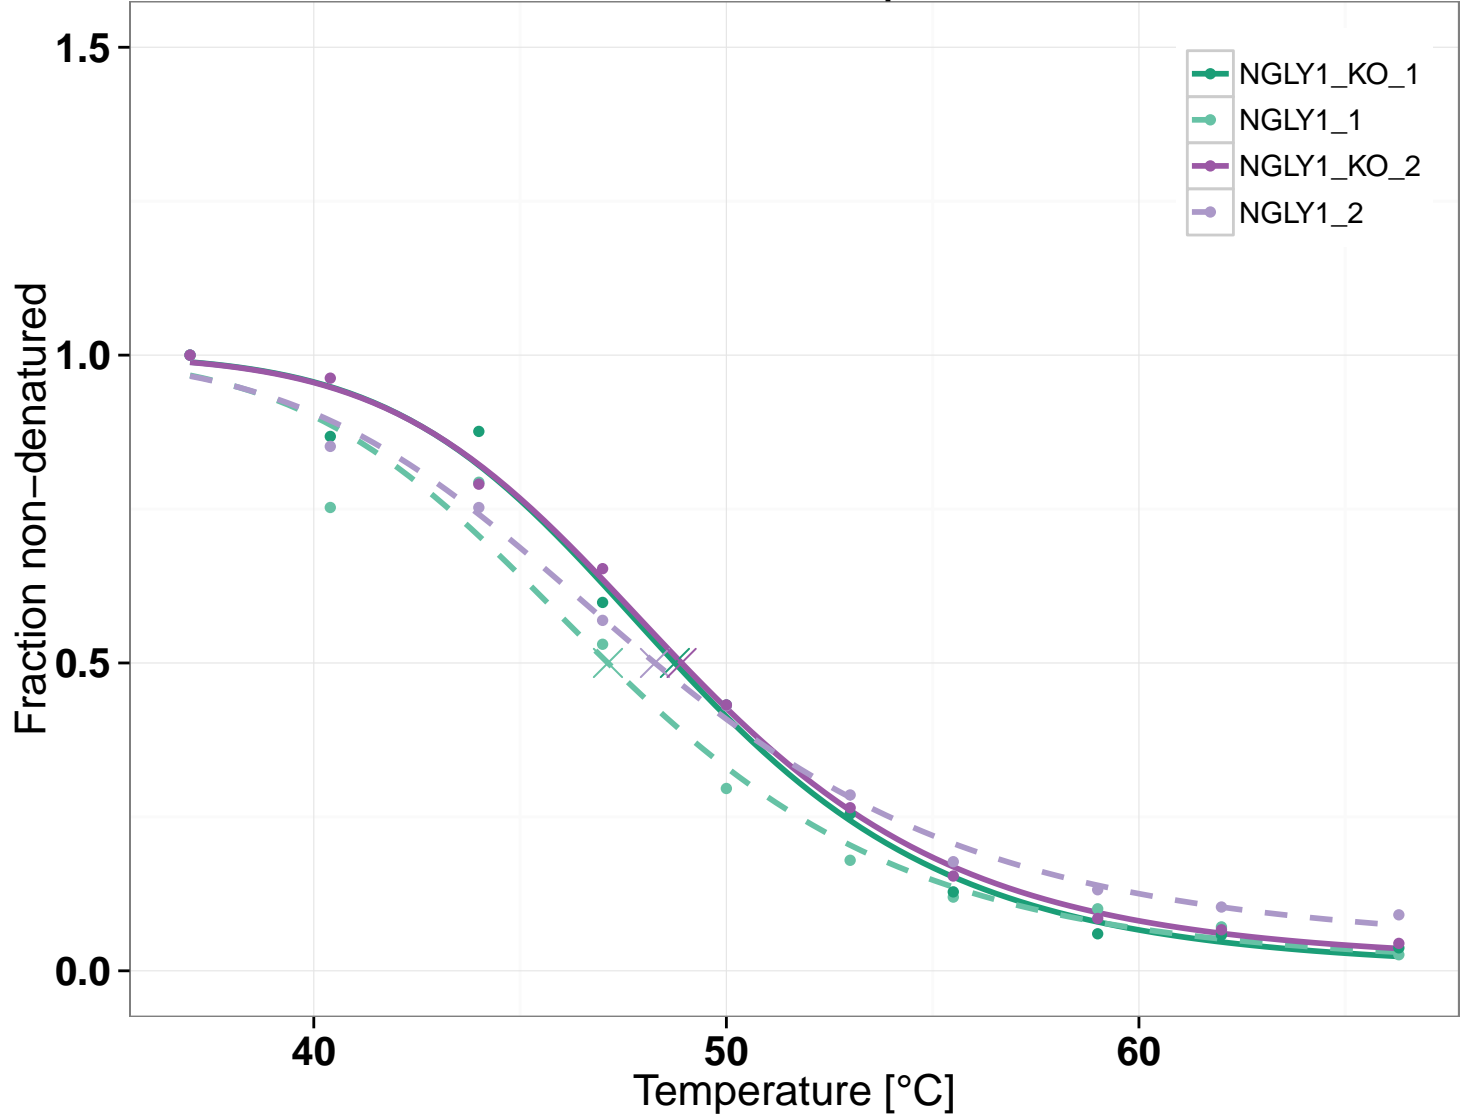

|            | meltPoint | slope  | plateau | R2   |
|------------|-----------|--------|---------|------|
| NGLY1_KO_1 | 48.75     | -0.074 | 0       | 0.99 |
| NGLY1_1    | 47.13     | -0.067 | 0       | 0.97 |
| NGLY1_KO_2 | 48.91     | -0.071 | 0.01    | 1    |
| NGLY1_2    | 48.27     | -0.058 | 0.03    | 1    |

Supplement: Supplementary file 1104 [file 1]

IPI00060046.1|TADA1L

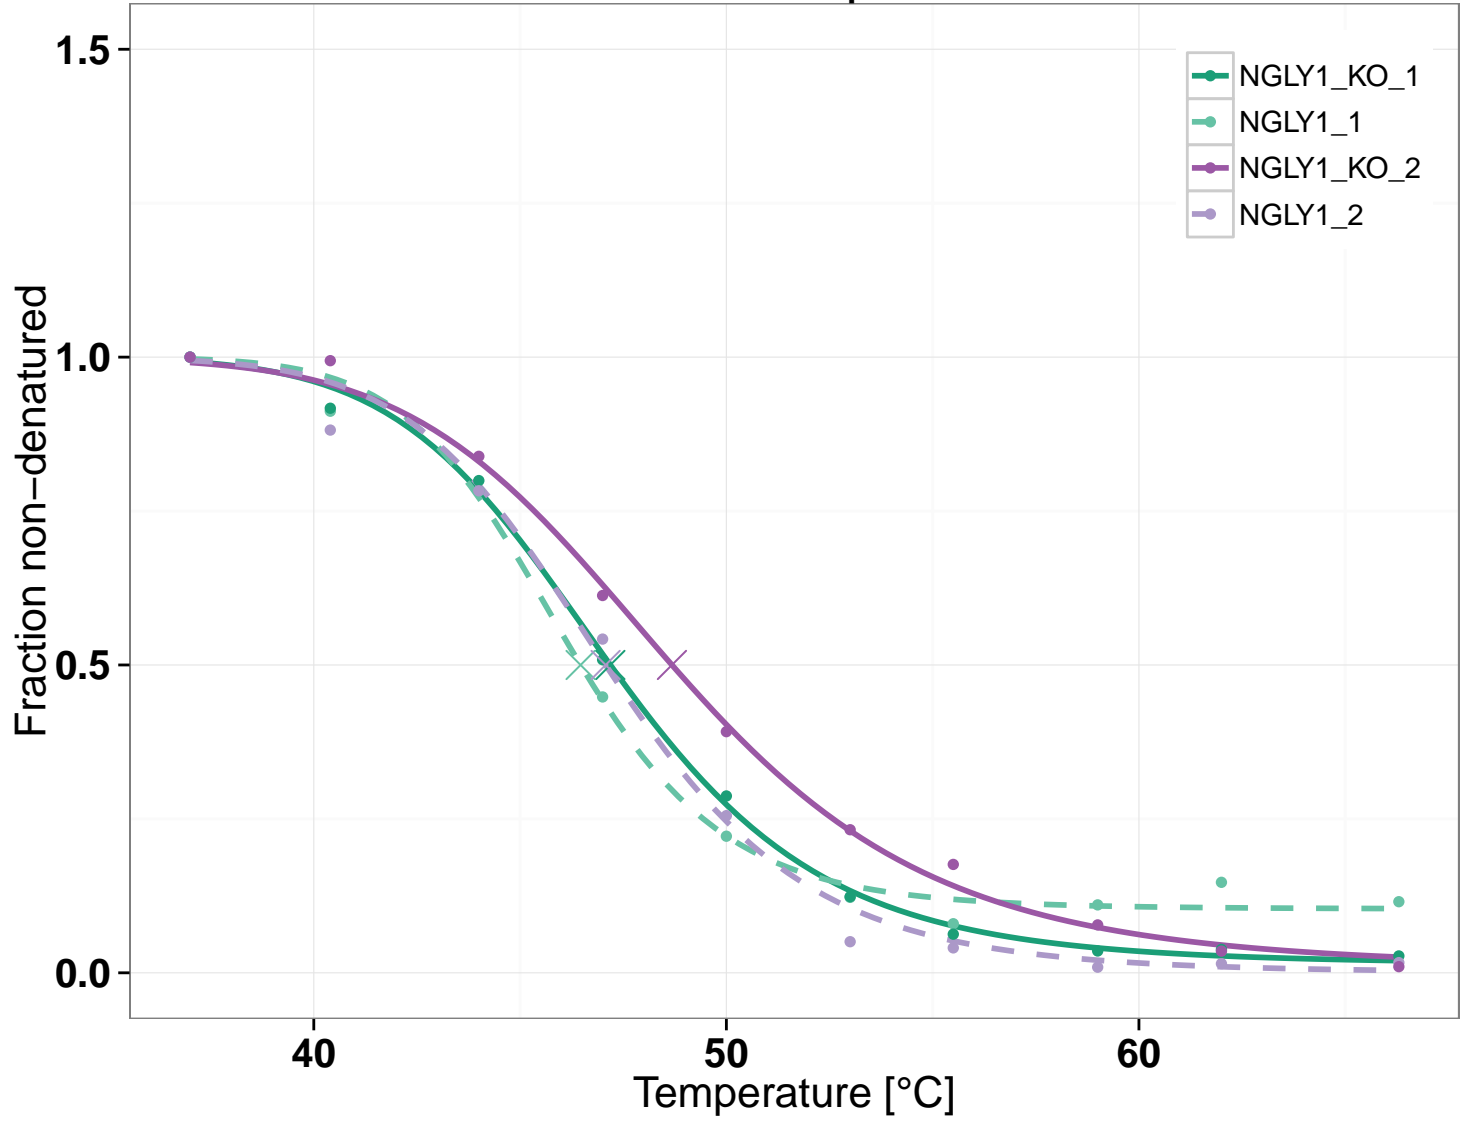

|            | meltPoint | slope  | plateau | R2   |
|------------|-----------|--------|---------|------|
| NGLY1_KO_1 | 47.19     | -0.095 | 0.01    | 1    |
| NGLY1_1    | 46.47     | -0.12  | 0.1     | 0.99 |
| NGLY1_KO_2 | 48.68     | -0.078 | 0.01    | 1    |
| NGLY1_2    | 47.07     | -0.1   | 0       | 0.99 |

Supplement: Supplementary file 1105 [file 1]

IPI00009737.1|RRAGD

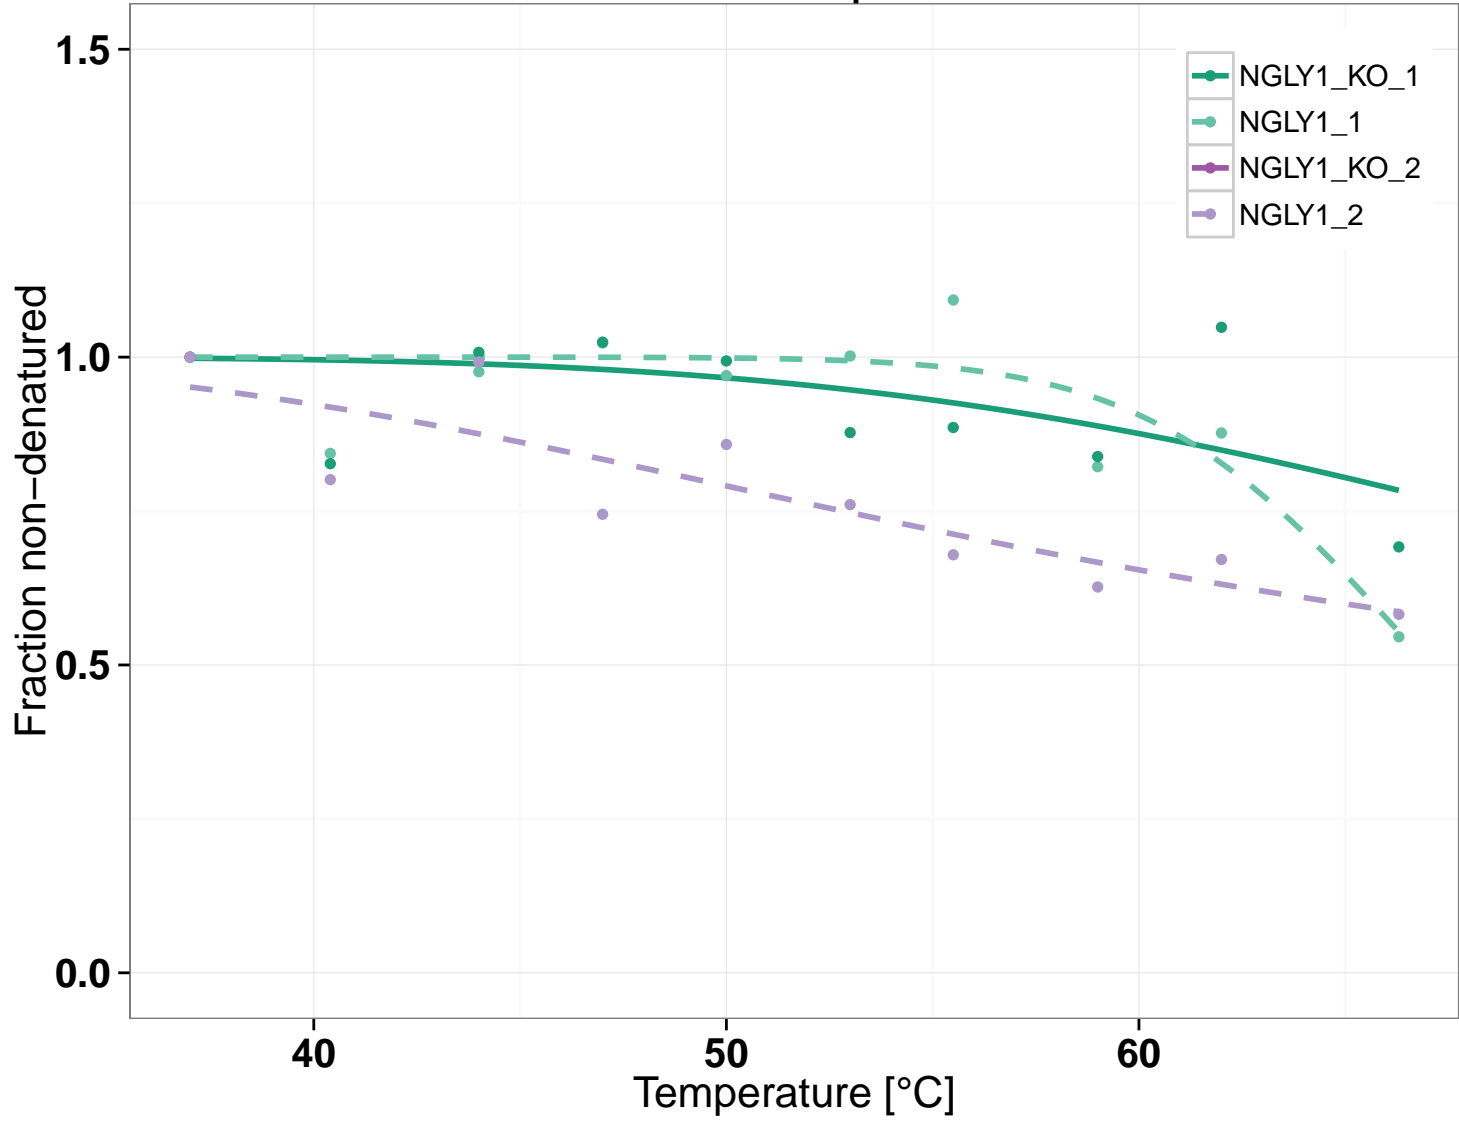

|            | meltPoint | slope  | plateau | R2   |
|------------|-----------|--------|---------|------|
| NGLY1_KO_1 | -         | -      | 0       | 0.25 |
| NGLY1_1    | -         | -      | 0       | 0.75 |
| NGLY1_KO_2 | -         | -      | -       | -    |
| NGLY1_2    | -         | -0.015 | 0.3     | 0.75 |

Supplement: Supplementary file 1106 [file 1]
