# Supplementary material (part 12 of 85)
Source: publisher figshare collection journal article supplement (https://gsajournals.figshare.com/articles/dataset/_/12014913)

# IPI00010706.1|GSS

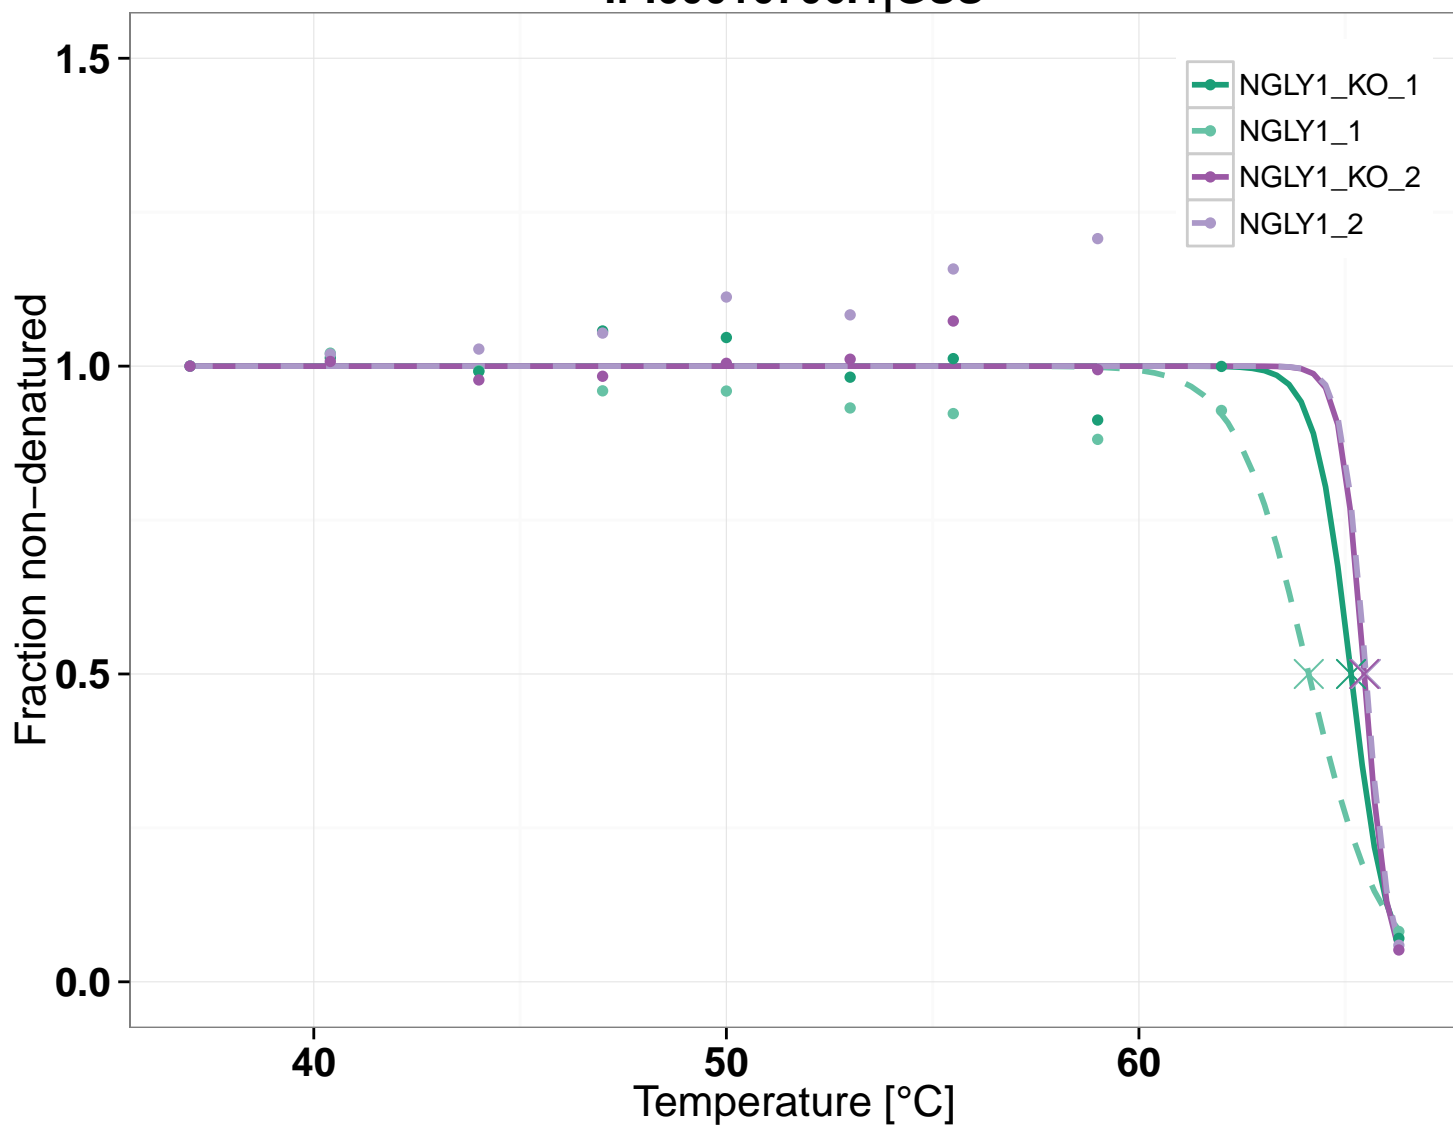

|            | meltPoint | slope | plateau | R2   |
|------------|-----------|-------|---------|------|
| NGLY1_KO_1 | 65.14     | -0.57 | 0       | 0.98 |
| NGLY1_1    | 64.12     | -0.28 | 0       | 0.96 |
| NGLY1_KO_2 | 65.46     | -0.88 | 0       | 0.85 |
| NGLY1_2    | 65.5      | -0.87 | 0       | 0.78 |

Supplement: Supplementary file 1107 [file 1]

# IPI00549761.3|ALG1

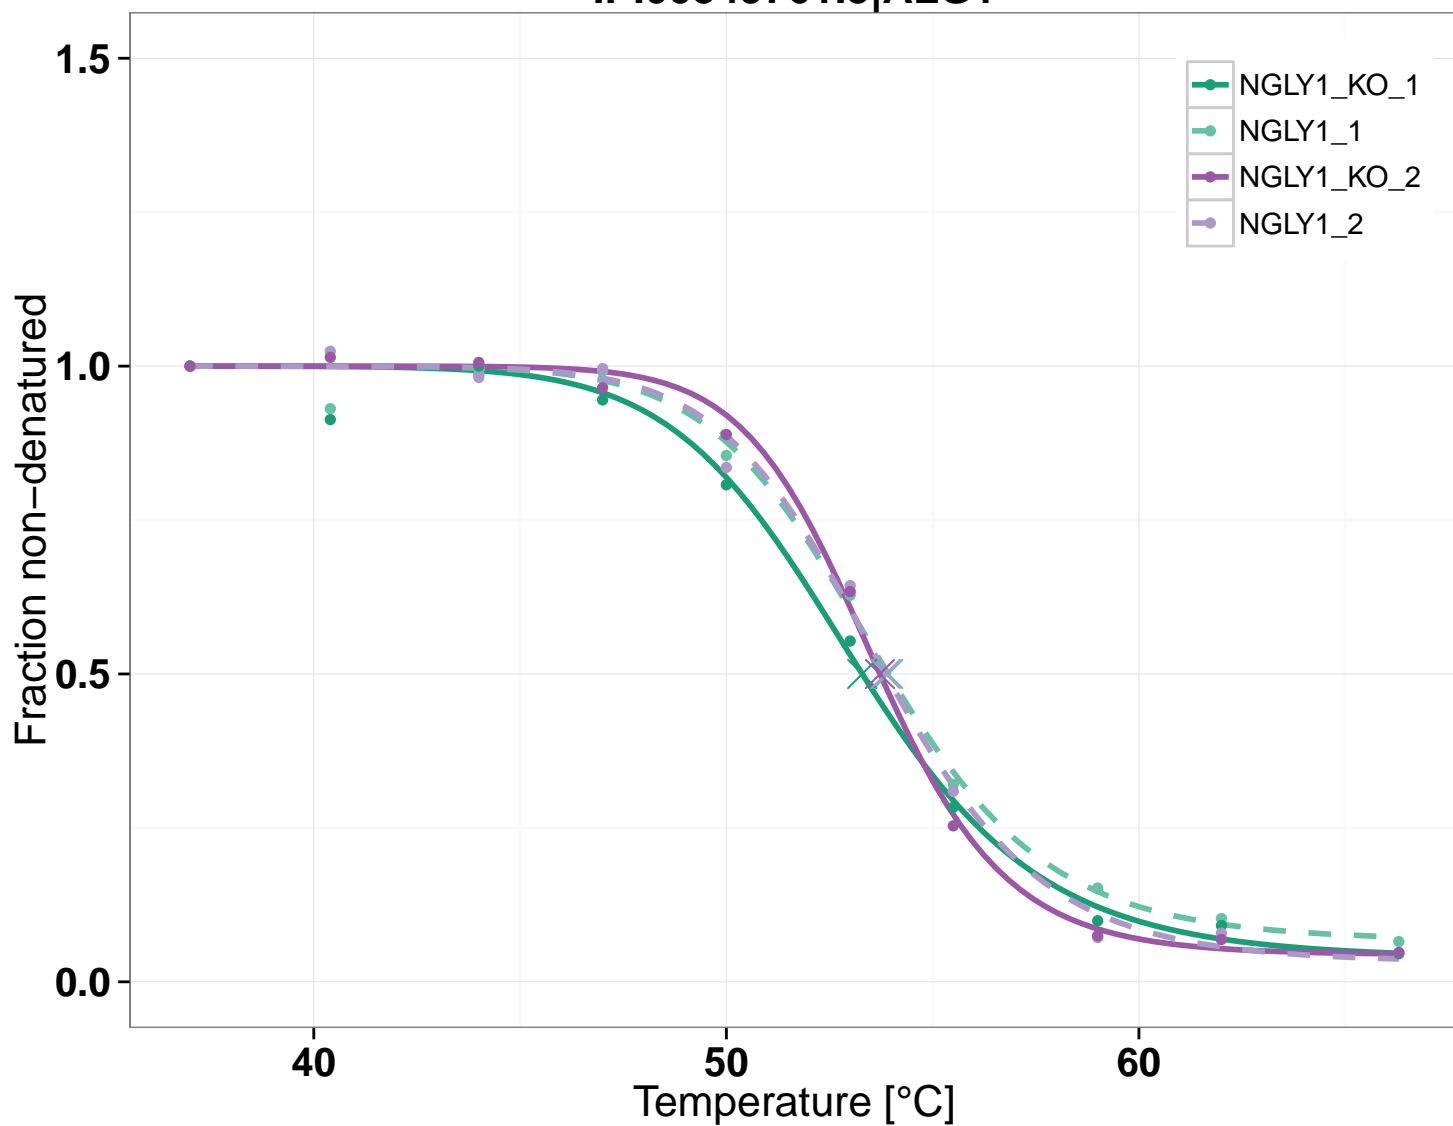

|            | meltPoint | slope | plateau | R2   |
|------------|-----------|-------|---------|------|
| NGLY1_KO_1 | 53.29     | -0.11 | 0.04    | 0.99 |
| NGLY1_1    | 53.92     | -0.11 | 0.07    | 1    |
| NGLY1_KO_2 | 53.72     | -0.15 | 0.04    | 1    |
| NGLY1_2    | 53.86     | -0.12 | 0.03    | 1    |

Supplement: Supplementary file 1108 [file 1]

# IPI00023591.1|PURA

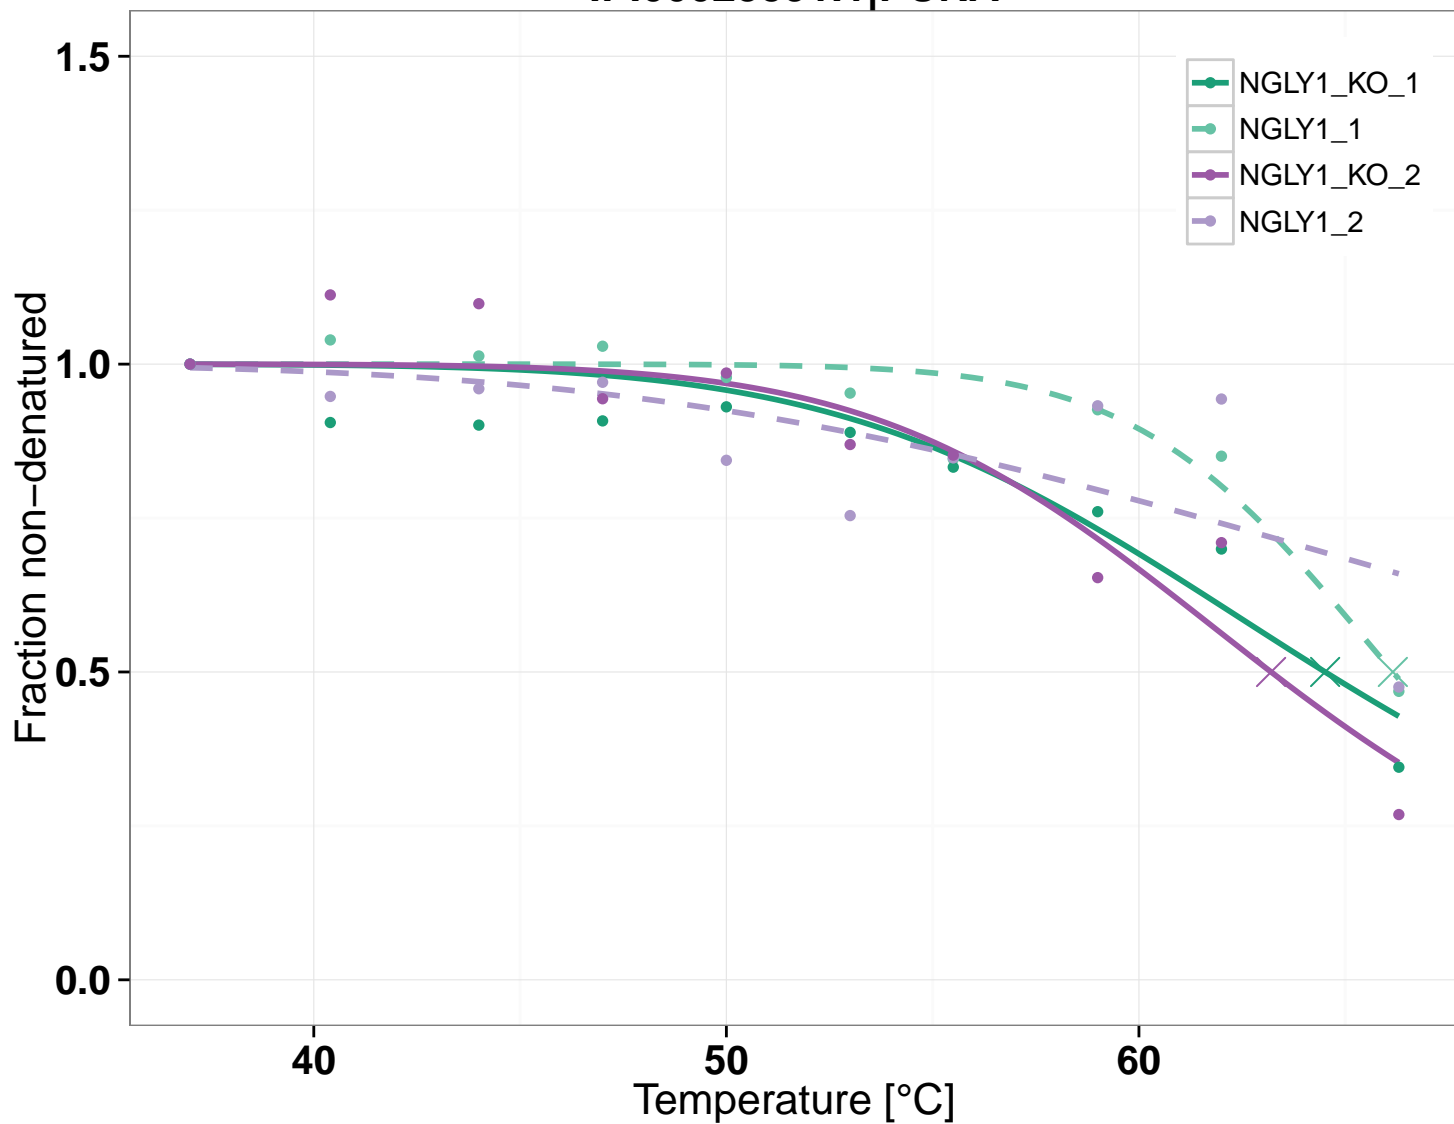

|            | meltPoint | slope  | plateau | R2   |
|------------|-----------|--------|---------|------|
| NGLY1_KO_1 | 64.51     | -0.043 | 0       | 0.87 |
| NGLY1_1    | 66.15     | -0.08  | 0       | 0.9  |
| NGLY1_KO_2 | 63.2      | -0.053 | 0       | 0.89 |
| NGLY1_2    | -         | -0.019 | 0       | 0.46 |

Supplement: Supplementary file 1109 [file 1]

IPI00002347.8|TBC1D14

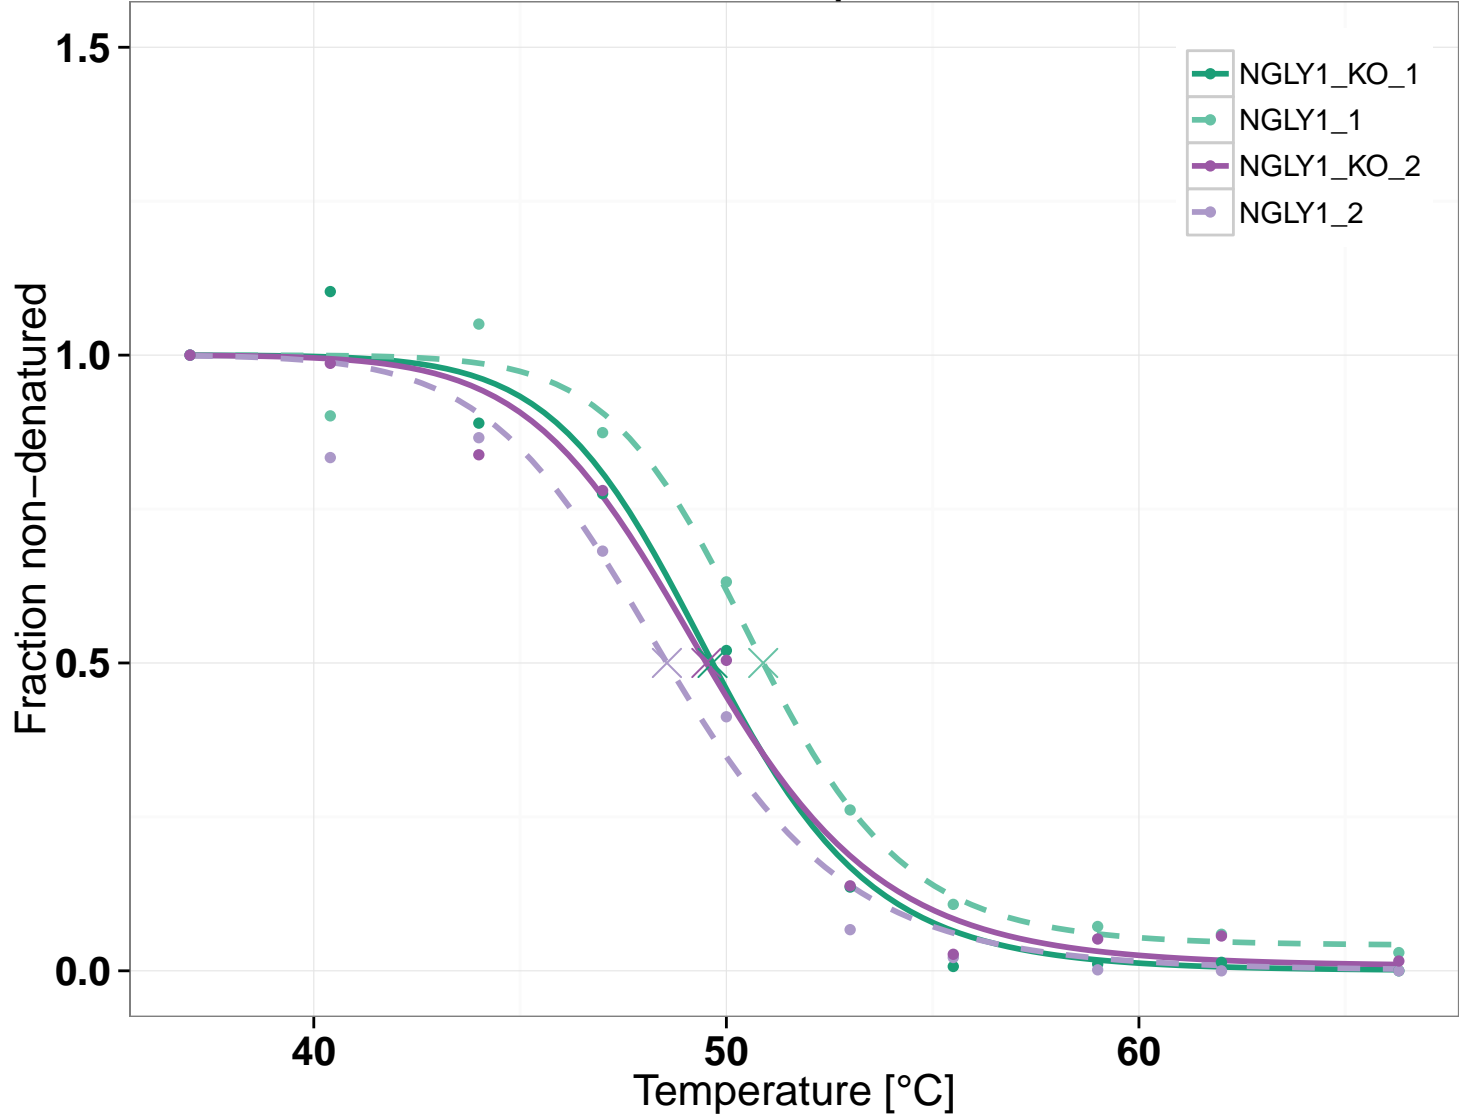

|            | meltPoint | slope | plateau | R2   |
|------------|-----------|-------|---------|------|
| NGLY1_KO_1 | 49.66     | -0.13 | 0       | 0.99 |
| NGLY1_1    | 50.89     | -0.13 | 0.04    | 0.99 |
| NGLY1_KO_2 | 49.52     | -0.12 | 0.01    | 0.99 |
| NGLY1_2    | 48.56     | -0.11 | 0       | 0.98 |

Supplement: Supplementary file 1110 [file 1]

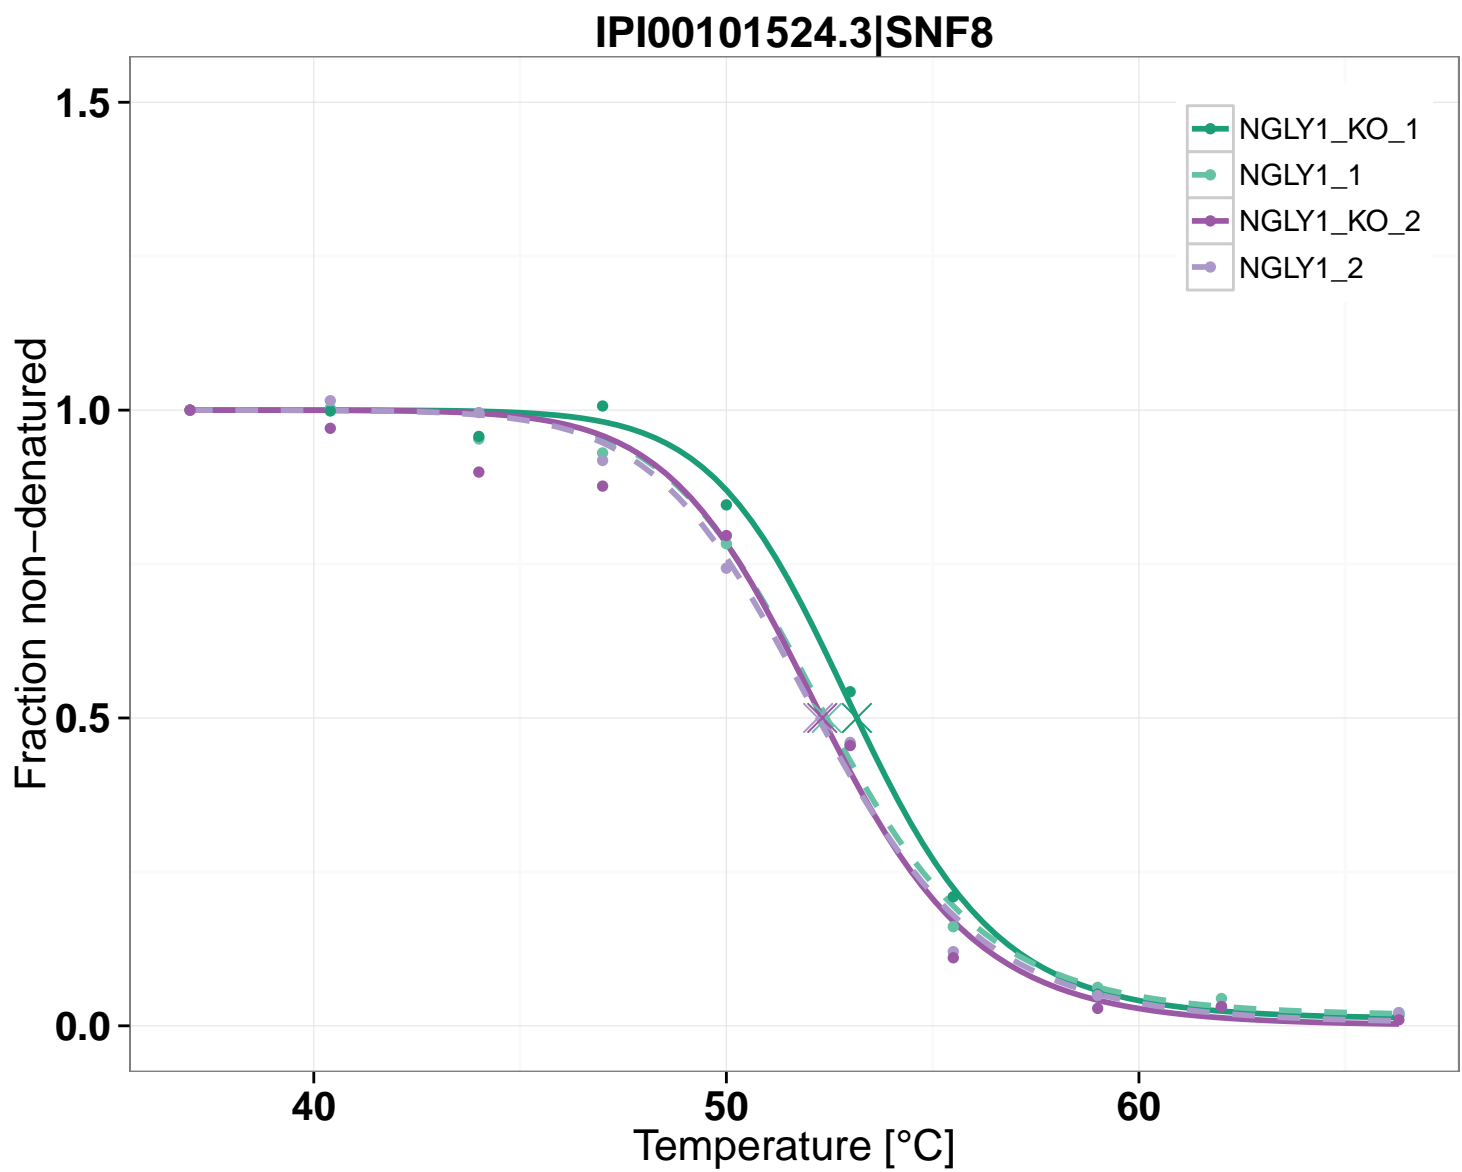

|            | meltPoint | slope | plateau | R2   |
|------------|-----------|-------|---------|------|
| NGLY1_KO_1 | 53.16     | -0.14 | 0.01    | 1    |
| NGLY1_1    | 52.43     | -0.13 | 0.02    | 1    |
| NGLY1_KO_2 | 52.32     | -0.13 | 0       | 0.99 |
| NGLY1_2    | 52.22     | -0.12 | 0       | 1    |

Supplement: Supplementary file 1111 [file 1]

IPI00170935.1|LRRC47

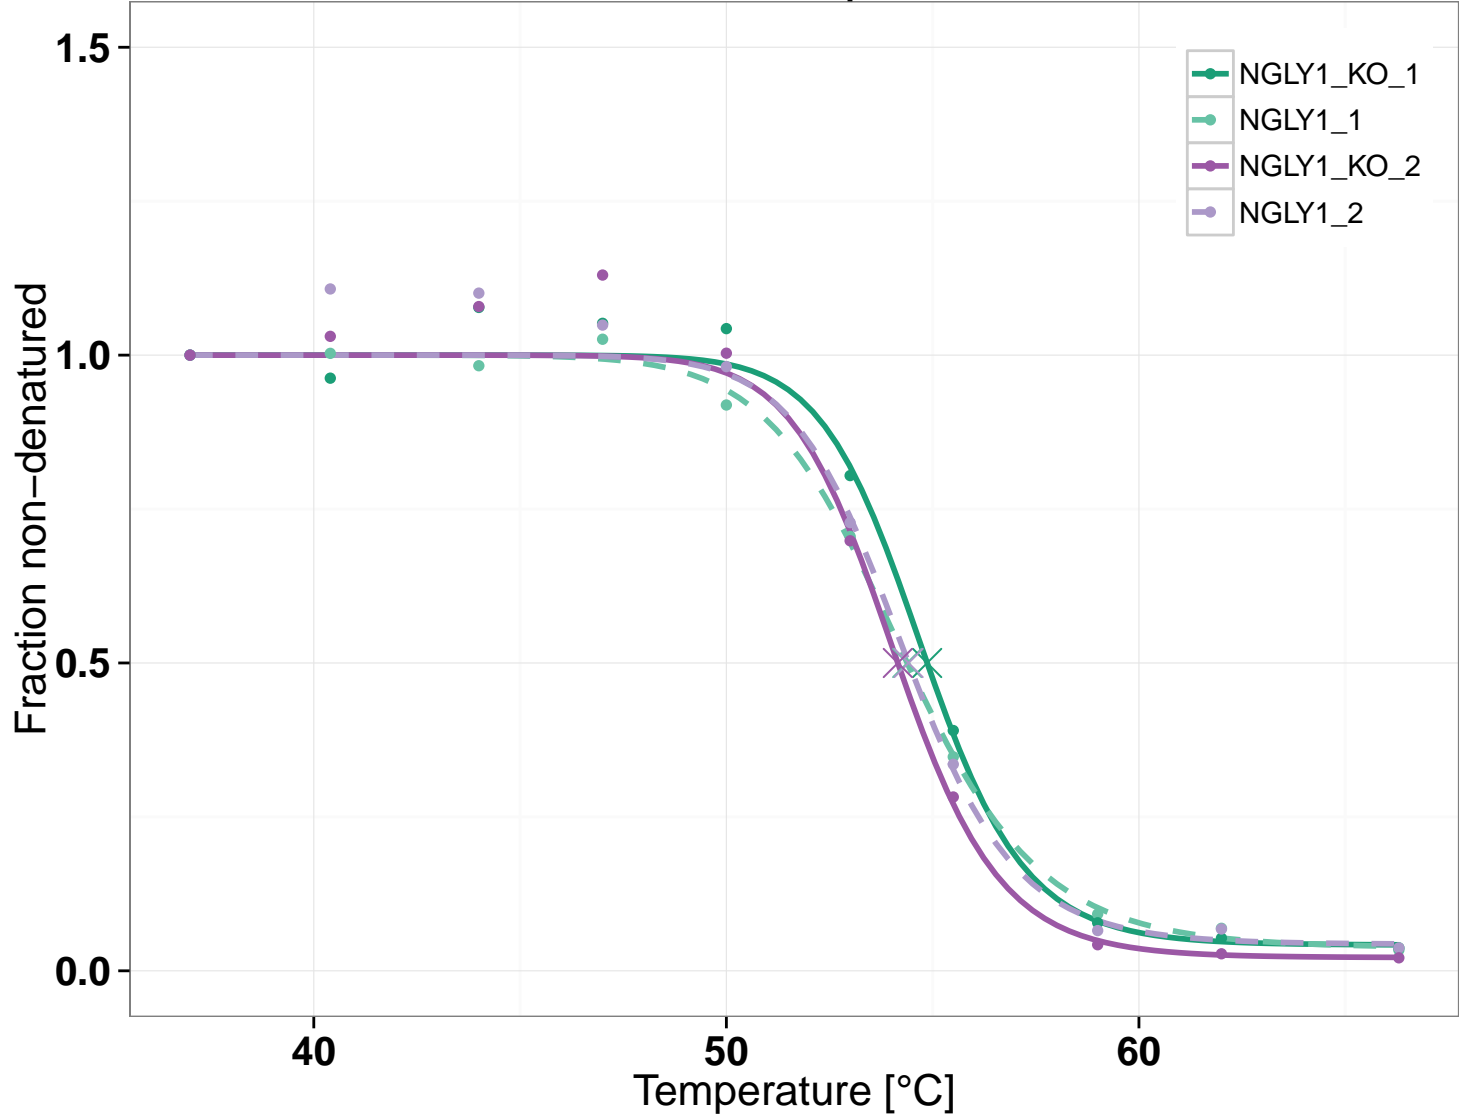

|            | meltPoint | slope | plateau | R2   |
|------------|-----------|-------|---------|------|
| NGLY1_KO_1 | 54.87     | -0.19 | 0.04    | 0.99 |
| NGLY1_1    | 54.38     | -0.15 | 0.04    | 1    |
| NGLY1_KO_2 | 54.16     | -0.19 | 0.02    | 0.99 |
| NGLY1_2    | 54.42     | -0.18 | 0.04    | 0.99 |

Supplement: Supplementary file 1112 [file 1]

# IPI00180143.2|CLK4

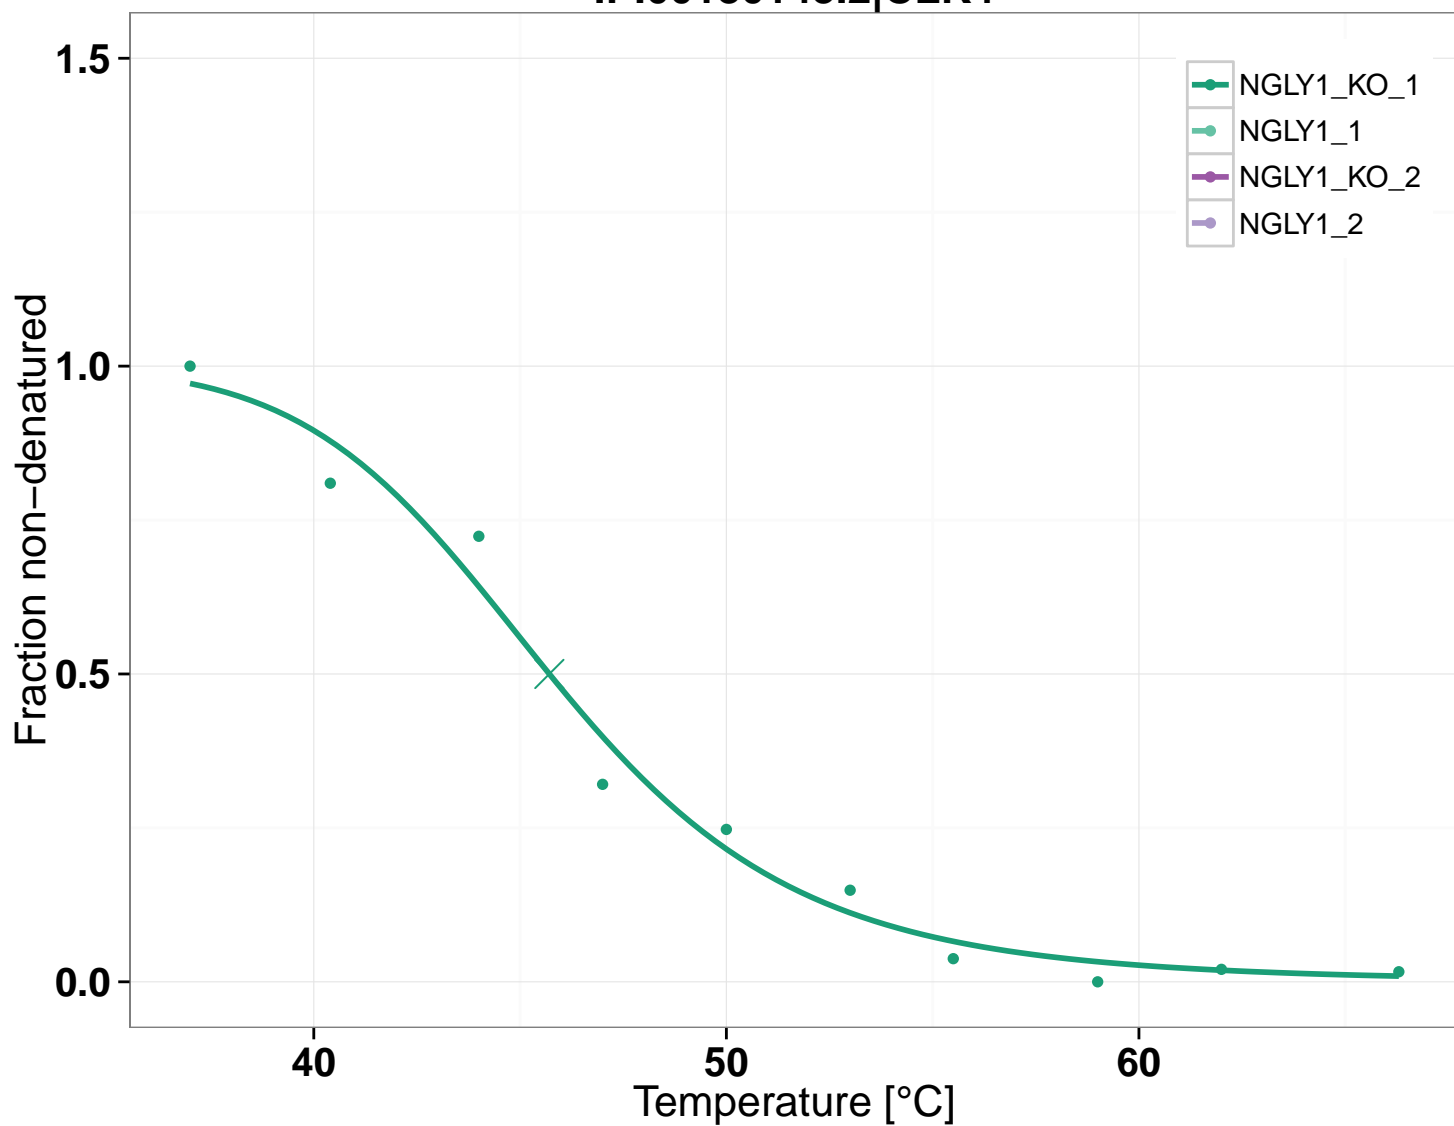

|            | meltPoint | slope  | plateau | R2   |
|------------|-----------|--------|---------|------|
| NGLY1_KO_1 | 45.71     | -0.084 | 0       | 0.98 |
| NGLY1_1    | -         | -      | -       | -    |
| NGLY1_KO_2 | -         | -      | -       | -    |
| NGLY1_2    | -         | -      | -       | -    |

Supplement: Supplementary file 1113 [file 1]

IPI00639909.1|SNAP47

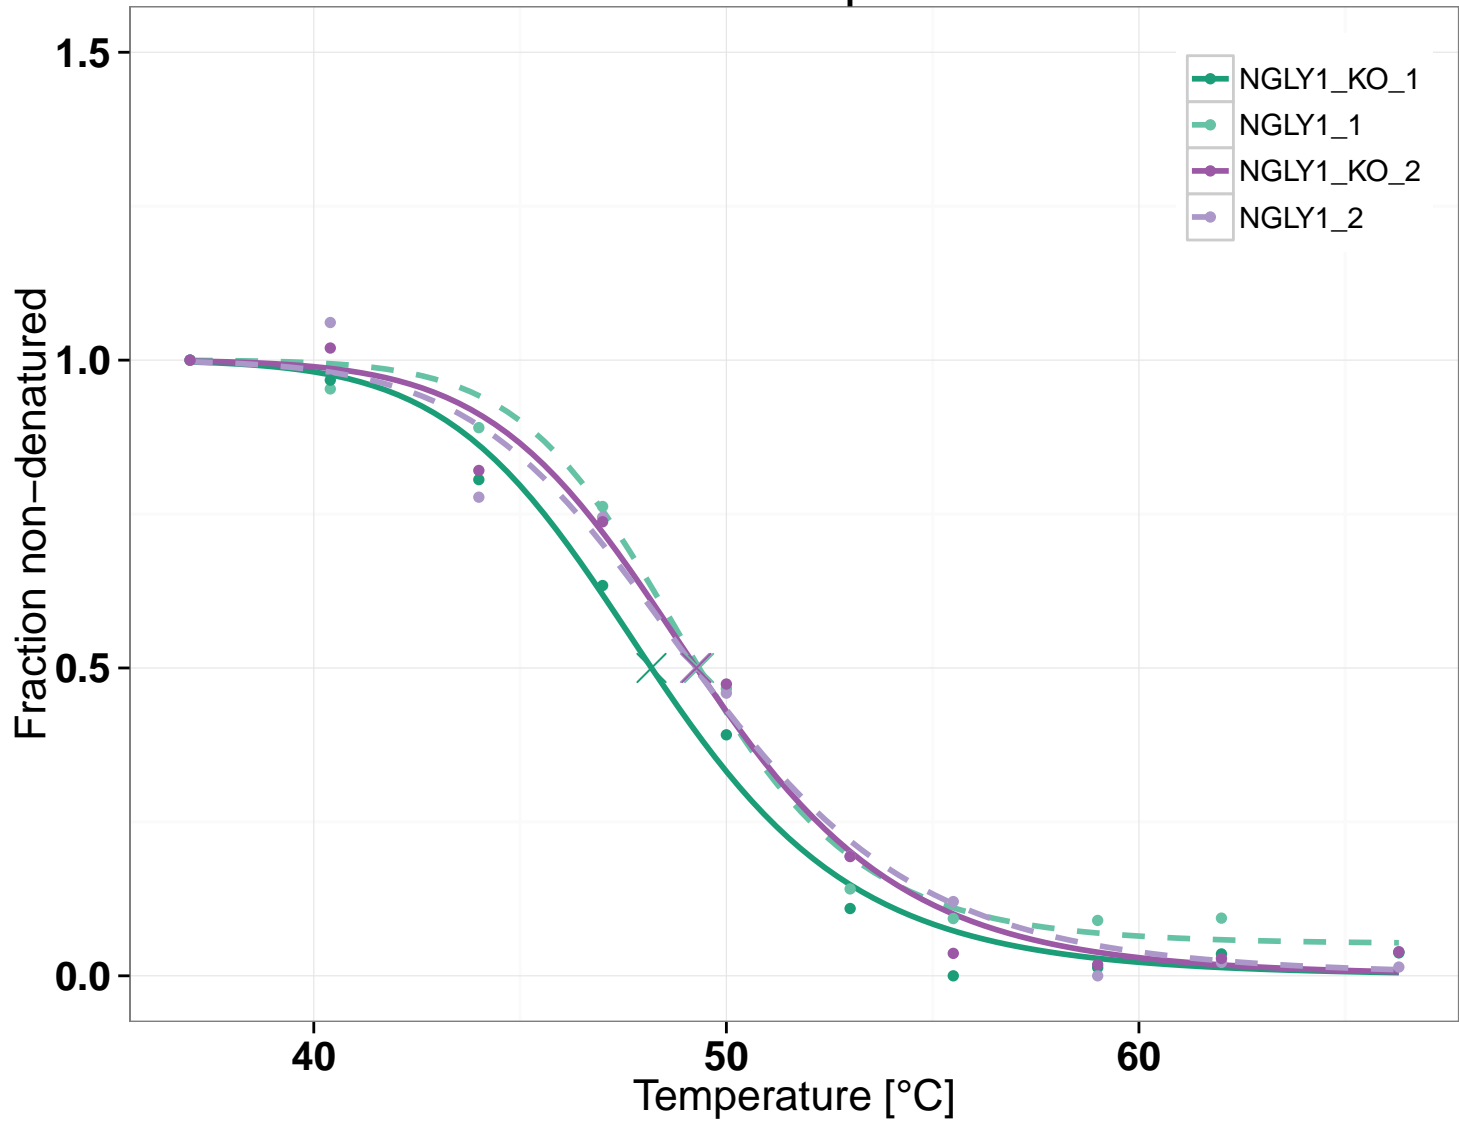

|            | meltPoint | slope  | plateau | R2   |
|------------|-----------|--------|---------|------|
| NGLY1_KO_1 | 48.19     | -0.1   | 0       | 0.99 |
| NGLY1_1    | 49.34     | -0.11  | 0.05    | 0.99 |
| NGLY1_KO_2 | 49.27     | -0.1   | 0       | 0.99 |
| NGLY1_2    | 49.24     | -0.092 | 0       | 0.98 |

Supplement: Supplementary file 1114 [file 1]

# IPI00418169.3|ANXA2

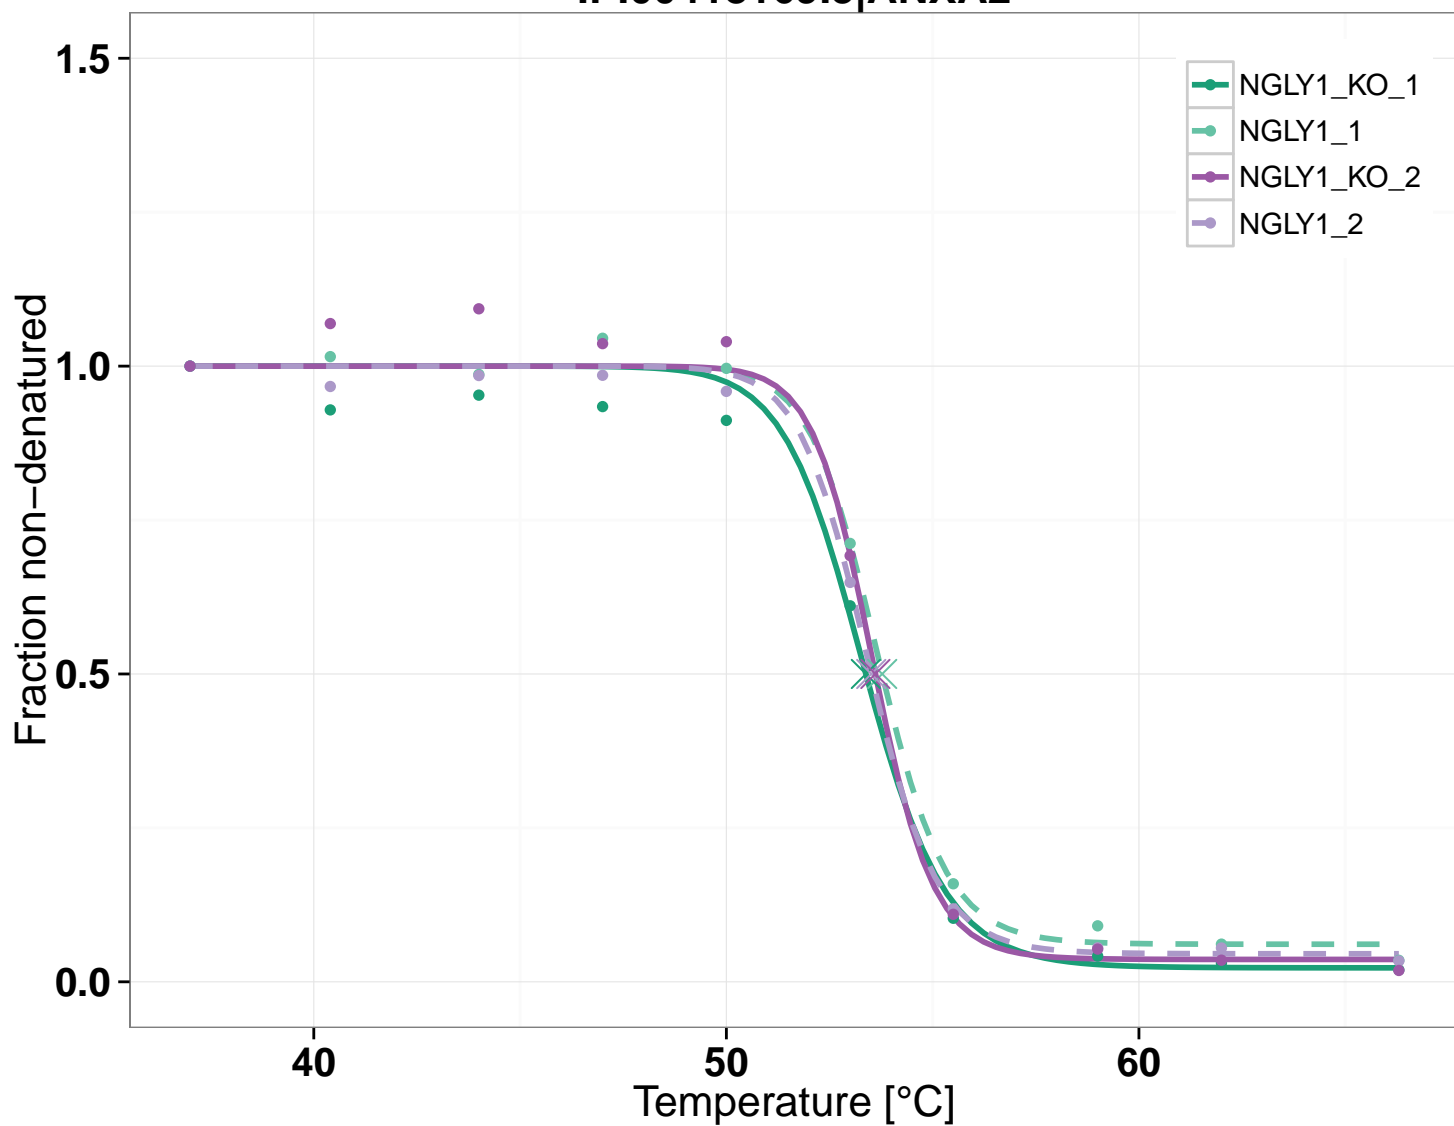

|            | meltPoint | slope | plateau | R2   |
|------------|-----------|-------|---------|------|
| NGLY1_KO_1 | 53.38     | -0.25 | 0.02    | 0.99 |
| NGLY1_1    | 53.78     | -0.28 | 0.06    | 1    |
| NGLY1_KO_2 | 53.61     | -0.33 | 0.04    | 0.99 |
| NGLY1_2    | 53.51     | -0.29 | 0.05    | 1    |

Supplement: Supplementary file 1115 [file 1]

IPI00376035.2|C6ORF120

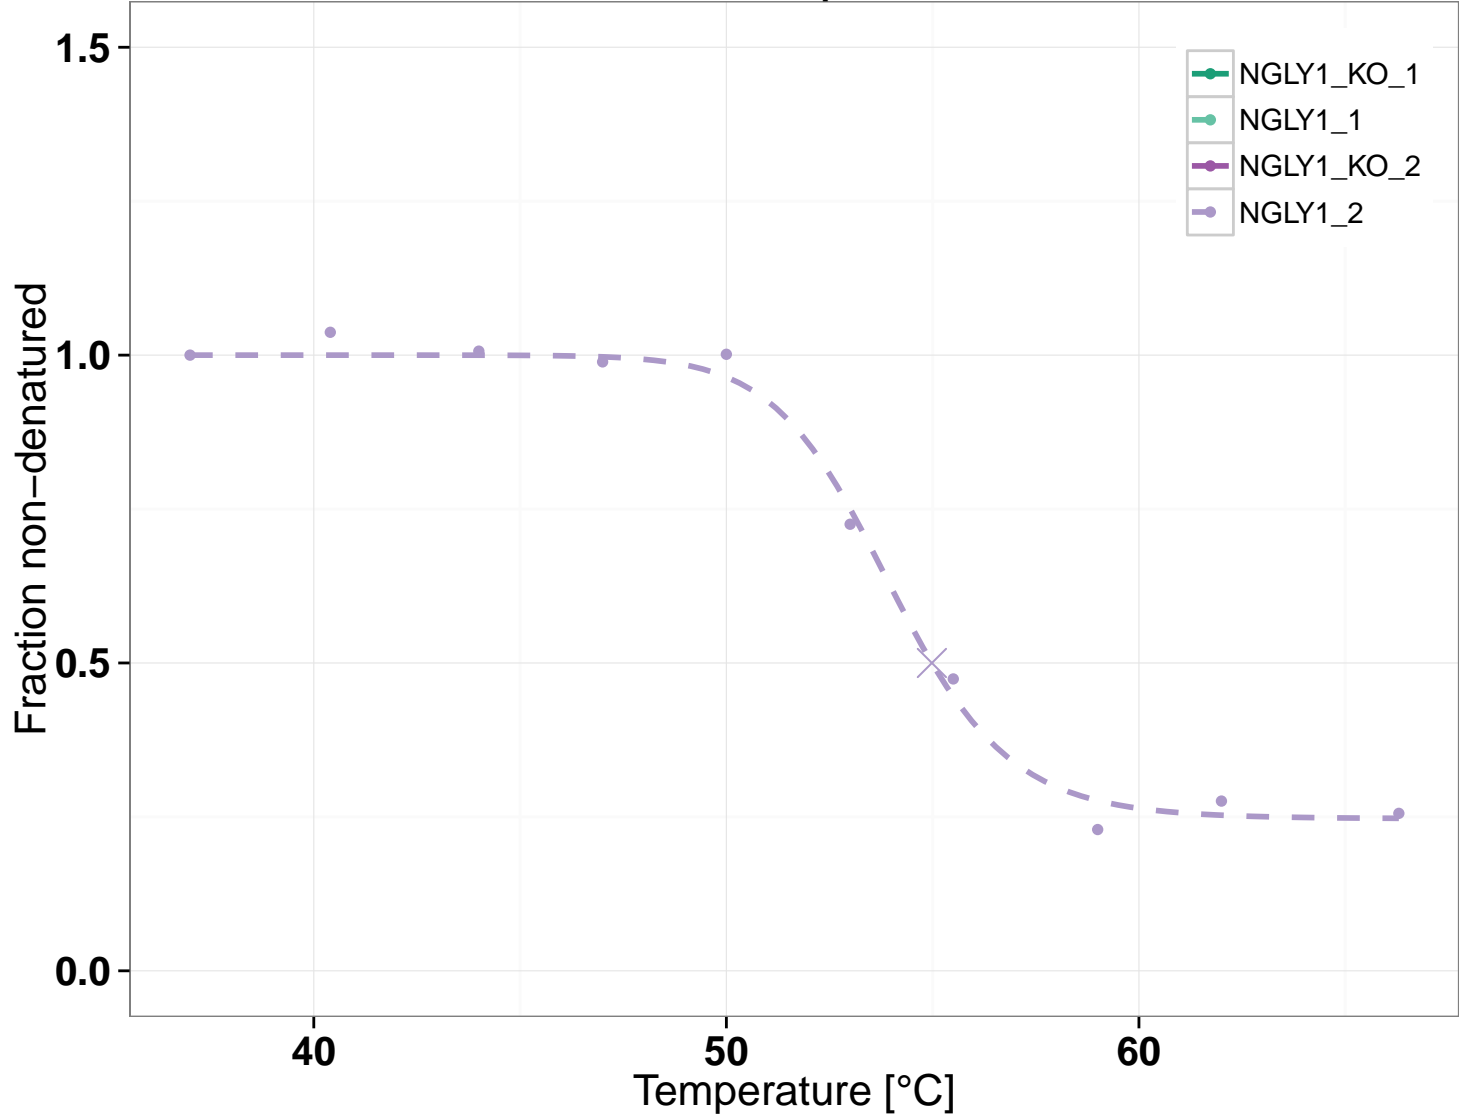

|            | meltPoint | slope | plateau | R2   |
|------------|-----------|-------|---------|------|
| NGLY1_KO_1 | —         | —     | —       | —    |
| NGLY1_1    | —         | —     | —       | —    |
| NGLY1_KO_2 | —         | —     | —       | —    |
| NGLY1_2    | 54.98     | −0.13 | 0.25    | 0.99 |

Supplement: Supplementary file 1116 [file 1]

# IPI00169400.1|MRPS5

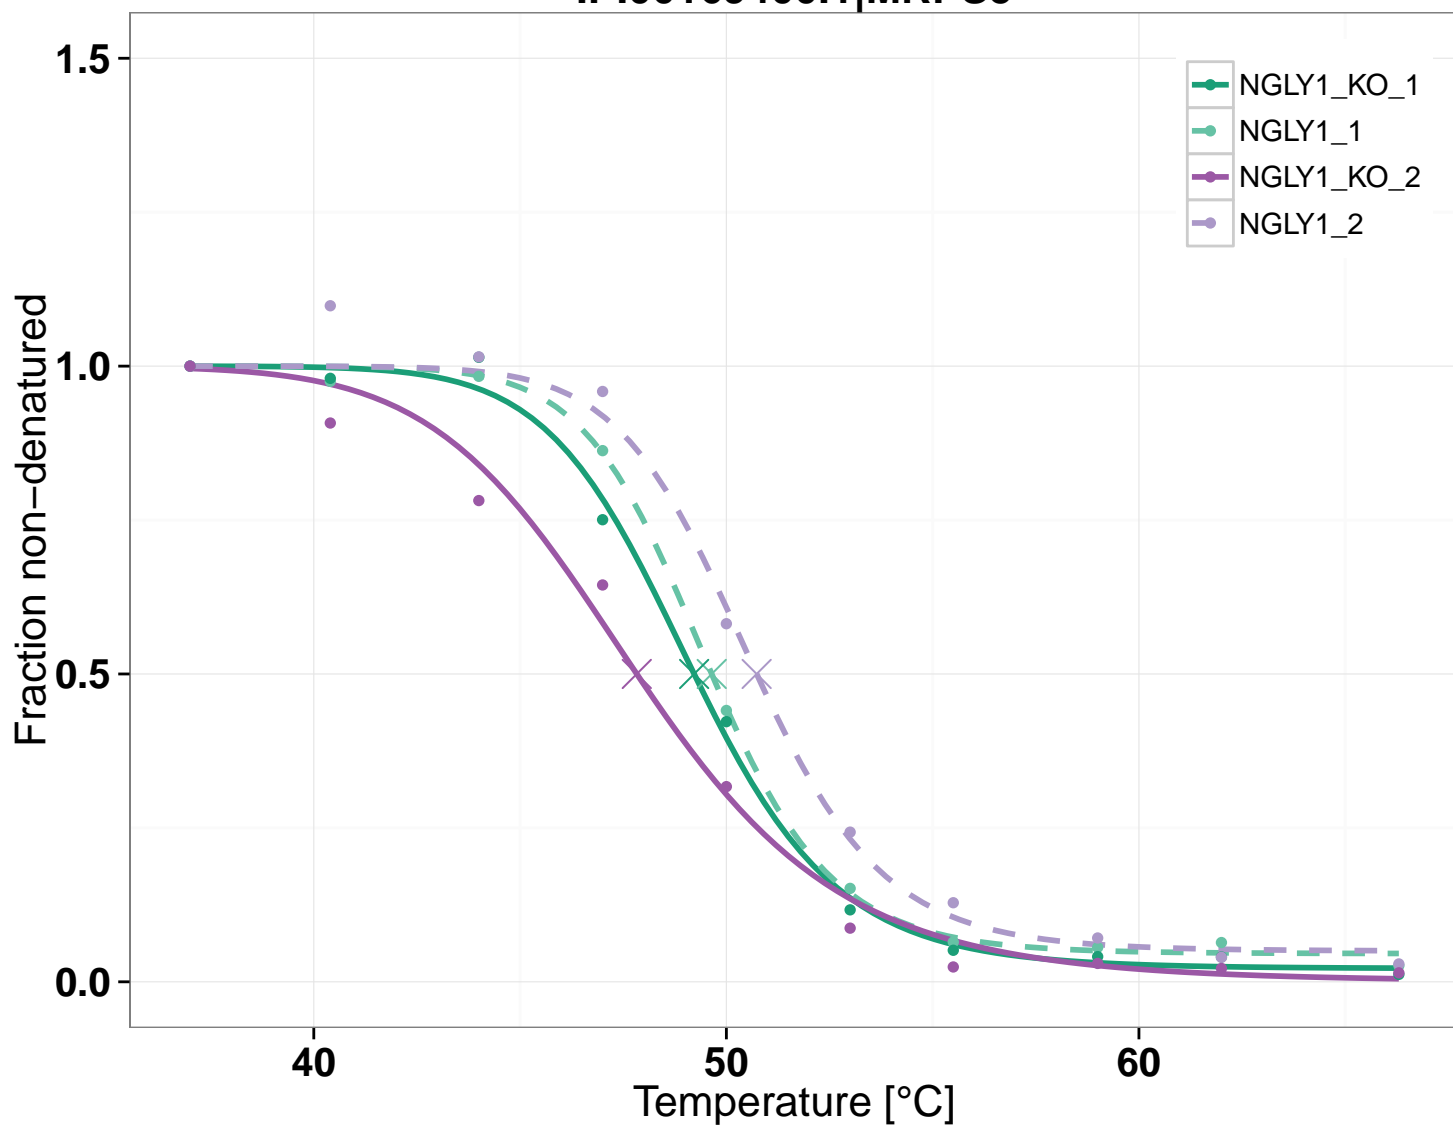

|            | meltPoint | slope | plateau | R2   |
|------------|-----------|-------|---------|------|
| NGLY1_KO_1 | 49.22     | -0.14 | 0.02    | 1    |
| NGLY1_1    | 49.64     | -0.16 | 0.05    | 1    |
| NGLY1_KO_2 | 47.83     | -0.1  | 0       | 0.99 |
| NGLY1_2    | 50.73     | -0.15 | 0.05    | 0.99 |

Supplement: Supplementary file 1117 [file 1]

IPI00005050.1|MRPS14

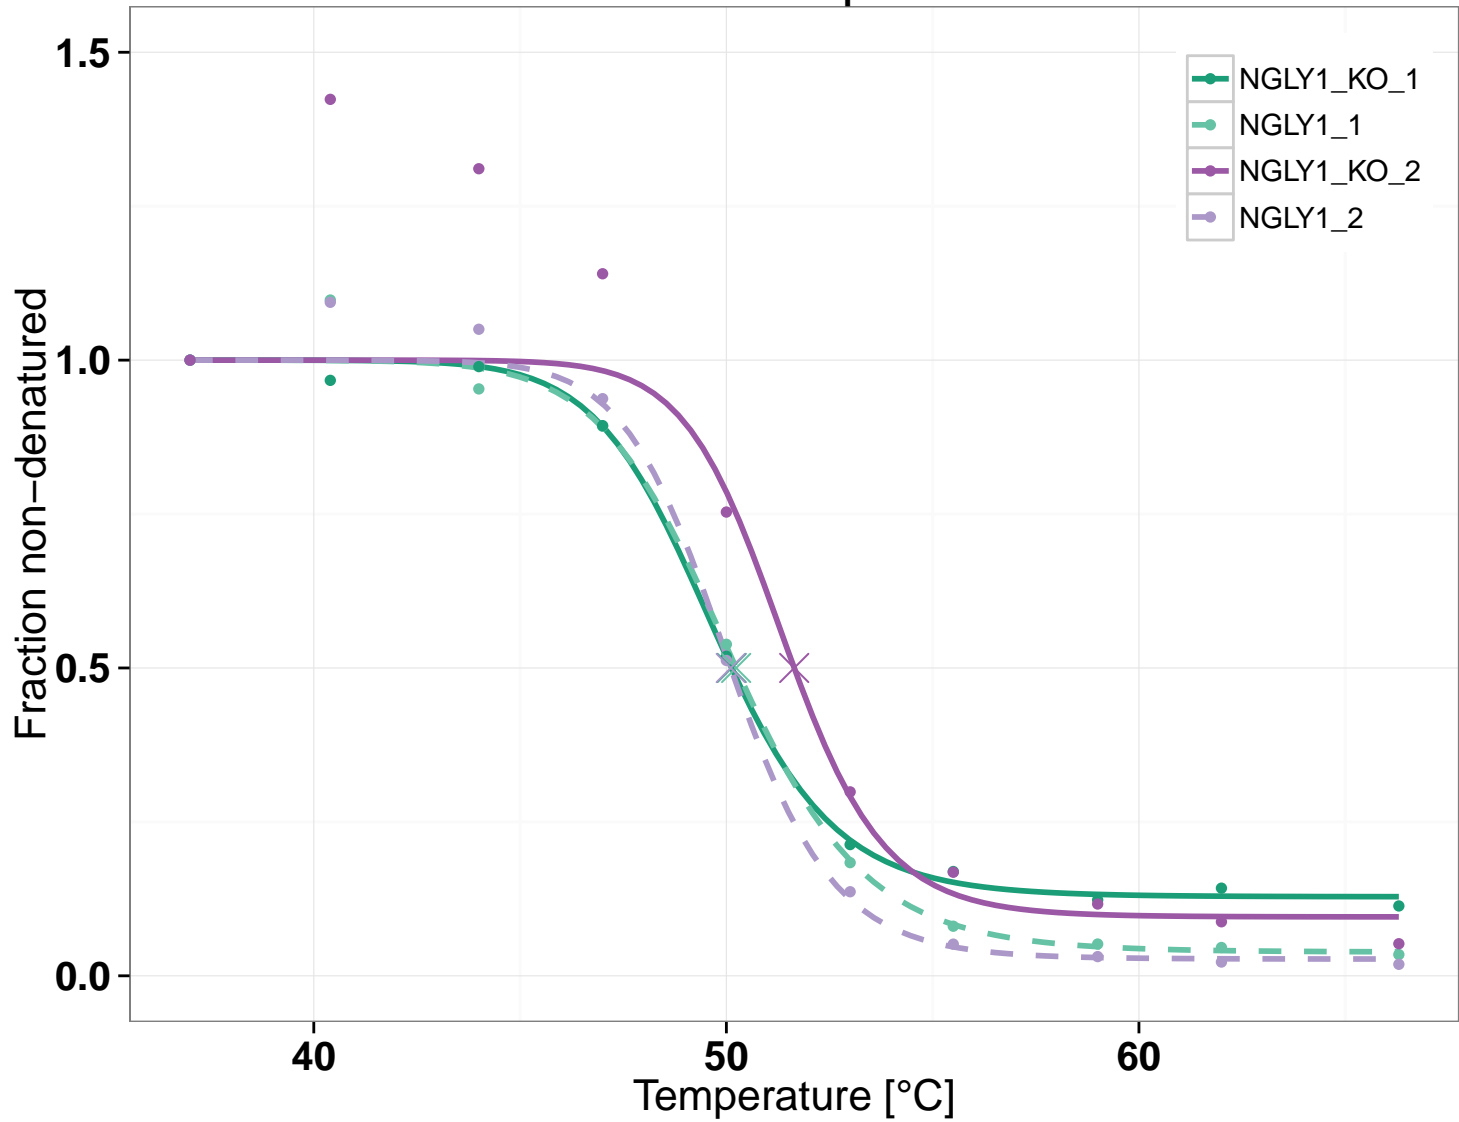

|            | meltPoint | slope | plateau | R2   |
|------------|-----------|-------|---------|------|
| NGLY1_KO_1 | 50.13     | -0.15 | 0.13    | 1    |
| NGLY1_1    | 50.24     | -0.15 | 0.04    | 0.99 |
| NGLY1_KO_2 | 51.64     | -0.19 | 0.1     | 0.89 |
| NGLY1_2    | 50.11     | -0.19 | 0.03    | 0.99 |

Supplement: Supplementary file 1118 [file 1]

# IPI00292548.3|RHPN2

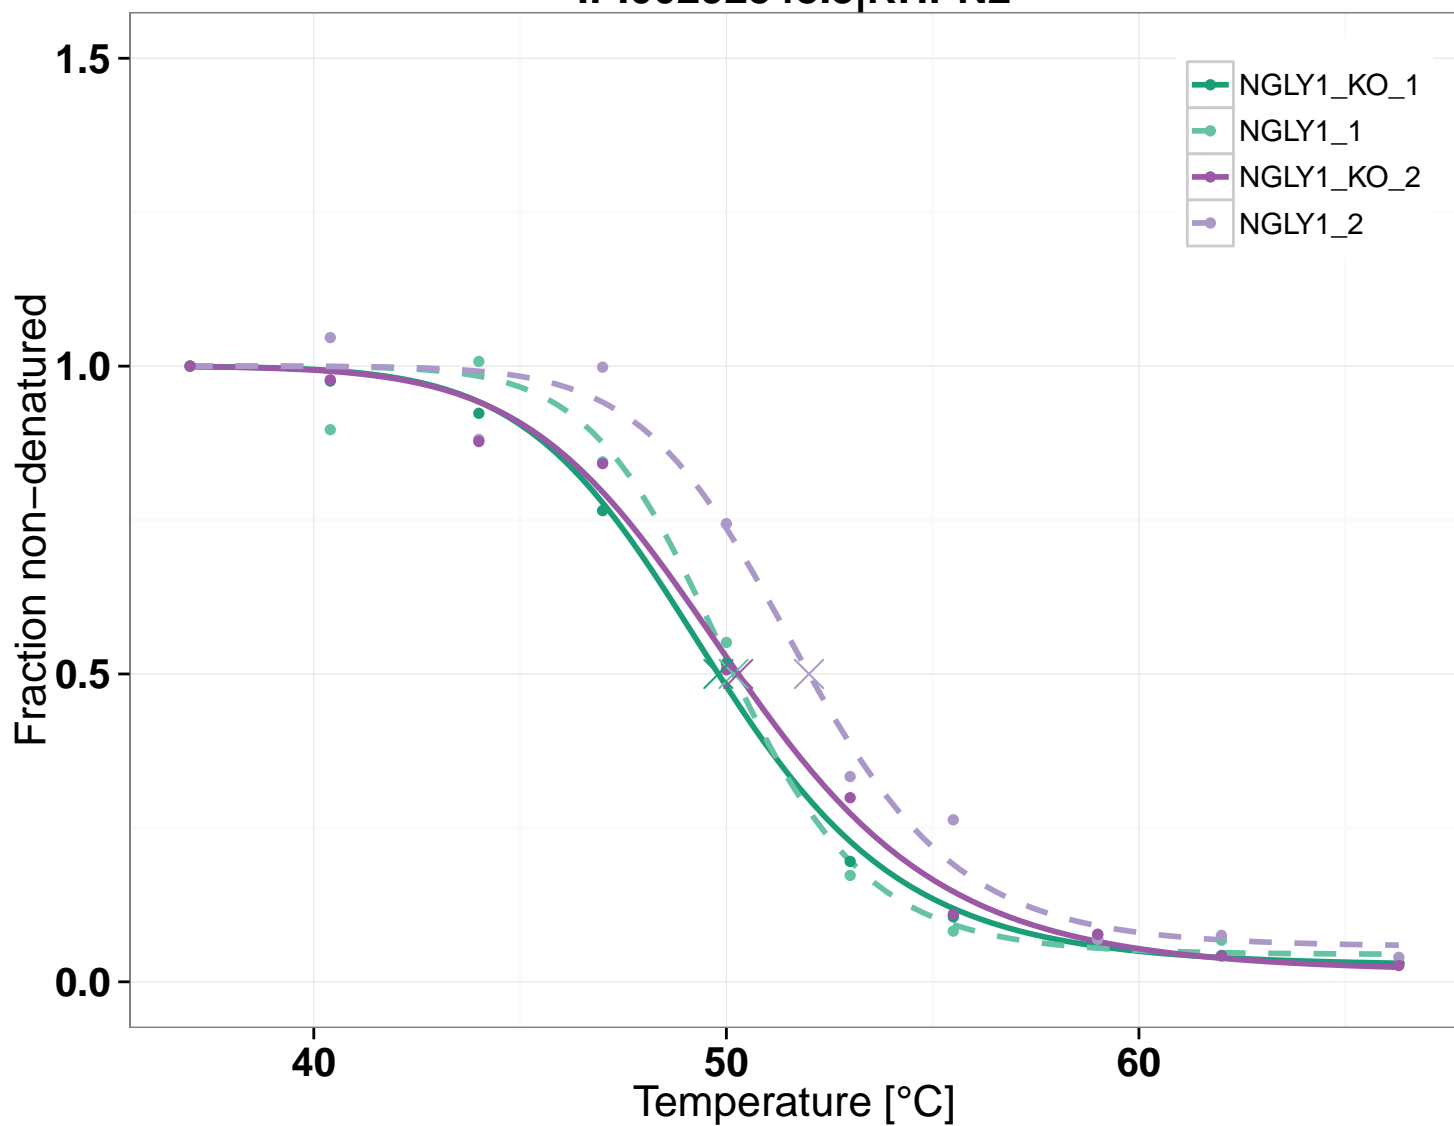

|            | meltPoint | slope  | plateau | R2   |
|------------|-----------|--------|---------|------|
| NGLY1_KO_1 | 49.81     | -0.11  | 0.03    | 1    |
| NGLY1_1    | 50.17     | -0.14  | 0.04    | 0.99 |
| NGLY1_KO_2 | 50.29     | -0.097 | 0.02    | 0.99 |
| NGLY1_2    | 52        | -0.12  | 0.06    | 0.98 |

Supplement: Supplementary file 1119 [file 1]

IPI00410584.4|LONP2

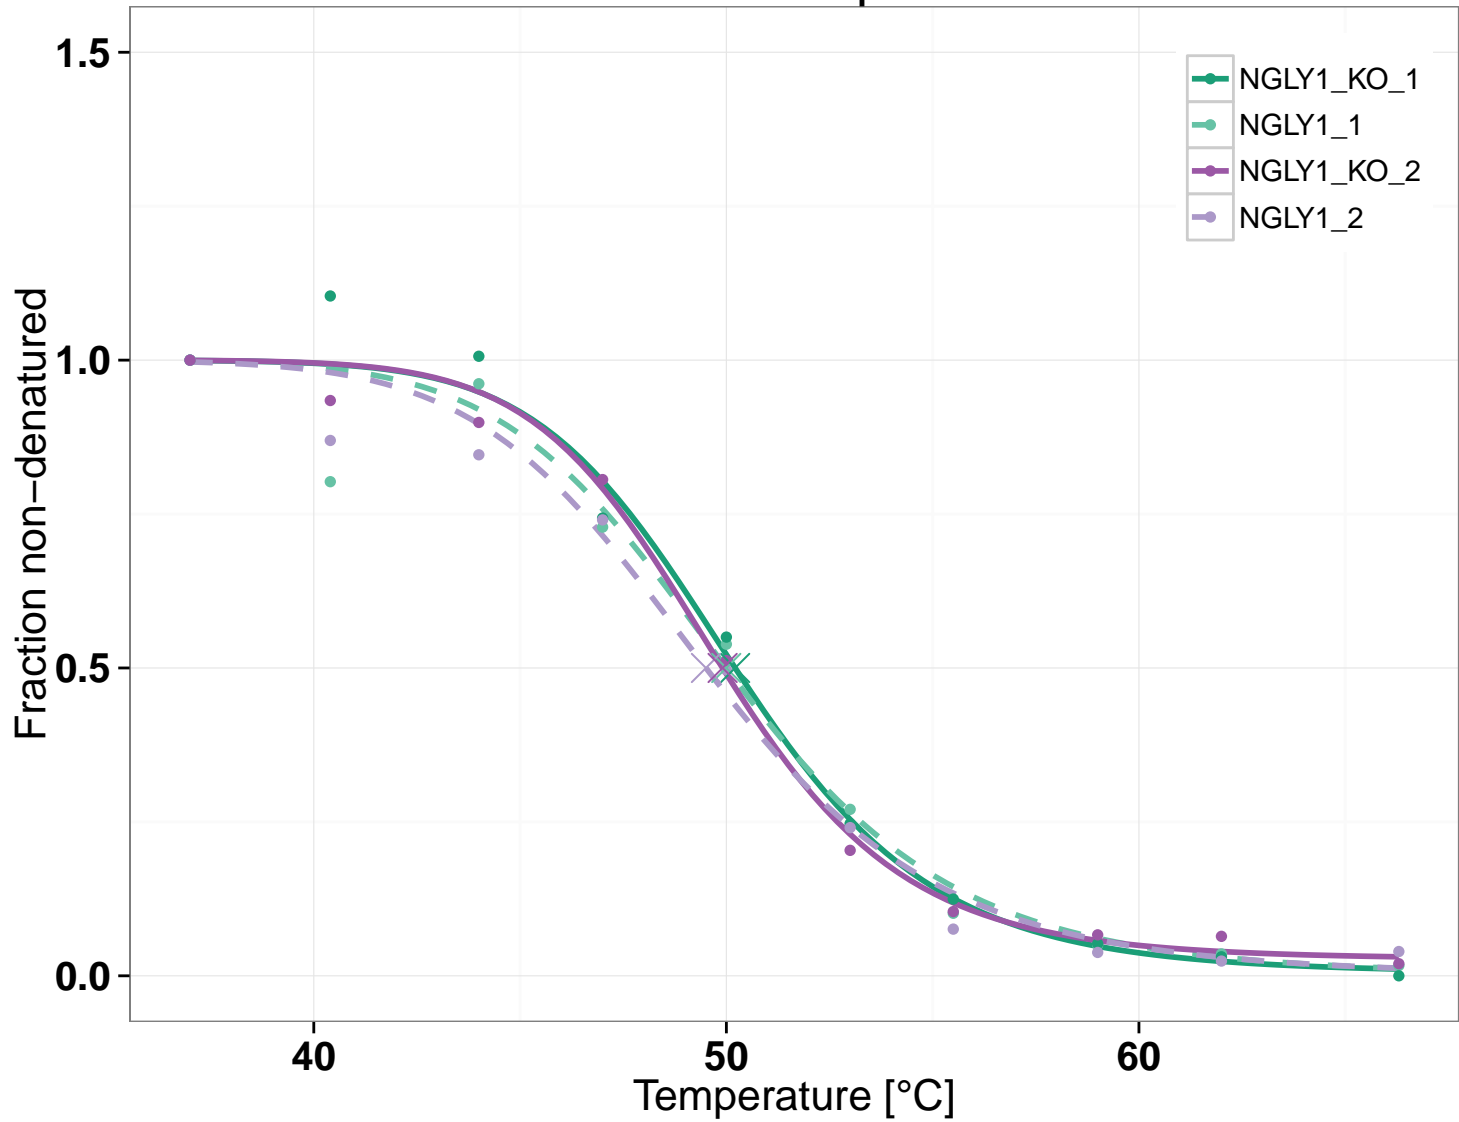

|            | meltPoint | slope  | plateau | R2   |
|------------|-----------|--------|---------|------|
| NGLY1_KO_1 | 50.21     | -0.1   | 0       | 0.99 |
| NGLY1_1    | 50        | -0.091 | 0       | 0.97 |
| NGLY1_KO_2 | 49.91     | -0.11  | 0.03    | 0.99 |
| NGLY1_2    | 49.51     | -0.088 | 0       | 0.98 |

Supplement: Supplementary file 1120 [file 1]

IPI00784020.1|ANKRD17

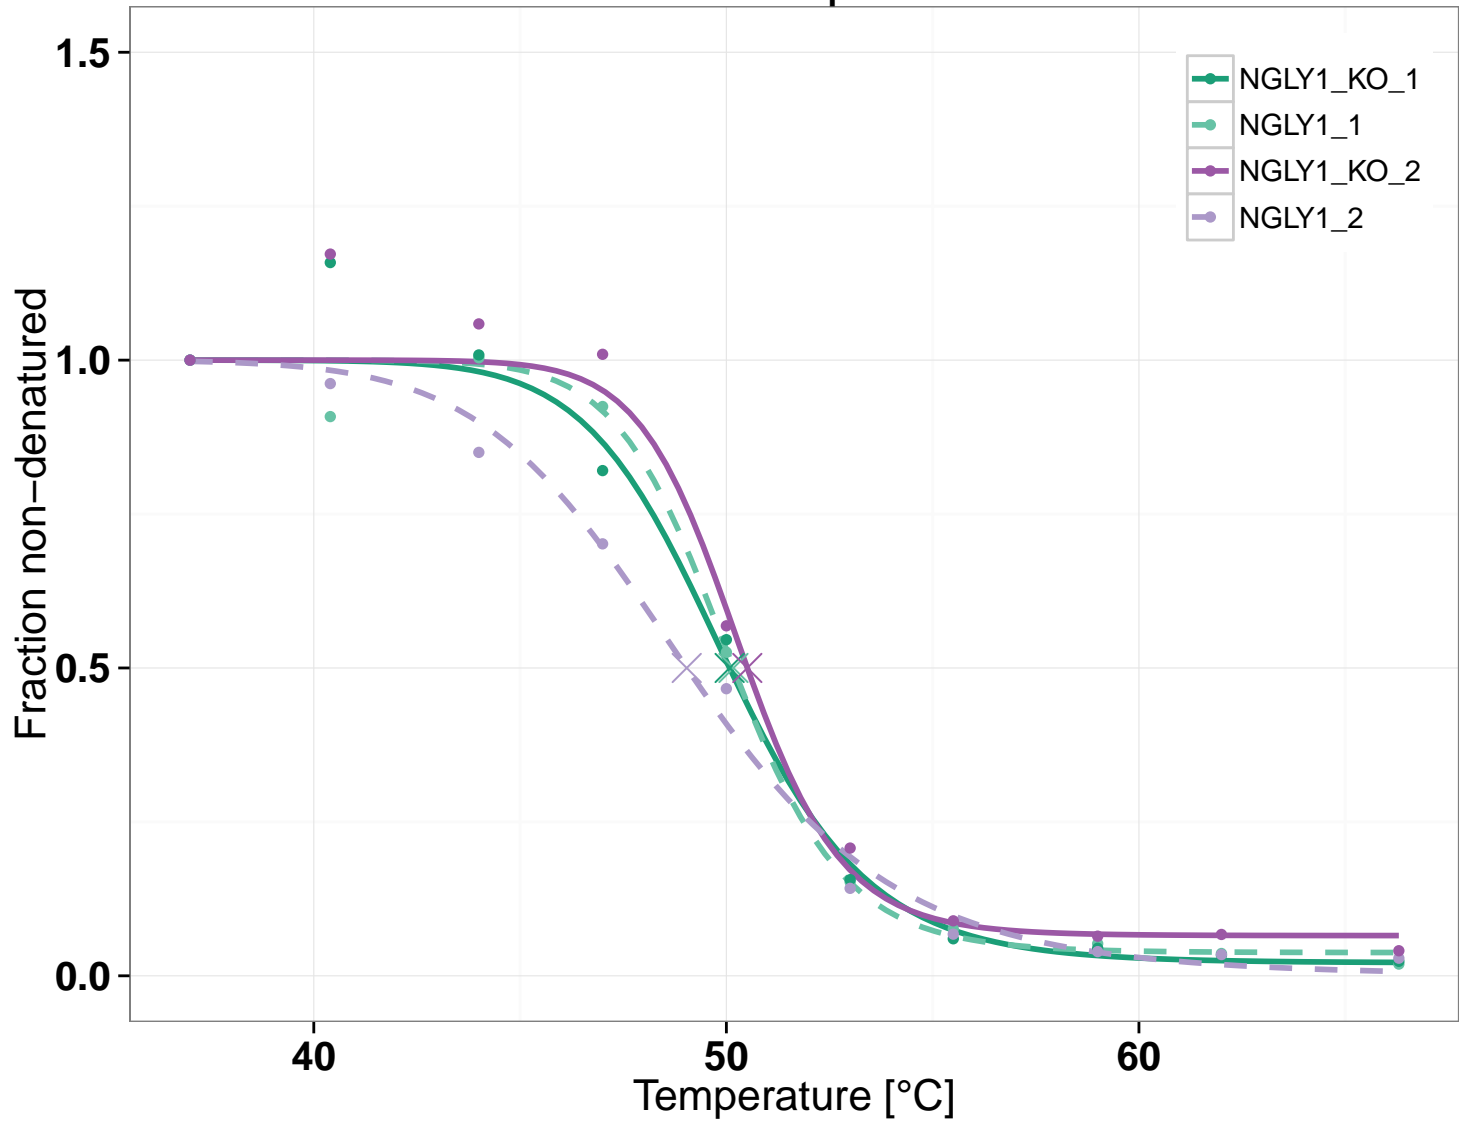

|            | meltPoint | slope  | plateau | R2   |
|------------|-----------|--------|---------|------|
| NGLY1_KO_1 | 50.08     | -0.14  | 0.02    | 0.98 |
| NGLY1_1    | 50.17     | -0.17  | 0.04    | 0.99 |
| NGLY1_KO_2 | 50.51     | -0.19  | 0.07    | 0.98 |
| NGLY1_2    | 49.04     | -0.099 | 0       | 0.99 |

Supplement: Supplementary file 1121 [file 1]

# IPI00215965.2|HNRPA1L-2

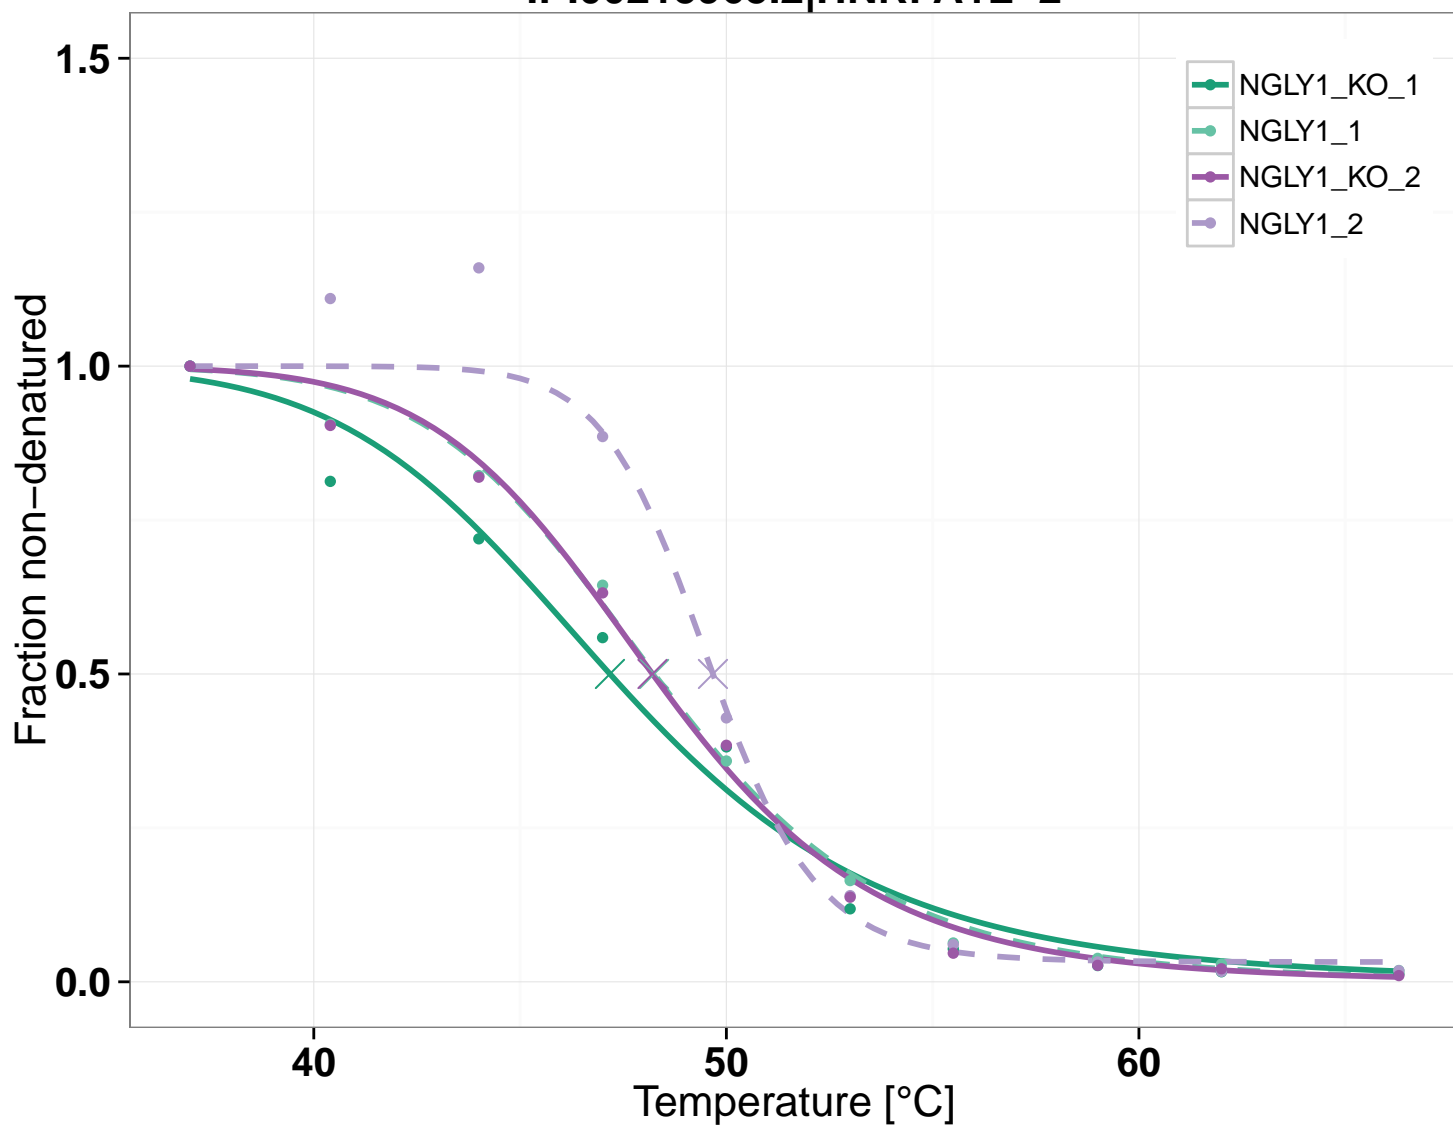

|            | meltPoint | slope  | plateau | R2   |
|------------|-----------|--------|---------|------|
| NGLY1_KO_1 | 47.18     | -0.076 | 0       | 0.98 |
| NGLY1_1    | 48.25     | -0.091 | 0       | 1    |
| NGLY1_KO_2 | 48.21     | -0.093 | 0       | 0.99 |
| NGLY1_2    | 49.67     | -0.19  | 0.03    | 0.98 |

Supplement: Supplementary file 1122 [file 1]

IPI00297407.5|SLC45A4

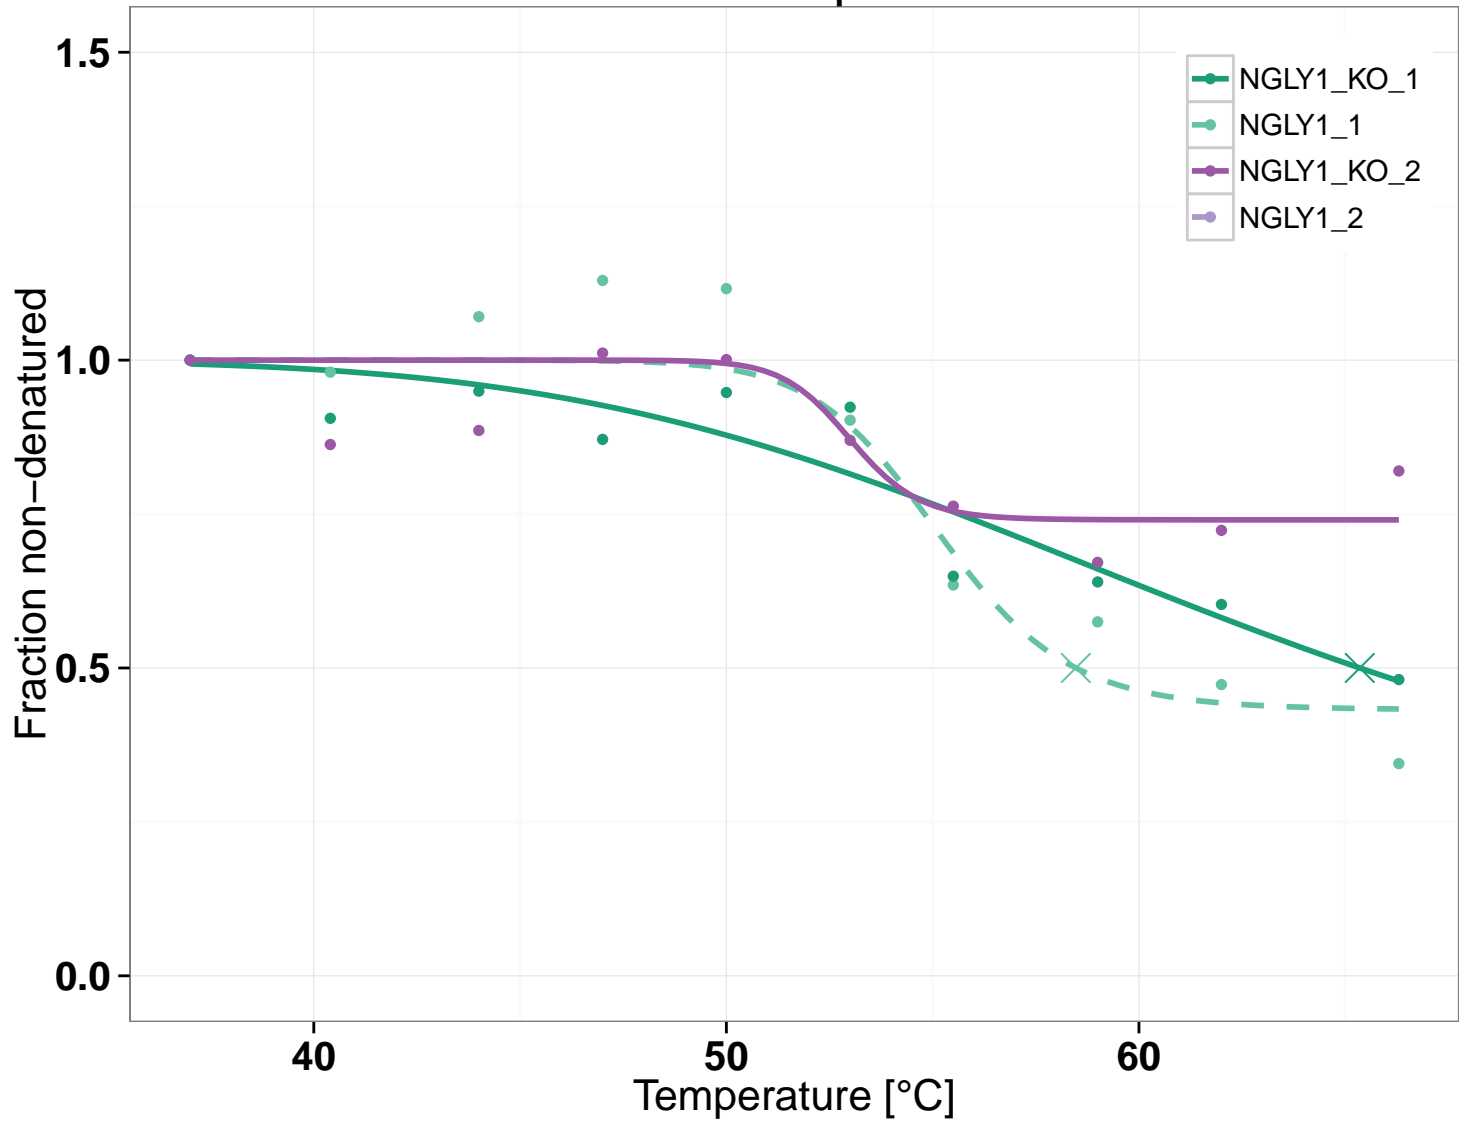

|            | meltPoint | slope  | plateau | R2   |
|------------|-----------|--------|---------|------|
| NGLY1_KO_1 | 65.35     | -0.027 | 0.11    | 0.88 |
| NGLY1_1    | 58.47     | -0.091 | 0.43    | 0.92 |
| NGLY1_KO_2 | -         | -0.078 | 0.74    | 0.66 |
| NGLY1_2    | -         | -      | -       | -    |

Supplement: Supplementary file 1123 [file 1]

IPI00304692.1|RBMX

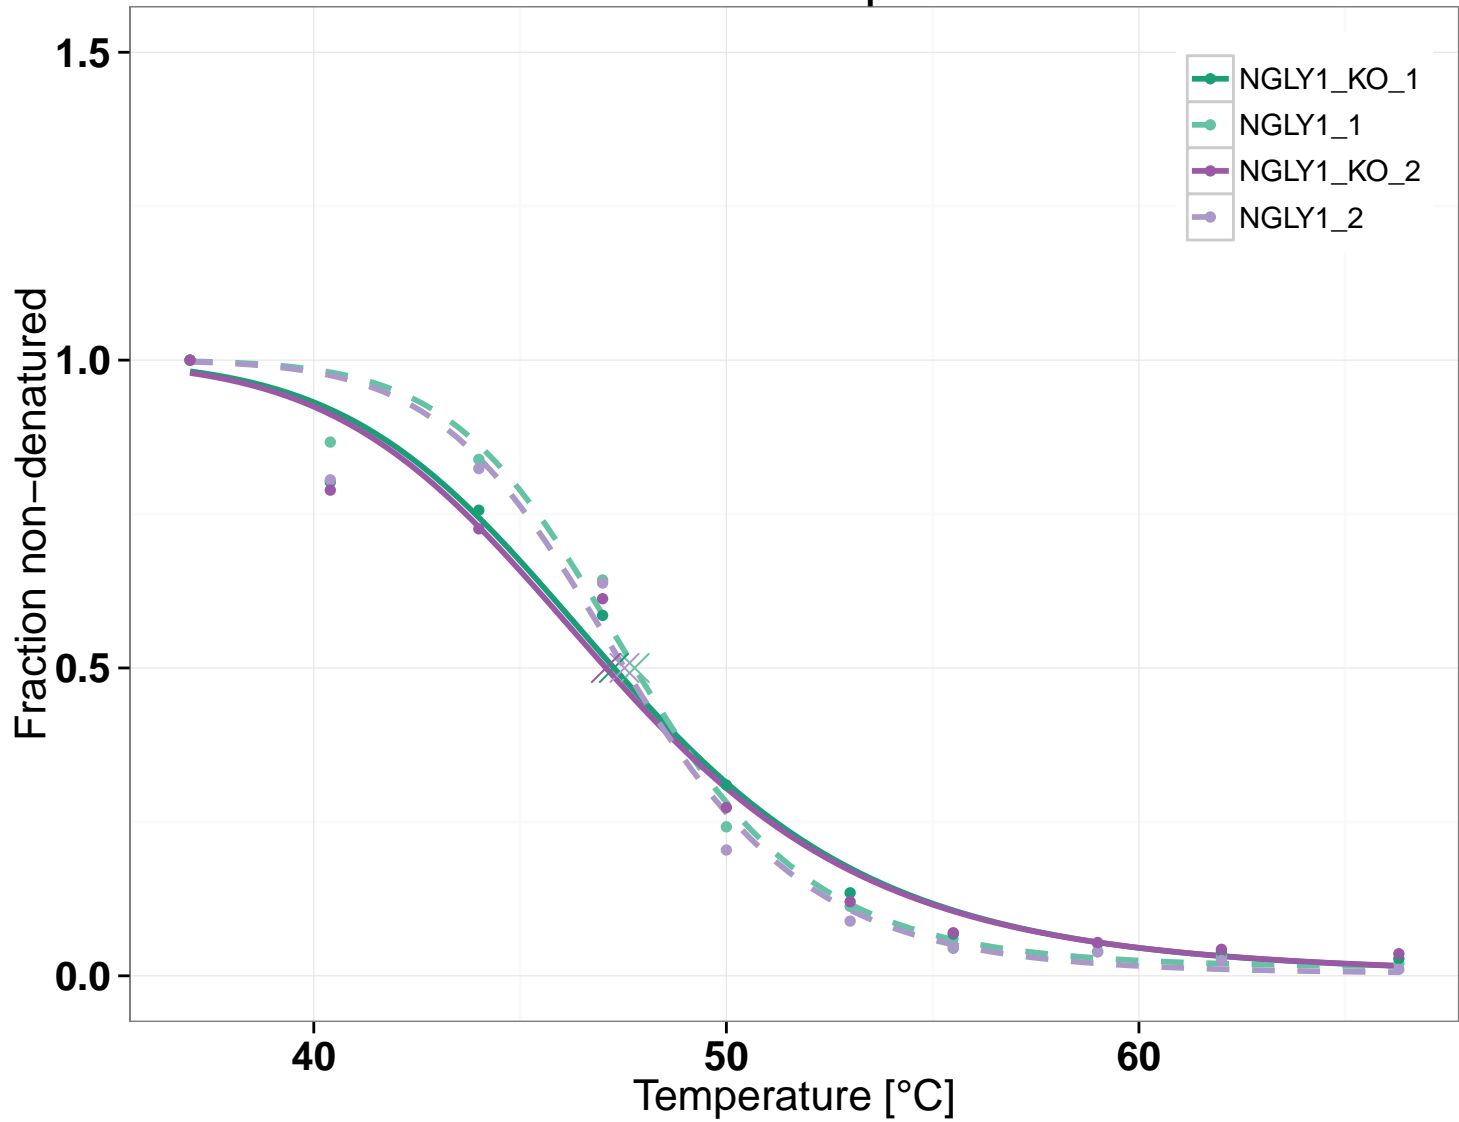

|            | meltPoint | slope  | plateau | R2   |
|------------|-----------|--------|---------|------|
| NGLY1_KO_1 | 47.27     | -0.077 | 0       | 0.98 |
| NGLY1_1    | 47.78     | -0.11  | 0.01    | 0.99 |
| NGLY1_KO_2 | 47.08     | -0.077 | 0       | 0.97 |
| NGLY1_2    | 47.53     | -0.11  | 0       | 0.97 |

Supplement: Supplementary file 1124 [file 1]

IPI00167762.2|C19ORF47

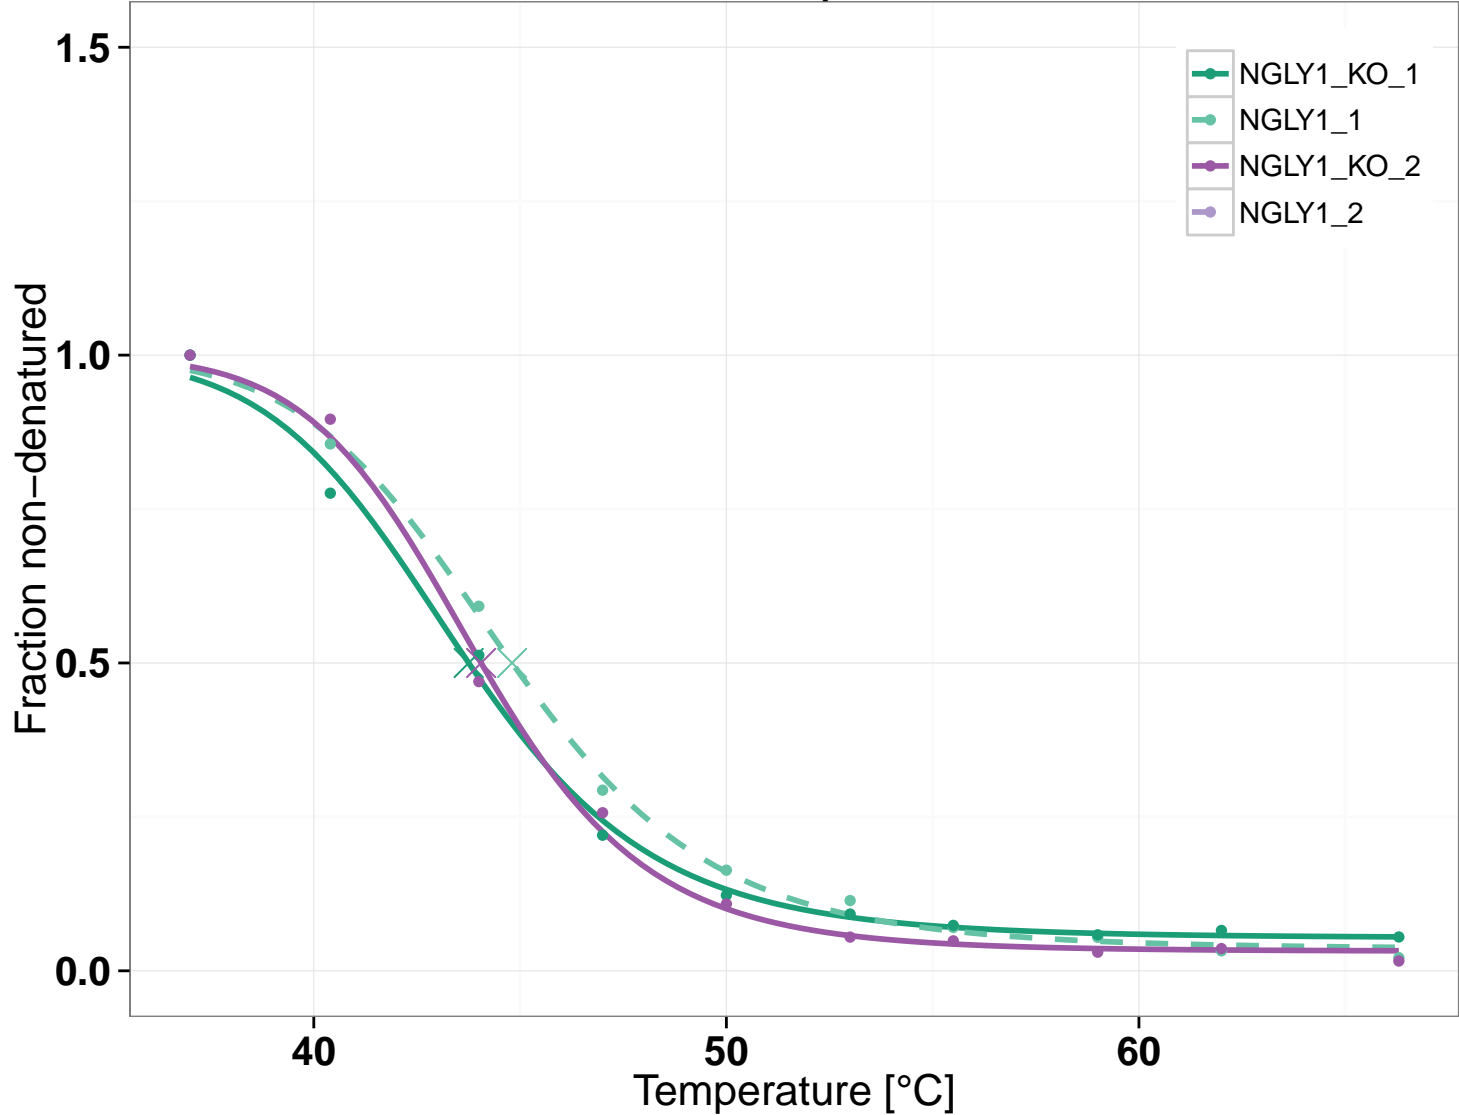

|            | meltPoint | slope  | plateau | R2 |
|------------|-----------|--------|---------|----|
| NGLY1_KO_1 | 43.75     | -0.1   | 0.05    | 1  |
| NGLY1_1    | 44.81     | -0.097 | 0.04    | 1  |
| NGLY1_KO_2 | 44.06     | -0.12  | 0.03    | 1  |
| NGLY1_2    | -         | -      | -       | -  |

Supplement: Supplementary file 1125 [file 1]

IPI00032831.4|SNAP29

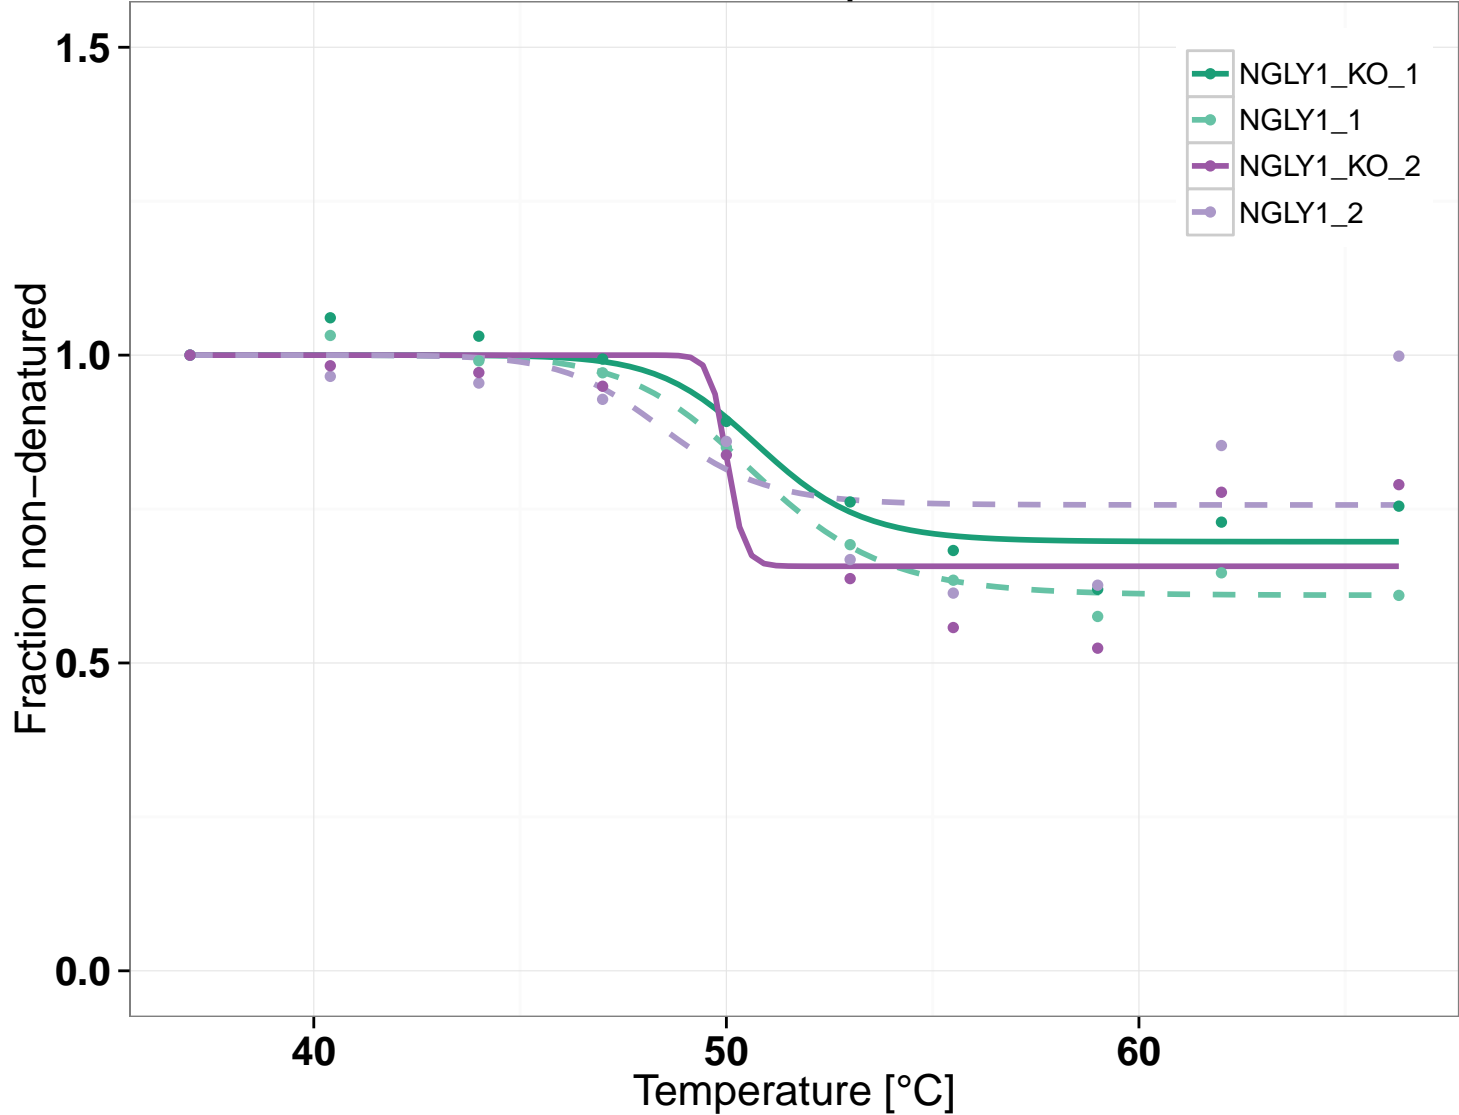

|            | meltPoint | slope  | plateau | R2   |
|------------|-----------|--------|---------|------|
| NGLY1_KO_1 | —         | -0.061 | 0.7     | 0.93 |
| NGLY1_1    | —         | -0.062 | 0.61    | 0.99 |
| NGLY1_KO_2 | —         | -0.43  | 0.66    | 0.78 |
| NGLY1_2    | —         | -0.049 | 0.76    | 0.44 |

Supplement: Supplementary file 1126 [file 1]

IPI00828150.1|SUGT1

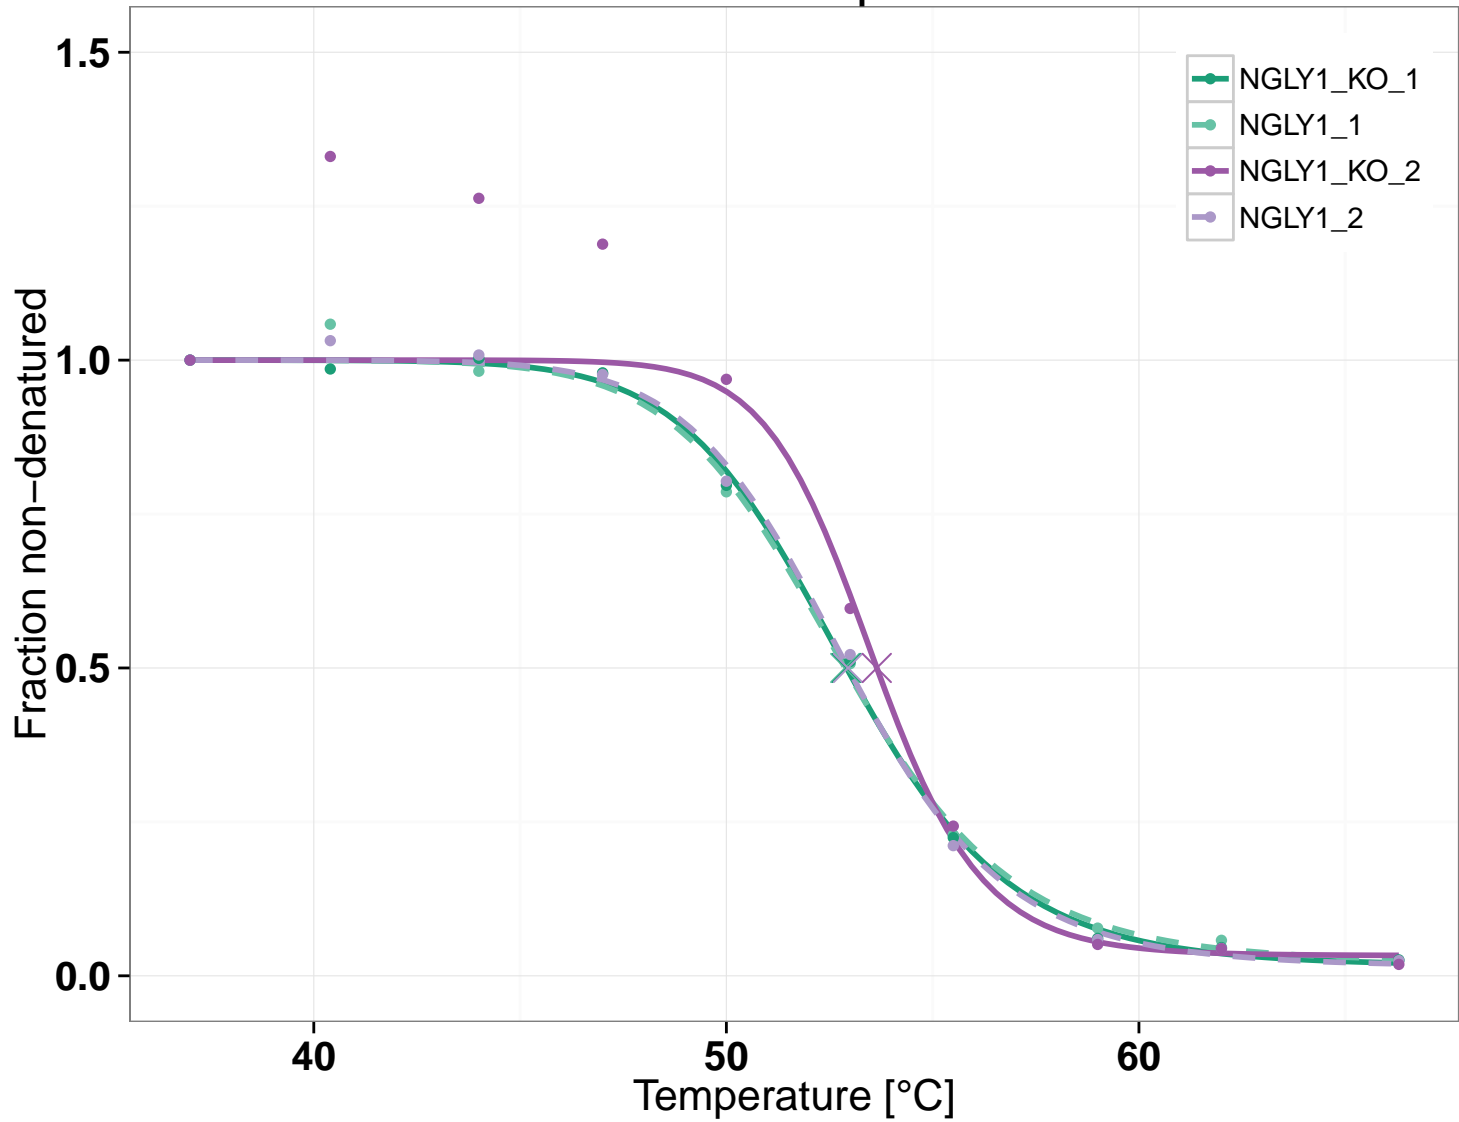

|            | meltPoint | slope | plateau | R2   |
|------------|-----------|-------|---------|------|
| NGLY1_KO_1 | 52.91     | -0.12 | 0.02    | 1    |
| NGLY1_1    | 52.88     | -0.12 | 0.02    | 1    |
| NGLY1_KO_2 | 53.65     | -0.18 | 0.03    | 0.92 |
| NGLY1_2    | 52.95     | -0.13 | 0.02    | 1    |

Supplement: Supplementary file 1127 [file 1]

# IPI00384428.3|BPHL

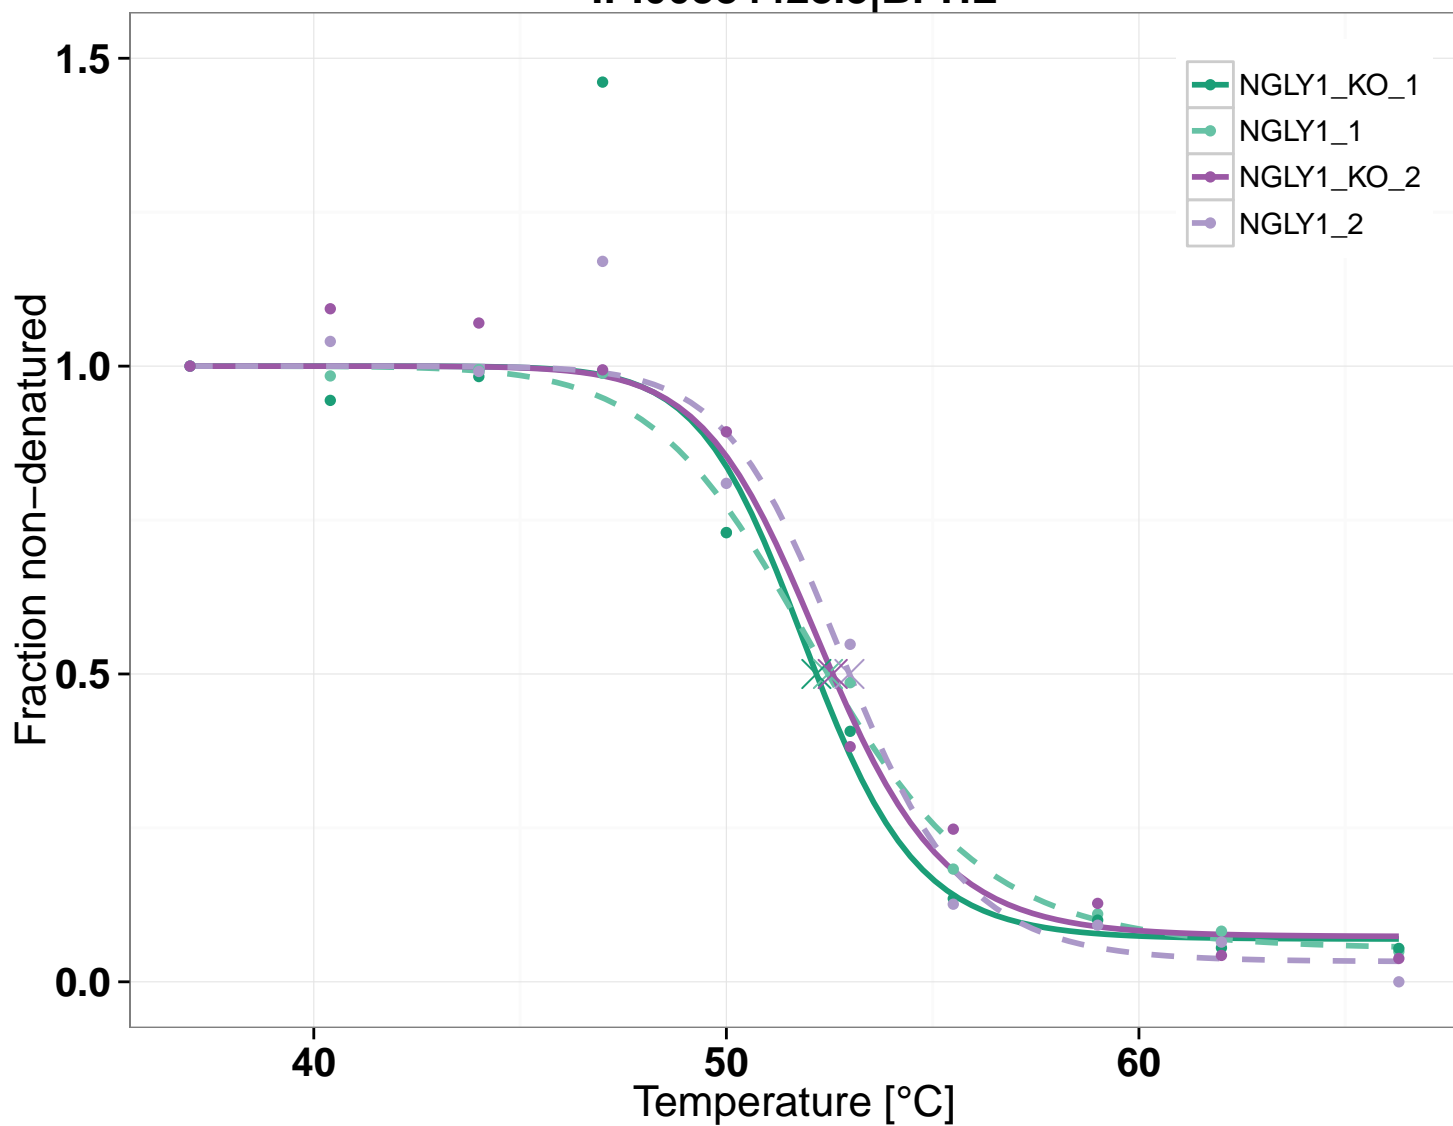

|            | meltPoint | slope | plateau | R2   |
|------------|-----------|-------|---------|------|
| NGLY1_KO_1 | 52.18     | -0.18 | 0.07    | 0.89 |
| NGLY1_1    | 52.46     | -0.12 | 0.05    | 1    |
| NGLY1_KO_2 | 52.58     | -0.16 | 0.07    | 0.99 |
| NGLY1_2    | 52.98     | -0.16 | 0.03    | 0.98 |

Supplement: Supplementary file 1128 [file 1]

# IPI00006754.1|WDR68

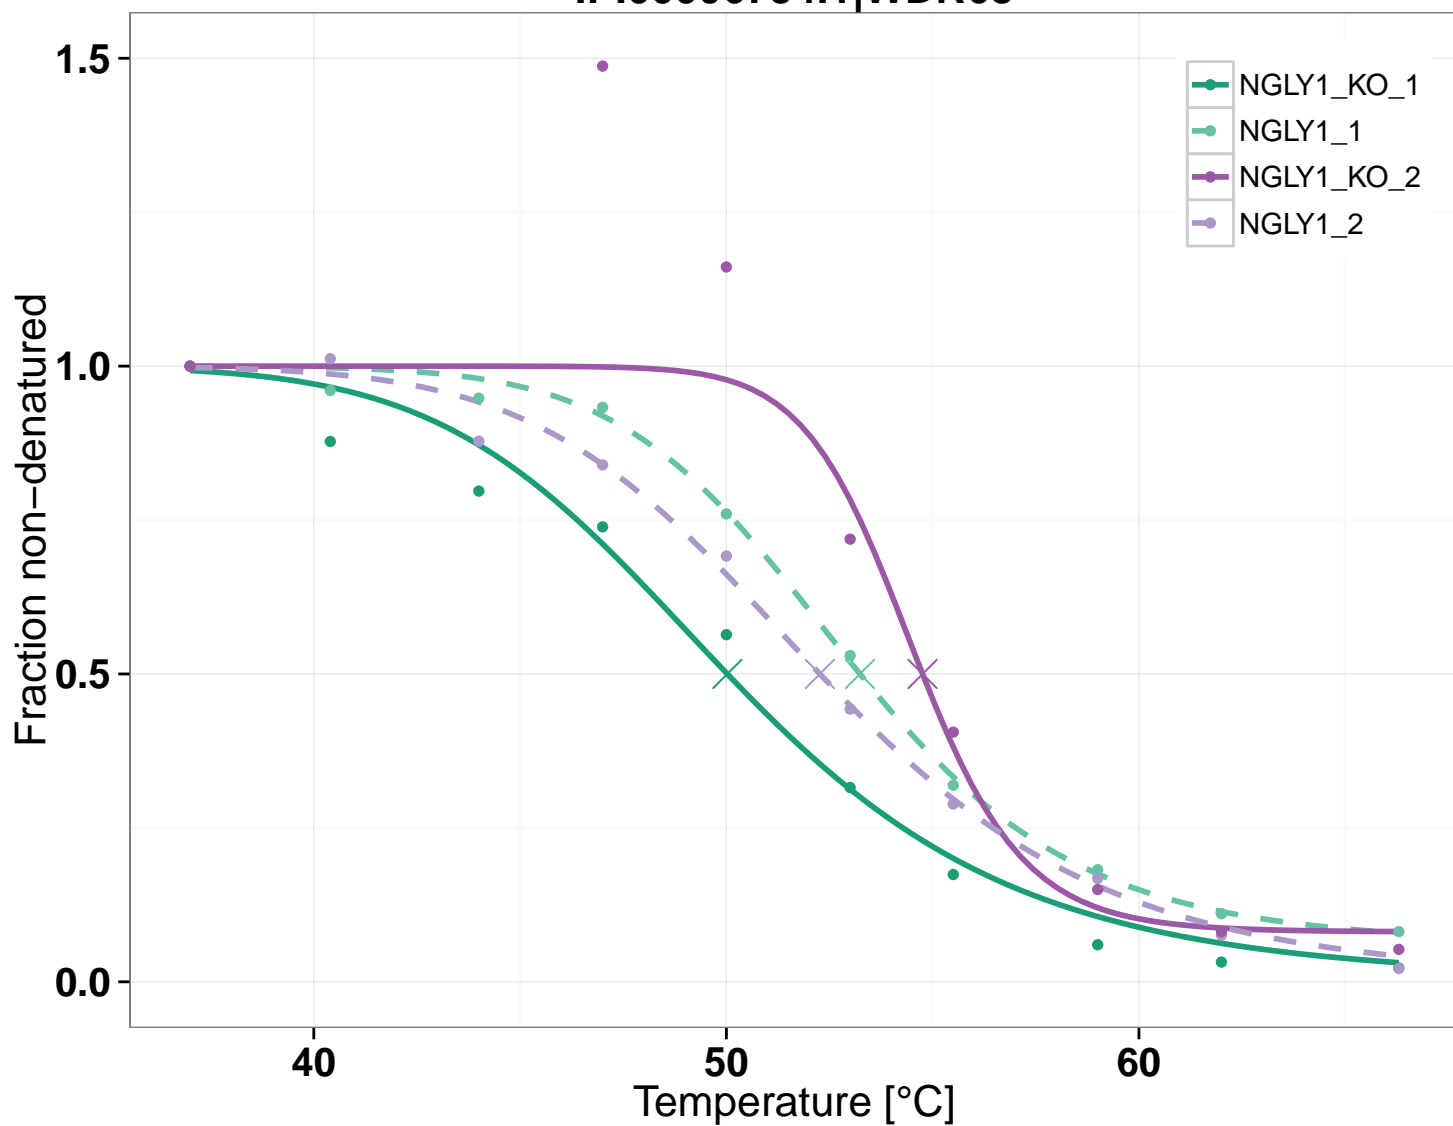

|            | meltPoint | slope  | plateau | R2   |
|------------|-----------|--------|---------|------|
| NGLY1_KO_1 | 50.02     | -0.071 | 0       | 0.98 |
| NGLY1_1    | 53.24     | -0.085 | 0.06    | 1    |
| NGLY1_KO_2 | 54.76     | -0.17  | 0.08    | 0.66 |
| NGLY1_2    | 52.27     | -0.072 | 0       | 1    |

Supplement: Supplementary file 1129 [file 1]

IPI00470533.2|TMEM120A

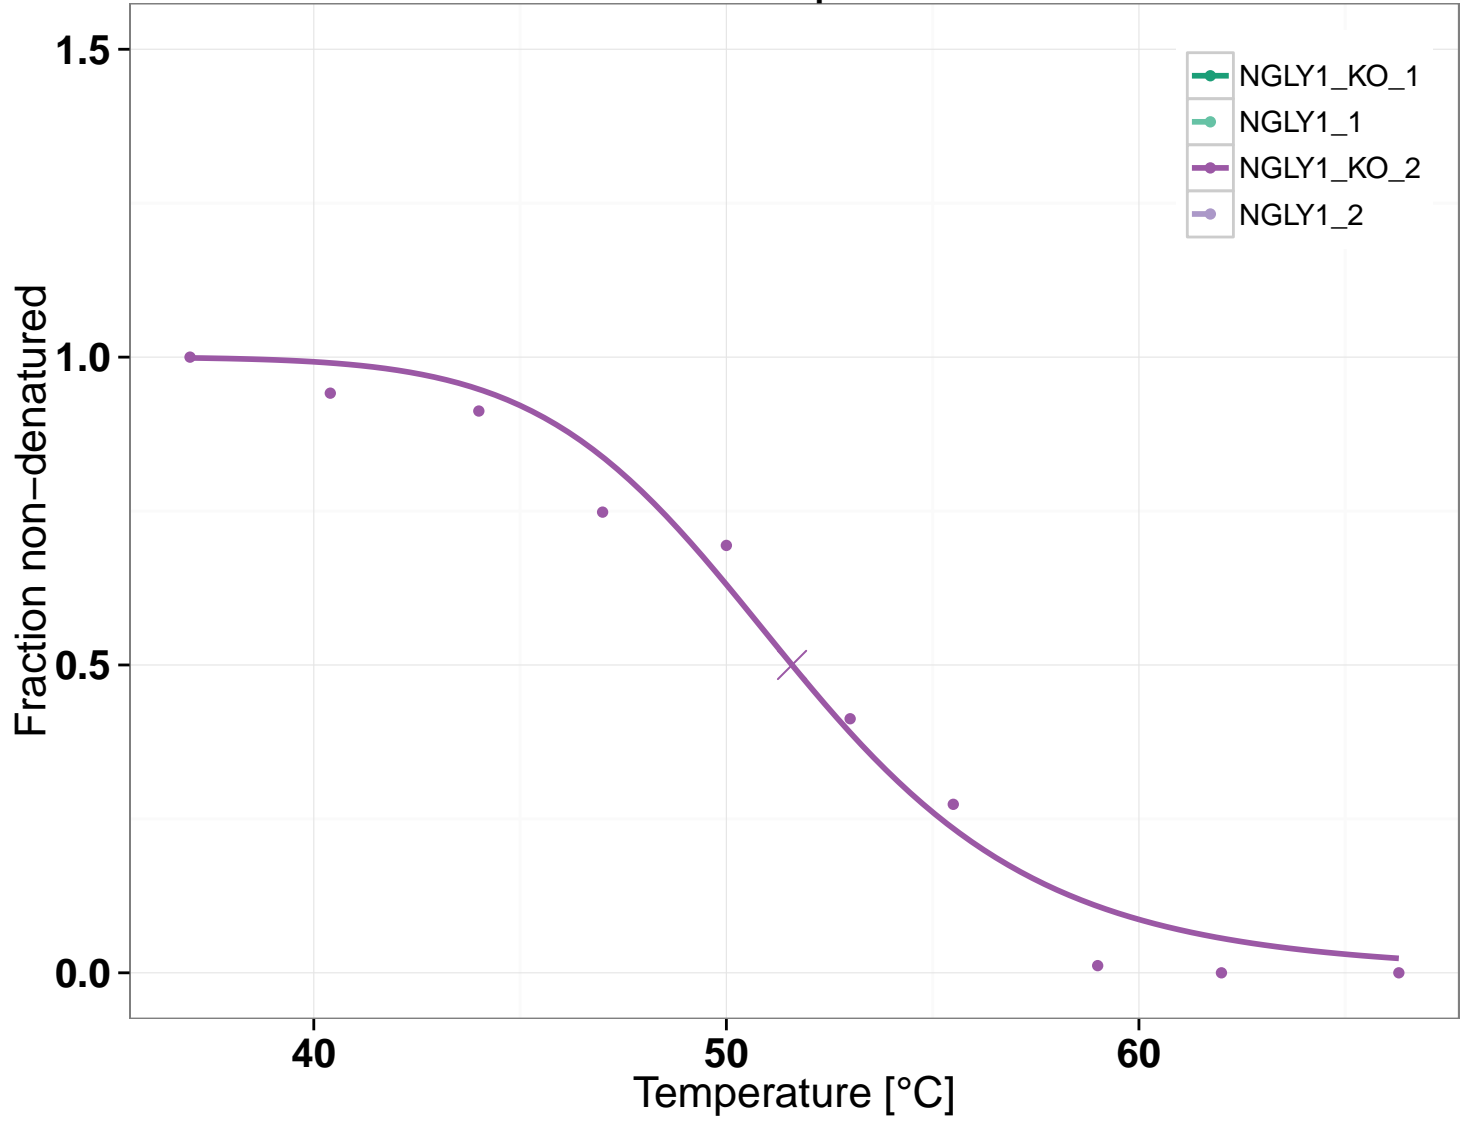

|            | meltPoint | slope  | plateau | R2   |
|------------|-----------|--------|---------|------|
| NGLY1_KO_1 | —         | —      | —       | —    |
| NGLY1_1    | —         | —      | —       | —    |
| NGLY1_KO_2 | 51.59     | -0.083 | 0       | 0.98 |
| NGLY1_2    | —         | —      | —       | —    |

Supplement: Supplementary file 1130 [file 1]

IPI00008575.3|KHDRBS1

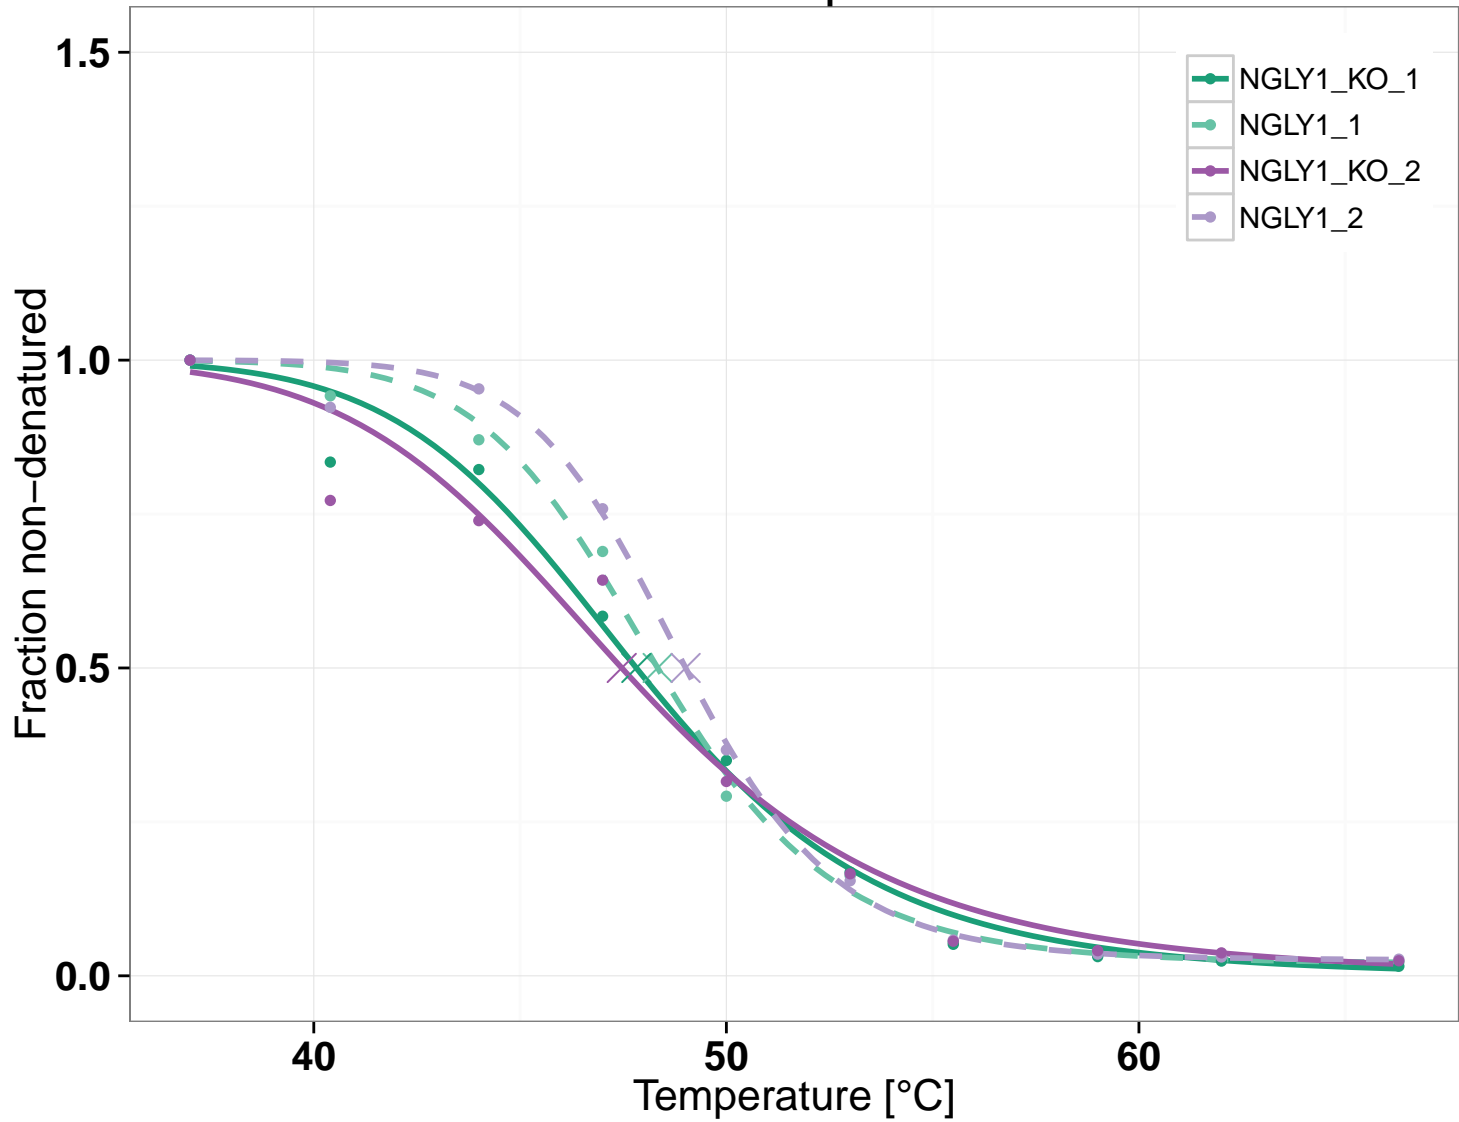

|            | meltPoint | slope  | plateau | R2   |
|------------|-----------|--------|---------|------|
| NGLY1_KO_1 | 47.82     | -0.085 | 0       | 0.99 |
| NGLY1_1    | 48.33     | -0.11  | 0.02    | 1    |
| NGLY1_KO_2 | 47.46     | -0.075 | 0       | 0.97 |
| NGLY1_2    | 49.01     | -0.13  | 0.03    | 1    |

Supplement: Supplementary file 1131 [file 1]

IPI00056496.1|RAB24

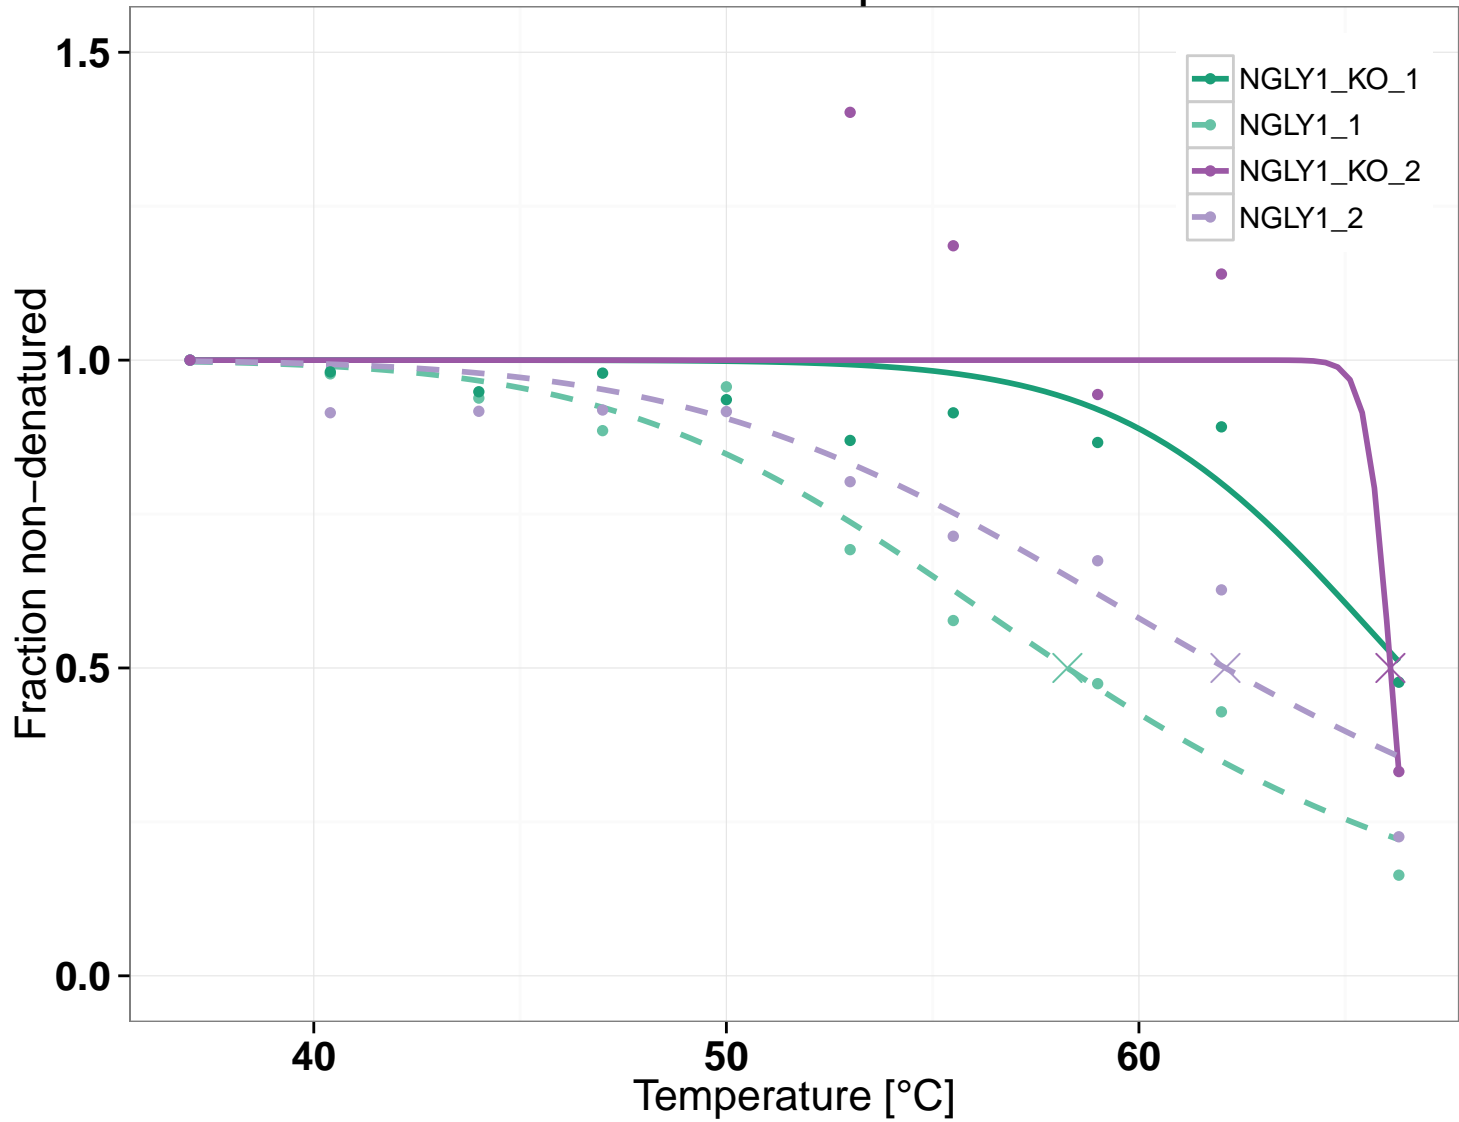

|            | meltPoint | slope  | plateau | R2    |
|------------|-----------|--------|---------|-------|
| NGLY1_KO_1 | -         | -0.074 | 0       | 0.81  |
| NGLY1_1    | 58.27     | -0.046 | 0       | 0.96  |
| NGLY1_KO_2 | 66.1      | -0.86  | 0       | -0.34 |
| NGLY1_2    | 62.1      | -0.039 | 0       | 0.9   |

Supplement: Supplementary file 1132 [file 1]

IPI00005038.1|HRSP12

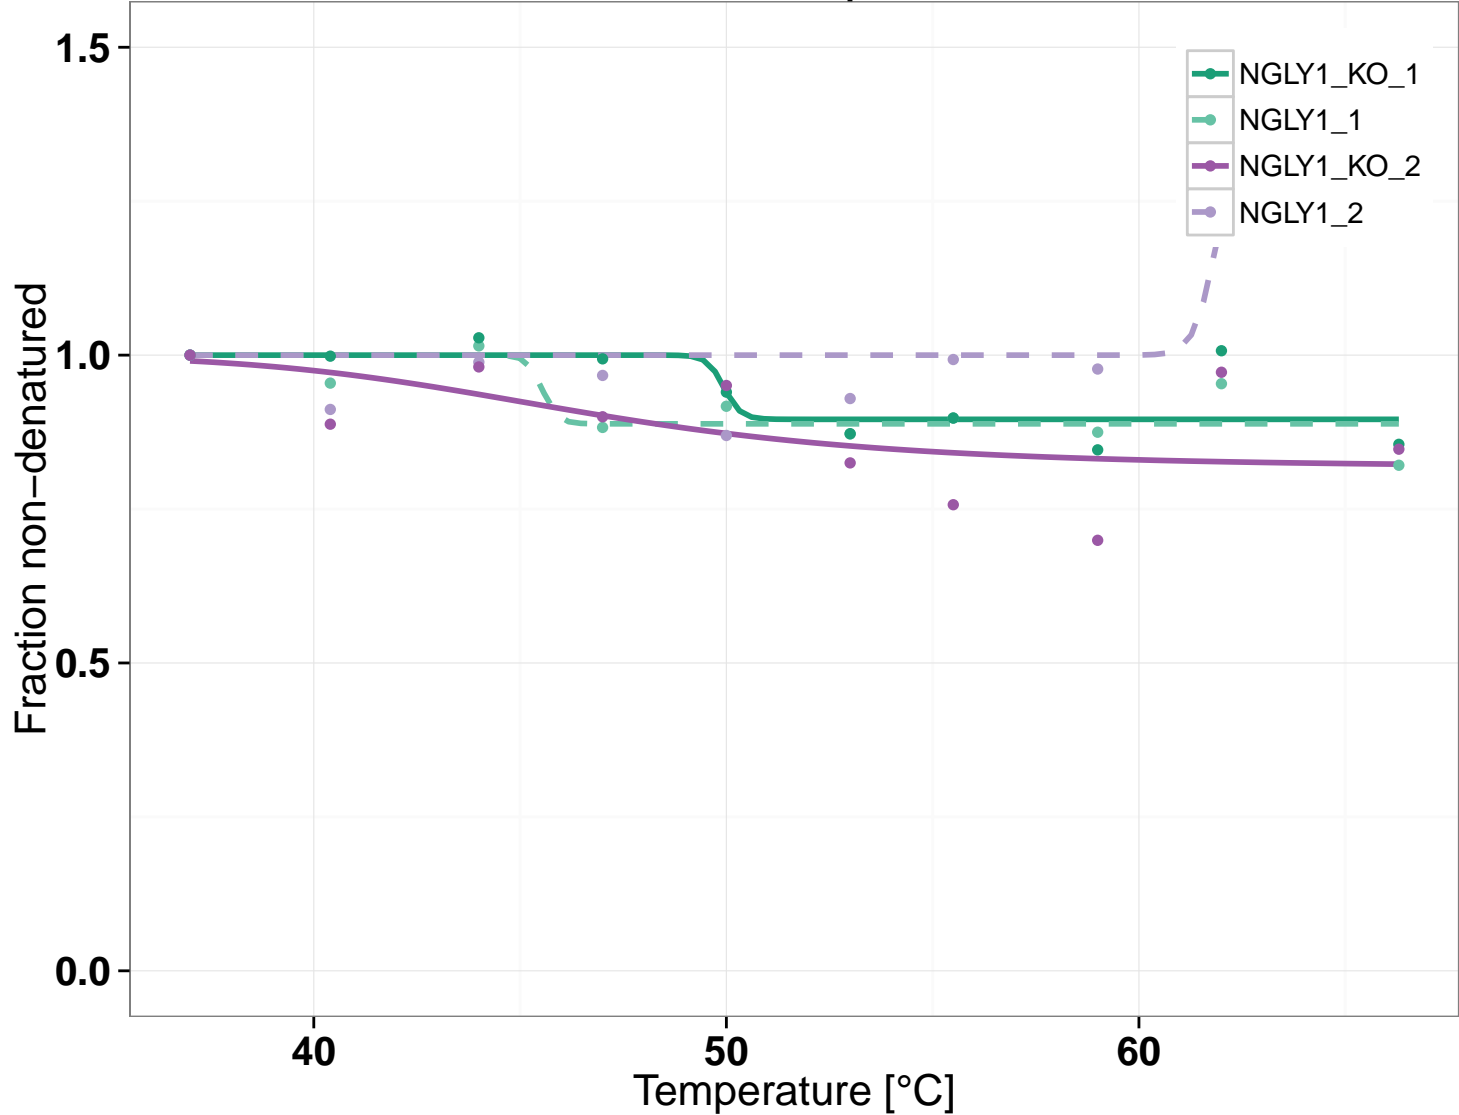

|            | meltPoint | slope  | plateau | R2   |
|------------|-----------|--------|---------|------|
| NGLY1_KO_1 | -         | -0.13  | 0.9     | 0.6  |
| NGLY1_1    | -         | -0.15  | 0.89    | 0.63 |
| NGLY1_KO_2 | -         | -0.012 | 0.82    | 0.31 |
| NGLY1_2    | -         | 0.32   | 1.32    | 0.82 |

Supplement: Supplementary file 1133 [file 1]

# IPI00000792.1|CRYZ

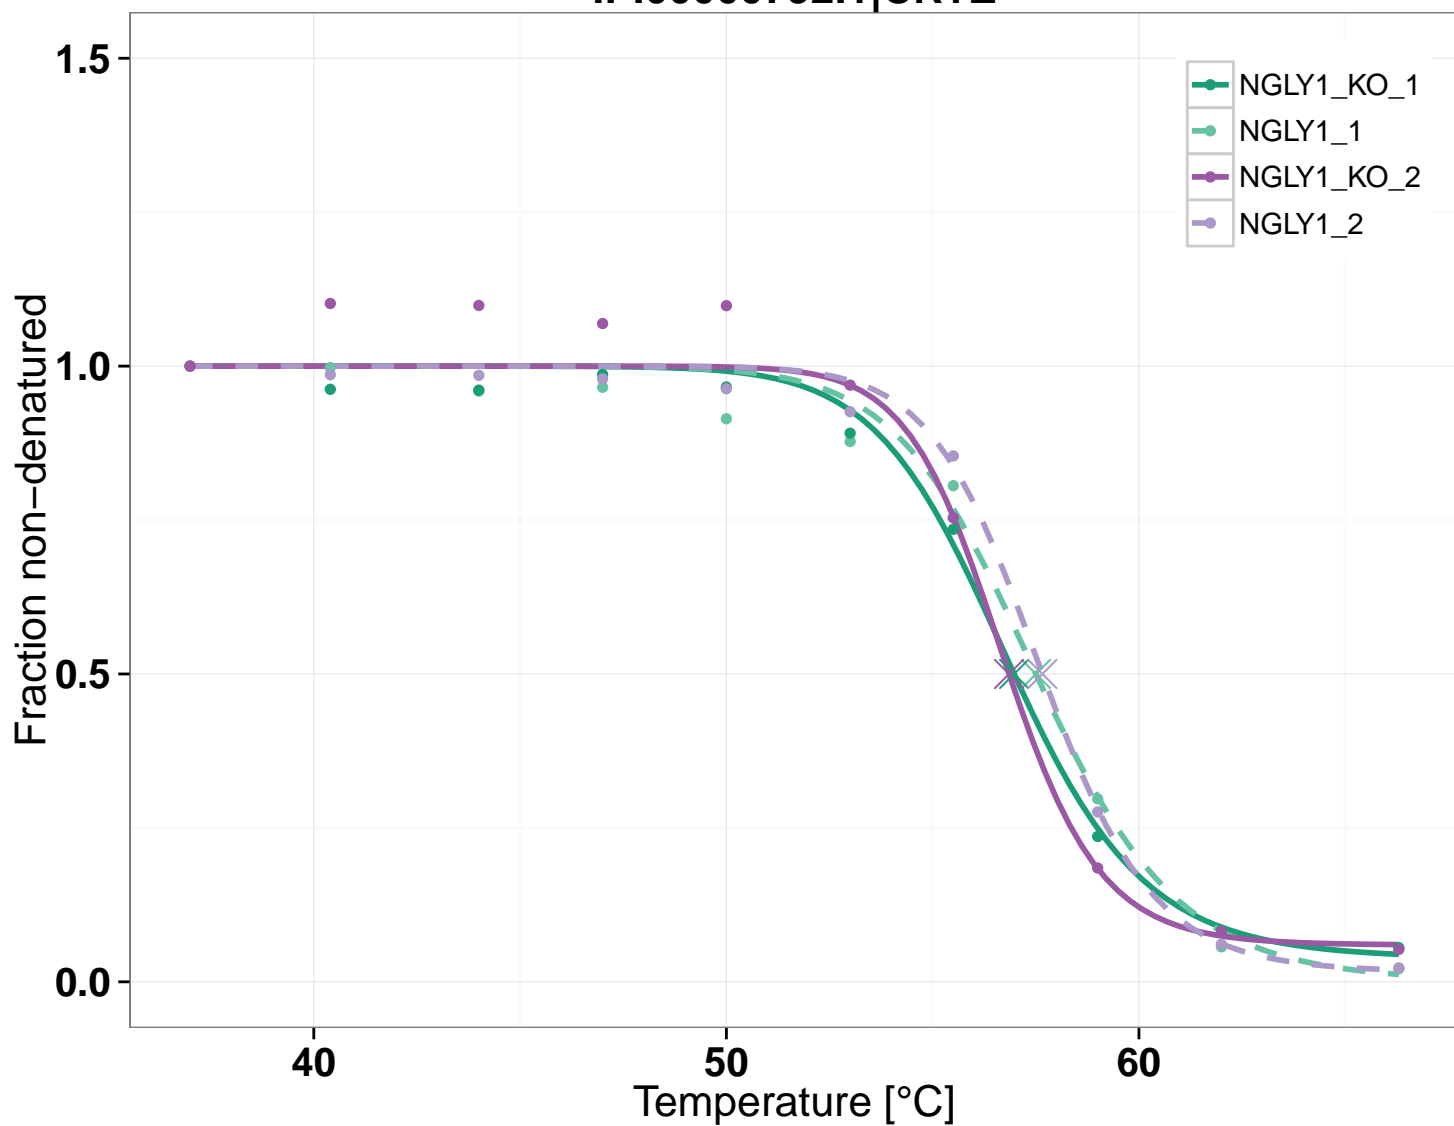

|            | meltPoint | slope | plateau | R2   |
|------------|-----------|-------|---------|------|
| NGLY1_KO_1 | 56.97     | -0.15 | 0.04    | 1    |
| NGLY1_1    | 57.5      | -0.15 | 0       | 0.99 |
| NGLY1_KO_2 | 56.85     | -0.2  | 0.06    | 0.98 |
| NGLY1_2    | 57.66     | -0.18 | 0.02    | 1    |

Supplement: Supplementary file 1134 [file 1]

IPI00289940.1|MAGEB3

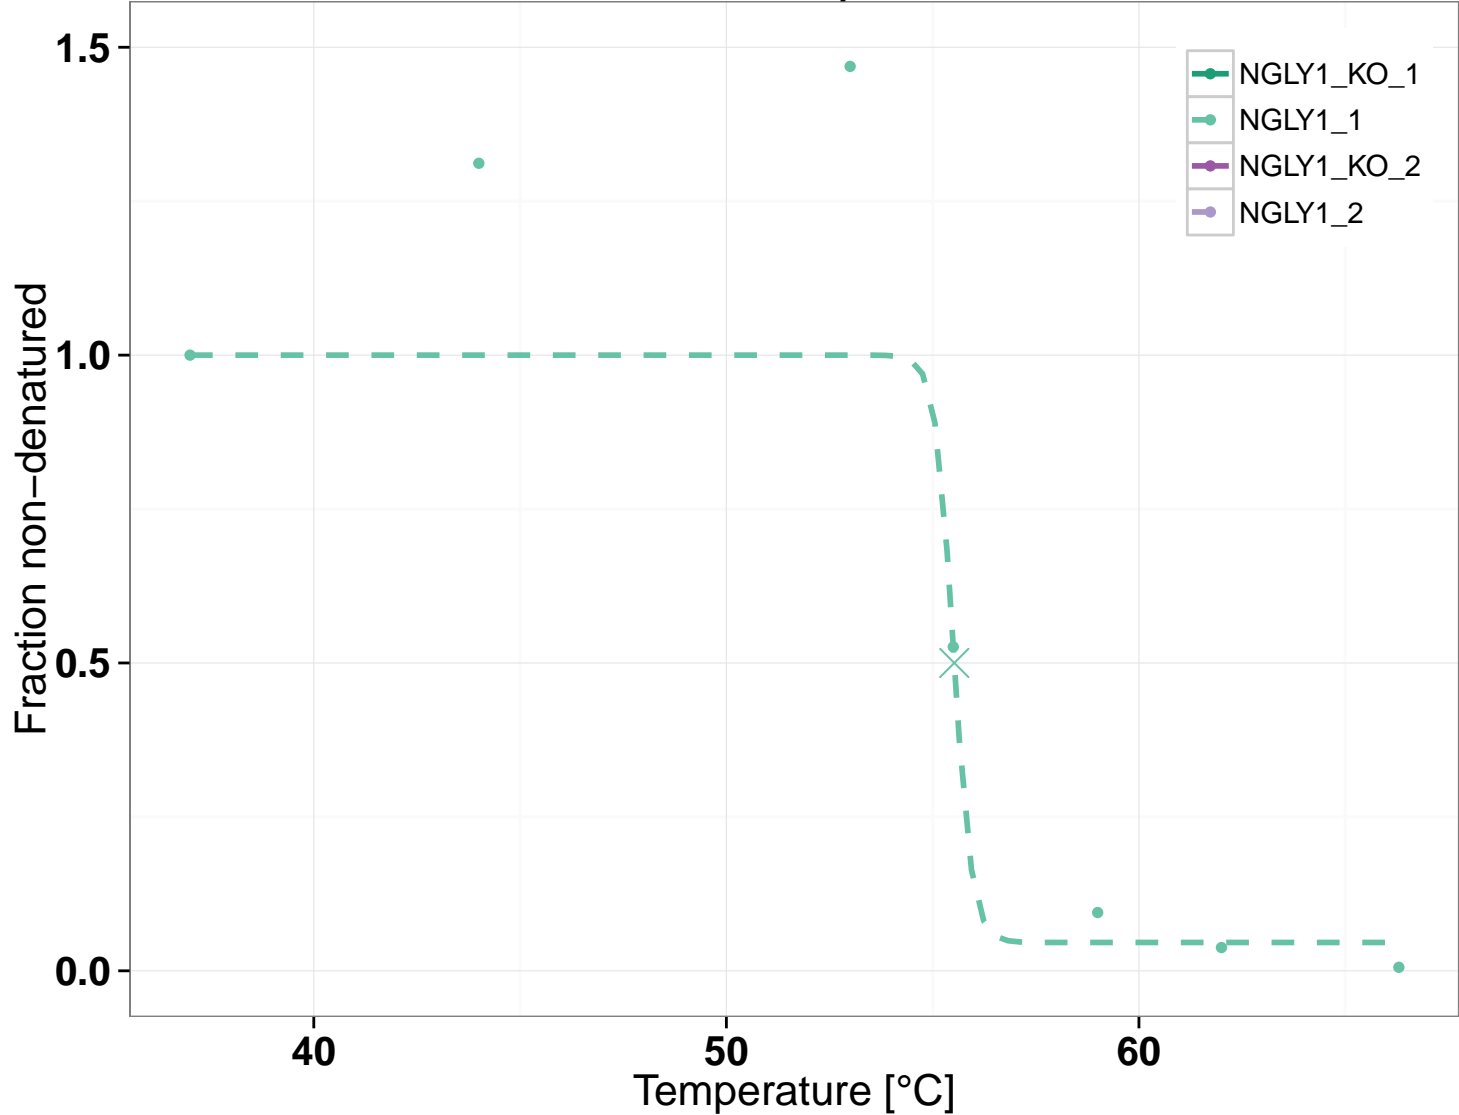

|            | meltPoint | slope | plateau | R2   |
|------------|-----------|-------|---------|------|
| NGLY1_KO_1 | –         | –     | –       | –    |
| NGLY1_1    | 55.52     | –1.1  | 0.05    | 0.56 |
| NGLY1_KO_2 | –         | –     | –       | –    |
| NGLY1_2    | –         | –     | –       | –    |

Supplement: Supplementary file 1135 [file 1]

# IPI00045335.1|TBX1

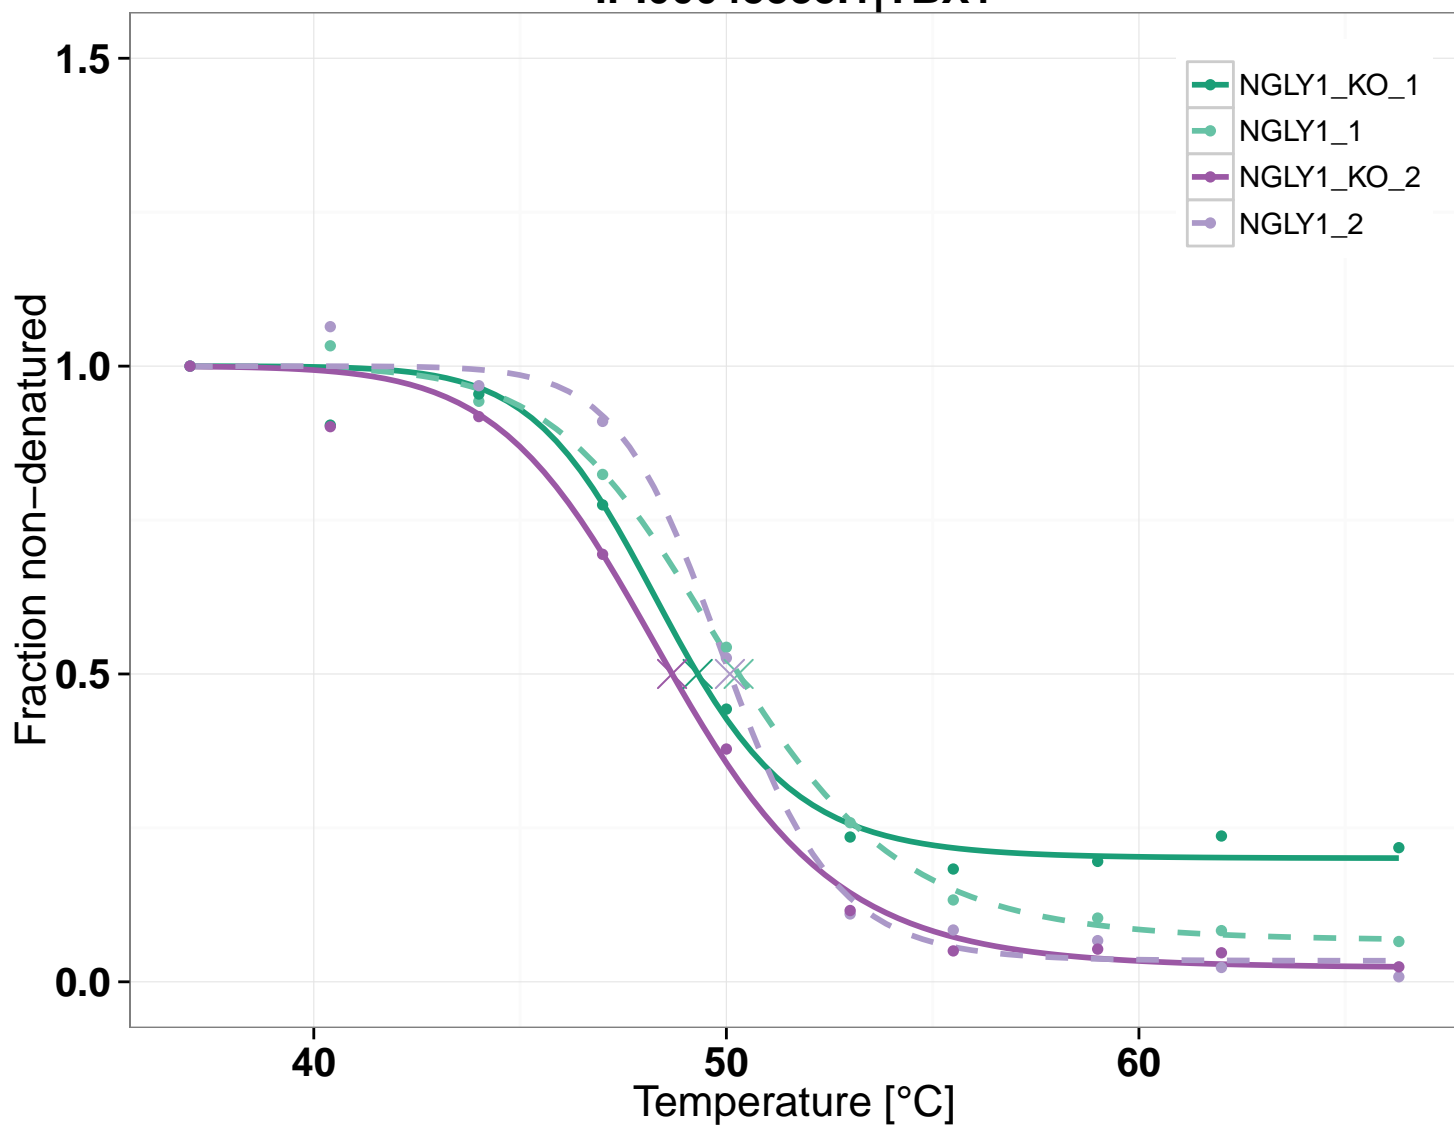

|            | meltPoint | slope | plateau | R2   |
|------------|-----------|-------|---------|------|
| NGLY1_KO_1 | 49.3      | -0.13 | 0.2     | 0.99 |
| NGLY1_1    | 50.3      | -0.11 | 0.07    | 1    |
| NGLY1_KO_2 | 48.68     | -0.12 | 0.02    | 0.99 |
| NGLY1_2    | 50.09     | -0.18 | 0.03    | 1    |

Supplement: Supplementary file 1136 [file 1]

IPI00028051.2|VPS41

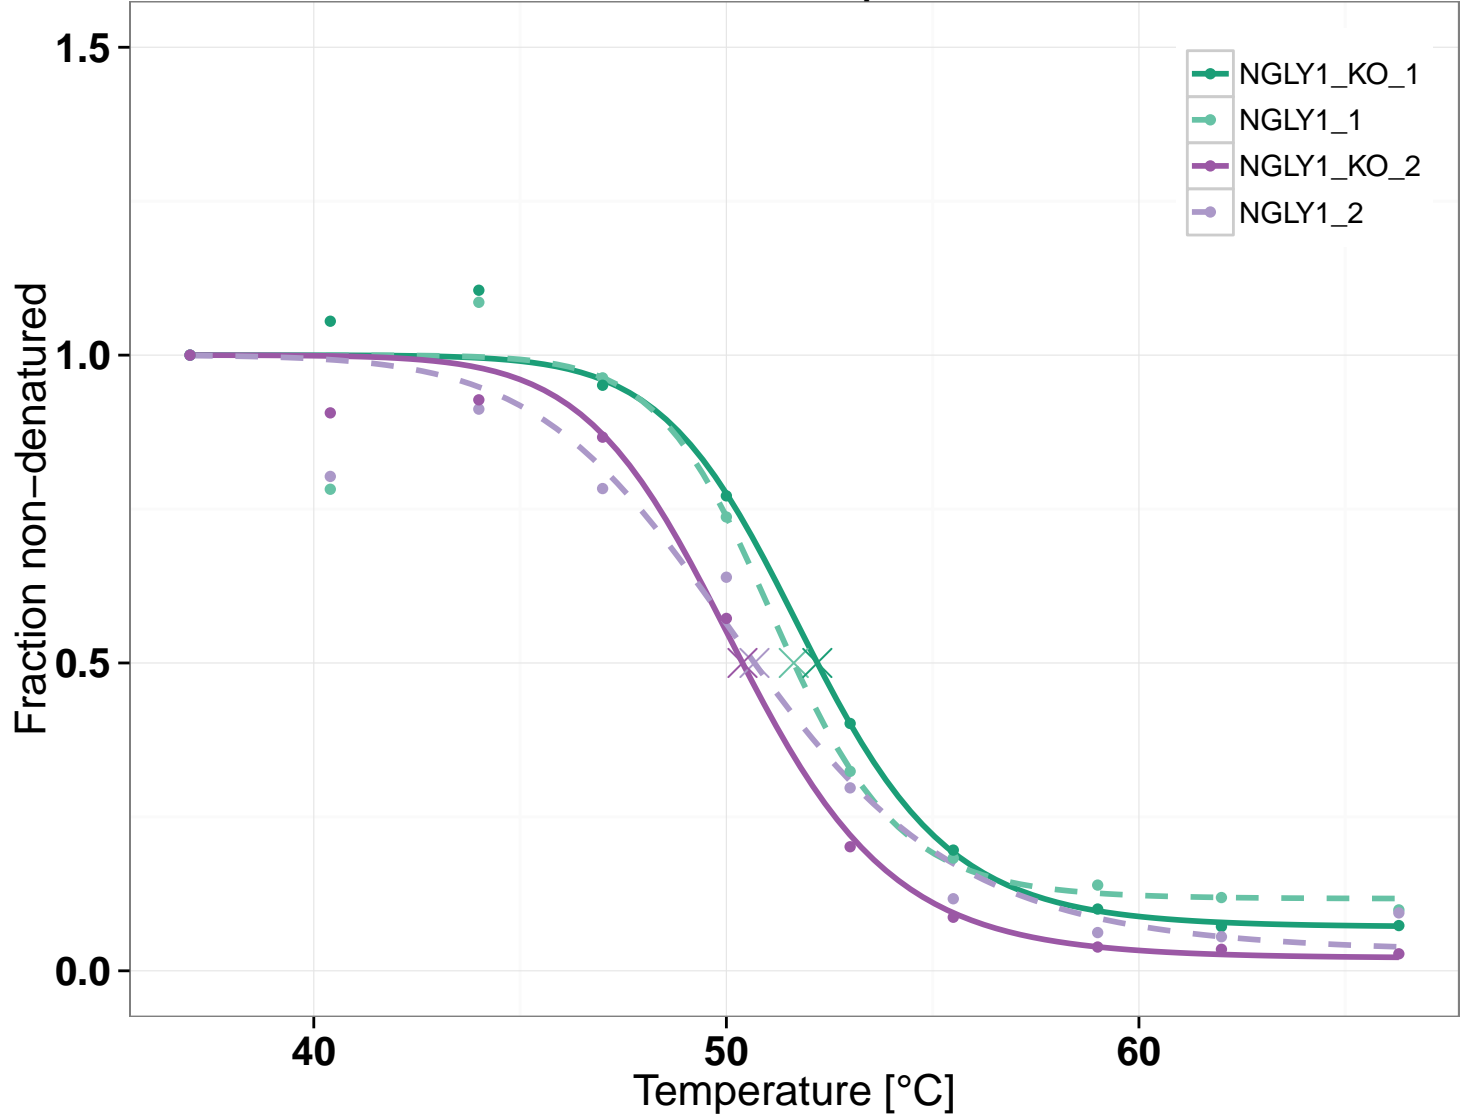

|            | meltPoint | slope  | plateau | R2   |
|------------|-----------|--------|---------|------|
| NGLY1_KO_1 | 52.2      | -0.13  | 0.07    | 0.99 |
| NGLY1_1    | 51.63     | -0.15  | 0.12    | 0.96 |
| NGLY1_KO_2 | 50.39     | -0.13  | 0.02    | 0.99 |
| NGLY1_2    | 50.68     | -0.094 | 0.03    | 0.96 |

Supplement: Supplementary file 1137 [file 1]

IPI00442073.5|CSRP1

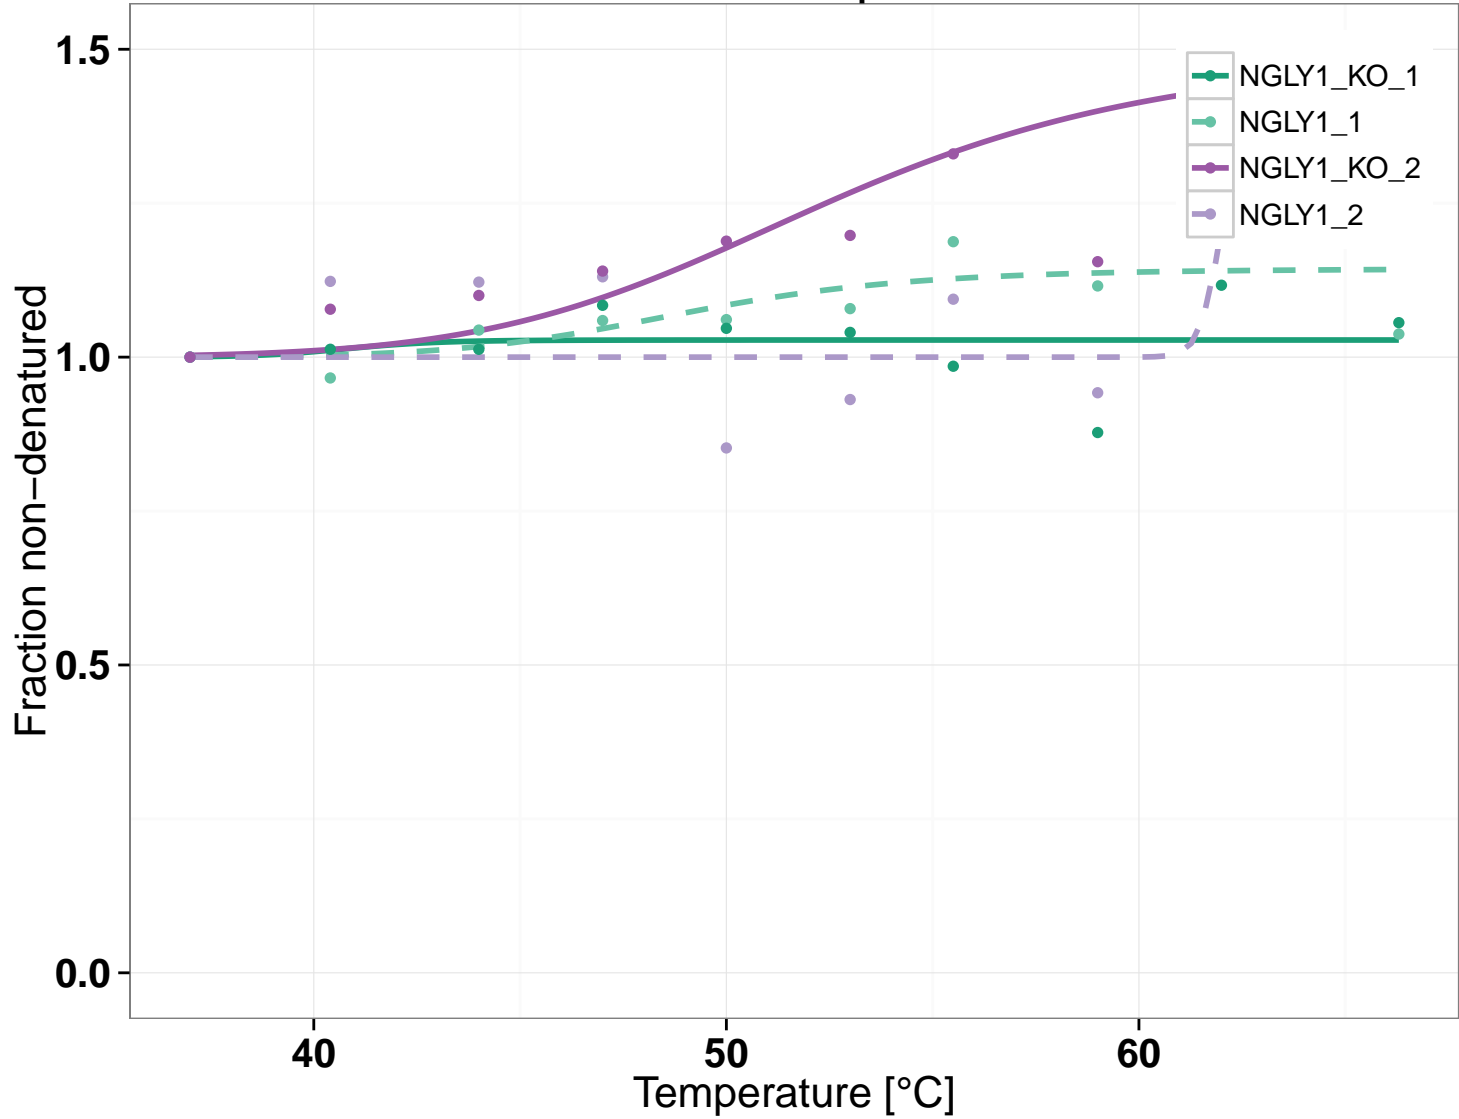

|            | meltPoint | slope  | plateau | R2   |
|------------|-----------|--------|---------|------|
| NGLY1_KO_1 | –         | 0.0063 | 1.03    | 0.02 |
| NGLY1_1    | –         | 0.013  | 1.14    | 0.52 |
| NGLY1_KO_2 | –         | 0.03   | 1.5     | 0.63 |
| NGLY1_2    | –         | 0.4    | 1.41    | 0.63 |

Supplement: Supplementary file 1138 [file 1]

IPI00328825.2|N4BP2

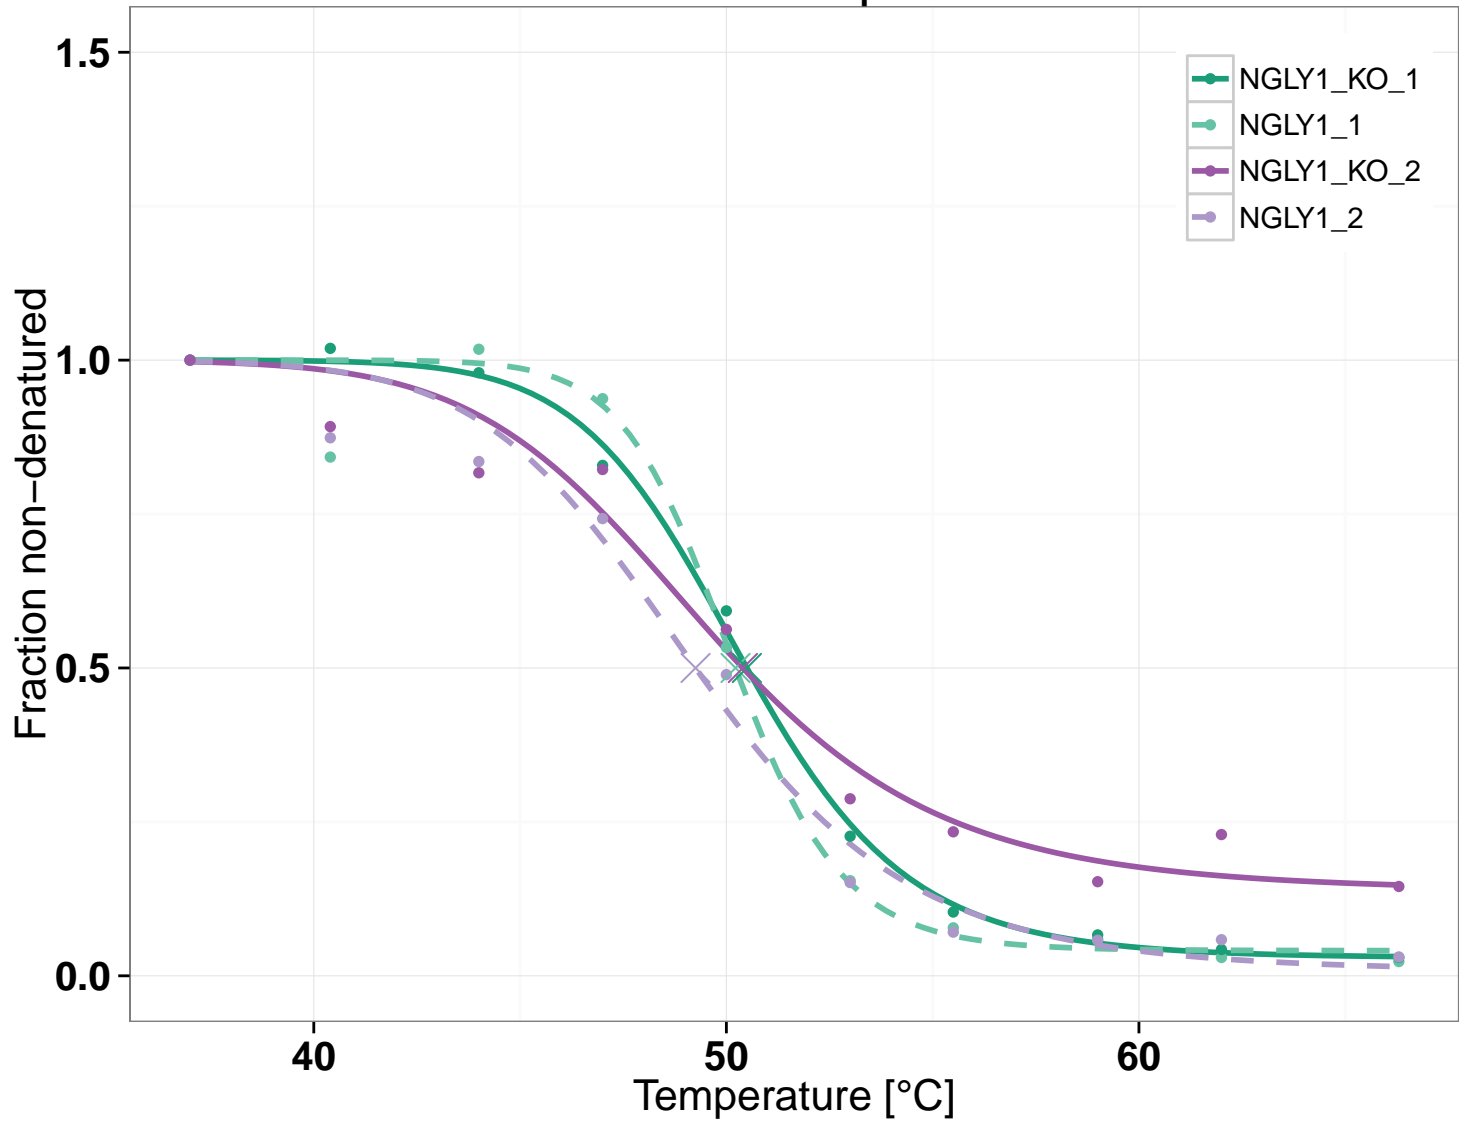

|            | meltPoint | slope  | plateau | R2   |
|------------|-----------|--------|---------|------|
| NGLY1_KO_1 | 50.5      | -0.12  | 0.03    | 1    |
| NGLY1_1    | 50.22     | -0.18  | 0.04    | 0.99 |
| NGLY1_KO_2 | 50.4      | -0.077 | 0.14    | 0.97 |
| NGLY1_2    | 49.25     | -0.095 | 0.01    | 0.98 |

Supplement: Supplementary file 1139 [file 1]

IPI00789639.2|DHX34

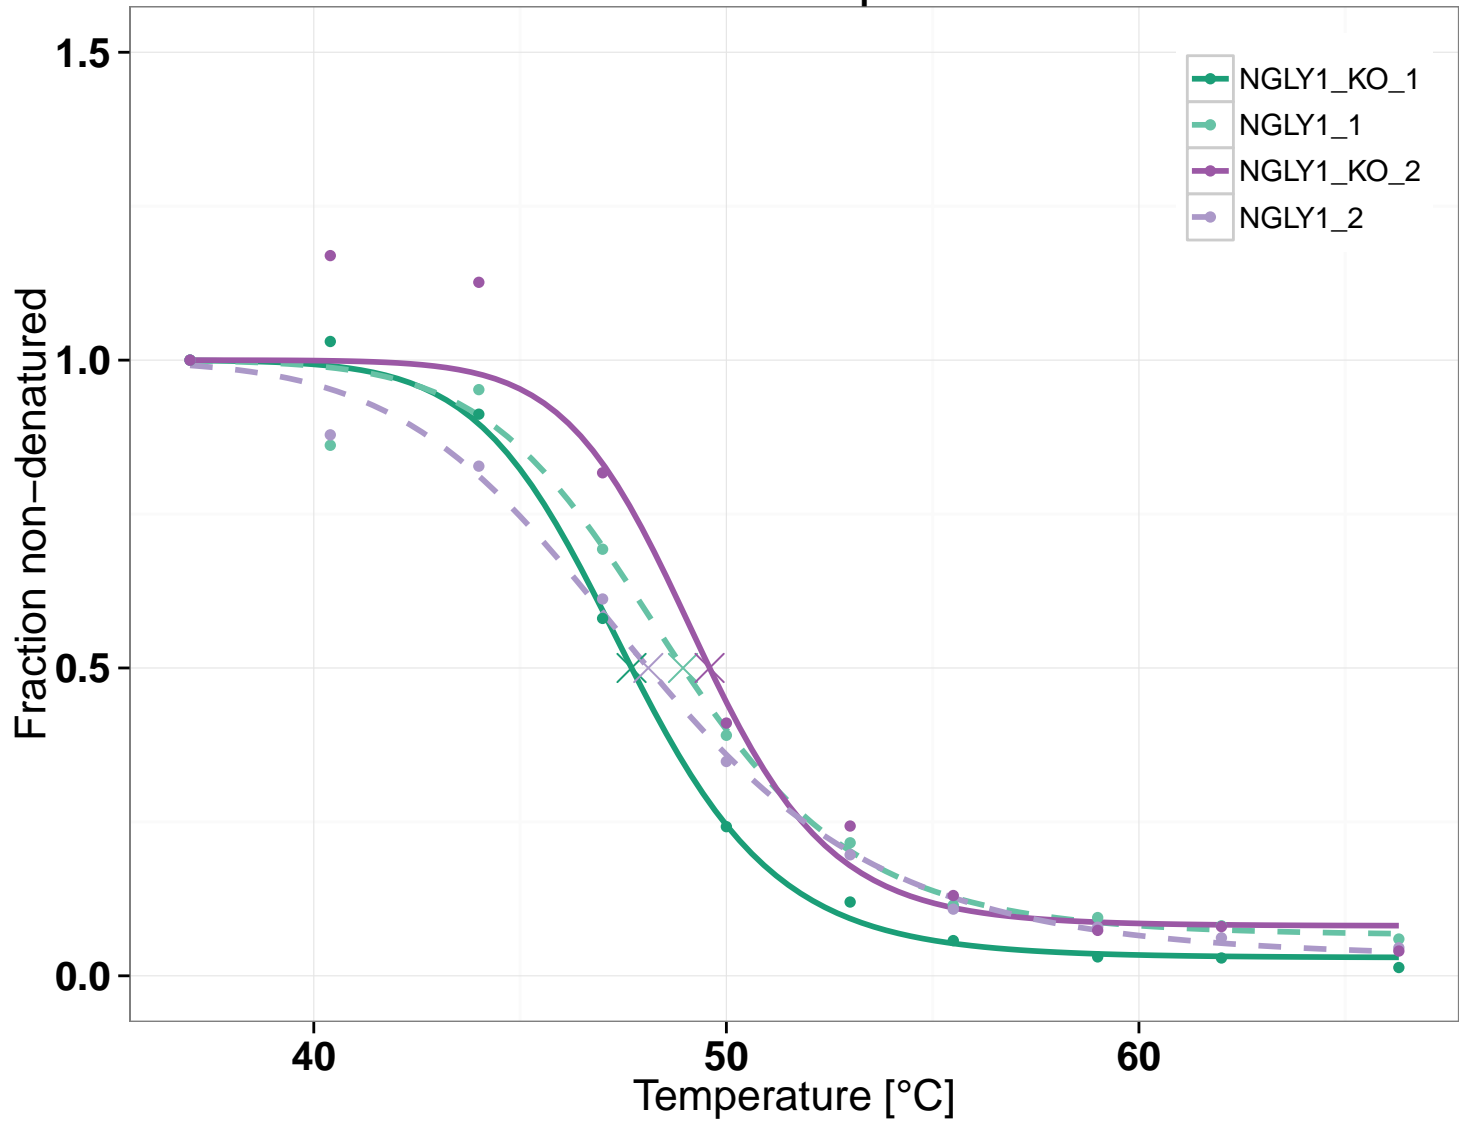

|            | meltPoint | slope  | plateau | R2   |
|------------|-----------|--------|---------|------|
| NGLY1_KO_1 | 47.7      | -0.13  | 0.03    | 1    |
| NGLY1_1    | 48.95     | -0.1   | 0.07    | 0.99 |
| NGLY1_KO_2 | 49.59     | -0.14  | 0.08    | 0.97 |
| NGLY1_2    | 48.11     | -0.082 | 0.03    | 0.99 |

Supplement: Supplementary file 1140 [file 1]

# IPI00871854.1|SAMM50

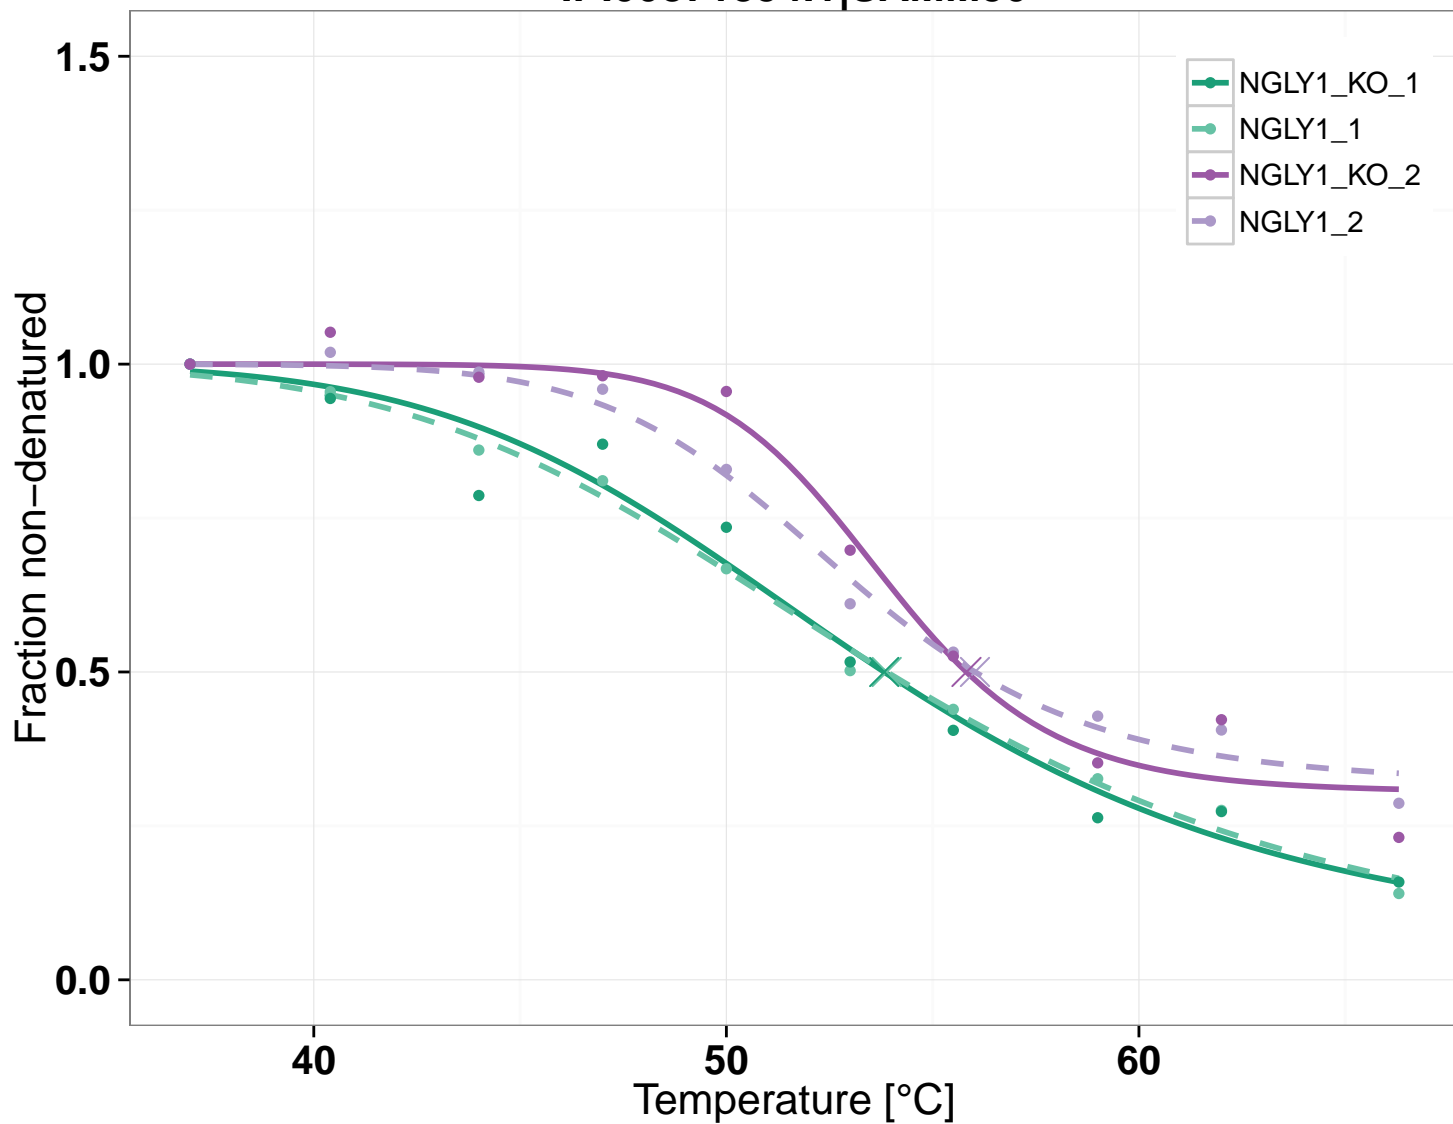

|            | meltPoint | slope  | plateau | R2   |
|------------|-----------|--------|---------|------|
| NGLY1_KO_1 | 53.83     | -0.047 | 0.04    | 0.97 |
| NGLY1_1    | 53.89     | -0.043 | 0.01    | 0.99 |
| NGLY1_KO_2 | 55.82     | -0.085 | 0.3     | 0.98 |
| NGLY1_2    | 56.03     | -0.058 | 0.32    | 0.99 |

Supplement: Supplementary file 1141 [file 1]

IPI00002707.1|SPAST

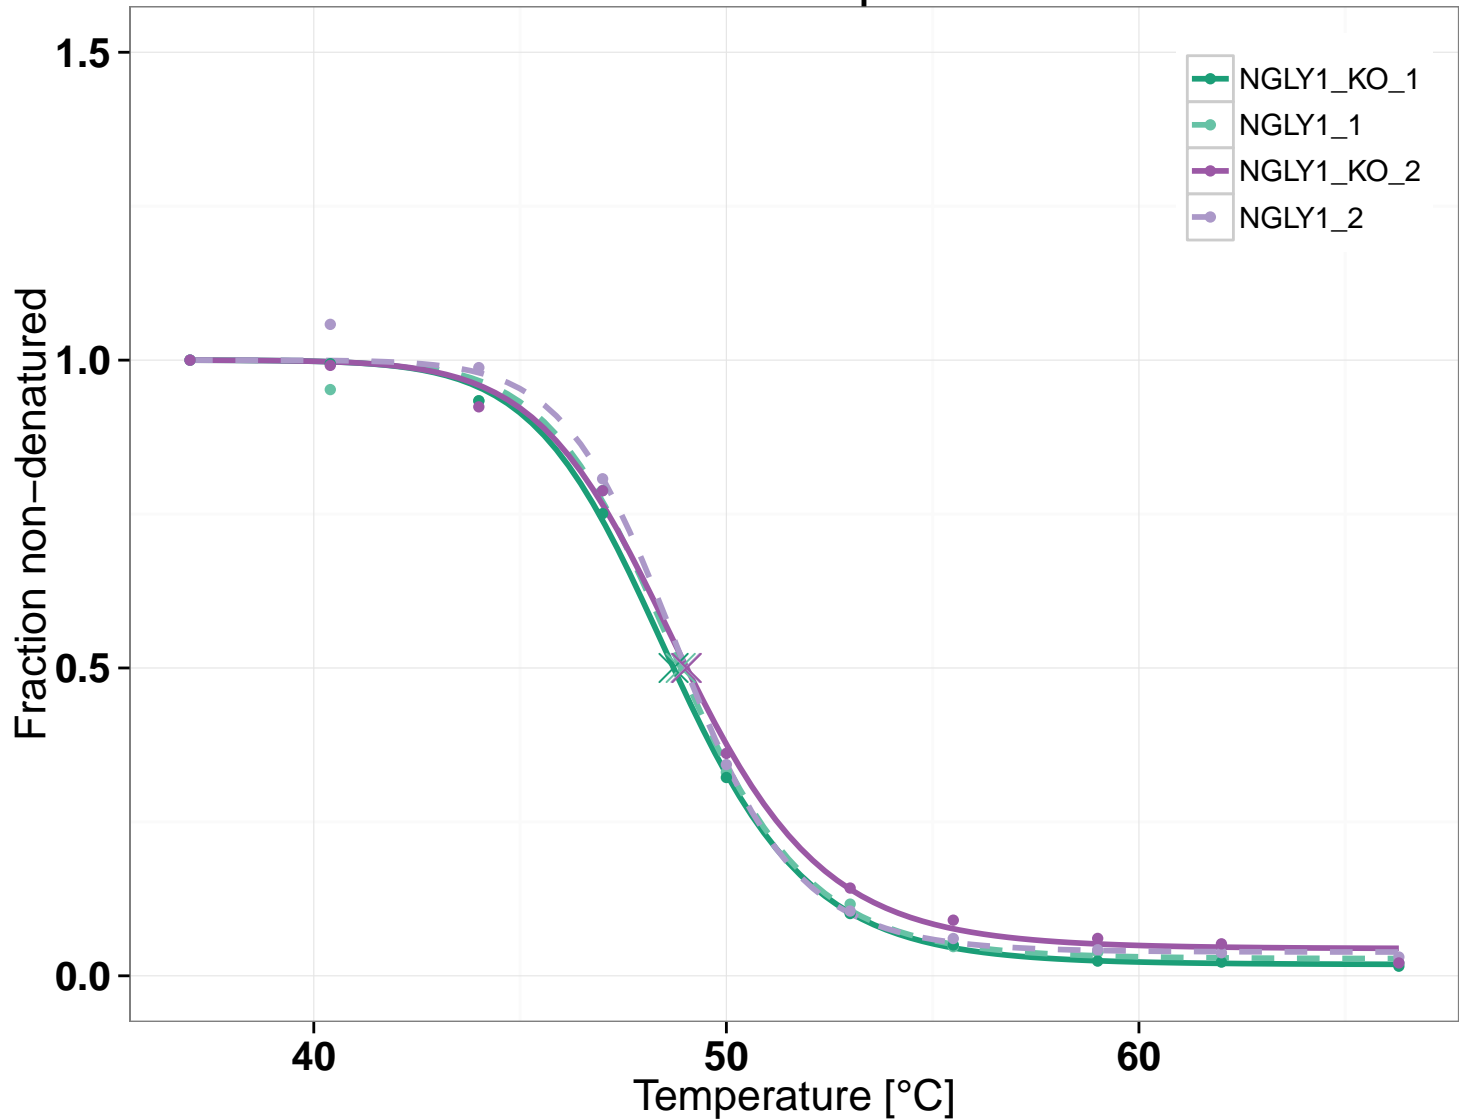

|            | meltPoint | slope | plateau | R2 |
|------------|-----------|-------|---------|----|
| NGLY1_KO_1 | 48.72     | -0.15 | 0.02    | 1  |
| NGLY1_1    | 48.89     | -0.15 | 0.03    | 1  |
| NGLY1_KO_2 | 49.04     | -0.14 | 0.04    | 1  |
| NGLY1_2    | 49.01     | -0.17 | 0.04    | 1  |

Supplement: Supplementary file 1142 [file 1]

IPI00031091.3|EFHD1

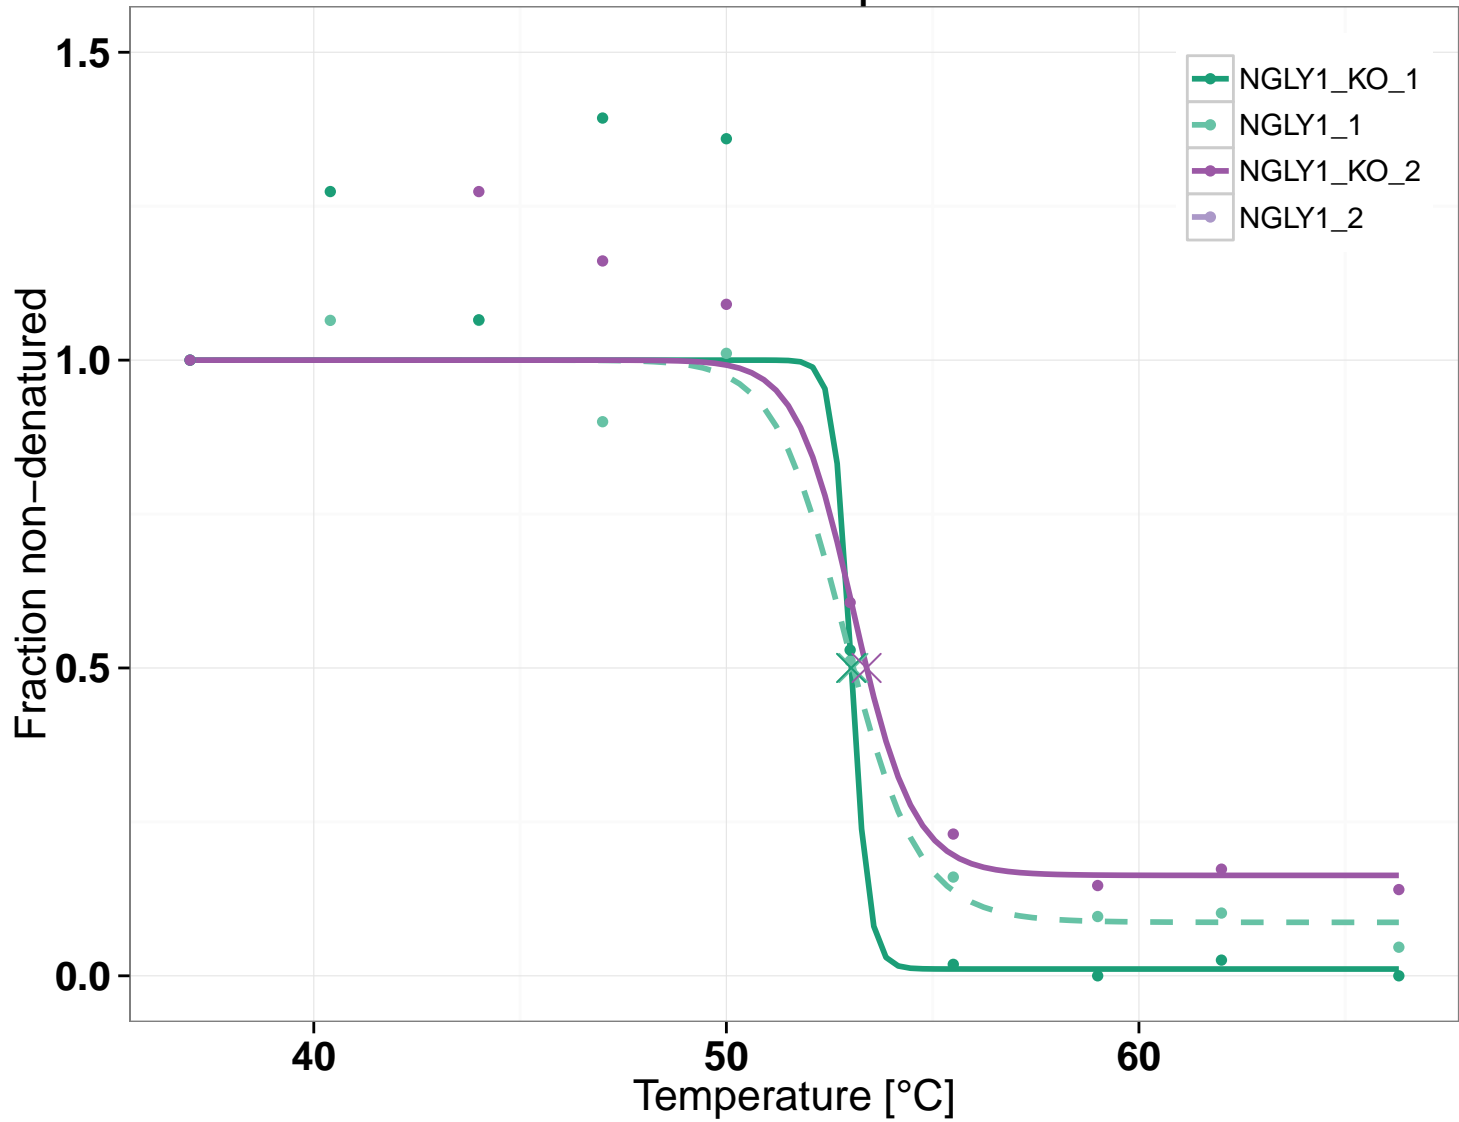

|            | meltPoint | slope | plateau | R2   |
|------------|-----------|-------|---------|------|
| NGLY1_KO_1 | 53.03     | -1.2  | 0.01    | 0.89 |
| NGLY1_1    | 53.08     | -0.26 | 0.09    | 0.99 |
| NGLY1_KO_2 | 53.4      | -0.29 | 0.16    | 0.84 |
| NGLY1_2    | -         | -     | -       | -    |

Supplement: Supplementary file 1143 [file 1]

# IPI00296992.7|AXL

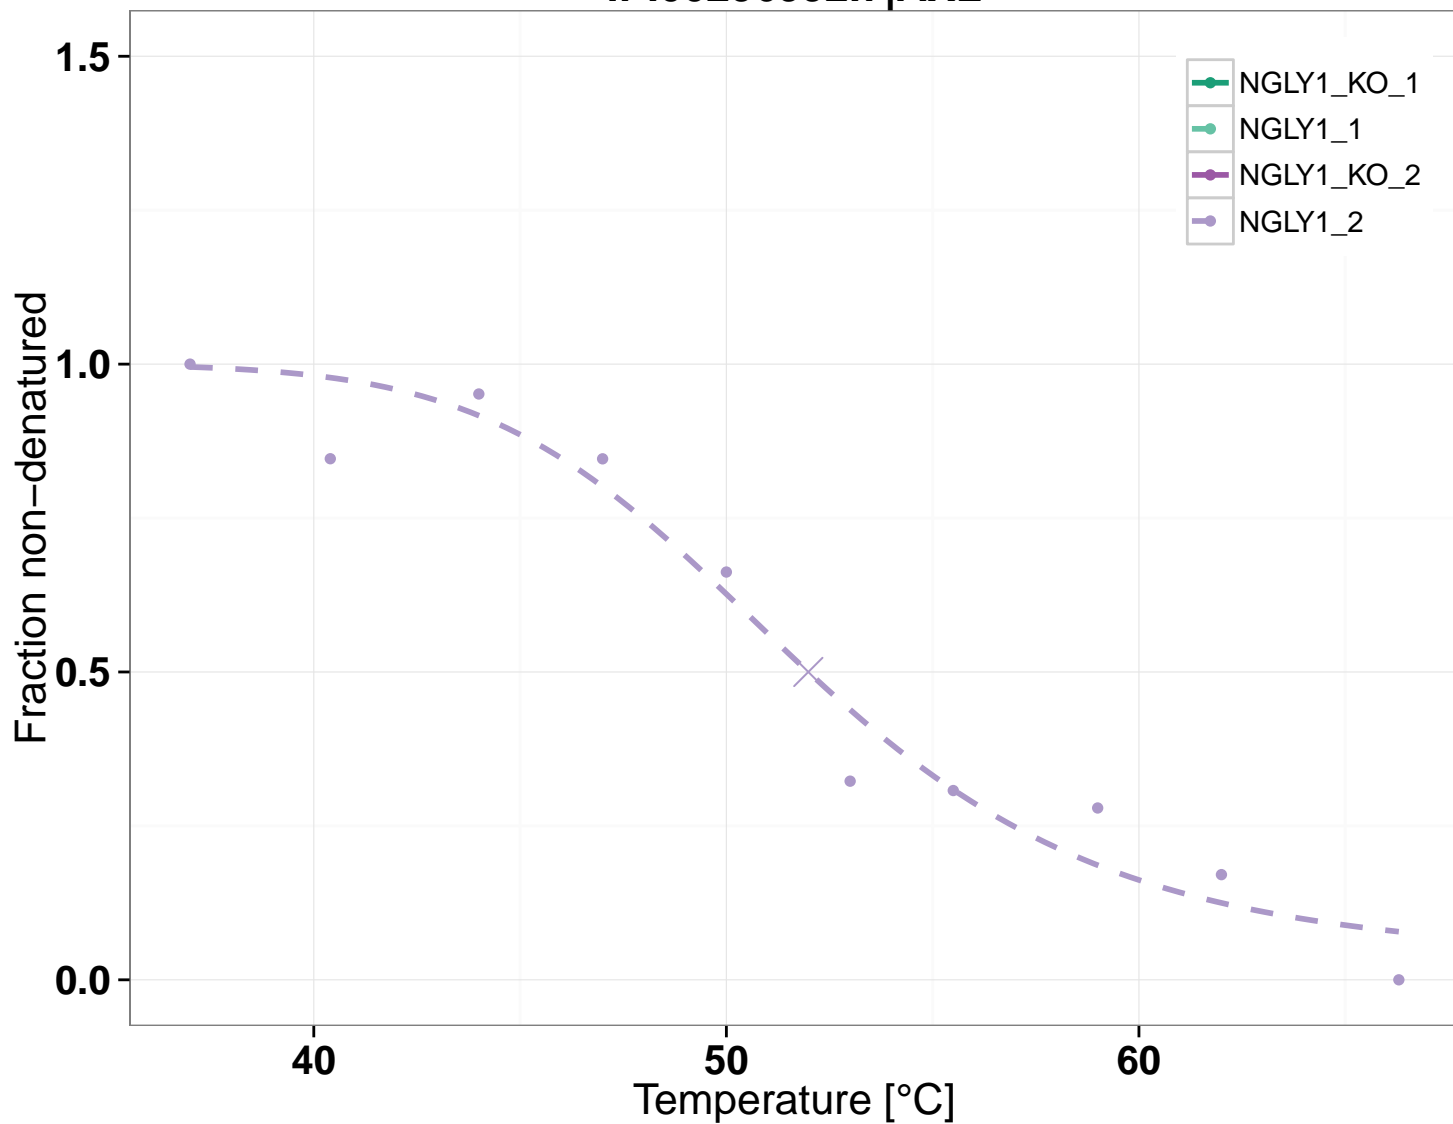

|            | meltPoint | slope  | plateau | R2   |
|------------|-----------|--------|---------|------|
| NGLY1_KO_1 | —         | —      | —       | —    |
| NGLY1_1    | —         | —      | —       | —    |
| NGLY1_KO_2 | —         | —      | —       | —    |
| NGLY1_2    | 51.99     | -0.064 | 0.03    | 0.96 |

Supplement: Supplementary file 1144 [file 1]

# IPI00018465.1|CCT7

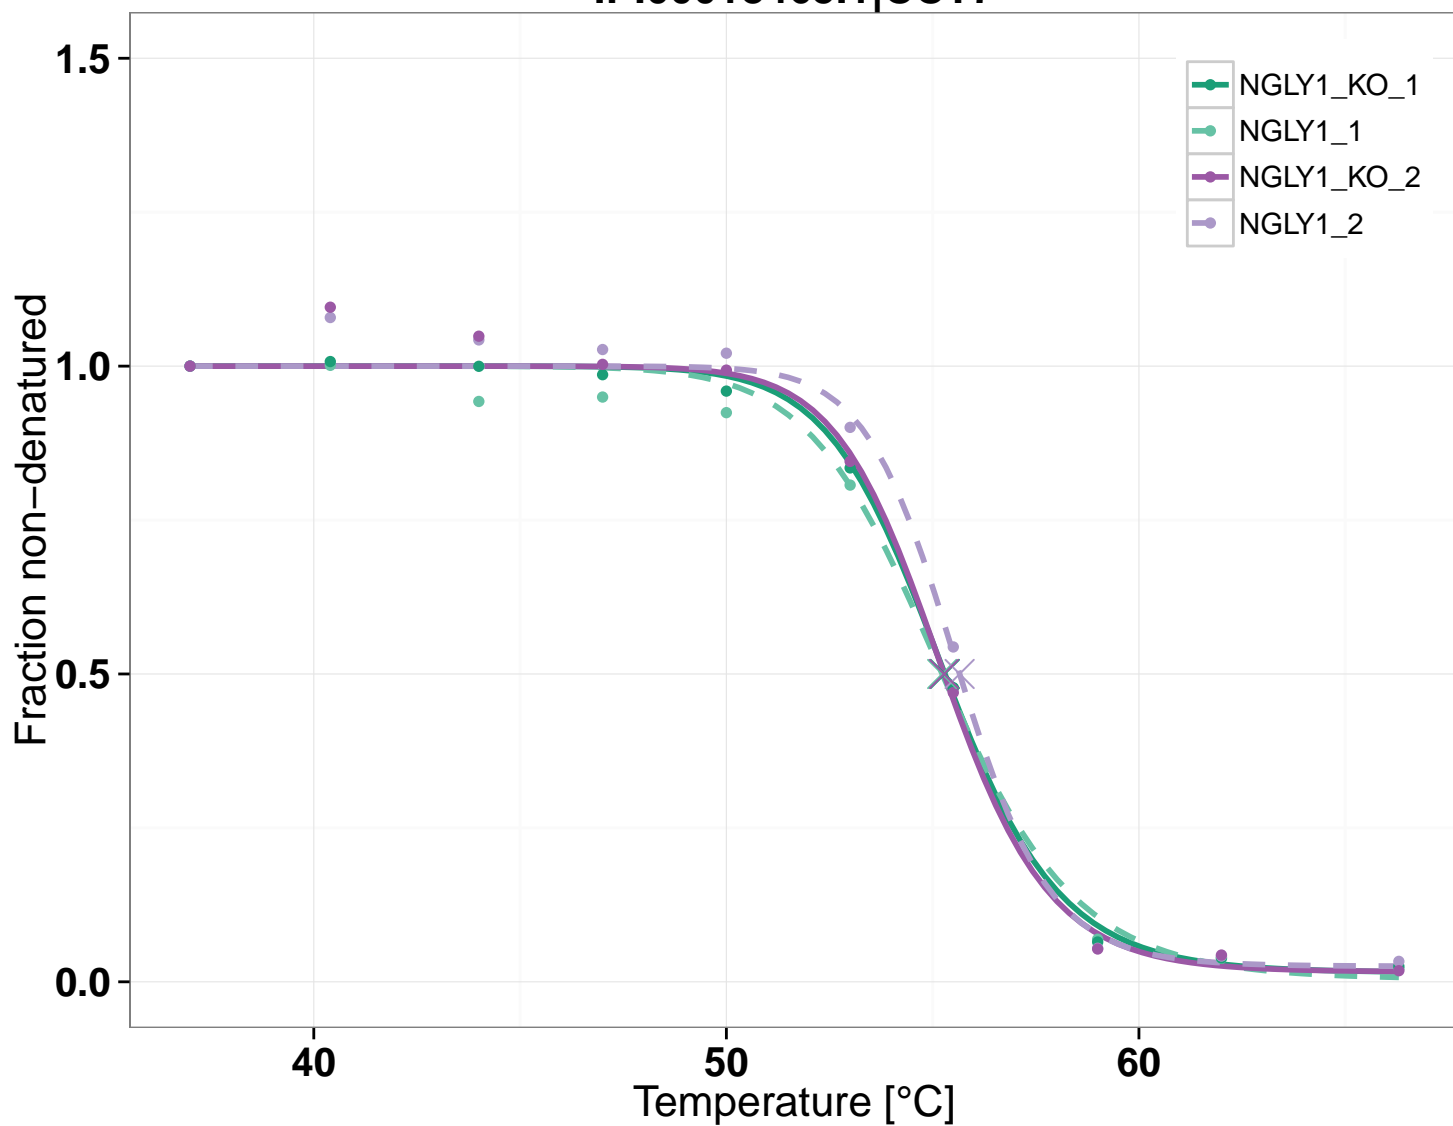

|            | meltPoint | slope | plateau | R2   |
|------------|-----------|-------|---------|------|
| NGLY1_KO_1 | 55.3      | -0.17 | 0.01    | 1    |
| NGLY1_1    | 55.23     | -0.15 | 0       | 0.99 |
| NGLY1_KO_2 | 55.28     | -0.19 | 0.02    | 0.99 |
| NGLY1_2    | 55.65     | -0.22 | 0.03    | 0.99 |

Supplement: Supplementary file 1145 [file 1]

# IPI00550746.4|NUDC

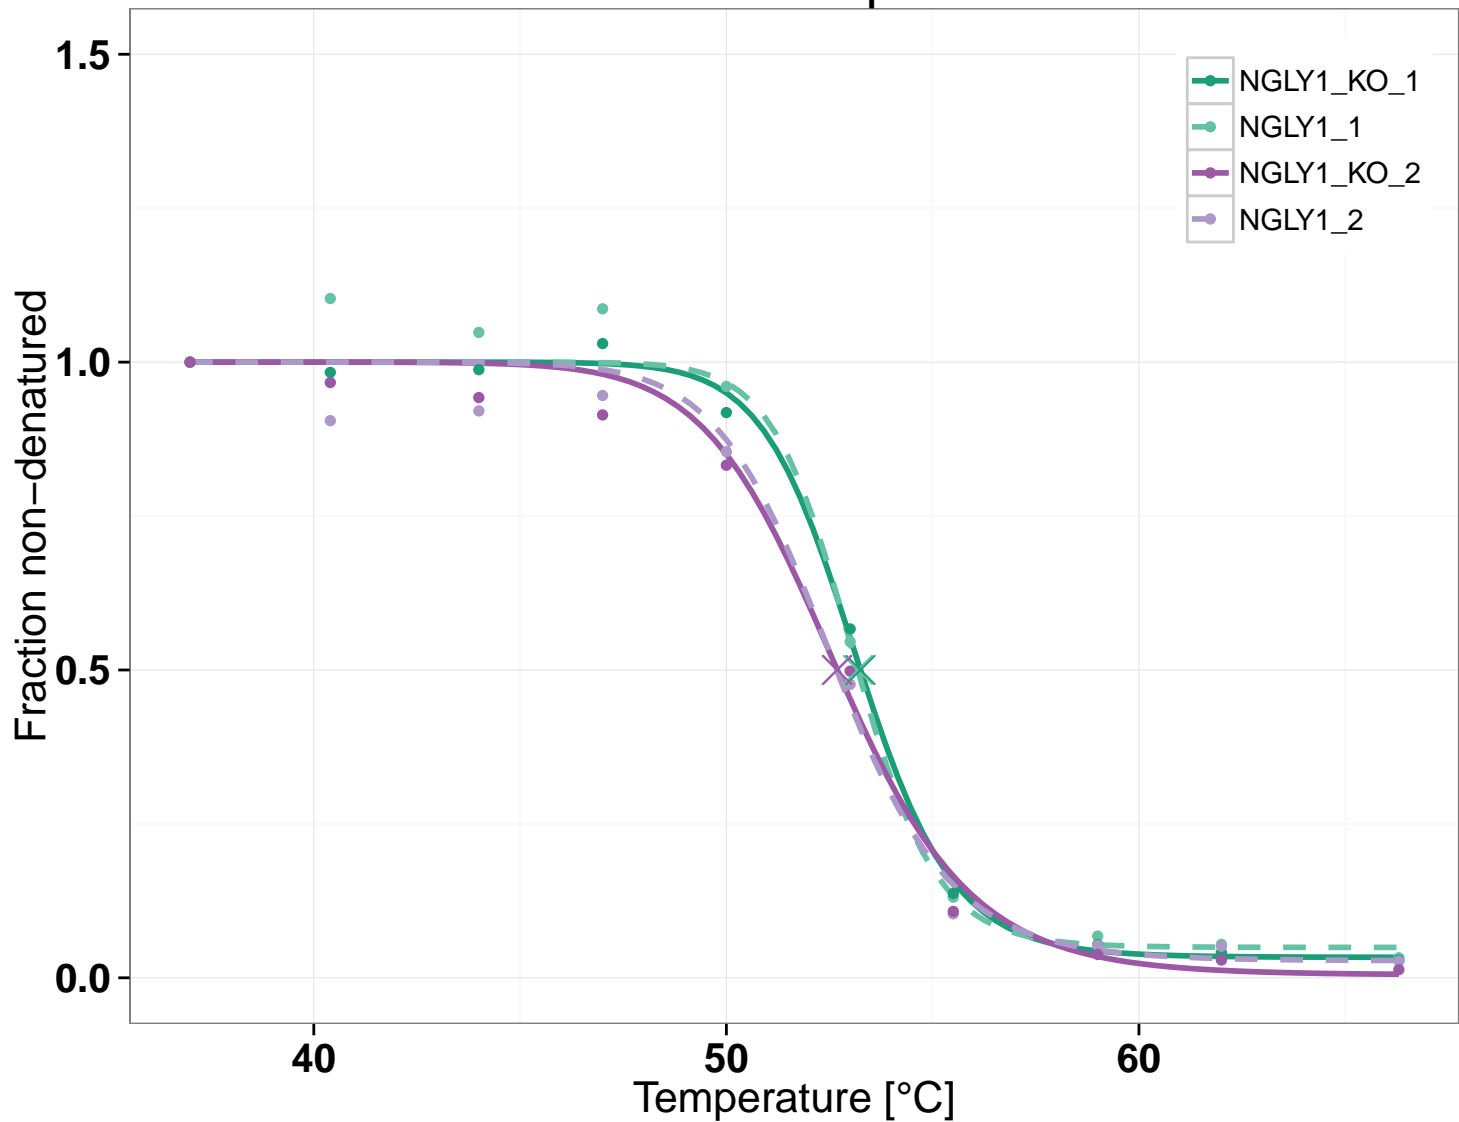

|            | meltPoint | slope | plateau | R2   |
|------------|-----------|-------|---------|------|
| NGLY1_KO_1 | 53.25     | −0.21 | 0.03    | 1    |
| NGLY1_1    | 53.19     | −0.24 | 0.05    | 0.99 |
| NGLY1_KO_2 | 52.69     | −0.15 | 0       | 0.99 |
| NGLY1_2    | 52.67     | −0.17 | 0.03    | 0.99 |

Supplement: Supplementary file 1146 [file 1]

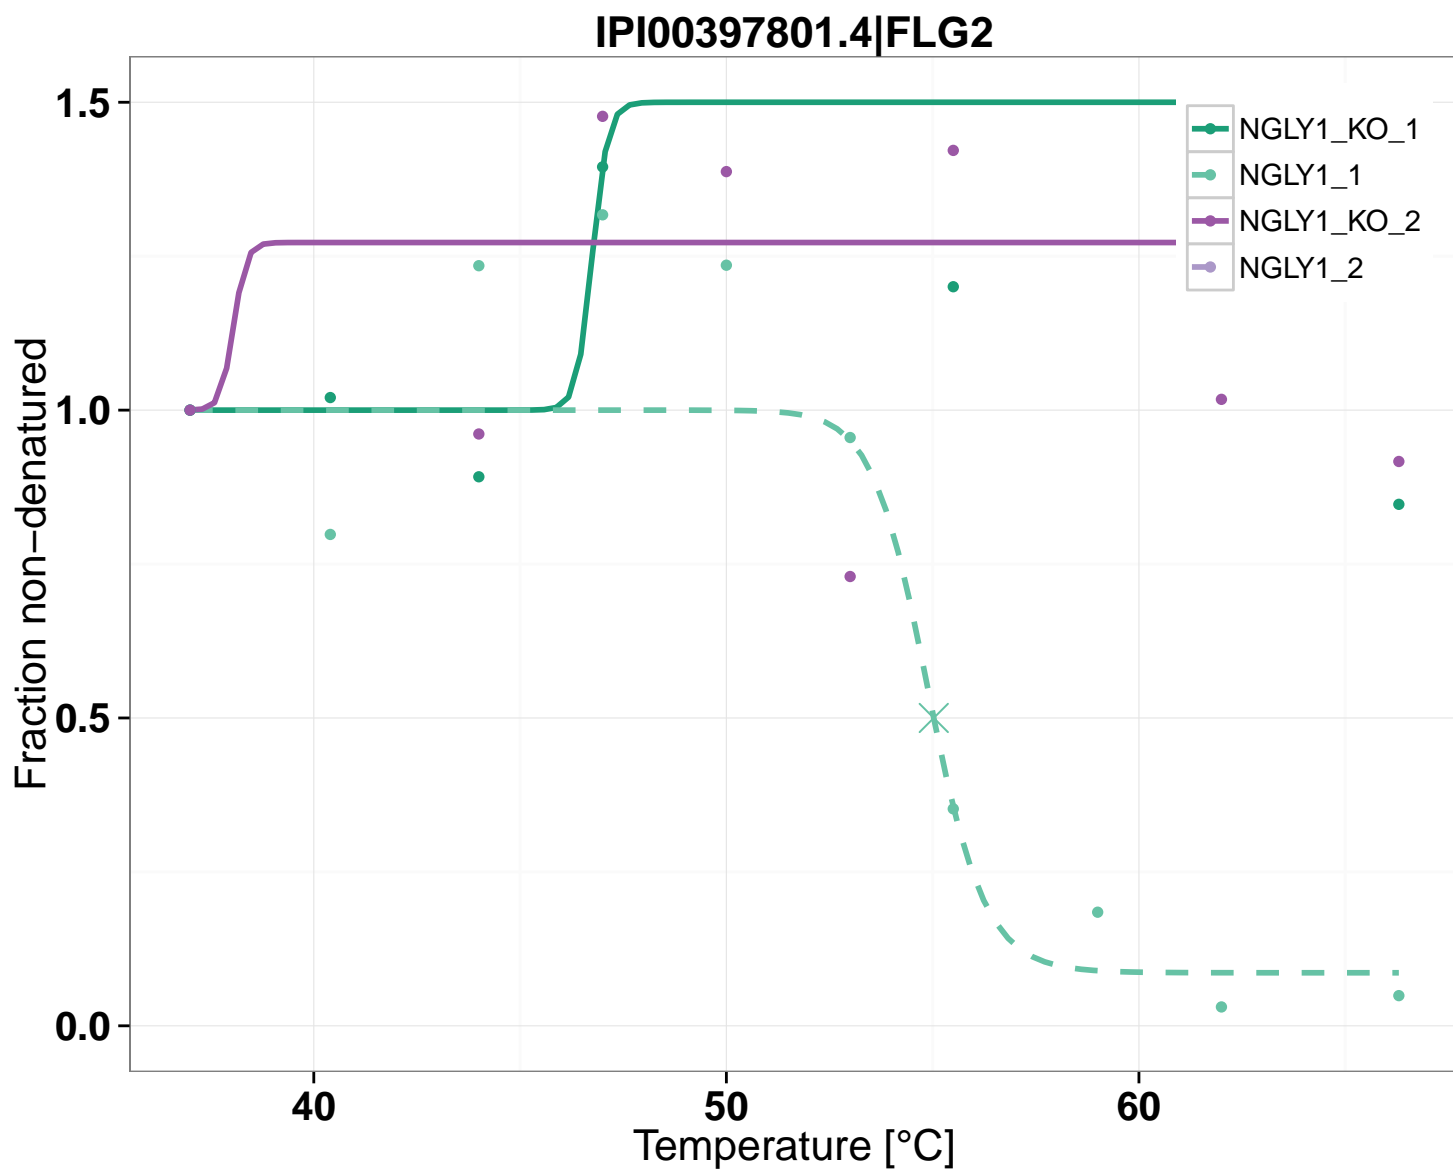

|            | meltPoint | slope | plateau | R2   |
|------------|-----------|-------|---------|------|
| NGLY1_KO_1 | –         | 0.67  | 1.5     | 0.32 |
| NGLY1_1    | 55.03     | –0.33 | 0.09    | 0.89 |
| NGLY1_KO_2 | –         | 0.45  | 1.27    | 0.05 |
| NGLY1_2    | –         | –     | –       | –    |

Supplement: Supplementary file 1147 [file 1]

IPI00022477.1|BCL10

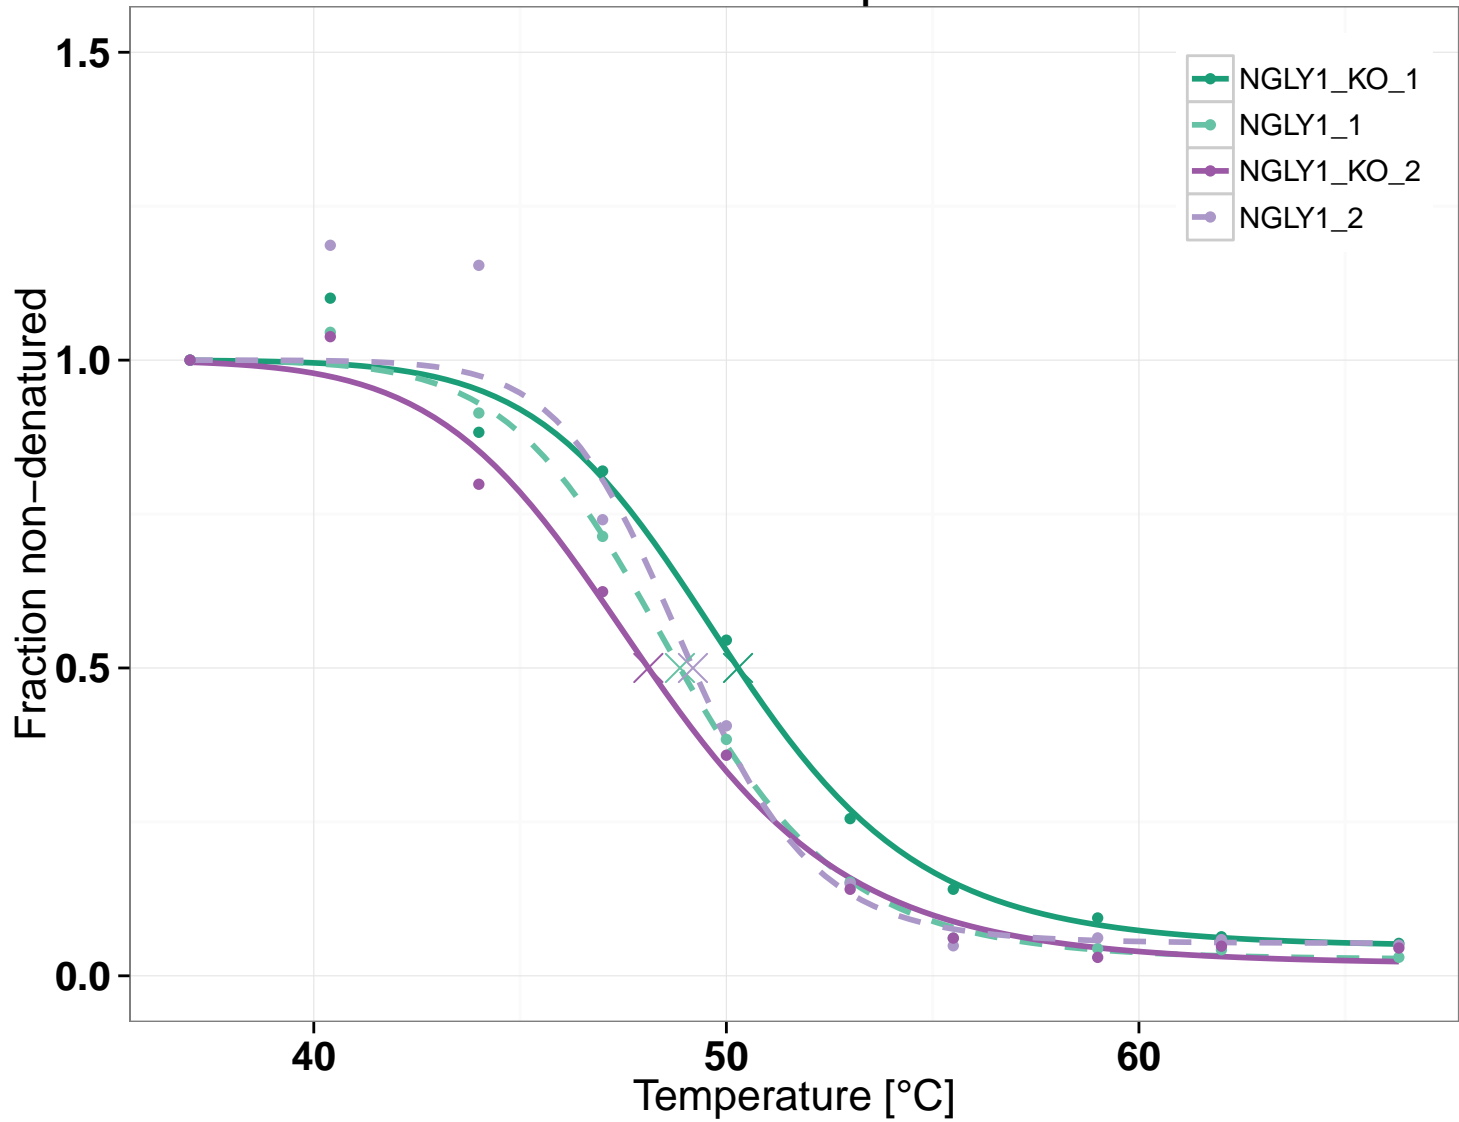

|            | meltPoint | slope  | plateau | R2   |
|------------|-----------|--------|---------|------|
| NGLY1_KO_1 | 50.28     | -0.1   | 0.05    | 0.99 |
| NGLY1_1    | 48.87     | -0.12  | 0.03    | 1    |
| NGLY1_KO_2 | 48.11     | -0.098 | 0.02    | 0.99 |
| NGLY1_2    | 49.19     | -0.15  | 0.05    | 0.97 |

Supplement: Supplementary file 1148 [file 1]

IPI00220271.3|AKR1A1

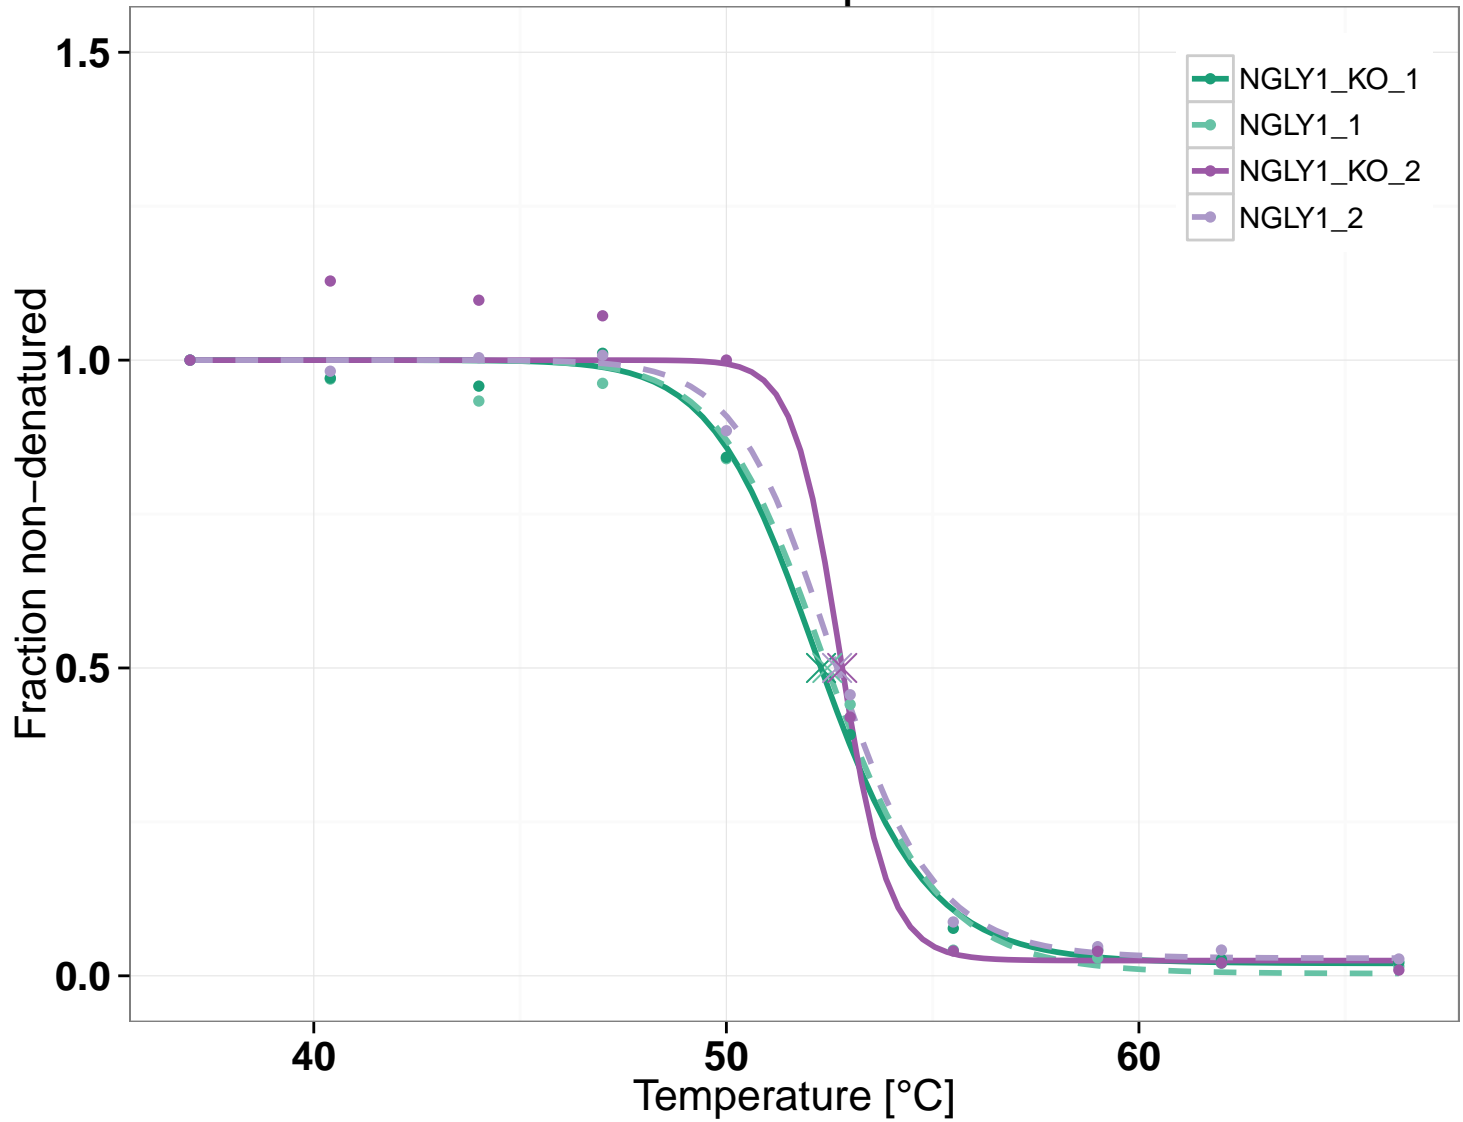

|            | meltPoint | slope | plateau | R2   |
|------------|-----------|-------|---------|------|
| NGLY1_KO_1 | 52.29     | -0.19 | 0.02    | 1    |
| NGLY1_1    | 52.45     | -0.19 | 0       | 0.99 |
| NGLY1_KO_2 | 52.81     | -0.42 | 0.02    | 0.99 |
| NGLY1_2    | 52.68     | -0.2  | 0.03    | 1    |

Supplement: Supplementary file 1149 [file 1]

IPI00005978.8|SFRS2

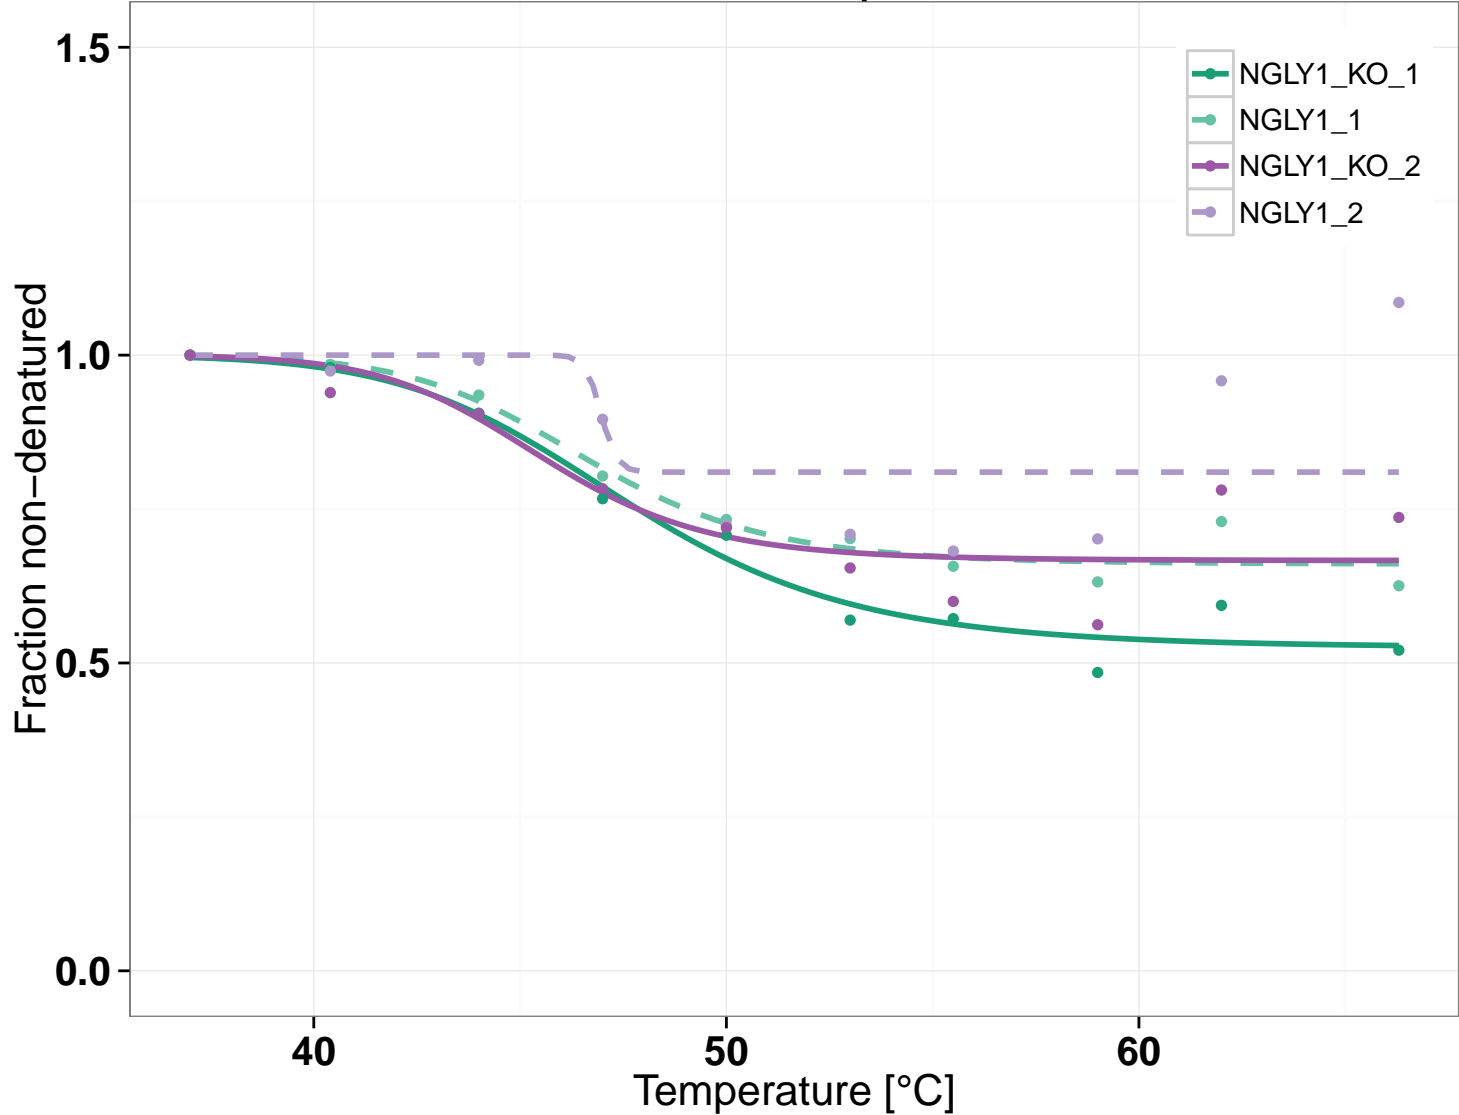

|            | meltPoint | slope  | plateau | R2   |
|------------|-----------|--------|---------|------|
| NGLY1_KO_1 | —         | −0.043 | 0.52    | 0.97 |
| NGLY1_1    | —         | −0.039 | 0.66    | 0.96 |
| NGLY1_KO_2 | —         | −0.042 | 0.67    | 0.8  |
| NGLY1_2    | —         | −0.25  | 0.81    | 0.31 |

Supplement: Supplementary file 1150 [file 1]

IPI00329131.3|LRRC28

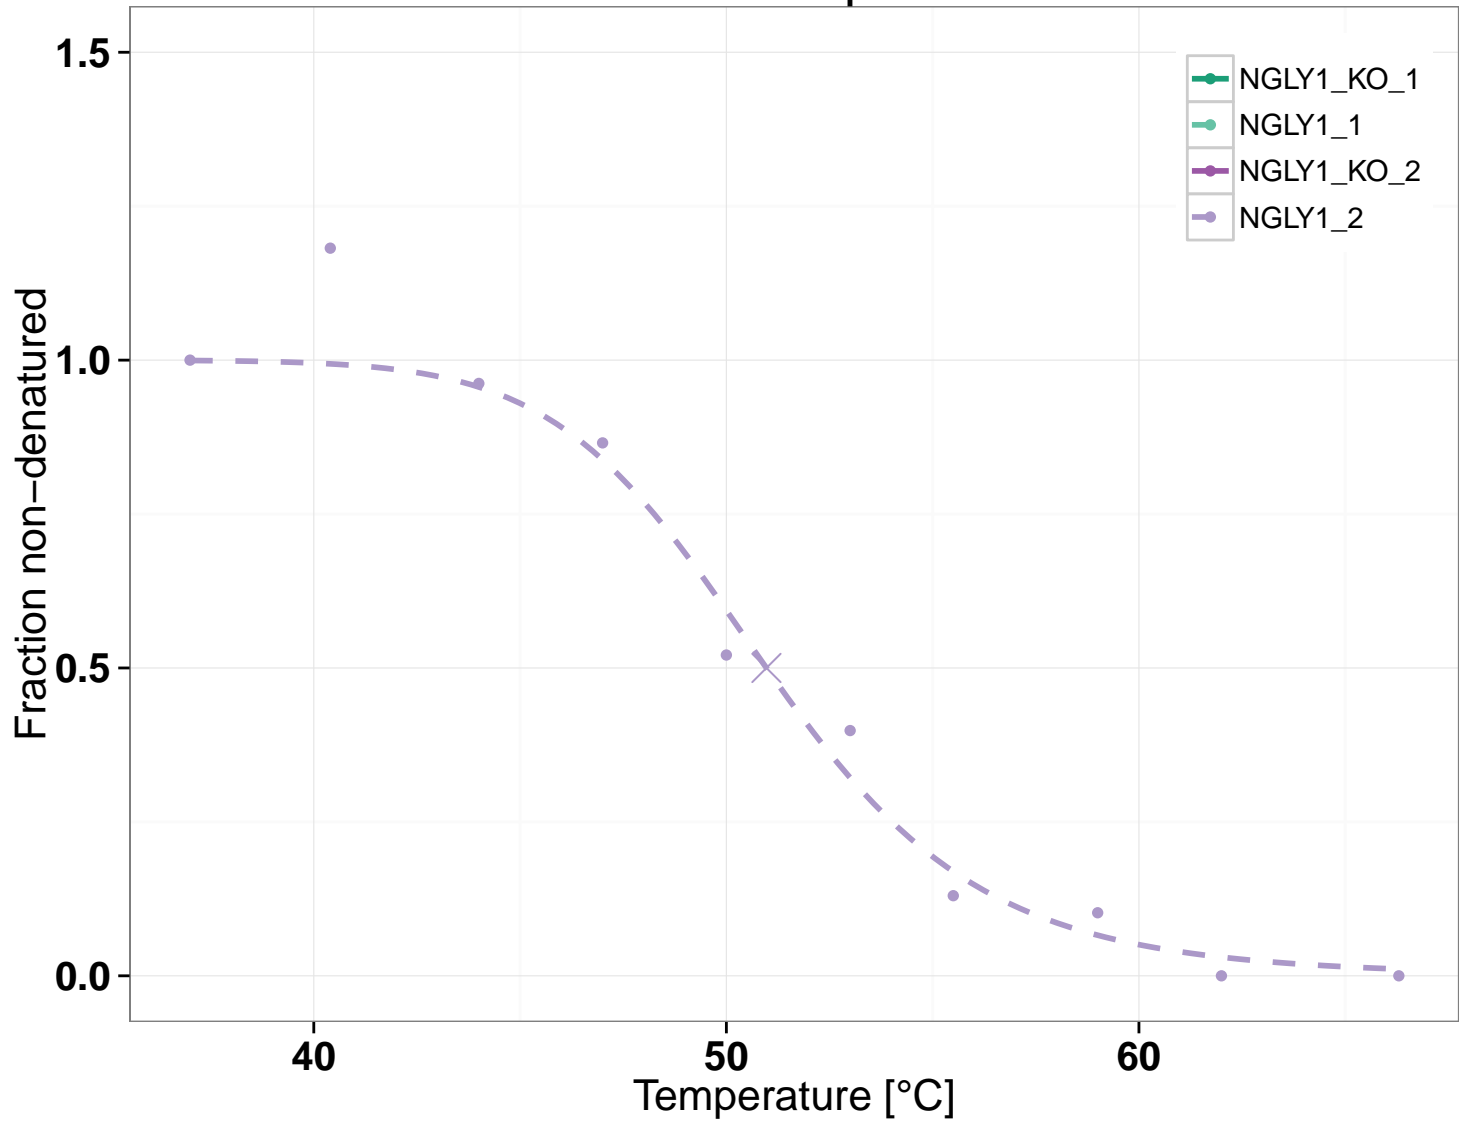

|            | meltPoint | slope  | plateau | R2   |
|------------|-----------|--------|---------|------|
| NGLY1_KO_1 | -         | -      | -       | -    |
| NGLY1_1    | -         | -      | -       | -    |
| NGLY1_KO_2 | -         | -      | -       | -    |
| NGLY1_2    | 50.97     | -0.097 | 0       | 0.97 |

Supplement: Supplementary file 1151 [file 1]

IPI00902533.1|POM121

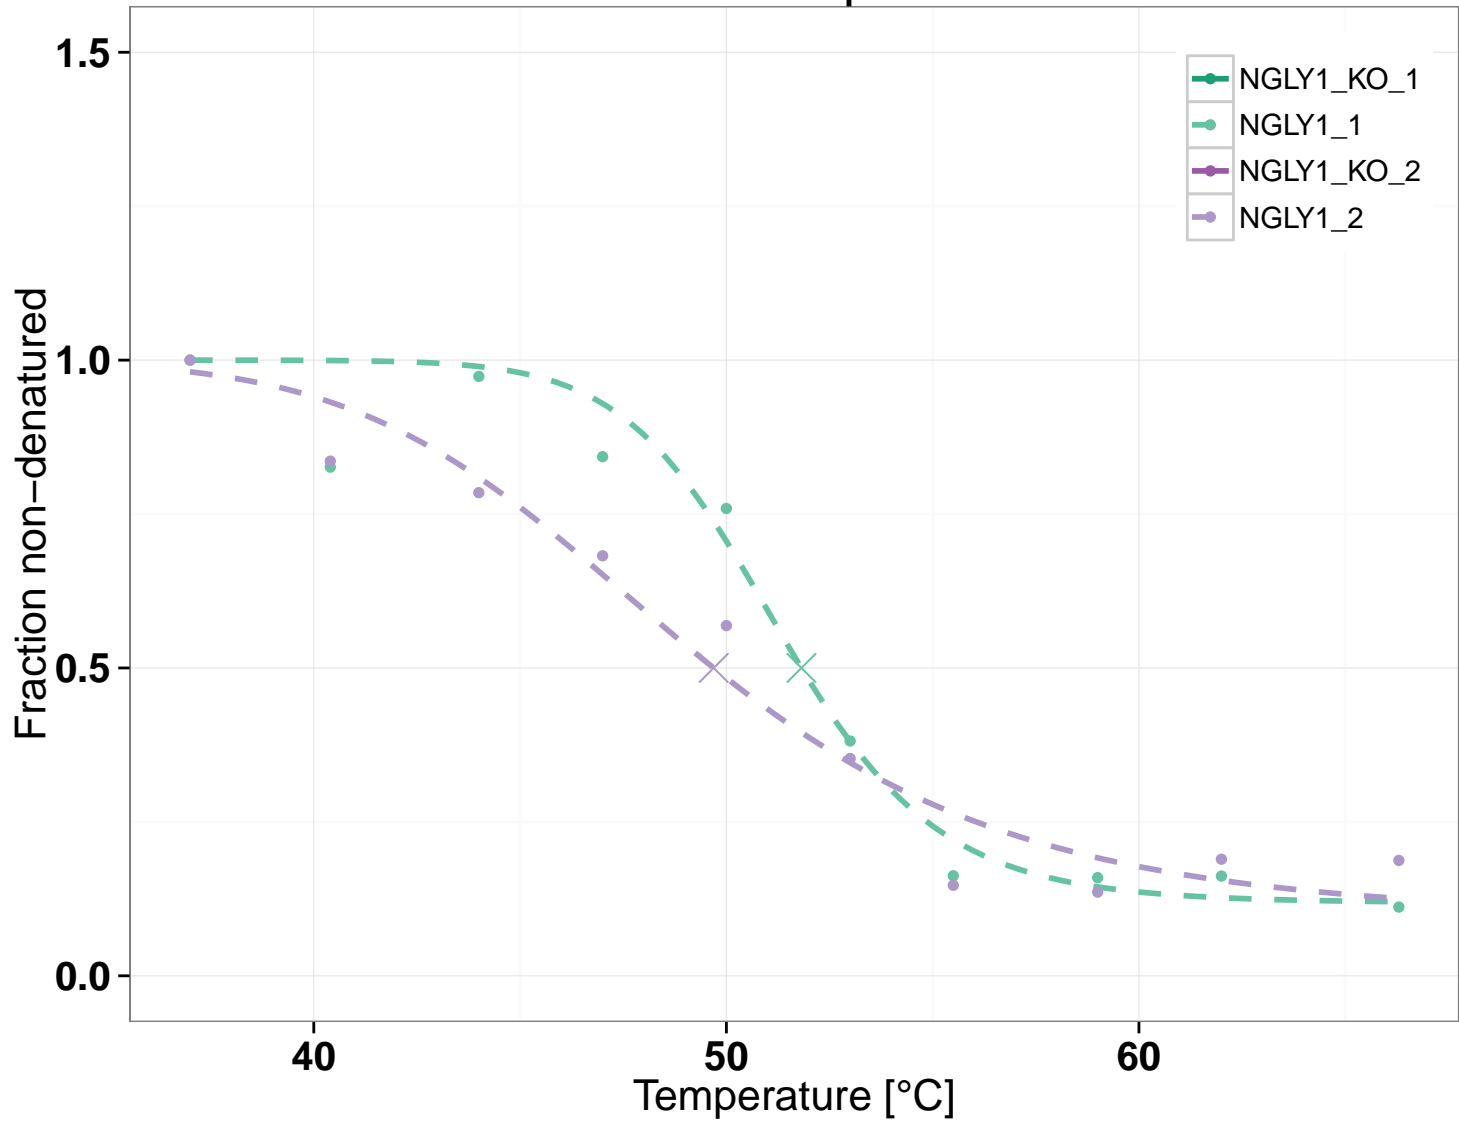

|            | meltPoint | slope  | plateau | R2   |
|------------|-----------|--------|---------|------|
| NGLY1_KO_1 | -         | -      | -       | -    |
| NGLY1_1    | 51.82     | -0.12  | 0.12    | 0.96 |
| NGLY1_KO_2 | -         | -      | -       | -    |
| NGLY1_2    | 49.69     | -0.057 | 0.09    | 0.96 |

Supplement: Supplementary file 1152 [file 1]

IPI00024915.2|PRDX5

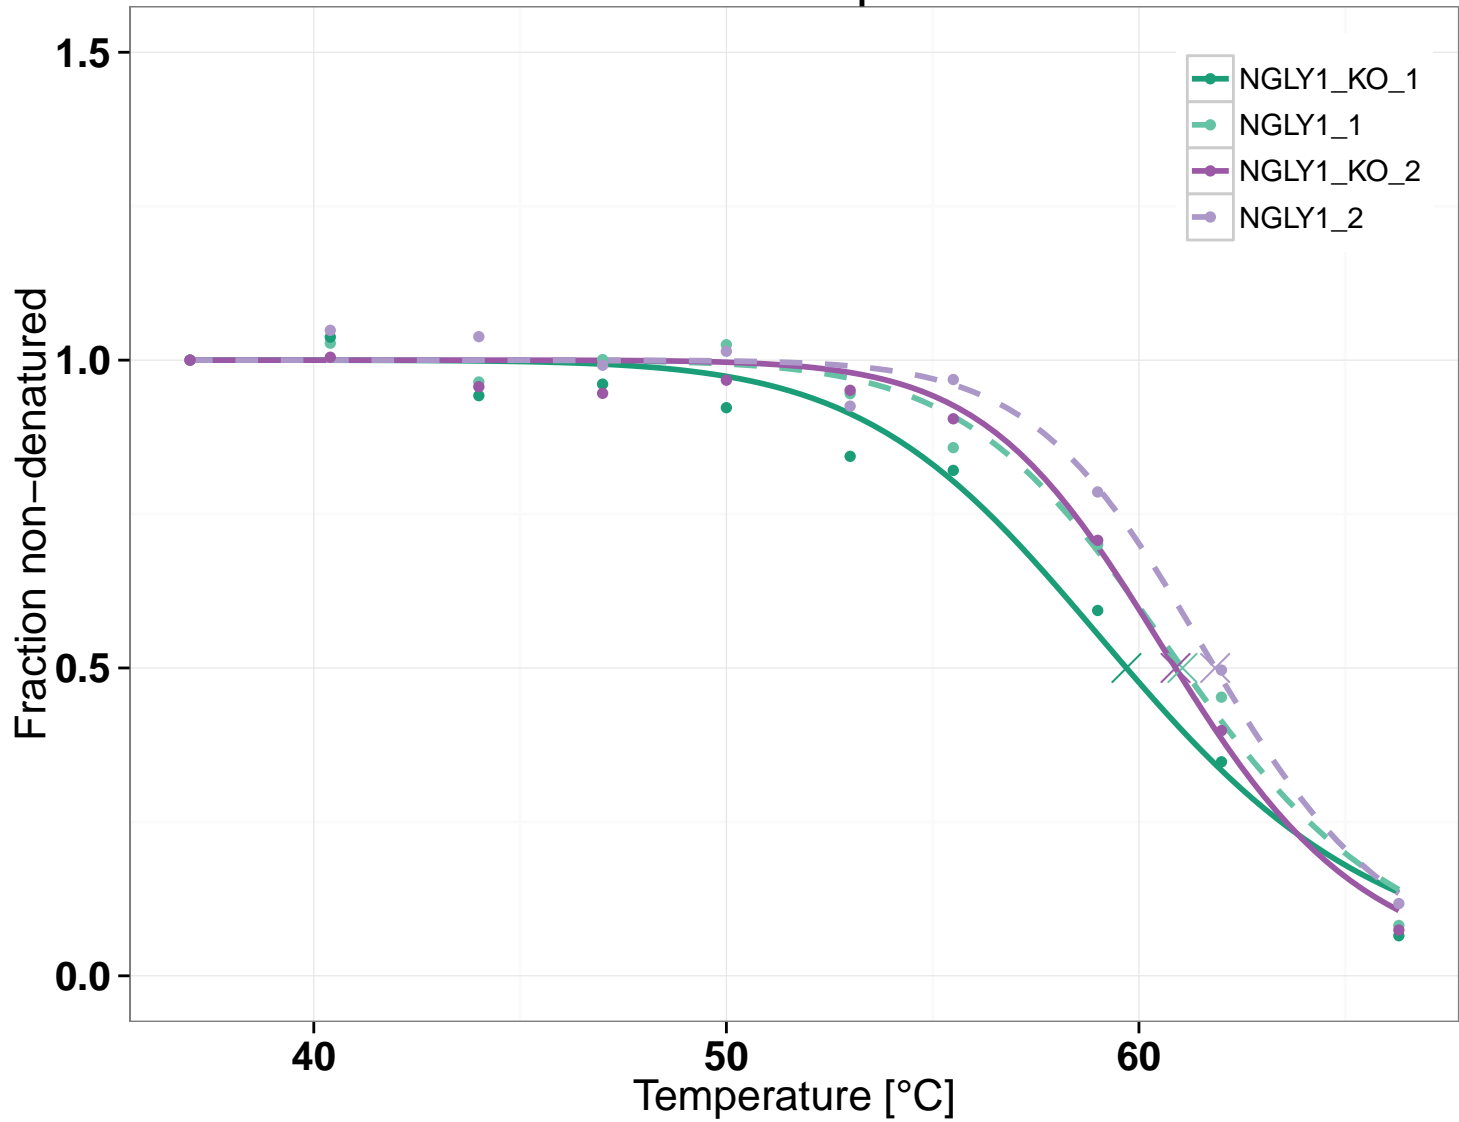

|            | meltPoint | slope  | plateau | R2   |
|------------|-----------|--------|---------|------|
| NGLY1_KO_1 | 59.7      | -0.079 | 0       | 0.98 |
| NGLY1_1    | 61.06     | -0.095 | 0       | 0.99 |
| NGLY1_KO_2 | 60.89     | -0.11  | 0       | 0.99 |
| NGLY1_2    | 61.85     | -0.11  | 0       | 0.99 |

Supplement: Supplementary file 1153 [file 1]

IPI00915008.1|METTL1

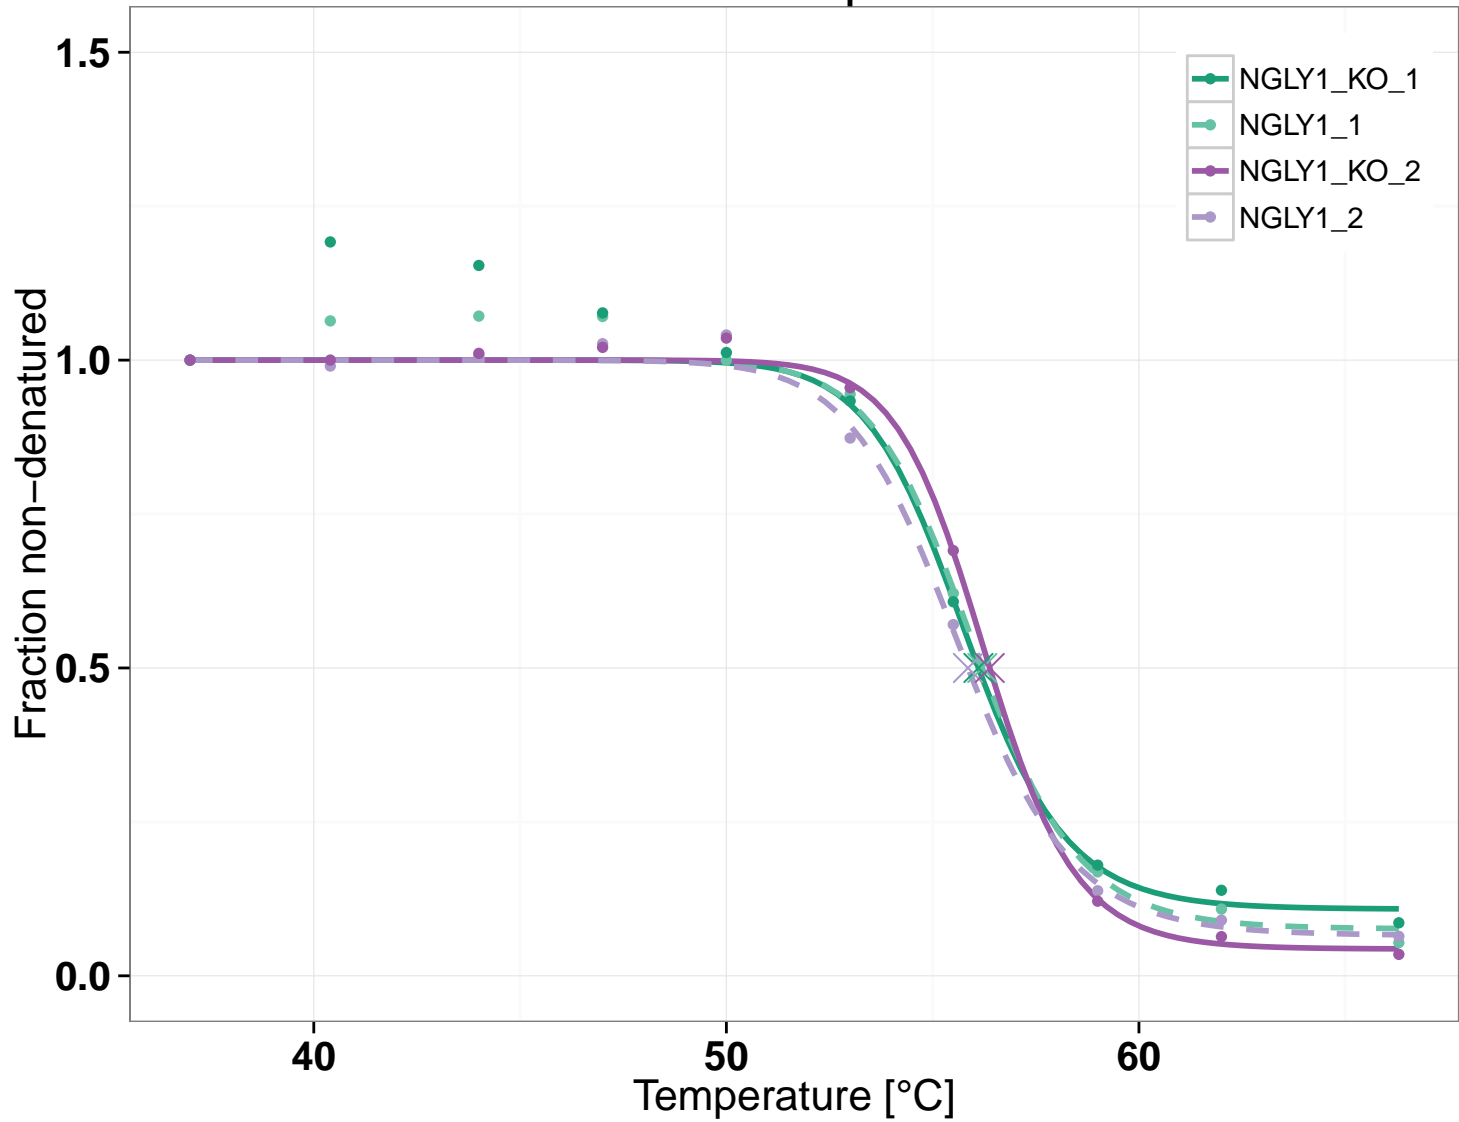

|            | meltPoint | slope | plateau | R2   |
|------------|-----------|-------|---------|------|
| NGLY1_KO_1 | 56.11     | -0.18 | 0.11    | 0.96 |
| NGLY1_1    | 56.21     | -0.18 | 0.08    | 0.99 |
| NGLY1_KO_2 | 56.38     | -0.22 | 0.04    | 1    |
| NGLY1_2    | 55.86     | -0.17 | 0.07    | 1    |

Supplement: Supplementary file 1154 [file 1]

IPI00375254.1|FBXO18

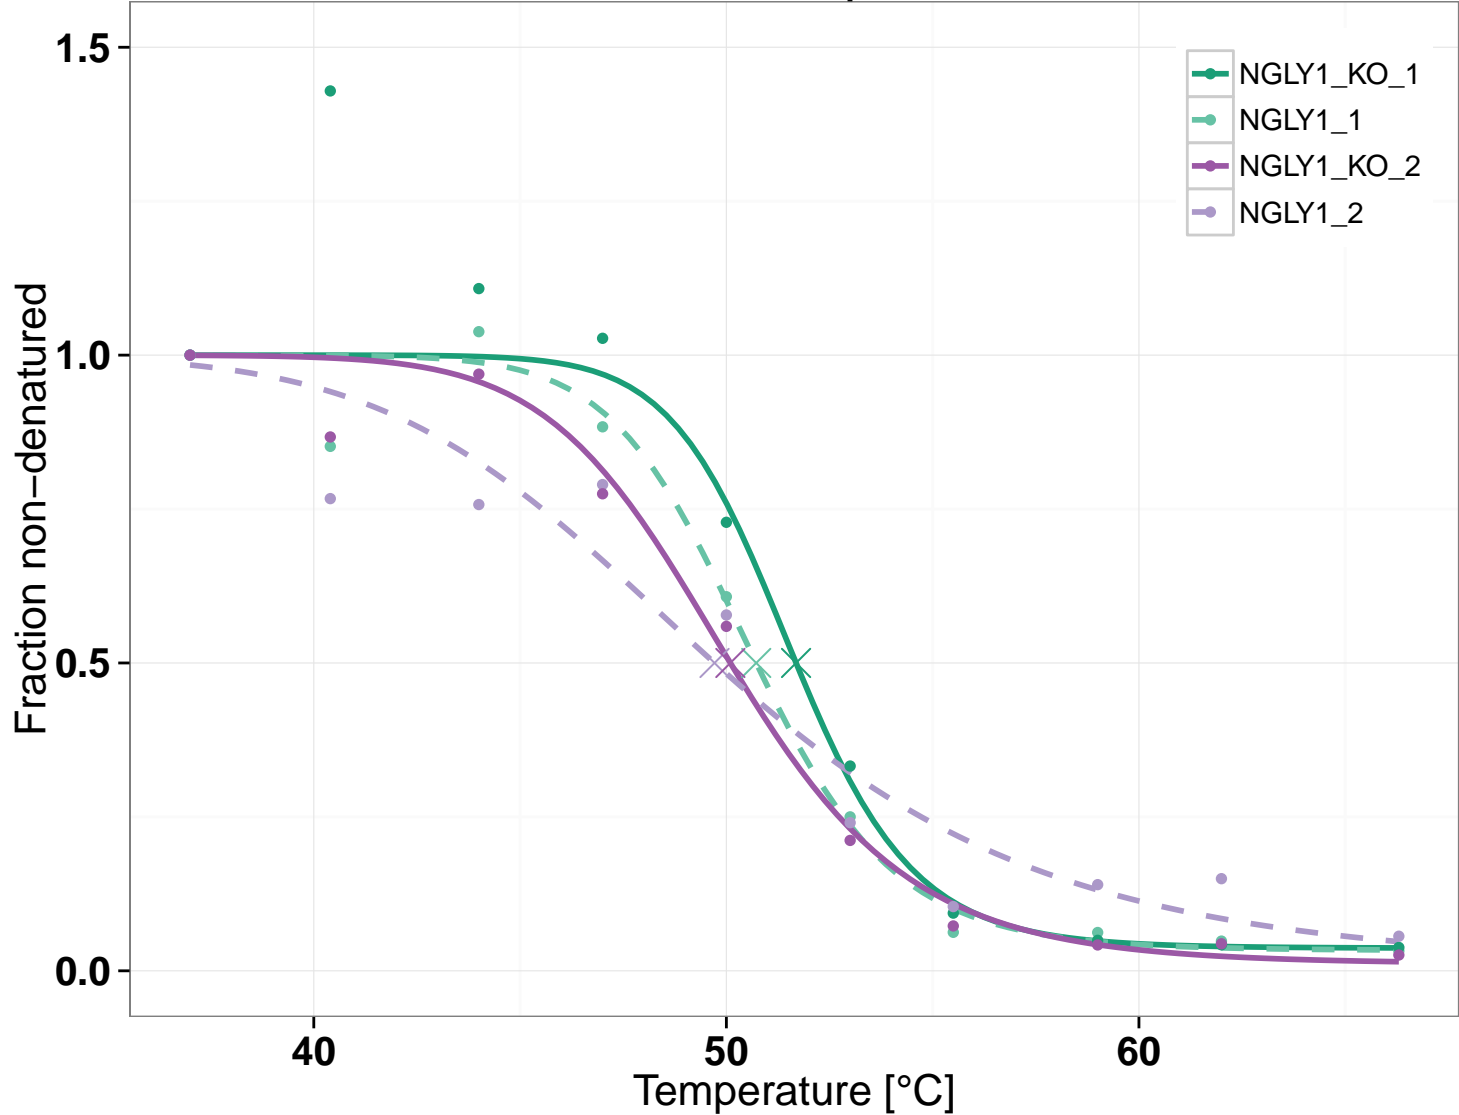

|            | meltPoint | slope  | plateau | R2   |
|------------|-----------|--------|---------|------|
| NGLY1_KO_1 | 51.69     | -0.16  | 0.04    | 0.92 |
| NGLY1_1    | 50.72     | -0.14  | 0.03    | 0.98 |
| NGLY1_KO_2 | 50.1      | -0.11  | 0.01    | 0.99 |
| NGLY1_2    | 49.71     | -0.062 | 0       | 0.93 |

Supplement: Supplementary file 1155 [file 1]

IPI00854653.2|C19ORF34

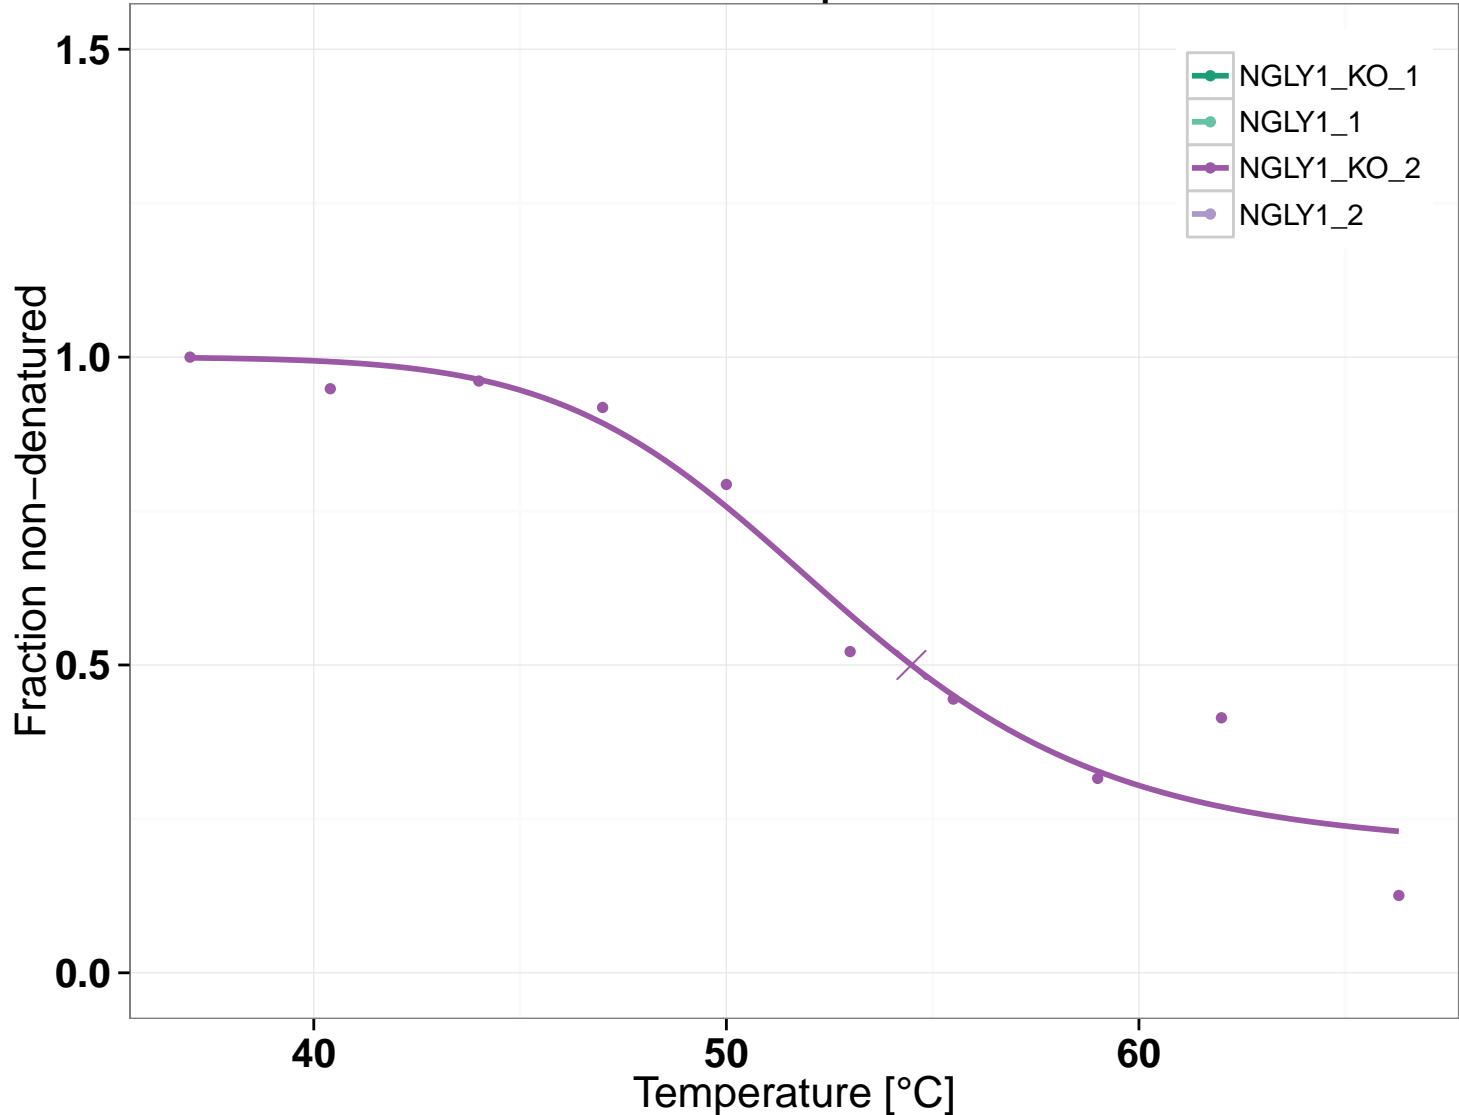

|            | meltPoint | slope | plateau | R2   |
|------------|-----------|-------|---------|------|
| NGLY1_KO_1 | —         | —     | —       | —    |
| NGLY1_1    | —         | —     | —       | —    |
| NGLY1_KO_2 | 54.49     | -0.06 | 0.2     | 0.96 |
| NGLY1_2    | —         | —     | —       | —    |

Supplement: Supplementary file 1156 [file 1]

IPI00852645.2|MICAL3

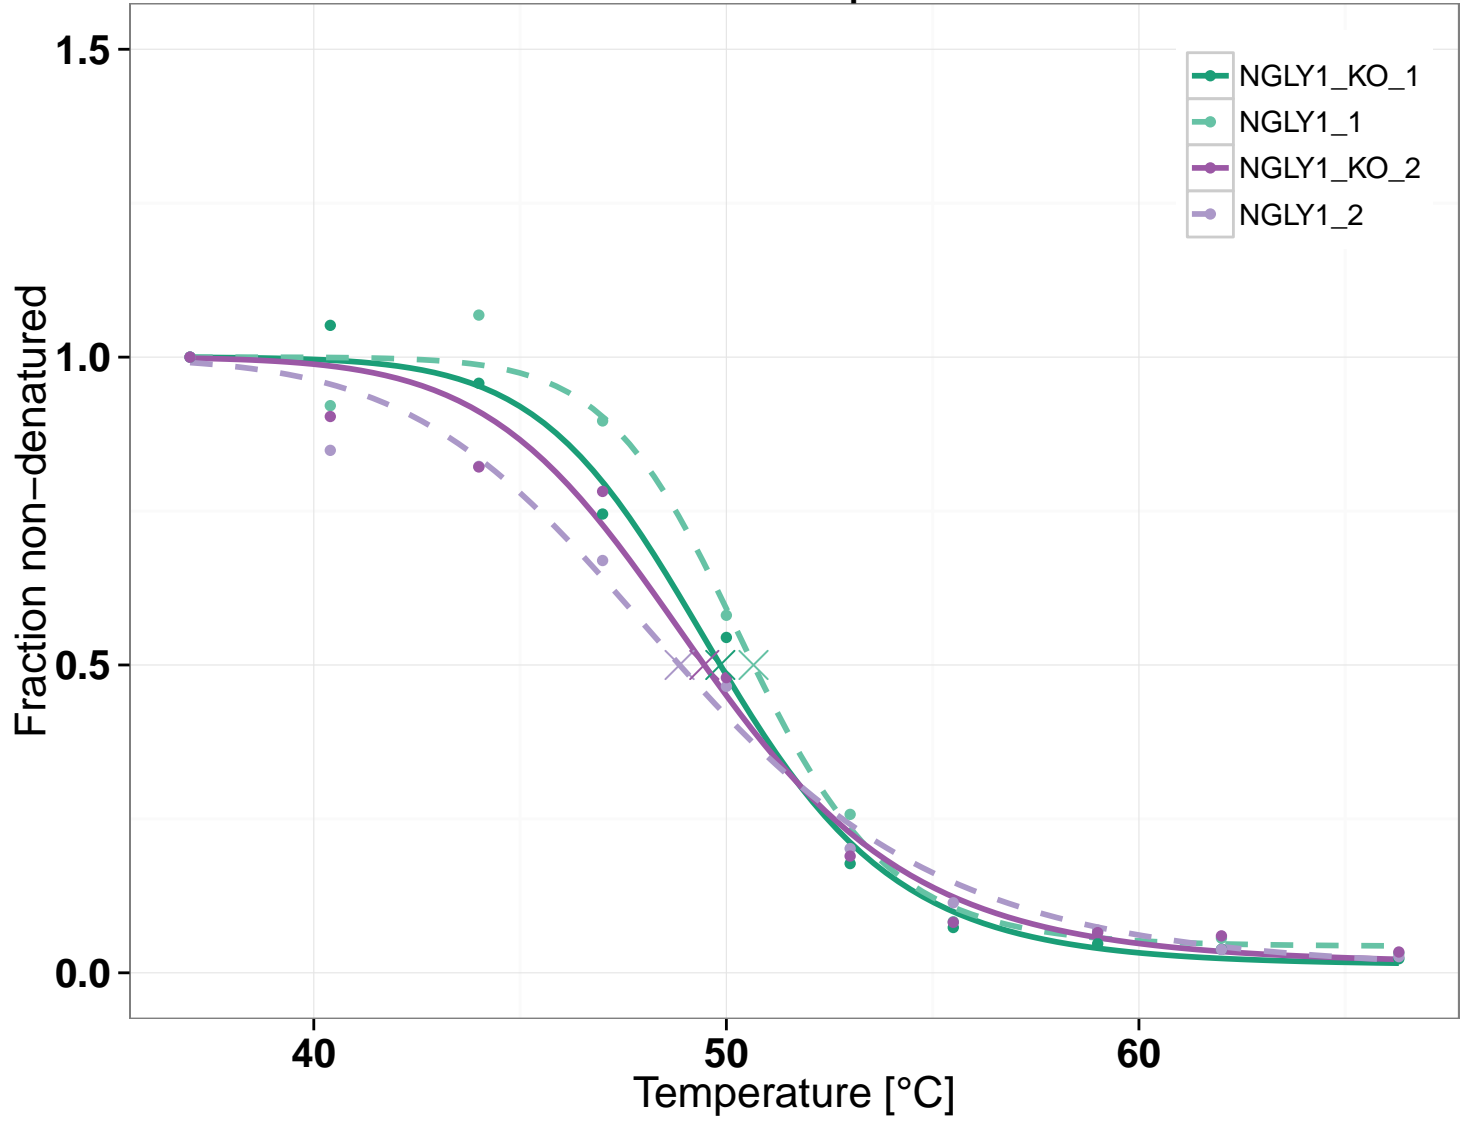

|            | meltPoint | slope  | plateau | R2   |
|------------|-----------|--------|---------|------|
| NGLY1_KO_1 | 49.85     | -0.11  | 0.01    | 0.99 |
| NGLY1_1    | 50.66     | -0.14  | 0.04    | 0.99 |
| NGLY1_KO_2 | 49.47     | -0.095 | 0.01    | 0.98 |
| NGLY1_2    | 48.87     | -0.077 | 0       | 0.99 |

Supplement: Supplementary file 1157 [file 1]

IPI00001458.1|KNTC1

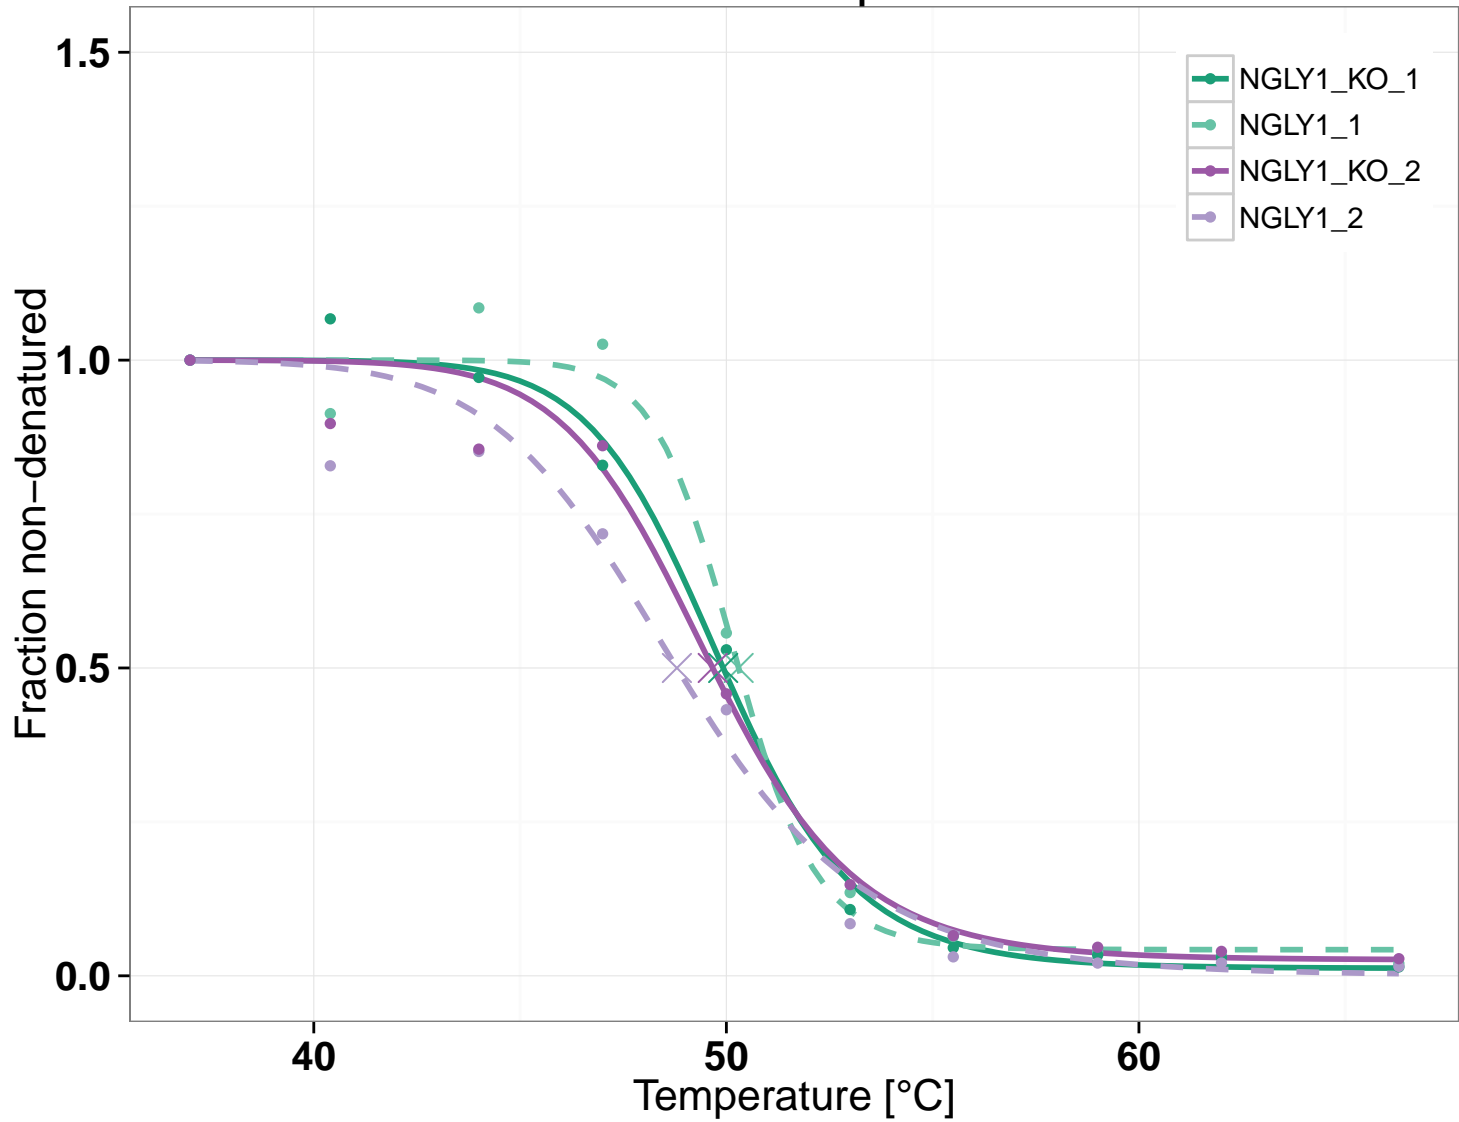

|            | meltPoint | slope | plateau | R2   |
|------------|-----------|-------|---------|------|
| NGLY1_KO_1 | 49.92     | -0.15 | 0.01    | 0.99 |
| NGLY1_1    | 50.3      | -0.24 | 0.04    | 0.99 |
| NGLY1_KO_2 | 49.67     | -0.14 | 0.03    | 0.98 |
| NGLY1_2    | 48.8      | -0.11 | 0       | 0.97 |

Supplement: Supplementary file 1158 [file 1]

IPI00032873.8|SLC35E3

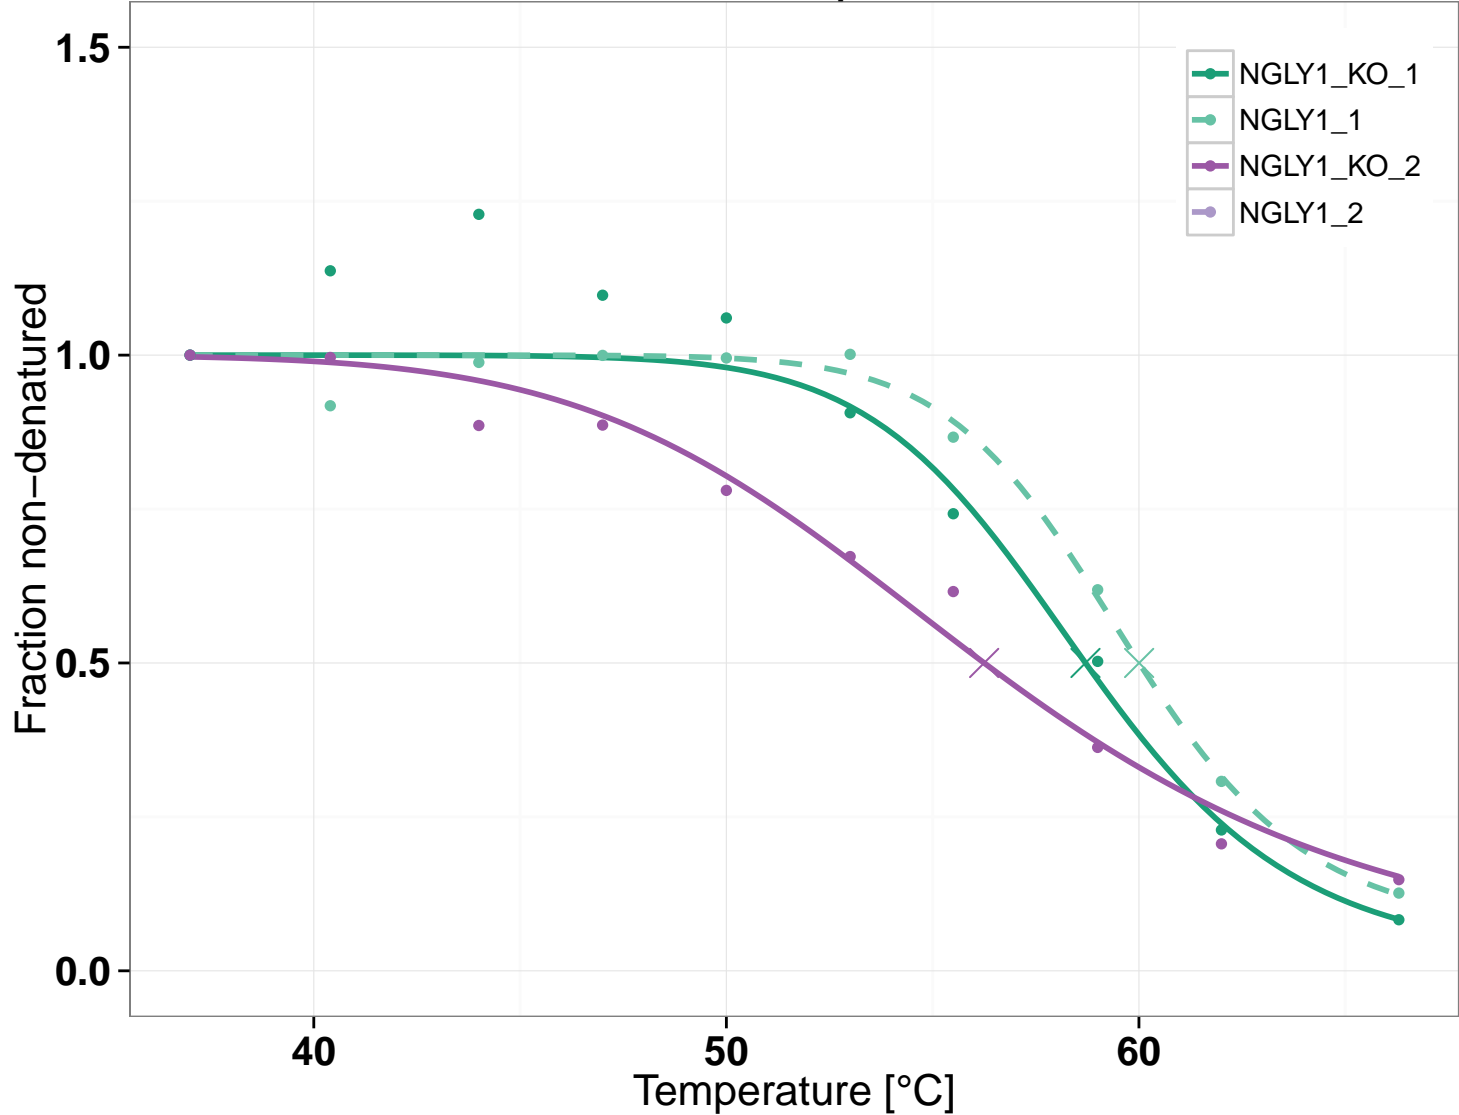

|            | meltPoint | slope  | plateau | R2   |
|------------|-----------|--------|---------|------|
| NGLY1_KO_1 | 58.7      | -0.095 | 0.02    | 0.94 |
| NGLY1_1    | 60        | -0.11  | 0.06    | 0.99 |
| NGLY1_KO_2 | 56.25     | -0.052 | 0       | 0.98 |
| NGLY1_2    | -         | -      | -       | -    |

Supplement: Supplementary file 1159 [file 1]

IPI00397883.6|YJ005\_HUMAN

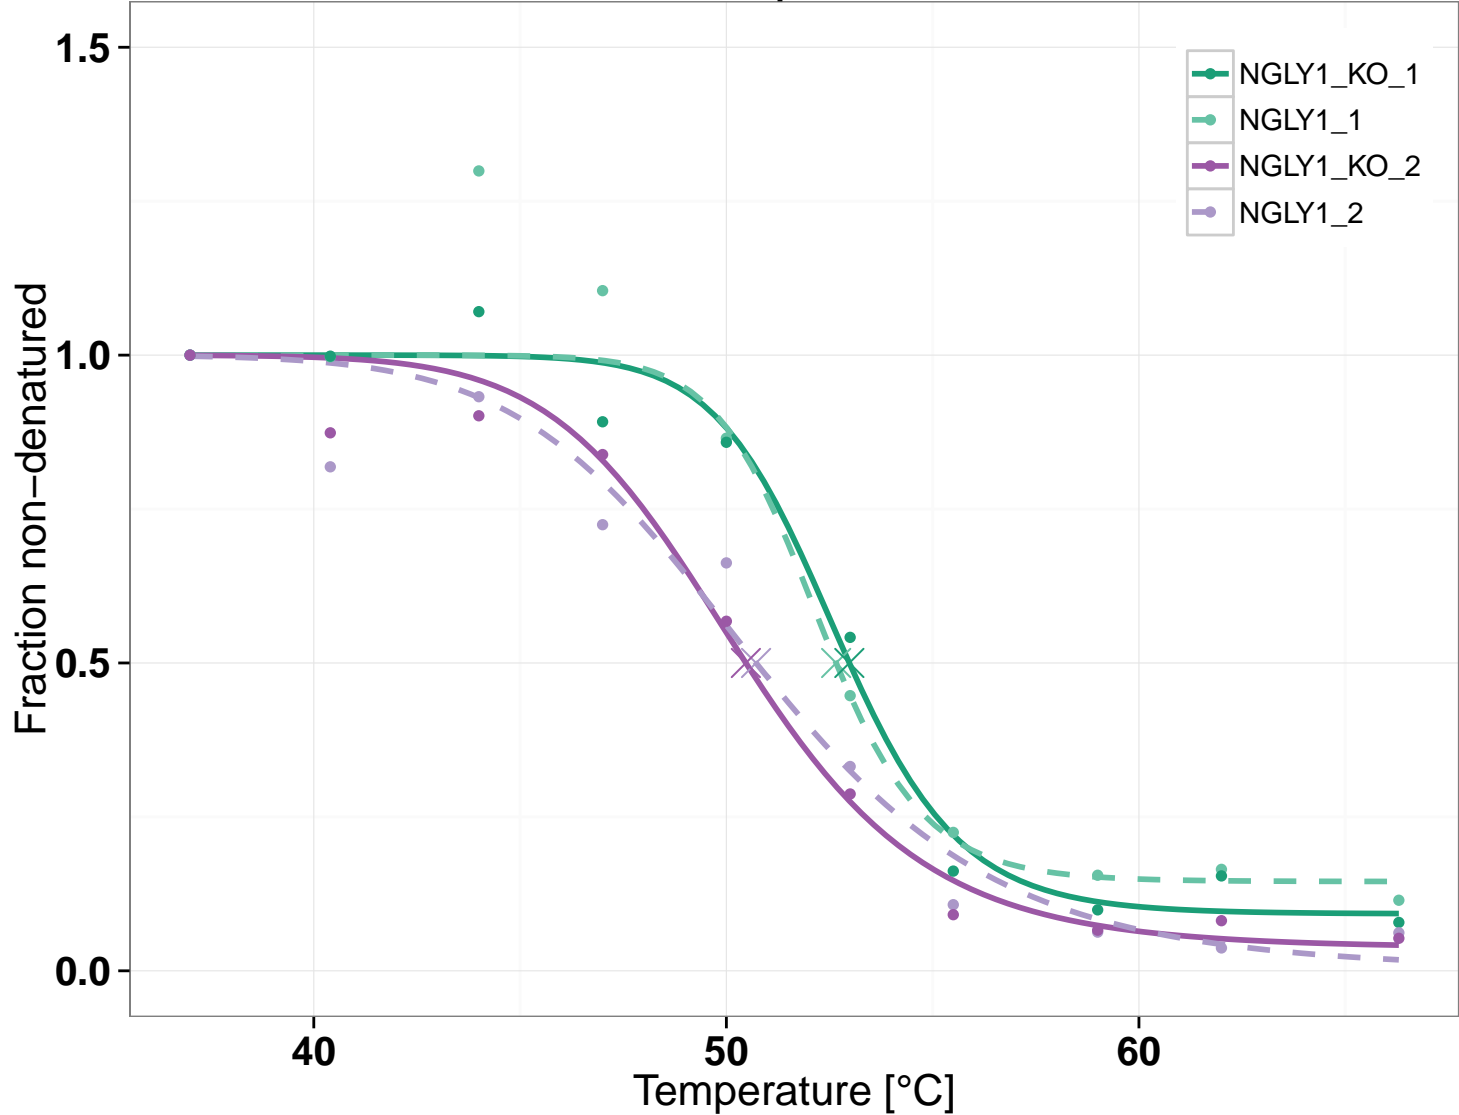

|            | meltPoint | slope  | plateau | R2   |
|------------|-----------|--------|---------|------|
| NGLY1_KO_1 | 52.98     | -0.15  | 0.09    | 0.99 |
| NGLY1_1    | 52.66     | -0.17  | 0.15    | 0.95 |
| NGLY1_KO_2 | 50.47     | -0.11  | 0.04    | 0.98 |
| NGLY1_2    | 50.72     | -0.085 | 0       | 0.96 |

Supplement: Supplementary file 1160 [file 1]

IPI00045946.4|YME1L1

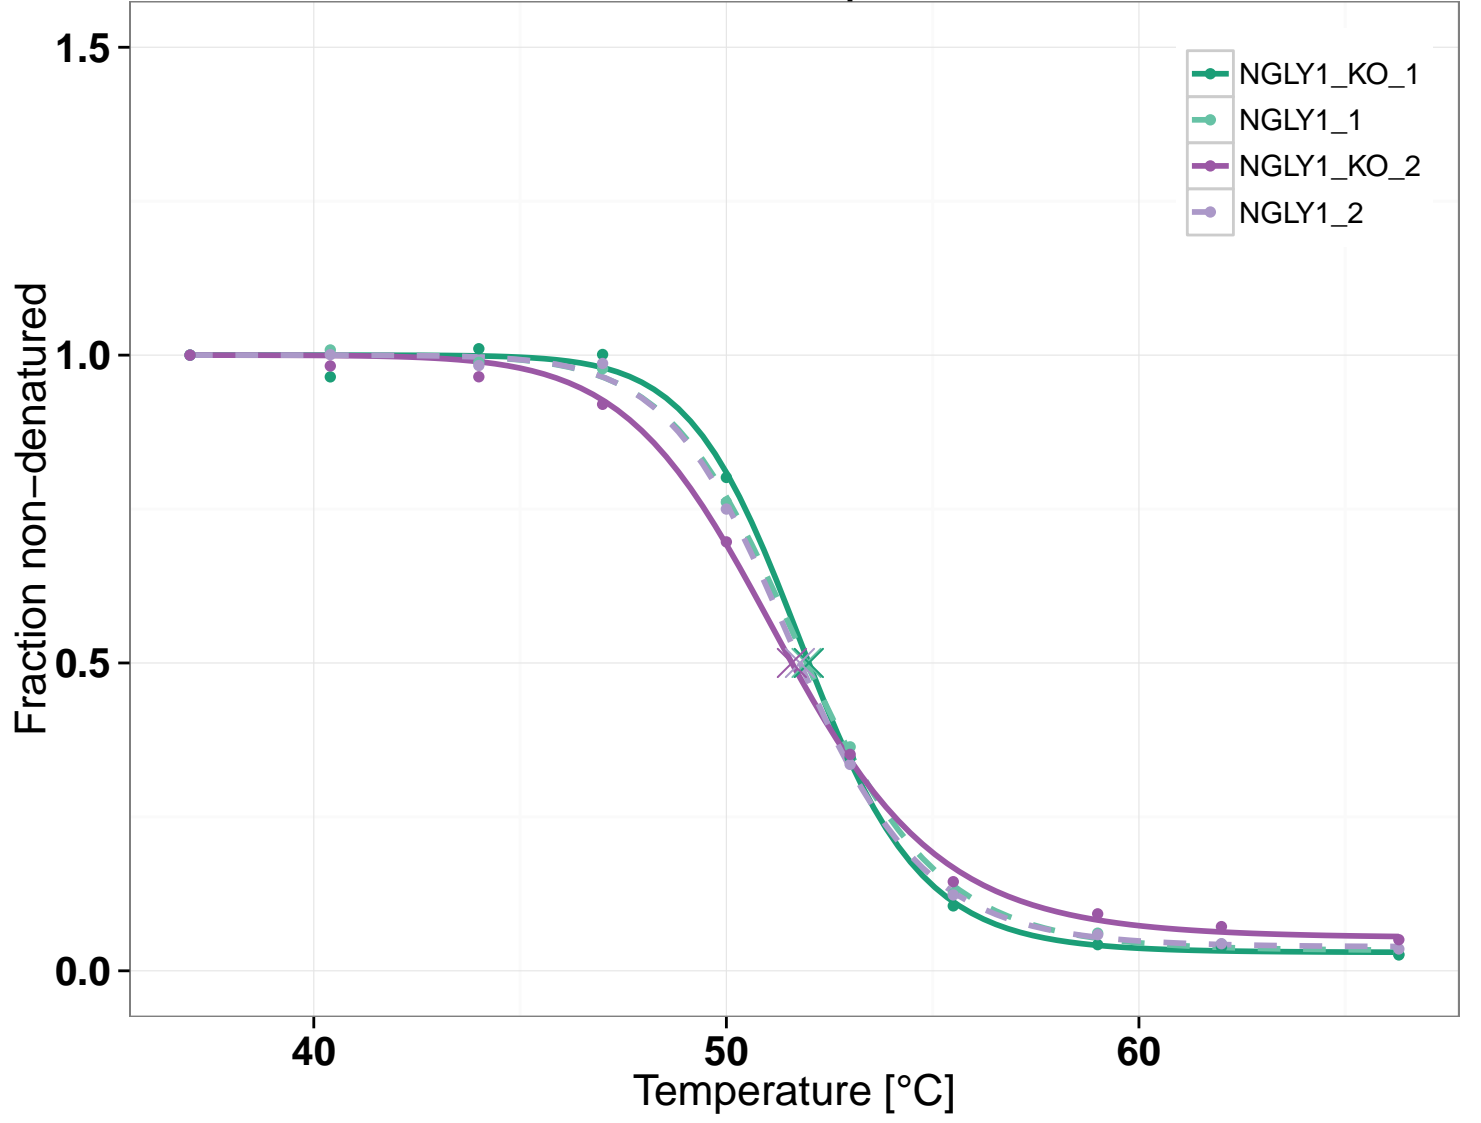

|            | meltPoint | slope | plateau | R2 |
|------------|-----------|-------|---------|----|
| NGLY1_KO_1 | 52        | -0.17 | 0.03    | 1  |
| NGLY1_1    | 51.94     | -0.15 | 0.03    | 1  |
| NGLY1_KO_2 | 51.59     | -0.12 | 0.05    | 1  |
| NGLY1_2    | 51.78     | -0.15 | 0.04    | 1  |

Supplement: Supplementary file 1161 [file 1]

IPI00165949.2|ERAP1

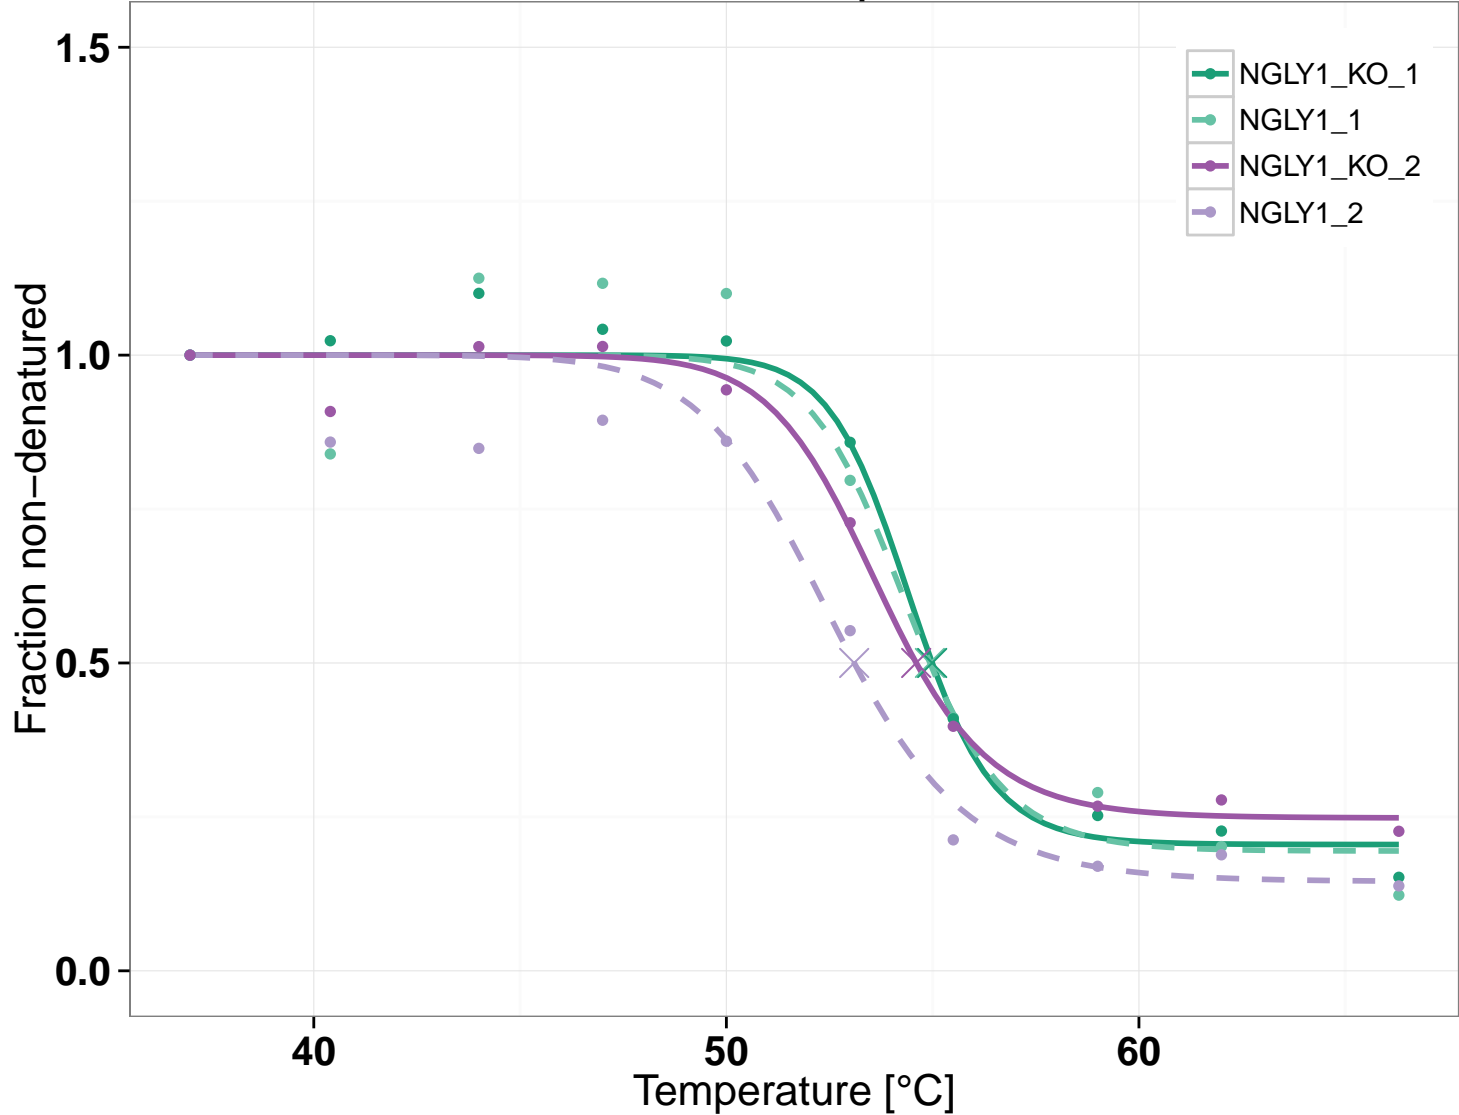

|            | meltPoint | slope | plateau | R2   |
|------------|-----------|-------|---------|------|
| NGLY1_KO_1 | 54.99     | -0.2  | 0.21    | 0.99 |
| NGLY1_1    | 54.93     | -0.17 | 0.19    | 0.95 |
| NGLY1_KO_2 | 54.6      | -0.14 | 0.25    | 0.99 |
| NGLY1_2    | 53.1      | -0.13 | 0.14    | 0.95 |

Supplement: Supplementary file 1162 [file 1]

# IPI00026580.1|OFD1

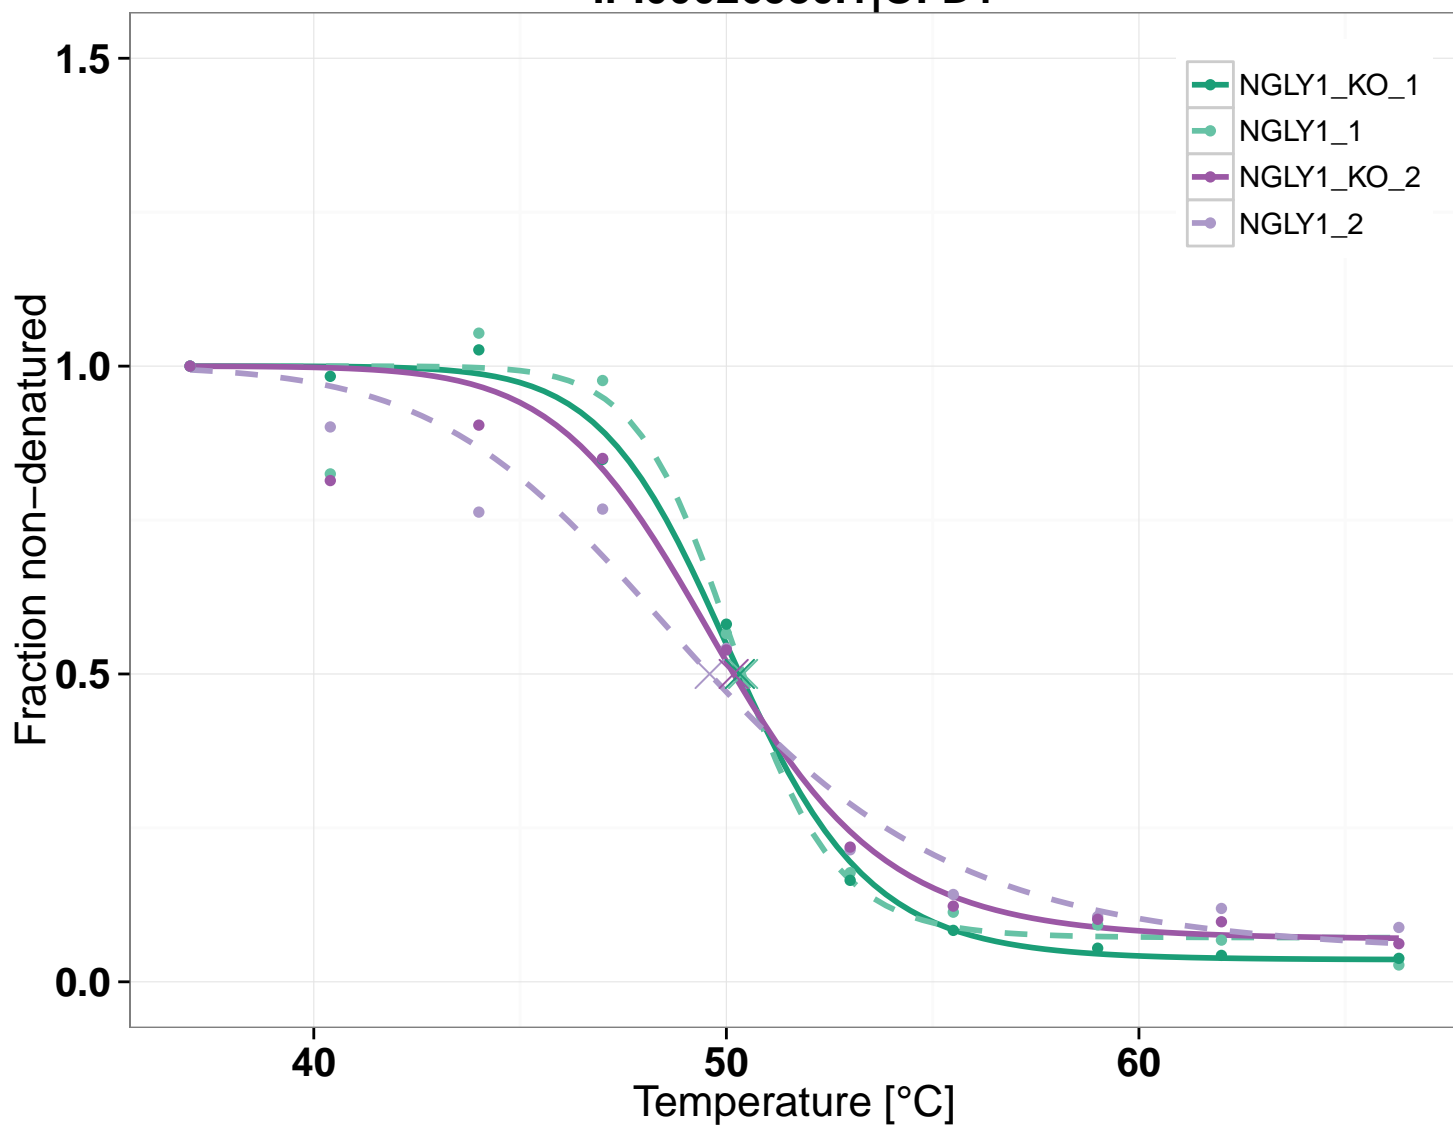

|            | meltPoint | slope  | plateau | R2   |
|------------|-----------|--------|---------|------|
| NGLY1_KO_1 | 50.33     | -0.15  | 0.04    | 1    |
| NGLY1_1    | 50.41     | -0.19  | 0.07    | 0.98 |
| NGLY1_KO_2 | 50.18     | -0.12  | 0.07    | 0.97 |
| NGLY1_2    | 49.59     | -0.075 | 0.04    | 0.97 |

Supplement: Supplementary file 1163 [file 1]

# IPI00021855.1|APOC1

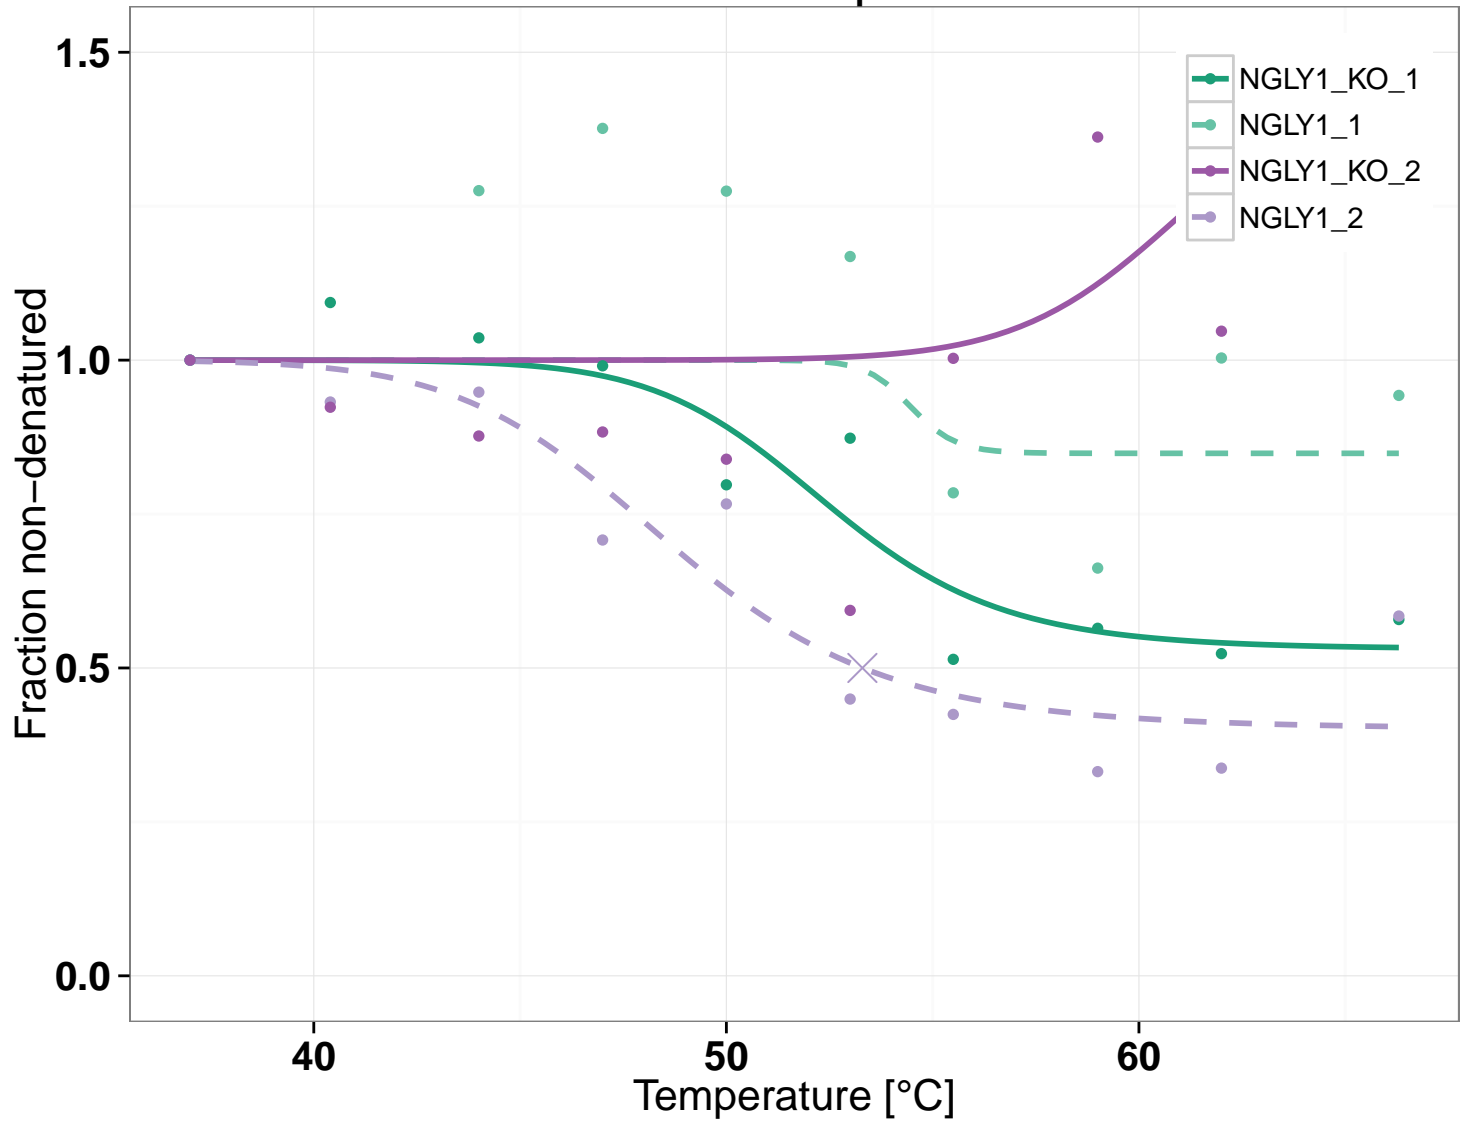

|            | meltPoint | slope  | plateau | R2    |
|------------|-----------|--------|---------|-------|
| NGLY1_KO_1 | -         | -0.055 | 0.53    | 0.89  |
| NGLY1_1    | -         | -0.069 | 0.85    | -0.05 |
| NGLY1_KO_2 | -         | 0.06   | 1.5     | 0.51  |
| NGLY1_2    | 53.3      | -0.058 | 0.4     | 0.87  |

Supplement: Supplementary file 1164 [file 1]

IPI00028099.2|CHM

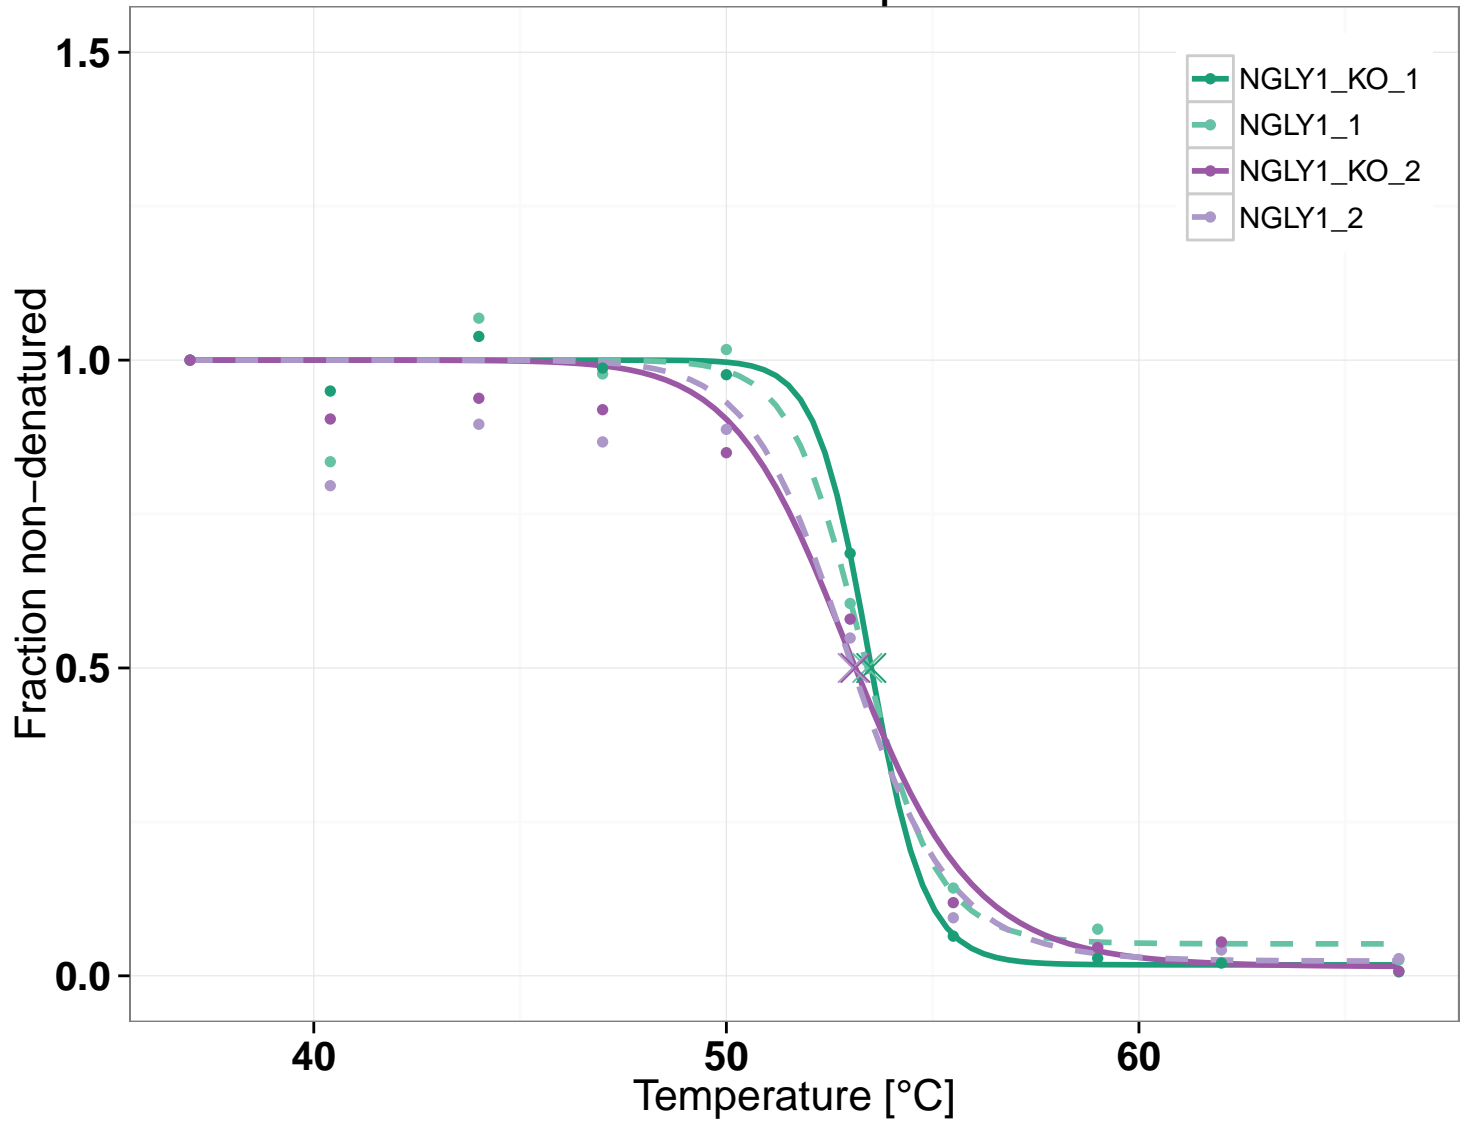

|            | meltPoint | slope | plateau | R2   |
|------------|-----------|-------|---------|------|
| NGLY1_KO_1 | 53.51     | -0.37 | 0.02    | 1    |
| NGLY1_1    | 53.42     | -0.27 | 0.05    | 0.98 |
| NGLY1_KO_2 | 53.13     | -0.17 | 0.01    | 0.98 |
| NGLY1_2    | 53.06     | -0.2  | 0.02    | 0.95 |

Supplement: Supplementary file 1165 [file 1]

IPI00025091.3|RPS11

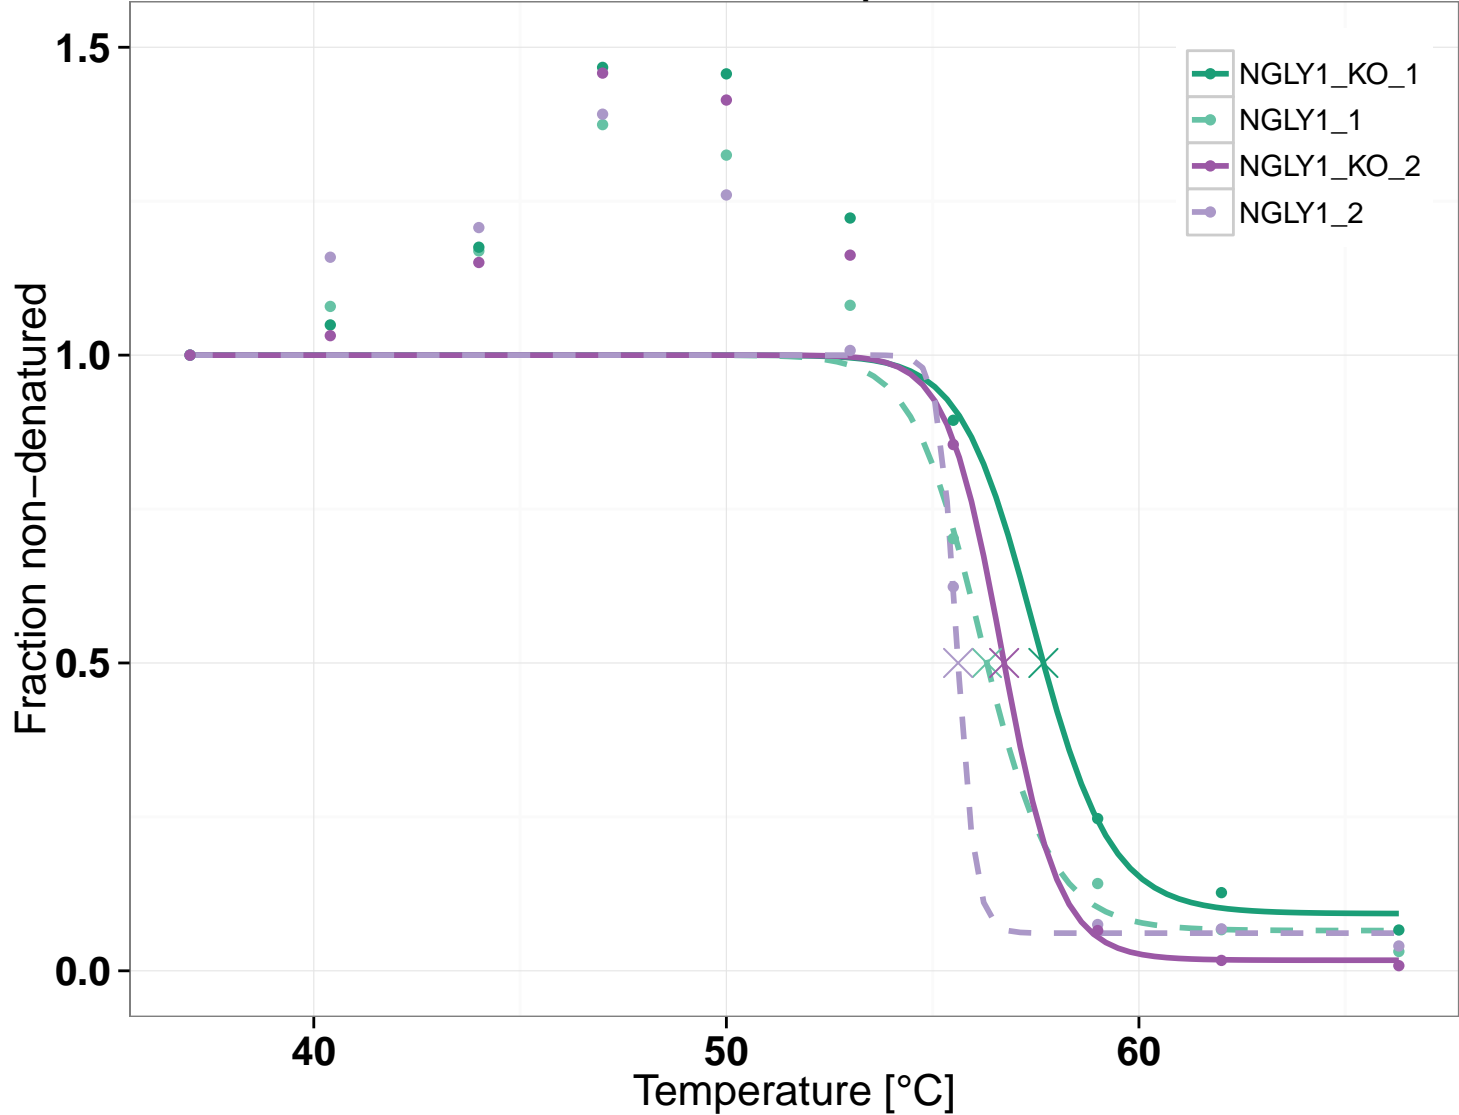

|            | meltPoint | slope | plateau | R2   |
|------------|-----------|-------|---------|------|
| NGLY1_KO_1 | 57.68     | -0.25 | 0.09    | 0.8  |
| NGLY1_1    | 56.31     | -0.28 | 0.07    | 0.88 |
| NGLY1_KO_2 | 56.73     | -0.36 | 0.02    | 0.85 |
| NGLY1_2    | 55.62     | -1.1  | 0.06    | 0.89 |

Supplement: Supplementary file 1166 [file 1]

IPI00292140.4|CASP3

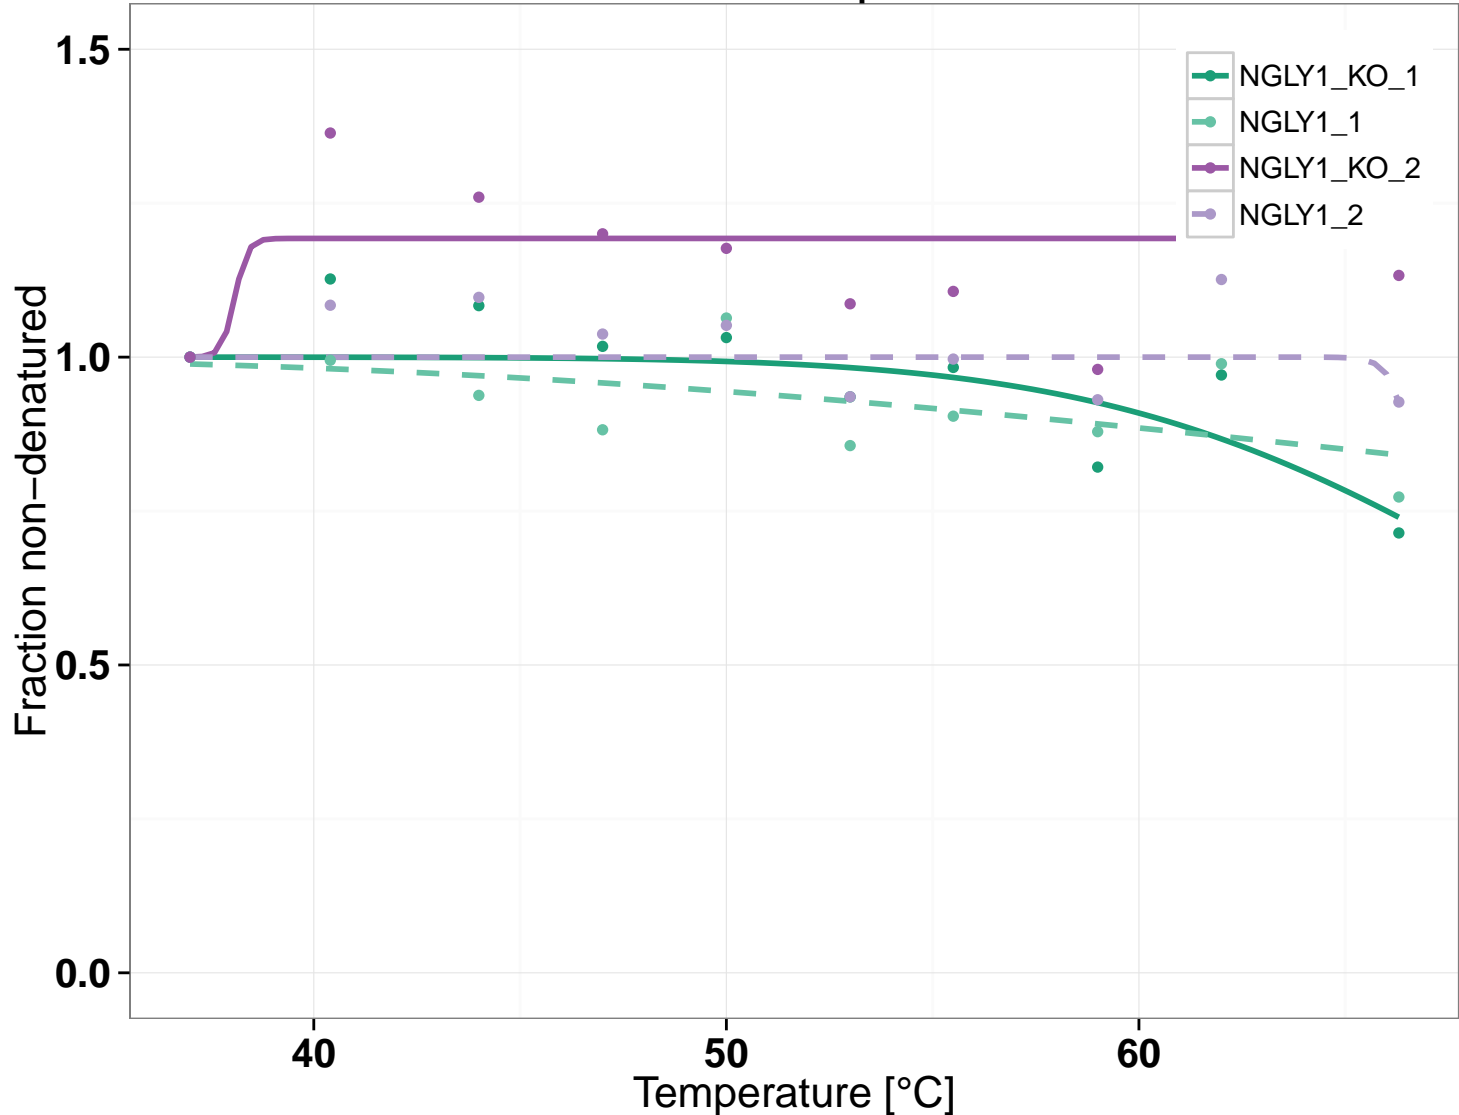

|            | meltPoint | slope | plateau | R2   |
|------------|-----------|-------|---------|------|
| NGLY1_KO_1 | -         | -     | 0       | 0.62 |
| NGLY1_1    | -         | -     | 0       | 0.31 |
| NGLY1_KO_2 | -         | 0.32  | 1.19    | 0.18 |
| NGLY1_2    | -         | -     | 0       | 0.04 |

Supplement: Supplementary file 1167 [file 1]

IPI00018116.2|PTPN9

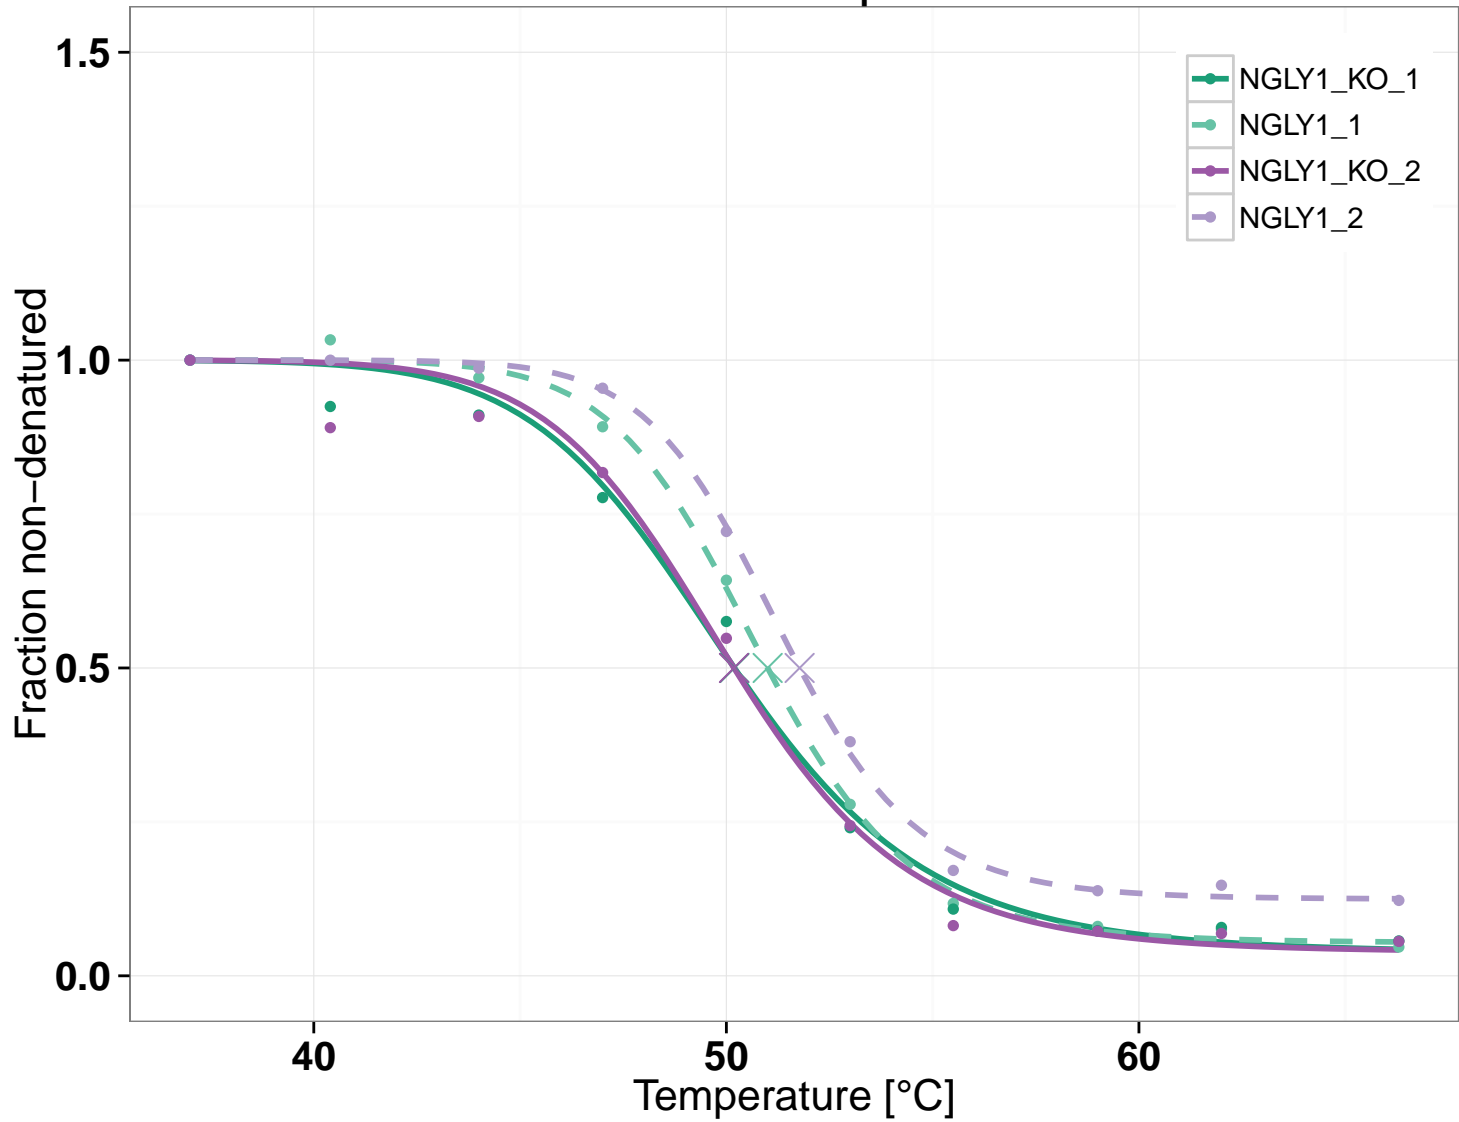

|            | meltPoint | slope | plateau | R2   |
|------------|-----------|-------|---------|------|
| NGLY1_KO_1 | 50.2      | -0.1  | 0.04    | 0.99 |
| NGLY1_1    | 51        | -0.13 | 0.05    | 1    |
| NGLY1_KO_2 | 50.18     | -0.11 | 0.04    | 0.99 |
| NGLY1_2    | 51.78     | -0.13 | 0.12    | 1    |

Supplement: Supplementary file 1168 [file 1]

IPI00412670.1|C2ORF56

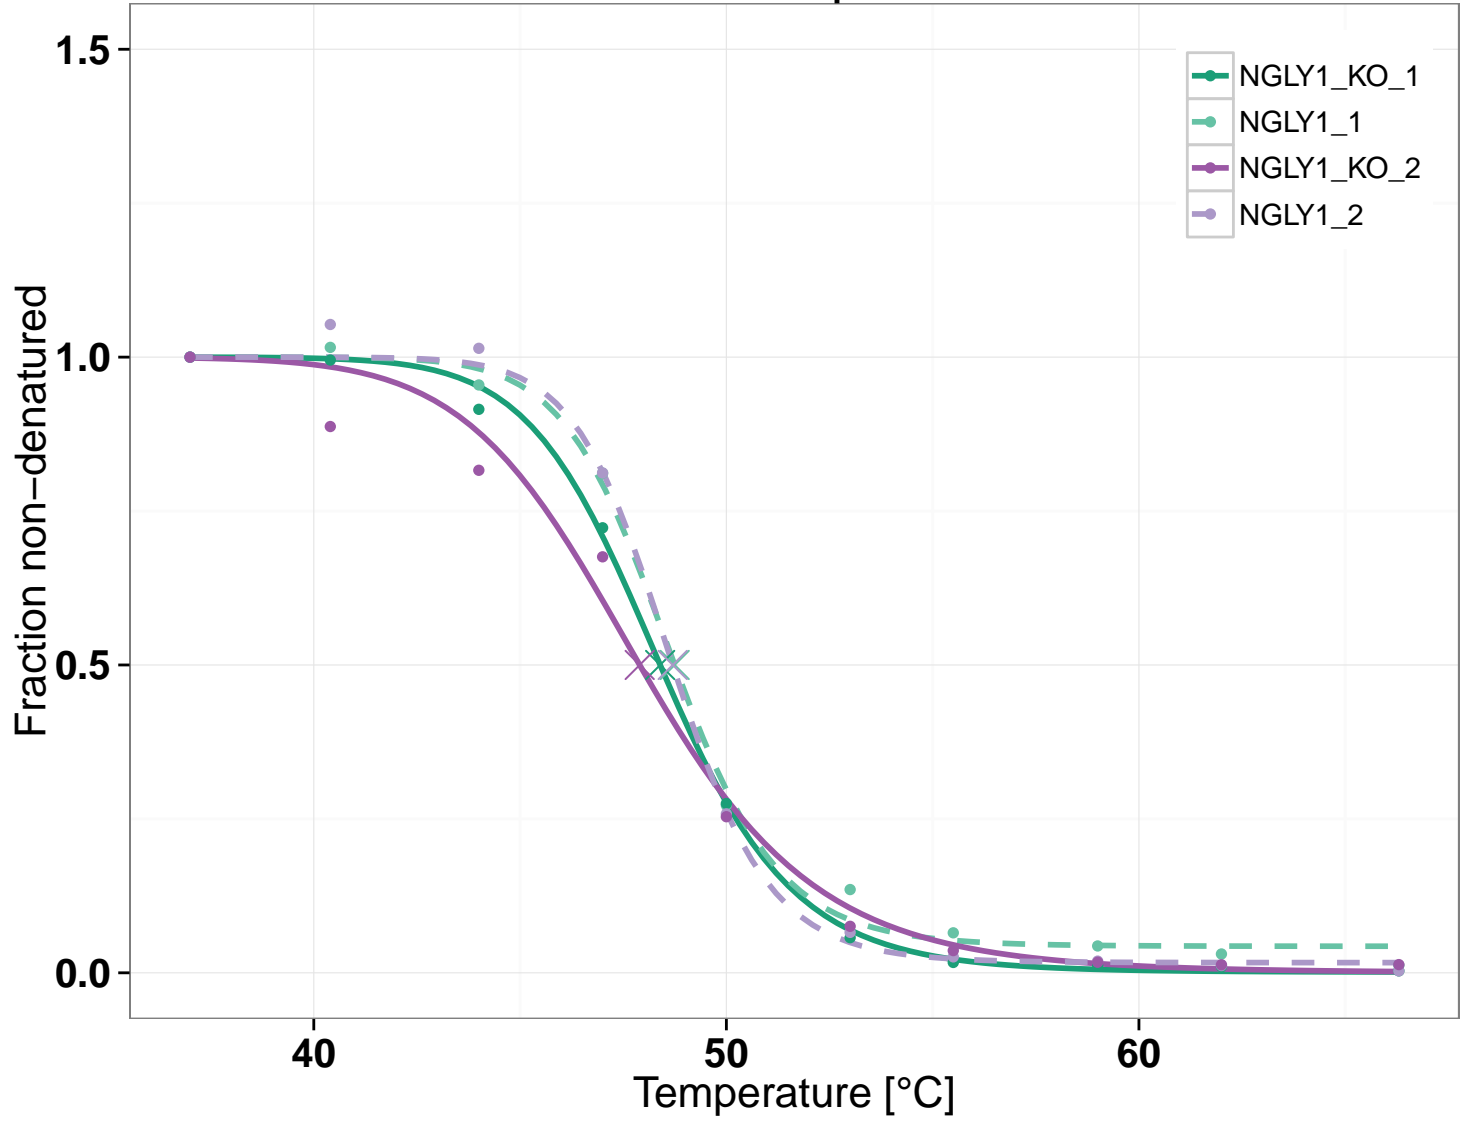

|            | meltPoint | slope | plateau | R2   |
|------------|-----------|-------|---------|------|
| NGLY1_KO_1 | 48.39     | -0.16 | 0       | 1    |
| NGLY1_1    | 48.75     | -0.18 | 0.04    | 1    |
| NGLY1_KO_2 | 47.9      | -0.12 | 0       | 0.99 |
| NGLY1_2    | 48.7      | -0.21 | 0.02    | 1    |

Supplement: Supplementary file 1169 [file 1]

# IPI00290279.1|ADK

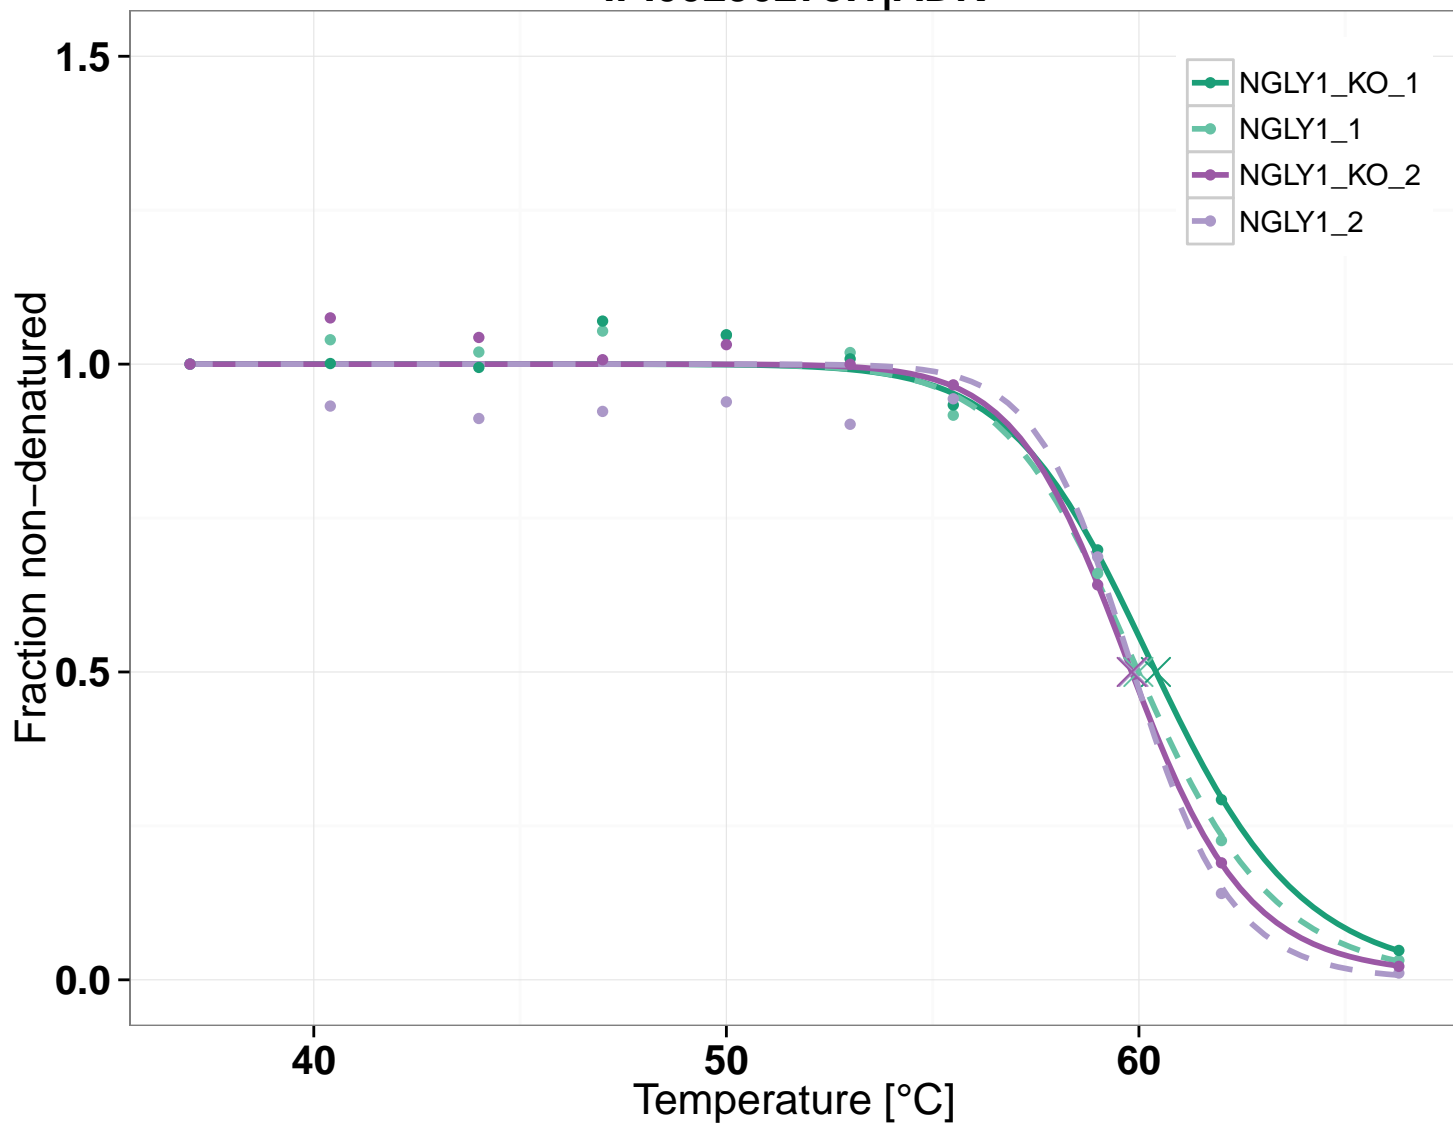

|            | meltPoint | slope | plateau | R2   |
|------------|-----------|-------|---------|------|
| NGLY1_KO_1 | 60.41     | -0.14 | 0       | 0.99 |
| NGLY1_1    | 59.99     | -0.15 | 0       | 0.99 |
| NGLY1_KO_2 | 59.82     | -0.18 | 0.01    | 0.99 |
| NGLY1_2    | 59.87     | -0.21 | 0       | 0.97 |

Supplement: Supplementary file 1170 [file 1]

IPI00001364.2|C21ORF66

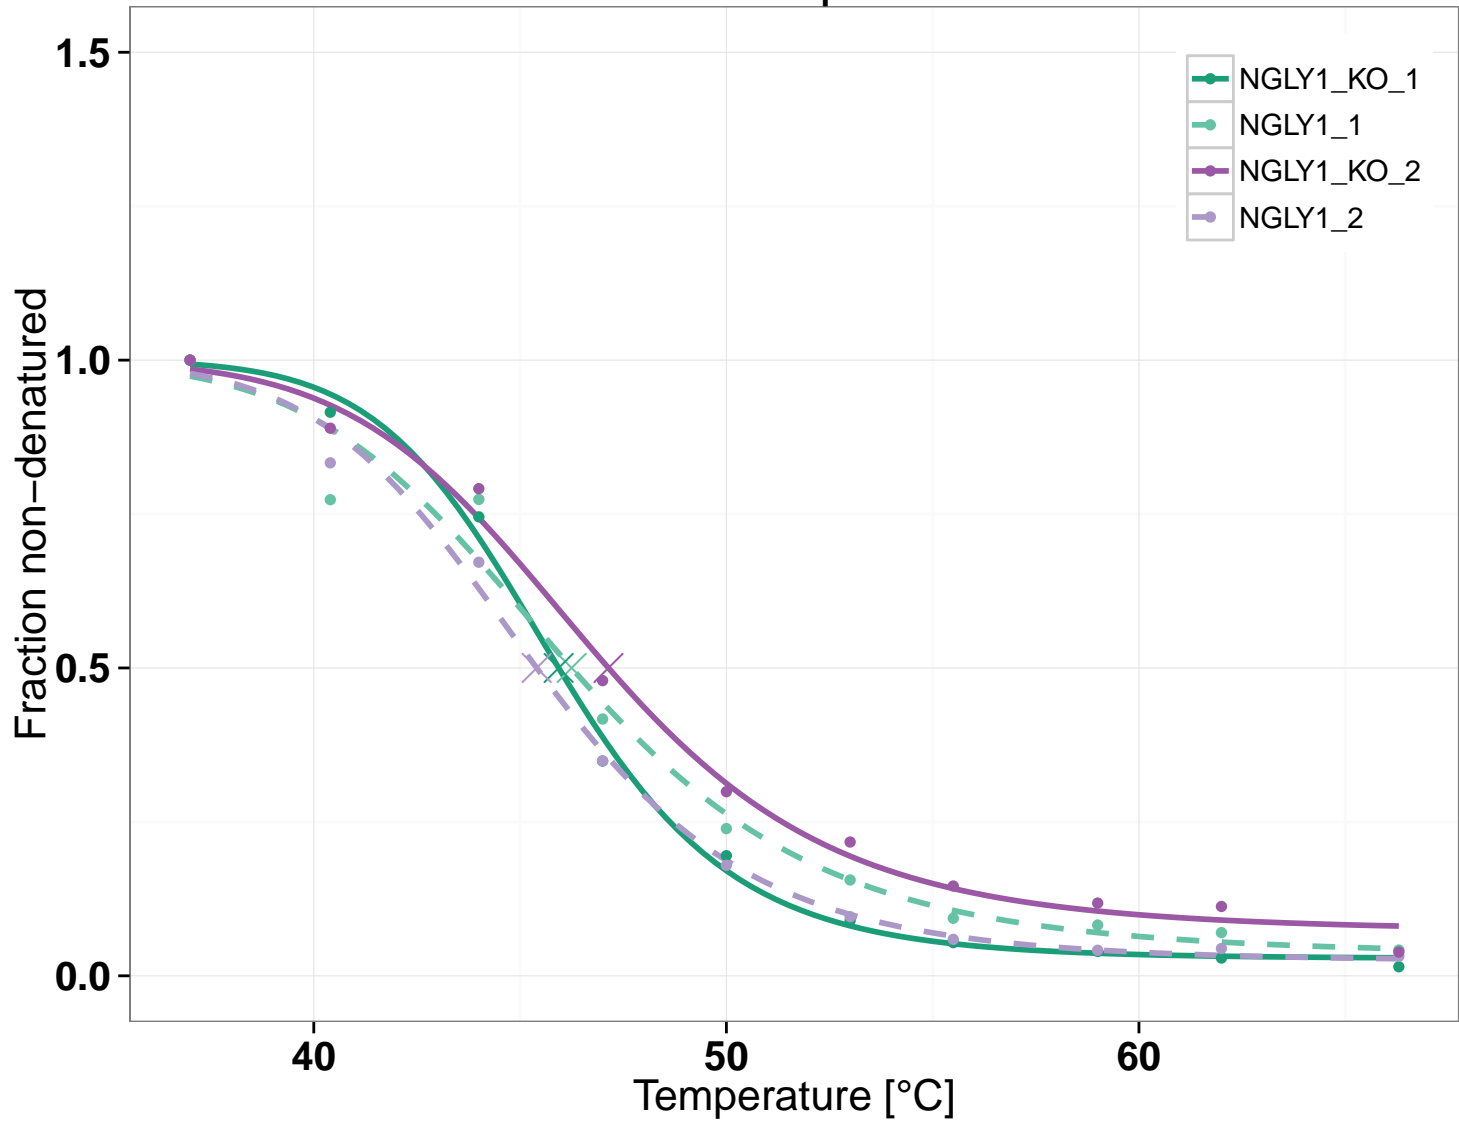

|            | meltPoint | slope  | plateau | R2   |
|------------|-----------|--------|---------|------|
| NGLY1_KO_1 | 45.94     | -0.11  | 0.03    | 1    |
| NGLY1_1    | 46.25     | -0.079 | 0.03    | 0.98 |
| NGLY1_KO_2 | 47.14     | -0.08  | 0.07    | 0.99 |
| NGLY1_2    | 45.4      | -0.093 | 0.02    | 1    |

Supplement: Supplementary file 1172 [file 1]

# IPI00328680.2|MCFD2

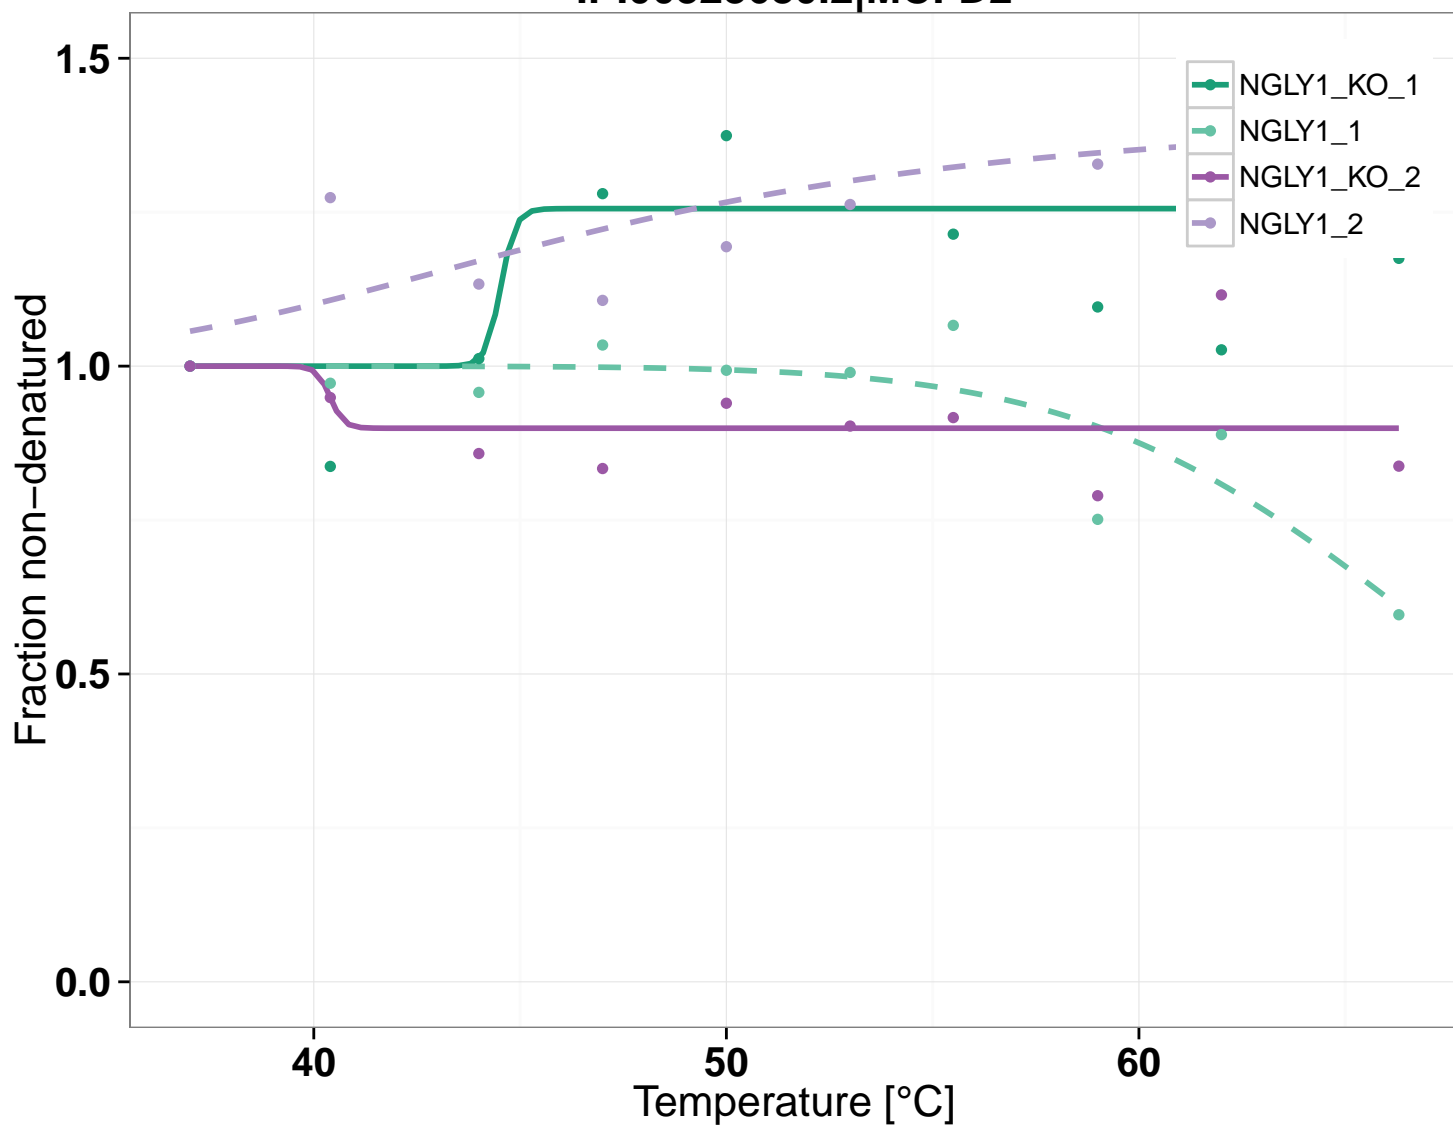

|            | meltPoint | slope | plateau | R2   |
|------------|-----------|-------|---------|------|
| NGLY1_KO_1 | –         | 0.36  | 1.26    | 0.42 |
| NGLY1_1    | –         | –     | 0       | 0.77 |
| NGLY1_KO_2 | –         | –0.16 | 0.9     | 0.13 |
| NGLY1_2    | –         | 0.018 | 1.41    | 0.41 |

Supplement: Supplementary file 1173 [file 1]

# IPI00328184.5|SHROOM1

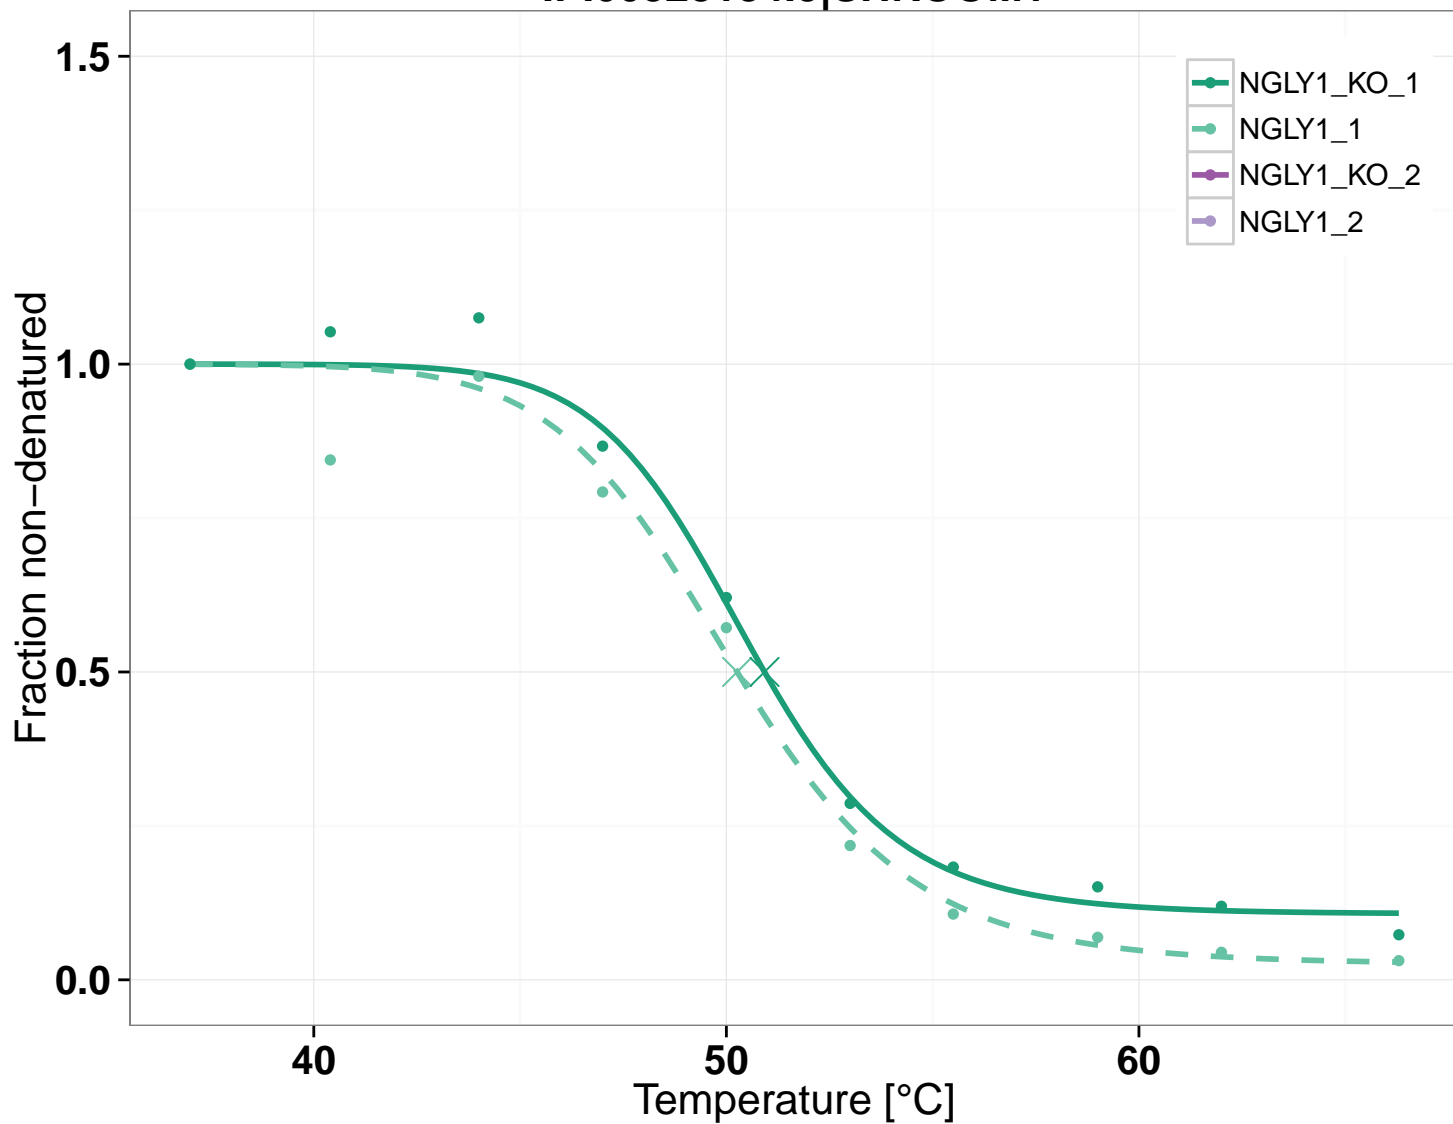

|            | meltPoint | slope | plateau | R2   |
|------------|-----------|-------|---------|------|
| NGLY1_KO_1 | 50.92     | -0.12 | 0.11    | 0.99 |
| NGLY1_1    | 50.26     | -0.11 | 0.02    | 0.98 |
| NGLY1_KO_2 | -         | -     | -       | -    |
| NGLY1_2    | -         | -     | -       | -    |

Supplement: Supplementary file 1174 [file 1]

# IPI00454695.4|HIST2H2BC

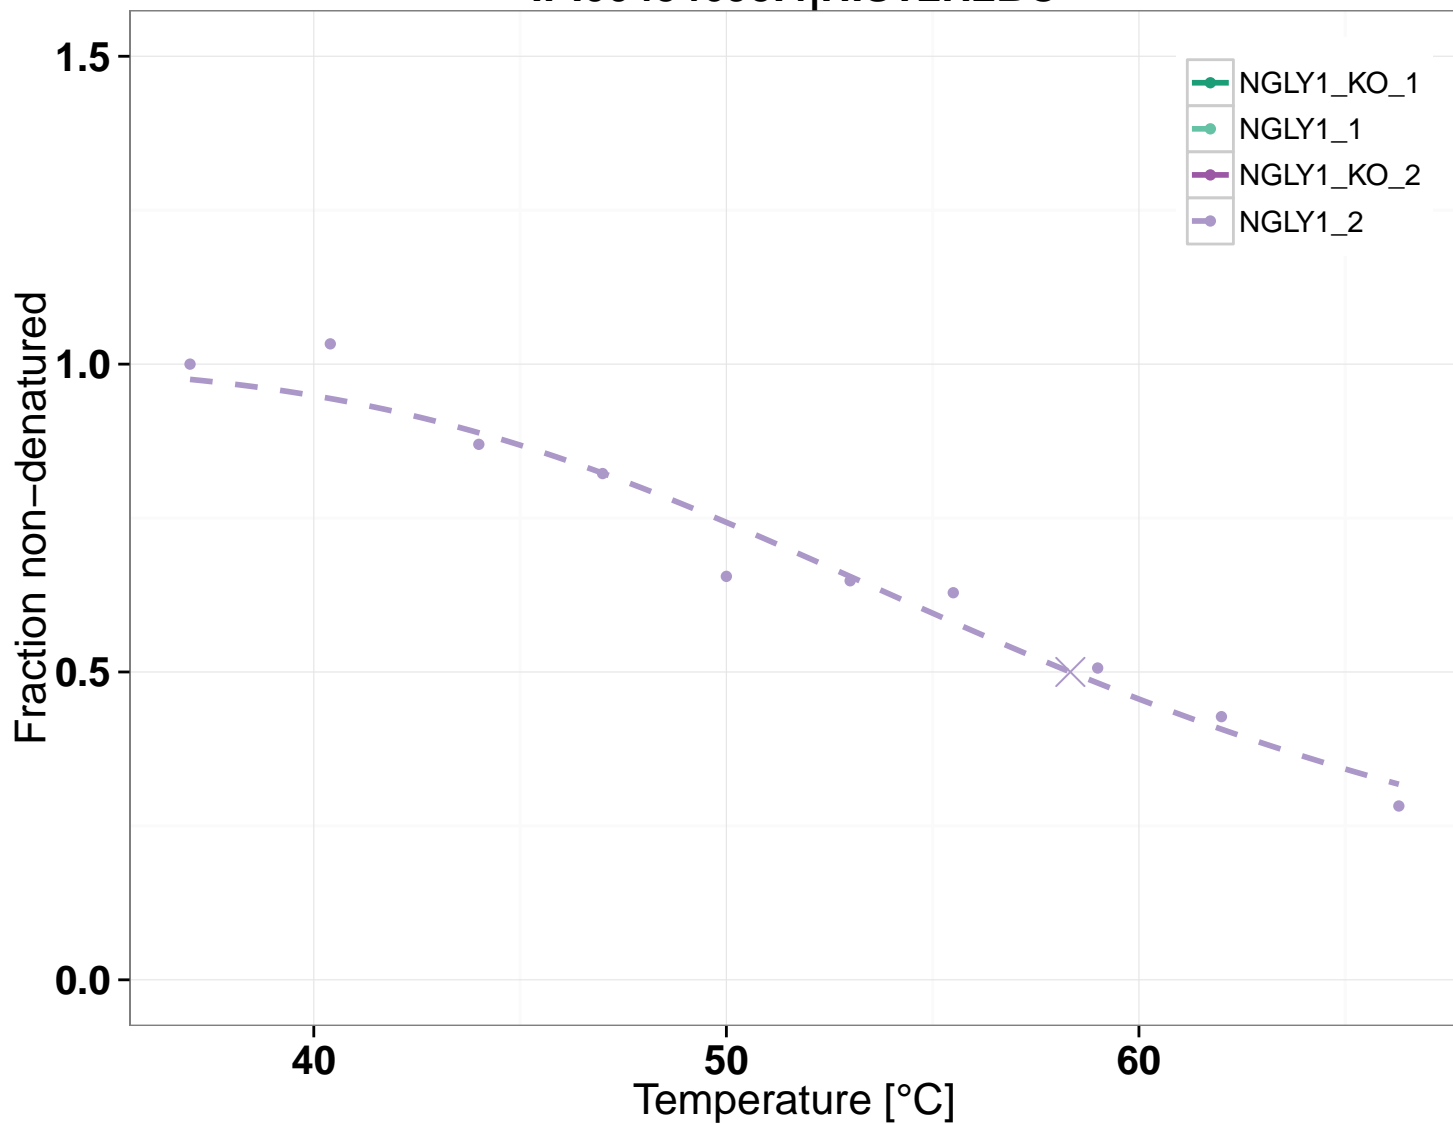

|            | meltPoint | slope | plateau | R2   |
|------------|-----------|-------|---------|------|
| NGLY1_KO_1 | —         | —     | —       | —    |
| NGLY1_1    | —         | —     | —       | —    |
| NGLY1_KO_2 | —         | —     | —       | —    |
| NGLY1_2    | 58.34     | -0.03 | 0       | 0.96 |

Supplement: Supplementary file 1175 [file 1]

# IPI00166860.3|DHR SX

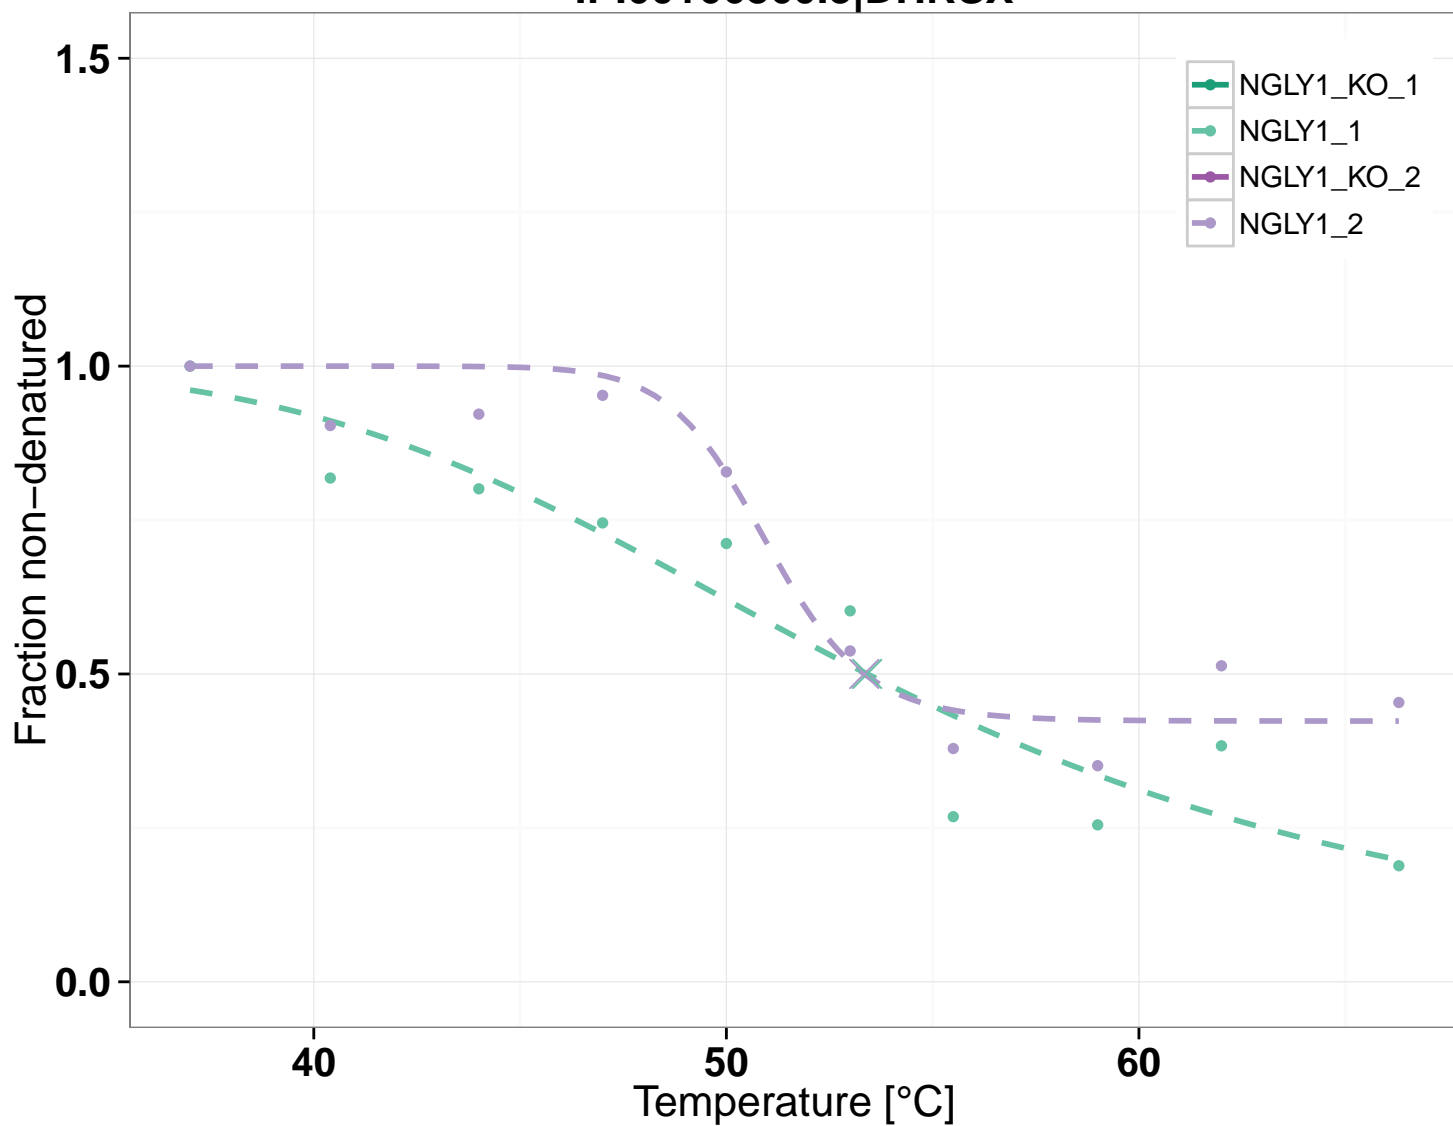

|            | meltPoint | slope  | plateau | R2   |
|------------|-----------|--------|---------|------|
| NGLY1_KO_1 | —         | —      | —       | —    |
| NGLY1_1    | 53.41     | -0.036 | 0       | 0.9  |
| NGLY1_KO_2 | —         | —      | —       | —    |
| NGLY1_2    | 53.34     | -0.12  | 0.42    | 0.94 |

Supplement: Supplementary file 1176 [file 1]

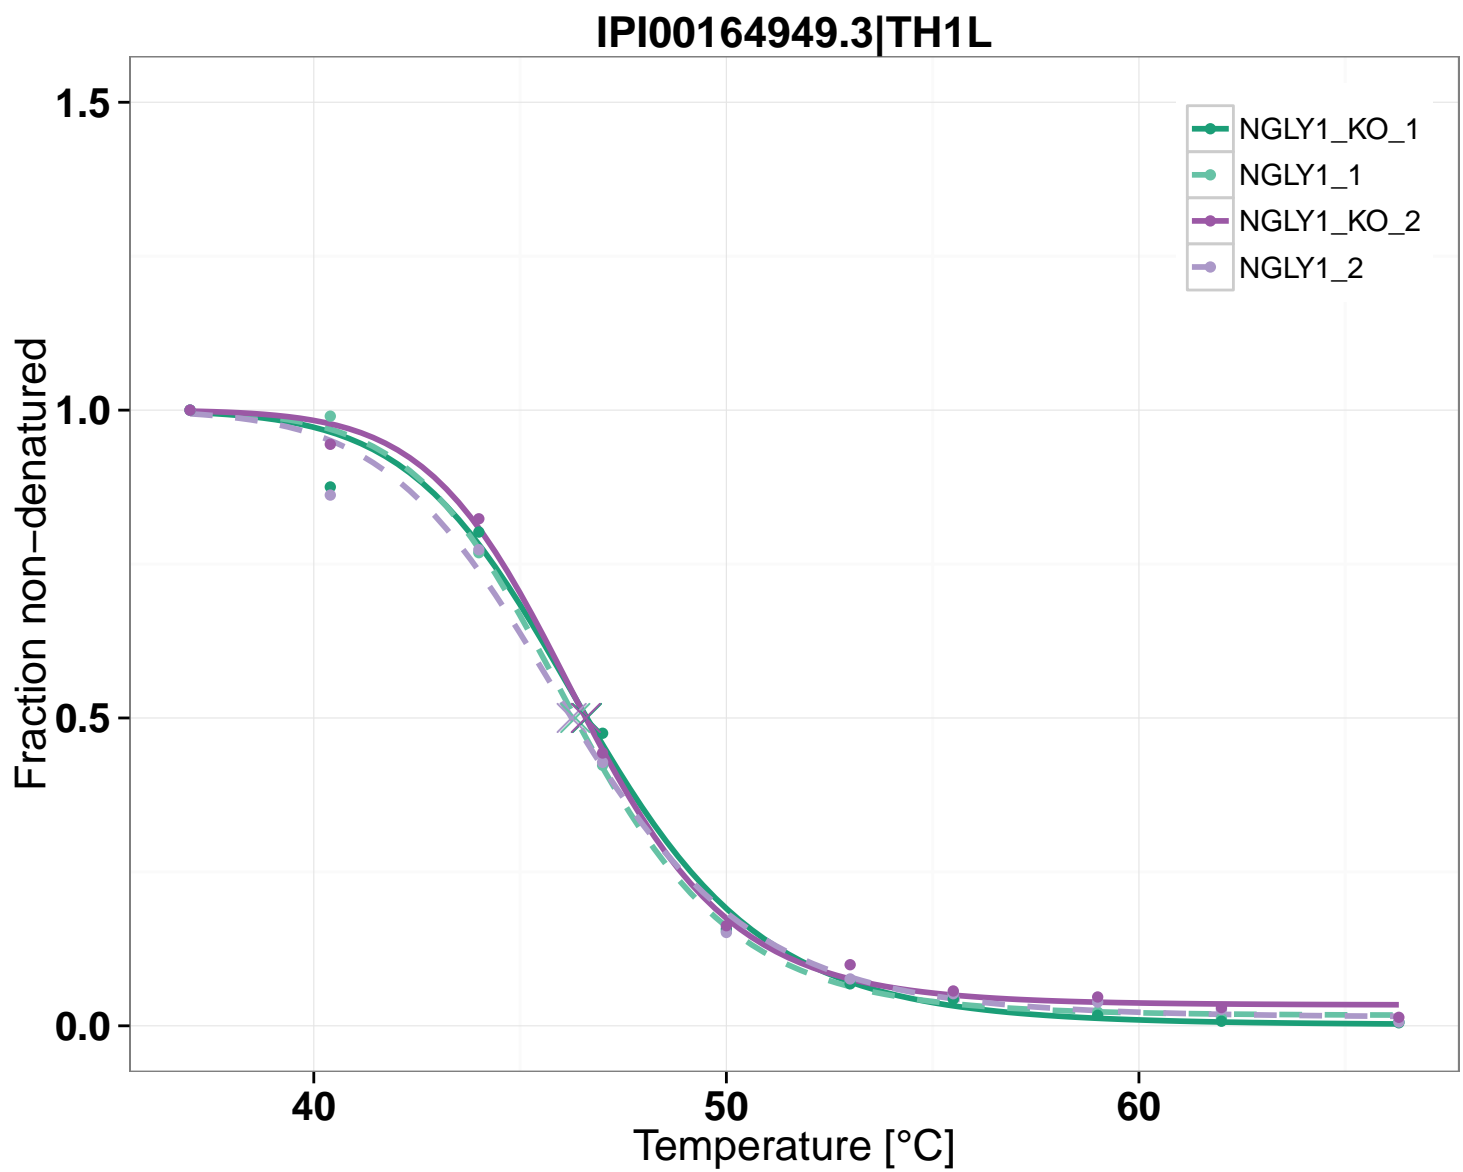

|            | meltPoint | slope | plateau | R2   |
|------------|-----------|-------|---------|------|
| NGLY1_KO_1 | 46.62     | -0.12 | 0       | 0.99 |
| NGLY1_1    | 46.34     | -0.13 | 0.02    | 1    |
| NGLY1_KO_2 | 46.59     | -0.13 | 0.03    | 1    |
| NGLY1_2    | 46.25     | -0.11 | 0.01    | 0.99 |

Supplement: Supplementary file 1177 [file 1]

IPI00016109.9|C19ORF12

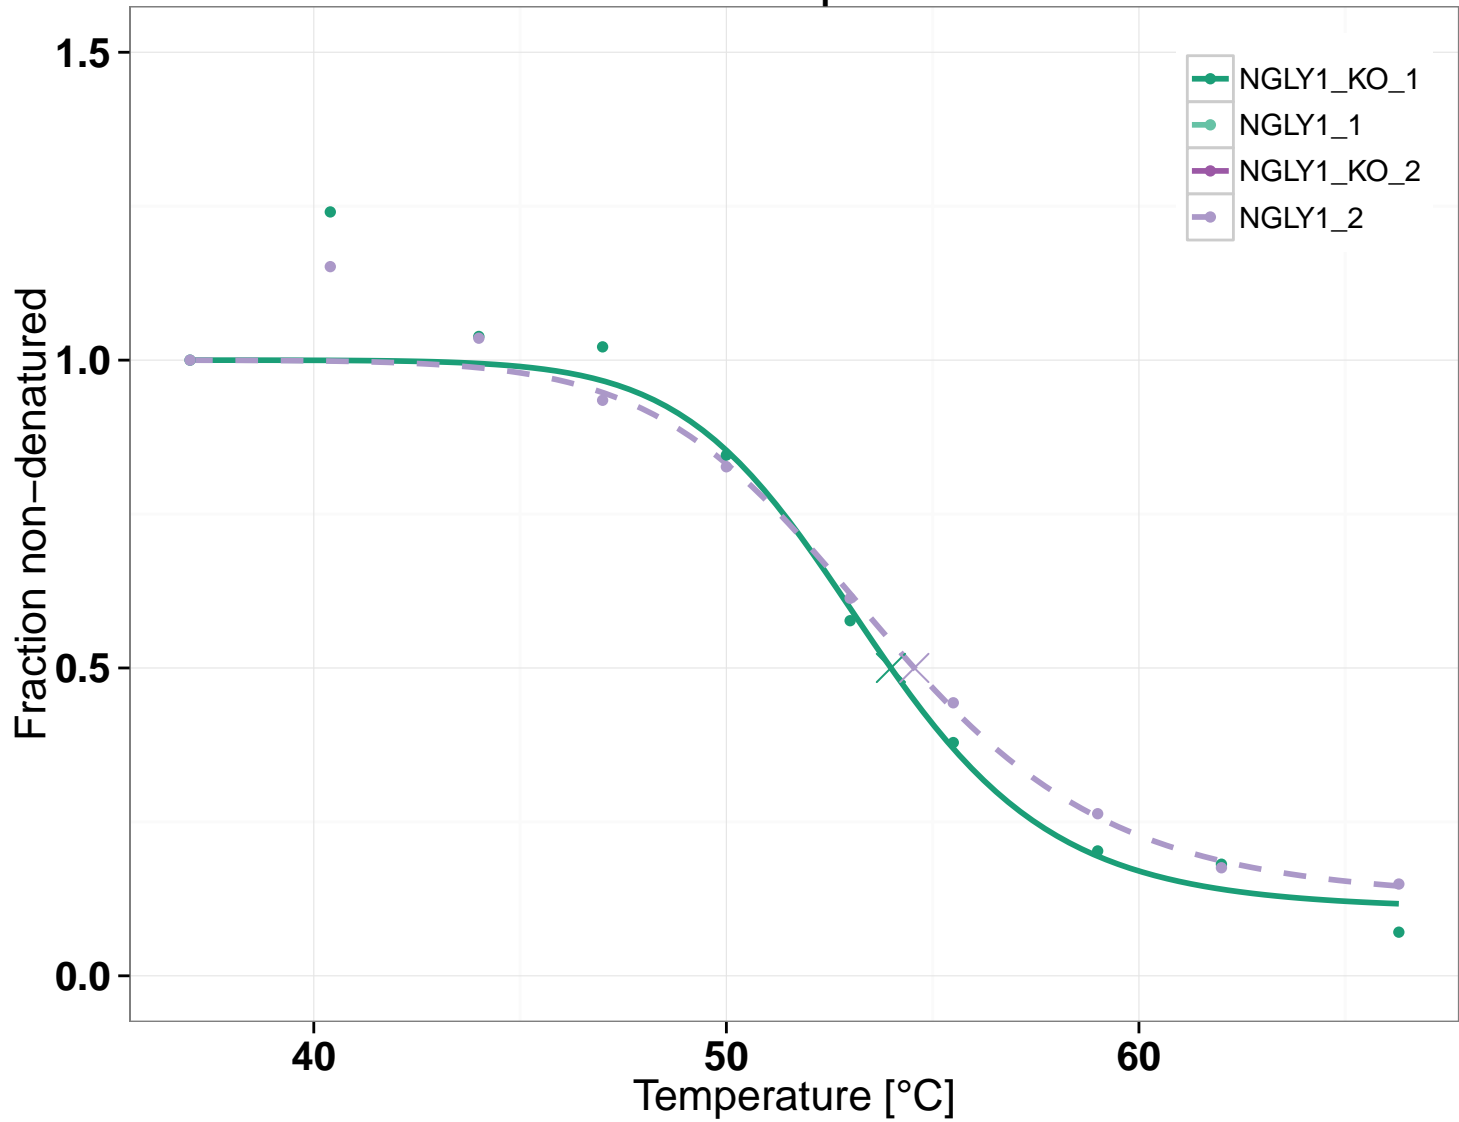

|            | meltPoint | slope  | plateau | R2   |
|------------|-----------|--------|---------|------|
| NGLY1_KO_1 | 53.99     | -0.1   | 0.11    | 0.96 |
| NGLY1_1    | -         | -      | -       | -    |
| NGLY1_KO_2 | -         | -      | -       | -    |
| NGLY1_2    | 54.56     | -0.079 | 0.12    | 0.98 |

Supplement: Supplementary file 1178 [file 1]

# IPI00790214.1|RCN2

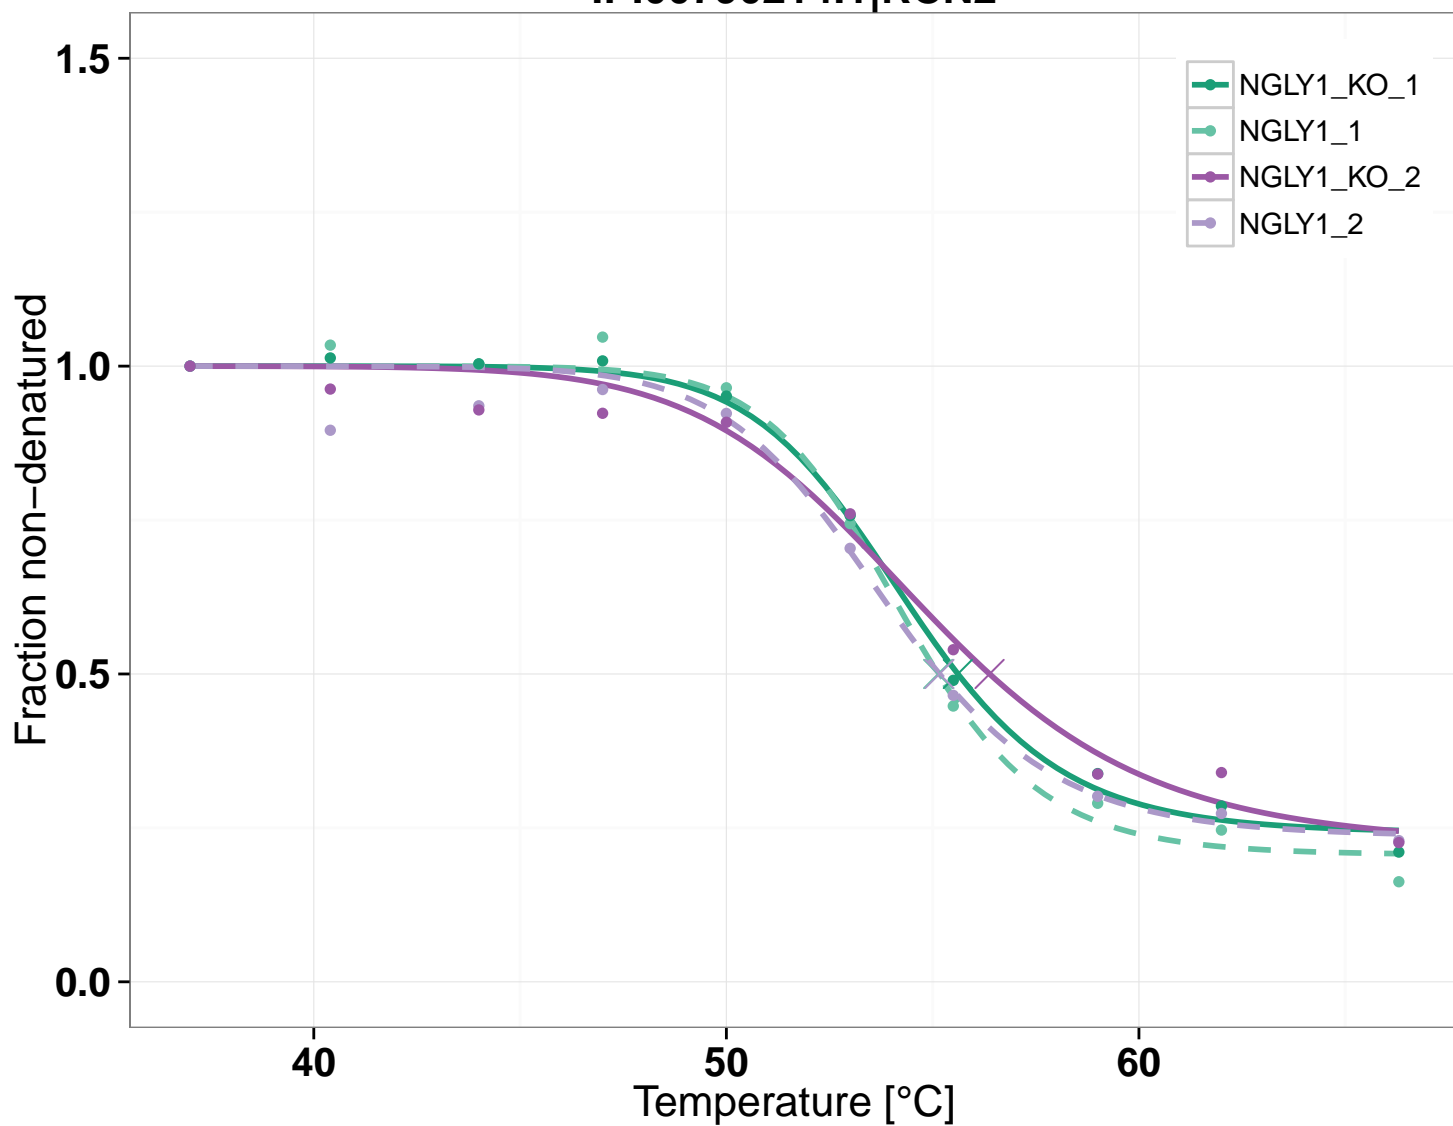

|            | meltPoint | slope  | plateau | R2   |
|------------|-----------|--------|---------|------|
| NGLY1_KO_1 | 55.61     | -0.1   | 0.24    | 1    |
| NGLY1_1    | 55.13     | -0.12  | 0.21    | 0.99 |
| NGLY1_KO_2 | 56.38     | -0.071 | 0.22    | 0.98 |
| NGLY1_2    | 55.16     | -0.096 | 0.24    | 0.98 |

Supplement: Supplementary file 1179 [file 1]

IPI00384638.2|KLHDC10

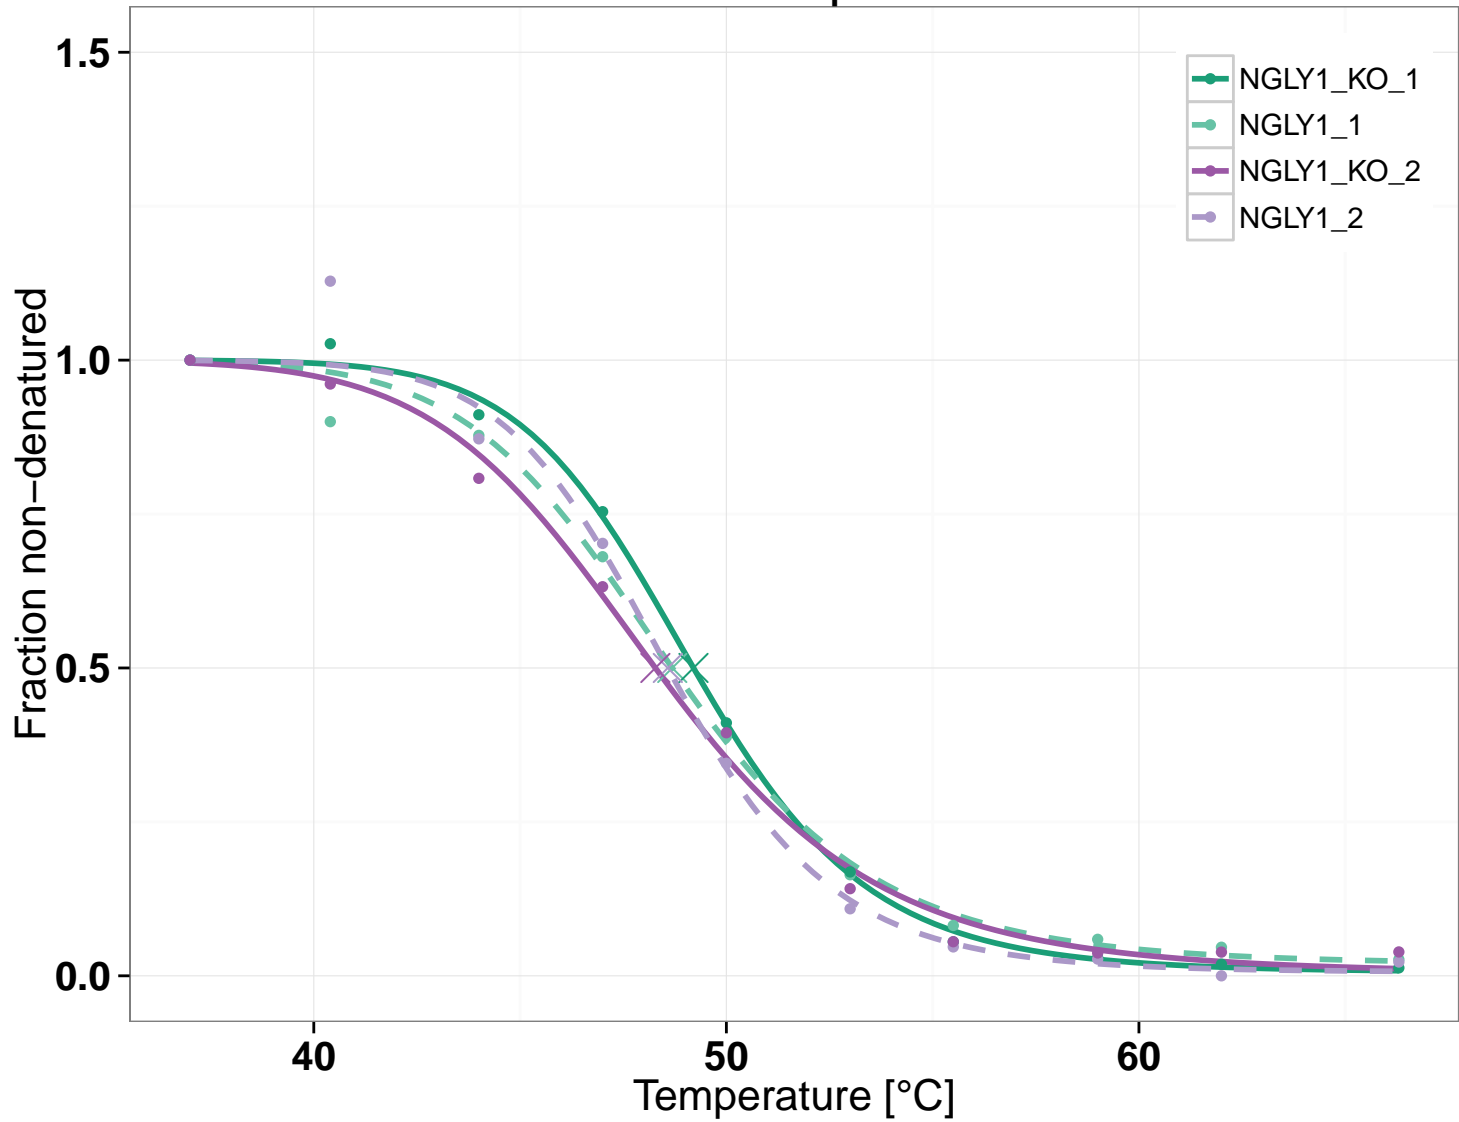

|            | meltPoint | slope  | plateau | R2   |
|------------|-----------|--------|---------|------|
| NGLY1_KO_1 | 49.2      | -0.12  | 0.01    | 1    |
| NGLY1_1    | 48.69     | -0.098 | 0.02    | 0.99 |
| NGLY1_KO_2 | 48.28     | -0.092 | 0       | 1    |
| NGLY1_2    | 48.58     | -0.12  | 0.01    | 0.99 |

Supplement: Supplementary file 1180 [file 1]

IPI00847596.2|LOC388789

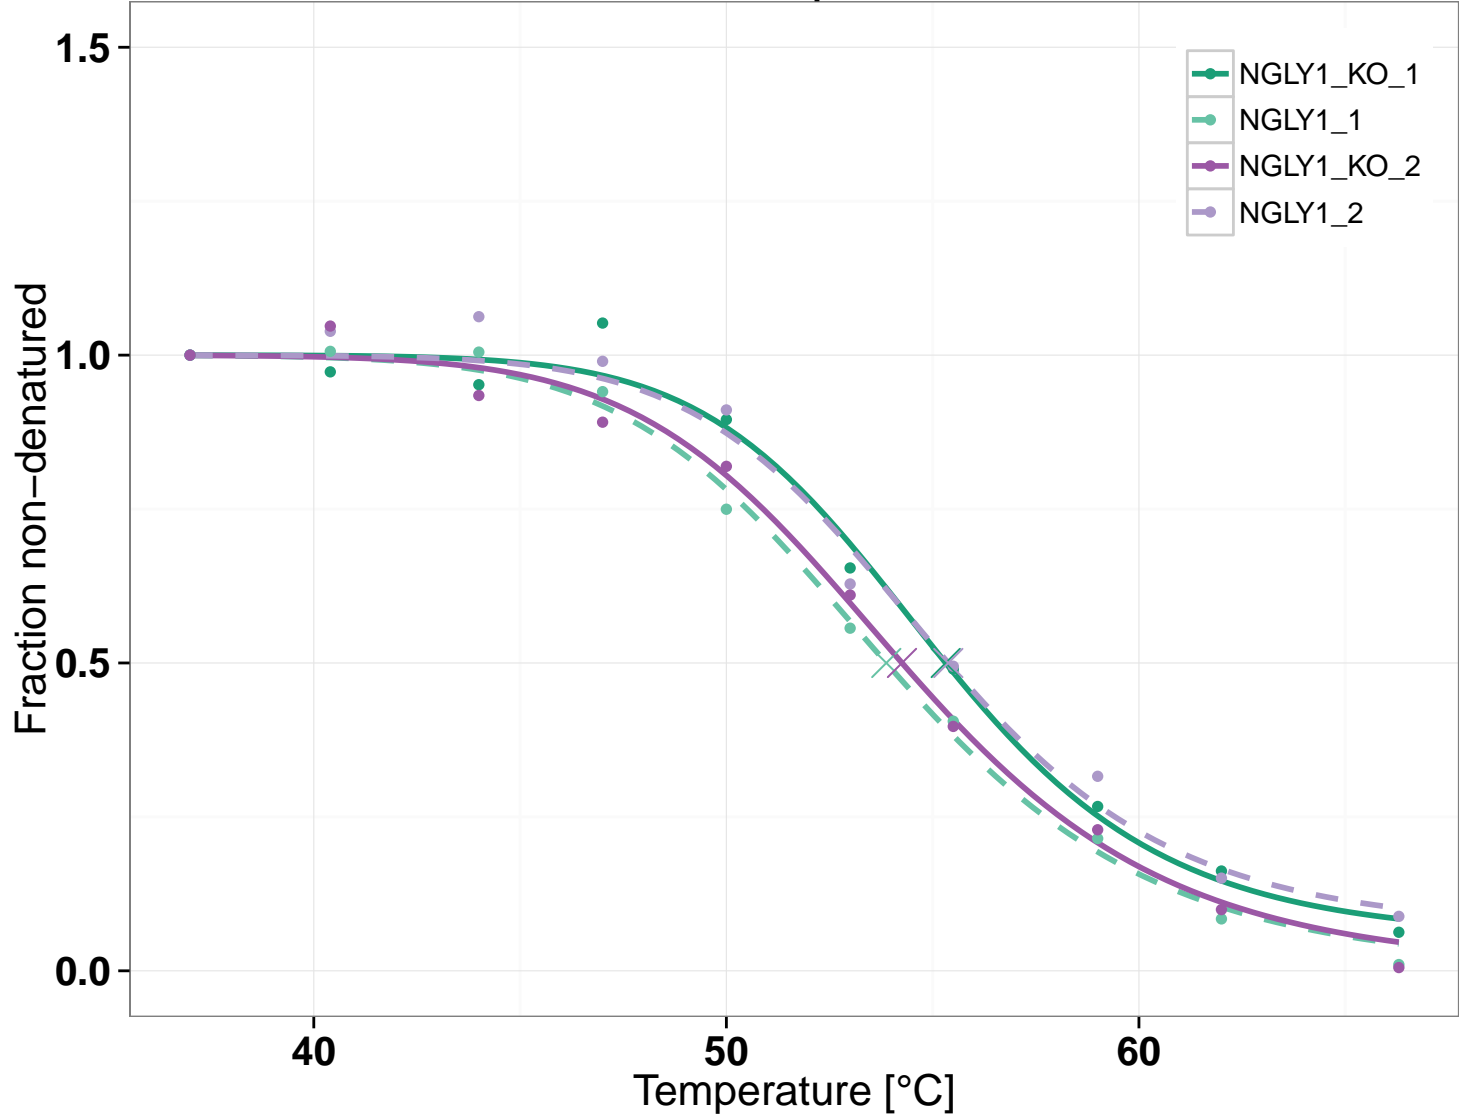

|            | meltPoint | slope  | plateau | R2   |
|------------|-----------|--------|---------|------|
| NGLY1_KO_1 | 55.32     | -0.085 | 0.05    | 0.99 |
| NGLY1_1    | 53.88     | -0.078 | 0       | 1    |
| NGLY1_KO_2 | 54.26     | -0.078 | 0       | 0.99 |
| NGLY1_2    | 55.38     | -0.08  | 0.06    | 0.99 |

Supplement: Supplementary file 1181 [file 1]

# IPI00872646.1|CLIP2

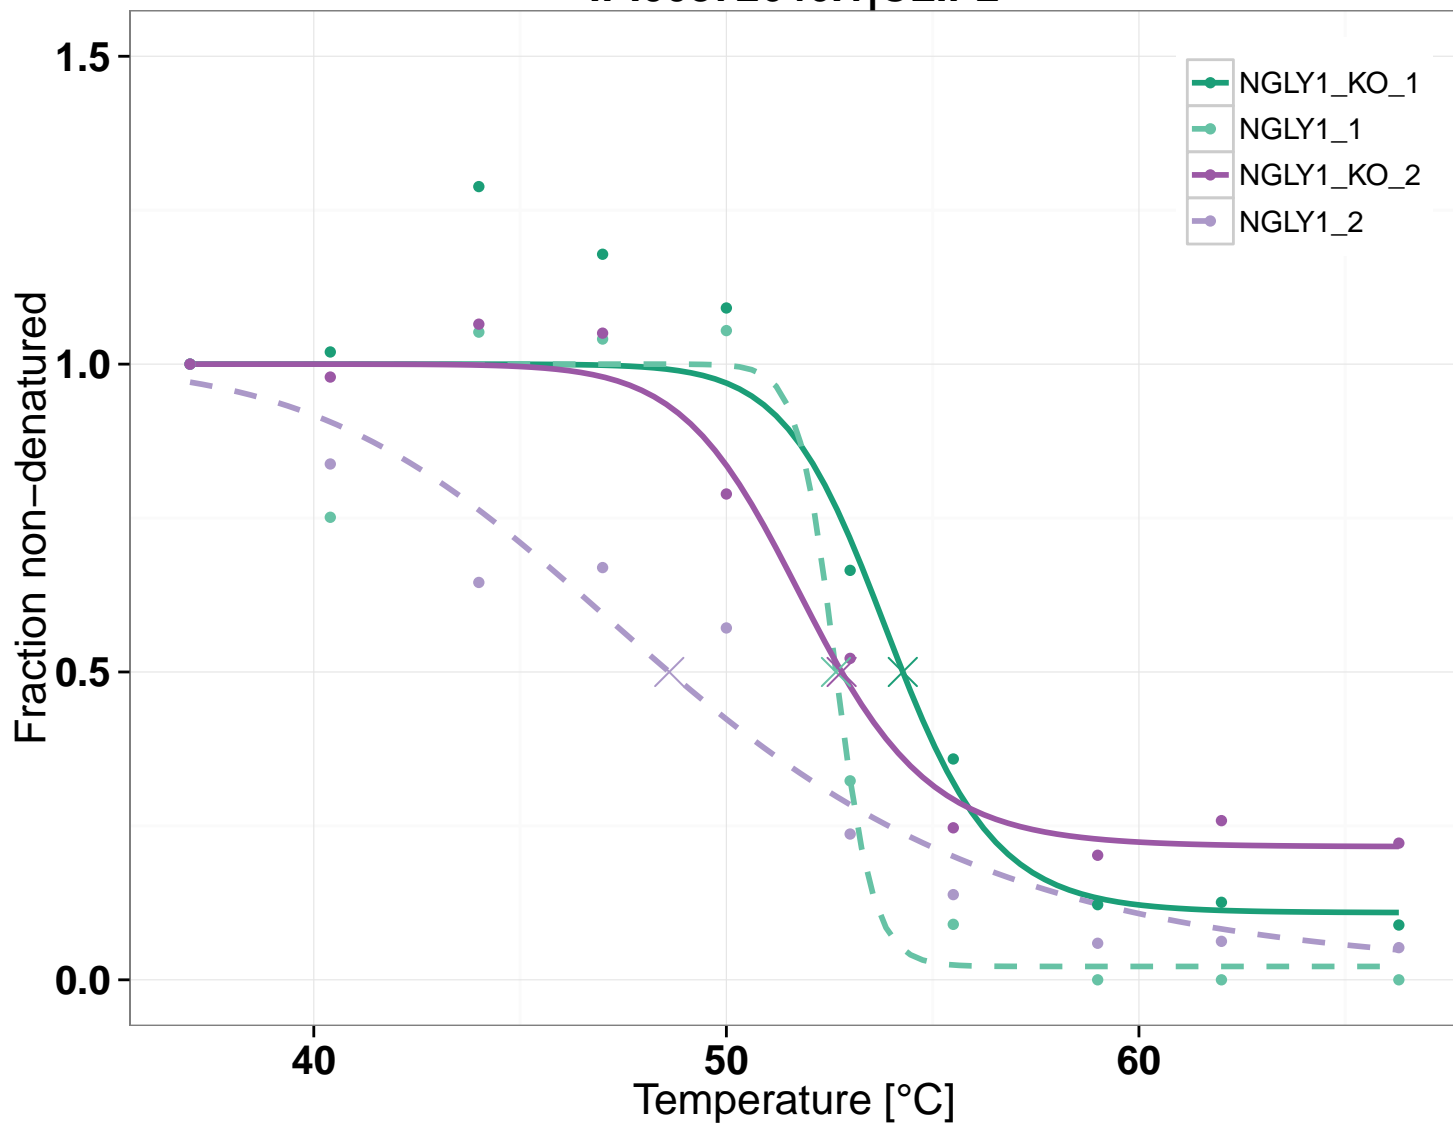

|            | meltPoint | slope  | plateau | R2   |
|------------|-----------|--------|---------|------|
| NGLY1_KO_1 | 54.28     | -0.17  | 0.11    | 0.93 |
| NGLY1_1    | 52.66     | -0.54  | 0.02    | 0.97 |
| NGLY1_KO_2 | 52.79     | -0.13  | 0.22    | 0.99 |
| NGLY1_2    | 48.62     | -0.059 | 0       | 0.95 |

Supplement: Supplementary file 1182 [file 1]

# IPI00398135.2|HCG\_21078

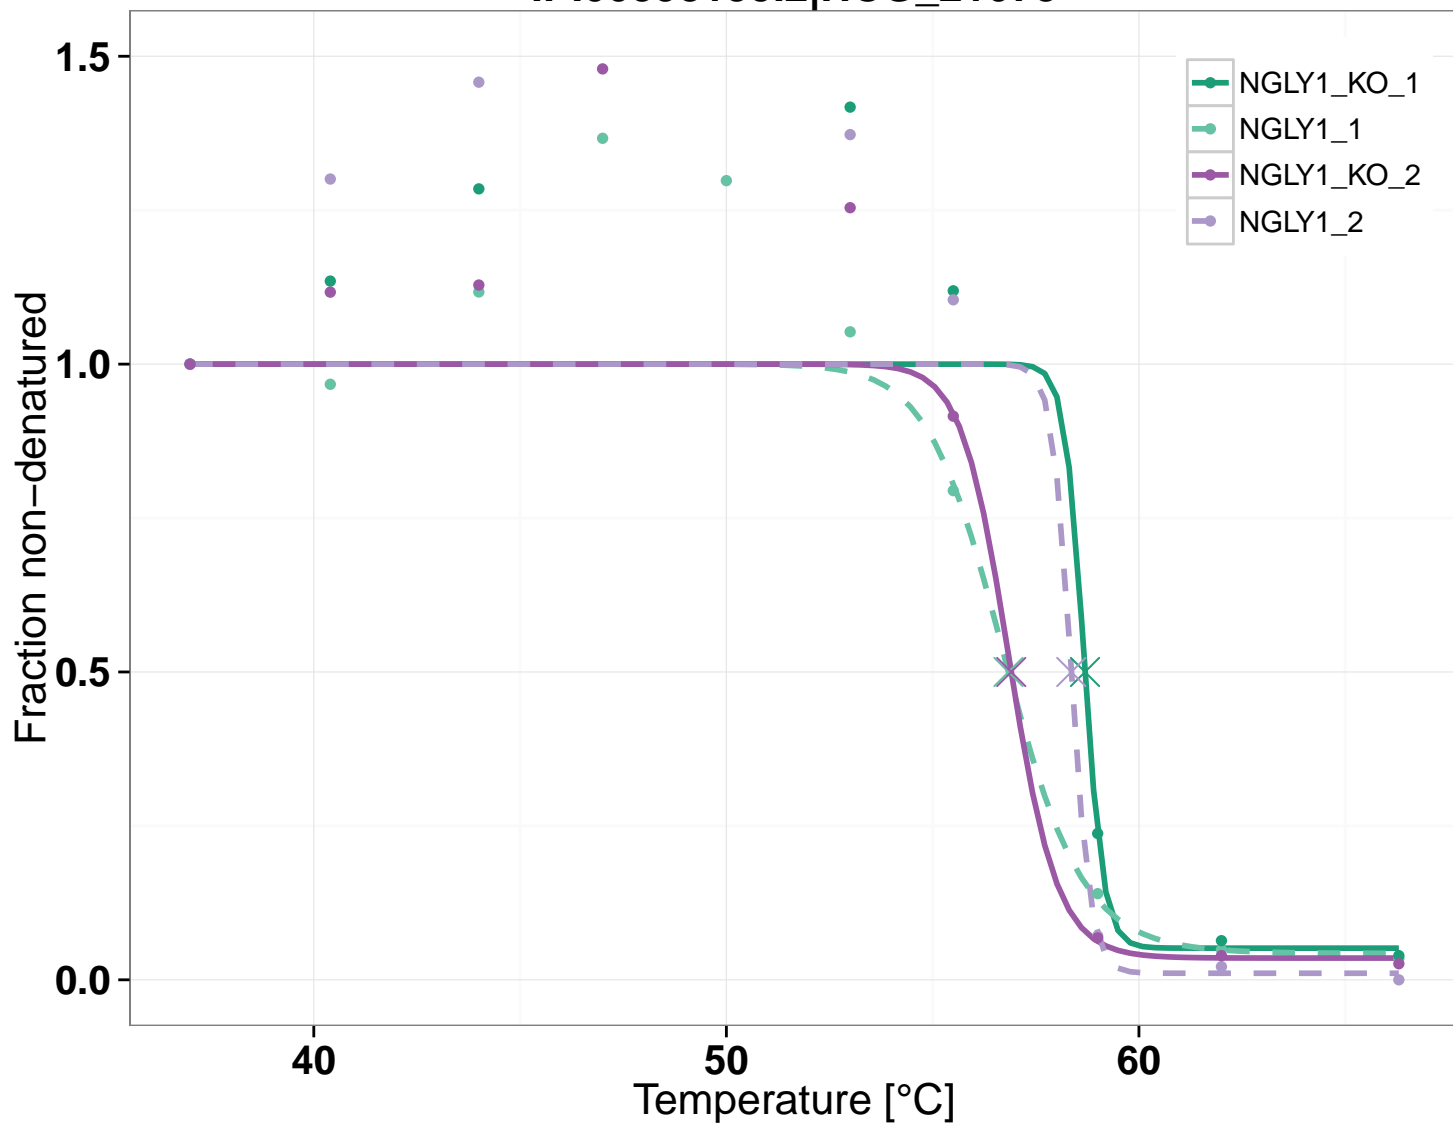

|            | meltPoint | slope | plateau | R2   |
|------------|-----------|-------|---------|------|
| NGLY1_KO_1 | 58.69     | -1    | 0.05    | 0.64 |
| NGLY1_1    | 56.84     | -0.26 | 0.04    | 0.9  |
| NGLY1_KO_2 | 56.9      | -0.42 | 0.04    | 0.8  |
| NGLY1_2    | 58.36     | -1.1  | 0.01    | 0.67 |

Supplement: Supplementary file 1183 [file 1]

# IPI00003870.1|CLPP

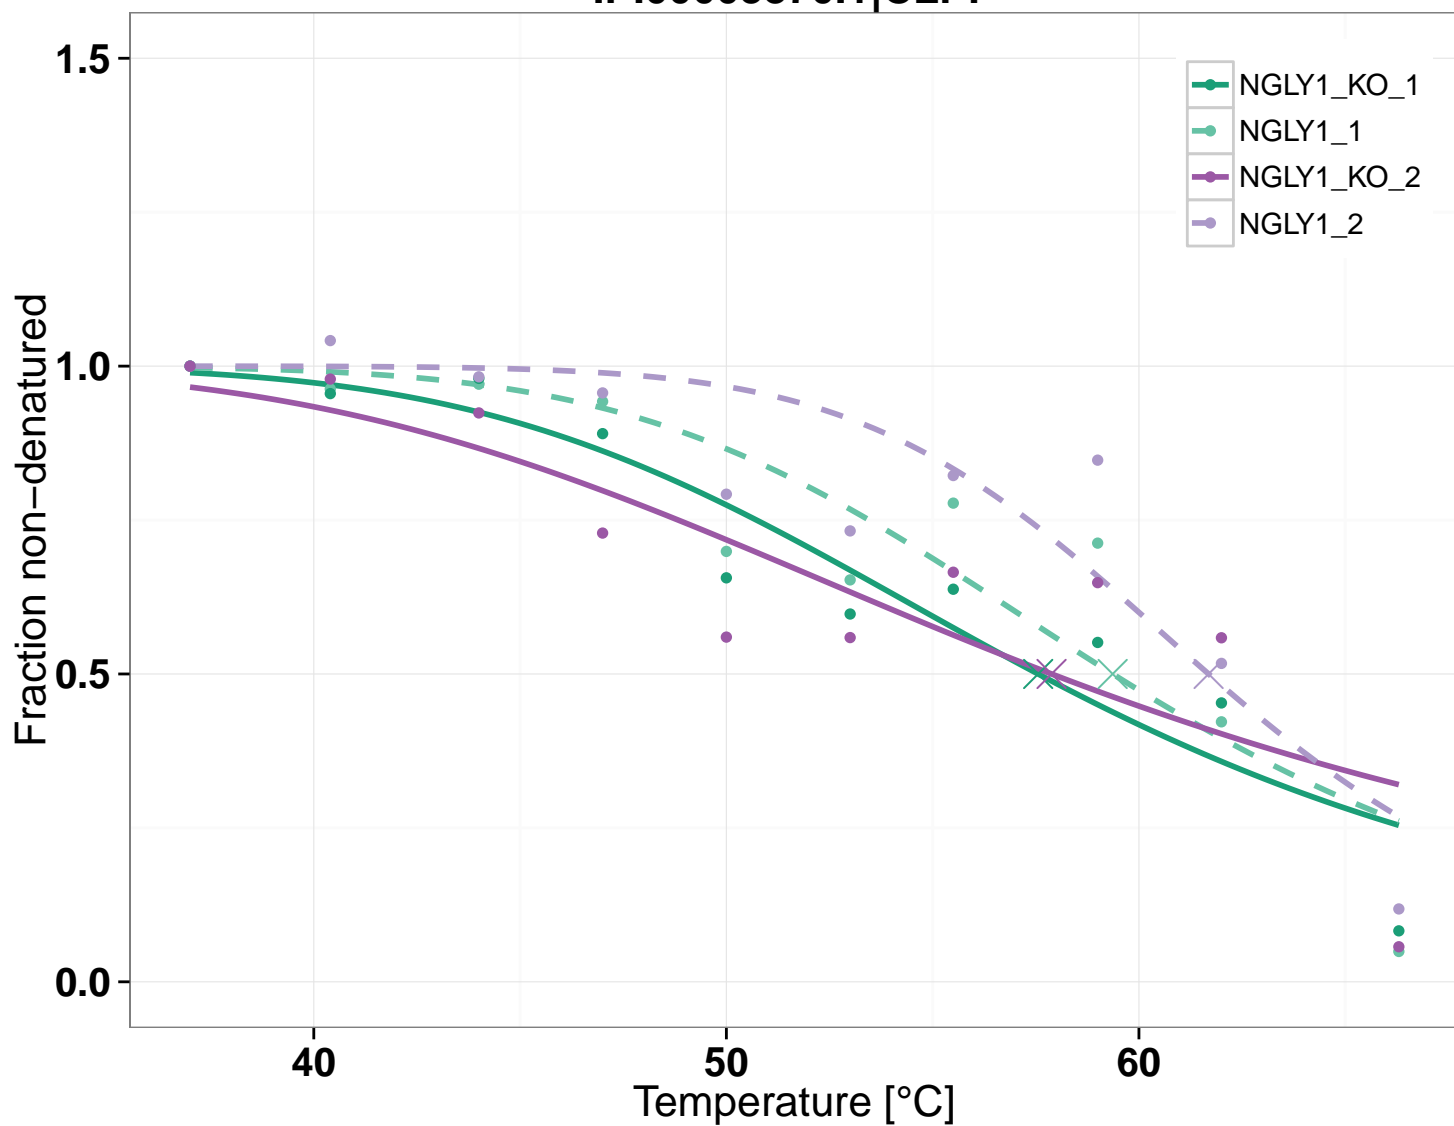

|            | meltPoint | slope  | plateau | R2   |
|------------|-----------|--------|---------|------|
| NGLY1_KO_1 | 57.56     | -0.038 | 0       | 0.9  |
| NGLY1_1    | 59.36     | -0.044 | 0       | 0.83 |
| NGLY1_KO_2 | 57.88     | -0.028 | 0       | 0.74 |
| NGLY1_2    | 61.69     | -0.06  | 0       | 0.82 |

Supplement: Supplementary file 1184 [file 1]

IPI00012426.1|SCPEP1

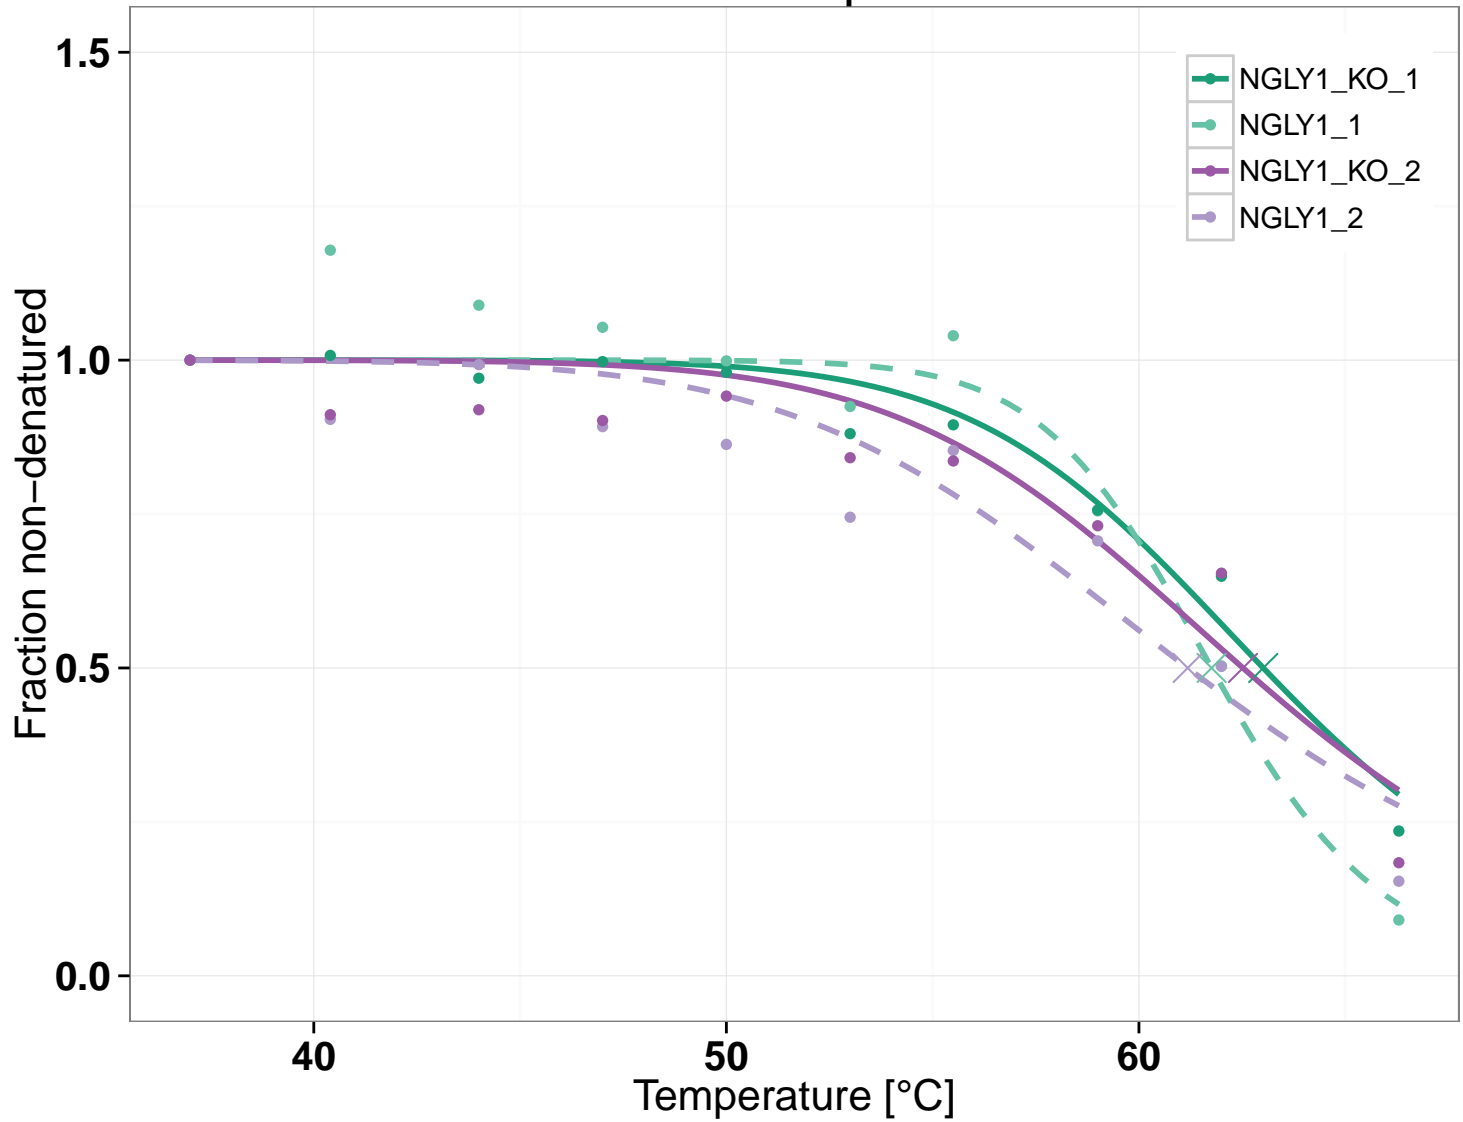

|            | meltPoint | slope  | plateau | R2   |
|------------|-----------|--------|---------|------|
| NGLY1_KO_1 | 63.01     | -0.071 | 0       | 0.97 |
| NGLY1_1    | 61.76     | -0.12  | 0       | 0.94 |
| NGLY1_KO_2 | 62.52     | -0.06  | 0       | 0.88 |
| NGLY1_2    | 61.18     | -0.052 | 0       | 0.89 |

Supplement: Supplementary file 1185 [file 1]

IPI00009815.1|C1ORF156

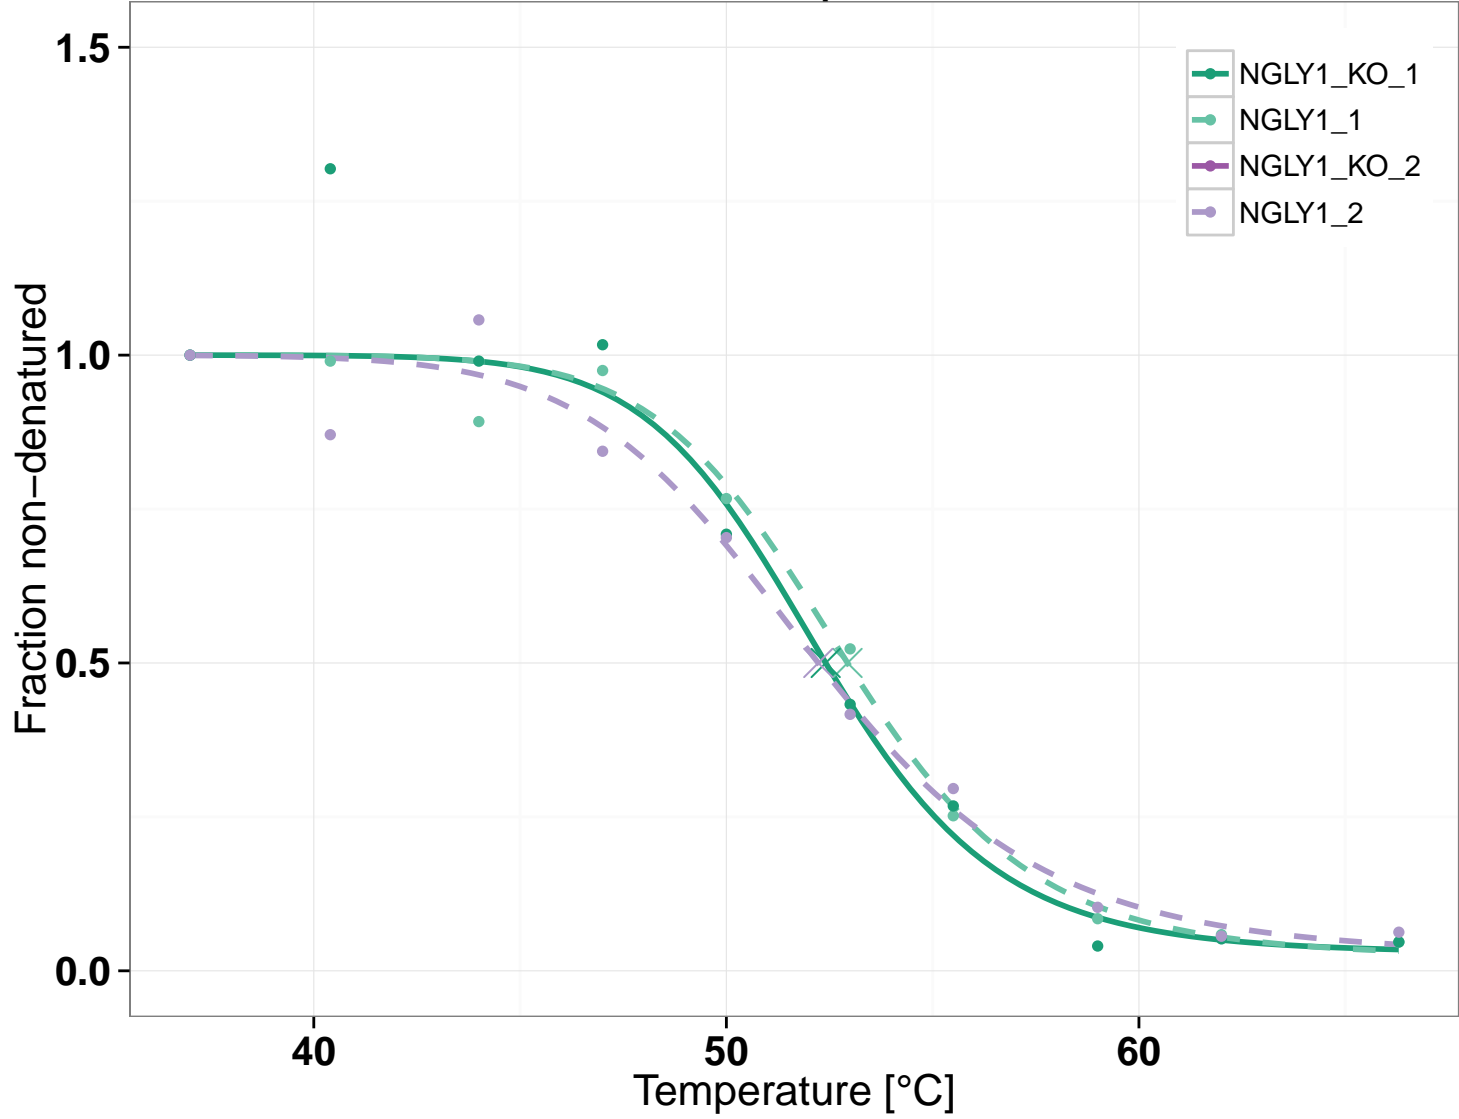

|            | meltPoint | slope  | plateau | R2   |
|------------|-----------|--------|---------|------|
| NGLY1_KO_1 | 52.41     | -0.11  | 0.03    | 0.95 |
| NGLY1_1    | 52.94     | -0.11  | 0.02    | 0.99 |
| NGLY1_KO_2 | -         | -      | -       | -    |
| NGLY1_2    | 52.23     | -0.087 | 0.02    | 0.98 |

Supplement: Supplementary file 1186 [file 1]

IPI00440932.1|ADAM9

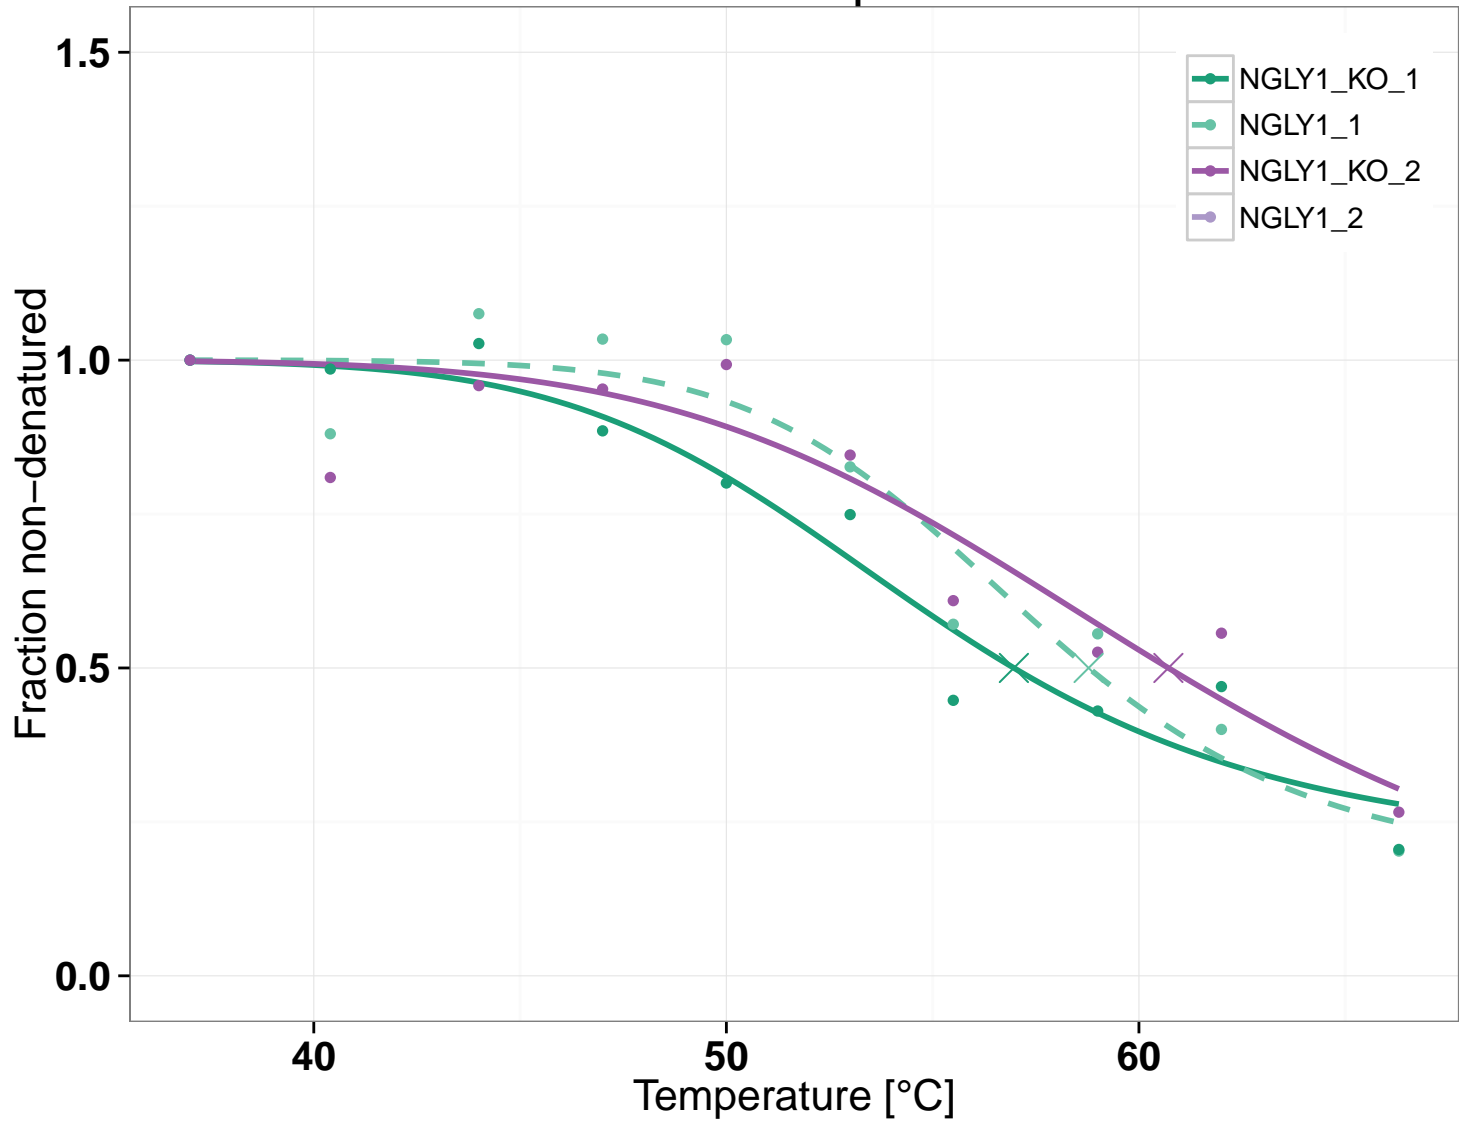

|            | meltPoint | slope  | plateau | R2   |
|------------|-----------|--------|---------|------|
| NGLY1_KO_1 | 56.97     | -0.047 | 0.2     | 0.94 |
| NGLY1_1    | 58.78     | -0.061 | 0.17    | 0.93 |
| NGLY1_KO_2 | 60.71     | -0.042 | 0       | 0.87 |
| NGLY1_2    | -         | -      | -       | -    |

Supplement: Supplementary file 1187 [file 1]

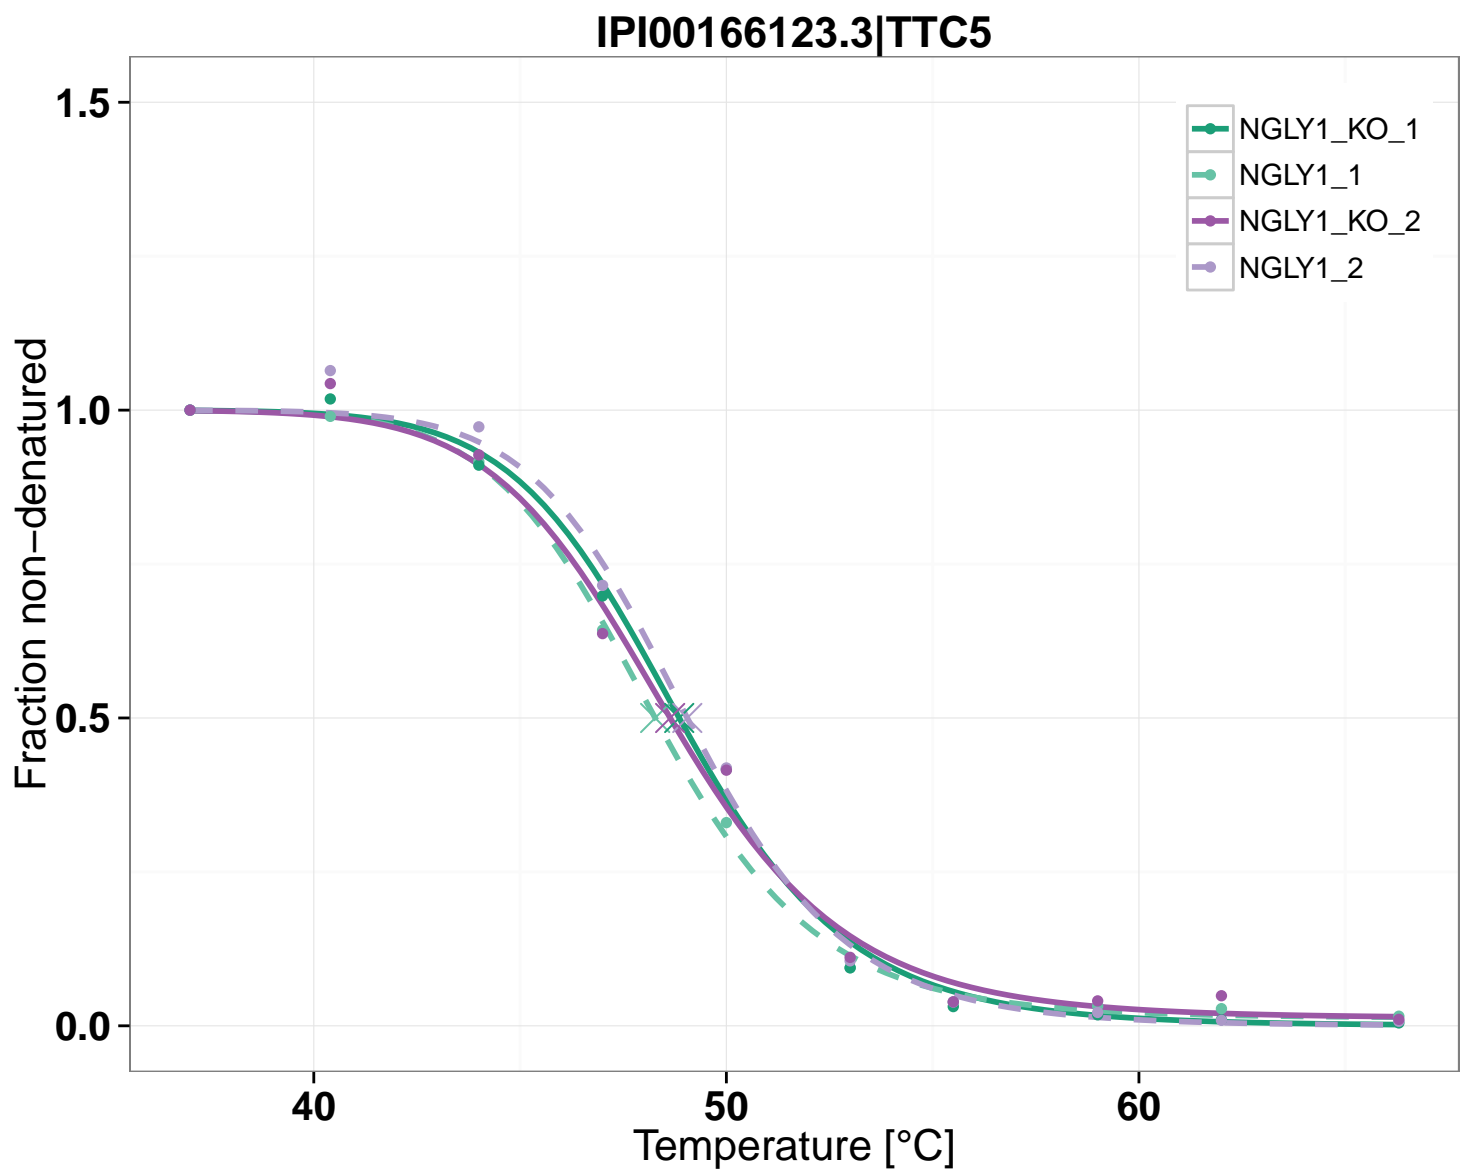

|            | meltPoint | slope | plateau | R2   |
|------------|-----------|-------|---------|------|
| NGLY1_KO_1 | 48.86     | -0.12 | 0       | 1    |
| NGLY1_1    | 48.27     | -0.12 | 0.01    | 1    |
| NGLY1_KO_2 | 48.64     | -0.11 | 0.01    | 0.99 |
| NGLY1_2    | 49.05     | -0.13 | 0       | 1    |

Supplement: Supplementary file 1188 [file 1]

IPI00549205.1|RAD50

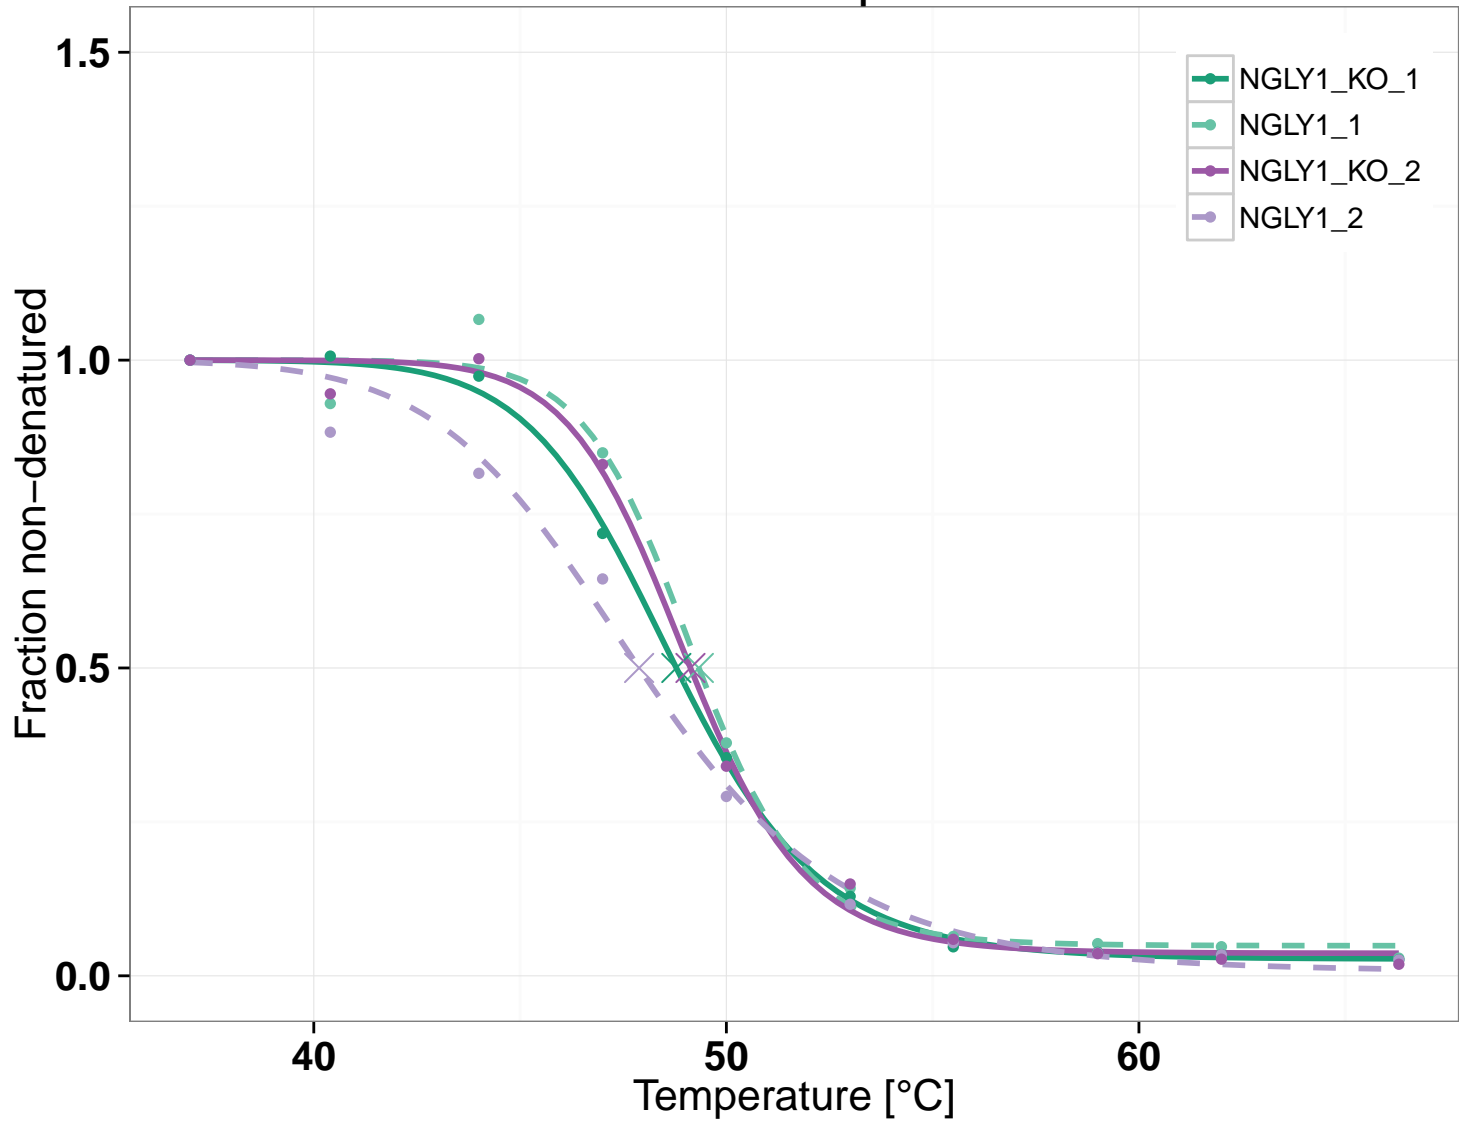

|            | meltPoint | slope | plateau | R2   |
|------------|-----------|-------|---------|------|
| NGLY1_KO_1 | 48.79     | -0.14 | 0.03    | 1    |
| NGLY1_1    | 49.33     | -0.18 | 0.05    | 0.99 |
| NGLY1_KO_2 | 49.13     | -0.17 | 0.04    | 1    |
| NGLY1_2    | 47.89     | -0.1  | 0.01    | 0.99 |

Supplement: Supplementary file 1189 [file 1]

# IPI00074604.1|GLMN

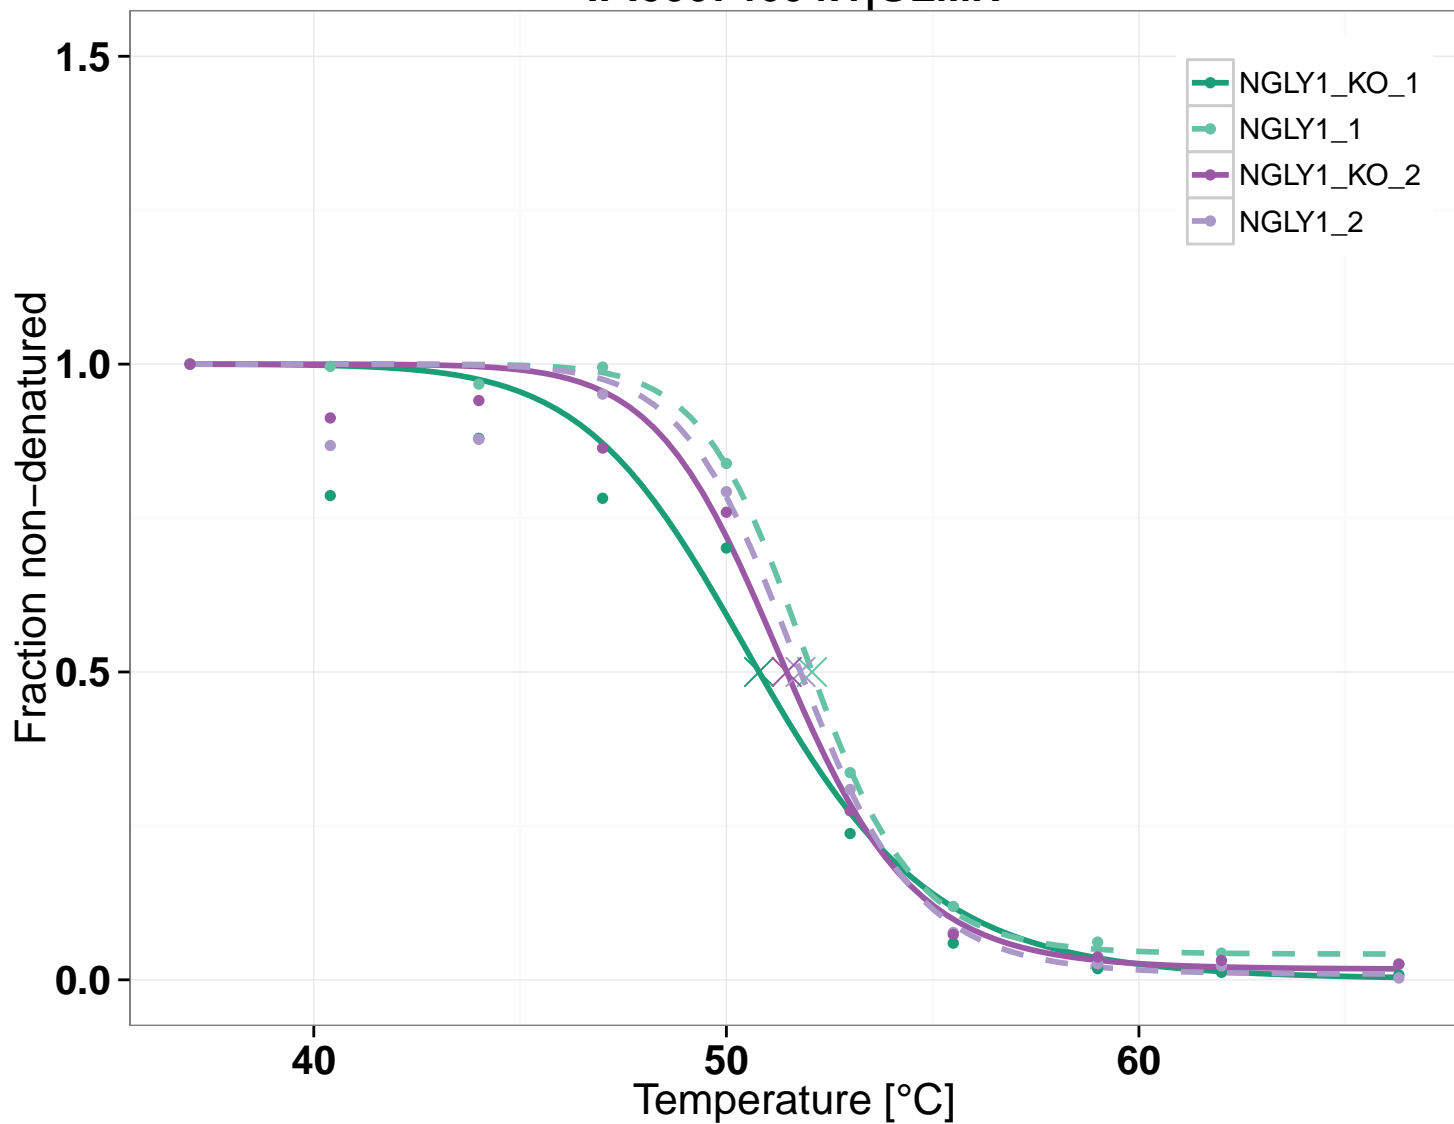

|            | meltPoint | slope | plateau | R2   |
|------------|-----------|-------|---------|------|
| NGLY1_KO_1 | 50.79     | -0.12 | 0       | 0.95 |
| NGLY1_1    | 52.08     | -0.19 | 0.04    | 1    |
| NGLY1_KO_2 | 51.46     | -0.16 | 0.02    | 0.99 |
| NGLY1_2    | 51.8      | -0.17 | 0.01    | 0.98 |

Supplement: Supplementary file 1190 [file 1]

# IPI00852669.1|ZNF516

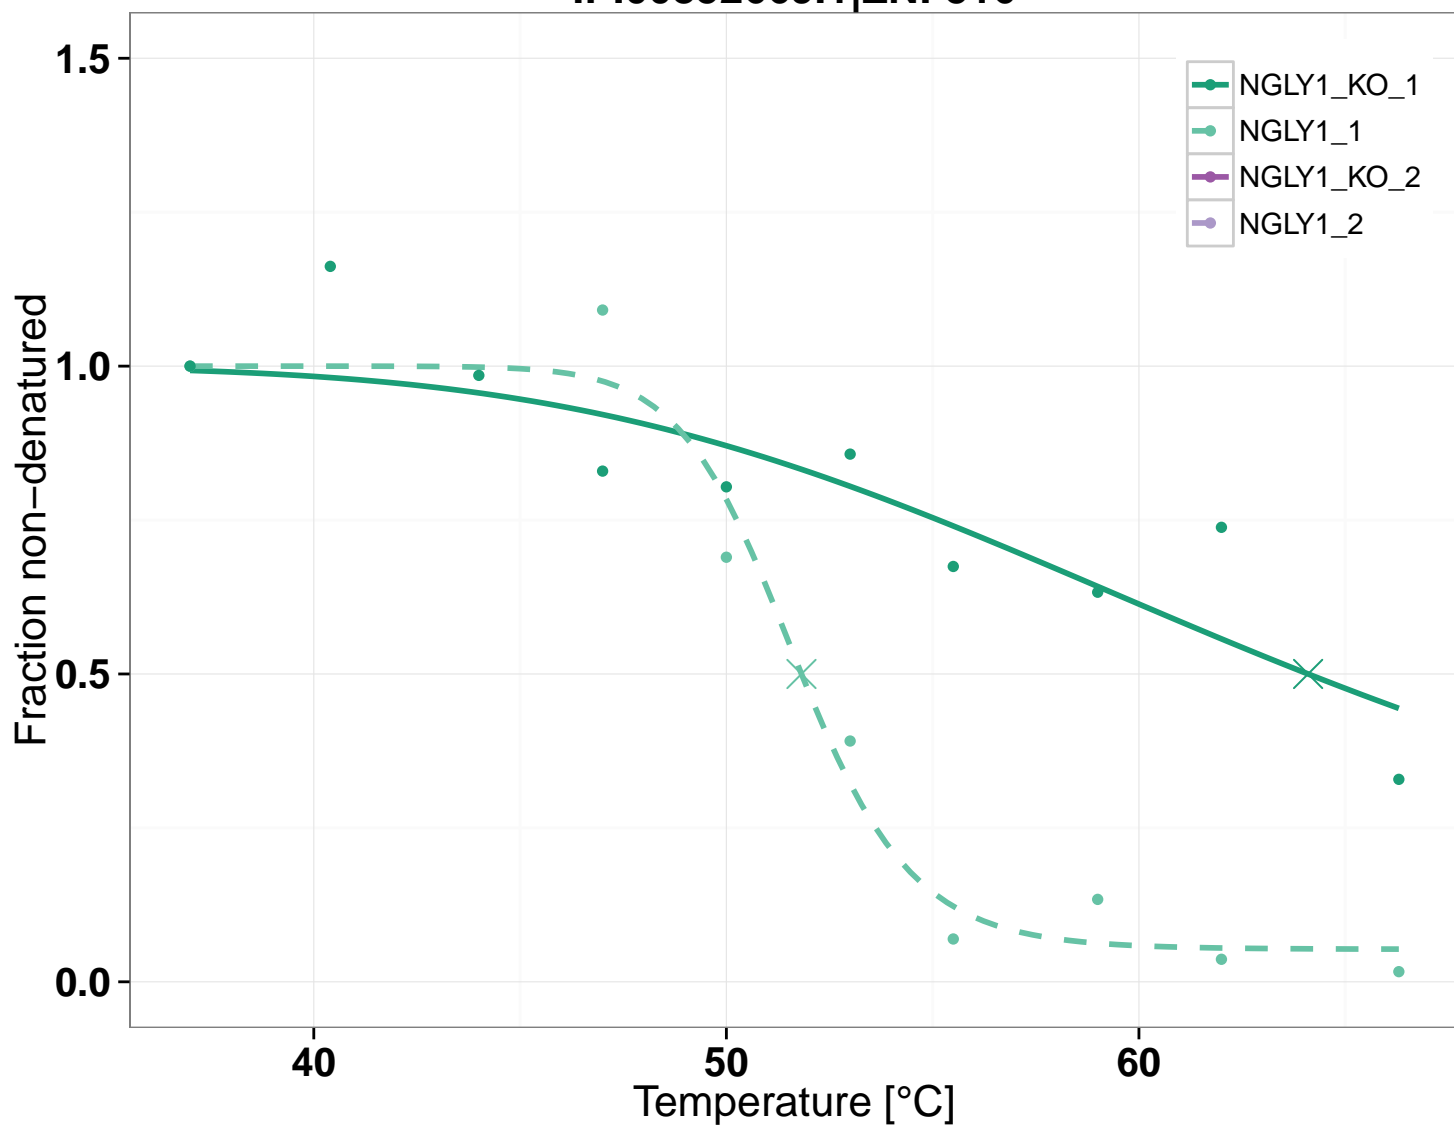

|            | meltPoint | slope  | plateau | R2   |
|------------|-----------|--------|---------|------|
| NGLY1_KO_1 | 64.1      | -0.029 | 0       | 0.79 |
| NGLY1_1    | 51.82     | -0.17  | 0.05    | 0.37 |
| NGLY1_KO_2 | -         | -      | -       | -    |
| NGLY1_2    | -         | -      | -       | -    |

Supplement: Supplementary file 1191 [file 1]

IPI00025646.5|ACTR8

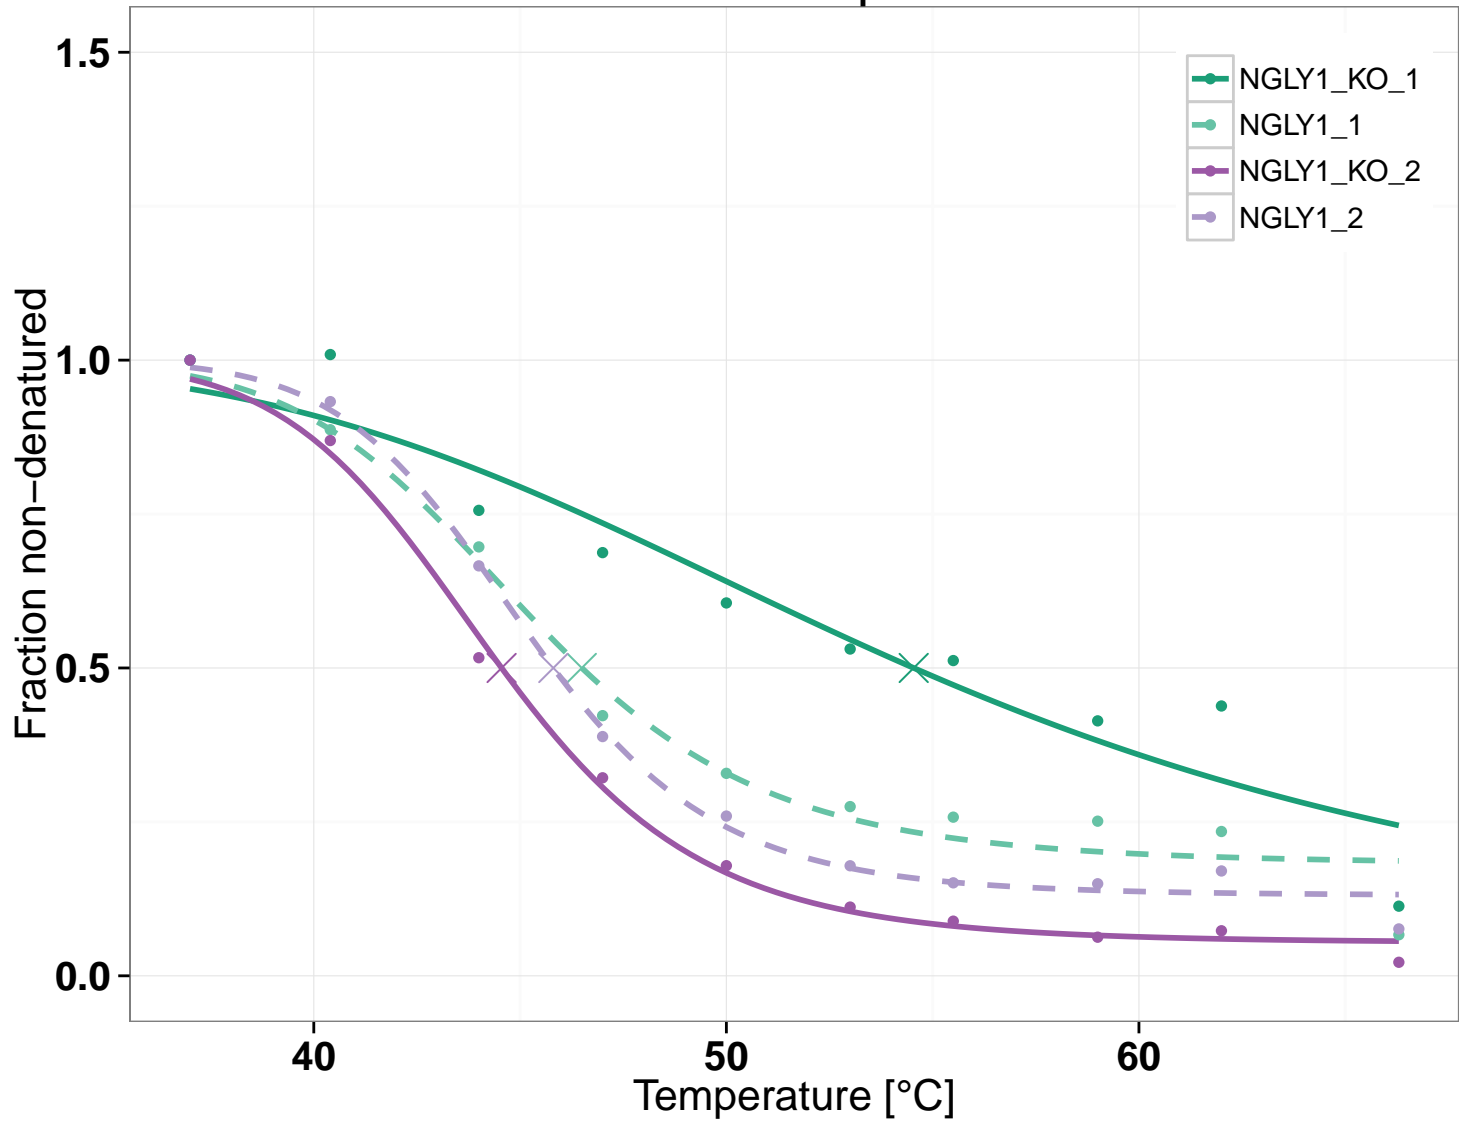

|            | meltPoint | slope  | plateau | R2   |
|------------|-----------|--------|---------|------|
| NGLY1_KO_1 | 54.54     | -0.032 | 0       | 0.92 |
| NGLY1_1    | 46.5      | -0.072 | 0.18    | 0.97 |
| NGLY1_KO_2 | 44.55     | -0.094 | 0.05    | 1    |
| NGLY1_2    | 45.81     | -0.095 | 0.13    | 0.99 |

Supplement: Supplementary file 1192 [file 1]

IPI00290452.3|TMBIM1

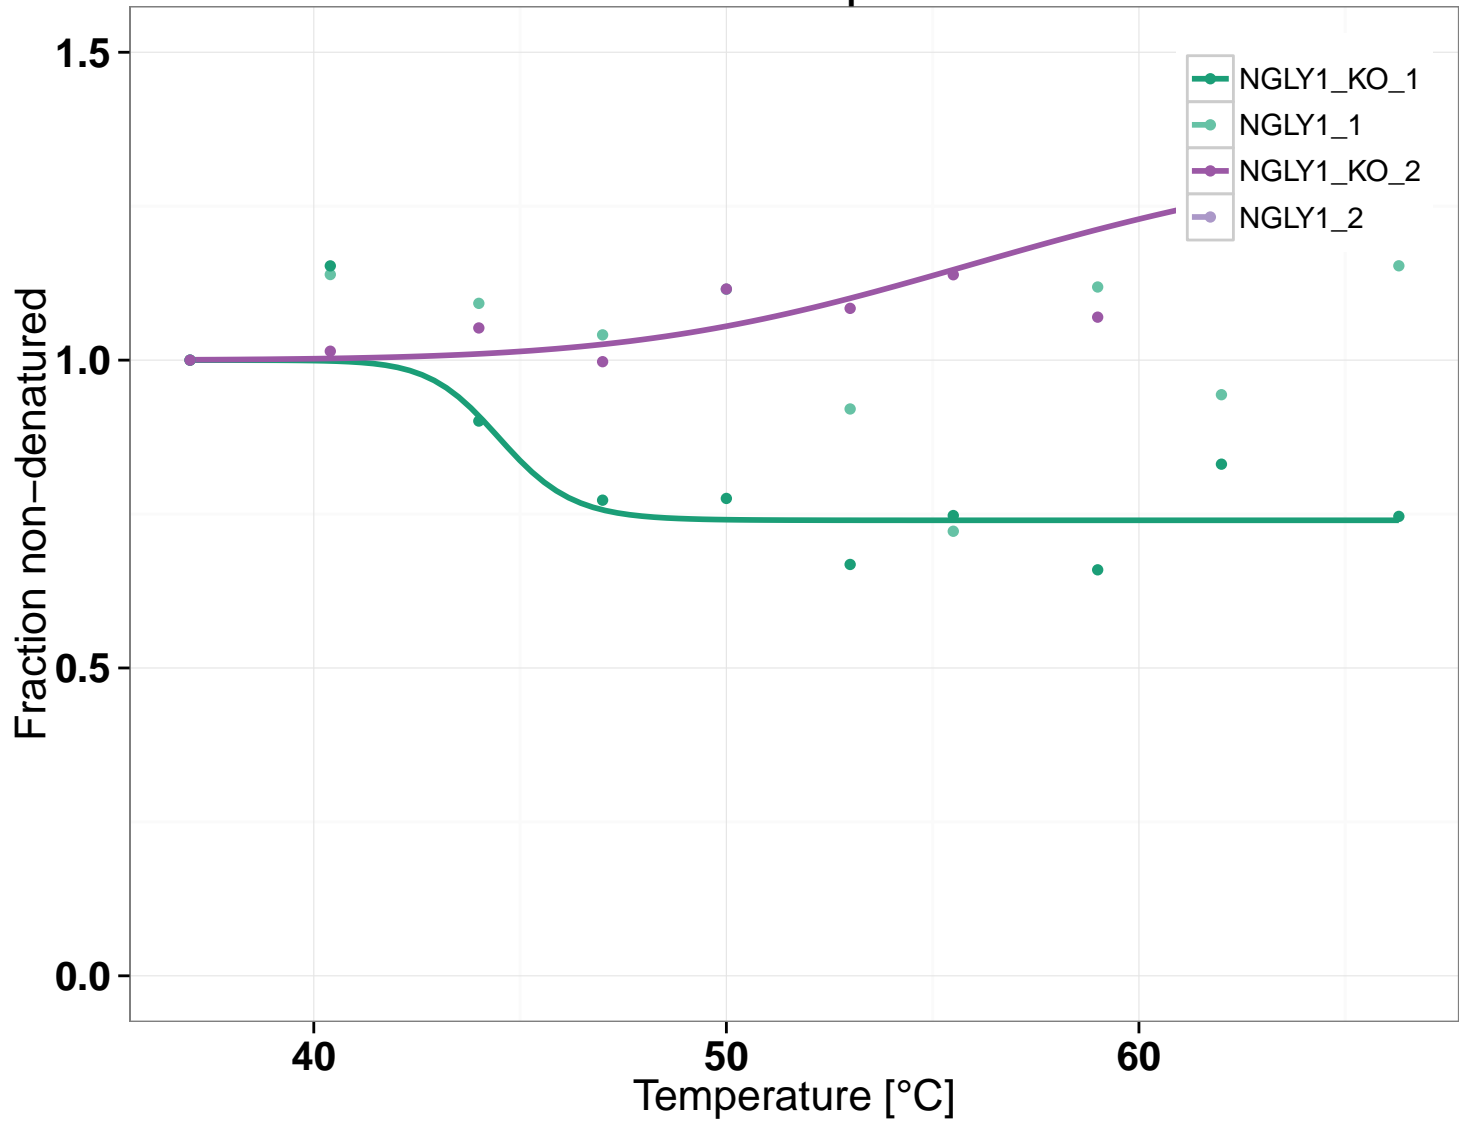

|            | meltPoint | slope  | plateau | R2   |
|------------|-----------|--------|---------|------|
| NGLY1_KO_1 | —         | −0.075 | 0.74    | 0.79 |
| NGLY1_1    | —         | —      | —       | —    |
| NGLY1_KO_2 | —         | 0.019  | 1.37    | 0.57 |
| NGLY1_2    | —         | —      | —       | —    |

Supplement: Supplementary file 1193 [file 1]

# IPI00007166.3|IER3IP1

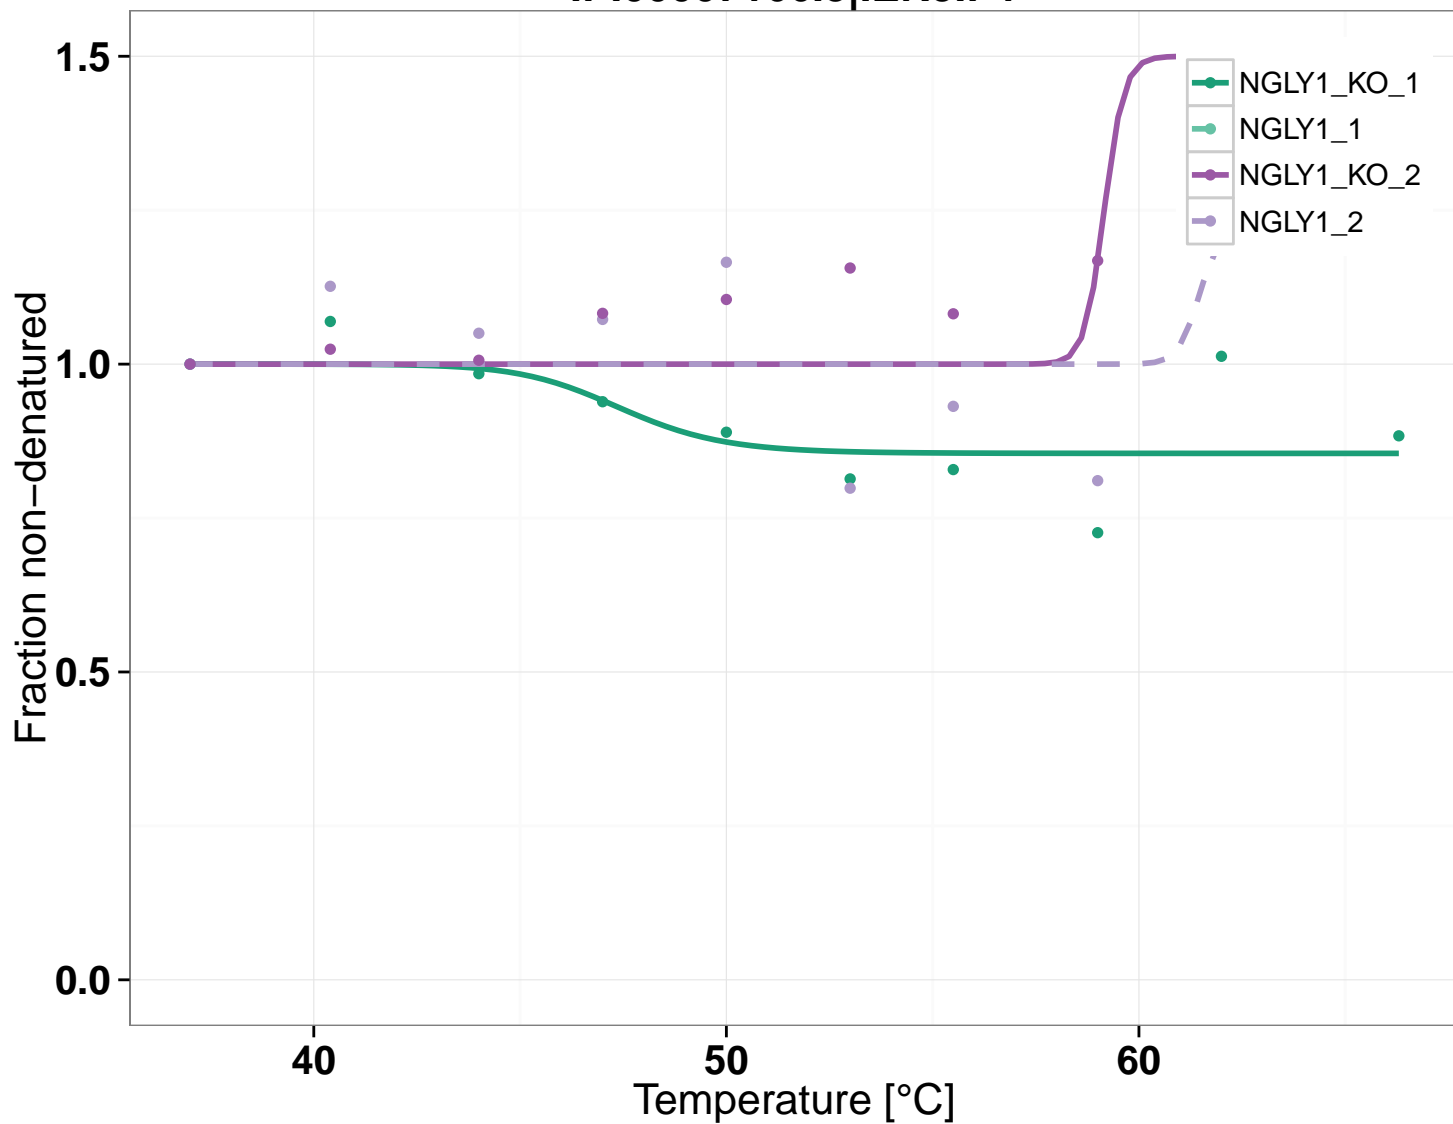

|            | meltPoint | slope  | plateau | R2   |
|------------|-----------|--------|---------|------|
| NGLY1_KO_1 | —         | -0.029 | 0.86    | 0.5  |
| NGLY1_1    | —         | —      | —       | —    |
| NGLY1_KO_2 | —         | 0.53   | 1.5     | 0.86 |
| NGLY1_2    | —         | 0.22   | 1.22    | 0.36 |

Supplement: Supplementary file 1194 [file 1]

IPI00396577.2|ARID1B

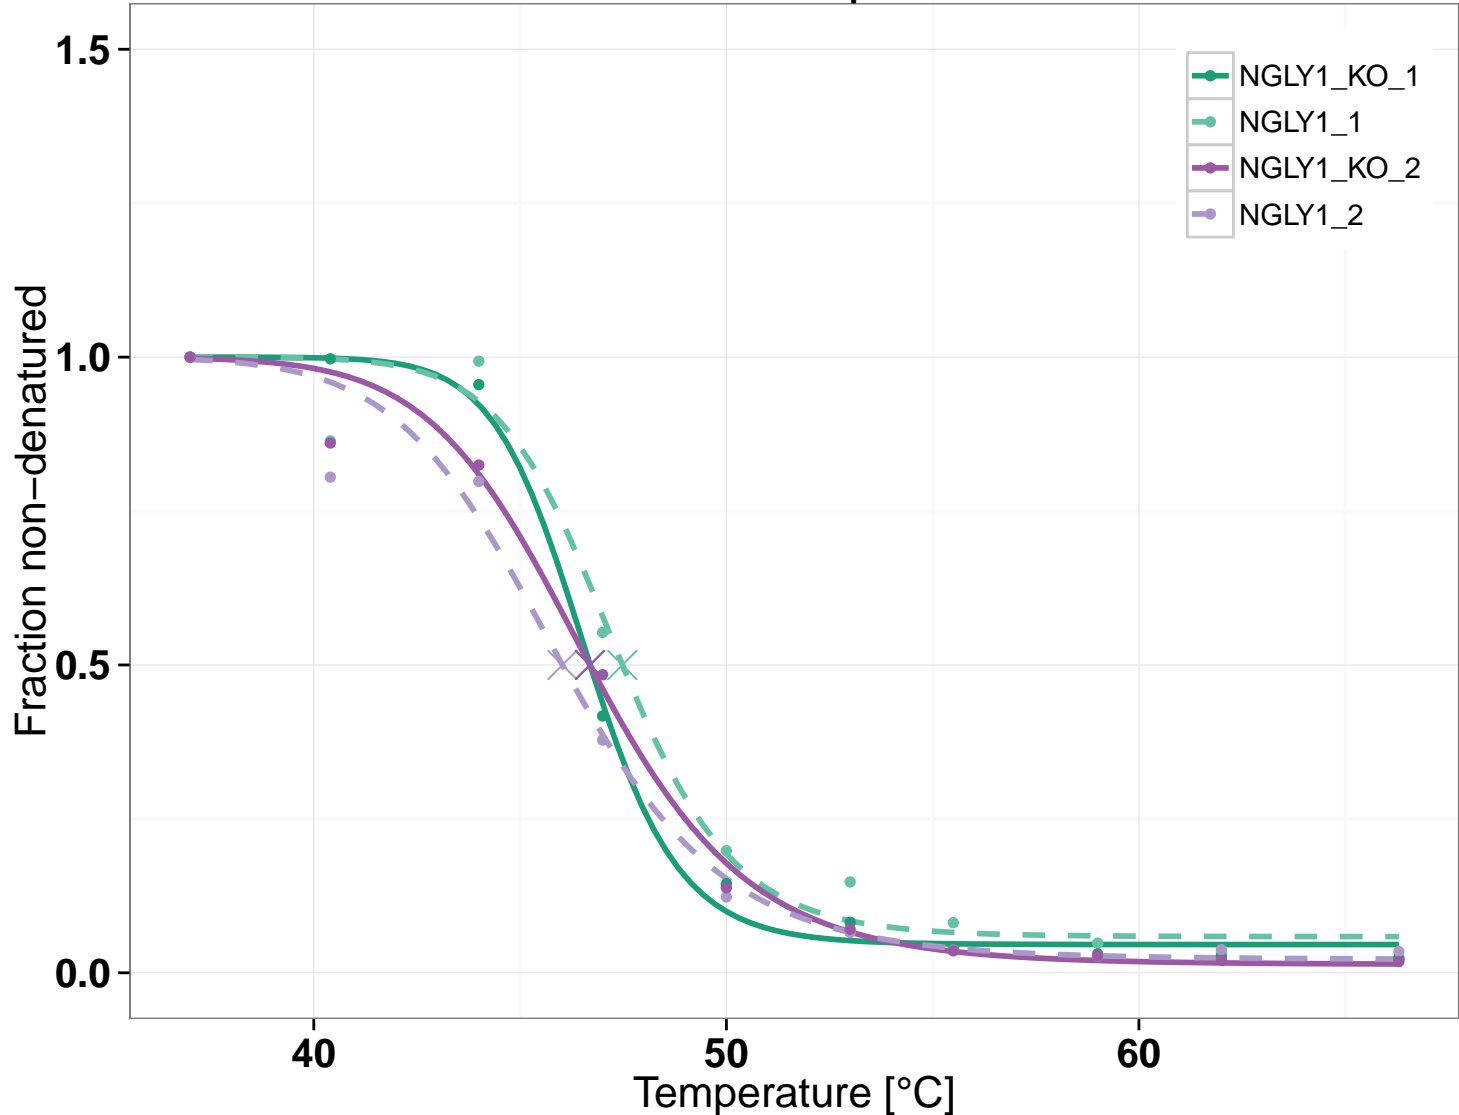

|            | meltPoint | slope | plateau | R2   |
|------------|-----------|-------|---------|------|
| NGLY1_KO_1 | 46.7      | -0.21 | 0.05    | 1    |
| NGLY1_1    | 47.48     | -0.17 | 0.06    | 0.98 |
| NGLY1_KO_2 | 46.69     | -0.13 | 0.01    | 0.99 |
| NGLY1_2    | 46.03     | -0.12 | 0.02    | 0.98 |

Supplement: Supplementary file 1195 [file 1]

# IPI00013925.3|GALT

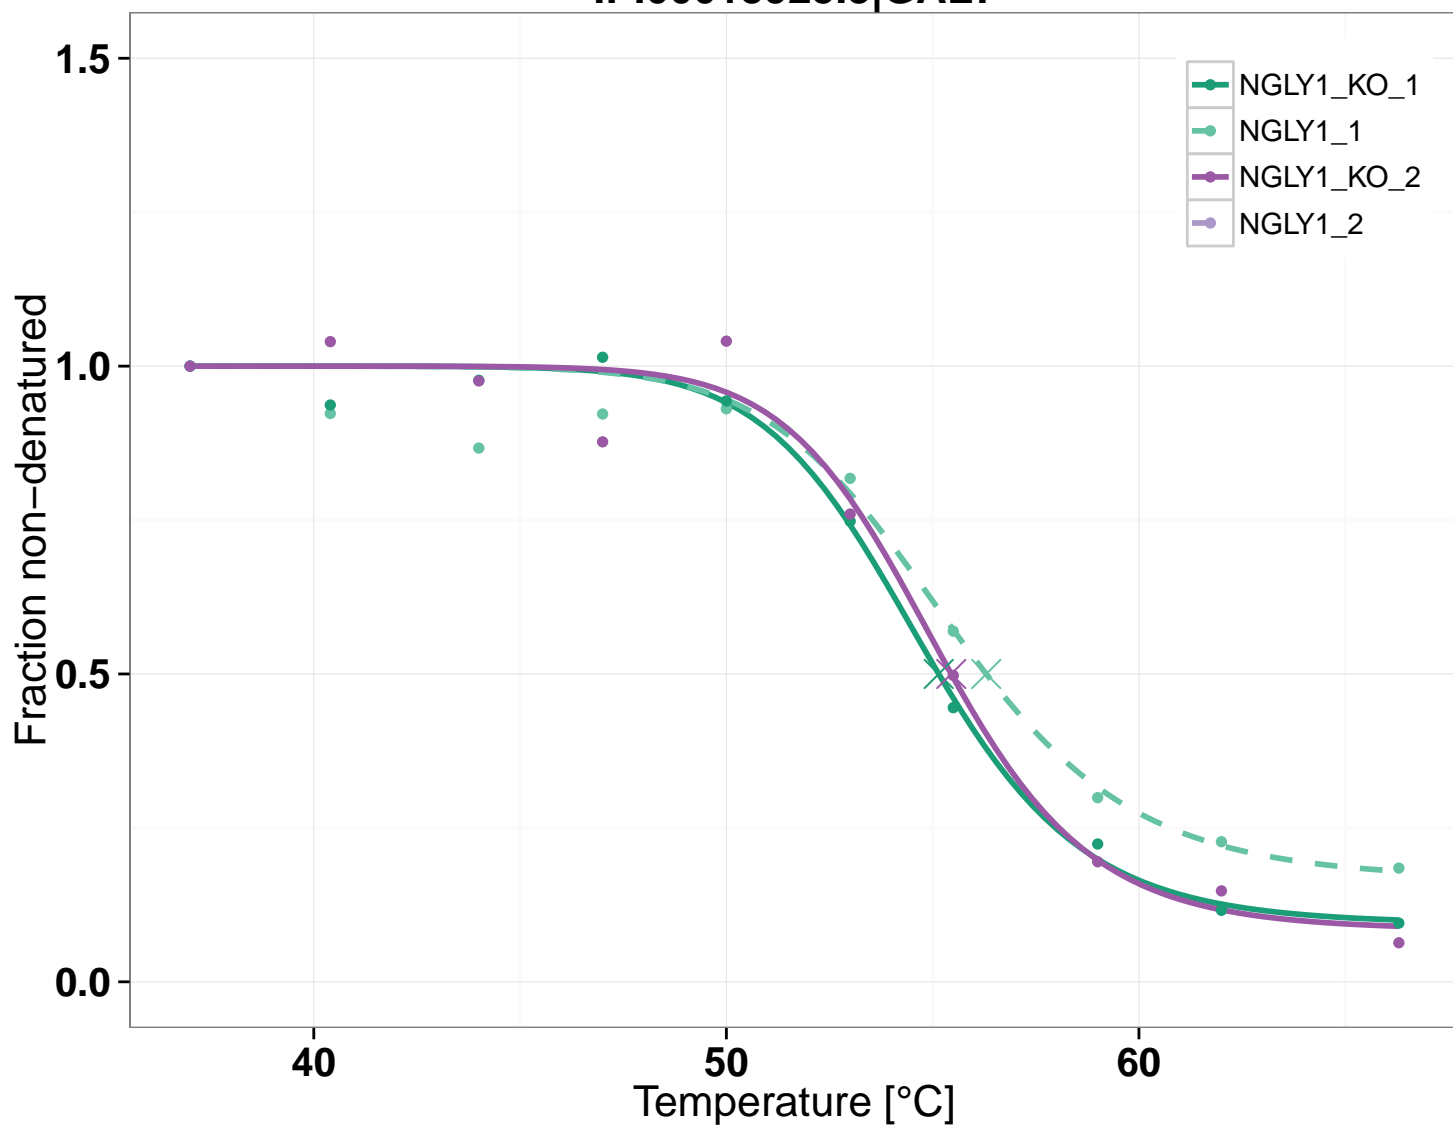

|            | meltPoint | slope  | plateau | R2   |
|------------|-----------|--------|---------|------|
| NGLY1_KO_1 | 55.15     | -0.12  | 0.09    | 1    |
| NGLY1_1    | 56.3      | -0.094 | 0.17    | 0.97 |
| NGLY1_KO_2 | 55.45     | -0.12  | 0.08    | 0.98 |
| NGLY1_2    | -         | -      | -       | -    |

Supplement: Supplementary file 1196 [file 1]

# IPI00452247.1|KIF16B

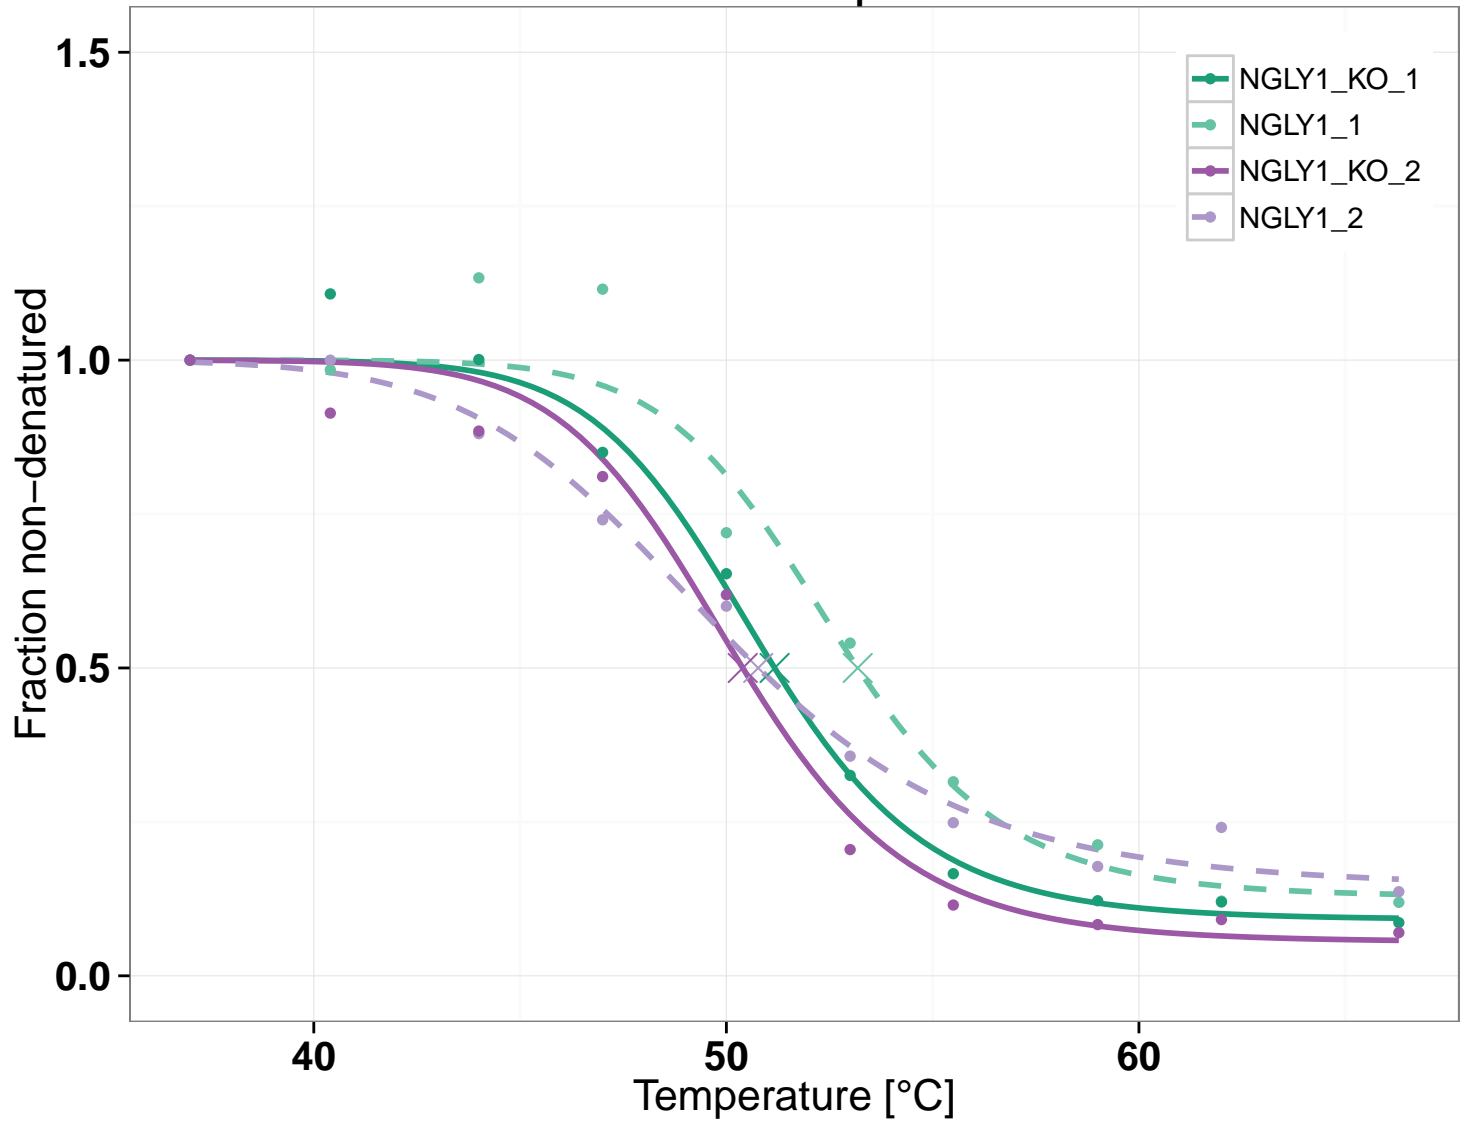

|            | meltPoint | slope  | plateau | R2   |
|------------|-----------|--------|---------|------|
| NGLY1_KO_1 | 51.17     | -0.11  | 0.09    | 0.99 |
| NGLY1_1    | 53.18     | -0.11  | 0.13    | 0.96 |
| NGLY1_KO_2 | 50.4      | -0.11  | 0.05    | 0.98 |
| NGLY1_2    | 50.77     | -0.071 | 0.14    | 0.99 |

Supplement: Supplementary file 1197 [file 1]

IPI00789798.1|RAI1

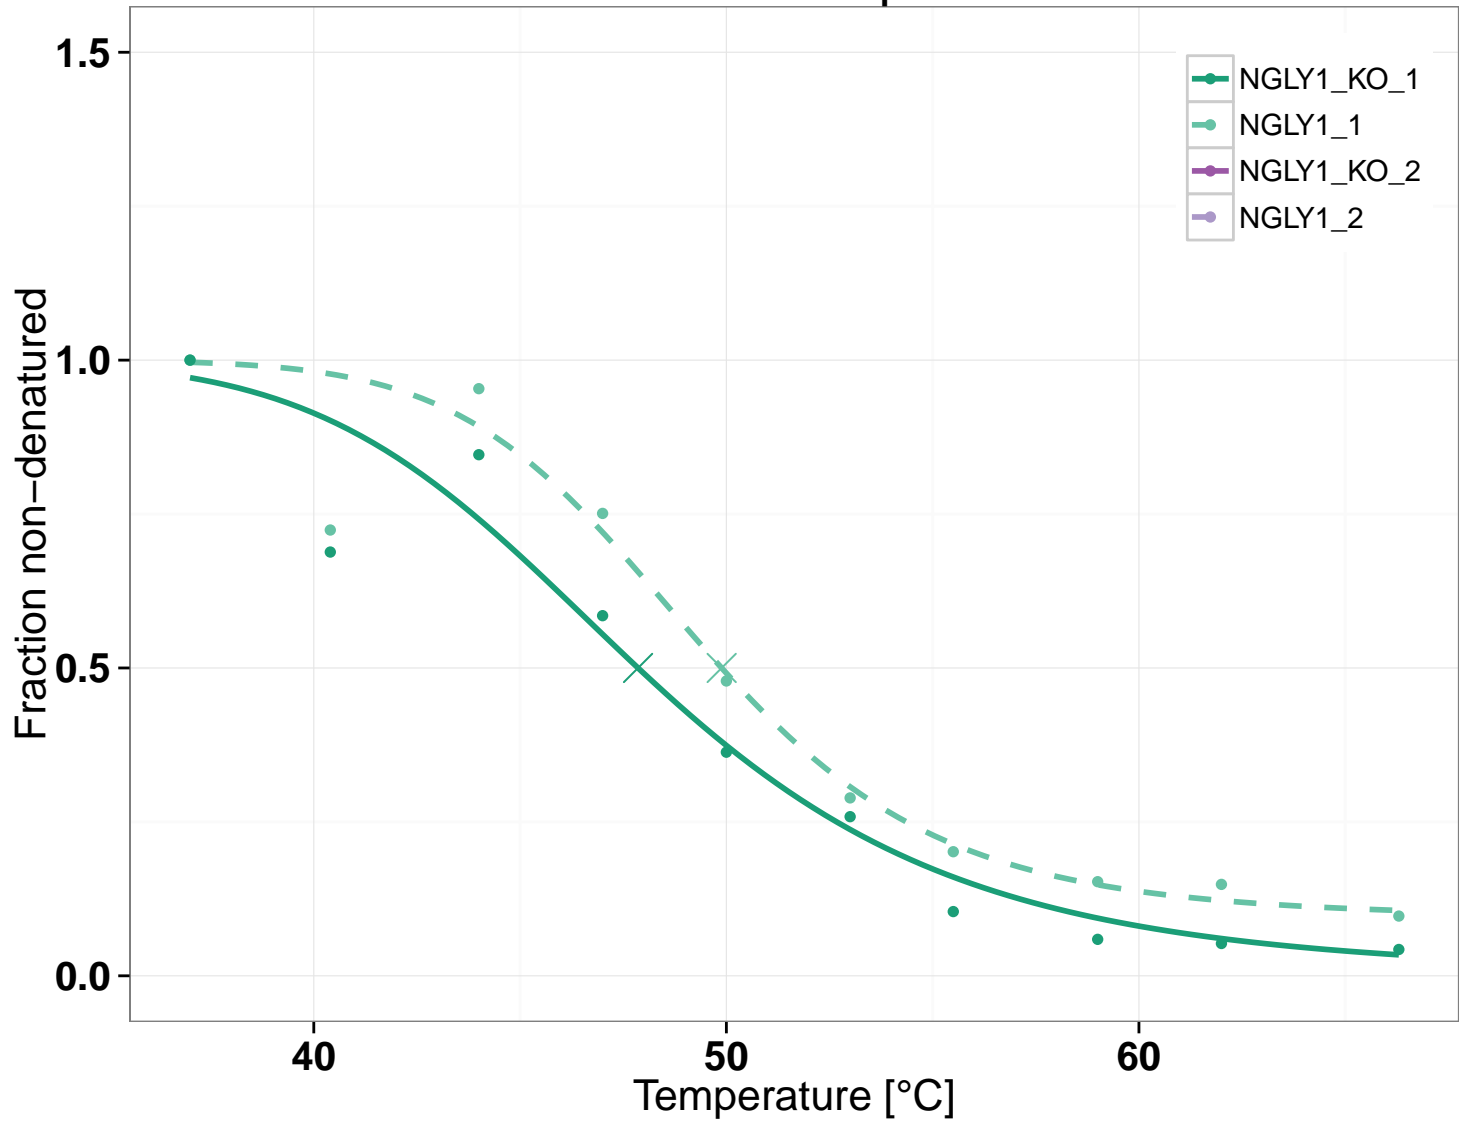

|            | meltPoint | slope  | plateau | R2   |
|------------|-----------|--------|---------|------|
| NGLY1_KO_1 | 47.86     | -0.065 | 0       | 0.94 |
| NGLY1_1    | 49.89     | -0.078 | 0.09    | 0.94 |
| NGLY1_KO_2 | -         | -      | -       | -    |
| NGLY1_2    | -         | -      | -       | -    |

Supplement: Supplementary file 1198 [file 1]

IPI00030279.5|ZRANB3

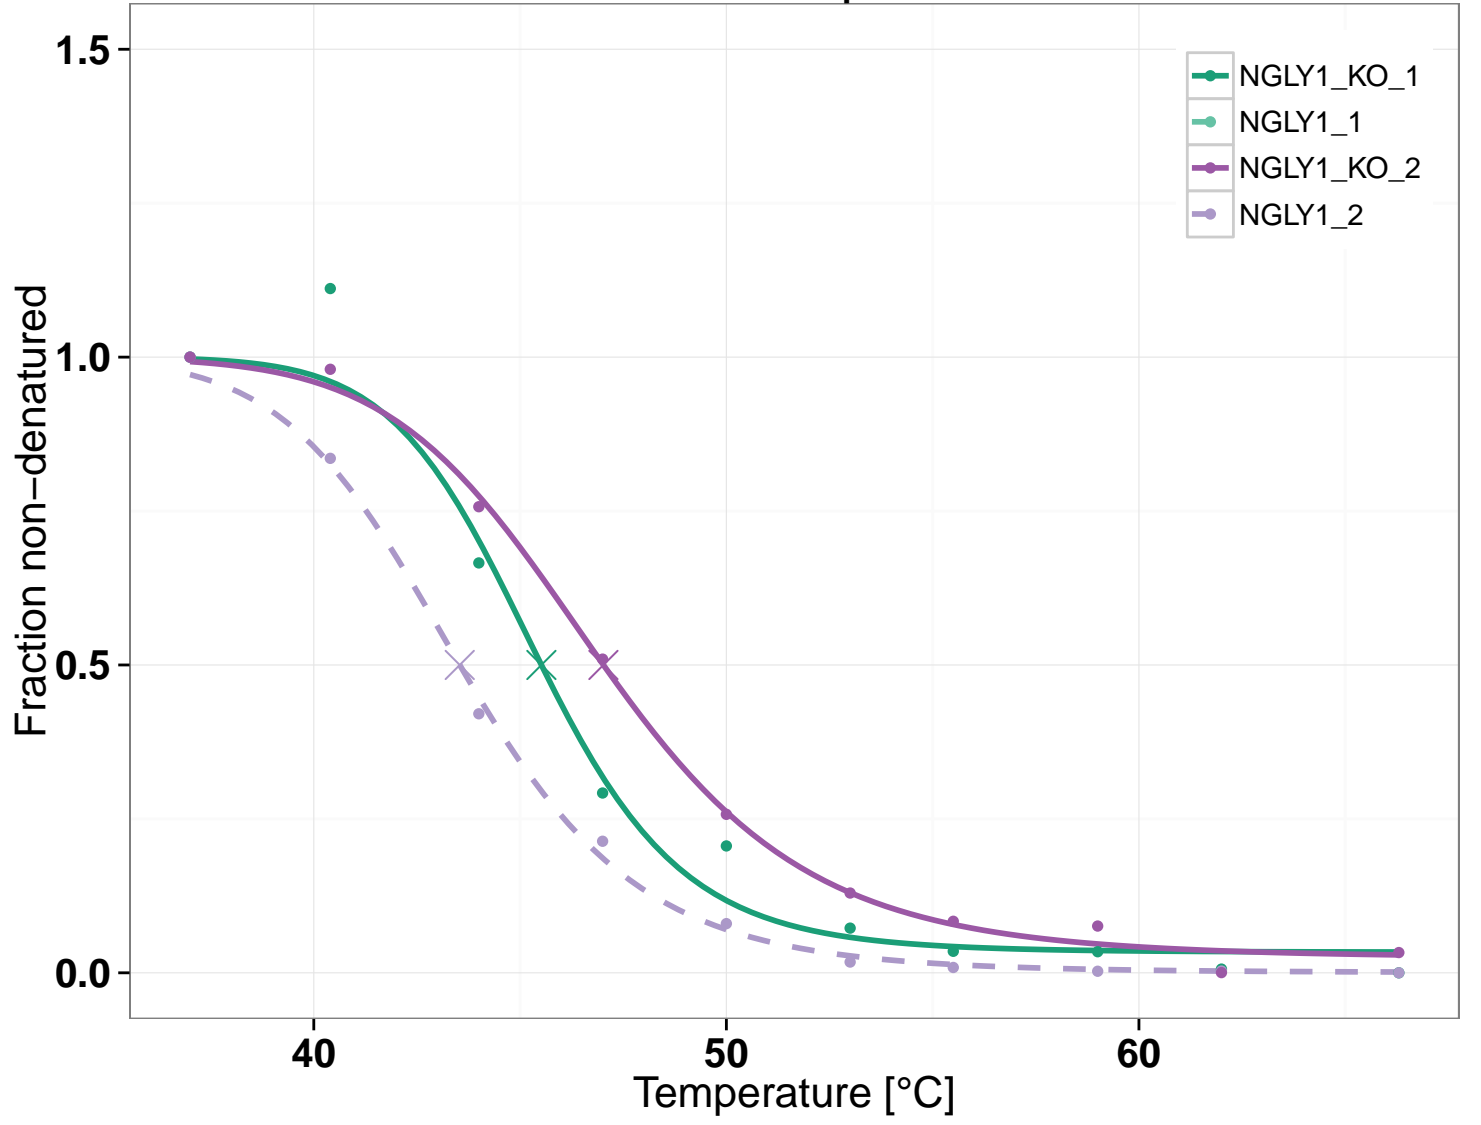

|            | meltPoint | slope  | plateau | R2   |
|------------|-----------|--------|---------|------|
| NGLY1_KO_1 | 45.52     | -0.14  | 0.03    | 0.98 |
| NGLY1_1    | -         | -      | -       | -    |
| NGLY1_KO_2 | 47.02     | -0.096 | 0.02    | 1    |
| NGLY1_2    | 43.54     | -0.12  | 0       | 1    |

Supplement: Supplementary file 1199 [file 1]

# IPI00744064.2|SP2

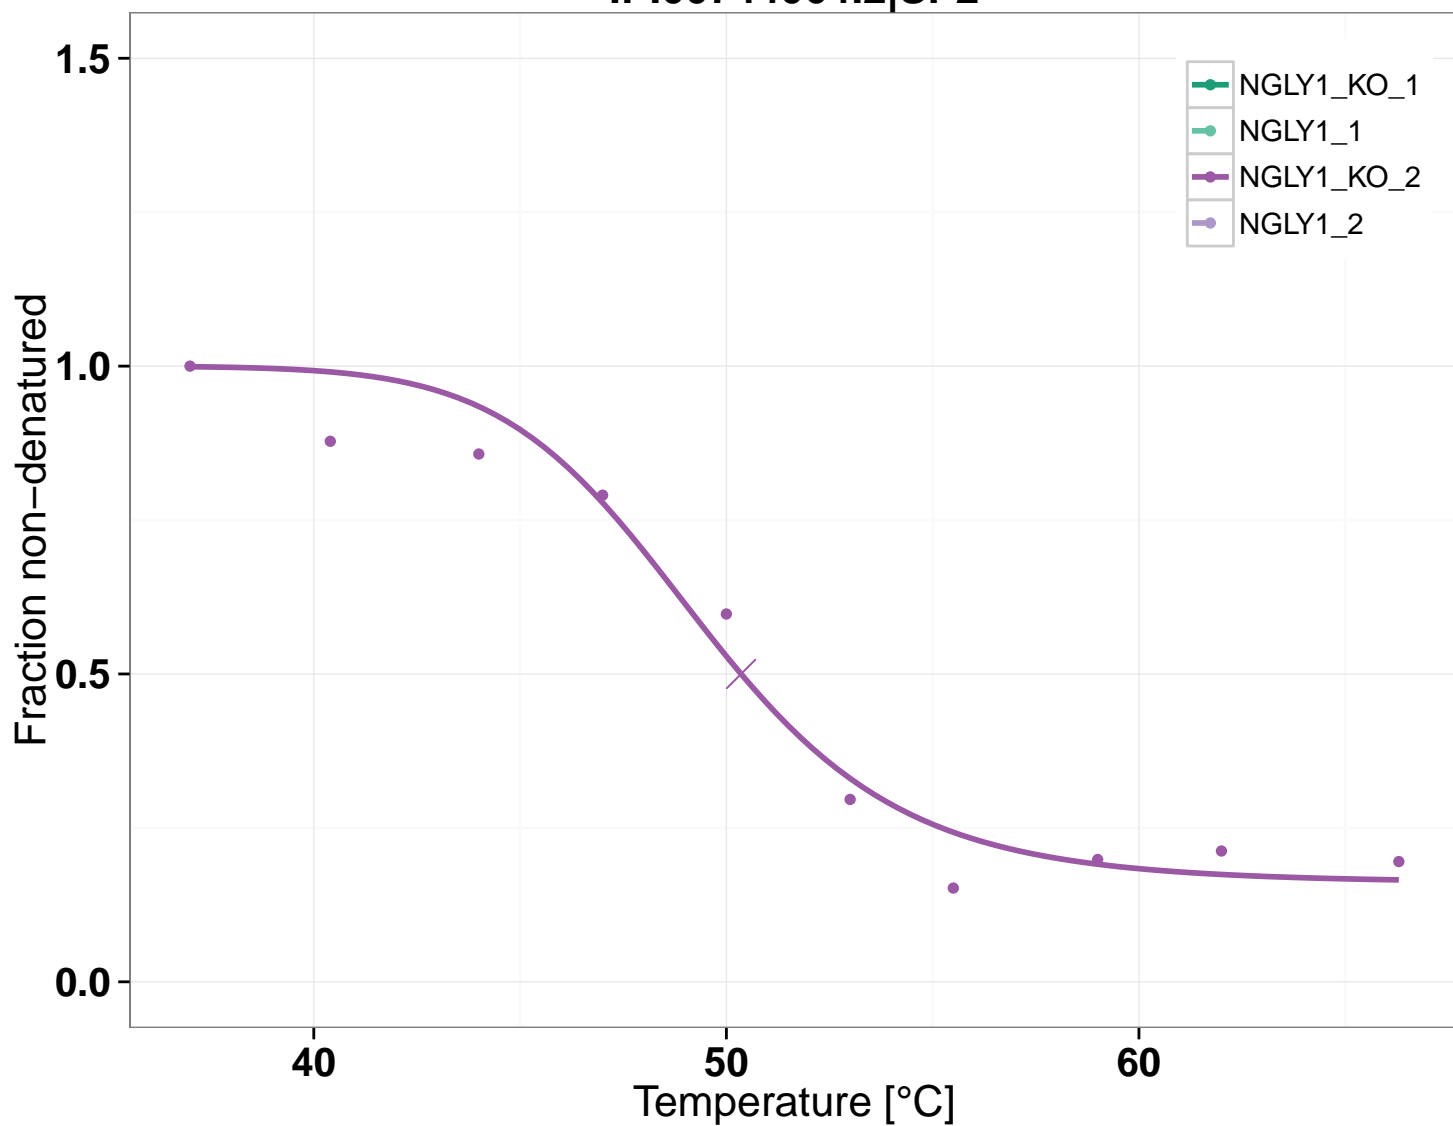

|            | meltPoint | slope  | plateau | R2   |
|------------|-----------|--------|---------|------|
| NGLY1_KO_1 | —         | —      | —       | —    |
| NGLY1_1    | —         | —      | —       | —    |
| NGLY1_KO_2 | 50.36     | -0.086 | 0.16    | 0.97 |
| NGLY1_2    | —         | —      | —       | —    |

Supplement: Supplementary file 1200 [file 1]

# IPI00377245.1|MLL2

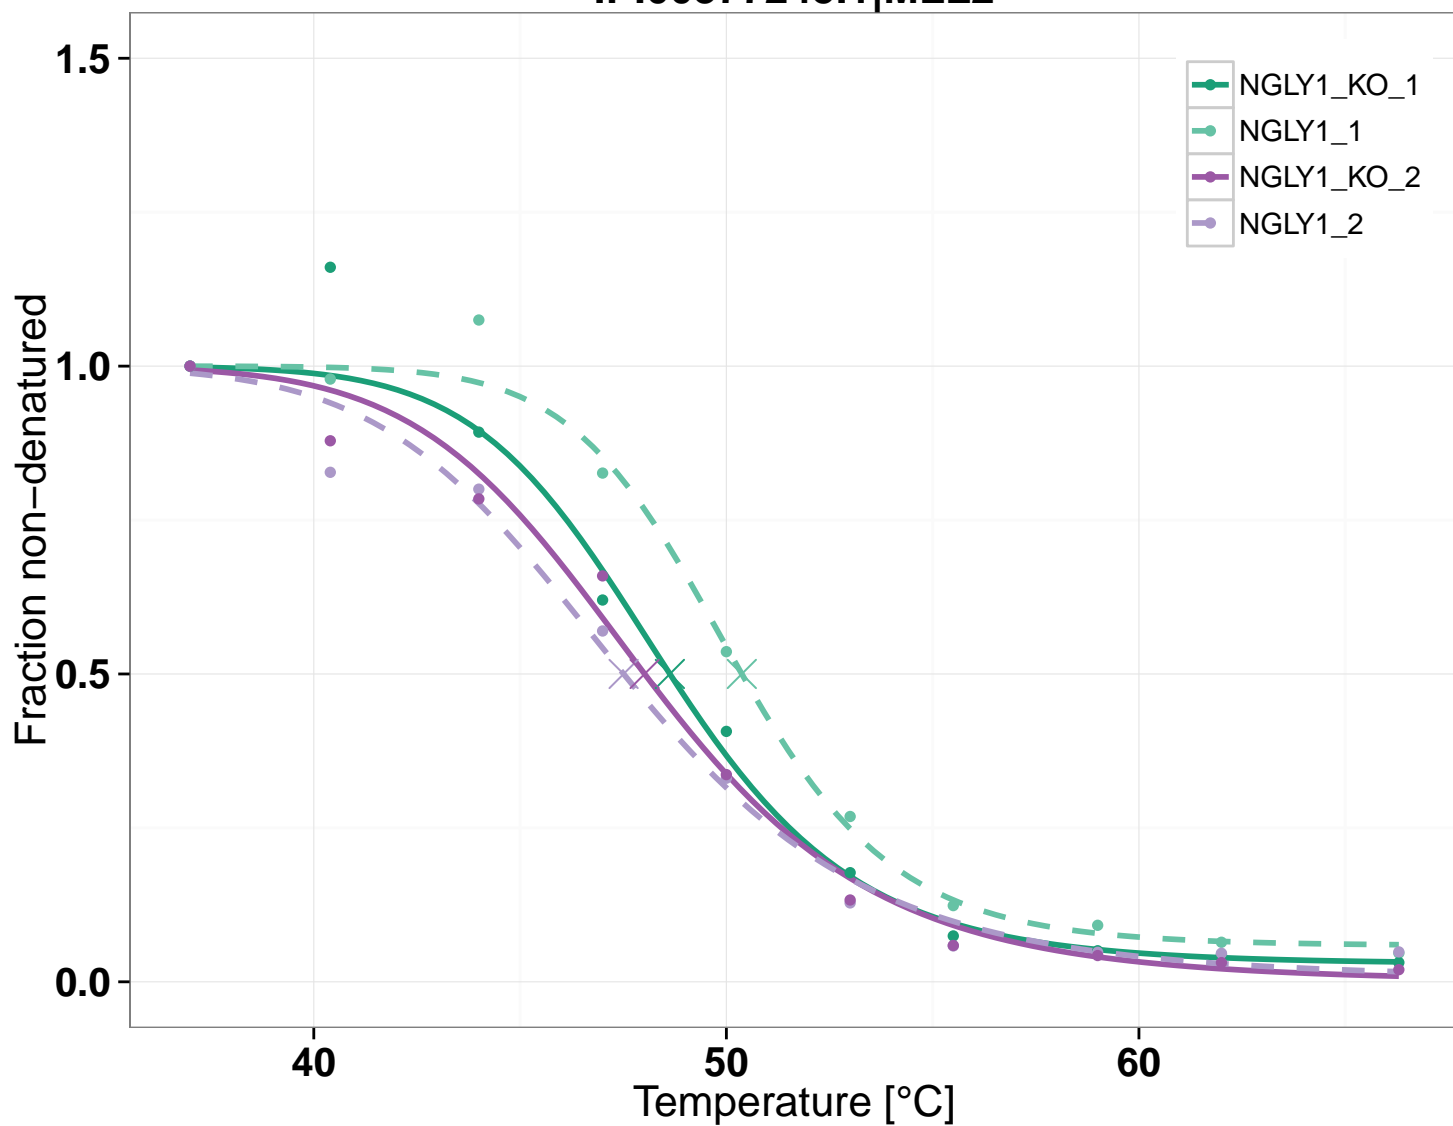

|            | meltPoint | slope  | plateau | R2   |
|------------|-----------|--------|---------|------|
| NGLY1_KO_1 | 48.63     | -0.1   | 0.03    | 0.98 |
| NGLY1_1    | 50.37     | -0.12  | 0.06    | 0.99 |
| NGLY1_KO_2 | 48.02     | -0.09  | 0       | 0.99 |
| NGLY1_2    | 47.51     | -0.084 | 0.01    | 0.99 |

Supplement: Supplementary file 1201 [file 1]

IPI00013107.3|SFRS16

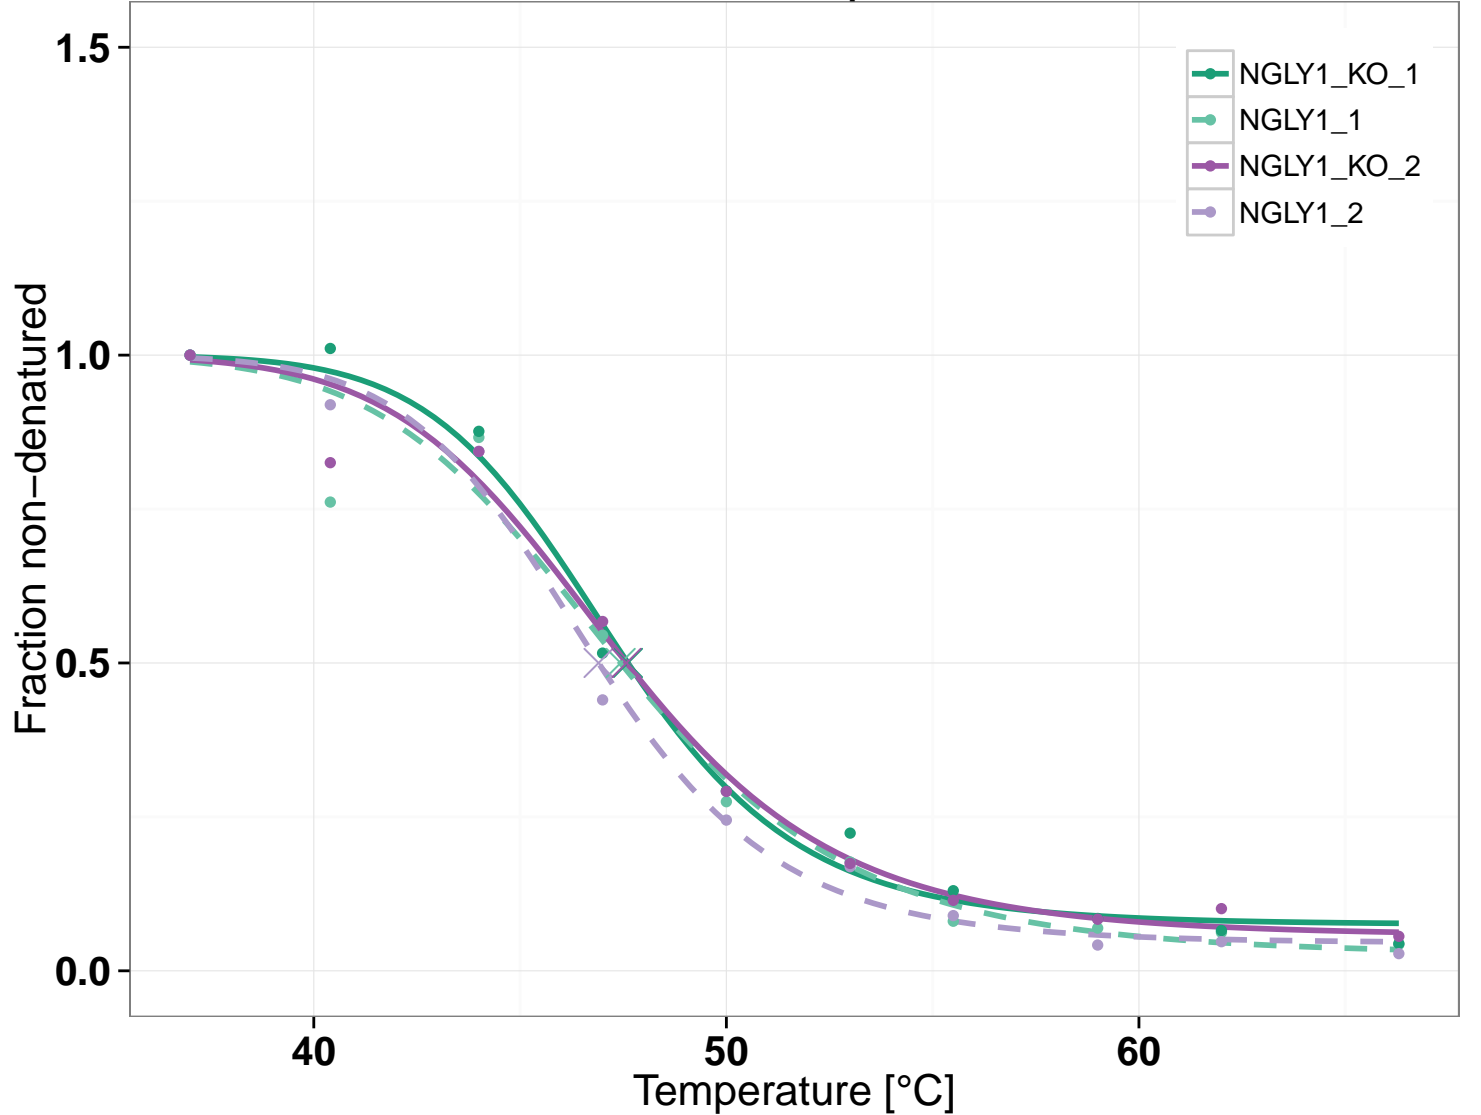

|            | meltPoint | slope  | plateau | R2   |
|------------|-----------|--------|---------|------|
| NGLY1_KO_1 | 47.61     | -0.1   | 0.07    | 0.99 |
| NGLY1_1    | 47.44     | -0.084 | 0.03    | 0.97 |
| NGLY1_KO_2 | 47.58     | -0.088 | 0.06    | 0.98 |
| NGLY1_2    | 46.9      | -0.11  | 0.04    | 0.99 |

Supplement: Supplementary file 1202 [file 1]

IPI00829681.1|MAGEA6

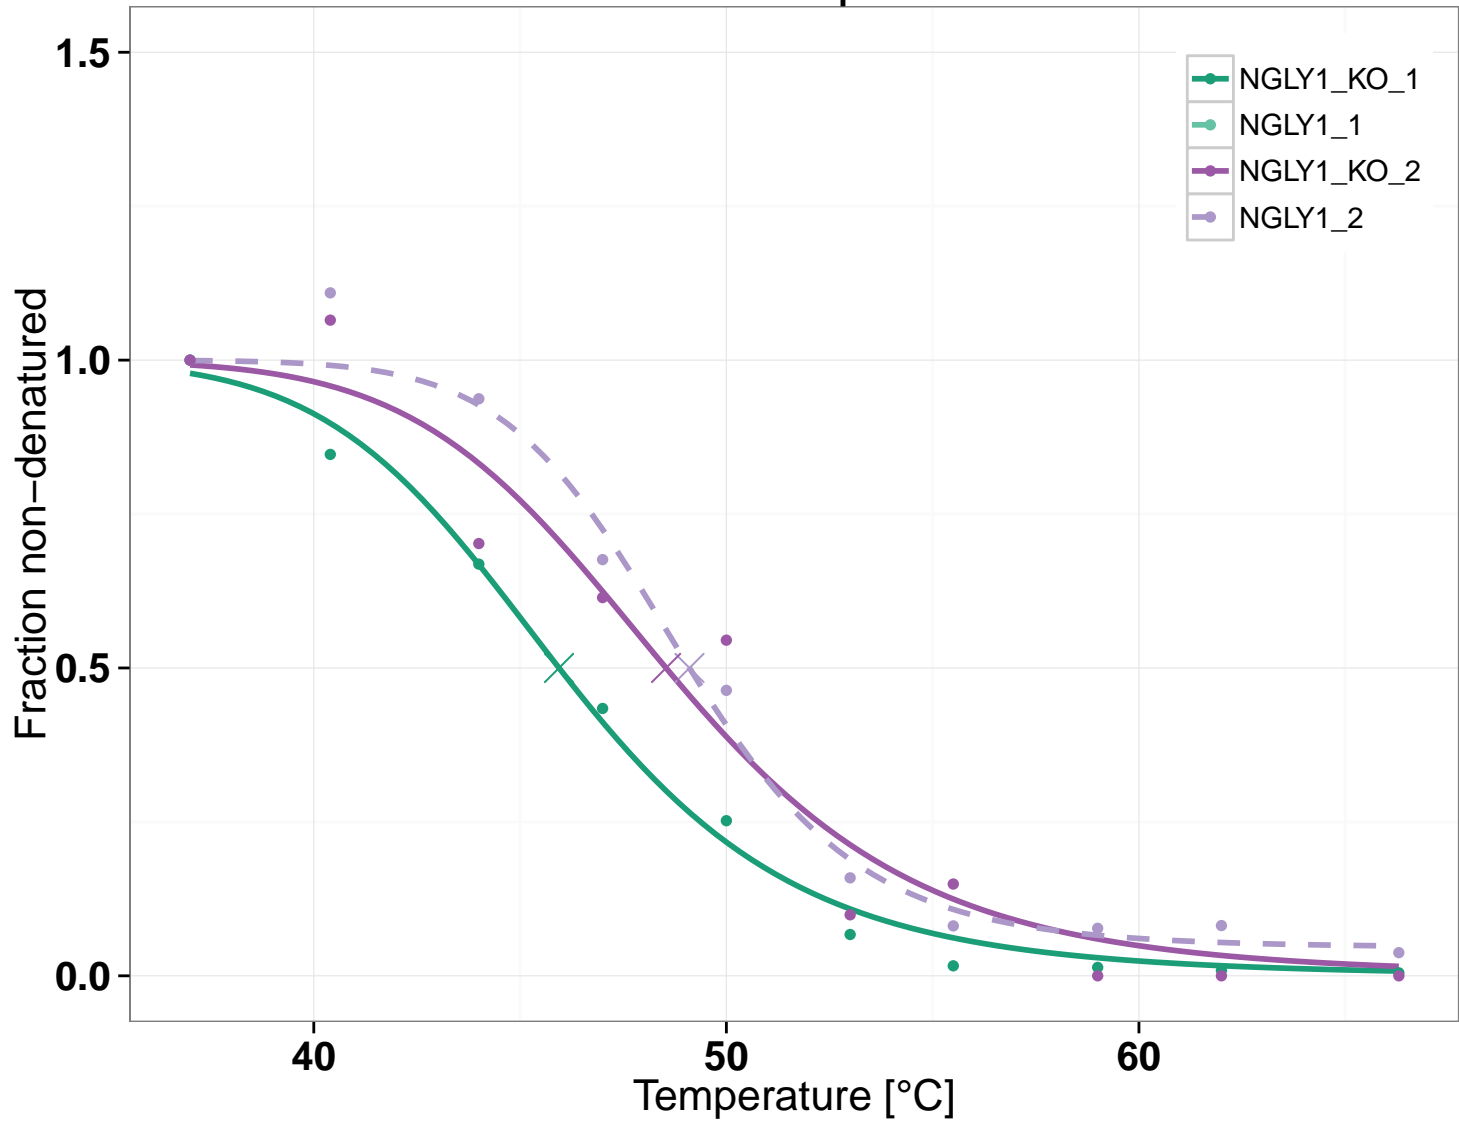

|            | meltPoint | slope  | plateau | R2   |
|------------|-----------|--------|---------|------|
| NGLY1_KO_1 | 45.94     | -0.087 | 0       | 0.99 |
| NGLY1_1    | —         | —      | —       | —    |
| NGLY1_KO_2 | 48.54     | -0.081 | 0       | 0.96 |
| NGLY1_2    | 49.11     | -0.11  | 0.05    | 0.99 |

Supplement: Supplementary file 1203 [file 1]

# IPI00158615.7|THOC2

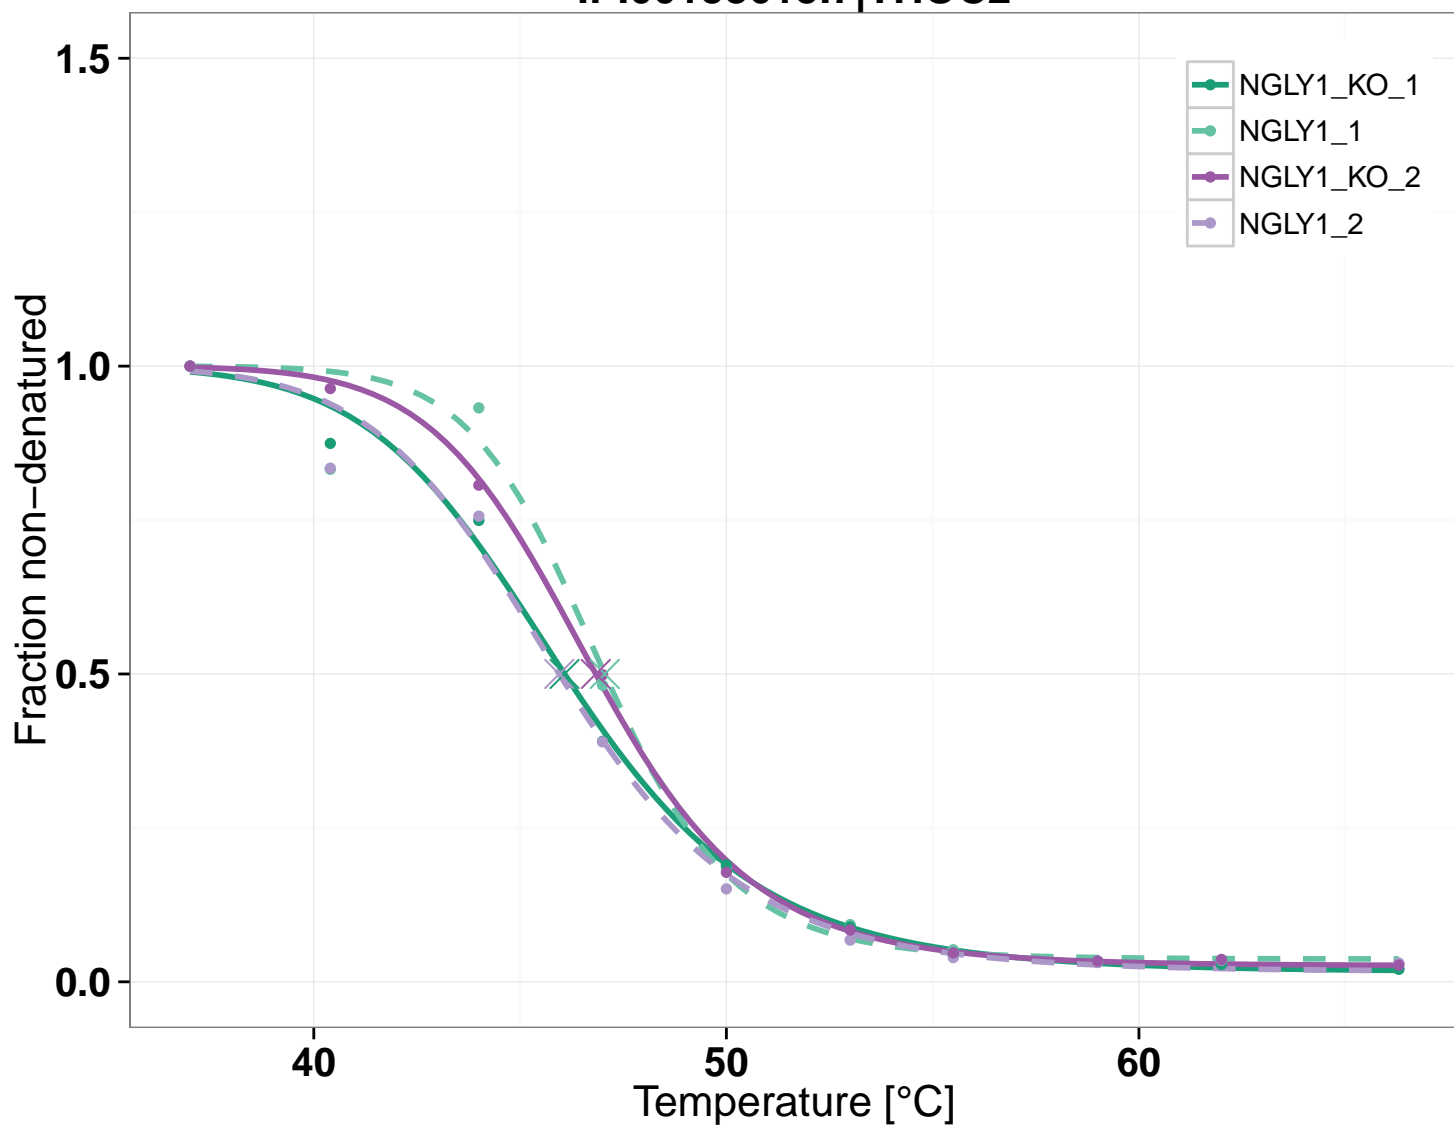

|            | meltPoint | slope | plateau | R2   |
|------------|-----------|-------|---------|------|
| NGLY1_KO_1 | 46.08     | -0.1  | 0.02    | 1    |
| NGLY1_1    | 47.05     | -0.15 | 0.04    | 0.98 |
| NGLY1_KO_2 | 46.84     | -0.12 | 0.03    | 1    |
| NGLY1_2    | 45.95     | -0.11 | 0.02    | 0.99 |

Supplement: Supplementary file 1204 [file 1]

IPI00792837.1|ZNF207

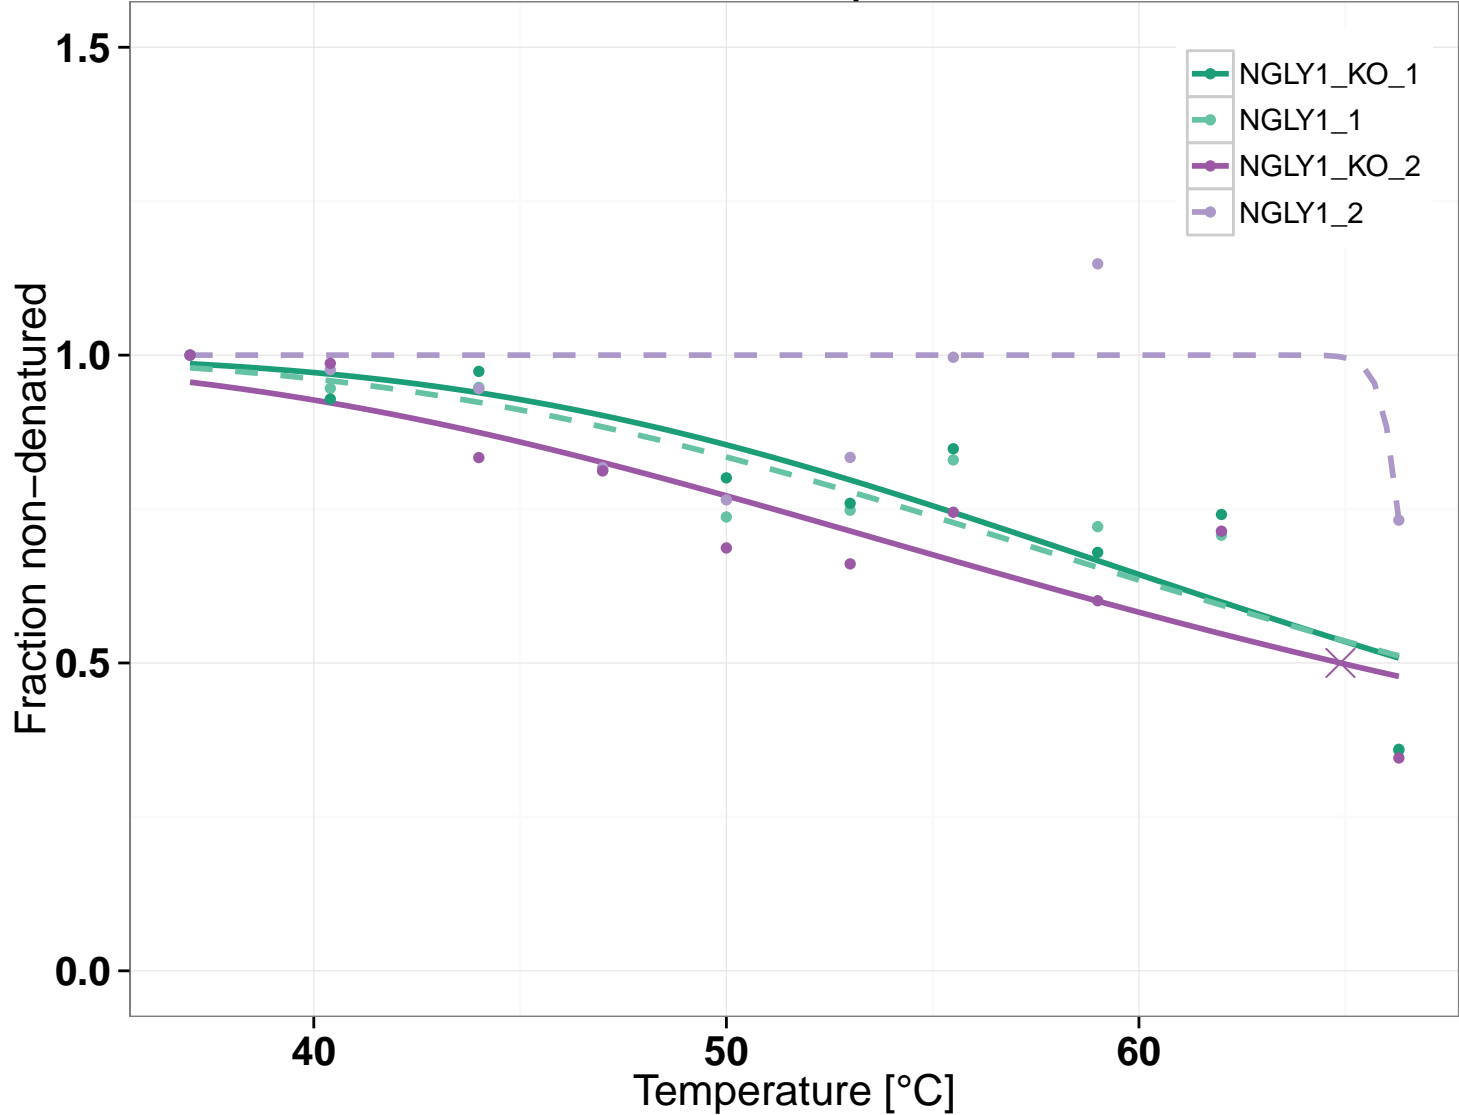

|            | meltPoint | slope  | plateau | R2   |
|------------|-----------|--------|---------|------|
| NGLY1_KO_1 | –         | –0.023 | 0       | 0.77 |
| NGLY1_1    | –         | –0.021 | 0       | 0.77 |
| NGLY1_KO_2 | 64.88     | –0.019 | 0       | 0.79 |
| NGLY1_2    | –         | –      | 0       | 0.17 |

Supplement: Supplementary file 1205 [file 1]

IPI00031679.2|C3ORF26

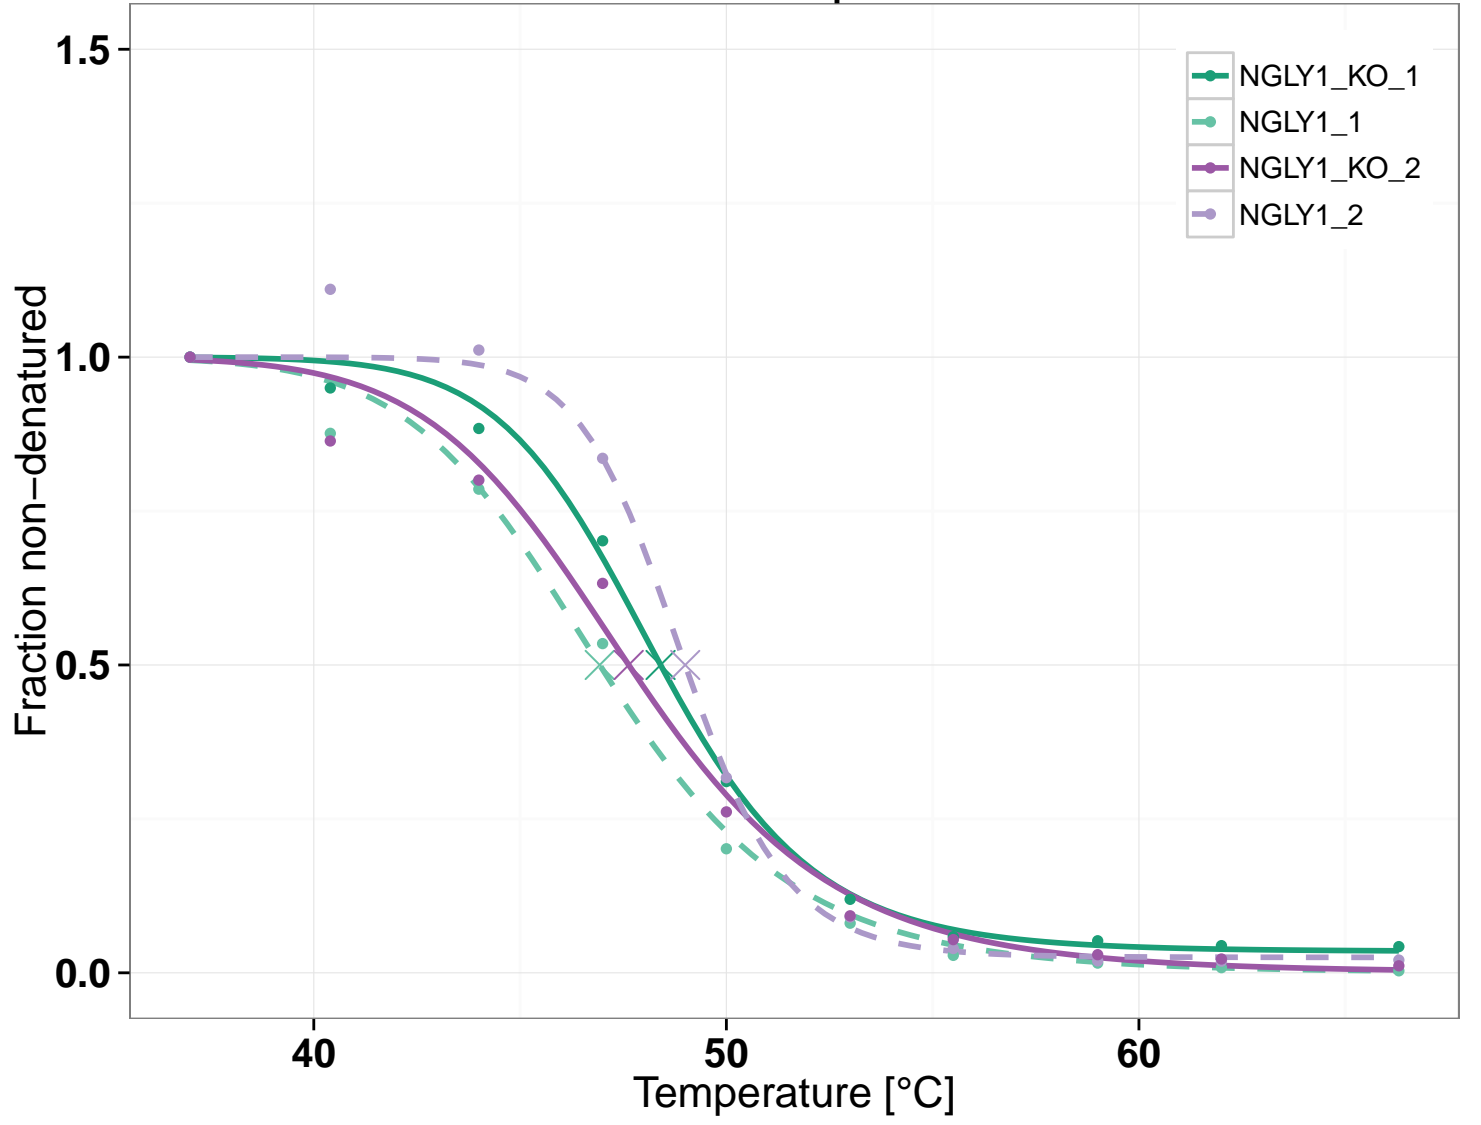

|            | meltPoint | slope | plateau | R2   |
|------------|-----------|-------|---------|------|
| NGLY1_KO_1 | 48.41     | -0.13 | 0.03    | 1    |
| NGLY1_1    | 46.93     | -0.11 | 0       | 0.99 |
| NGLY1_KO_2 | 47.63     | -0.1  | 0       | 0.99 |
| NGLY1_2    | 49        | -0.19 | 0.03    | 0.99 |

Supplement: Supplementary file 1206 [file 1]

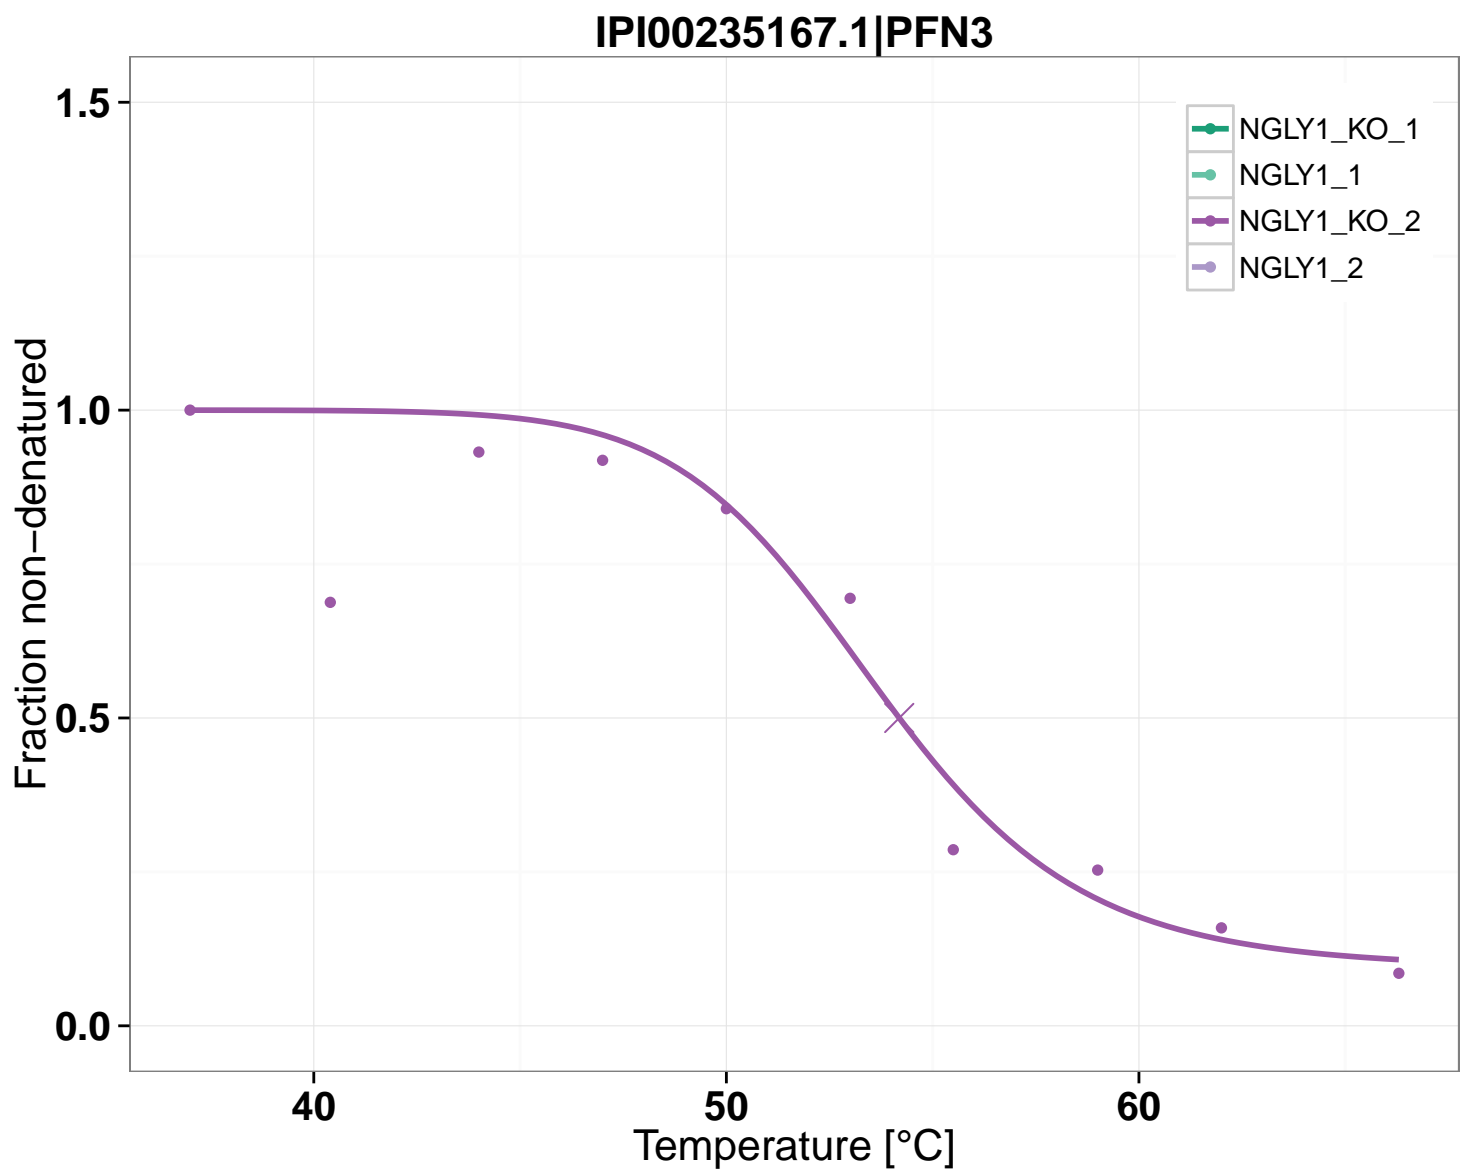

|            | meltPoint | slope  | plateau | R2   |
|------------|-----------|--------|---------|------|
| NGLY1_KO_1 | —         | —      | —       | —    |
| NGLY1_1    | —         | —      | —       | —    |
| NGLY1_KO_2 | 54.19     | -0.092 | 0.09    | 0.89 |
| NGLY1_2    | —         | —      | —       | —    |

Supplement: Supplementary file 1207 [file 1]
