# Supplementary material (part 13 of 85)
Source: publisher figshare collection journal article supplement (https://gsajournals.figshare.com/articles/dataset/_/12014913)

IPI00740474.2|LOC642451

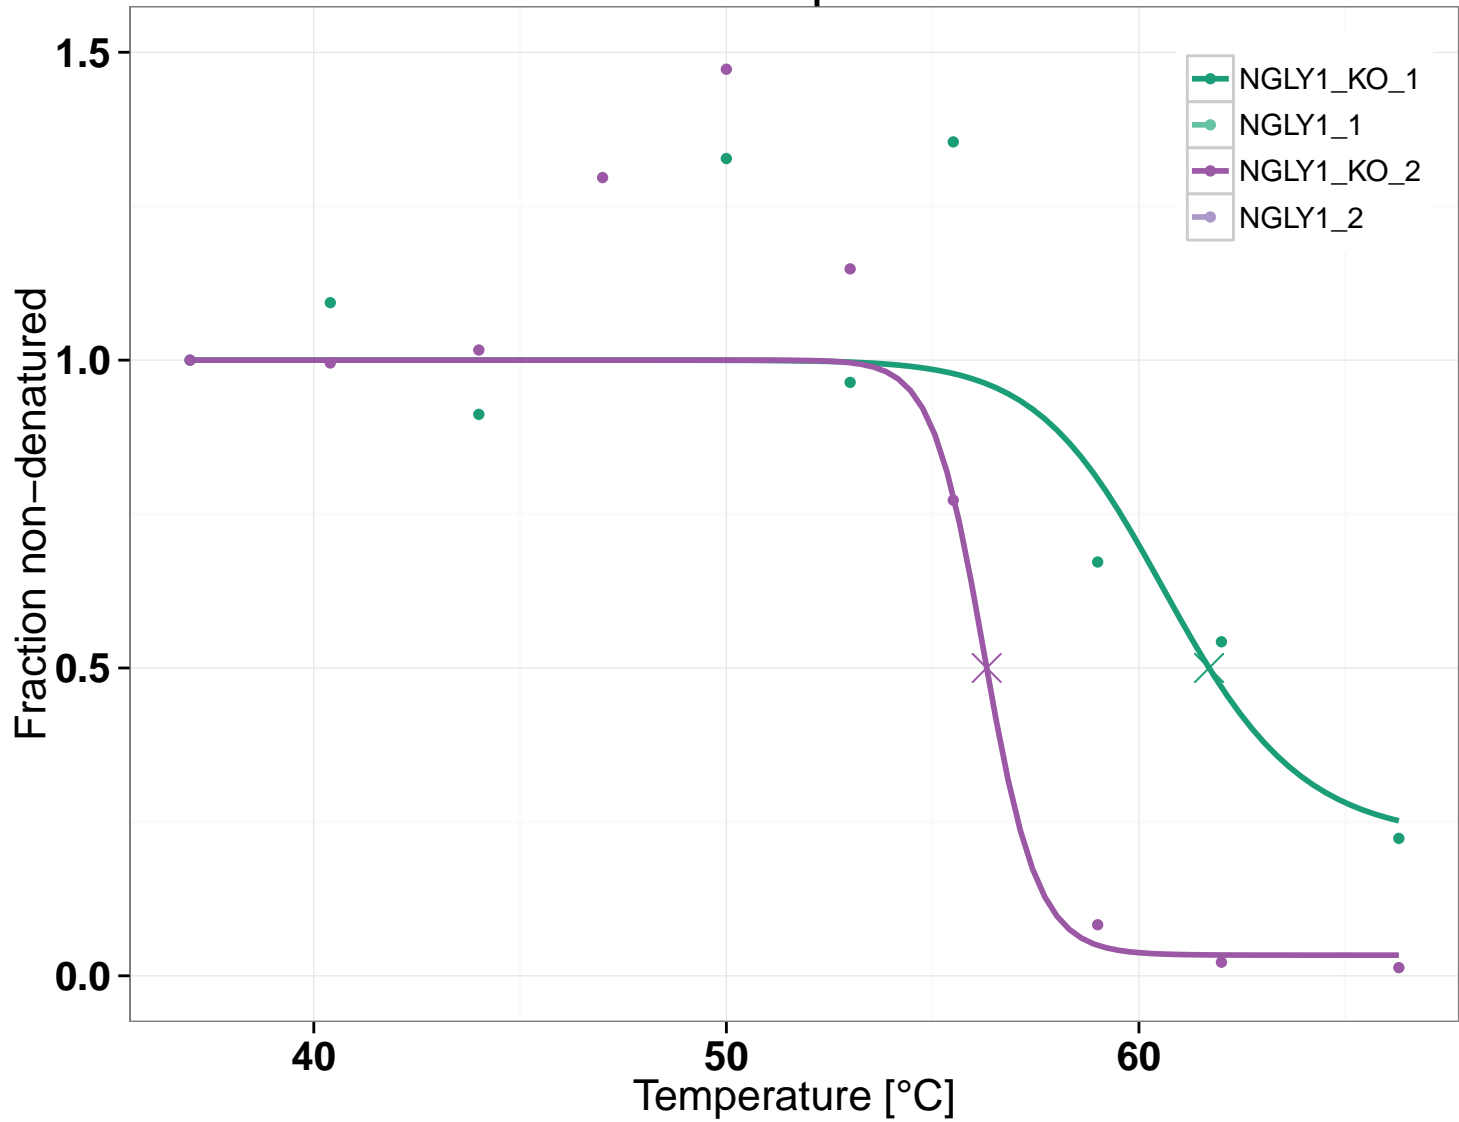

|            | meltPoint | slope | plateau | R2   |
|------------|-----------|-------|---------|------|
| NGLY1_KO_1 | 61.7      | -0.12 | 0.22    | 0.46 |
| NGLY1_1    | -         | -     | -       | -    |
| NGLY1_KO_2 | 56.31     | -0.38 | 0.03    | 0.87 |
| NGLY1_2    | -         | -     | -       | -    |

Supplement: Supplementary file 1208 [file 1]

# IPI00293307.1|ADFP

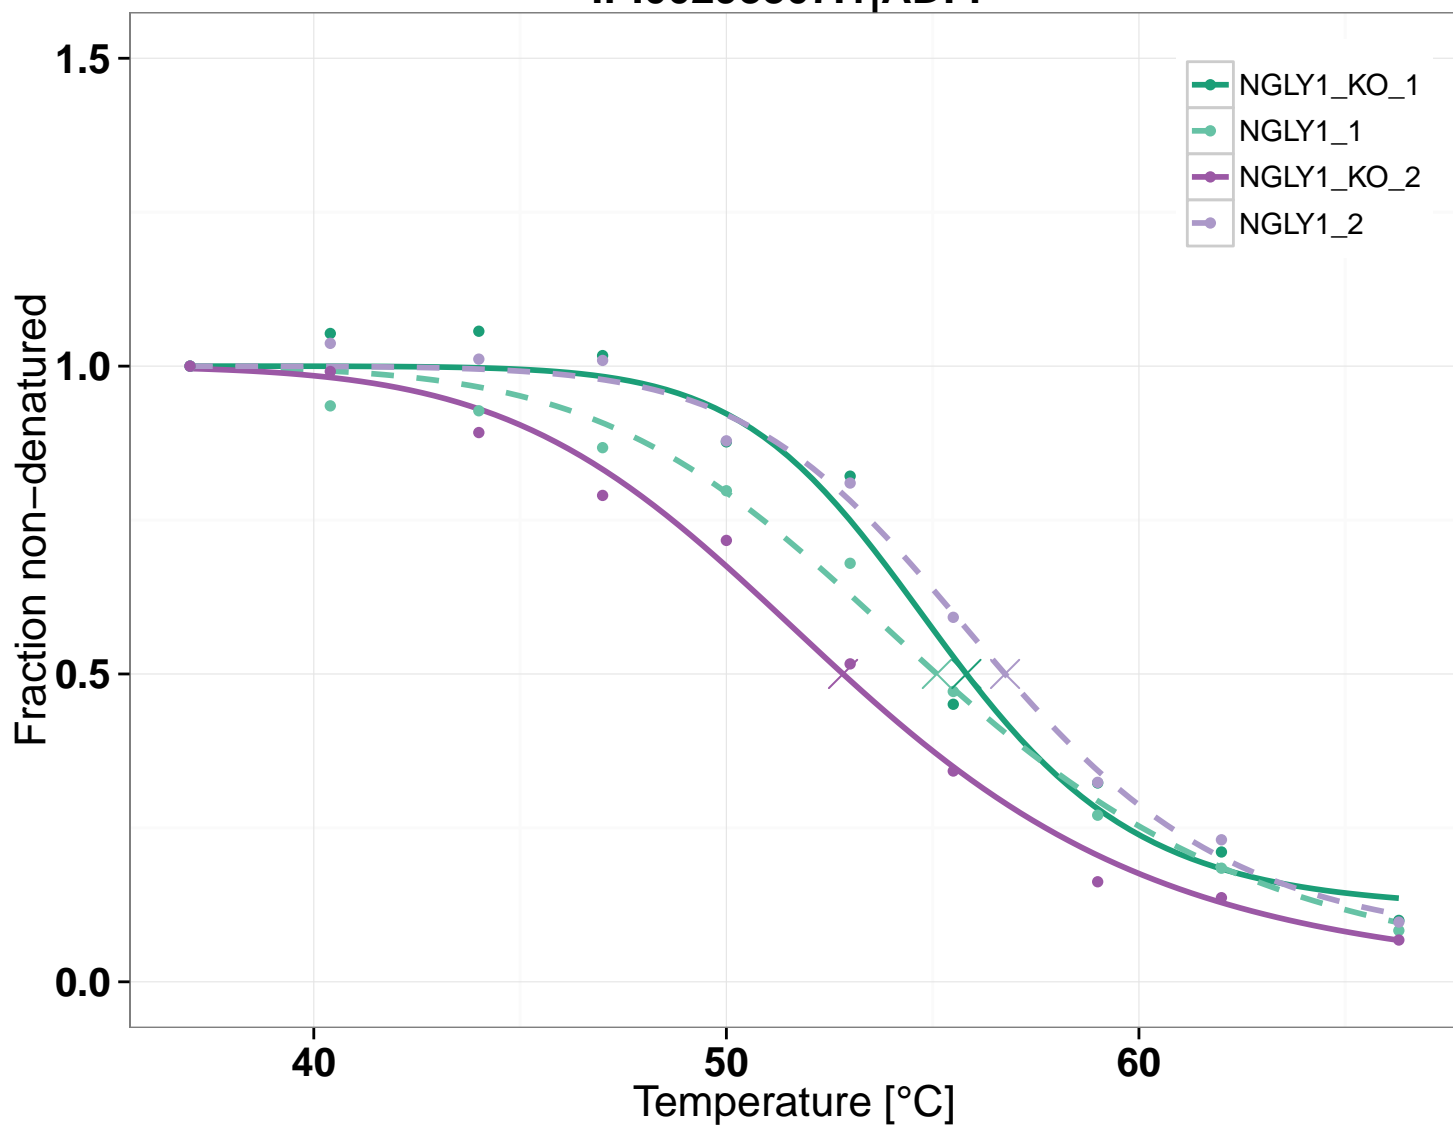

|            | meltPoint | slope  | plateau | R2   |
|------------|-----------|--------|---------|------|
| NGLY1_KO_1 | 55.82     | -0.092 | 0.12    | 0.98 |
| NGLY1_1    | 55.1      | -0.062 | 0       | 0.99 |
| NGLY1_KO_2 | 52.83     | -0.063 | 0       | 0.99 |
| NGLY1_2    | 56.76     | -0.079 | 0.05    | 0.99 |

Supplement: Supplementary file 1209 [file 1]

IPI00470596.3|ZNF638

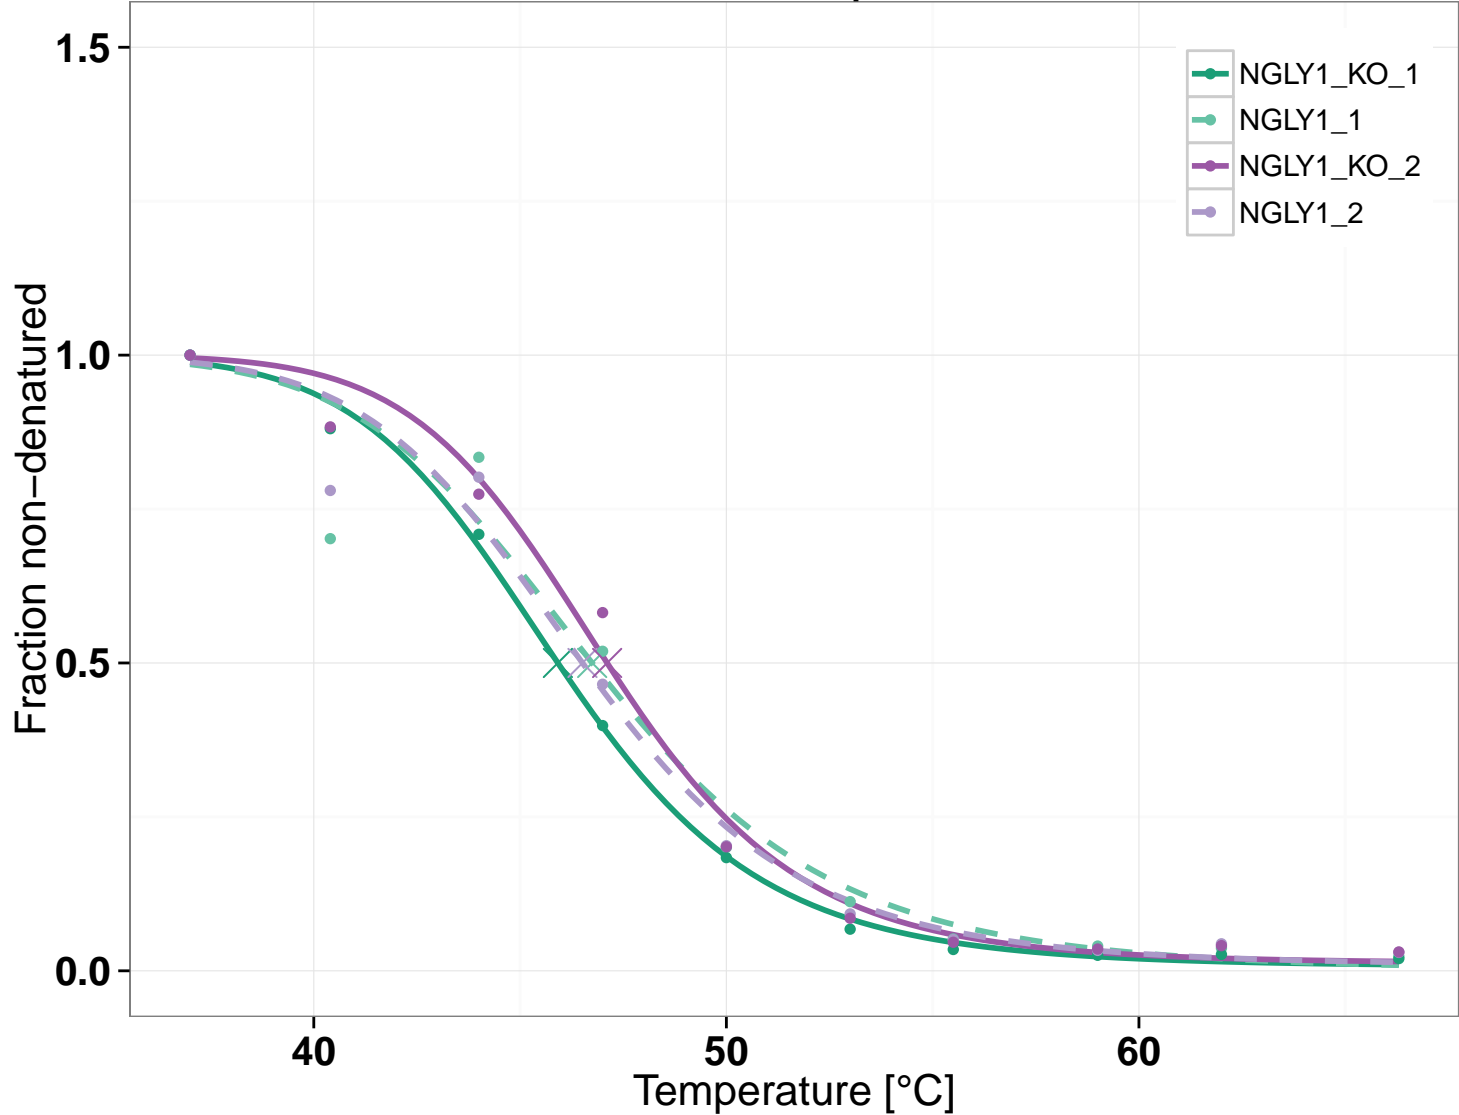

|            | meltPoint | slope  | plateau | R2   |
|------------|-----------|--------|---------|------|
| NGLY1_KO_1 | 45.92     | -0.1   | 0.01    | 1    |
| NGLY1_1    | 46.75     | -0.086 | 0       | 0.95 |
| NGLY1_KO_2 | 47.11     | -0.1   | 0.01    | 0.99 |
| NGLY1_2    | 46.51     | -0.094 | 0.01    | 0.98 |

Supplement: Supplementary file 1210 [file 1]

IPI00029728.3|ERCC2

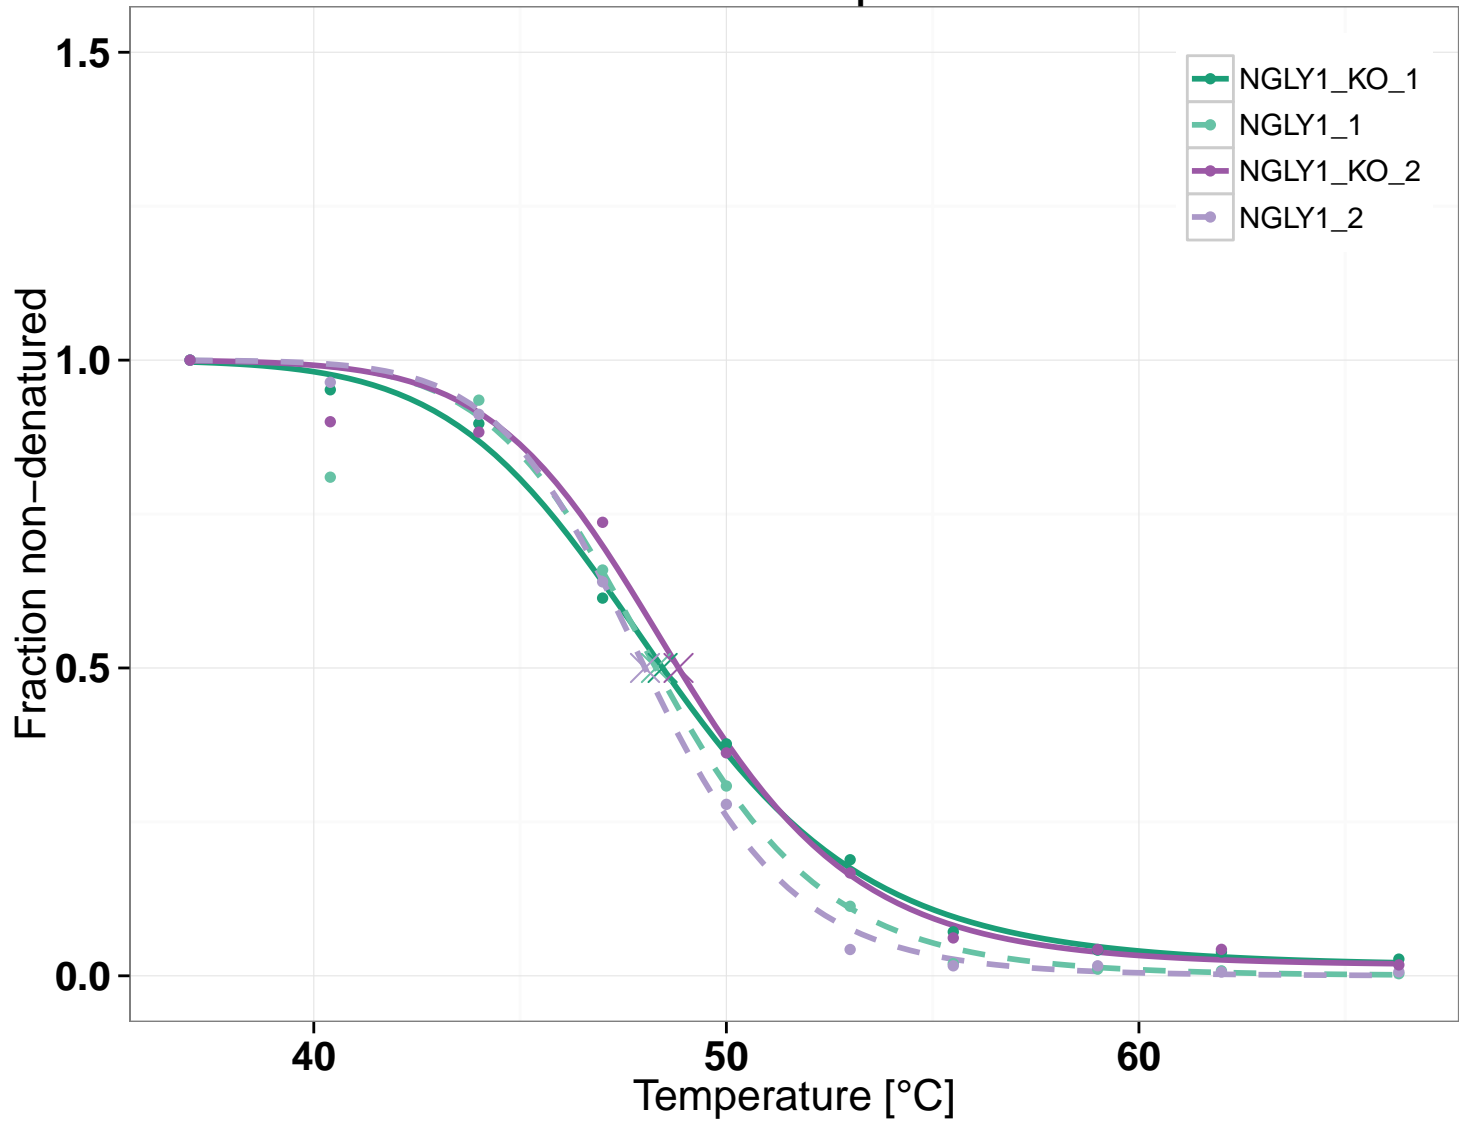

|            | meltPoint | slope  | plateau | R2   |
|------------|-----------|--------|---------|------|
| NGLY1_KO_1 | 48.45     | -0.097 | 0.02    | 1    |
| NGLY1_1    | 48.29     | -0.12  | 0       | 0.98 |
| NGLY1_KO_2 | 48.84     | -0.11  | 0.02    | 0.99 |
| NGLY1_2    | 48.03     | -0.14  | 0       | 1    |

Supplement: Supplementary file 1211 [file 1]

IPI00043201.2|CENPJ

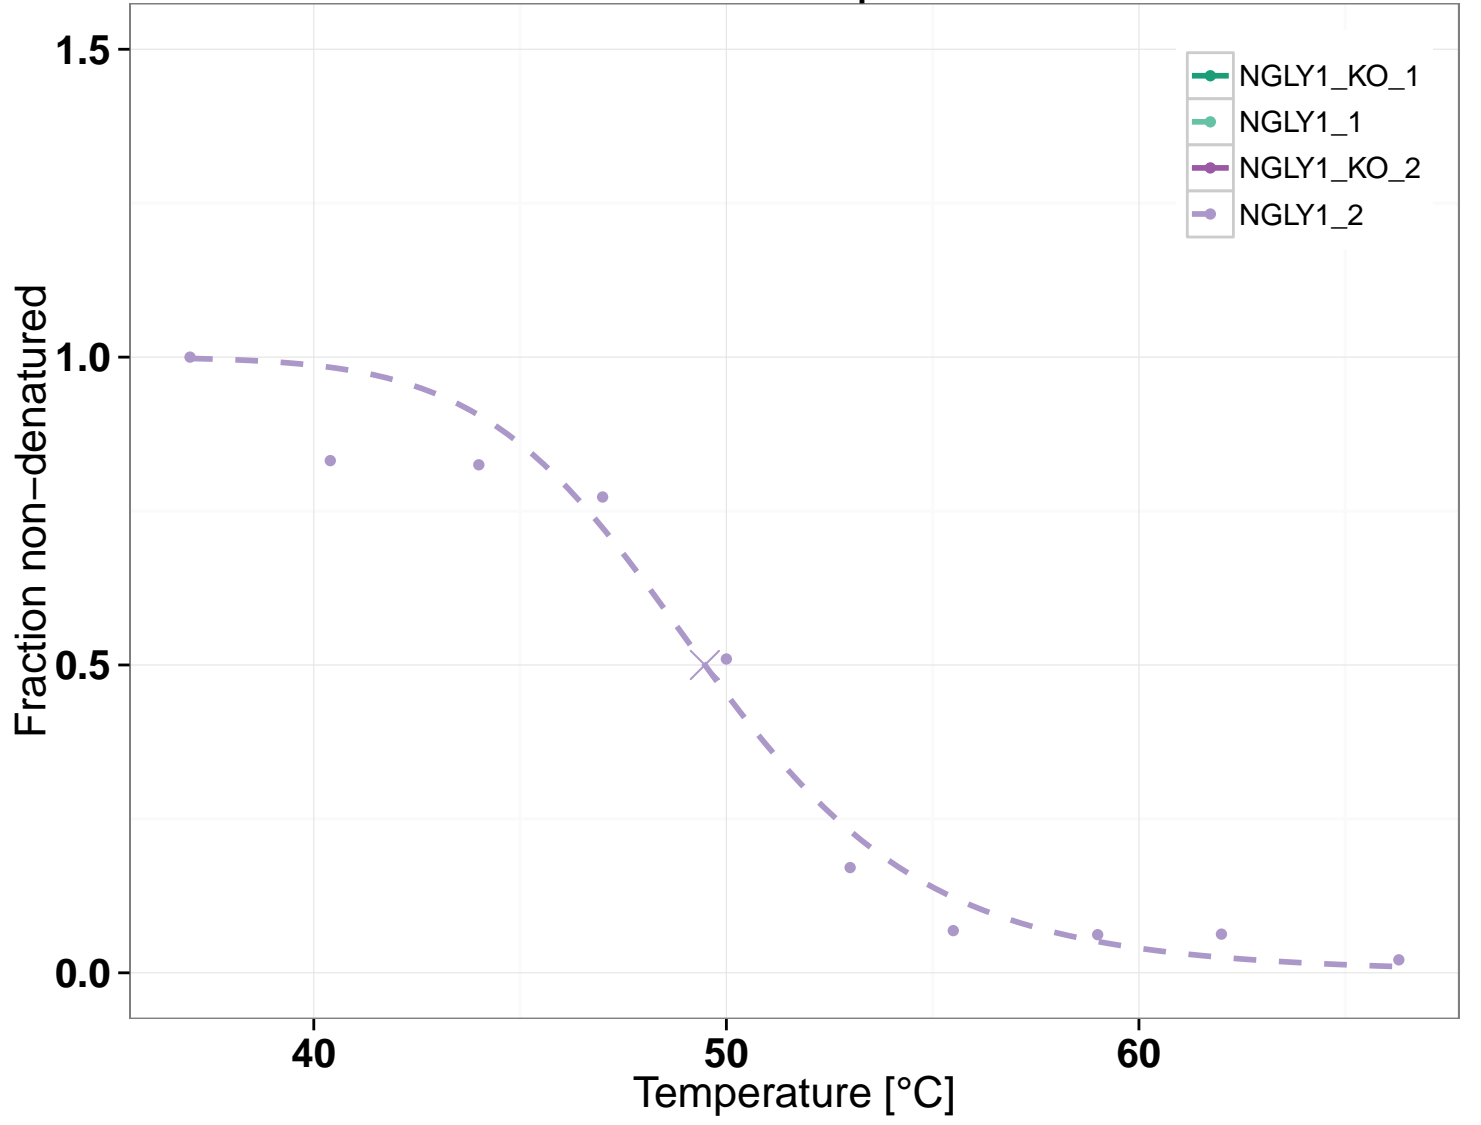

|            | meltPoint | slope  | plateau | R2   |
|------------|-----------|--------|---------|------|
| NGLY1_KO_1 | —         | —      | —       | —    |
| NGLY1_1    | —         | —      | —       | —    |
| NGLY1_KO_2 | —         | —      | —       | —    |
| NGLY1_2    | 49.48     | -0.093 | 0       | 0.97 |

Supplement: Supplementary file 1212 [file 1]

# IPI00335280.3|RPE

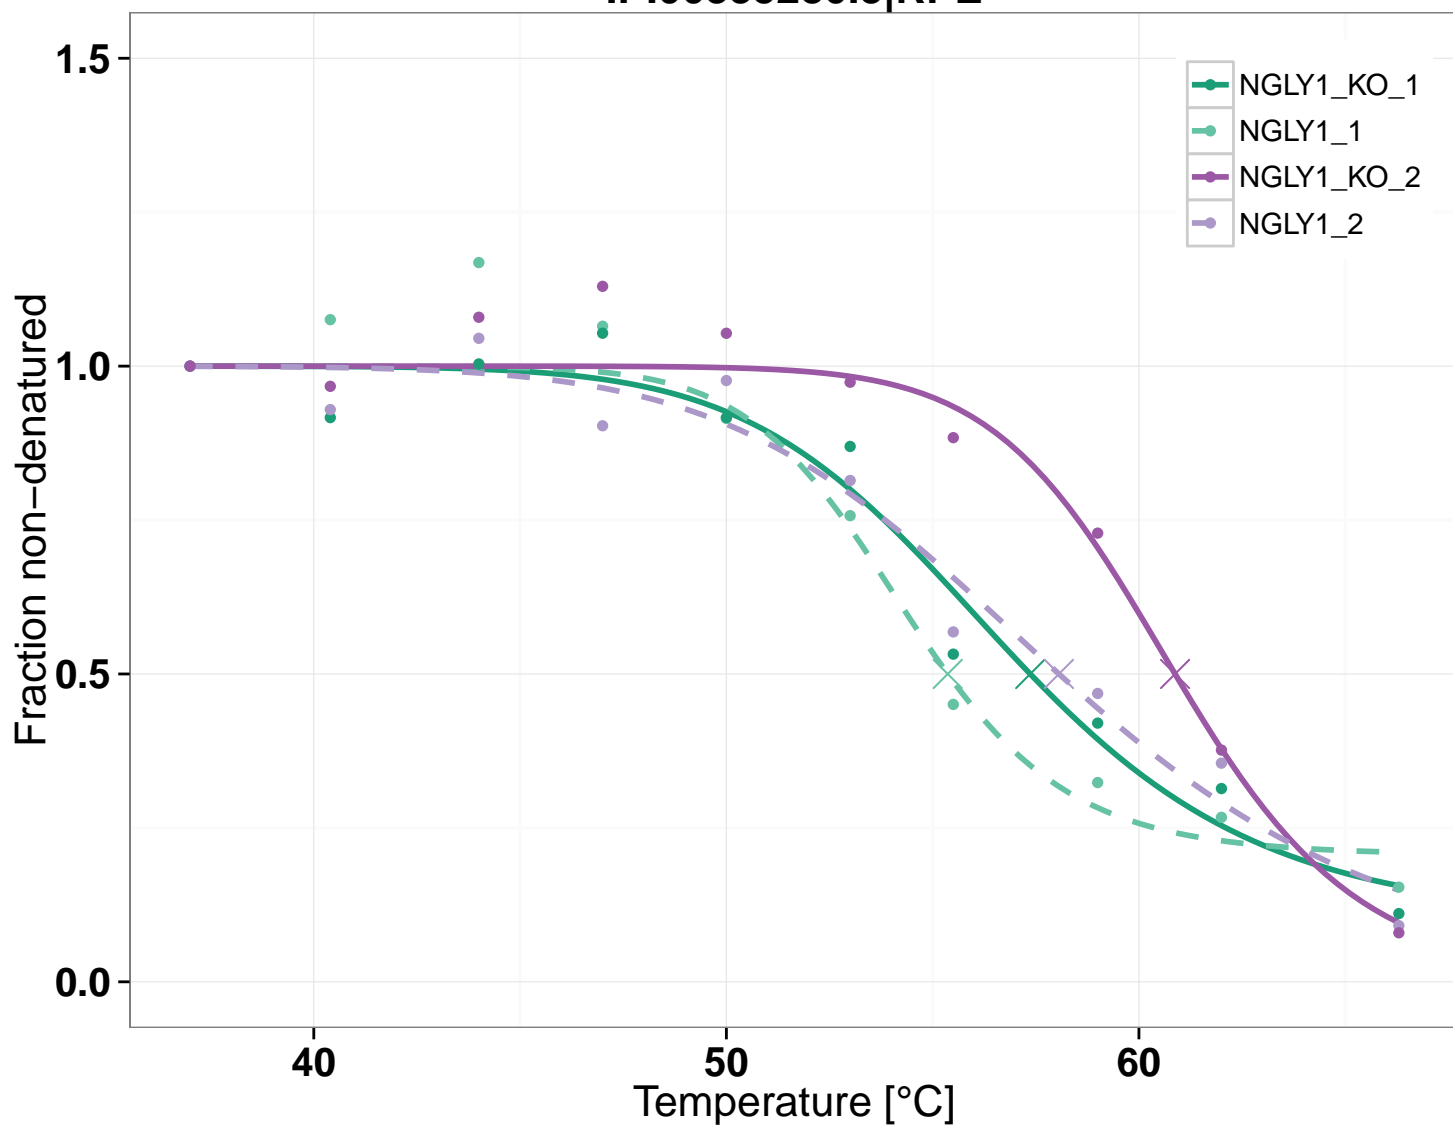

|            | meltPoint | slope  | plateau | R2   |
|------------|-----------|--------|---------|------|
| NGLY1_KO_1 | 57.37     | -0.073 | 0.09    | 0.97 |
| NGLY1_1    | 55.36     | -0.1   | 0.21    | 0.96 |
| NGLY1_KO_2 | 60.88     | -0.11  | 0       | 0.97 |
| NGLY1_2    | 58.06     | -0.062 | 0       | 0.97 |

Supplement: Supplementary file 1213 [file 1]

IPI00555838.1|MARK2

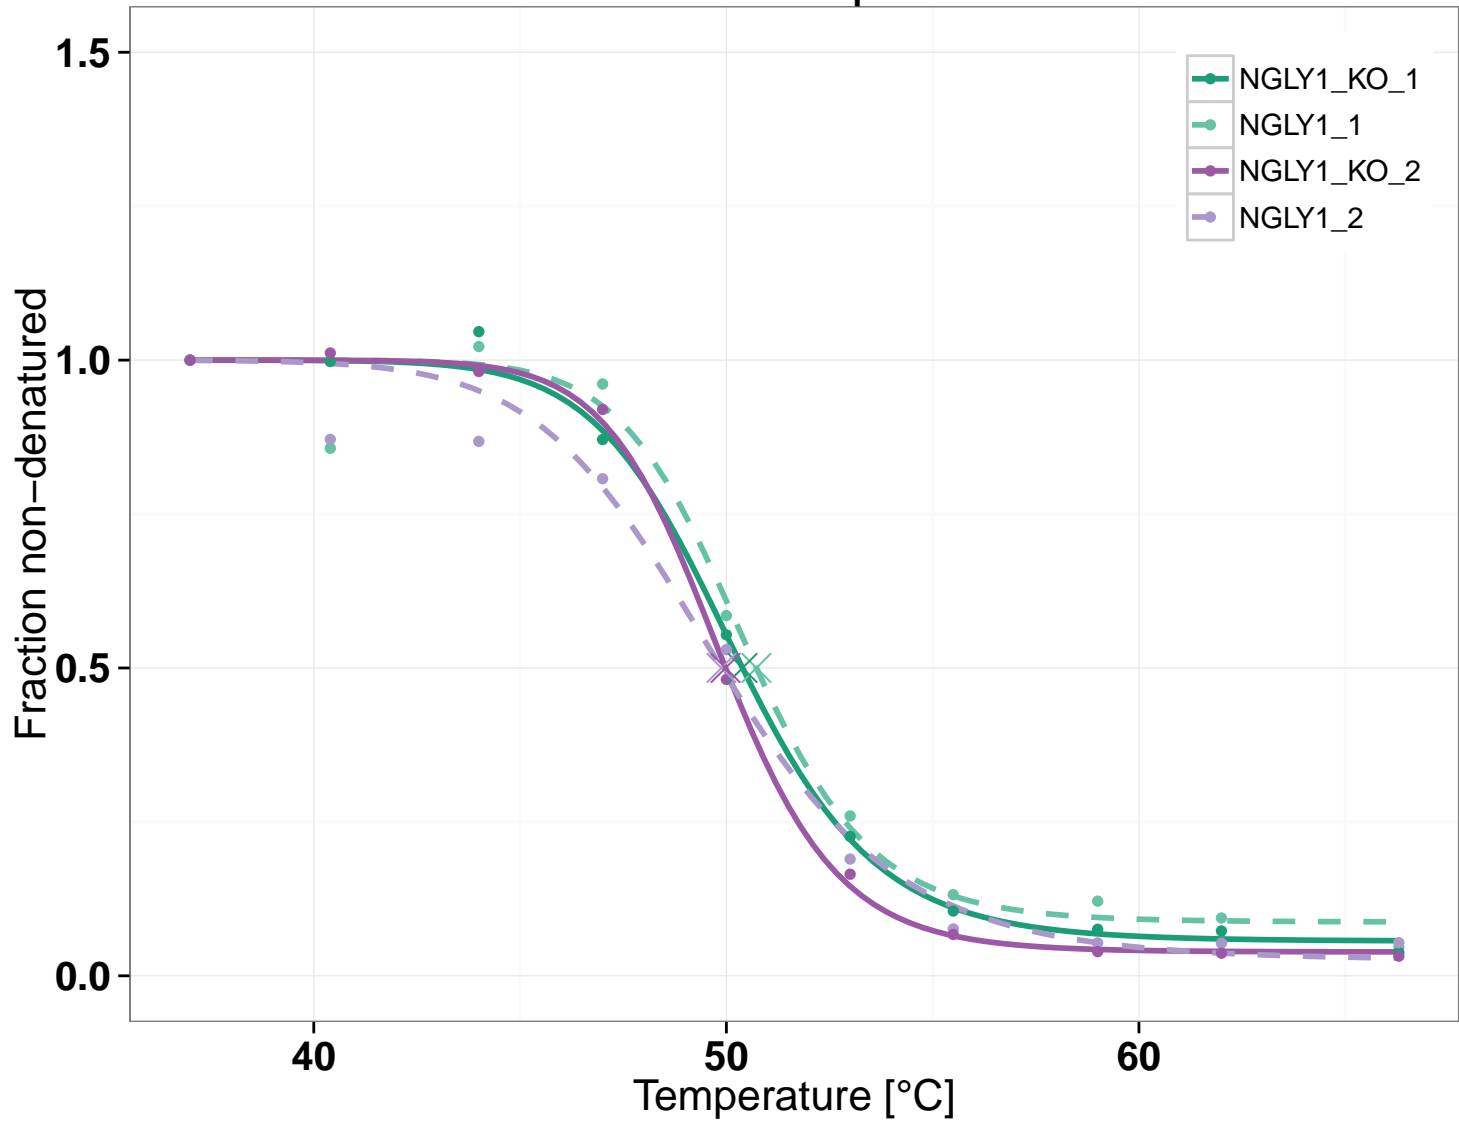

|            | meltPoint | slope | plateau | R2   |
|------------|-----------|-------|---------|------|
| NGLY1_KO_1 | 50.39     | -0.14 | 0.06    | 1    |
| NGLY1_1    | 50.73     | -0.15 | 0.09    | 0.98 |
| NGLY1_KO_2 | 49.98     | -0.17 | 0.04    | 1    |
| NGLY1_2    | 49.88     | -0.11 | 0.03    | 0.98 |

Supplement: Supplementary file 1214 [file 1]

# IPI00152344.1|PHOSPHO2

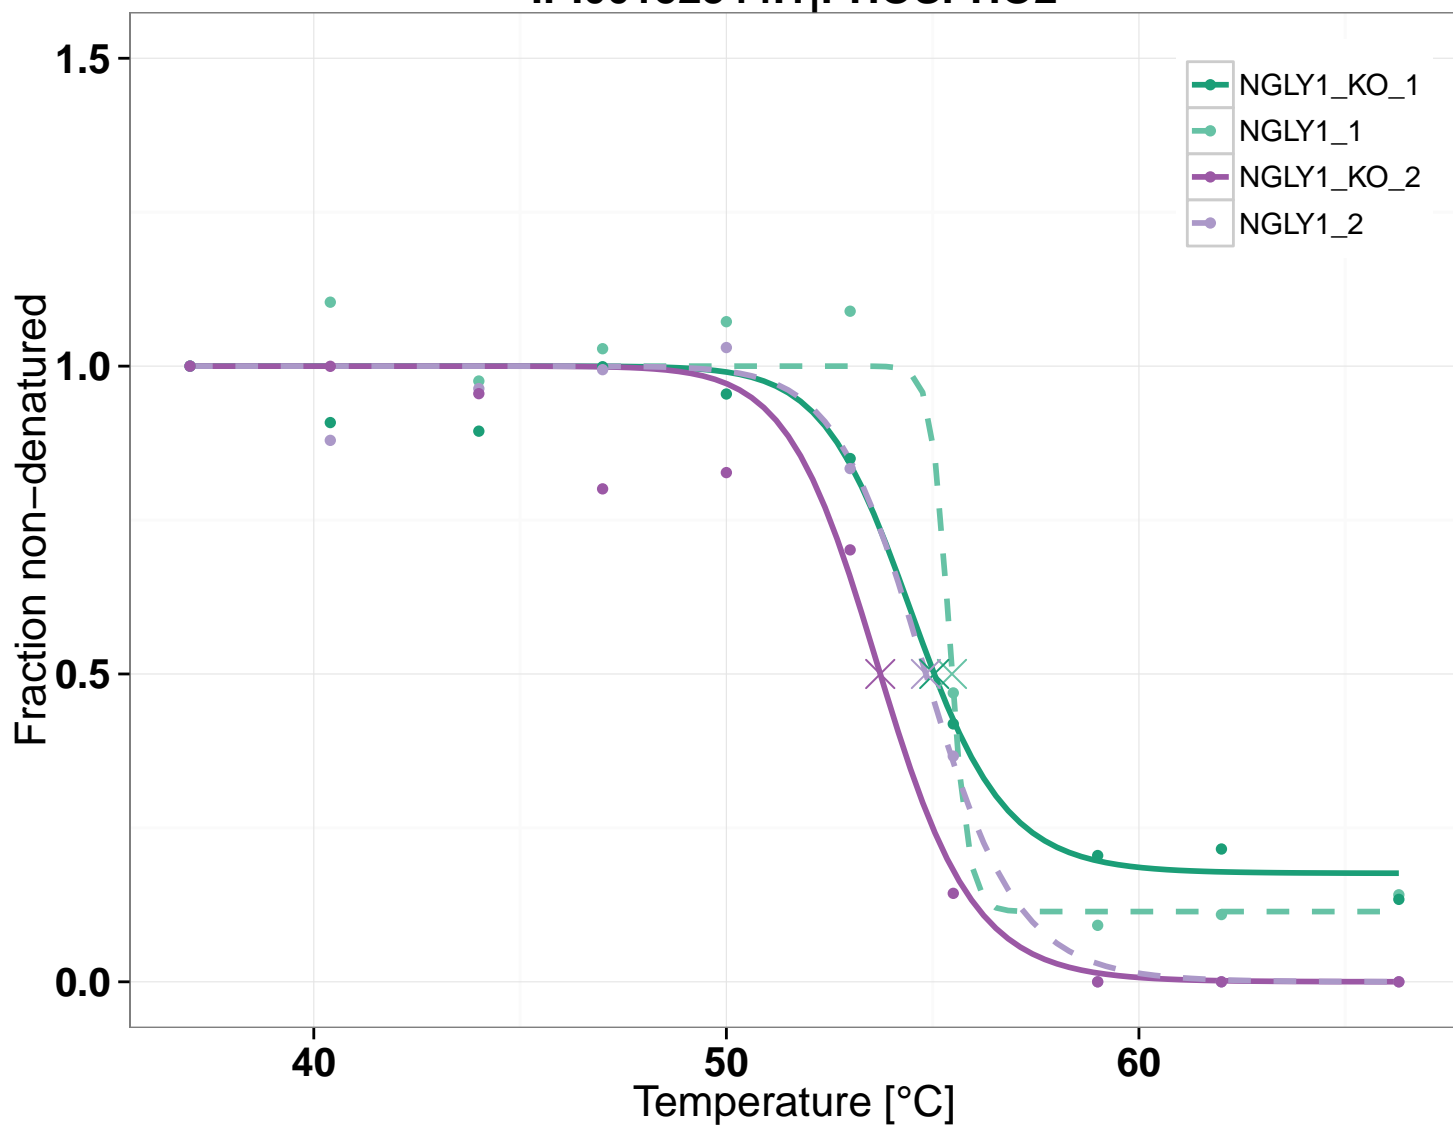

|            | meltPoint | slope | plateau | R2   |
|------------|-----------|-------|---------|------|
| NGLY1_KO_1 | 55.04     | -0.18 | 0.18    | 0.98 |
| NGLY1_1    | 55.47     | -1    | 0.11    | 0.99 |
| NGLY1_KO_2 | 53.73     | -0.22 | 0       | 0.96 |
| NGLY1_2    | 54.84     | -0.23 | 0       | 0.99 |

Supplement: Supplementary file 1215 [file 1]

# IPI00220158.1|ADD1

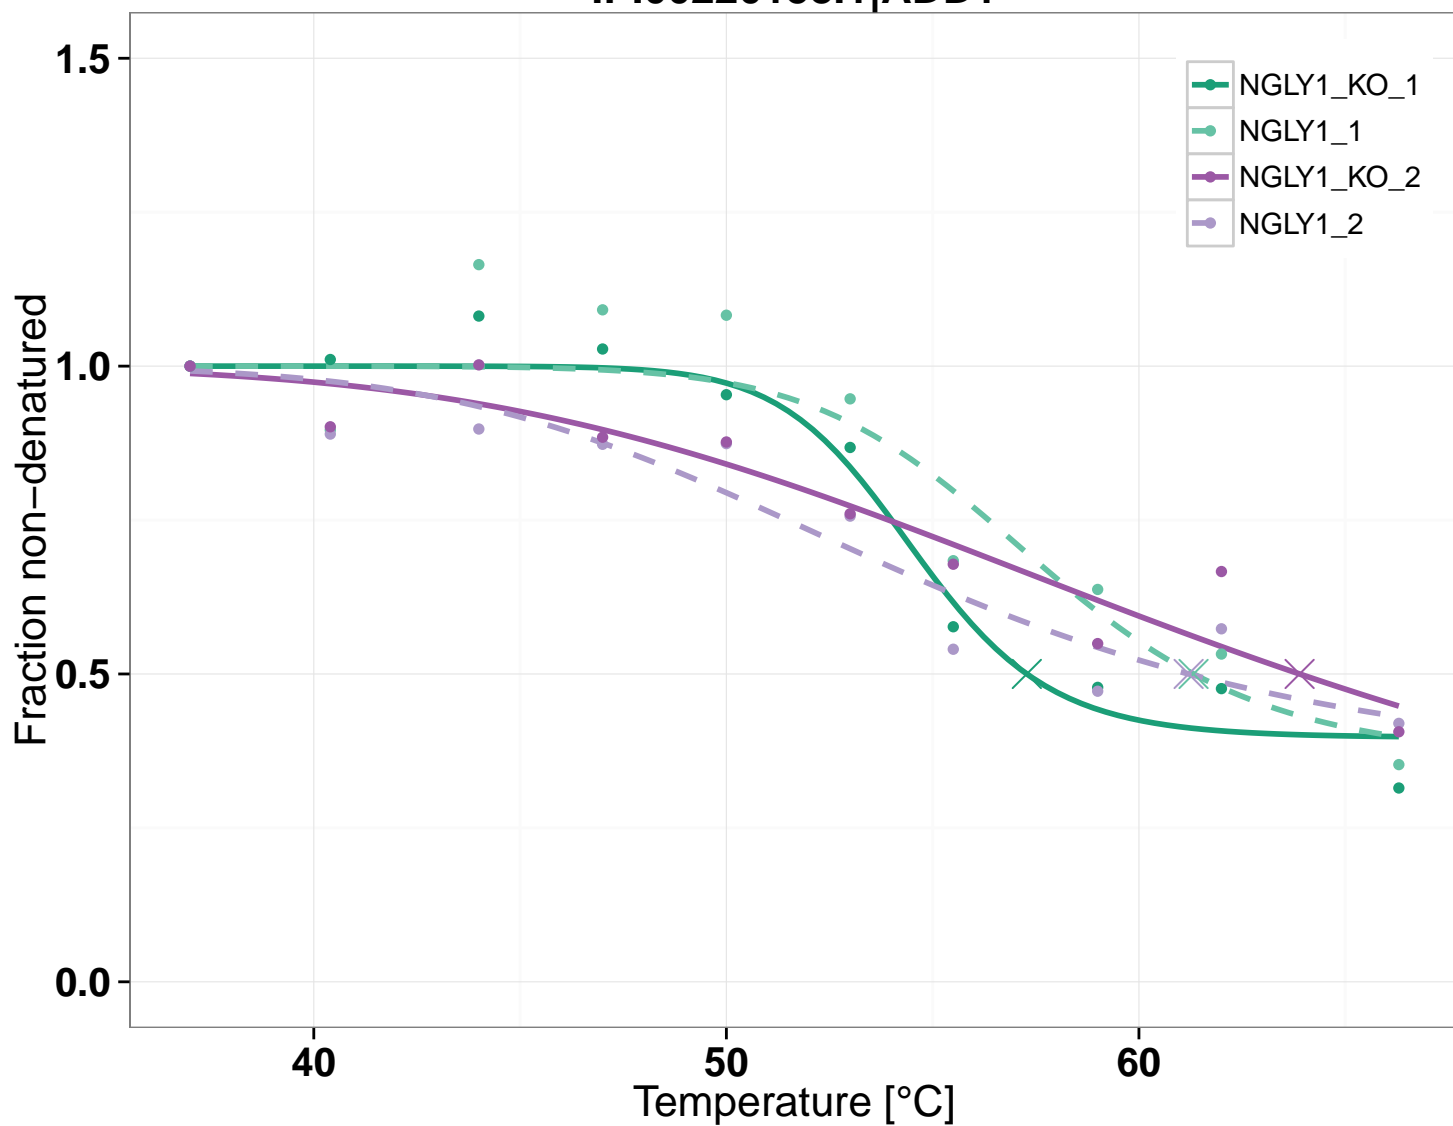

|            | meltPoint | slope  | plateau | R2   |
|------------|-----------|--------|---------|------|
| NGLY1_KO_1 | 57.28     | -0.092 | 0.4     | 0.97 |
| NGLY1_1    | 61.32     | -0.058 | 0.36    | 0.88 |
| NGLY1_KO_2 | 63.89     | -0.026 | 0.05    | 0.9  |
| NGLY1_2    | 61.2      | -0.031 | 0.33    | 0.9  |

Supplement: Supplementary file 1216 [file 1]

IPI00018829.2|SPTBN4

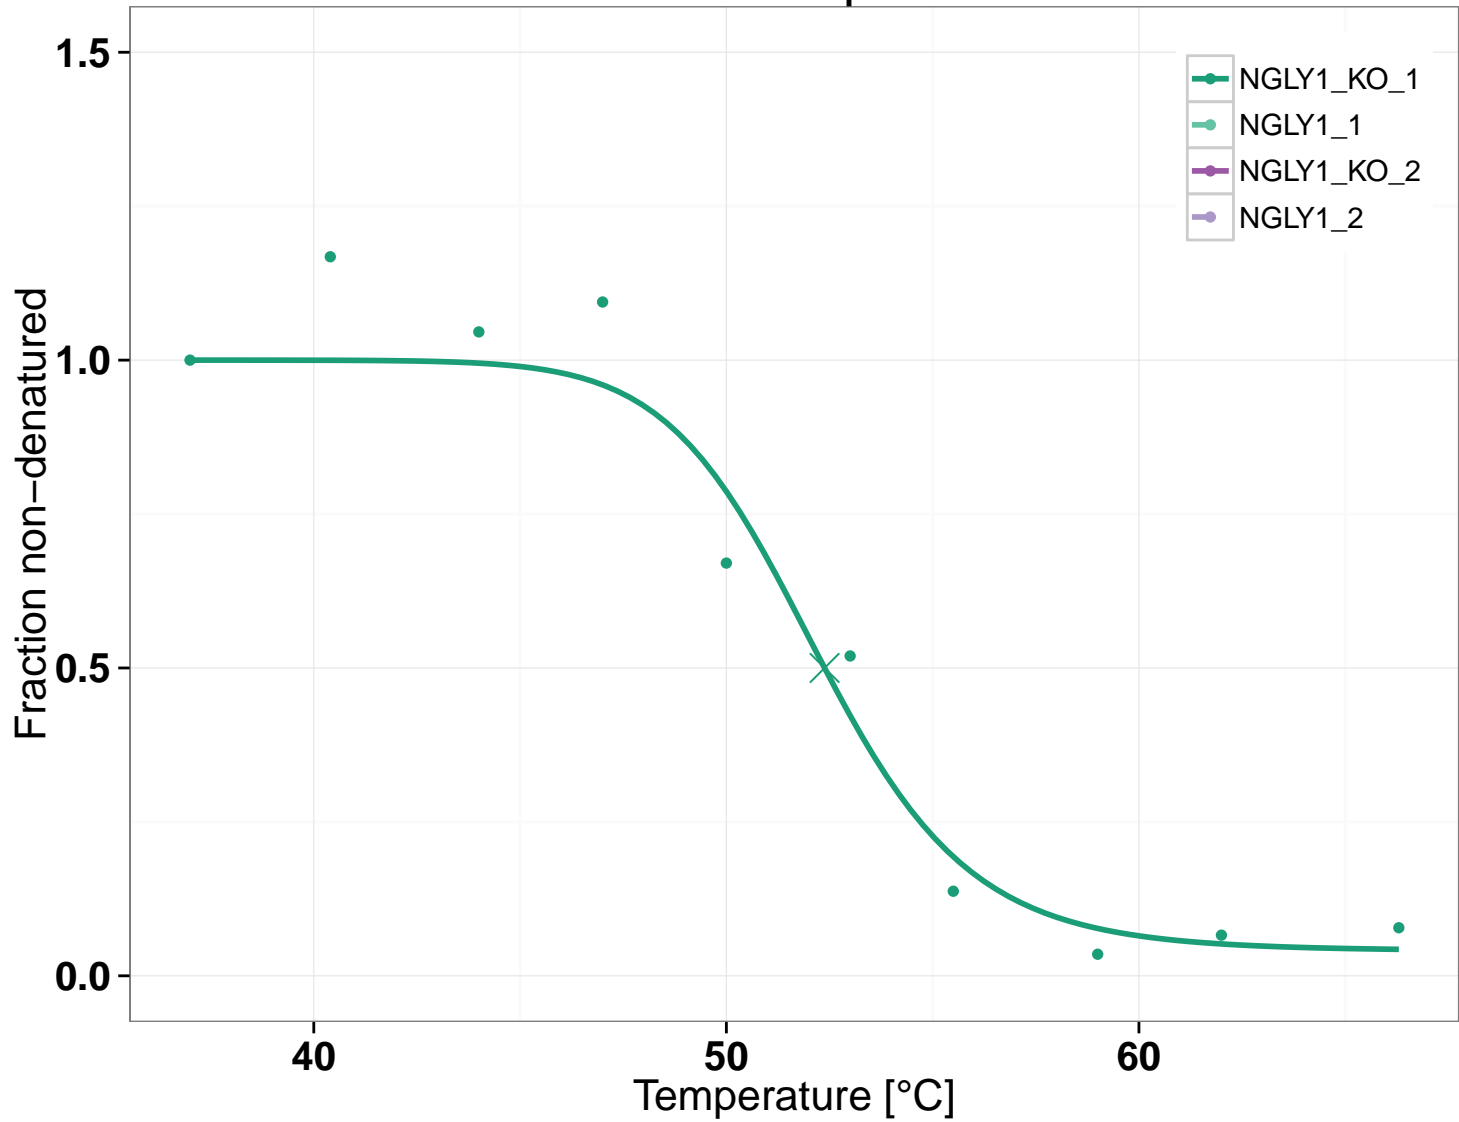

|            | meltPoint | slope | plateau | R2   |
|------------|-----------|-------|---------|------|
| NGLY1_KO_1 | 52.38     | -0.13 | 0.04    | 0.96 |
| NGLY1_1    | -         | -     | -       | -    |
| NGLY1_KO_2 | -         | -     | -       | -    |
| NGLY1_2    | -         | -     | -       | -    |

Supplement: Supplementary file 1217 [file 1]

# IPI00005260.4|PSME4

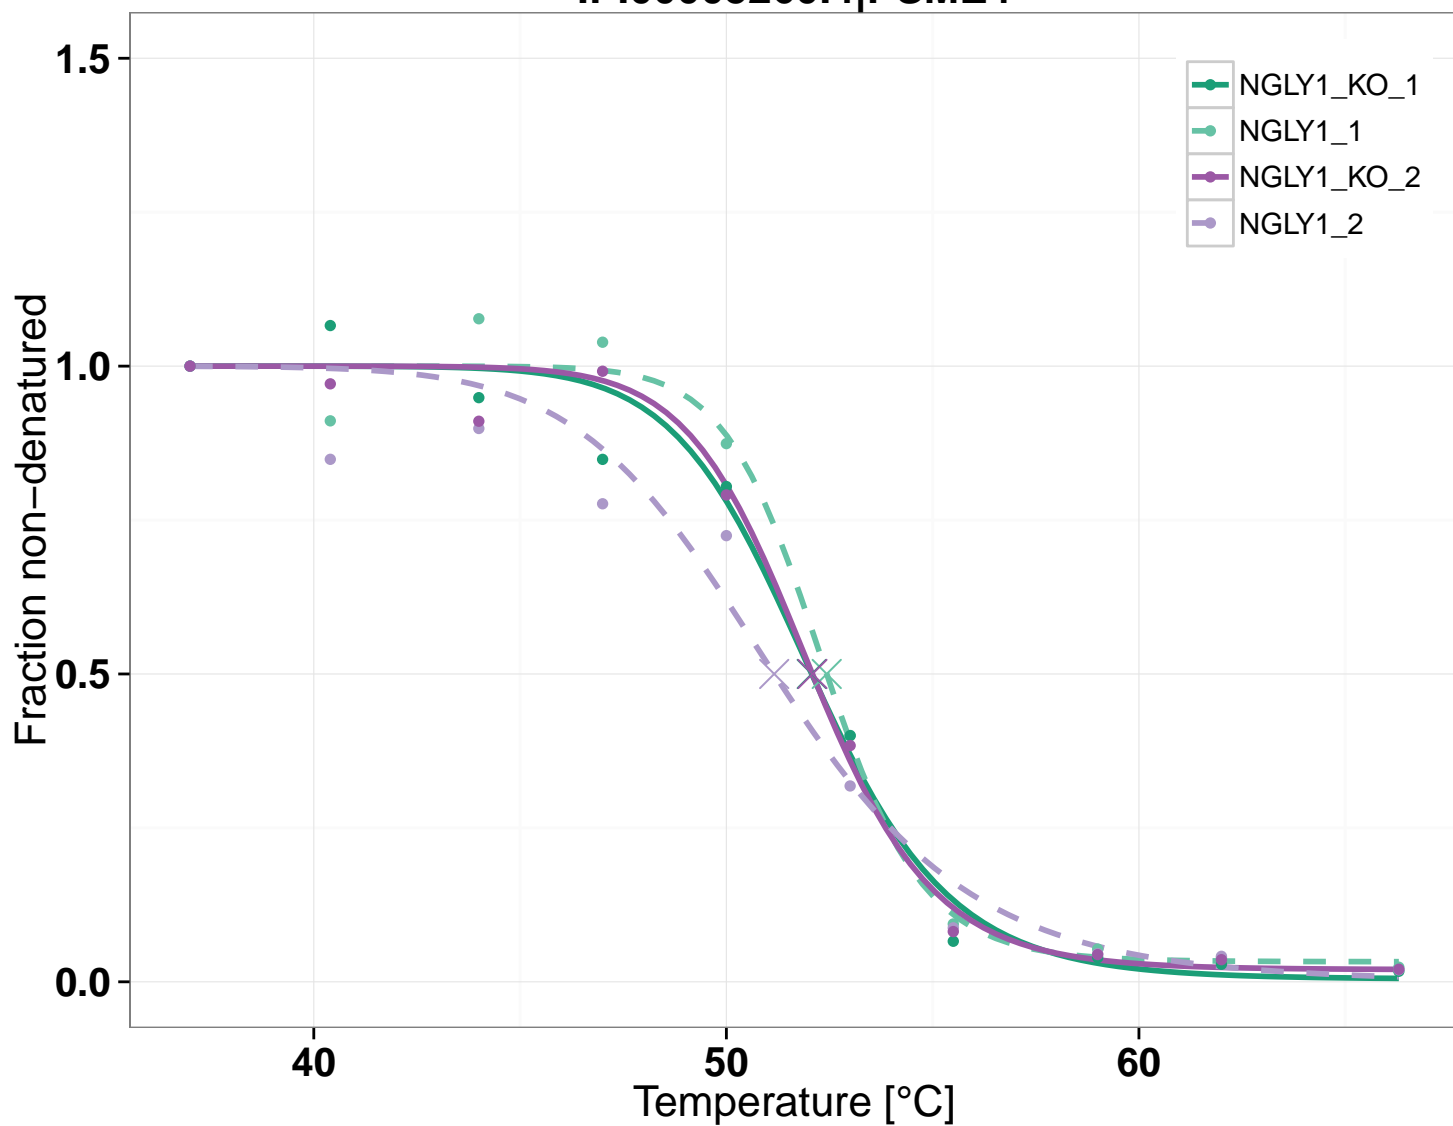

|            | meltPoint | slope | plateau | R2   |
|------------|-----------|-------|---------|------|
| NGLY1_KO_1 | 52.07     | -0.15 | 0       | 0.99 |
| NGLY1_1    | 52.43     | -0.2  | 0.03    | 0.99 |
| NGLY1_KO_2 | 52.09     | -0.16 | 0.02    | 0.99 |
| NGLY1_2    | 51.16     | -0.1  | 0       | 0.97 |

Supplement: Supplementary file 1218 [file 1]

IPI00306343.5|RBM41

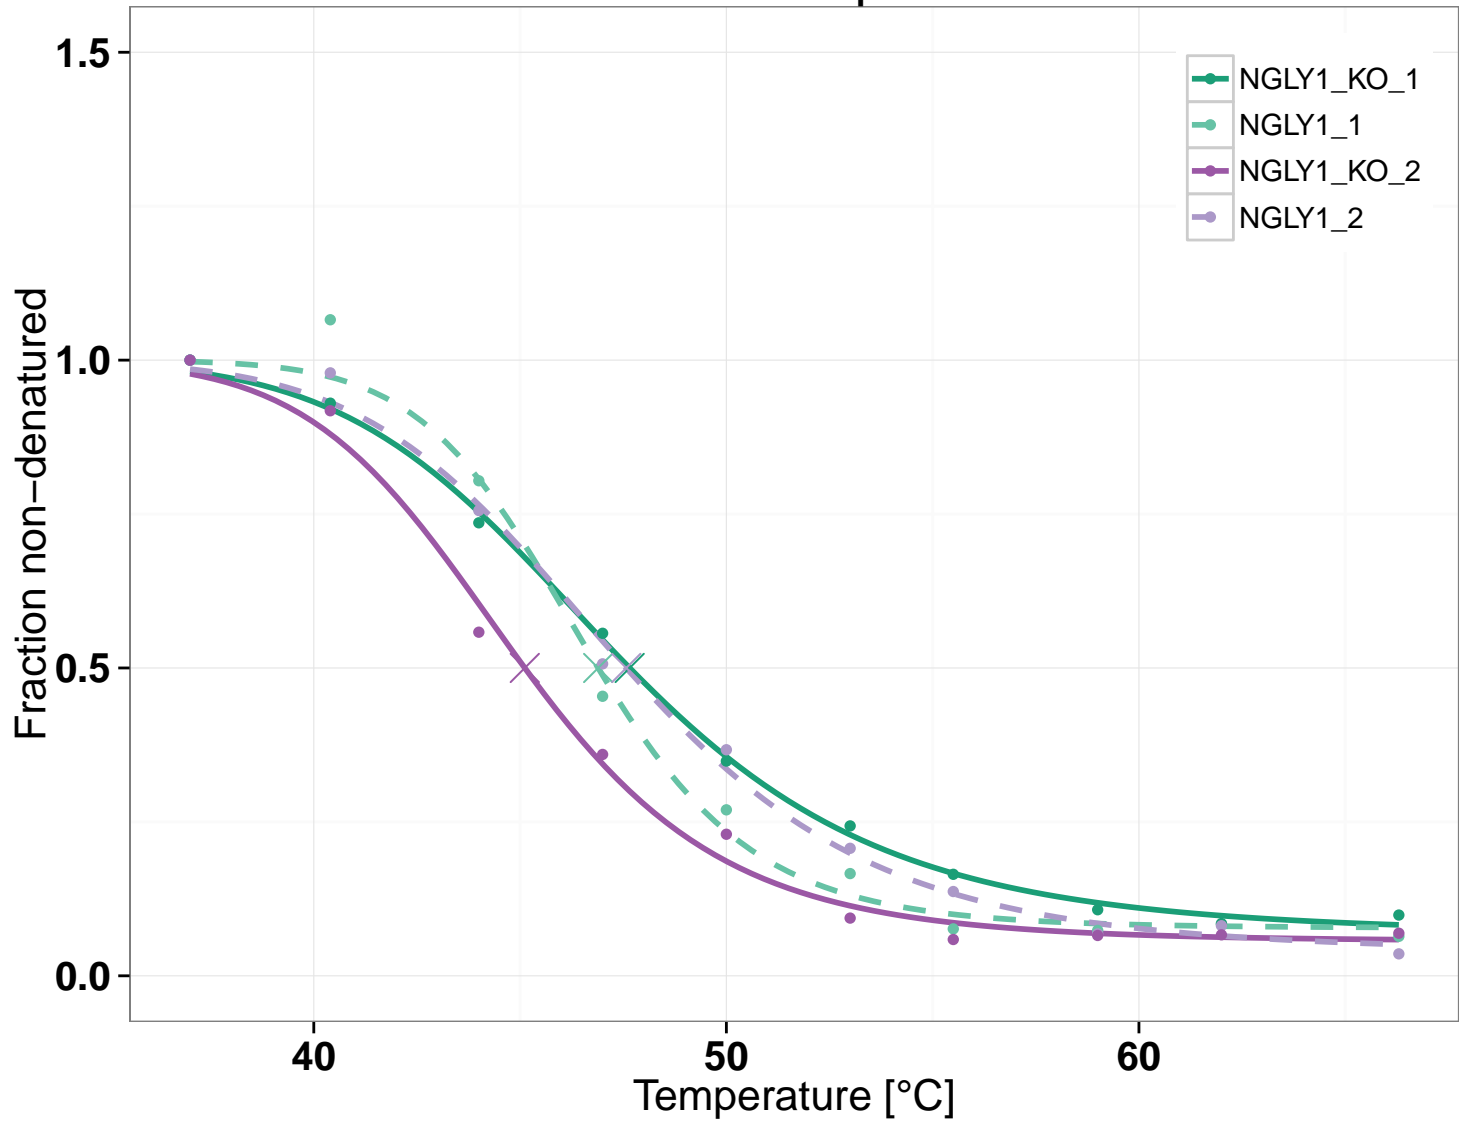

|            | meltPoint | slope  | plateau | R2   |
|------------|-----------|--------|---------|------|
| NGLY1_KO_1 | 47.66     | -0.072 | 0.07    | 1    |
| NGLY1_1    | 46.89     | -0.11  | 0.08    | 0.99 |
| NGLY1_KO_2 | 45.11     | -0.094 | 0.06    | 0.99 |
| NGLY1_2    | 47.57     | -0.077 | 0.04    | 1    |

Supplement: Supplementary file 1219 [file 1]

IPI00171390.2|PRPF38A

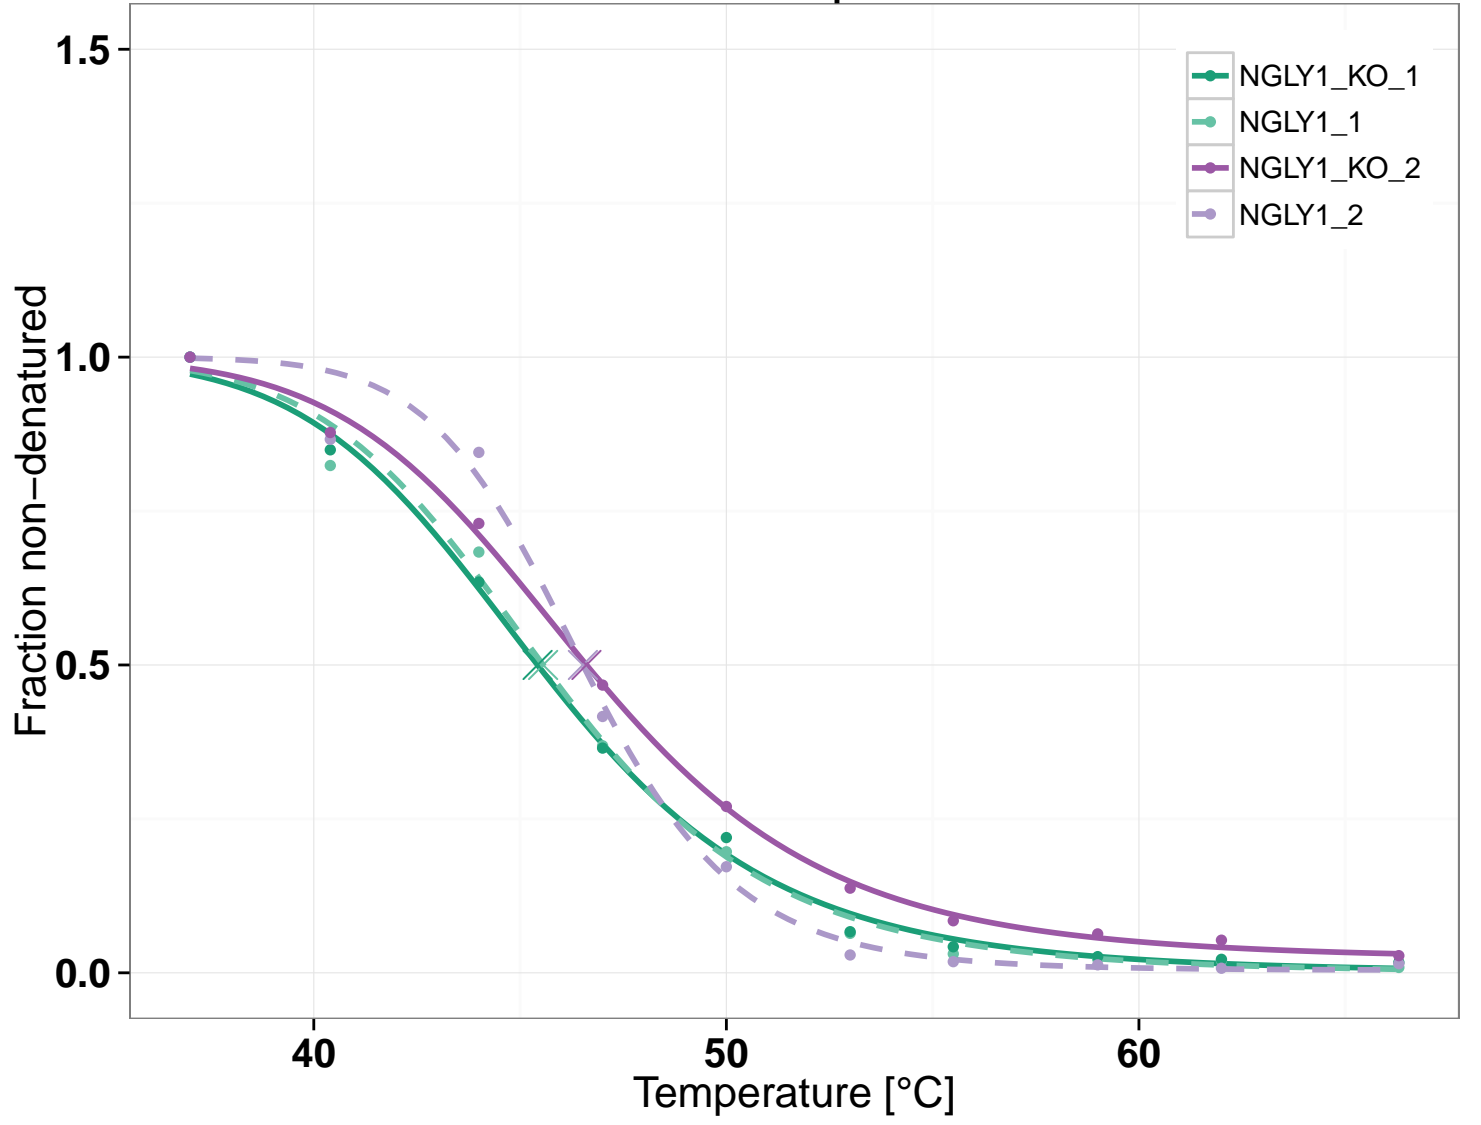

|            | meltPoint | slope  | plateau | R2   |
|------------|-----------|--------|---------|------|
| NGLY1_KO_1 | 45.42     | -0.088 | 0       | 1    |
| NGLY1_1    | 45.56     | -0.092 | 0       | 0.99 |
| NGLY1_KO_2 | 46.61     | -0.083 | 0.02    | 1    |
| NGLY1_2    | 46.52     | -0.13  | 0       | 0.99 |

Supplement: Supplementary file 1220 [file 1]

IPI00174962.2|MICALL1

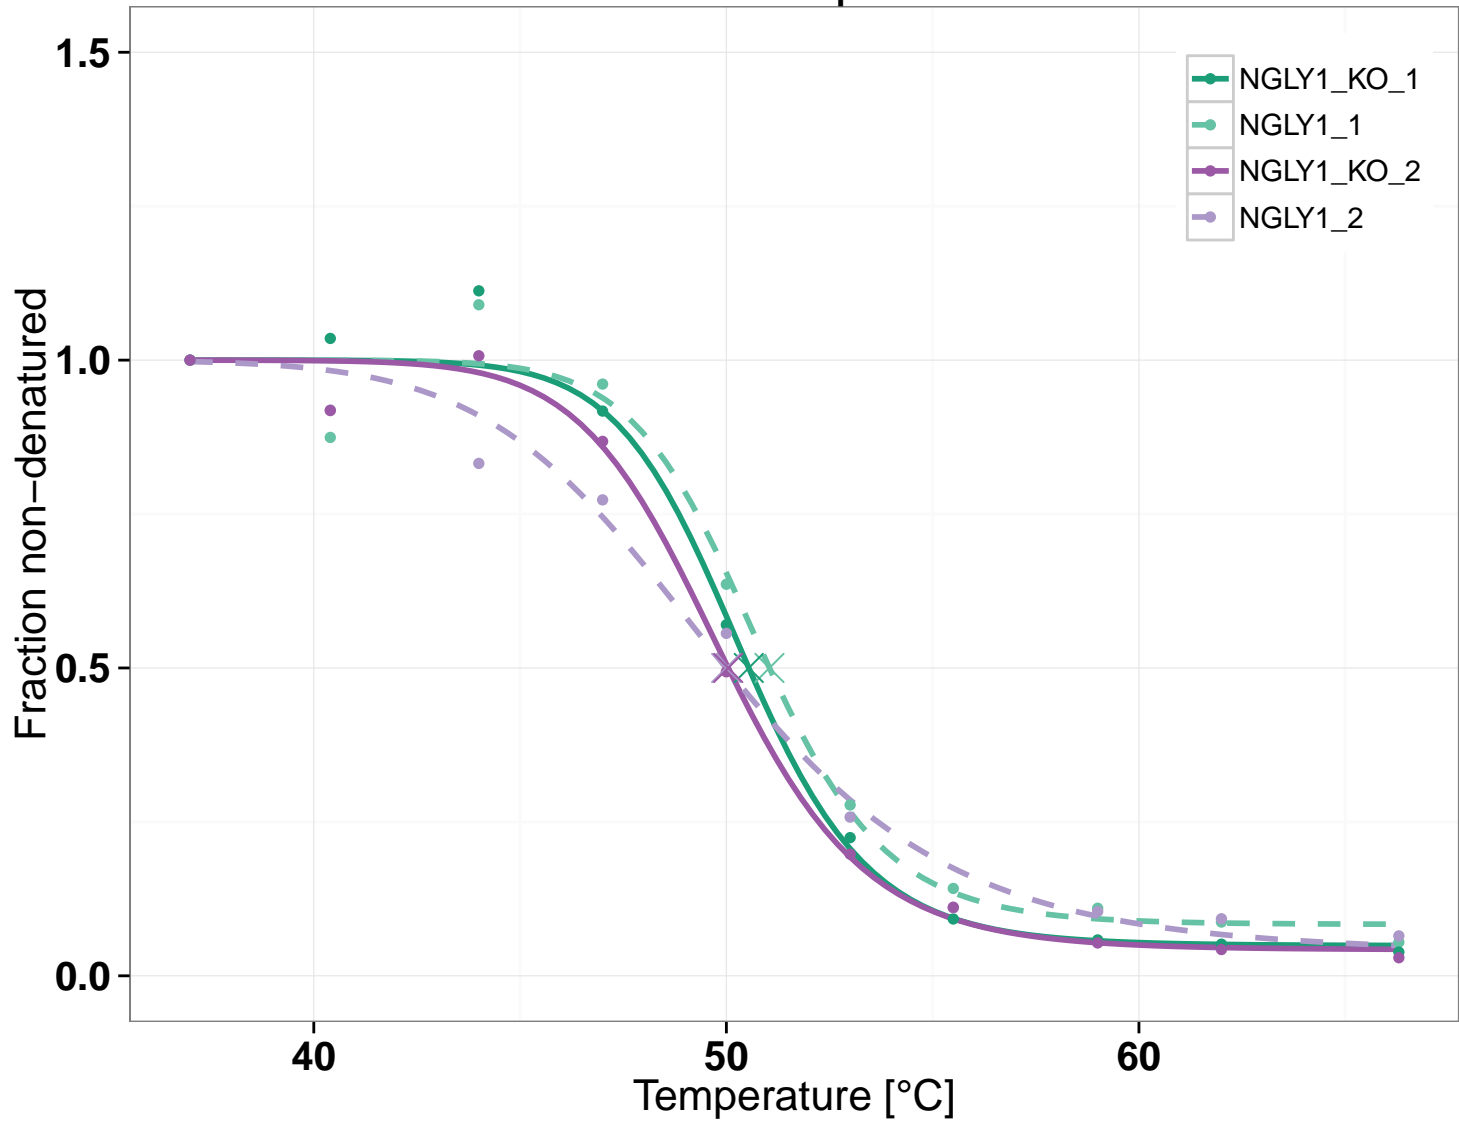

|            | meltPoint | slope  | plateau | R2   |
|------------|-----------|--------|---------|------|
| NGLY1_KO_1 | 50.54     | -0.16  | 0.05    | 0.99 |
| NGLY1_1    | 51.04     | -0.15  | 0.08    | 0.98 |
| NGLY1_KO_2 | 50.04     | -0.14  | 0.04    | 1    |
| NGLY1_2    | 50        | -0.085 | 0.04    | 0.98 |

Supplement: Supplementary file 1221 [file 1]

IPI00915855.1|VDAC2

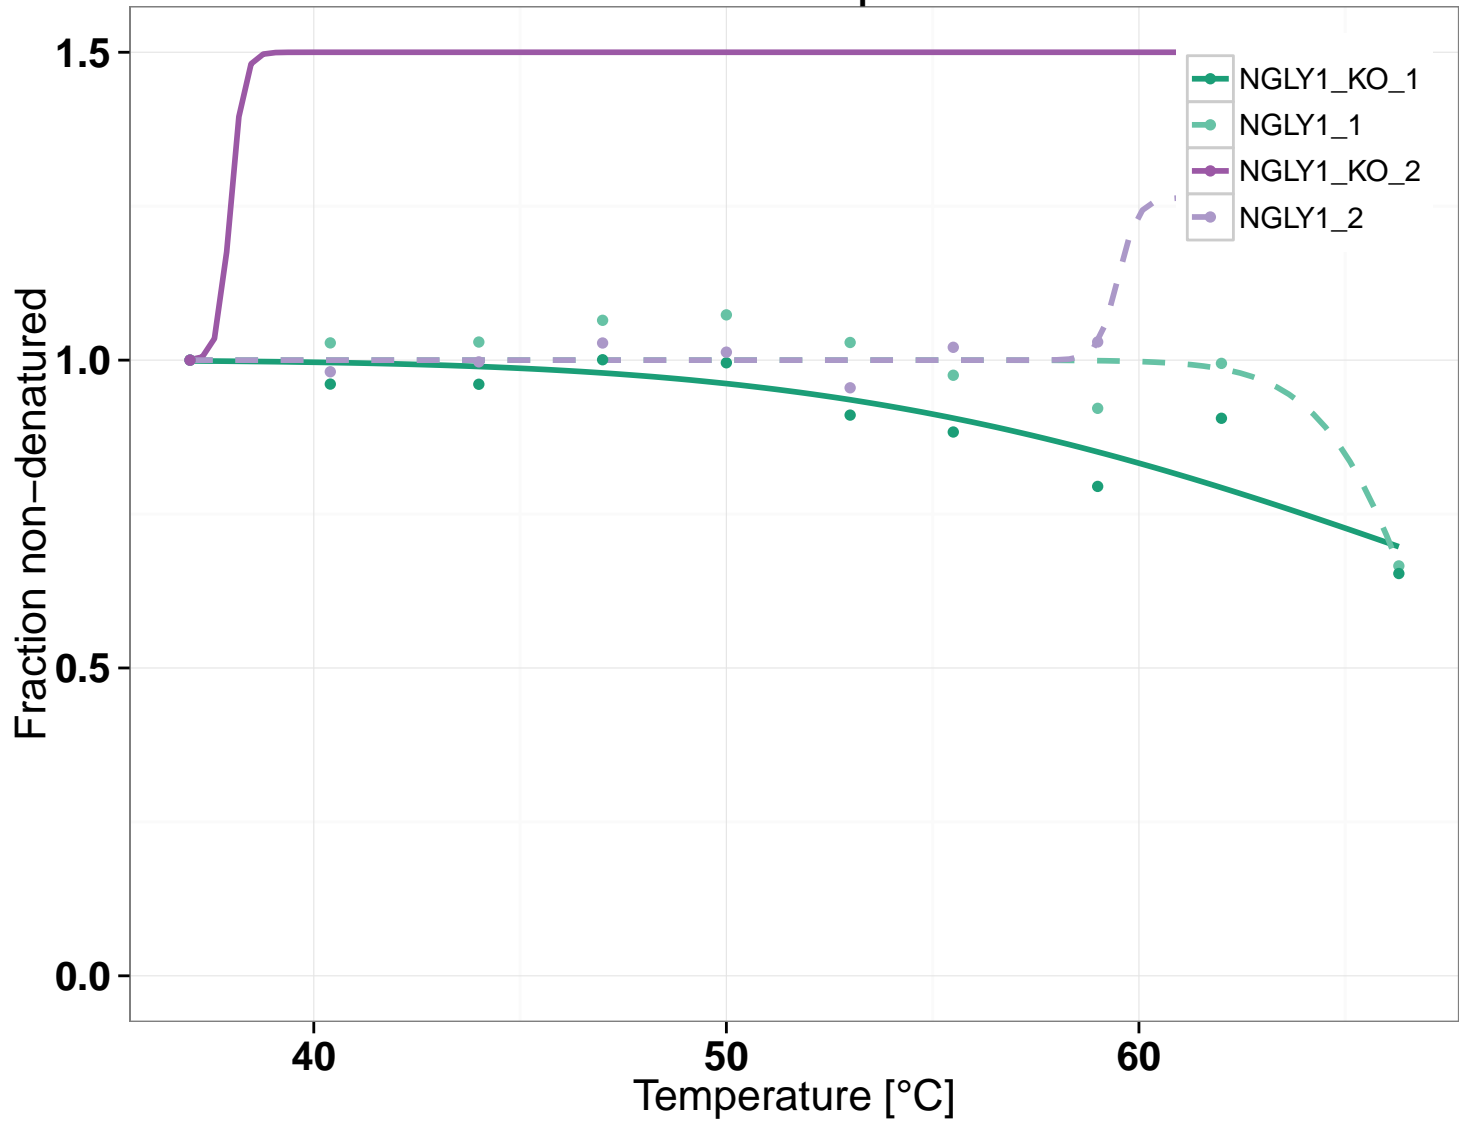

|            | meltPoint | slope | plateau | R2    |
|------------|-----------|-------|---------|-------|
| NGLY1_KO_1 | –         | –     | 0       | 0.79  |
| NGLY1_1    | –         | –     | 0       | 0.85  |
| NGLY1_KO_2 | –         | 0.82  | 1.5     | –4.47 |
| NGLY1_2    | –         | 0.28  | 1.26    | 0.92  |

Supplement: Supplementary file 1222 [file 1]

IPI00550906.6|CSTF2T

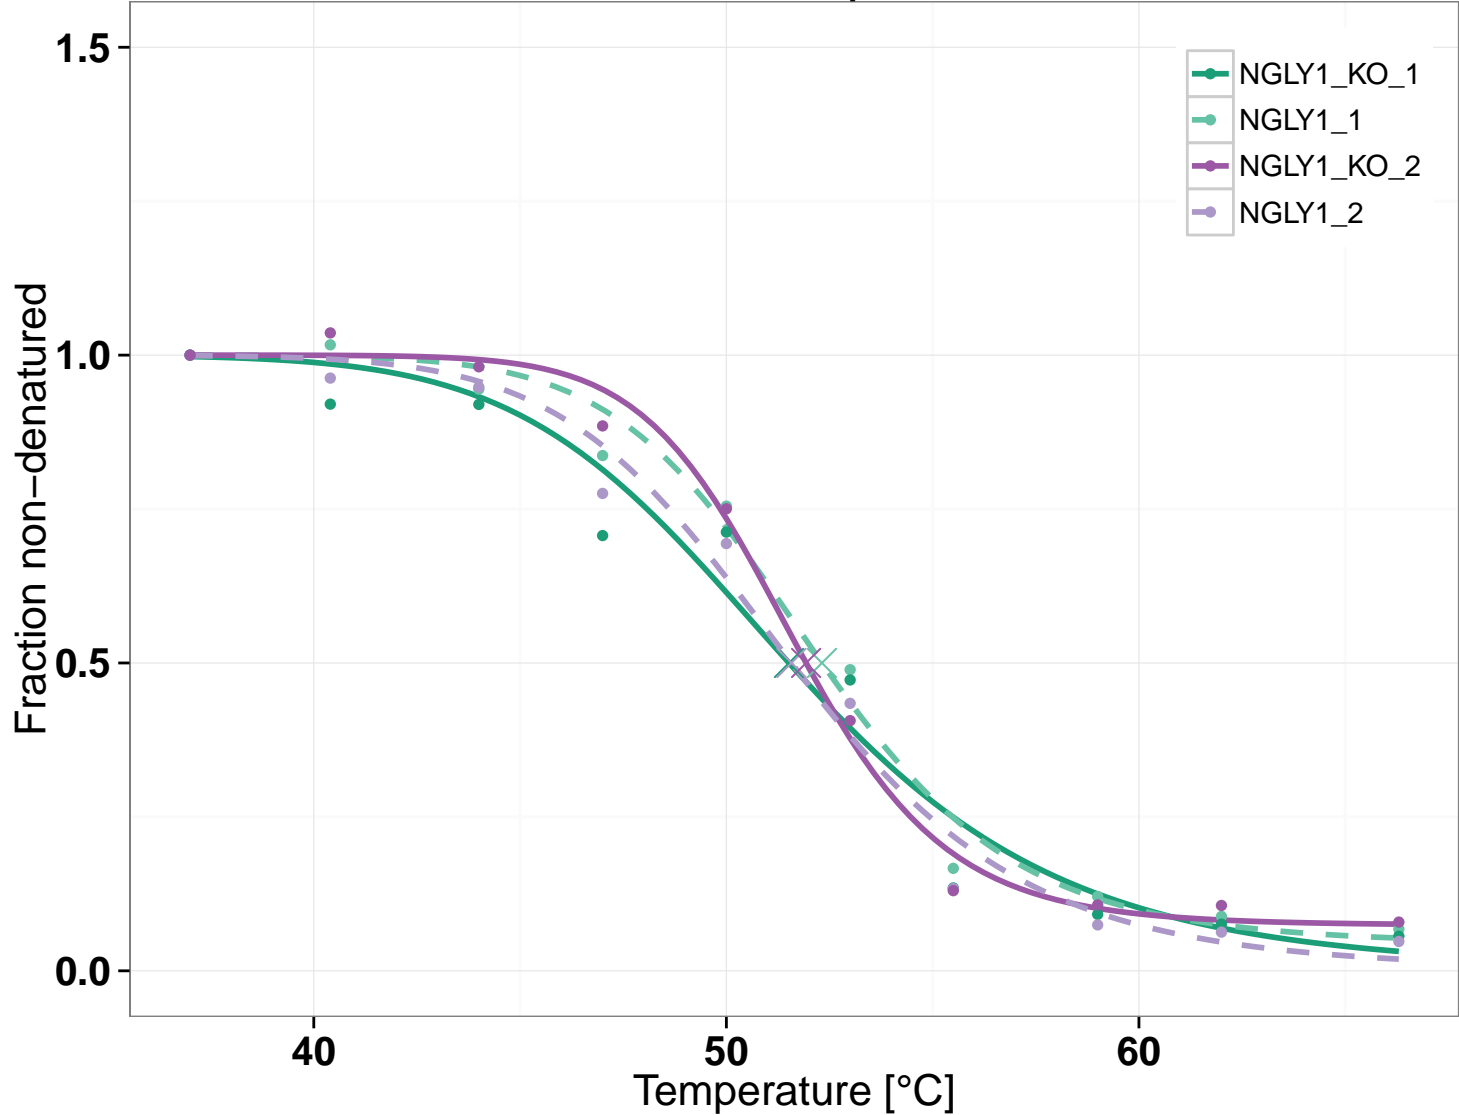

|            | meltPoint | slope  | plateau | R2   |
|------------|-----------|--------|---------|------|
| NGLY1_KO_1 | 51.52     | -0.076 | 0       | 0.97 |
| NGLY1_1    | 52.32     | -0.098 | 0.04    | 0.99 |
| NGLY1_KO_2 | 51.93     | -0.13  | 0.07    | 0.99 |
| NGLY1_2    | 51.58     | -0.089 | 0       | 0.99 |

Supplement: Supplementary file 1223 [file 1]

IPI00221231.3|NUDT2

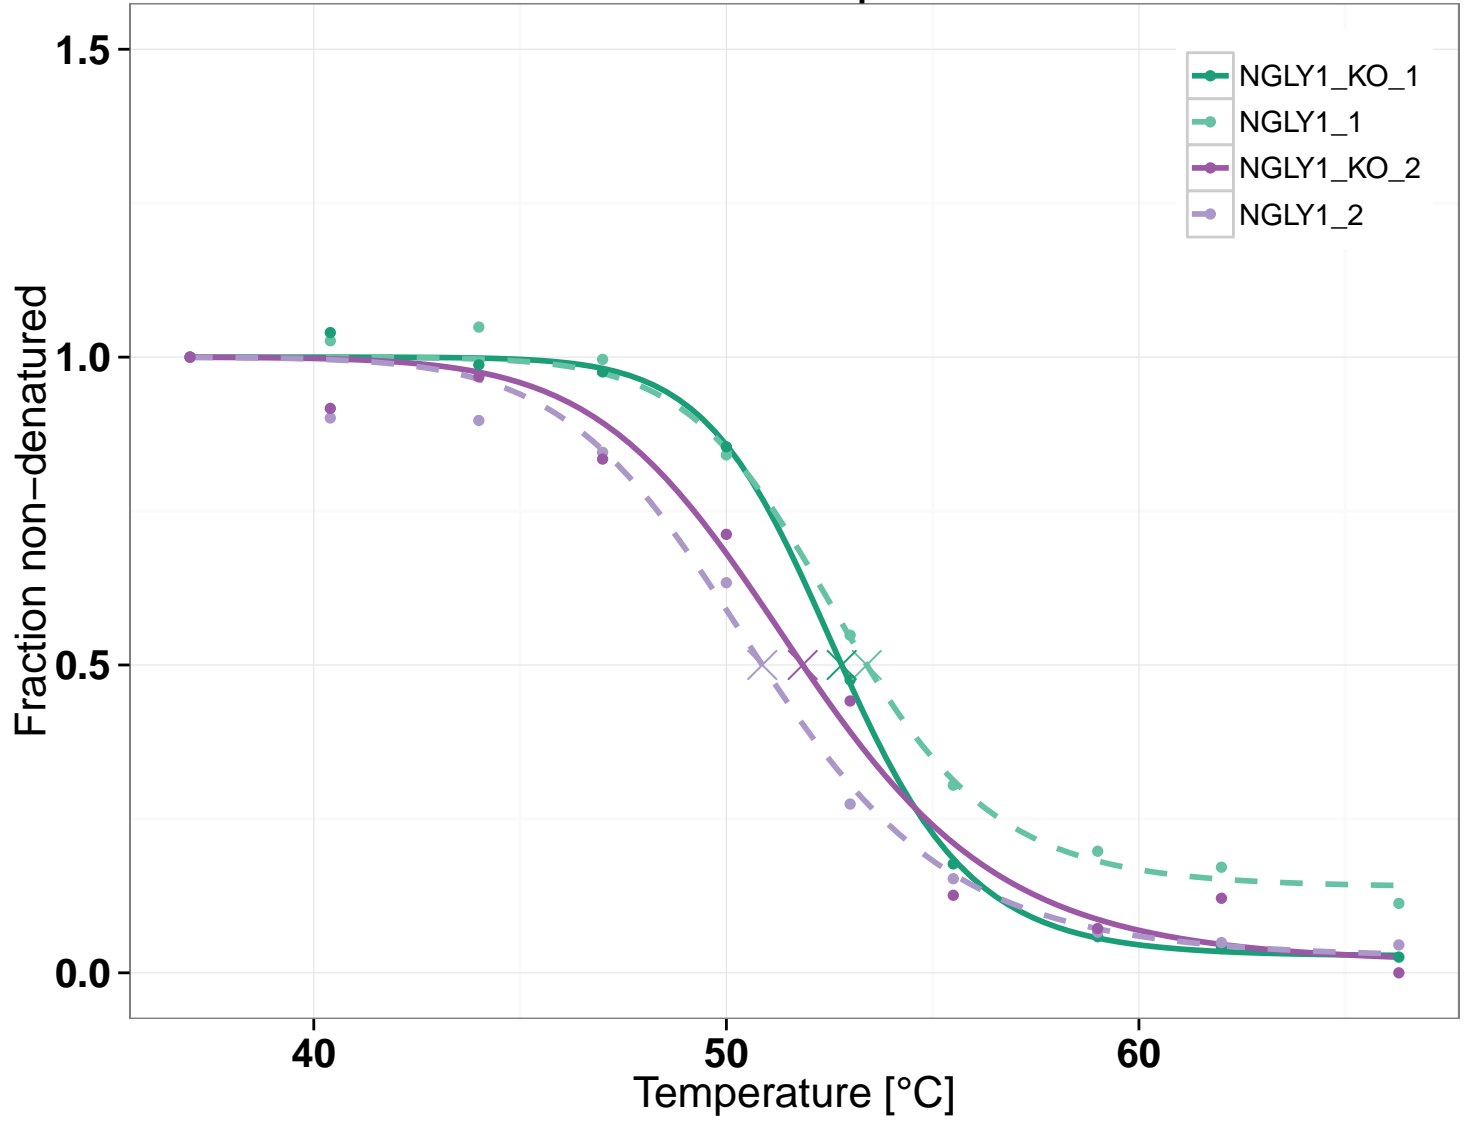

|            | meltPoint | slope | plateau | R2   |
|------------|-----------|-------|---------|------|
| NGLY1_KO_1 | 52.8      | -0.15 | 0.03    | 1    |
| NGLY1_1    | 53.4      | -0.12 | 0.14    | 1    |
| NGLY1_KO_2 | 51.85     | -0.1  | 0.02    | 0.98 |
| NGLY1_2    | 50.87     | -0.1  | 0.02    | 0.99 |

Supplement: Supplementary file 1224 [file 1]

IPI00023122.1|PDLIM7

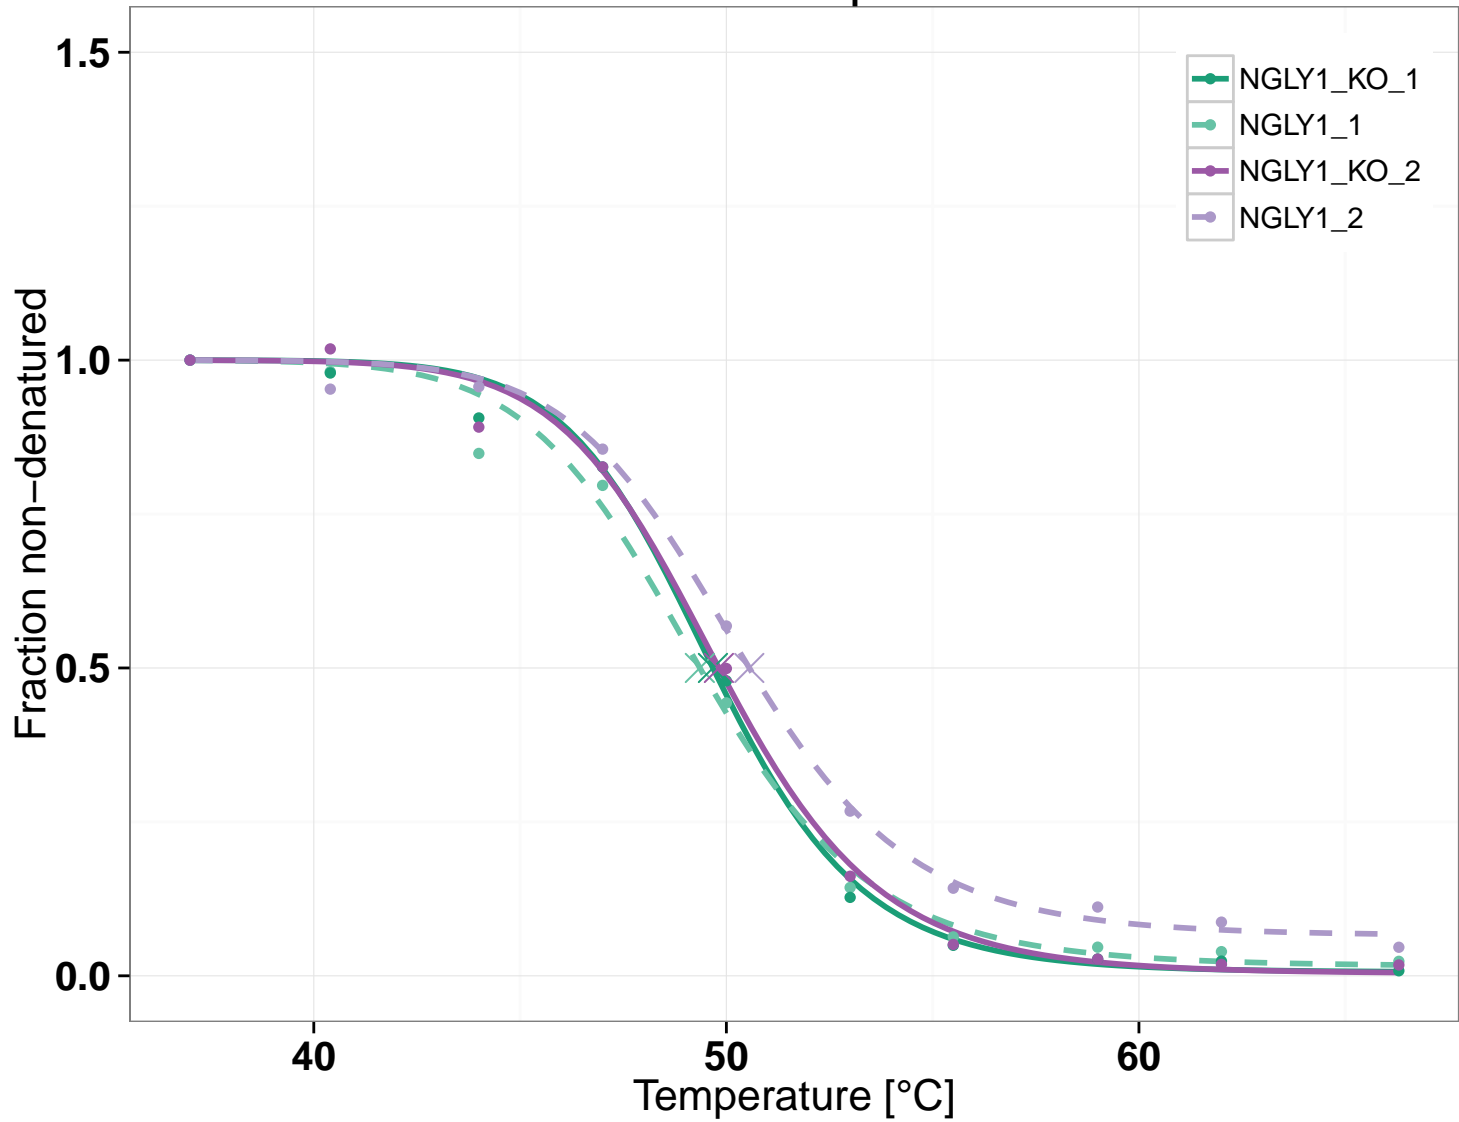

|            | meltPoint | slope | plateau | R2   |
|------------|-----------|-------|---------|------|
| NGLY1_KO_1 | 49.67     | -0.14 | 0.01    | 1    |
| NGLY1_1    | 49.36     | -0.12 | 0.02    | 0.99 |
| NGLY1_KO_2 | 49.82     | -0.13 | 0       | 1    |
| NGLY1_2    | 50.56     | -0.11 | 0.06    | 1    |

Supplement: Supplementary file 1225 [file 1]

IPI00456737.3|DENND5A

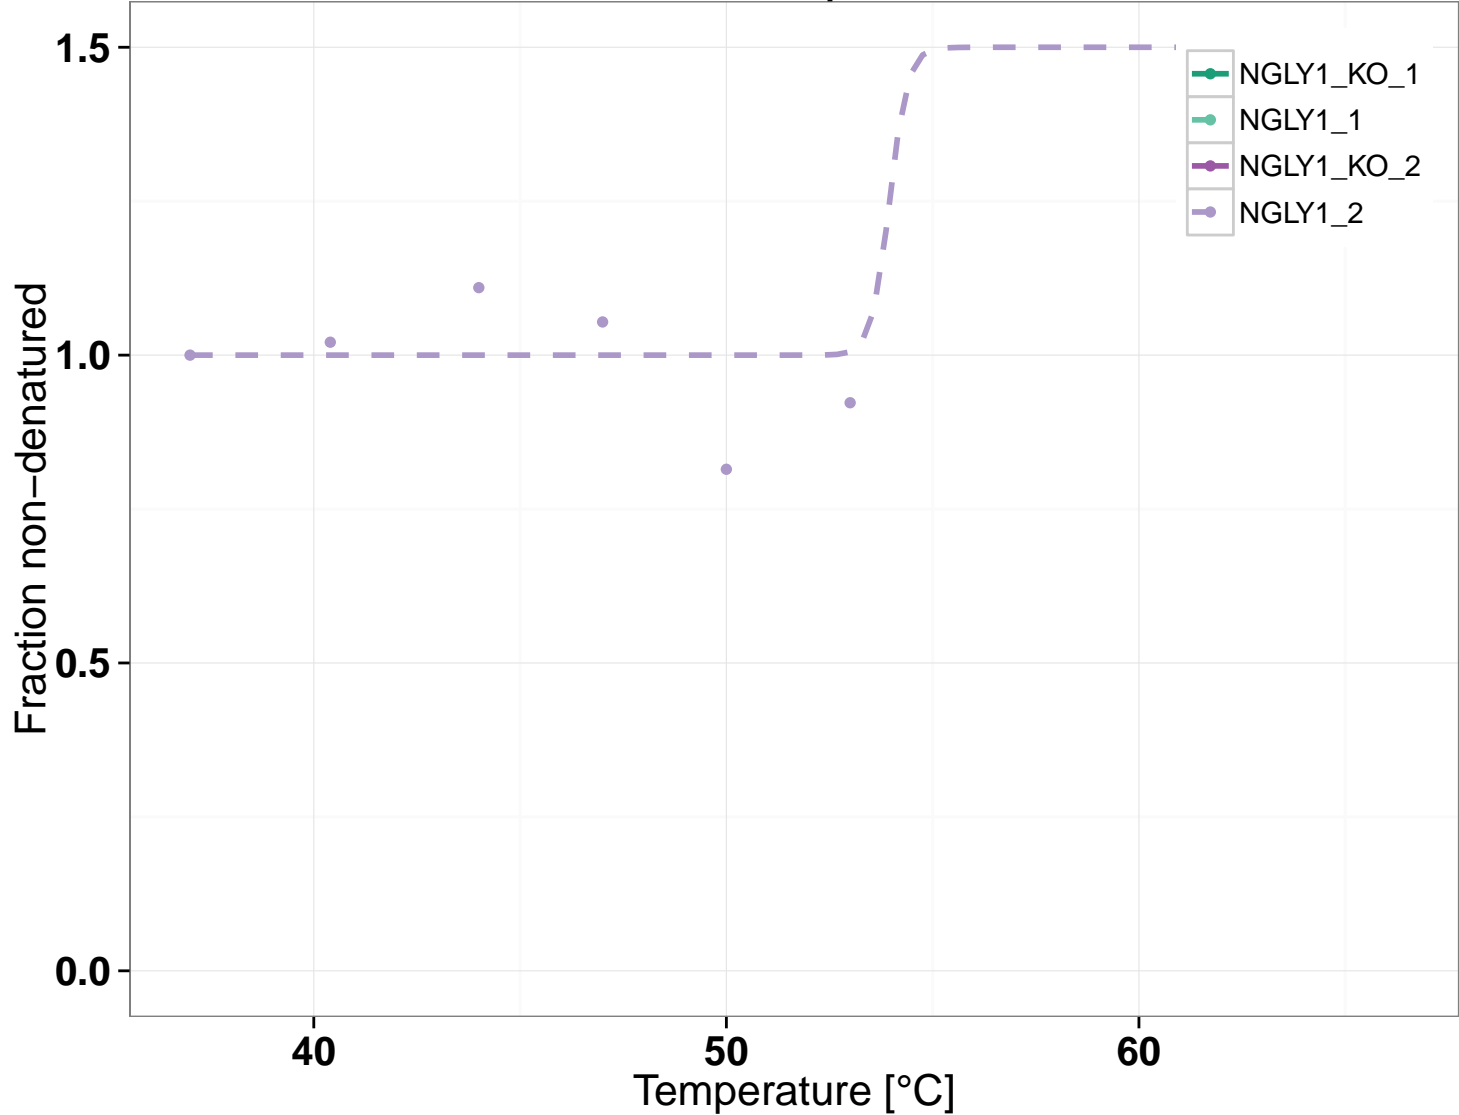

|            | meltPoint | slope | plateau | R2    |
|------------|-----------|-------|---------|-------|
| NGLY1_KO_1 | —         | —     | —       | —     |
| NGLY1_1    | —         | —     | —       | —     |
| NGLY1_KO_2 | —         | —     | —       | —     |
| NGLY1_2    | —         | 0.58  | 1.5     | -0.07 |

Supplement: Supplementary file 1226 [file 1]

# IPI00165984.4|WDR35

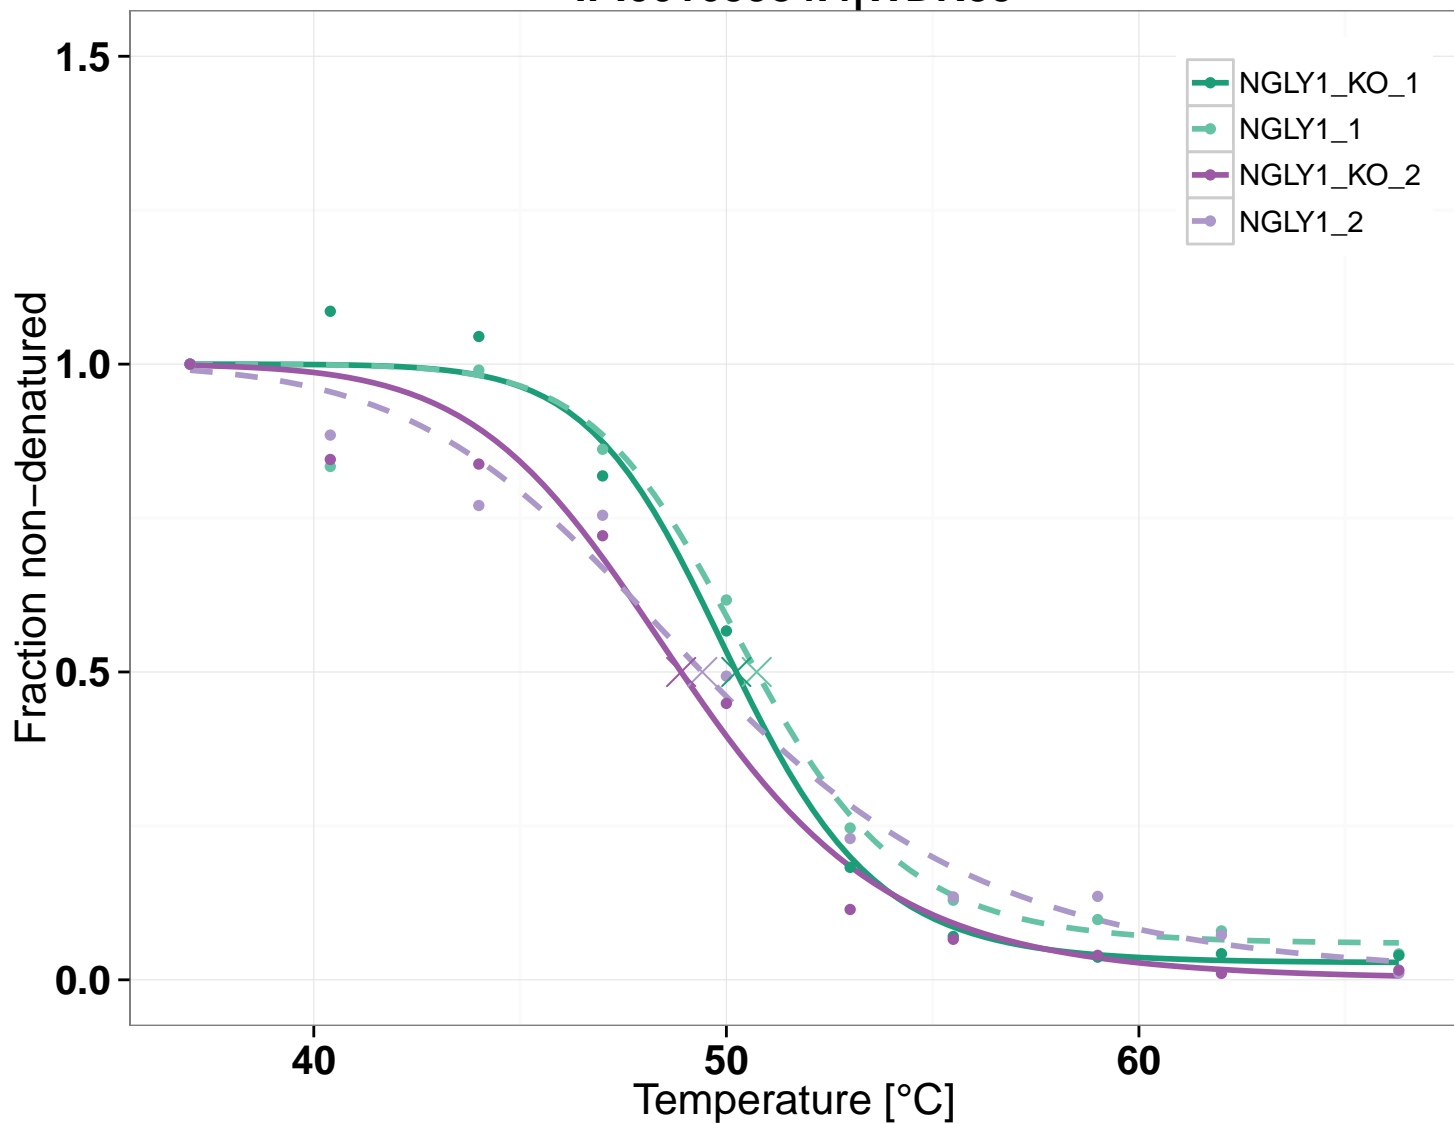

|            | meltPoint | slope  | plateau | R2   |
|------------|-----------|--------|---------|------|
| NGLY1_KO_1 | 50.24     | -0.14  | 0.03    | 0.99 |
| NGLY1_1    | 50.74     | -0.12  | 0.06    | 0.98 |
| NGLY1_KO_2 | 48.9      | -0.1   | 0       | 0.98 |
| NGLY1_2    | 49.42     | -0.071 | 0       | 0.98 |

Supplement: Supplementary file 1227 [file 1]

IPI00301163.1|KTELC1

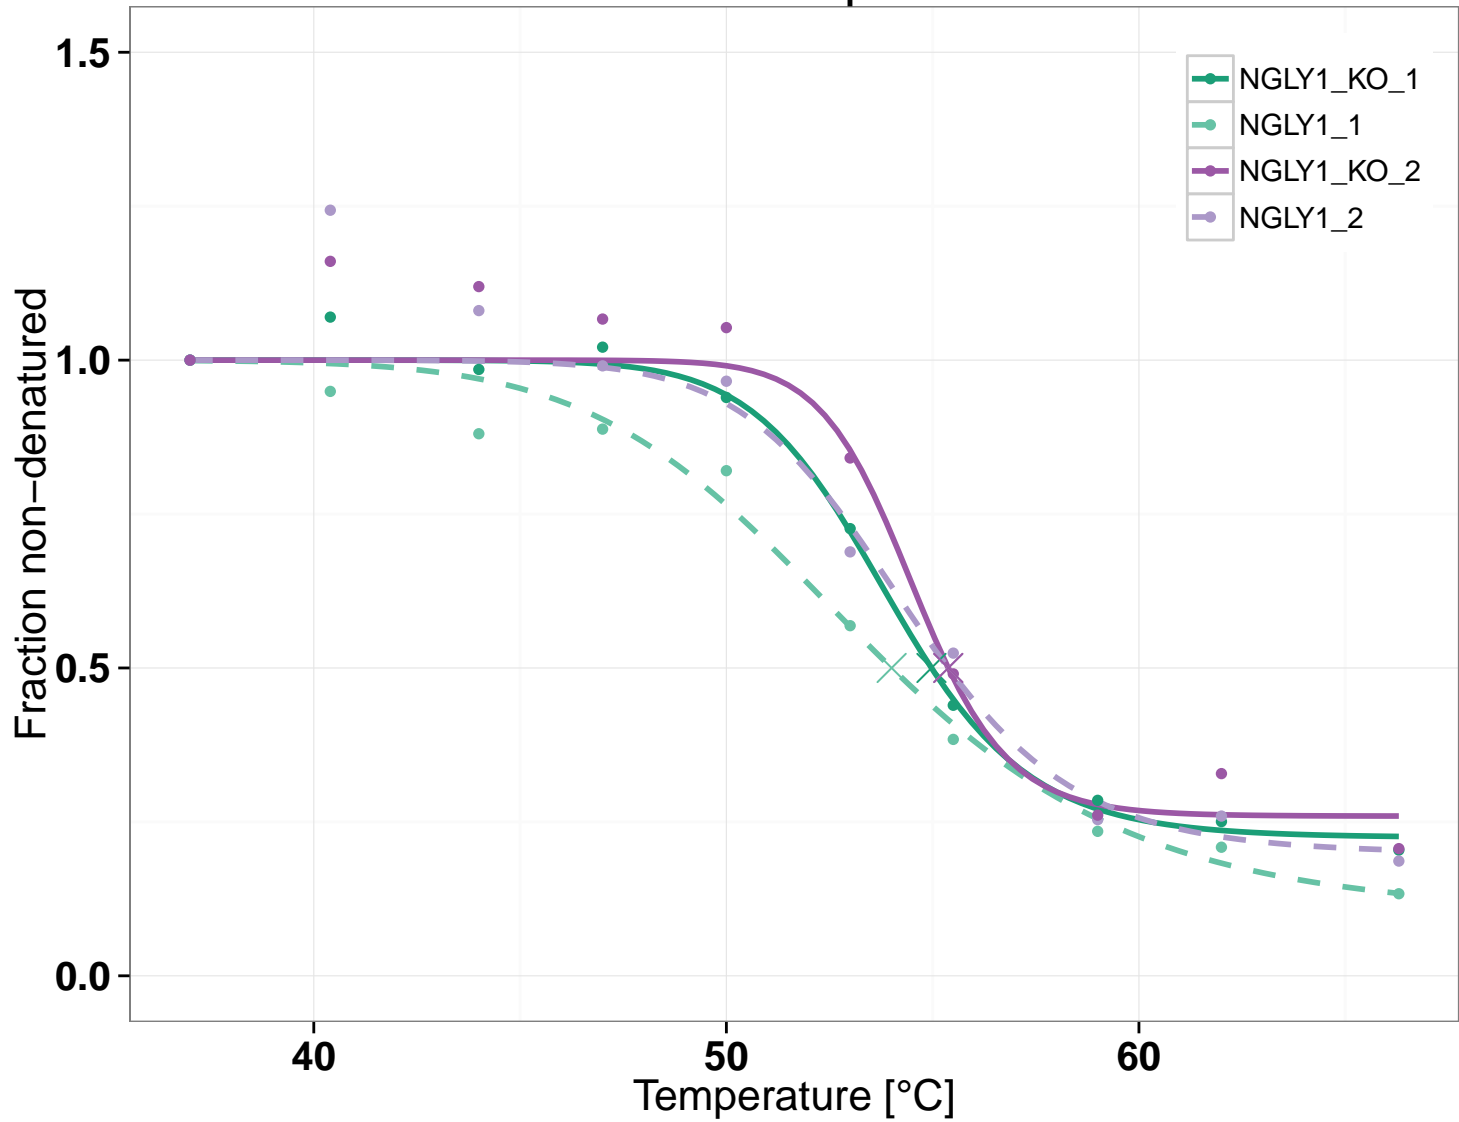

|            | meltPoint | slope  | plateau | R2   |
|------------|-----------|--------|---------|------|
| NGLY1_KO_1 | 54.97     | -0.12  | 0.22    | 0.99 |
| NGLY1_1    | 54.01     | -0.069 | 0.1     | 0.99 |
| NGLY1_KO_2 | 55.38     | -0.16  | 0.26    | 0.96 |
| NGLY1_2    | 55.38     | -0.1   | 0.2     | 0.95 |

Supplement: Supplementary file 1228 [file 1]

# IPI00000005.1|NRAS

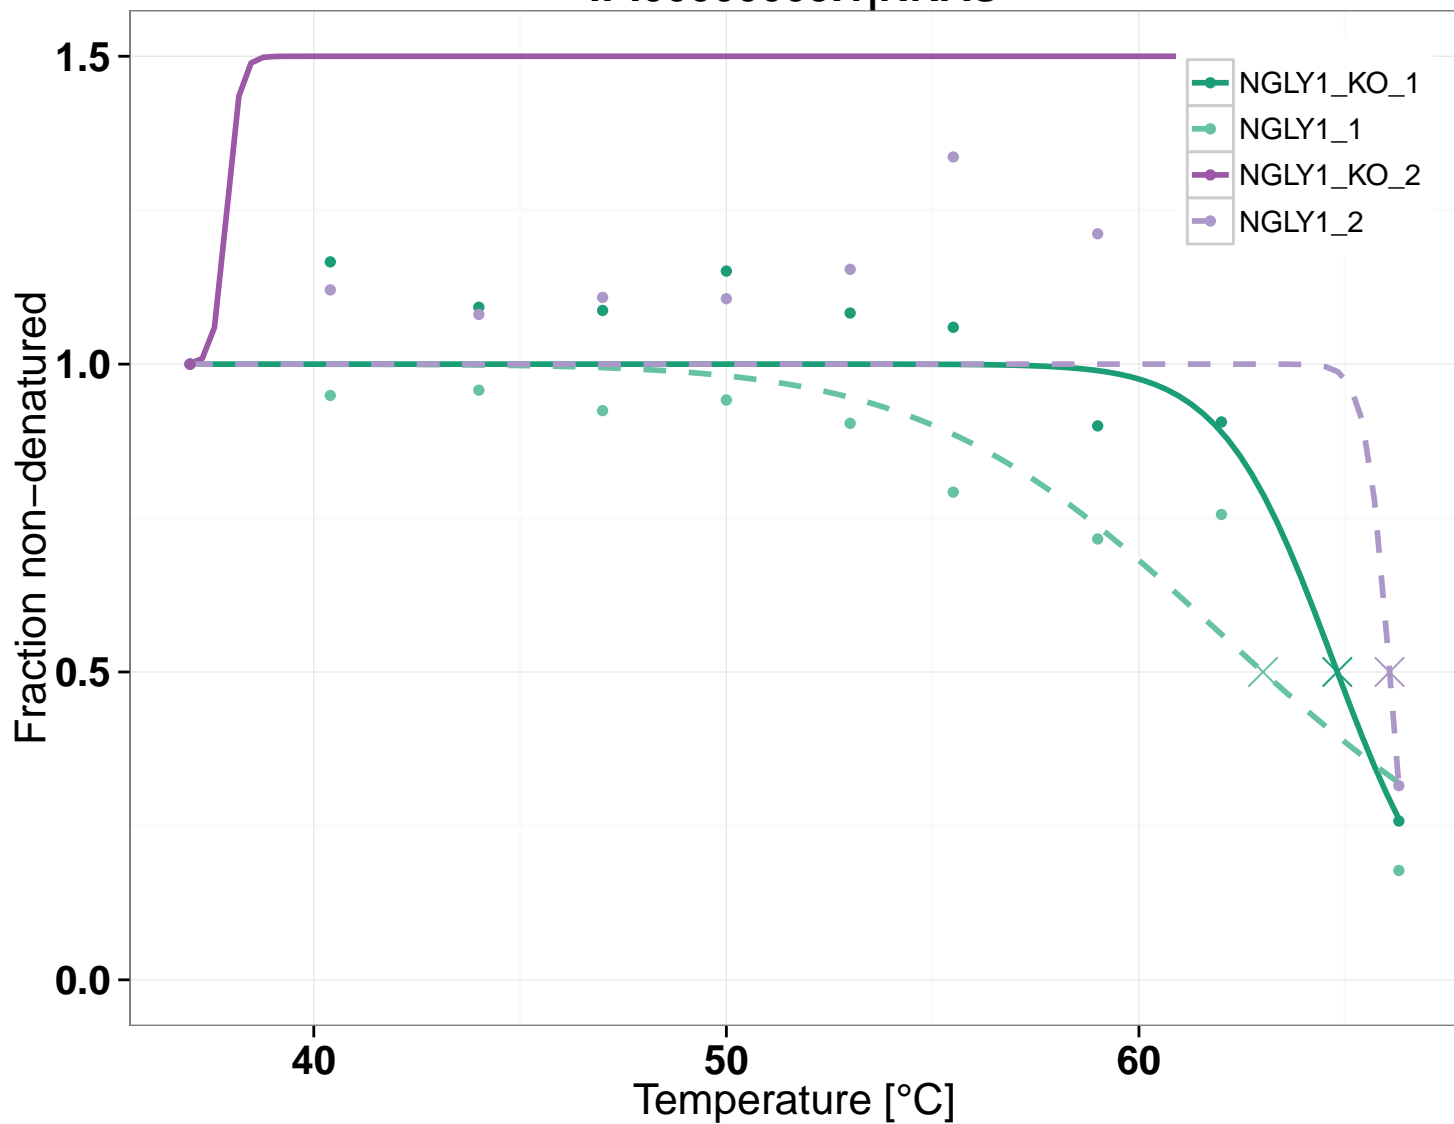

|            | meltPoint | slope  | plateau | R2    |
|------------|-----------|--------|---------|-------|
| NGLY1_KO_1 | 64.81     | -0.18  | 0       | 0.87  |
| NGLY1_1    | 63.01     | -0.061 | 0       | 0.85  |
| NGLY1_KO_2 | -         | 0.82   | 1.5     | -3.86 |
| NGLY1_2    | 66.07     | -0.86  | 0       | 0.58  |

Supplement: Supplementary file 1229 [file 1]

# IPI00646493.1|COPA

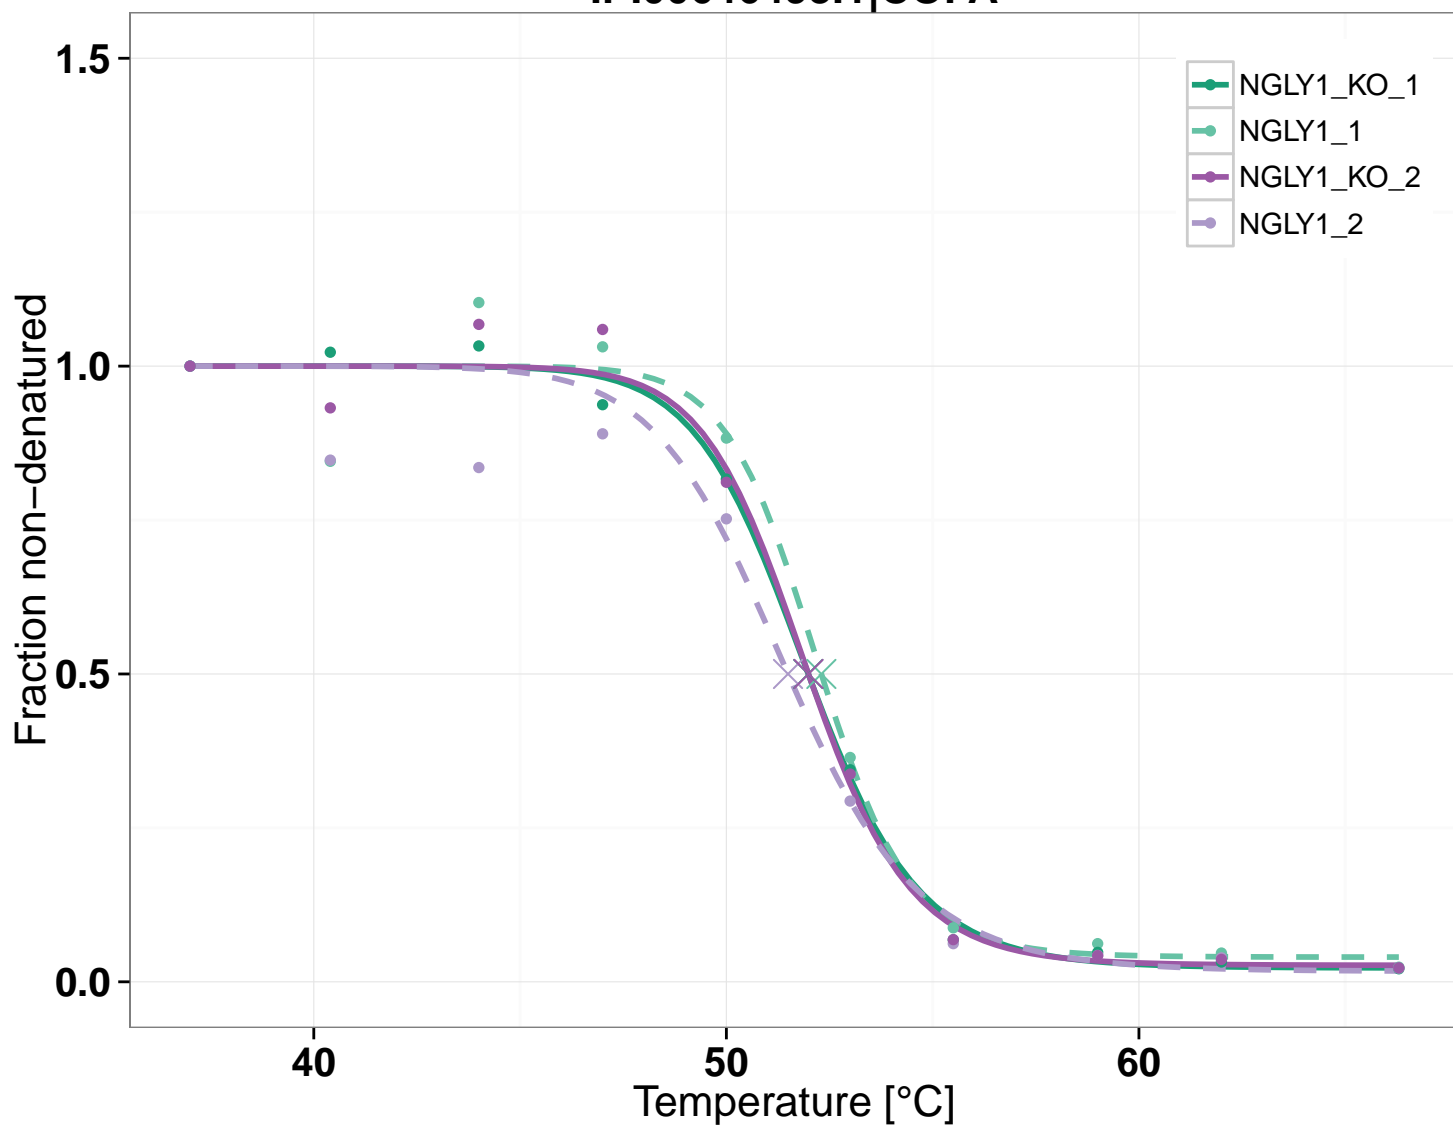

|            | meltPoint | slope | plateau | R2   |
|------------|-----------|-------|---------|------|
| NGLY1_KO_1 | 51.98     | -0.18 | 0.02    | 1    |
| NGLY1_1    | 52.3      | -0.21 | 0.04    | 0.98 |
| NGLY1_KO_2 | 51.99     | -0.19 | 0.03    | 0.99 |
| NGLY1_2    | 51.49     | -0.15 | 0.02    | 0.96 |

Supplement: Supplementary file 1230 [file 1]

IPI00909484.1|CDC42

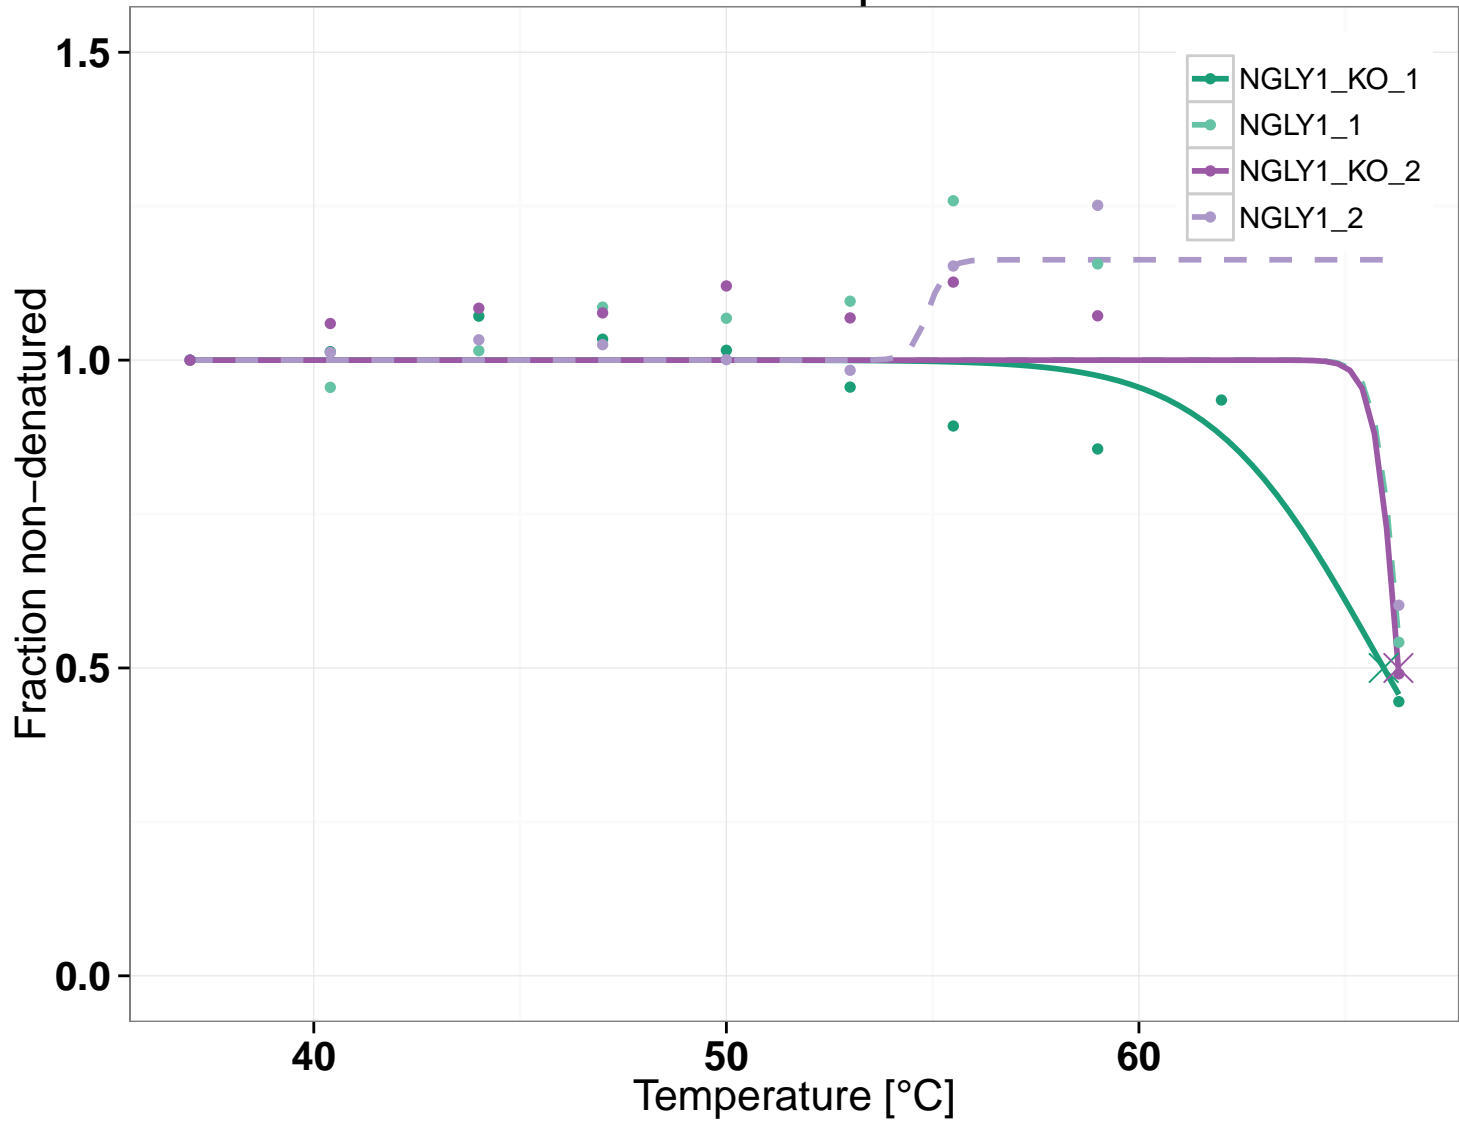

|            | meltPoint | slope | plateau | R2   |
|------------|-----------|-------|---------|------|
| NGLY1_KO_1 | 65.93     | -0.12 | 0       | 0.87 |
| NGLY1_1    | -         | -     | 0       | 0.54 |
| NGLY1_KO_2 | 66.29     | -0.85 | 0       | 0.61 |
| NGLY1_2    | -         | 0.19  | 1.16    | 0.09 |

Supplement: Supplementary file 1231 [file 1]

# IPI00289491.3|CASC3

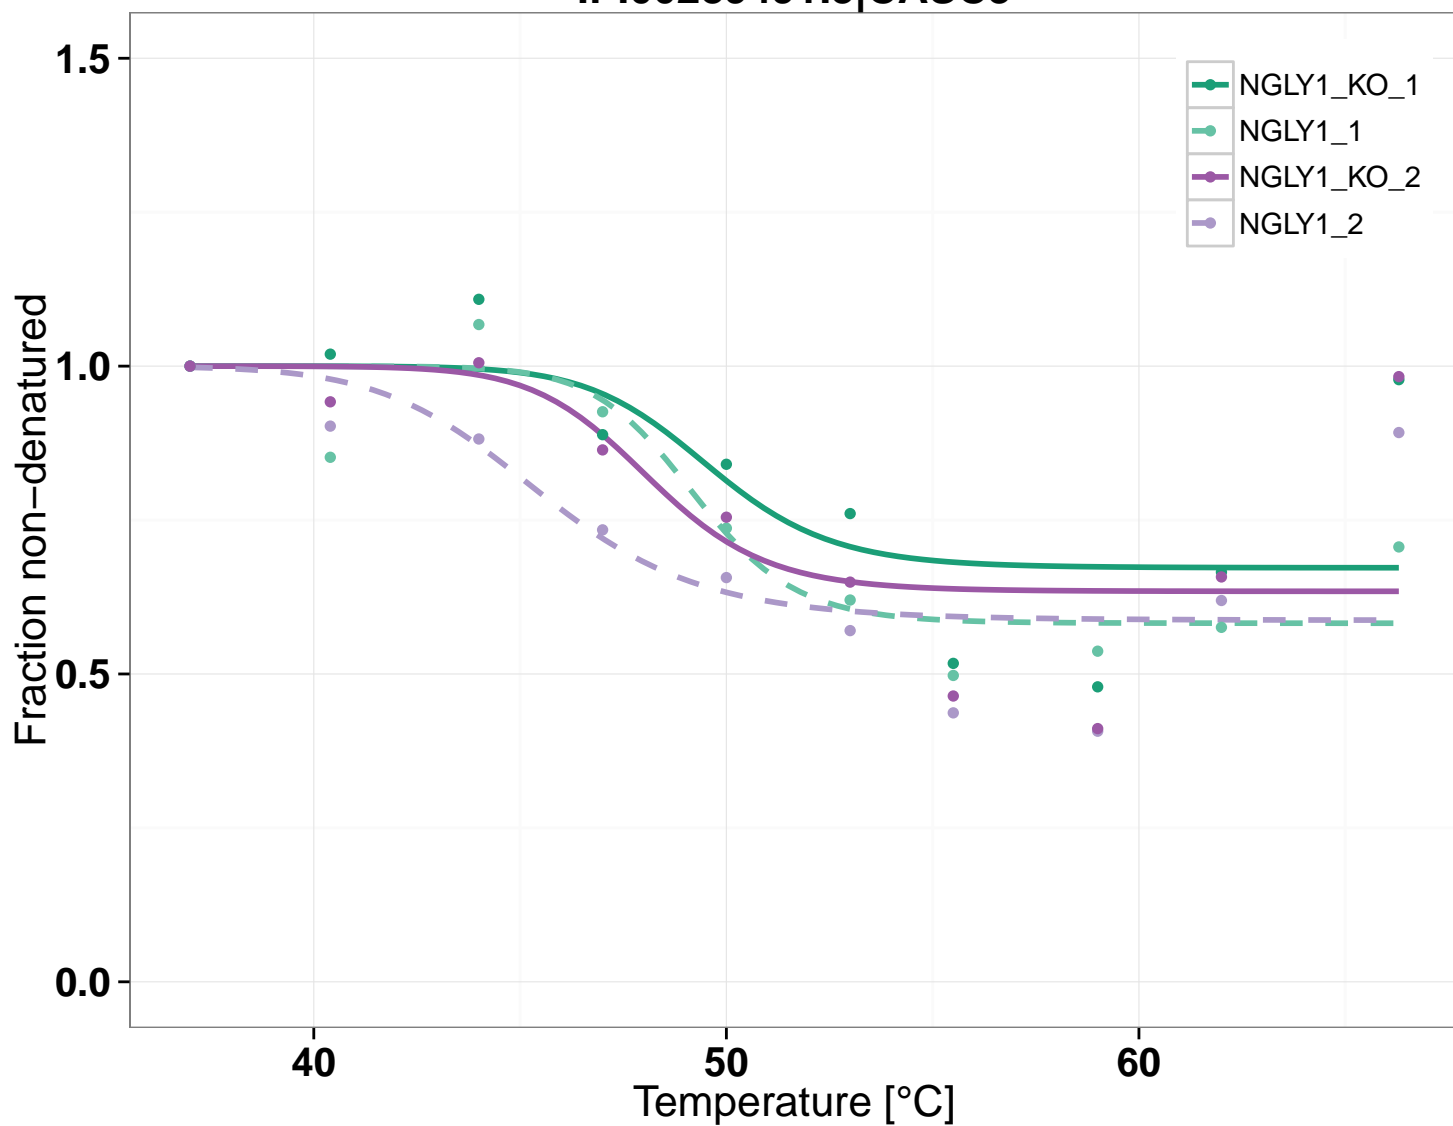

|            | meltPoint | slope  | plateau | R2   |
|------------|-----------|--------|---------|------|
| NGLY1_KO_1 | —         | −0.055 | 0.67    | 0.57 |
| NGLY1_1    | —         | −0.085 | 0.58    | 0.85 |
| NGLY1_KO_2 | —         | −0.065 | 0.63    | 0.53 |
| NGLY1_2    | —         | −0.053 | 0.59    | 0.58 |

Supplement: Supplementary file 1232 [file 1]

IPI00017963.1|SNRPD2

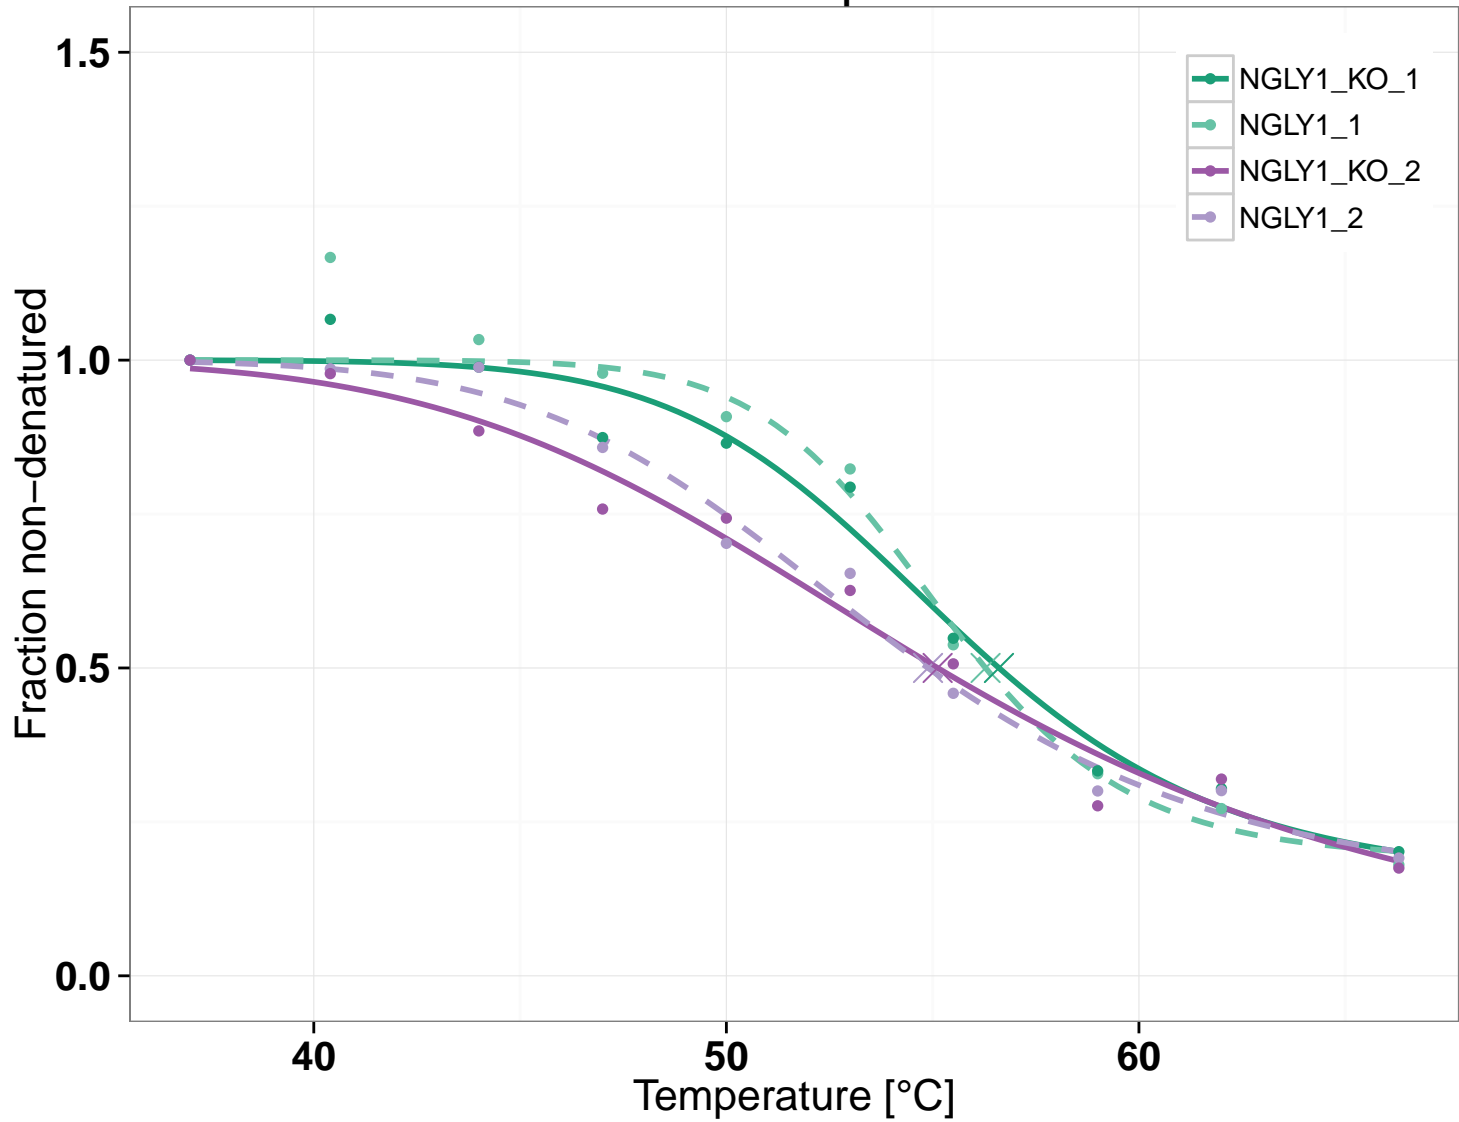

|            | meltPoint | slope  | plateau | R2   |
|------------|-----------|--------|---------|------|
| NGLY1_KO_1 | 56.61     | -0.064 | 0.15    | 0.98 |
| NGLY1_1    | 56.28     | -0.09  | 0.19    | 0.97 |
| NGLY1_KO_2 | 55.12     | -0.042 | 0       | 0.98 |
| NGLY1_2    | 54.89     | -0.052 | 0.13    | 0.99 |

Supplement: Supplementary file 1233 [file 1]

IPI00414554.5|ARPC5L

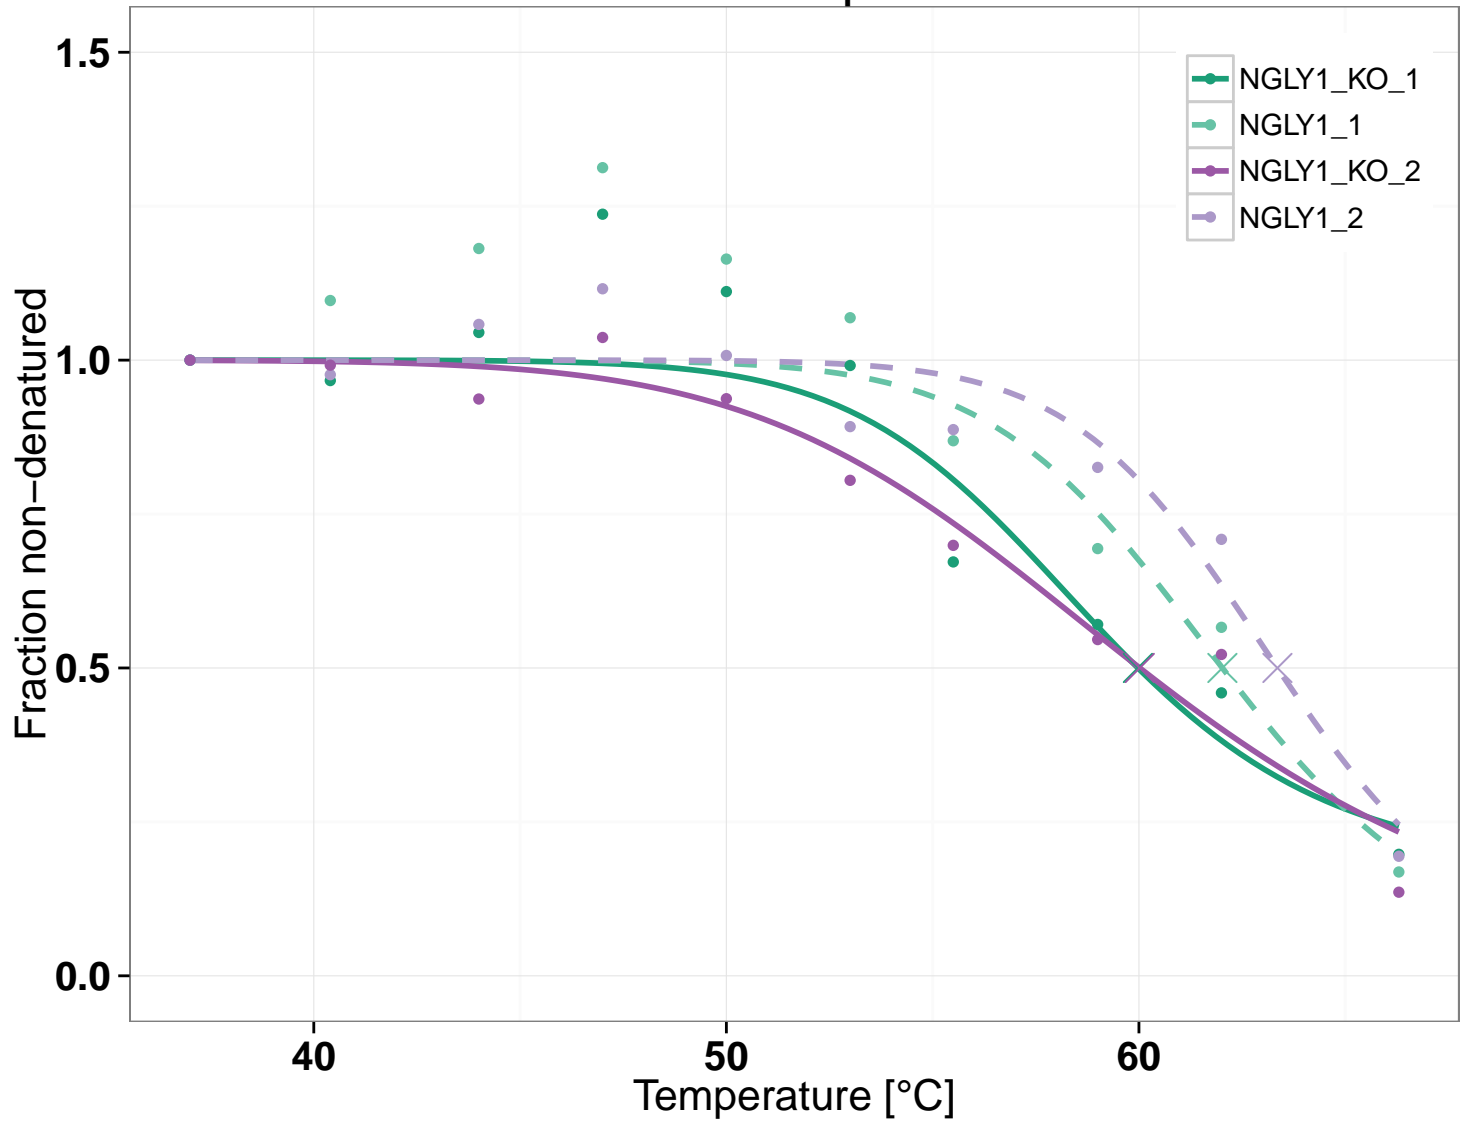

|            | meltPoint | slope  | plateau | R2   |
|------------|-----------|--------|---------|------|
| NGLY1_KO_1 | 59.98     | -0.072 | 0.17    | 0.89 |
| NGLY1_1    | 62.02     | -0.088 | 0       | 0.83 |
| NGLY1_KO_2 | 60.02     | -0.054 | 0       | 0.95 |
| NGLY1_2    | 63.36     | -0.1   | 0       | 0.93 |

Supplement: Supplementary file 1234 [file 1]

IPI00604664.5|NDUFS1

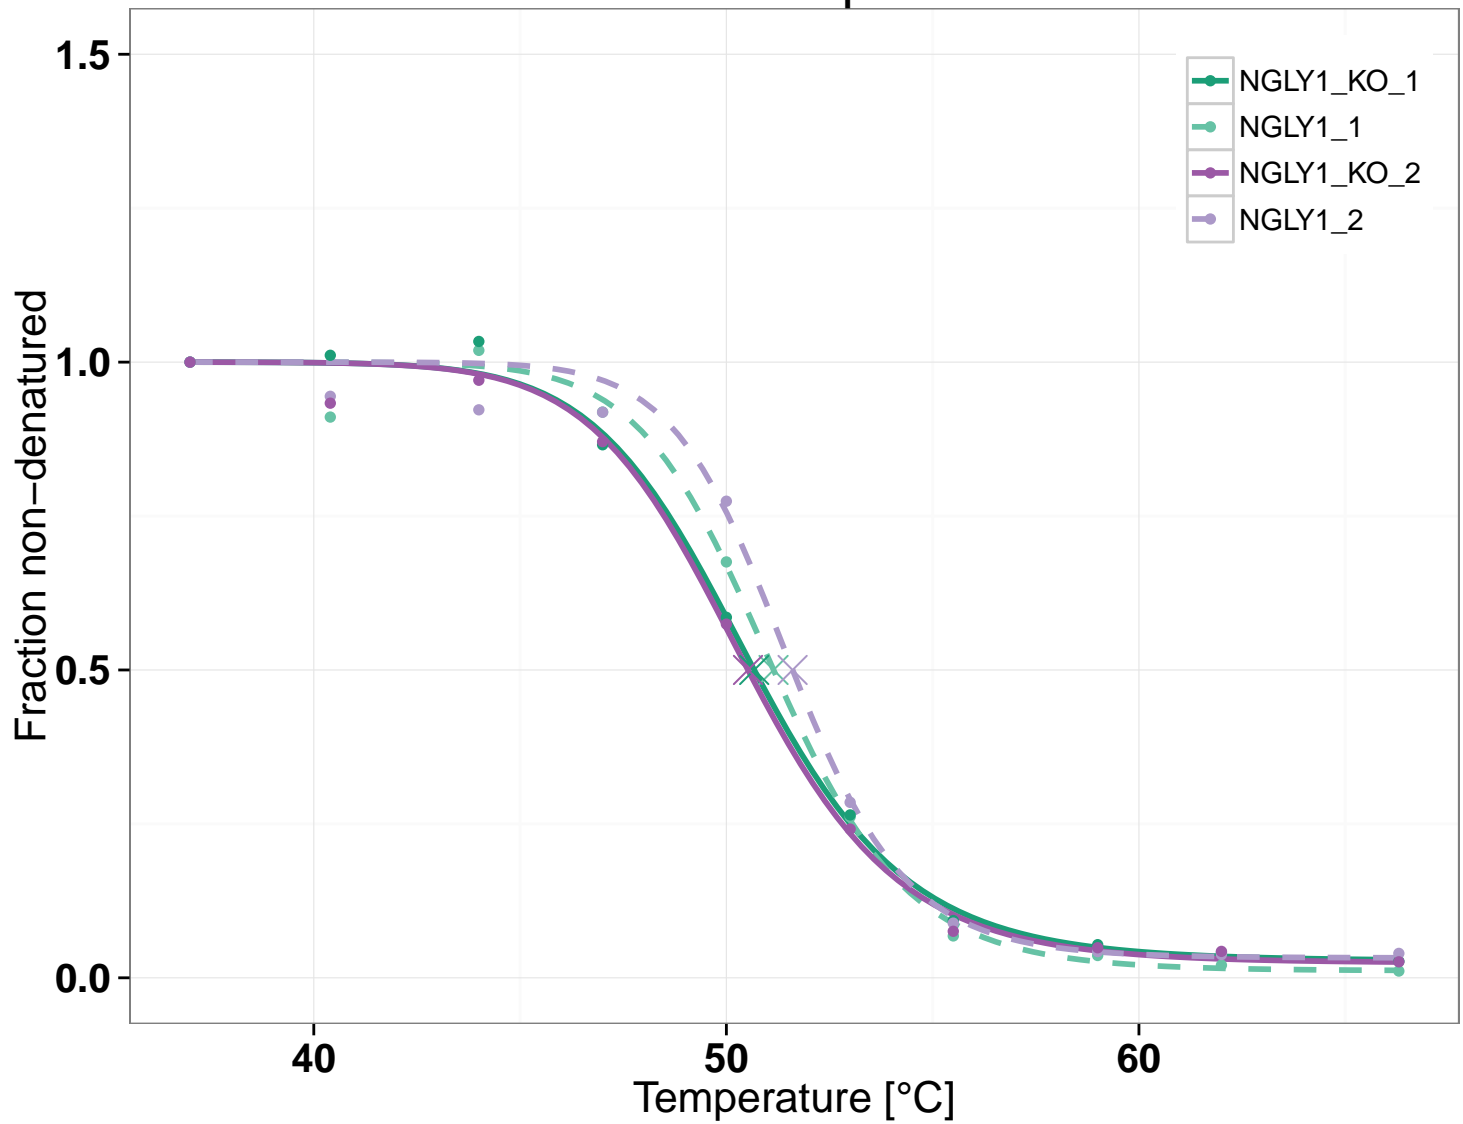

|            | meltPoint | slope | plateau | R2   |
|------------|-----------|-------|---------|------|
| NGLY1_KO_1 | 50.68     | -0.13 | 0.03    | 1    |
| NGLY1_1    | 51.14     | -0.15 | 0.01    | 0.99 |
| NGLY1_KO_2 | 50.52     | -0.13 | 0.02    | 1    |
| NGLY1_2    | 51.61     | -0.17 | 0.03    | 0.99 |

Supplement: Supplementary file 1235 [file 1]

# IPI00027798.1|FAM103A1

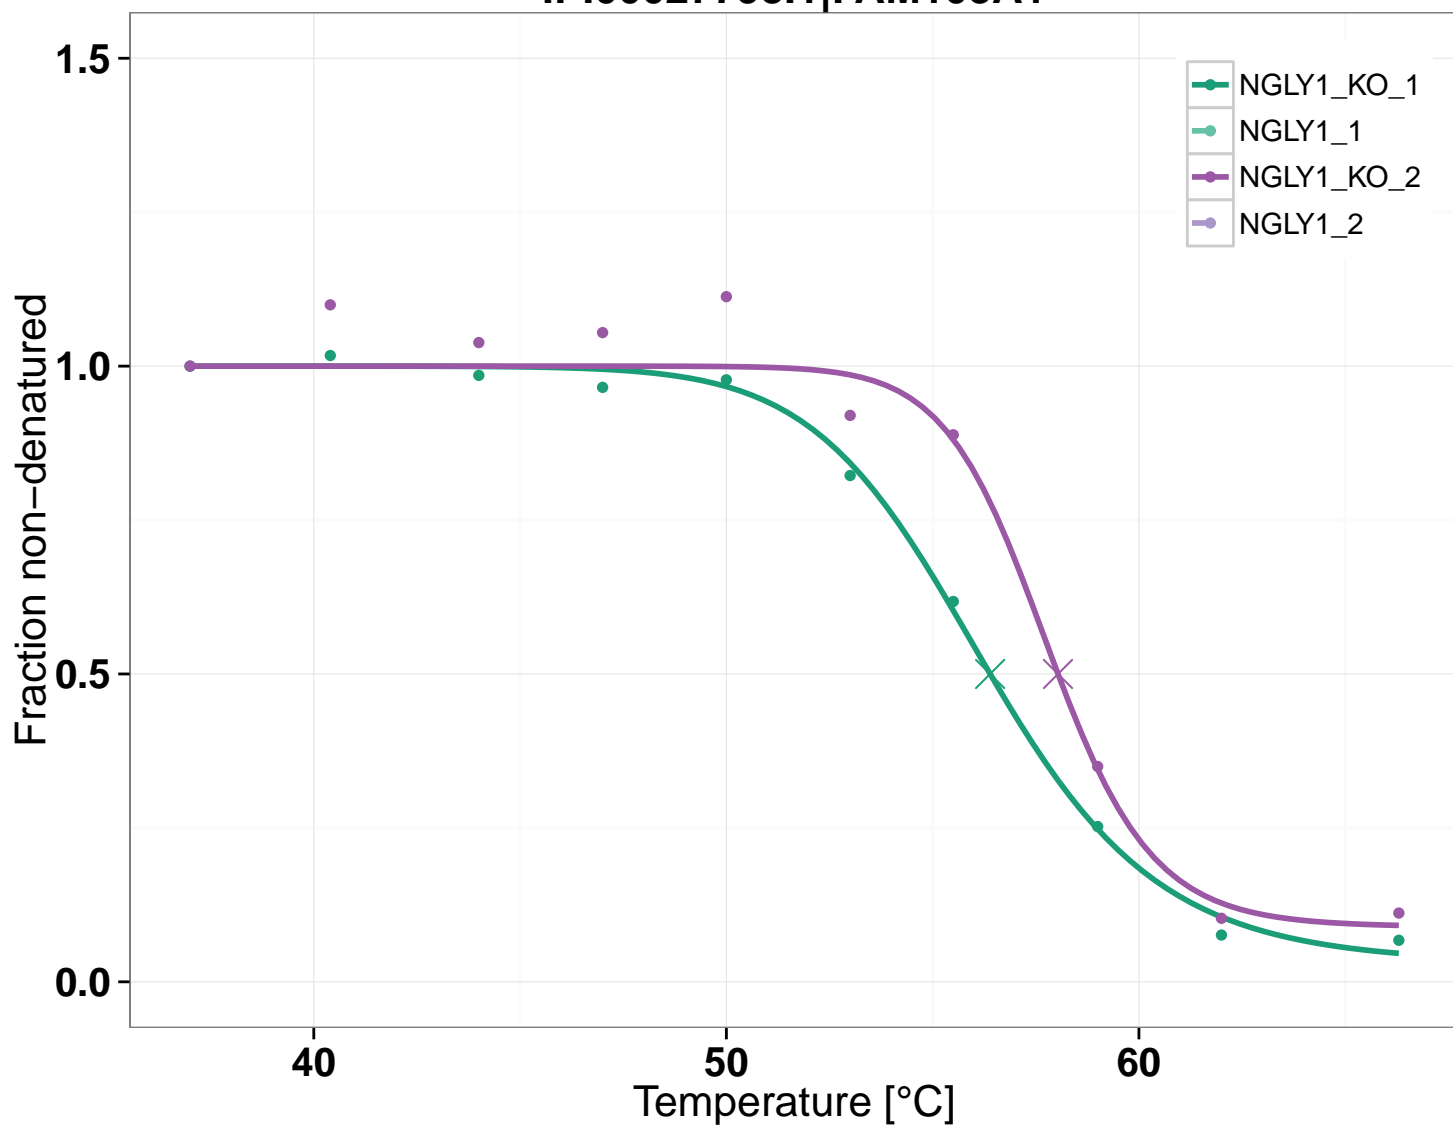

|            | meltPoint | slope | plateau | R2   |
|------------|-----------|-------|---------|------|
| NGLY1_KO_1 | 56.39     | -0.12 | 0.03    | 1    |
| NGLY1_1    | -         | -     | -       | -    |
| NGLY1_KO_2 | 58.04     | -0.18 | 0.09    | 0.98 |
| NGLY1_2    | -         | -     | -       | -    |

Supplement: Supplementary file 1236 [file 1]

IPI00910581.1|TMEM199

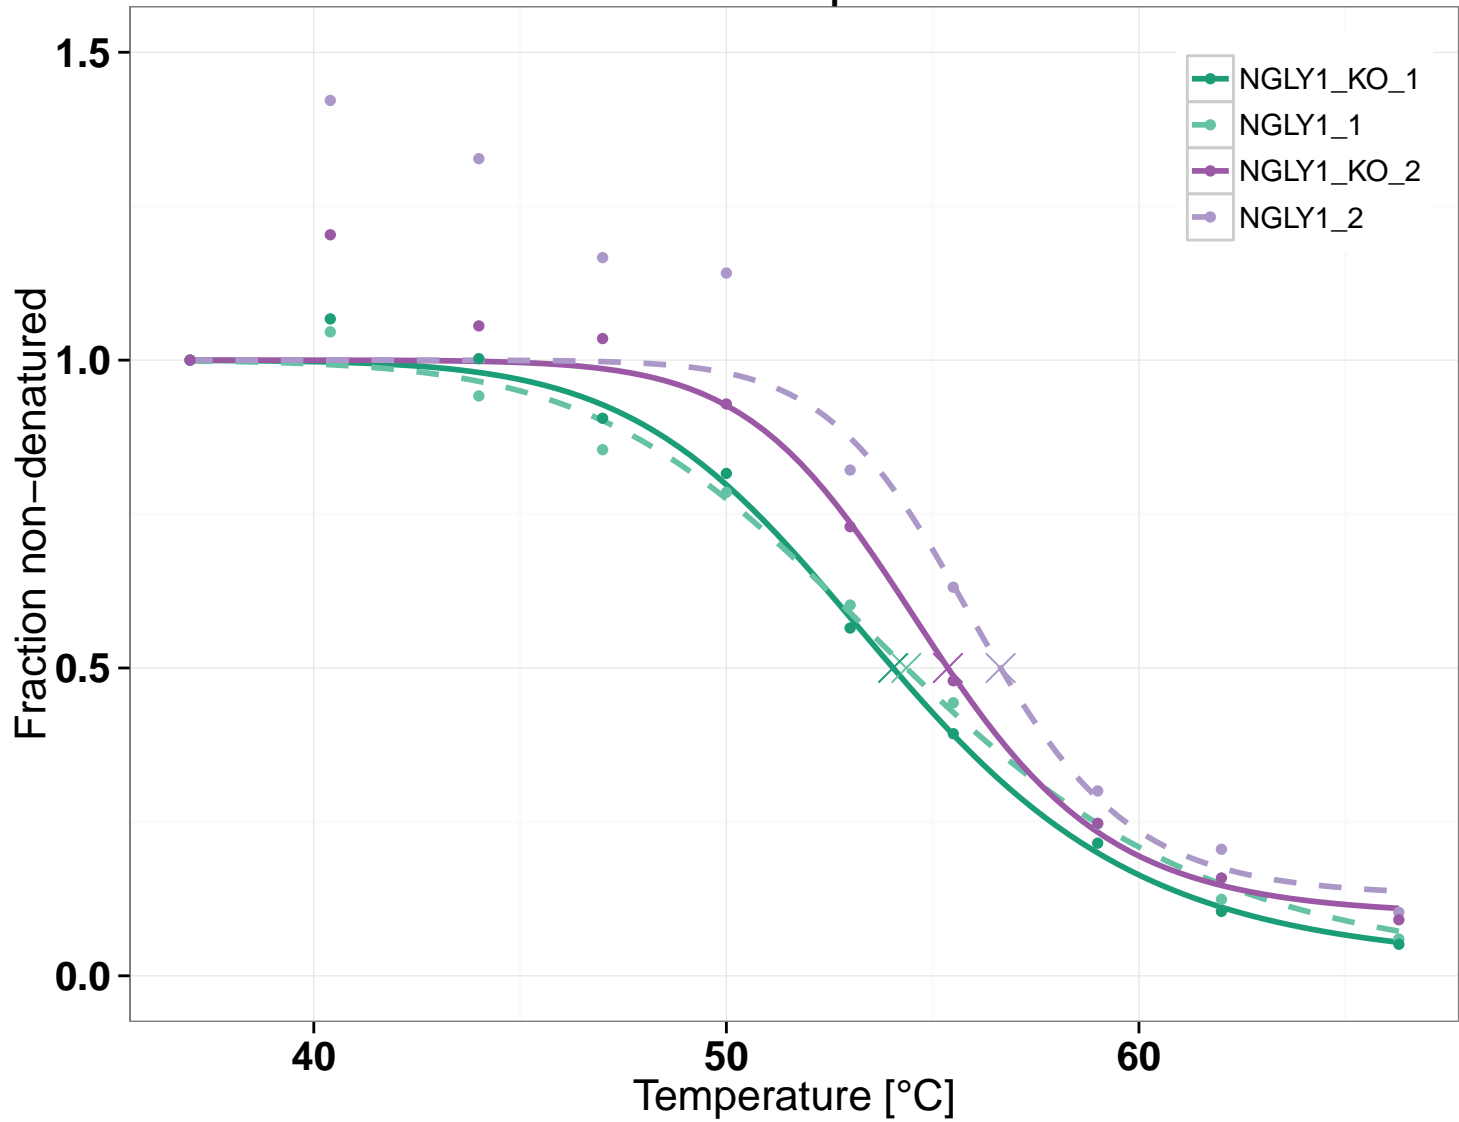

|            | meltPoint | slope  | plateau | R2   |
|------------|-----------|--------|---------|------|
| NGLY1_KO_1 | 54.04     | -0.079 | 0.02    | 1    |
| NGLY1_1    | 54.36     | -0.066 | 0       | 0.99 |
| NGLY1_KO_2 | 55.37     | -0.1   | 0.1     | 0.97 |
| NGLY1_2    | 56.65     | -0.12  | 0.13    | 0.83 |

Supplement: Supplementary file 1237 [file 1]

IPI00470717.5|ZNF468

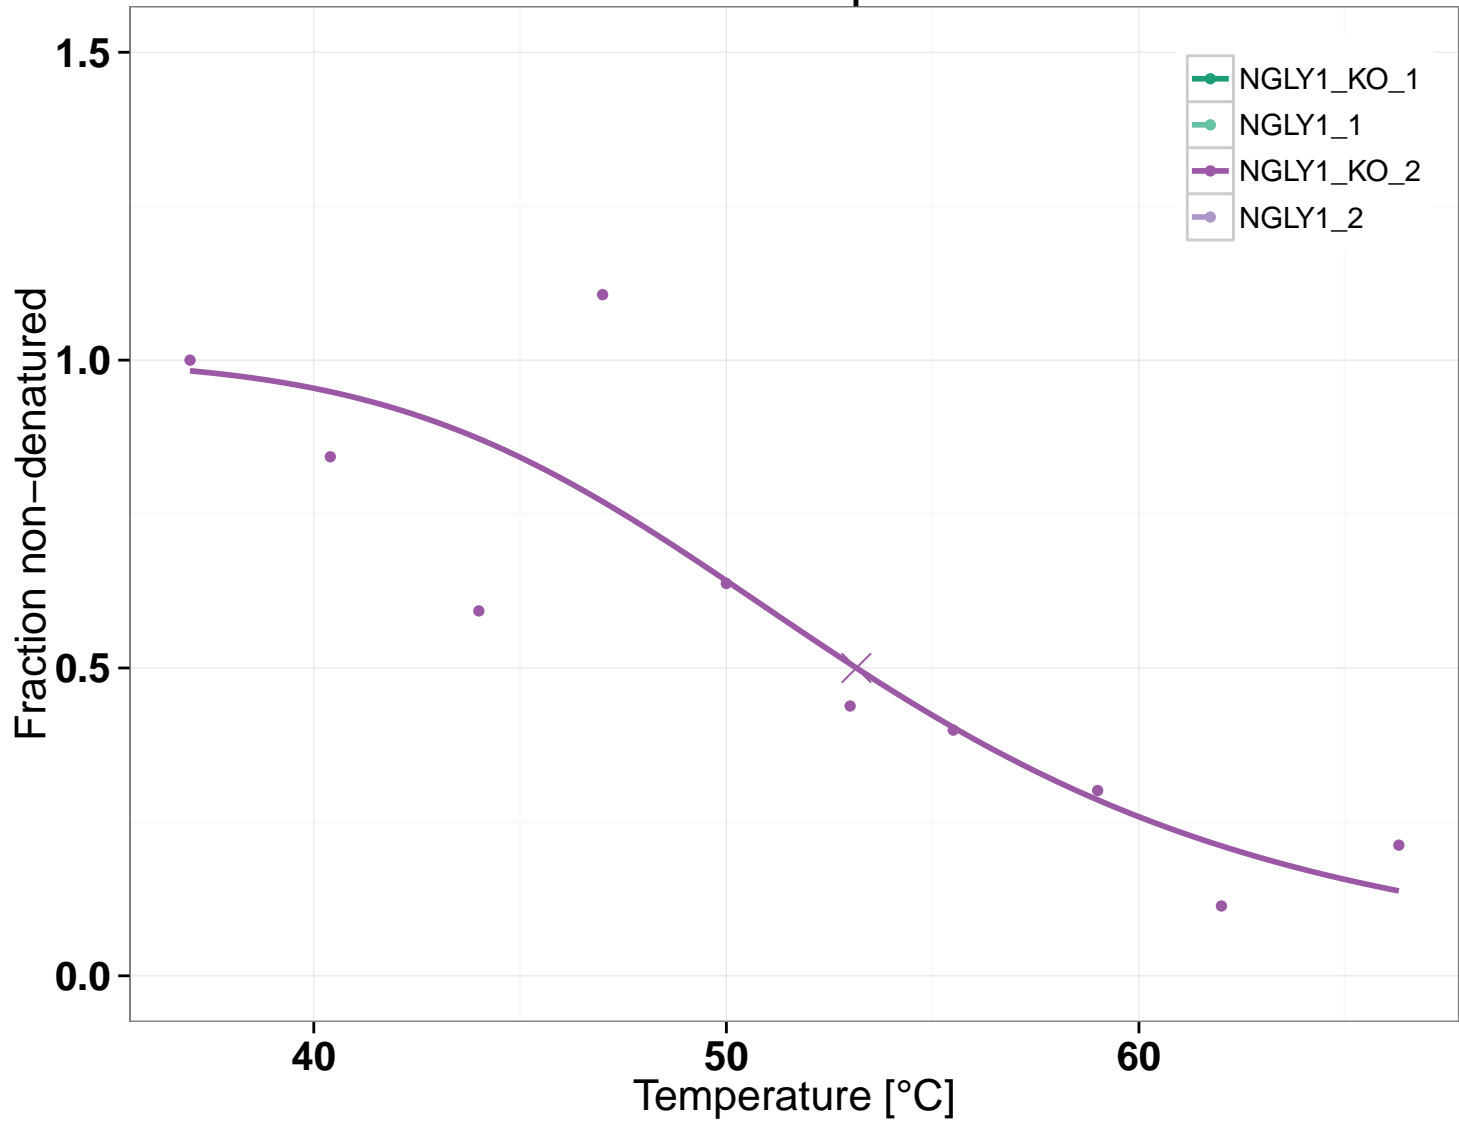

|            | meltPoint | slope  | plateau | R2   |
|------------|-----------|--------|---------|------|
| NGLY1_KO_1 | —         | —      | —       | —    |
| NGLY1_1    | —         | —      | —       | —    |
| NGLY1_KO_2 | 53.15     | -0.045 | 0       | 0.78 |
| NGLY1_2    | —         | —      | —       | —    |

Supplement: Supplementary file 1238 [file 1]

# IPI00022648.2|EIF5

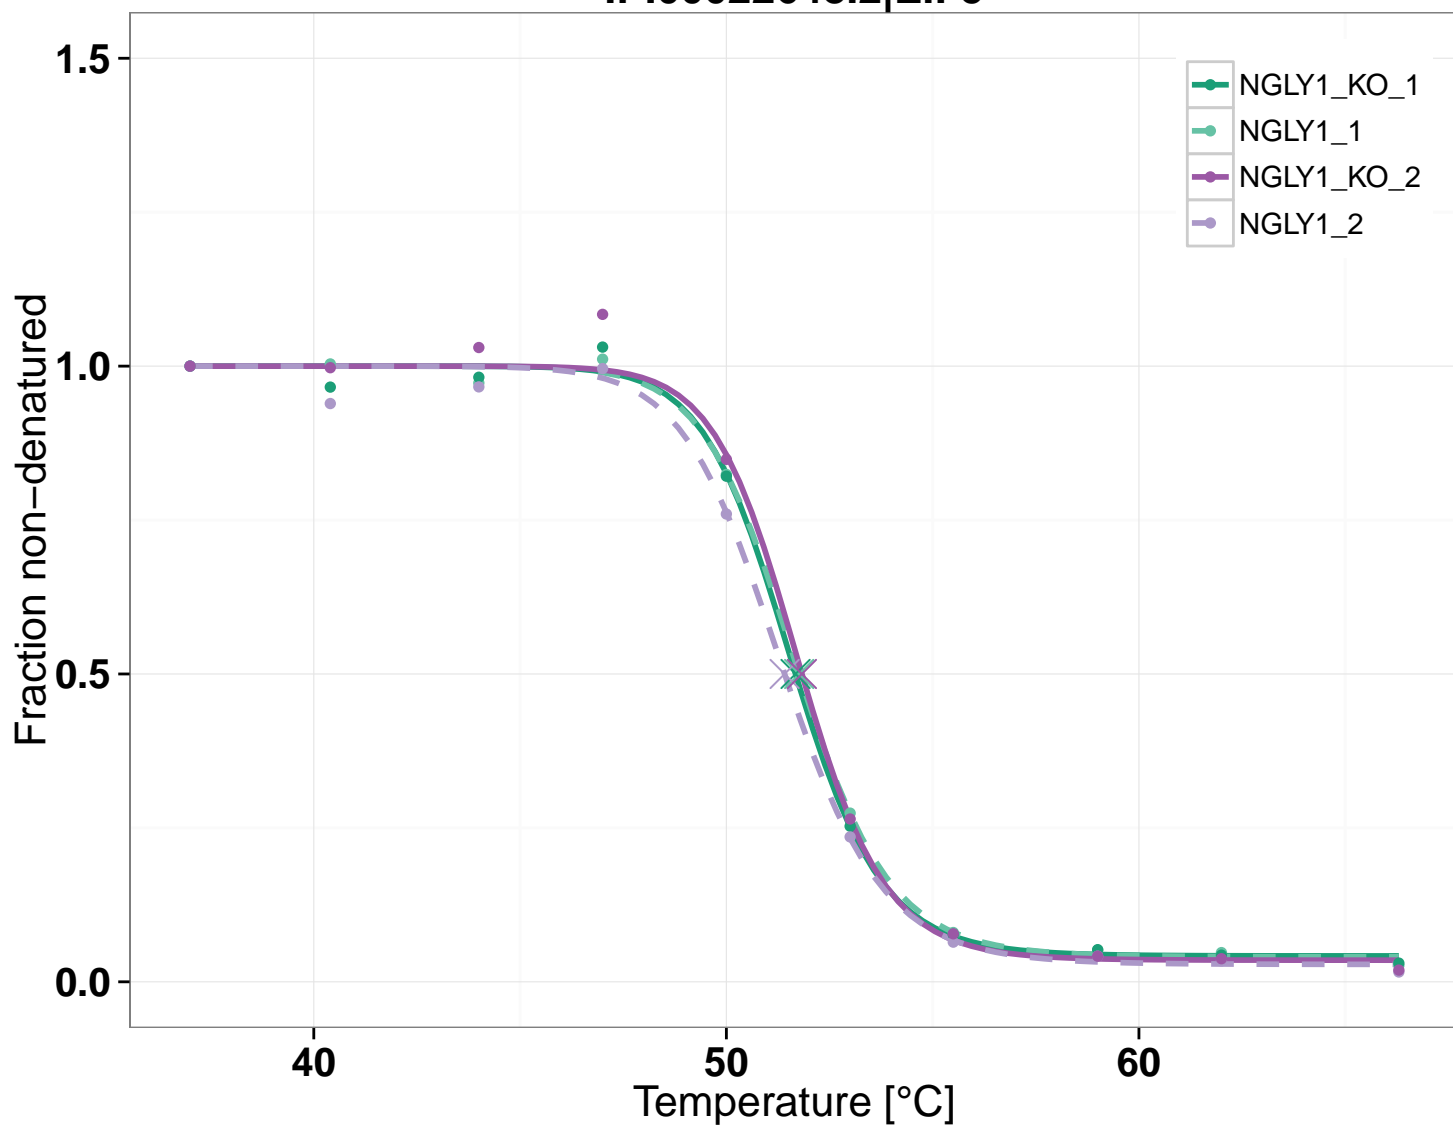

|            | meltPoint | slope | plateau | R2 |
|------------|-----------|-------|---------|----|
| NGLY1_KO_1 | 51.68     | -0.22 | 0.04    | 1  |
| NGLY1_1    | 51.76     | -0.21 | 0.04    | 1  |
| NGLY1_KO_2 | 51.83     | -0.23 | 0.04    | 1  |
| NGLY1_2    | 51.41     | -0.2  | 0.03    | 1  |

Supplement: Supplementary file 1239 [file 1]

IPI00413755.1|TAF4

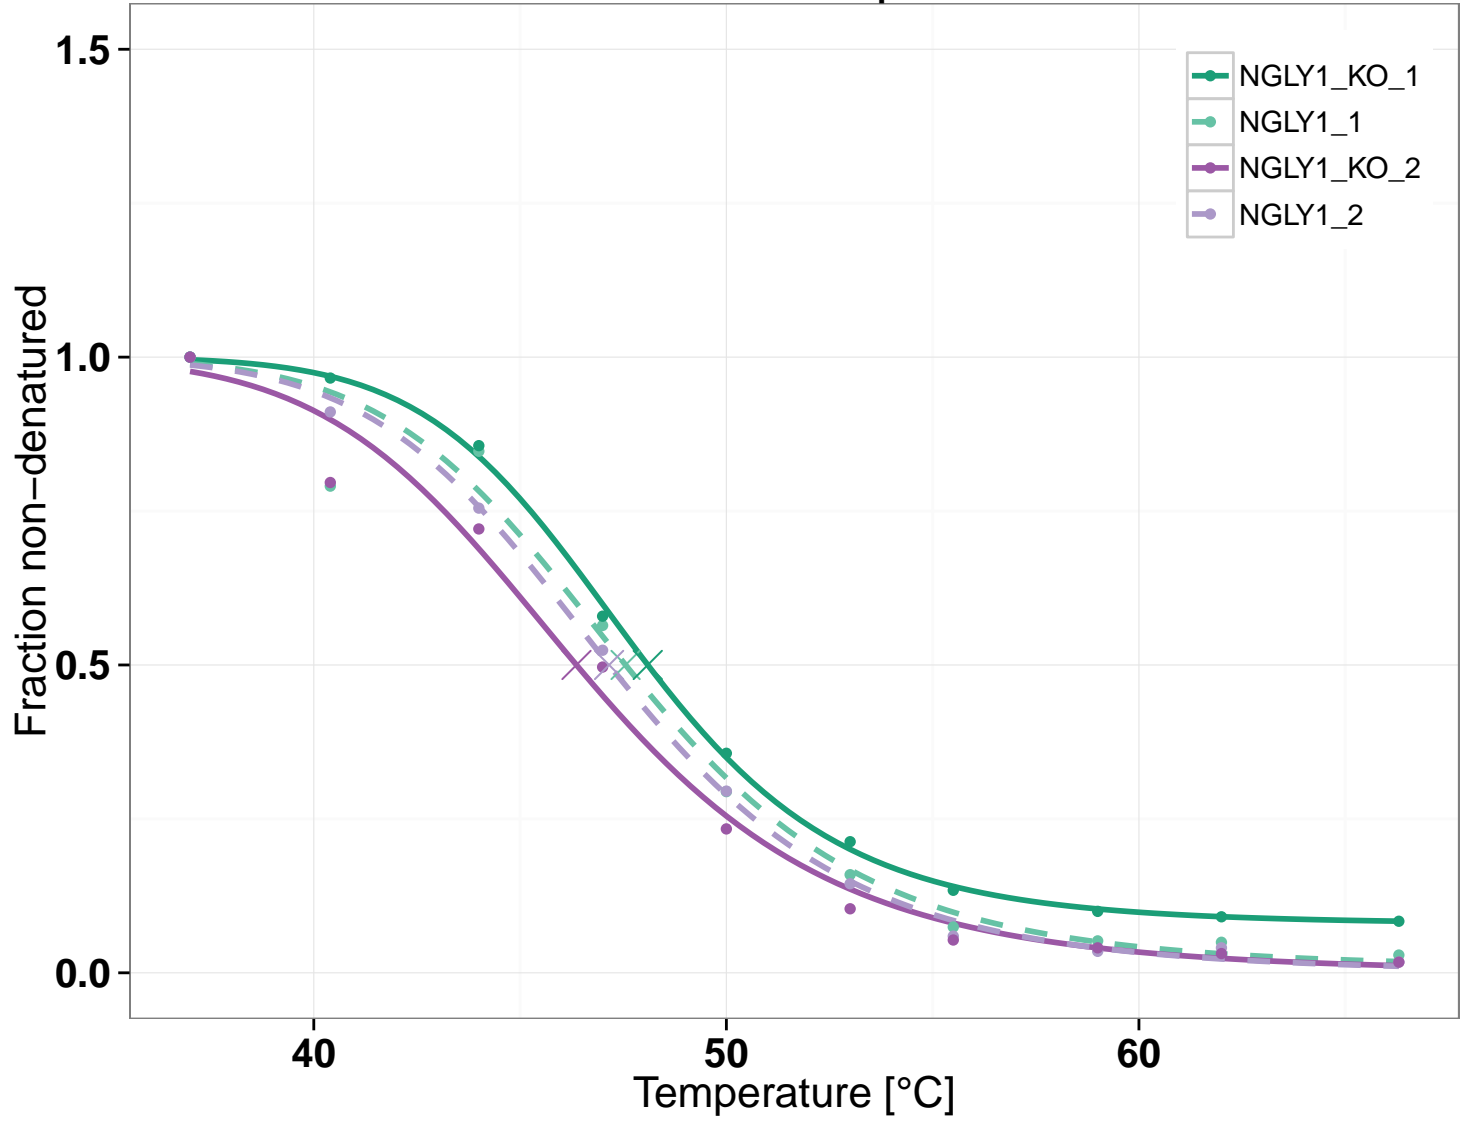

|            | meltPoint | slope  | plateau | R2   |
|------------|-----------|--------|---------|------|
| NGLY1_KO_1 | 48.1      | -0.091 | 0.08    | 1    |
| NGLY1_1    | 47.56     | -0.085 | 0.01    | 0.98 |
| NGLY1_KO_2 | 46.37     | -0.081 | 0       | 0.99 |
| NGLY1_2    | 47.16     | -0.085 | 0       | 1    |

Supplement: Supplementary file 1240 [file 1]

# IPI00006672.1|SLC31A1

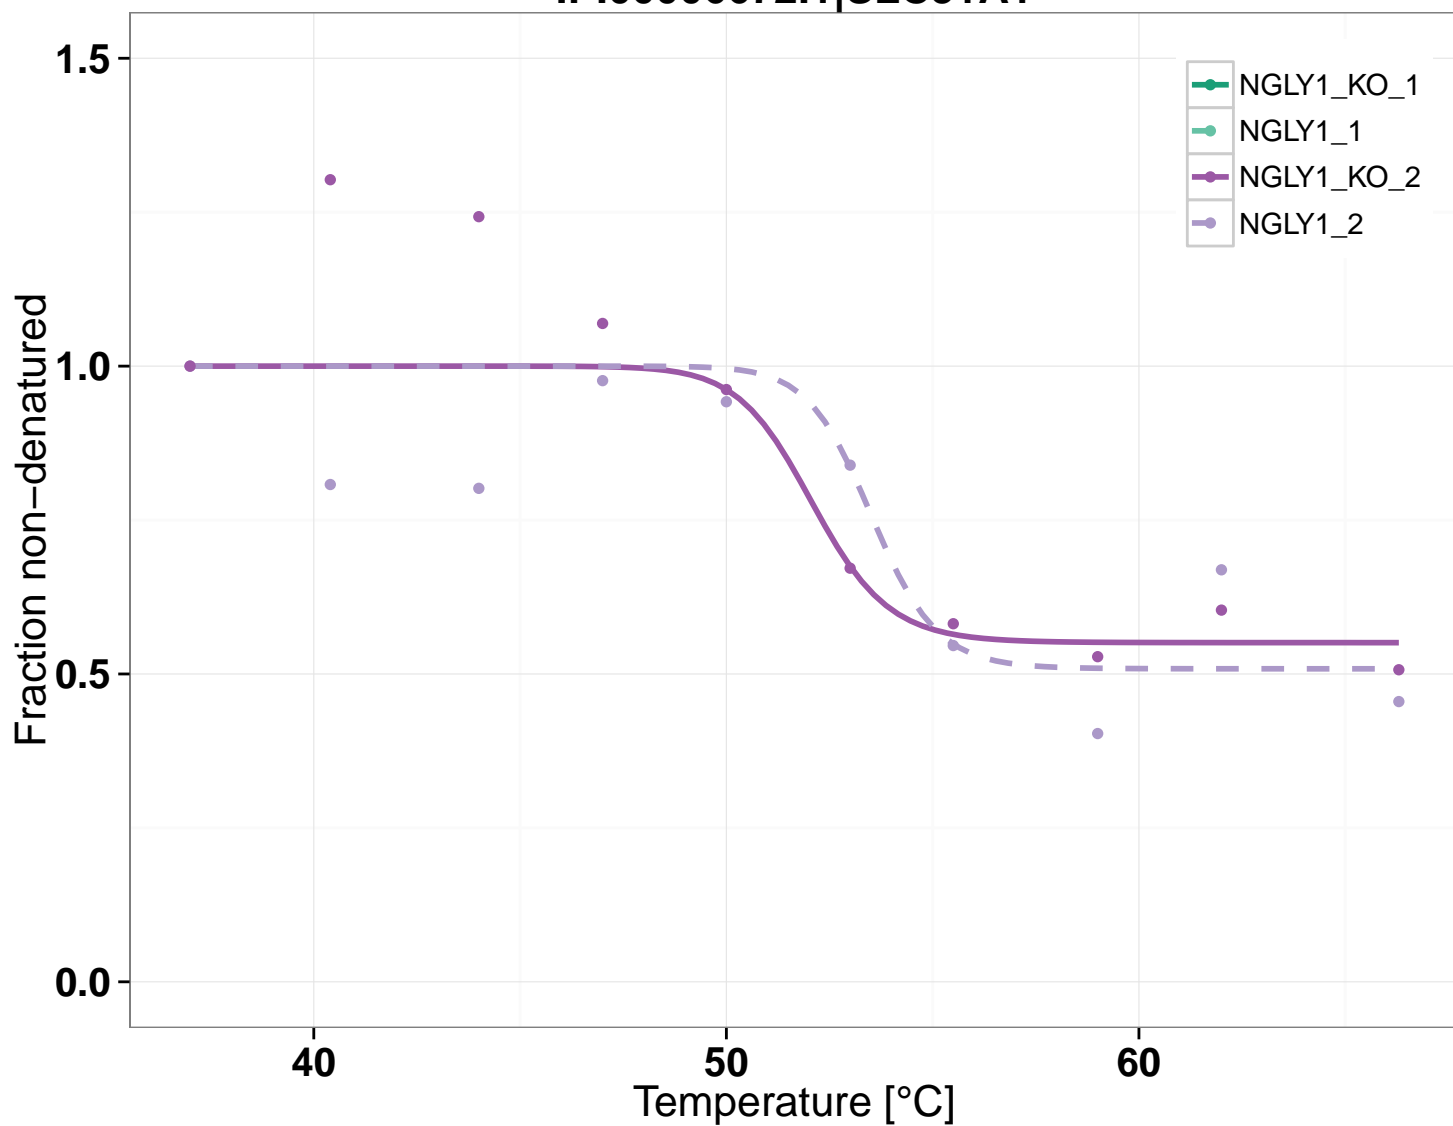

|            | meltPoint | slope | plateau | R2   |
|------------|-----------|-------|---------|------|
| NGLY1_KO_1 | —         | —     | —       | —    |
| NGLY1_1    | —         | —     | —       | —    |
| NGLY1_KO_2 | —         | -0.12 | 0.55    | 0.81 |
| NGLY1_2    | —         | -0.16 | 0.51    | 0.71 |

Supplement: Supplementary file 1241 [file 1]

# IPI00166526.4|APITD1

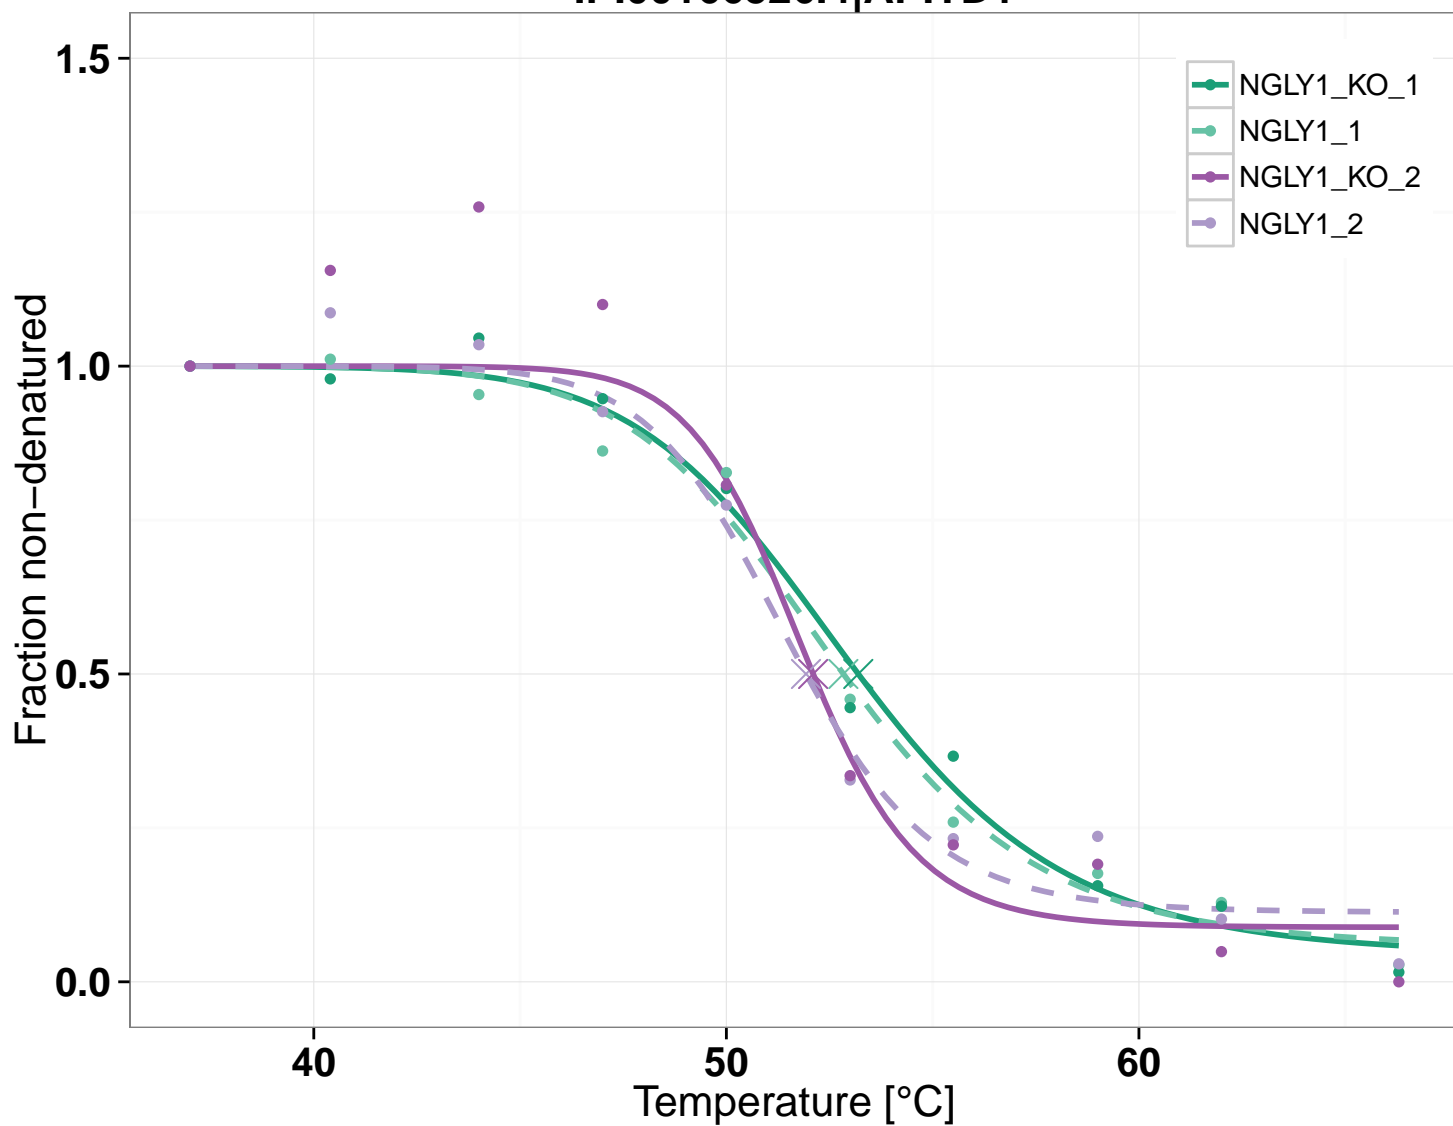

|            | meltPoint | slope  | plateau | R2   |
|------------|-----------|--------|---------|------|
| NGLY1_KO_1 | 53.2      | -0.092 | 0.04    | 0.99 |
| NGLY1_1    | 52.84     | -0.095 | 0.06    | 0.99 |
| NGLY1_KO_2 | 52.1      | -0.17  | 0.09    | 0.94 |
| NGLY1_2    | 51.93     | -0.13  | 0.11    | 0.98 |

Supplement: Supplementary file 1242 [file 1]

# IPI00916248.1|WDR13

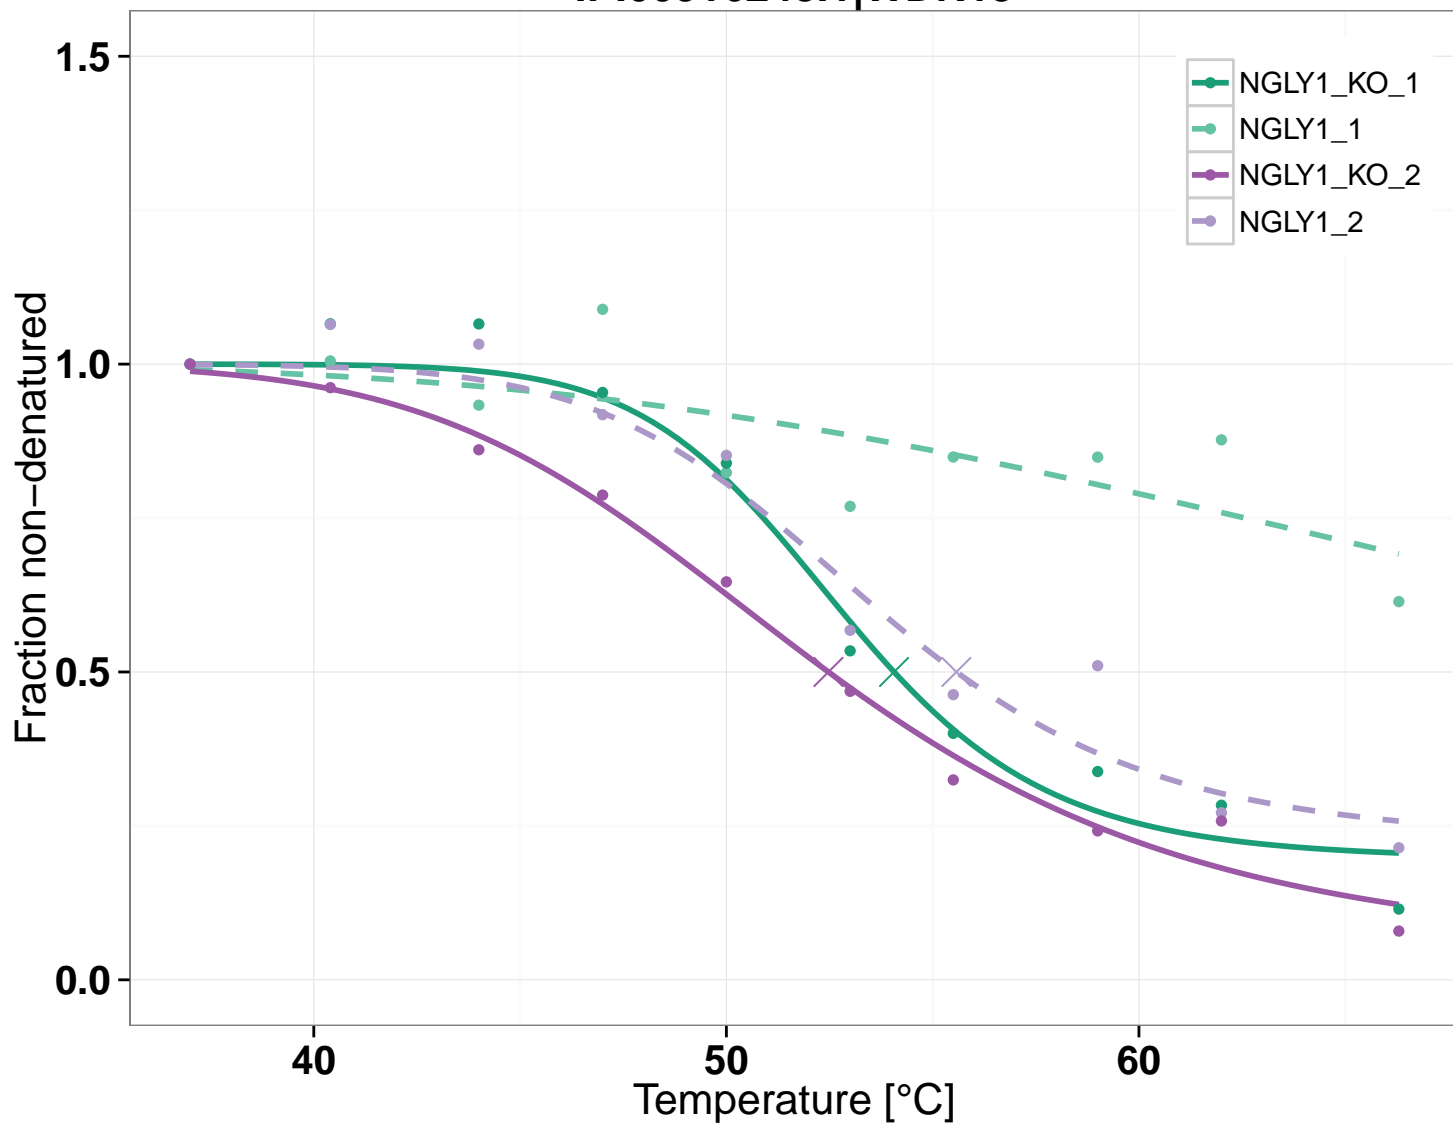

|            | meltPoint | slope  | plateau | R2   |
|------------|-----------|--------|---------|------|
| NGLY1_KO_1 | 54.06     | -0.082 | 0.2     | 0.98 |
| NGLY1_1    | -         | -0.016 | 0       | 0.59 |
| NGLY1_KO_2 | 52.47     | -0.052 | 0.04    | 0.99 |
| NGLY1_2    | 55.58     | -0.058 | 0.22    | 0.96 |

Supplement: Supplementary file 1243 [file 1]

# IPI00010653.6|REXO4

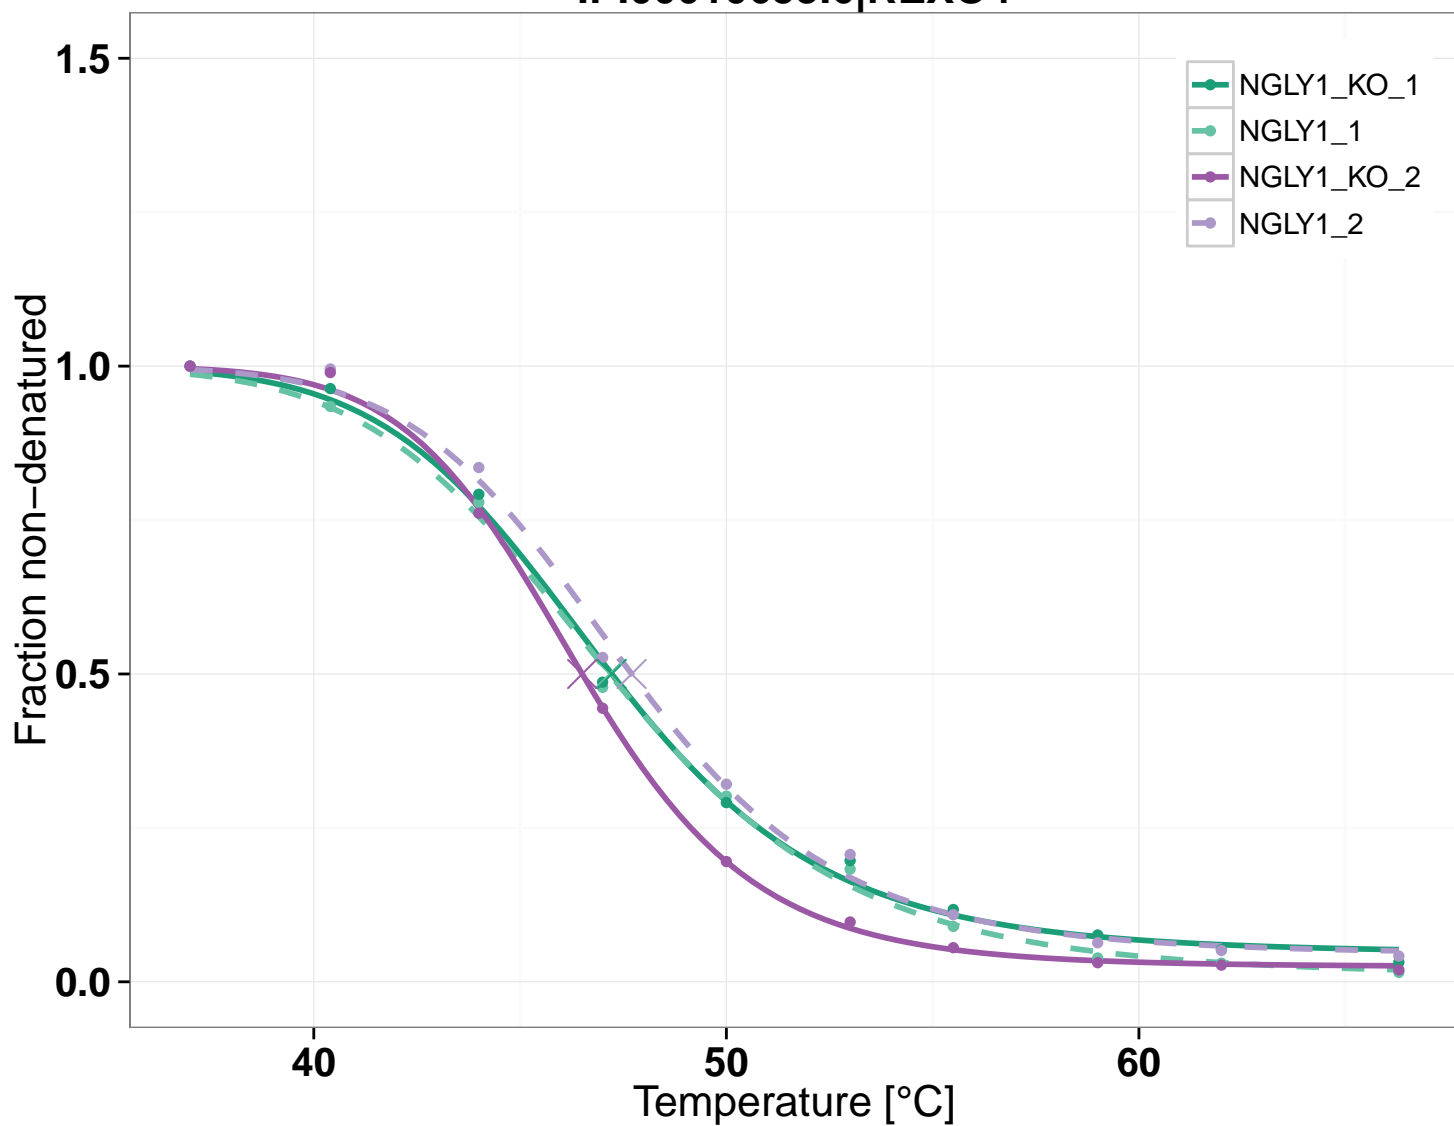

|            | meltPoint | slope  | plateau | R2 |
|------------|-----------|--------|---------|----|
| NGLY1_KO_1 | 47.22     | -0.089 | 0.05    | 1  |
| NGLY1_1    | 47.17     | -0.084 | 0.01    | 1  |
| NGLY1_KO_2 | 46.51     | -0.11  | 0.02    | 1  |
| NGLY1_2    | 47.7      | -0.092 | 0.04    | 1  |

Supplement: Supplementary file 1244 [file 1]

IPI00552369.1|WIPF1

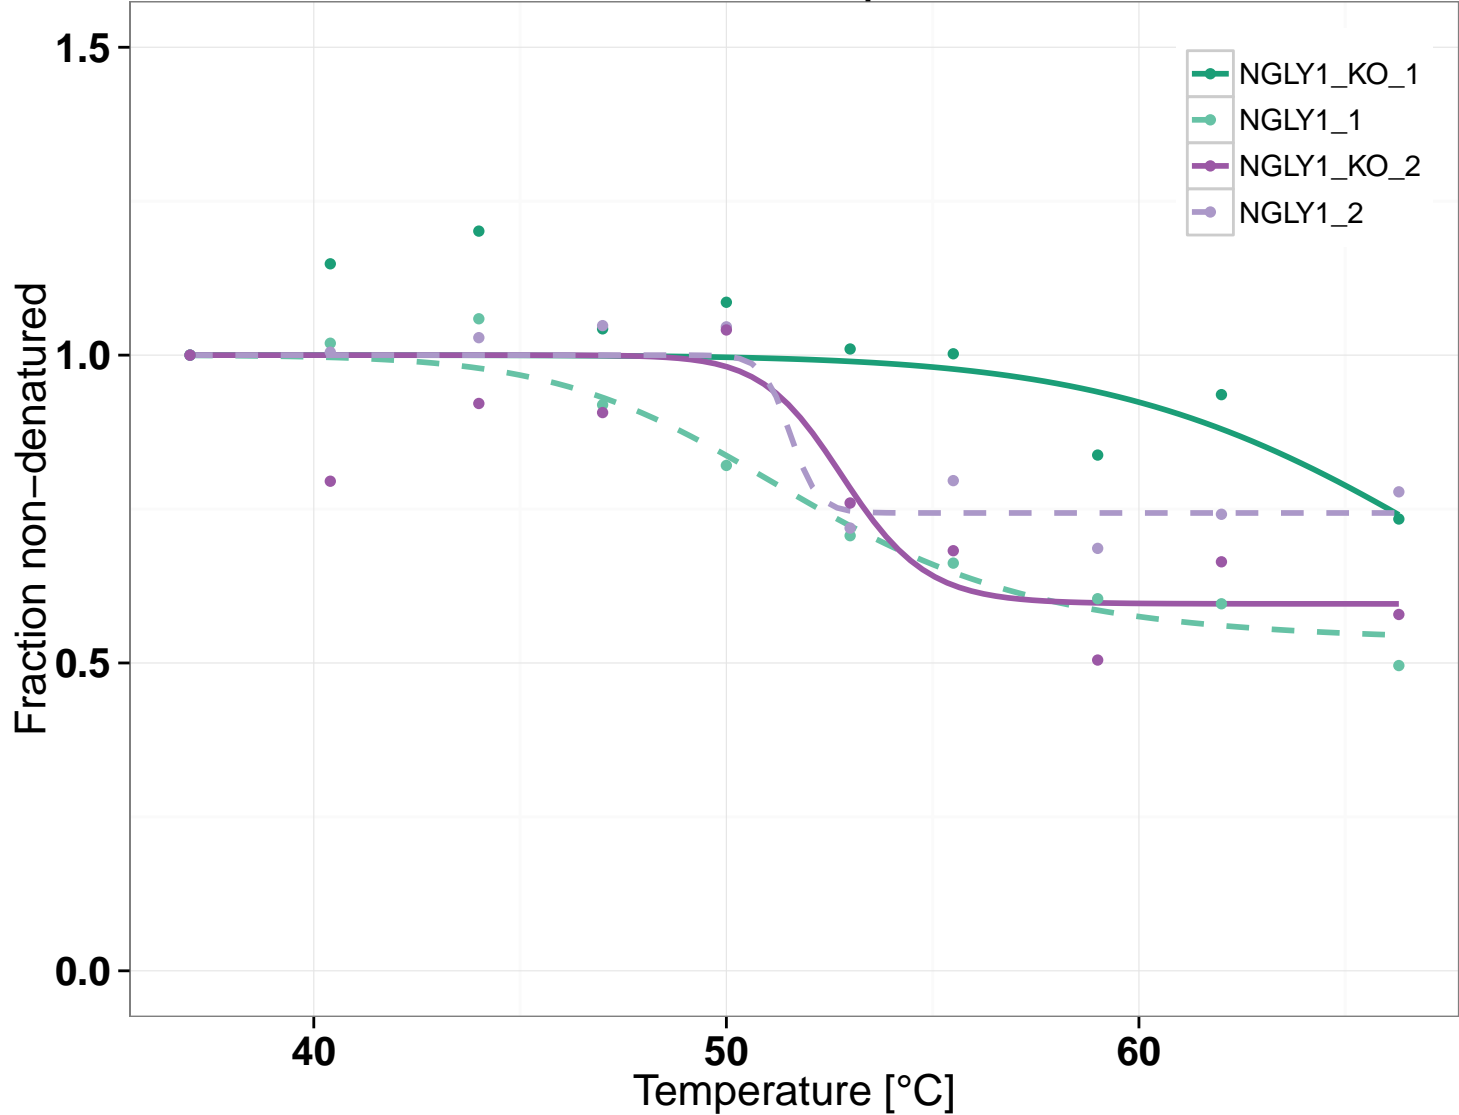

|            | meltPoint | slope  | plateau | R2   |
|------------|-----------|--------|---------|------|
| NGLY1_KO_1 | -         | -      | 0.19    | 0.5  |
| NGLY1_1    | -         | -0.039 | 0.53    | 0.97 |
| NGLY1_KO_2 | -         | -0.1   | 0.6     | 0.73 |
| NGLY1_2    | -         | -0.19  | 0.74    | 0.94 |

Supplement: Supplementary file 1245 [file 1]

IPI00216293.6|TST

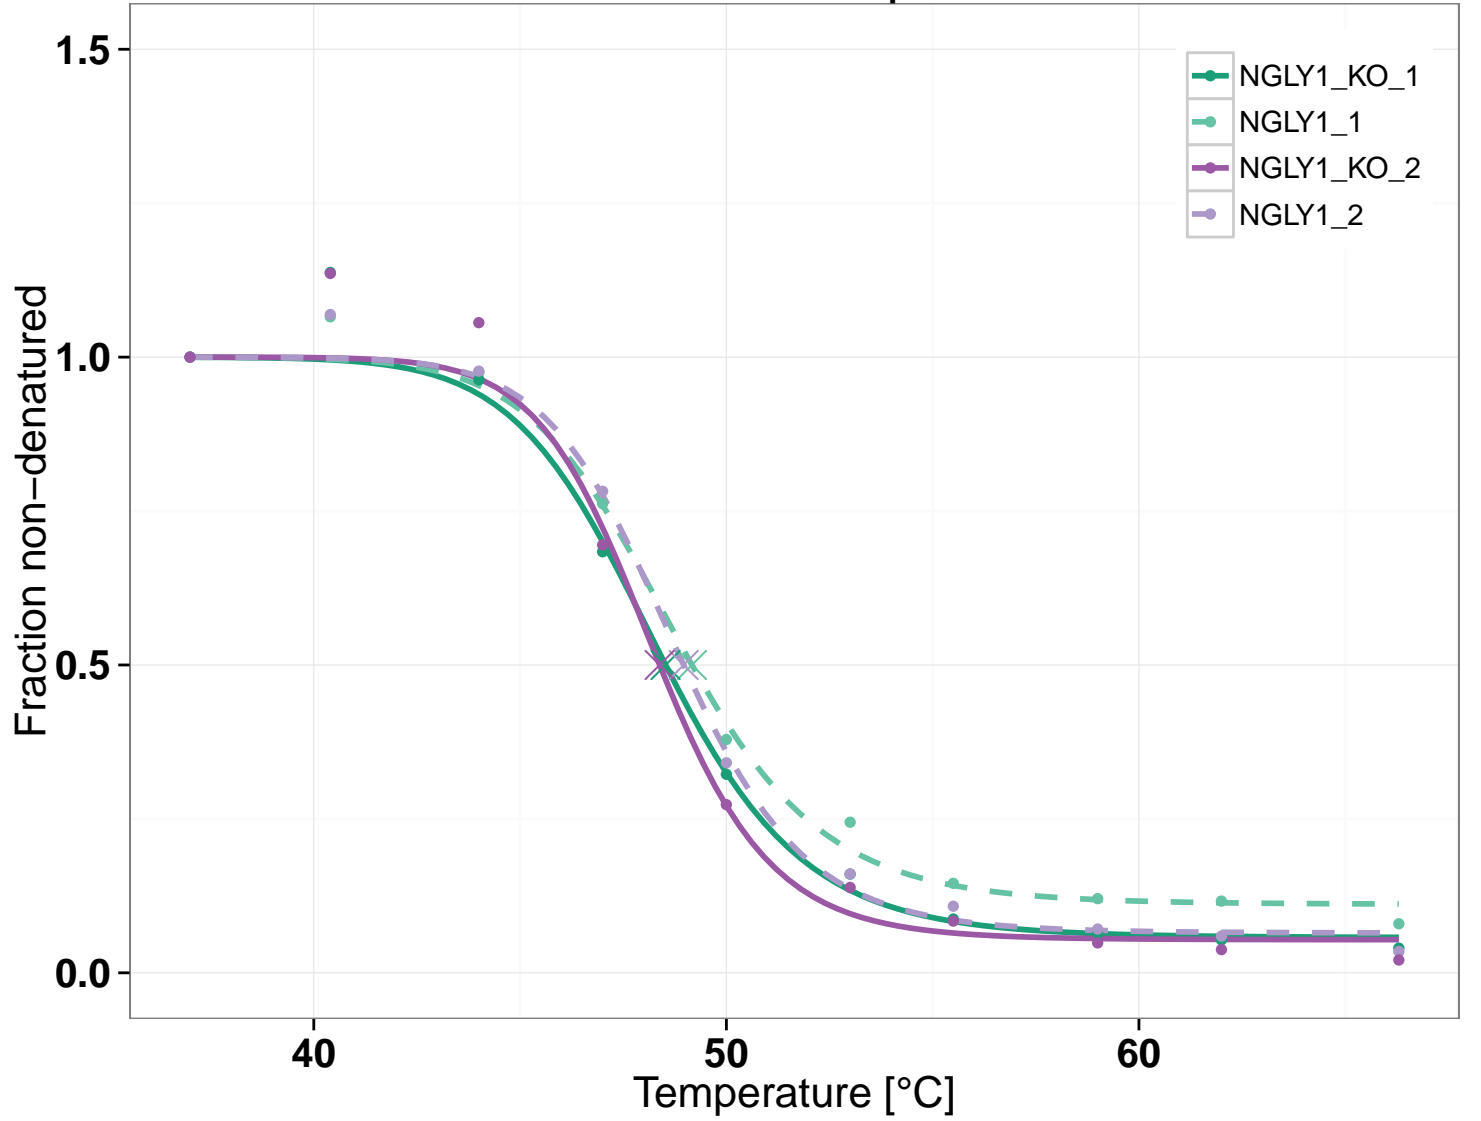

|            | meltPoint | slope | plateau | R2   |
|------------|-----------|-------|---------|------|
| NGLY1_KO_1 | 48.53     | -0.13 | 0.06    | 0.99 |
| NGLY1_1    | 49.17     | -0.12 | 0.11    | 0.99 |
| NGLY1_KO_2 | 48.38     | -0.17 | 0.05    | 0.98 |
| NGLY1_2    | 48.96     | -0.15 | 0.06    | 1    |

Supplement: Supplementary file 1246 [file 1]

# IPI00789155.1|CALU

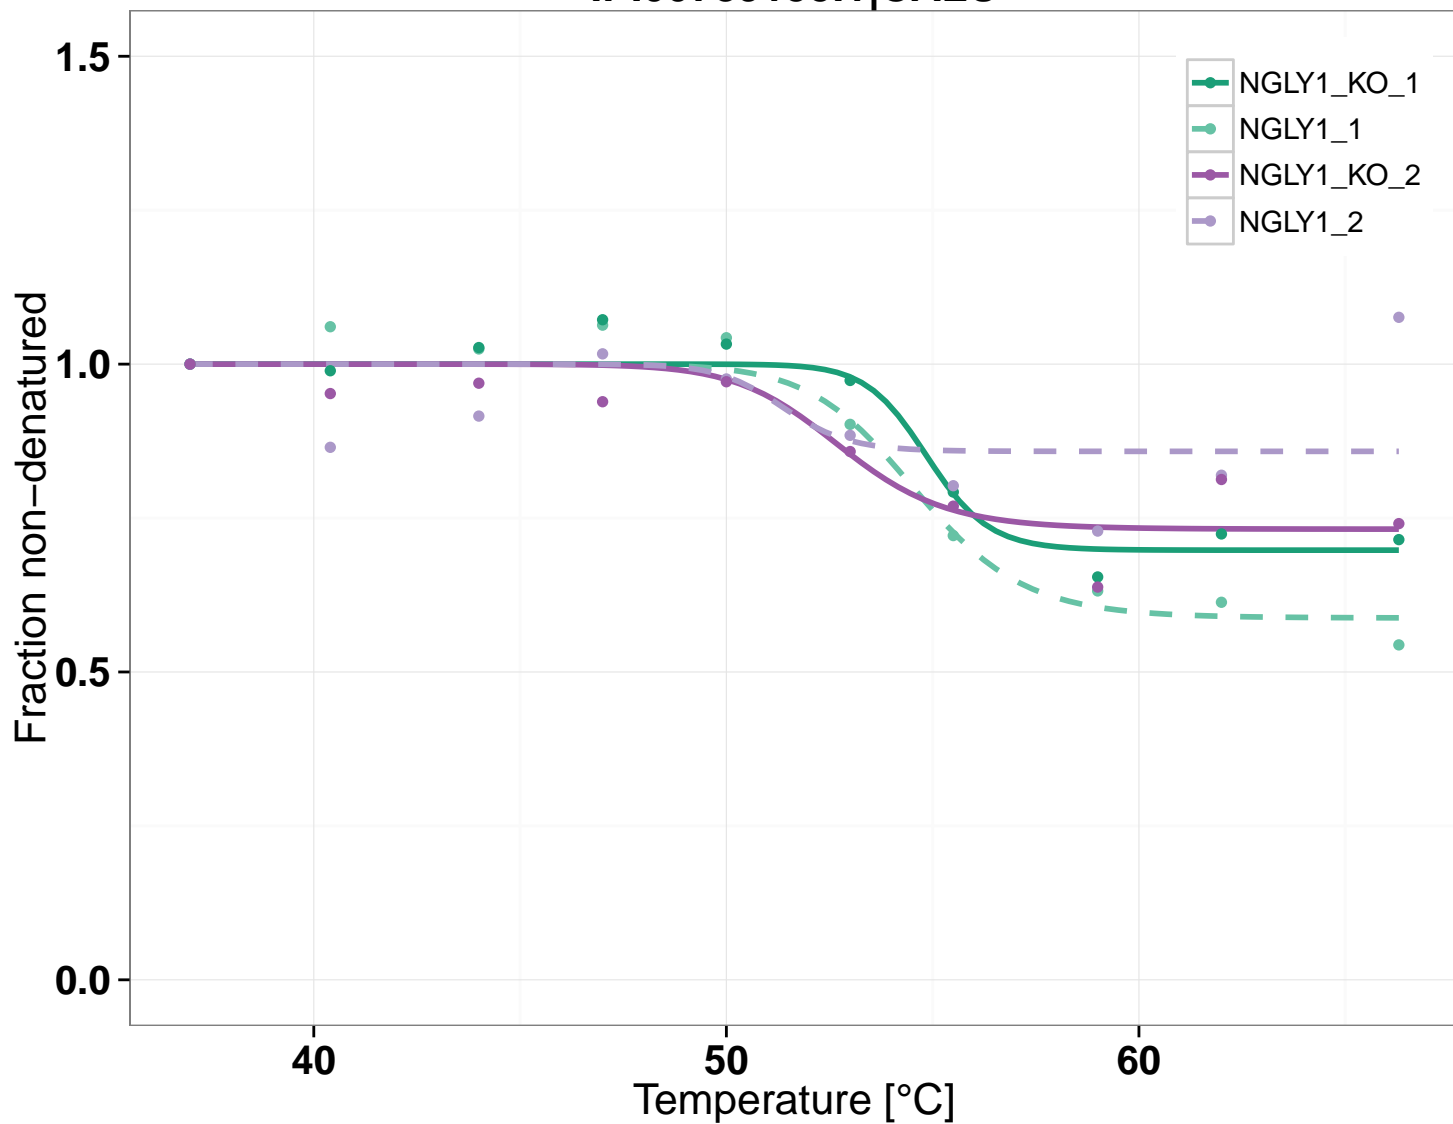

|            | meltPoint | slope  | plateau | R2   |
|------------|-----------|--------|---------|------|
| NGLY1_KO_1 | –         | –0.1   | 0.7     | 0.95 |
| NGLY1_1    | –         | –0.079 | 0.59    | 0.96 |
| NGLY1_KO_2 | –         | –0.053 | 0.73    | 0.83 |
| NGLY1_2    | –         | –0.045 | 0.86    | 0.11 |

Supplement: Supplementary file 1247 [file 1]

IPI00220232.1|EIF2B4

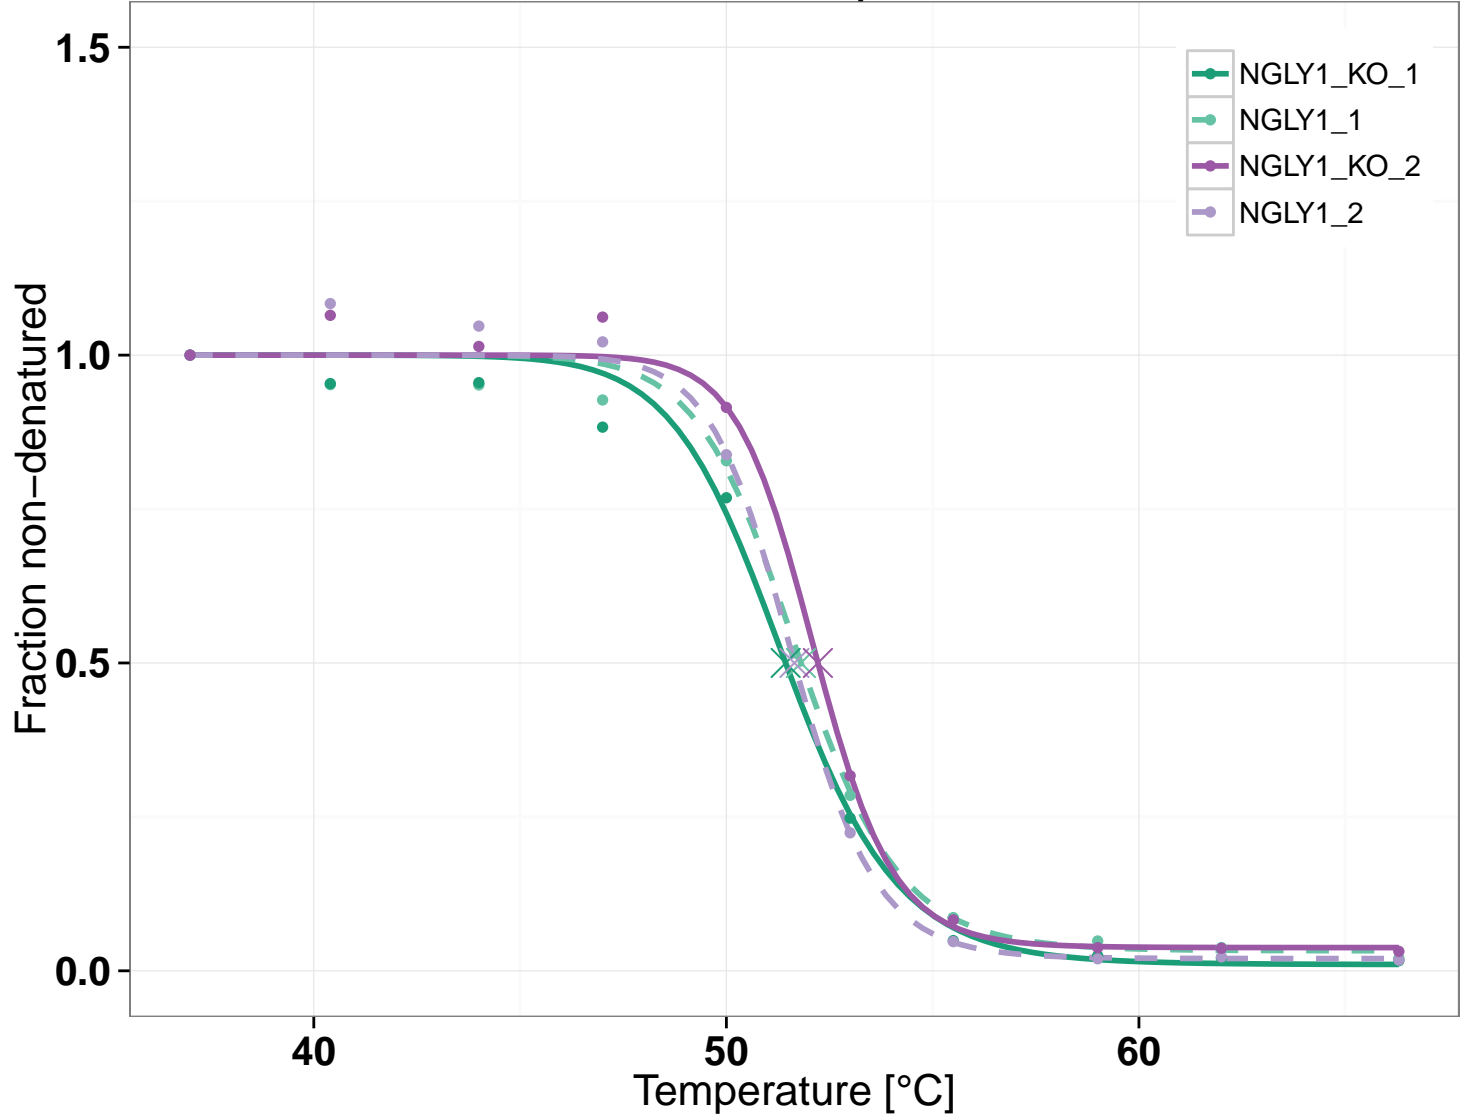

|            | meltPoint | slope | plateau | R2   |
|------------|-----------|-------|---------|------|
| NGLY1_KO_1 | 51.44     | -0.18 | 0.01    | 0.99 |
| NGLY1_1    | 51.81     | -0.2  | 0.03    | 1    |
| NGLY1_KO_2 | 52.22     | -0.25 | 0.04    | 1    |
| NGLY1_2    | 51.65     | -0.24 | 0.02    | 1    |

Supplement: Supplementary file 1248 [file 1]

IPI00470483.10|WDR62

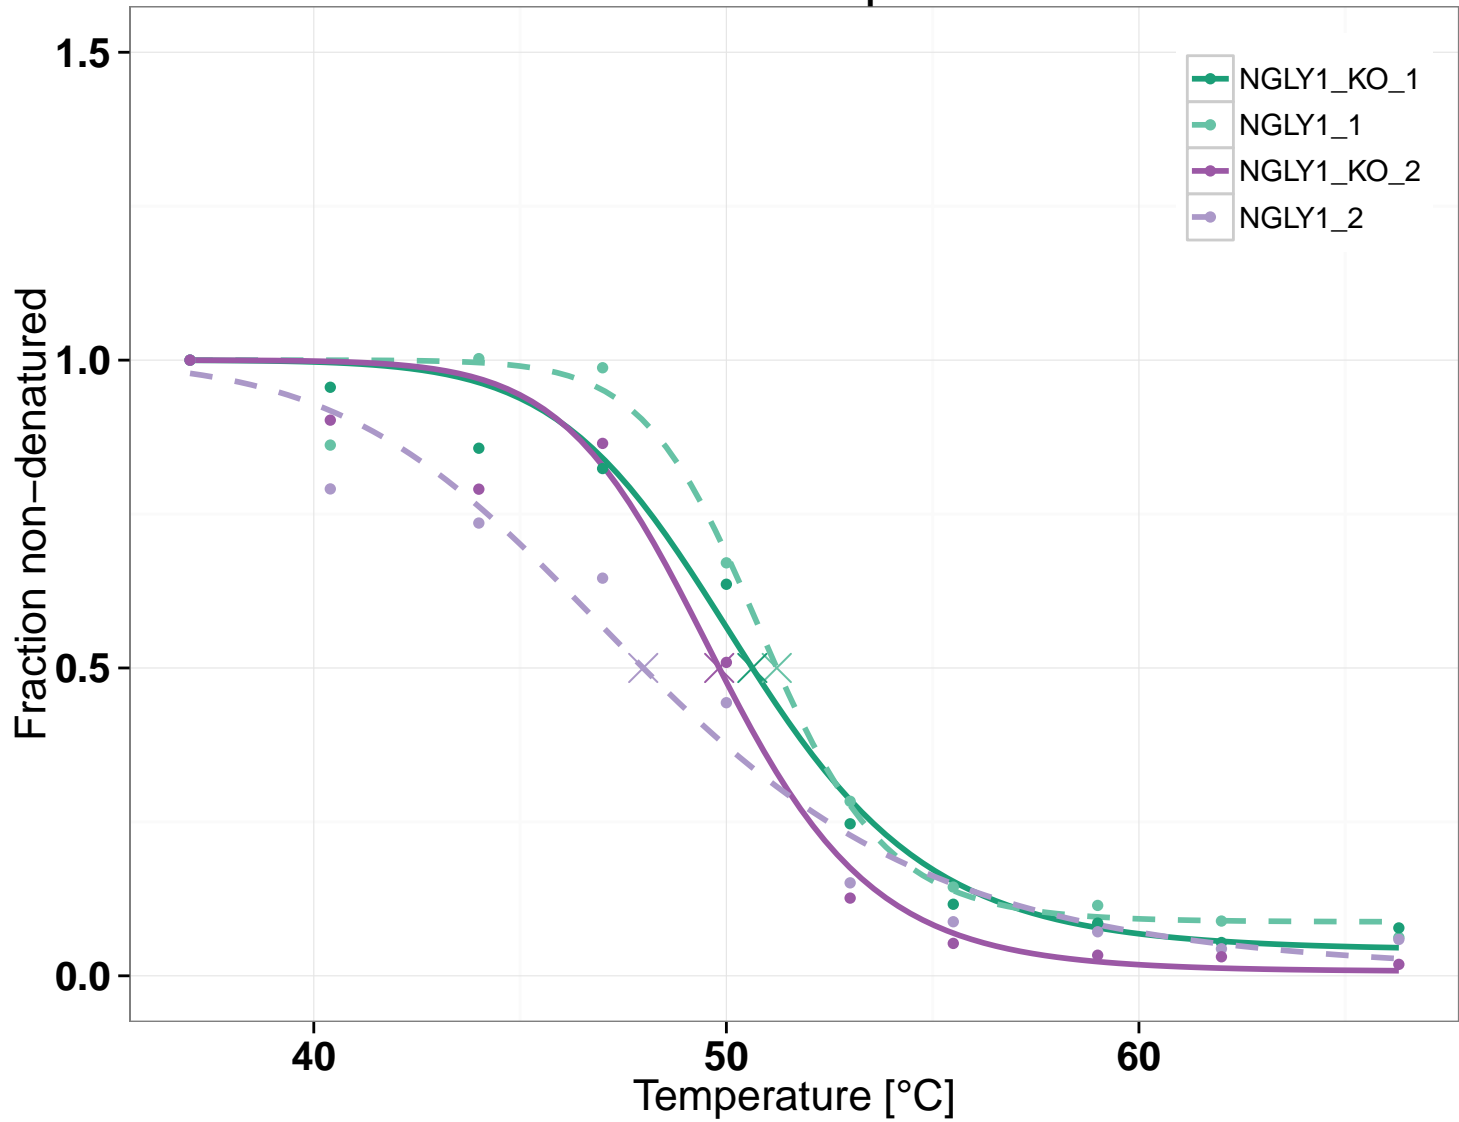

|            | meltPoint | slope  | plateau | R2   |
|------------|-----------|--------|---------|------|
| NGLY1_KO_1 | 50.63     | -0.11  | 0.04    | 0.98 |
| NGLY1_1    | 51.22     | -0.15  | 0.09    | 0.99 |
| NGLY1_KO_2 | 49.83     | -0.13  | 0.01    | 0.97 |
| NGLY1_2    | 47.98     | -0.069 | 0       | 0.97 |

Supplement: Supplementary file 1249 [file 1]

# IPI00023138.1|RAC3

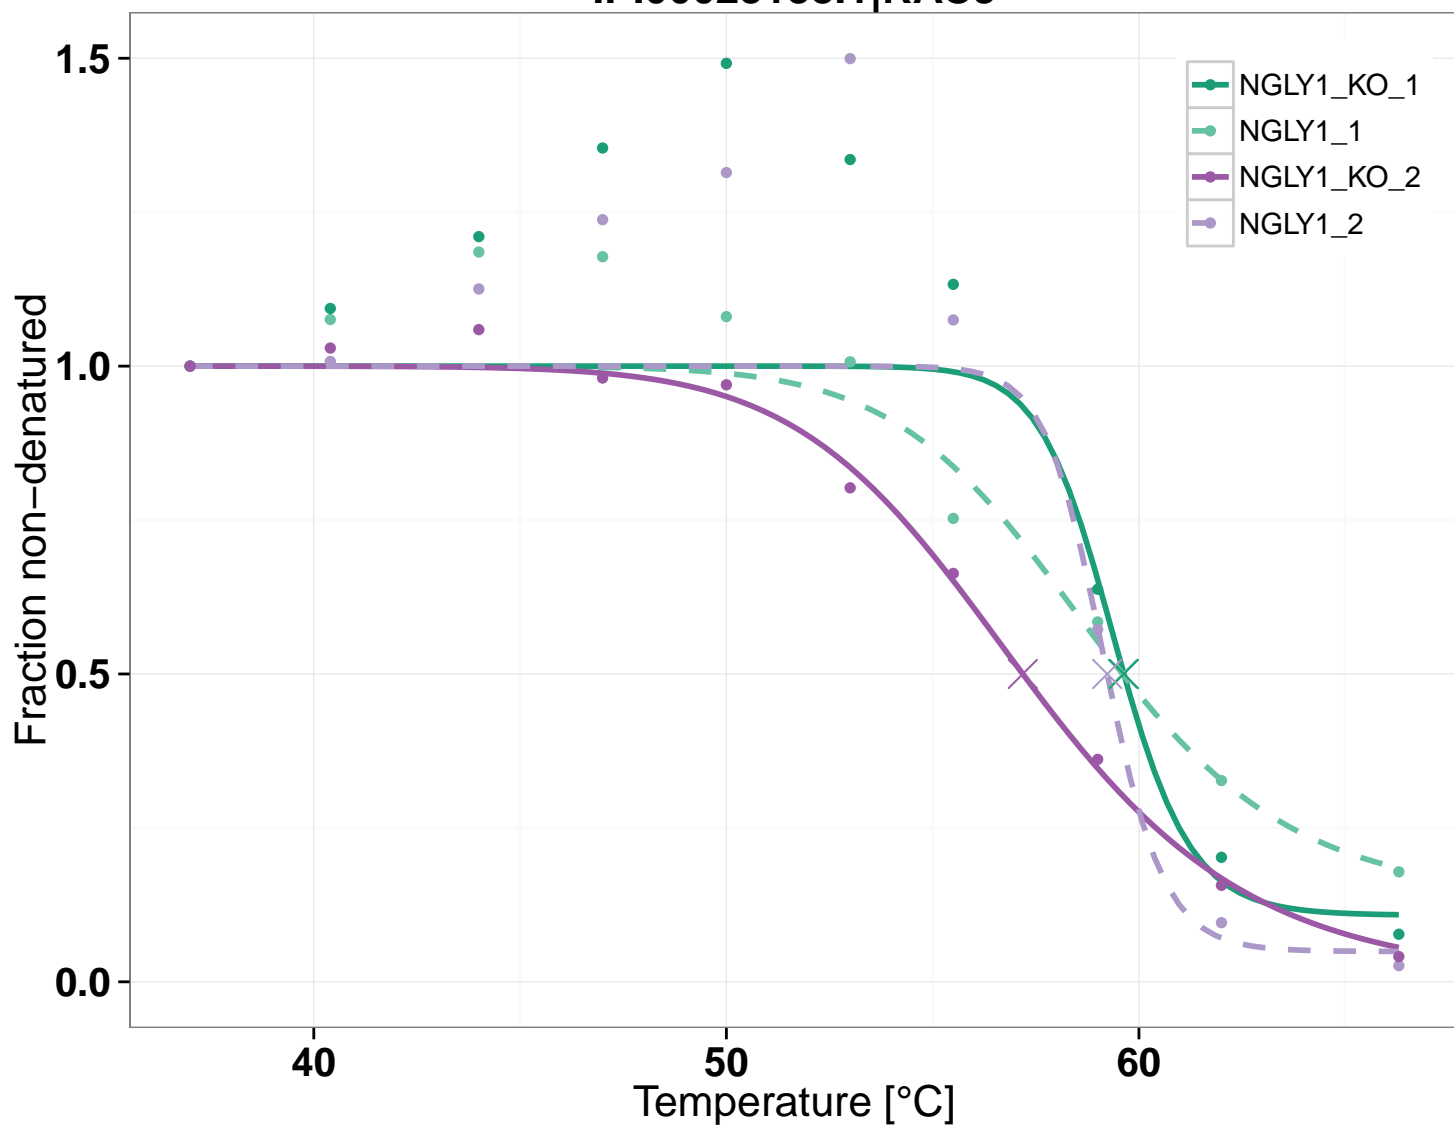

|            | meltPoint | slope  | plateau | R2   |
|------------|-----------|--------|---------|------|
| NGLY1_KO_1 | 59.64     | -0.24  | 0.11    | 0.74 |
| NGLY1_1    | 59.6      | -0.09  | 0.13    | 0.92 |
| NGLY1_KO_2 | 57.19     | -0.091 | 0       | 0.99 |
| NGLY1_2    | 59.23     | -0.33  | 0.05    | 0.81 |

Supplement: Supplementary file 1250 [file 1]

IPI00790489.2|RNF10

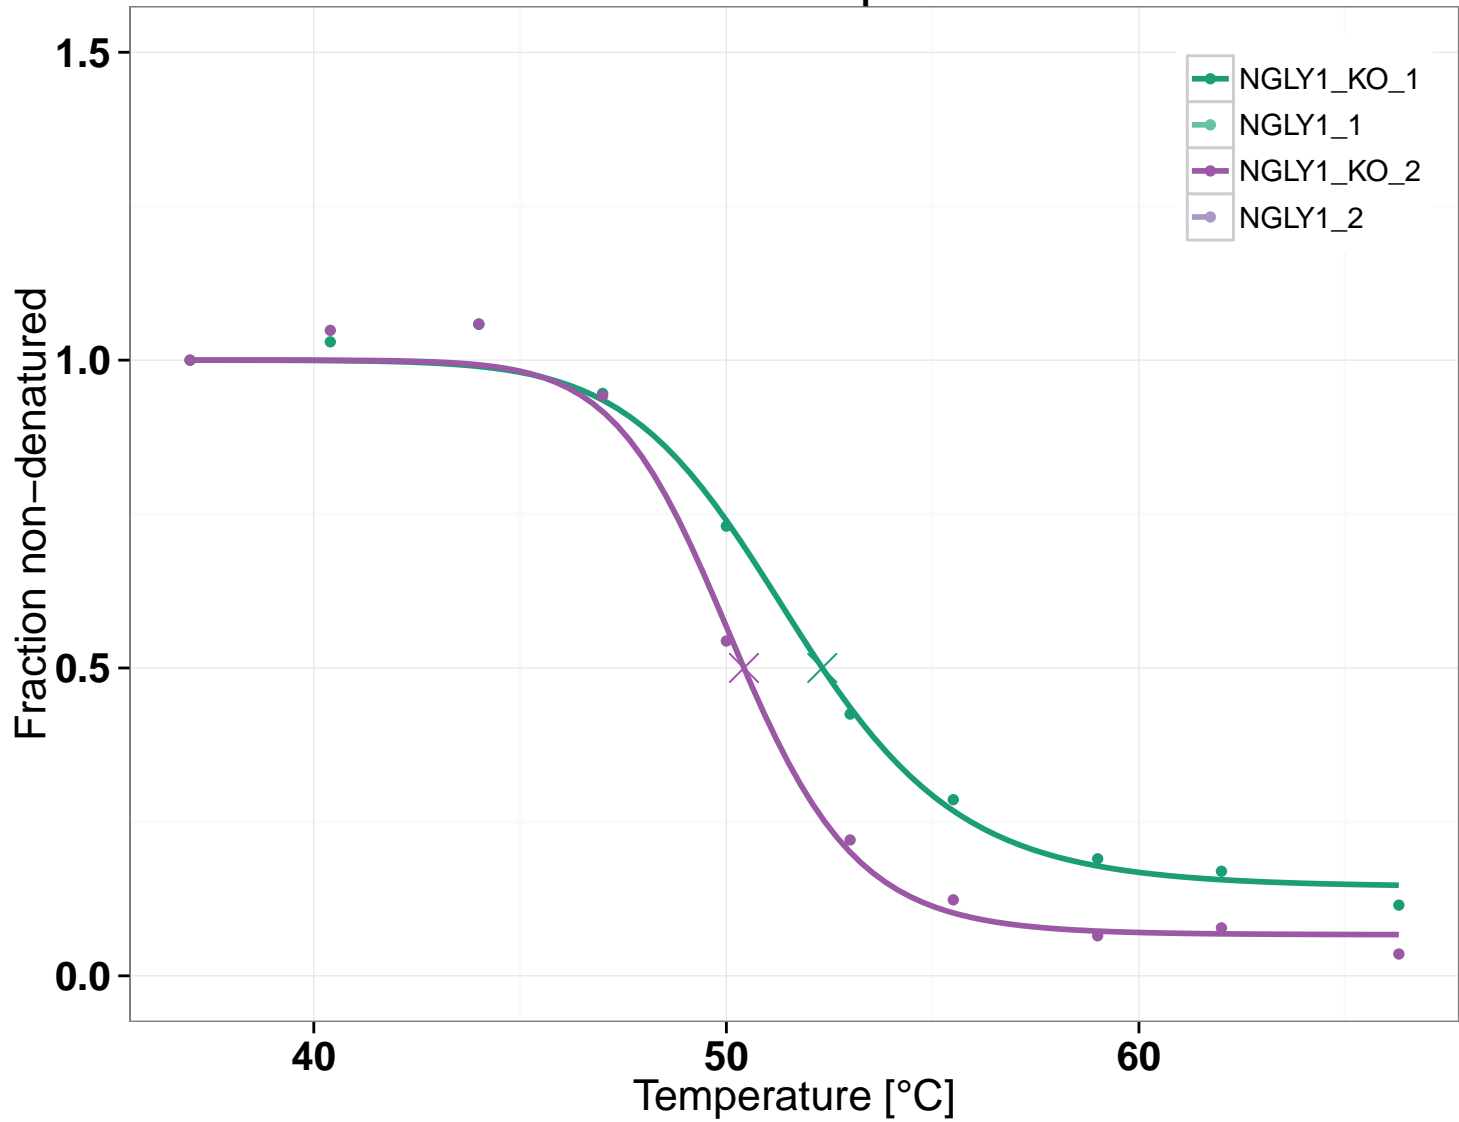

|            | meltPoint | slope | plateau | R2   |
|------------|-----------|-------|---------|------|
| NGLY1_KO_1 | 52.32     | -0.11 | 0.14    | 0.99 |
| NGLY1_1    | -         | -     | -       | -    |
| NGLY1_KO_2 | 50.43     | -0.16 | 0.07    | 0.99 |
| NGLY1_2    | -         | -     | -       | -    |

Supplement: Supplementary file 1251 [file 1]

IPI00103940.4|MFSD10

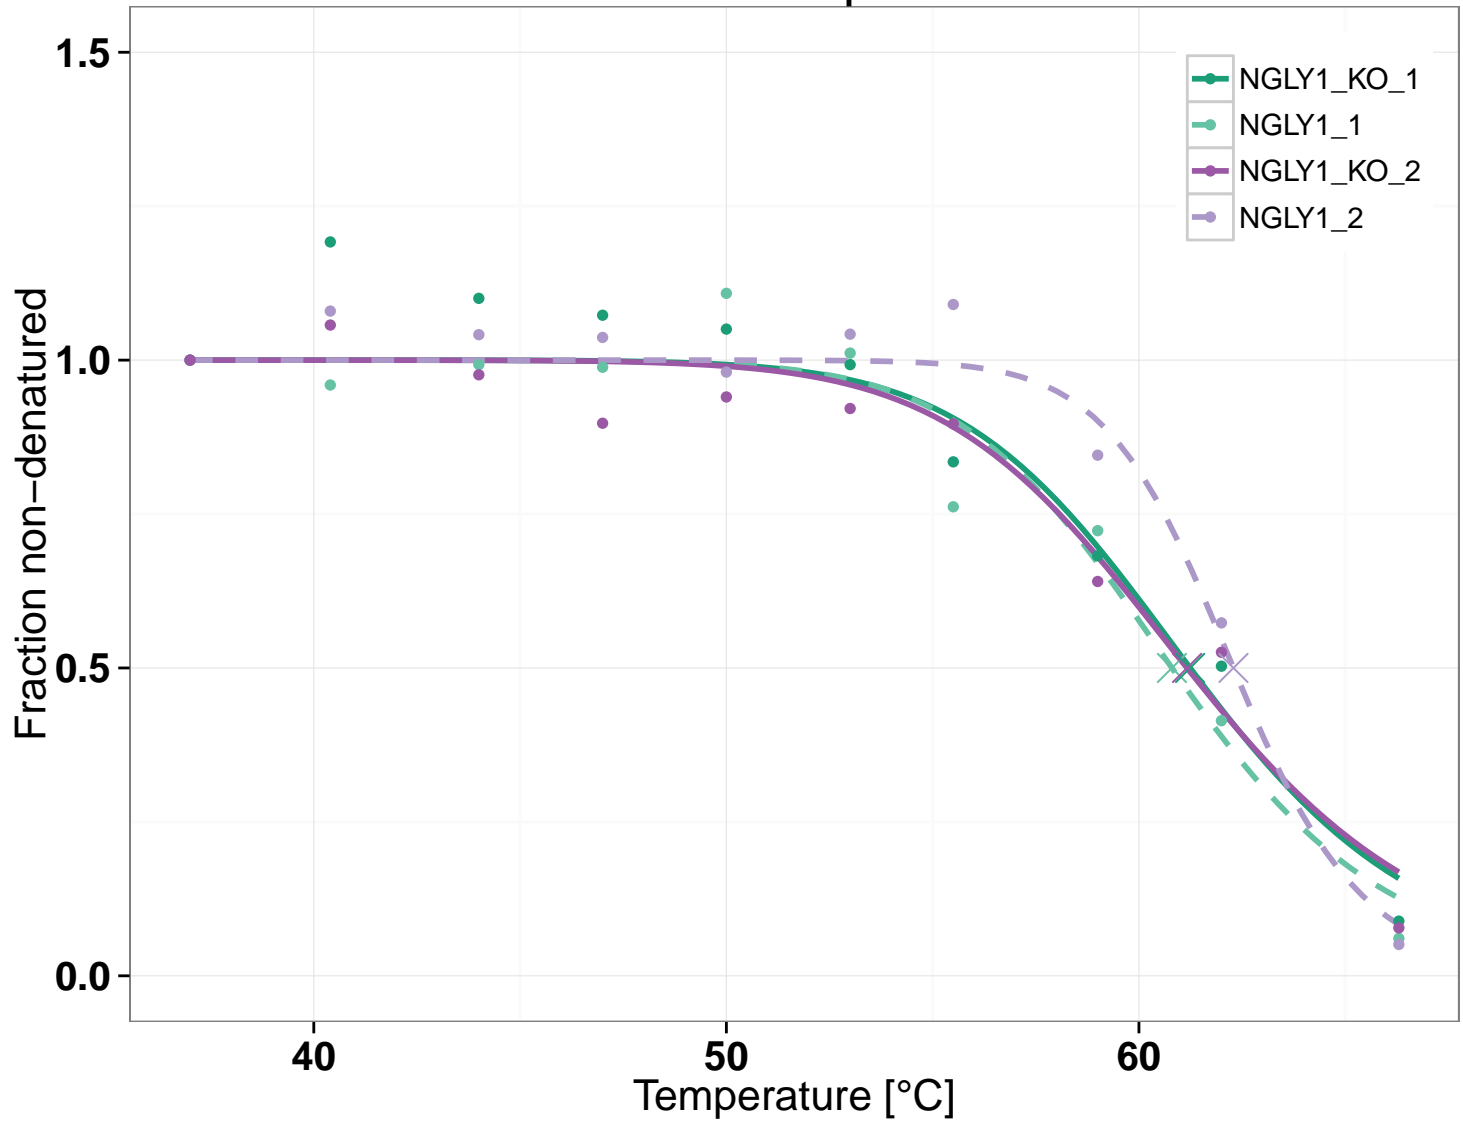

|            | meltPoint | slope  | plateau | R2   |
|------------|-----------|--------|---------|------|
| NGLY1_KO_1 | 61.24     | -0.09  | 0       | 0.93 |
| NGLY1_1    | 60.8      | -0.097 | 0       | 0.95 |
| NGLY1_KO_2 | 61.17     | -0.085 | 0       | 0.95 |
| NGLY1_2    | 62.29     | -0.16  | 0       | 0.97 |

Supplement: Supplementary file 1252 [file 1]

IPI00375207.6|GRID2IP

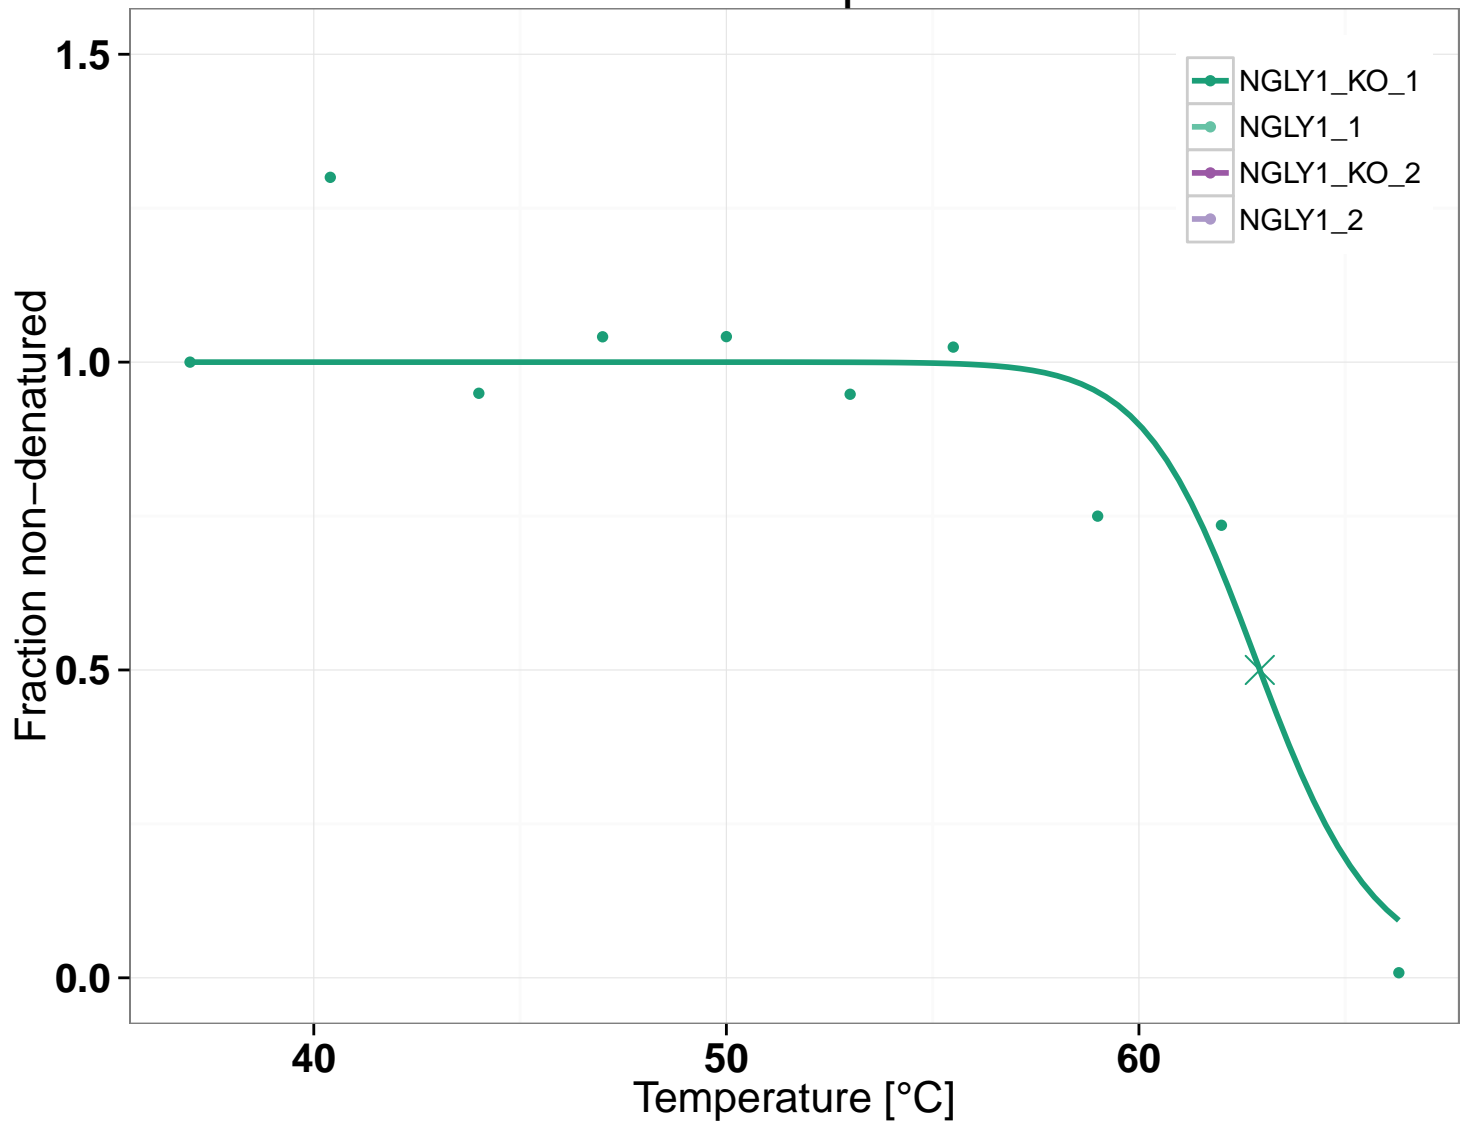

|            | meltPoint | slope | plateau | R2   |
|------------|-----------|-------|---------|------|
| NGLY1_KO_1 | 62.93     | -0.18 | 0       | 0.86 |
| NGLY1_1    | -         | -     | -       | -    |
| NGLY1_KO_2 | -         | -     | -       | -    |
| NGLY1_2    | -         | -     | -       | -    |

Supplement: Supplementary file 1253 [file 1]

IPI00000171.1|TSC22D4

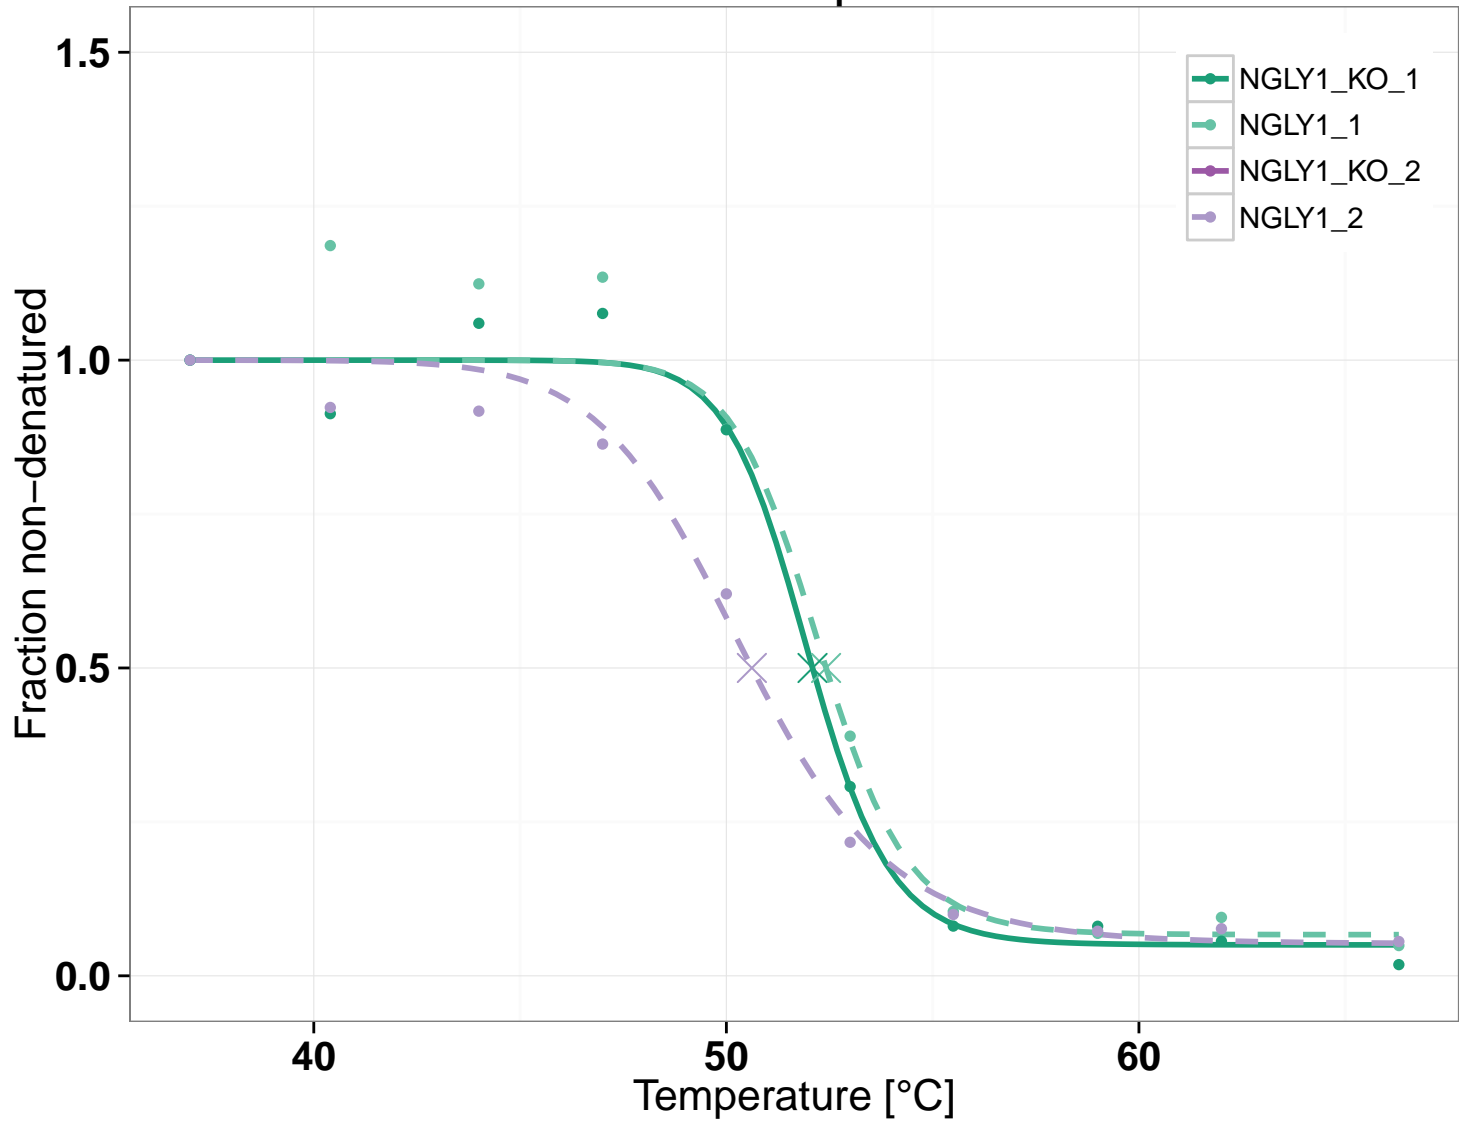

|            | meltPoint | slope | plateau | R2   |
|------------|-----------|-------|---------|------|
| NGLY1_KO_1 | 52.09     | -0.24 | 0.05    | 0.99 |
| NGLY1_1    | 52.42     | -0.22 | 0.07    | 0.97 |
| NGLY1_KO_2 | -         | -     | -       | -    |
| NGLY1_2    | 50.62     | -0.13 | 0.05    | 0.99 |

Supplement: Supplementary file 1254 [file 1]

IPI00335251.3|DUS1L

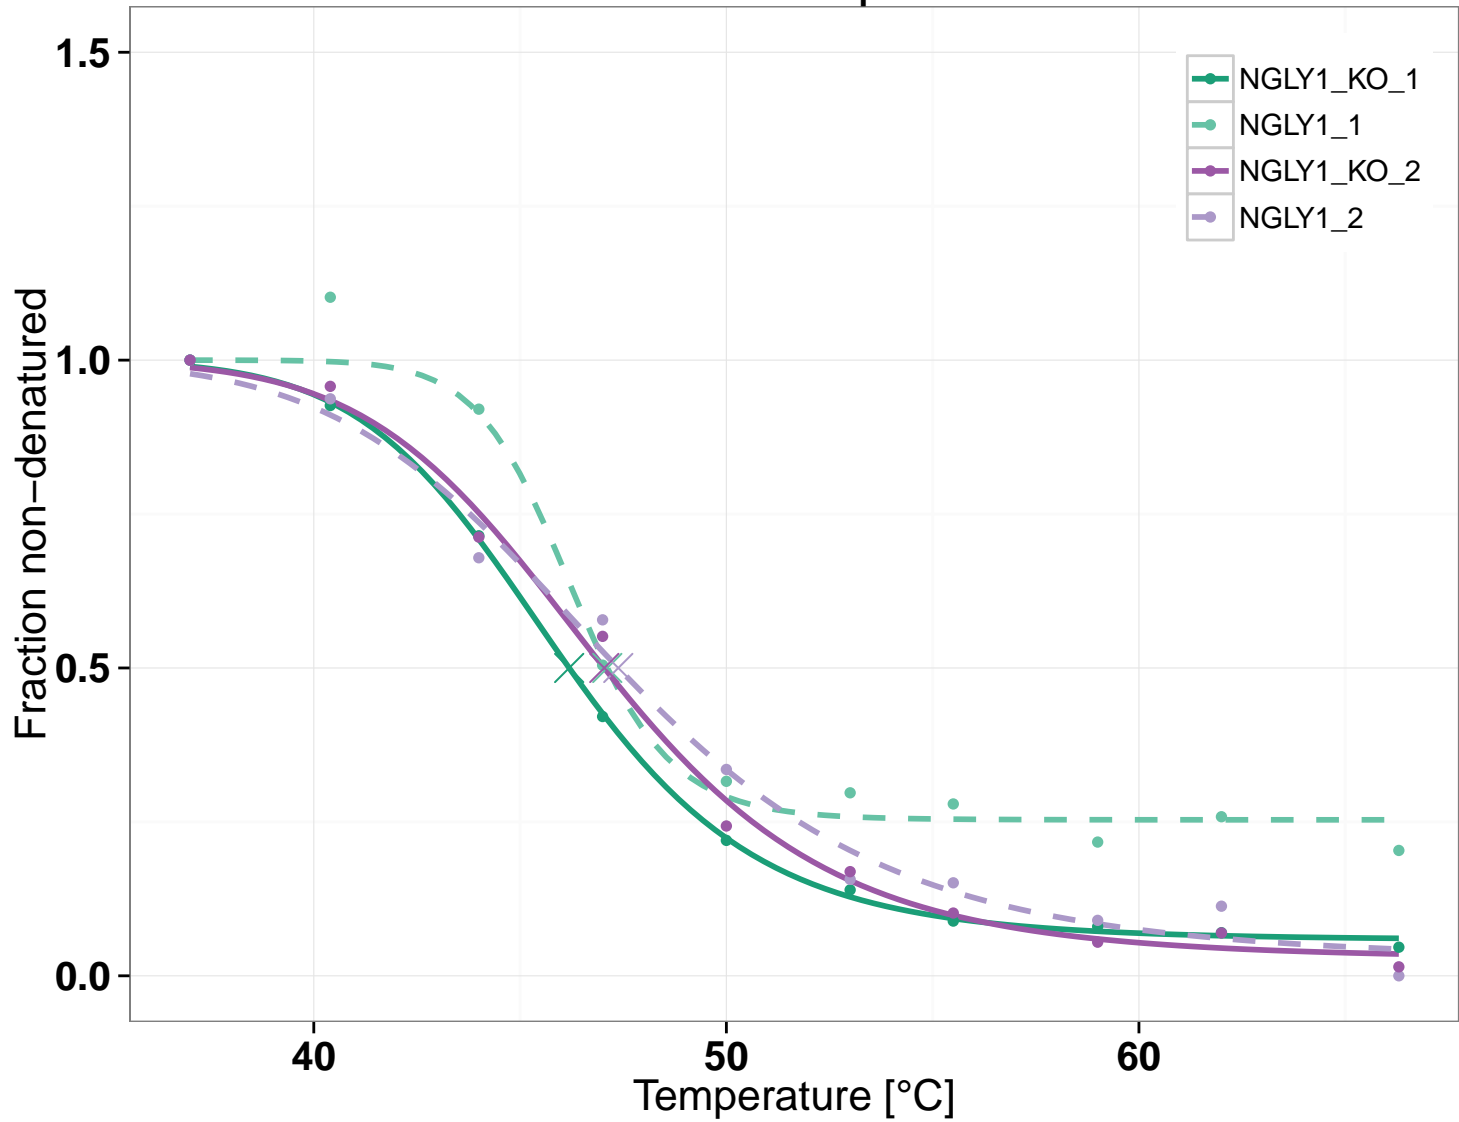

|            | meltPoint | slope  | plateau | R2   |
|------------|-----------|--------|---------|------|
| NGLY1_KO_1 | 46.19     | -0.097 | 0.06    | 1    |
| NGLY1_1    | 47.11     | -0.16  | 0.25    | 0.98 |
| NGLY1_KO_2 | 47.04     | -0.086 | 0.03    | 0.99 |
| NGLY1_2    | 47.38     | -0.072 | 0.02    | 0.99 |

Supplement: Supplementary file 1255 [file 1]

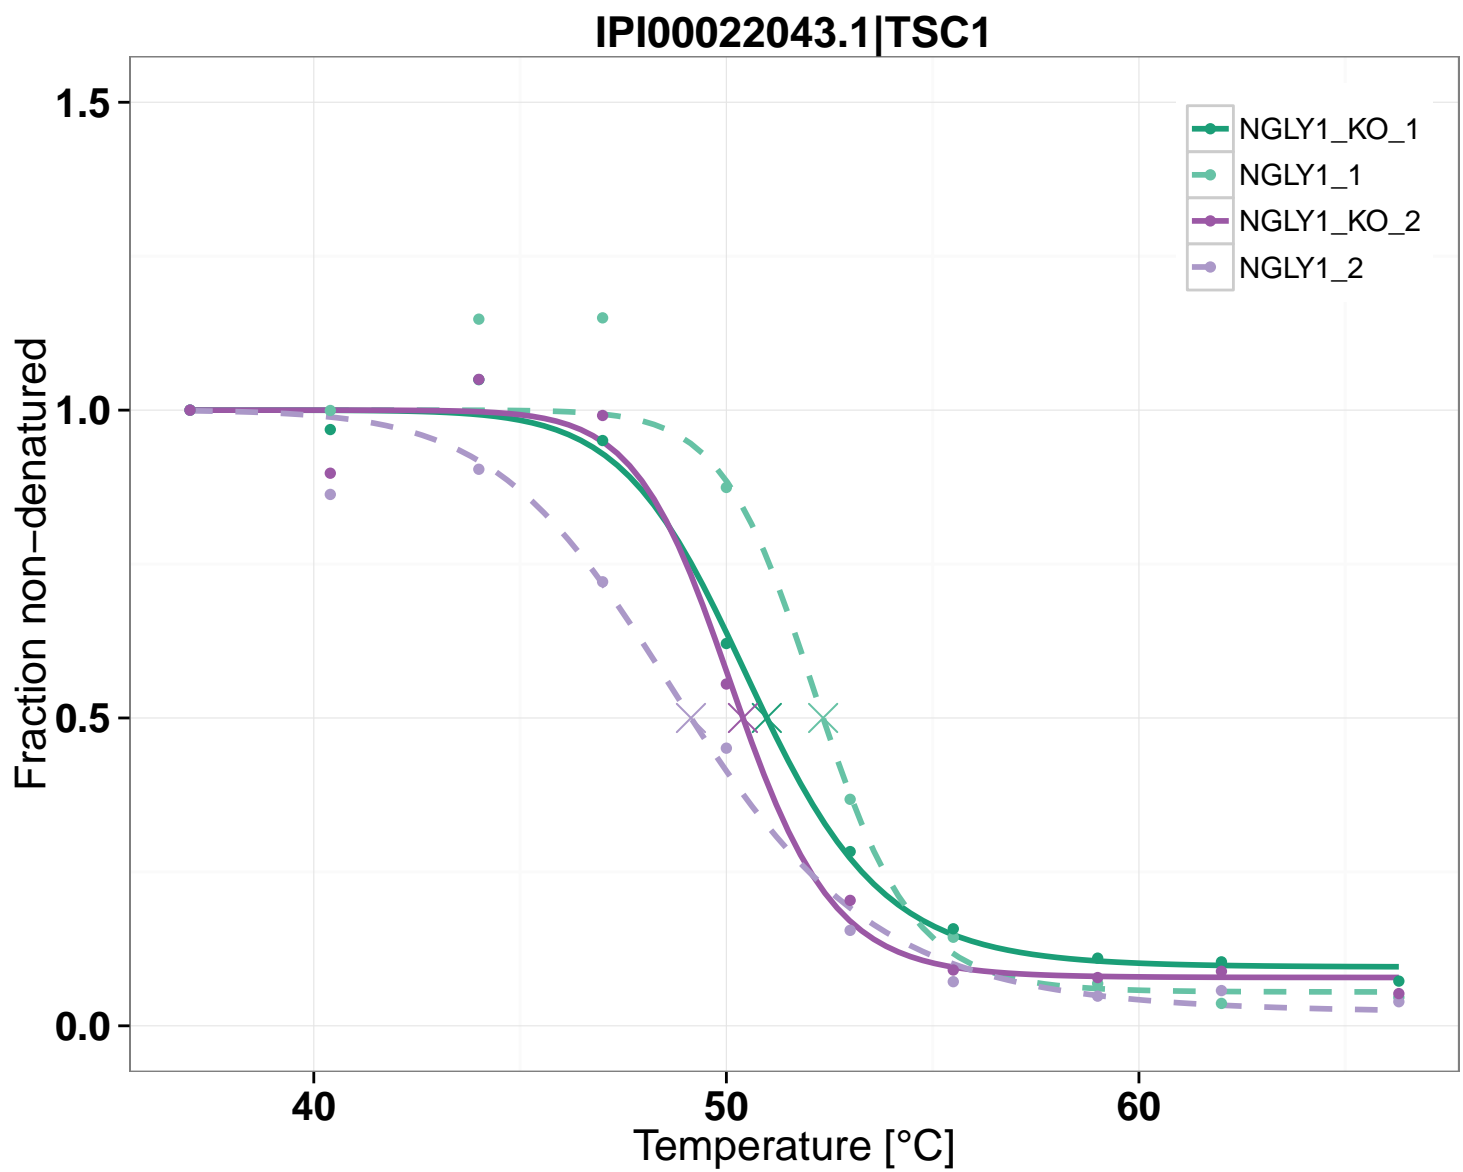

|            | meltPoint | slope | plateau | R2   |
|------------|-----------|-------|---------|------|
| NGLY1_KO_1 | 50.98     | -0.14 | 0.1     | 1    |
| NGLY1_1    | 52.35     | -0.2  | 0.05    | 0.98 |
| NGLY1_KO_2 | 50.4      | -0.19 | 0.08    | 0.99 |
| NGLY1_2    | 49.14     | -0.11 | 0.02    | 0.99 |

Supplement: Supplementary file 1256 [file 1]

IPI00410663.1|ZDHHC13

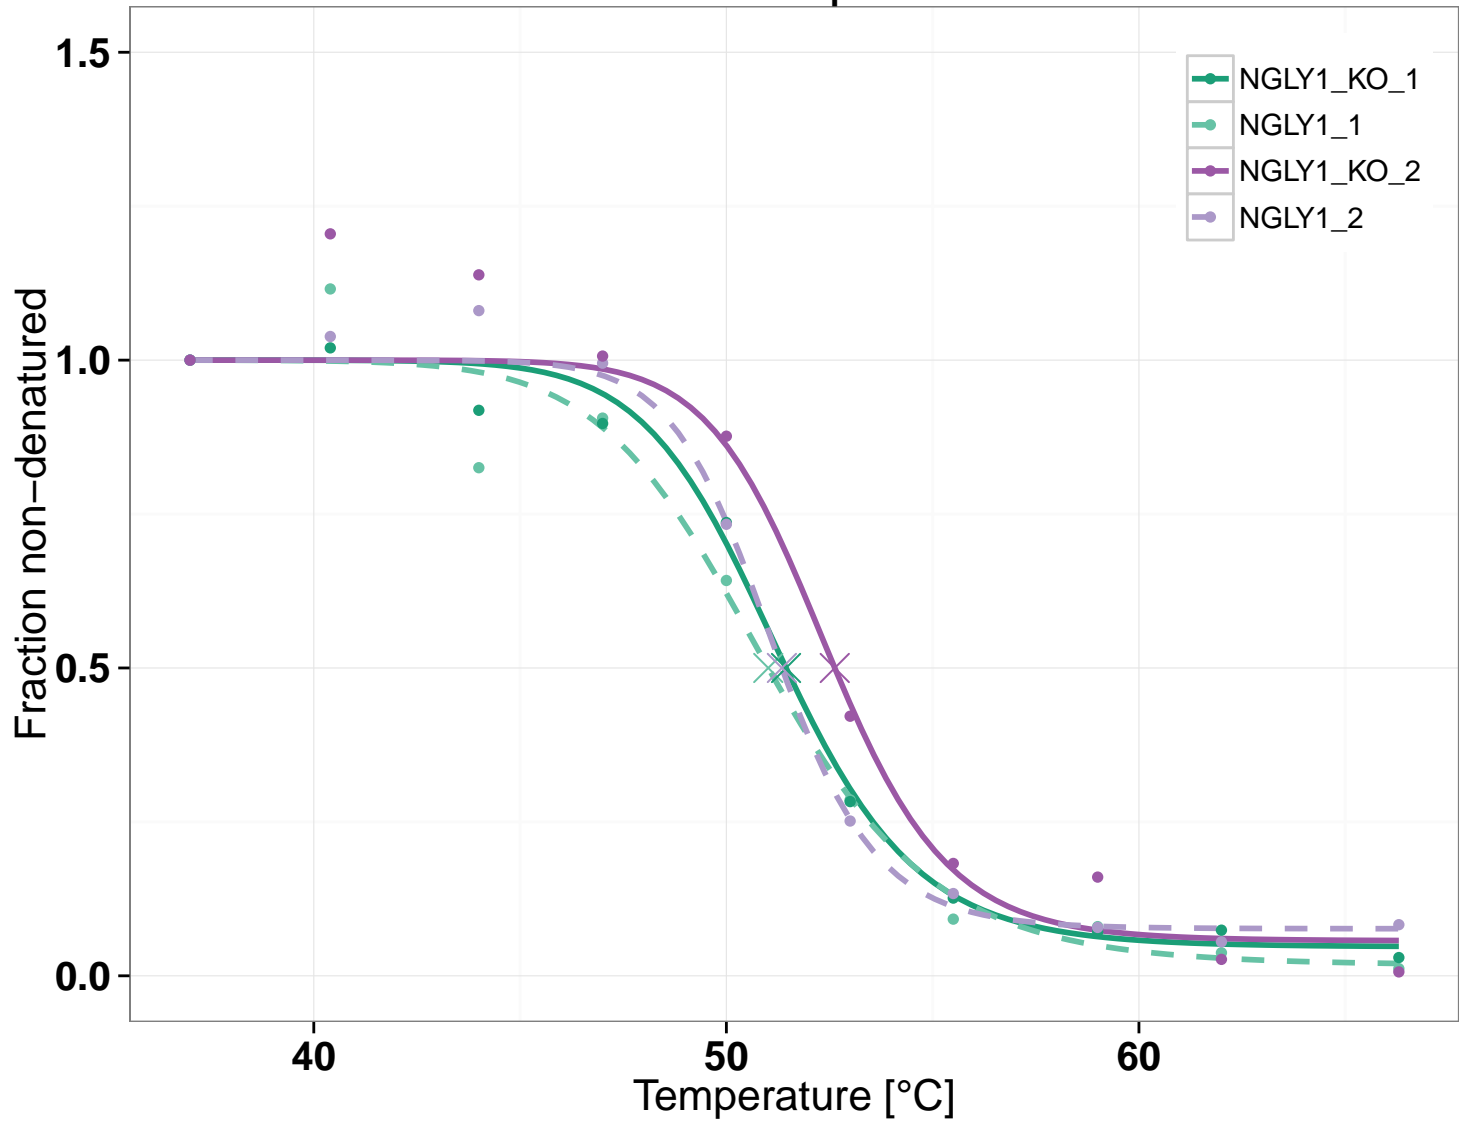

|            | meltPoint | slope | plateau | R2   |
|------------|-----------|-------|---------|------|
| NGLY1_KO_1 | 51.45     | -0.14 | 0.05    | 0.99 |
| NGLY1_1    | 51.02     | -0.12 | 0.02    | 0.98 |
| NGLY1_KO_2 | 52.63     | -0.16 | 0.06    | 0.97 |
| NGLY1_2    | 51.35     | -0.18 | 0.08    | 0.99 |

Supplement: Supplementary file 1257 [file 1]

# IPI00004344.1|AFF4

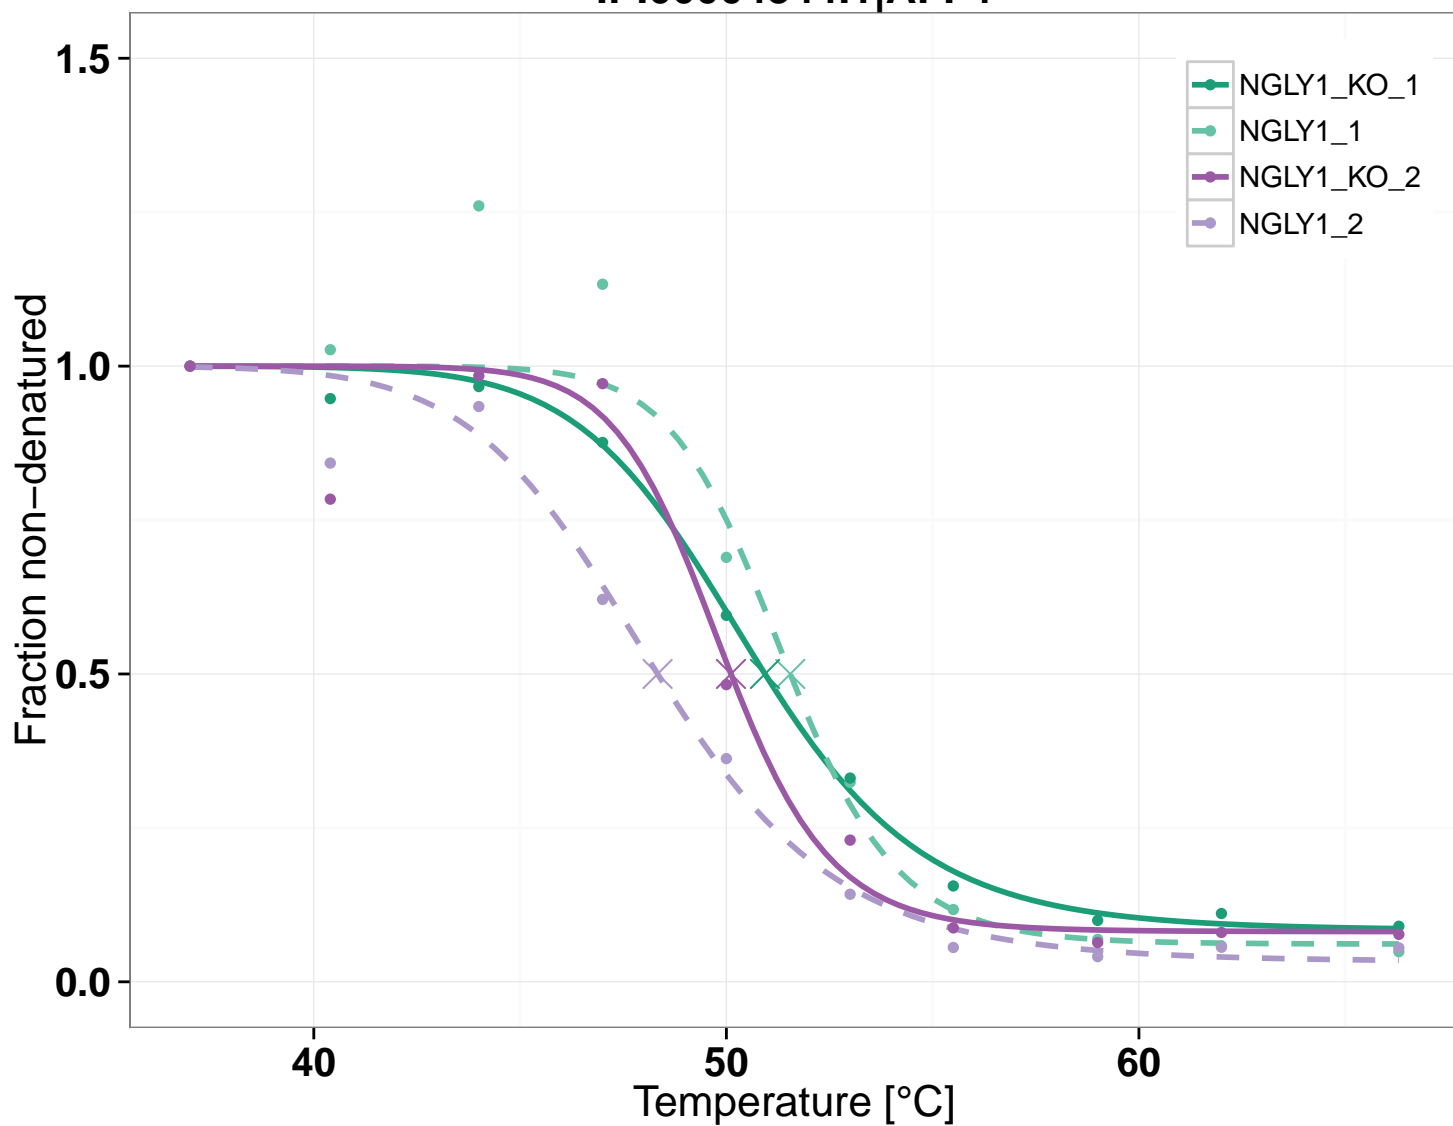

|            | meltPoint | slope | plateau | R2   |
|------------|-----------|-------|---------|------|
| NGLY1_KO_1 | 50.94     | -0.11 | 0.08    | 1    |
| NGLY1_1    | 51.55     | -0.17 | 0.06    | 0.96 |
| NGLY1_KO_2 | 50.11     | -0.18 | 0.08    | 0.96 |
| NGLY1_2    | 48.33     | -0.11 | 0.03    | 0.98 |

Supplement: Supplementary file 1258 [file 1]

IPI00056505.6|NT5C3L

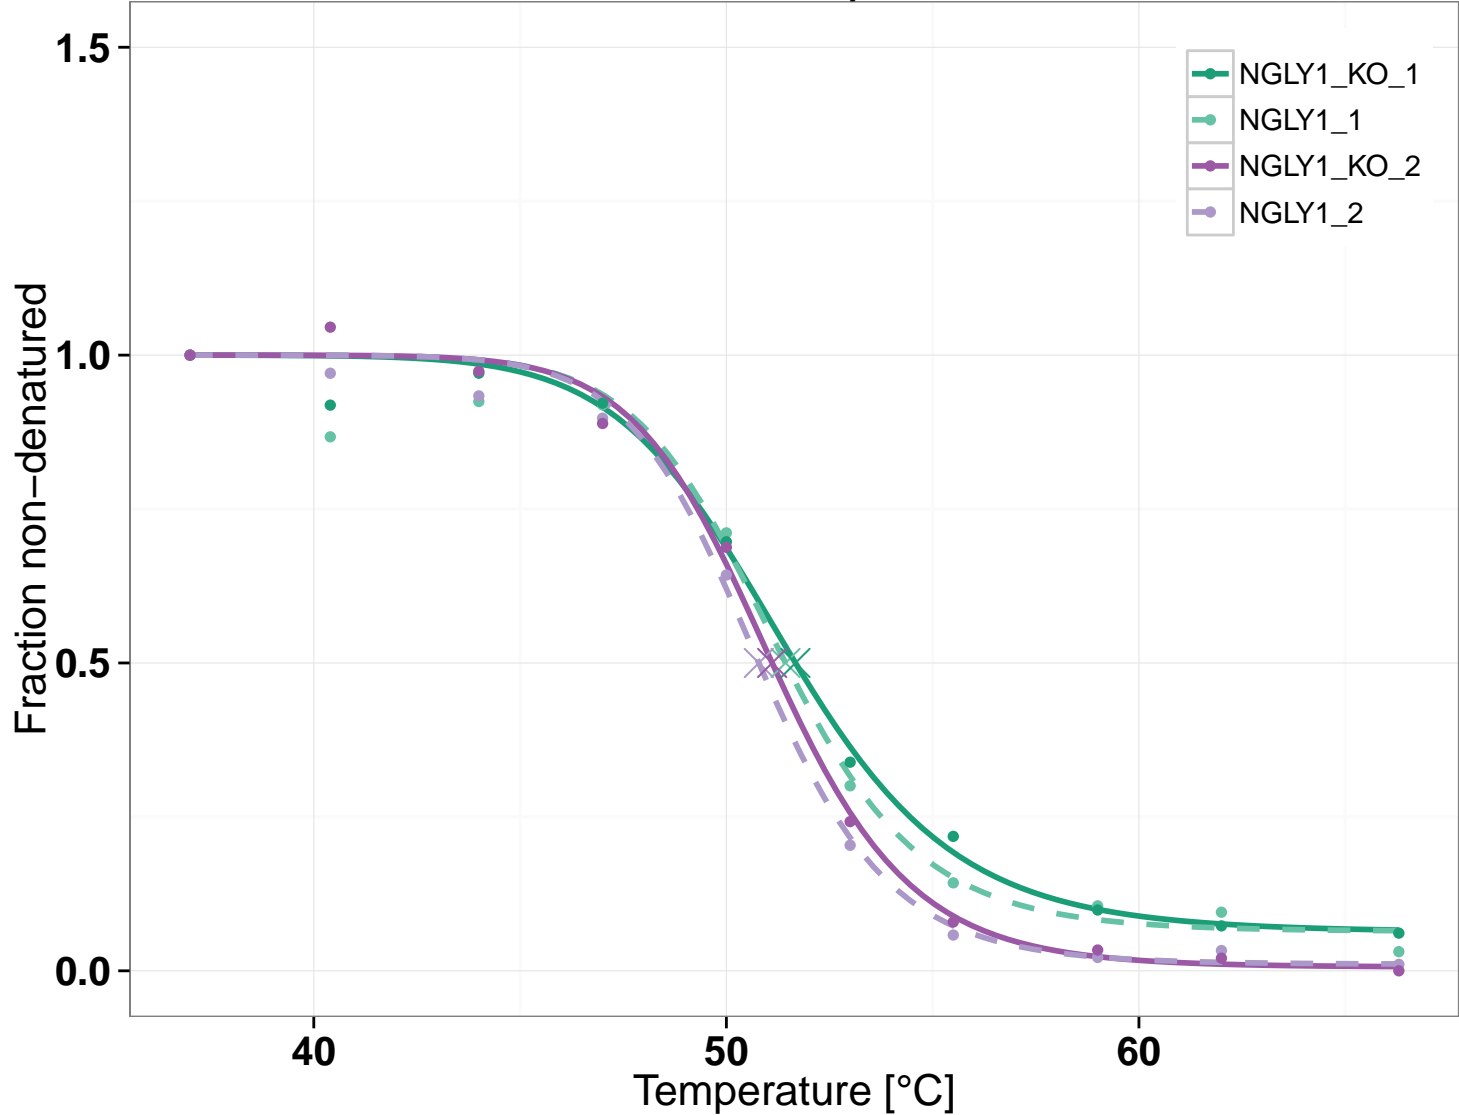

|            | meltPoint | slope | plateau | R2   |
|------------|-----------|-------|---------|------|
| NGLY1_KO_1 | 51.68     | -0.11 | 0.06    | 0.99 |
| NGLY1_1    | 51.43     | -0.13 | 0.06    | 0.98 |
| NGLY1_KO_2 | 51.11     | -0.15 | 0.01    | 1    |
| NGLY1_2    | 50.79     | -0.15 | 0.01    | 1    |

Supplement: Supplementary file 1259 [file 1]

# IPI00028083.1|EIF2B2

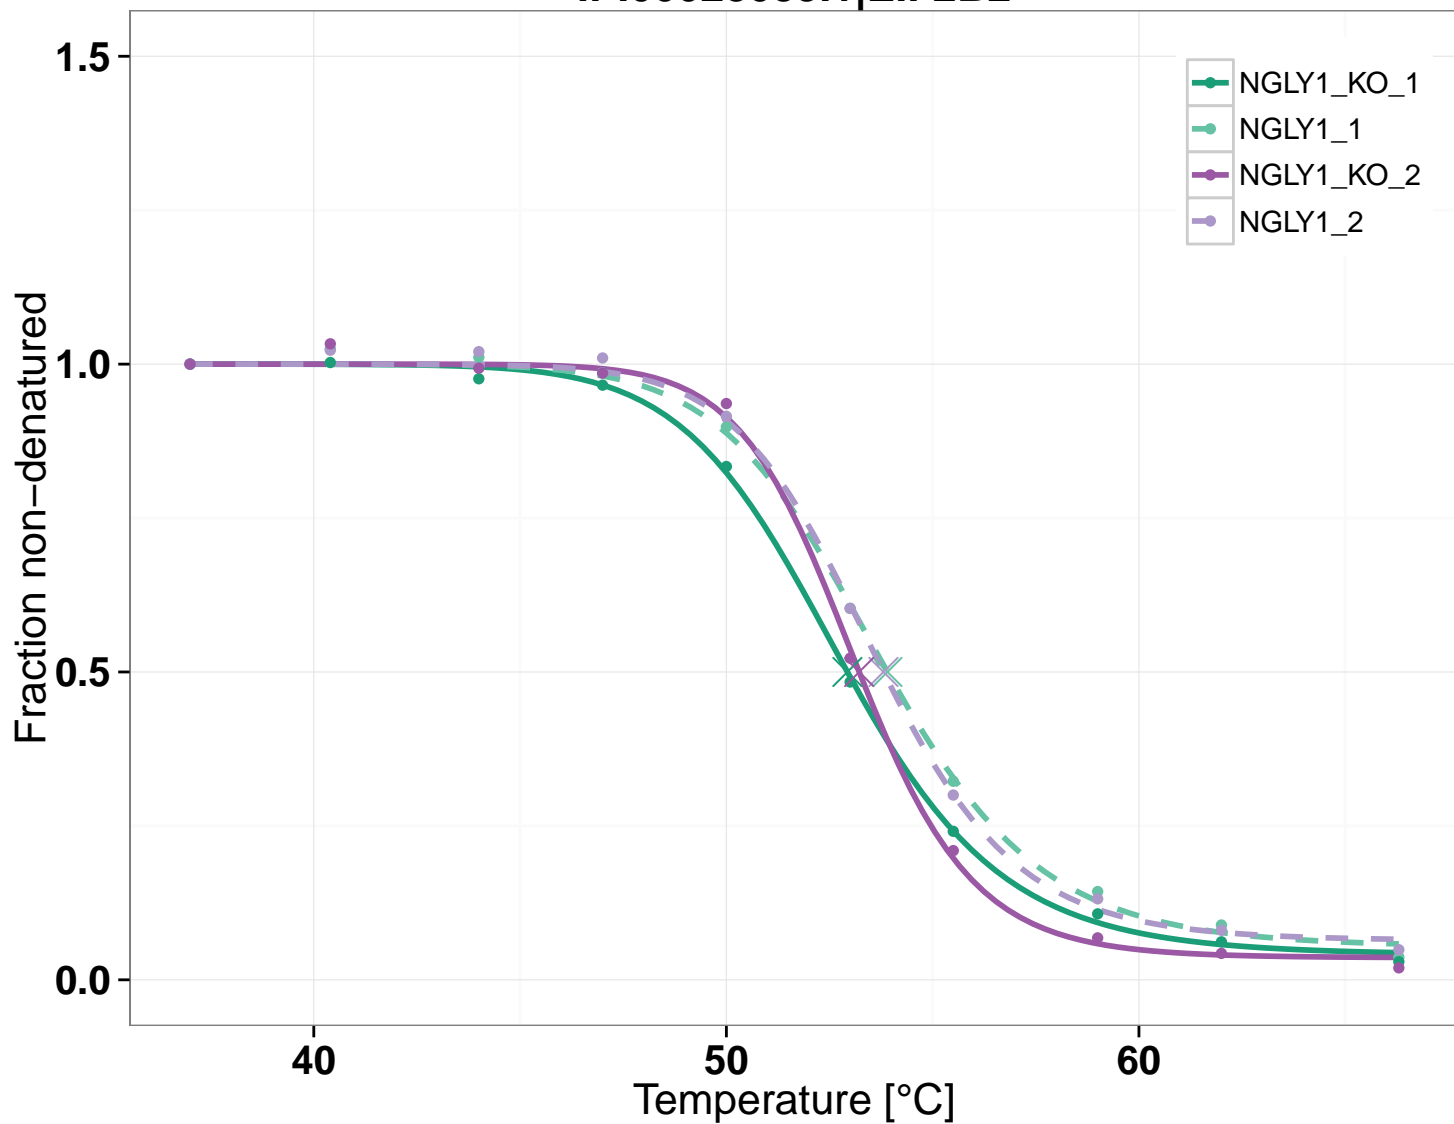

|            | meltPoint | slope | plateau | R2 |
|------------|-----------|-------|---------|----|
| NGLY1_KO_1 | 52.93     | -0.12 | 0.04    | 1  |
| NGLY1_1    | 53.9      | -0.12 | 0.05    | 1  |
| NGLY1_KO_2 | 53.22     | -0.17 | 0.04    | 1  |
| NGLY1_2    | 53.81     | -0.14 | 0.06    | 1  |

Supplement: Supplementary file 1260 [file 1]

IPI00166957.1|ZBTB2

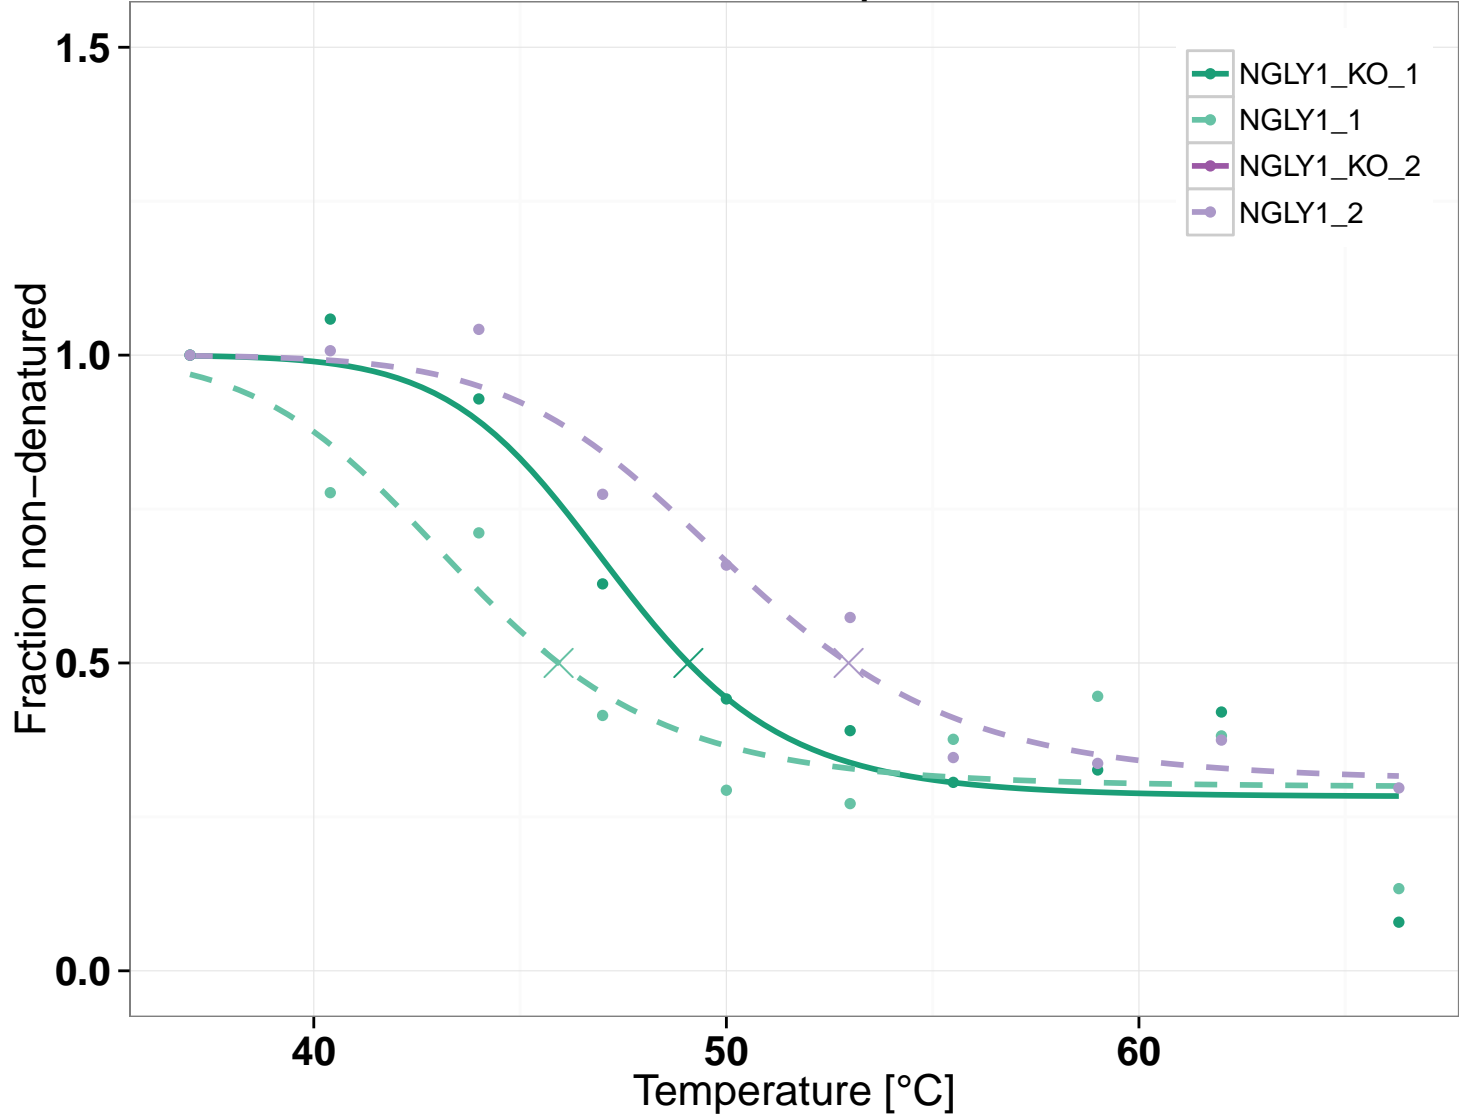

|            | meltPoint | slope  | plateau | R2   |
|------------|-----------|--------|---------|------|
| NGLY1_KO_1 | 49.08     | -0.088 | 0.28    | 0.93 |
| NGLY1_1    | 45.93     | -0.071 | 0.3     | 0.87 |
| NGLY1_KO_2 | -         | -      | -       | -    |
| NGLY1_2    | 52.96     | -0.063 | 0.31    | 0.97 |

Supplement: Supplementary file 1261 [file 1]

# IPI00396243.6|WDR19

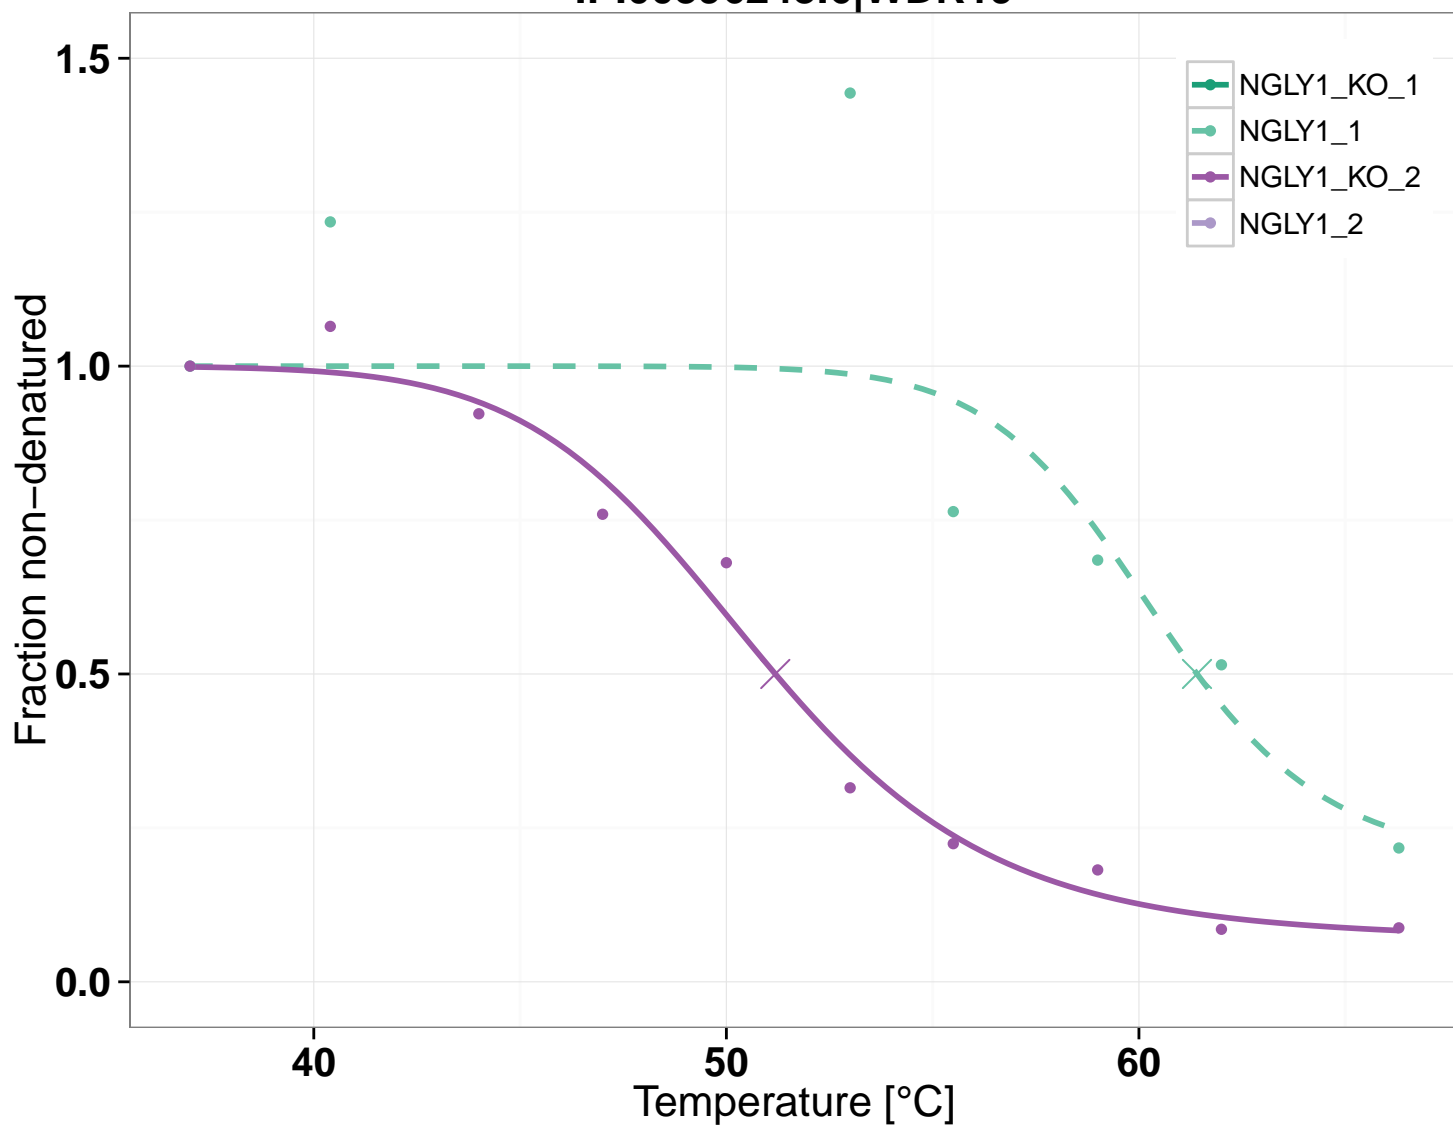

|            | meltPoint | slope  | plateau | R2   |
|------------|-----------|--------|---------|------|
| NGLY1_KO_1 | —         | —      | —       | —    |
| NGLY1_1    | 61.41     | -0.099 | 0.19    | 0.33 |
| NGLY1_KO_2 | 51.19     | -0.082 | 0.07    | 0.98 |
| NGLY1_2    | —         | —      | —       | —    |

Supplement: Supplementary file 1262 [file 1]

# IPI00409684.2|NCKAP1

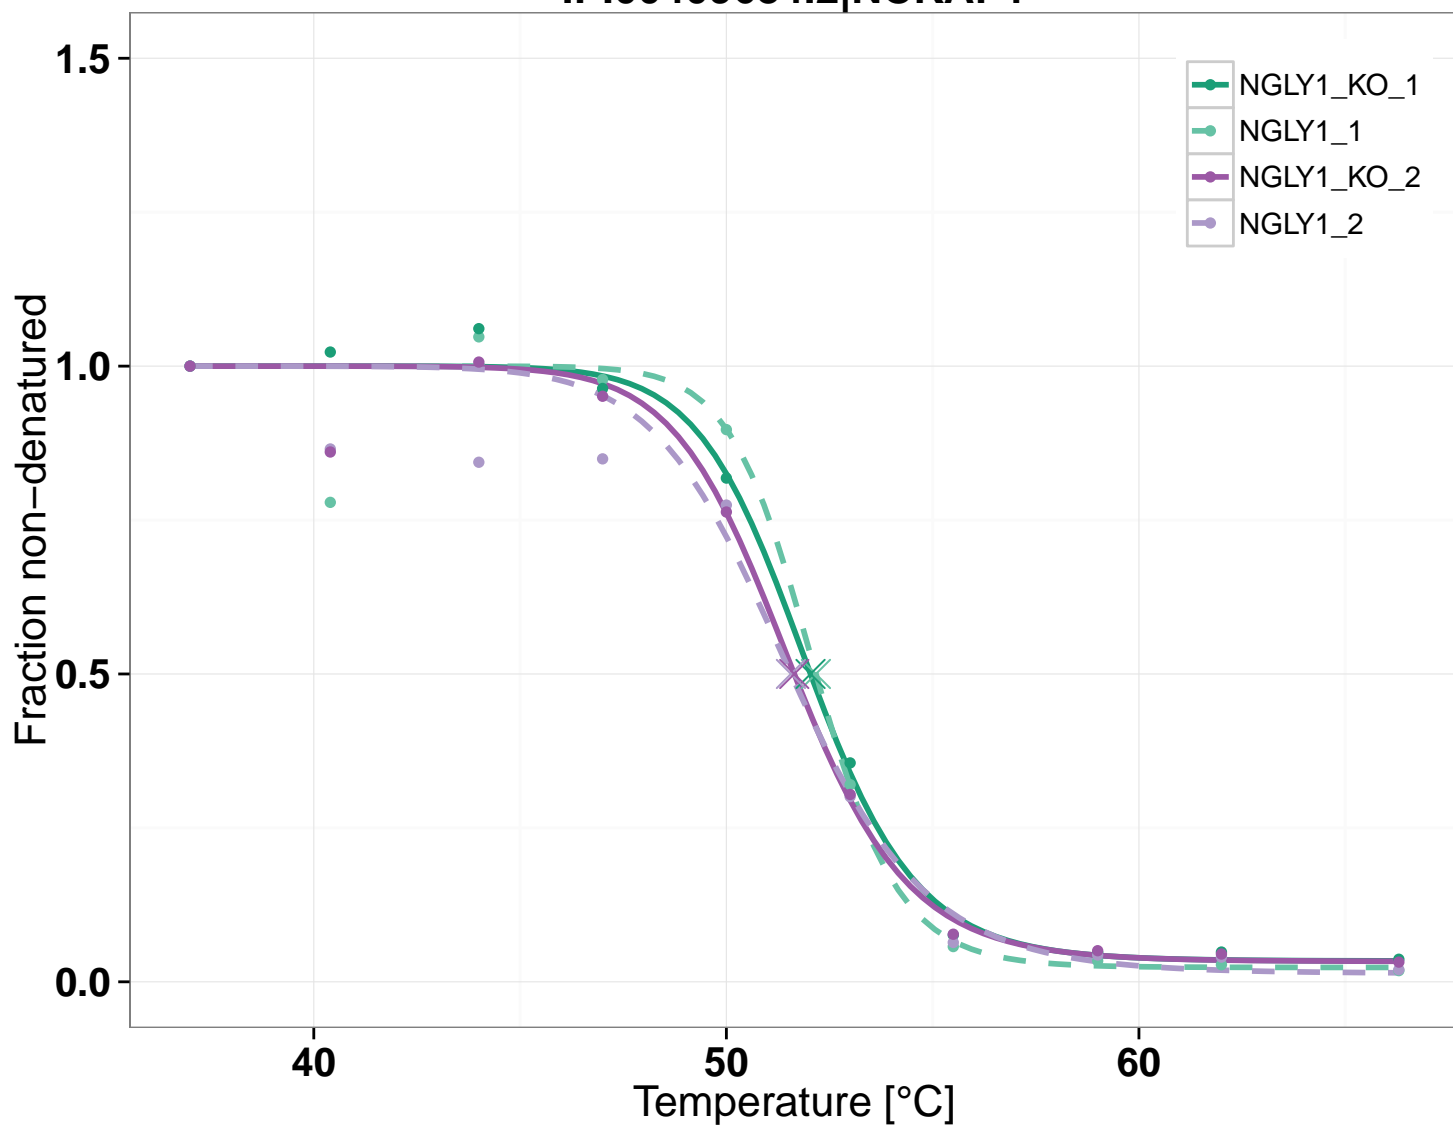

|            | meltPoint | slope | plateau | R2   |
|------------|-----------|-------|---------|------|
| NGLY1_KO_1 | 52.04     | -0.18 | 0.03    | 1    |
| NGLY1_1    | 52.17     | -0.24 | 0.02    | 0.97 |
| NGLY1_KO_2 | 51.65     | -0.17 | 0.03    | 0.99 |
| NGLY1_2    | 51.56     | -0.15 | 0.01    | 0.96 |

Supplement: Supplementary file 1263 [file 1]

IPI00026942.5|ERLIN2

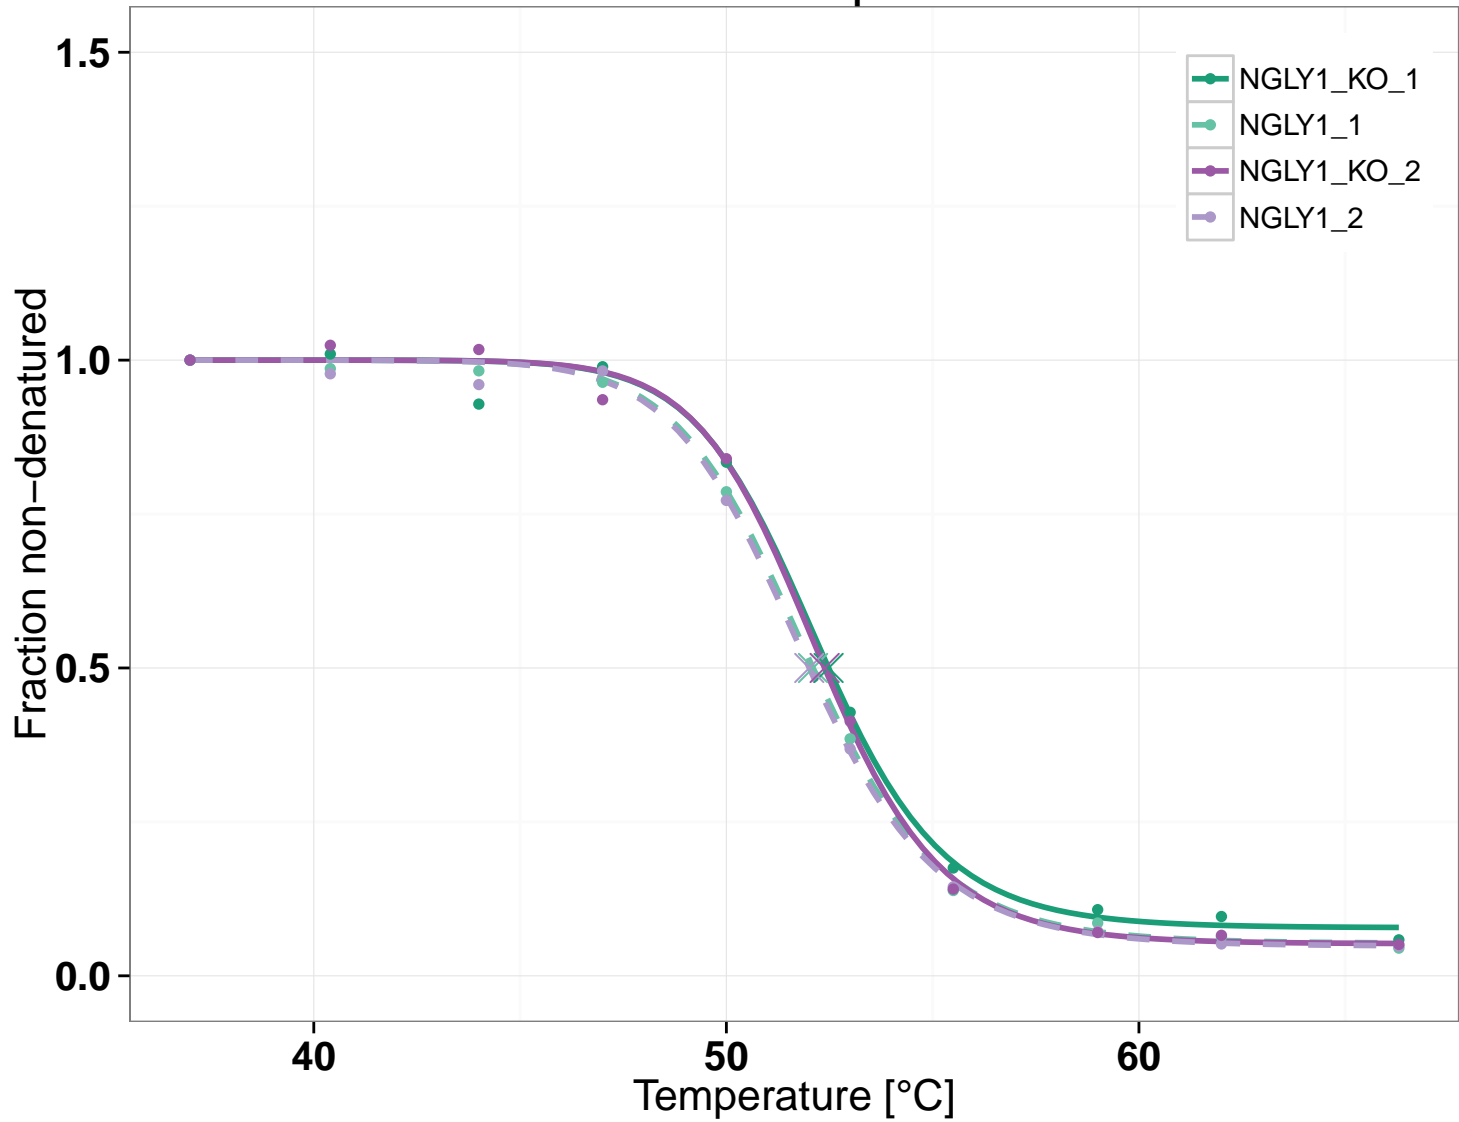

|            | meltPoint | slope | plateau | R2 |
|------------|-----------|-------|---------|----|
| NGLY1_KO_1 | 52.48     | -0.15 | 0.08    | 1  |
| NGLY1_1    | 52.1      | -0.15 | 0.05    | 1  |
| NGLY1_KO_2 | 52.38     | -0.16 | 0.05    | 1  |
| NGLY1_2    | 52.01     | -0.15 | 0.05    | 1  |

Supplement: Supplementary file 1264 [file 1]

IPI00465346.3|DSTYK

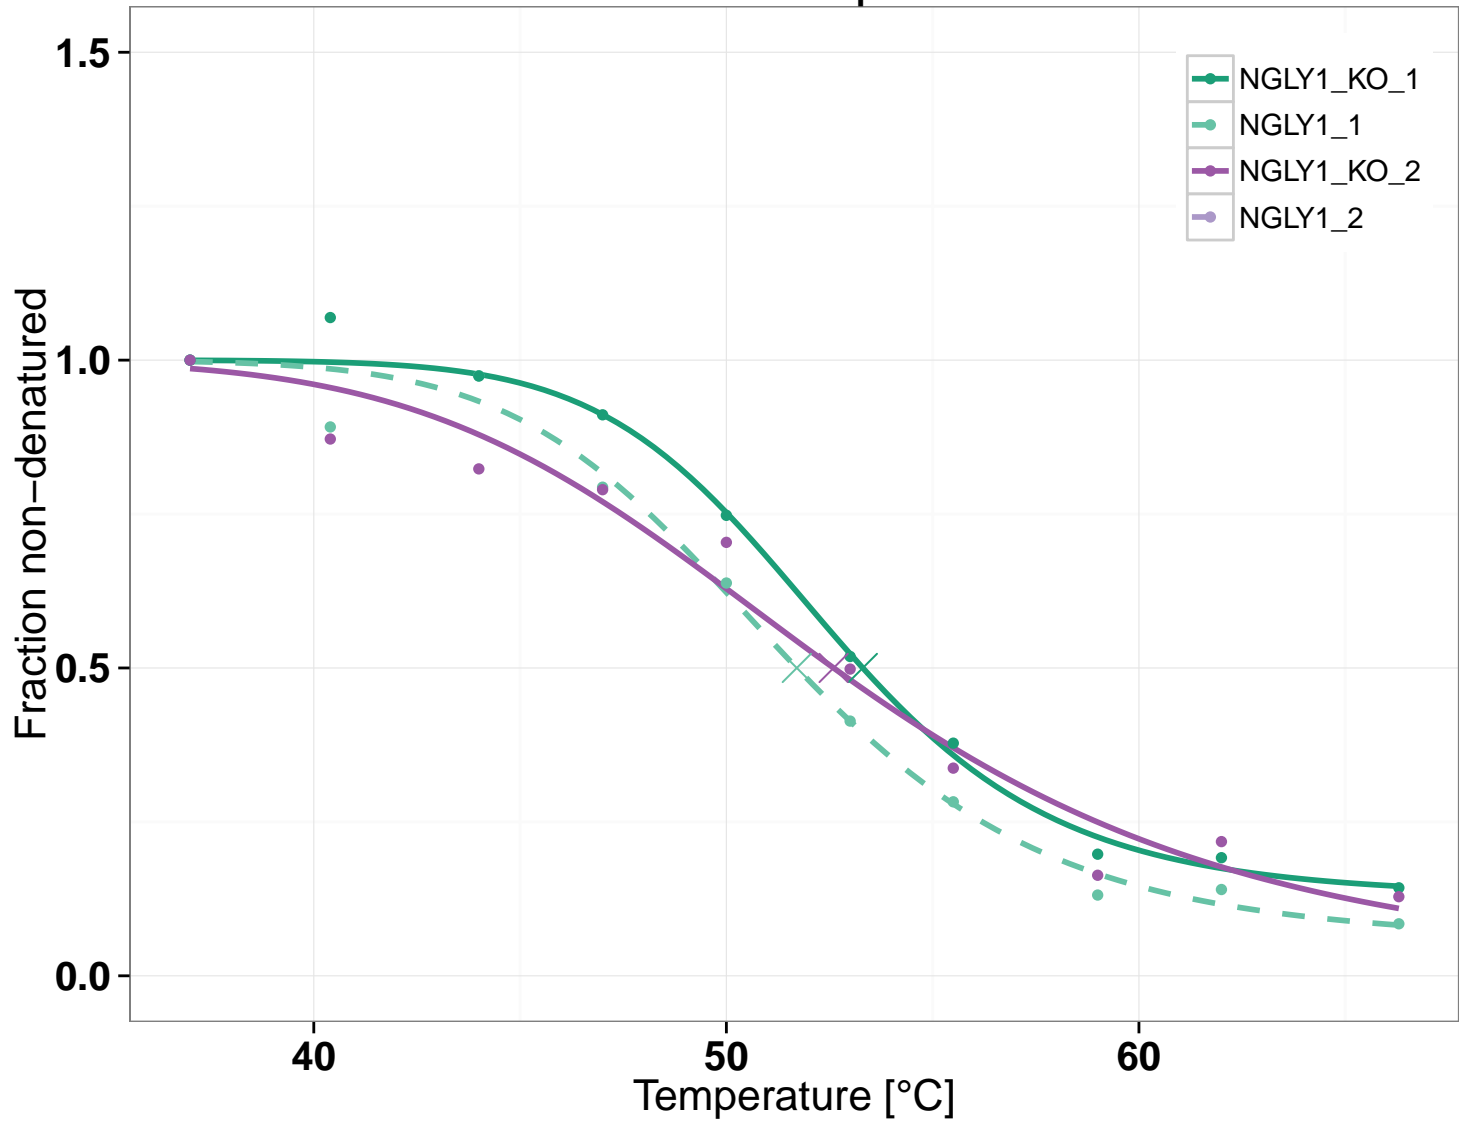

|            | meltPoint | slope  | plateau | R2   |
|------------|-----------|--------|---------|------|
| NGLY1_KO_1 | 53.31     | -0.079 | 0.13    | 0.99 |
| NGLY1_1    | 51.71     | -0.073 | 0.05    | 0.99 |
| NGLY1_KO_2 | 52.6      | -0.05  | 0       | 0.97 |
| NGLY1_2    | -         | -      | -       | -    |

Supplement: Supplementary file 1265 [file 1]

IPI00479533.5|ZNF277

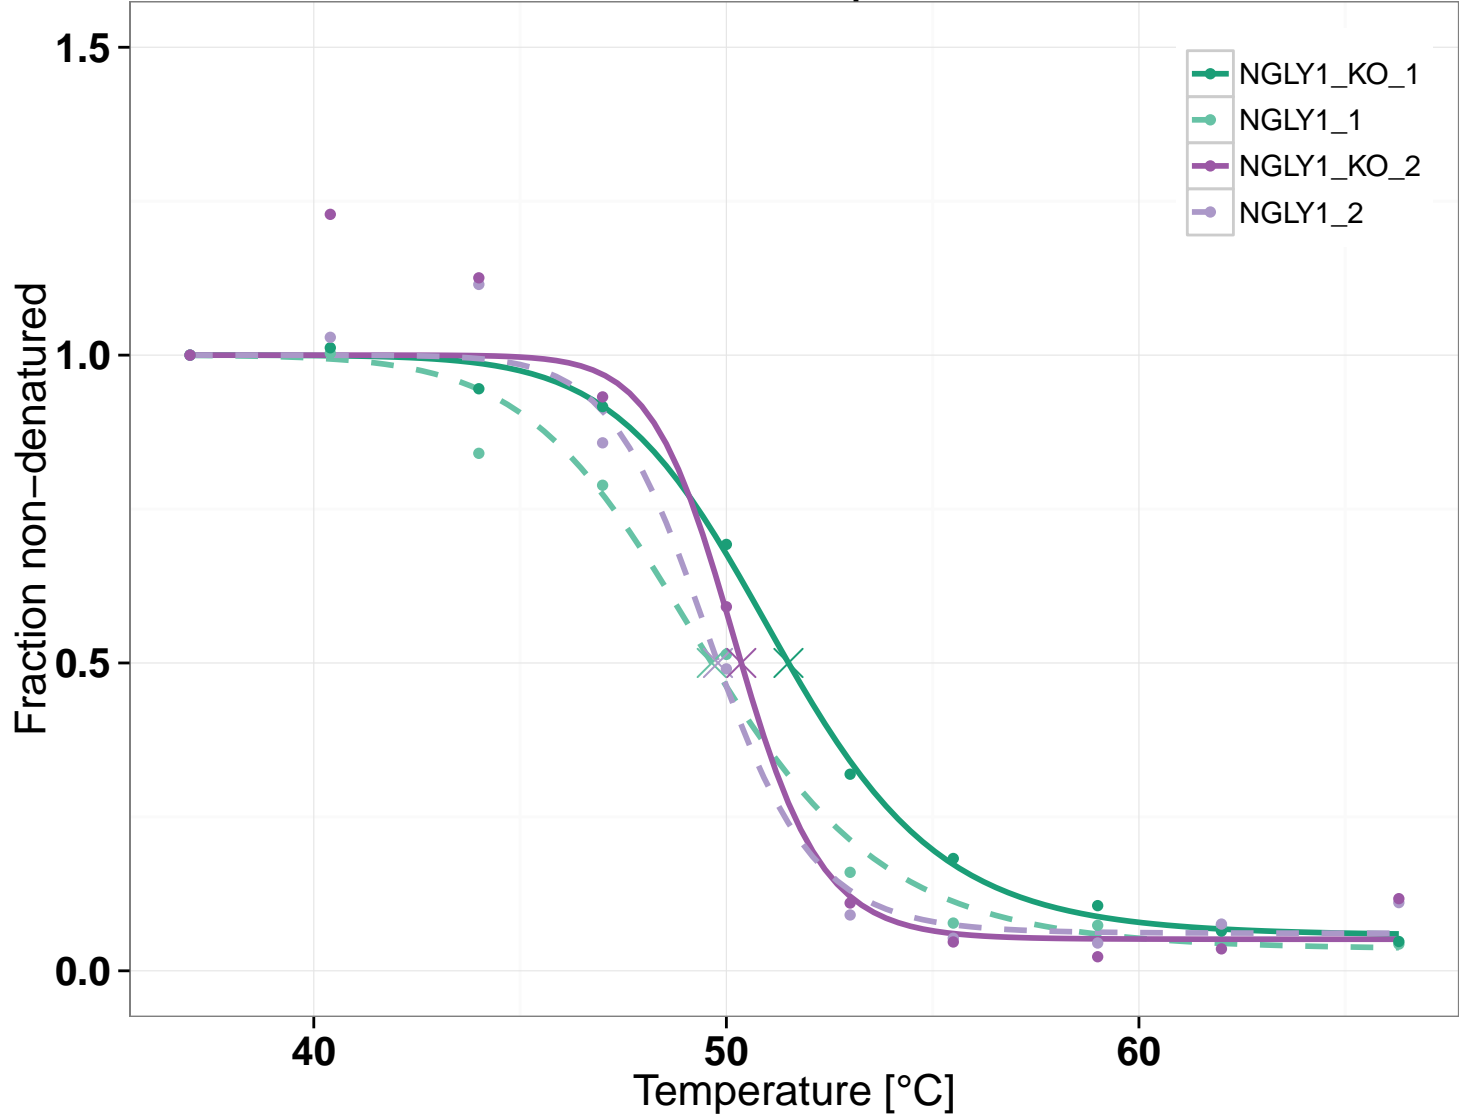

|            | meltPoint | slope | plateau | R2   |
|------------|-----------|-------|---------|------|
| NGLY1_KO_1 | 51.51     | -0.12 | 0.06    | 1    |
| NGLY1_1    | 49.65     | -0.11 | 0.03    | 0.99 |
| NGLY1_KO_2 | 50.36     | -0.23 | 0.05    | 0.97 |
| NGLY1_2    | 49.8      | -0.19 | 0.06    | 0.99 |

Supplement: Supplementary file 1266 [file 1]

IPI00301631.5|TOR3A

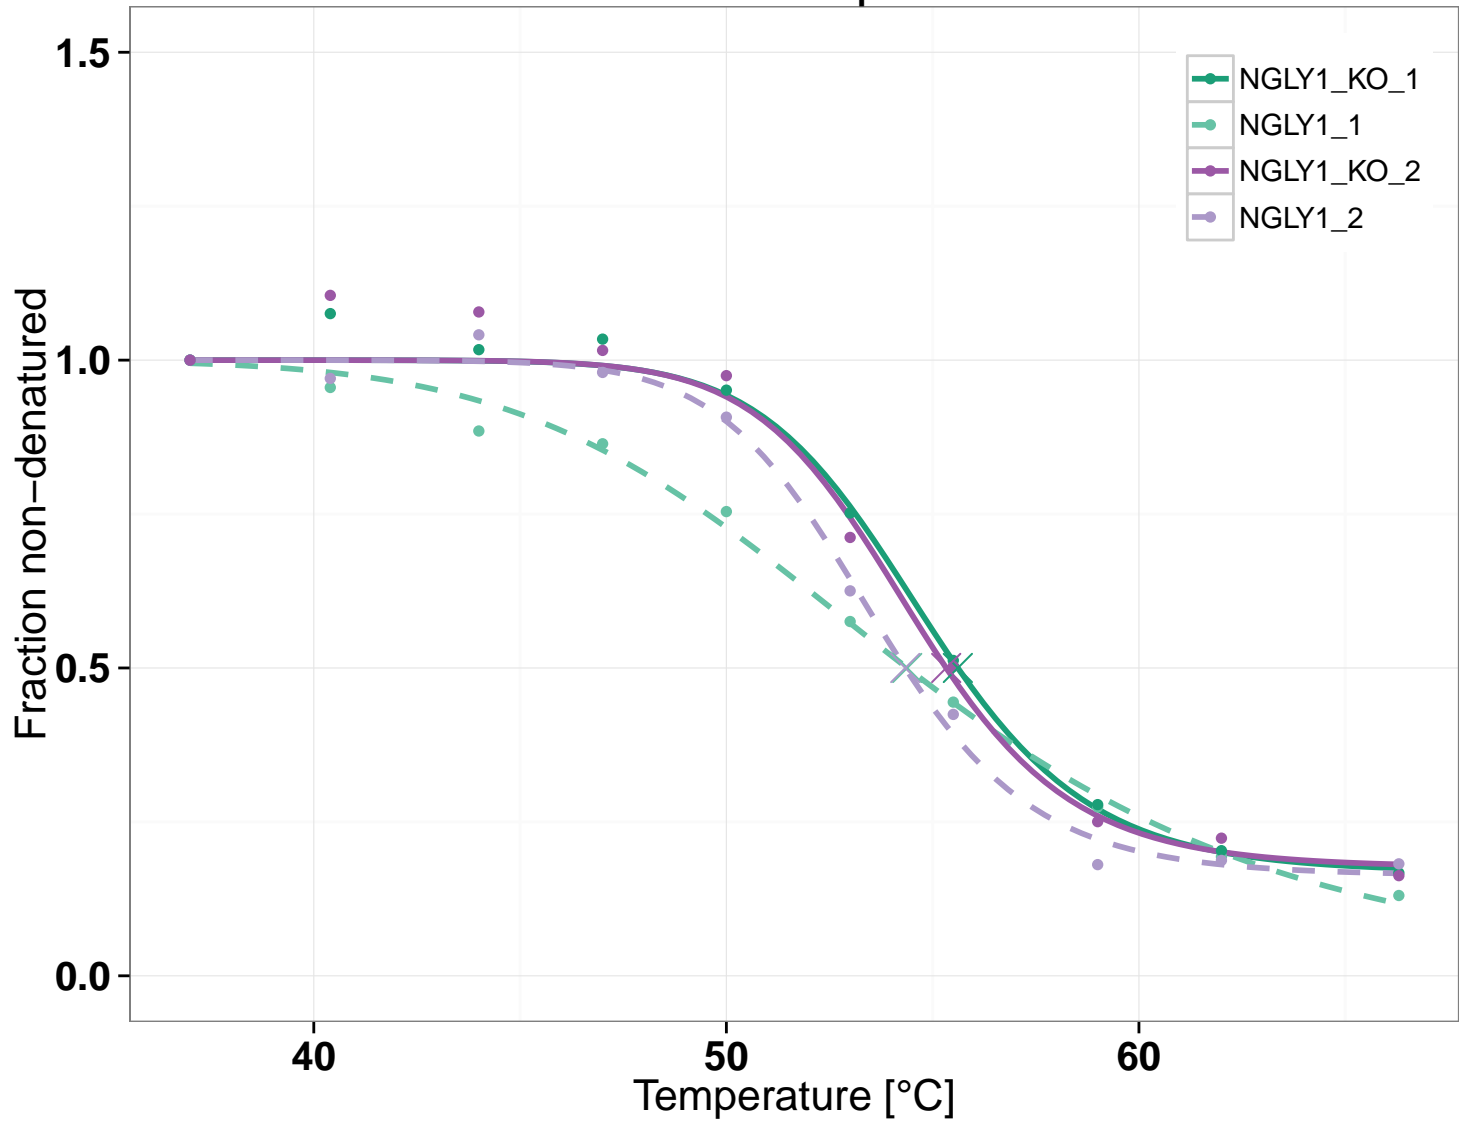

|            | meltPoint | slope  | plateau | R2   |
|------------|-----------|--------|---------|------|
| NGLY1_KO_1 | 55.61     | -0.1   | 0.17    | 0.99 |
| NGLY1_1    | 54.38     | -0.053 | 0       | 1    |
| NGLY1_KO_2 | 55.33     | -0.11  | 0.18    | 0.98 |
| NGLY1_2    | 54.34     | -0.11  | 0.16    | 1    |

Supplement: Supplementary file 1267 [file 1]

# IPI00069309.5|LRWD1

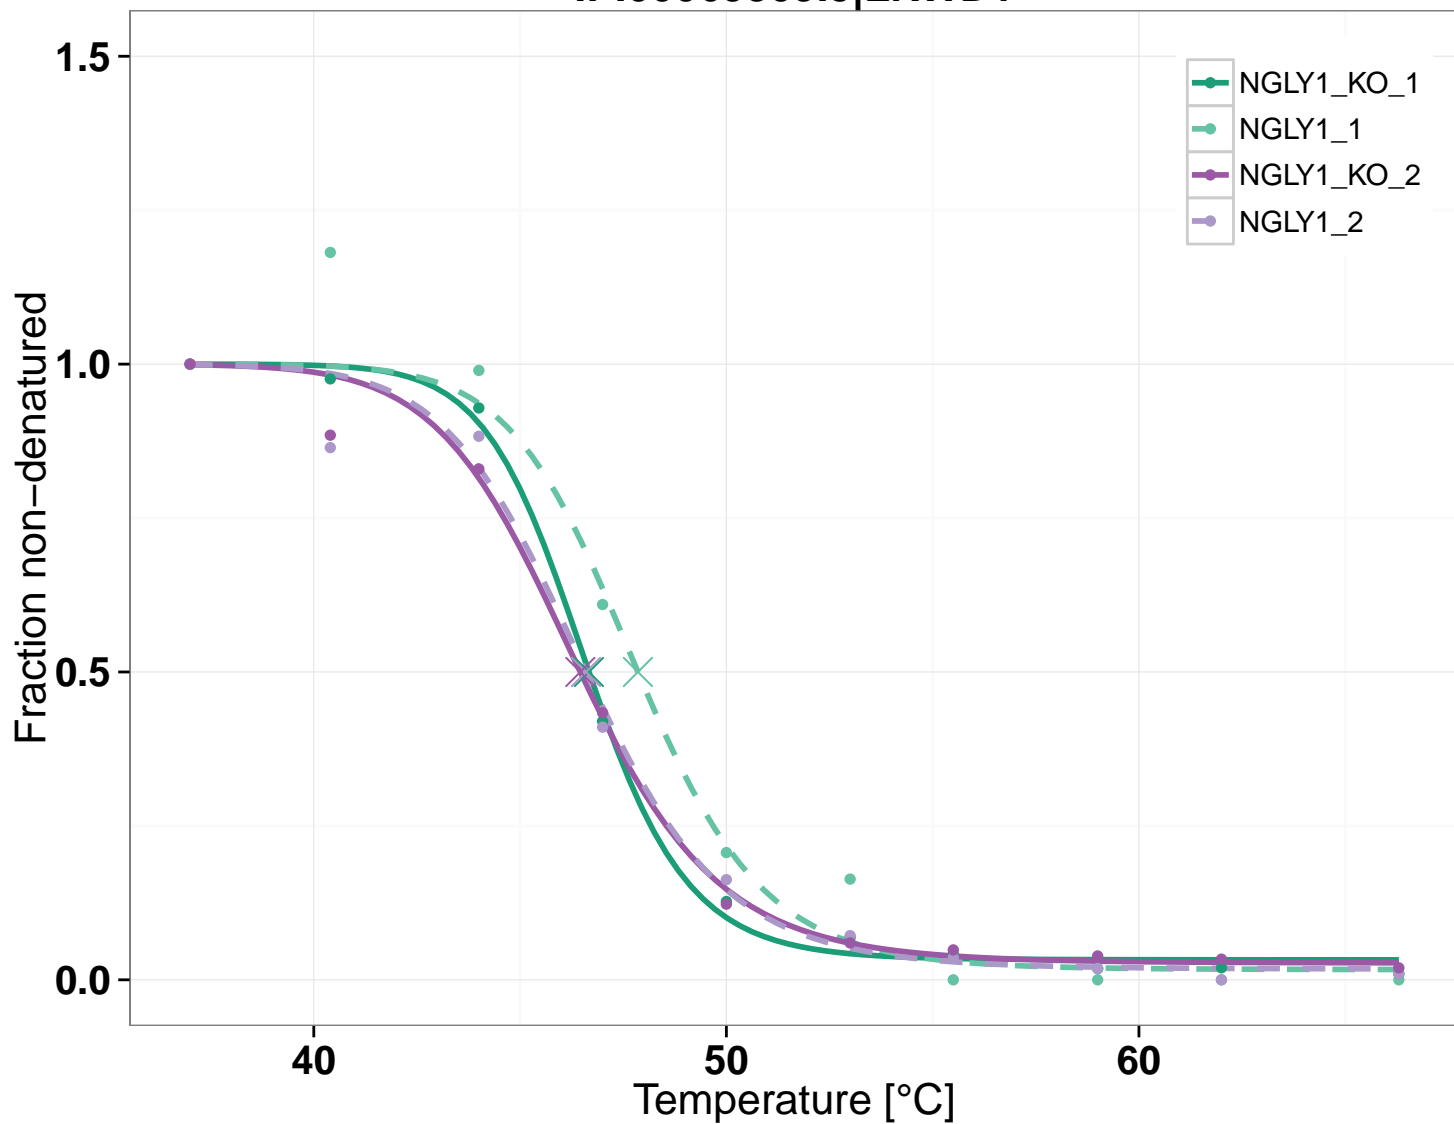

|            | meltPoint | slope | plateau | R2   |
|------------|-----------|-------|---------|------|
| NGLY1_KO_1 | 46.67     | -0.2  | 0.03    | 1    |
| NGLY1_1    | 47.86     | -0.16 | 0.02    | 0.98 |
| NGLY1_KO_2 | 46.46     | -0.14 | 0.03    | 0.99 |
| NGLY1_2    | 46.6      | -0.15 | 0.02    | 0.99 |

Supplement: Supplementary file 1268 [file 1]

# IPI00219036.5|DICER1

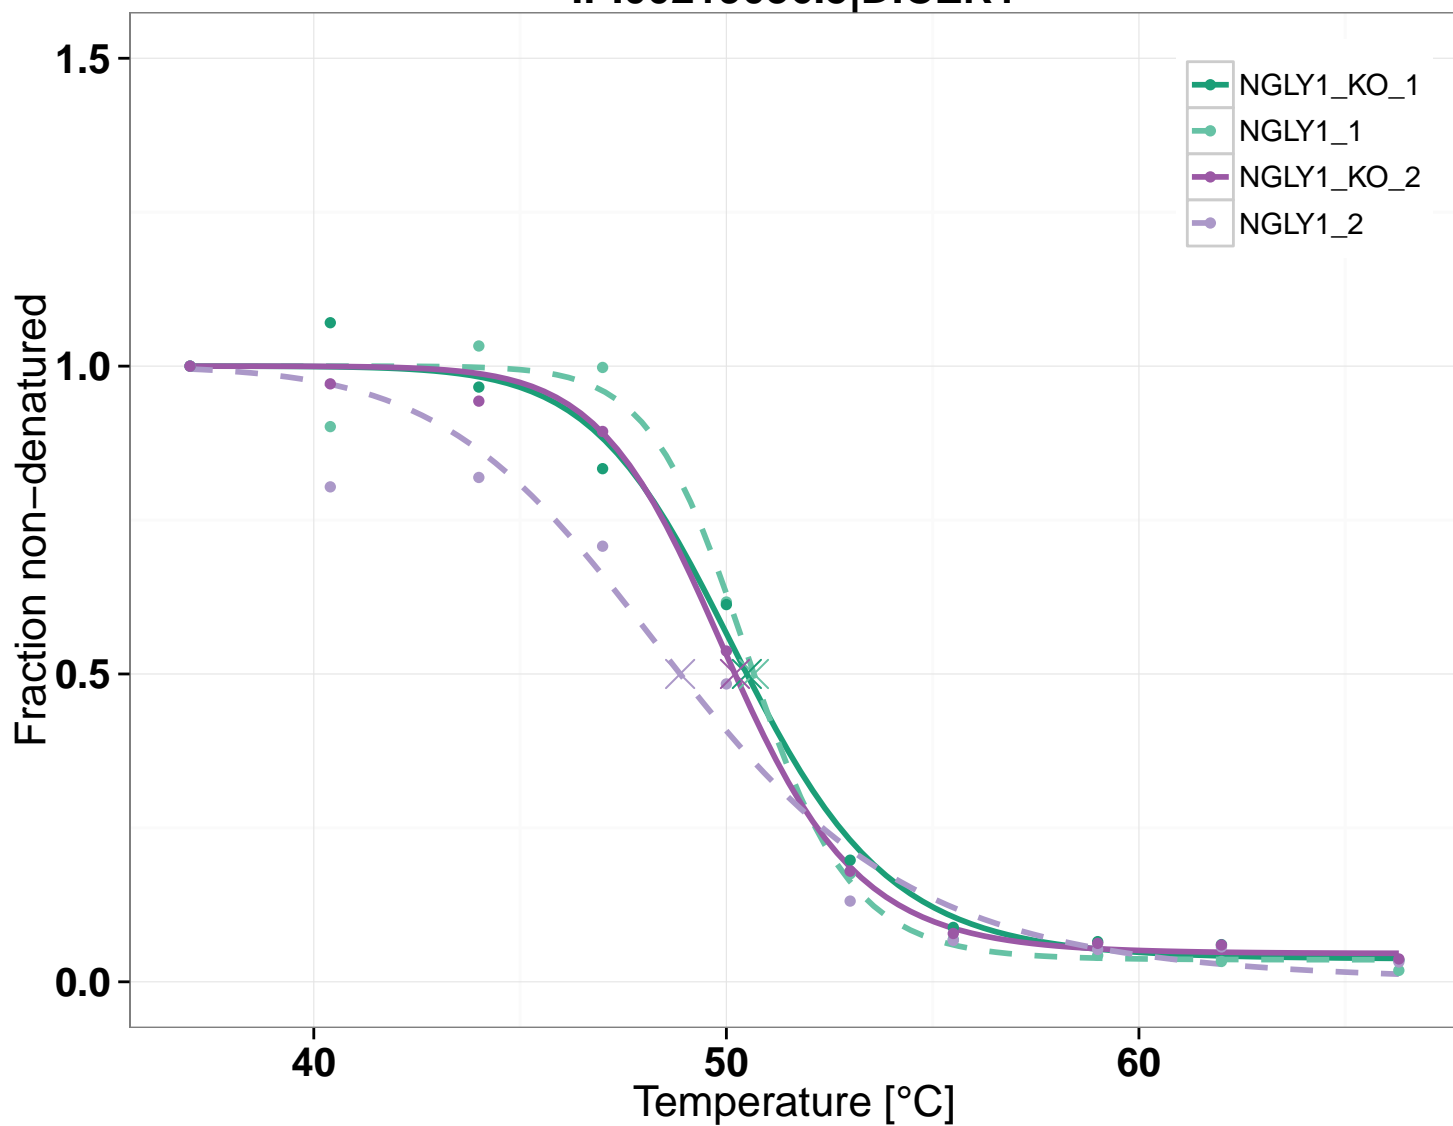

|            | meltPoint | slope  | plateau | R2   |
|------------|-----------|--------|---------|------|
| NGLY1_KO_1 | 50.5      | -0.13  | 0.04    | 0.99 |
| NGLY1_1    | 50.67     | -0.2   | 0.04    | 0.99 |
| NGLY1_KO_2 | 50.21     | -0.15  | 0.05    | 1    |
| NGLY1_2    | 48.88     | -0.086 | 0       | 0.96 |

Supplement: Supplementary file 1269 [file 1]

# IPI00301202.9|MAGT1

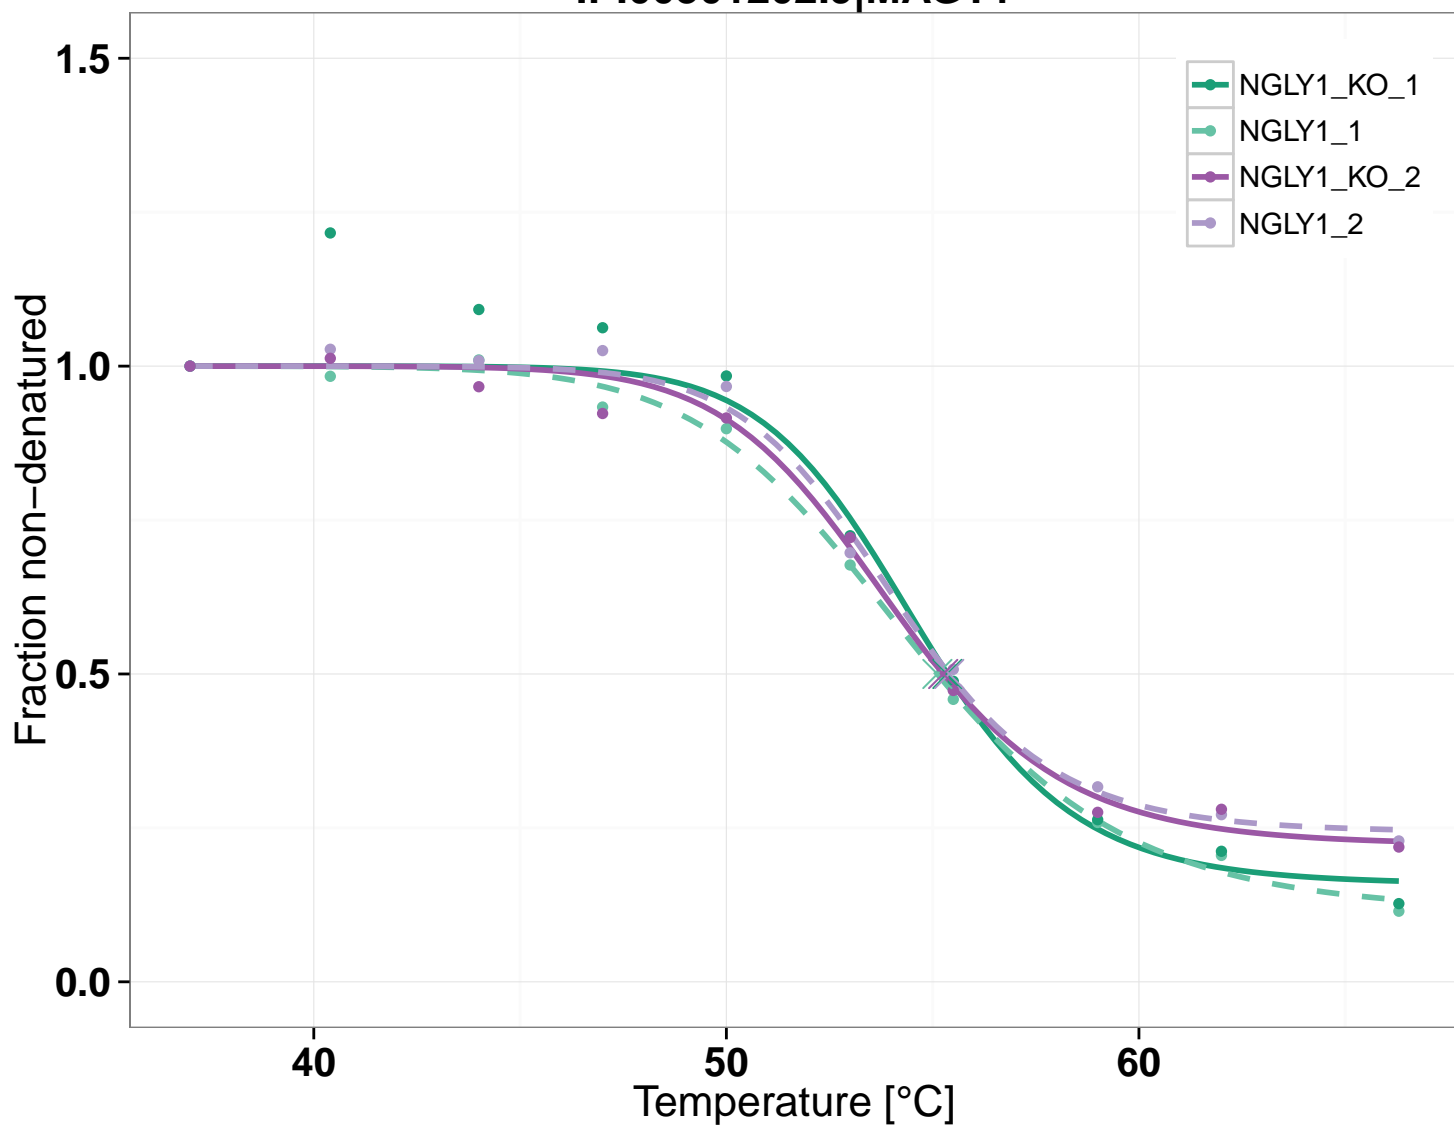

|            | meltPoint | slope  | plateau | R2   |
|------------|-----------|--------|---------|------|
| NGLY1_KO_1 | 55.36     | -0.11  | 0.16    | 0.96 |
| NGLY1_1    | 55.11     | -0.085 | 0.11    | 1    |
| NGLY1_KO_2 | 55.26     | -0.094 | 0.22    | 0.99 |
| NGLY1_2    | 55.4      | -0.1   | 0.24    | 1    |

Supplement: Supplementary file 1270 [file 1]

IPI00251749.1|NR3C1

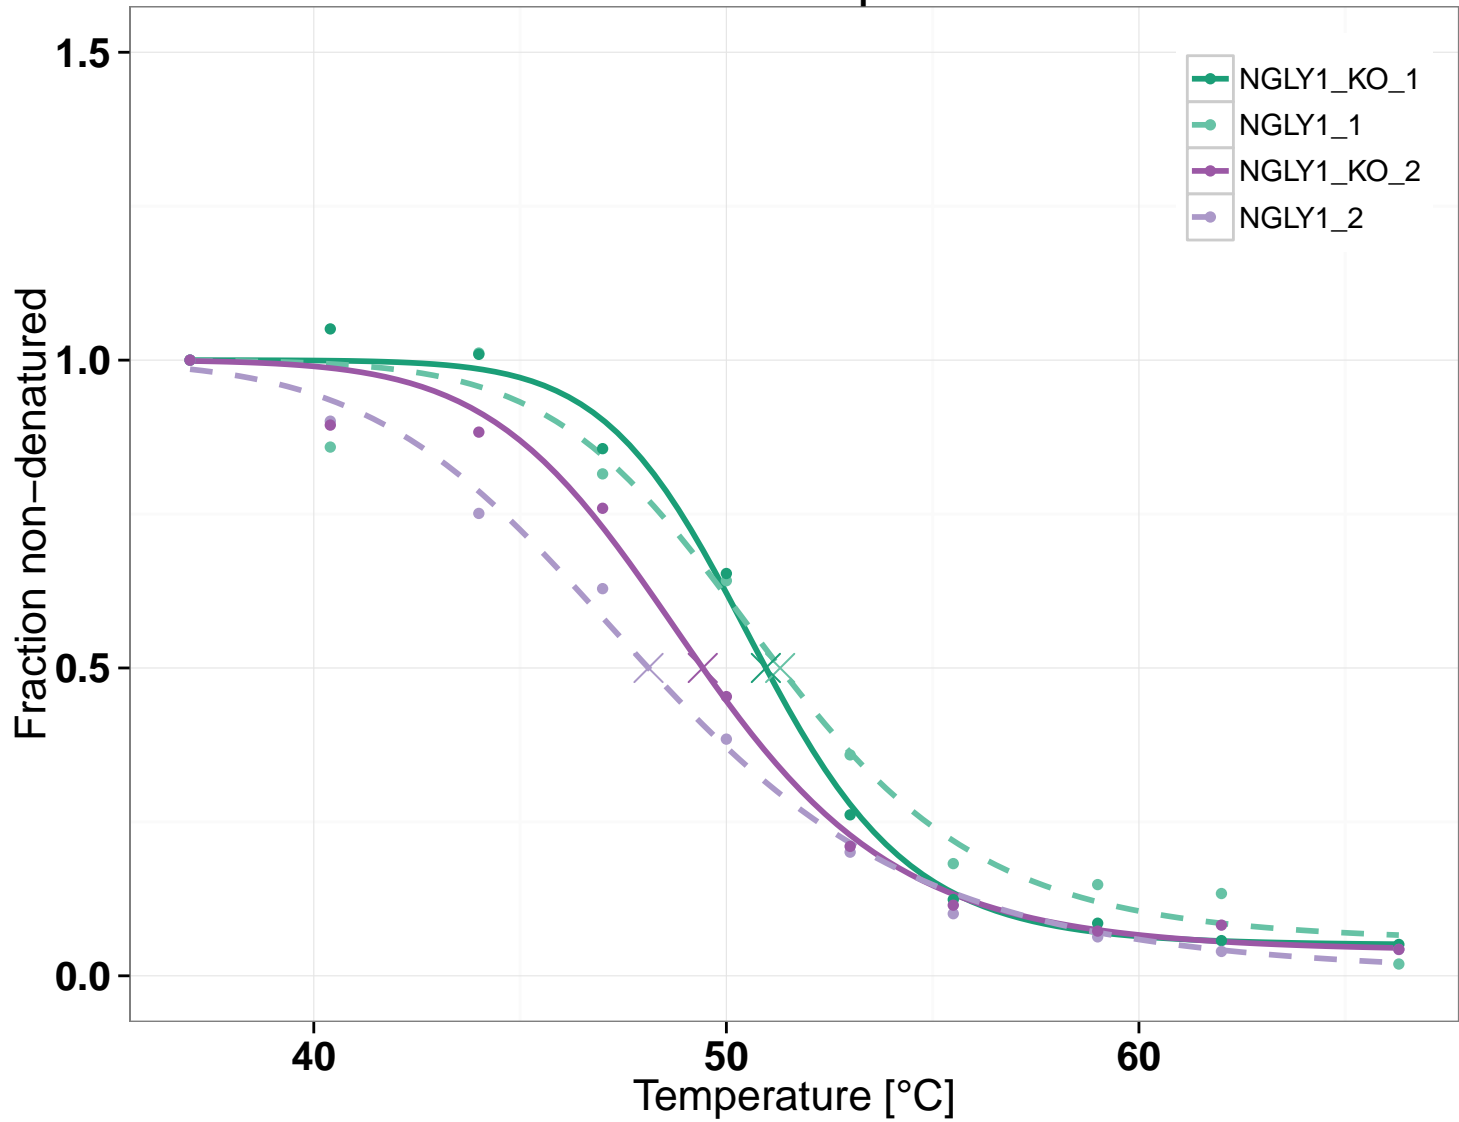

|            | meltPoint | slope  | plateau | R2   |
|------------|-----------|--------|---------|------|
| NGLY1_KO_1 | 50.96     | -0.13  | 0.05    | 1    |
| NGLY1_1    | 51.3      | -0.09  | 0.06    | 0.98 |
| NGLY1_KO_2 | 49.43     | -0.097 | 0.04    | 0.99 |
| NGLY1_2    | 48.11     | -0.074 | 0       | 0.99 |

Supplement: Supplementary file 1271 [file 1]

# IPI00419258.4|HMGB1

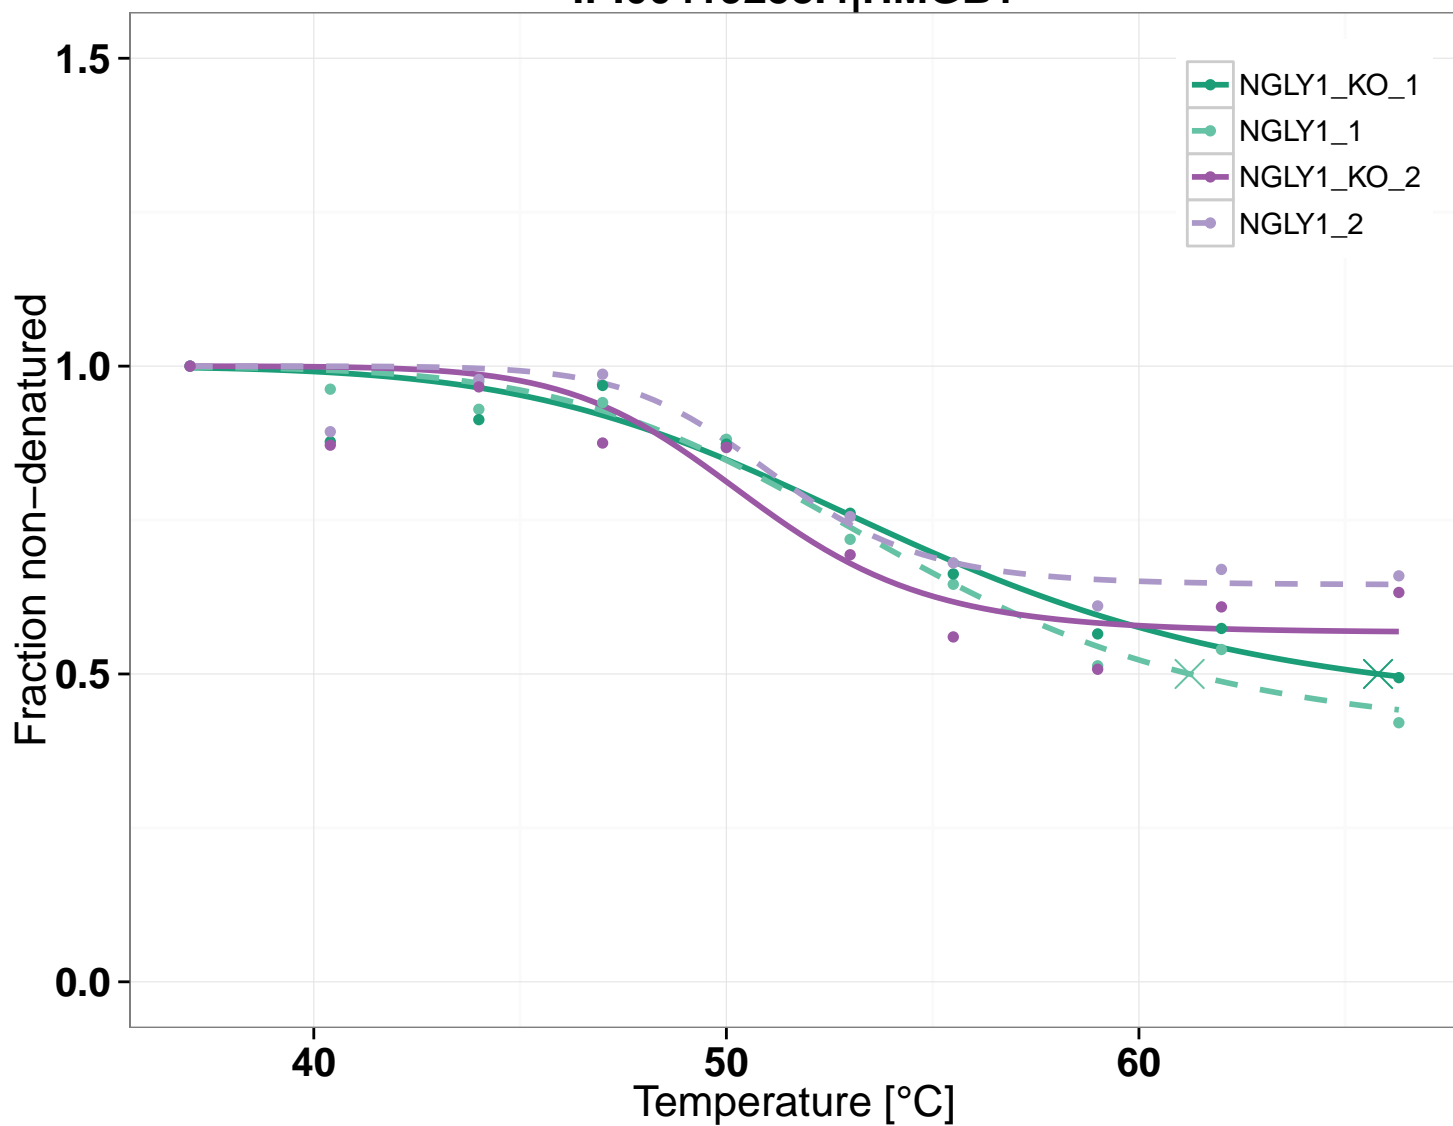

|            | meltPoint | slope  | plateau | R2   |
|------------|-----------|--------|---------|------|
| NGLY1_KO_1 | 65.8      | -0.031 | 0.43    | 0.93 |
| NGLY1_1    | 61.23     | -0.038 | 0.39    | 0.98 |
| NGLY1_KO_2 | -         | -0.049 | 0.57    | 0.87 |
| NGLY1_2    | -         | -0.049 | 0.64    | 0.93 |

Supplement: Supplementary file 1272 [file 1]

IPI00909579.1|ACSF2

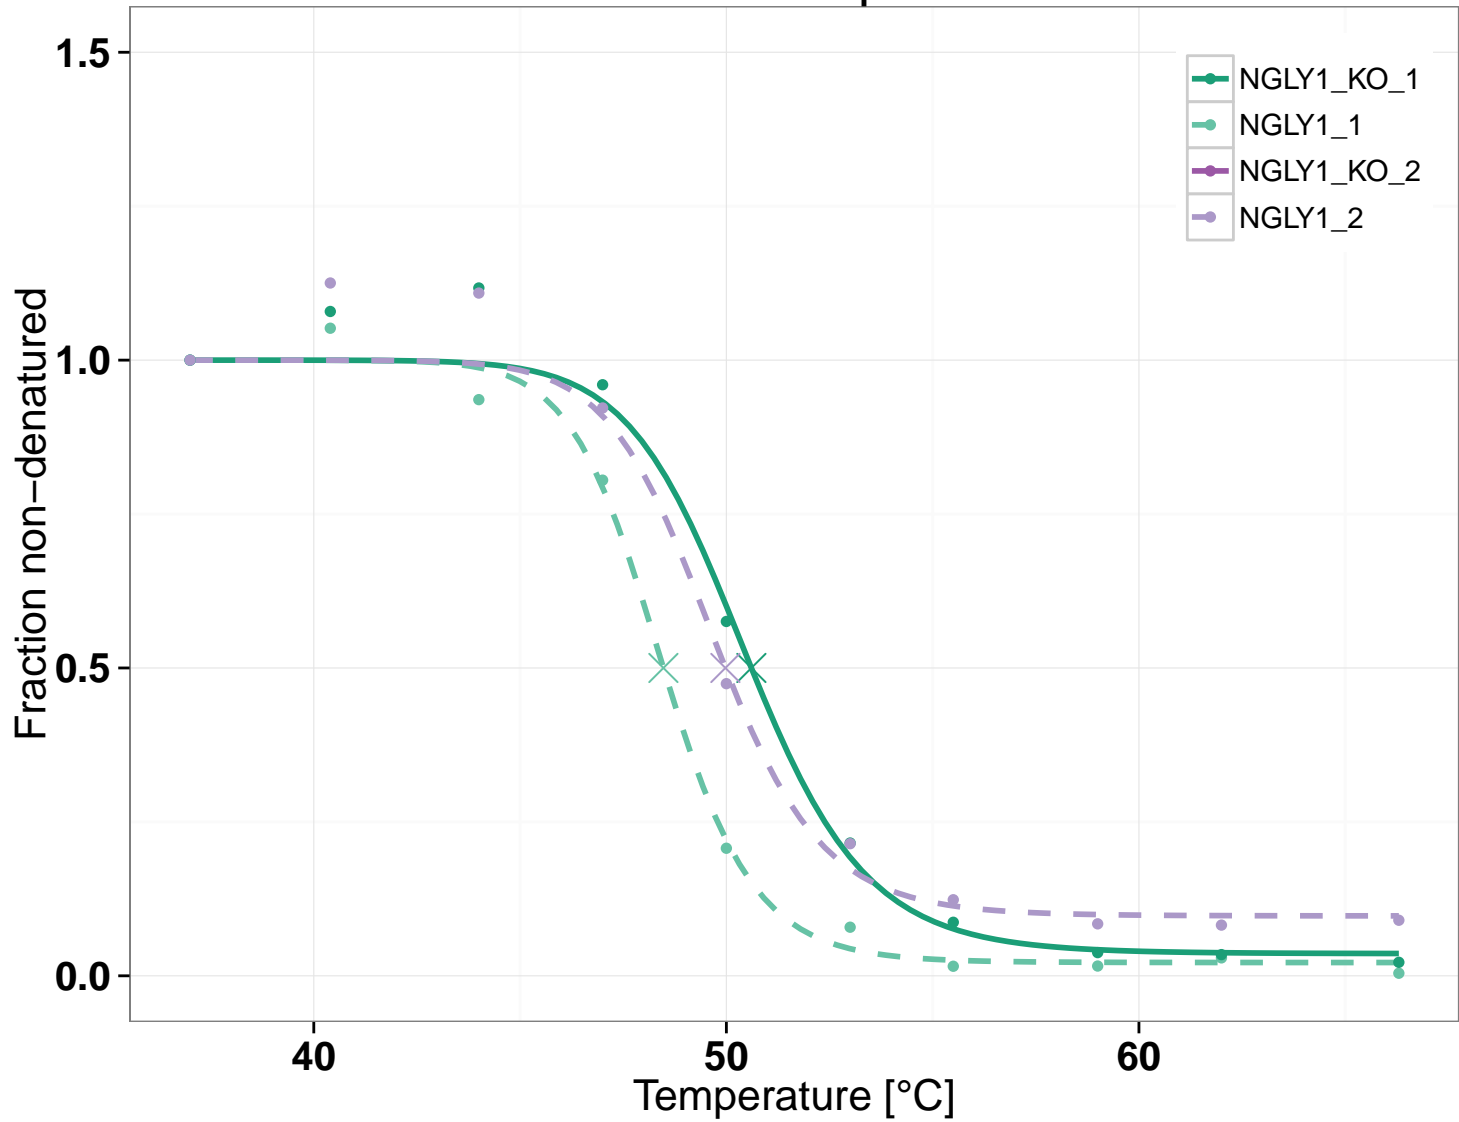

|            | meltPoint | slope | plateau | R2   |
|------------|-----------|-------|---------|------|
| NGLY1_KO_1 | 50.61     | -0.17 | 0.04    | 0.99 |
| NGLY1_1    | 48.47     | -0.22 | 0.02    | 1    |
| NGLY1_KO_2 | -         | -     | -       | -    |
| NGLY1_2    | 49.98     | -0.17 | 0.1     | 0.98 |

Supplement: Supplementary file 1273 [file 1]

# IPI00455210.1|CHD4

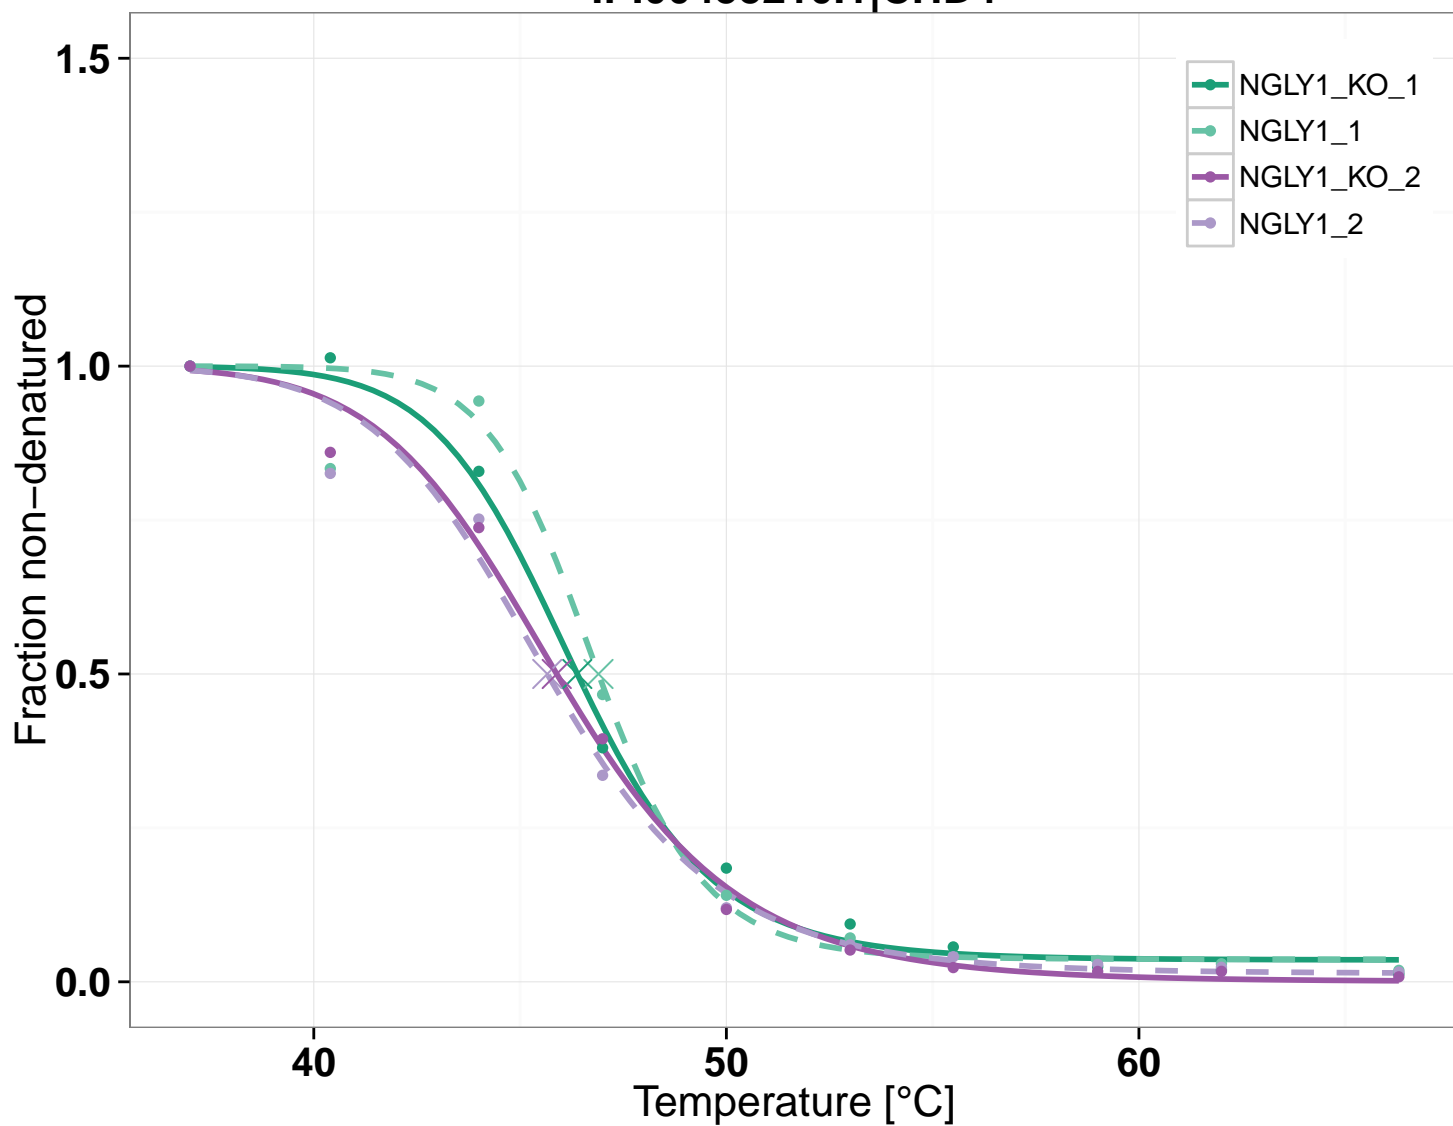

|            | meltPoint | slope | plateau | R2   |
|------------|-----------|-------|---------|------|
| NGLY1_KO_1 | 46.39     | -0.14 | 0.04    | 1    |
| NGLY1_1    | 46.9      | -0.18 | 0.04    | 0.98 |
| NGLY1_KO_2 | 45.89     | -0.11 | 0       | 0.99 |
| NGLY1_2    | 45.66     | -0.12 | 0.01    | 0.99 |

Supplement: Supplementary file 1274 [file 1]

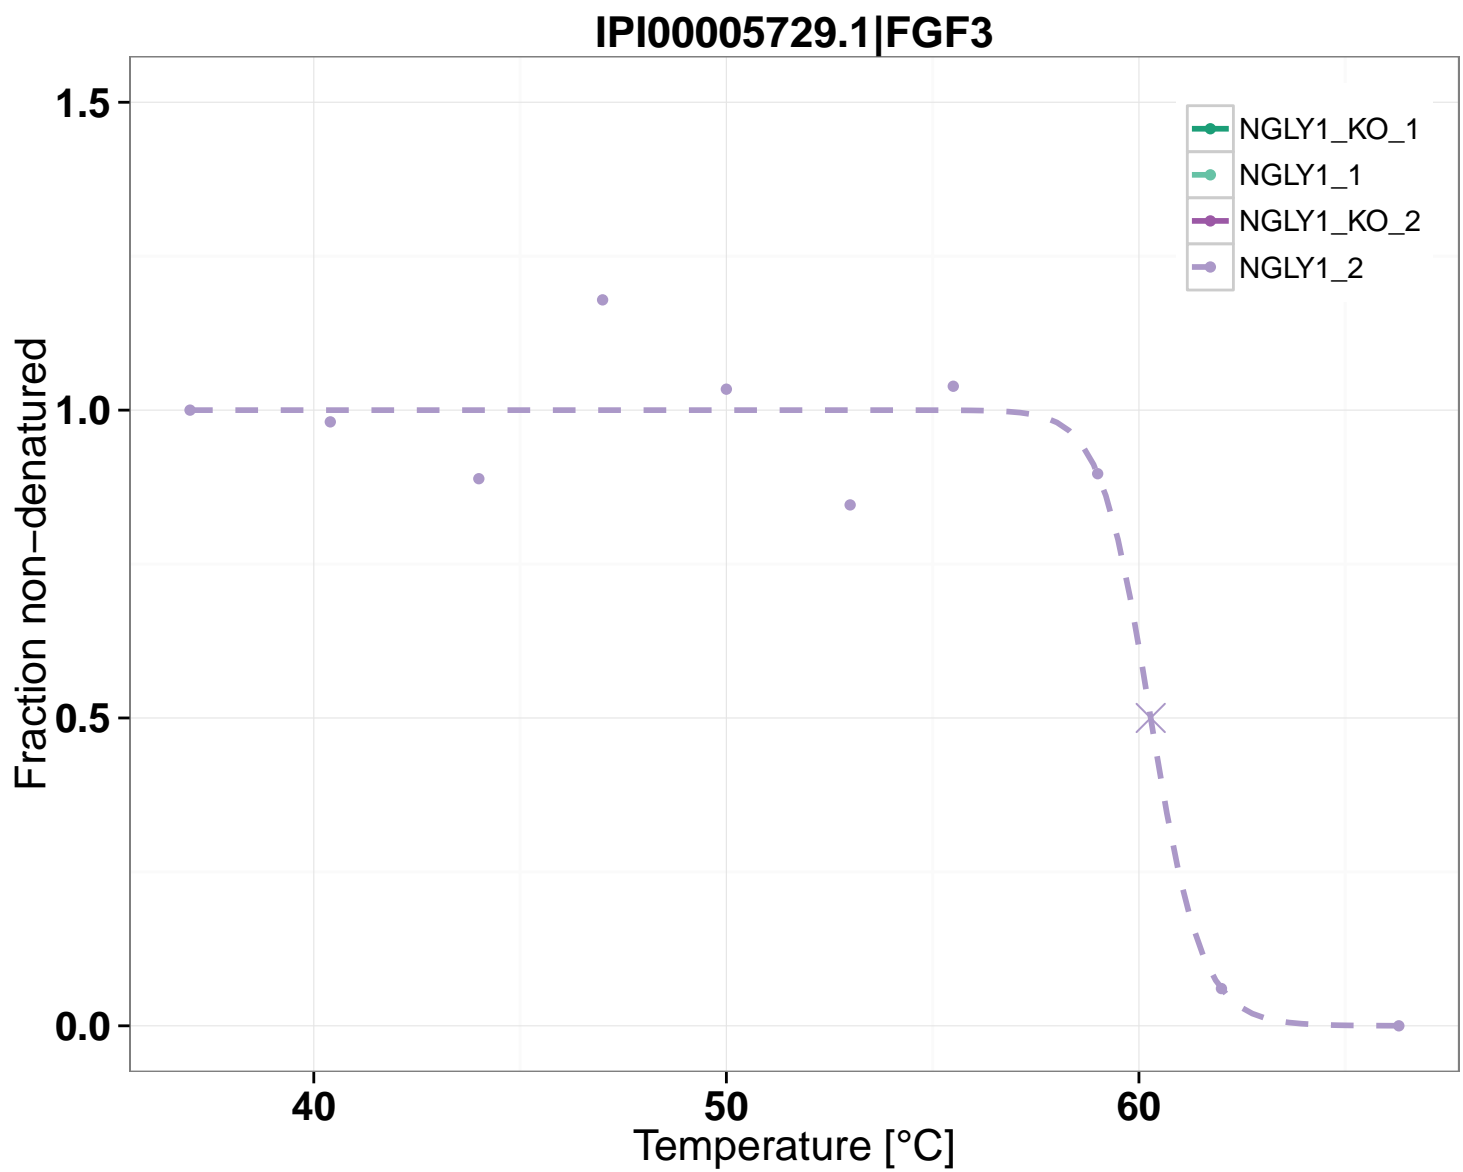

|            | meltPoint | slope | plateau | R2   |
|------------|-----------|-------|---------|------|
| NGLY1_KO_1 | —         | —     | —       | —    |
| NGLY1_1    | —         | —     | —       | —    |
| NGLY1_KO_2 | —         | —     | —       | —    |
| NGLY1_2    | 60.29     | -0.41 | 0       | 0.95 |

Supplement: Supplementary file 1275 [file 1]

# IPI00005589.1|HCG\_18290

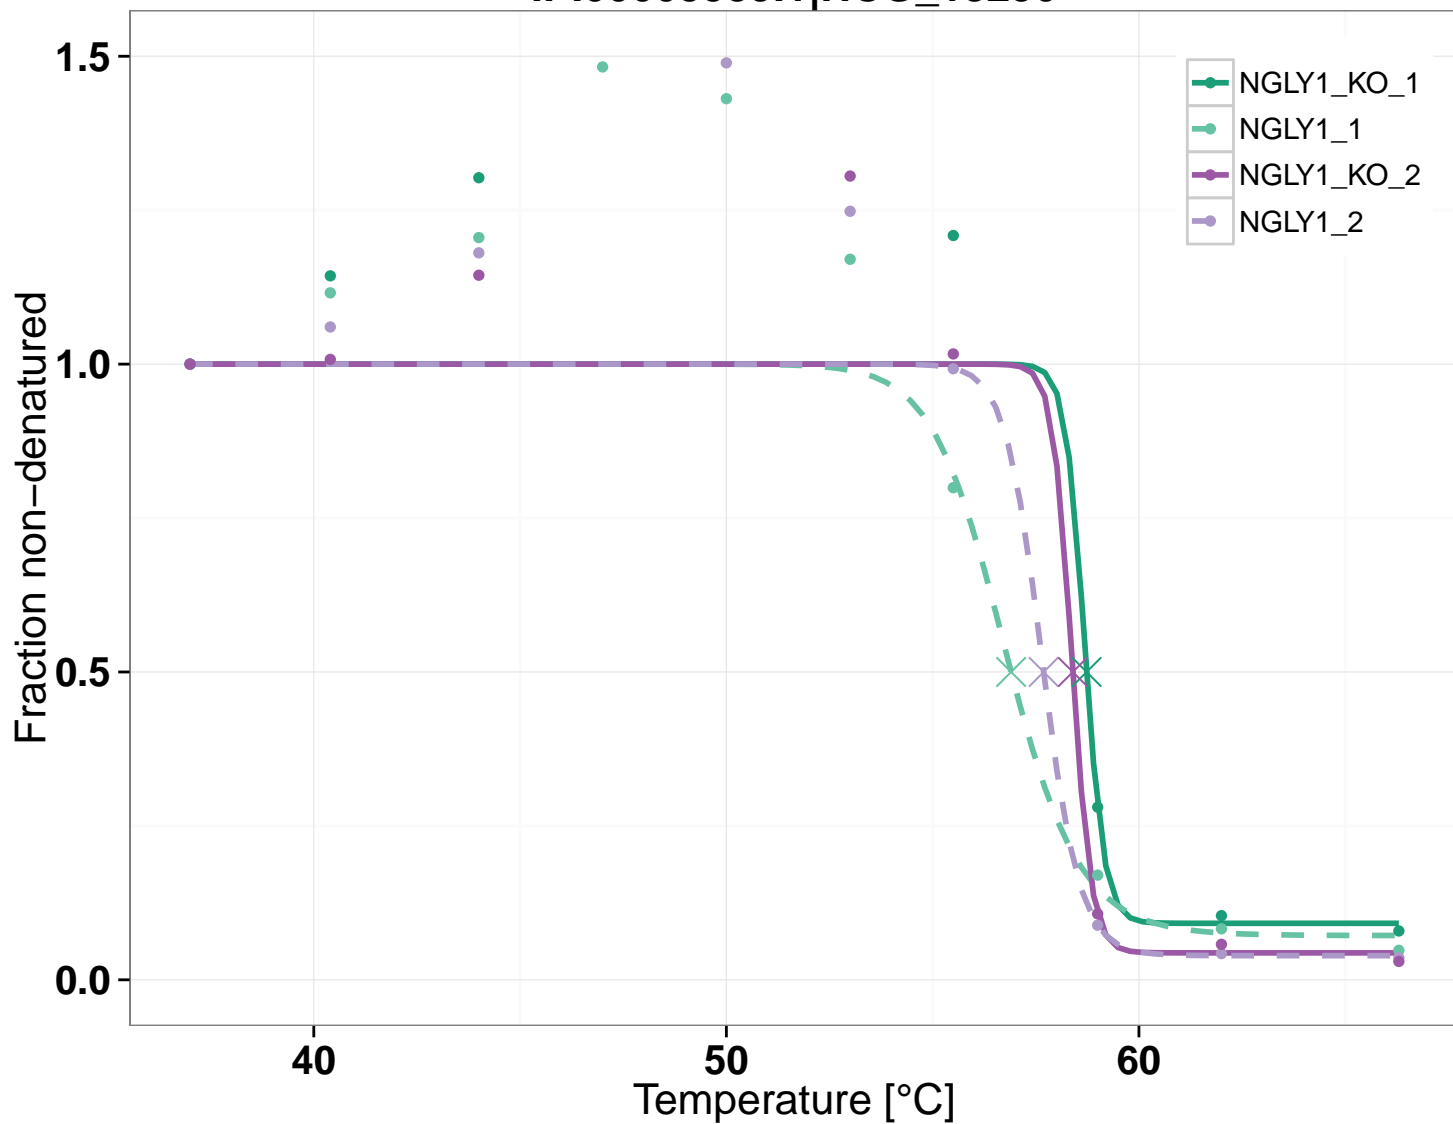

|            | meltPoint | slope | plateau | R2   |
|------------|-----------|-------|---------|------|
| NGLY1_KO_1 | 58.73     | -0.97 | 0.09    | 0.52 |
| NGLY1_1    | 56.9      | -0.26 | 0.07    | 0.82 |
| NGLY1_KO_2 | 58.4      | -1    | 0.04    | 0.76 |
| NGLY1_2    | 57.69     | -0.53 | 0.04    | 0.78 |

Supplement: Supplementary file 1276 [file 1]

IPI00789551.1|MATR3

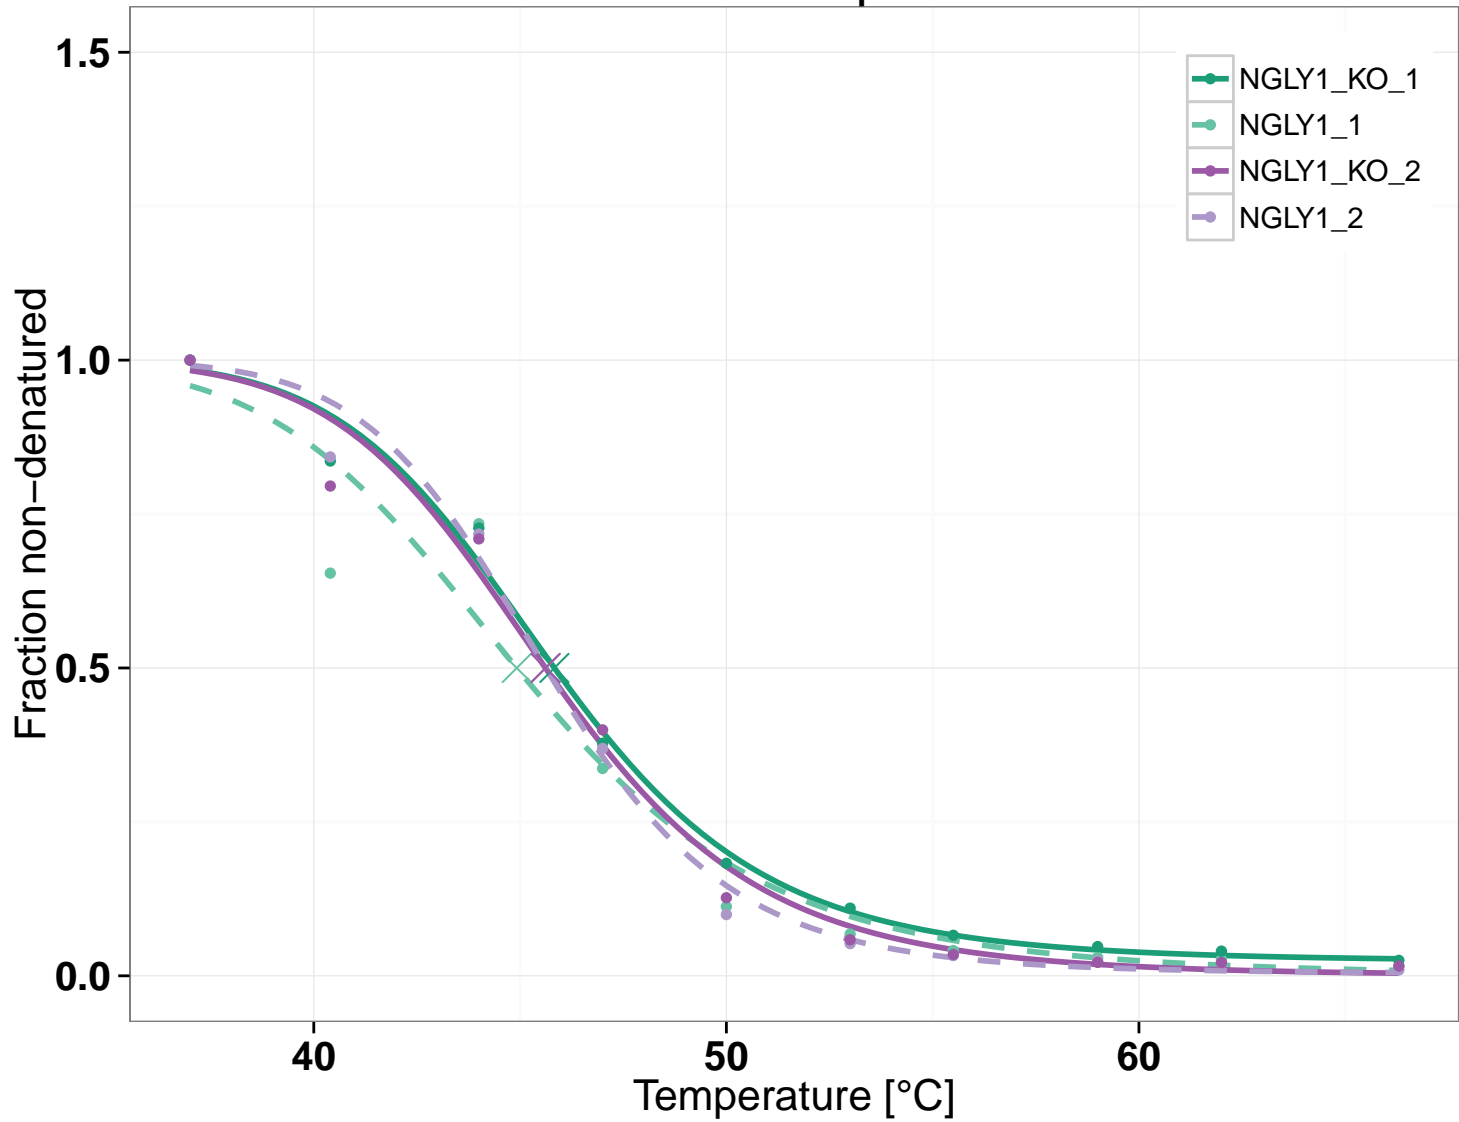

|            | meltPoint | slope  | plateau | R2   |
|------------|-----------|--------|---------|------|
| NGLY1_KO_1 | 45.83     | -0.095 | 0.02    | 0.99 |
| NGLY1_1    | 44.92     | -0.083 | 0       | 0.94 |
| NGLY1_KO_2 | 45.62     | -0.097 | 0       | 0.99 |
| NGLY1_2    | 45.62     | -0.11  | 0       | 0.99 |

Supplement: Supplementary file 1277 [file 1]

IPI00017375.2|SEC23A

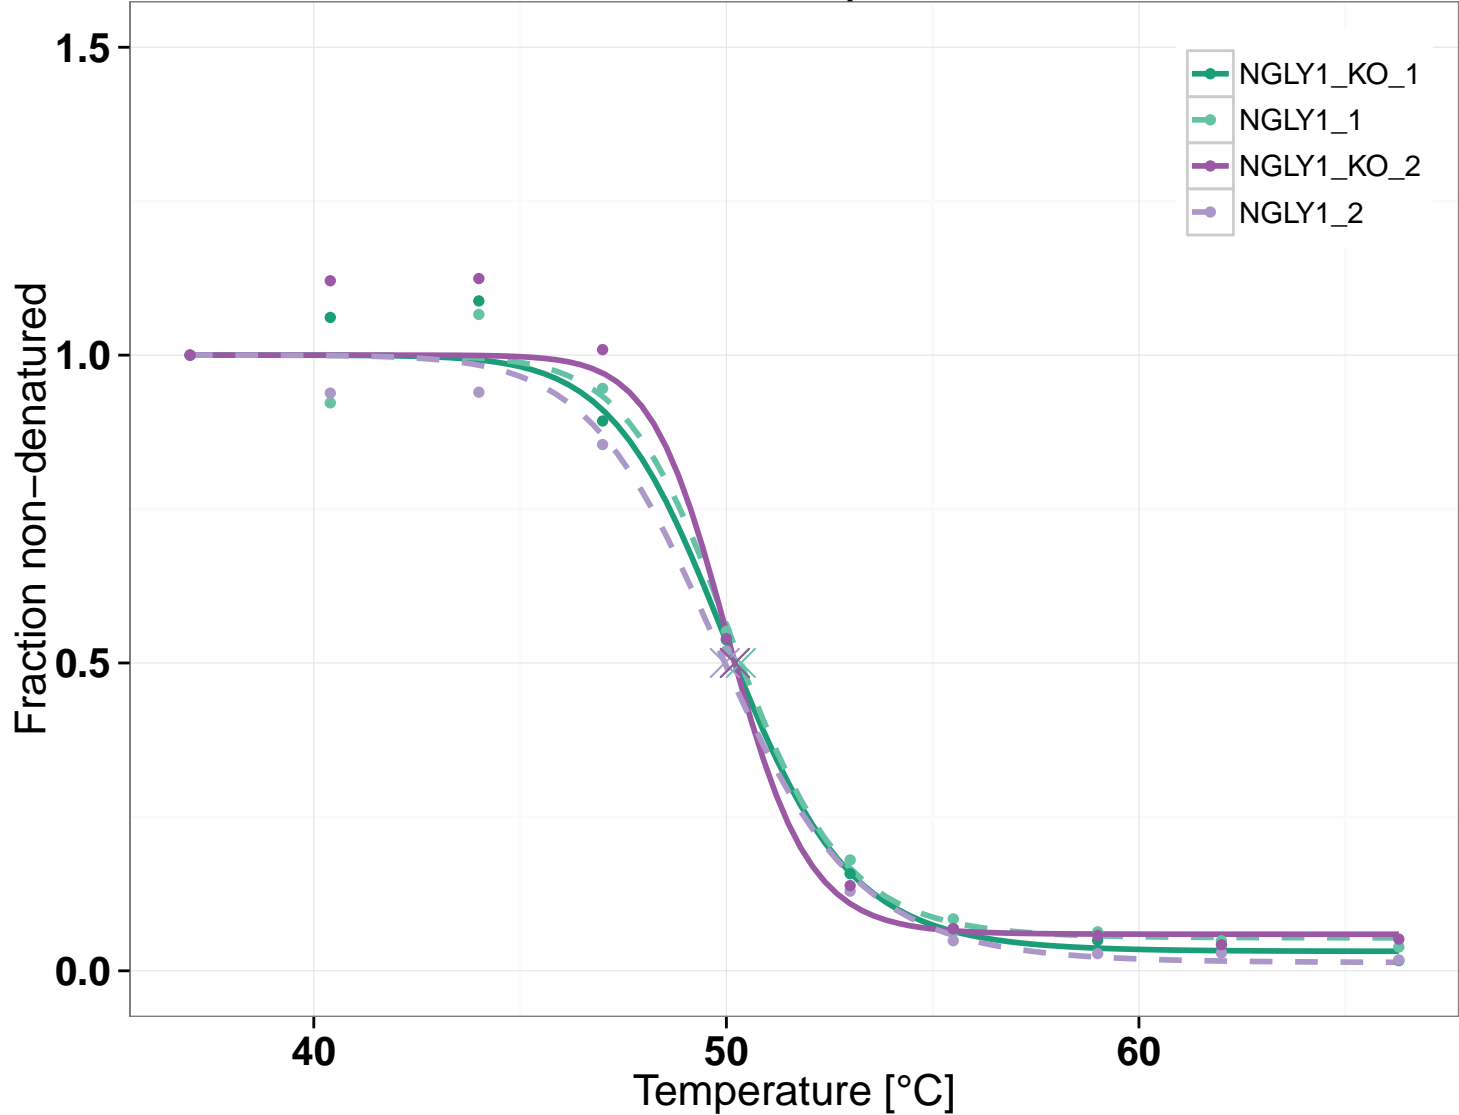

|            | meltPoint | slope | plateau | R2   |
|------------|-----------|-------|---------|------|
| NGLY1_KO_1 | 50.21     | -0.17 | 0.03    | 0.99 |
| NGLY1_1    | 50.35     | -0.18 | 0.05    | 0.99 |
| NGLY1_KO_2 | 50.21     | -0.25 | 0.06    | 0.99 |
| NGLY1_2    | 49.96     | -0.15 | 0.01    | 1    |

Supplement: Supplementary file 1278 [file 1]

# IPI00000663.1|MLYCD

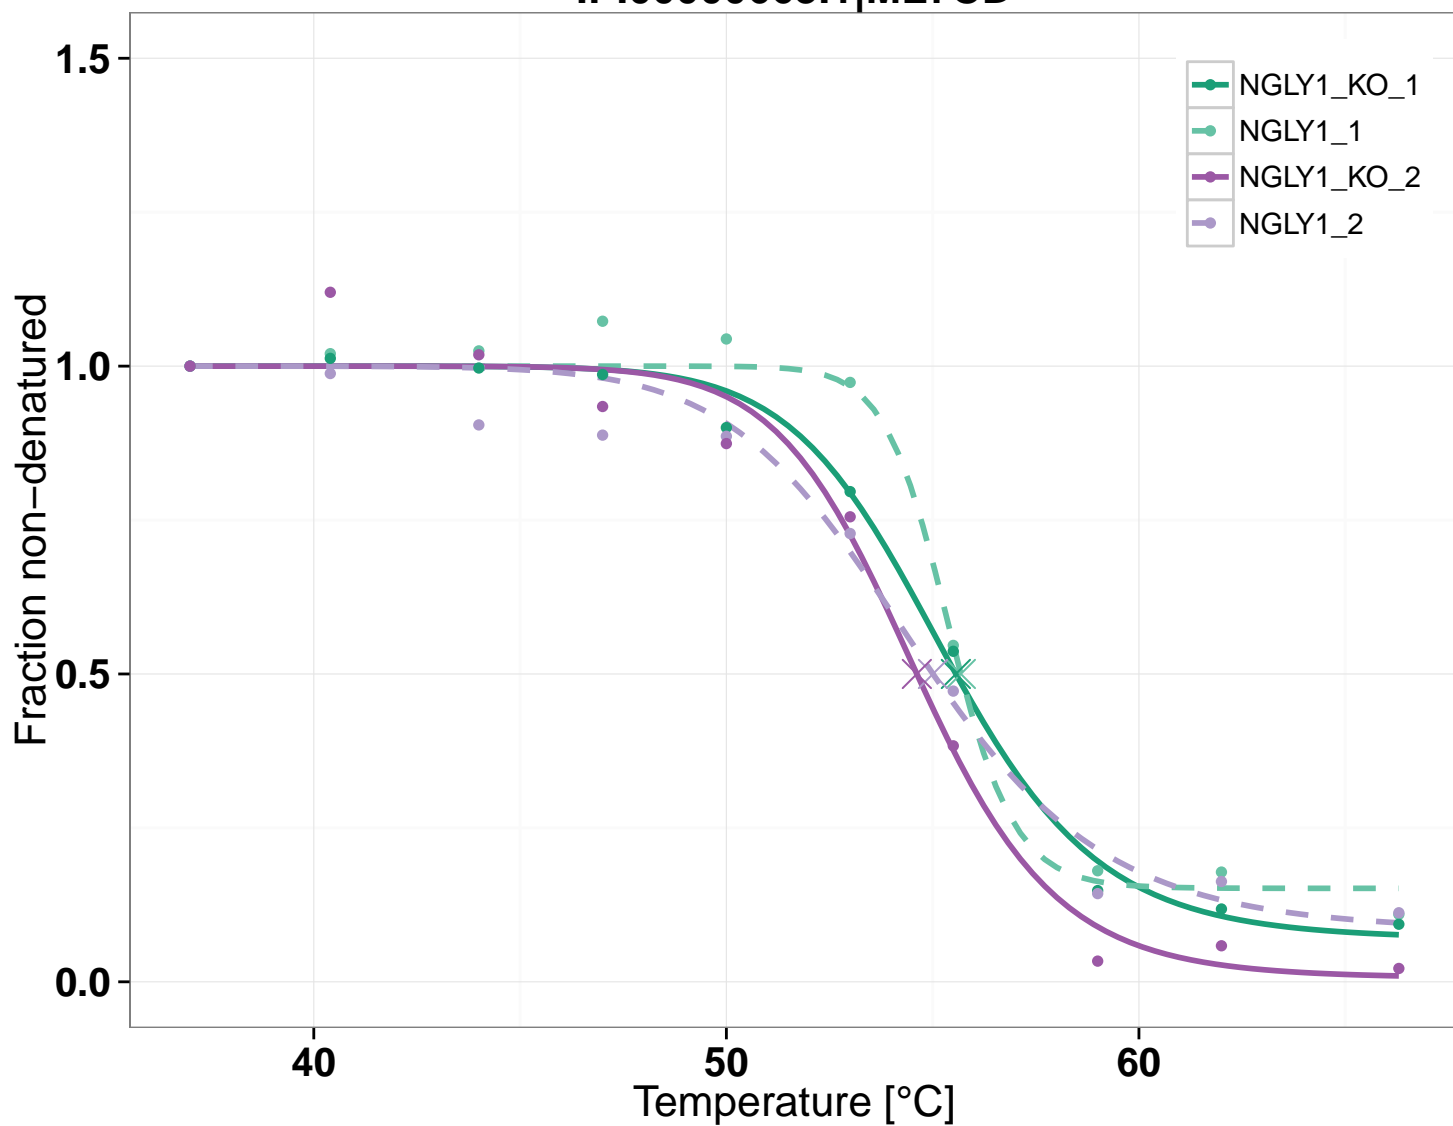

|            | meltPoint | slope | plateau | R2   |
|------------|-----------|-------|---------|------|
| NGLY1_KO_1 | 55.56     | -0.12 | 0.07    | 0.99 |
| NGLY1_1    | 55.68     | -0.27 | 0.15    | 0.99 |
| NGLY1_KO_2 | 54.62     | -0.15 | 0.01    | 0.98 |
| NGLY1_2    | 55.01     | -0.1  | 0.08    | 0.98 |

Supplement: Supplementary file 1279 [file 1]

# IPI00100673.6|RNF103

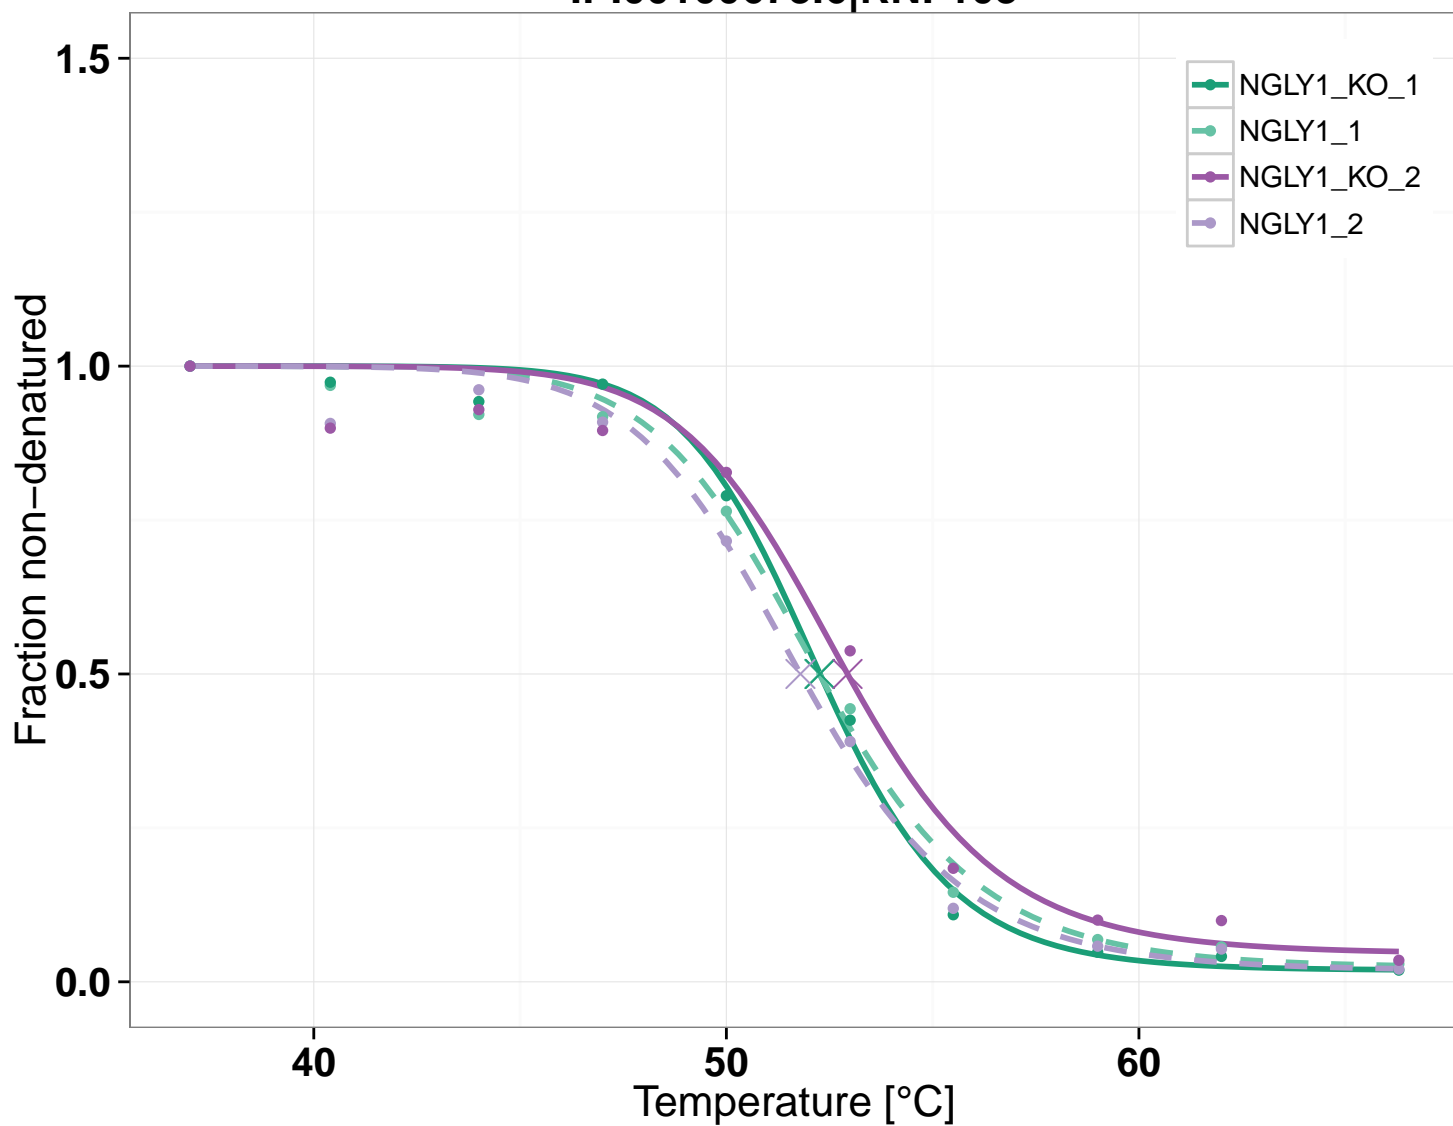

|            | meltPoint | slope | plateau | R2   |
|------------|-----------|-------|---------|------|
| NGLY1_KO_1 | 52.27     | -0.15 | 0.02    | 1    |
| NGLY1_1    | 52.25     | -0.12 | 0.02    | 0.99 |
| NGLY1_KO_2 | 52.94     | -0.12 | 0.05    | 0.98 |
| NGLY1_2    | 51.8      | -0.12 | 0.02    | 0.99 |

Supplement: Supplementary file 1280 [file 1]

IPI00031612.3|UTP23

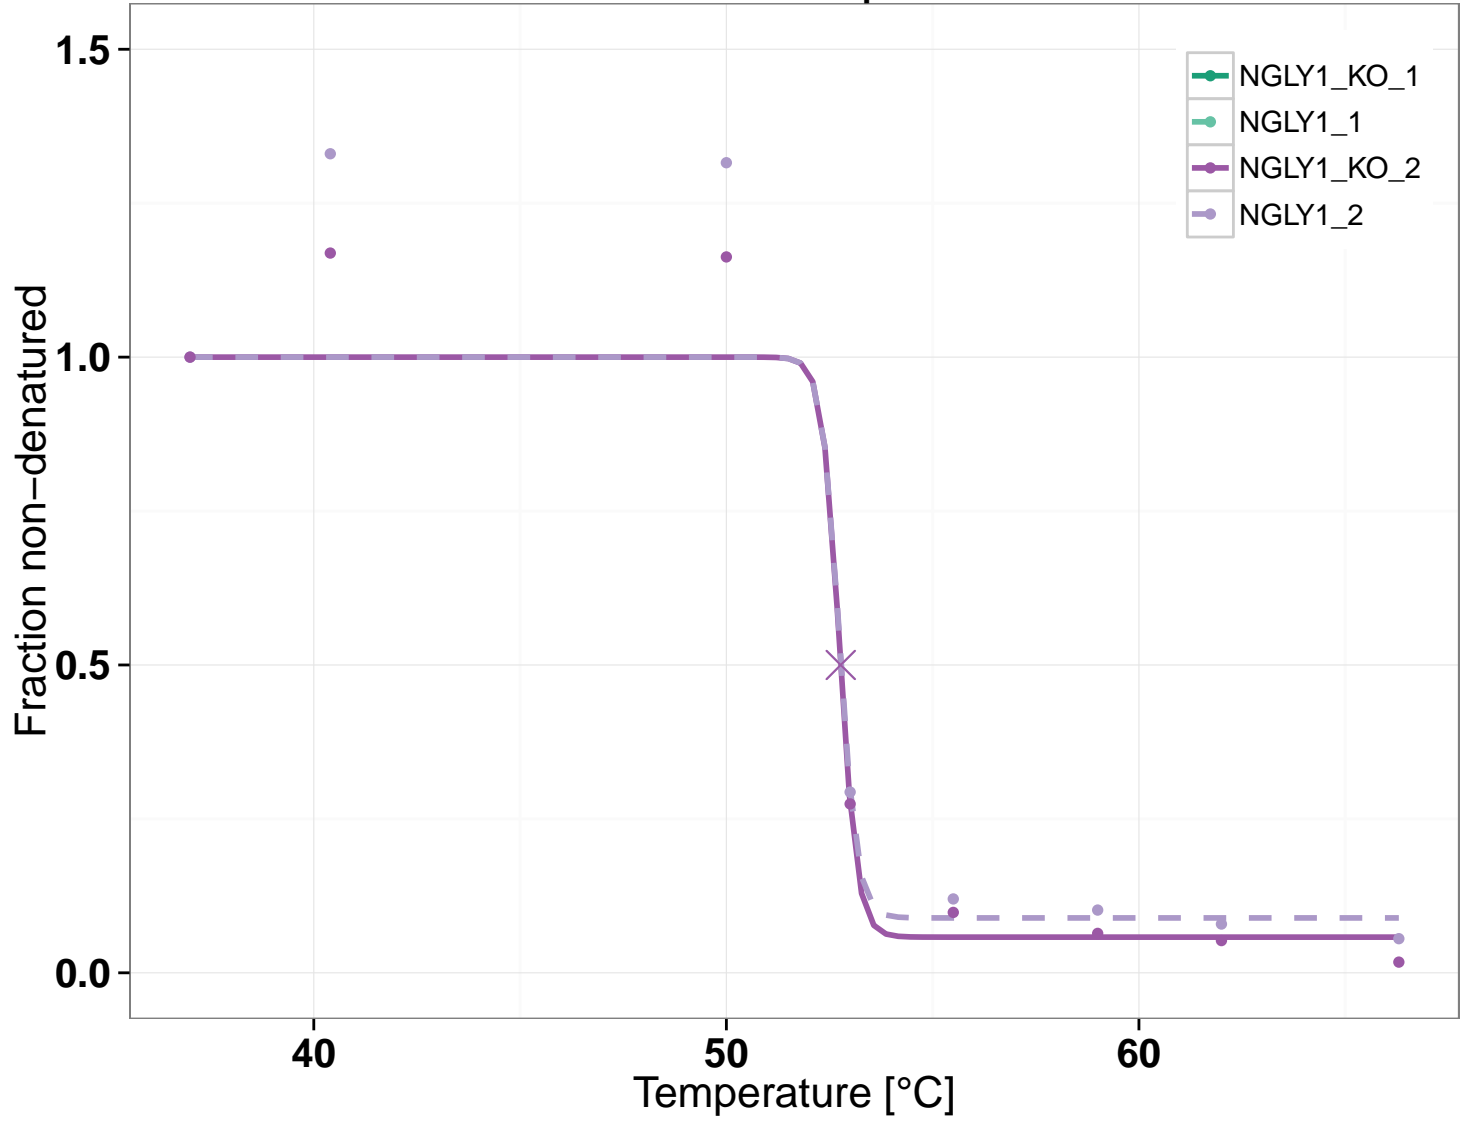

|            | meltPoint | slope | plateau | R2   |
|------------|-----------|-------|---------|------|
| NGLY1_KO_1 | -         | -     | -       | -    |
| NGLY1_1    | -         | -     | -       | -    |
| NGLY1_KO_2 | 52.77     | -1.1  | 0.06    | 0.68 |
| NGLY1_2    | 52.78     | -1.1  | 0.09    | 0.43 |

Supplement: Supplementary file 1281 [file 1]

IPI00290812.2|TTF2

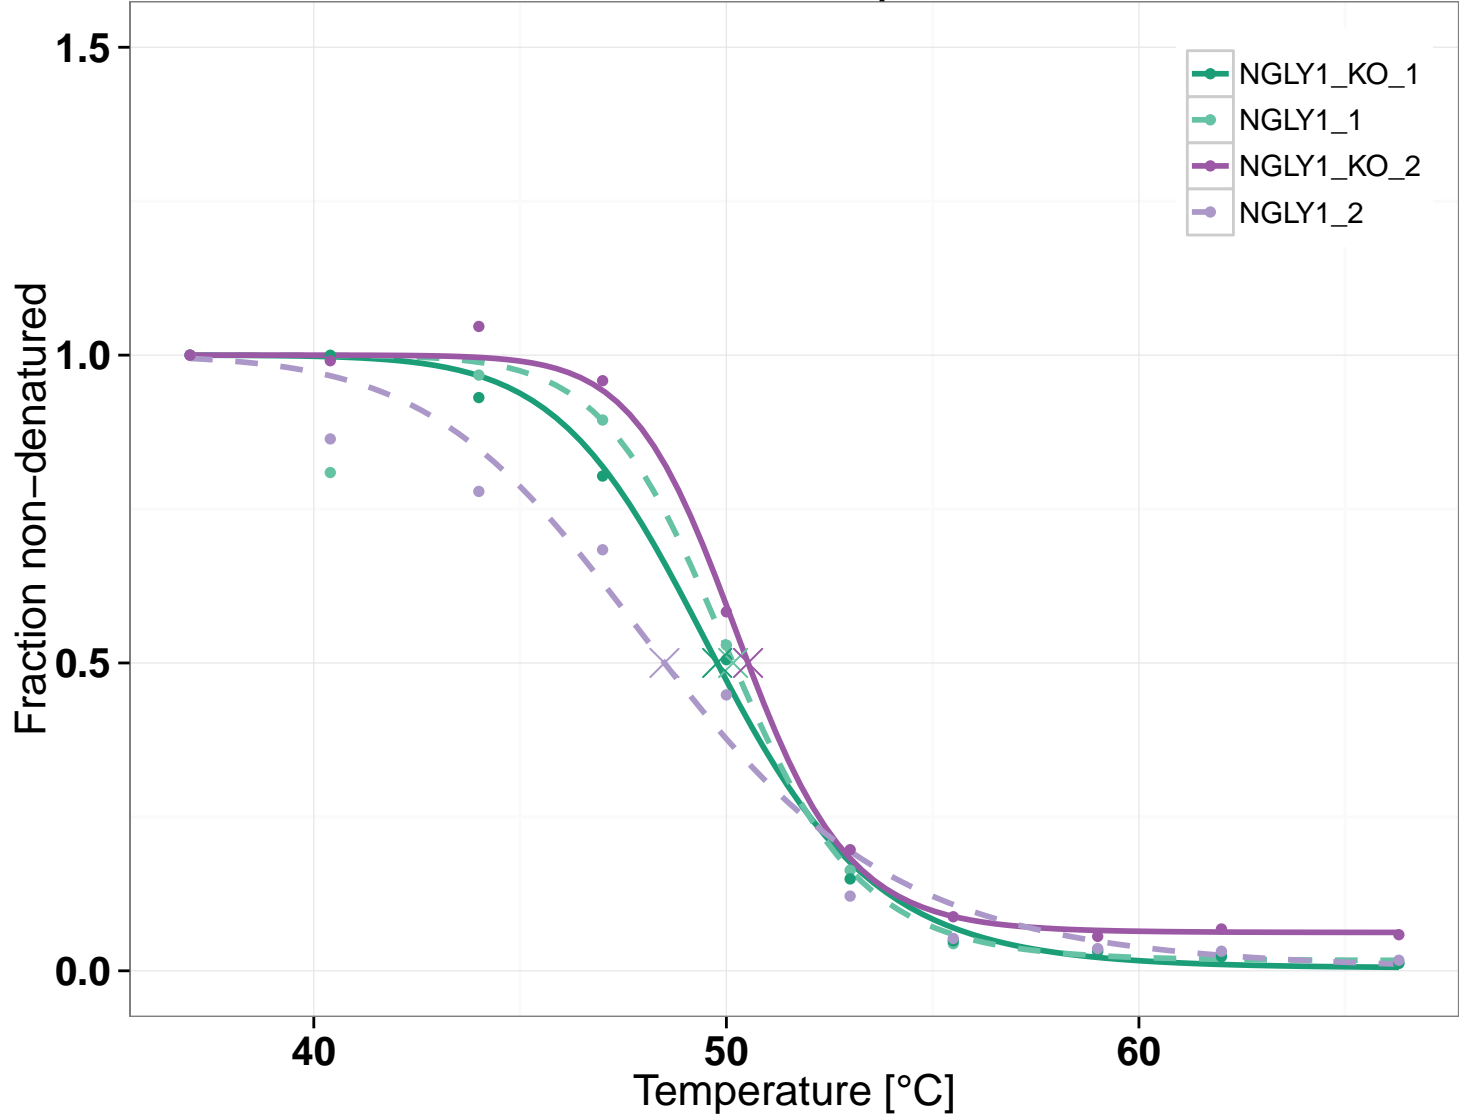

|            | meltPoint | slope  | plateau | R2   |
|------------|-----------|--------|---------|------|
| NGLY1_KO_1 | 49.78     | -0.13  | 0       | 1    |
| NGLY1_1    | 50.16     | -0.16  | 0.02    | 0.98 |
| NGLY1_KO_2 | 50.53     | -0.18  | 0.06    | 1    |
| NGLY1_2    | 48.5      | -0.088 | 0       | 0.98 |

Supplement: Supplementary file 1282 [file 1]

# IPI00018744.1|TRADD

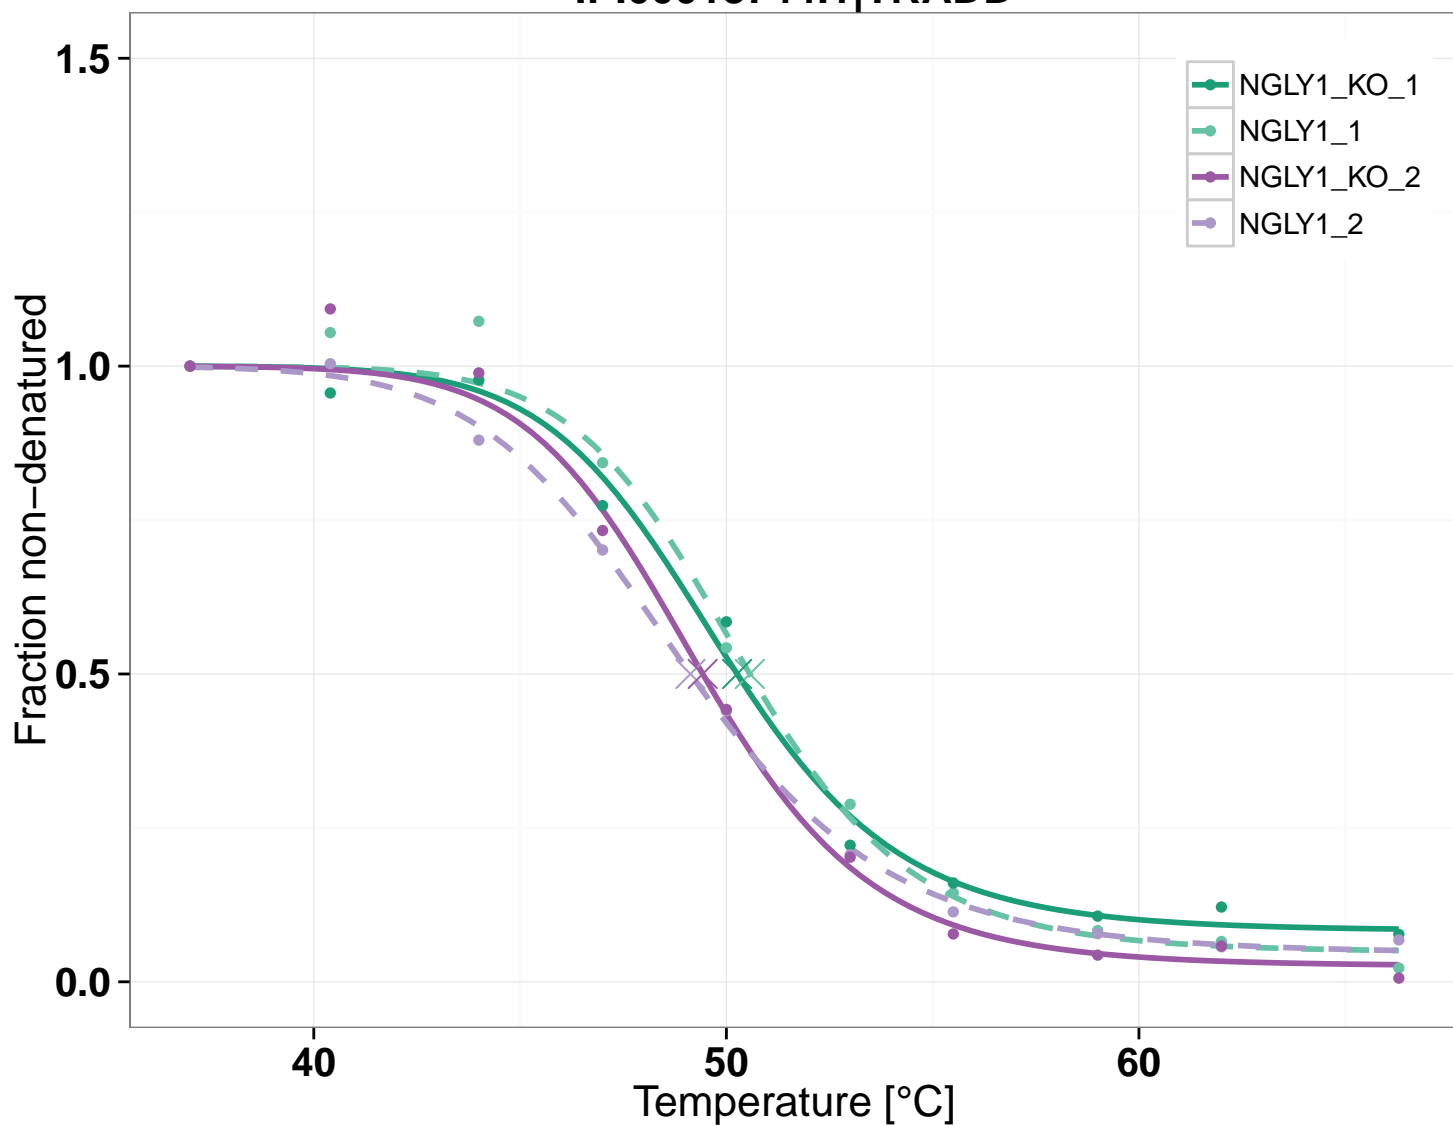

|            | meltPoint | slope  | plateau | R2   |
|------------|-----------|--------|---------|------|
| NGLY1_KO_1 | 50.26     | -0.11  | 0.08    | 0.99 |
| NGLY1_1    | 50.57     | -0.12  | 0.05    | 0.99 |
| NGLY1_KO_2 | 49.43     | -0.12  | 0.03    | 0.99 |
| NGLY1_2    | 49.13     | -0.096 | 0.05    | 1    |

Supplement: Supplementary file 1283 [file 1]

# IPI00017303.1|MSH2

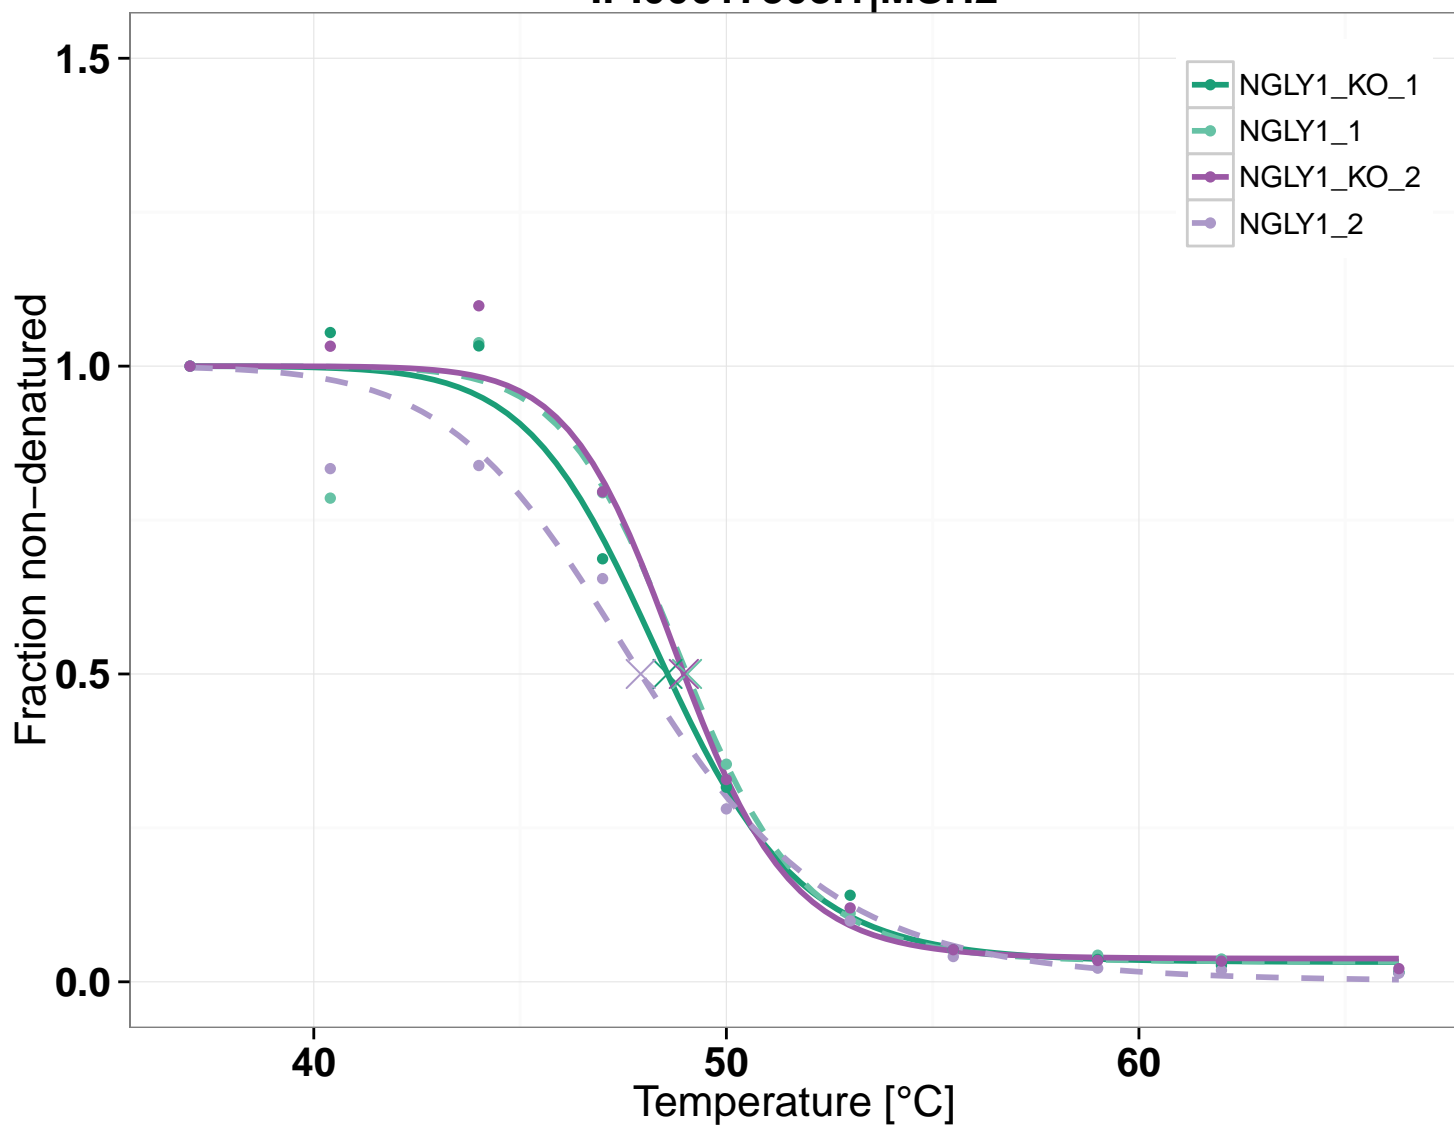

|            | meltPoint | slope | plateau | R2   |
|------------|-----------|-------|---------|------|
| NGLY1_KO_1 | 48.57     | -0.15 | 0.03    | 0.99 |
| NGLY1_1    | 49.05     | -0.16 | 0.03    | 0.97 |
| NGLY1_KO_2 | 48.97     | -0.18 | 0.04    | 0.99 |
| NGLY1_2    | 47.92     | -0.11 | 0       | 0.98 |

Supplement: Supplementary file 1284 [file 1]

# IPI00021828.1|CSTB

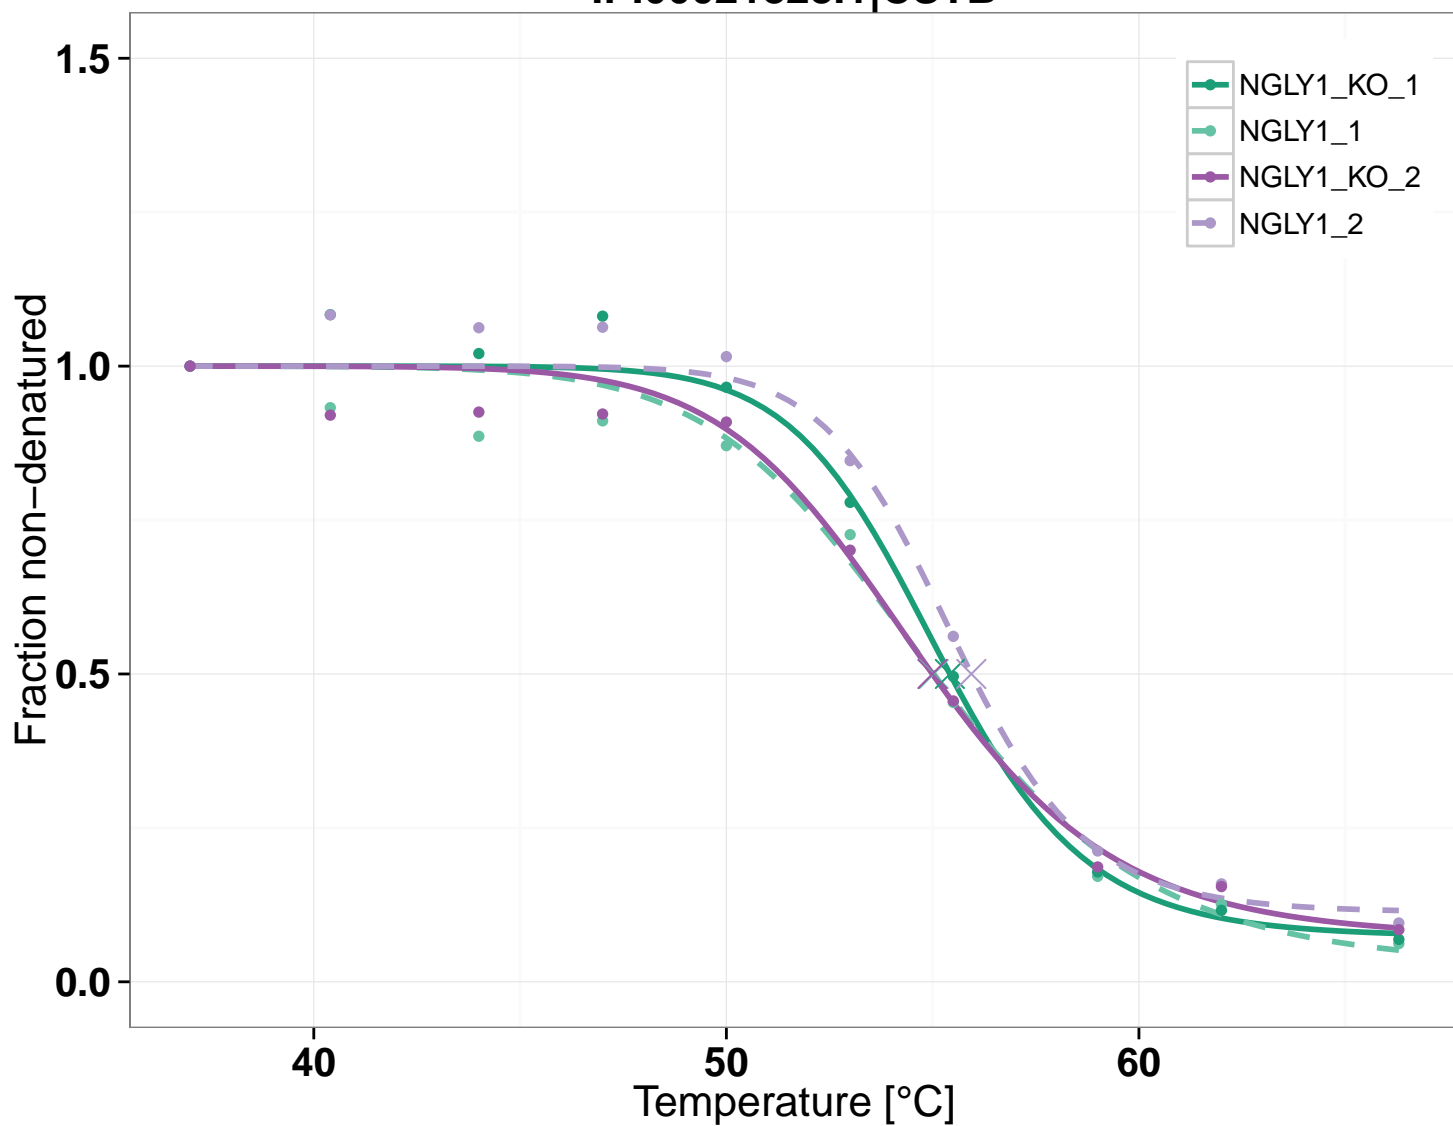

|            | meltPoint | slope  | plateau | R2   |
|------------|-----------|--------|---------|------|
| NGLY1_KO_1 | 55.42     | -0.13  | 0.07    | 0.99 |
| NGLY1_1    | 55.02     | -0.092 | 0.02    | 0.98 |
| NGLY1_KO_2 | 54.99     | -0.097 | 0.07    | 0.99 |
| NGLY1_2    | 55.94     | -0.14  | 0.11    | 0.99 |

Supplement: Supplementary file 1285 [file 1]

IPI00748619.2|AGPAT3

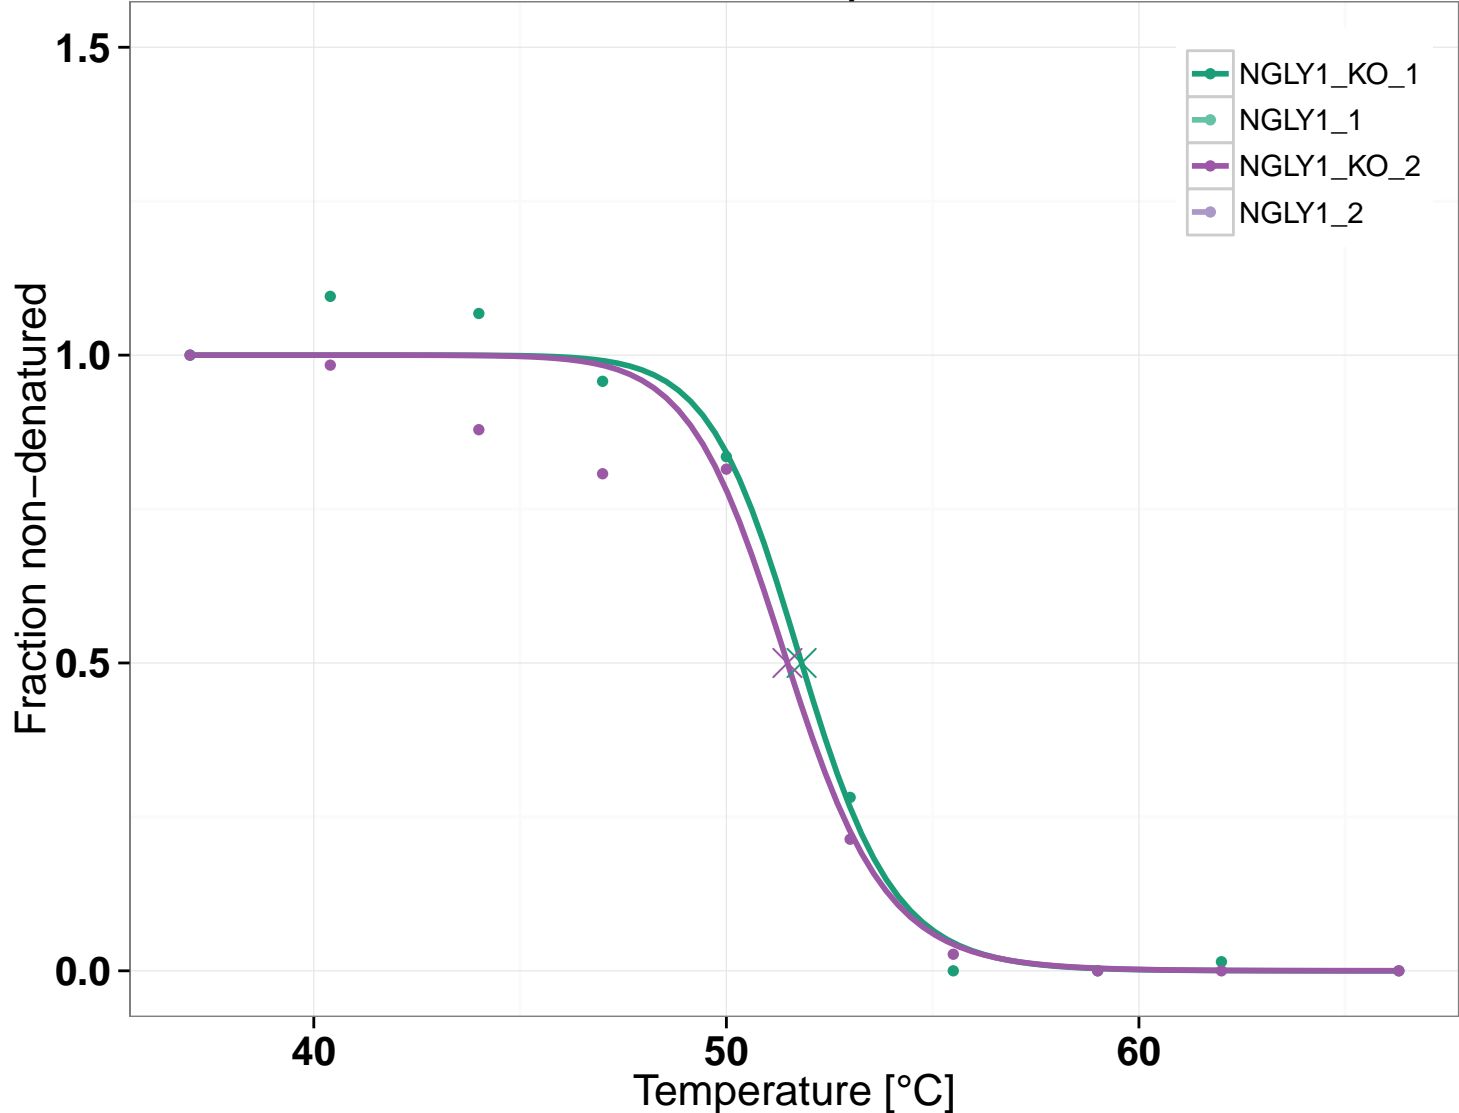

|            | meltPoint | slope | plateau | R2   |
|------------|-----------|-------|---------|------|
| NGLY1_KO_1 | 51.82     | -0.22 | 0       | 0.99 |
| NGLY1_1    | -         | -     | -       | -    |
| NGLY1_KO_2 | 51.48     | -0.21 | 0       | 0.97 |
| NGLY1_2    | -         | -     | -       | -    |

Supplement: Supplementary file 1286 [file 1]

IPI00152182.1|KLHDC4

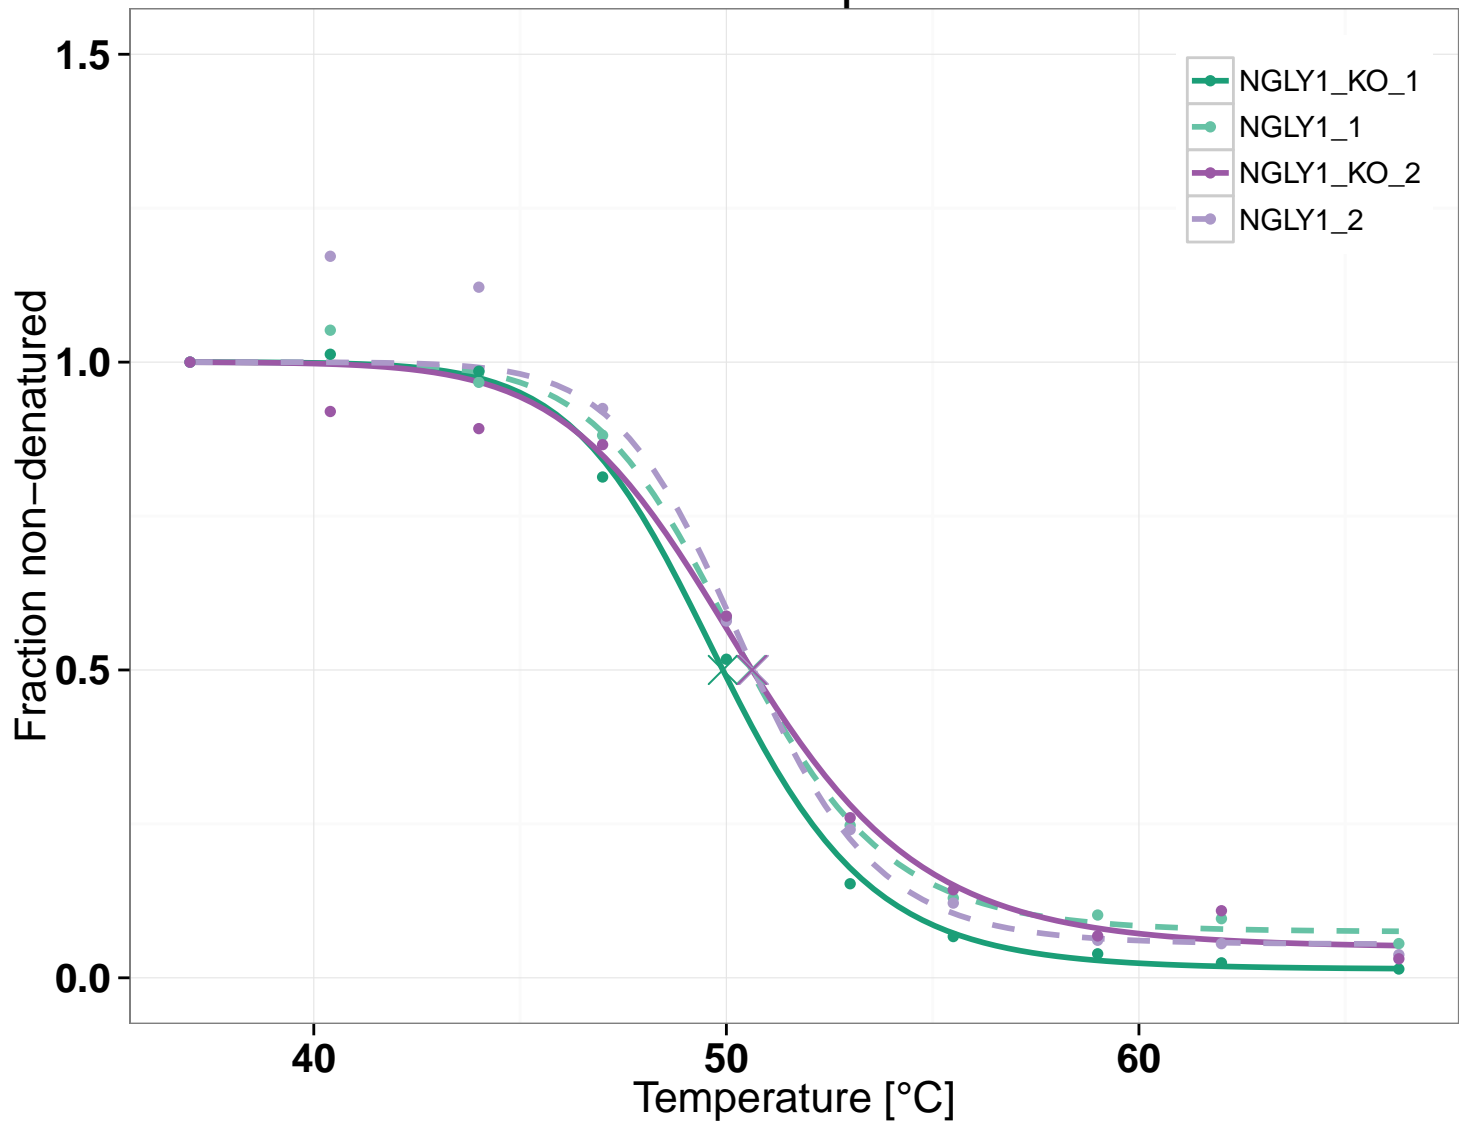

|            | meltPoint | slope | plateau | R2   |
|------------|-----------|-------|---------|------|
| NGLY1_KO_1 | 49.91     | -0.14 | 0.01    | 1    |
| NGLY1_1    | 50.59     | -0.13 | 0.07    | 1    |
| NGLY1_KO_2 | 50.62     | -0.11 | 0.05    | 0.99 |
| NGLY1_2    | 50.67     | -0.15 | 0.05    | 0.98 |

Supplement: Supplementary file 1287 [file 1]

IPI00031456.2|SLC29A2

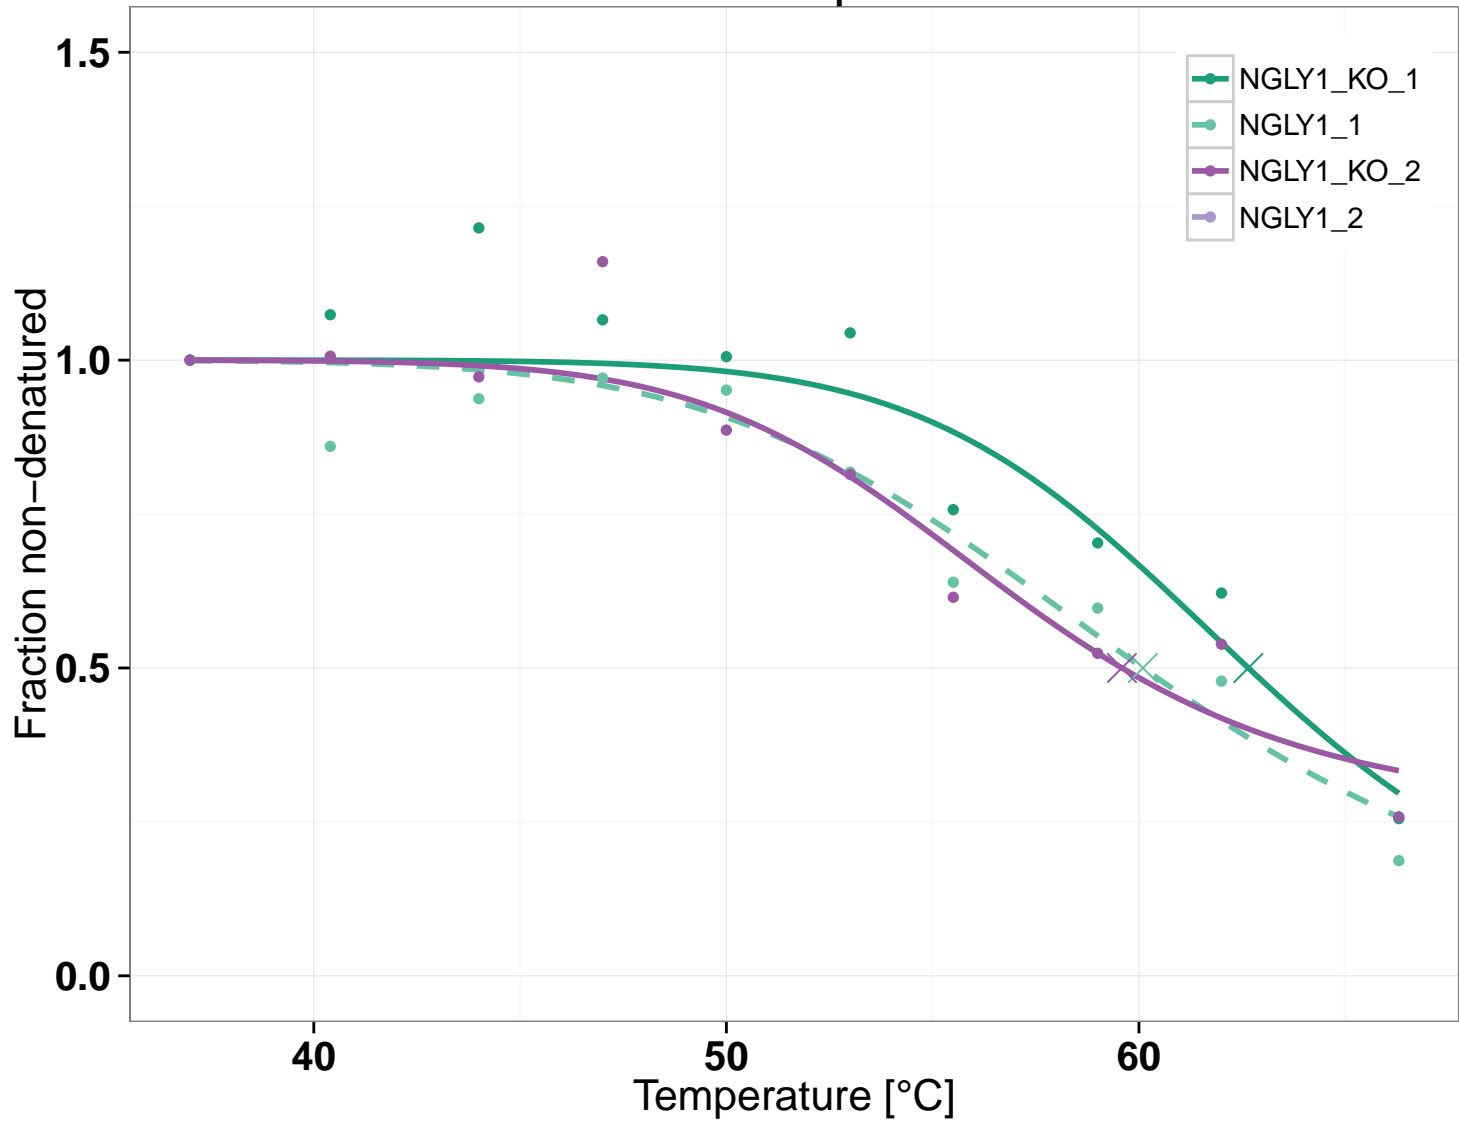

|            | meltPoint | slope  | plateau | R2   |
|------------|-----------|--------|---------|------|
| NGLY1_KO_1 | 62.65     | -0.064 | 0       | 0.88 |
| NGLY1_1    | 60.09     | -0.048 | 0       | 0.94 |
| NGLY1_KO_2 | 59.59     | -0.051 | 0.26    | 0.91 |
| NGLY1_2    | -         | -      | -       | -    |

Supplement: Supplementary file 1288 [file 1]

IPI00100245.1|POLR3F

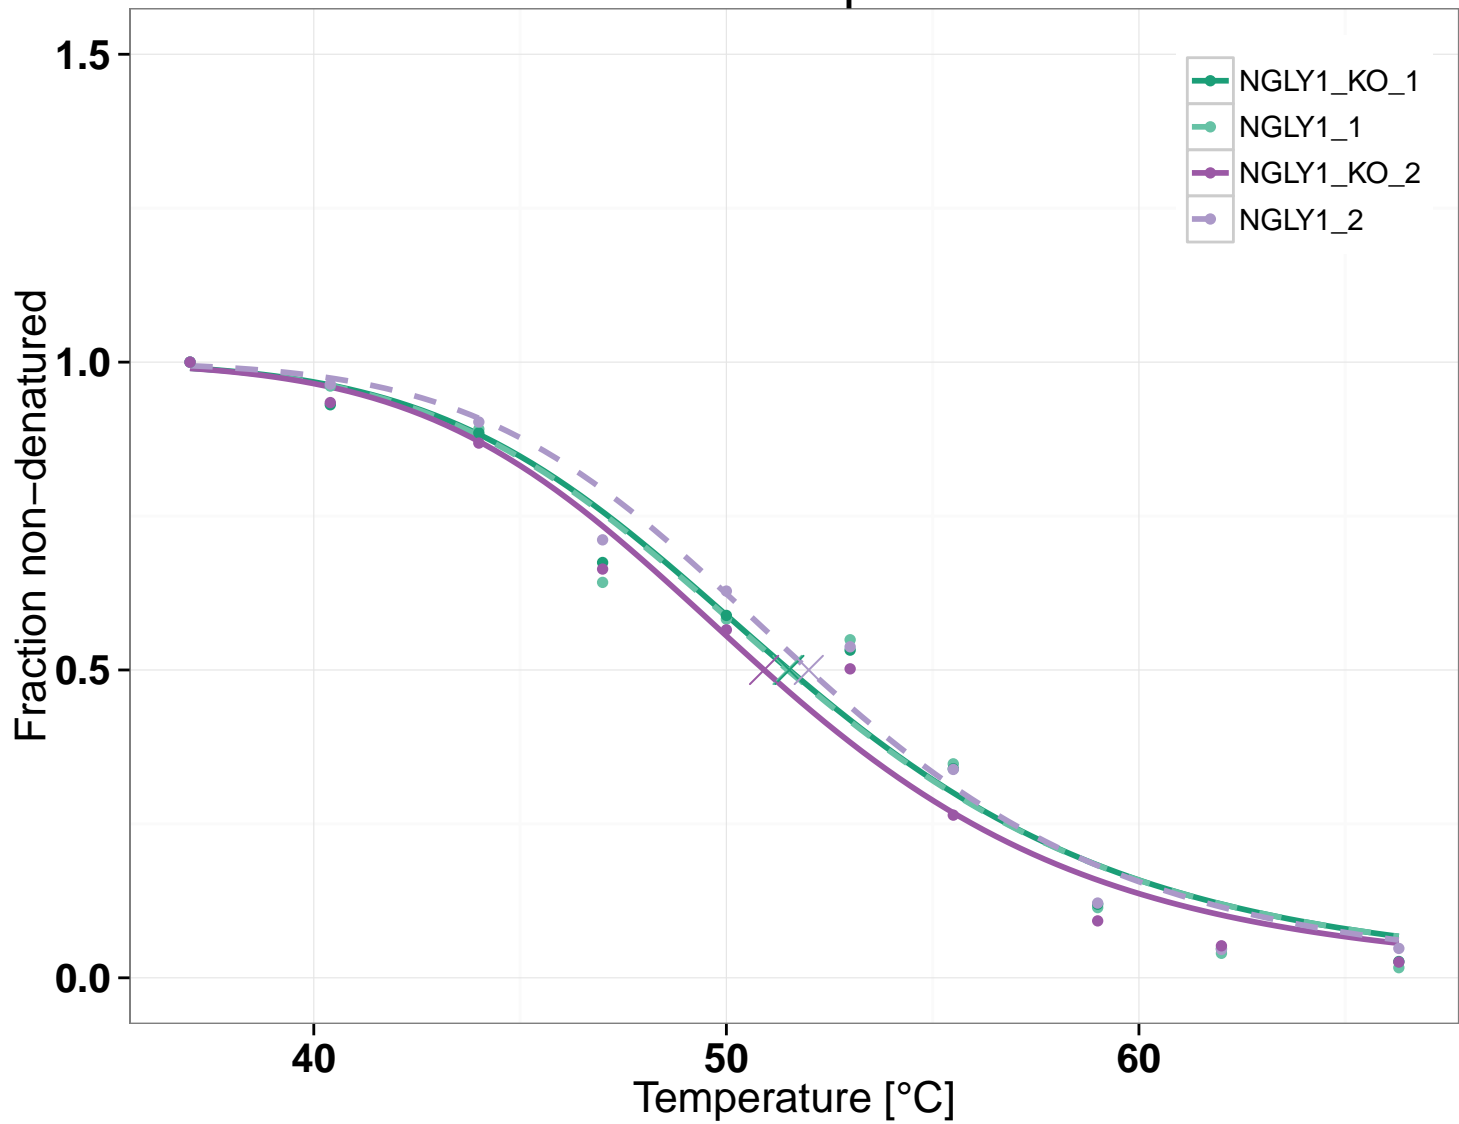

|            | meltPoint | slope  | plateau | R2   |
|------------|-----------|--------|---------|------|
| NGLY1_KO_1 | 51.53     | -0.059 | 0       | 0.97 |
| NGLY1_1    | 51.48     | -0.059 | 0       | 0.96 |
| NGLY1_KO_2 | 50.91     | -0.061 | 0       | 0.98 |
| NGLY1_2    | 52        | -0.062 | 0       | 0.98 |

Supplement: Supplementary file 1289 [file 1]

IPI00001134.3|RBM7

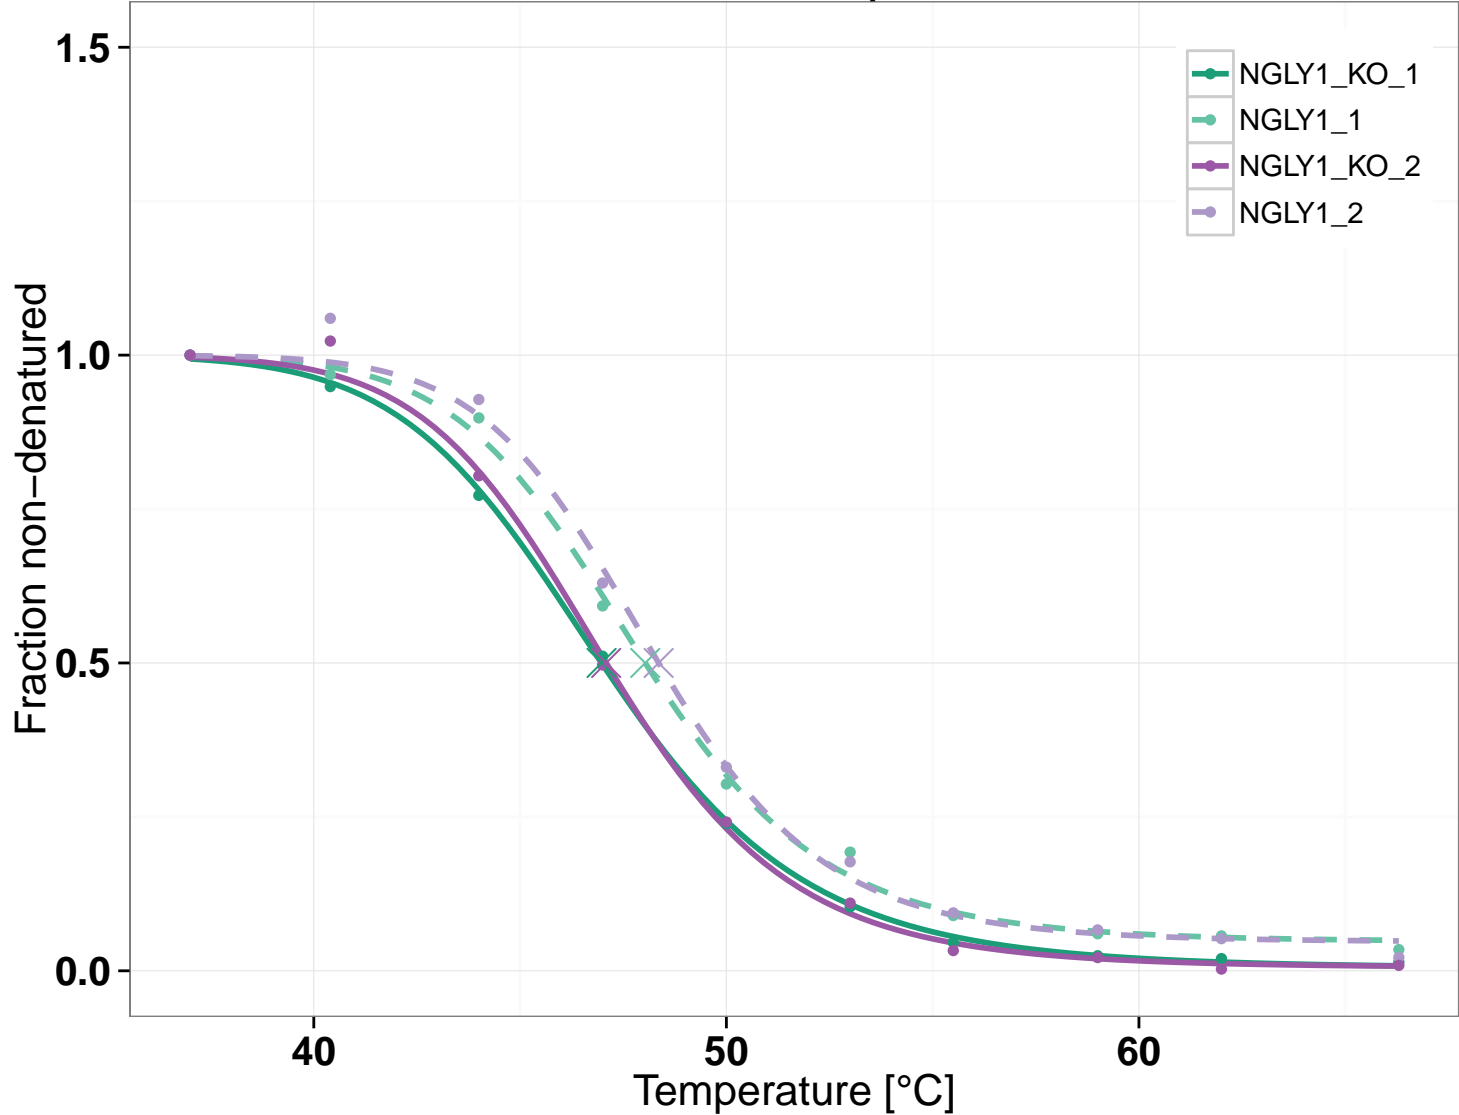

|            | meltPoint | slope | plateau | R2 |
|------------|-----------|-------|---------|----|
| NGLY1_KO_1 | 46.97     | -0.1  | 0       | 1  |
| NGLY1_1    | 48.03     | -0.11 | 0.05    | 1  |
| NGLY1_KO_2 | 47.09     | -0.11 | 0.01    | 1  |
| NGLY1_2    | 48.36     | -0.11 | 0.05    | 1  |

Supplement: Supplementary file 1290 [file 1]

IPI00410705.2|NKIRAS1

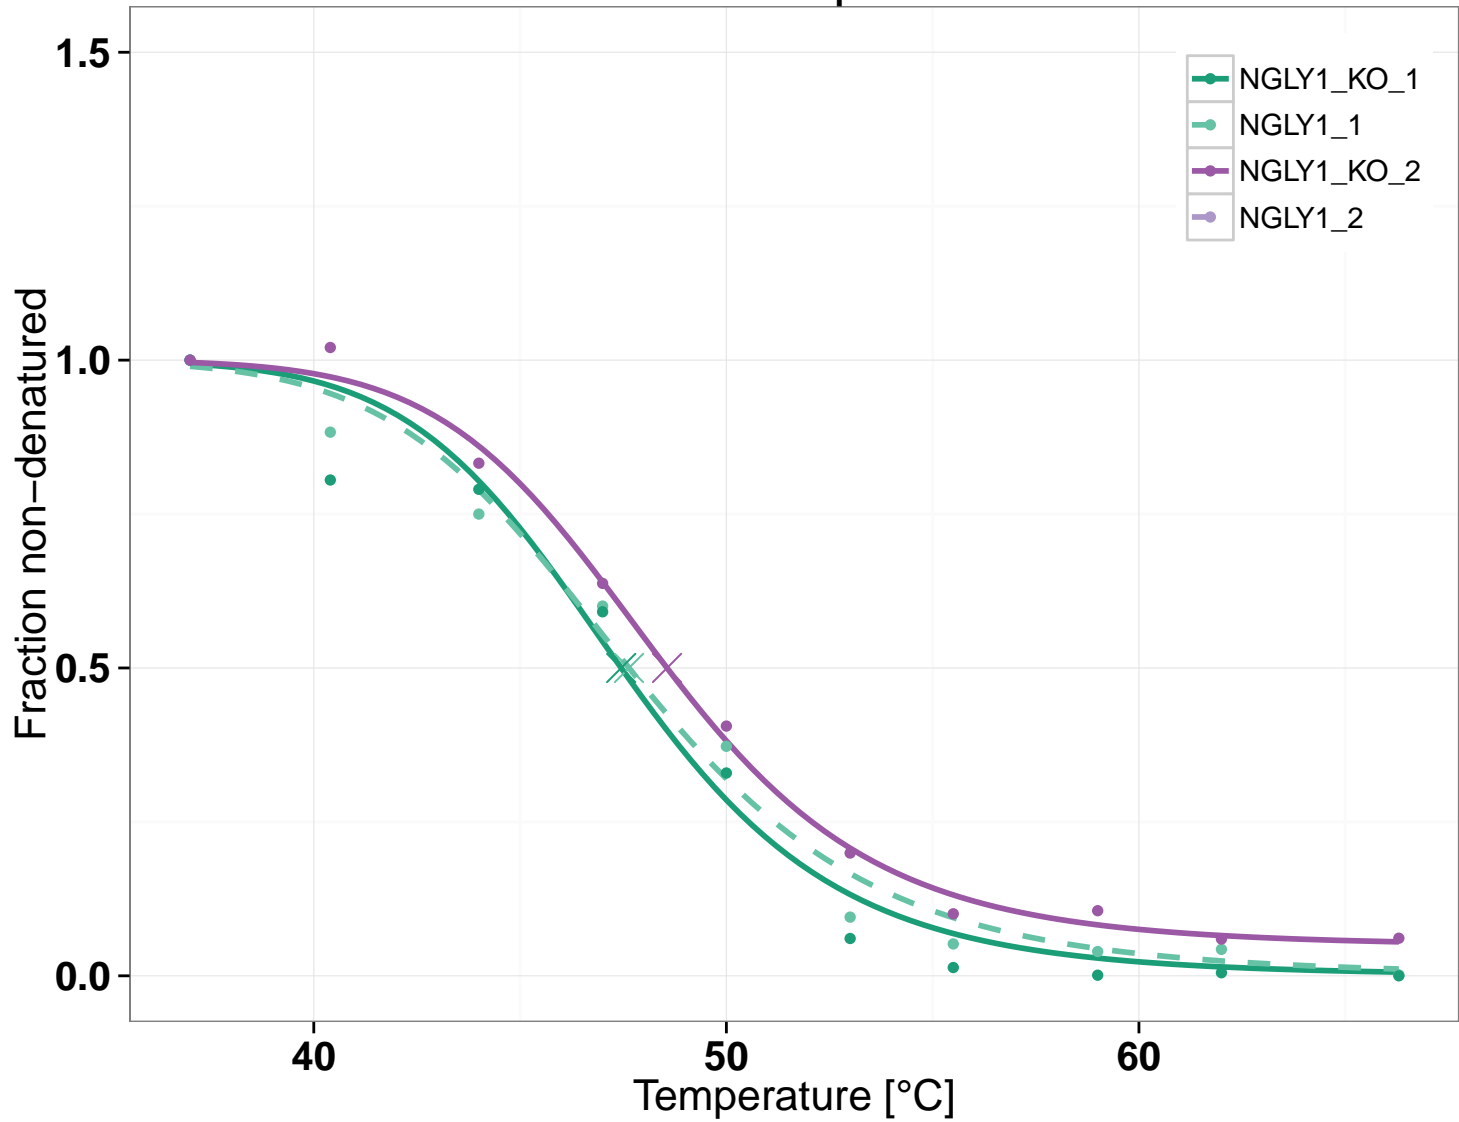

|            | meltPoint | slope  | plateau | R2   |
|------------|-----------|--------|---------|------|
| NGLY1_KO_1 | 47.45     | -0.096 | 0       | 0.97 |
| NGLY1_1    | 47.64     | -0.085 | 0       | 0.99 |
| NGLY1_KO_2 | 48.56     | -0.09  | 0.05    | 1    |
| NGLY1_2    | -         | -      | -       | -    |

Supplement: Supplementary file 1291 [file 1]

# IPI00177008.1|PGP

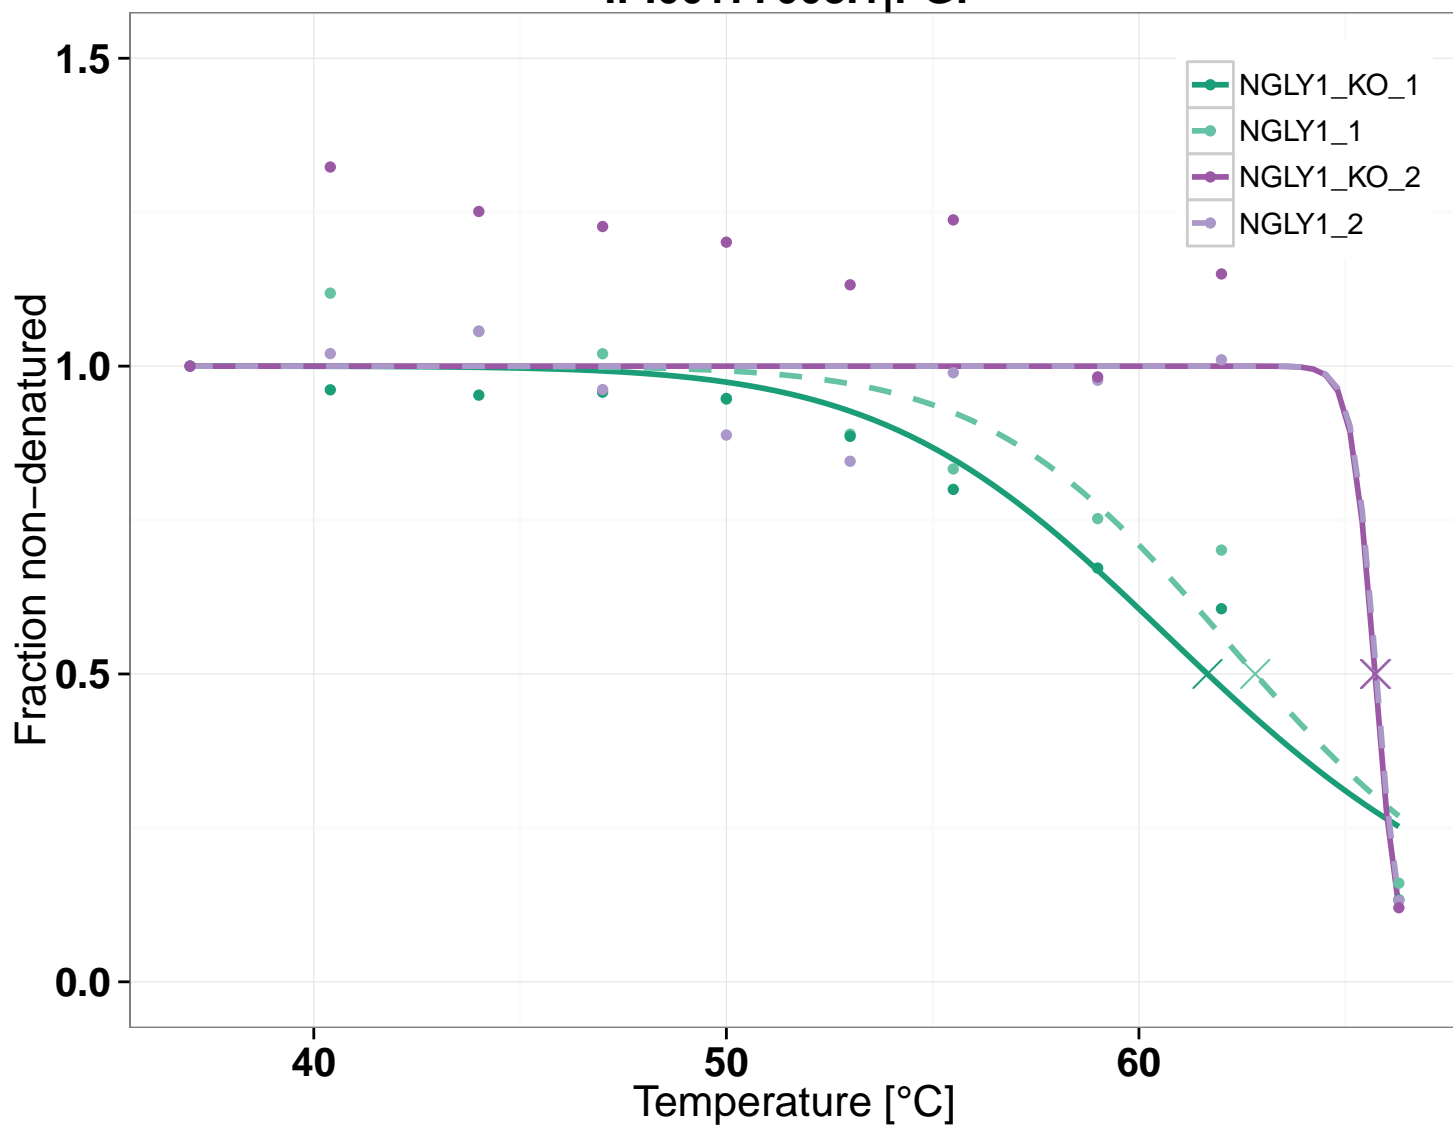

|            | meltPoint | slope  | plateau | R2   |
|------------|-----------|--------|---------|------|
| NGLY1_KO_1 | 61.66     | -0.064 | 0       | 0.94 |
| NGLY1_1    | 62.82     | -0.077 | 0       | 0.9  |
| NGLY1_KO_2 | 65.72     | -0.87  | 0       | 0.67 |
| NGLY1_2    | 65.75     | -0.87  | 0       | 0.94 |

Supplement: Supplementary file 1292 [file 1]

IPI00154512.4|C22ORF32

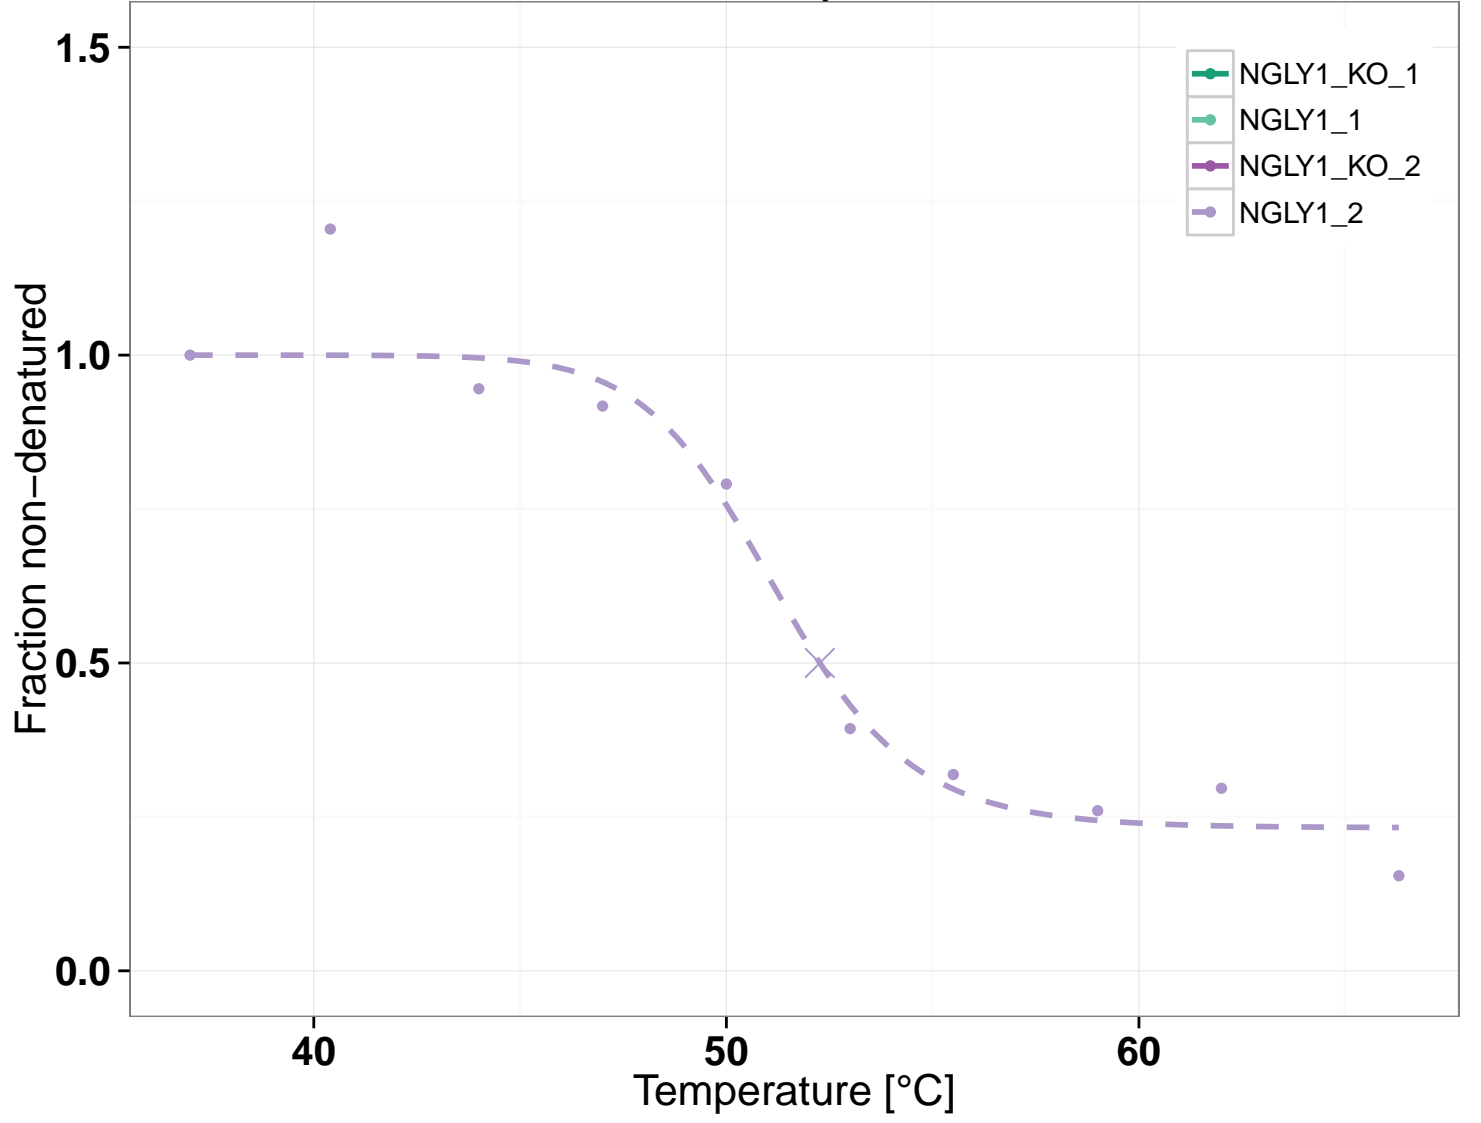

|            | meltPoint | slope | plateau | R2   |
|------------|-----------|-------|---------|------|
| NGLY1_KO_1 | —         | —     | —       | —    |
| NGLY1_1    | —         | —     | —       | —    |
| NGLY1_KO_2 | —         | —     | —       | —    |
| NGLY1_2    | 52.27     | -0.12 | 0.23    | 0.95 |

Supplement: Supplementary file 1293 [file 1]

IPI00030703.2|MNX1

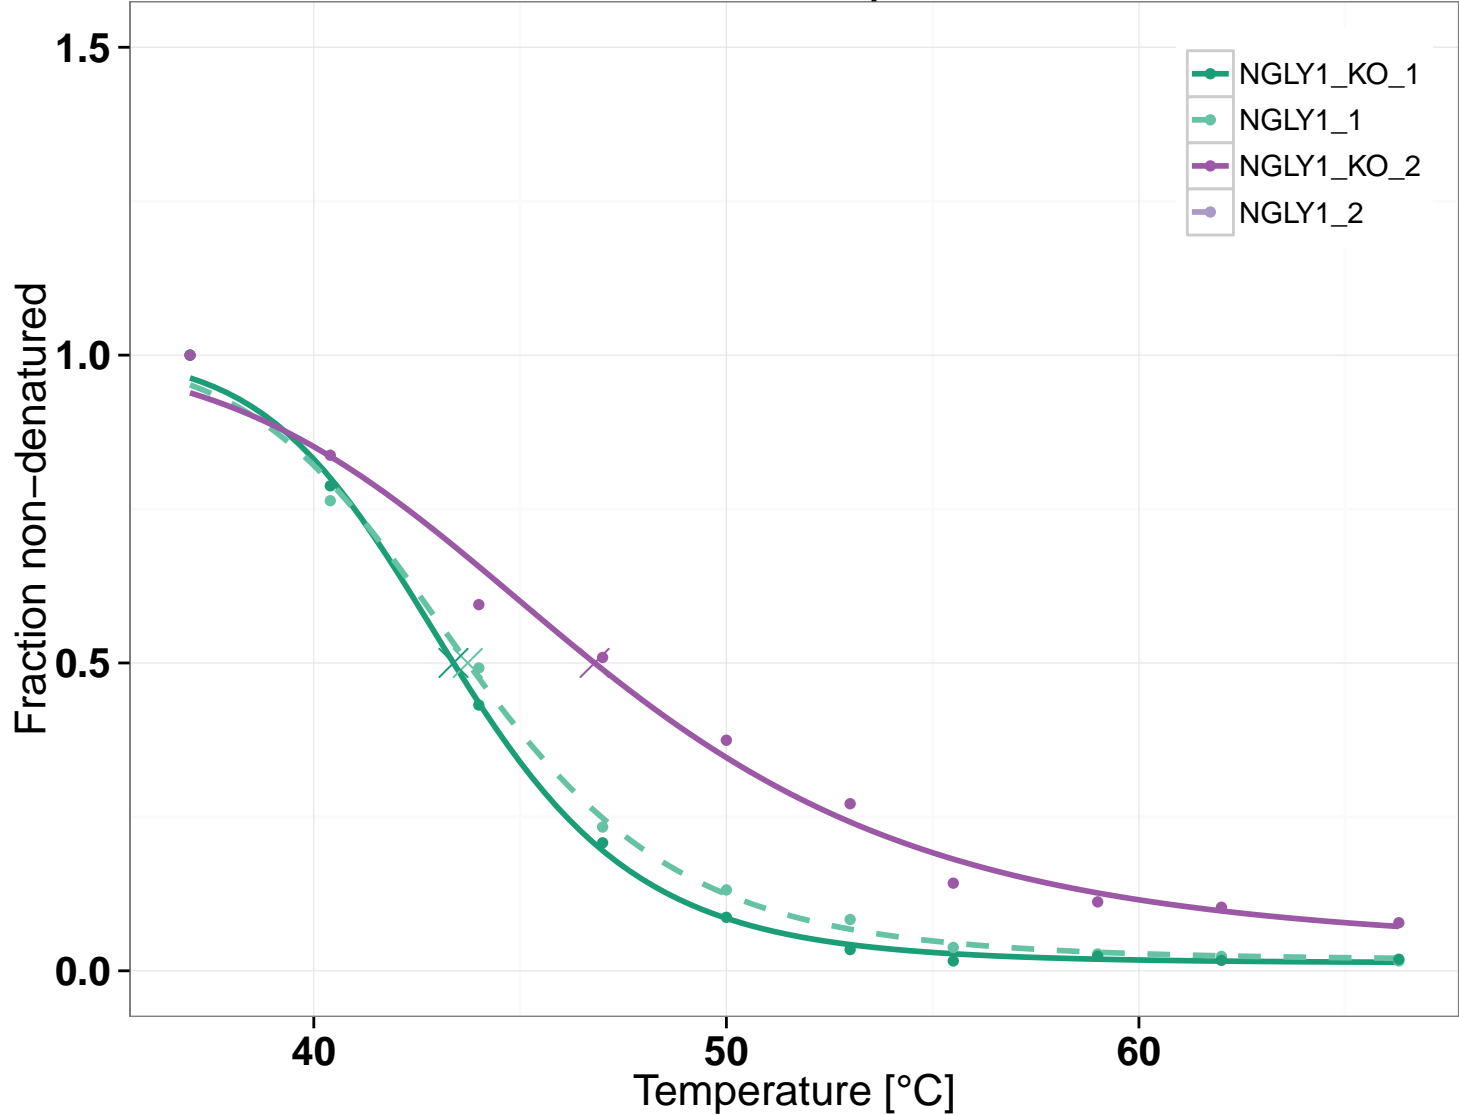

|            | meltPoint | slope  | plateau | R2   |
|------------|-----------|--------|---------|------|
| NGLY1_KO_1 | 43.39     | -0.11  | 0.01    | 1    |
| NGLY1_1    | 43.73     | -0.094 | 0.02    | 1    |
| NGLY1_KO_2 | 46.81     | -0.057 | 0.03    | 0.99 |
| NGLY1_2    | -         | -      | -       | -    |

Supplement: Supplementary file 1294 [file 1]

# IPI00184330.5|MCM2

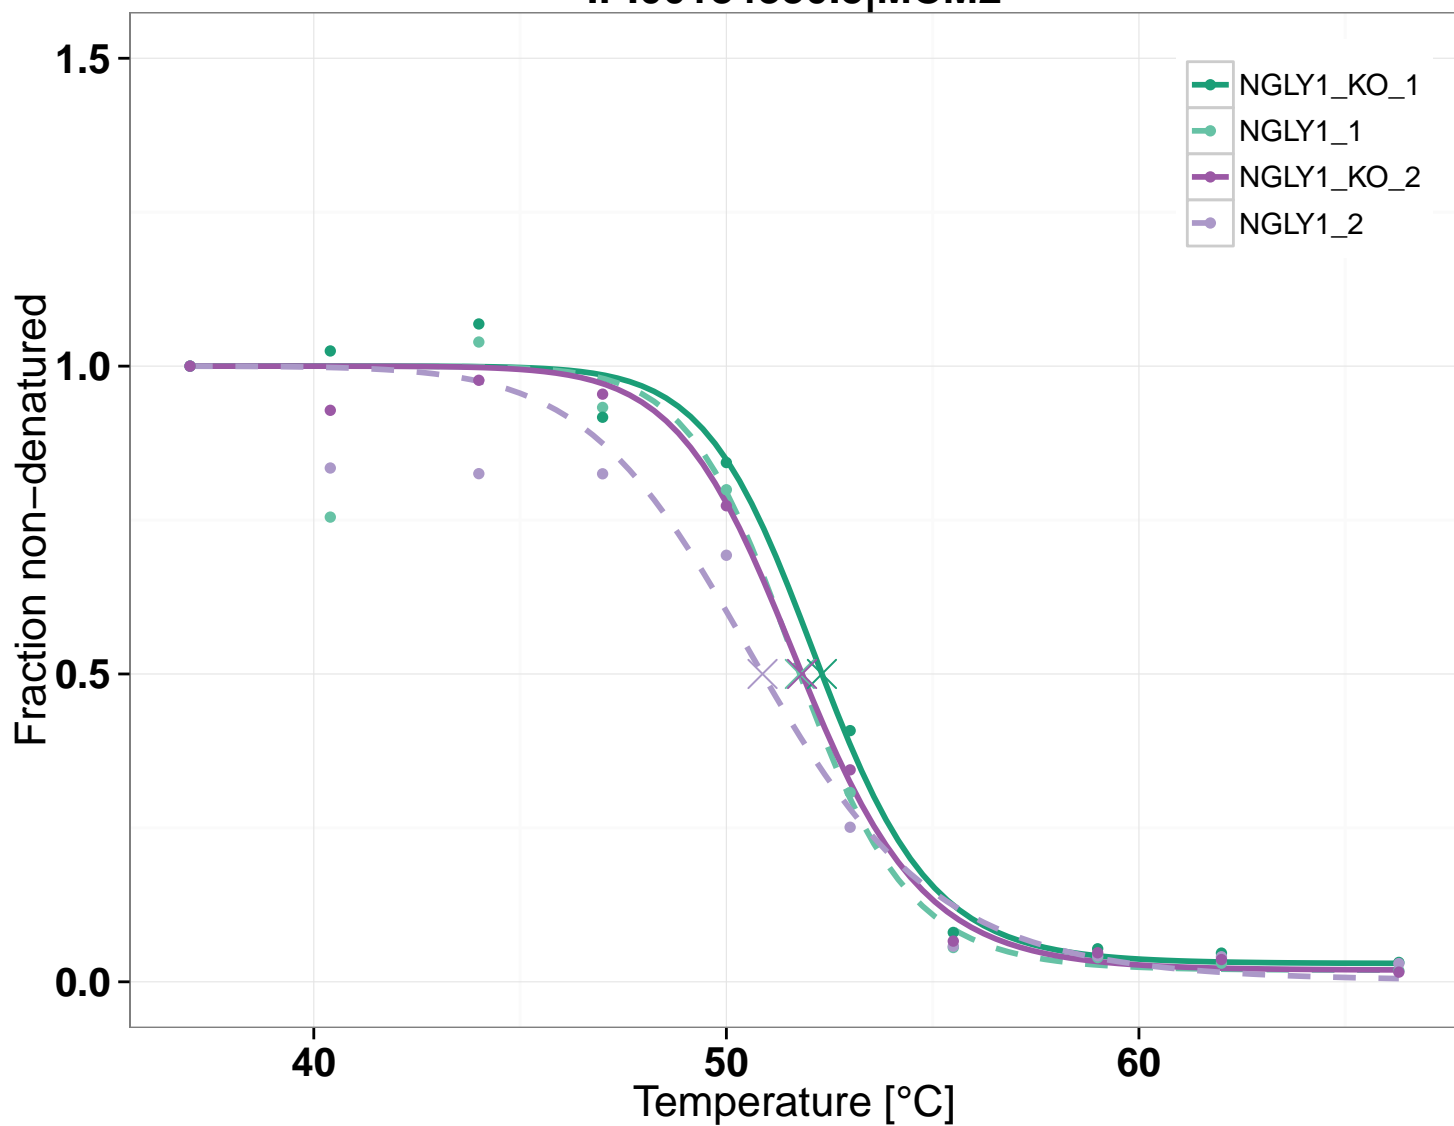

|            | meltPoint | slope | plateau | R2   |
|------------|-----------|-------|---------|------|
| NGLY1_KO_1 | 52.32     | -0.18 | 0.03    | 0.99 |
| NGLY1_1    | 51.78     | -0.18 | 0.02    | 0.96 |
| NGLY1_KO_2 | 51.84     | -0.16 | 0.02    | 1    |
| NGLY1_2    | 50.88     | -0.12 | 0       | 0.96 |

Supplement: Supplementary file 1295 [file 1]

IPI00179328.3|CTNNAL1

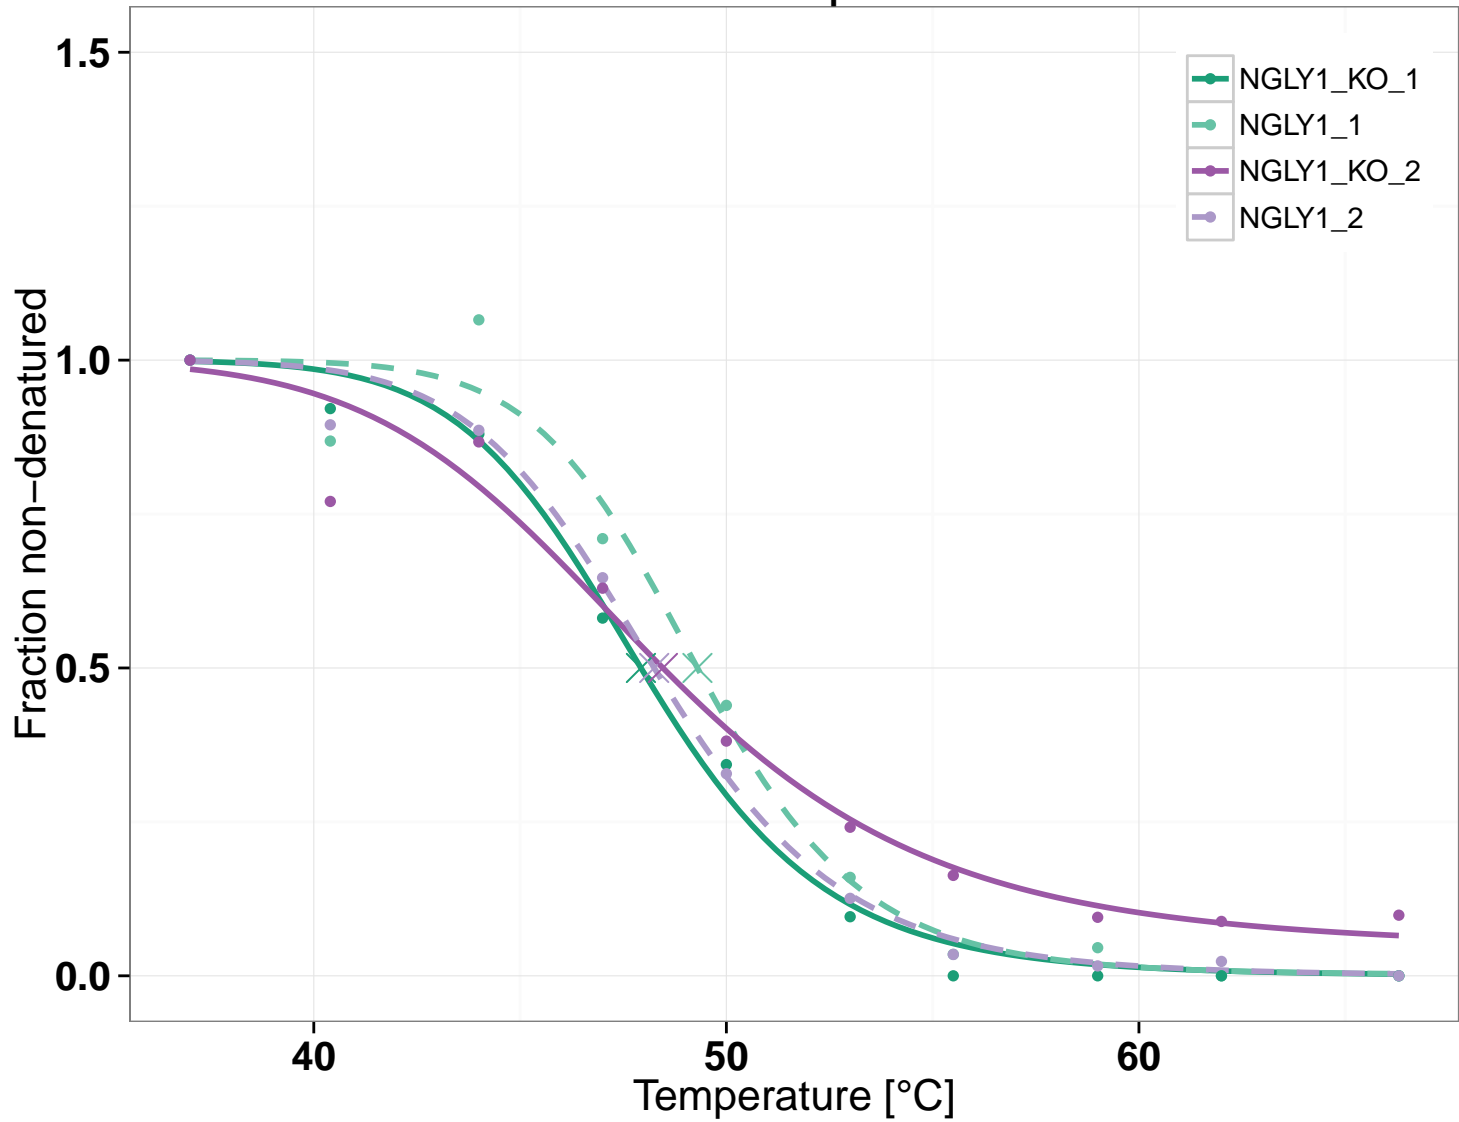

|            | meltPoint | slope | plateau | R2   |
|------------|-----------|-------|---------|------|
| NGLY1_KO_1 | 47.93     | -0.11 | 0       | 0.99 |
| NGLY1_1    | 49.3      | -0.12 | 0       | 0.98 |
| NGLY1_KO_2 | 48.46     | -0.07 | 0.04    | 0.97 |
| NGLY1_2    | 48.25     | -0.11 | 0       | 0.99 |

Supplement: Supplementary file 1296 [file 1]

# IPI00384817.2|PIK3CD

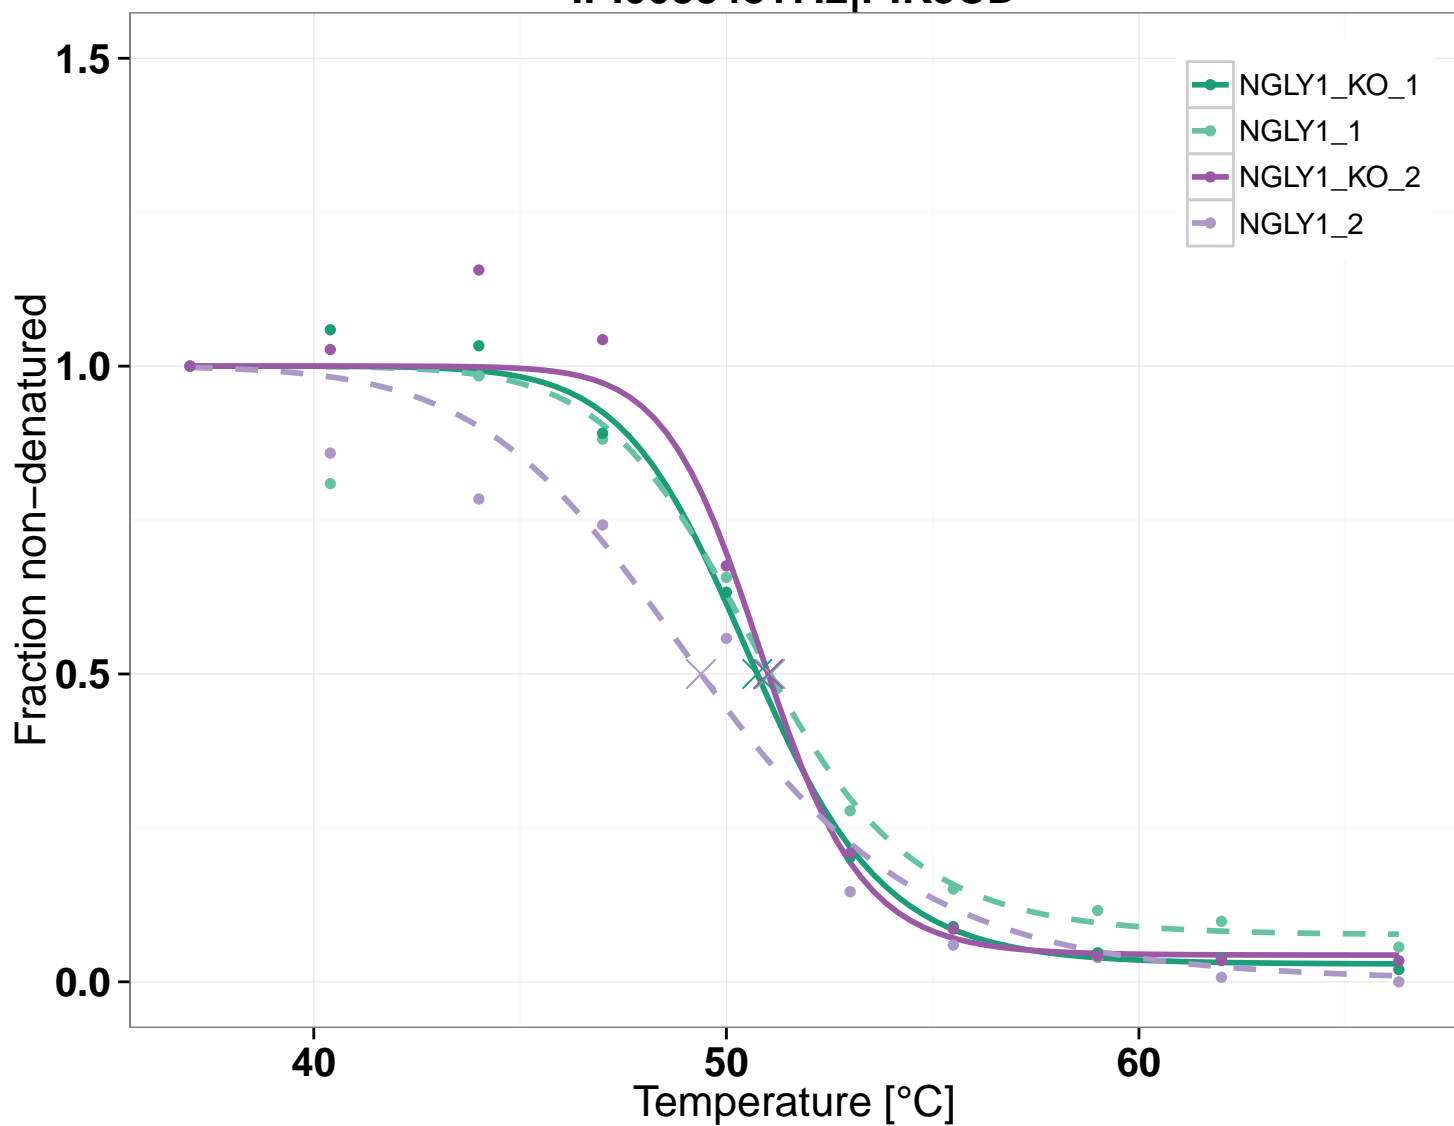

|            | meltPoint | slope  | plateau | R2   |
|------------|-----------|--------|---------|------|
| NGLY1_KO_1 | 50.75     | -0.15  | 0.03    | 1    |
| NGLY1_1    | 51.06     | -0.12  | 0.08    | 0.97 |
| NGLY1_KO_2 | 51.01     | -0.2   | 0.04    | 0.99 |
| NGLY1_2    | 49.38     | -0.093 | 0       | 0.96 |

Supplement: Supplementary file 1297 [file 1]

IPI00007283.1|POLR2D

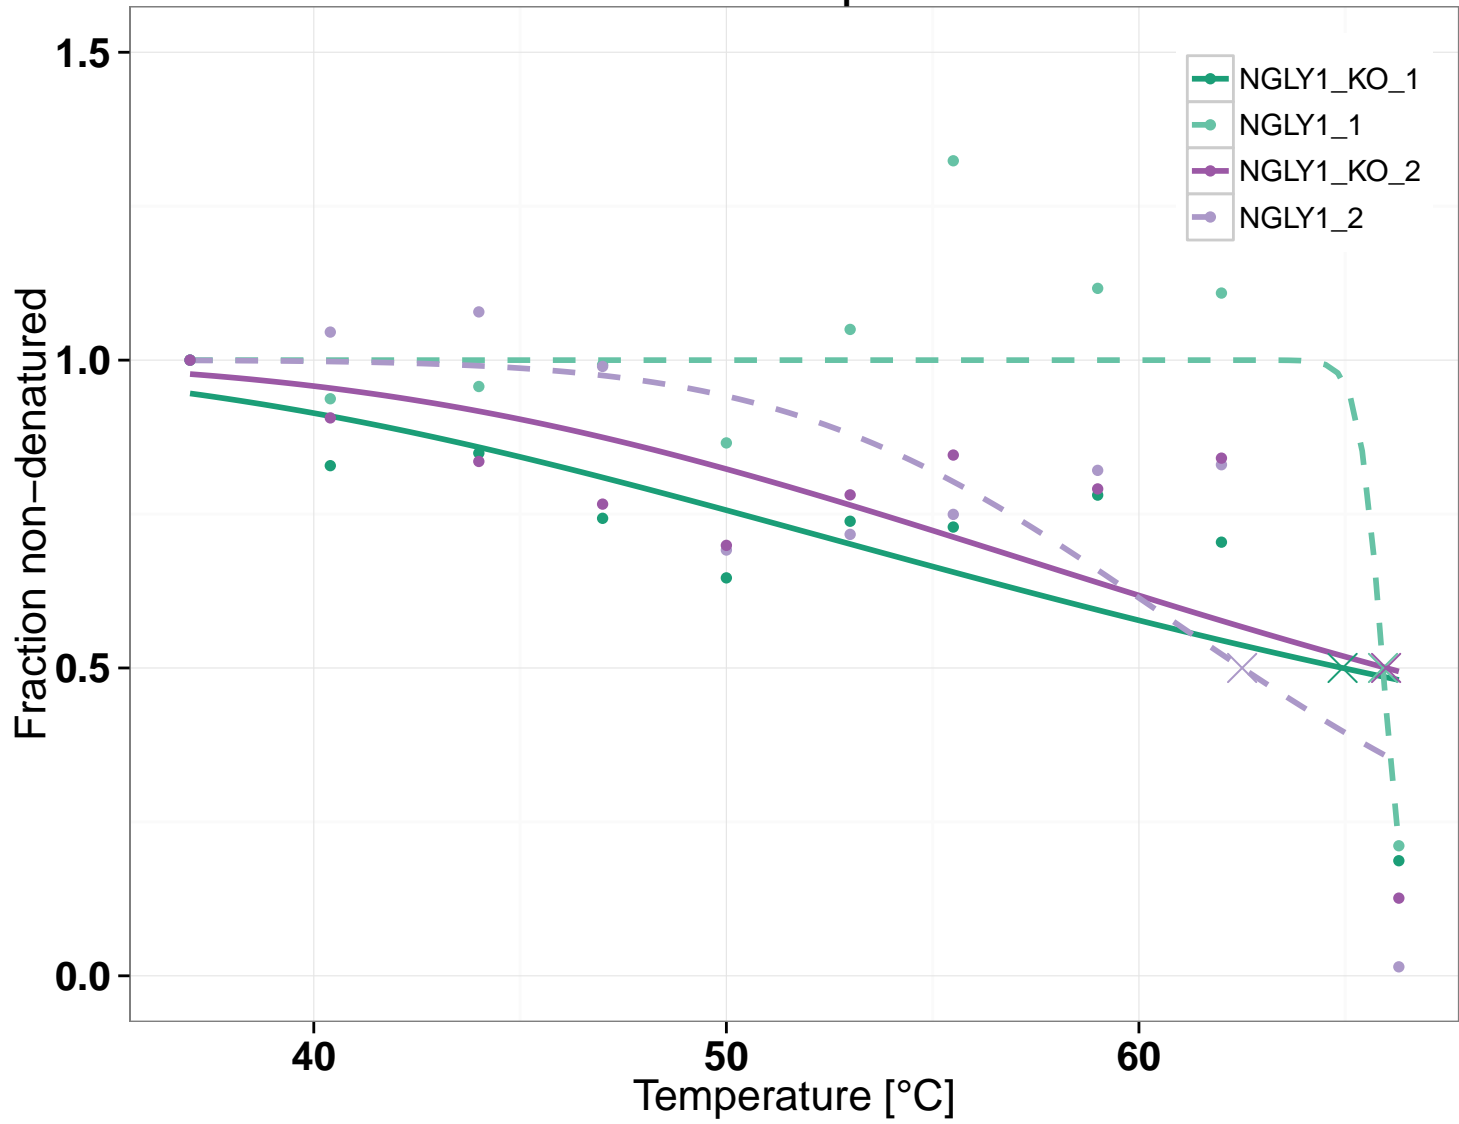

|            | meltPoint | slope  | plateau | R2   |
|------------|-----------|--------|---------|------|
| NGLY1_KO_1 | 64.94     | -0.018 | 0       | 0.55 |
| NGLY1_1    | 65.92     | -0.86  | 0       | 0.79 |
| NGLY1_KO_2 | 65.99     | -0.021 | 0       | 0.44 |
| NGLY1_2    | 62.5      | -0.046 | 0       | 0.61 |

Supplement: Supplementary file 1298 [file 1]

IPI00760602.3|LYRM5

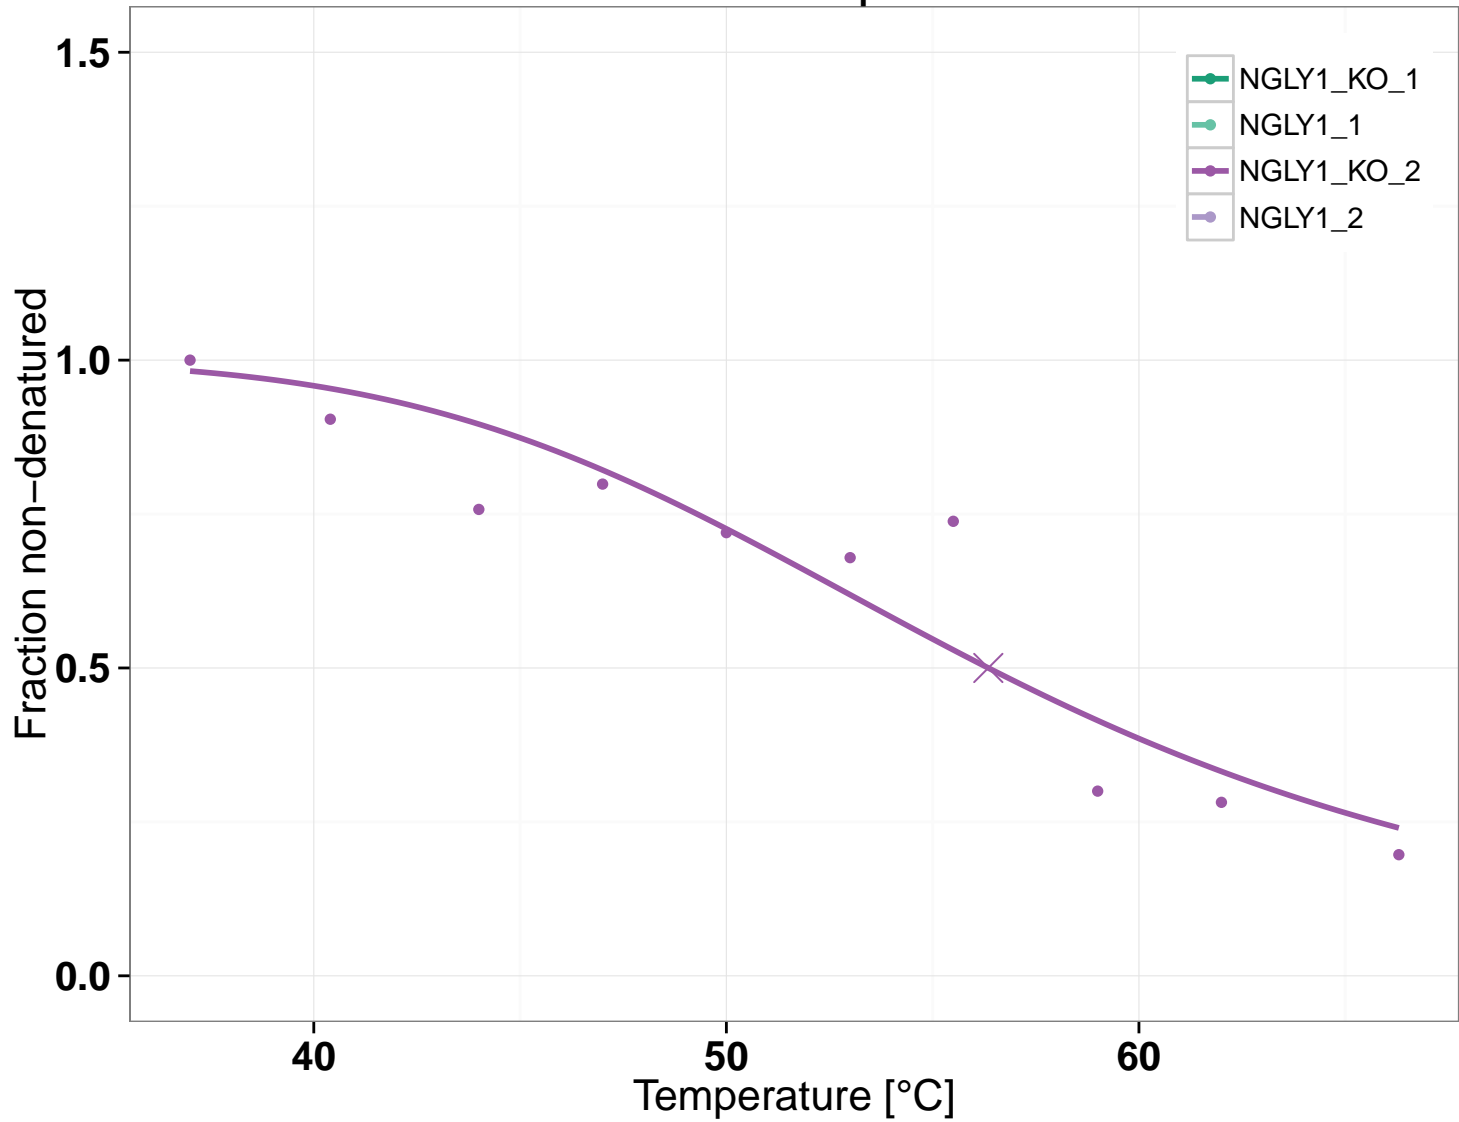

|            | meltPoint | slope  | plateau | R2   |
|------------|-----------|--------|---------|------|
| NGLY1_KO_1 | -         | -      | -       | -    |
| NGLY1_1    | -         | -      | -       | -    |
| NGLY1_KO_2 | 56.35     | -0.036 | 0       | 0.87 |
| NGLY1_2    | -         | -      | -       | -    |

Supplement: Supplementary file 1299 [file 1]

IPI00167538.2|COX18

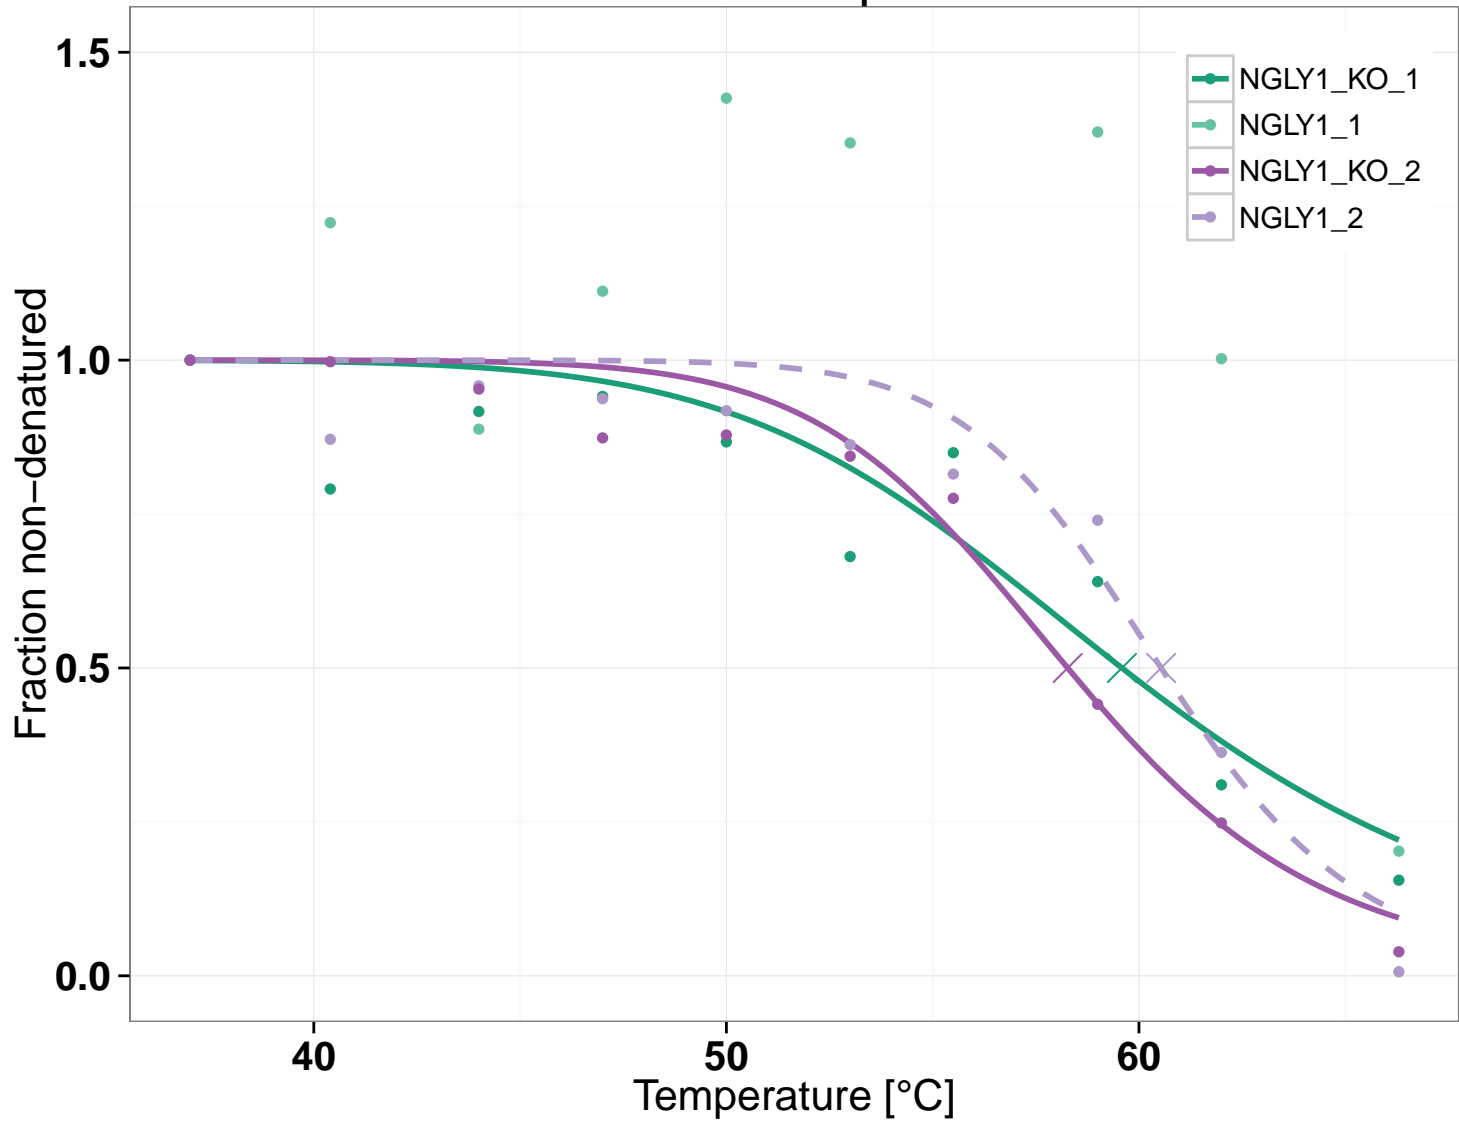

|            | meltPoint | slope  | plateau | R2   |
|------------|-----------|--------|---------|------|
| NGLY1_KO_1 | 59.59     | -0.054 | 0       | 0.84 |
| NGLY1_1    | -         | -      | -       | -    |
| NGLY1_KO_2 | 58.27     | -0.081 | 0       | 0.97 |
| NGLY1_2    | 60.54     | -0.1   | 0       | 0.93 |

Supplement: Supplementary file 1300 [file 1]

IPI00007120.2|TUBD1

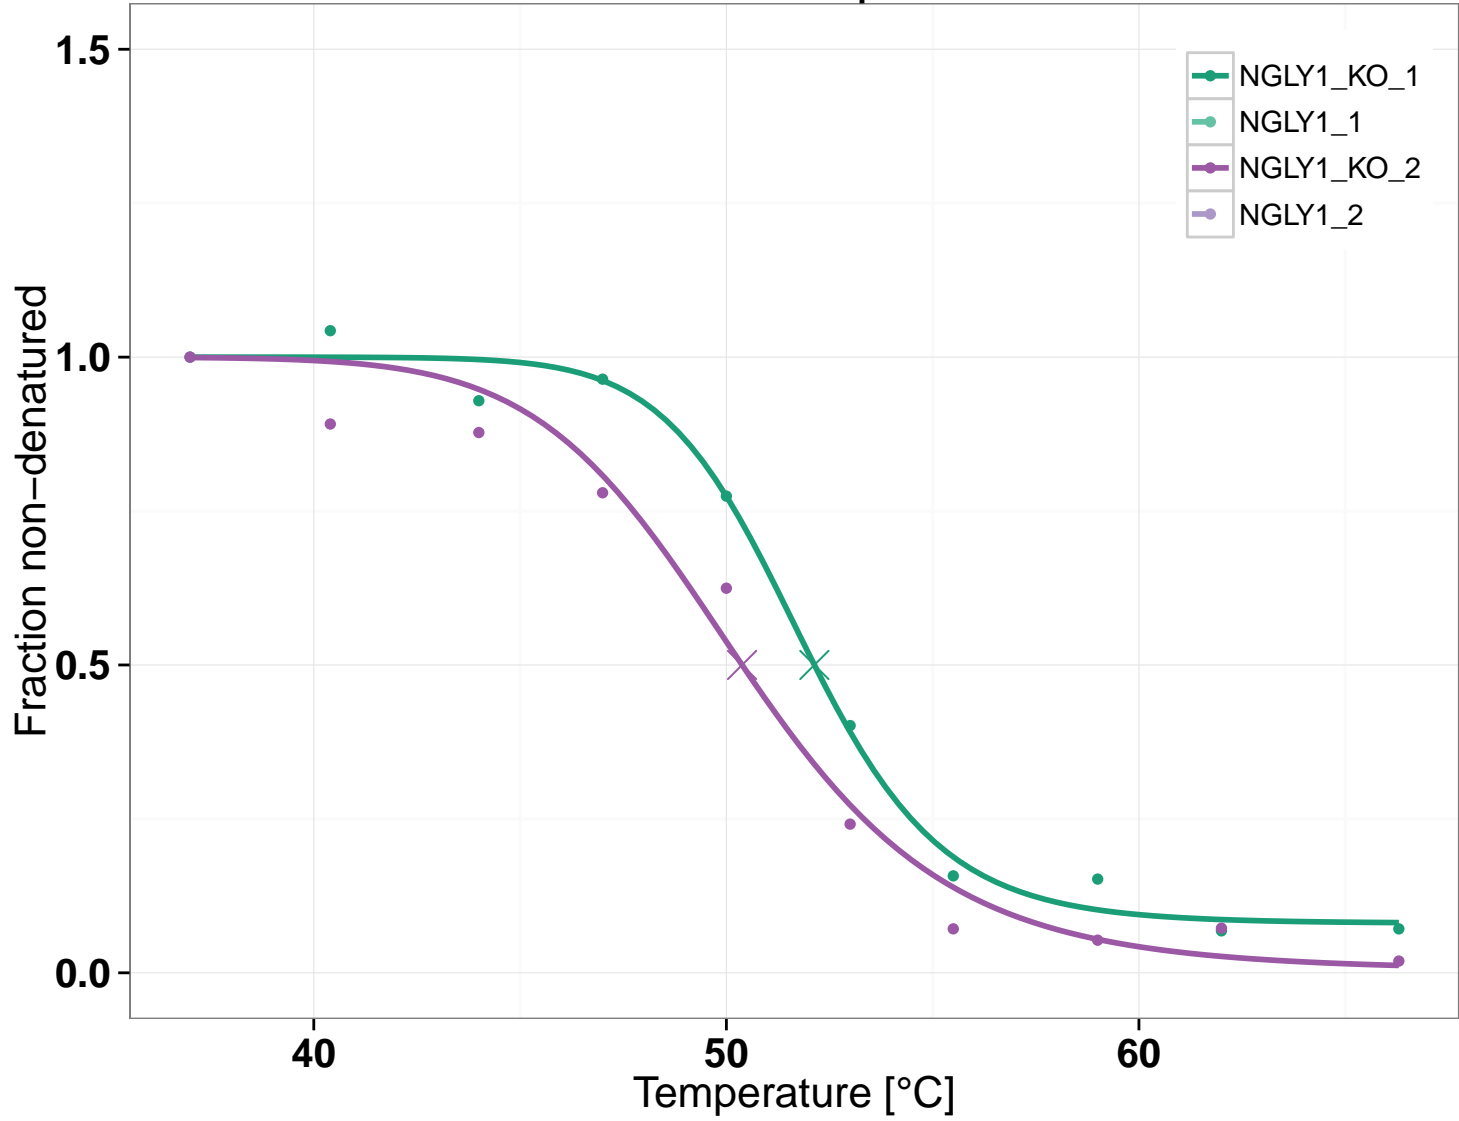

|            | meltPoint | slope | plateau | R2   |
|------------|-----------|-------|---------|------|
| NGLY1_KO_1 | 52.13     | -0.14 | 0.08    | 0.99 |
| NGLY1_1    | -         | -     | -       | -    |
| NGLY1_KO_2 | 50.38     | -0.1  | 0       | 0.98 |
| NGLY1_2    | -         | -     | -       | -    |

Supplement: Supplementary file 1301 [file 1]

# IPI00006904.1|AVEN

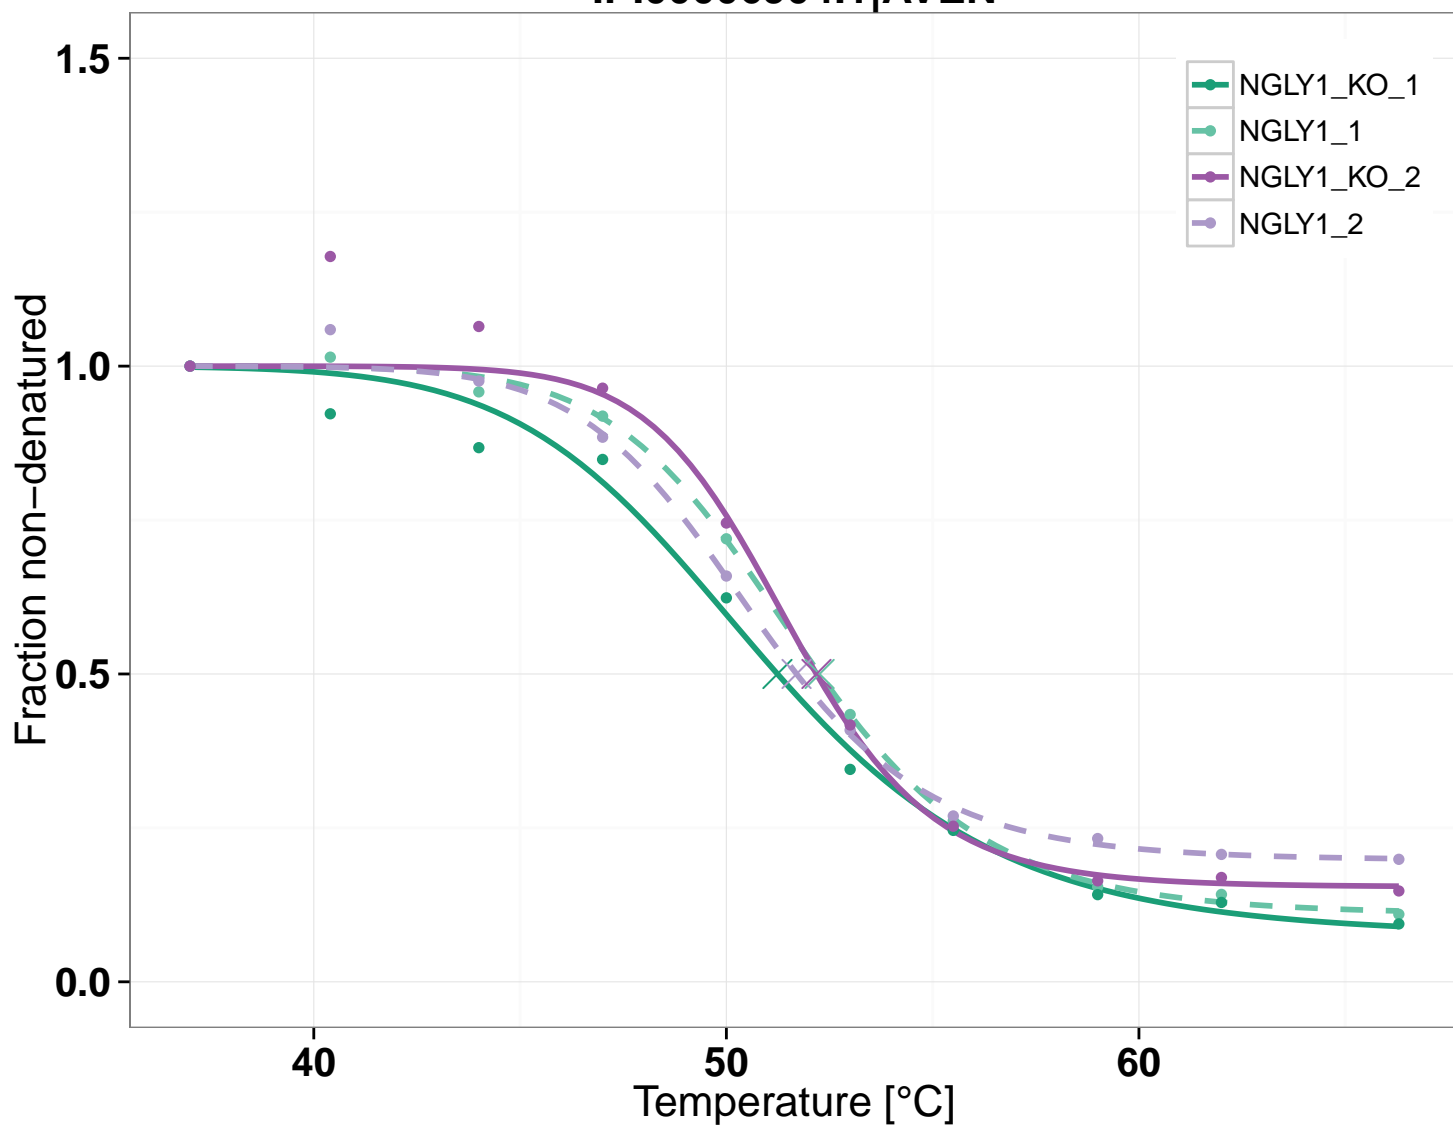

|            | meltPoint | slope  | plateau | R2   |
|------------|-----------|--------|---------|------|
| NGLY1_KO_1 | 51.24     | -0.079 | 0.07    | 0.99 |
| NGLY1_1    | 52.26     | -0.098 | 0.11    | 1    |
| NGLY1_KO_2 | 52.18     | -0.12  | 0.15    | 0.98 |
| NGLY1_2    | 51.7      | -0.096 | 0.2     | 1    |

Supplement: Supplementary file 1302 [file 1]

IPI00296724.2|KLHL36

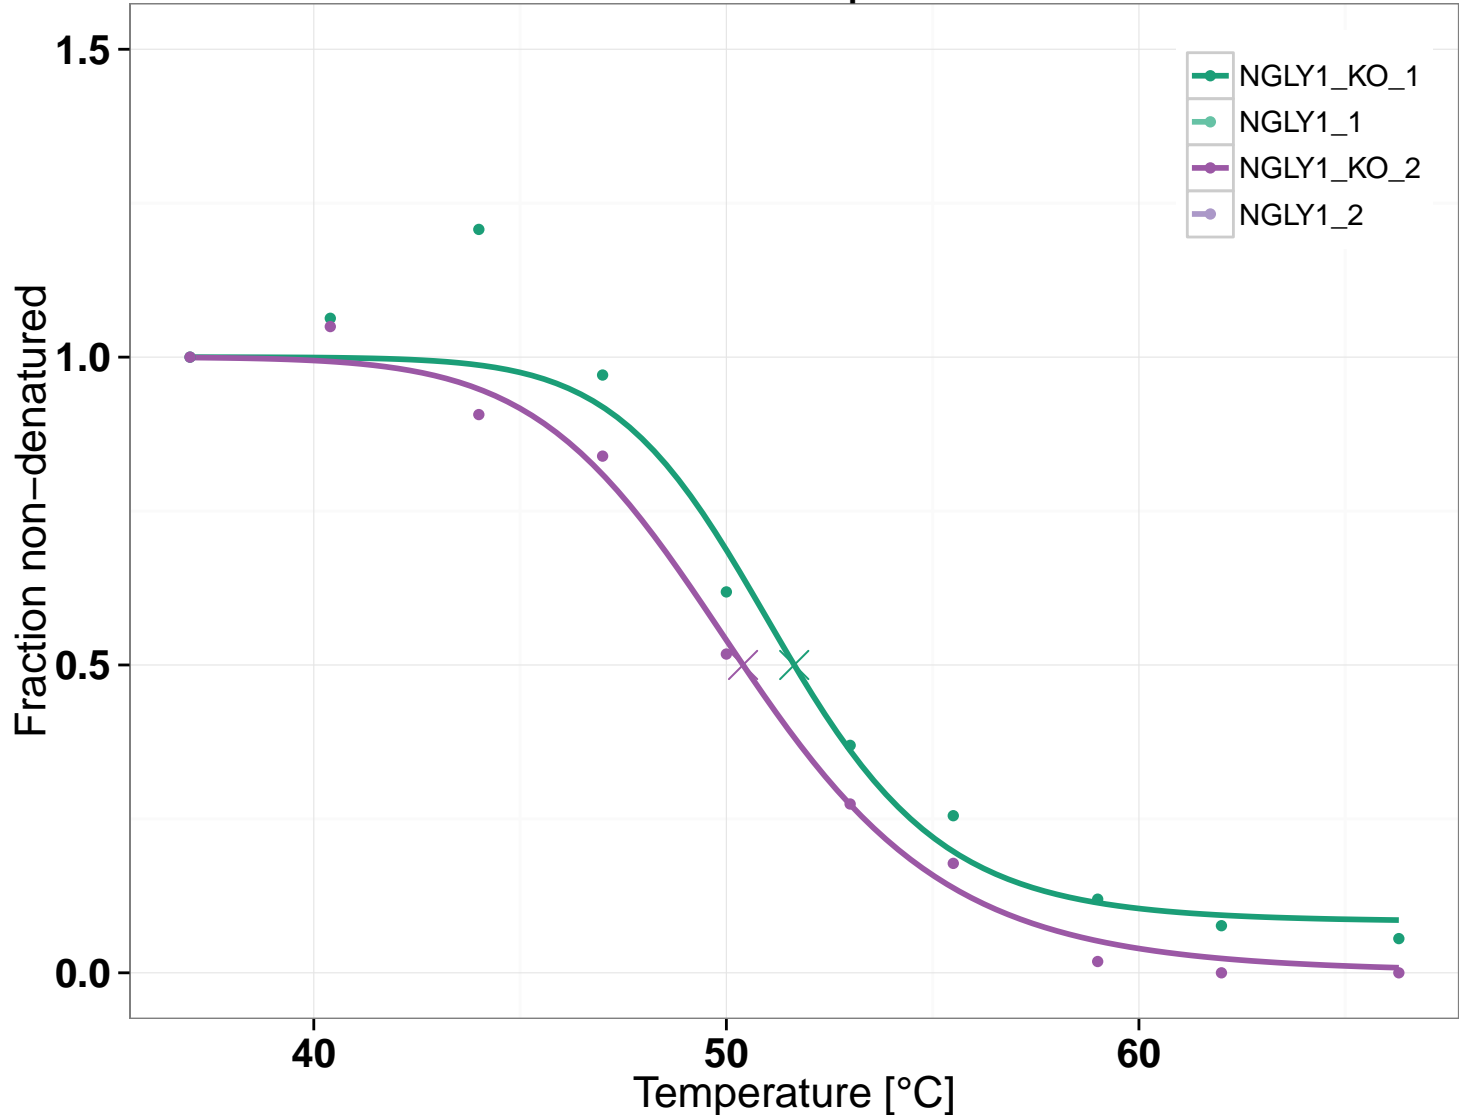

|            | meltPoint | slope | plateau | R2   |
|------------|-----------|-------|---------|------|
| NGLY1_KO_1 | 51.64     | -0.12 | 0.08    | 0.96 |
| NGLY1_1    | -         | -     | -       | -    |
| NGLY1_KO_2 | 50.4      | -0.1  | 0       | 0.99 |
| NGLY1_2    | -         | -     | -       | -    |

Supplement: Supplementary file 1303 [file 1]

# IPI00879588.1|CLSPN

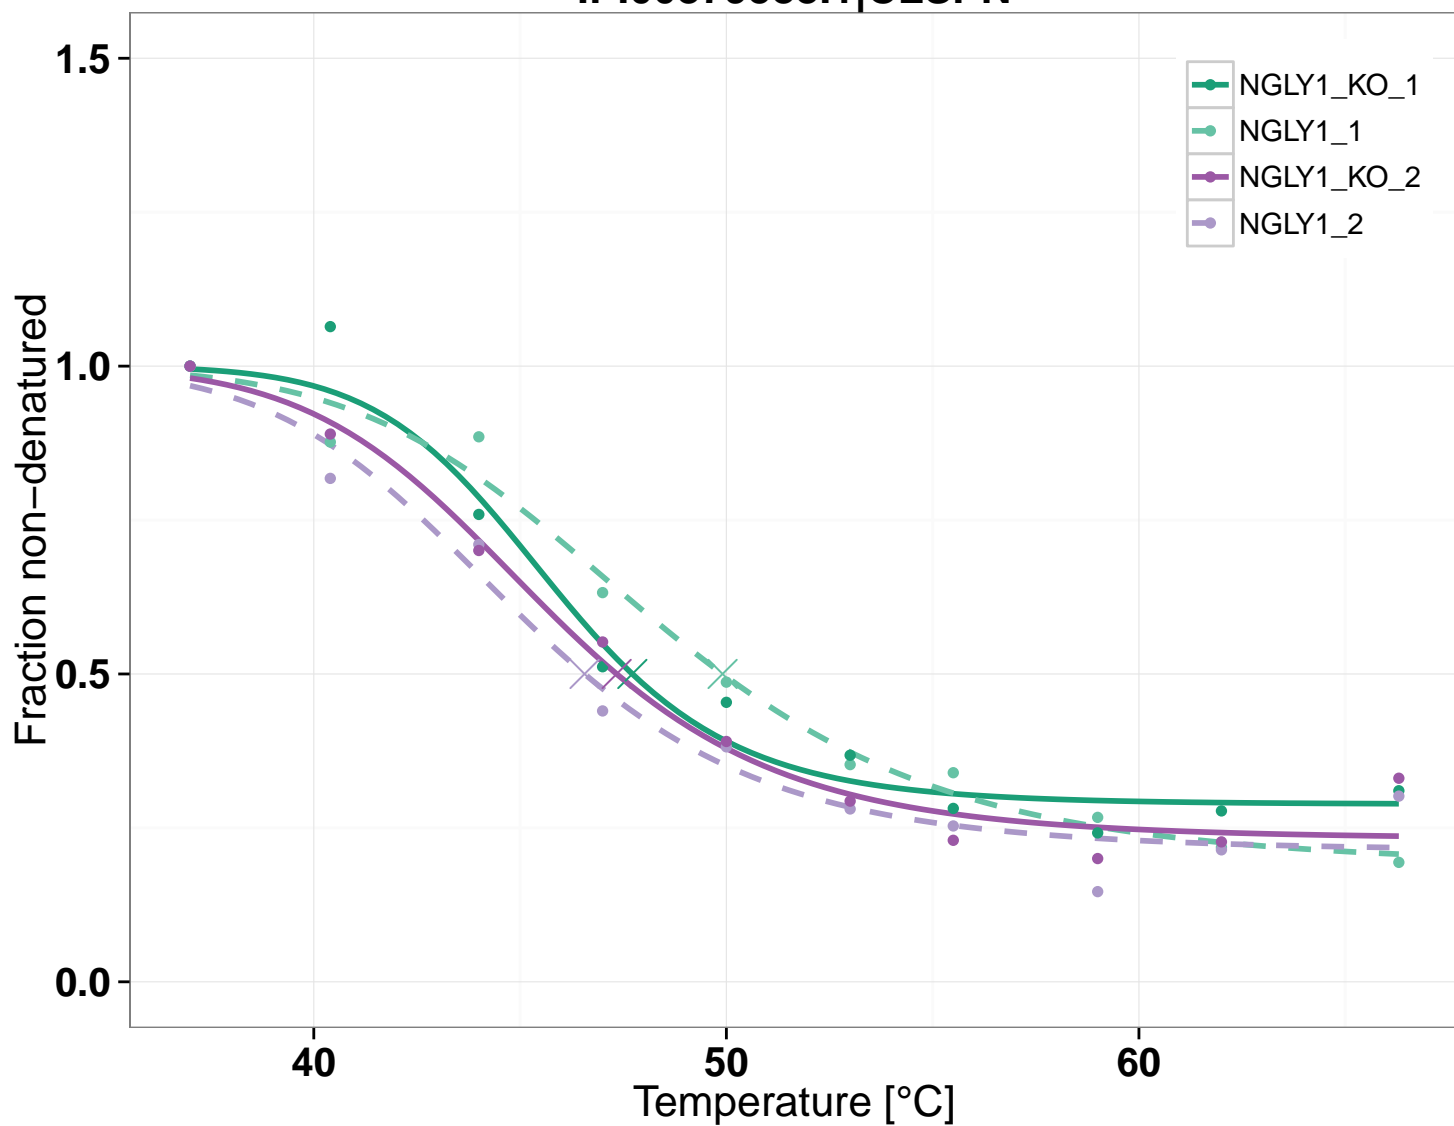

|            | meltPoint | slope  | plateau | R2   |
|------------|-----------|--------|---------|------|
| NGLY1_KO_1 | 47.72     | -0.083 | 0.29    | 0.97 |
| NGLY1_1    | 49.91     | -0.057 | 0.19    | 0.99 |
| NGLY1_KO_2 | 47.34     | -0.068 | 0.23    | 0.98 |
| NGLY1_2    | 46.56     | -0.067 | 0.21    | 0.97 |

Supplement: Supplementary file 1304 [file 1]

# IPI00107502.1|WSB1

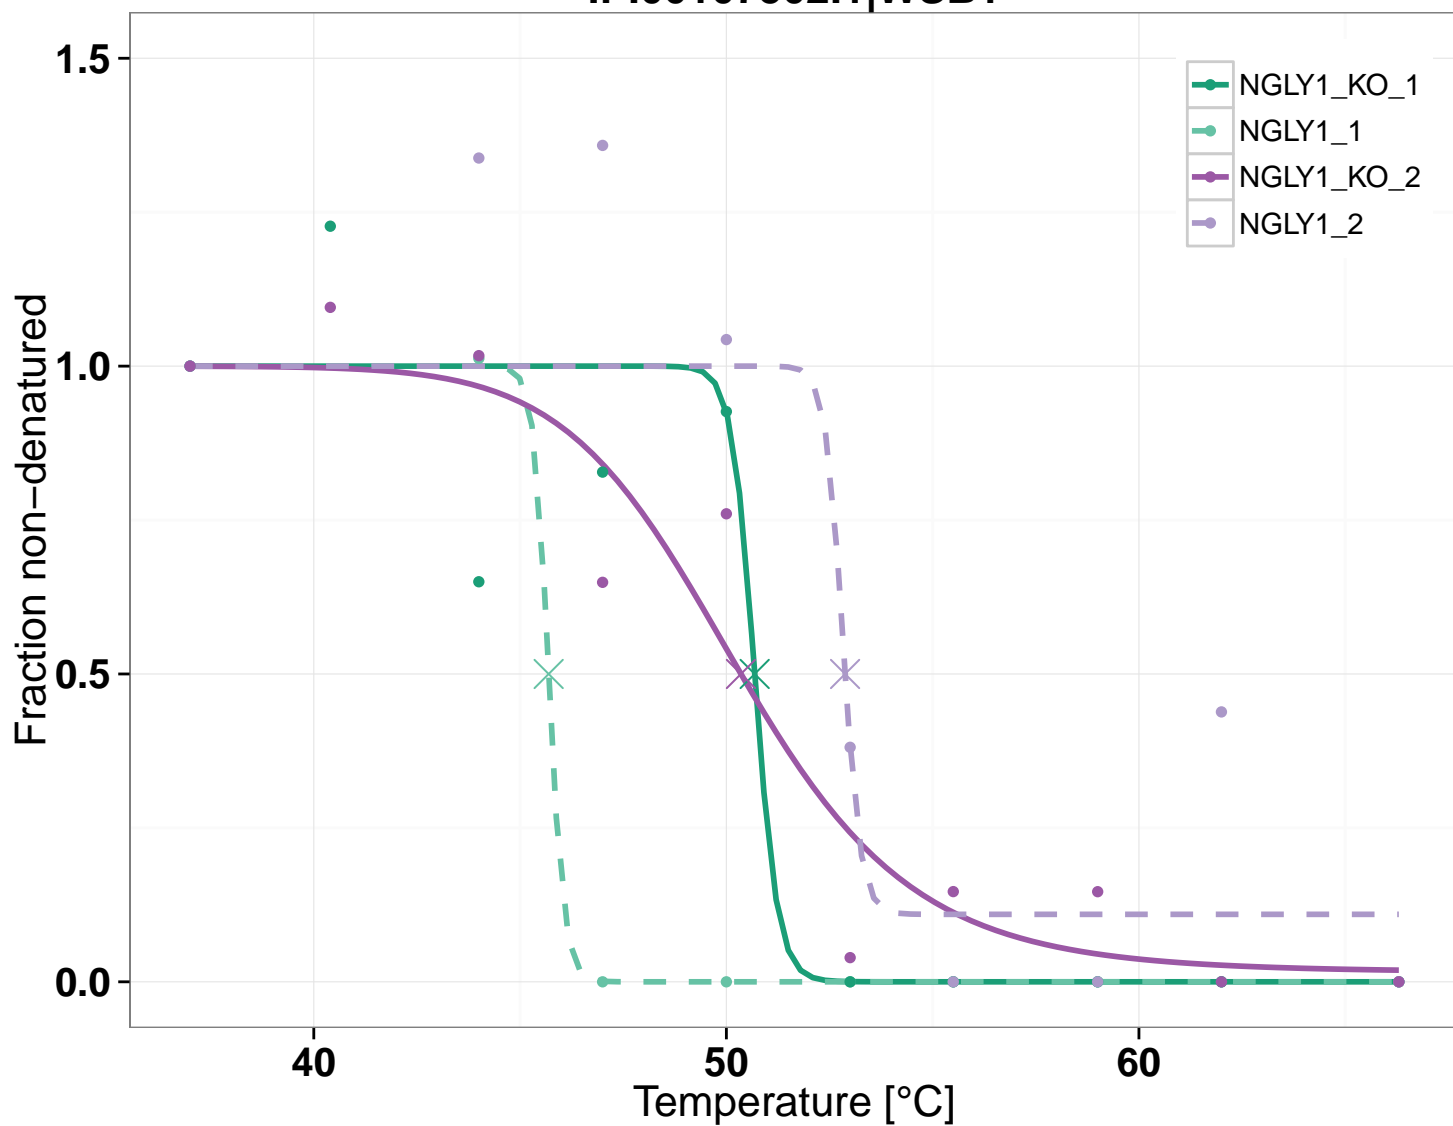

|            | meltPoint | slope | plateau | R2   |
|------------|-----------|-------|---------|------|
| NGLY1_KO_1 | 50.69     | -0.91 | 0       | 0.91 |
| NGLY1_1    | 45.69     | -1.4  | 0       | 0.89 |
| NGLY1_KO_2 | 50.35     | -0.12 | 0.02    | 0.92 |
| NGLY1_2    | 52.88     | -1.1  | 0.11    | 0.75 |

Supplement: Supplementary file 1305 [file 1]

IPI00414112.3|ZNF791

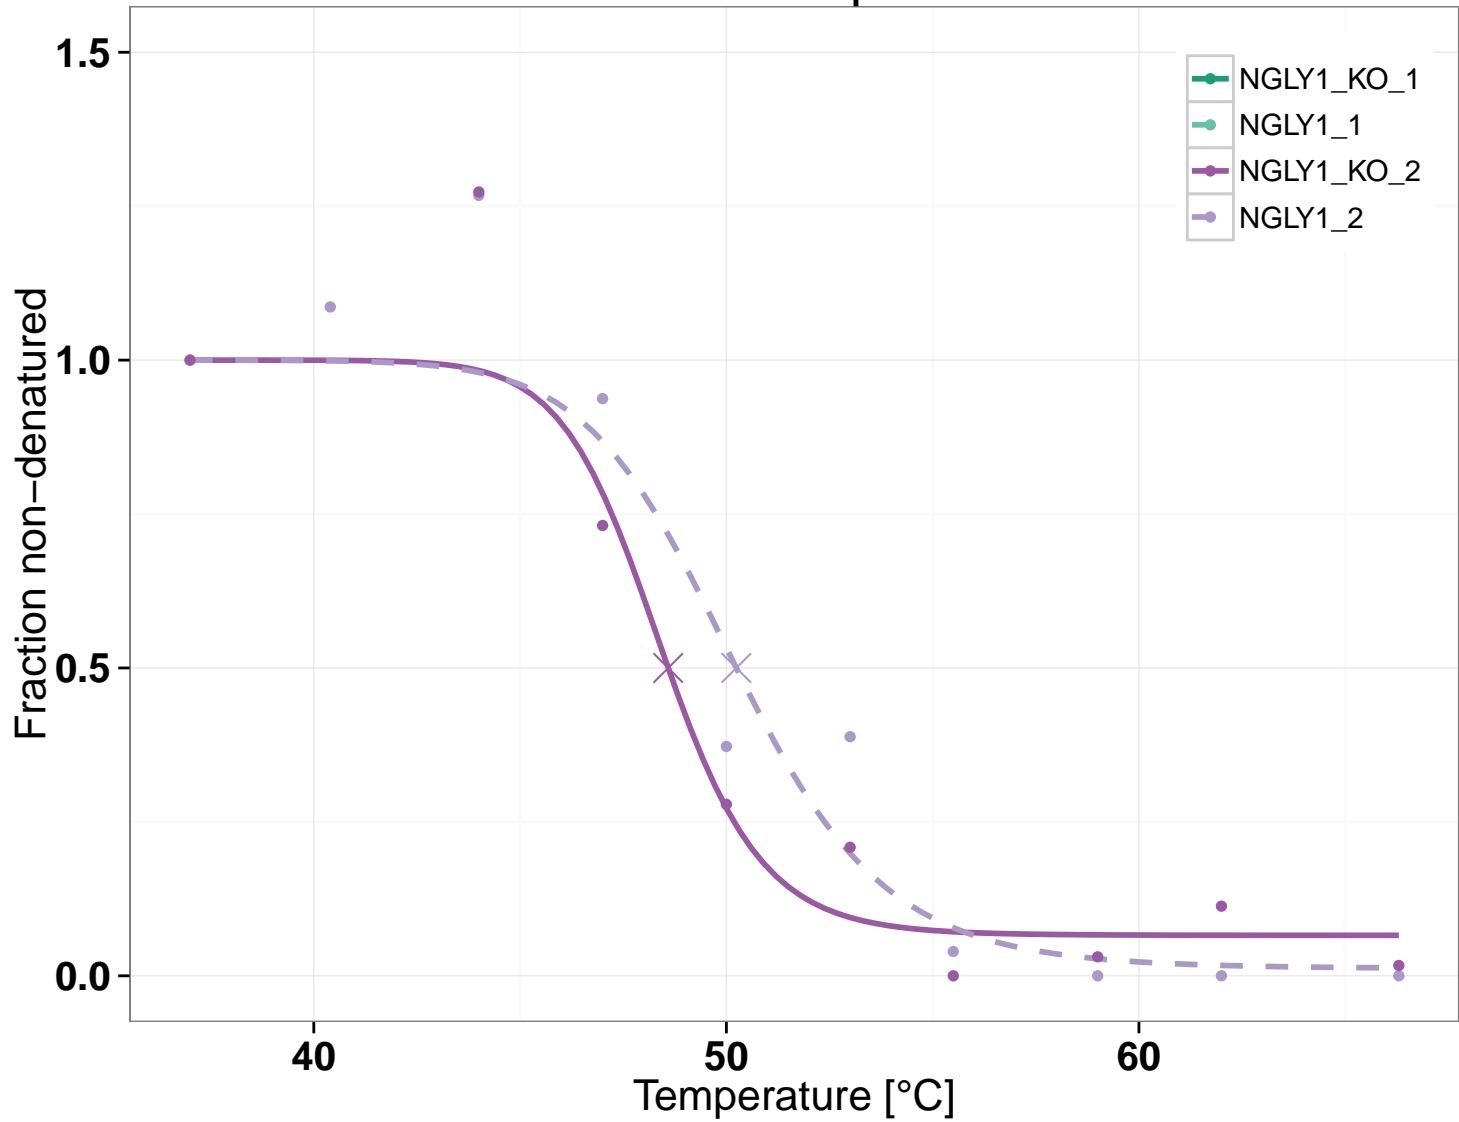

|            | meltPoint | slope | plateau | R2   |
|------------|-----------|-------|---------|------|
| NGLY1_KO_1 | —         | —     | —       | —    |
| NGLY1_1    | —         | —     | —       | —    |
| NGLY1_KO_2 | 48.59     | -0.19 | 0.07    | 0.87 |
| NGLY1_2    | 50.24     | -0.14 | 0.01    | 0.93 |

Supplement: Supplementary file 1306 [file 1]

# IPI00013789.5|SMYD5

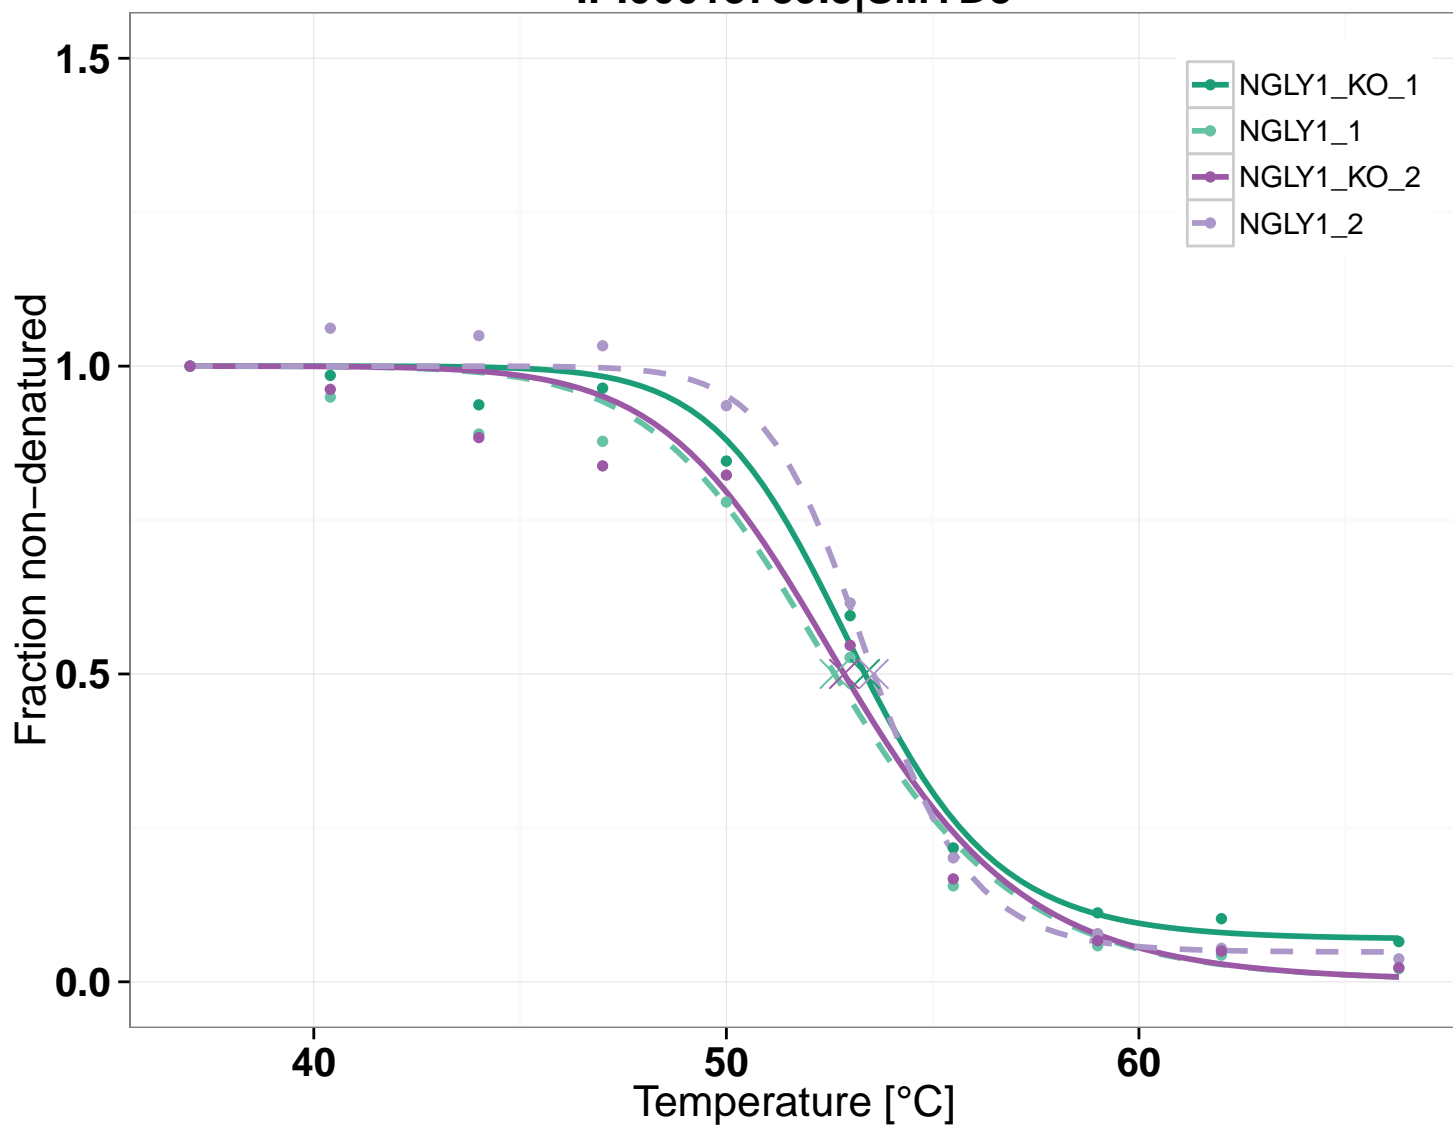

|            | meltPoint | slope | plateau | R2   |
|------------|-----------|-------|---------|------|
| NGLY1_KO_1 | 53.36     | -0.14 | 0.07    | 0.99 |
| NGLY1_1    | 52.62     | -0.11 | 0       | 0.98 |
| NGLY1_KO_2 | 52.85     | -0.11 | 0       | 0.98 |
| NGLY1_2    | 53.57     | -0.19 | 0.05    | 1    |

Supplement: Supplementary file 1307 [file 1]
