# Supplementary material (part 14 of 85)
Source: publisher figshare collection journal article supplement (https://gsajournals.figshare.com/articles/dataset/_/12014913)

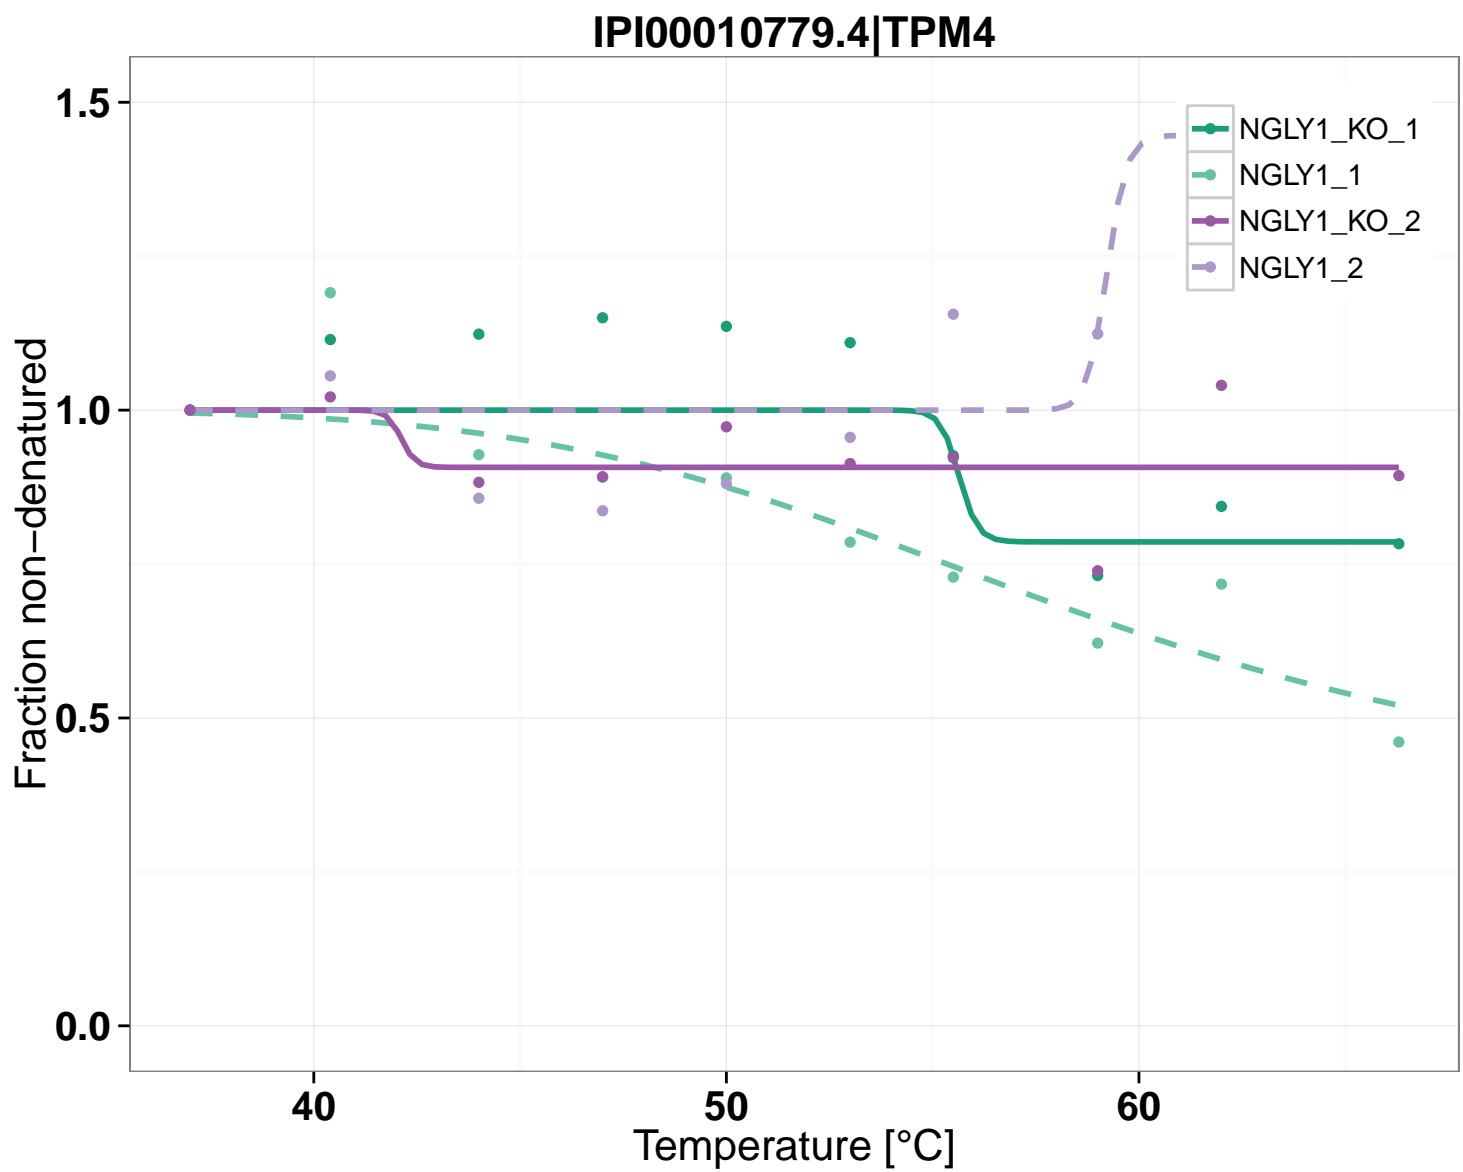

|            | meltPoint | slope  | plateau | R2   |
|------------|-----------|--------|---------|------|
| NGLY1_KO_1 | —         | −0.24  | 0.79    | 0.62 |
| NGLY1_1    | —         | −0.025 | 0.34    | 0.83 |
| NGLY1_KO_2 | —         | −0.14  | 0.91    | 0.25 |
| NGLY1_2    | —         | 0.47   | 1.45    | 0.8  |

Supplement: Supplementary file 1308 [file 1]

IPI00015924.1|TFIP11

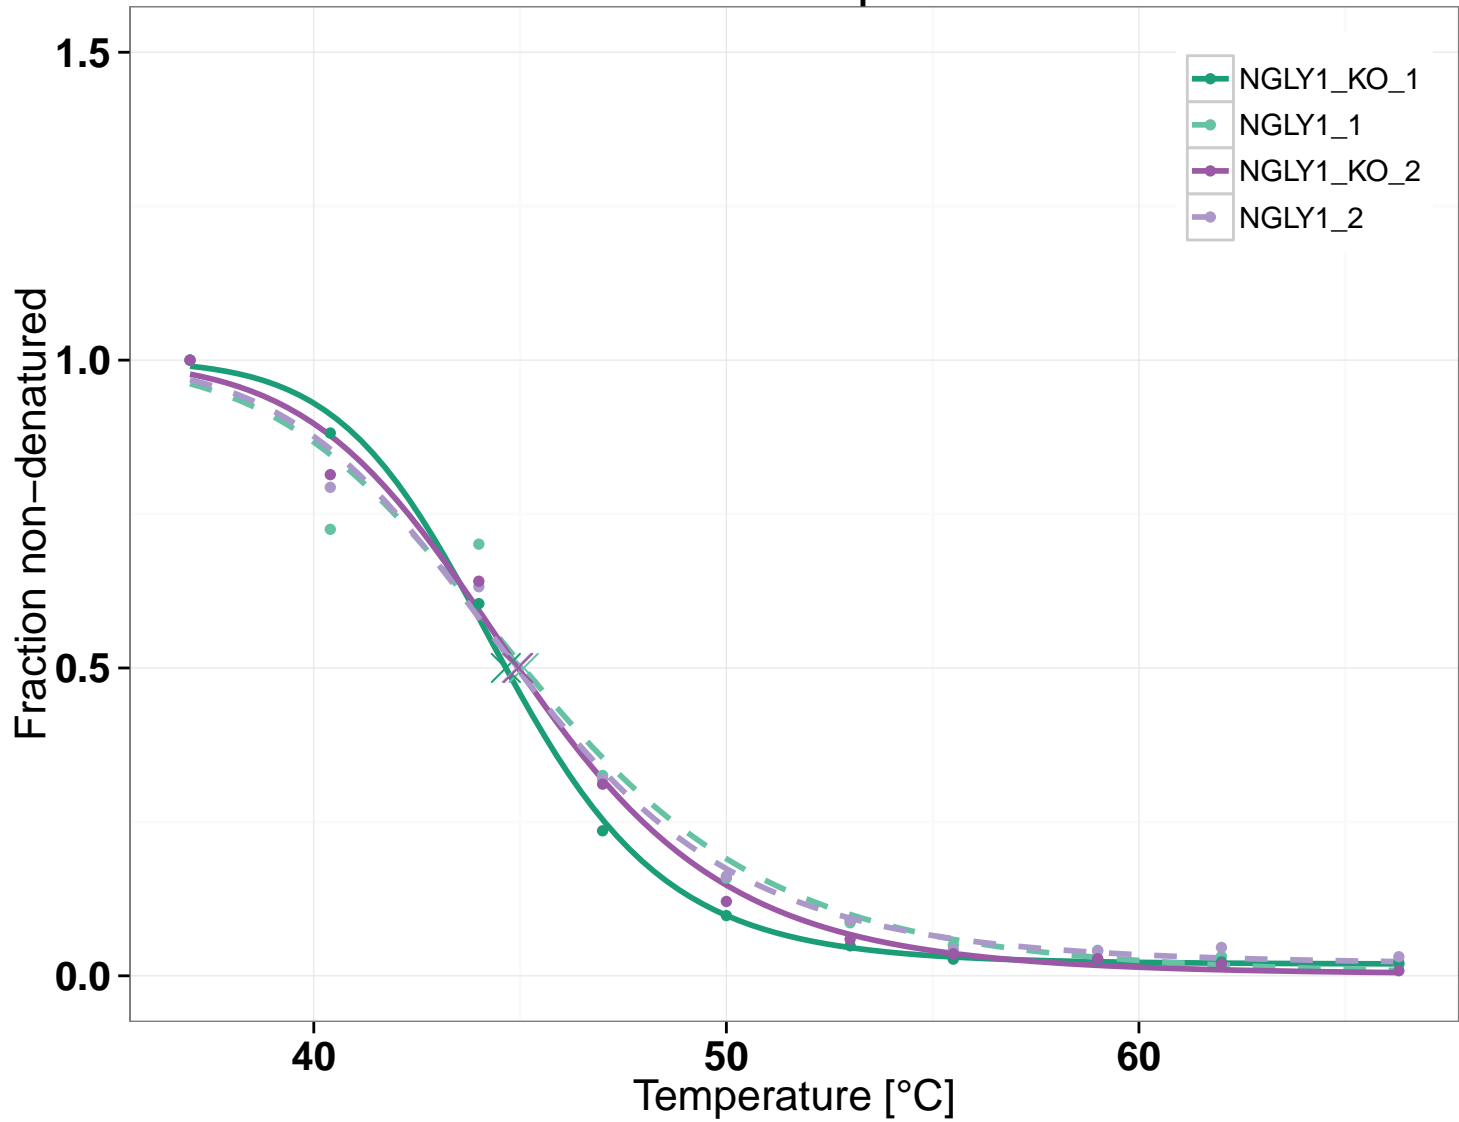

|            | meltPoint | slope  | plateau | R2   |
|------------|-----------|--------|---------|------|
| NGLY1_KO_1 | 44.65     | -0.12  | 0.02    | 1    |
| NGLY1_1    | 45.09     | -0.083 | 0       | 0.97 |
| NGLY1_KO_2 | 44.95     | -0.098 | 0       | 0.99 |
| NGLY1_2    | 44.92     | -0.089 | 0.02    | 0.99 |

Supplement: Supplementary file 1309 [file 1]

IPI00396435.3|DHX15

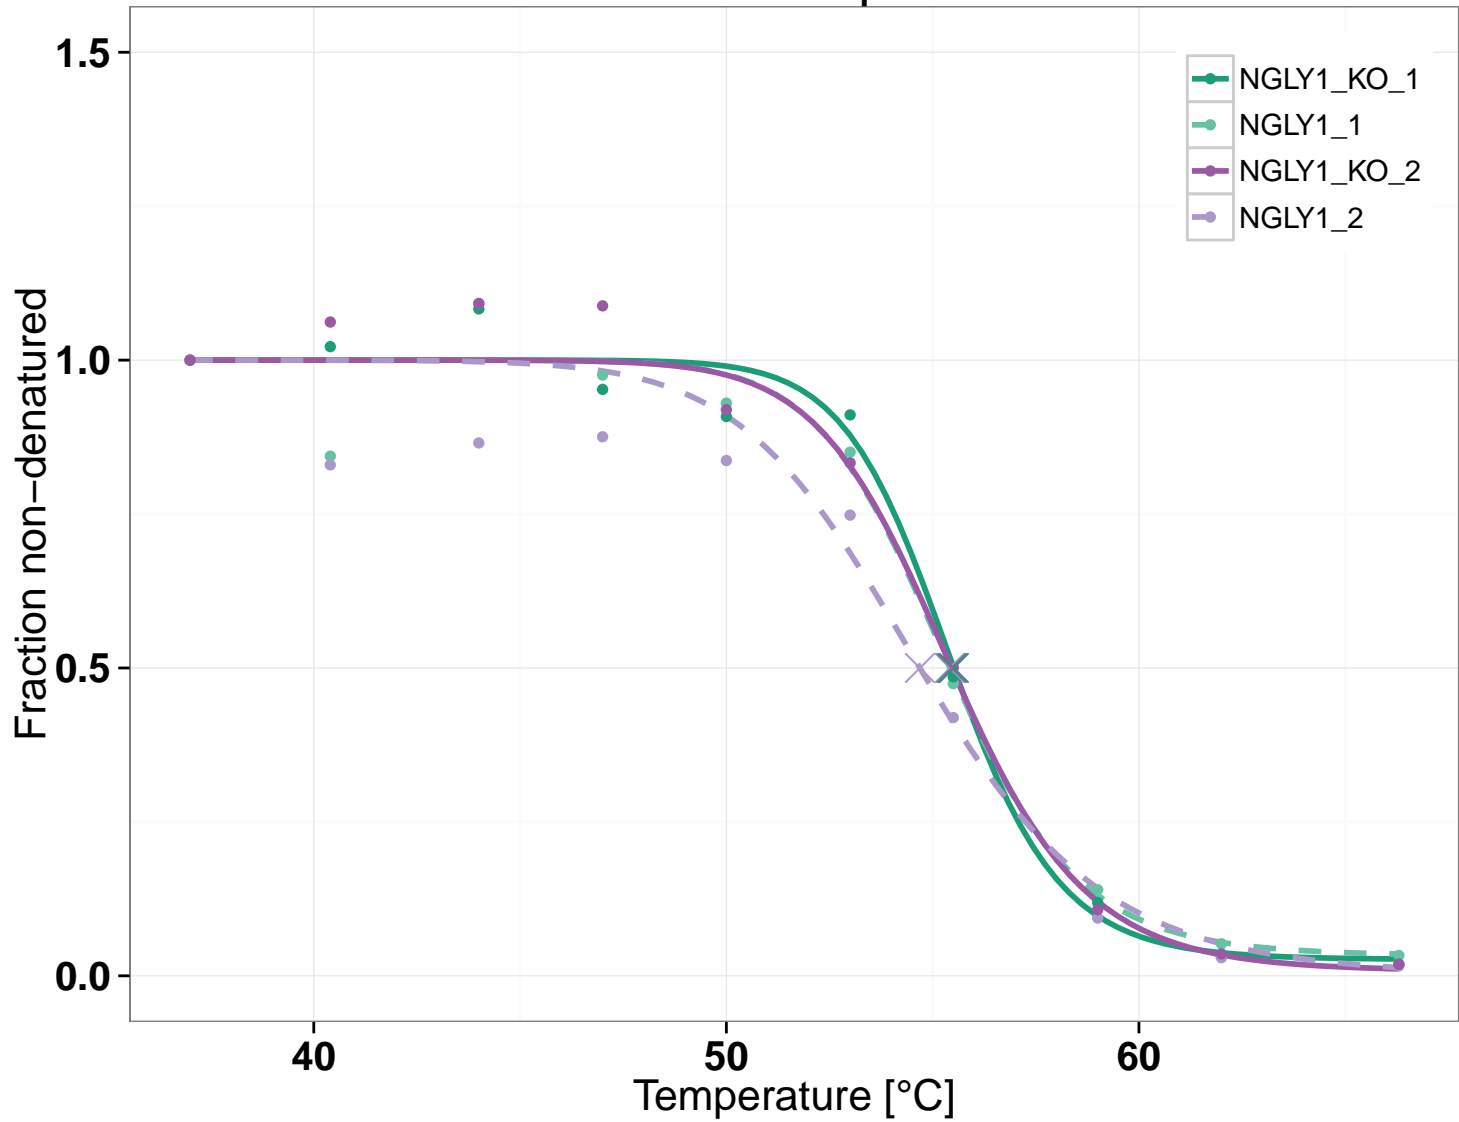

|            | meltPoint | slope | plateau | R2   |
|------------|-----------|-------|---------|------|
| NGLY1_KO_1 | 55.51     | -0.19 | 0.03    | 0.99 |
| NGLY1_1    | 55.42     | -0.15 | 0.03    | 0.98 |
| NGLY1_KO_2 | 55.46     | -0.15 | 0.01    | 0.99 |
| NGLY1_2    | 54.69     | -0.11 | 0       | 0.95 |

Supplement: Supplementary file 1310 [file 1]

IPI00005149.3|CCDC76

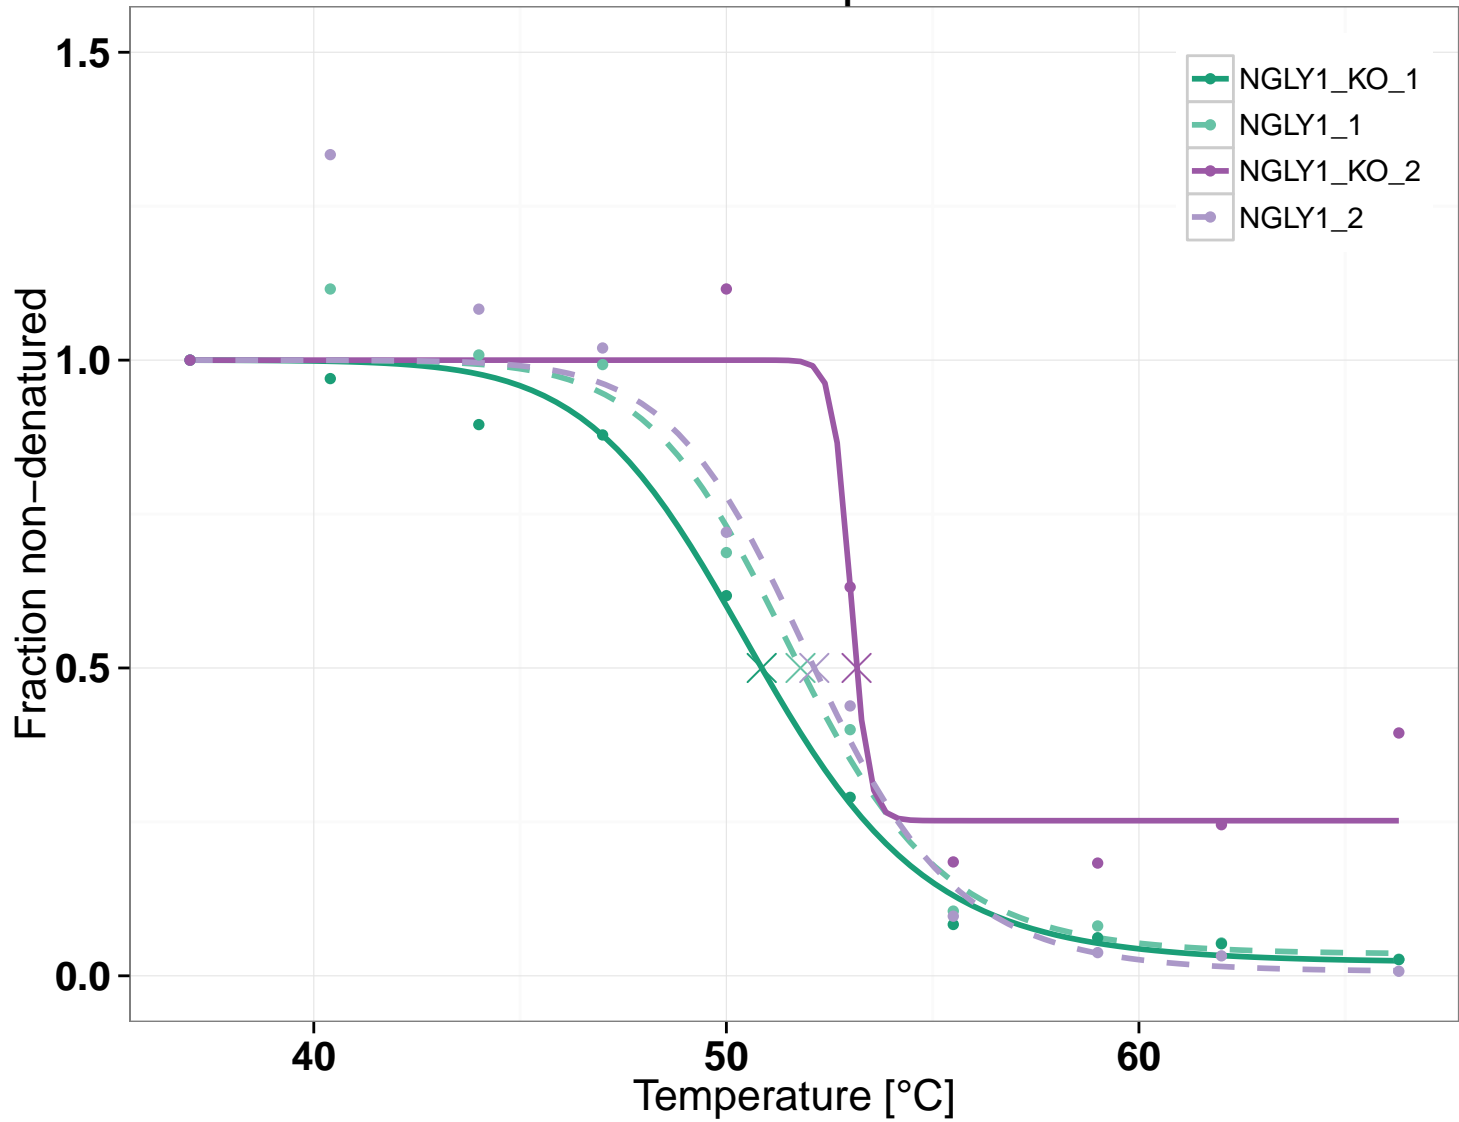

|            | meltPoint | slope | plateau | R2   |
|------------|-----------|-------|---------|------|
| NGLY1_KO_1 | 50.86     | -0.12 | 0.02    | 0.99 |
| NGLY1_1    | 51.8      | -0.13 | 0.03    | 0.99 |
| NGLY1_KO_2 | 53.16     | -0.88 | 0.25    | 0.61 |
| NGLY1_2    | 52.13     | -0.14 | 0.01    | 0.94 |

Supplement: Supplementary file 1311 [file 1]

# IPI00021975.2|TNFRSF10A

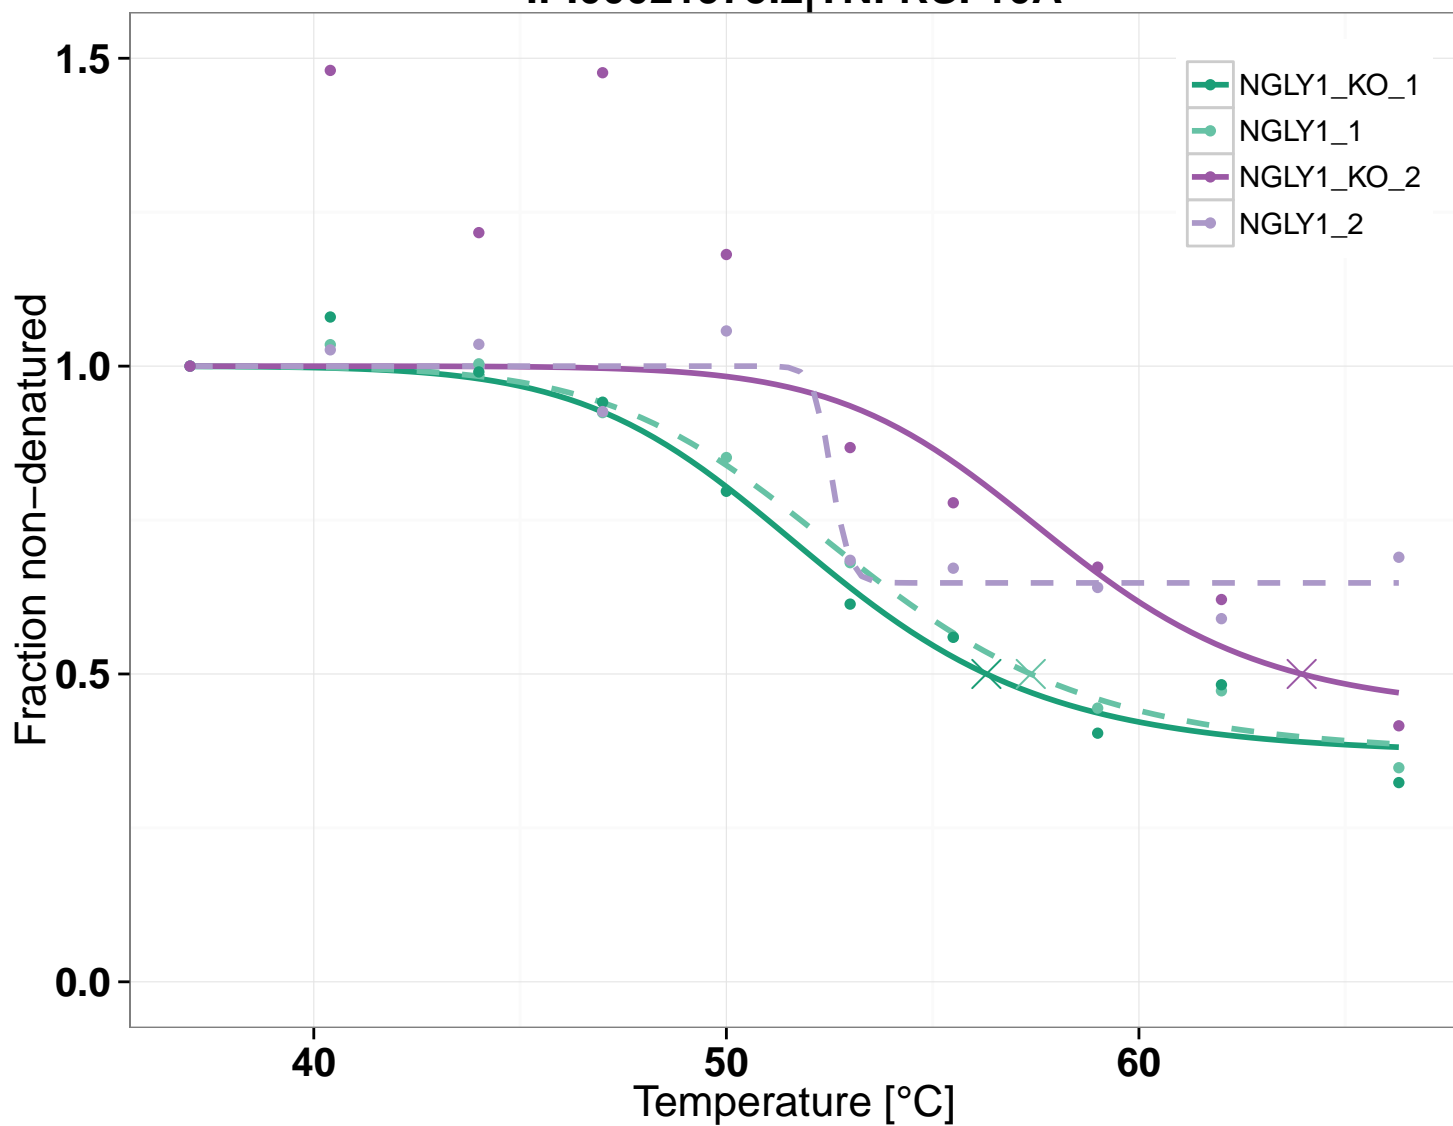

|            | meltPoint | slope  | plateau | R2   |
|------------|-----------|--------|---------|------|
| NGLY1_KO_1 | 56.3      | -0.056 | 0.37    | 0.97 |
| NGLY1_1    | 57.38     | -0.053 | 0.37    | 0.99 |
| NGLY1_KO_2 | 63.94     | -0.054 | 0.44    | 0.52 |
| NGLY1_2    | -         | -0.42  | 0.65    | 0.95 |

Supplement: Supplementary file 1312 [file 1]

# IPI00375190.2|HPS4

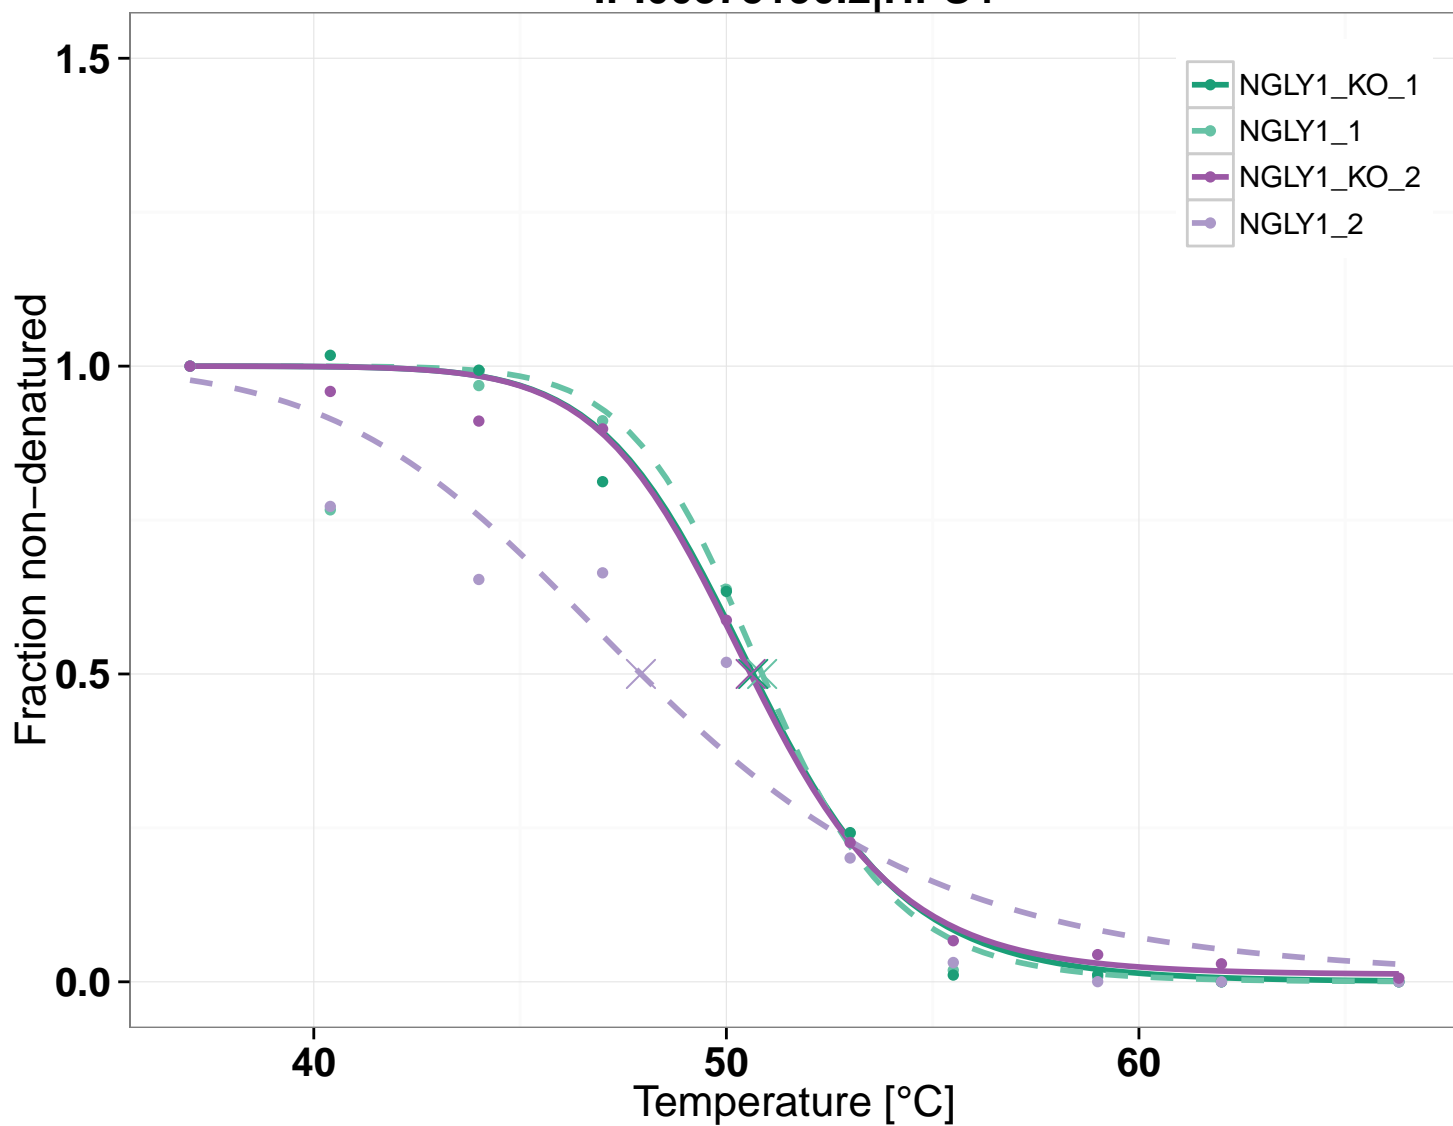

|            | meltPoint | slope  | plateau | R2   |
|------------|-----------|--------|---------|------|
| NGLY1_KO_1 | 50.65     | -0.14  | 0       | 0.99 |
| NGLY1_1    | 50.87     | -0.15  | 0       | 0.97 |
| NGLY1_KO_2 | 50.59     | -0.14  | 0.01    | 1    |
| NGLY1_2    | 47.93     | -0.068 | 0       | 0.93 |

Supplement: Supplementary file 1313 [file 1]

# IPI00329600.3|SCCPDH

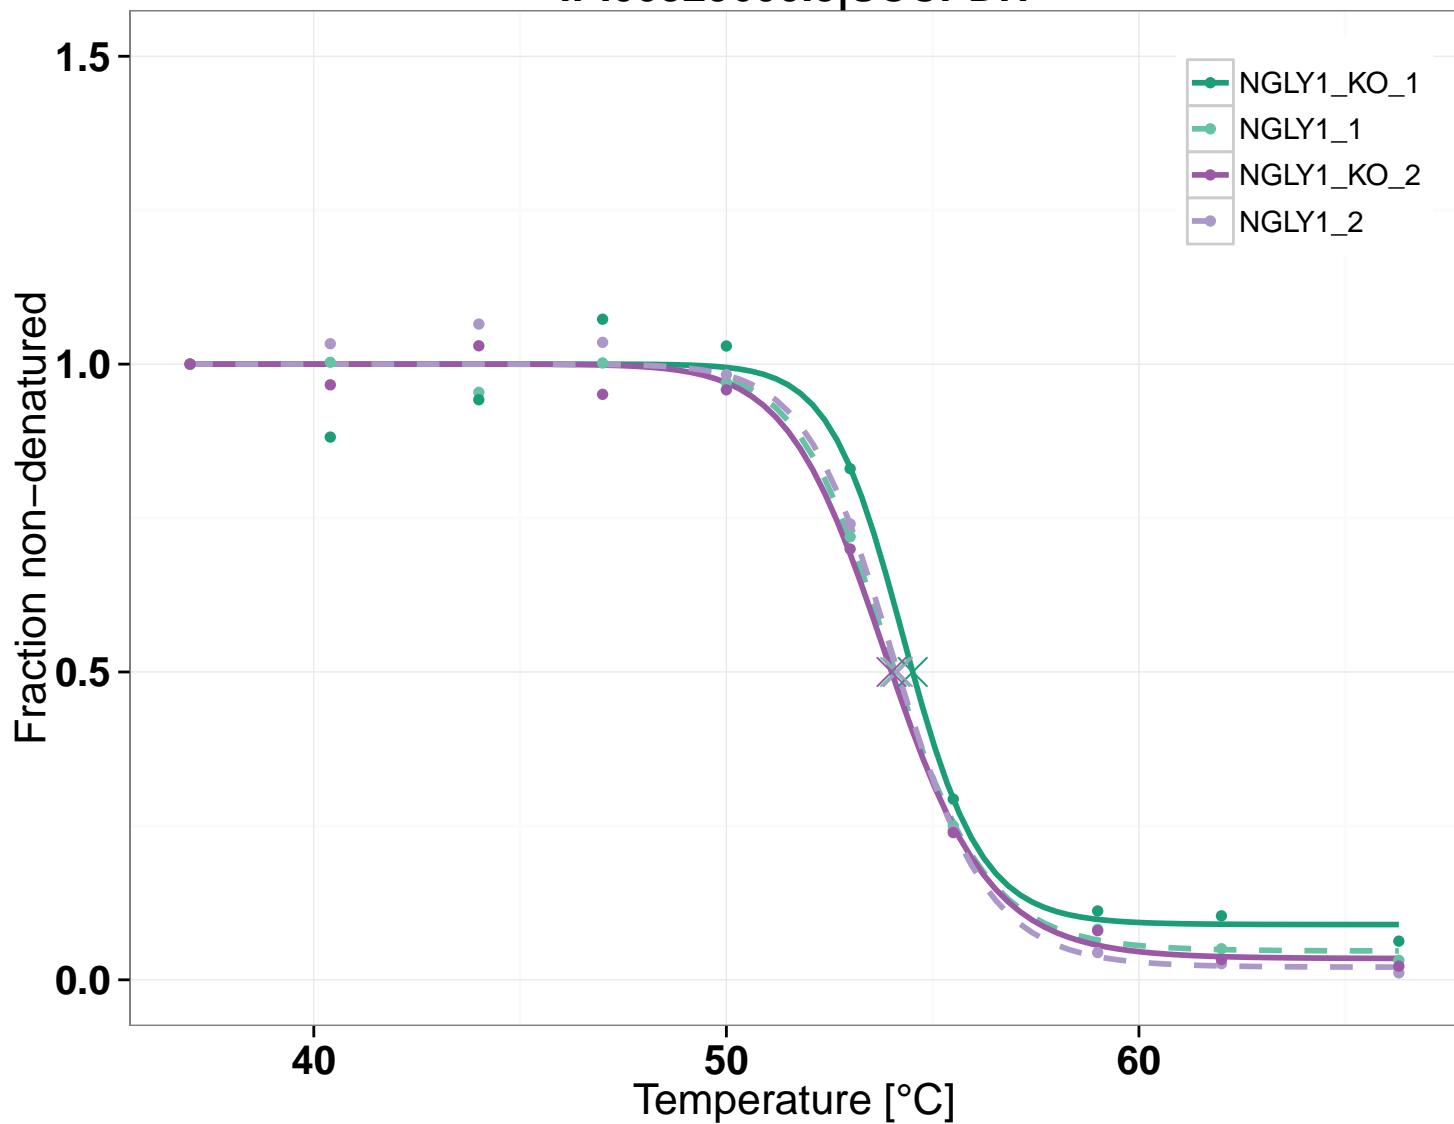

|            | meltPoint | slope | plateau | R2   |
|------------|-----------|-------|---------|------|
| NGLY1_KO_1 | 54.52     | -0.25 | 0.09    | 0.99 |
| NGLY1_1    | 54.09     | -0.21 | 0.05    | 1    |
| NGLY1_KO_2 | 54        | -0.2  | 0.03    | 1    |
| NGLY1_2    | 54.16     | -0.22 | 0.02    | 1    |

Supplement: Supplementary file 1314 [file 1]

# IPI00013773.2|RIPK1

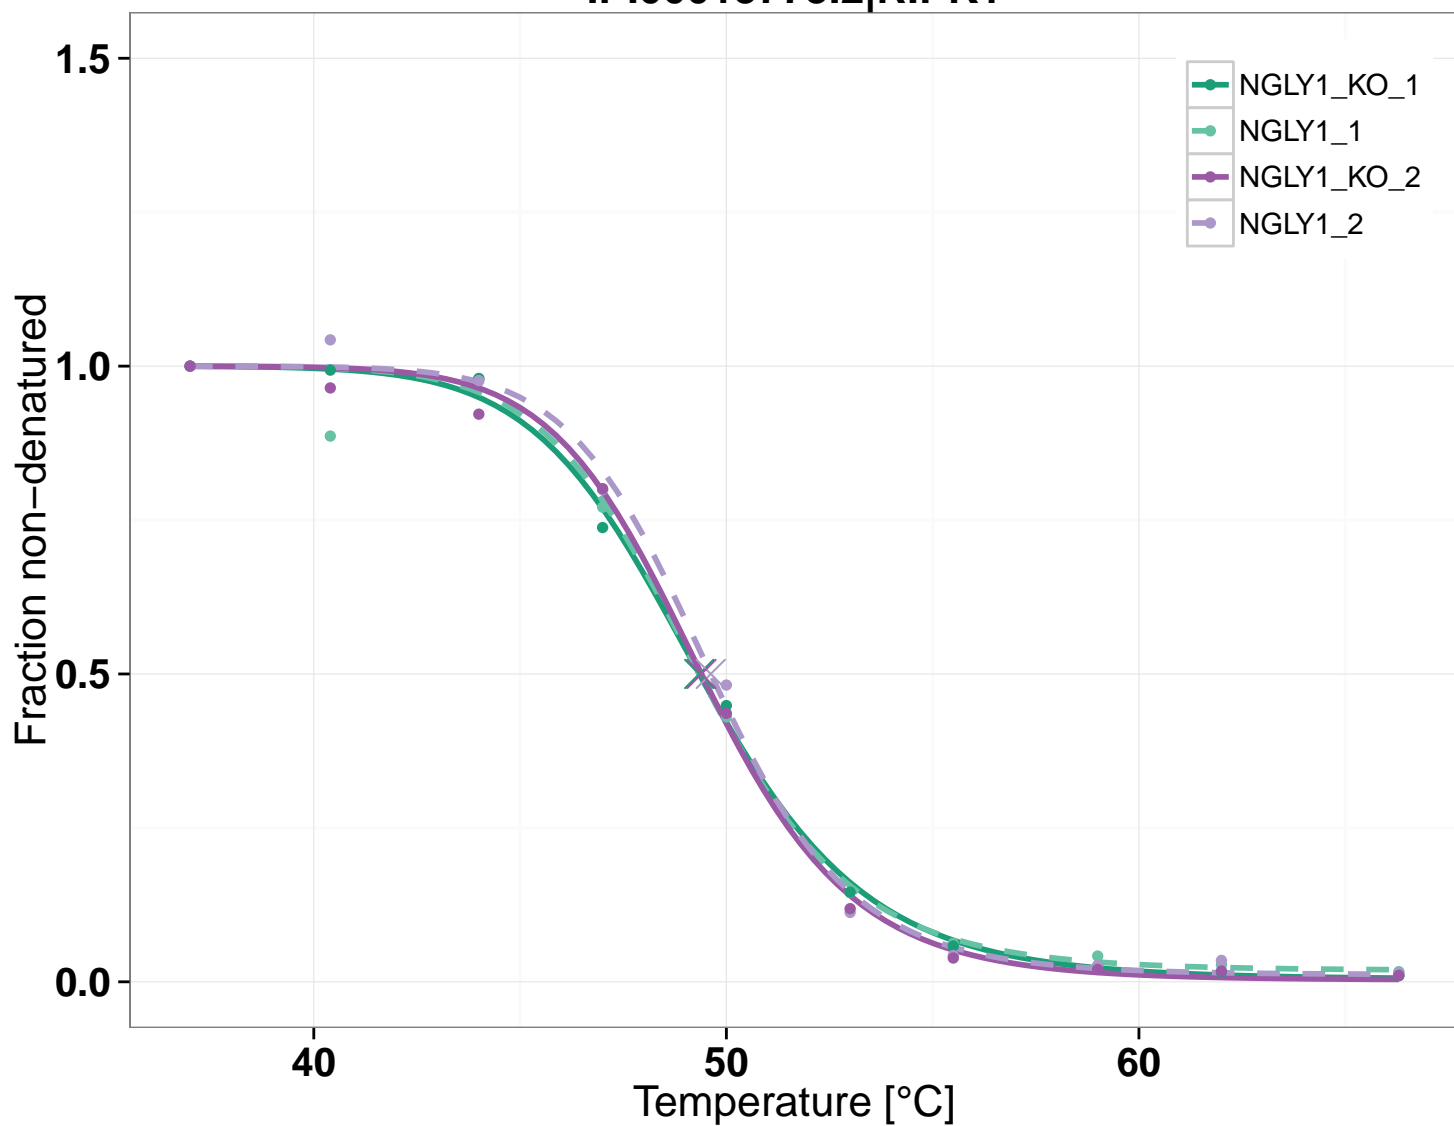

|            | meltPoint | slope | plateau | R2   |
|------------|-----------|-------|---------|------|
| NGLY1_KO_1 | 49.34     | -0.12 | 0       | 1    |
| NGLY1_1    | 49.35     | -0.13 | 0.02    | 0.99 |
| NGLY1_KO_2 | 49.4      | -0.14 | 0       | 1    |
| NGLY1_2    | 49.62     | -0.14 | 0.01    | 1    |

Supplement: Supplementary file 1315 [file 1]

IPI00329385.4|MTMR6

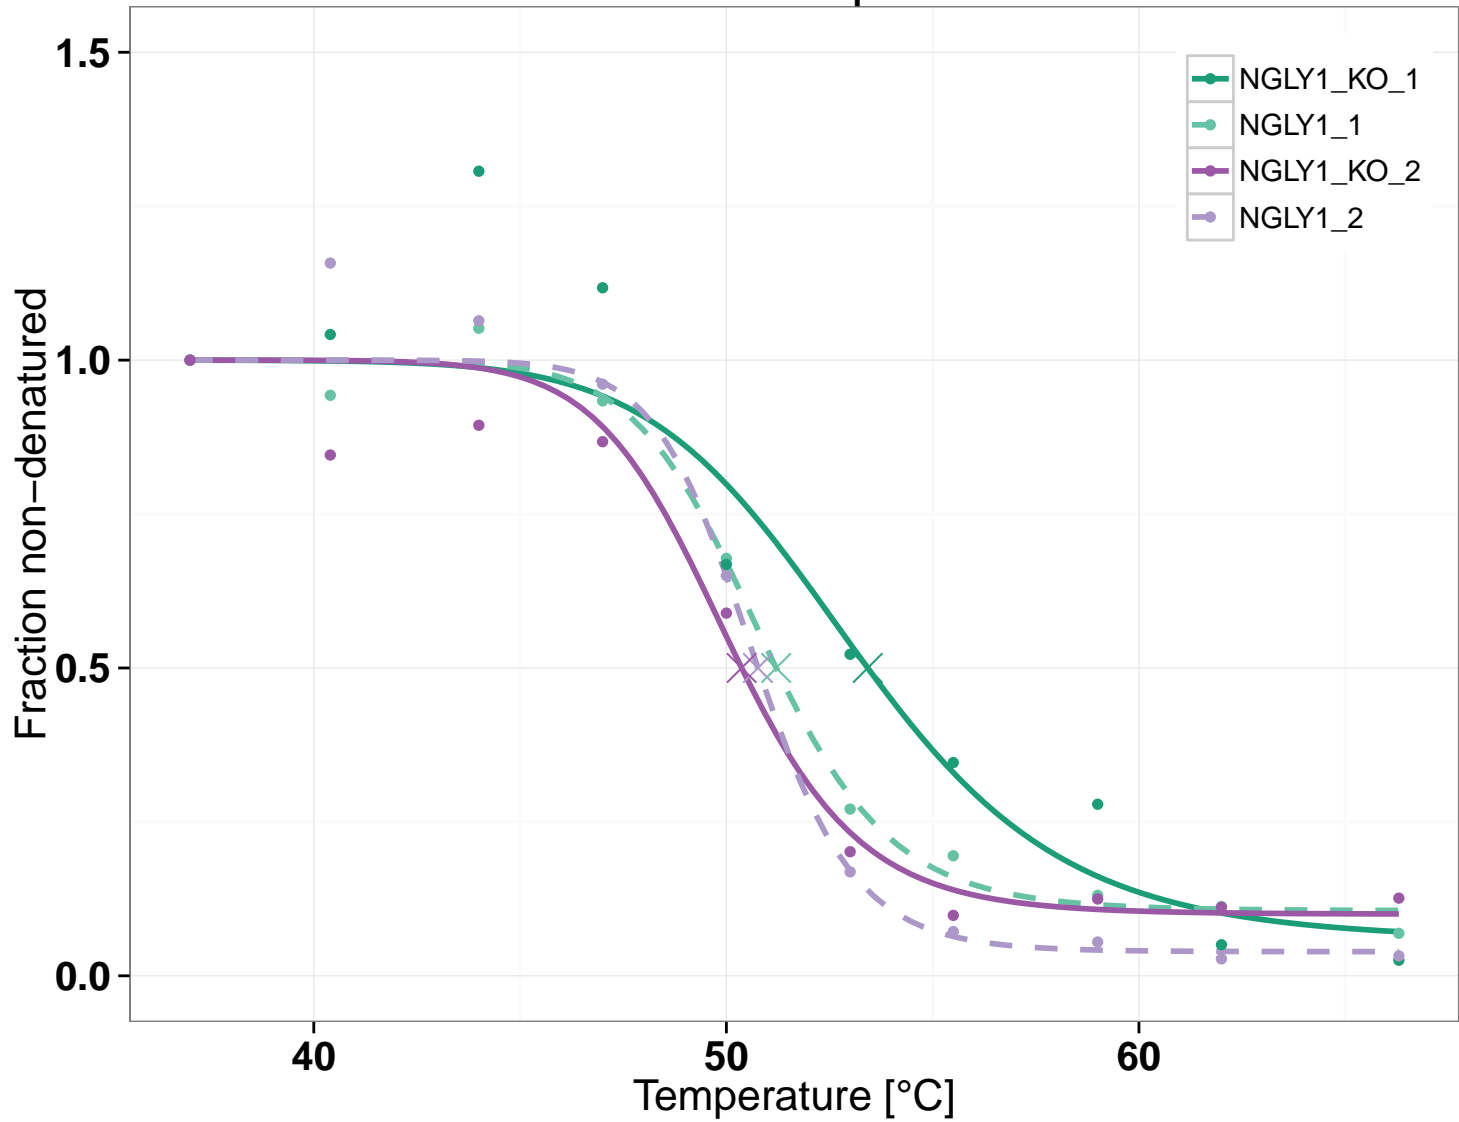

|            | meltPoint | slope  | plateau | R2   |
|------------|-----------|--------|---------|------|
| NGLY1_KO_1 | 53.43     | -0.094 | 0.06    | 0.91 |
| NGLY1_1    | 51.21     | -0.14  | 0.11    | 0.99 |
| NGLY1_KO_2 | 50.37     | -0.14  | 0.1     | 0.97 |
| NGLY1_2    | 50.77     | -0.2   | 0.04    | 0.99 |

Supplement: Supplementary file 1316 [file 1]

# IPI00000949.1|CRYM

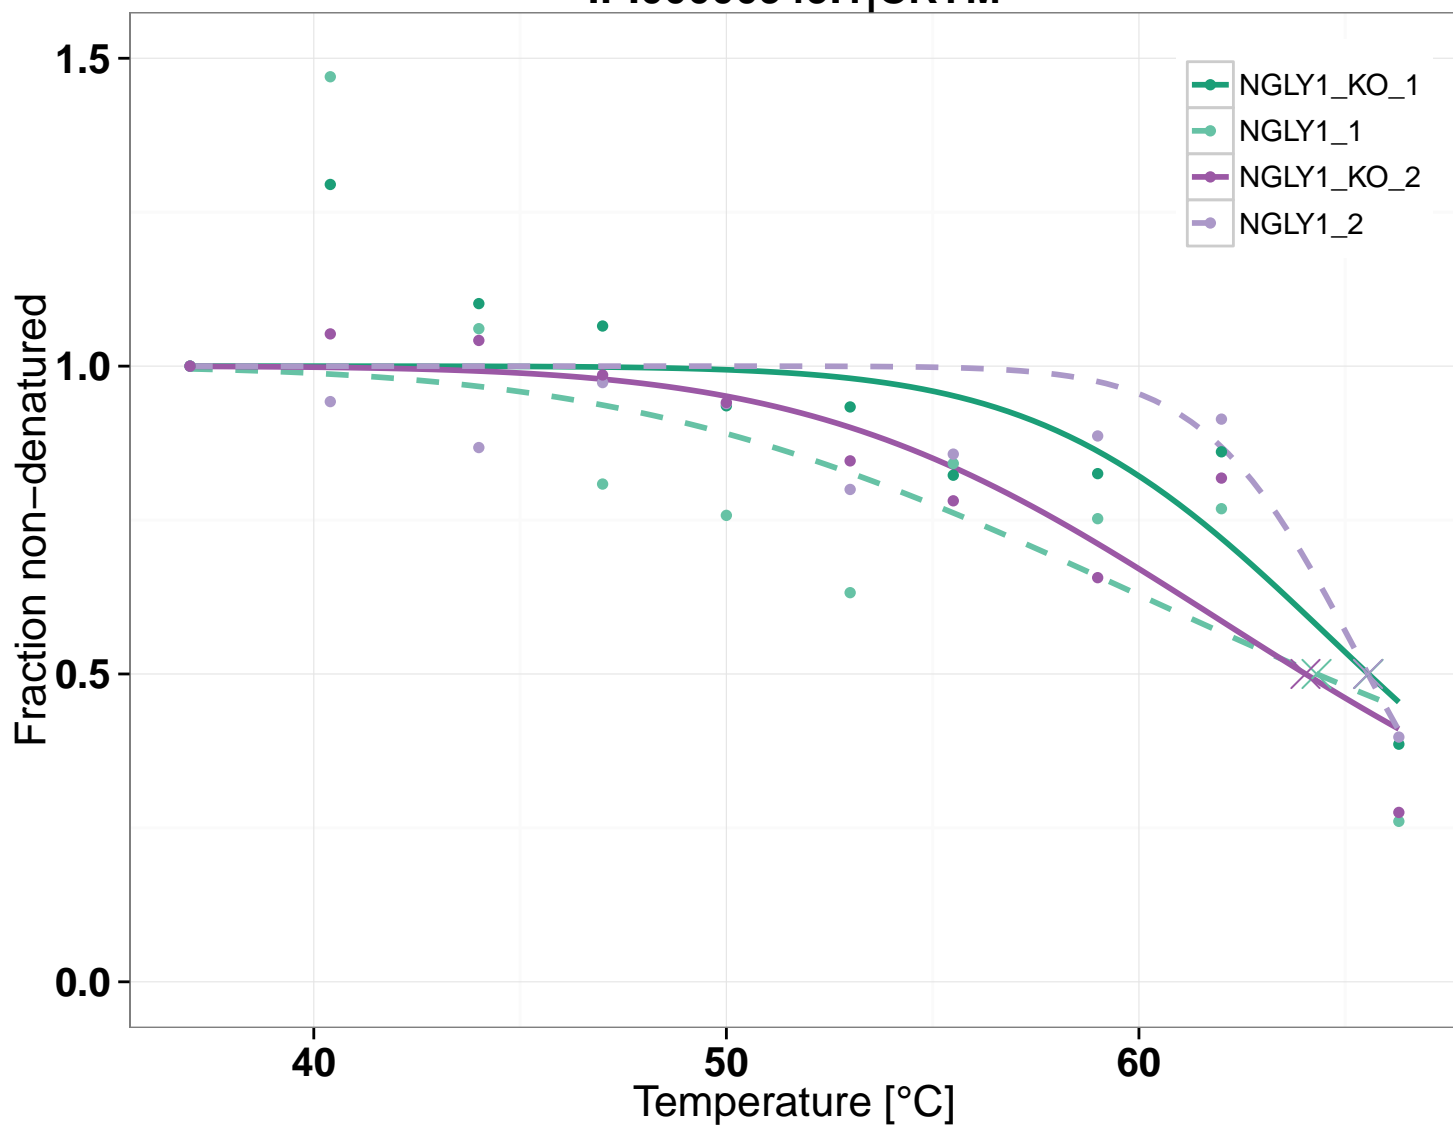

|            | meltPoint | slope  | plateau | R2   |
|------------|-----------|--------|---------|------|
| NGLY1_KO_1 | 65.56     | -0.064 | 0       | 0.71 |
| NGLY1_1    | 64.31     | -0.031 | 0       | 0.54 |
| NGLY1_KO_2 | 64.04     | -0.043 | 0       | 0.83 |
| NGLY1_2    | 65.55     | -0.13  | 0       | 0.64 |

Supplement: Supplementary file 1317 [file 1]

IPI00045511.1|CLCC1

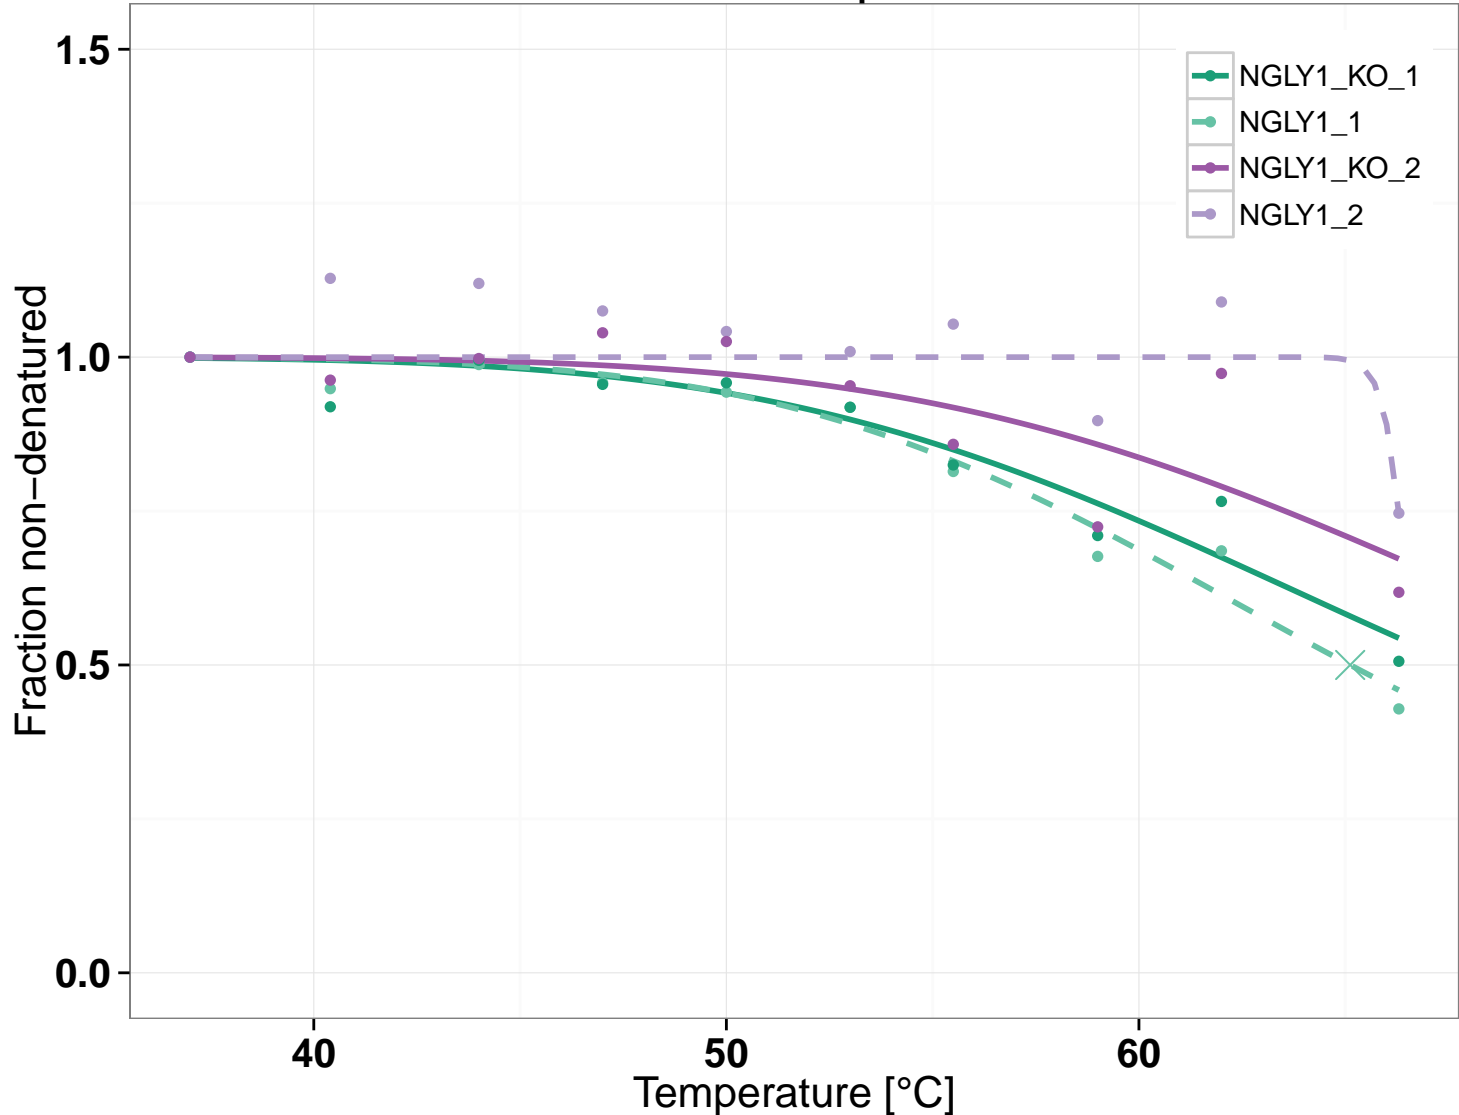

|            | meltPoint | slope  | plateau | R2   |
|------------|-----------|--------|---------|------|
| NGLY1_KO_1 | -         | -0.031 | 0       | 0.91 |
| NGLY1_1    | 65.12     | -0.037 | 0       | 0.96 |
| NGLY1_KO_2 | -         | -      | 0       | 0.63 |
| NGLY1_2    | -         | -      | 0       | 0.51 |

Supplement: Supplementary file 1318 [file 1]

IPI00396406.6|MKRN2

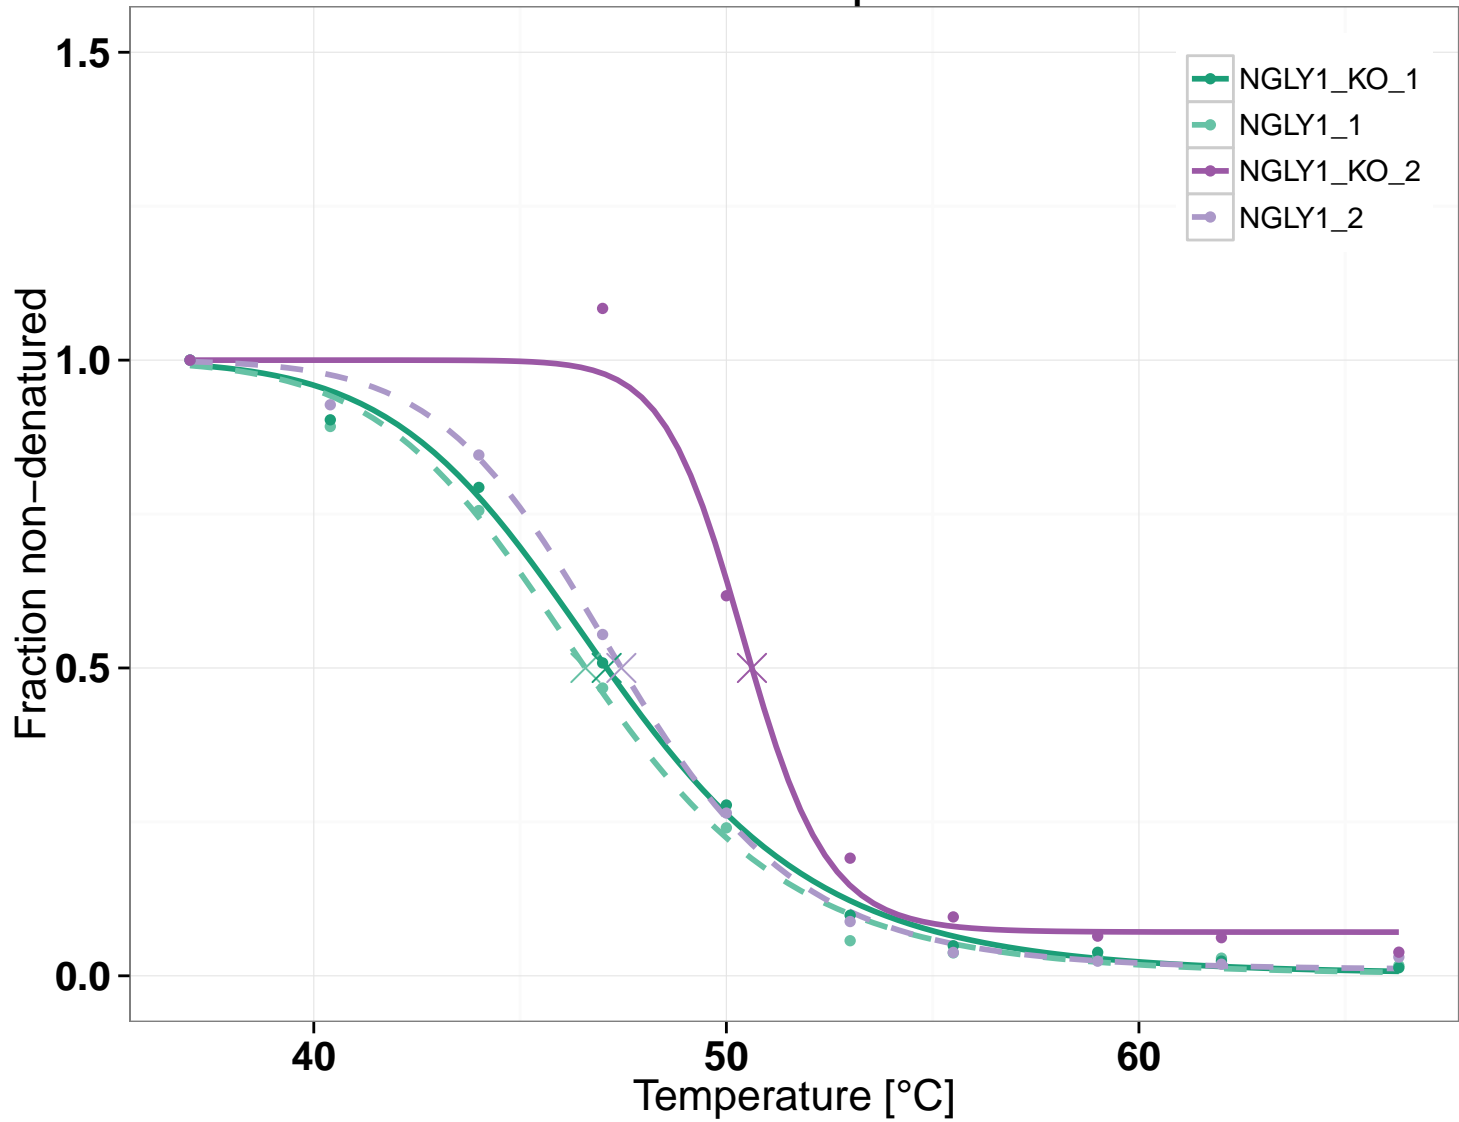

|            | meltPoint | slope  | plateau | R2   |
|------------|-----------|--------|---------|------|
| NGLY1_KO_1 | 47.1      | -0.096 | 0       | 1    |
| NGLY1_1    | 46.58     | -0.099 | 0       | 1    |
| NGLY1_KO_2 | 50.62     | -0.23  | 0.07    | 0.71 |
| NGLY1_2    | 47.45     | -0.11  | 0.01    | 1    |

Supplement: Supplementary file 1319 [file 1]

IPI00448173.2|PSRC1

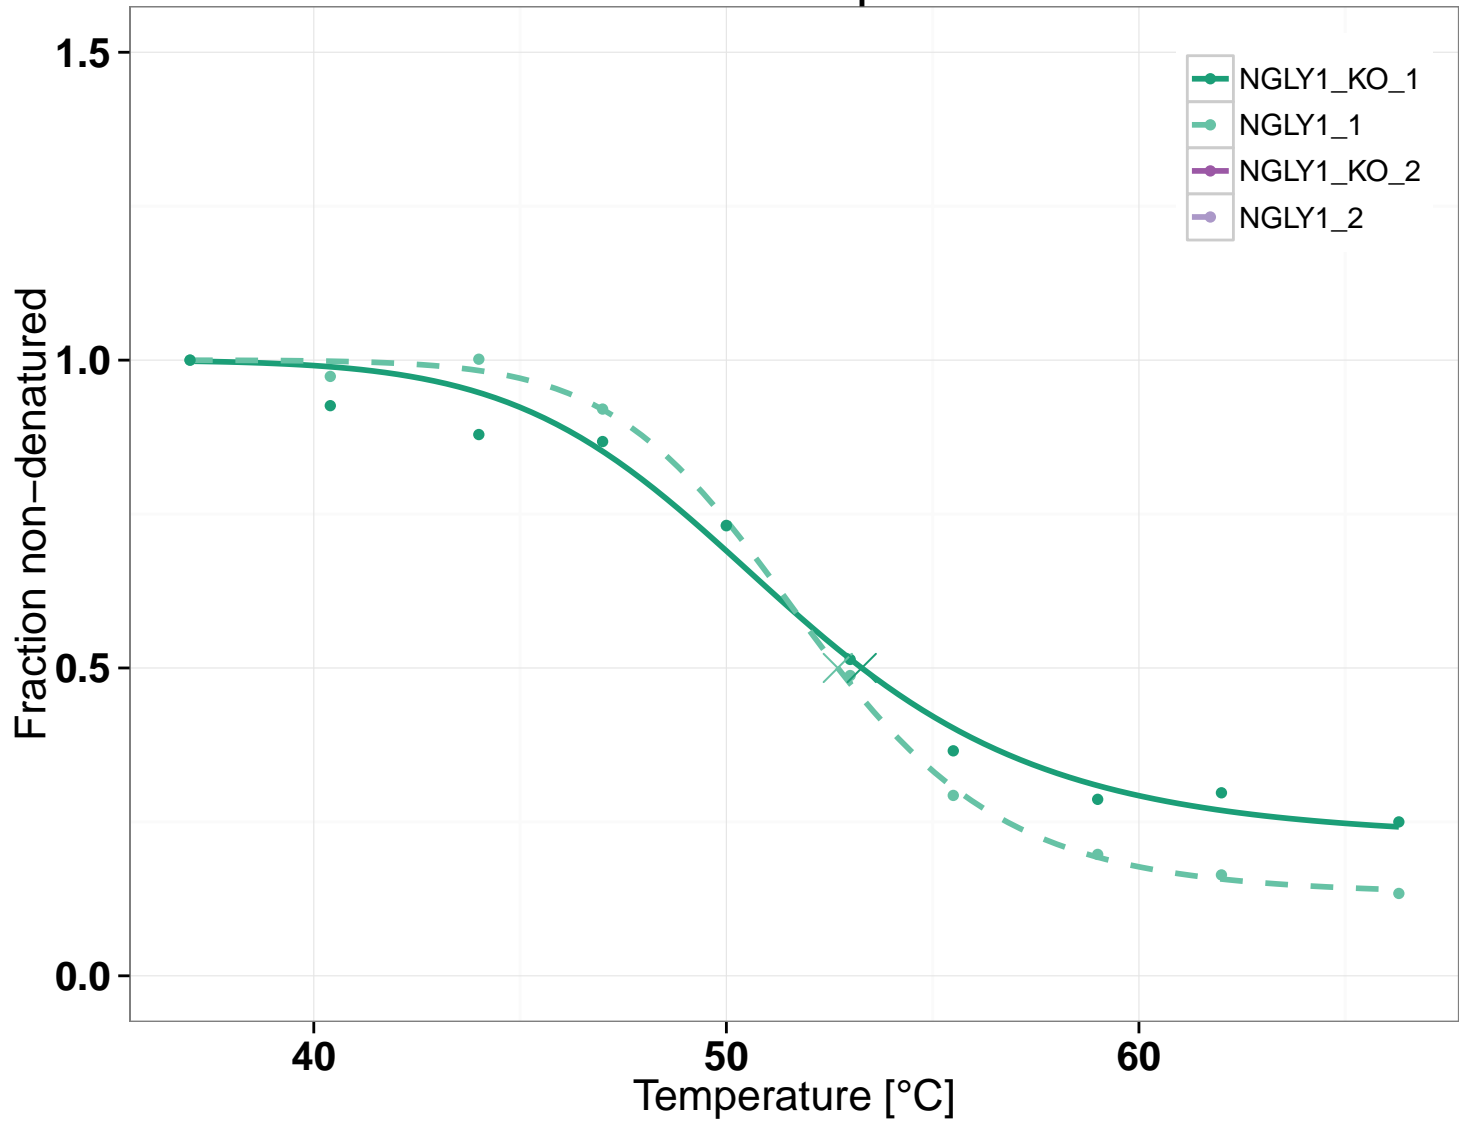

|            | meltPoint | slope  | plateau | R2   |
|------------|-----------|--------|---------|------|
| NGLY1_KO_1 | 53.28     | -0.061 | 0.22    | 0.98 |
| NGLY1_1    | 52.7      | -0.091 | 0.13    | 1    |
| NGLY1_KO_2 | -         | -      | -       | -    |
| NGLY1_2    | -         | -      | -       | -    |

Supplement: Supplementary file 1320 [file 1]

IPI00747327.3|ZNF195

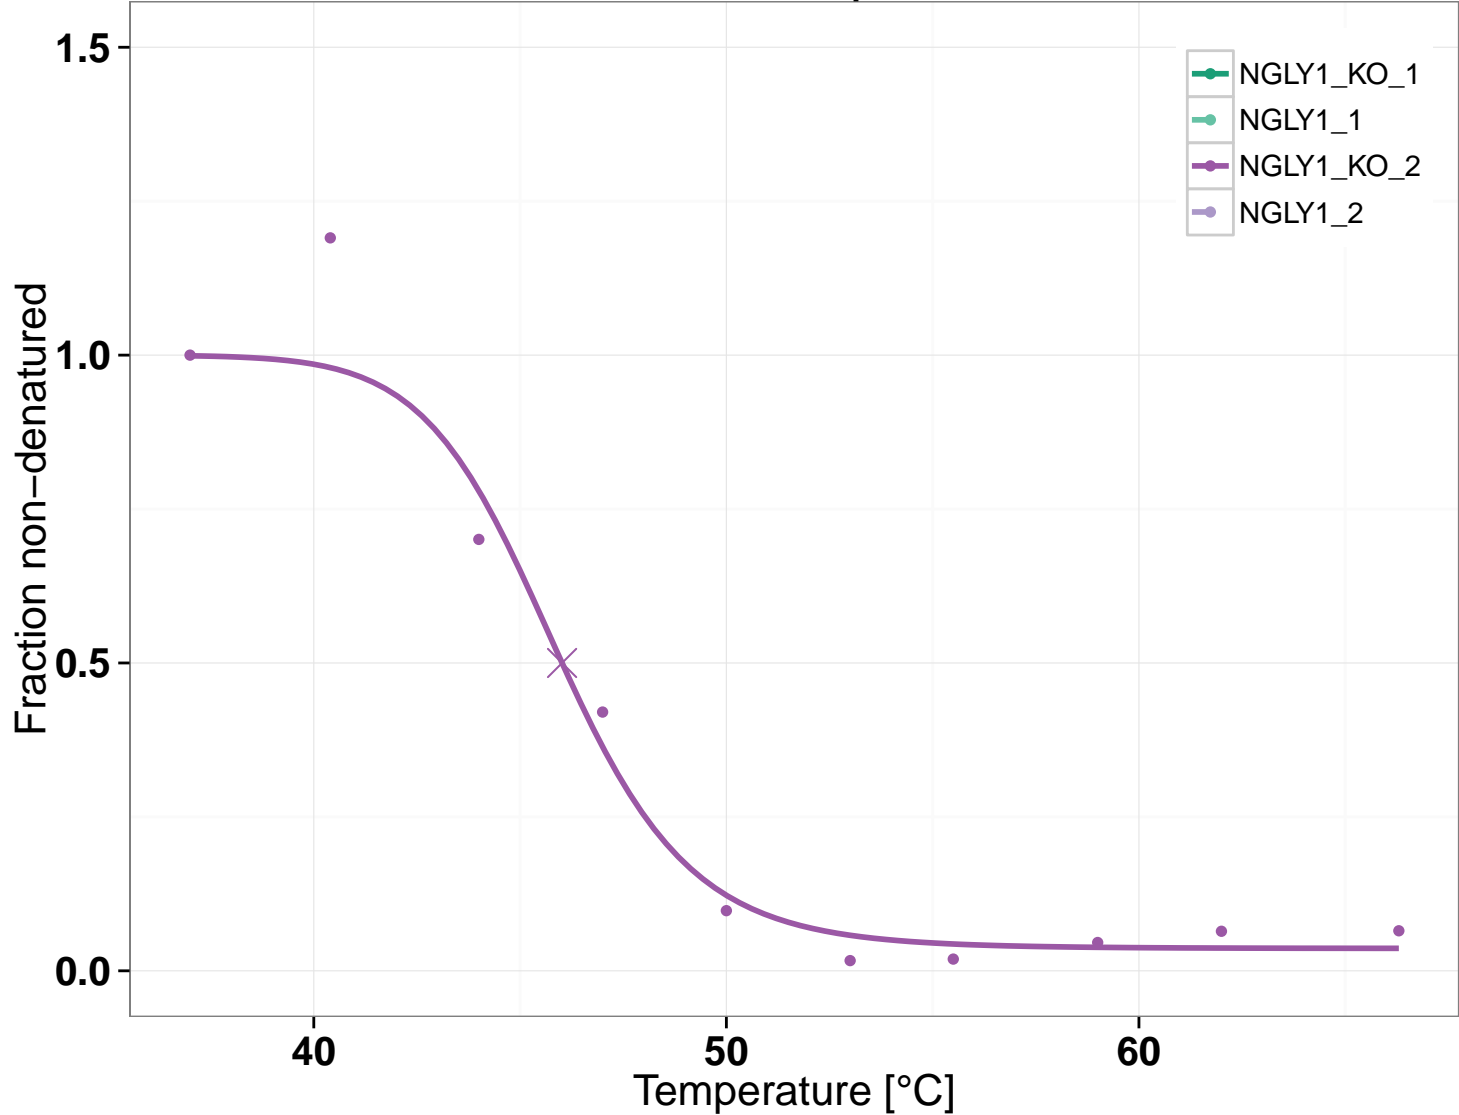

|            | meltPoint | slope | plateau | R2   |
|------------|-----------|-------|---------|------|
| NGLY1_KO_1 | -         | -     | -       | -    |
| NGLY1_1    | -         | -     | -       | -    |
| NGLY1_KO_2 | 46.02     | -0.15 | 0.04    | 0.97 |
| NGLY1_2    | -         | -     | -       | -    |

Supplement: Supplementary file 1321 [file 1]

IPI00410255.4|KBTBD4

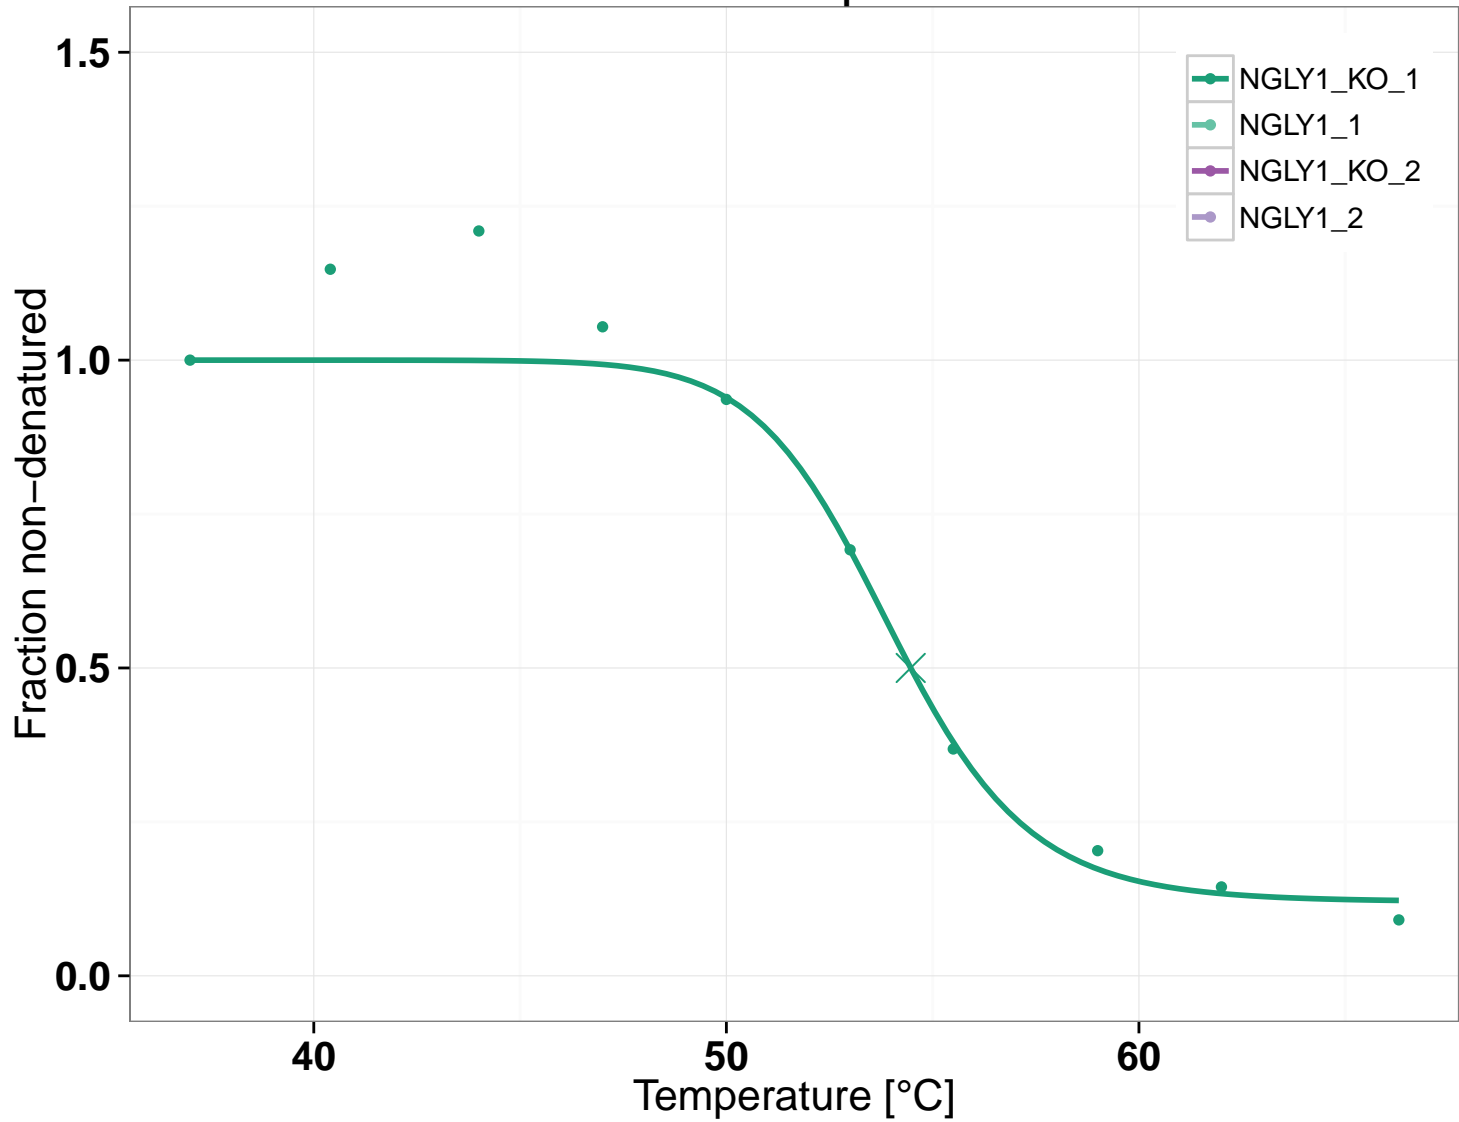

|            | meltPoint | slope | plateau | R2   |
|------------|-----------|-------|---------|------|
| NGLY1_KO_1 | 54.47     | -0.13 | 0.12    | 0.96 |
| NGLY1_1    | -         | -     | -       | -    |
| NGLY1_KO_2 | -         | -     | -       | -    |
| NGLY1_2    | -         | -     | -       | -    |

Supplement: Supplementary file 1322 [file 1]

# IPI00220736.3|NEU3

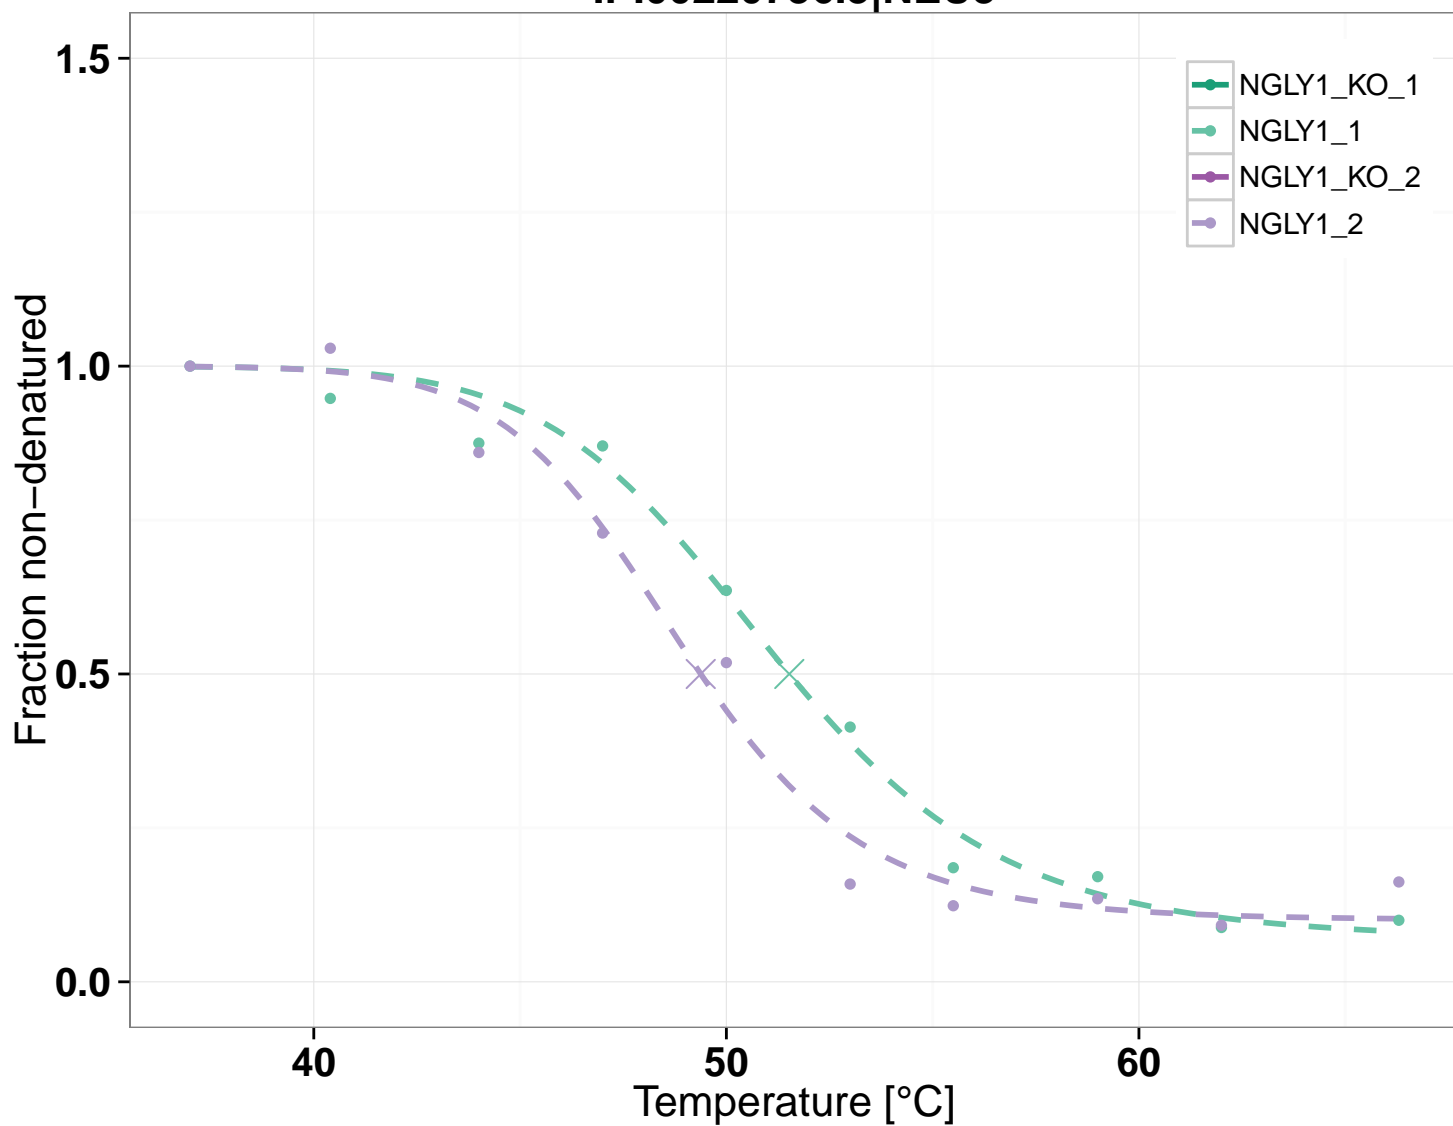

|            | meltPoint | slope  | plateau | R2   |
|------------|-----------|--------|---------|------|
| NGLY1_KO_1 | -         | -      | -       | -    |
| NGLY1_1    | 51.53     | -0.084 | 0.07    | 0.99 |
| NGLY1_KO_2 | -         | -      | -       | -    |
| NGLY1_2    | 49.38     | -0.1   | 0.1     | 0.98 |

Supplement: Supplementary file 1323 [file 1]

# IPI00154451.9|MMS19

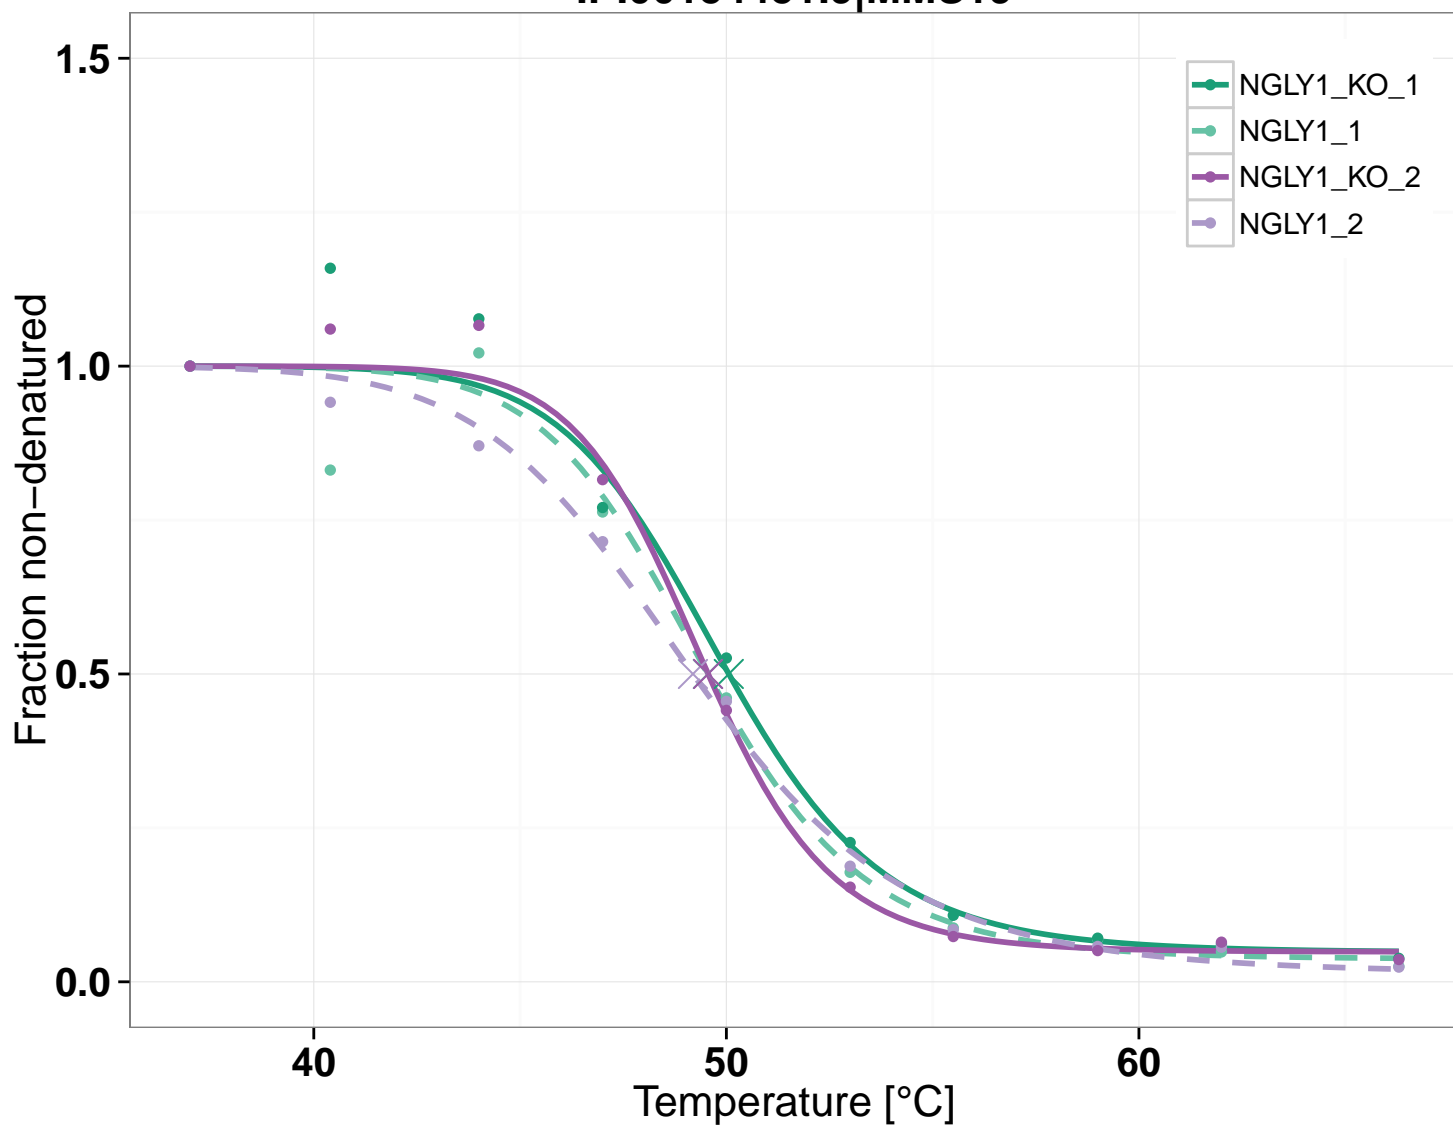

|            | meltPoint | slope  | plateau | R2   |
|------------|-----------|--------|---------|------|
| NGLY1_KO_1 | 50.06     | -0.12  | 0.05    | 0.98 |
| NGLY1_1    | 49.55     | -0.12  | 0.04    | 0.98 |
| NGLY1_KO_2 | 49.56     | -0.15  | 0.05    | 0.99 |
| NGLY1_2    | 49.19     | -0.095 | 0.01    | 1    |

Supplement: Supplementary file 1324 [file 1]

# IPI00550682.1|GRHPR

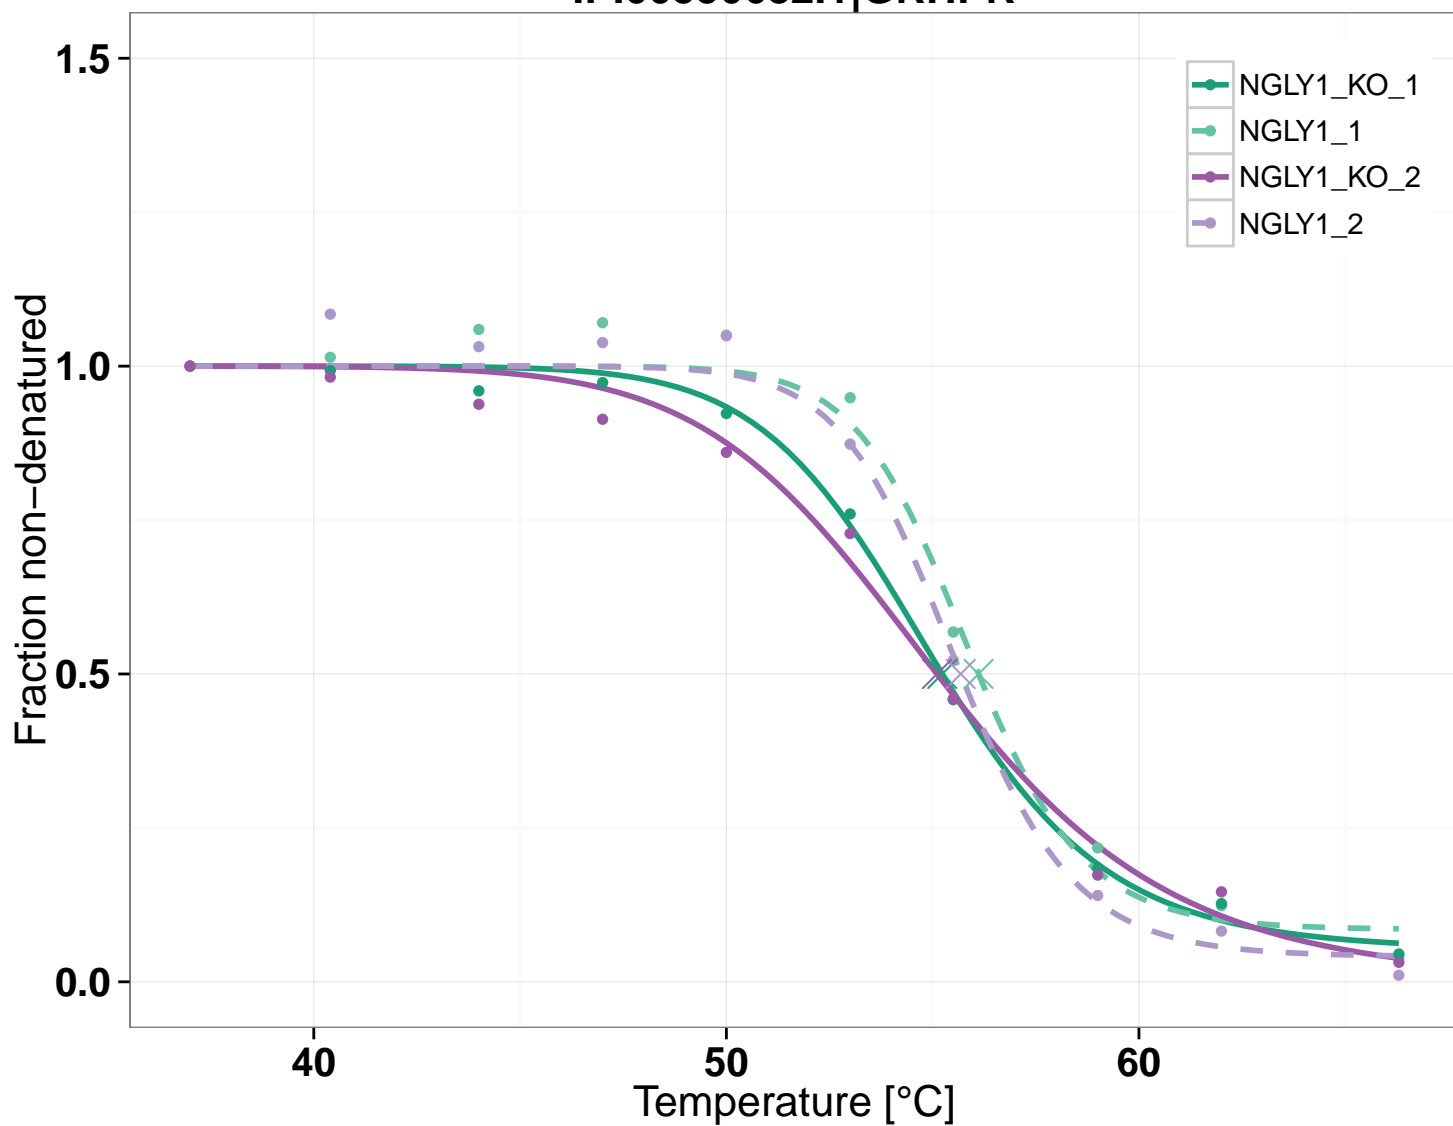

|            | meltPoint | slope  | plateau | R2   |
|------------|-----------|--------|---------|------|
| NGLY1_KO_1 | 55.23     | -0.11  | 0.05    | 1    |
| NGLY1_1    | 56.11     | -0.17  | 0.08    | 0.99 |
| NGLY1_KO_2 | 55.11     | -0.088 | 0       | 0.99 |
| NGLY1_2    | 55.68     | -0.17  | 0.04    | 0.99 |

Supplement: Supplementary file 1325 [file 1]

IPI00024787.1|SLC27A2

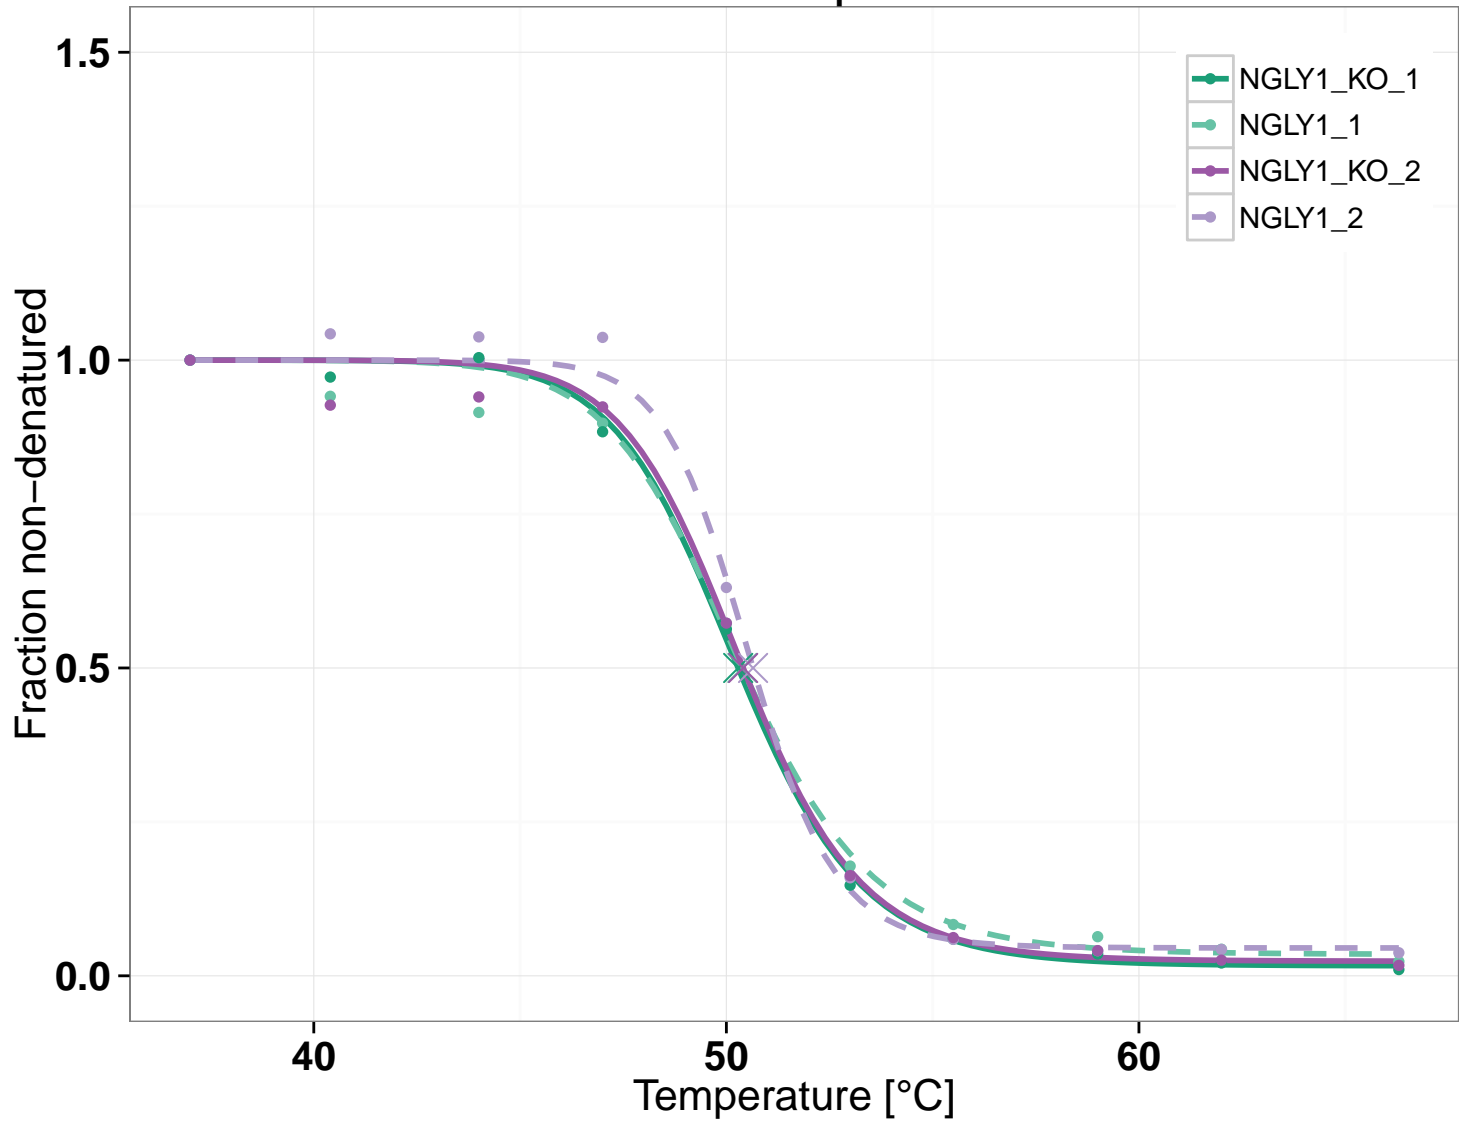

|            | meltPoint | slope | plateau | R2   |
|------------|-----------|-------|---------|------|
| NGLY1_KO_1 | 50.29     | -0.16 | 0.02    | 1    |
| NGLY1_1    | 50.39     | -0.15 | 0.03    | 0.99 |
| NGLY1_KO_2 | 50.41     | -0.17 | 0.02    | 1    |
| NGLY1_2    | 50.65     | -0.23 | 0.05    | 1    |

Supplement: Supplementary file 1326 [file 1]

IPI00017391.4|MTHFD2L

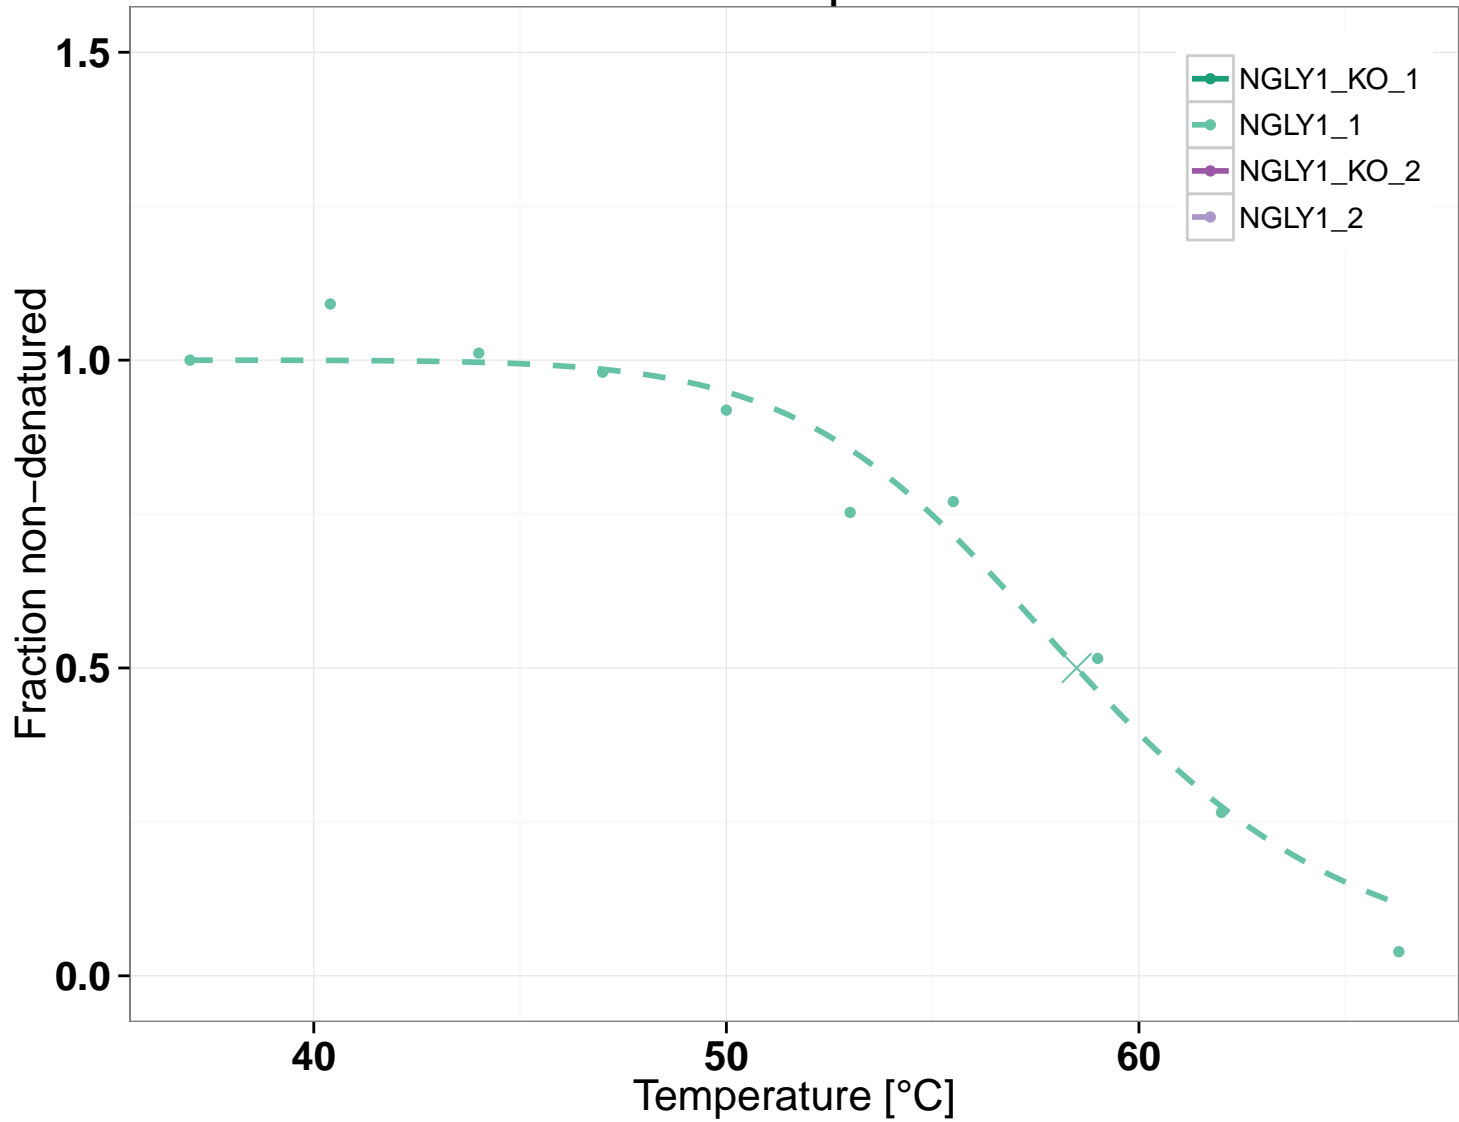

|            | meltPoint | slope  | plateau | R2   |
|------------|-----------|--------|---------|------|
| NGLY1_KO_1 | -         | -      | -       | -    |
| NGLY1_1    | 58.49     | -0.074 | 0       | 0.97 |
| NGLY1_KO_2 | -         | -      | -       | -    |
| NGLY1_2    | -         | -      | -       | -    |

Supplement: Supplementary file 1327 [file 1]

IPI00007461.4|DPY19L1

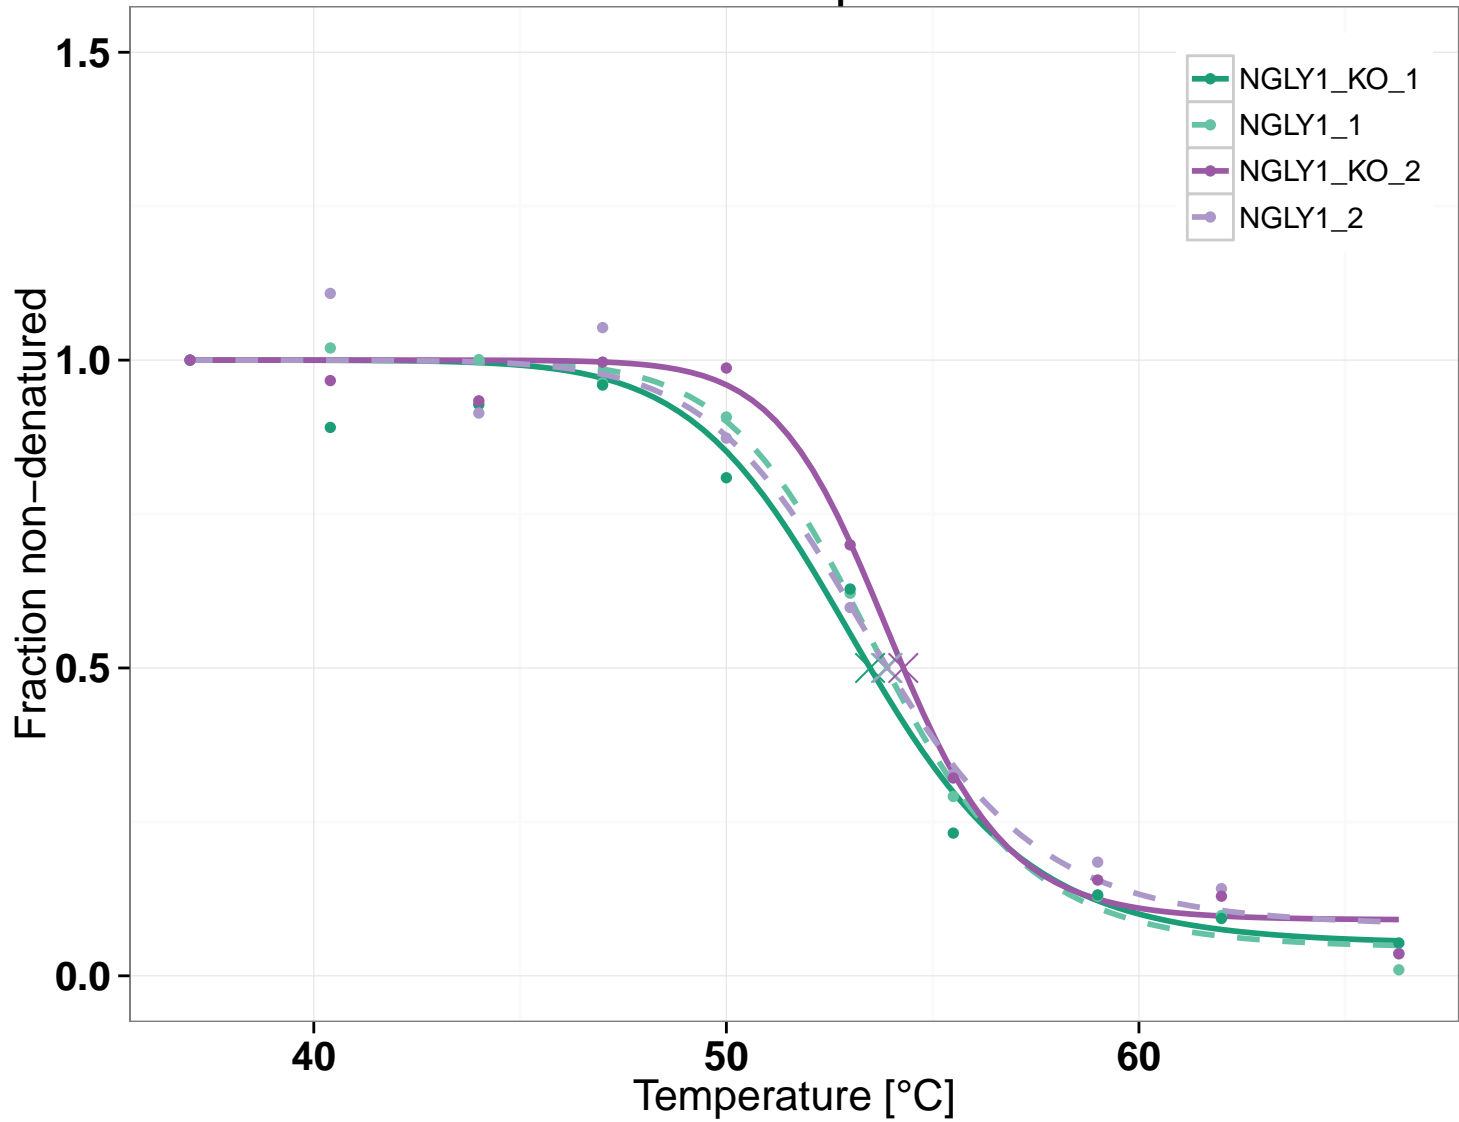

|            | meltPoint | slope | plateau | R2   |
|------------|-----------|-------|---------|------|
| NGLY1_KO_1 | 53.48     | -0.12 | 0.05    | 0.98 |
| NGLY1_1    | 53.87     | -0.13 | 0.05    | 1    |
| NGLY1_KO_2 | 54.29     | -0.16 | 0.09    | 0.99 |
| NGLY1_2    | 53.91     | -0.11 | 0.08    | 0.98 |

Supplement: Supplementary file 1328 [file 1]

IPI00220739.3|PGRMC1

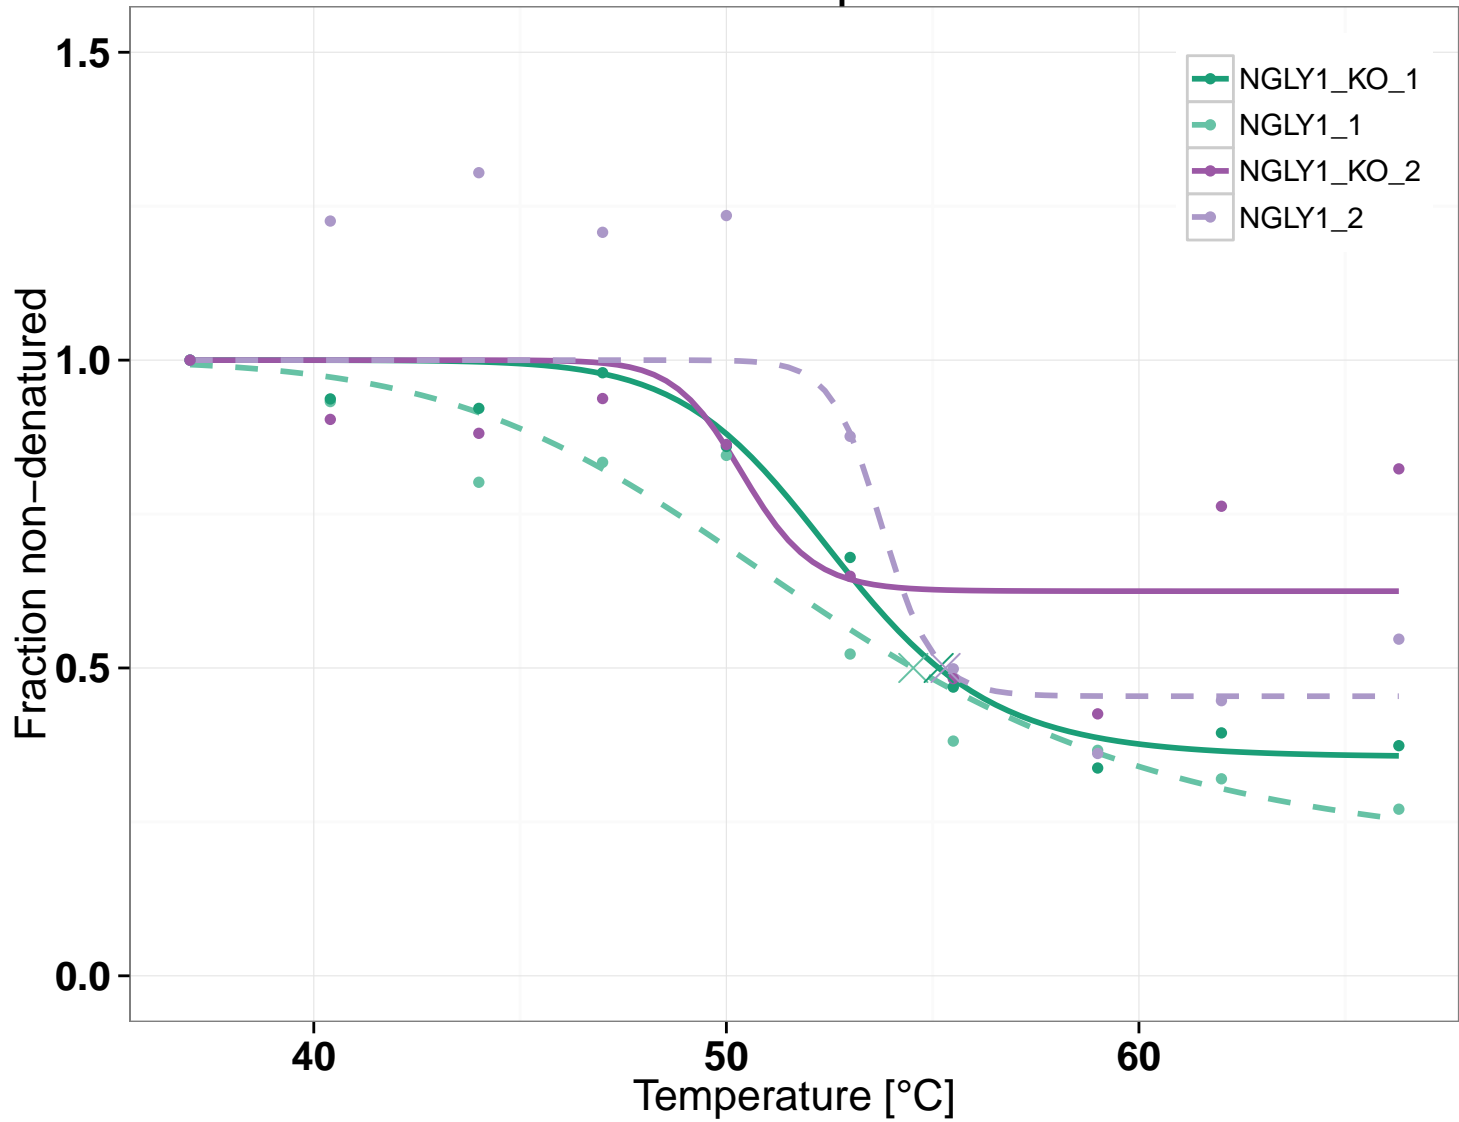

|            | meltPoint | slope  | plateau | R2   |
|------------|-----------|--------|---------|------|
| NGLY1_KO_1 | 55.15     | -0.085 | 0.36    | 0.98 |
| NGLY1_1    | 54.53     | -0.046 | 0.19    | 0.94 |
| NGLY1_KO_2 | -         | -0.11  | 0.62    | 0.57 |
| NGLY1_2    | 55.31     | -0.22  | 0.45    | 0.79 |

Supplement: Supplementary file 1329 [file 1]

# IPI00103595.2|CEP350

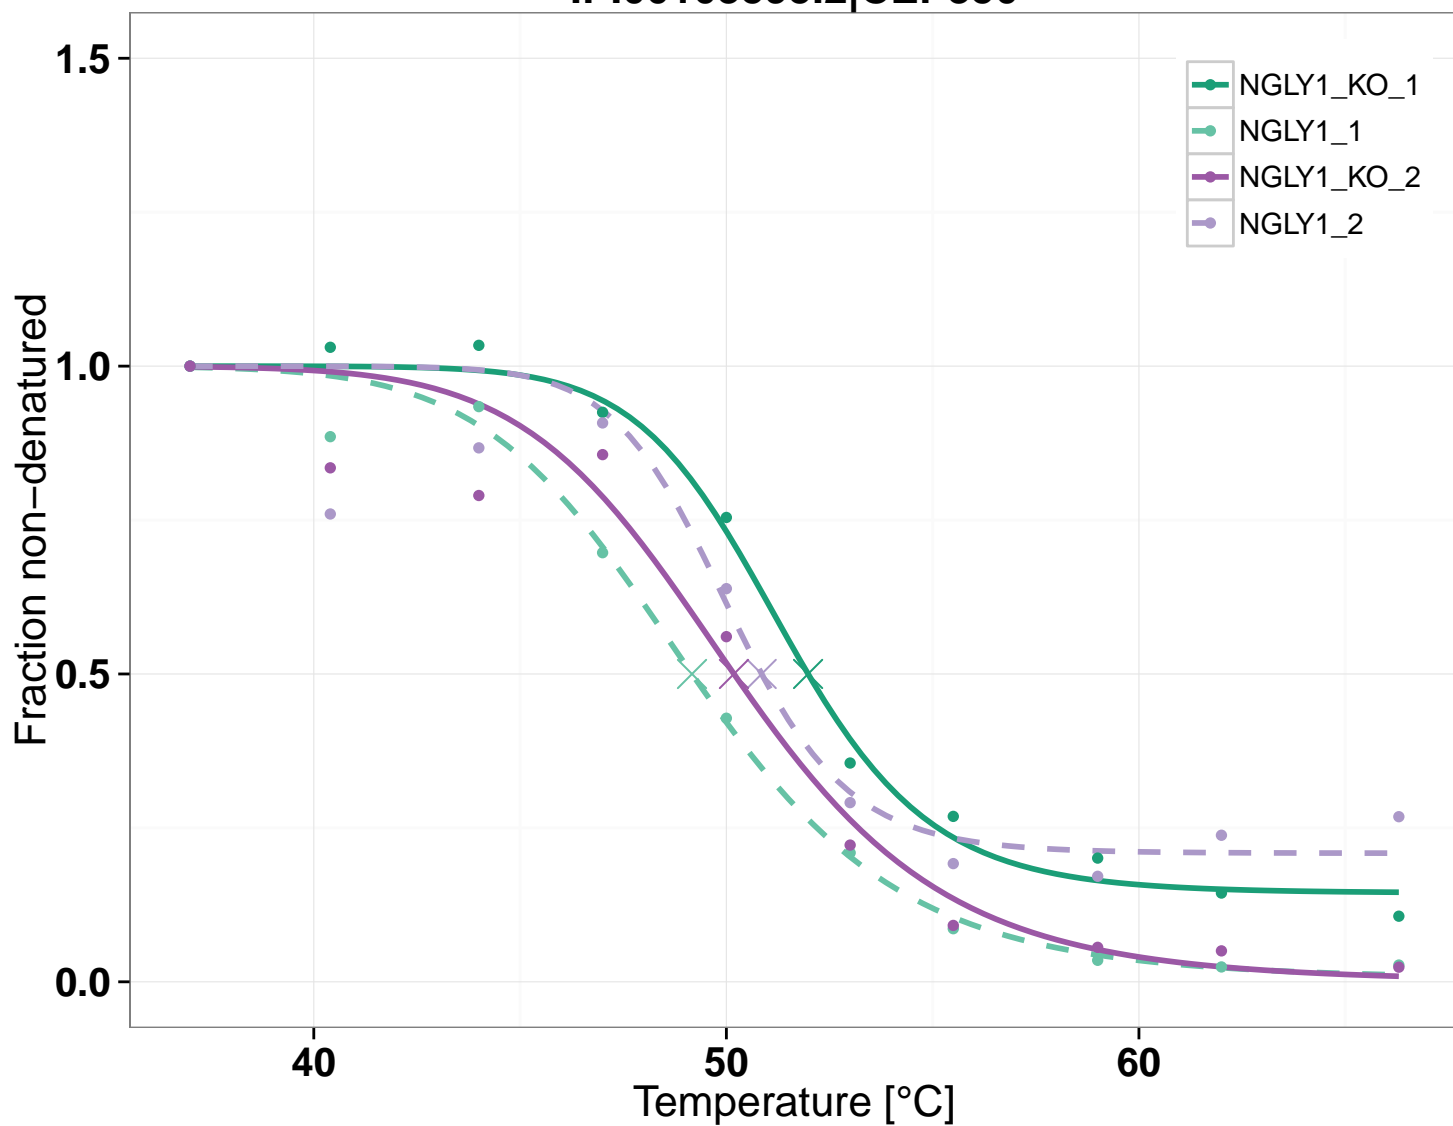

|            | meltPoint | slope  | plateau | R2   |
|------------|-----------|--------|---------|------|
| NGLY1_KO_1 | 51.98     | -0.12  | 0.14    | 0.99 |
| NGLY1_1    | 49.17     | -0.098 | 0       | 0.99 |
| NGLY1_KO_2 | 50.18     | -0.098 | 0       | 0.96 |
| NGLY1_2    | 50.86     | -0.14  | 0.21    | 0.92 |

Supplement: Supplementary file 1330 [file 1]

IPI00845227.1|C1ORF131

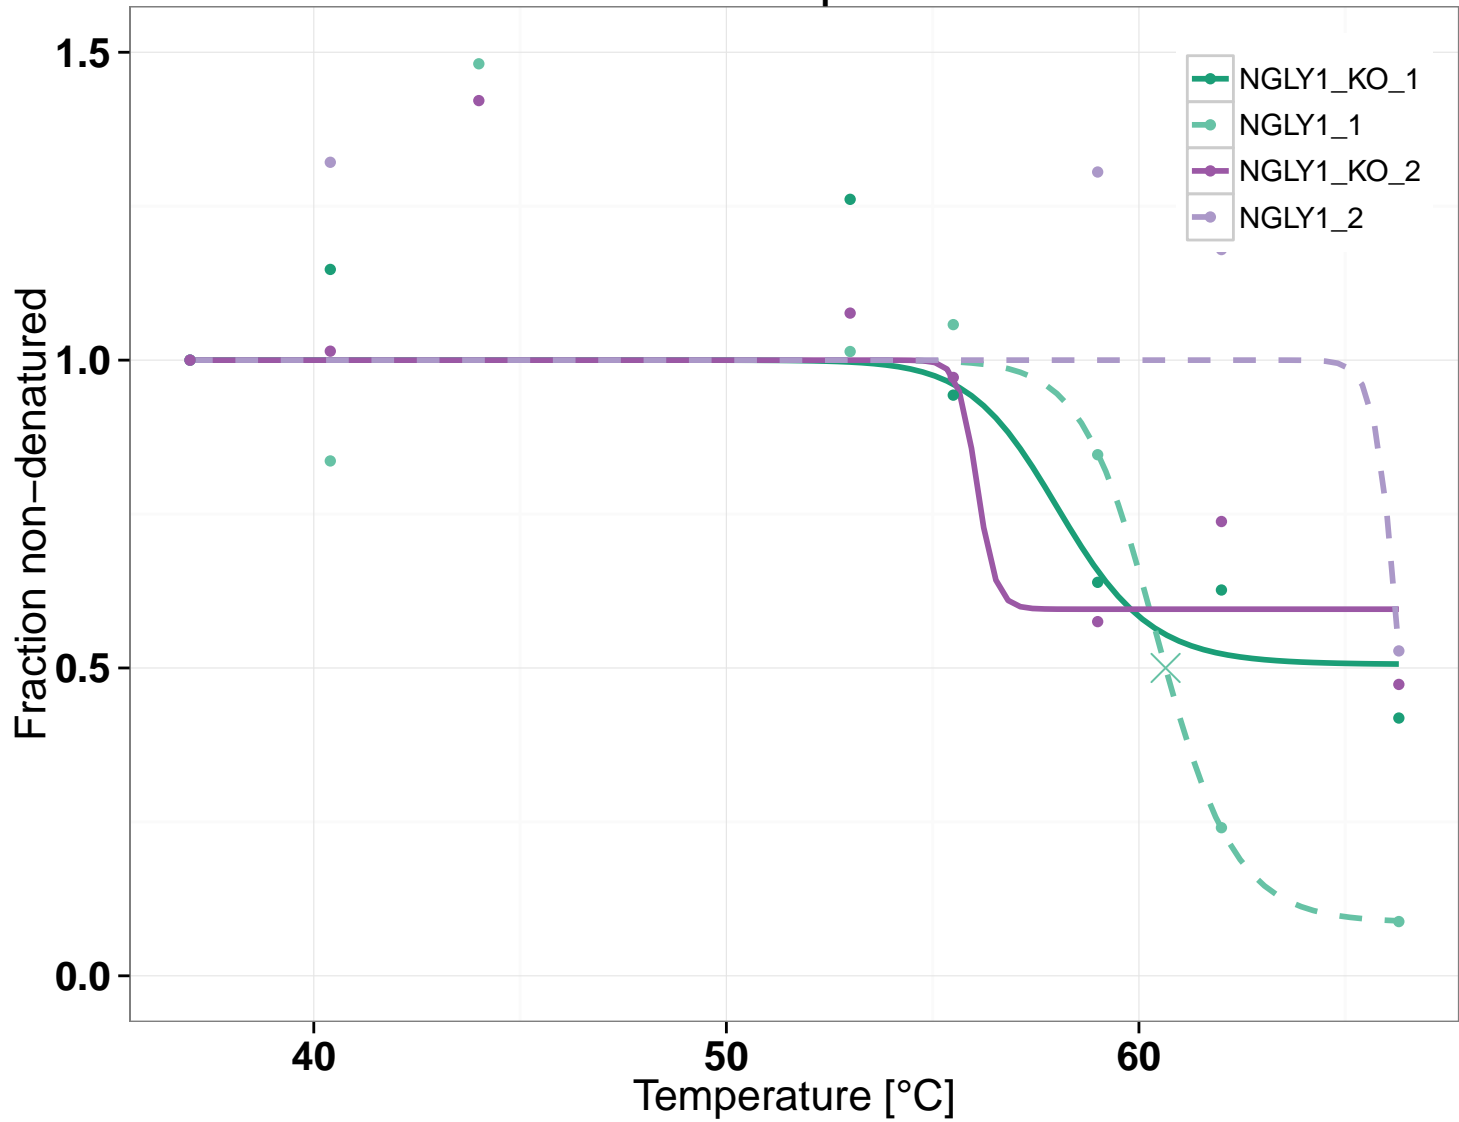

|            | meltPoint | slope | plateau | R2    |
|------------|-----------|-------|---------|-------|
| NGLY1_KO_1 | -         | -0.11 | 0.51    | -0.01 |
| NGLY1_1    | 60.65     | -0.25 | 0.09    | 0.27  |
| NGLY1_KO_2 | -         | -0.45 | 0.6     | 0.18  |
| NGLY1_2    | -         | -     | 0       | -0.74 |

Supplement: Supplementary file 1331 [file 1]

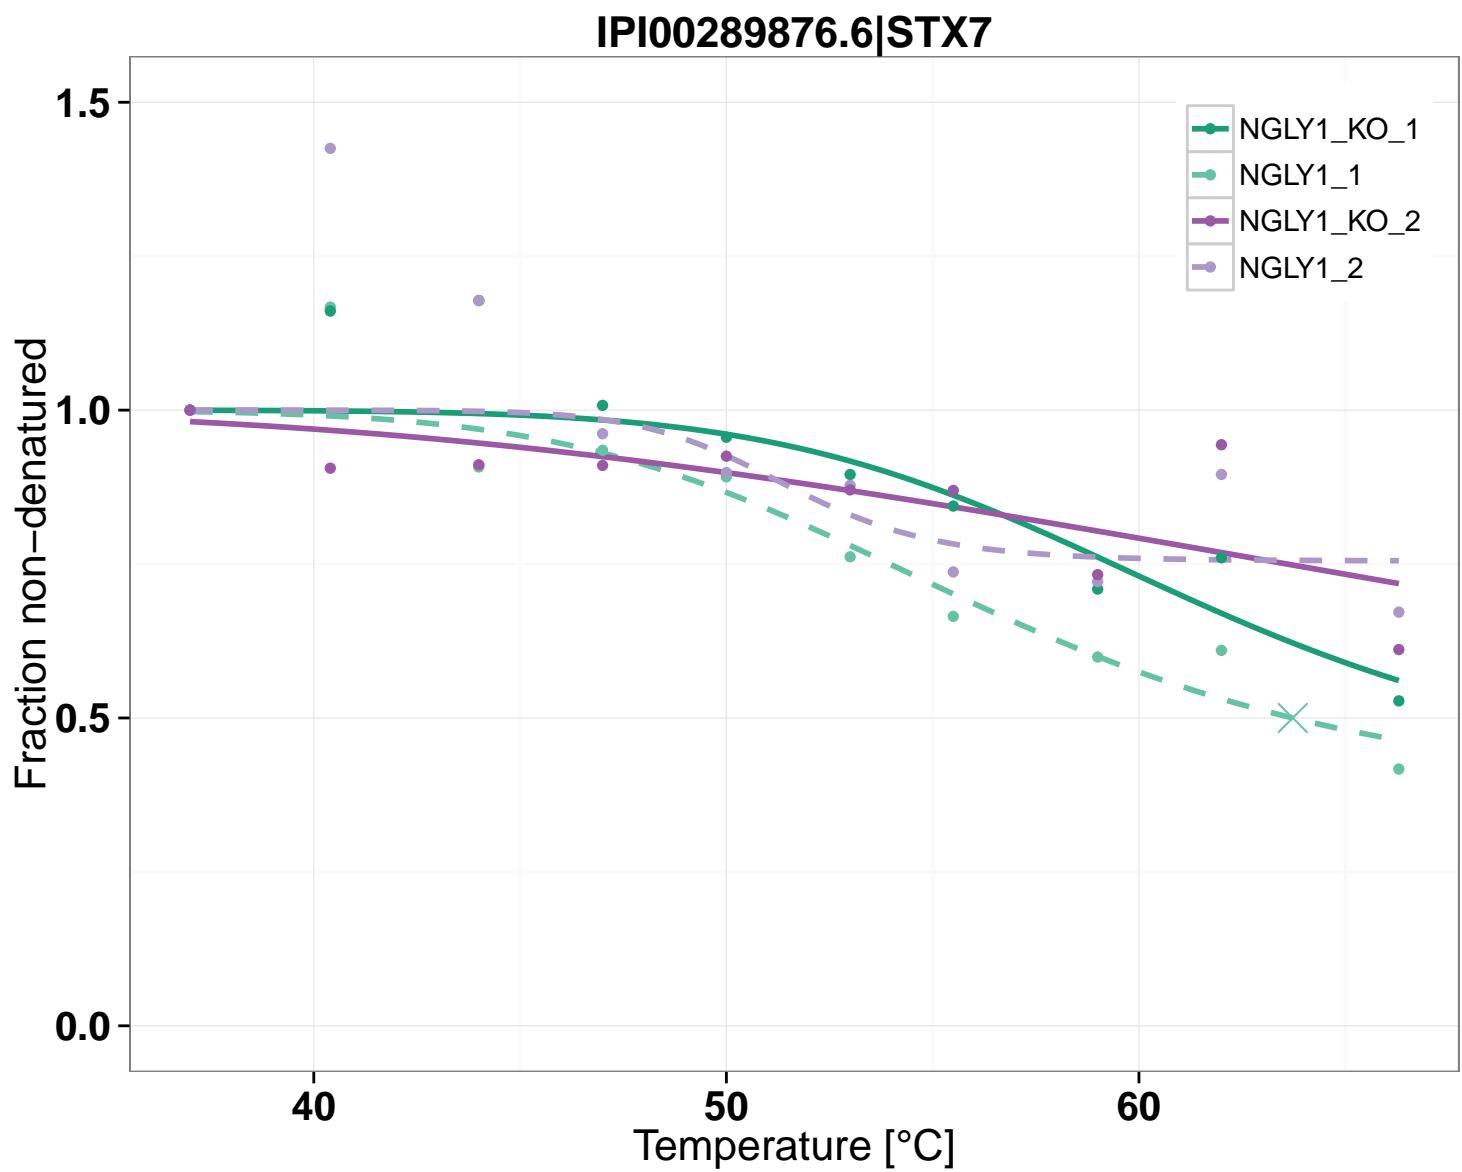

|            | meltPoint | slope  | plateau | R2   |
|------------|-----------|--------|---------|------|
| NGLY1_KO_1 | –         | –0.031 | 0.38    | 0.8  |
| NGLY1_1    | 63.73     | –0.032 | 0.36    | 0.9  |
| NGLY1_KO_2 | –         | –0.012 | 0       | 0.53 |
| NGLY1_2    | –         | –0.034 | 0.75    | 0.47 |

Supplement: Supplementary file 1332 [file 1]

# IPI00013217.1|NFYB

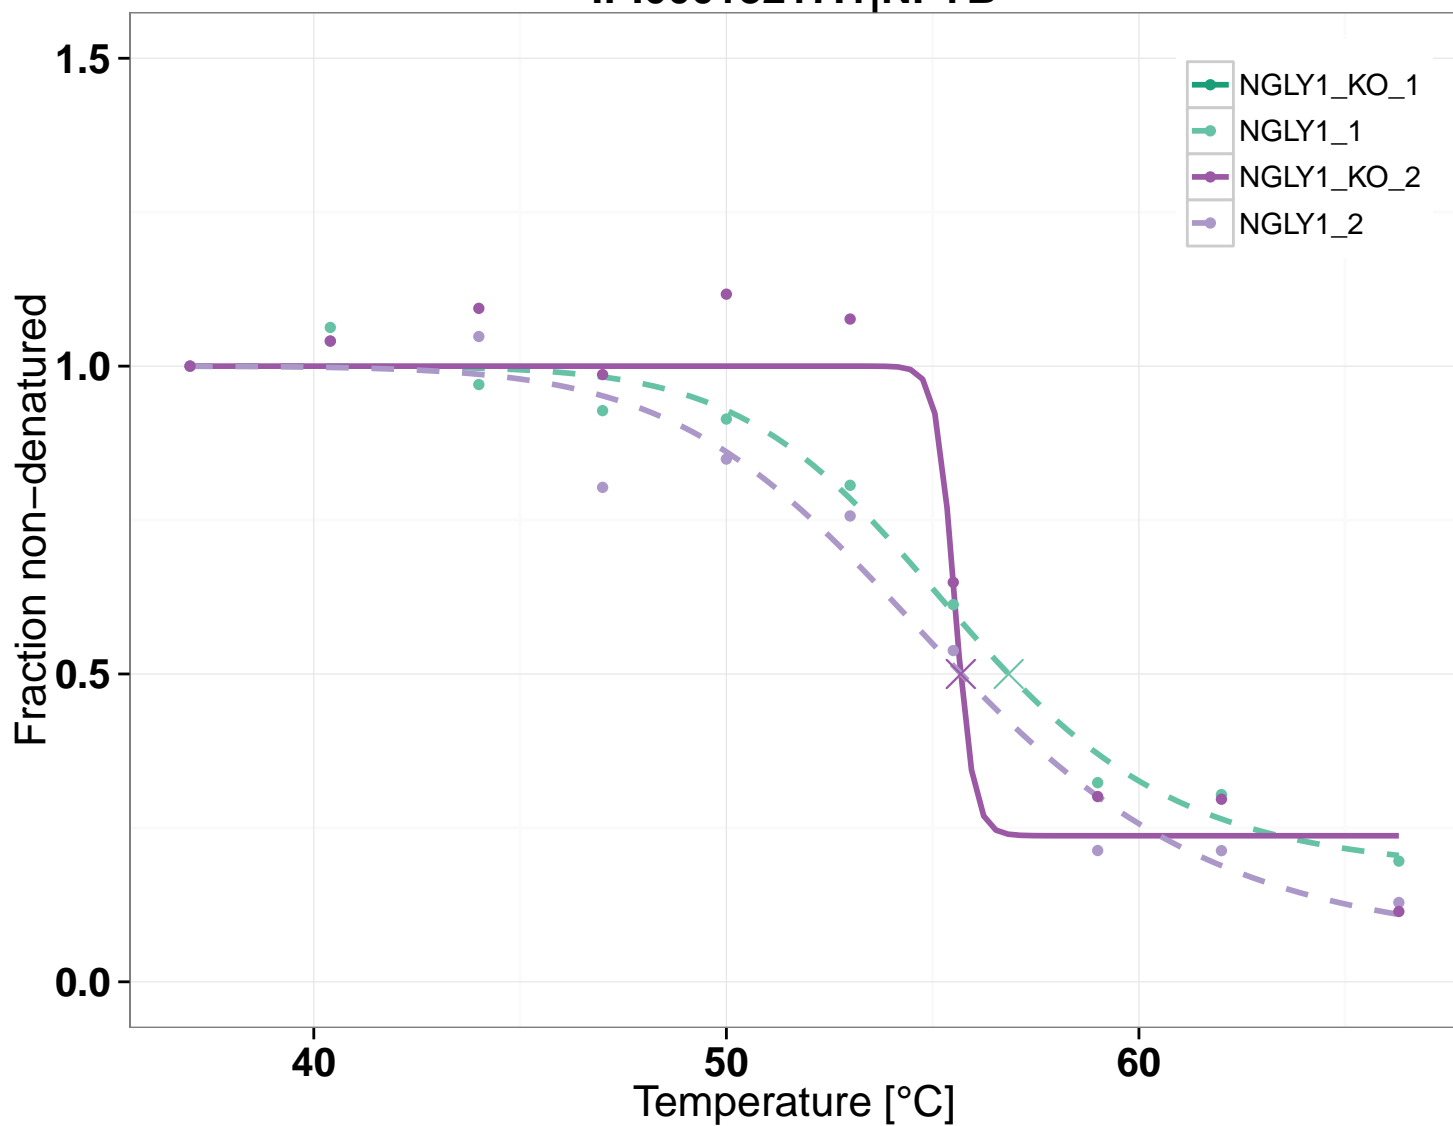

|            | meltPoint | slope  | plateau | R2   |
|------------|-----------|--------|---------|------|
| NGLY1_KO_1 | —         | —      | —       | —    |
| NGLY1_1    | 56.84     | -0.078 | 0.18    | 0.99 |
| NGLY1_KO_2 | 55.68     | -0.86  | 0.24    | 0.96 |
| NGLY1_2    | 55.69     | -0.072 | 0.05    | 0.96 |

Supplement: Supplementary file 1333 [file 1]

# IPI00642862.1|PPIL4

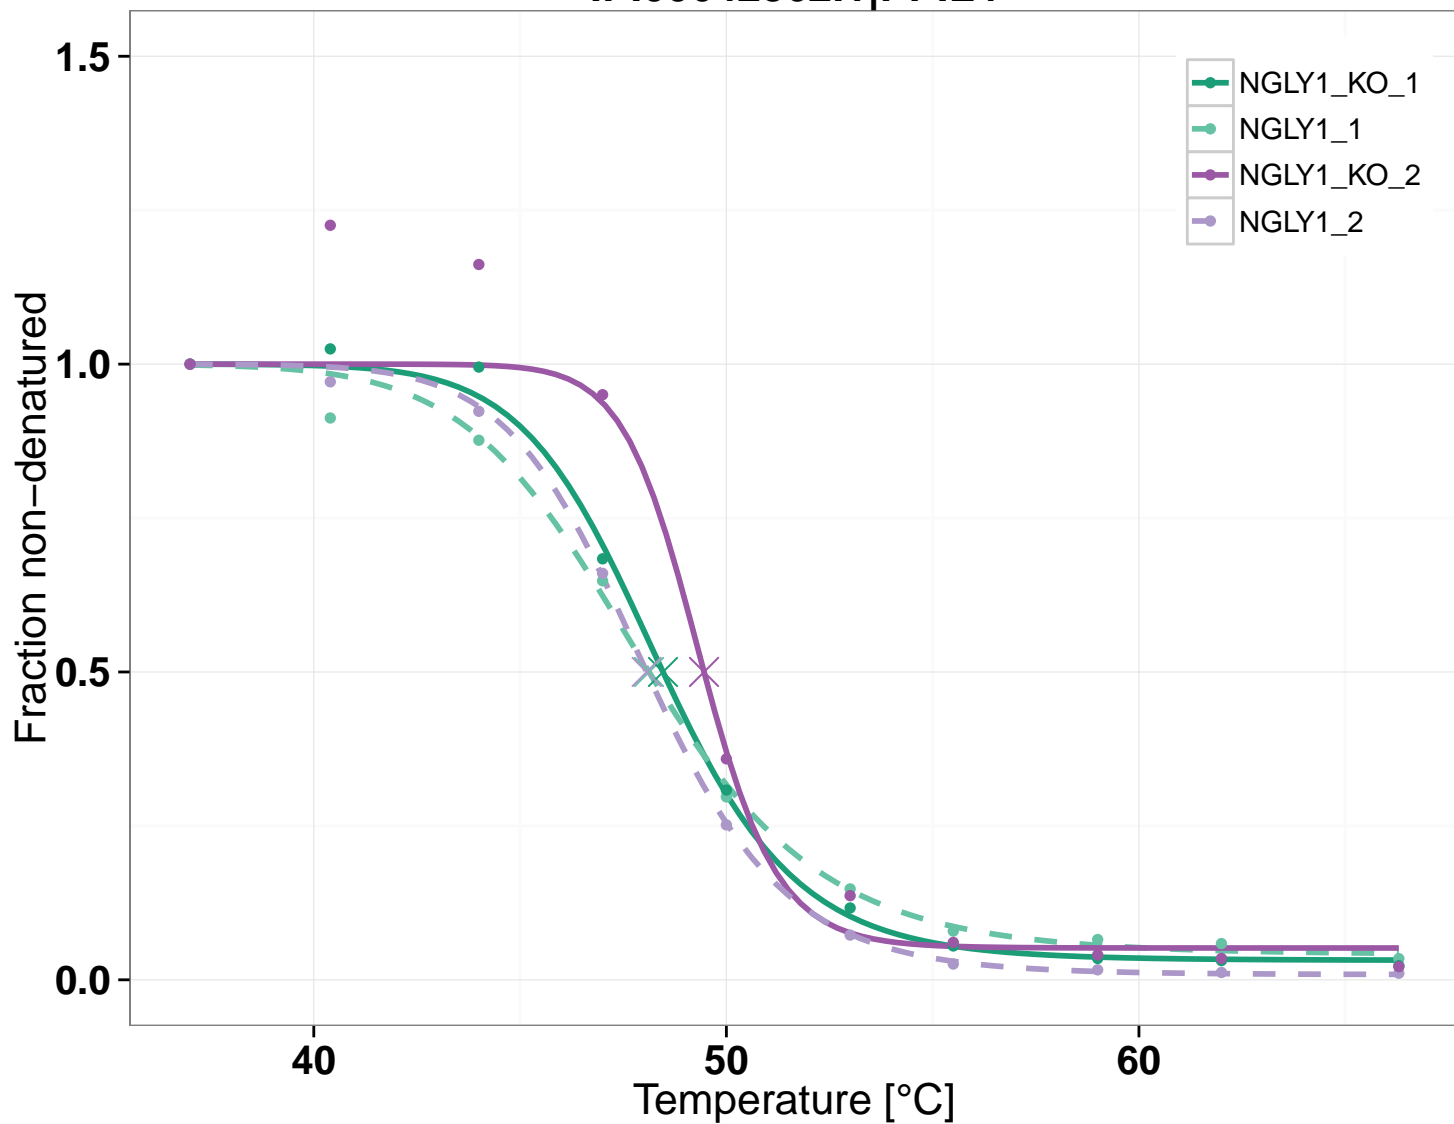

|            | meltPoint | slope | plateau | R2   |
|------------|-----------|-------|---------|------|
| NGLY1_KO_1 | 48.46     | -0.15 | 0.03    | 1    |
| NGLY1_1    | 48.12     | -0.11 | 0.04    | 1    |
| NGLY1_KO_2 | 49.46     | -0.25 | 0.05    | 0.97 |
| NGLY1_2    | 48.07     | -0.15 | 0.01    | 1    |

Supplement: Supplementary file 1334 [file 1]

# IPI00329598.2|HSD17B11

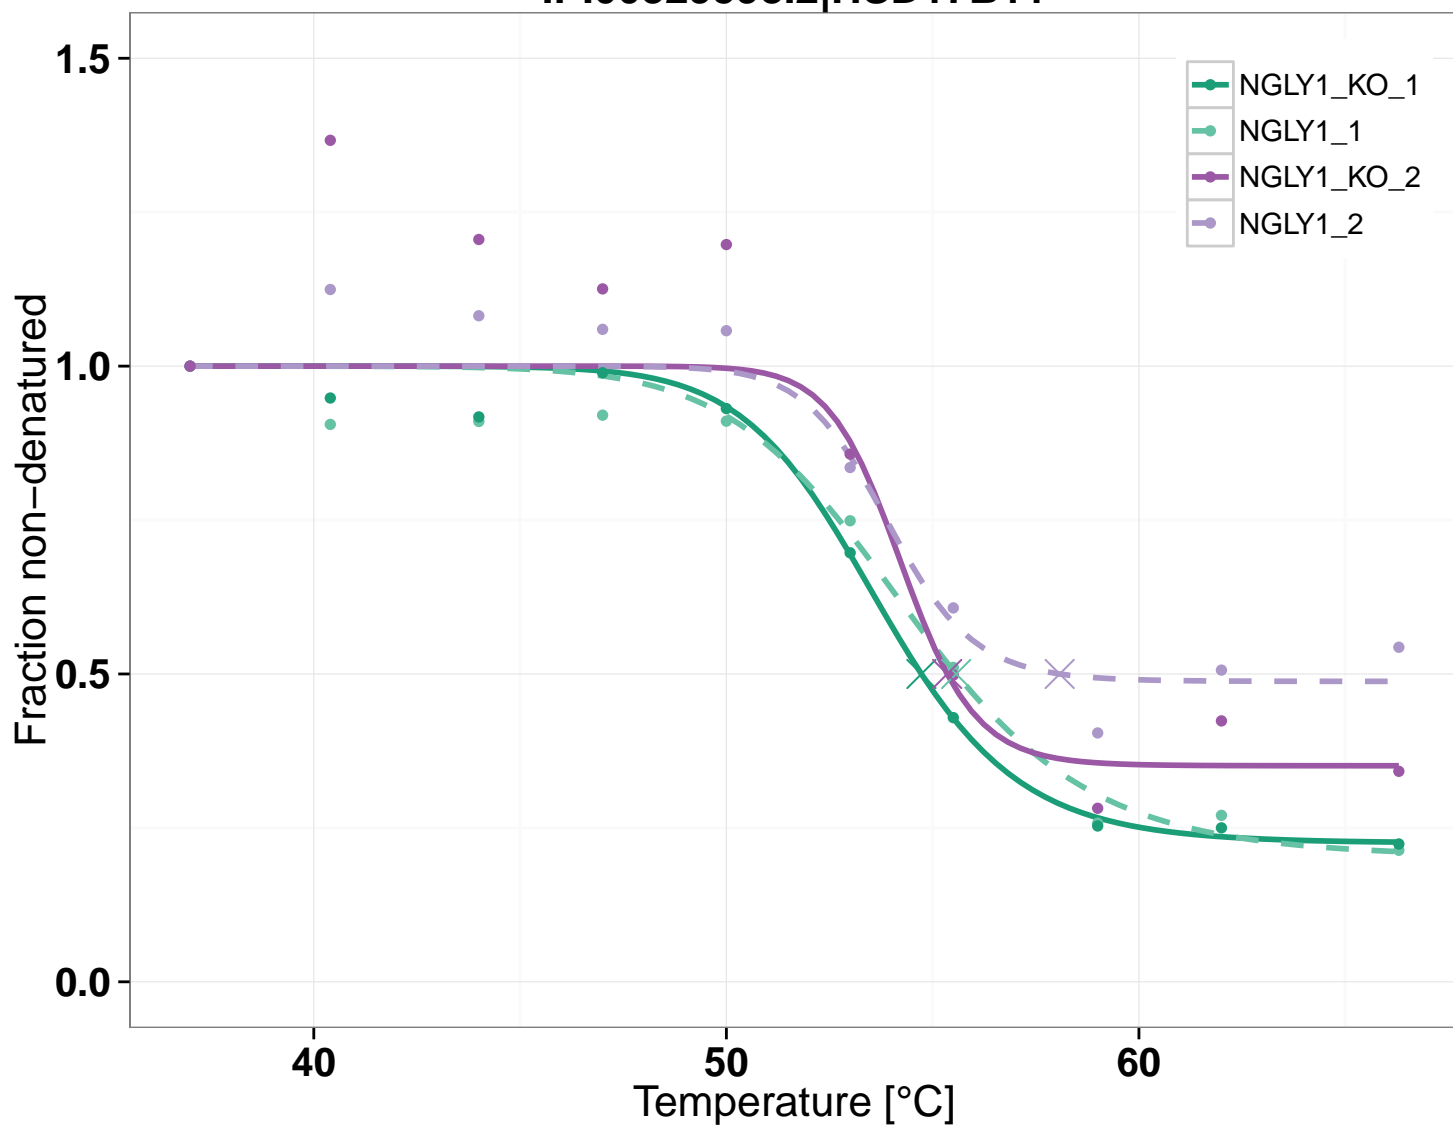

|            | meltPoint | slope  | plateau | R2   |
|------------|-----------|--------|---------|------|
| NGLY1_KO_1 | 54.73     | -0.12  | 0.23    | 0.99 |
| NGLY1_1    | 55.57     | -0.091 | 0.2     | 0.97 |
| NGLY1_KO_2 | 55.35     | -0.18  | 0.35    | 0.84 |
| NGLY1_2    | 58.08     | -0.12  | 0.49    | 0.94 |

Supplement: Supplementary file 1335 [file 1]

# IPI00027032.1|LYPLA2

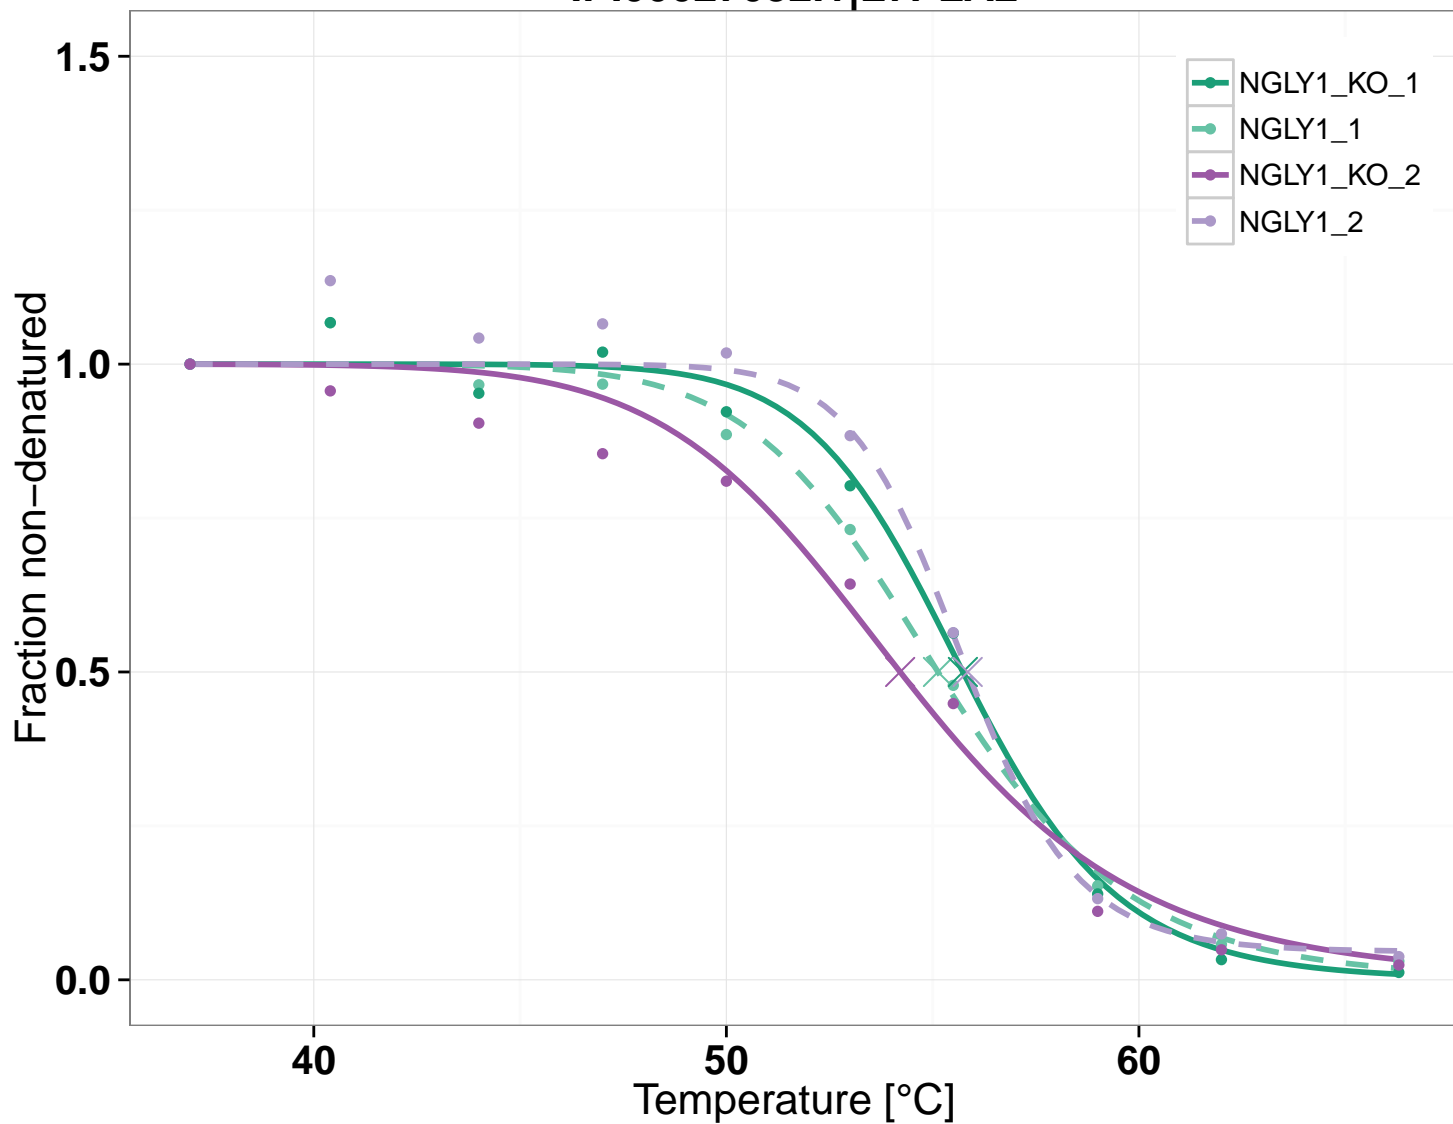

|            | meltPoint | slope  | plateau | R2   |
|------------|-----------|--------|---------|------|
| NGLY1_KO_1 | 55.73     | -0.13  | 0       | 0.99 |
| NGLY1_1    | 55.13     | -0.11  | 0       | 0.99 |
| NGLY1_KO_2 | 54.21     | -0.087 | 0       | 0.98 |
| NGLY1_2    | 55.85     | -0.17  | 0.05    | 0.99 |

Supplement: Supplementary file 1336 [file 1]

IPI00335421.4|FIGNL1

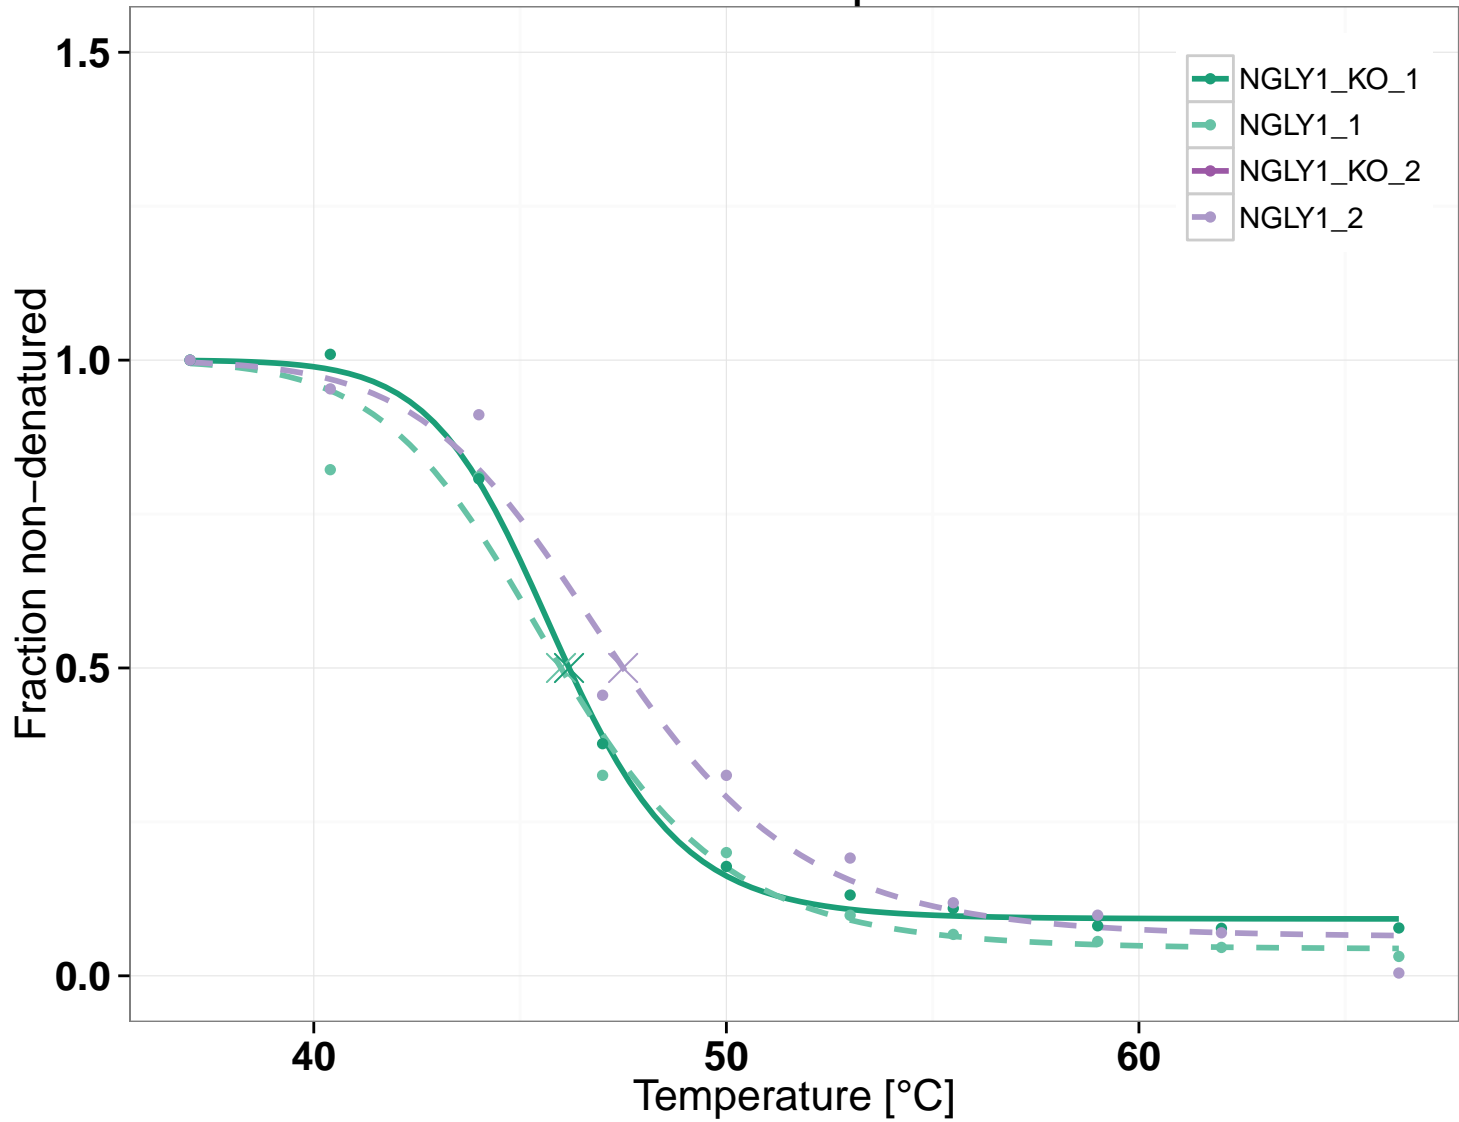

|            | meltPoint | slope | plateau | R2   |
|------------|-----------|-------|---------|------|
| NGLY1_KO_1 | 46.19     | -0.15 | 0.09    | 1    |
| NGLY1_1    | 45.99     | -0.11 | 0.04    | 0.98 |
| NGLY1_KO_2 | -         | -     | -       | -    |
| NGLY1_2    | 47.5      | -0.1  | 0.06    | 0.98 |

Supplement: Supplementary file 1337 [file 1]

IPI00166555.3|RBM26

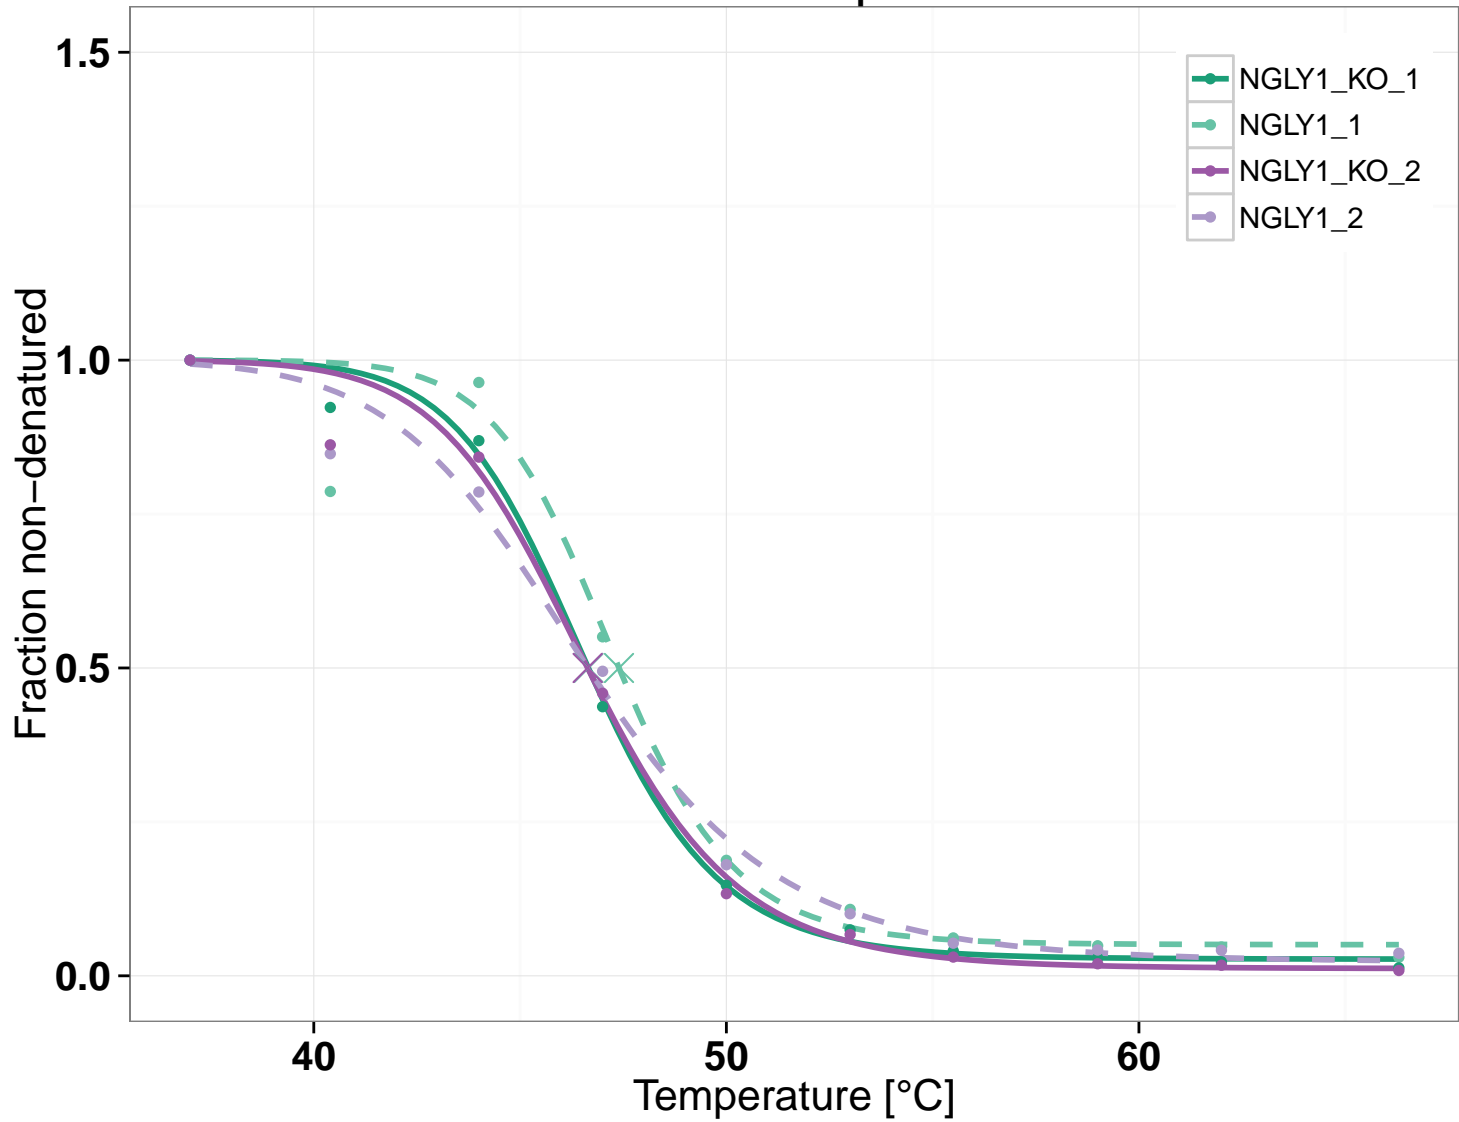

|            | meltPoint | slope | plateau | R2   |
|------------|-----------|-------|---------|------|
| NGLY1_KO_1 | 46.65     | -0.15 | 0.03    | 1    |
| NGLY1_1    | 47.4      | -0.16 | 0.05    | 0.97 |
| NGLY1_KO_2 | 46.64     | -0.14 | 0.01    | 0.99 |
| NGLY1_2    | 46.64     | -0.1  | 0.02    | 0.99 |

Supplement: Supplementary file 1338 [file 1]

IPI00375560.2|ZNF804A

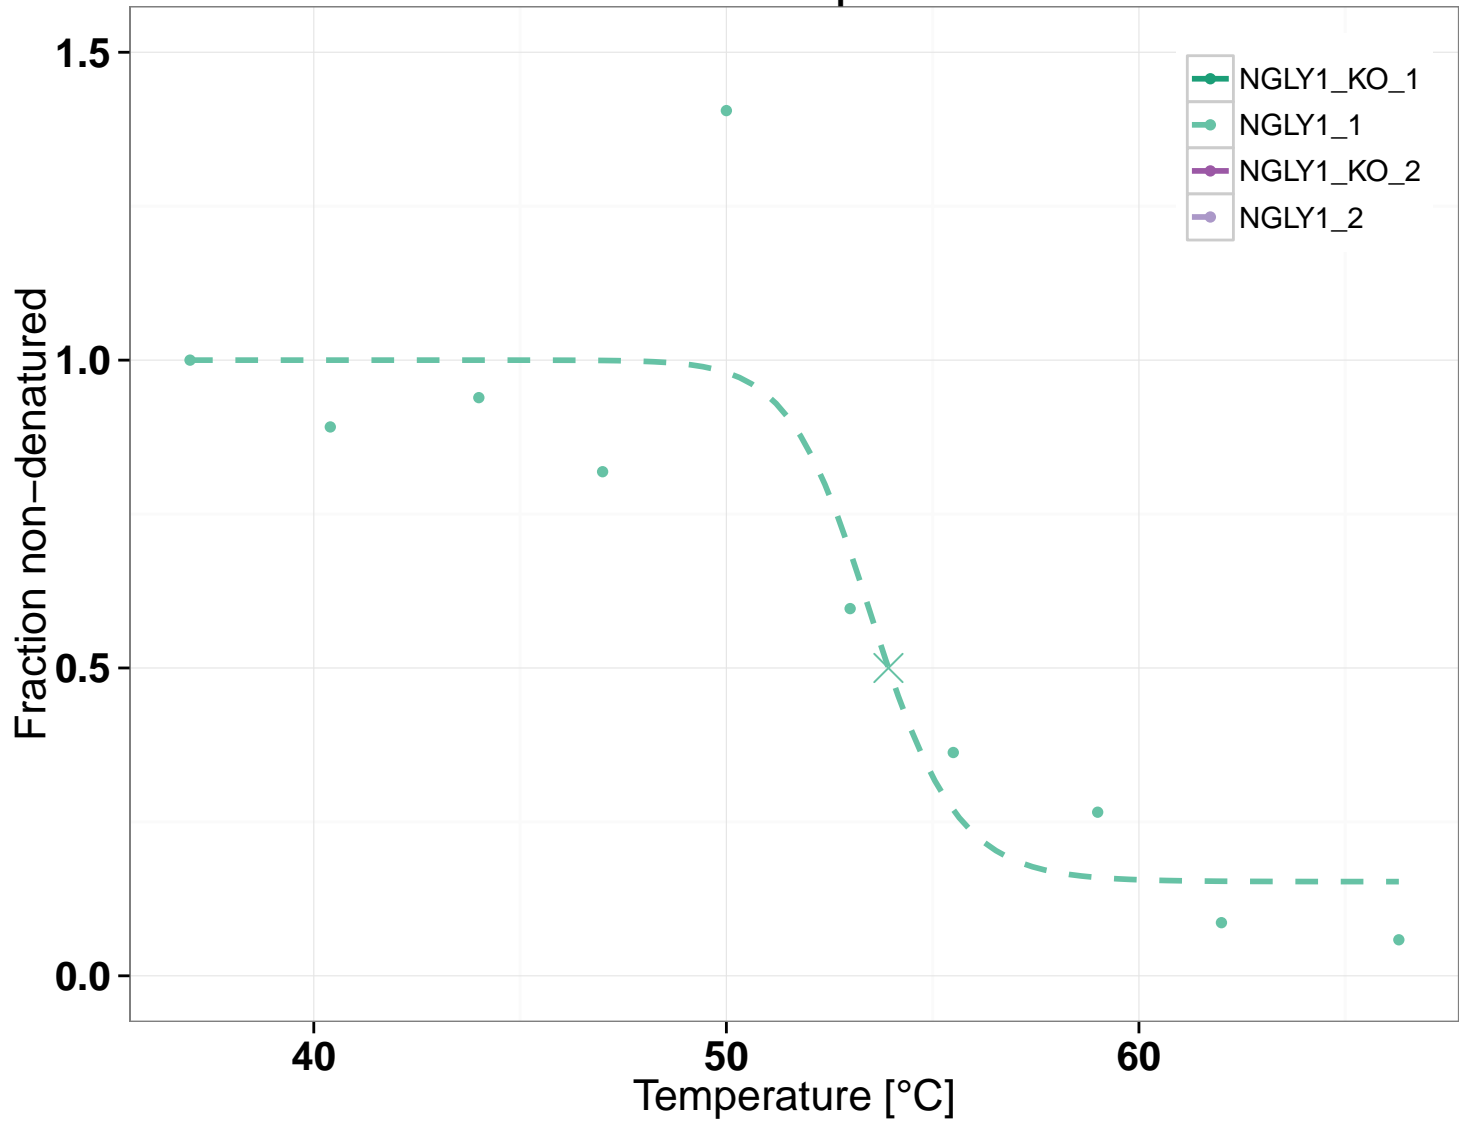

|            | meltPoint | slope | plateau | R2   |
|------------|-----------|-------|---------|------|
| NGLY1_KO_1 | -         | -     | -       | -    |
| NGLY1_1    | 53.93     | -0.21 | 0.15    | 0.85 |
| NGLY1_KO_2 | -         | -     | -       | -    |
| NGLY1_2    | -         | -     | -       | -    |

Supplement: Supplementary file 1339 [file 1]

IPI00900353.1|DENND1B

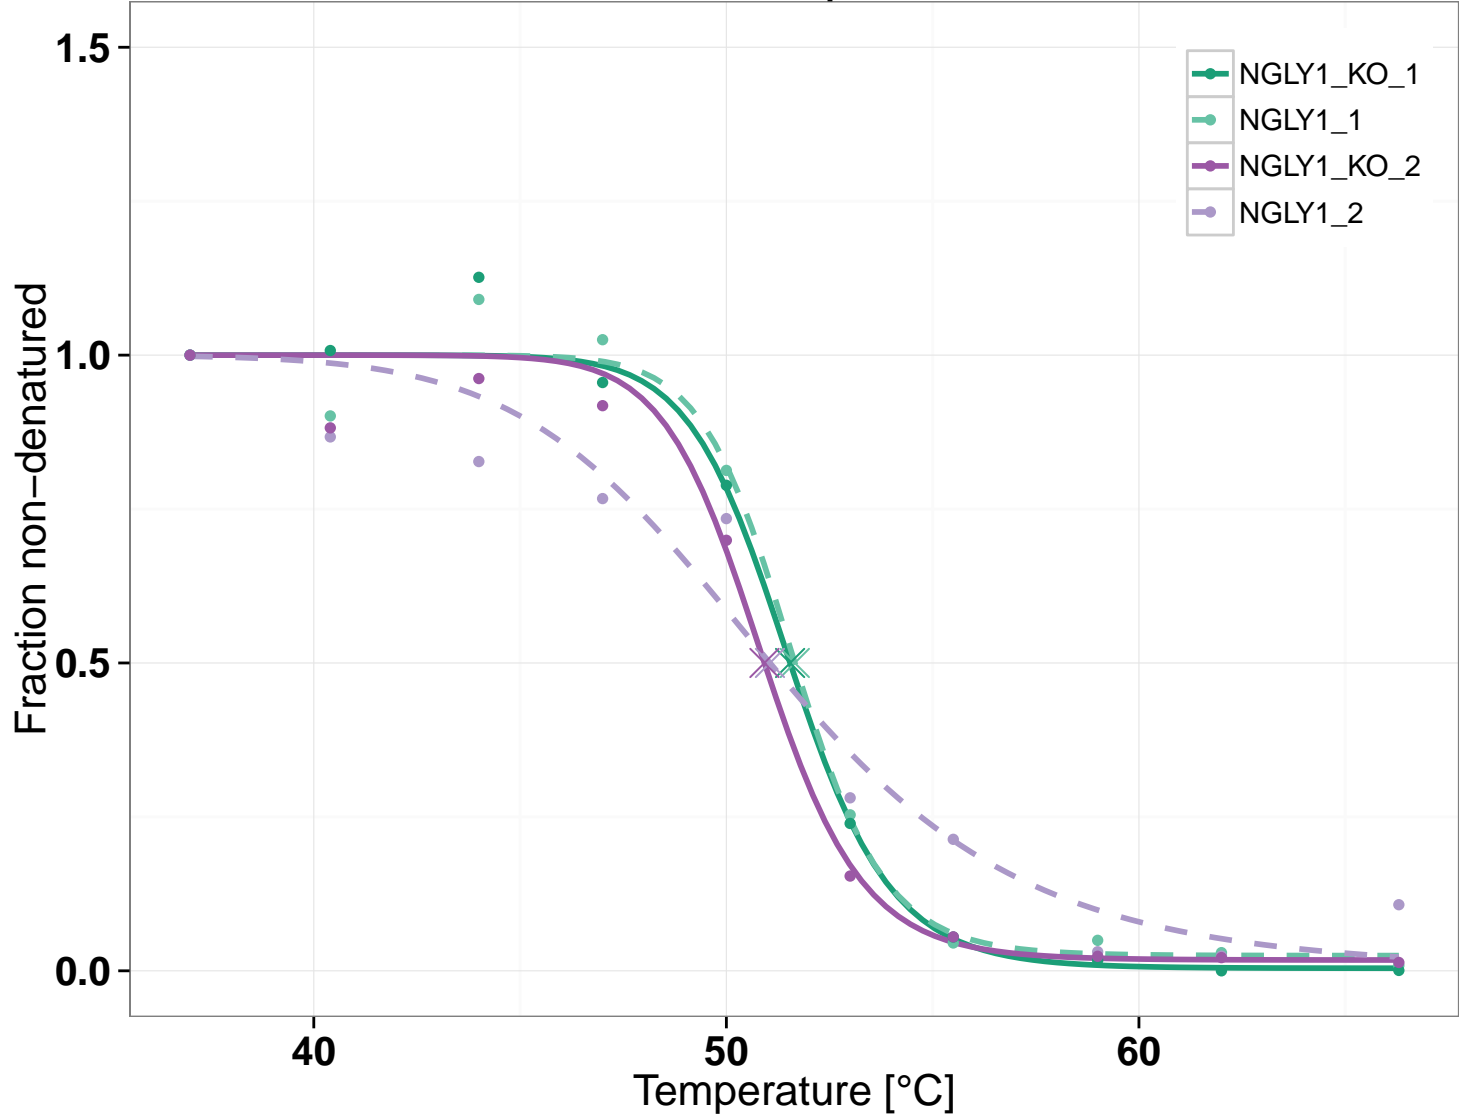

|            | meltPoint | slope  | plateau | R2   |
|------------|-----------|--------|---------|------|
| NGLY1_KO_1 | 51.55     | -0.2   | 0       | 0.99 |
| NGLY1_1    | 51.66     | -0.22  | 0.02    | 0.99 |
| NGLY1_KO_2 | 50.92     | -0.2   | 0.02    | 0.99 |
| NGLY1_2    | 51.06     | -0.082 | 0       | 0.95 |

Supplement: Supplementary file 1340 [file 1]

# IPI00026559.1|USF1

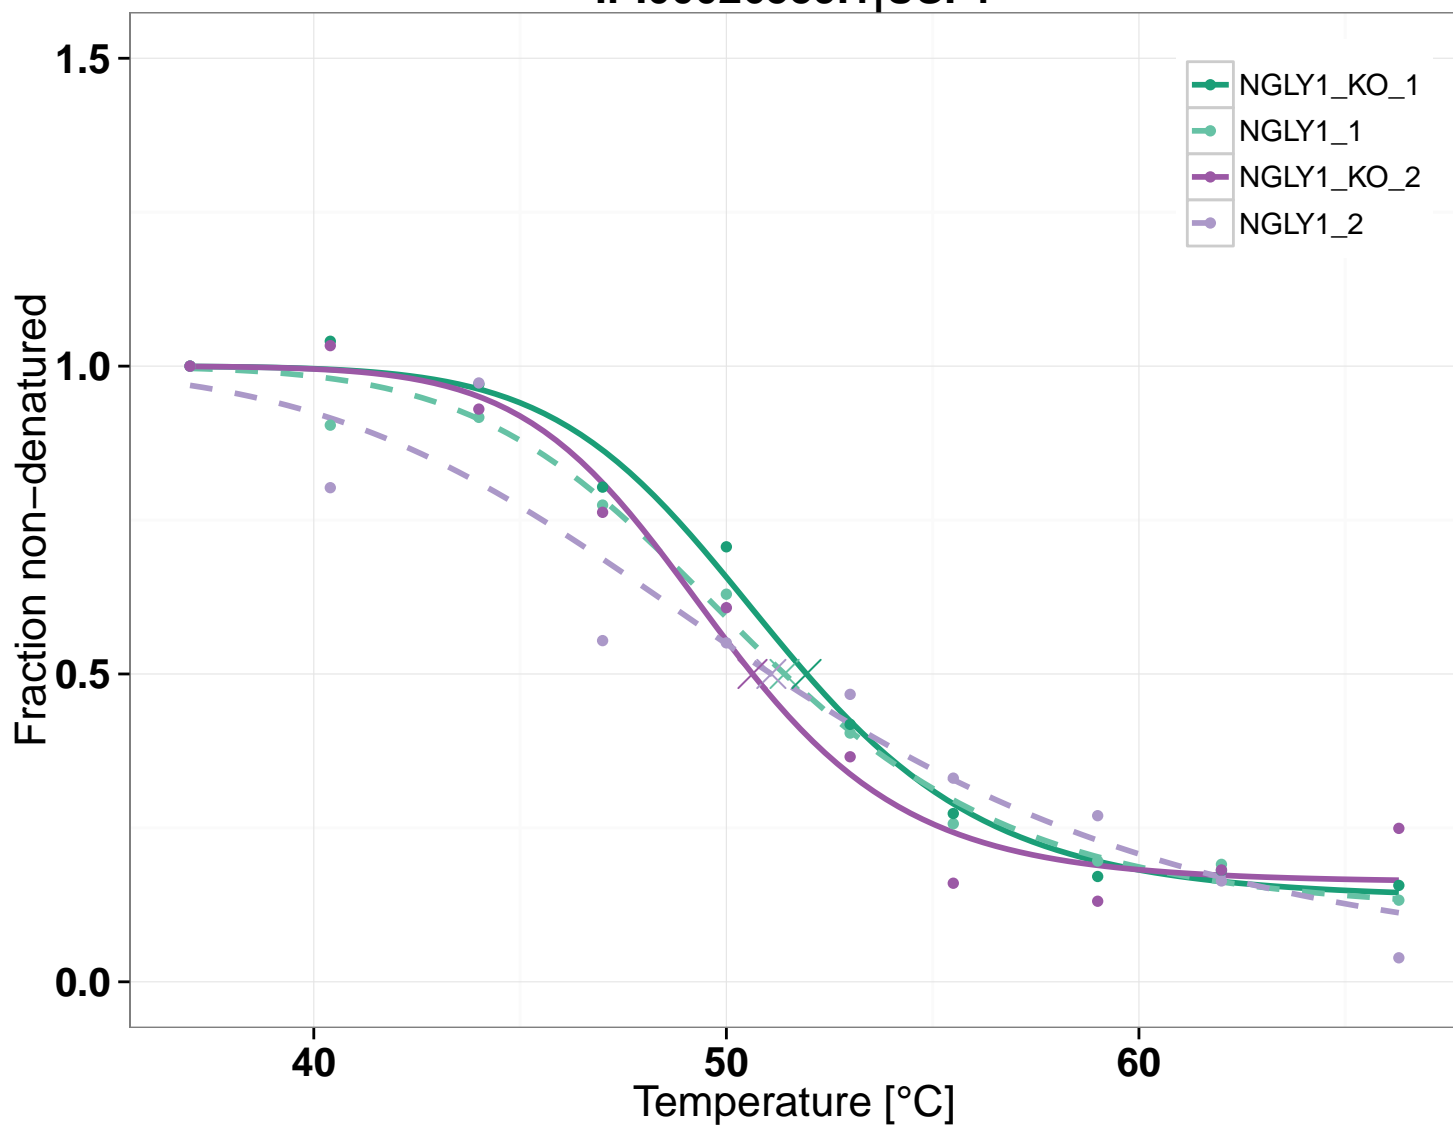

|            | meltPoint | slope  | plateau | R2   |
|------------|-----------|--------|---------|------|
| NGLY1_KO_1 | 51.94     | -0.082 | 0.13    | 0.99 |
| NGLY1_1    | 51.41     | -0.067 | 0.11    | 0.99 |
| NGLY1_KO_2 | 50.63     | -0.091 | 0.16    | 0.98 |
| NGLY1_2    | 51.09     | -0.046 | 0       | 0.93 |

Supplement: Supplementary file 1341 [file 1]

IPI00744286.4|B3GALNT2

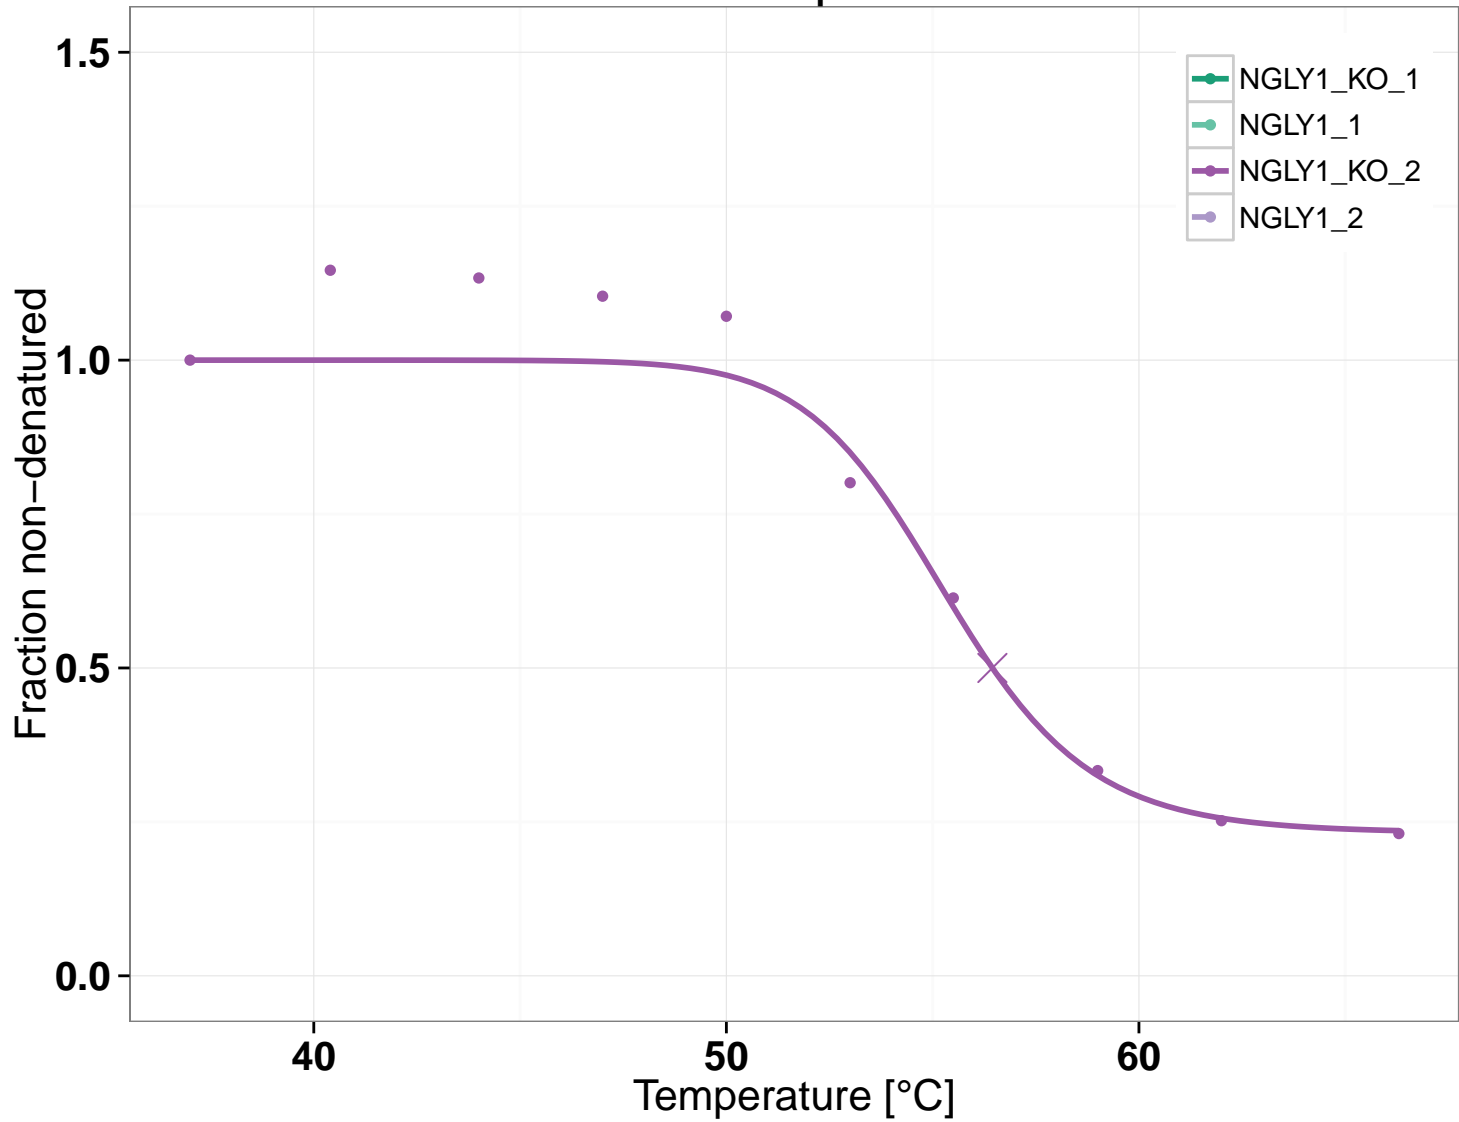

|            | meltPoint | slope | plateau | R2   |
|------------|-----------|-------|---------|------|
| NGLY1_KO_1 | —         | —     | —       | —    |
| NGLY1_1    | —         | —     | —       | —    |
| NGLY1_KO_2 | 56.45     | -0.11 | 0.23    | 0.95 |
| NGLY1_2    | —         | —     | —       | —    |

Supplement: Supplementary file 1342 [file 1]

# IPI00289584.4|RNF139

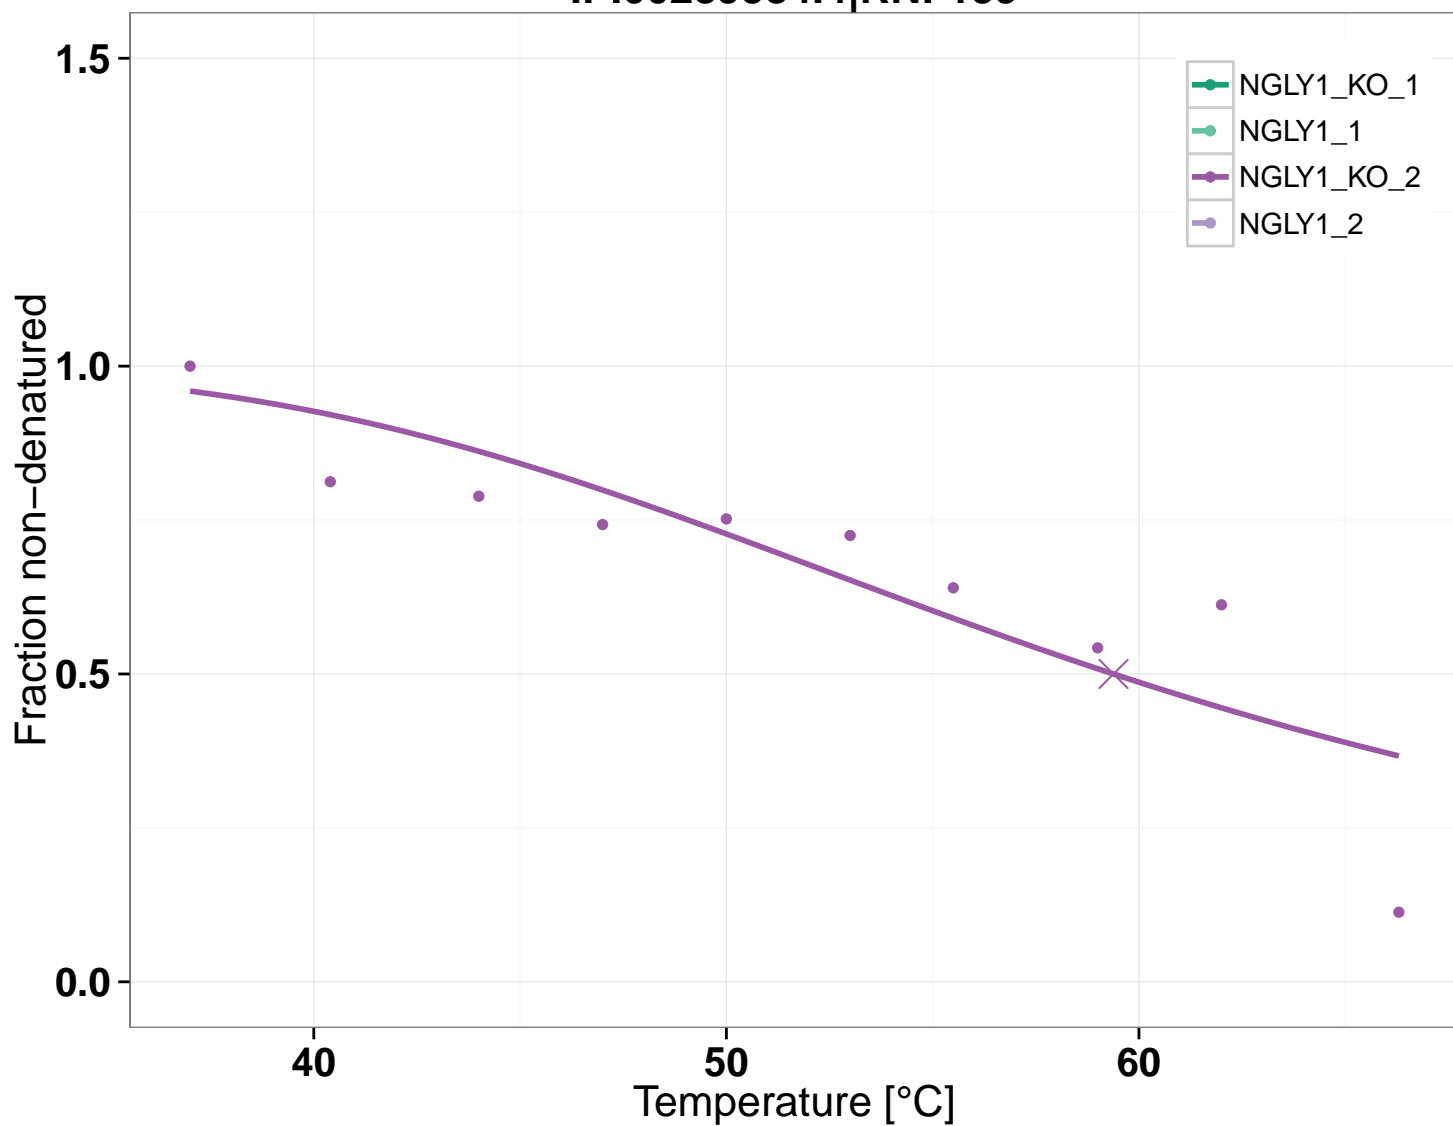

|            | meltPoint | slope  | plateau | R2   |
|------------|-----------|--------|---------|------|
| NGLY1_KO_1 | -         | -      | -       | -    |
| NGLY1_1    | -         | -      | -       | -    |
| NGLY1_KO_2 | 59.38     | -0.025 | 0       | 0.75 |
| NGLY1_2    | -         | -      | -       | -    |

Supplement: Supplementary file 1343 [file 1]

# IPI00018349.5|MCM4

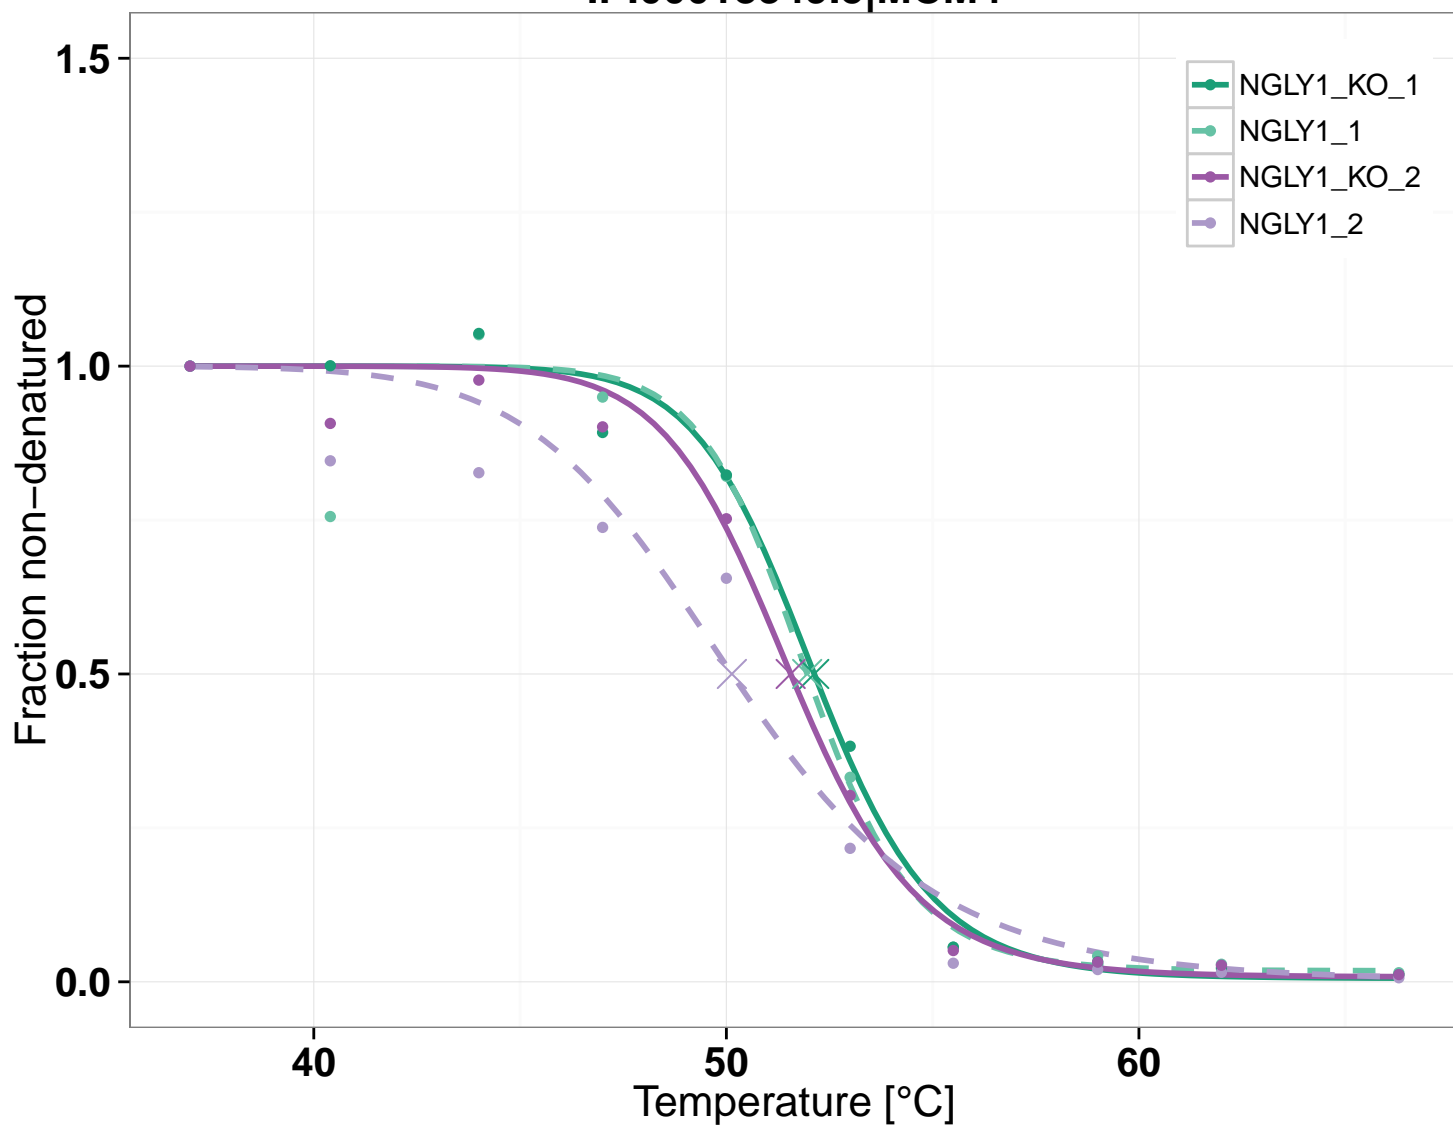

|            | meltPoint | slope | plateau | R2   |
|------------|-----------|-------|---------|------|
| NGLY1_KO_1 | 52.13     | -0.17 | 0.01    | 0.99 |
| NGLY1_1    | 51.96     | -0.19 | 0.02    | 0.96 |
| NGLY1_KO_2 | 51.56     | -0.16 | 0.01    | 0.99 |
| NGLY1_2    | 50.13     | -0.1  | 0       | 0.95 |

Supplement: Supplementary file 1344 [file 1]

# IPI00328172.11|TTC26

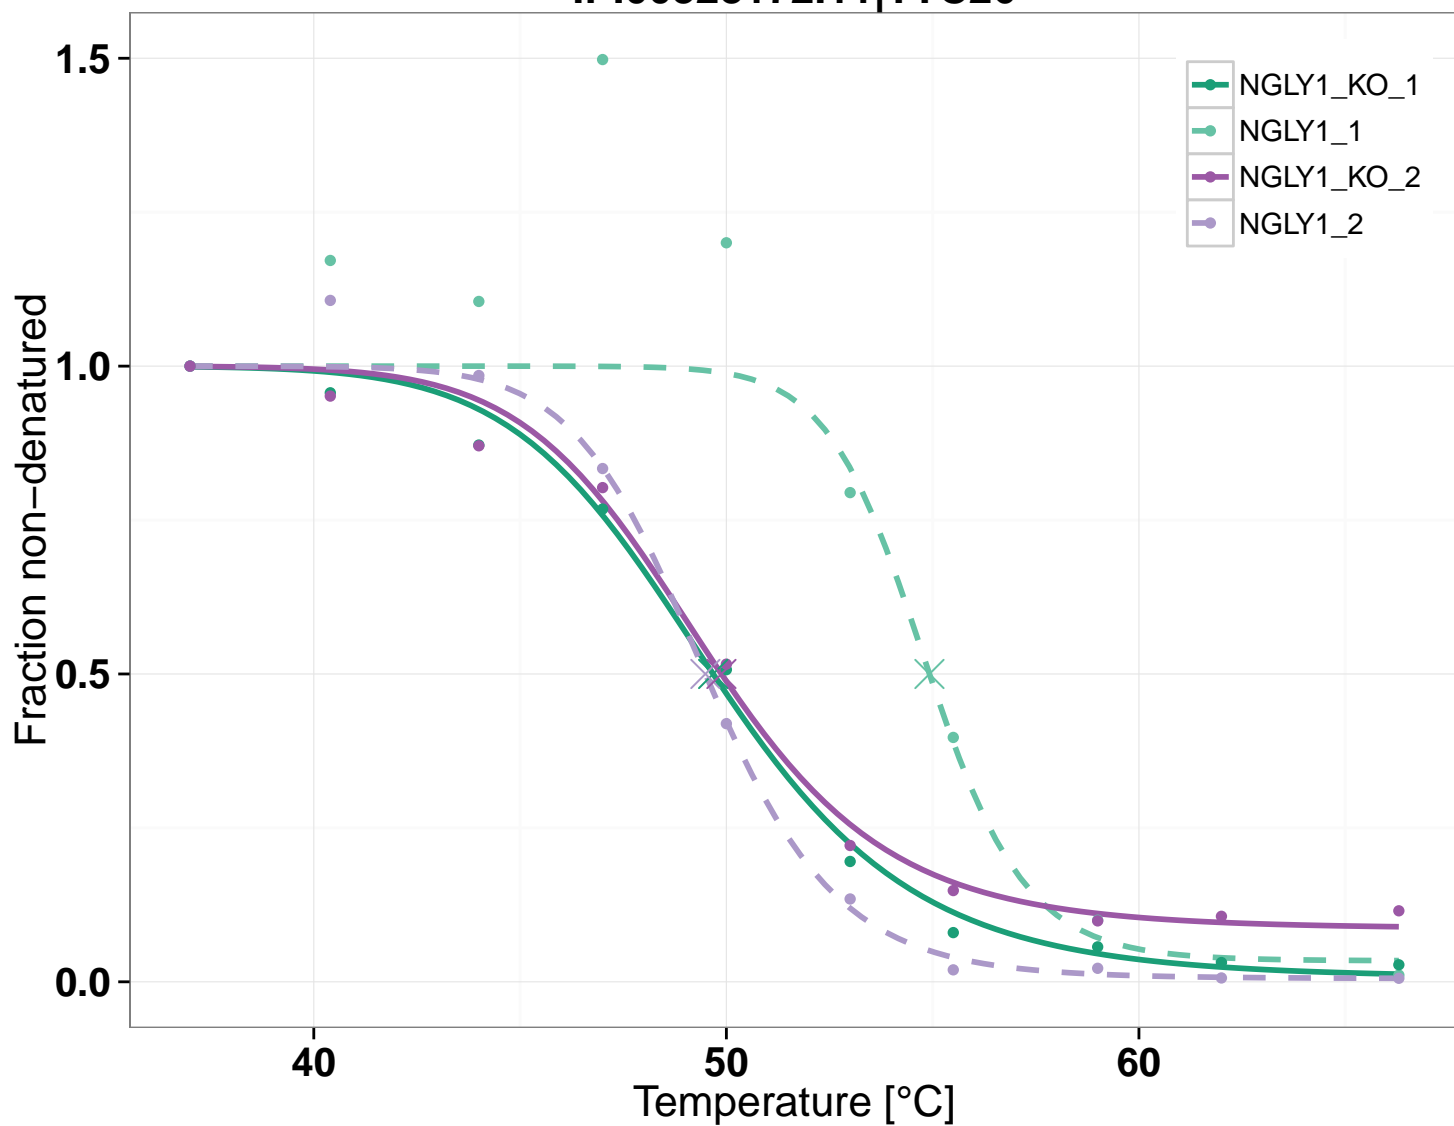

|            | meltPoint | slope | plateau | R2   |
|------------|-----------|-------|---------|------|
| NGLY1_KO_1 | 49.68     | -0.1  | 0.01    | 0.99 |
| NGLY1_1    | 54.92     | -0.2  | 0.03    | 0.88 |
| NGLY1_KO_2 | 49.88     | -0.1  | 0.09    | 0.99 |
| NGLY1_2    | 49.49     | -0.15 | 0.01    | 0.99 |

Supplement: Supplementary file 1345 [file 1]

IPI00292326.5|SPAG1

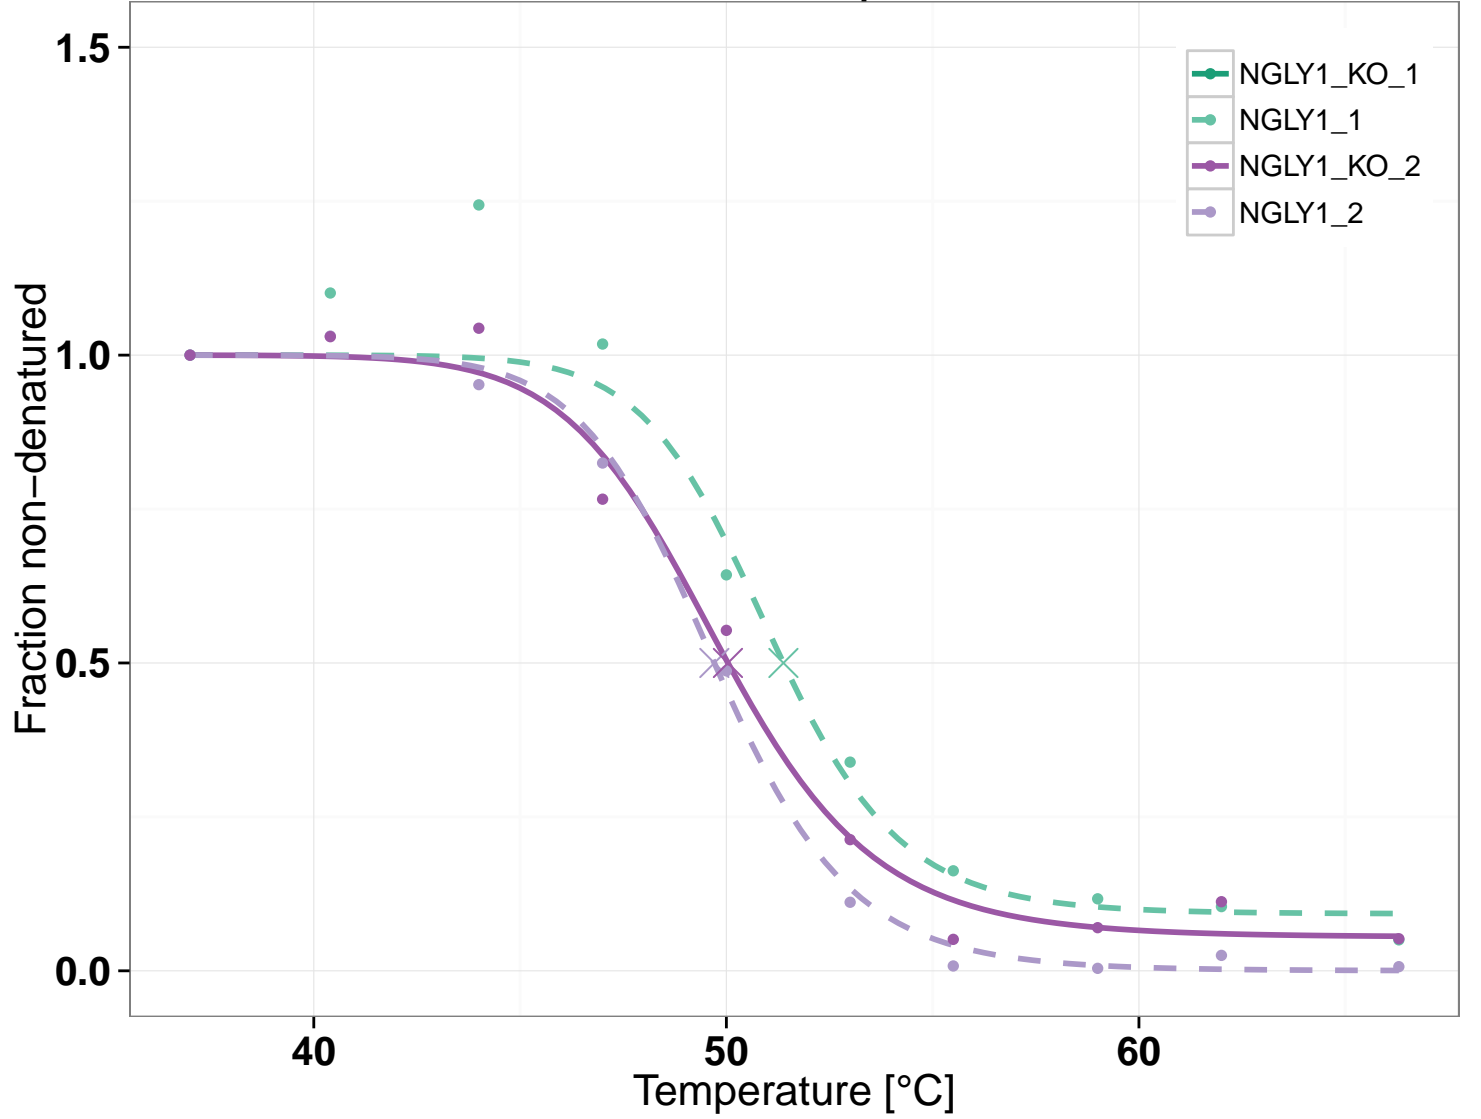

|            | meltPoint | slope | plateau | R2   |
|------------|-----------|-------|---------|------|
| NGLY1_KO_1 | –         | –     | –       | –    |
| NGLY1_1    | 51.38     | –0.15 | 0.09    | 0.96 |
| NGLY1_KO_2 | 50.04     | –0.13 | 0.05    | 0.99 |
| NGLY1_2    | 49.71     | –0.15 | 0       | 1    |

Supplement: Supplementary file 1346 [file 1]

IPI00026991.4|GALNT6

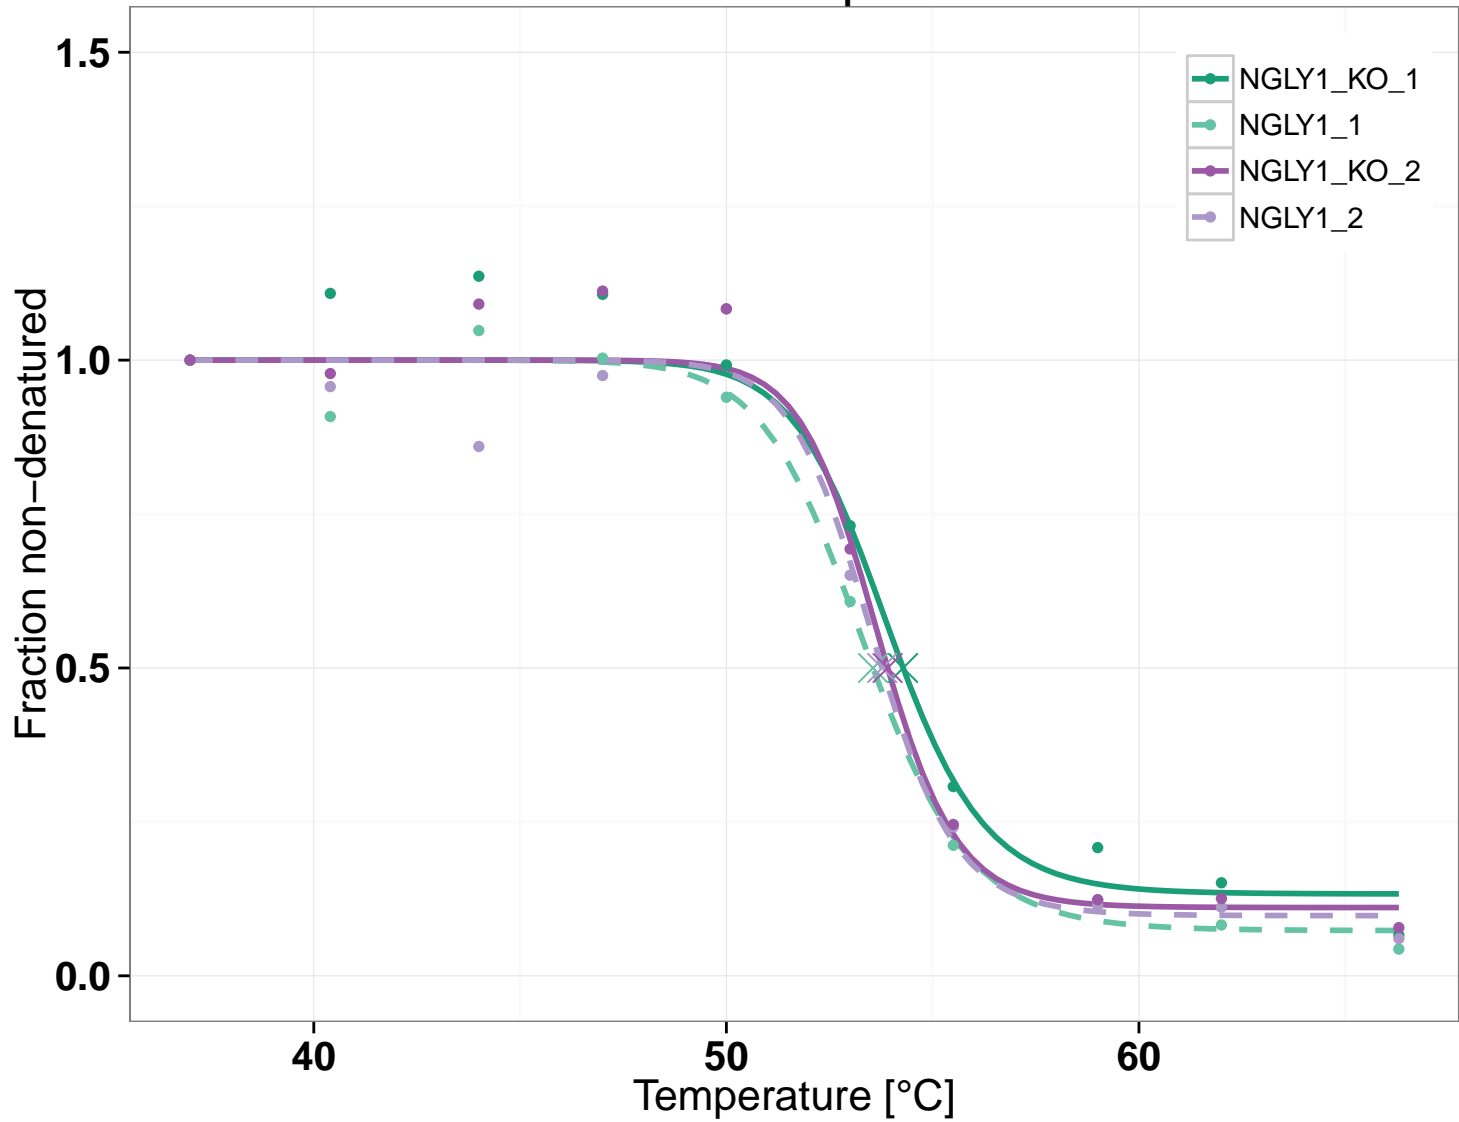

|            | meltPoint | slope | plateau | R2   |
|------------|-----------|-------|---------|------|
| NGLY1_KO_1 | 54.28     | -0.19 | 0.13    | 0.97 |
| NGLY1_1    | 53.55     | -0.18 | 0.07    | 0.99 |
| NGLY1_KO_2 | 53.91     | -0.24 | 0.11    | 0.98 |
| NGLY1_2    | 53.78     | -0.23 | 0.1     | 0.98 |

Supplement: Supplementary file 1347 [file 1]

IPI00020524.6|CLCN7

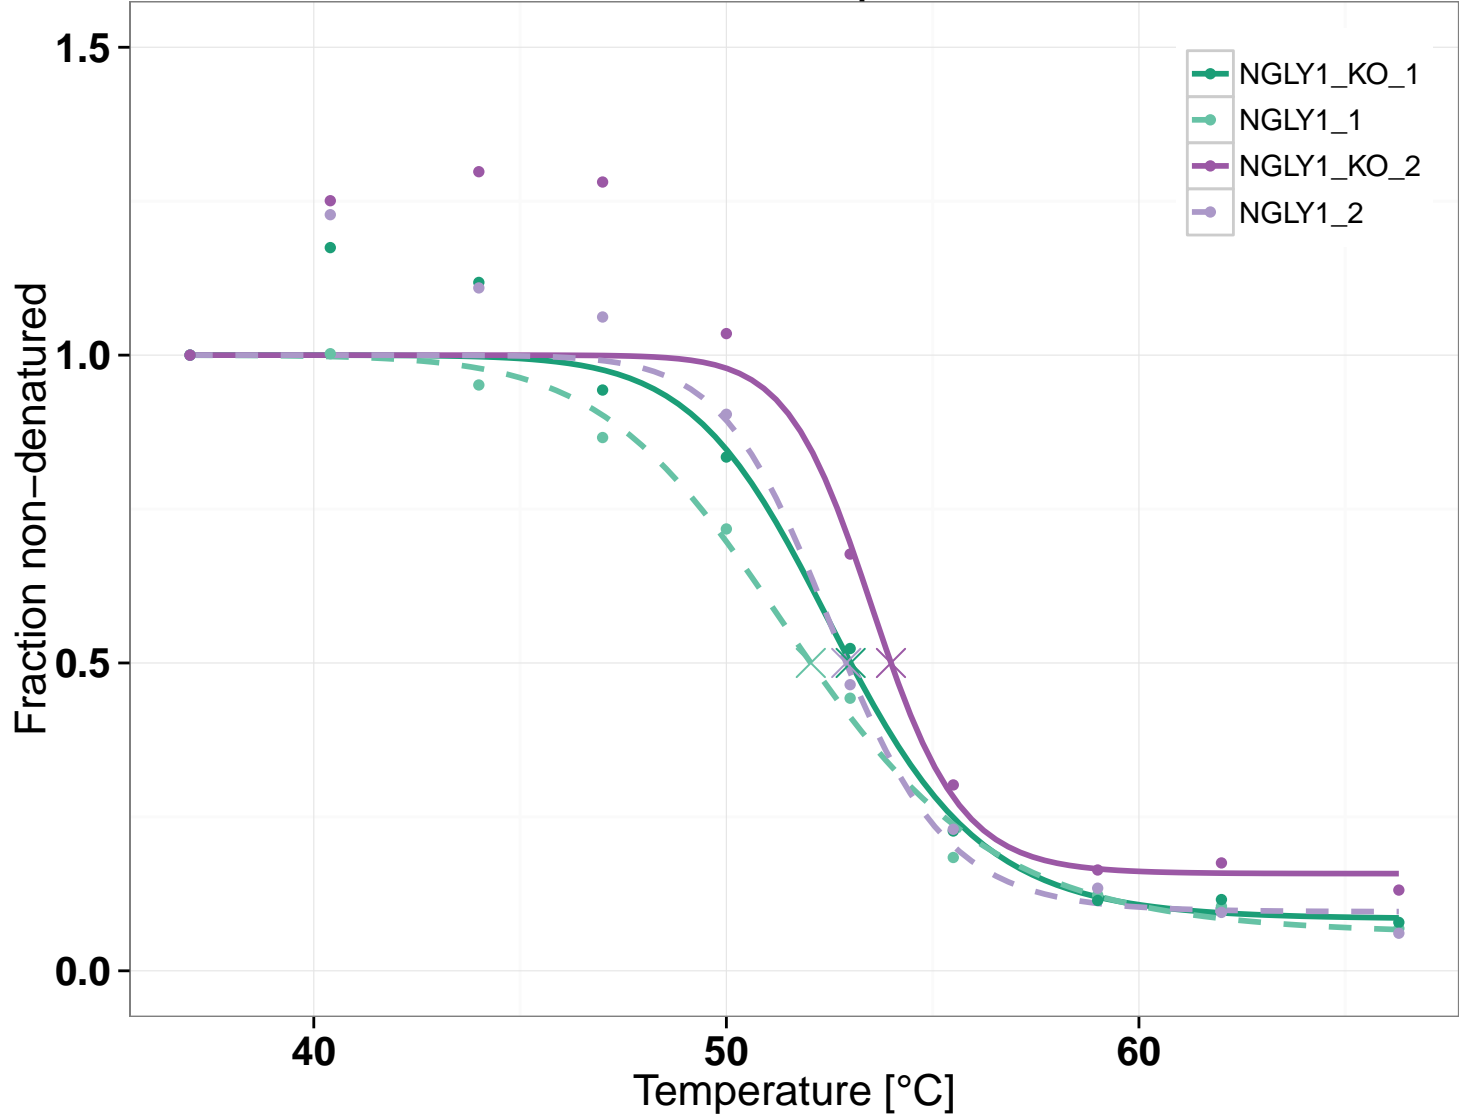

|            | meltPoint | slope  | plateau | R2   |
|------------|-----------|--------|---------|------|
| NGLY1_KO_1 | 53.01     | -0.13  | 0.08    | 0.97 |
| NGLY1_1    | 52.05     | -0.098 | 0.06    | 1    |
| NGLY1_KO_2 | 53.99     | -0.2   | 0.16    | 0.89 |
| NGLY1_2    | 52.91     | -0.17  | 0.1     | 0.96 |

Supplement: Supplementary file 1348 [file 1]

# IPI00003933.2|HAGH

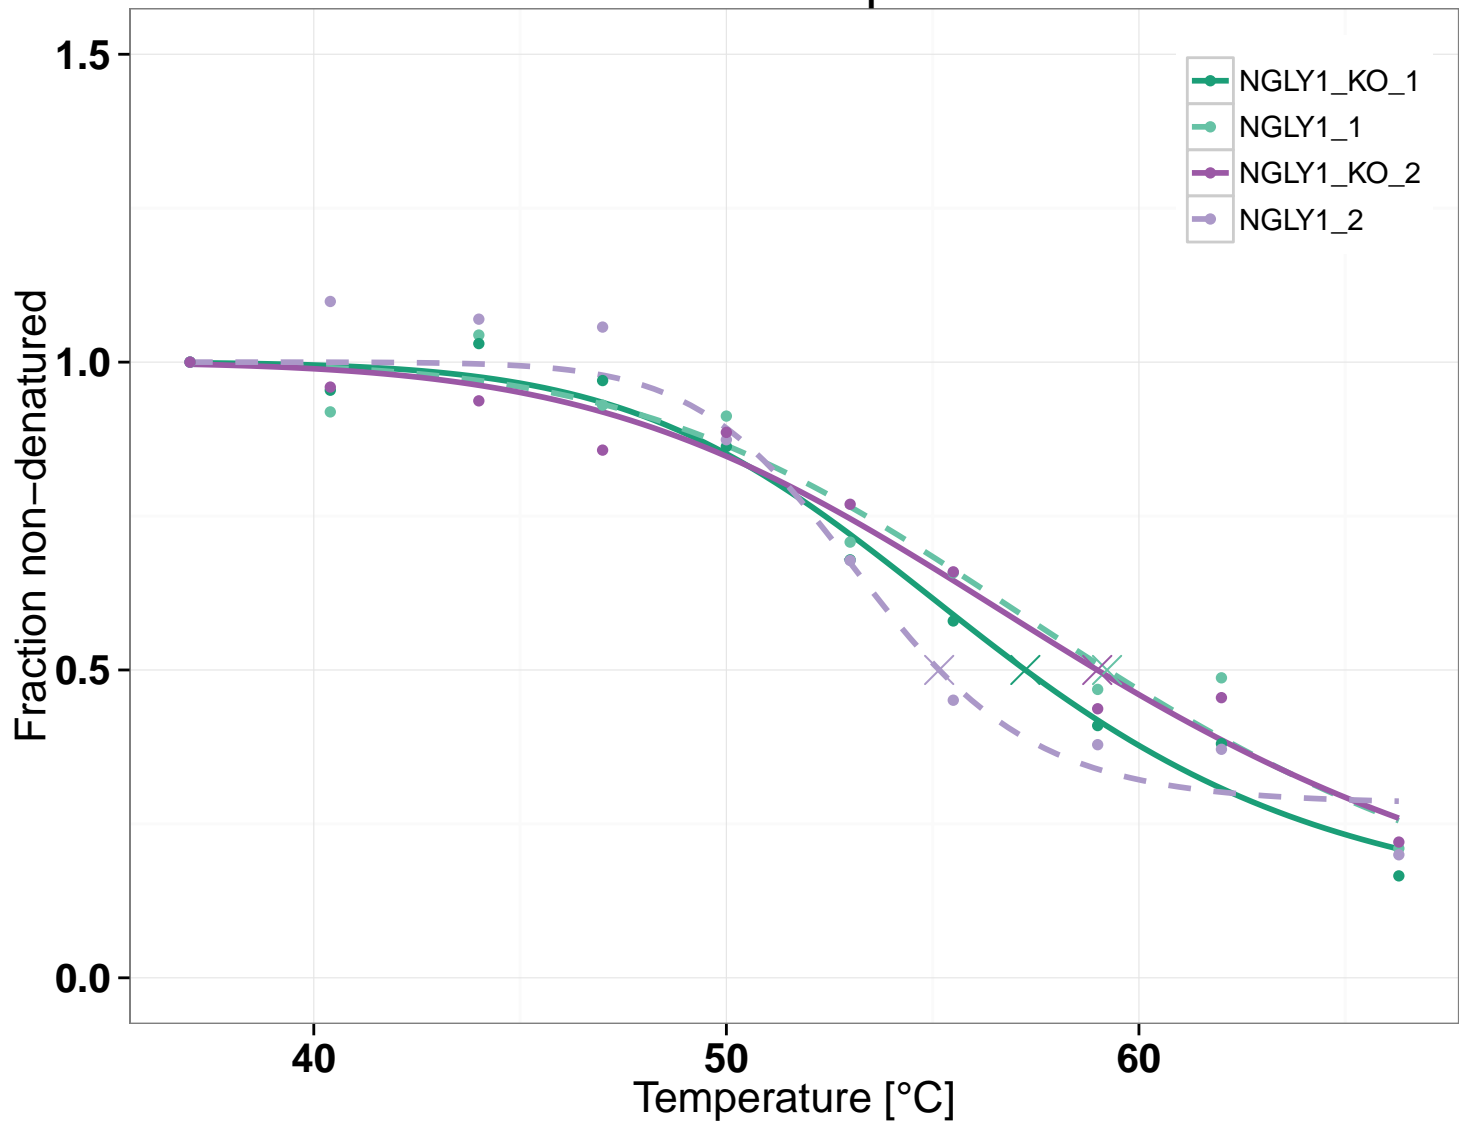

|            | meltPoint | slope  | plateau | R2   |
|------------|-----------|--------|---------|------|
| NGLY1_KO_1 | 57.25     | -0.053 | 0.1     | 0.98 |
| NGLY1_1    | 59.23     | -0.044 | 0       | 0.96 |
| NGLY1_KO_2 | 58.99     | -0.042 | 0       | 0.97 |
| NGLY1_2    | 55.16     | -0.087 | 0.28    | 0.97 |

Supplement: Supplementary file 1349 [file 1]

IPI00789737.1|TMEM85

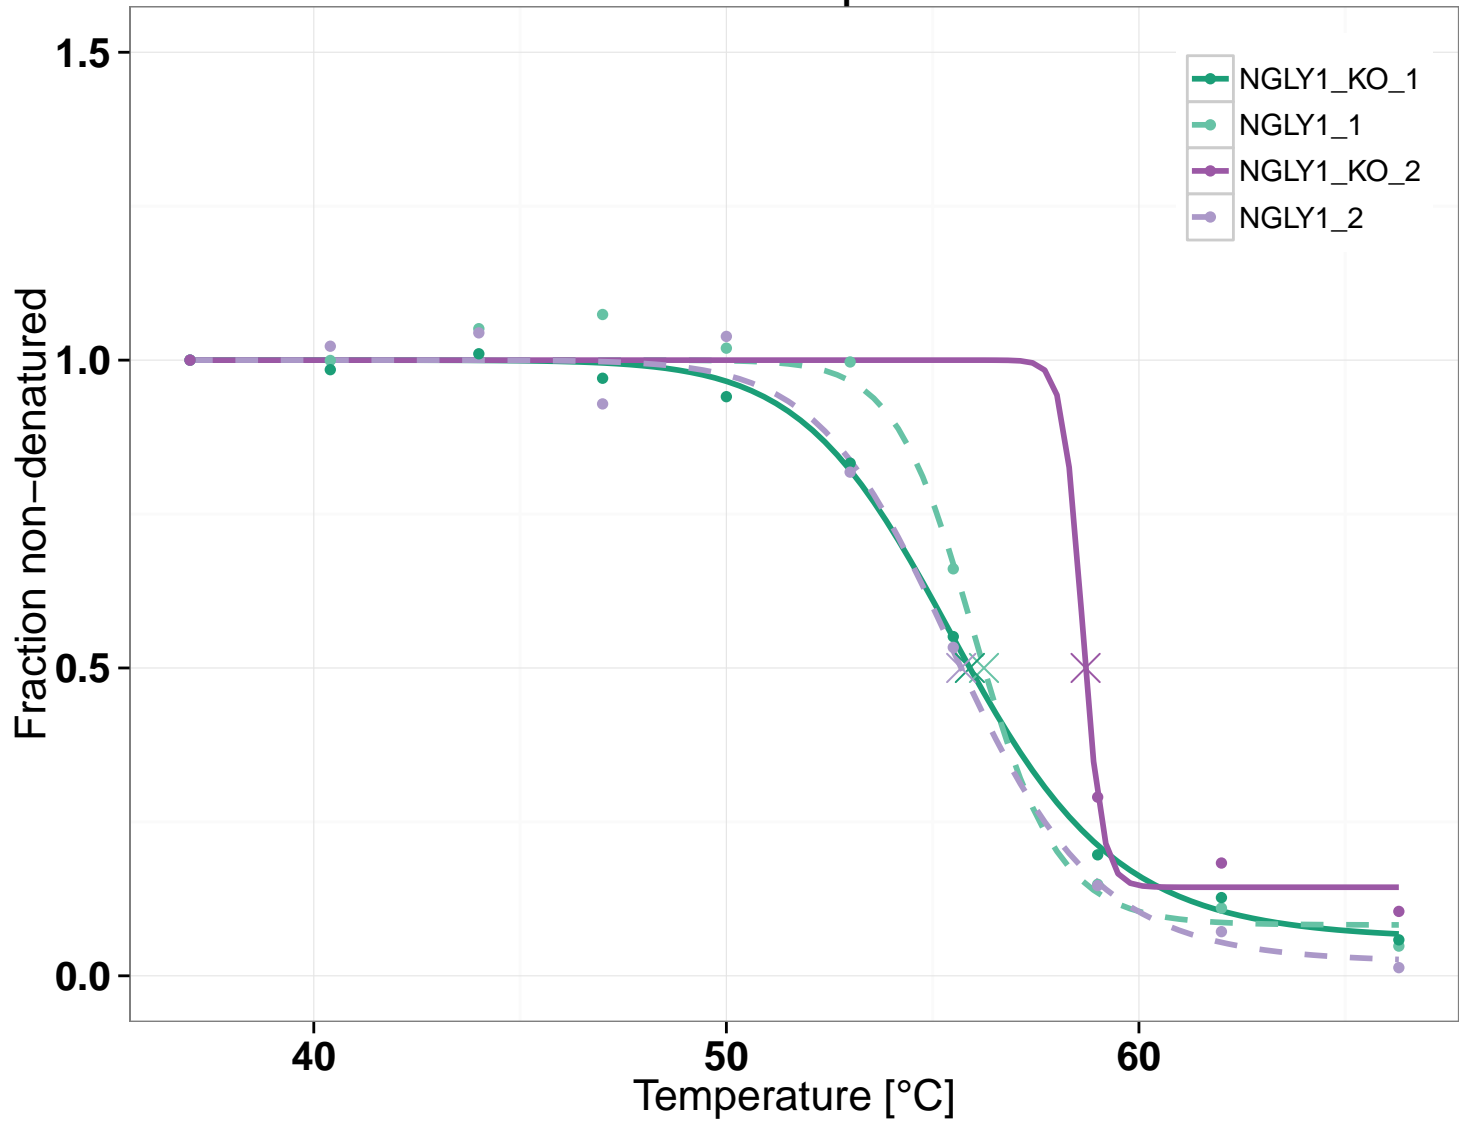

|            | meltPoint | slope | plateau | R2    |
|------------|-----------|-------|---------|-------|
| NGLY1_KO_1 | 55.9      | -0.12 | 0.06    | 1     |
| NGLY1_1    | 56.24     | -0.23 | 0.08    | 0.99  |
| NGLY1_KO_2 | 58.71     | -0.91 | 0.14    | -0.16 |
| NGLY1_2    | 55.69     | -0.14 | 0.02    | 0.99  |

Supplement: Supplementary file 1350 [file 1]

# IPI00464951.5|HMG20B

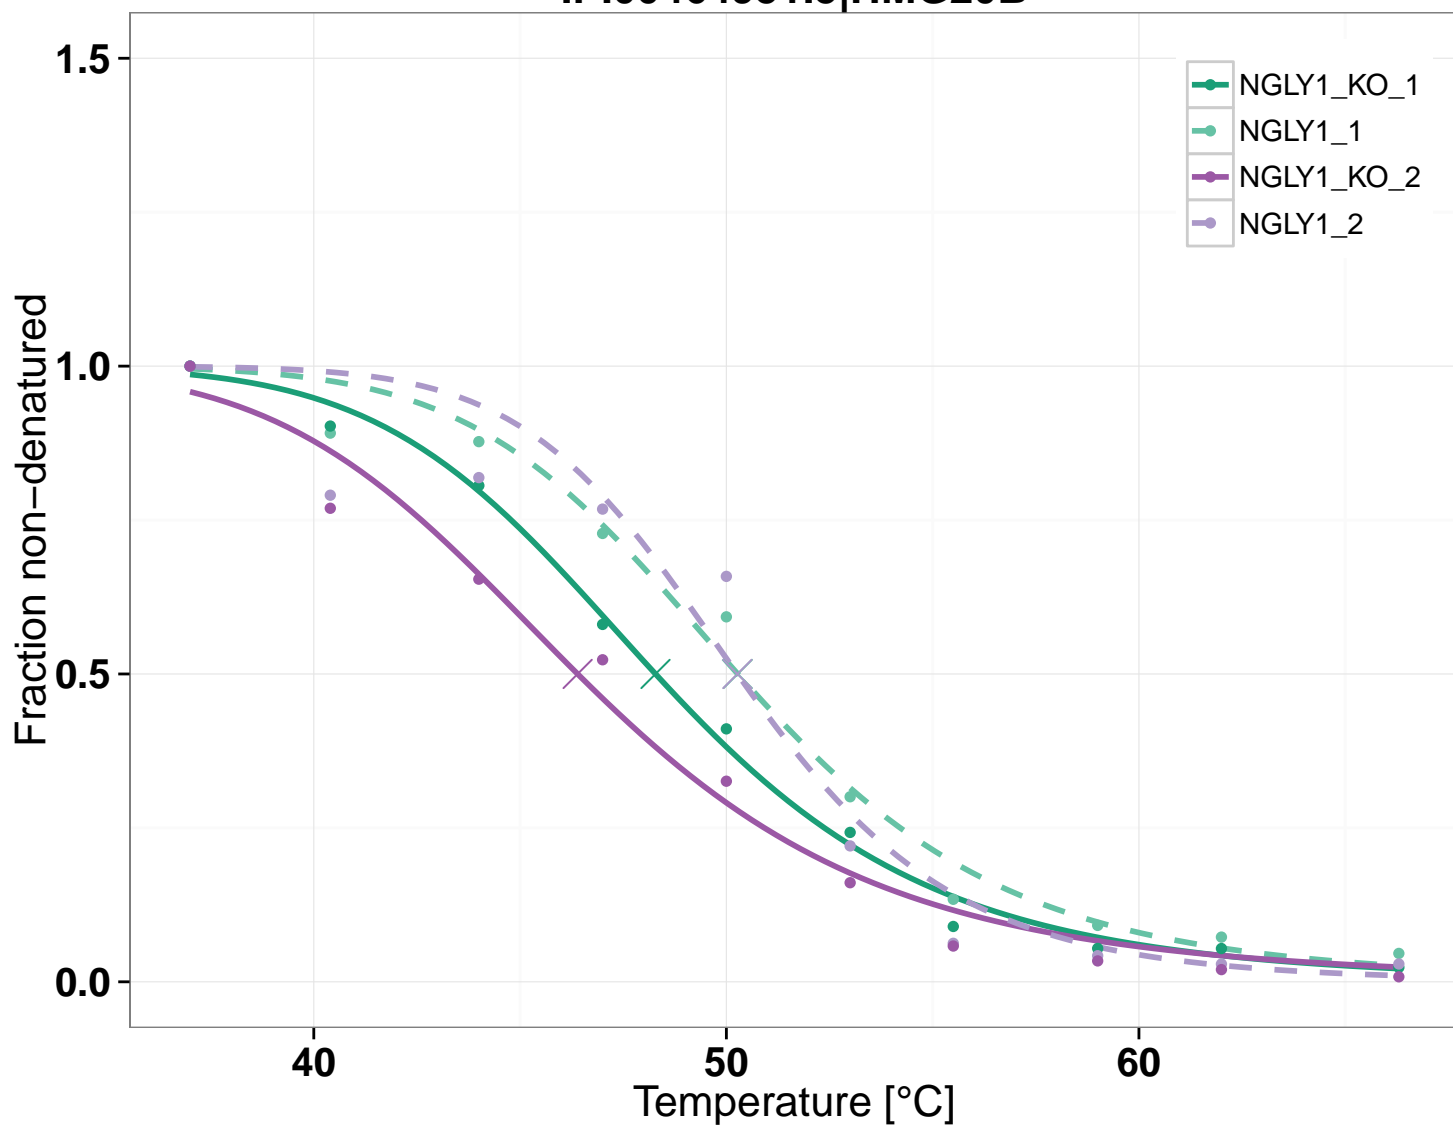

|            | meltPoint | slope  | plateau | R2   |
|------------|-----------|--------|---------|------|
| NGLY1_KO_1 | 48.28     | -0.074 | 0       | 1    |
| NGLY1_1    | 50.28     | -0.077 | 0       | 0.99 |
| NGLY1_KO_2 | 46.39     | -0.068 | 0       | 0.98 |
| NGLY1_2    | 50.27     | -0.095 | 0       | 0.94 |

Supplement: Supplementary file 1351 [file 1]

IPI00473074.3|ZNF136

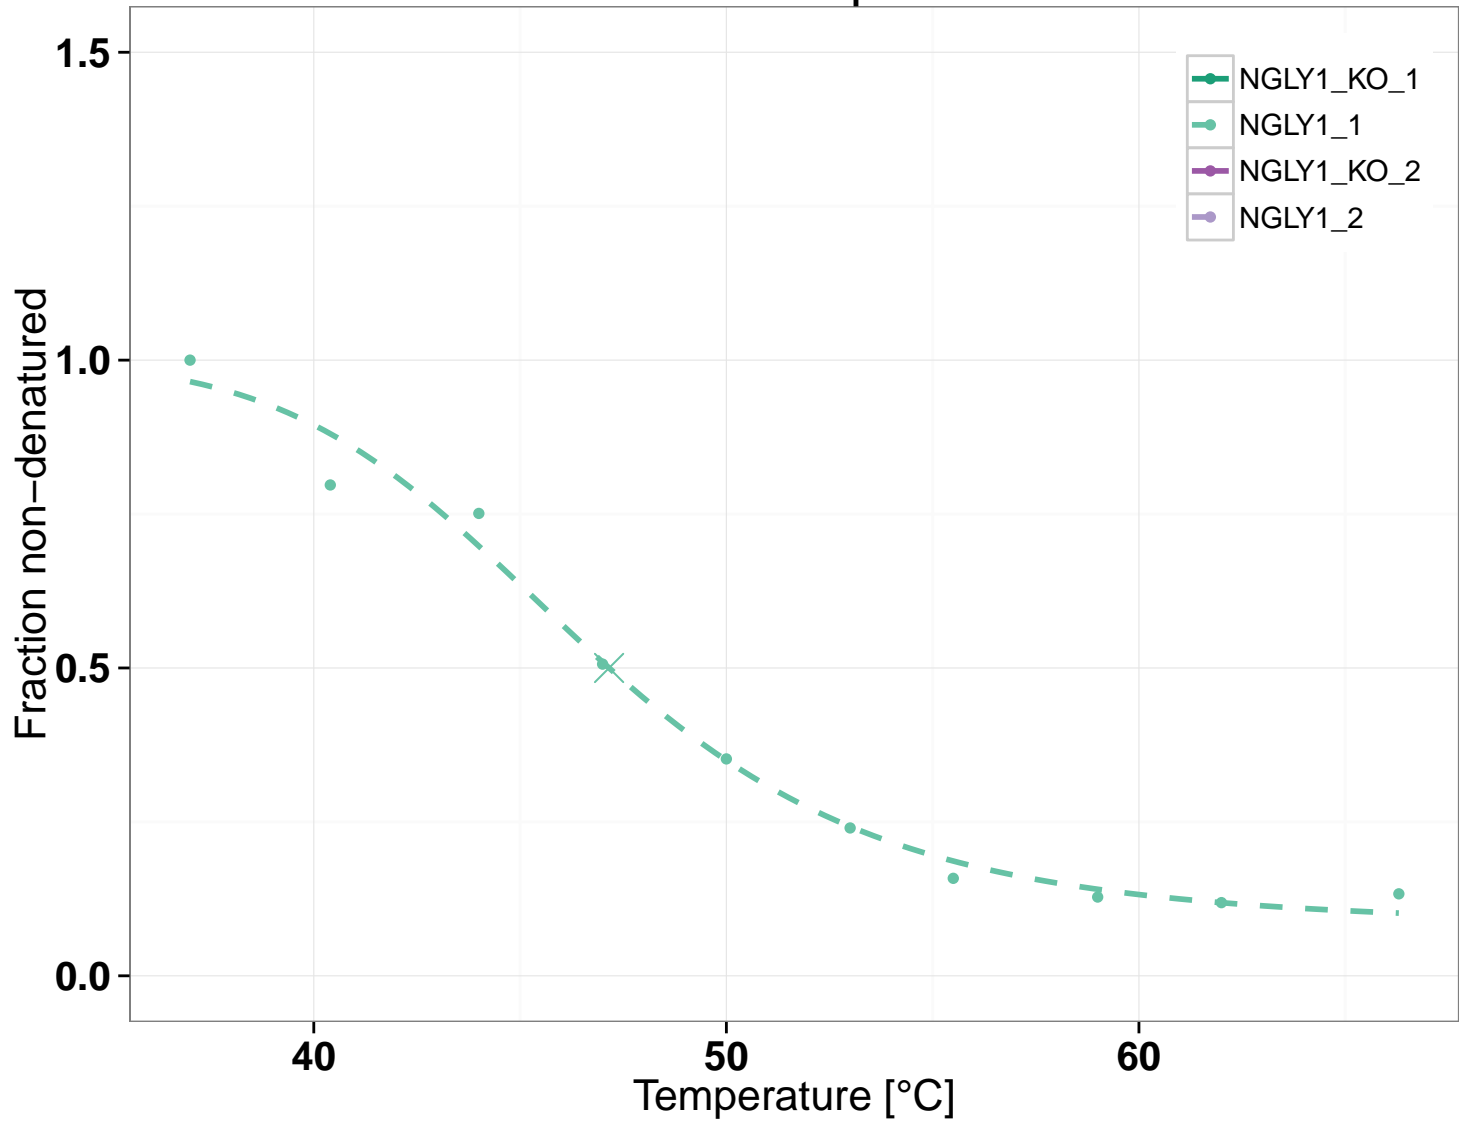

|            | meltPoint | slope  | plateau | R2   |
|------------|-----------|--------|---------|------|
| NGLY1_KO_1 | –         | –      | –       | –    |
| NGLY1_1    | 47.16     | –0.064 | 0.08    | 0.99 |
| NGLY1_KO_2 | –         | –      | –       | –    |
| NGLY1_2    | –         | –      | –       | –    |

Supplement: Supplementary file 1352 [file 1]

IPI00218448.4|H2AFZ

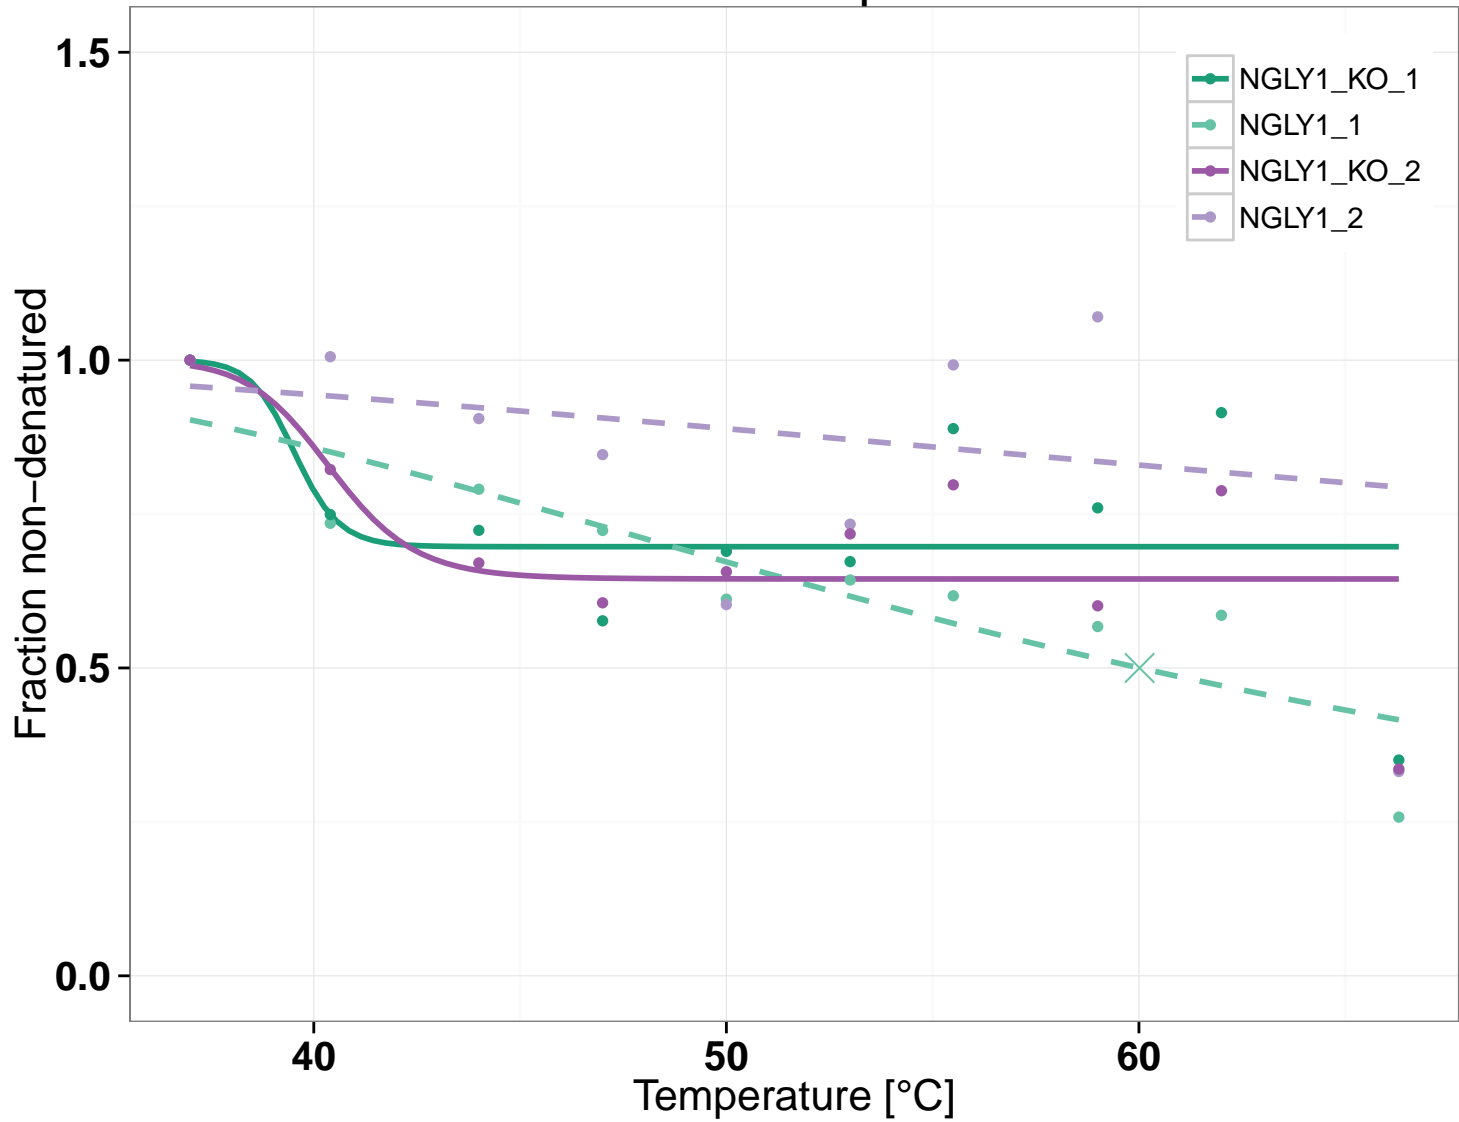

|            | meltPoint | slope   | plateau | R2   |
|------------|-----------|---------|---------|------|
| NGLY1_KO_1 | –         | –0.14   | 0.7     | 0.27 |
| NGLY1_1    | 60.02     | –0.019  | 0       | 0.78 |
| NGLY1_KO_2 | –         | –0.088  | 0.64    | 0.46 |
| NGLY1_2    | –         | –0.0059 | 0       | 0.04 |

Supplement: Supplementary file 1353 [file 1]

# IPI00025347.4|EMG1

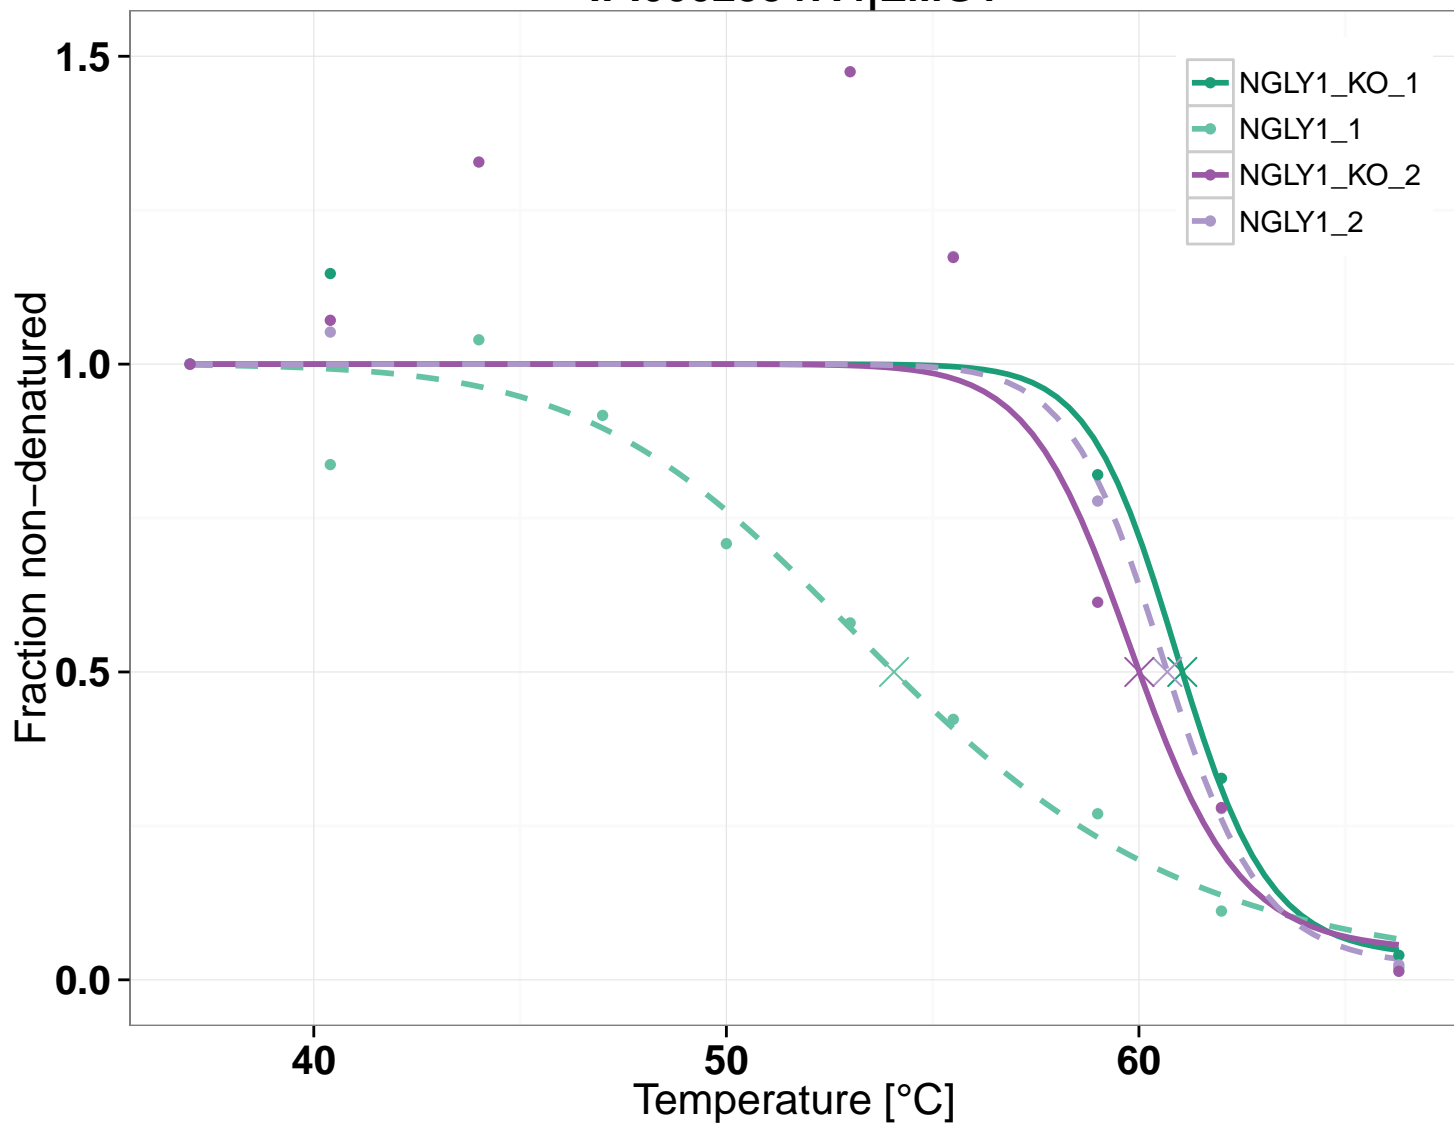

|            | meltPoint | slope  | plateau | R2   |
|------------|-----------|--------|---------|------|
| NGLY1_KO_1 | 61.05     | -0.22  | 0.04    | 0.06 |
| NGLY1_1    | 54.06     | -0.068 | 0       | 0.97 |
| NGLY1_KO_2 | 60.01     | -0.19  | 0.05    | 0.43 |
| NGLY1_2    | 60.69     | -0.21  | 0.02    | 0.22 |

Supplement: Supplementary file 1354 [file 1]

# IPI00783208.2|C17ORF59

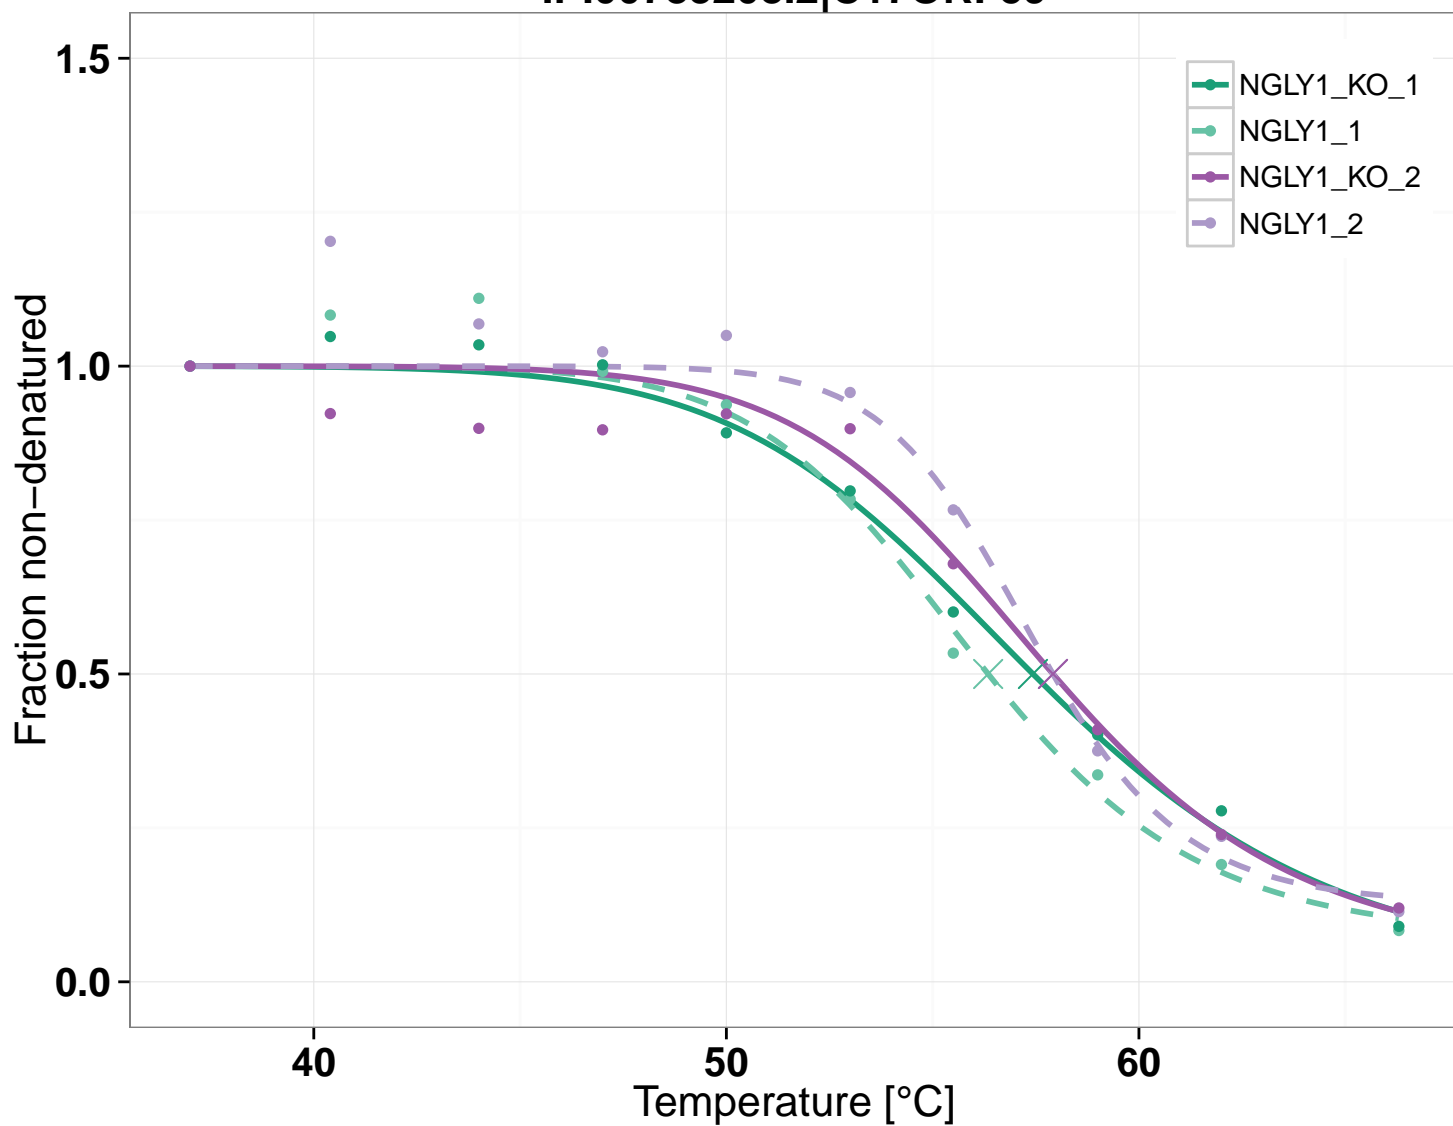

|            | meltPoint | slope  | plateau | R2   |
|------------|-----------|--------|---------|------|
| NGLY1_KO_1 | 57.43     | -0.068 | 0       | 0.99 |
| NGLY1_1    | 56.35     | -0.086 | 0.07    | 0.98 |
| NGLY1_KO_2 | 57.92     | -0.079 | 0.04    | 0.97 |
| NGLY1_2    | 57.92     | -0.12  | 0.13    | 0.96 |

Supplement: Supplementary file 1355 [file 1]

IPI00031631.1|SLC19A2

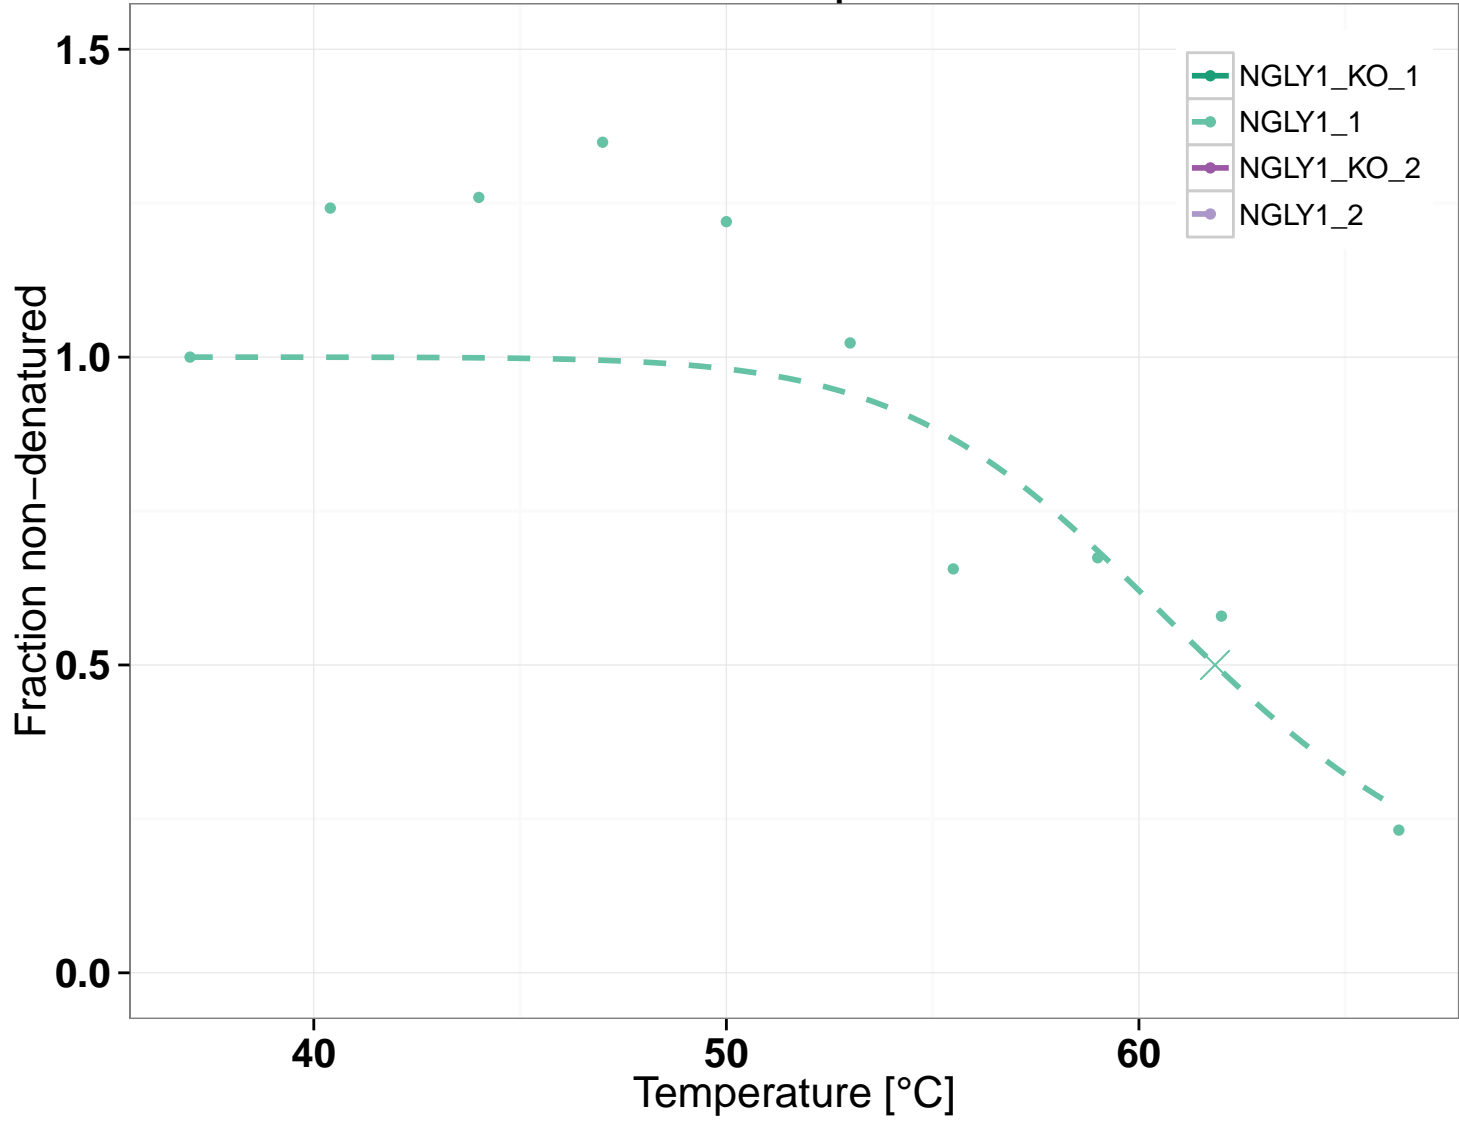

|            | meltPoint | slope  | plateau | R2  |
|------------|-----------|--------|---------|-----|
| NGLY1_KO_1 | -         | -      | -       | -   |
| NGLY1_1    | 61.84     | -0.066 | 0.06    | 0.7 |
| NGLY1_KO_2 | -         | -      | -       | -   |
| NGLY1_2    | -         | -      | -       | -   |

Supplement: Supplementary file 1356 [file 1]

IPI00872463.1|TUBAL3

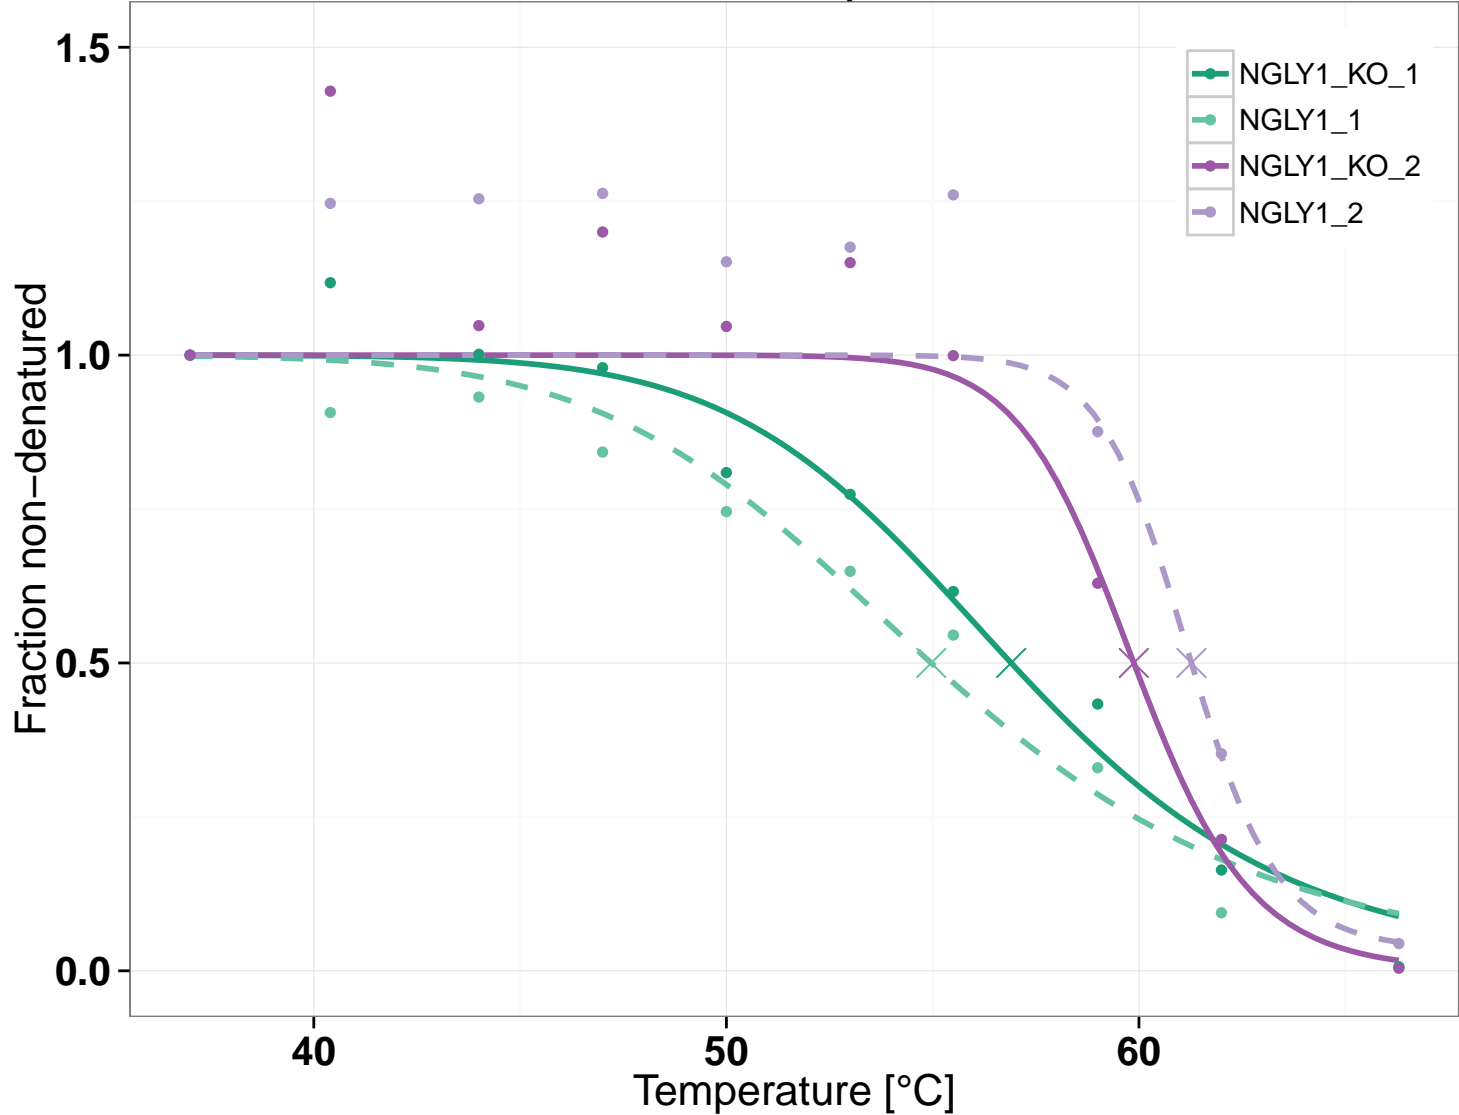

|            | meltPoint | slope  | plateau | R2   |
|------------|-----------|--------|---------|------|
| NGLY1_KO_1 | 56.9      | -0.073 | 0       | 0.97 |
| NGLY1_1    | 54.97     | -0.062 | 0       | 0.97 |
| NGLY1_KO_2 | 59.88     | -0.18  | 0       | 0.86 |
| NGLY1_2    | 61.27     | -0.22  | 0.03    | 0.81 |

Supplement: Supplementary file 1357 [file 1]

IPI00061677.3|ALG14

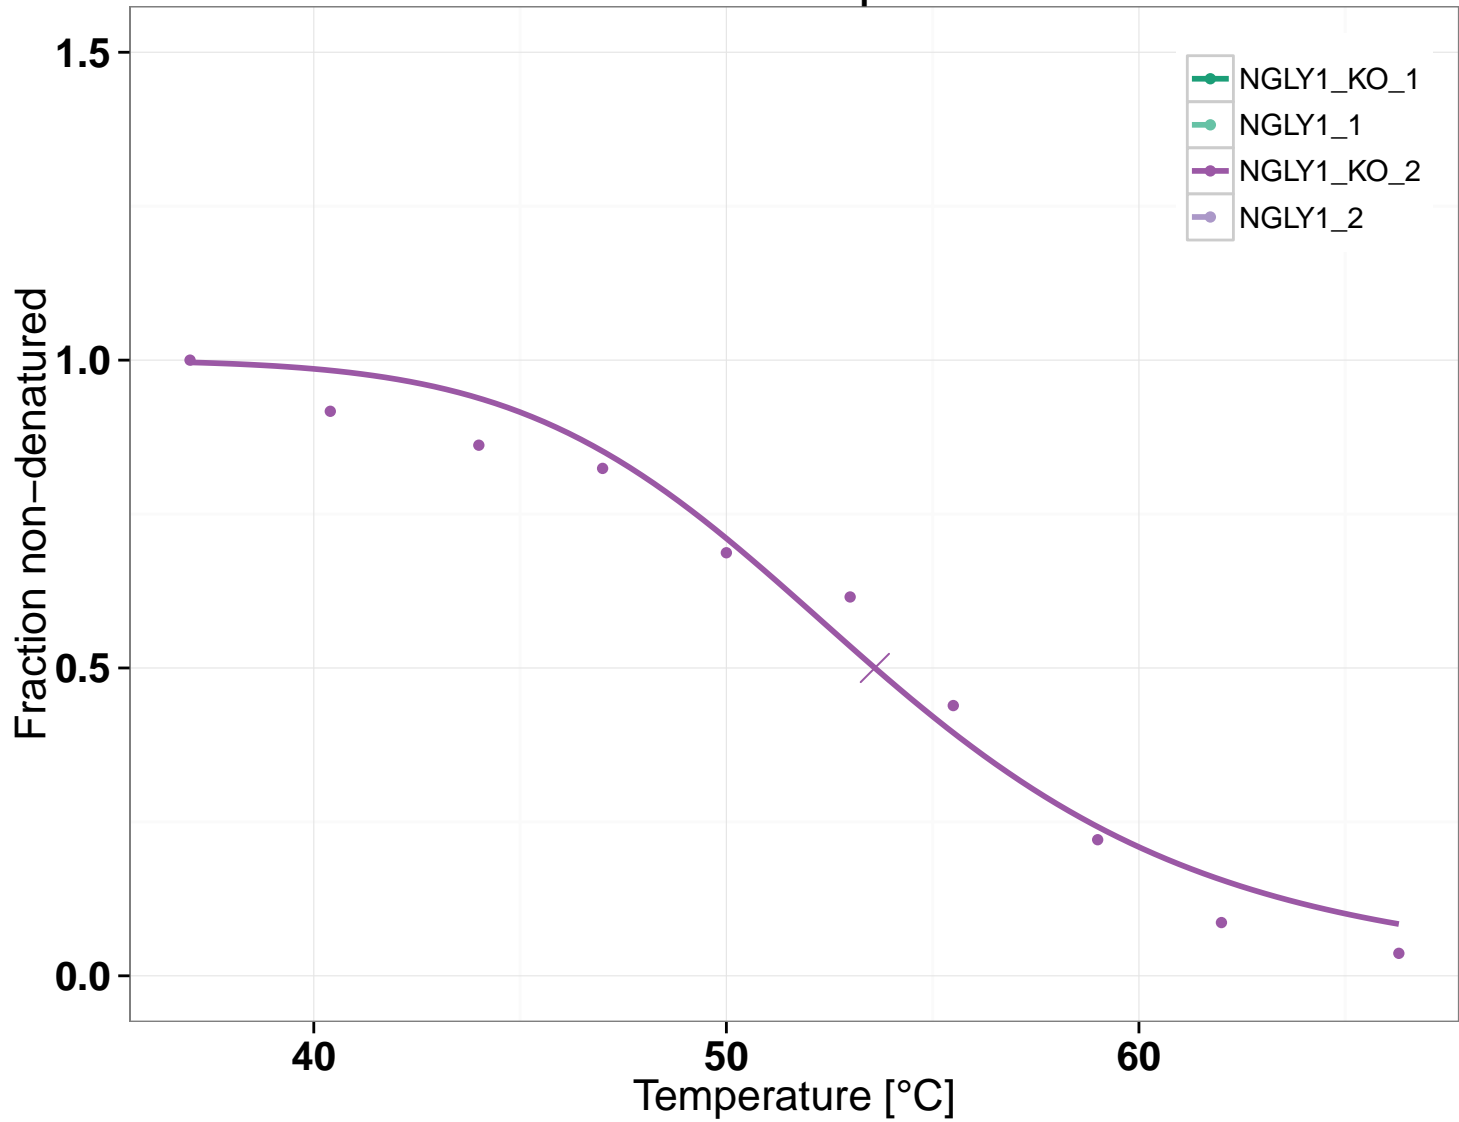

|            | meltPoint | slope | plateau | R2   |
|------------|-----------|-------|---------|------|
| NGLY1_KO_1 | —         | —     | —       | —    |
| NGLY1_1    | —         | —     | —       | —    |
| NGLY1_KO_2 | 53.6      | -0.06 | 0       | 0.98 |
| NGLY1_2    | —         | —     | —       | —    |

Supplement: Supplementary file 1358 [file 1]

# IPI00253036.5|CD99

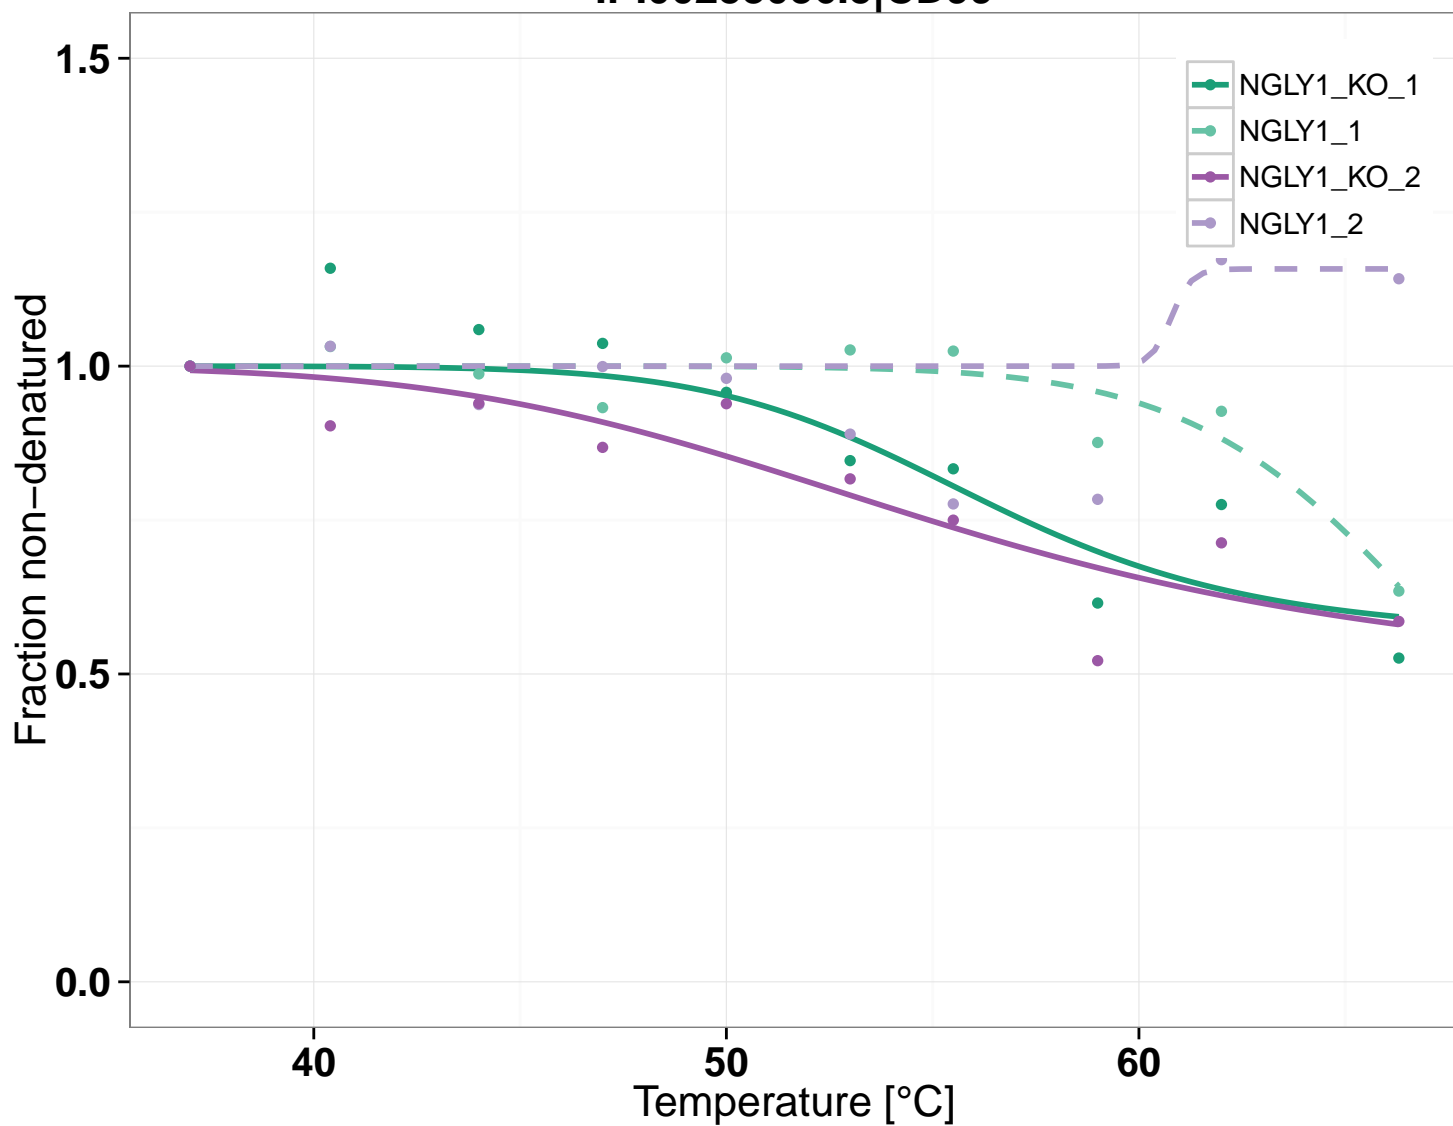

|            | meltPoint | slope  | plateau | R2   |
|------------|-----------|--------|---------|------|
| NGLY1_KO_1 | –         | –0.033 | 0.56    | 0.82 |
| NGLY1_1    | –         | –      | 0       | 0.87 |
| NGLY1_KO_2 | –         | –0.021 | 0.48    | 0.8  |
| NGLY1_2    | –         | 0.16   | 1.16    | 0.26 |

Supplement: Supplementary file 1359 [file 1]

IPI00783902.1|HEATR5A

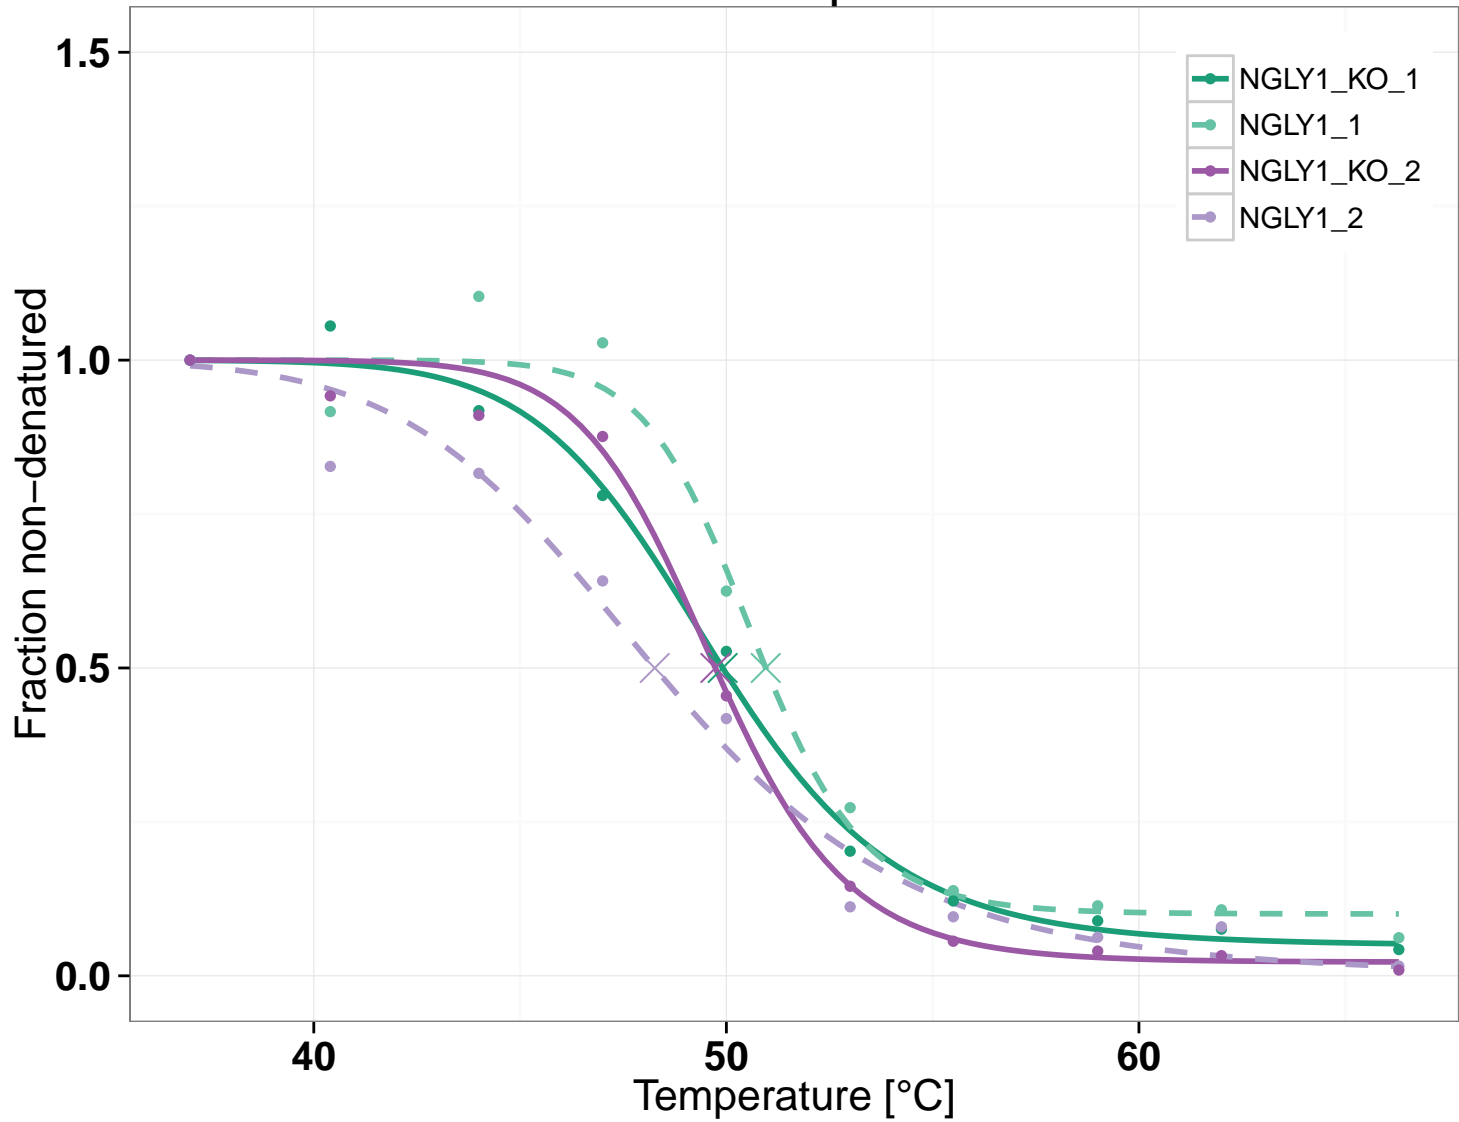

|            | meltPoint | slope  | plateau | R2   |
|------------|-----------|--------|---------|------|
| NGLY1_KO_1 | 49.91     | -0.11  | 0.05    | 0.99 |
| NGLY1_1    | 50.95     | -0.17  | 0.1     | 0.98 |
| NGLY1_KO_2 | 49.73     | -0.15  | 0.02    | 0.99 |
| NGLY1_2    | 48.26     | -0.081 | 0       | 0.98 |

Supplement: Supplementary file 1360 [file 1]

IPI00022300.5|METTL7A

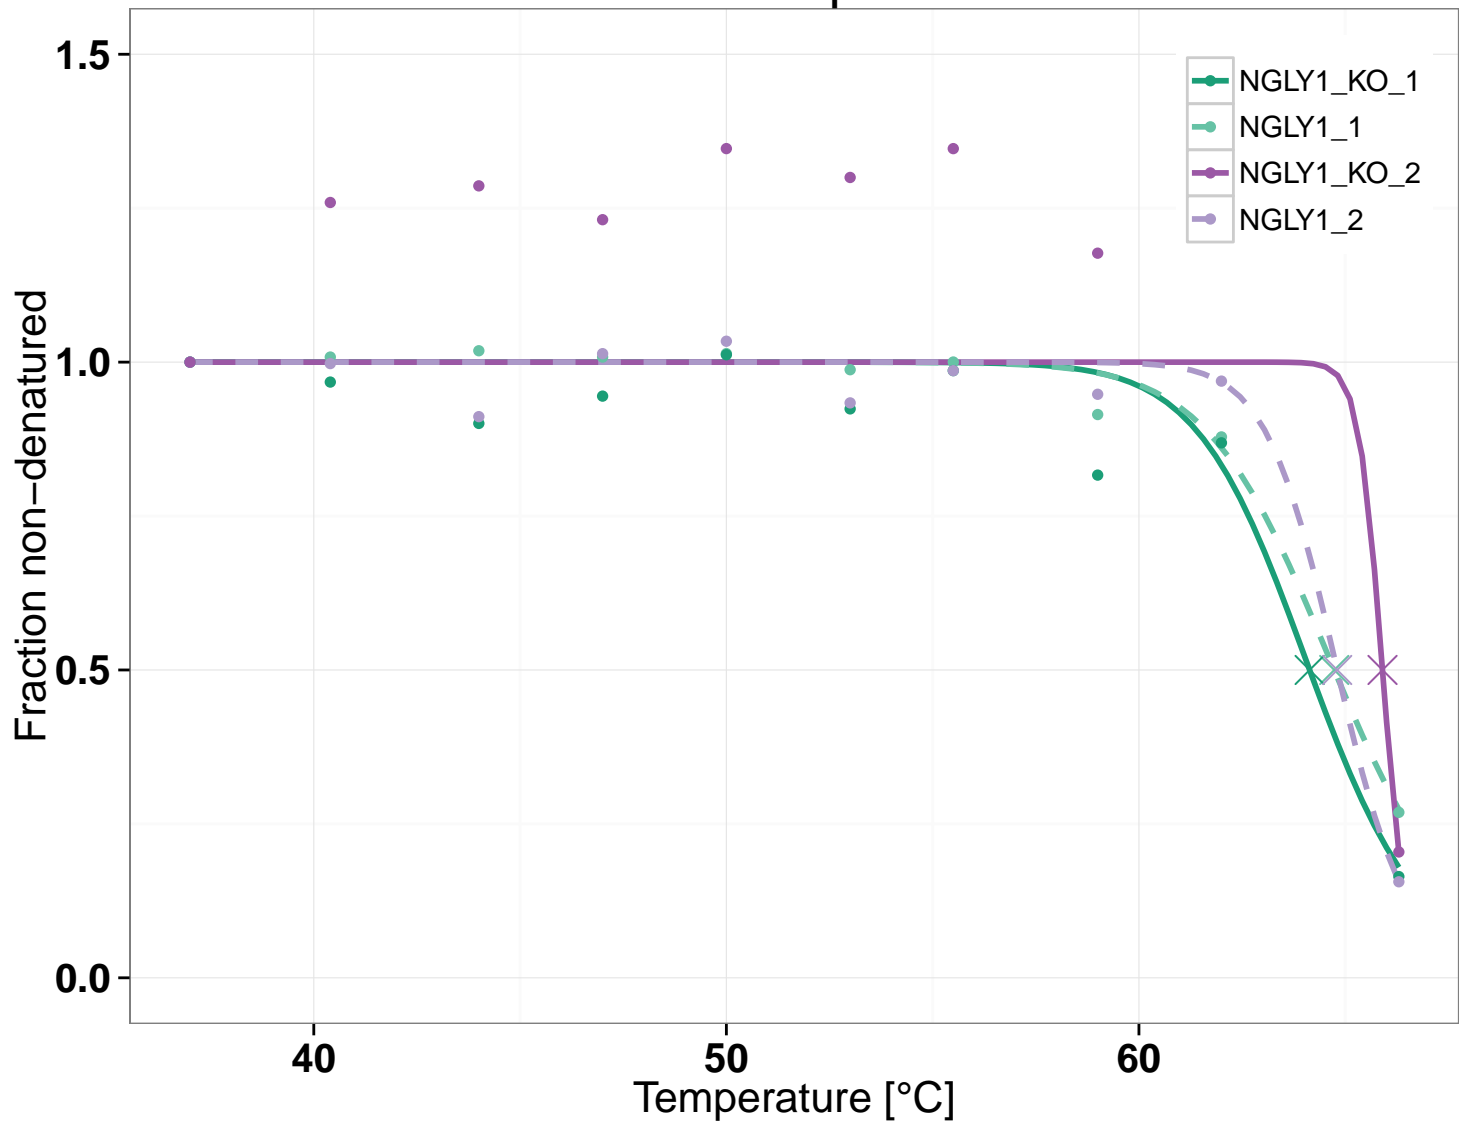

|            | meltPoint | slope | plateau | R2   |
|------------|-----------|-------|---------|------|
| NGLY1_KO_1 | 64.14     | -0.18 | 0       | 0.91 |
| NGLY1_1    | 64.73     | -0.16 | 0       | 0.99 |
| NGLY1_KO_2 | 65.9      | -0.86 | 0       | 0.38 |
| NGLY1_2    | 64.81     | -0.29 | 0       | 0.97 |

Supplement: Supplementary file 1361 [file 1]

# IPI00007304.1|ARIH2

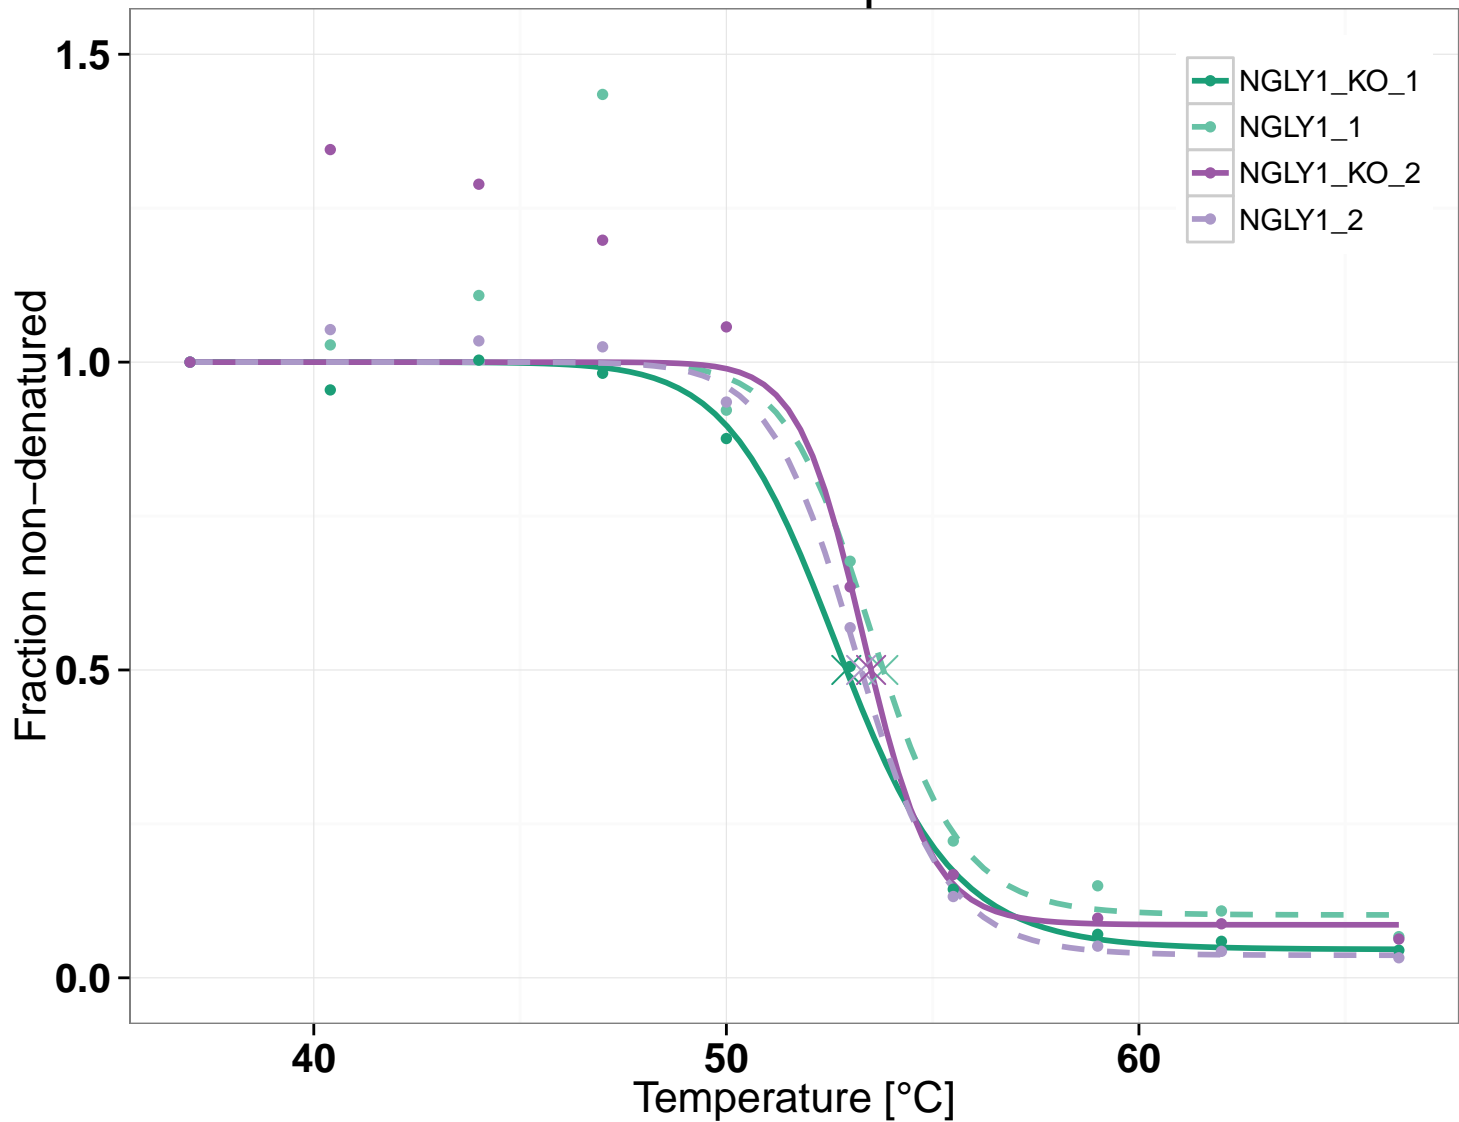

|            | meltPoint | slope | plateau | R2   |
|------------|-----------|-------|---------|------|
| NGLY1_KO_1 | 52.91     | -0.17 | 0.05    | 1    |
| NGLY1_1    | 53.8      | -0.21 | 0.1     | 0.91 |
| NGLY1_KO_2 | 53.51     | -0.28 | 0.09    | 0.91 |
| NGLY1_2    | 53.27     | -0.22 | 0.04    | 1    |

Supplement: Supplementary file 1362 [file 1]

# IPI00395474.1|SAMD1

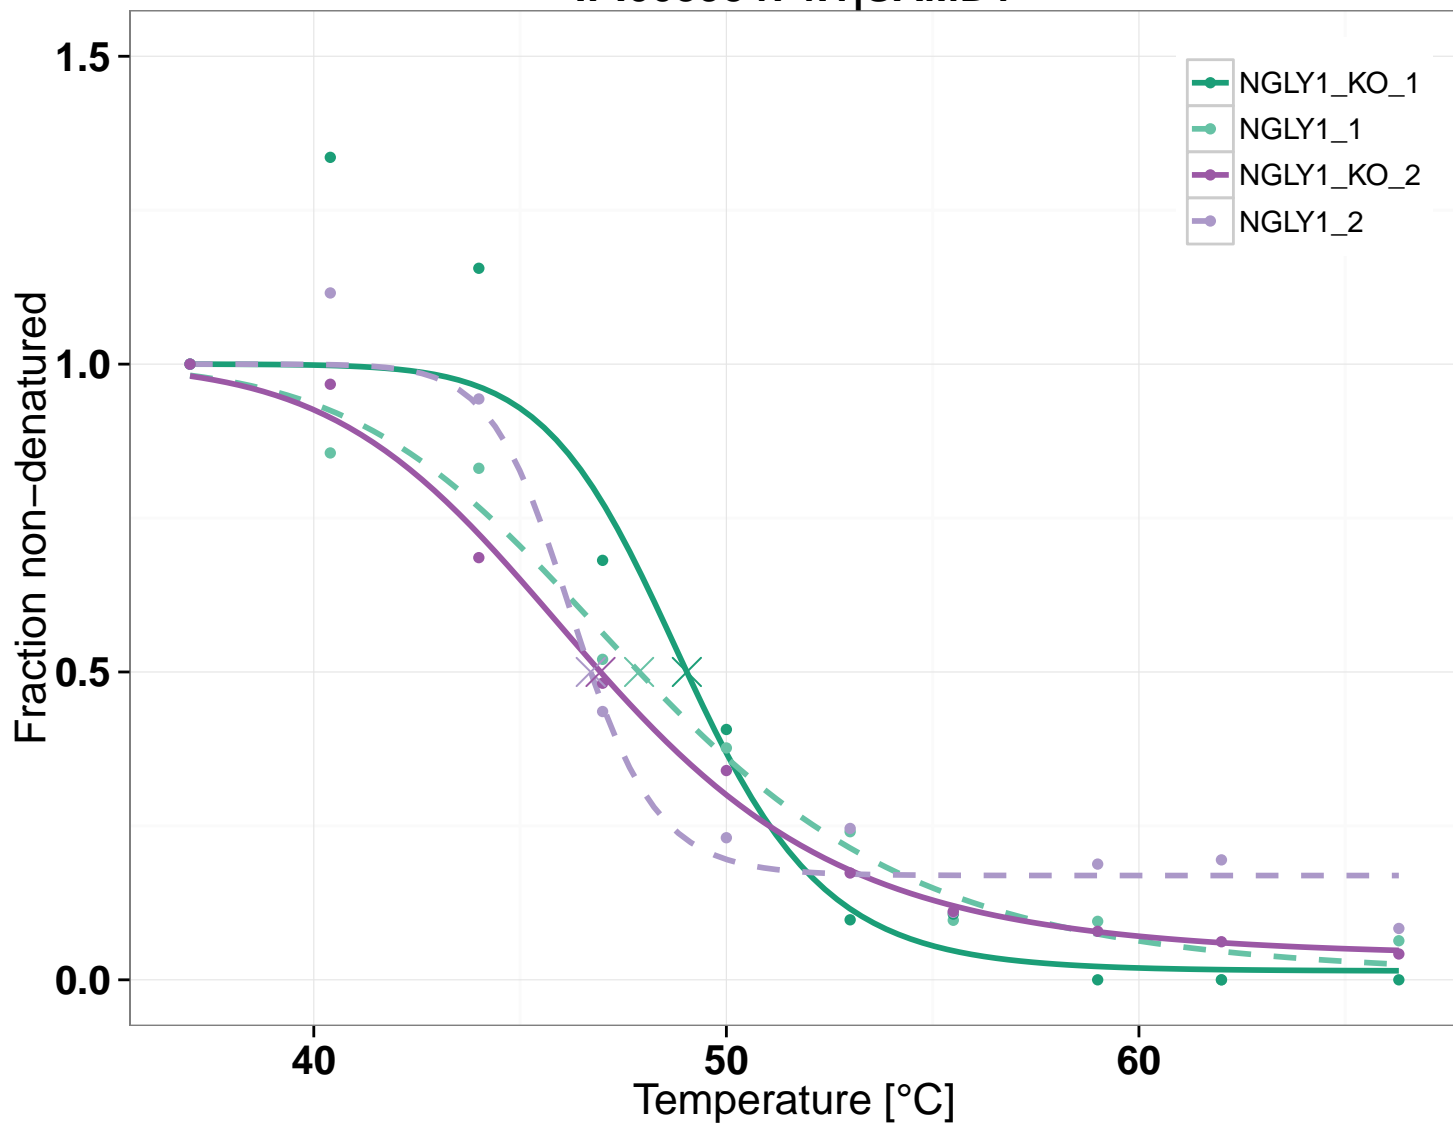

|            | meltPoint | slope  | plateau | R2   |
|------------|-----------|--------|---------|------|
| NGLY1_KO_1 | 49.04     | -0.15  | 0.01    | 0.93 |
| NGLY1_1    | 47.88     | -0.072 | 0       | 0.99 |
| NGLY1_KO_2 | 46.95     | -0.078 | 0.04    | 0.99 |
| NGLY1_2    | 46.71     | -0.21  | 0.17    | 0.98 |

Supplement: Supplementary file 1363 [file 1]

IPI00005585.5|TAX1BP3

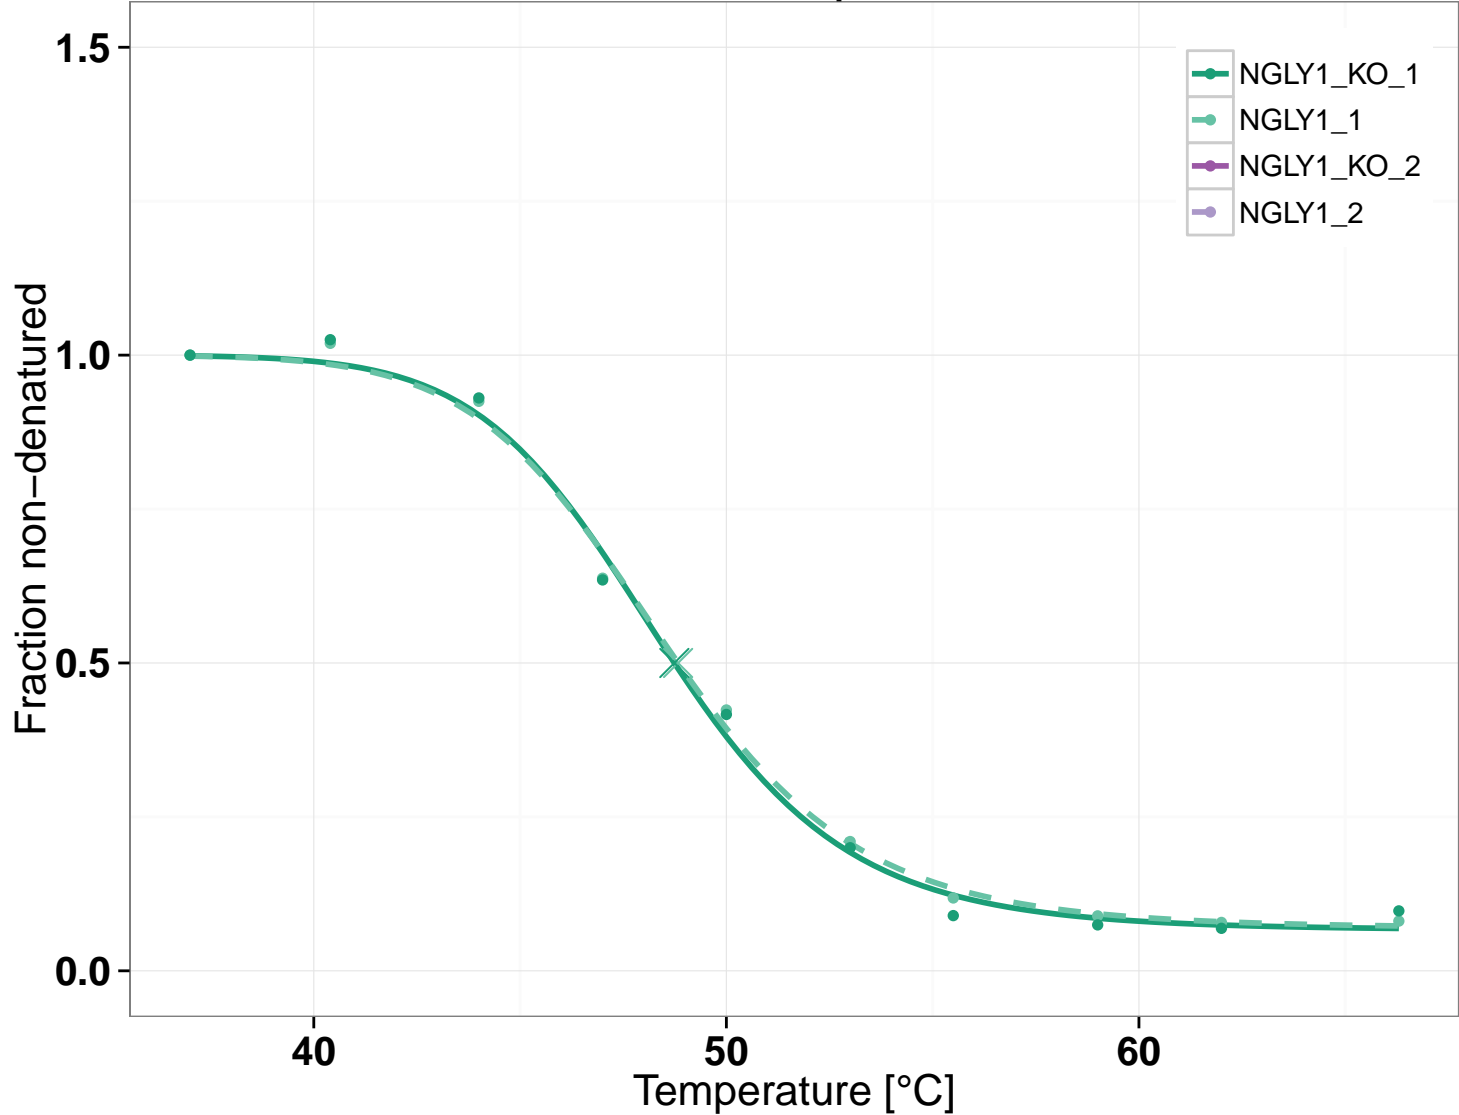

|            | meltPoint | slope  | plateau | R2   |
|------------|-----------|--------|---------|------|
| NGLY1_KO_1 | 48.74     | -0.1   | 0.07    | 0.99 |
| NGLY1_1    | 48.83     | -0.099 | 0.07    | 1    |
| NGLY1_KO_2 | -         | -      | -       | -    |
| NGLY1_2    | -         | -      | -       | -    |

Supplement: Supplementary file 1364 [file 1]

# IPI00045801.3|FIZ1

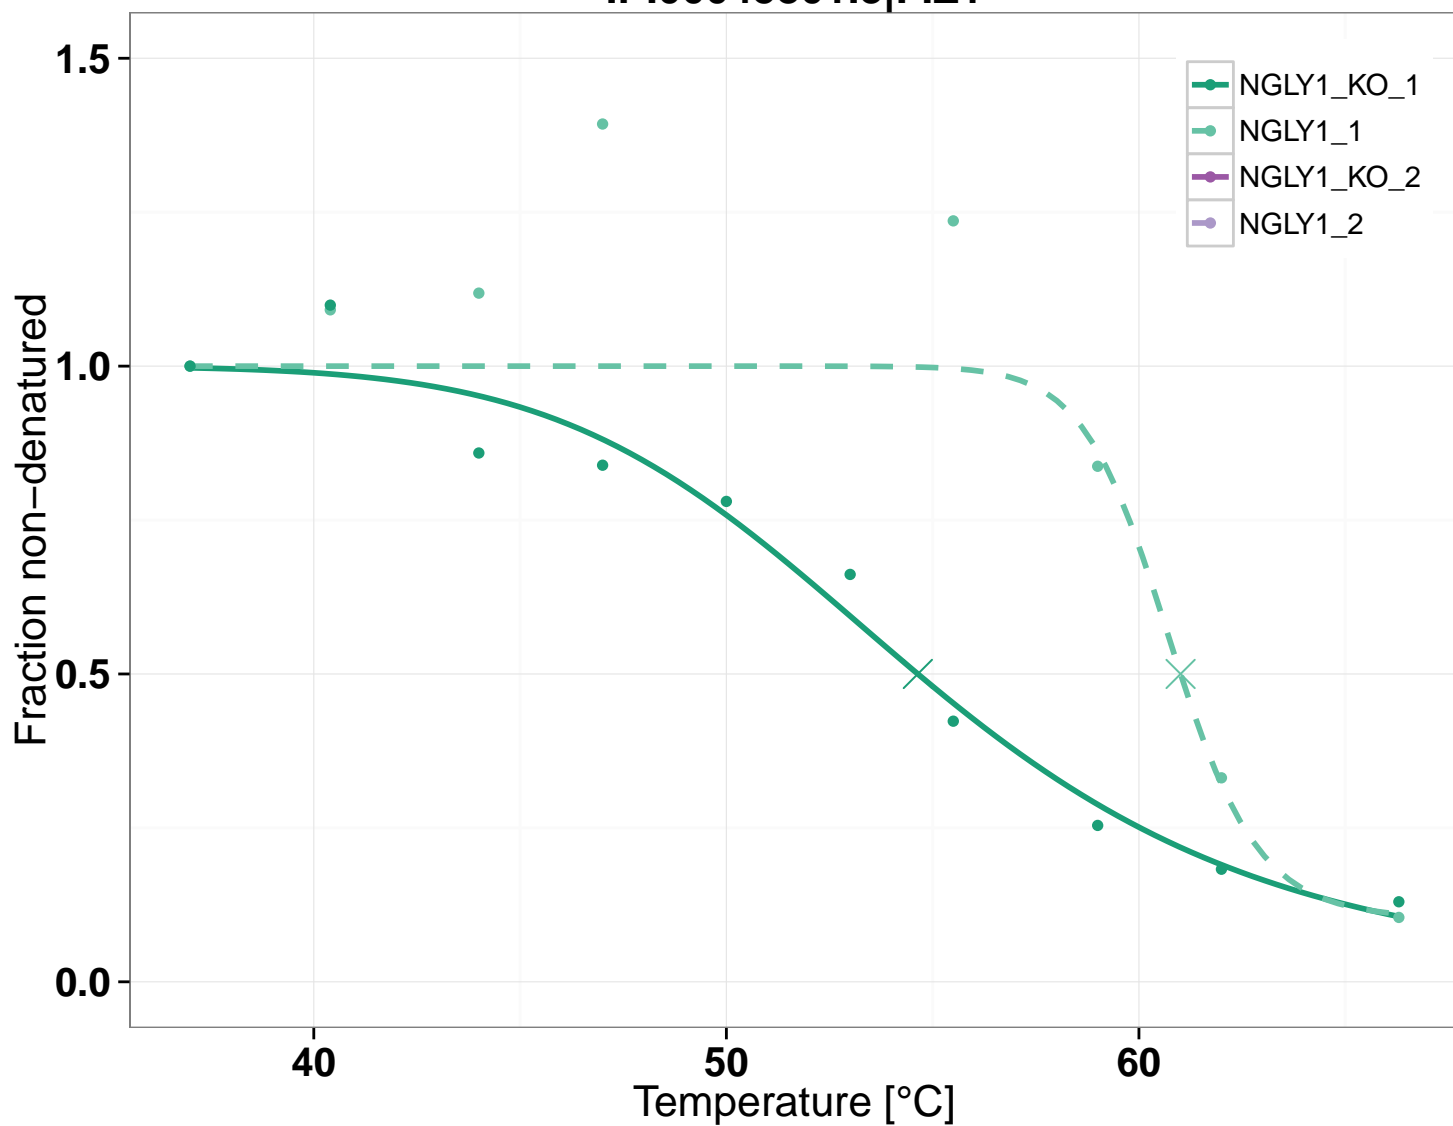

|            | meltPoint | slope  | plateau | R2   |
|------------|-----------|--------|---------|------|
| NGLY1_KO_1 | 54.64     | -0.058 | 0.01    | 0.97 |
| NGLY1_1    | 61.01     | -0.21  | 0.1     | 0.45 |
| NGLY1_KO_2 | -         | -      | -       | -    |
| NGLY1_2    | -         | -      | -       | -    |

Supplement: Supplementary file 1365 [file 1]

IPI00218337.3|LMAN2L

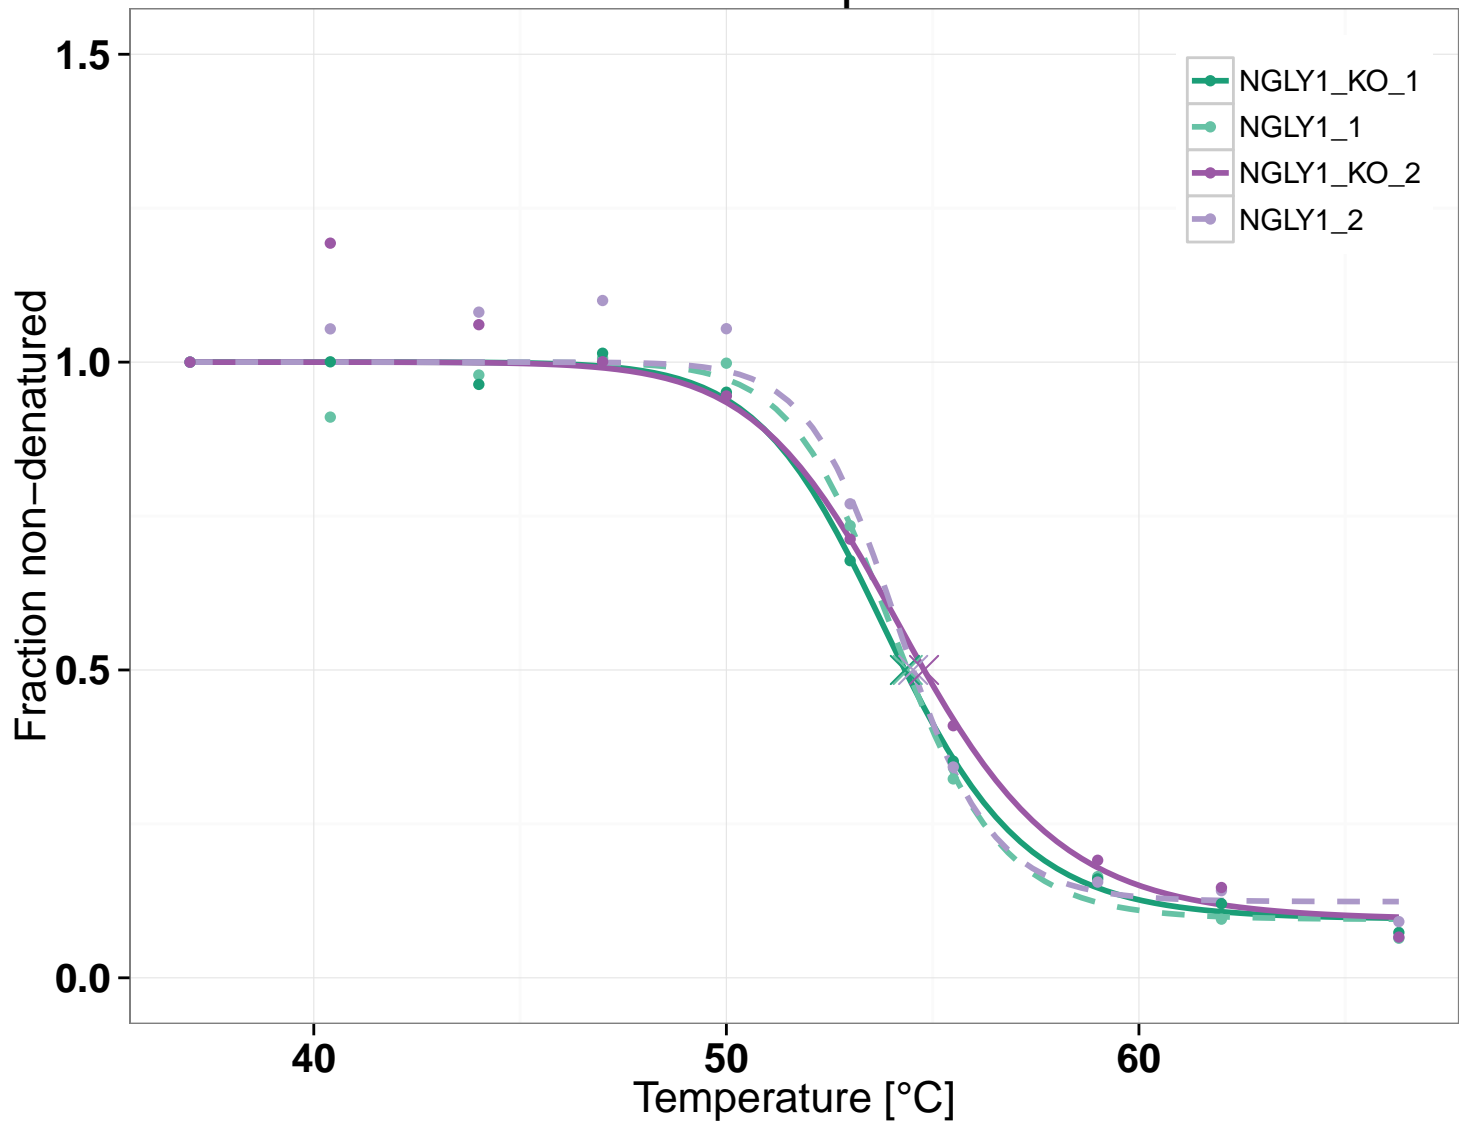

|            | meltPoint | slope | plateau | R2   |
|------------|-----------|-------|---------|------|
| NGLY1_KO_1 | 54.33     | -0.14 | 0.09    | 1    |
| NGLY1_1    | 54.4      | -0.18 | 0.09    | 0.99 |
| NGLY1_KO_2 | 54.79     | -0.12 | 0.09    | 0.97 |
| NGLY1_2    | 54.53     | -0.2  | 0.12    | 0.99 |

Supplement: Supplementary file 1366 [file 1]

IPI00301294.2|FAM134A

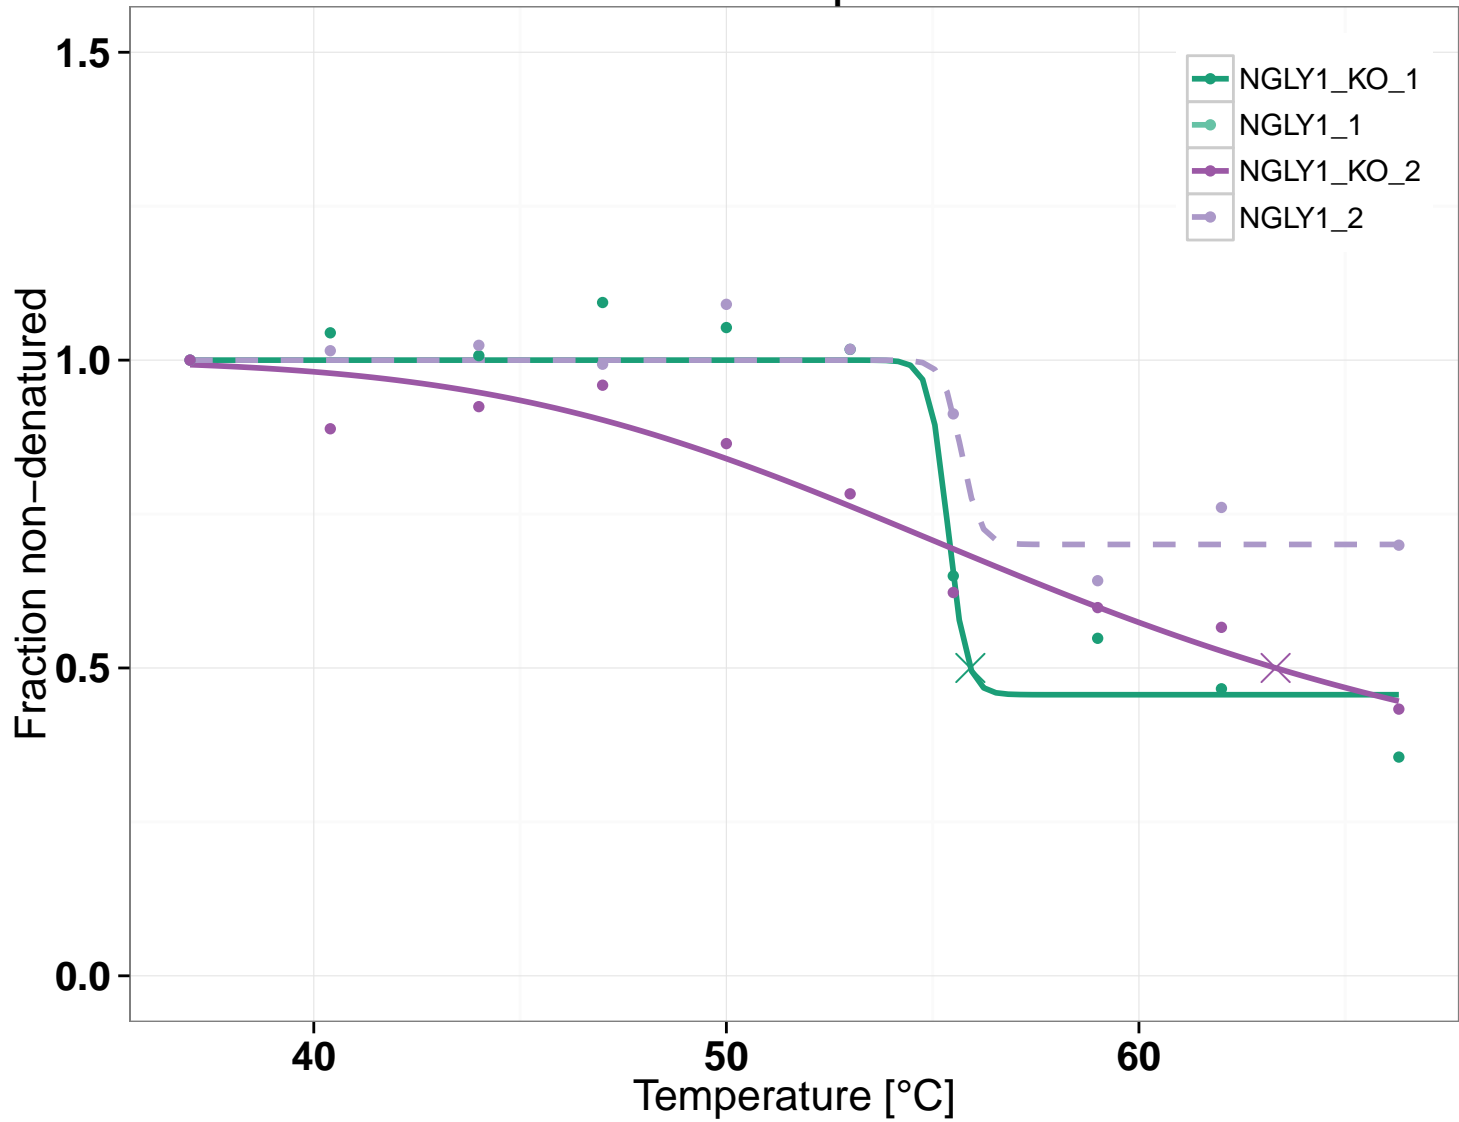

|            | meltPoint | slope  | plateau | R2   |
|------------|-----------|--------|---------|------|
| NGLY1_KO_1 | 55.91     | -0.61  | 0.46    | 0.96 |
| NGLY1_1    | -         | -      | -       | -    |
| NGLY1_KO_2 | 63.31     | -0.028 | 0.24    | 0.94 |
| NGLY1_2    | -         | -0.34  | 0.7     | 0.93 |

Supplement: Supplementary file 1367 [file 1]

# IPI00550534.2|MLLT10

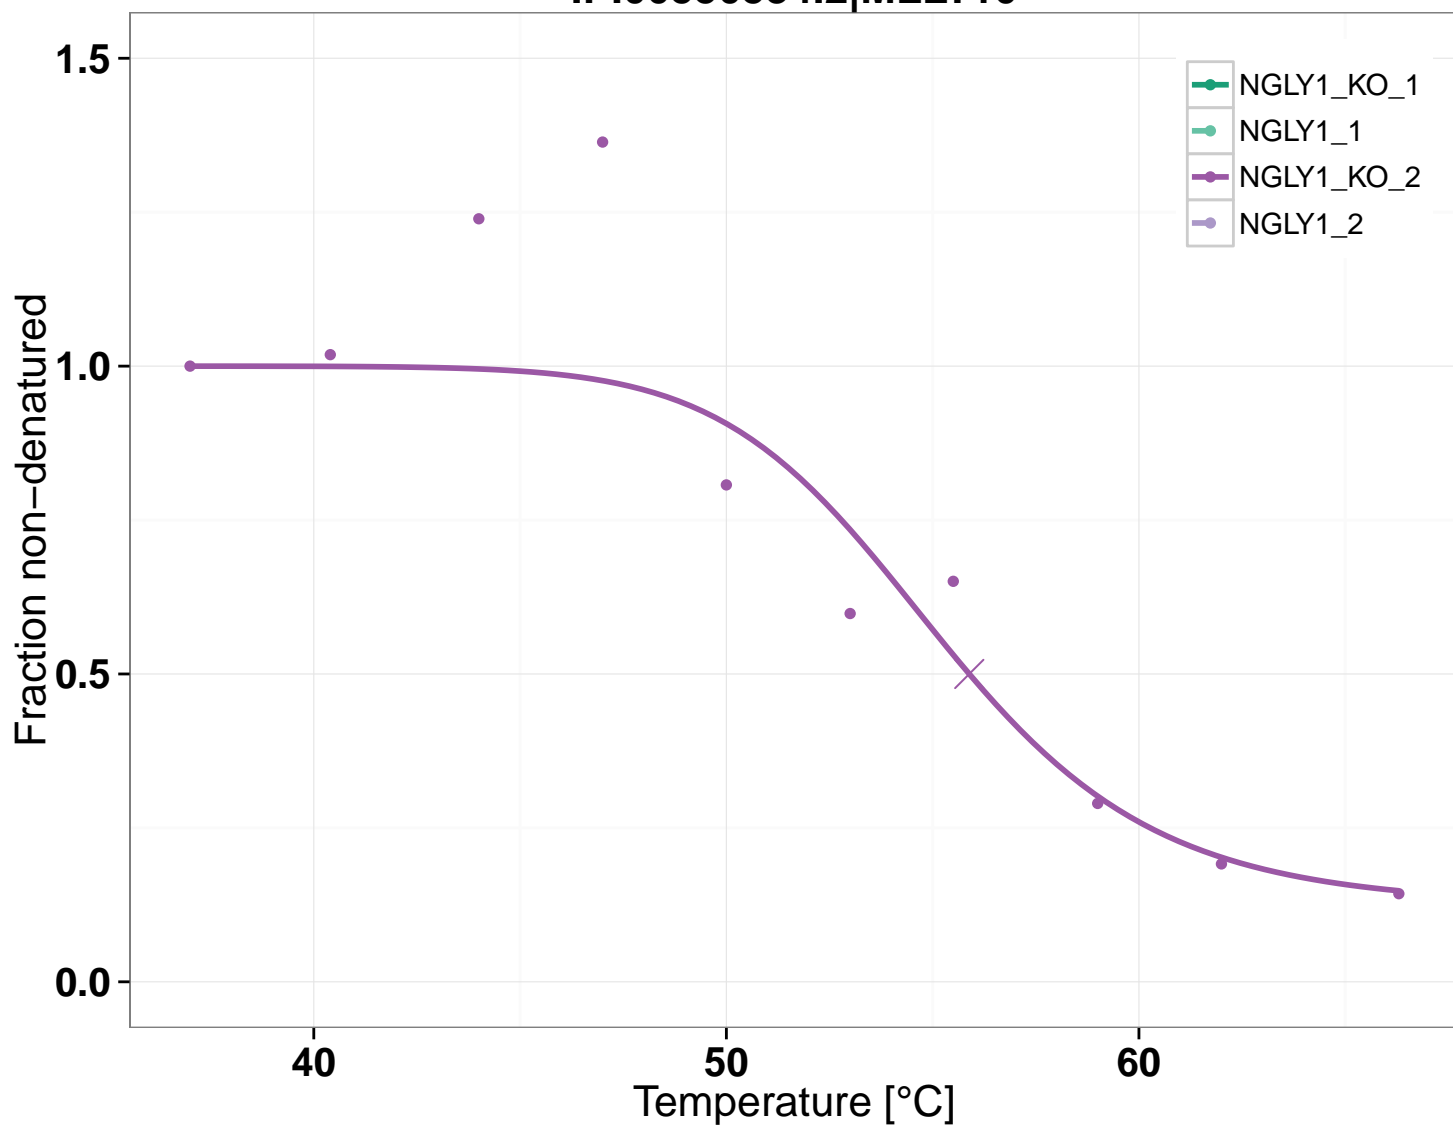

|            | meltPoint | slope  | plateau | R2   |
|------------|-----------|--------|---------|------|
| NGLY1_KO_1 | —         | —      | —       | —    |
| NGLY1_1    | —         | —      | —       | —    |
| NGLY1_KO_2 | 55.89     | -0.083 | 0.12    | 0.85 |
| NGLY1_2    | —         | —      | —       | —    |

Supplement: Supplementary file 1368 [file 1]

# IPI00554560.4|C16ORF88

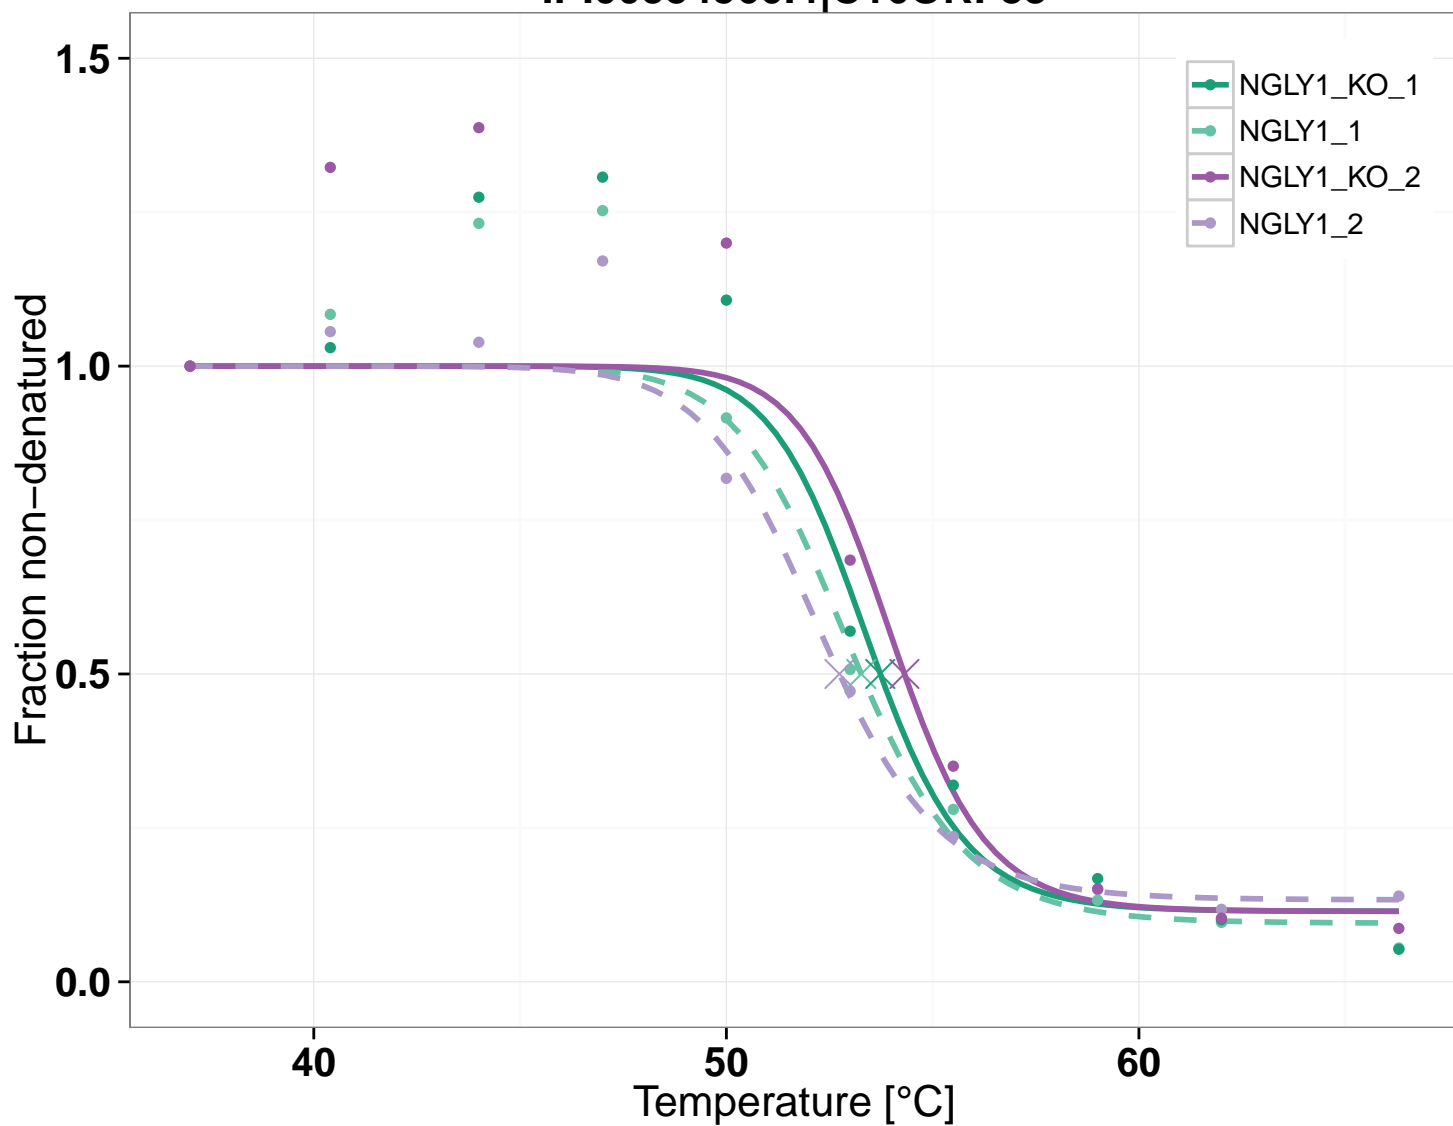

|            | meltPoint | slope | plateau | R2   |
|------------|-----------|-------|---------|------|
| NGLY1_KO_1 | 53.73     | -0.19 | 0.11    | 0.91 |
| NGLY1_1    | 53.27     | -0.16 | 0.1     | 0.94 |
| NGLY1_KO_2 | 54.32     | -0.2  | 0.11    | 0.74 |
| NGLY1_2    | 52.74     | -0.15 | 0.13    | 0.98 |

Supplement: Supplementary file 1369 [file 1]

IPI00157790.7|KIAA0368

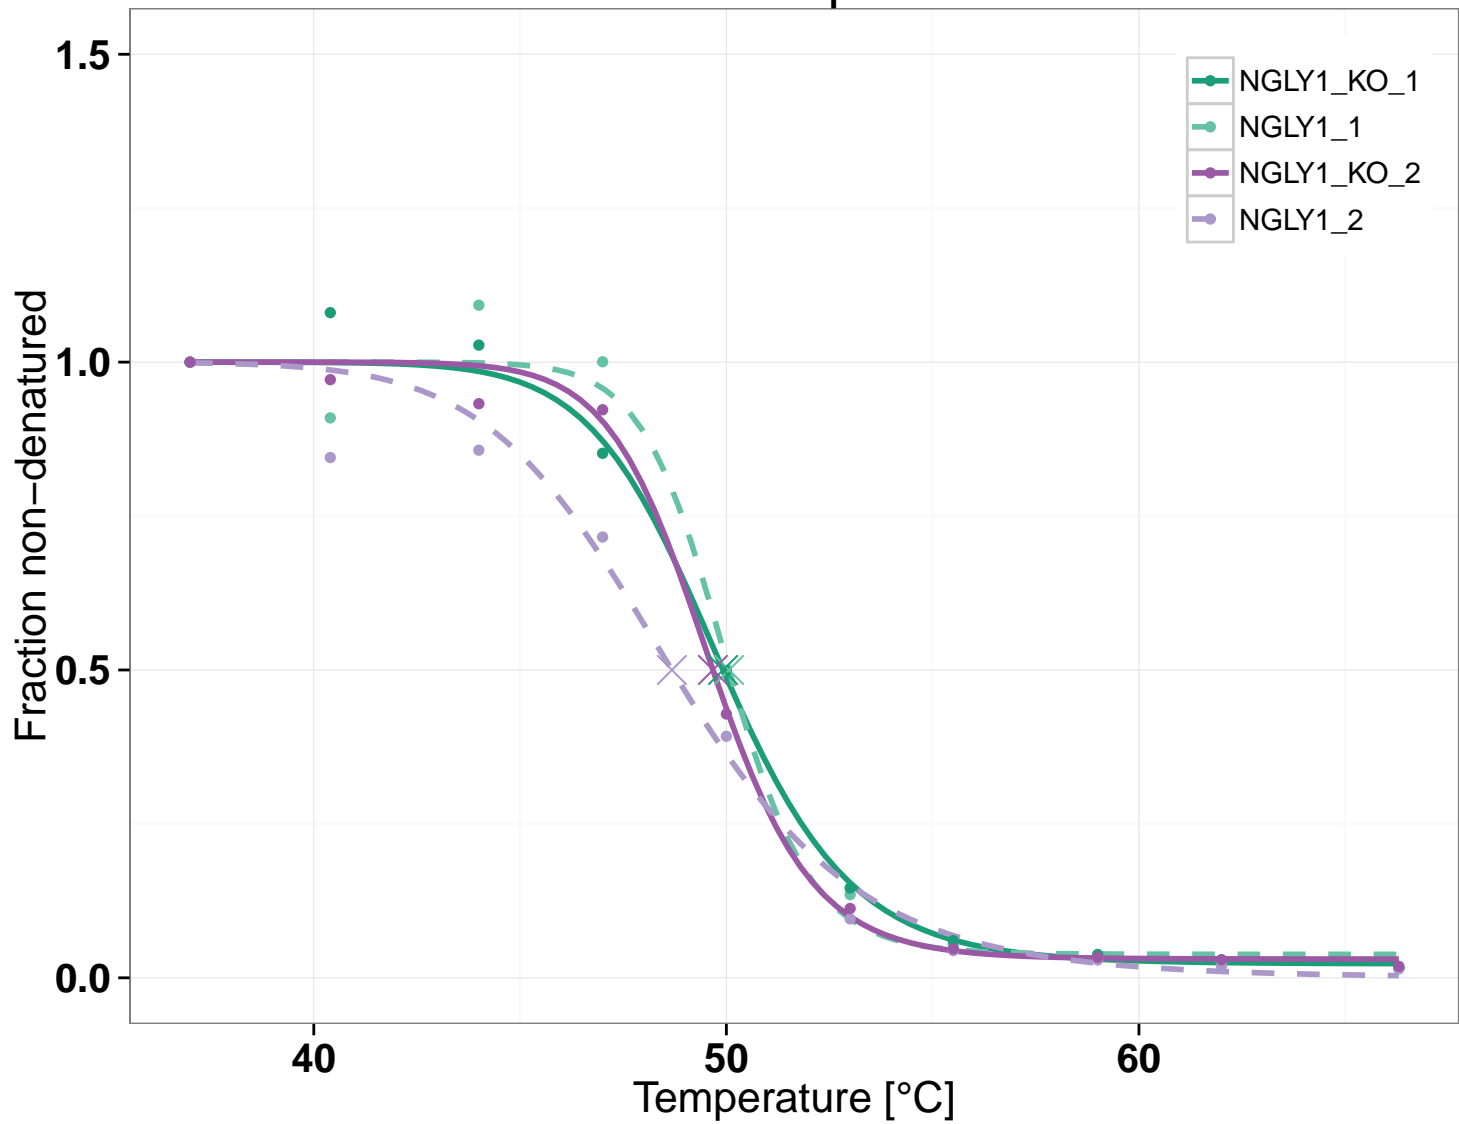

|            | meltPoint | slope | plateau | R2   |
|------------|-----------|-------|---------|------|
| NGLY1_KO_1 | 49.92     | -0.15 | 0.02    | 1    |
| NGLY1_1    | 50.07     | -0.23 | 0.04    | 0.99 |
| NGLY1_KO_2 | 49.67     | -0.2  | 0.03    | 1    |
| NGLY1_2    | 48.68     | -0.11 | 0       | 0.98 |

Supplement: Supplementary file 1370 [file 1]

IPI00399115.5|PTAR1

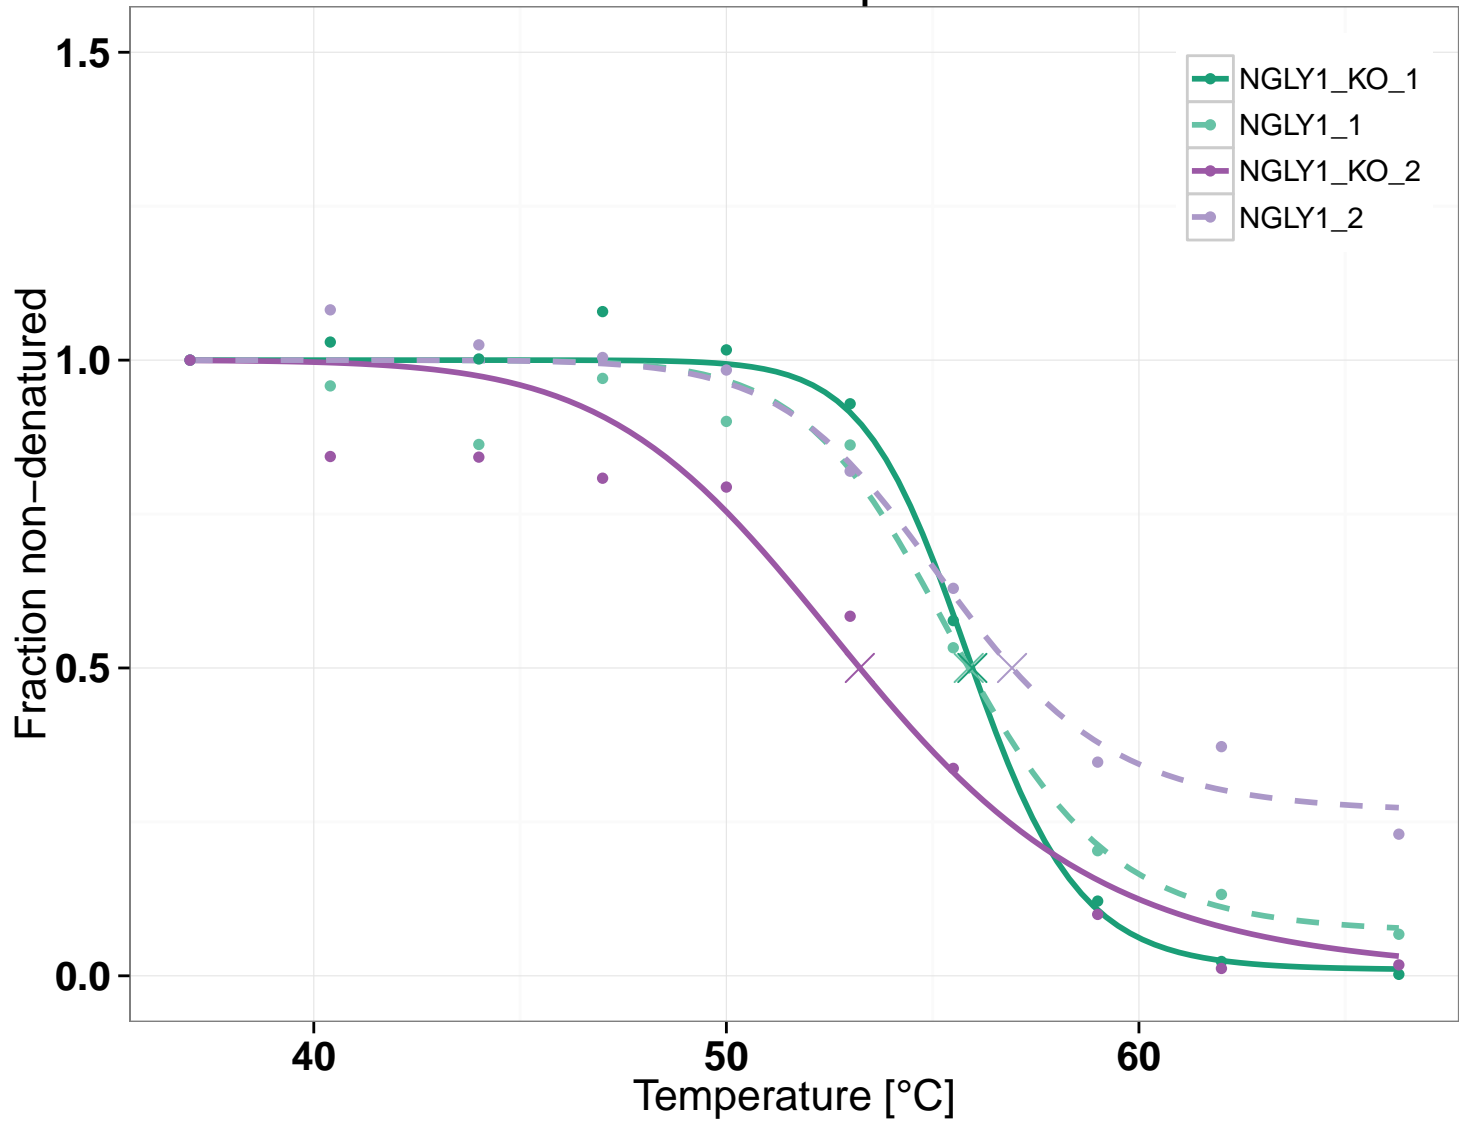

|            | meltPoint | slope  | plateau | R2   |
|------------|-----------|--------|---------|------|
| NGLY1_KO_1 | 55.96     | -0.19  | 0.01    | 1    |
| NGLY1_1    | 55.87     | -0.12  | 0.07    | 0.98 |
| NGLY1_KO_2 | 53.24     | -0.082 | 0       | 0.95 |
| NGLY1_2    | 56.92     | -0.091 | 0.27    | 0.98 |

Supplement: Supplementary file 1371 [file 1]

# IPI00796170.1|RENBP

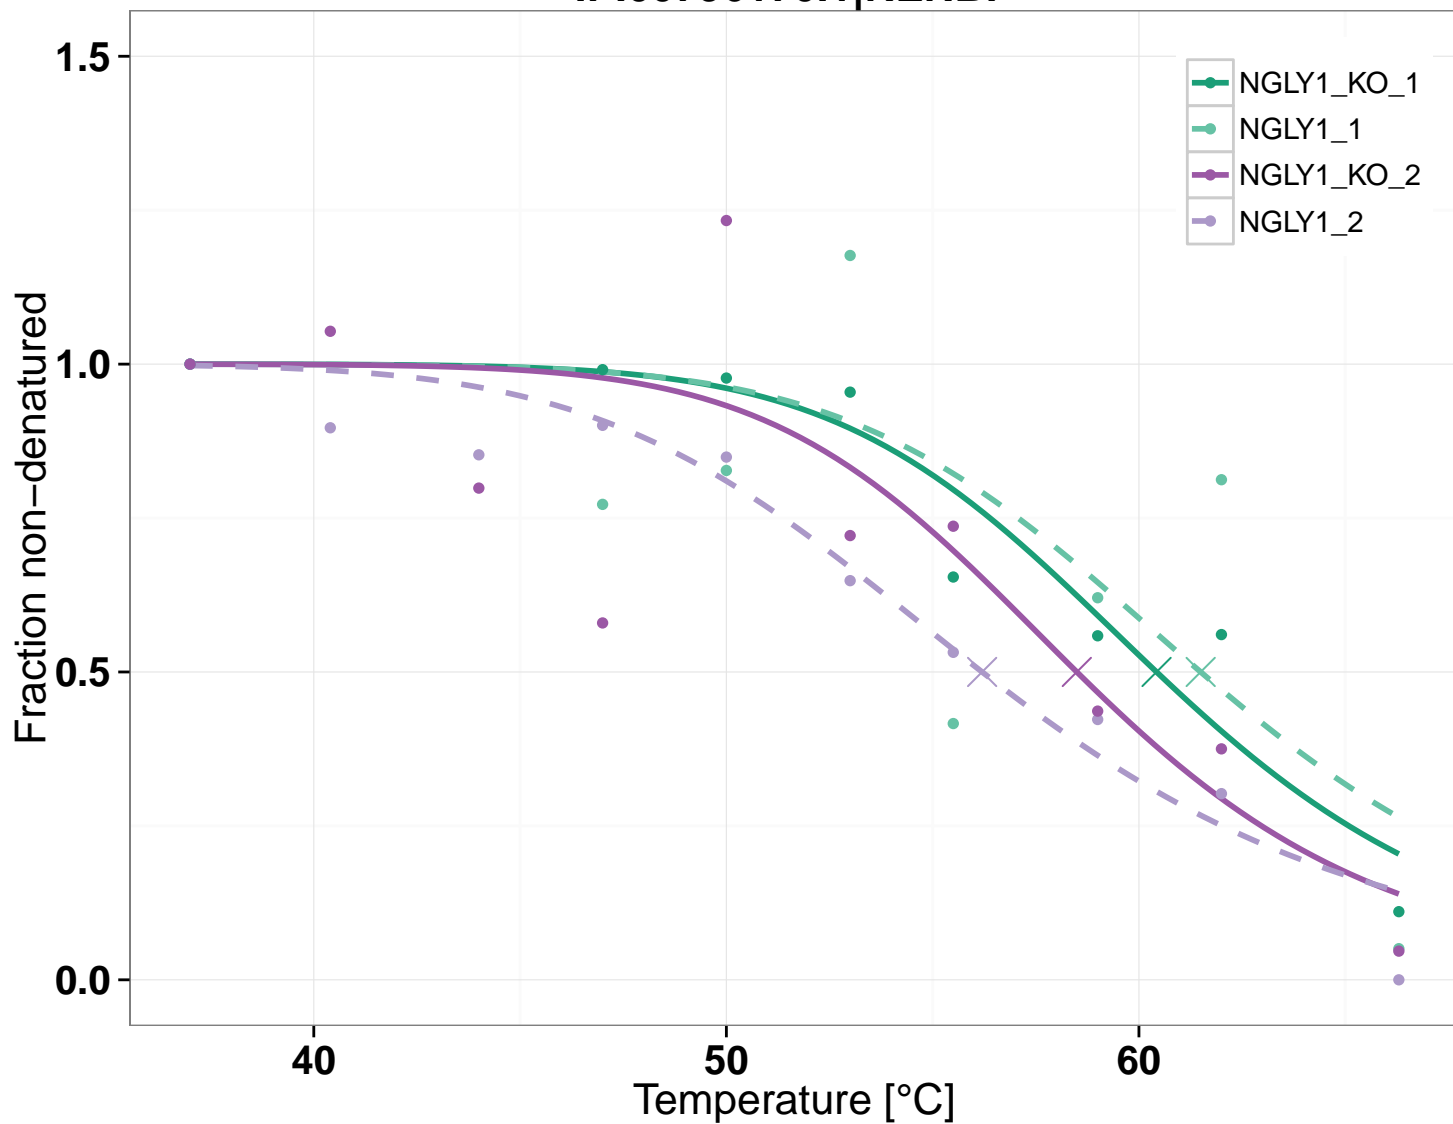

|            | meltPoint | slope  | plateau | R2   |
|------------|-----------|--------|---------|------|
| NGLY1_KO_1 | 60.43     | -0.065 | 0       | 0.44 |
| NGLY1_1    | 61.5      | -0.059 | 0       | 0.1  |
| NGLY1_KO_2 | 58.49     | -0.067 | 0       | 0.72 |
| NGLY1_2    | 56.2      | -0.054 | 0       | 0.95 |

Supplement: Supplementary file 1372 [file 1]

IPI00335541.4|TIMELESS

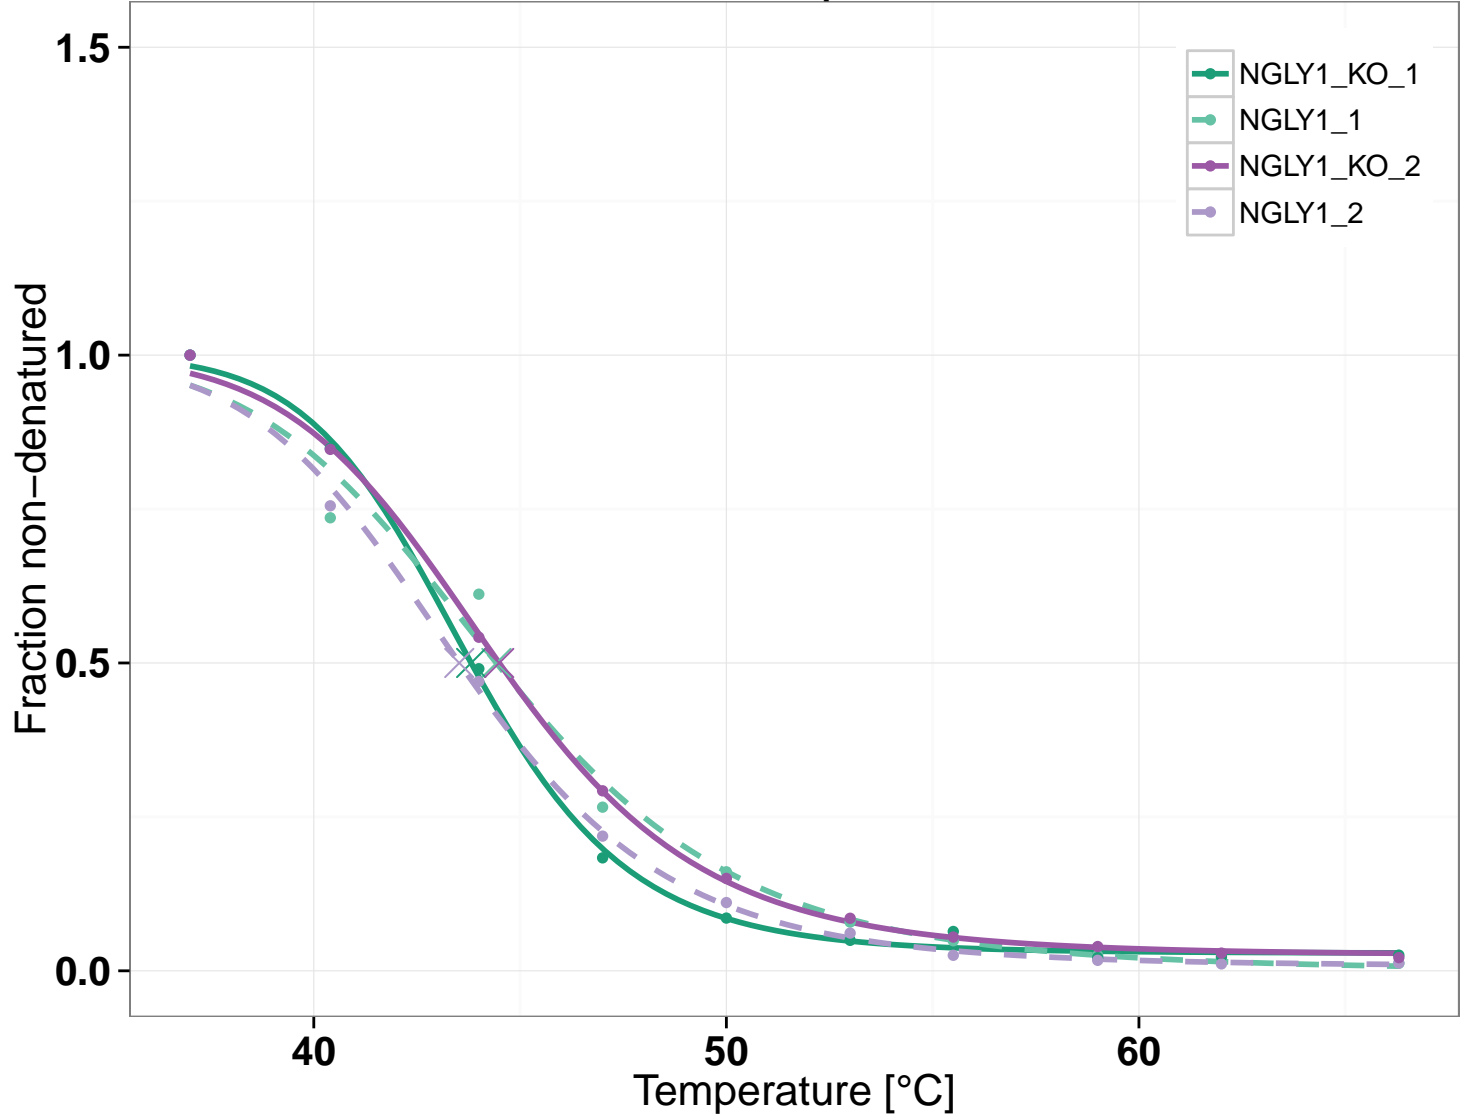

|            | meltPoint | slope  | plateau | R2   |
|------------|-----------|--------|---------|------|
| NGLY1_KO_1 | 43.81     | -0.12  | 0.03    | 1    |
| NGLY1_1    | 44.43     | -0.085 | 0       | 0.99 |
| NGLY1_KO_2 | 44.49     | -0.097 | 0.03    | 1    |
| NGLY1_2    | 43.53     | -0.098 | 0.01    | 1    |

Supplement: Supplementary file 1373 [file 1]

# IPI00306531.3|NCK2

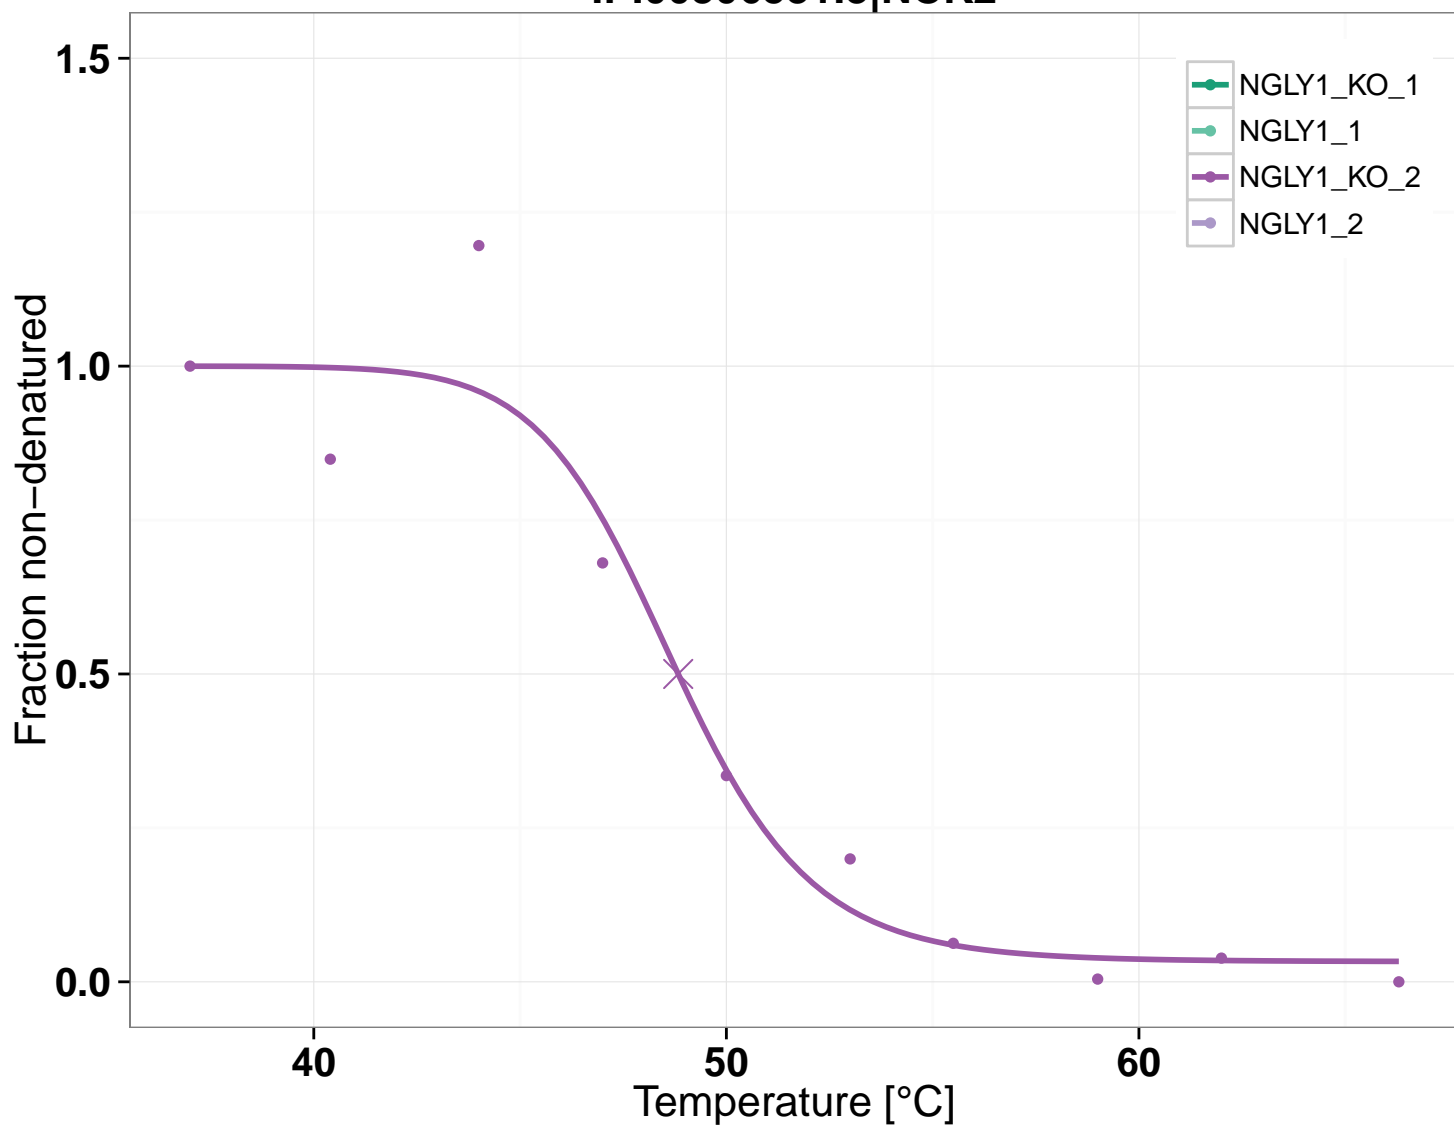

|            | meltPoint | slope | plateau | R2   |
|------------|-----------|-------|---------|------|
| NGLY1_KO_1 | —         | —     | —       | —    |
| NGLY1_1    | —         | —     | —       | —    |
| NGLY1_KO_2 | 48.83     | -0.15 | 0.03    | 0.95 |
| NGLY1_2    | —         | —     | —       | —    |

Supplement: Supplementary file 1374 [file 1]

IPI00386199.2|C19ORF6

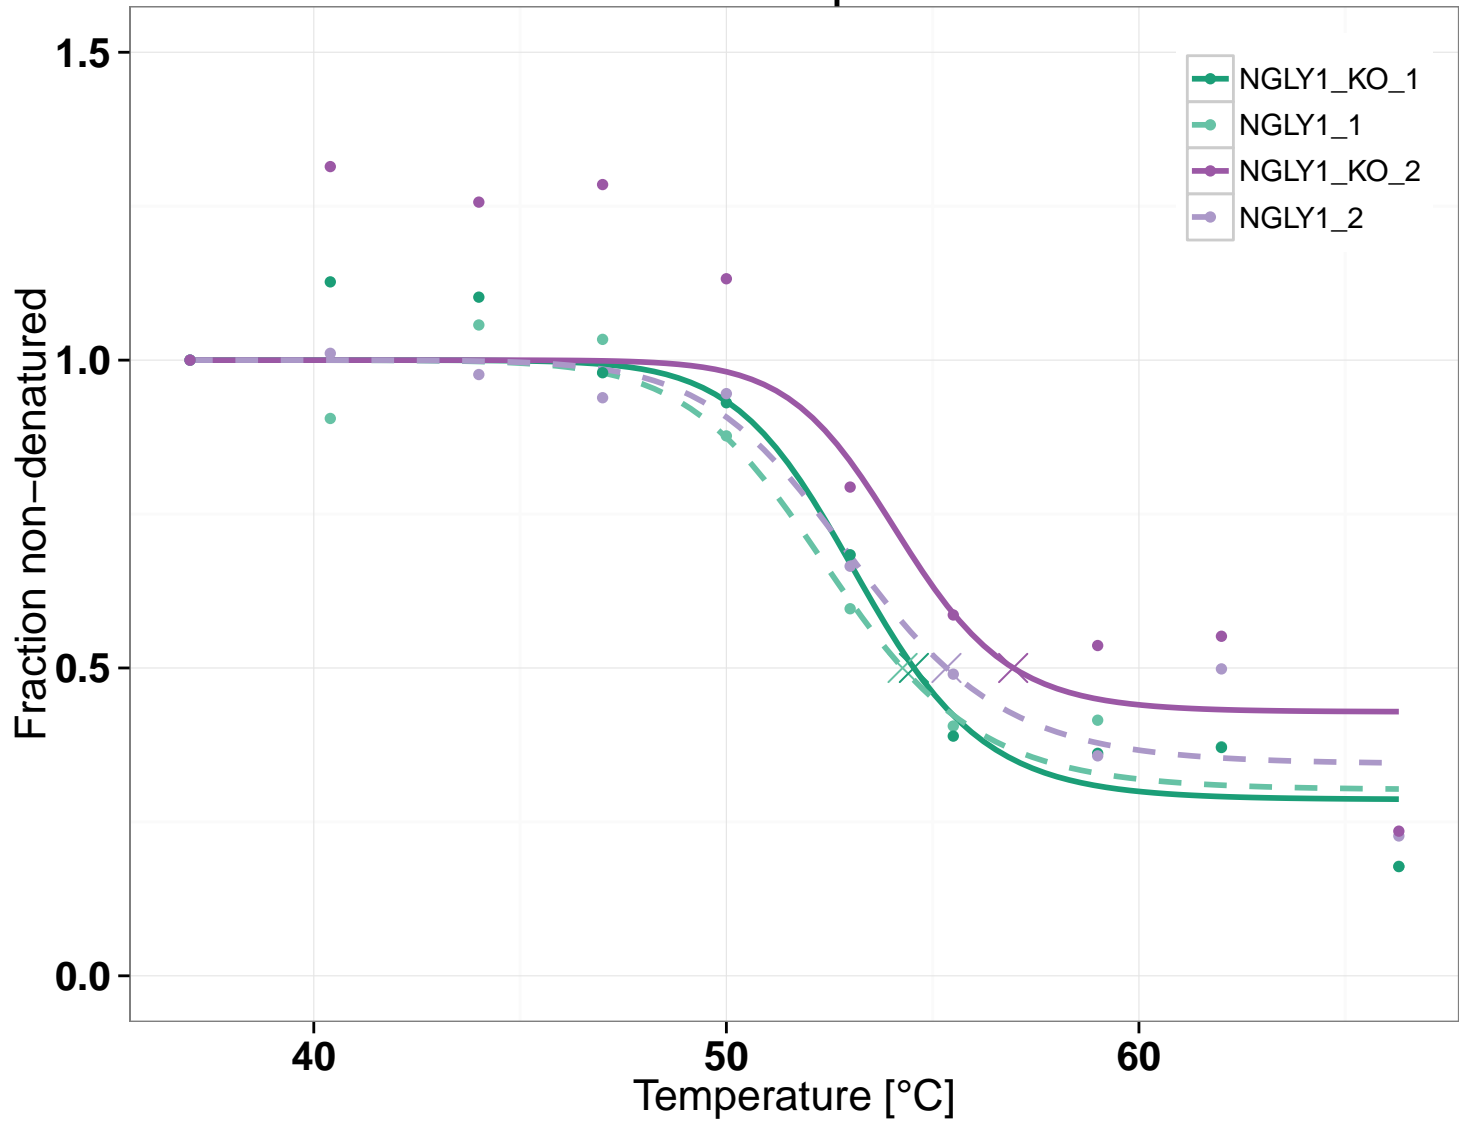

|            | meltPoint | slope  | plateau | R2   |
|------------|-----------|--------|---------|------|
| NGLY1_KO_1 | 54.55     | -0.12  | 0.29    | 0.96 |
| NGLY1_1    | 54.27     | -0.098 | 0.3     | 0.96 |
| NGLY1_KO_2 | 56.95     | -0.11  | 0.43    | 0.75 |
| NGLY1_2    | 55.33     | -0.09  | 0.34    | 0.95 |

Supplement: Supplementary file 1375 [file 1]

IPI00219358.7|MPI

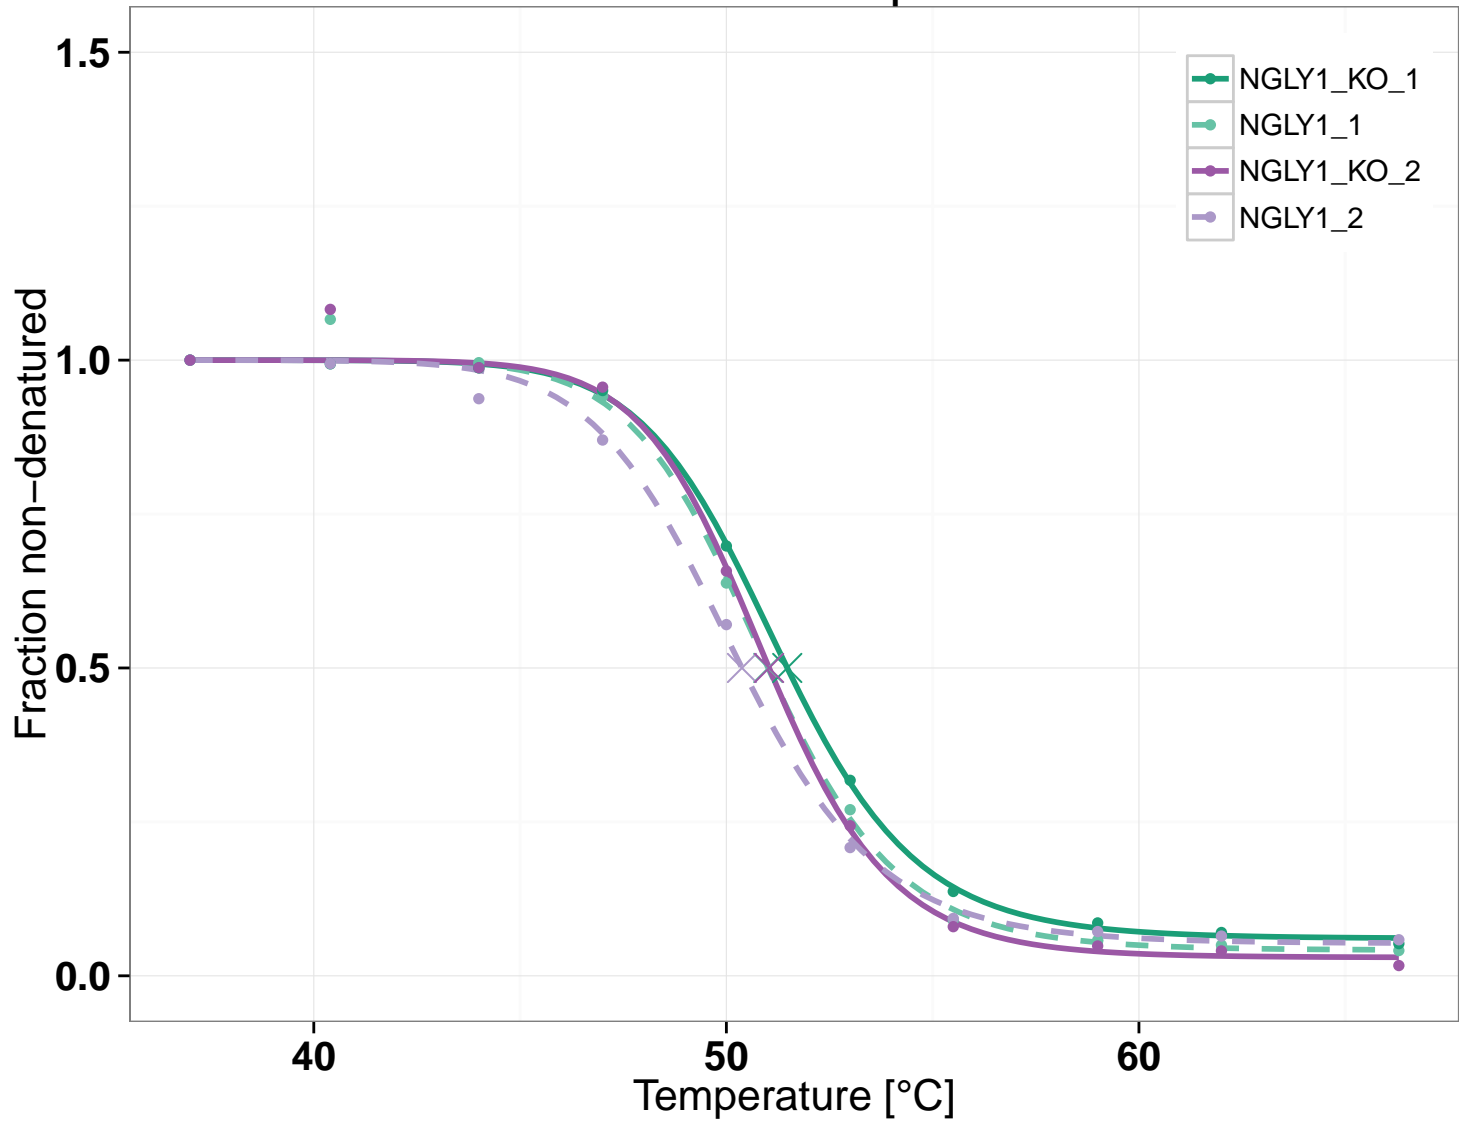

|            | meltPoint | slope | plateau | R2 |
|------------|-----------|-------|---------|----|
| NGLY1_KO_1 | 51.48     | -0.14 | 0.06    | 1  |
| NGLY1_1    | 51.01     | -0.15 | 0.04    | 1  |
| NGLY1_KO_2 | 51.04     | -0.16 | 0.03    | 1  |
| NGLY1_2    | 50.38     | -0.14 | 0.05    | 1  |

Supplement: Supplementary file 1376 [file 1]

# IPI00215920.8|ARF6

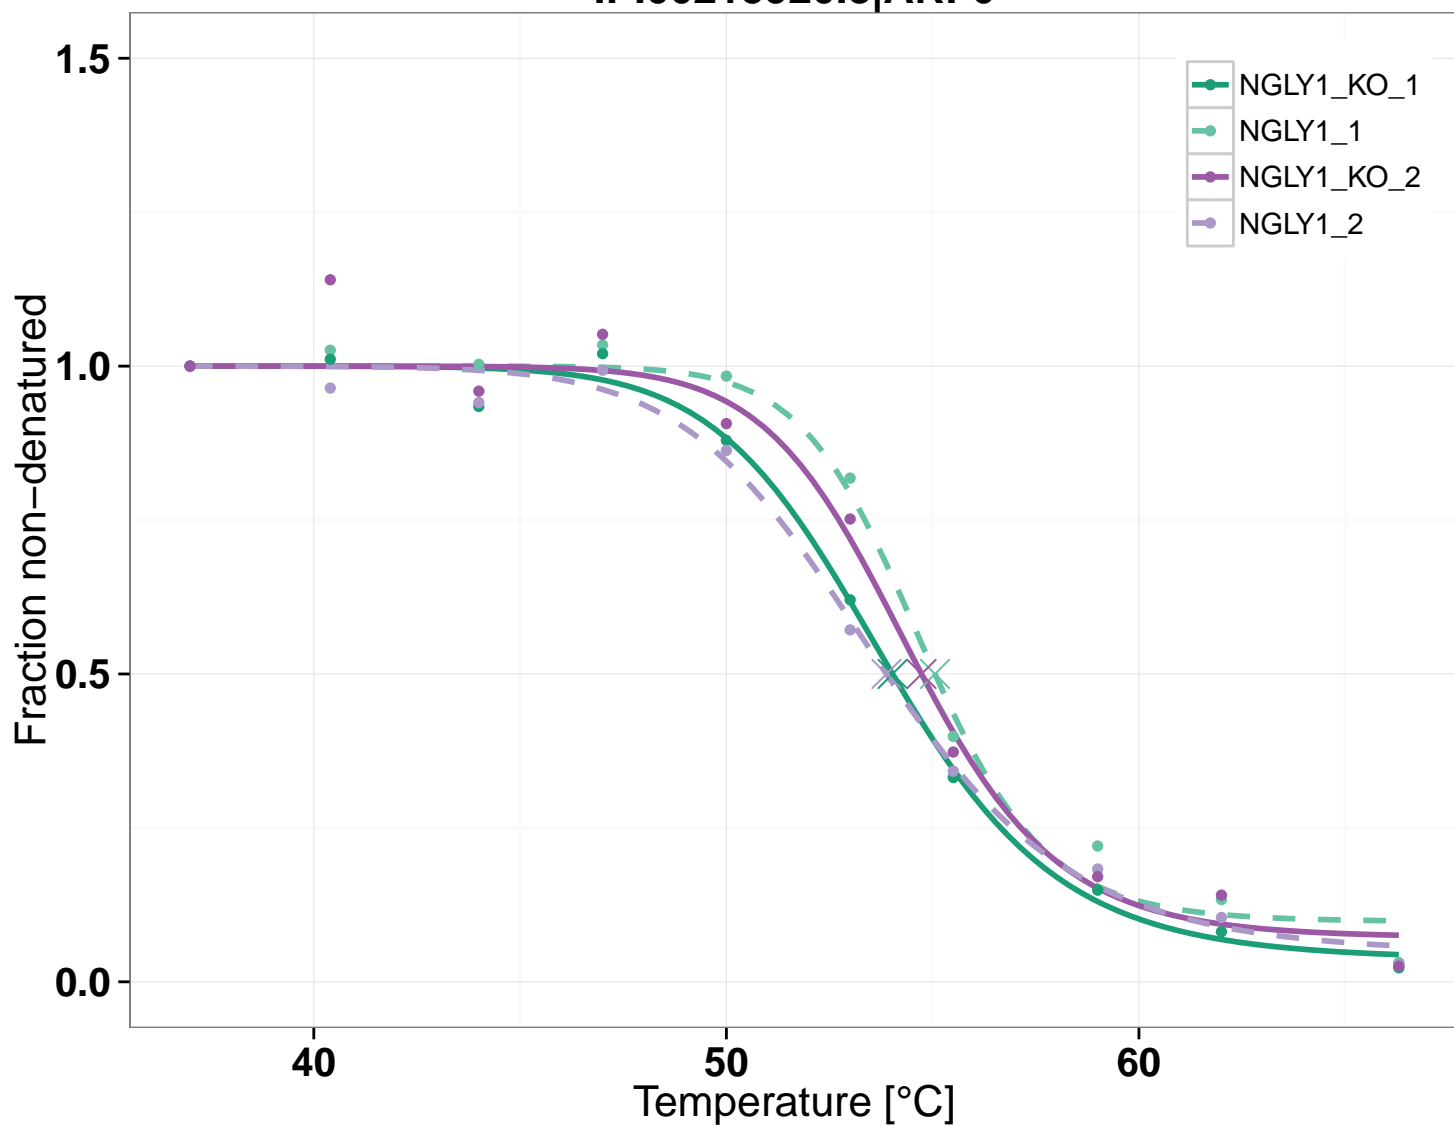

|            | meltPoint | slope | plateau | R2   |
|------------|-----------|-------|---------|------|
| NGLY1_KO_1 | 54.03     | -0.12 | 0.04    | 1    |
| NGLY1_1    | 55.06     | -0.15 | 0.1     | 0.99 |
| NGLY1_KO_2 | 54.73     | -0.13 | 0.07    | 0.98 |
| NGLY1_2    | 53.88     | -0.1  | 0.05    | 0.99 |

Supplement: Supplementary file 1377 [file 1]

IPI00007750.1|TUBA4A

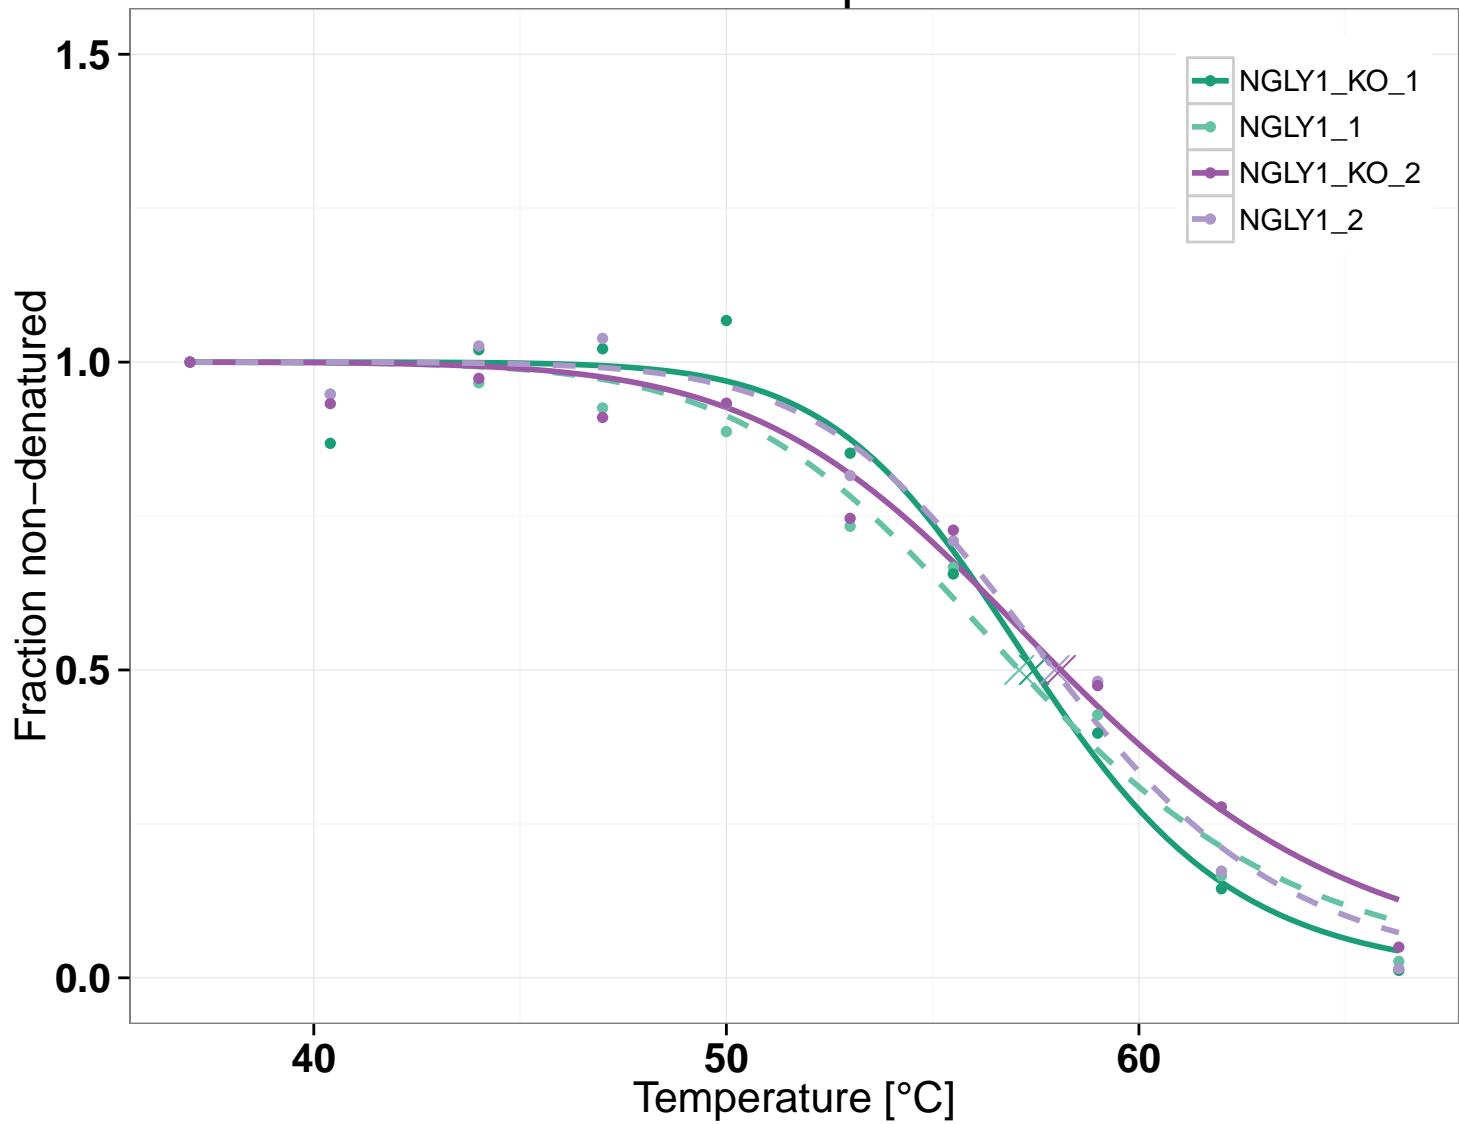

|            | meltPoint | slope  | plateau | R2   |
|------------|-----------|--------|---------|------|
| NGLY1_KO_1 | 57.46     | -0.1   | 0       | 0.98 |
| NGLY1_1    | 57.1      | -0.073 | 0       | 0.98 |
| NGLY1_KO_2 | 58.11     | -0.068 | 0       | 0.98 |
| NGLY1_2    | 57.96     | -0.088 | 0       | 0.98 |

Supplement: Supplementary file 1378 [file 1]

IPI00022745.1|MVD

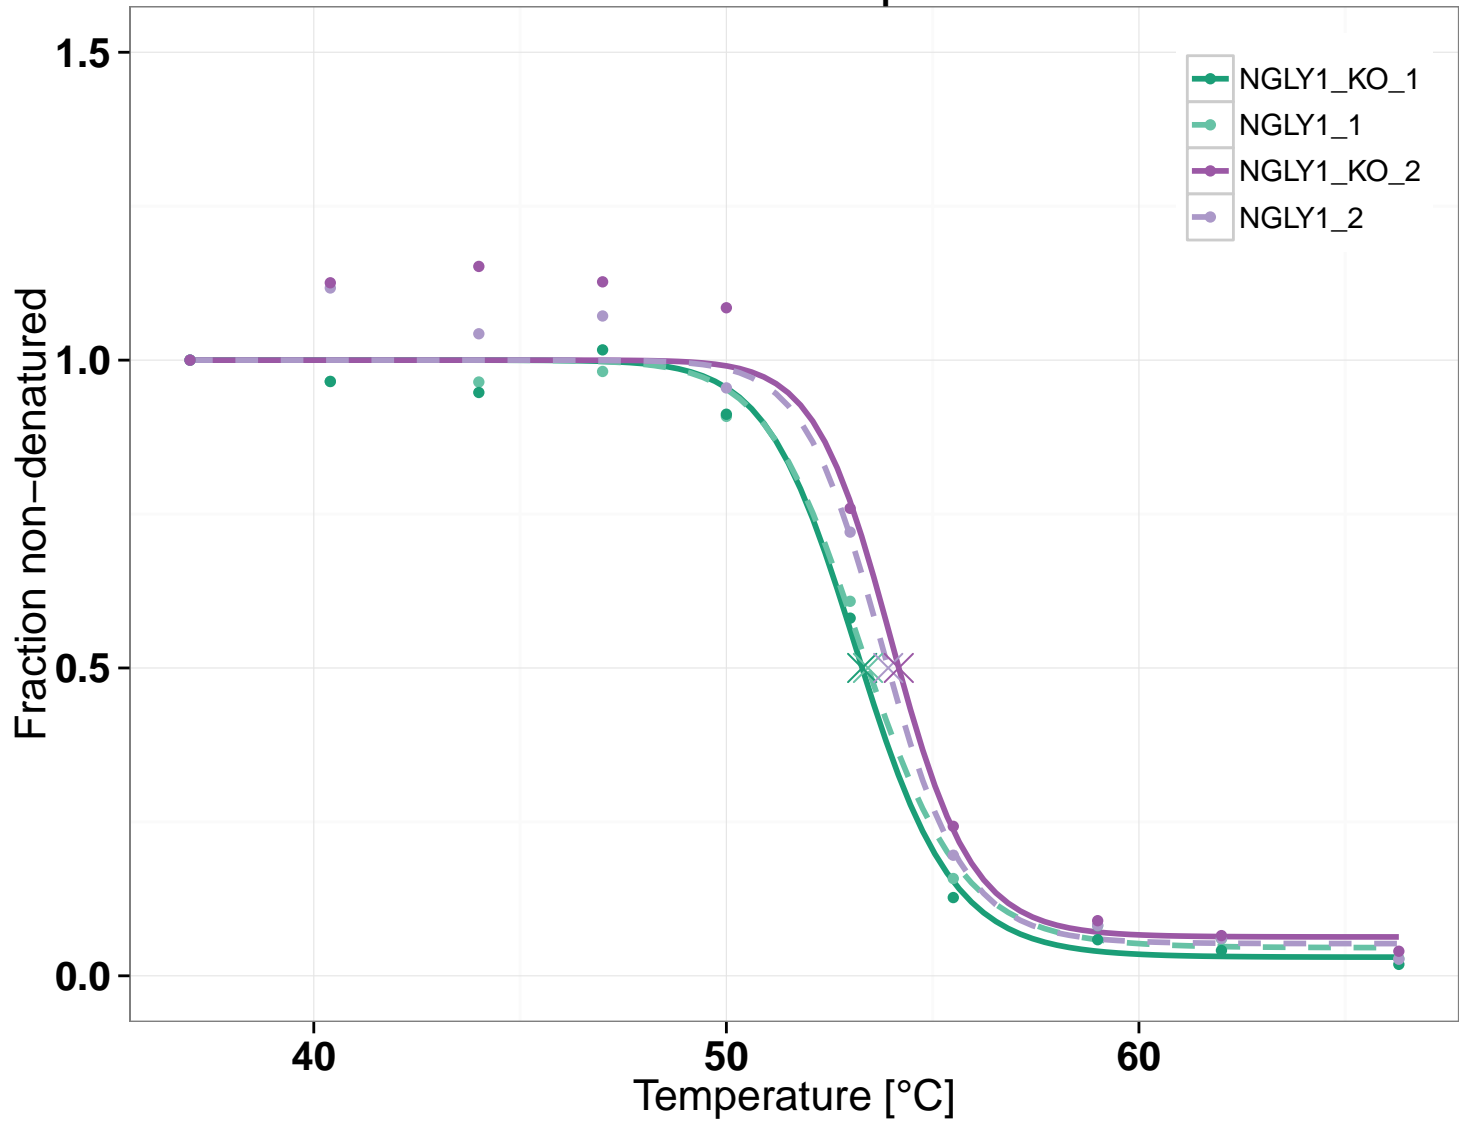

|            | meltPoint | slope | plateau | R2   |
|------------|-----------|-------|---------|------|
| NGLY1_KO_1 | 53.29     | -0.21 | 0.03    | 1    |
| NGLY1_1    | 53.43     | -0.2  | 0.05    | 1    |
| NGLY1_KO_2 | 54.18     | -0.25 | 0.06    | 0.97 |
| NGLY1_2    | 53.92     | -0.24 | 0.05    | 0.99 |

Supplement: Supplementary file 1379 [file 1]

# IPI00641924.2|MRPS9

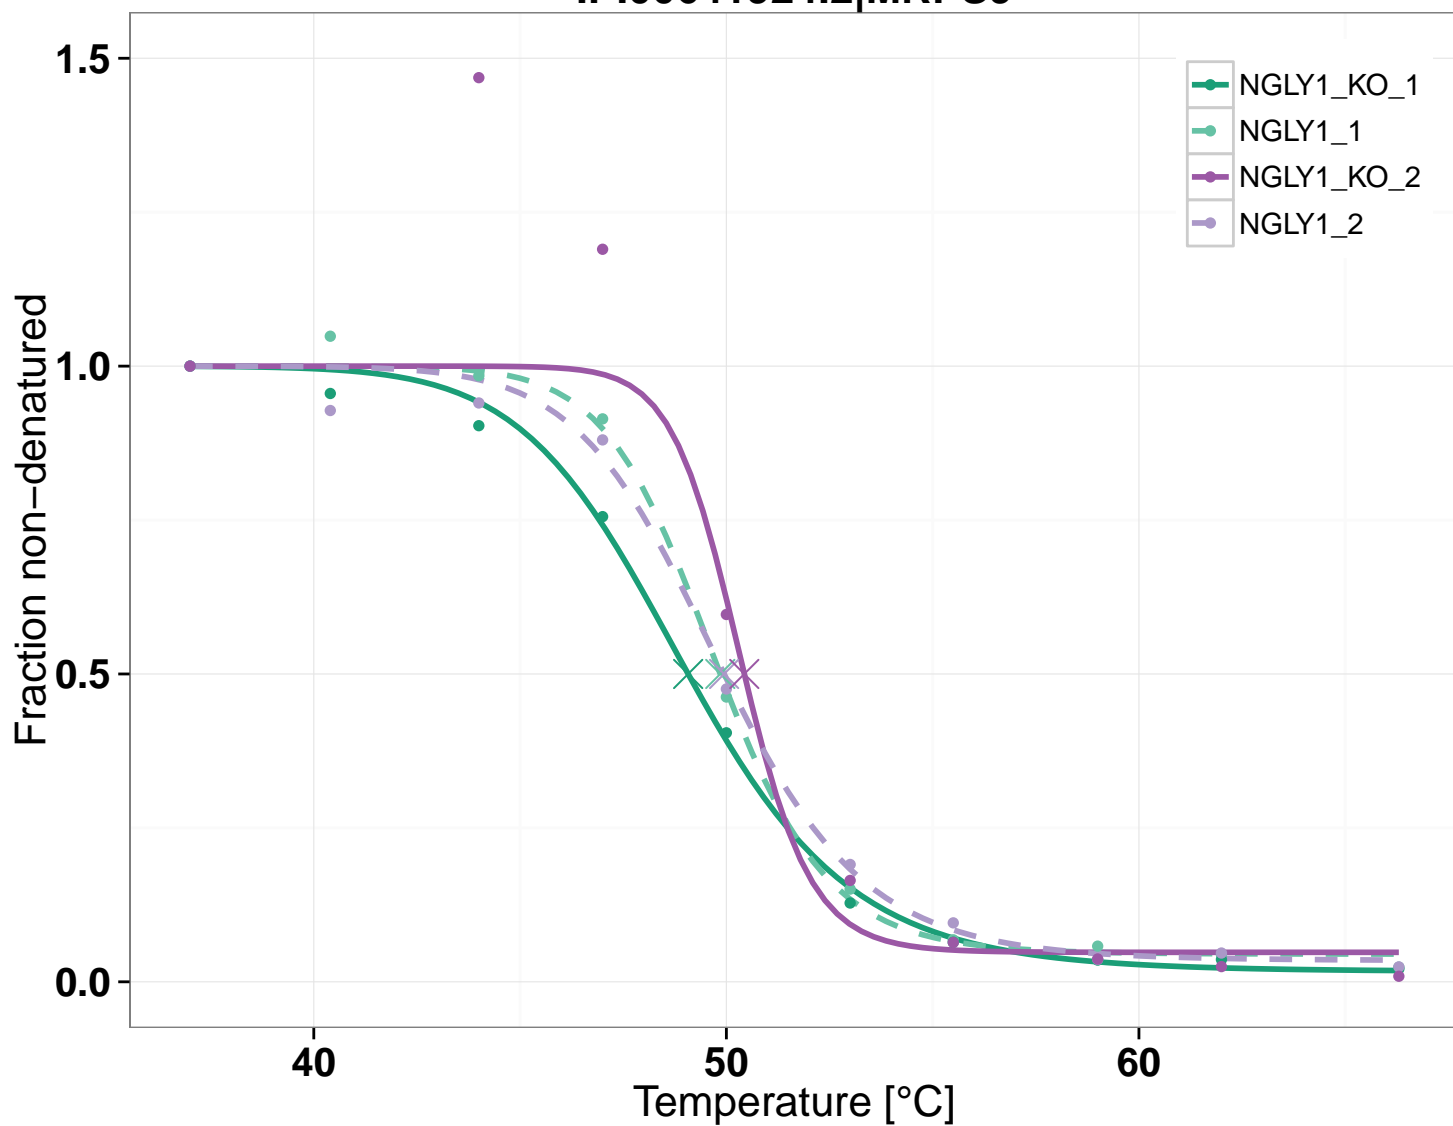

|            | meltPoint | slope | plateau | R2   |
|------------|-----------|-------|---------|------|
| NGLY1_KO_1 | 49.07     | -0.12 | 0.02    | 1    |
| NGLY1_1    | 49.85     | -0.18 | 0.04    | 1    |
| NGLY1_KO_2 | 50.43     | -0.28 | 0.05    | 0.83 |
| NGLY1_2    | 49.95     | -0.14 | 0.03    | 1    |

Supplement: Supplementary file 1380 [file 1]

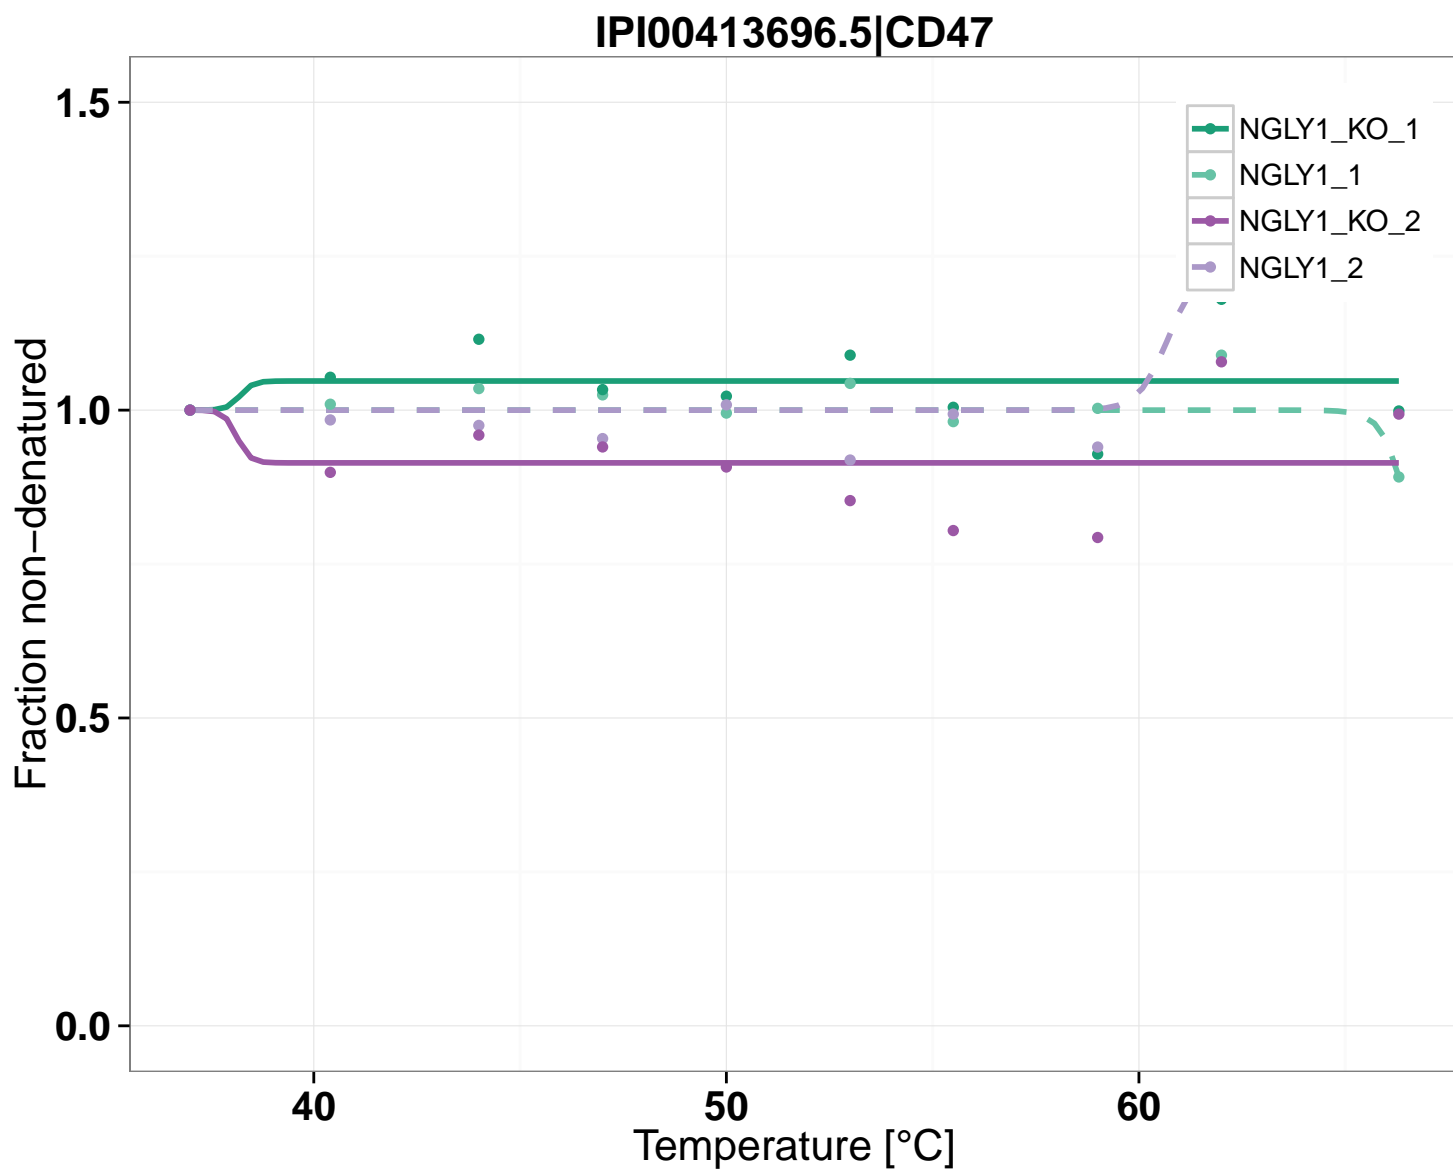

|            | meltPoint | slope | plateau | R2   |
|------------|-----------|-------|---------|------|
| NGLY1_KO_1 | –         | 0.077 | 1.05    | 0.04 |
| NGLY1_1    | –         | –     | 0.07    | 0.48 |
| NGLY1_KO_2 | –         | –0.14 | 0.91    | 0.09 |
| NGLY1_2    | –         | 0.16  | 1.24    | 0.88 |

Supplement: Supplementary file 1381 [file 1]

# IPI00872942.1|SIRT2

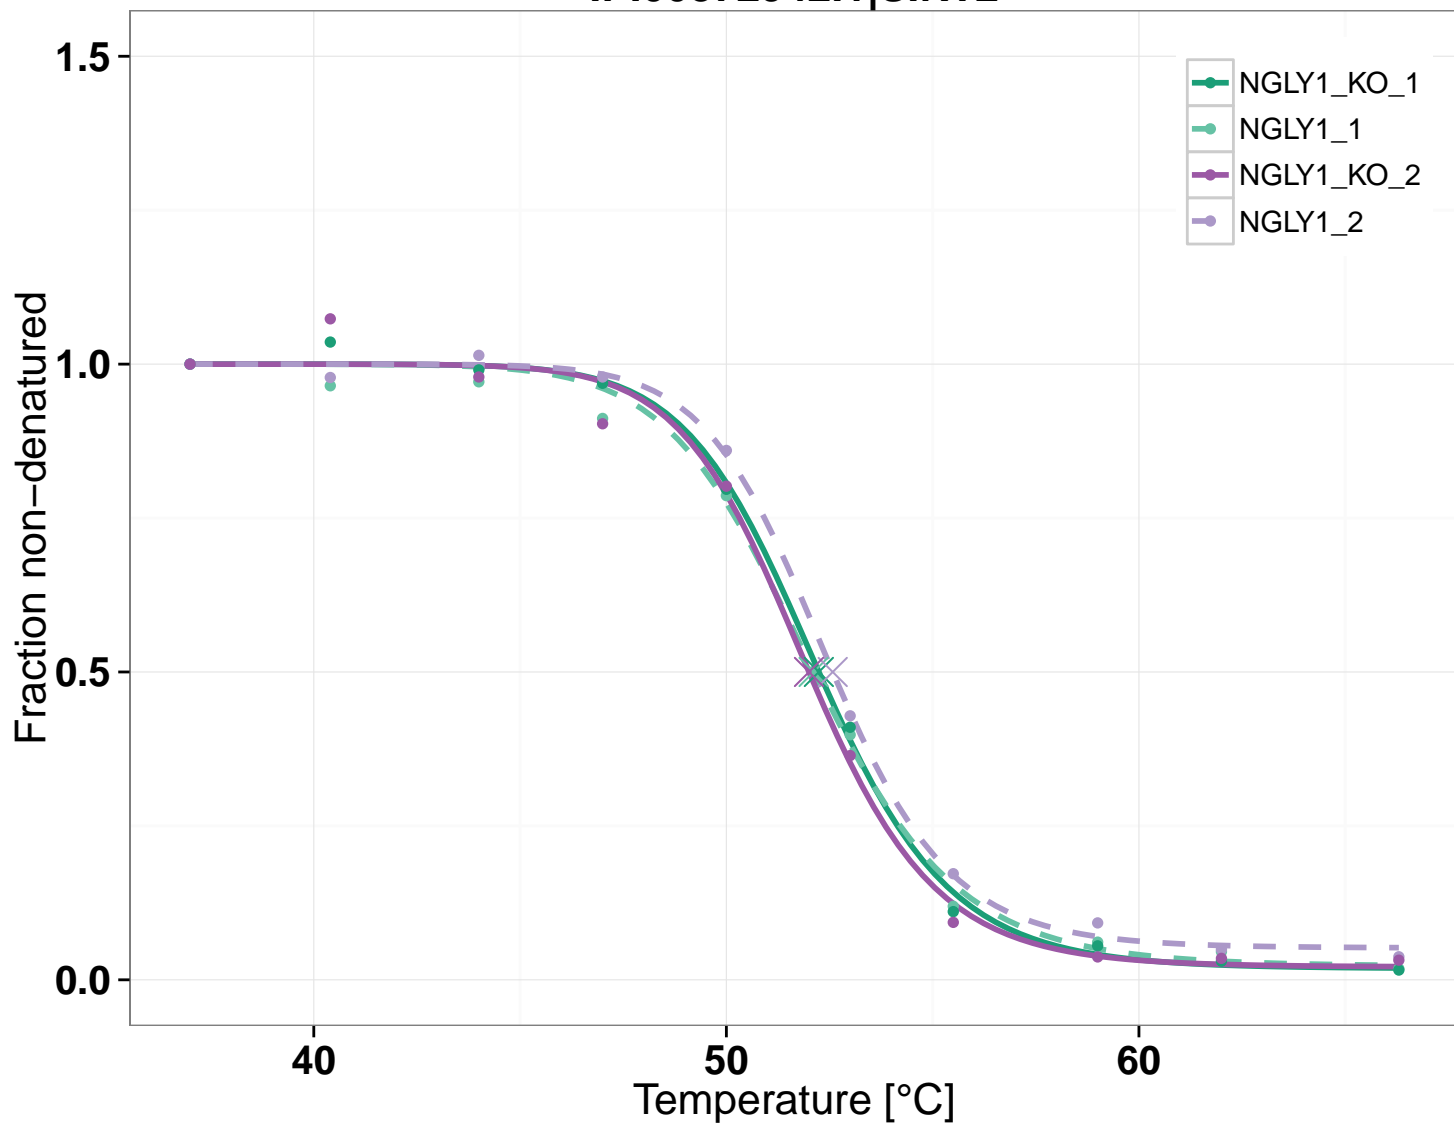

|            | meltPoint | slope | plateau | R2   |
|------------|-----------|-------|---------|------|
| NGLY1_KO_1 | 52.24     | -0.15 | 0.02    | 1    |
| NGLY1_1    | 52.11     | -0.14 | 0.02    | 1    |
| NGLY1_KO_2 | 52        | -0.16 | 0.02    | 0.99 |
| NGLY1_2    | 52.58     | -0.16 | 0.05    | 1    |

Supplement: Supplementary file 1382 [file 1]

IPI00555744.6|RPL14

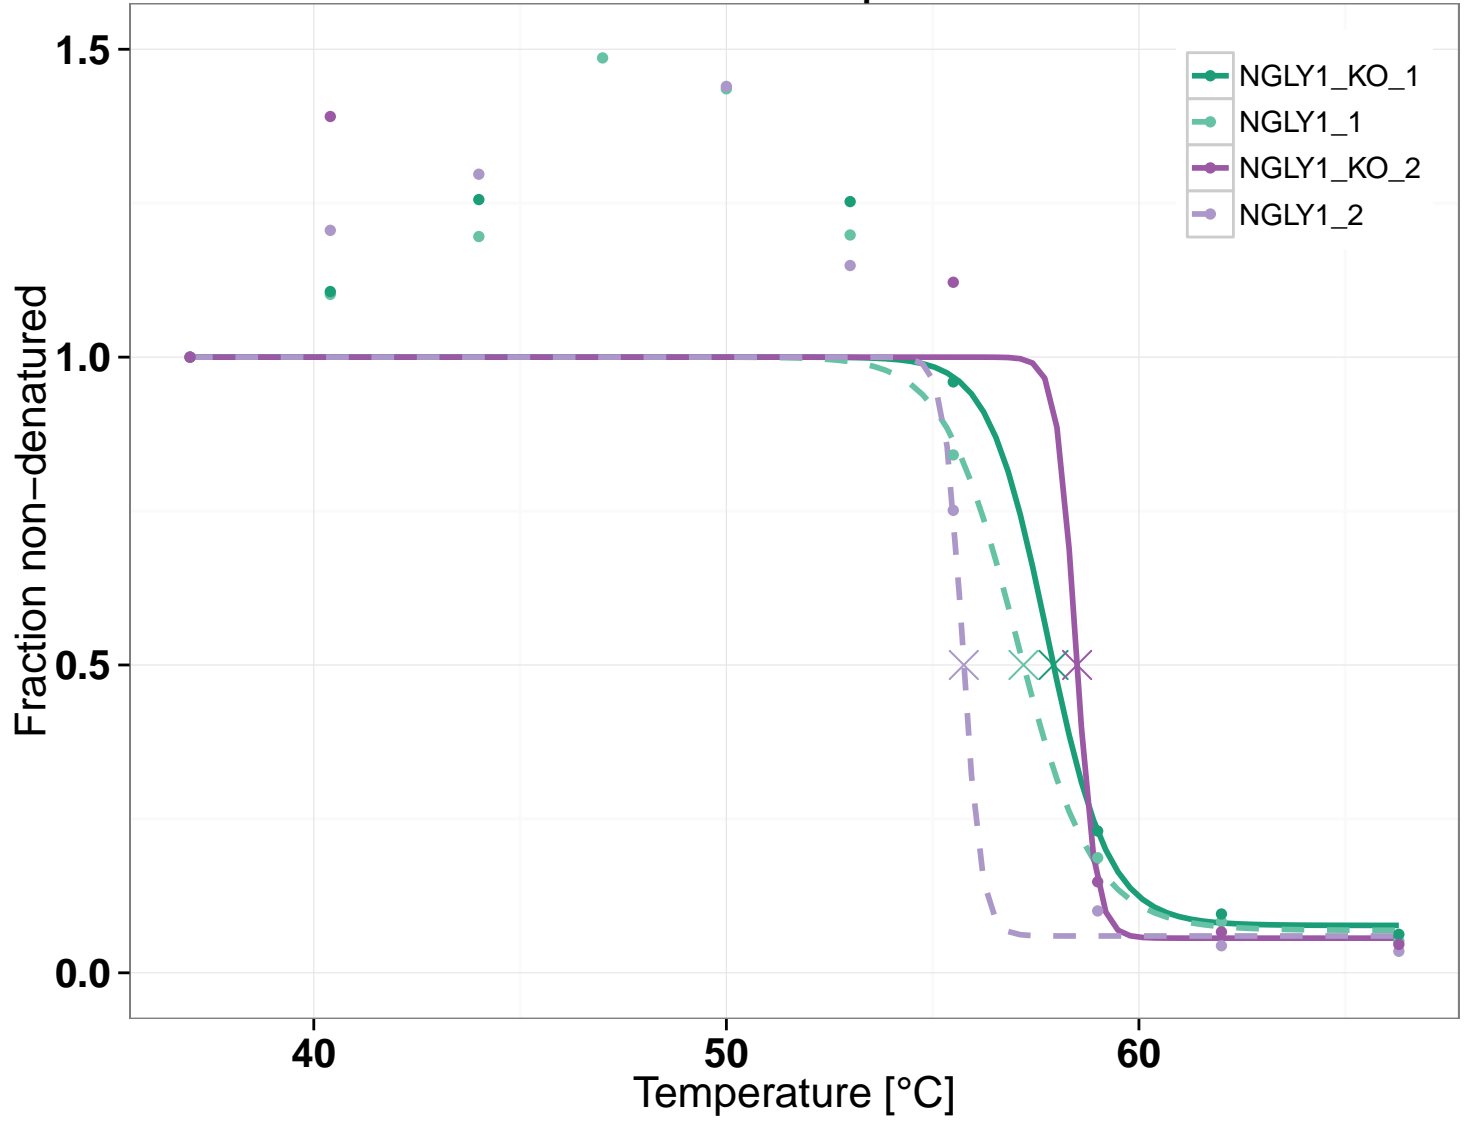

|            | meltPoint | slope | plateau | R2   |
|------------|-----------|-------|---------|------|
| NGLY1_KO_1 | 57.93     | -0.32 | 0.08    | 0.72 |
| NGLY1_1    | 57.2      | -0.26 | 0.07    | 0.81 |
| NGLY1_KO_2 | 58.5      | -1    | 0.06    | 0.48 |
| NGLY1_2    | 55.76     | -1.1  | 0.06    | 0.79 |

Supplement: Supplementary file 1383 [file 1]

# IPI00300078.6|PWP2

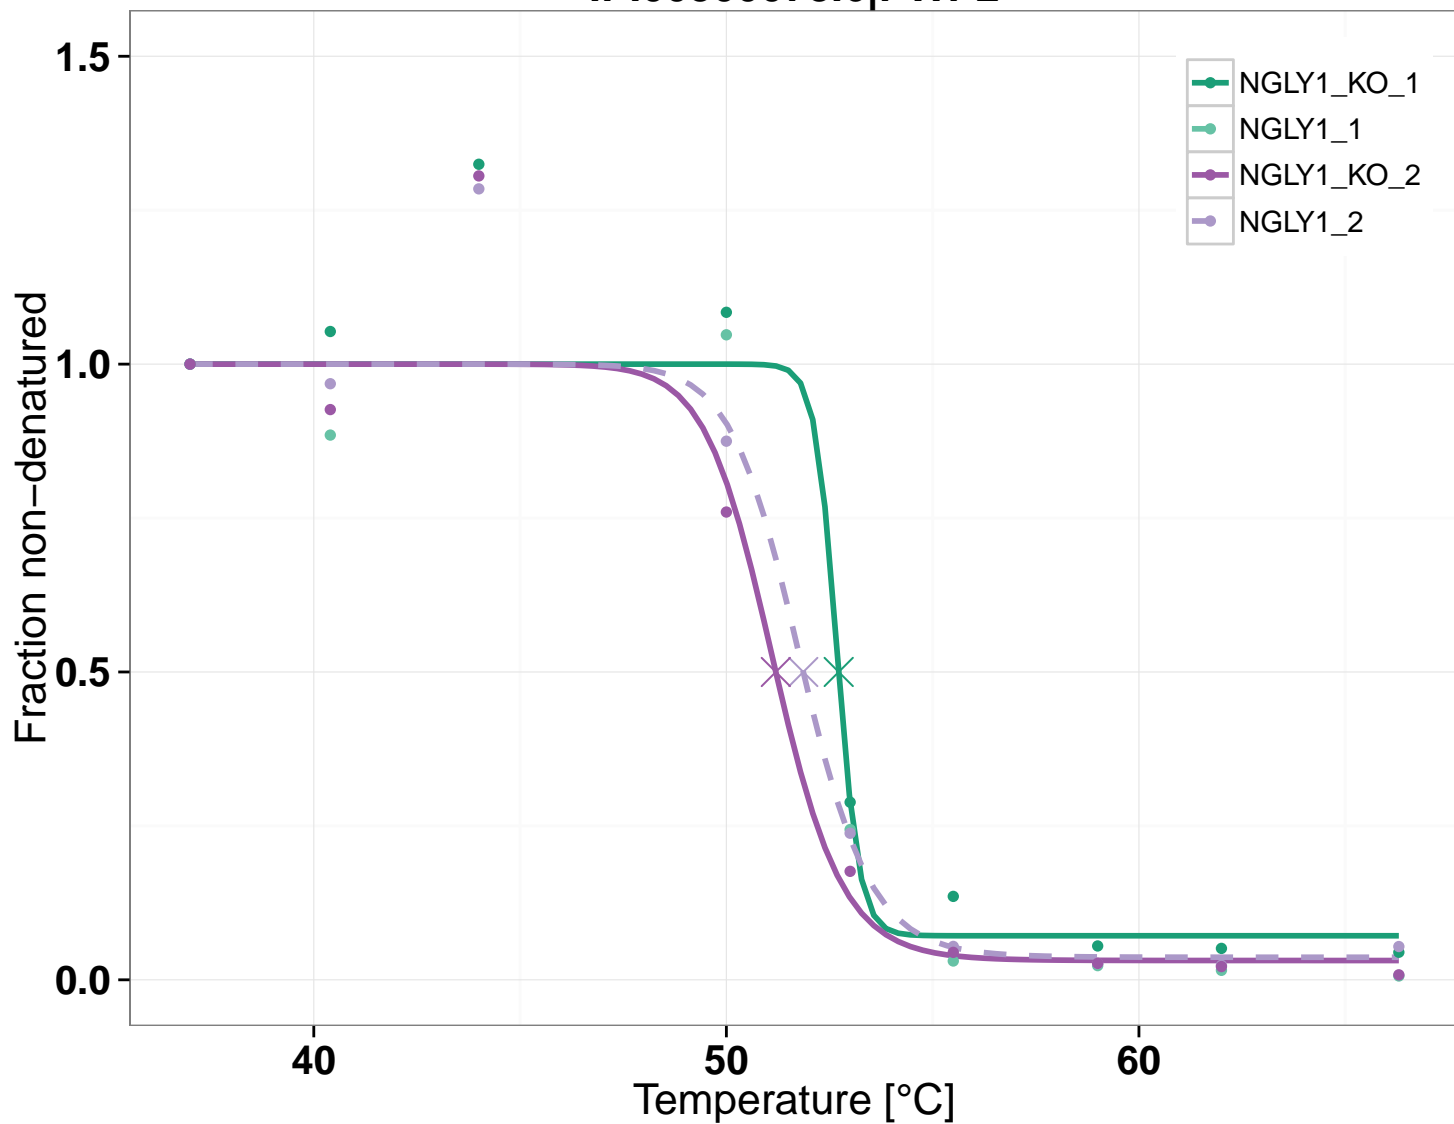

|            | meltPoint | slope | plateau | R2   |
|------------|-----------|-------|---------|------|
| NGLY1_KO_1 | 52.72     | -0.87 | 0.07    | 0.85 |
| NGLY1_1    | -         | -     | -       | -    |
| NGLY1_KO_2 | 51.2      | -0.29 | 0.03    | 0.8  |
| NGLY1_2    | 51.86     | -0.28 | 0.04    | 0.85 |

Supplement: Supplementary file 1384 [file 1]

IPI00170778.4|FNBP4

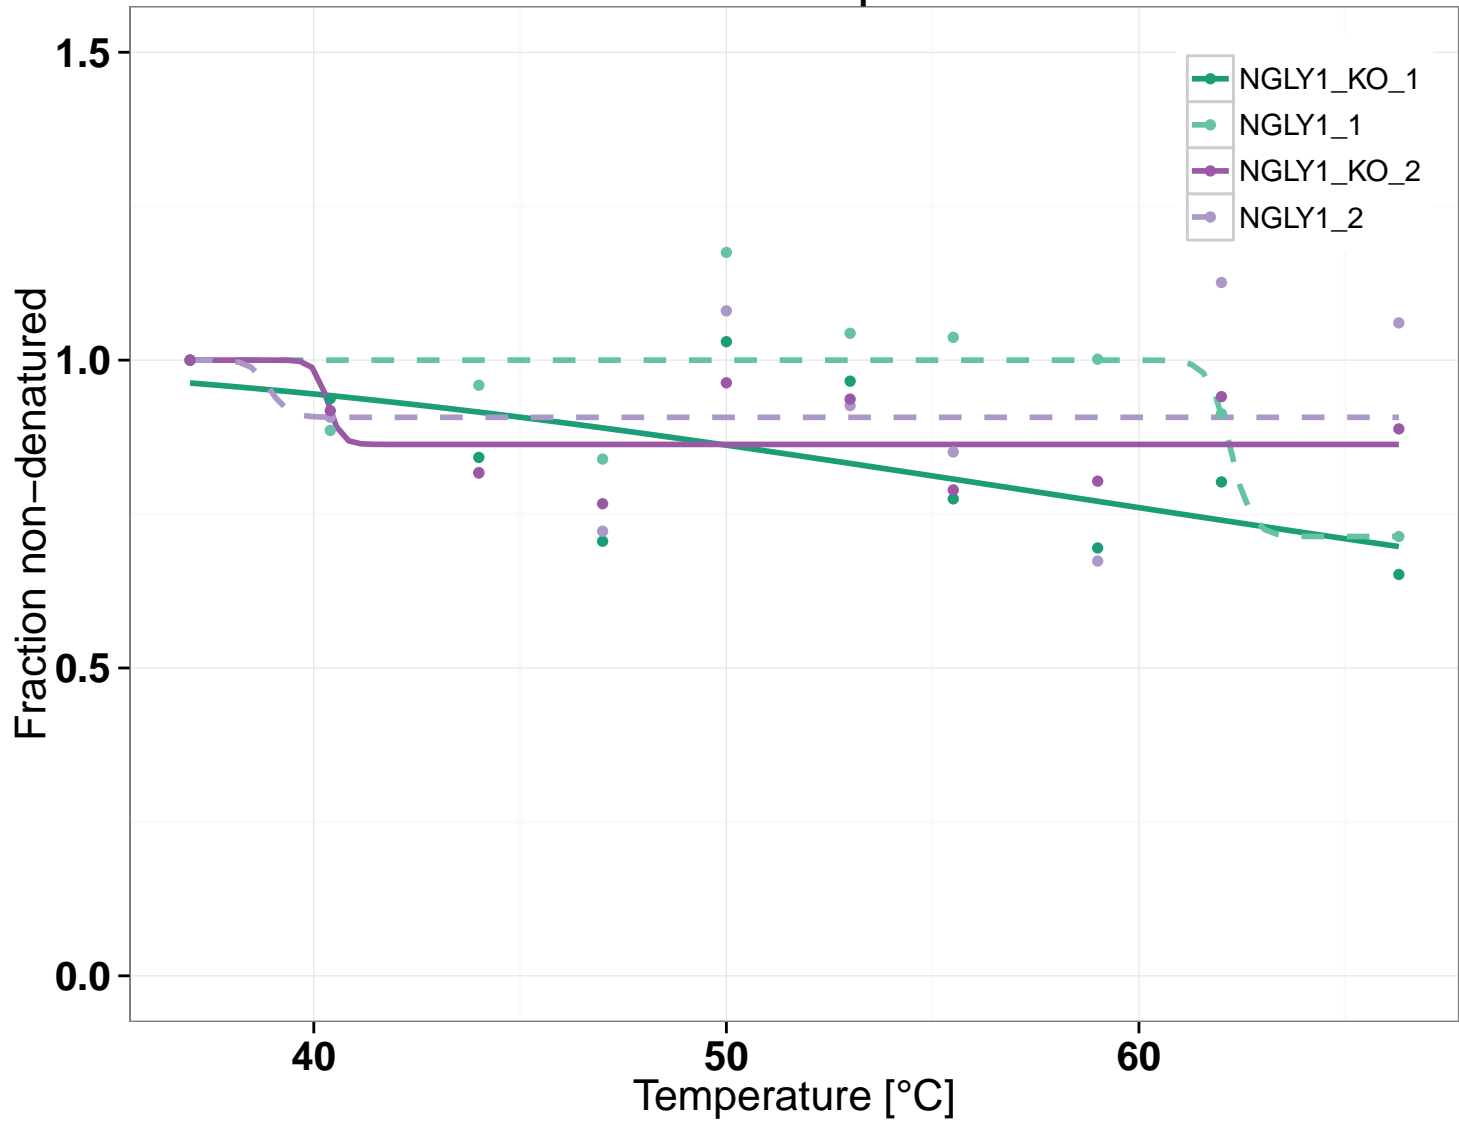

|            | meltPoint | slope | plateau | R2   |
|------------|-----------|-------|---------|------|
| NGLY1_KO_1 | –         | –0.01 | 0       | 0.4  |
| NGLY1_1    | –         | –0.28 | 0.71    | 0.49 |
| NGLY1_KO_2 | –         | –0.21 | 0.86    | 0.3  |
| NGLY1_2    | –         | –0.1  | 0.91    | 0.04 |

Supplement: Supplementary file 1385 [file 1]

IPI00848138.1|MON1B

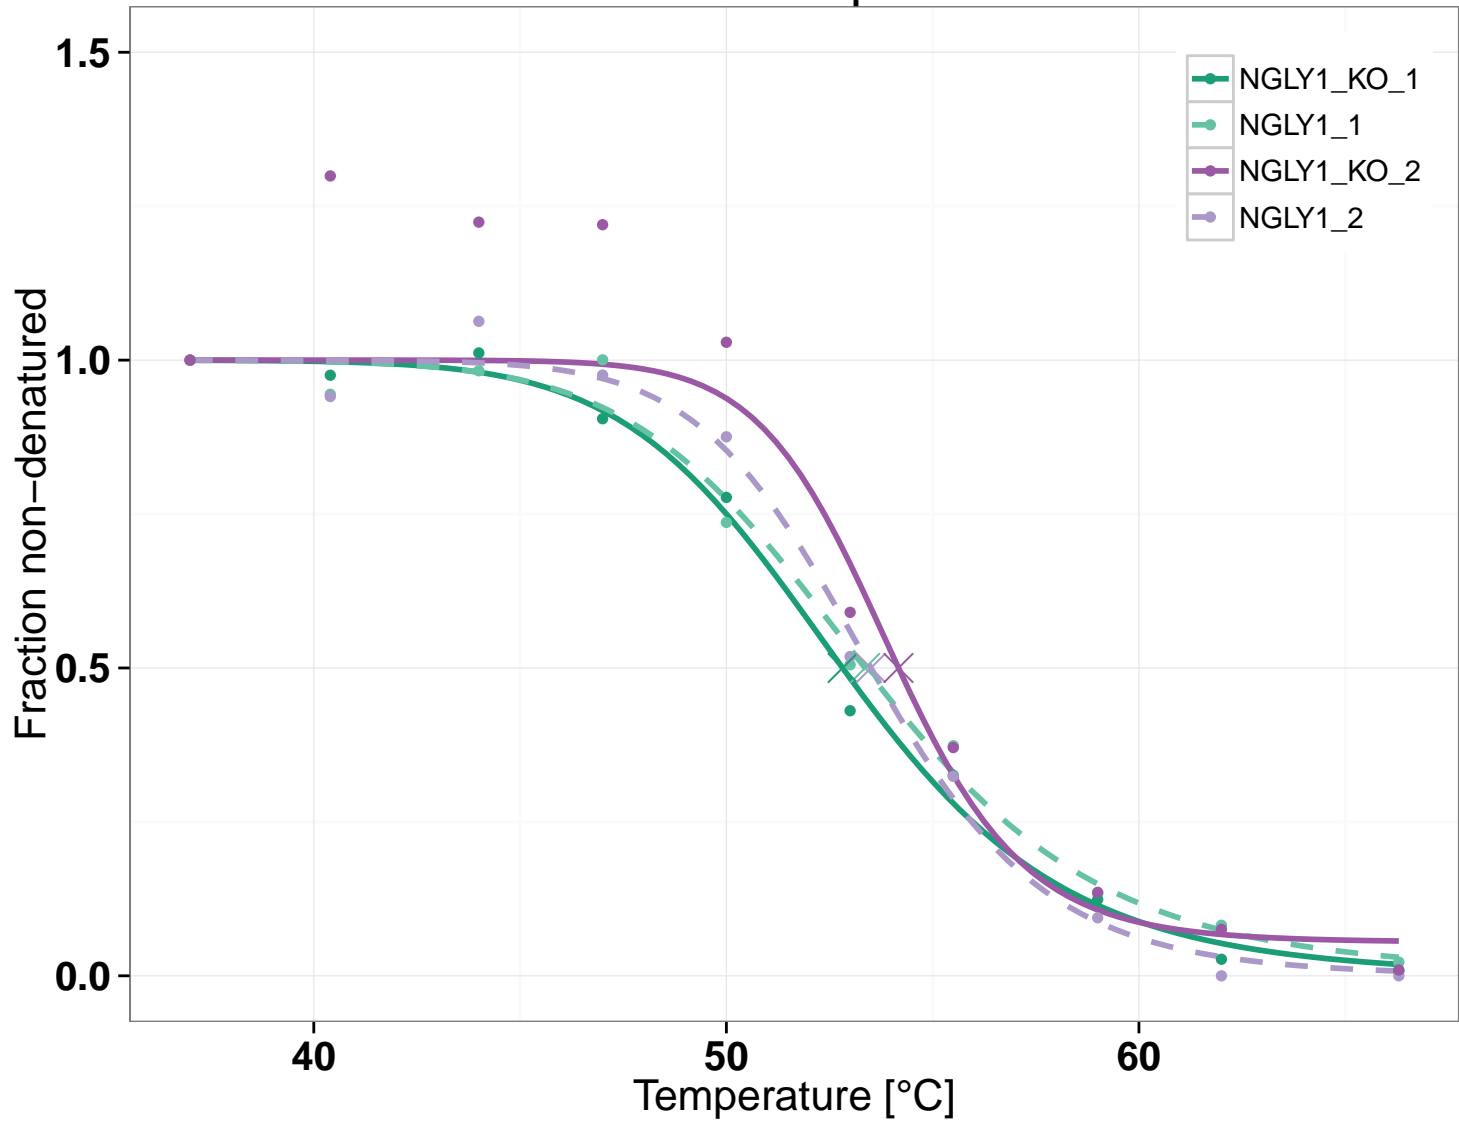

|            | meltPoint | slope  | plateau | R2   |
|------------|-----------|--------|---------|------|
| NGLY1_KO_1 | 52.82     | -0.093 | 0       | 0.99 |
| NGLY1_1    | 53.36     | -0.087 | 0       | 0.99 |
| NGLY1_KO_2 | 54.17     | -0.15  | 0.05    | 0.91 |
| NGLY1_2    | 53.5      | -0.12  | 0       | 0.99 |

Supplement: Supplementary file 1386 [file 1]

IPI00328383.3|SLC25A46

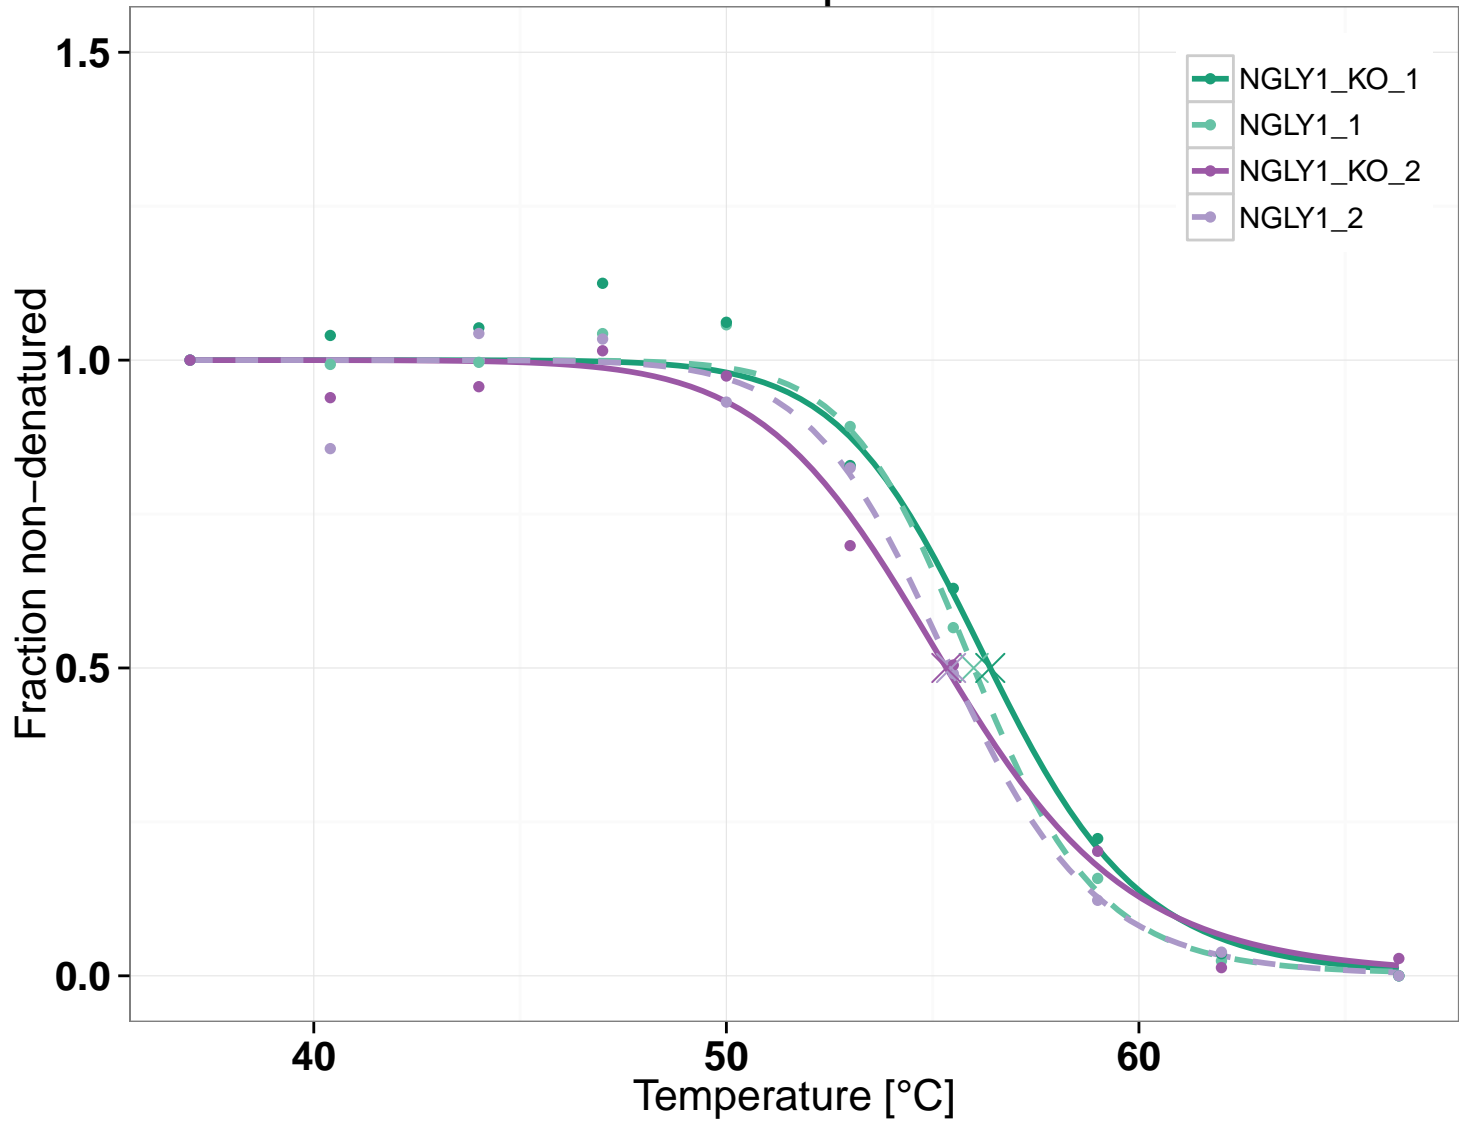

|            | meltPoint | slope | plateau | R2   |
|------------|-----------|-------|---------|------|
| NGLY1_KO_1 | 56.4      | -0.14 | 0       | 0.98 |
| NGLY1_1    | 55.99     | -0.16 | 0       | 1    |
| NGLY1_KO_2 | 55.33     | -0.11 | 0       | 0.99 |
| NGLY1_2    | 55.45     | -0.14 | 0       | 0.98 |

Supplement: Supplementary file 1387 [file 1]

# IPI00002519.1|SHMT1

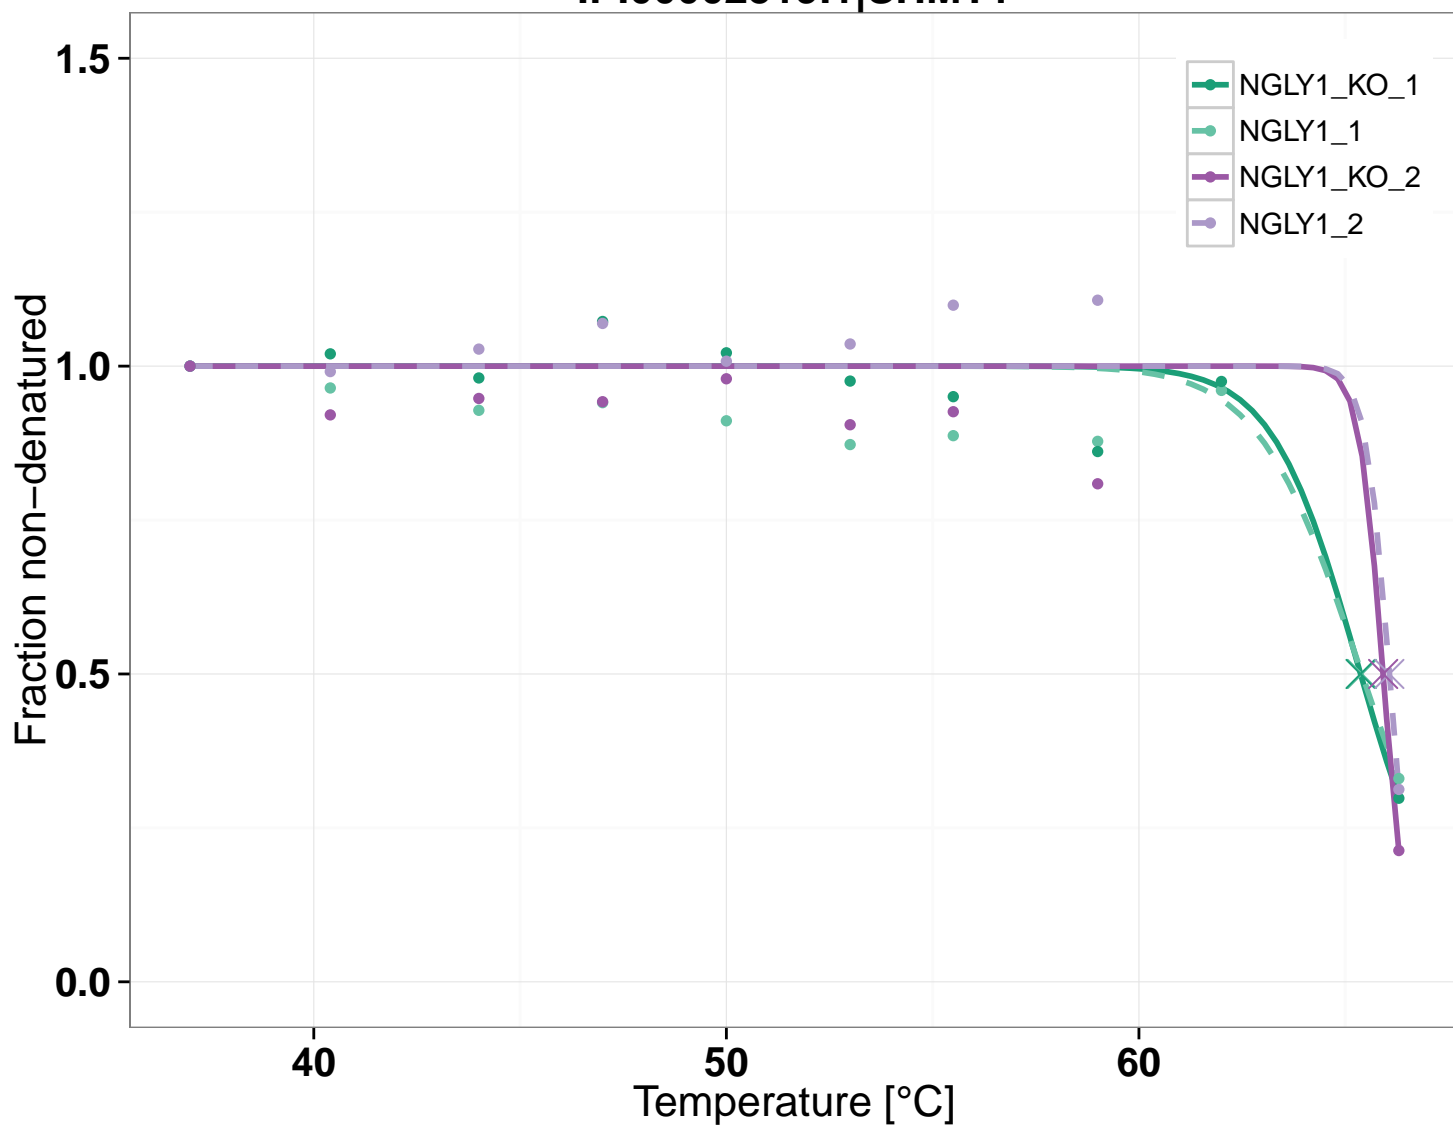

|            | meltPoint | slope | plateau | R2   |
|------------|-----------|-------|---------|------|
| NGLY1_KO_1 | 65.37     | -0.23 | 0       | 0.94 |
| NGLY1_1    | 65.41     | -0.2  | 0       | 0.82 |
| NGLY1_KO_2 | 65.92     | -0.86 | 0       | 0.82 |
| NGLY1_2    | 66.07     | -0.86 | 0       | 0.7  |

Supplement: Supplementary file 1388 [file 1]

# IPI00385267.4|SRPR

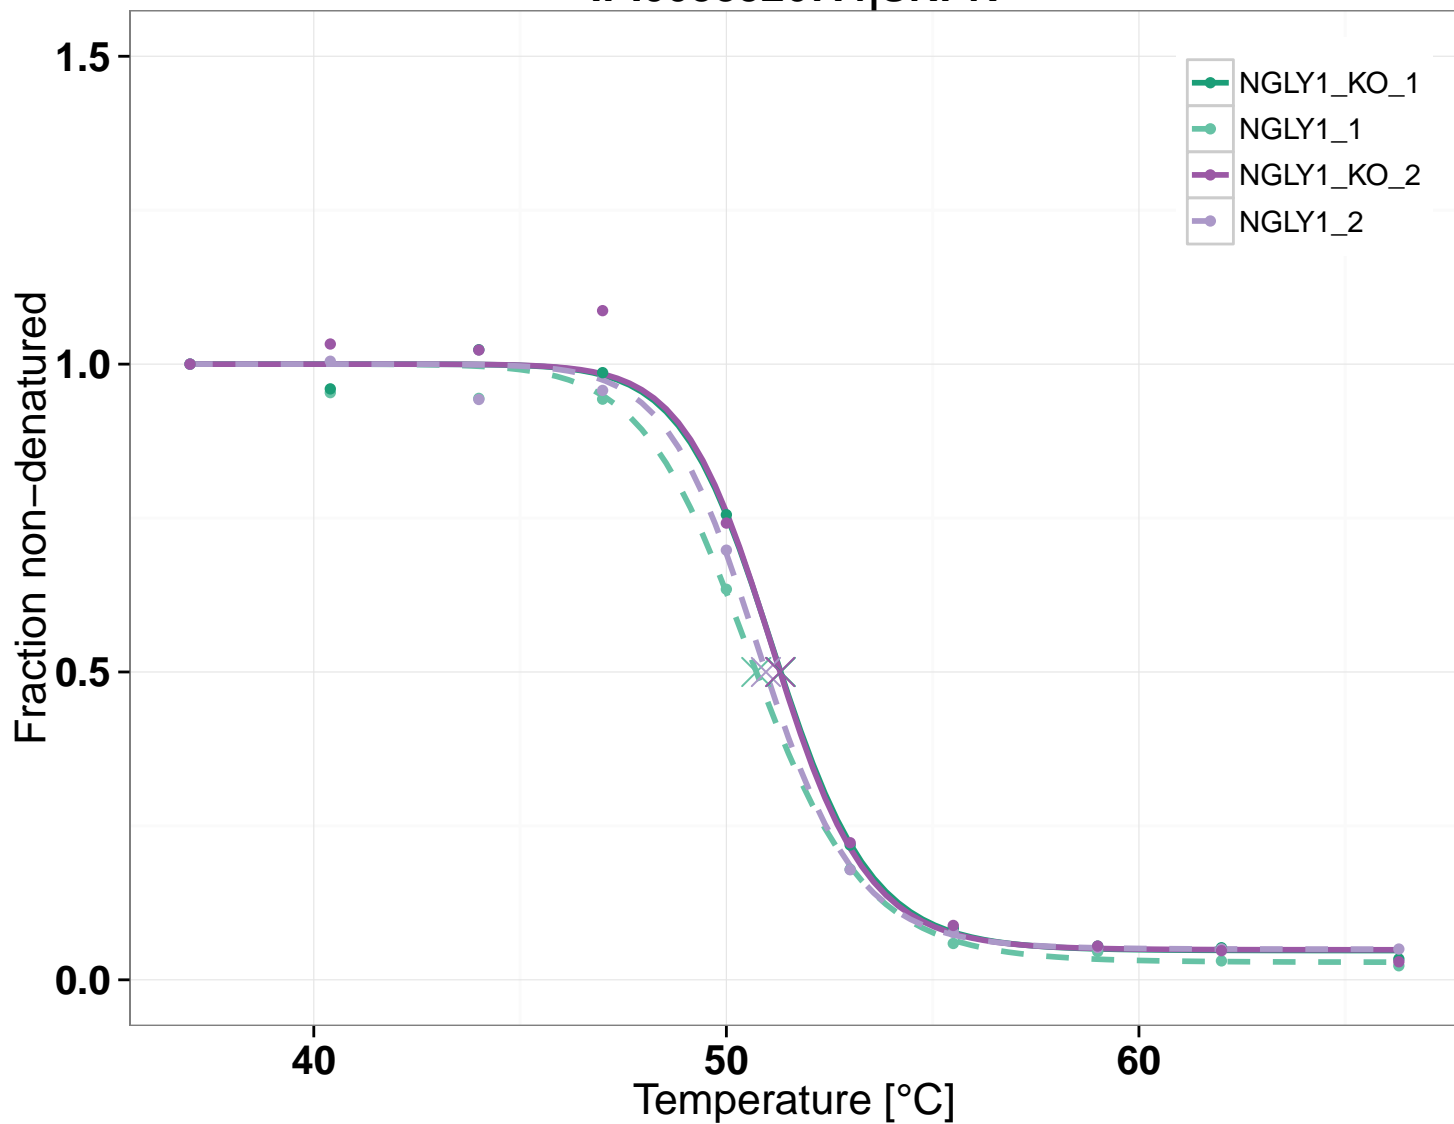

|            | meltPoint | slope | plateau | R2   |
|------------|-----------|-------|---------|------|
| NGLY1_KO_1 | 51.32     | -0.21 | 0.05    | 1    |
| NGLY1_1    | 50.73     | -0.18 | 0.03    | 1    |
| NGLY1_KO_2 | 51.3      | -0.21 | 0.05    | 0.99 |
| NGLY1_2    | 50.96     | -0.21 | 0.05    | 1    |

Supplement: Supplementary file 1389 [file 1]

IPI00902433.1|IQCE

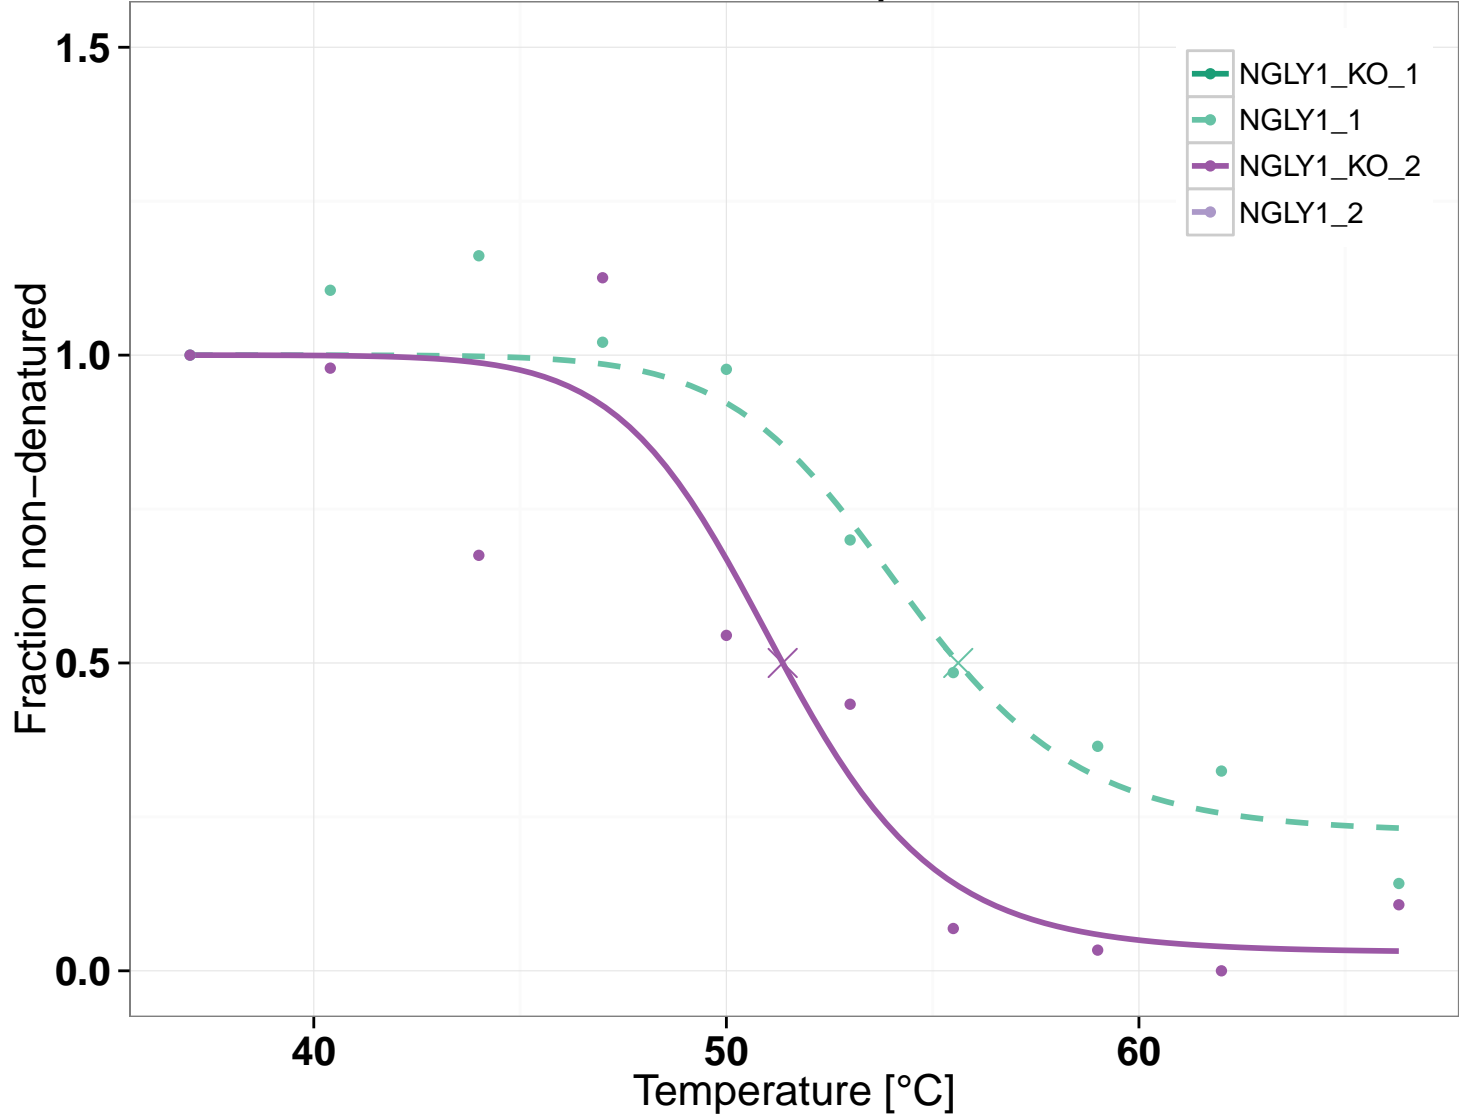

|            | meltPoint | slope  | plateau | R2   |
|------------|-----------|--------|---------|------|
| NGLY1_KO_1 | -         | -      | -       | -    |
| NGLY1_1    | 55.62     | -0.091 | 0.22    | 0.95 |
| NGLY1_KO_2 | 51.36     | -0.13  | 0.03    | 0.89 |
| NGLY1_2    | -         | -      | -       | -    |

Supplement: Supplementary file 1390 [file 1]

IPI00022628.4|MAP7

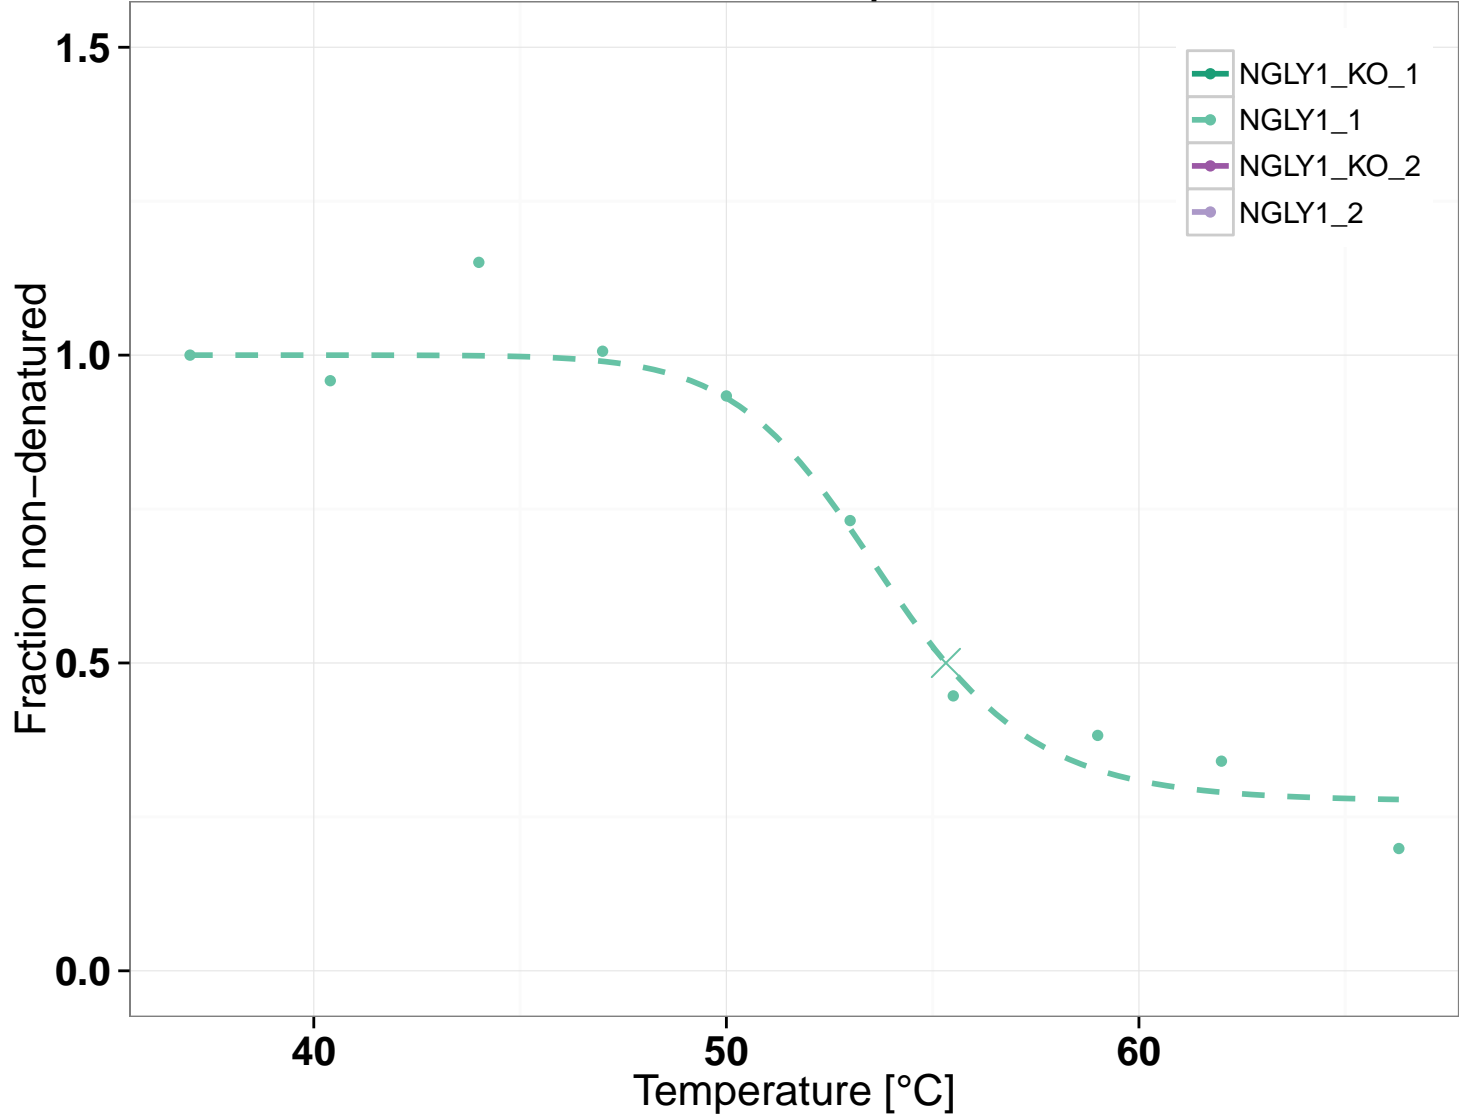

|            | meltPoint | slope  | plateau | R2   |
|------------|-----------|--------|---------|------|
| NGLY1_KO_1 | –         | –      | –       | –    |
| NGLY1_1    | 55.32     | –0.099 | 0.28    | 0.96 |
| NGLY1_KO_2 | –         | –      | –       | –    |
| NGLY1_2    | –         | –      | –       | –    |

Supplement: Supplementary file 1391 [file 1]

# IPI00412789.4|C14ORF101

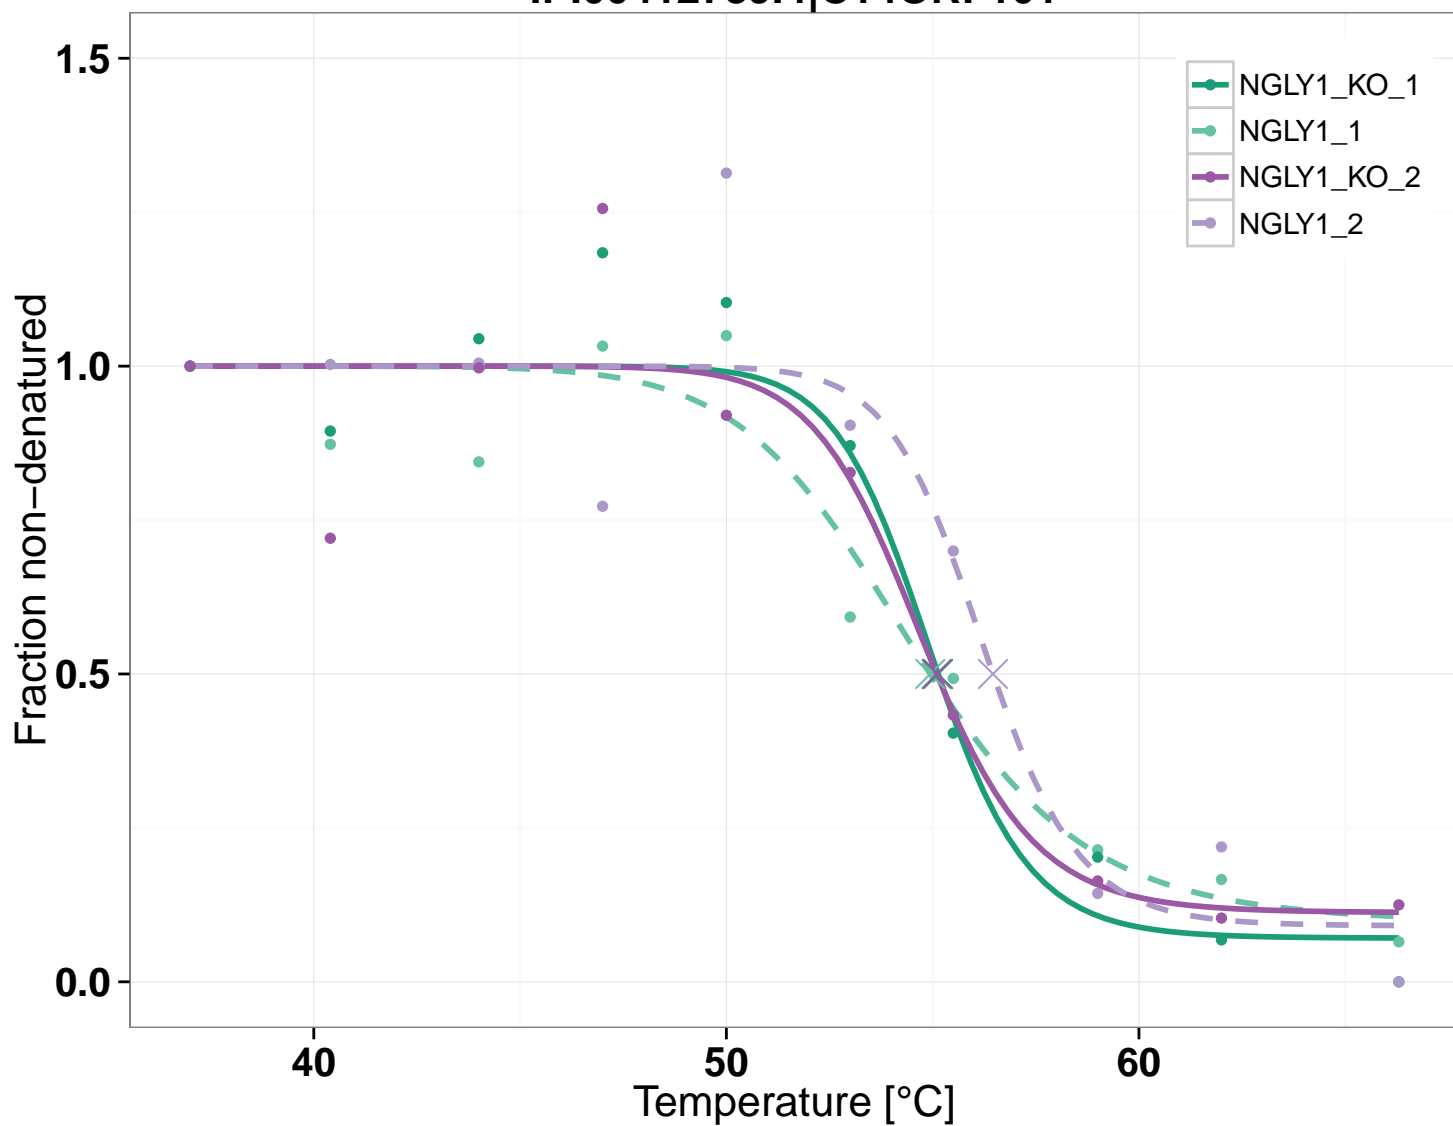

|            | meltPoint | slope | plateau | R2   |
|------------|-----------|-------|---------|------|
| NGLY1_KO_1 | 55.13     | -0.2  | 0.07    | 0.96 |
| NGLY1_1    | 54.94     | -0.11 | 0.1     | 0.94 |
| NGLY1_KO_2 | 55.1      | -0.17 | 0.11    | 0.91 |
| NGLY1_2    | 56.46     | -0.2  | 0.09    | 0.9  |

Supplement: Supplementary file 1392 [file 1]

# IPI00396171.3|MAP4

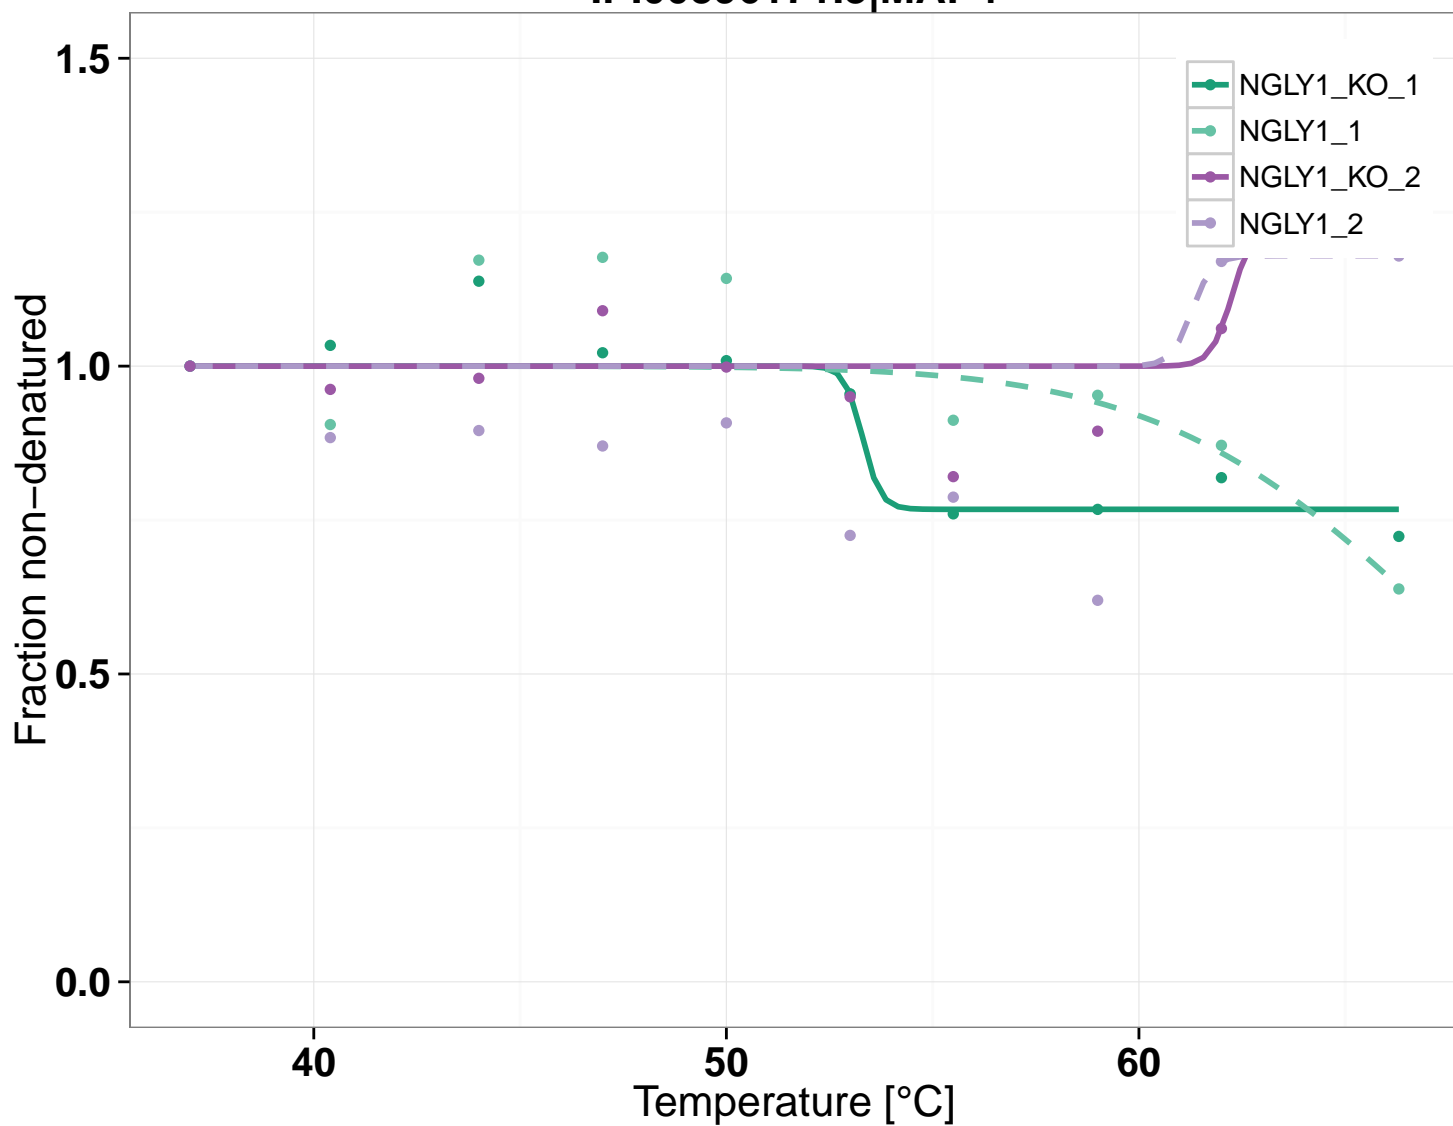

|            | meltPoint | slope | plateau | R2    |
|------------|-----------|-------|---------|-------|
| NGLY1_KO_1 | —         | −0.27 | 0.77    | 0.86  |
| NGLY1_1    | —         | —     | 0       | 0.6   |
| NGLY1_KO_2 | —         | 0.23  | 1.24    | 0.51  |
| NGLY1_2    | —         | 0.18  | 1.18    | −0.11 |

Supplement: Supplementary file 1393 [file 1]

IPI00910034.1|ARFIP2

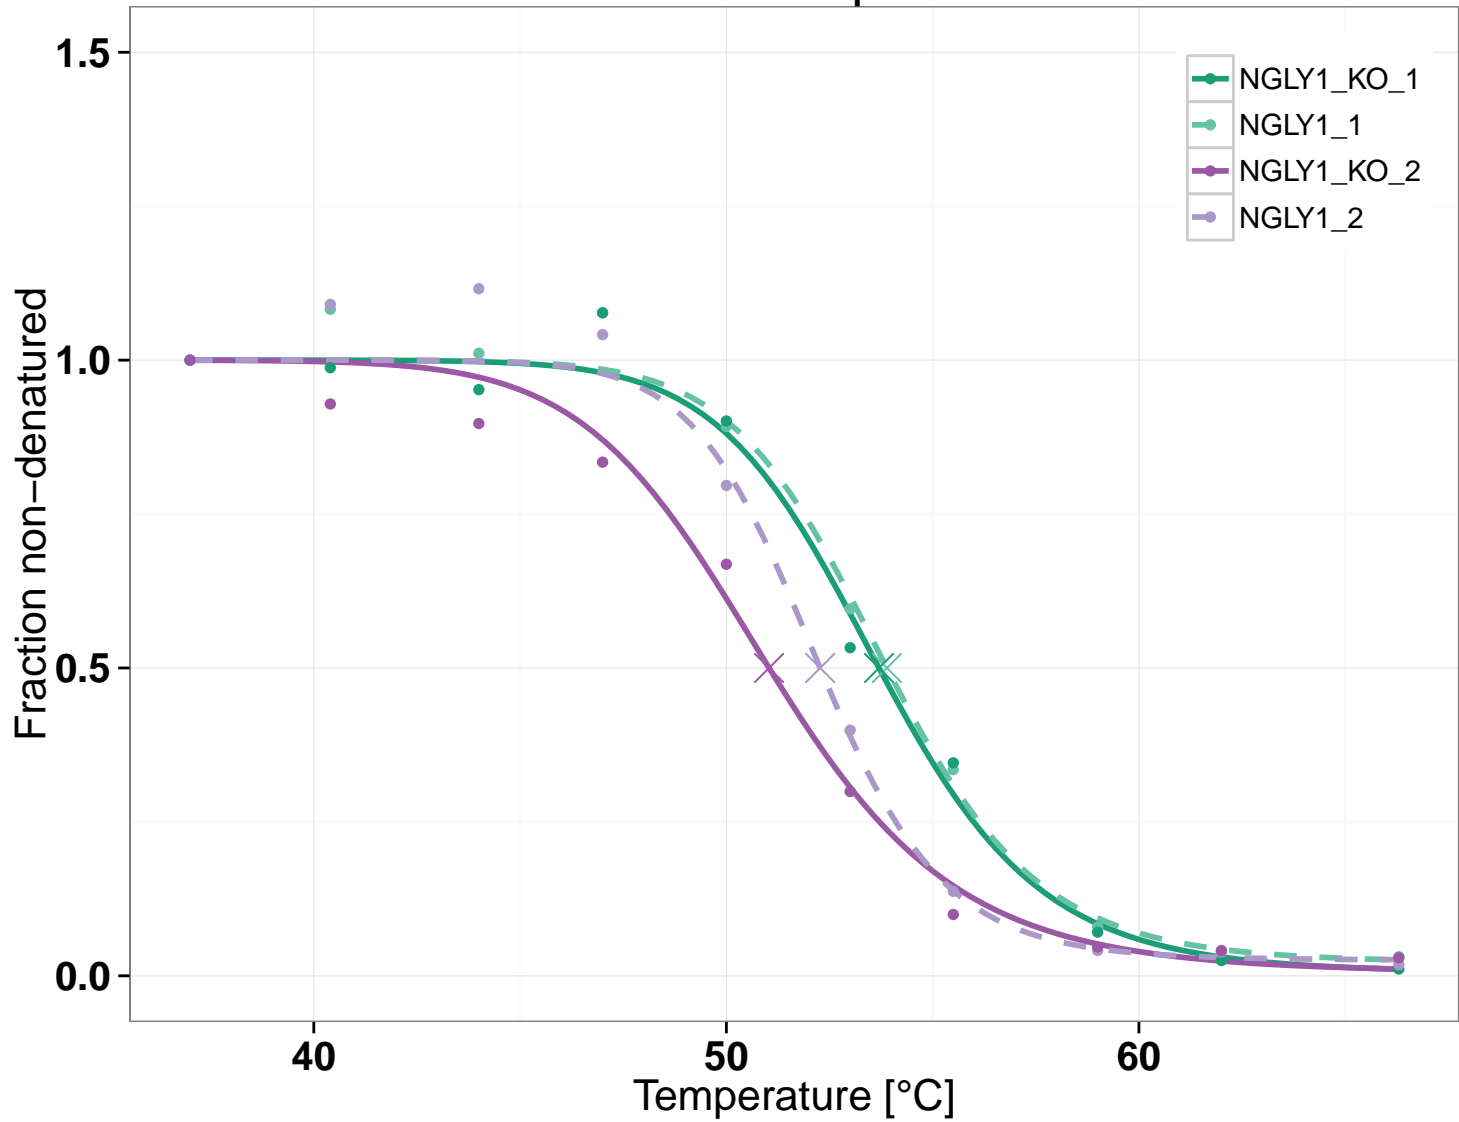

|            | meltPoint | slope | plateau | R2   |
|------------|-----------|-------|---------|------|
| NGLY1_KO_1 | 53.7      | -0.13 | 0.01    | 0.99 |
| NGLY1_1    | 53.89     | -0.13 | 0.02    | 0.99 |
| NGLY1_KO_2 | 51.04     | -0.11 | 0.01    | 0.99 |
| NGLY1_2    | 52.27     | -0.16 | 0.03    | 0.99 |

Supplement: Supplementary file 1394 [file 1]

IPI00013216.1|ORC2L

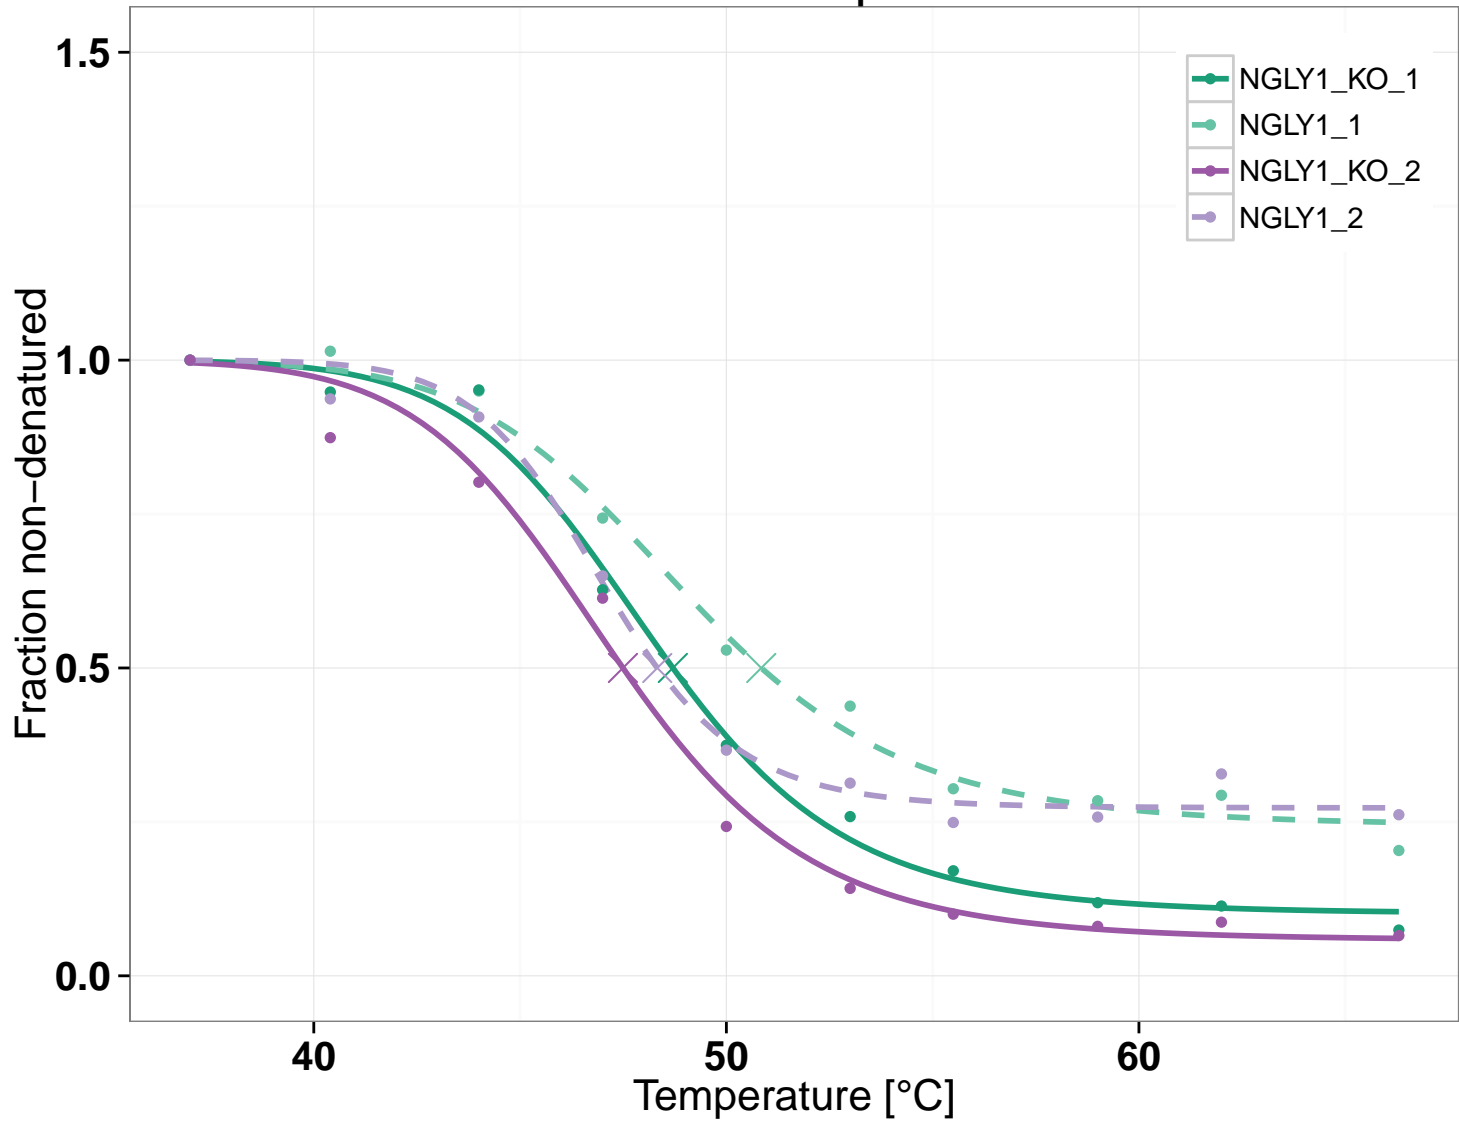

|            | meltPoint | slope  | plateau | R2   |
|------------|-----------|--------|---------|------|
| NGLY1_KO_1 | 48.7      | -0.096 | 0.1     | 0.99 |
| NGLY1_1    | 50.85     | -0.072 | 0.24    | 0.99 |
| NGLY1_KO_2 | 47.49     | -0.099 | 0.06    | 0.99 |
| NGLY1_2    | 48.33     | -0.11  | 0.27    | 0.99 |

Supplement: Supplementary file 1395 [file 1]

# IPI00306301.2|PDHA1

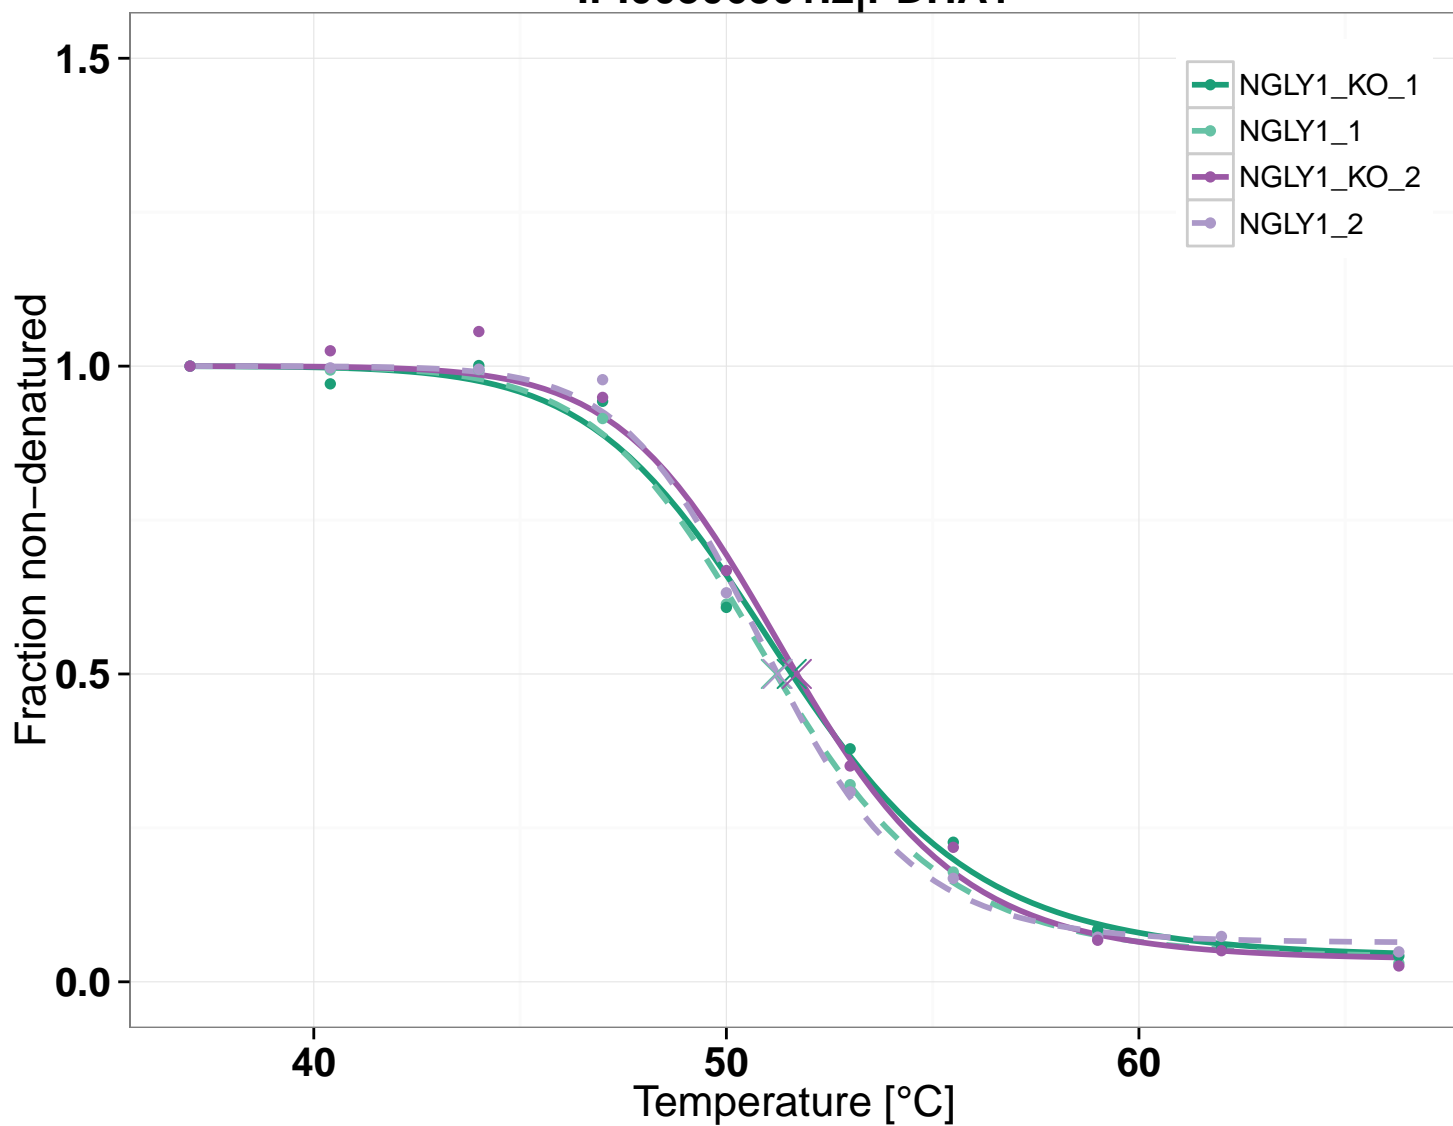

|            | meltPoint | slope | plateau | R2   |
|------------|-----------|-------|---------|------|
| NGLY1_KO_1 | 51.58     | -0.1  | 0.04    | 0.99 |
| NGLY1_1    | 51.2      | -0.11 | 0.04    | 1    |
| NGLY1_KO_2 | 51.71     | -0.12 | 0.04    | 0.99 |
| NGLY1_2    | 51.24     | -0.13 | 0.06    | 1    |

Supplement: Supplementary file 1396 [file 1]

# IPI00432723.3|XYLT2

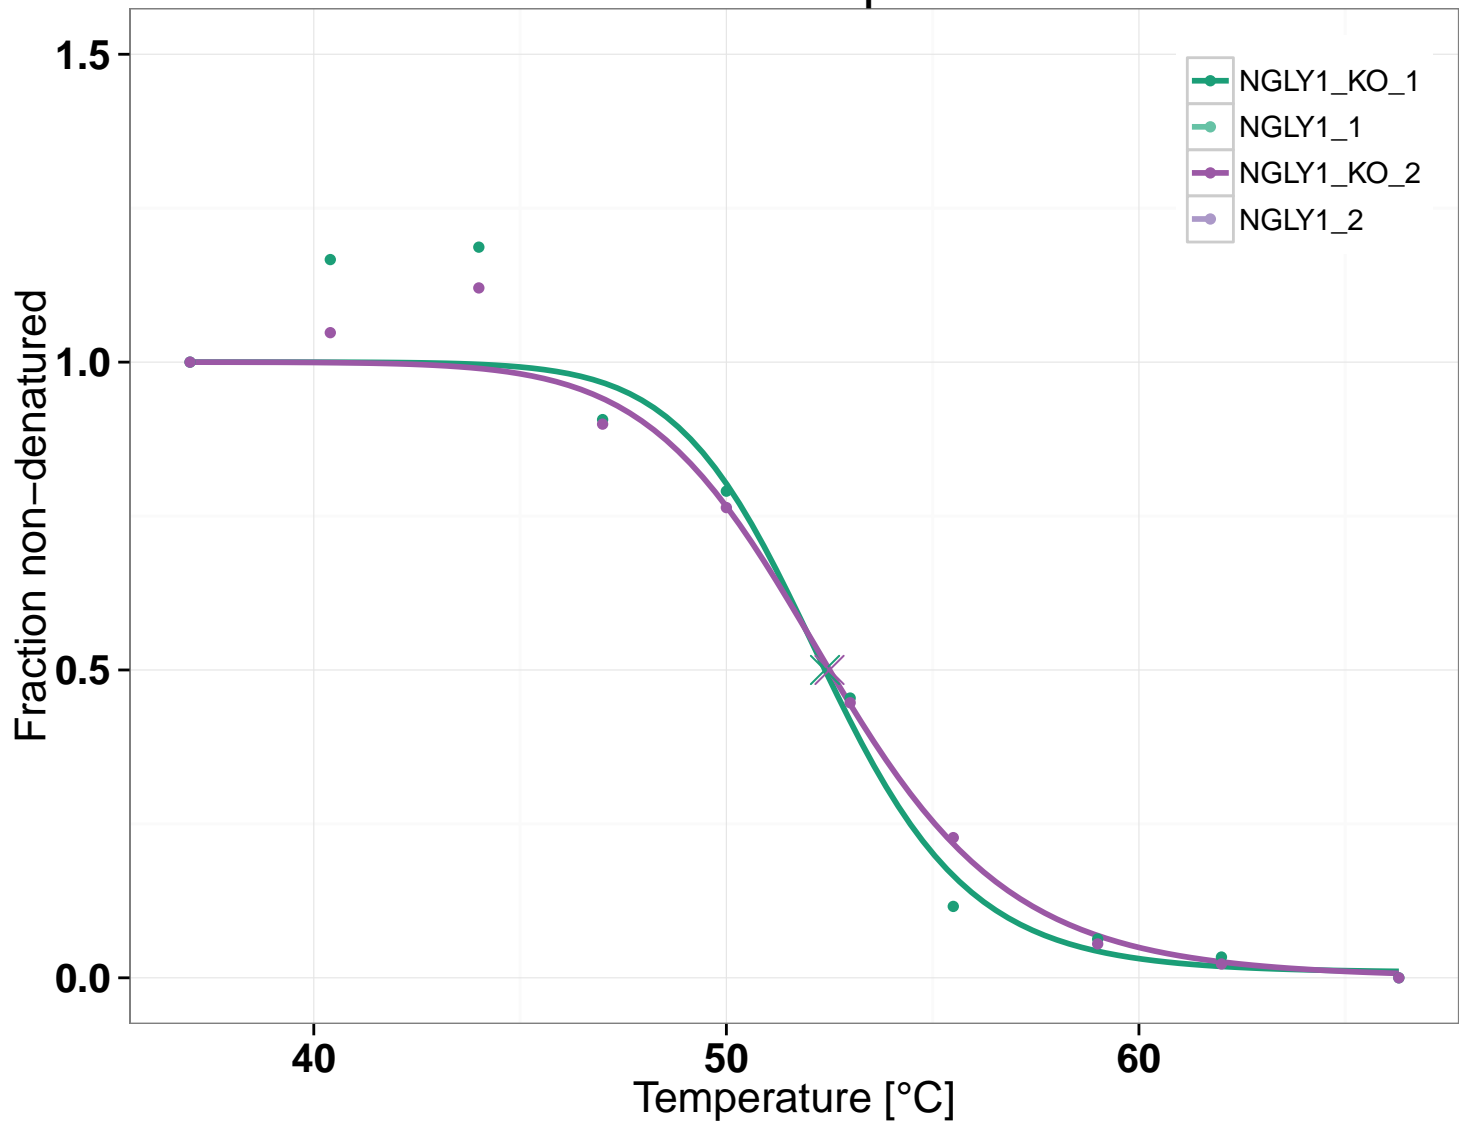

|            | meltPoint | slope | plateau | R2   |
|------------|-----------|-------|---------|------|
| NGLY1_KO_1 | 52.39     | -0.14 | 0.01    | 0.97 |
| NGLY1_1    | -         | -     | -       | -    |
| NGLY1_KO_2 | 52.5      | -0.11 | 0       | 0.99 |
| NGLY1_2    | -         | -     | -       | -    |

Supplement: Supplementary file 1397 [file 1]

IPI00413366.5|DNAJC21

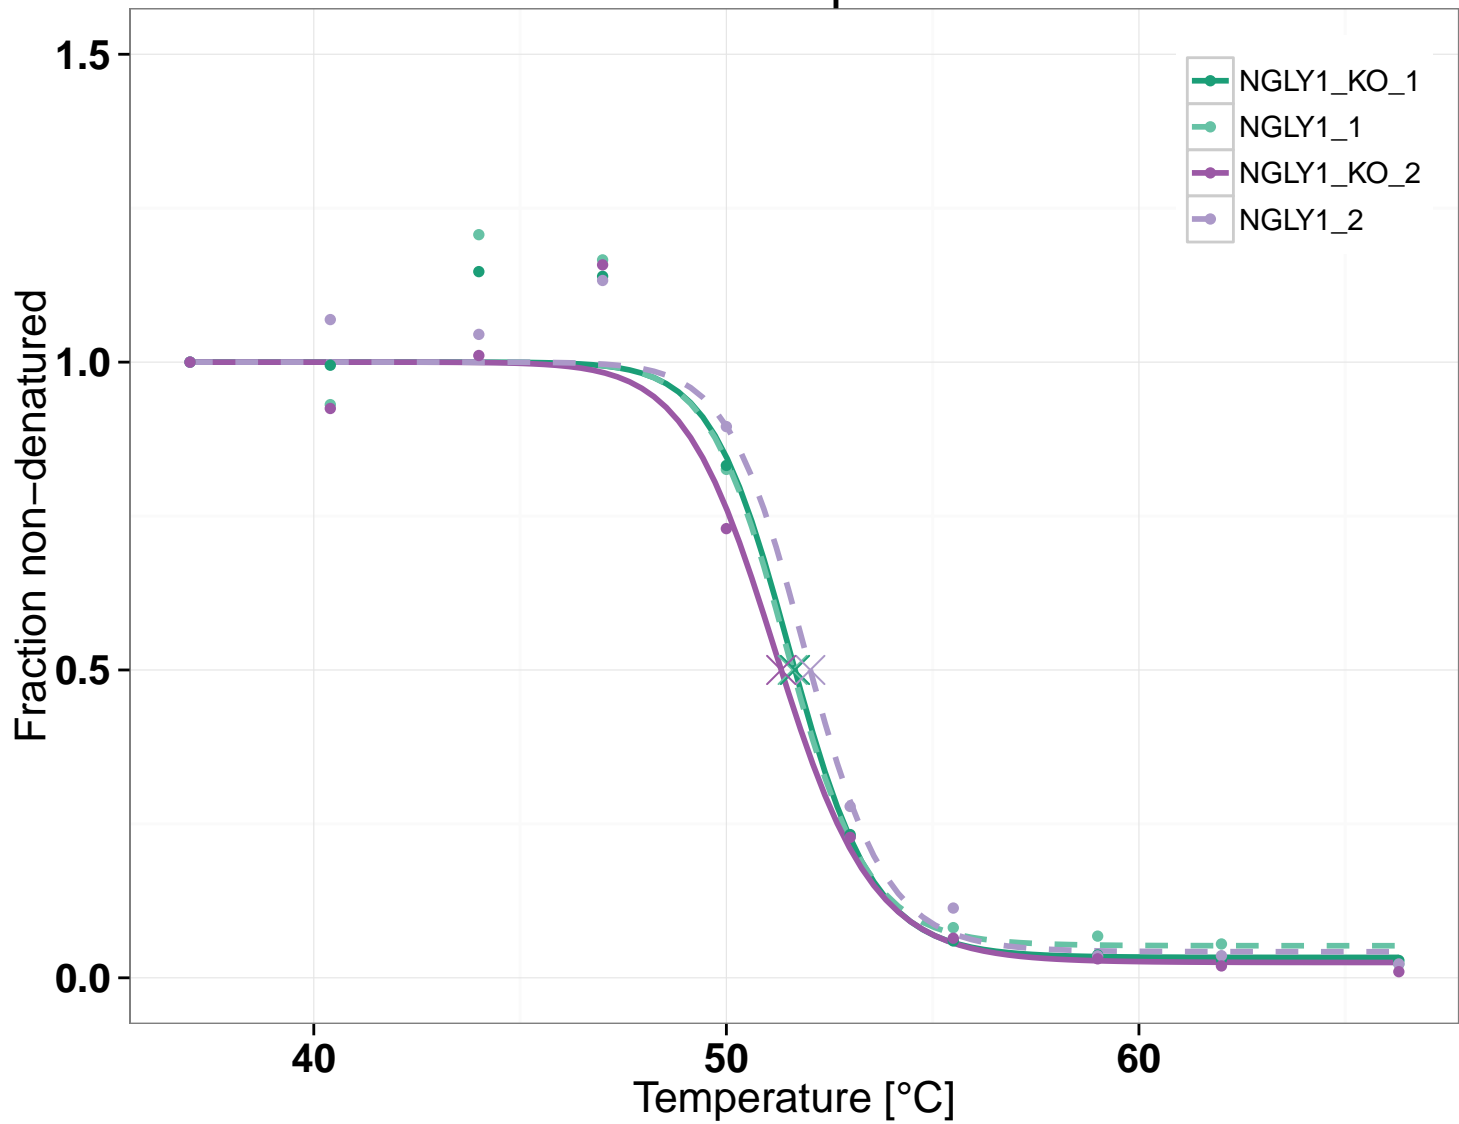

|            | meltPoint | slope | plateau | R2   |
|------------|-----------|-------|---------|------|
| NGLY1_KO_1 | 51.66     | -0.24 | 0.03    | 0.98 |
| NGLY1_1    | 51.61     | -0.25 | 0.05    | 0.97 |
| NGLY1_KO_2 | 51.33     | -0.21 | 0.02    | 0.98 |
| NGLY1_2    | 52.03     | -0.25 | 0.04    | 0.99 |

Supplement: Supplementary file 1398 [file 1]

# IPI00296211.6|DYM

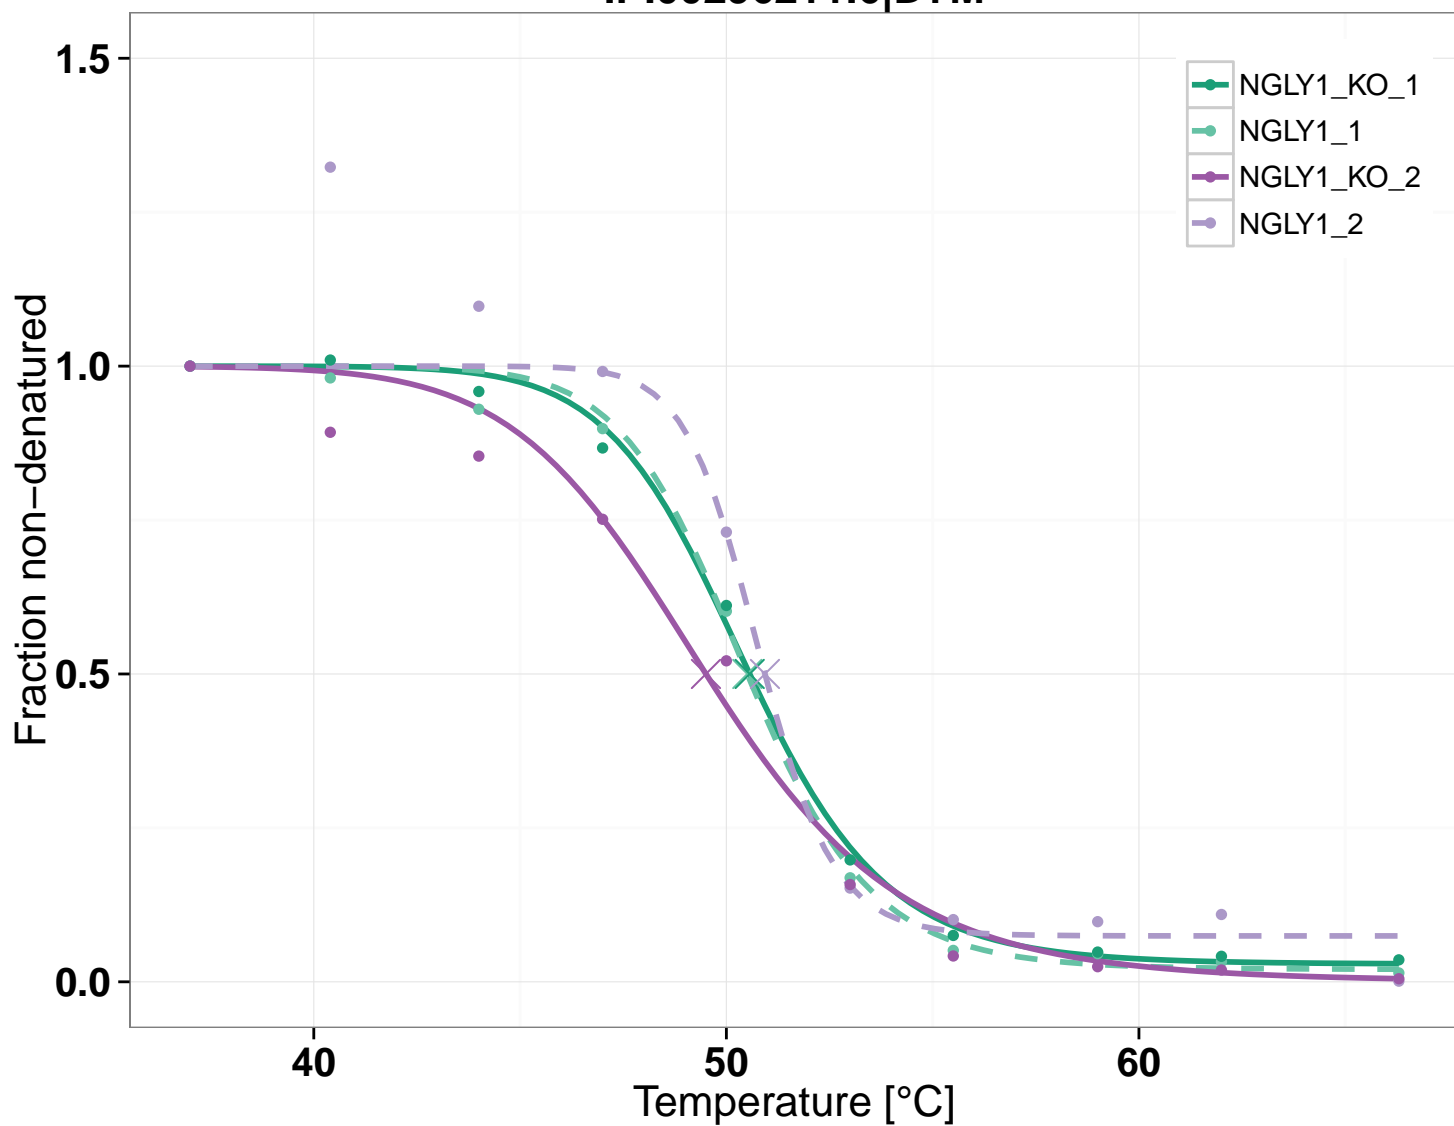

|            | meltPoint | slope | plateau | R2   |
|------------|-----------|-------|---------|------|
| NGLY1_KO_1 | 50.57     | -0.14 | 0.03    | 1    |
| NGLY1_1    | 50.51     | -0.16 | 0.02    | 1    |
| NGLY1_KO_2 | 49.5      | -0.11 | 0       | 0.98 |
| NGLY1_2    | 50.94     | -0.26 | 0.07    | 0.95 |

Supplement: Supplementary file 1399 [file 1]

# IPI00007814.3|ATP6V1C1

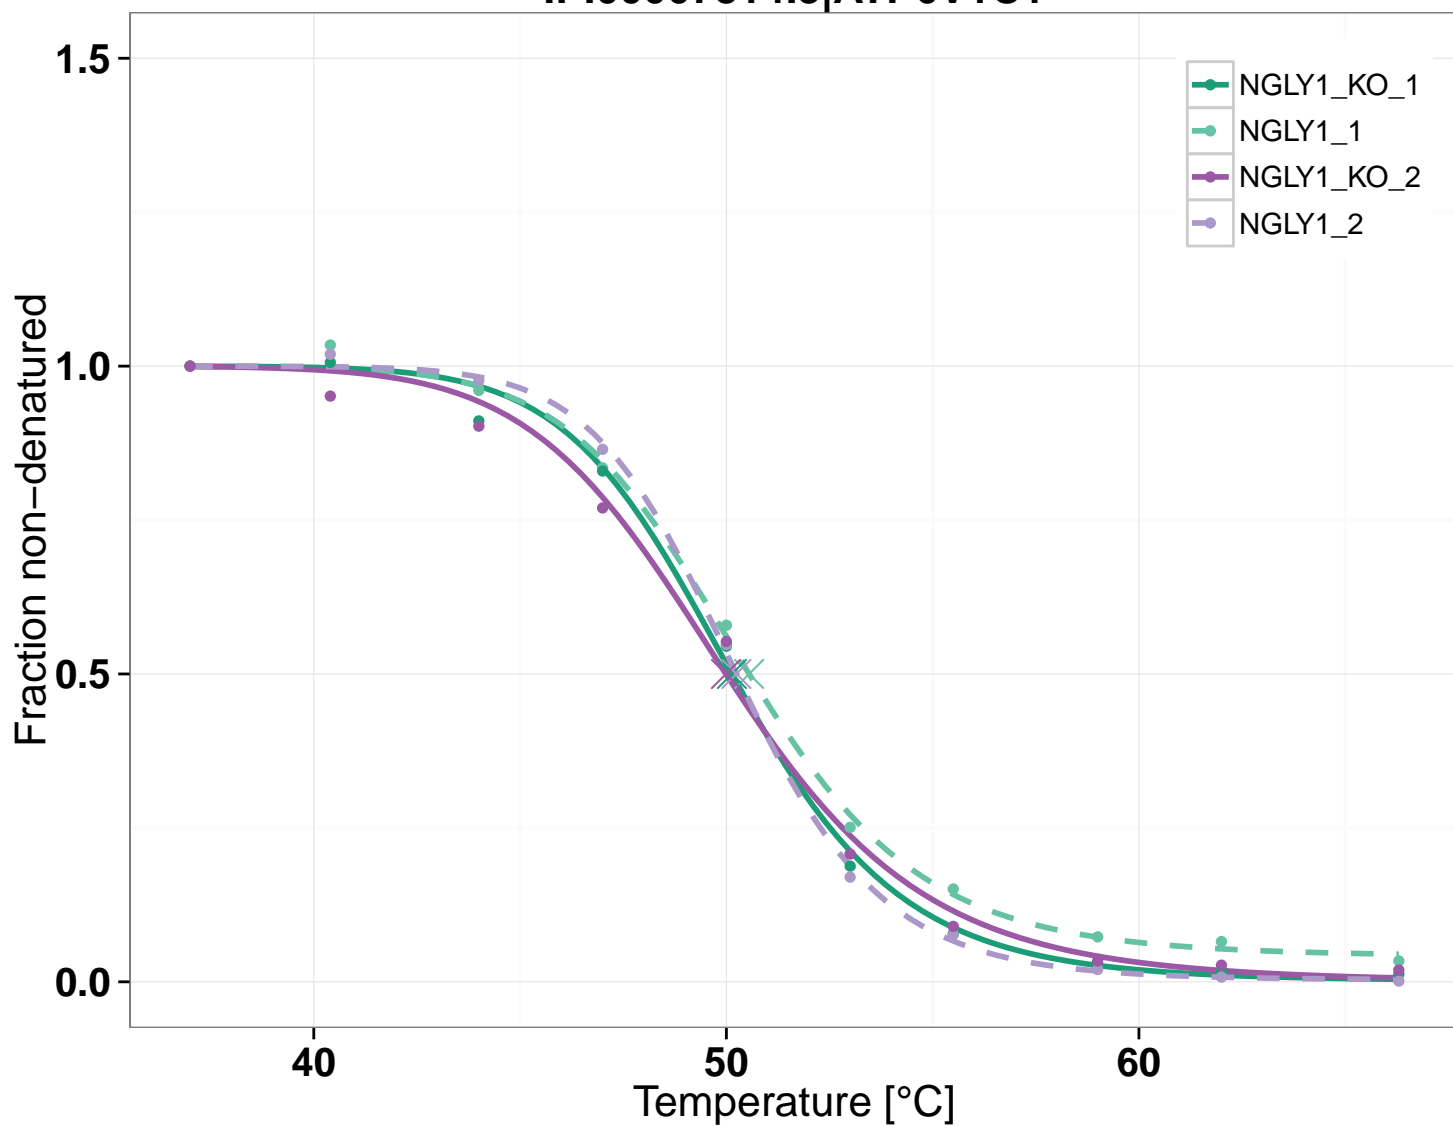

|            | meltPoint | slope | plateau | R2   |
|------------|-----------|-------|---------|------|
| NGLY1_KO_1 | 50.13     | -0.12 | 0       | 1    |
| NGLY1_1    | 50.55     | -0.11 | 0.04    | 1    |
| NGLY1_KO_2 | 49.99     | -0.1  | 0       | 0.99 |
| NGLY1_2    | 50.24     | -0.14 | 0       | 1    |

Supplement: Supplementary file 1400 [file 1]

IPI00158248.3|MAP2K5

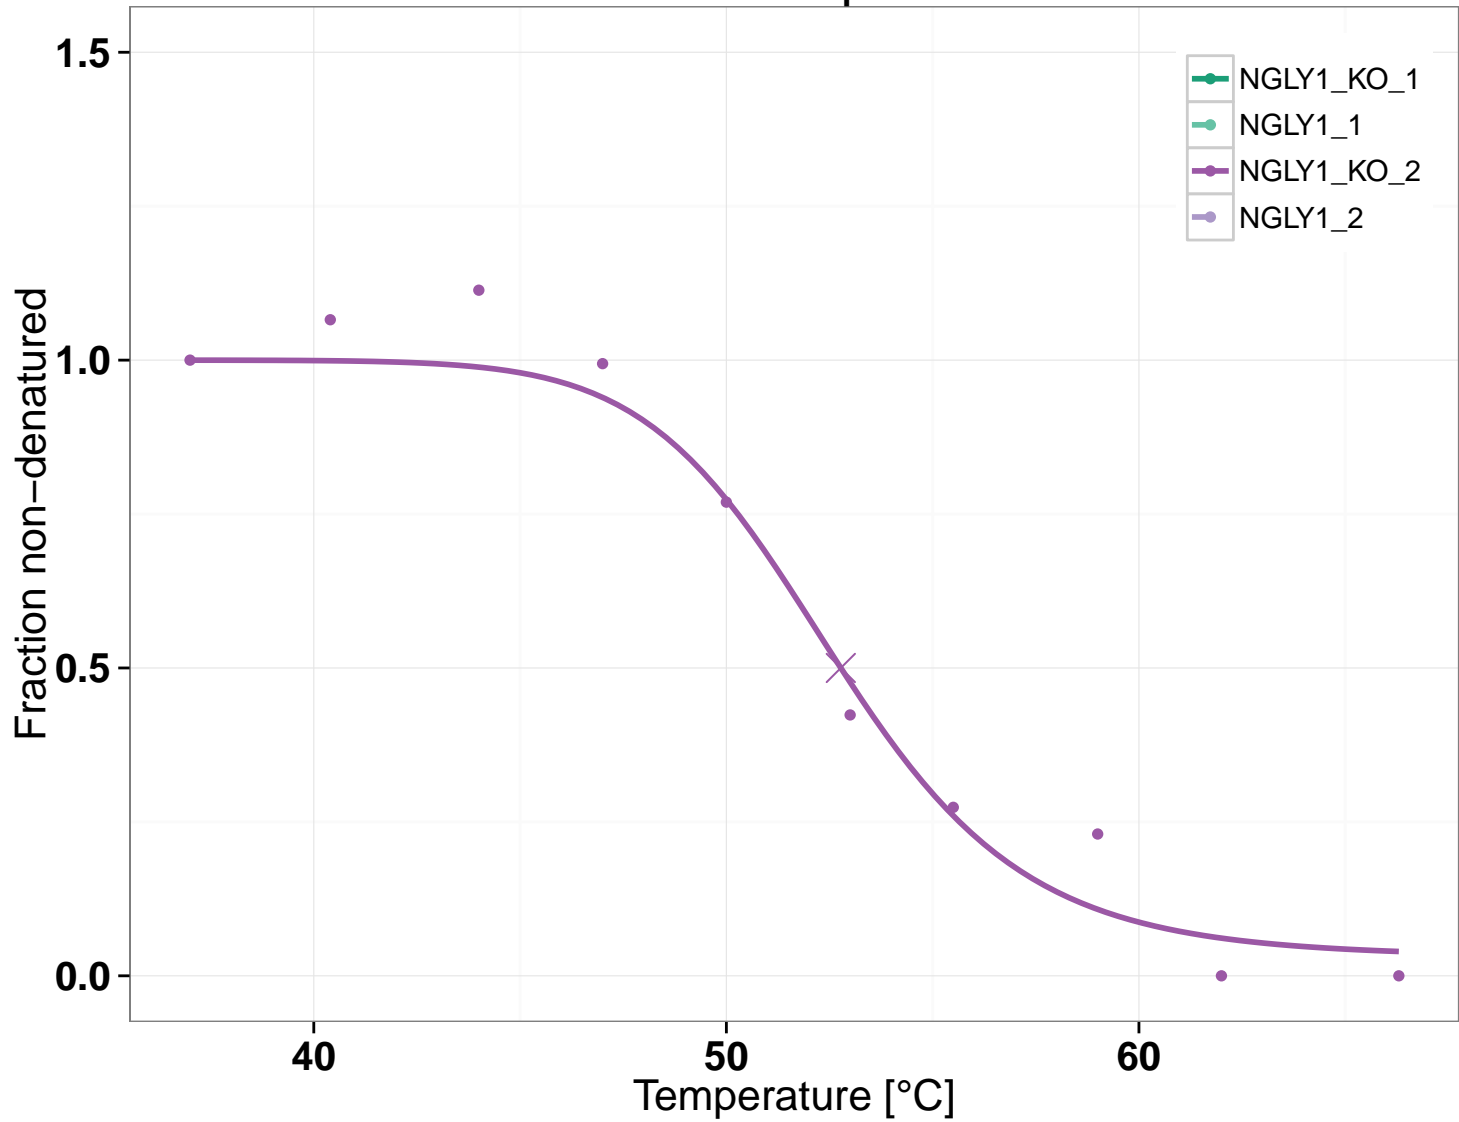

|            | meltPoint | slope | plateau | R2   |
|------------|-----------|-------|---------|------|
| NGLY1_KO_1 | —         | —     | —       | —    |
| NGLY1_1    | —         | —     | —       | —    |
| NGLY1_KO_2 | 52.77     | -0.11 | 0.03    | 0.97 |
| NGLY1_2    | —         | —     | —       | —    |

Supplement: Supplementary file 1401 [file 1]

# IPI00141933.3|BUB1B

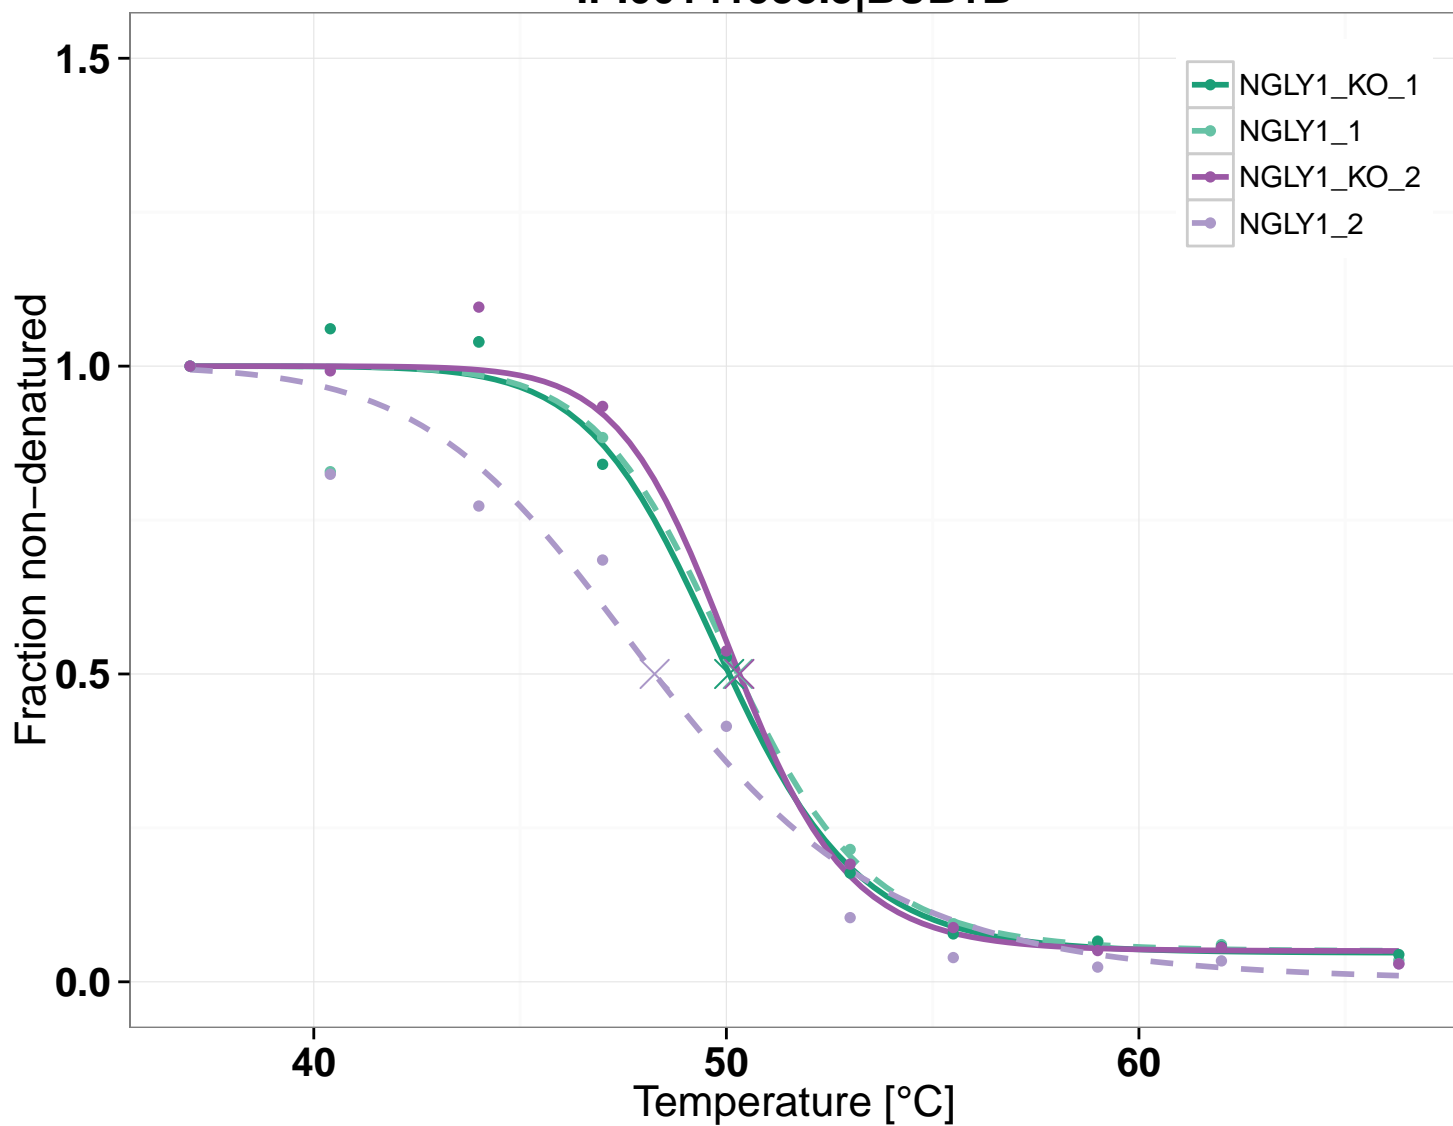

|            | meltPoint | slope  | plateau | R2   |
|------------|-----------|--------|---------|------|
| NGLY1_KO_1 | 50.07     | -0.15  | 0.05    | 1    |
| NGLY1_1    | 50.28     | -0.14  | 0.05    | 0.98 |
| NGLY1_KO_2 | 50.31     | -0.17  | 0.05    | 0.99 |
| NGLY1_2    | 48.26     | -0.089 | 0       | 0.97 |

Supplement: Supplementary file 1402 [file 1]

# IPI00743888.2|TMUB2

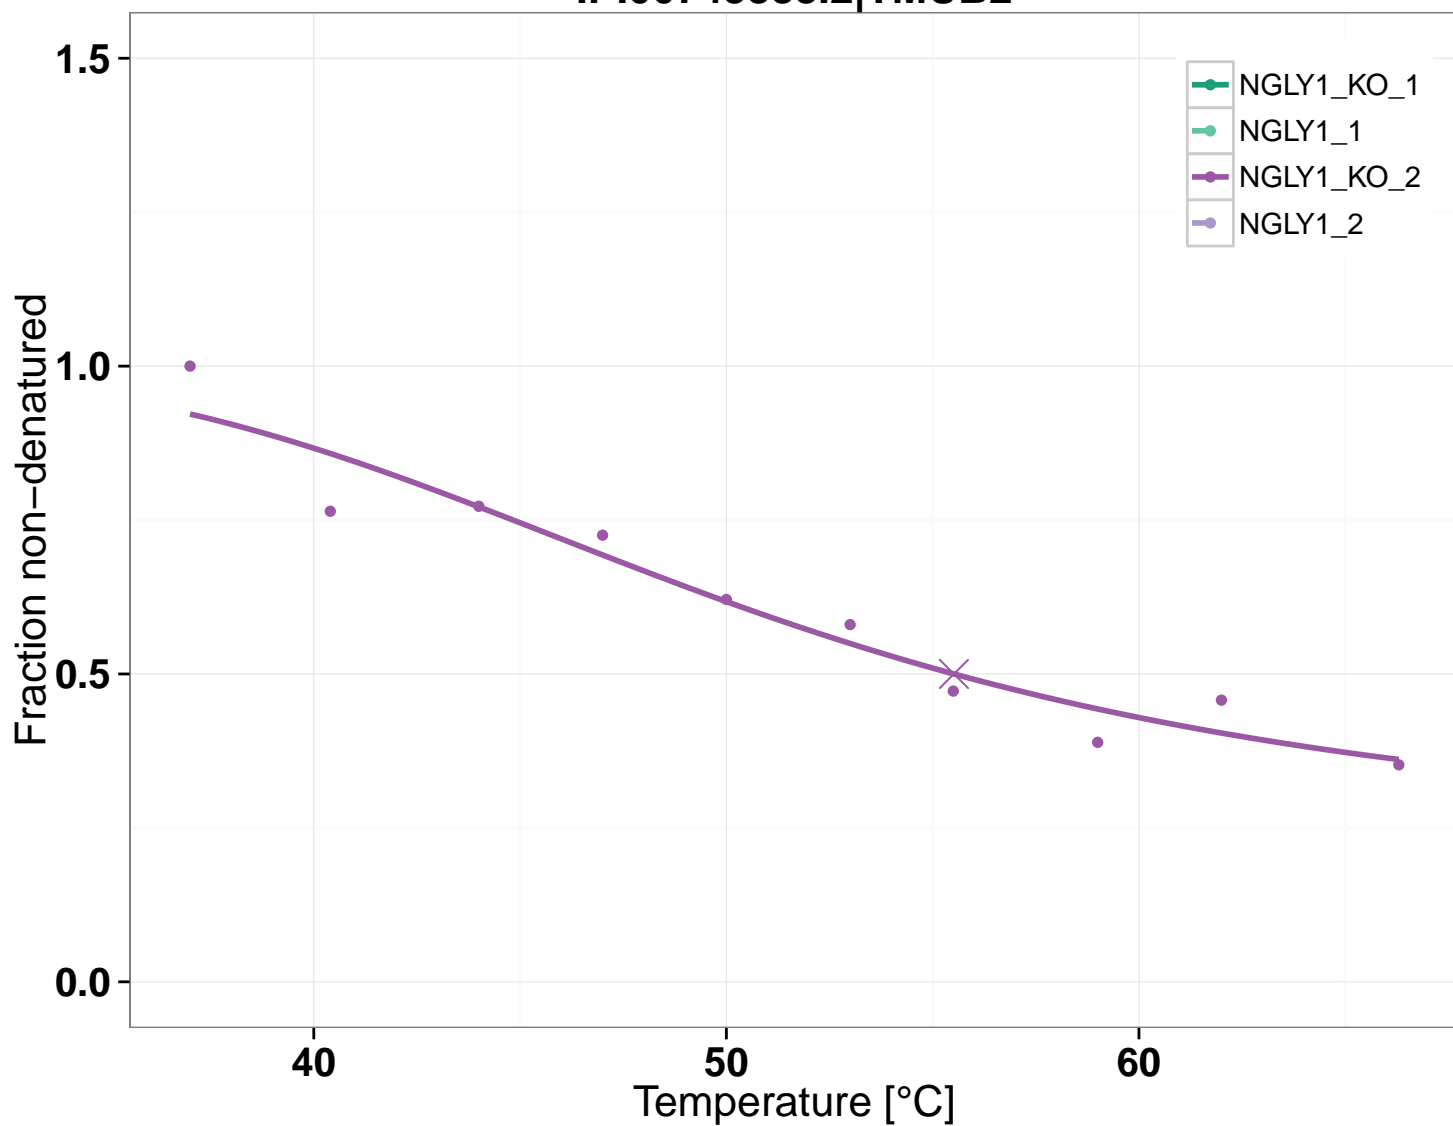

|            | meltPoint | slope  | plateau | R2   |
|------------|-----------|--------|---------|------|
| NGLY1_KO_1 | —         | —      | —       | —    |
| NGLY1_1    | —         | —      | —       | —    |
| NGLY1_KO_2 | 55.52     | -0.026 | 0.21    | 0.94 |
| NGLY1_2    | —         | —      | —       | —    |

Supplement: Supplementary file 1403 [file 1]

# IPI00176427.1|CADM4

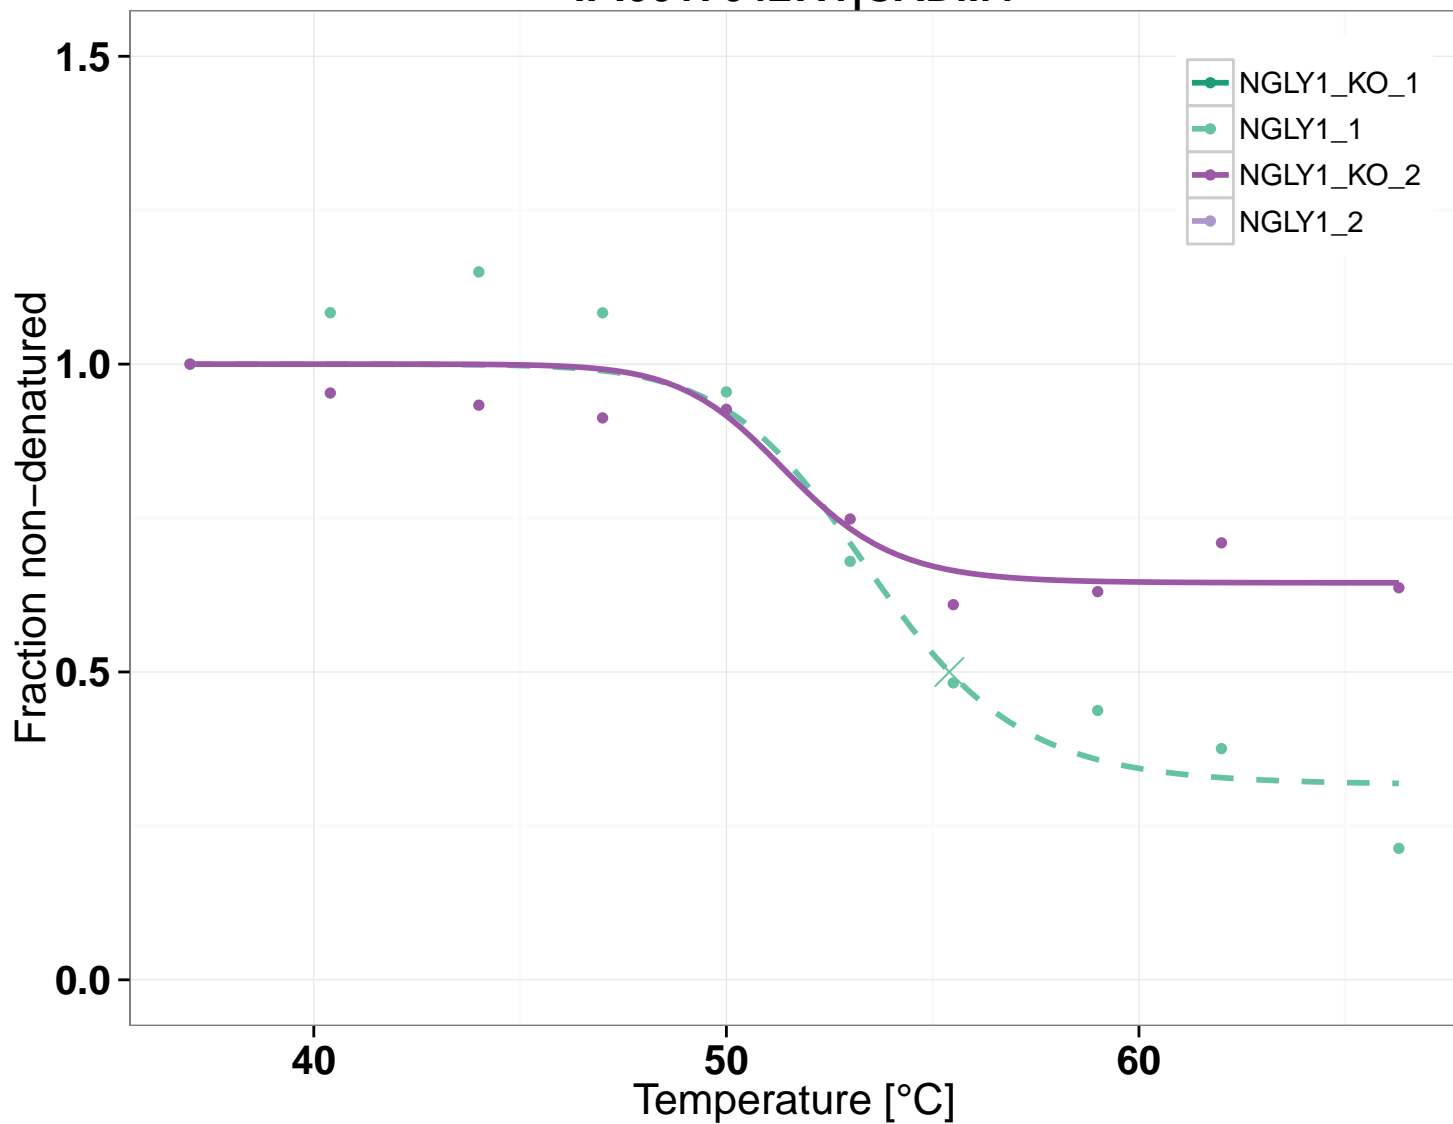

|            | meltPoint | slope  | plateau | R2   |
|------------|-----------|--------|---------|------|
| NGLY1_KO_1 | —         | —      | —       | —    |
| NGLY1_1    | 55.4      | -0.095 | 0.32    | 0.94 |
| NGLY1_KO_2 | —         | -0.068 | 0.64    | 0.9  |
| NGLY1_2    | —         | —      | —       | —    |

Supplement: Supplementary file 1404 [file 1]

# IPI00293748.3|MINPP1

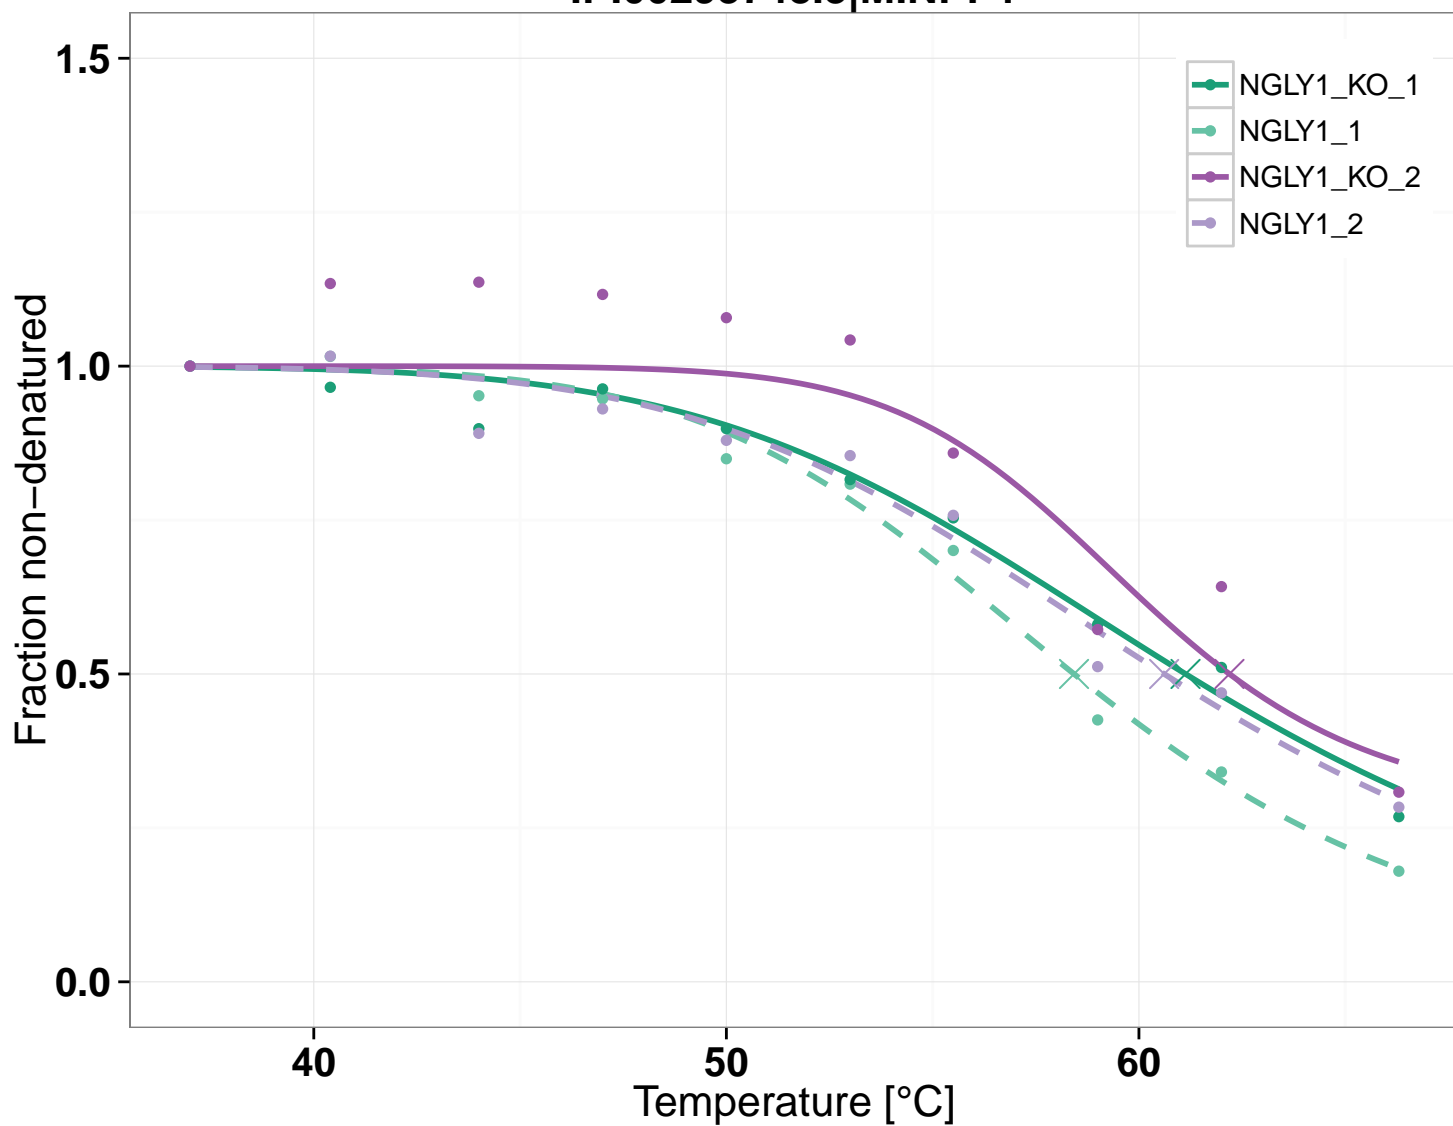

|            | meltPoint | slope  | plateau | R2   |
|------------|-----------|--------|---------|------|
| NGLY1_KO_1 | 61.13     | -0.043 | 0       | 0.98 |
| NGLY1_1    | 58.43     | -0.055 | 0       | 0.99 |
| NGLY1_KO_2 | 62.19     | -0.064 | 0.27    | 0.86 |
| NGLY1_2    | 60.61     | -0.044 | 0       | 0.97 |

Supplement: Supplementary file 1405 [file 1]

IPI00009364.3|ORMDL1

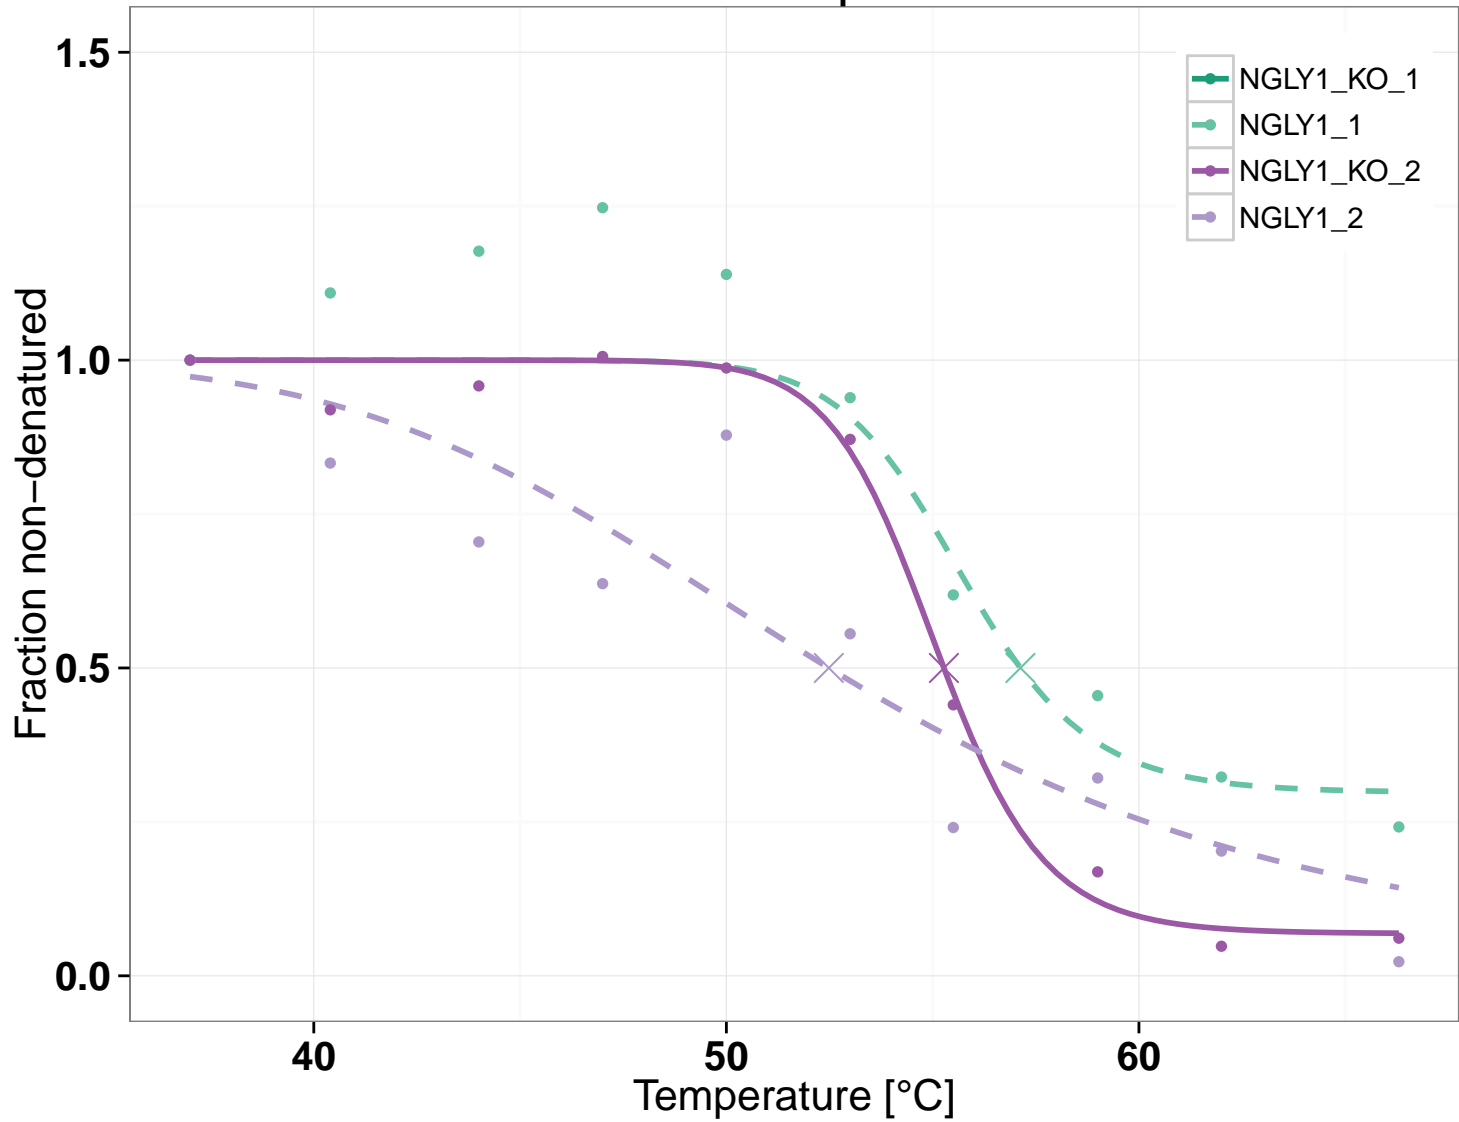

|            | meltPoint | slope  | plateau | R2   |
|------------|-----------|--------|---------|------|
| NGLY1_KO_1 | —         | —      | —       | —    |
| NGLY1_1    | 57.13     | -0.12  | 0.3     | 0.89 |
| NGLY1_KO_2 | 55.27     | -0.18  | 0.07    | 0.99 |
| NGLY1_2    | 52.48     | -0.043 | 0       | 0.84 |

Supplement: Supplementary file 1406 [file 1]

# IPI00642259.2|DST

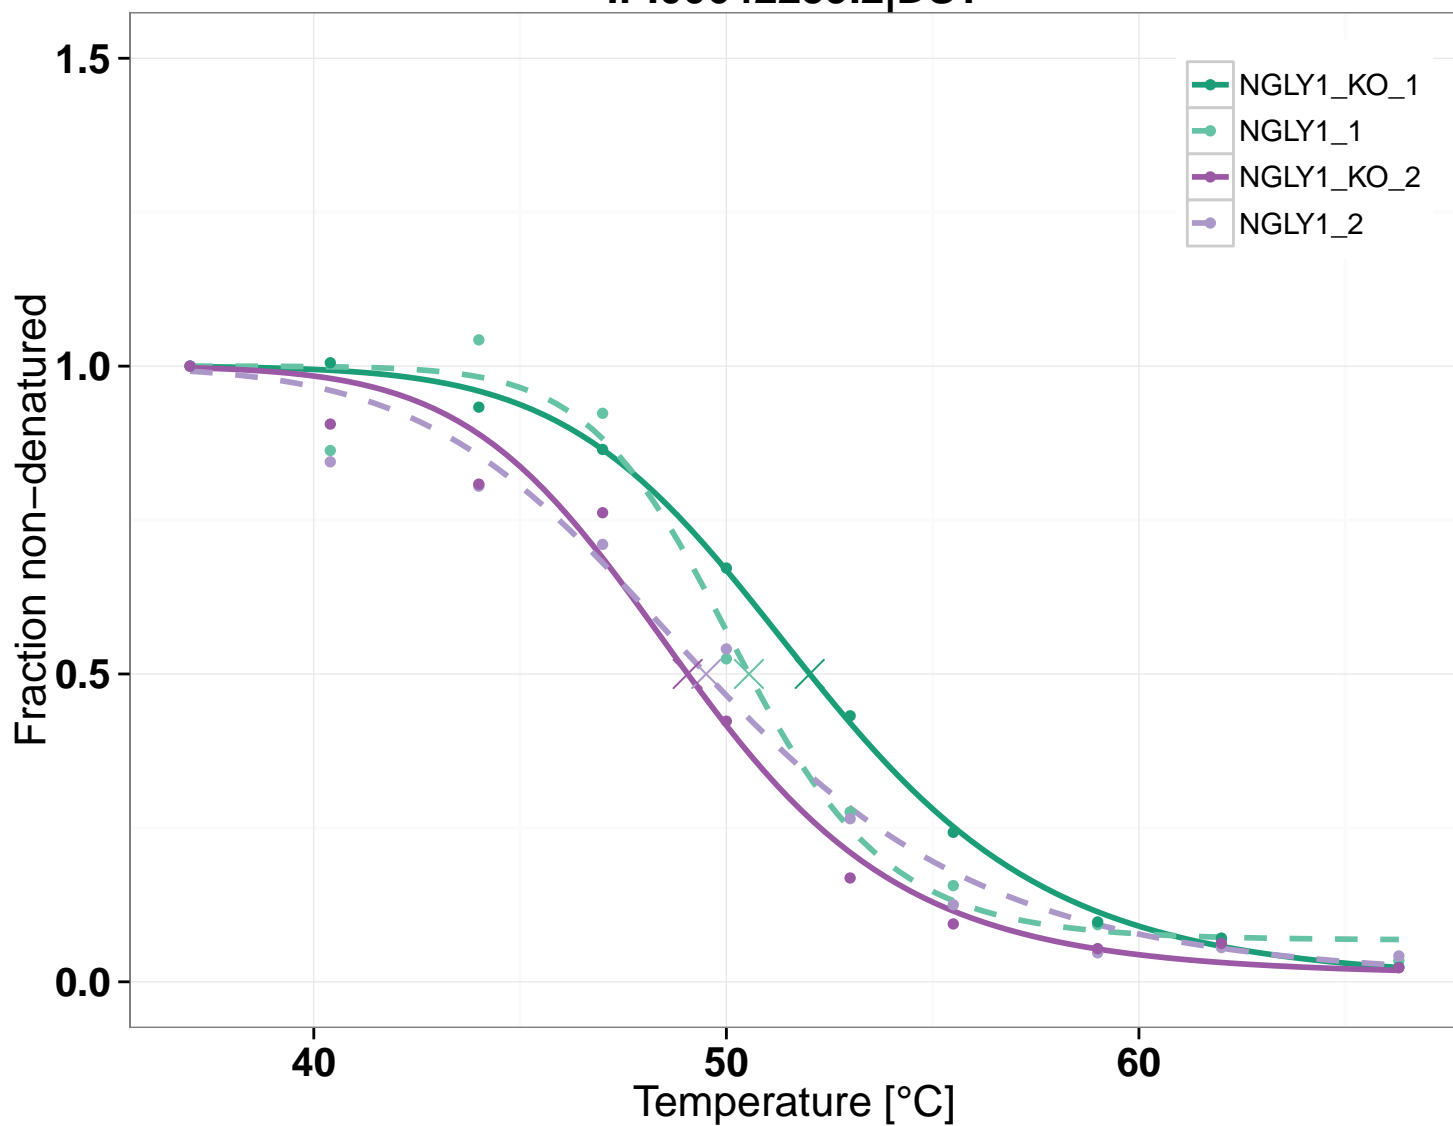

|            | meltPoint | slope  | plateau | R2   |
|------------|-----------|--------|---------|------|
| NGLY1_KO_1 | 52.02     | -0.085 | 0       | 1    |
| NGLY1_1    | 50.55     | -0.13  | 0.07    | 0.98 |
| NGLY1_KO_2 | 49.06     | -0.093 | 0.01    | 0.99 |
| NGLY1_2    | 49.51     | -0.073 | 0       | 0.98 |

Supplement: Supplementary file 1407 [file 1]
