# Supplementary material (part 15 of 85)
Source: publisher figshare collection journal article supplement (https://gsajournals.figshare.com/articles/dataset/_/12014913)

# IPI00016339.4|RAB5C

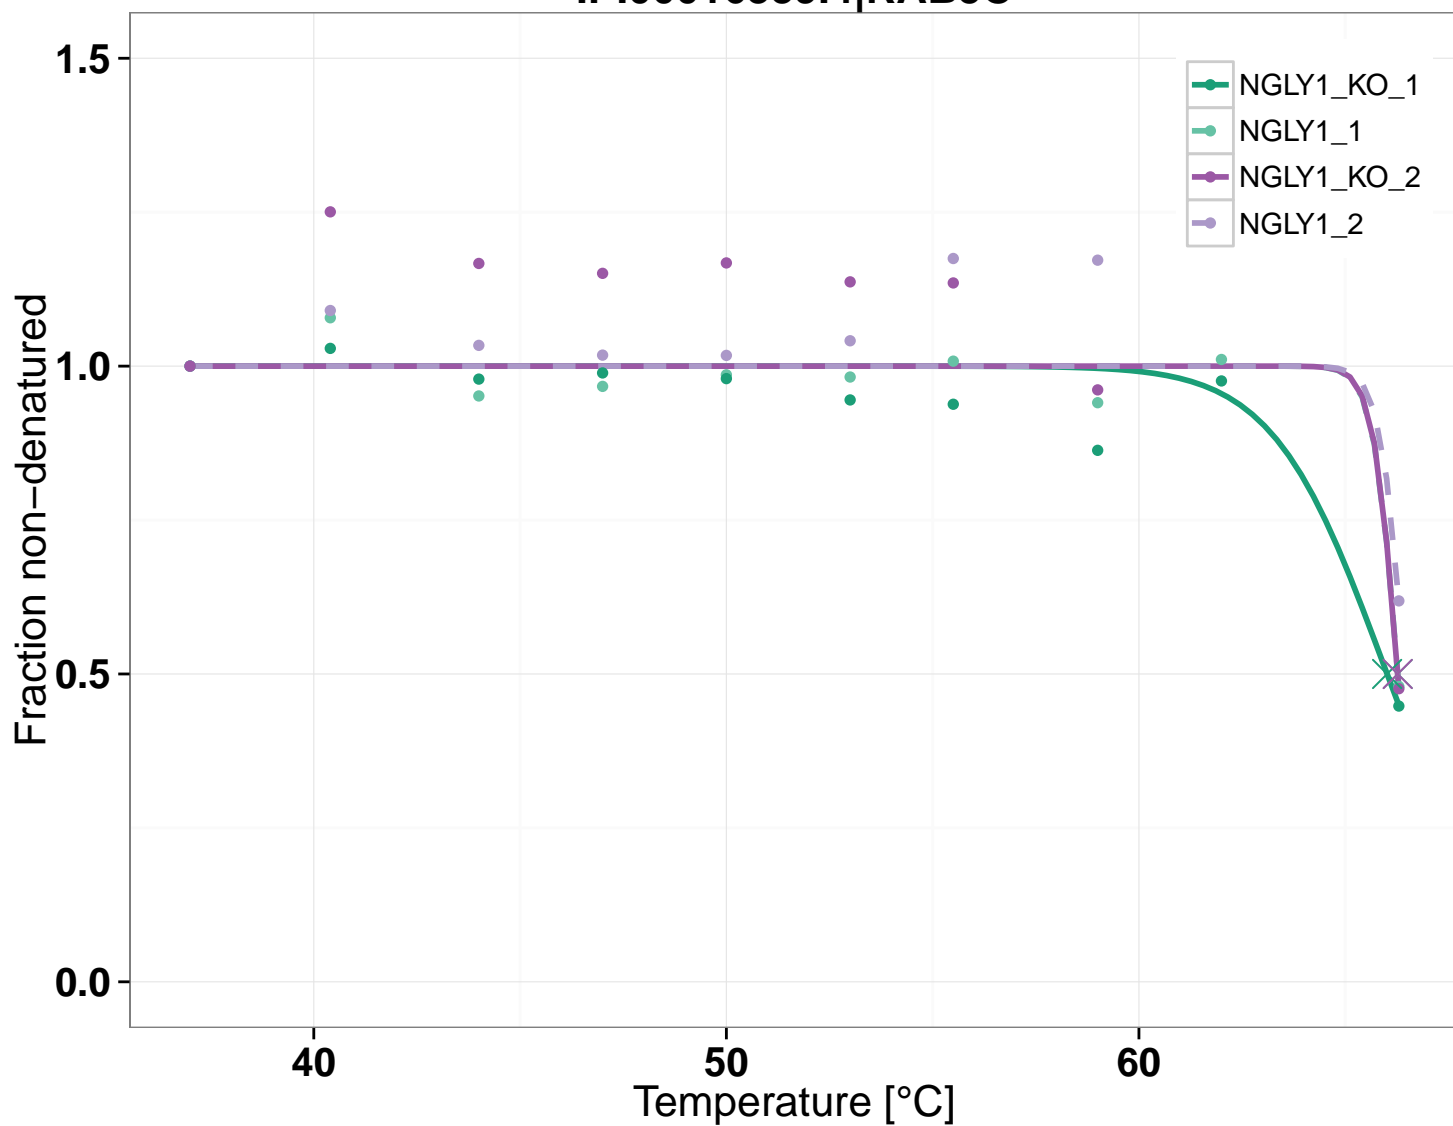

|            | meltPoint | slope | plateau | R2   |
|------------|-----------|-------|---------|------|
| NGLY1_KO_1 | 66.02     | -0.18 | 0       | 0.9  |
| NGLY1_1    | 66.28     | -0.84 | 0       | 0.94 |
| NGLY1_KO_2 | 66.27     | -0.85 | 0       | 0.38 |
| NGLY1_2    | -         | -     | 0       | 0.28 |

Supplement: Supplementary file 1408 [file 1]

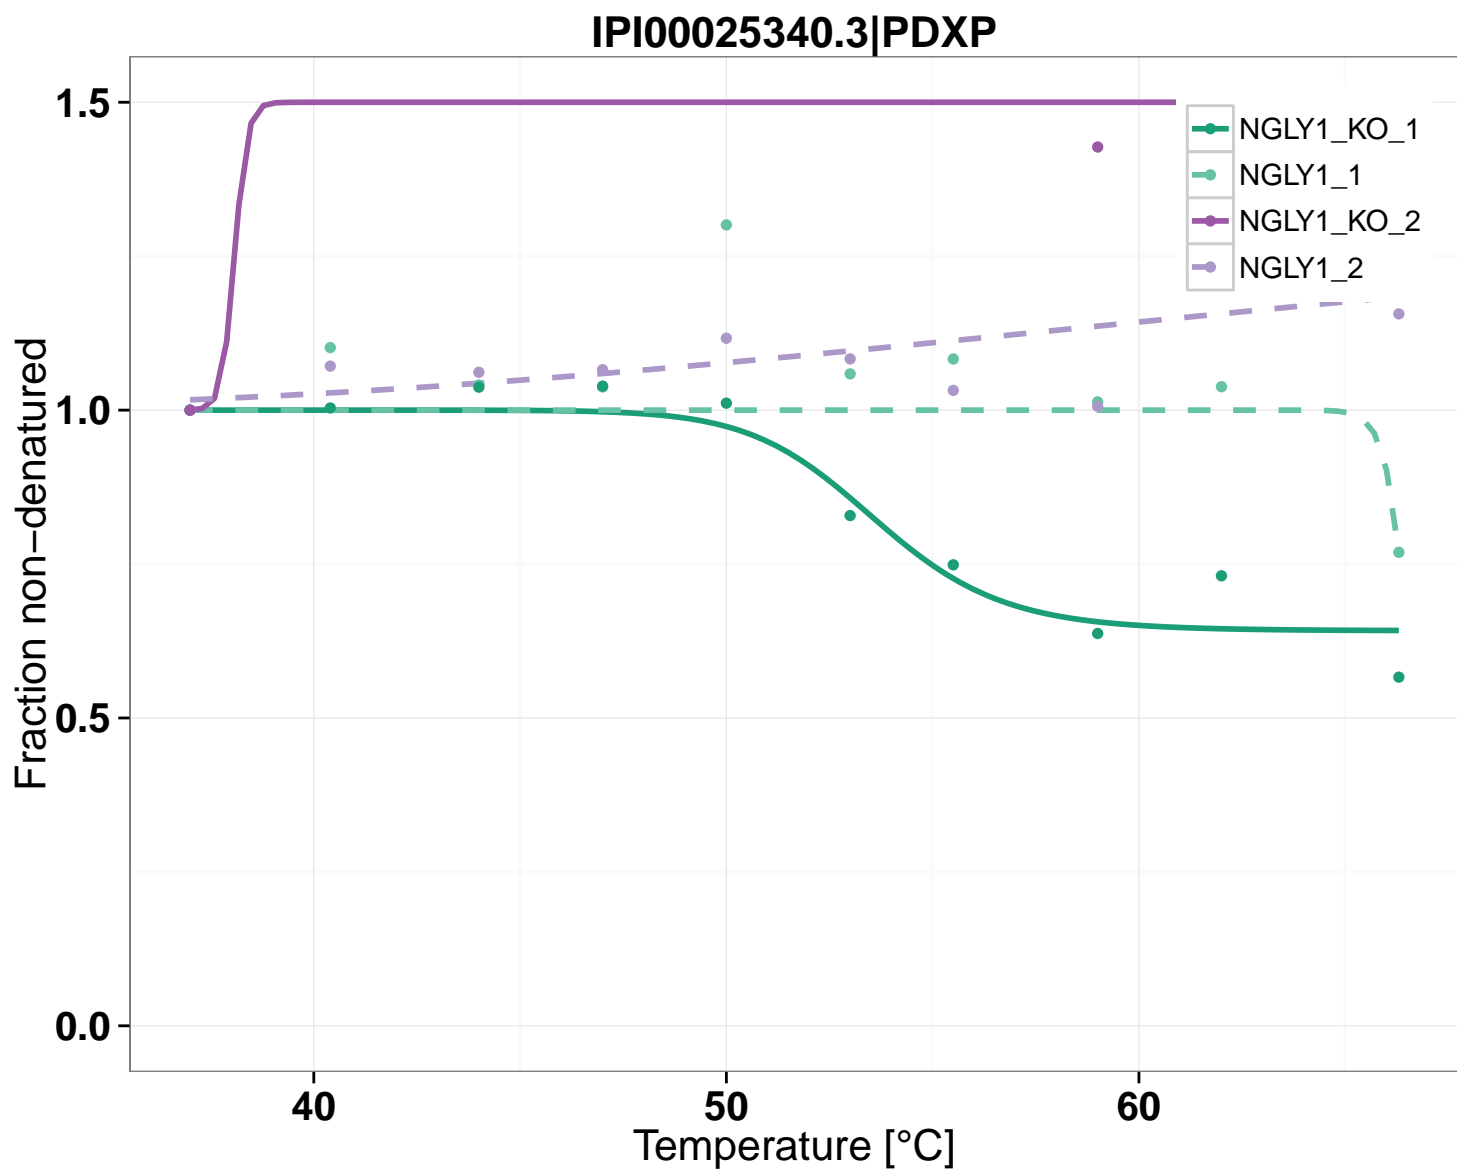

|            | meltPoint | slope  | plateau | R2   |
|------------|-----------|--------|---------|------|
| NGLY1_KO_1 | –         | –0.058 | 0.64    | 0.93 |
| NGLY1_1    | –         | –      | 0       | 0.23 |
| NGLY1_KO_2 | –         | 0.82   | 1.5     | 0.07 |
| NGLY1_2    | –         | 0.0067 | 1.5     | 0.29 |

Supplement: Supplementary file 1409 [file 1]

# IPI00456492.2|CROCC

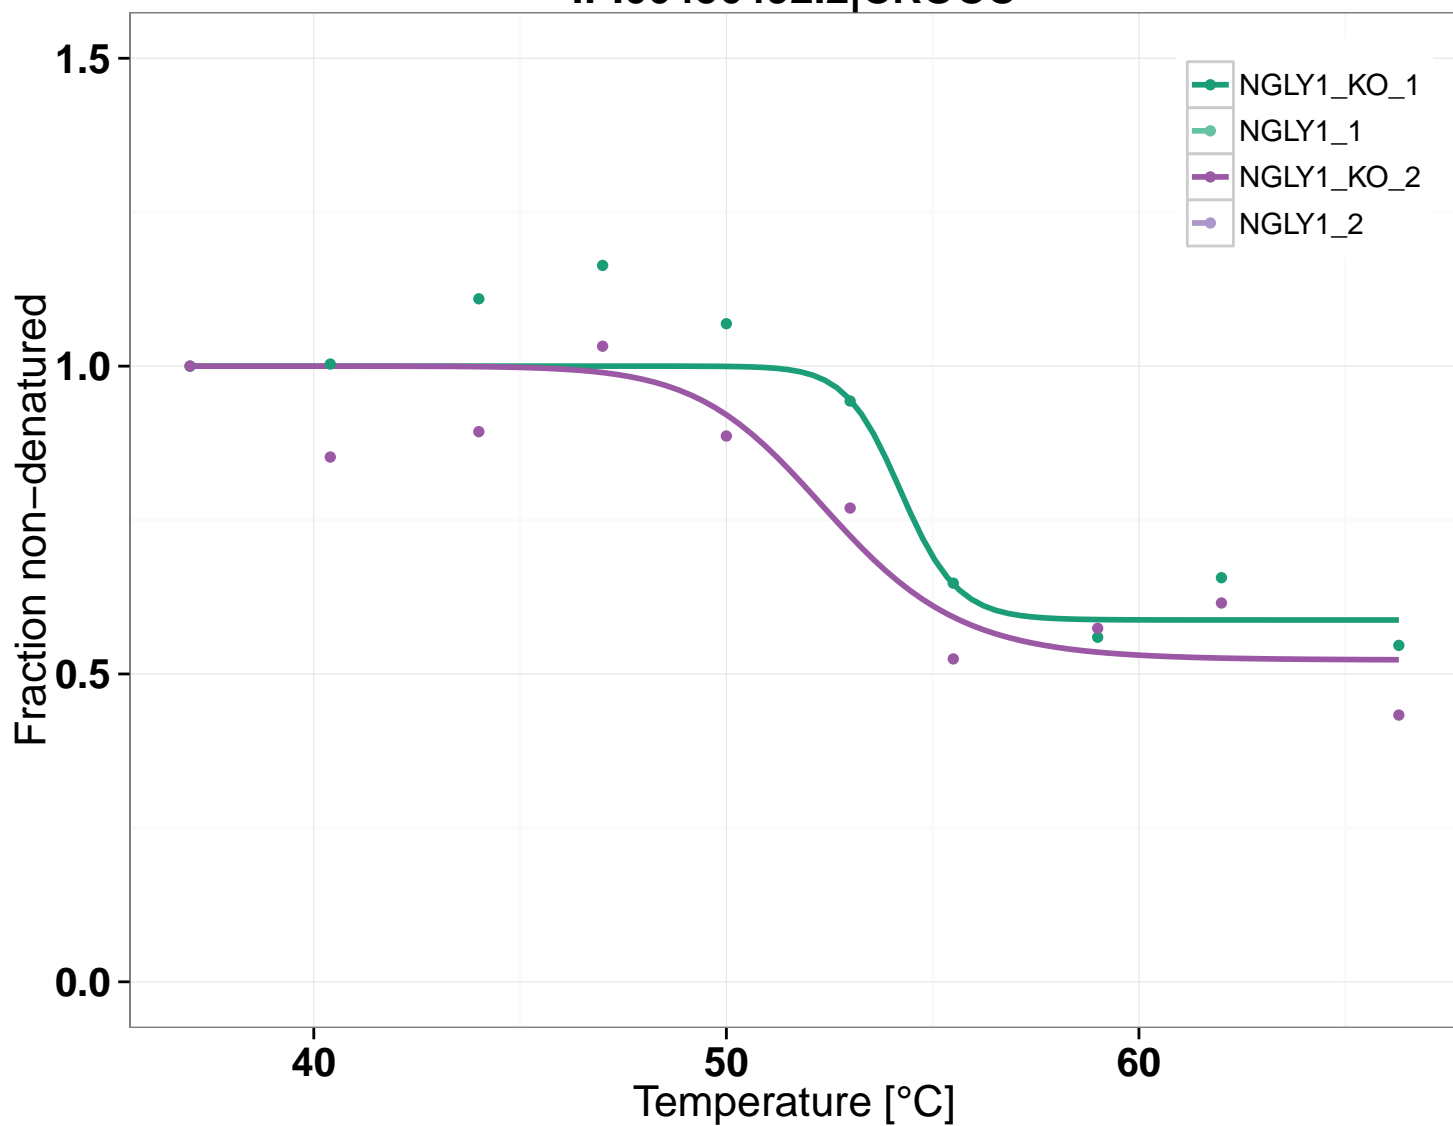

|            | meltPoint | slope  | plateau | R2   |
|------------|-----------|--------|---------|------|
| NGLY1_KO_1 | —         | -0.15  | 0.59    | 0.9  |
| NGLY1_1    | —         | —      | —       | —    |
| NGLY1_KO_2 | —         | -0.074 | 0.52    | 0.85 |
| NGLY1_2    | —         | —      | —       | —    |

Supplement: Supplementary file 1410 [file 1]

IPI00018260.1|ARMC1

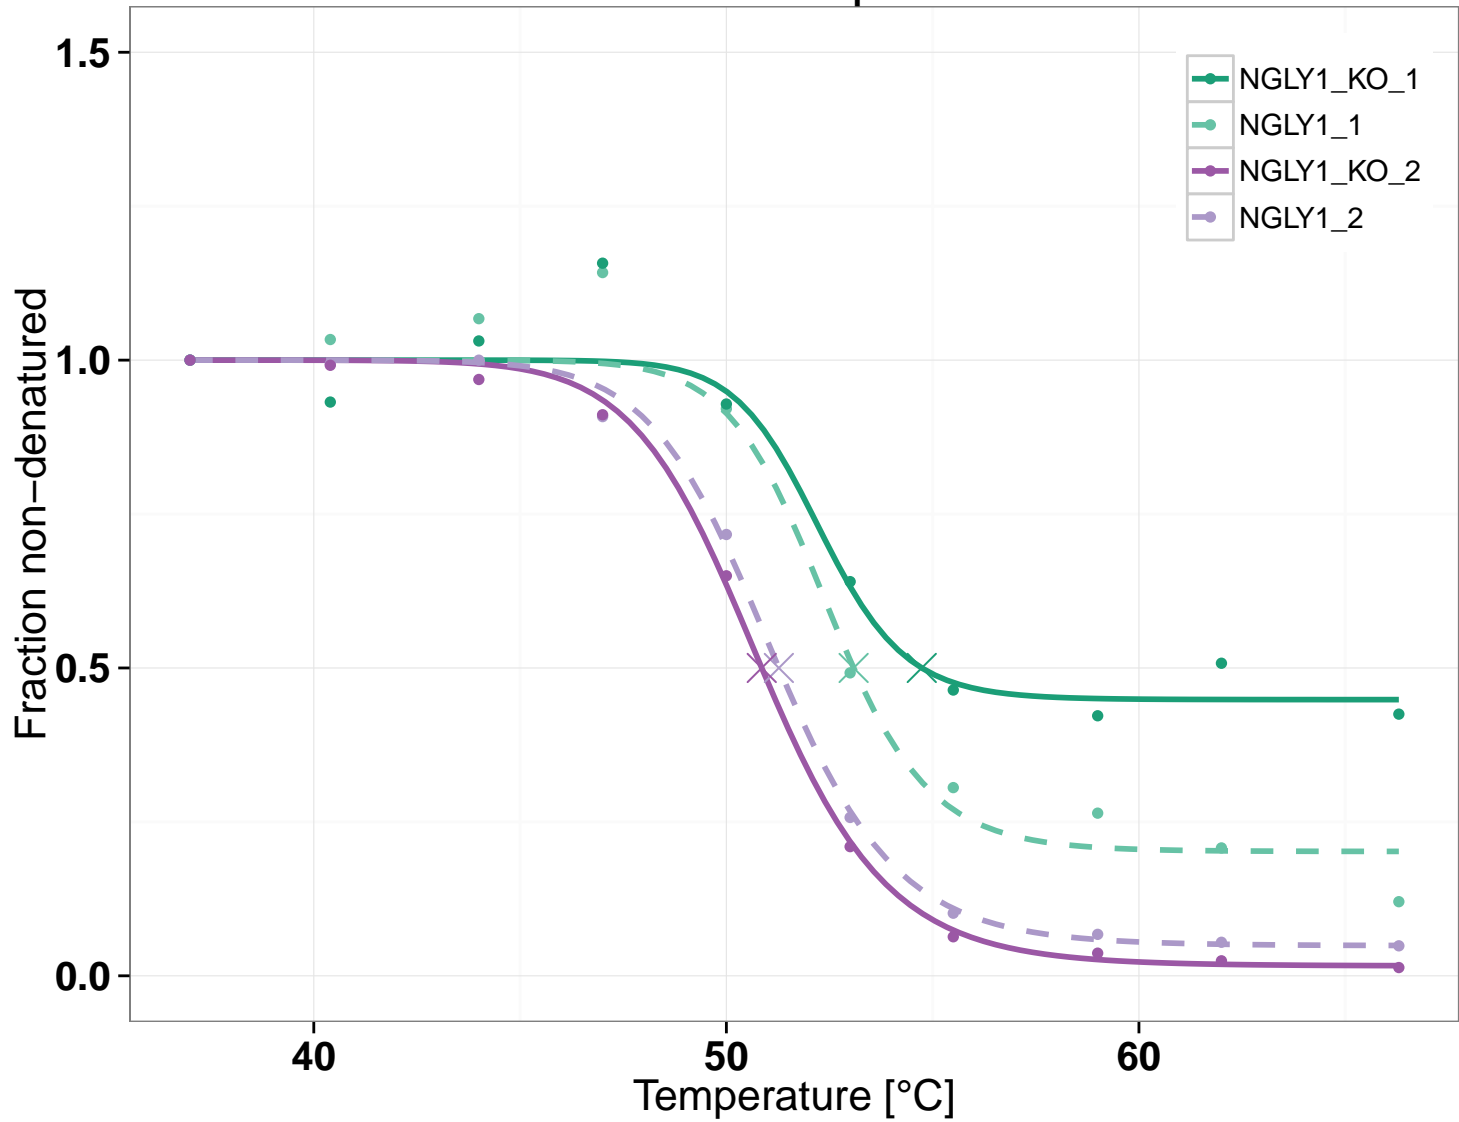

|            | meltPoint | slope | plateau | R2   |
|------------|-----------|-------|---------|------|
| NGLY1_KO_1 | 54.74     | -0.13 | 0.45    | 0.95 |
| NGLY1_1    | 53.08     | -0.16 | 0.2     | 0.97 |
| NGLY1_KO_2 | 50.86     | -0.16 | 0.02    | 1    |
| NGLY1_2    | 51.27     | -0.16 | 0.05    | 1    |

Supplement: Supplementary file 1411 [file 1]

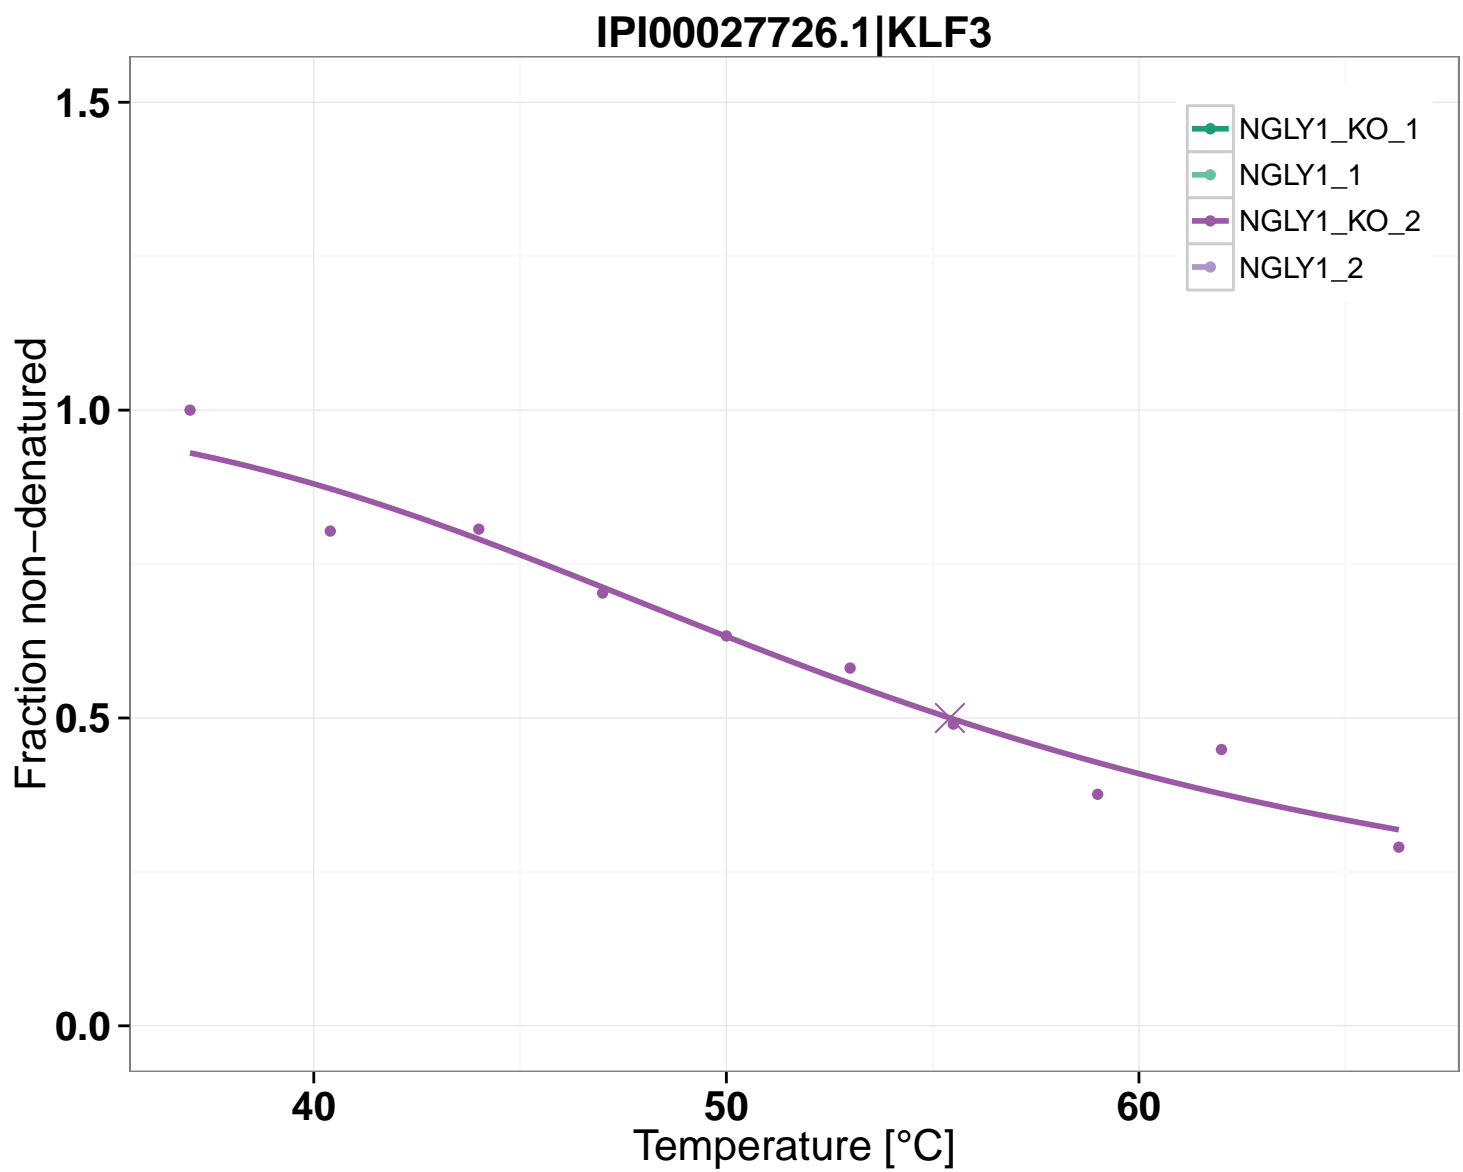

|            | meltPoint | slope  | plateau | R2   |
|------------|-----------|--------|---------|------|
| NGLY1_KO_1 | —         | —      | —       | —    |
| NGLY1_1    | —         | —      | —       | —    |
| NGLY1_KO_2 | 55.42     | -0.027 | 0.09    | 0.96 |
| NGLY1_2    | —         | —      | —       | —    |

Supplement: Supplementary file 1412 [file 1]

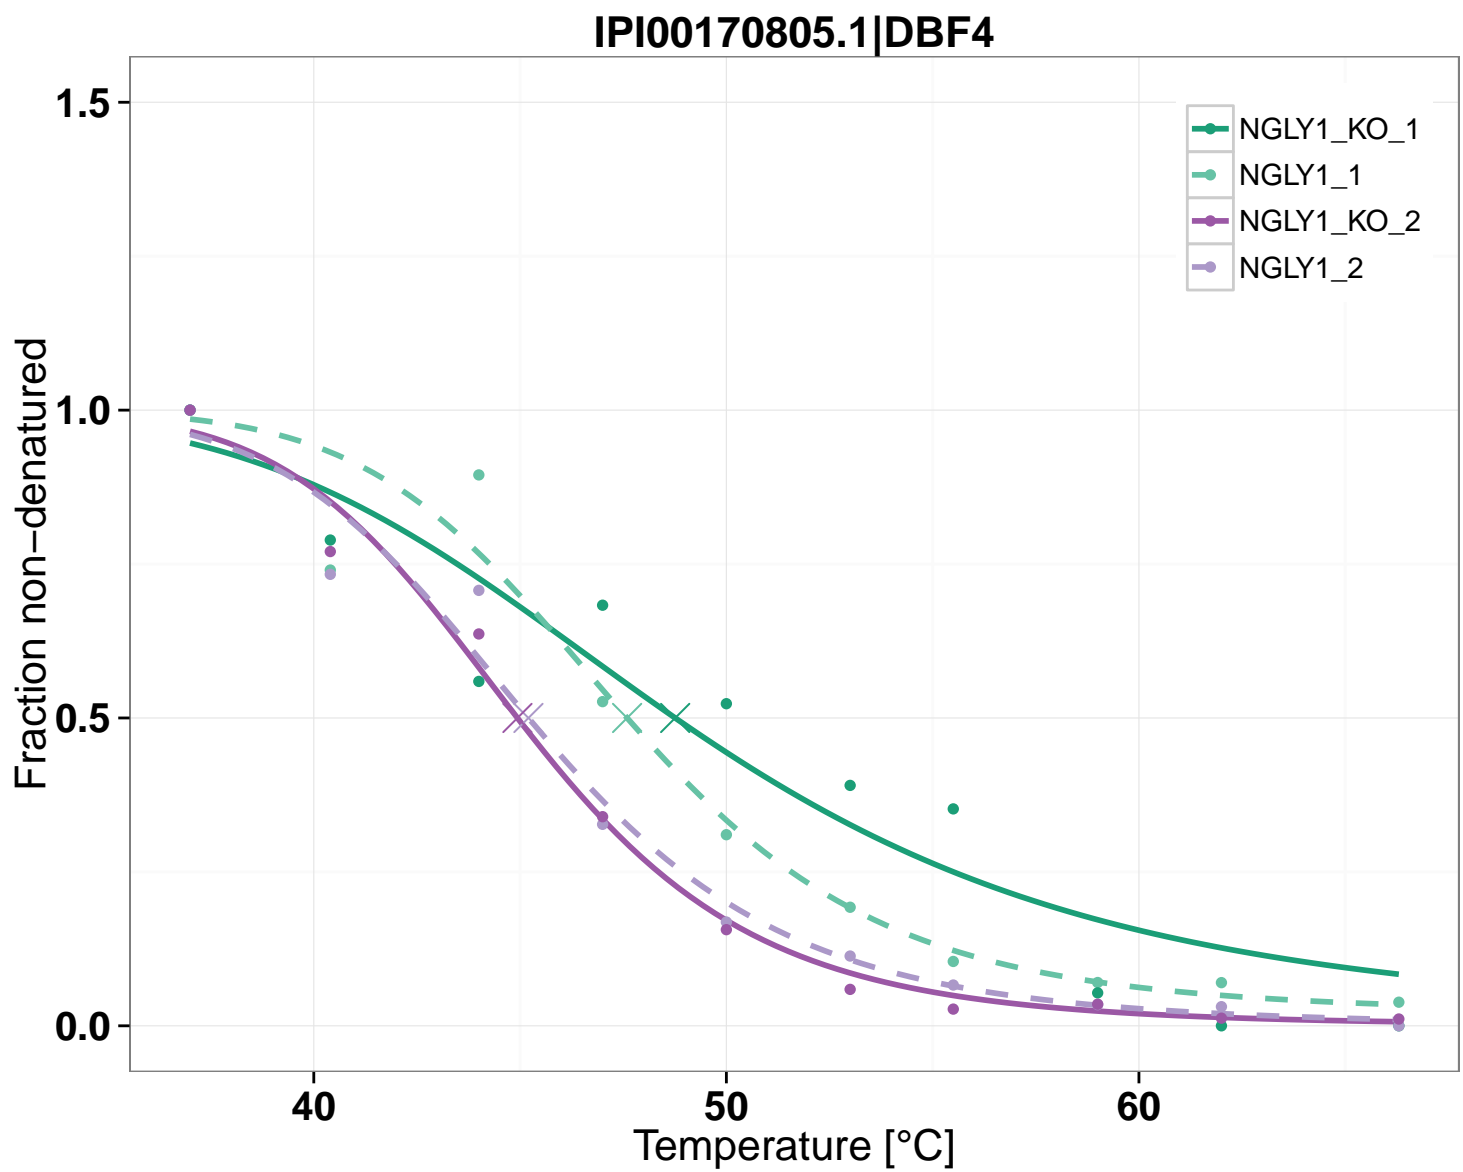

|            | meltPoint | slope  | plateau | R2   |
|------------|-----------|--------|---------|------|
| NGLY1_KO_1 | 48.76     | -0.049 | 0       | 0.9  |
| NGLY1_1    | 47.59     | -0.078 | 0.02    | 0.96 |
| NGLY1_KO_2 | 44.94     | -0.088 | 0       | 0.99 |
| NGLY1_2    | 45.2      | -0.081 | 0       | 0.98 |

Supplement: Supplementary file 1413 [file 1]

# IPI00013488.4|CHN1

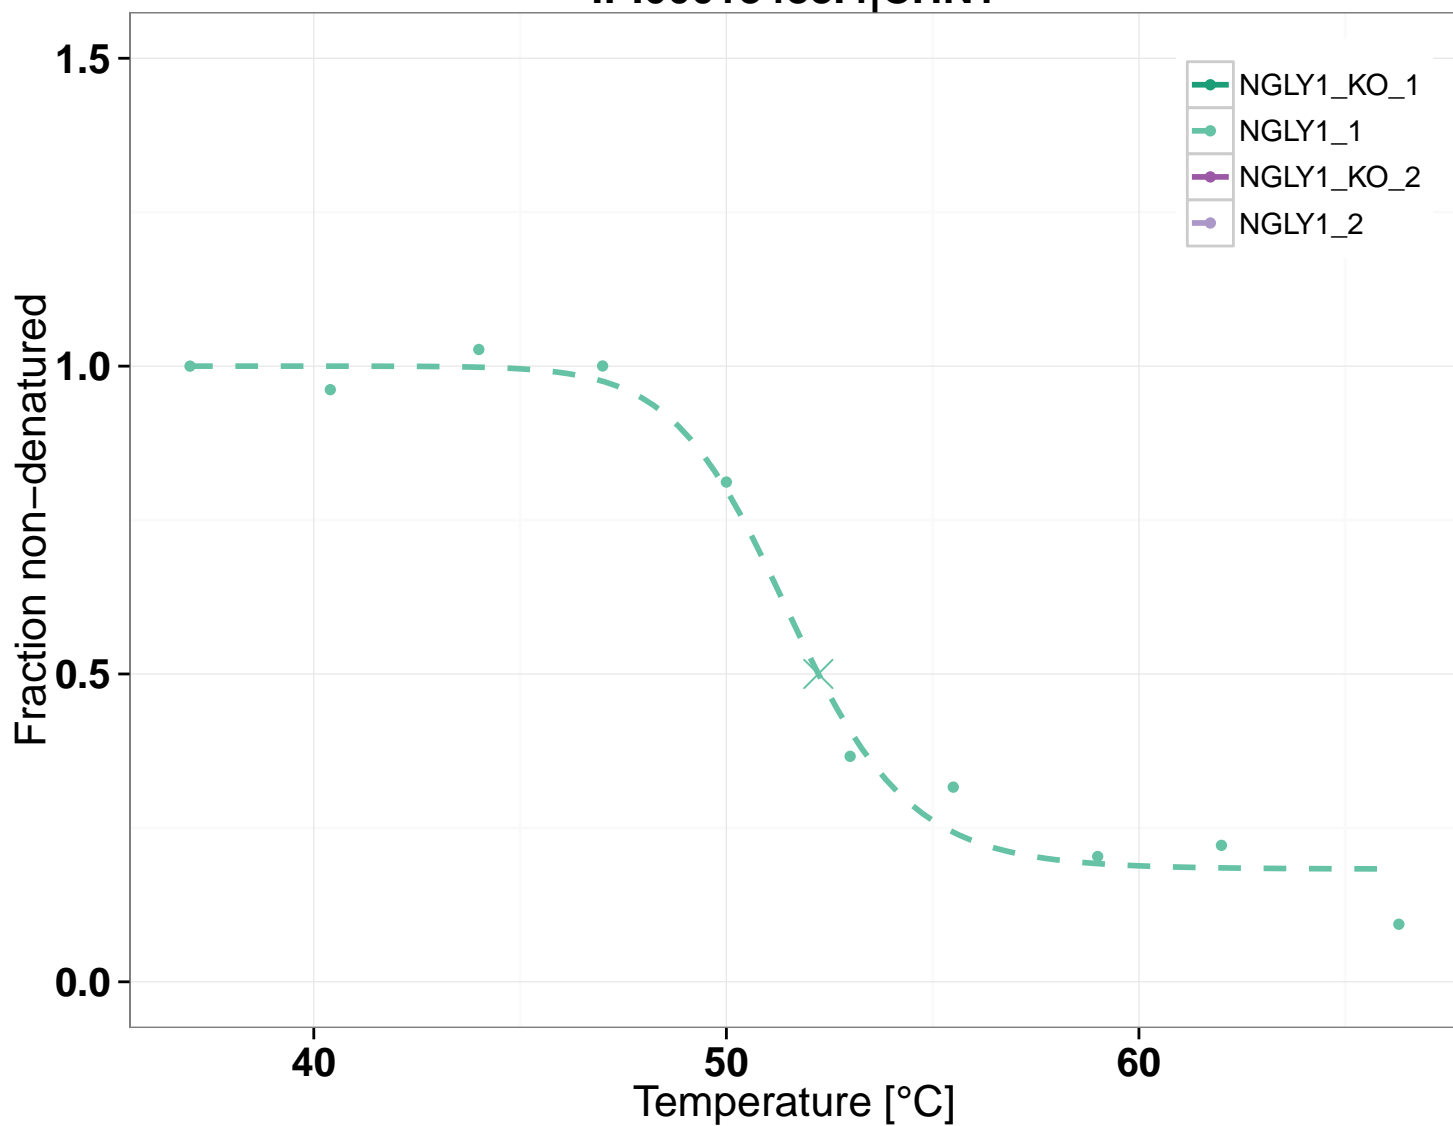

|            | meltPoint | slope | plateau | R2   |
|------------|-----------|-------|---------|------|
| NGLY1_KO_1 | -         | -     | -       | -    |
| NGLY1_1    | 52.23     | -0.14 | 0.18    | 0.99 |
| NGLY1_KO_2 | -         | -     | -       | -    |
| NGLY1_2    | -         | -     | -       | -    |

Supplement: Supplementary file 1414 [file 1]

IPI00442274.3|NFXL1

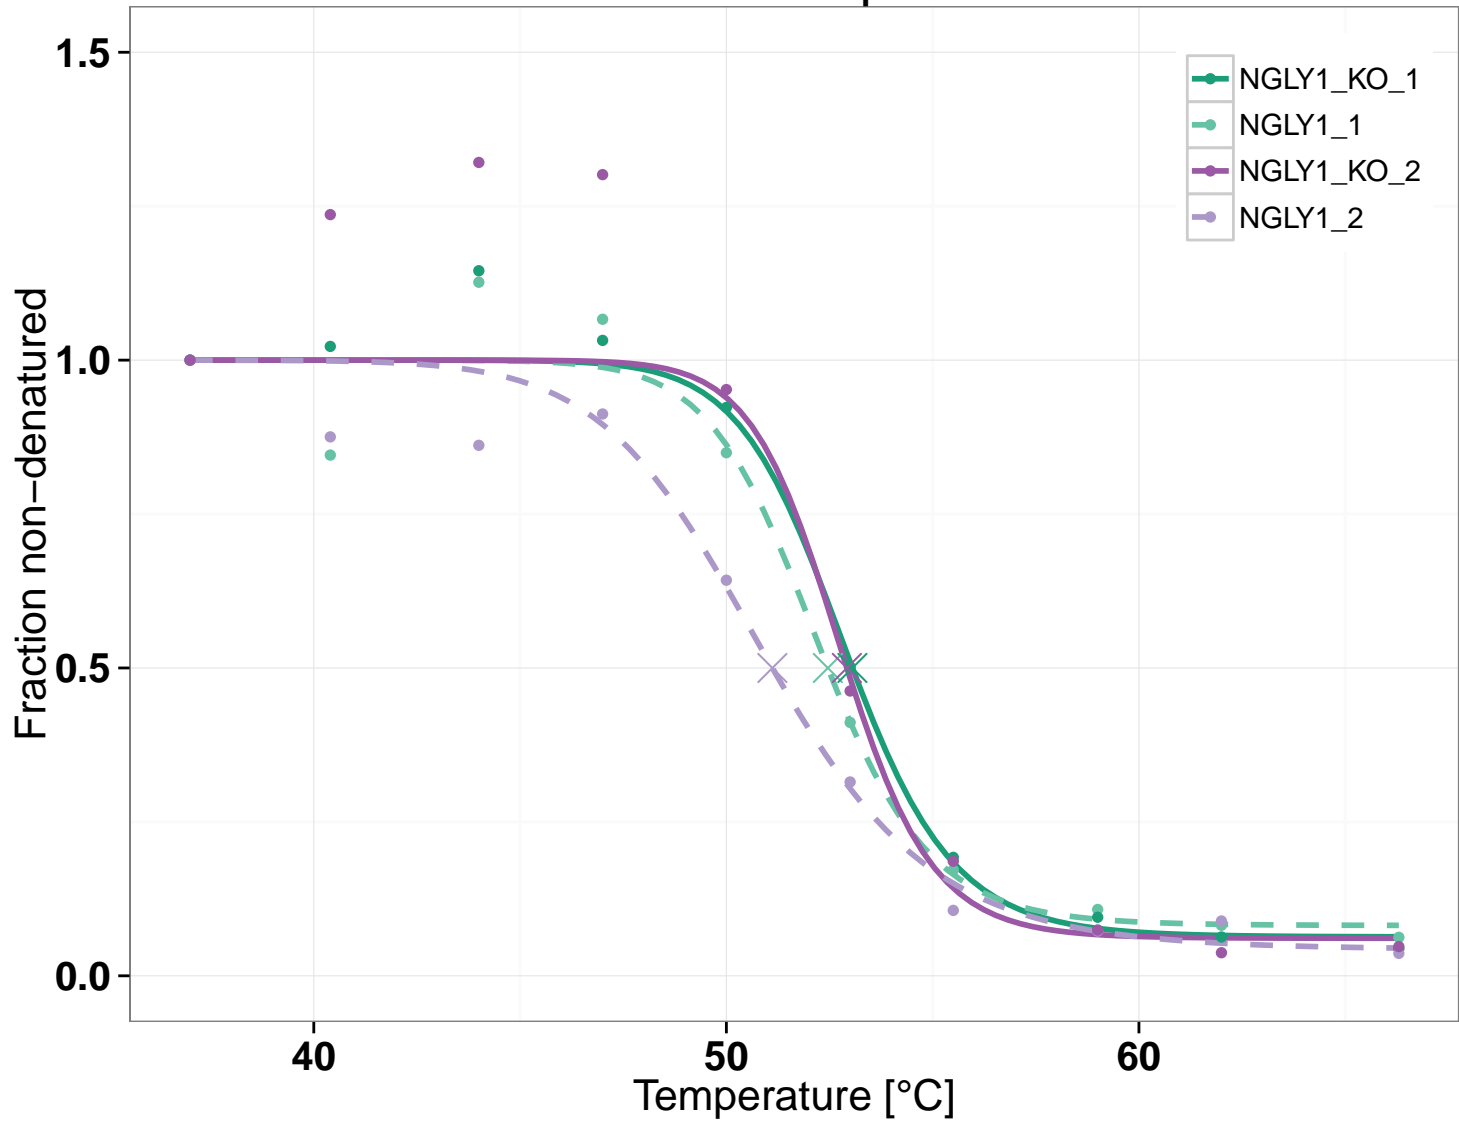

|            | meltPoint | slope | plateau | R2   |
|------------|-----------|-------|---------|------|
| NGLY1_KO_1 | 53.06     | -0.18 | 0.06    | 0.99 |
| NGLY1_1    | 52.46     | -0.17 | 0.08    | 0.97 |
| NGLY1_KO_2 | 52.92     | -0.21 | 0.06    | 0.91 |
| NGLY1_2    | 51.12     | -0.12 | 0.04    | 0.98 |

Supplement: Supplementary file 1415 [file 1]

IPI00006203.3|ZBED1

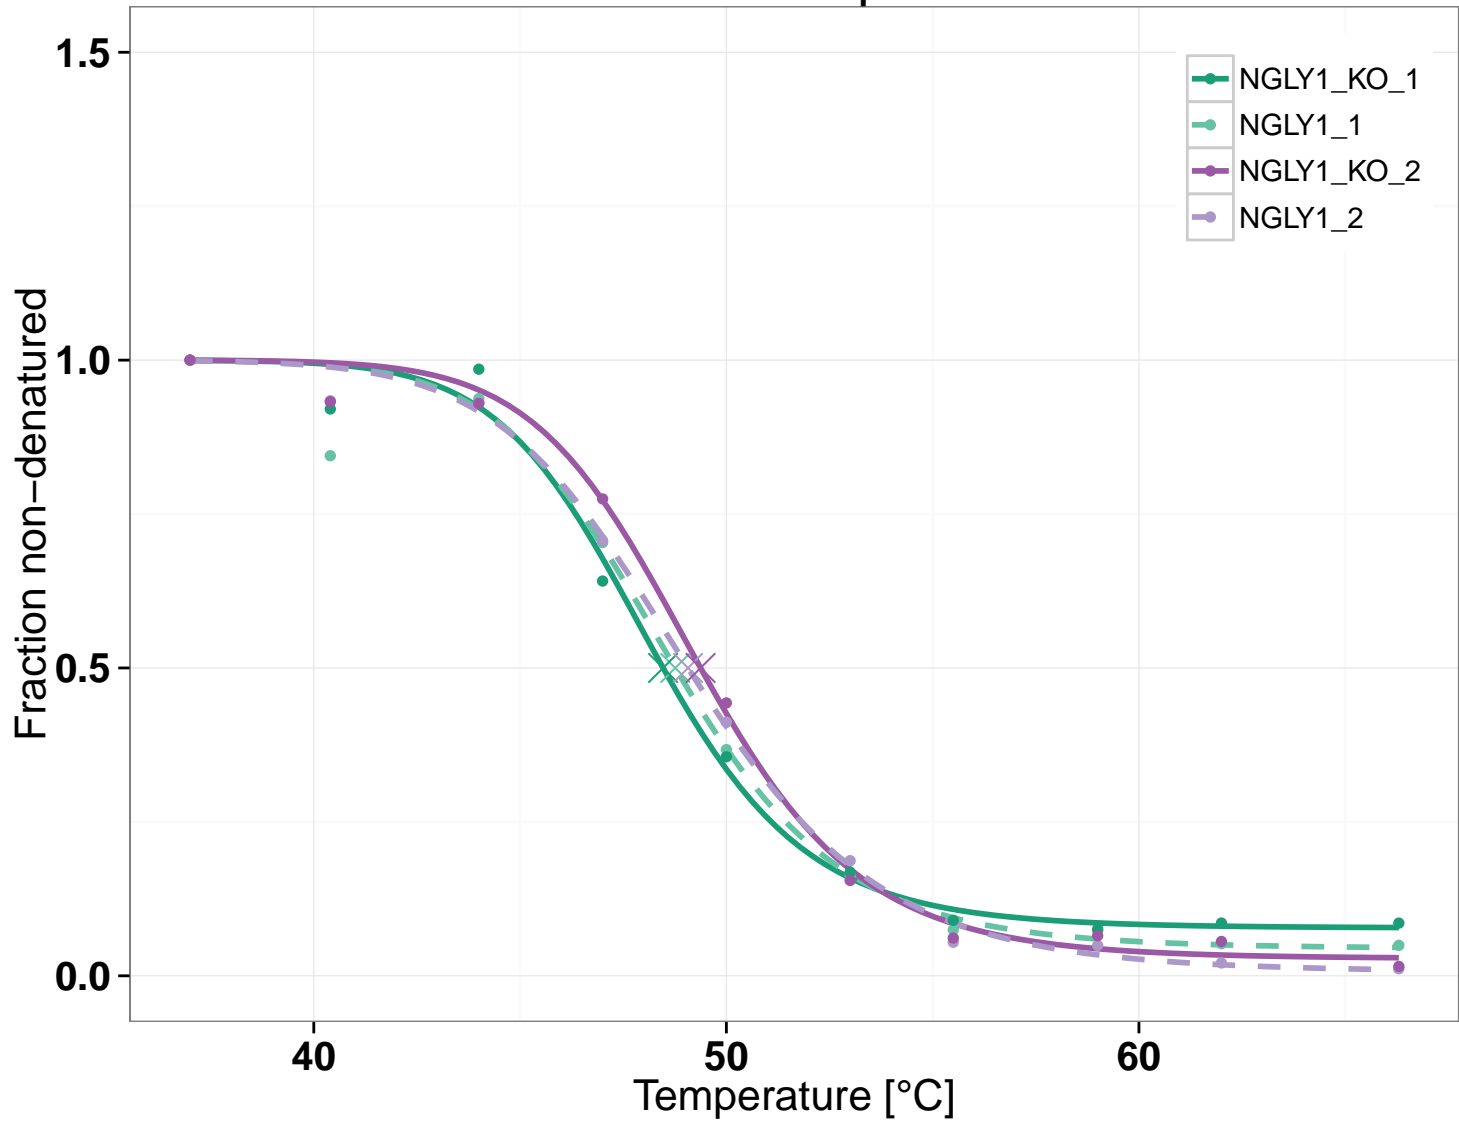

|            | meltPoint | slope | plateau | R2   |
|------------|-----------|-------|---------|------|
| NGLY1_KO_1 | 48.47     | -0.12 | 0.08    | 0.99 |
| NGLY1_1    | 48.76     | -0.11 | 0.04    | 0.98 |
| NGLY1_KO_2 | 49.38     | -0.12 | 0.03    | 1    |
| NGLY1_2    | 49.07     | -0.11 | 0.01    | 1    |

Supplement: Supplementary file 1416 [file 1]

IPI00477526.2|C7ORF28A

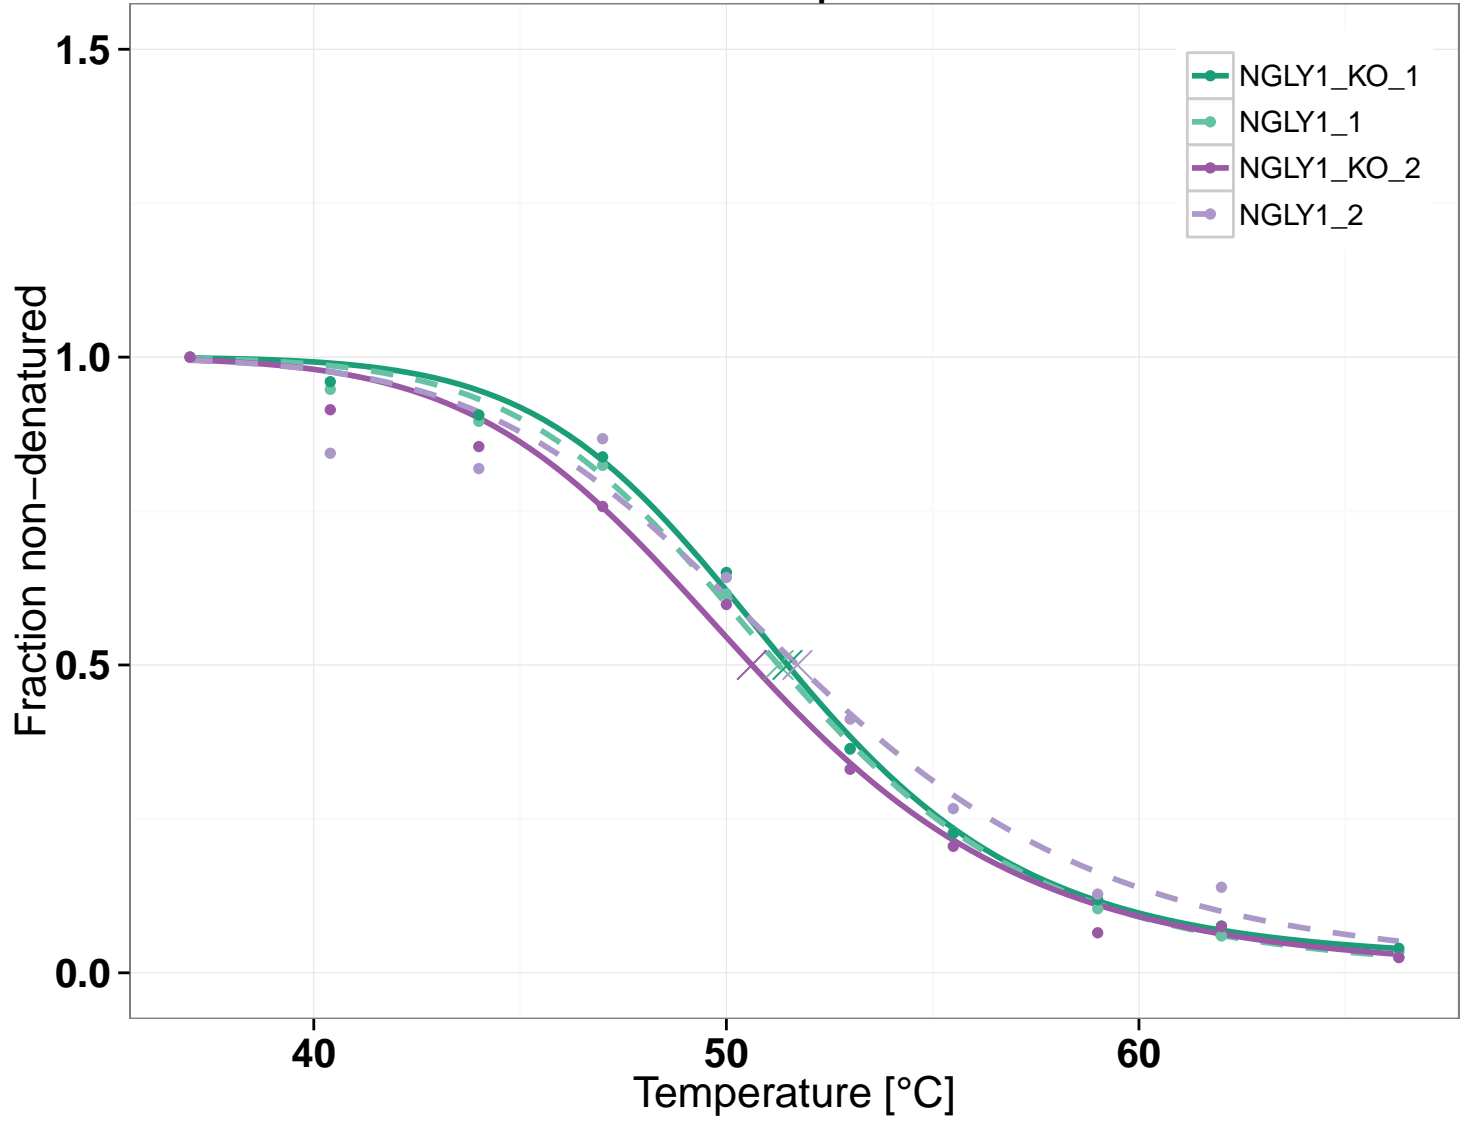

|            | meltPoint | slope  | plateau | R2   |
|------------|-----------|--------|---------|------|
| NGLY1_KO_1 | 51.48     | -0.082 | 0.02    | 1    |
| NGLY1_1    | 51.27     | -0.078 | 0       | 1    |
| NGLY1_KO_2 | 50.62     | -0.074 | 0       | 0.99 |
| NGLY1_2    | 51.72     | -0.066 | 0       | 0.97 |

Supplement: Supplementary file 1417 [file 1]

# IPI00604620.3|NCL

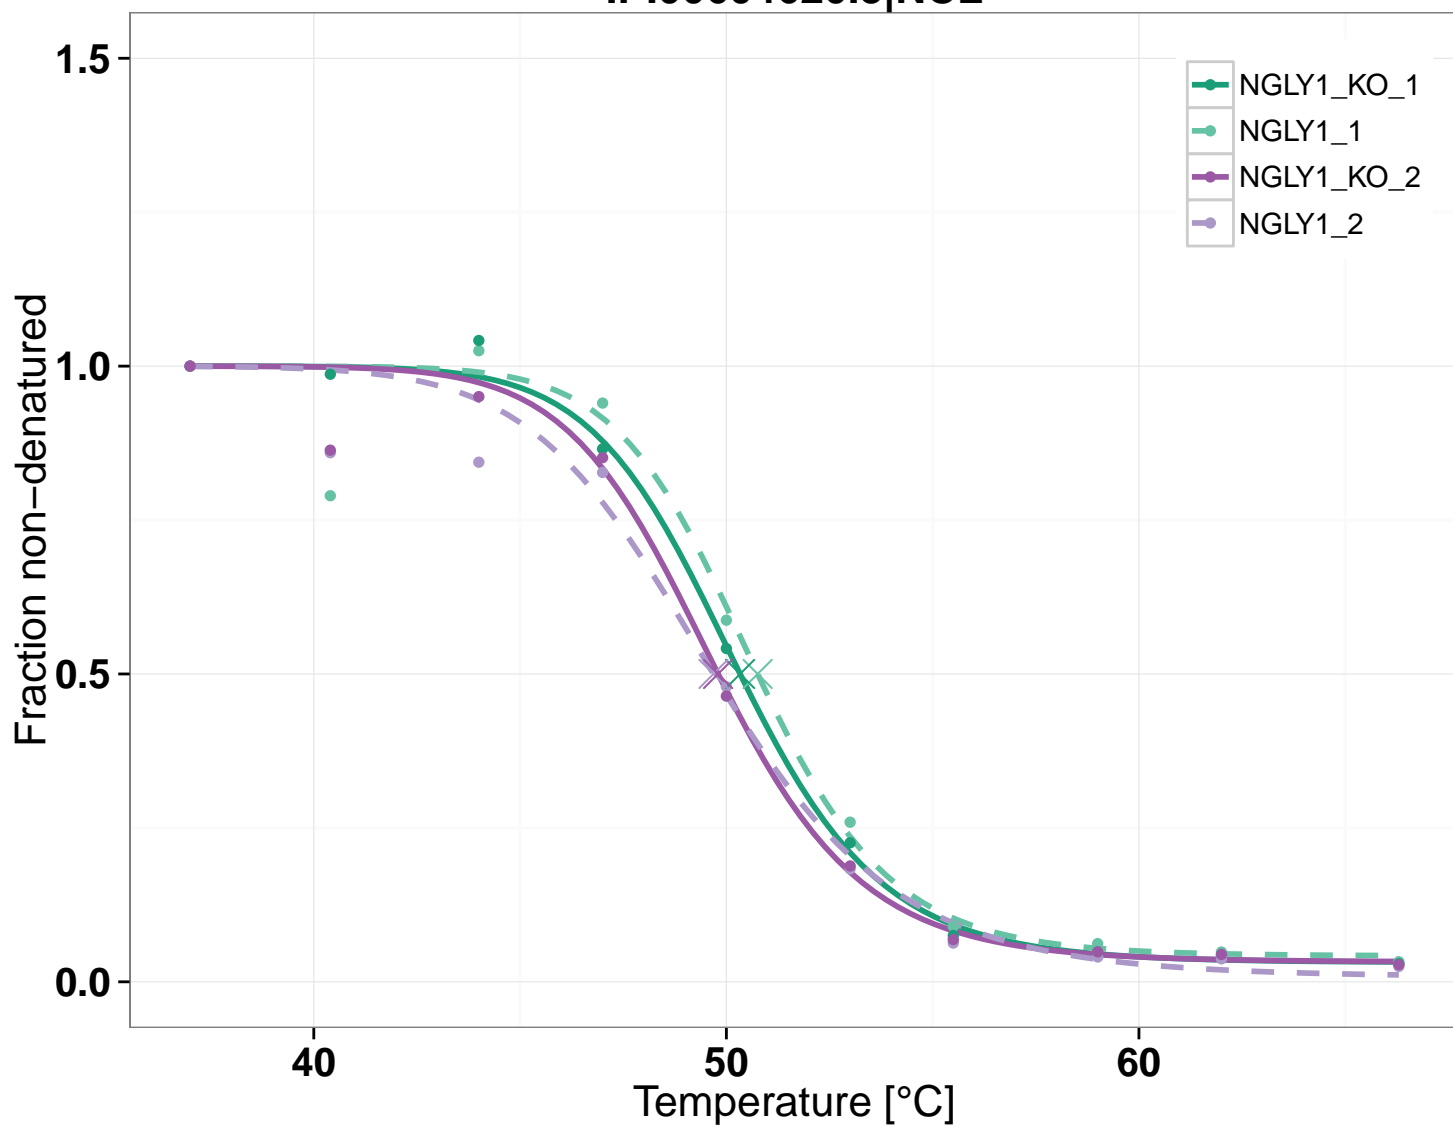

|            | meltPoint | slope | plateau | R2   |
|------------|-----------|-------|---------|------|
| NGLY1_KO_1 | 50.33     | -0.14 | 0.03    | 1    |
| NGLY1_1    | 50.76     | -0.14 | 0.04    | 0.97 |
| NGLY1_KO_2 | 49.8      | -0.14 | 0.03    | 0.99 |
| NGLY1_2    | 49.69     | -0.11 | 0.01    | 0.98 |

Supplement: Supplementary file 1418 [file 1]

# IPI00478472.3|GREB1

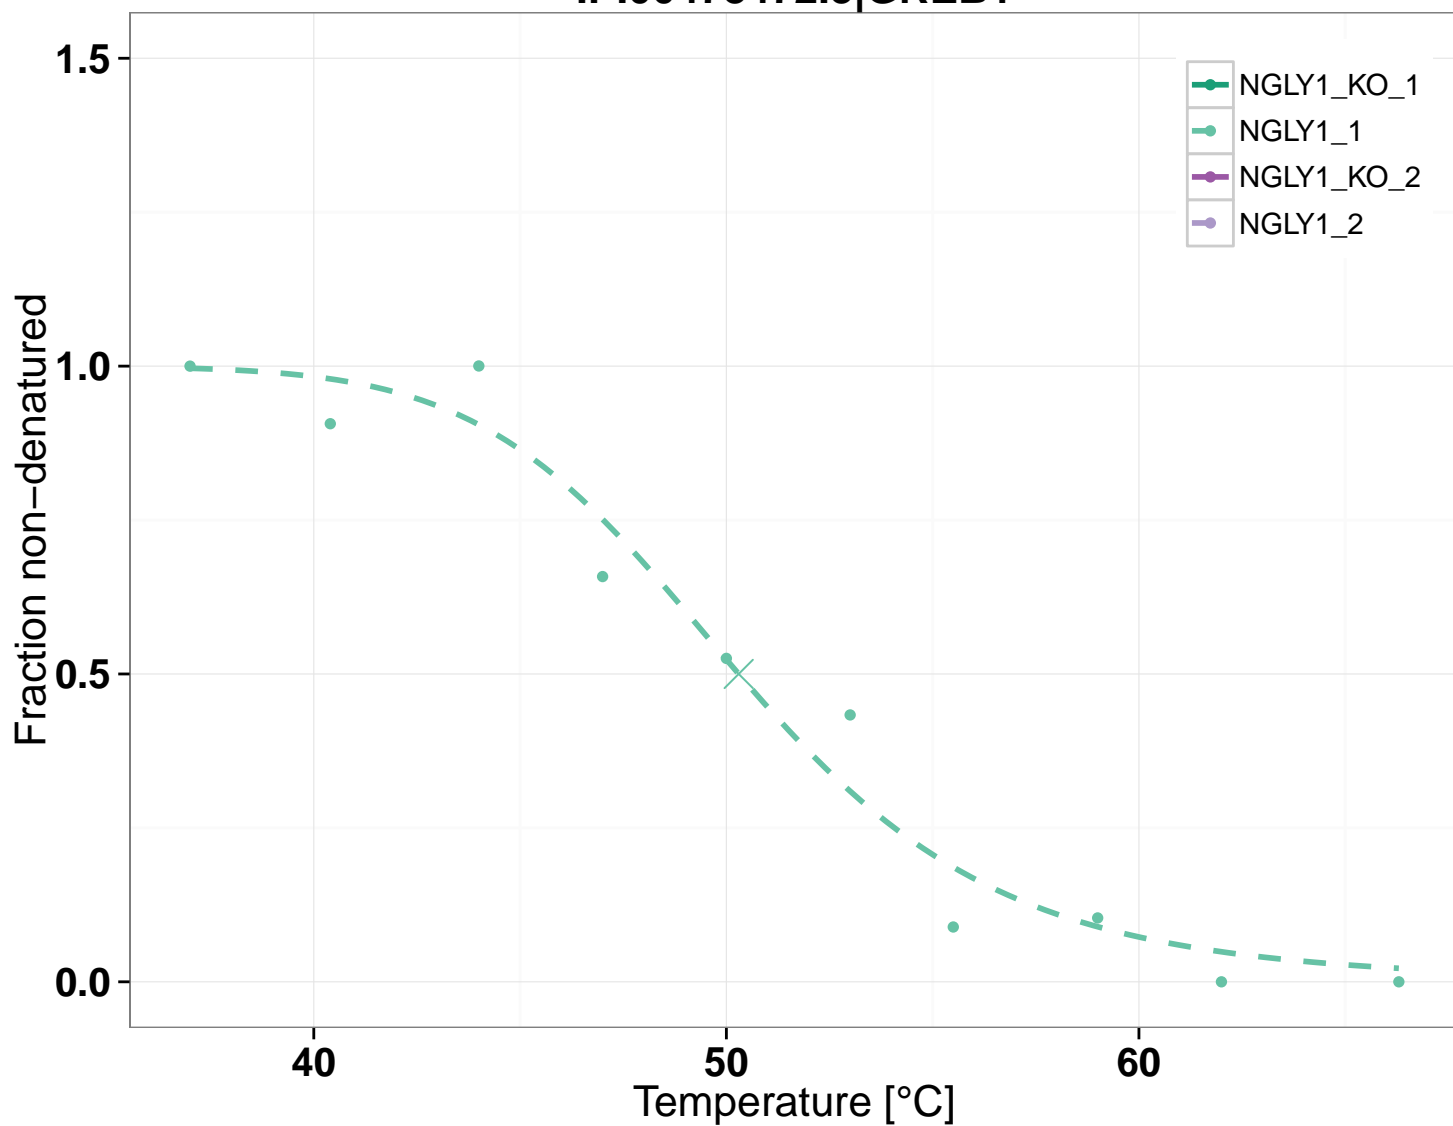

|            | meltPoint | slope  | plateau | R2   |
|------------|-----------|--------|---------|------|
| NGLY1_KO_1 | —         | —      | —       | —    |
| NGLY1_1    | 50.3      | -0.079 | 0       | 0.97 |
| NGLY1_KO_2 | —         | —      | —       | —    |
| NGLY1_2    | —         | —      | —       | —    |

Supplement: Supplementary file 1419 [file 1]

IPI00017817.3|APBA2

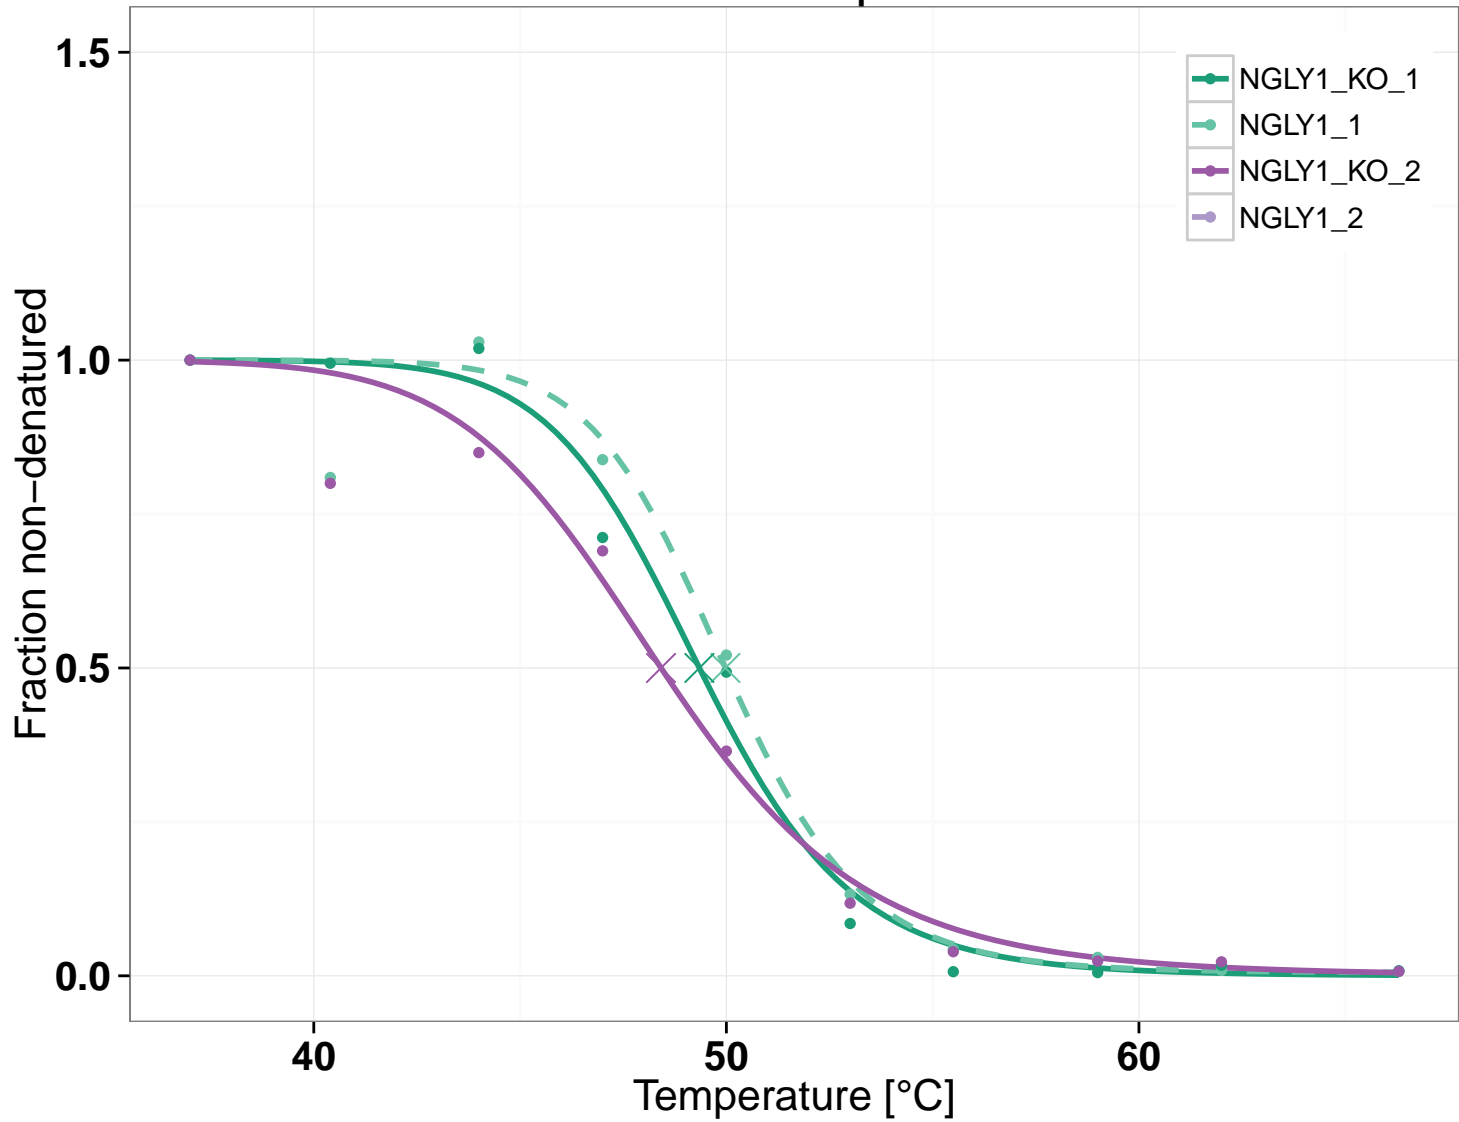

|            | meltPoint | slope | plateau | R2   |
|------------|-----------|-------|---------|------|
| NGLY1_KO_1 | 49.35     | -0.14 | 0       | 0.99 |
| NGLY1_1    | 49.98     | -0.15 | 0.01    | 0.98 |
| NGLY1_KO_2 | 48.42     | -0.1  | 0       | 0.97 |
| NGLY1_2    | -         | -     | -       | -    |

Supplement: Supplementary file 1420 [file 1]

# IPI00872889.1|WDR59

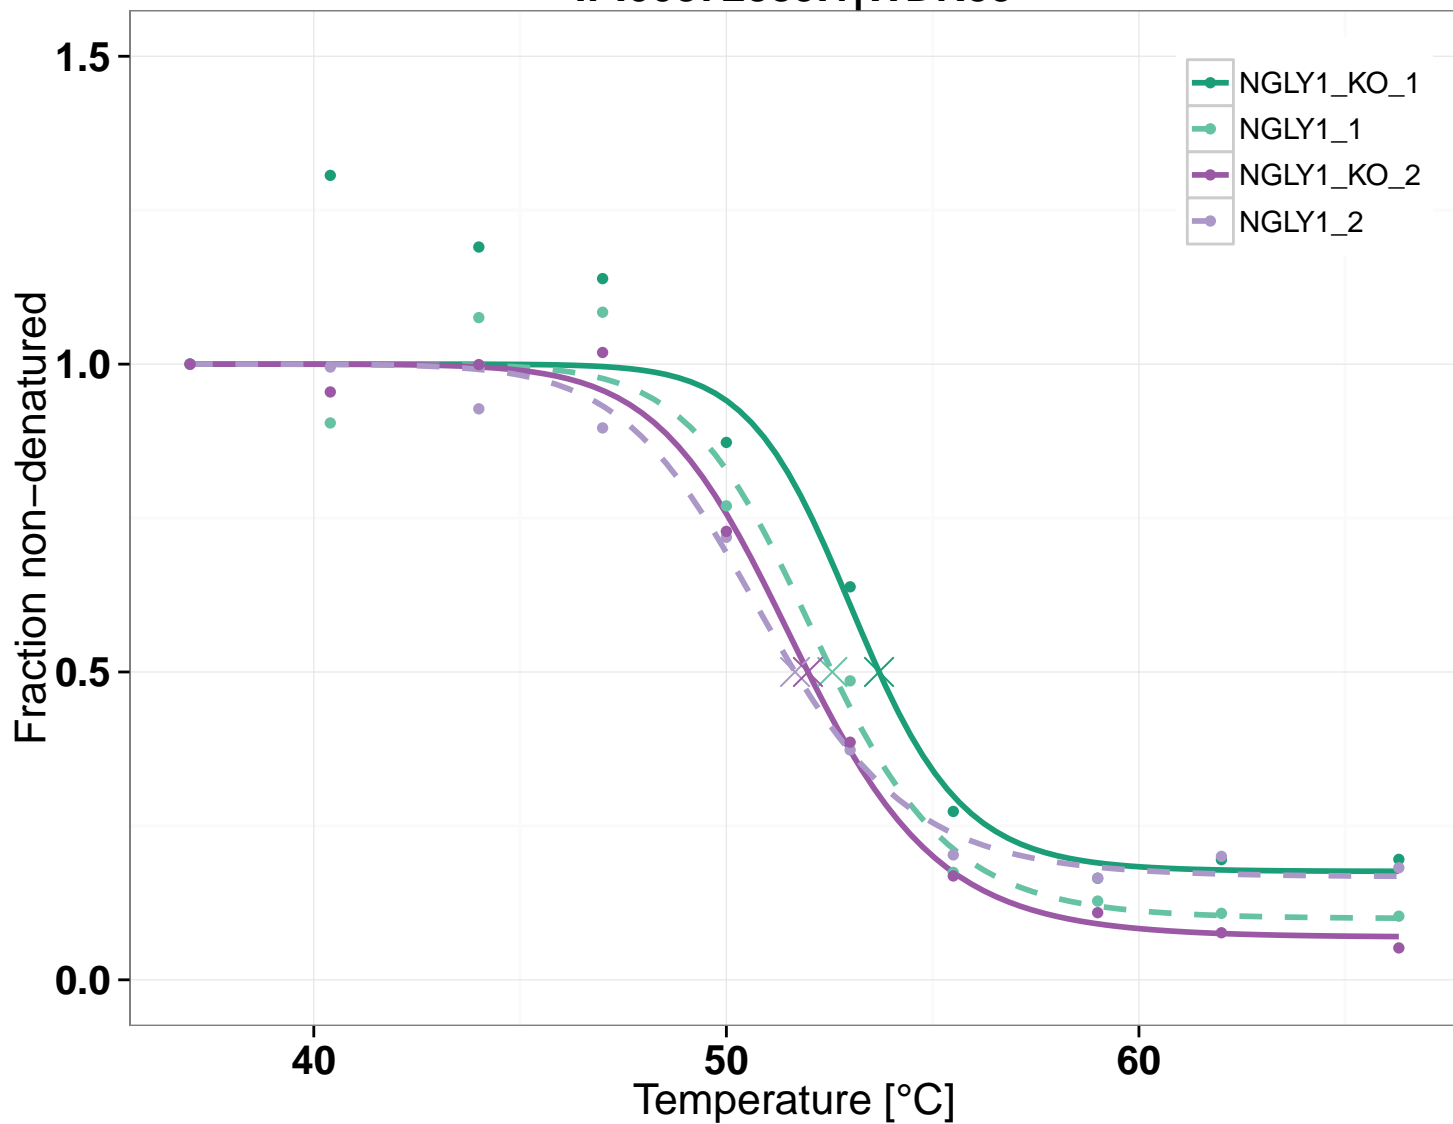

|            | meltPoint | slope | plateau | R2   |
|------------|-----------|-------|---------|------|
| NGLY1_KO_1 | 53.7      | -0.16 | 0.18    | 0.92 |
| NGLY1_1    | 52.57     | -0.14 | 0.1     | 0.98 |
| NGLY1_KO_2 | 51.98     | -0.14 | 0.07    | 1    |
| NGLY1_2    | 51.66     | -0.12 | 0.17    | 0.99 |

Supplement: Supplementary file 1421 [file 1]

# IPI00007362.2|UTX

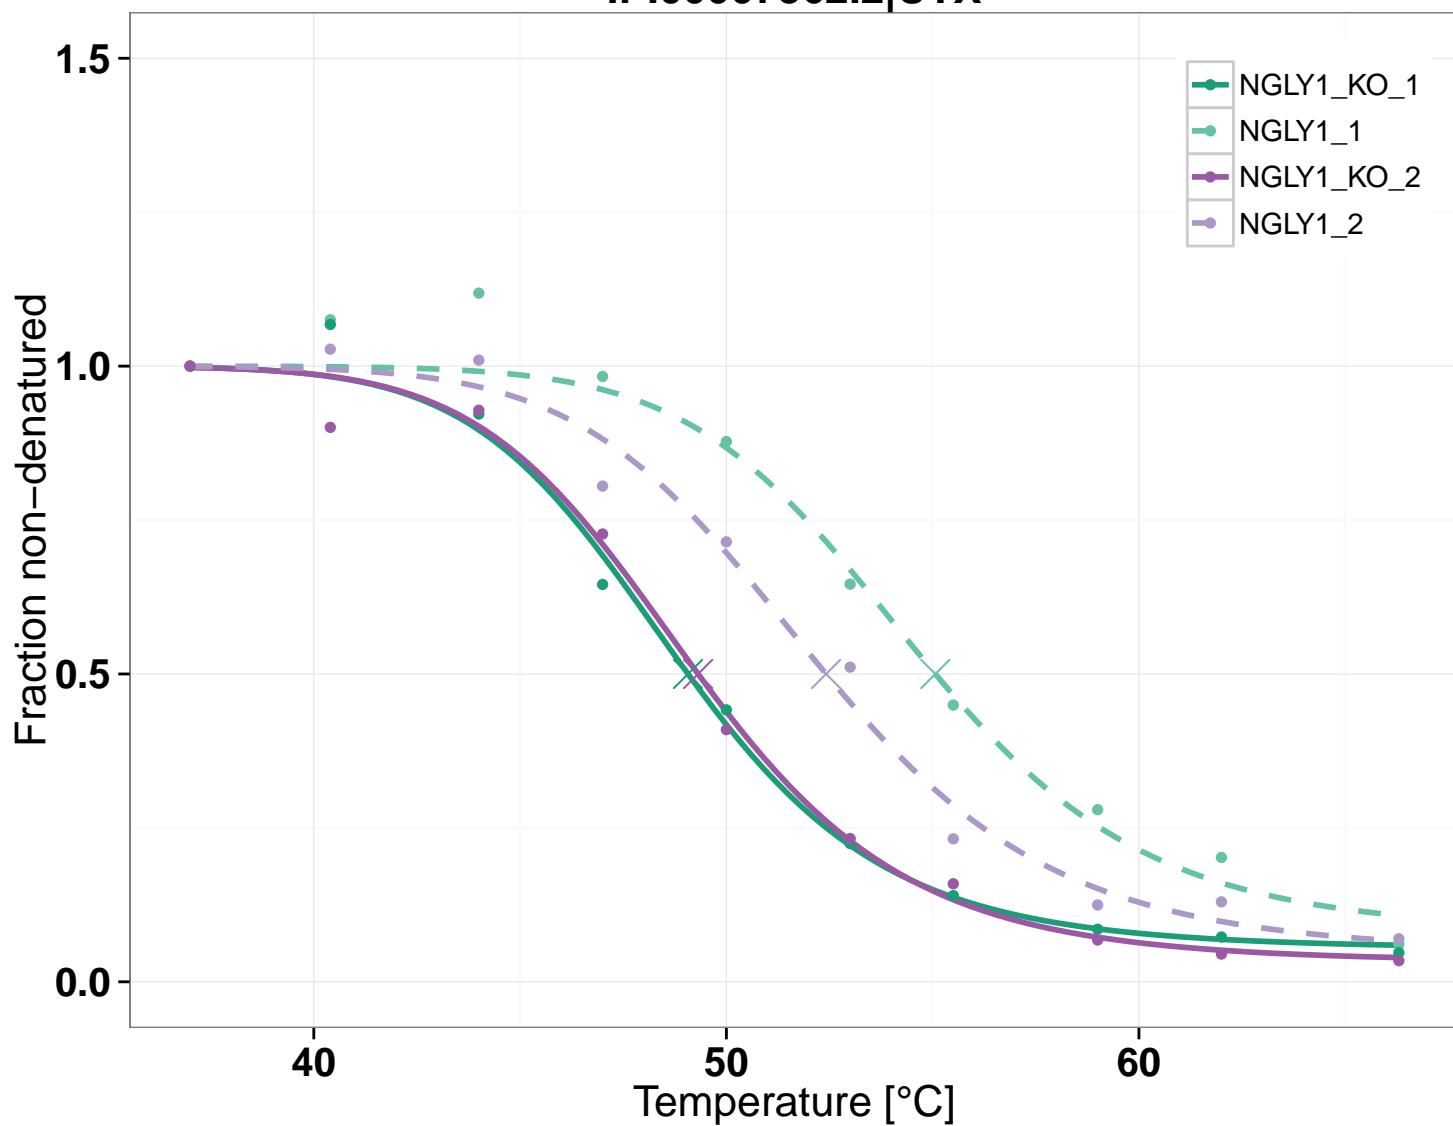

|            | meltPoint | slope  | plateau | R2   |
|------------|-----------|--------|---------|------|
| NGLY1_KO_1 | 49.07     | -0.095 | 0.05    | 0.99 |
| NGLY1_1    | 55.07     | -0.083 | 0.08    | 0.98 |
| NGLY1_KO_2 | 49.31     | -0.093 | 0.03    | 0.99 |
| NGLY1_2    | 52.42     | -0.083 | 0.05    | 0.99 |

Supplement: Supplementary file 1422 [file 1]

IPI00016613.2|CSNK2A1

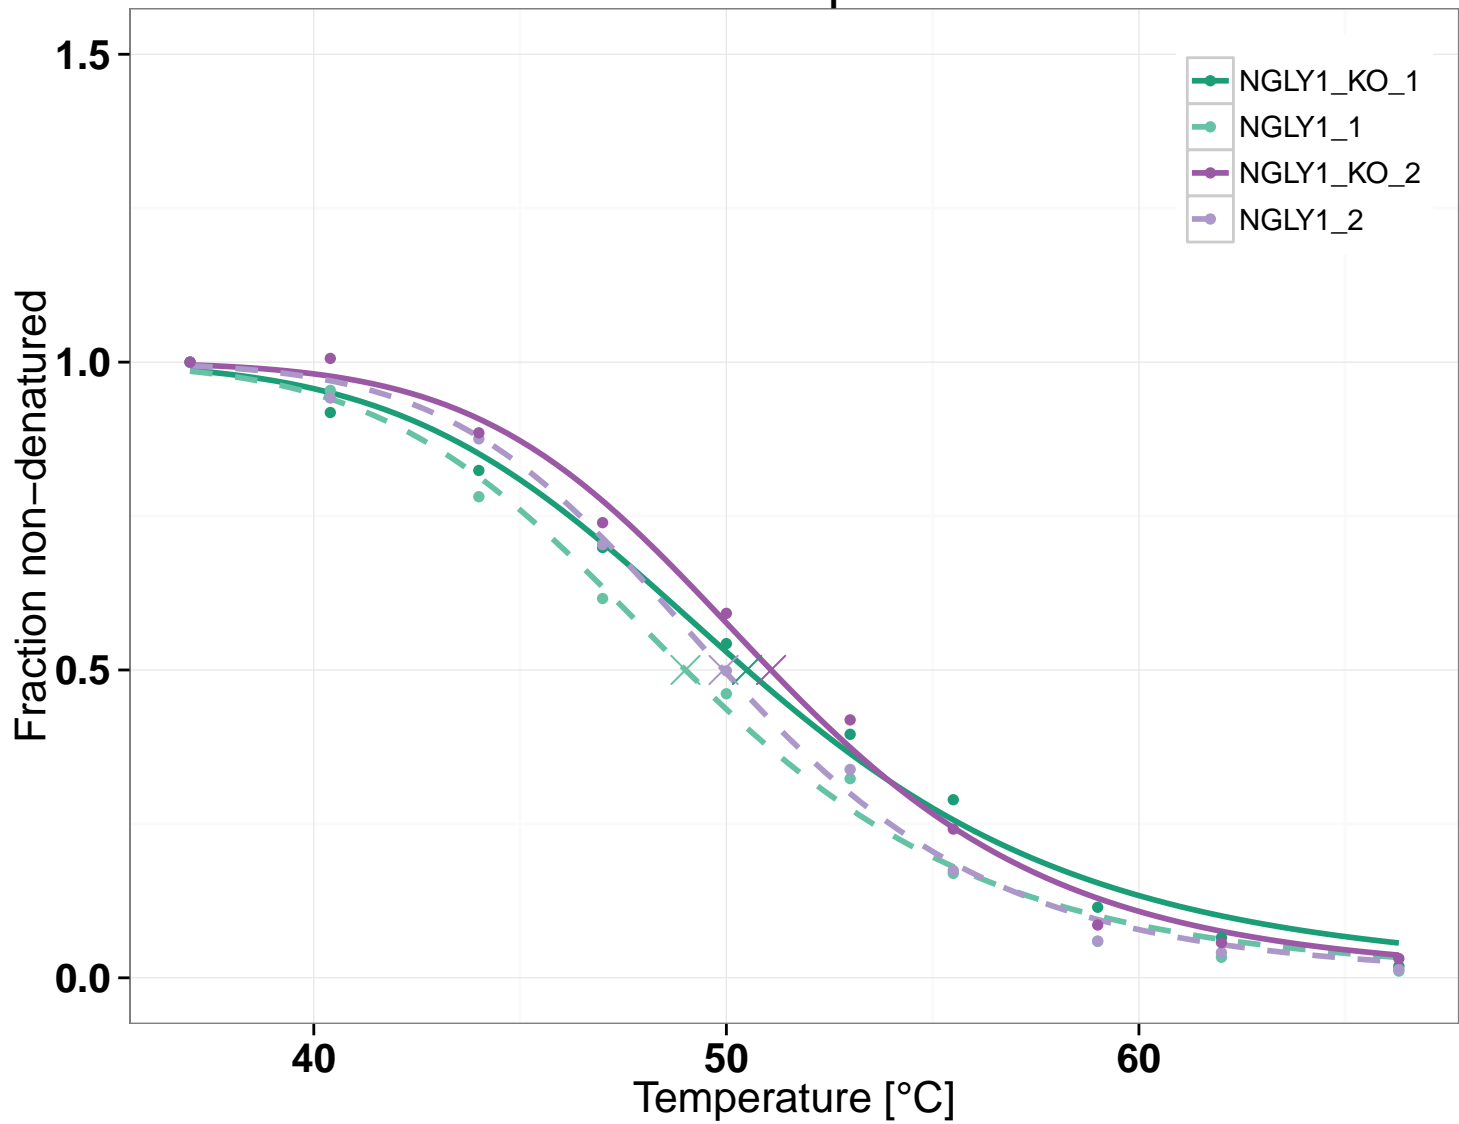

|            | meltPoint | slope  | plateau | R2   |
|------------|-----------|--------|---------|------|
| NGLY1_KO_1 | 50.5      | -0.06  | 0       | 0.99 |
| NGLY1_1    | 49.01     | -0.068 | 0       | 0.99 |
| NGLY1_KO_2 | 51.08     | -0.071 | 0       | 0.99 |
| NGLY1_2    | 49.93     | -0.075 | 0       | 1    |

Supplement: Supplementary file 1423 [file 1]

IPI00015799.2|DGAT1

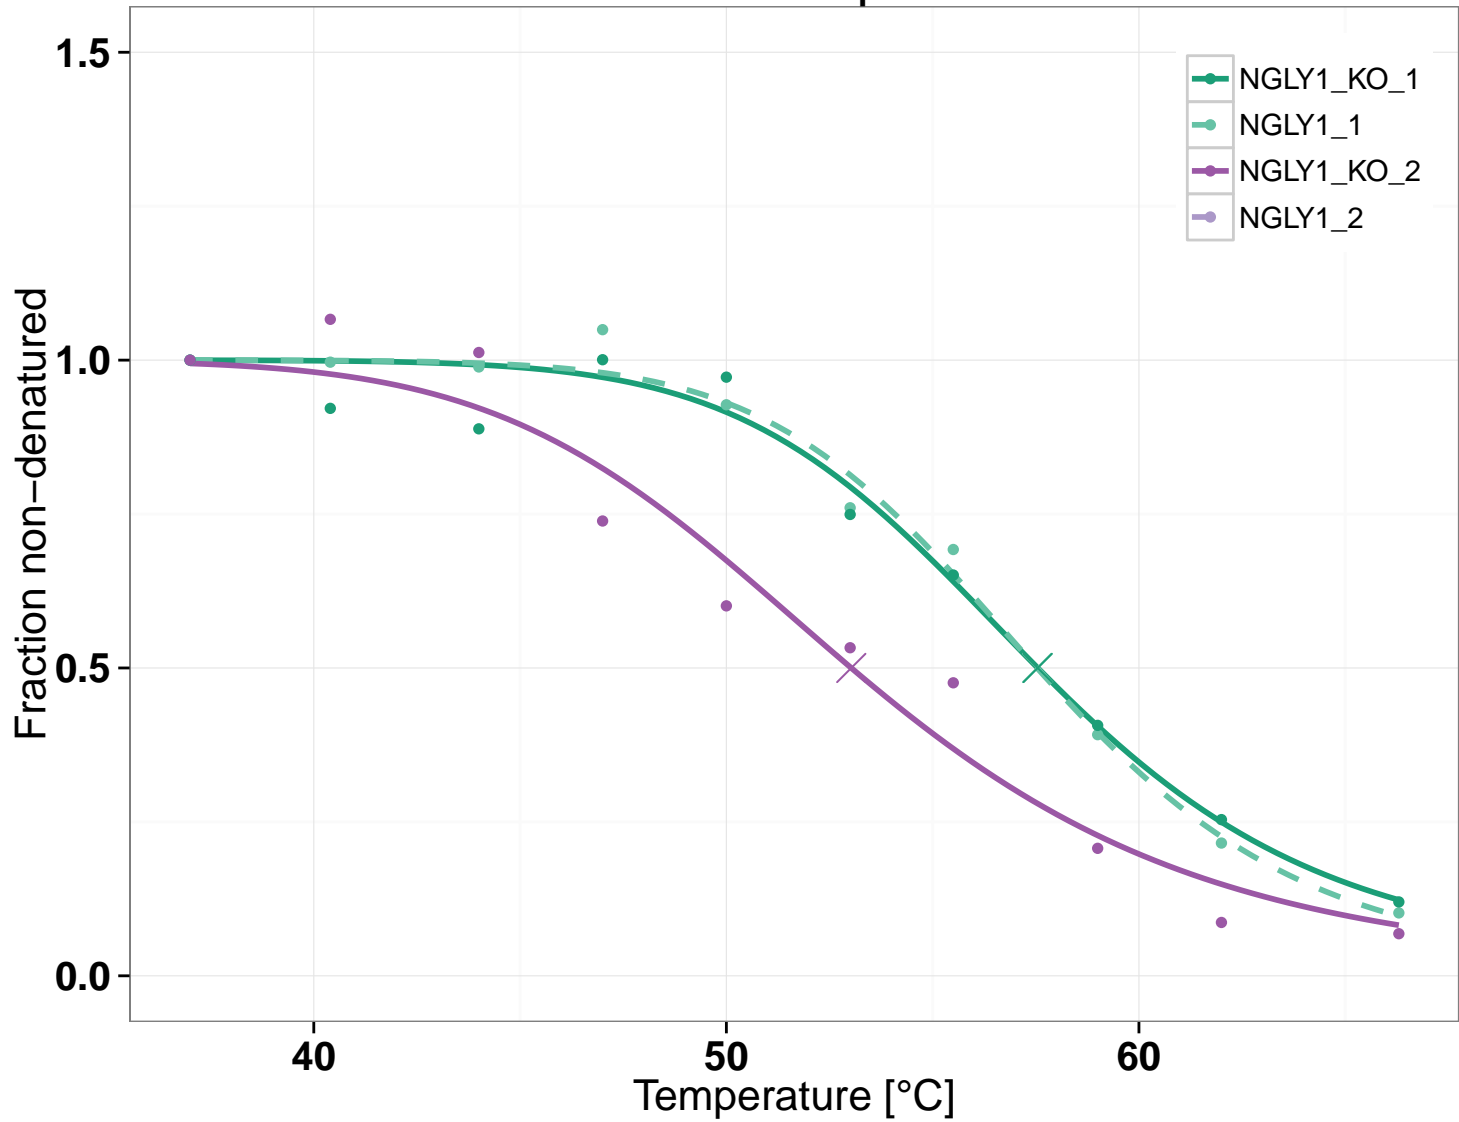

|            | meltPoint | slope  | plateau | R2   |
|------------|-----------|--------|---------|------|
| NGLY1_KO_1 | 57.55     | -0.069 | 0.02    | 0.98 |
| NGLY1_1    | 57.53     | -0.076 | 0.01    | 0.99 |
| NGLY1_KO_2 | 53.03     | -0.058 | 0       | 0.96 |
| NGLY1_2    | -         | -      | -       | -    |

Supplement: Supplementary file 1424 [file 1]

IPI00009425.1|TBC1D7

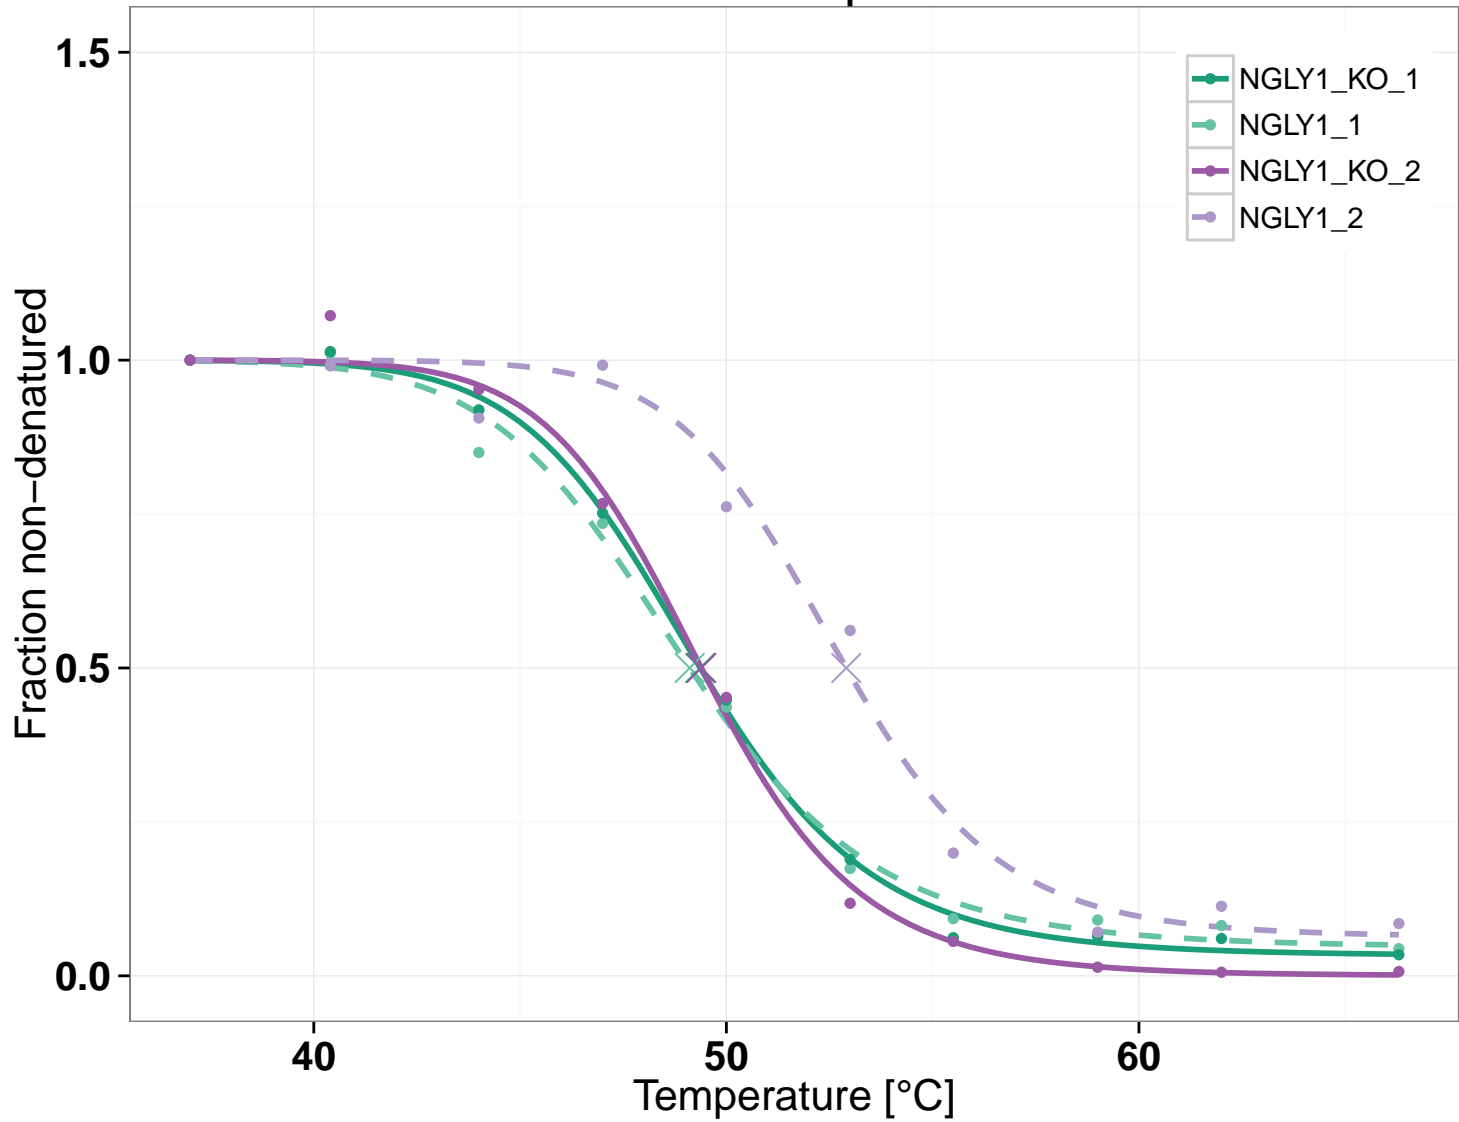

|            | meltPoint | slope | plateau | R2   |
|------------|-----------|-------|---------|------|
| NGLY1_KO_1 | 49.37     | -0.11 | 0.03    | 1    |
| NGLY1_1    | 49.11     | -0.1  | 0.05    | 0.99 |
| NGLY1_KO_2 | 49.39     | -0.13 | 0       | 1    |
| NGLY1_2    | 52.91     | -0.12 | 0.06    | 0.98 |

Supplement: Supplementary file 1425 [file 1]

# IPI00641368.4|TSKU

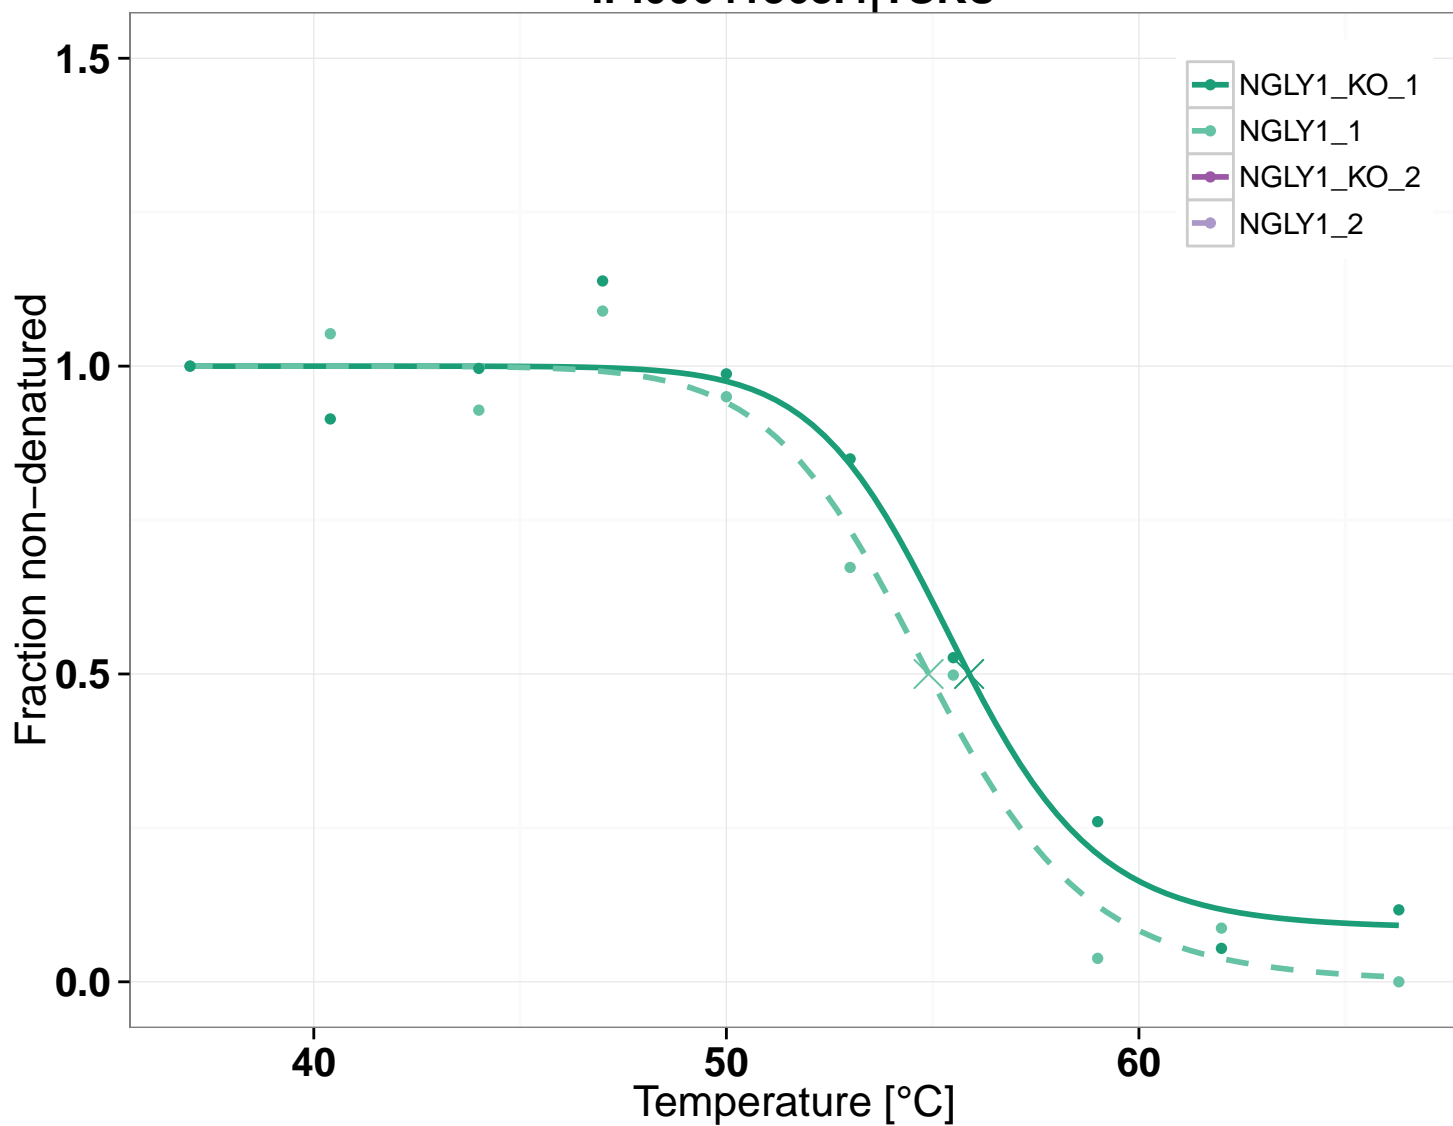

|            | meltPoint | slope | plateau | R2   |
|------------|-----------|-------|---------|------|
| NGLY1_KO_1 | 55.89     | -0.13 | 0.09    | 0.98 |
| NGLY1_1    | 54.9      | -0.13 | 0       | 0.98 |
| NGLY1_KO_2 | -         | -     | -       | -    |
| NGLY1_2    | -         | -     | -       | -    |

Supplement: Supplementary file 1426 [file 1]

IPI00021594.3|GPAA1

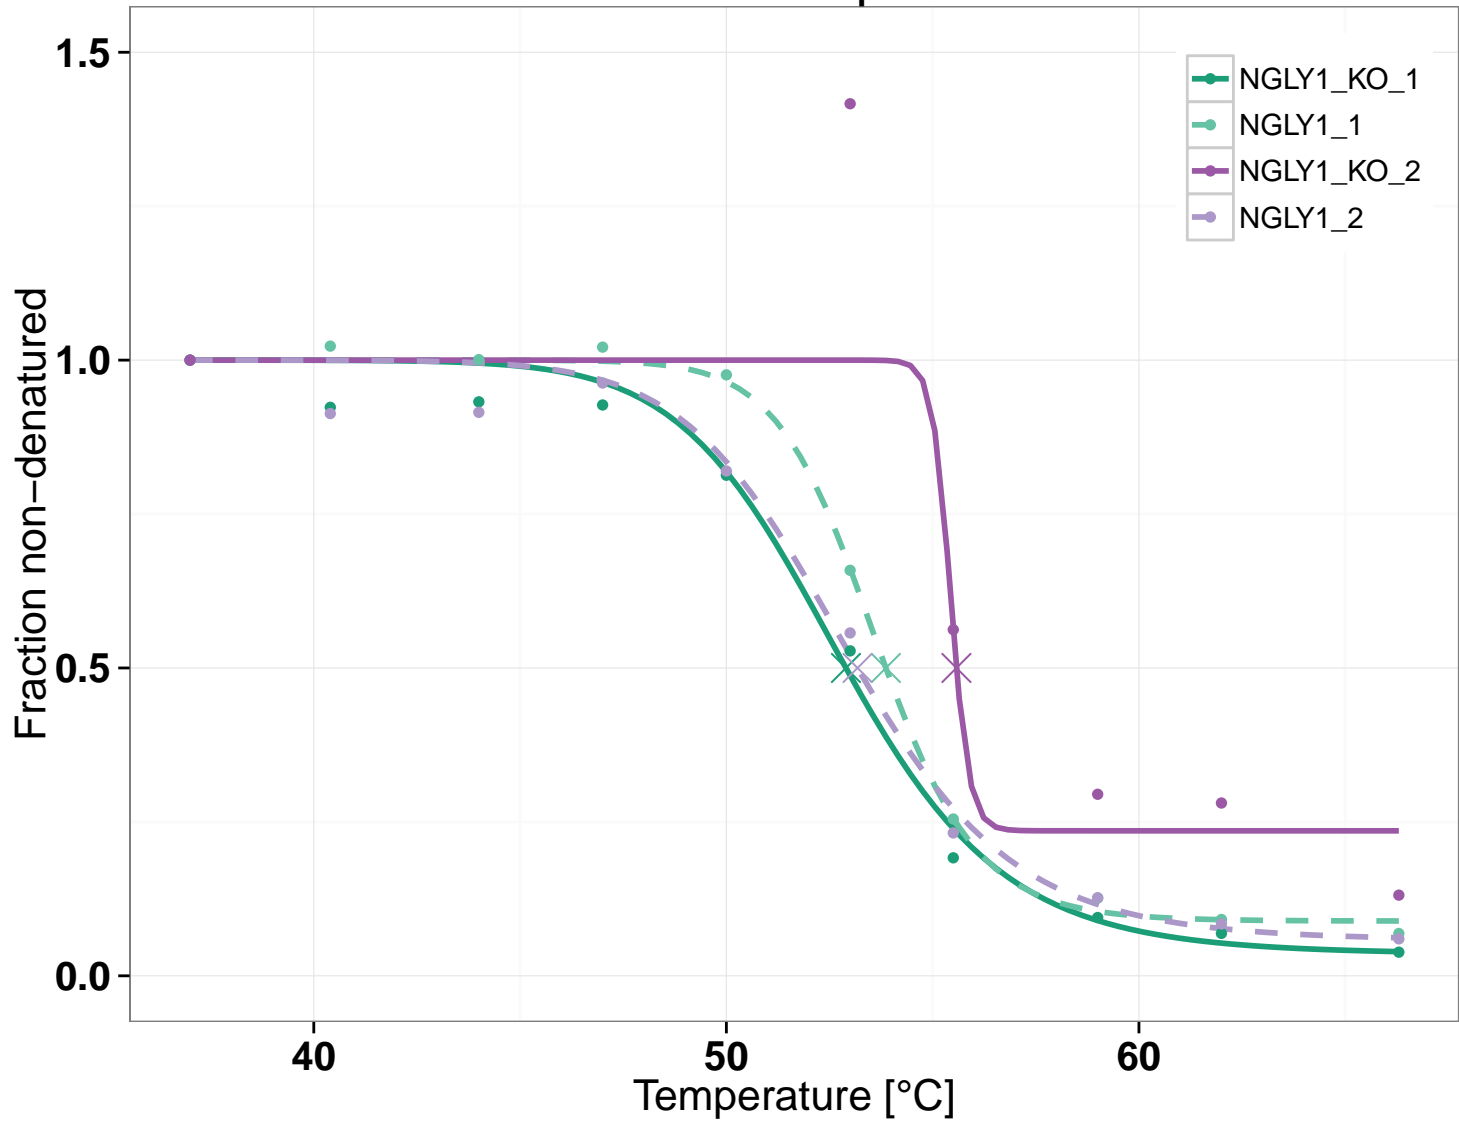

|            | meltPoint | slope | plateau | R2   |
|------------|-----------|-------|---------|------|
| NGLY1_KO_1 | 52.9      | -0.12 | 0.04    | 0.99 |
| NGLY1_1    | 53.87     | -0.19 | 0.09    | 1    |
| NGLY1_KO_2 | 55.58     | -0.86 | 0.24    | 0.21 |
| NGLY1_2    | 53.18     | -0.12 | 0.06    | 0.99 |

Supplement: Supplementary file 1427 [file 1]

IPI00007058.1|CORO1B

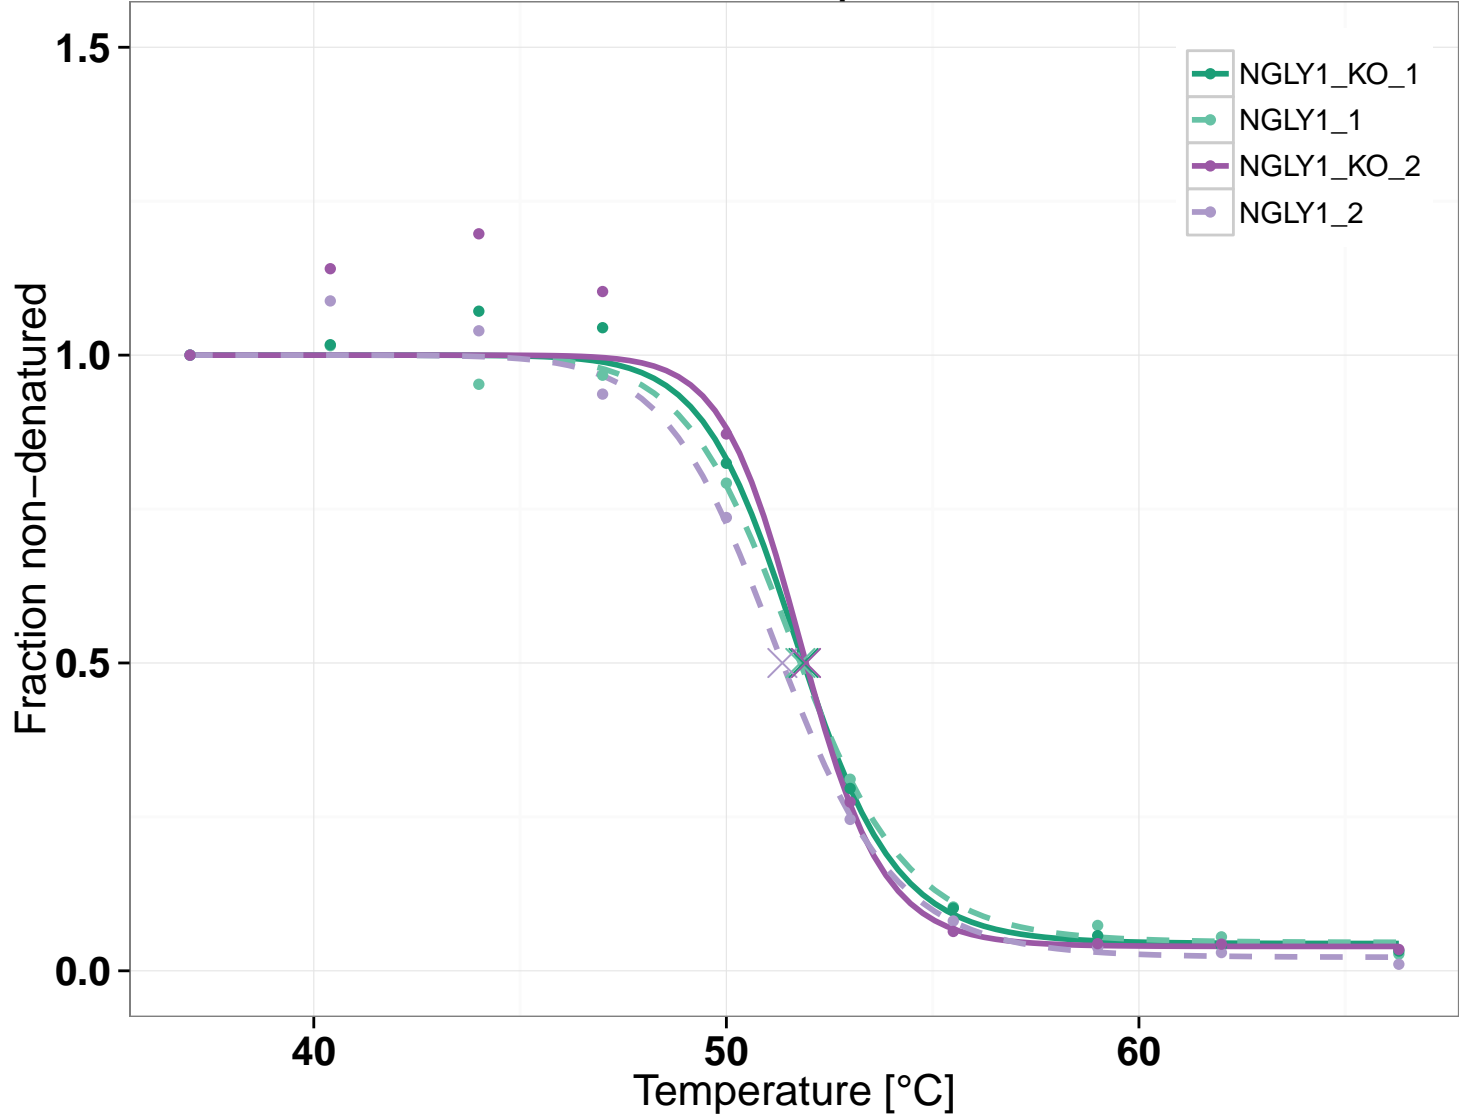

|            | meltPoint | slope | plateau | R2   |
|------------|-----------|-------|---------|------|
| NGLY1_KO_1 | 51.87     | -0.2  | 0.04    | 1    |
| NGLY1_1    | 51.79     | -0.17 | 0.05    | 1    |
| NGLY1_KO_2 | 51.93     | -0.25 | 0.04    | 0.97 |
| NGLY1_2    | 51.36     | -0.17 | 0.02    | 0.99 |

Supplement: Supplementary file 1428 [file 1]

IPI00413058.3|SYNPO

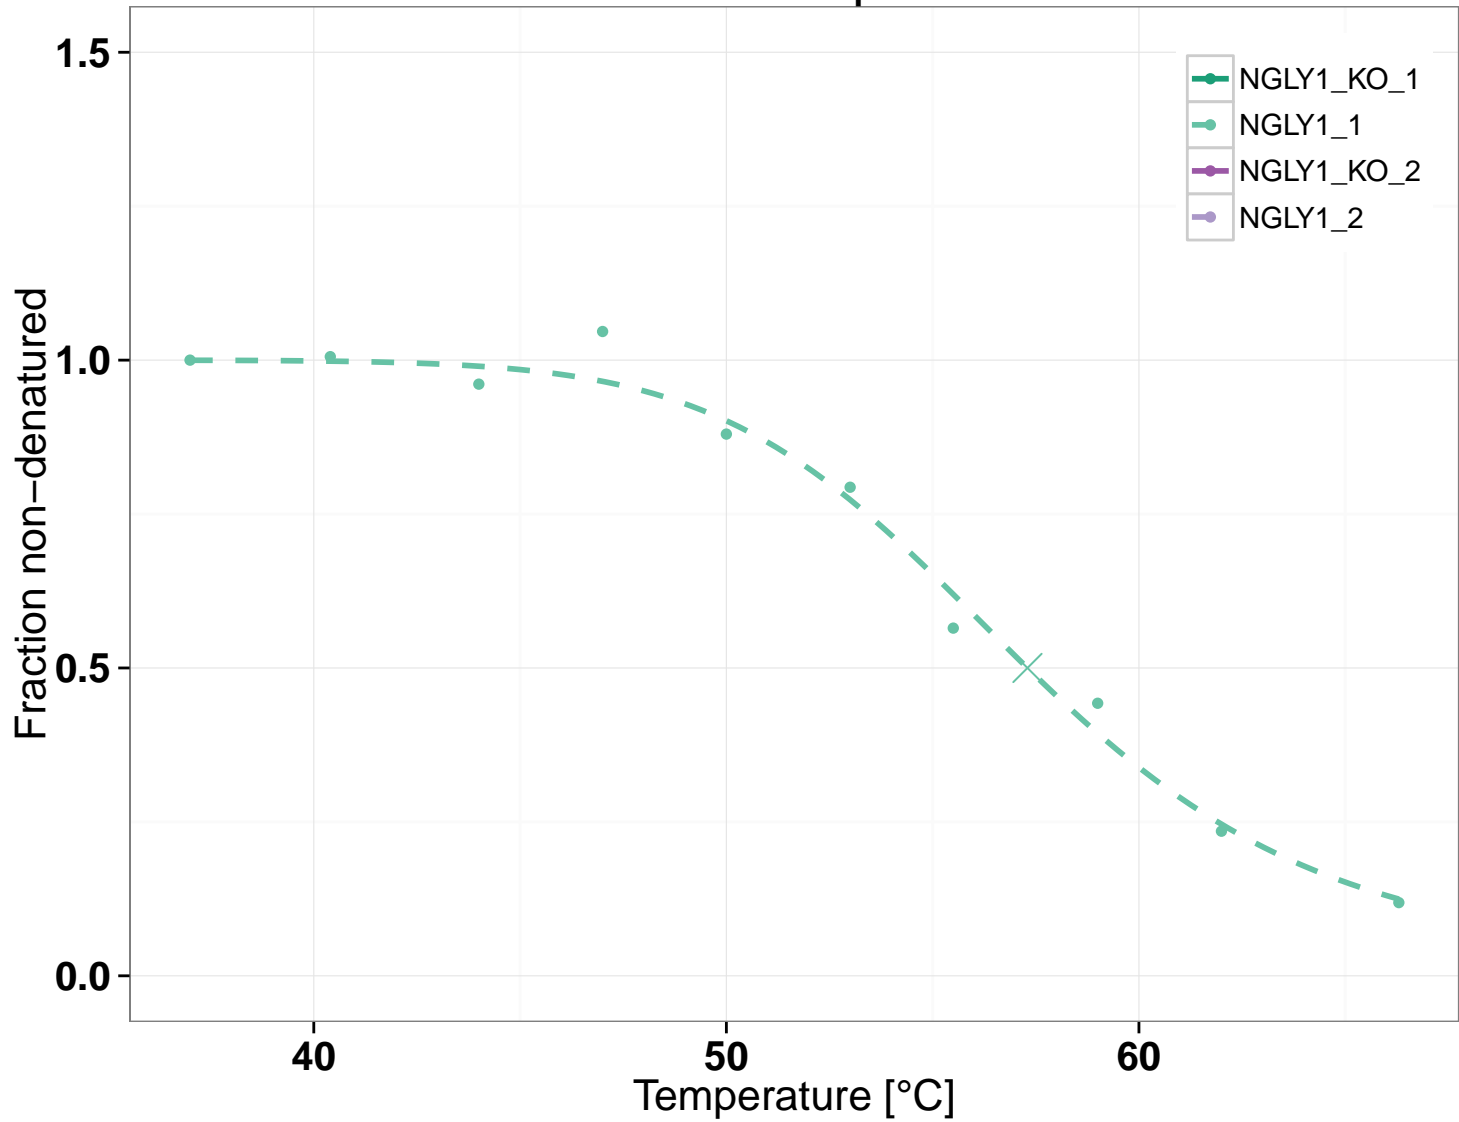

|            | meltPoint | slope  | plateau | R2   |
|------------|-----------|--------|---------|------|
| NGLY1_KO_1 | -         | -      | -       | -    |
| NGLY1_1    | 57.3      | -0.067 | 0.02    | 0.99 |
| NGLY1_KO_2 | -         | -      | -       | -    |
| NGLY1_2    | -         | -      | -       | -    |

Supplement: Supplementary file 1429 [file 1]

# IPI00439446.2|MAN1A1

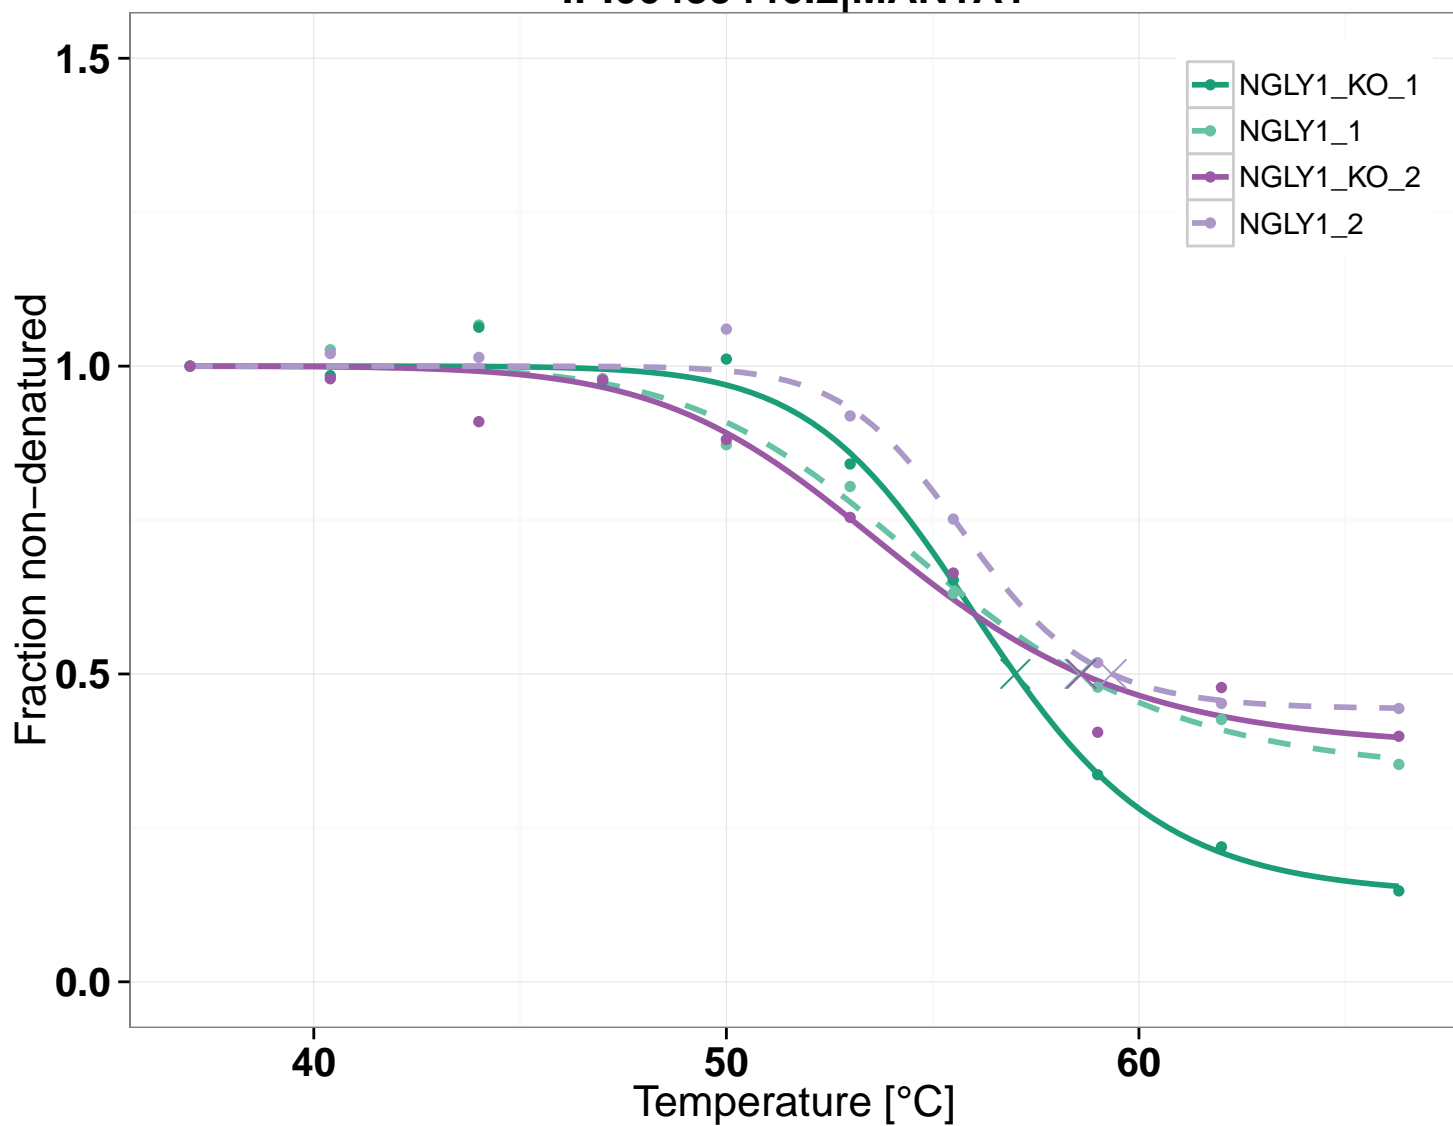

|            | meltPoint | slope  | plateau | R2   |
|------------|-----------|--------|---------|------|
| NGLY1_KO_1 | 57        | -0.1   | 0.14    | 0.99 |
| NGLY1_1    | 58.56     | -0.056 | 0.33    | 0.99 |
| NGLY1_KO_2 | 58.61     | -0.054 | 0.38    | 0.97 |
| NGLY1_2    | 59.34     | -0.092 | 0.44    | 0.99 |

Supplement: Supplementary file 1430 [file 1]

IPI00556447.1|FAM133B

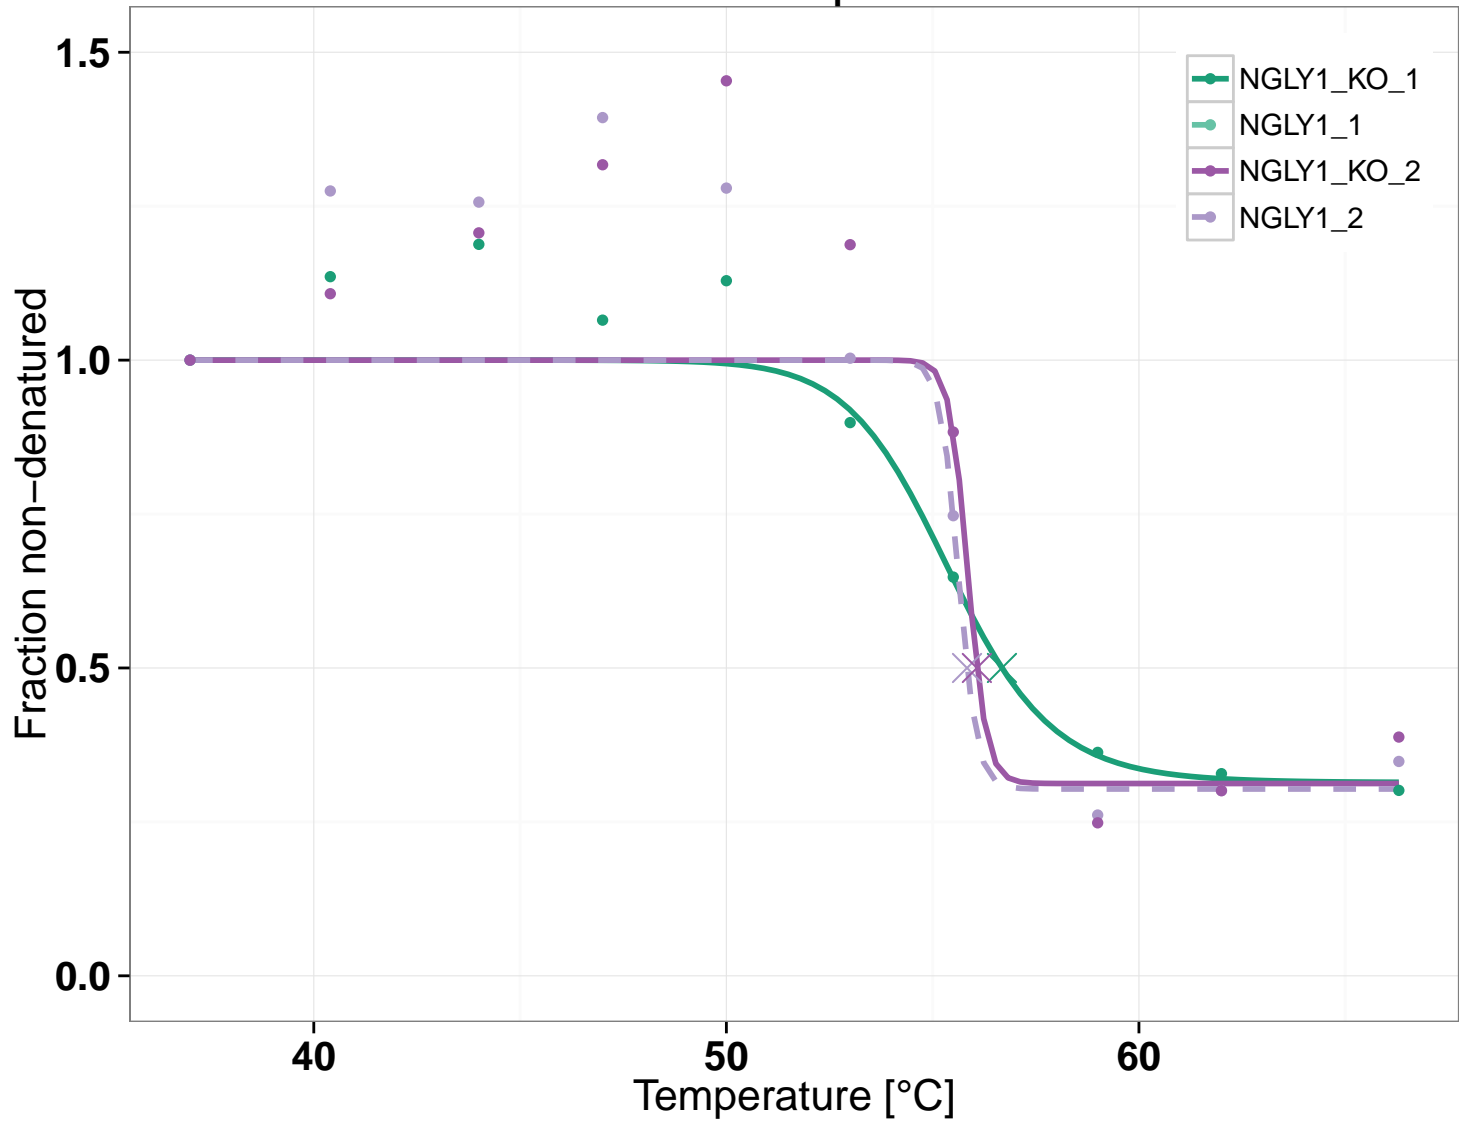

|            | meltPoint | slope | plateau | R2   |
|------------|-----------|-------|---------|------|
| NGLY1_KO_1 | 56.68     | -0.14 | 0.31    | 0.93 |
| NGLY1_1    | -         | -     | -       | -    |
| NGLY1_KO_2 | 56.07     | -0.77 | 0.31    | 0.77 |
| NGLY1_2    | 55.83     | -0.78 | 0.3     | 0.79 |

Supplement: Supplementary file 1431 [file 1]

IPI00295849.3|RABGGTB

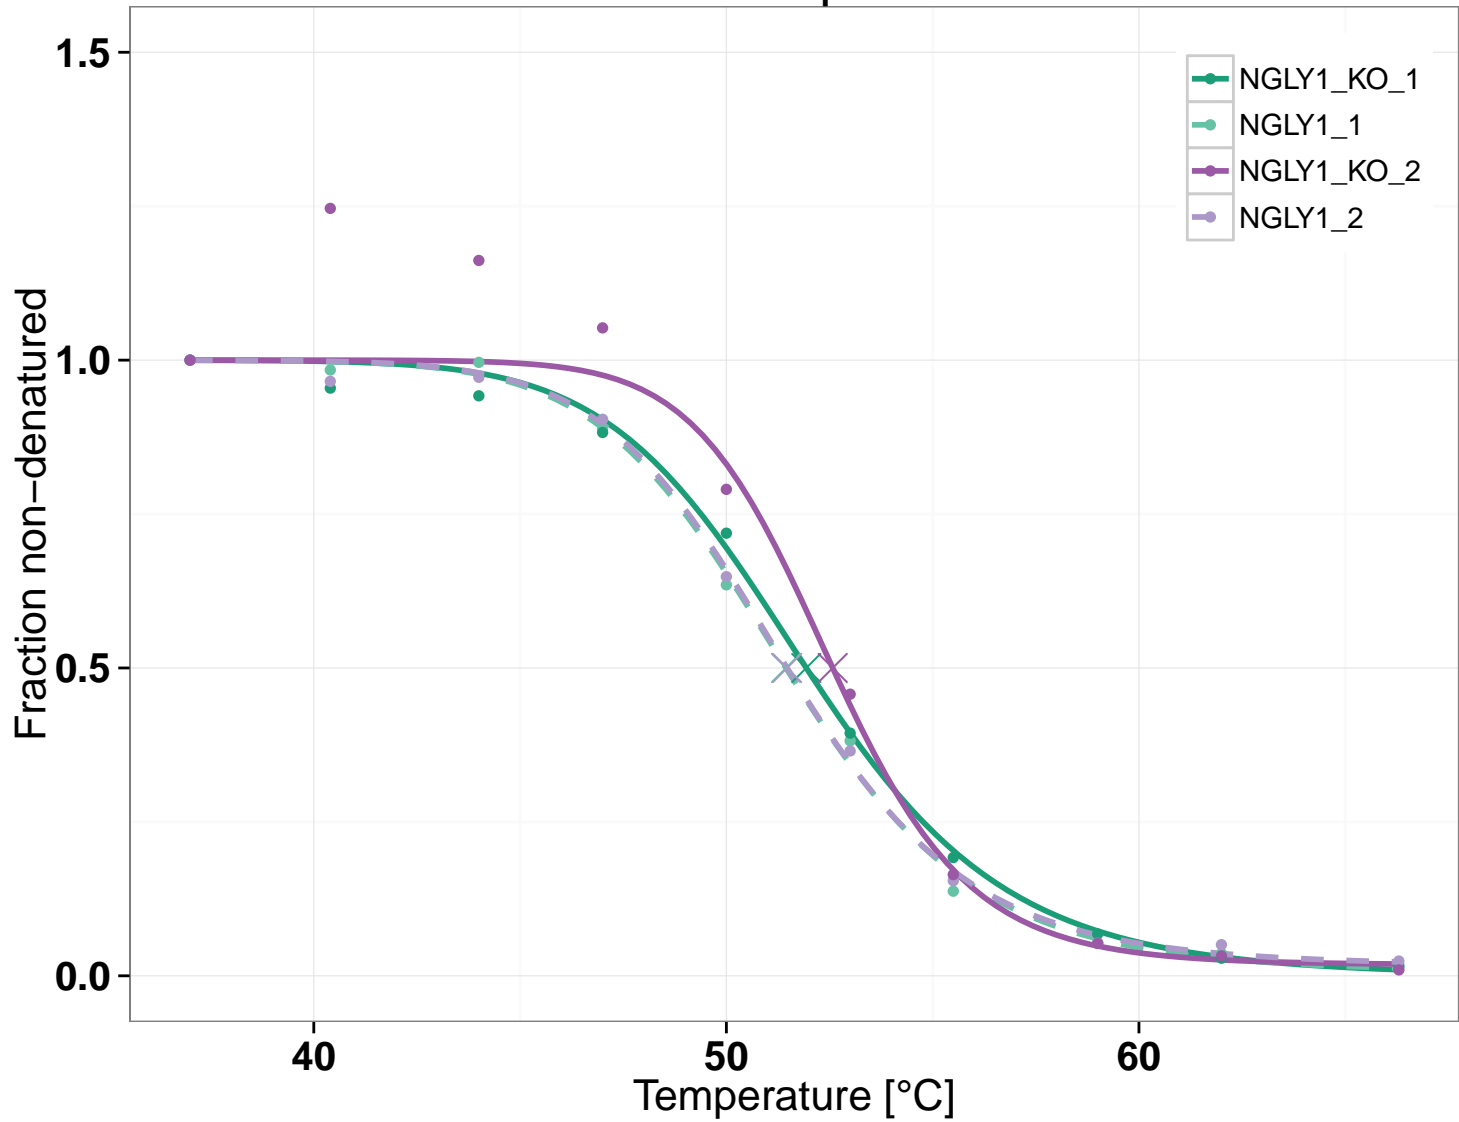

|            | meltPoint | slope | plateau | R2   |
|------------|-----------|-------|---------|------|
| NGLY1_KO_1 | 51.94     | -0.1  | 0       | 1    |
| NGLY1_1    | 51.45     | -0.11 | 0.01    | 1    |
| NGLY1_KO_2 | 52.58     | -0.15 | 0.02    | 0.96 |
| NGLY1_2    | 51.47     | -0.11 | 0.02    | 1    |

Supplement: Supplementary file 1432 [file 1]

# IPI00217869.4|OGFOD3

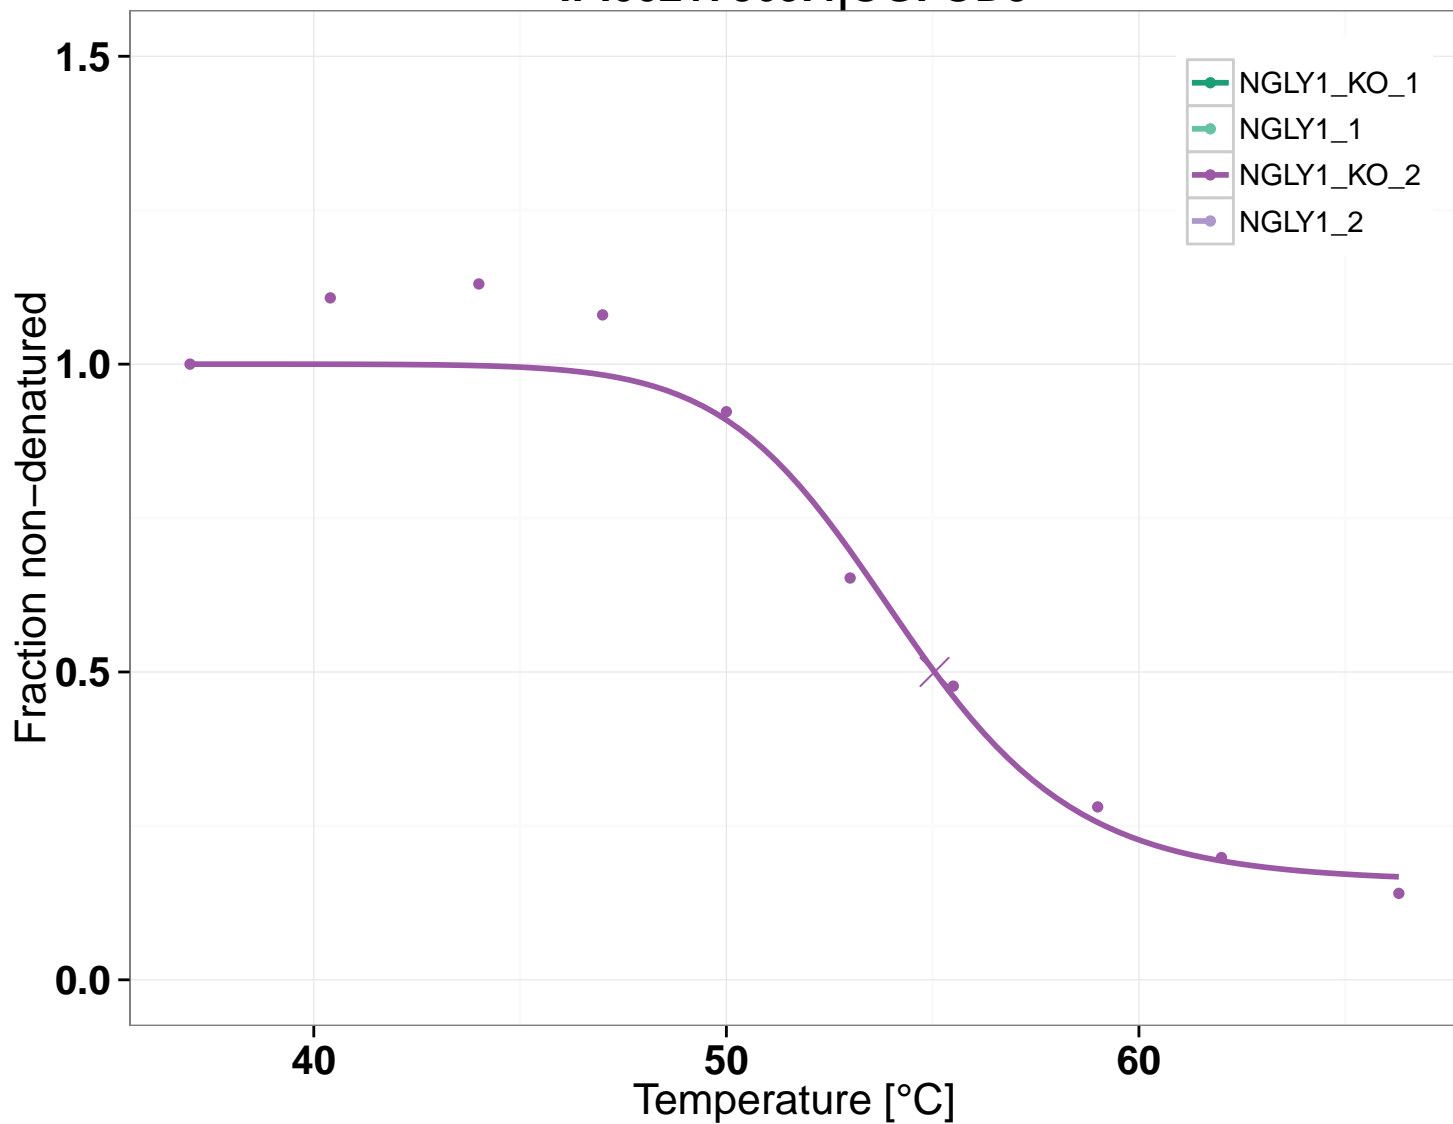

|            | meltPoint | slope  | plateau | R2   |
|------------|-----------|--------|---------|------|
| NGLY1_KO_1 | —         | —      | —       | —    |
| NGLY1_1    | —         | —      | —       | —    |
| NGLY1_KO_2 | 55.05     | -0.098 | 0.16    | 0.97 |
| NGLY1_2    | —         | —      | —       | —    |

Supplement: Supplementary file 1433 [file 1]

IPI00761016.4|C7ORF43

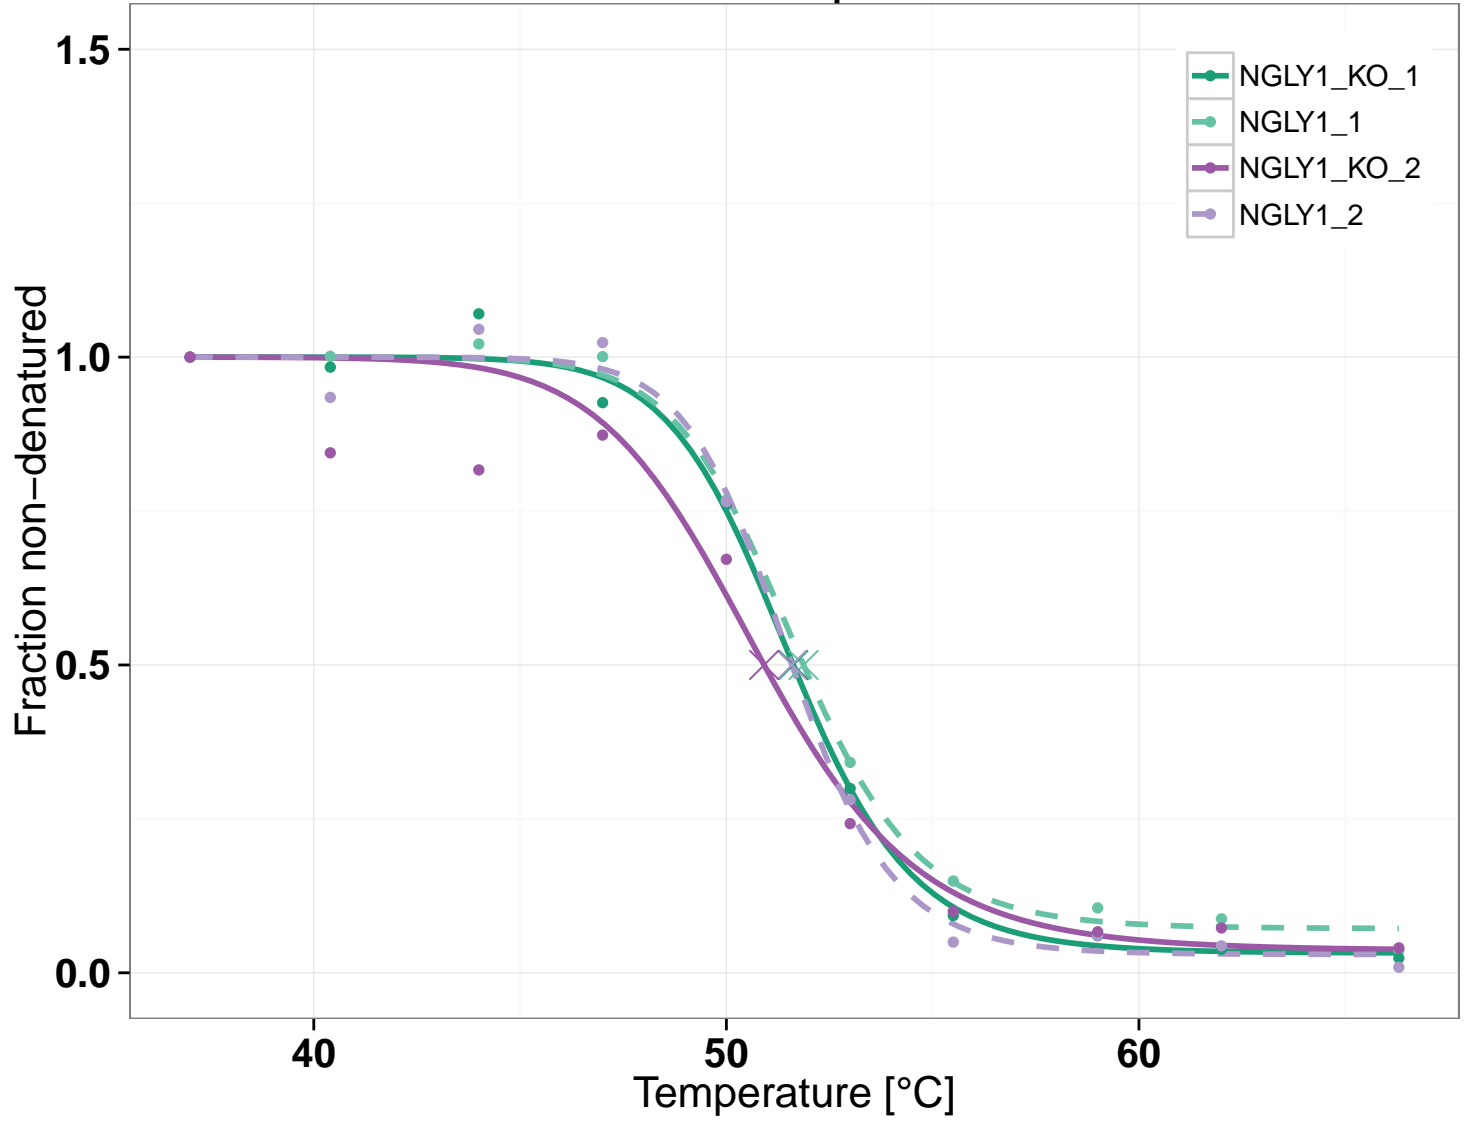

|            | meltPoint | slope | plateau | R2   |
|------------|-----------|-------|---------|------|
| NGLY1_KO_1 | 51.62     | -0.16 | 0.03    | 1    |
| NGLY1_1    | 51.87     | -0.16 | 0.07    | 1    |
| NGLY1_KO_2 | 50.92     | -0.12 | 0.04    | 0.96 |
| NGLY1_2    | 51.59     | -0.19 | 0.03    | 0.99 |

Supplement: Supplementary file 1434 [file 1]

IPI00025805.2|SP4

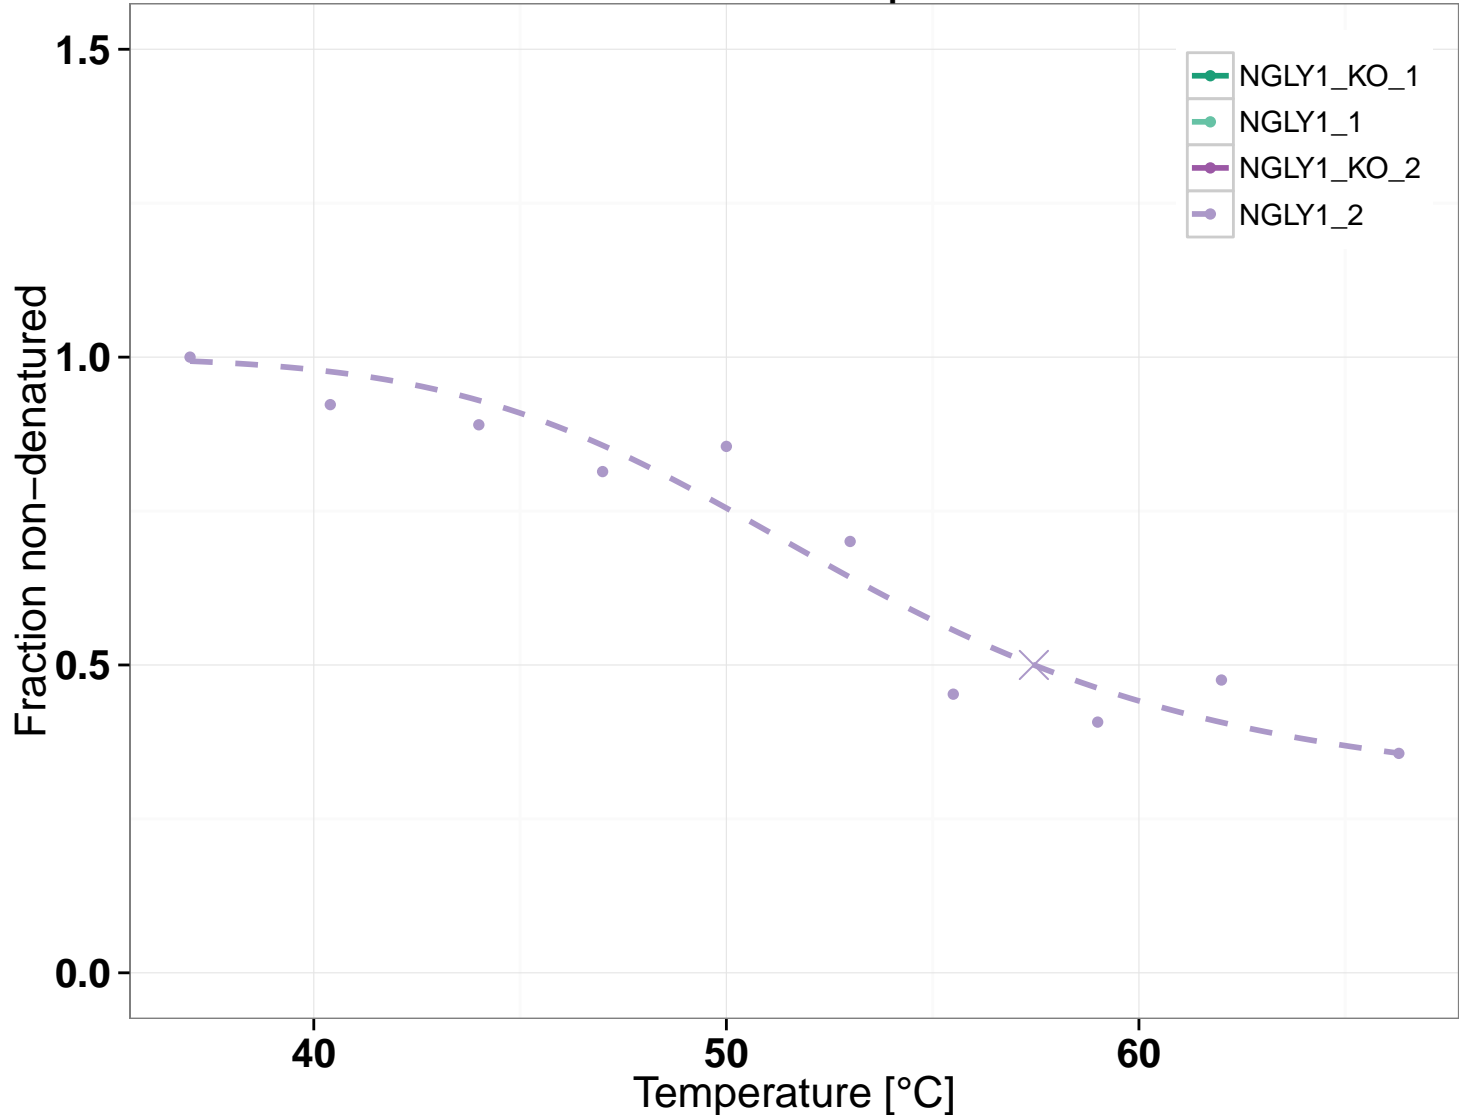

|            | meltPoint | slope  | plateau | R2   |
|------------|-----------|--------|---------|------|
| NGLY1_KO_1 | -         | -      | -       | -    |
| NGLY1_1    | -         | -      | -       | -    |
| NGLY1_KO_2 | -         | -      | -       | -    |
| NGLY1_2    | 57.45     | -0.038 | 0.28    | 0.93 |

Supplement: Supplementary file 1435 [file 1]

# IPI00748891.2|FAM177A1

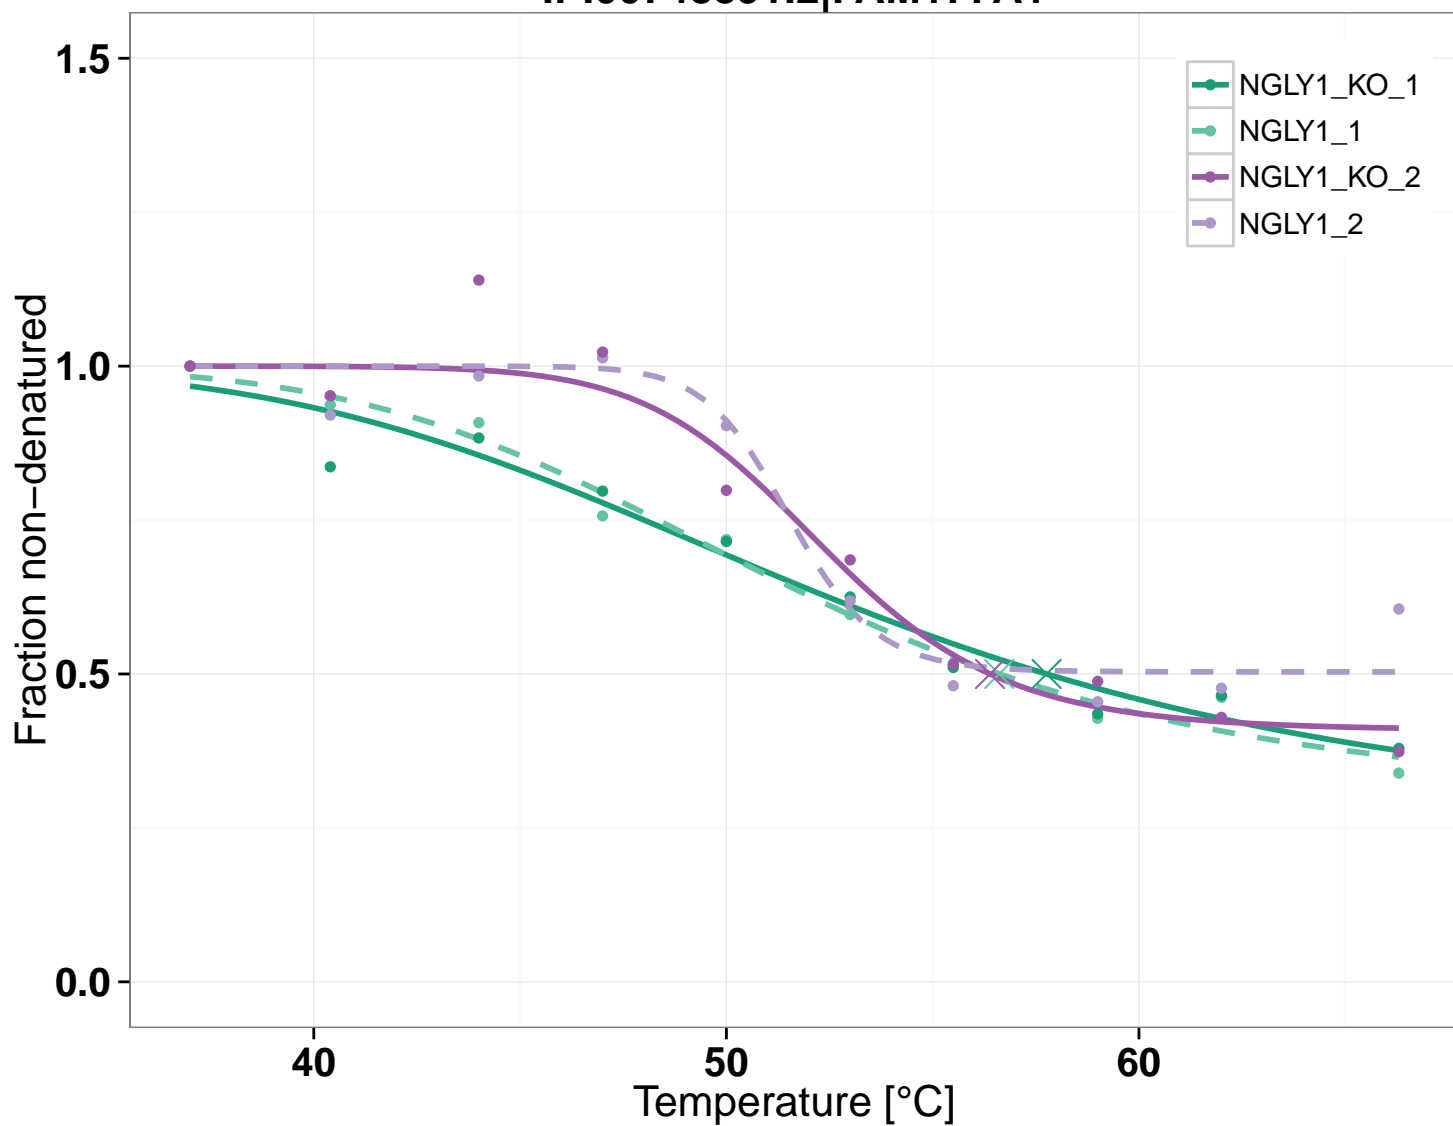

|            | meltPoint | slope  | plateau | R2   |
|------------|-----------|--------|---------|------|
| NGLY1_KO_1 | 57.76     | -0.028 | 0.24    | 0.96 |
| NGLY1_1    | 56.61     | -0.034 | 0.29    | 0.98 |
| NGLY1_KO_2 | 56.39     | -0.068 | 0.41    | 0.95 |
| NGLY1_2    | –         | -0.12  | 0.5     | 0.96 |

Supplement: Supplementary file 1436 [file 1]

# IPI00642432.1|GSTM5

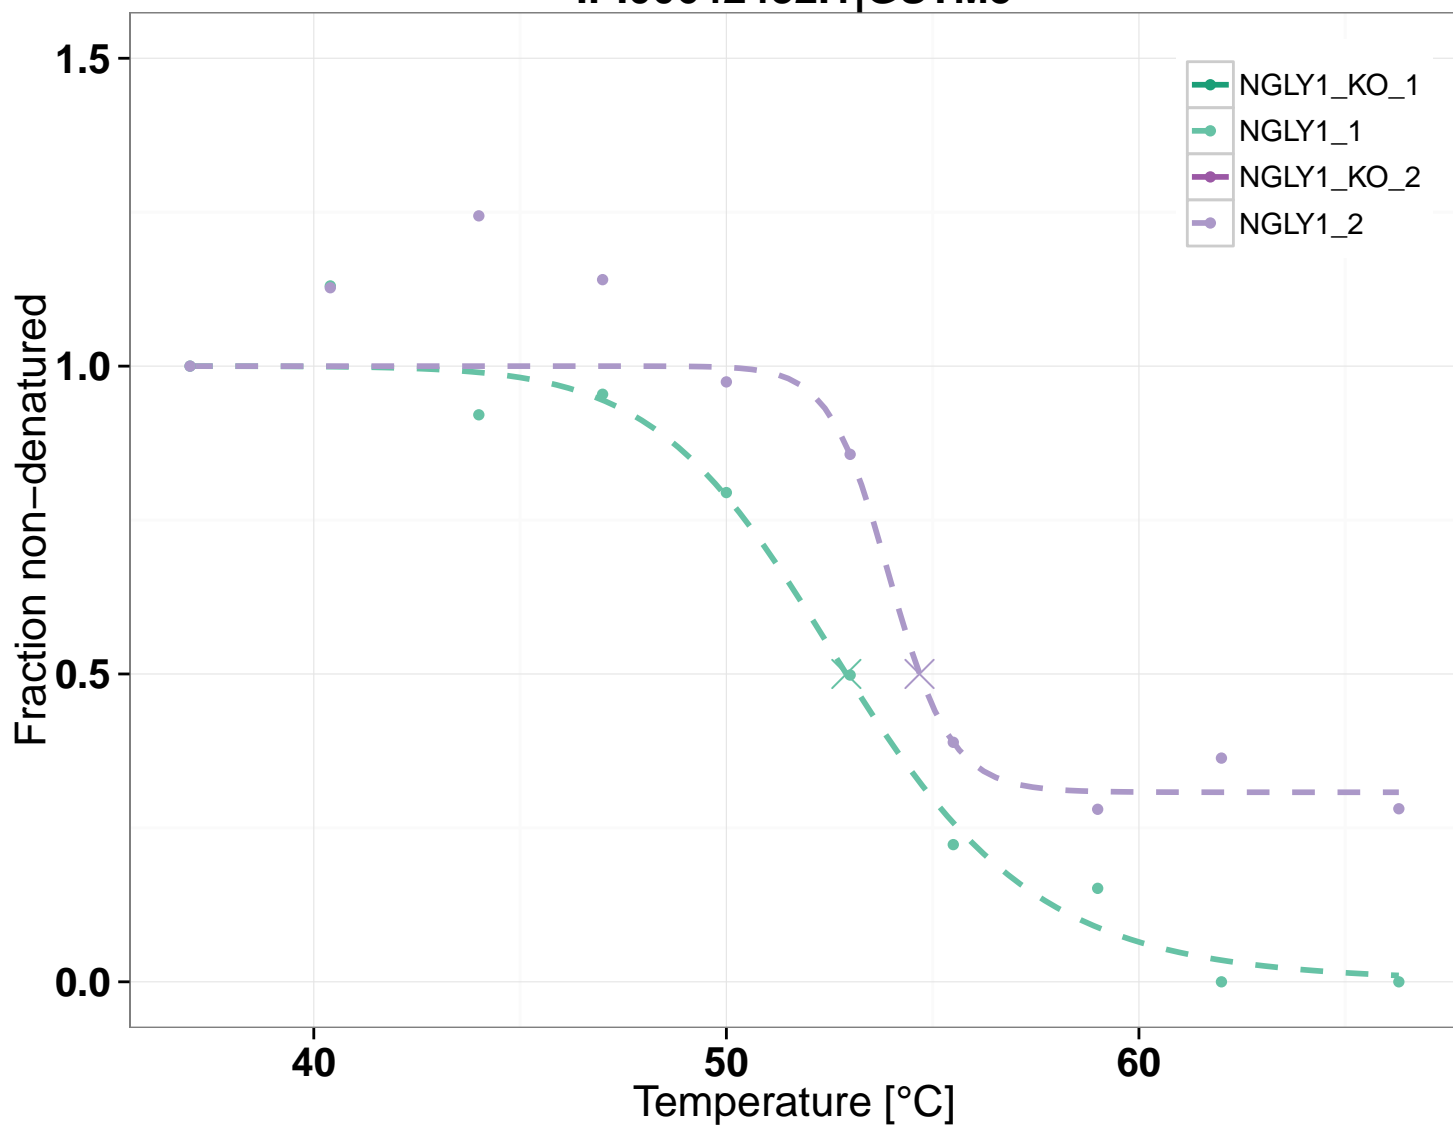

|            | meltPoint | slope | plateau | R2   |
|------------|-----------|-------|---------|------|
| NGLY1_KO_1 | -         | -     | -       | -    |
| NGLY1_1    | 52.91     | -0.11 | 0       | 0.98 |
| NGLY1_KO_2 | -         | -     | -       | -    |
| NGLY1_2    | 54.68     | -0.24 | 0.31    | 0.93 |

Supplement: Supplementary file 1437 [file 1]

IPI00888969.1|LOC100133973

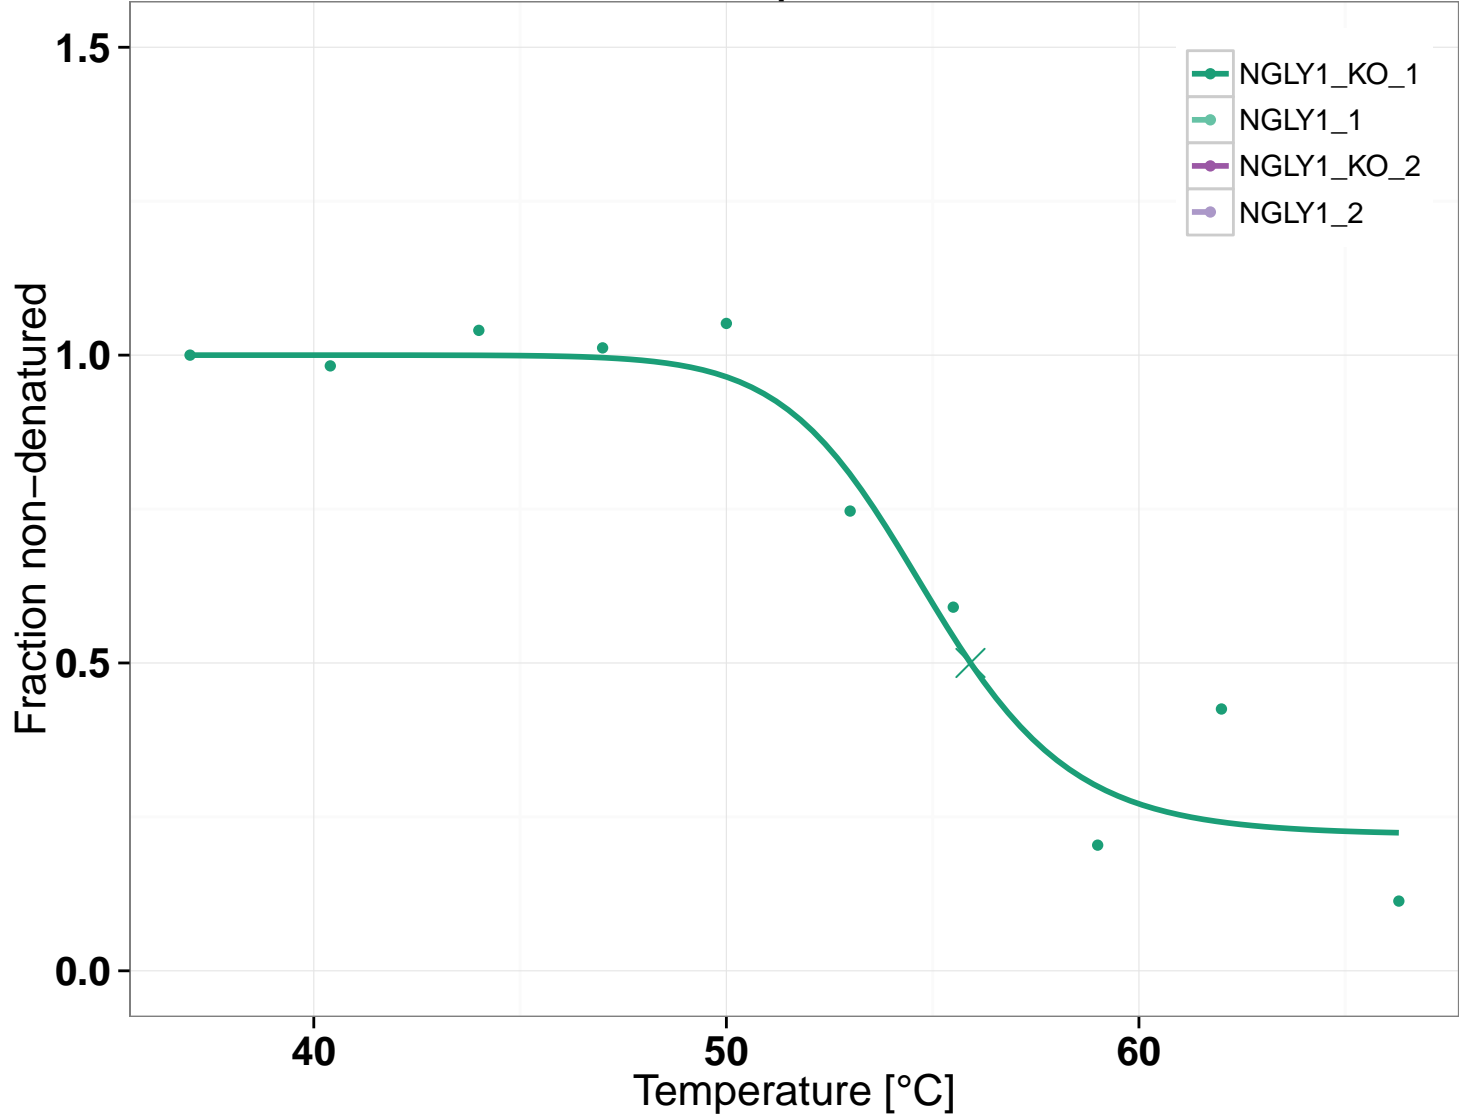

|            | meltPoint | slope | plateau | R2   |
|------------|-----------|-------|---------|------|
| NGLY1_KO_1 | 55.92     | -0.11 | 0.22    | 0.94 |
| NGLY1_1    | -         | -     | -       | -    |
| NGLY1_KO_2 | -         | -     | -       | -    |
| NGLY1_2    | -         | -     | -       | -    |

Supplement: Supplementary file 1439 [file 1]

IPI00385311.6|DALRD3

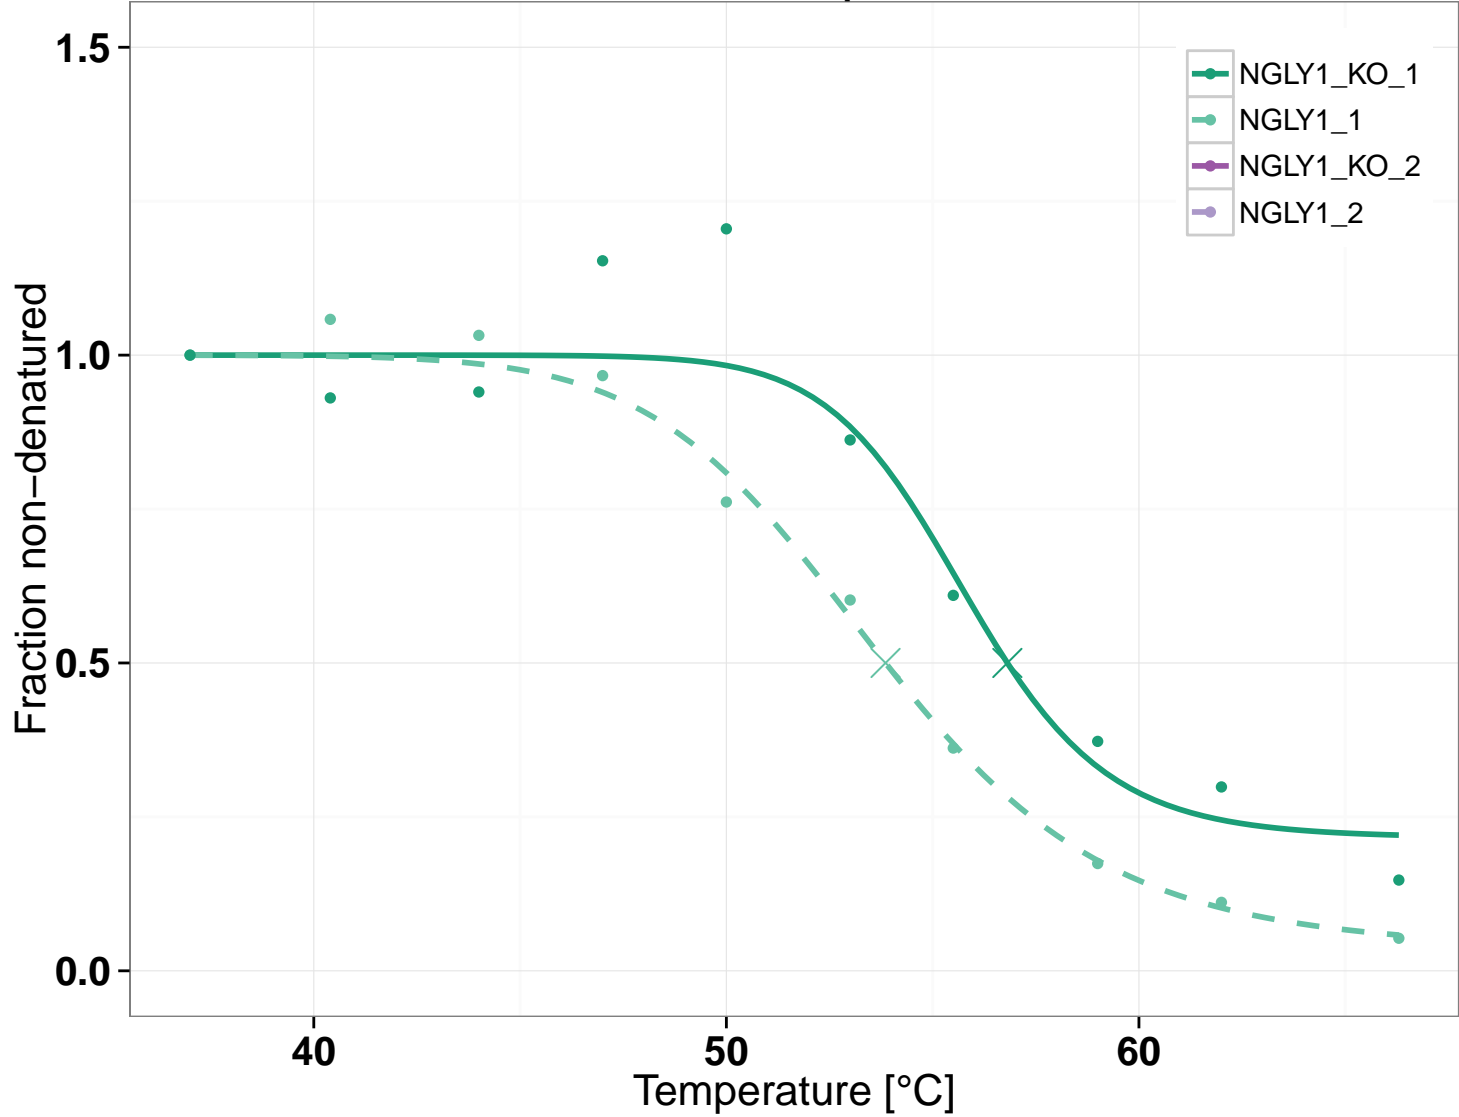

|            | meltPoint | slope  | plateau | R2   |
|------------|-----------|--------|---------|------|
| NGLY1_KO_1 | 56.81     | -0.12  | 0.22    | 0.92 |
| NGLY1_1    | 53.86     | -0.087 | 0.03    | 0.99 |
| NGLY1_KO_2 | -         | -      | -       | -    |
| NGLY1_2    | -         | -      | -       | -    |

Supplement: Supplementary file 1440 [file 1]

IPI00044725.3|MYSM1

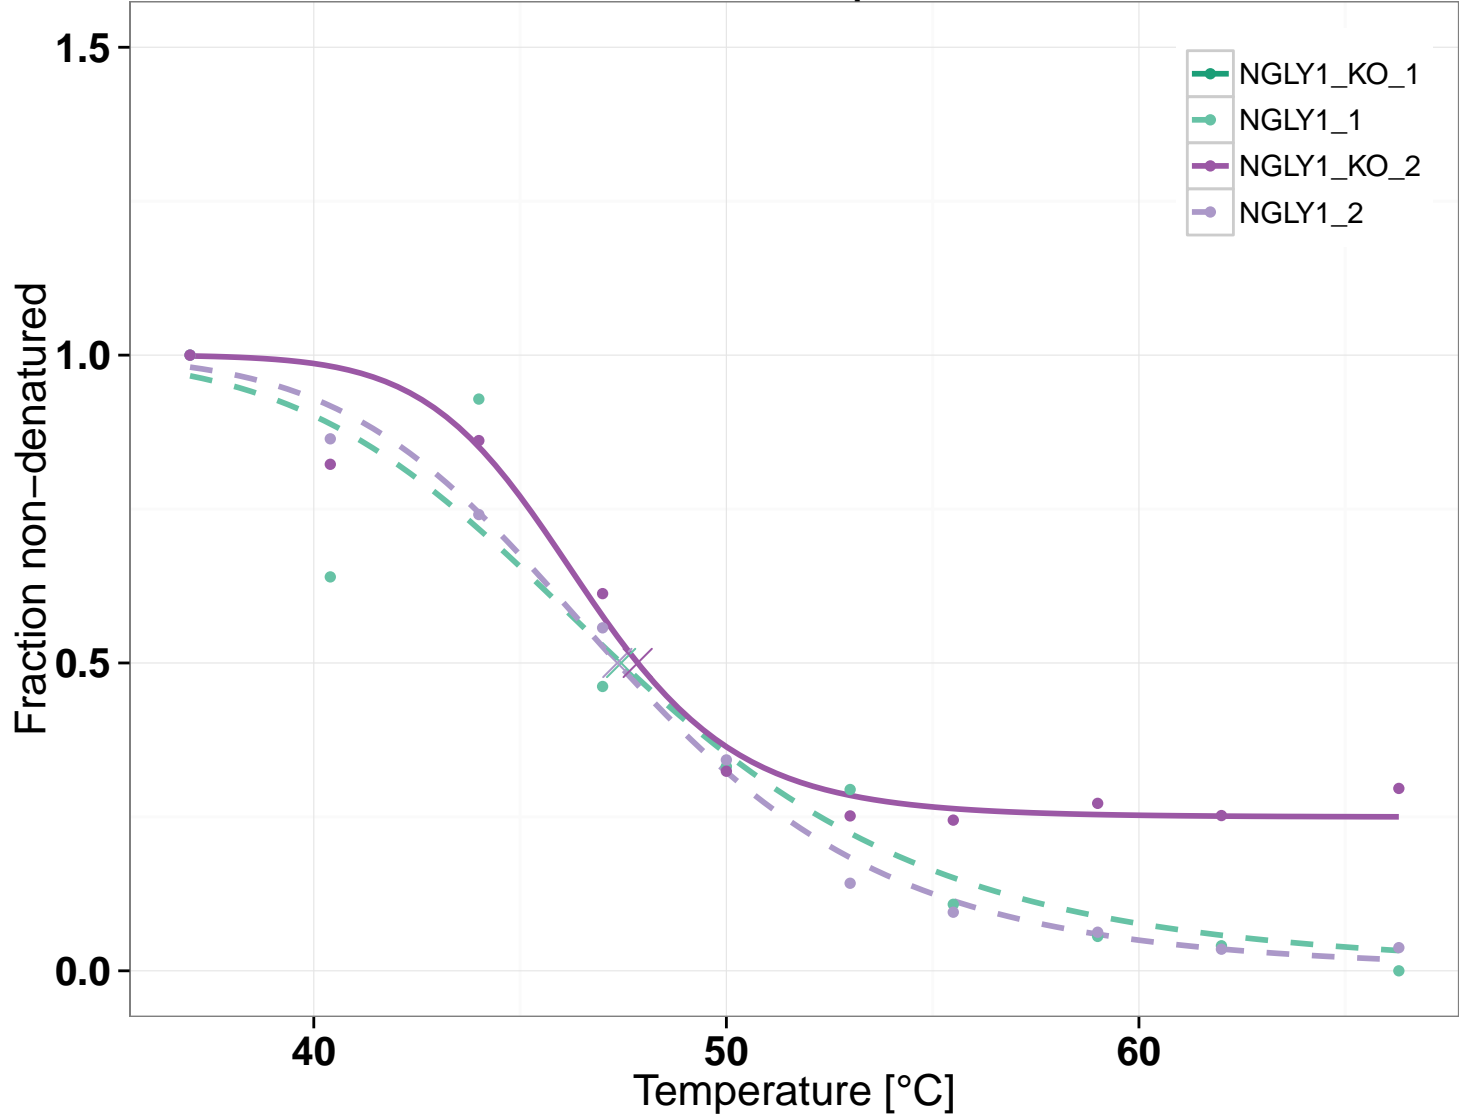

|            | meltPoint | slope  | plateau | R2   |
|------------|-----------|--------|---------|------|
| NGLY1_KO_1 | -         | -      | -       | -    |
| NGLY1_1    | 47.45     | -0.064 | 0       | 0.9  |
| NGLY1_KO_2 | 47.85     | -0.1   | 0.25    | 0.96 |
| NGLY1_2    | 47.36     | -0.075 | 0       | 0.99 |

Supplement: Supplementary file 1441 [file 1]

# IPI00100796.4|CHMP5

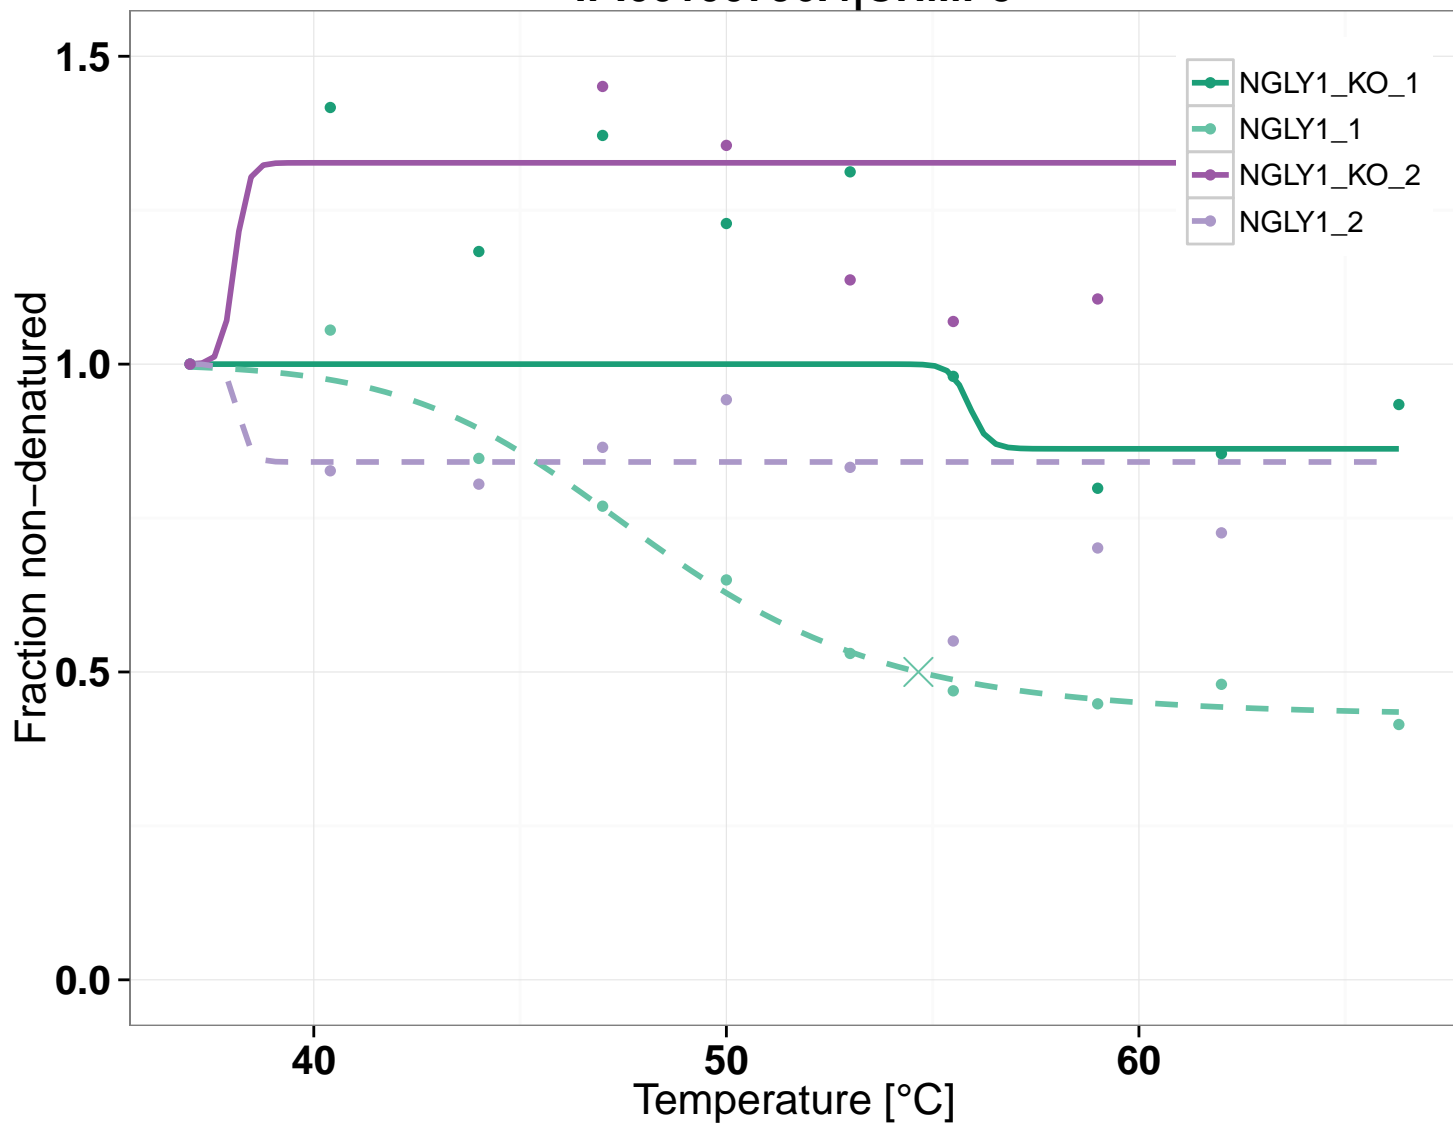

|            | meltPoint | slope  | plateau | R2    |
|------------|-----------|--------|---------|-------|
| NGLY1_KO_1 | –         | –0.15  | 0.86    | –0.13 |
| NGLY1_1    | 54.65     | –0.049 | 0.43    | 0.98  |
| NGLY1_KO_2 | –         | 0.54   | 1.33    | 0.23  |
| NGLY1_2    | –         | –0.26  | 0.84    | 0.06  |

Supplement: Supplementary file 1442 [file 1]

IPI00299057.3|SLC37A1

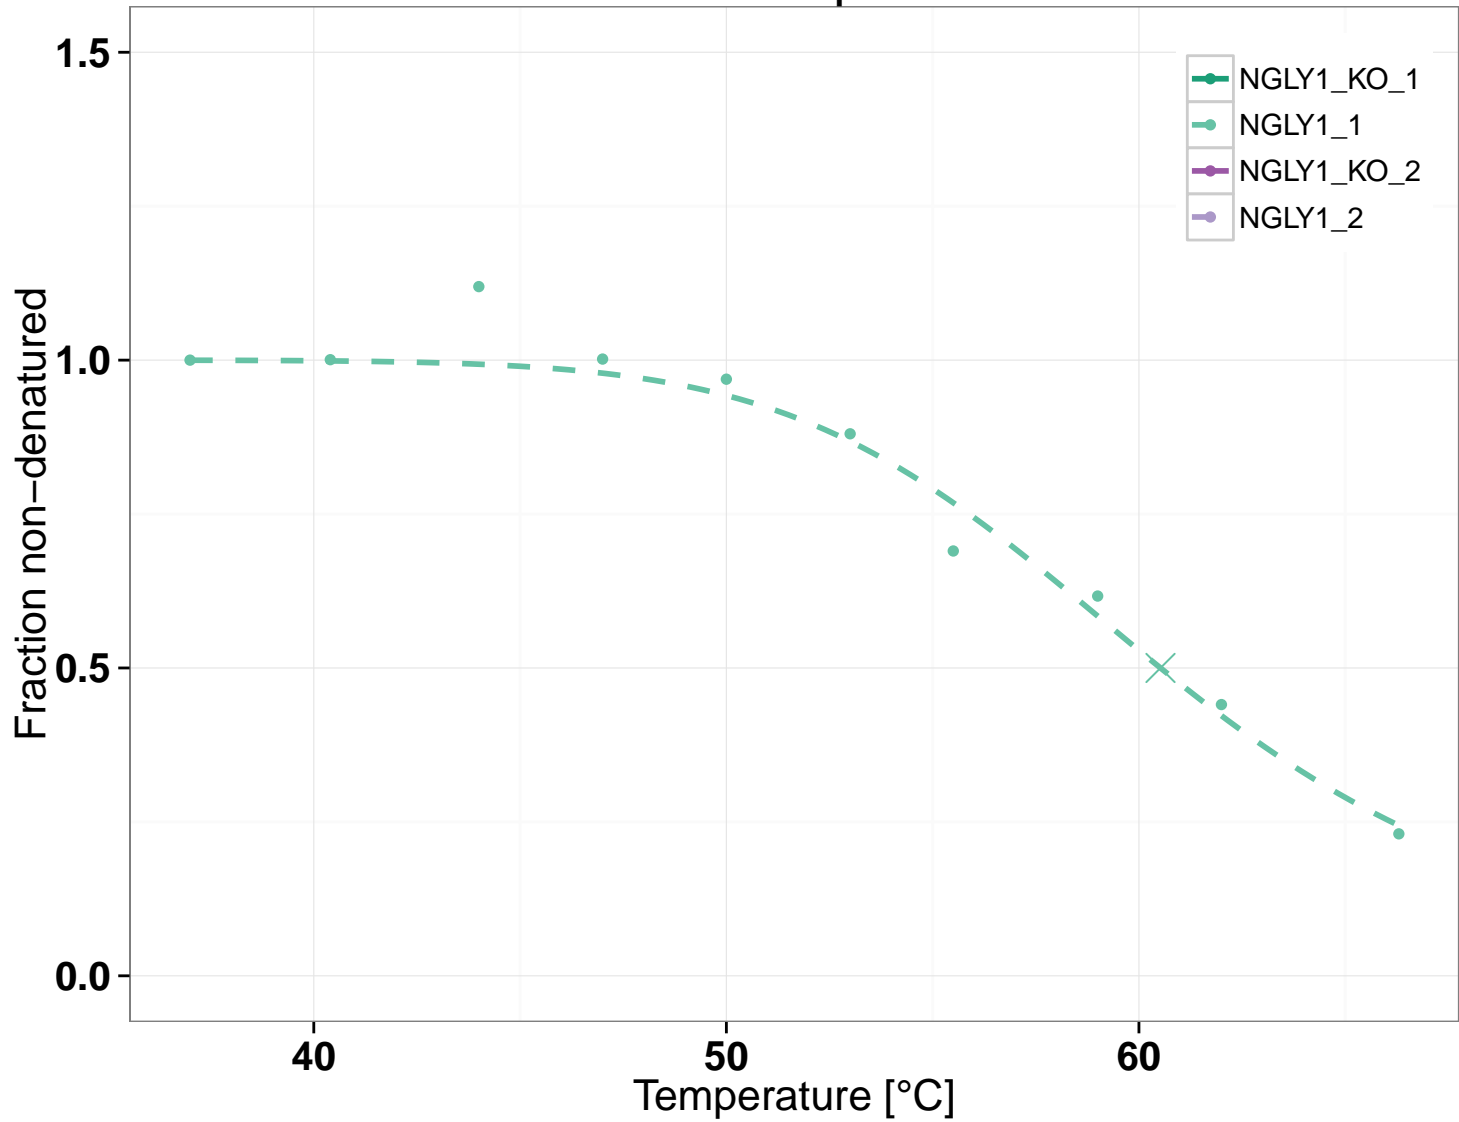

|            | meltPoint | slope  | plateau | R2   |
|------------|-----------|--------|---------|------|
| NGLY1_KO_1 | —         | —      | —       | —    |
| NGLY1_1    | 60.52     | -0.056 | 0.02    | 0.97 |
| NGLY1_KO_2 | —         | —      | —       | —    |
| NGLY1_2    | —         | —      | —       | —    |

Supplement: Supplementary file 1443 [file 1]

IPI00847568.1|TARBP2

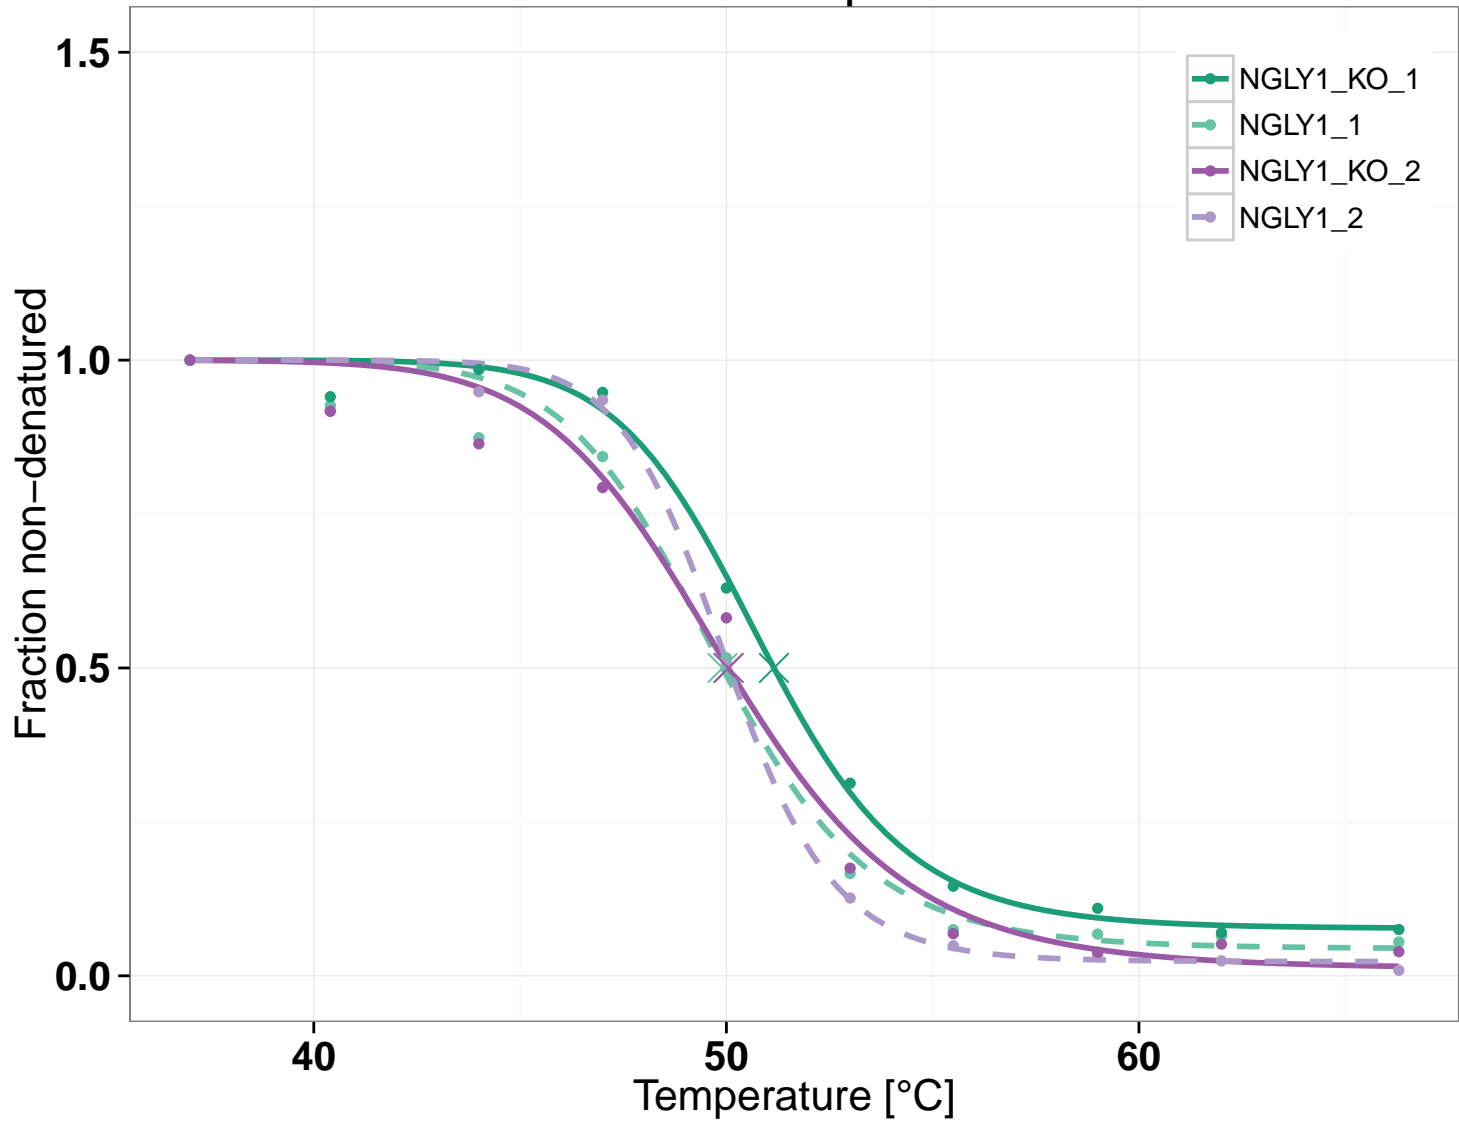

|            | meltPoint | slope | plateau | R2   |
|------------|-----------|-------|---------|------|
| NGLY1_KO_1 | 51.15     | -0.13 | 0.08    | 1    |
| NGLY1_1    | 49.91     | -0.13 | 0.04    | 0.99 |
| NGLY1_KO_2 | 50.05     | -0.11 | 0.01    | 0.98 |
| NGLY1_2    | 50.06     | -0.19 | 0.02    | 0.99 |

Supplement: Supplementary file 1444 [file 1]

# IPI00642494.2|UPRT

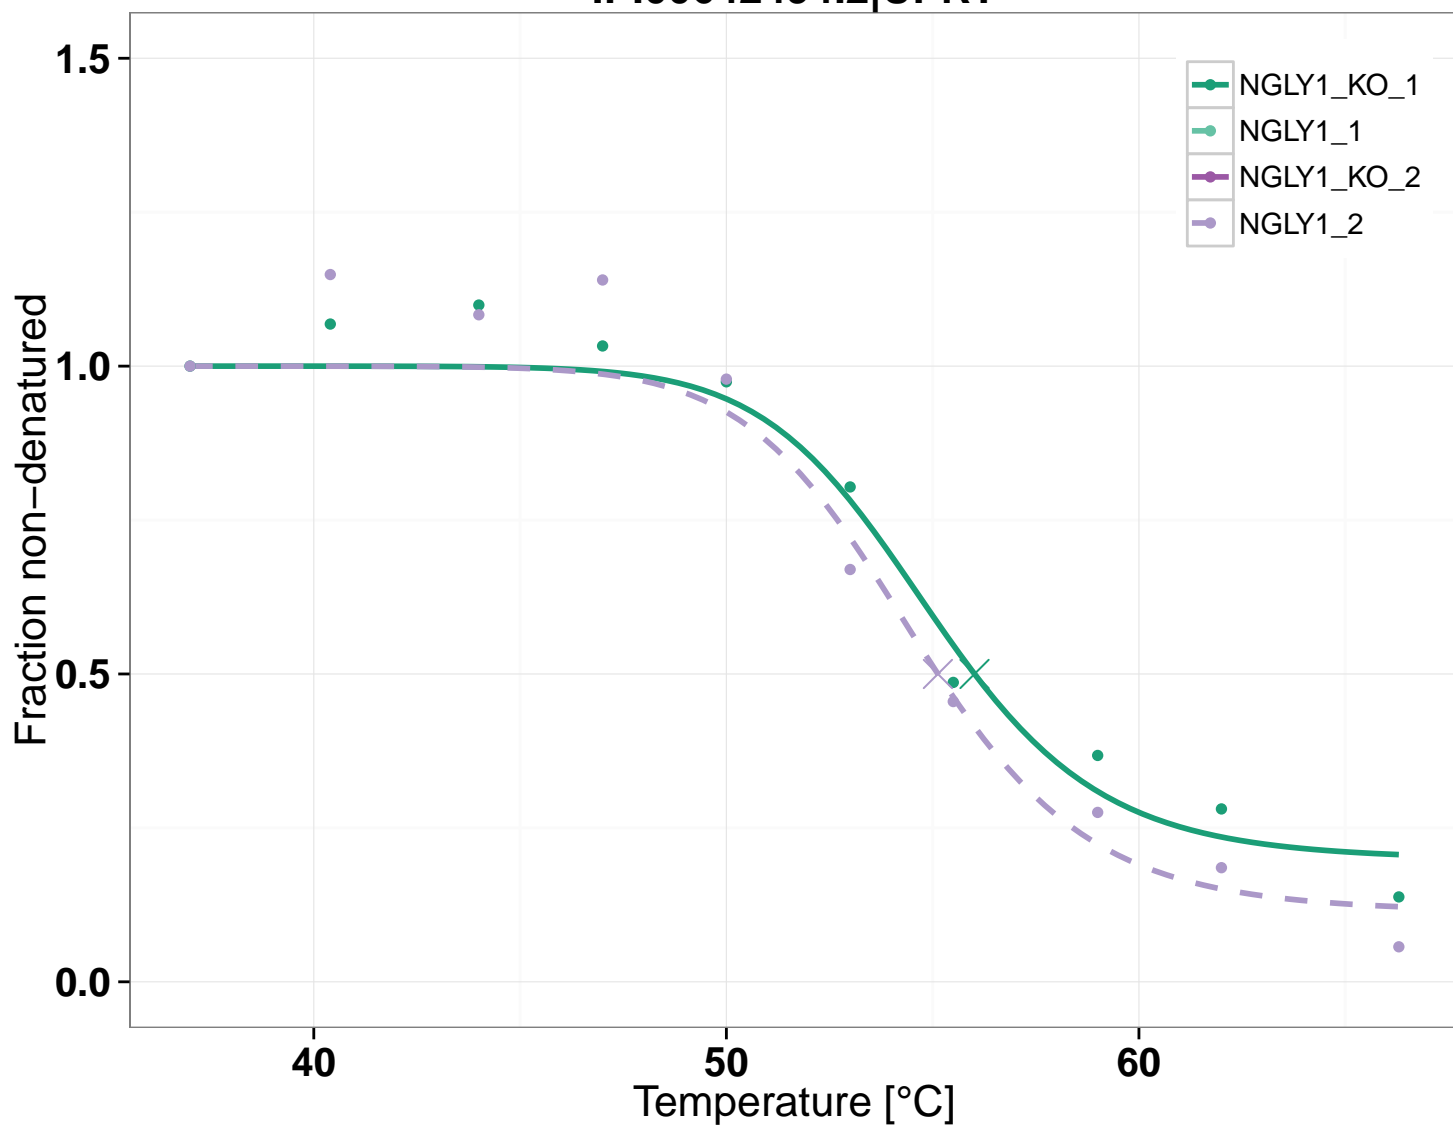

|            | meltPoint | slope  | plateau | R2   |
|------------|-----------|--------|---------|------|
| NGLY1_KO_1 | 56.02     | -0.098 | 0.2     | 0.97 |
| NGLY1_1    | -         | -      | -       | -    |
| NGLY1_KO_2 | -         | -      | -       | -    |
| NGLY1_2    | 55.13     | -0.11  | 0.11    | 0.96 |

Supplement: Supplementary file 1445 [file 1]

# IPI00019899.1|SC4MOL

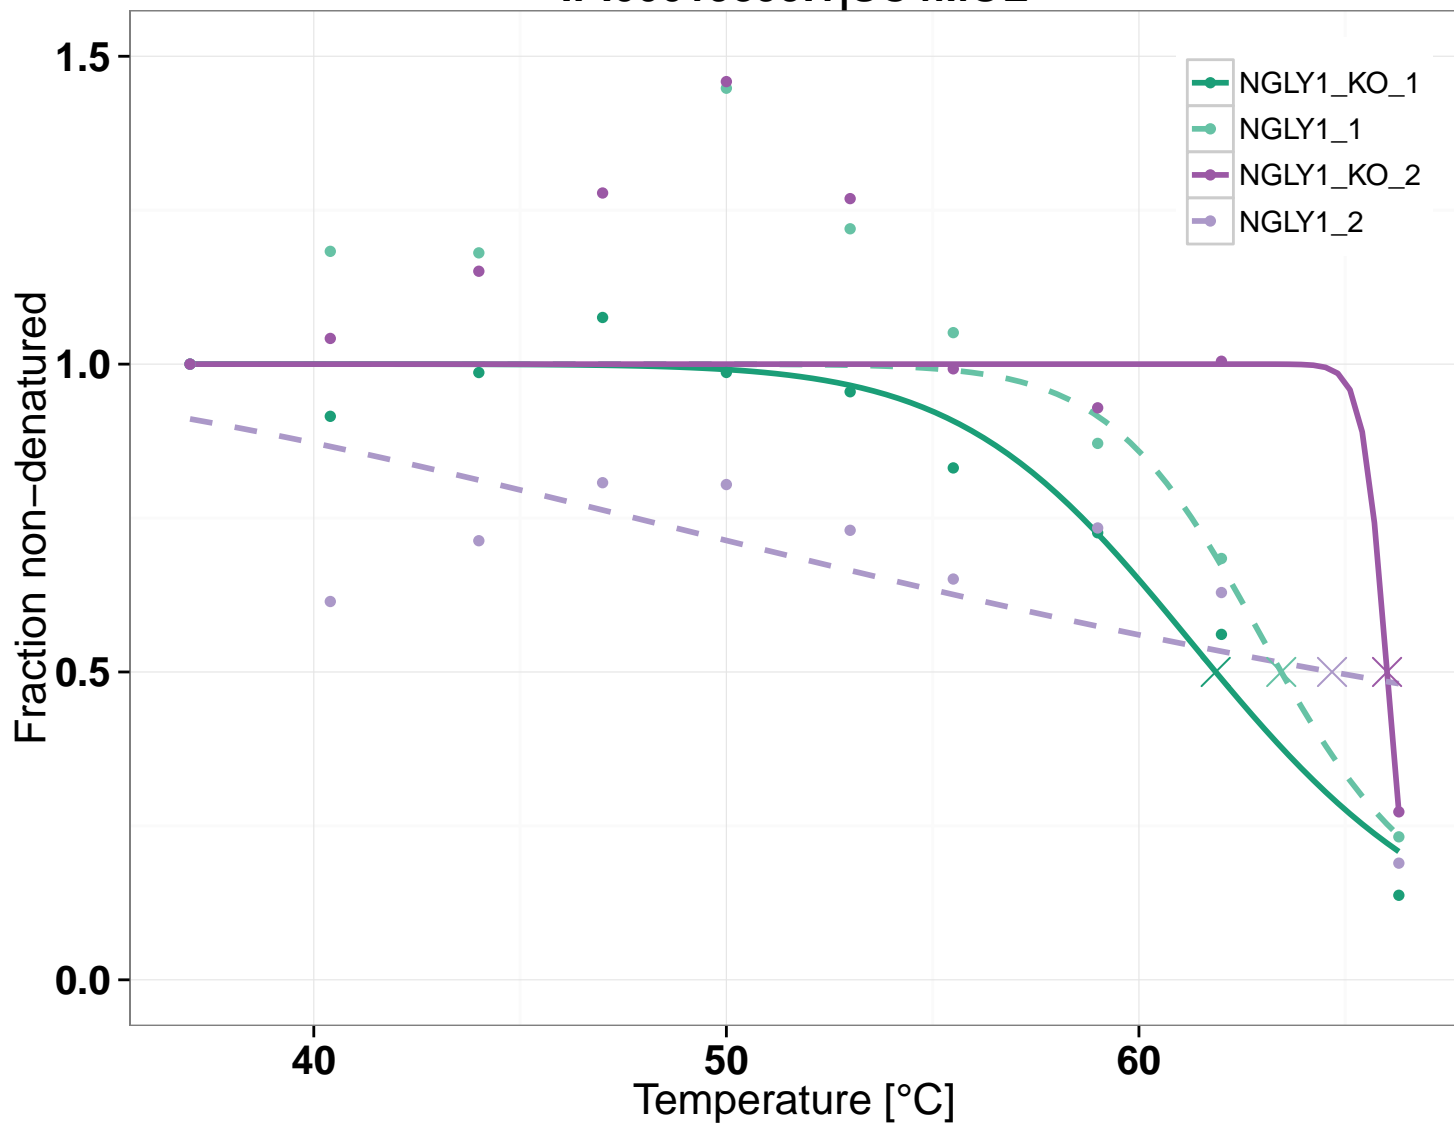

|            | meltPoint | slope  | plateau | R2   |
|------------|-----------|--------|---------|------|
| NGLY1_KO_1 | 61.86     | -0.081 | 0       | 0.96 |
| NGLY1_1    | 63.45     | -0.12  | 0.07    | 0.52 |
| NGLY1_KO_2 | 66.01     | -0.86  | 0       | 0.57 |
| NGLY1_2    | 64.68     | -0.017 | 0       | 0.44 |

Supplement: Supplementary file 1446 [file 1]

# IPI00218924.5|CHP

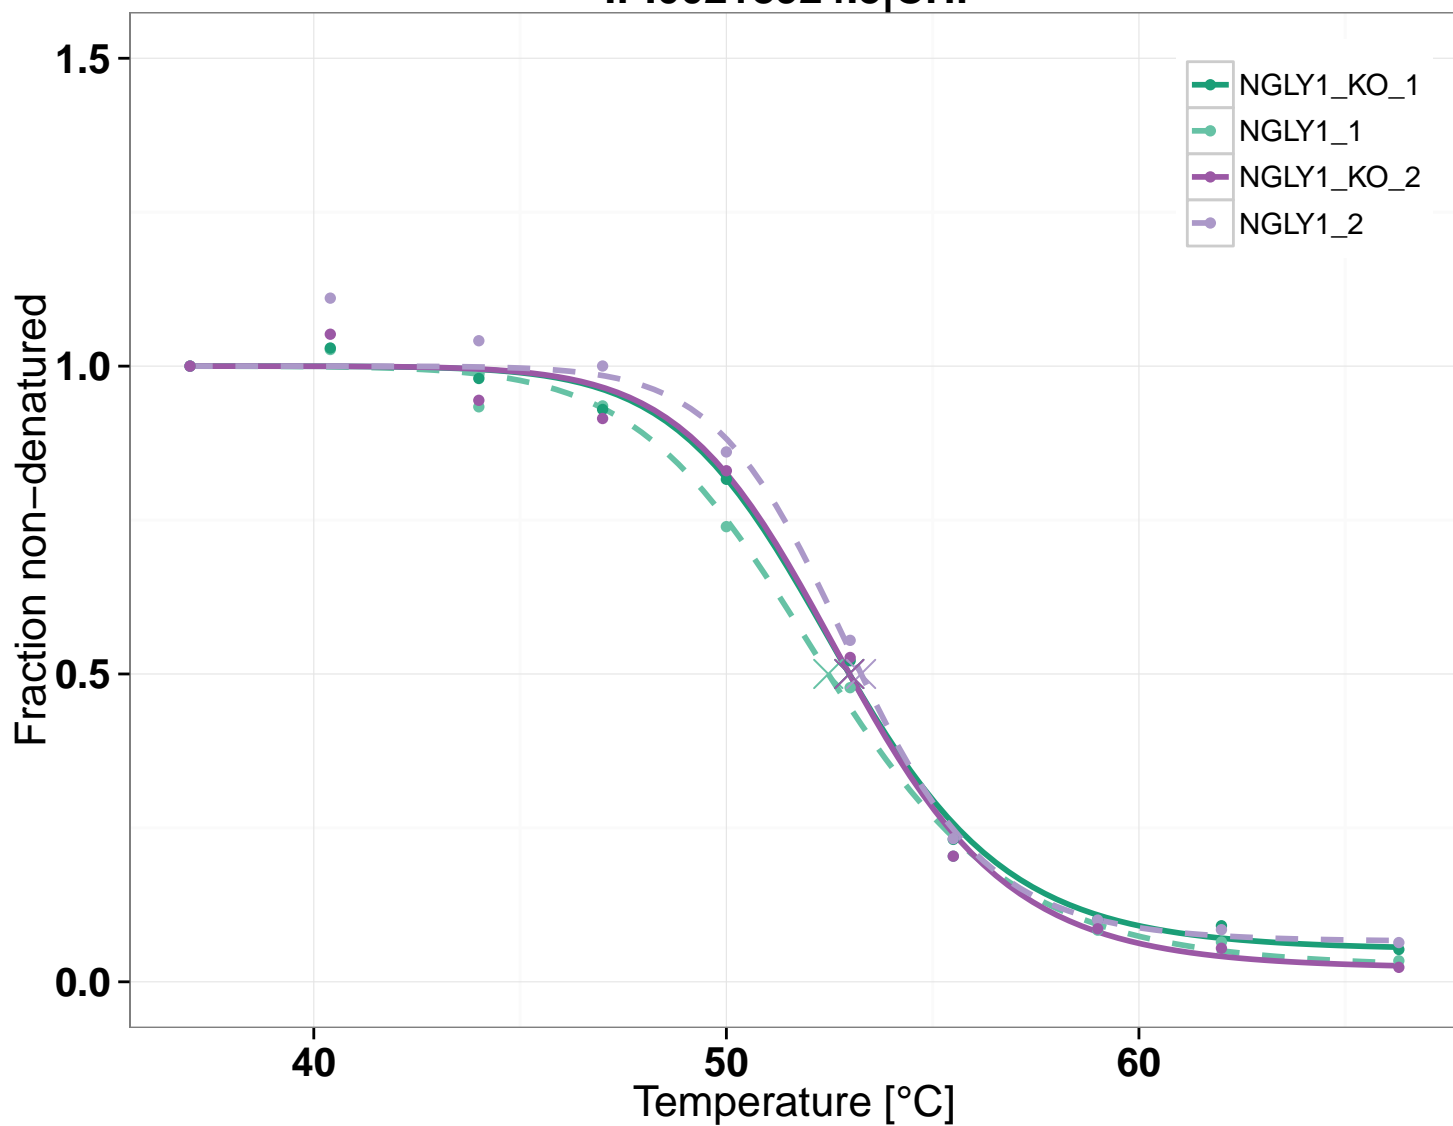

|            | meltPoint | slope | plateau | R2   |
|------------|-----------|-------|---------|------|
| NGLY1_KO_1 | 52.98     | -0.12 | 0.05    | 1    |
| NGLY1_1    | 52.47     | -0.11 | 0.02    | 1    |
| NGLY1_KO_2 | 52.98     | -0.12 | 0.02    | 0.99 |
| NGLY1_2    | 53.27     | -0.14 | 0.07    | 0.99 |

Supplement: Supplementary file 1447 [file 1]

IPI00008536.3|YEATS4

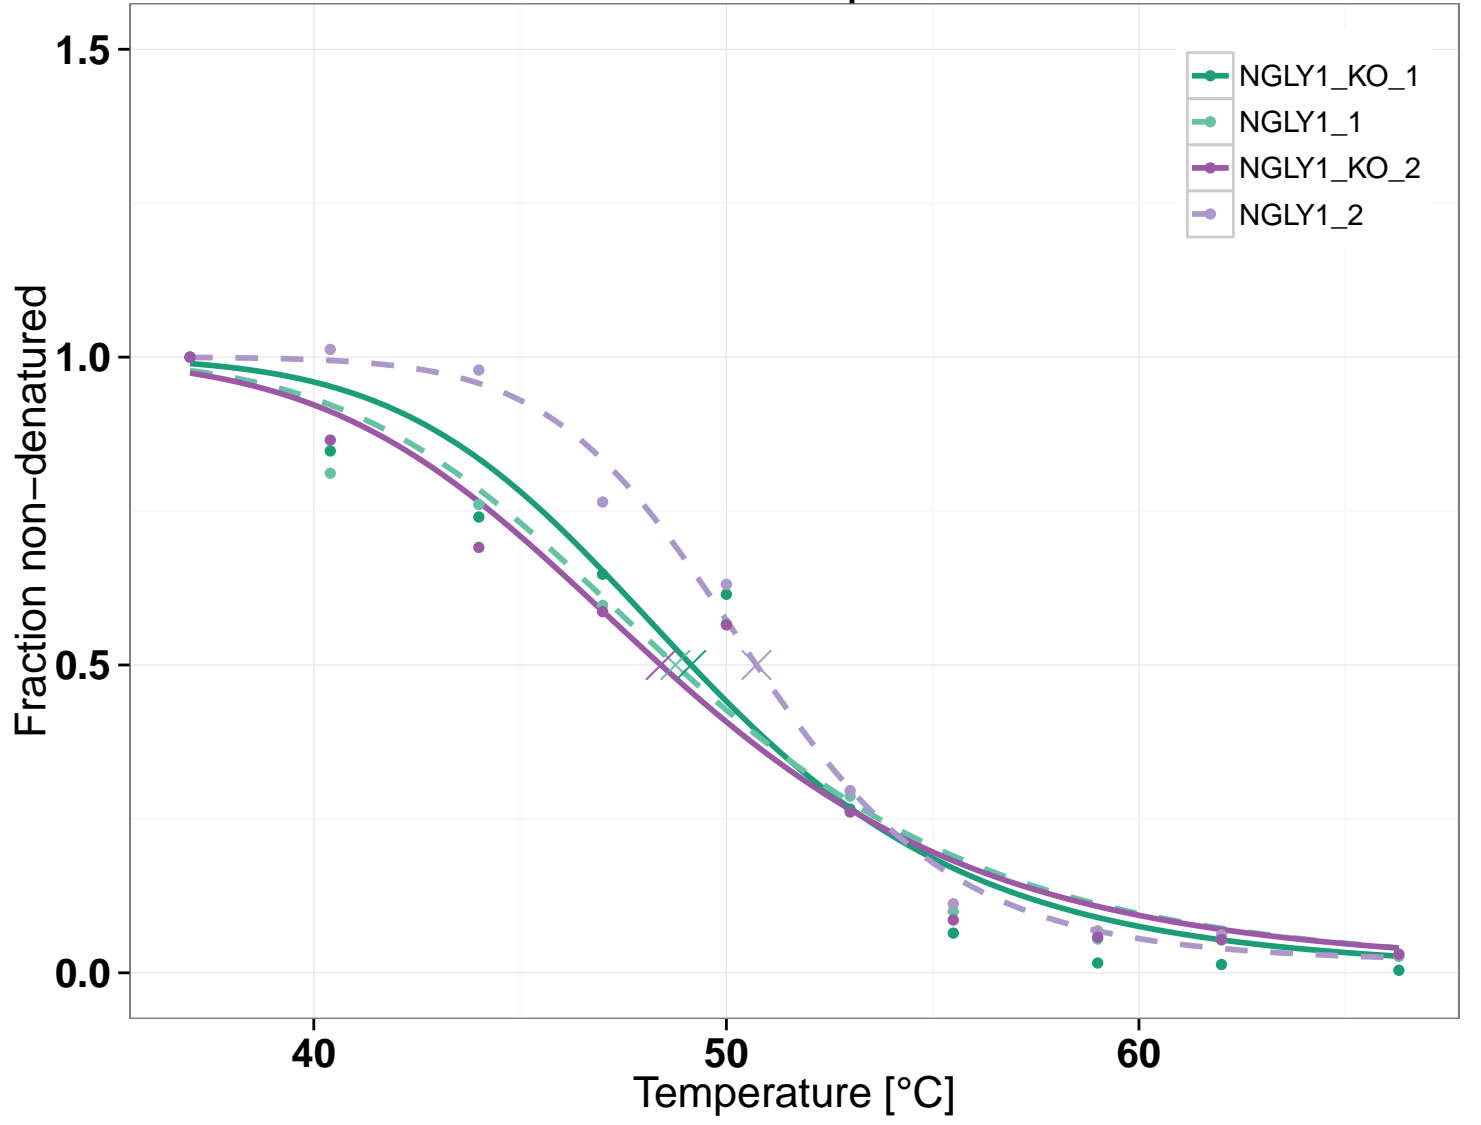

|            | meltPoint | slope  | plateau | R2   |
|------------|-----------|--------|---------|------|
| NGLY1_KO_1 | 49.15     | -0.072 | 0       | 0.95 |
| NGLY1_1    | 48.77     | -0.063 | 0       | 0.96 |
| NGLY1_KO_2 | 48.41     | -0.063 | 0       | 0.96 |
| NGLY1_2    | 50.73     | -0.1   | 0.02    | 0.99 |

Supplement: Supplementary file 1448 [file 1]

# IPI00472779.1|ANK3

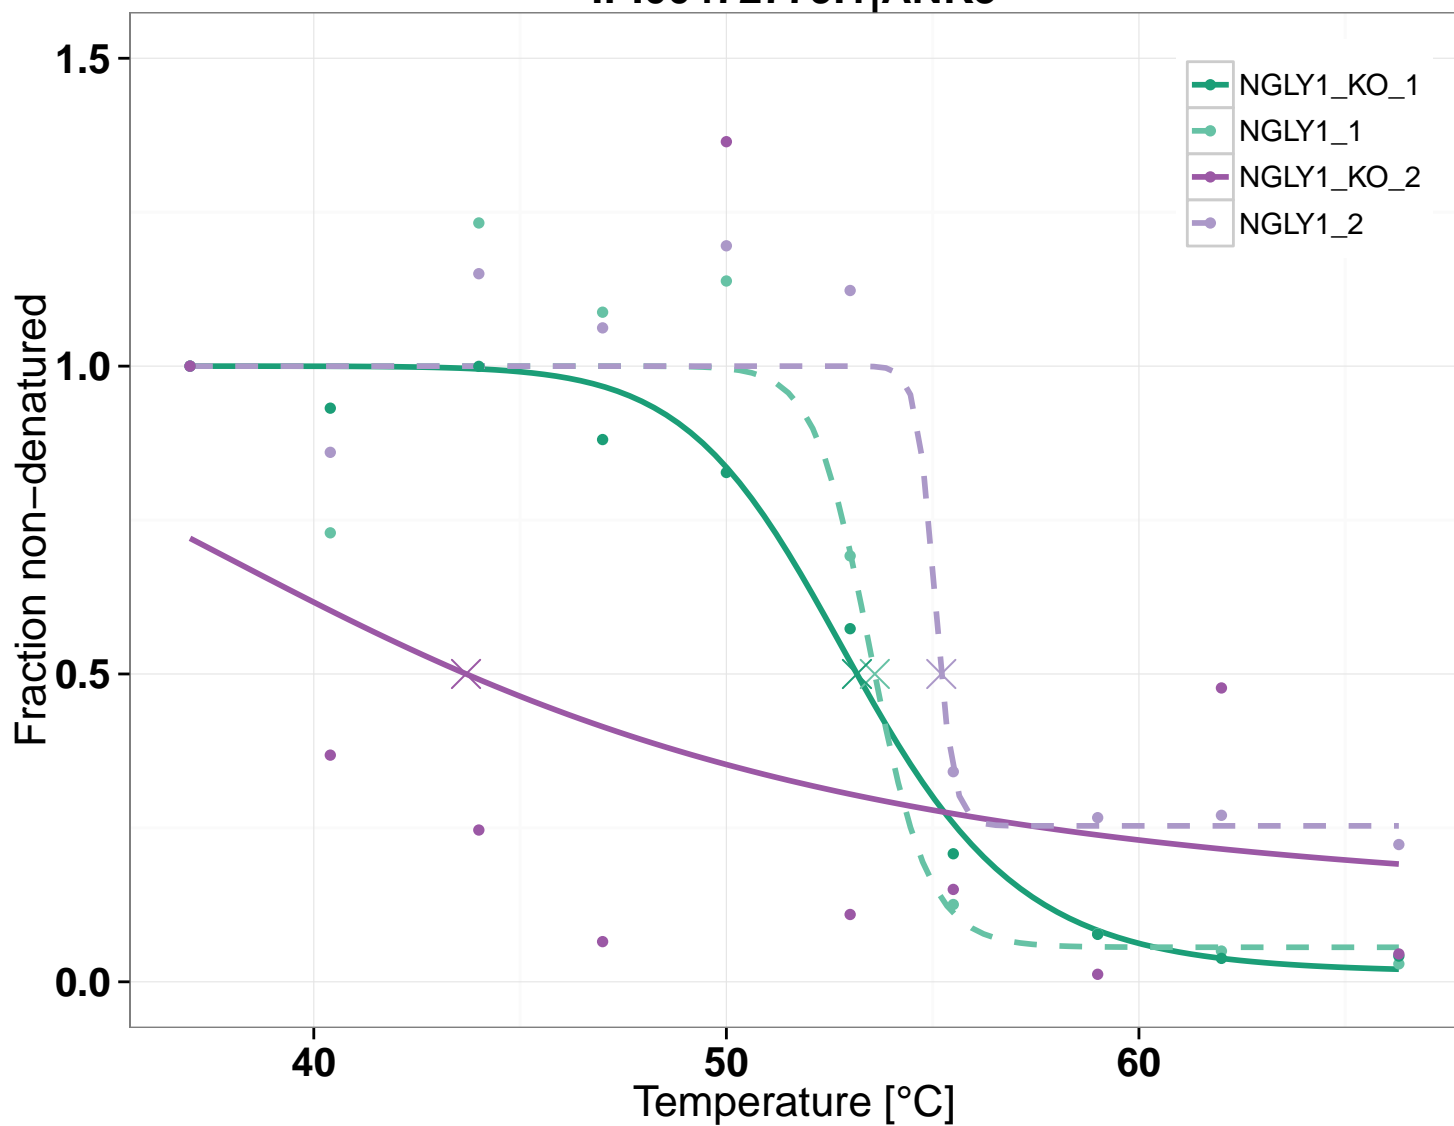

|            | meltPoint | slope  | plateau | R2   |
|------------|-----------|--------|---------|------|
| NGLY1_KO_1 | 53.17     | -0.12  | 0.01    | 0.99 |
| NGLY1_1    | 53.6      | -0.34  | 0.06    | 0.93 |
| NGLY1_KO_2 | 43.69     | -0.035 | 0.09    | 0.17 |
| NGLY1_2    | 55.21     | -0.85  | 0.25    | 0.94 |

Supplement: Supplementary file 1449 [file 1]

IPI00008461.2|POLR3K

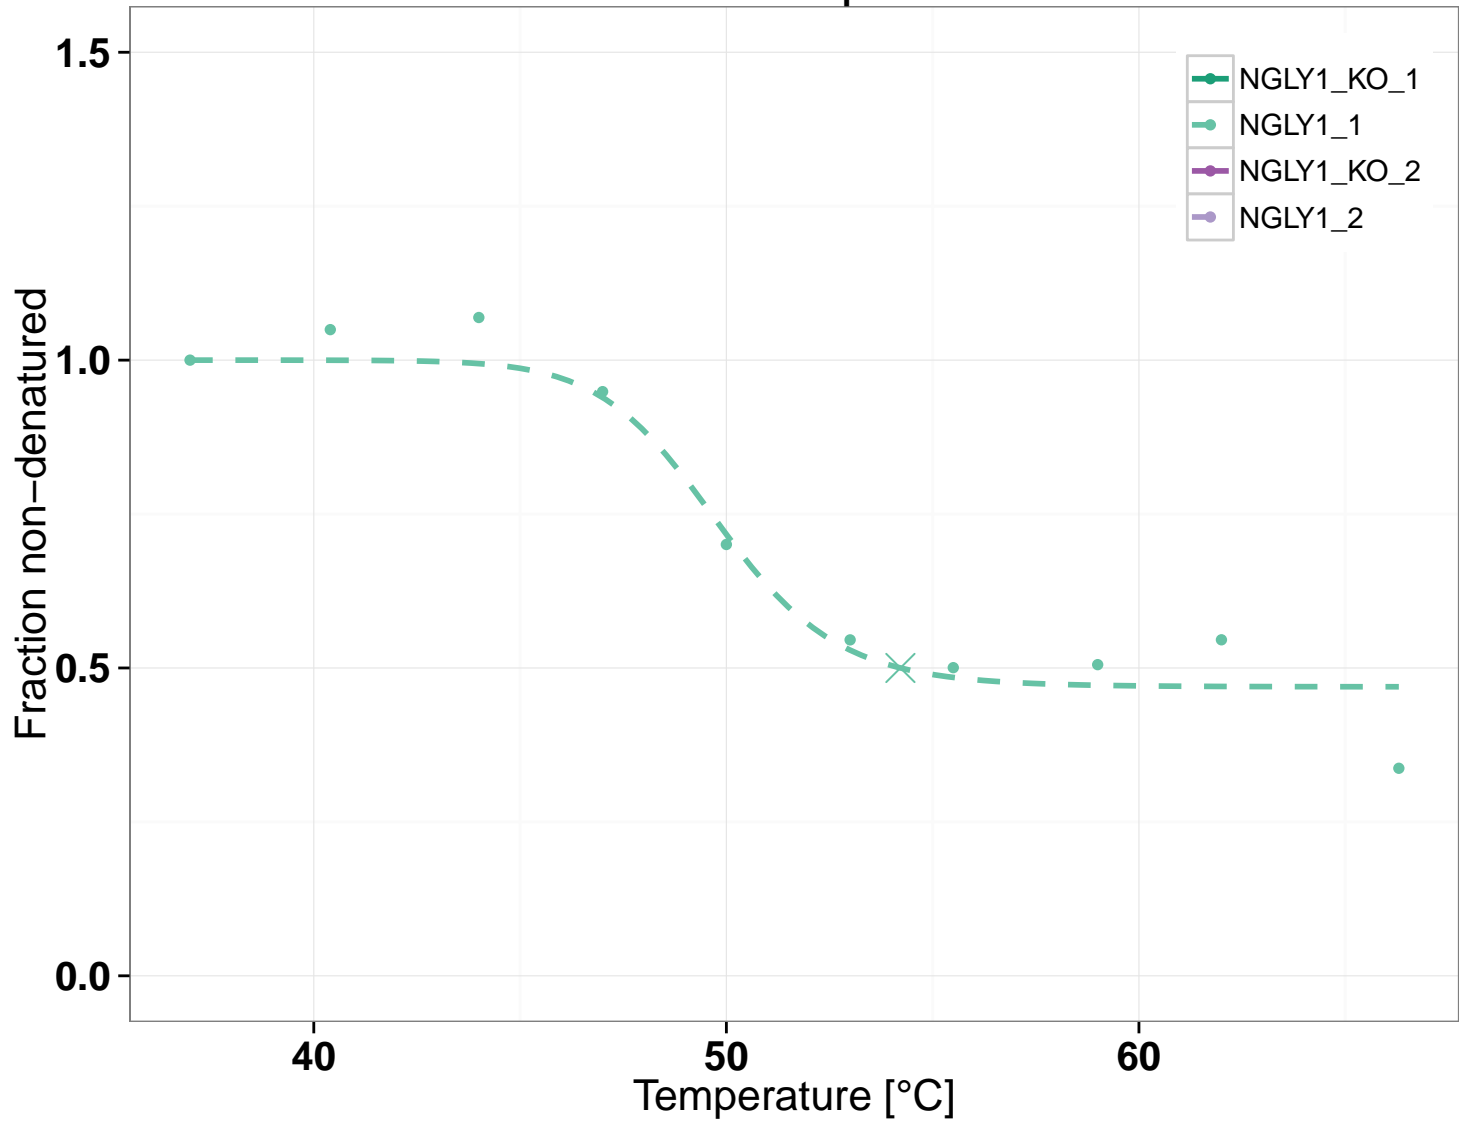

|            | meltPoint | slope  | plateau | R2   |
|------------|-----------|--------|---------|------|
| NGLY1_KO_1 | -         | -      | -       | -    |
| NGLY1_1    | 54.22     | -0.092 | 0.47    | 0.95 |
| NGLY1_KO_2 | -         | -      | -       | -    |
| NGLY1_2    | -         | -      | -       | -    |

Supplement: Supplementary file 1450 [file 1]

IPI00009841.5|EWSR1

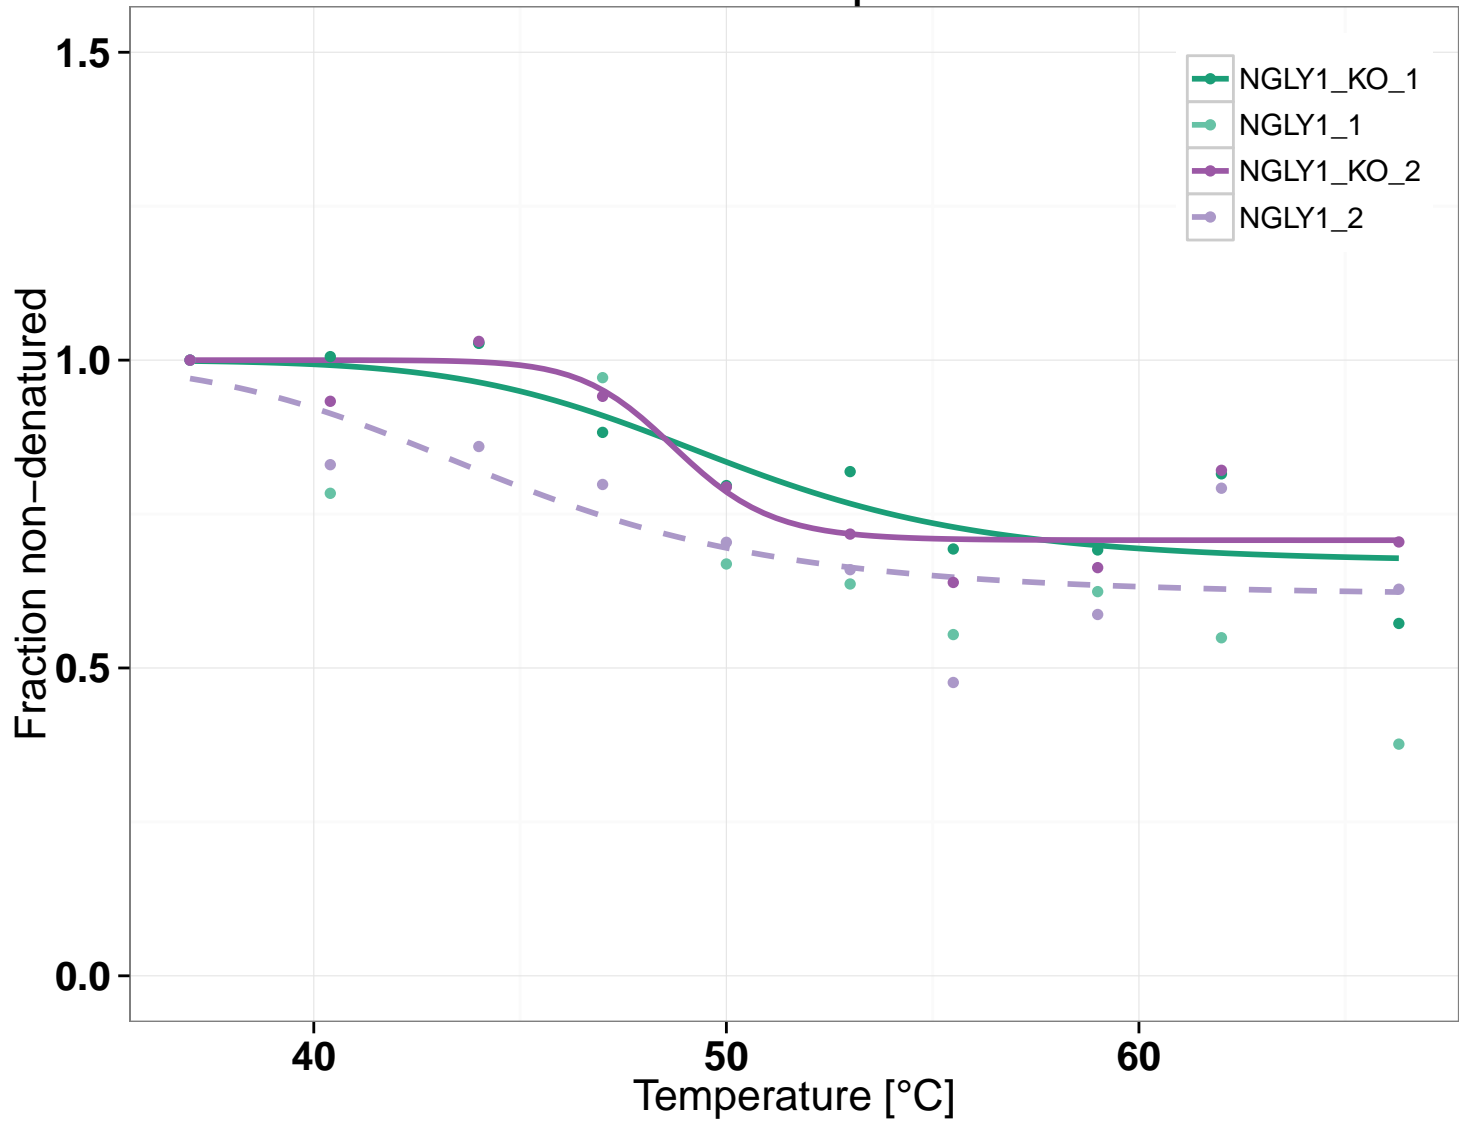

|            | meltPoint | slope  | plateau | R2   |
|------------|-----------|--------|---------|------|
| NGLY1_KO_1 | —         | −0.026 | 0.67    | 0.82 |
| NGLY1_1    | —         | —      | —       | —    |
| NGLY1_KO_2 | —         | −0.063 | 0.71    | 0.86 |
| NGLY1_2    | —         | −0.027 | 0.62    | 0.66 |

Supplement: Supplementary file 1451 [file 1]

IPI00643763.4|PAPD5

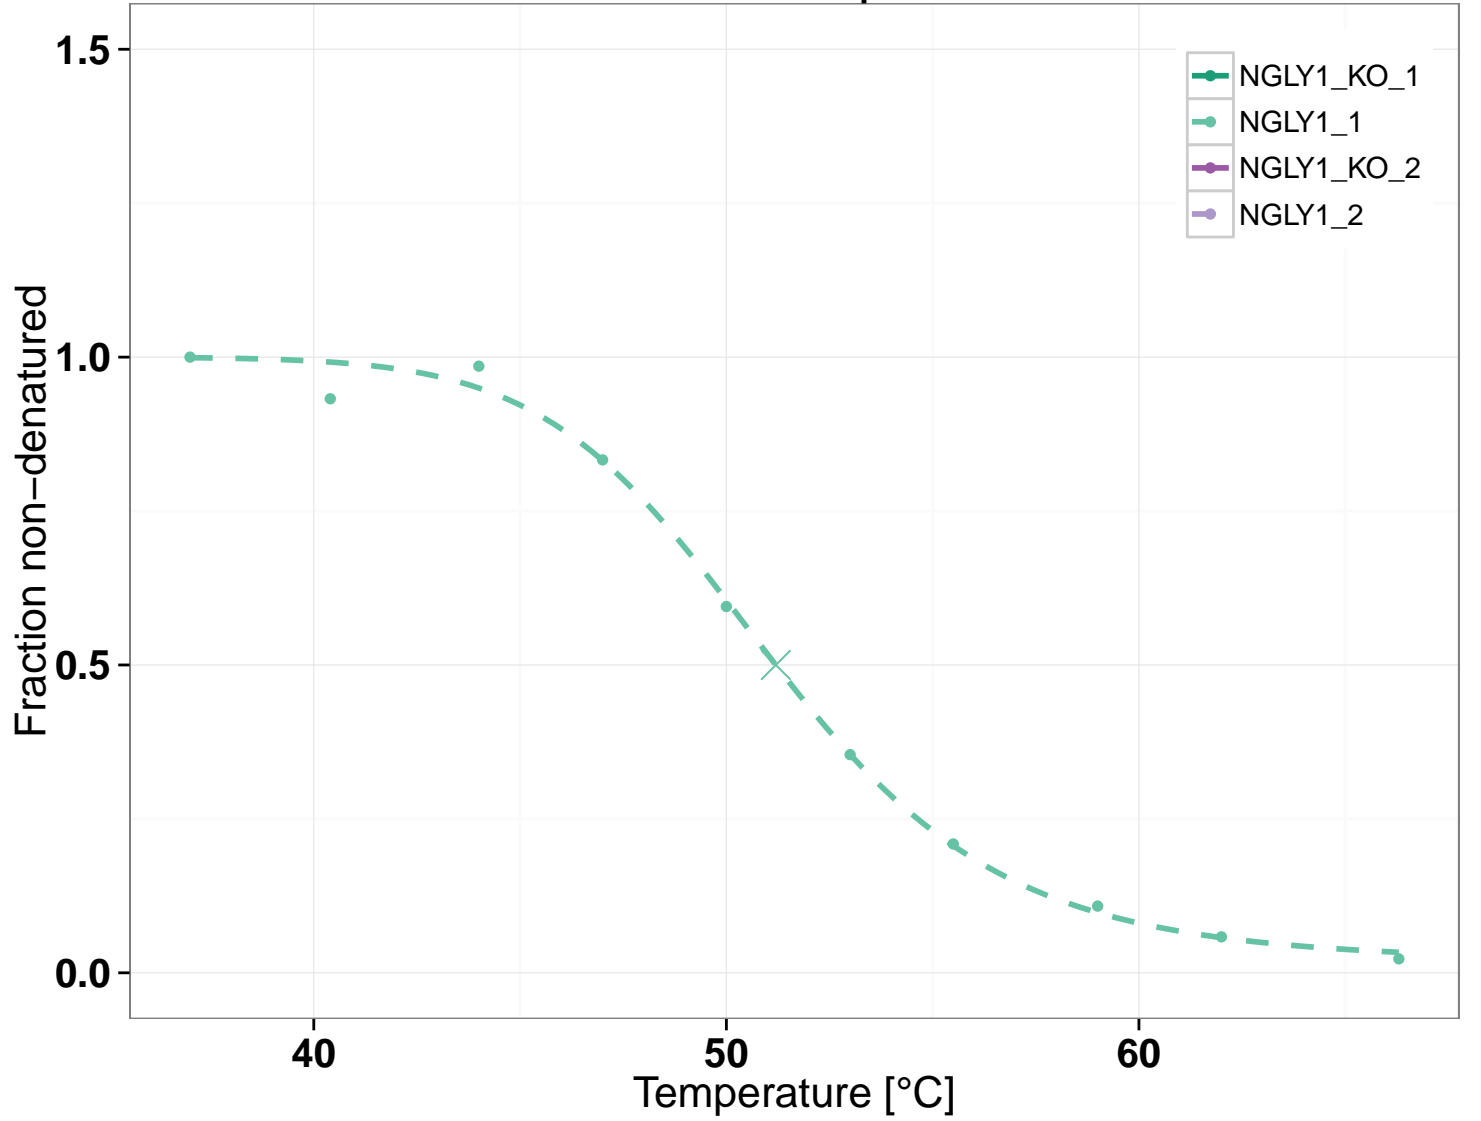

|            | meltPoint | slope  | plateau | R2 |
|------------|-----------|--------|---------|----|
| NGLY1_KO_1 | -         | -      | -       | -  |
| NGLY1_1    | 51.2      | -0.088 | 0.02    | 1  |
| NGLY1_KO_2 | -         | -      | -       | -  |
| NGLY1_2    | -         | -      | -       | -  |

Supplement: Supplementary file 1452 [file 1]

# IPI00017617.1|DDX5

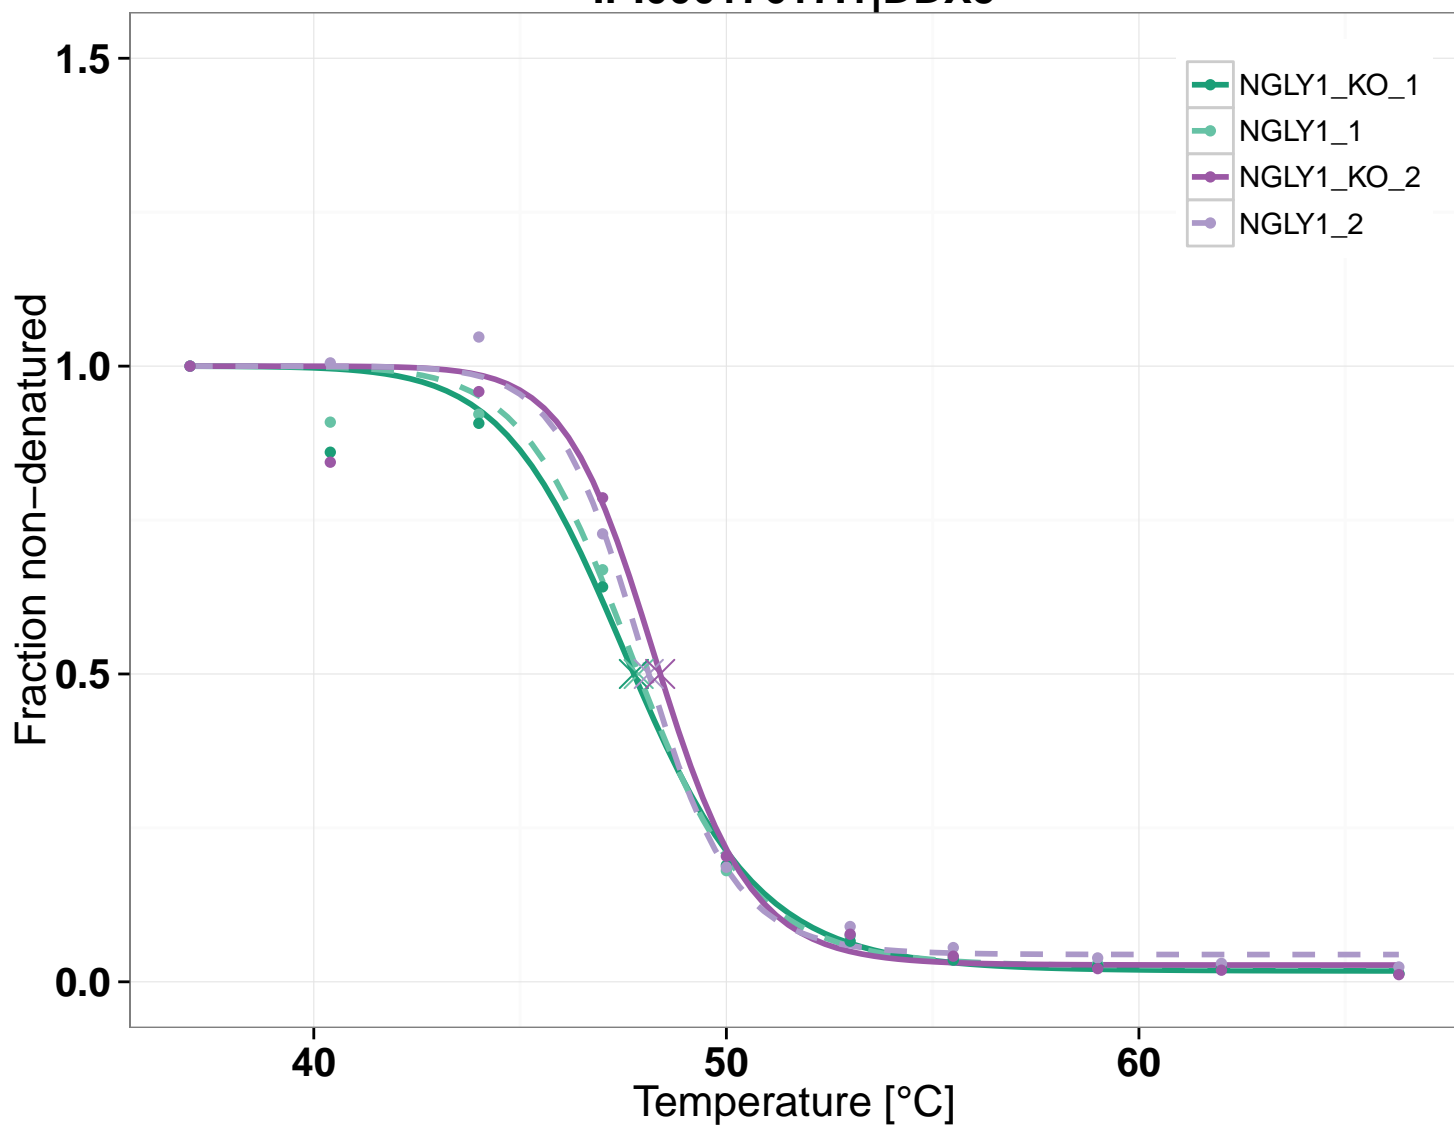

|            | meltPoint | slope | plateau | R2   |
|------------|-----------|-------|---------|------|
| NGLY1_KO_1 | 47.76     | -0.16 | 0.02    | 0.99 |
| NGLY1_1    | 47.87     | -0.18 | 0.03    | 0.99 |
| NGLY1_KO_2 | 48.4      | -0.22 | 0.03    | 0.98 |
| NGLY1_2    | 48.12     | -0.22 | 0.04    | 1    |

Supplement: Supplementary file 1453 [file 1]

IPI00796914.1|AURKB

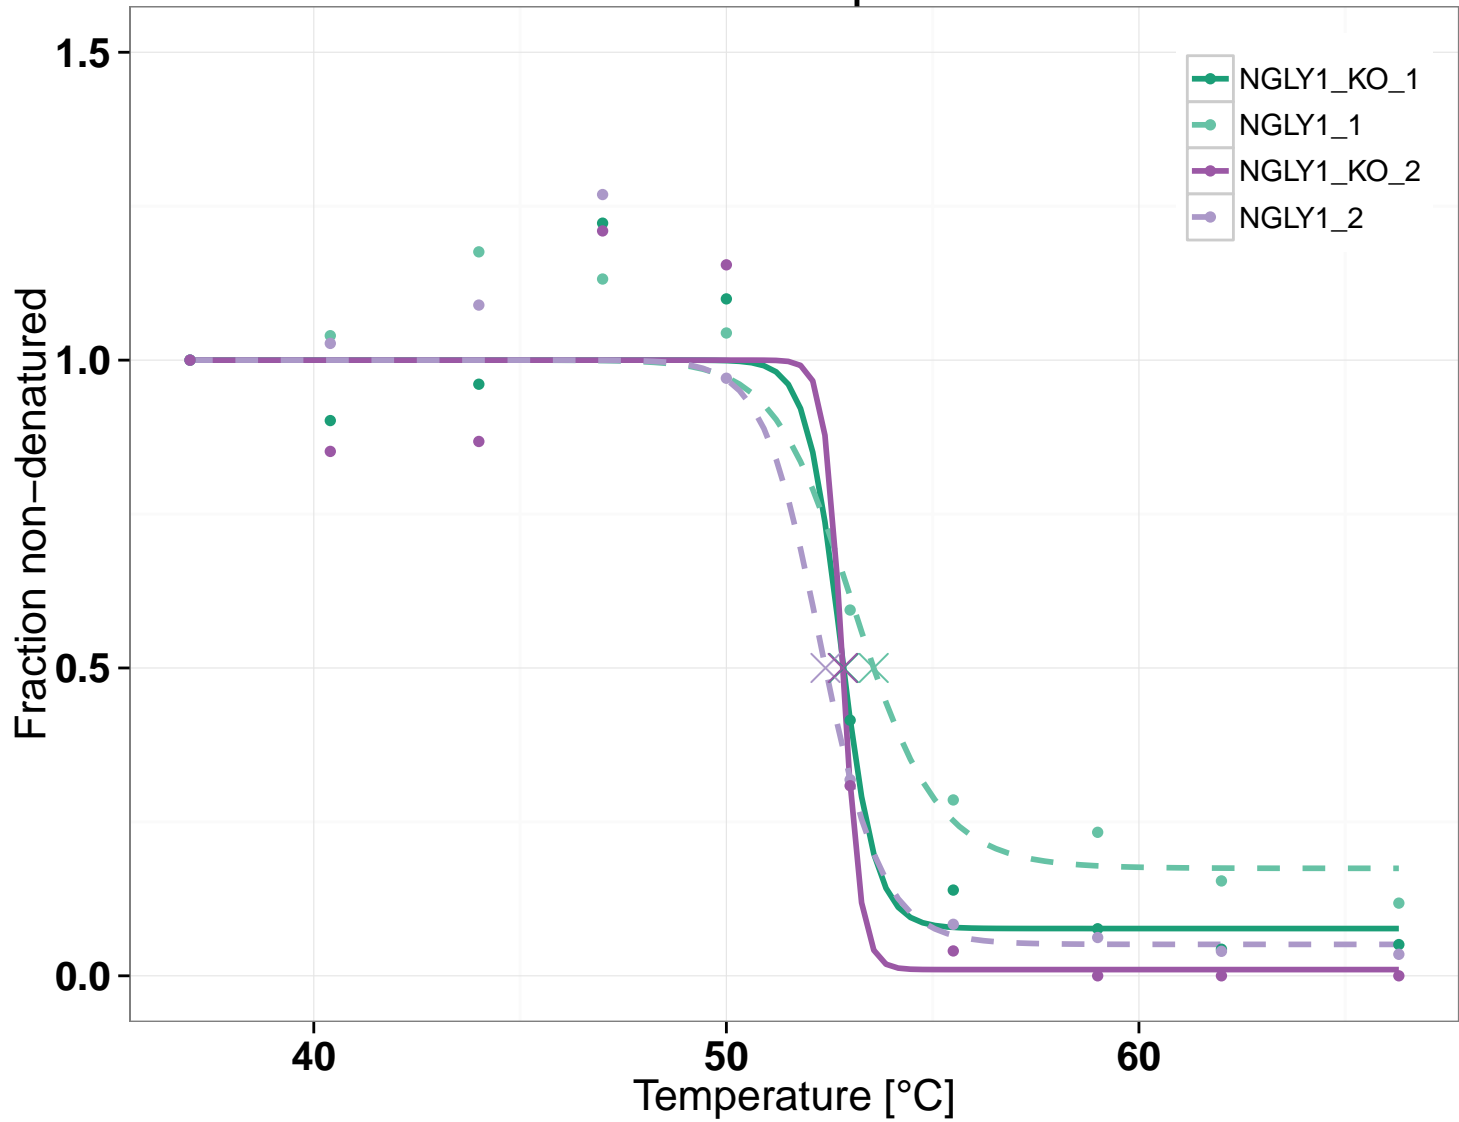

|            | meltPoint | slope | plateau | R2   |
|------------|-----------|-------|---------|------|
| NGLY1_KO_1 | 52.84     | -0.55 | 0.08    | 0.96 |
| NGLY1_1    | 53.57     | -0.21 | 0.17    | 0.96 |
| NGLY1_KO_2 | 52.82     | -1.1  | 0.01    | 0.96 |
| NGLY1_2    | 52.4      | -0.33 | 0.05    | 0.97 |

Supplement: Supplementary file 1454 [file 1]

IPI00646420.1|PSEN2

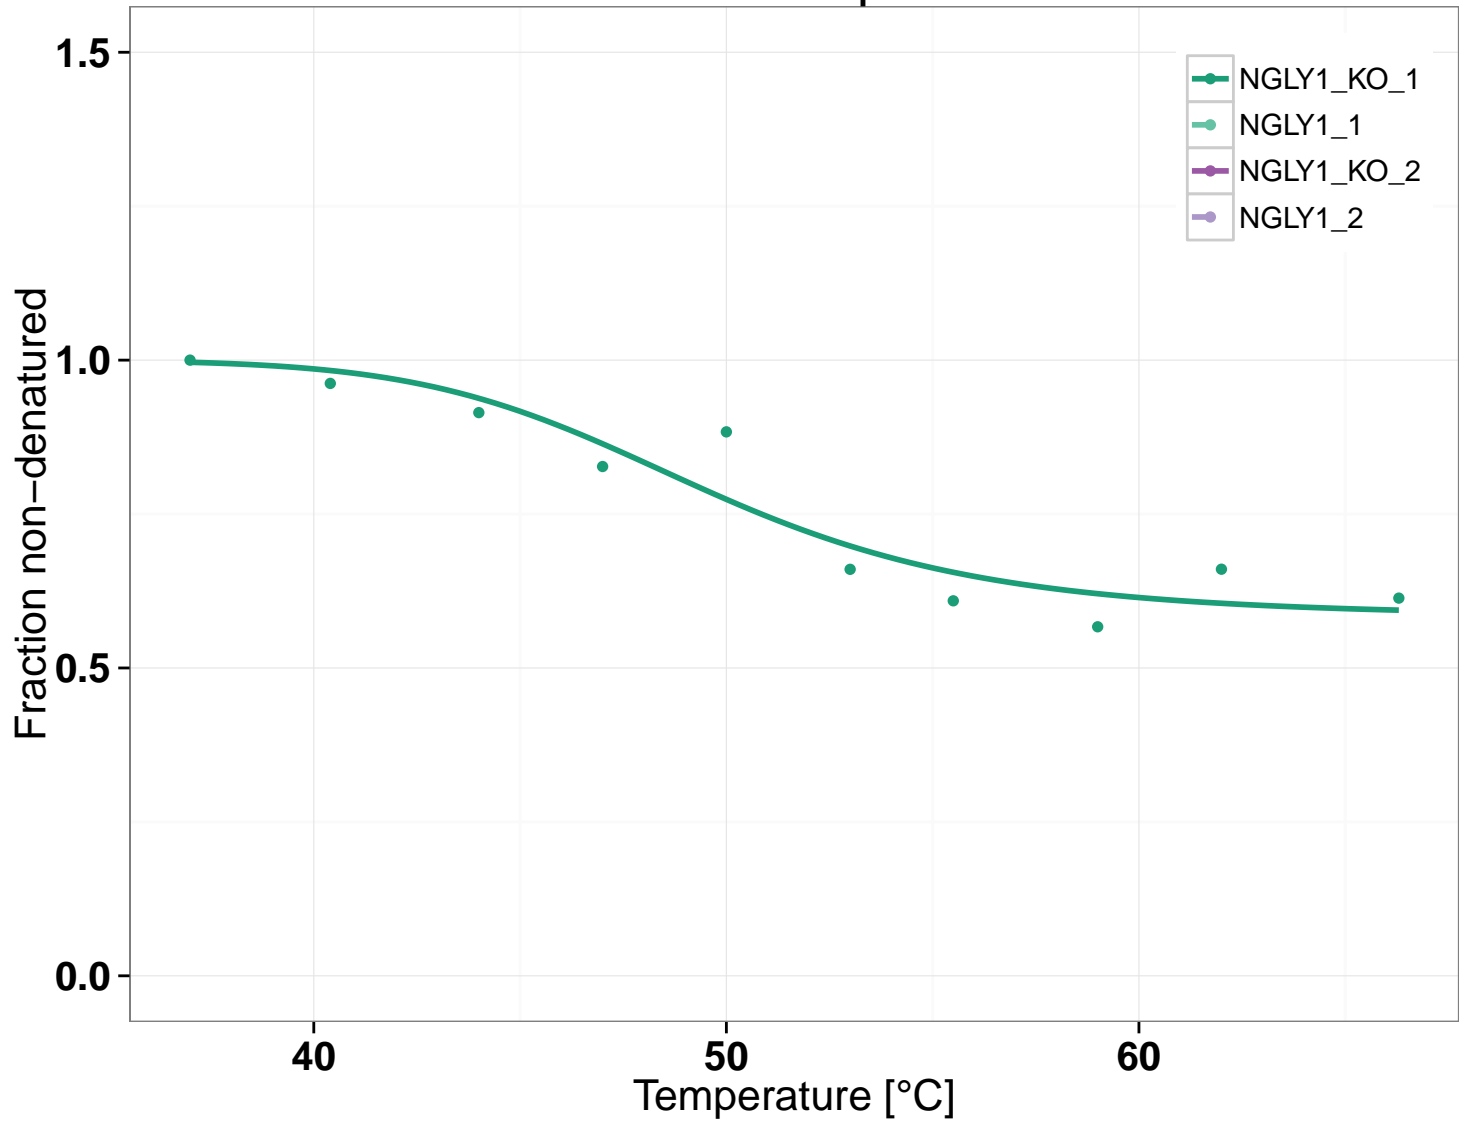

|            | meltPoint | slope  | plateau | R2  |
|------------|-----------|--------|---------|-----|
| NGLY1_KO_1 | —         | −0.031 | 0.58    | 0.9 |
| NGLY1_1    | —         | —      | —       | —   |
| NGLY1_KO_2 | —         | —      | —       | —   |
| NGLY1_2    | —         | —      | —       | —   |

Supplement: Supplementary file 1455 [file 1]

IPI00328748.4|ARMET

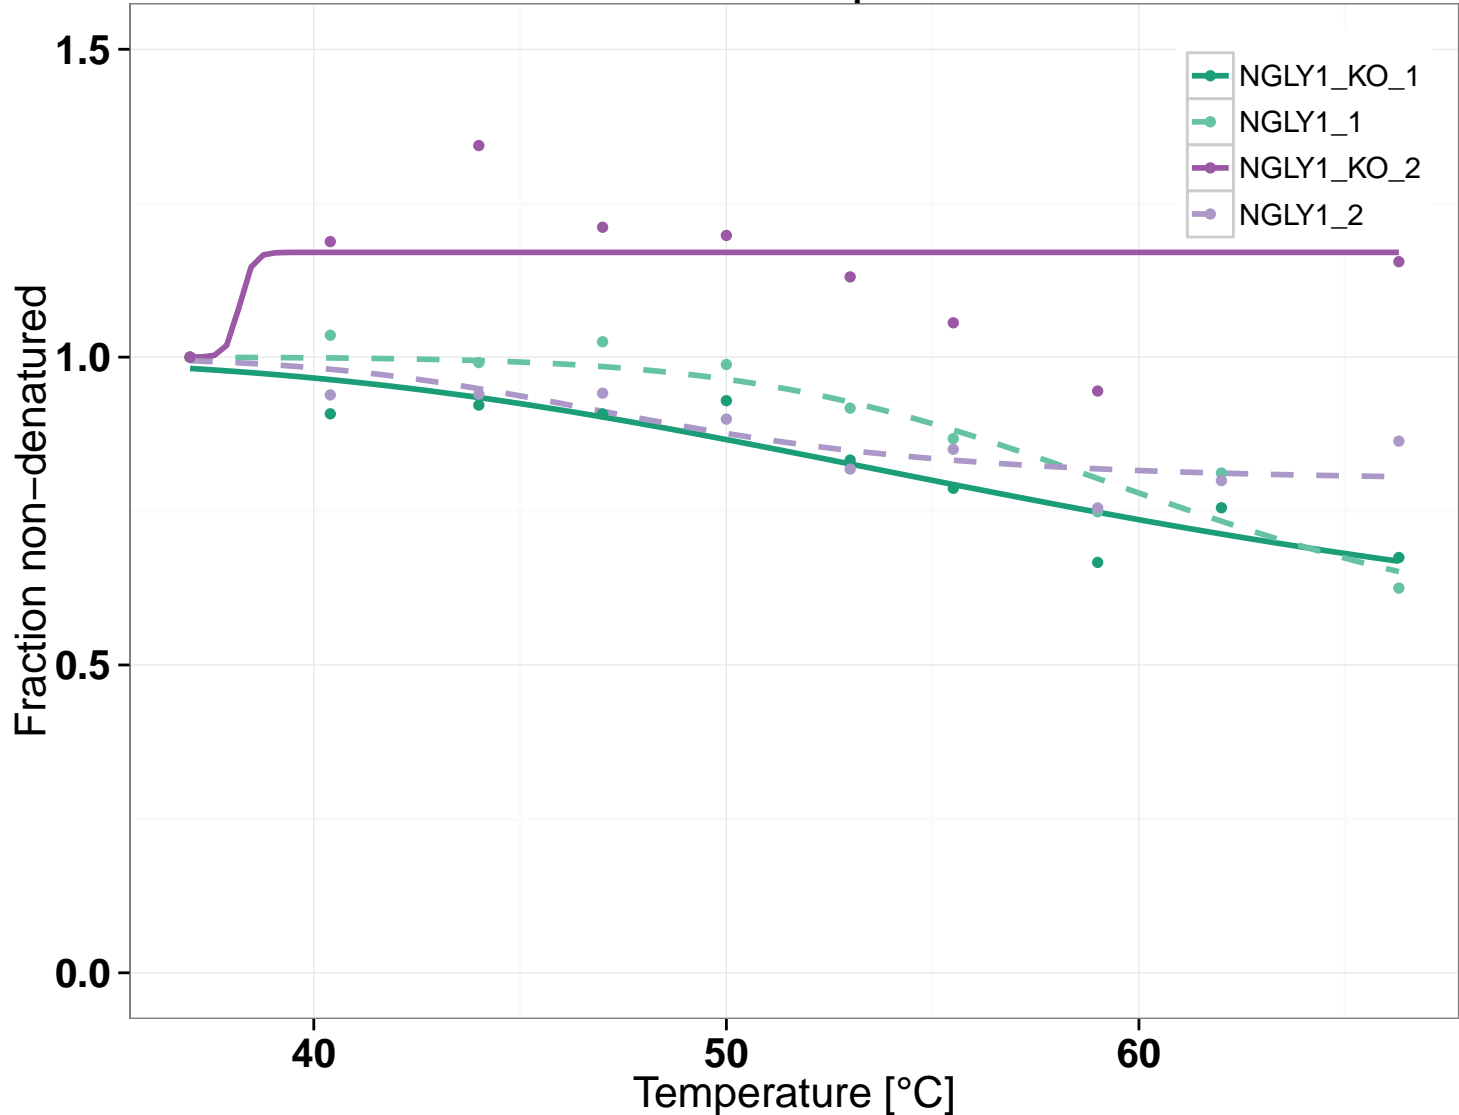

|            | meltPoint | slope  | plateau | R2   |
|------------|-----------|--------|---------|------|
| NGLY1_KO_1 | -         | -0.013 | 0.46    | 0.86 |
| NGLY1_1    | -         | -0.024 | 0.51    | 0.92 |
| NGLY1_KO_2 | -         | 0.28   | 1.17    | 0.18 |
| NGLY1_2    | -         | -0.013 | 0.8     | 0.77 |

Supplement: Supplementary file 1456 [file 1]

IPI00741973.1|LOC131691

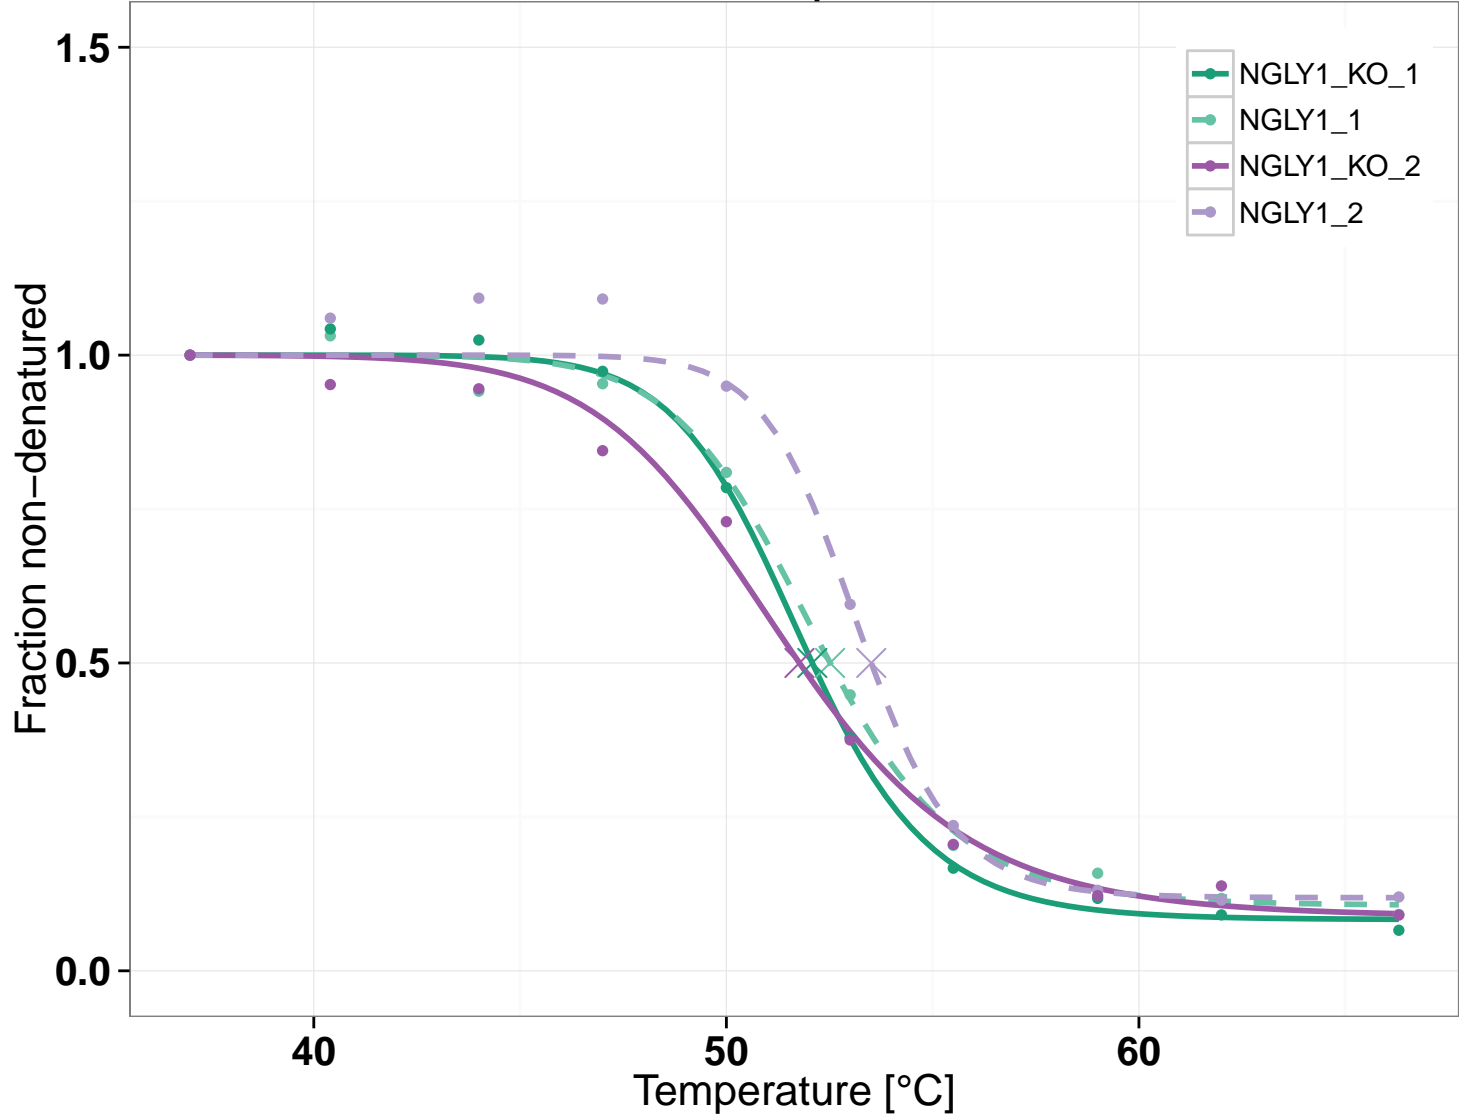

|            | meltPoint | slope | plateau | R2   |
|------------|-----------|-------|---------|------|
| NGLY1_KO_1 | 52.08     | -0.15 | 0.08    | 1    |
| NGLY1_1    | 52.51     | -0.13 | 0.11    | 1    |
| NGLY1_KO_2 | 51.77     | -0.1  | 0.09    | 0.99 |
| NGLY1_2    | 53.51     | -0.19 | 0.12    | 0.99 |

Supplement: Supplementary file 1457 [file 1]

# IPI00789663.1|MDM2

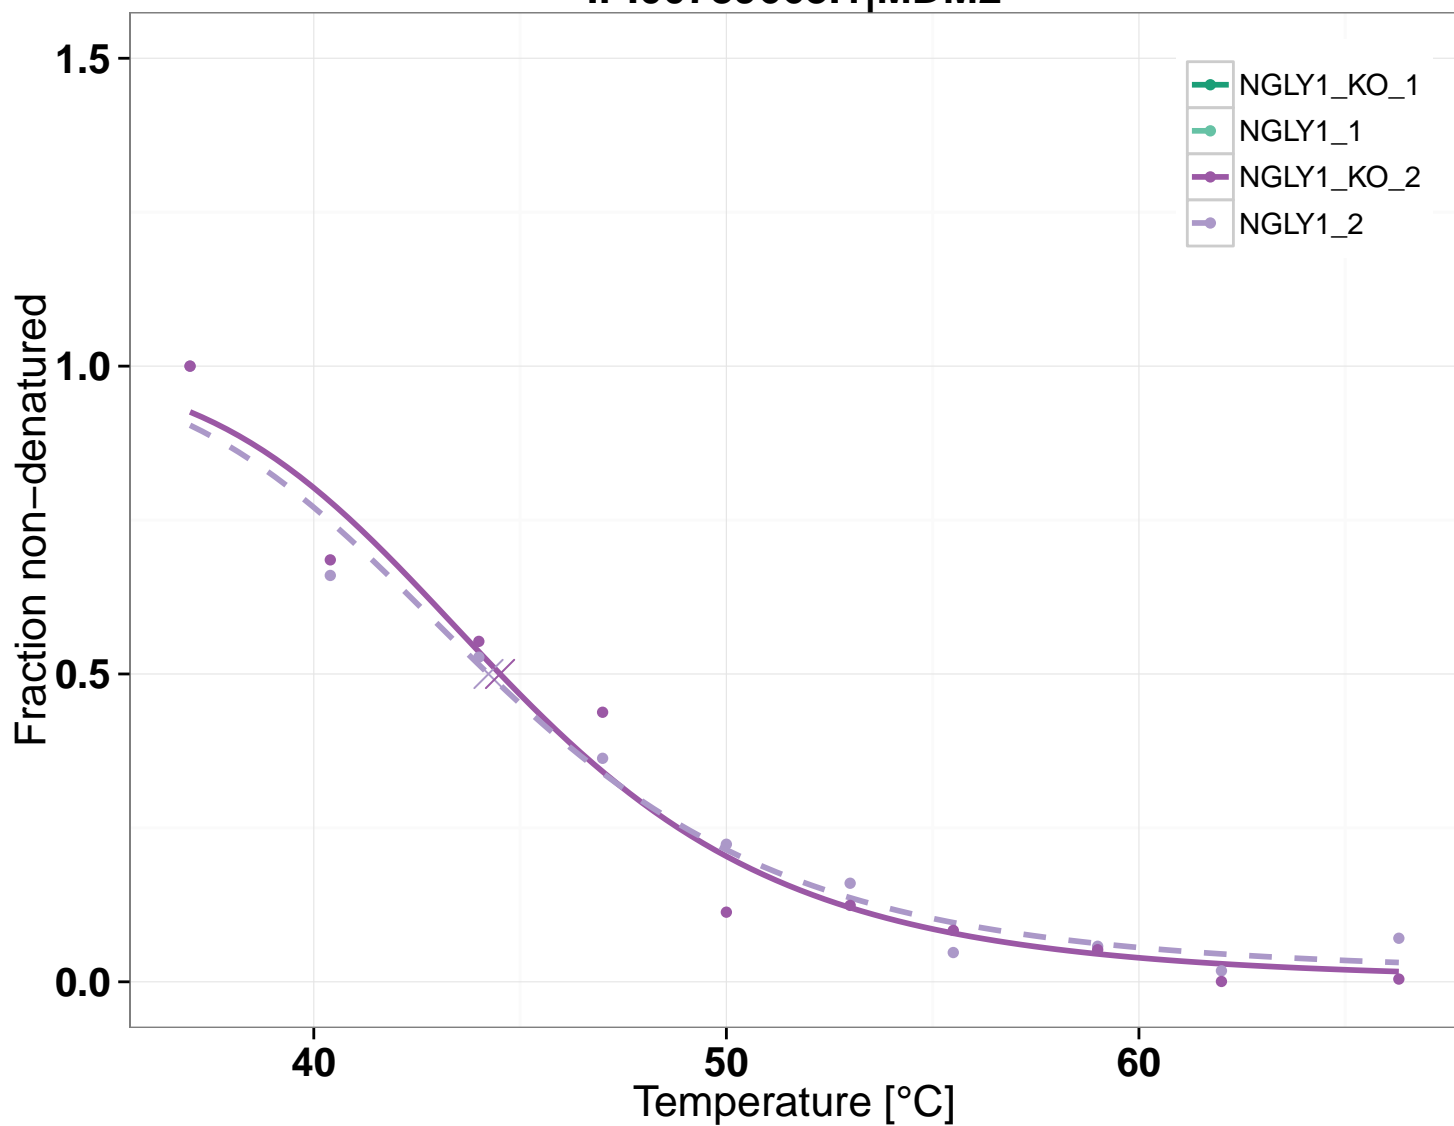

|            | meltPoint | slope  | plateau | R2   |
|------------|-----------|--------|---------|------|
| NGLY1_KO_1 | —         | —      | —       | —    |
| NGLY1_1    | —         | —      | —       | —    |
| NGLY1_KO_2 | 44.51     | -0.072 | 0       | 0.97 |
| NGLY1_2    | 44.23     | -0.067 | 0.01    | 0.98 |

Supplement: Supplementary file 1458 [file 1]

# IPI00513824.2|DFFB

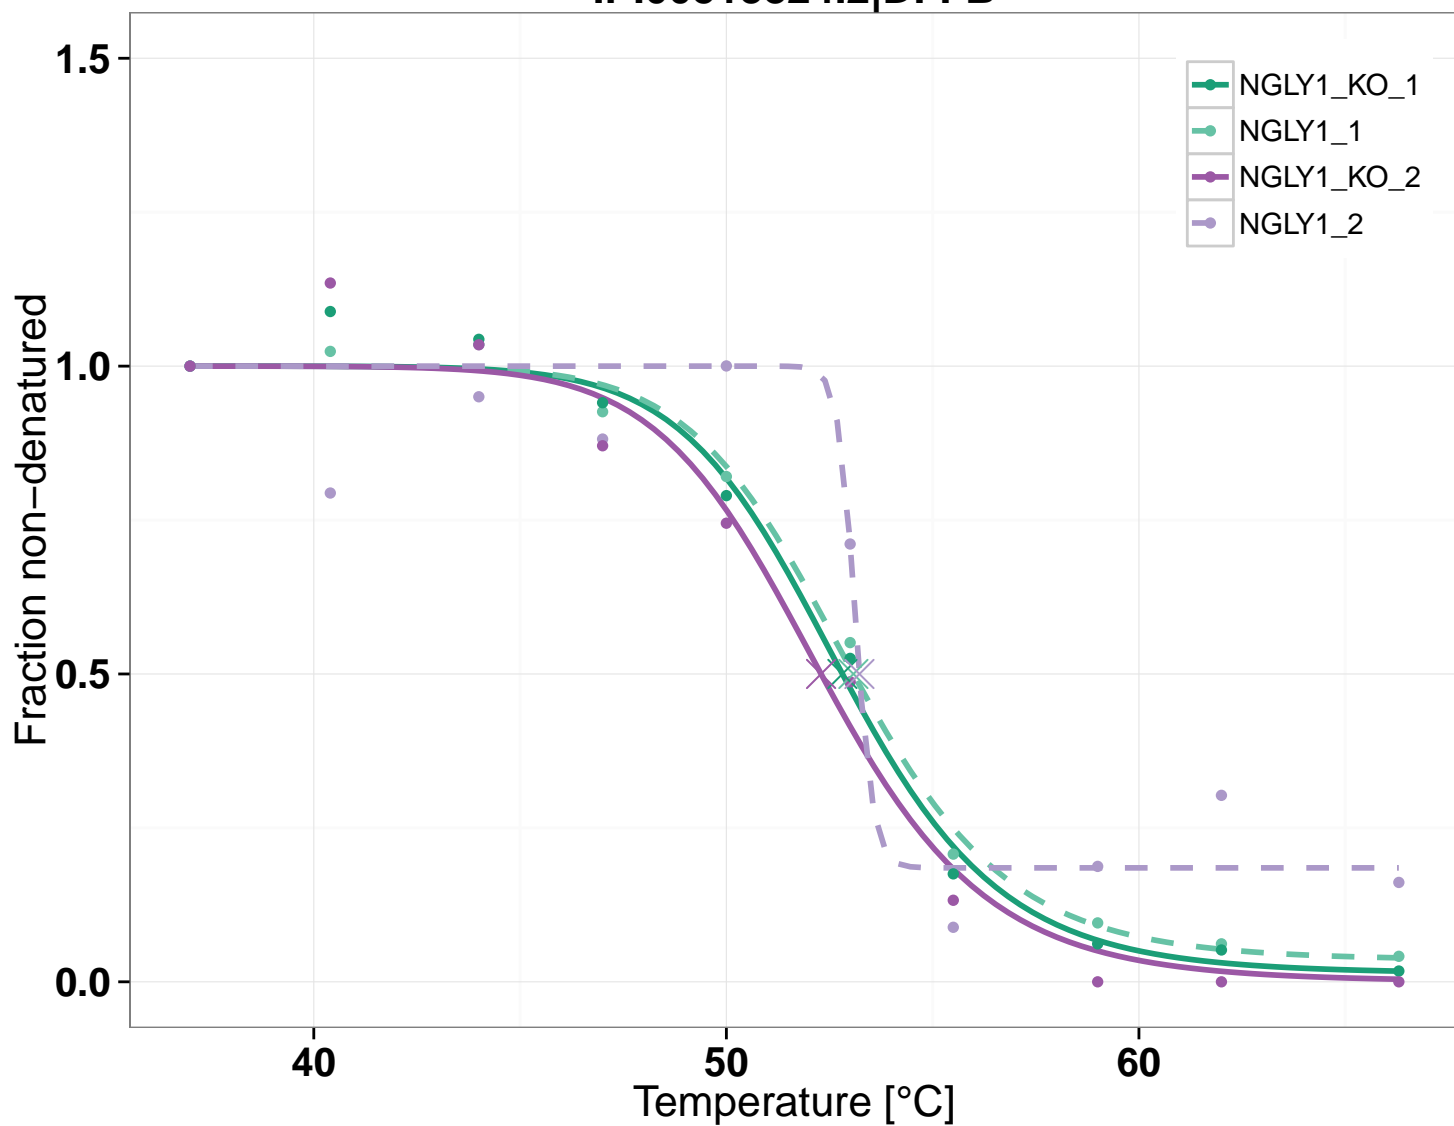

|            | meltPoint | slope | plateau | R2   |
|------------|-----------|-------|---------|------|
| NGLY1_KO_1 | 52.81     | -0.13 | 0.01    | 0.99 |
| NGLY1_1    | 53.08     | -0.12 | 0.03    | 1    |
| NGLY1_KO_2 | 52.3      | -0.12 | 0       | 0.98 |
| NGLY1_2    | 53.23     | -0.96 | 0.19    | 0.94 |

Supplement: Supplementary file 1459 [file 1]

# IPI00024006.3|PIK3R4

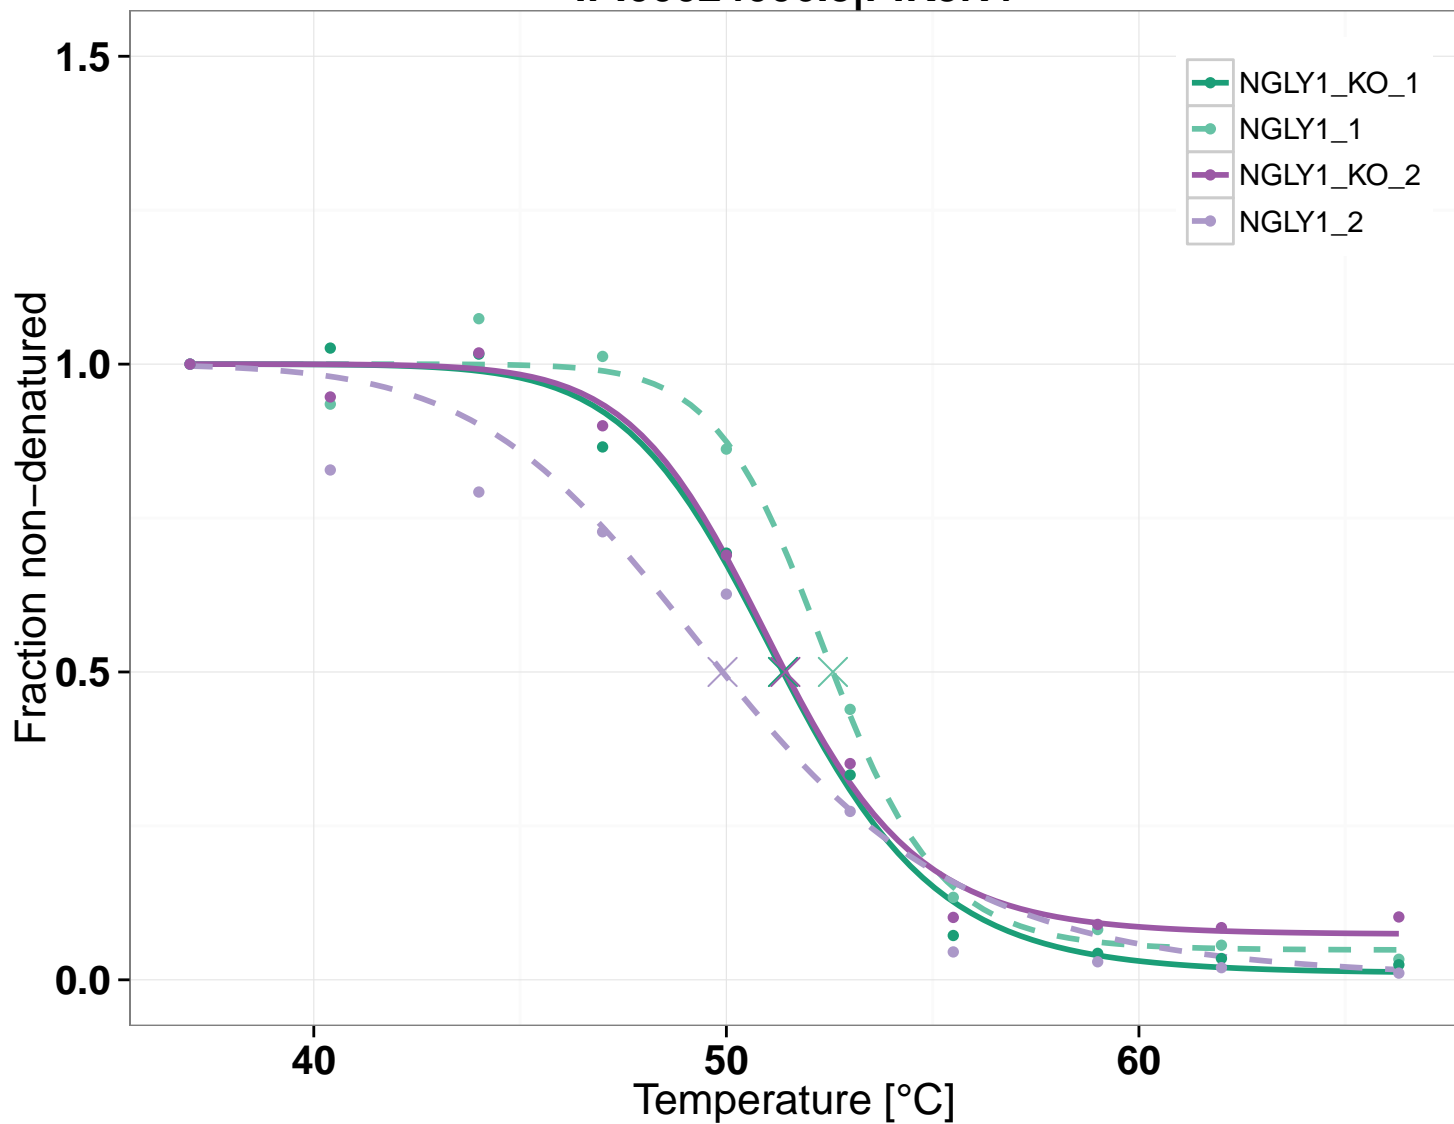

|            | meltPoint | slope  | plateau | R2   |
|------------|-----------|--------|---------|------|
| NGLY1_KO_1 | 51.37     | -0.13  | 0.01    | 1    |
| NGLY1_1    | 52.58     | -0.18  | 0.05    | 0.99 |
| NGLY1_KO_2 | 51.43     | -0.13  | 0.07    | 0.99 |
| NGLY1_2    | 49.91     | -0.084 | 0       | 0.95 |

Supplement: Supplementary file 1460 [file 1]

IPI00008475.1|HMGCS1

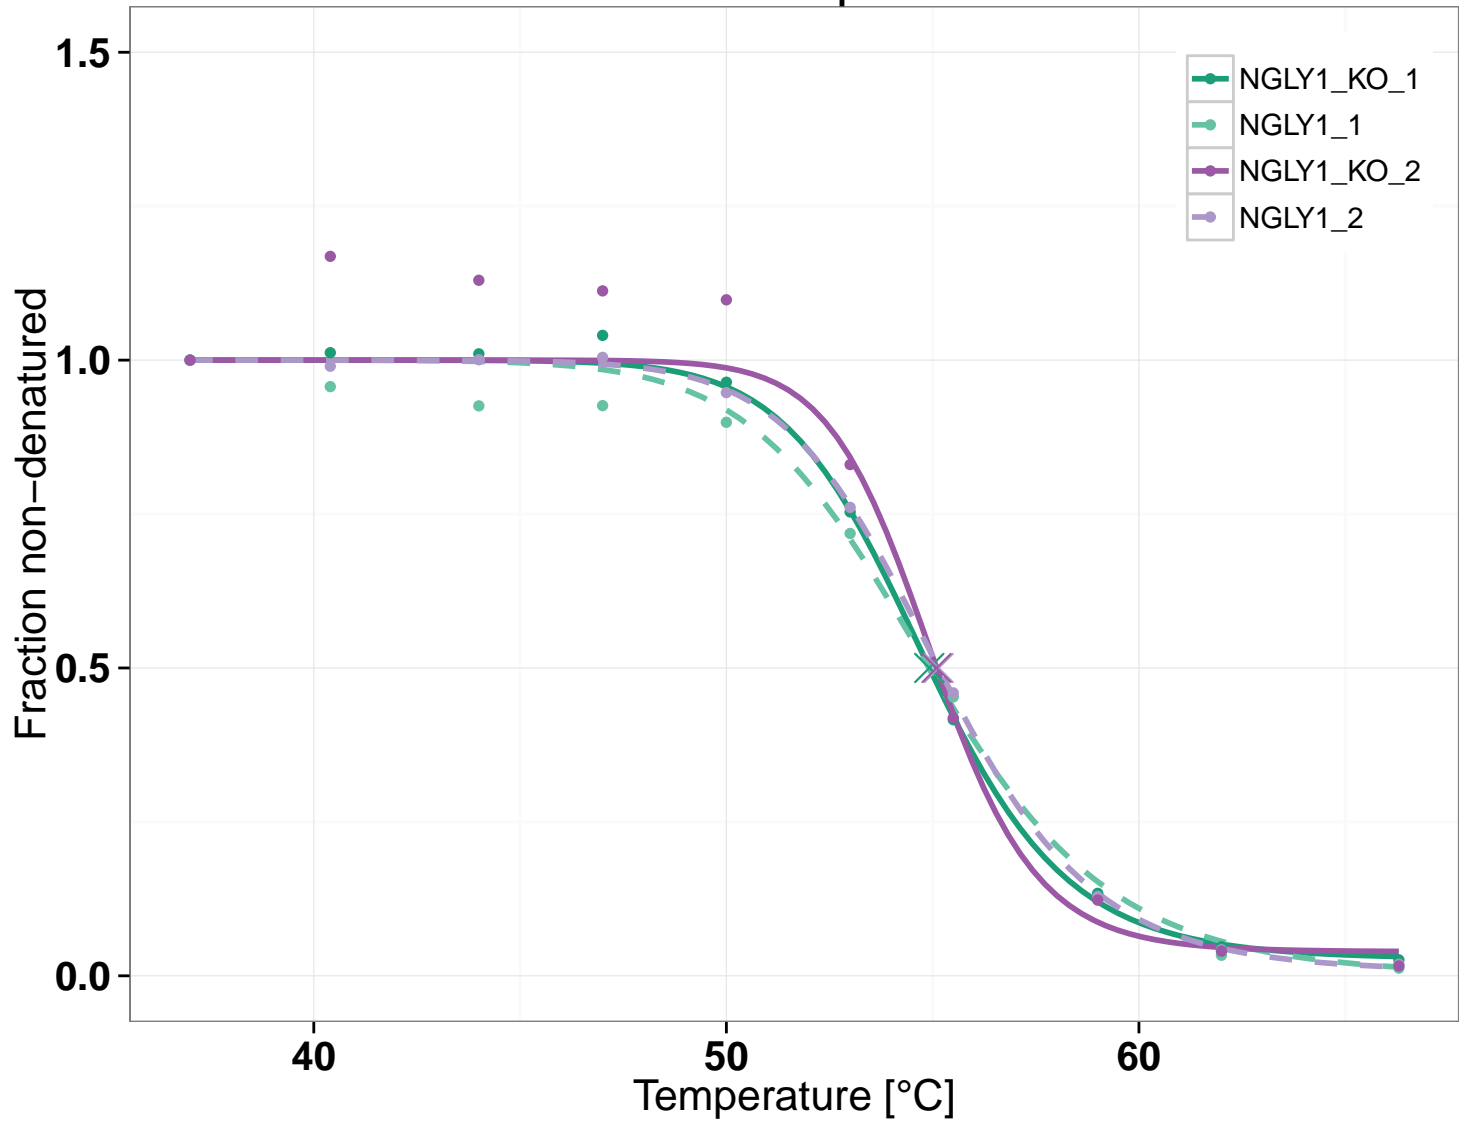

|            | meltPoint | slope | plateau | R2   |
|------------|-----------|-------|---------|------|
| NGLY1_KO_1 | 54.92     | -0.14 | 0.03    | 1    |
| NGLY1_1    | 54.91     | -0.11 | 0       | 0.99 |
| NGLY1_KO_2 | 55.09     | -0.19 | 0.04    | 0.97 |
| NGLY1_2    | 55.15     | -0.13 | 0.01    | 1    |

Supplement: Supplementary file 1461 [file 1]

IPI00168554.1|SRXN1

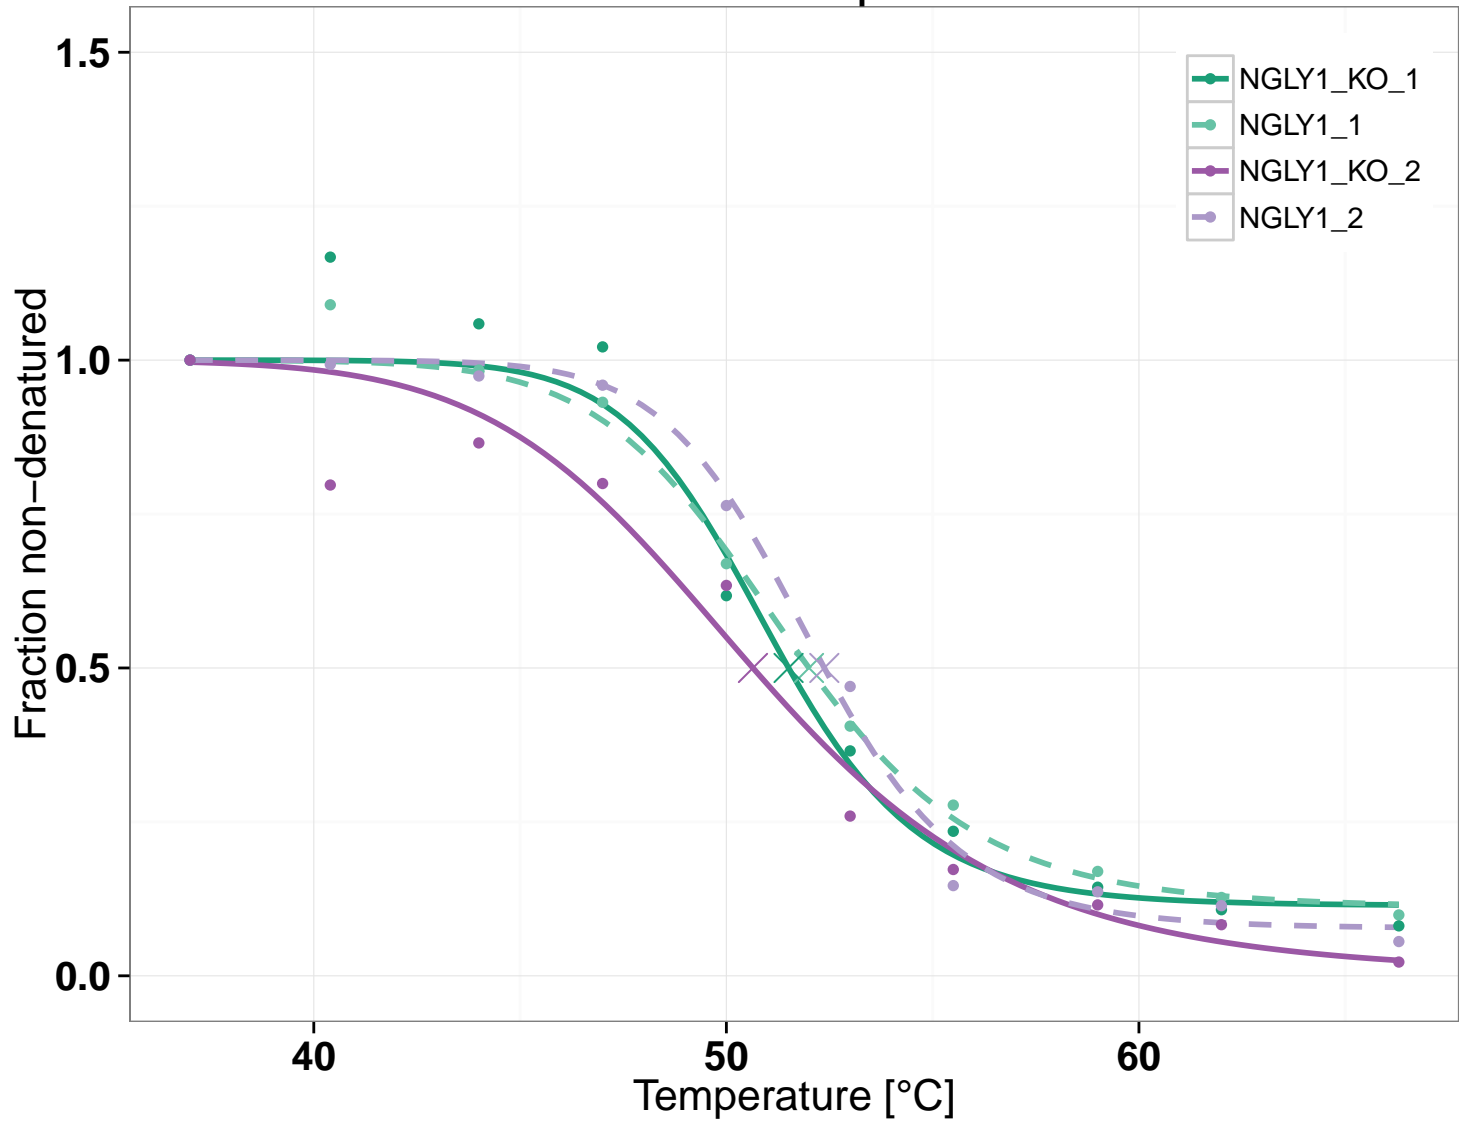

|            | meltPoint | slope  | plateau | R2   |
|------------|-----------|--------|---------|------|
| NGLY1_KO_1 | 51.51     | -0.12  | 0.11    | 0.97 |
| NGLY1_1    | 52        | -0.097 | 0.11    | 0.99 |
| NGLY1_KO_2 | 50.64     | -0.078 | 0       | 0.96 |
| NGLY1_2    | 52.37     | -0.13  | 0.08    | 0.99 |

Supplement: Supplementary file 1462 [file 1]

IPI00306689.5|NADSYN1

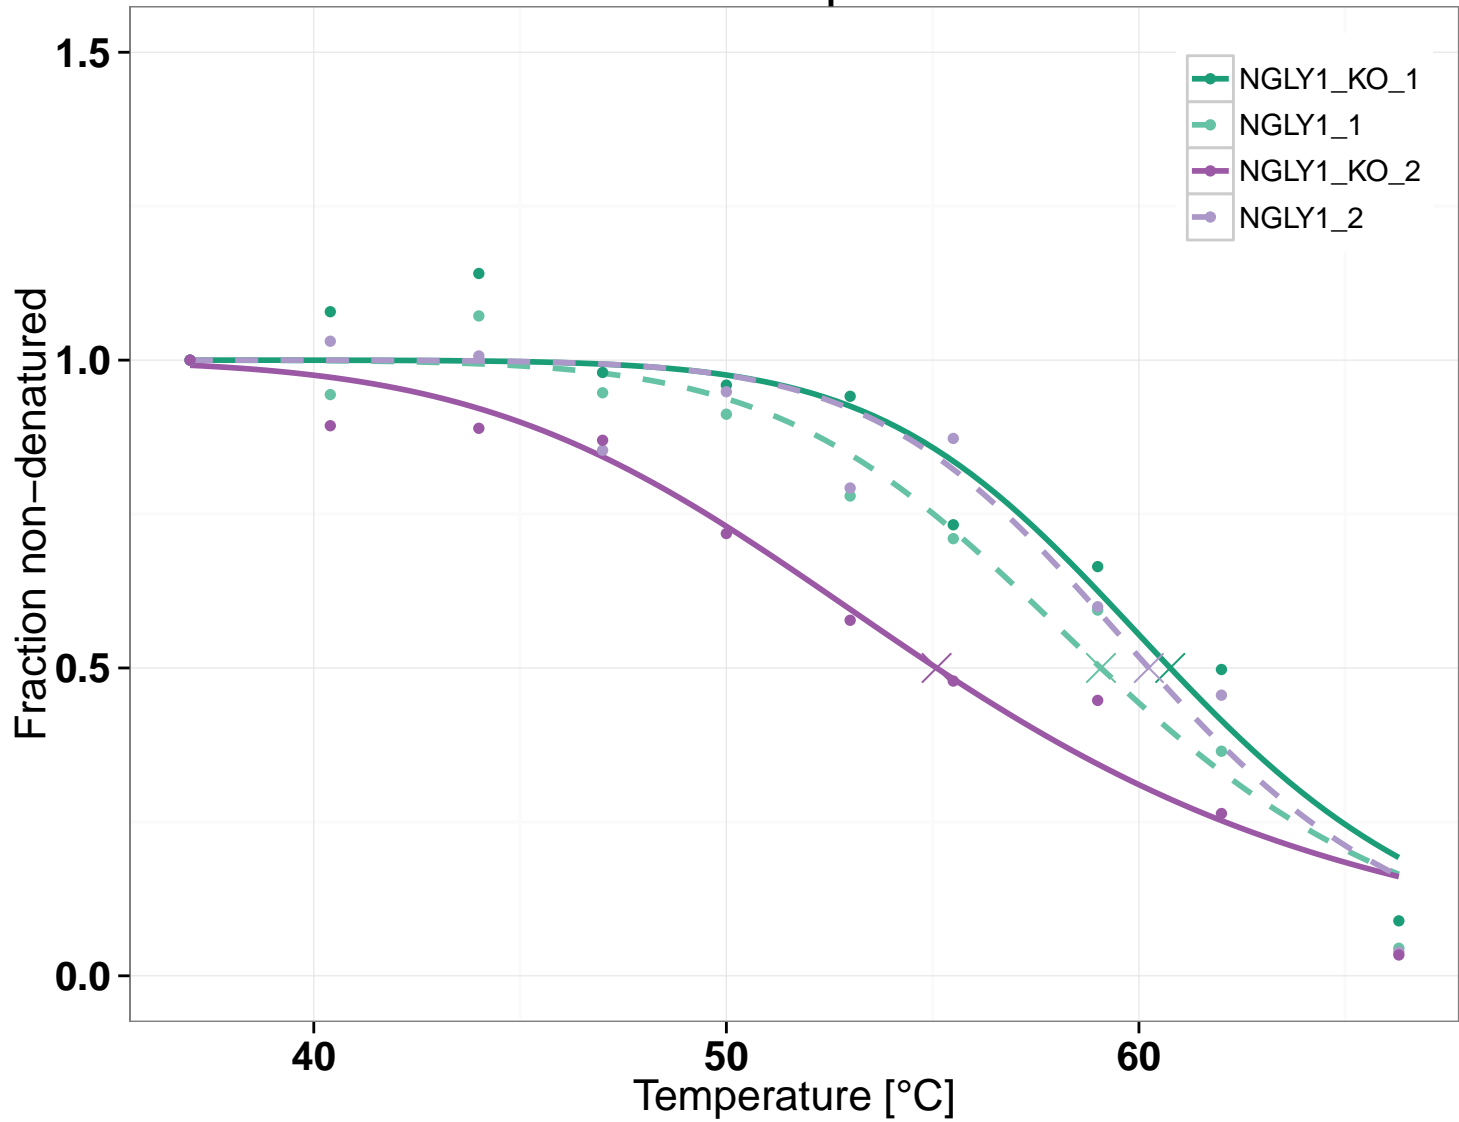

|            | meltPoint | slope  | plateau | R2   |
|------------|-----------|--------|---------|------|
| NGLY1_KO_1 | 60.76     | -0.072 | 0       | 0.94 |
| NGLY1_1    | 59.08     | -0.064 | 0       | 0.96 |
| NGLY1_KO_2 | 55.1      | -0.046 | 0       | 0.96 |
| NGLY1_2    | 60.24     | -0.075 | 0       | 0.93 |

Supplement: Supplementary file 1463 [file 1]

IPI00006715.3|RAD21

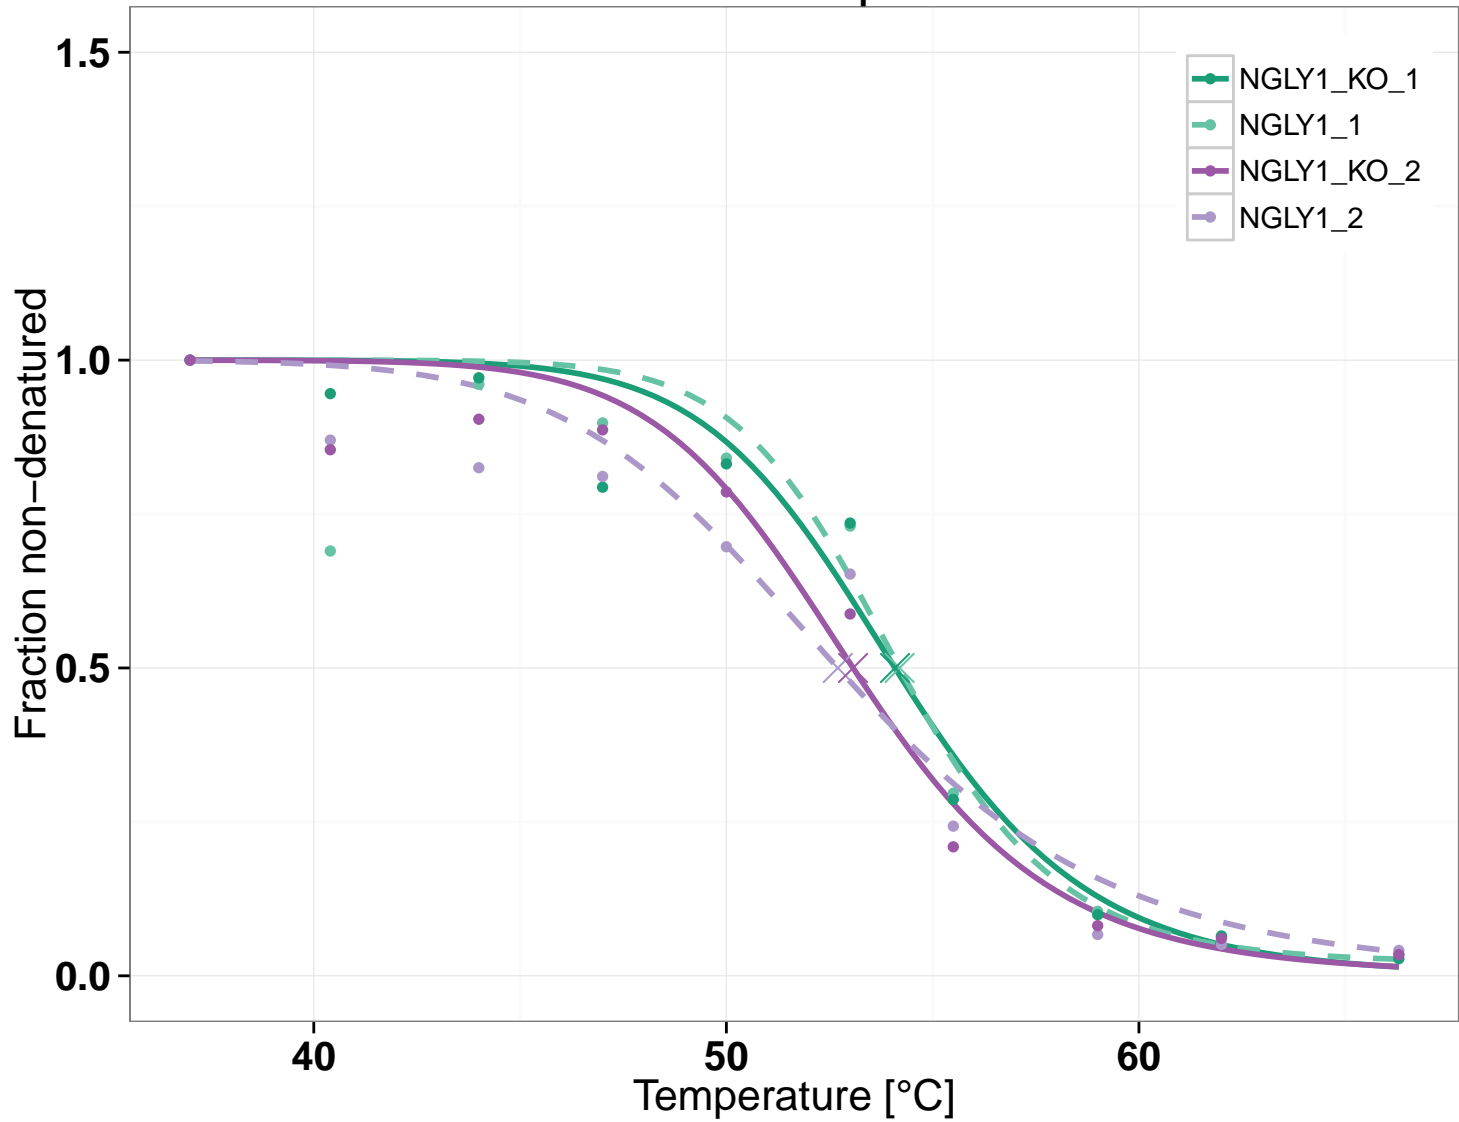

|            | meltPoint | slope  | plateau | R2   |
|------------|-----------|--------|---------|------|
| NGLY1_KO_1 | 54.09     | -0.11  | 0       | 0.96 |
| NGLY1_1    | 54.2      | -0.12  | 0.02    | 0.91 |
| NGLY1_KO_2 | 53.07     | -0.1   | 0       | 0.97 |
| NGLY1_2    | 52.7      | -0.075 | 0       | 0.94 |

Supplement: Supplementary file 1464 [file 1]

IPI00062598.3|PHYHD1

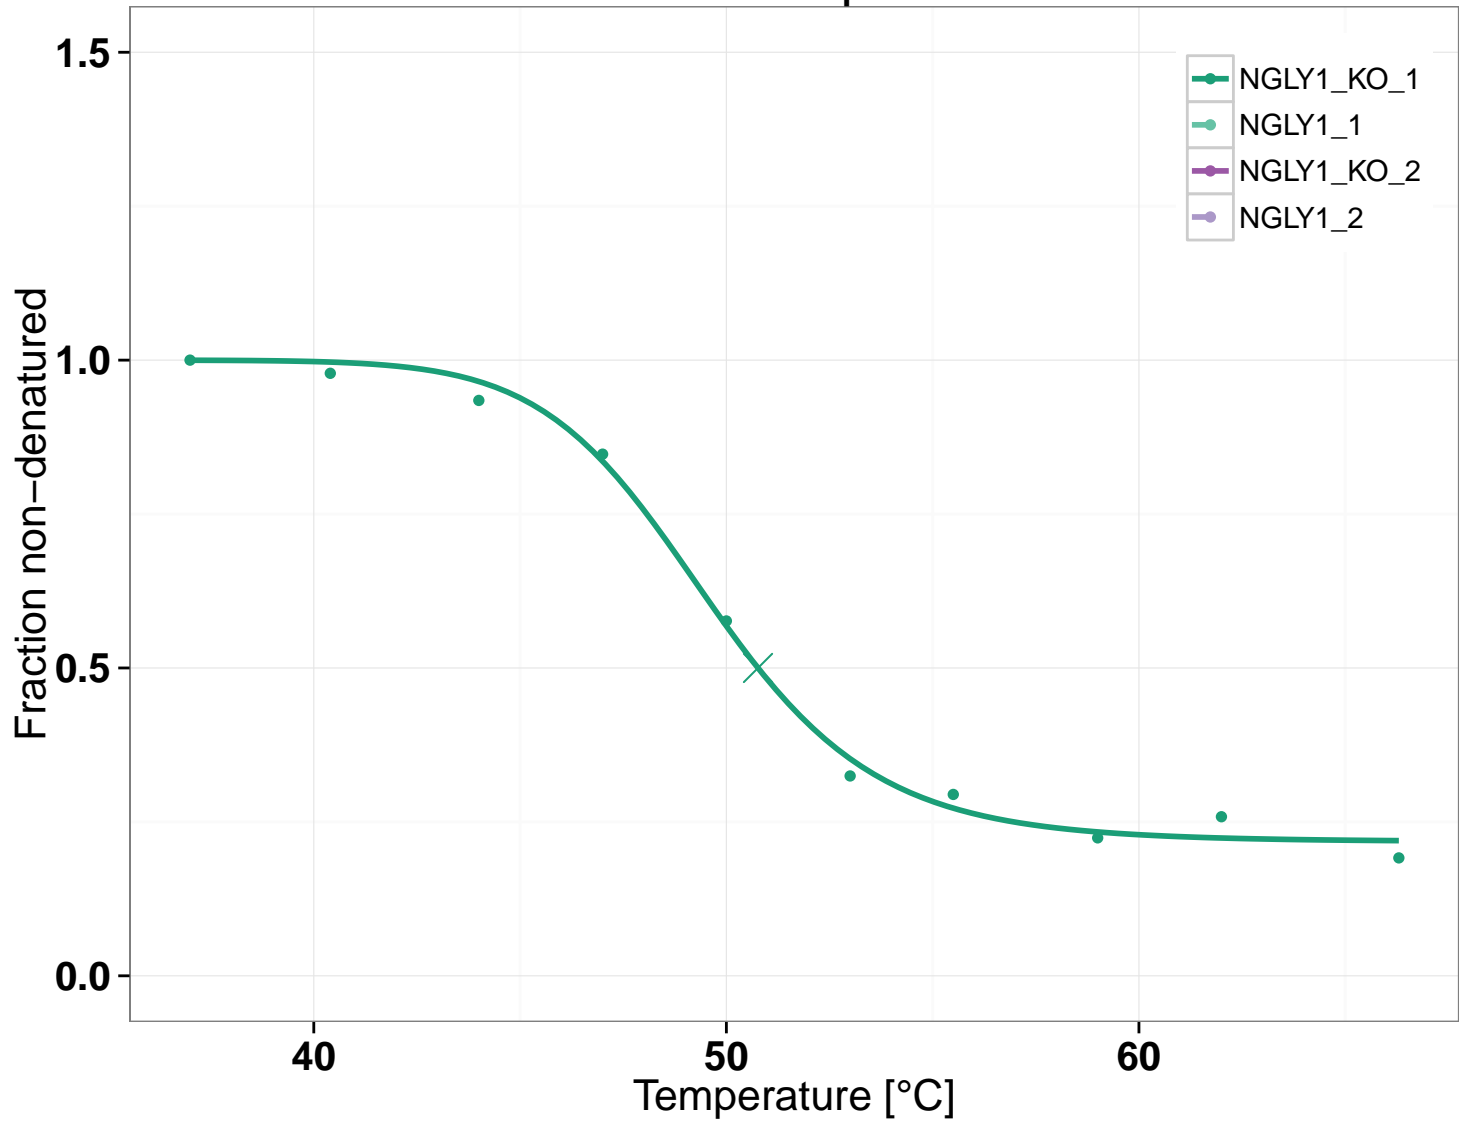

|            | meltPoint | slope  | plateau | R2 |
|------------|-----------|--------|---------|----|
| NGLY1_KO_1 | 50.77     | -0.096 | 0.22    | 1  |
| NGLY1_1    | -         | -      | -       | -  |
| NGLY1_KO_2 | -         | -      | -       | -  |
| NGLY1_2    | -         | -      | -       | -  |

Supplement: Supplementary file 1465 [file 1]

IPI00419869.1|COX15

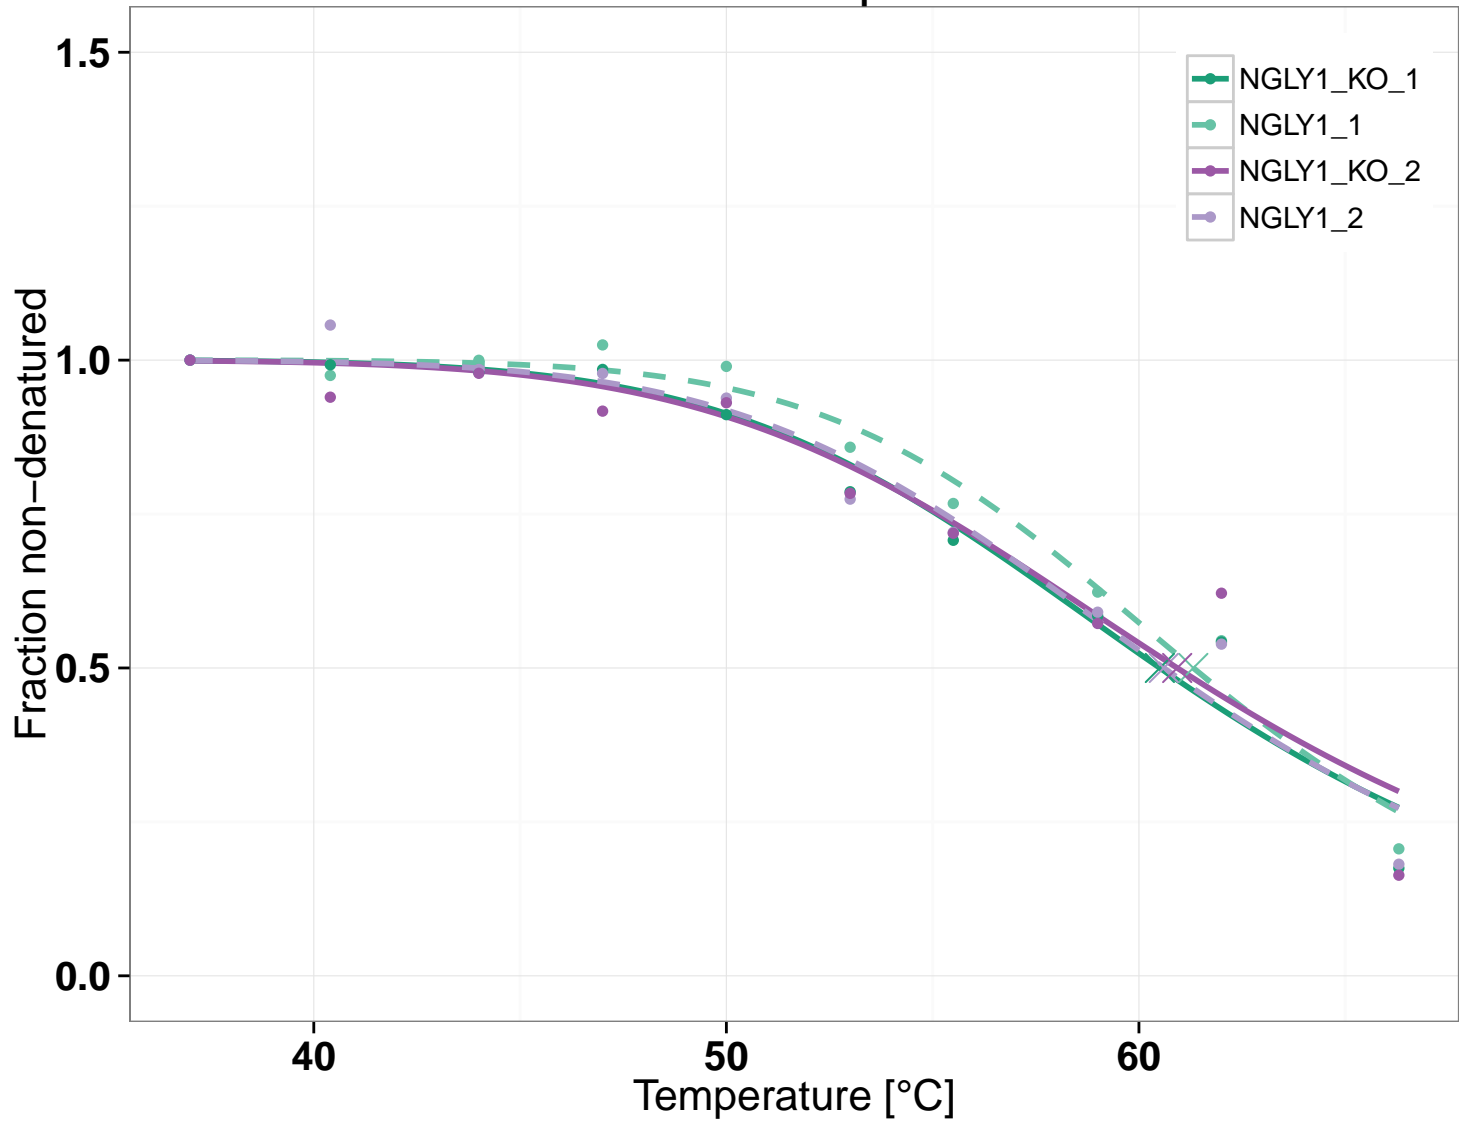

|            | meltPoint | slope  | plateau | R2   |
|------------|-----------|--------|---------|------|
| NGLY1_KO_1 | 60.51     | -0.048 | 0       | 0.96 |
| NGLY1_1    | 61.32     | -0.056 | 0       | 0.98 |
| NGLY1_KO_2 | 60.93     | -0.045 | 0       | 0.91 |
| NGLY1_2    | 60.6      | -0.049 | 0       | 0.96 |

Supplement: Supplementary file 1466 [file 1]

# IPI00032597.2|RBMX2

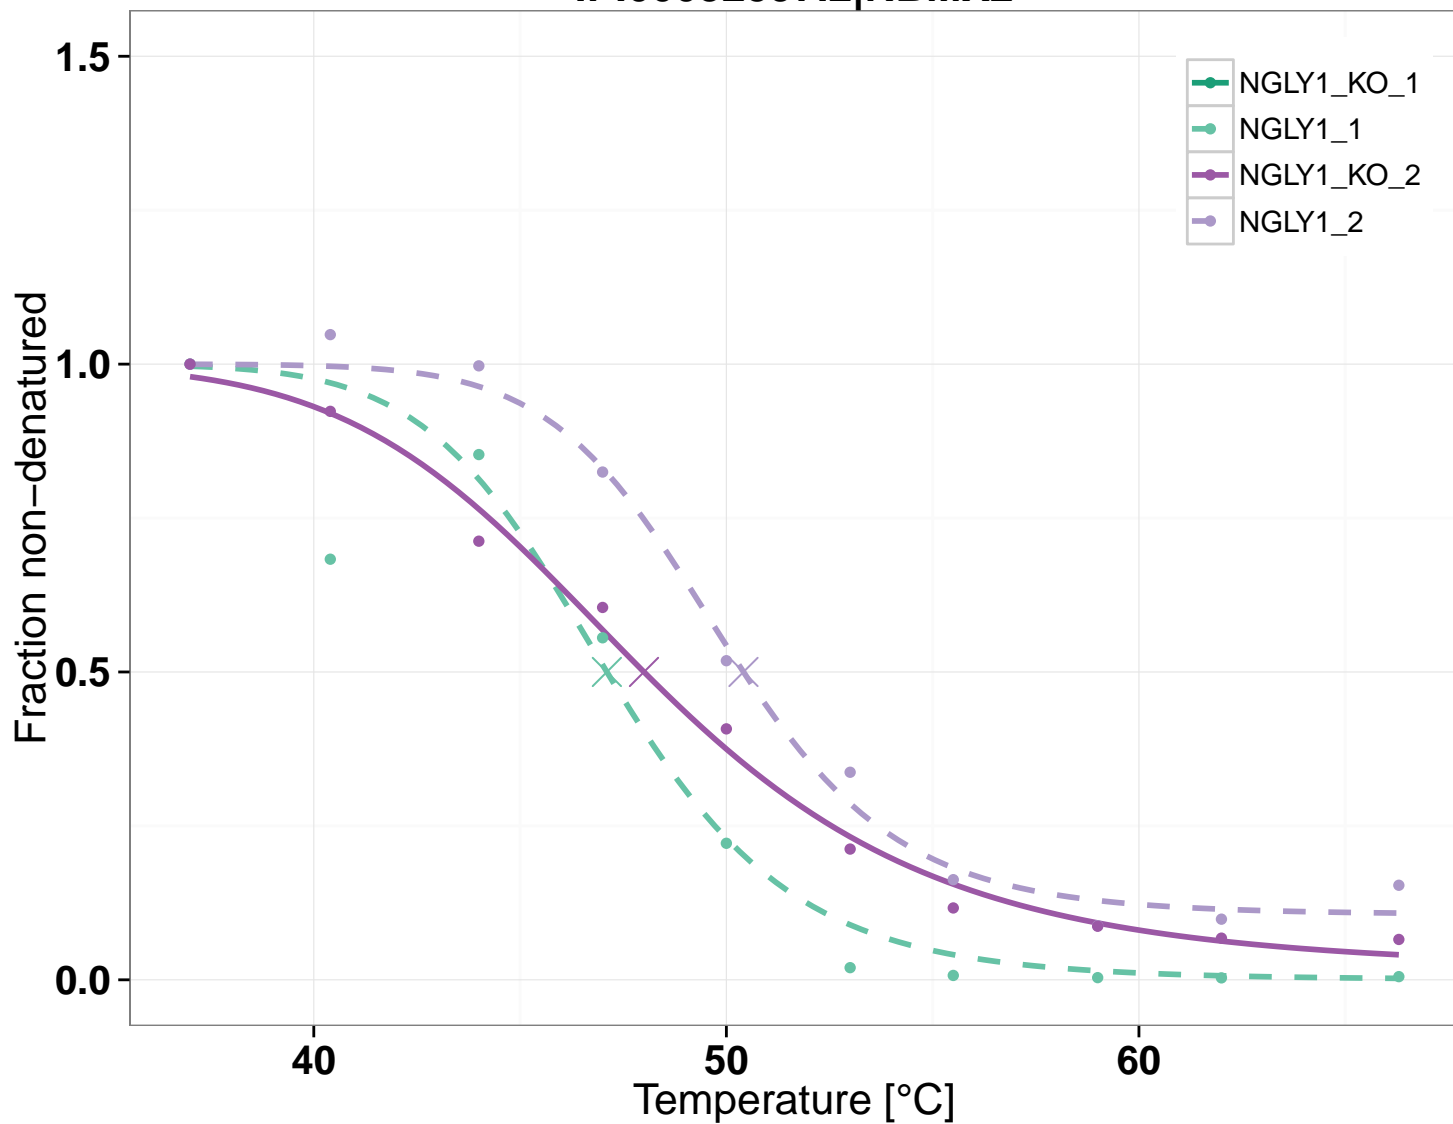

|            | meltPoint | slope  | plateau | R2   |
|------------|-----------|--------|---------|------|
| NGLY1_KO_1 | —         | —      | —       | —    |
| NGLY1_1    | 47.1      | -0.11  | 0       | 0.94 |
| NGLY1_KO_2 | 48        | -0.069 | 0.02    | 0.99 |
| NGLY1_2    | 50.41     | -0.11  | 0.11    | 0.99 |

Supplement: Supplementary file 1467 [file 1]

IPI00005904.3|DDX20

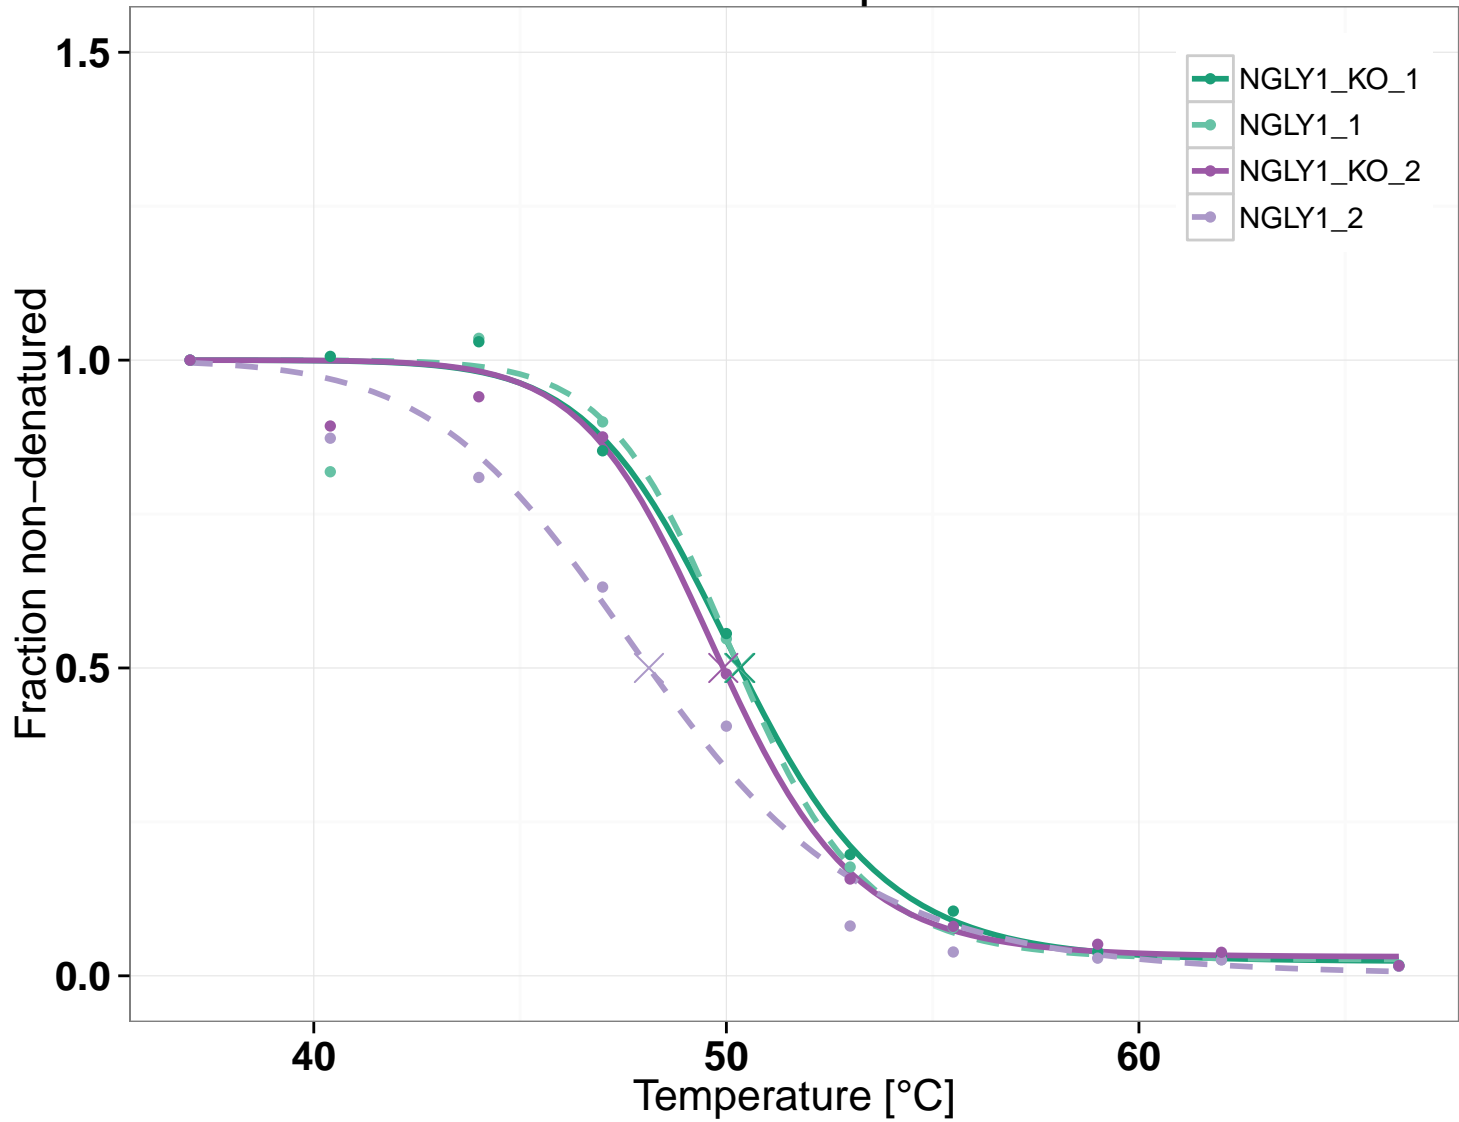

|            | meltPoint | slope  | plateau | R2   |
|------------|-----------|--------|---------|------|
| NGLY1_KO_1 | 50.34     | -0.14  | 0.02    | 1    |
| NGLY1_1    | 50.31     | -0.16  | 0.03    | 0.98 |
| NGLY1_KO_2 | 49.93     | -0.15  | 0.03    | 0.99 |
| NGLY1_2    | 48.12     | -0.095 | 0       | 0.98 |

Supplement: Supplementary file 1468 [file 1]

IPI00001541.1|TIMM9

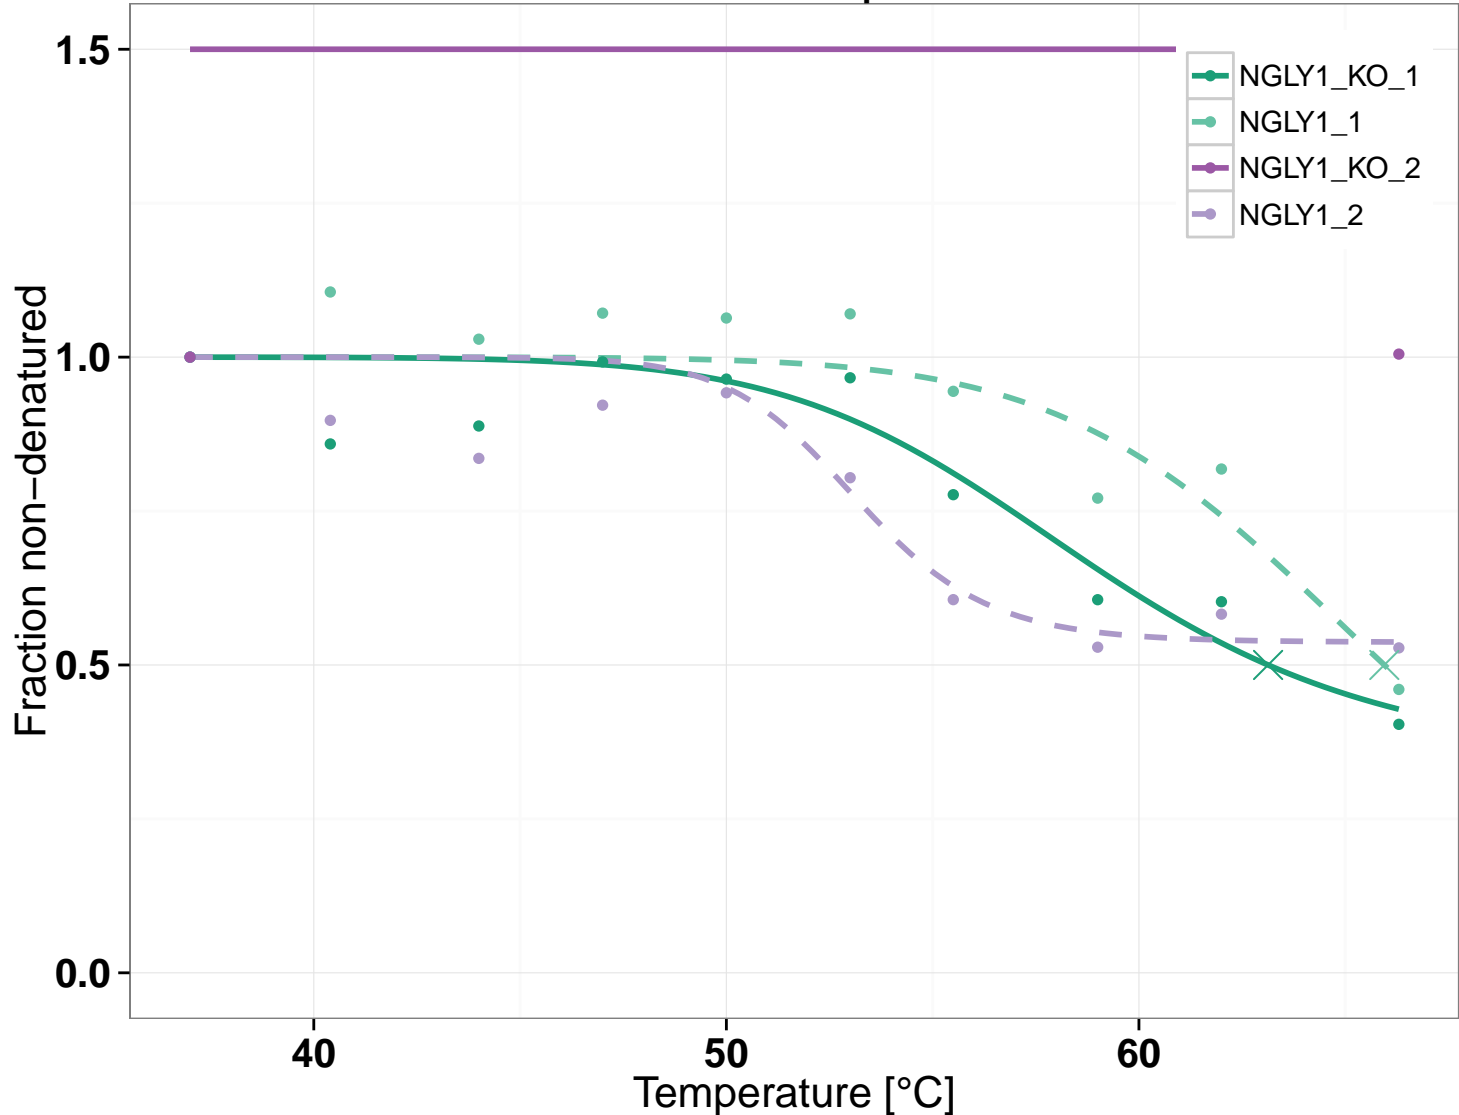

|            | meltPoint | slope  | plateau | R2    |
|------------|-----------|--------|---------|-------|
| NGLY1_KO_1 | 63.13     | -0.046 | 0.34    | 0.88  |
| NGLY1_1    | 65.95     | -0.064 | 0       | 0.87  |
| NGLY1_KO_2 | -         | -      | 1.5     | -0.26 |
| NGLY1_2    | -         | -0.073 | 0.54    | 0.85  |

Supplement: Supplementary file 1469 [file 1]

IPI00816771.3|WASH1

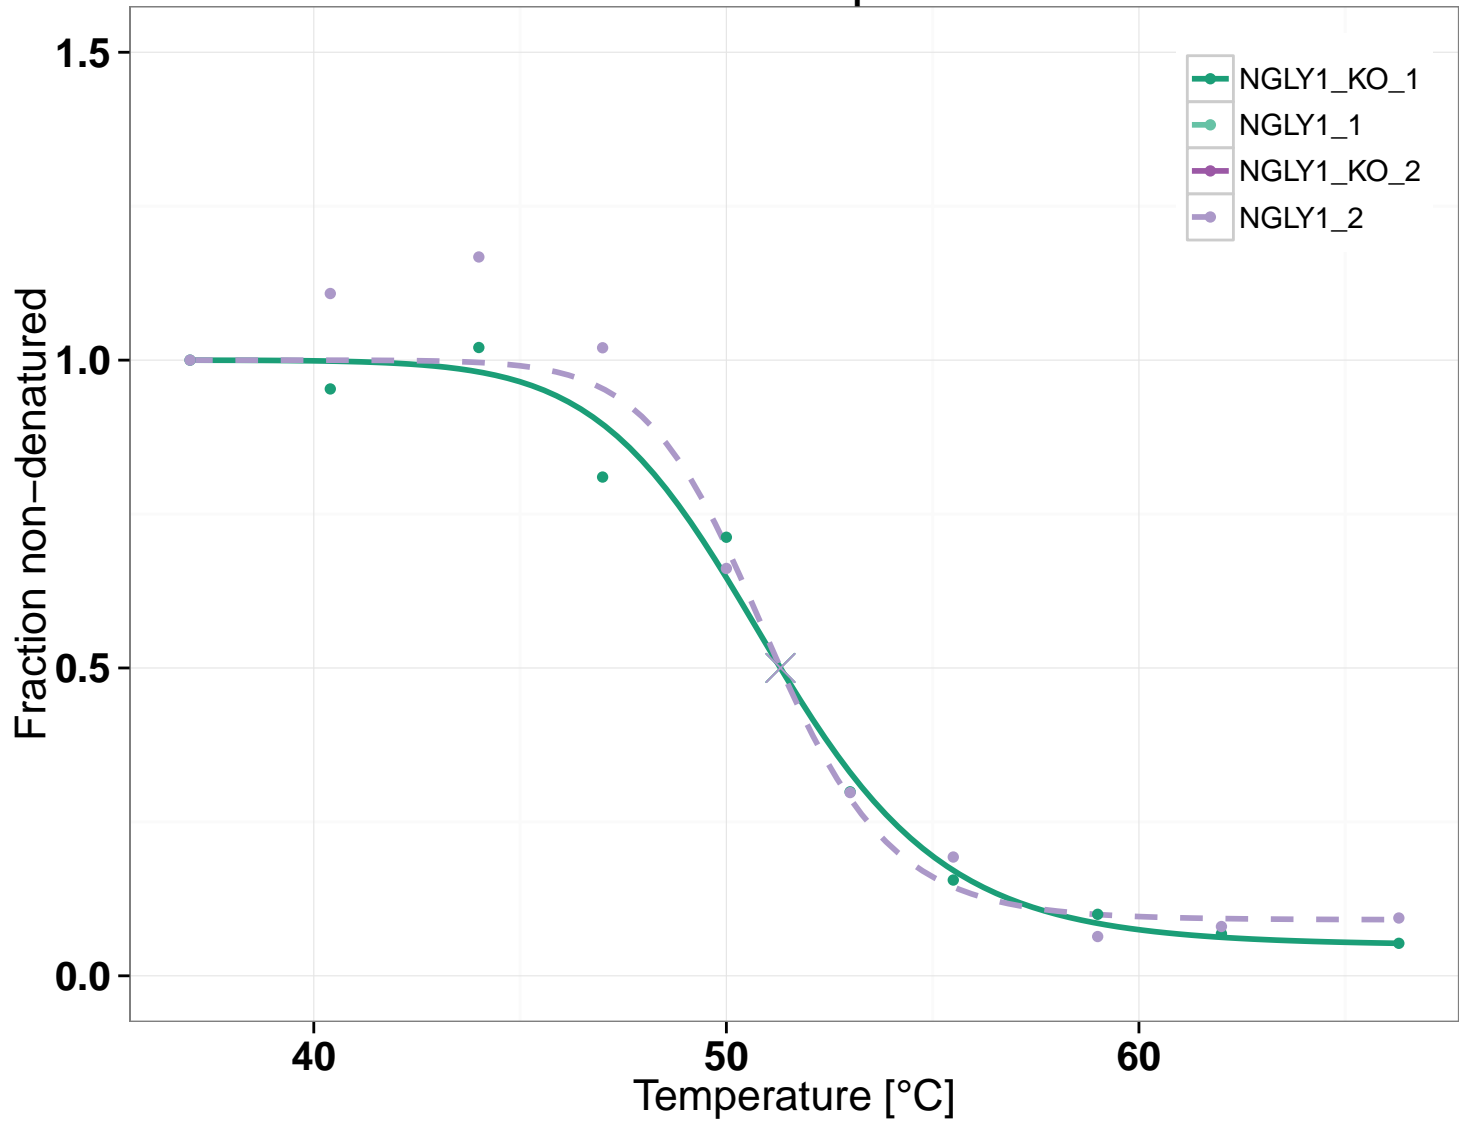

|            | meltPoint | slope | plateau | R2   |
|------------|-----------|-------|---------|------|
| NGLY1_KO_1 | 51.31     | -0.11 | 0.05    | 0.99 |
| NGLY1_1    | -         | -     | -       | -    |
| NGLY1_KO_2 | -         | -     | -       | -    |
| NGLY1_2    | 51.31     | -0.15 | 0.09    | 0.97 |

Supplement: Supplementary file 1470 [file 1]

IPI00914890.1|LOC100128443

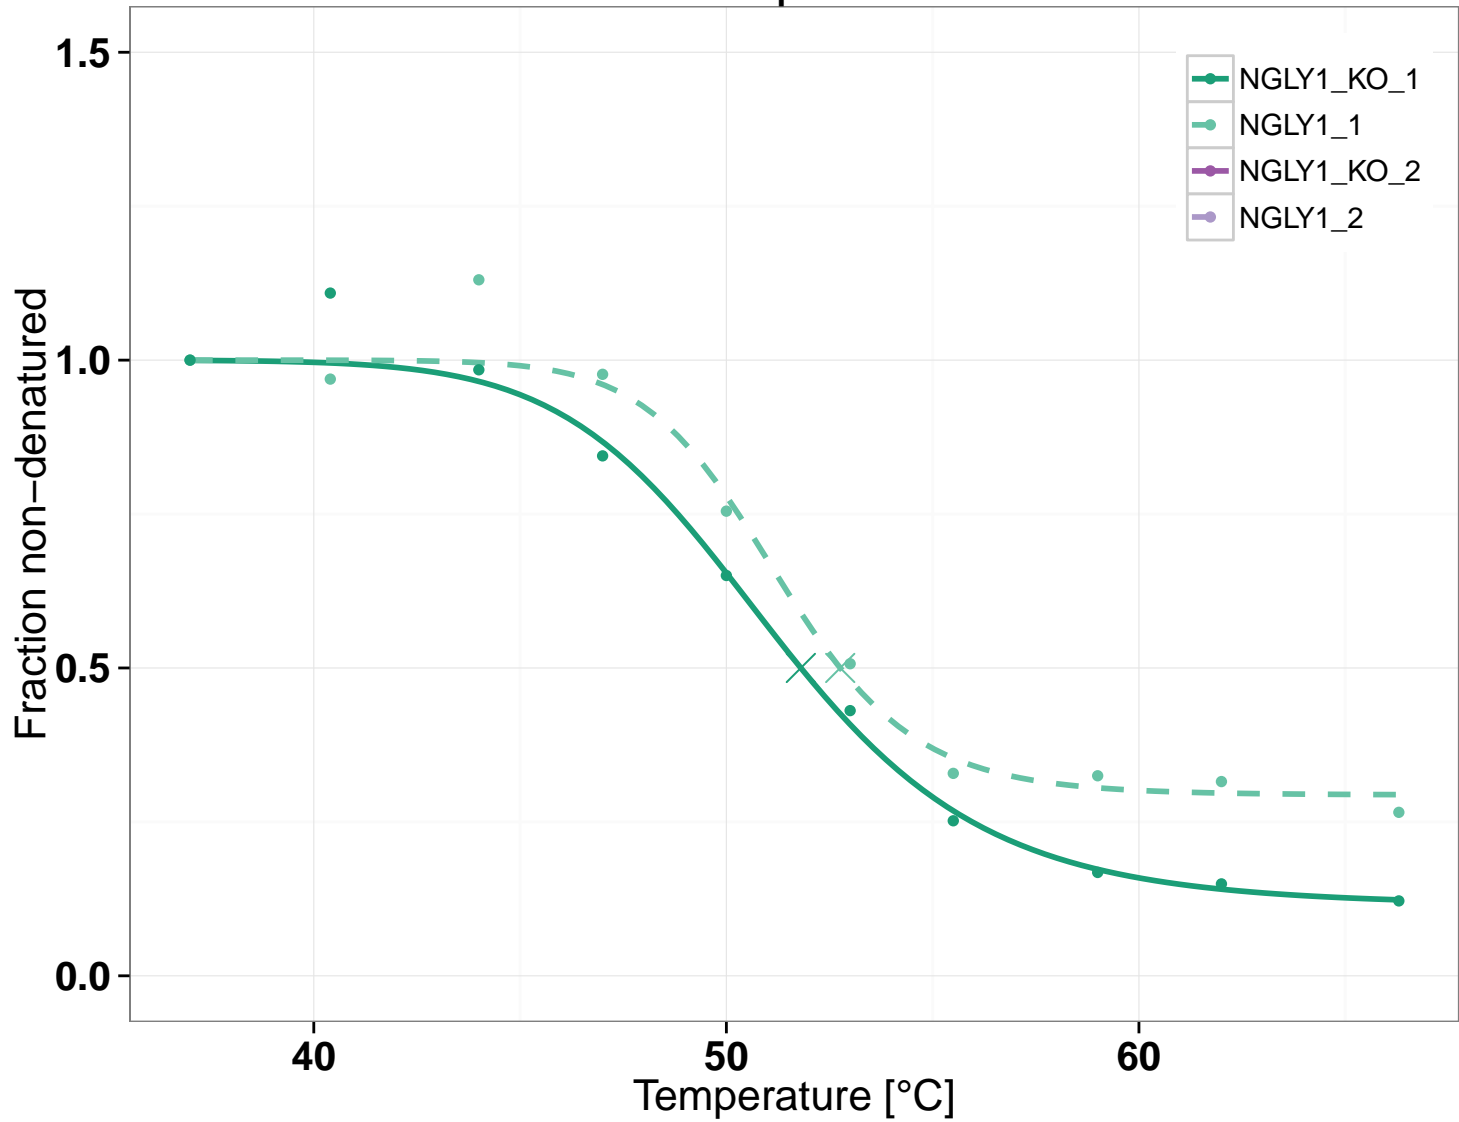

|            | meltPoint | slope  | plateau | R2   |
|------------|-----------|--------|---------|------|
| NGLY1_KO_1 | 51.81     | -0.087 | 0.11    | 0.99 |
| NGLY1_1    | 52.76     | -0.11  | 0.29    | 0.98 |
| NGLY1_KO_2 | -         | -      | -       | -    |
| NGLY1_2    | -         | -      | -       | -    |

Supplement: Supplementary file 1471 [file 1]

IPI00644447.2|DHX32

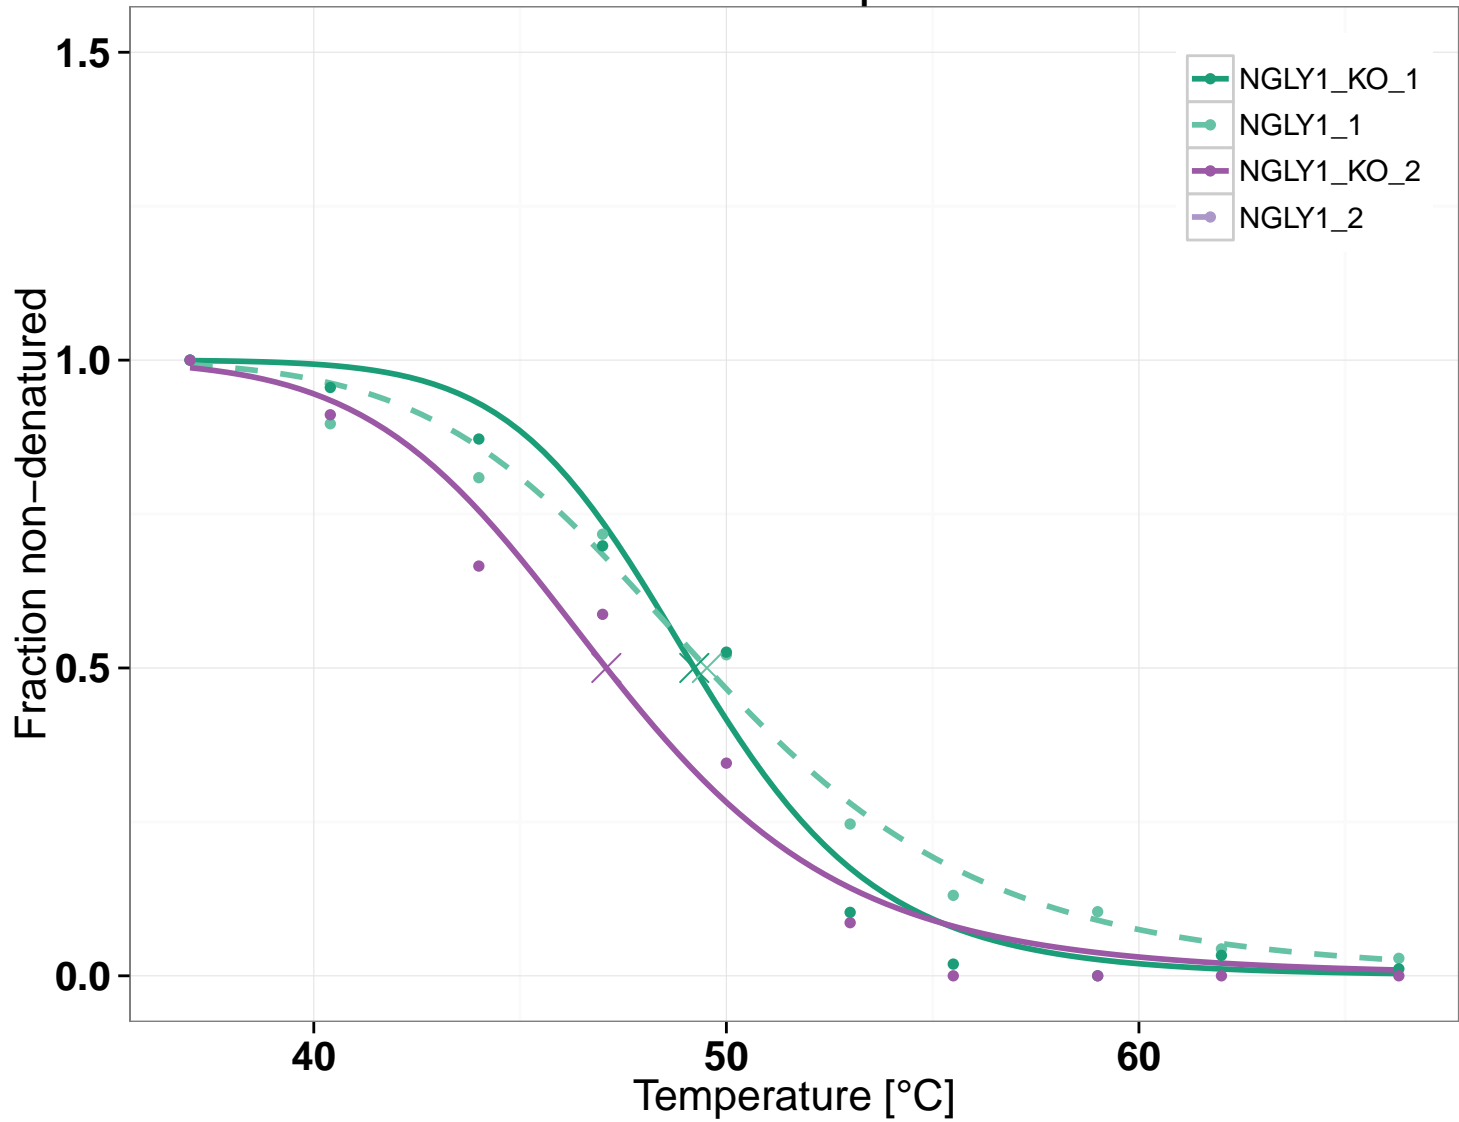

|            | meltPoint | slope  | plateau | R2   |
|------------|-----------|--------|---------|------|
| NGLY1_KO_1 | 49.22     | -0.11  | 0       | 0.98 |
| NGLY1_1    | 49.53     | -0.074 | 0       | 0.99 |
| NGLY1_KO_2 | 47.09     | -0.087 | 0       | 0.98 |
| NGLY1_2    | -         | -      | -       | -    |

Supplement: Supplementary file 1472 [file 1]

IPI00176708.2|C12ORF62

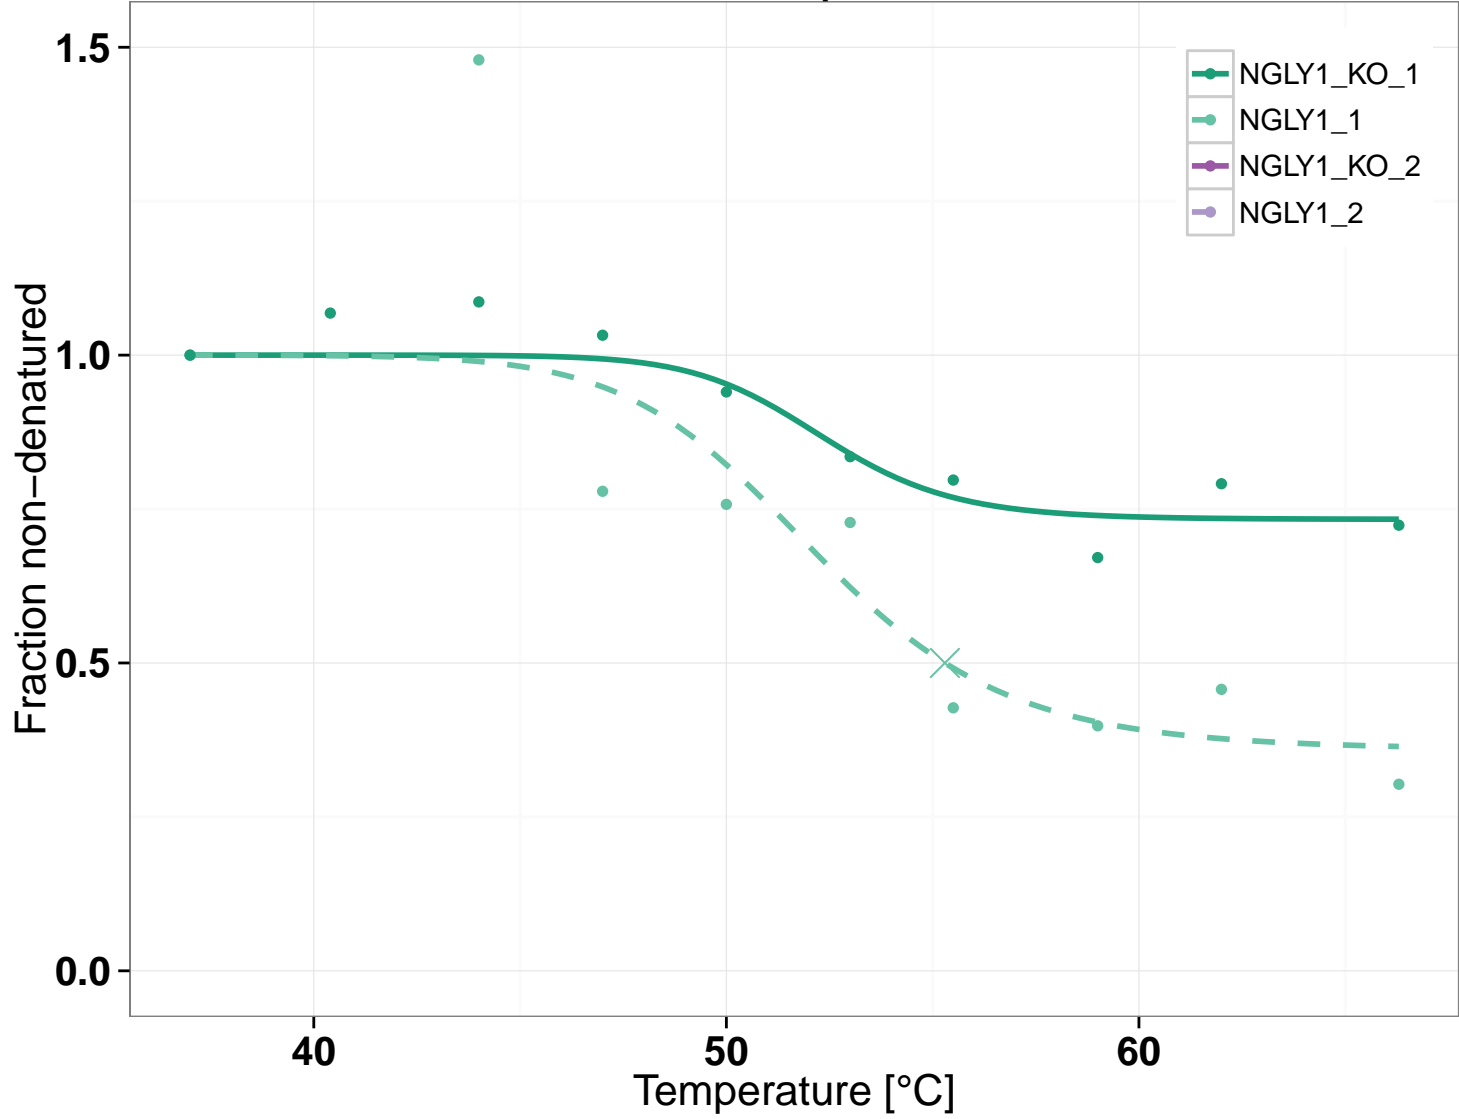

|            | meltPoint | slope  | plateau | R2   |
|------------|-----------|--------|---------|------|
| NGLY1_KO_1 | —         | −0.042 | 0.73    | 0.89 |
| NGLY1_1    | 55.3      | −0.069 | 0.36    | 0.49 |
| NGLY1_KO_2 | —         | —      | —       | —    |
| NGLY1_2    | —         | —      | —       | —    |

Supplement: Supplementary file 1473 [file 1]

# IPI00795015.2|SACS

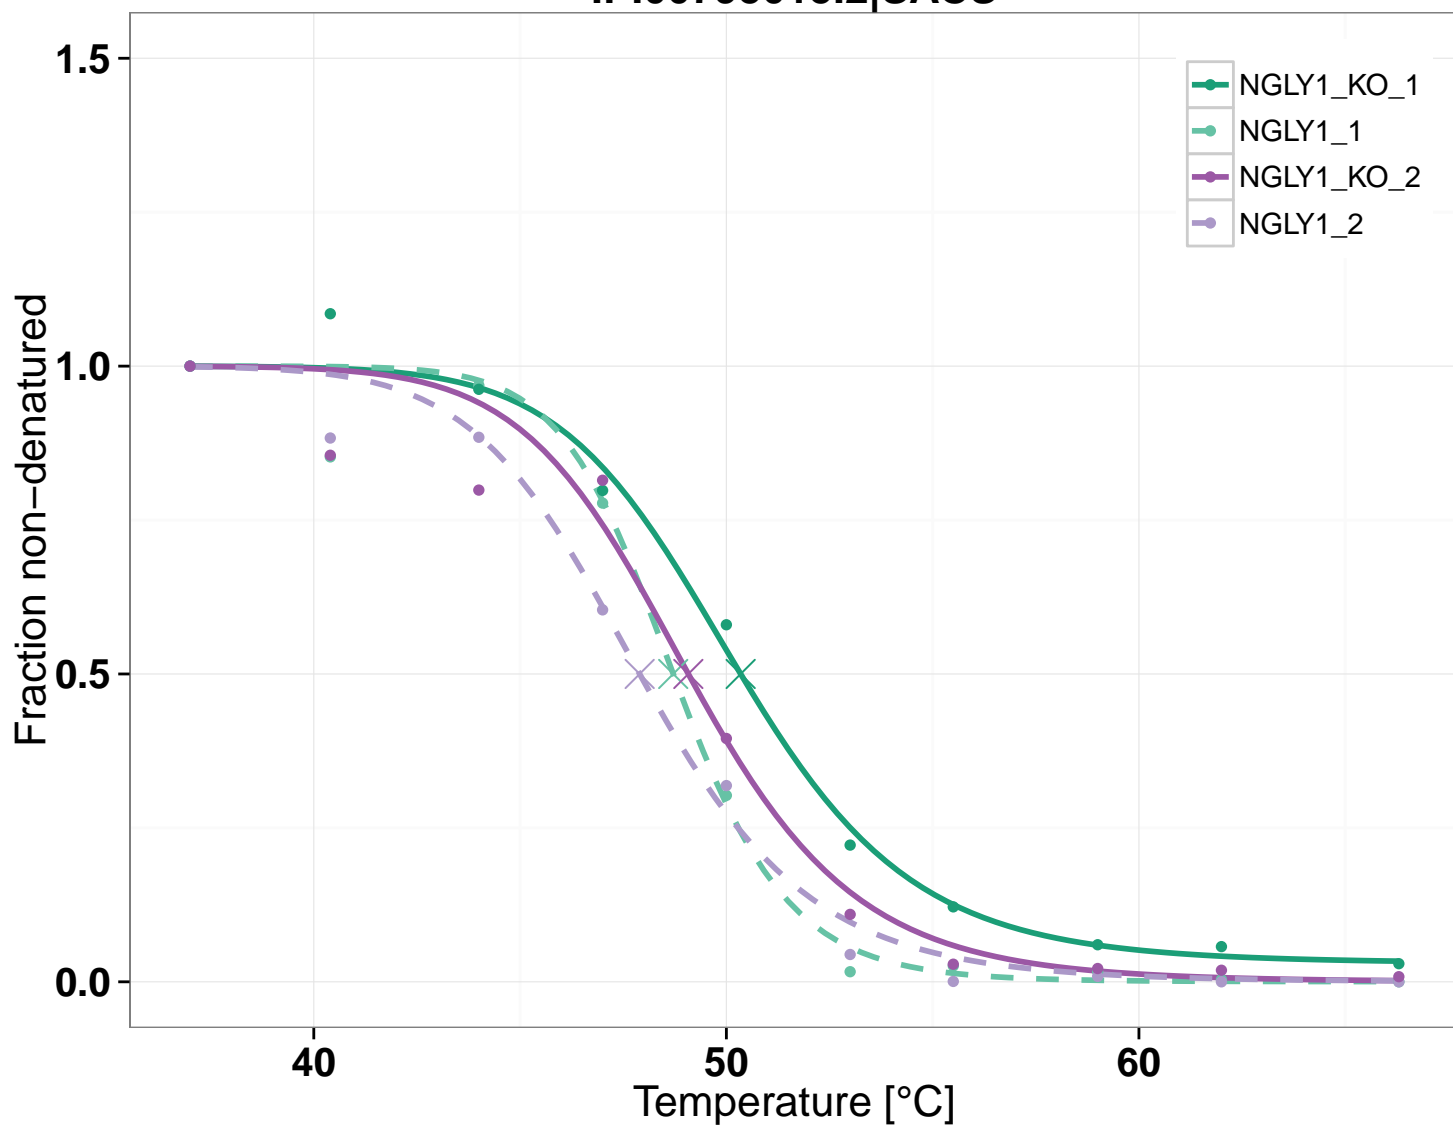

|            | meltPoint | slope | plateau | R2   |
|------------|-----------|-------|---------|------|
| NGLY1_KO_1 | 50.35     | -0.11 | 0.03    | 0.99 |
| NGLY1_1    | 48.71     | -0.18 | 0       | 0.99 |
| NGLY1_KO_2 | 49.08     | -0.12 | 0       | 0.97 |
| NGLY1_2    | 47.9      | -0.12 | 0       | 0.99 |

Supplement: Supplementary file 1474 [file 1]

IPI00747810.2|FSCN1

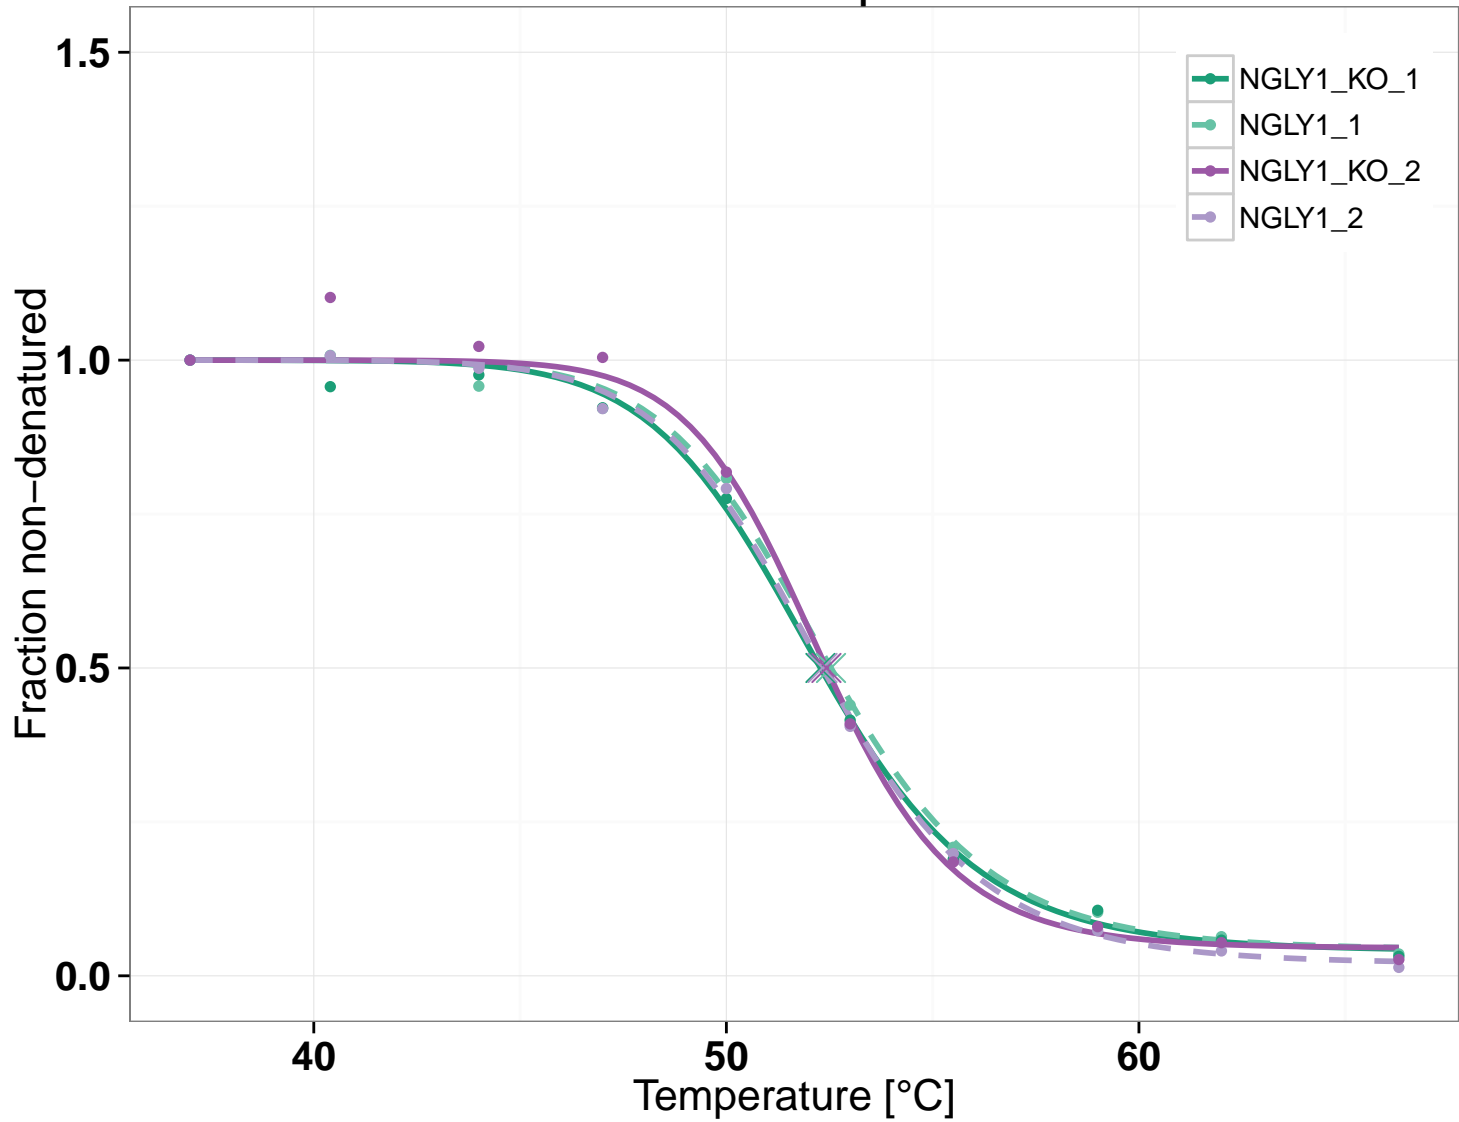

|            | meltPoint | slope | plateau | R2   |
|------------|-----------|-------|---------|------|
| NGLY1_KO_1 | 52.28     | -0.12 | 0.04    | 1    |
| NGLY1_1    | 52.54     | -0.12 | 0.04    | 1    |
| NGLY1_KO_2 | 52.43     | -0.15 | 0.04    | 0.99 |
| NGLY1_2    | 52.33     | -0.12 | 0.02    | 1    |

Supplement: Supplementary file 1475 [file 1]

# IPI00009703.1|SOX2

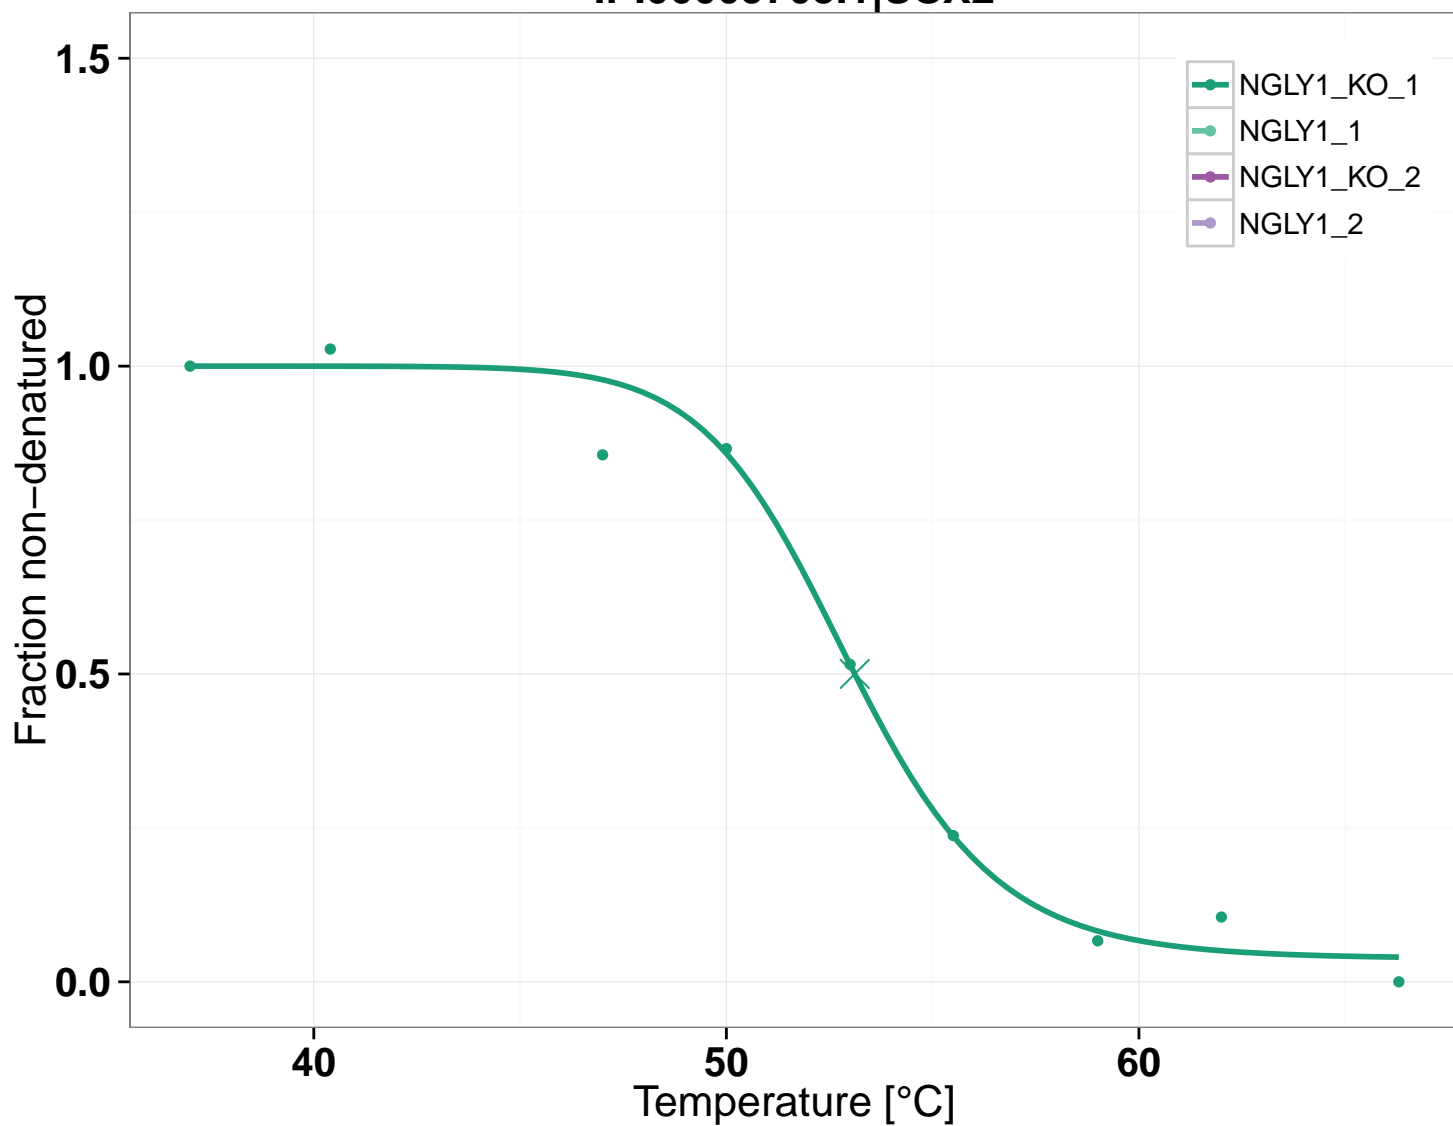

|            | meltPoint | slope | plateau | R2   |
|------------|-----------|-------|---------|------|
| NGLY1_KO_1 | 53.11     | -0.13 | 0.04    | 0.84 |
| NGLY1_1    | -         | -     | -       | -    |
| NGLY1_KO_2 | -         | -     | -       | -    |
| NGLY1_2    | -         | -     | -       | -    |

Supplement: Supplementary file 1476 [file 1]

IPI00167305.5|ANKRD13B

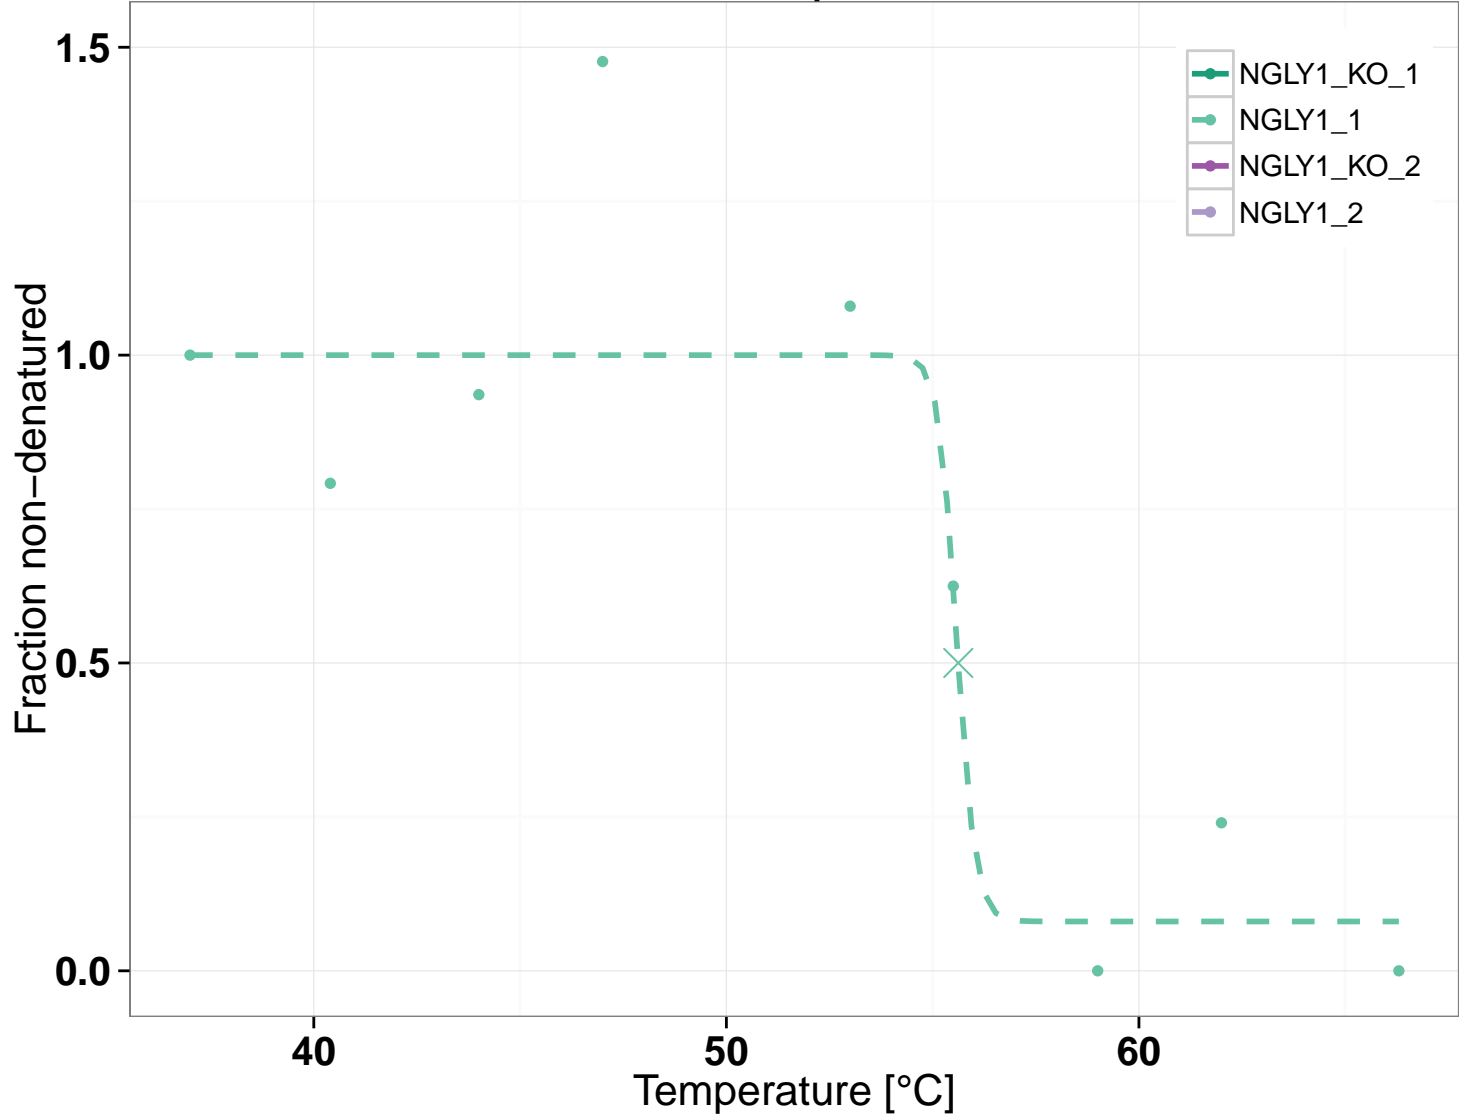

|            | meltPoint | slope | plateau | R2   |
|------------|-----------|-------|---------|------|
| NGLY1_KO_1 | -         | -     | -       | -    |
| NGLY1_1    | 55.62     | -1    | 0.08    | 0.77 |
| NGLY1_KO_2 | -         | -     | -       | -    |
| NGLY1_2    | -         | -     | -       | -    |

Supplement: Supplementary file 1477 [file 1]

IPI00014482.3|ALKBH1

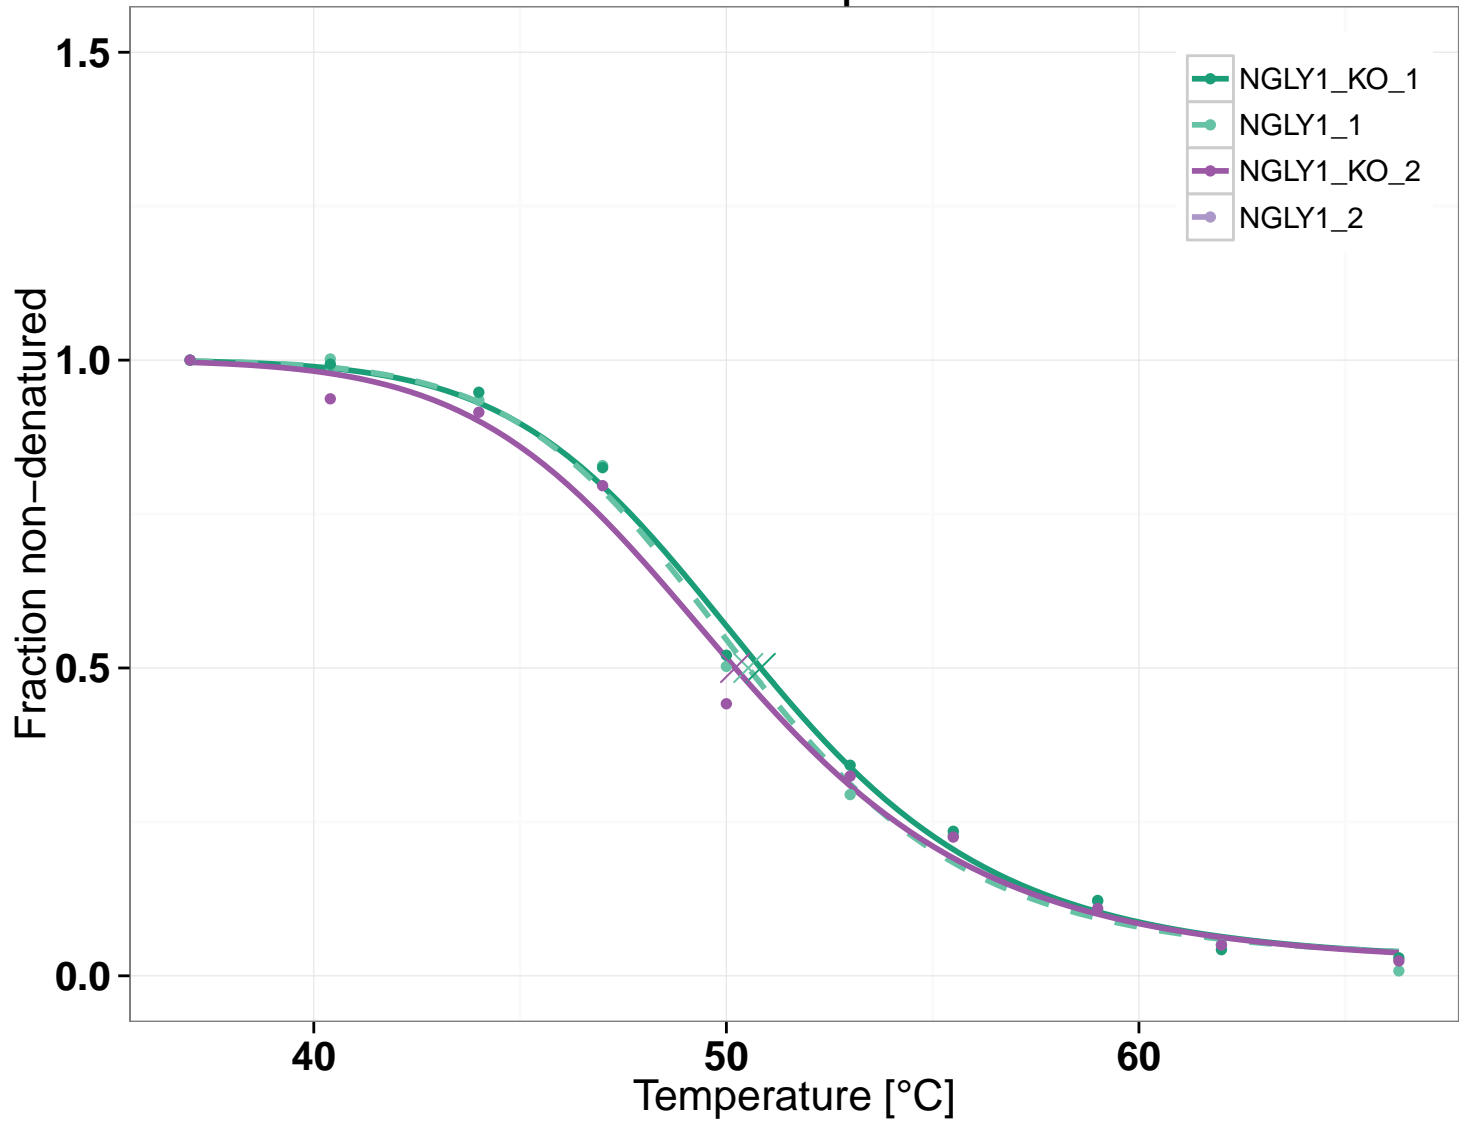

|            | meltPoint | slope  | plateau | R2   |
|------------|-----------|--------|---------|------|
| NGLY1_KO_1 | 50.83     | -0.083 | 0.02    | 1    |
| NGLY1_1    | 50.53     | -0.087 | 0.03    | 0.99 |
| NGLY1_KO_2 | 50.21     | -0.079 | 0.02    | 0.99 |
| NGLY1_2    | -         | -      | -       | -    |

Supplement: Supplementary file 1478 [file 1]

IPI00394679.3|WHSC2

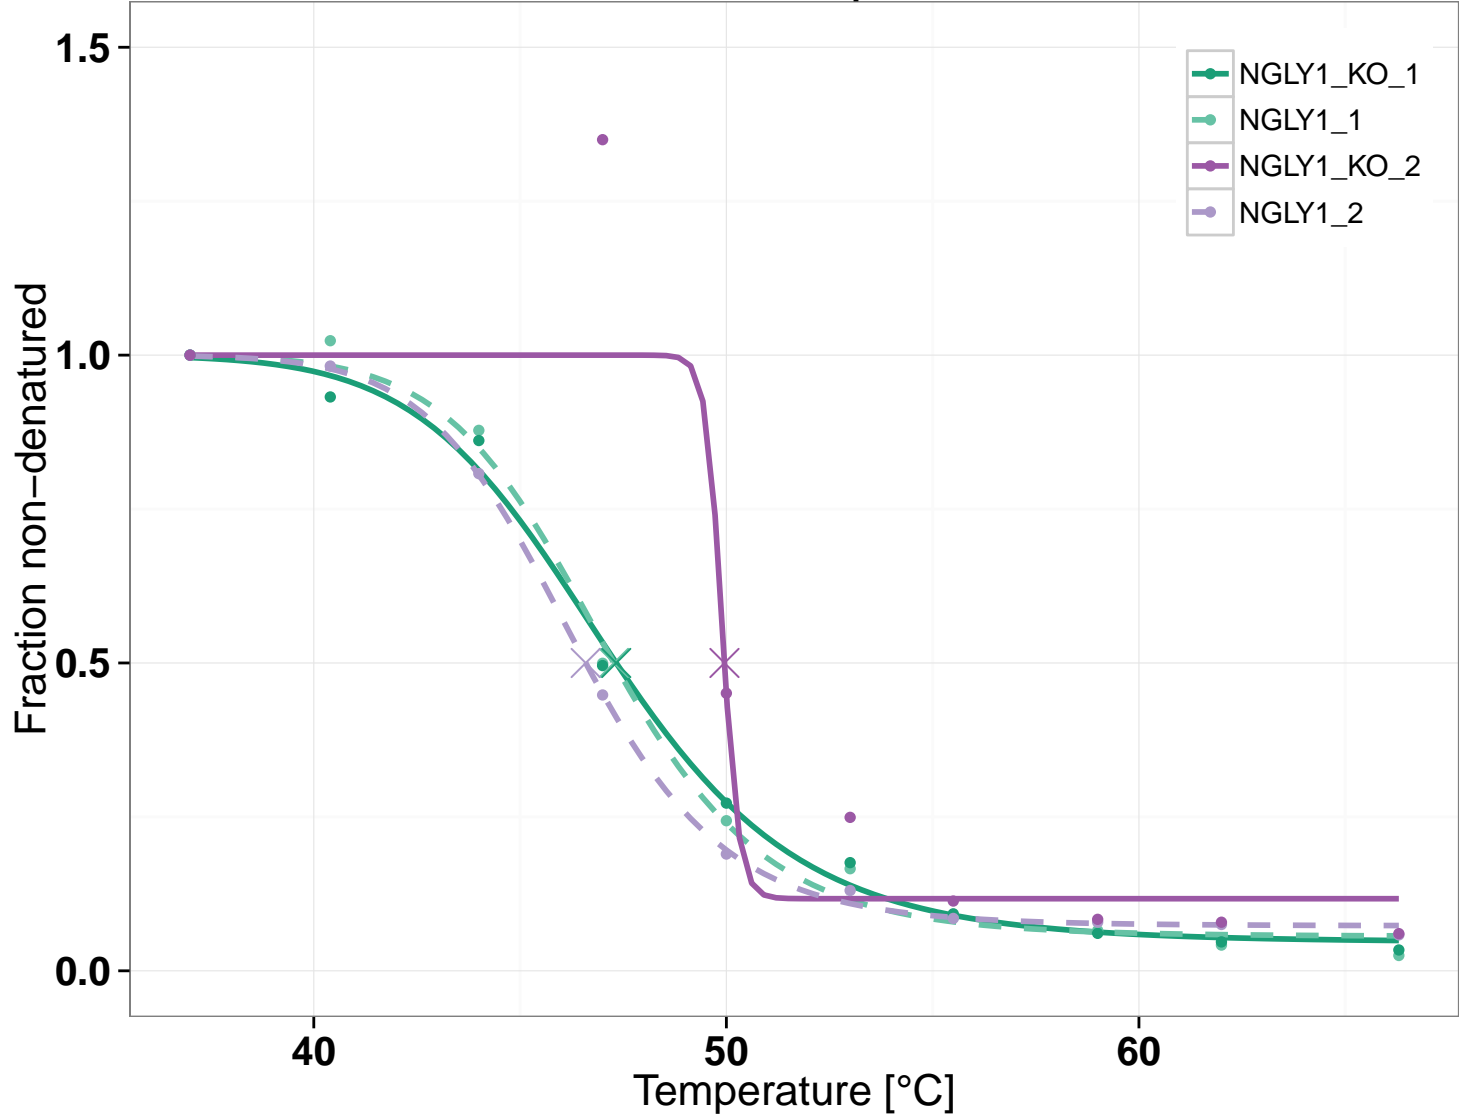

|            | meltPoint | slope | plateau | R2   |
|------------|-----------|-------|---------|------|
| NGLY1_KO_1 | 47.33     | -0.1  | 0.05    | 1    |
| NGLY1_1    | 47.27     | -0.12 | 0.06    | 1    |
| NGLY1_KO_2 | 49.95     | -1.1  | 0.12    | 0.45 |
| NGLY1_2    | 46.59     | -0.13 | 0.07    | 1    |

Supplement: Supplementary file 1479 [file 1]

# IPI00306127.1|THUMPD3

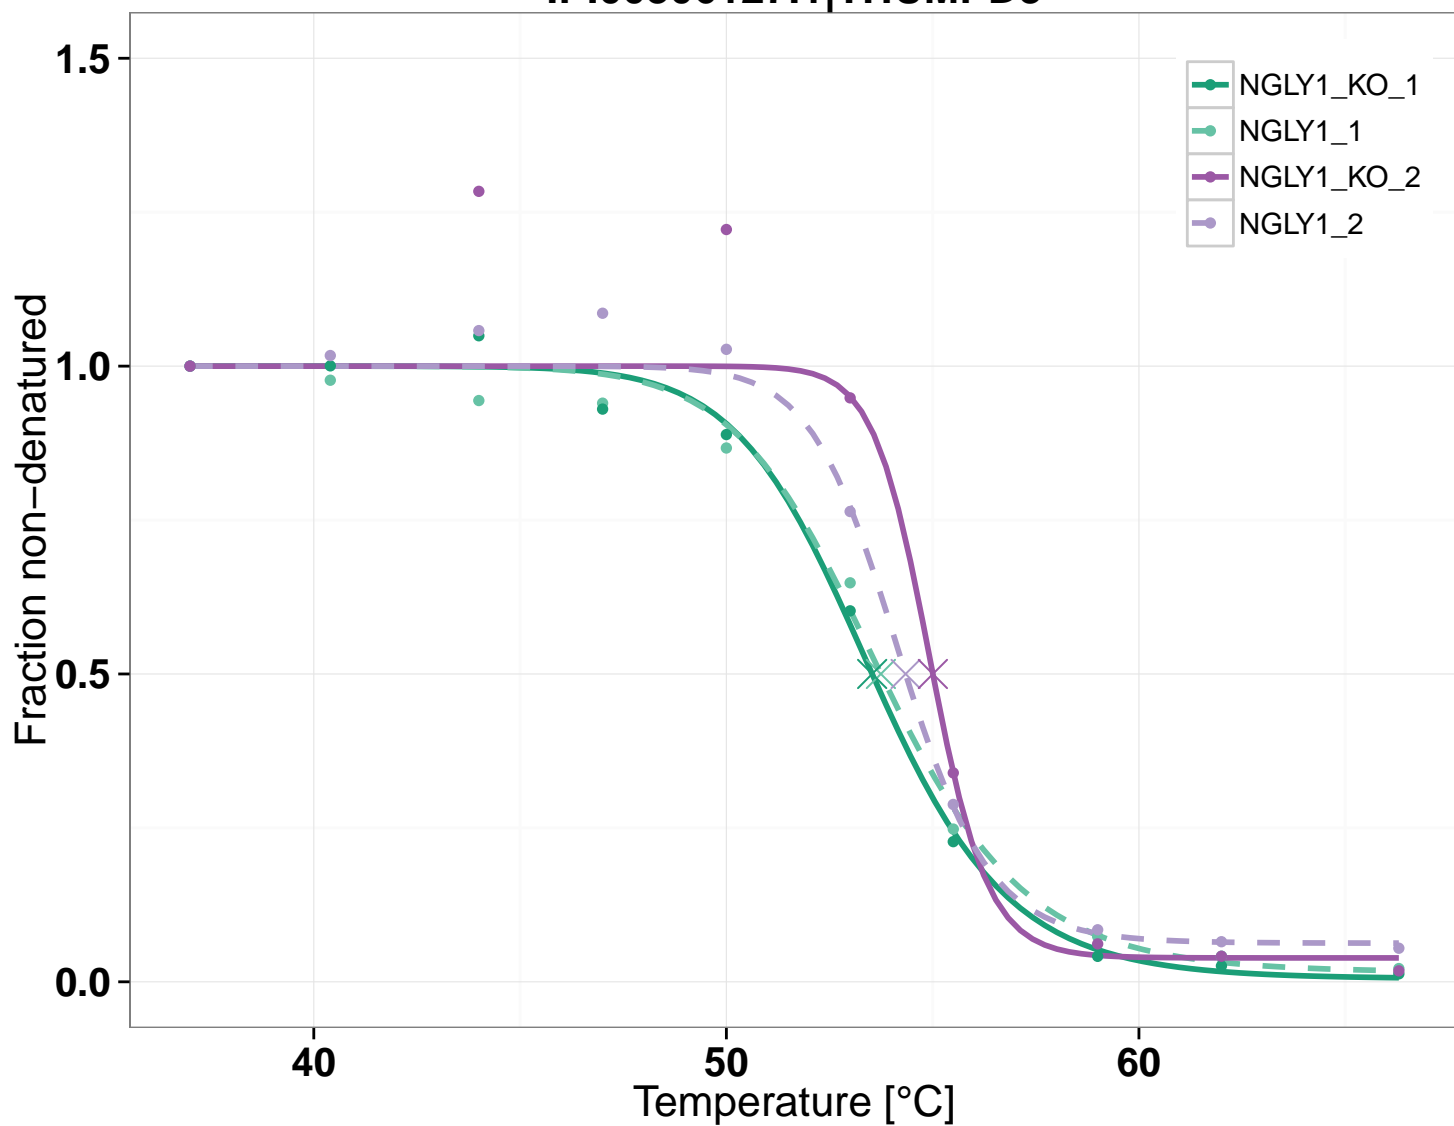

|            | meltPoint | slope | plateau | R2   |
|------------|-----------|-------|---------|------|
| NGLY1_KO_1 | 53.53     | -0.15 | 0       | 1    |
| NGLY1_1    | 53.75     | -0.14 | 0.01    | 0.99 |
| NGLY1_KO_2 | 55.01     | -0.35 | 0.04    | 0.79 |
| NGLY1_2    | 54.34     | -0.22 | 0.06    | 0.99 |

Supplement: Supplementary file 1480 [file 1]

# IPI00023974.1|PTTG1IP

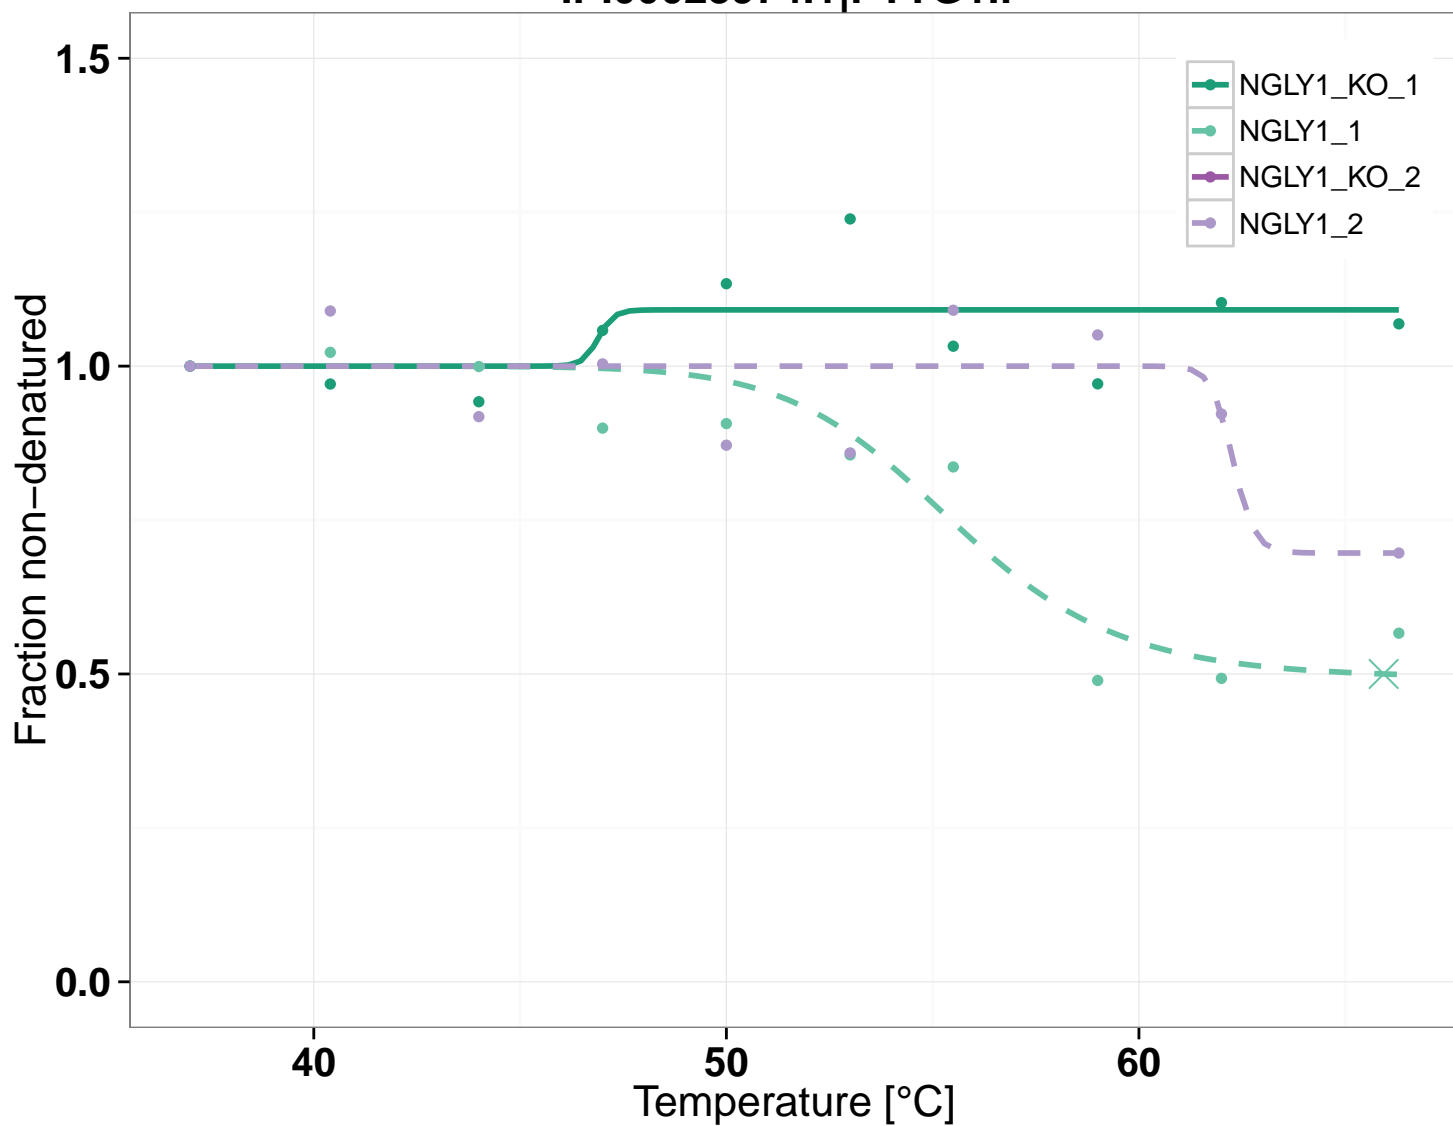

|            | meltPoint | slope  | plateau | R2   |
|------------|-----------|--------|---------|------|
| NGLY1_KO_1 | –         | 0.12   | 1.09    | 0.36 |
| NGLY1_1    | 65.93     | –0.062 | 0.49    | 0.91 |
| NGLY1_KO_2 | –         | –      | –       | –    |
| NGLY1_2    | –         | –0.29  | 0.7     | 0.54 |

Supplement: Supplementary file 1481 [file 1]

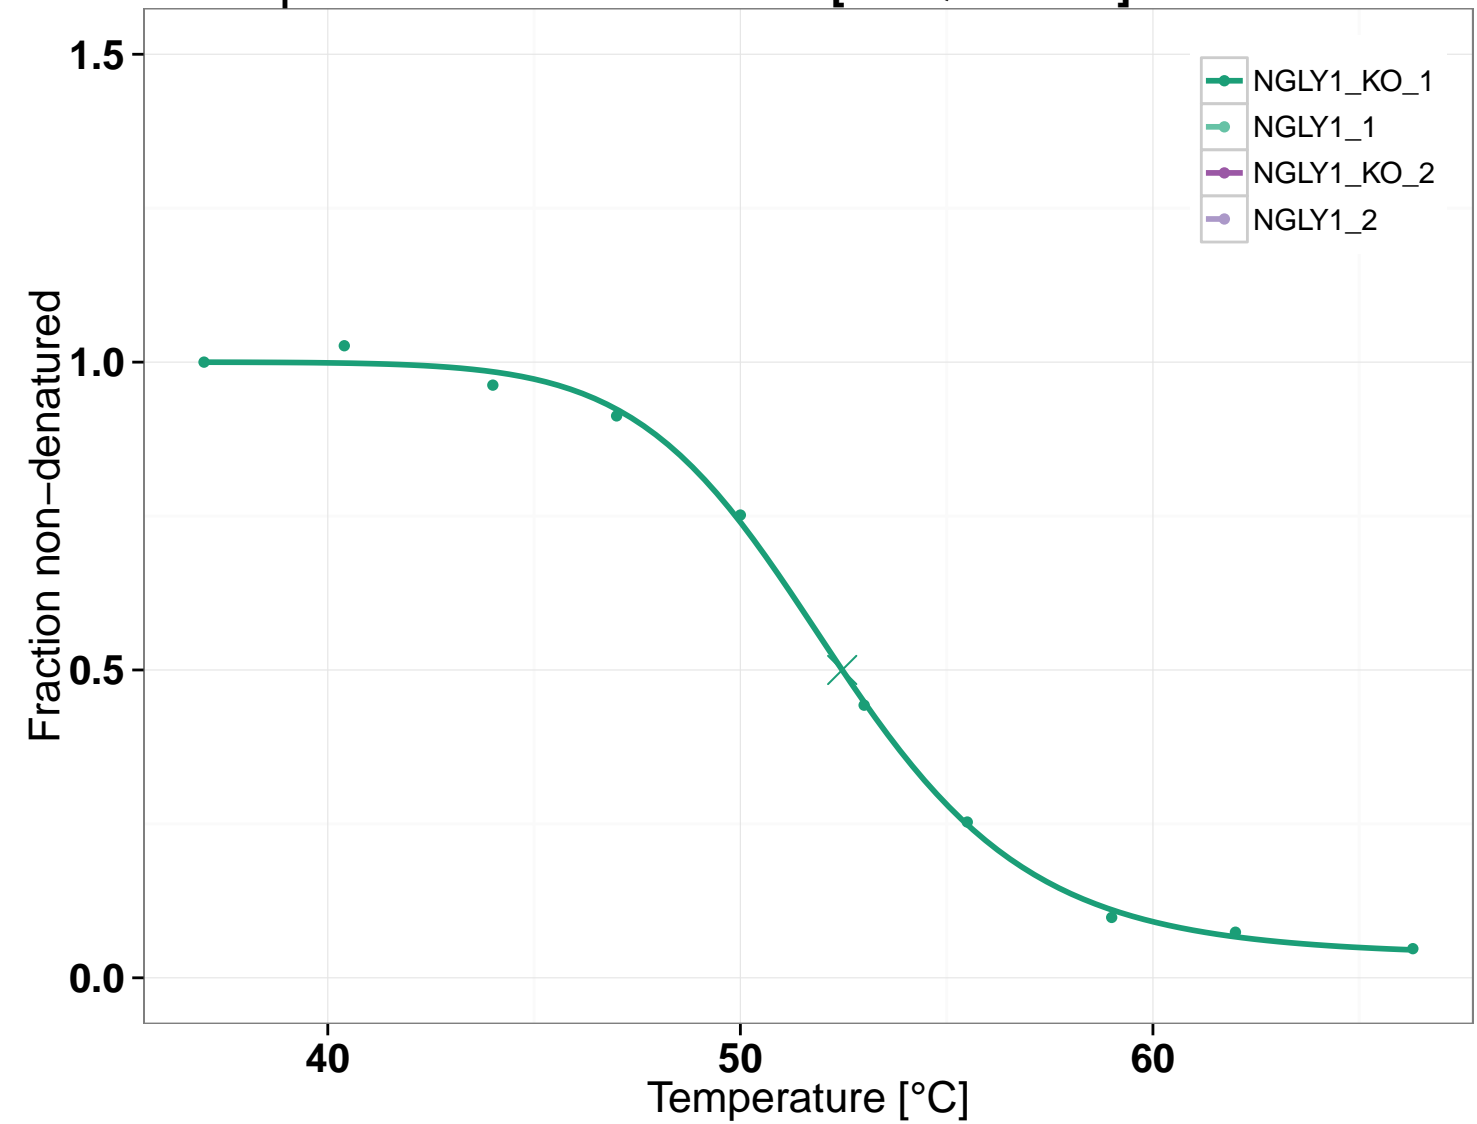

|            | meltPoint | slope | plateau | R2 |
|------------|-----------|-------|---------|----|
| NGLY1_KO_1 | 52.47     | -0.1  | 0.04    | 1  |
| NGLY1_1    | -         | -     | -       | -  |
| NGLY1_KO_2 | -         | -     | -       | -  |
| NGLY1_2    | -         | -     | -       | -  |

Supplement: Supplementary file 1482 [file 1]

IPI00028108.1|RGS19

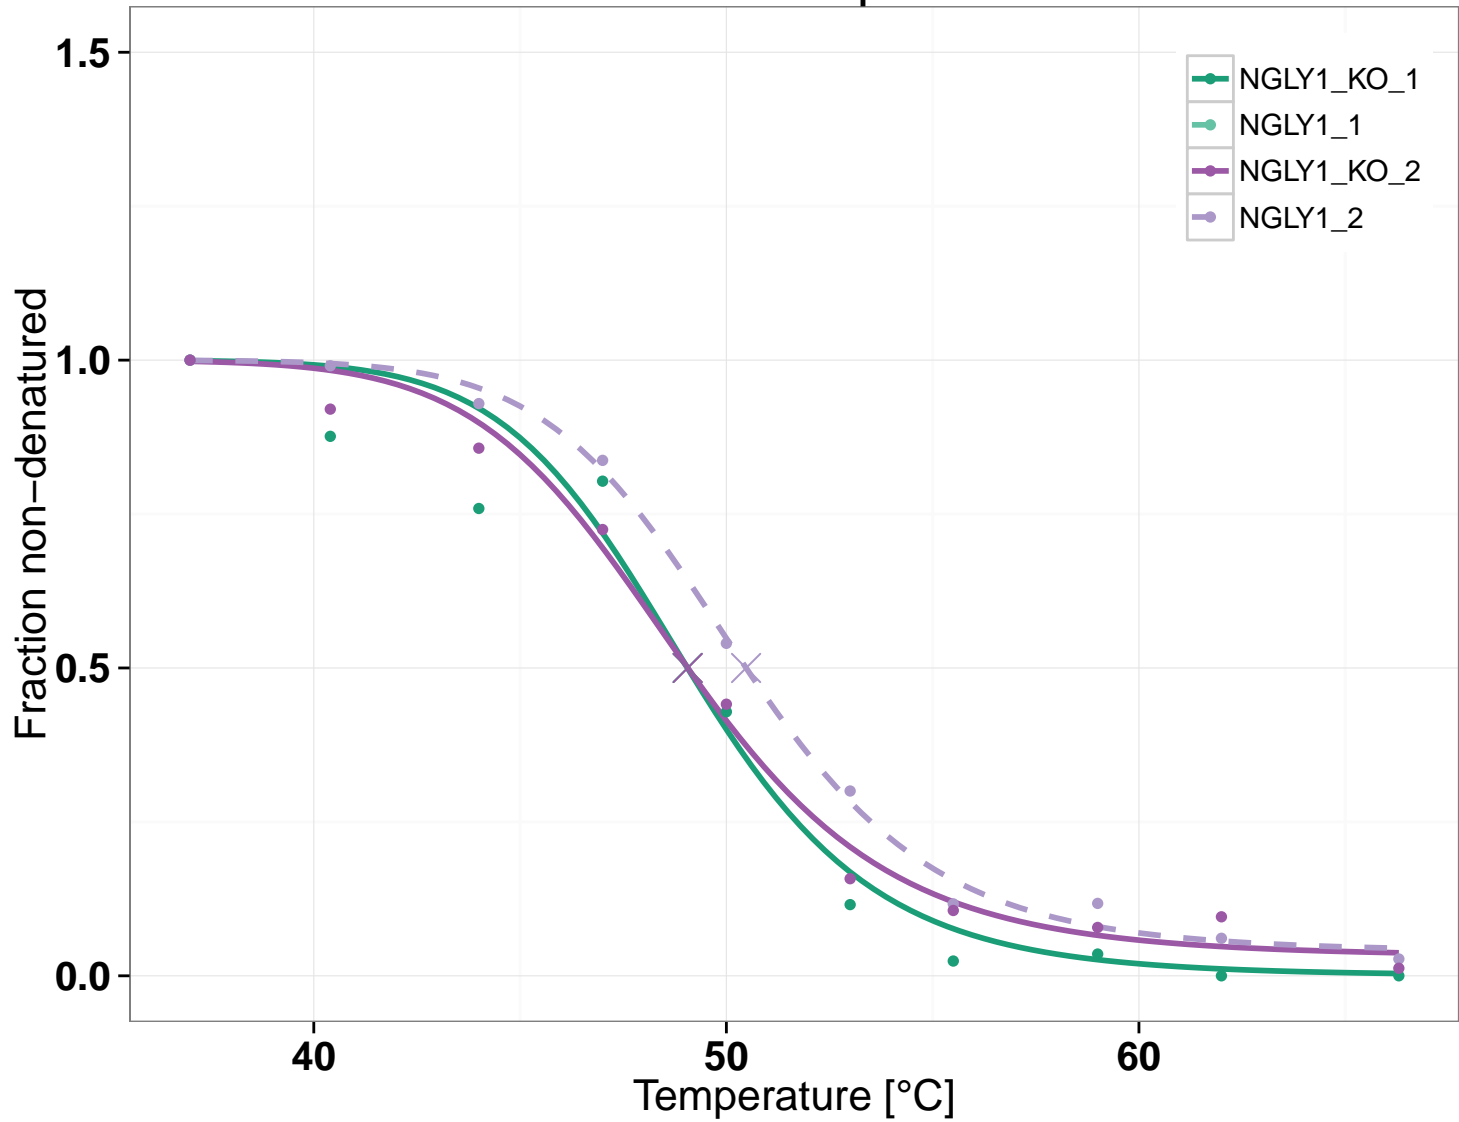

|            | meltPoint | slope  | plateau | R2   |
|------------|-----------|--------|---------|------|
| NGLY1_KO_1 | 49.06     | -0.11  | 0       | 0.97 |
| NGLY1_1    | -         | -      | -       | -    |
| NGLY1_KO_2 | 49.06     | -0.096 | 0.03    | 0.99 |
| NGLY1_2    | 50.48     | -0.1   | 0.04    | 1    |

Supplement: Supplementary file 1483 [file 1]

# IPI00827592.1|C11ORF57

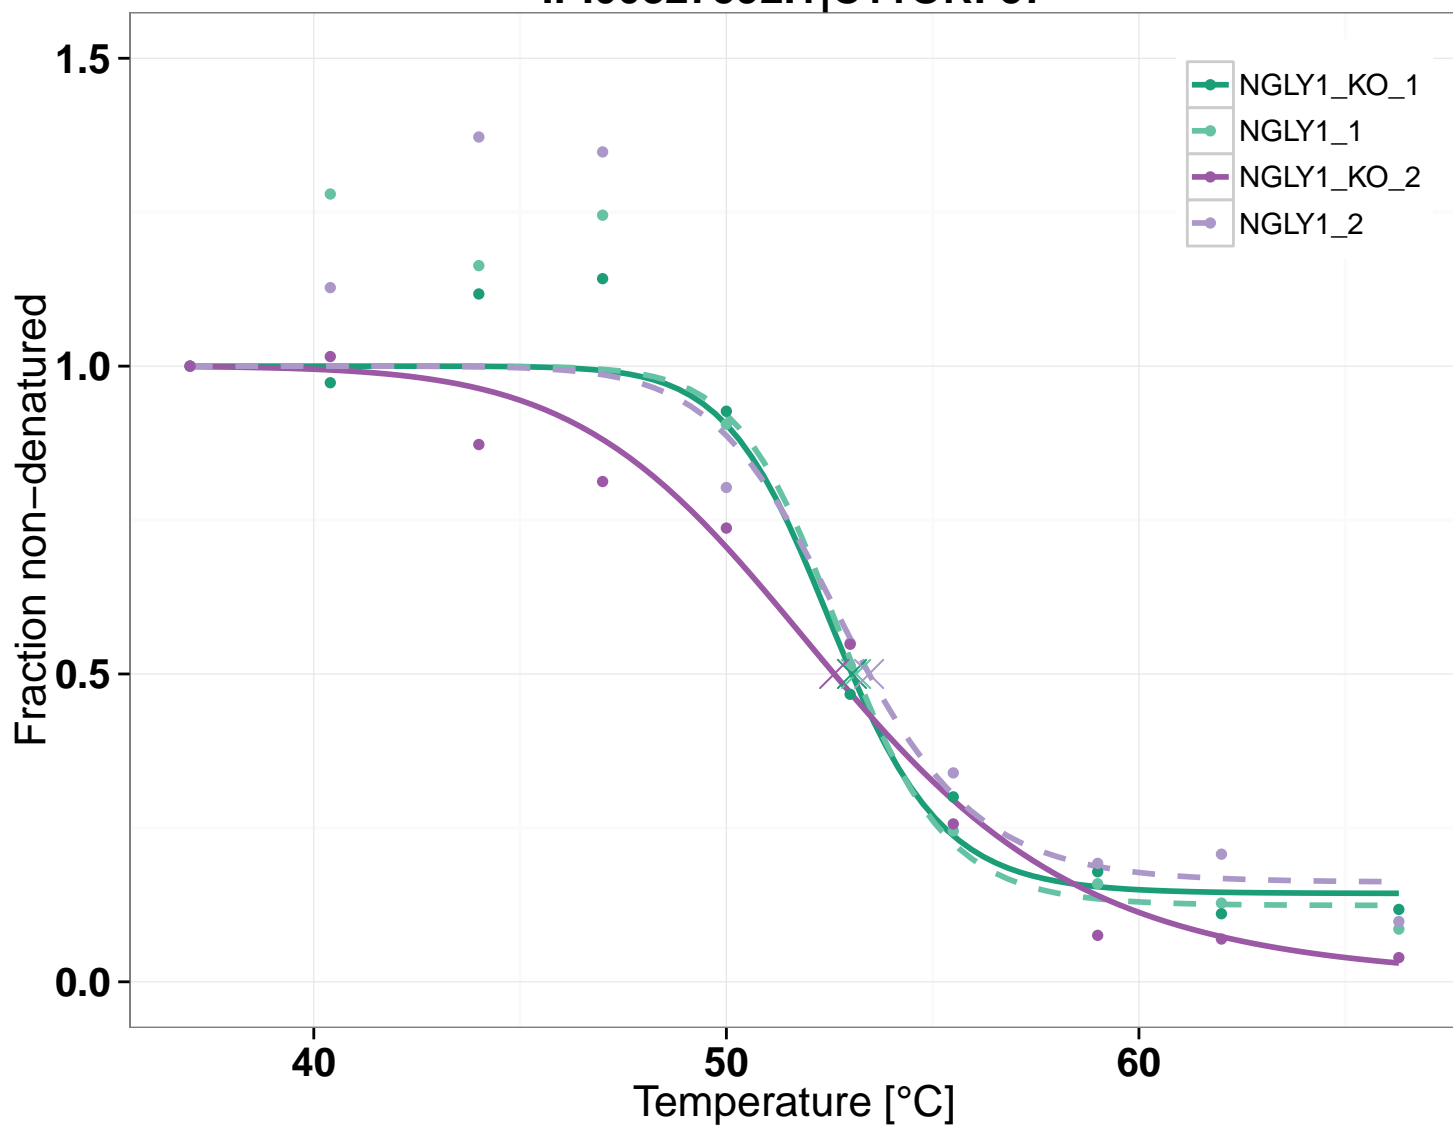

|            | meltPoint | slope  | plateau | R2   |
|------------|-----------|--------|---------|------|
| NGLY1_KO_1 | 53.05     | -0.16  | 0.14    | 0.97 |
| NGLY1_1    | 53.14     | -0.17  | 0.12    | 0.92 |
| NGLY1_KO_2 | 52.61     | -0.081 | 0       | 0.98 |
| NGLY1_2    | 53.46     | -0.13  | 0.16    | 0.86 |

Supplement: Supplementary file 1484 [file 1]

IPI00010821.1|SH2B3

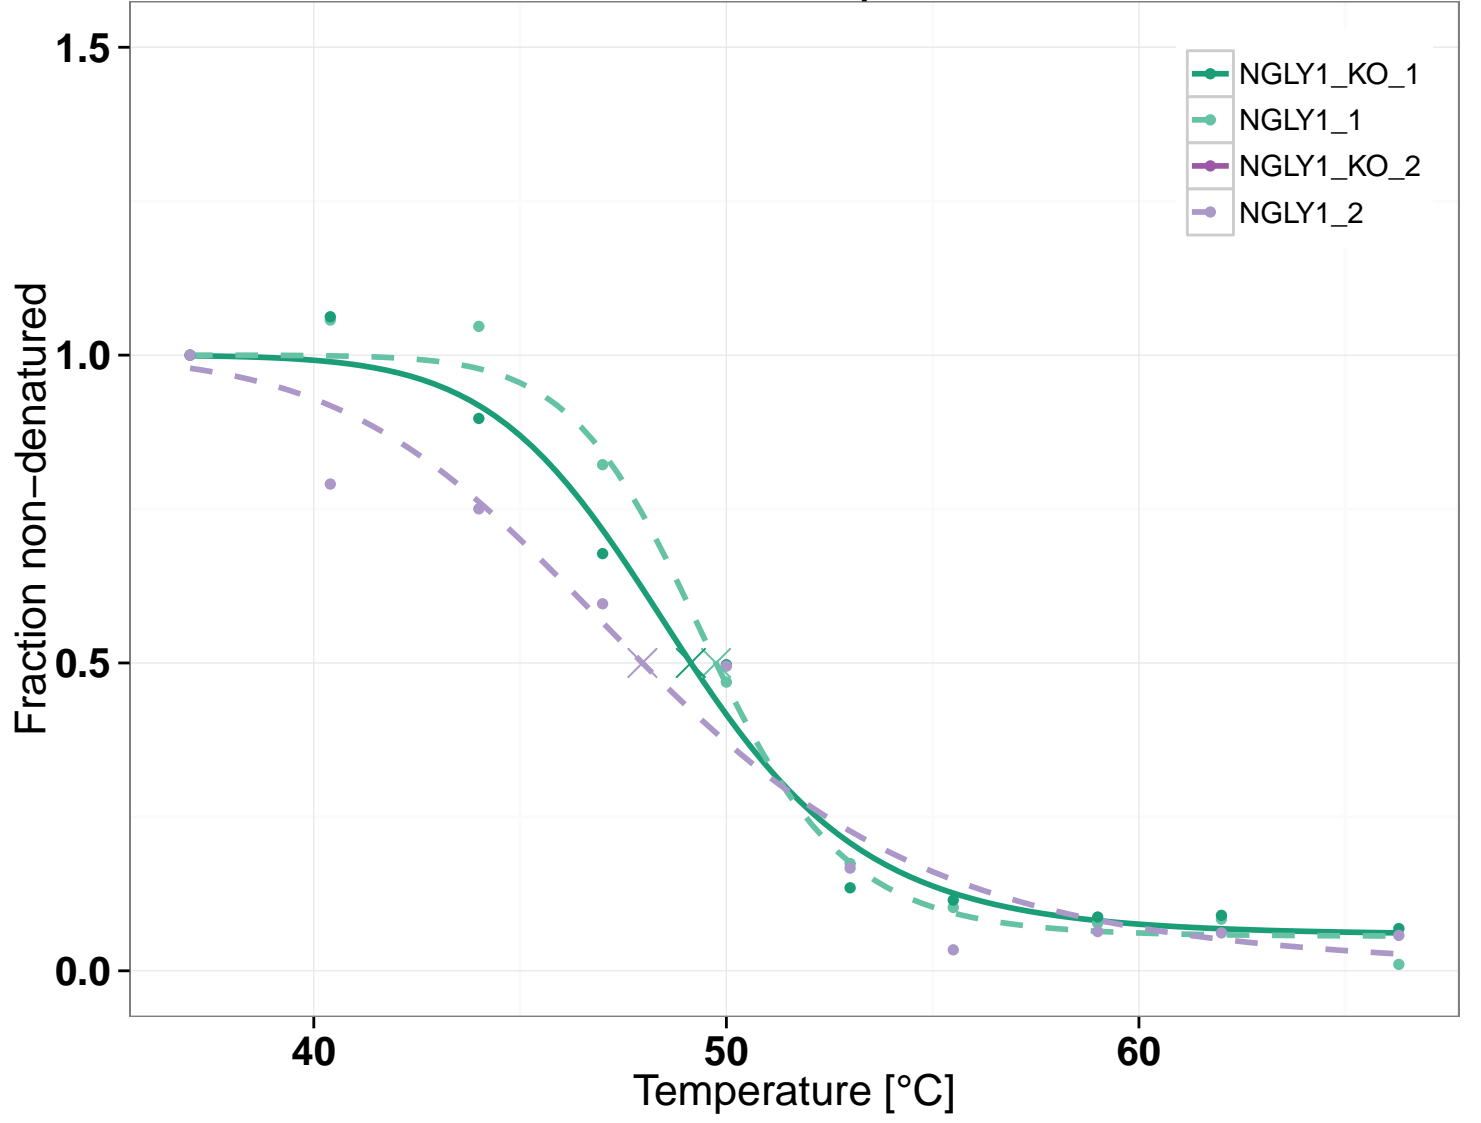

|            | meltPoint | slope  | plateau | R2   |
|------------|-----------|--------|---------|------|
| NGLY1_KO_1 | 49.14     | -0.1   | 0.06    | 0.99 |
| NGLY1_1    | 49.75     | -0.14  | 0.06    | 0.99 |
| NGLY1_KO_2 | -         | -      | -       | -    |
| NGLY1_2    | 47.97     | -0.069 | 0       | 0.96 |

Supplement: Supplementary file 1485 [file 1]

# IPI00303868.1|GYS1

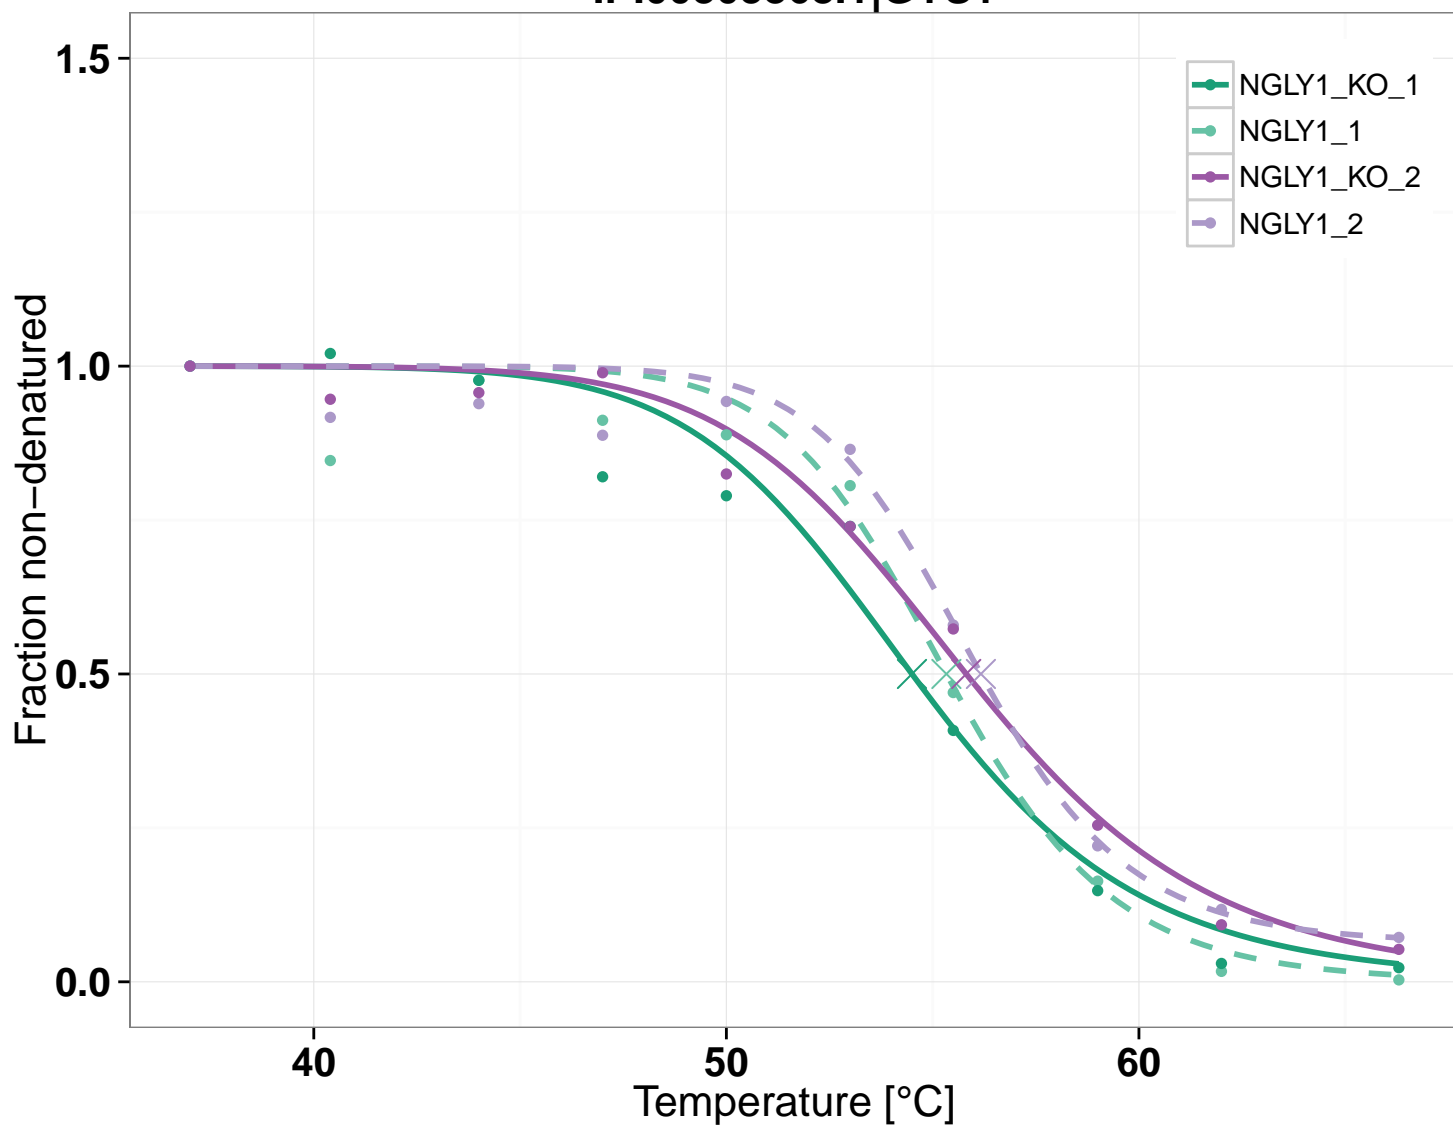

|            | meltPoint | slope  | plateau | R2   |
|------------|-----------|--------|---------|------|
| NGLY1_KO_1 | 54.5      | -0.091 | 0       | 0.97 |
| NGLY1_1    | 55.33     | -0.12  | 0       | 0.98 |
| NGLY1_KO_2 | 55.81     | -0.085 | 0       | 0.99 |
| NGLY1_2    | 56.17     | -0.12  | 0.06    | 0.98 |

Supplement: Supplementary file 1486 [file 1]

IPI00872549.1|SPATS2

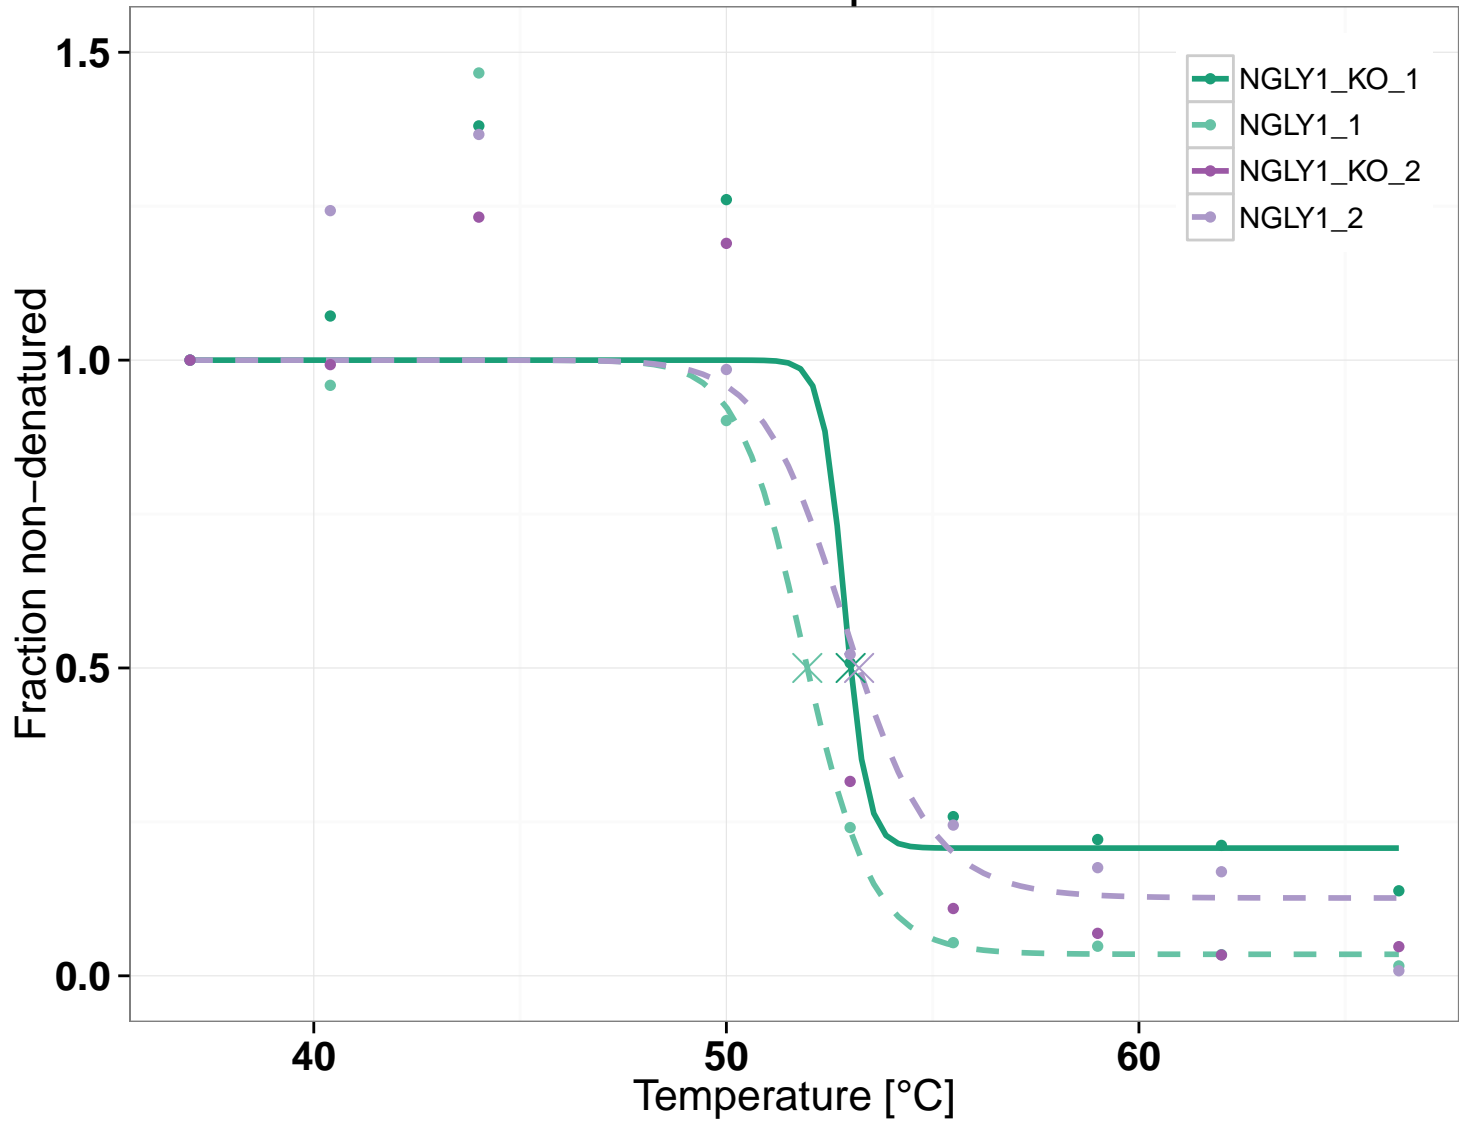

|            | meltPoint | slope | plateau | R2   |
|------------|-----------|-------|---------|------|
| NGLY1_KO_1 | 53.01     | -0.73 | 0.21    | 0.74 |
| NGLY1_1    | 51.96     | -0.3  | 0.03    | 0.83 |
| NGLY1_KO_2 | -         | -     | -       | -    |
| NGLY1_2    | 53.22     | -0.21 | 0.13    | 0.83 |

Supplement: Supplementary file 1487 [file 1]

IPI00071824.3|CKAP2

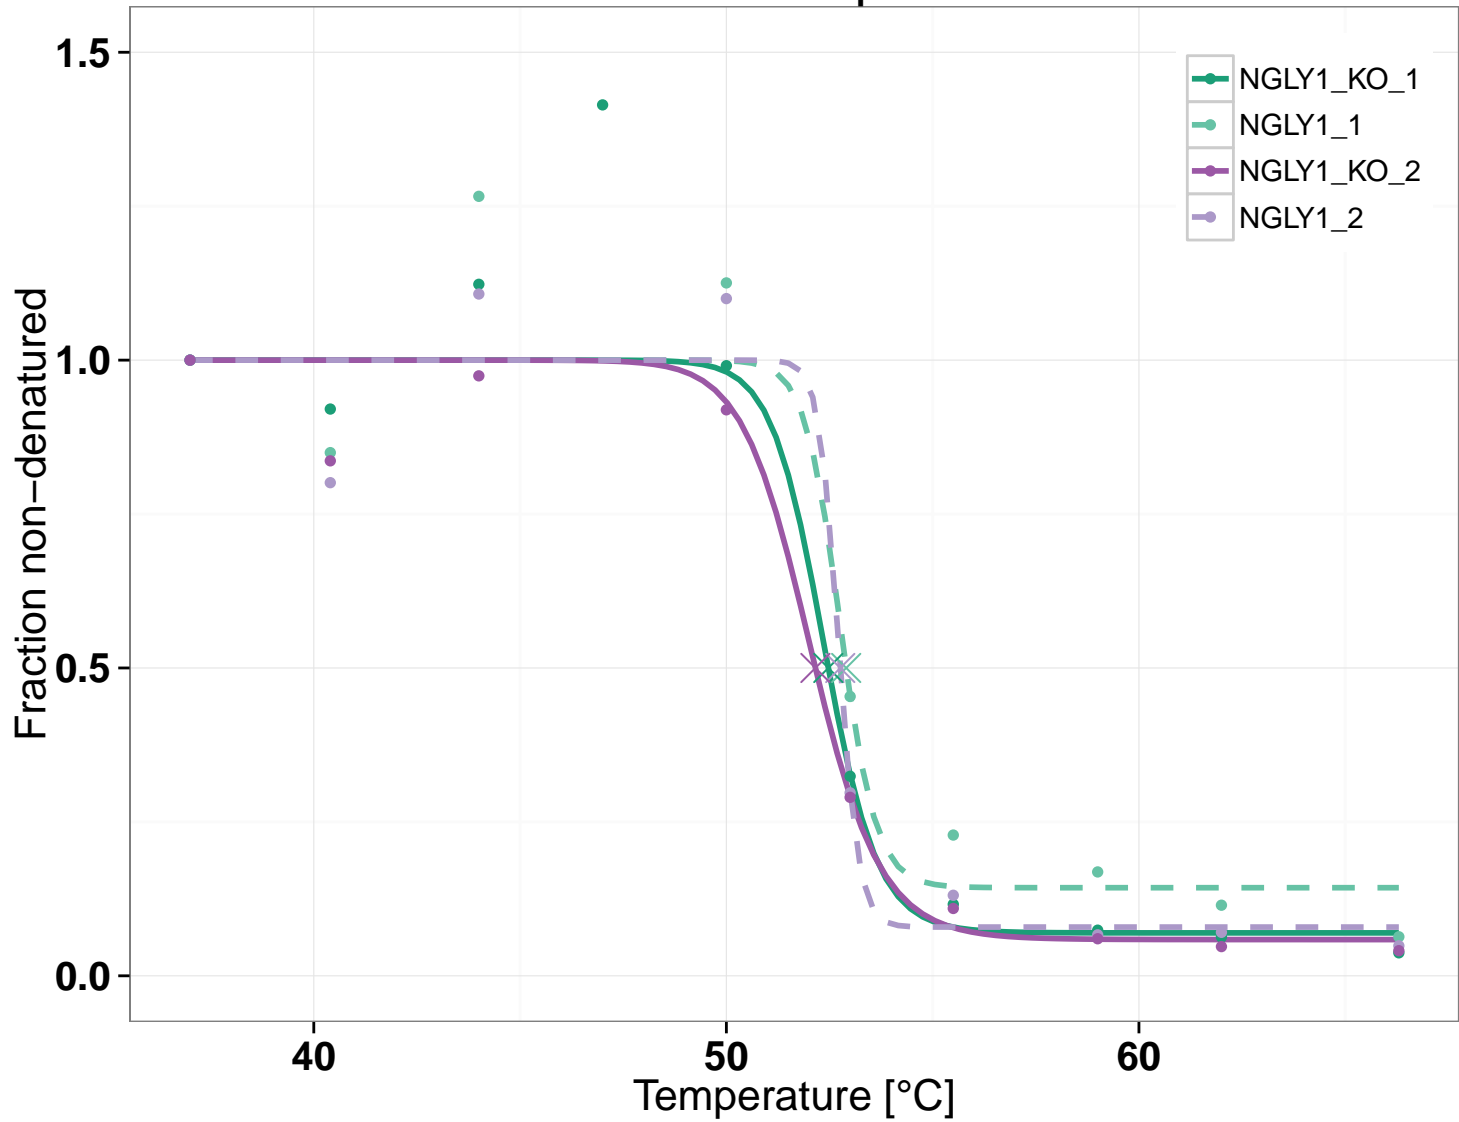

|            | meltPoint | slope | plateau | R2   |
|------------|-----------|-------|---------|------|
| NGLY1_KO_1 | 52.47     | -0.36 | 0.07    | 0.92 |
| NGLY1_1    | 52.9      | -0.5  | 0.14    | 0.77 |
| NGLY1_KO_2 | 52.16     | -0.28 | 0.06    | 0.89 |
| NGLY1_2    | 52.76     | -0.97 | 0.08    | 0.85 |

Supplement: Supplementary file 1488 [file 1]

IPI00018893.1|ZBTB48

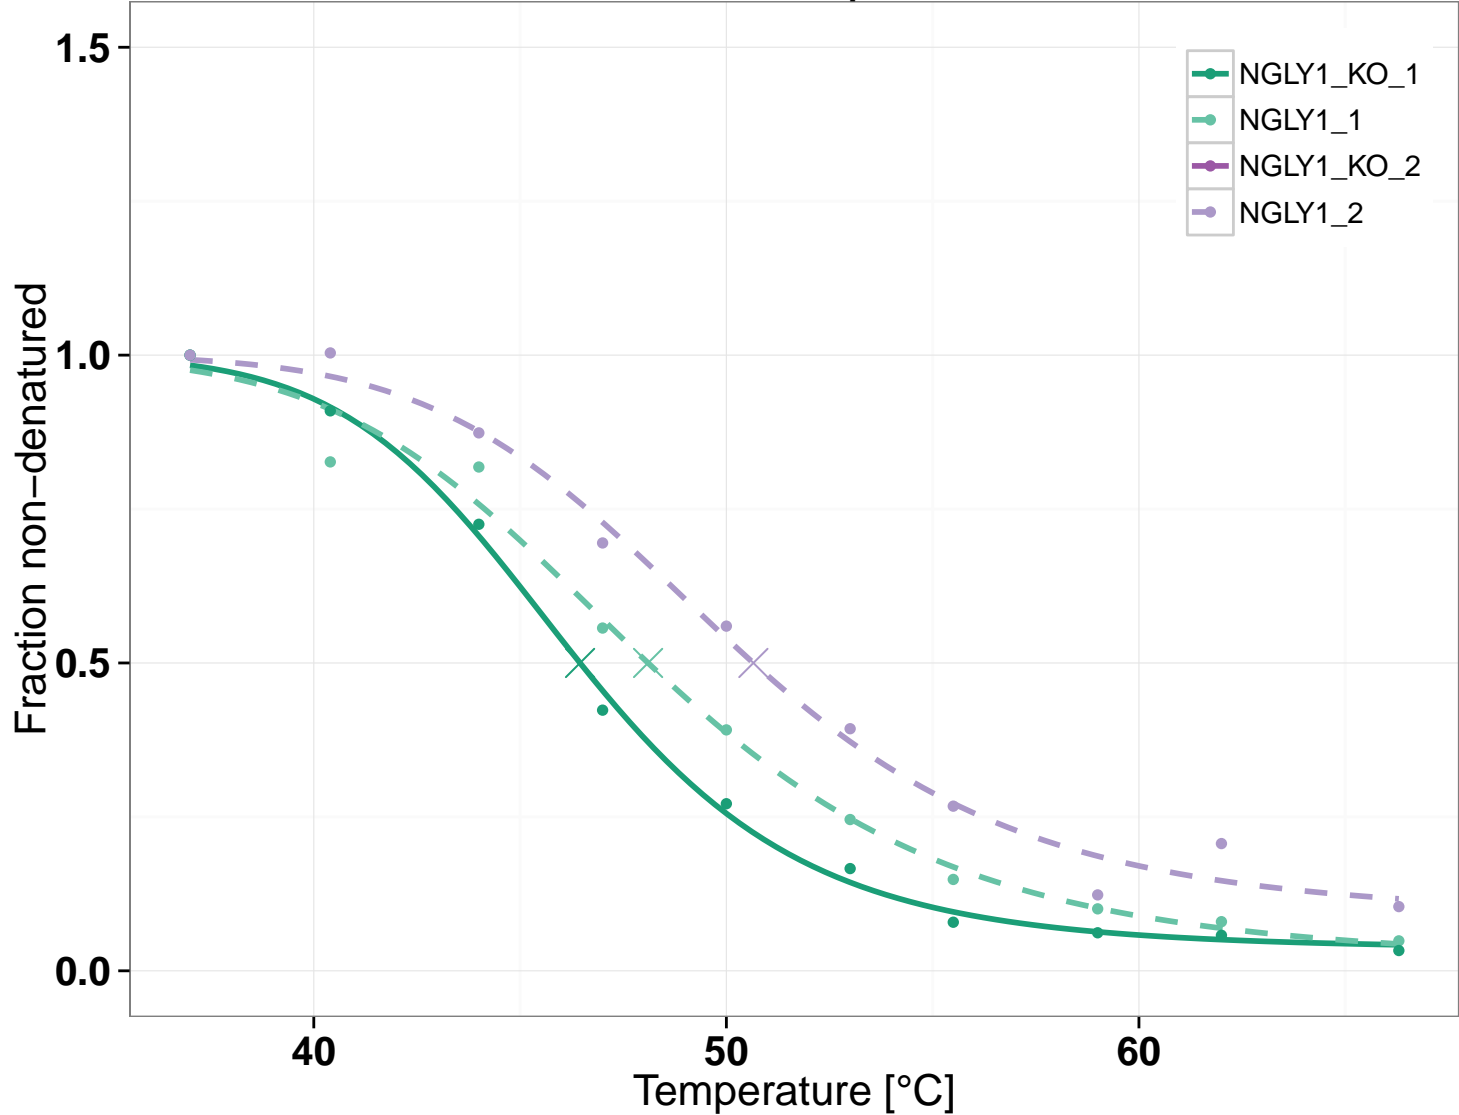

|            | meltPoint | slope  | plateau | R2   |
|------------|-----------|--------|---------|------|
| NGLY1_KO_1 | 46.45     | -0.086 | 0.04    | 1    |
| NGLY1_1    | 48.1      | -0.065 | 0.01    | 0.99 |
| NGLY1_KO_2 | -         | -      | -       | -    |
| NGLY1_2    | 50.66     | -0.064 | 0.09    | 0.99 |

Supplement: Supplementary file 1489 [file 1]

# IPI00902728.1|MACF1

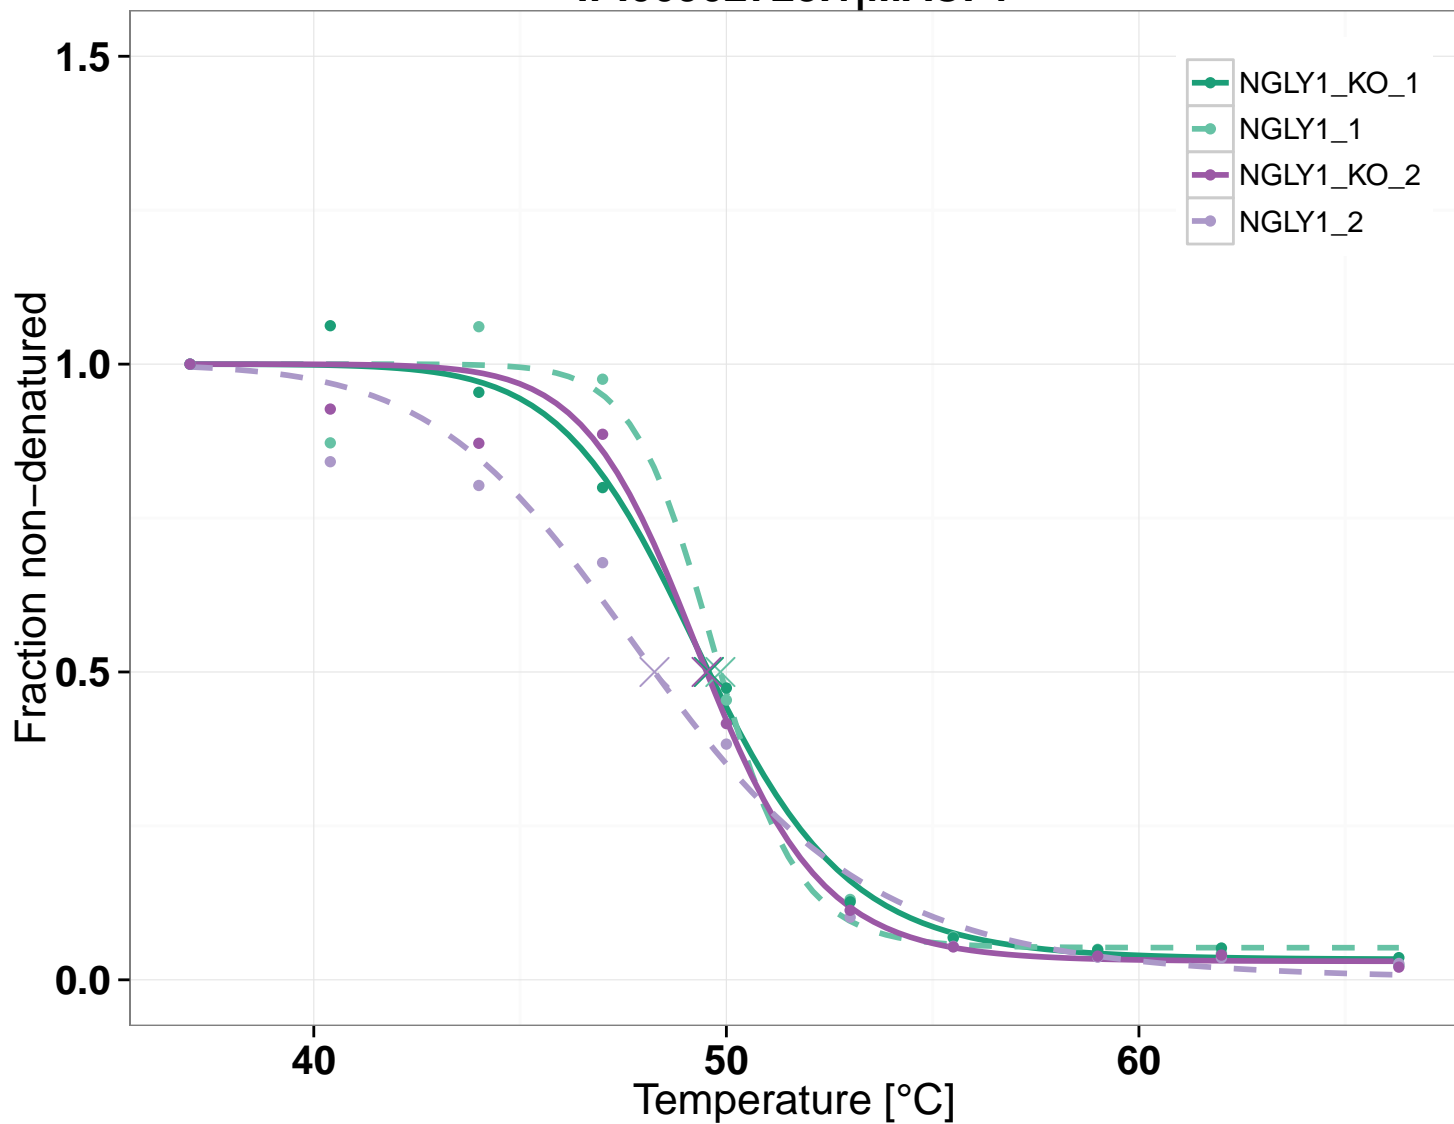

|            | meltPoint | slope  | plateau | R2   |
|------------|-----------|--------|---------|------|
| NGLY1_KO_1 | 49.58     | -0.14  | 0.03    | 1    |
| NGLY1_1    | 49.85     | -0.24  | 0.05    | 0.99 |
| NGLY1_KO_2 | 49.52     | -0.17  | 0.03    | 0.99 |
| NGLY1_2    | 48.26     | -0.093 | 0       | 0.98 |

Supplement: Supplementary file 1490 [file 1]

IPI00042604.3|C16ORF14

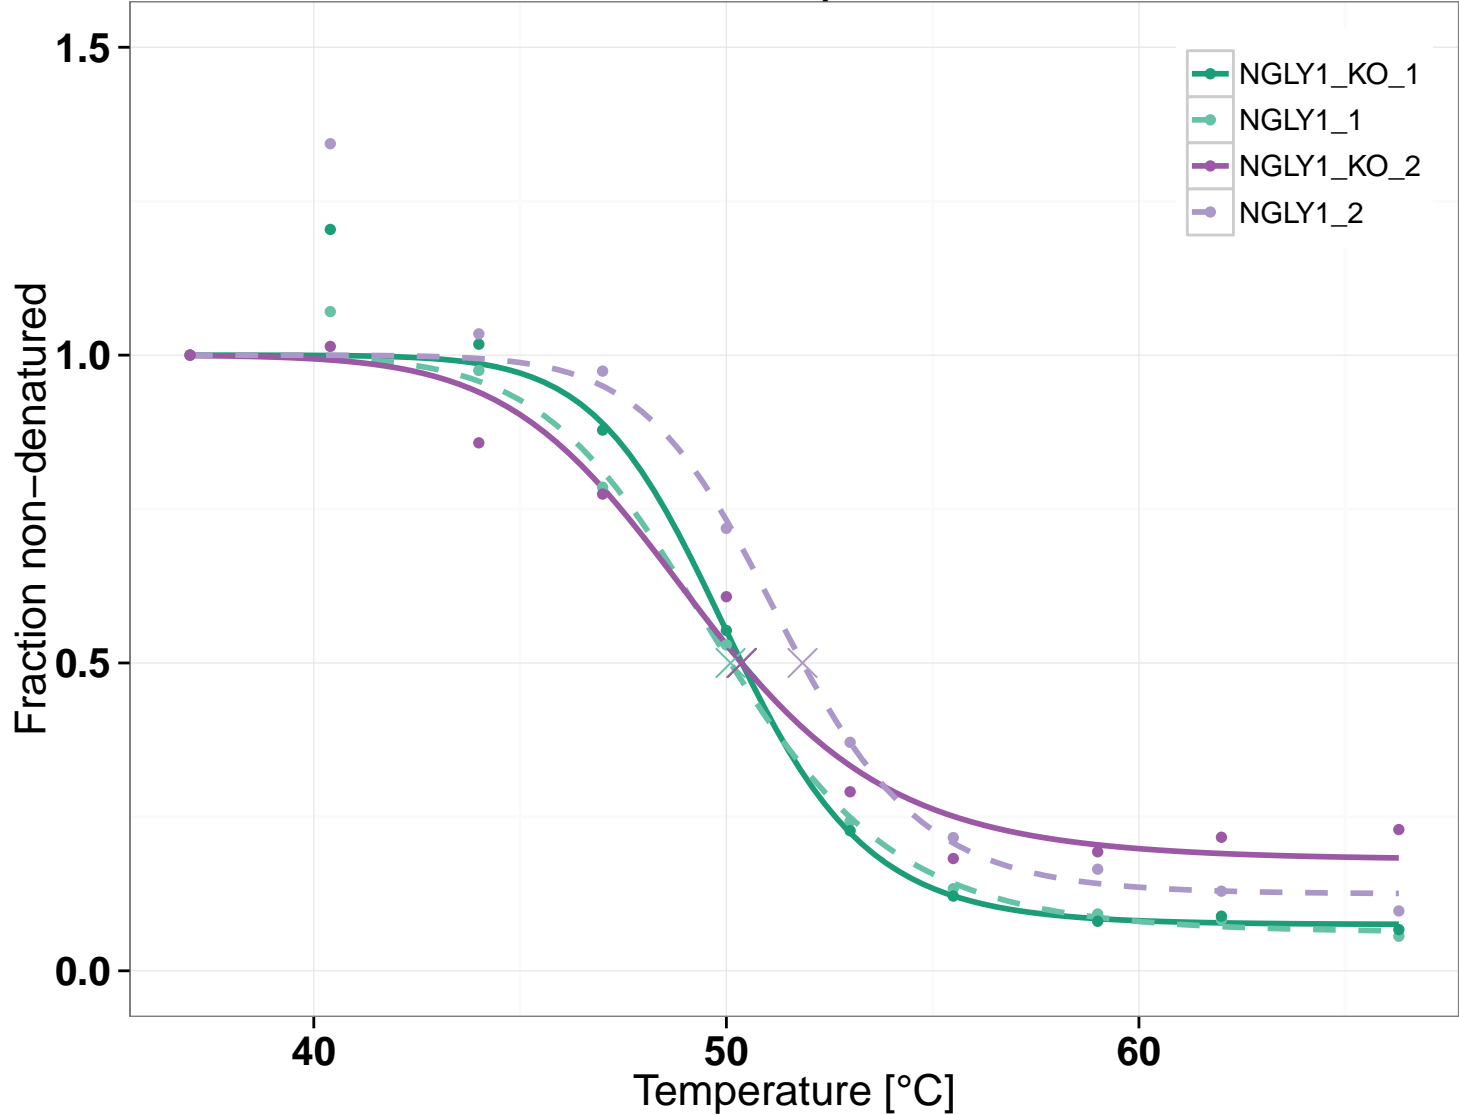

|            | meltPoint | slope  | plateau | R2   |
|------------|-----------|--------|---------|------|
| NGLY1_KO_1 | 50.38     | -0.14  | 0.08    | 0.98 |
| NGLY1_1    | 50.1      | -0.11  | 0.06    | 1    |
| NGLY1_KO_2 | 50.37     | -0.088 | 0.18    | 0.98 |
| NGLY1_2    | 51.85     | -0.13  | 0.12    | 0.94 |

Supplement: Supplementary file 1491 [file 1]

IPI00903105.1|CIAPIN1

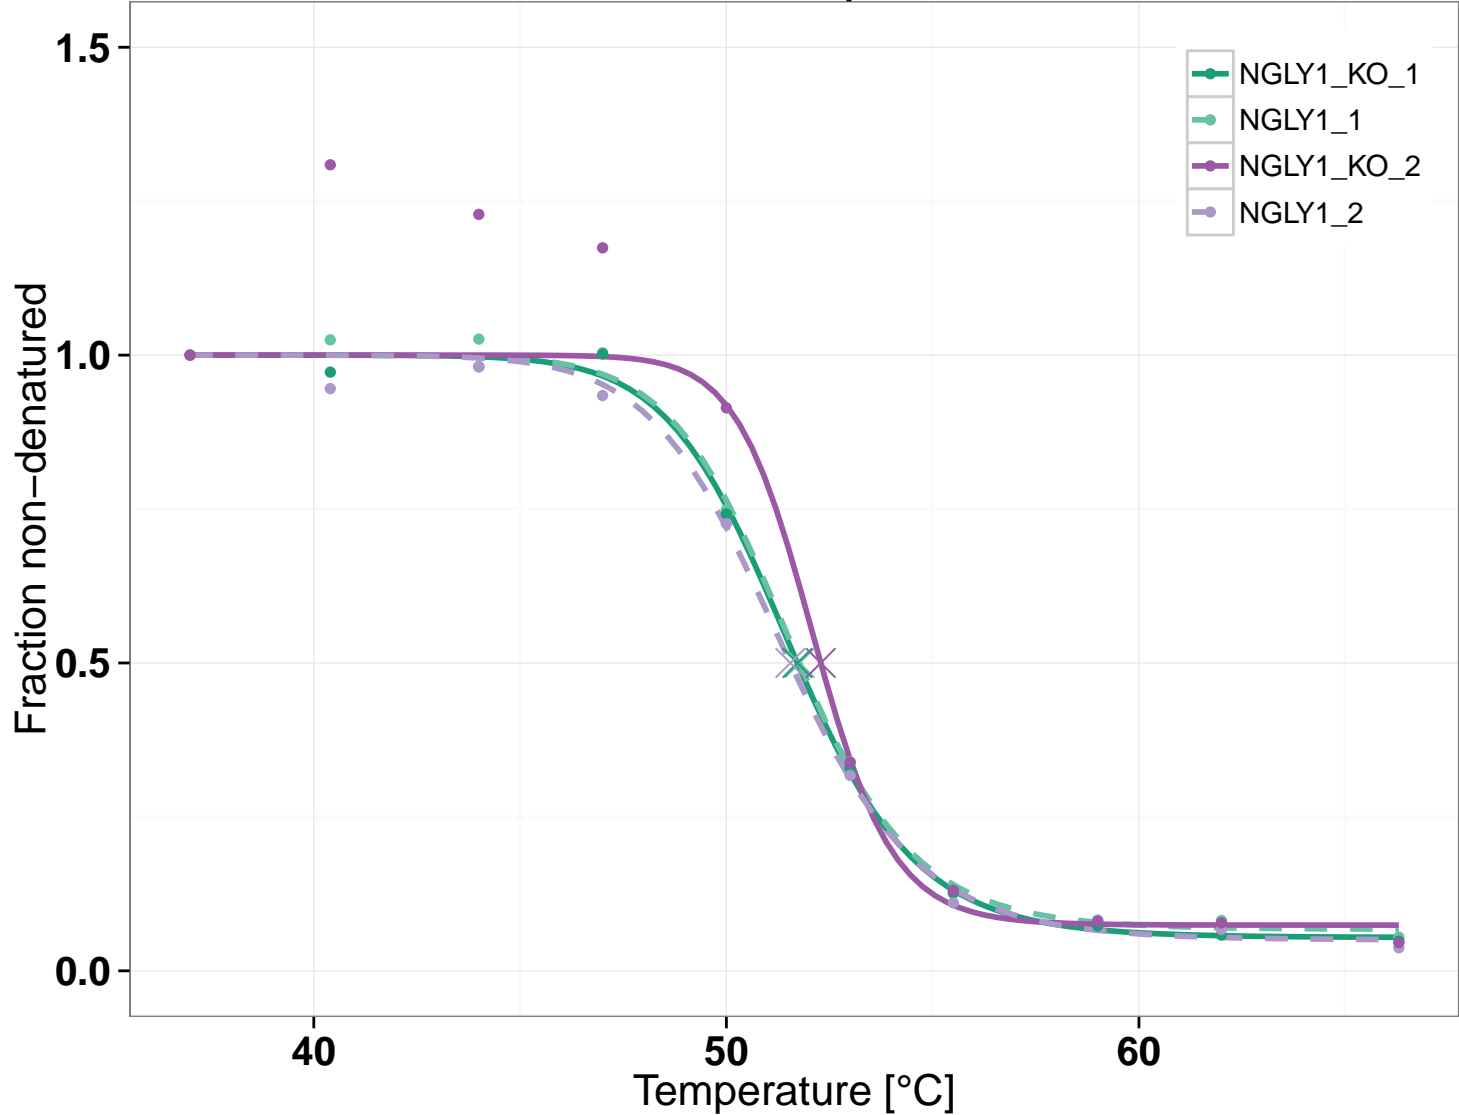

|            | meltPoint | slope | plateau | R2   |
|------------|-----------|-------|---------|------|
| NGLY1_KO_1 | 51.72     | -0.16 | 0.05    | 1    |
| NGLY1_1    | 51.77     | -0.16 | 0.07    | 1    |
| NGLY1_KO_2 | 52.29     | -0.24 | 0.07    | 0.93 |
| NGLY1_2    | 51.55     | -0.15 | 0.05    | 1    |

Supplement: Supplementary file 1492 [file 1]

# IPI00007060.1|COG8

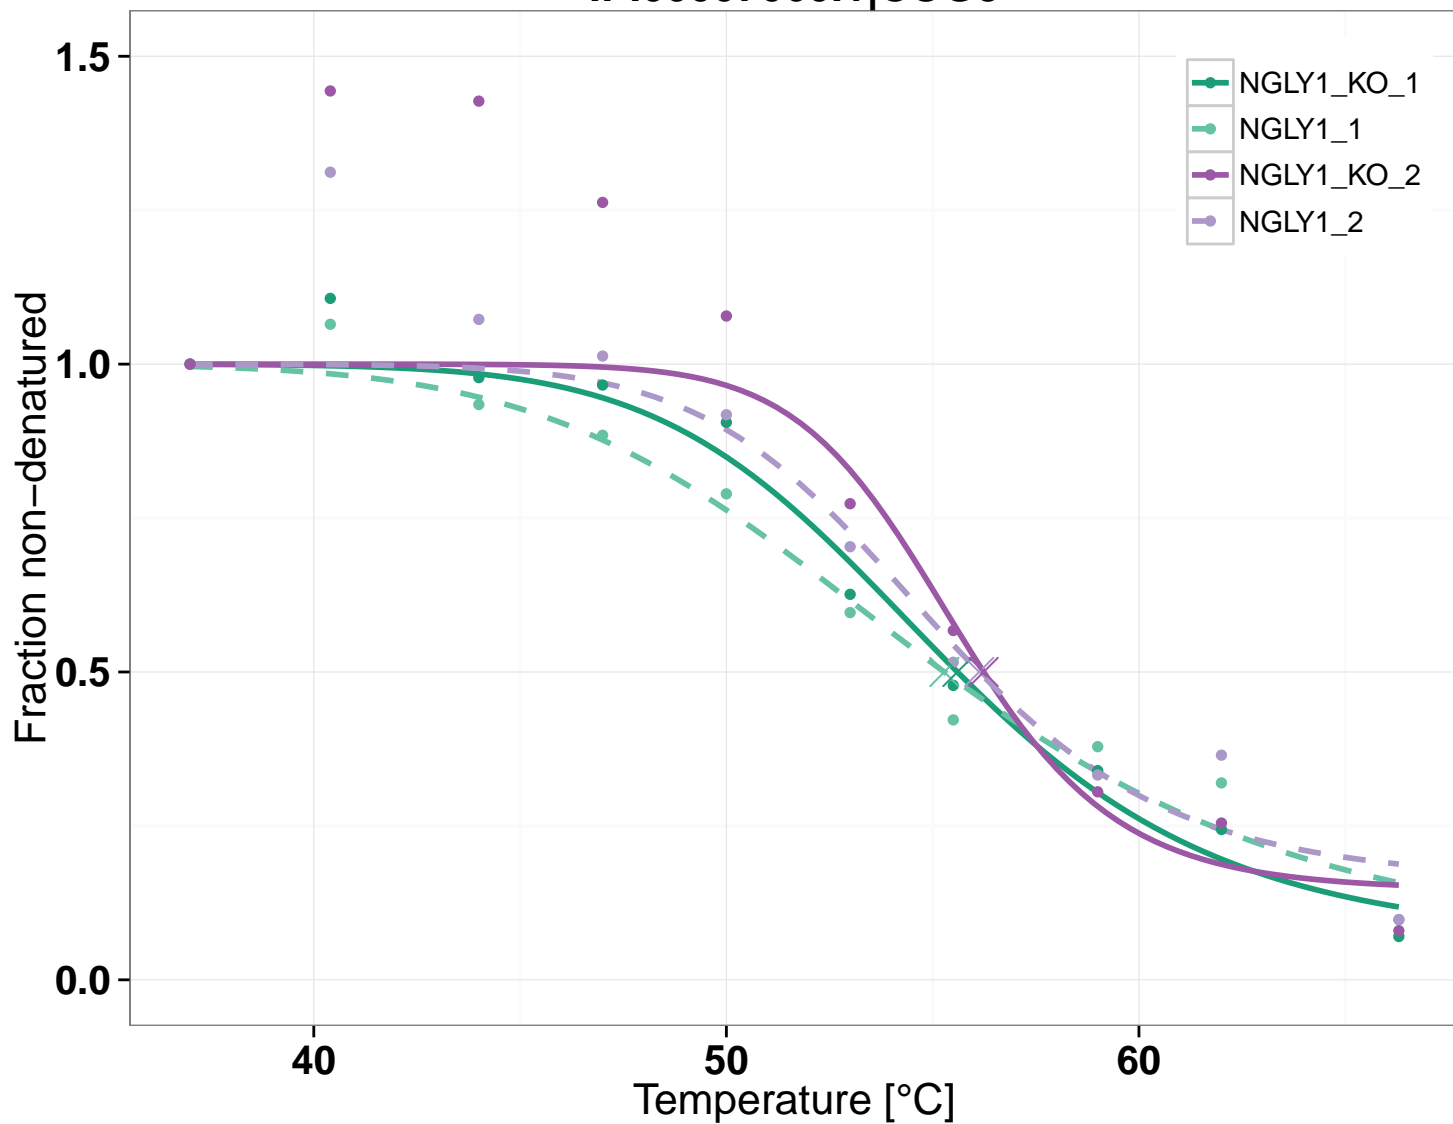

|            | meltPoint | slope  | plateau | R2   |
|------------|-----------|--------|---------|------|
| NGLY1_KO_1 | 55.6      | -0.069 | 0.06    | 0.98 |
| NGLY1_1    | 55.28     | -0.051 | 0.04    | 0.98 |
| NGLY1_KO_2 | 56.24     | -0.11  | 0.15    | 0.79 |
| NGLY1_2    | 56.13     | -0.074 | 0.16    | 0.91 |

Supplement: Supplementary file 1493 [file 1]

IPI00169285.5|P76

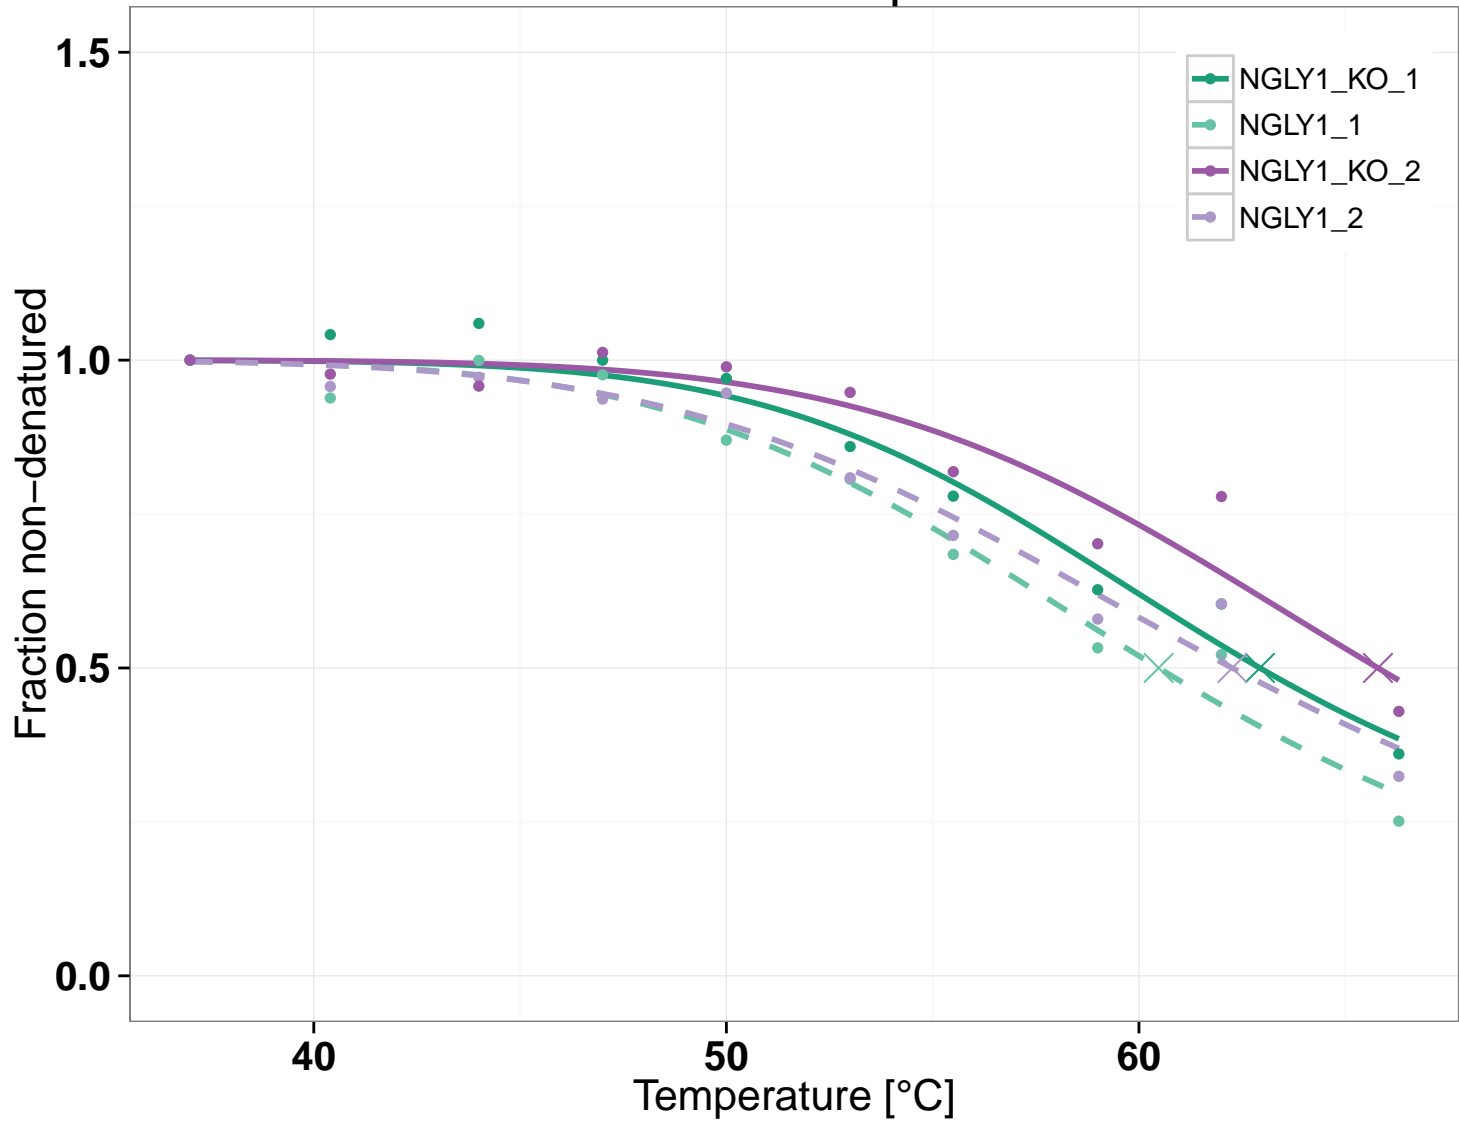

|            | meltPoint | slope  | plateau | R2   |
|------------|-----------|--------|---------|------|
| NGLY1_KO_1 | 62.93     | -0.043 | 0.13    | 0.97 |
| NGLY1_1    | 60.48     | -0.042 | 0       | 0.97 |
| NGLY1_KO_2 | 65.79     | -0.041 | 0       | 0.91 |
| NGLY1_2    | 62.26     | -0.037 | 0       | 0.96 |

Supplement: Supplementary file 1494 [file 1]

IPI00043990.3|DDX31

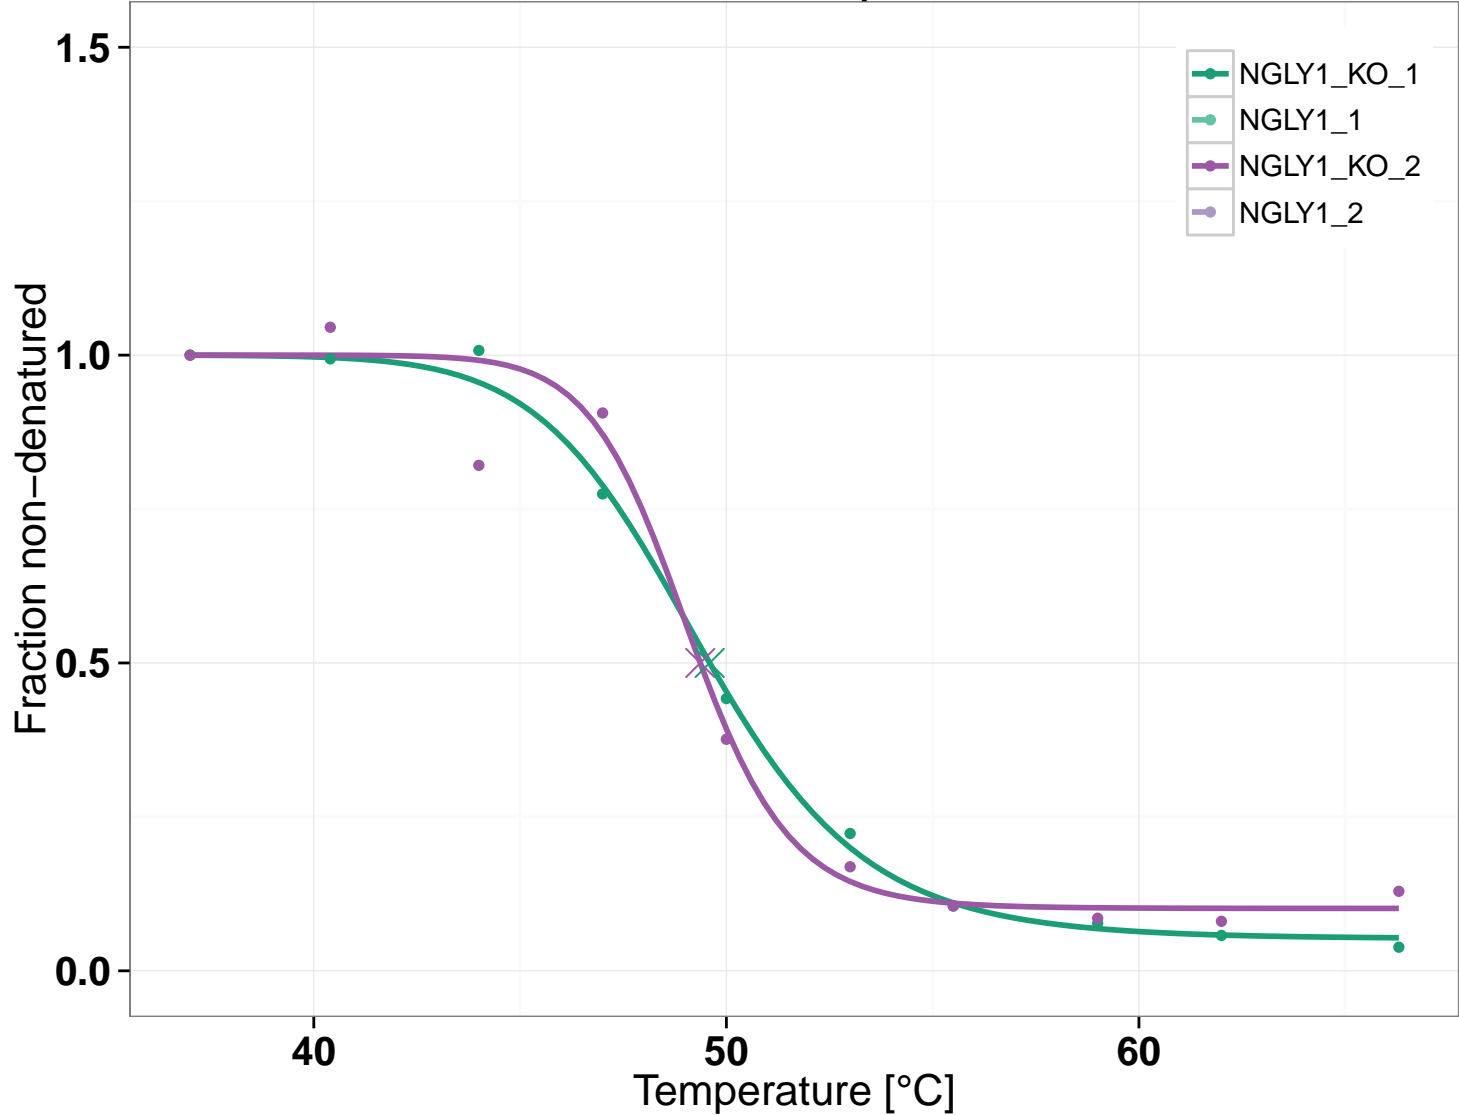

|            | meltPoint | slope | plateau | R2   |
|------------|-----------|-------|---------|------|
| NGLY1_KO_1 | 49.6      | -0.12 | 0.05    | 1    |
| NGLY1_1    | -         | -     | -       | -    |
| NGLY1_KO_2 | 49.37     | -0.18 | 0.1     | 0.98 |
| NGLY1_2    | -         | -     | -       | -    |

Supplement: Supplementary file 1495 [file 1]

# IPI00010440.5|HAX1

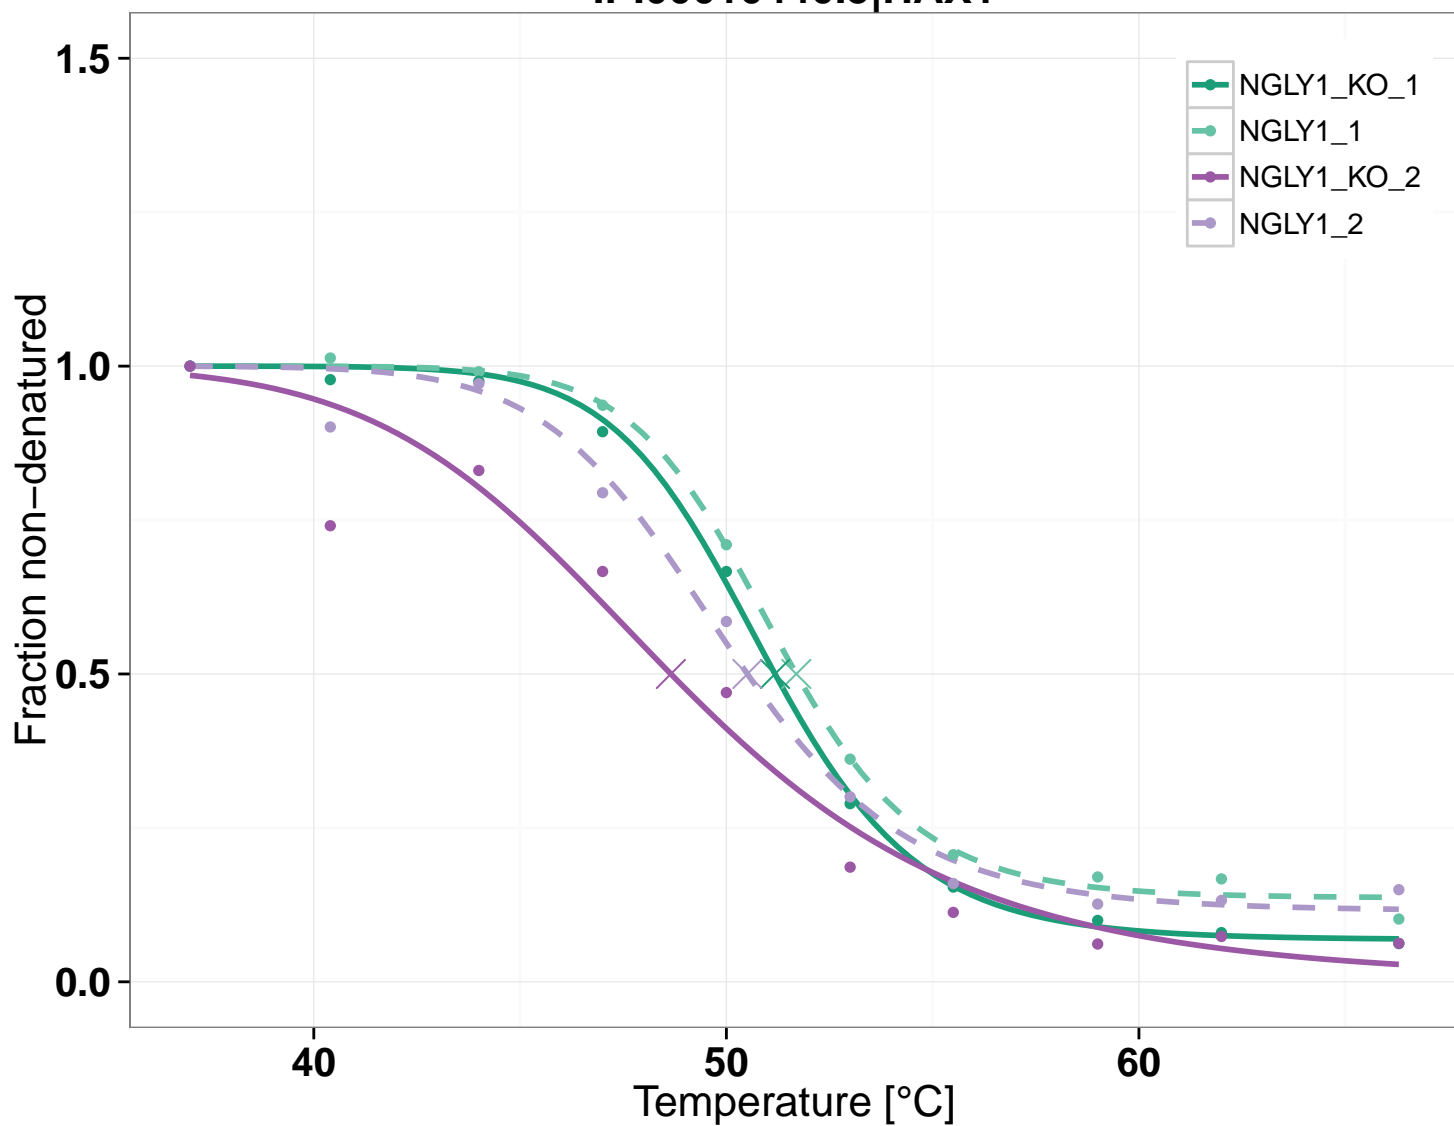

|            | meltPoint | slope | plateau | R2   |
|------------|-----------|-------|---------|------|
| NGLY1_KO_1 | 51.18     | -0.13 | 0.07    | 1    |
| NGLY1_1    | 51.7      | -0.12 | 0.14    | 1    |
| NGLY1_KO_2 | 48.66     | -0.07 | 0       | 0.95 |
| NGLY1_2    | 50.51     | -0.1  | 0.11    | 0.99 |

Supplement: Supplementary file 1496 [file 1]

IPI00031647.2|PDCD2L

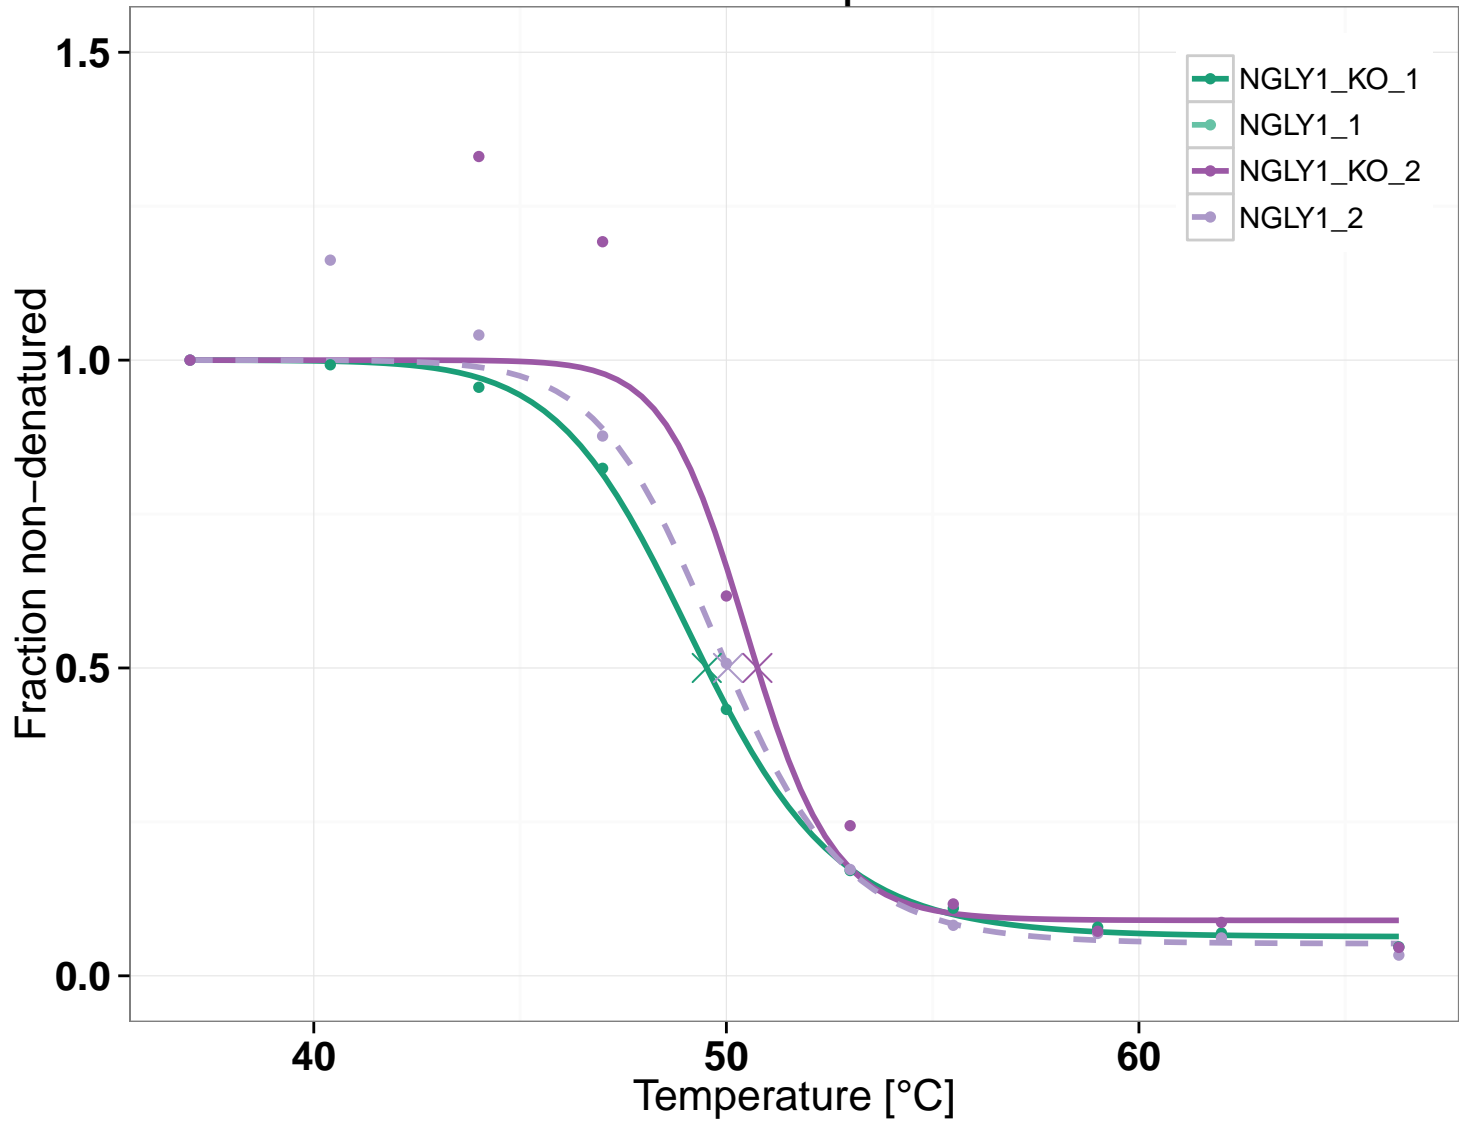

|            | meltPoint | slope | plateau | R2   |
|------------|-----------|-------|---------|------|
| NGLY1_KO_1 | 49.52     | -0.14 | 0.06    | 1    |
| NGLY1_1    | -         | -     | -       | -    |
| NGLY1_KO_2 | 50.75     | -0.22 | 0.09    | 0.86 |
| NGLY1_2    | 50.04     | -0.16 | 0.05    | 0.99 |

Supplement: Supplementary file 1497 [file 1]

# IPI00031836.3|DRG1

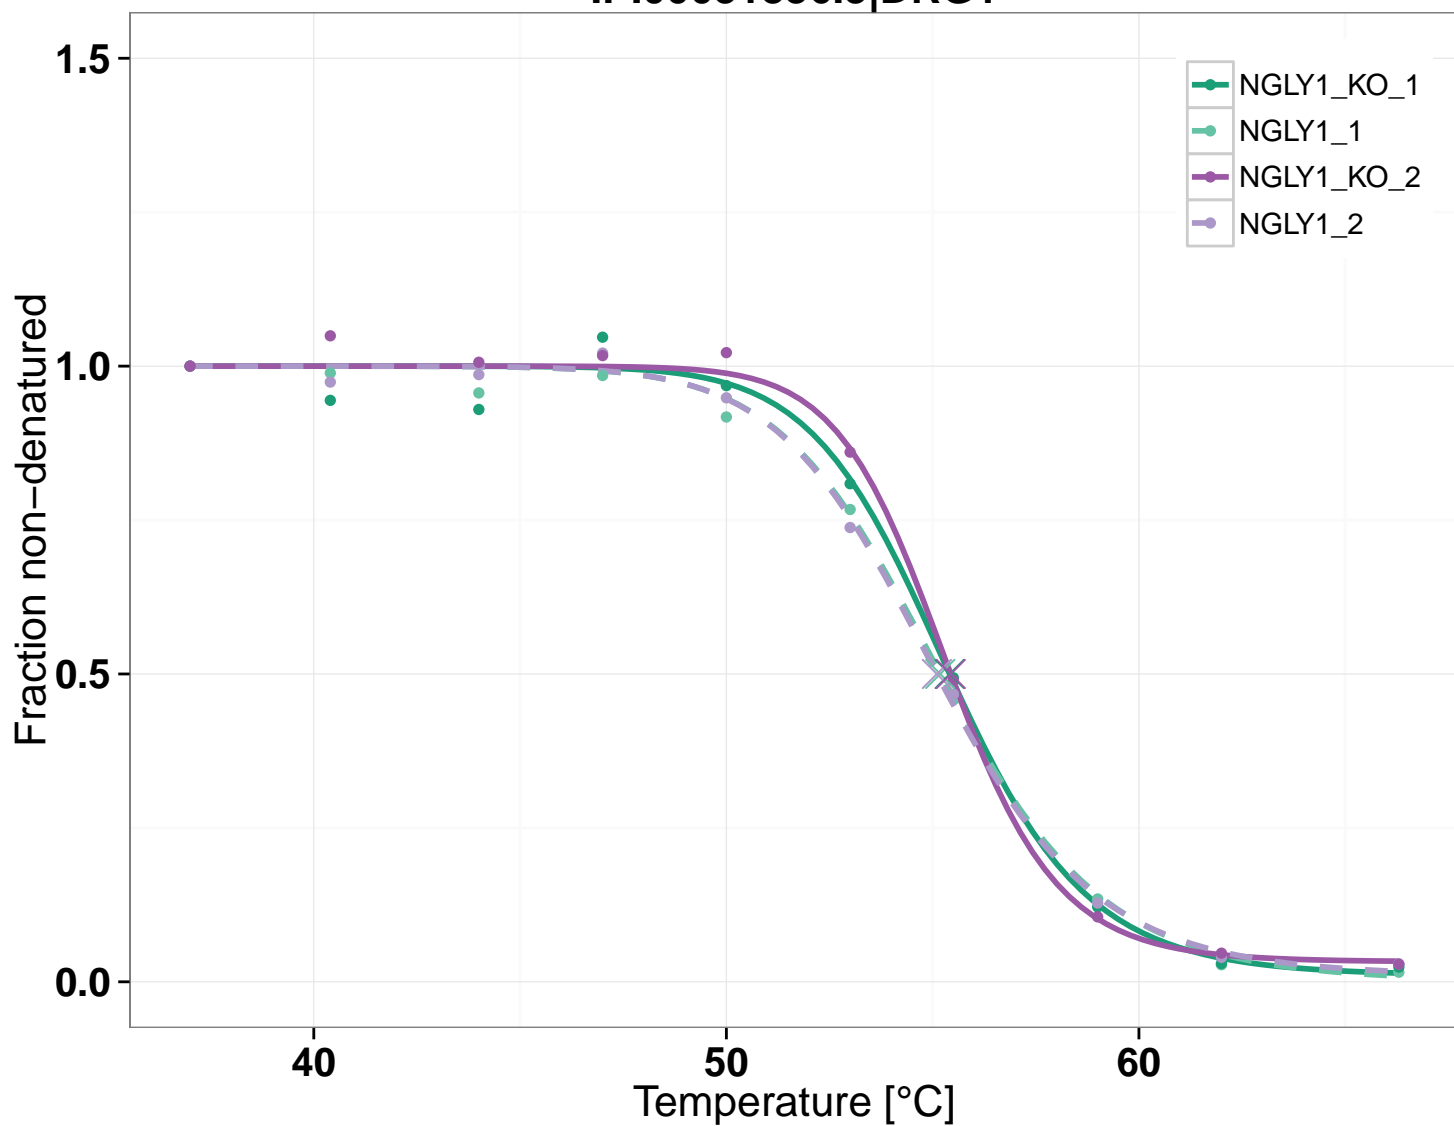

|            | meltPoint | slope | plateau | R2   |
|------------|-----------|-------|---------|------|
| NGLY1_KO_1 | 55.41     | -0.15 | 0.01    | 0.99 |
| NGLY1_1    | 55.18     | -0.13 | 0       | 1    |
| NGLY1_KO_2 | 55.44     | -0.18 | 0.03    | 1    |
| NGLY1_2    | 55.1      | -0.13 | 0.01    | 1    |

Supplement: Supplementary file 1498 [file 1]

# IPI00435433.2|RNF185

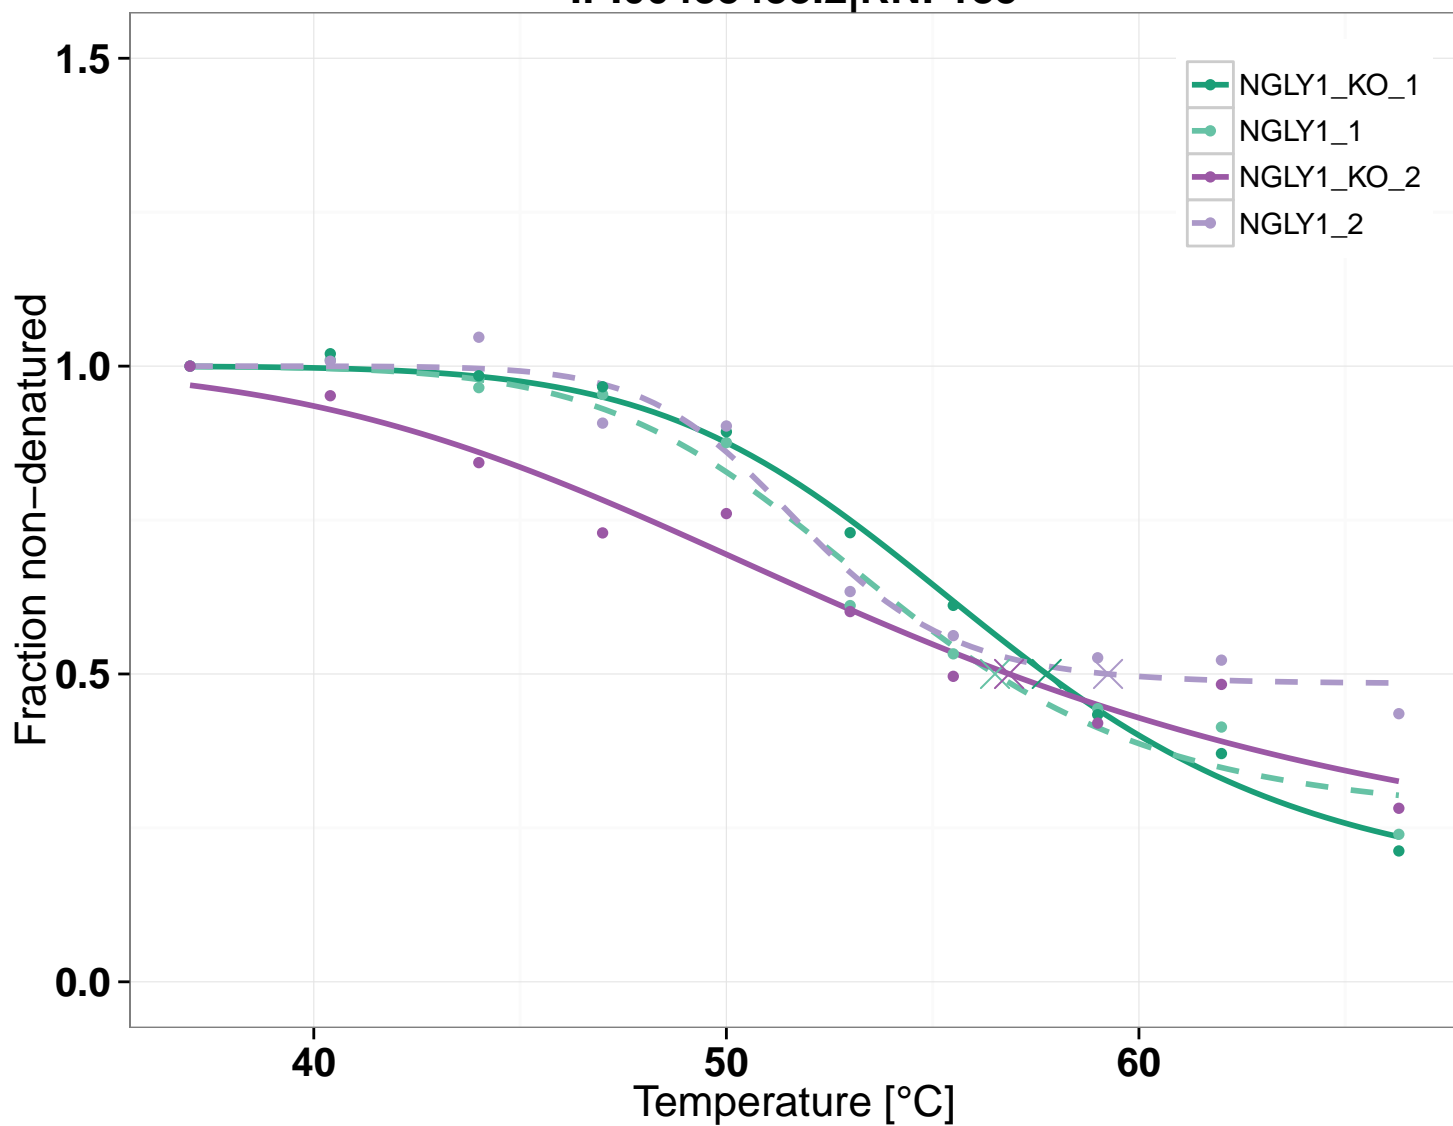

|            | meltPoint | slope  | plateau | R2   |
|------------|-----------|--------|---------|------|
| NGLY1_KO_1 | 57.76     | -0.054 | 0.14    | 1    |
| NGLY1_1    | 56.51     | -0.054 | 0.27    | 0.98 |
| NGLY1_KO_2 | 56.85     | -0.03  | 0.14    | 0.96 |
| NGLY1_2    | 59.25     | -0.069 | 0.48    | 0.97 |

Supplement: Supplementary file 1499 [file 1]

# IPI00293613.2|TBK1

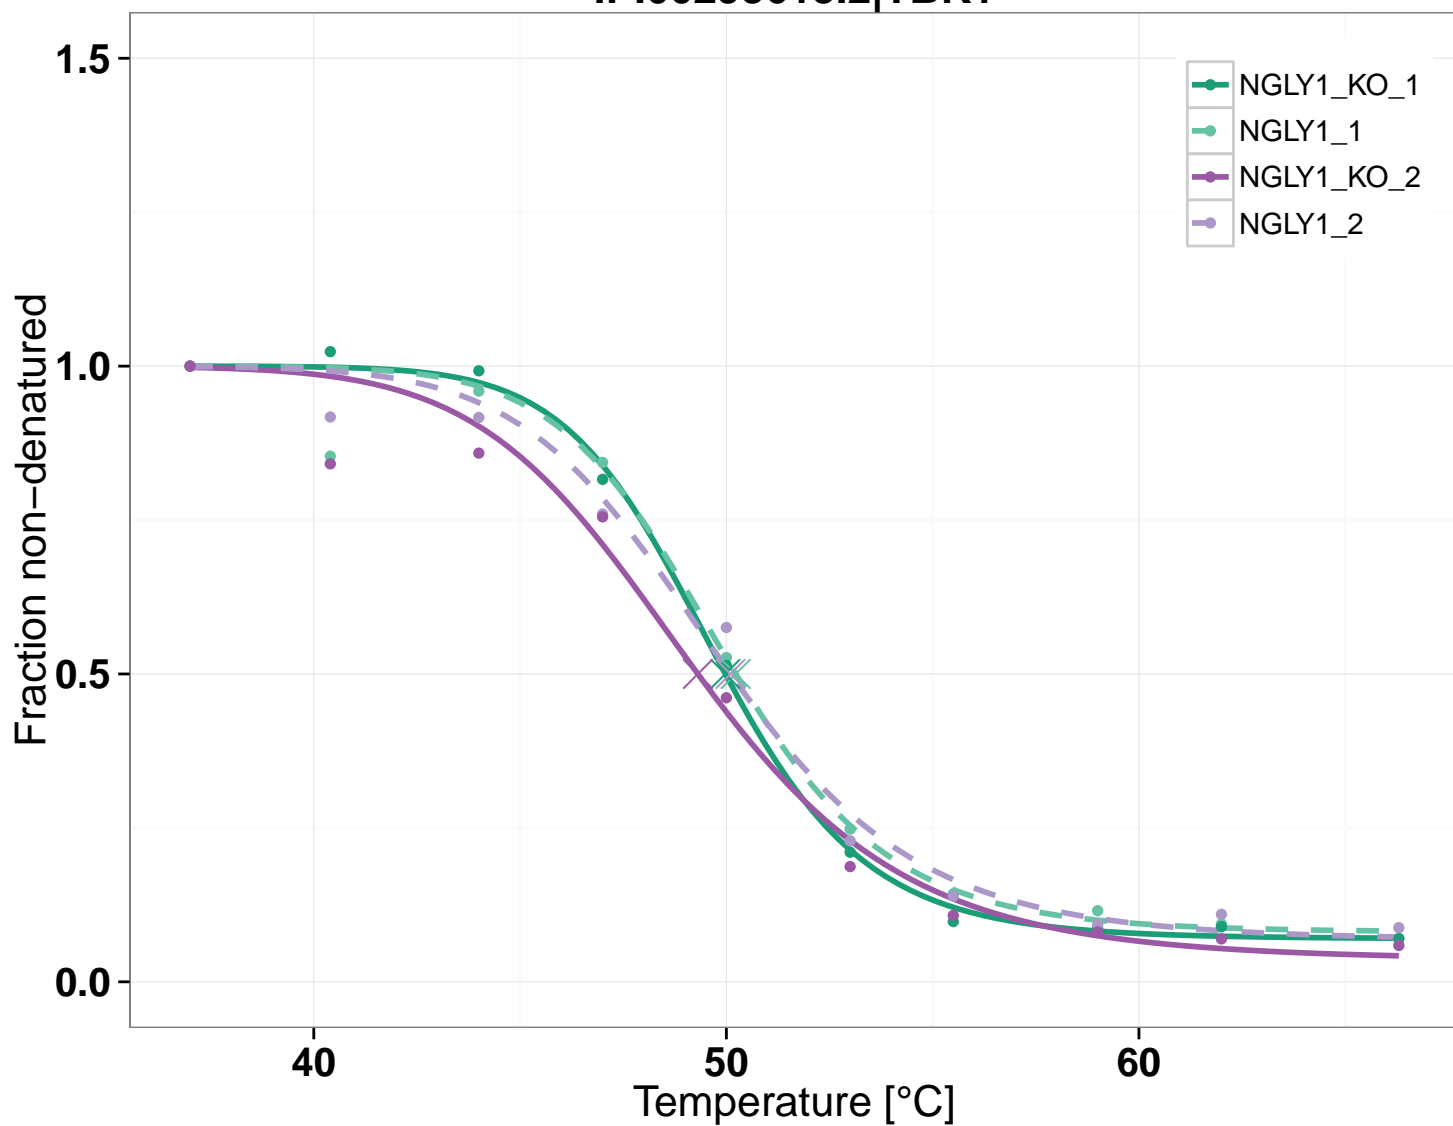

|            | meltPoint | slope  | plateau | R2   |
|------------|-----------|--------|---------|------|
| NGLY1_KO_1 | 49.97     | -0.13  | 0.07    | 1    |
| NGLY1_1    | 50.23     | -0.11  | 0.08    | 0.98 |
| NGLY1_KO_2 | 49.31     | -0.093 | 0.03    | 0.98 |
| NGLY1_2    | 50.1      | -0.097 | 0.07    | 0.99 |

Supplement: Supplementary file 1500 [file 1]

IPI00168084.2|USP38

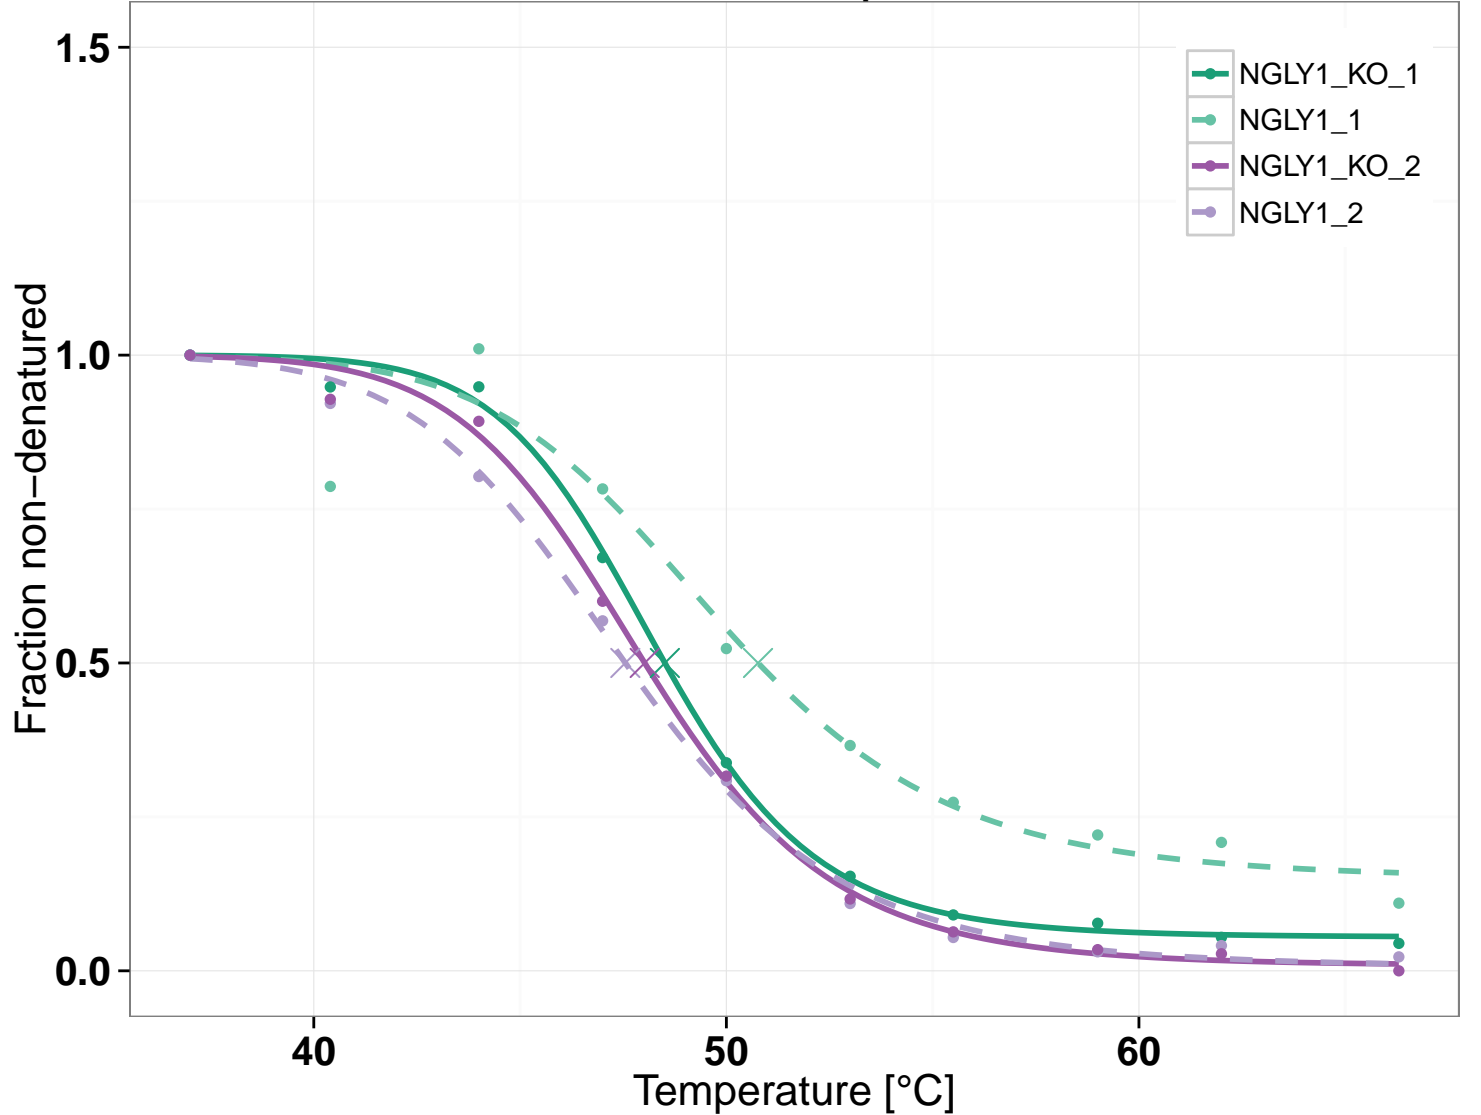

|            | meltPoint | slope  | plateau | R2   |
|------------|-----------|--------|---------|------|
| NGLY1_KO_1 | 48.51     | -0.12  | 0.05    | 1    |
| NGLY1_1    | 50.77     | -0.076 | 0.15    | 0.95 |
| NGLY1_KO_2 | 48.02     | -0.11  | 0.01    | 1    |
| NGLY1_2    | 47.55     | -0.096 | 0.01    | 1    |

Supplement: Supplementary file 1501 [file 1]

# IPI00552701.1|DLG3

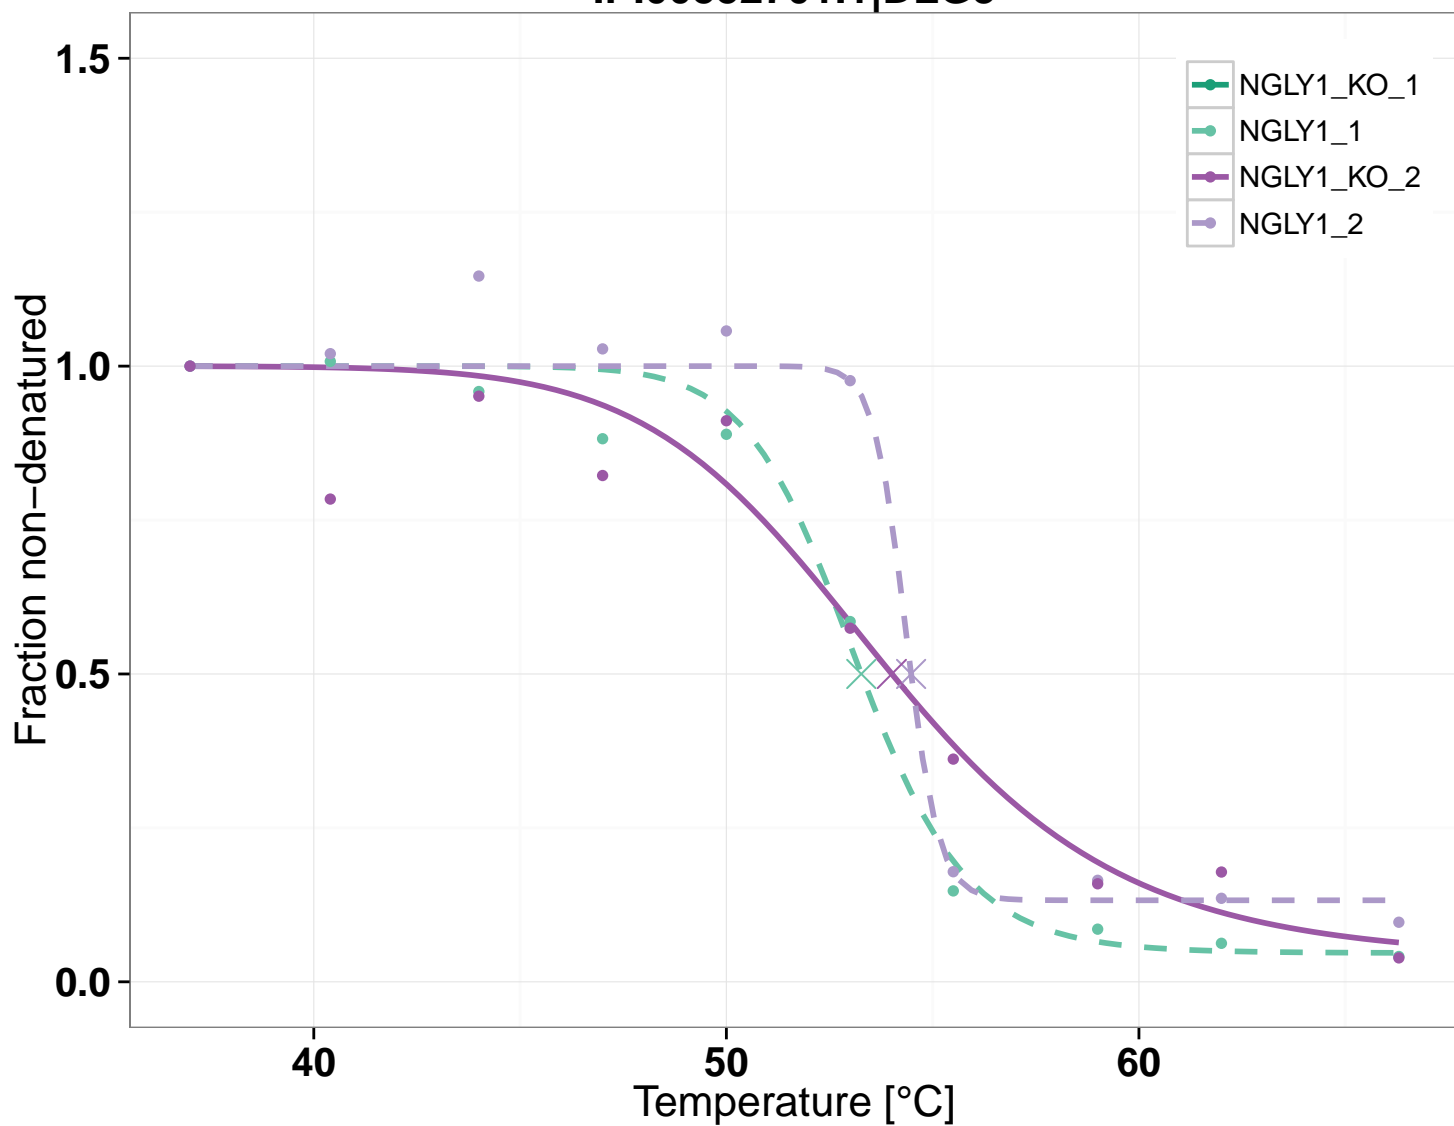

|            | meltPoint | slope  | plateau | R2   |
|------------|-----------|--------|---------|------|
| NGLY1_KO_1 | –         | –      | –       | –    |
| NGLY1_1    | 53.27     | –0.18  | 0.05    | 0.99 |
| NGLY1_KO_2 | 54.01     | –0.083 | 0.03    | 0.94 |
| NGLY1_2    | 54.48     | –0.56  | 0.13    | 0.99 |

Supplement: Supplementary file 1502 [file 1]

IPI00513803.3|MAP3K2

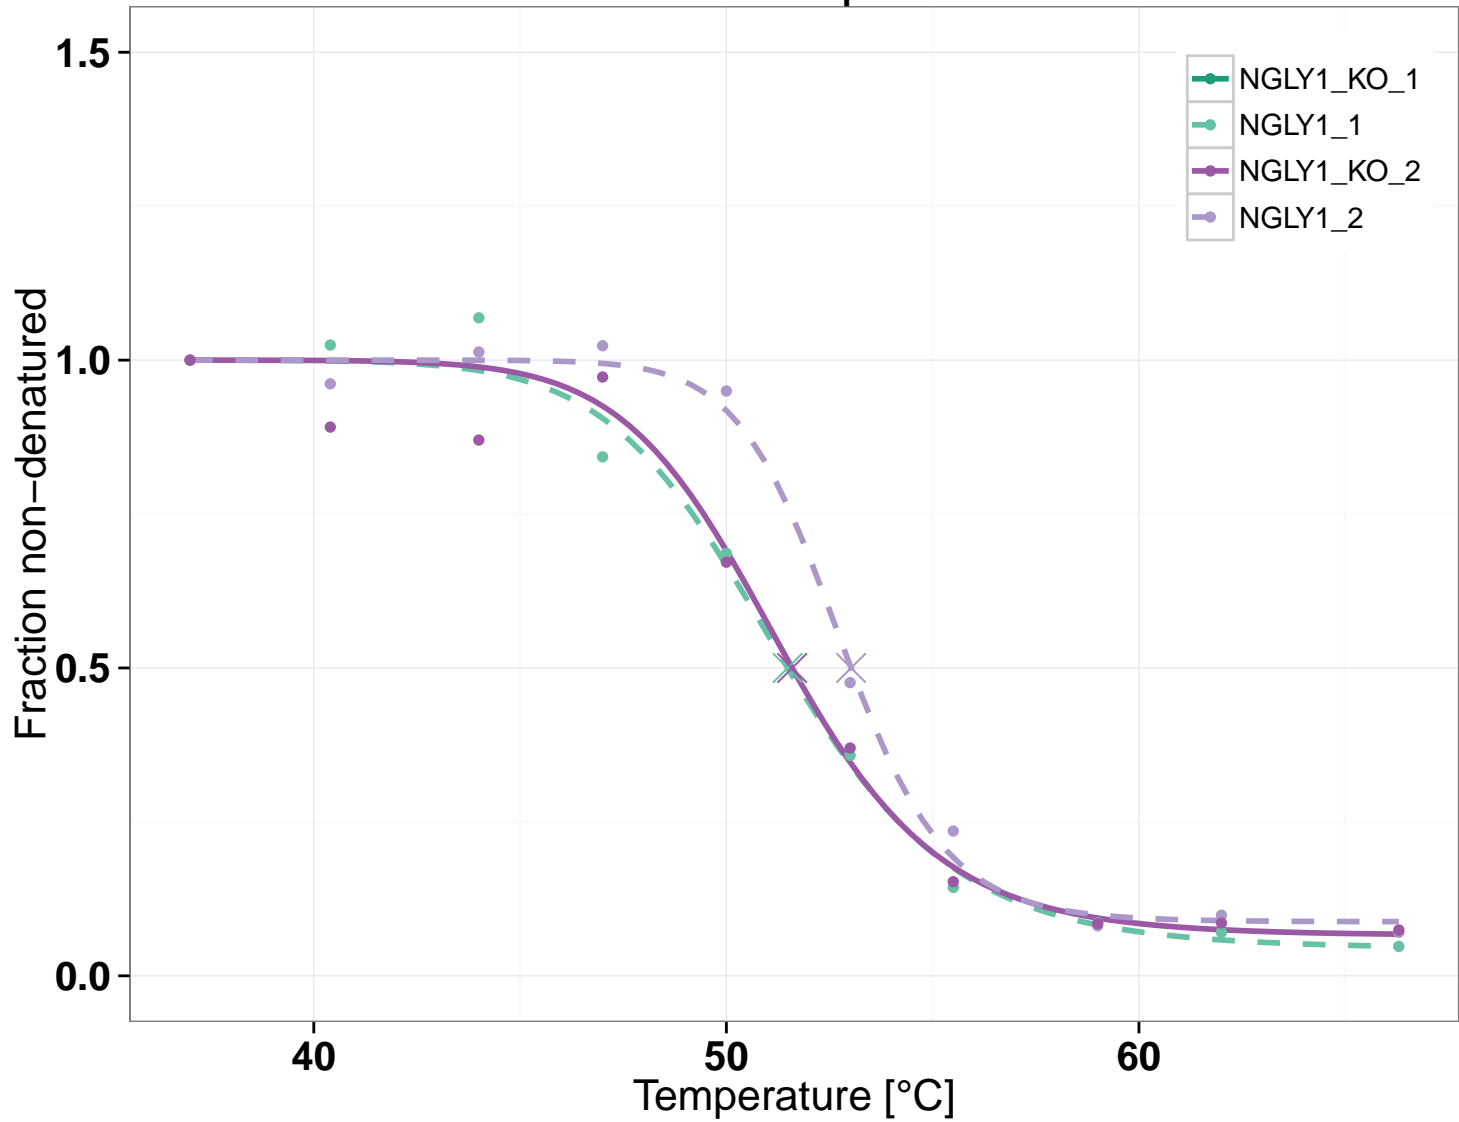

|            | meltPoint | slope | plateau | R2   |
|------------|-----------|-------|---------|------|
| NGLY1_KO_1 | –         | –     | –       | –    |
| NGLY1_1    | 51.48     | –0.11 | 0.04    | 0.99 |
| NGLY1_KO_2 | 51.6      | –0.12 | 0.07    | 0.98 |
| NGLY1_2    | 53.02     | –0.18 | 0.09    | 1    |

Supplement: Supplementary file 1503 [file 1]

IPI00549434.2|SEPT8

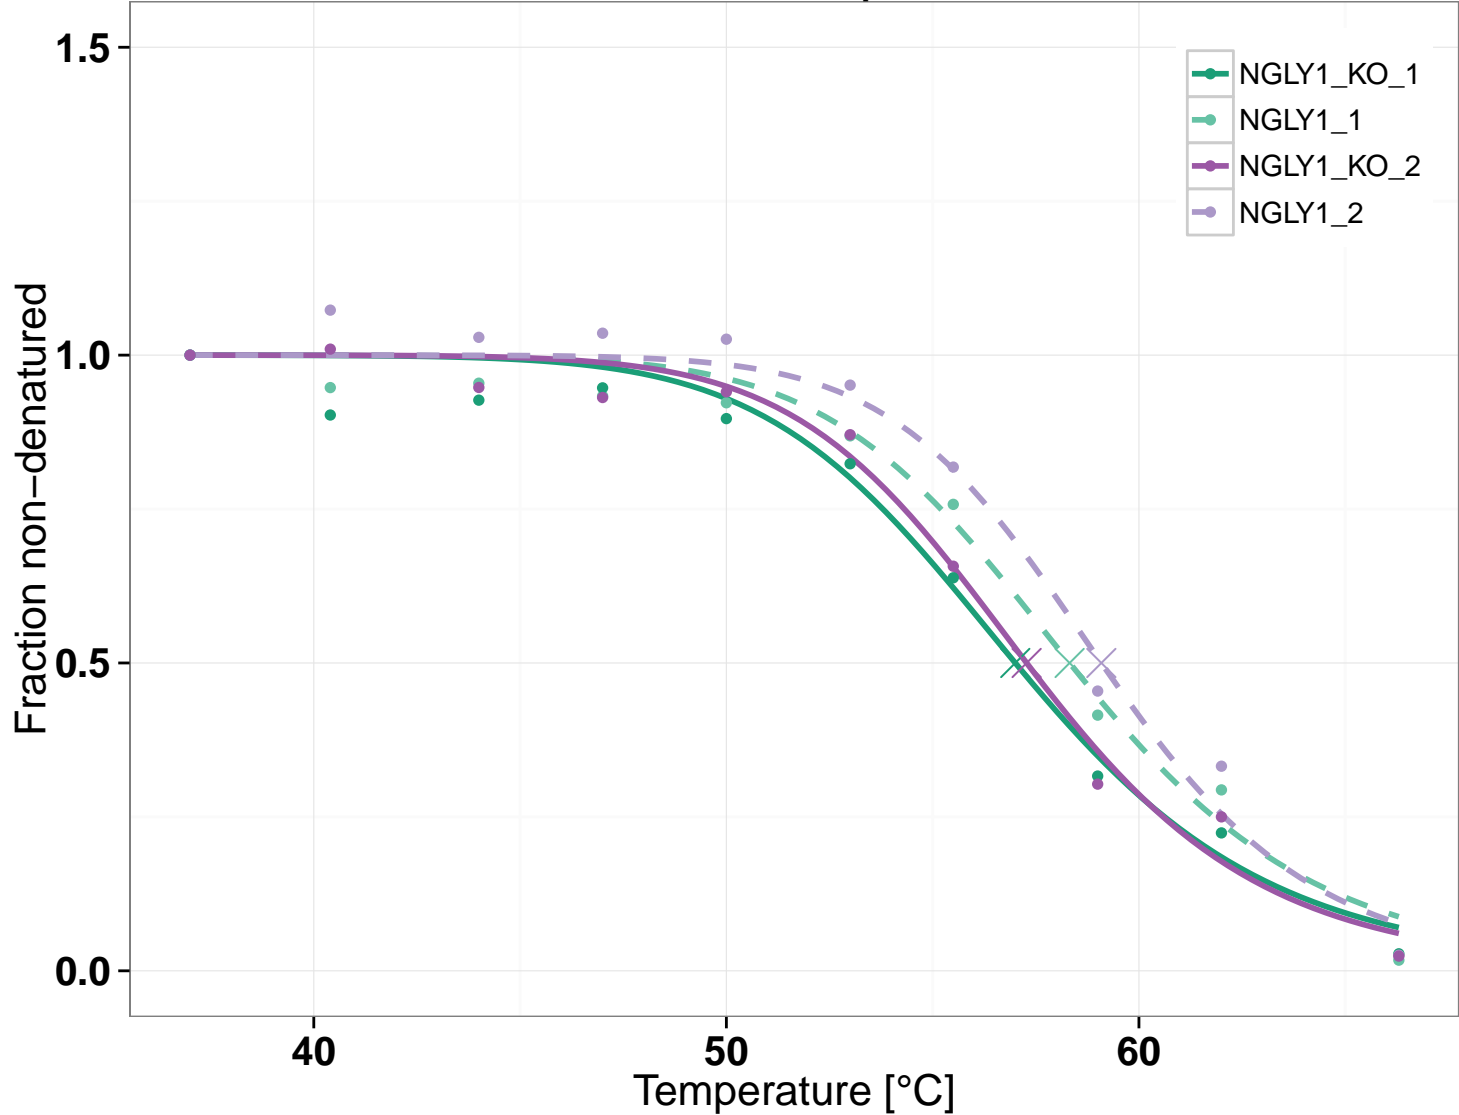

|            | meltPoint | slope  | plateau | R2   |
|------------|-----------|--------|---------|------|
| NGLY1_KO_1 | 57        | -0.082 | 0       | 0.98 |
| NGLY1_1    | 58.32     | -0.084 | 0       | 0.98 |
| NGLY1_KO_2 | 57.28     | -0.089 | 0       | 0.99 |
| NGLY1_2    | 59.09     | -0.098 | 0       | 0.98 |

Supplement: Supplementary file 1504 [file 1]

# IPI00007811.1|CDK4

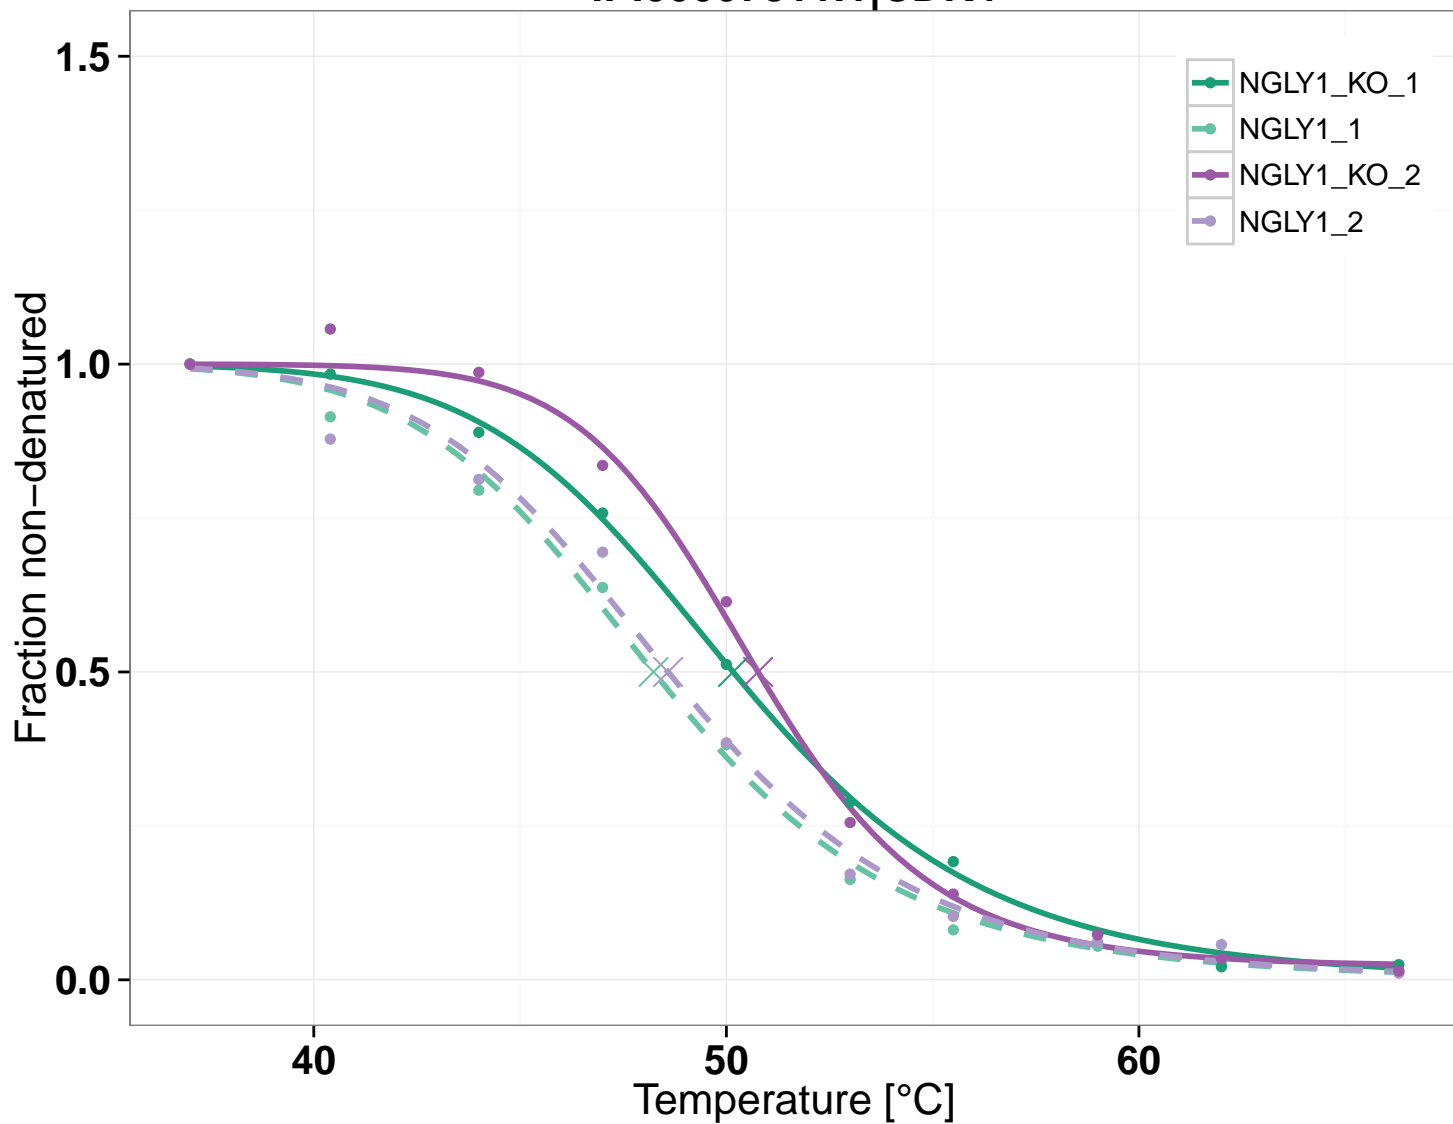

|            | meltPoint | slope  | plateau | R2   |
|------------|-----------|--------|---------|------|
| NGLY1_KO_1 | 50.16     | -0.082 | 0       | 1    |
| NGLY1_1    | 48.23     | -0.085 | 0       | 1    |
| NGLY1_KO_2 | 50.77     | -0.11  | 0.02    | 1    |
| NGLY1_2    | 48.59     | -0.084 | 0       | 0.99 |

Supplement: Supplementary file 1505 [file 1]

IPI00006863.5|SPAG7

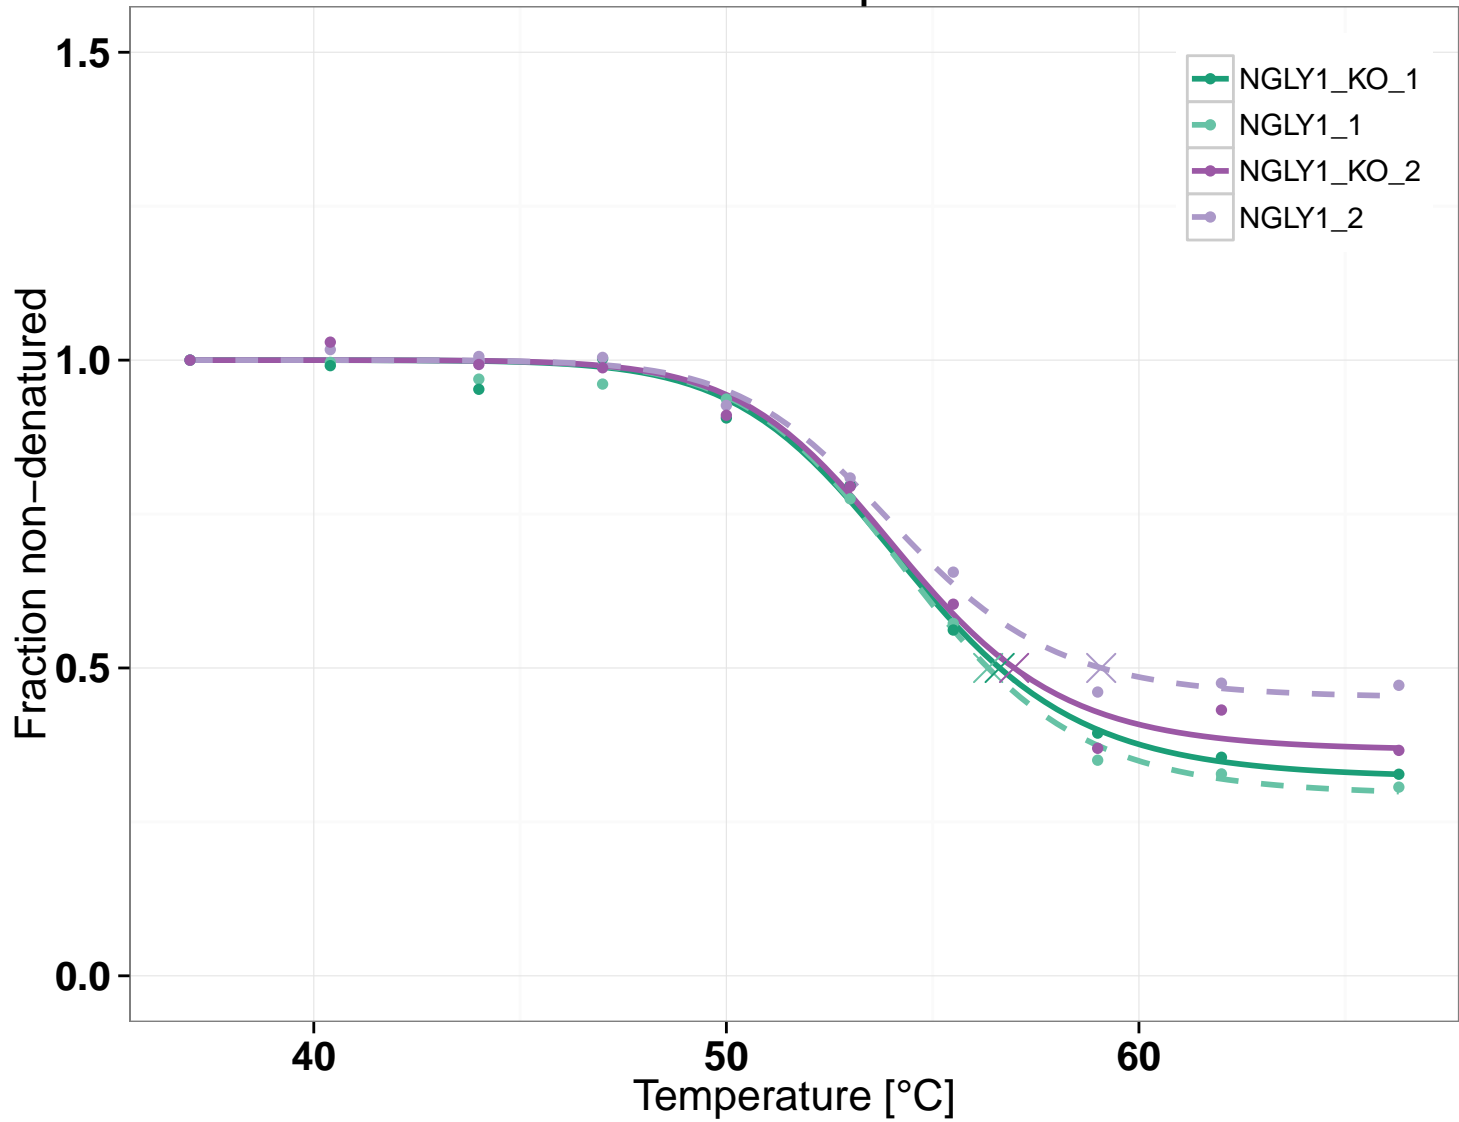

|            | meltPoint | slope  | plateau | R2   |
|------------|-----------|--------|---------|------|
| NGLY1_KO_1 | 56.62     | -0.082 | 0.32    | 0.99 |
| NGLY1_1    | 56.35     | -0.087 | 0.29    | 1    |
| NGLY1_KO_2 | 56.97     | -0.081 | 0.37    | 0.99 |
| NGLY1_2    | 59.09     | -0.071 | 0.45    | 0.99 |

Supplement: Supplementary file 1506 [file 1]

# IPI00816452.1|MYO6

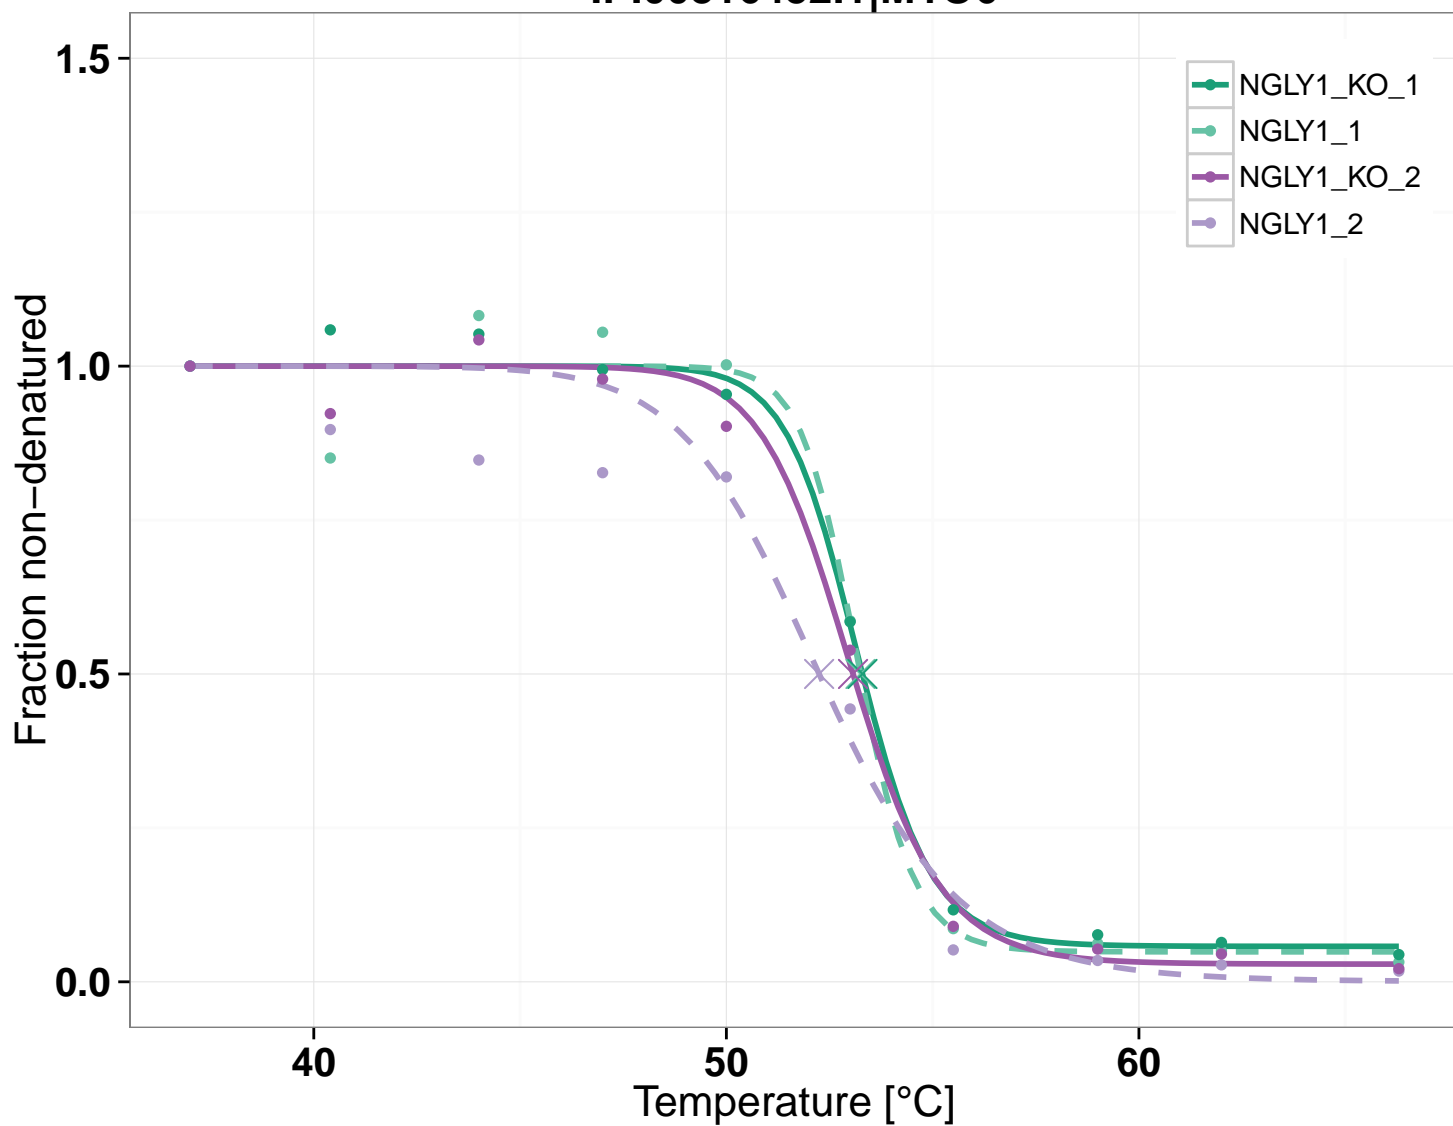

|            | meltPoint | slope | plateau | R2   |
|------------|-----------|-------|---------|------|
| NGLY1_KO_1 | 53.3      | -0.27 | 0.06    | 1    |
| NGLY1_1    | 53.25     | -0.35 | 0.05    | 0.98 |
| NGLY1_KO_2 | 53.07     | -0.22 | 0.03    | 0.99 |
| NGLY1_2    | 52.25     | -0.15 | 0       | 0.96 |

Supplement: Supplementary file 1507 [file 1]

# IPI00012828.3|ACAA1

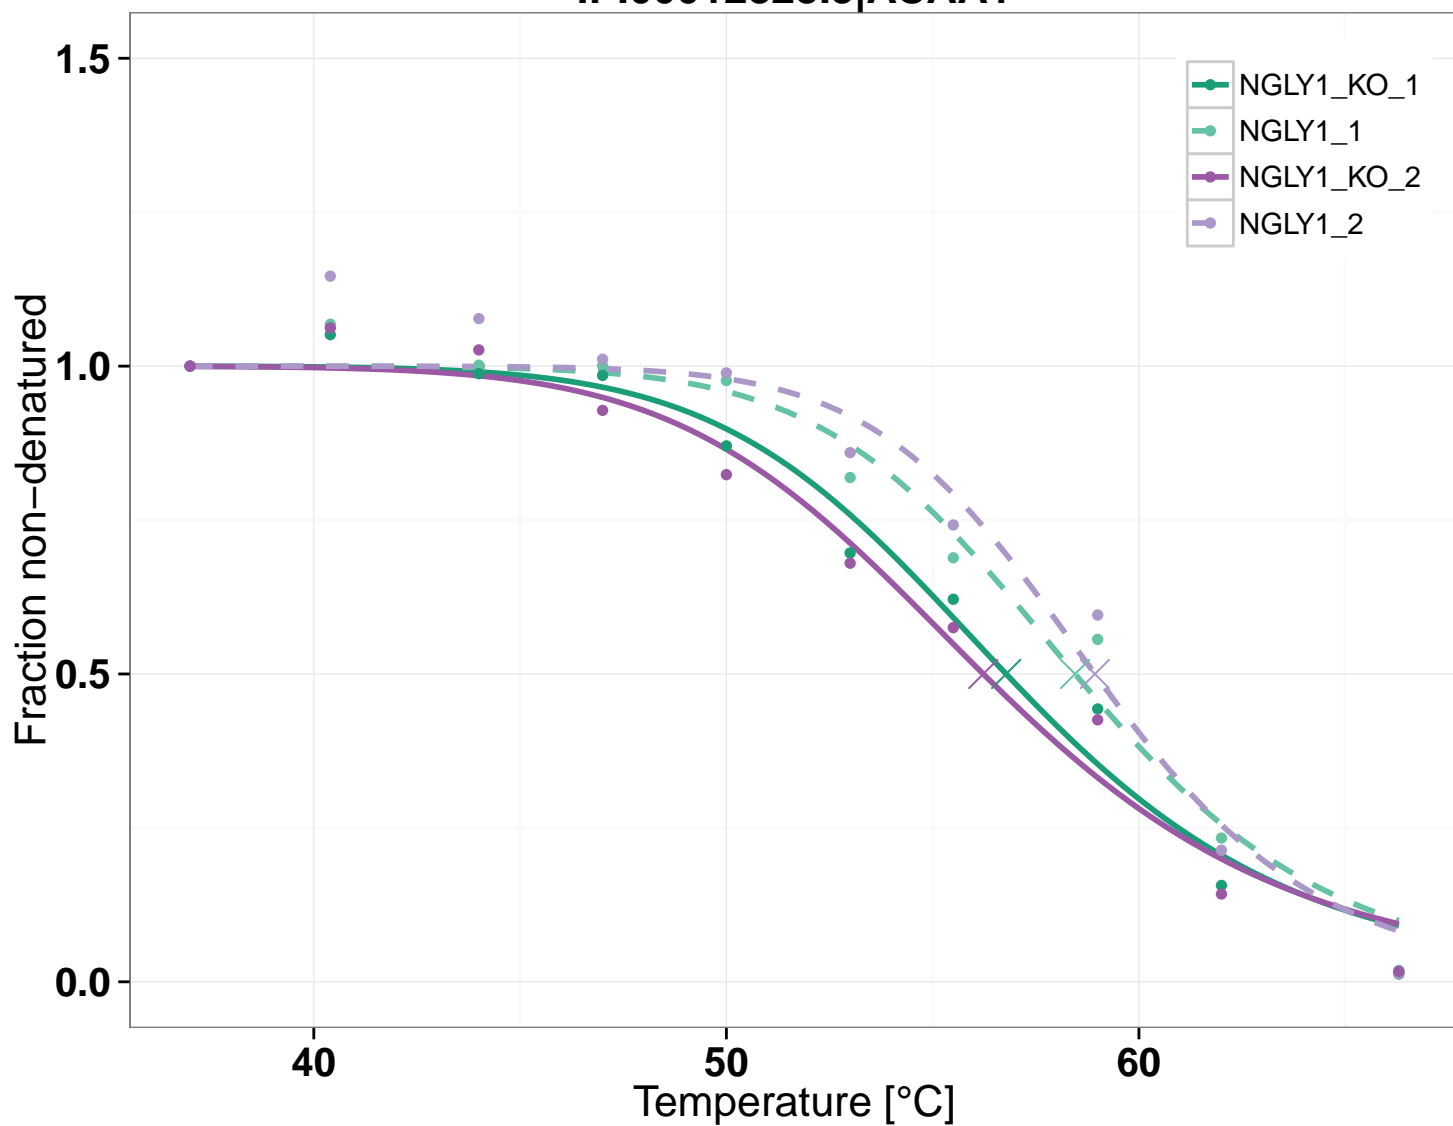

|            | meltPoint | slope  | plateau | R2   |
|------------|-----------|--------|---------|------|
| NGLY1_KO_1 | 56.78     | -0.072 | 0       | 0.98 |
| NGLY1_1    | 58.45     | -0.081 | 0       | 0.98 |
| NGLY1_KO_2 | 56.23     | -0.067 | 0       | 0.98 |
| NGLY1_2    | 58.93     | -0.093 | 0       | 0.96 |

Supplement: Supplementary file 1508 [file 1]
