# Supplementary material (part 16 of 85)
Source: publisher figshare collection journal article supplement (https://gsajournals.figshare.com/articles/dataset/_/12014913)

IPI00260322.3|DGCR6L

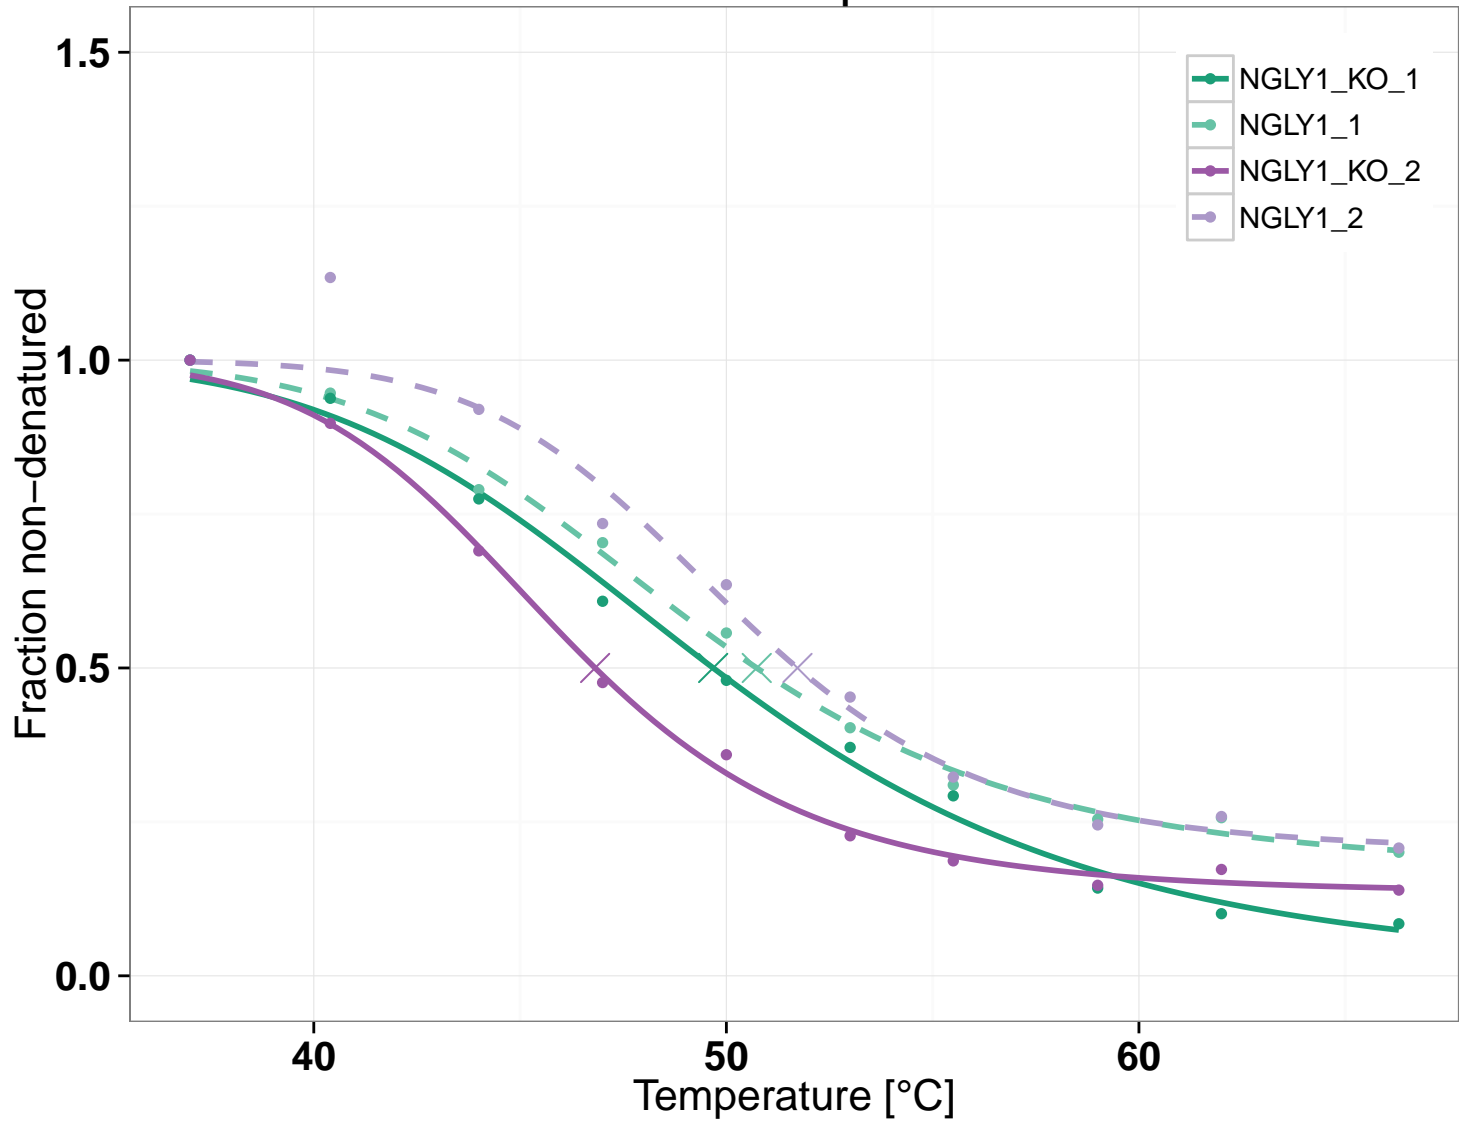

|            | meltPoint | slope  | plateau | R2   |
|------------|-----------|--------|---------|------|
| NGLY1_KO_1 | 49.68     | -0.053 | 0       | 0.99 |
| NGLY1_1    | 50.74     | -0.052 | 0.17    | 1    |
| NGLY1_KO_2 | 46.82     | -0.071 | 0.13    | 1    |
| NGLY1_2    | 51.72     | -0.066 | 0.2     | 0.97 |

Supplement: Supplementary file 1509 [file 1]

IPI00855856.2|API5

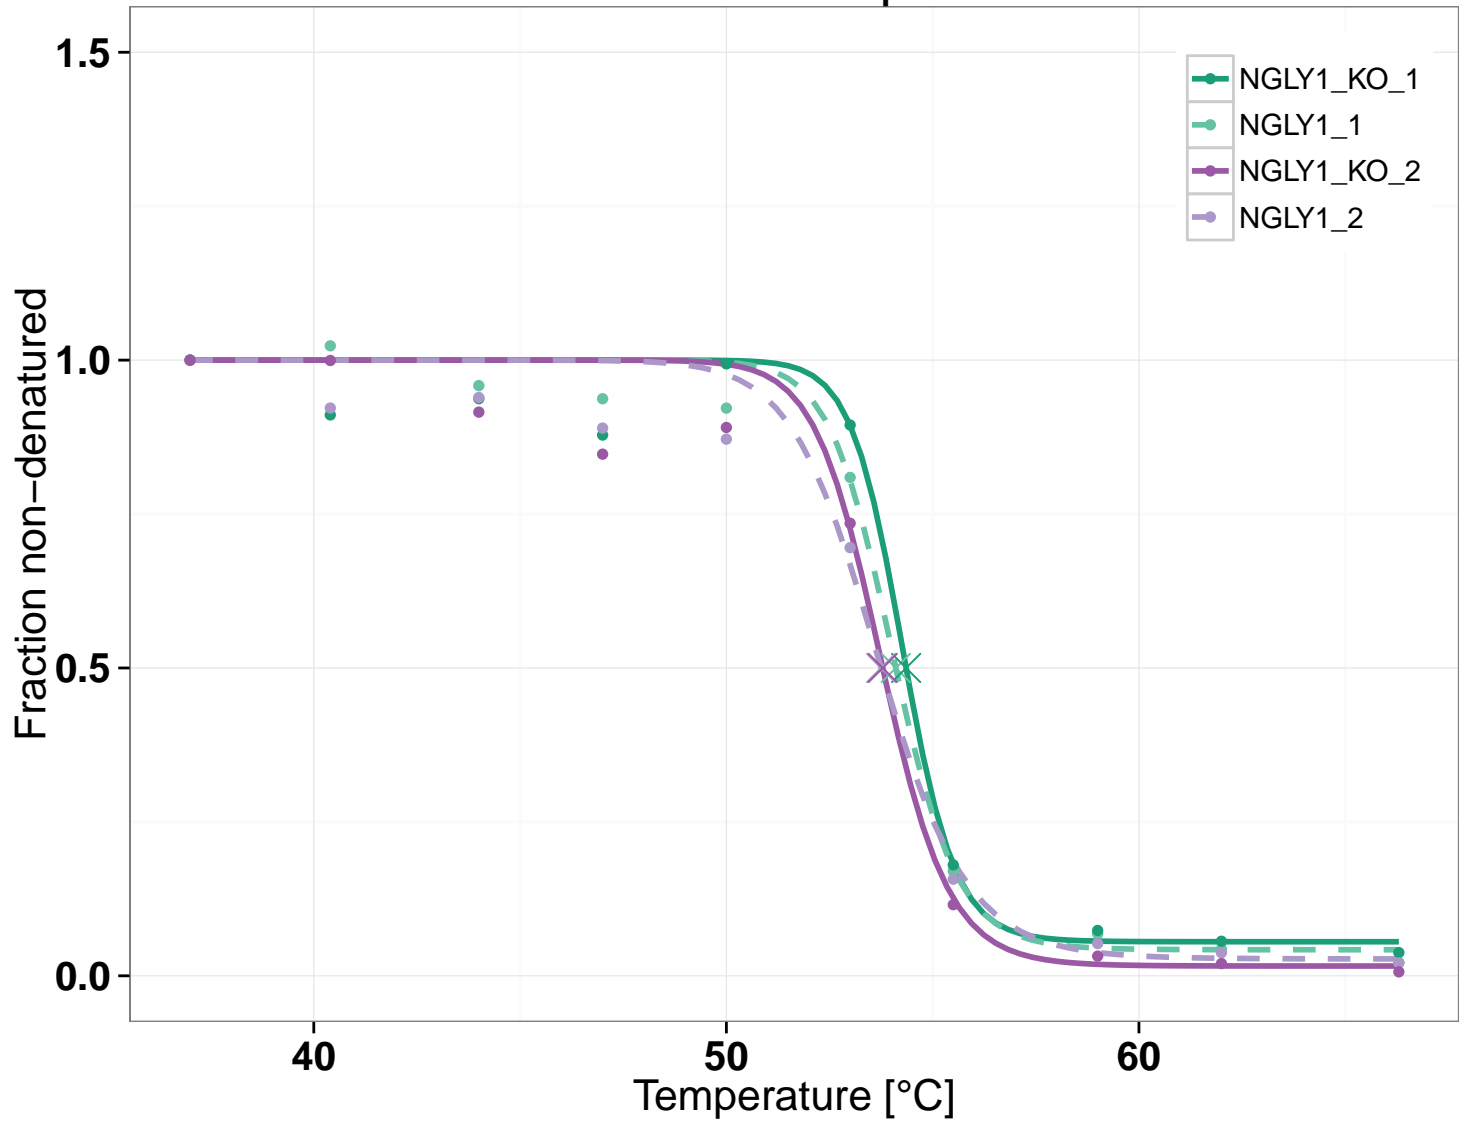

|            | meltPoint | slope | plateau | R2   |
|------------|-----------|-------|---------|------|
| NGLY1_KO_1 | 54.36     | -0.37 | 0.06    | 0.98 |
| NGLY1_1    | 54.11     | -0.31 | 0.04    | 0.99 |
| NGLY1_KO_2 | 53.79     | -0.3  | 0.02    | 0.98 |
| NGLY1_2    | 53.75     | -0.23 | 0.03    | 0.98 |

Supplement: Supplementary file 1510 [file 1]

IPI00016956.1|AGPAT4

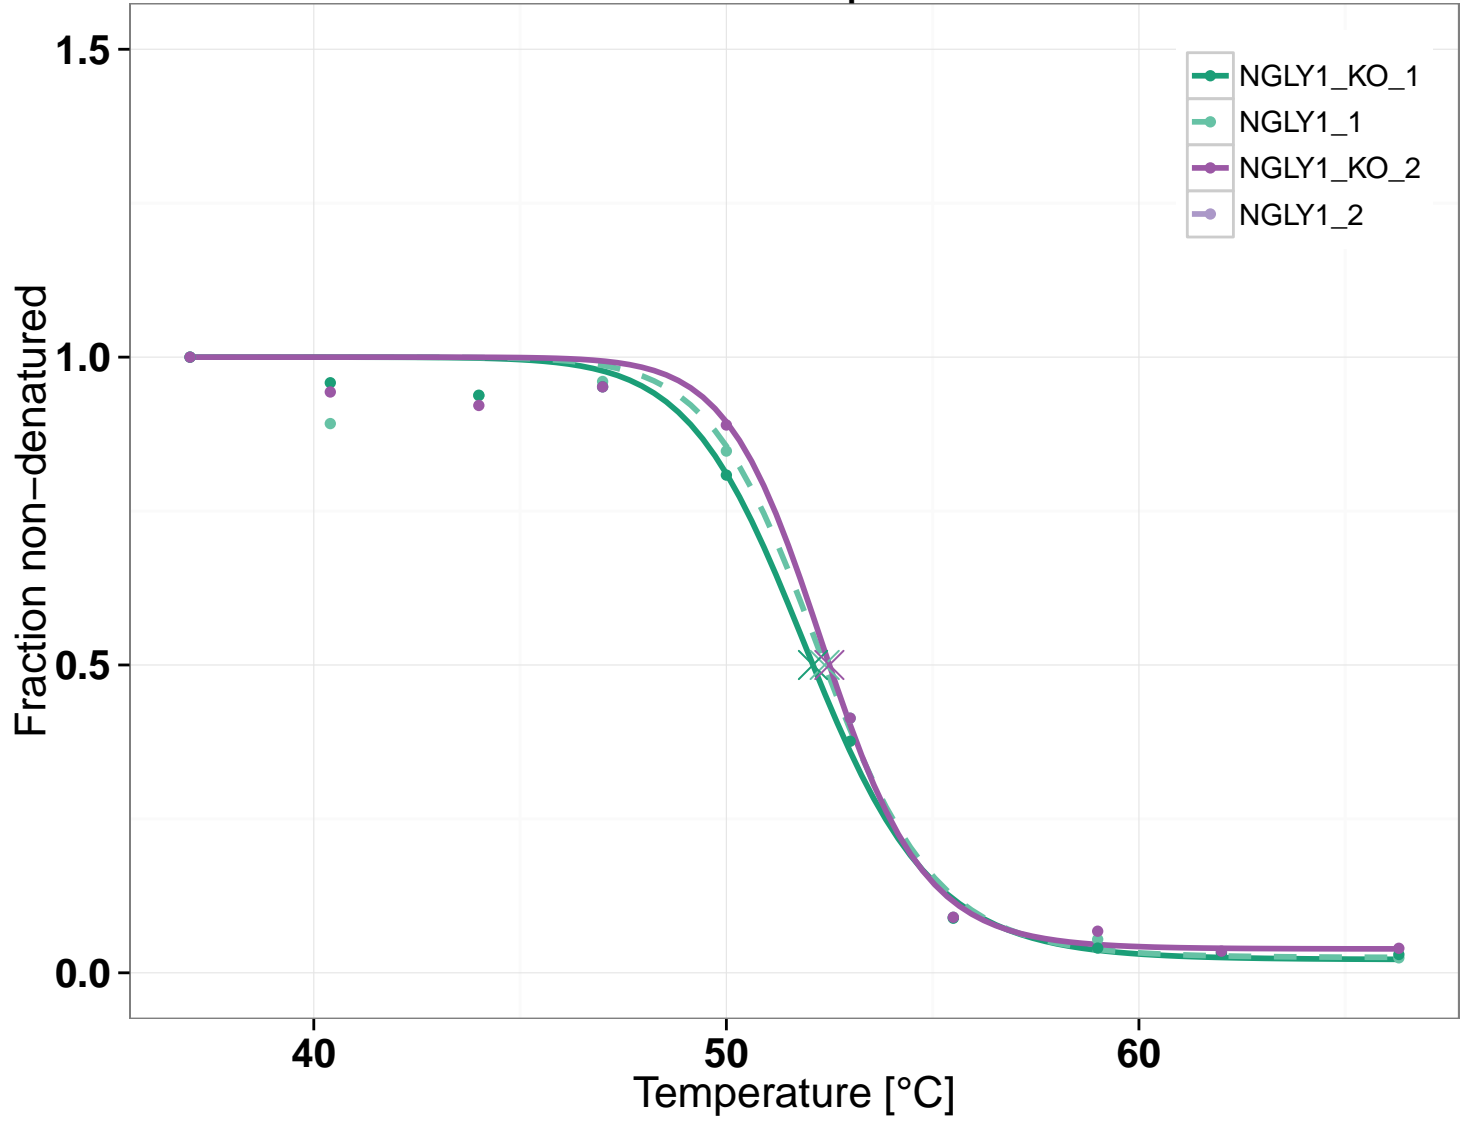

|            | meltPoint | slope | plateau | R2   |
|------------|-----------|-------|---------|------|
| NGLY1_KO_1 | 52.1      | -0.17 | 0.02    | 1    |
| NGLY1_1    | 52.38     | -0.18 | 0.02    | 0.99 |
| NGLY1_KO_2 | 52.5      | -0.2  | 0.04    | 0.99 |
| NGLY1_2    | -         | -     | -       | -    |

Supplement: Supplementary file 1511 [file 1]

IPI00290995.3|C7ORF58

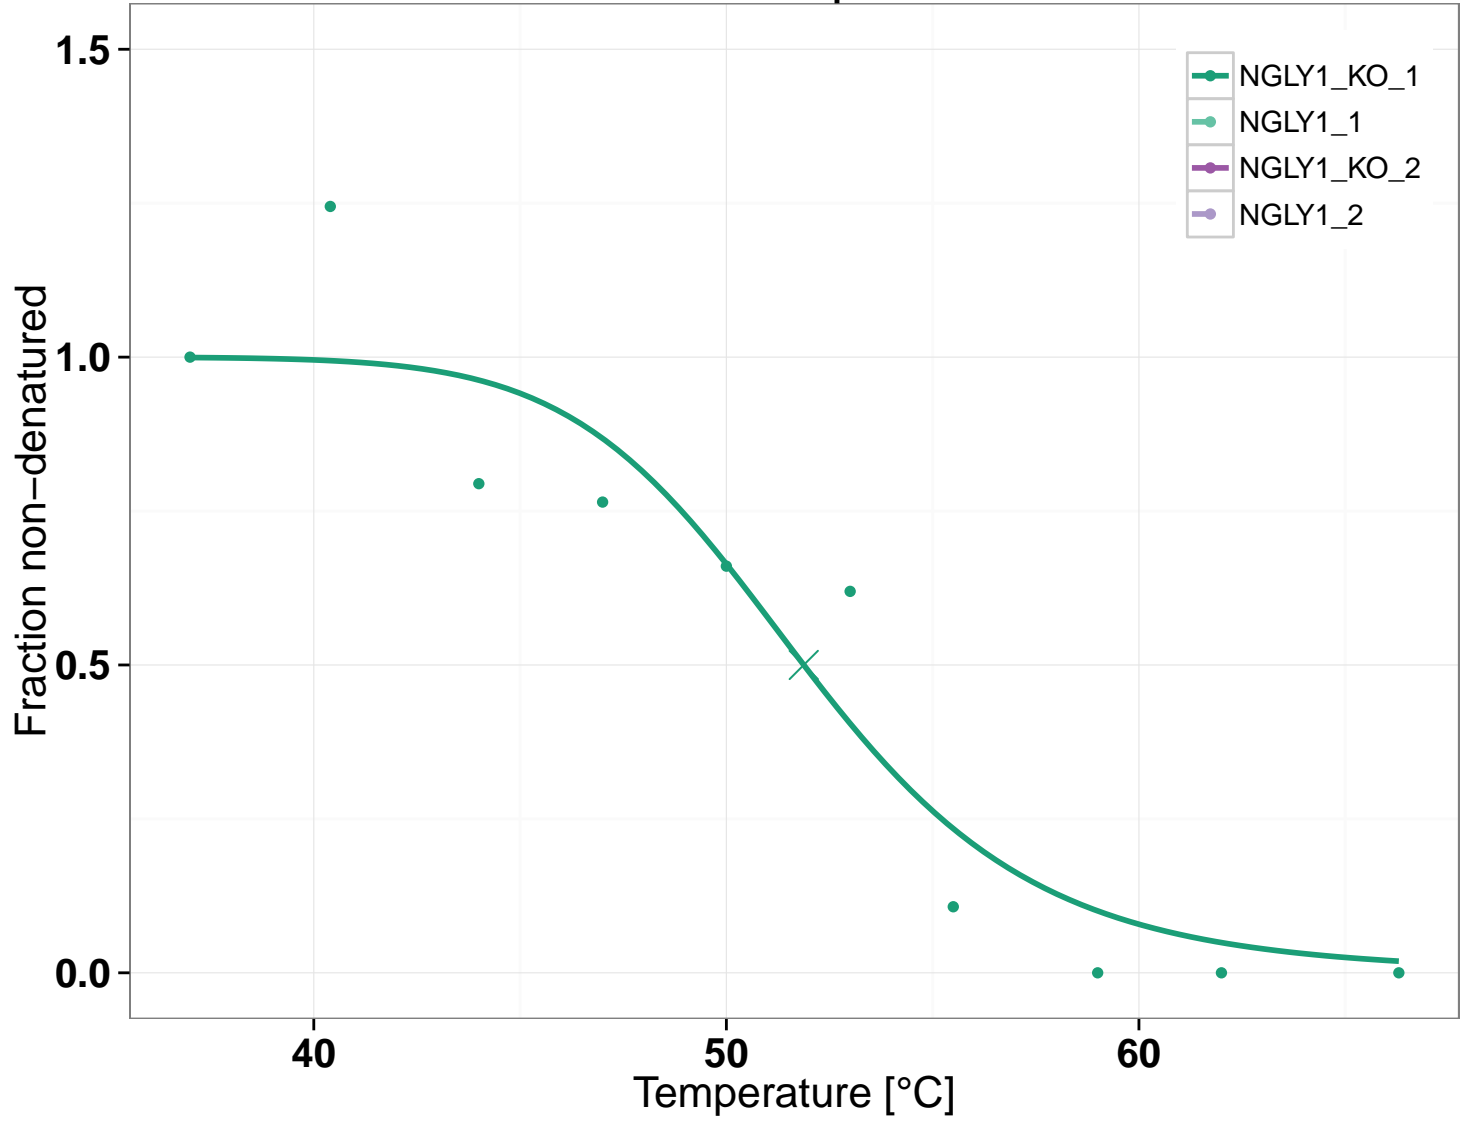

|            | meltPoint | slope  | plateau | R2   |
|------------|-----------|--------|---------|------|
| NGLY1_KO_1 | 51.88     | -0.089 | 0       | 0.91 |
| NGLY1_1    | -         | -      | -       | -    |
| NGLY1_KO_2 | -         | -      | -       | -    |
| NGLY1_2    | -         | -      | -       | -    |

Supplement: Supplementary file 1512 [file 1]

IPI00014199.1|ACAP1

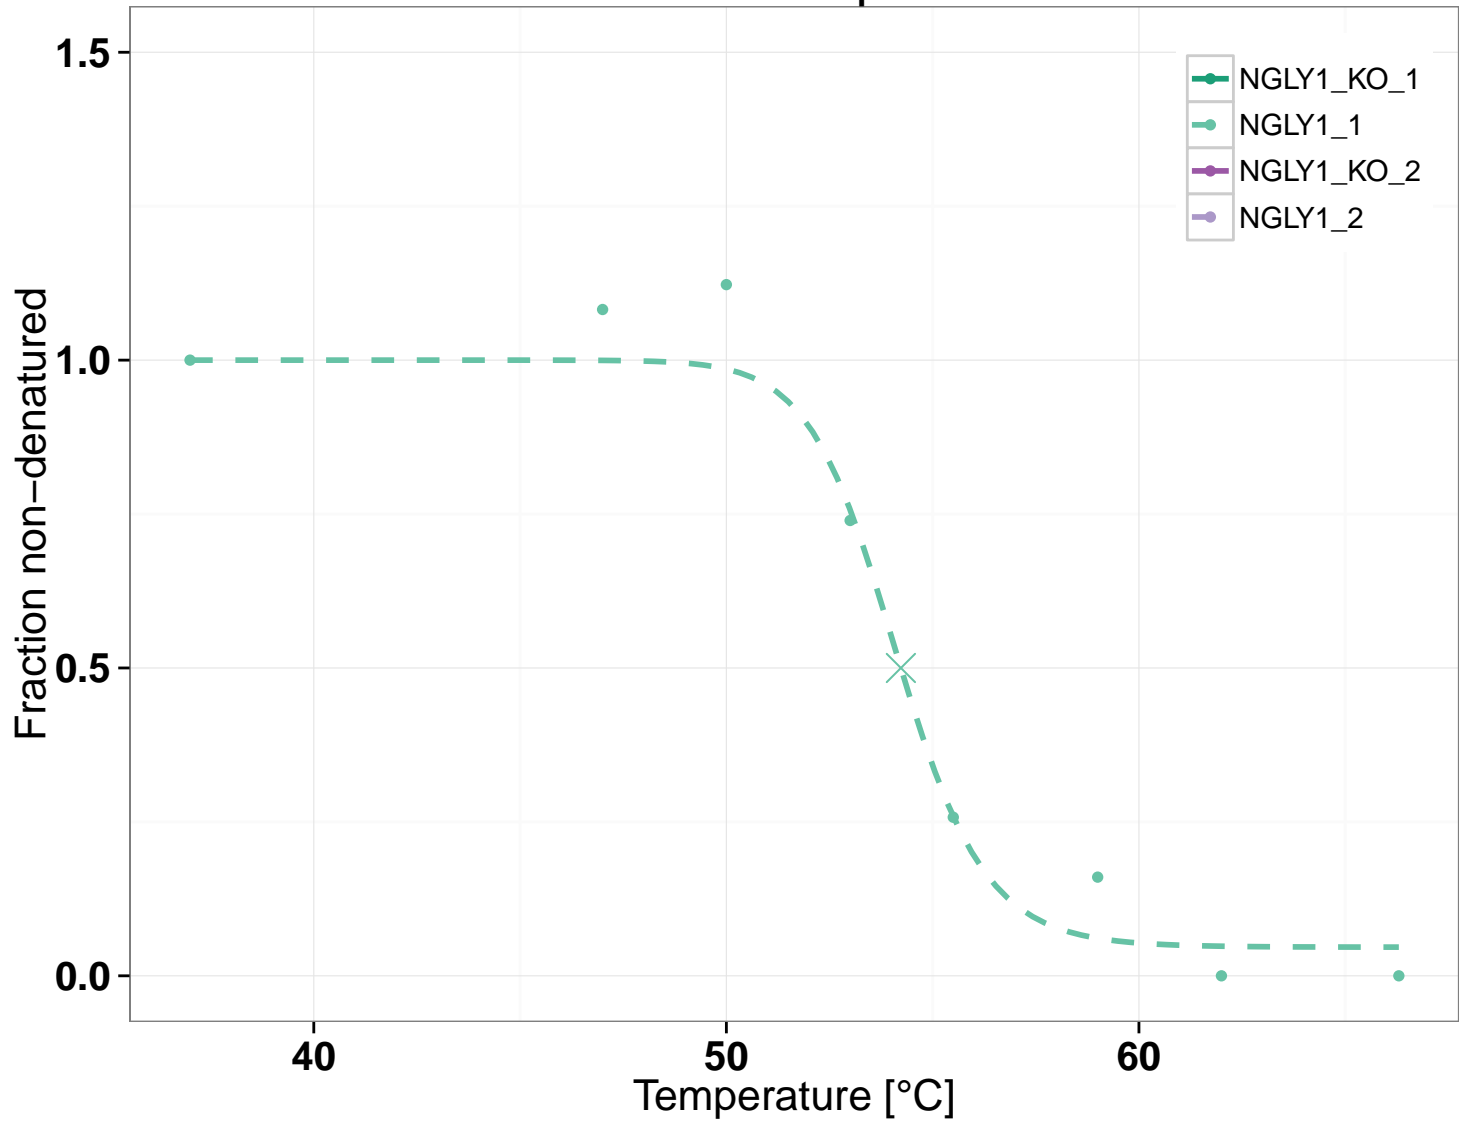

|            | meltPoint | slope | plateau | R2   |
|------------|-----------|-------|---------|------|
| NGLY1_KO_1 | -         | -     | -       | -    |
| NGLY1_1    | 54.23     | -0.22 | 0.05    | 0.76 |
| NGLY1_KO_2 | -         | -     | -       | -    |
| NGLY1_2    | -         | -     | -       | -    |

Supplement: Supplementary file 1513 [file 1]

# IPI00641330.1|RING1

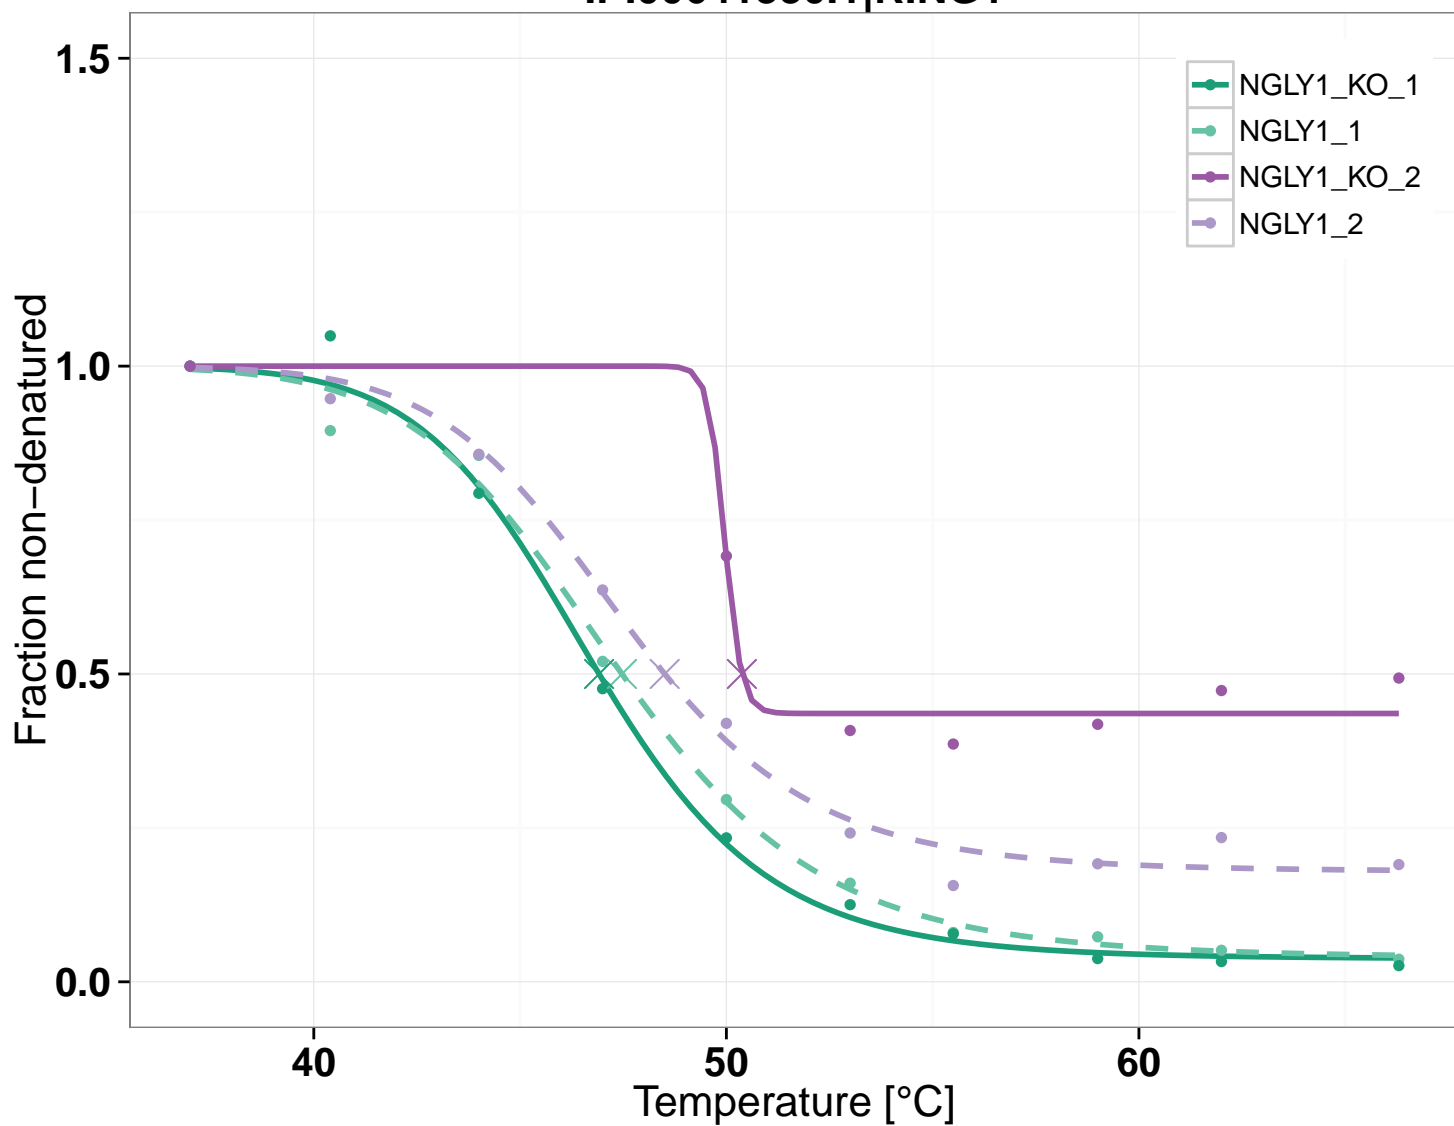

|            | meltPoint | slope  | plateau | R2    |
|------------|-----------|--------|---------|-------|
| NGLY1_KO_1 | 46.91     | -0.11  | 0.04    | 1     |
| NGLY1_1    | 47.47     | -0.097 | 0.04    | 0.99  |
| NGLY1_KO_2 | 50.38     | -0.71  | 0.44    | -0.07 |
| NGLY1_2    | 48.5      | -0.091 | 0.18    | 0.99  |

Supplement: Supplementary file 1514 [file 1]

IPI00005015.1|CNOT3

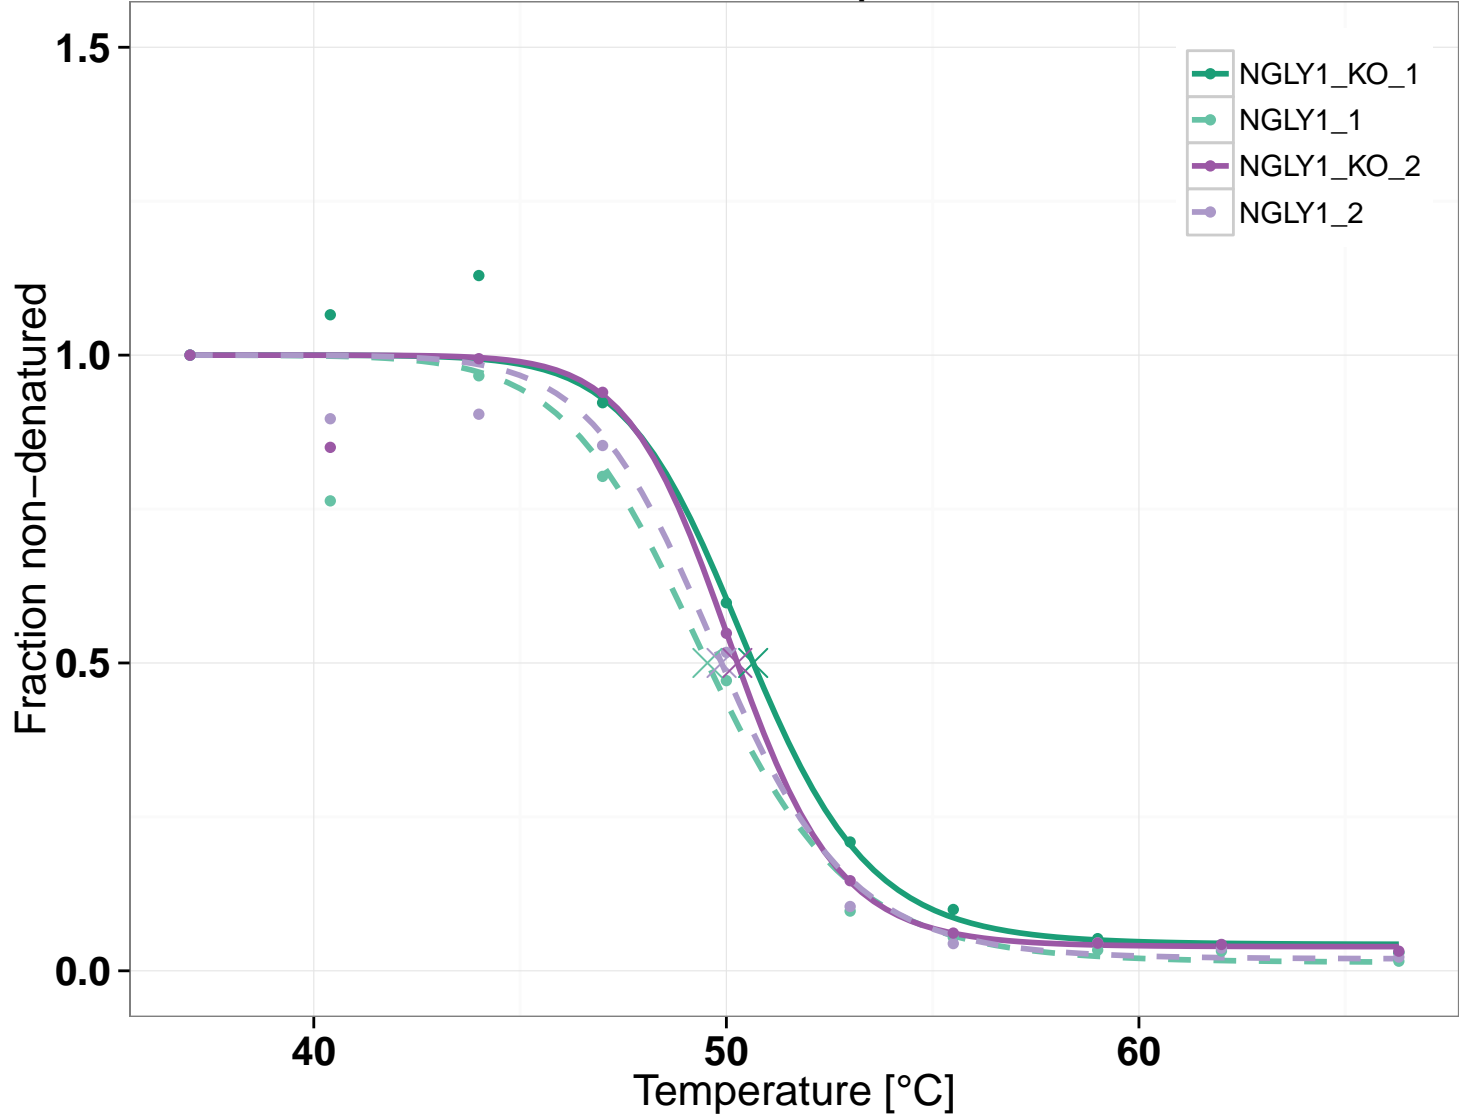

|            | meltPoint | slope | plateau | R2   |
|------------|-----------|-------|---------|------|
| NGLY1_KO_1 | 50.65     | -0.16 | 0.04    | 0.99 |
| NGLY1_1    | 49.54     | -0.14 | 0.01    | 0.96 |
| NGLY1_KO_2 | 50.27     | -0.19 | 0.04    | 0.99 |
| NGLY1_2    | 49.88     | -0.15 | 0.02    | 0.99 |

Supplement: Supplementary file 1515 [file 1]

IPI00412497.2|DYNLRB1

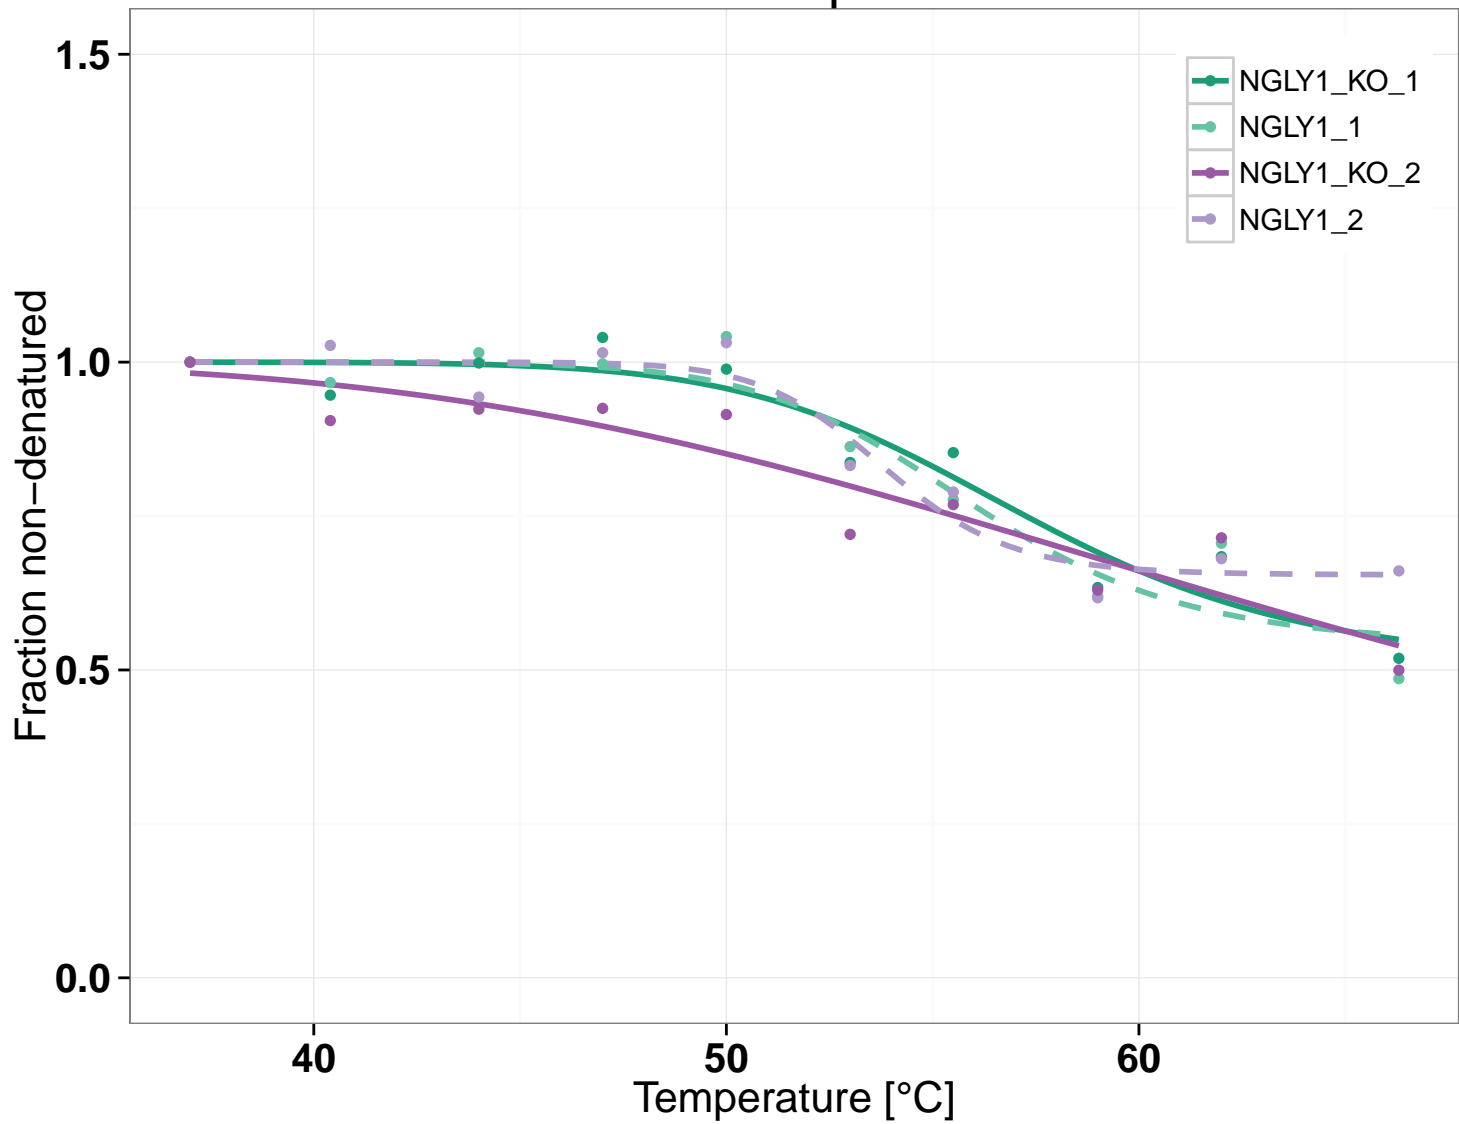

|            | meltPoint | slope  | plateau | R2   |
|------------|-----------|--------|---------|------|
| NGLY1_KO_1 | -         | -0.036 | 0.5     | 0.93 |
| NGLY1_1    | -         | -0.043 | 0.54    | 0.92 |
| NGLY1_KO_2 | -         | -0.02  | 0       | 0.88 |
| NGLY1_2    | -         | -0.057 | 0.65    | 0.94 |

Supplement: Supplementary file 1516 [file 1]

IPI00396131.4|YTHDF3

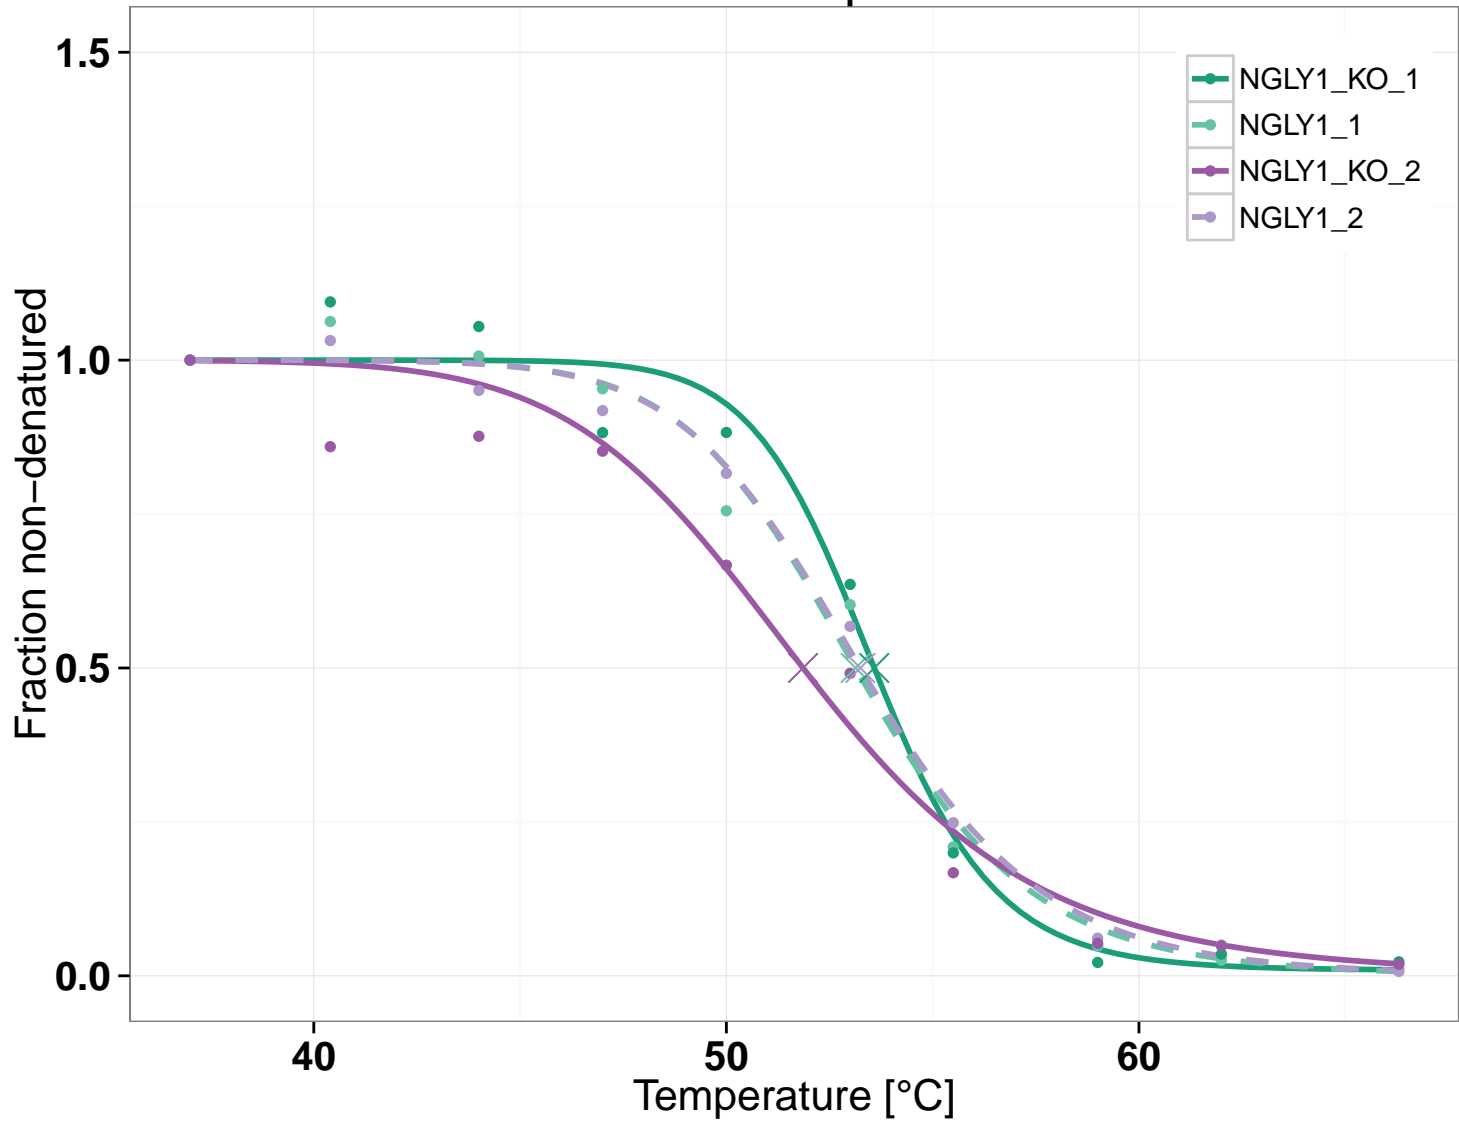

|            | meltPoint | slope  | plateau | R2   |
|------------|-----------|--------|---------|------|
| NGLY1_KO_1 | 53.59     | -0.17  | 0.01    | 0.98 |
| NGLY1_1    | 53.13     | -0.12  | 0       | 0.99 |
| NGLY1_KO_2 | 51.86     | -0.088 | 0       | 0.97 |
| NGLY1_2    | 53.25     | -0.11  | 0       | 1    |

Supplement: Supplementary file 1517 [file 1]

IPI00873550.1|POLR1D

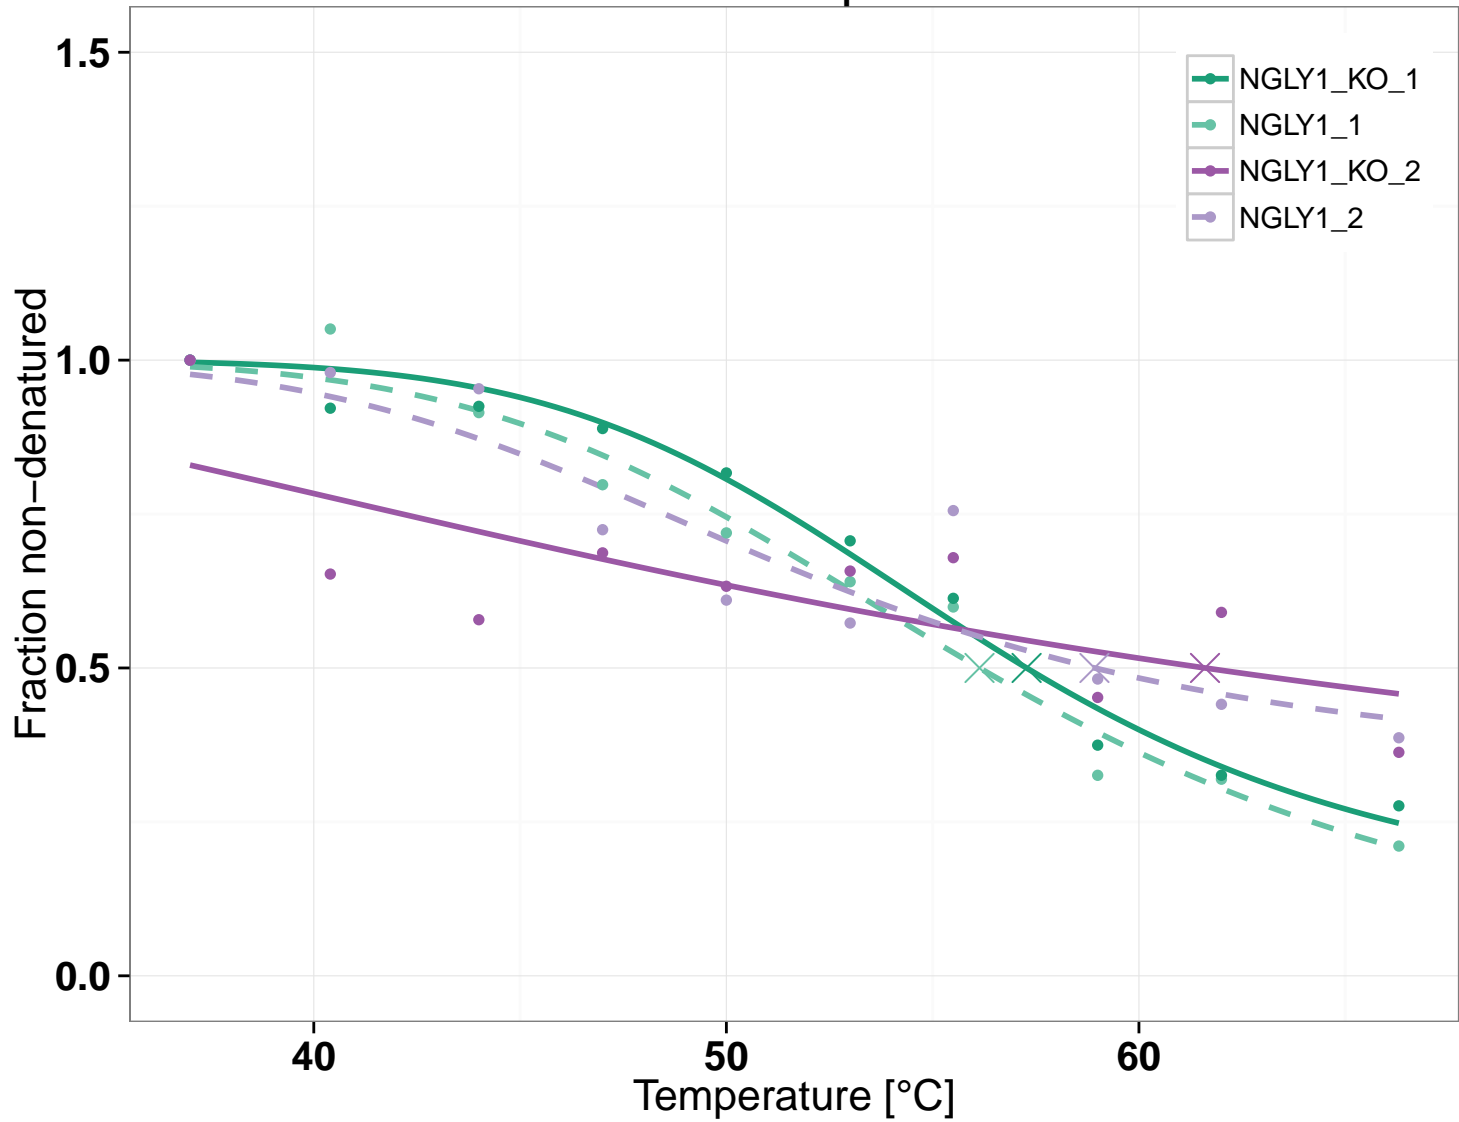

|            | meltPoint | slope  | plateau | R2   |
|------------|-----------|--------|---------|------|
| NGLY1_KO_1 | 57.28     | -0.044 | 0.11    | 0.98 |
| NGLY1_1    | 56.14     | -0.041 | 0       | 0.97 |
| NGLY1_KO_2 | 61.6      | -0.016 | 0       | 0.58 |
| NGLY1_2    | 58.92     | -0.029 | 0.33    | 0.87 |

Supplement: Supplementary file 1518 [file 1]

IPI00174438.2|FBXO45

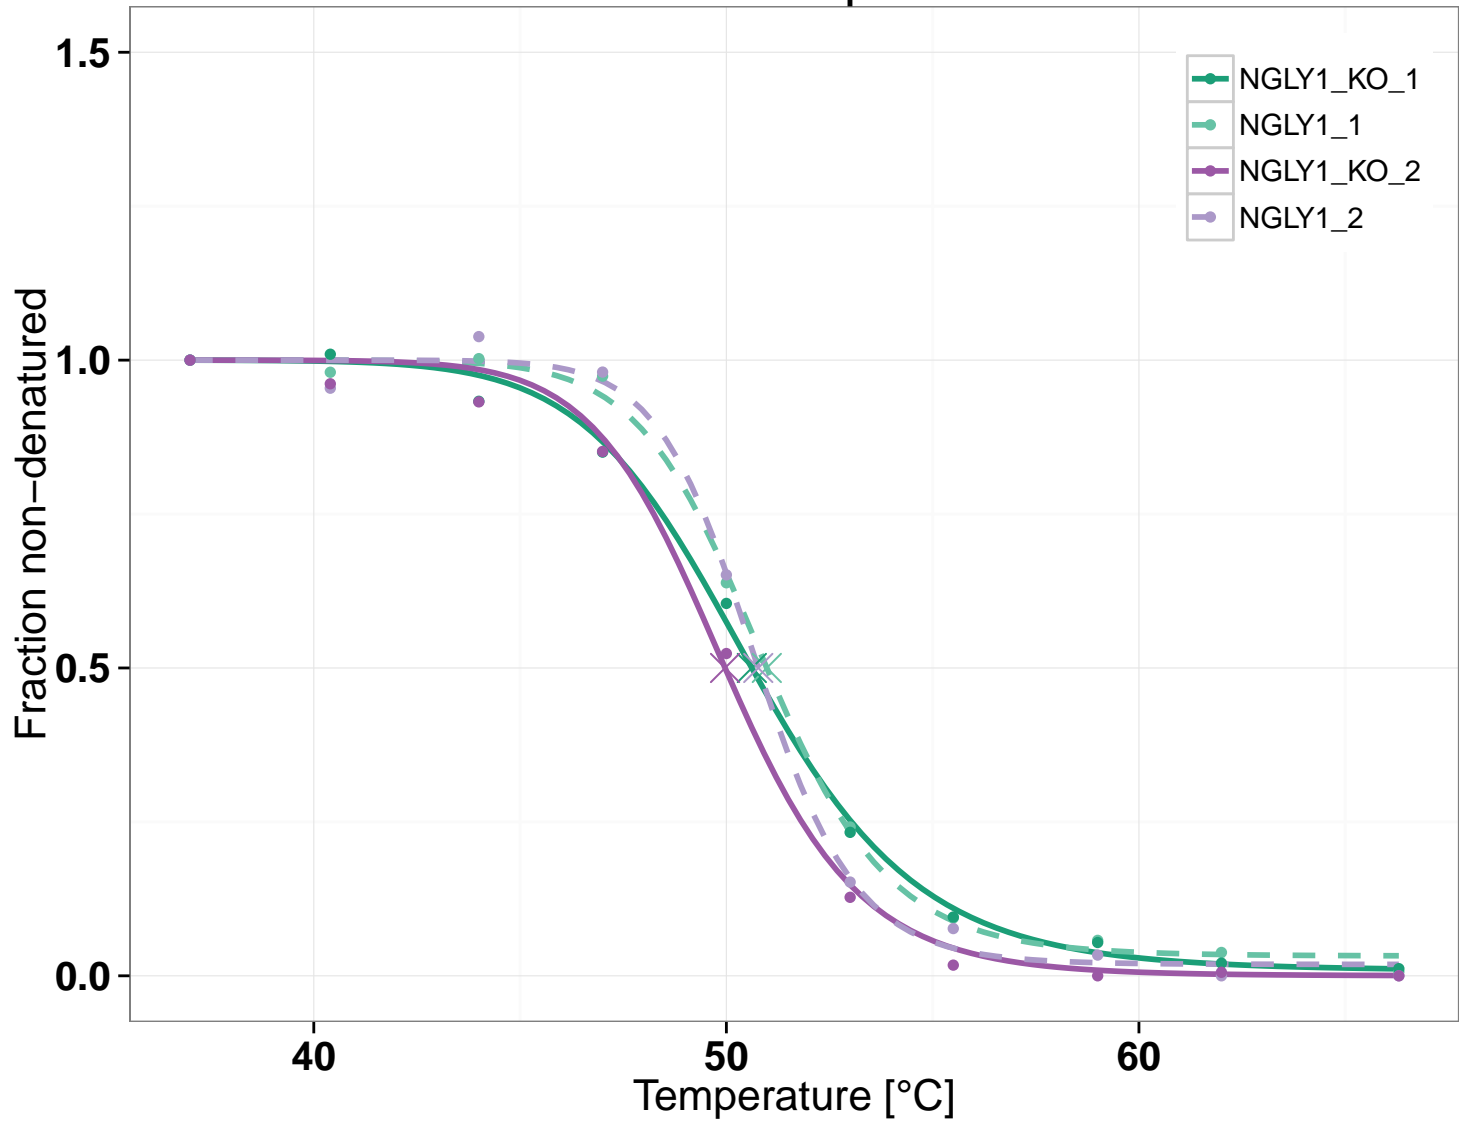

|            | meltPoint | slope | plateau | R2 |
|------------|-----------|-------|---------|----|
| NGLY1_KO_1 | 50.62     | -0.12 | 0.01    | 1  |
| NGLY1_1    | 50.98     | -0.16 | 0.03    | 1  |
| NGLY1_KO_2 | 49.97     | -0.15 | 0       | 1  |
| NGLY1_2    | 50.77     | -0.2  | 0.02    | 1  |

Supplement: Supplementary file 1519 [file 1]

# IPI00386311.2|SMARCAL1

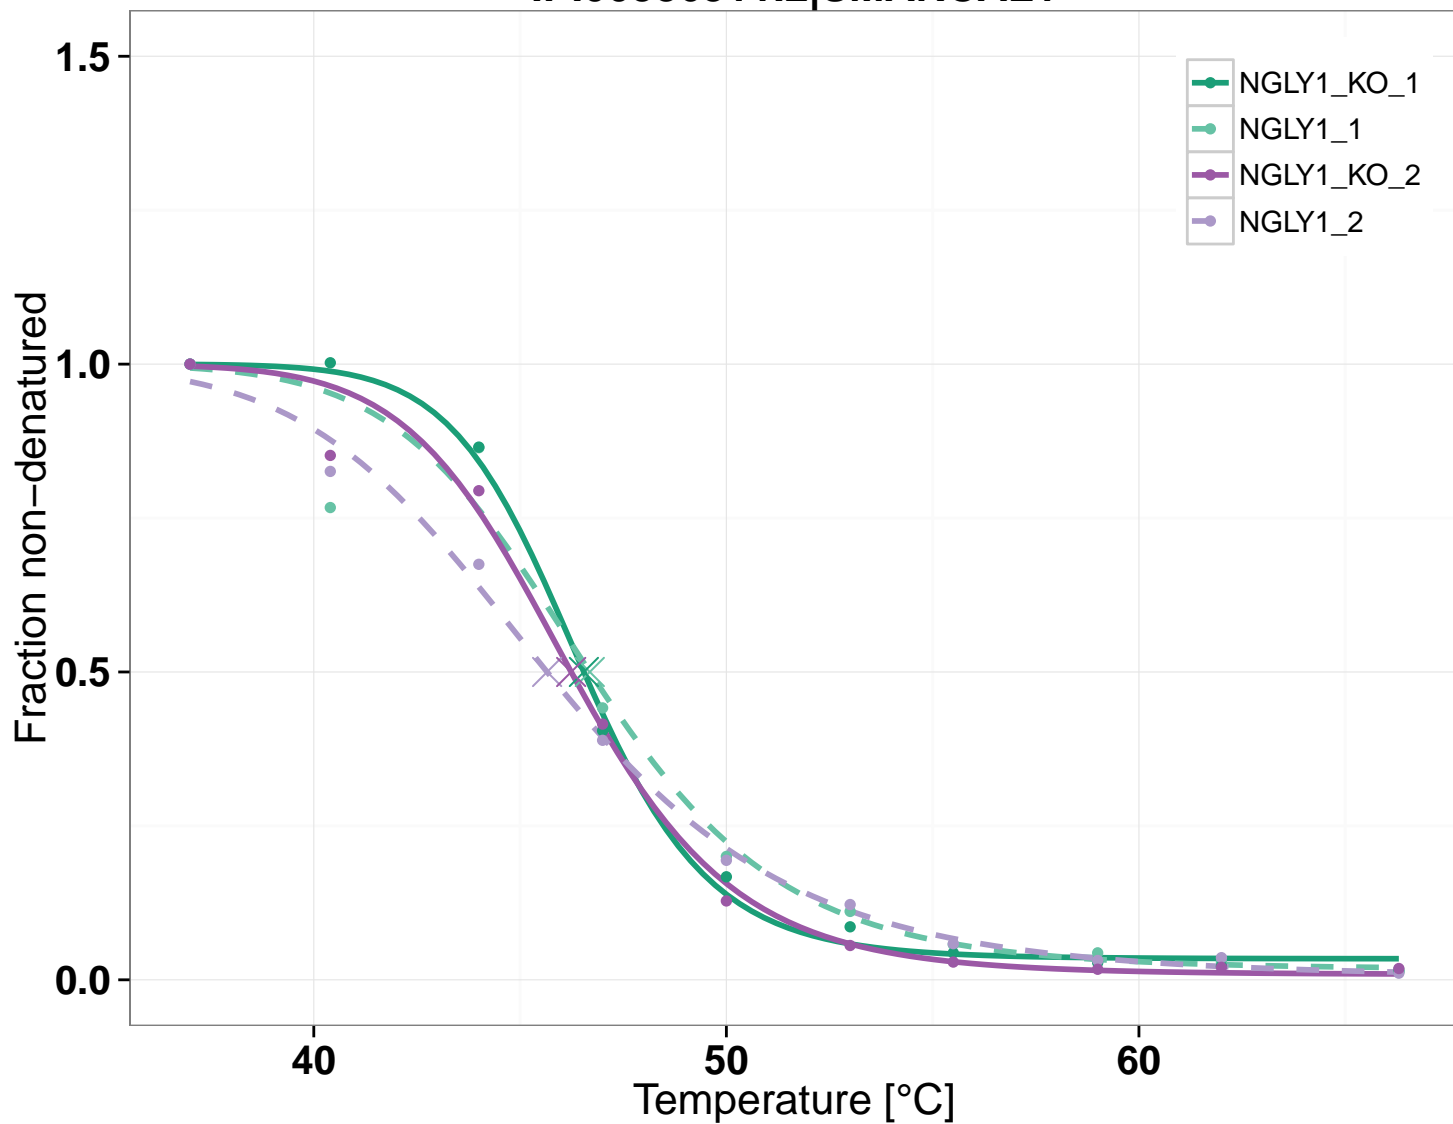

|            | meltPoint | slope  | plateau | R2   |
|------------|-----------|--------|---------|------|
| NGLY1_KO_1 | 46.55     | -0.15  | 0.03    | 1    |
| NGLY1_1    | 46.69     | -0.1   | 0.02    | 0.97 |
| NGLY1_KO_2 | 46.24     | -0.12  | 0.01    | 0.99 |
| NGLY1_2    | 45.65     | -0.084 | 0       | 1    |

Supplement: Supplementary file 1520 [file 1]

IPI00026089.3|SF3B1

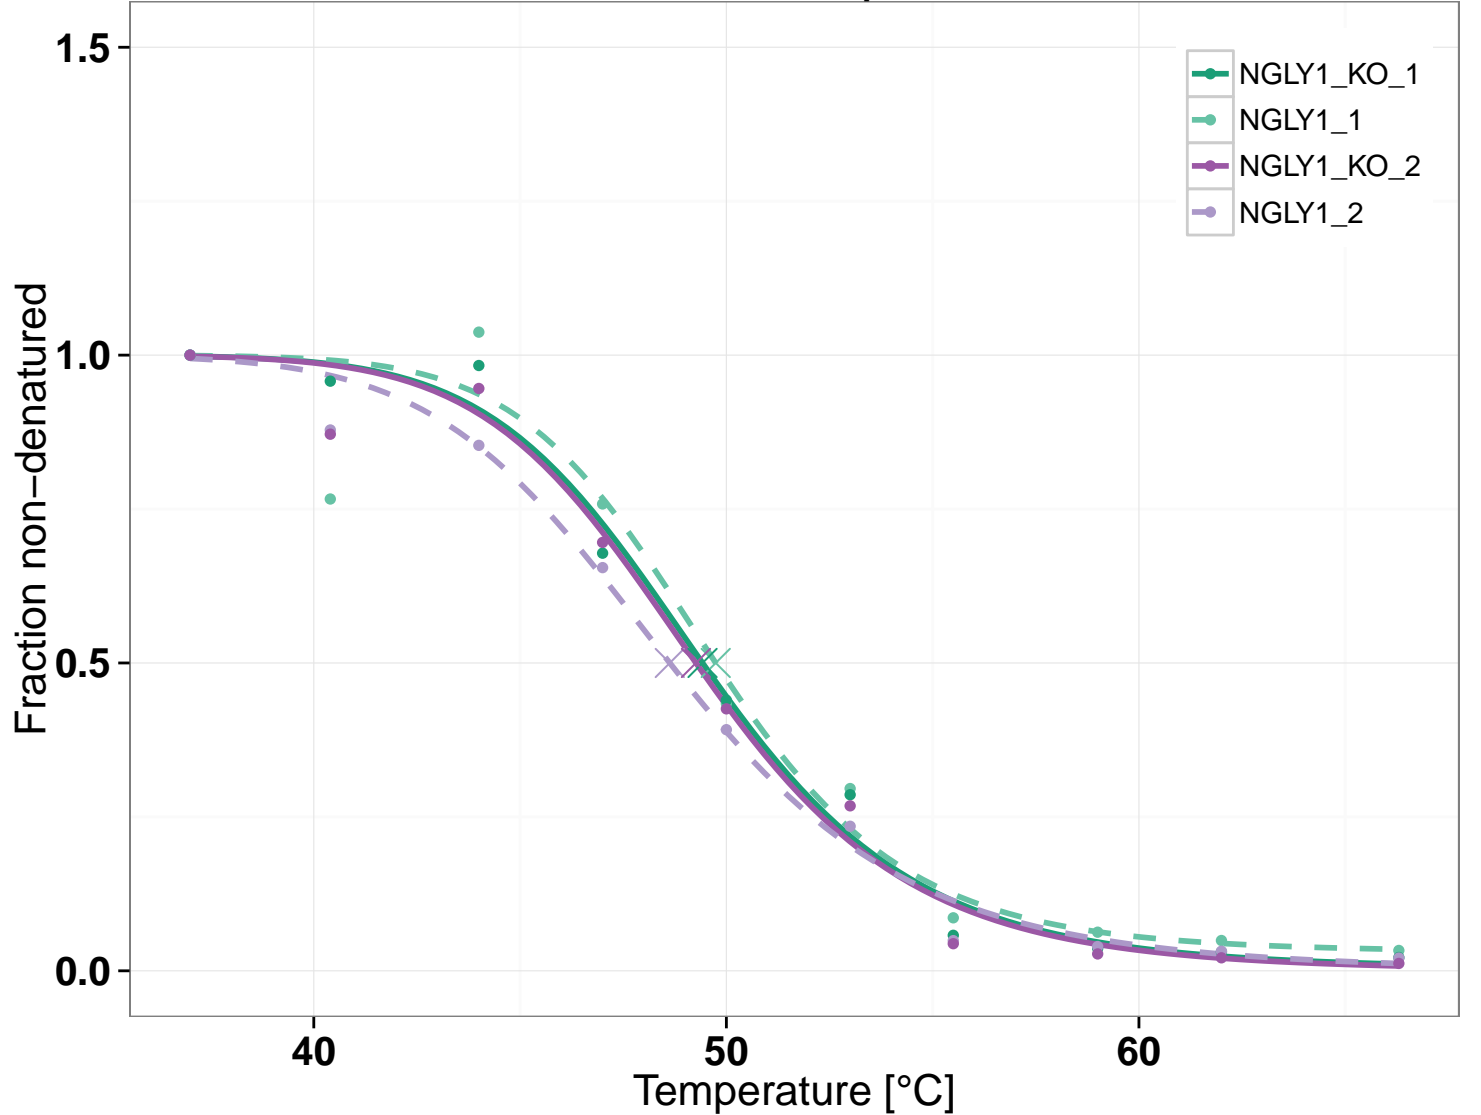

|            | meltPoint | slope  | plateau | R2   |
|------------|-----------|--------|---------|------|
| NGLY1_KO_1 | 49.42     | -0.097 | 0       | 0.99 |
| NGLY1_1    | 49.74     | -0.1   | 0.03    | 0.95 |
| NGLY1_KO_2 | 49.26     | -0.097 | 0       | 0.99 |
| NGLY1_2    | 48.63     | -0.086 | 0       | 0.99 |

Supplement: Supplementary file 1521 [file 1]

IPI00413140.4|DNM1

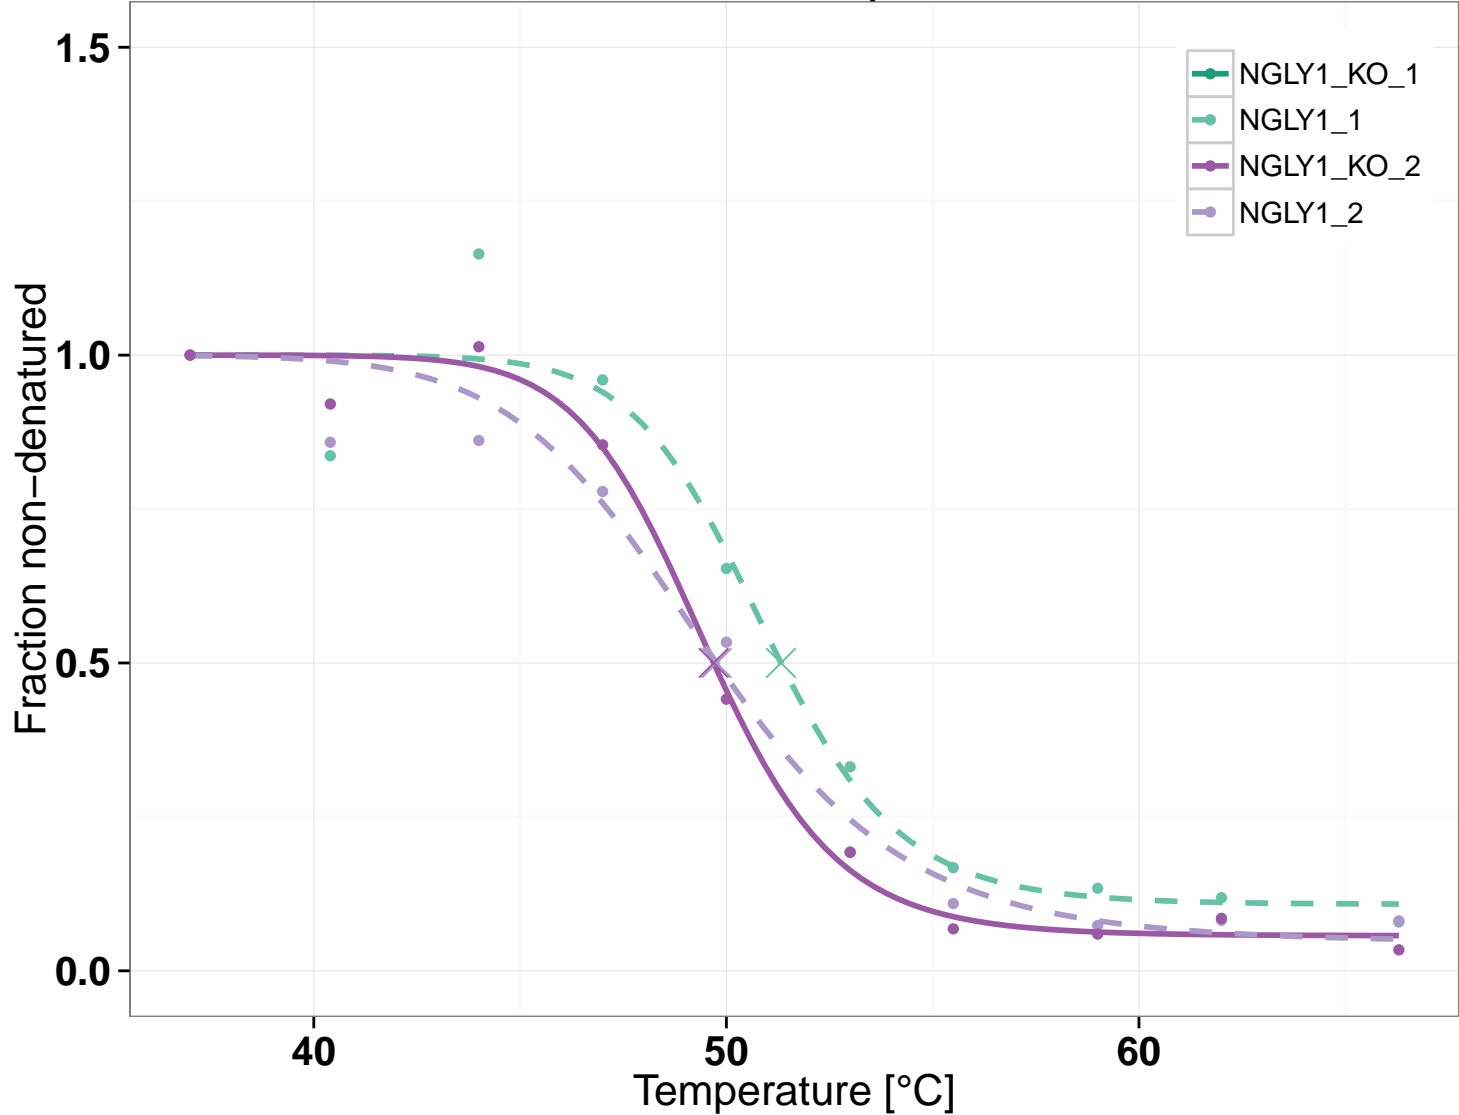

|            | meltPoint | slope  | plateau | R2   |
|------------|-----------|--------|---------|------|
| NGLY1_KO_1 | –         | –      | –       | –    |
| NGLY1_1    | 51.32     | –0.14  | 0.11    | 0.96 |
| NGLY1_KO_2 | 49.69     | –0.15  | 0.06    | 0.99 |
| NGLY1_2    | 49.76     | –0.099 | 0.05    | 0.98 |

Supplement: Supplementary file 1522 [file 1]

IPI00001639.2|KPNB1

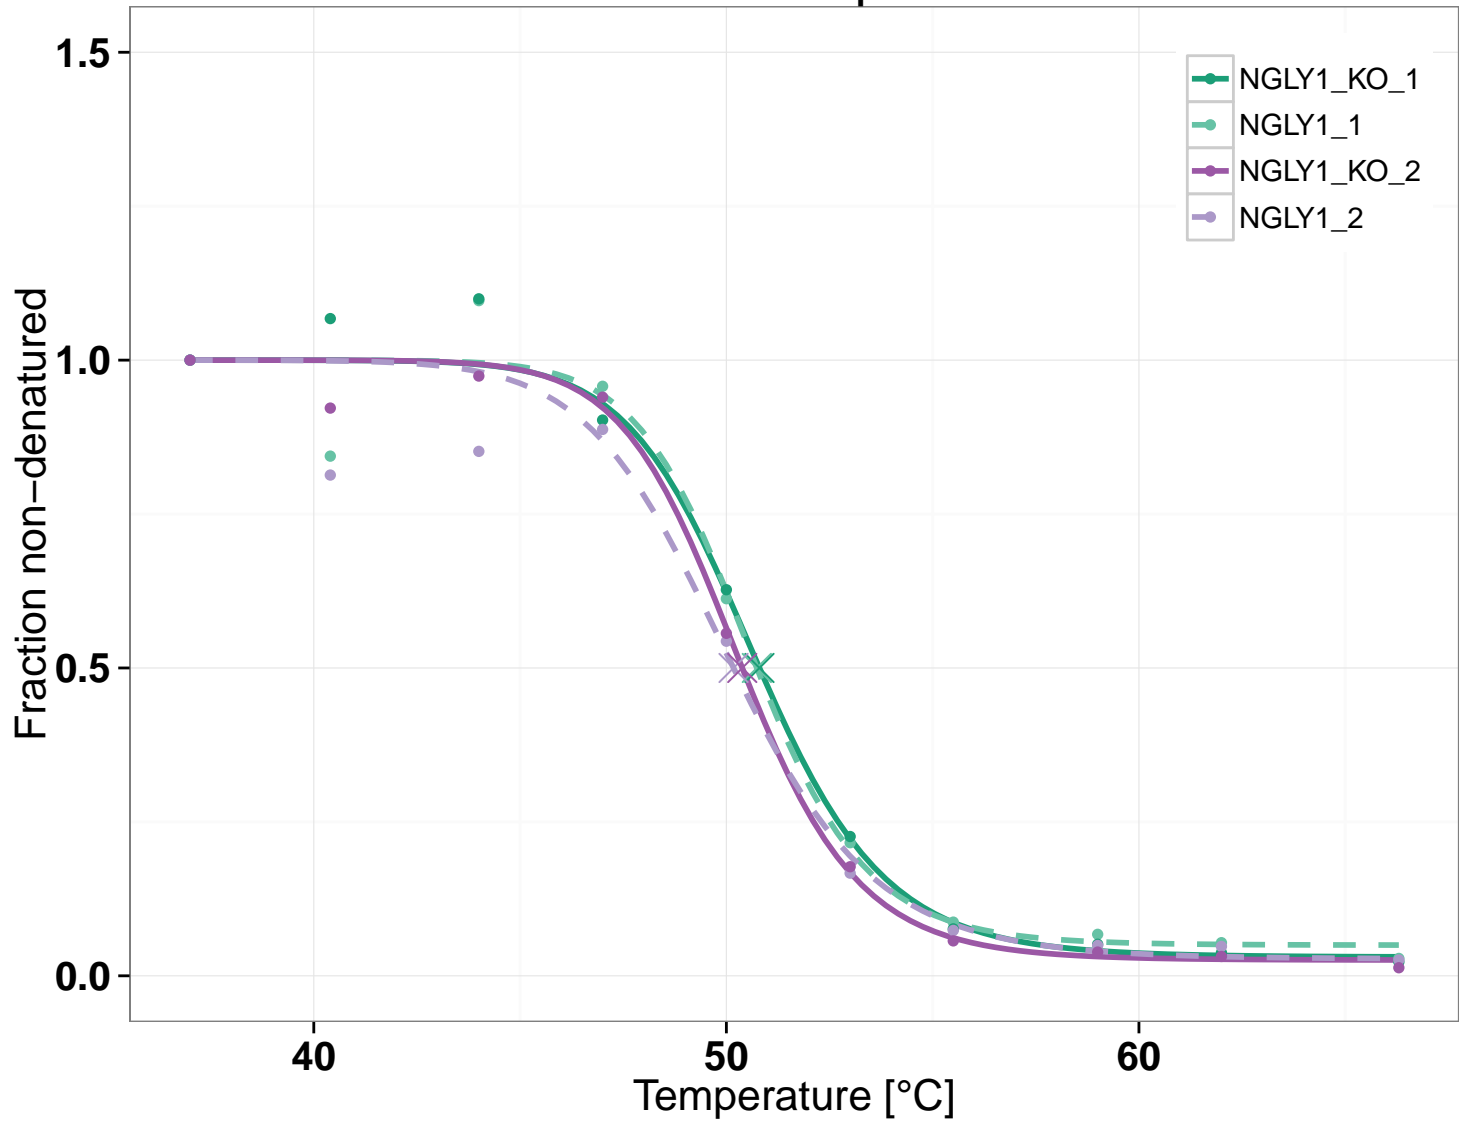

|            | meltPoint | slope | plateau | R2   |
|------------|-----------|-------|---------|------|
| NGLY1_KO_1 | 50.8      | -0.15 | 0.03    | 0.99 |
| NGLY1_1    | 50.74     | -0.17 | 0.05    | 0.98 |
| NGLY1_KO_2 | 50.39     | -0.17 | 0.03    | 1    |
| NGLY1_2    | 50.17     | -0.14 | 0.03    | 0.97 |

Supplement: Supplementary file 1523 [file 1]

IPI00216984.5|CALML3

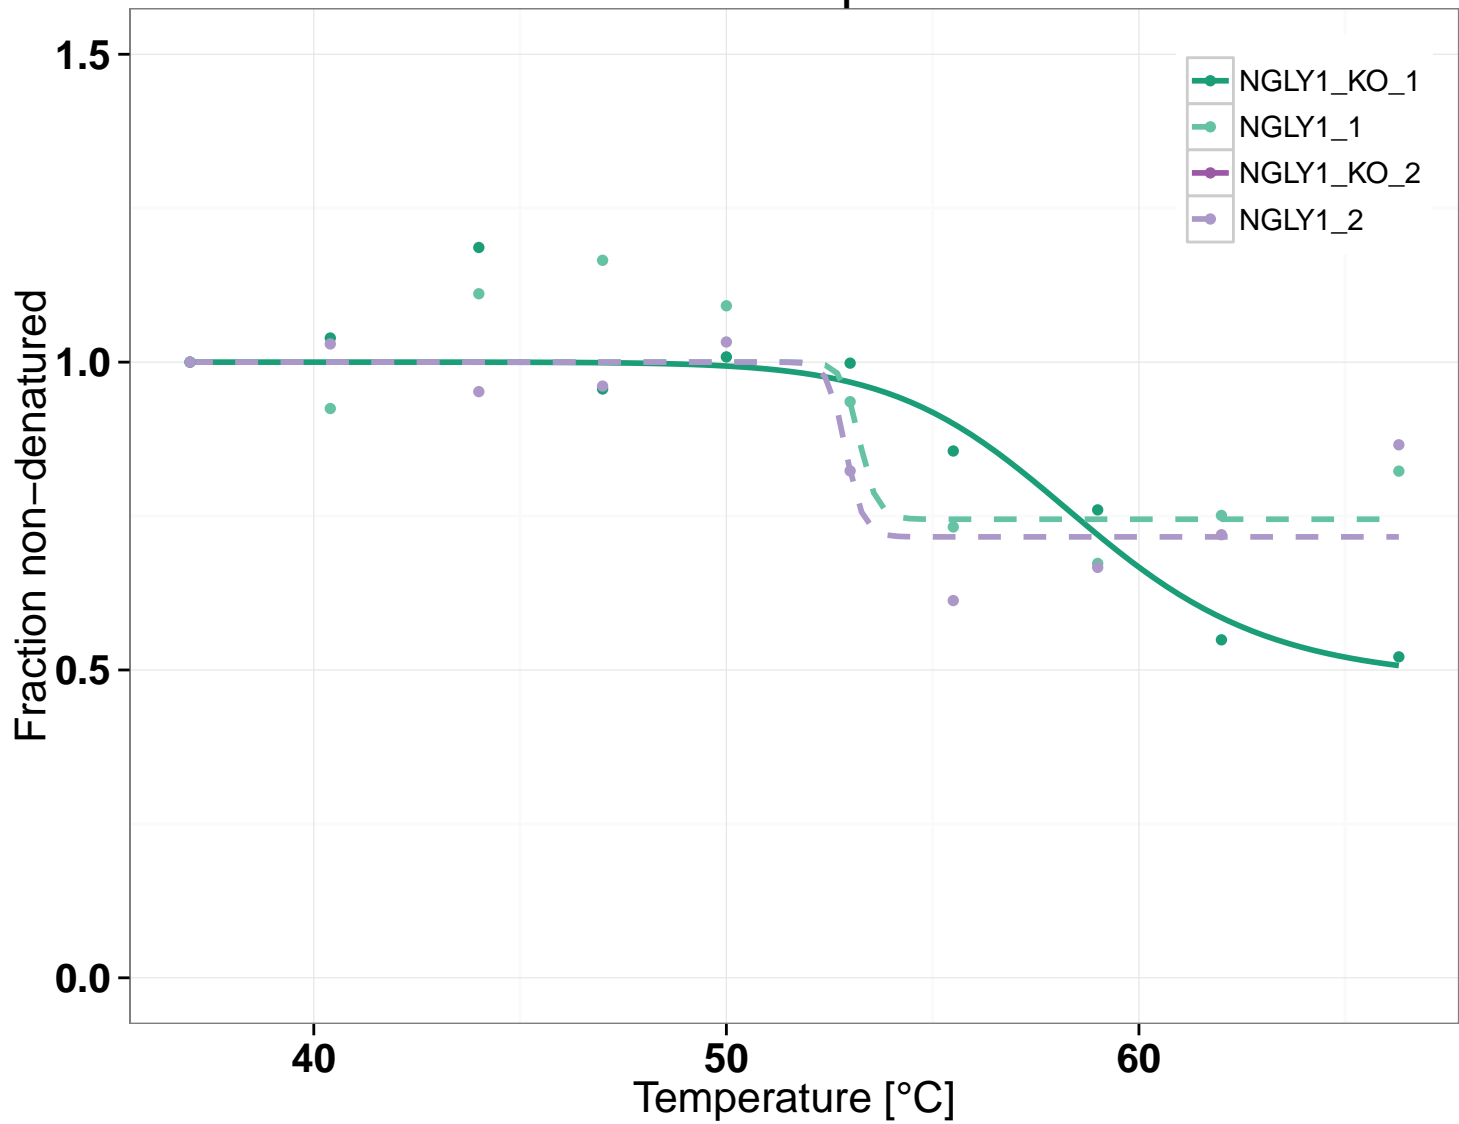

|            | meltPoint | slope  | plateau | R2   |
|------------|-----------|--------|---------|------|
| NGLY1_KO_1 | -         | -0.057 | 0.48    | 0.9  |
| NGLY1_1    | -         | -0.3   | 0.74    | 0.76 |
| NGLY1_KO_2 | -         | -      | -       | -    |
| NGLY1_2    | -         | -0.34  | 0.72    | 0.81 |

Supplement: Supplementary file 1524 [file 1]

IPI00647892.1|DLGAP5

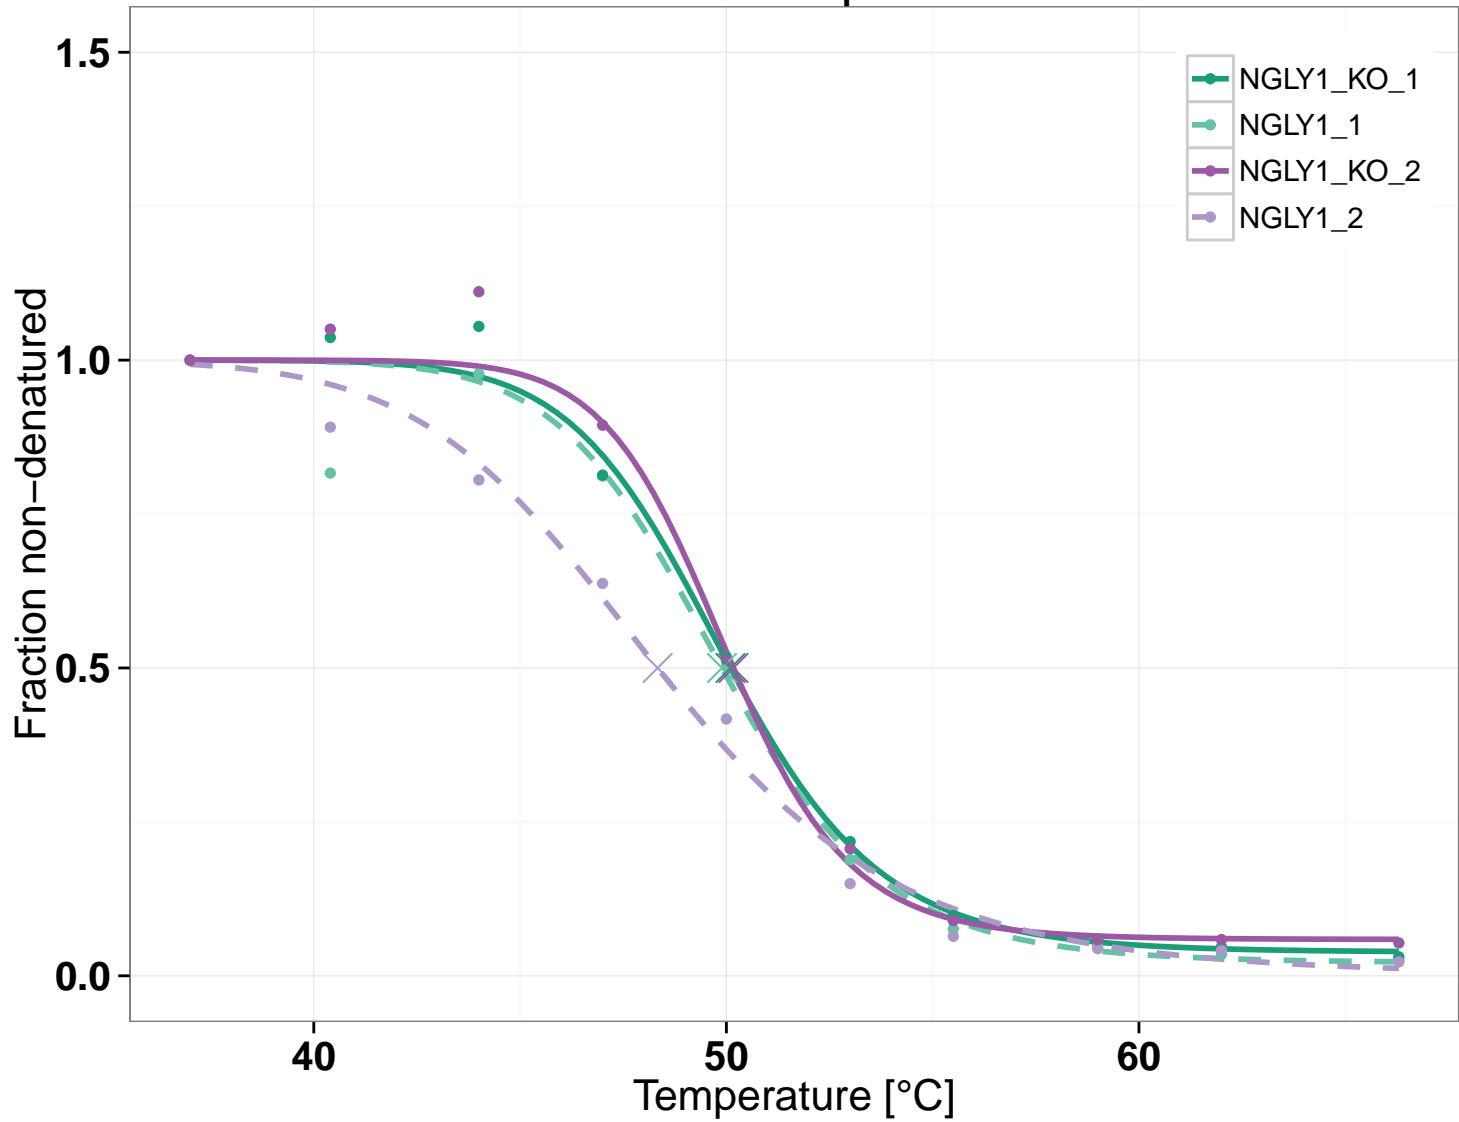

|            | meltPoint | slope  | plateau | R2   |
|------------|-----------|--------|---------|------|
| NGLY1_KO_1 | 50.1      | -0.13  | 0.04    | 0.99 |
| NGLY1_1    | 49.89     | -0.12  | 0.02    | 0.98 |
| NGLY1_KO_2 | 50.17     | -0.16  | 0.06    | 0.99 |
| NGLY1_2    | 48.33     | -0.085 | 0       | 0.99 |

Supplement: Supplementary file 1525 [file 1]

IPI00339265.3|BRSK2

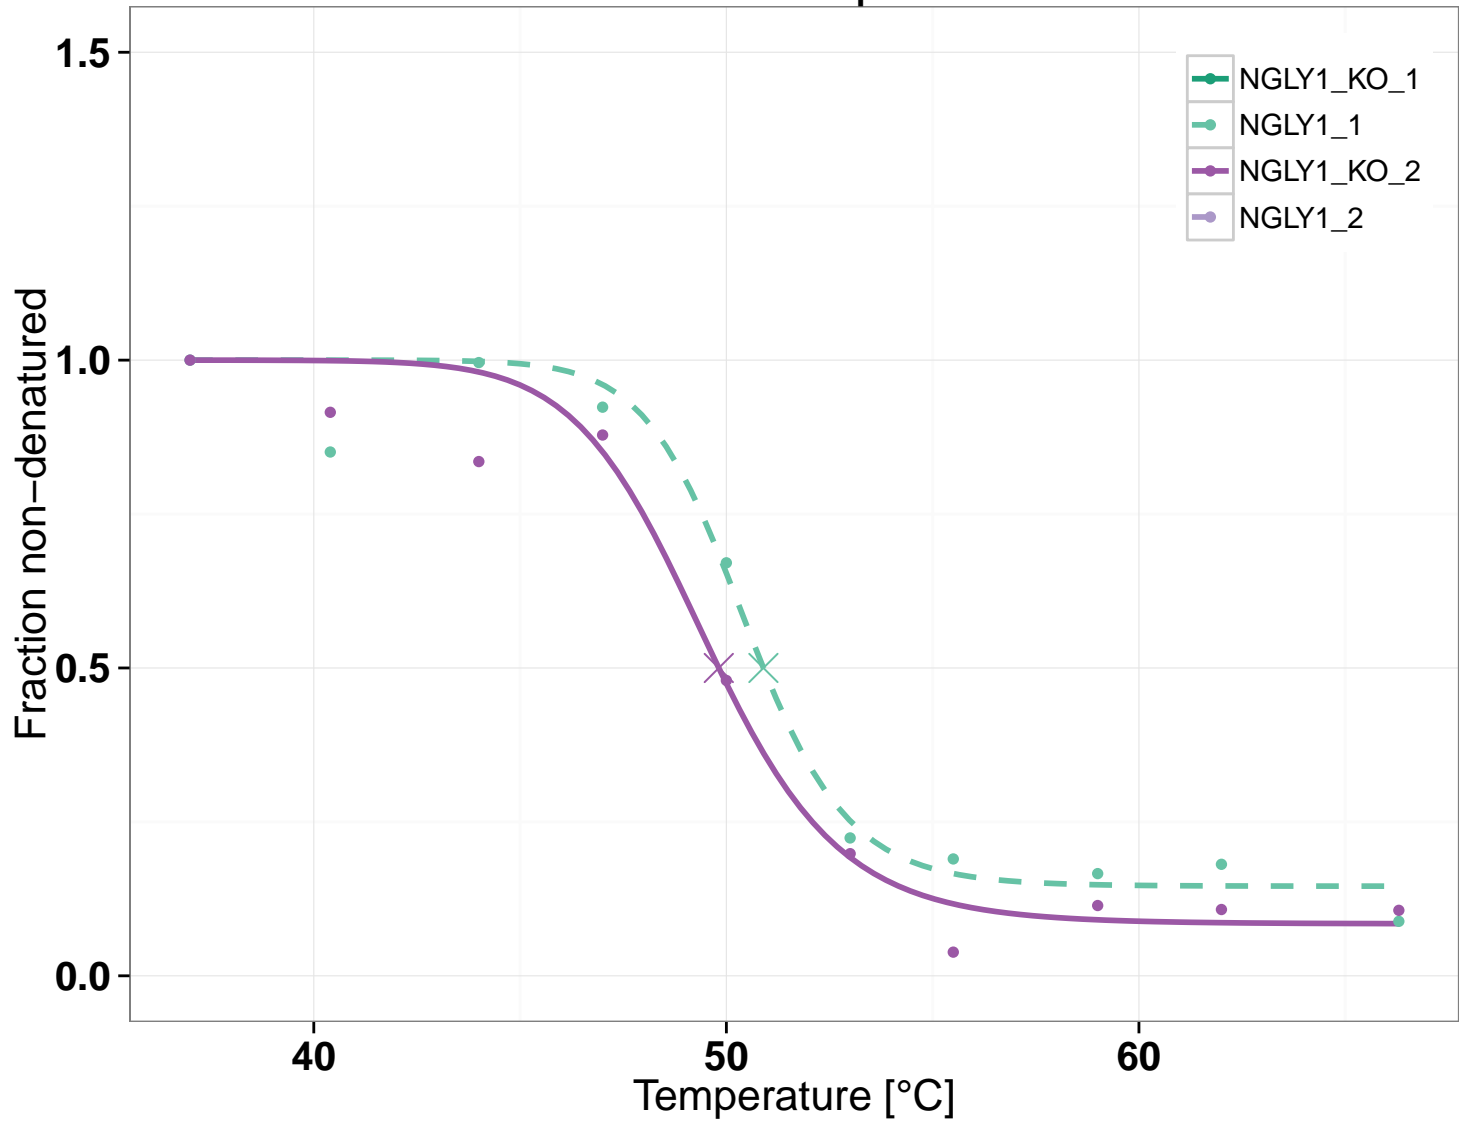

|            | meltPoint | slope | plateau | R2   |
|------------|-----------|-------|---------|------|
| NGLY1_KO_1 | -         | -     | -       | -    |
| NGLY1_1    | 50.9      | -0.17 | 0.15    | 0.98 |
| NGLY1_KO_2 | 49.82     | -0.14 | 0.08    | 0.97 |
| NGLY1_2    | -         | -     | -       | -    |

Supplement: Supplementary file 1526 [file 1]

IPI00023975.1|POLR2K

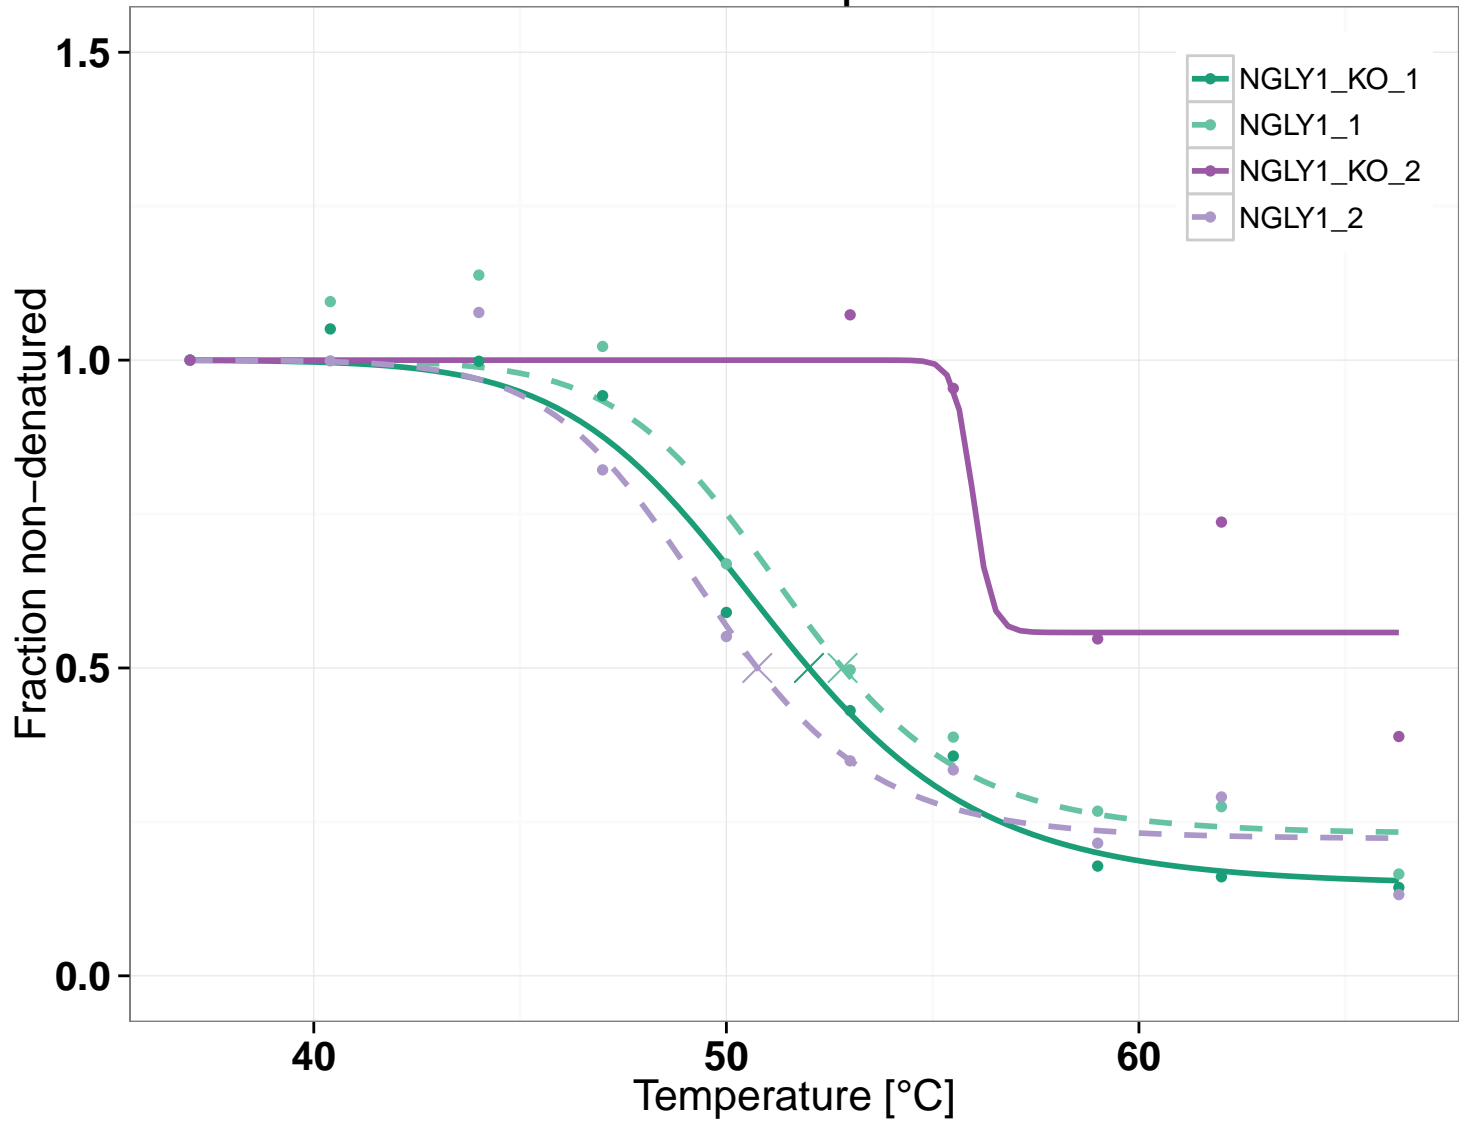

|            | meltPoint | slope  | plateau | R2    |
|------------|-----------|--------|---------|-------|
| NGLY1_KO_1 | 52        | -0.085 | 0.15    | 0.99  |
| NGLY1_1    | 52.82     | -0.093 | 0.23    | 0.96  |
| NGLY1_KO_2 | -         | -0.49  | 0.56    | -0.12 |
| NGLY1_2    | 50.75     | -0.099 | 0.22    | 0.98  |

Supplement: Supplementary file 1527 [file 1]

IPI00011032.4|TBC1D22A

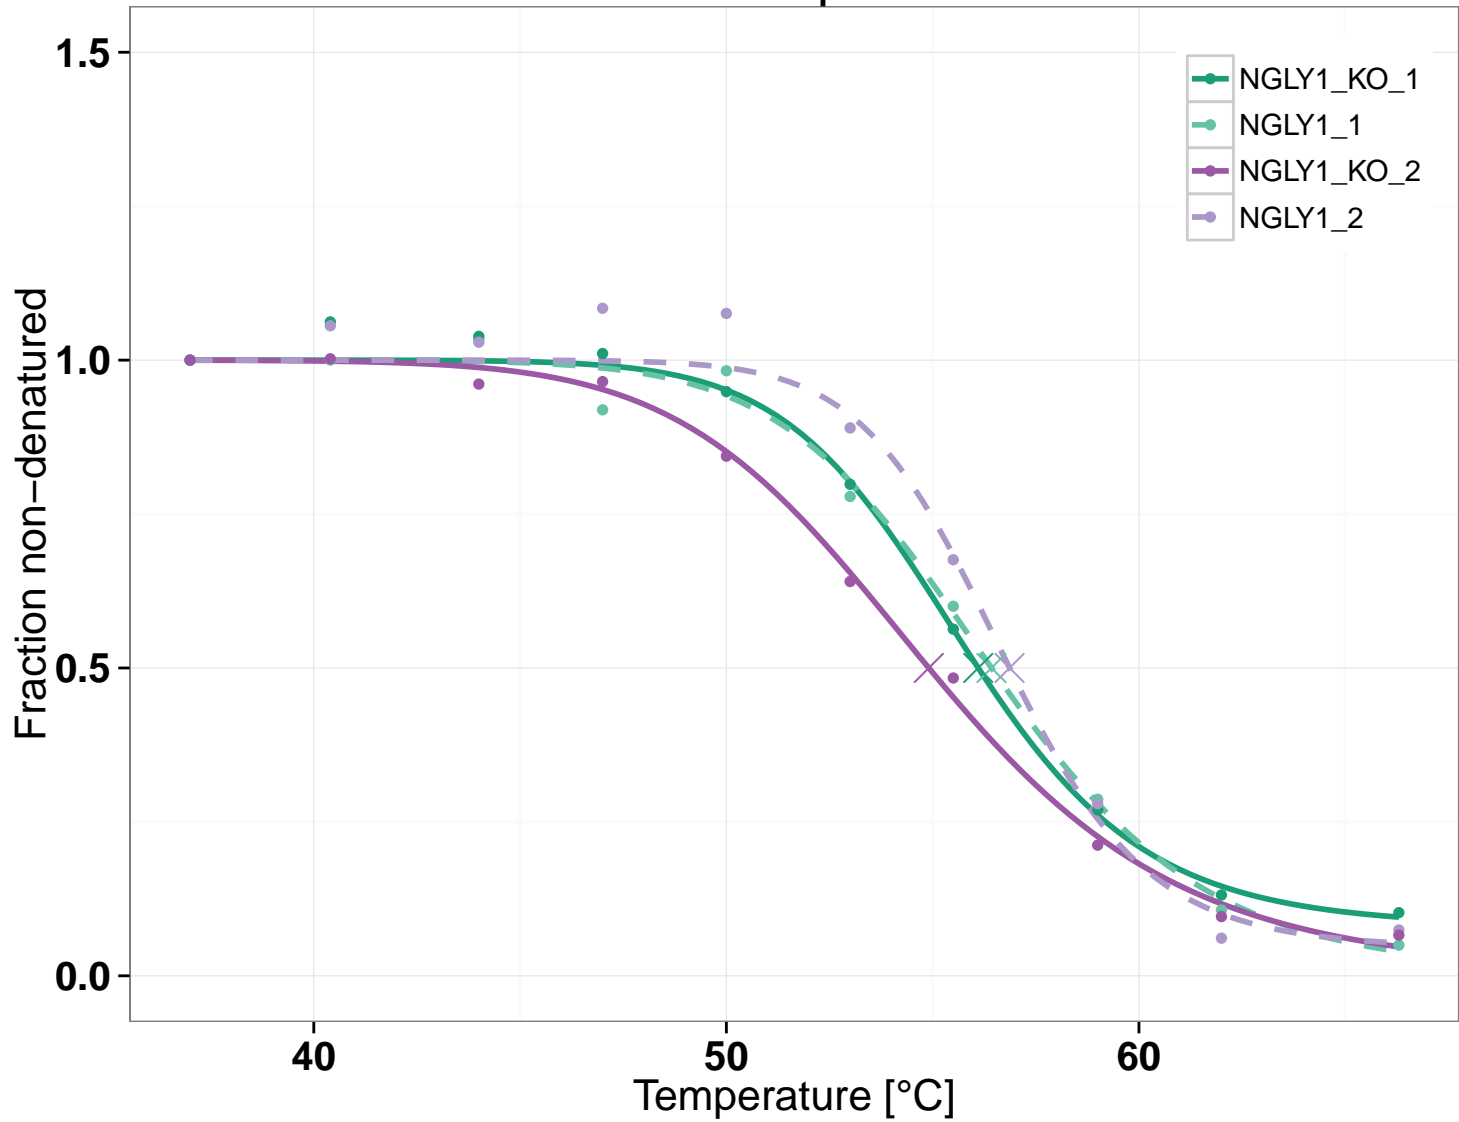

|            | meltPoint | slope  | plateau | R2   |
|------------|-----------|--------|---------|------|
| NGLY1_KO_1 | 56.11     | -0.1   | 0.08    | 1    |
| NGLY1_1    | 56.43     | -0.097 | 0       | 0.99 |
| NGLY1_KO_2 | 54.91     | -0.082 | 0       | 1    |
| NGLY1_2    | 56.86     | -0.14  | 0.04    | 0.99 |

Supplement: Supplementary file 1528 [file 1]

IPI00470629.4|C2ORF34

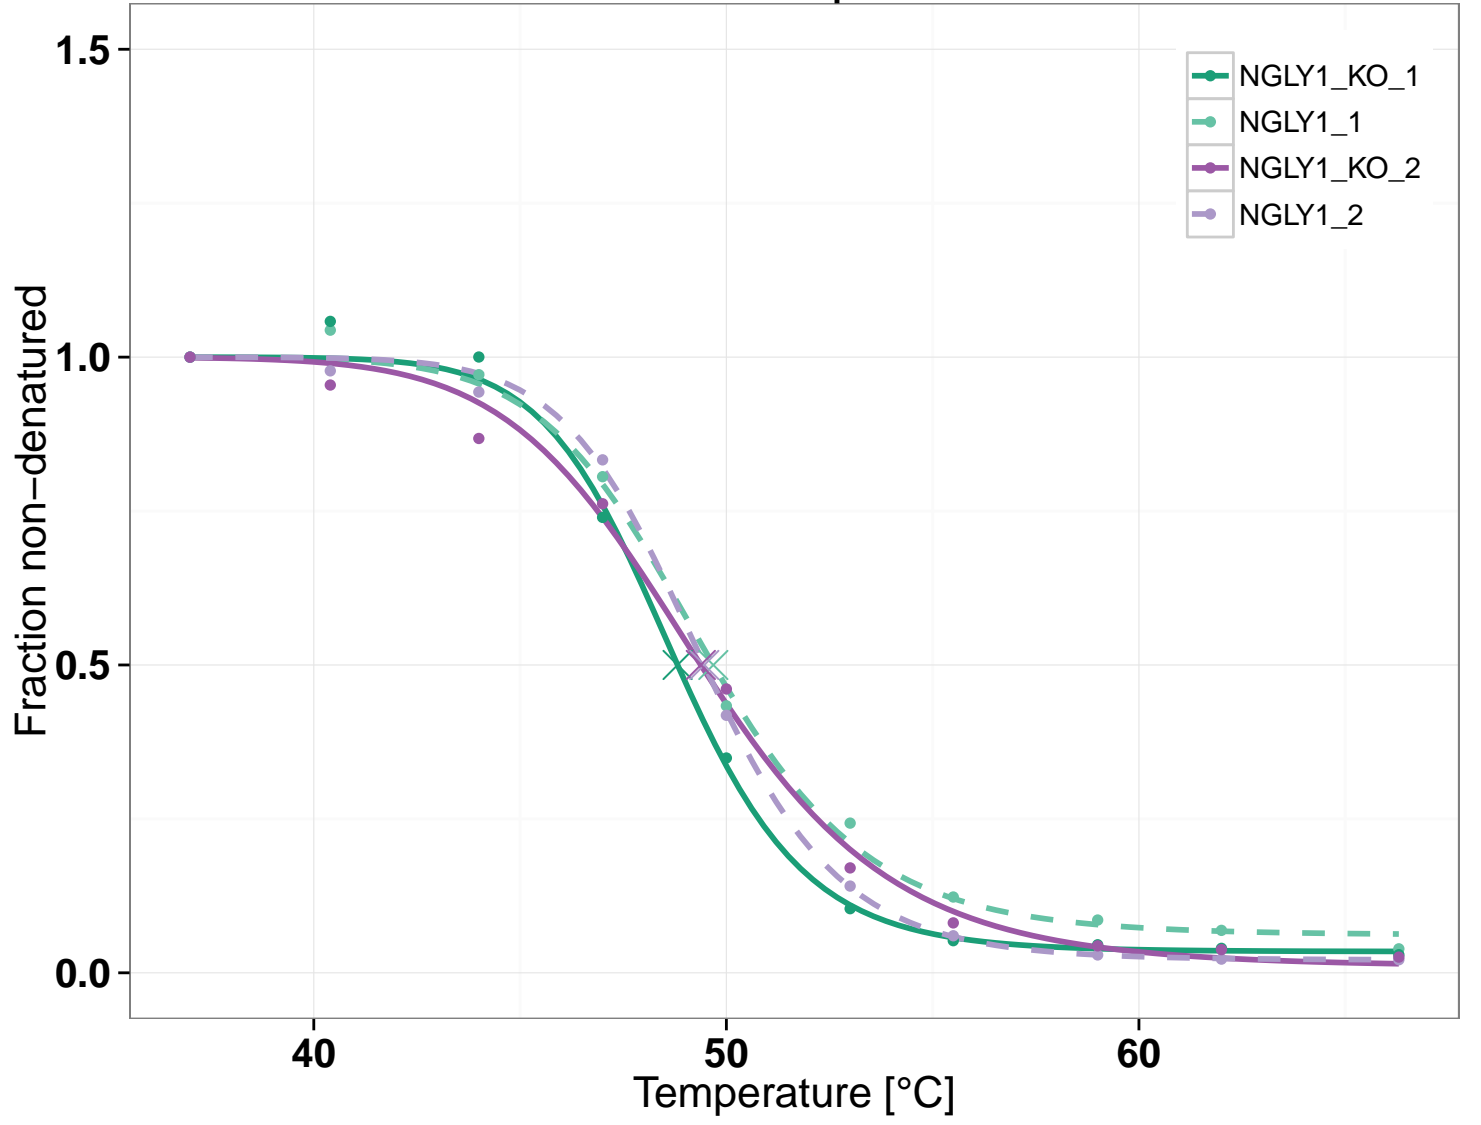

|            | meltPoint | slope | plateau | R2 |
|------------|-----------|-------|---------|----|
| NGLY1_KO_1 | 48.82     | -0.15 | 0.03    | 1  |
| NGLY1_1    | 49.68     | -0.12 | 0.06    | 1  |
| NGLY1_KO_2 | 49.38     | -0.11 | 0.01    | 1  |
| NGLY1_2    | 49.46     | -0.15 | 0.02    | 1  |

Supplement: Supplementary file 1529 [file 1]

IPI00419373.1|HNRNPA3

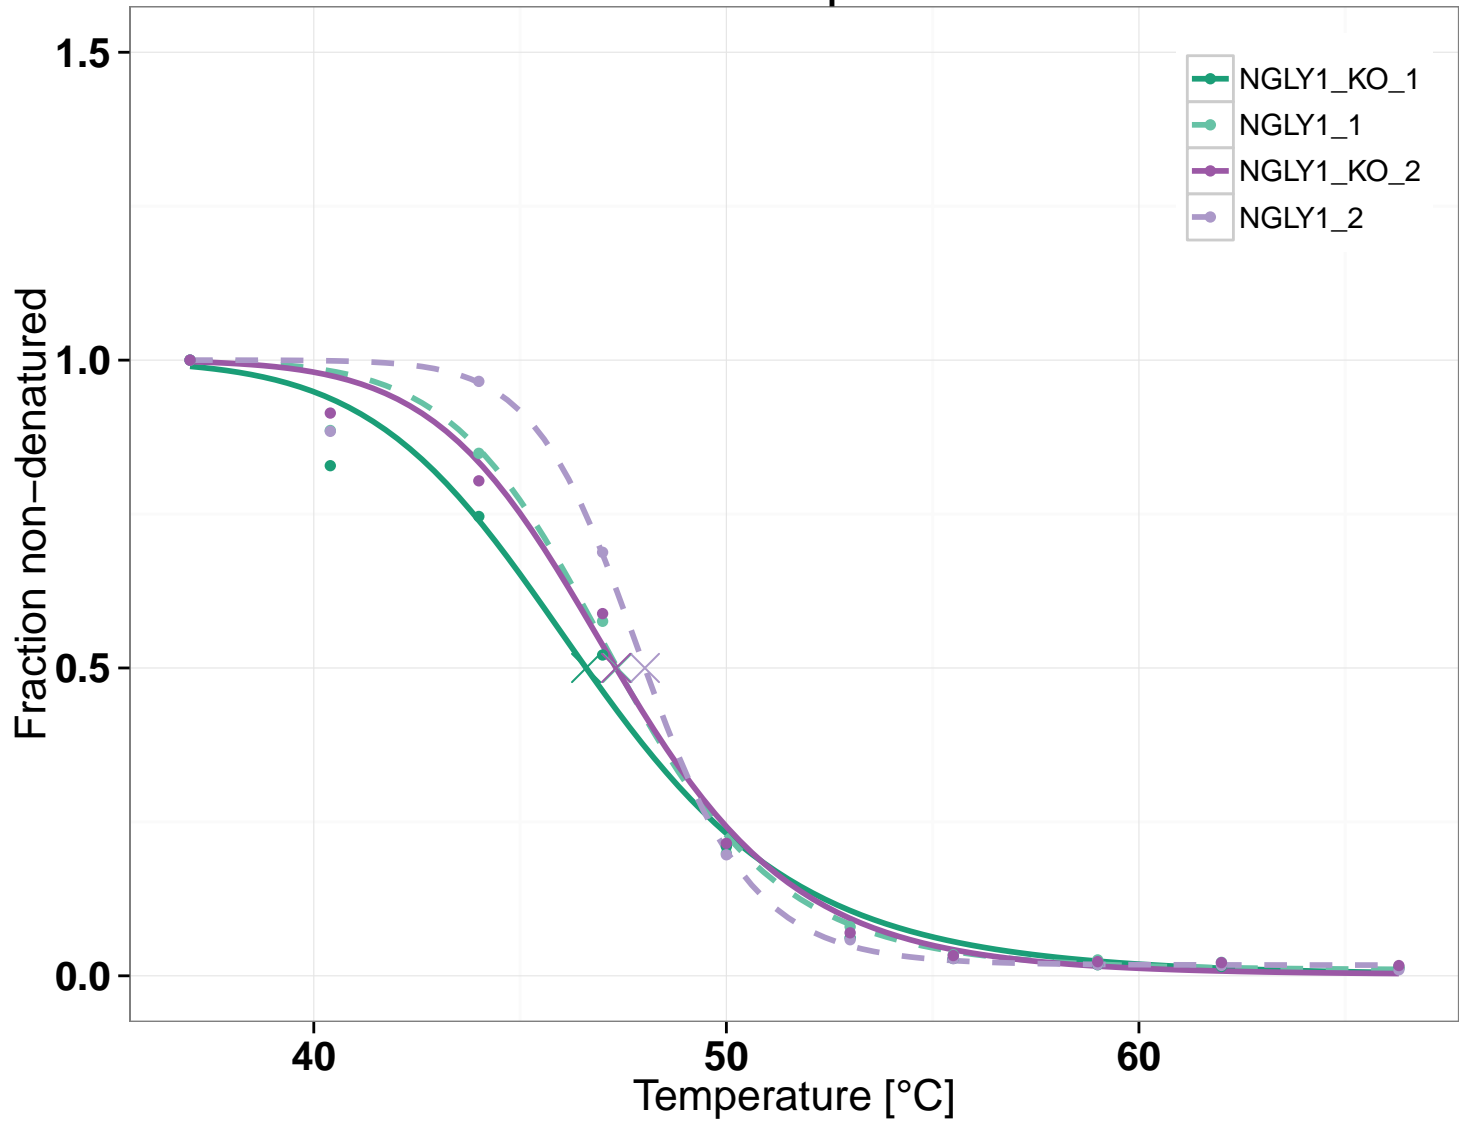

|            | meltPoint | slope  | plateau | R2   |
|------------|-----------|--------|---------|------|
| NGLY1_KO_1 | 46.6      | -0.096 | 0       | 0.99 |
| NGLY1_1    | 47.36     | -0.12  | 0.01    | 0.99 |
| NGLY1_KO_2 | 47.33     | -0.11  | 0       | 0.99 |
| NGLY1_2    | 48.02     | -0.19  | 0.02    | 0.99 |

Supplement: Supplementary file 1530 [file 1]

# IPI00005740.1|COX4NB

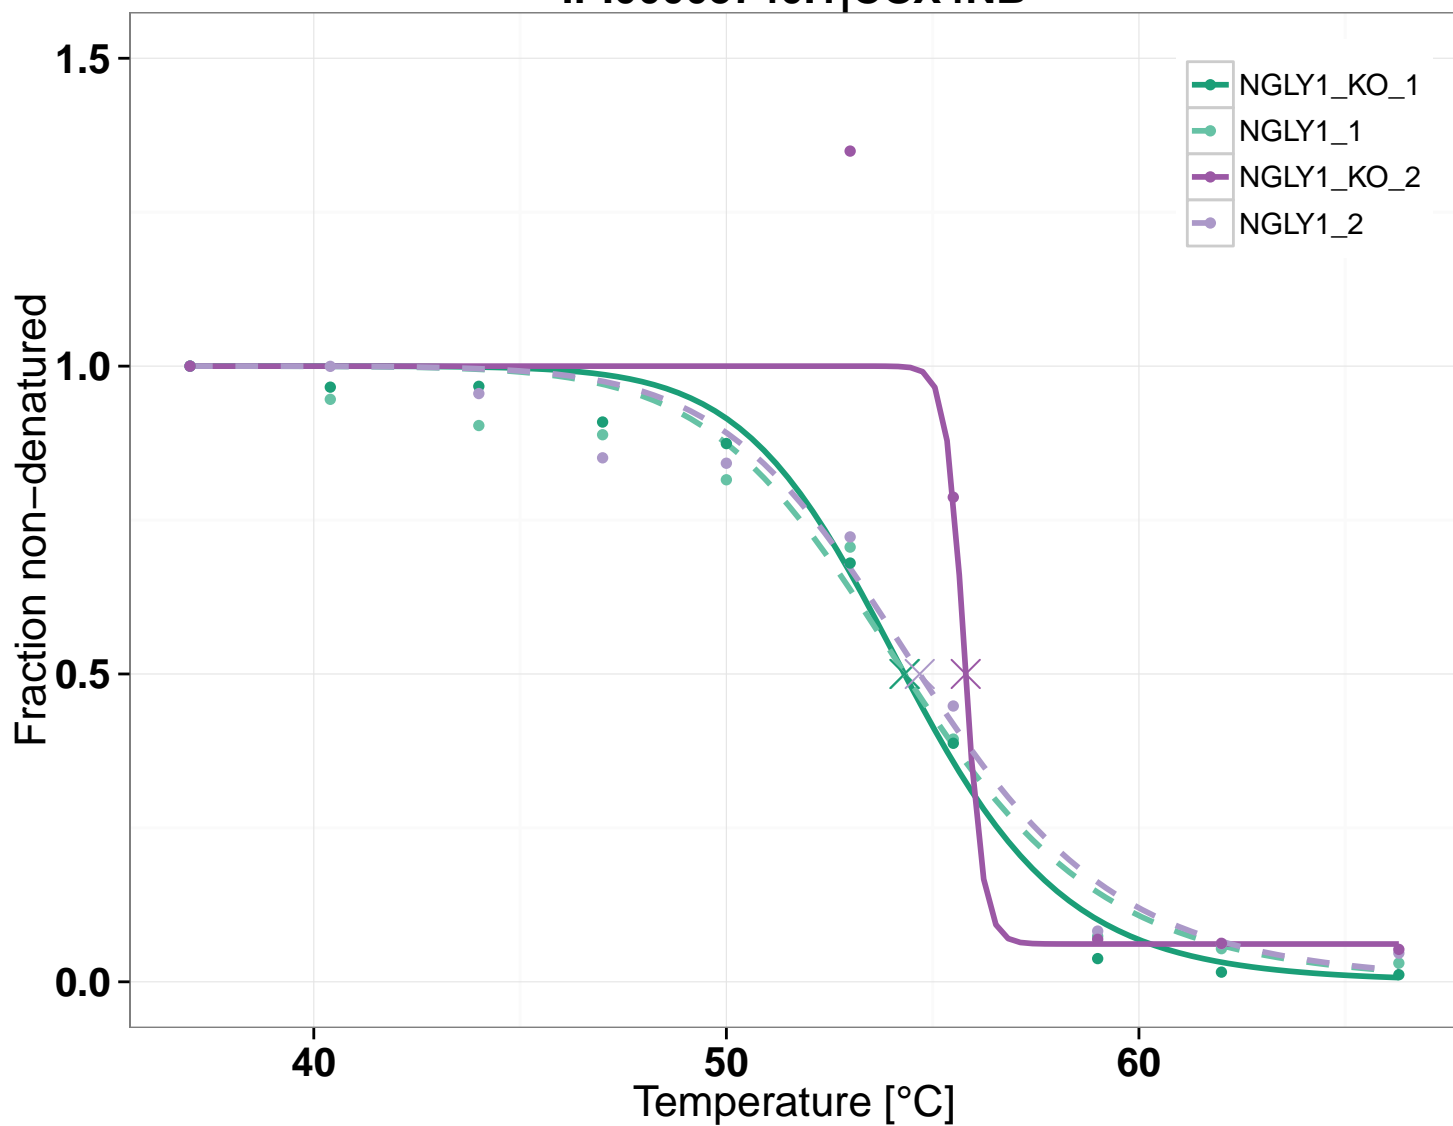

|            | meltPoint | slope | plateau | R2   |
|------------|-----------|-------|---------|------|
| NGLY1_KO_1 | 54.32     | -0.13 | 0       | 0.99 |
| NGLY1_1    | 54.33     | -0.1  | 0       | 0.98 |
| NGLY1_KO_2 | 55.8      | -1.1  | 0.06    | 0.53 |
| NGLY1_2    | 54.69     | -0.1  | 0       | 0.98 |

Supplement: Supplementary file 1531 [file 1]

# IPI00171626.3|LPCAT1

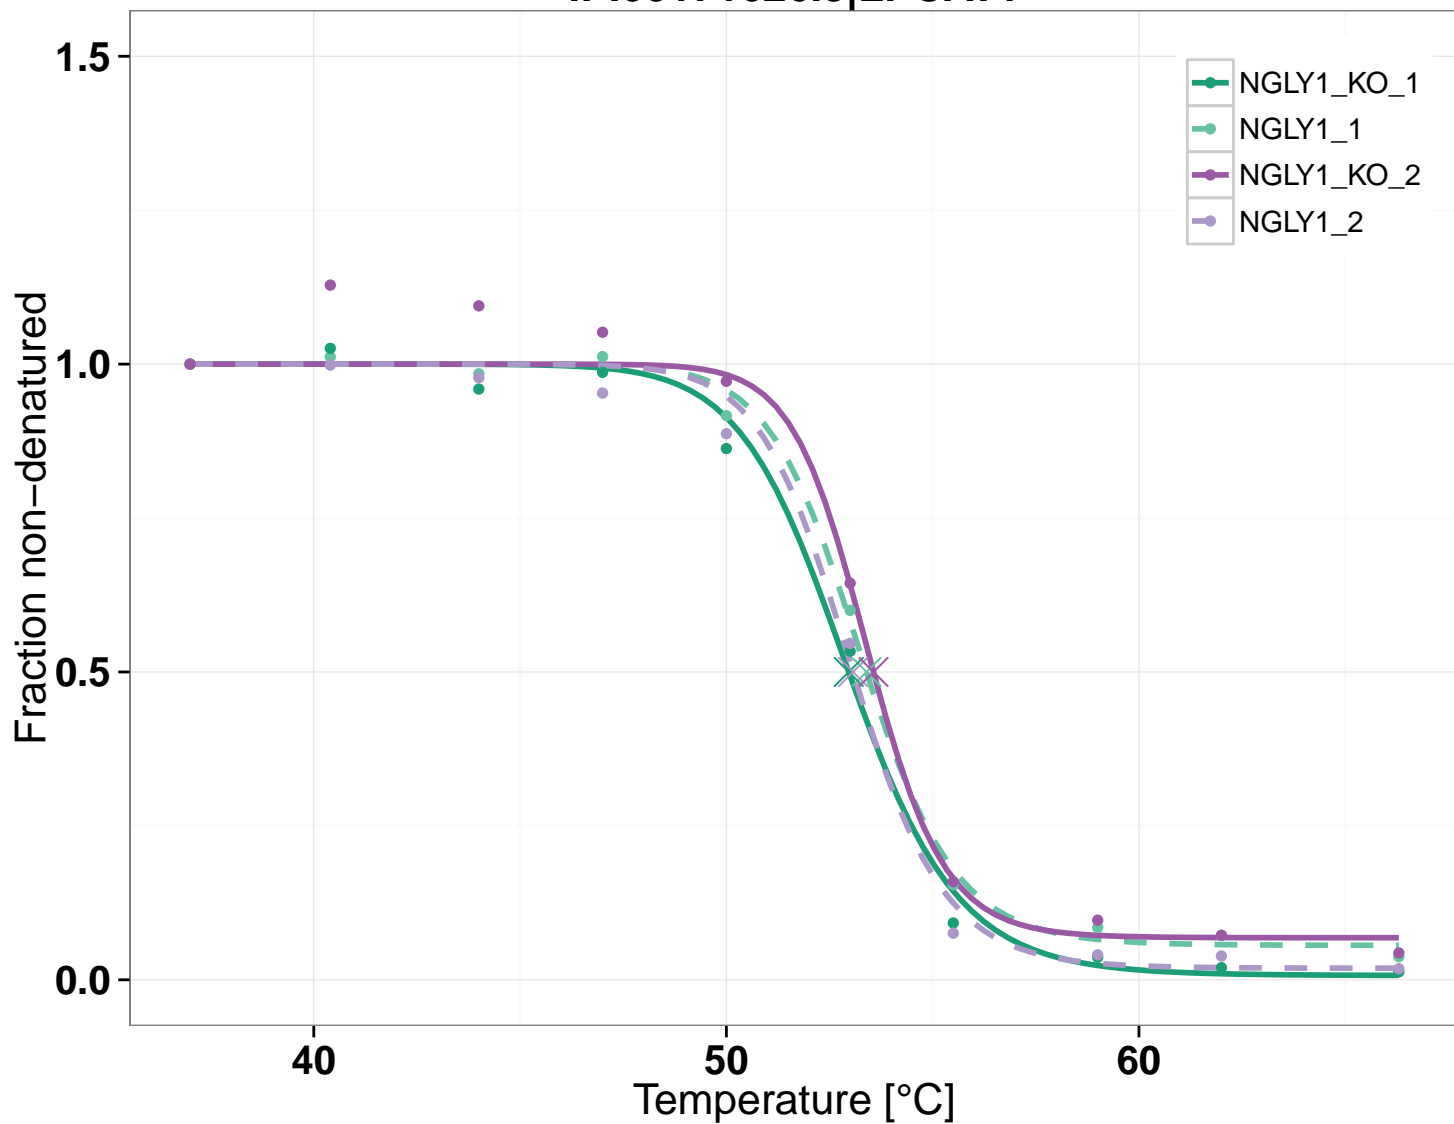

|            | meltPoint | slope | plateau | R2   |
|------------|-----------|-------|---------|------|
| NGLY1_KO_1 | 52.97     | -0.19 | 0.01    | 1    |
| NGLY1_1    | 53.4      | -0.21 | 0.06    | 1    |
| NGLY1_KO_2 | 53.57     | -0.25 | 0.07    | 0.99 |
| NGLY1_2    | 53.07     | -0.22 | 0.02    | 0.99 |

Supplement: Supplementary file 1532 [file 1]

IPI00329441.1|RAB43

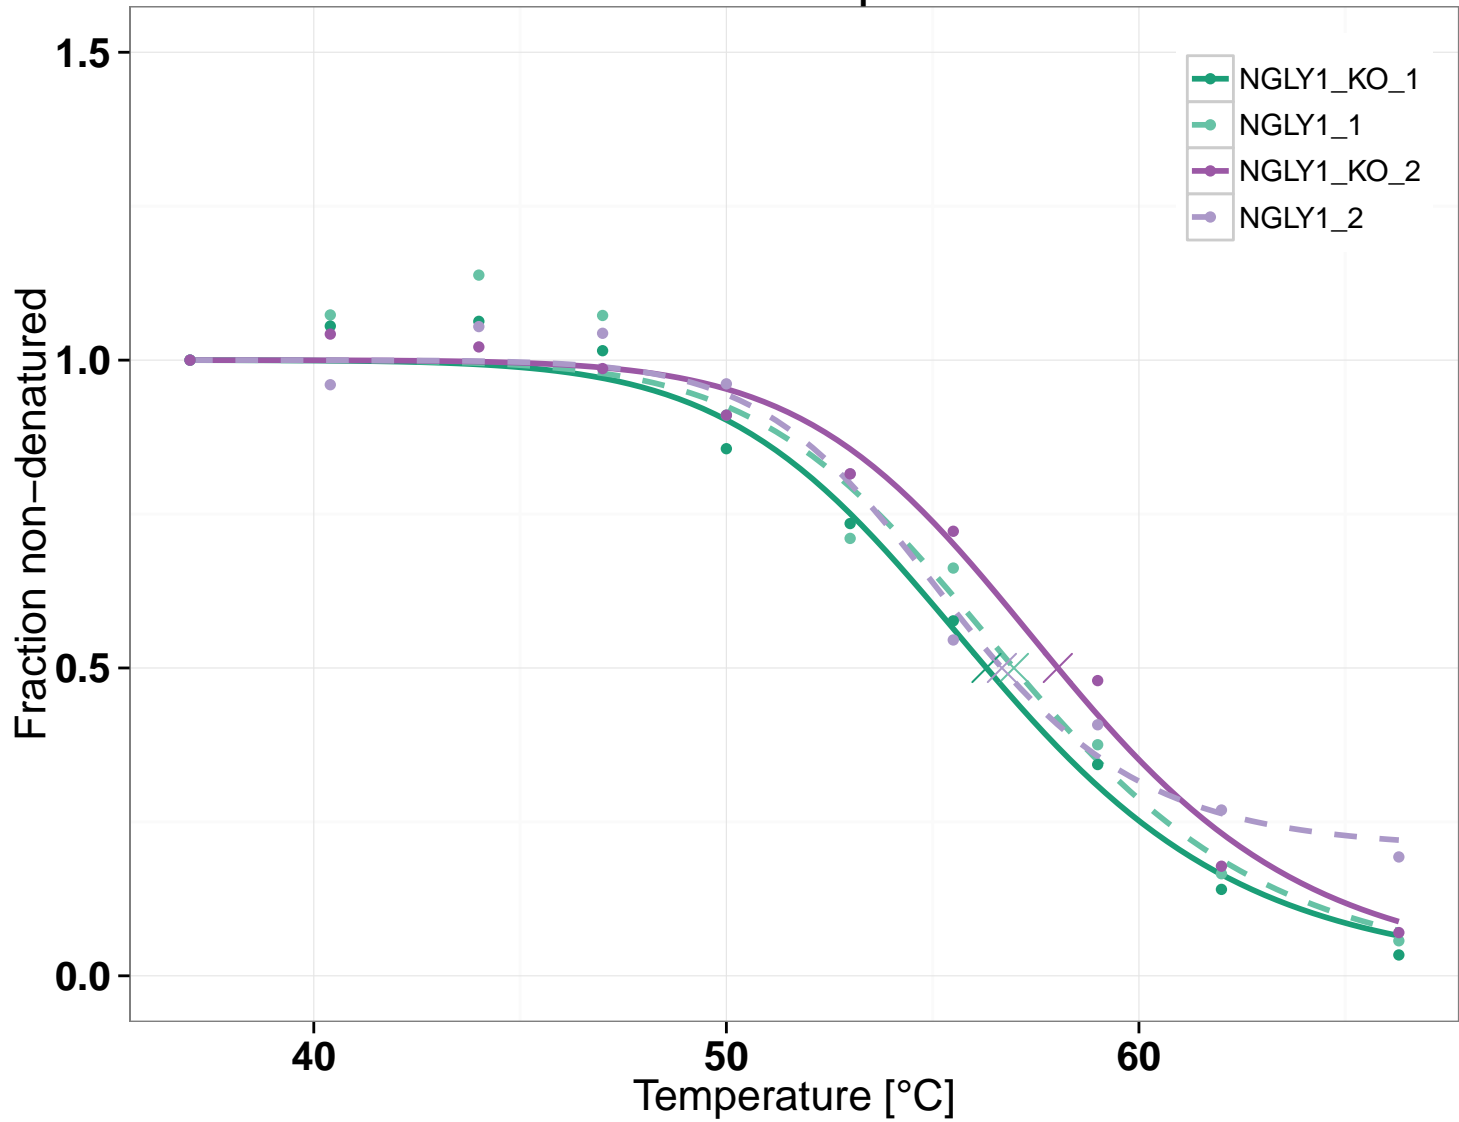

|            | meltPoint | slope  | plateau | R2   |
|------------|-----------|--------|---------|------|
| NGLY1_KO_1 | 56.31     | -0.08  | 0       | 0.99 |
| NGLY1_1    | 56.97     | -0.08  | 0       | 0.97 |
| NGLY1_KO_2 | 58.03     | -0.082 | 0       | 0.99 |
| NGLY1_2    | 56.68     | -0.086 | 0.2     | 0.99 |

Supplement: Supplementary file 1533 [file 1]

IPI00220901.4|TBC1D4

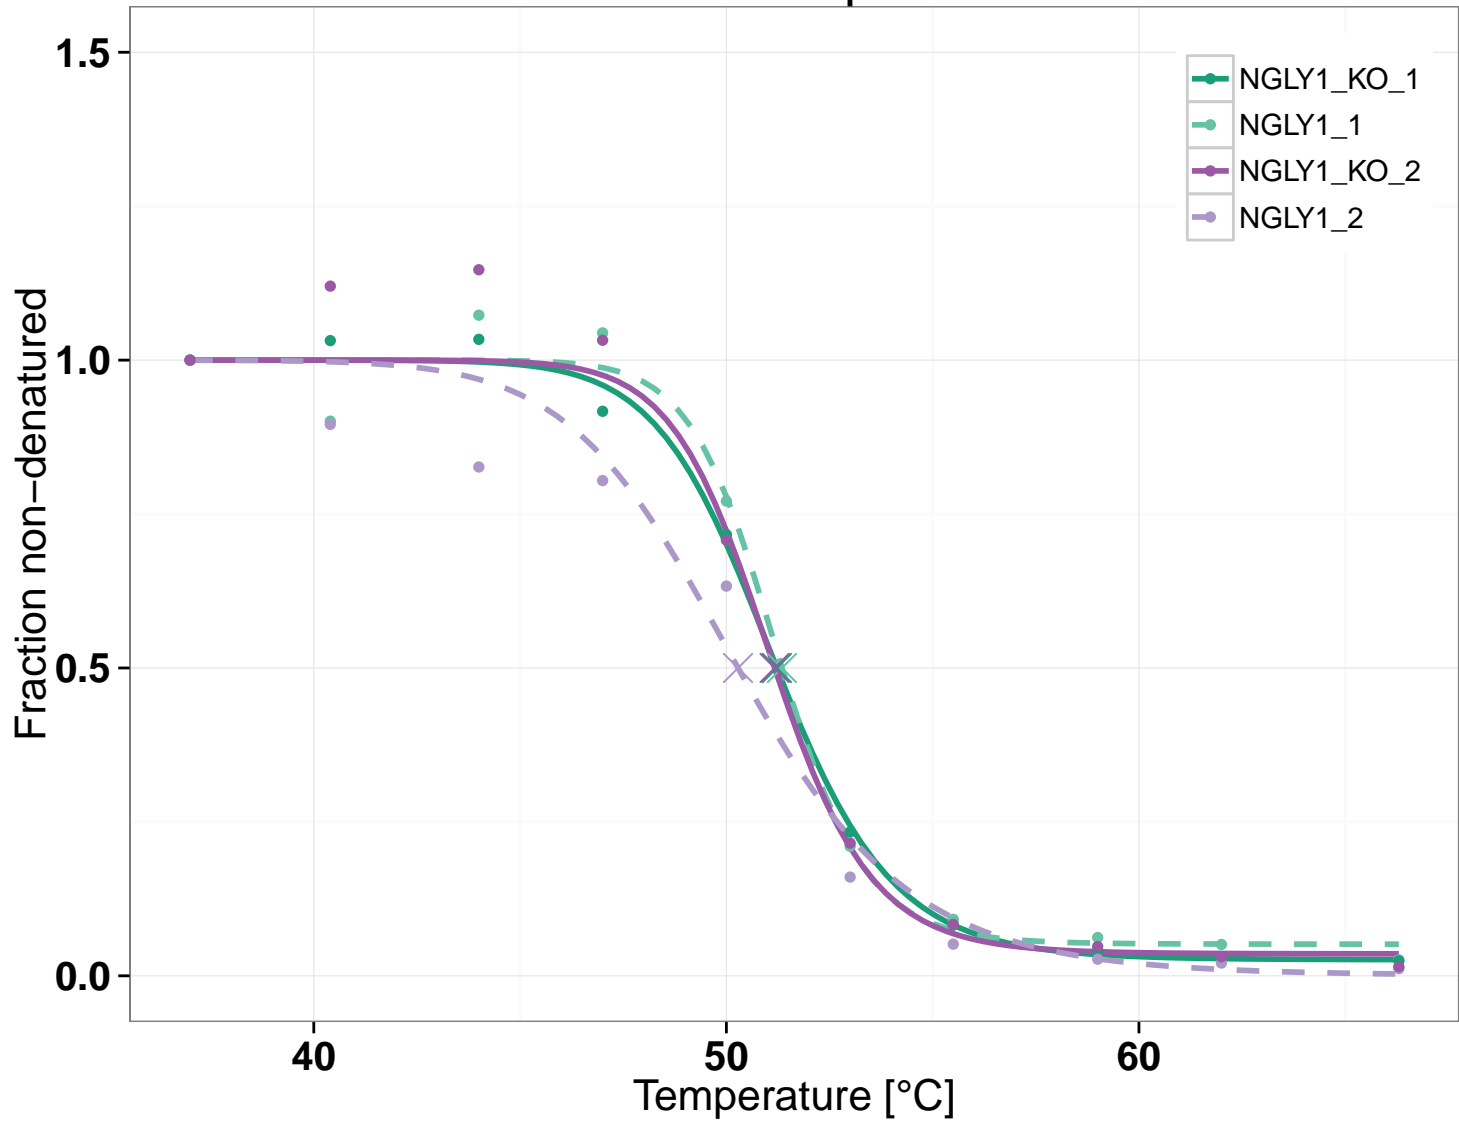

|            | meltPoint | slope | plateau | R2   |
|------------|-----------|-------|---------|------|
| NGLY1_KO_1 | 51.22     | -0.17 | 0.03    | 1    |
| NGLY1_1    | 51.35     | -0.22 | 0.05    | 0.99 |
| NGLY1_KO_2 | 51.17     | -0.2  | 0.04    | 0.98 |
| NGLY1_2    | 50.28     | -0.12 | 0       | 0.97 |

Supplement: Supplementary file 1534 [file 1]

# IPI00294435.8|SLU7

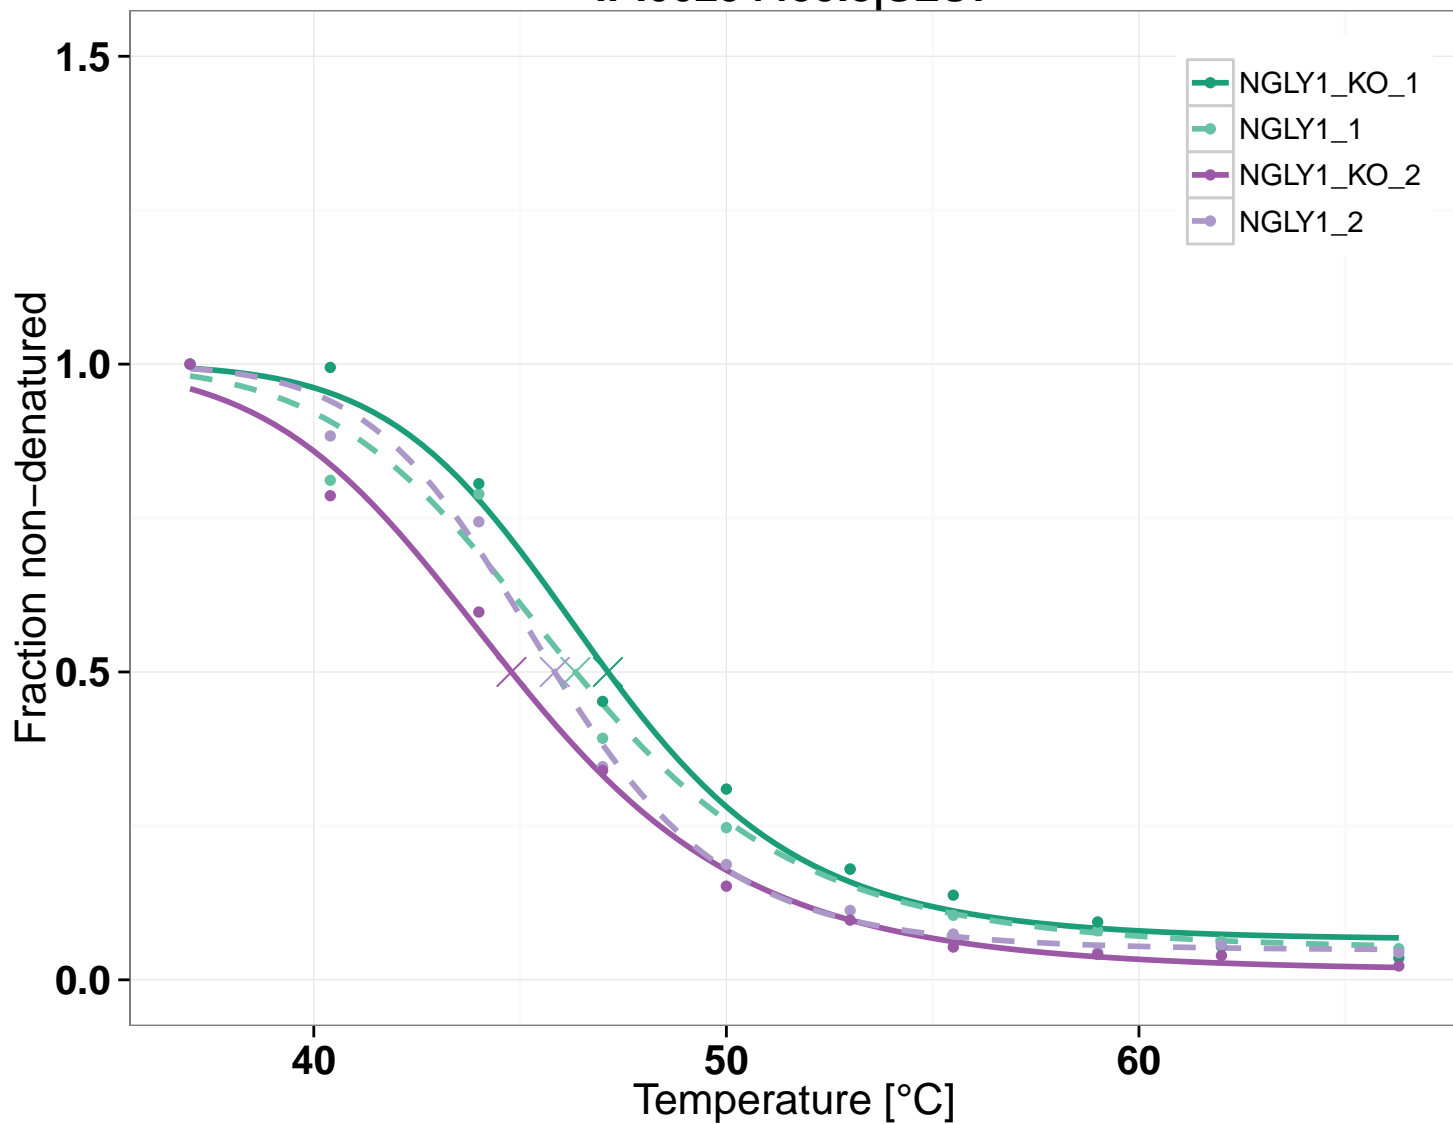

|            | meltPoint | slope  | plateau | R2   |
|------------|-----------|--------|---------|------|
| NGLY1_KO_1 | 47.13     | -0.094 | 0.06    | 0.99 |
| NGLY1_1    | 46.34     | -0.083 | 0.05    | 0.98 |
| NGLY1_KO_2 | 44.79     | -0.085 | 0.01    | 0.99 |
| NGLY1_2    | 45.84     | -0.11  | 0.05    | 0.99 |

Supplement: Supplementary file 1535 [file 1]

IPI00026054.1|MAPKAPK2

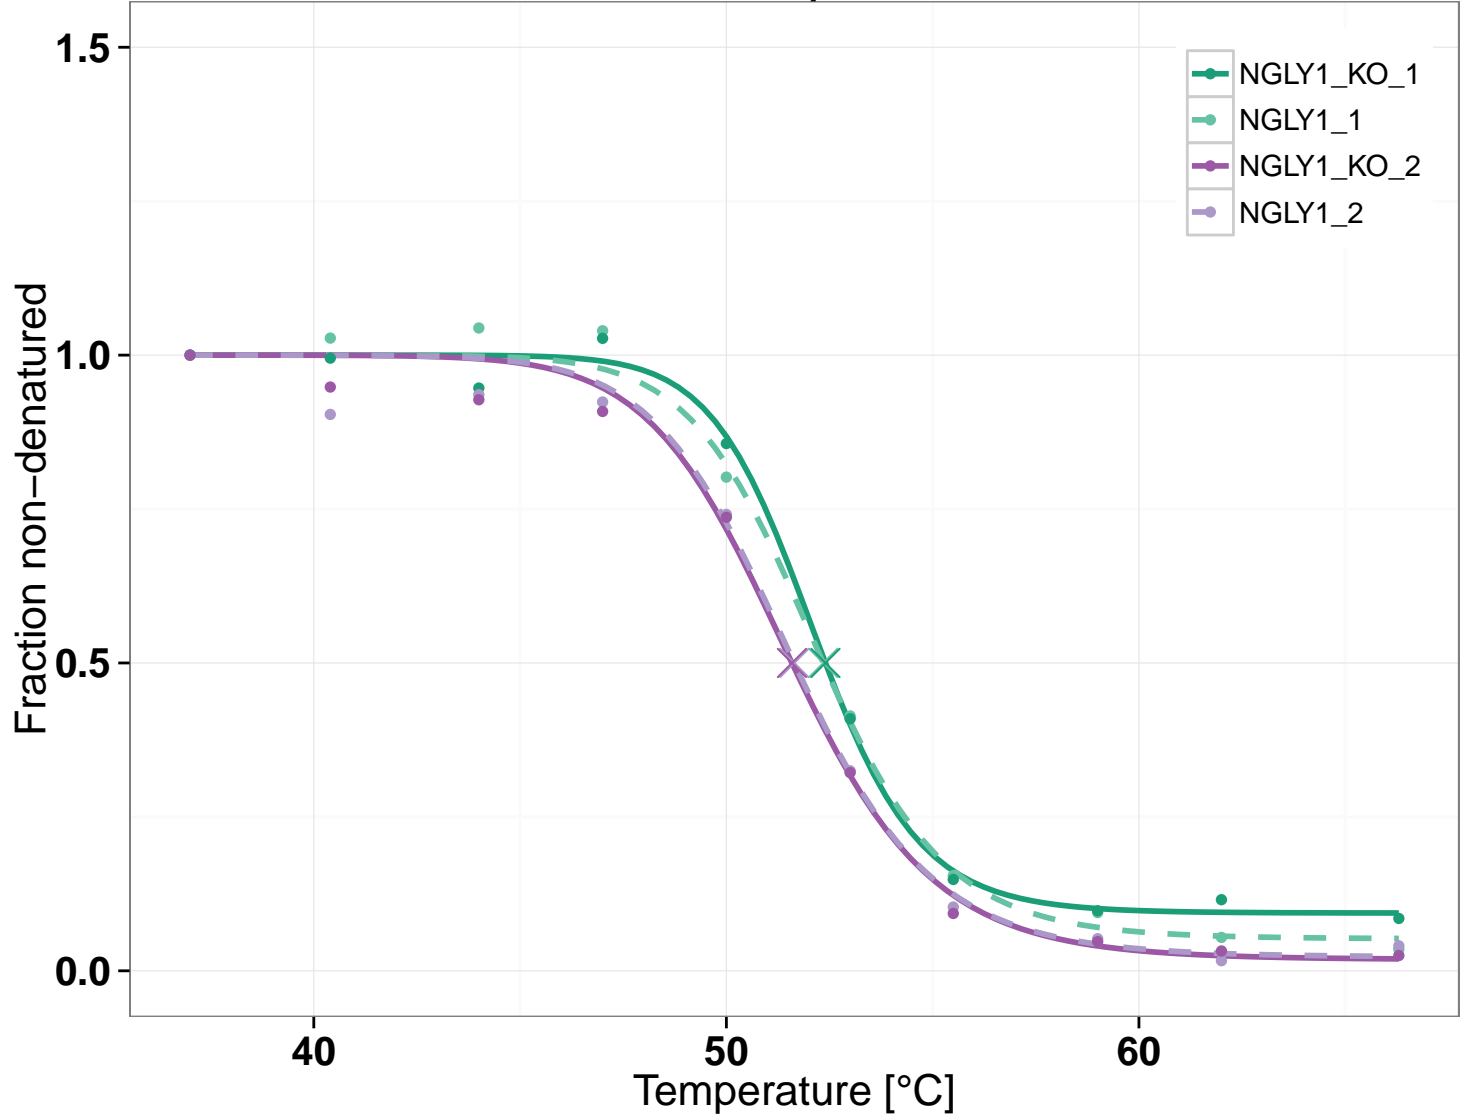

|            | meltPoint | slope | plateau | R2   |
|------------|-----------|-------|---------|------|
| NGLY1_KO_1 | 52.4      | -0.18 | 0.09    | 1    |
| NGLY1_1    | 52.35     | -0.15 | 0.05    | 1    |
| NGLY1_KO_2 | 51.59     | -0.14 | 0.02    | 0.99 |
| NGLY1_2    | 51.65     | -0.14 | 0.02    | 0.99 |

Supplement: Supplementary file 1536 [file 1]

# IPI00844415.1|ATP8B2

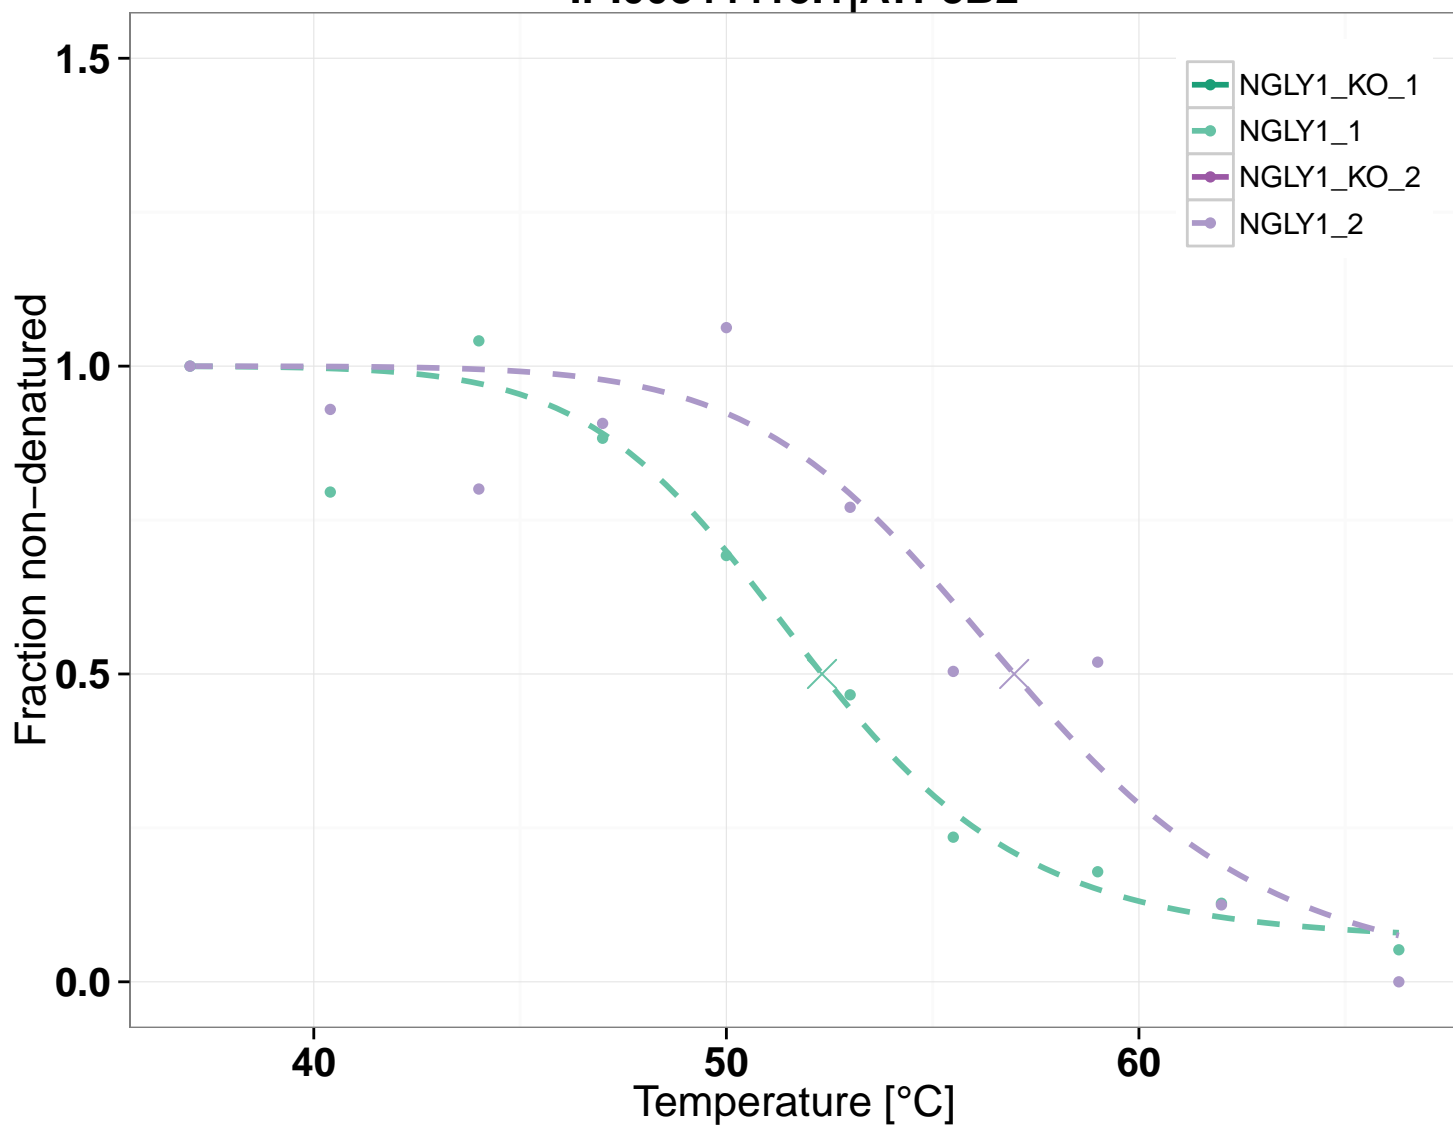

|            | meltPoint | slope  | plateau | R2   |
|------------|-----------|--------|---------|------|
| NGLY1_KO_1 | -         | -      | -       | -    |
| NGLY1_1    | 52.32     | -0.087 | 0.07    | 0.96 |
| NGLY1_KO_2 | -         | -      | -       | -    |
| NGLY1_2    | 56.98     | -0.079 | 0       | 0.9  |

Supplement: Supplementary file 1537 [file 1]

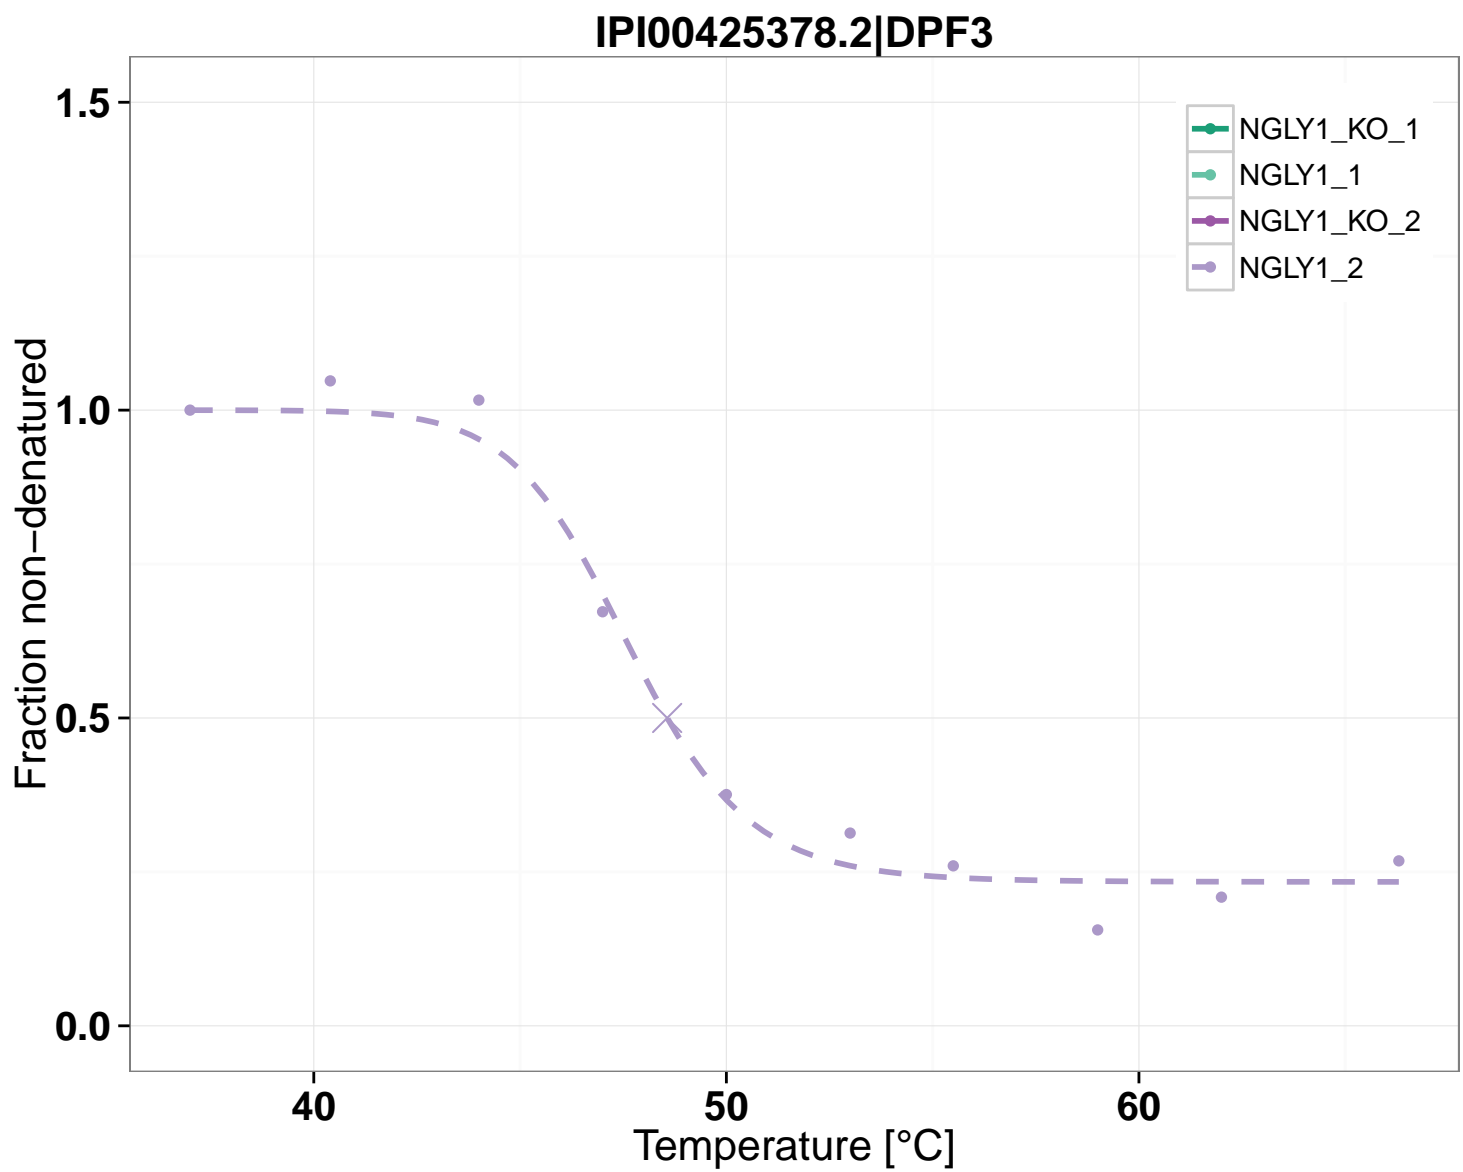

|            | meltPoint | slope | plateau | R2   |
|------------|-----------|-------|---------|------|
| NGLY1_KO_1 | —         | —     | —       | —    |
| NGLY1_1    | —         | —     | —       | —    |
| NGLY1_KO_2 | —         | —     | —       | —    |
| NGLY1_2    | 48.56     | -0.13 | 0.23    | 0.98 |

Supplement: Supplementary file 1538 [file 1]

IPI00026697.2|ZMYM6

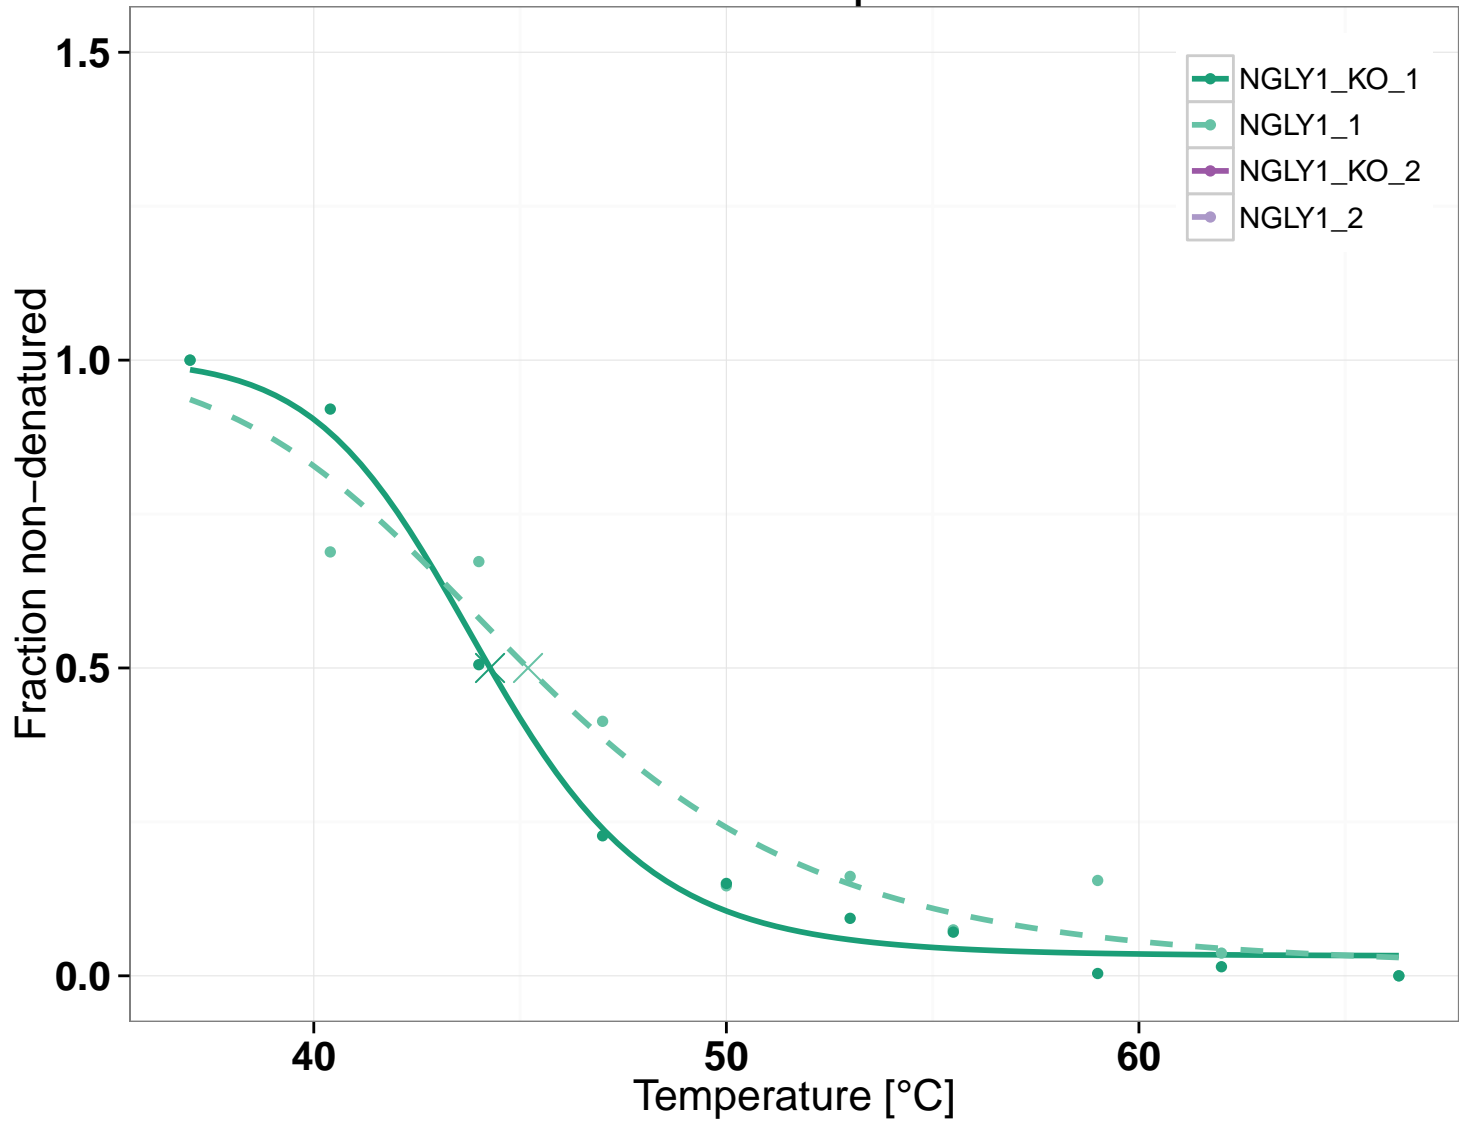

|            | meltPoint | slope  | plateau | R2   |
|------------|-----------|--------|---------|------|
| NGLY1_KO_1 | 44.27     | -0.12  | 0.03    | 0.99 |
| NGLY1_1    | 45.19     | -0.069 | 0.01    | 0.96 |
| NGLY1_KO_2 | -         | -      | -       | -    |
| NGLY1_2    | -         | -      | -       | -    |

Supplement: Supplementary file 1539 [file 1]

IPI00887159.1|LOC389342

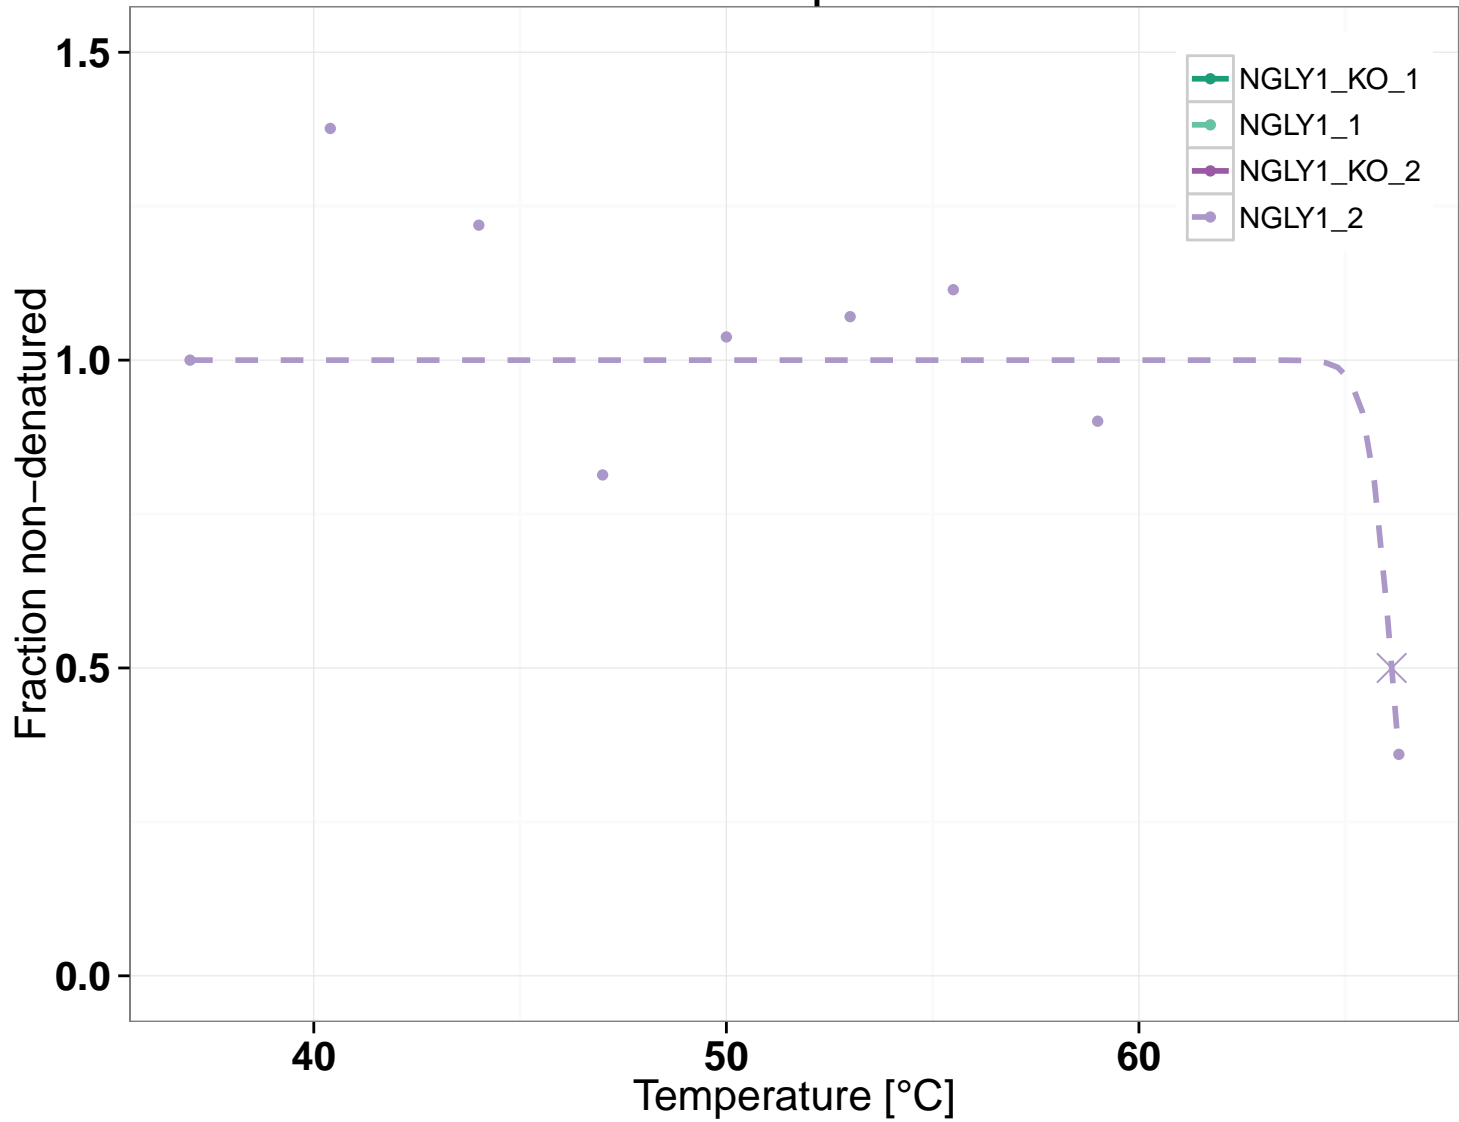

|            | meltPoint | slope | plateau | R2   |
|------------|-----------|-------|---------|------|
| NGLY1_KO_1 | —         | —     | —       | —    |
| NGLY1_1    | —         | —     | —       | —    |
| NGLY1_KO_2 | —         | —     | —       | —    |
| NGLY1_2    | 66.13     | −0.83 | 0       | 0.53 |

Supplement: Supplementary file 1540 [file 1]

IPI00910194.1|NUP153

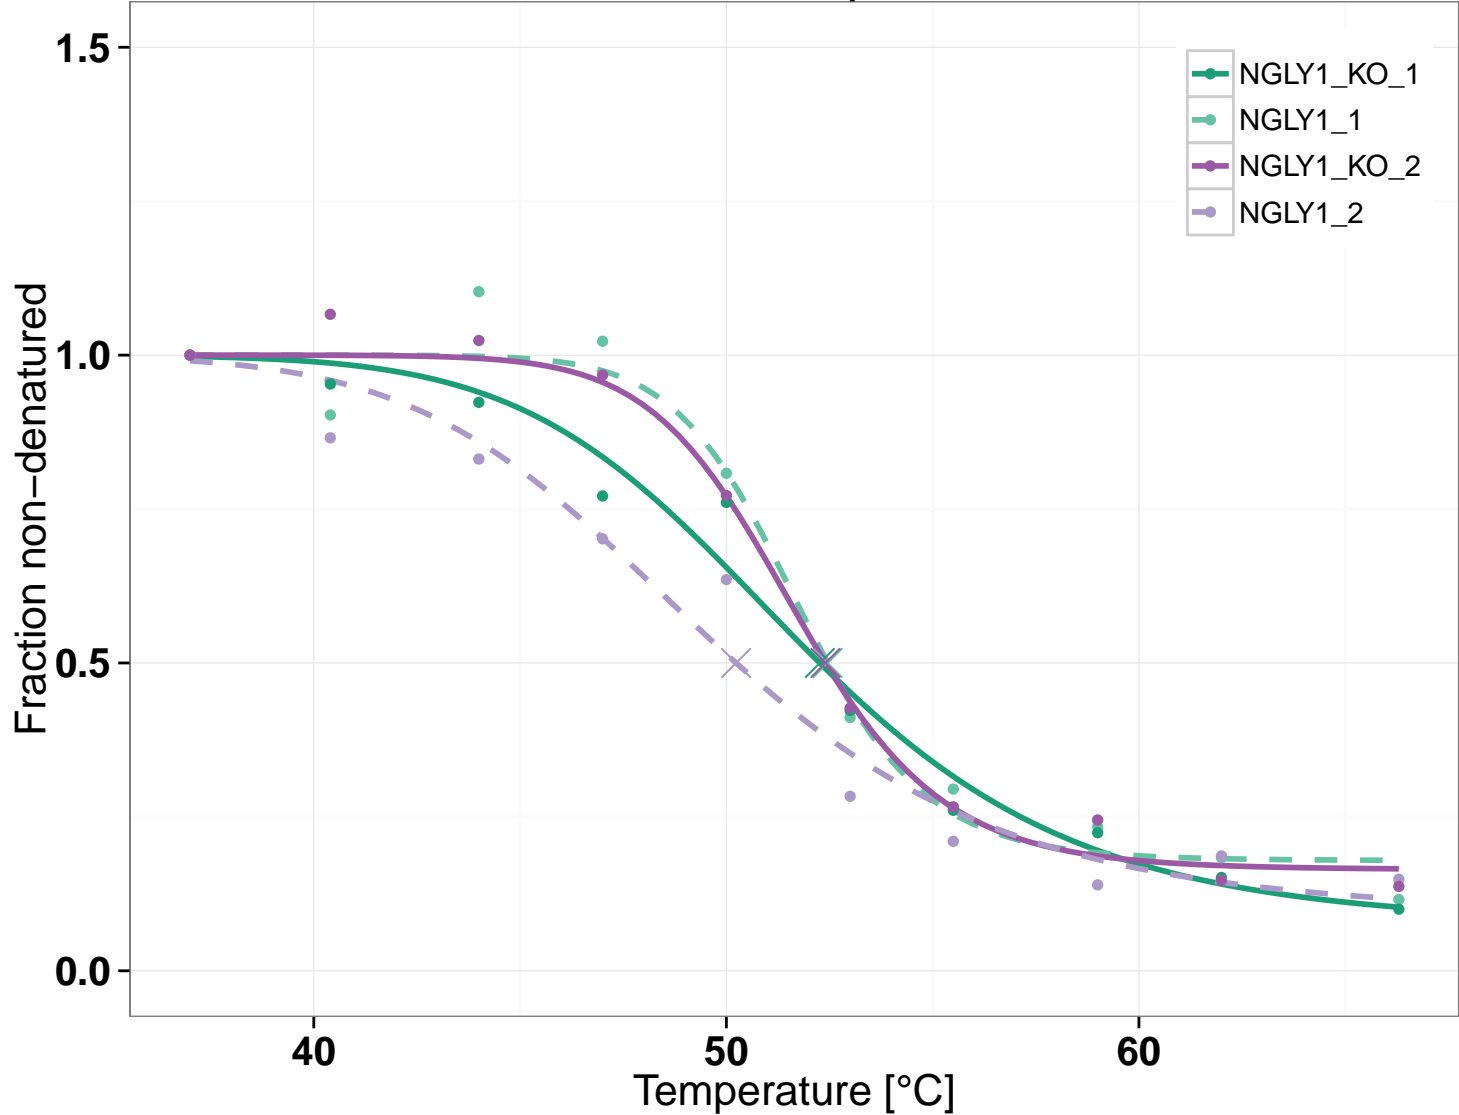

|            | meltPoint | slope  | plateau | R2   |
|------------|-----------|--------|---------|------|
| NGLY1_KO_1 | 52.27     | -0.069 | 0.07    | 0.98 |
| NGLY1_1    | 52.46     | -0.14  | 0.18    | 0.98 |
| NGLY1_KO_2 | 52.4      | -0.12  | 0.16    | 0.99 |
| NGLY1_2    | 50.24     | -0.064 | 0.09    | 0.97 |

Supplement: Supplementary file 1541 [file 1]

# IPI00027705.2|PRIM2

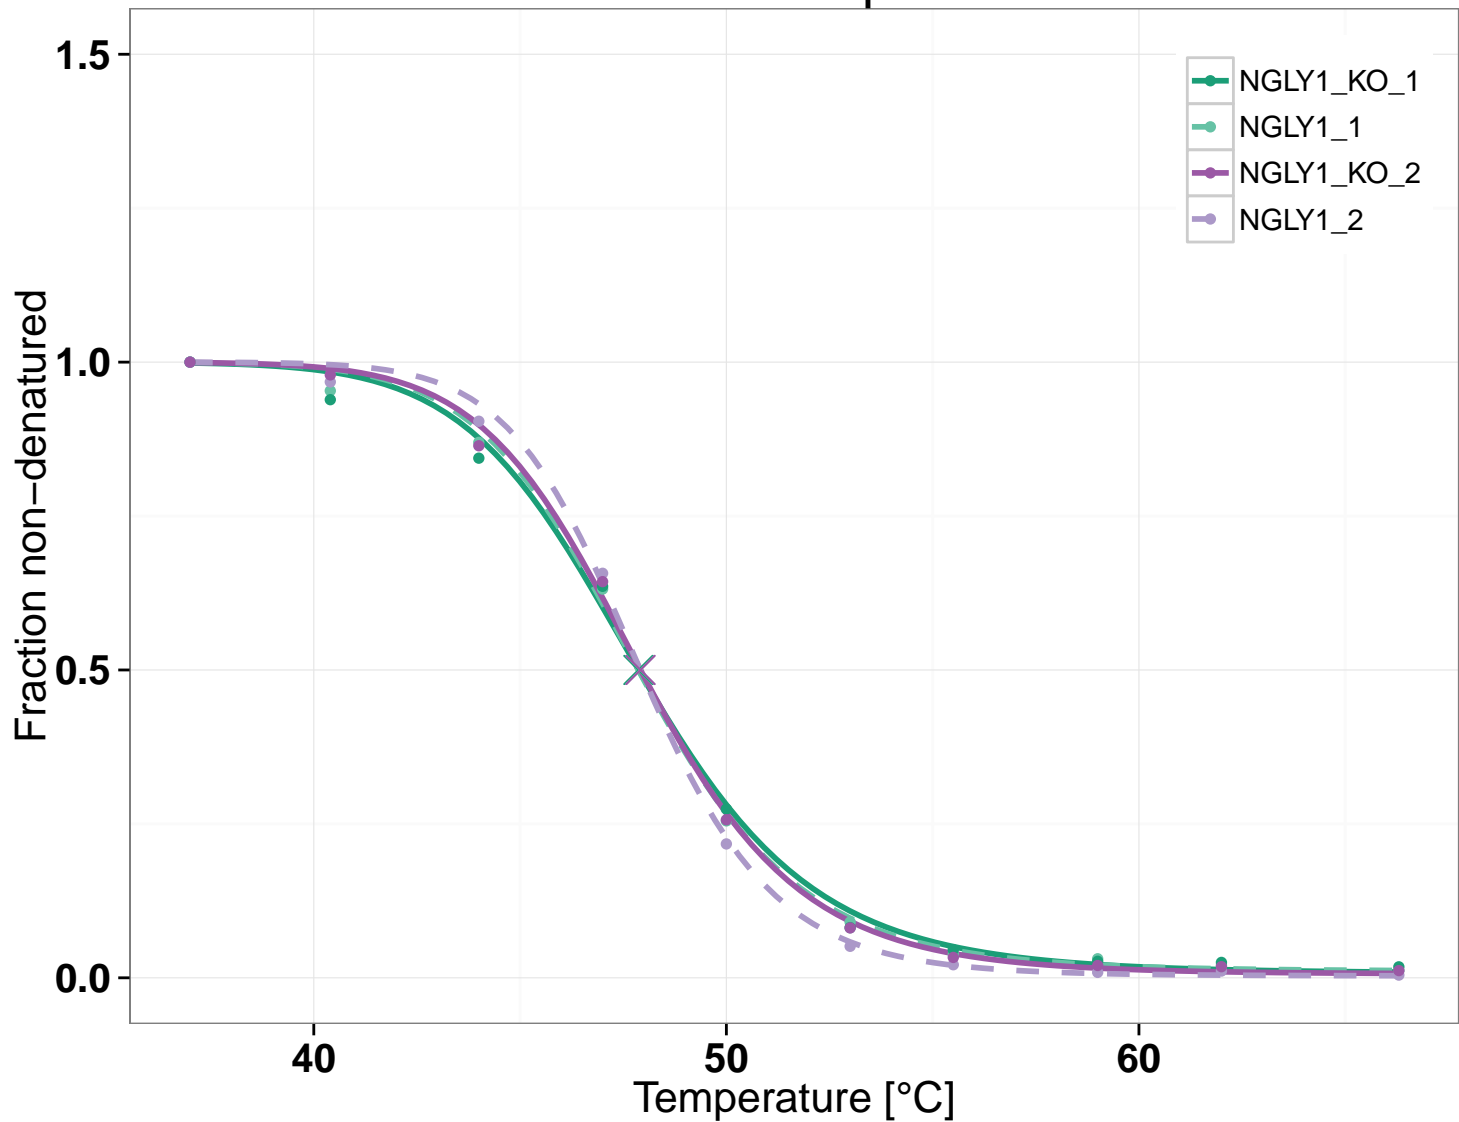

|            | meltPoint | slope | plateau | R2 |
|------------|-----------|-------|---------|----|
| NGLY1_KO_1 | 47.87     | -0.12 | 0.01    | 1  |
| NGLY1_1    | 47.87     | -0.13 | 0.01    | 1  |
| NGLY1_KO_2 | 47.92     | -0.13 | 0.01    | 1  |
| NGLY1_2    | 47.92     | -0.15 | 0       | 1  |

Supplement: Supplementary file 1542 [file 1]

IPI00008278.1|MAGEC2

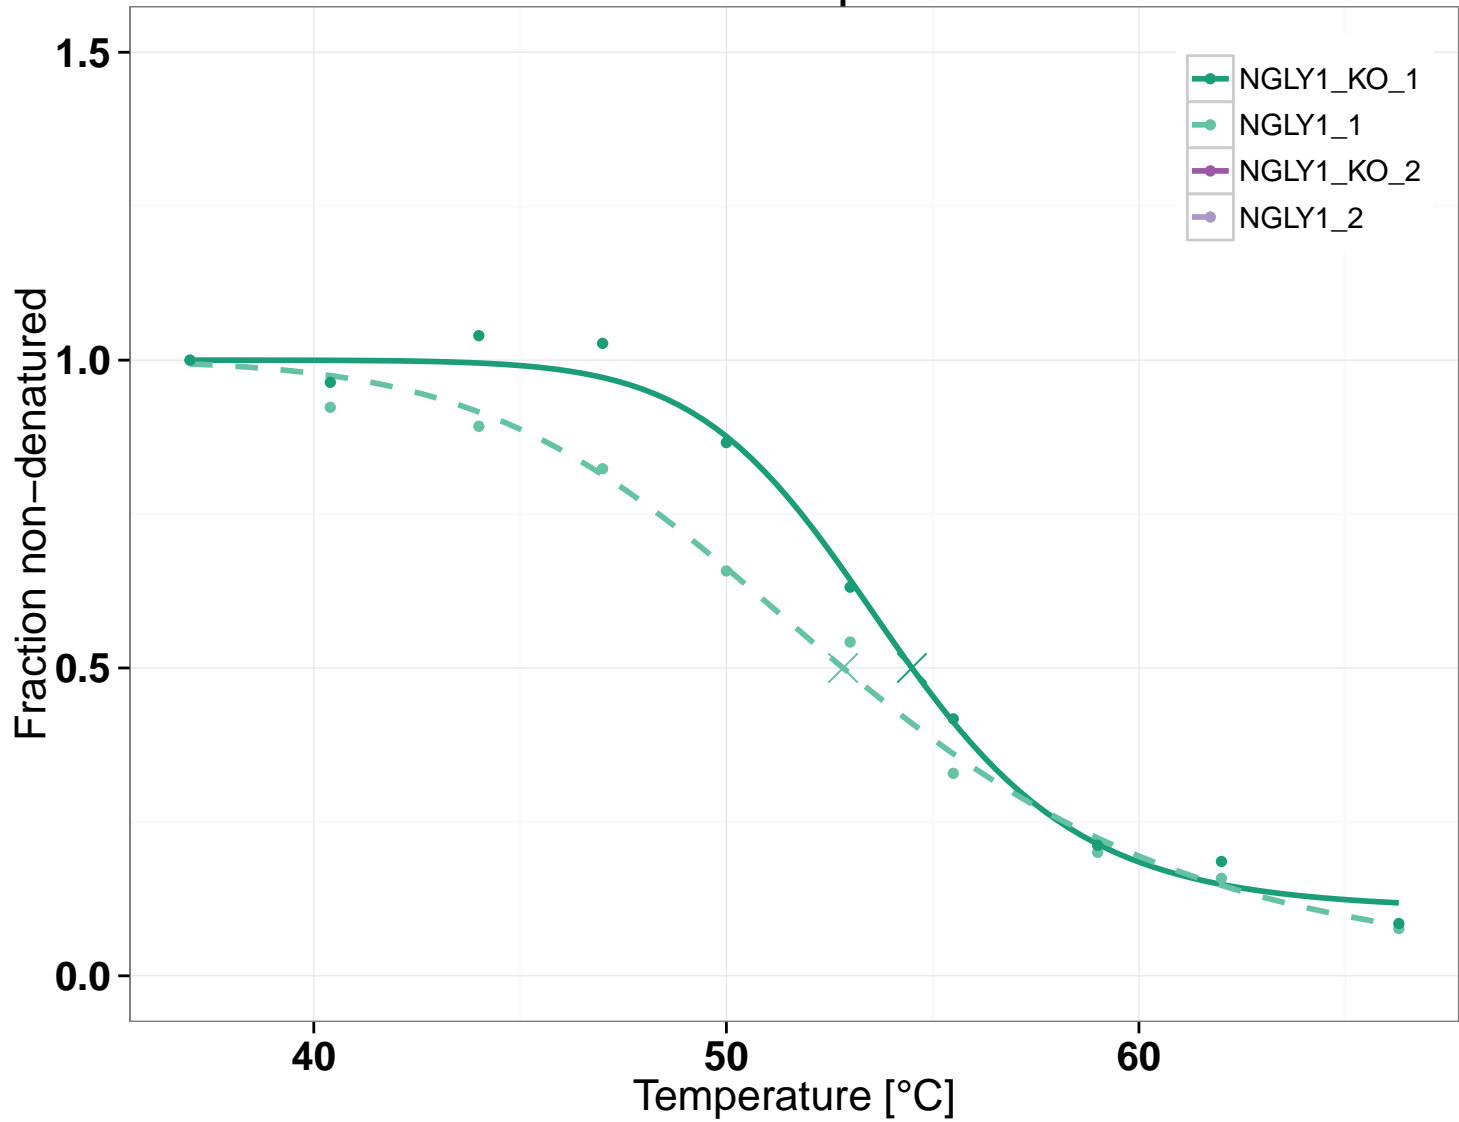

|            | meltPoint | slope  | plateau | R2   |
|------------|-----------|--------|---------|------|
| NGLY1_KO_1 | 54.5      | -0.097 | 0.11    | 0.99 |
| NGLY1_1    | 52.83     | -0.058 | 0       | 0.99 |
| NGLY1_KO_2 | -         | -      | -       | -    |
| NGLY1_2    | -         | -      | -       | -    |

Supplement: Supplementary file 1543 [file 1]

IPI00871408.2|B4DSG6\_HUMAN

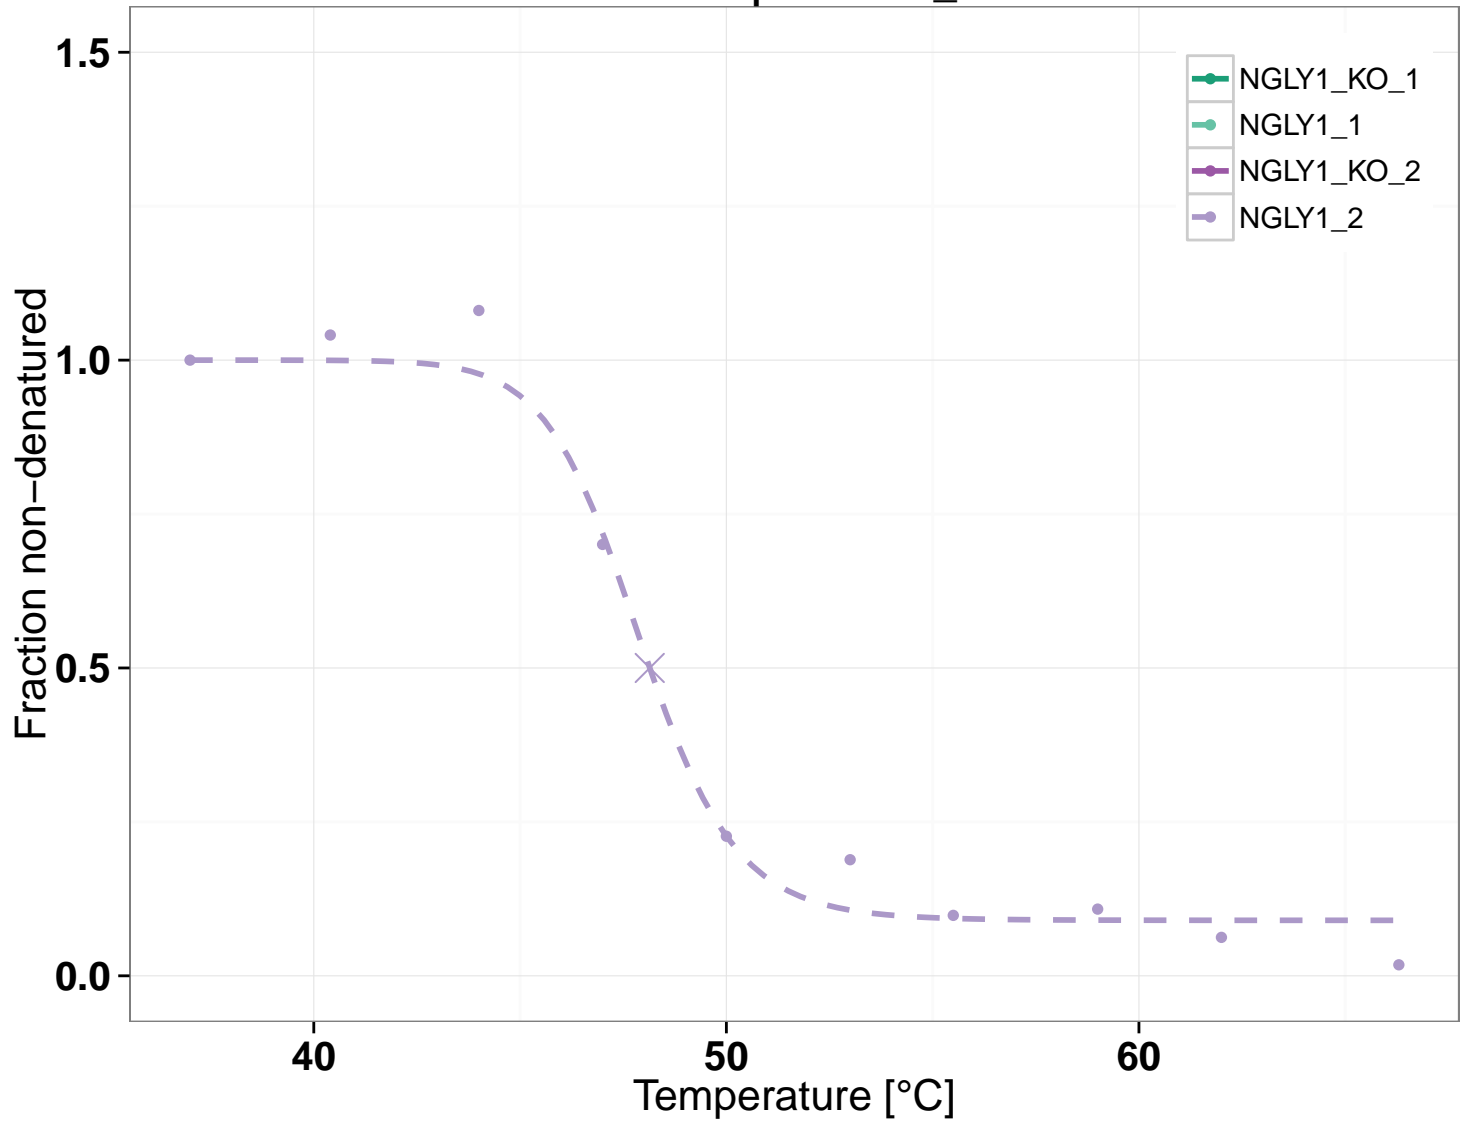

|            | meltPoint | slope | plateau | R2   |
|------------|-----------|-------|---------|------|
| NGLY1_KO_1 | —         | —     | —       | —    |
| NGLY1_1    | —         | —     | —       | —    |
| NGLY1_KO_2 | —         | —     | —       | —    |
| NGLY1_2    | 48.14     | -0.2  | 0.09    | 0.99 |

Supplement: Supplementary file 1544 [file 1]

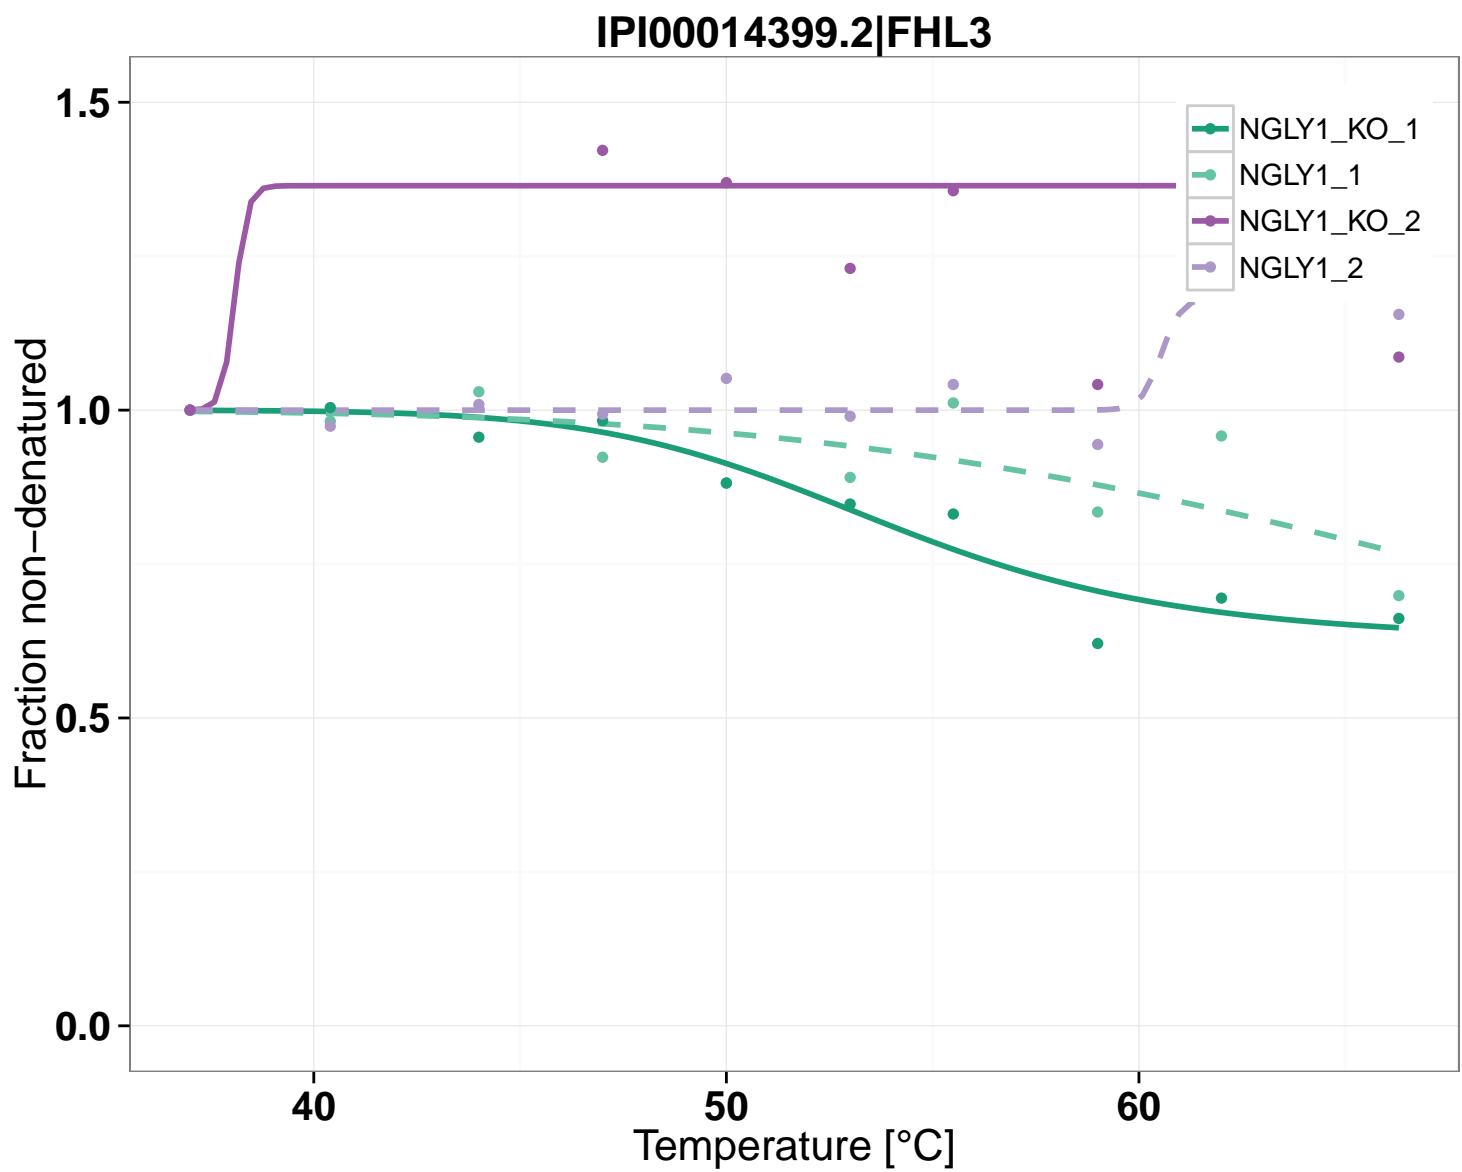

|            | meltPoint | slope  | plateau | R2   |
|------------|-----------|--------|---------|------|
| NGLY1_KO_1 | –         | –0.027 | 0.63    | 0.93 |
| NGLY1_1    | –         | –      | 0       | 0.51 |
| NGLY1_KO_2 | –         | 0.6    | 1.36    | 0.23 |
| NGLY1_2    | –         | 0.19   | 1.18    | 0.84 |

Supplement: Supplementary file 1545 [file 1]

IPI00335849.2|RASAL2

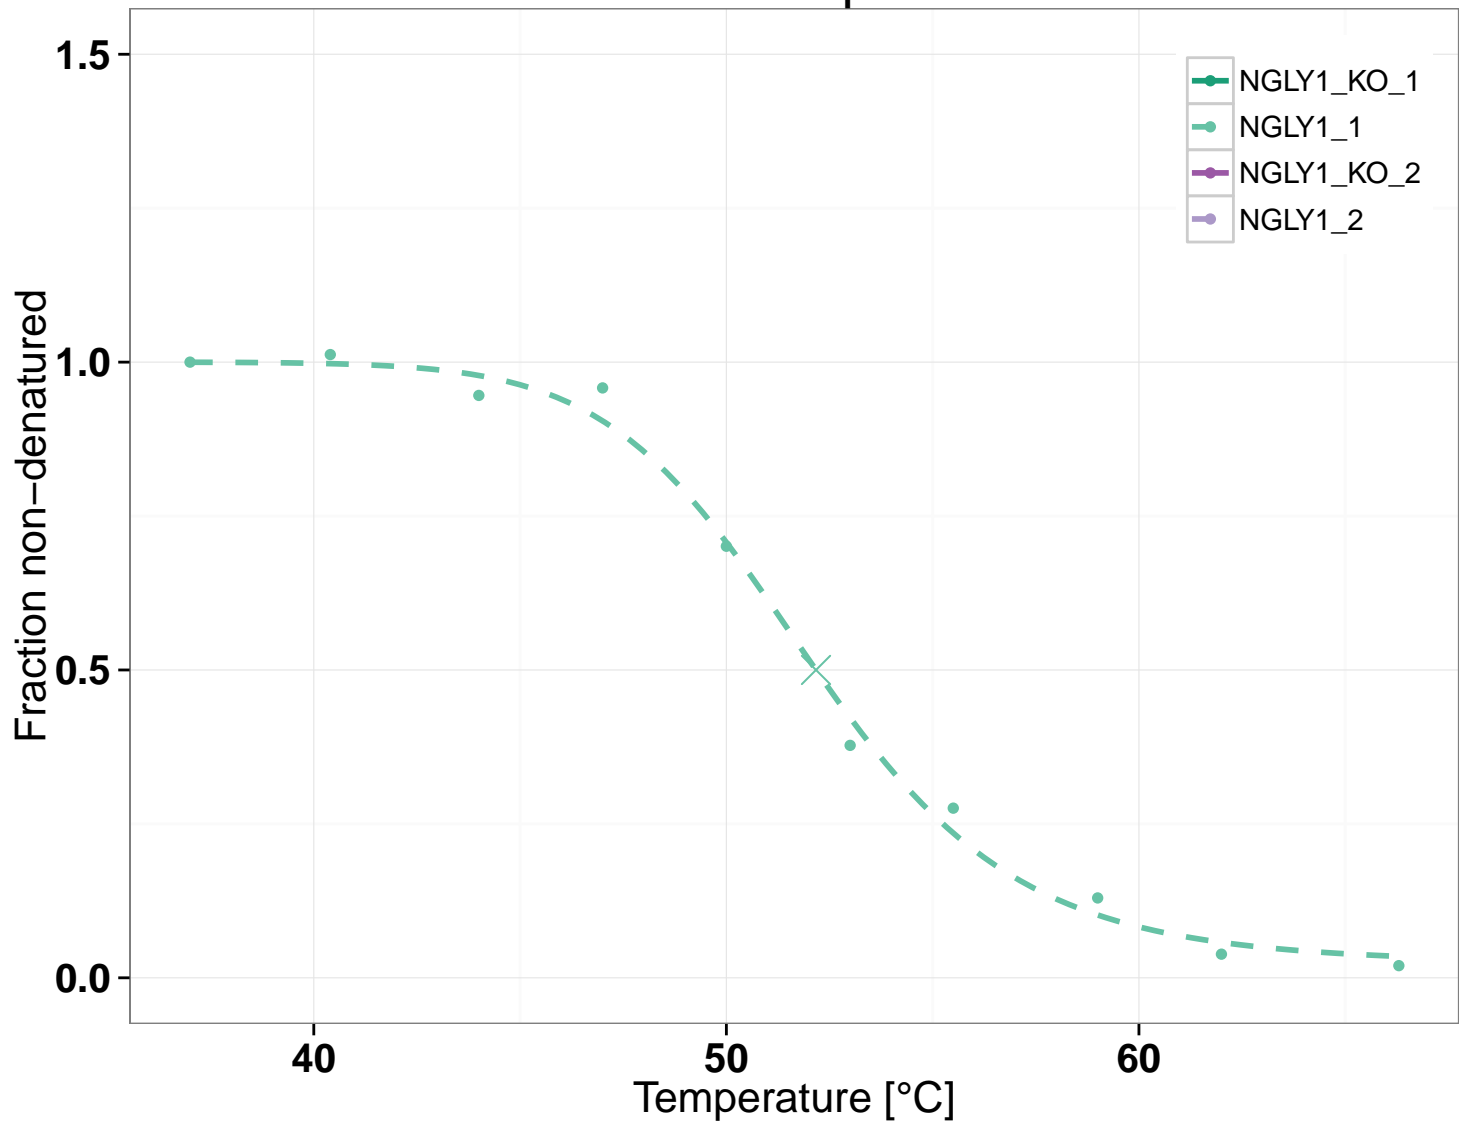

|            | meltPoint | slope  | plateau | R2   |
|------------|-----------|--------|---------|------|
| NGLY1_KO_1 | –         | –      | –       | –    |
| NGLY1_1    | 52.17     | –0.098 | 0.02    | 0.99 |
| NGLY1_KO_2 | –         | –      | –       | –    |
| NGLY1_2    | –         | –      | –       | –    |

Supplement: Supplementary file 1546 [file 1]

IPI00297113.1|TRIM32

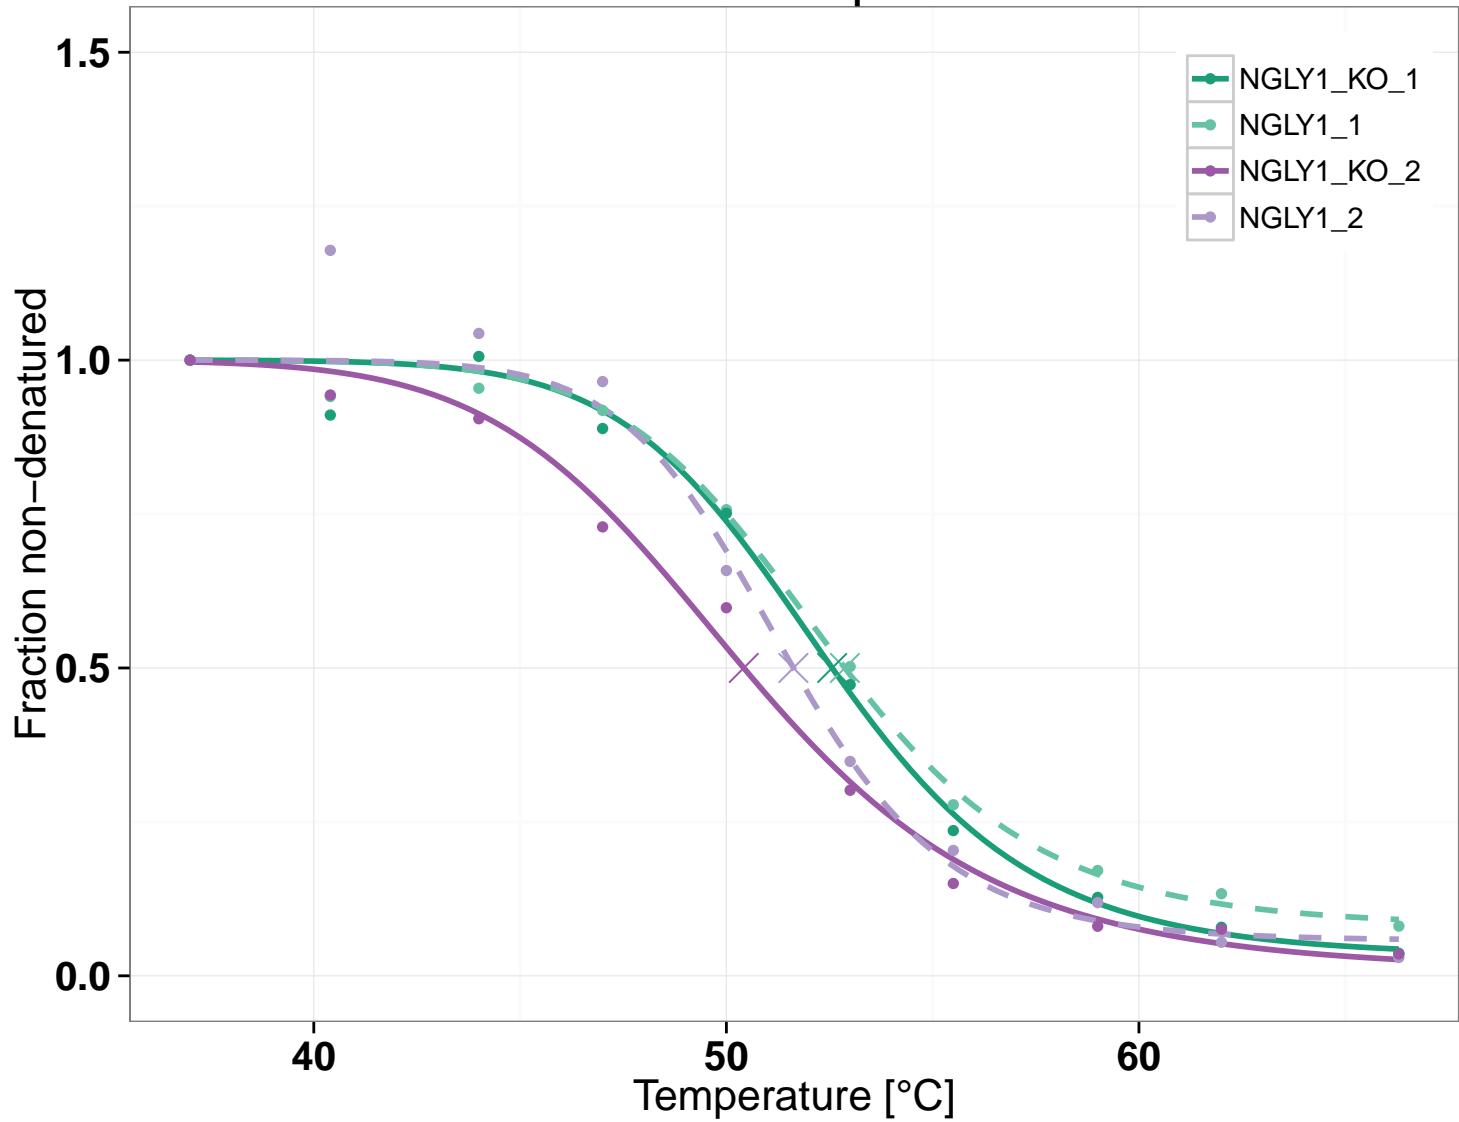

|            | meltPoint | slope  | plateau | R2   |
|------------|-----------|--------|---------|------|
| NGLY1_KO_1 | 52.56     | -0.097 | 0.03    | 0.99 |
| NGLY1_1    | 52.87     | -0.091 | 0.08    | 1    |
| NGLY1_KO_2 | 50.42     | -0.081 | 0.01    | 0.99 |
| NGLY1_2    | 51.62     | -0.12  | 0.06    | 0.98 |

Supplement: Supplementary file 1547 [file 1]

# IPI00100199.4|CYBRD1

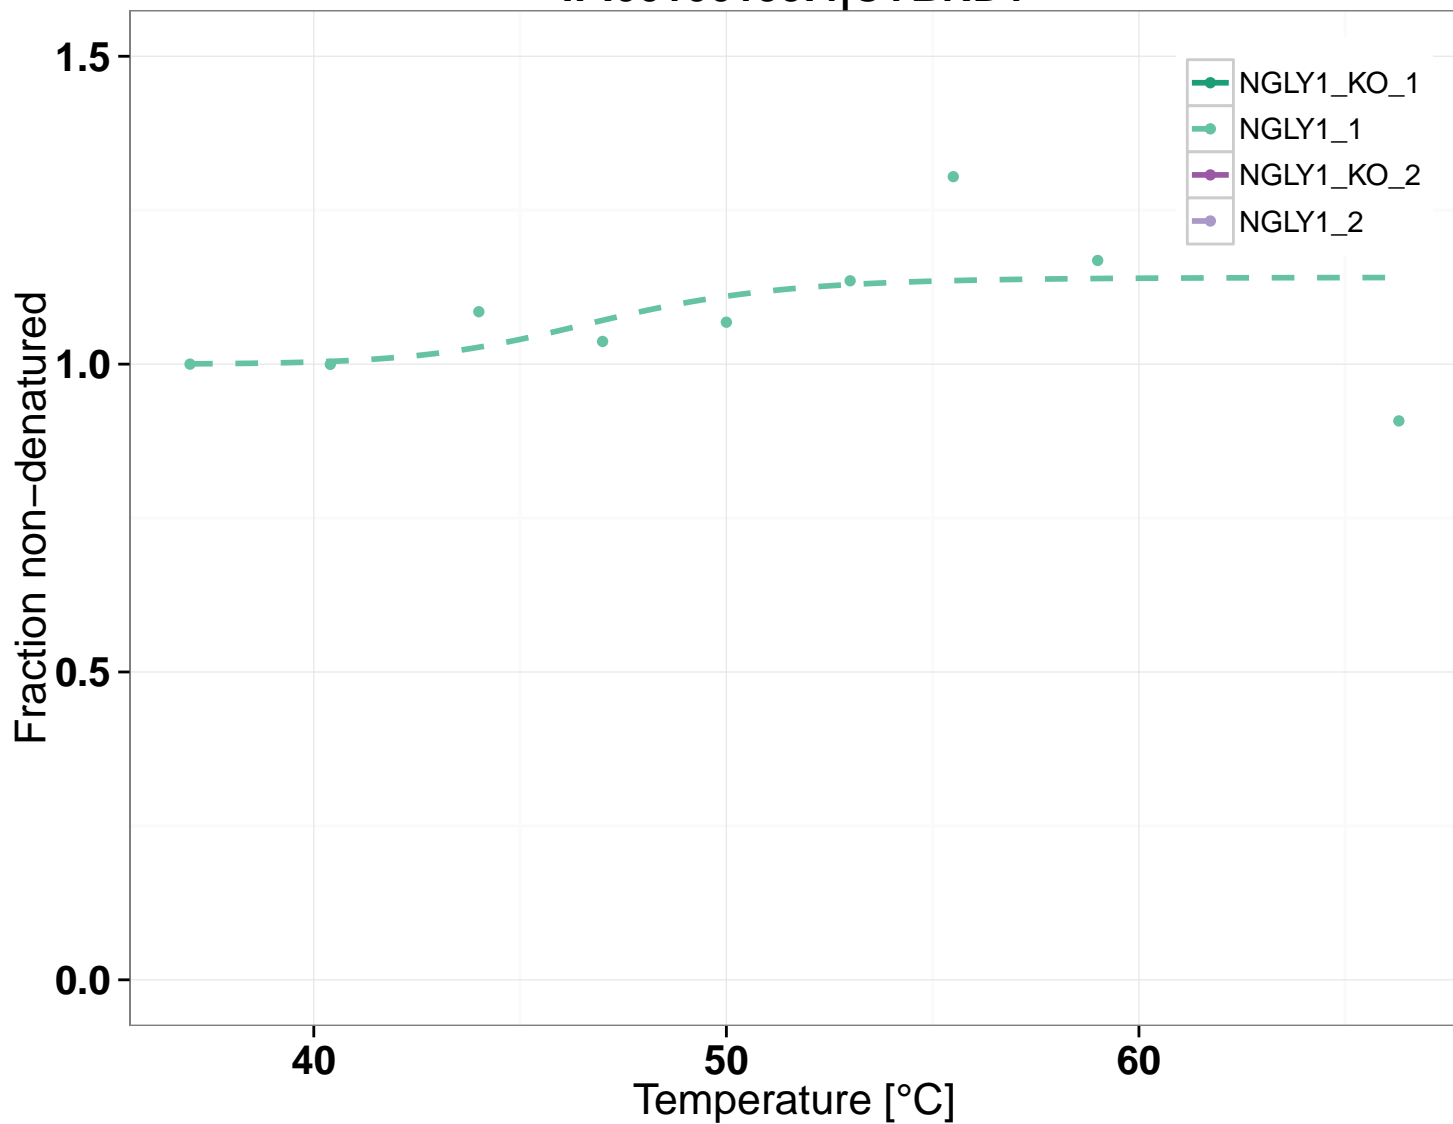

|            | meltPoint | slope | plateau | R2   |
|------------|-----------|-------|---------|------|
| NGLY1_KO_1 | —         | —     | —       | —    |
| NGLY1_1    | —         | 0.016 | 1.14    | 0.22 |
| NGLY1_KO_2 | —         | —     | —       | —    |
| NGLY1_2    | —         | —     | —       | —    |

Supplement: Supplementary file 1548 [file 1]

# IPI00009811.1|BFAR

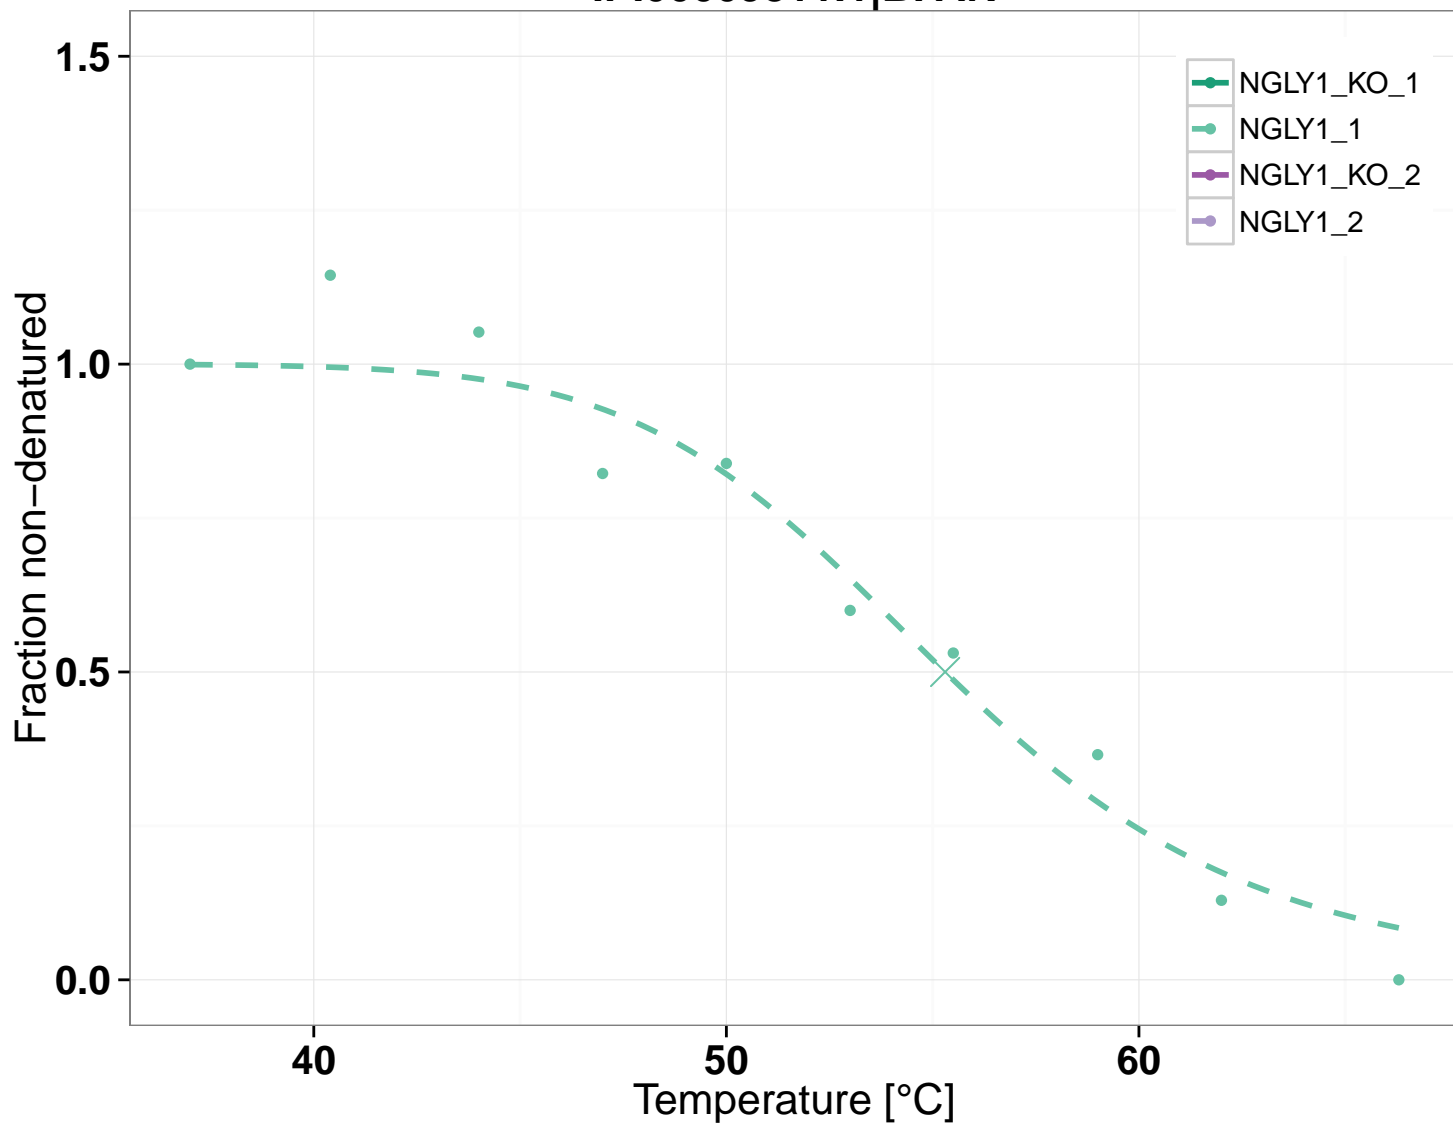

|            | meltPoint | slope  | plateau | R2   |
|------------|-----------|--------|---------|------|
| NGLY1_KO_1 | —         | —      | —       | —    |
| NGLY1_1    | 55.3      | -0.066 | 0       | 0.96 |
| NGLY1_KO_2 | —         | —      | —       | —    |
| NGLY1_2    | —         | —      | —       | —    |

Supplement: Supplementary file 1549 [file 1]

IPI00026634.3|WDR45

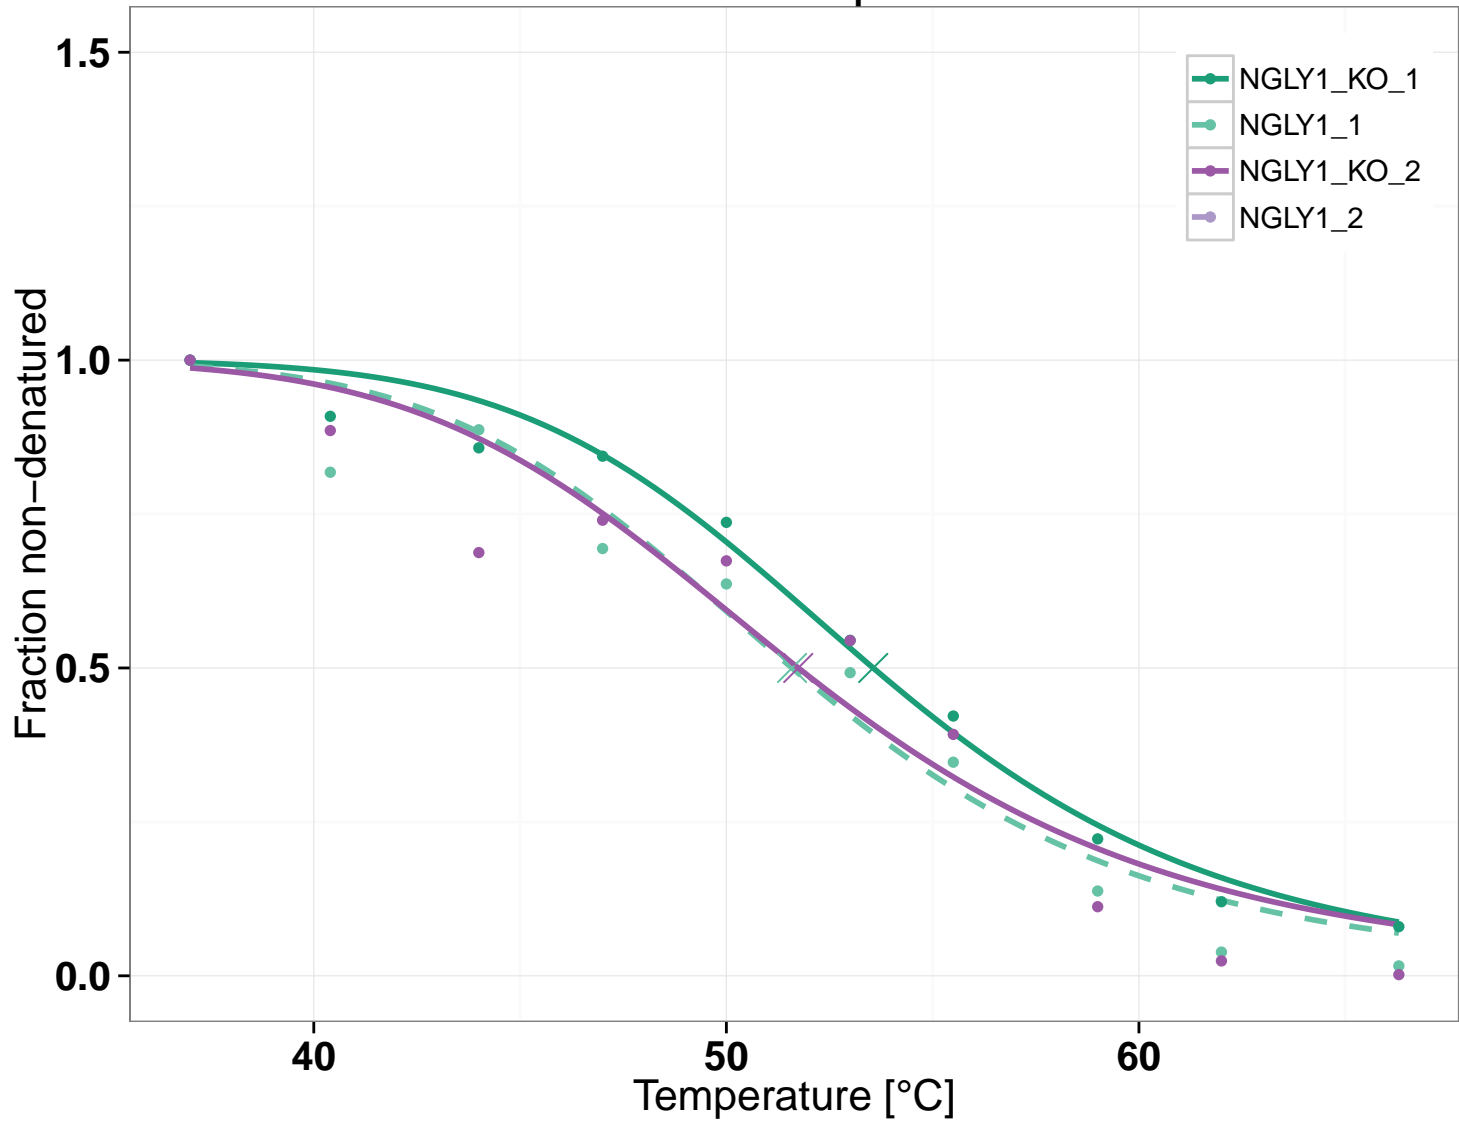

|            | meltPoint | slope  | plateau | R2   |
|------------|-----------|--------|---------|------|
| NGLY1_KO_1 | 53.56     | -0.059 | 0       | 0.99 |
| NGLY1_1    | 51.59     | -0.058 | 0       | 0.96 |
| NGLY1_KO_2 | 51.74     | -0.055 | 0       | 0.92 |
| NGLY1_2    | -         | -      | -       | -    |

Supplement: Supplementary file 1550 [file 1]

IPI00300659.4|CDC73

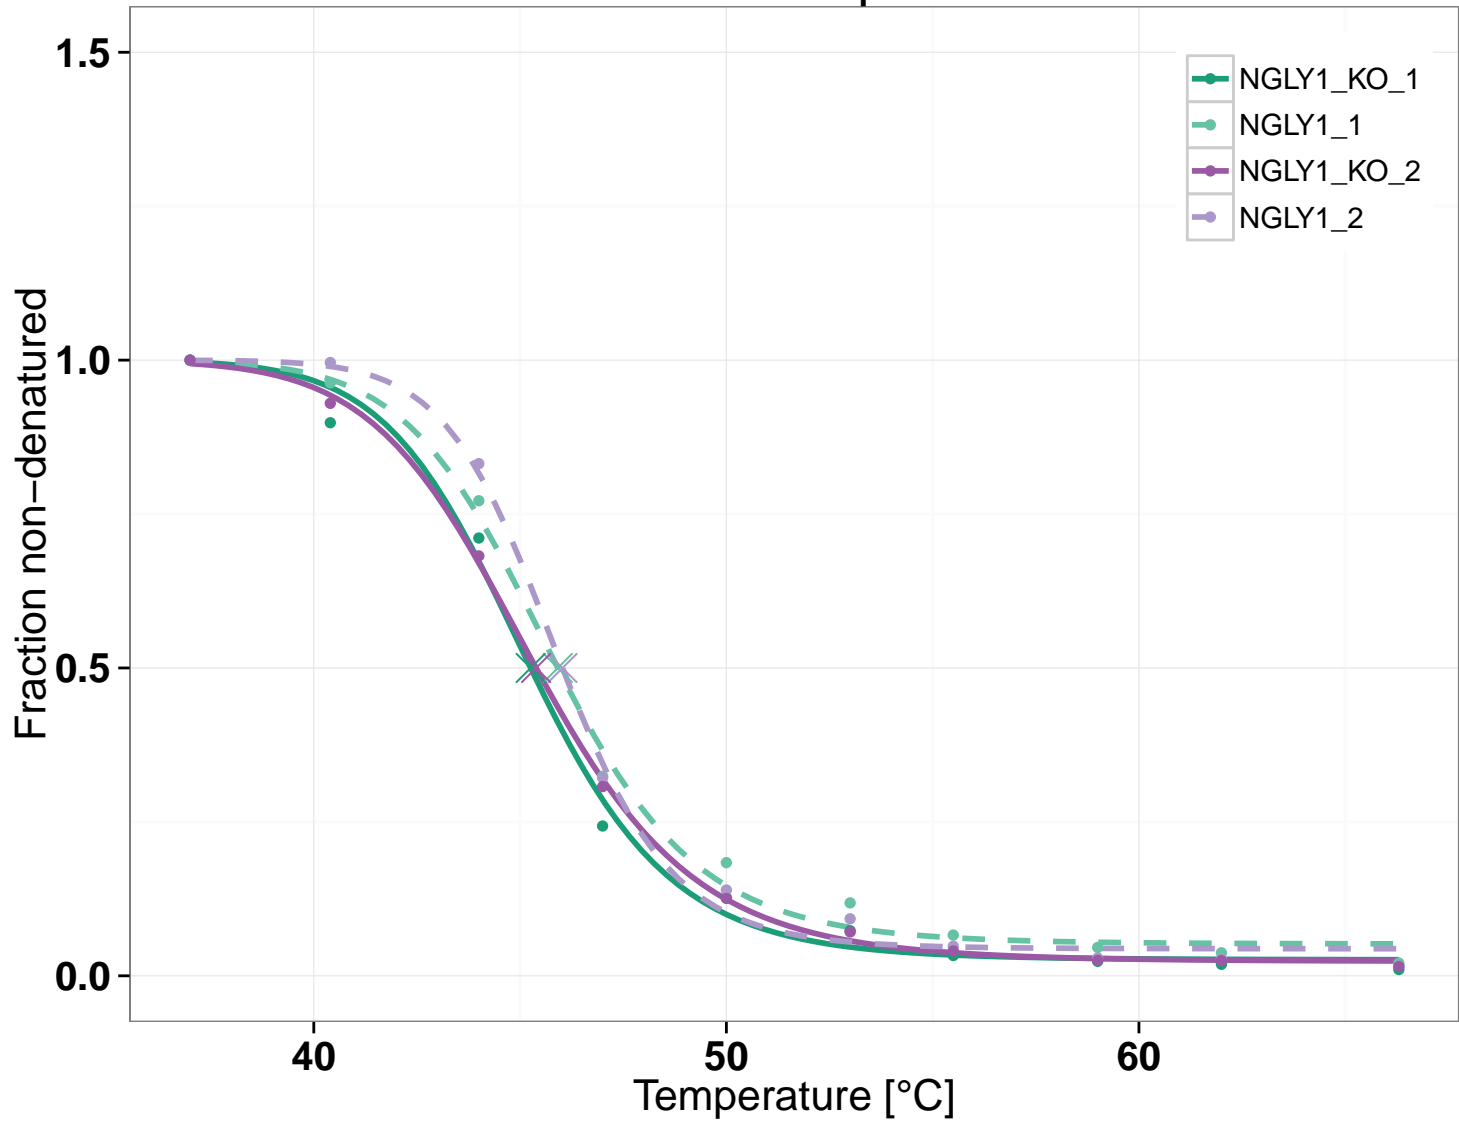

|            | meltPoint | slope | plateau | R2   |
|------------|-----------|-------|---------|------|
| NGLY1_KO_1 | 45.26     | -0.14 | 0.03    | 0.99 |
| NGLY1_1    | 45.91     | -0.13 | 0.05    | 1    |
| NGLY1_KO_2 | 45.39     | -0.12 | 0.02    | 1    |
| NGLY1_2    | 46.03     | -0.17 | 0.04    | 1    |

Supplement: Supplementary file 1551 [file 1]

# IPI00217313.5|HSCB

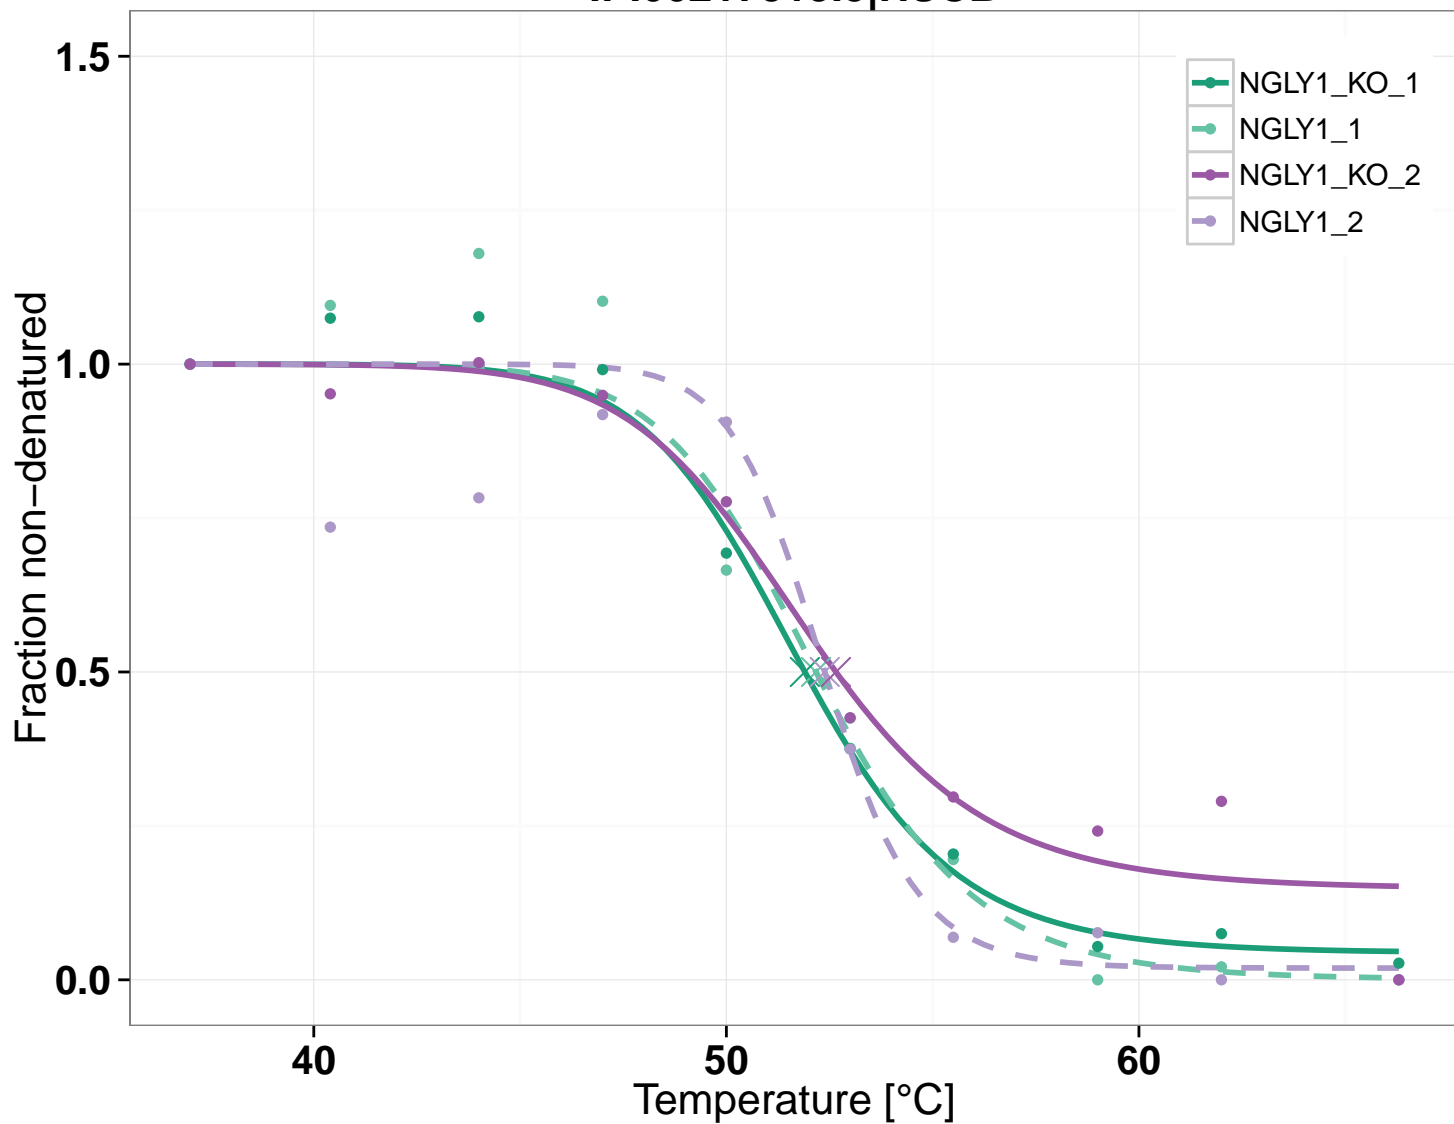

|            | meltPoint | slope  | plateau | R2   |
|------------|-----------|--------|---------|------|
| NGLY1_KO_1 | 51.9      | -0.13  | 0.04    | 0.99 |
| NGLY1_1    | 52.17     | -0.13  | 0       | 0.96 |
| NGLY1_KO_2 | 52.66     | -0.099 | 0.15    | 0.96 |
| NGLY1_2    | 52.39     | -0.22  | 0.02    | 0.92 |

Supplement: Supplementary file 1552 [file 1]

# IPI00792100.1|C14ORF166

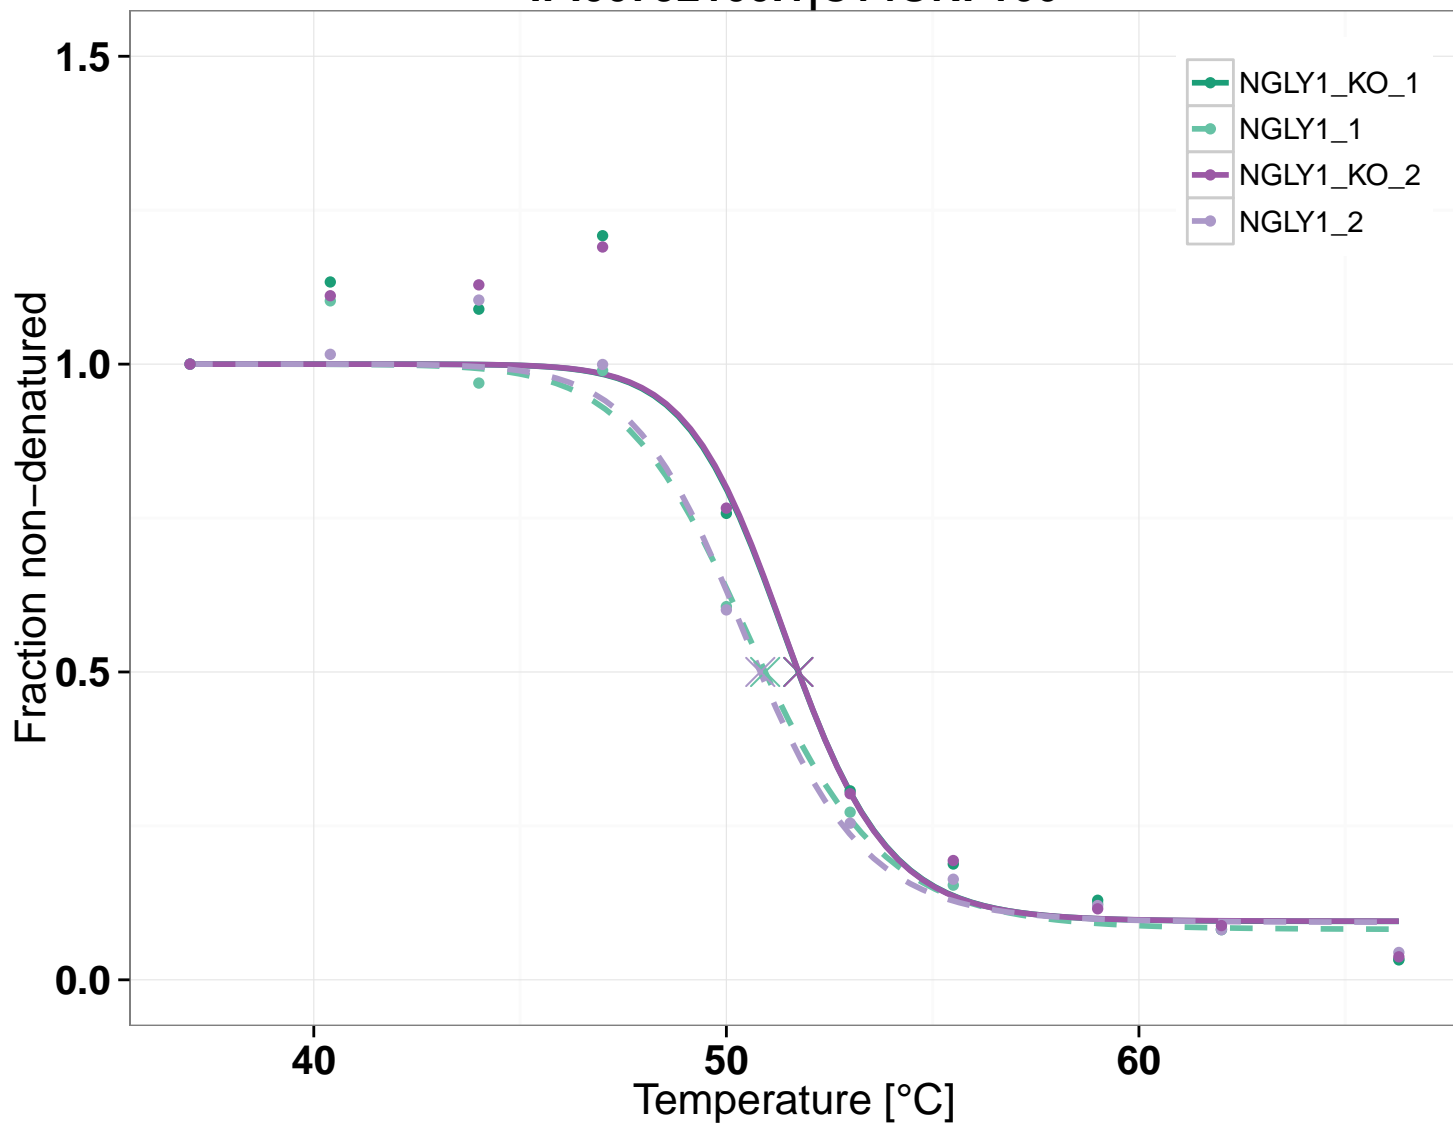

|            | meltPoint | slope | plateau | R2   |
|------------|-----------|-------|---------|------|
| NGLY1_KO_1 | 51.74     | -0.18 | 0.09    | 0.96 |
| NGLY1_1    | 50.94     | -0.15 | 0.08    | 0.99 |
| NGLY1_KO_2 | 51.75     | -0.19 | 0.1     | 0.96 |
| NGLY1_2    | 50.82     | -0.16 | 0.09    | 0.99 |

Supplement: Supplementary file 1553 [file 1]

IPI00604547.2|AKIRIN2

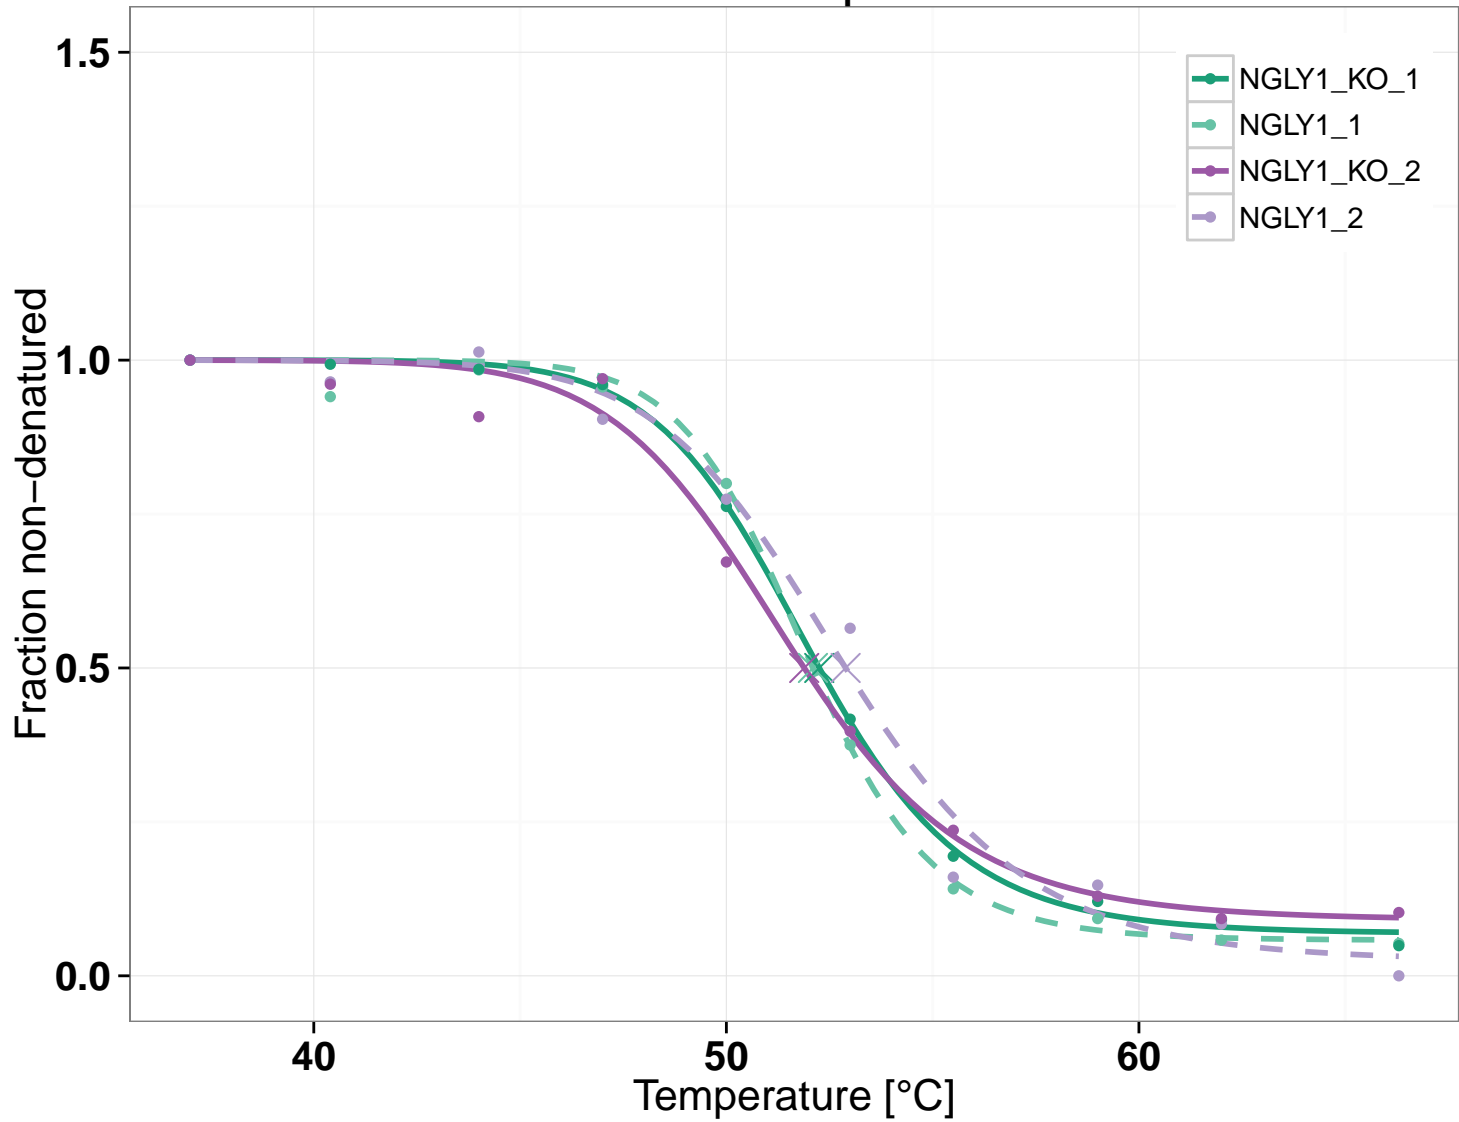

|            | meltPoint | slope | plateau | R2   |
|------------|-----------|-------|---------|------|
| NGLY1_KO_1 | 52.25     | -0.12 | 0.07    | 1    |
| NGLY1_1    | 52.1      | -0.15 | 0.06    | 1    |
| NGLY1_KO_2 | 51.89     | -0.11 | 0.09    | 0.99 |
| NGLY1_2    | 52.89     | -0.11 | 0.02    | 0.99 |

Supplement: Supplementary file 1554 [file 1]

IPI00218914.5|ALDH1A1

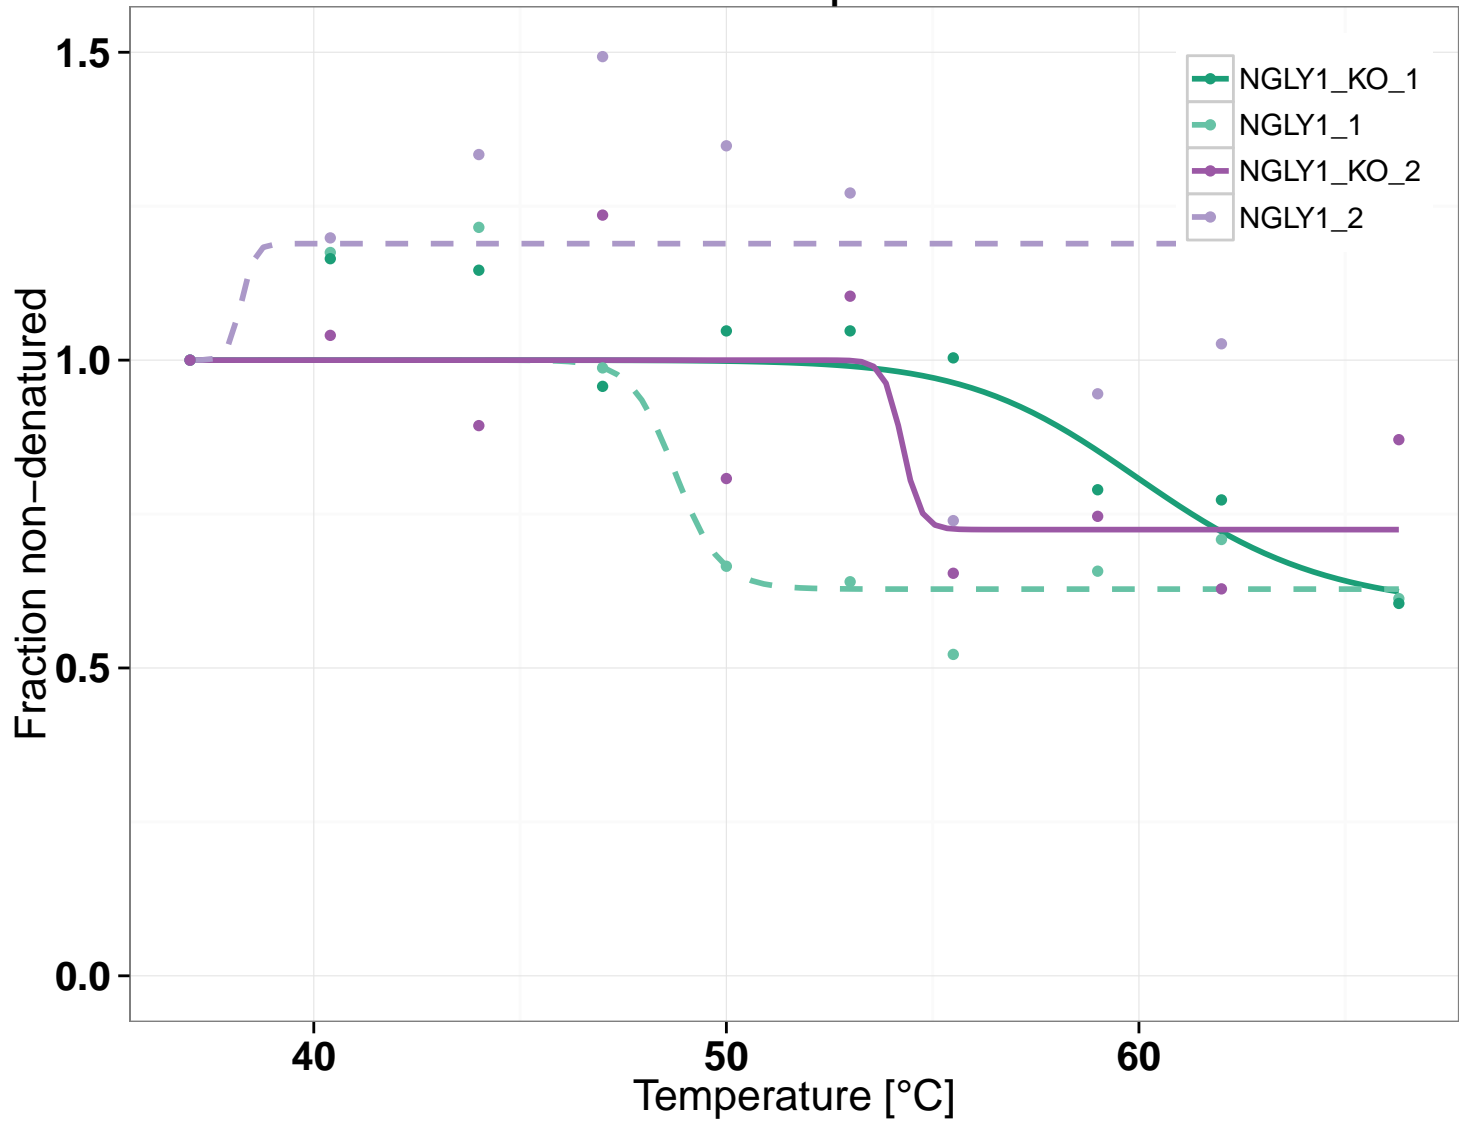

|            | meltPoint | slope  | plateau | R2   |
|------------|-----------|--------|---------|------|
| NGLY1_KO_1 | -         | -0.046 | 0.59    | 0.77 |
| NGLY1_1    | -         | -0.17  | 0.63    | 0.83 |
| NGLY1_KO_2 | -         | -0.32  | 0.72    | 0.57 |
| NGLY1_2    | -         | 0.31   | 1.19    | 0.07 |

Supplement: Supplementary file 1555 [file 1]

IPI00304945.1|NEDD4L

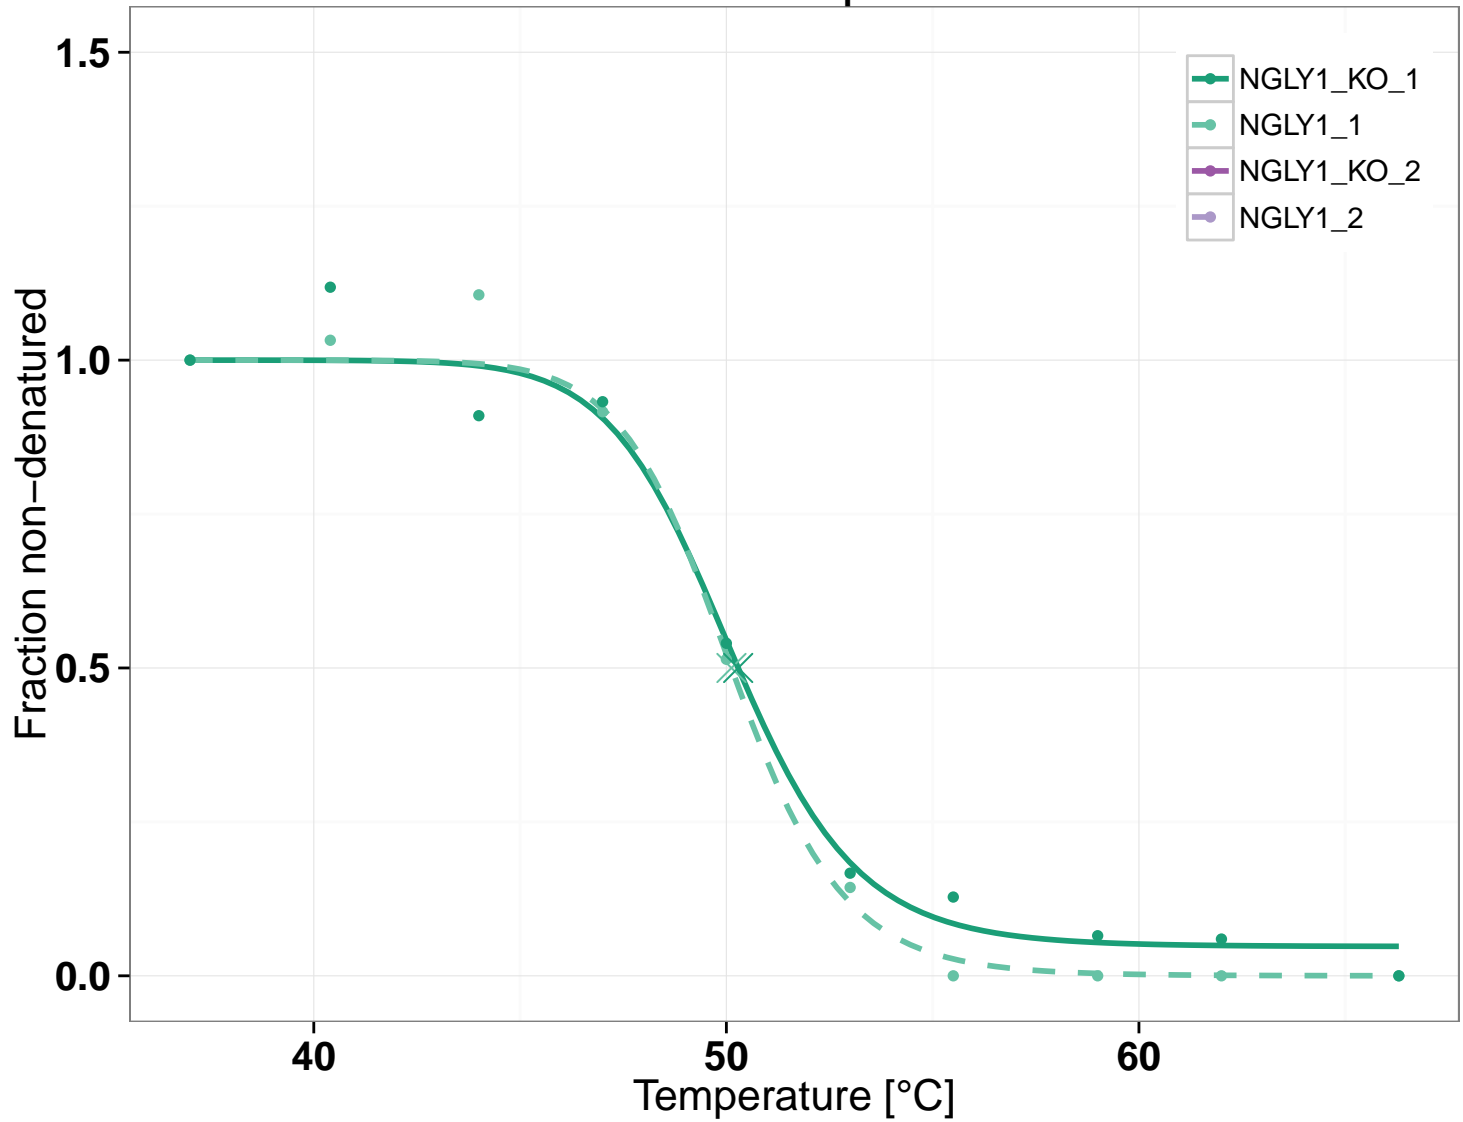

|            | meltPoint | slope | plateau | R2   |
|------------|-----------|-------|---------|------|
| NGLY1_KO_1 | 50.29     | -0.16 | 0.05    | 0.99 |
| NGLY1_1    | 50.12     | -0.18 | 0       | 0.99 |
| NGLY1_KO_2 | -         | -     | -       | -    |
| NGLY1_2    | -         | -     | -       | -    |

Supplement: Supplementary file 1556 [file 1]

IPI00419273.5|CUL4A

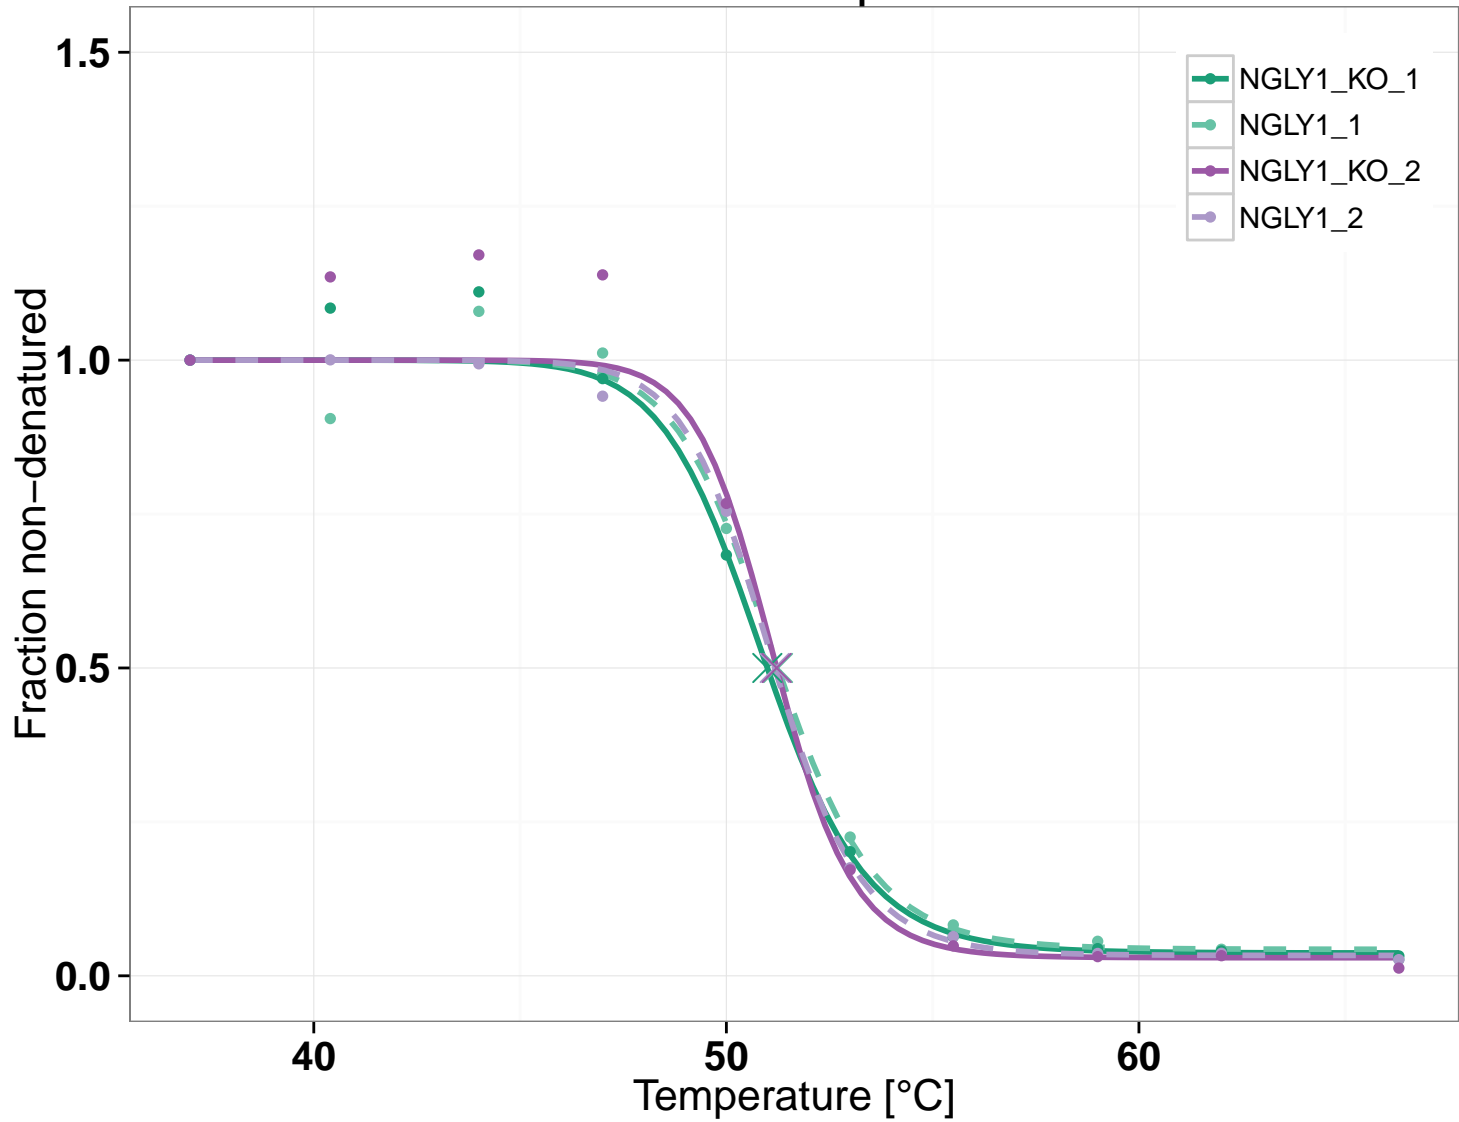

|            | meltPoint | slope | plateau | R2   |
|------------|-----------|-------|---------|------|
| NGLY1_KO_1 | 50.99     | -0.19 | 0.04    | 0.99 |
| NGLY1_1    | 51.25     | -0.2  | 0.04    | 0.99 |
| NGLY1_KO_2 | 51.22     | -0.25 | 0.03    | 0.97 |
| NGLY1_2    | 51.17     | -0.22 | 0.03    | 1    |

Supplement: Supplementary file 1557 [file 1]

# IPI00291376.4|TGS1

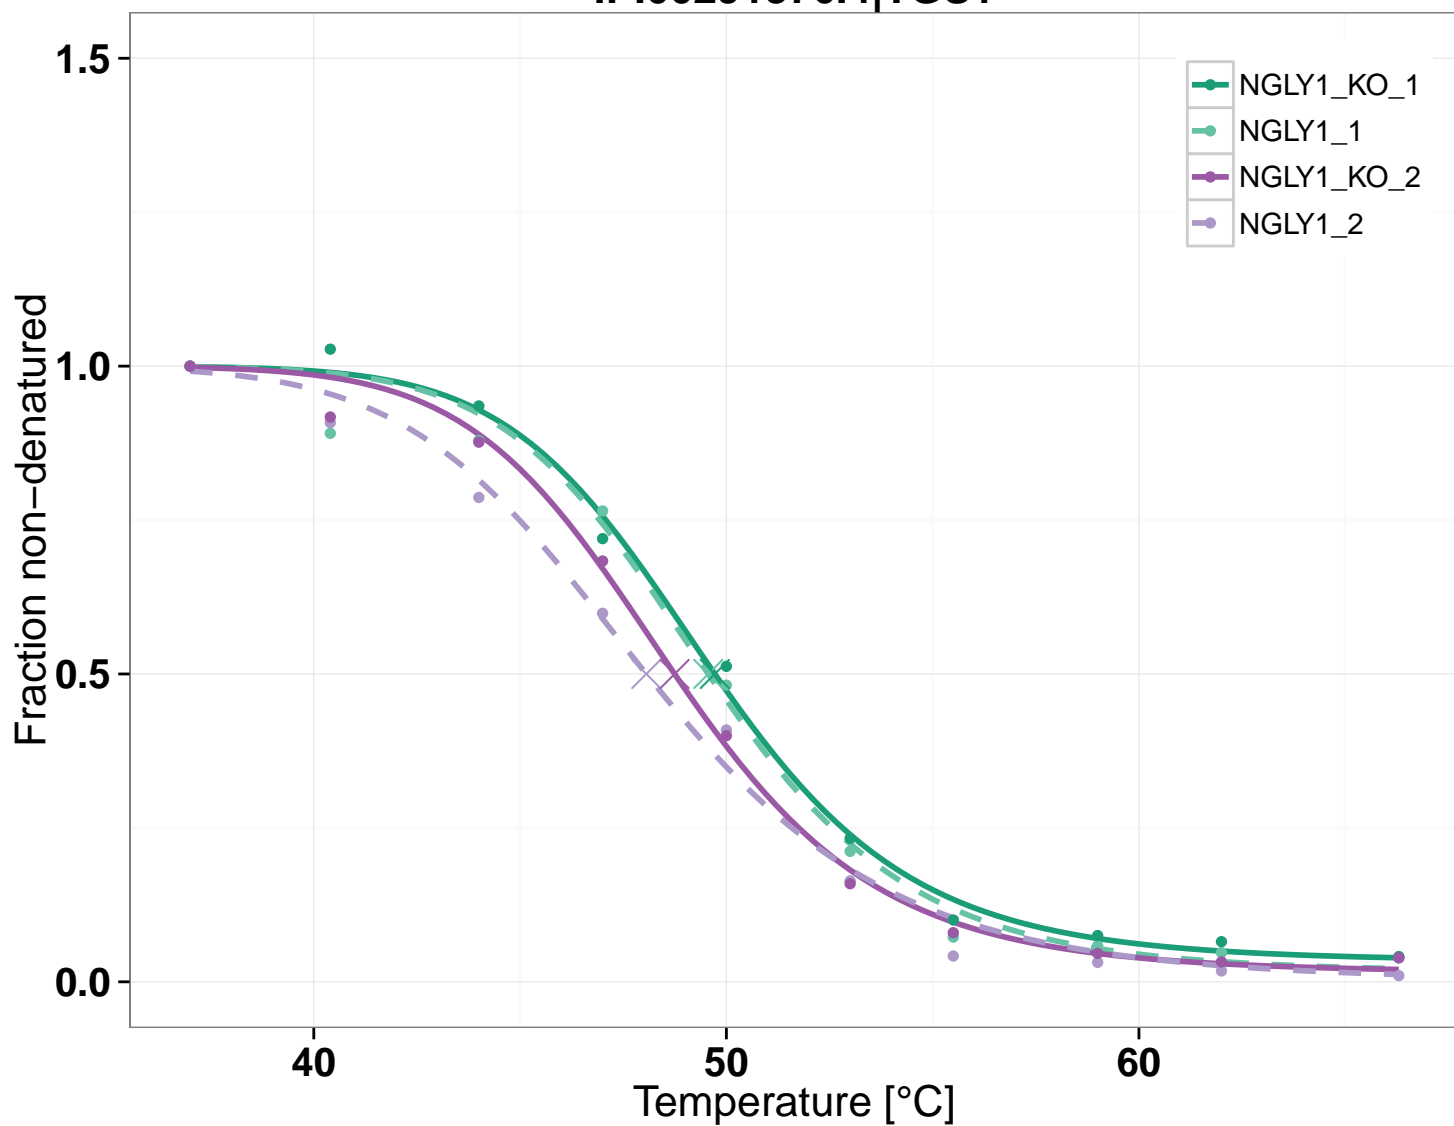

|            | meltPoint | slope  | plateau | R2   |
|------------|-----------|--------|---------|------|
| NGLY1_KO_1 | 49.72     | -0.099 | 0.03    | 1    |
| NGLY1_1    | 49.56     | -0.099 | 0.01    | 0.99 |
| NGLY1_KO_2 | 48.75     | -0.1   | 0.01    | 1    |
| NGLY1_2    | 48.06     | -0.085 | 0       | 0.99 |

Supplement: Supplementary file 1558 [file 1]

IPI00014219.1|SNX17

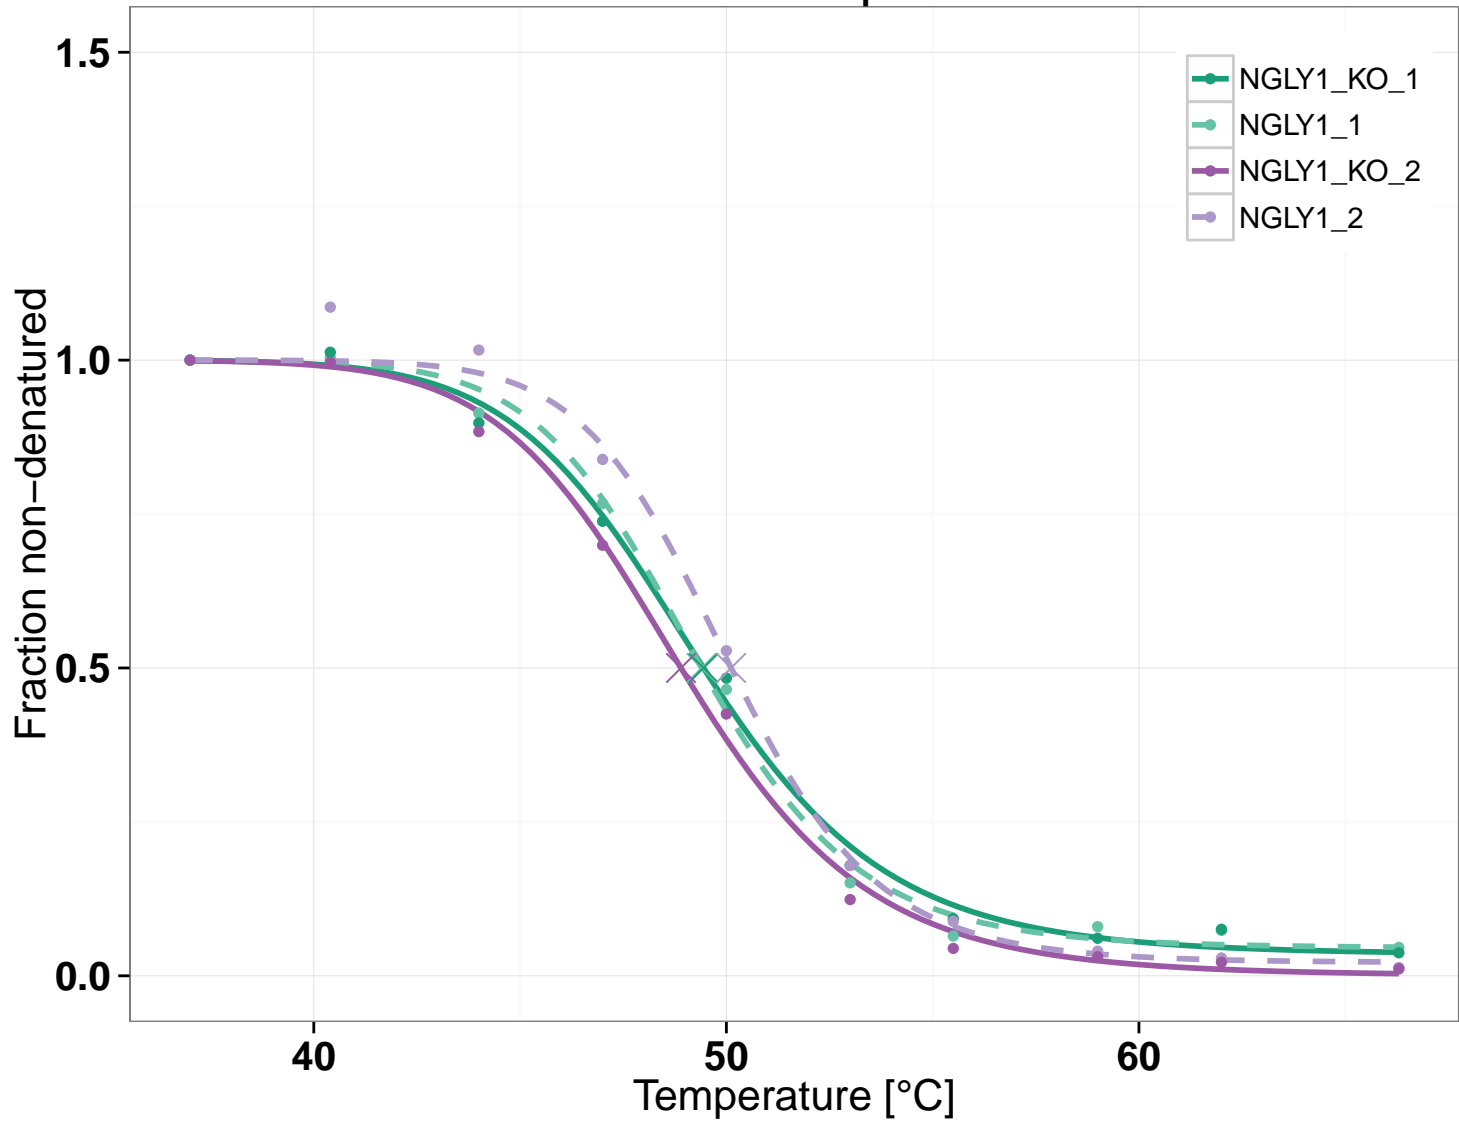

|            | meltPoint | slope | plateau | R2   |
|------------|-----------|-------|---------|------|
| NGLY1_KO_1 | 49.45     | -0.11 | 0.03    | 1    |
| NGLY1_1    | 49.4      | -0.12 | 0.05    | 1    |
| NGLY1_KO_2 | 48.9      | -0.11 | 0       | 1    |
| NGLY1_2    | 50.11     | -0.14 | 0.02    | 0.99 |

Supplement: Supplementary file 1559 [file 1]

IPI00000581.6|OTUB1

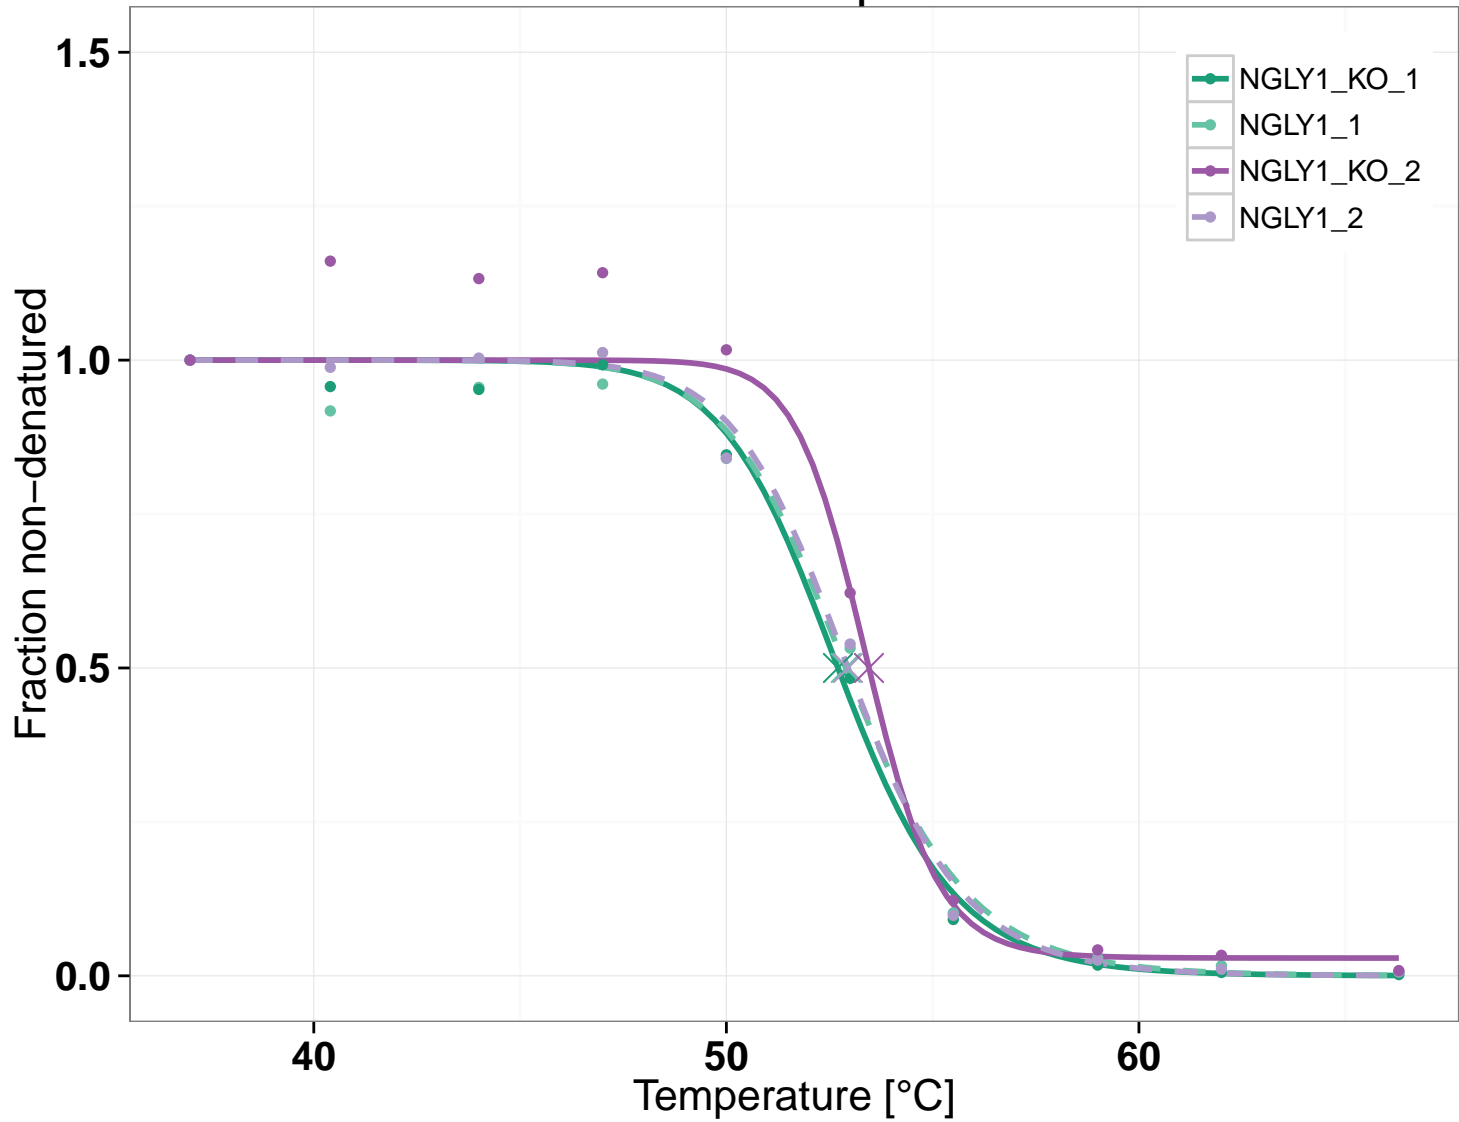

|            | meltPoint | slope | plateau | R2   |
|------------|-----------|-------|---------|------|
| NGLY1_KO_1 | 52.7      | -0.18 | 0       | 1    |
| NGLY1_1    | 52.89     | -0.17 | 0       | 0.99 |
| NGLY1_KO_2 | 53.46     | -0.28 | 0.03    | 0.97 |
| NGLY1_2    | 52.95     | -0.18 | 0       | 1    |

Supplement: Supplementary file 1560 [file 1]

# IPI00289773.3|CEBPB

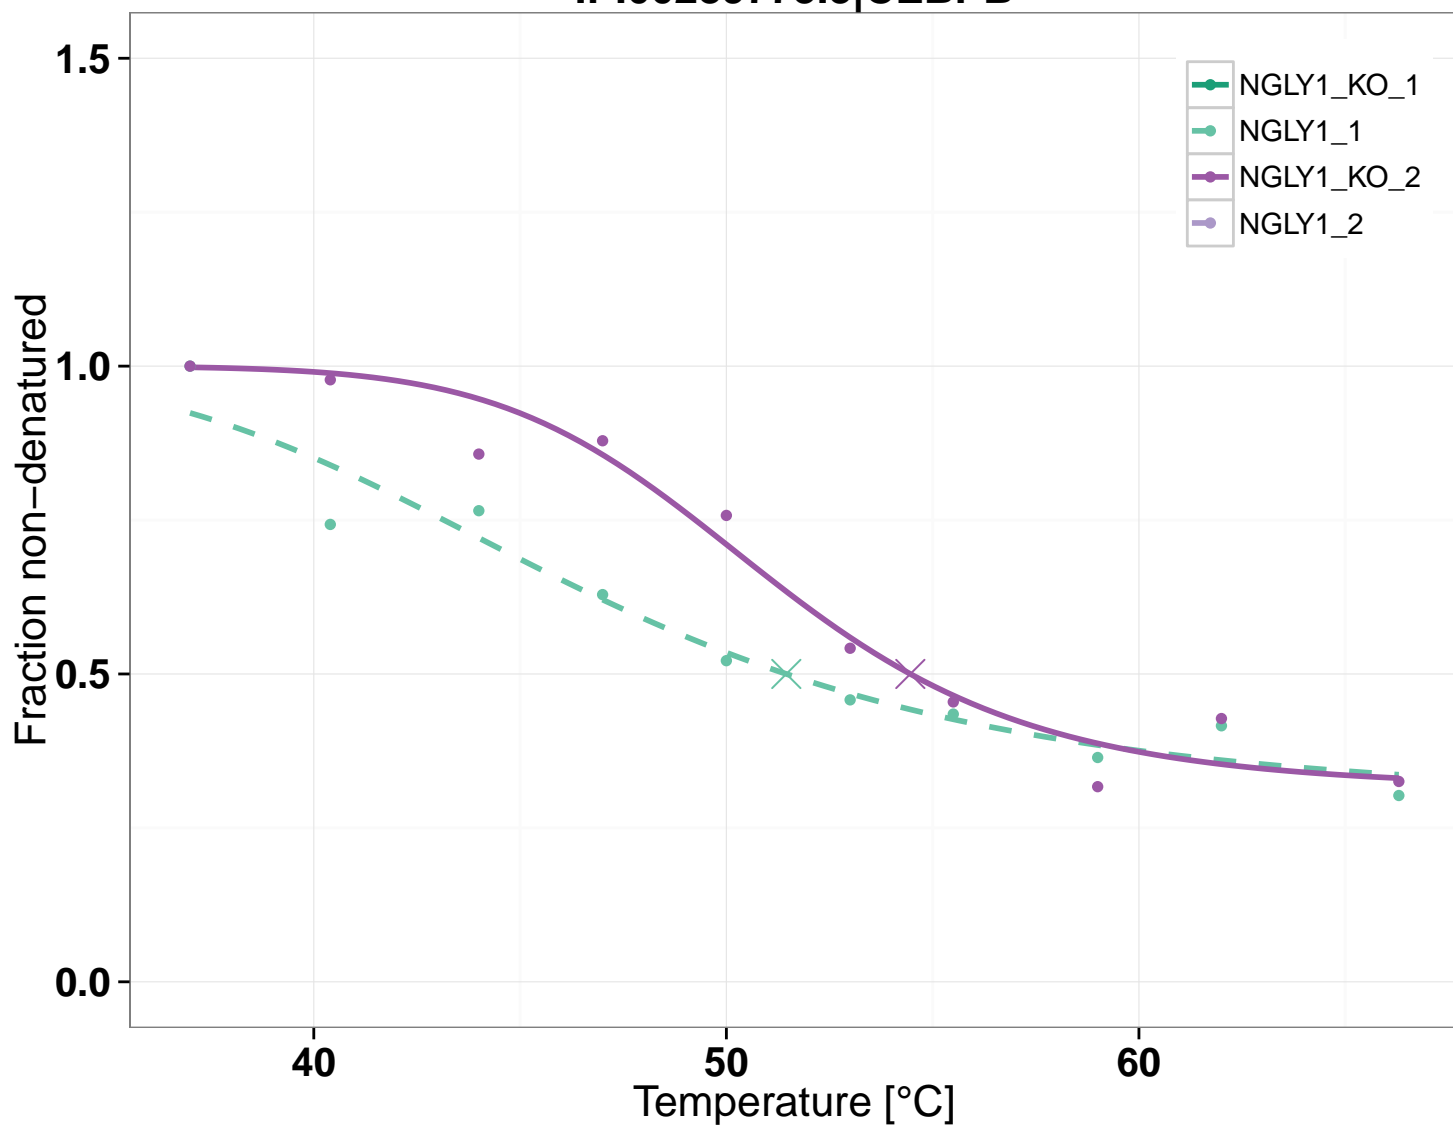

|            | meltPoint | slope  | plateau | R2   |
|------------|-----------|--------|---------|------|
| NGLY1_KO_1 | —         | —      | —       | —    |
| NGLY1_1    | 51.45     | -0.034 | 0.28    | 0.95 |
| NGLY1_KO_2 | 54.46     | -0.053 | 0.31    | 0.97 |
| NGLY1_2    | —         | —      | —       | —    |

Supplement: Supplementary file 1561 [file 1]

IPI00790024.1|FAM65C

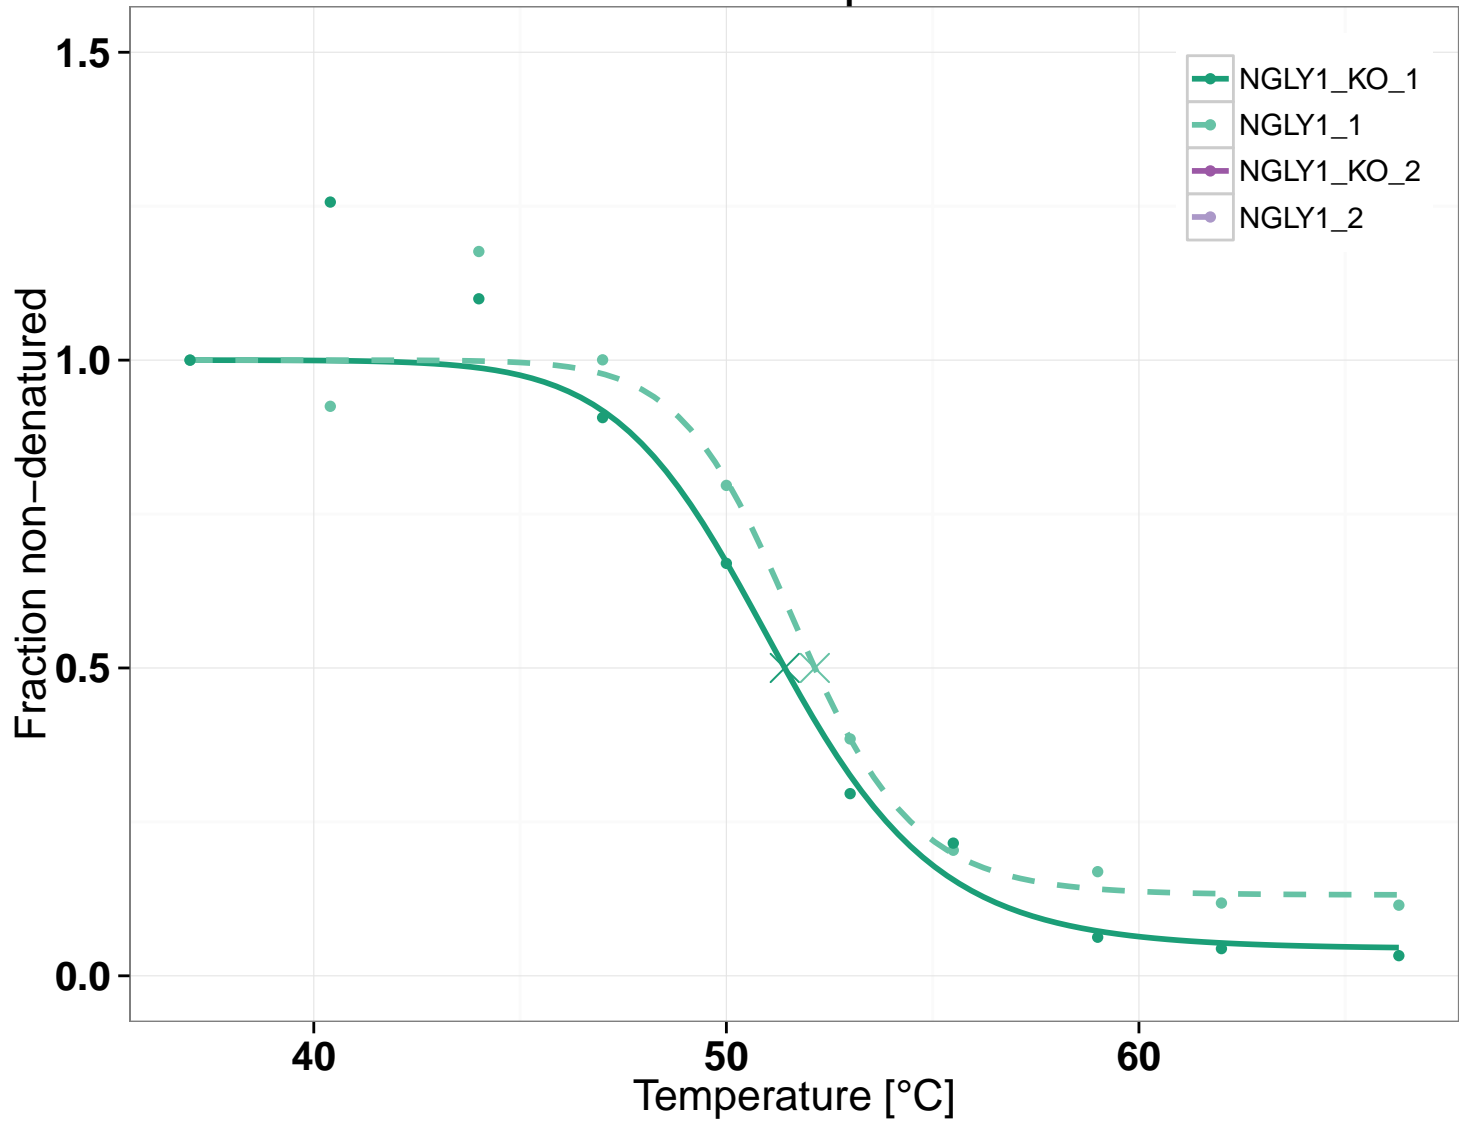

|            | meltPoint | slope | plateau | R2   |
|------------|-----------|-------|---------|------|
| NGLY1_KO_1 | 51.42     | -0.12 | 0.04    | 0.96 |
| NGLY1_1    | 52.14     | -0.15 | 0.13    | 0.98 |
| NGLY1_KO_2 | -         | -     | -       | -    |
| NGLY1_2    | -         | -     | -       | -    |

Supplement: Supplementary file 1562 [file 1]

IPI00027933.3|PSMB10

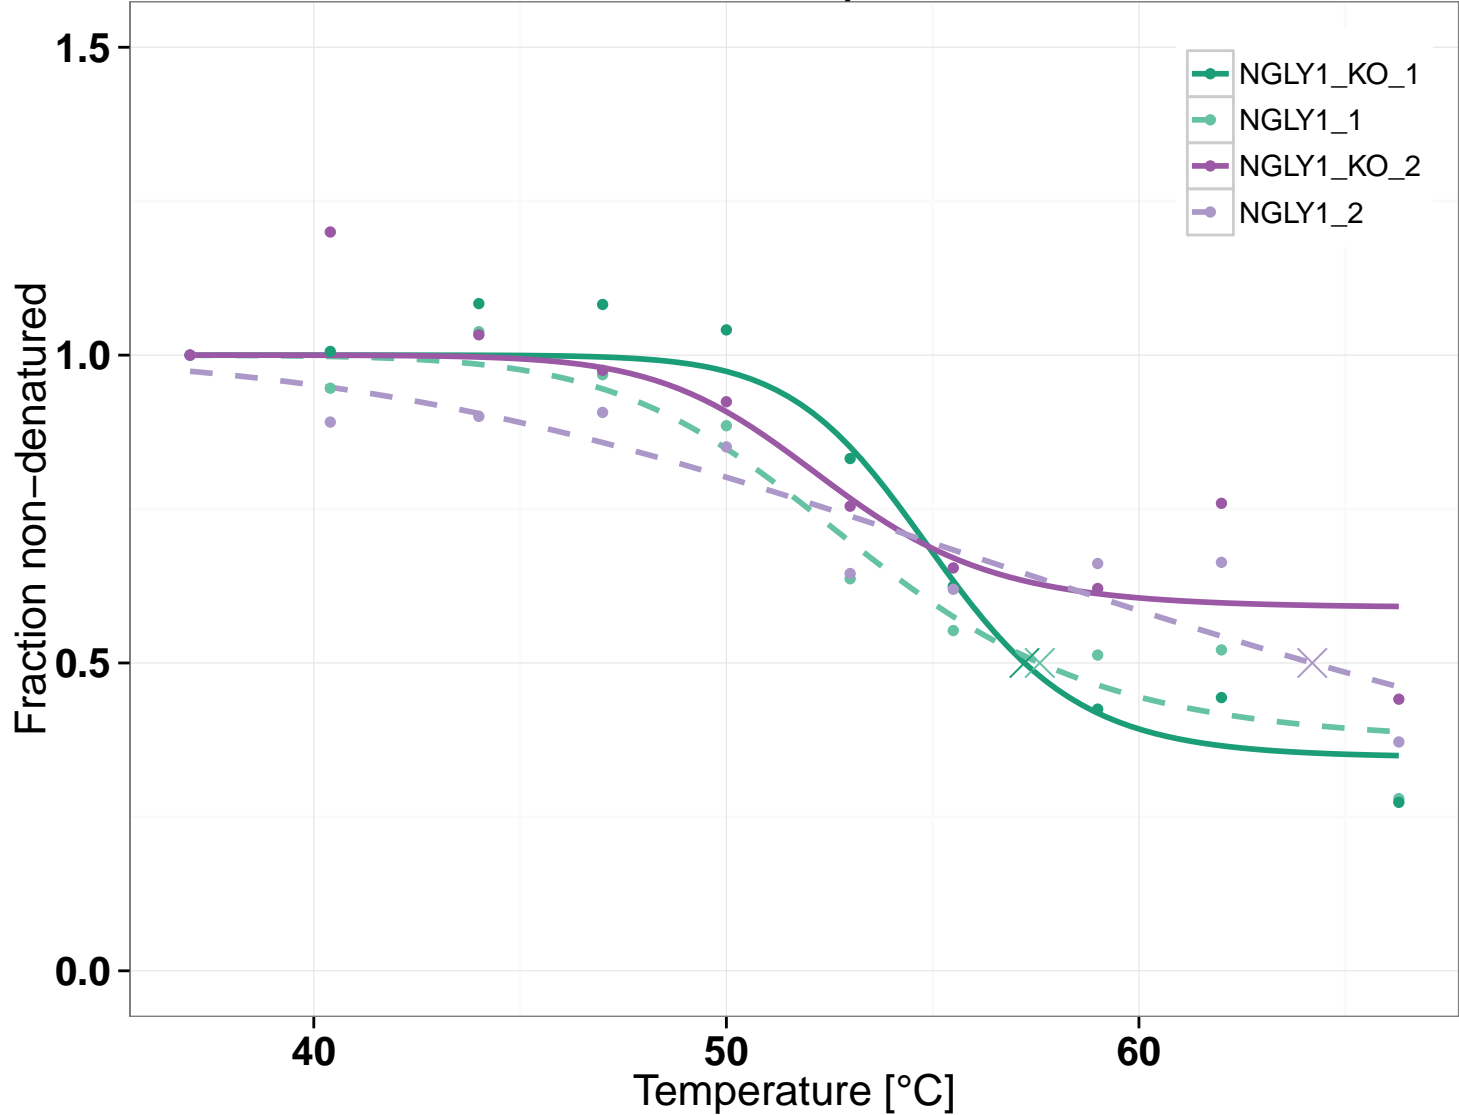

|            | meltPoint | slope  | plateau | R2   |
|------------|-----------|--------|---------|------|
| NGLY1_KO_1 | 57.23     | -0.093 | 0.35    | 0.96 |
| NGLY1_1    | 57.6      | -0.053 | 0.37    | 0.94 |
| NGLY1_KO_2 | -         | -0.05  | 0.59    | 0.81 |
| NGLY1_2    | 64.2      | -0.022 | 0       | 0.86 |

Supplement: Supplementary file 1563 [file 1]

IPI00013459.1|NDUFB5

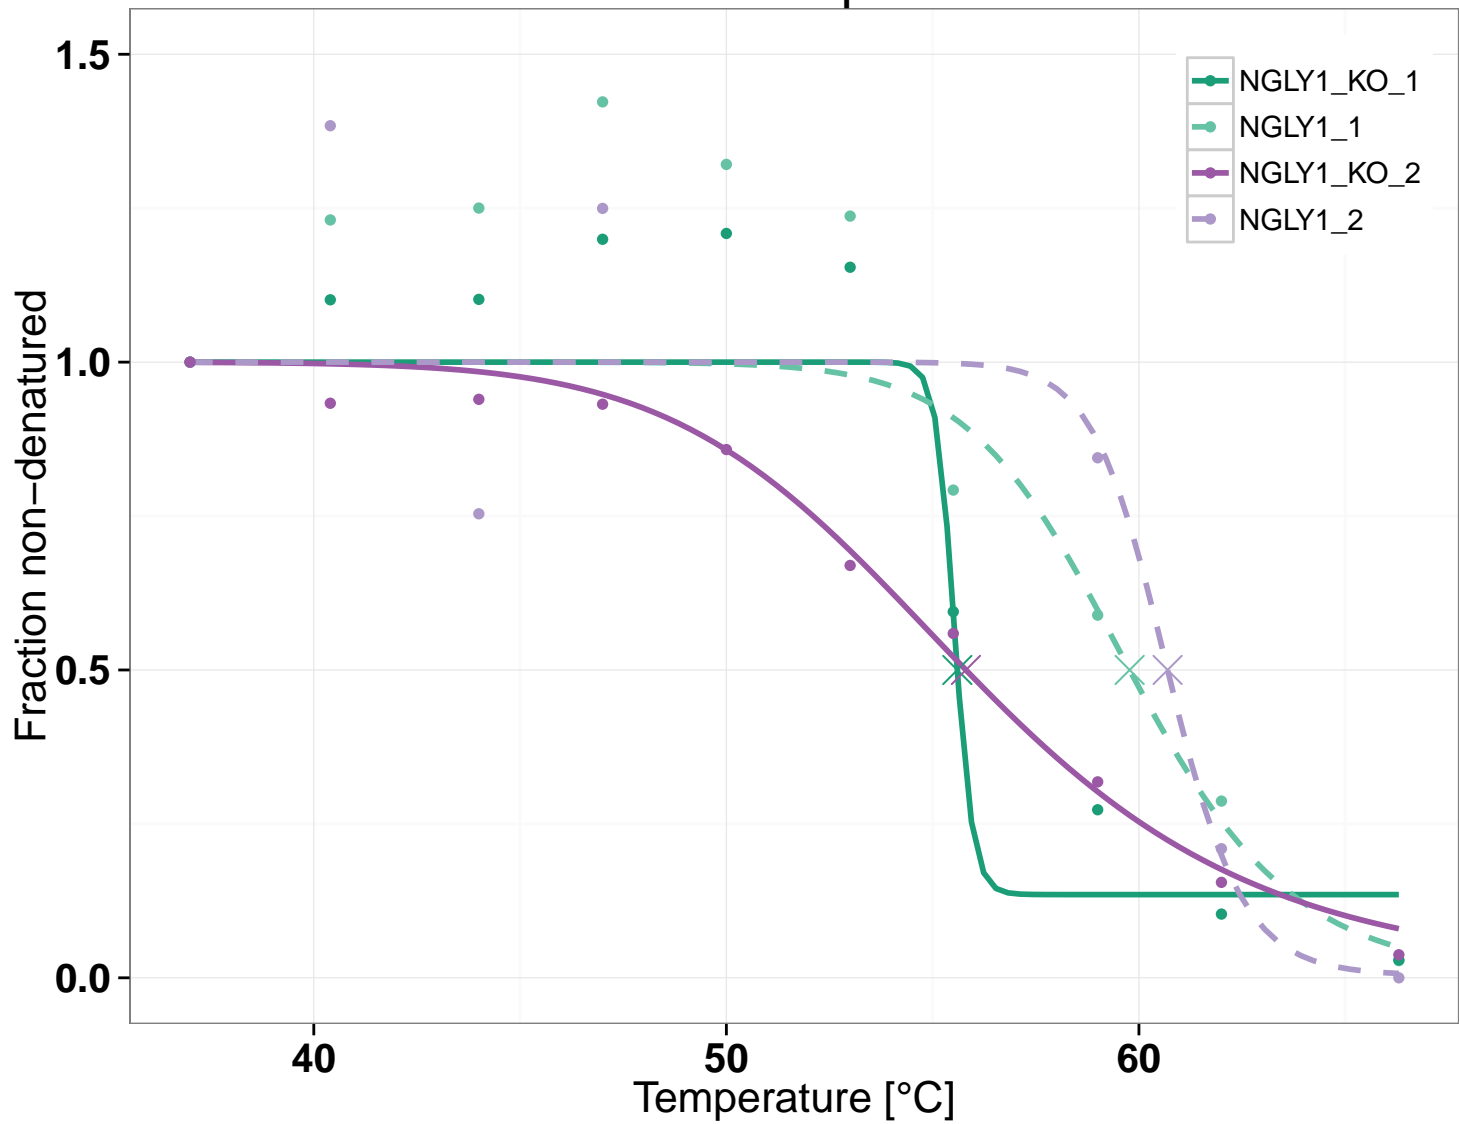

|            | meltPoint | slope | plateau | R2   |
|------------|-----------|-------|---------|------|
| NGLY1_KO_1 | 55.6      | -0.97 | 0.14    | 0.92 |
| NGLY1_1    | 59.77     | -0.13 | 0       | 0.76 |
| NGLY1_KO_2 | 55.81     | -0.07 | 0       | 0.99 |
| NGLY1_2    | 60.69     | -0.27 | 0       | 0.28 |

Supplement: Supplementary file 1564 [file 1]

# IPI00030131.3|TMPO

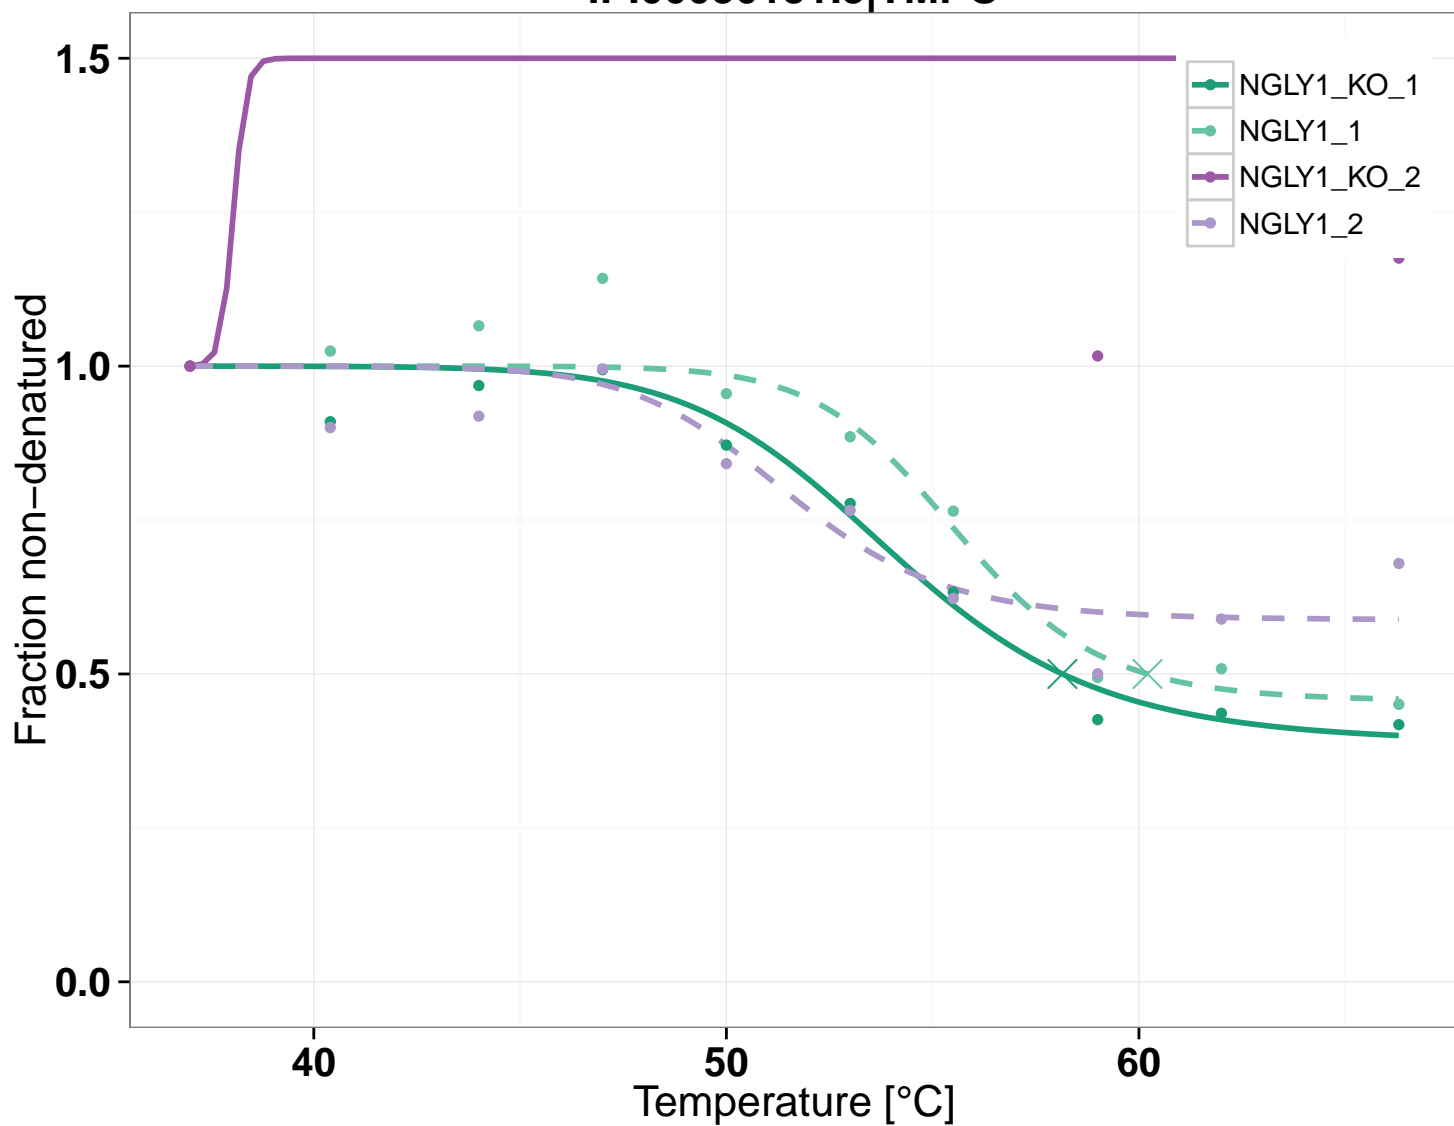

|            | meltPoint | slope  | plateau | R2    |
|------------|-----------|--------|---------|-------|
| NGLY1_KO_1 | 58.15     | -0.061 | 0.39    | 0.97  |
| NGLY1_1    | 60.21     | -0.078 | 0.46    | 0.95  |
| NGLY1_KO_2 | -         | 0.82   | 1.5     | -0.04 |
| NGLY1_2    | -         | -0.054 | 0.59    | 0.86  |

Supplement: Supplementary file 1565 [file 1]

# IPI00170596.1|SIN3A

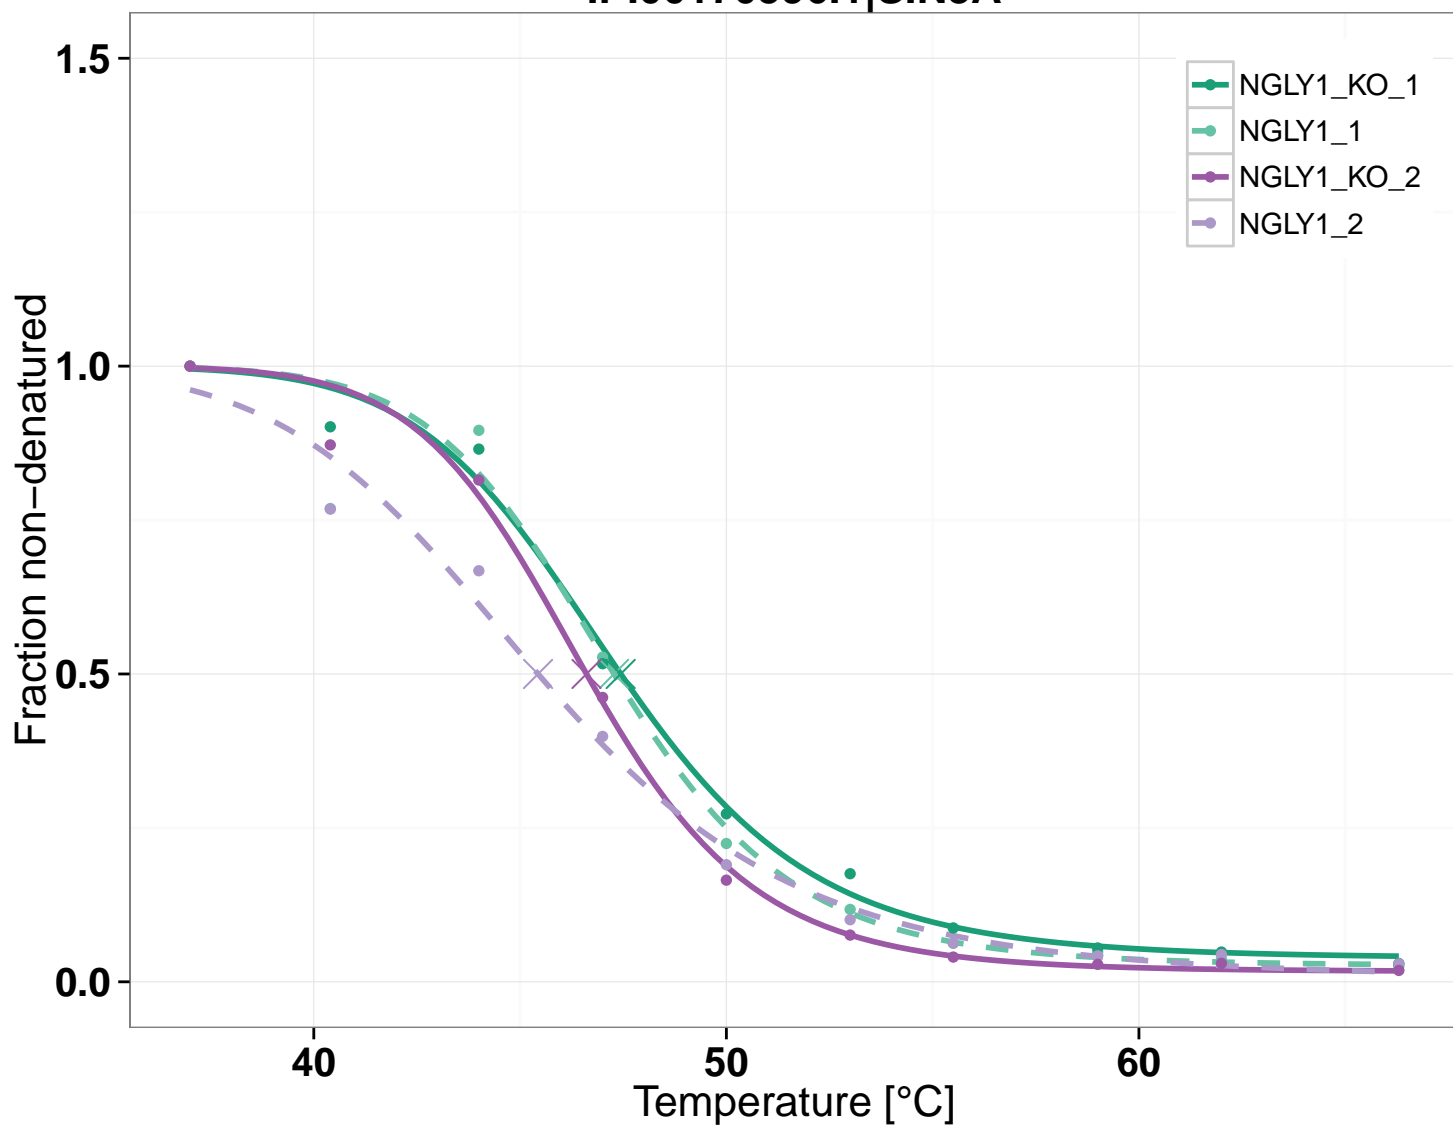

|            | meltPoint | slope  | plateau | R2   |
|------------|-----------|--------|---------|------|
| NGLY1_KO_1 | 47.44     | -0.1   | 0.04    | 0.99 |
| NGLY1_1    | 47.28     | -0.11  | 0.03    | 0.97 |
| NGLY1_KO_2 | 46.61     | -0.12  | 0.02    | 0.99 |
| NGLY1_2    | 45.44     | -0.079 | 0       | 0.99 |

Supplement: Supplementary file 1566 [file 1]

# IPI00014151.3|PSMD6

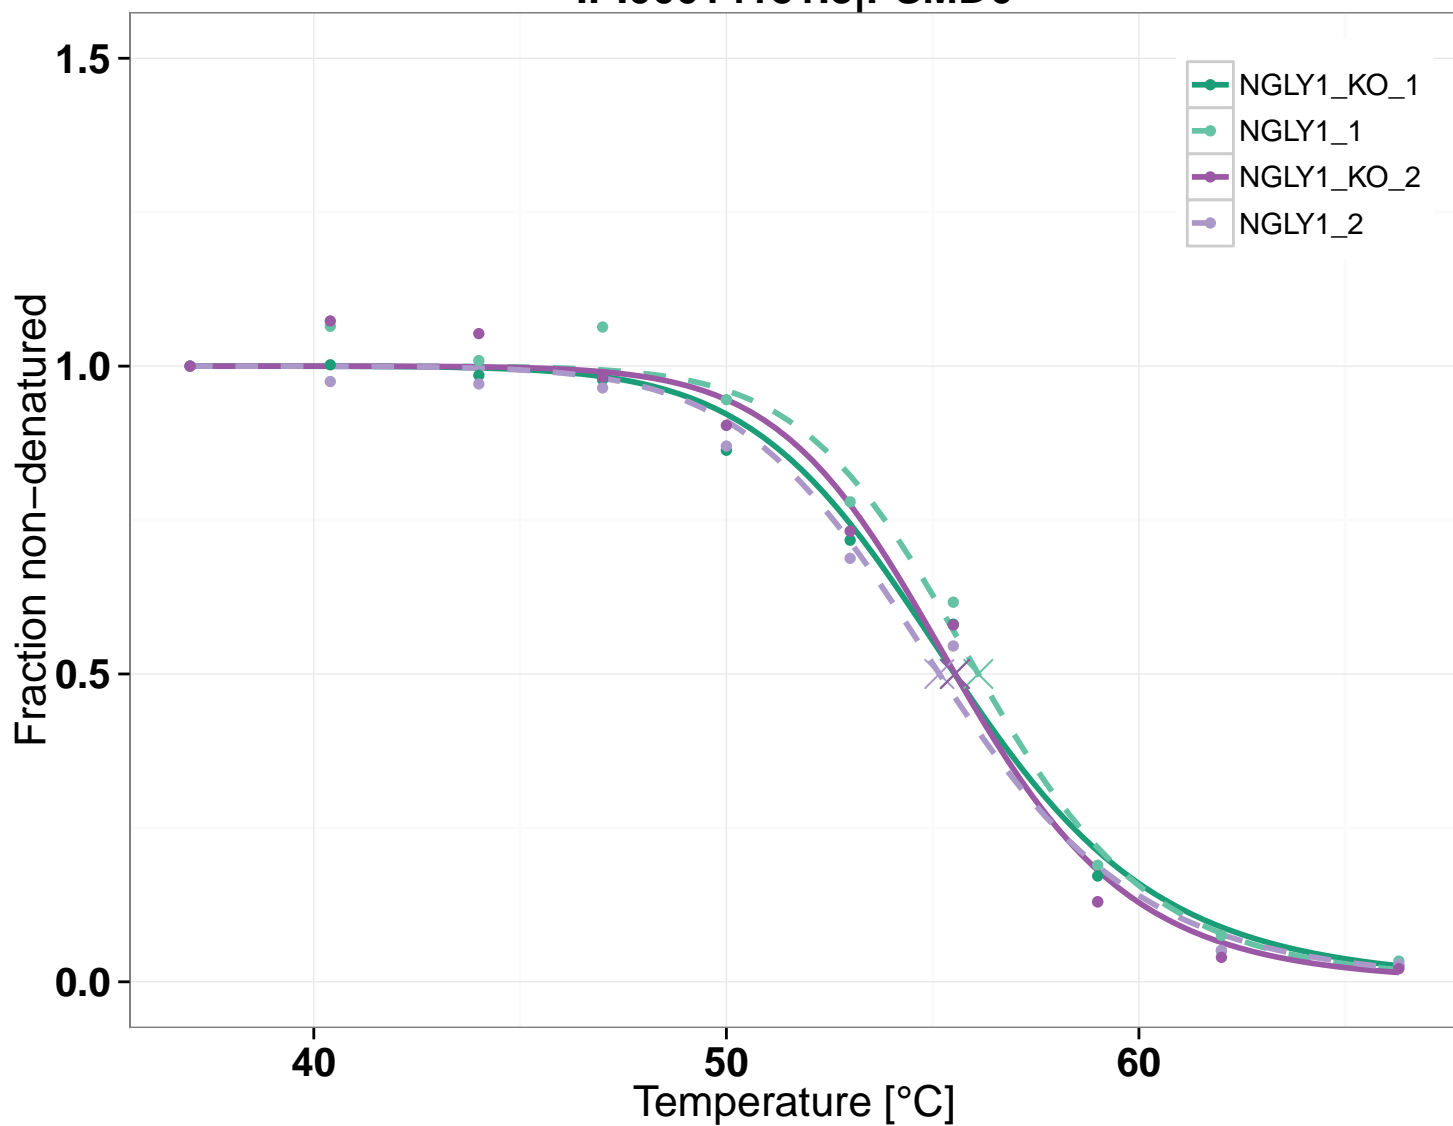

|            | meltPoint | slope | plateau | R2   |
|------------|-----------|-------|---------|------|
| NGLY1_KO_1 | 55.54     | -0.1  | 0       | 0.99 |
| NGLY1_1    | 56.11     | -0.12 | 0       | 0.99 |
| NGLY1_KO_2 | 55.54     | -0.12 | 0       | 0.99 |
| NGLY1_2    | 55.16     | -0.1  | 0       | 0.99 |

Supplement: Supplementary file 1567 [file 1]

IPI00412787.1|ARL5A

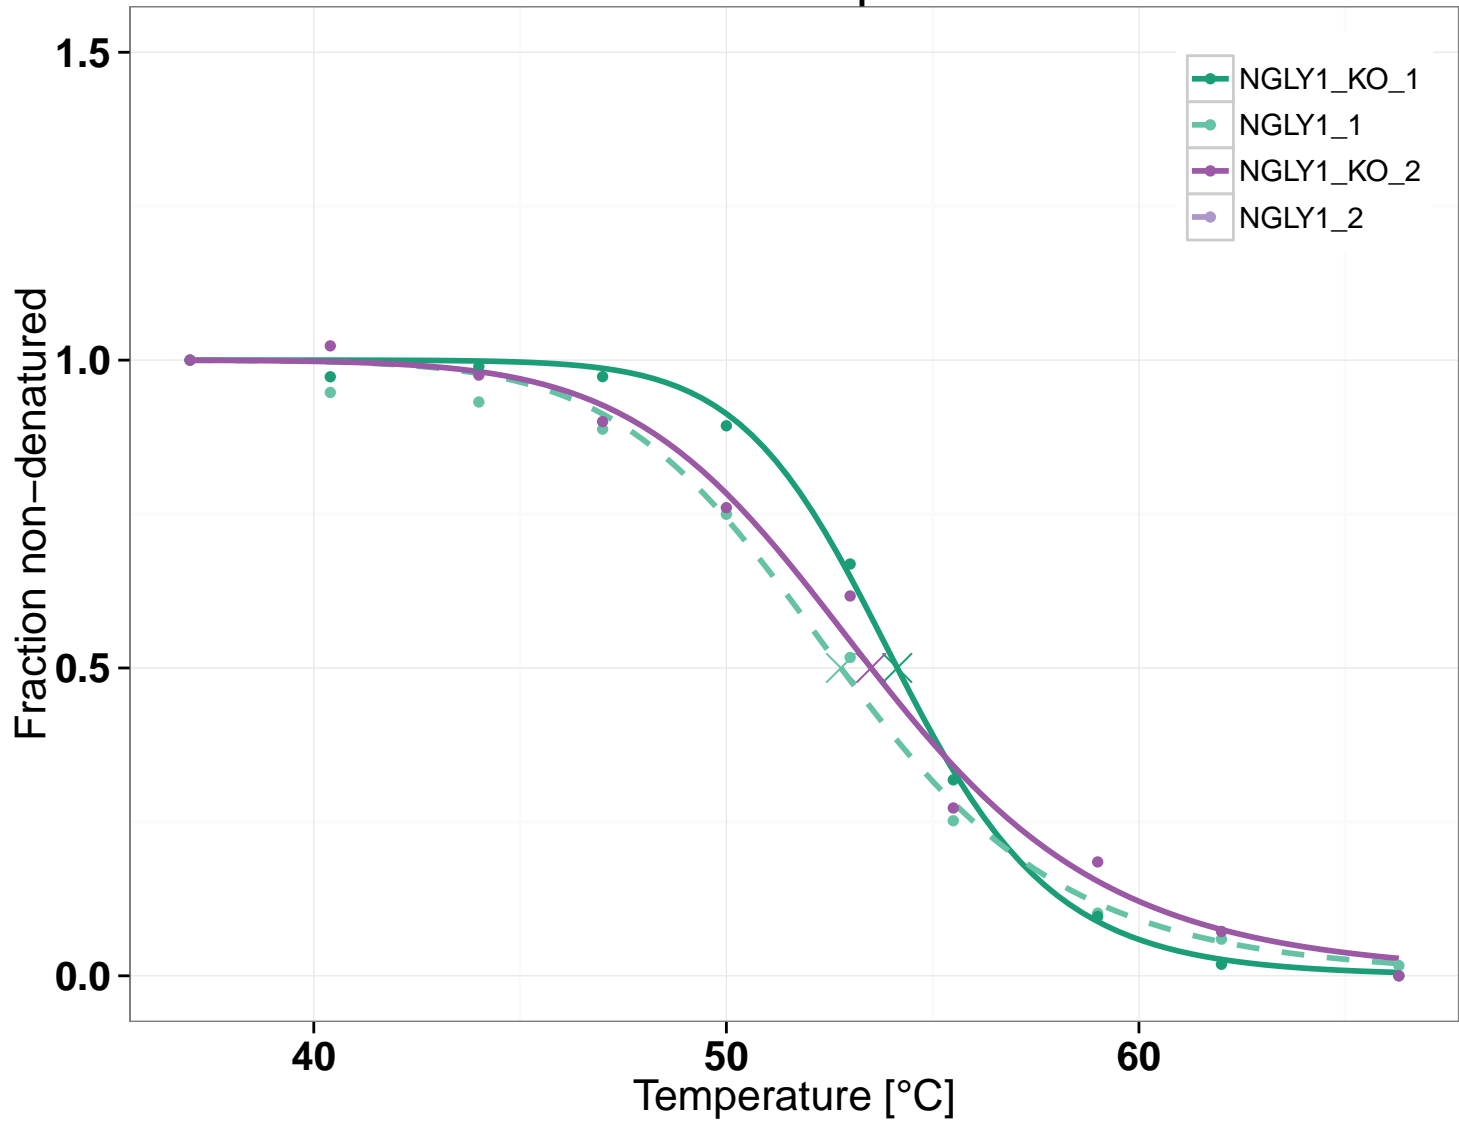

|            | meltPoint | slope  | plateau | R2   |
|------------|-----------|--------|---------|------|
| NGLY1_KO_1 | 54.14     | -0.13  | 0       | 1    |
| NGLY1_1    | 52.78     | -0.091 | 0       | 0.99 |
| NGLY1_KO_2 | 53.51     | -0.087 | 0       | 0.99 |
| NGLY1_2    | -         | -      | -       | -    |

Supplement: Supplementary file 1568 [file 1]

# IPI00216730.3|HIST2H2AB

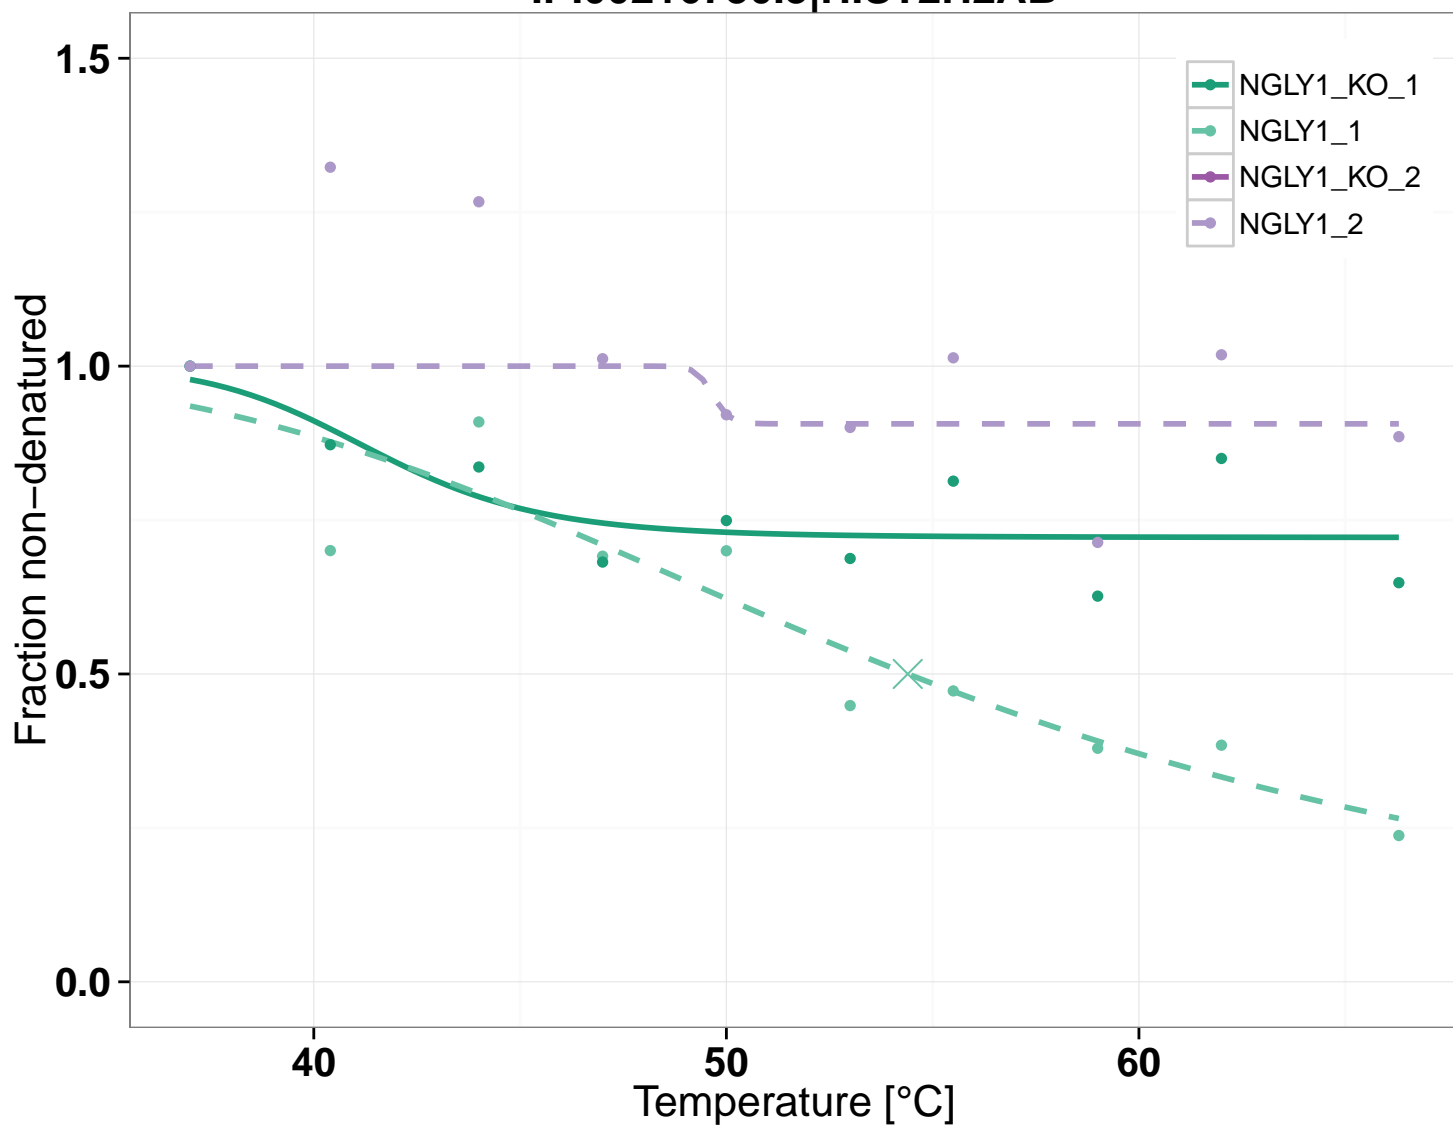

|            | meltPoint | slope  | plateau | R2   |
|------------|-----------|--------|---------|------|
| NGLY1_KO_1 | –         | –0.034 | 0.72    | 0.62 |
| NGLY1_1    | 54.4      | –0.029 | 0       | 0.88 |
| NGLY1_KO_2 | –         | –      | –       | –    |
| NGLY1_2    | –         | –0.12  | 0.91    | 0.17 |

Supplement: Supplementary file 1569 [file 1]

IPI00045839.3|LEPRE1

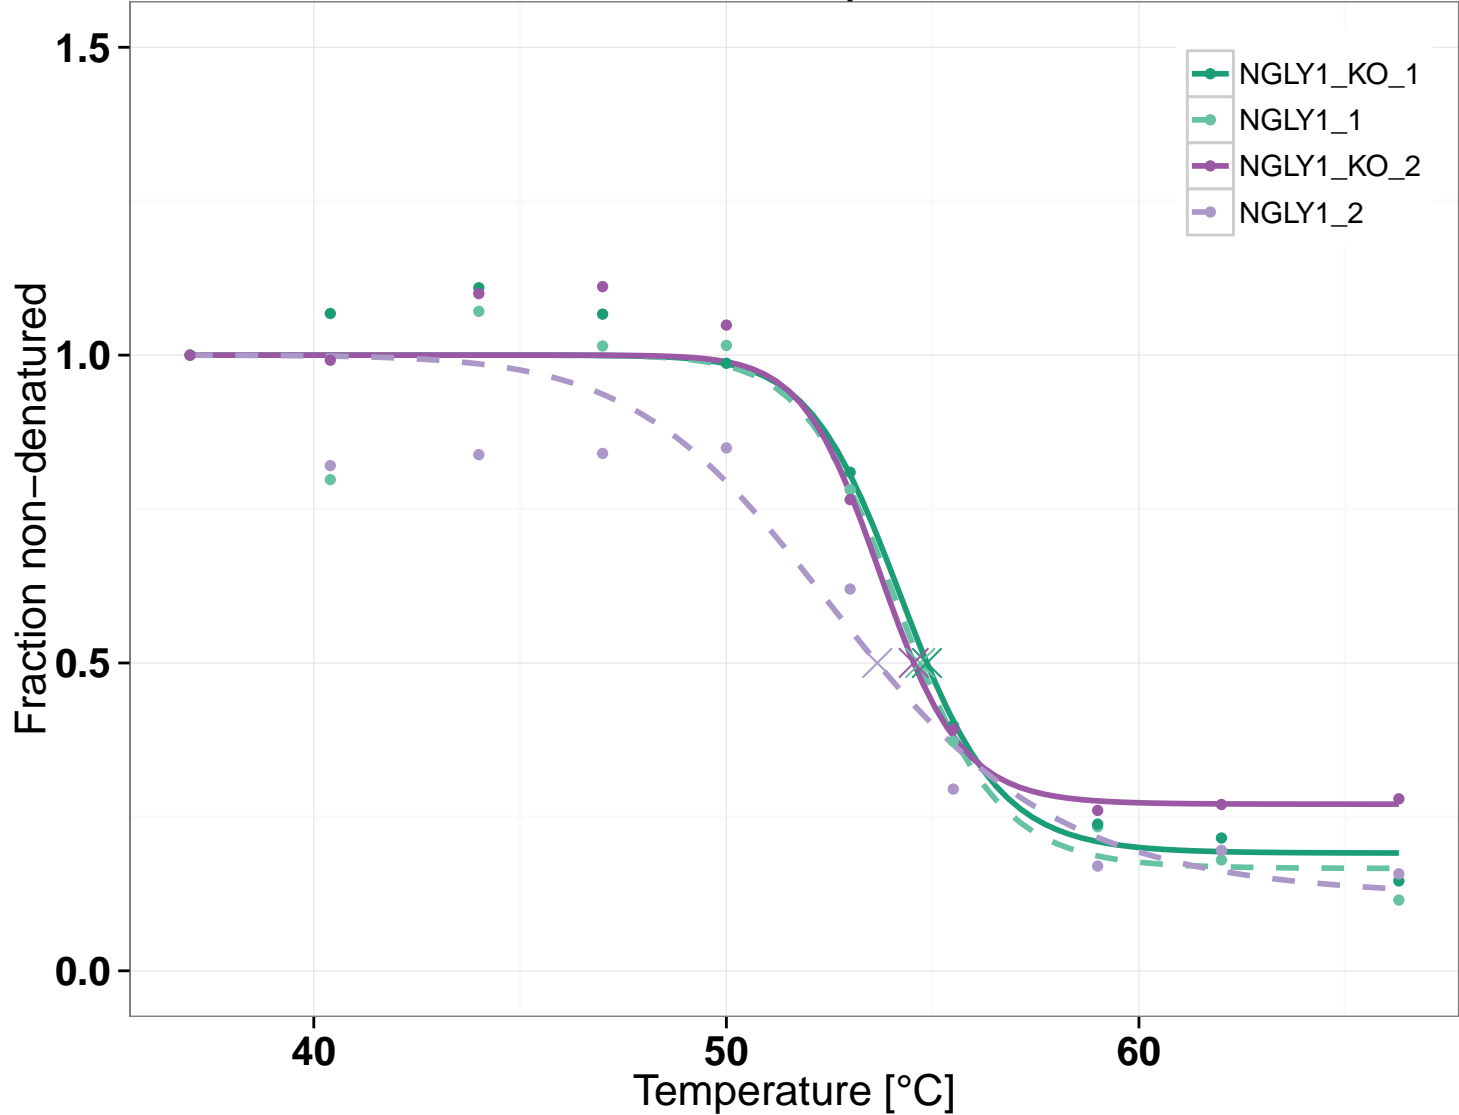

|            | meltPoint | slope  | plateau | R2   |
|------------|-----------|--------|---------|------|
| NGLY1_KO_1 | 54.86     | -0.18  | 0.19    | 0.98 |
| NGLY1_1    | 54.7      | -0.18  | 0.17    | 0.96 |
| NGLY1_KO_2 | 54.54     | -0.19  | 0.27    | 0.98 |
| NGLY1_2    | 53.66     | -0.085 | 0.12    | 0.92 |

Supplement: Supplementary file 1570 [file 1]

# IPI00465132.4|COPE

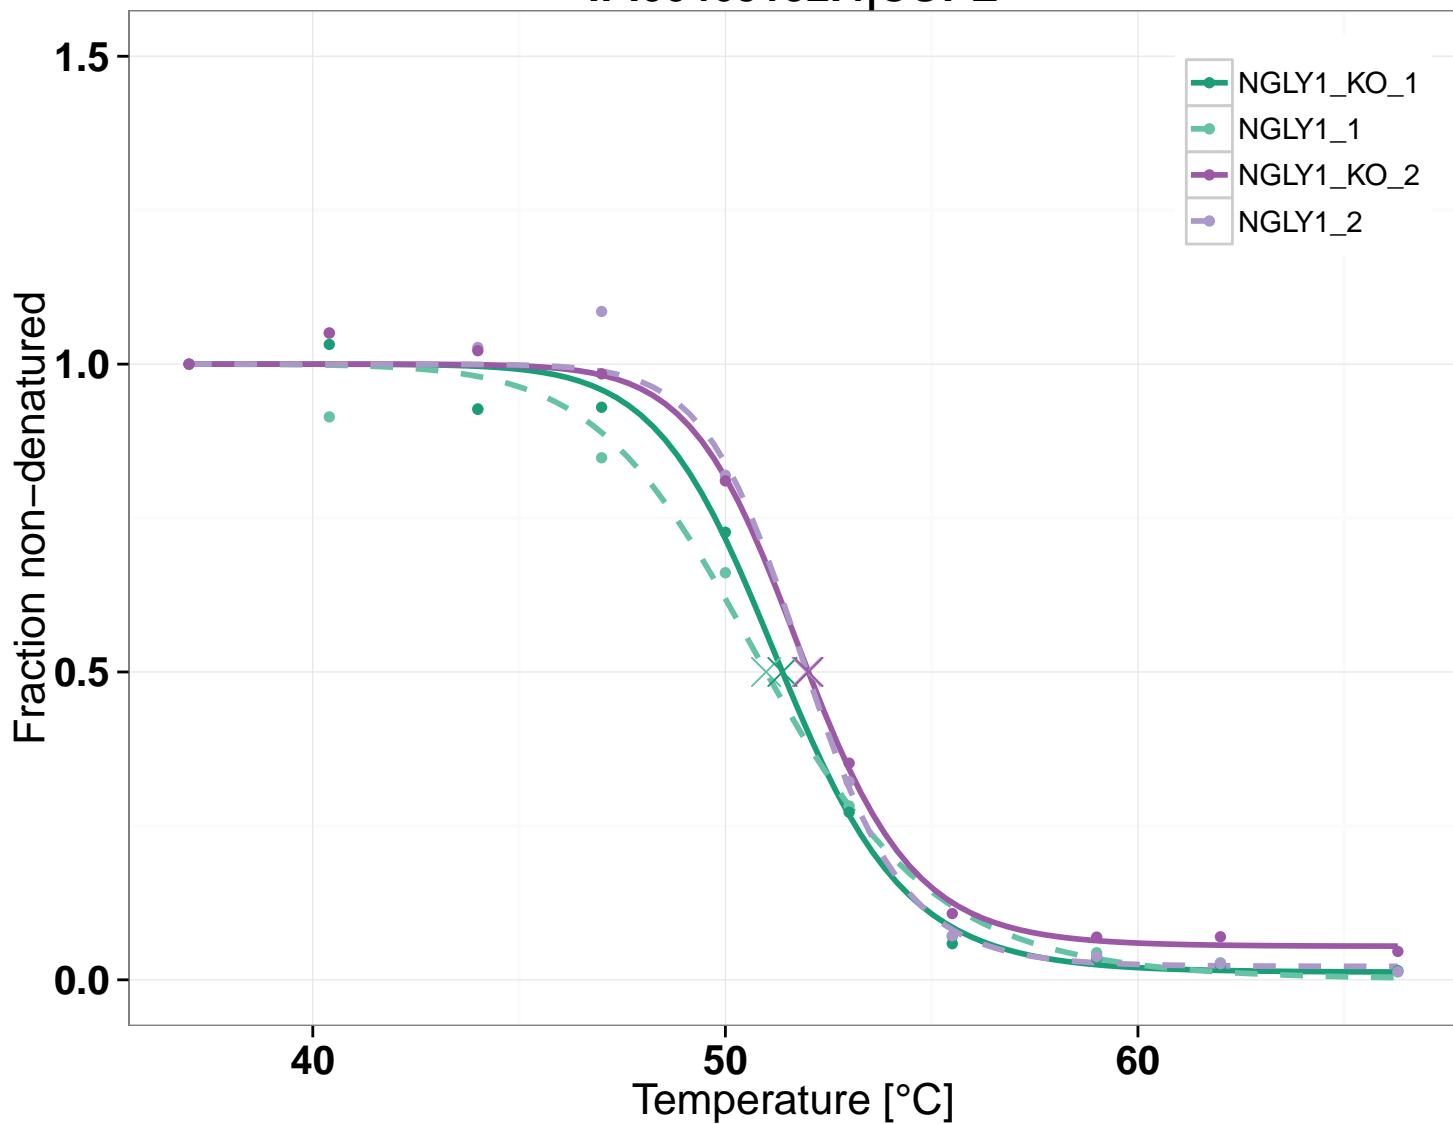

|            | meltPoint | slope | plateau | R2   |
|------------|-----------|-------|---------|------|
| NGLY1_KO_1 | 51.38     | -0.16 | 0.01    | 1    |
| NGLY1_1    | 50.99     | -0.12 | 0       | 0.99 |
| NGLY1_KO_2 | 52.01     | -0.18 | 0.05    | 1    |
| NGLY1_2    | 51.97     | -0.2  | 0.02    | 0.99 |

Supplement: Supplementary file 1571 [file 1]

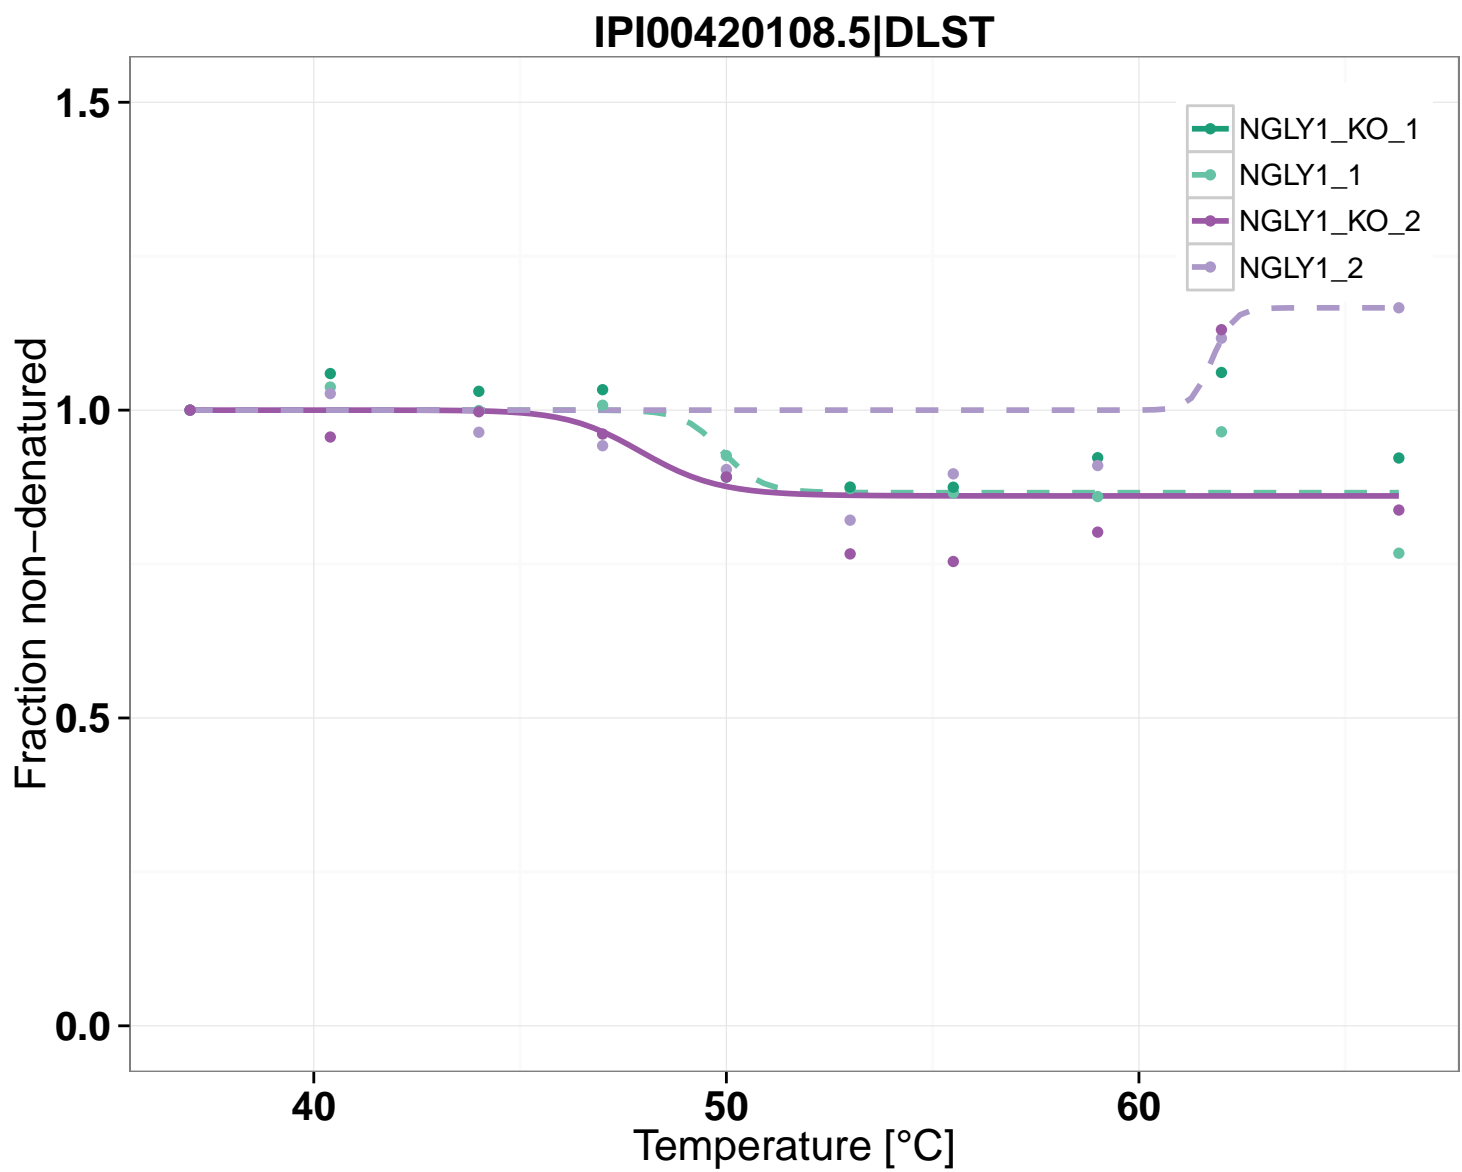

|            | meltPoint | slope  | plateau | R2   |
|------------|-----------|--------|---------|------|
| NGLY1_KO_1 | —         | —      | —       | —    |
| NGLY1_1    | —         | -0.07  | 0.87    | 0.69 |
| NGLY1_KO_2 | —         | -0.038 | 0.86    | 0.24 |
| NGLY1_2    | —         | 0.16   | 1.17    | 0.35 |

Supplement: Supplementary file 1572 [file 1]

# IPI00296374.3|ZFPL1

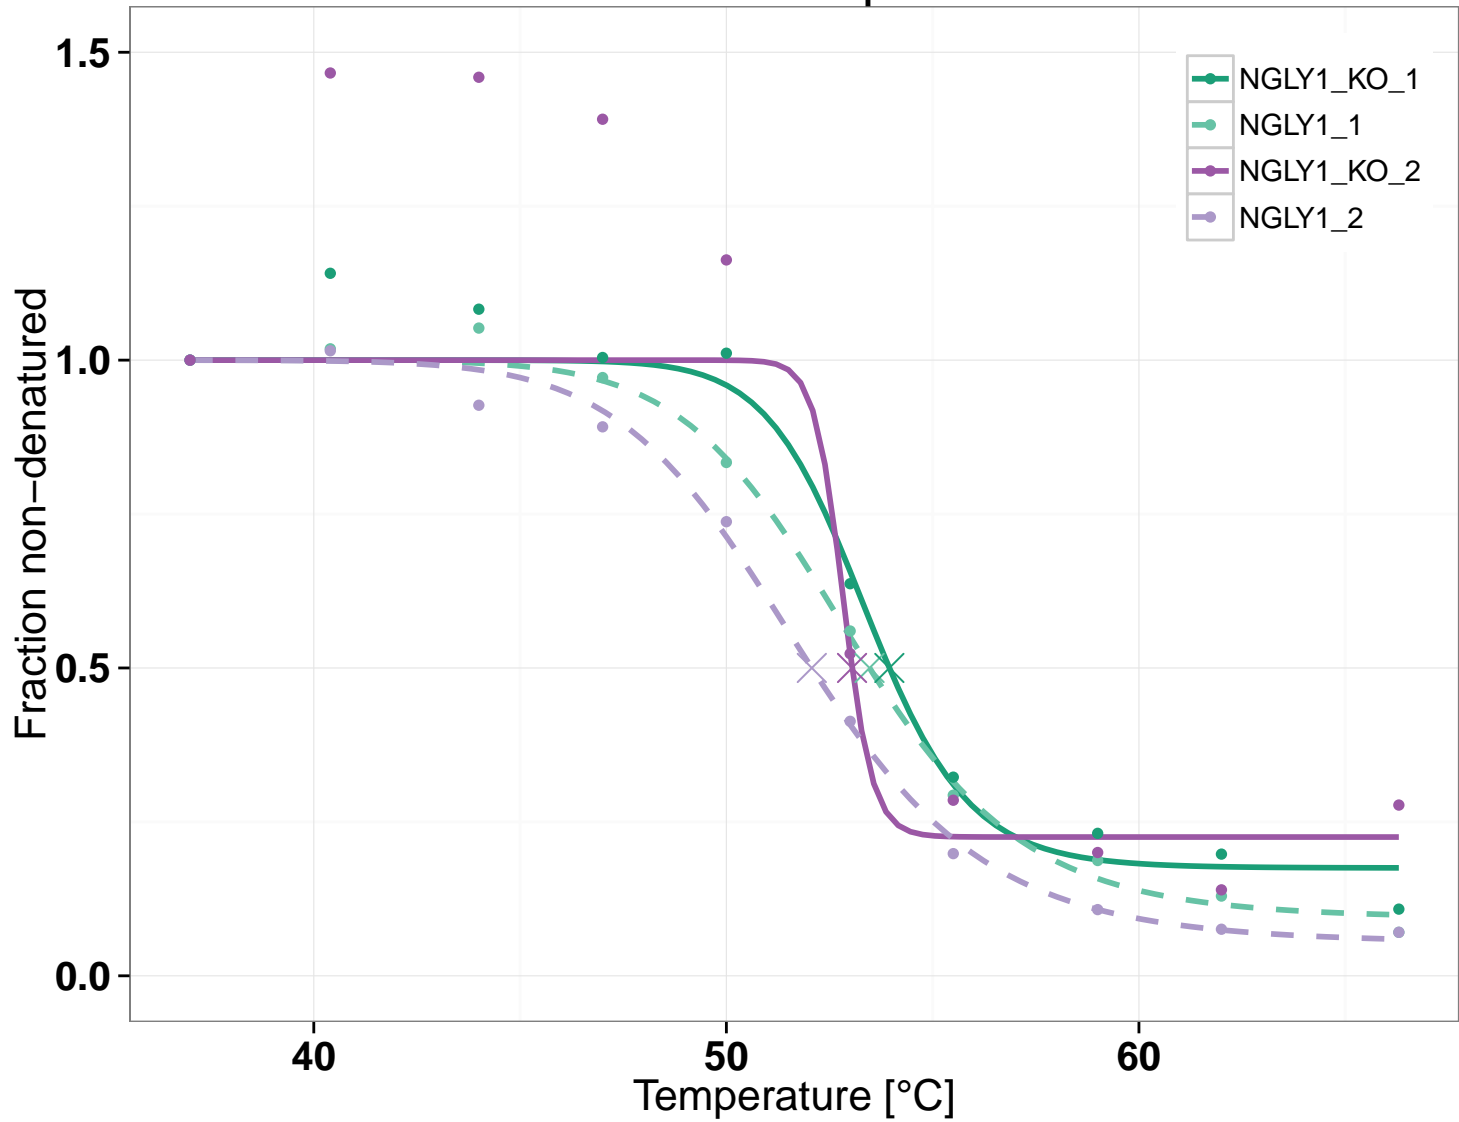

|            | meltPoint | slope | plateau | R2   |
|------------|-----------|-------|---------|------|
| NGLY1_KO_1 | 53.95     | -0.17 | 0.18    | 0.98 |
| NGLY1_1    | 53.47     | -0.11 | 0.09    | 1    |
| NGLY1_KO_2 | 53.05     | -0.55 | 0.23    | 0.78 |
| NGLY1_2    | 52.07     | -0.11 | 0.05    | 1    |

Supplement: Supplementary file 1573 [file 1]

IPI00893829.1|TSSC1

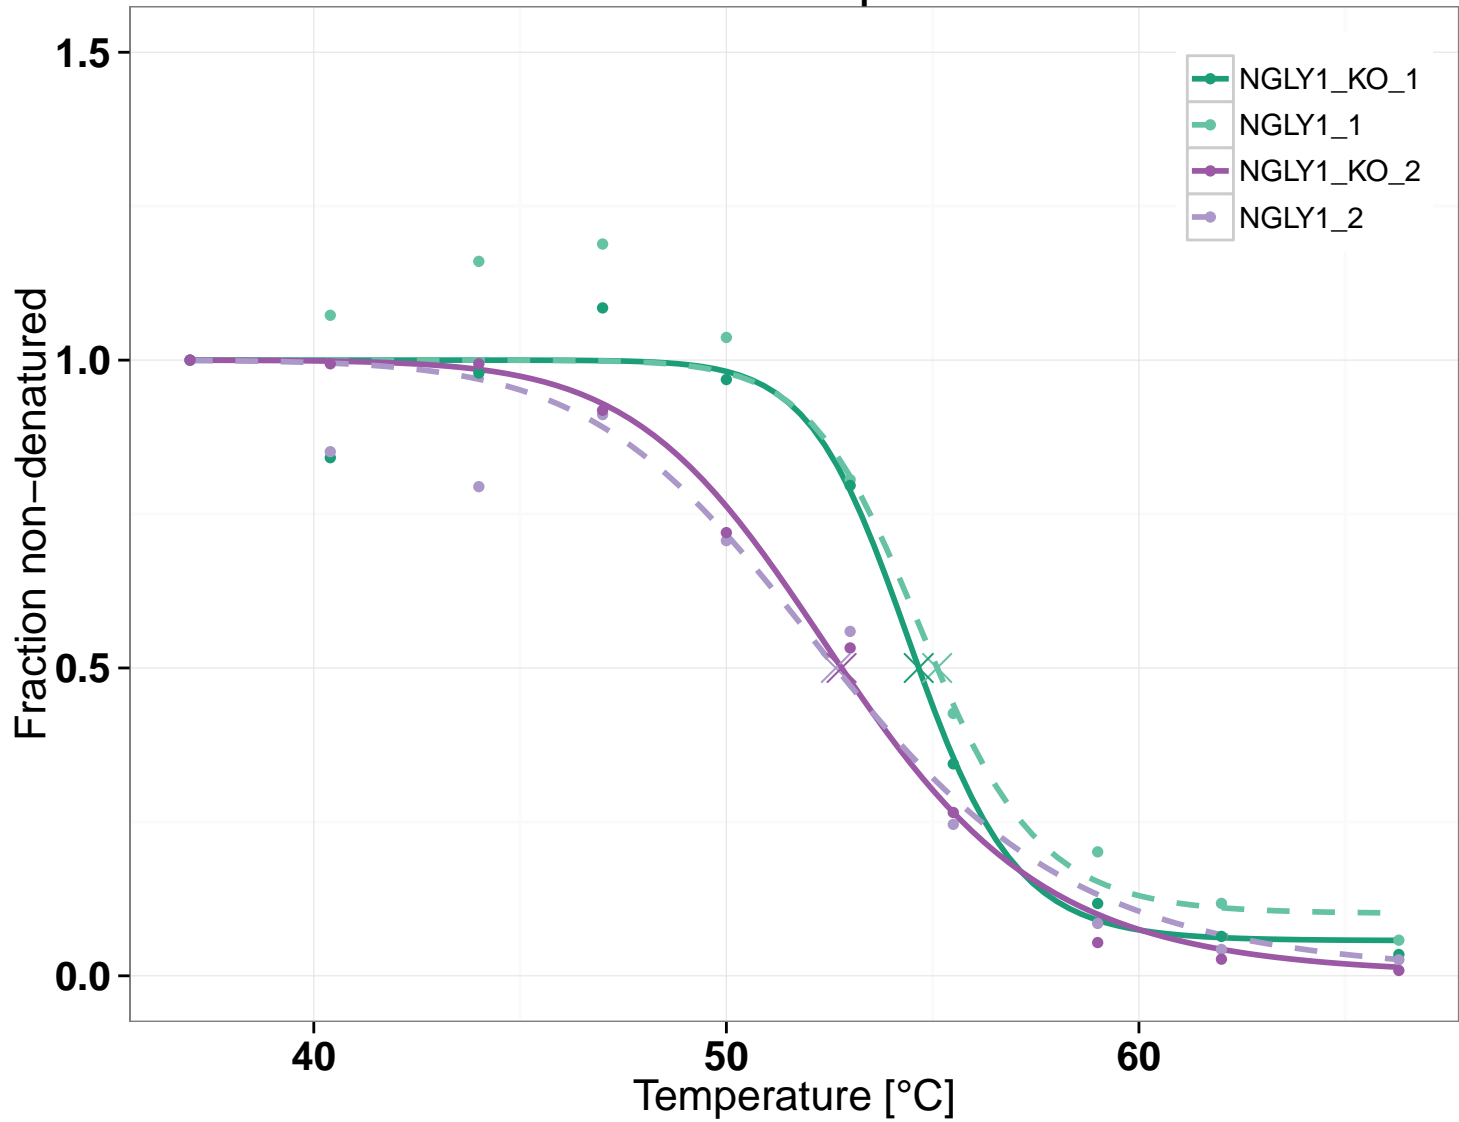

|            | meltPoint | slope  | plateau | R2   |
|------------|-----------|--------|---------|------|
| NGLY1_KO_1 | 54.66     | -0.19  | 0.06    | 0.98 |
| NGLY1_1    | 55.11     | -0.16  | 0.1     | 0.96 |
| NGLY1_KO_2 | 52.79     | -0.1   | 0       | 1    |
| NGLY1_2    | 52.65     | -0.084 | 0       | 0.95 |

Supplement: Supplementary file 1574 [file 1]

# IPI00301609.8|NEK9

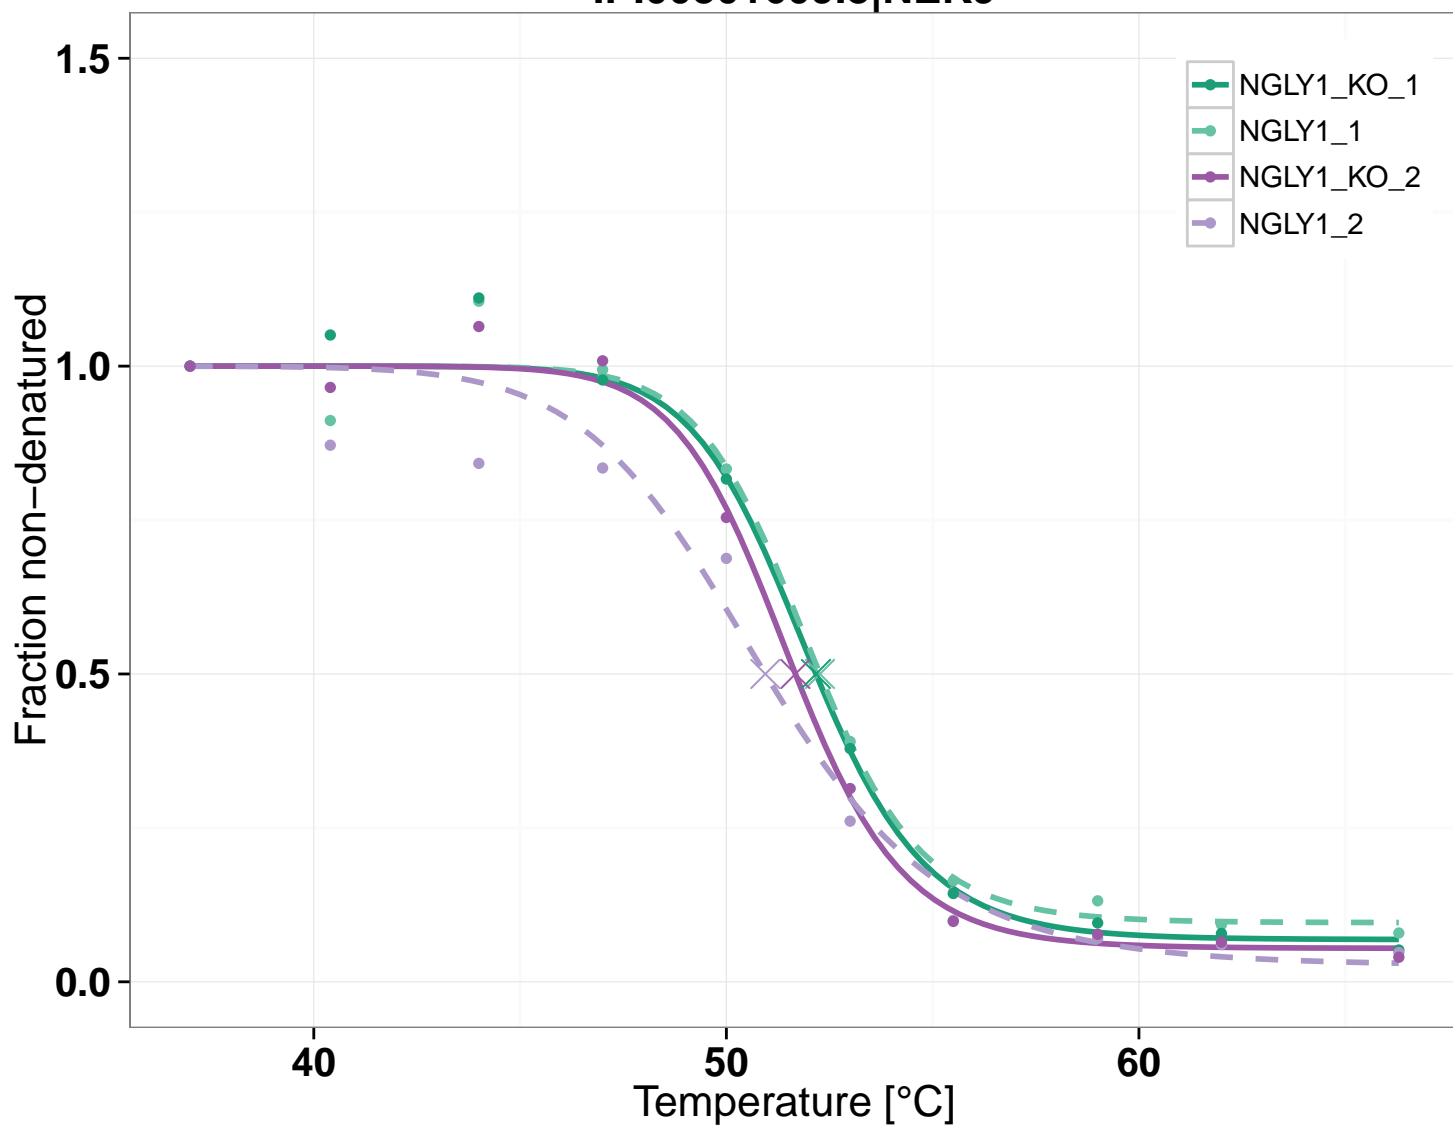

|            | meltPoint | slope | plateau | R2   |
|------------|-----------|-------|---------|------|
| NGLY1_KO_1 | 52.17     | -0.16 | 0.07    | 0.99 |
| NGLY1_1    | 52.27     | -0.17 | 0.1     | 0.99 |
| NGLY1_KO_2 | 51.67     | -0.17 | 0.05    | 1    |
| NGLY1_2    | 50.94     | -0.11 | 0.03    | 0.97 |

Supplement: Supplementary file 1575 [file 1]

IPI00306207.4|C8ORF41

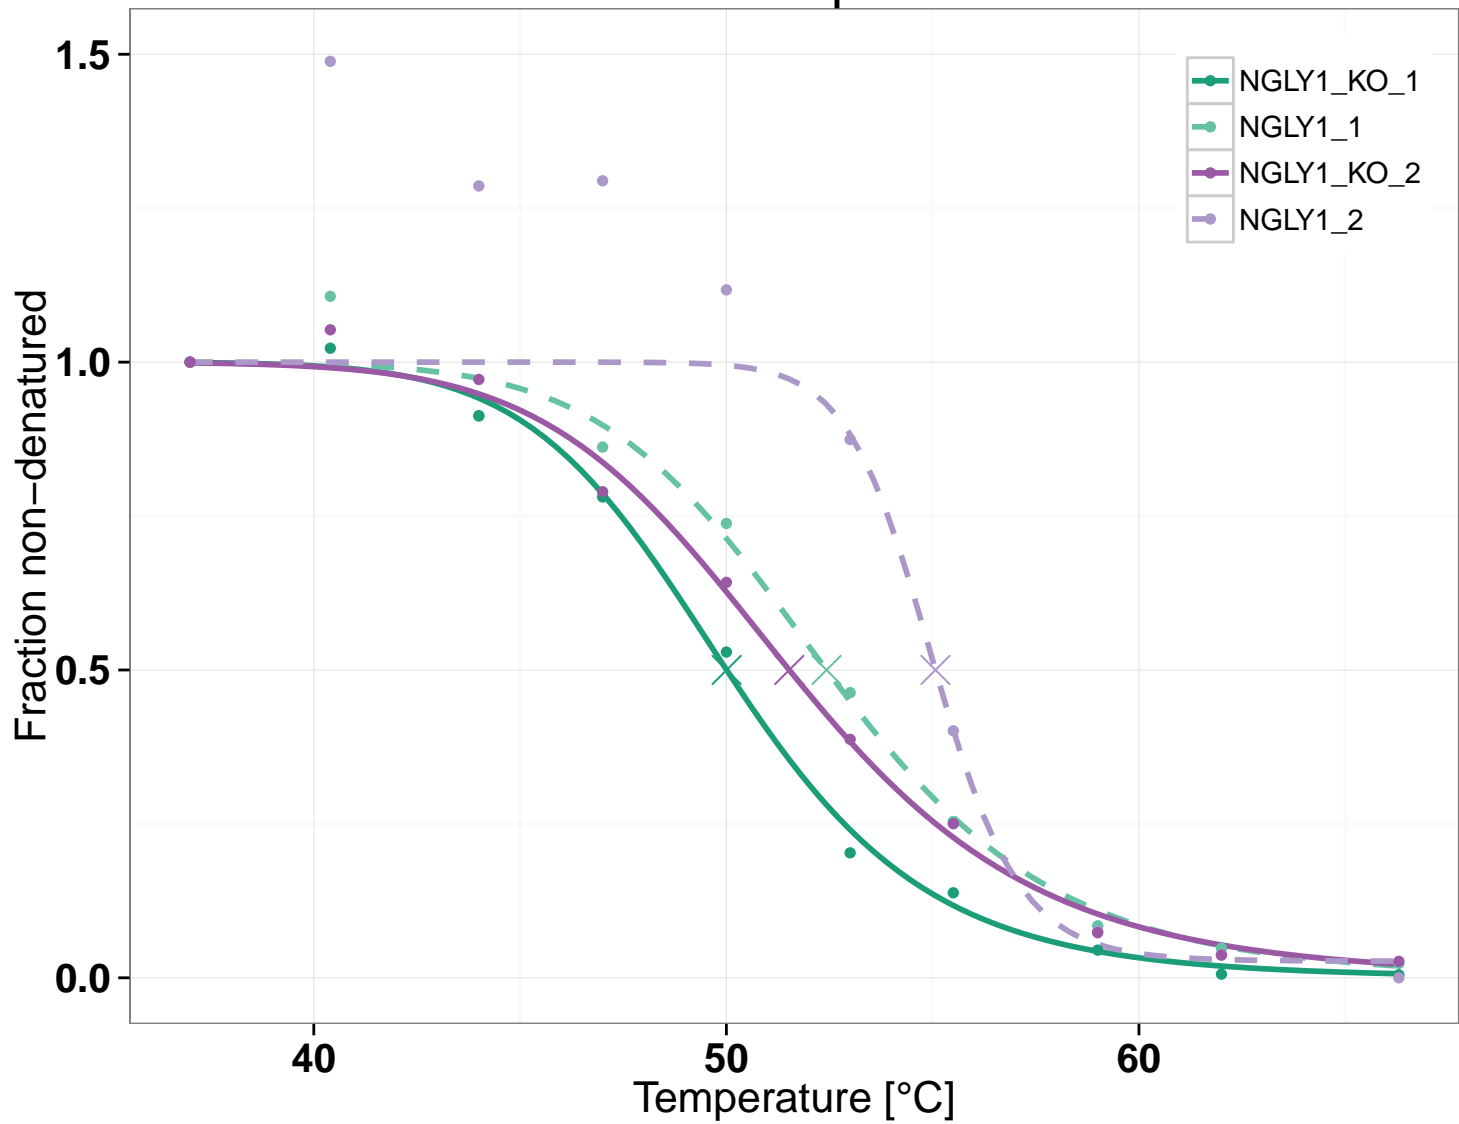

|            | meltPoint | slope  | plateau | R2   |
|------------|-----------|--------|---------|------|
| NGLY1_KO_1 | 50.01     | -0.1   | 0       | 1    |
| NGLY1_1    | 52.43     | -0.091 | 0       | 0.99 |
| NGLY1_KO_2 | 51.52     | -0.084 | 0       | 0.99 |
| NGLY1_2    | 55.07     | -0.23  | 0.03    | 0.86 |

Supplement: Supplementary file 1576 [file 1]

IPI00256706.1|SIMILAR TO RIBOSOMAL PROTEIN L14.

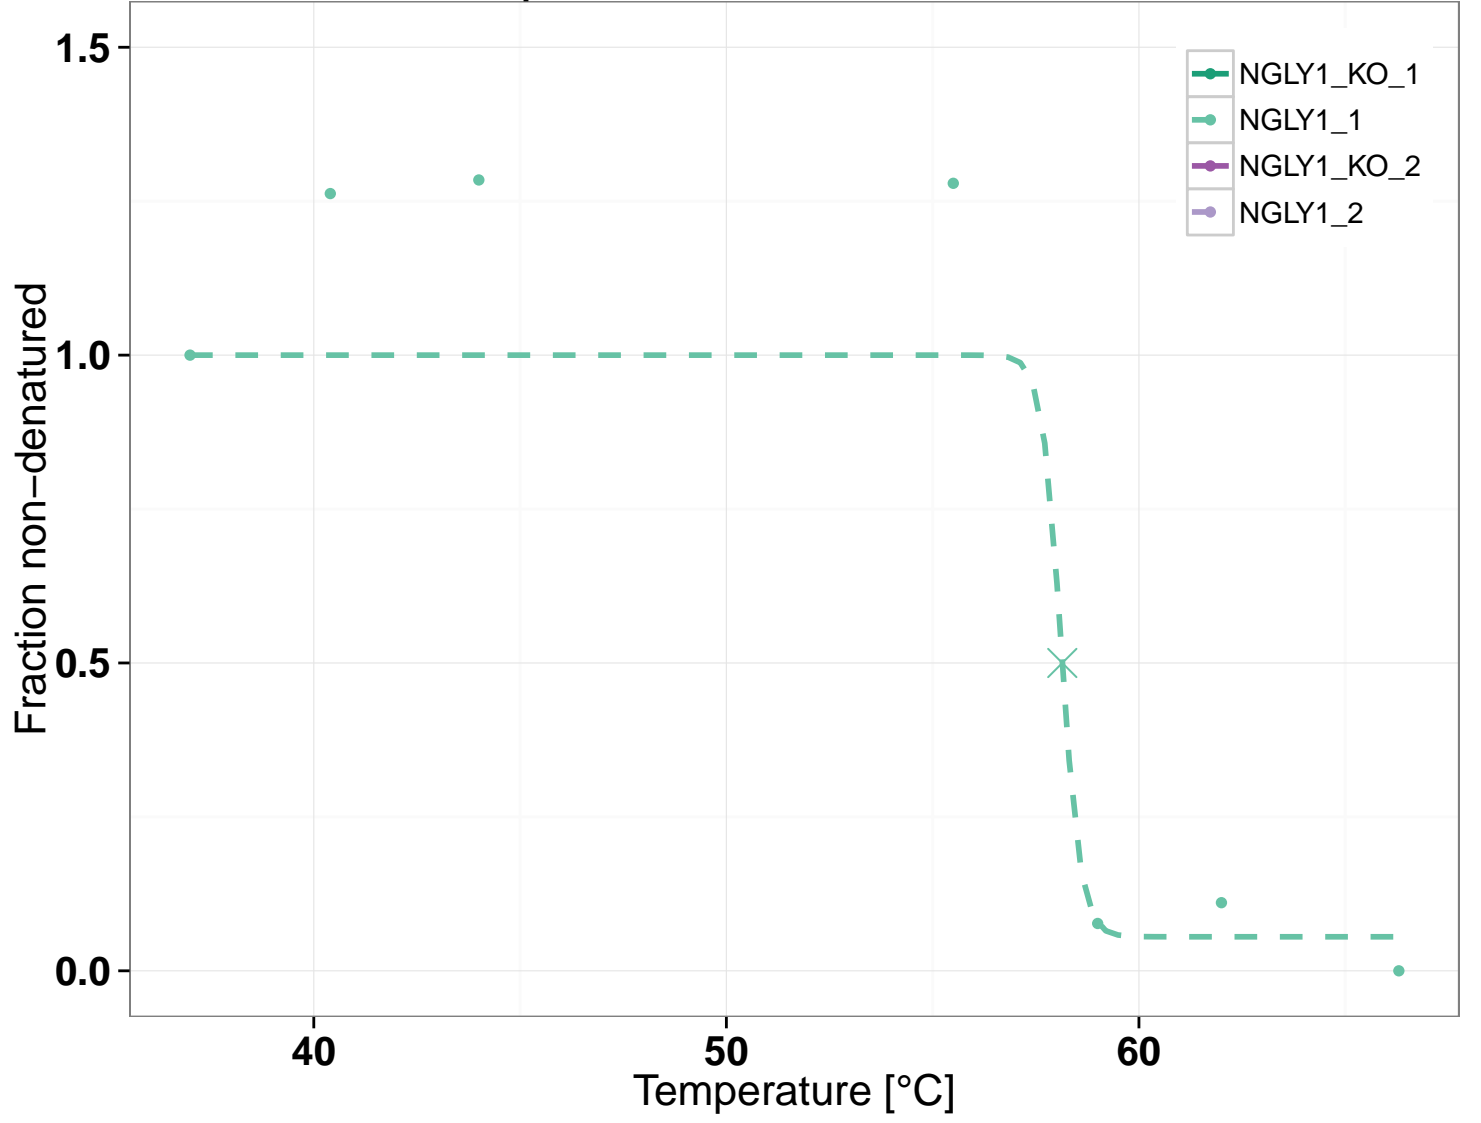

|            | meltPoint | slope | plateau | R2   |
|------------|-----------|-------|---------|------|
| NGLY1_KO_1 | -         | -     | -       | -    |
| NGLY1_1    | 58.14     | -1    | 0.06    | 0.53 |
| NGLY1_KO_2 | -         | -     | -       | -    |
| NGLY1_2    | -         | -     | -       | -    |

Supplement: Supplementary file 1577 [file 1]

IPI00103047.1|CHAC2

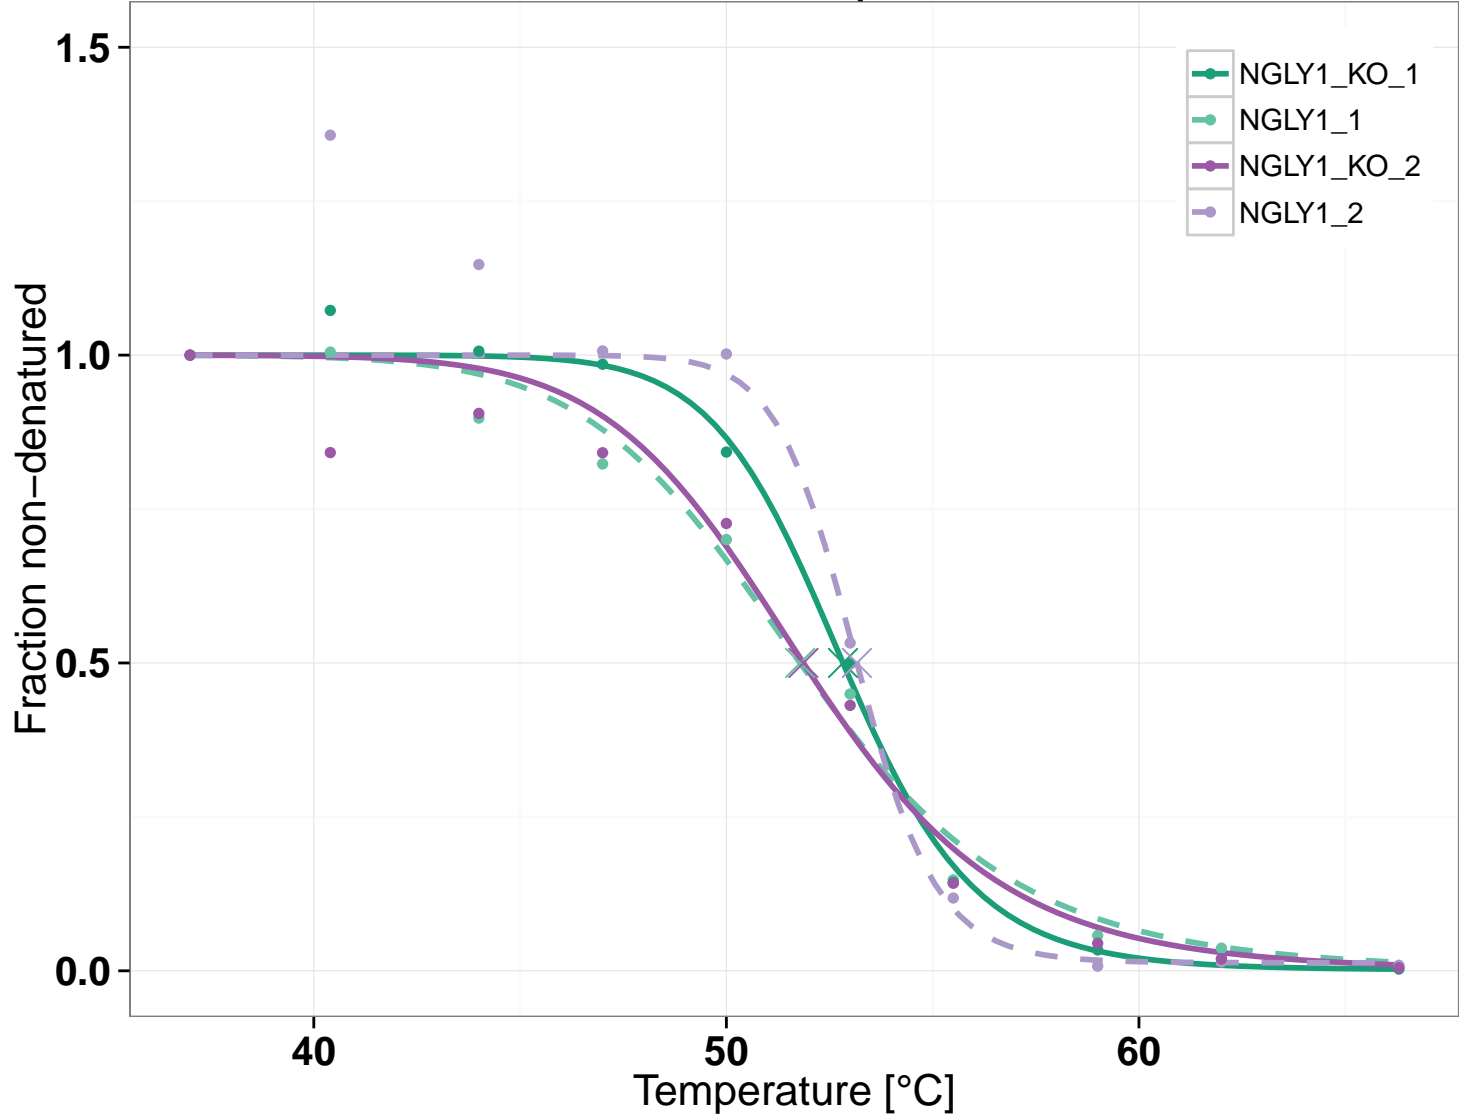

|            | meltPoint | slope  | plateau | R2   |
|------------|-----------|--------|---------|------|
| NGLY1_KO_1 | 52.83     | -0.16  | 0       | 1    |
| NGLY1_1    | 51.79     | -0.095 | 0       | 0.99 |
| NGLY1_KO_2 | 51.87     | -0.1   | 0       | 0.97 |
| NGLY1_2    | 53.17     | -0.25  | 0.01    | 0.94 |

Supplement: Supplementary file 1578 [file 1]

IPI00008934.1|HMGCS2

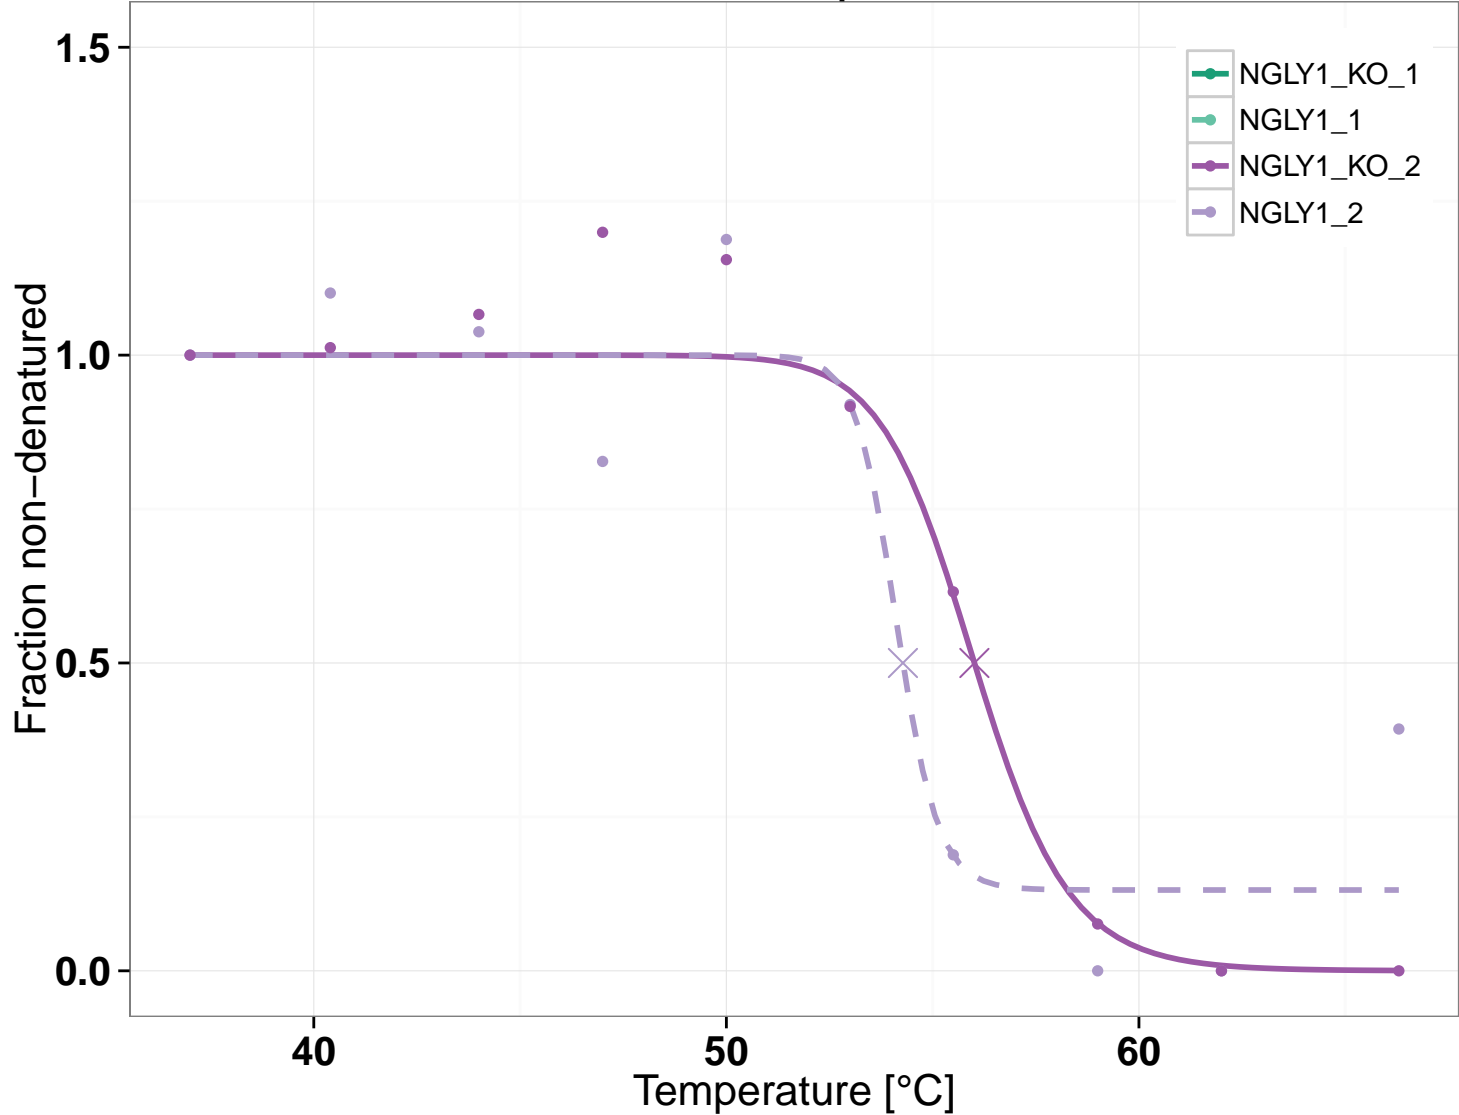

|            | meltPoint | slope | plateau | R2   |
|------------|-----------|-------|---------|------|
| NGLY1_KO_1 | —         | —     | —       | —    |
| NGLY1_1    | —         | —     | —       | —    |
| NGLY1_KO_2 | 56.01     | -0.22 | 0       | 0.97 |
| NGLY1_2    | 54.28     | -0.43 | 0.13    | 0.91 |

Supplement: Supplementary file 1579 [file 1]

IPI00009075.1|ATP5G1

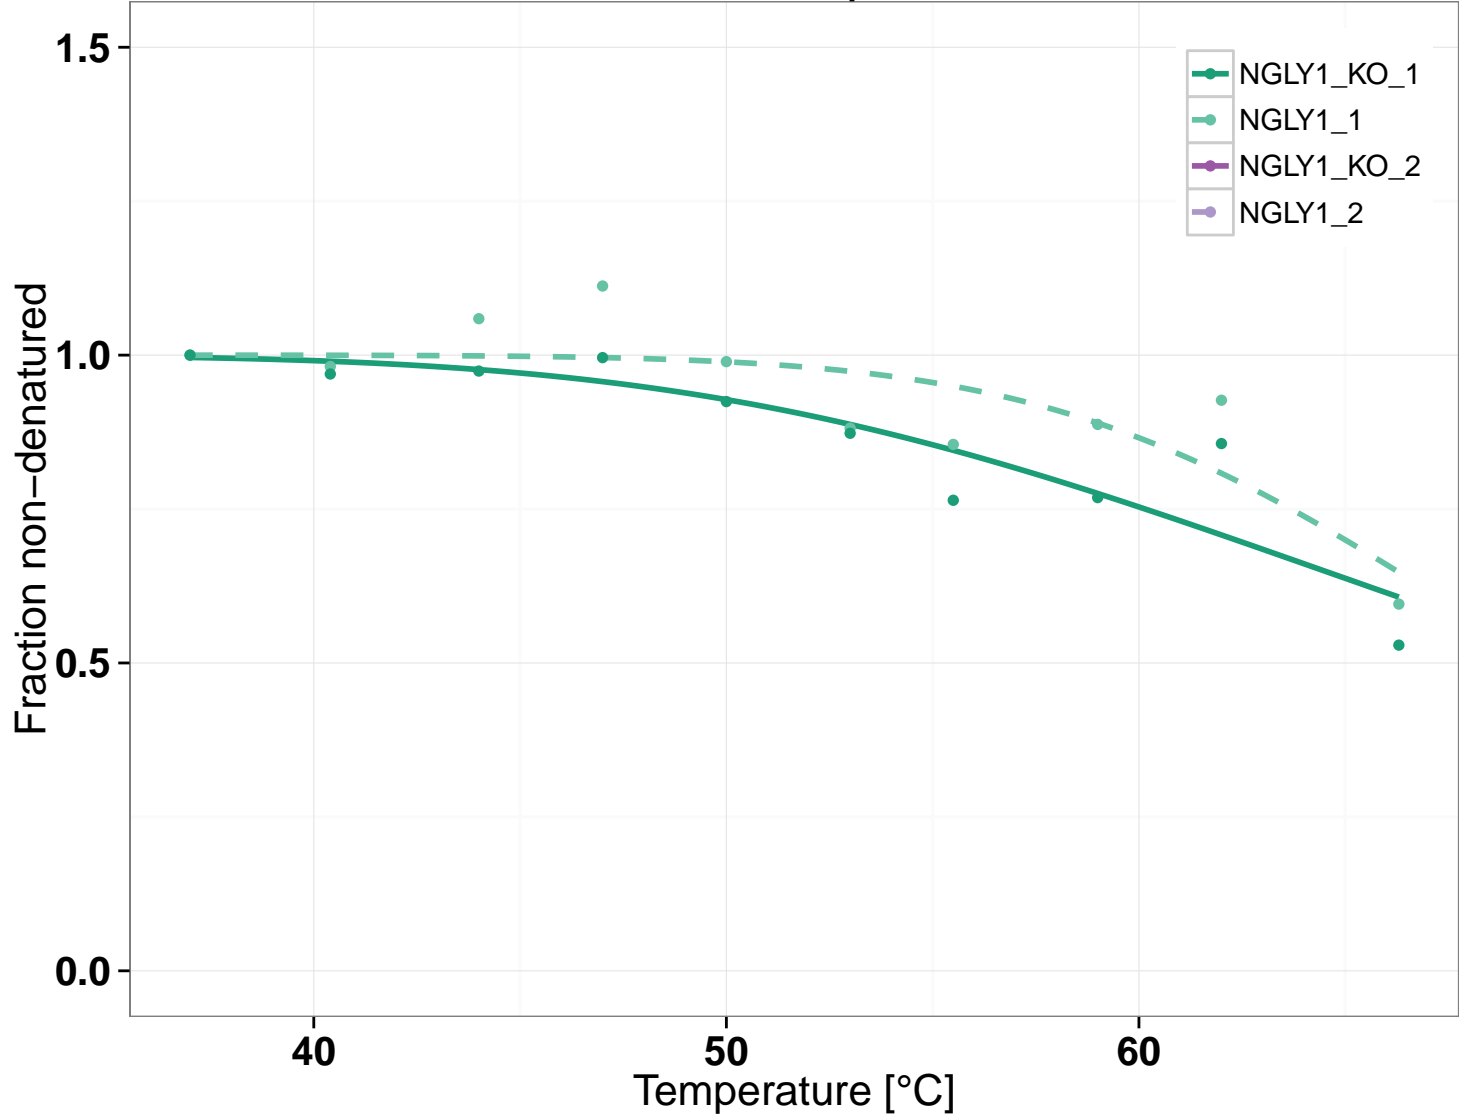

|            | meltPoint | slope  | plateau | R2   |
|------------|-----------|--------|---------|------|
| NGLY1_KO_1 | -         | -0.024 | 0       | 0.81 |
| NGLY1_1    | -         | -      | 0       | 0.72 |
| NGLY1_KO_2 | -         | -      | -       | -    |
| NGLY1_2    | -         | -      | -       | -    |

Supplement: Supplementary file 1580 [file 1]

IPI00297982.7|EIF2S3

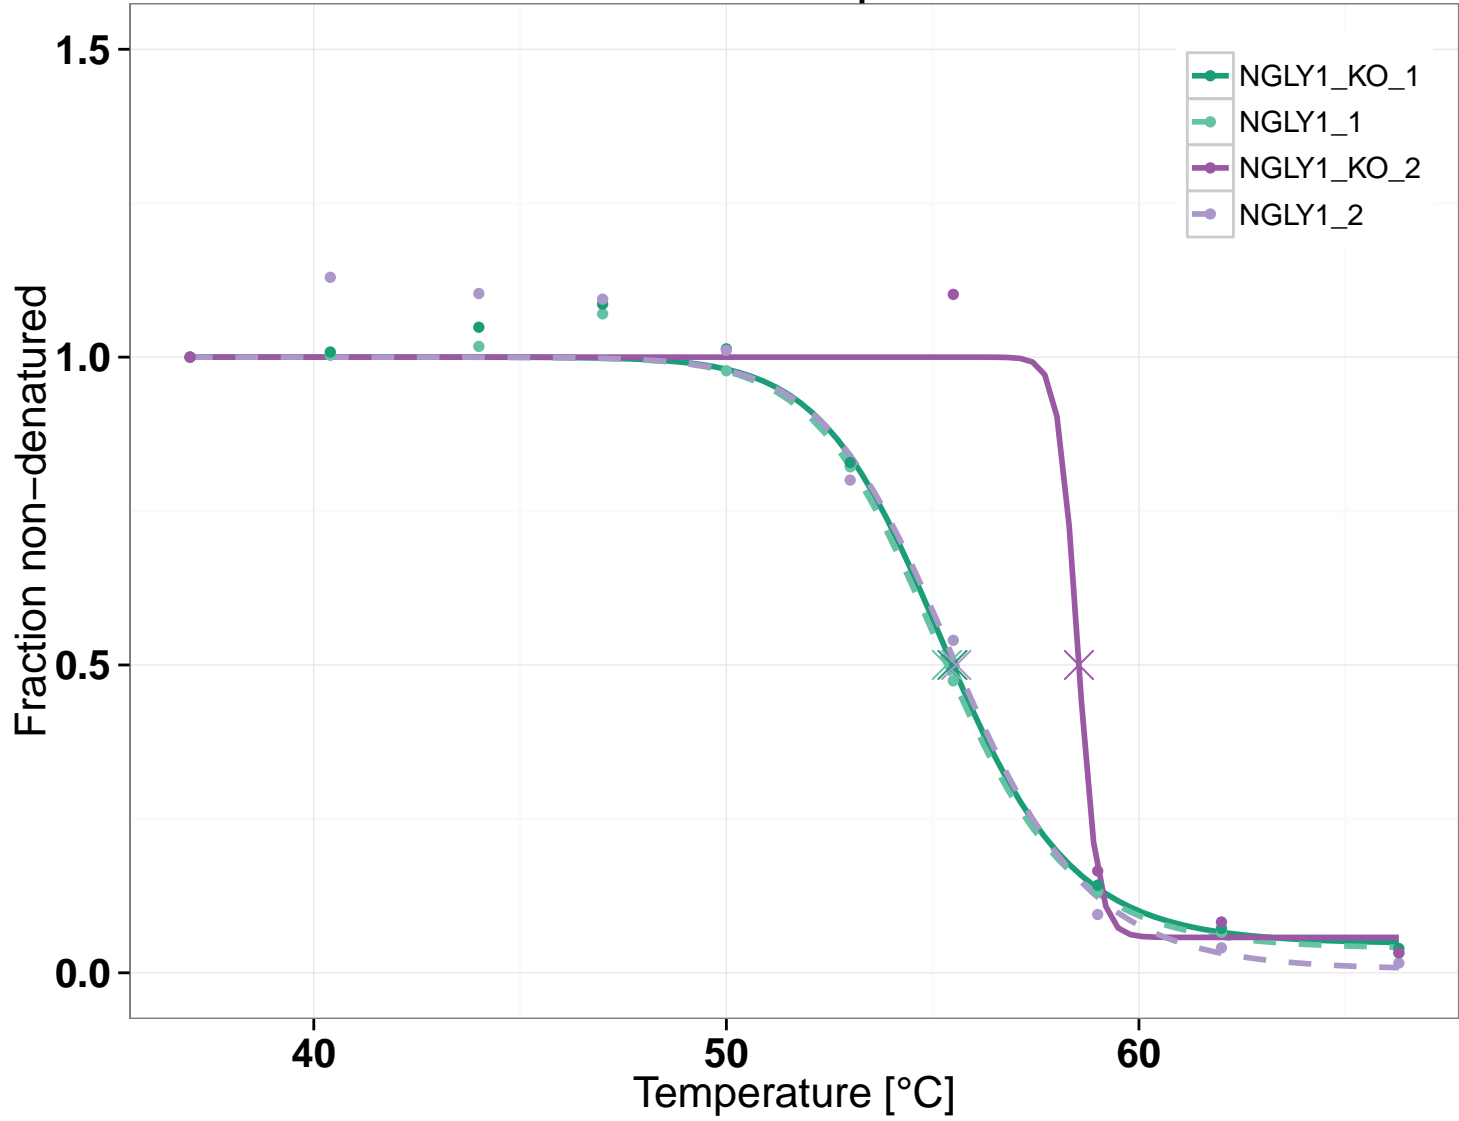

|            | meltPoint | slope | plateau | R2   |
|------------|-----------|-------|---------|------|
| NGLY1_KO_1 | 55.48     | -0.16 | 0.05    | 0.99 |
| NGLY1_1    | 55.34     | -0.15 | 0.04    | 1    |
| NGLY1_KO_2 | 58.55     | -1    | 0.06    | 0.26 |
| NGLY1_2    | 55.57     | -0.15 | 0       | 0.98 |

Supplement: Supplementary file 1581 [file 1]

# IPI00042580.4|APOO

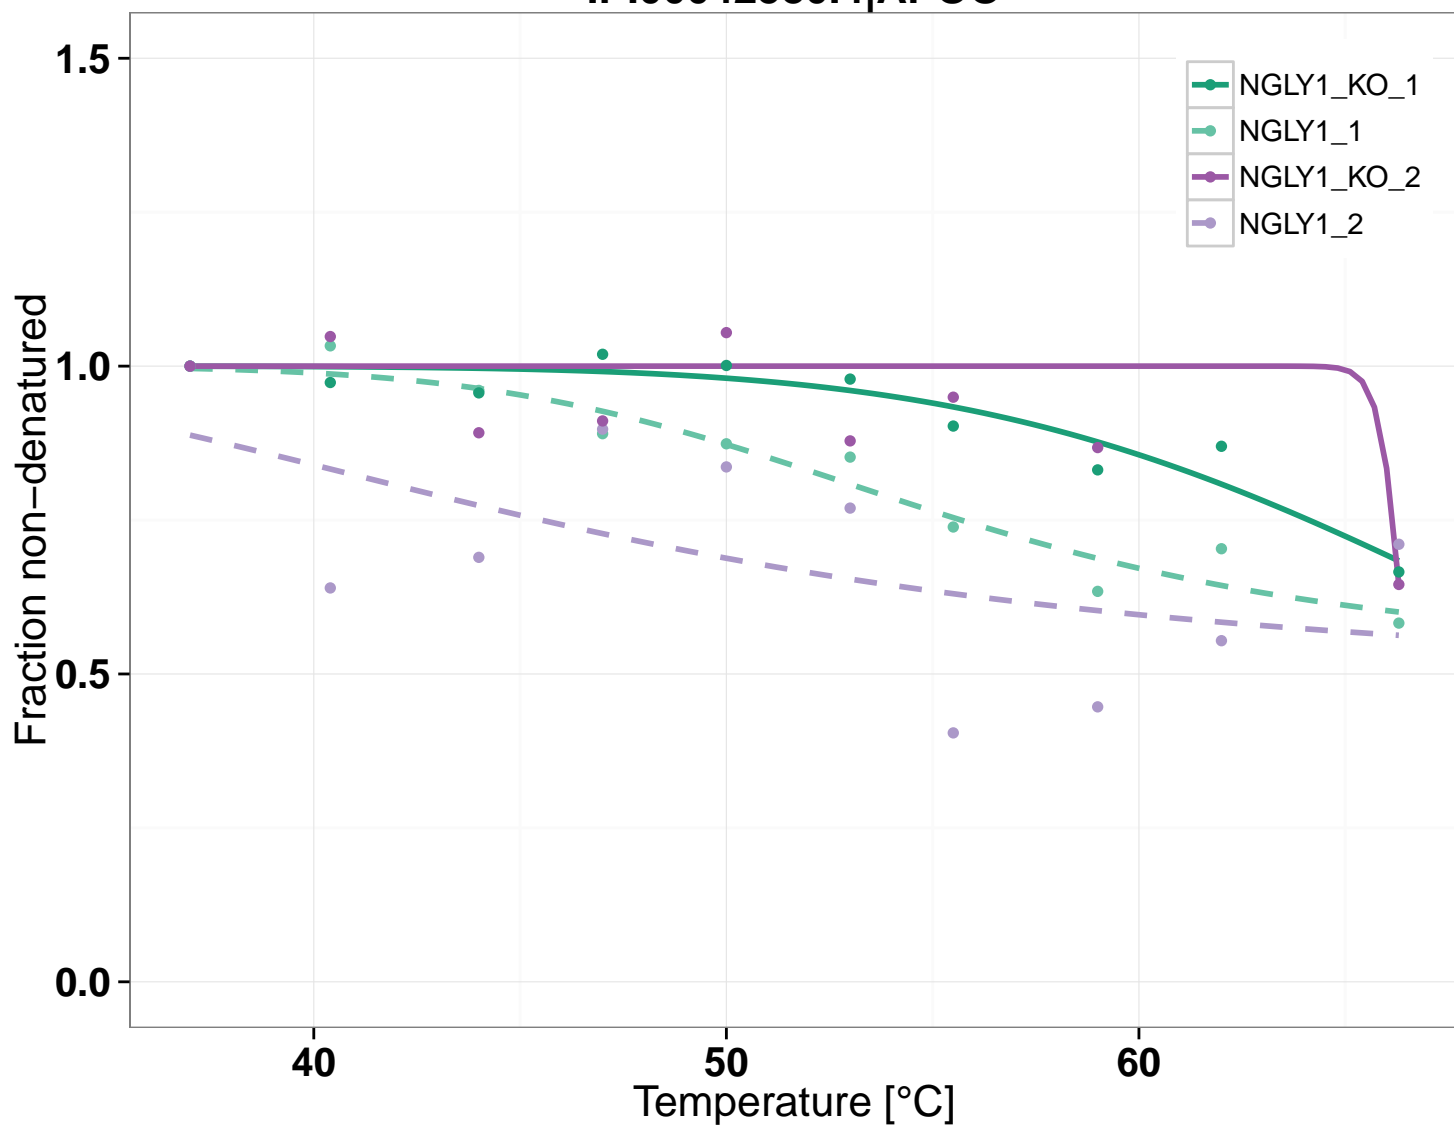

|            | meltPoint | slope  | plateau | R2   |
|------------|-----------|--------|---------|------|
| NGLY1_KO_1 | –         | –      | 0       | 0.9  |
| NGLY1_1    | –         | –0.022 | 0.53    | 0.94 |
| NGLY1_KO_2 | –         | –      | 0       | 0.48 |
| NGLY1_2    | –         | –0.017 | 0.47    | 0.33 |

Supplement: Supplementary file 1582 [file 1]

# IPI00304803.3|GMPR

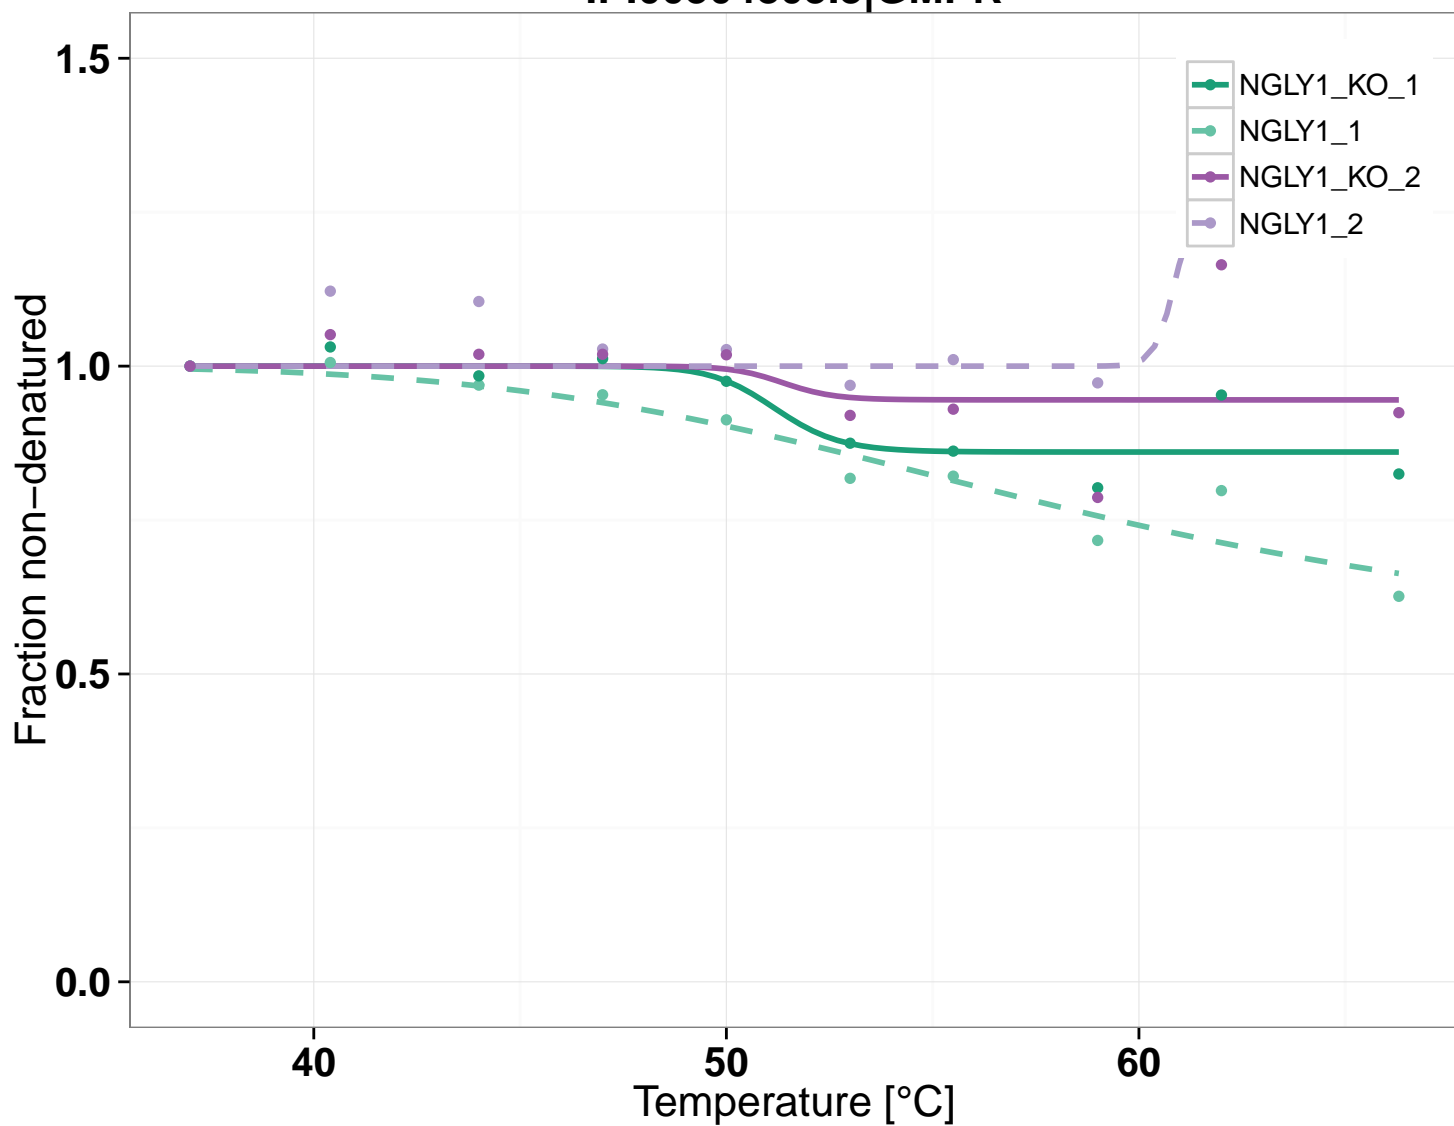

|            | meltPoint | slope  | plateau | R2   |
|------------|-----------|--------|---------|------|
| NGLY1_KO_1 | –         | –0.045 | 0.86    | 0.77 |
| NGLY1_1    | –         | –0.017 | 0.53    | 0.92 |
| NGLY1_KO_2 | –         | –0.022 | 0.95    | 0.13 |
| NGLY1_2    | –         | 0.28   | 1.27    | 0.75 |

Supplement: Supplementary file 1583 [file 1]

# IPI00023664.3|CHEK1

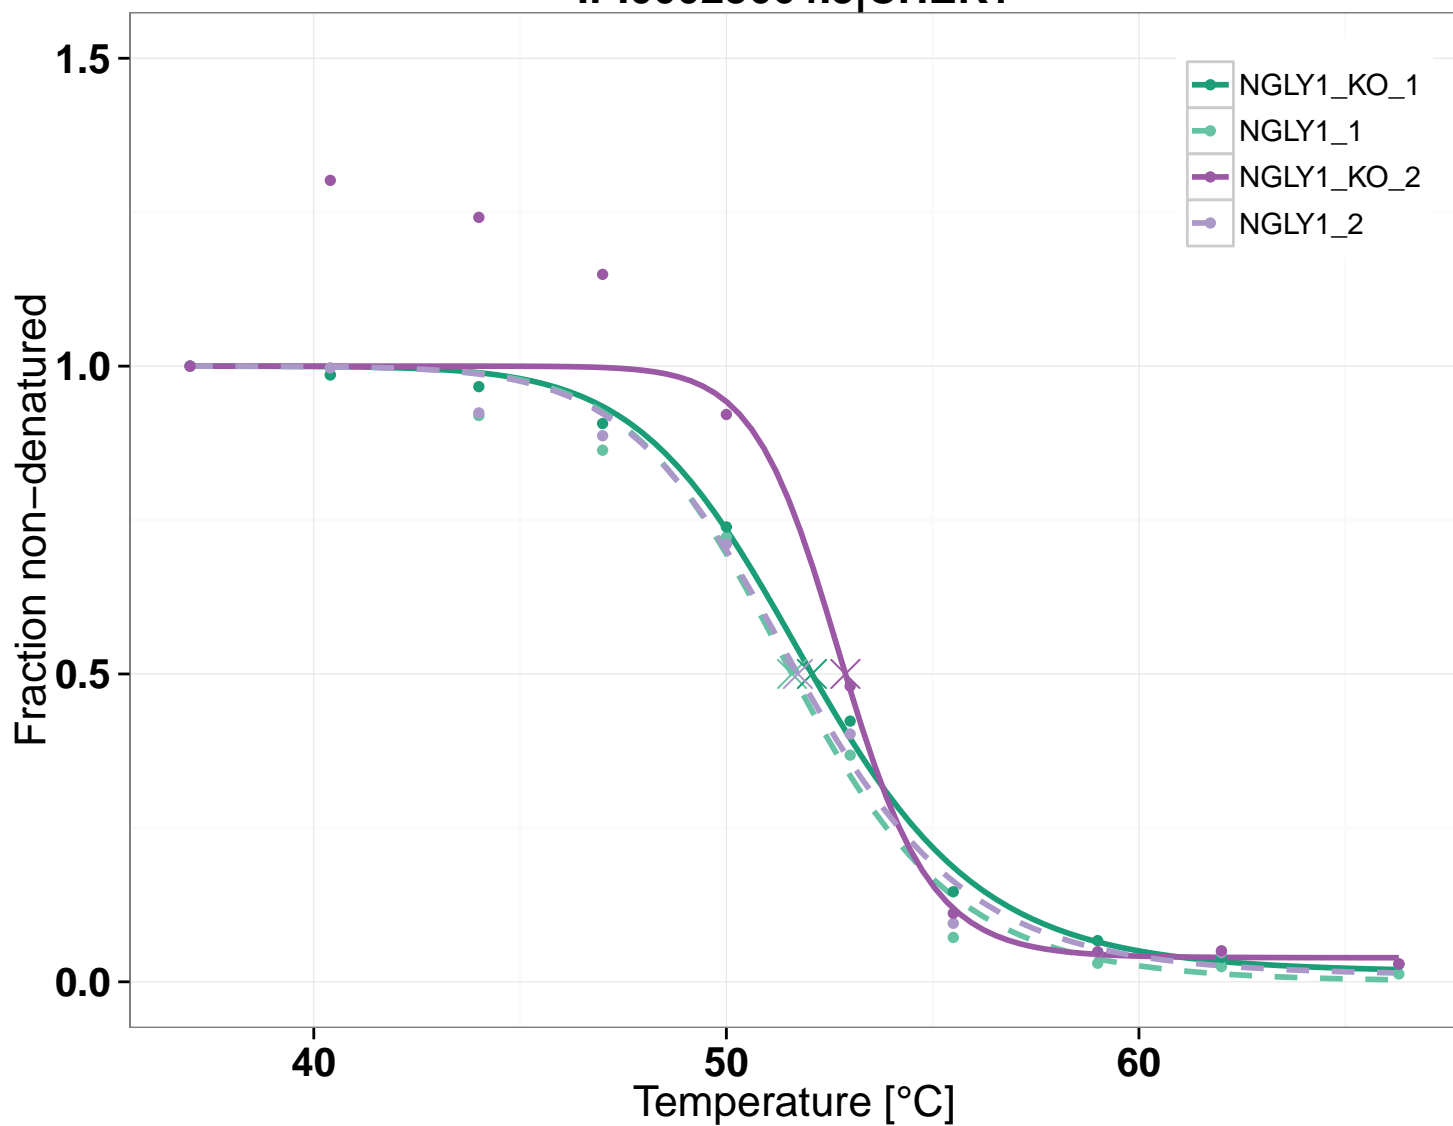

|            | meltPoint | slope | plateau | R2   |
|------------|-----------|-------|---------|------|
| NGLY1_KO_1 | 52.07     | -0.12 | 0.02    | 1    |
| NGLY1_1    | 51.59     | -0.13 | 0       | 0.99 |
| NGLY1_KO_2 | 52.89     | -0.22 | 0.04    | 0.93 |
| NGLY1_2    | 51.73     | -0.12 | 0.01    | 0.99 |

Supplement: Supplementary file 1584 [file 1]

# IPI00894288.1|49 KDA PROTEIN.

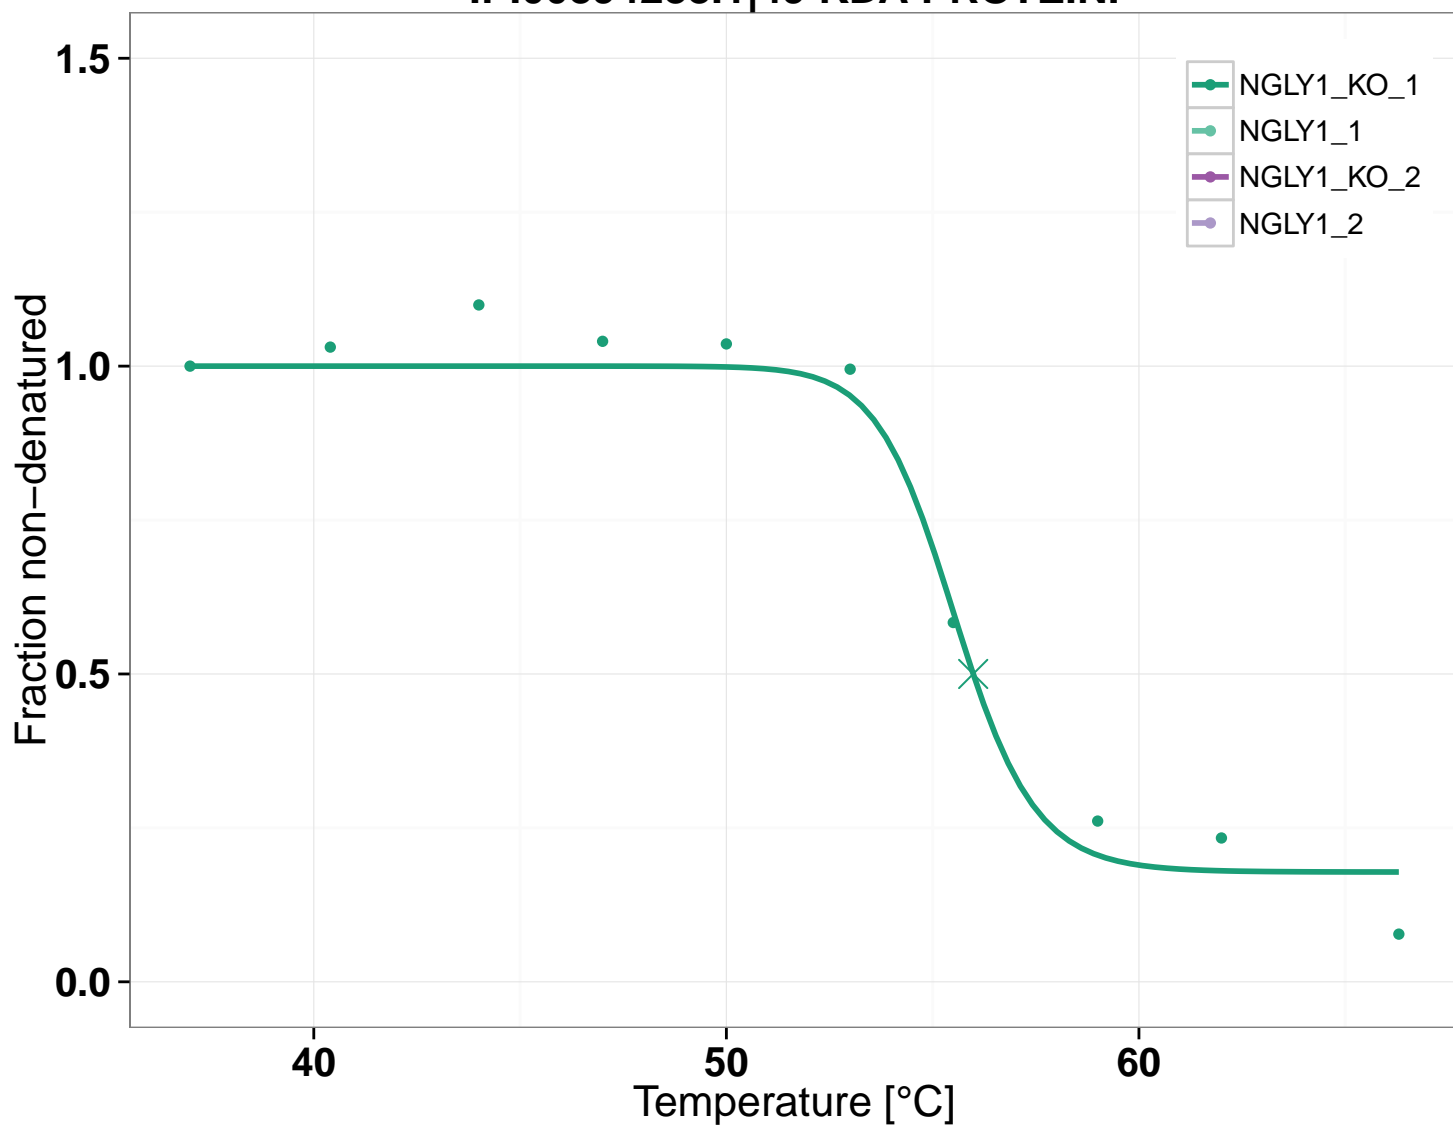

|            | meltPoint | slope | plateau | R2   |
|------------|-----------|-------|---------|------|
| NGLY1_KO_1 | 55.98     | -0.21 | 0.18    | 0.98 |
| NGLY1_1    | -         | -     | -       | -    |
| NGLY1_KO_2 | -         | -     | -       | -    |
| NGLY1_2    | -         | -     | -       | -    |

Supplement: Supplementary file 1585 [file 1]

# IPI00032892.1|GGPS1

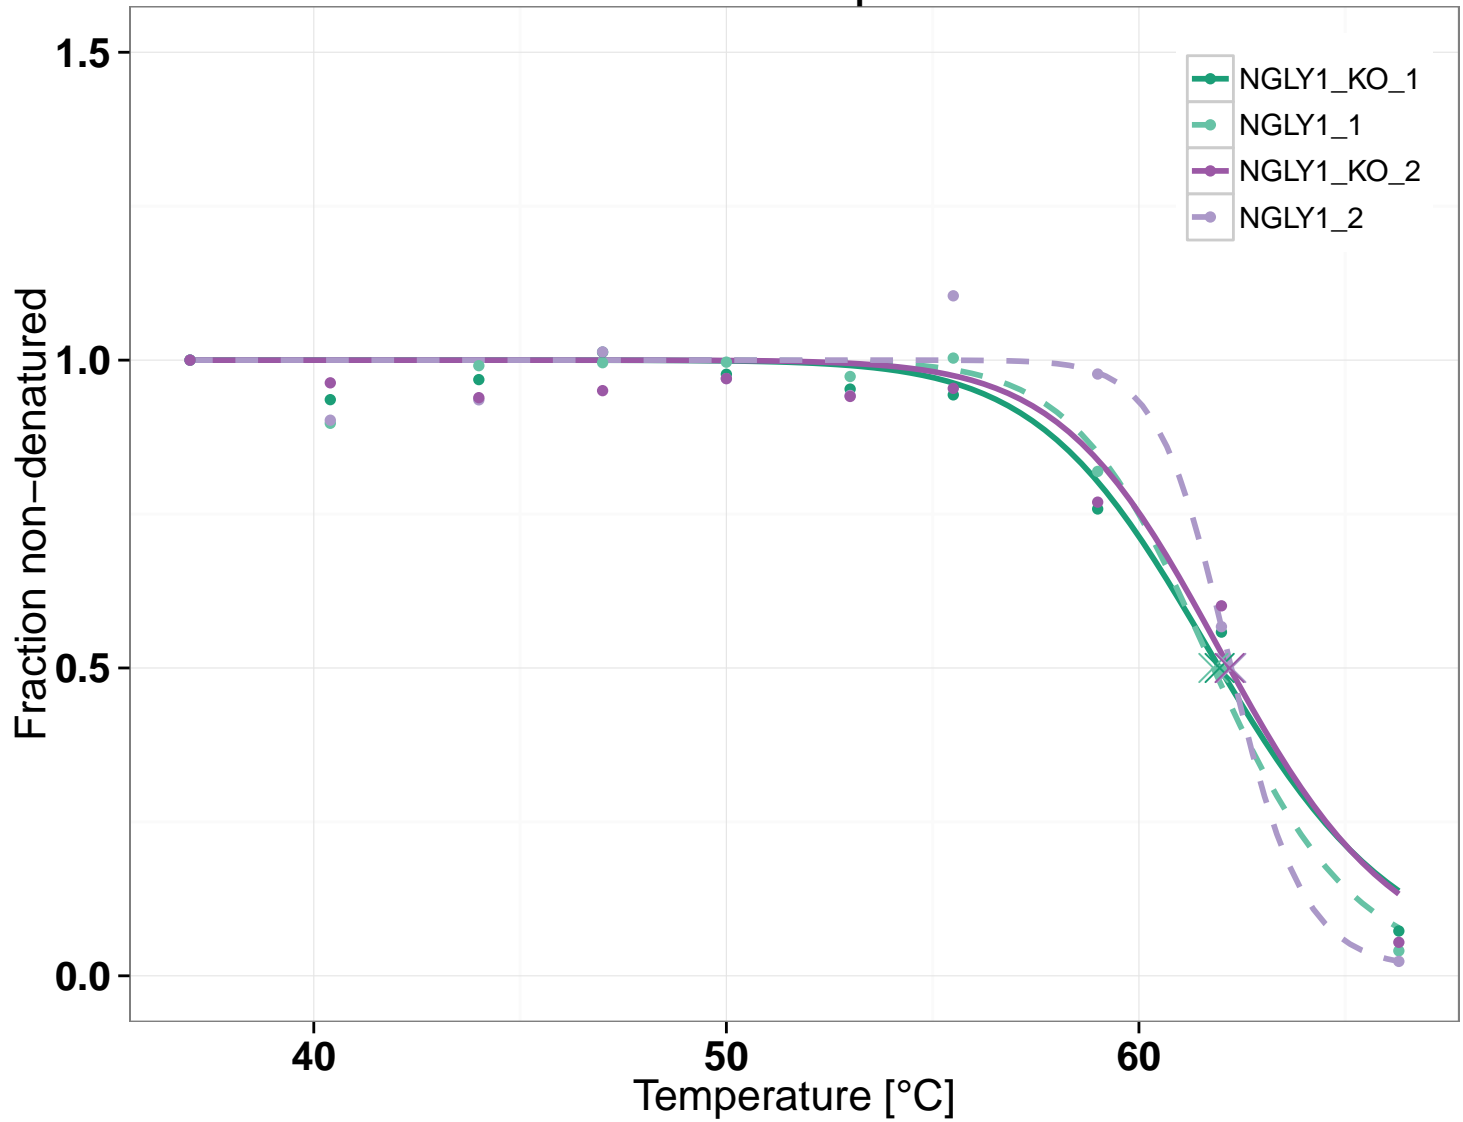

|            | meltPoint | slope | plateau | R2   |
|------------|-----------|-------|---------|------|
| NGLY1_KO_1 | 61.96     | -0.11 | 0       | 0.98 |
| NGLY1_1    | 61.81     | -0.15 | 0       | 0.98 |
| NGLY1_KO_2 | 62.2      | -0.12 | 0       | 0.96 |
| NGLY1_2    | 62.24     | -0.28 | 0.01    | 0.97 |

Supplement: Supplementary file 1586 [file 1]

# IPI00395768.4|STX3

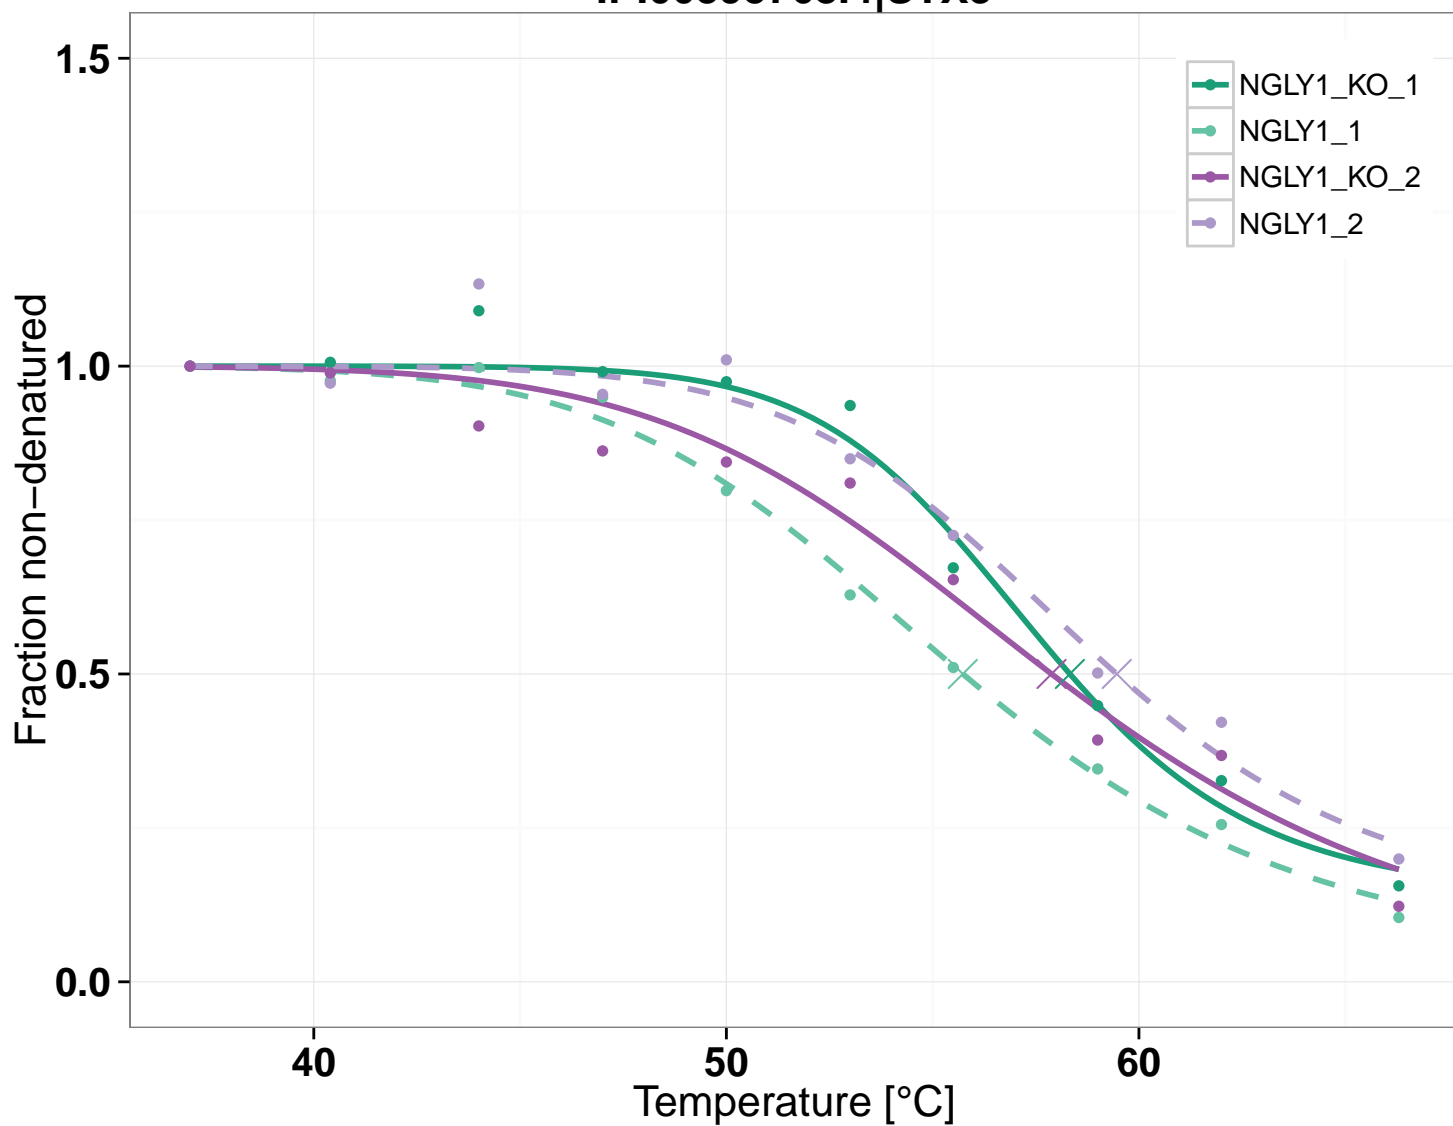

|            | meltPoint | slope  | plateau | R2   |
|------------|-----------|--------|---------|------|
| NGLY1_KO_1 | 58.33     | -0.082 | 0.14    | 0.98 |
| NGLY1_1    | 55.73     | -0.058 | 0.02    | 1    |
| NGLY1_KO_2 | 57.88     | -0.053 | 0       | 0.97 |
| NGLY1_2    | 59.46     | -0.063 | 0.11    | 0.97 |

Supplement: Supplementary file 1587 [file 1]

# IPI00008525.4|ND6

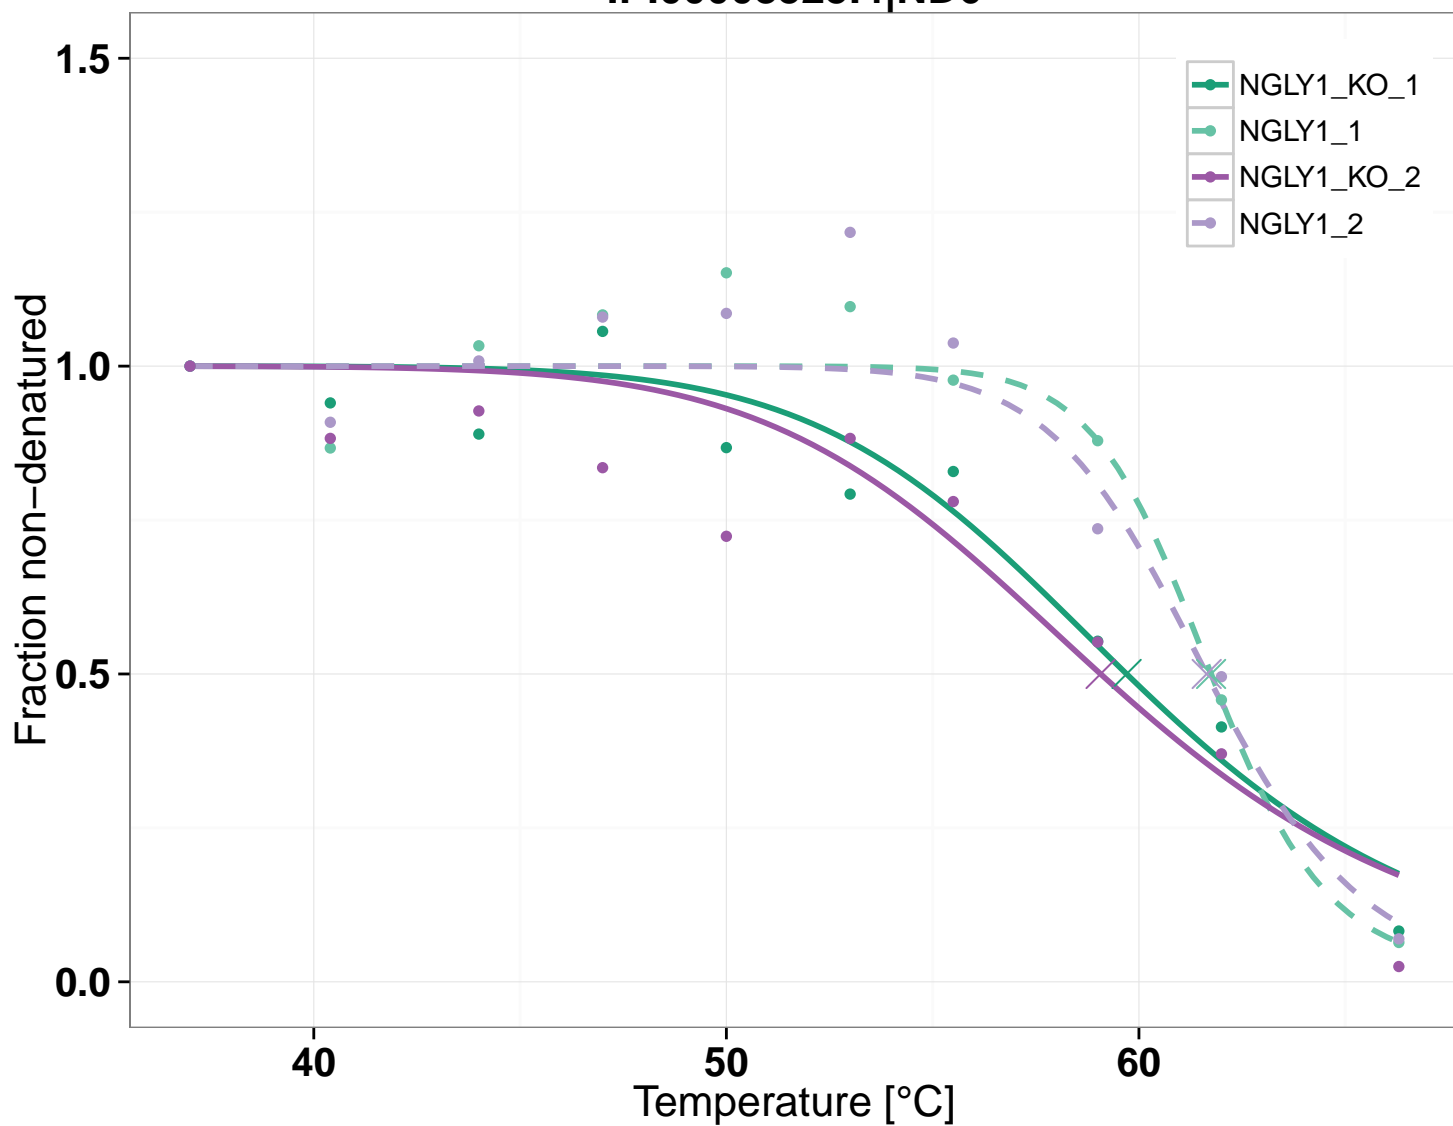

|            | meltPoint | slope  | plateau | R2   |
|------------|-----------|--------|---------|------|
| NGLY1_KO_1 | 59.7      | -0.066 | 0       | 0.94 |
| NGLY1_1    | 61.75     | -0.17  | 0.02    | 0.94 |
| NGLY1_KO_2 | 59.07     | -0.062 | 0       | 0.86 |
| NGLY1_2    | 61.64     | -0.13  | 0       | 0.92 |

Supplement: Supplementary file 1588 [file 1]

# IPI00031697.1|Mitsugumin 23

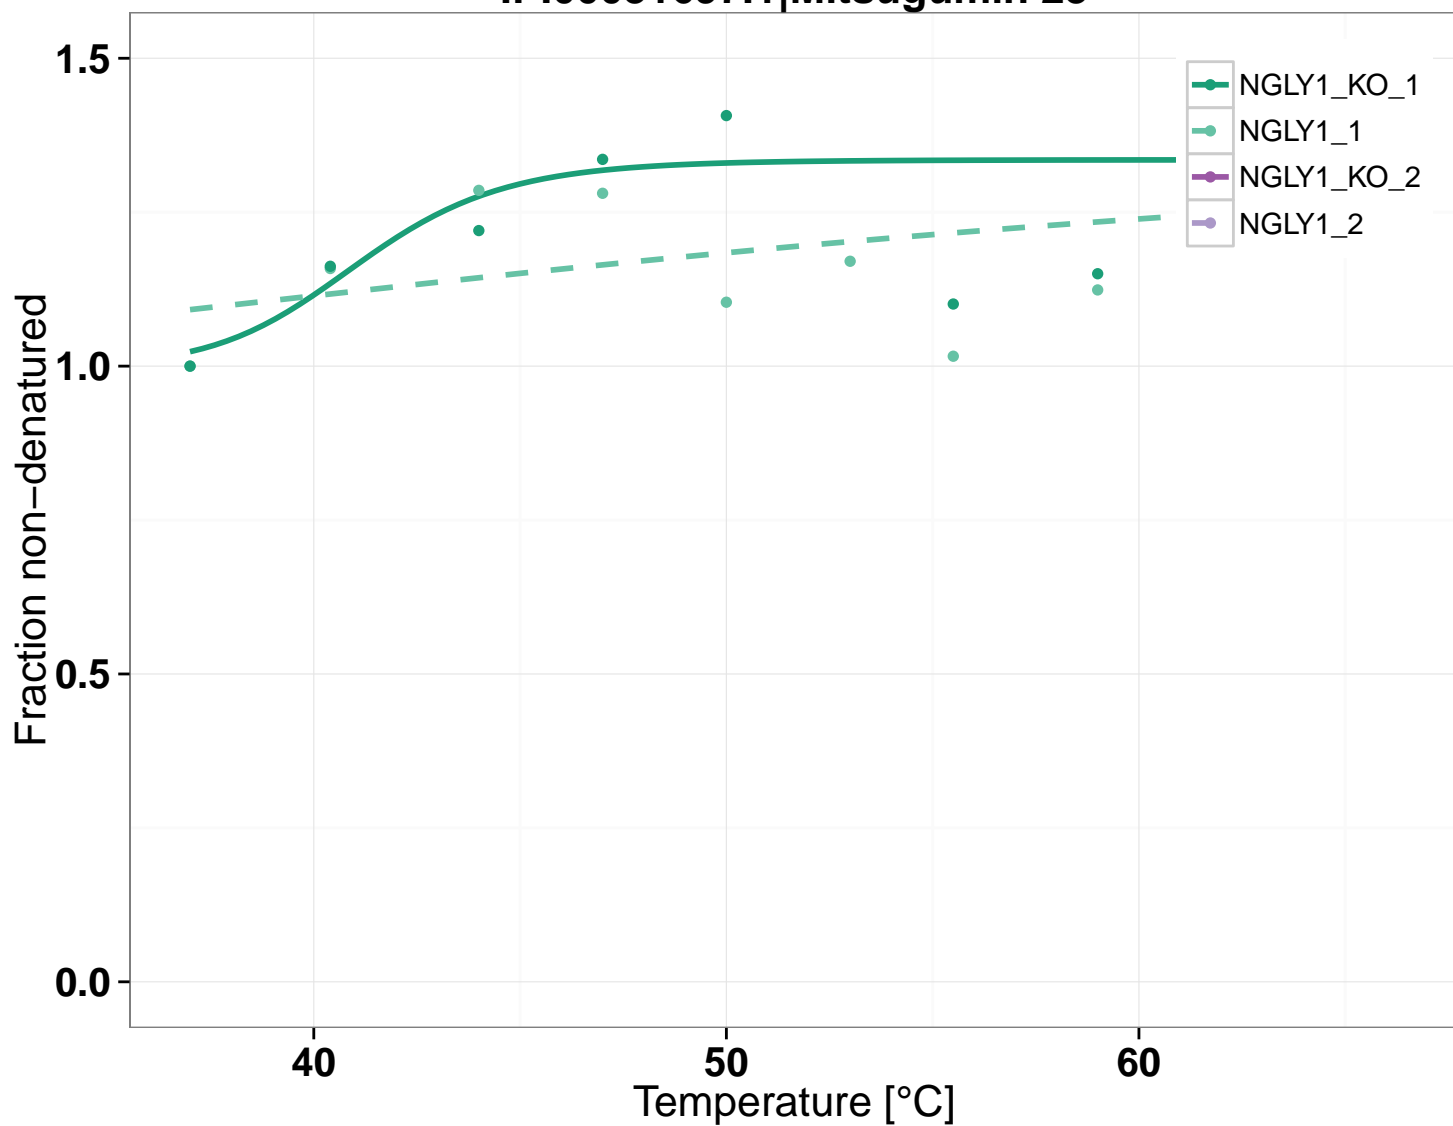

|            | meltPoint | slope  | plateau | R2   |
|------------|-----------|--------|---------|------|
| NGLY1_KO_1 | —         | 0.048  | 1.34    | 0.36 |
| NGLY1_1    | —         | 0.0075 | 1.5     | 0.2  |
| NGLY1_KO_2 | —         | —      | —       | —    |
| NGLY1_2    | —         | —      | —       | —    |

Supplement: Supplementary file 1589 [file 1]

IPI00152156.6|CXXC5

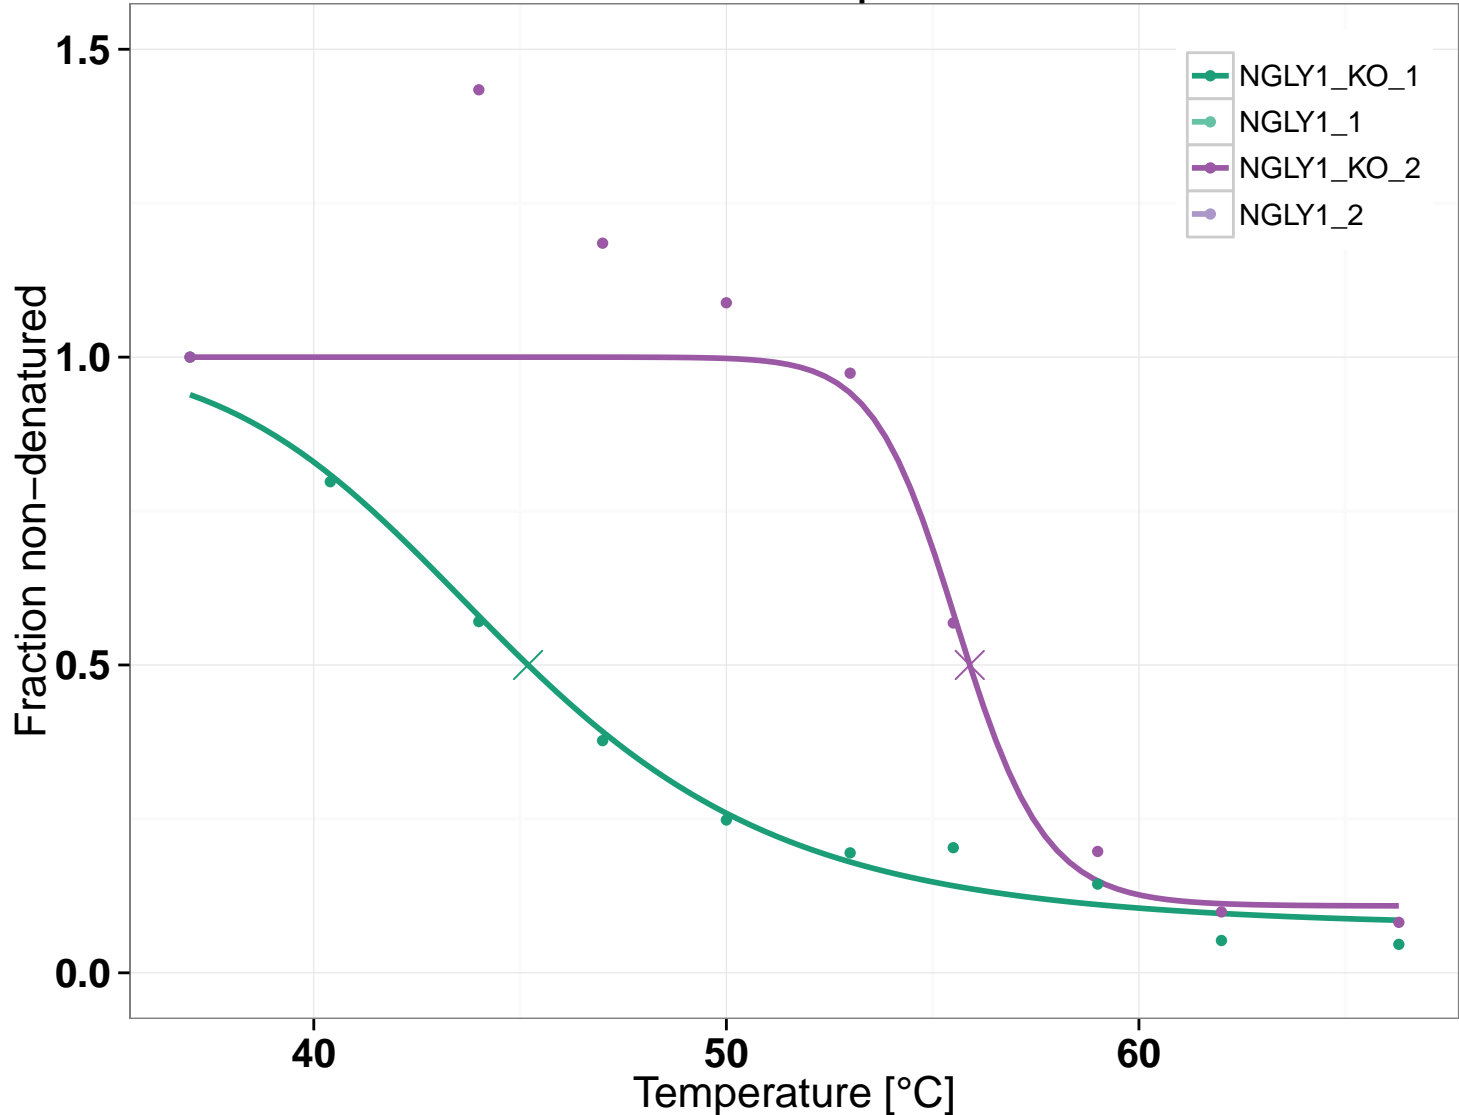

|            | meltPoint | slope  | plateau | R2   |
|------------|-----------|--------|---------|------|
| NGLY1_KO_1 | 45.19     | -0.068 | 0.07    | 0.99 |
| NGLY1_1    | -         | -      | -       | -    |
| NGLY1_KO_2 | 55.9      | -0.21  | 0.11    | 0.73 |
| NGLY1_2    | -         | -      | -       | -    |

Supplement: Supplementary file 1590 [file 1]

# IPI00031508.1|DHX8

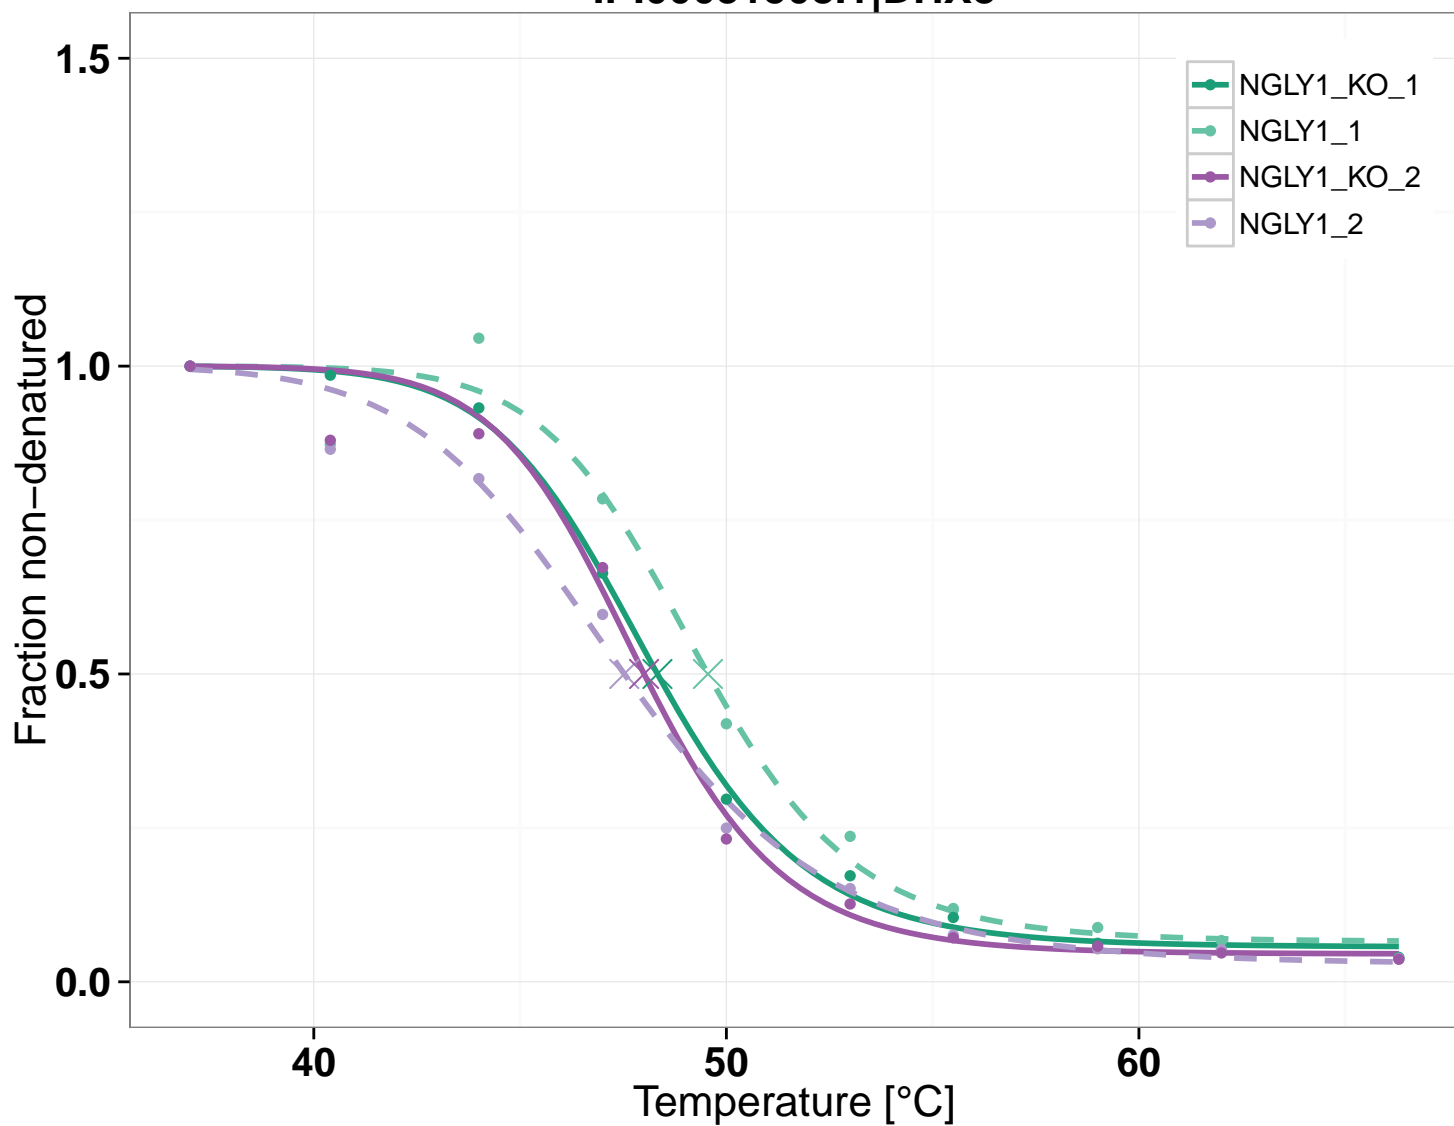

|            | meltPoint | slope  | plateau | R2   |
|------------|-----------|--------|---------|------|
| NGLY1_KO_1 | 48.33     | -0.12  | 0.06    | 1    |
| NGLY1_1    | 49.55     | -0.12  | 0.07    | 0.98 |
| NGLY1_KO_2 | 48.01     | -0.14  | 0.05    | 0.99 |
| NGLY1_2    | 47.53     | -0.096 | 0.03    | 0.99 |

Supplement: Supplementary file 1591 [file 1]

# IPI00015856.4|DNPEP

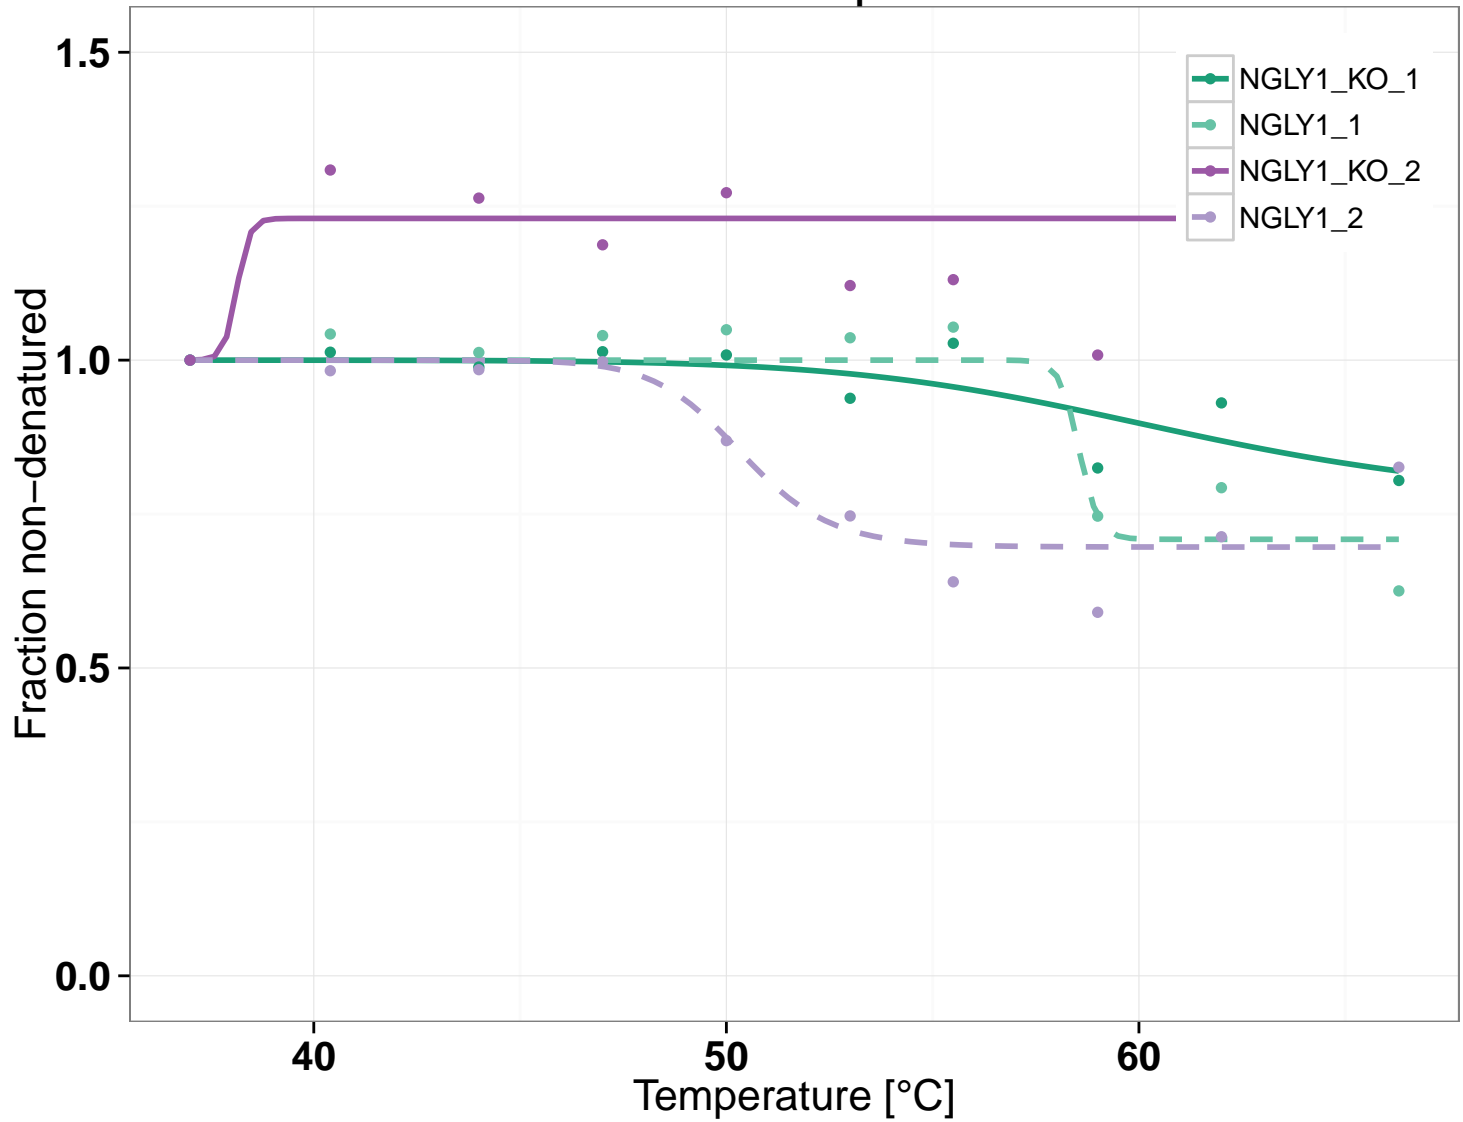

|            | meltPoint | slope  | plateau | R2   |
|------------|-----------|--------|---------|------|
| NGLY1_KO_1 | –         | –0.015 | 0.76    | 0.67 |
| NGLY1_1    | –         | –0.31  | 0.71    | 0.89 |
| NGLY1_KO_2 | –         | 0.38   | 1.23    | 0.24 |
| NGLY1_2    | –         | –0.071 | 0.7     | 0.85 |

Supplement: Supplementary file 1592 [file 1]

IPI00874143.1|GSTZ1

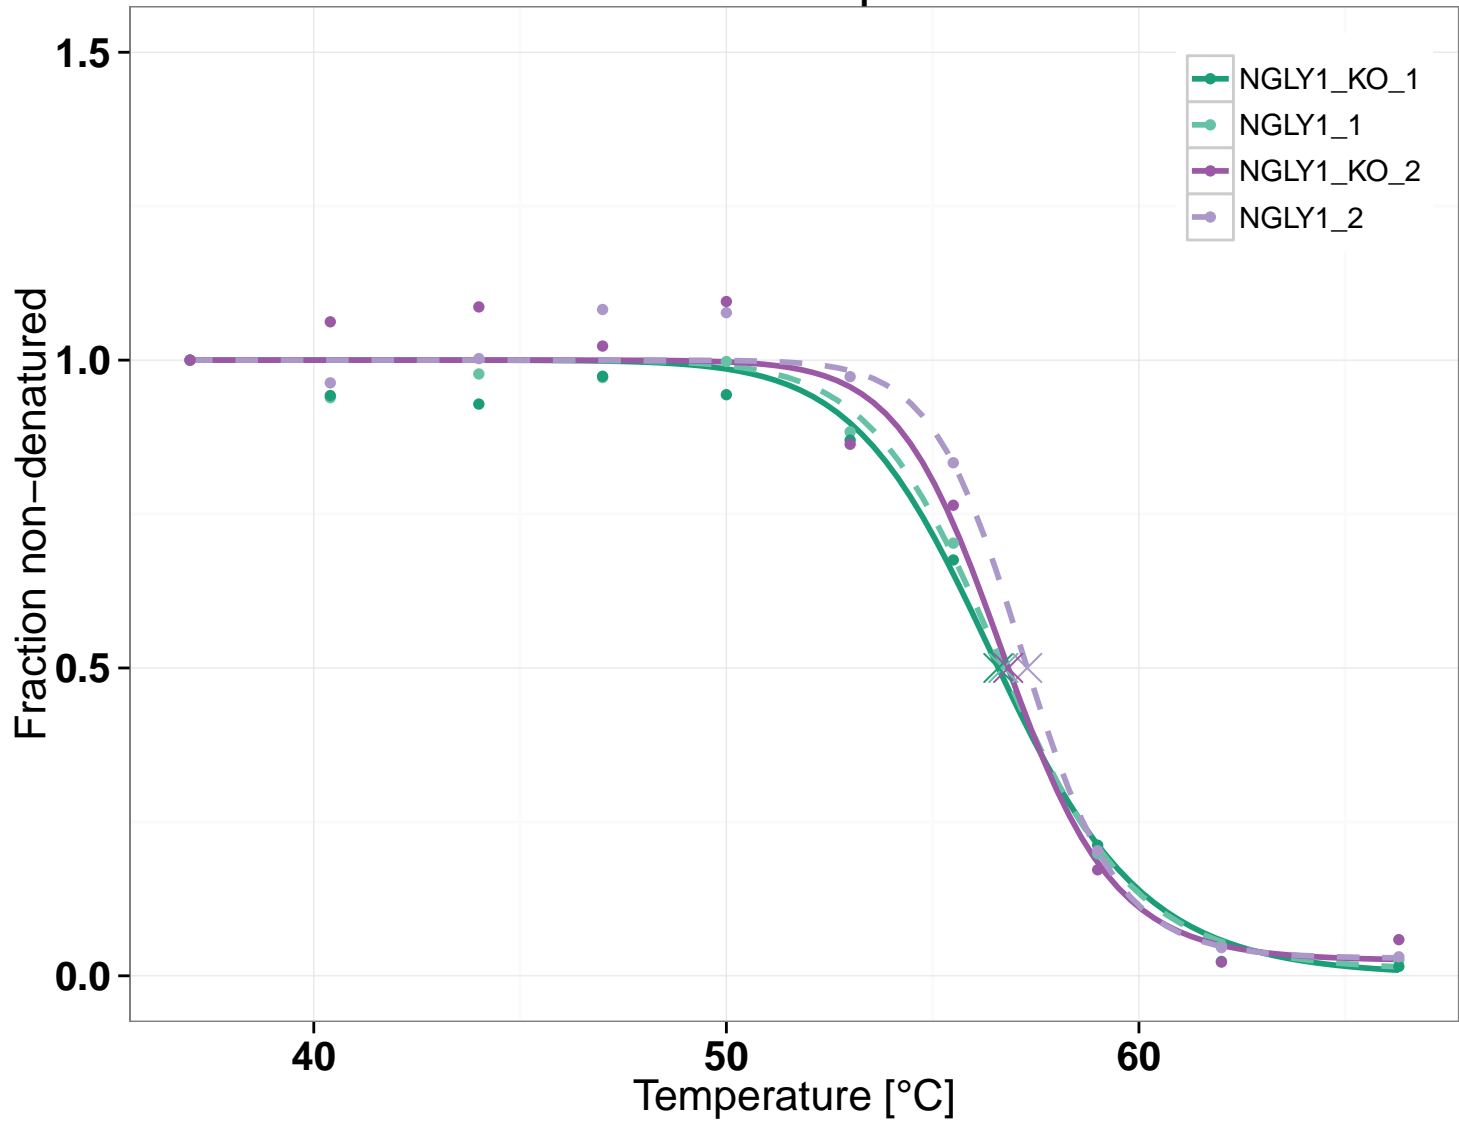

|            | meltPoint | slope | plateau | R2   |
|------------|-----------|-------|---------|------|
| NGLY1_KO_1 | 56.59     | -0.14 | 0       | 0.99 |
| NGLY1_1    | 56.71     | -0.15 | 0.01    | 1    |
| NGLY1_KO_2 | 56.83     | -0.19 | 0.02    | 0.98 |
| NGLY1_2    | 57.29     | -0.21 | 0.03    | 0.99 |

Supplement: Supplementary file 1593 [file 1]

# IPI00908416.1|EIF4E

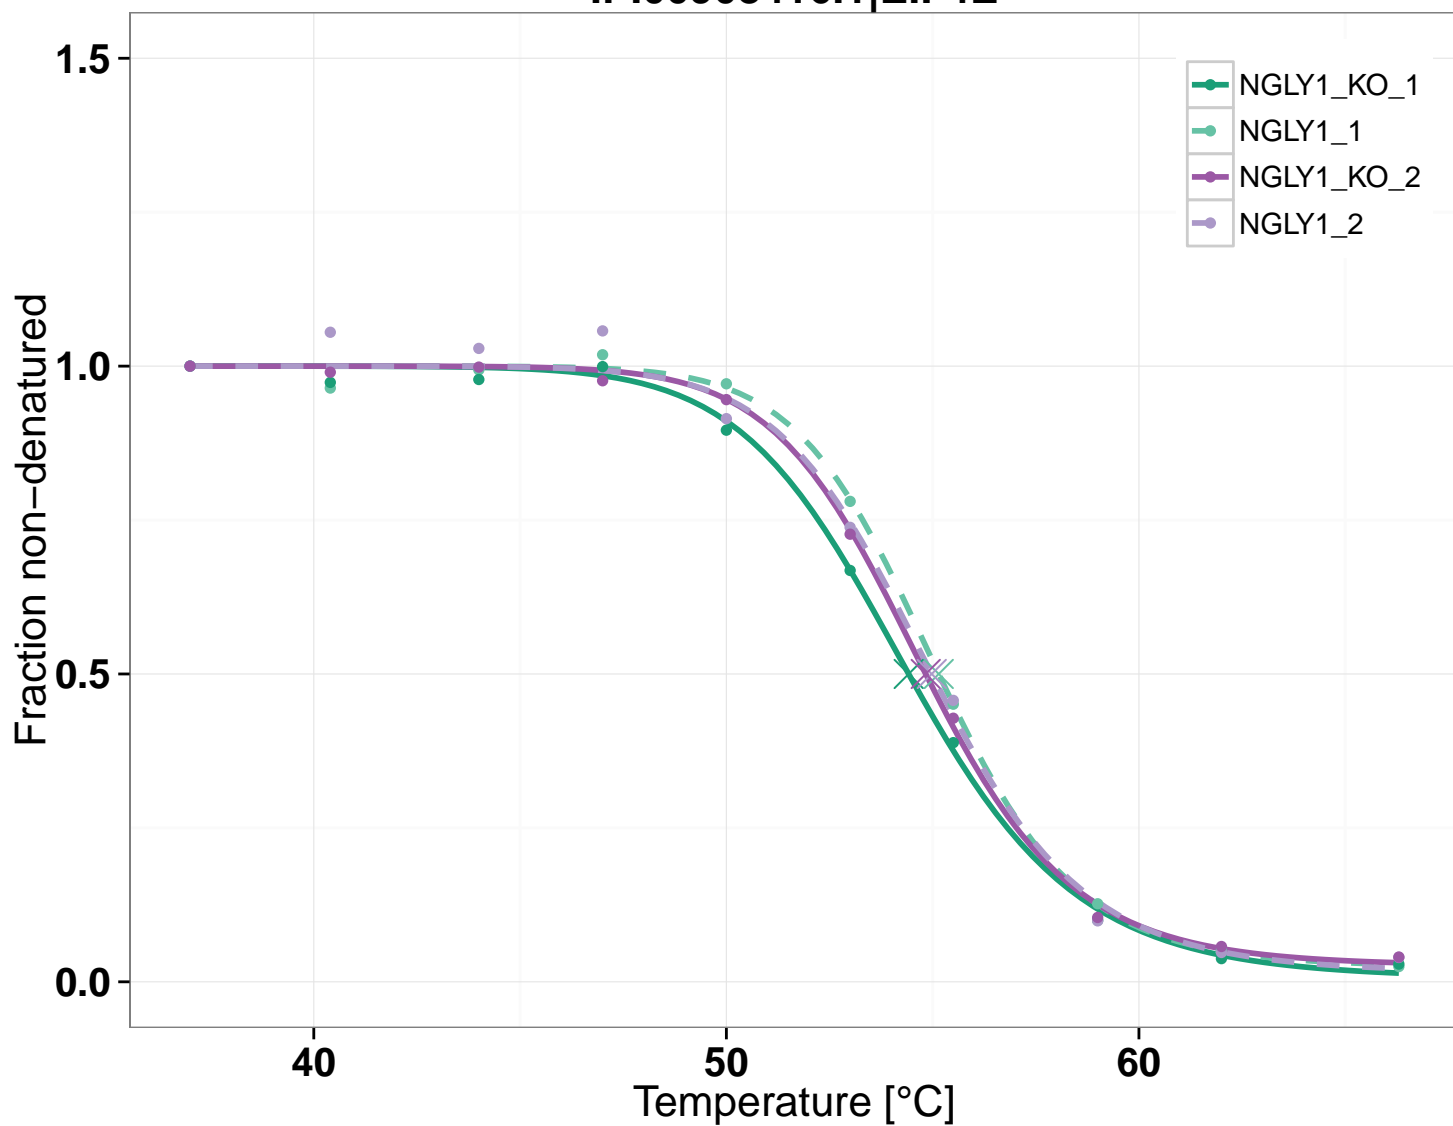

|            | meltPoint | slope | plateau | R2   |
|------------|-----------|-------|---------|------|
| NGLY1_KO_1 | 54.42     | -0.12 | 0.01    | 1    |
| NGLY1_1    | 55.15     | -0.14 | 0.02    | 1    |
| NGLY1_KO_2 | 54.83     | -0.13 | 0.03    | 1    |
| NGLY1_2    | 54.98     | -0.13 | 0.02    | 0.99 |

Supplement: Supplementary file 1594 [file 1]

IPI00015147.1|ATF7

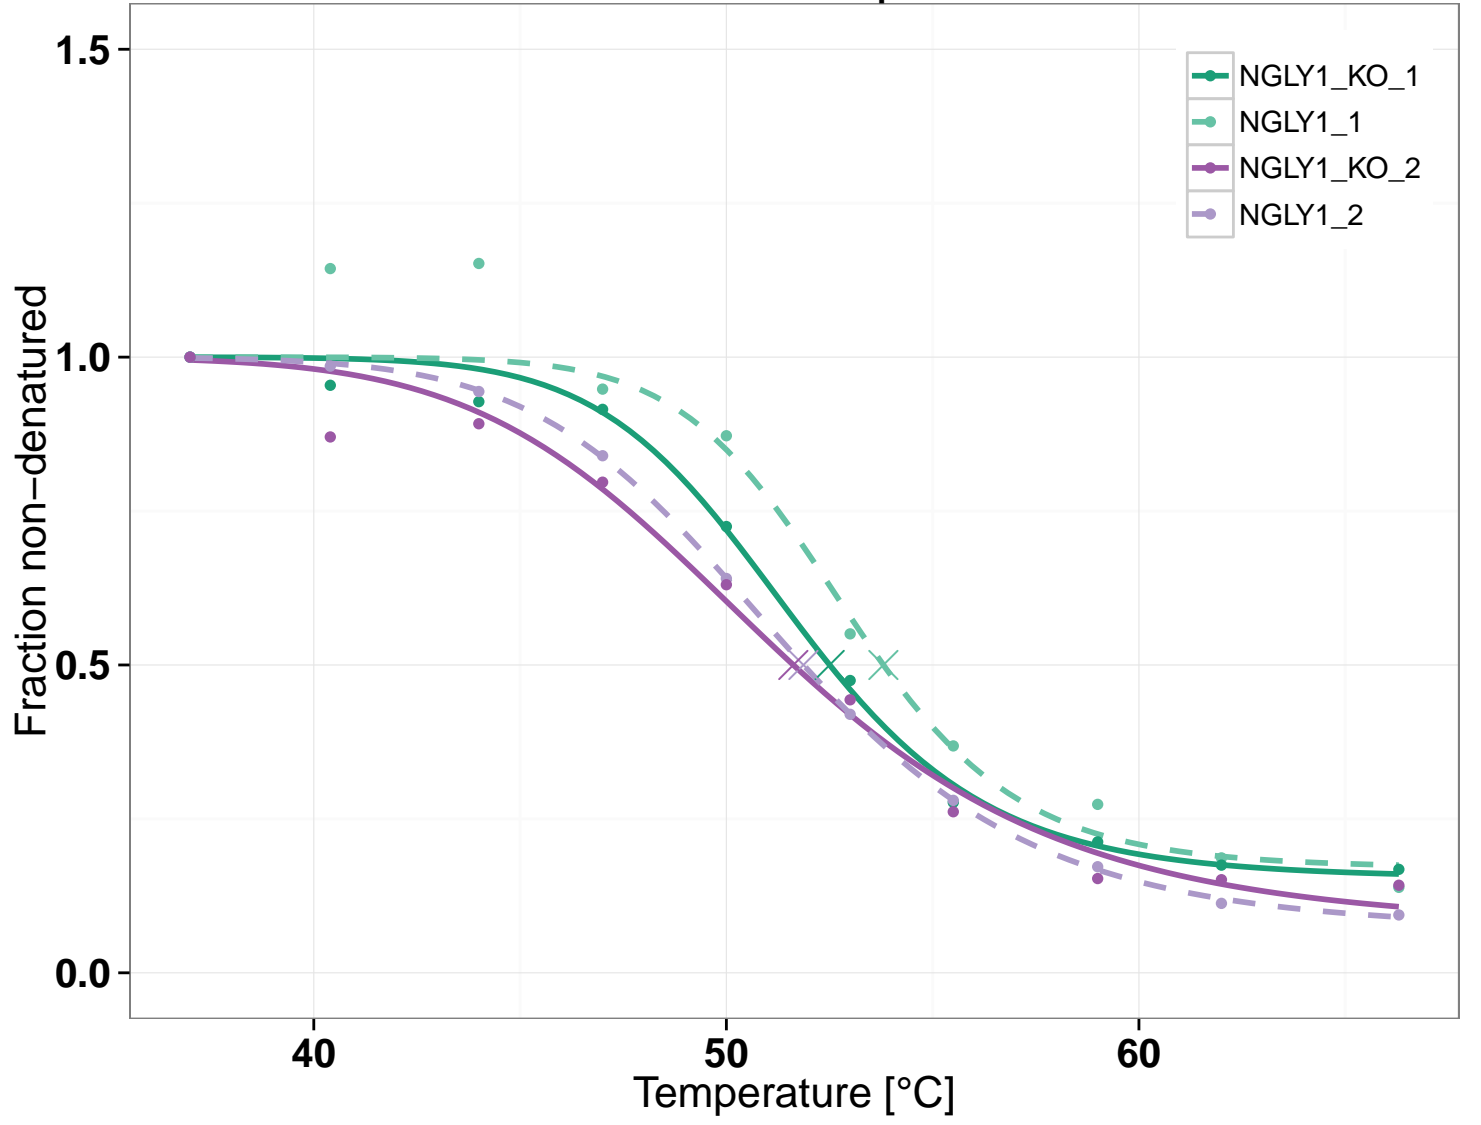

|            | meltPoint | slope  | plateau | R2   |
|------------|-----------|--------|---------|------|
| NGLY1_KO_1 | 52.5      | -0.09  | 0.15    | 0.99 |
| NGLY1_1    | 53.81     | -0.1   | 0.17    | 0.97 |
| NGLY1_KO_2 | 51.62     | -0.065 | 0.07    | 0.98 |
| NGLY1_2    | 51.87     | -0.076 | 0.07    | 1    |

Supplement: Supplementary file 1595 [file 1]

IPI00183002.6|PPP1R12A

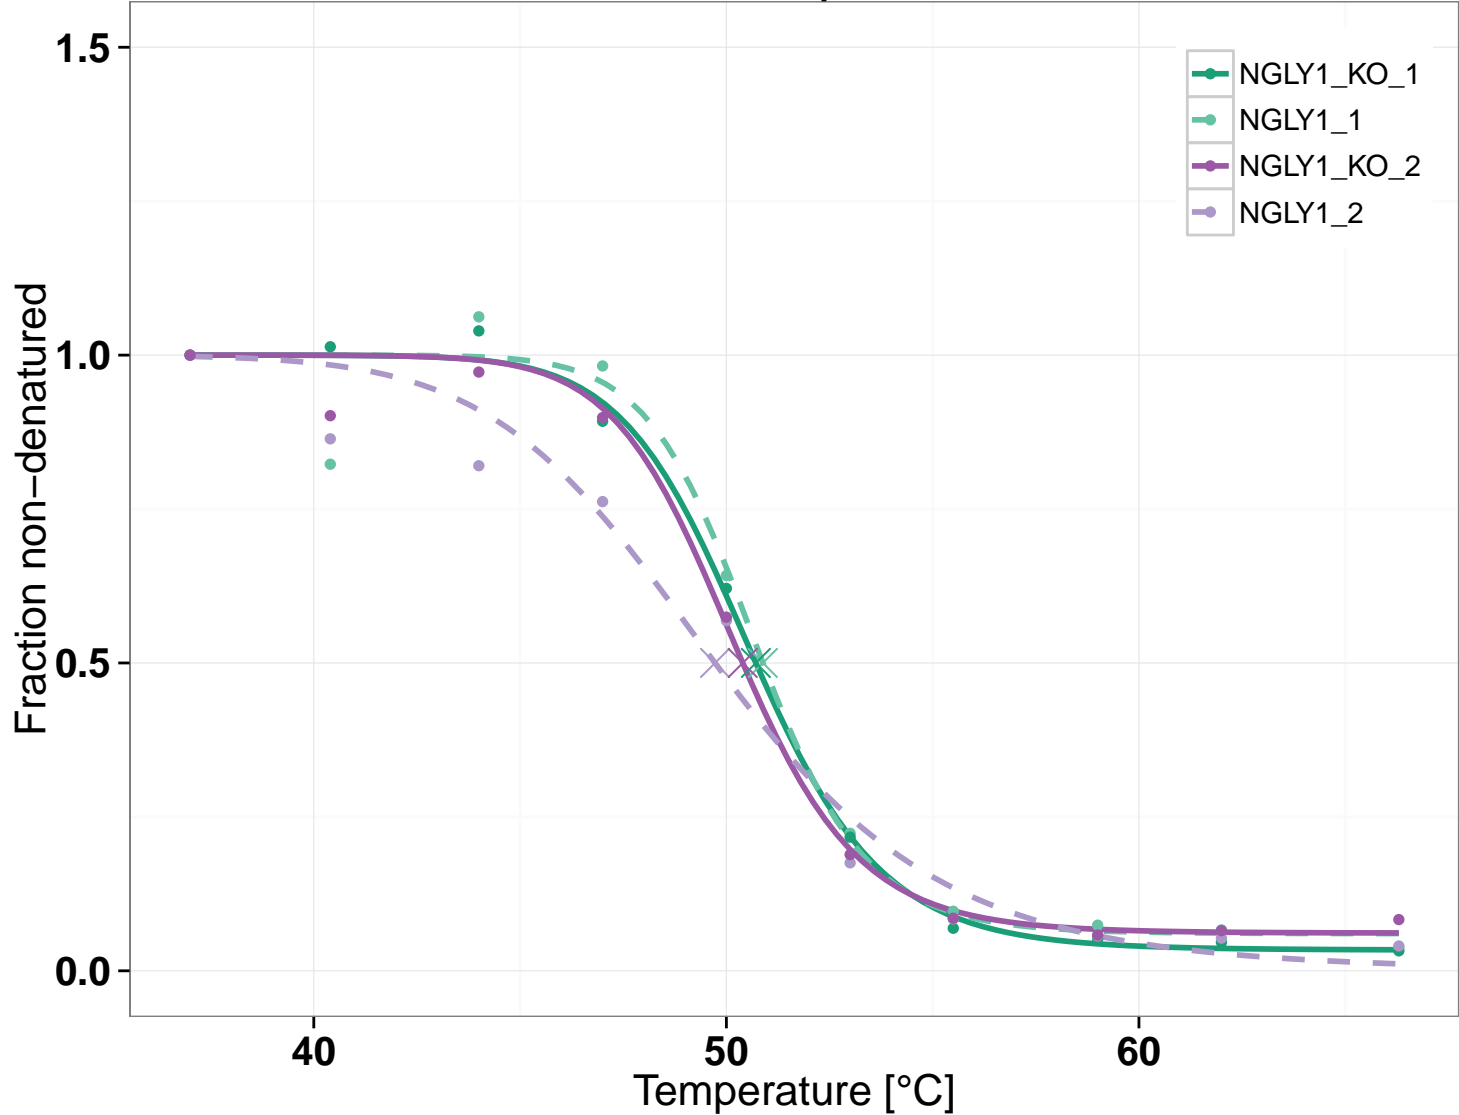

|            | meltPoint | slope  | plateau | R2   |
|------------|-----------|--------|---------|------|
| NGLY1_KO_1 | 50.72     | -0.15  | 0.03    | 1    |
| NGLY1_1    | 50.89     | -0.18  | 0.06    | 0.98 |
| NGLY1_KO_2 | 50.4      | -0.16  | 0.06    | 0.99 |
| NGLY1_2    | 49.73     | -0.091 | 0       | 0.97 |

Supplement: Supplementary file 1596 [file 1]

# IPI00743713.1|PKLR

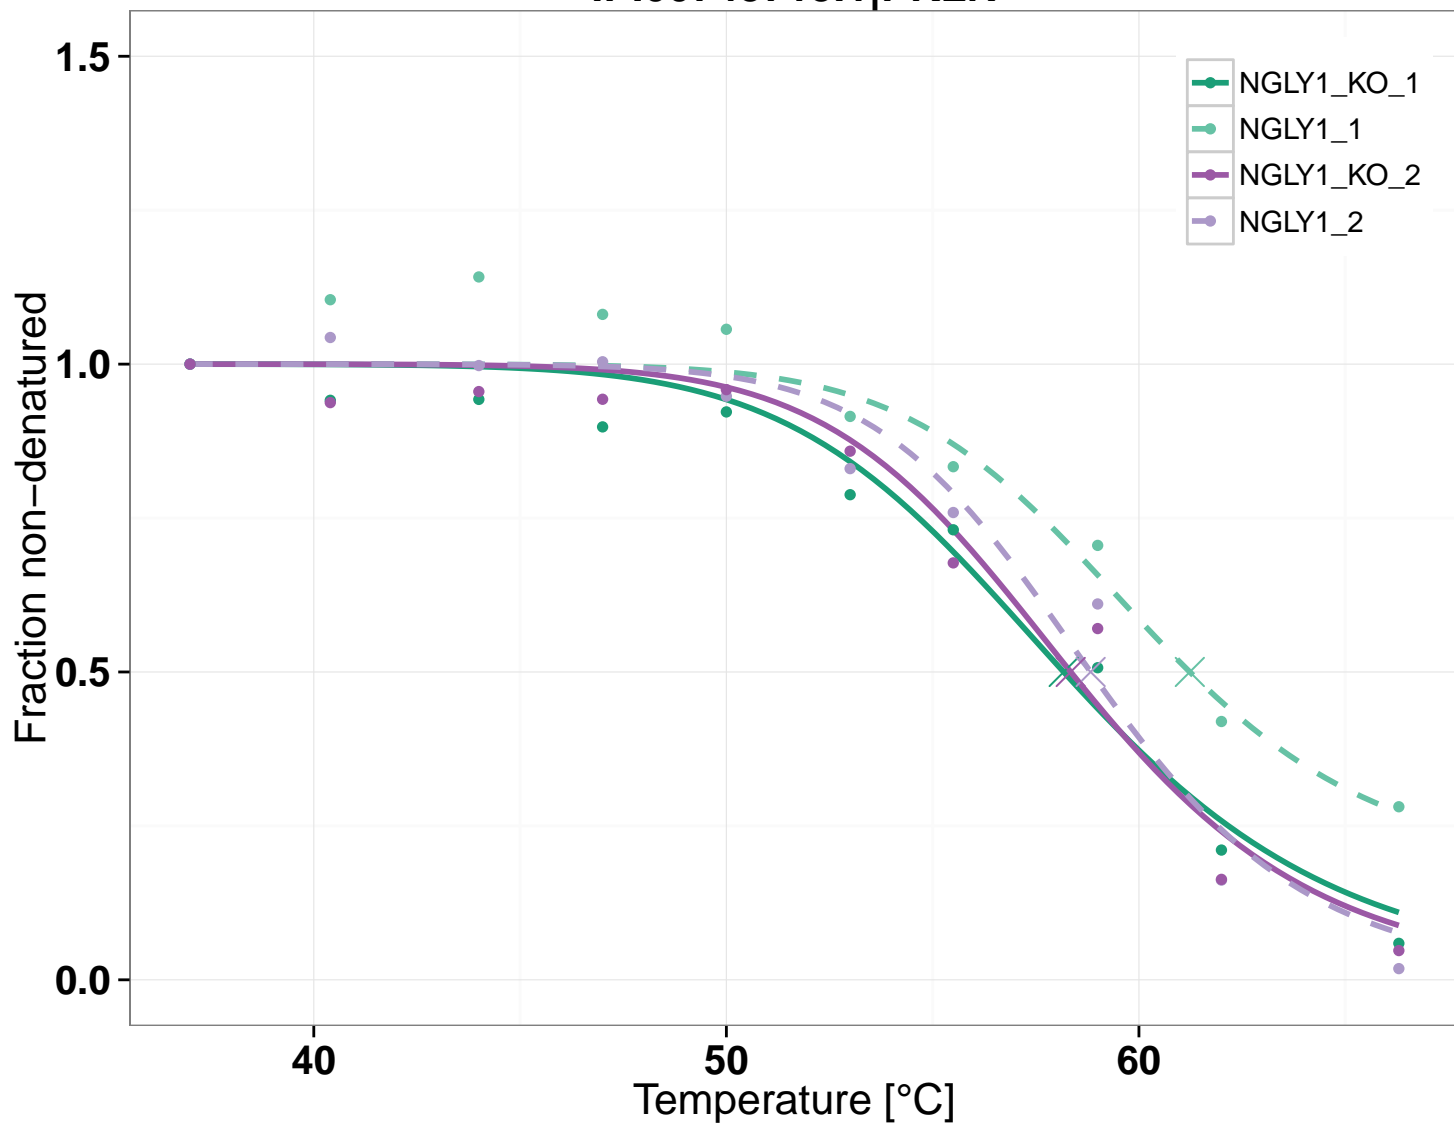

|            | meltPoint | slope  | plateau | R2   |
|------------|-----------|--------|---------|------|
| NGLY1_KO_1 | 58.18     | -0.075 | 0       | 0.97 |
| NGLY1_1    | 61.23     | -0.072 | 0.17    | 0.94 |
| NGLY1_KO_2 | 58.35     | -0.084 | 0       | 0.97 |
| NGLY1_2    | 58.83     | -0.095 | 0       | 0.97 |

Supplement: Supplementary file 1597 [file 1]

IPI00154553.1|CEP76

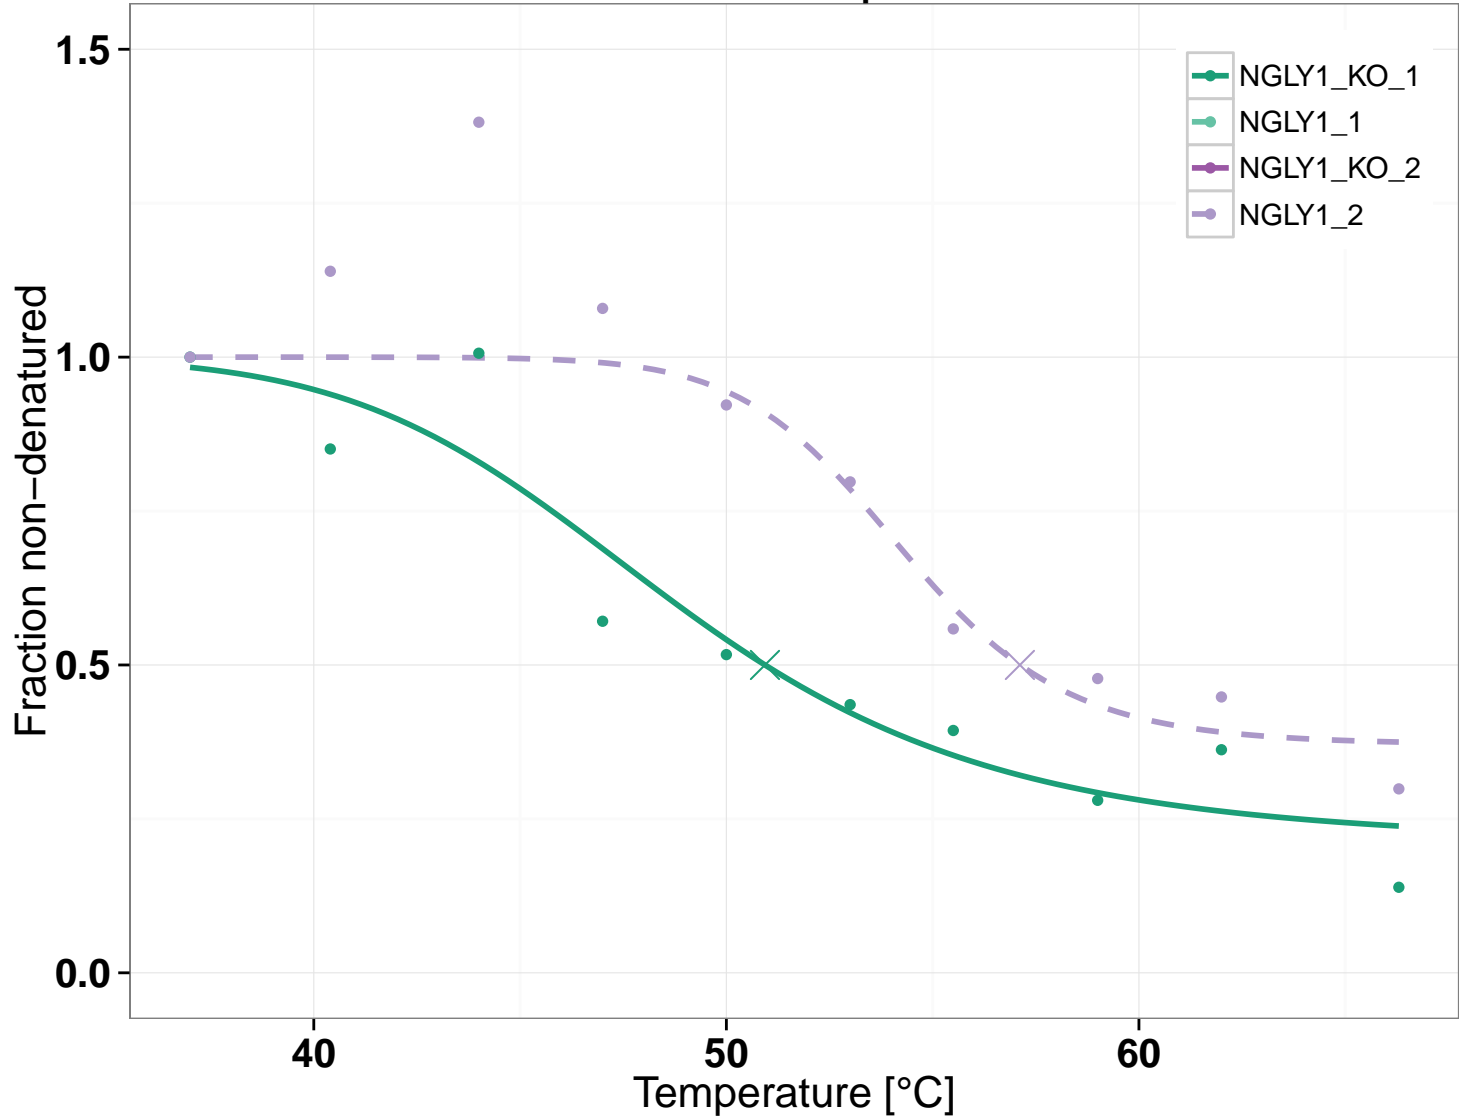

|            | meltPoint | slope  | plateau | R2   |
|------------|-----------|--------|---------|------|
| NGLY1_KO_1 | 50.94     | -0.051 | 0.21    | 0.91 |
| NGLY1_1    | -         | -      | -       | -    |
| NGLY1_KO_2 | -         | -      | -       | -    |
| NGLY1_2    | 57.12     | -0.079 | 0.37    | 0.83 |

Supplement: Supplementary file 1598 [file 1]

# IPI00909064.1|COASY

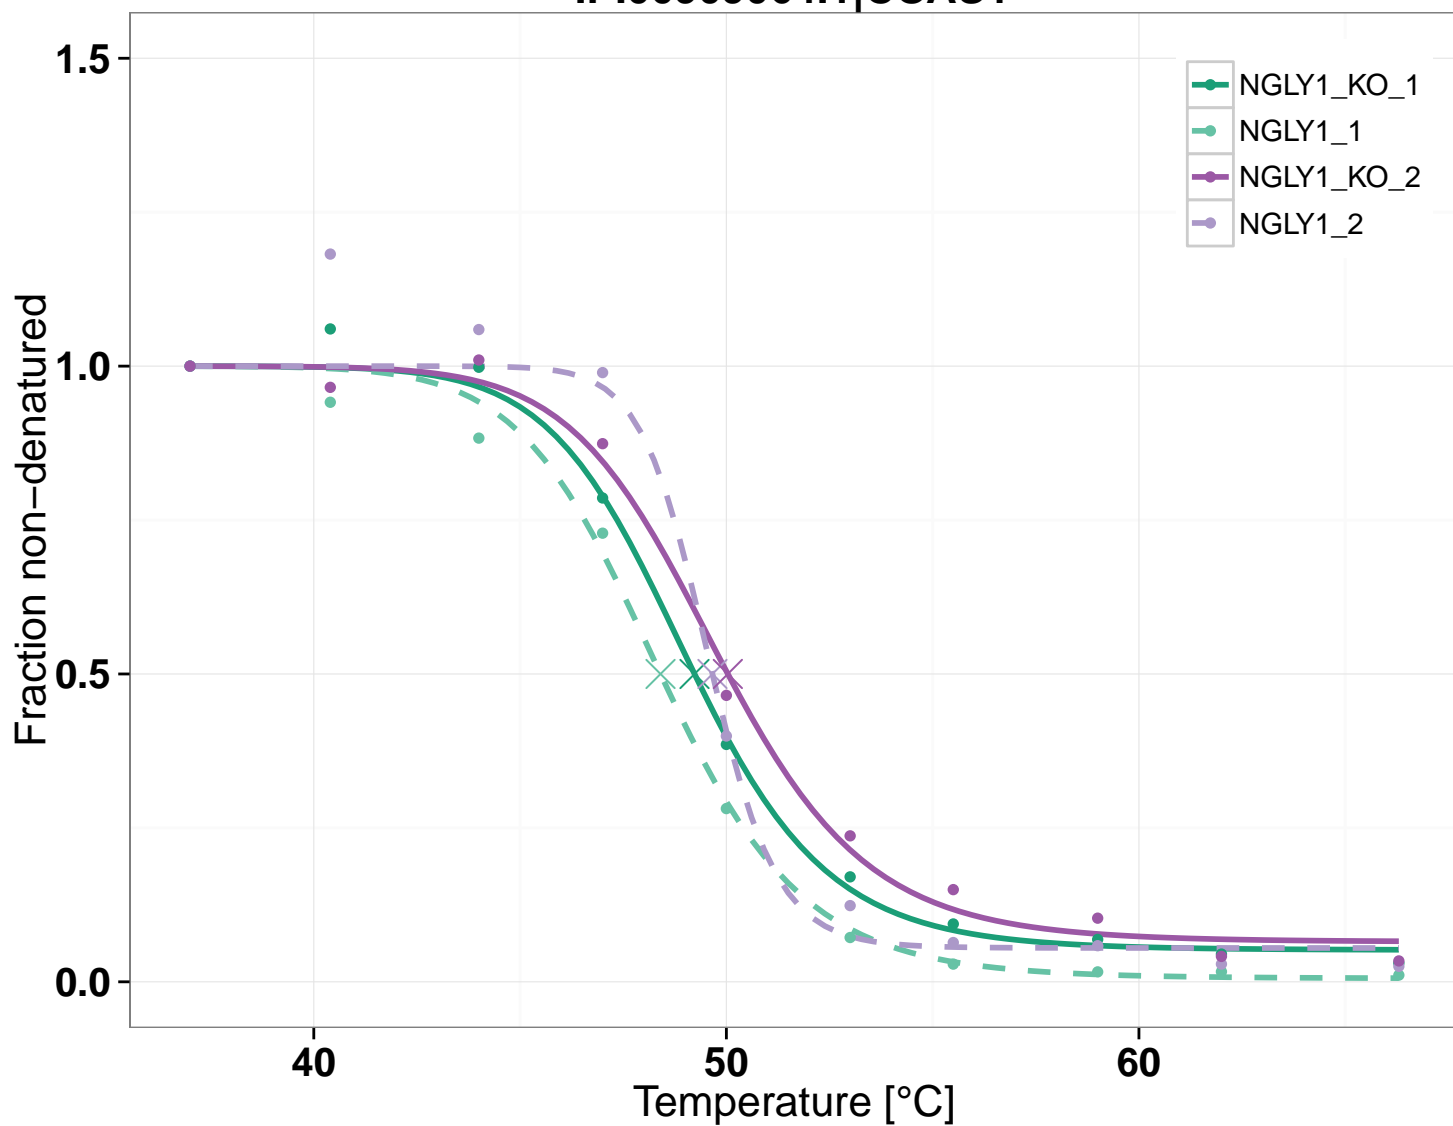

|            | meltPoint | slope | plateau | R2   |
|------------|-----------|-------|---------|------|
| NGLY1_KO_1 | 49.23     | -0.14 | 0.05    | 1    |
| NGLY1_1    | 48.4      | -0.14 | 0.01    | 1    |
| NGLY1_KO_2 | 50.04     | -0.13 | 0.06    | 0.99 |
| NGLY1_2    | 49.66     | -0.29 | 0.05    | 0.98 |

Supplement: Supplementary file 1599 [file 1]

IPI00006222.1|LOC643284

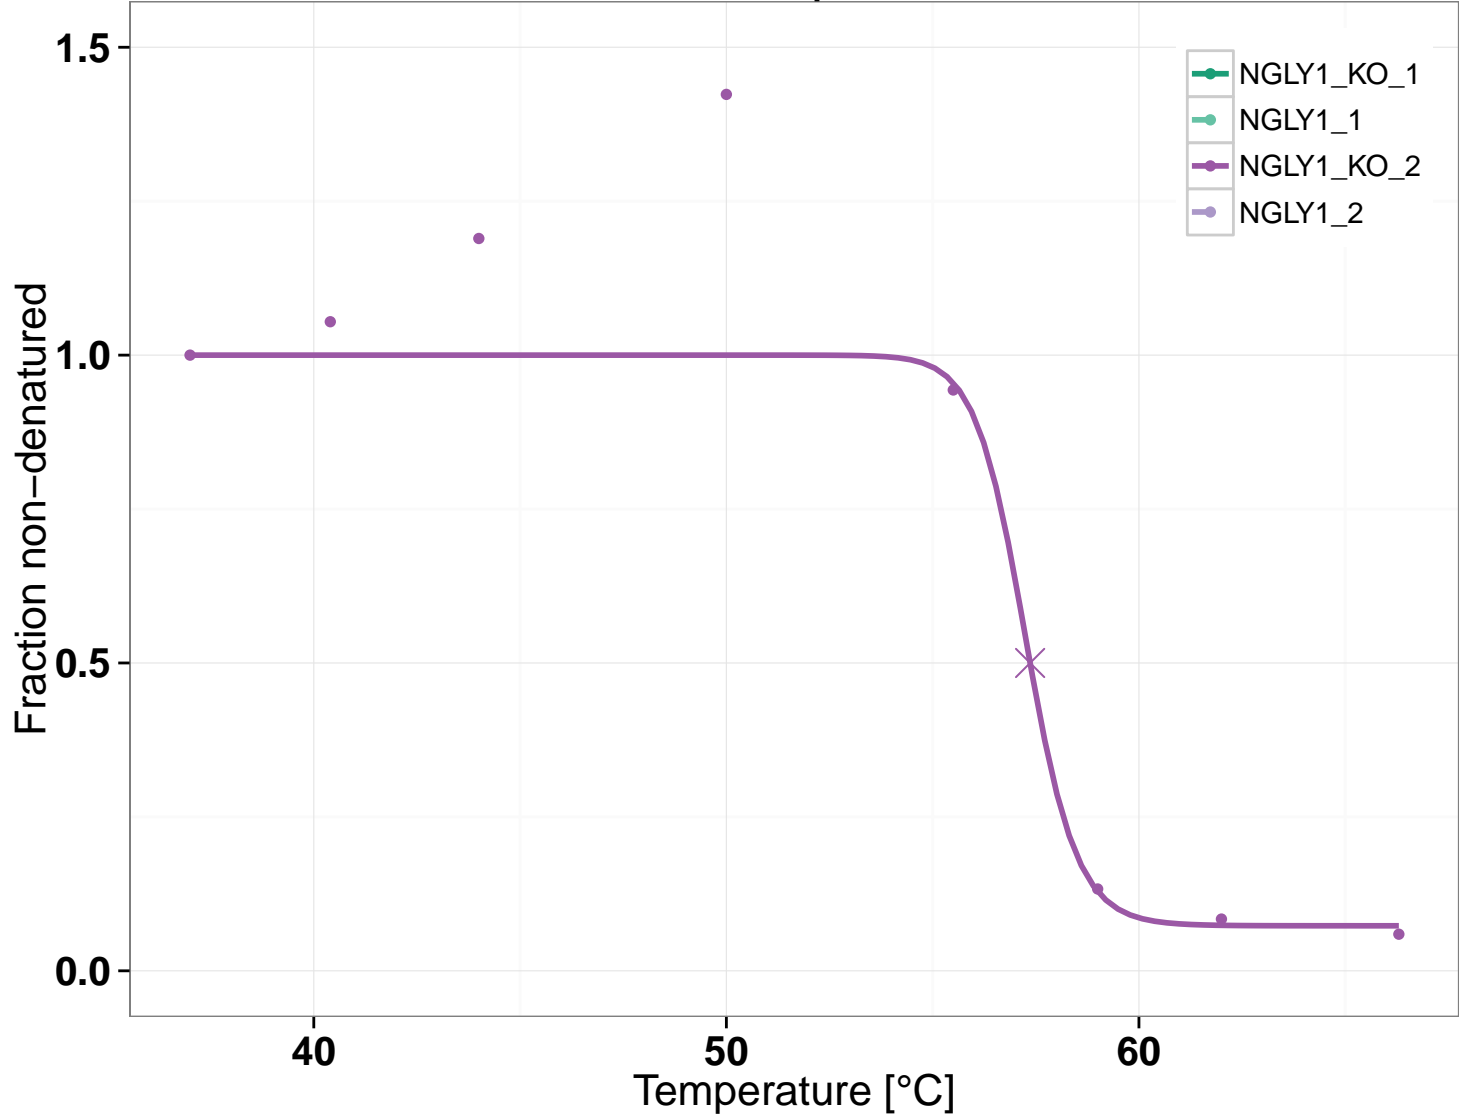

|            | meltPoint | slope | plateau | R2   |
|------------|-----------|-------|---------|------|
| NGLY1_KO_1 | -         | -     | -       | -    |
| NGLY1_1    | -         | -     | -       | -    |
| NGLY1_KO_2 | 57.36     | -0.38 | 0.07    | 0.51 |
| NGLY1_2    | -         | -     | -       | -    |

Supplement: Supplementary file 1600 [file 1]

IPI00103247.1|HNRPLL

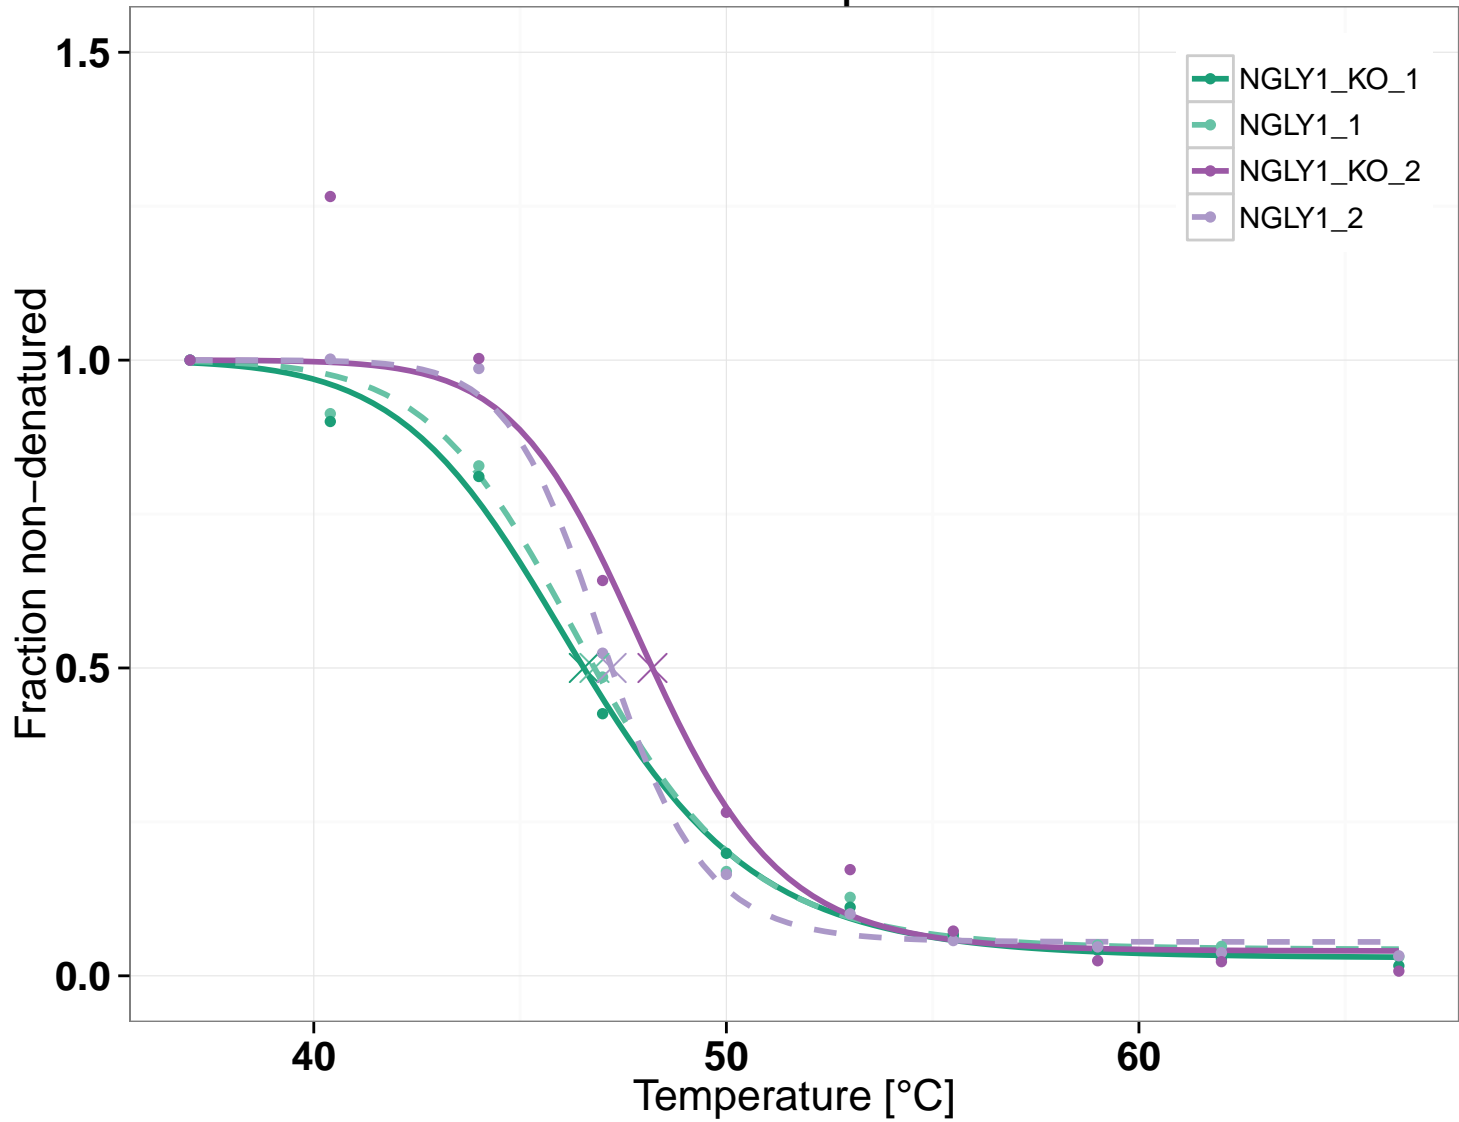

|            | meltPoint | slope | plateau | R2   |
|------------|-----------|-------|---------|------|
| NGLY1_KO_1 | 46.54     | -0.11 | 0.03    | 1    |
| NGLY1_1    | 46.8      | -0.12 | 0.04    | 1    |
| NGLY1_KO_2 | 48.21     | -0.15 | 0.04    | 0.96 |
| NGLY1_2    | 47.22     | -0.2  | 0.06    | 1    |

Supplement: Supplementary file 1601 [file 1]

IPI00909366.1|MYL6B

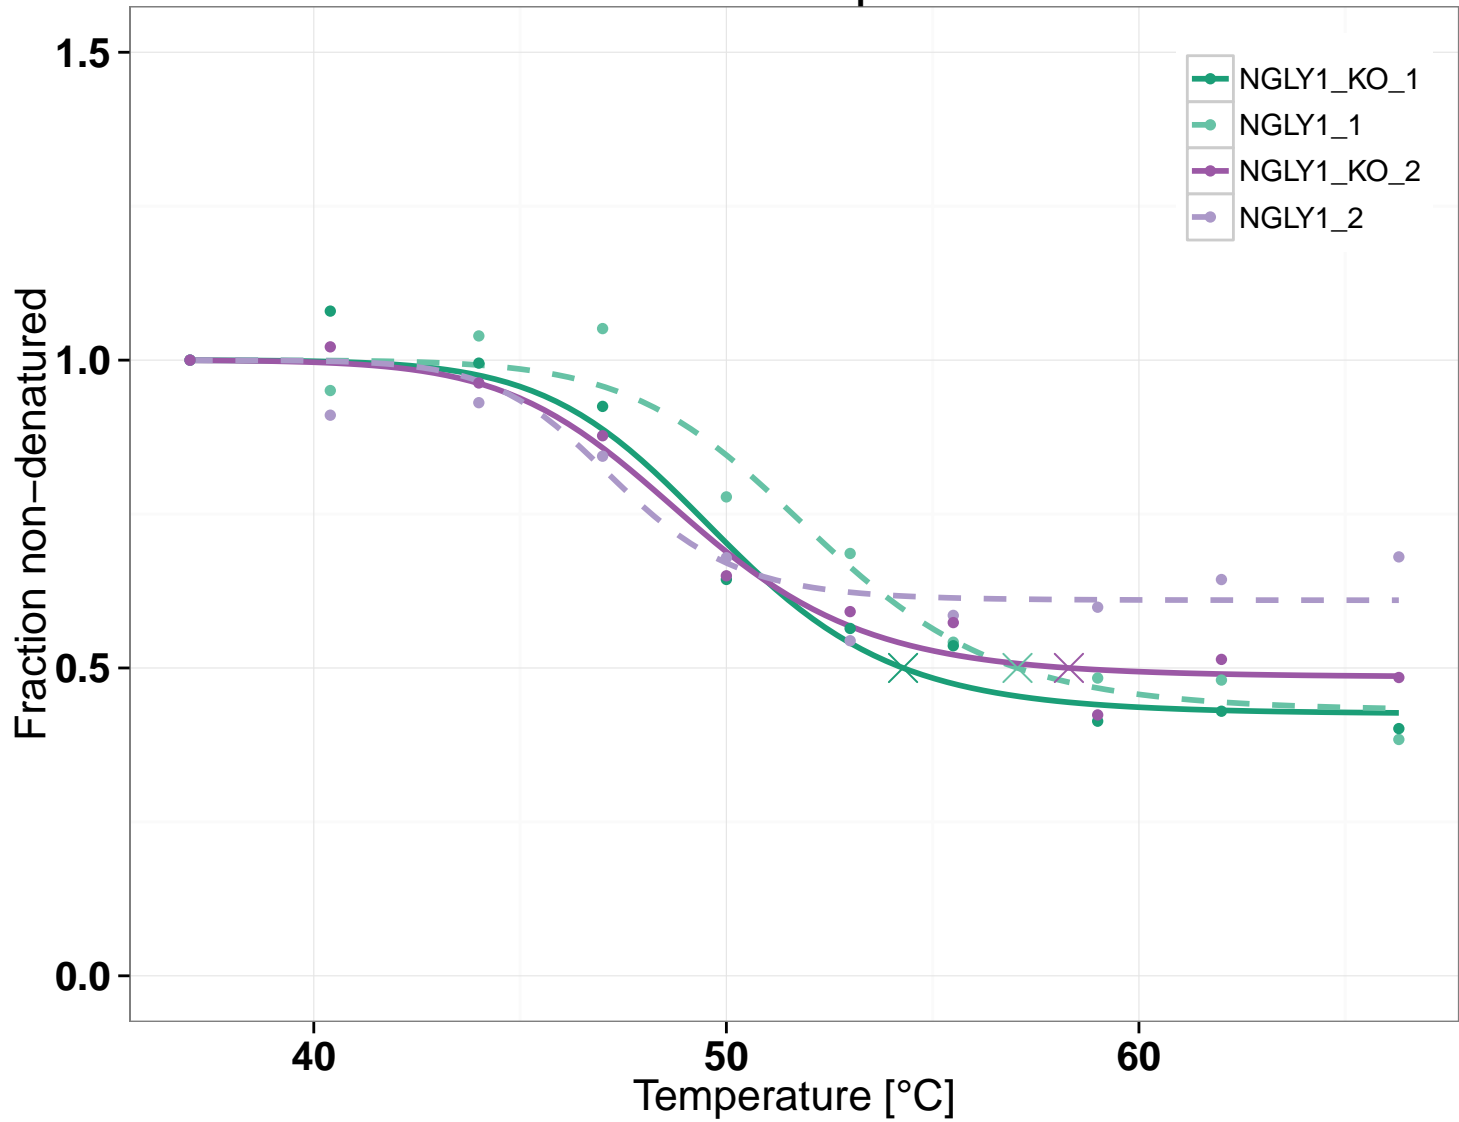

|            | meltPoint | slope  | plateau | R2   |
|------------|-----------|--------|---------|------|
| NGLY1_KO_1 | 54.28     | -0.068 | 0.43    | 0.97 |
| NGLY1_1    | 57.06     | -0.063 | 0.43    | 0.96 |
| NGLY1_KO_2 | 58.3      | -0.059 | 0.49    | 0.98 |
| NGLY1_2    | -         | -0.065 | 0.61    | 0.91 |

Supplement: Supplementary file 1602 [file 1]

IPI00029734.1|CDC25B

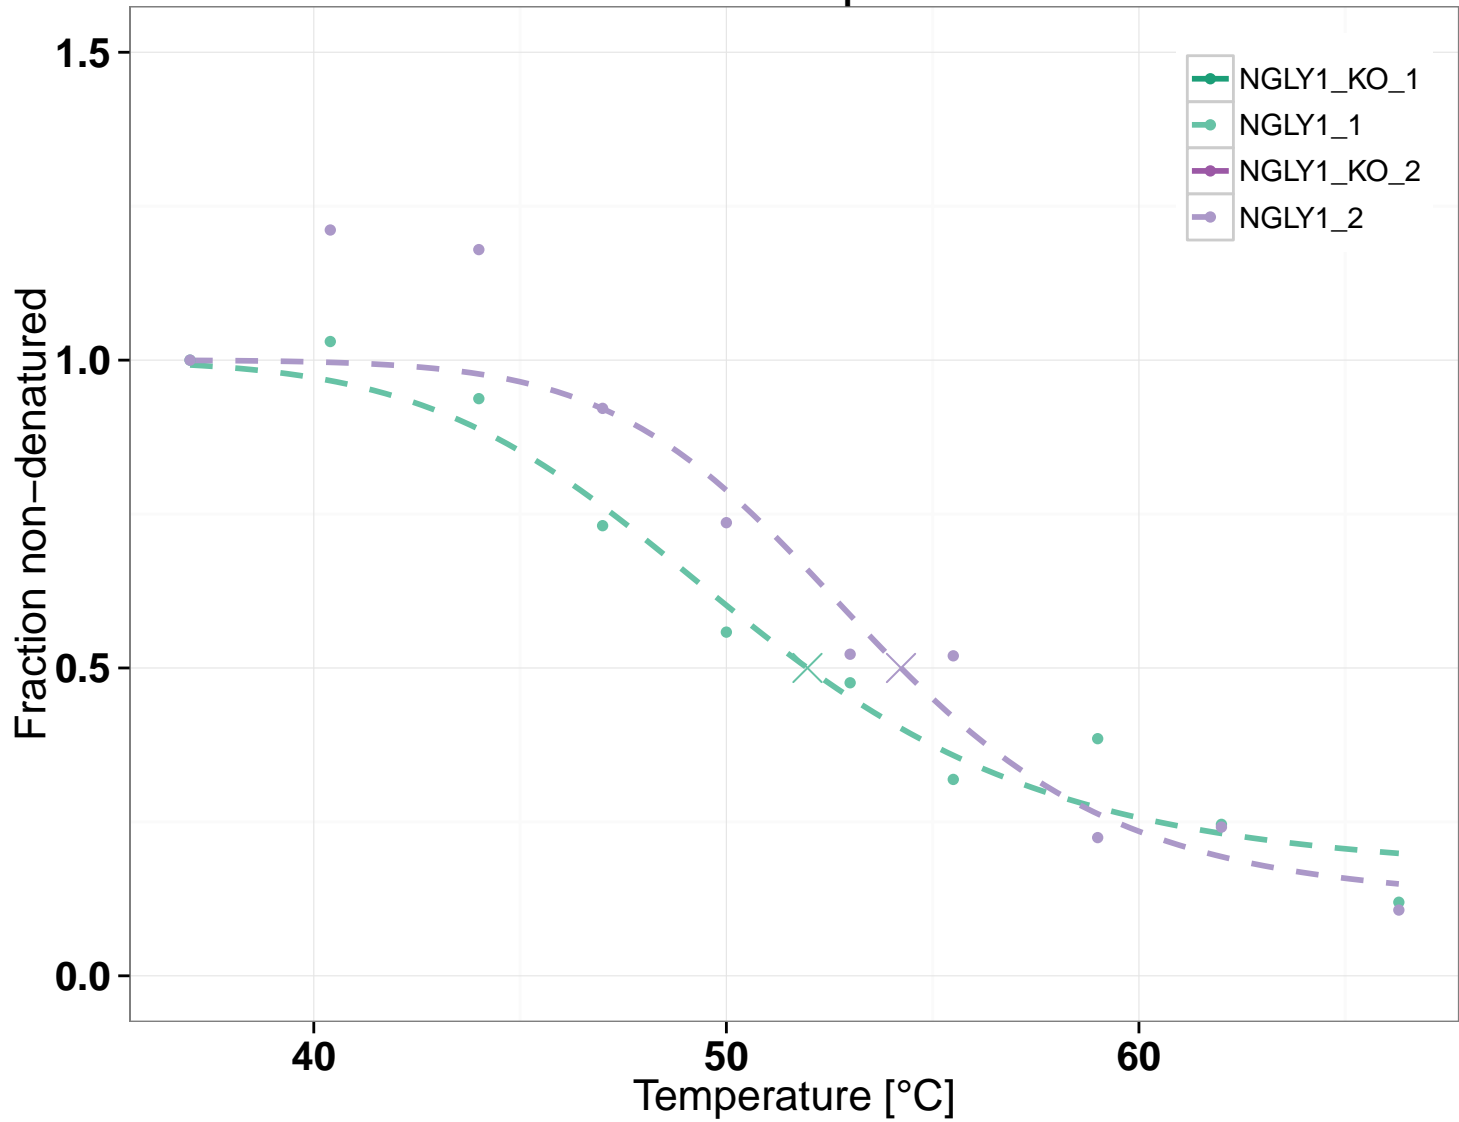

|            | meltPoint | slope  | plateau | R2   |
|------------|-----------|--------|---------|------|
| NGLY1_KO_1 | —         | —      | —       | —    |
| NGLY1_1    | 51.97     | -0.055 | 0.16    | 0.97 |
| NGLY1_KO_2 | —         | —      | —       | —    |
| NGLY1_2    | 54.23     | -0.072 | 0.12    | 0.93 |

Supplement: Supplementary file 1603 [file 1]

IPI00479191.2|HNRNPH1

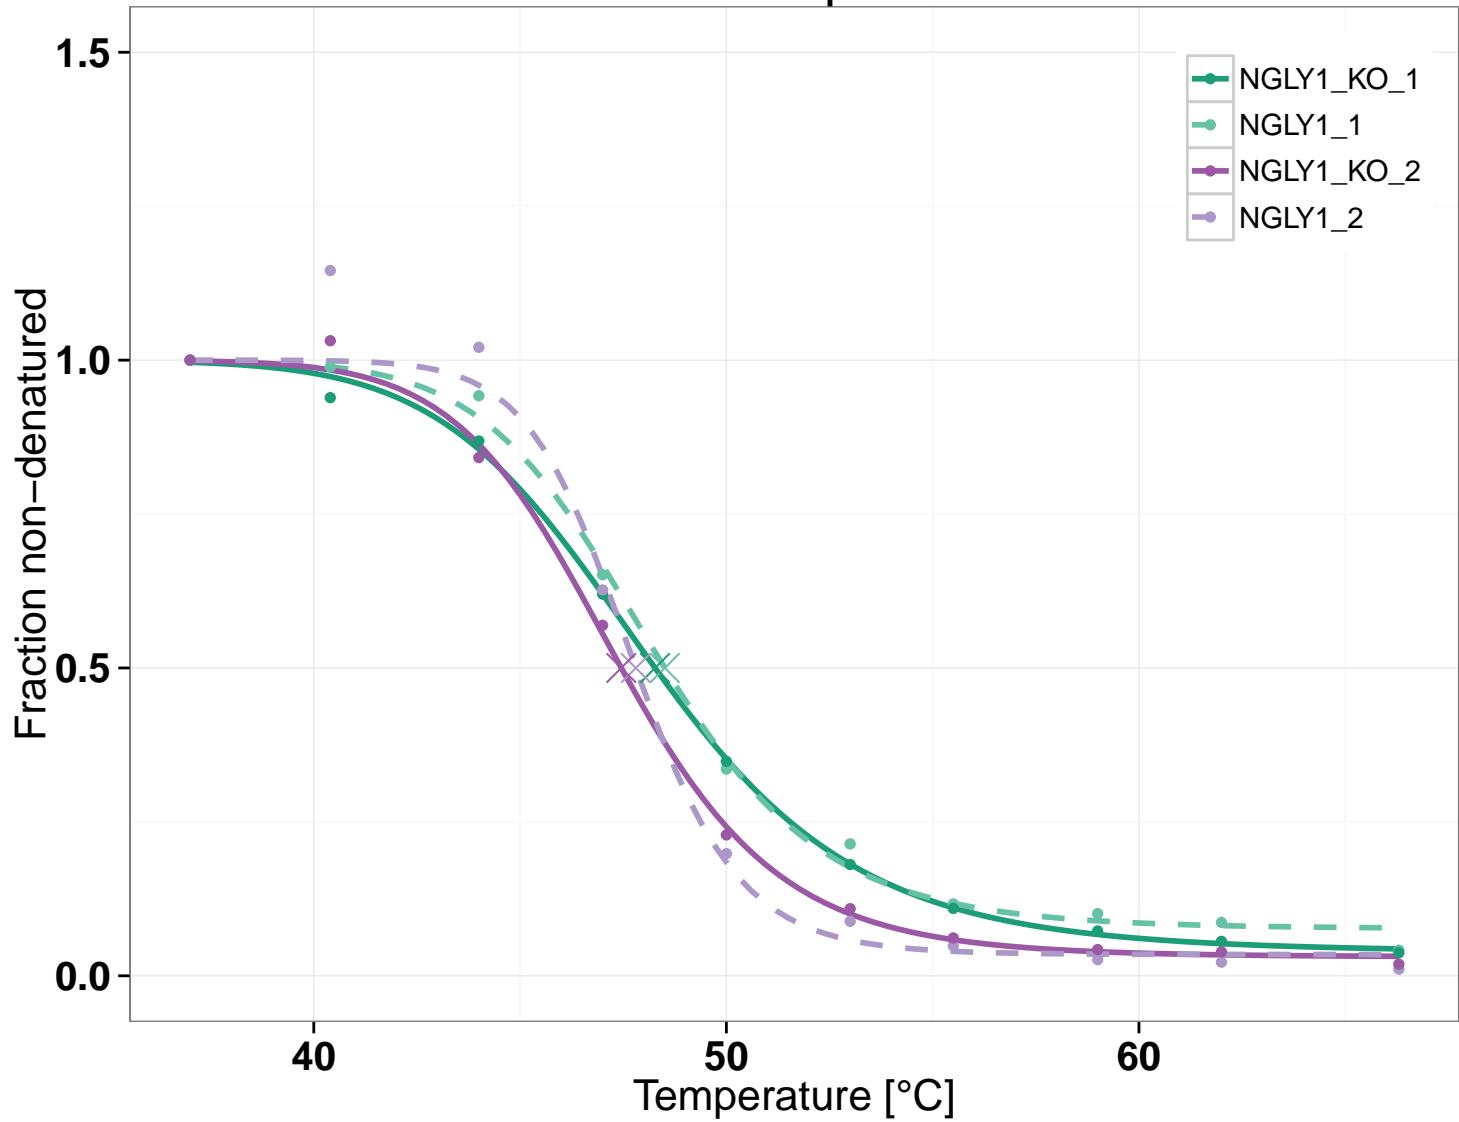

|            | meltPoint | slope  | plateau | R2   |
|------------|-----------|--------|---------|------|
| NGLY1_KO_1 | 48.27     | -0.095 | 0.04    | 1    |
| NGLY1_1    | 48.51     | -0.11  | 0.08    | 1    |
| NGLY1_KO_2 | 47.45     | -0.12  | 0.03    | 1    |
| NGLY1_2    | 47.81     | -0.19  | 0.03    | 0.99 |

Supplement: Supplementary file 1604 [file 1]

# IPI00033349.3|PREB

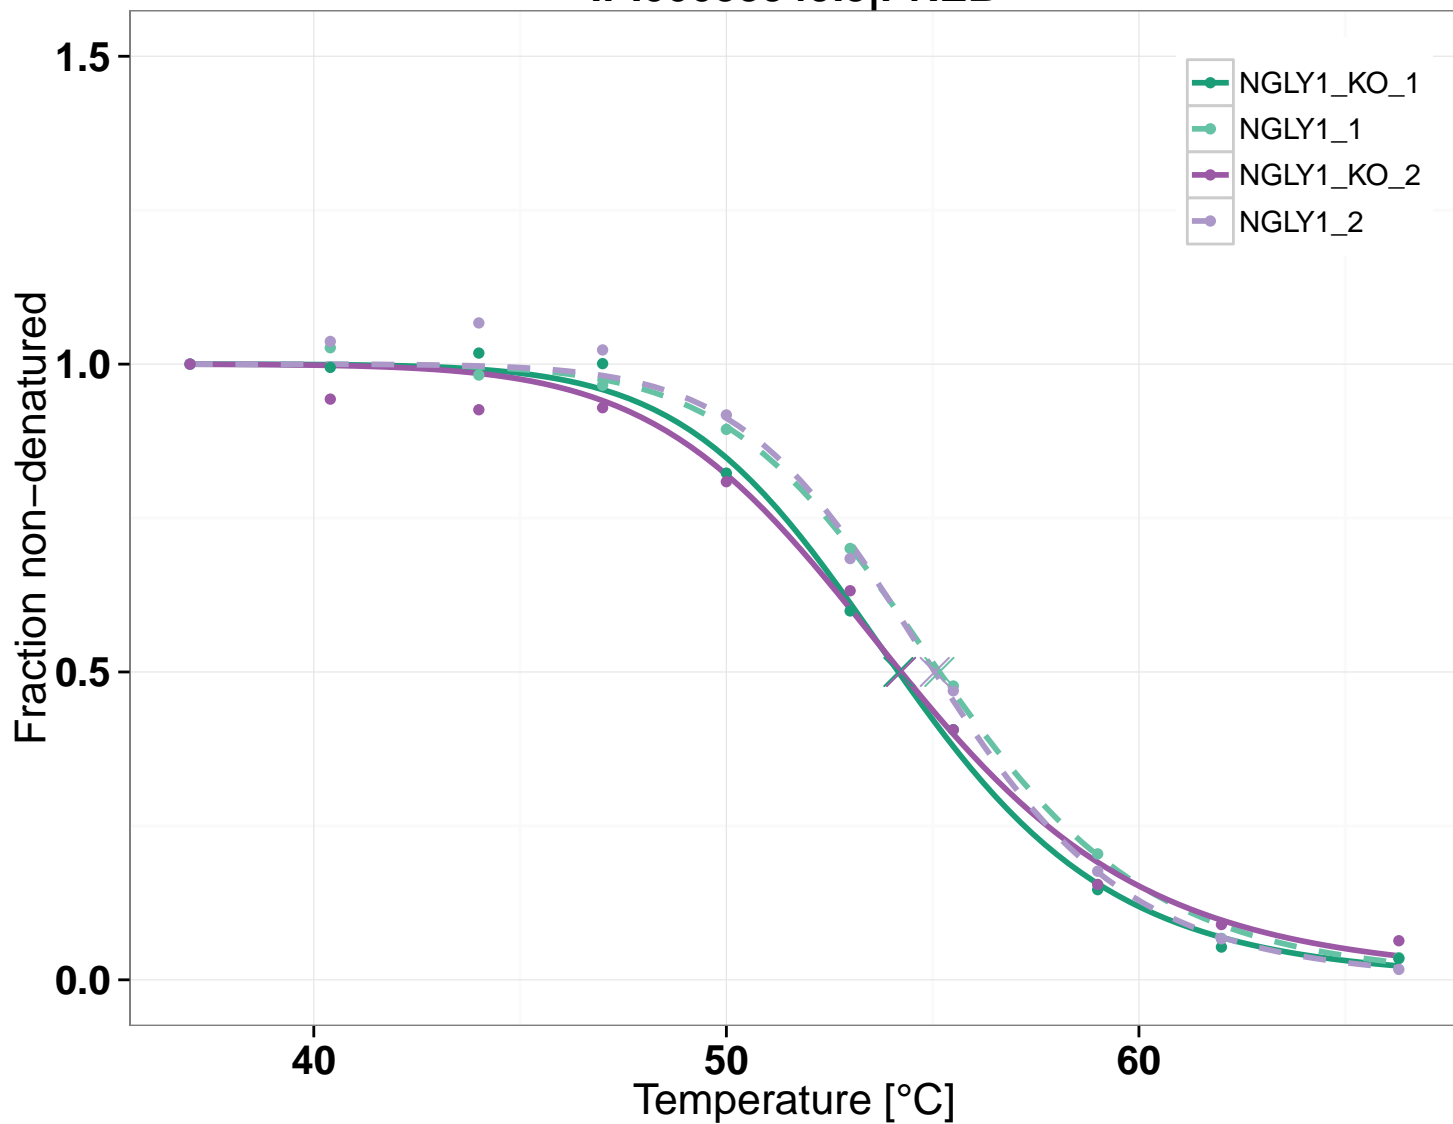

|            | meltPoint | slope  | plateau | R2   |
|------------|-----------|--------|---------|------|
| NGLY1_KO_1 | 54.17     | -0.096 | 0       | 1    |
| NGLY1_1    | 55.16     | -0.097 | 0       | 1    |
| NGLY1_KO_2 | 54.23     | -0.084 | 0       | 0.99 |
| NGLY1_2    | 55.05     | -0.11  | 0       | 0.99 |

Supplement: Supplementary file 1605 [file 1]

IPI00217477.5|HMGB3

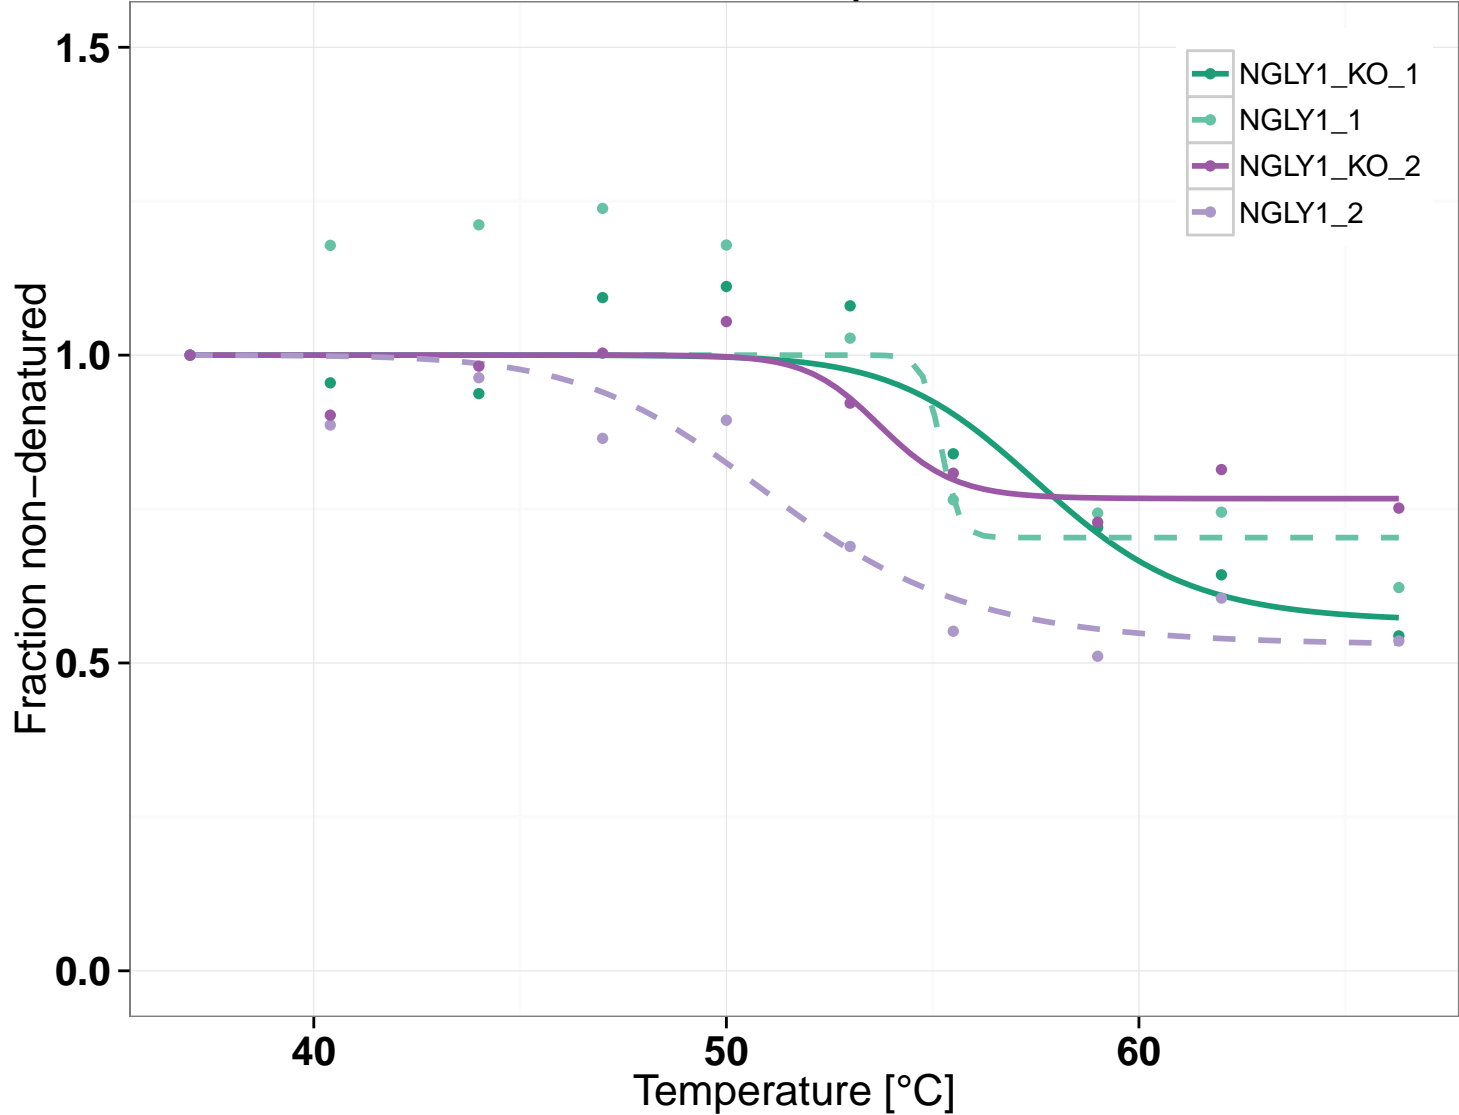

|            | meltPoint | slope  | plateau | R2   |
|------------|-----------|--------|---------|------|
| NGLY1_KO_1 | –         | –0.06  | 0.57    | 0.87 |
| NGLY1_1    | –         | –0.34  | 0.7     | 0.64 |
| NGLY1_KO_2 | –         | –0.065 | 0.77    | 0.85 |
| NGLY1_2    | –         | –0.05  | 0.53    | 0.9  |

Supplement: Supplementary file 1606 [file 1]

IPI00902493.1|LOC100134292

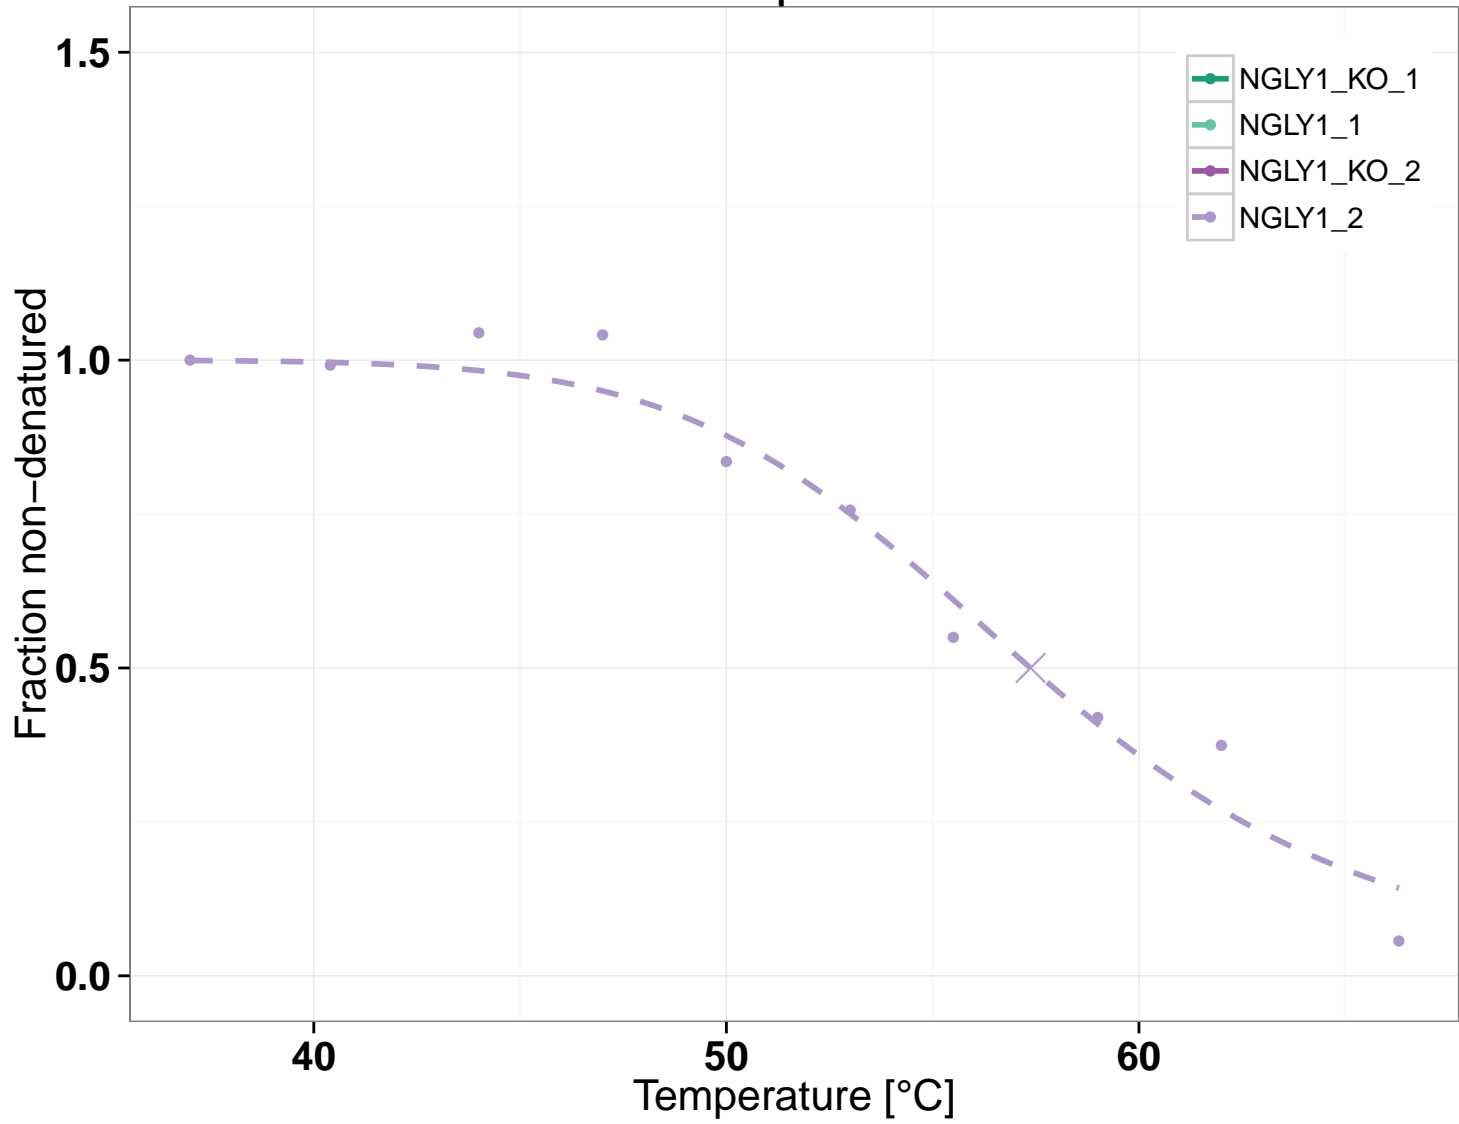

|            | meltPoint | slope  | plateau | R2   |
|------------|-----------|--------|---------|------|
| NGLY1_KO_1 | —         | —      | —       | —    |
| NGLY1_1    | —         | —      | —       | —    |
| NGLY1_KO_2 | —         | —      | —       | —    |
| NGLY1_2    | 57.37     | -0.059 | 0       | 0.97 |

Supplement: Supplementary file 1607 [file 1]

IPI00550115.3|SMPDL3B

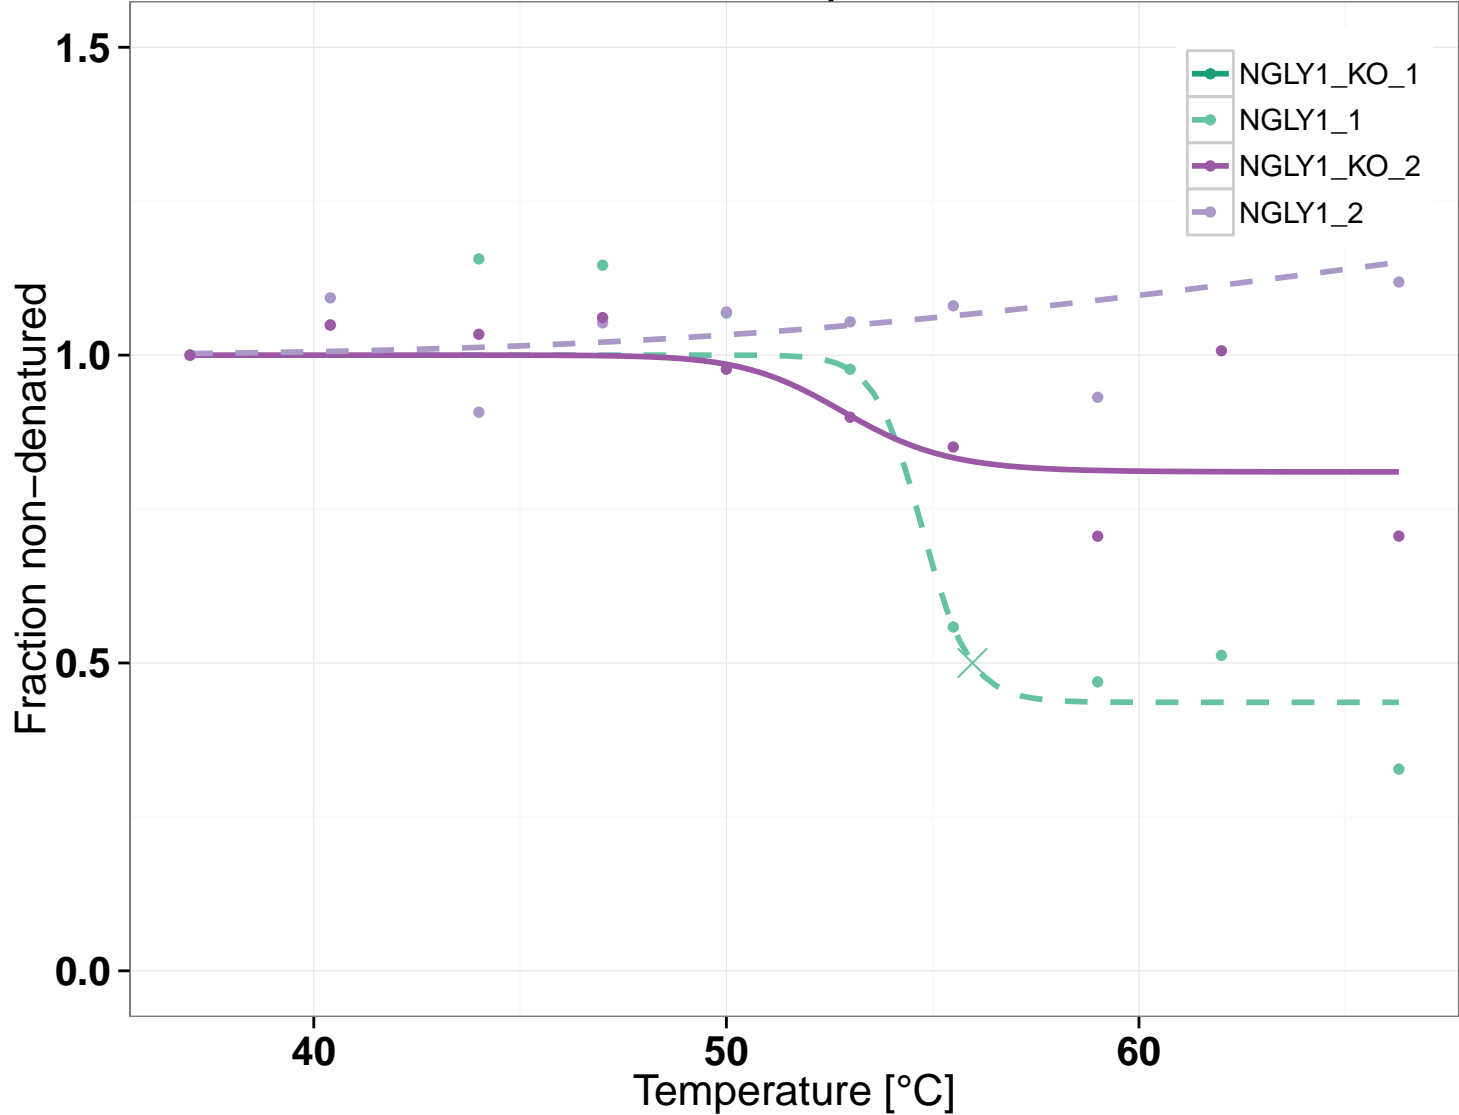

|            | meltPoint | slope  | plateau | R2   |
|------------|-----------|--------|---------|------|
| NGLY1_KO_1 | -         | -      | -       | -    |
| NGLY1_1    | 55.97     | -0.24  | 0.44    | 0.92 |
| NGLY1_KO_2 | -         | -0.038 | 0.81    | 0.58 |
| NGLY1_2    | -         | -      | 1.5     | 0.22 |

Supplement: Supplementary file 1608 [file 1]
