# Supplementary material (part 17 of 85)
Source: publisher figshare collection journal article supplement (https://gsajournals.figshare.com/articles/dataset/_/12014913)

IPI00022403.1|MRPL13

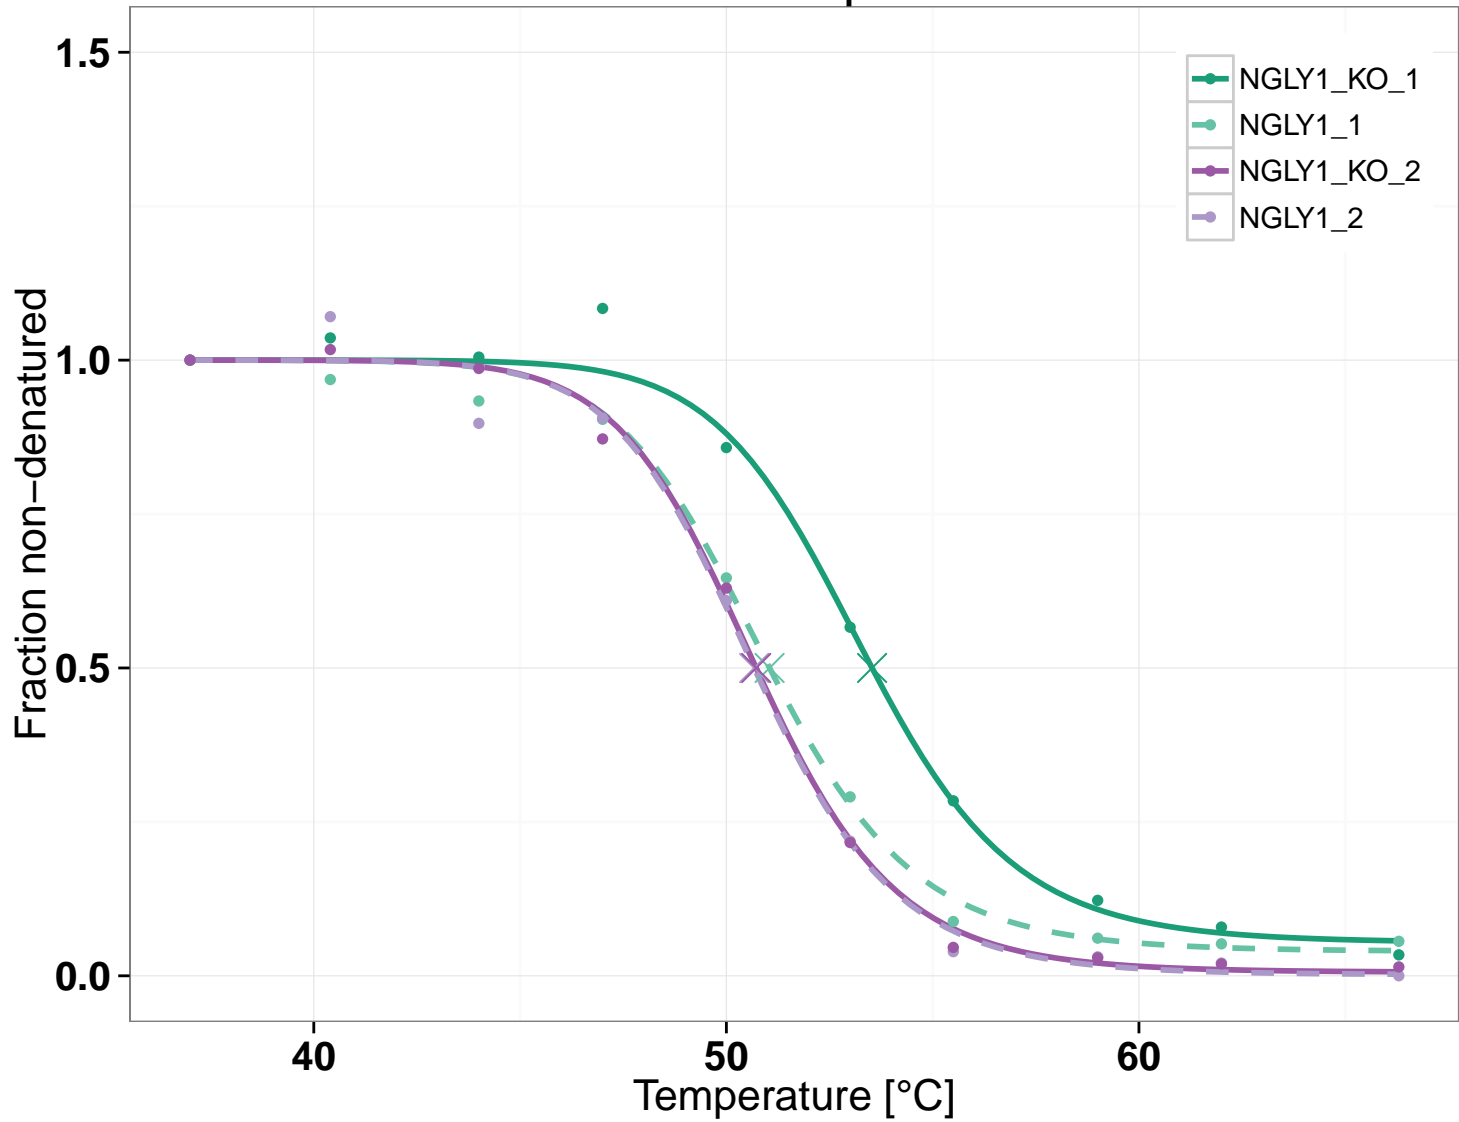

|            | meltPoint | slope | plateau | R2   |
|------------|-----------|-------|---------|------|
| NGLY1_KO_1 | 53.53     | -0.13 | 0.05    | 0.99 |
| NGLY1_1    | 51.05     | -0.13 | 0.04    | 1    |
| NGLY1_KO_2 | 50.72     | -0.15 | 0.01    | 1    |
| NGLY1_2    | 50.67     | -0.15 | 0       | 0.99 |

Supplement: Supplementary file 1609 [file 1]

IPI00306708.4|PBK

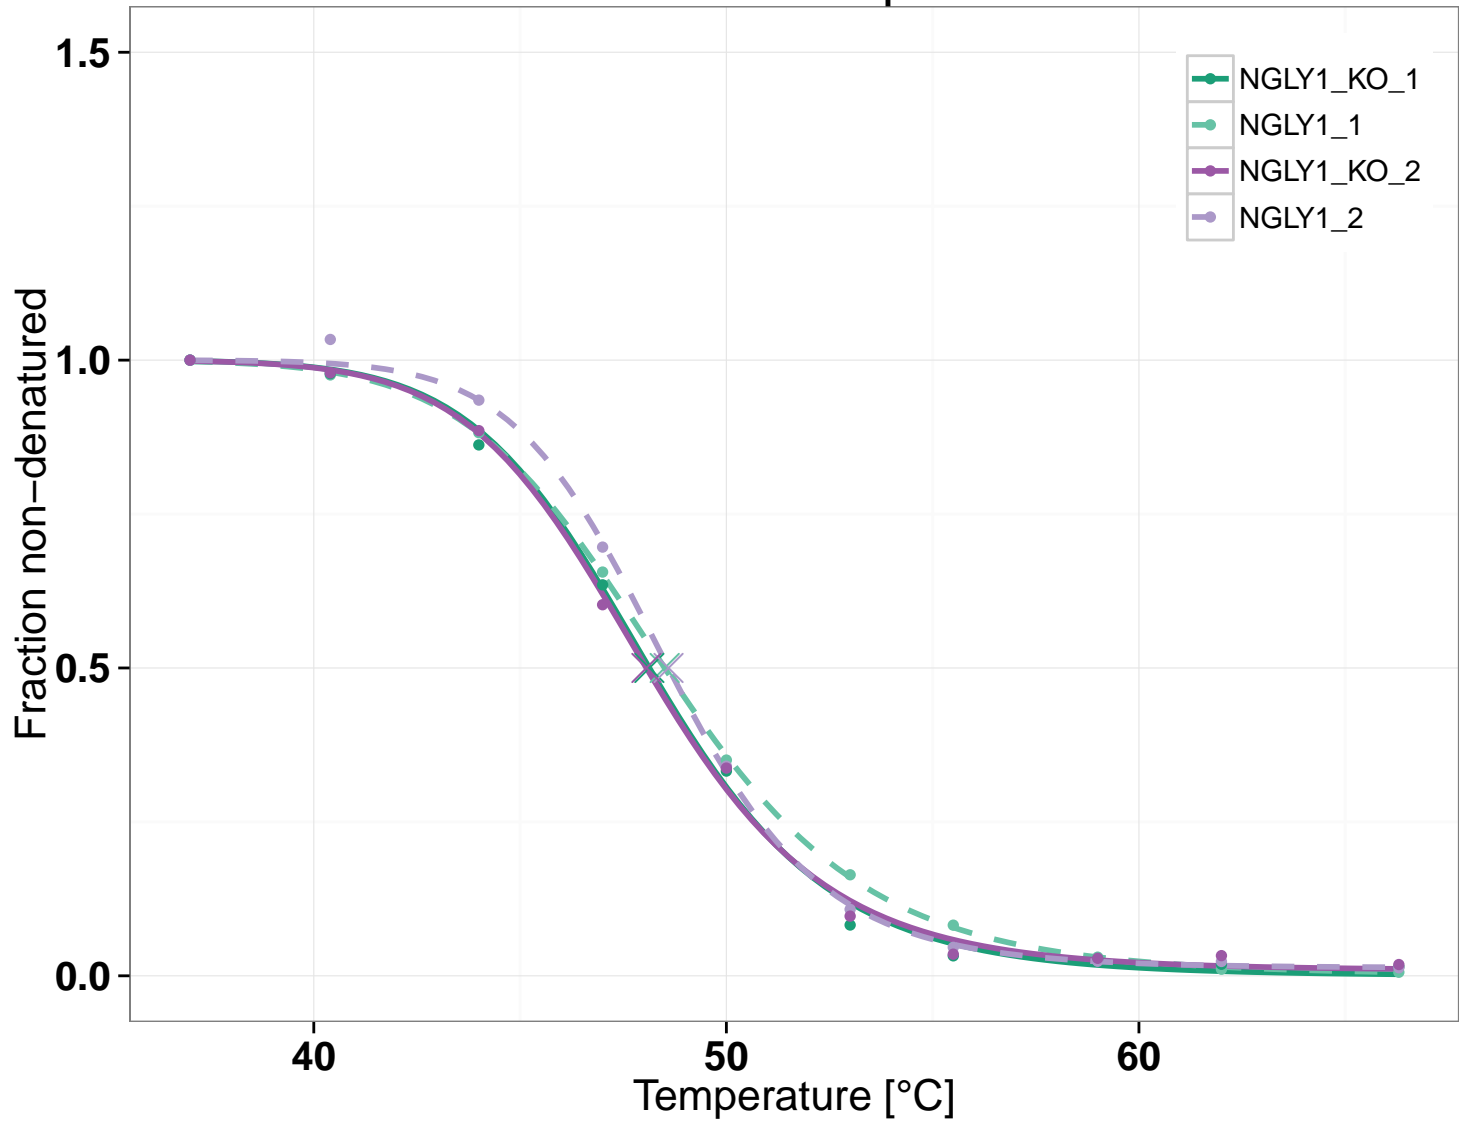

|            | meltPoint | slope | plateau | R2 |
|------------|-----------|-------|---------|----|
| NGLY1_KO_1 | 48.13     | -0.11 | 0       | 1  |
| NGLY1_1    | 48.51     | -0.1  | 0       | 1  |
| NGLY1_KO_2 | 48.06     | -0.11 | 0.01    | 1  |
| NGLY1_2    | 48.6      | -0.13 | 0.01    | 1  |

Supplement: Supplementary file 1610 [file 1]

# IPI00219445.1|PSME3

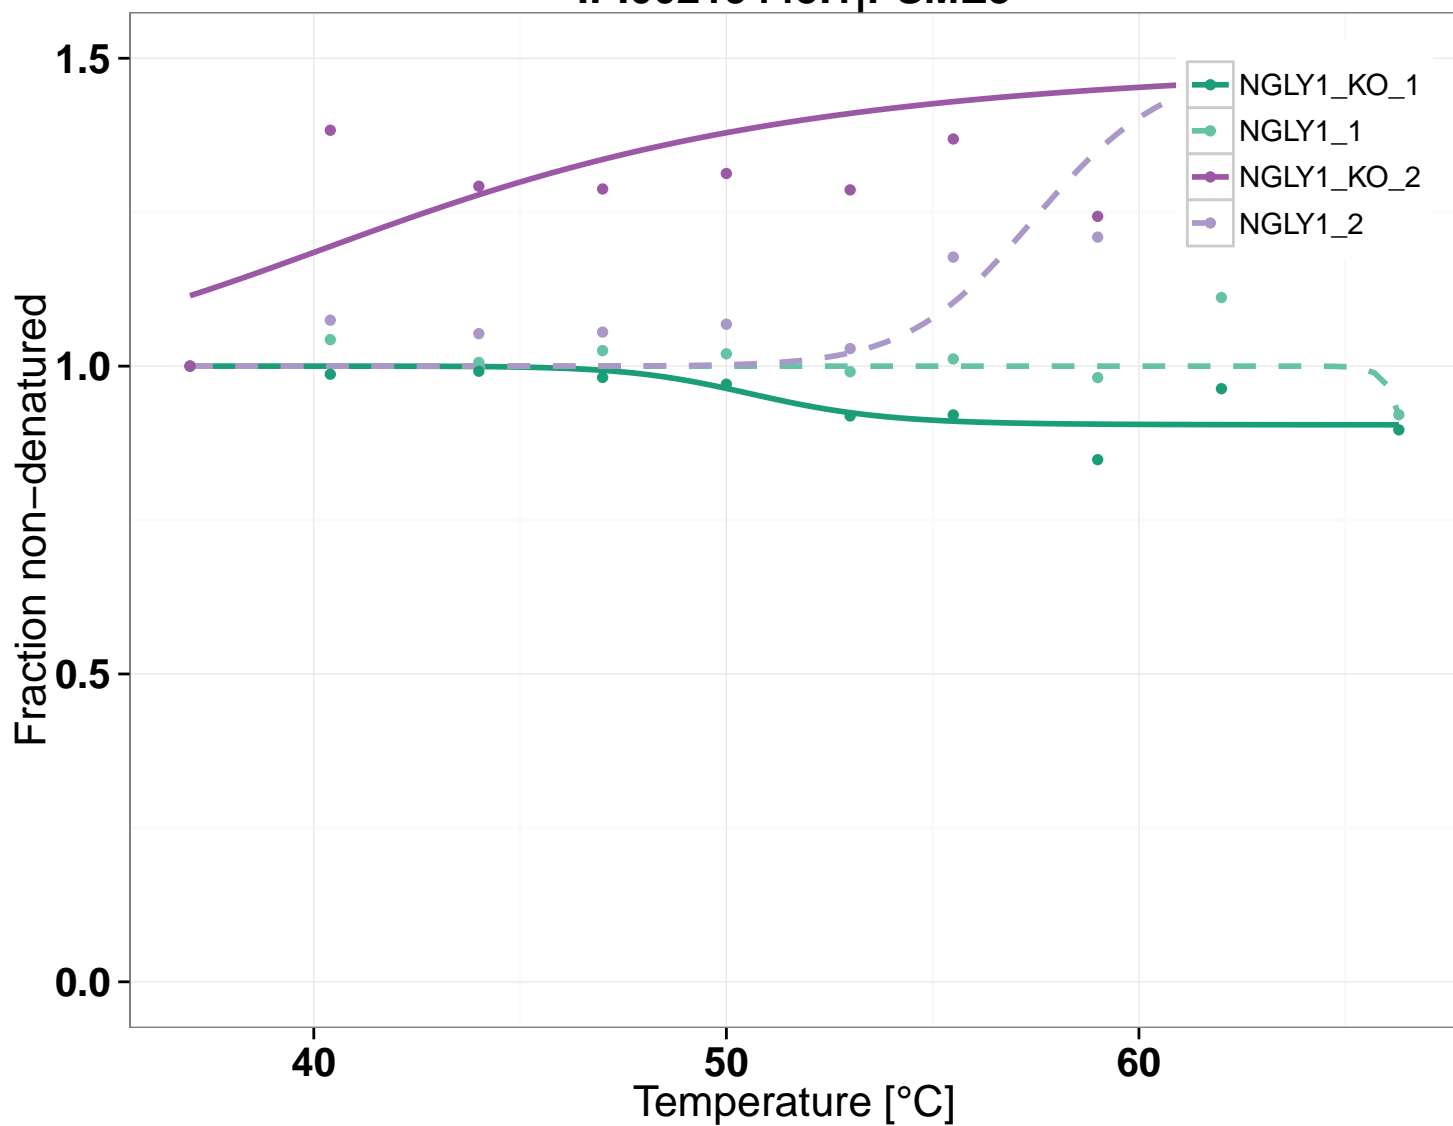

|            | meltPoint | slope  | plateau | R2   |
|------------|-----------|--------|---------|------|
| NGLY1_KO_1 | -         | -0.015 | 0.9     | 0.67 |
| NGLY1_1    | -         | -      | 0       | 0.24 |
| NGLY1_KO_2 | -         | 0.024  | 1.5     | 0.37 |
| NGLY1_2    | -         | 0.078  | 1.5     | 0.81 |

Supplement: Supplementary file 1611 [file 1]

IPI00289690.2|IP6K3

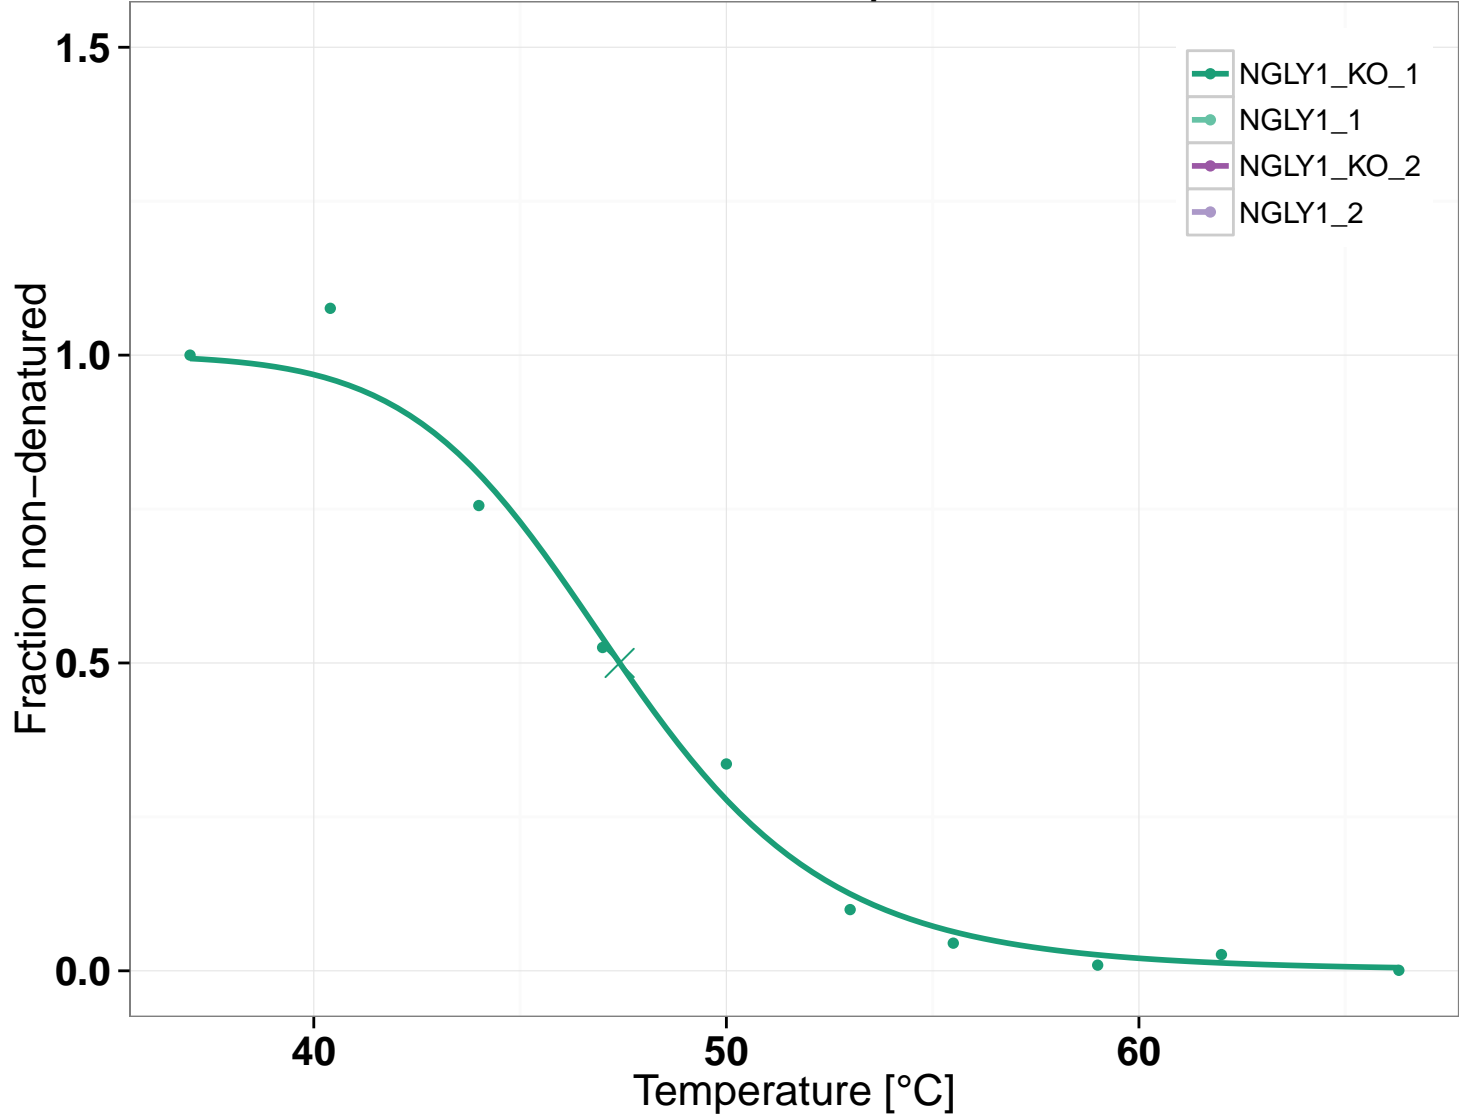

|            | meltPoint | slope  | plateau | R2   |
|------------|-----------|--------|---------|------|
| NGLY1_KO_1 | 47.41     | -0.099 | 0       | 0.99 |
| NGLY1_1    | -         | -      | -       | -    |
| NGLY1_KO_2 | -         | -      | -       | -    |
| NGLY1_2    | -         | -      | -       | -    |

Supplement: Supplementary file 1612 [file 1]

IPI00844264.7|CSDE1

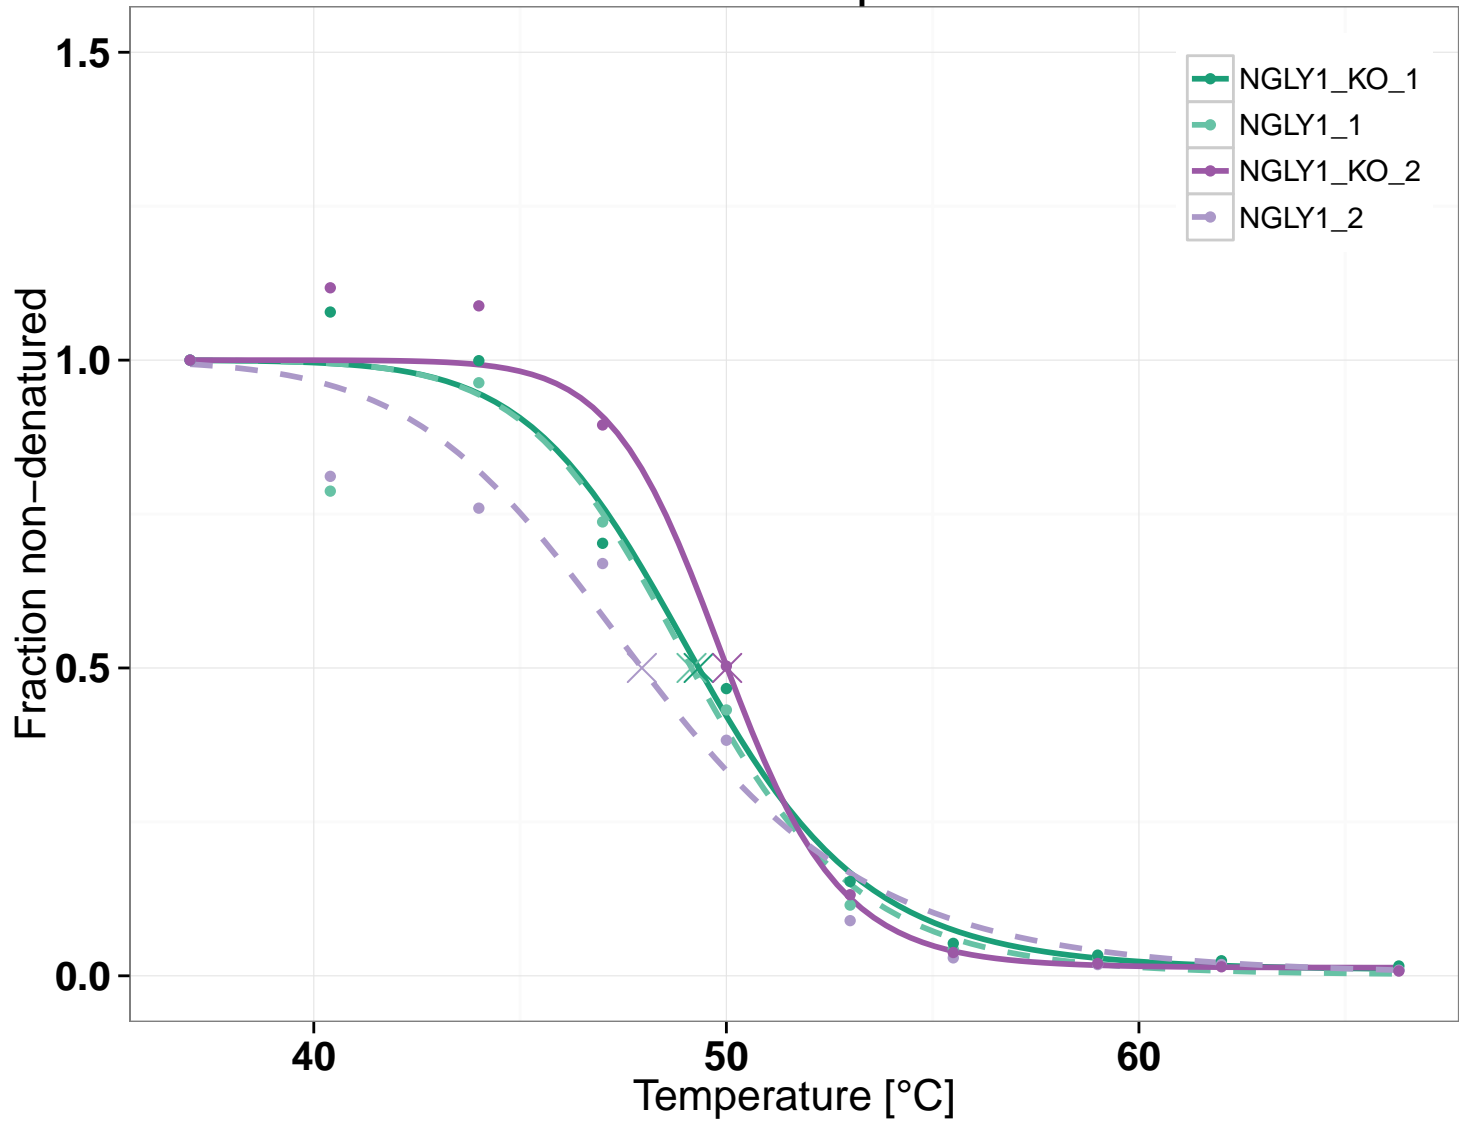

|            | meltPoint | slope  | plateau | R2   |
|------------|-----------|--------|---------|------|
| NGLY1_KO_1 | 49.33     | -0.12  | 0.01    | 0.99 |
| NGLY1_1    | 49.16     | -0.12  | 0       | 0.97 |
| NGLY1_KO_2 | 50.02     | -0.18  | 0.01    | 0.99 |
| NGLY1_2    | 47.95     | -0.089 | 0       | 0.97 |

Supplement: Supplementary file 1613 [file 1]

IPI00643639.2|LANCL3

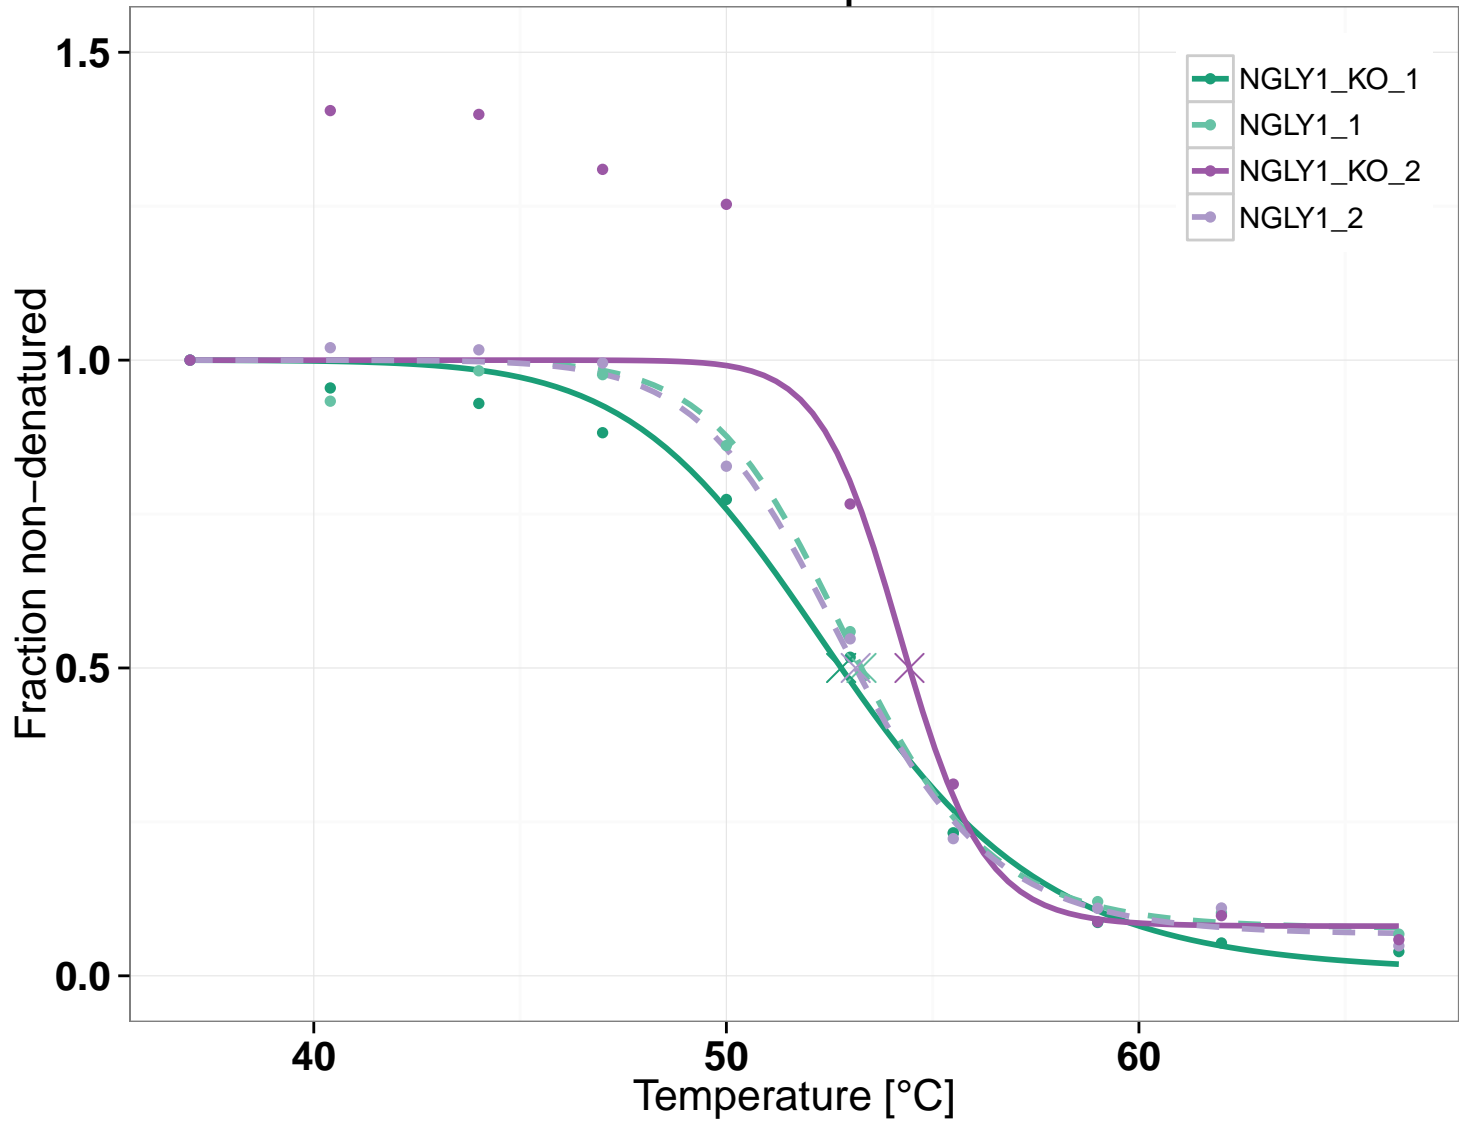

|            | meltPoint | slope  | plateau | R2   |
|------------|-----------|--------|---------|------|
| NGLY1_KO_1 | 52.78     | -0.098 | 0       | 0.99 |
| NGLY1_1    | 53.28     | -0.14  | 0.08    | 1    |
| NGLY1_KO_2 | 54.44     | -0.23  | 0.08    | 0.84 |
| NGLY1_2    | 53.14     | -0.13  | 0.07    | 1    |

Supplement: Supplementary file 1614 [file 1]

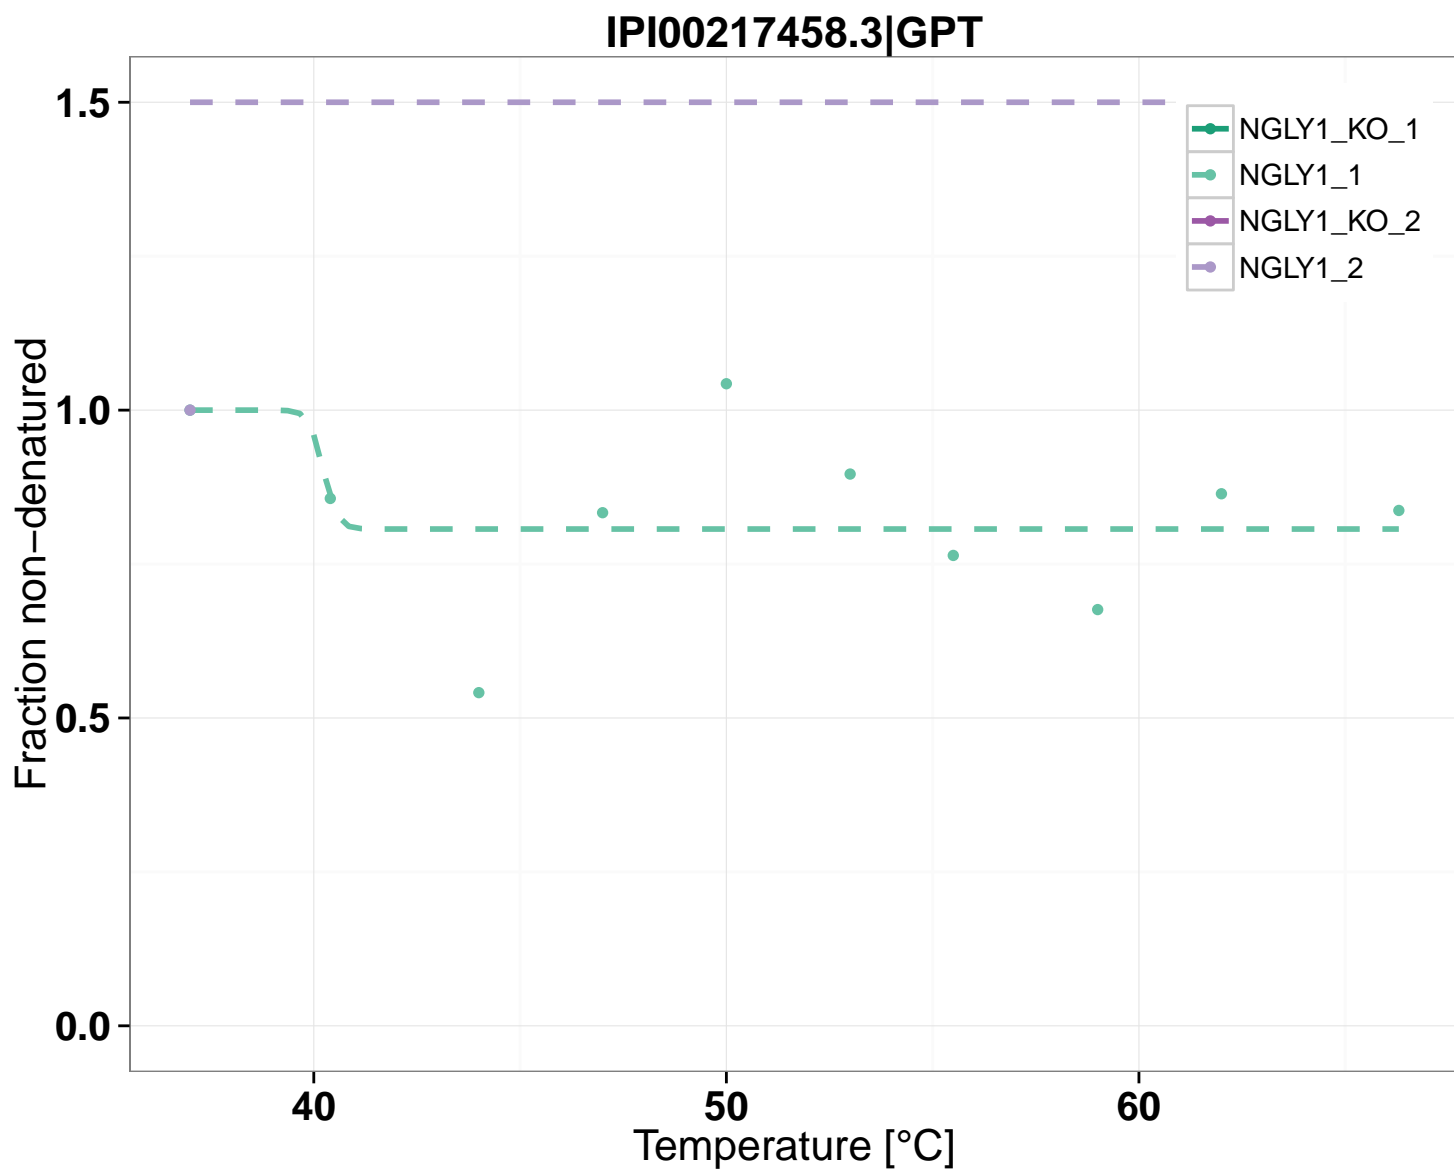

|            | meltPoint | slope | plateau | R2    |
|------------|-----------|-------|---------|-------|
| NGLY1_KO_1 | —         | —     | —       | —     |
| NGLY1_1    | —         | −0.3  | 0.81    | 0.18  |
| NGLY1_KO_2 | —         | —     | —       | —     |
| NGLY1_2    | —         | —     | 1.5     | −2.46 |

Supplement: Supplementary file 1615 [file 1]

# IPI00332155.1|GPRIN1

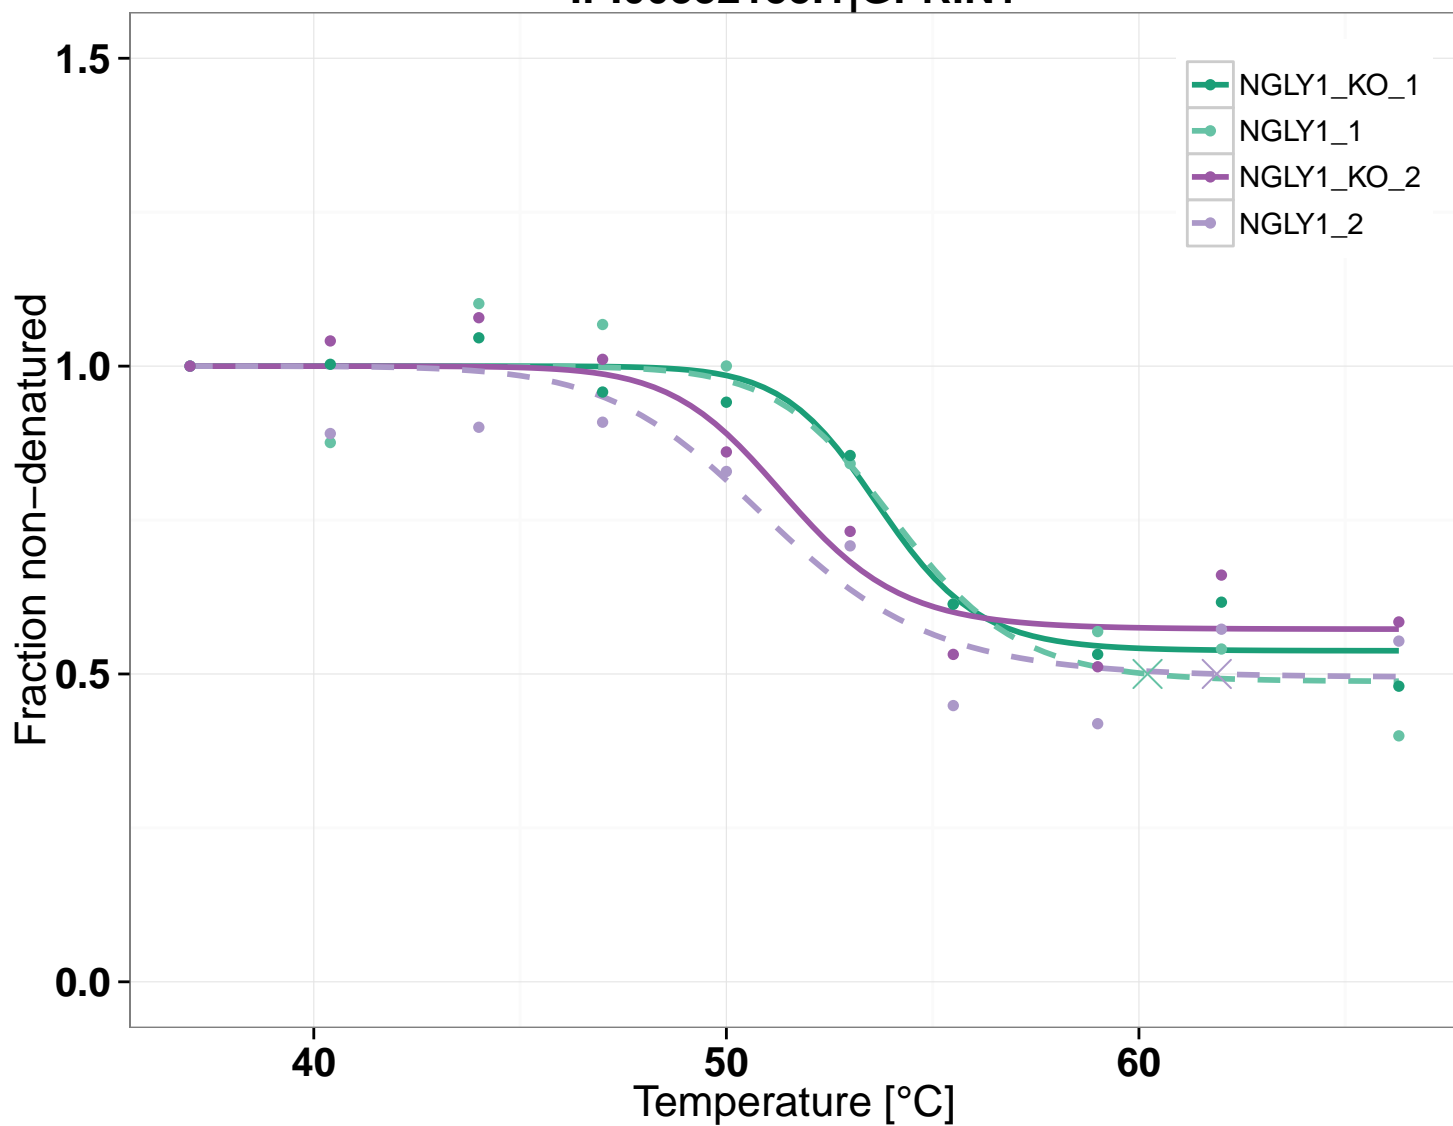

|            | meltPoint | slope  | plateau | R2   |
|------------|-----------|--------|---------|------|
| NGLY1_KO_1 | –         | –0.098 | 0.54    | 0.96 |
| NGLY1_1    | 60.21     | –0.087 | 0.49    | 0.92 |
| NGLY1_KO_2 | –         | –0.076 | 0.57    | 0.94 |
| NGLY1_2    | 61.89     | –0.064 | 0.49    | 0.86 |

Supplement: Supplementary file 1616 [file 1]

IPI00303954.3|CYB5B

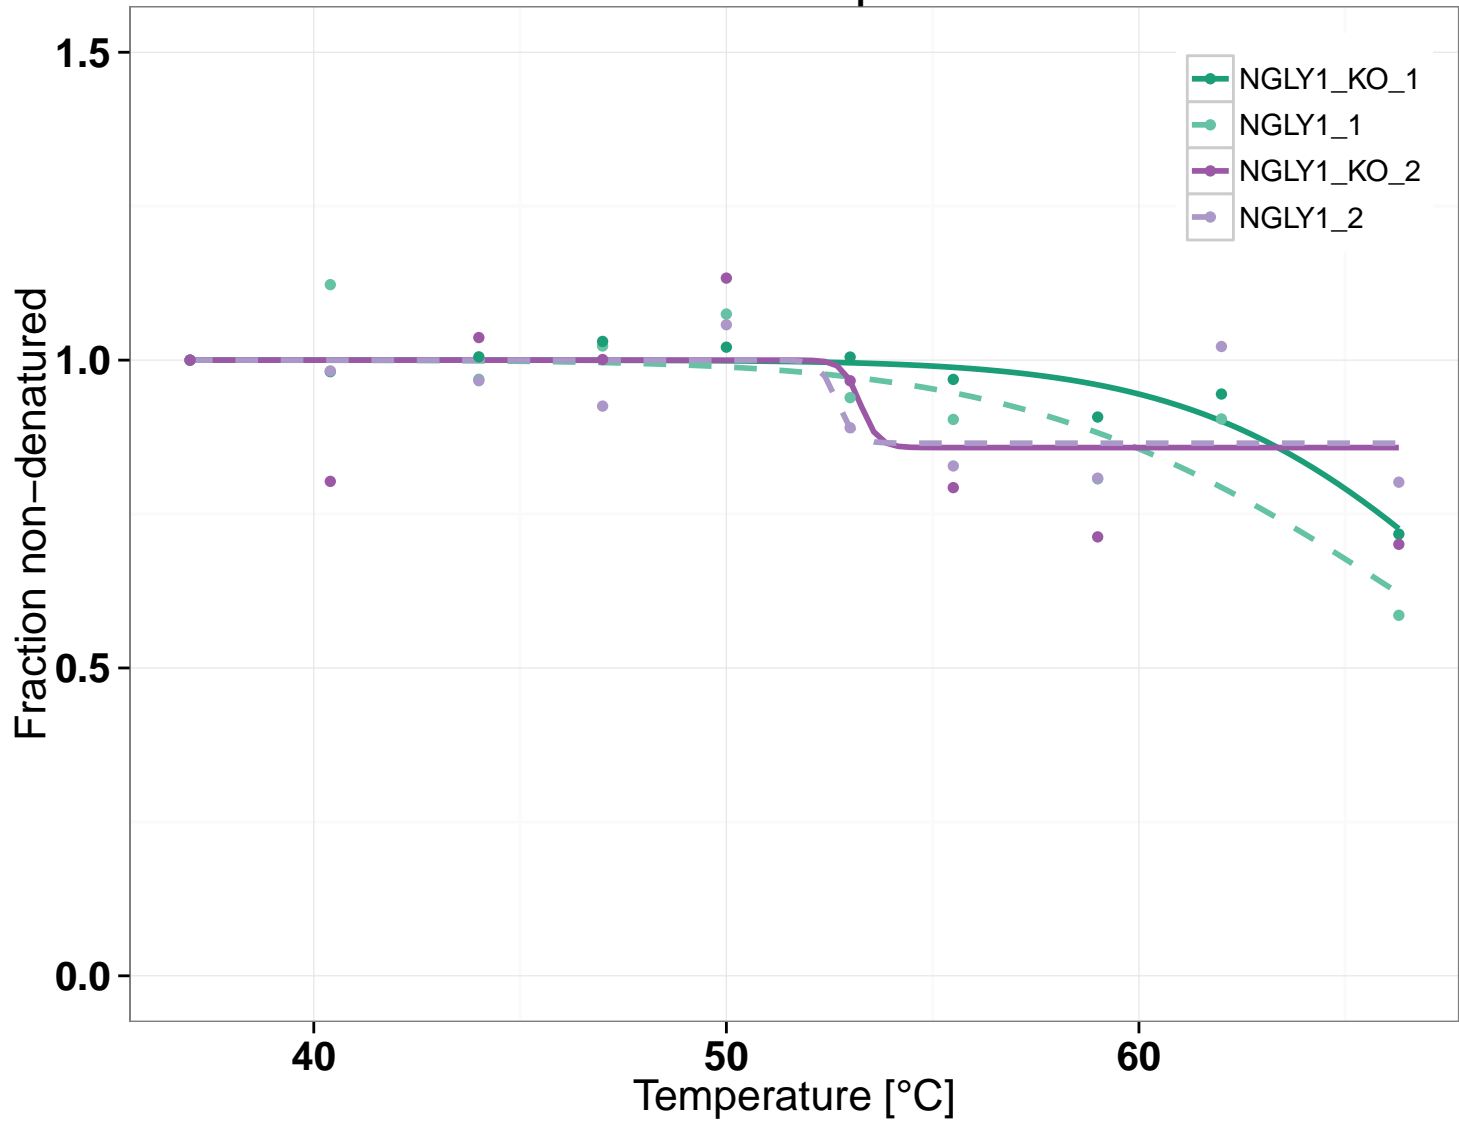

|            | meltPoint | slope | plateau | R2   |
|------------|-----------|-------|---------|------|
| NGLY1_KO_1 | -         | -     | 0       | 0.91 |
| NGLY1_1    | -         | -     | 0       | 0.78 |
| NGLY1_KO_2 | -         | -0.17 | 0.86    | 0.15 |
| NGLY1_2    | -         | -0.16 | 0.87    | 0.43 |

Supplement: Supplementary file 1617 [file 1]

# IPI00744558.2|C19ORF63

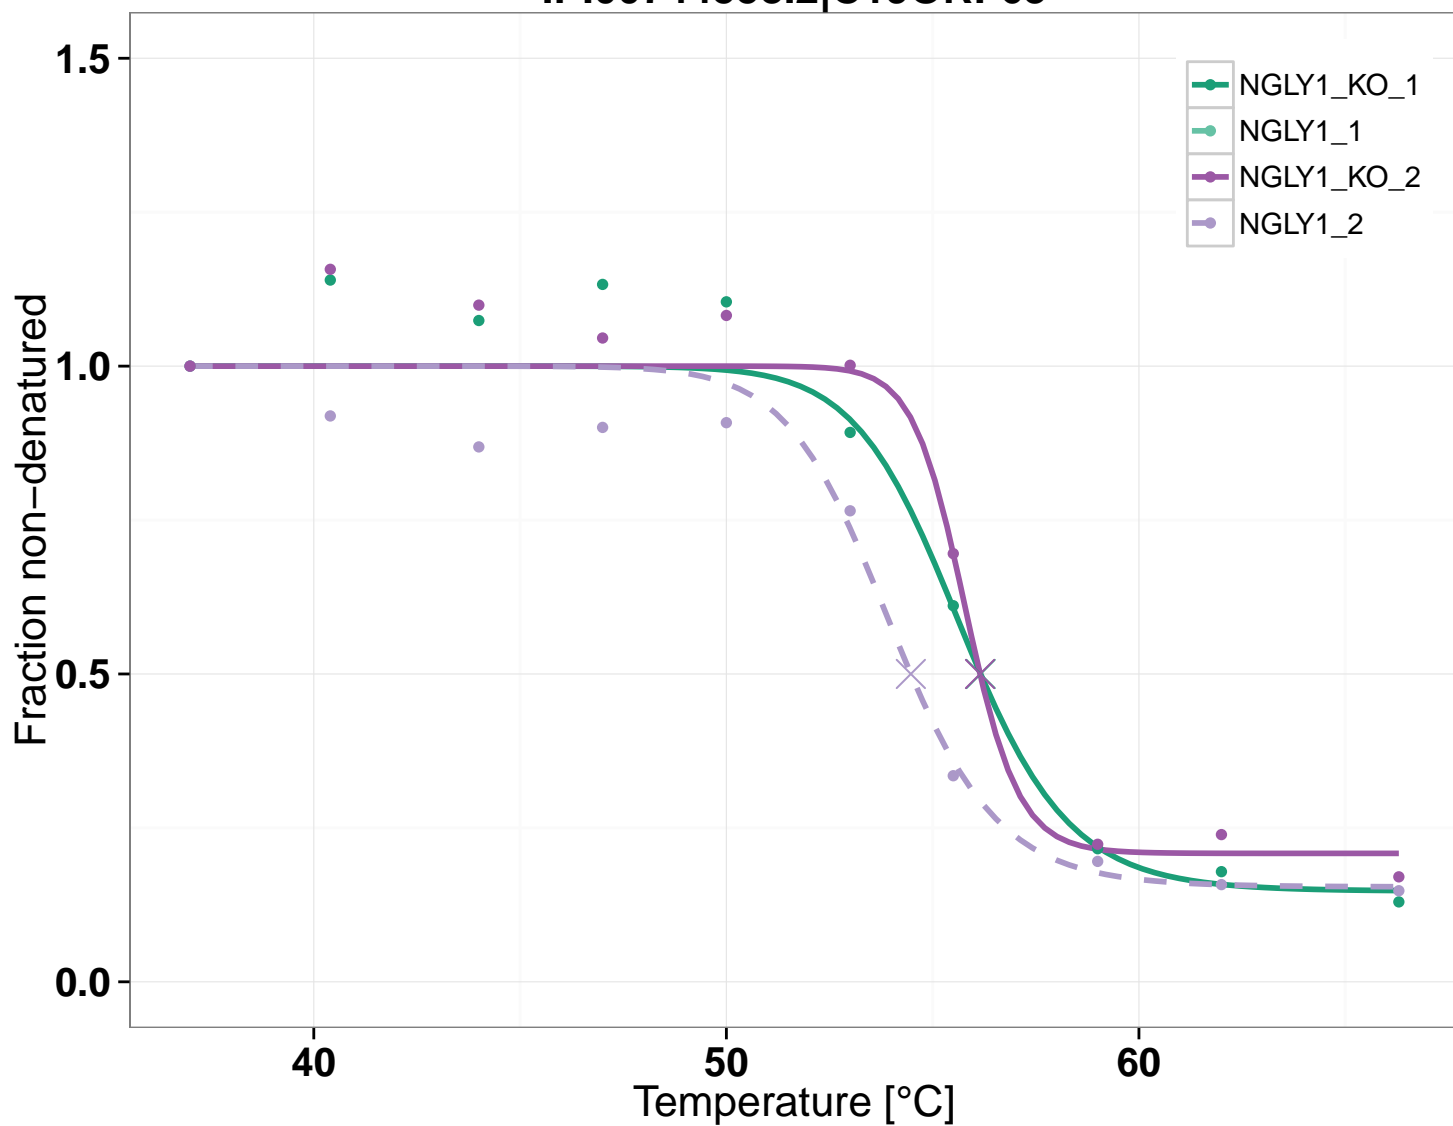

|            | meltPoint | slope | plateau | R2   |
|------------|-----------|-------|---------|------|
| NGLY1_KO_1 | 56.16     | -0.16 | 0.15    | 0.97 |
| NGLY1_1    | -         | -     | -       | -    |
| NGLY1_KO_2 | 56.15     | -0.31 | 0.21    | 0.97 |
| NGLY1_2    | 54.47     | -0.17 | 0.15    | 0.97 |

Supplement: Supplementary file 1618 [file 1]

# IPI00008422.5|SMARCAD1

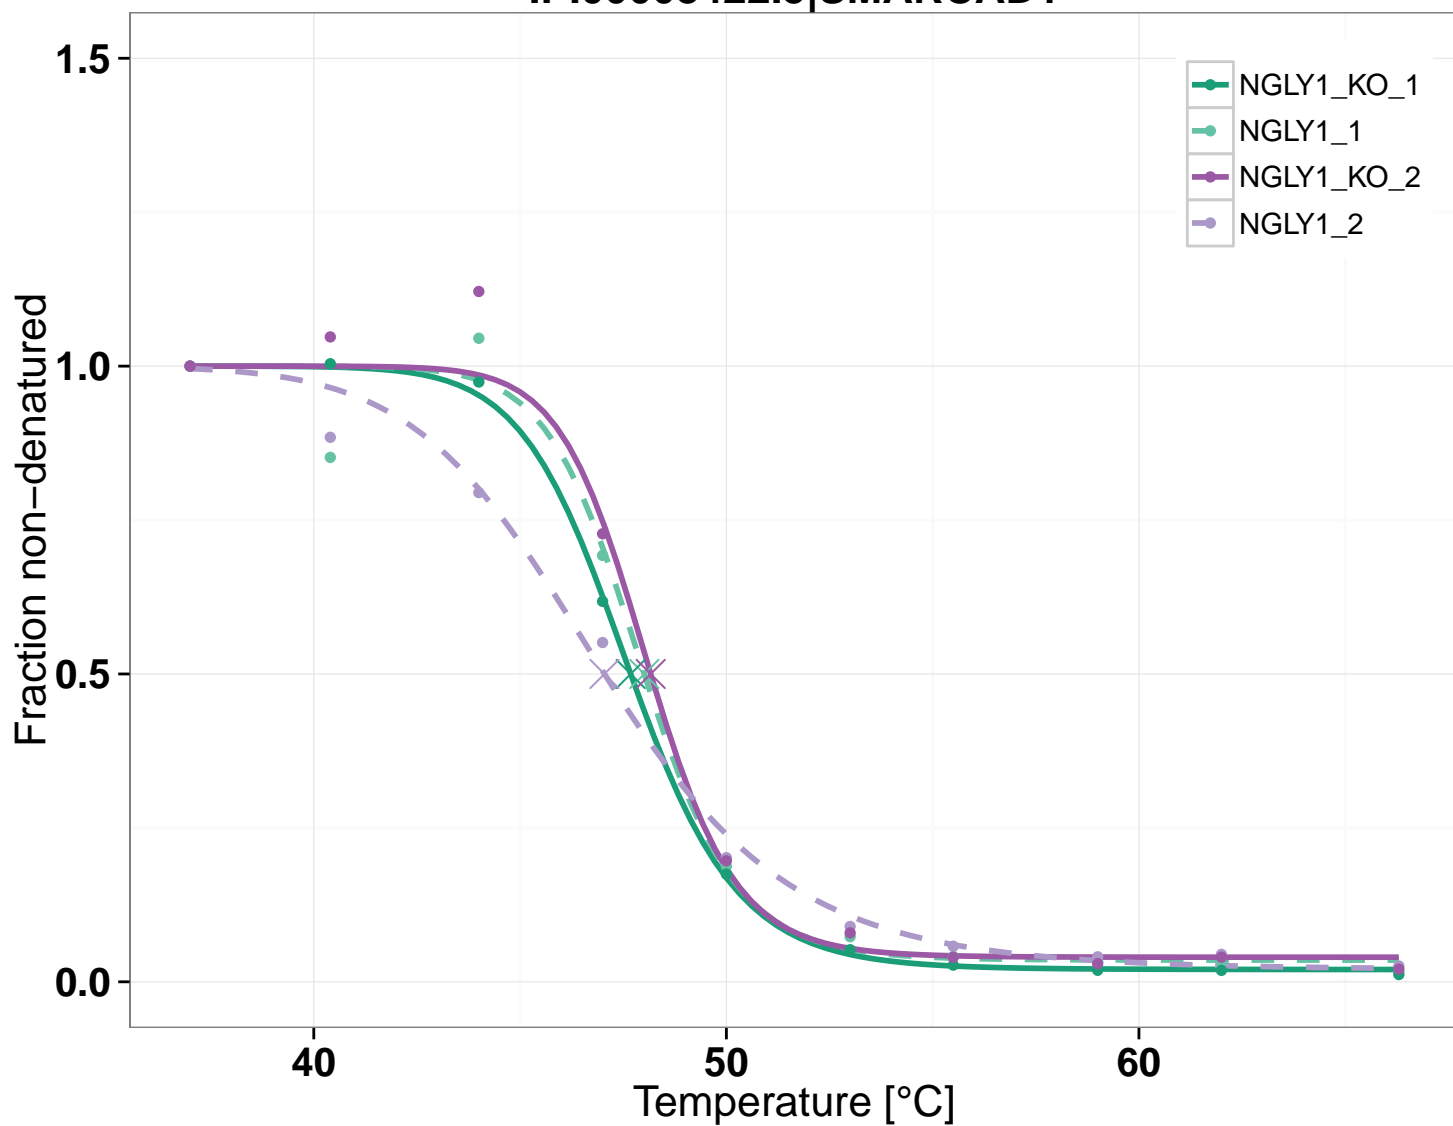

|            | meltPoint | slope | plateau | R2   |
|------------|-----------|-------|---------|------|
| NGLY1_KO_1 | 47.68     | -0.19 | 0.02    | 1    |
| NGLY1_1    | 48.01     | -0.21 | 0.04    | 0.98 |
| NGLY1_KO_2 | 48.17     | -0.23 | 0.04    | 0.99 |
| NGLY1_2    | 47.04     | -0.11 | 0.02    | 0.99 |

Supplement: Supplementary file 1619 [file 1]

IPI00219385.3|NDUFB6

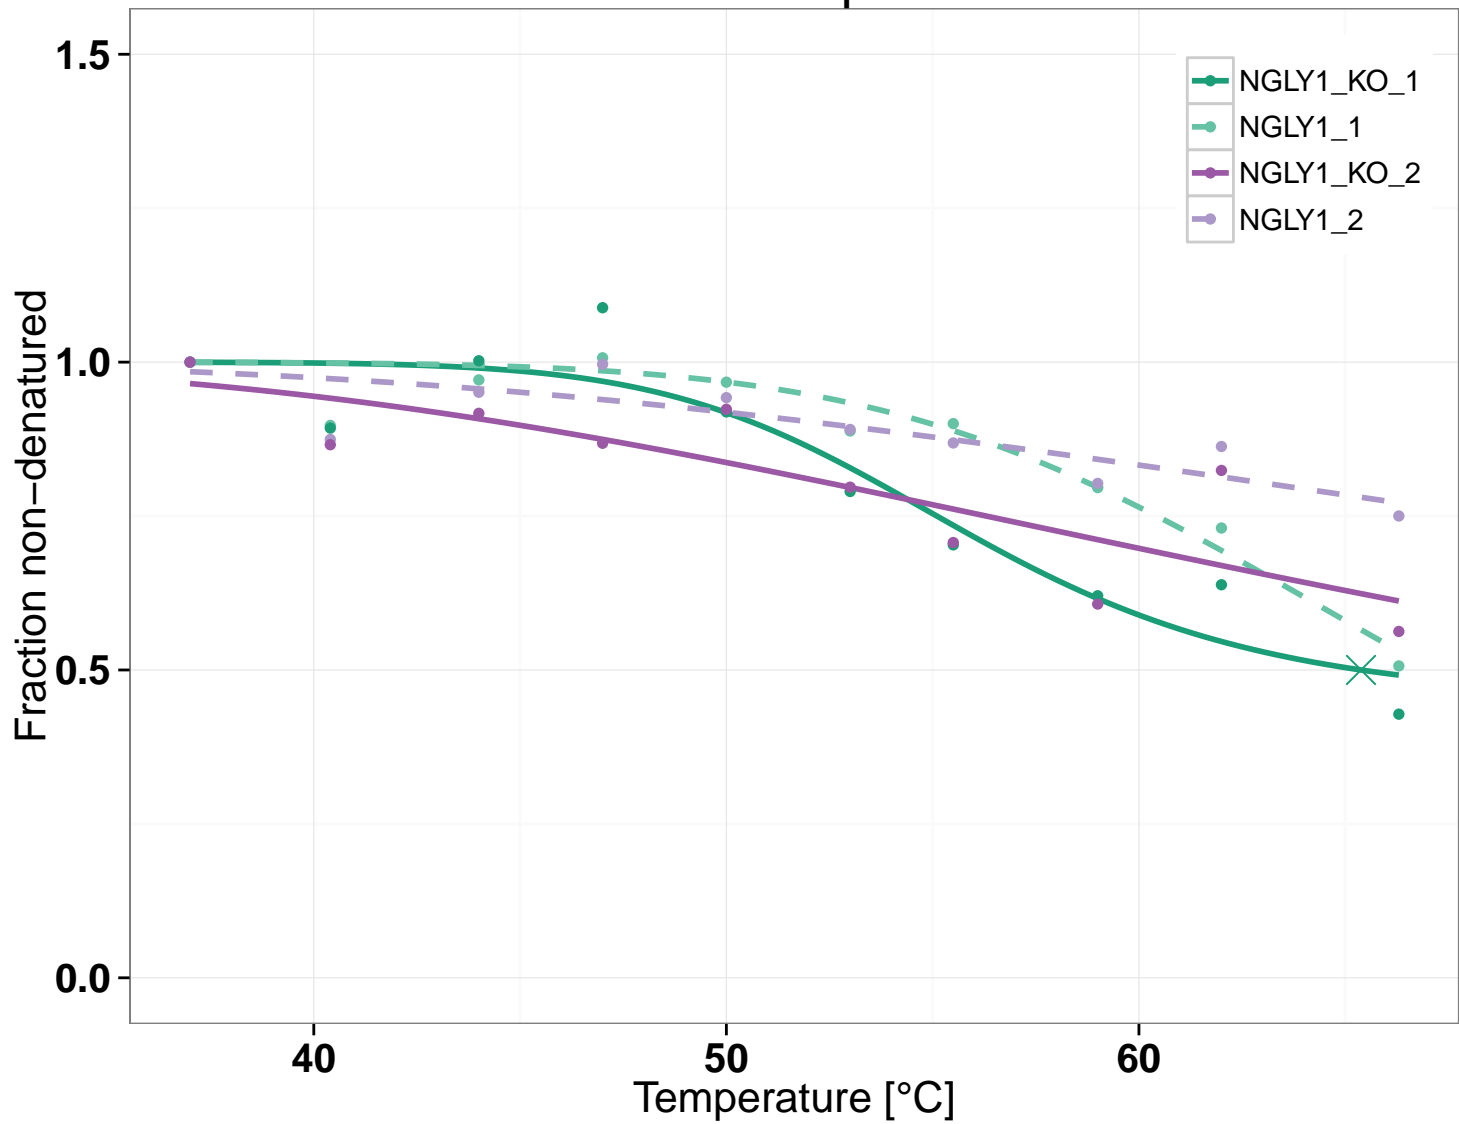

|            | meltPoint | slope  | plateau | R2   |
|------------|-----------|--------|---------|------|
| NGLY1_KO_1 | 65.38     | -0.038 | 0.44    | 0.9  |
| NGLY1_1    | -         | -0.038 | 0       | 0.93 |
| NGLY1_KO_2 | -         | -0.014 | 0       | 0.7  |
| NGLY1_2    | -         | -      | 0       | 0.69 |

Supplement: Supplementary file 1620 [file 1]

# IPI00061528.3|KTI12

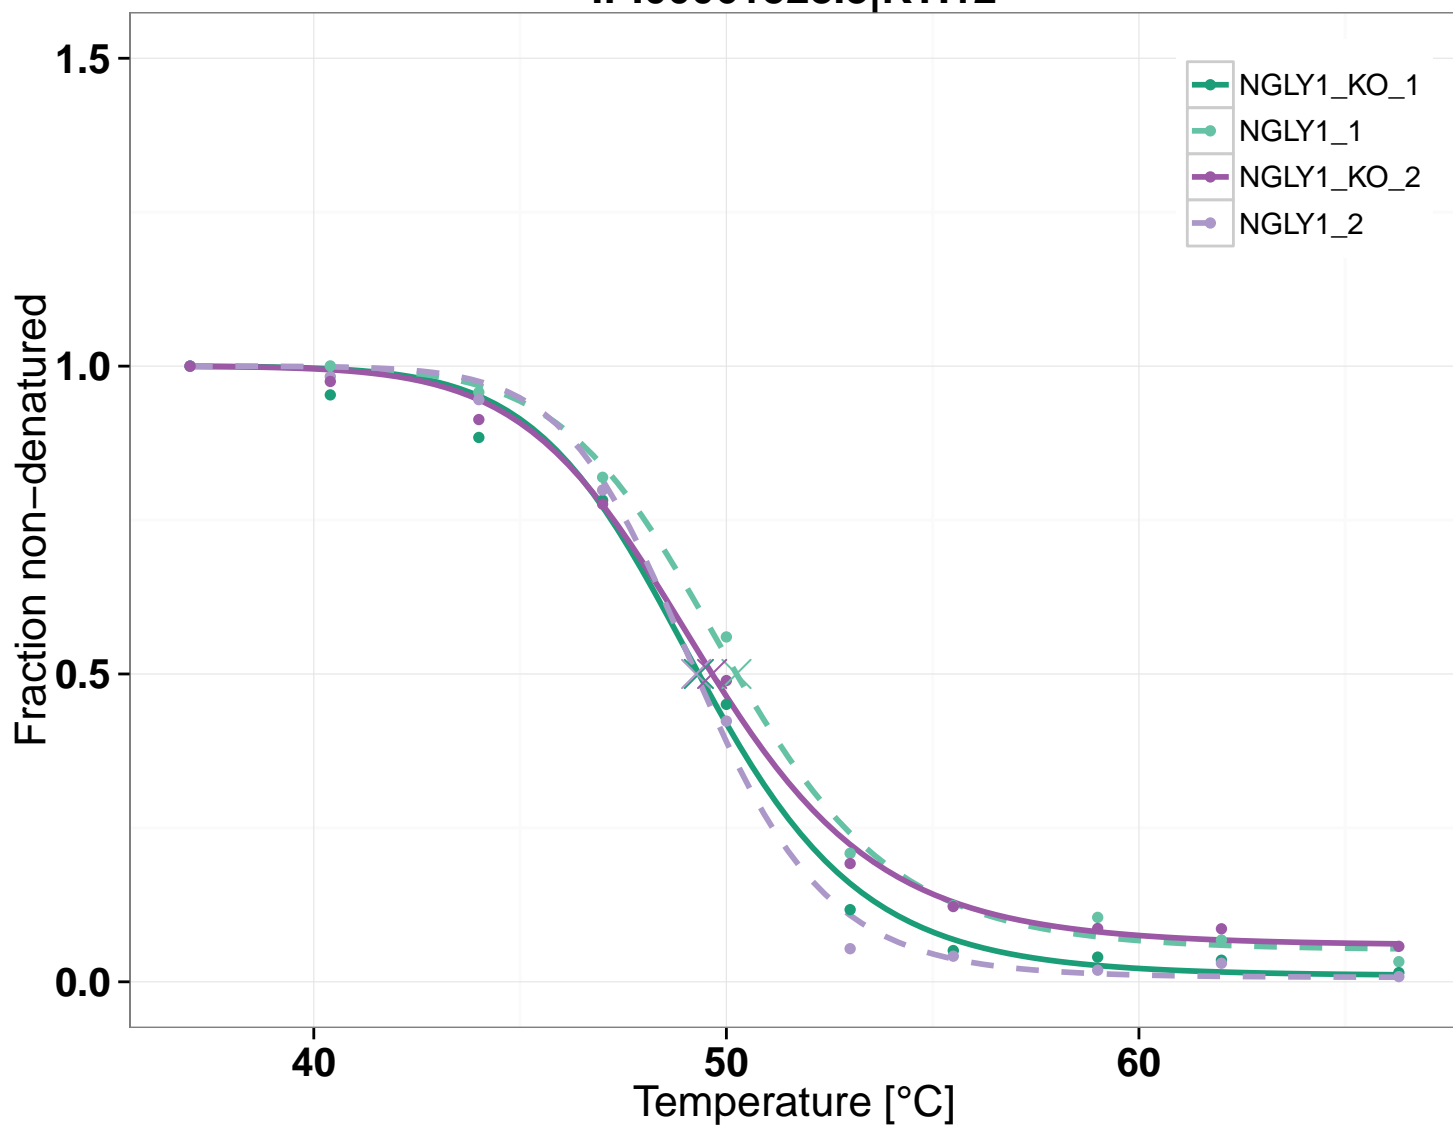

|            | meltPoint | slope | plateau | R2   |
|------------|-----------|-------|---------|------|
| NGLY1_KO_1 | 49.33     | -0.12 | 0.01    | 0.99 |
| NGLY1_1    | 50.25     | -0.12 | 0.05    | 1    |
| NGLY1_KO_2 | 49.66     | -0.11 | 0.06    | 1    |
| NGLY1_2    | 49.27     | -0.16 | 0.01    | 1    |

Supplement: Supplementary file 1621 [file 1]

# IPI00012069.1|NQO1

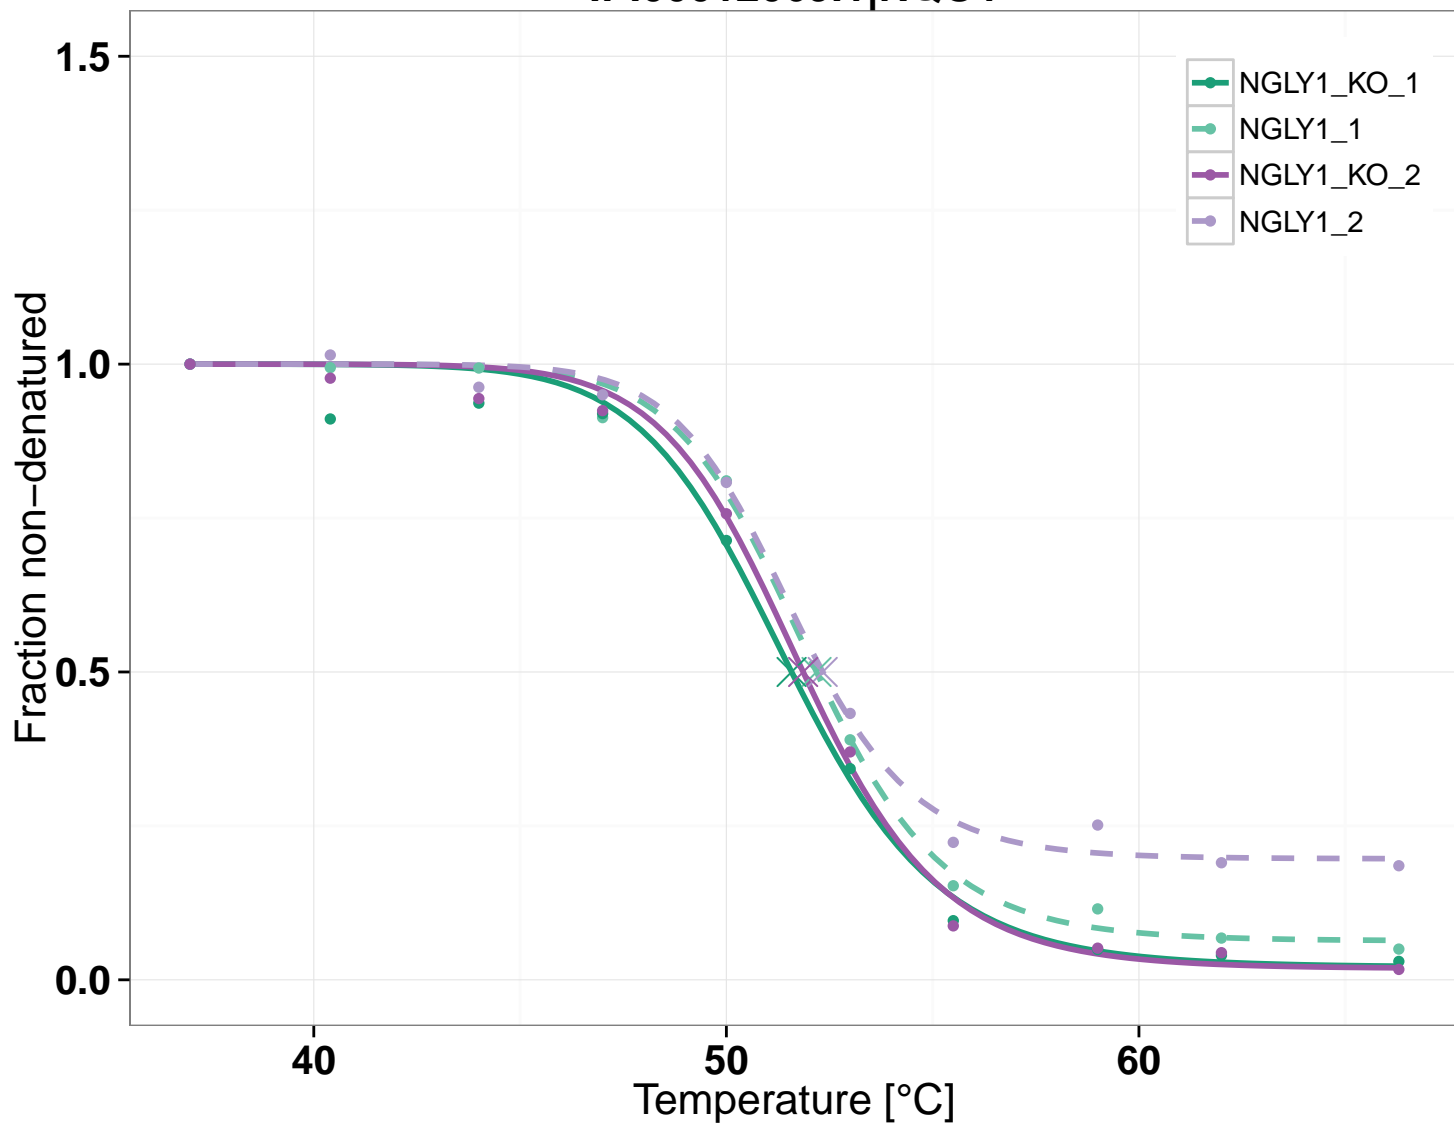

|            | meltPoint | slope | plateau | R2   |
|------------|-----------|-------|---------|------|
| NGLY1_KO_1 | 51.58     | -0.13 | 0.02    | 0.99 |
| NGLY1_1    | 52.19     | -0.14 | 0.06    | 1    |
| NGLY1_KO_2 | 51.86     | -0.14 | 0.02    | 1    |
| NGLY1_2    | 52.34     | -0.14 | 0.2     | 1    |

Supplement: Supplementary file 1622 [file 1]

IPI00034277.1|ATP13A1

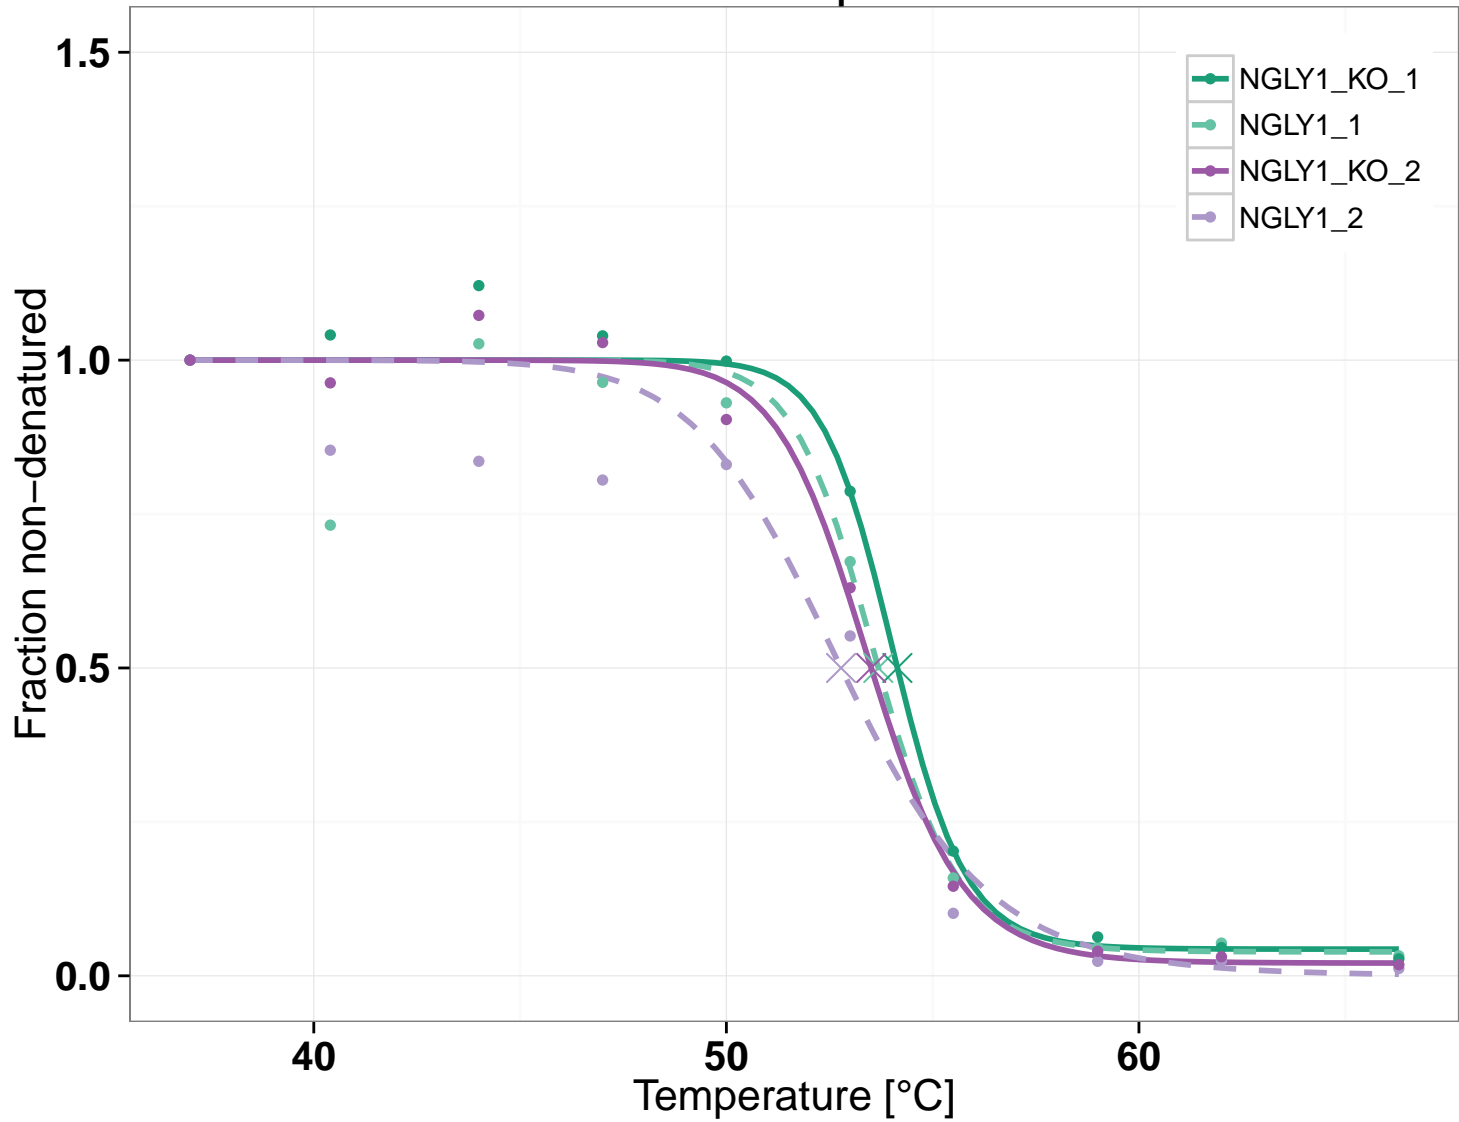

|            | meltPoint | slope | plateau | R2   |
|------------|-----------|-------|---------|------|
| NGLY1_KO_1 | 54.15     | -0.27 | 0.04    | 0.99 |
| NGLY1_1    | 53.68     | -0.24 | 0.04    | 0.96 |
| NGLY1_KO_2 | 53.51     | -0.22 | 0.02    | 0.99 |
| NGLY1_2    | 52.78     | -0.14 | 0       | 0.94 |

Supplement: Supplementary file 1623 [file 1]

# IPI00333823.1|ACCN1

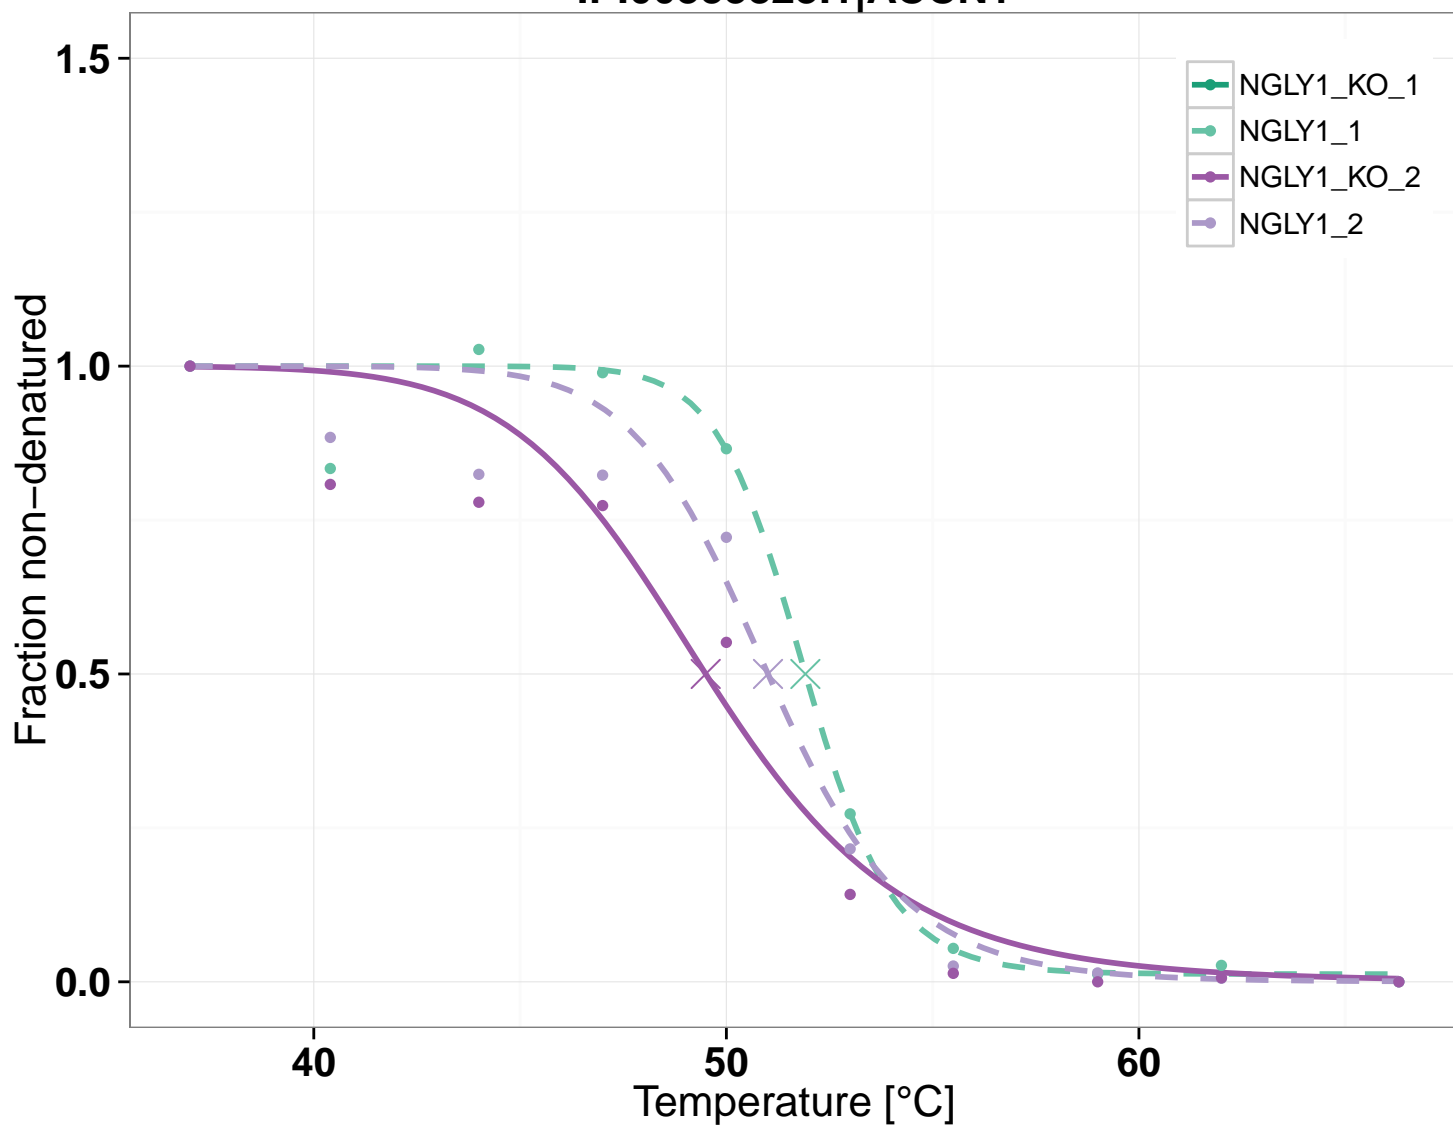

|            | meltPoint | slope | plateau | R2   |
|------------|-----------|-------|---------|------|
| NGLY1_KO_1 | –         | –     | –       | –    |
| NGLY1_1    | 51.92     | –0.23 | 0.01    | 0.99 |
| NGLY1_KO_2 | 49.5      | –0.11 | 0       | 0.95 |
| NGLY1_2    | 51.01     | –0.15 | 0       | 0.96 |

Supplement: Supplementary file 1624 [file 1]

# IPI00003505.3|TRIP13

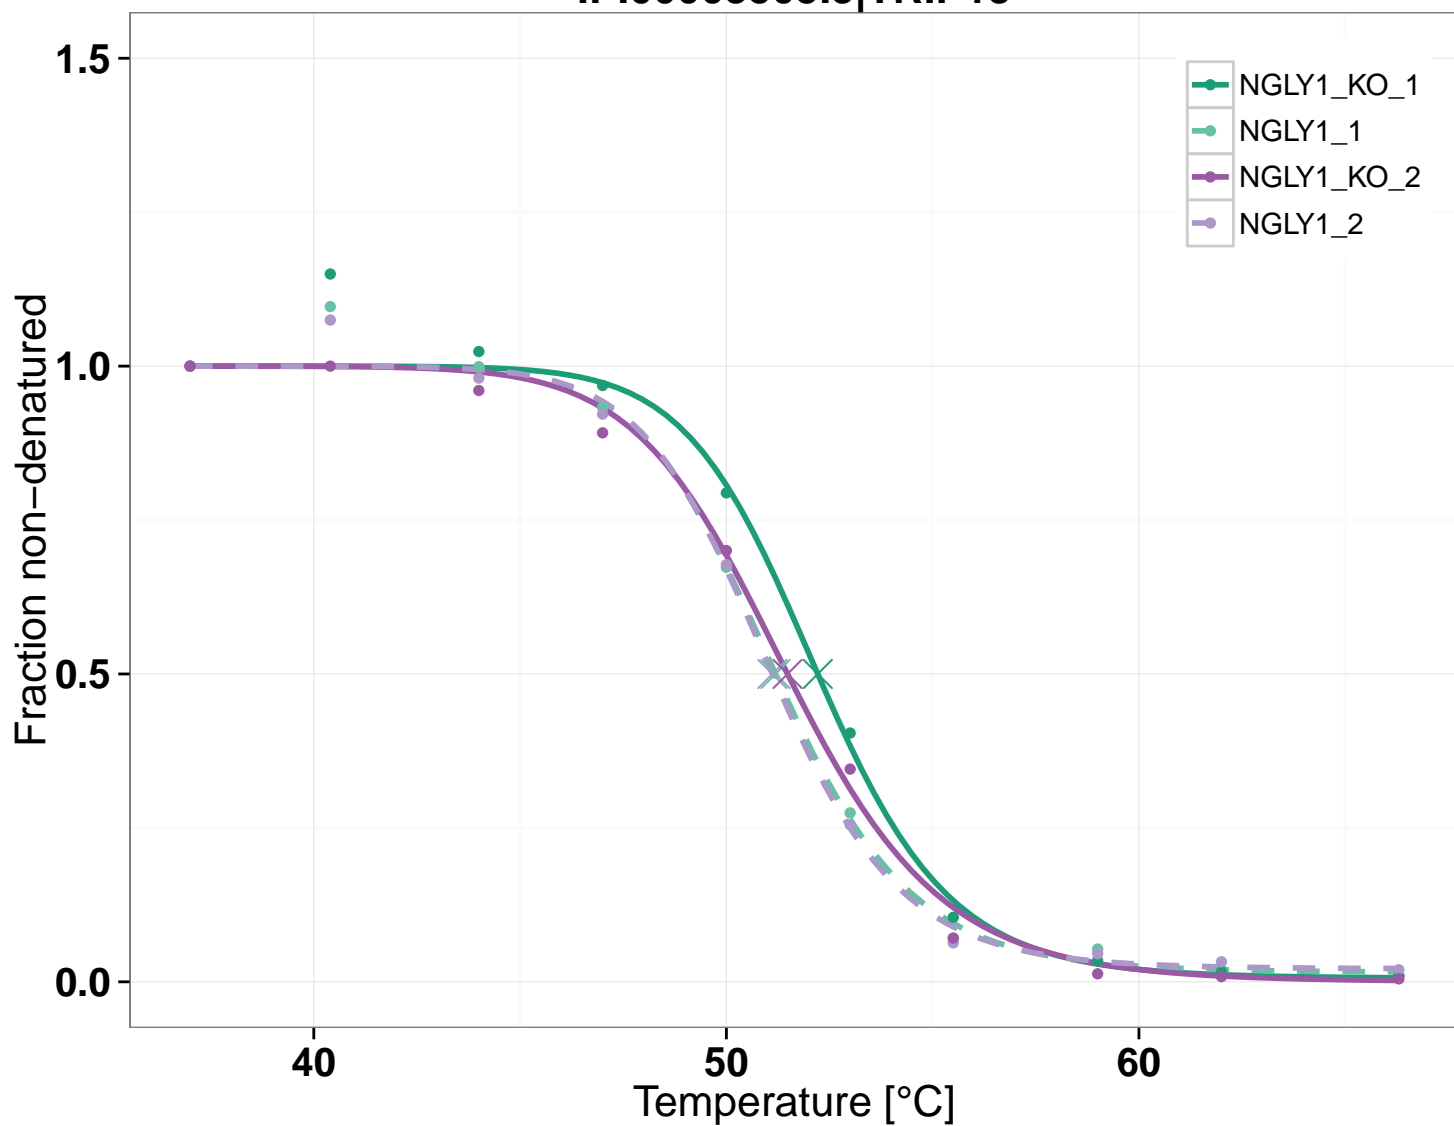

|            | meltPoint | slope | plateau | R2   |
|------------|-----------|-------|---------|------|
| NGLY1_KO_1 | 52.22     | -0.15 | 0.01    | 0.99 |
| NGLY1_1    | 51.19     | -0.15 | 0.02    | 0.99 |
| NGLY1_KO_2 | 51.48     | -0.13 | 0       | 1    |
| NGLY1_2    | 51.12     | -0.16 | 0.02    | 1    |

Supplement: Supplementary file 1625 [file 1]

IPI00888867.1|LOC100130966

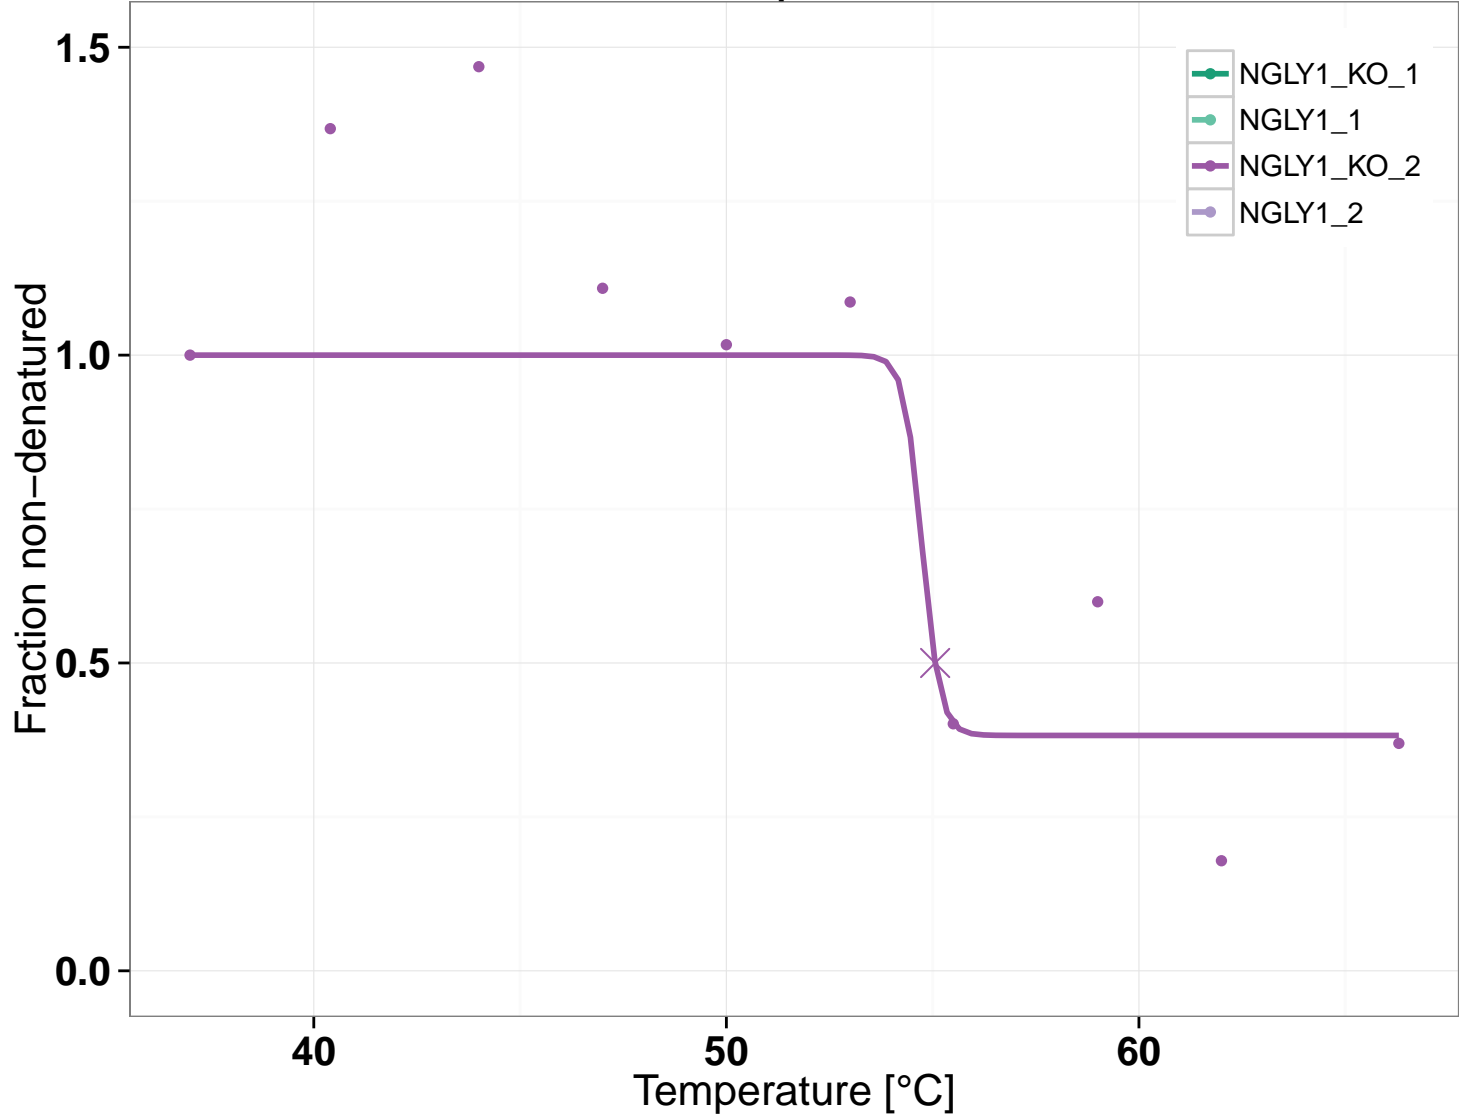

|            | meltPoint | slope | plateau | R2   |
|------------|-----------|-------|---------|------|
| NGLY1_KO_1 | -         | -     | -       | -    |
| NGLY1_1    | -         | -     | -       | -    |
| NGLY1_KO_2 | 55.06     | -0.71 | 0.38    | 0.74 |
| NGLY1_2    | -         | -     | -       | -    |

Supplement: Supplementary file 1626 [file 1]

IPI00025076.2|NTRK1

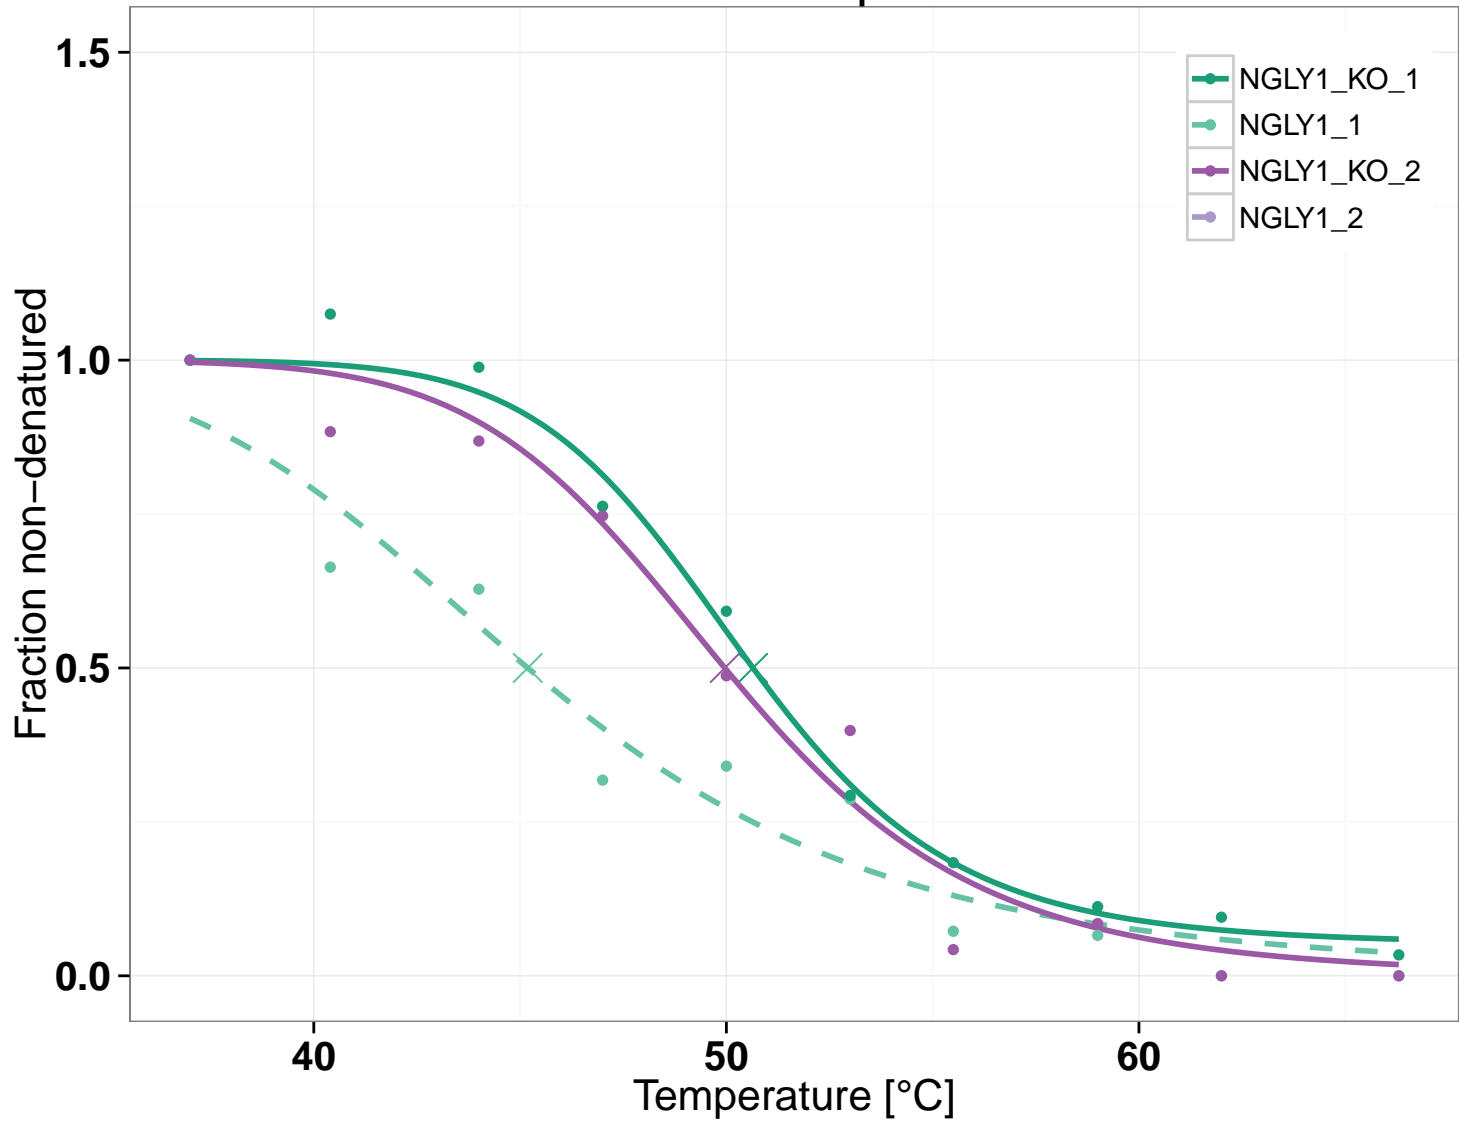

|            | meltPoint | slope  | plateau | R2   |
|------------|-----------|--------|---------|------|
| NGLY1_KO_1 | 50.65     | -0.094 | 0.05    | 0.99 |
| NGLY1_1    | 45.19     | -0.059 | 0       | 0.94 |
| NGLY1_KO_2 | 49.96     | -0.082 | 0       | 0.97 |
| NGLY1_2    | -         | -      | -       | -    |

Supplement: Supplementary file 1627 [file 1]

# IPI00306087.5|WDR79

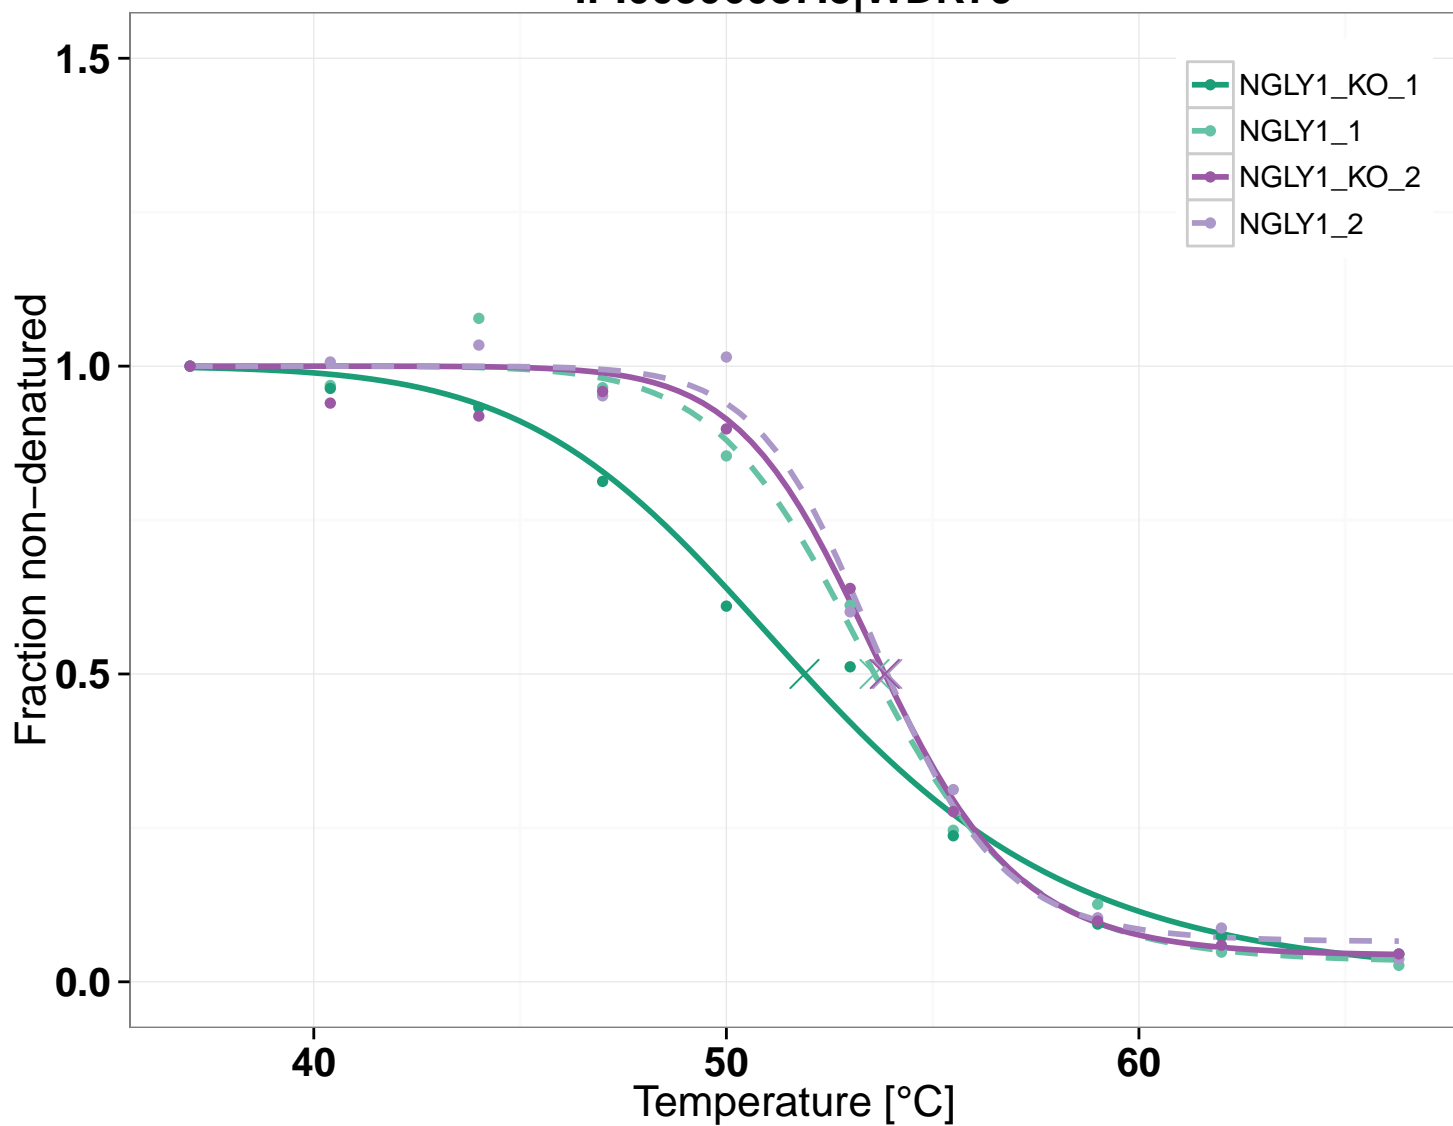

|            | meltPoint | slope  | plateau | R2   |
|------------|-----------|--------|---------|------|
| NGLY1_KO_1 | 51.89     | -0.074 | 0       | 0.99 |
| NGLY1_1    | 53.59     | -0.13  | 0.03    | 0.99 |
| NGLY1_KO_2 | 53.84     | -0.14  | 0.04    | 0.99 |
| NGLY1_2    | 53.9      | -0.16  | 0.07    | 0.99 |

Supplement: Supplementary file 1628 [file 1]

IPI00012450.4|NMI

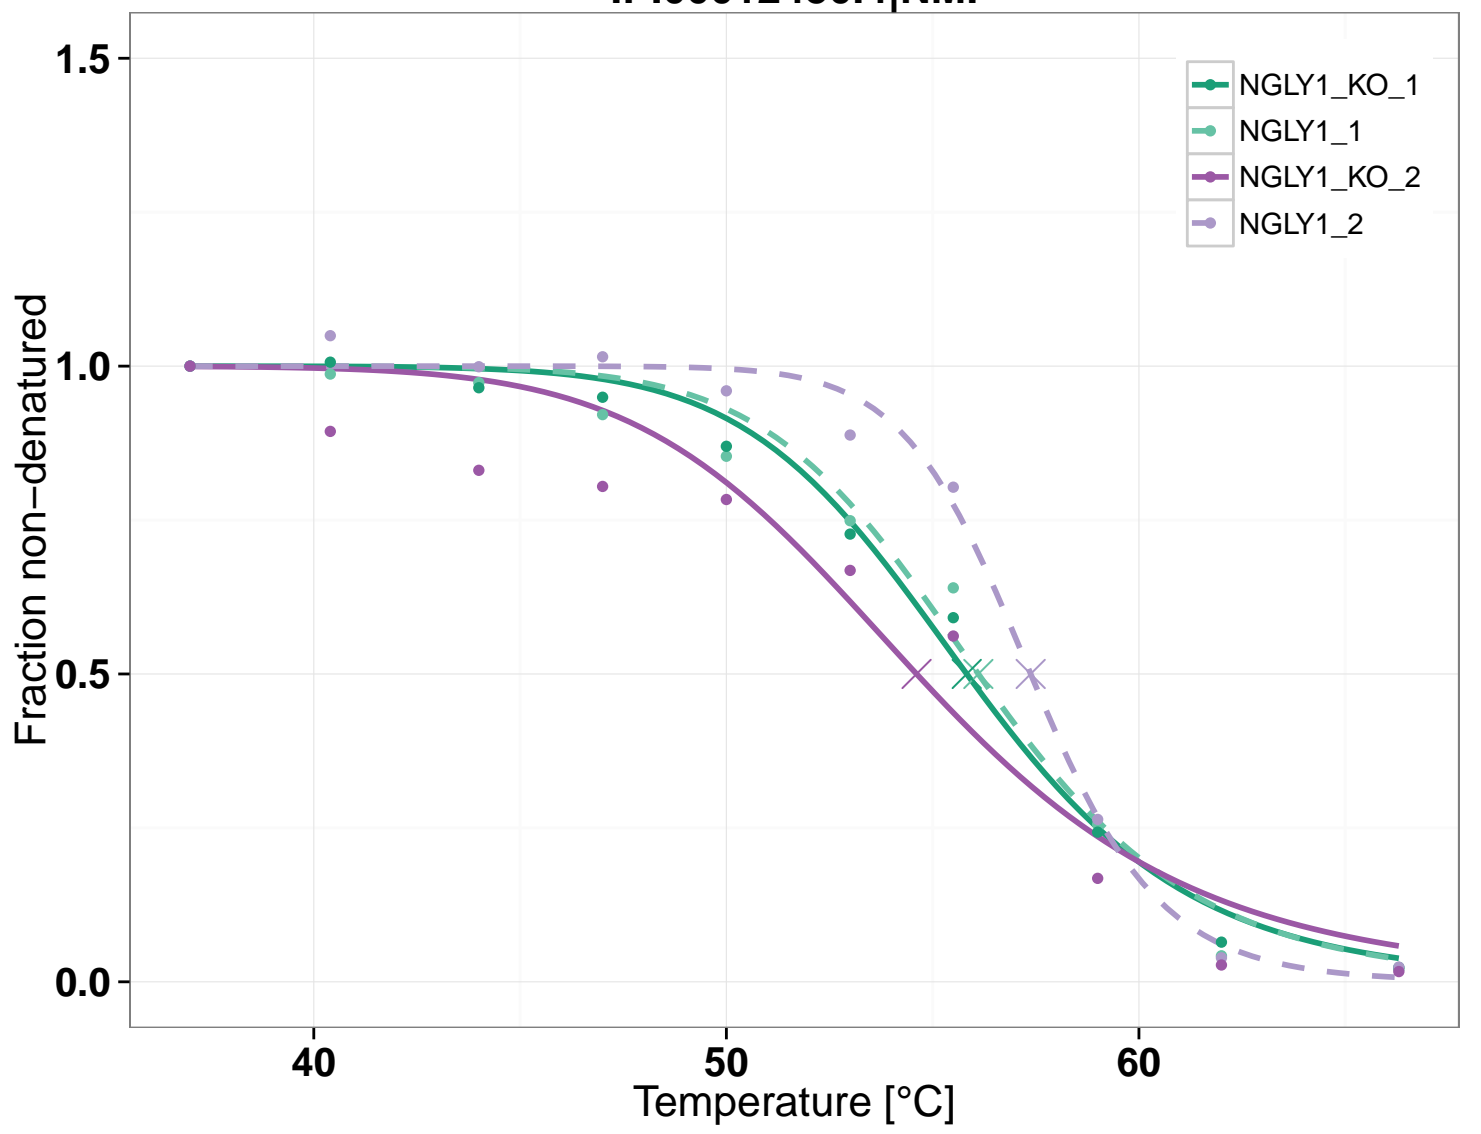

|            | meltPoint | slope  | plateau | R2   |
|------------|-----------|--------|---------|------|
| NGLY1_KO_1 | 55.83     | -0.092 | 0       | 0.99 |
| NGLY1_1    | 56.11     | -0.095 | 0       | 0.98 |
| NGLY1_KO_2 | 54.61     | -0.073 | 0       | 0.93 |
| NGLY1_2    | 57.38     | -0.16  | 0       | 0.99 |

Supplement: Supplementary file 1629 [file 1]

IPI00884187.2|EFCAB4B

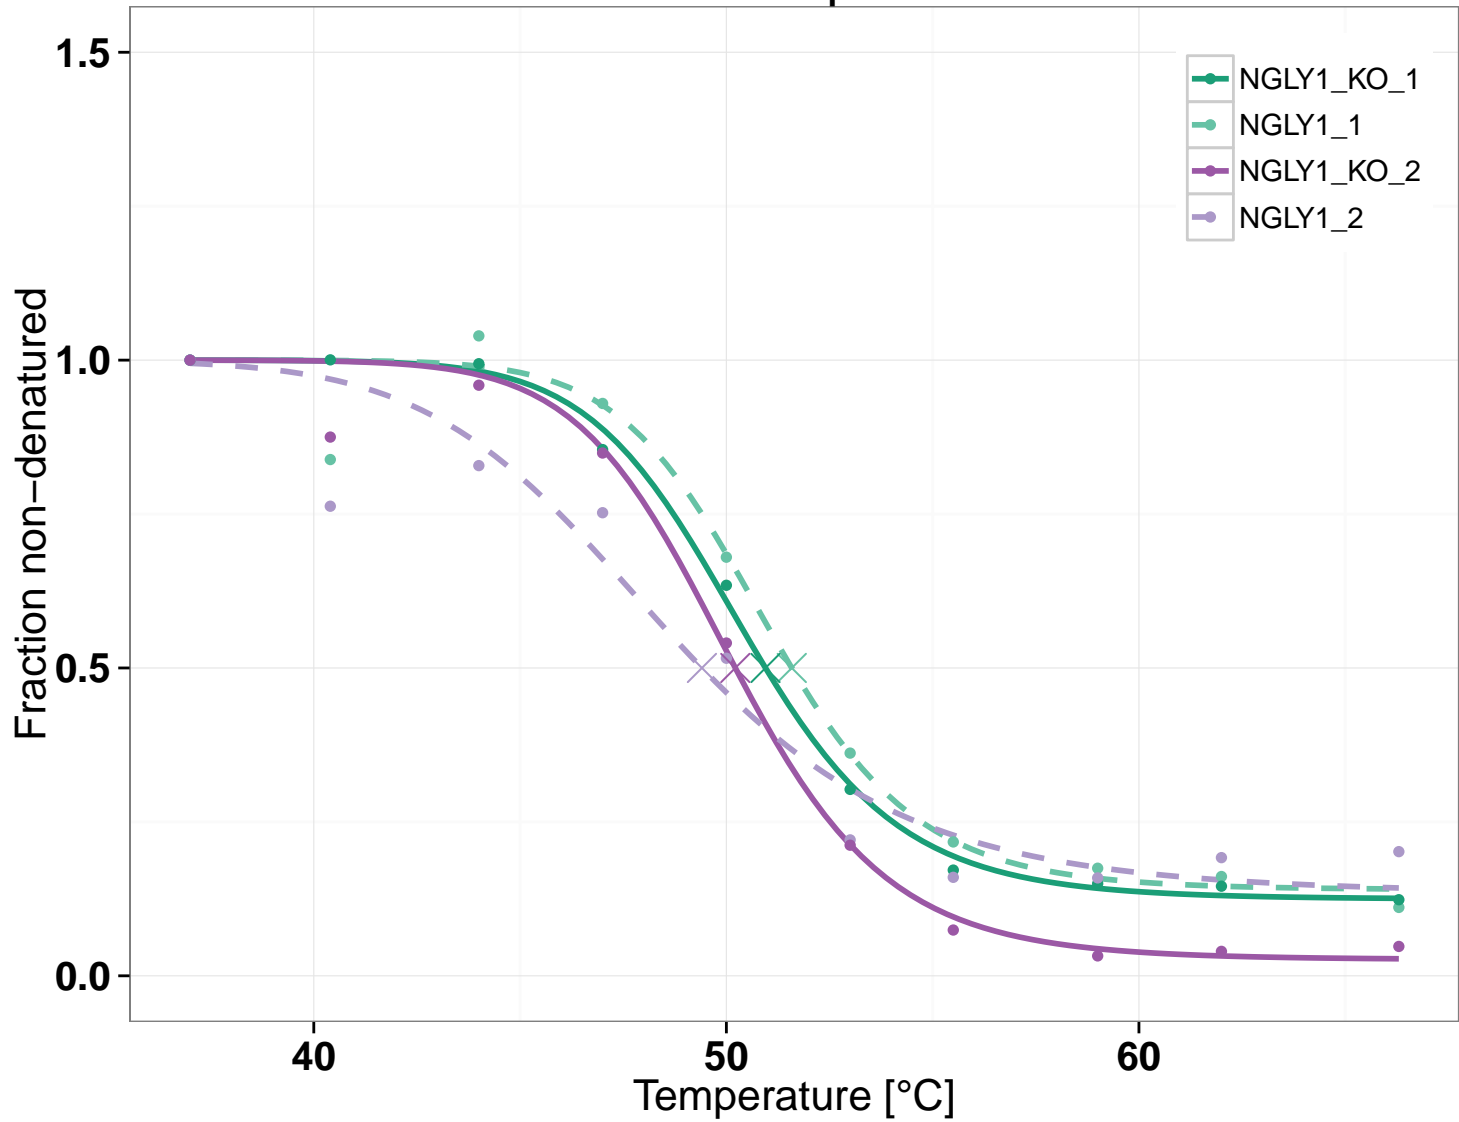

|            | meltPoint | slope  | plateau | R2   |
|------------|-----------|--------|---------|------|
| NGLY1_KO_1 | 50.95     | -0.12  | 0.12    | 1    |
| NGLY1_1    | 51.59     | -0.12  | 0.14    | 0.98 |
| NGLY1_KO_2 | 50.22     | -0.13  | 0.03    | 0.99 |
| NGLY1_2    | 49.41     | -0.075 | 0.13    | 0.93 |

Supplement: Supplementary file 1630 [file 1]

# IPI00439548.1|BCOR

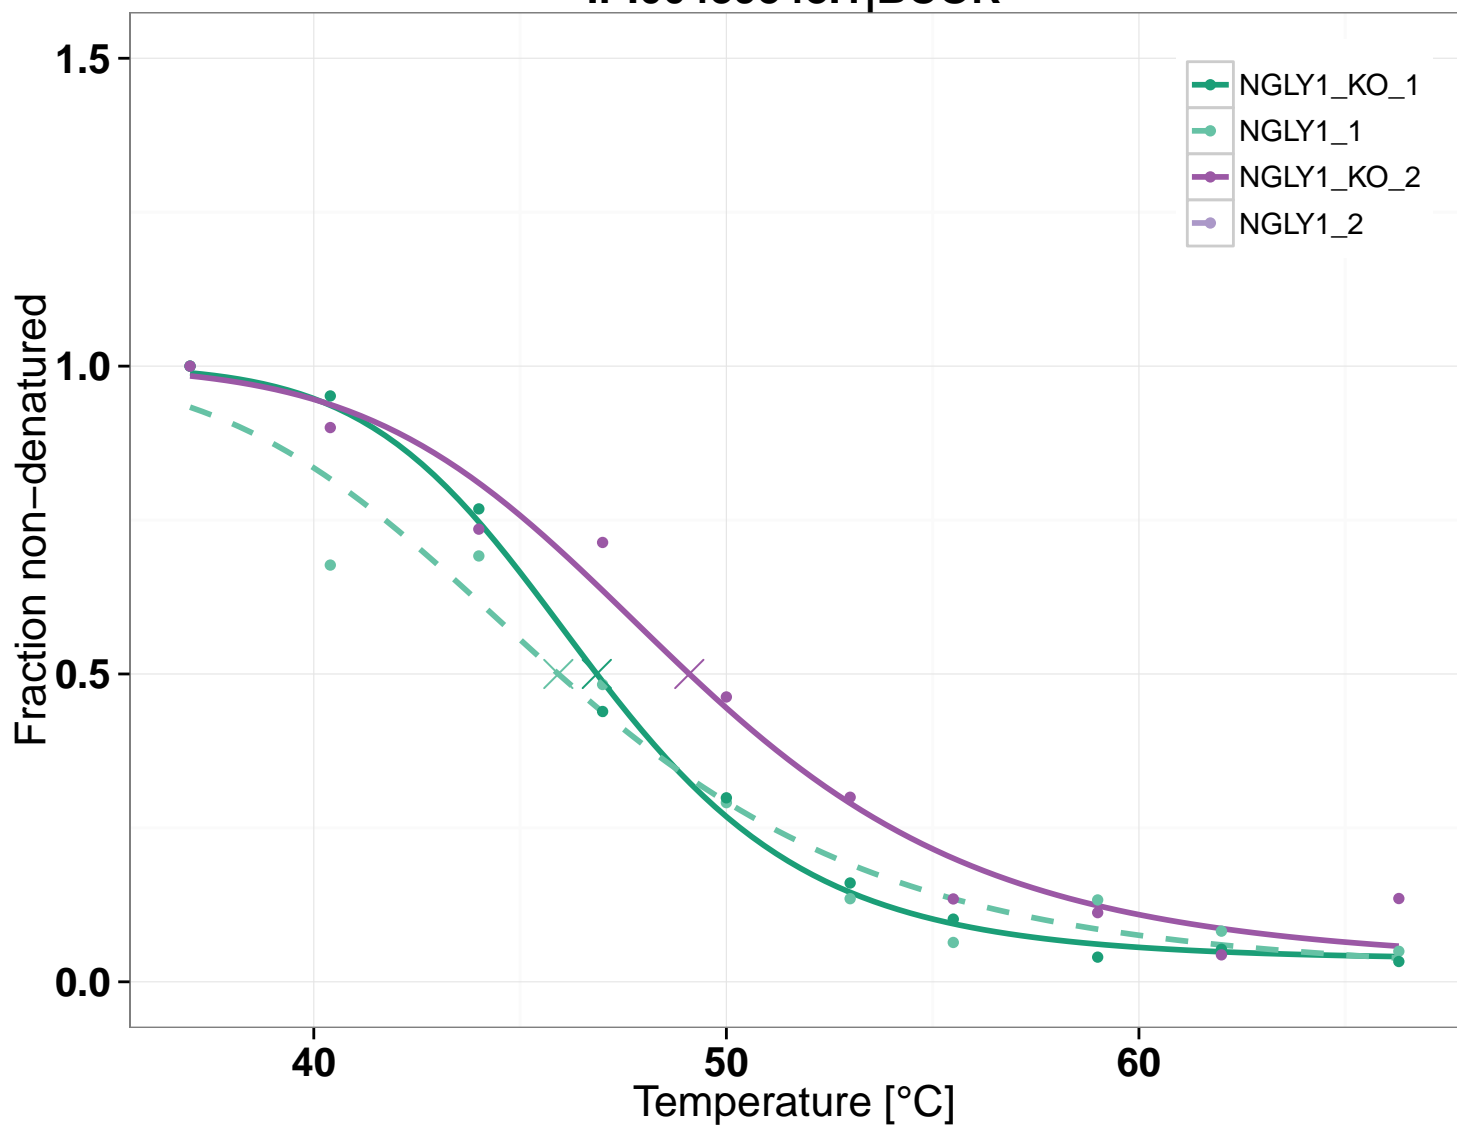

|            | meltPoint | slope  | plateau | R2   |
|------------|-----------|--------|---------|------|
| NGLY1_KO_1 | 46.86     | -0.09  | 0.03    | 1    |
| NGLY1_1    | 45.93     | -0.061 | 0.01    | 0.96 |
| NGLY1_KO_2 | 49.1      | -0.065 | 0.02    | 0.98 |
| NGLY1_2    | -         | -      | -       | -    |

Supplement: Supplementary file 1631 [file 1]

IPI00329143.1|TSEN54

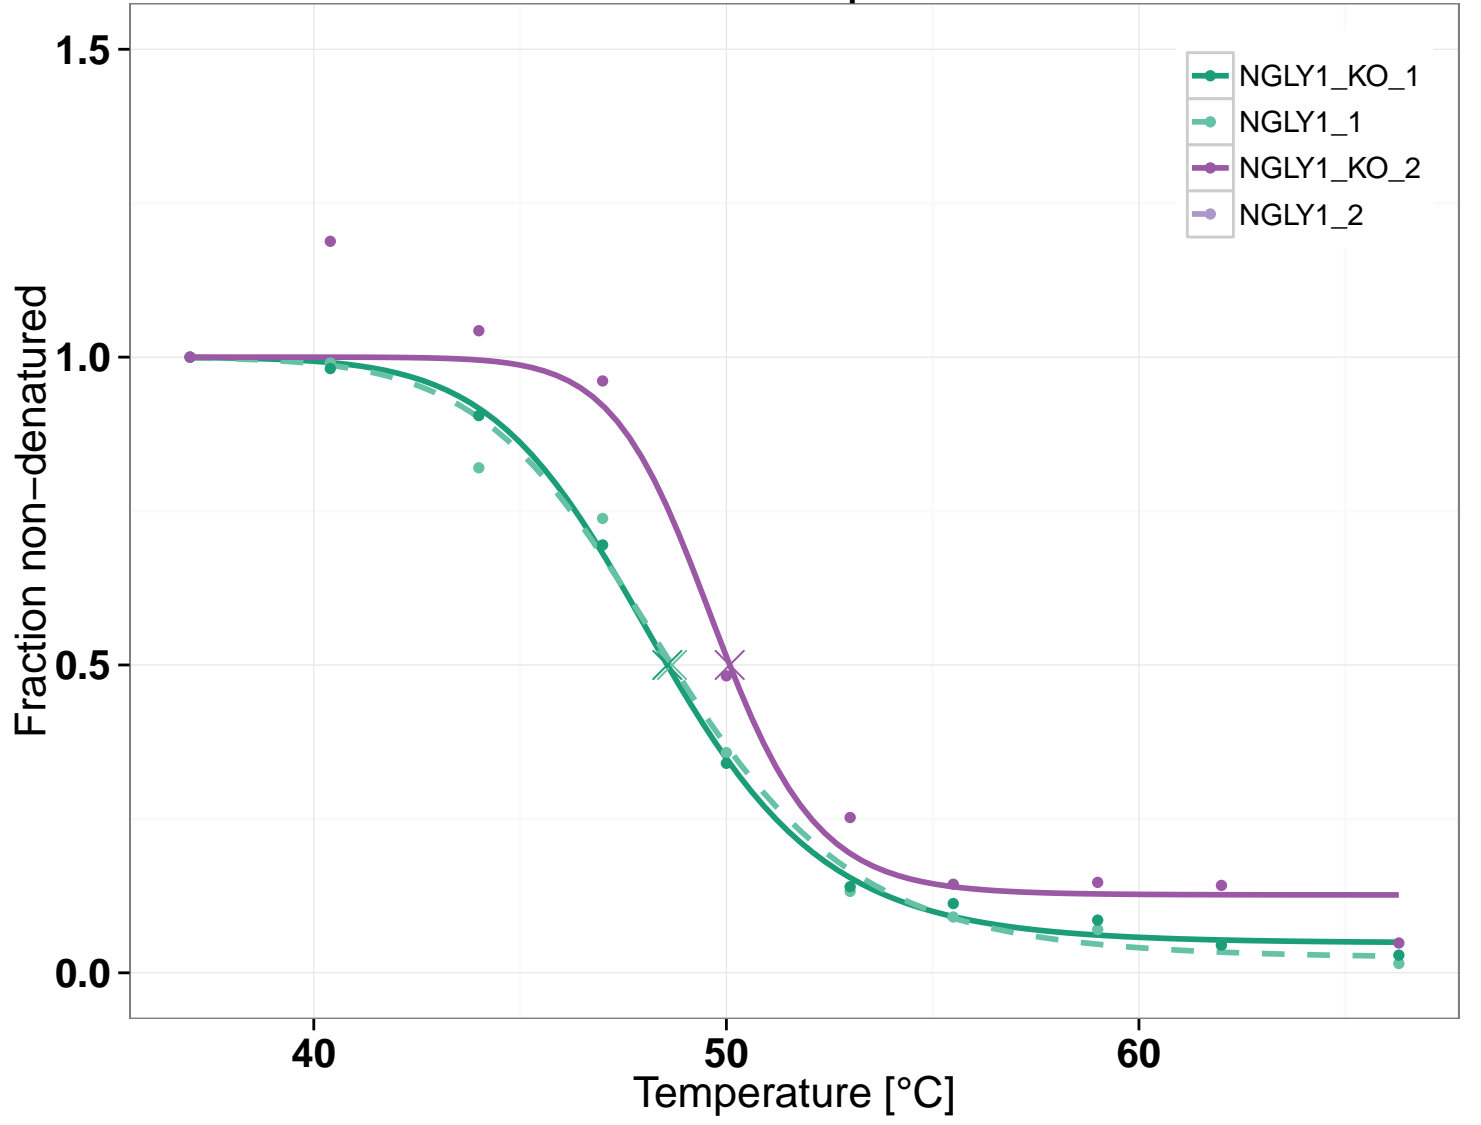

|            | meltPoint | slope | plateau | R2   |
|------------|-----------|-------|---------|------|
| NGLY1_KO_1 | 48.57     | -0.12 | 0.05    | 1    |
| NGLY1_1    | 48.68     | -0.11 | 0.02    | 0.99 |
| NGLY1_KO_2 | 50.08     | -0.18 | 0.13    | 0.97 |
| NGLY1_2    | -         | -     | -       | -    |

Supplement: Supplementary file 1632 [file 1]

IPI00013293.4|TMEM147

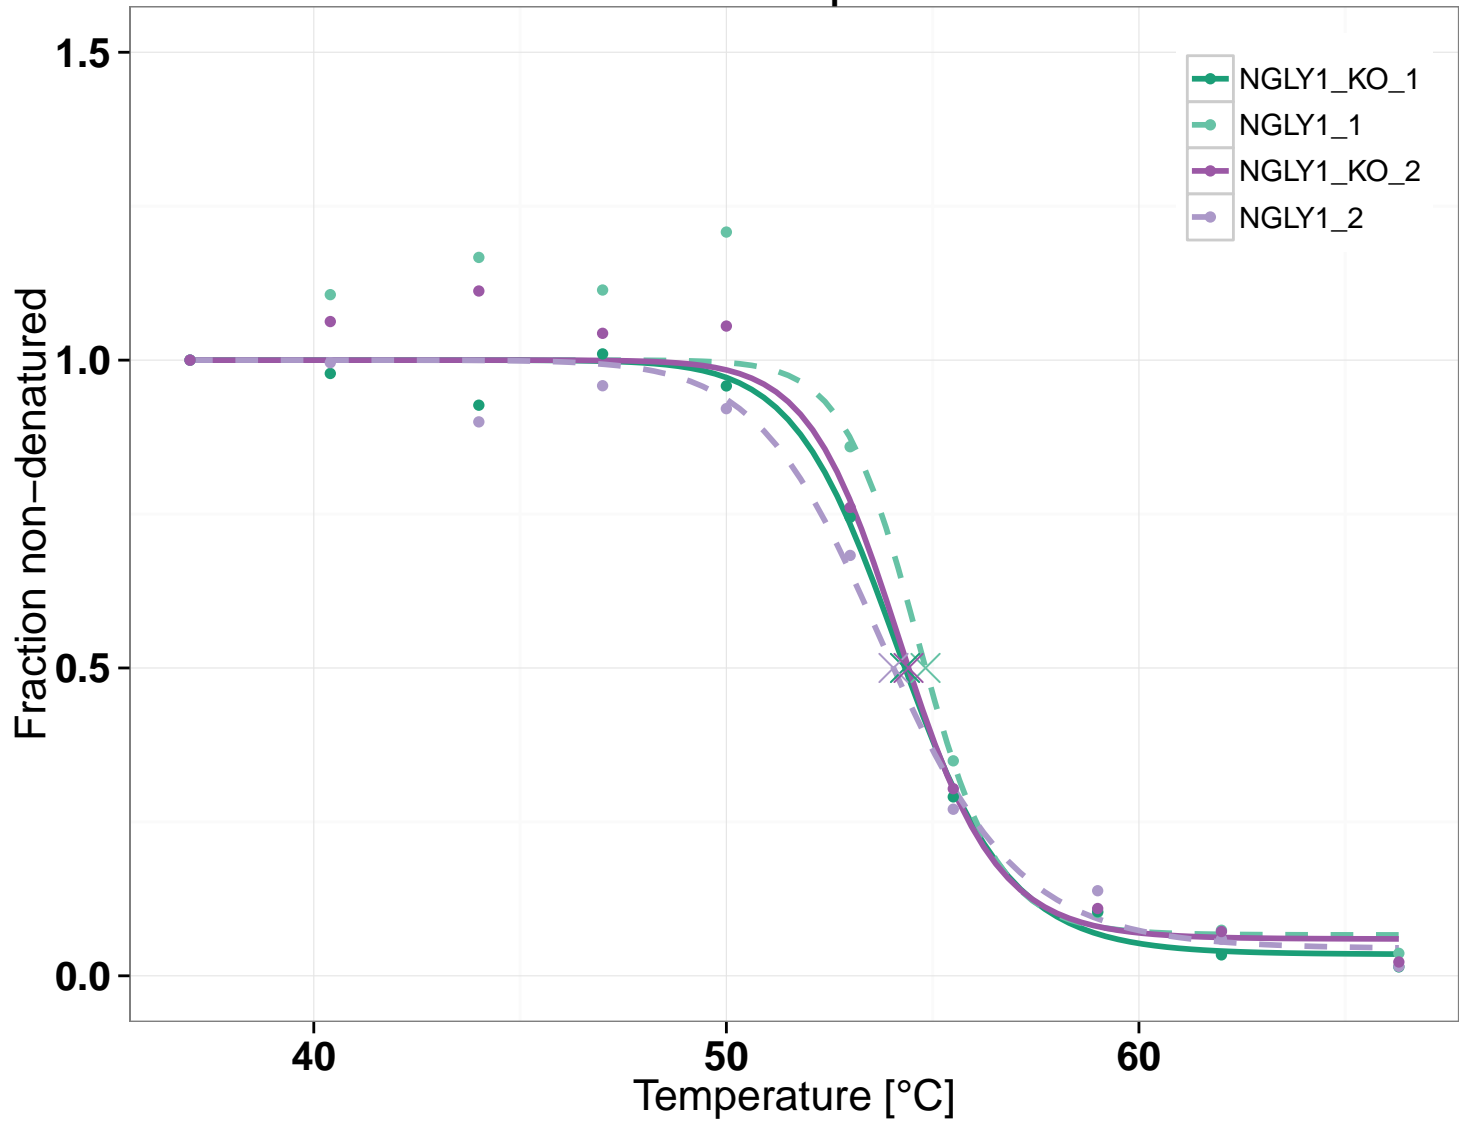

|            | meltPoint | slope | plateau | R2   |
|------------|-----------|-------|---------|------|
| NGLY1_KO_1 | 54.33     | -0.18 | 0.03    | 1    |
| NGLY1_1    | 54.83     | -0.25 | 0.07    | 0.96 |
| NGLY1_KO_2 | 54.42     | -0.21 | 0.06    | 0.99 |
| NGLY1_2    | 54.05     | -0.15 | 0.04    | 0.99 |

Supplement: Supplementary file 1633 [file 1]

IPI00472160.5|ARHGEF2

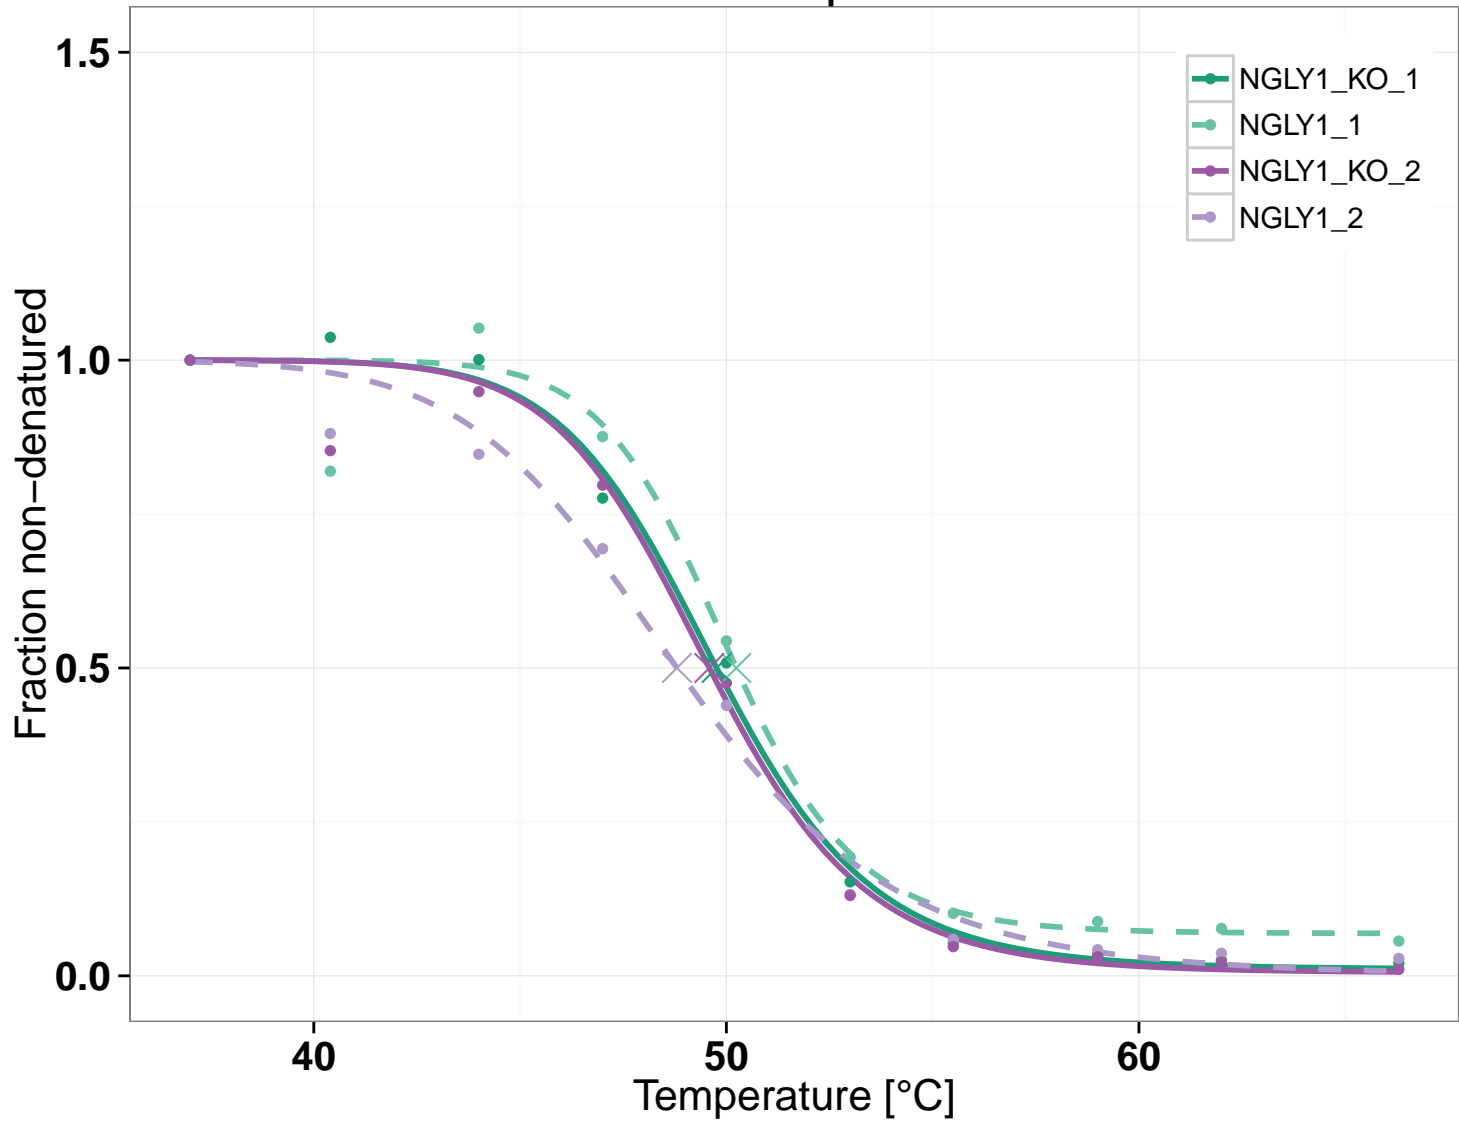

|            | meltPoint | slope  | plateau | R2   |
|------------|-----------|--------|---------|------|
| NGLY1_KO_1 | 49.76     | -0.13  | 0.01    | 1    |
| NGLY1_1    | 50.24     | -0.15  | 0.07    | 0.98 |
| NGLY1_KO_2 | 49.59     | -0.13  | 0       | 0.99 |
| NGLY1_2    | 48.8      | -0.096 | 0       | 0.99 |

Supplement: Supplementary file 1634 [file 1]

IPI00402144.4|ZNF555

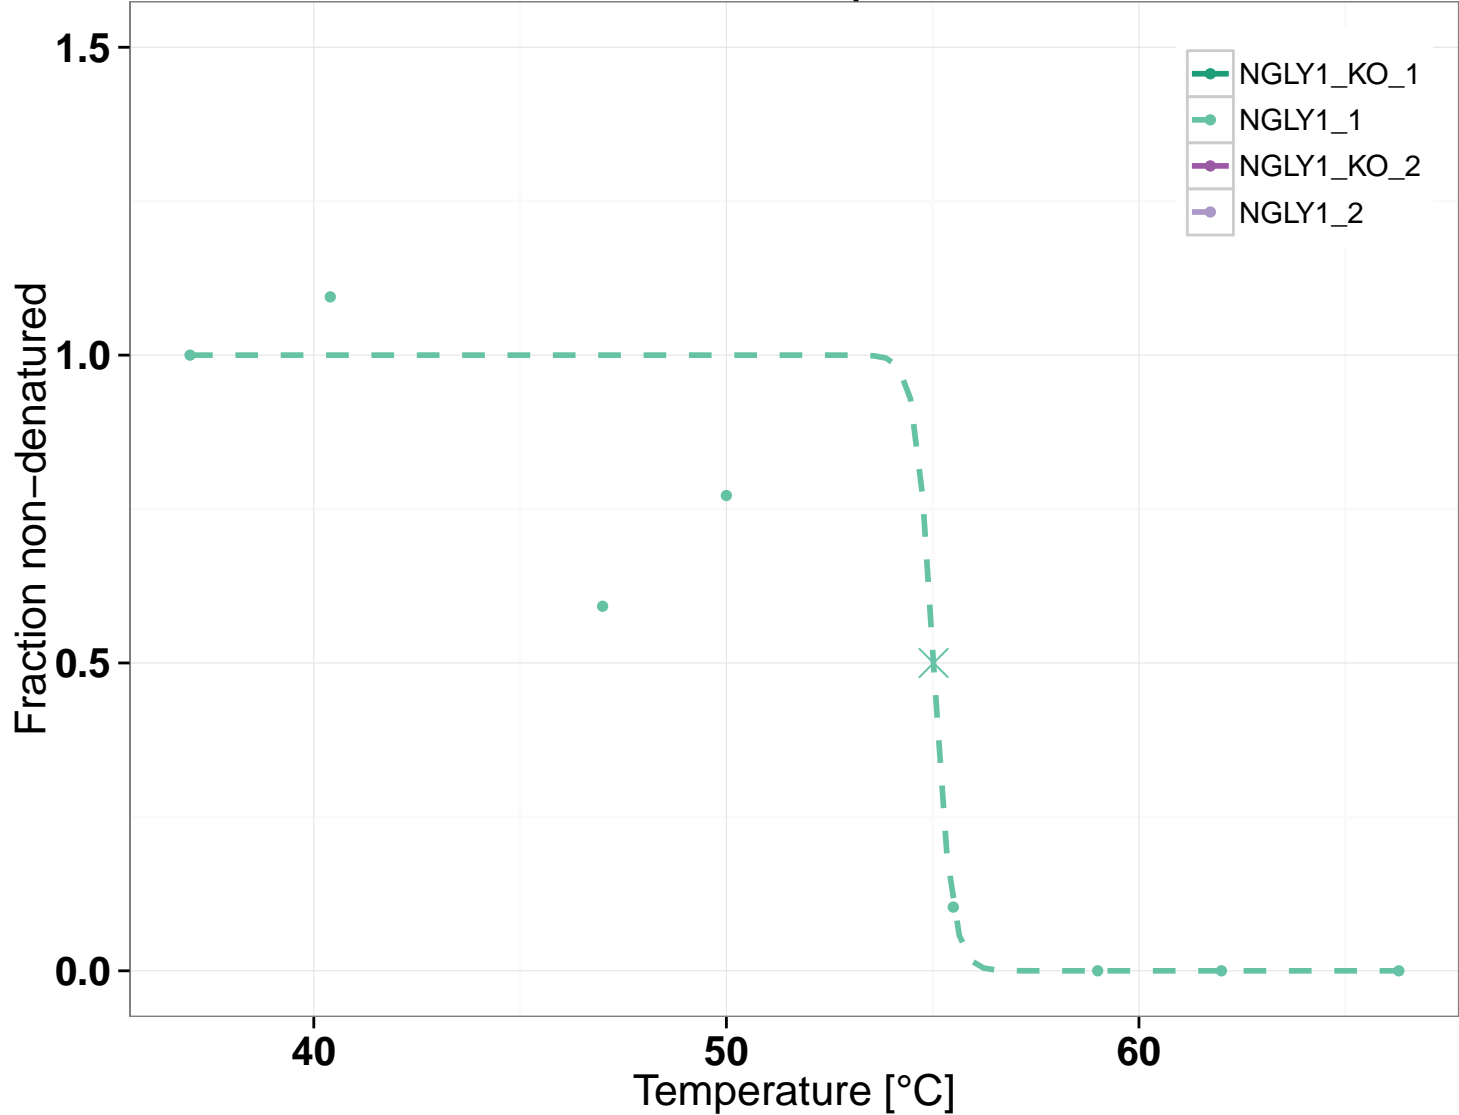

|            | meltPoint | slope | plateau | R2   |
|------------|-----------|-------|---------|------|
| NGLY1_KO_1 | –         | –     | –       | –    |
| NGLY1_1    | 55.02     | –1.1  | 0       | 0.54 |
| NGLY1_KO_2 | –         | –     | –       | –    |
| NGLY1_2    | –         | –     | –       | –    |

Supplement: Supplementary file 1635 [file 1]

IPI00436632.1|NIPBL

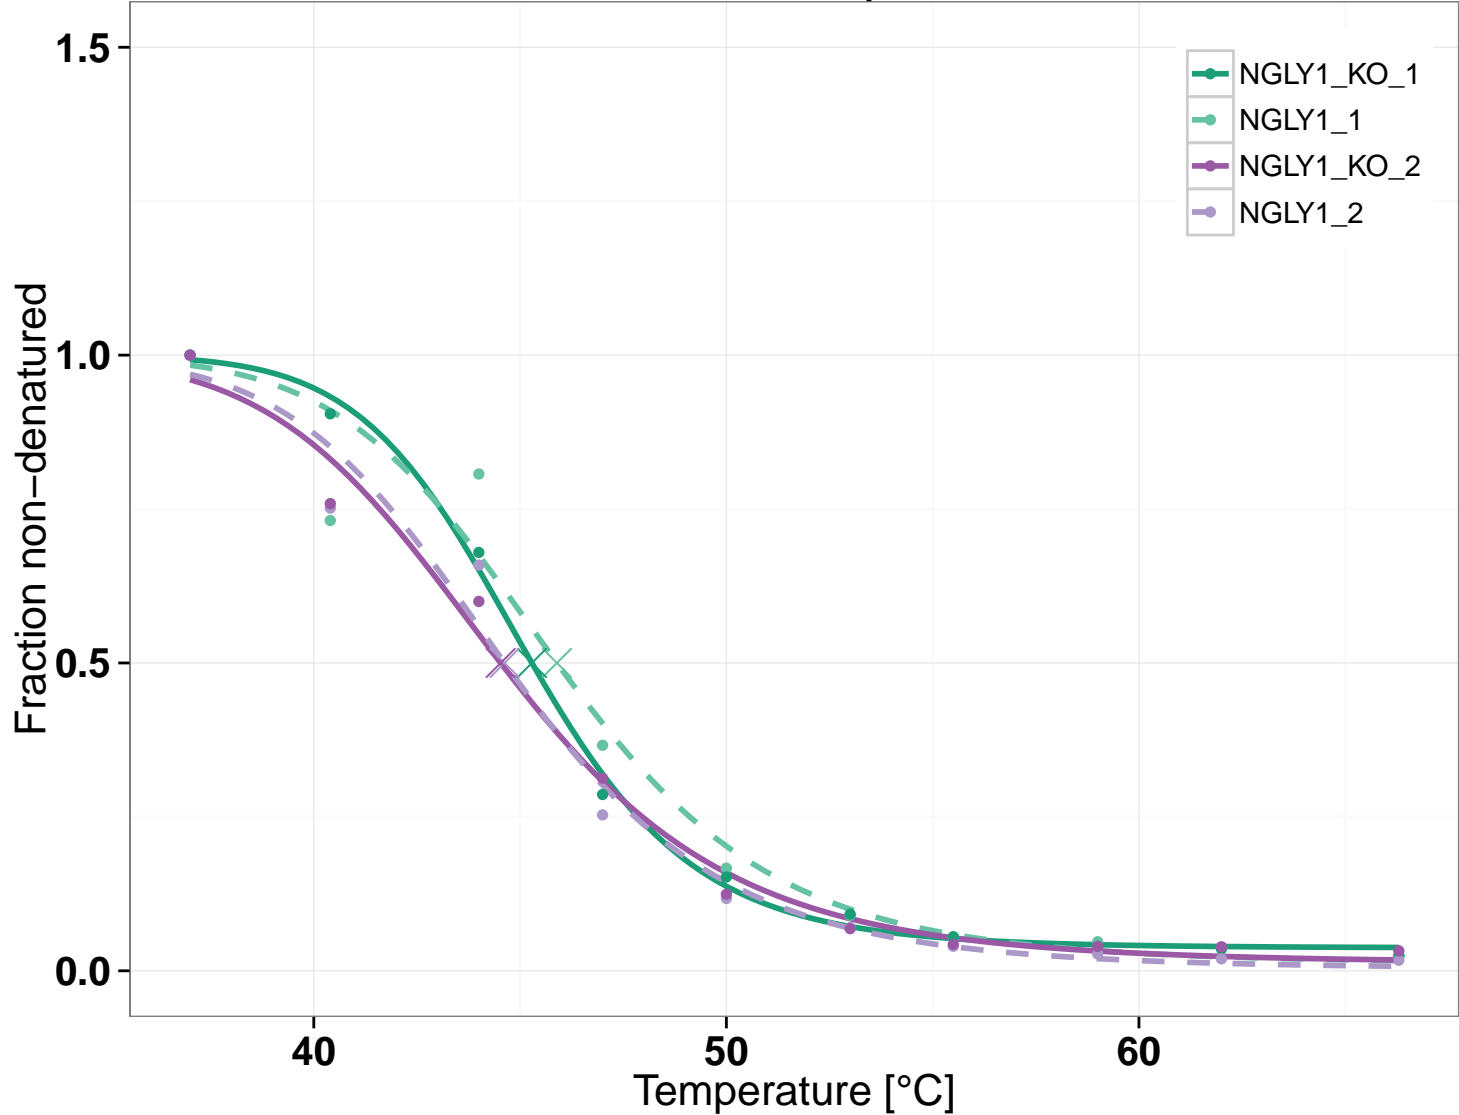

|            | meltPoint | slope  | plateau | R2   |
|------------|-----------|--------|---------|------|
| NGLY1_KO_1 | 45.29     | -0.12  | 0.04    | 1    |
| NGLY1_1    | 45.89     | -0.094 | 0.01    | 0.96 |
| NGLY1_KO_2 | 44.53     | -0.089 | 0.01    | 0.99 |
| NGLY1_2    | 44.62     | -0.095 | 0       | 0.98 |

Supplement: Supplementary file 1636 [file 1]

IPI00479357.3|BSCL2

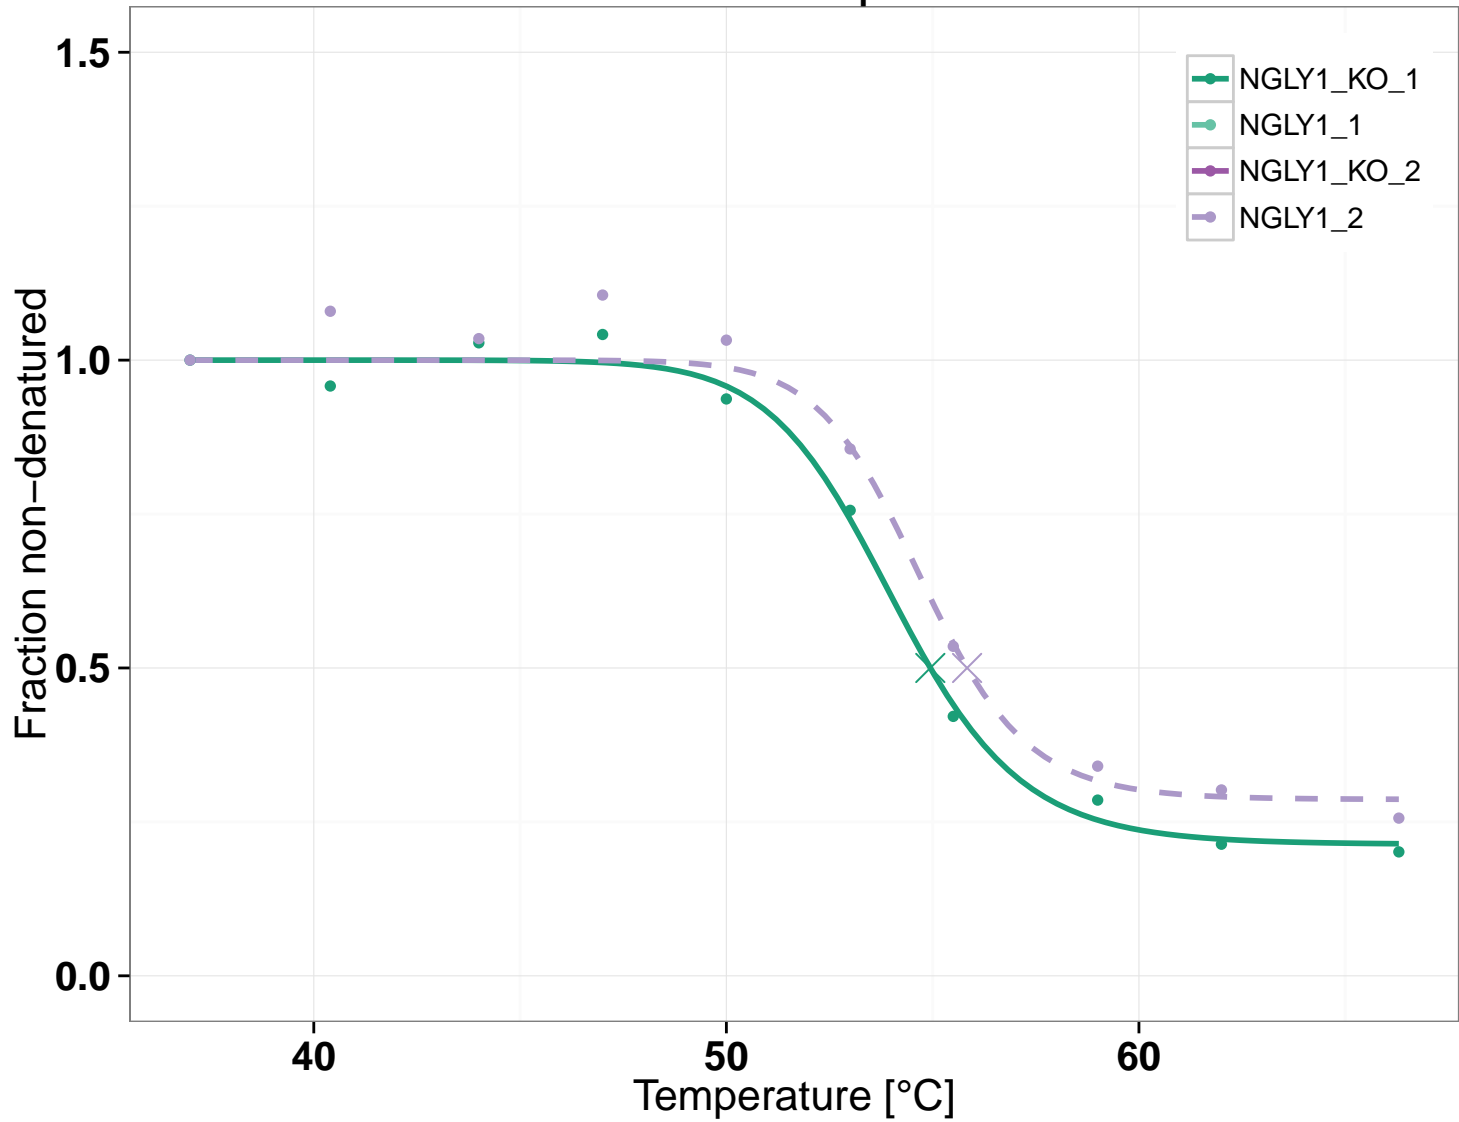

|            | meltPoint | slope | plateau | R2   |
|------------|-----------|-------|---------|------|
| NGLY1_KO_1 | 54.94     | -0.13 | 0.21    | 0.99 |
| NGLY1_1    | -         | -     | -       | -    |
| NGLY1_KO_2 | -         | -     | -       | -    |
| NGLY1_2    | 55.84     | -0.14 | 0.29    | 0.98 |

Supplement: Supplementary file 1637 [file 1]

IPI00797384.2|LARP4

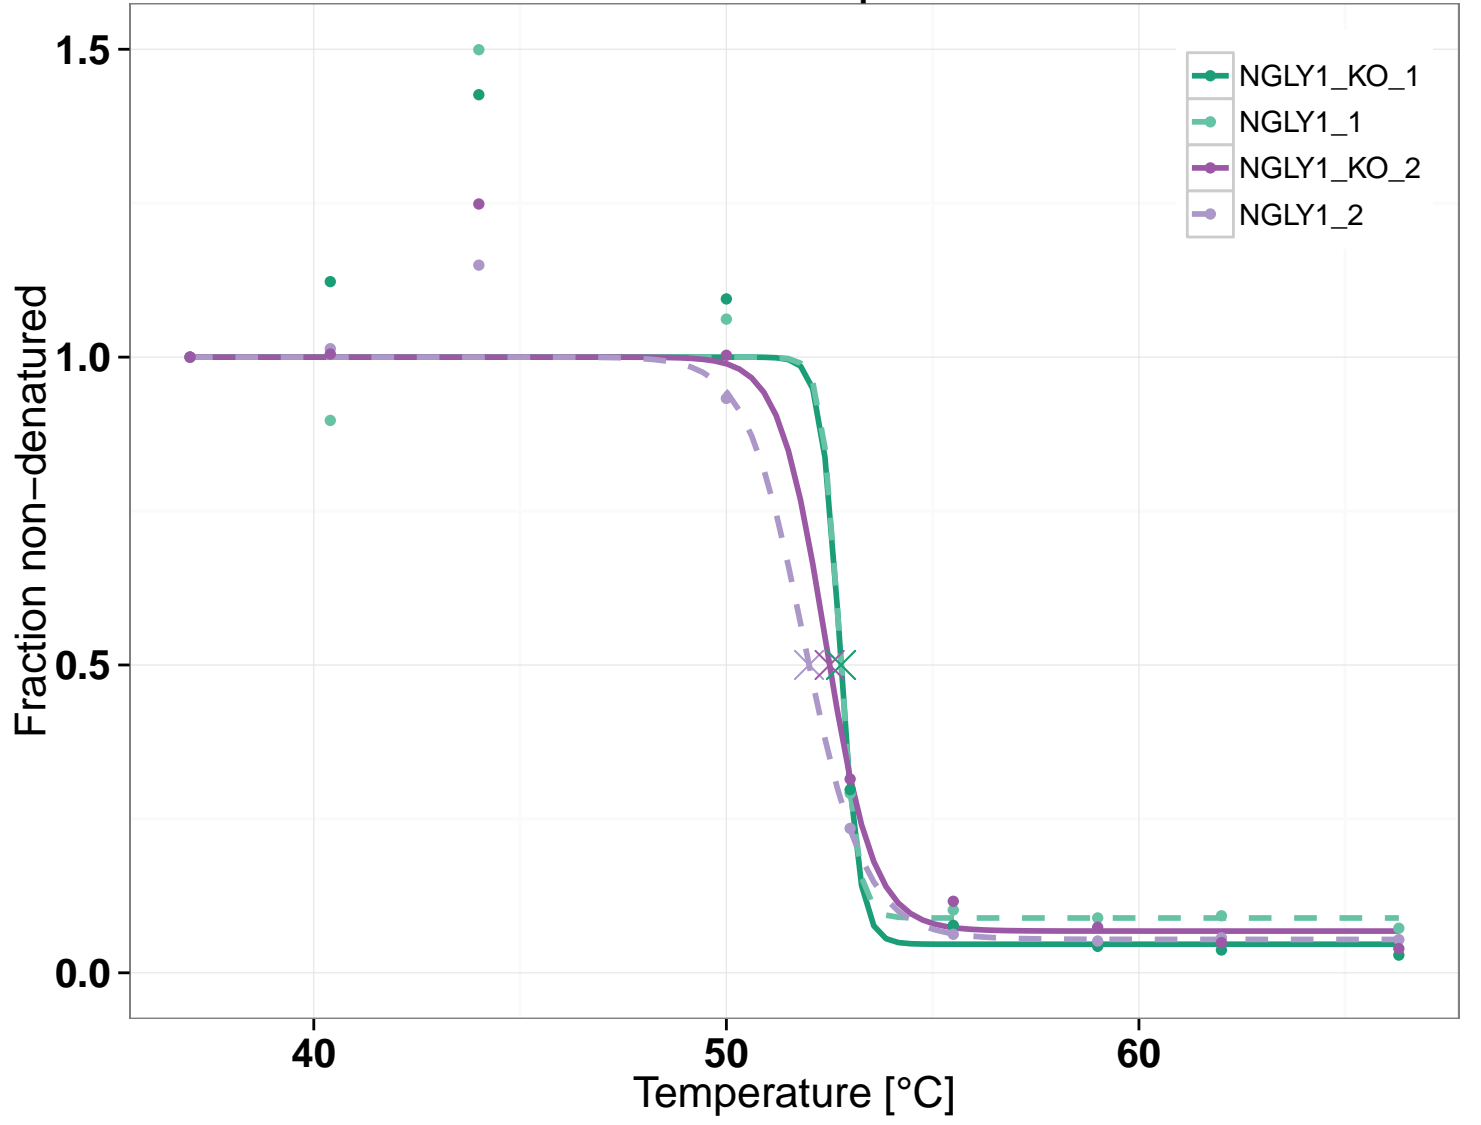

|            | meltPoint | slope | plateau | R2   |
|------------|-----------|-------|---------|------|
| NGLY1_KO_1 | 52.78     | -1    | 0.05    | 0.83 |
| NGLY1_1    | 52.78     | -1.1  | 0.09    | 0.78 |
| NGLY1_KO_2 | 52.5      | -0.41 | 0.07    | 0.84 |
| NGLY1_2    | 52        | -0.33 | 0.05    | 0.9  |

Supplement: Supplementary file 1638 [file 1]

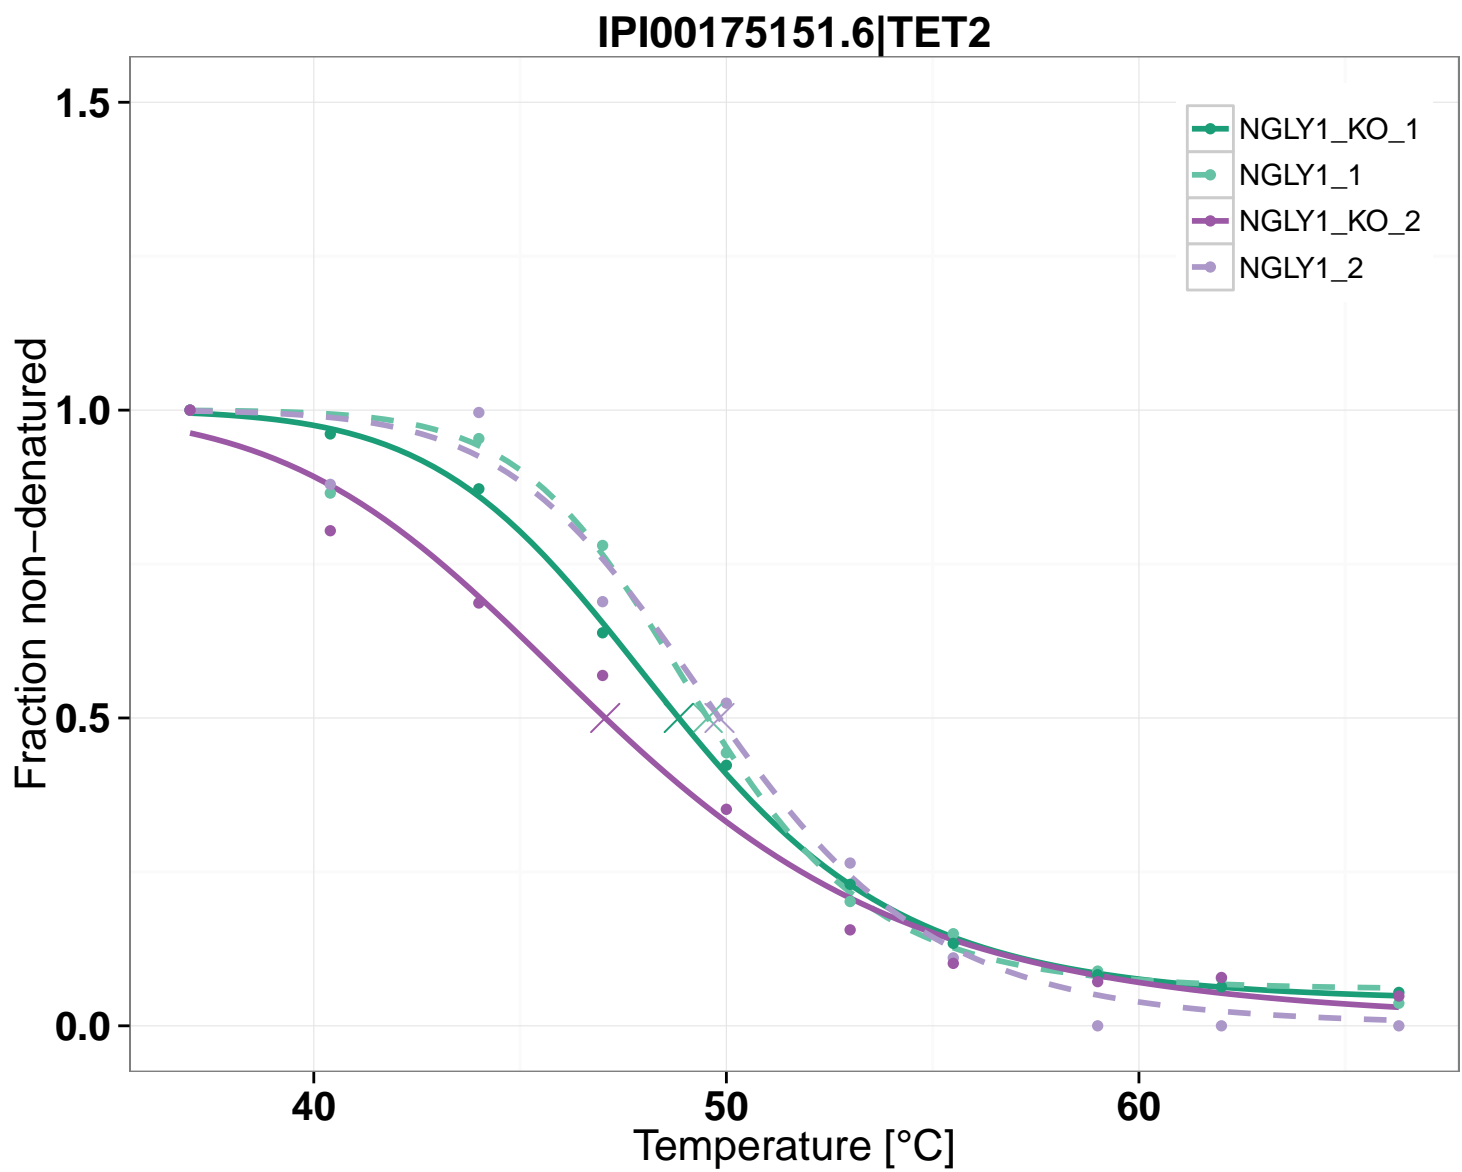

|            | meltPoint | slope  | plateau | R2   |
|------------|-----------|--------|---------|------|
| NGLY1_KO_1 | 48.85     | -0.085 | 0.04    | 1    |
| NGLY1_1    | 49.55     | -0.11  | 0.06    | 0.99 |
| NGLY1_KO_2 | 47.06     | -0.065 | 0       | 0.98 |
| NGLY1_2    | 49.83     | -0.096 | 0       | 0.98 |

Supplement: Supplementary file 1639 [file 1]

IPI00170641.3|DENND1A

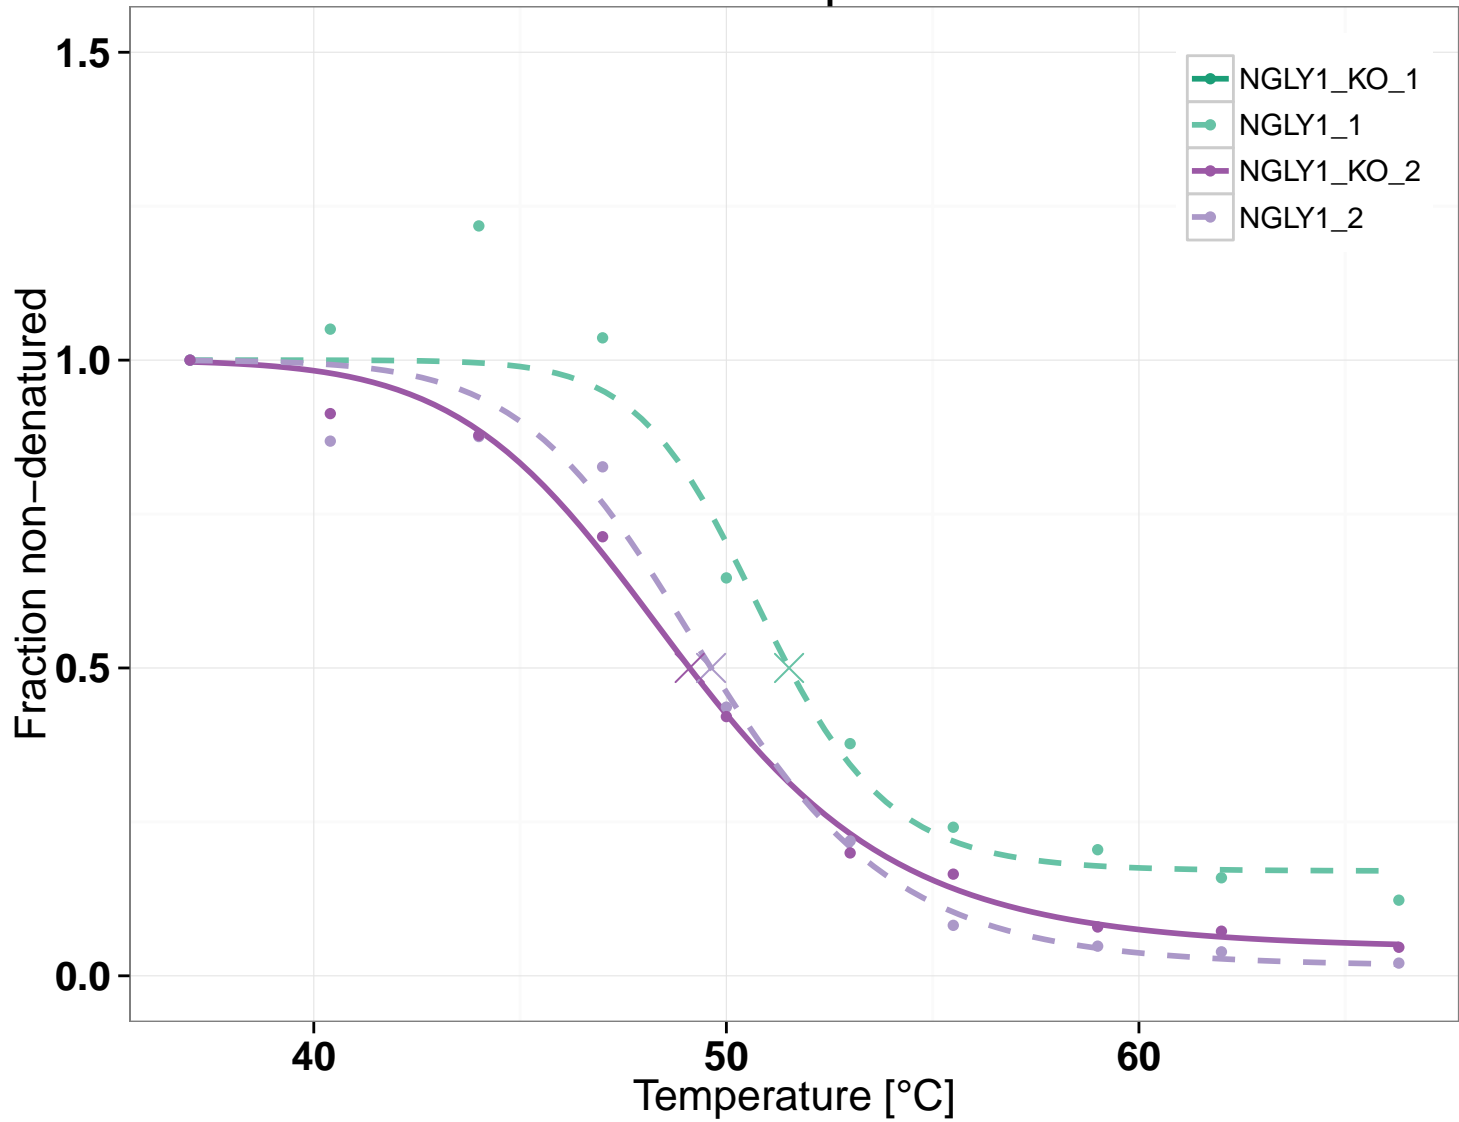

|            | meltPoint | slope | plateau | R2   |
|------------|-----------|-------|---------|------|
| NGLY1_KO_1 | -         | -     | -       | -    |
| NGLY1_1    | 51.52     | -0.14 | 0.17    | 0.96 |
| NGLY1_KO_2 | 49.11     | -0.09 | 0.04    | 1    |
| NGLY1_2    | 49.63     | -0.11 | 0.01    | 0.98 |

Supplement: Supplementary file 1640 [file 1]

# IPI00903226.1|HK1

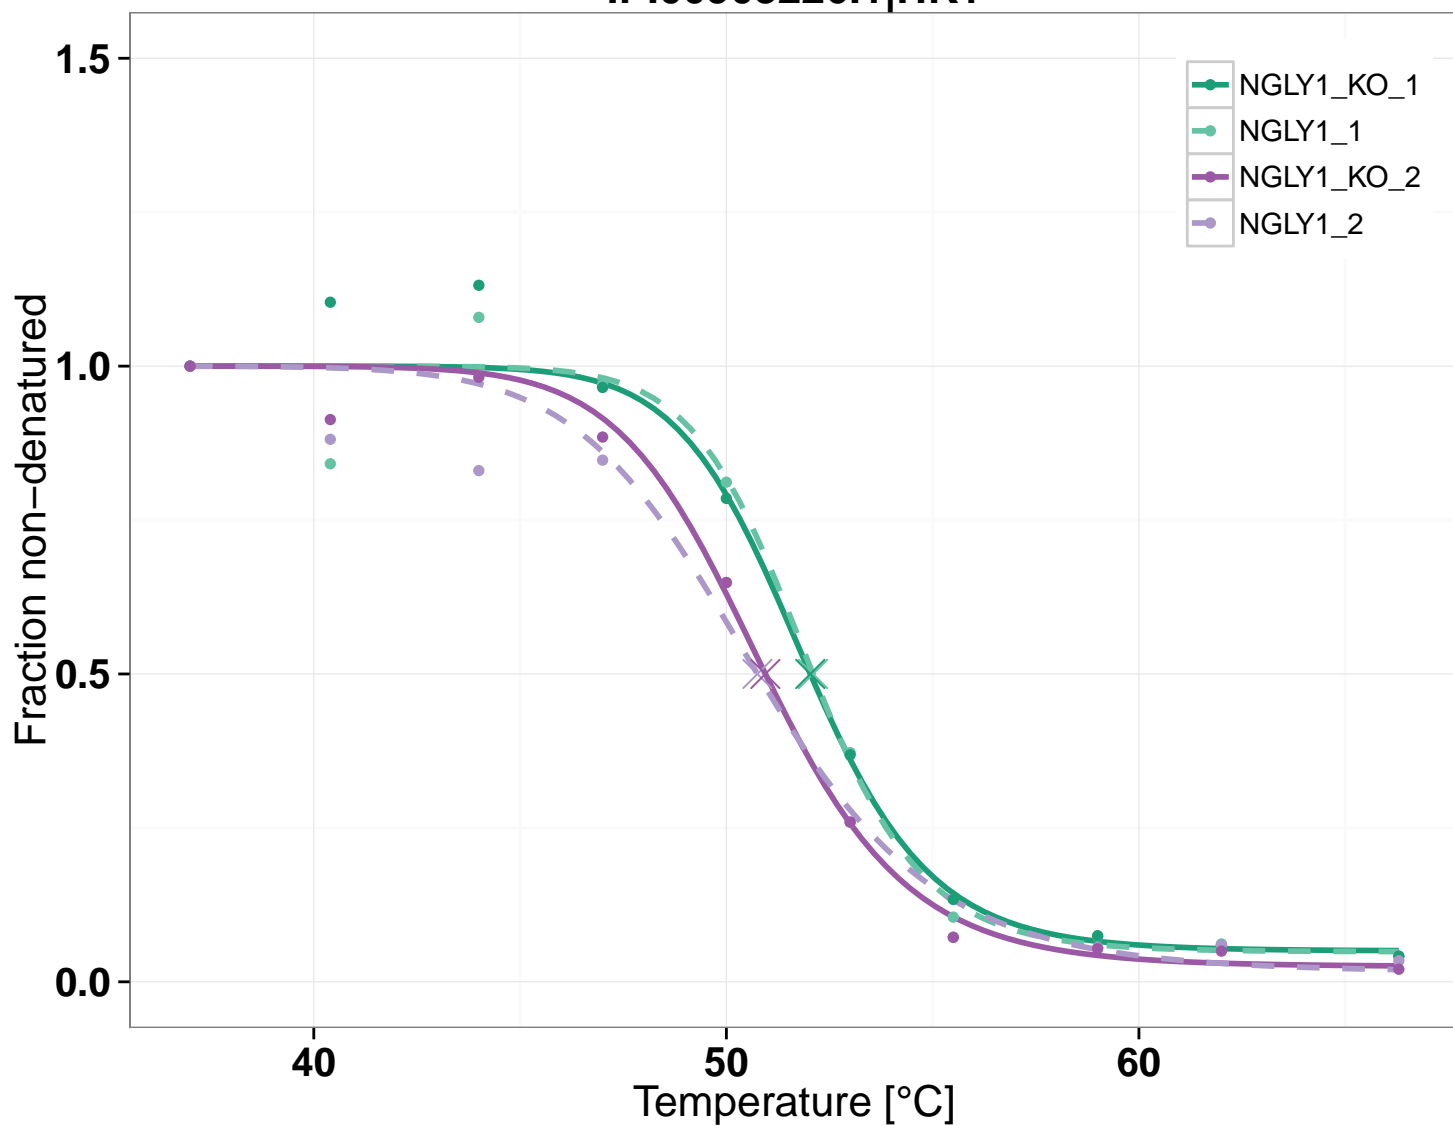

|            | meltPoint | slope | plateau | R2   |
|------------|-----------|-------|---------|------|
| NGLY1_KO_1 | 52.03     | -0.16 | 0.05    | 0.99 |
| NGLY1_1    | 52.1      | -0.17 | 0.05    | 0.98 |
| NGLY1_KO_2 | 50.95     | -0.14 | 0.02    | 0.99 |
| NGLY1_2    | 50.75     | -0.11 | 0.02    | 0.97 |

Supplement: Supplementary file 1641 [file 1]

IPI00166500.3|PIAS4

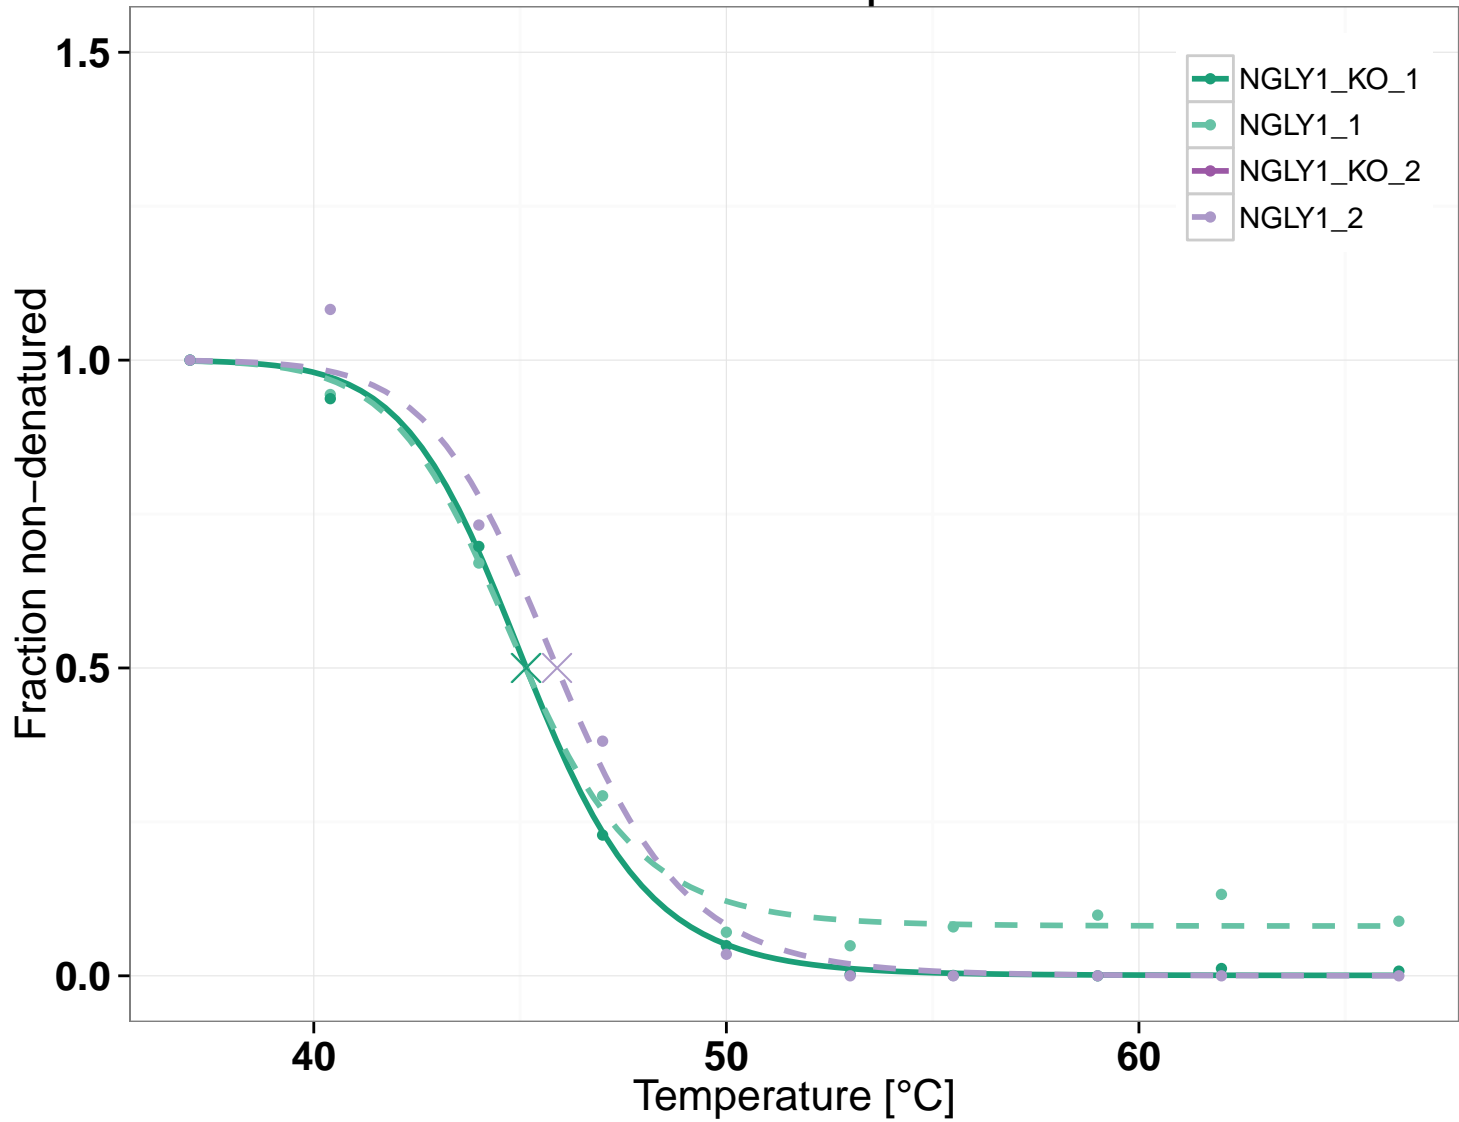

|            | meltPoint | slope | plateau | R2   |
|------------|-----------|-------|---------|------|
| NGLY1_KO_1 | 45.15     | -0.17 | 0       | 1    |
| NGLY1_1    | 45.14     | -0.15 | 0.08    | 0.99 |
| NGLY1_KO_2 | -         | -     | -       | -    |
| NGLY1_2    | 45.9      | -0.16 | 0       | 0.99 |

Supplement: Supplementary file 1642 [file 1]

IPI00060551.1|SIMILAR TO RIBOSOMAL PROTEIN L10.

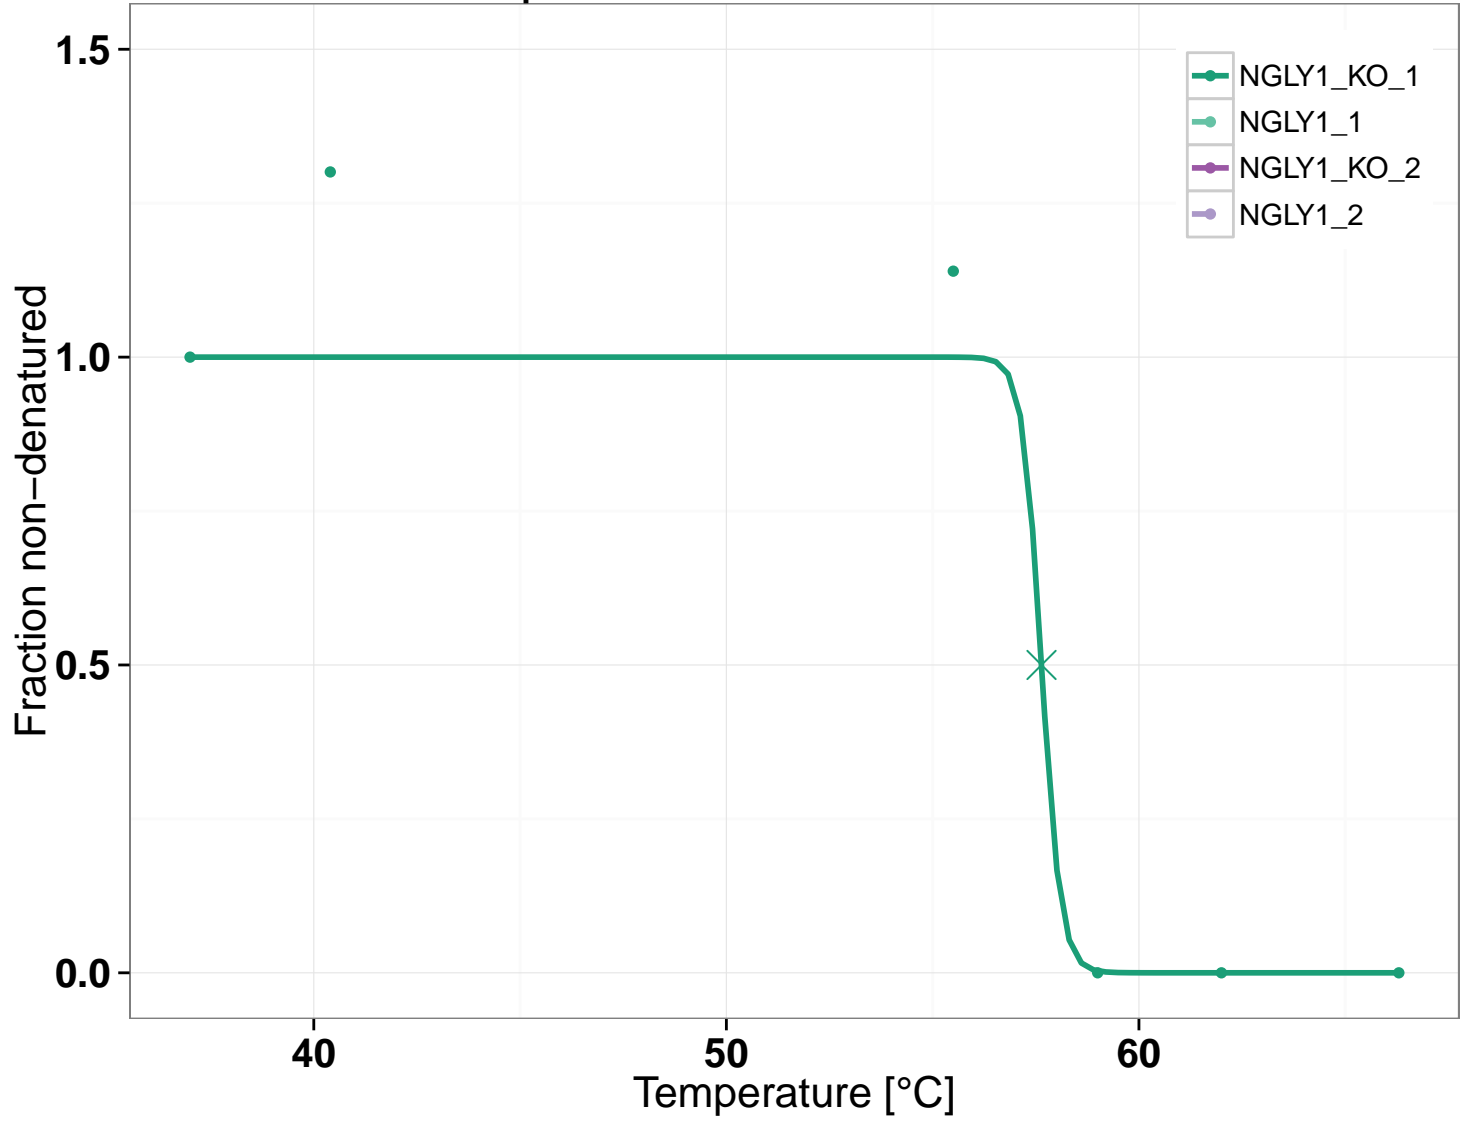

|            | meltPoint | slope | plateau | R2   |
|------------|-----------|-------|---------|------|
| NGLY1_KO_1 | 57.64     | -1.1  | 0       | 0.42 |
| NGLY1_1    | -         | -     | -       | -    |
| NGLY1_KO_2 | -         | -     | -       | -    |
| NGLY1_2    | -         | -     | -       | -    |

Supplement: Supplementary file 1643 [file 1]

# IPI00003881.5|HNRNPF

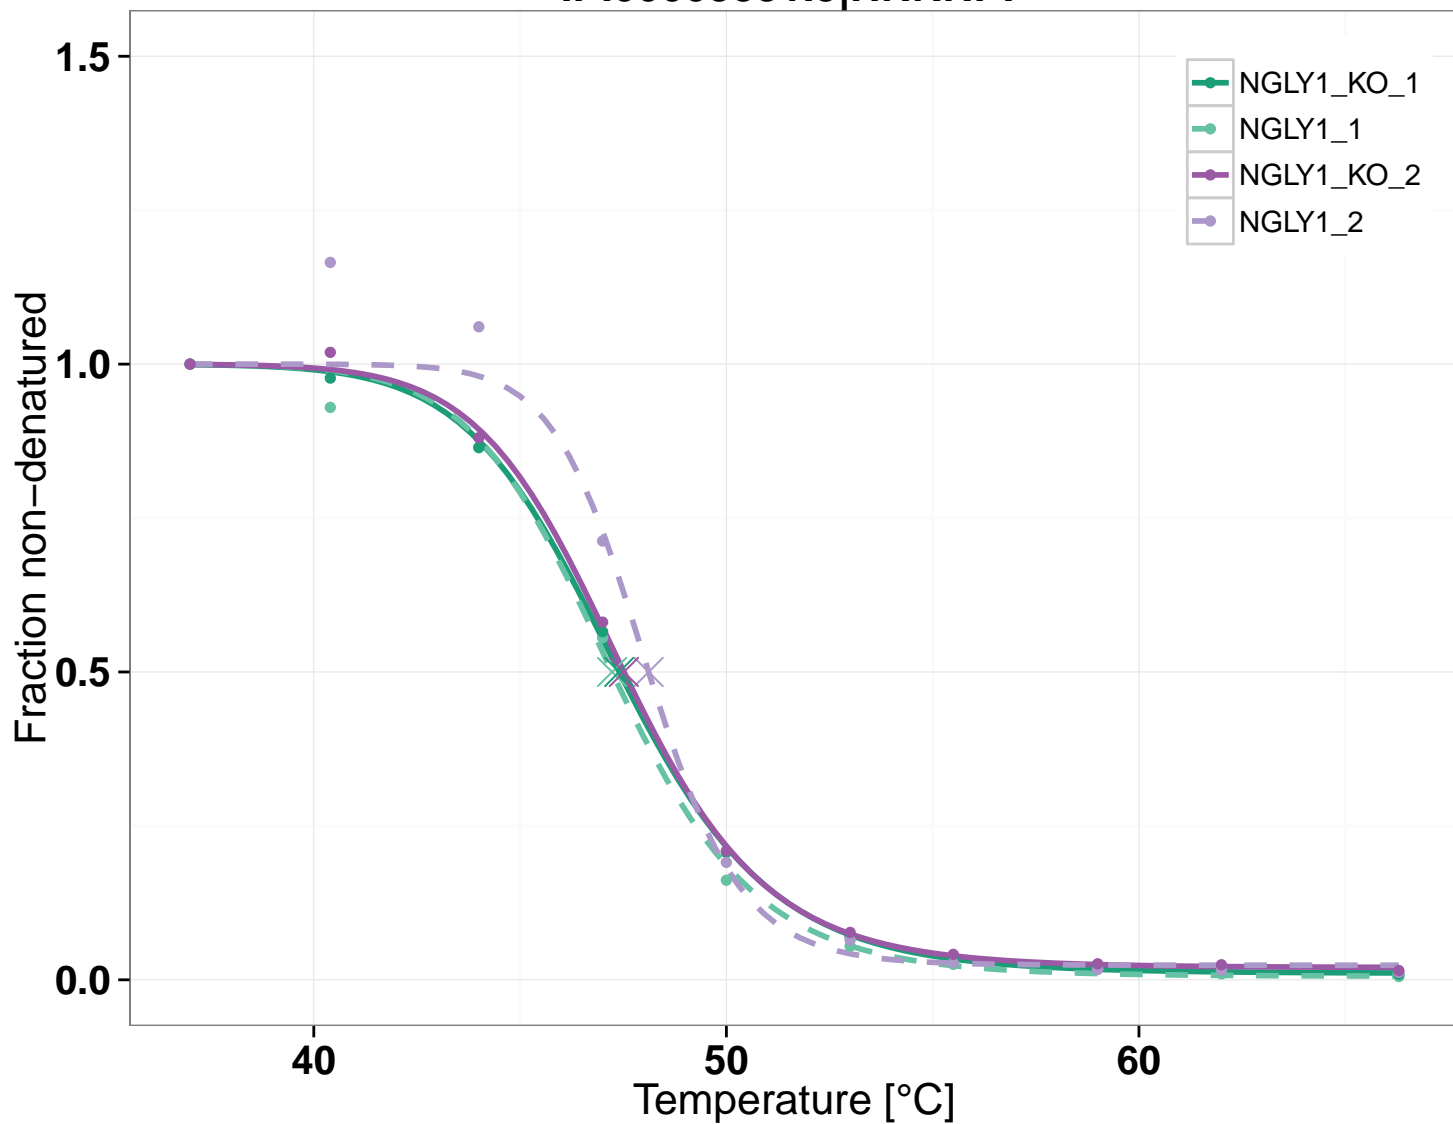

|            | meltPoint | slope | plateau | R2   |
|------------|-----------|-------|---------|------|
| NGLY1_KO_1 | 47.4      | -0.13 | 0.01    | 1    |
| NGLY1_1    | 47.23     | -0.14 | 0.01    | 1    |
| NGLY1_KO_2 | 47.52     | -0.14 | 0.02    | 1    |
| NGLY1_2    | 48.12     | -0.22 | 0.02    | 0.98 |

Supplement: Supplementary file 1644 [file 1]

IPI00012795.3|EIF3I

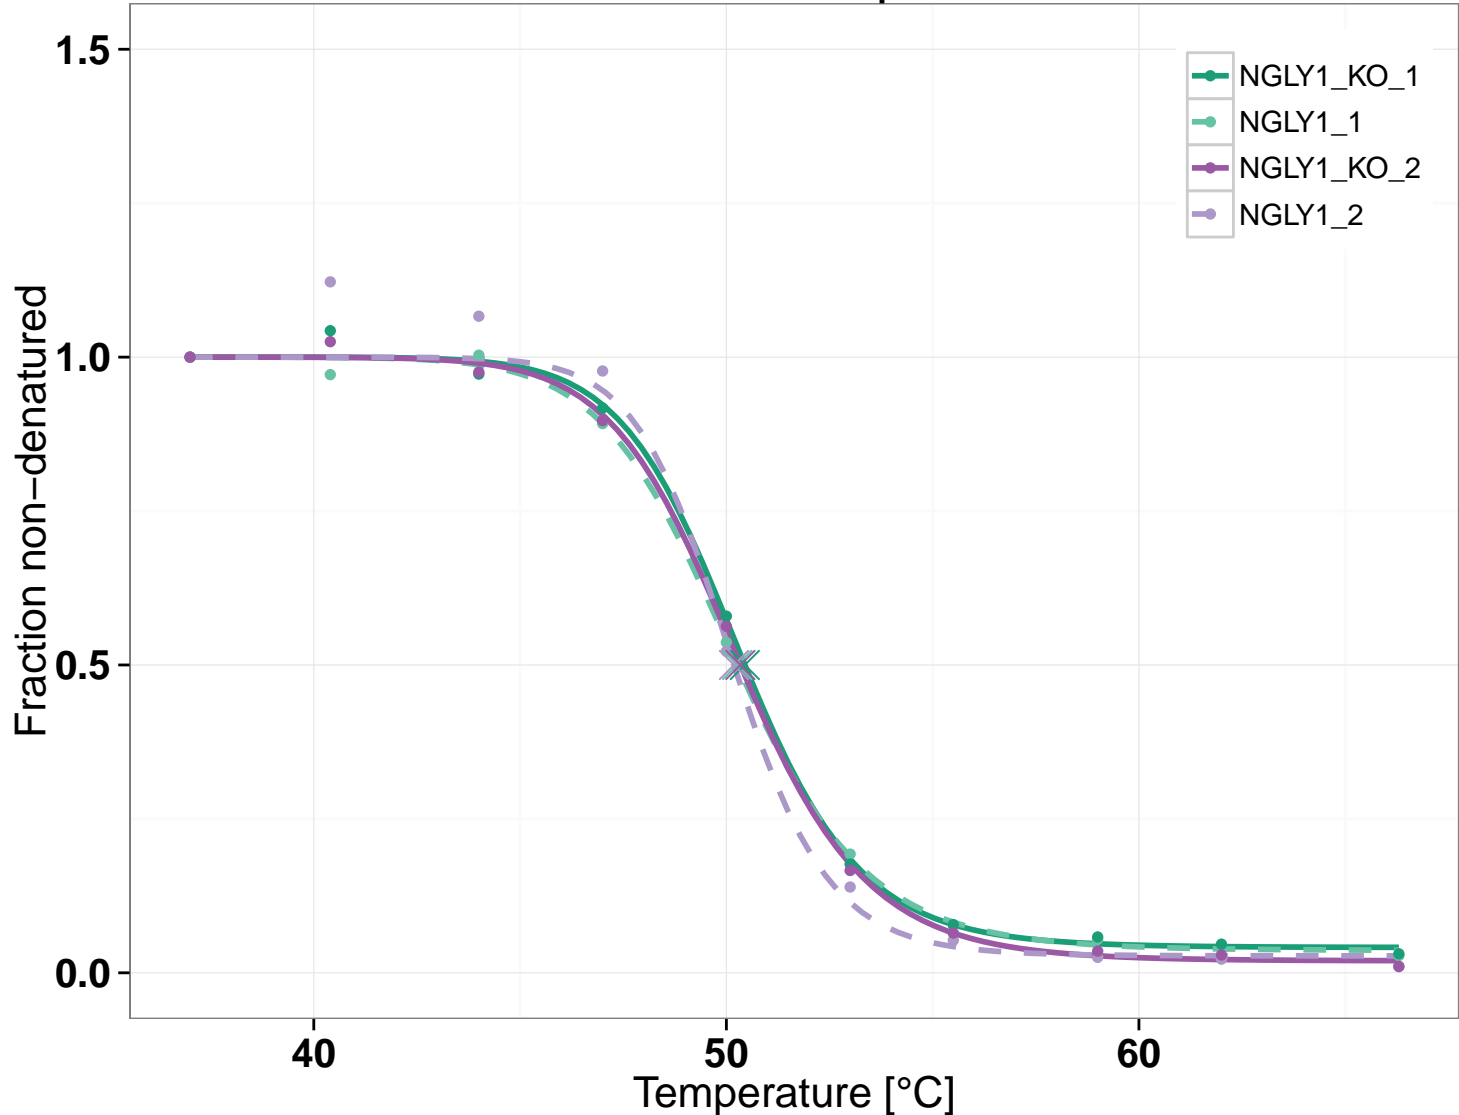

|            | meltPoint | slope | plateau | R2   |
|------------|-----------|-------|---------|------|
| NGLY1_KO_1 | 50.45     | -0.16 | 0.04    | 1    |
| NGLY1_1    | 50.26     | -0.15 | 0.04    | 1    |
| NGLY1_KO_2 | 50.34     | -0.16 | 0.02    | 1    |
| NGLY1_2    | 50.18     | -0.21 | 0.03    | 0.99 |

Supplement: Supplementary file 1645 [file 1]

IPI00030369.1|NFATC3

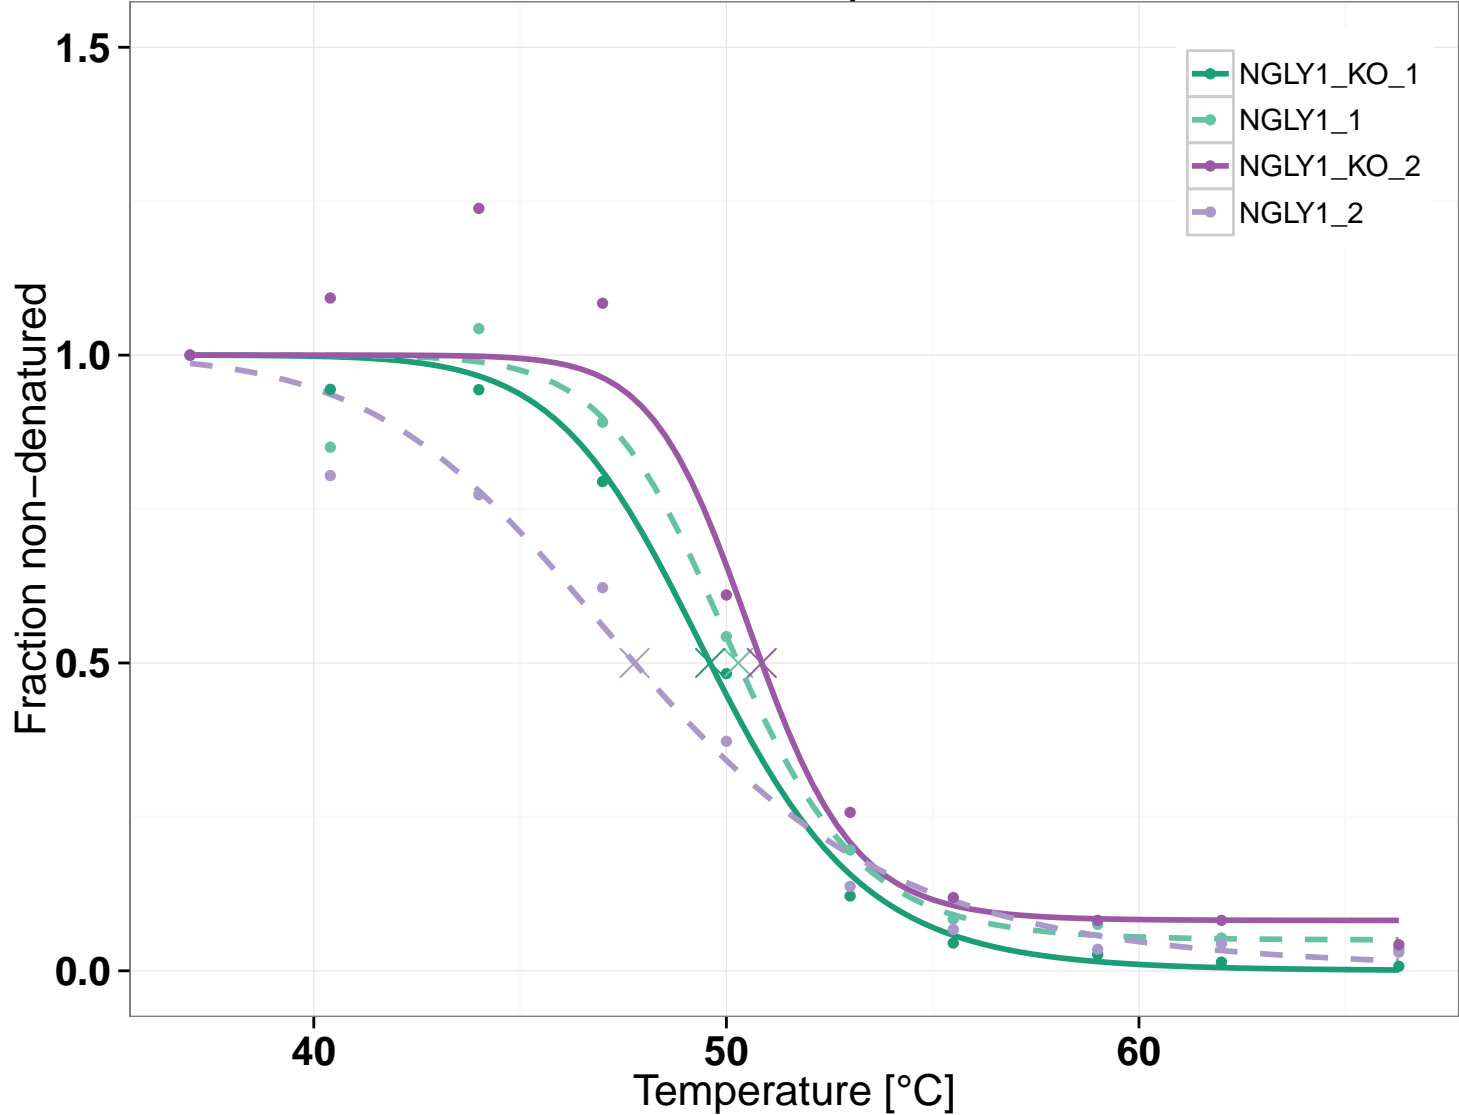

|            | meltPoint | slope  | plateau | R2   |
|------------|-----------|--------|---------|------|
| NGLY1_KO_1 | 49.61     | -0.13  | 0       | 1    |
| NGLY1_1    | 50.29     | -0.15  | 0.05    | 0.98 |
| NGLY1_KO_2 | 50.86     | -0.19  | 0.08    | 0.96 |
| NGLY1_2    | 47.78     | -0.079 | 0       | 0.98 |

Supplement: Supplementary file 1646 [file 1]

# IPI00304417.7|IDH3B

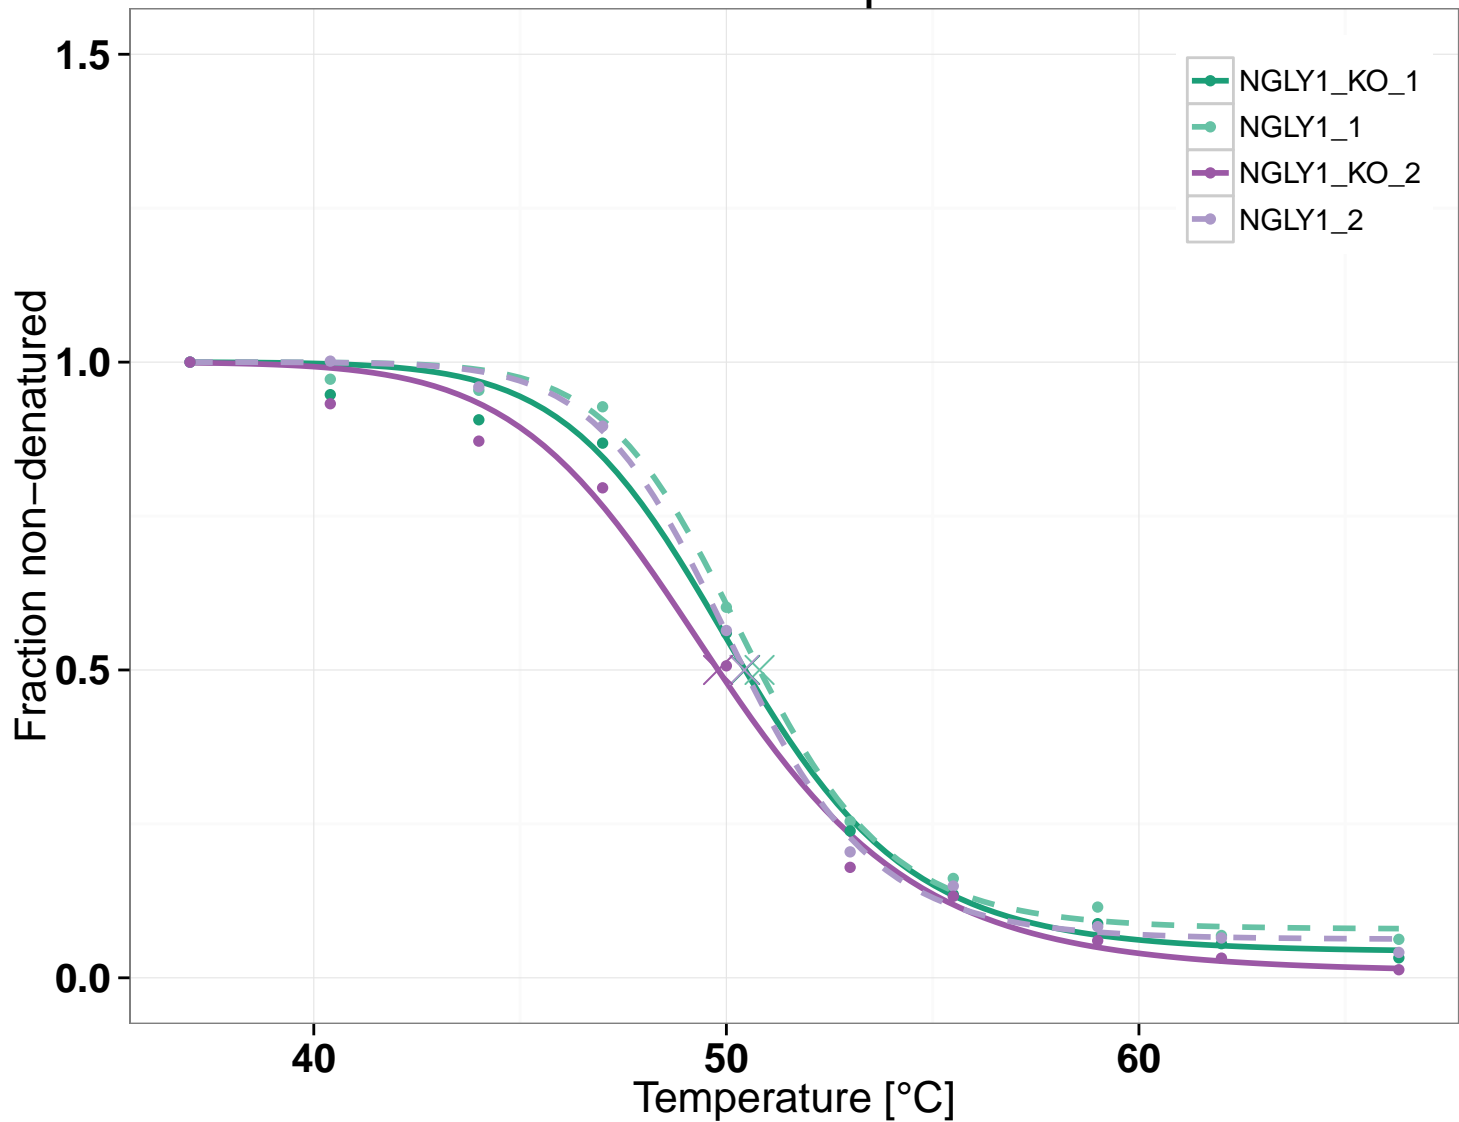

|            | meltPoint | slope | plateau | R2   |
|------------|-----------|-------|---------|------|
| NGLY1_KO_1 | 50.45     | -0.11 | 0.04    | 0.99 |
| NGLY1_1    | 50.8      | -0.13 | 0.08    | 1    |
| NGLY1_KO_2 | 49.8      | -0.1  | 0.01    | 0.99 |
| NGLY1_2    | 50.44     | -0.14 | 0.06    | 1    |

Supplement: Supplementary file 1647 [file 1]

IPI00103764.1|CHCHD10

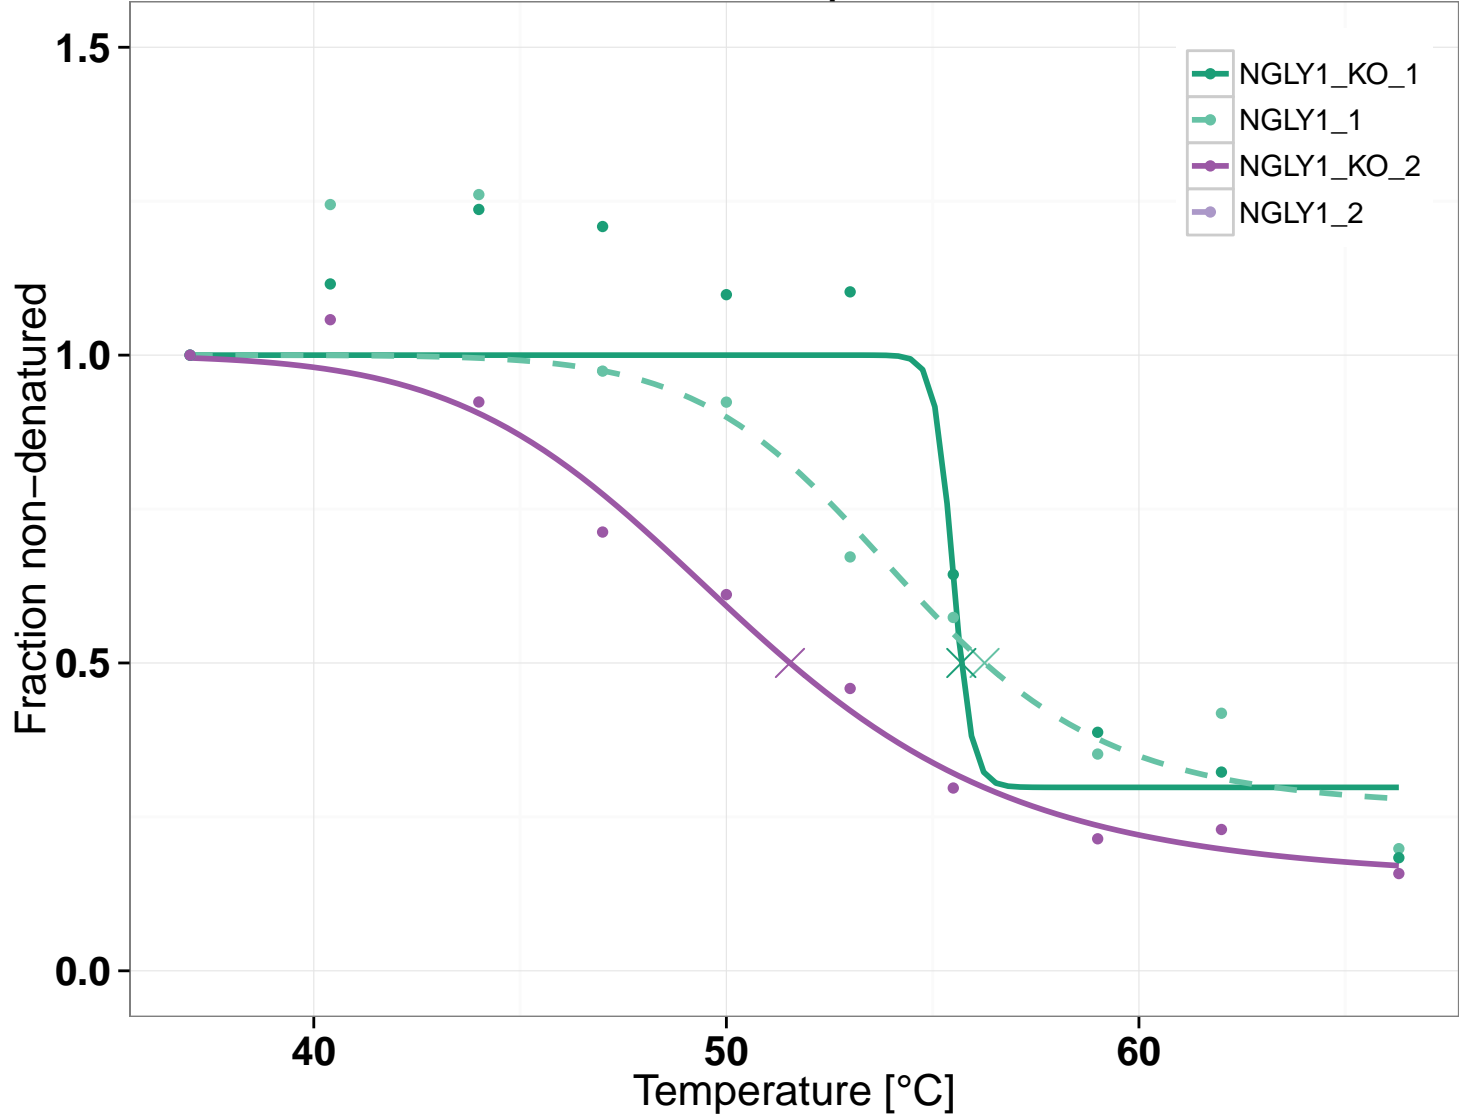

|            | meltPoint | slope  | plateau | R2   |
|------------|-----------|--------|---------|------|
| NGLY1_KO_1 | 55.7      | -0.79  | 0.3     | 0.89 |
| NGLY1_1    | 56.26     | -0.073 | 0.27    | 0.88 |
| NGLY1_KO_2 | 51.54     | -0.063 | 0.15    | 0.99 |
| NGLY1_2    | -         | -      | -       | -    |

Supplement: Supplementary file 1648 [file 1]

# IPI00744811.2|LRP5

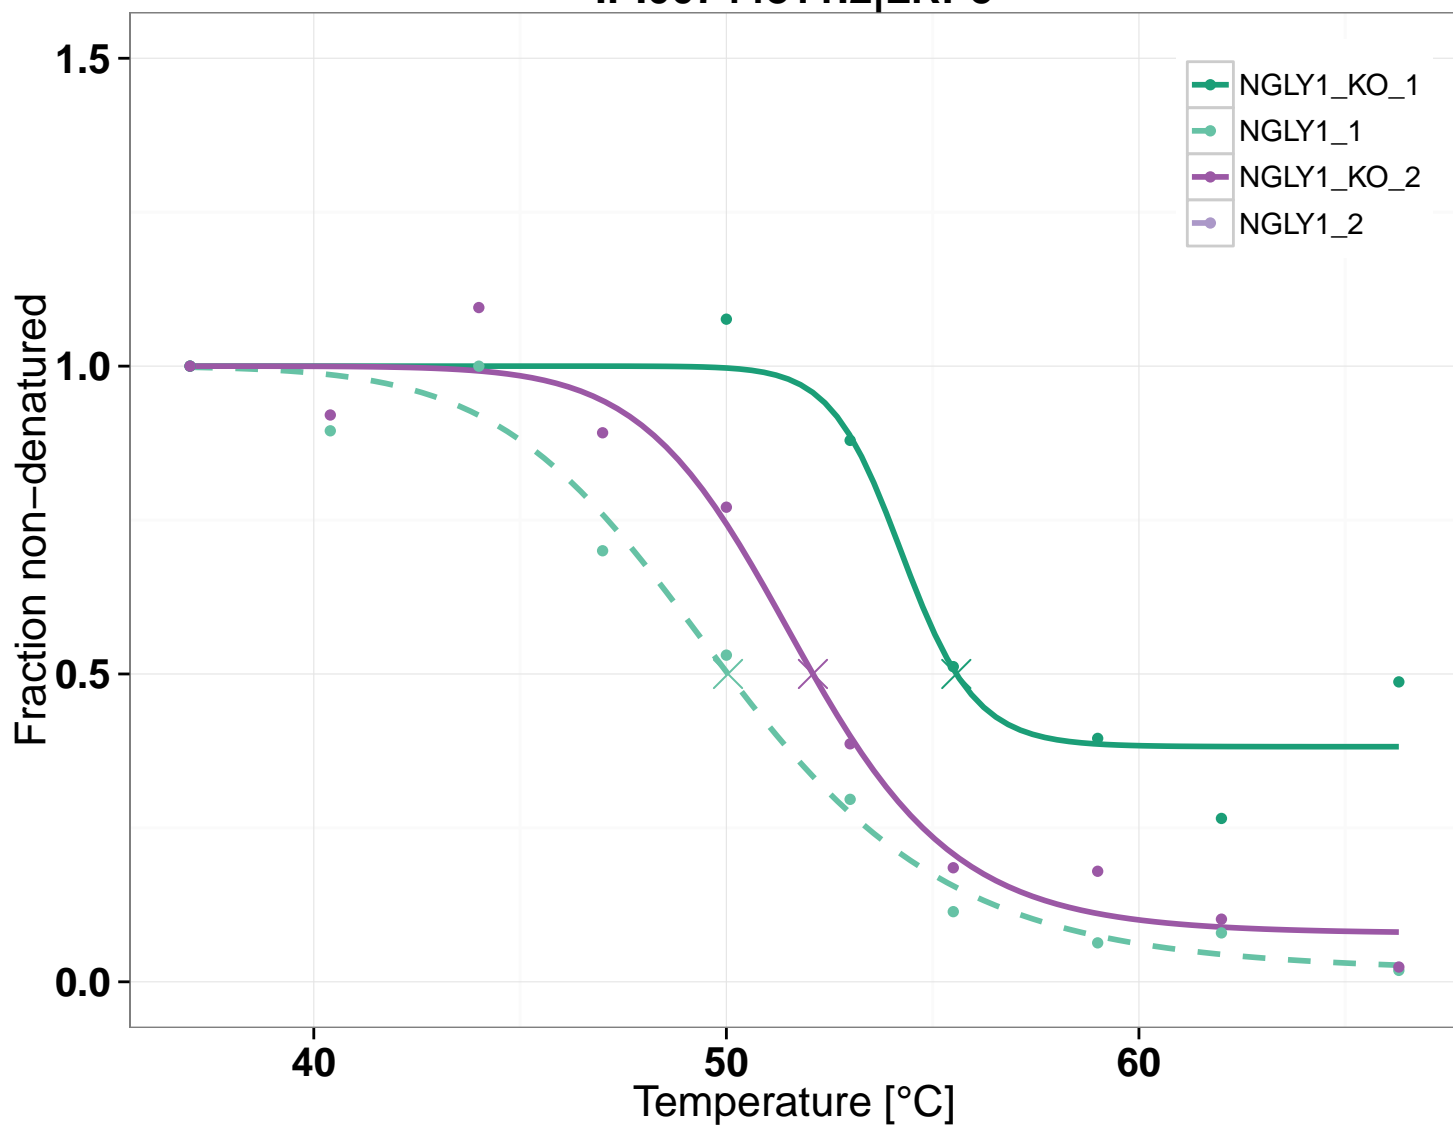

|            | meltPoint | slope | plateau | R2   |
|------------|-----------|-------|---------|------|
| NGLY1_KO_1 | 55.57     | -0.18 | 0.38    | 0.44 |
| NGLY1_1    | 50.04     | -0.09 | 0.02    | 0.98 |
| NGLY1_KO_2 | 52.1      | -0.12 | 0.08    | 0.98 |
| NGLY1_2    | -         | -     | -       | -    |

Supplement: Supplementary file 1649 [file 1]

# IPI00009976.1|TMED1

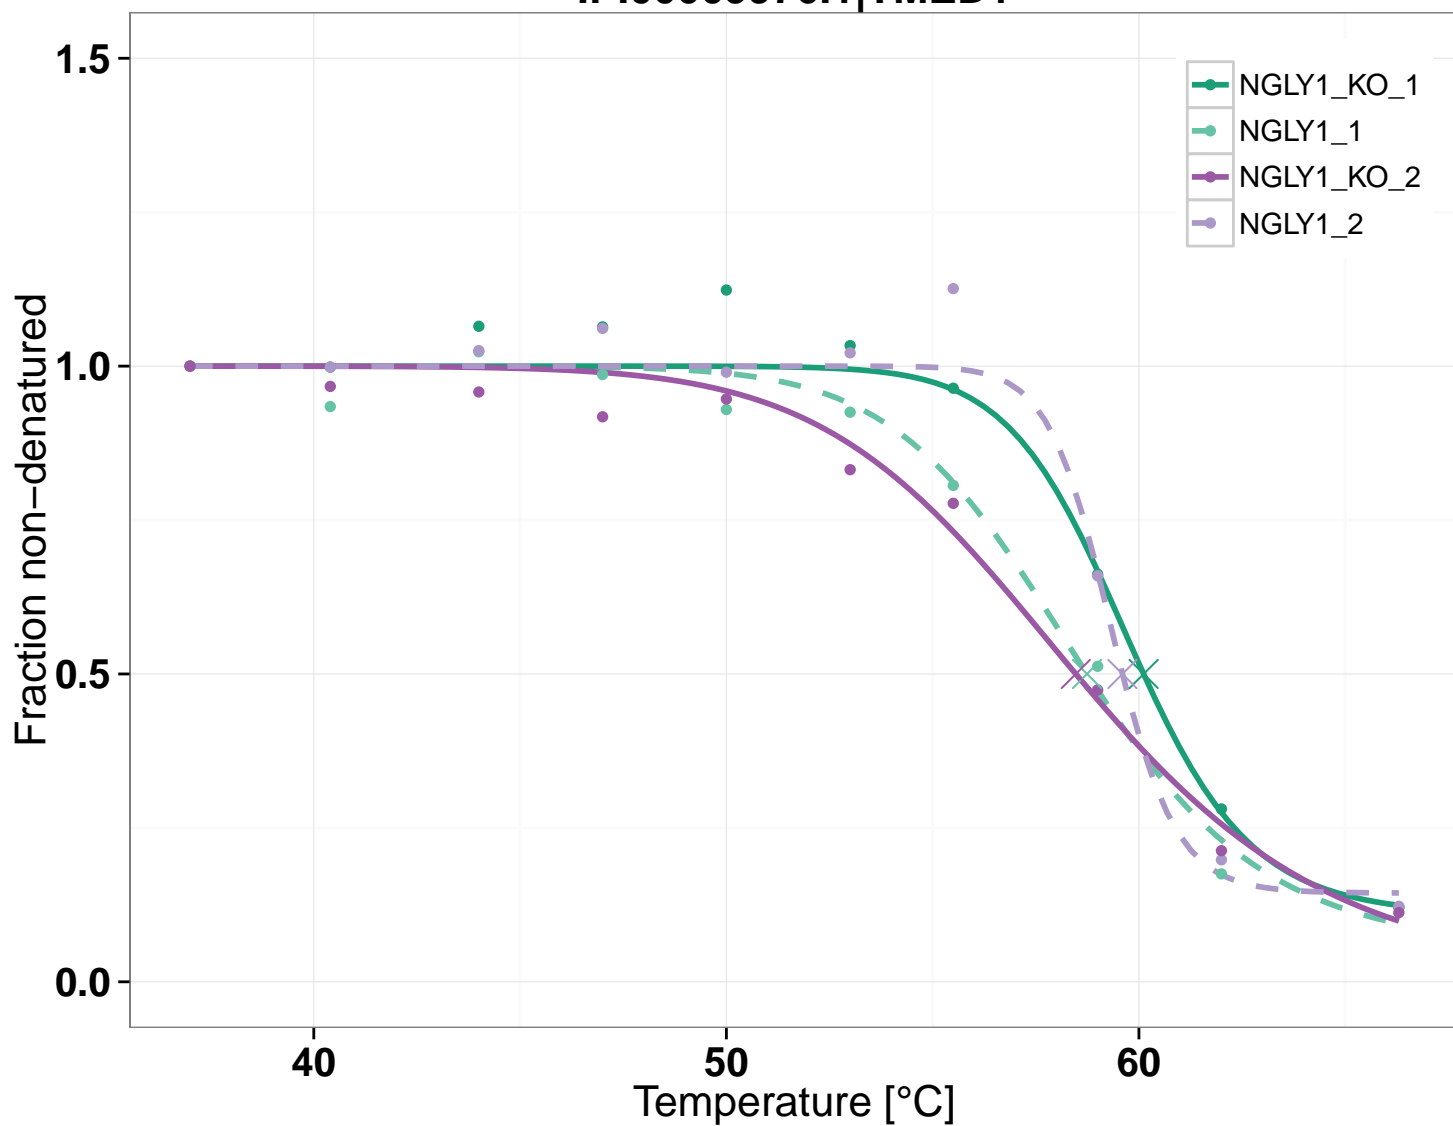

|            | meltPoint | slope  | plateau | R2   |
|------------|-----------|--------|---------|------|
| NGLY1_KO_1 | 60.11     | -0.15  | 0.11    | 0.98 |
| NGLY1_1    | 58.74     | -0.11  | 0.05    | 0.99 |
| NGLY1_KO_2 | 58.47     | -0.081 | 0       | 0.99 |
| NGLY1_2    | 59.6      | -0.28  | 0.14    | 0.98 |

Supplement: Supplementary file 1650 [file 1]

IPI00329594.4|CCDC59

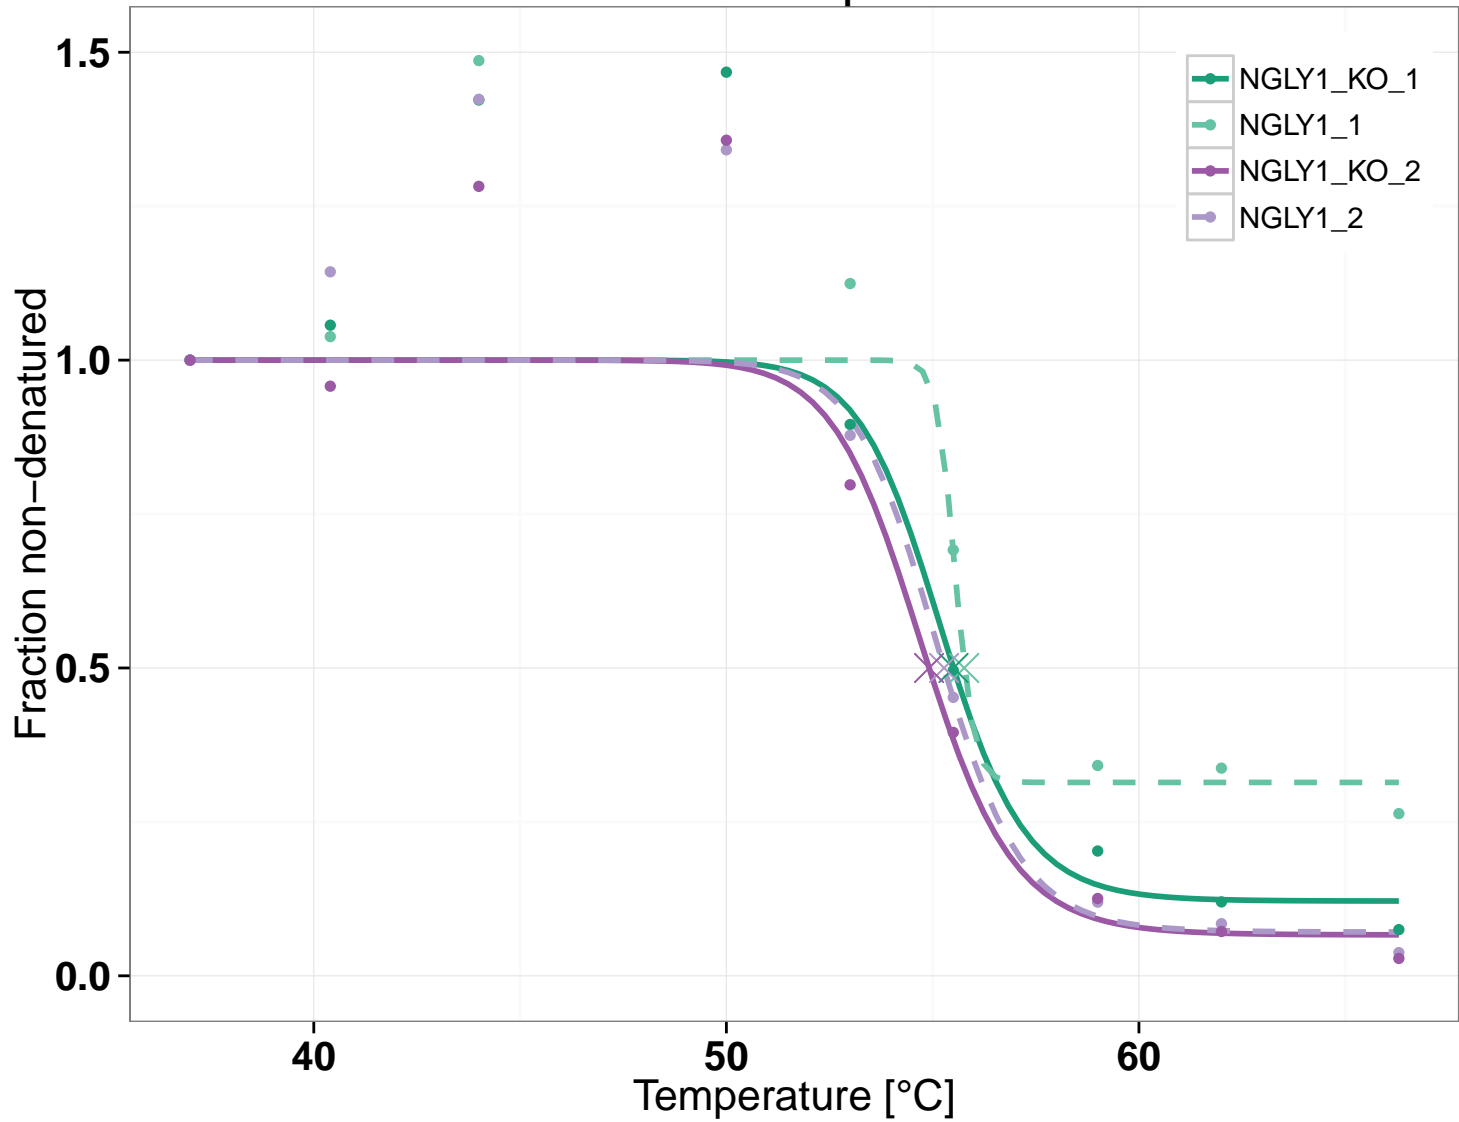

|            | meltPoint | slope | plateau | R2   |
|------------|-----------|-------|---------|------|
| NGLY1_KO_1 | 55.51     | -0.22 | 0.12    | 0.7  |
| NGLY1_1    | 55.77     | -0.77 | 0.31    | 0.48 |
| NGLY1_KO_2 | 54.91     | -0.21 | 0.07    | 0.82 |
| NGLY1_2    | 55.28     | -0.23 | 0.07    | 0.76 |

Supplement: Supplementary file 1651 [file 1]

# IPI00748284.2|NDOR1

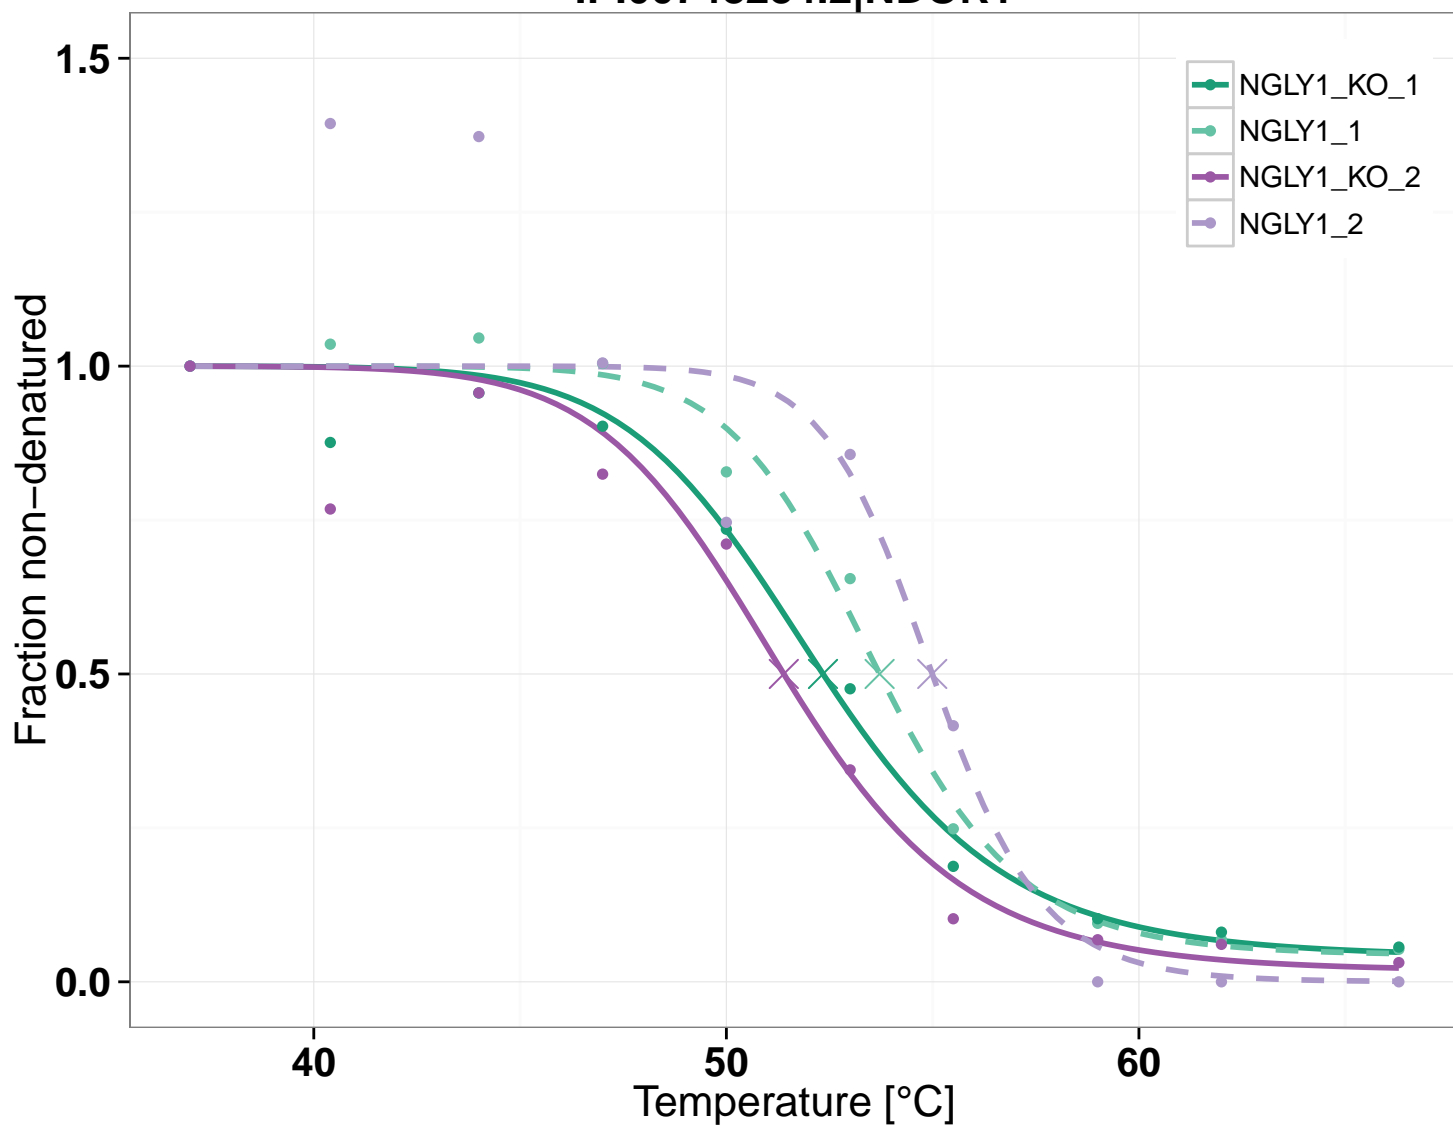

|            | meltPoint | slope | plateau | R2   |
|------------|-----------|-------|---------|------|
| NGLY1_KO_1 | 52.34     | -0.1  | 0.04    | 0.99 |
| NGLY1_1    | 53.71     | -0.14 | 0.04    | 0.99 |
| NGLY1_KO_2 | 51.39     | -0.11 | 0.02    | 0.95 |
| NGLY1_2    | 54.99     | -0.19 | 0       | 0.87 |

Supplement: Supplementary file 1652 [file 1]

# IPI00744627.1|PECR

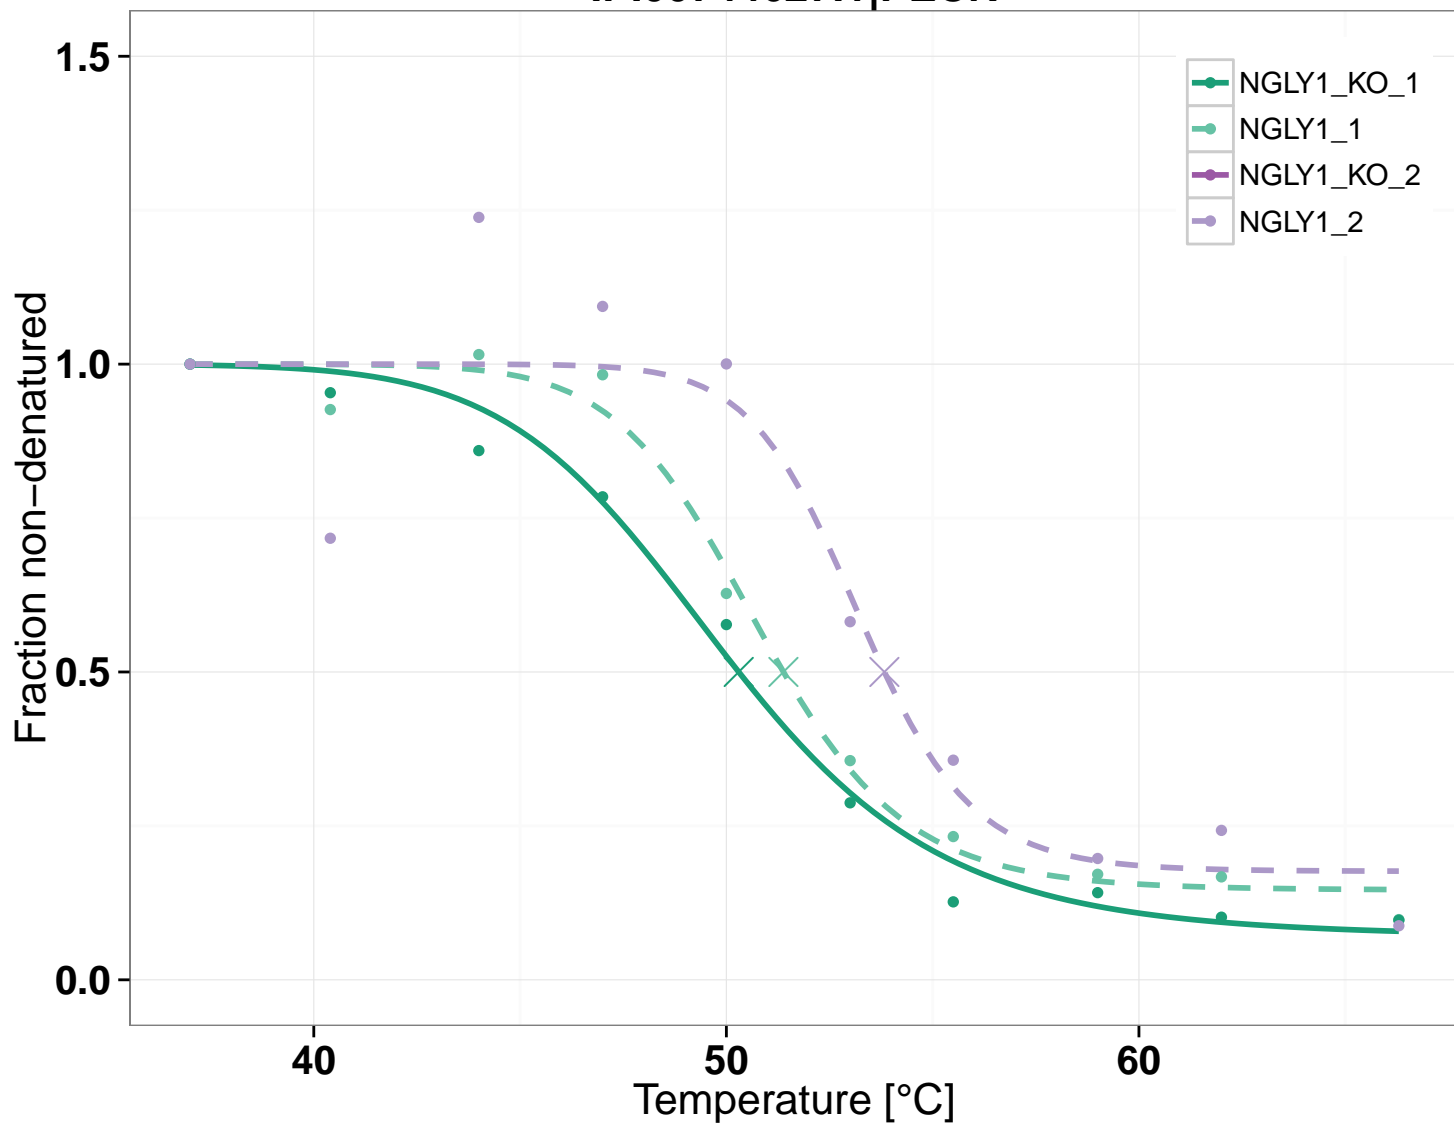

|            | meltPoint | slope  | plateau | R2   |
|------------|-----------|--------|---------|------|
| NGLY1_KO_1 | 50.3      | -0.088 | 0.07    | 0.99 |
| NGLY1_1    | 51.38     | -0.12  | 0.15    | 0.99 |
| NGLY1_KO_2 | -         | -      | -       | -    |
| NGLY1_2    | 53.83     | -0.15  | 0.18    | 0.89 |

Supplement: Supplementary file 1653 [file 1]

IPI00747259.2|HDAC8

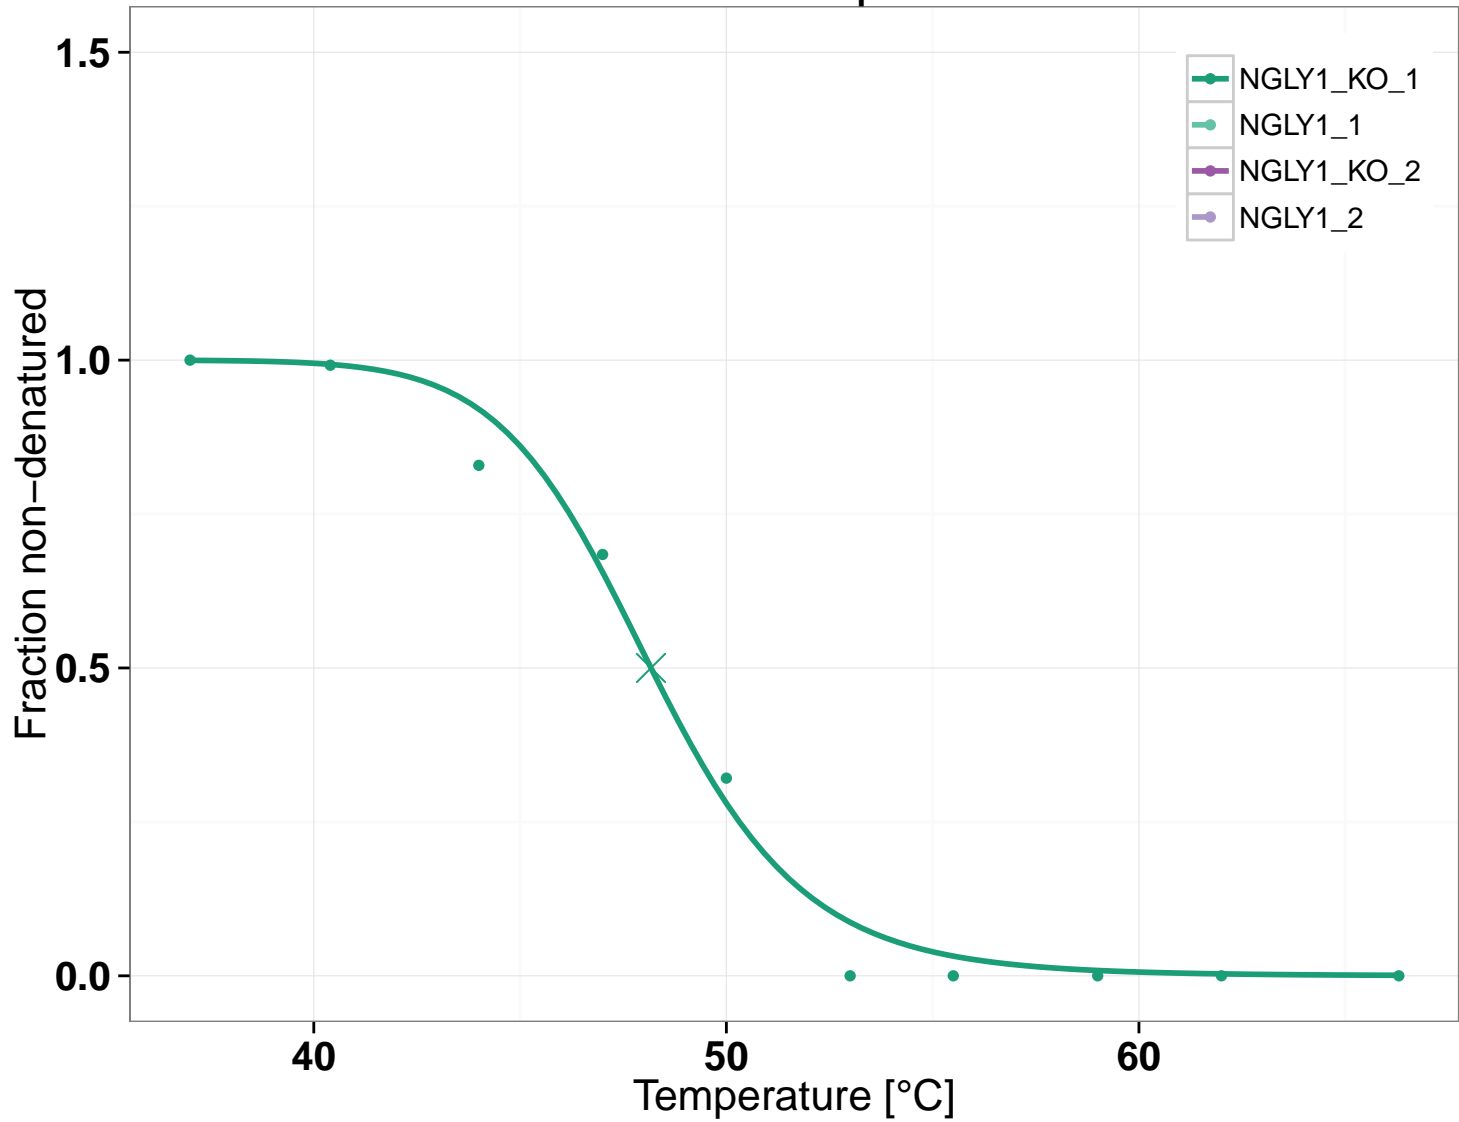

|            | meltPoint | slope | plateau | R2   |
|------------|-----------|-------|---------|------|
| NGLY1_KO_1 | 48.17     | -0.13 | 0       | 0.99 |
| NGLY1_1    | -         | -     | -       | -    |
| NGLY1_KO_2 | -         | -     | -       | -    |
| NGLY1_2    | -         | -     | -       | -    |

Supplement: Supplementary file 1654 [file 1]

IPI00300222.6|BBX

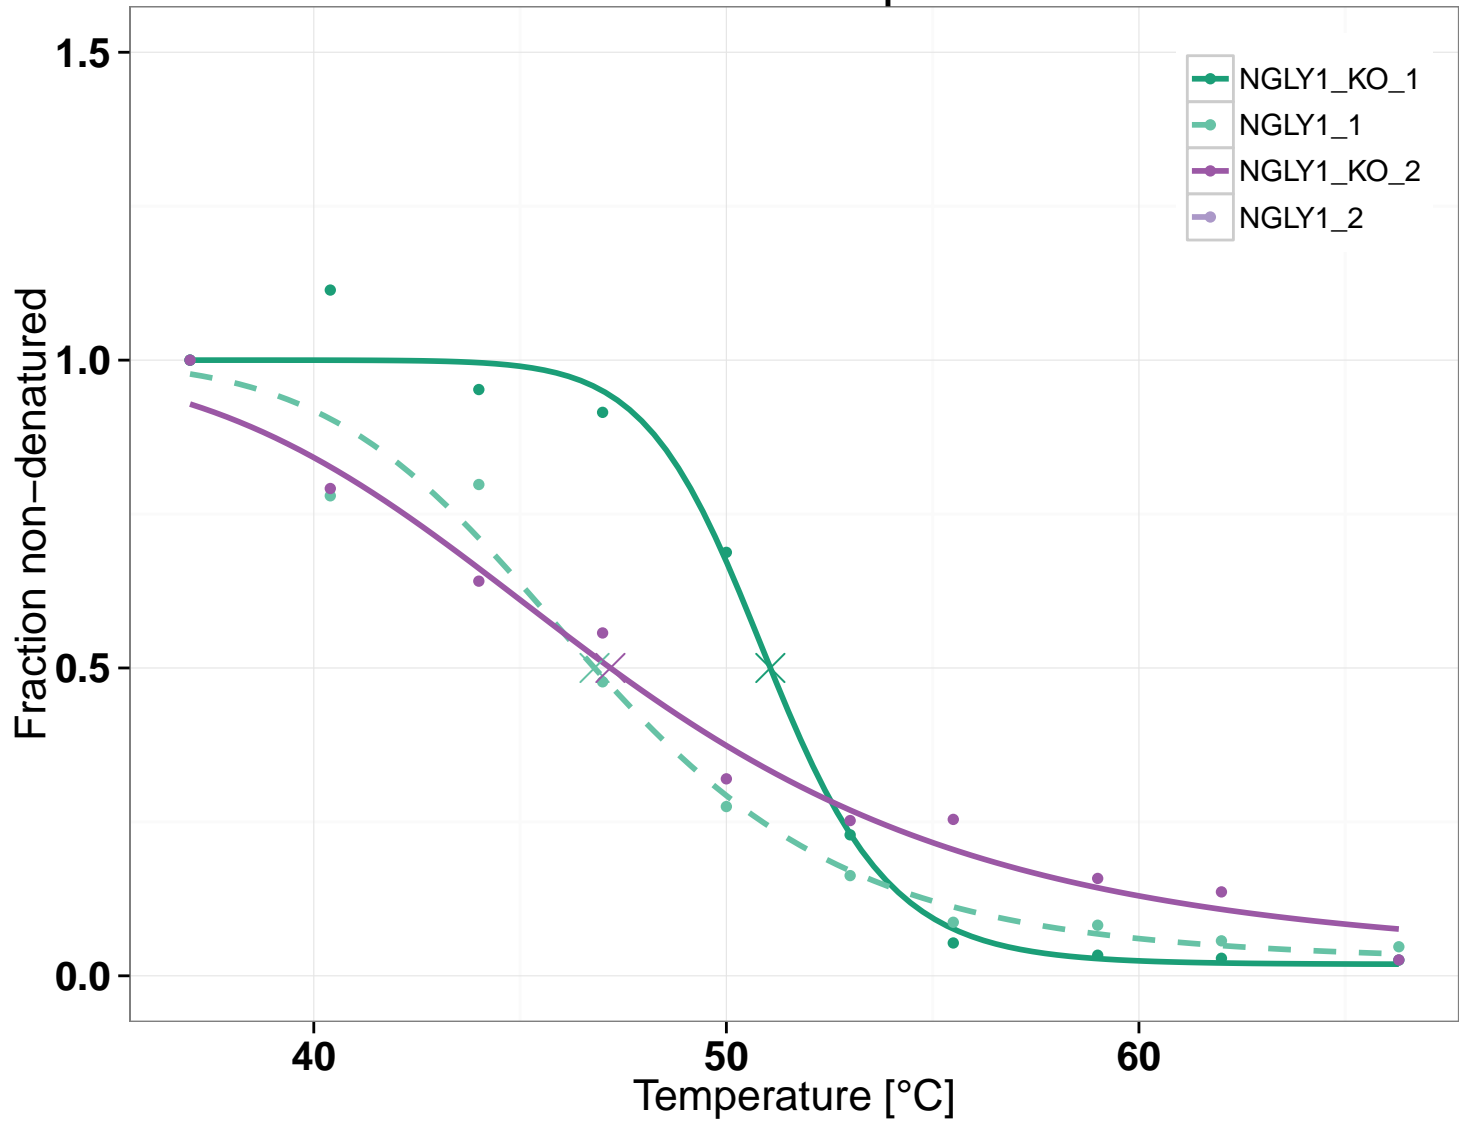

|            | meltPoint | slope  | plateau | R2   |
|------------|-----------|--------|---------|------|
| NGLY1_KO_1 | 51.07     | -0.17  | 0.02    | 0.99 |
| NGLY1_1    | 46.8      | -0.077 | 0.02    | 0.98 |
| NGLY1_KO_2 | 47.19     | -0.051 | 0.02    | 0.98 |
| NGLY1_2    | -         | -      | -       | -    |

Supplement: Supplementary file 1655 [file 1]

# IPI00034010.3|RWDD1

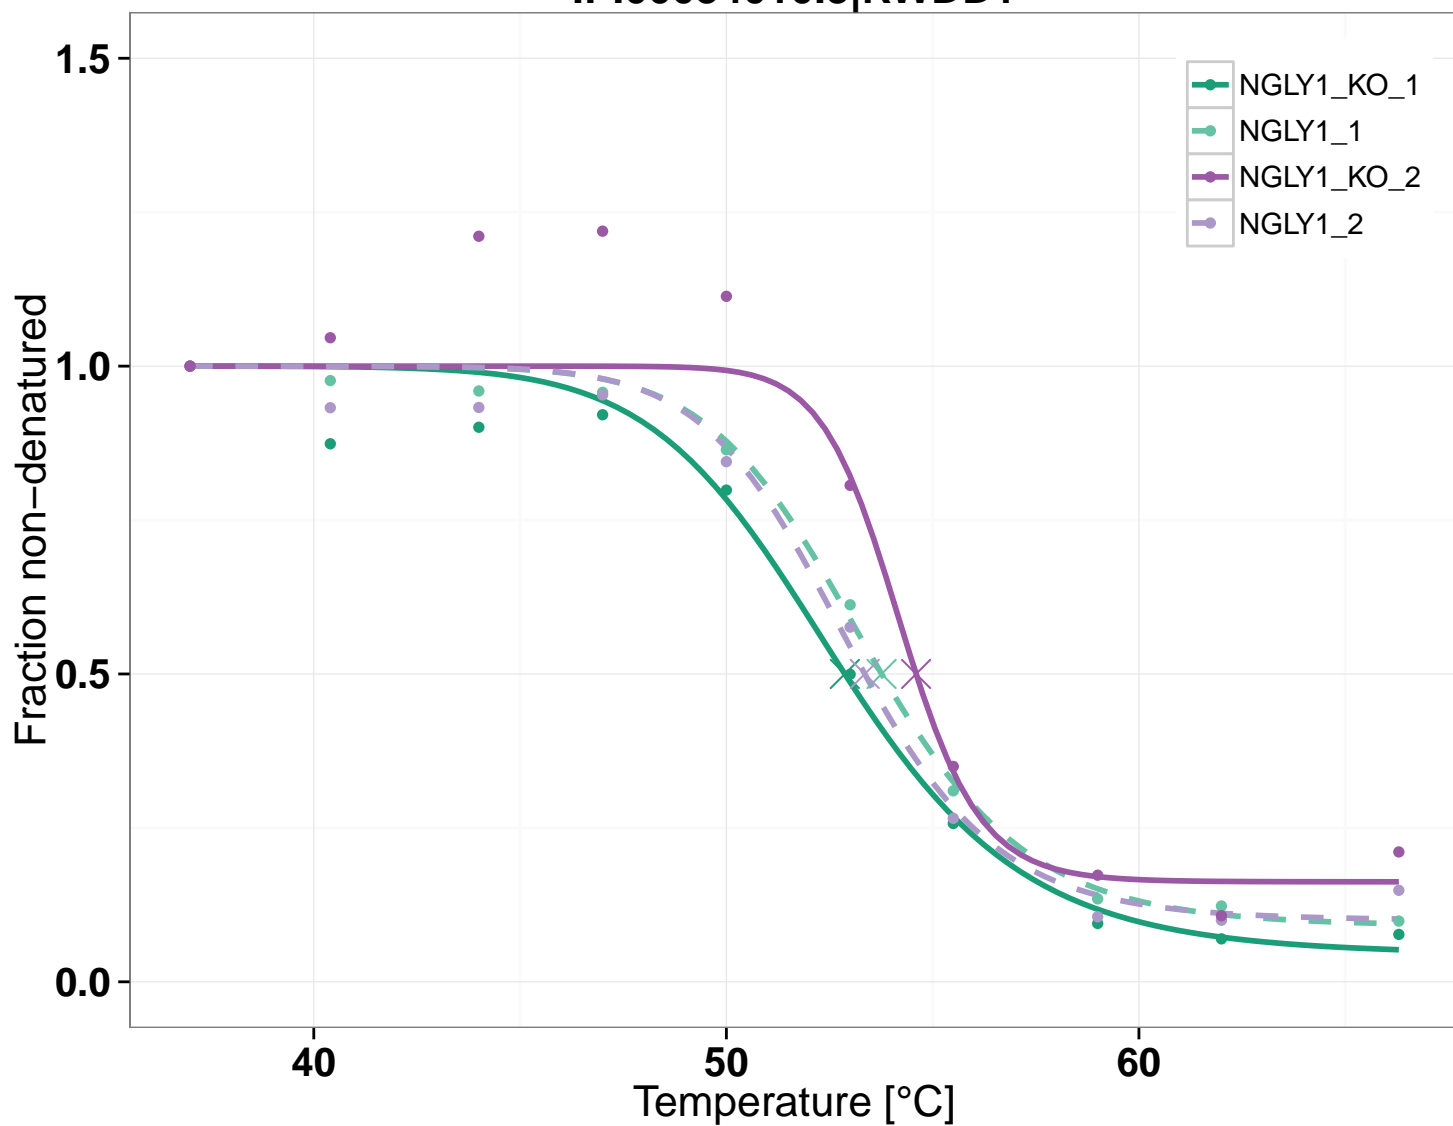

|            | meltPoint | slope | plateau | R2   |
|------------|-----------|-------|---------|------|
| NGLY1_KO_1 | 52.87     | -0.11 | 0.04    | 0.98 |
| NGLY1_1    | 53.76     | -0.12 | 0.09    | 1    |
| NGLY1_KO_2 | 54.6      | -0.22 | 0.16    | 0.94 |
| NGLY1_2    | 53.35     | -0.13 | 0.1     | 0.99 |

Supplement: Supplementary file 1656 [file 1]

# IPI00015833.1|CHCHD3

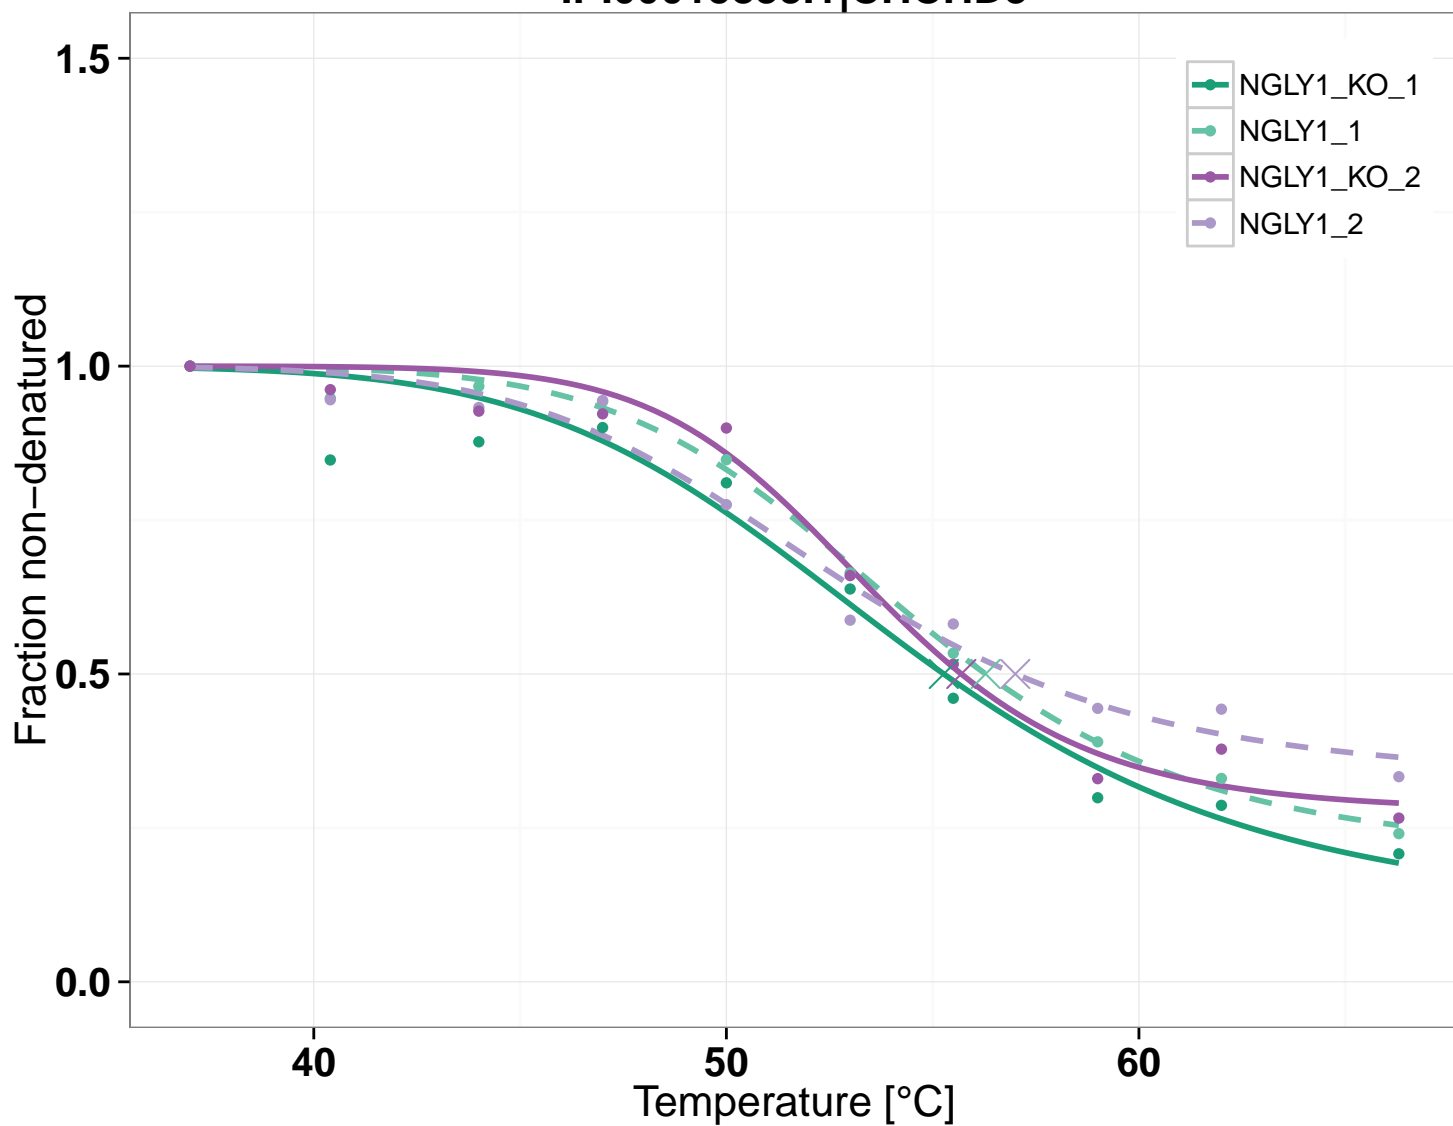

|            | meltPoint | slope  | plateau | R2   |
|------------|-----------|--------|---------|------|
| NGLY1_KO_1 | 55.27     | -0.051 | 0.1     | 0.96 |
| NGLY1_1    | 56.28     | -0.057 | 0.21    | 1    |
| NGLY1_KO_2 | 55.69     | -0.069 | 0.28    | 0.98 |
| NGLY1_2    | 57        | -0.045 | 0.33    | 0.98 |

Supplement: Supplementary file 1657 [file 1]

IPI00479571.4|DTNBP1

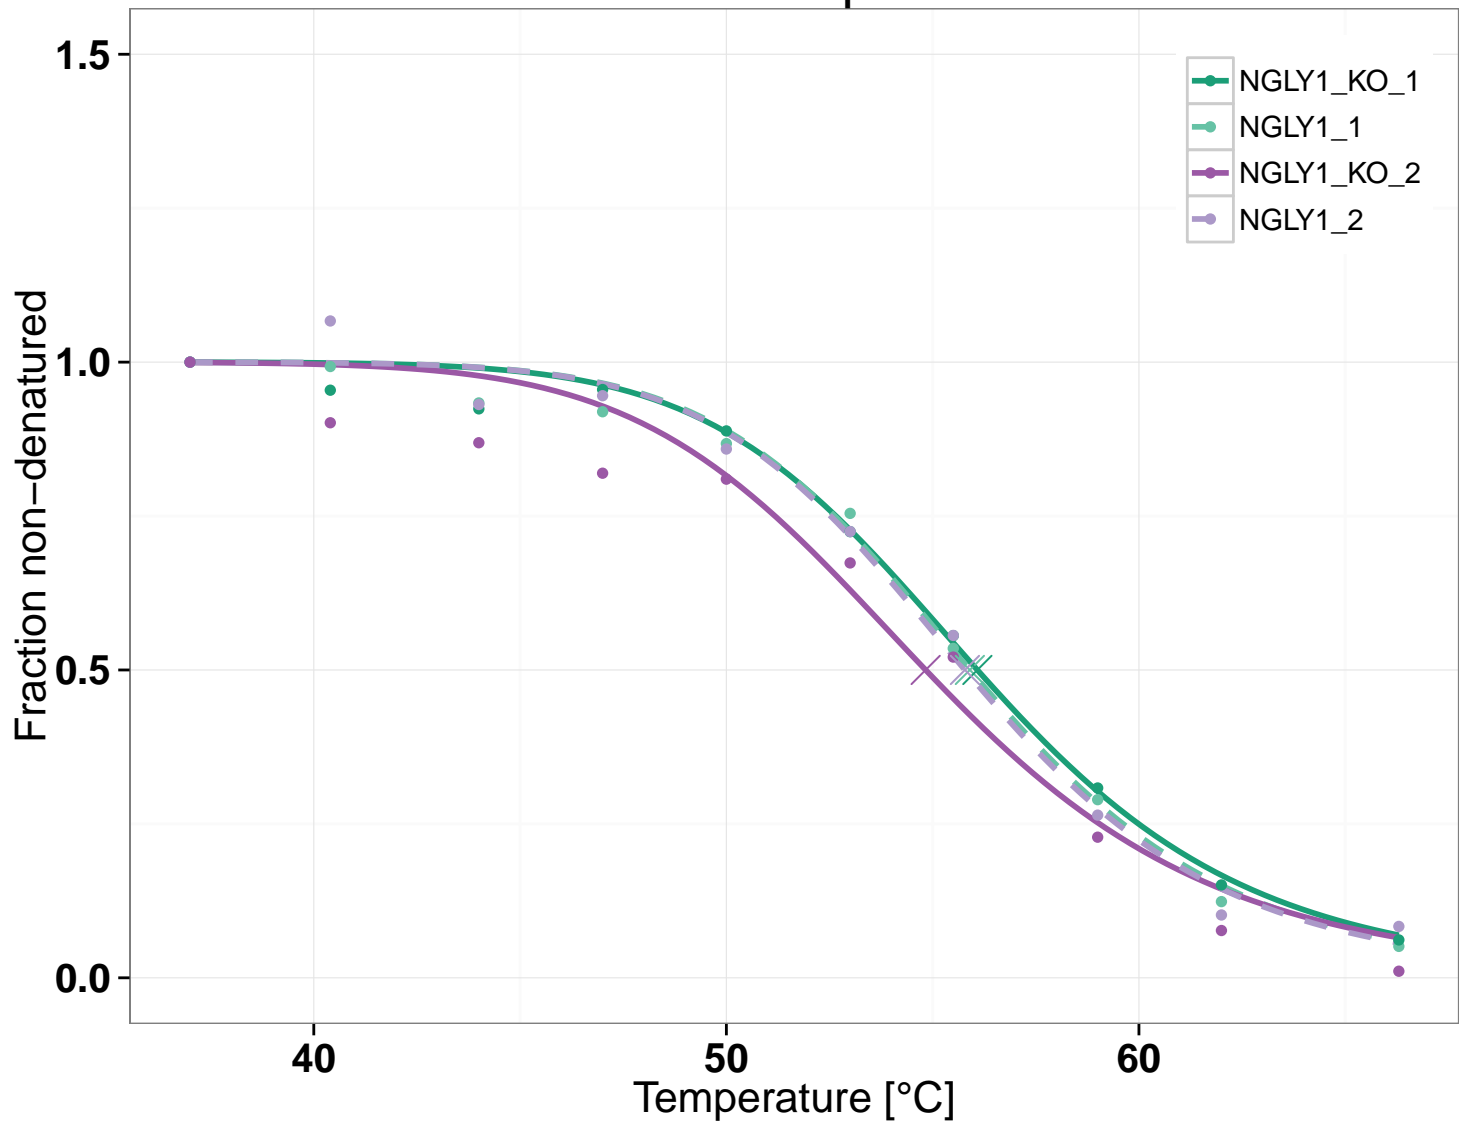

|            | meltPoint | slope  | plateau | R2   |
|------------|-----------|--------|---------|------|
| NGLY1_KO_1 | 56.08     | -0.076 | 0       | 0.99 |
| NGLY1_1    | 55.9      | -0.08  | 0       | 0.99 |
| NGLY1_KO_2 | 54.83     | -0.071 | 0       | 0.96 |
| NGLY1_2    | 55.78     | -0.08  | 0       | 0.99 |

Supplement: Supplementary file 1658 [file 1]

# IPI00328260.3|NSMAF

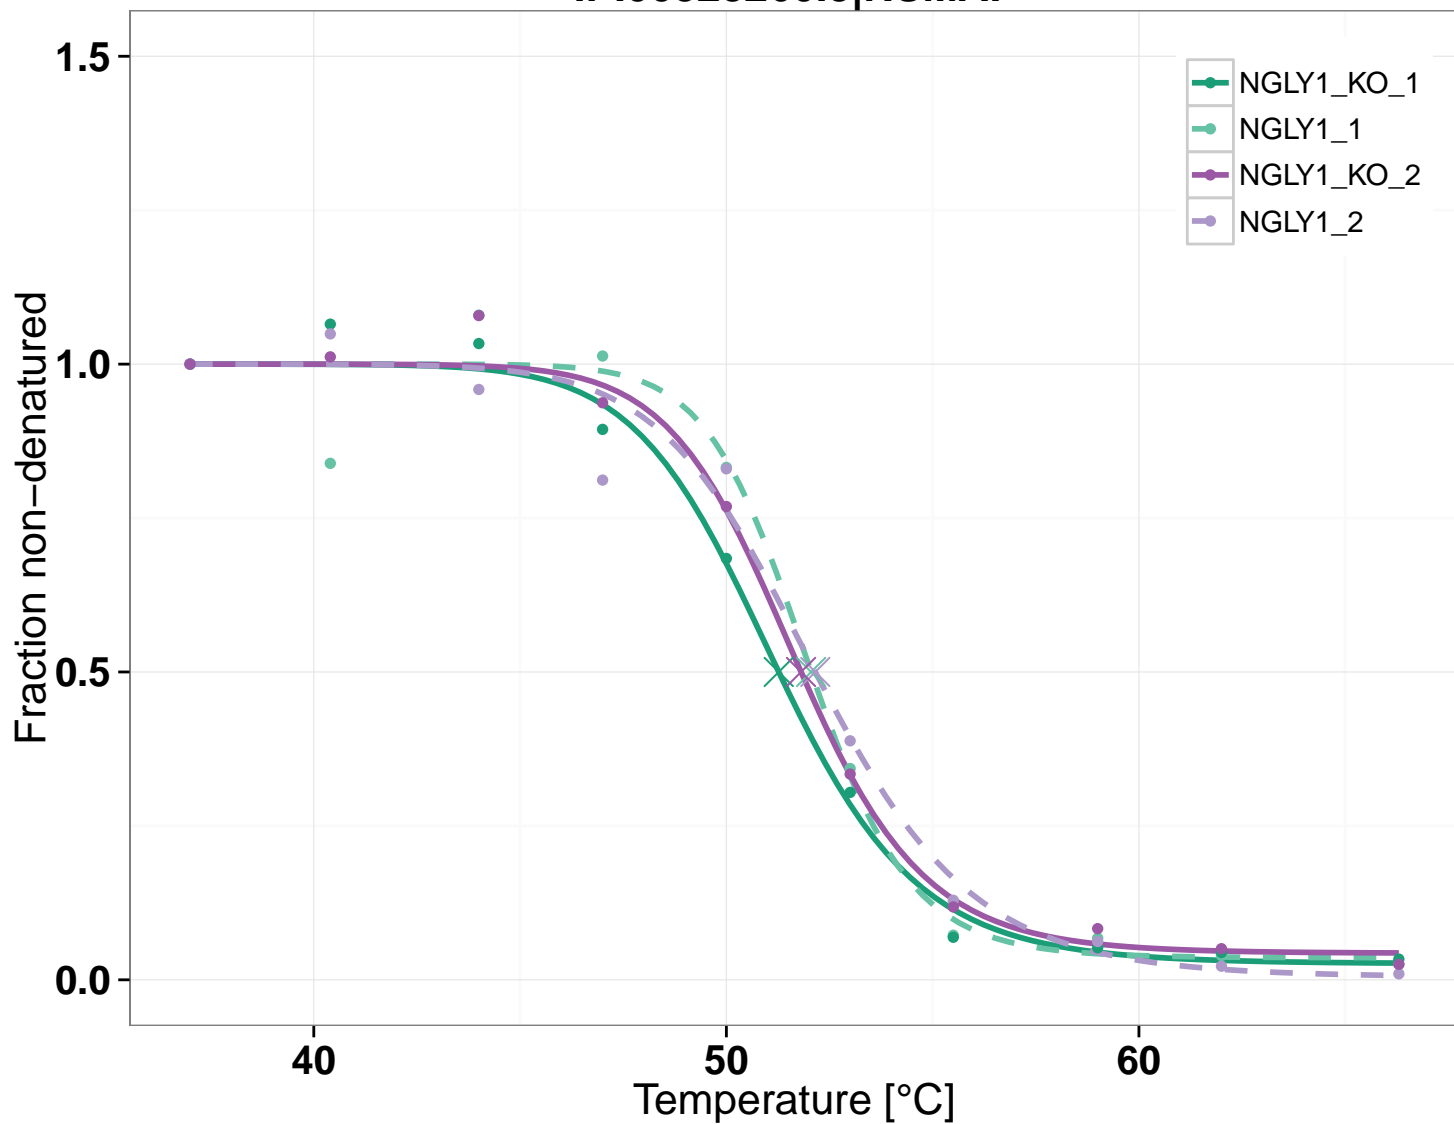

|            | meltPoint | slope | plateau | R2   |
|------------|-----------|-------|---------|------|
| NGLY1_KO_1 | 51.27     | -0.14 | 0.03    | 0.99 |
| NGLY1_1    | 52.06     | -0.19 | 0.04    | 0.98 |
| NGLY1_KO_2 | 51.81     | -0.15 | 0.04    | 1    |
| NGLY1_2    | 52.16     | -0.13 | 0       | 0.98 |

Supplement: Supplementary file 1659 [file 1]

IPI00903286.1|SNRPD1

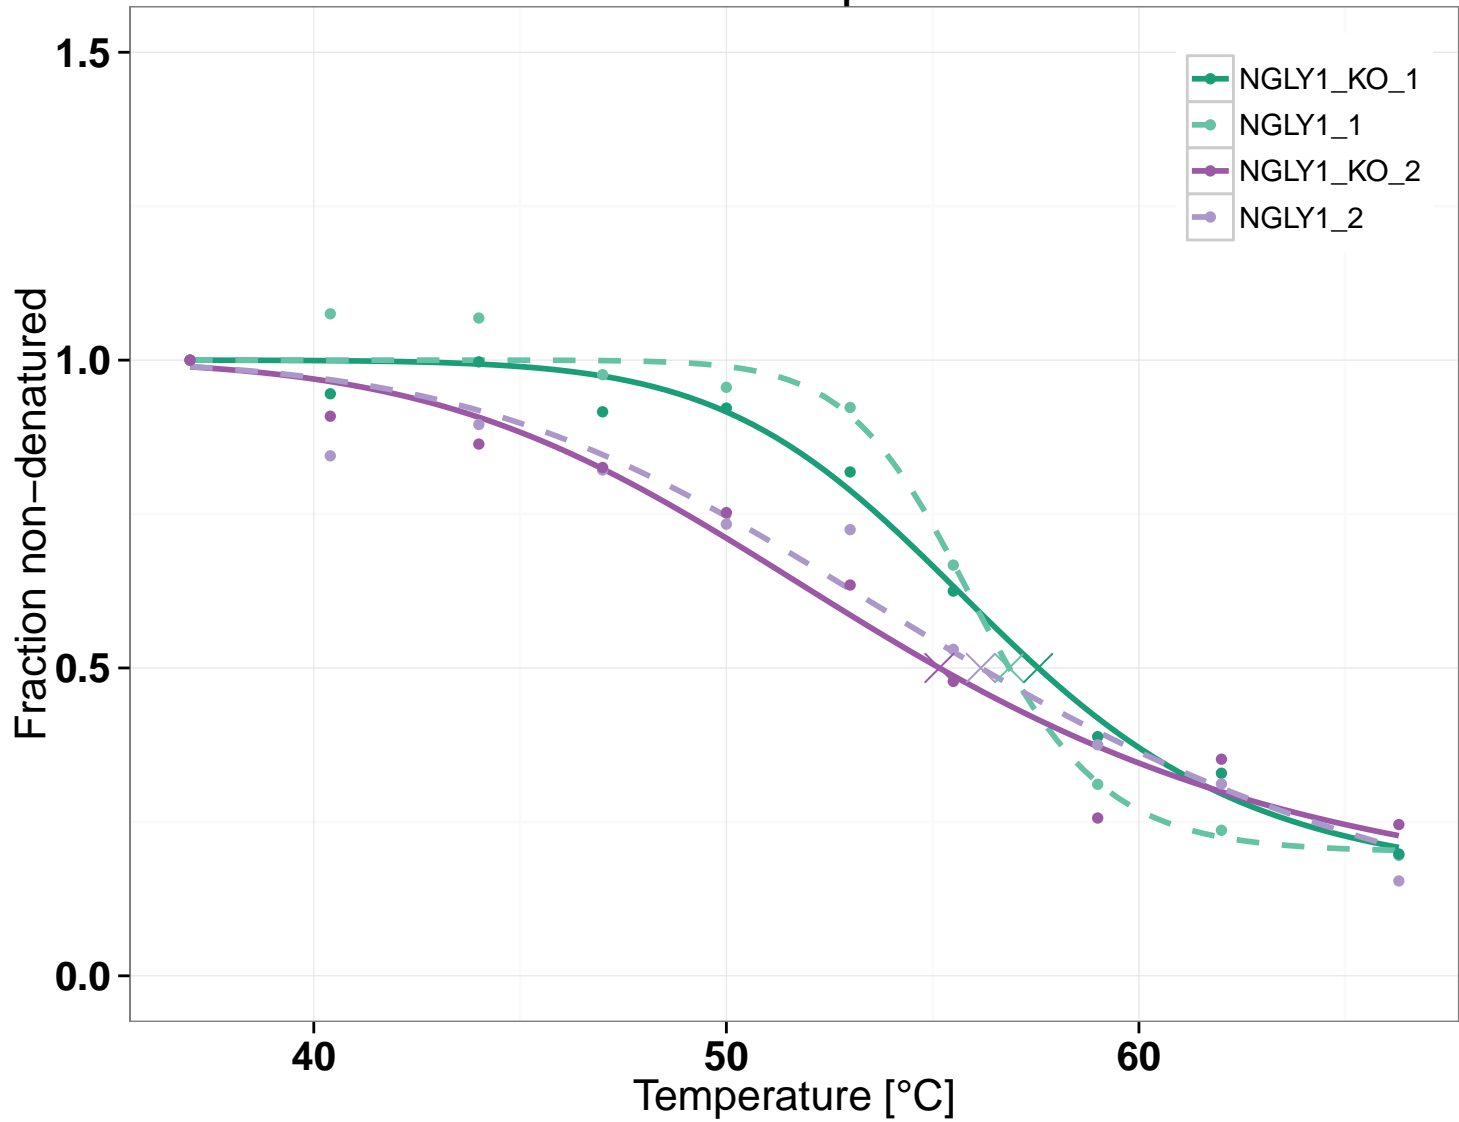

|            | meltPoint | slope  | plateau | R2   |
|------------|-----------|--------|---------|------|
| NGLY1_KO_1 | 57.56     | -0.066 | 0.15    | 0.99 |
| NGLY1_1    | 56.86     | -0.13  | 0.2     | 0.99 |
| NGLY1_KO_2 | 55.16     | -0.042 | 0.1     | 0.96 |
| NGLY1_2    | 56.17     | -0.041 | 0       | 0.96 |

Supplement: Supplementary file 1660 [file 1]

# IPI00465222.2|CHD3

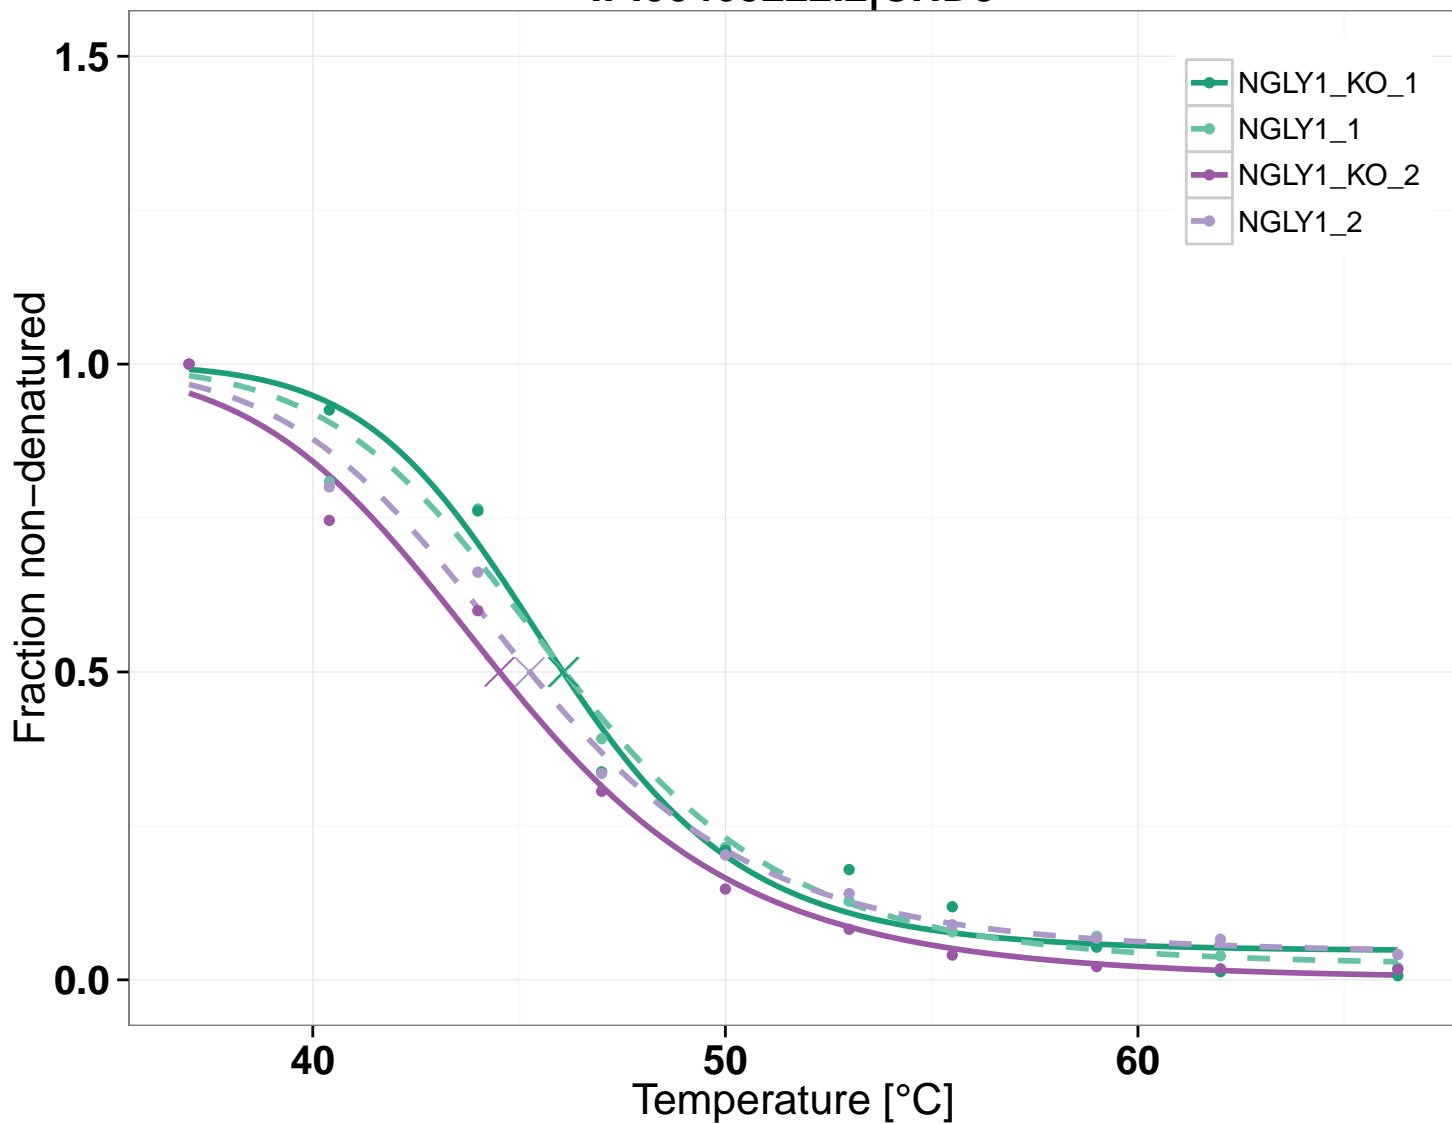

|            | meltPoint | slope  | plateau | R2   |
|------------|-----------|--------|---------|------|
| NGLY1_KO_1 | 46.07     | -0.1   | 0.05    | 0.99 |
| NGLY1_1    | 46.1      | -0.088 | 0.02    | 0.98 |
| NGLY1_KO_2 | 44.53     | -0.085 | 0       | 0.99 |
| NGLY1_2    | 45.26     | -0.083 | 0.04    | 0.99 |

Supplement: Supplementary file 1661 [file 1]

IPI00784076.1|PNPLA8

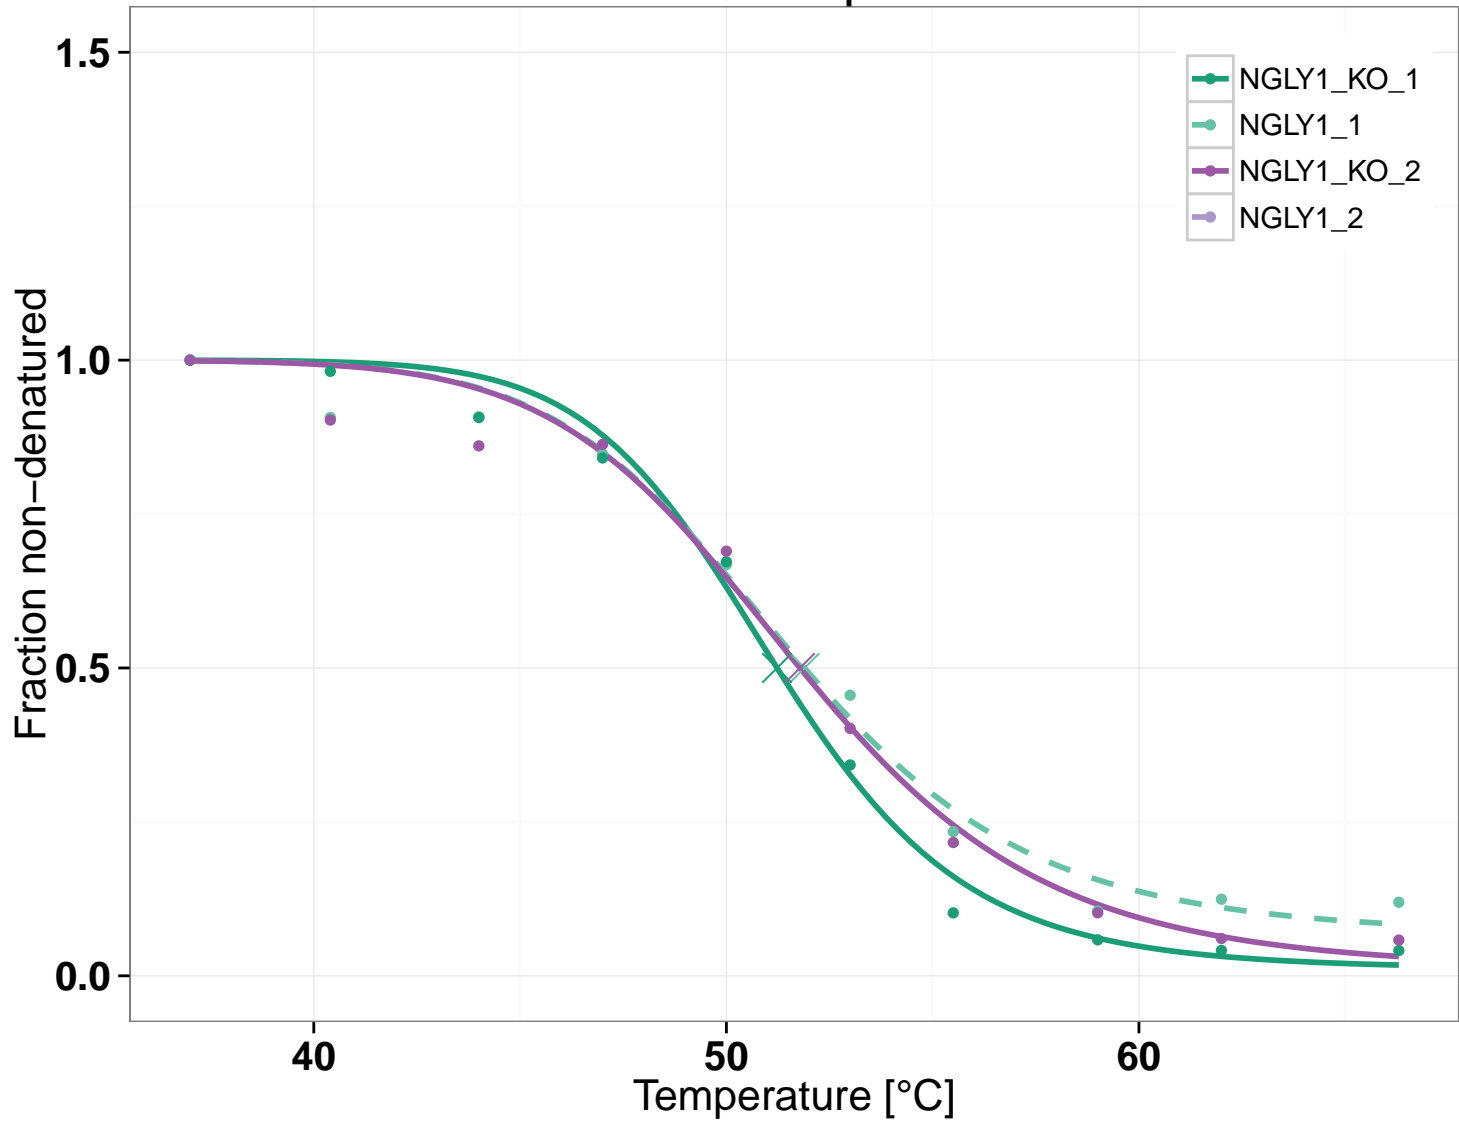

|            | meltPoint | slope  | plateau | R2   |
|------------|-----------|--------|---------|------|
| NGLY1_KO_1 | 51.23     | -0.11  | 0.01    | 0.99 |
| NGLY1_1    | 51.9      | -0.081 | 0.07    | 0.99 |
| NGLY1_KO_2 | 51.78     | -0.083 | 0.01    | 0.98 |
| NGLY1_2    | -         | -      | -       | -    |

Supplement: Supplementary file 1662 [file 1]

# IPI00914566.2|FDPS

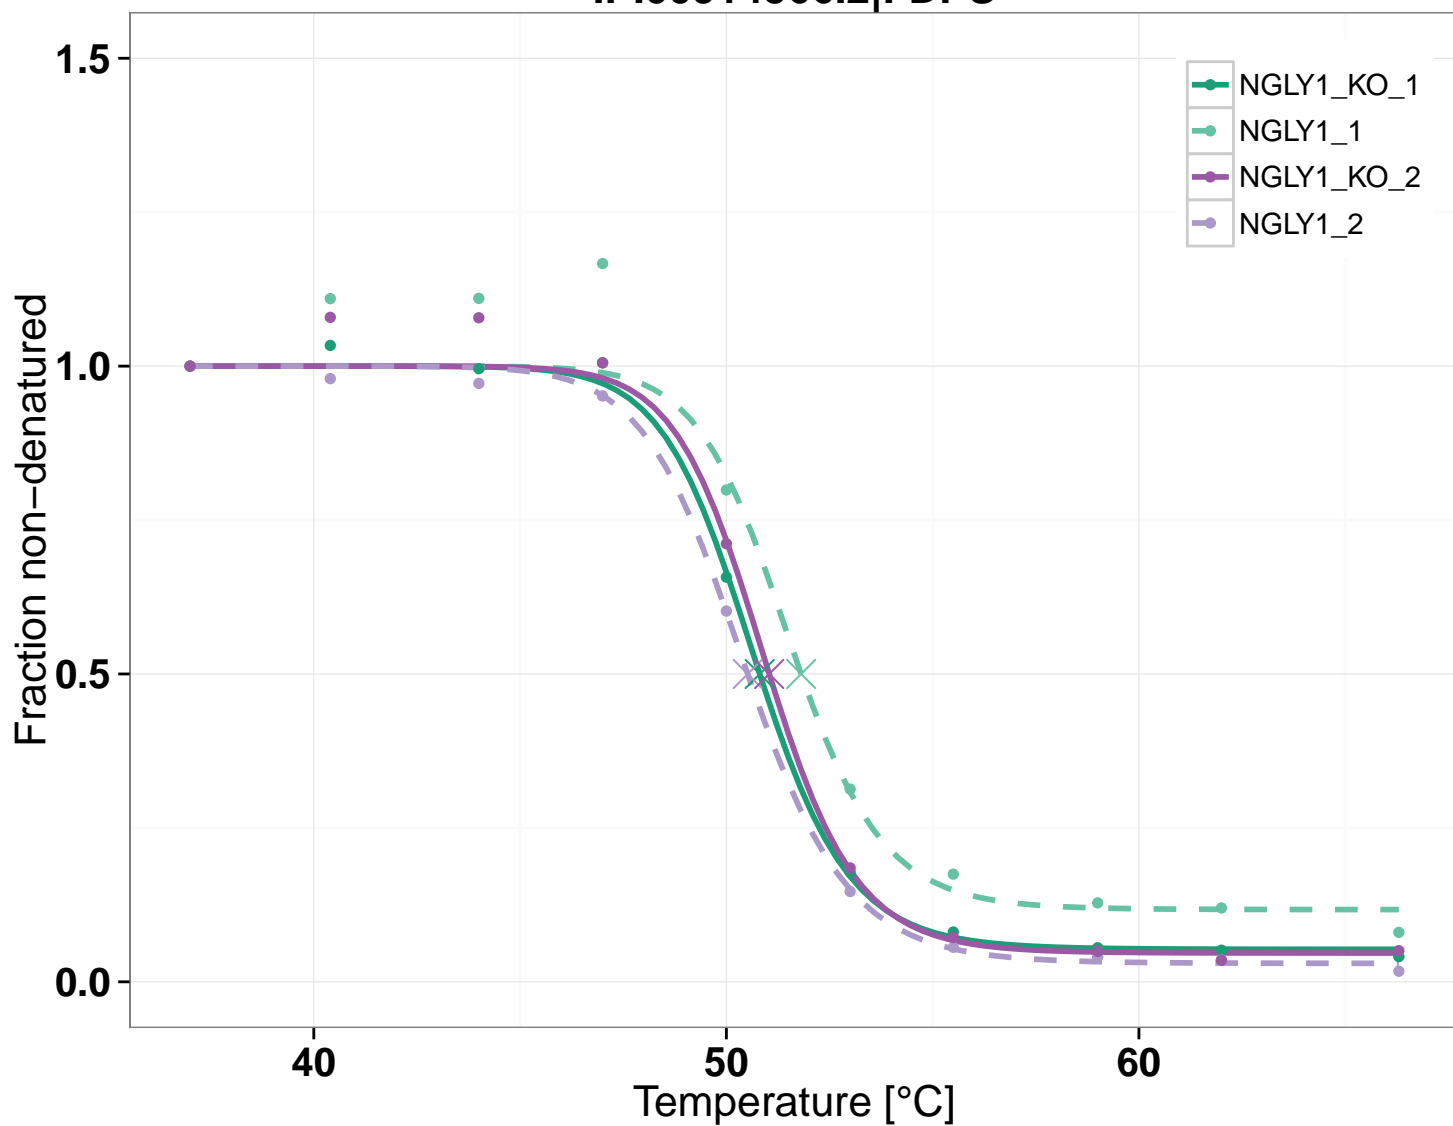

|            | meltPoint | slope | plateau | R2   |
|------------|-----------|-------|---------|------|
| NGLY1_KO_1 | 50.81     | -0.21 | 0.05    | 1    |
| NGLY1_1    | 51.81     | -0.2  | 0.12    | 0.97 |
| NGLY1_KO_2 | 51.04     | -0.22 | 0.05    | 0.99 |
| NGLY1_2    | 50.52     | -0.2  | 0.03    | 1    |

Supplement: Supplementary file 1663 [file 1]

# IPI00792737.2|BRAP

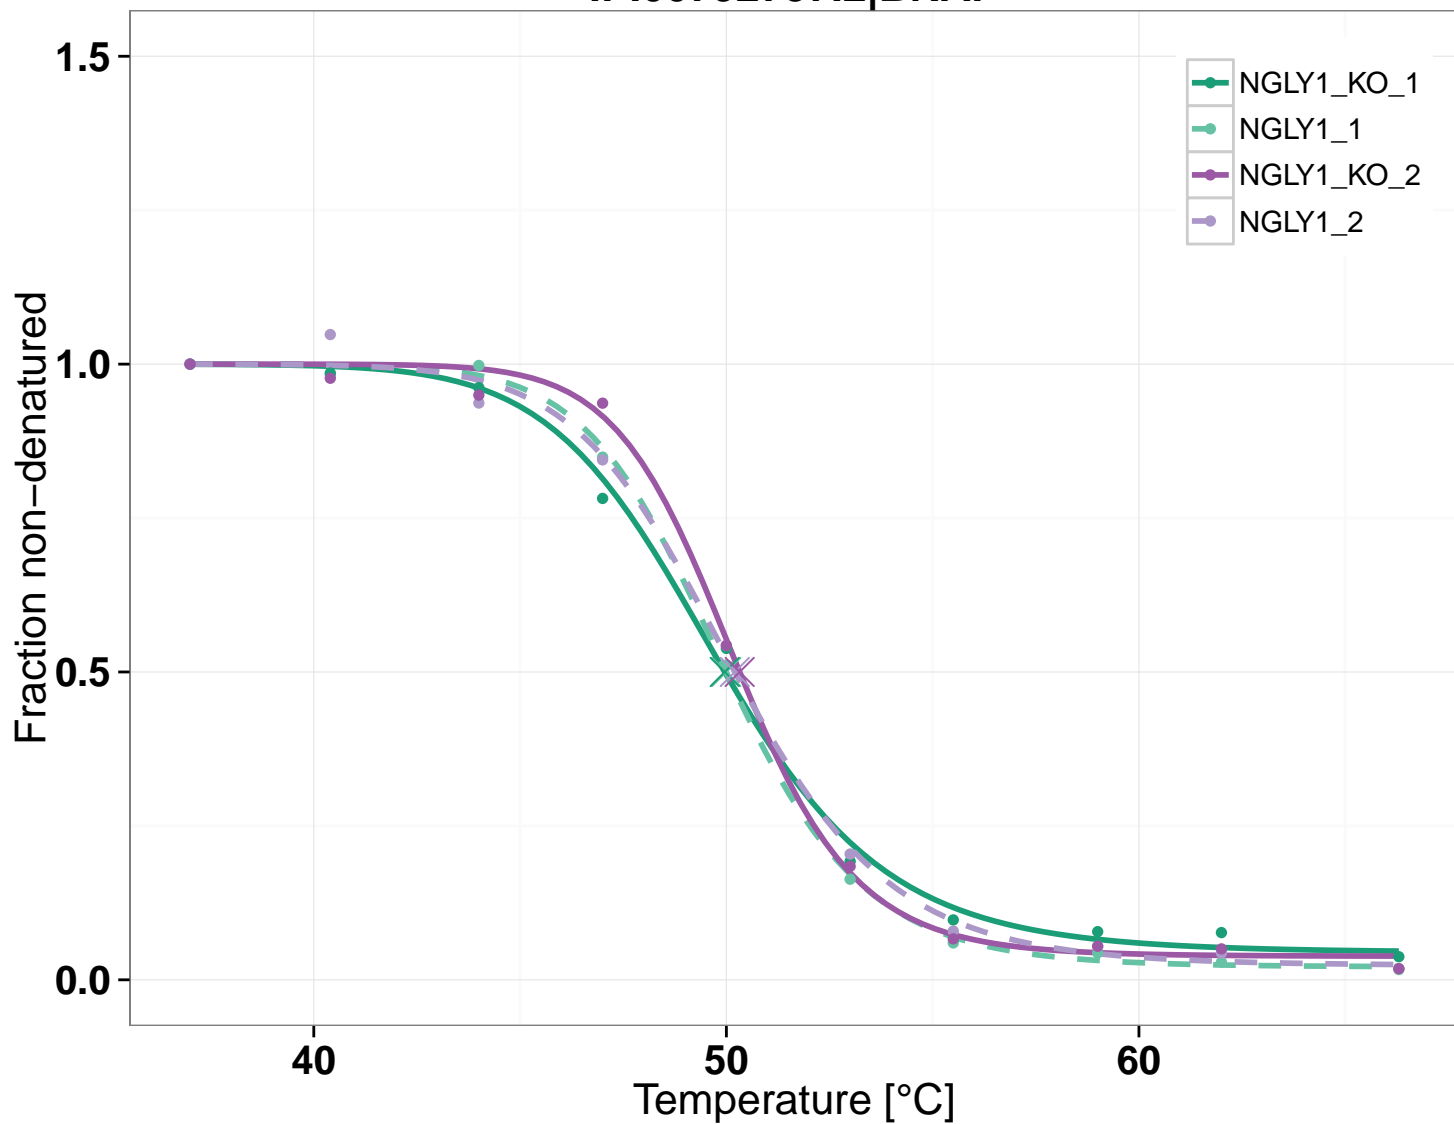

|            | meltPoint | slope | plateau | R2 |
|------------|-----------|-------|---------|----|
| NGLY1_KO_1 | 49.96     | -0.12 | 0.04    | 1  |
| NGLY1_1    | 50        | -0.14 | 0.02    | 1  |
| NGLY1_KO_2 | 50.32     | -0.16 | 0.04    | 1  |
| NGLY1_2    | 50.21     | -0.13 | 0.02    | 1  |

Supplement: Supplementary file 1664 [file 1]

# IPI00019269.3|WDR61

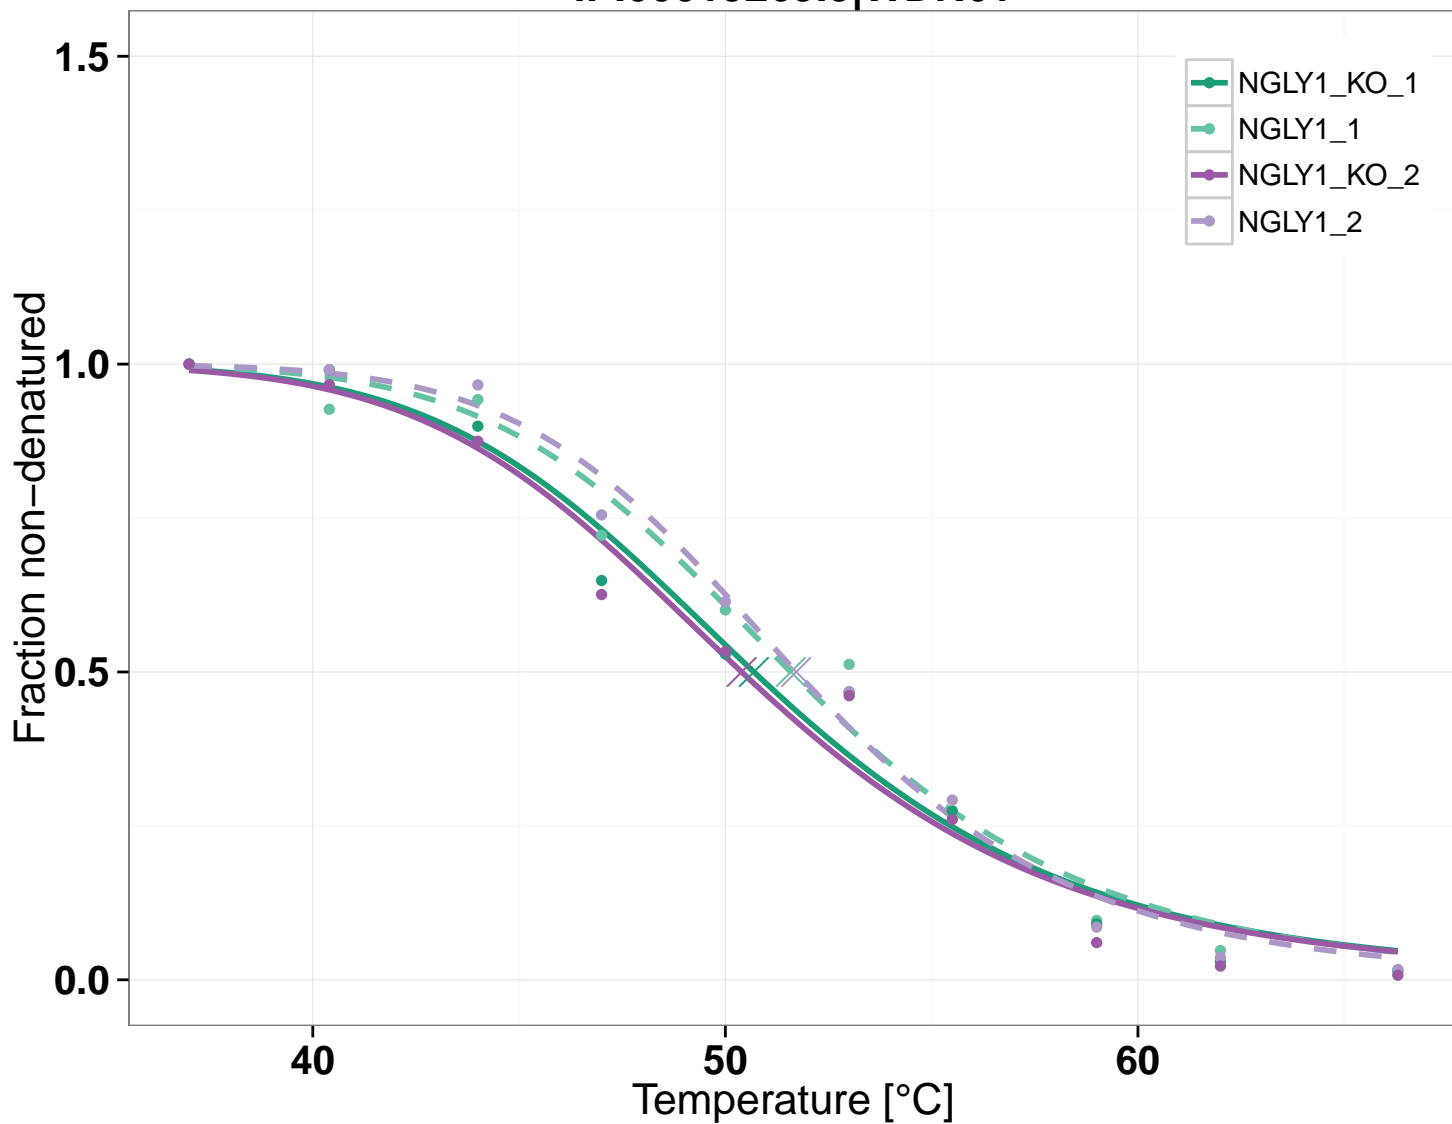

|            | meltPoint | slope  | plateau | R2   |
|------------|-----------|--------|---------|------|
| NGLY1_KO_1 | 50.69     | -0.065 | 0       | 0.98 |
| NGLY1_1    | 51.59     | -0.068 | 0       | 0.98 |
| NGLY1_KO_2 | 50.4      | -0.064 | 0       | 0.98 |
| NGLY1_2    | 51.72     | -0.074 | 0       | 0.99 |

Supplement: Supplementary file 1665 [file 1]

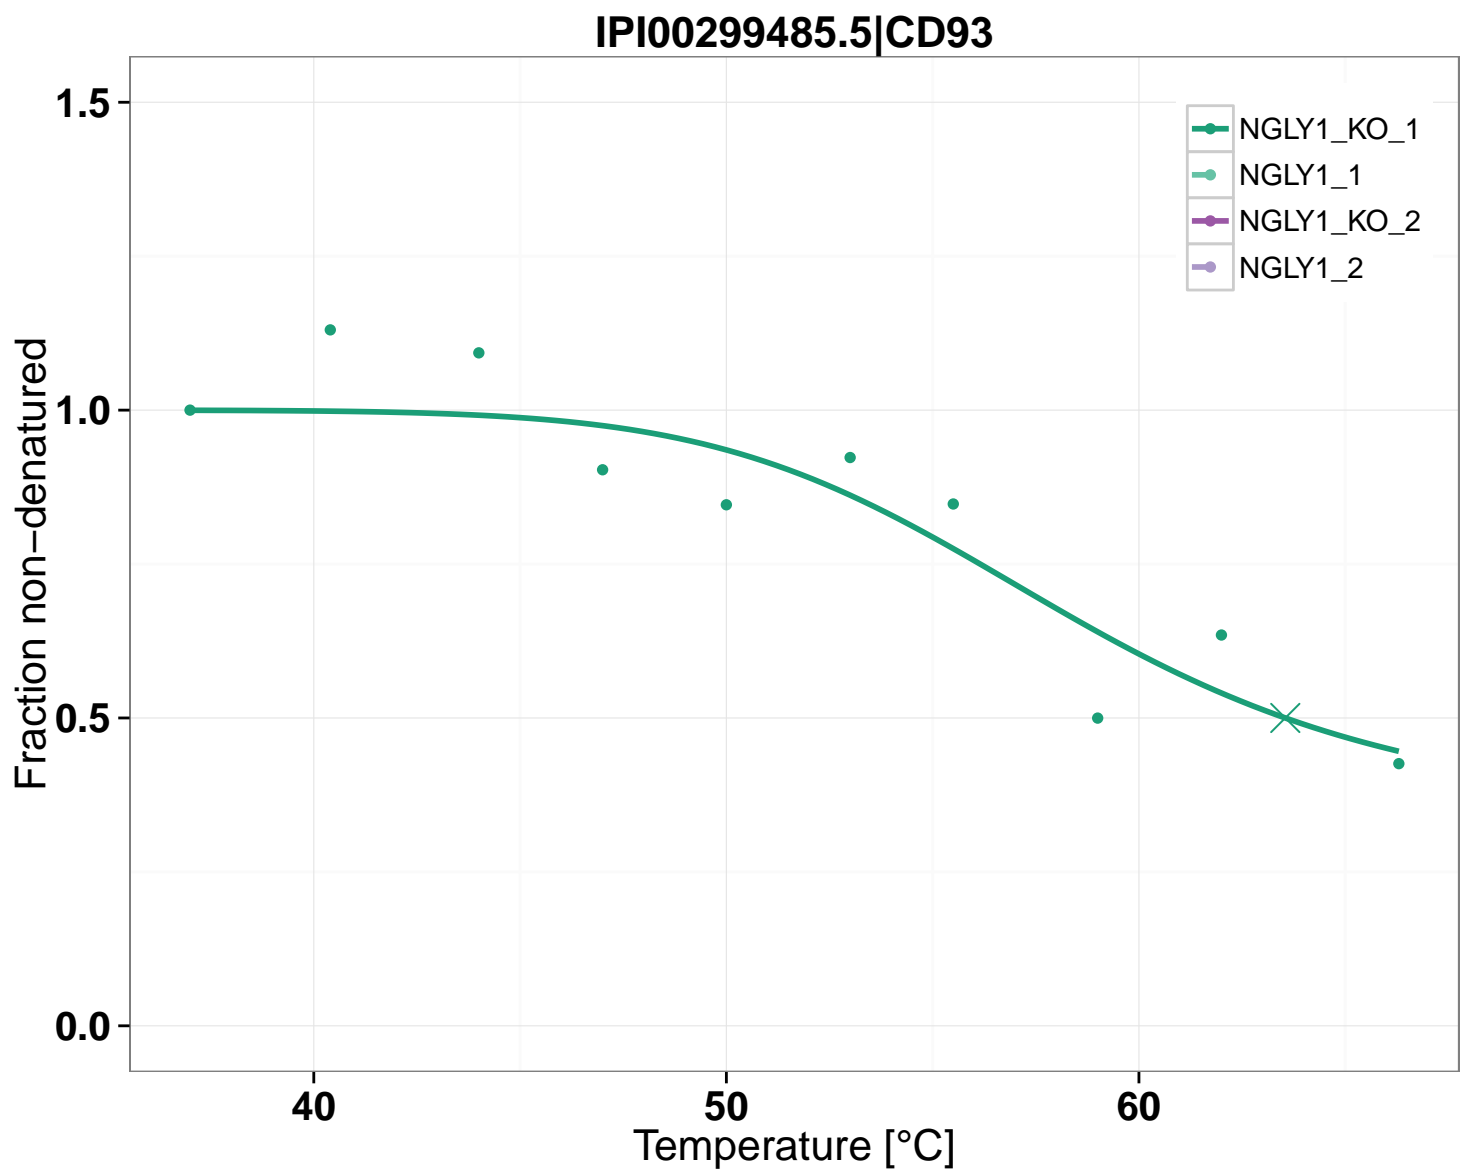

|            | meltPoint | slope  | plateau | R2   |
|------------|-----------|--------|---------|------|
| NGLY1_KO_1 | 63.55     | -0.039 | 0.34    | 0.85 |
| NGLY1_1    | -         | -      | -       | -    |
| NGLY1_KO_2 | -         | -      | -       | -    |
| NGLY1_2    | -         | -      | -       | -    |

Supplement: Supplementary file 1666 [file 1]

IPI00514002.4|STARD9

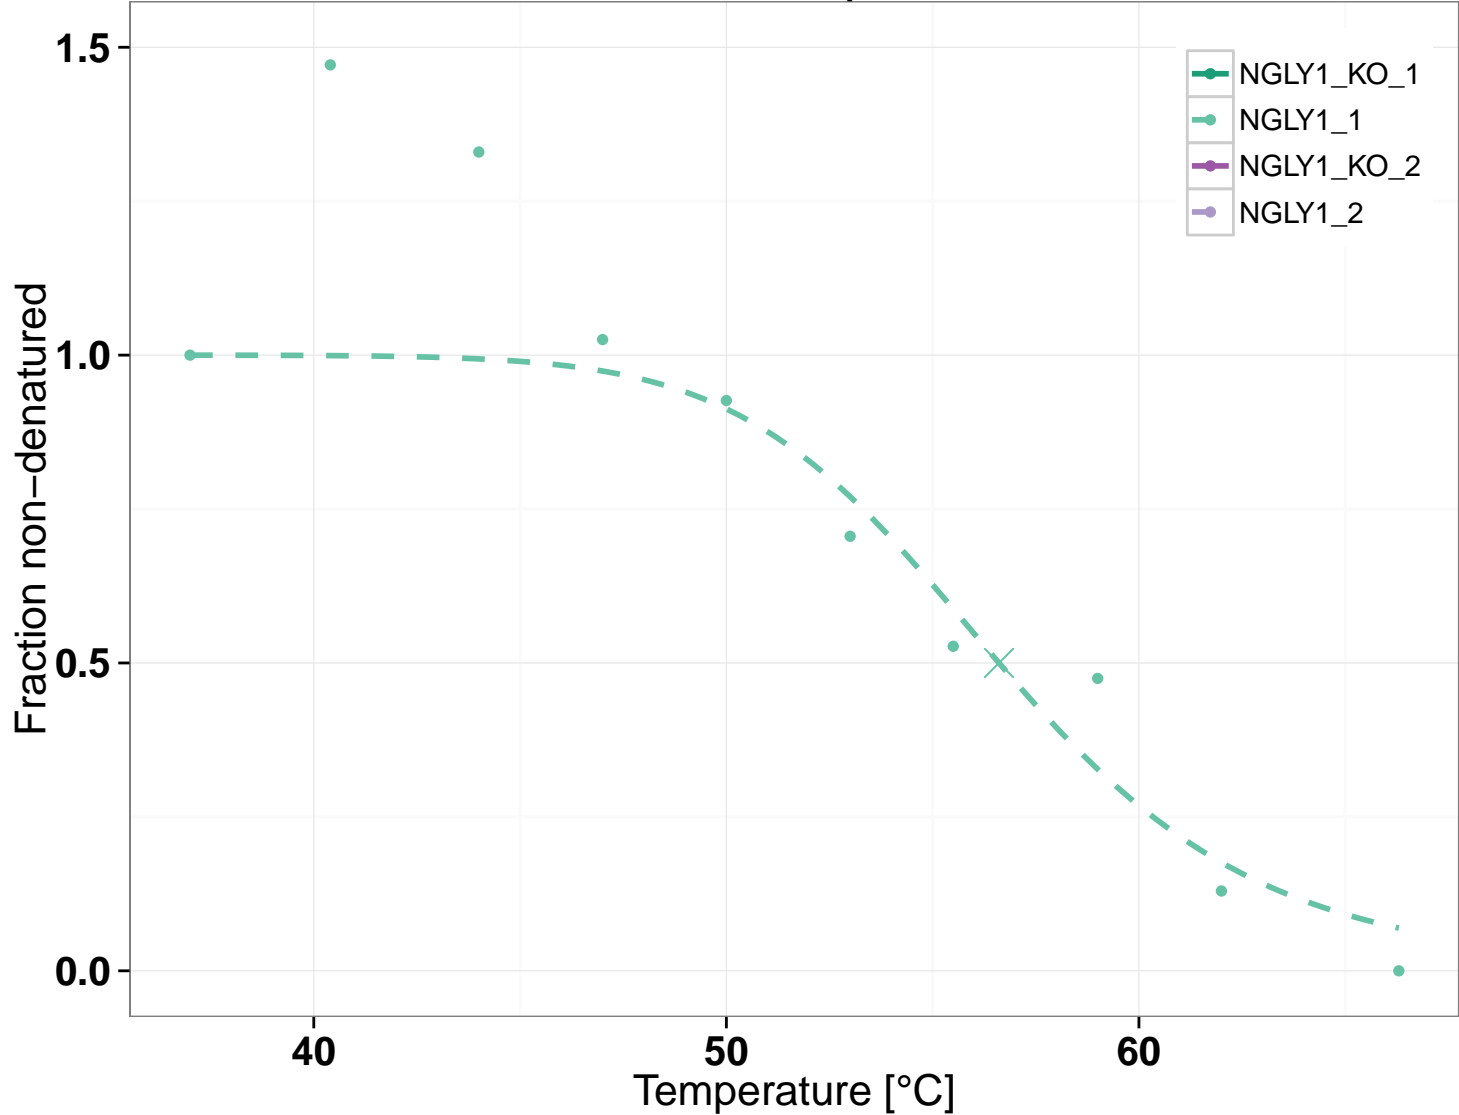

|            | meltPoint | slope  | plateau | R2   |
|------------|-----------|--------|---------|------|
| NGLY1_KO_1 | -         | -      | -       | -    |
| NGLY1_1    | 56.61     | -0.079 | 0       | 0.82 |
| NGLY1_KO_2 | -         | -      | -       | -    |
| NGLY1_2    | -         | -      | -       | -    |

Supplement: Supplementary file 1667 [file 1]

IPI00216275.1|ST3GAL4

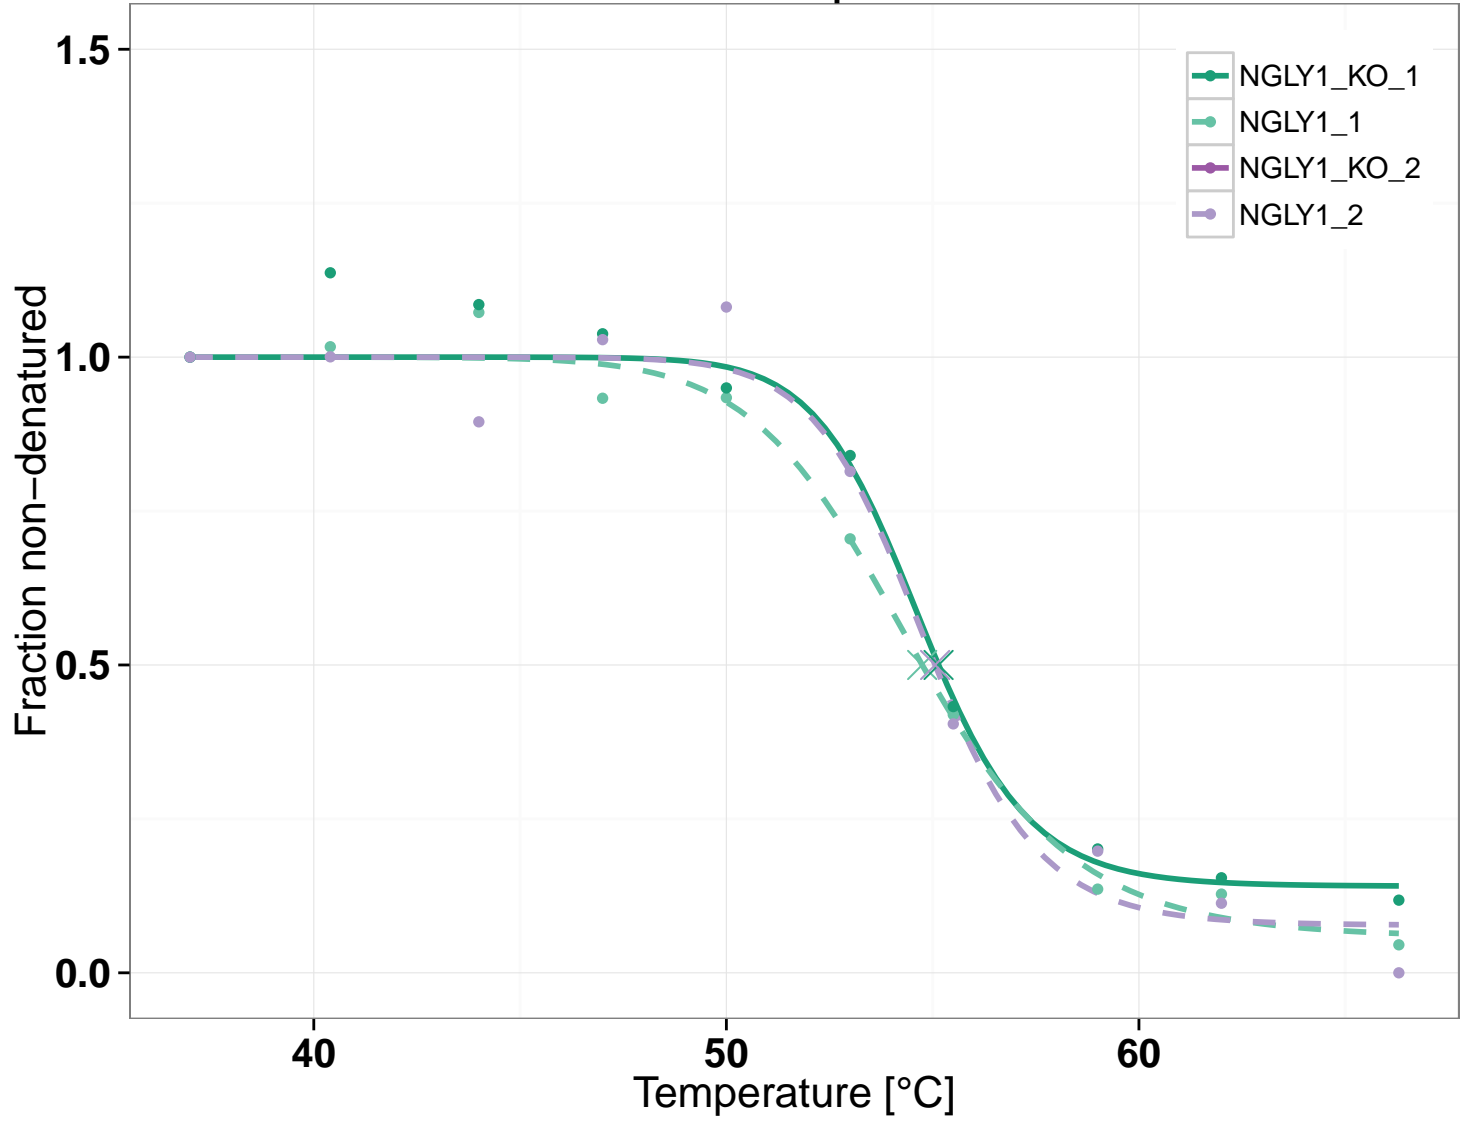

|            | meltPoint | slope | plateau | R2   |
|------------|-----------|-------|---------|------|
| NGLY1_KO_1 | 55.14     | -0.17 | 0.14    | 0.98 |
| NGLY1_1    | 54.75     | -0.12 | 0.06    | 0.99 |
| NGLY1_KO_2 | -         | -     | -       | -    |
| NGLY1_2    | 55.06     | -0.17 | 0.08    | 0.98 |

Supplement: Supplementary file 1668 [file 1]

IPI00013146.1|MRPS22

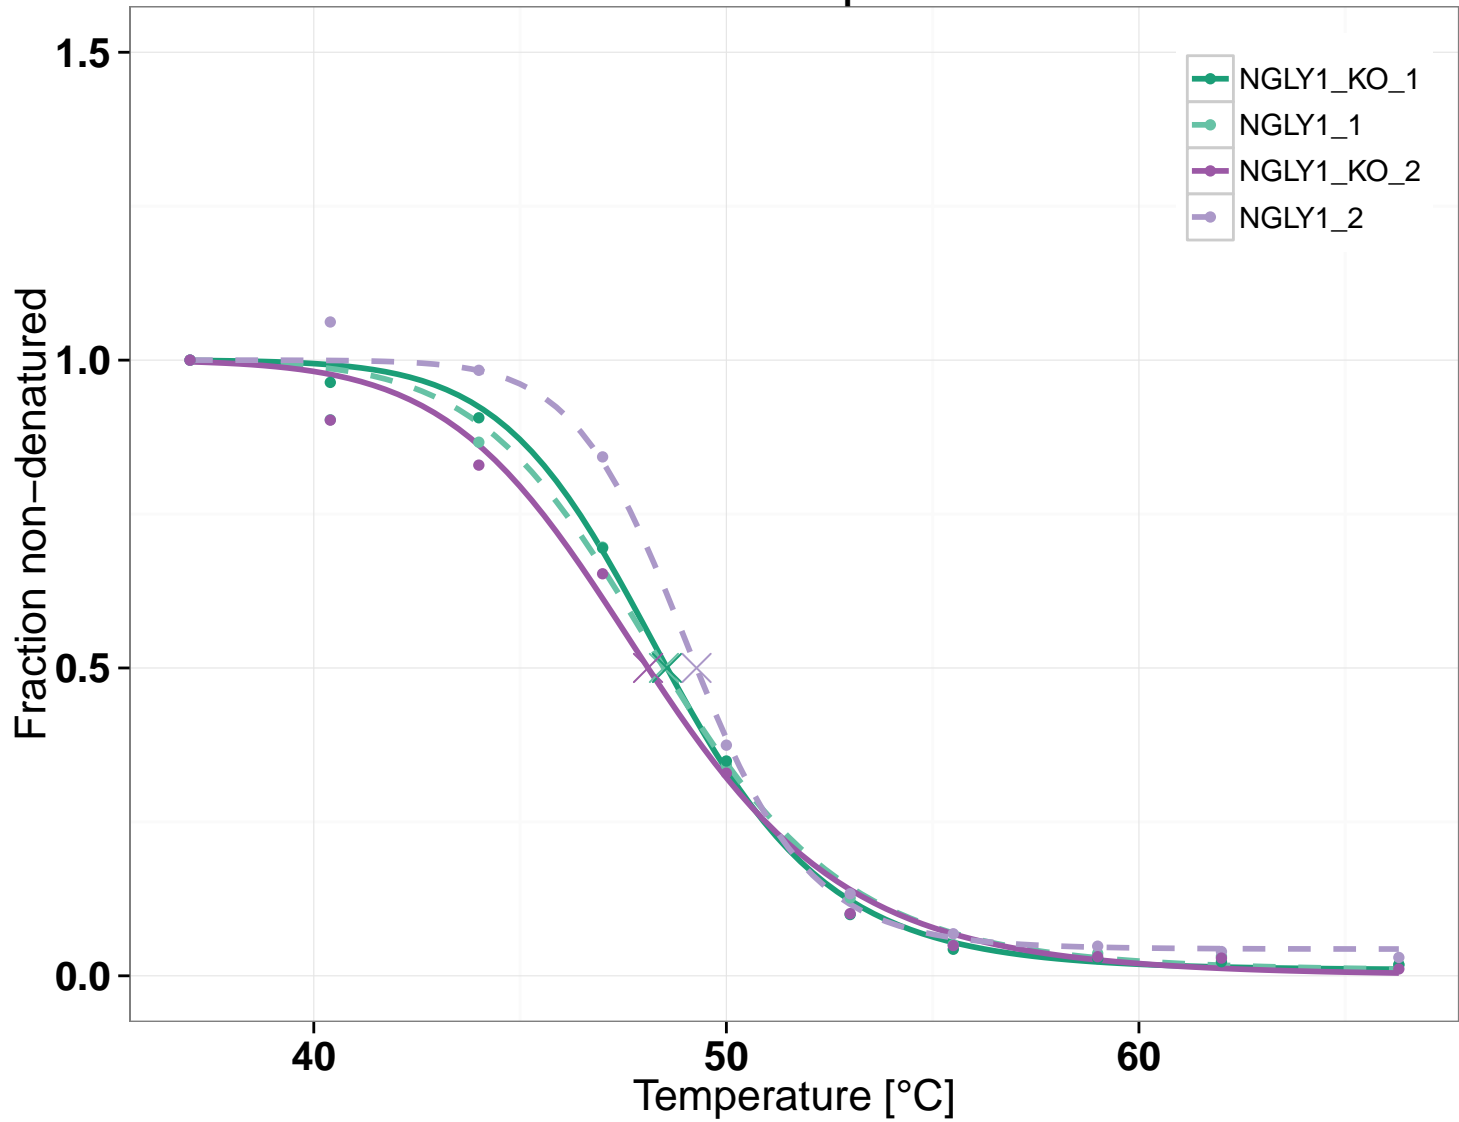

|            | meltPoint | slope | plateau | R2   |
|------------|-----------|-------|---------|------|
| NGLY1_KO_1 | 48.56     | -0.12 | 0.01    | 1    |
| NGLY1_1    | 48.49     | -0.11 | 0.01    | 0.99 |
| NGLY1_KO_2 | 48.1      | -0.1  | 0       | 0.99 |
| NGLY1_2    | 49.28     | -0.17 | 0.04    | 1    |

Supplement: Supplementary file 1669 [file 1]

# IPI00794284.2|ECT2

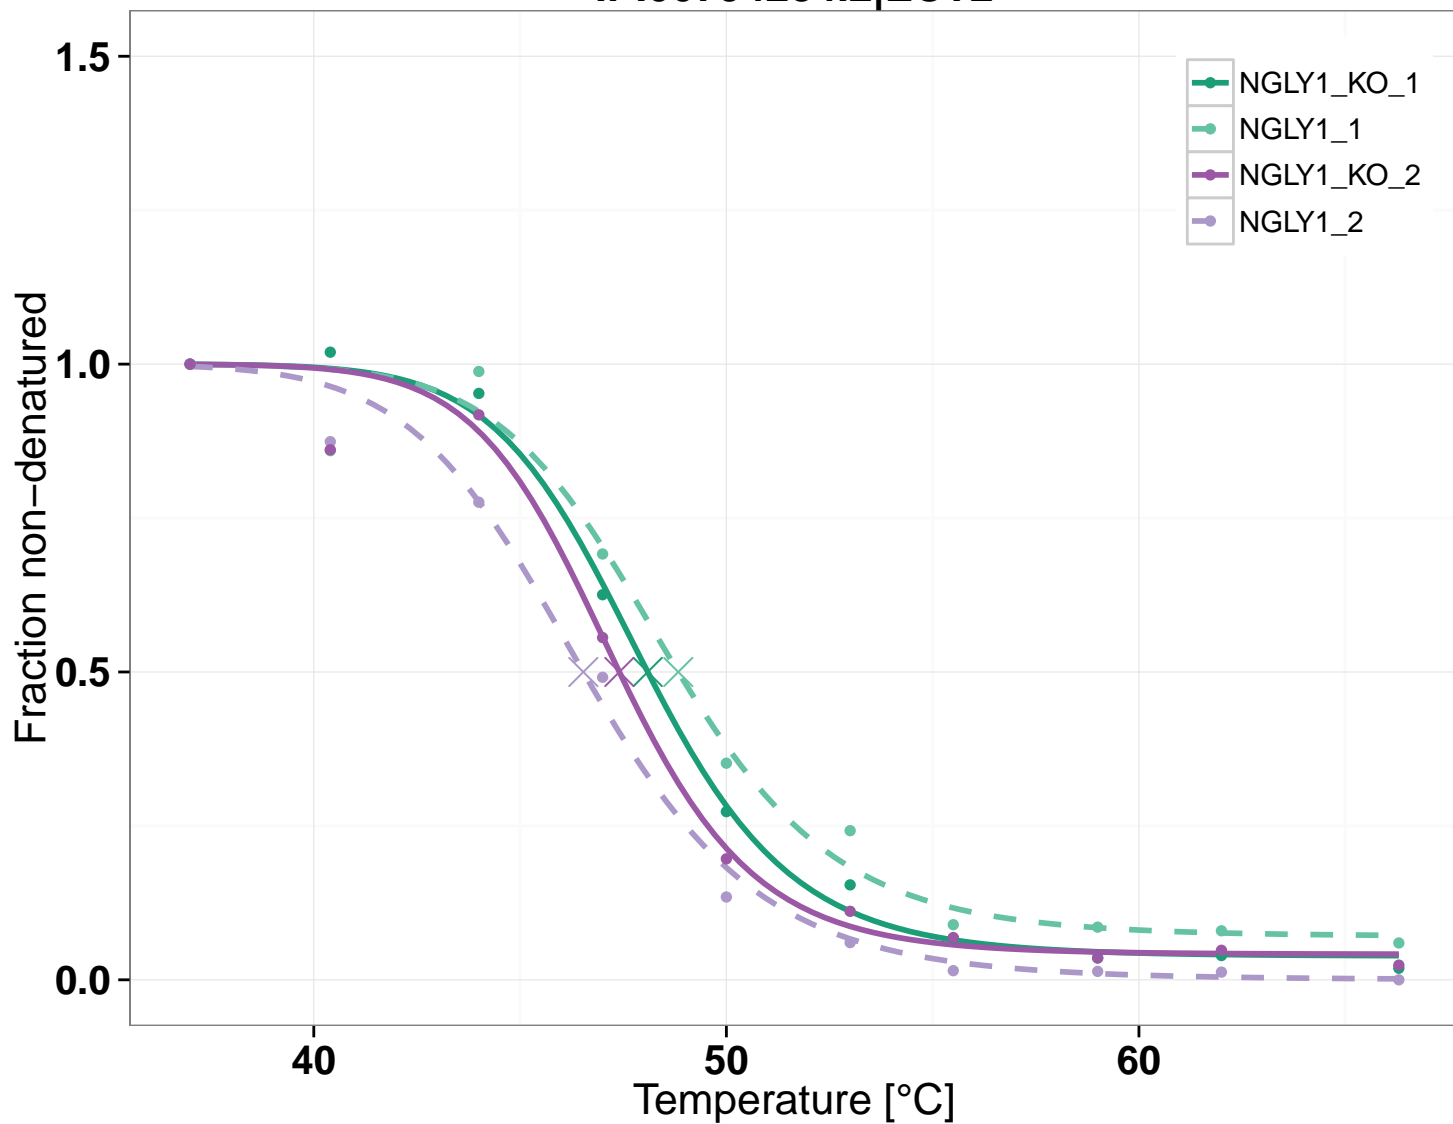

|            | meltPoint | slope | plateau | R2   |
|------------|-----------|-------|---------|------|
| NGLY1_KO_1 | 48.09     | -0.13 | 0.04    | 1    |
| NGLY1_1    | 48.83     | -0.11 | 0.07    | 0.98 |
| NGLY1_KO_2 | 47.41     | -0.14 | 0.04    | 0.99 |
| NGLY1_2    | 46.53     | -0.12 | 0       | 0.99 |

Supplement: Supplementary file 1670 [file 1]

# IPI00411753.1|WDR40A

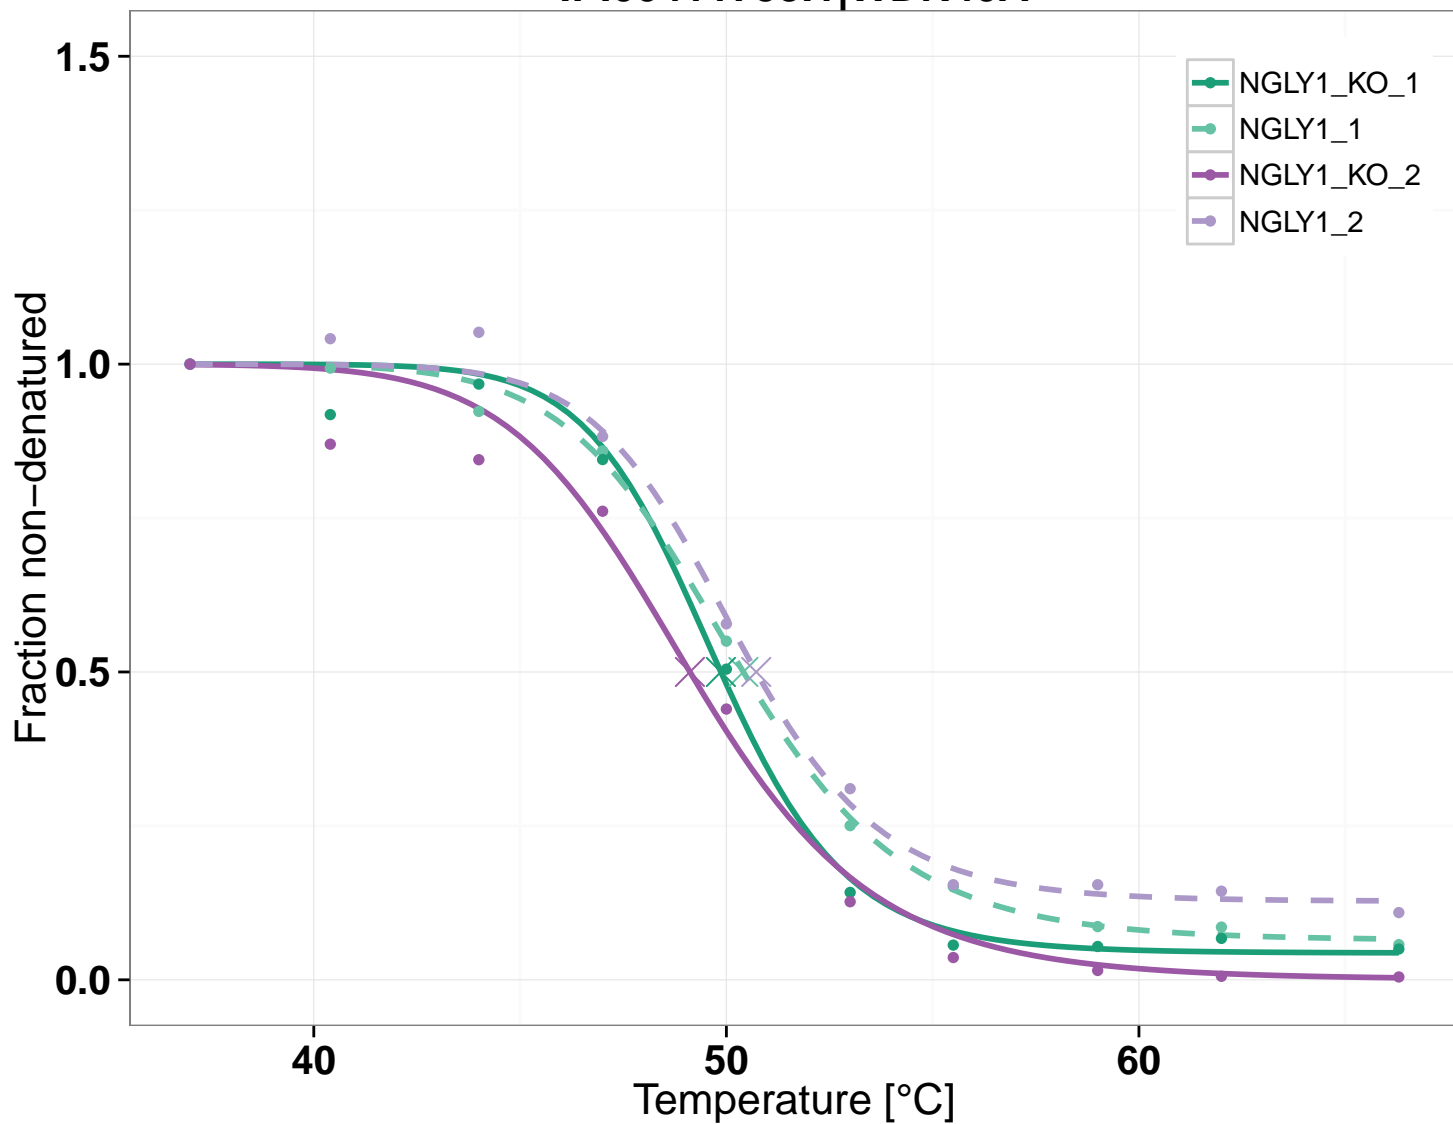

|            | meltPoint | slope | plateau | R2   |
|------------|-----------|-------|---------|------|
| NGLY1_KO_1 | 49.87     | -0.15 | 0.04    | 0.99 |
| NGLY1_1    | 50.41     | -0.11 | 0.06    | 1    |
| NGLY1_KO_2 | 49.12     | -0.11 | 0       | 0.98 |
| NGLY1_2    | 50.72     | -0.13 | 0.13    | 0.99 |

Supplement: Supplementary file 1671 [file 1]

IPI00289807.3|TRNT1

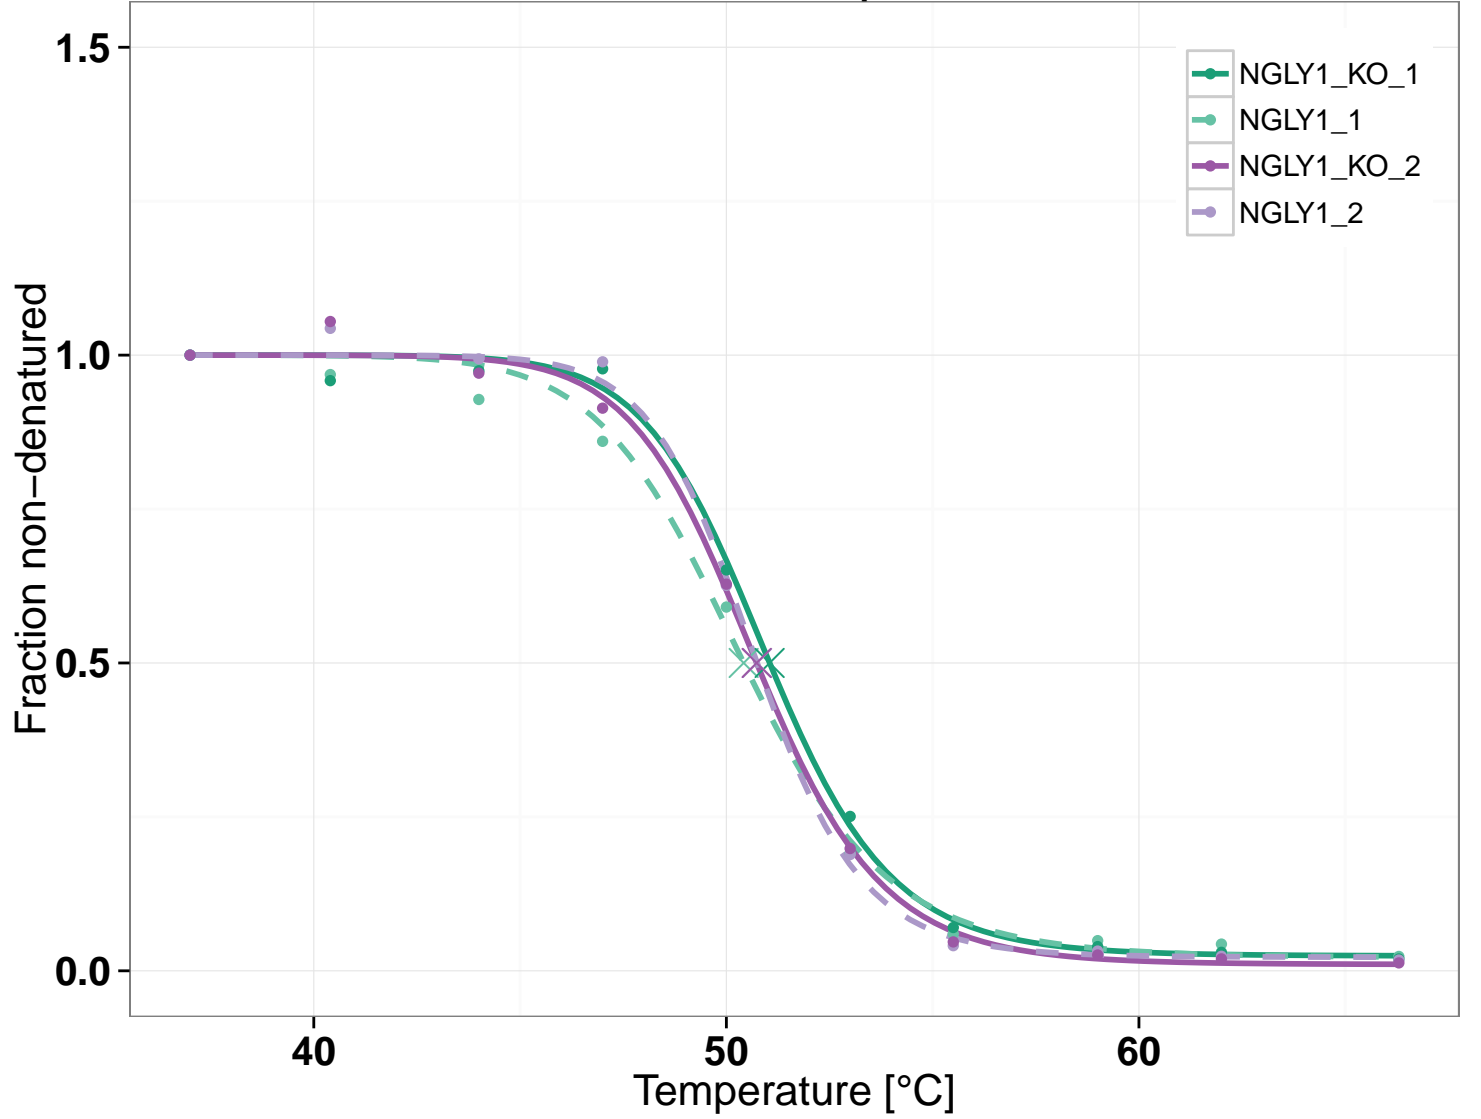

|            | meltPoint | slope | plateau | R2 |
|------------|-----------|-------|---------|----|
| NGLY1_KO_1 | 51.05     | -0.16 | 0.02    | 1  |
| NGLY1_1    | 50.42     | -0.14 | 0.02    | 1  |
| NGLY1_KO_2 | 50.73     | -0.16 | 0.01    | 1  |
| NGLY1_2    | 50.75     | -0.19 | 0.02    | 1  |

Supplement: Supplementary file 1672 [file 1]

IPI00005202.2|PGRMC2

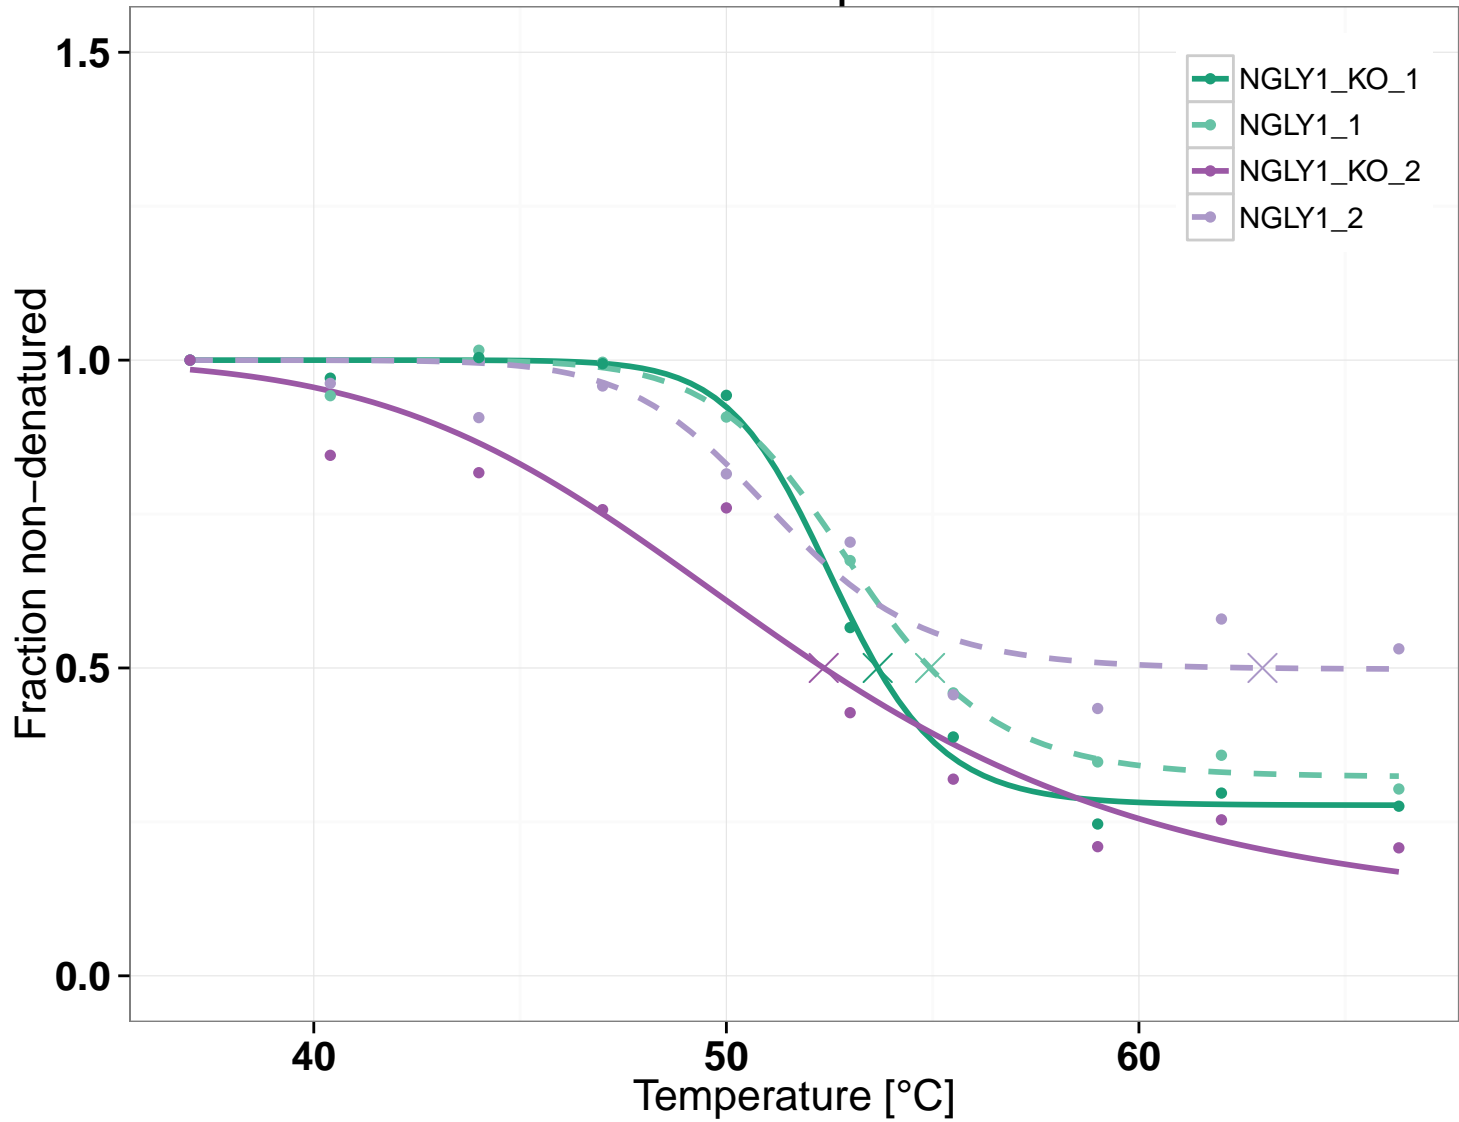

|            | meltPoint | slope  | plateau | R2   |
|------------|-----------|--------|---------|------|
| NGLY1_KO_1 | 53.67     | -0.14  | 0.28    | 1    |
| NGLY1_1    | 54.94     | -0.099 | 0.32    | 0.99 |
| NGLY1_KO_2 | 52.36     | -0.048 | 0.09    | 0.94 |
| NGLY1_2    | 62.99     | -0.071 | 0.5     | 0.92 |

Supplement: Supplementary file 1673 [file 1]

IPI00013272.1|GOLGA4

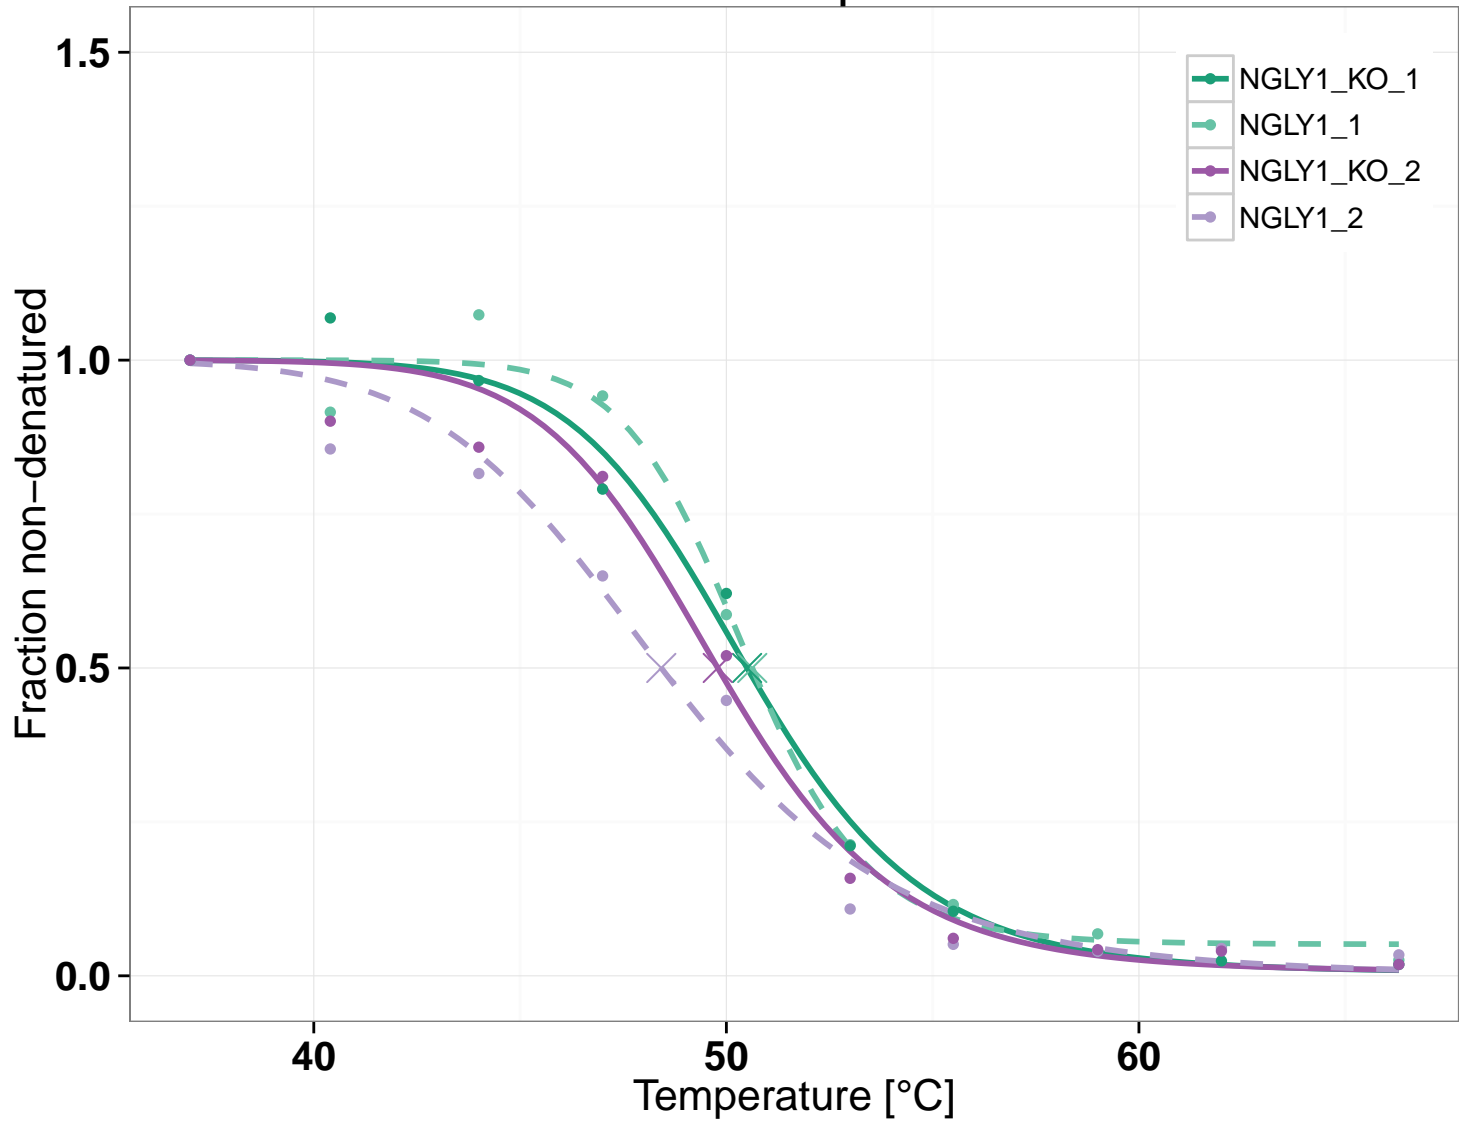

|            | meltPoint | slope  | plateau | R2   |
|------------|-----------|--------|---------|------|
| NGLY1_KO_1 | 50.5      | -0.12  | 0.01    | 0.99 |
| NGLY1_1    | 50.63     | -0.16  | 0.05    | 0.99 |
| NGLY1_KO_2 | 49.79     | -0.12  | 0.01    | 0.98 |
| NGLY1_2    | 48.42     | -0.089 | 0       | 0.98 |

Supplement: Supplementary file 1674 [file 1]

# IPI00879287.1|CDCA5

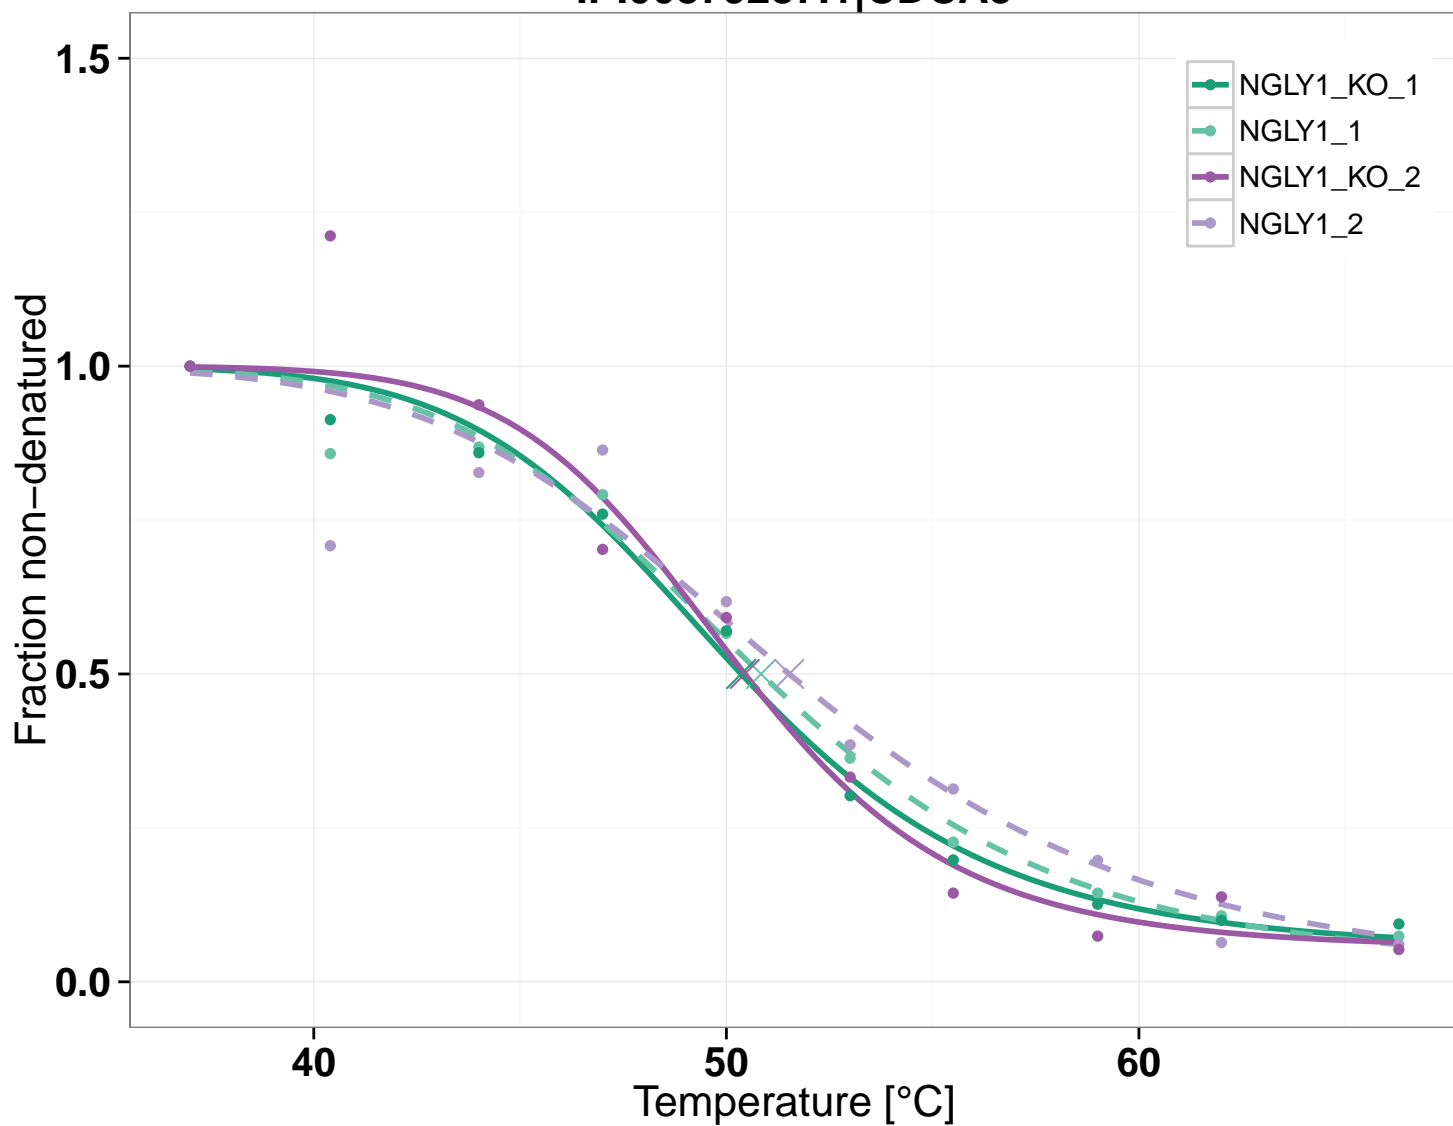

|            | meltPoint | slope  | plateau | R2   |
|------------|-----------|--------|---------|------|
| NGLY1_KO_1 | 50.36     | -0.074 | 0.05    | 0.99 |
| NGLY1_1    | 50.84     | -0.066 | 0.02    | 0.99 |
| NGLY1_KO_2 | 50.45     | -0.088 | 0.05    | 0.96 |
| NGLY1_2    | 51.52     | -0.057 | 0       | 0.92 |

Supplement: Supplementary file 1675 [file 1]

# IPI00024272.1|DGCR2

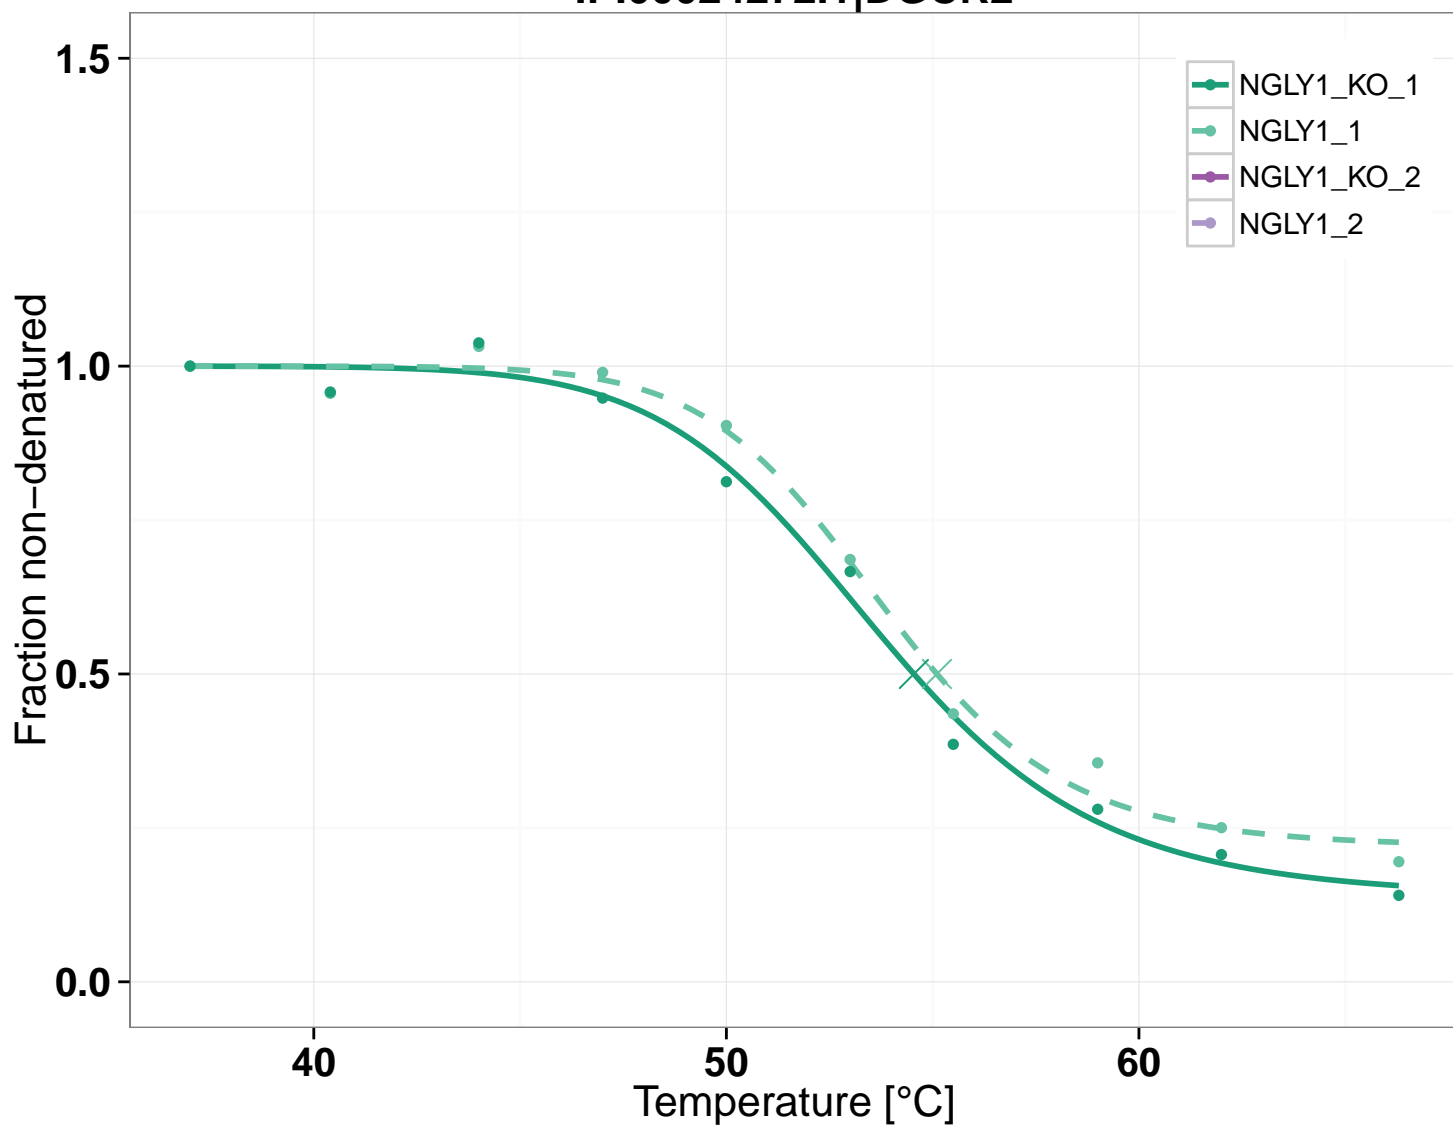

|            | meltPoint | slope  | plateau | R2   |
|------------|-----------|--------|---------|------|
| NGLY1_KO_1 | 54.54     | -0.081 | 0.14    | 0.99 |
| NGLY1_1    | 55.1      | -0.089 | 0.22    | 0.99 |
| NGLY1_KO_2 | -         | -      | -       | -    |
| NGLY1_2    | -         | -      | -       | -    |

Supplement: Supplementary file 1676 [file 1]

# IPI00033153.1|NXF1

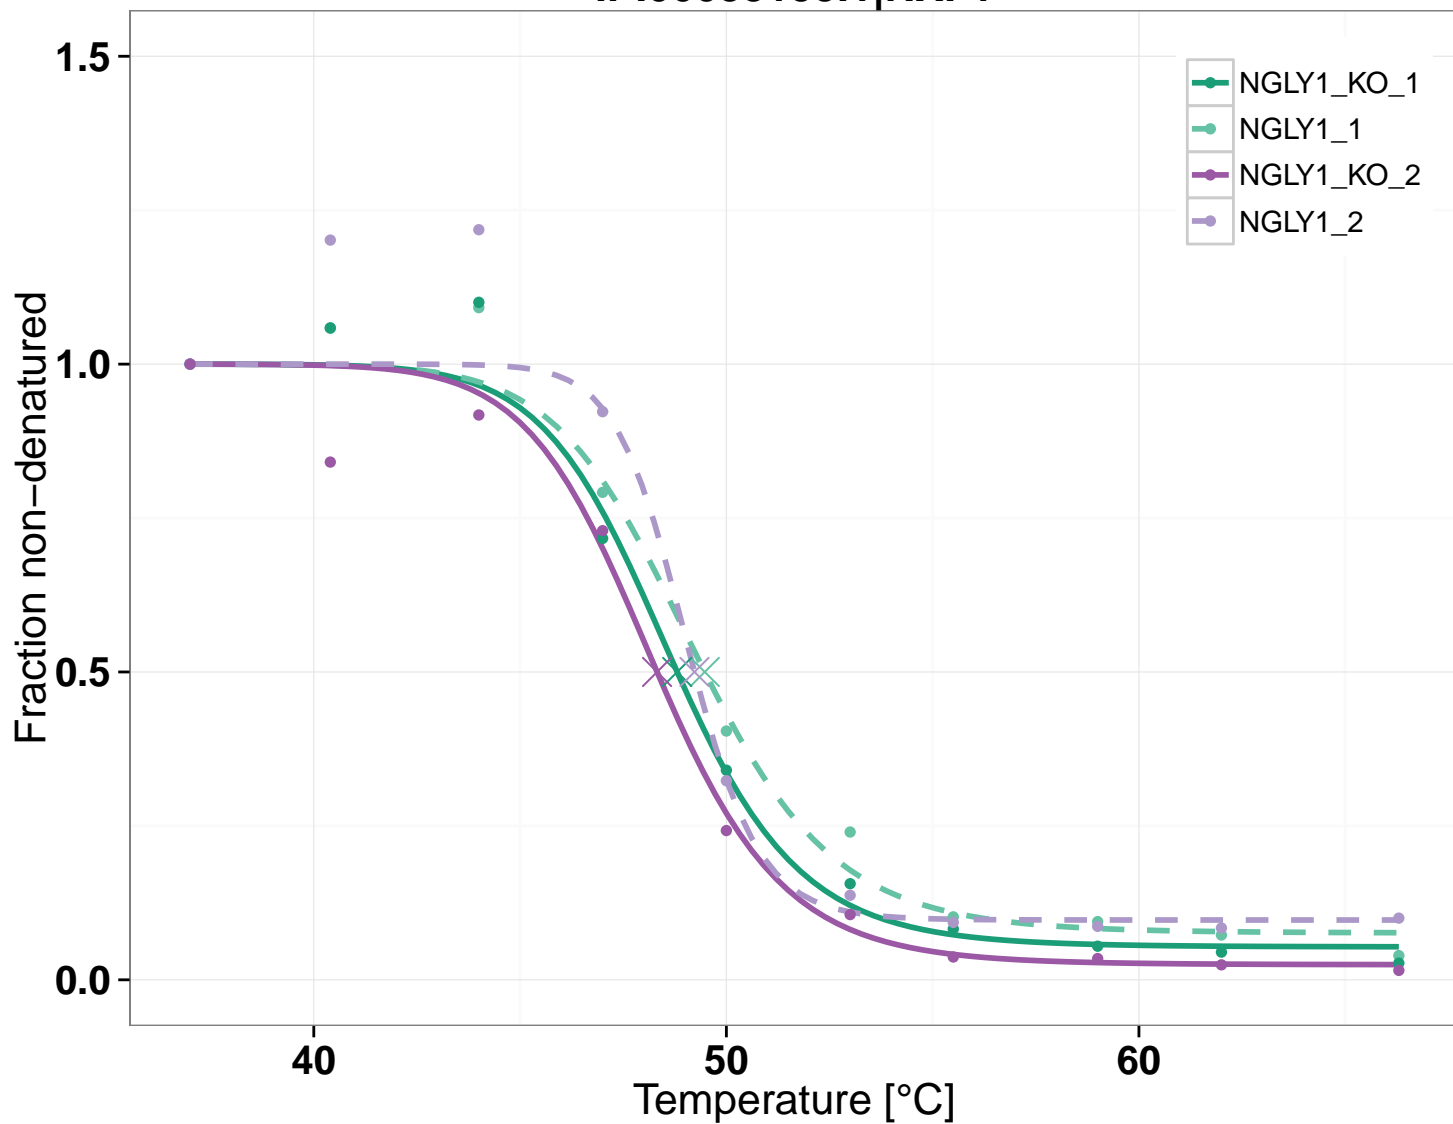

|            | meltPoint | slope | plateau | R2   |
|------------|-----------|-------|---------|------|
| NGLY1_KO_1 | 48.81     | -0.15 | 0.05    | 0.99 |
| NGLY1_1    | 49.48     | -0.14 | 0.08    | 0.99 |
| NGLY1_KO_2 | 48.32     | -0.16 | 0.02    | 0.98 |
| NGLY1_2    | 49.23     | -0.26 | 0.1     | 0.96 |

Supplement: Supplementary file 1677 [file 1]

# IPI00374590.4|CASC4

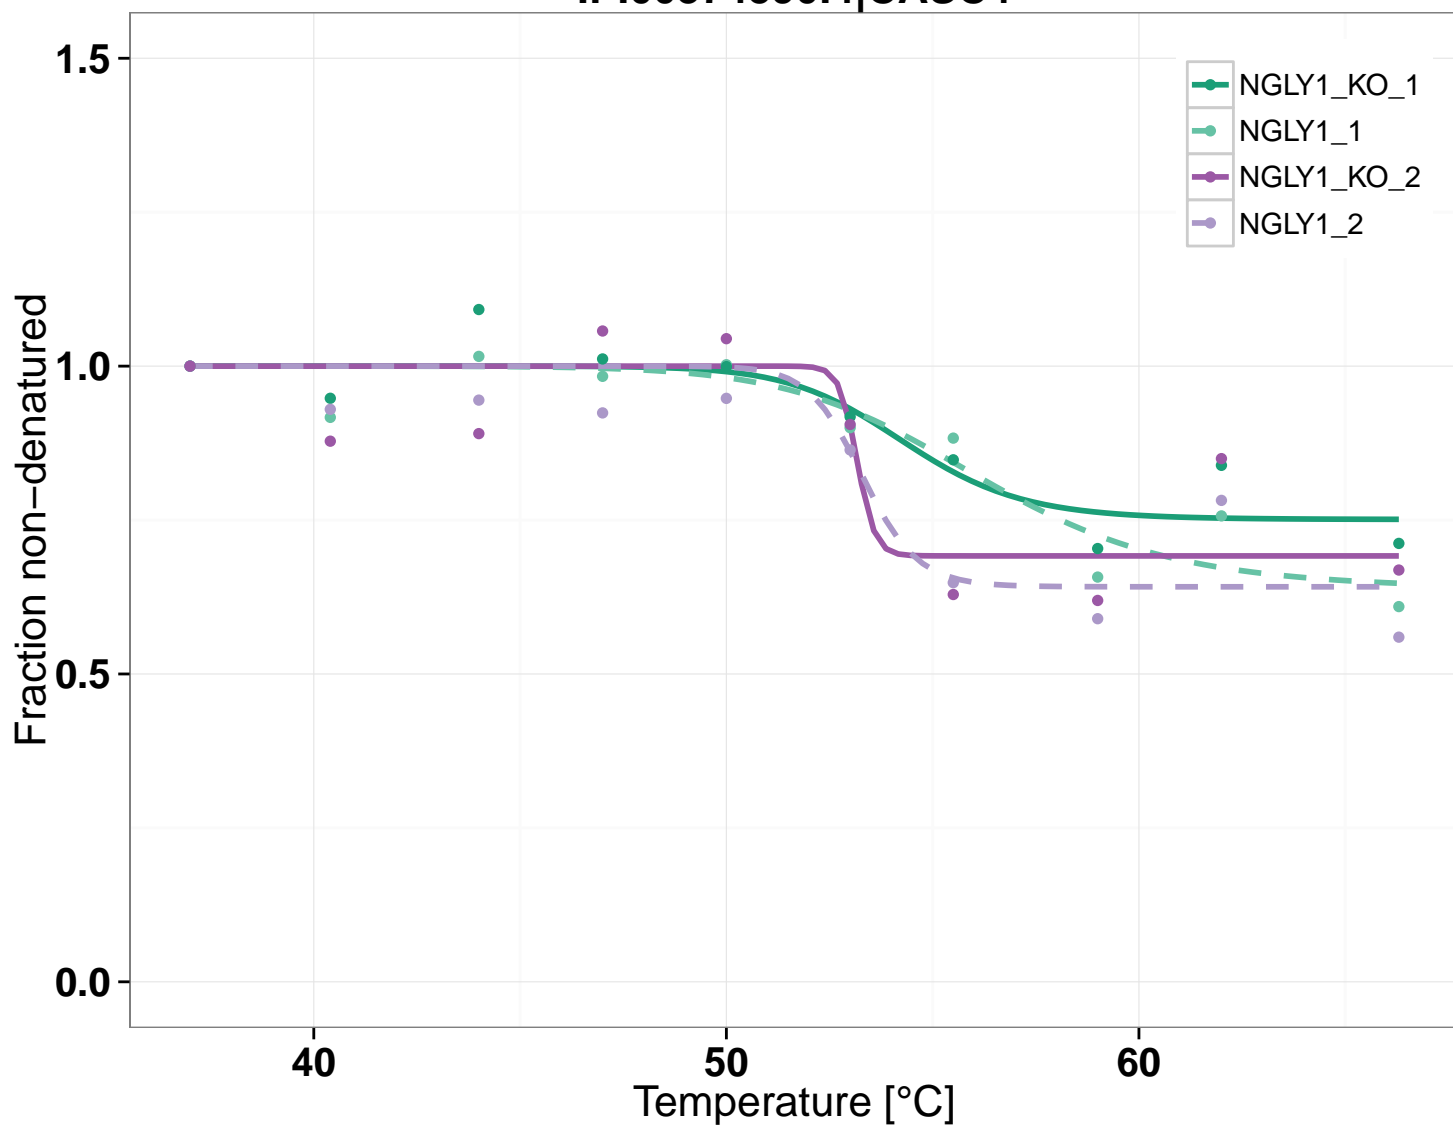

|            | meltPoint | slope  | plateau | R2   |
|------------|-----------|--------|---------|------|
| NGLY1_KO_1 | —         | −0.044 | 0.75    | 0.84 |
| NGLY1_1    | —         | −0.039 | 0.64    | 0.88 |
| NGLY1_KO_2 | —         | −0.36  | 0.69    | 0.73 |
| NGLY1_2    | —         | −0.14  | 0.64    | 0.81 |

Supplement: Supplementary file 1678 [file 1]

IPI00220059.5|LOC727762

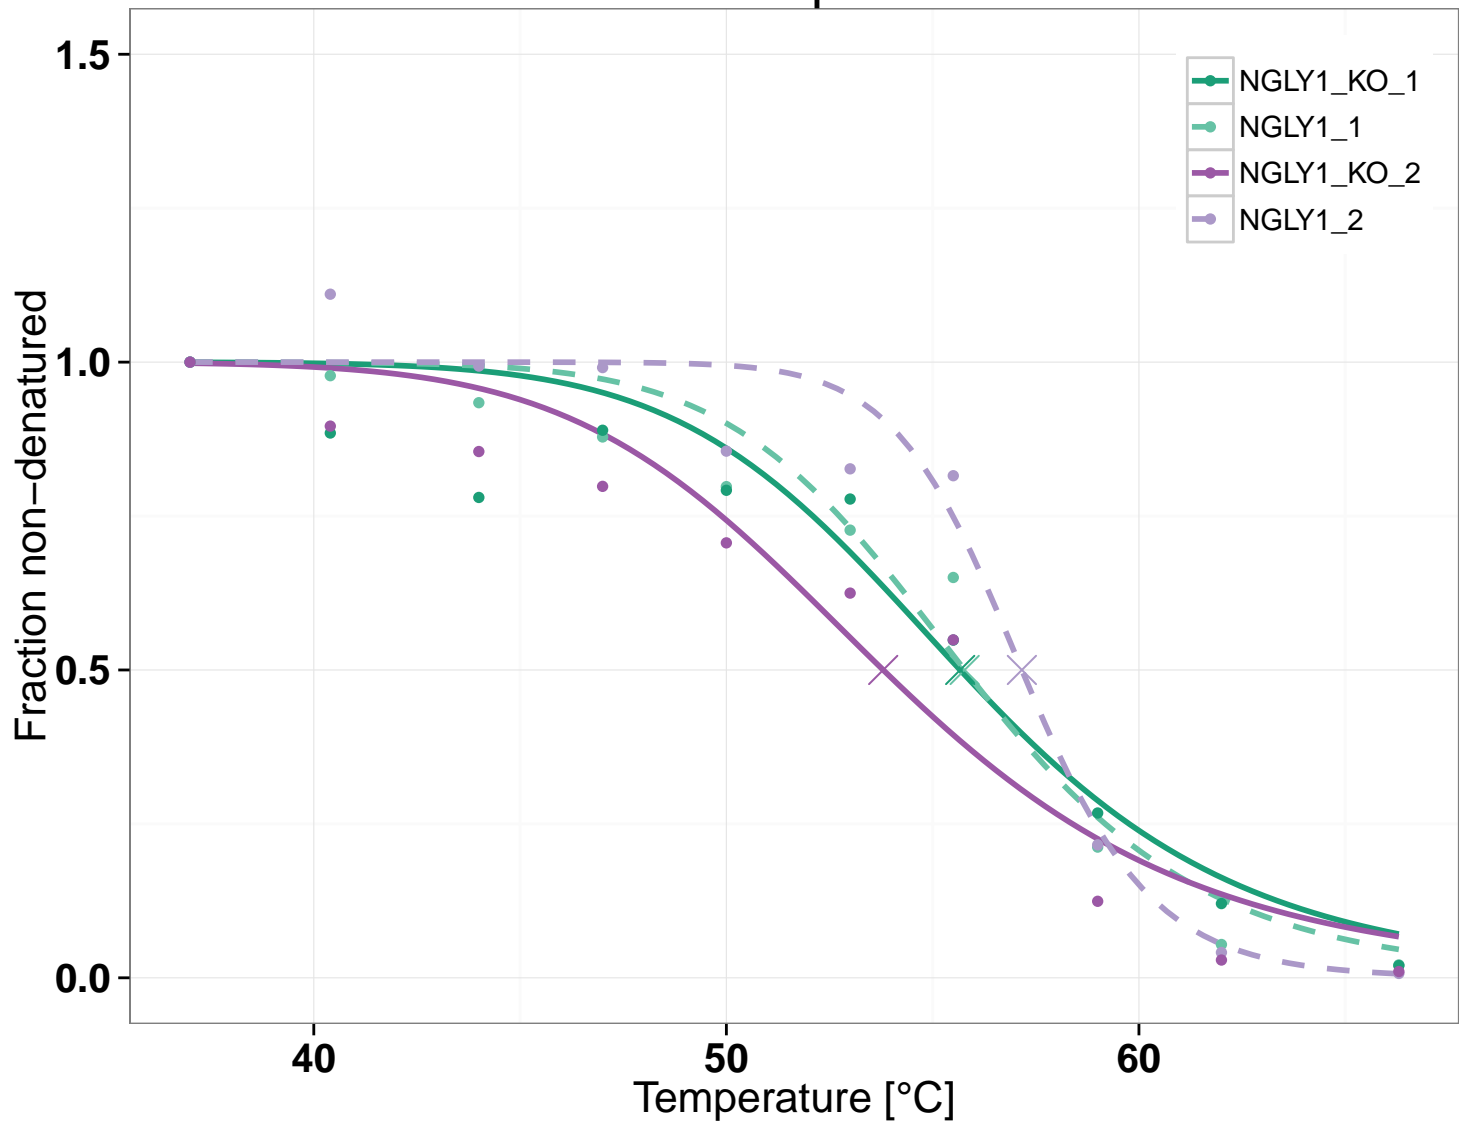

|            | meltPoint | slope  | plateau | R2   |
|------------|-----------|--------|---------|------|
| NGLY1_KO_1 | 55.67     | -0.073 | 0       | 0.93 |
| NGLY1_1    | 55.78     | -0.086 | 0       | 0.96 |
| NGLY1_KO_2 | 53.8      | -0.066 | 0       | 0.93 |
| NGLY1_2    | 57.16     | -0.16  | 0       | 0.97 |

Supplement: Supplementary file 1679 [file 1]

# IPI00219861.3|ACP1

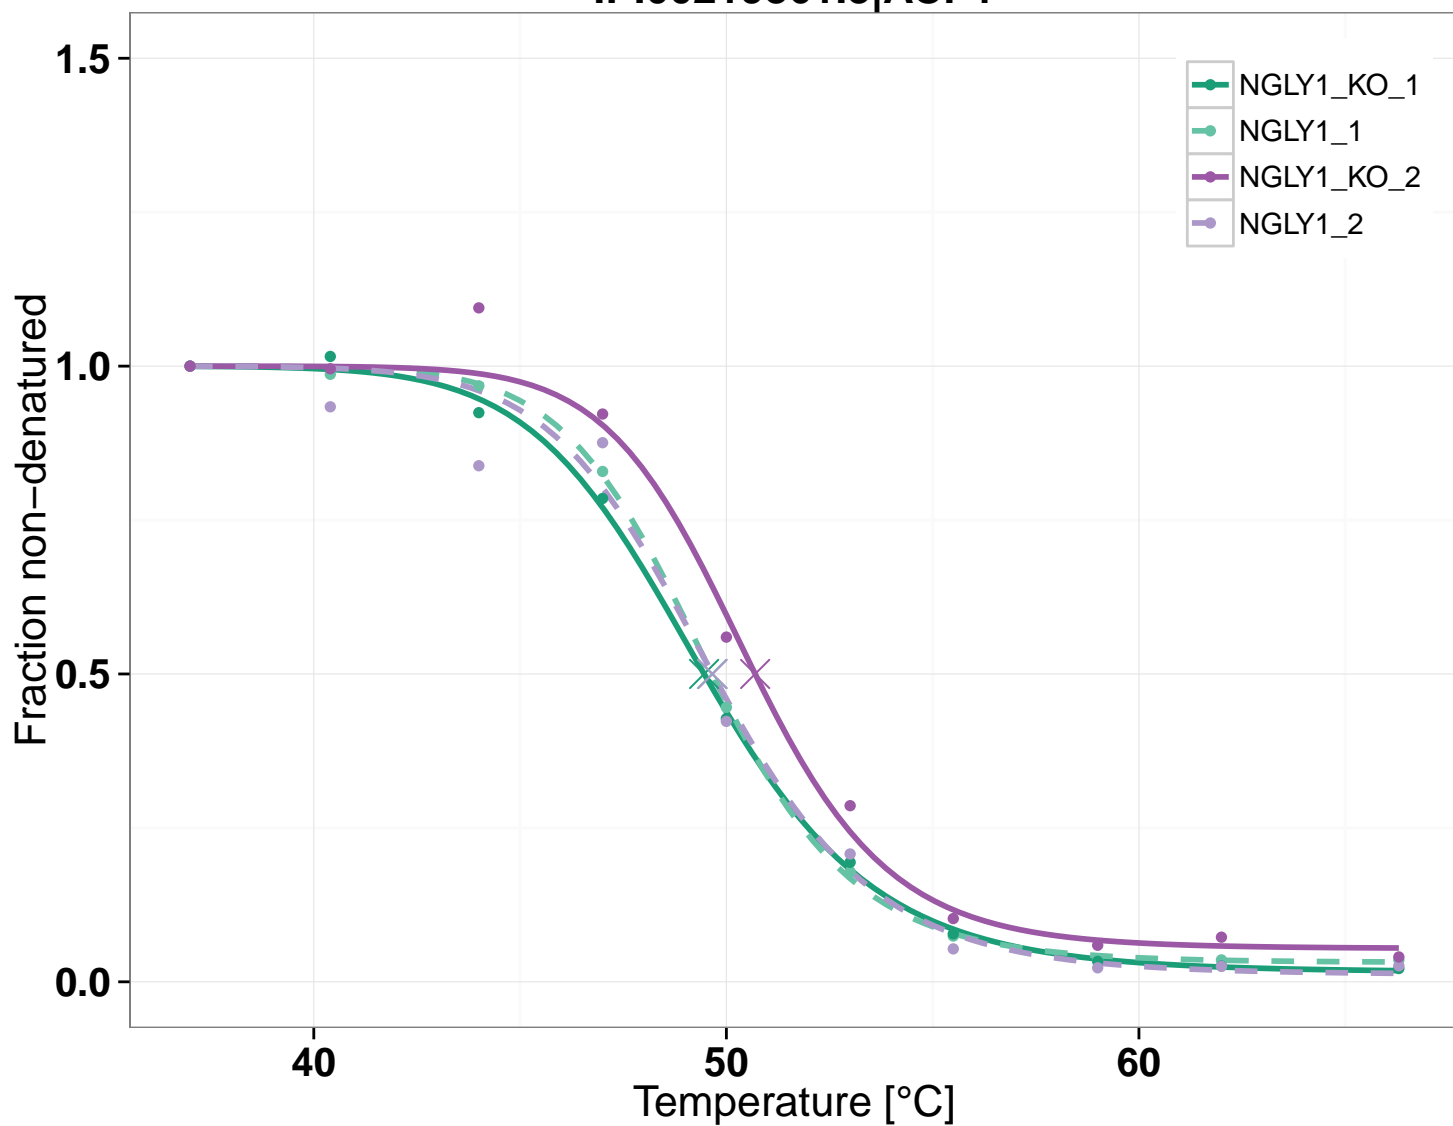

|            | meltPoint | slope | plateau | R2   |
|------------|-----------|-------|---------|------|
| NGLY1_KO_1 | 49.46     | -0.12 | 0.02    | 1    |
| NGLY1_1    | 49.65     | -0.14 | 0.03    | 1    |
| NGLY1_KO_2 | 50.7      | -0.14 | 0.05    | 0.99 |
| NGLY1_2    | 49.67     | -0.12 | 0.01    | 0.98 |

Supplement: Supplementary file 1680 [file 1]

# IPI00470669.3|SSX2IP

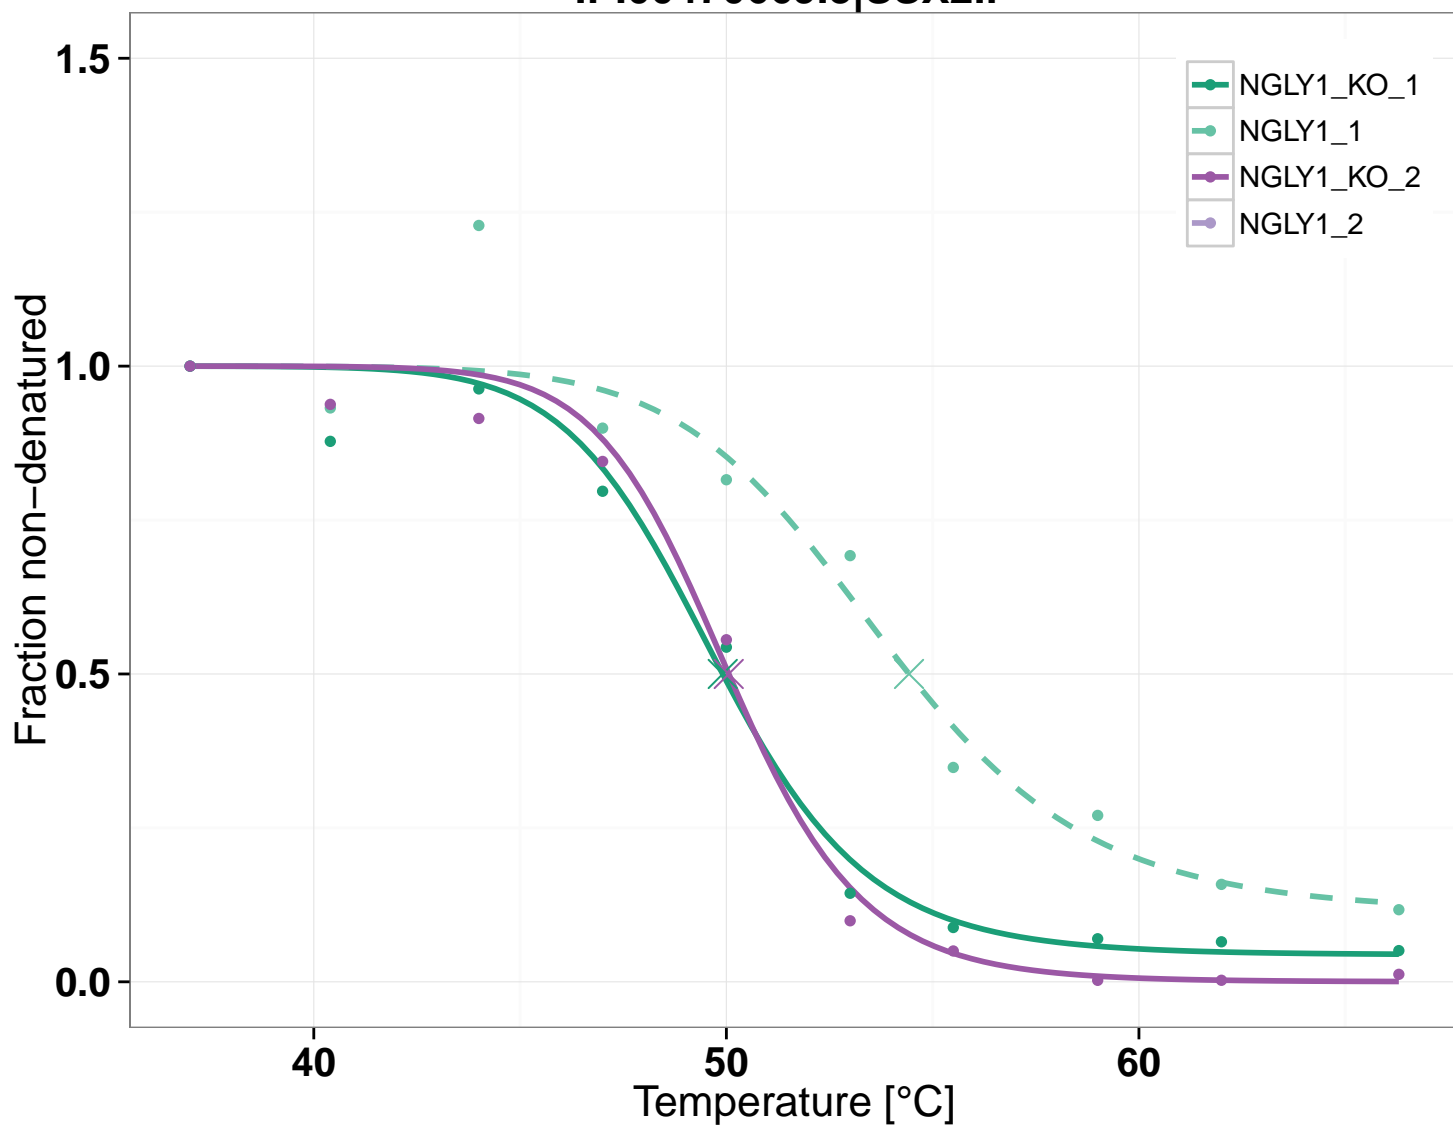

|            | meltPoint | slope  | plateau | R2   |
|------------|-----------|--------|---------|------|
| NGLY1_KO_1 | 49.91     | -0.13  | 0.04    | 0.99 |
| NGLY1_1    | 54.43     | -0.089 | 0.11    | 0.95 |
| NGLY1_KO_2 | 50.06     | -0.15  | 0       | 0.99 |
| NGLY1_2    | —         | —      | —       | —    |

Supplement: Supplementary file 1681 [file 1]

IPI00911049.1|B4E046\_HUMAN

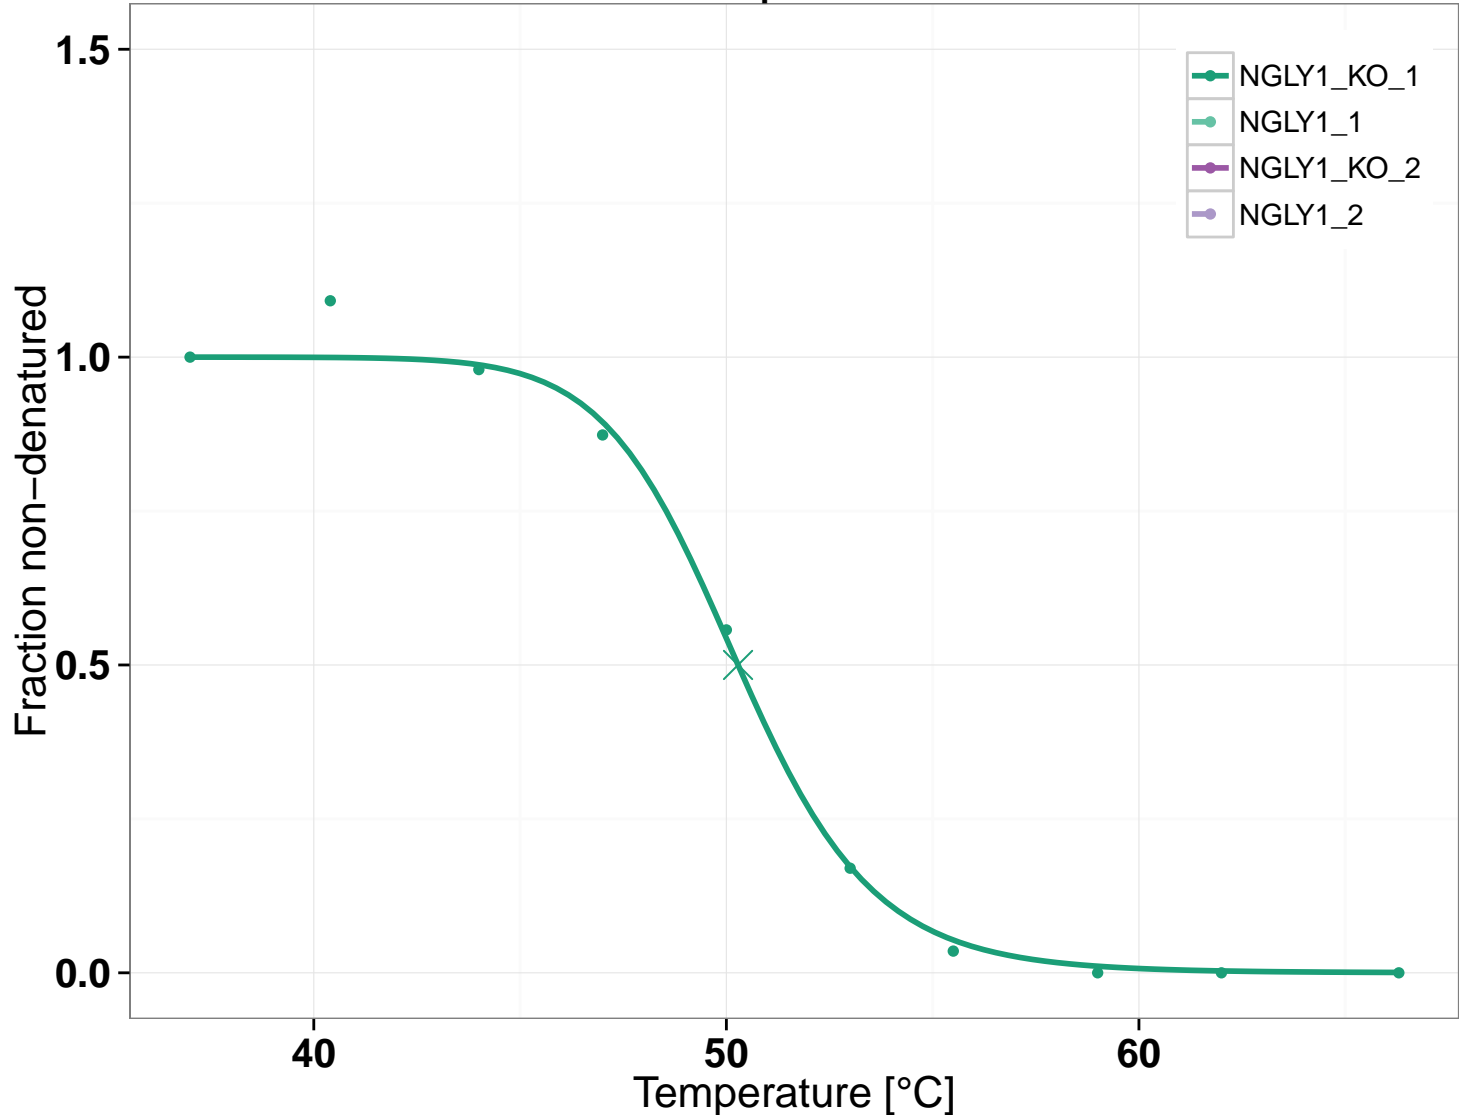

|            | meltPoint | slope | plateau | R2 |
|------------|-----------|-------|---------|----|
| NGLY1_KO_1 | 50.28     | -0.15 | 0       | 1  |
| NGLY1_1    | -         | -     | -       | -  |
| NGLY1_KO_2 | -         | -     | -       | -  |
| NGLY1_2    | -         | -     | -       | -  |

Supplement: Supplementary file 1682 [file 1]

IPI00056416.1|LSM10

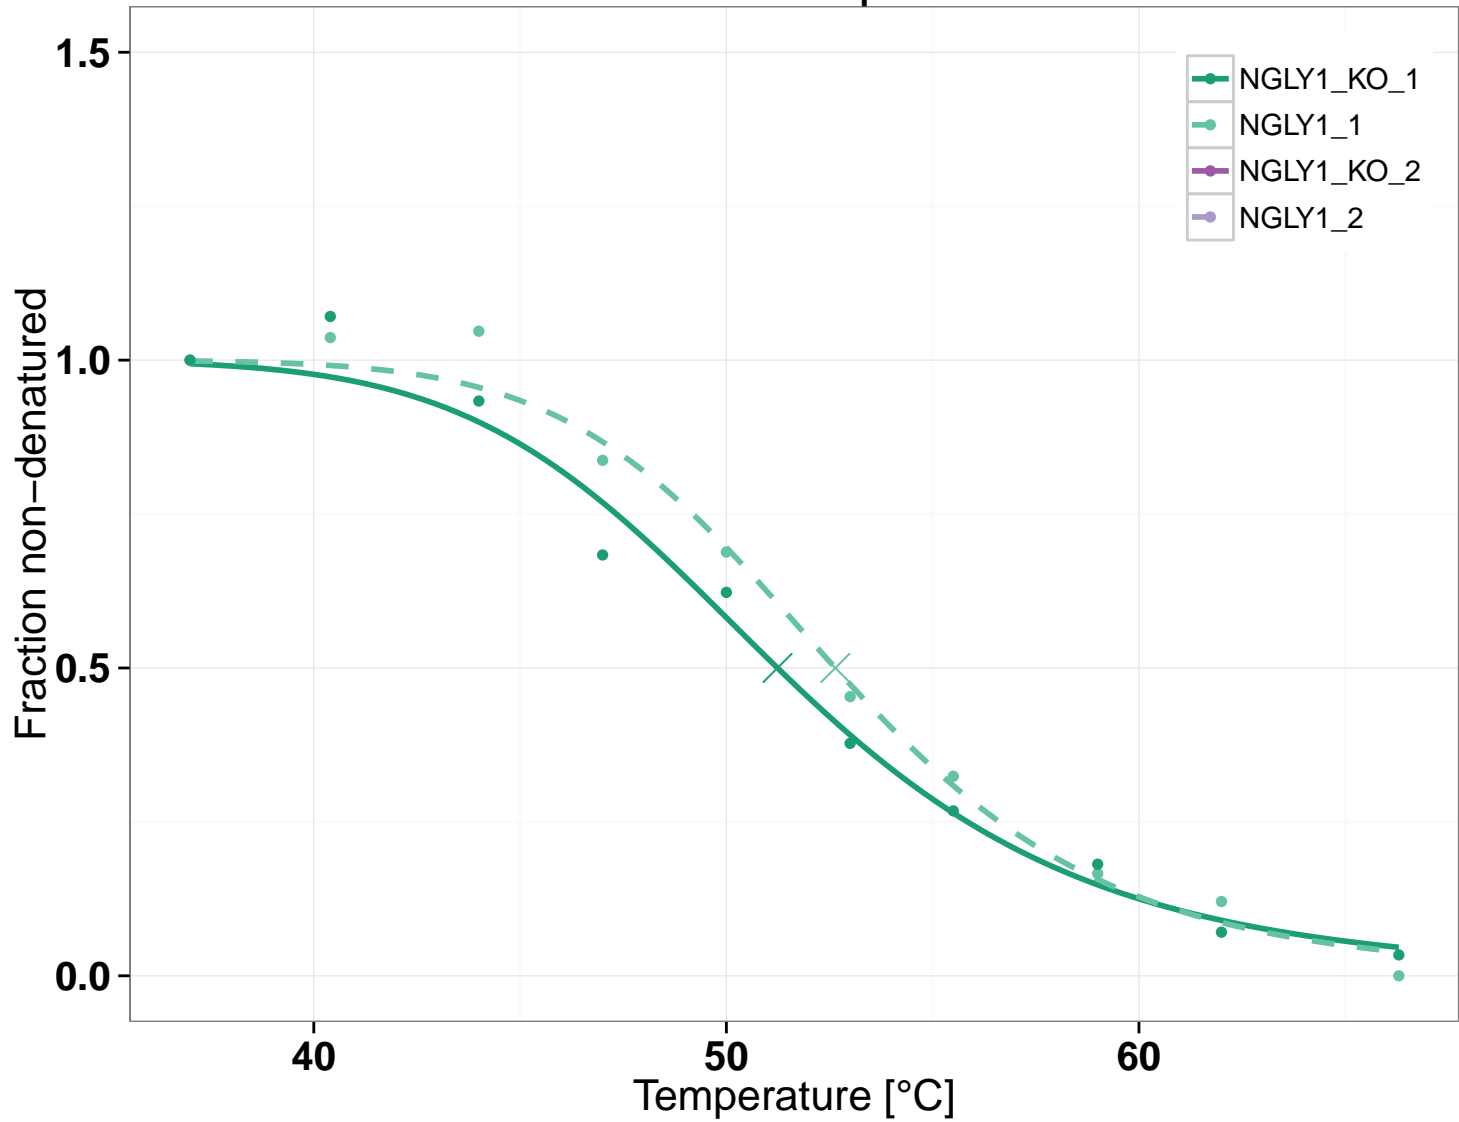

|            | meltPoint | slope  | plateau | R2   |
|------------|-----------|--------|---------|------|
| NGLY1_KO_1 | 51.24     | -0.066 | 0       | 0.98 |
| NGLY1_1    | 52.64     | -0.075 | 0       | 0.99 |
| NGLY1_KO_2 | -         | -      | -       | -    |
| NGLY1_2    | -         | -      | -       | -    |

Supplement: Supplementary file 1683 [file 1]

IPI00410319.1|C10ORF46

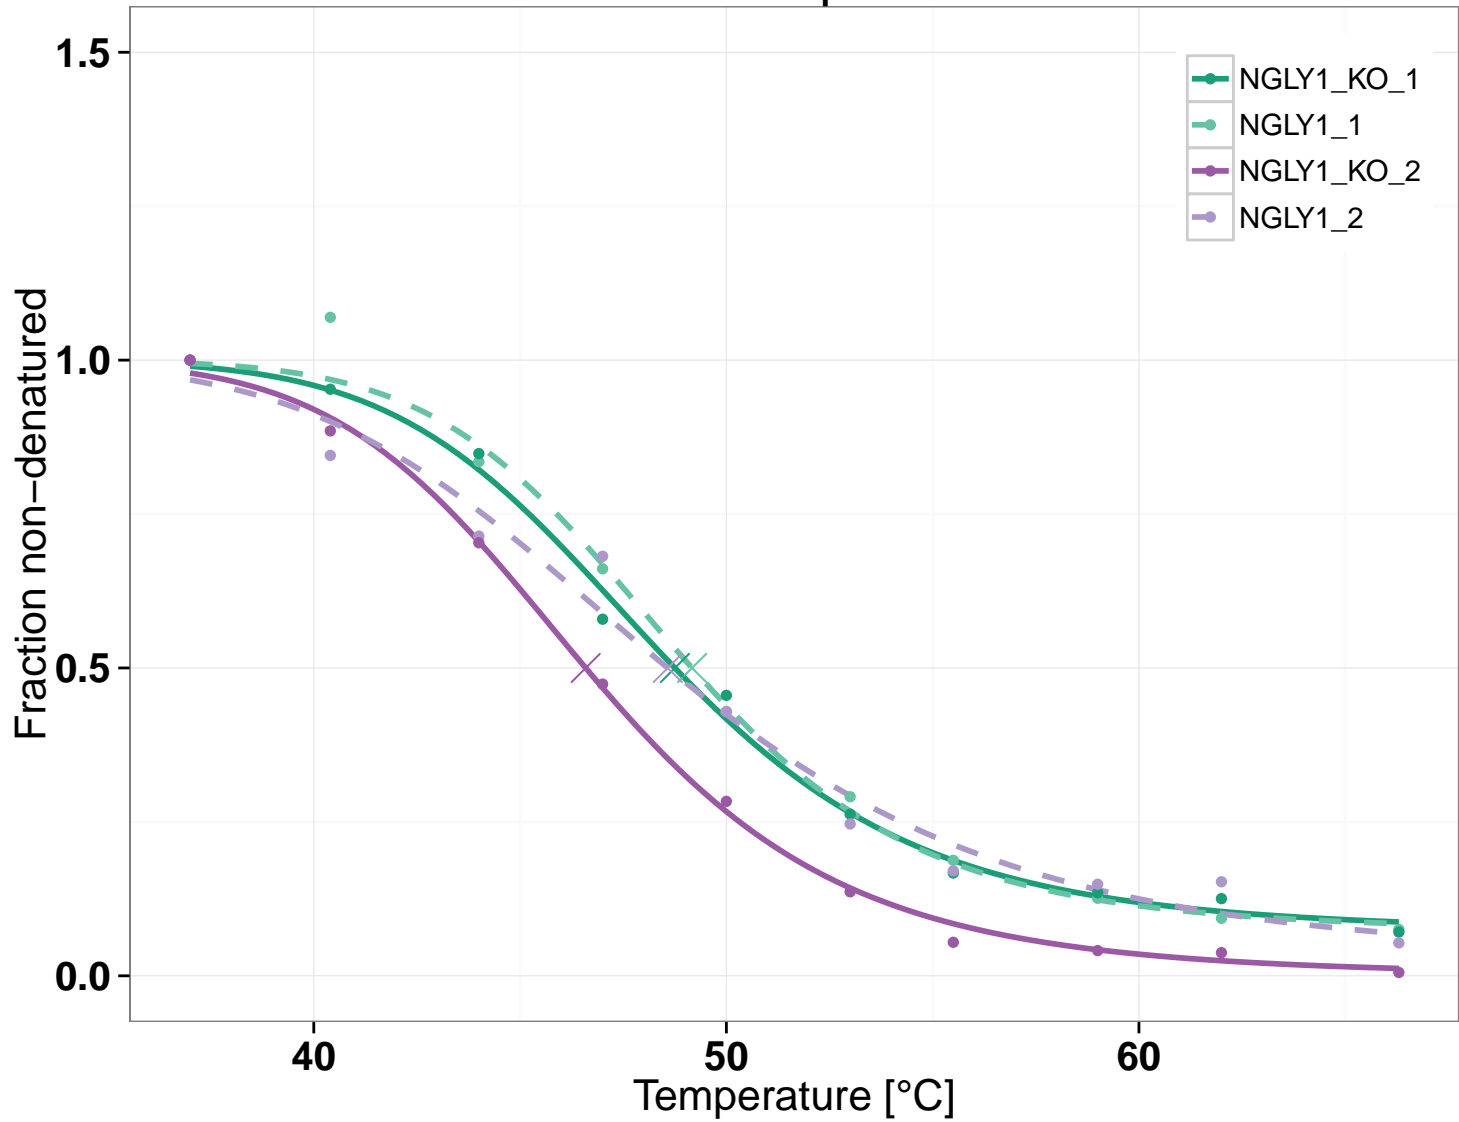

|            | meltPoint | slope  | plateau | R2   |
|------------|-----------|--------|---------|------|
| NGLY1_KO_1 | 48.75     | -0.073 | 0.07    | 1    |
| NGLY1_1    | 49.17     | -0.079 | 0.07    | 0.99 |
| NGLY1_KO_2 | 46.59     | -0.081 | 0       | 1    |
| NGLY1_2    | 48.58     | -0.057 | 0.02    | 0.98 |

Supplement: Supplementary file 1684 [file 1]

# IPI00106966.4|TMEM70

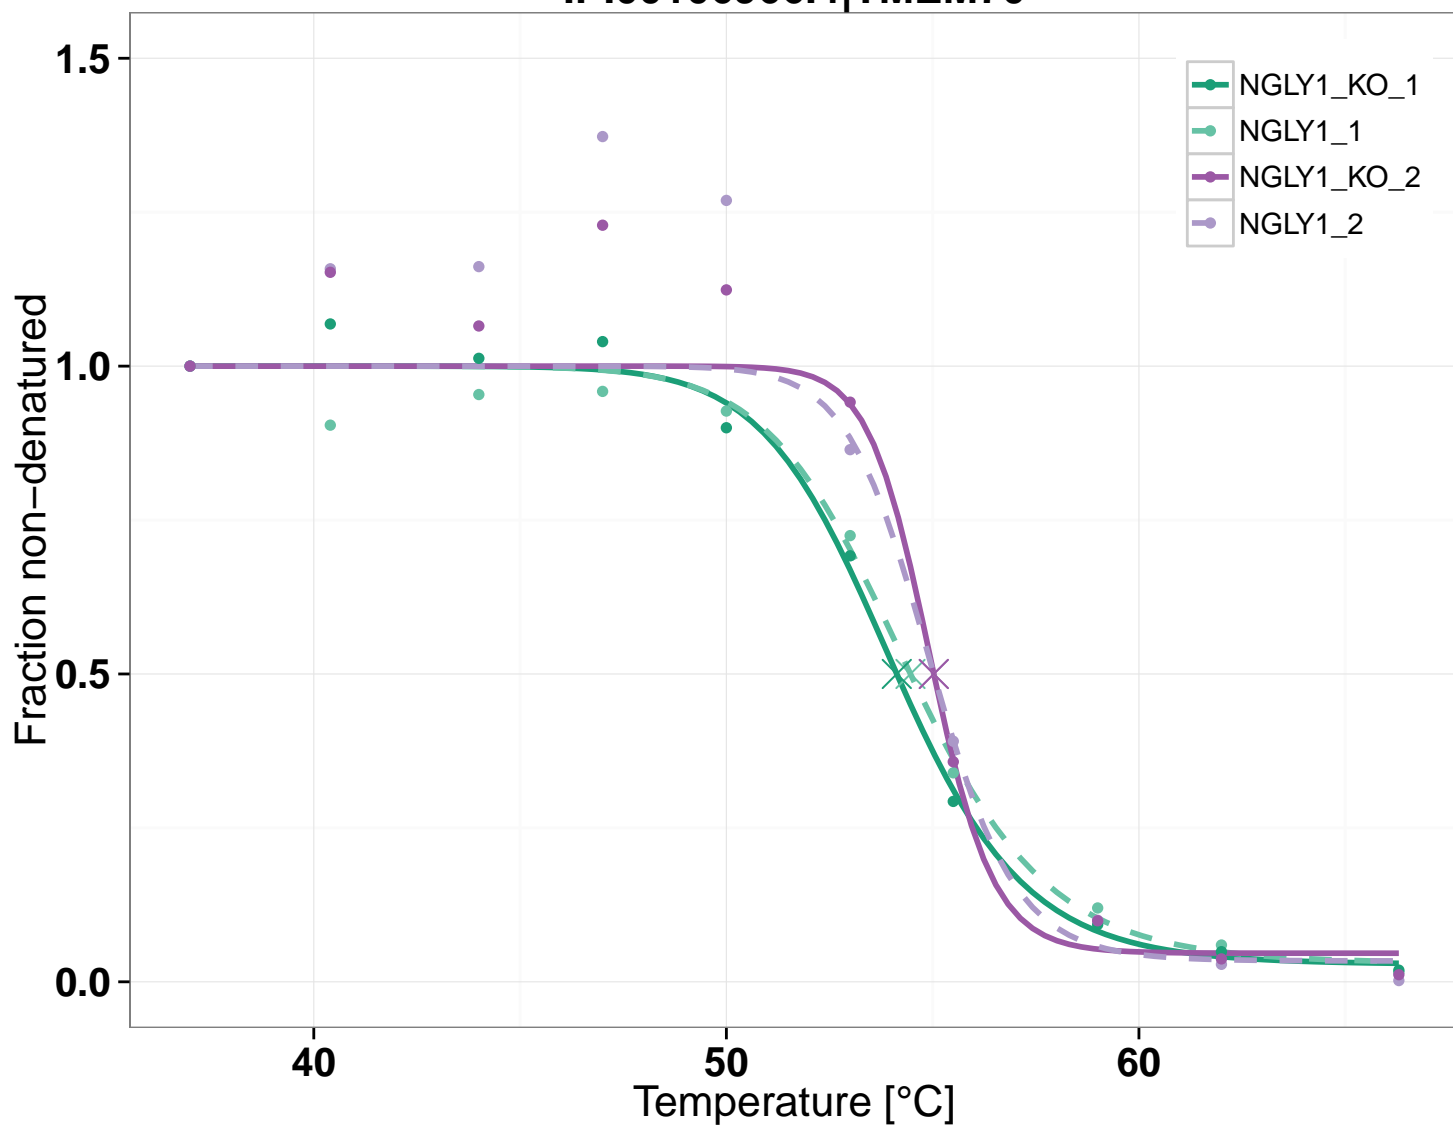

|            | meltPoint | slope | plateau | R2   |
|------------|-----------|-------|---------|------|
| NGLY1_KO_1 | 54.13     | -0.15 | 0.03    | 0.99 |
| NGLY1_1    | 54.46     | -0.14 | 0.03    | 0.99 |
| NGLY1_KO_2 | 55.03     | -0.32 | 0.05    | 0.96 |
| NGLY1_2    | 55.03     | -0.24 | 0.03    | 0.9  |

Supplement: Supplementary file 1685 [file 1]

IPI00004527.2|KIAA0355

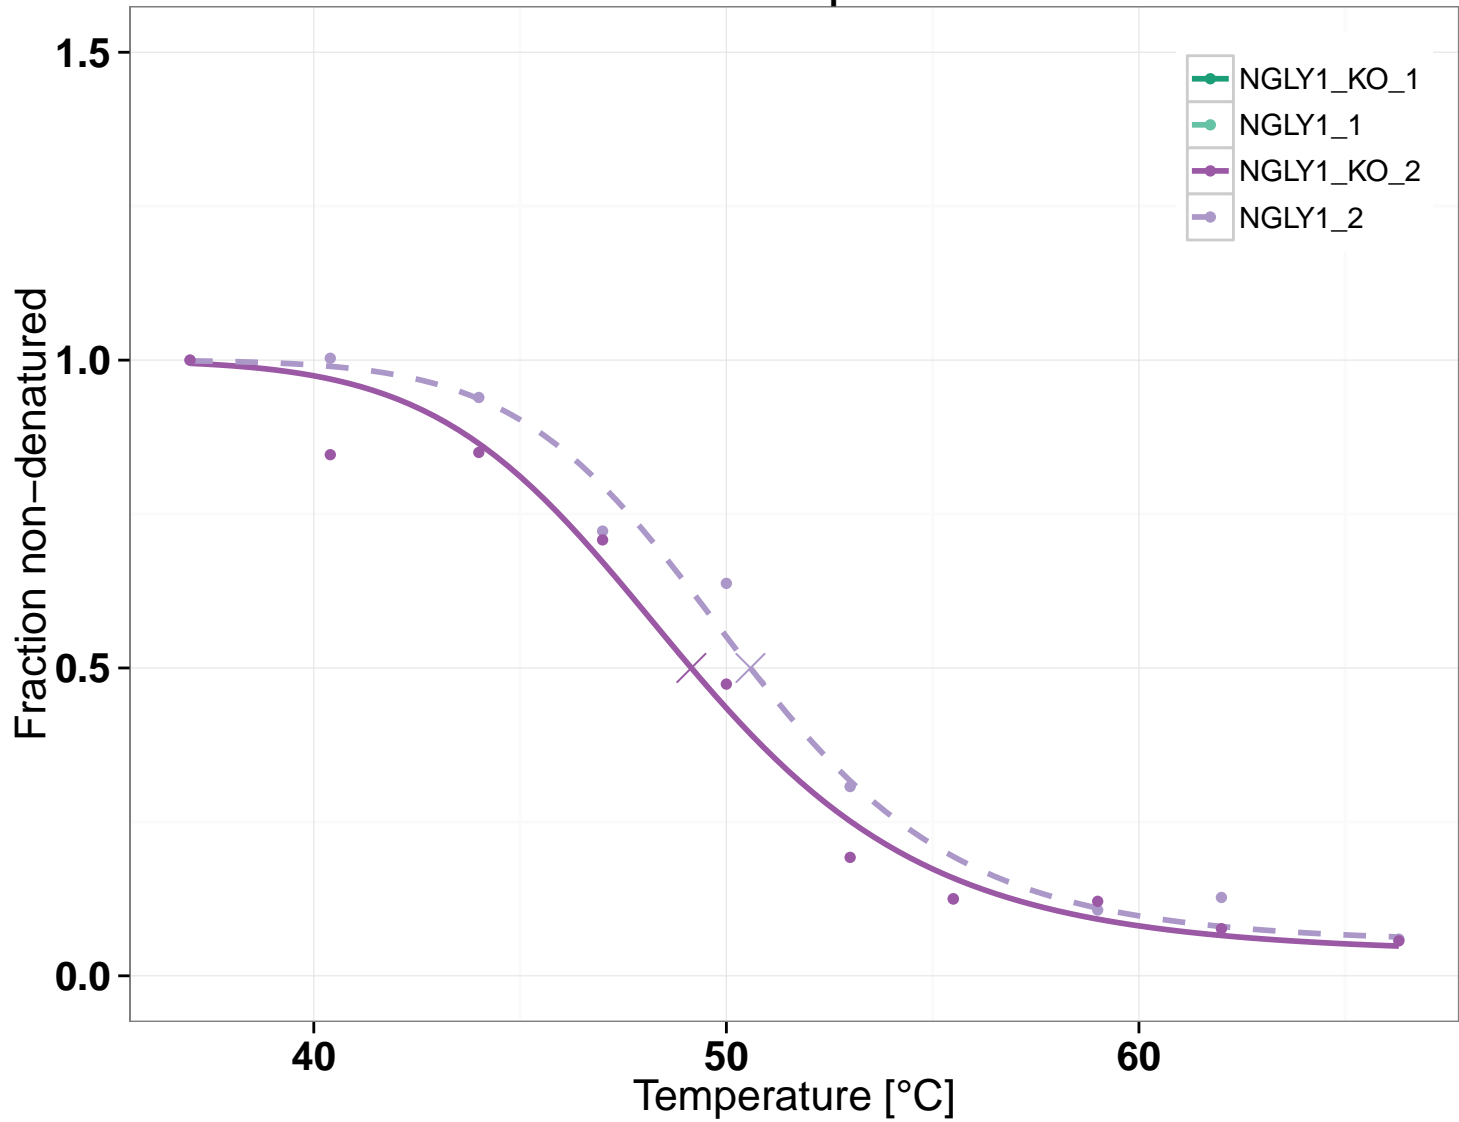

|            | meltPoint | slope  | plateau | R2   |
|------------|-----------|--------|---------|------|
| NGLY1_KO_1 | —         | —      | —       | —    |
| NGLY1_1    | —         | —      | —       | —    |
| NGLY1_KO_2 | 49.15     | -0.081 | 0.03    | 0.98 |
| NGLY1_2    | 50.58     | -0.088 | 0.05    | 0.99 |

Supplement: Supplementary file 1686 [file 1]

IPI00853162.3|PTCD2

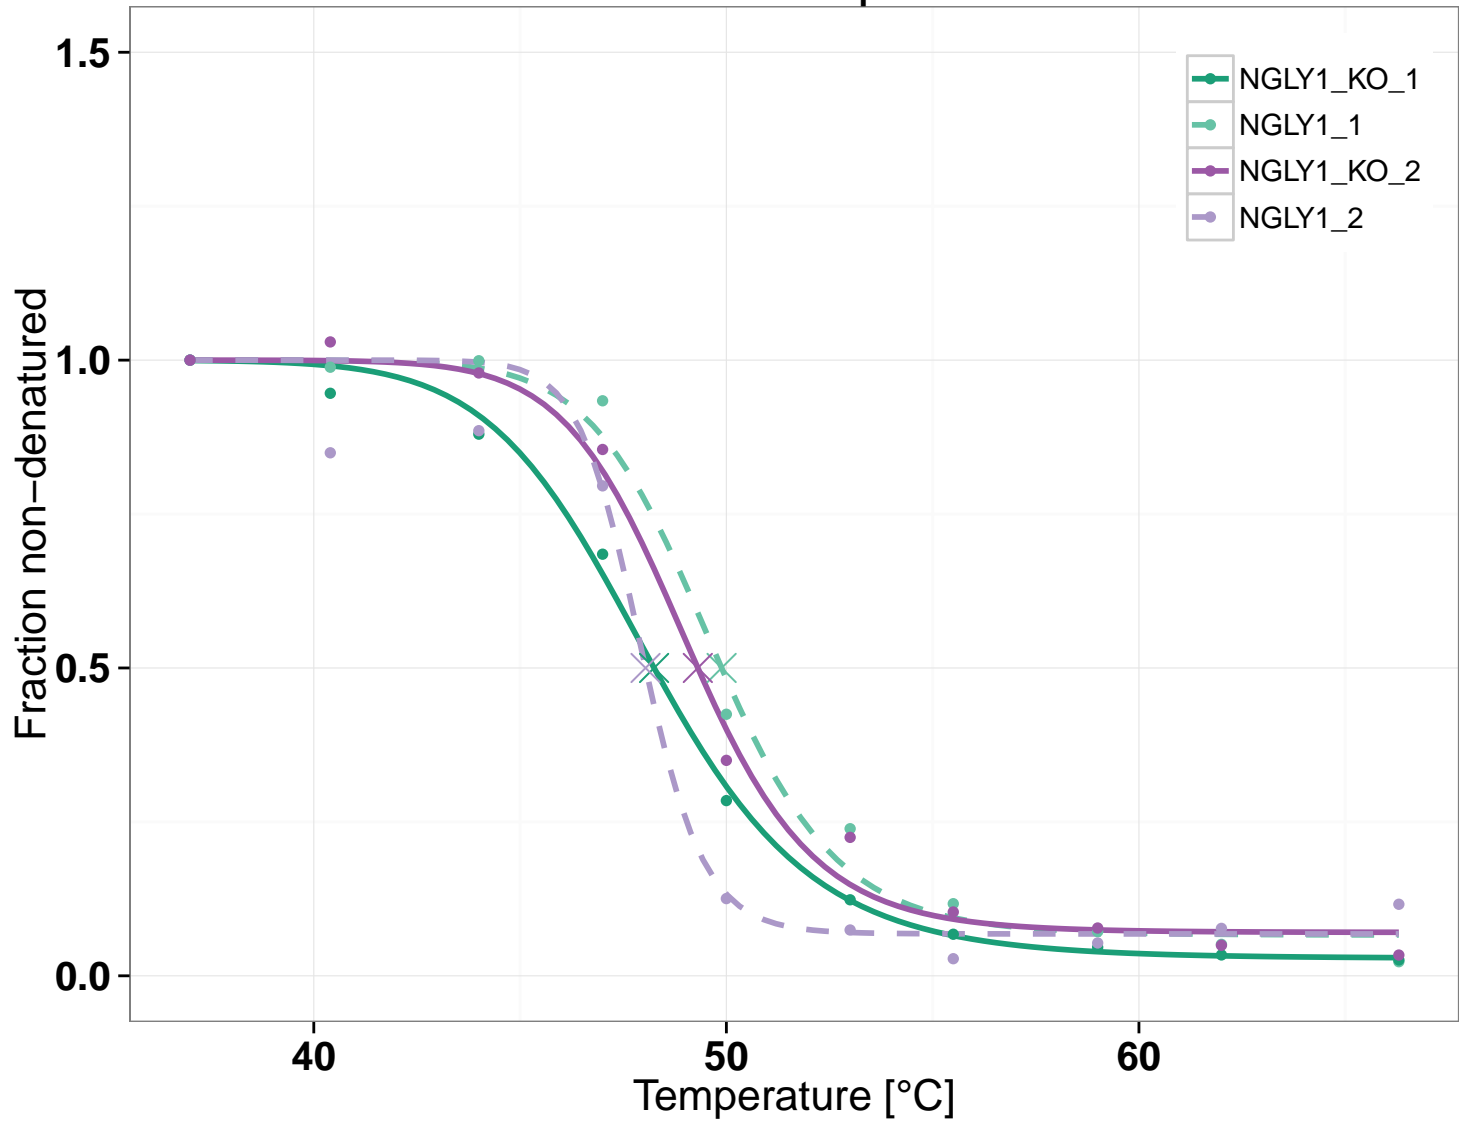

|            | meltPoint | slope | plateau | R2   |
|------------|-----------|-------|---------|------|
| NGLY1_KO_1 | 48.25     | -0.12 | 0.03    | 1    |
| NGLY1_1    | 49.89     | -0.16 | 0.07    | 0.99 |
| NGLY1_KO_2 | 49.31     | -0.15 | 0.07    | 0.99 |
| NGLY1_2    | 48.04     | -0.31 | 0.07    | 0.98 |

Supplement: Supplementary file 1687 [file 1]

# IPI00306604.5|ITGA5

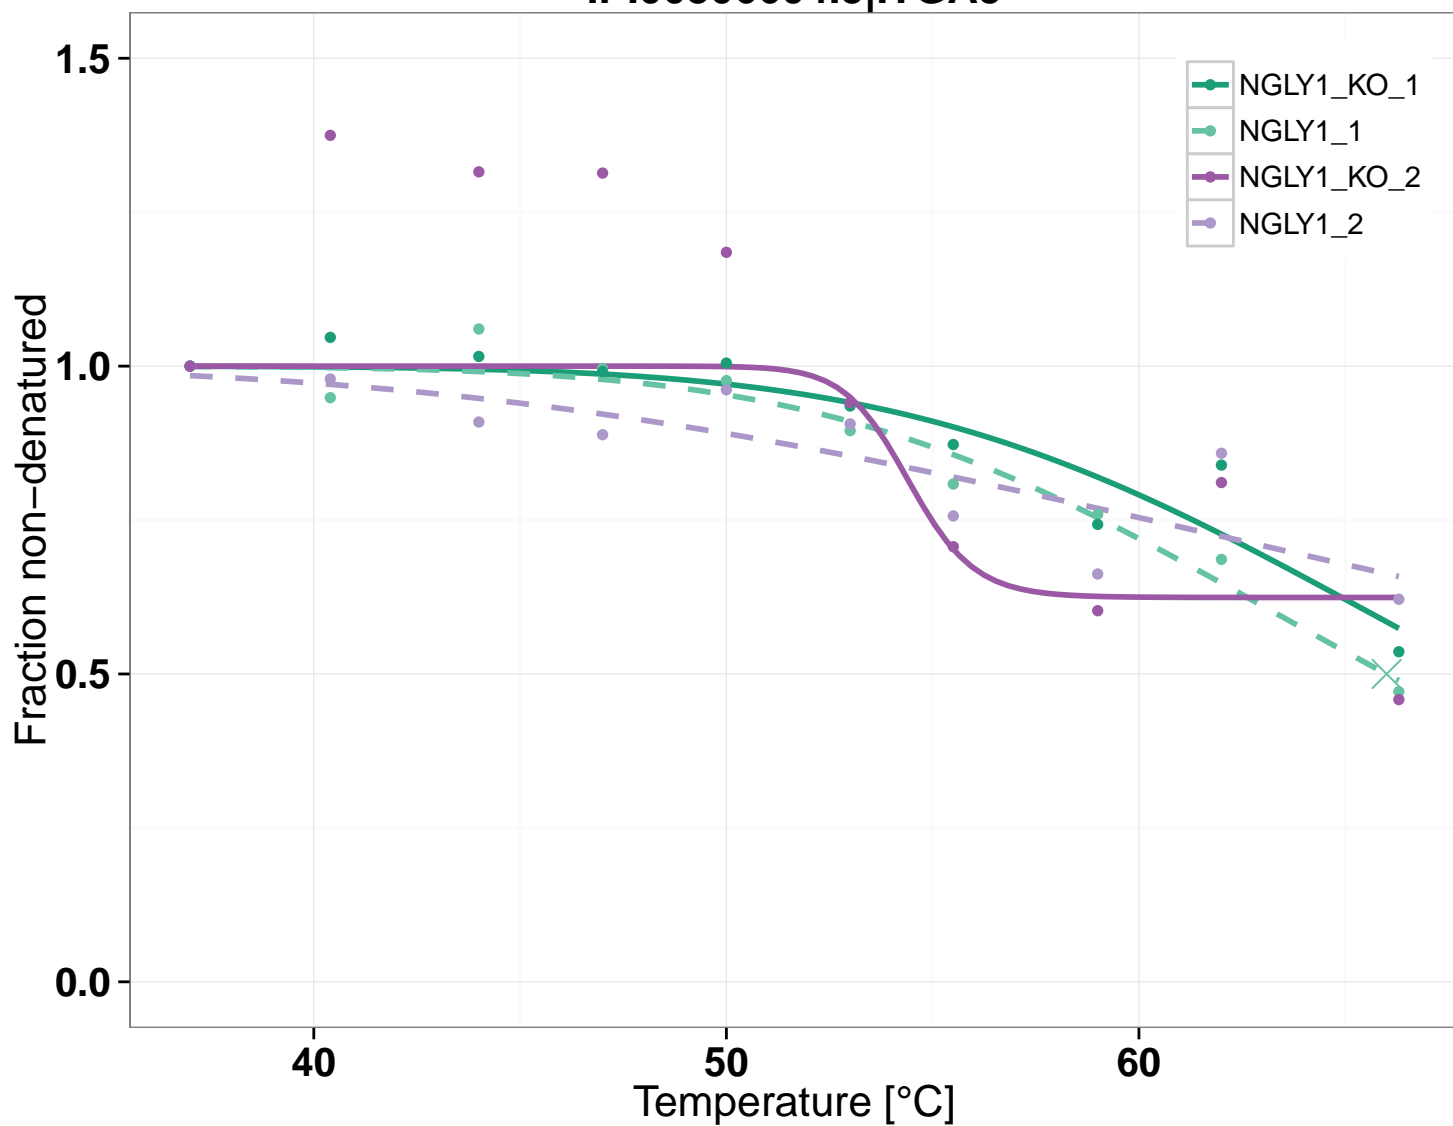

|            | meltPoint | slope  | plateau | R2   |
|------------|-----------|--------|---------|------|
| NGLY1_KO_1 | –         | –0.036 | 0       | 0.89 |
| NGLY1_1    | 66        | –0.037 | 0       | 0.96 |
| NGLY1_KO_2 | –         | –0.12  | 0.62    | 0.54 |
| NGLY1_2    | –         | –0.015 | 0       | 0.71 |

Supplement: Supplementary file 1688 [file 1]

# IPI00299402.1|PC

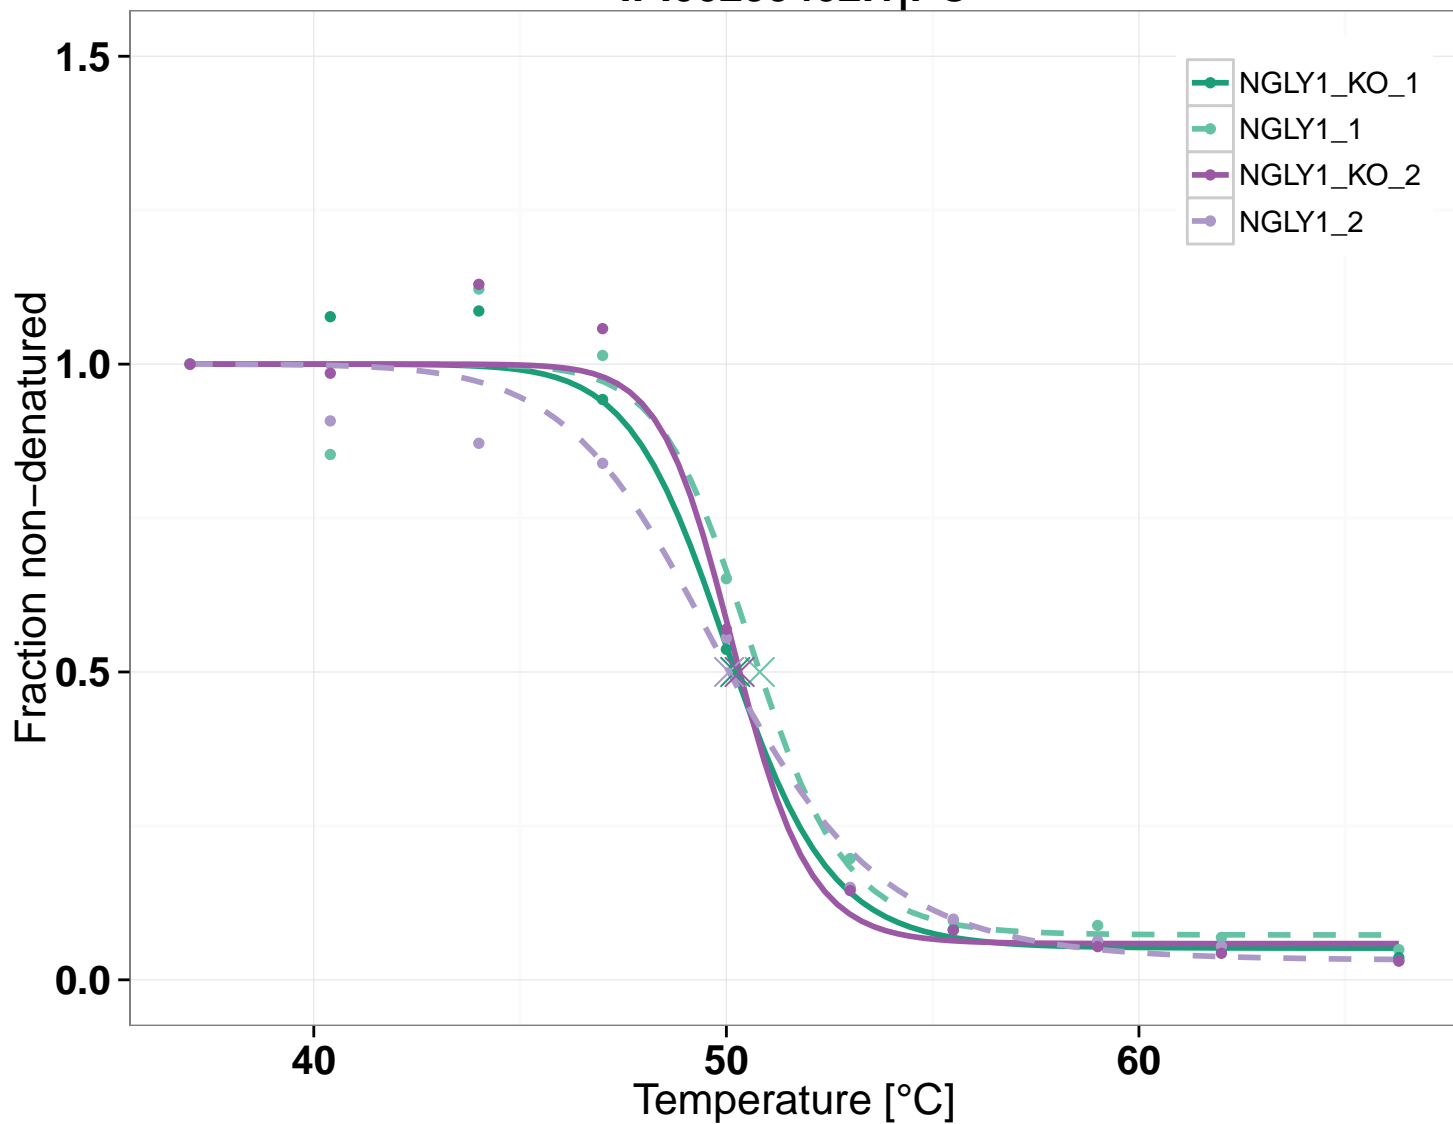

|            | meltPoint | slope | plateau | R2   |
|------------|-----------|-------|---------|------|
| NGLY1_KO_1 | 50.22     | -0.19 | 0.05    | 0.99 |
| NGLY1_1    | 50.81     | -0.21 | 0.07    | 0.98 |
| NGLY1_KO_2 | 50.32     | -0.26 | 0.06    | 0.99 |
| NGLY1_2    | 50.07     | -0.13 | 0.03    | 0.98 |

Supplement: Supplementary file 1689 [file 1]

# IPI00478119.5|RHD

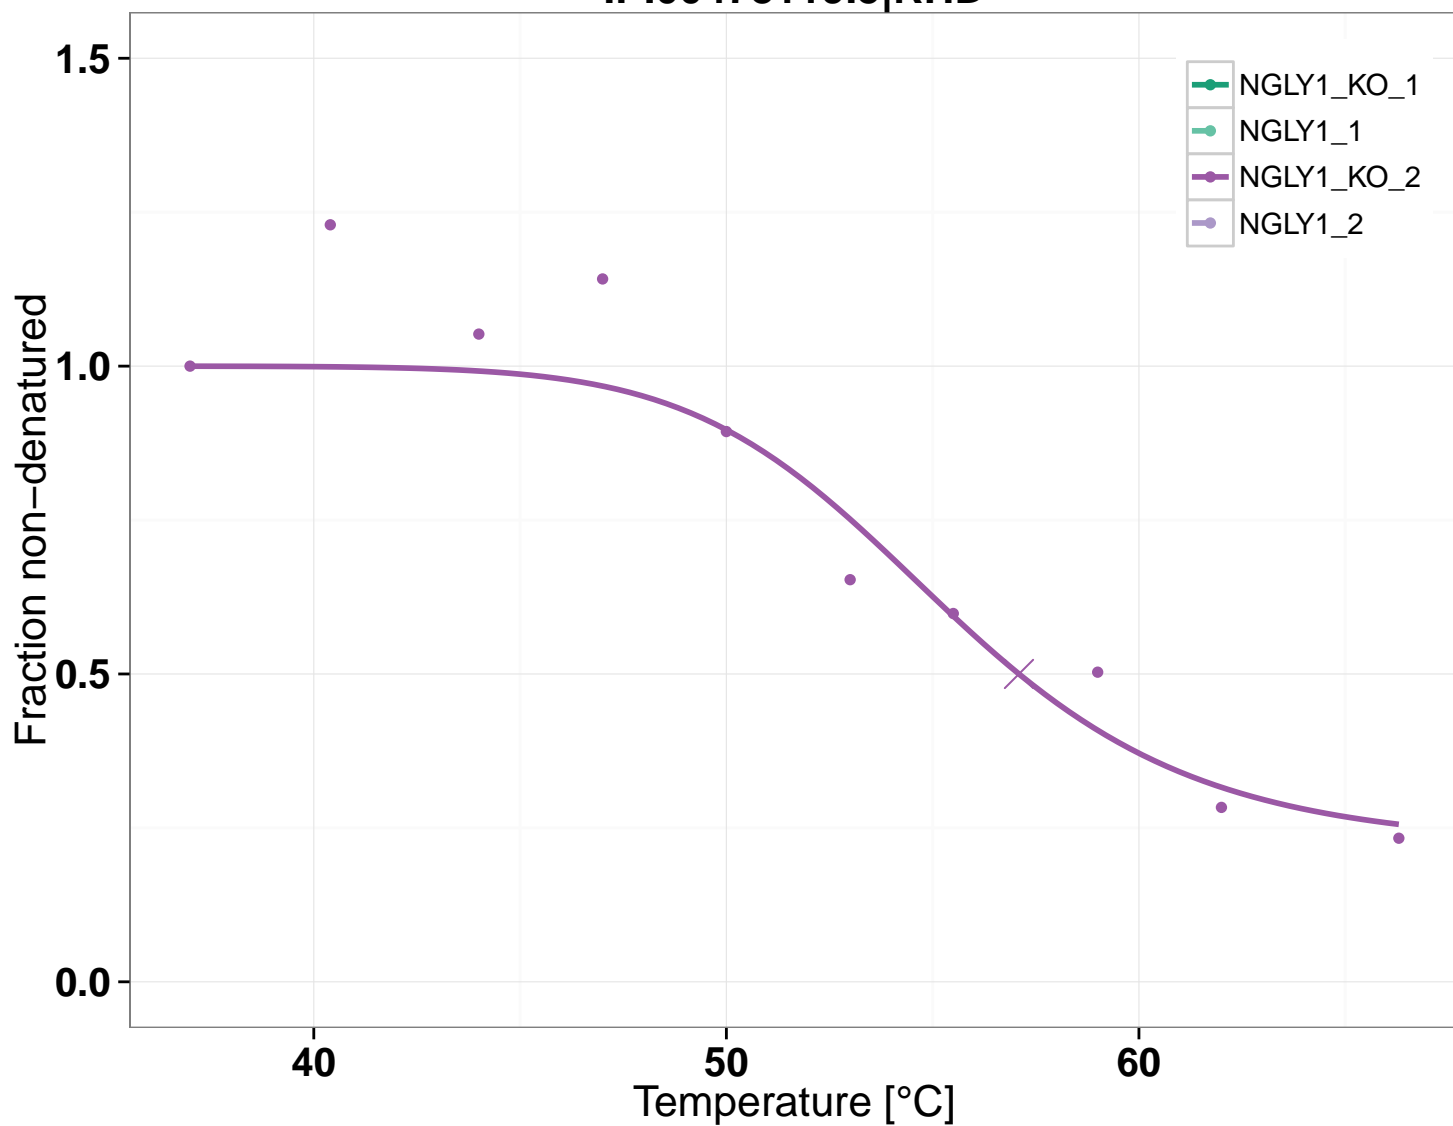

|            | meltPoint | slope  | plateau | R2   |
|------------|-----------|--------|---------|------|
| NGLY1_KO_1 | —         | —      | —       | —    |
| NGLY1_1    | —         | —      | —       | —    |
| NGLY1_KO_2 | 57.09     | -0.064 | 0.22    | 0.91 |
| NGLY1_2    | —         | —      | —       | —    |

Supplement: Supplementary file 1690 [file 1]

# IPI00043563.3|C16ORF63

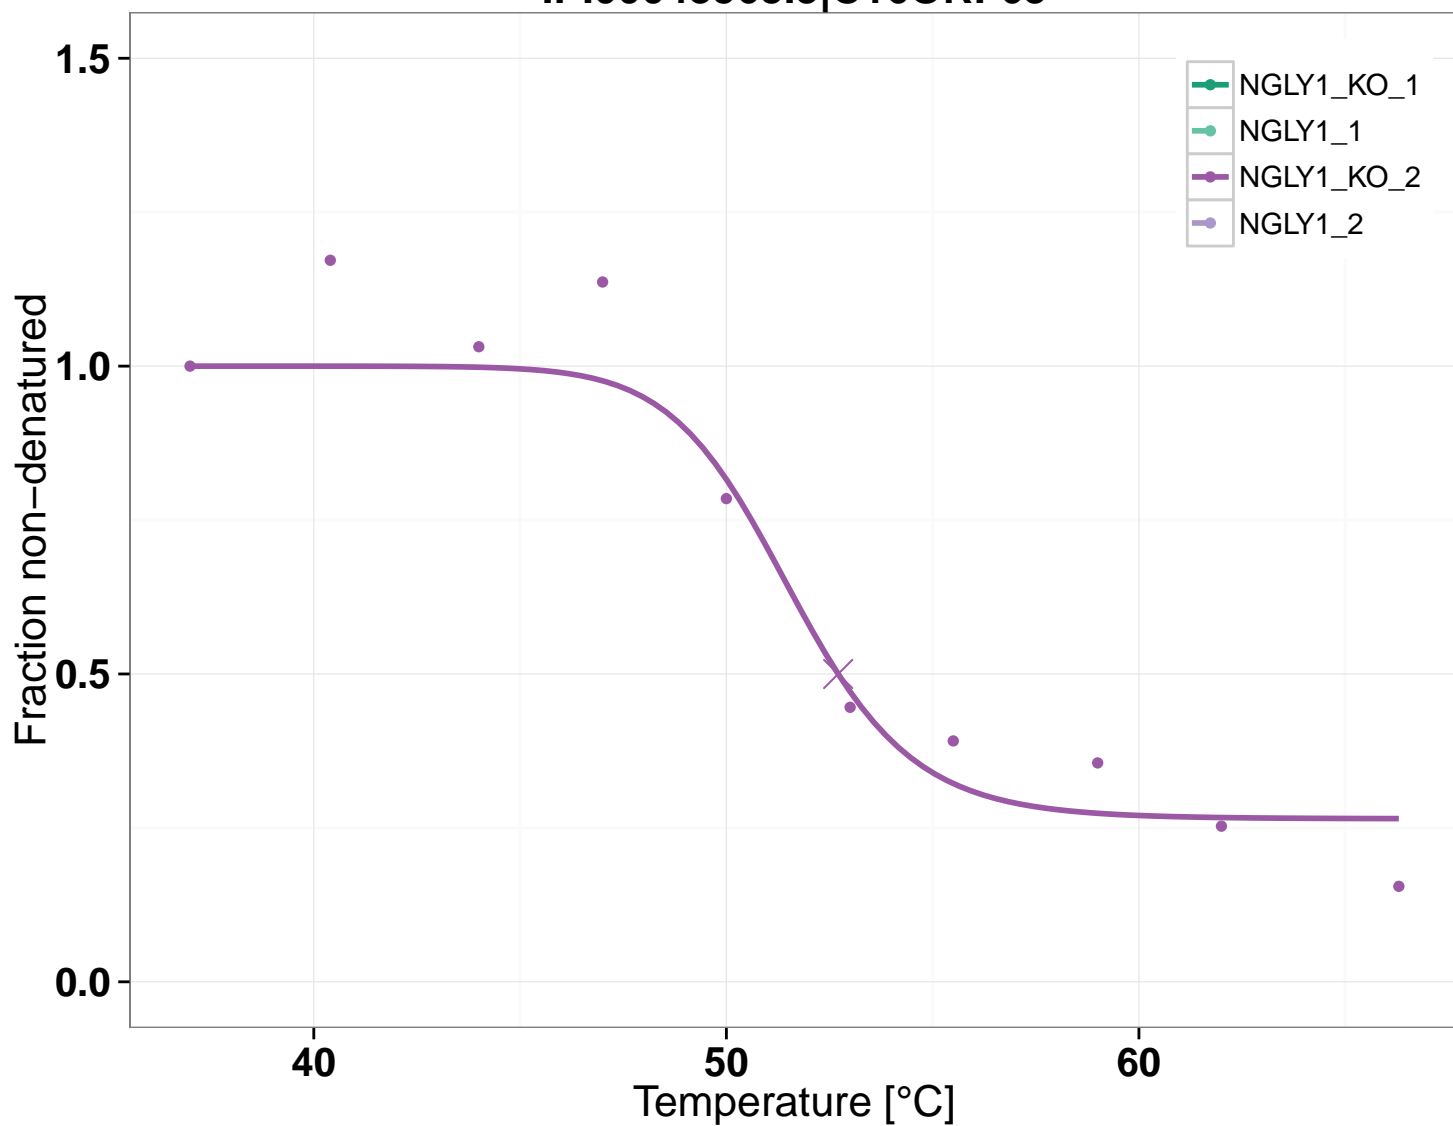

|            | meltPoint | slope | plateau | R2   |
|------------|-----------|-------|---------|------|
| NGLY1_KO_1 | —         | —     | —       | —    |
| NGLY1_1    | —         | —     | —       | —    |
| NGLY1_KO_2 | 52.71     | -0.12 | 0.26    | 0.94 |
| NGLY1_2    | —         | —     | —       | —    |

Supplement: Supplementary file 1691 [file 1]

IPI00884011.1|A8MTT3\_HUMAN

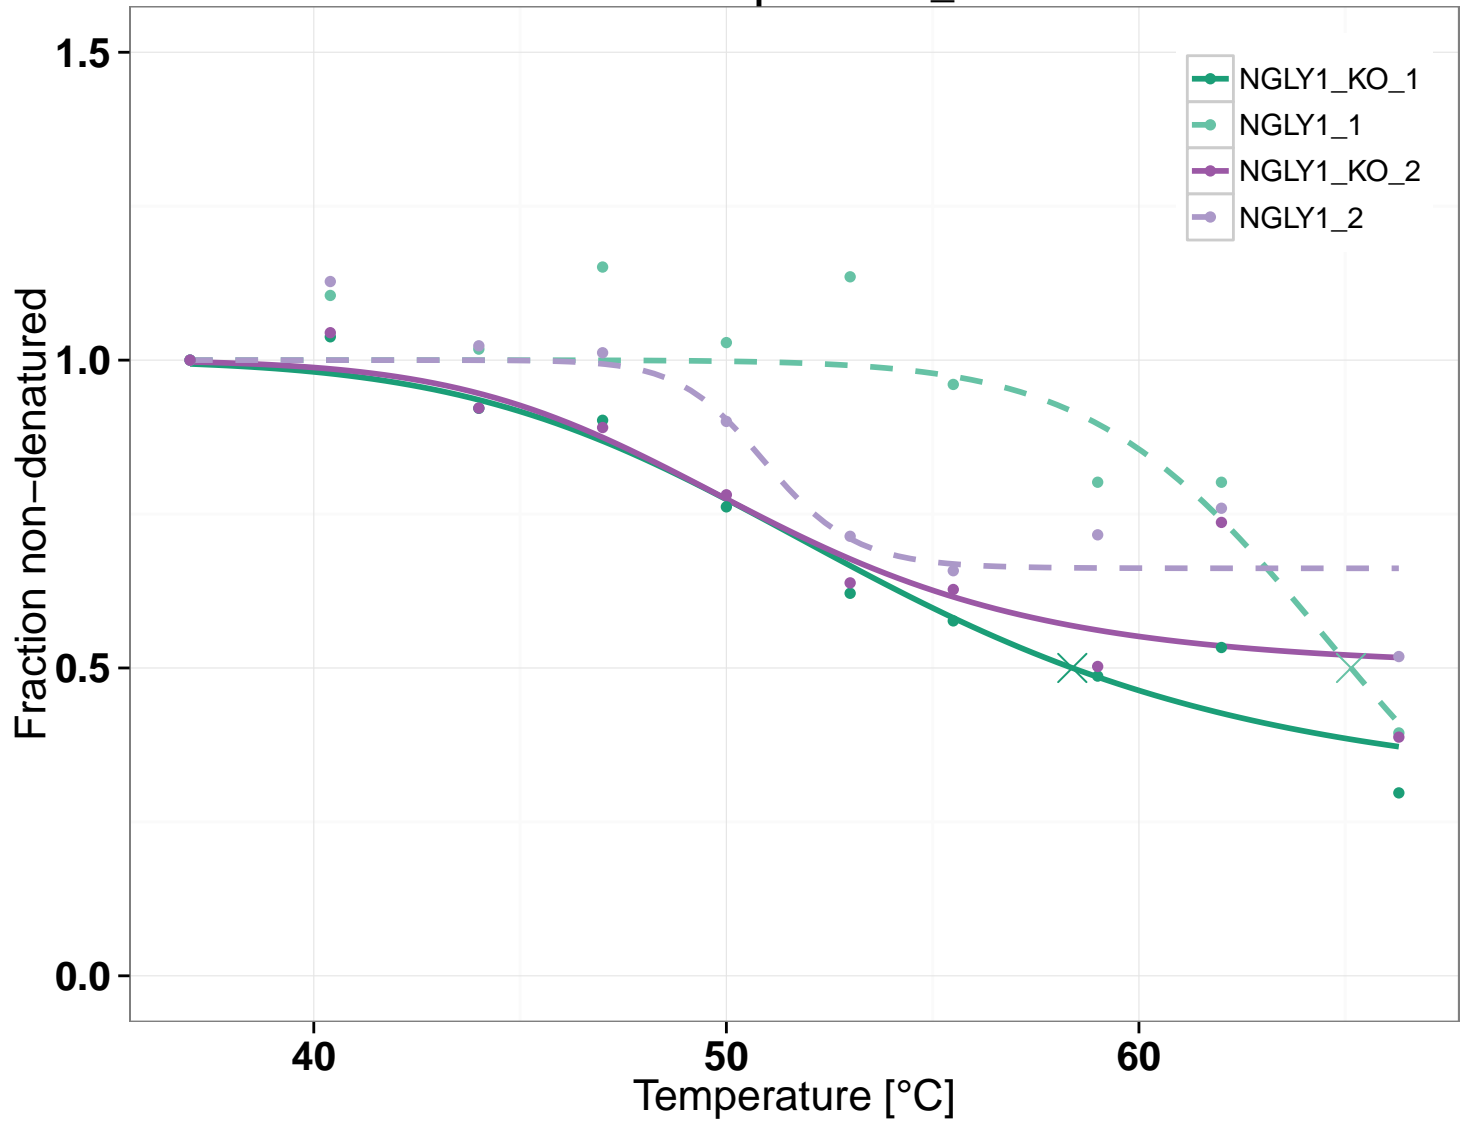

|            | meltPoint | slope  | plateau | R2   |
|------------|-----------|--------|---------|------|
| NGLY1_KO_1 | 58.38     | -0.036 | 0.29    | 0.96 |
| NGLY1_1    | 65.14     | -0.08  | 0       | 0.85 |
| NGLY1_KO_2 | -         | -0.035 | 0.5     | 0.84 |
| NGLY1_2    | -         | -0.078 | 0.66    | 0.86 |

Supplement: Supplementary file 1692 [file 1]

IPI00741970.1|STRN4

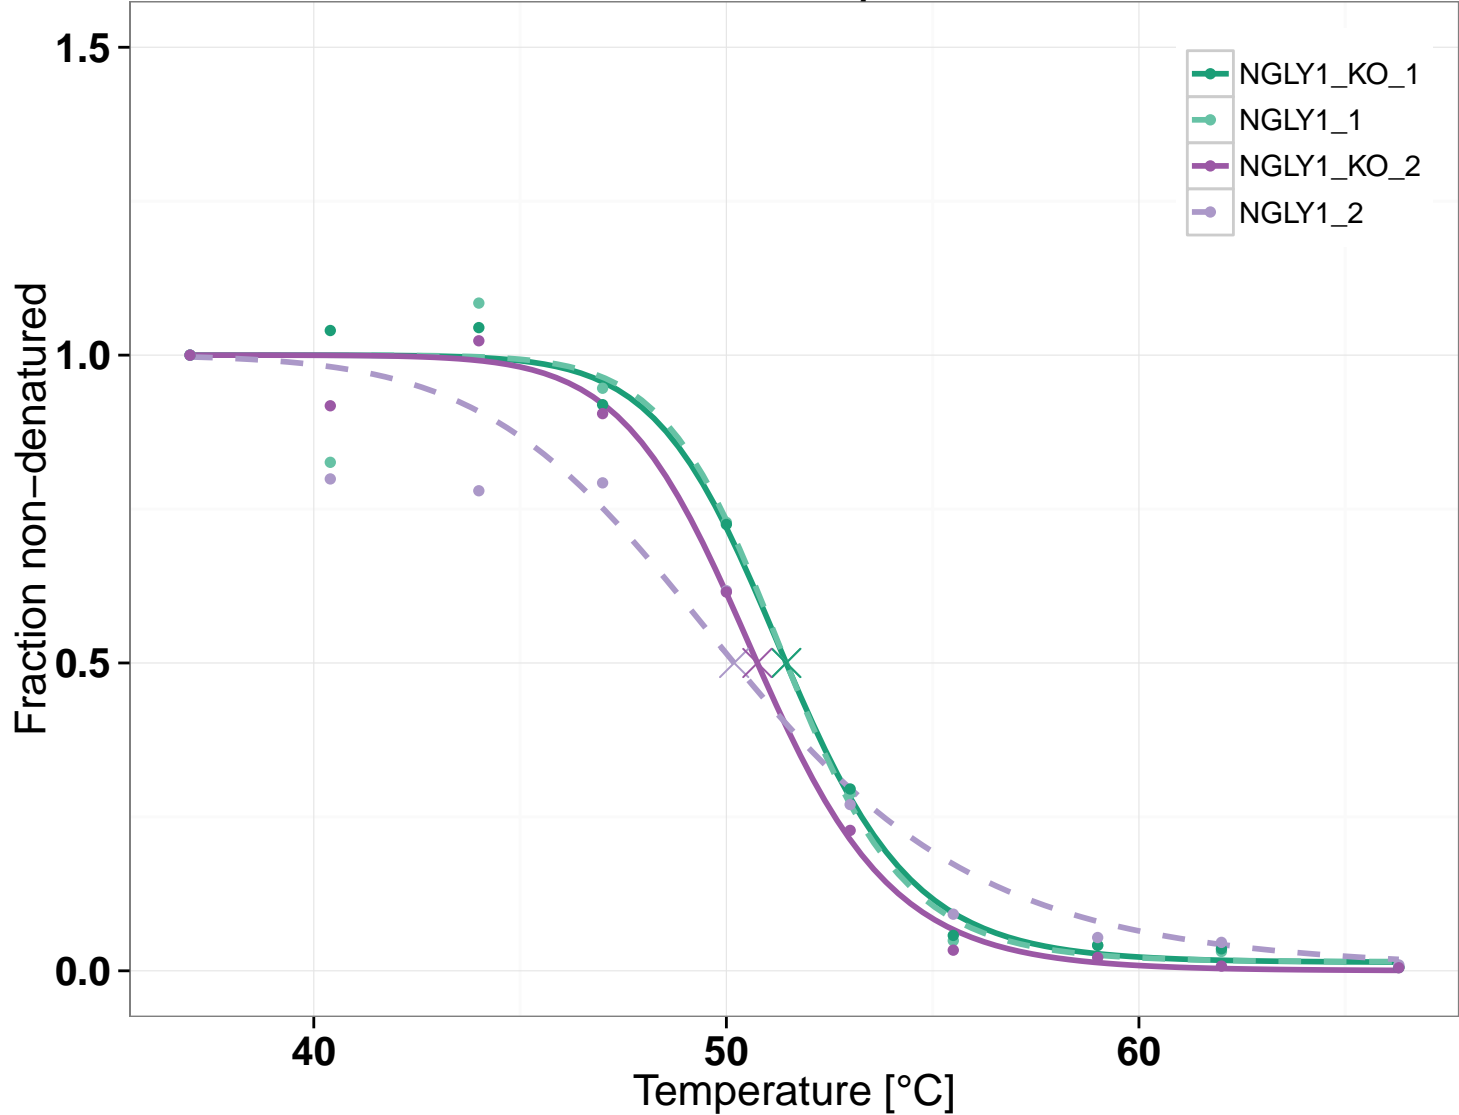

|            | meltPoint | slope  | plateau | R2   |
|------------|-----------|--------|---------|------|
| NGLY1_KO_1 | 51.45     | -0.16  | 0.01    | 1    |
| NGLY1_1    | 51.45     | -0.17  | 0.01    | 0.98 |
| NGLY1_KO_2 | 50.75     | -0.15  | 0       | 0.99 |
| NGLY1_2    | 50.19     | -0.083 | 0       | 0.95 |

Supplement: Supplementary file 1693 [file 1]

# IPI00644570.1|18 KDA PROTEIN.

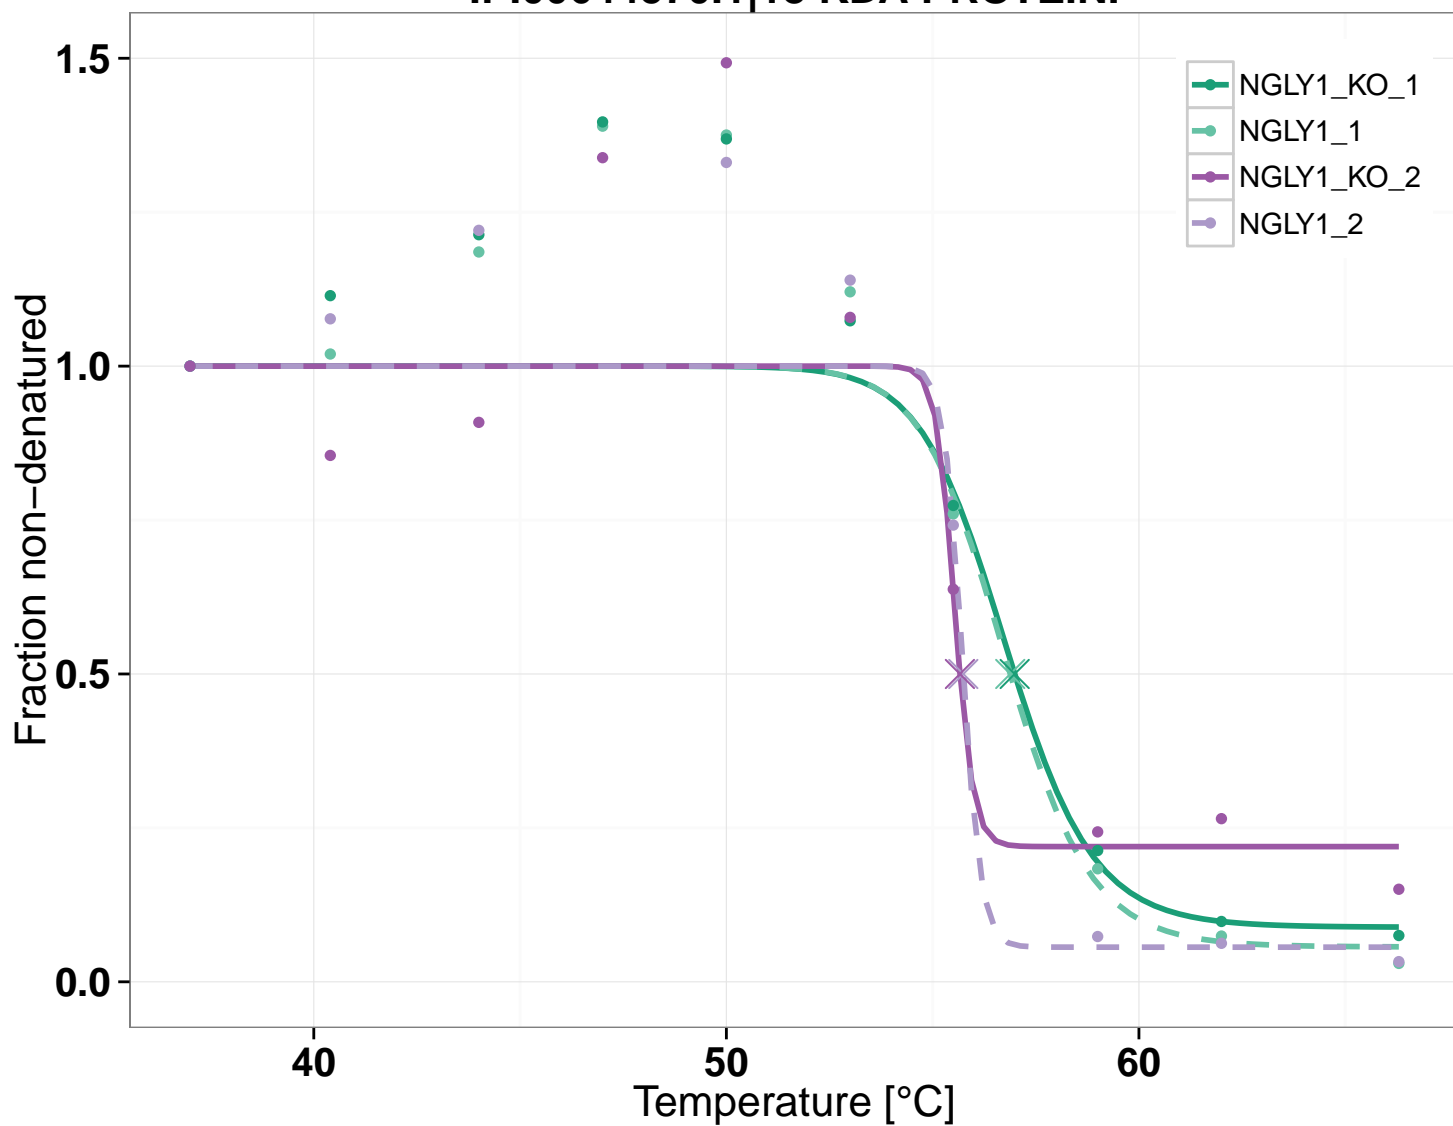

|            | meltPoint | slope | plateau | R2   |
|------------|-----------|-------|---------|------|
| NGLY1_KO_1 | 56.99     | -0.22 | 0.09    | 0.85 |
| NGLY1_1    | 56.88     | -0.23 | 0.06    | 0.86 |
| NGLY1_KO_2 | 55.66     | -0.88 | 0.22    | 0.79 |
| NGLY1_2    | 55.74     | -1.1  | 0.06    | 0.83 |

Supplement: Supplementary file 1694 [file 1]

# IPI00016608.1|TMED2

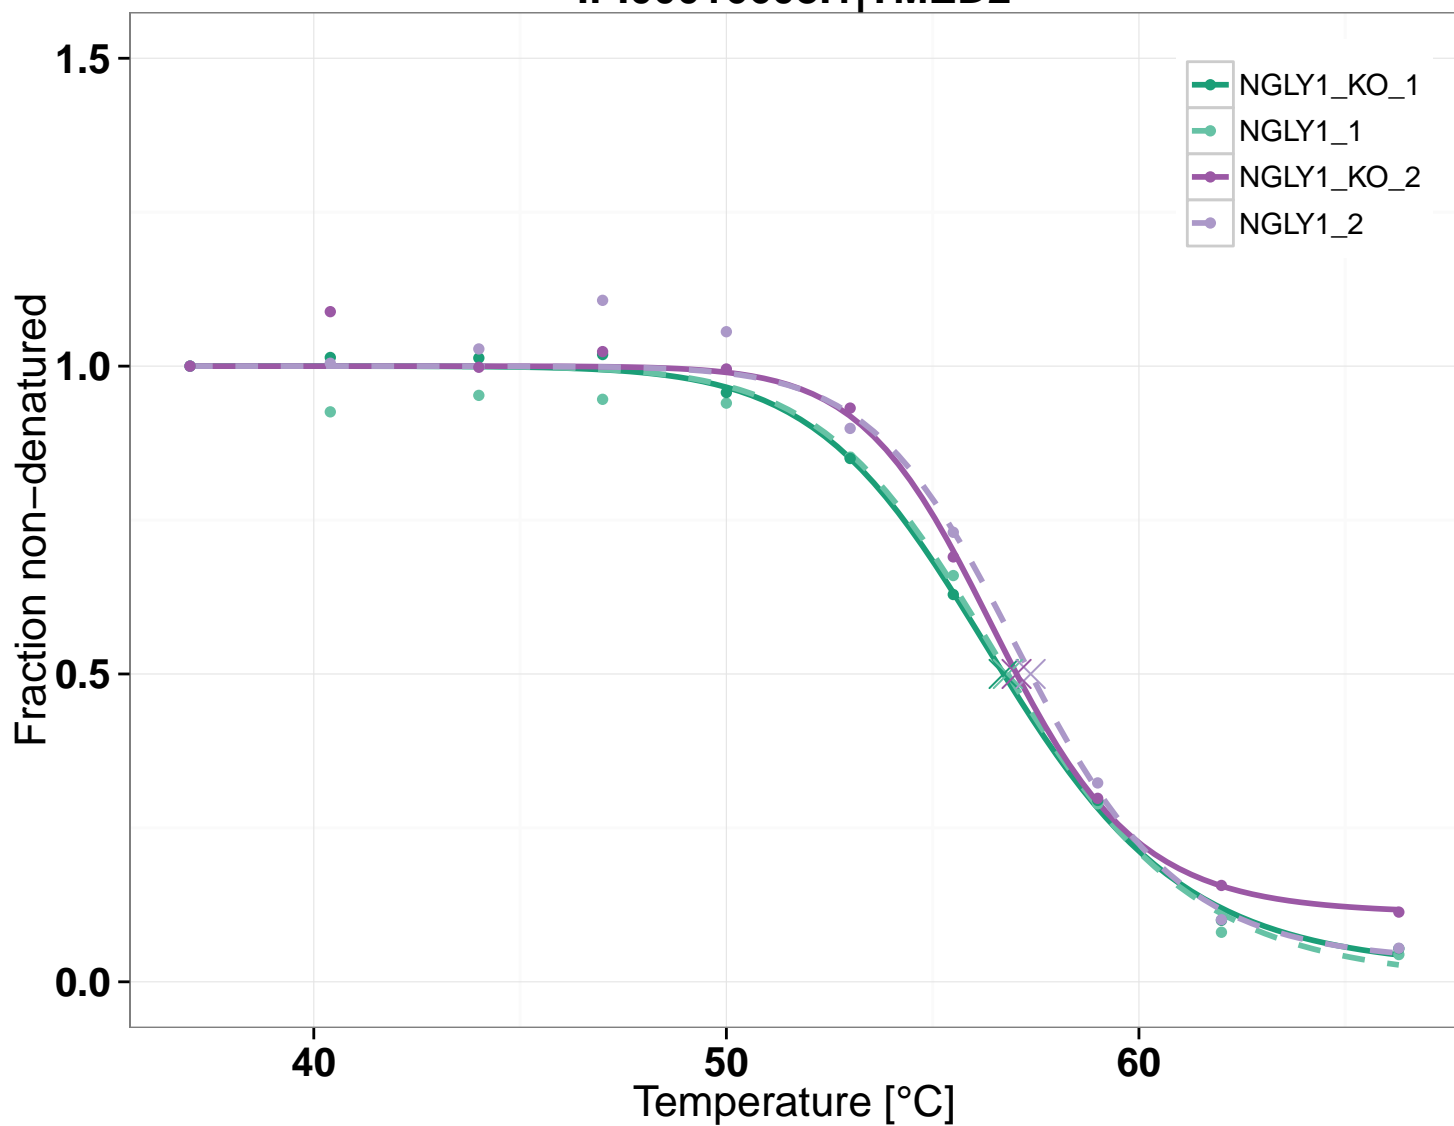

|            | meltPoint | slope | plateau | R2   |
|------------|-----------|-------|---------|------|
| NGLY1_KO_1 | 56.72     | -0.11 | 0.02    | 1    |
| NGLY1_1    | 56.82     | -0.11 | 0       | 0.99 |
| NGLY1_KO_2 | 57.03     | -0.13 | 0.11    | 0.99 |
| NGLY1_2    | 57.38     | -0.13 | 0.03    | 0.99 |

Supplement: Supplementary file 1695 [file 1]

IPI00554740.1|AFTPH

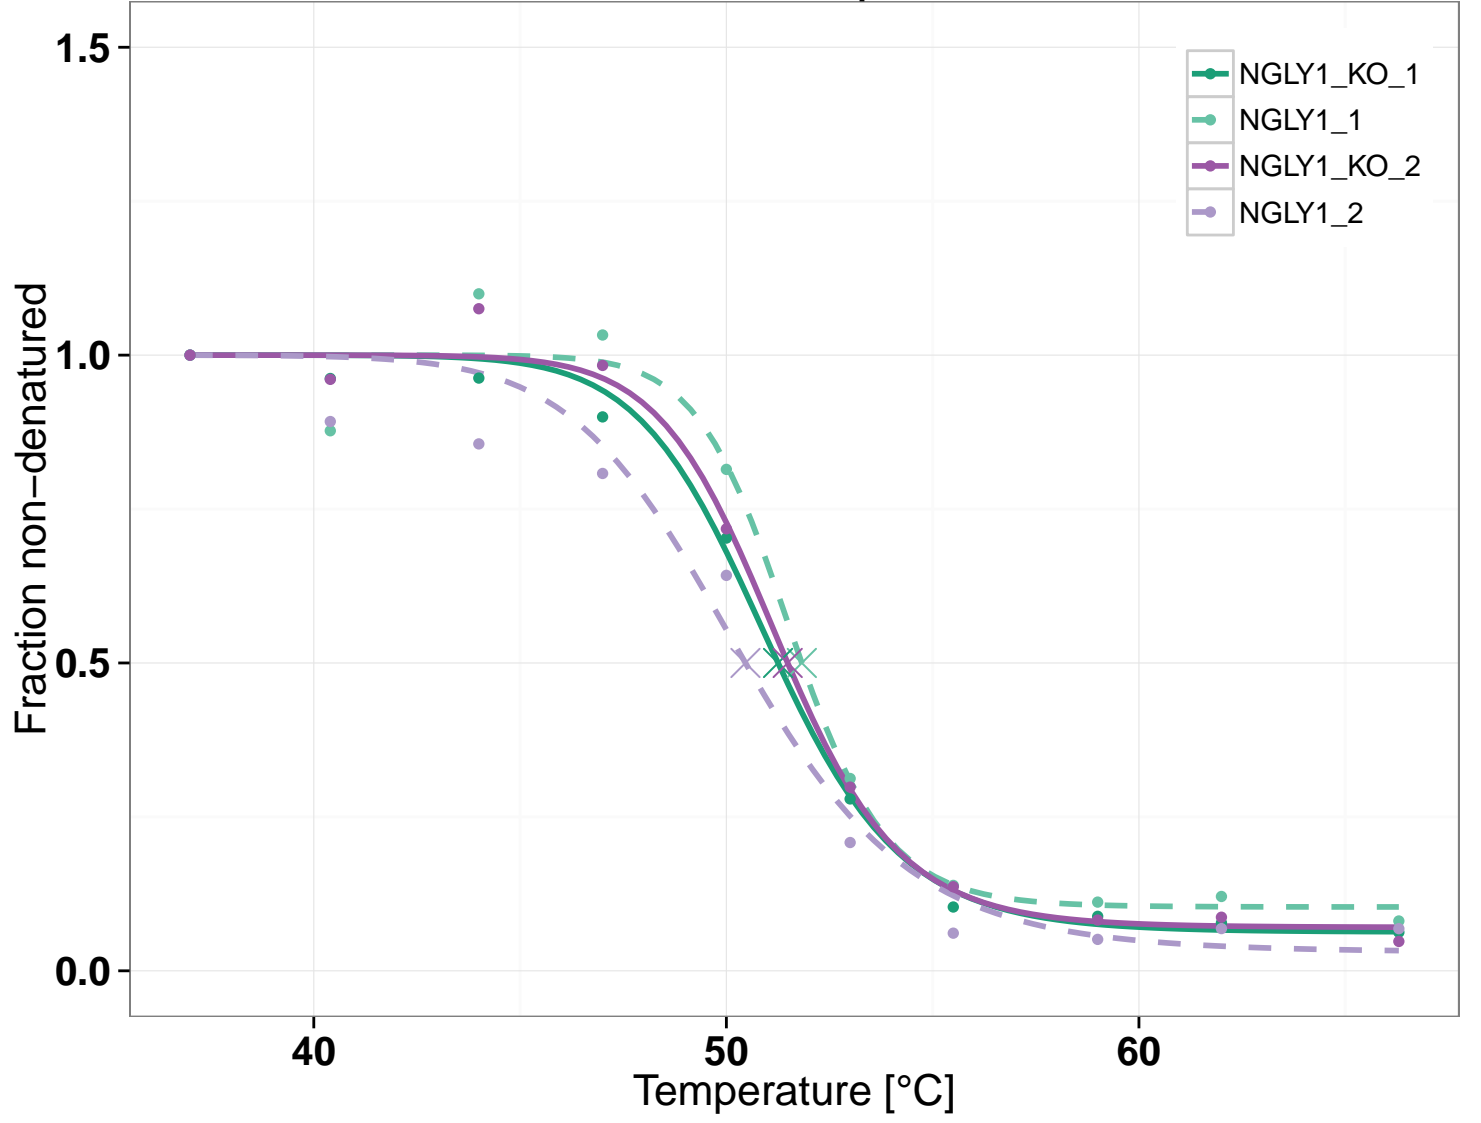

|            | meltPoint | slope | plateau | R2   |
|------------|-----------|-------|---------|------|
| NGLY1_KO_1 | 51.25     | -0.15 | 0.06    | 1    |
| NGLY1_1    | 51.83     | -0.2  | 0.1     | 0.98 |
| NGLY1_KO_2 | 51.49     | -0.16 | 0.07    | 0.99 |
| NGLY1_2    | 50.46     | -0.12 | 0.03    | 0.97 |

Supplement: Supplementary file 1696 [file 1]

# IPI00165357.4|MTA3

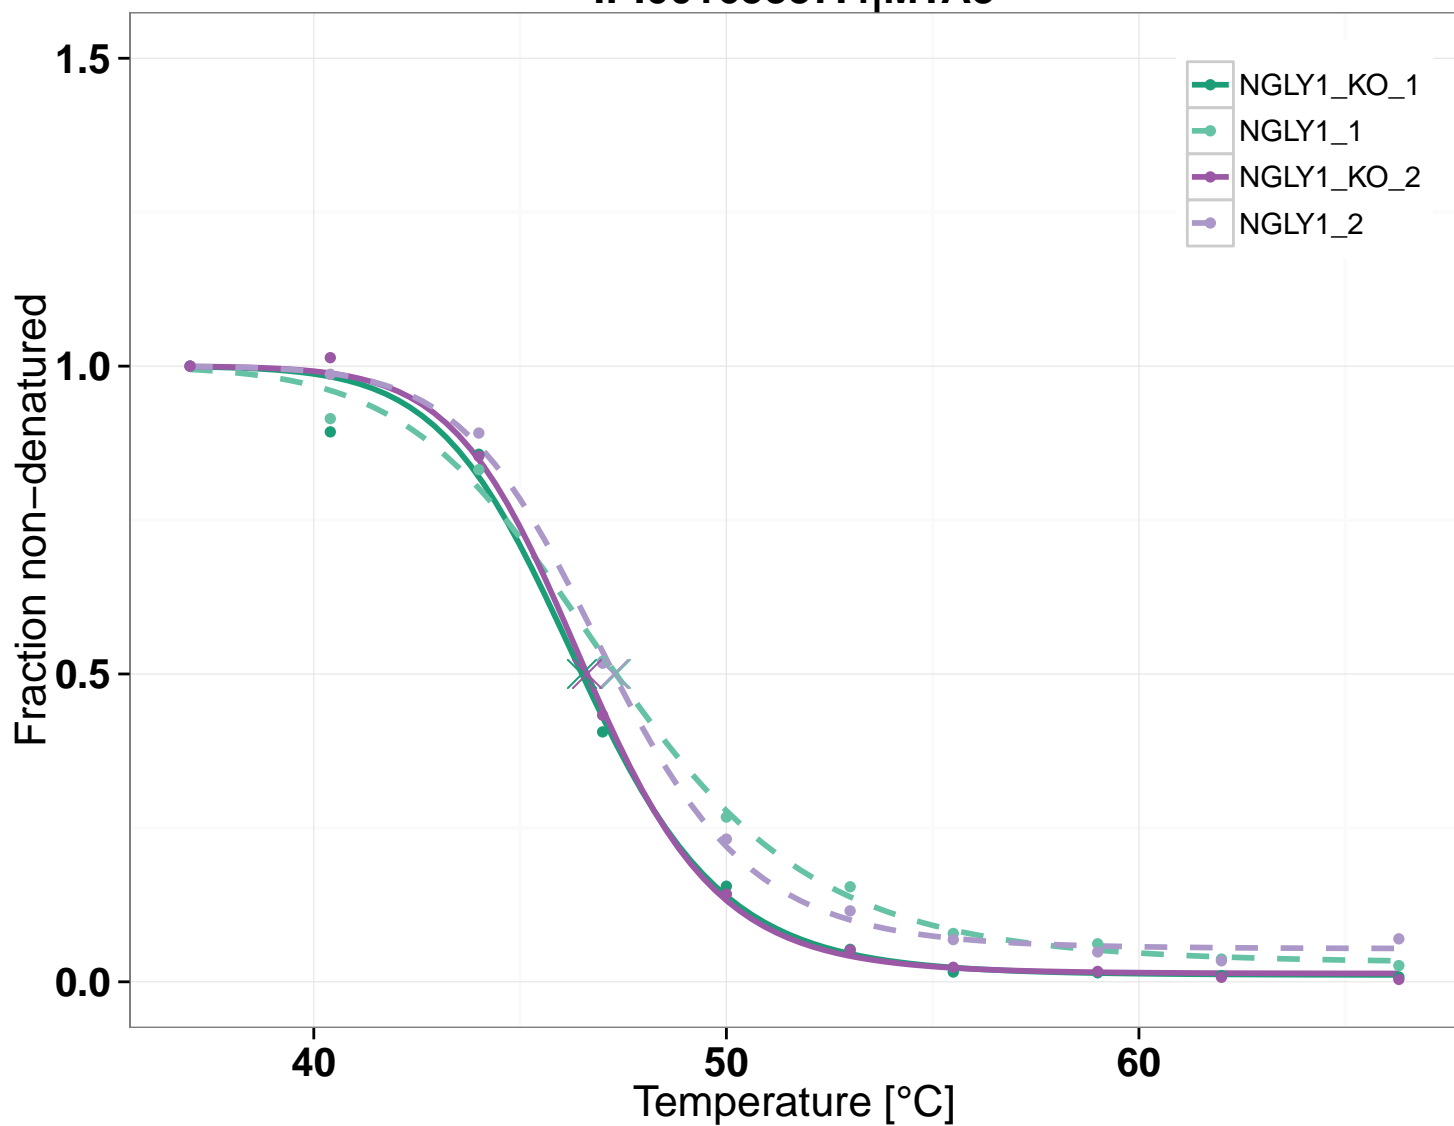

|            | meltPoint | slope  | plateau | R2   |
|------------|-----------|--------|---------|------|
| NGLY1_KO_1 | 46.5      | -0.14  | 0.01    | 0.99 |
| NGLY1_1    | 47.32     | -0.098 | 0.03    | 1    |
| NGLY1_KO_2 | 46.62     | -0.15  | 0.01    | 1    |
| NGLY1_2    | 47.27     | -0.13  | 0.05    | 1    |

Supplement: Supplementary file 1697 [file 1]

# IPI00022296.1|KIT

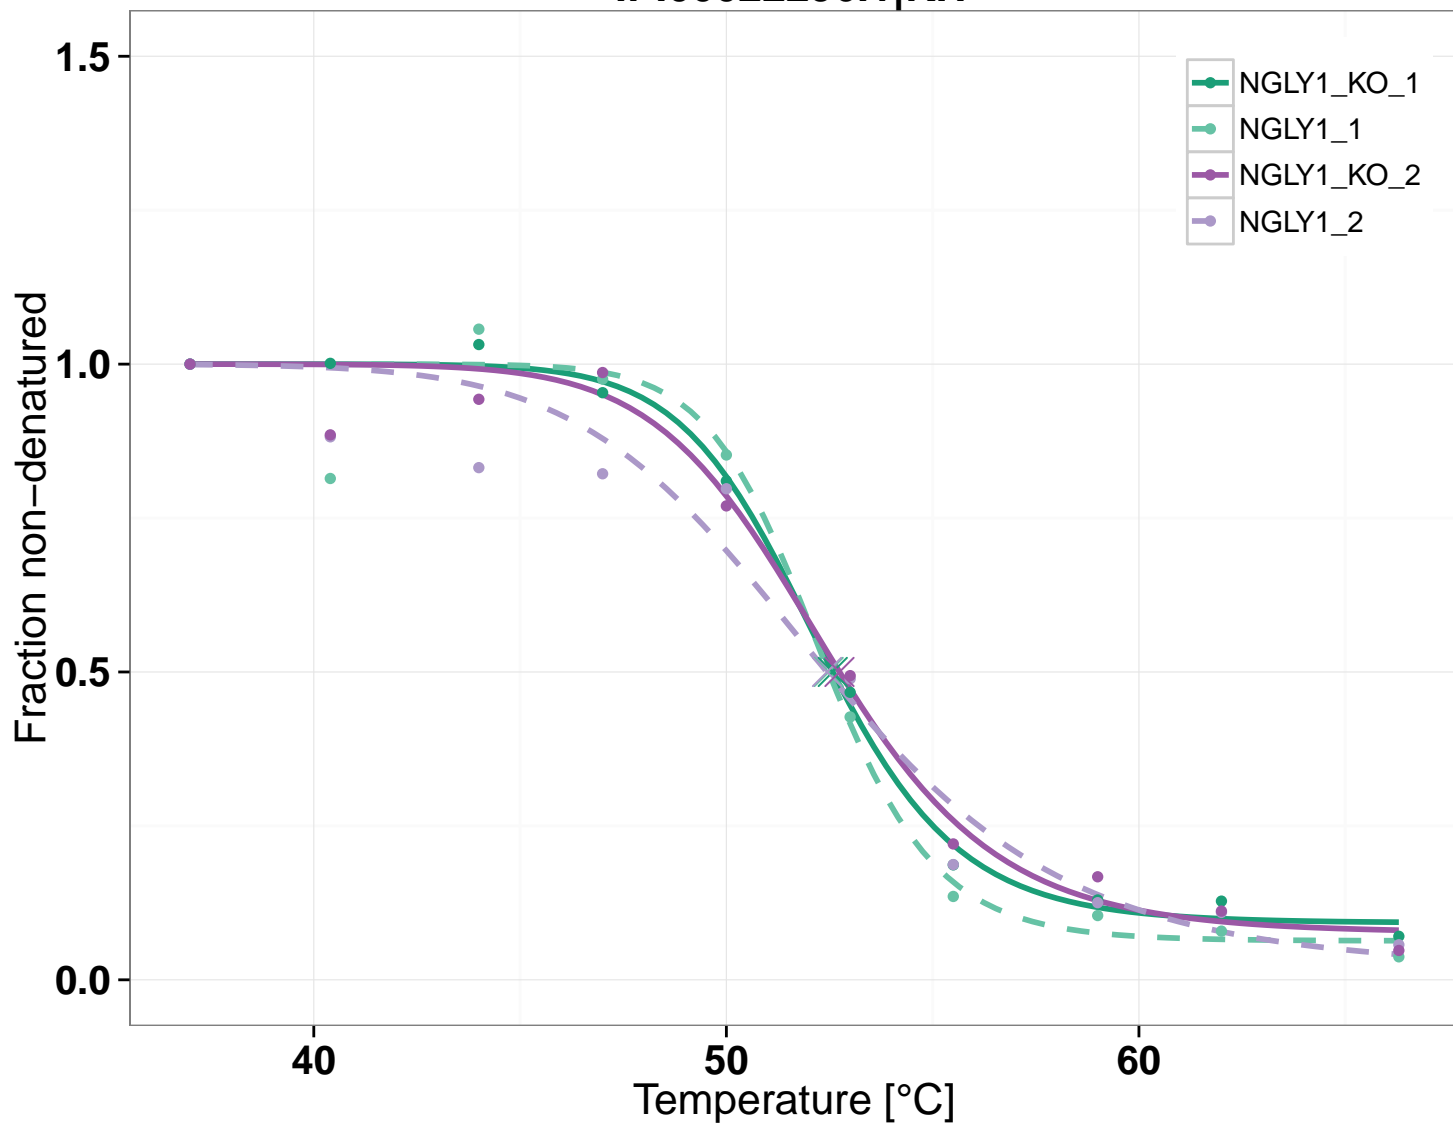

|            | meltPoint | slope  | plateau | R2   |
|------------|-----------|--------|---------|------|
| NGLY1_KO_1 | 52.58     | -0.13  | 0.09    | 1    |
| NGLY1_1    | 52.48     | -0.17  | 0.06    | 0.98 |
| NGLY1_KO_2 | 52.74     | -0.11  | 0.08    | 0.98 |
| NGLY1_2    | 52.44     | -0.082 | 0.02    | 0.96 |

Supplement: Supplementary file 1698 [file 1]

IPI00423874.1|AMFR

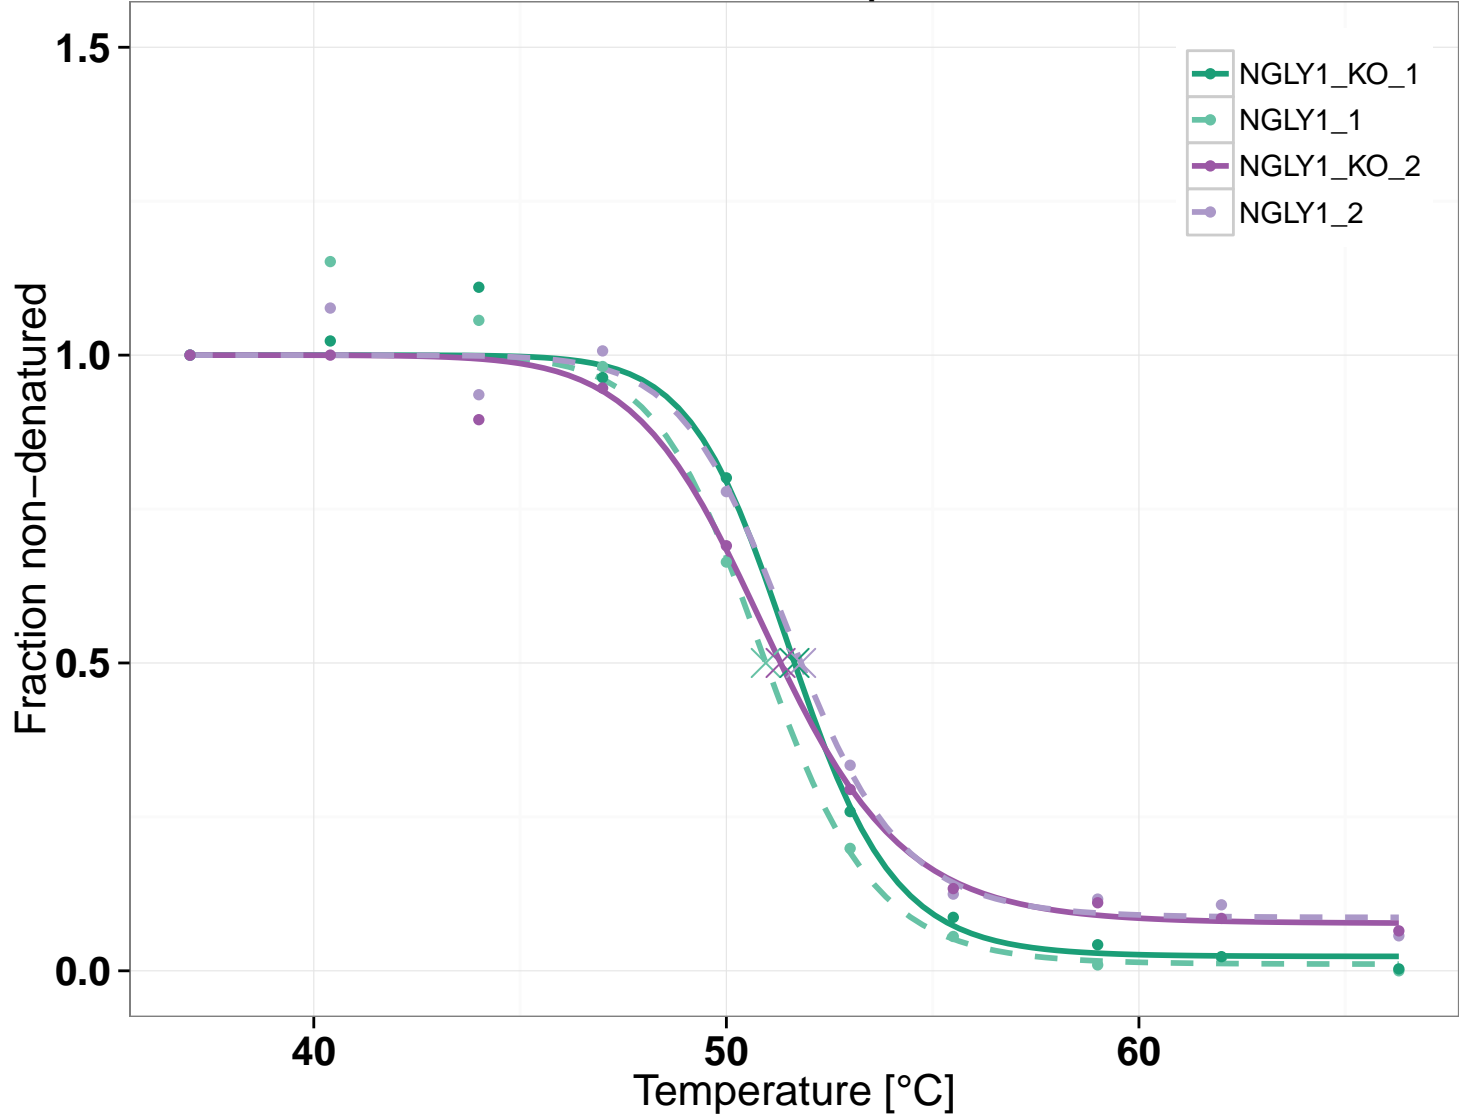

|            | meltPoint | slope | plateau | R2   |
|------------|-----------|-------|---------|------|
| NGLY1_KO_1 | 51.65     | -0.2  | 0.02    | 0.99 |
| NGLY1_1    | 50.96     | -0.19 | 0.01    | 0.99 |
| NGLY1_KO_2 | 51.31     | -0.14 | 0.08    | 0.99 |
| NGLY1_2    | 51.81     | -0.17 | 0.09    | 0.99 |

Supplement: Supplementary file 1699 [file 1]

IPI00023972.5|DDX47

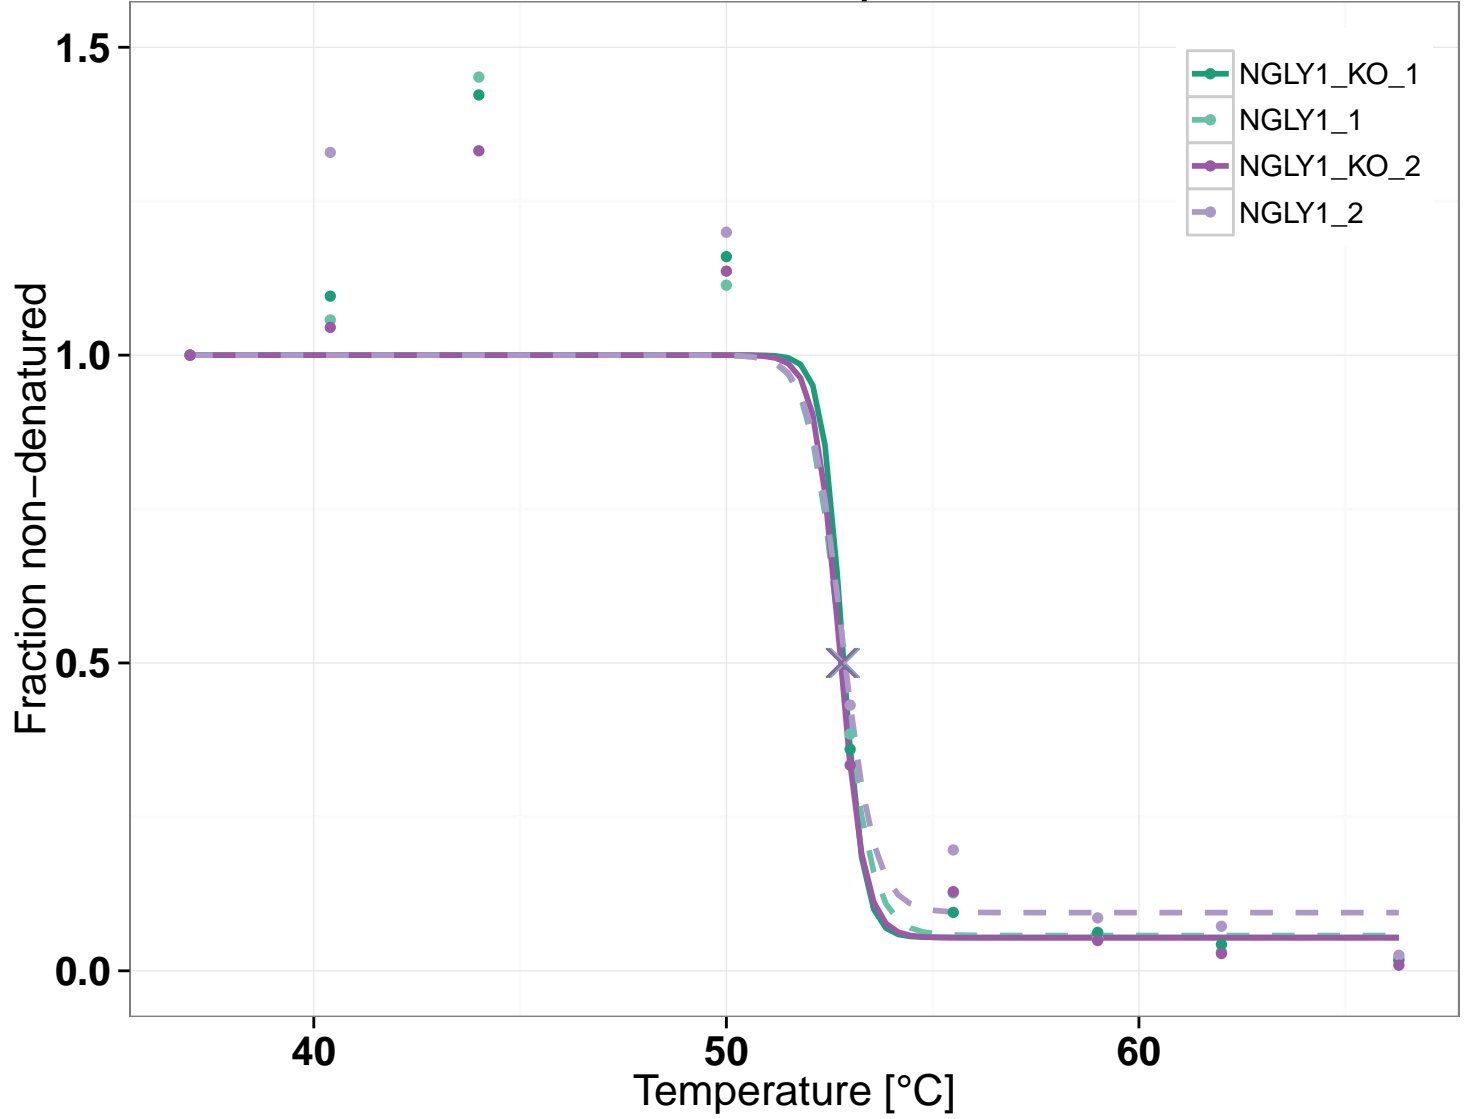

|            | meltPoint | slope | plateau | R2   |
|------------|-----------|-------|---------|------|
| NGLY1_KO_1 | 52.84     | -0.94 | 0.05    | 0.8  |
| NGLY1_1    | 52.81     | -0.62 | 0.06    | 0.82 |
| NGLY1_KO_2 | 52.77     | -0.79 | 0.05    | 0.8  |
| NGLY1_2    | 52.88     | -0.58 | 0.09    | 0.72 |

Supplement: Supplementary file 1700 [file 1]

IPI00004795.1|CLNS1A

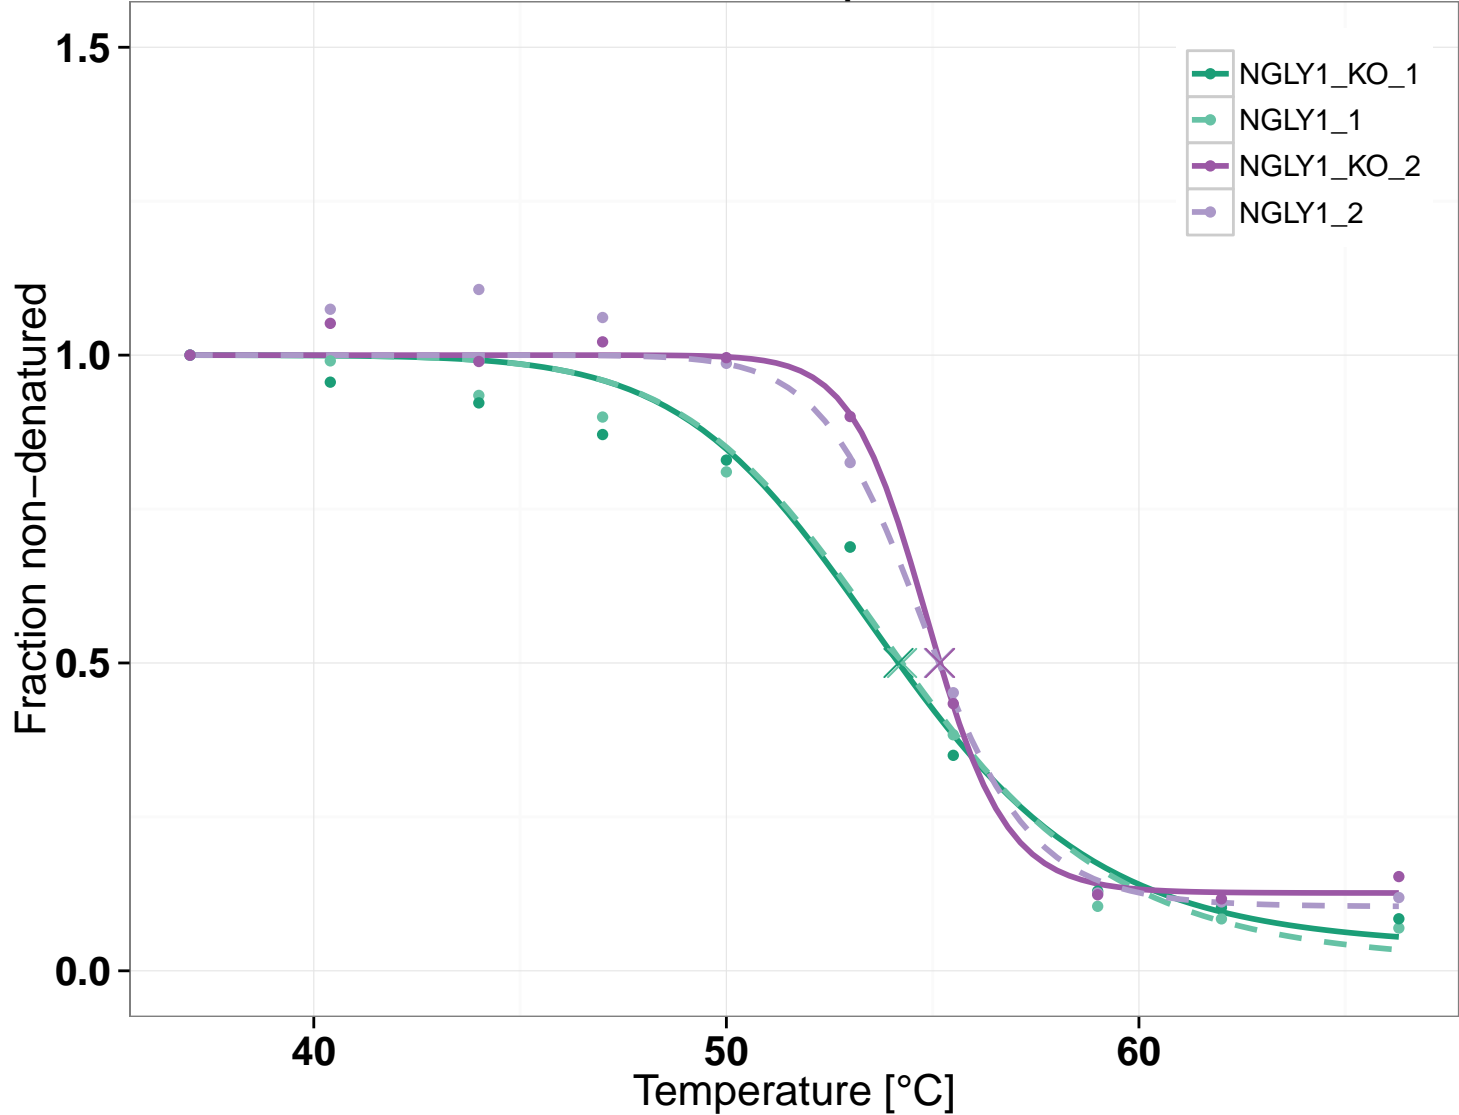

|            | meltPoint | slope  | plateau | R2   |
|------------|-----------|--------|---------|------|
| NGLY1_KO_1 | 54.17     | -0.095 | 0.04    | 0.98 |
| NGLY1_1    | 54.26     | -0.095 | 0.01    | 0.99 |
| NGLY1_KO_2 | 55.18     | -0.23  | 0.13    | 1    |
| NGLY1_2    | 55.15     | -0.17  | 0.1     | 0.99 |

Supplement: Supplementary file 1701 [file 1]

# IPI00029997.1|PGLS

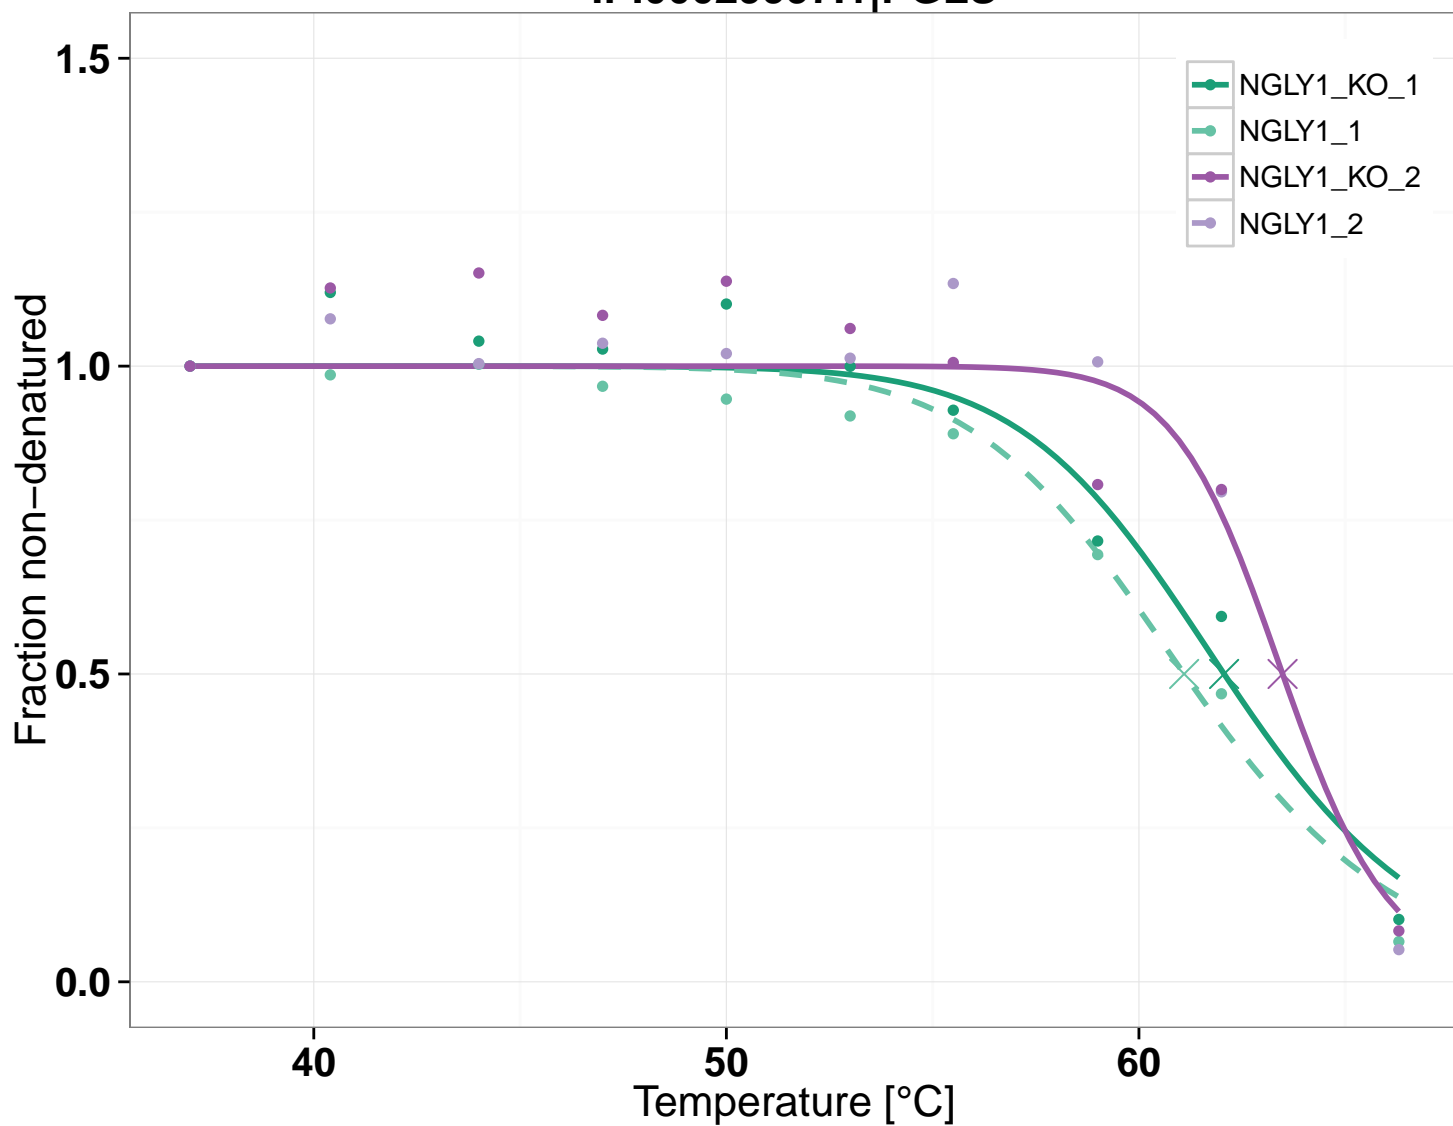

|            | meltPoint | slope  | plateau | R2   |
|------------|-----------|--------|---------|------|
| NGLY1_KO_1 | 62.06     | -0.1   | 0       | 0.95 |
| NGLY1_1    | 61.1      | -0.096 | 0       | 0.98 |
| NGLY1_KO_2 | 63.48     | -0.19  | 0       | 0.89 |
| NGLY1_2    | -         | -      | -       | -    |

Supplement: Supplementary file 1702 [file 1]

IPI00878541.1|RAD50

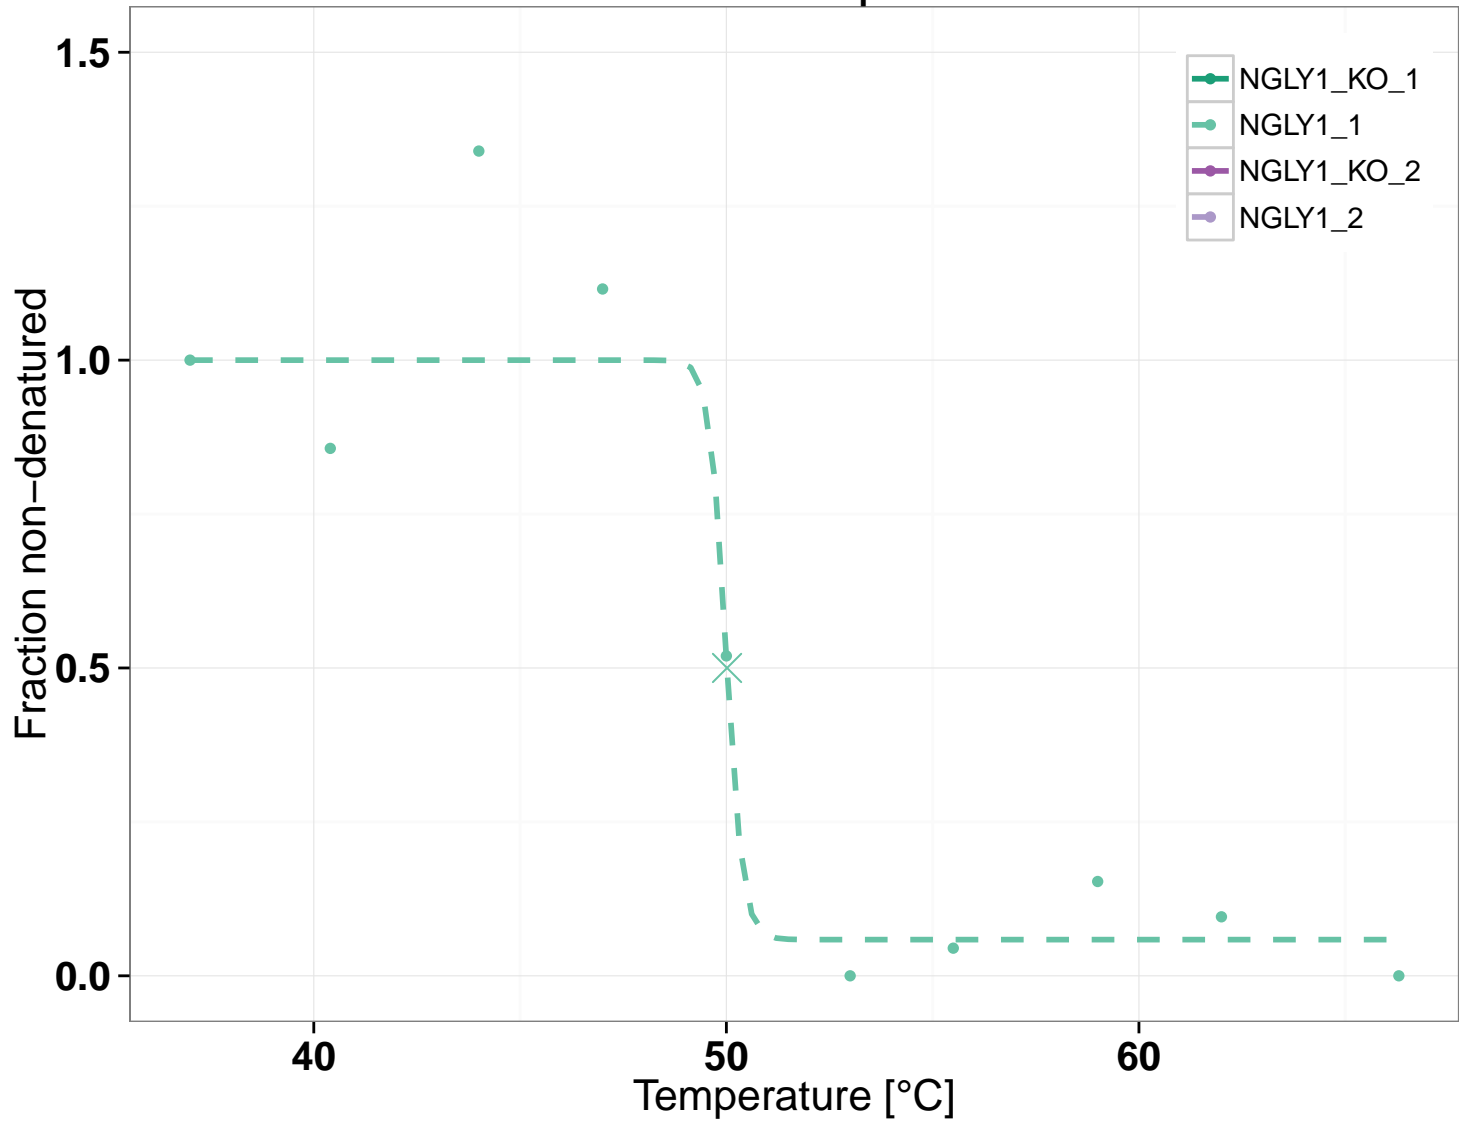

|            | meltPoint | slope | plateau | R2   |
|------------|-----------|-------|---------|------|
| NGLY1_KO_1 | -         | -     | -       | -    |
| NGLY1_1    | 50.02     | -1.2  | 0.06    | 0.93 |
| NGLY1_KO_2 | -         | -     | -       | -    |
| NGLY1_2    | -         | -     | -       | -    |

Supplement: Supplementary file 1703 [file 1]

IPI00219678.3|EIF2S1

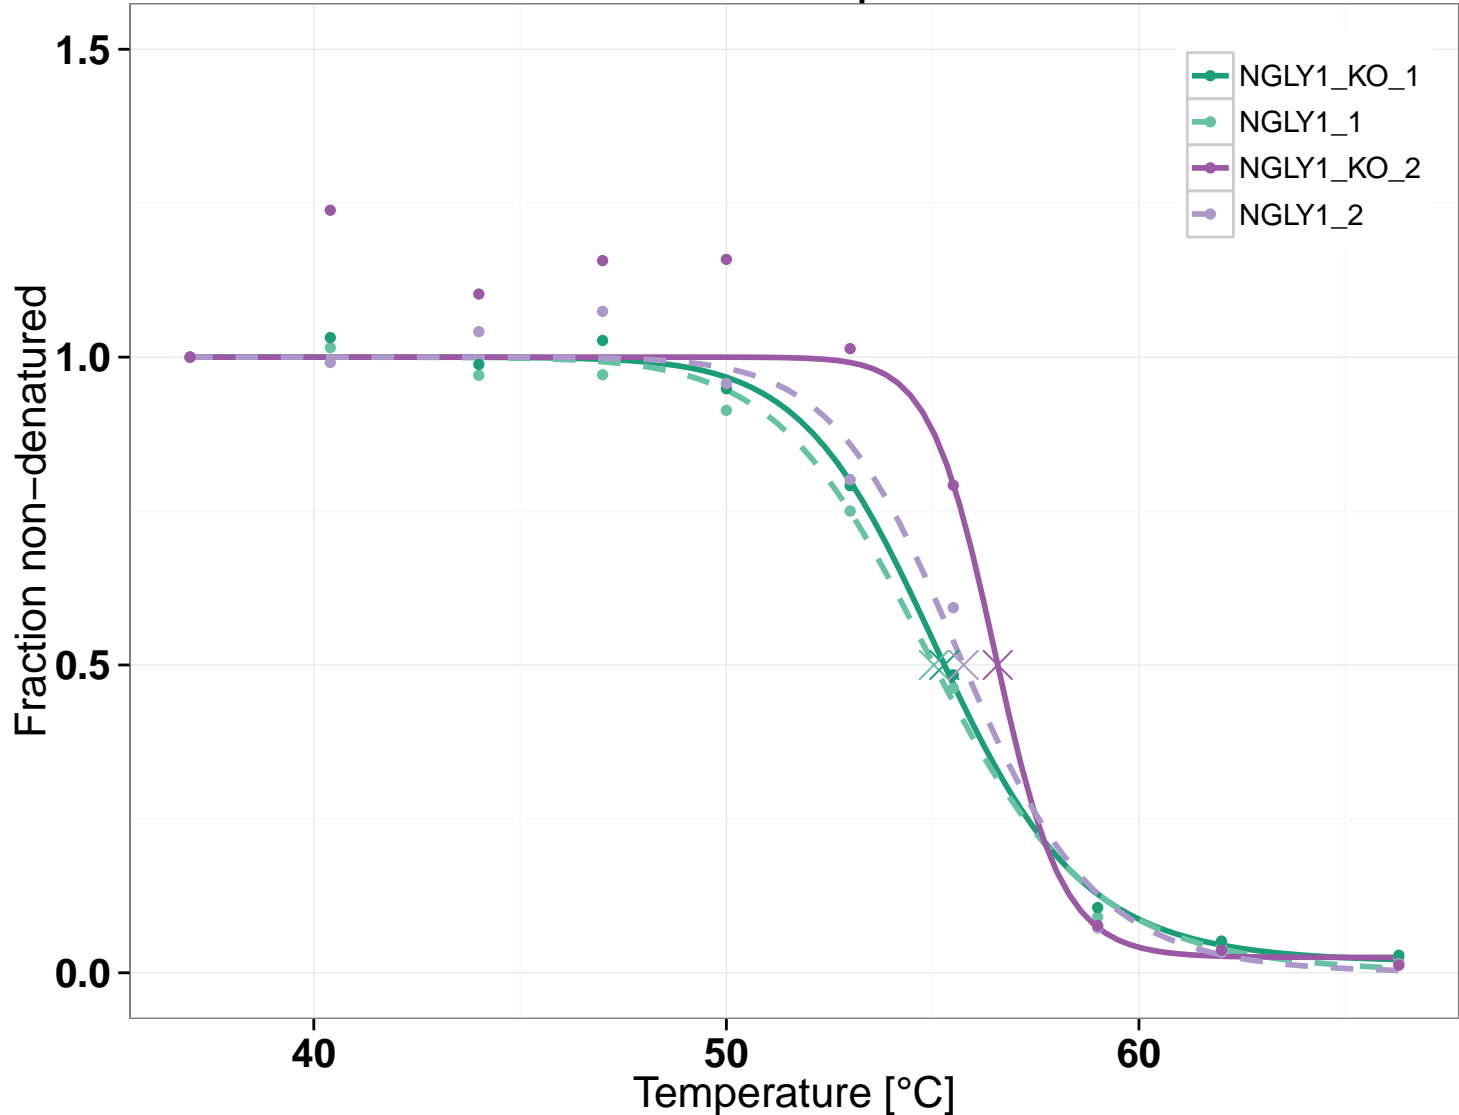

|            | meltPoint | slope | plateau | R2   |
|------------|-----------|-------|---------|------|
| NGLY1_KO_1 | 55.28     | -0.14 | 0.02    | 1    |
| NGLY1_1    | 55.03     | -0.13 | 0       | 1    |
| NGLY1_KO_2 | 56.58     | -0.3  | 0.03    | 0.95 |
| NGLY1_2    | 55.75     | -0.16 | 0       | 0.99 |

Supplement: Supplementary file 1704 [file 1]

# IPI00007334.1|ACIN1

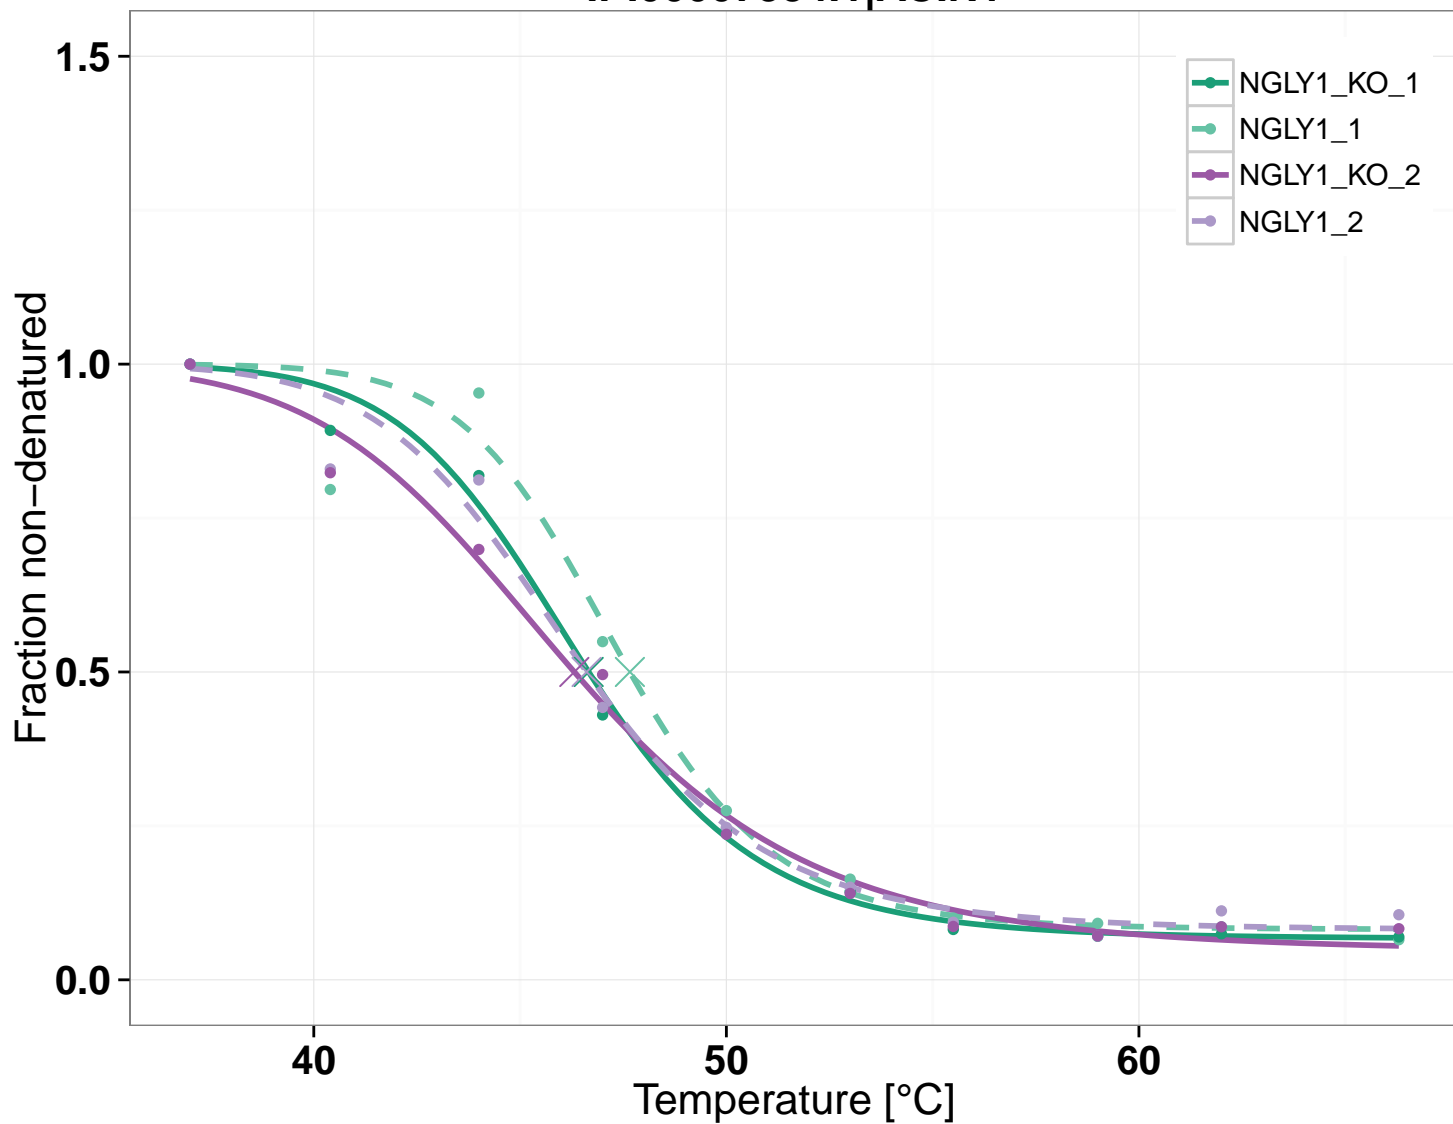

|            | meltPoint | slope  | plateau | R2   |
|------------|-----------|--------|---------|------|
| NGLY1_KO_1 | 46.66     | -0.11  | 0.07    | 0.99 |
| NGLY1_1    | 47.66     | -0.12  | 0.08    | 0.97 |
| NGLY1_KO_2 | 46.31     | -0.079 | 0.05    | 0.99 |
| NGLY1_2    | 46.61     | -0.098 | 0.08    | 0.98 |

Supplement: Supplementary file 1705 [file 1]

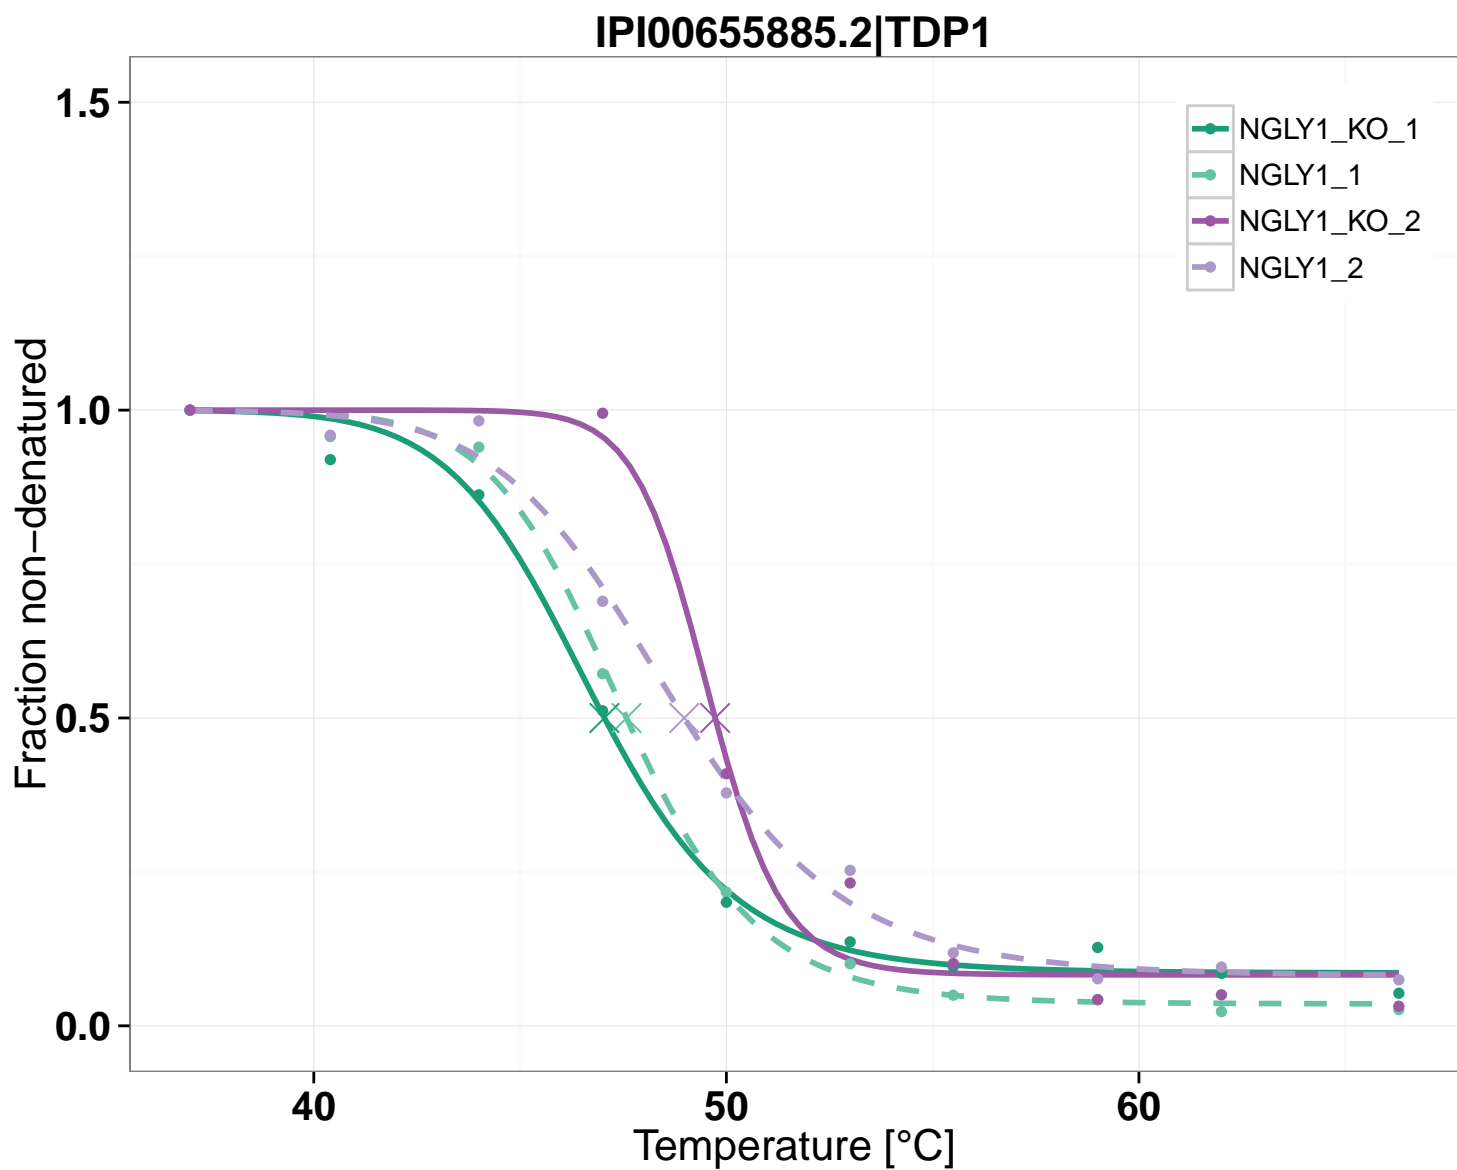

|            | meltPoint | slope | plateau | R2   |
|------------|-----------|-------|---------|------|
| NGLY1_KO_1 | 47.04     | -0.13 | 0.09    | 0.99 |
| NGLY1_1    | 47.58     | -0.15 | 0.04    | 1    |
| NGLY1_KO_2 | 49.73     | -0.26 | 0.08    | 0.8  |
| NGLY1_2    | 48.98     | -0.11 | 0.08    | 0.99 |

Supplement: Supplementary file 1706 [file 1]

# IPI00329260.3|C13ORF23

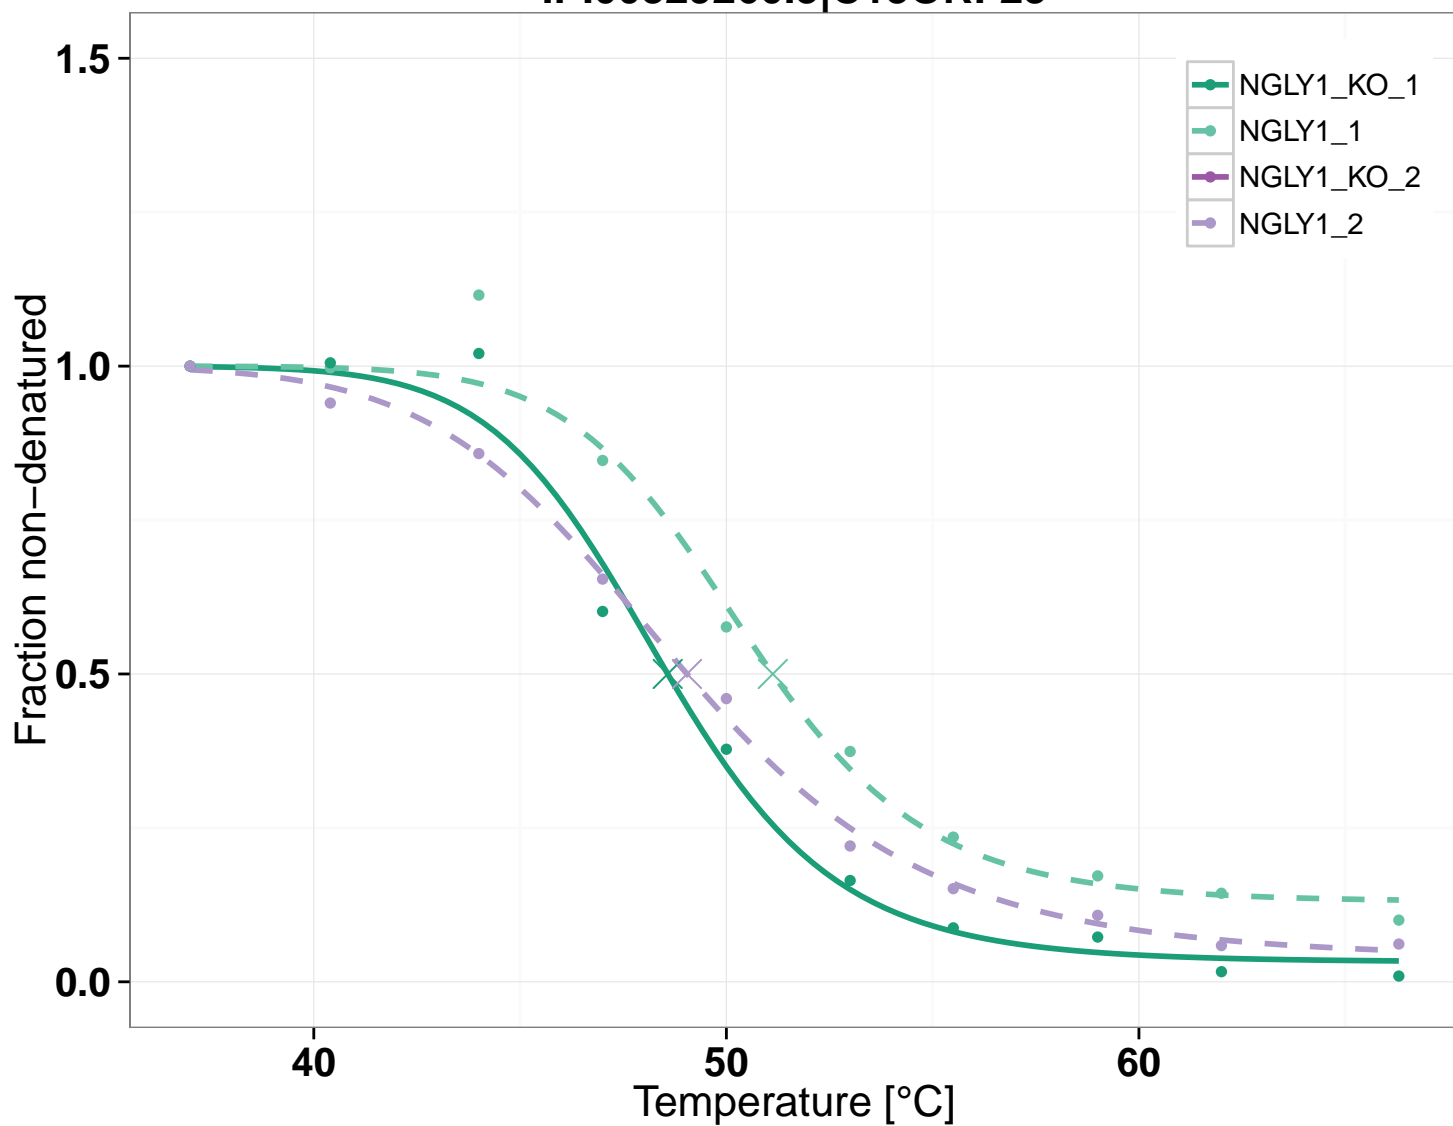

|            | meltPoint | slope | plateau | R2   |
|------------|-----------|-------|---------|------|
| NGLY1_KO_1 | 48.58     | -0.12 | 0.03    | 0.99 |
| NGLY1_1    | 51.13     | -0.1  | 0.13    | 0.98 |
| NGLY1_KO_2 | -         | -     | -       | -    |
| NGLY1_2    | 49.05     | -0.08 | 0.04    | 1    |

Supplement: Supplementary file 1707 [file 1]

IPI00031696.4|FASTKD3

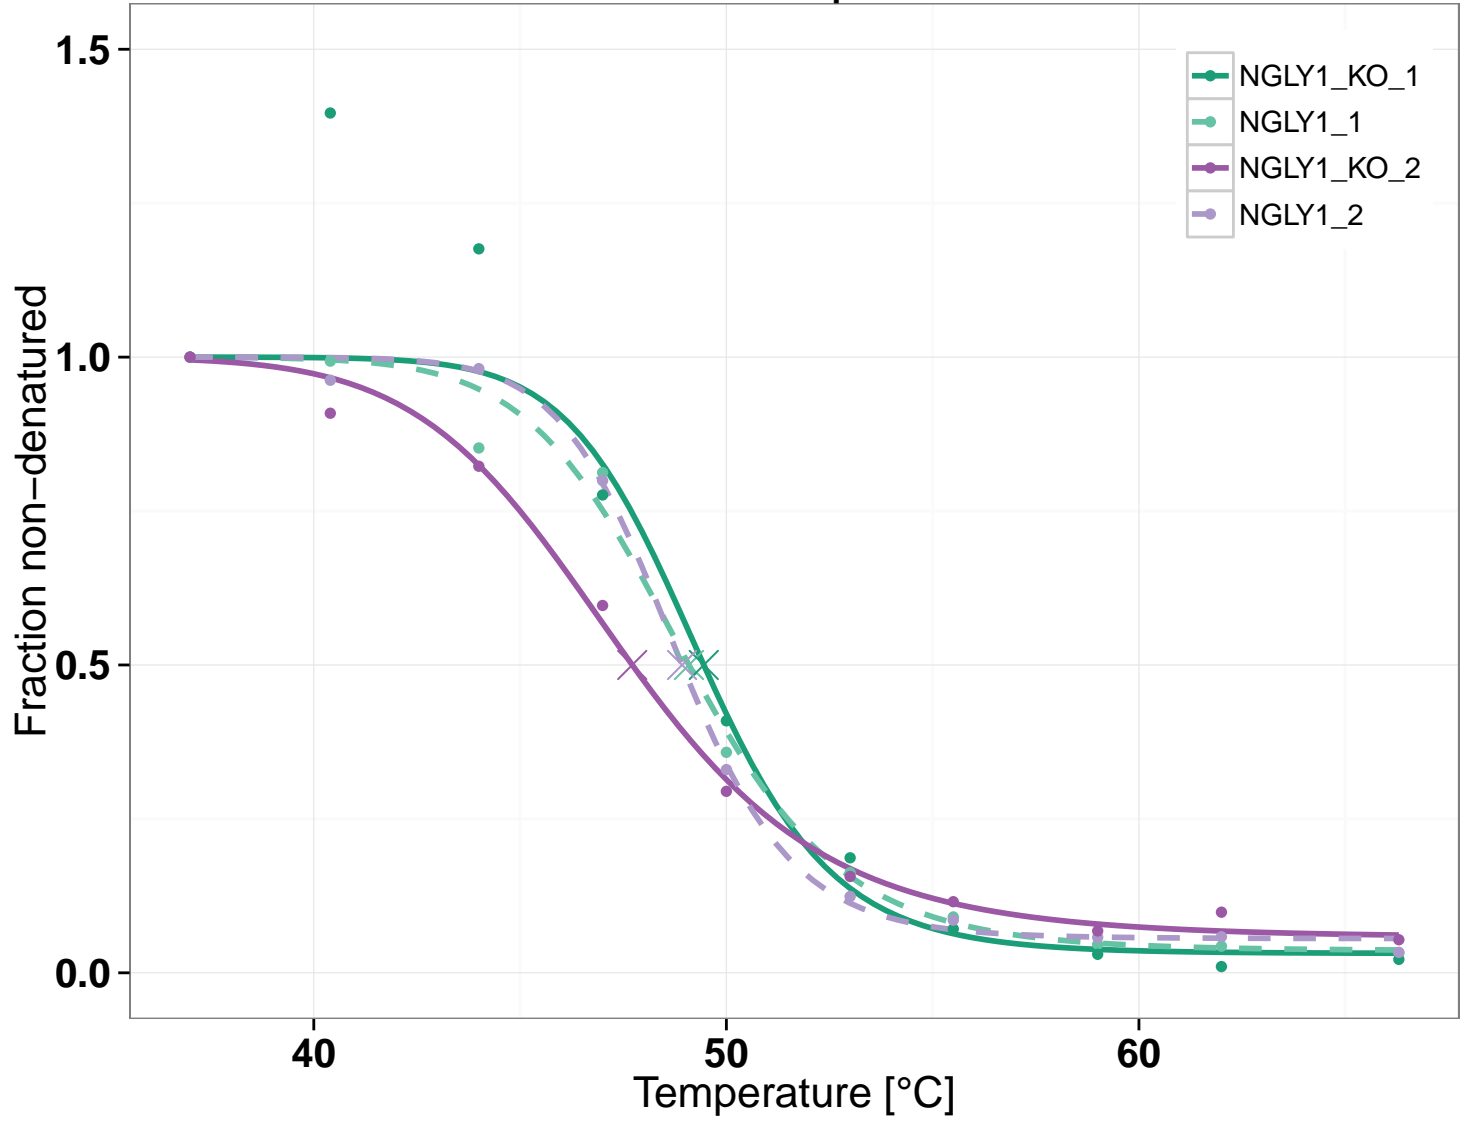

|            | meltPoint | slope  | plateau | R2   |
|------------|-----------|--------|---------|------|
| NGLY1_KO_1 | 49.45     | -0.15  | 0.03    | 0.92 |
| NGLY1_1    | 49.09     | -0.13  | 0.04    | 0.99 |
| NGLY1_KO_2 | 47.72     | -0.096 | 0.06    | 1    |
| NGLY1_2    | 48.93     | -0.17  | 0.06    | 1    |

Supplement: Supplementary file 1708 [file 1]
