# Supplementary material (part 18 of 85)
Source: publisher figshare collection journal article supplement (https://gsajournals.figshare.com/articles/dataset/_/12014913)

# IPI00008274.7|CAP1

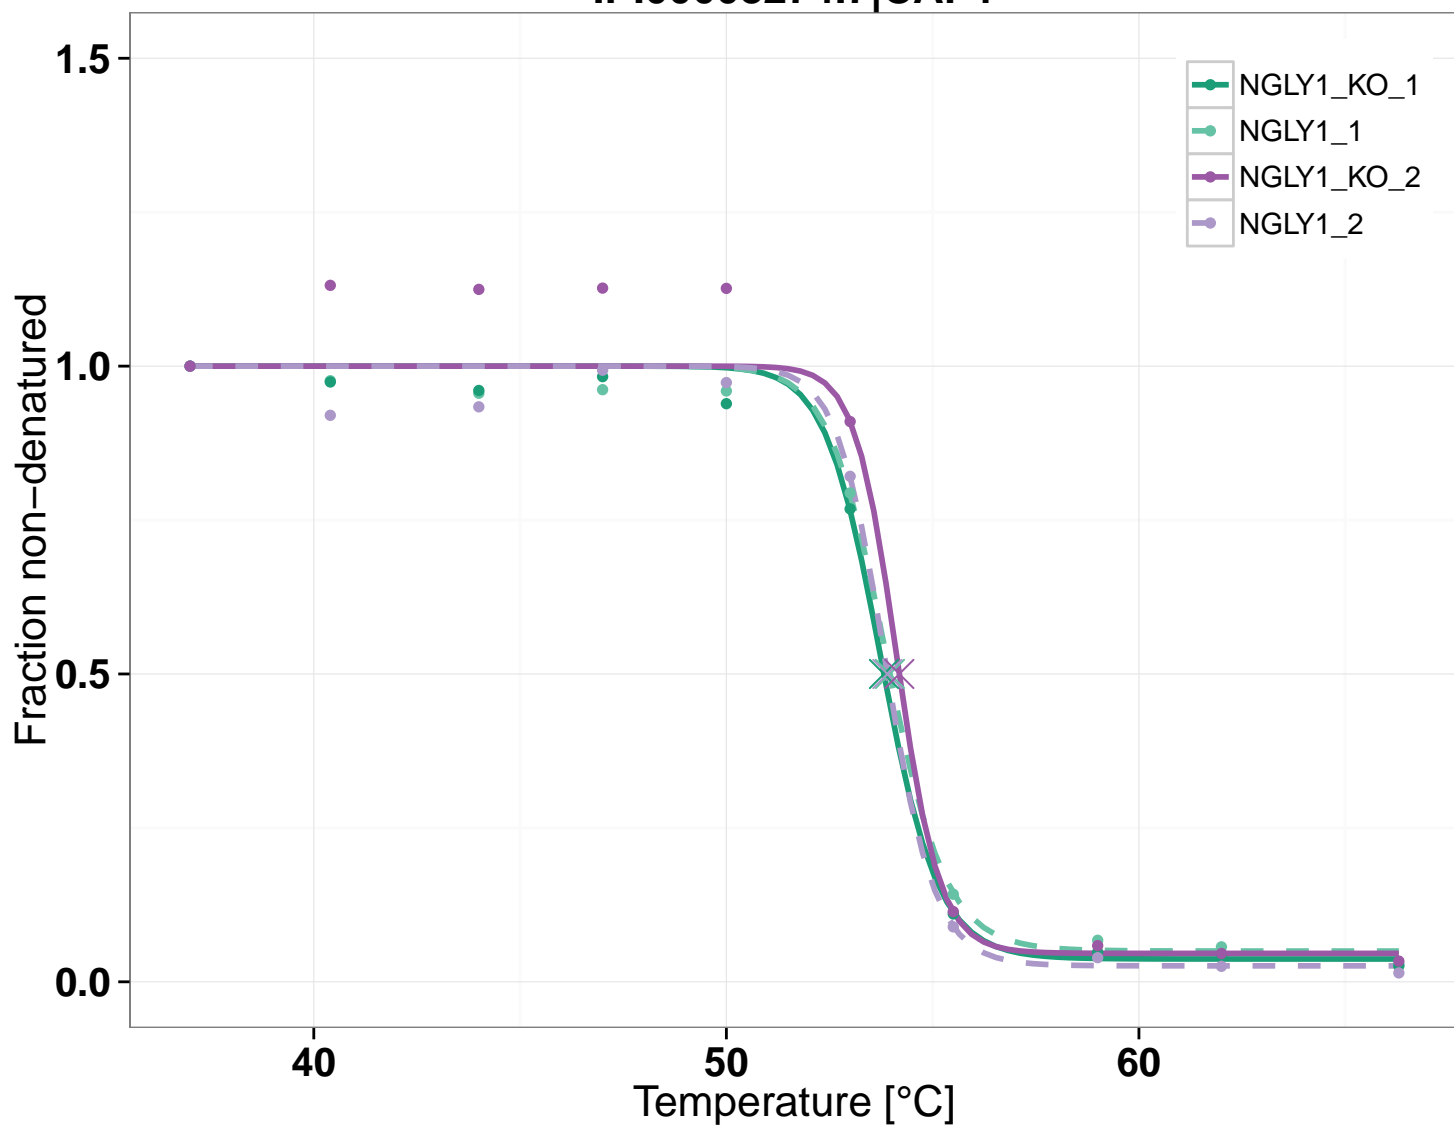

|            | meltPoint | slope | plateau | R2   |
|------------|-----------|-------|---------|------|
| NGLY1_KO_1 | 53.82     | -0.35 | 0.04    | 1    |
| NGLY1_1    | 53.96     | -0.33 | 0.05    | 1    |
| NGLY1_KO_2 | 54.19     | -0.46 | 0.05    | 0.97 |
| NGLY1_2    | 53.9      | -0.41 | 0.03    | 0.99 |

Supplement: Supplementary file 1709 [file 1]

# IPI00009852.1|ATP6V0A4

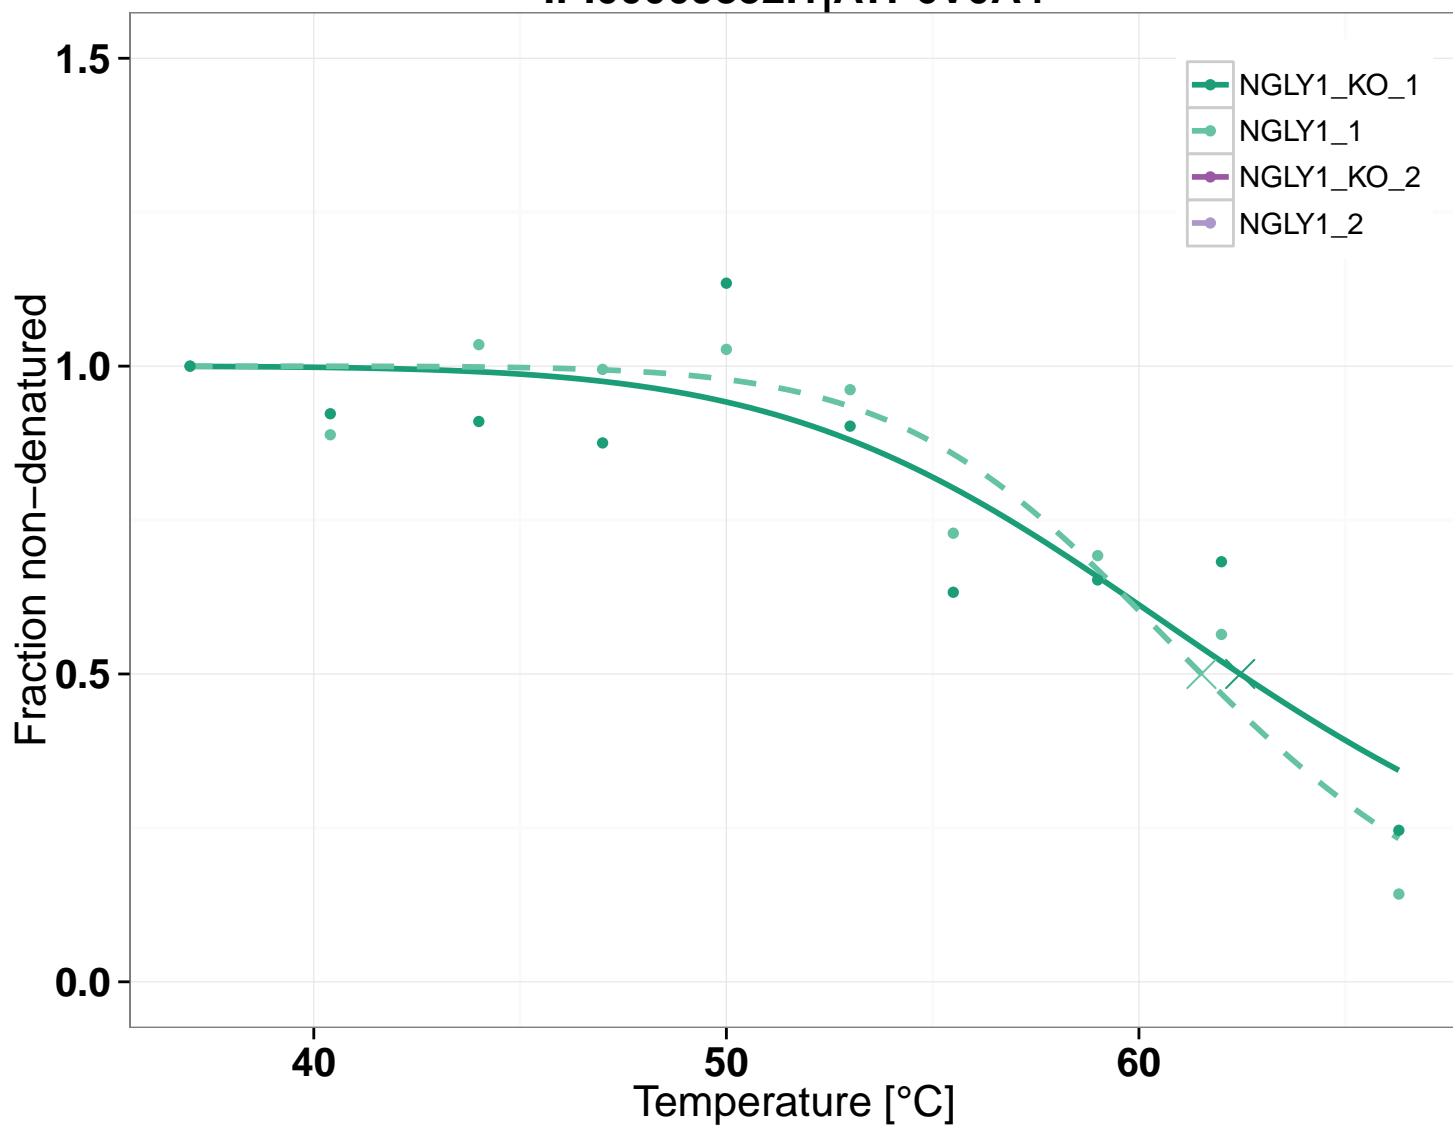

|            | meltPoint | slope  | plateau | R2   |
|------------|-----------|--------|---------|------|
| NGLY1_KO_1 | 62.45     | -0.046 | 0       | 0.78 |
| NGLY1_1    | 61.52     | -0.068 | 0       | 0.93 |
| NGLY1_KO_2 | -         | -      | -       | -    |
| NGLY1_2    | -         | -      | -       | -    |

Supplement: Supplementary file 1710 [file 1]

# IPI00646304.4|PPIB

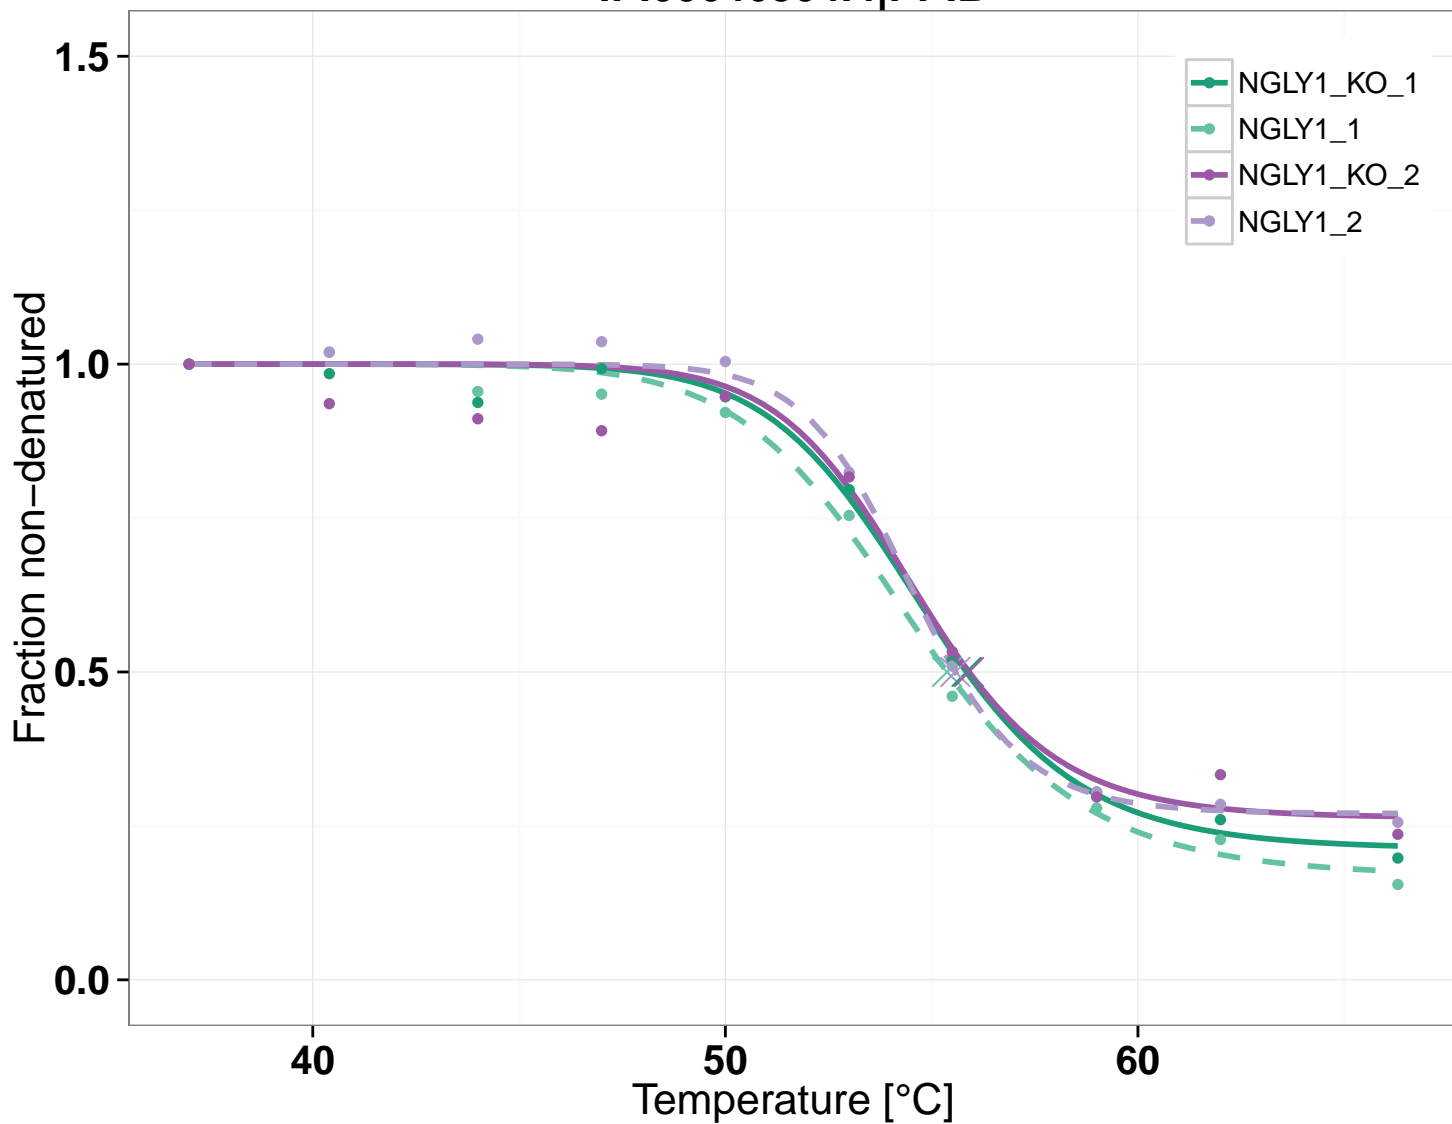

|            | meltPoint | slope  | plateau | R2   |
|------------|-----------|--------|---------|------|
| NGLY1_KO_1 | 55.84     | -0.1   | 0.21    | 0.99 |
| NGLY1_1    | 55.37     | -0.098 | 0.17    | 0.99 |
| NGLY1_KO_2 | 55.9      | -0.11  | 0.26    | 0.97 |
| NGLY1_2    | 55.57     | -0.14  | 0.27    | 1    |

Supplement: Supplementary file 1711 [file 1]

IPI00382605.2|PARVB

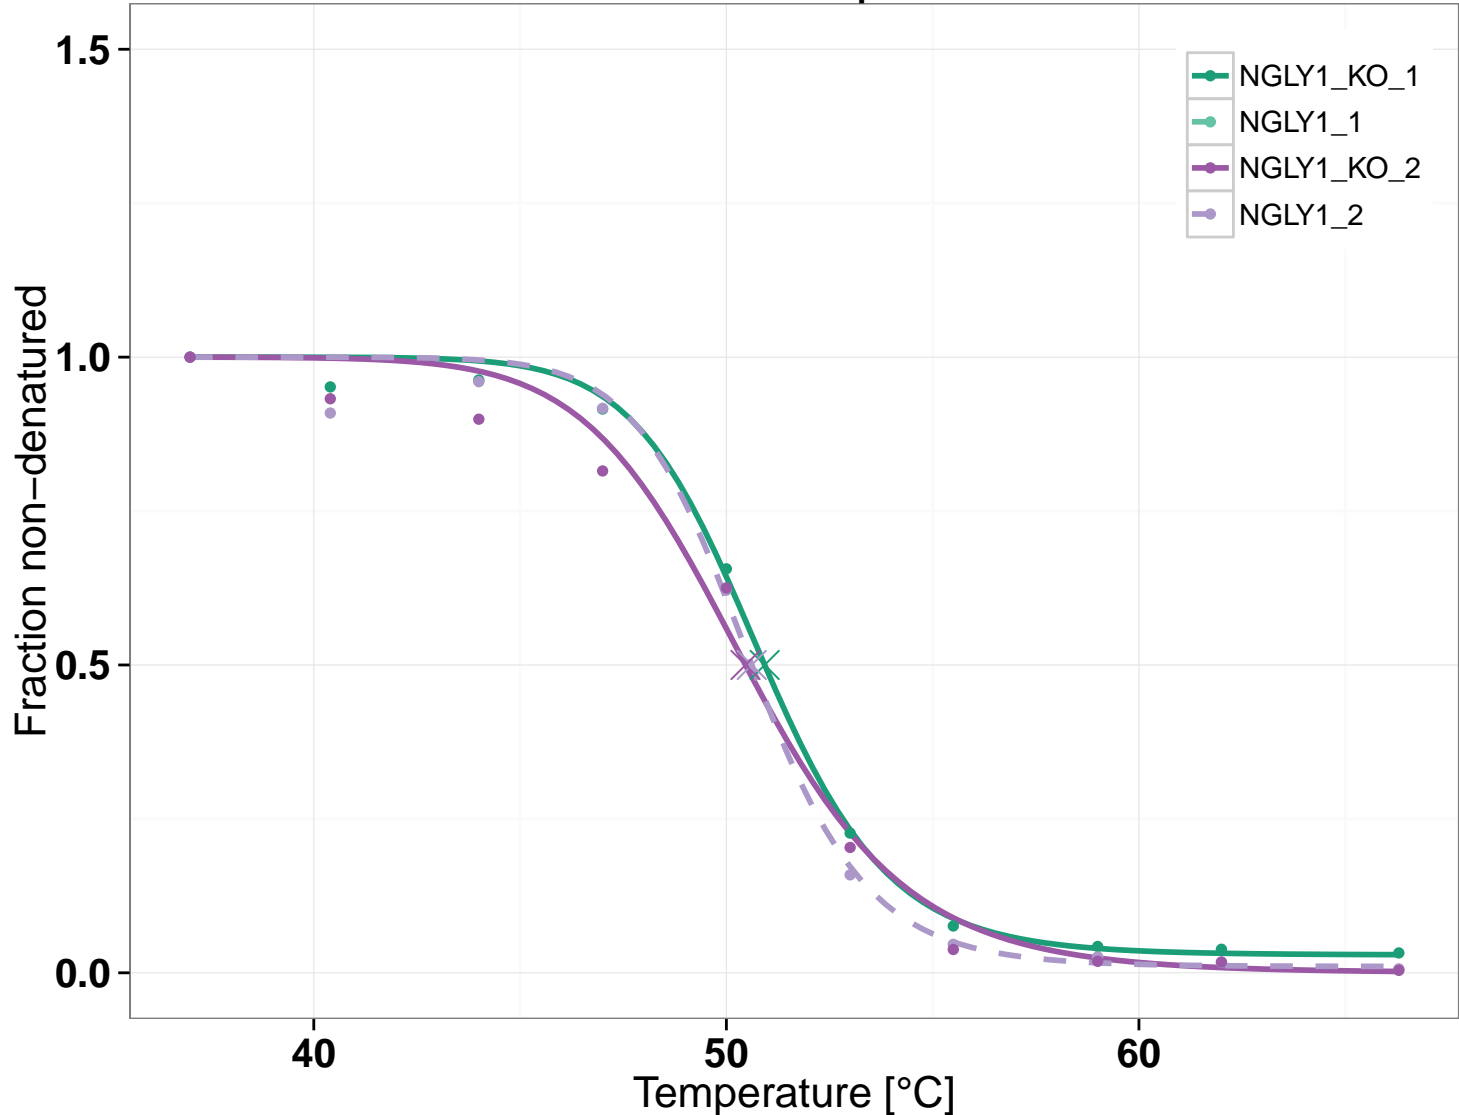

|            | meltPoint | slope | plateau | R2   |
|------------|-----------|-------|---------|------|
| NGLY1_KO_1 | 50.93     | -0.16 | 0.03    | 1    |
| NGLY1_1    | -         | -     | -       | -    |
| NGLY1_KO_2 | 50.46     | -0.13 | 0       | 0.99 |
| NGLY1_2    | 50.62     | -0.18 | 0.01    | 0.99 |

Supplement: Supplementary file 1712 [file 1]

# IPI00011416.2|ECH1

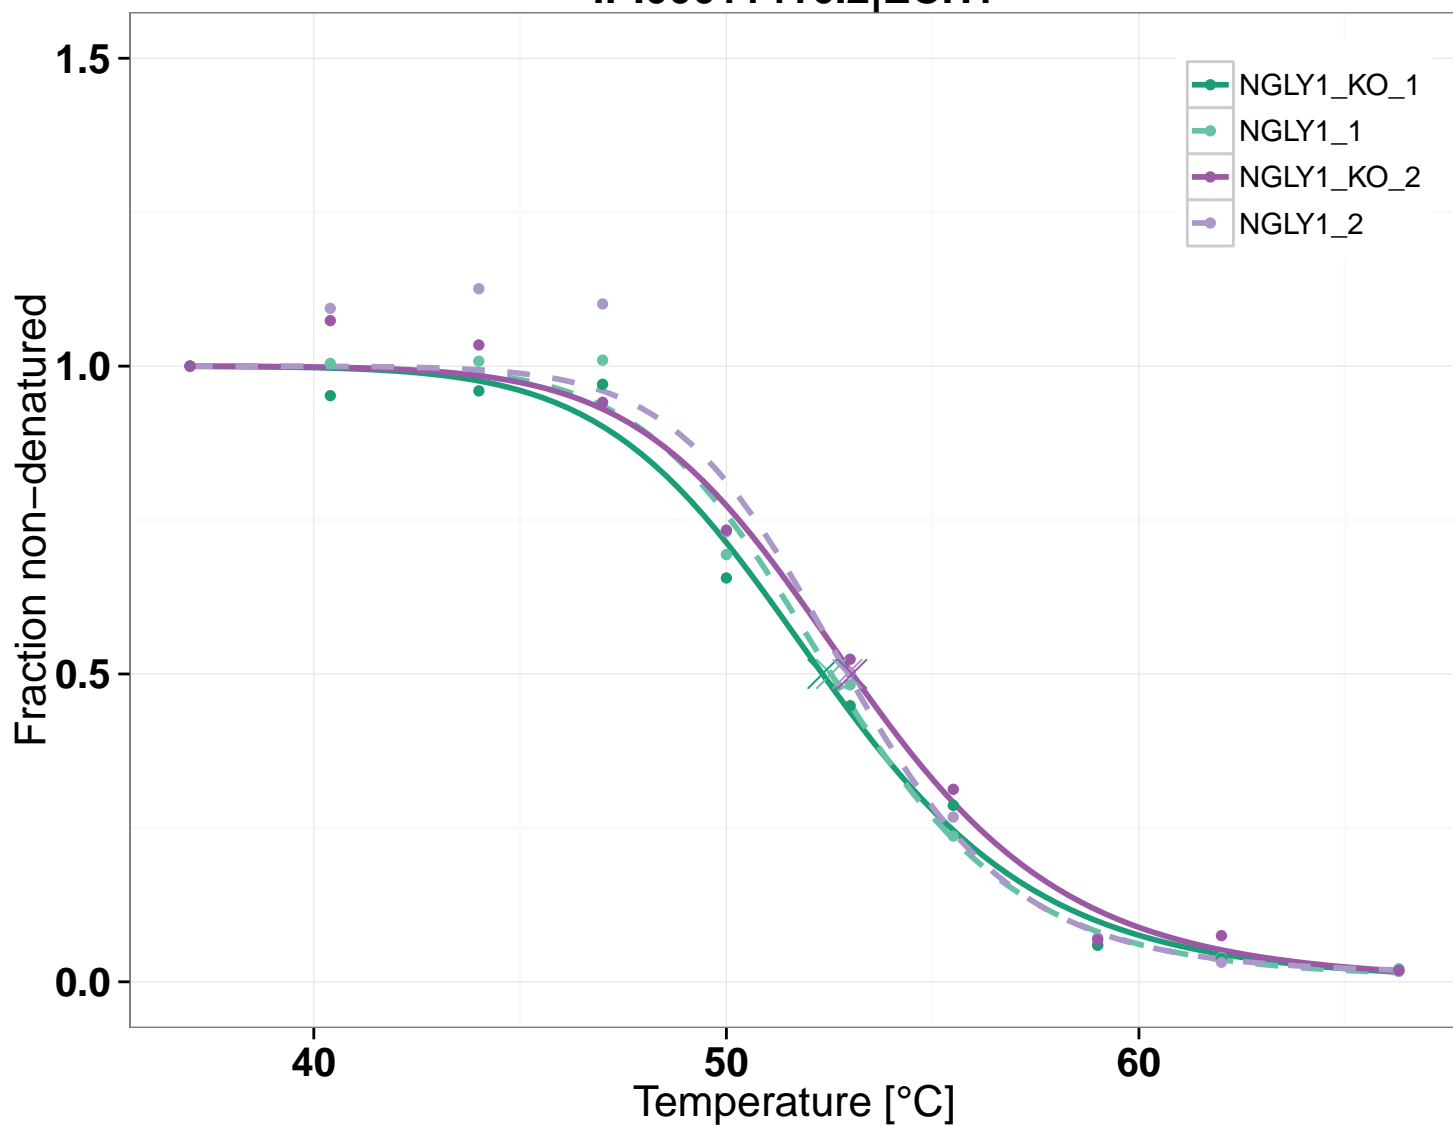

|            | meltPoint | slope  | plateau | R2   |
|------------|-----------|--------|---------|------|
| NGLY1_KO_1 | 52.33     | -0.095 | 0       | 0.99 |
| NGLY1_1    | 52.54     | -0.11  | 0.01    | 0.99 |
| NGLY1_KO_2 | 53.05     | -0.096 | 0       | 0.99 |
| NGLY1_2    | 52.93     | -0.12  | 0.01    | 0.97 |

Supplement: Supplementary file 1713 [file 1]

IPI00292601.1|MTMR1

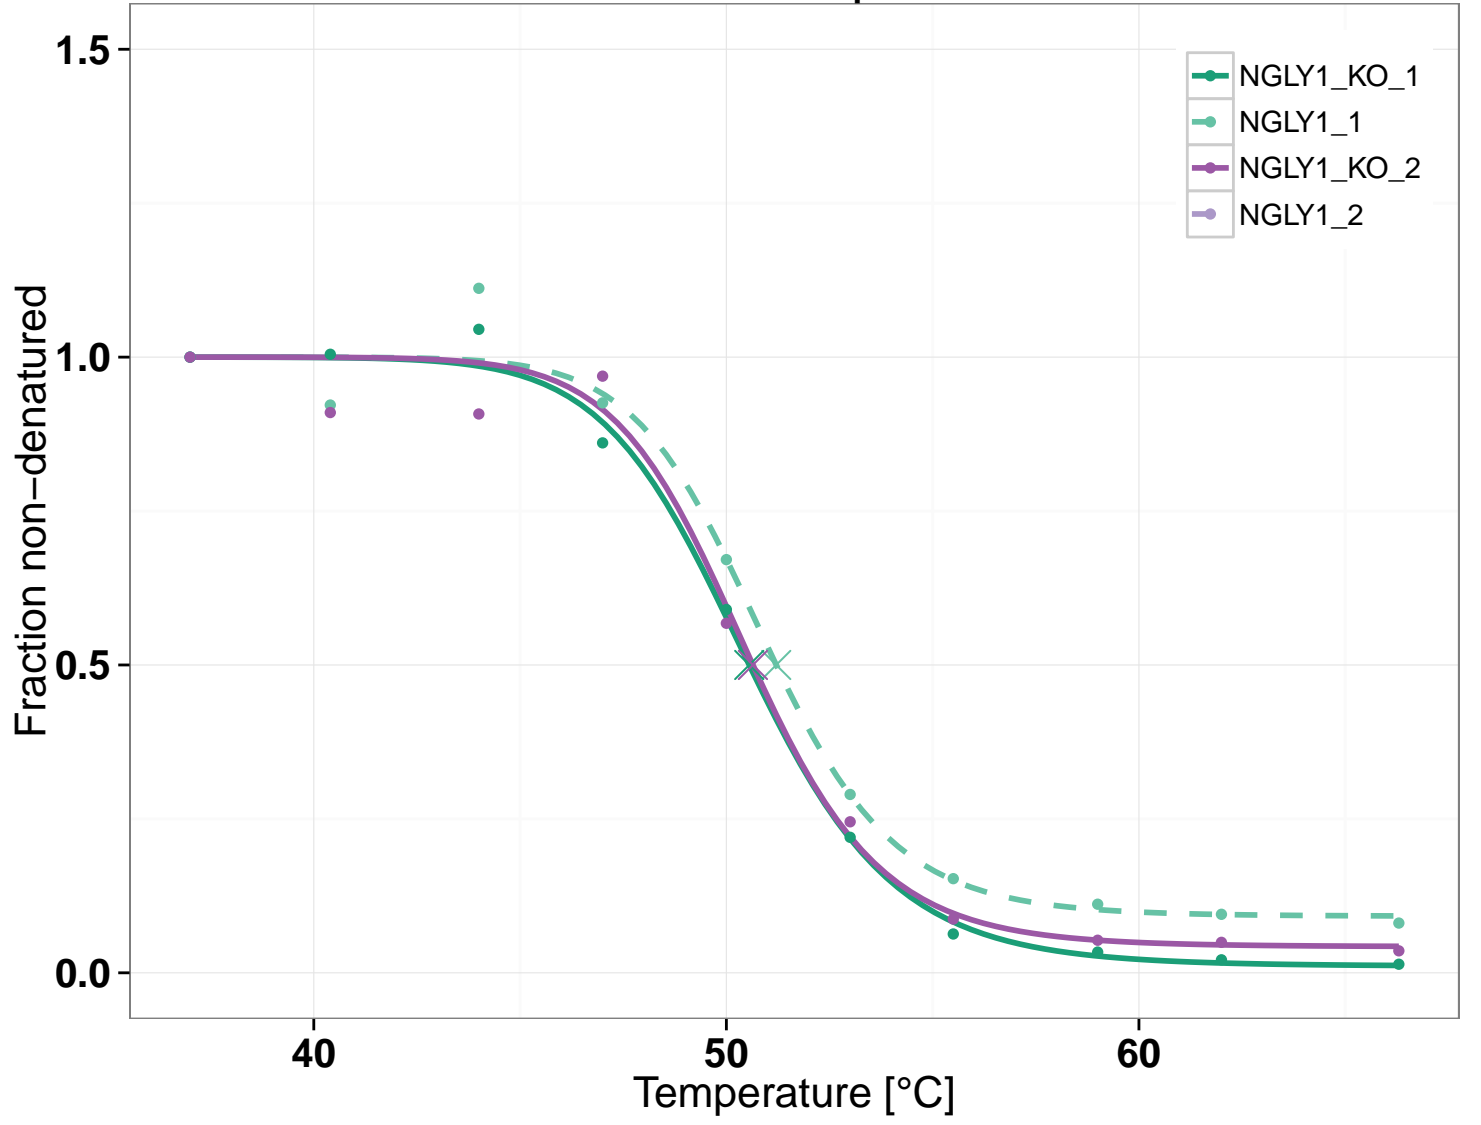

|            | meltPoint | slope | plateau | R2   |
|------------|-----------|-------|---------|------|
| NGLY1_KO_1 | 50.56     | -0.14 | 0.01    | 1    |
| NGLY1_1    | 51.21     | -0.14 | 0.09    | 0.99 |
| NGLY1_KO_2 | 50.64     | -0.15 | 0.04    | 0.99 |
| NGLY1_2    | -         | -     | -       | -    |

Supplement: Supplementary file 1714 [file 1]

# IPI00470595.4|MUL1

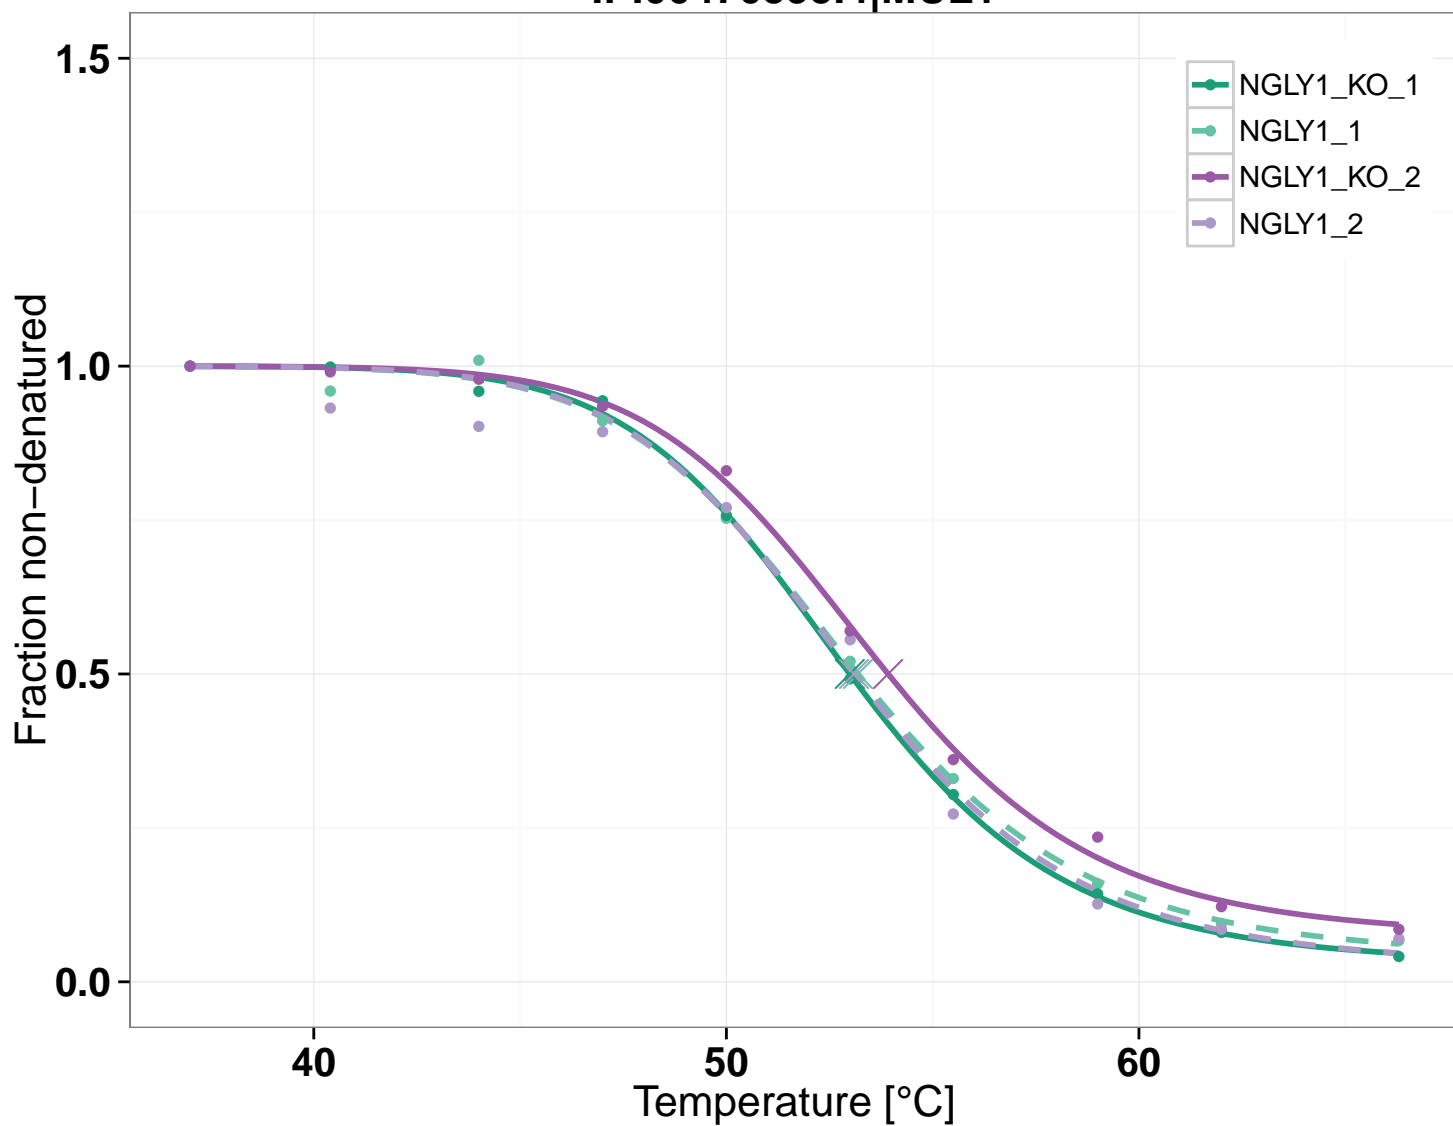

|            | meltPoint | slope  | plateau | R2   |
|------------|-----------|--------|---------|------|
| NGLY1_KO_1 | 52.99     | -0.092 | 0.03    | 1    |
| NGLY1_1    | 53.19     | -0.085 | 0.04    | 1    |
| NGLY1_KO_2 | 53.92     | -0.085 | 0.07    | 1    |
| NGLY1_2    | 53.09     | -0.088 | 0.03    | 0.99 |

Supplement: Supplementary file 1715 [file 1]

IPI00014812.1|MRPS21

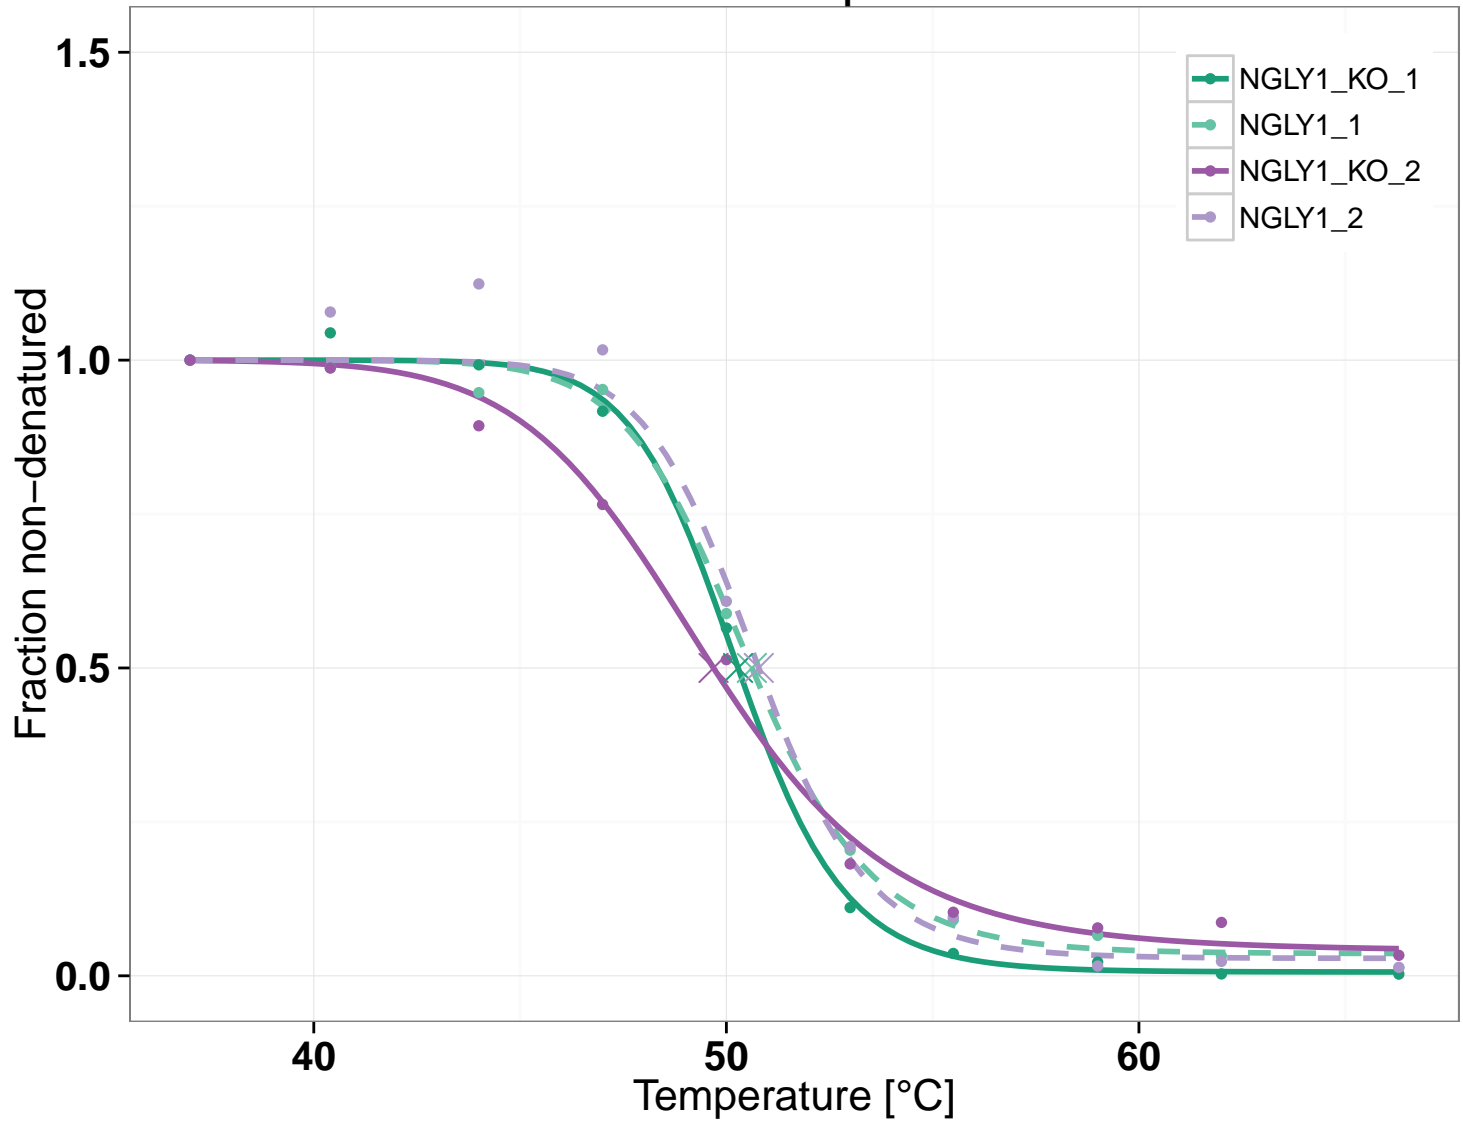

|            | meltPoint | slope | plateau | R2   |
|------------|-----------|-------|---------|------|
| NGLY1_KO_1 | 50.28     | -0.19 | 0.01    | 1    |
| NGLY1_1    | 50.62     | -0.16 | 0.04    | 1    |
| NGLY1_KO_2 | 49.69     | -0.11 | 0.04    | 0.99 |
| NGLY1_2    | 50.79     | -0.18 | 0.03    | 0.99 |

Supplement: Supplementary file 1716 [file 1]

# IPI00032050.4|WBP2

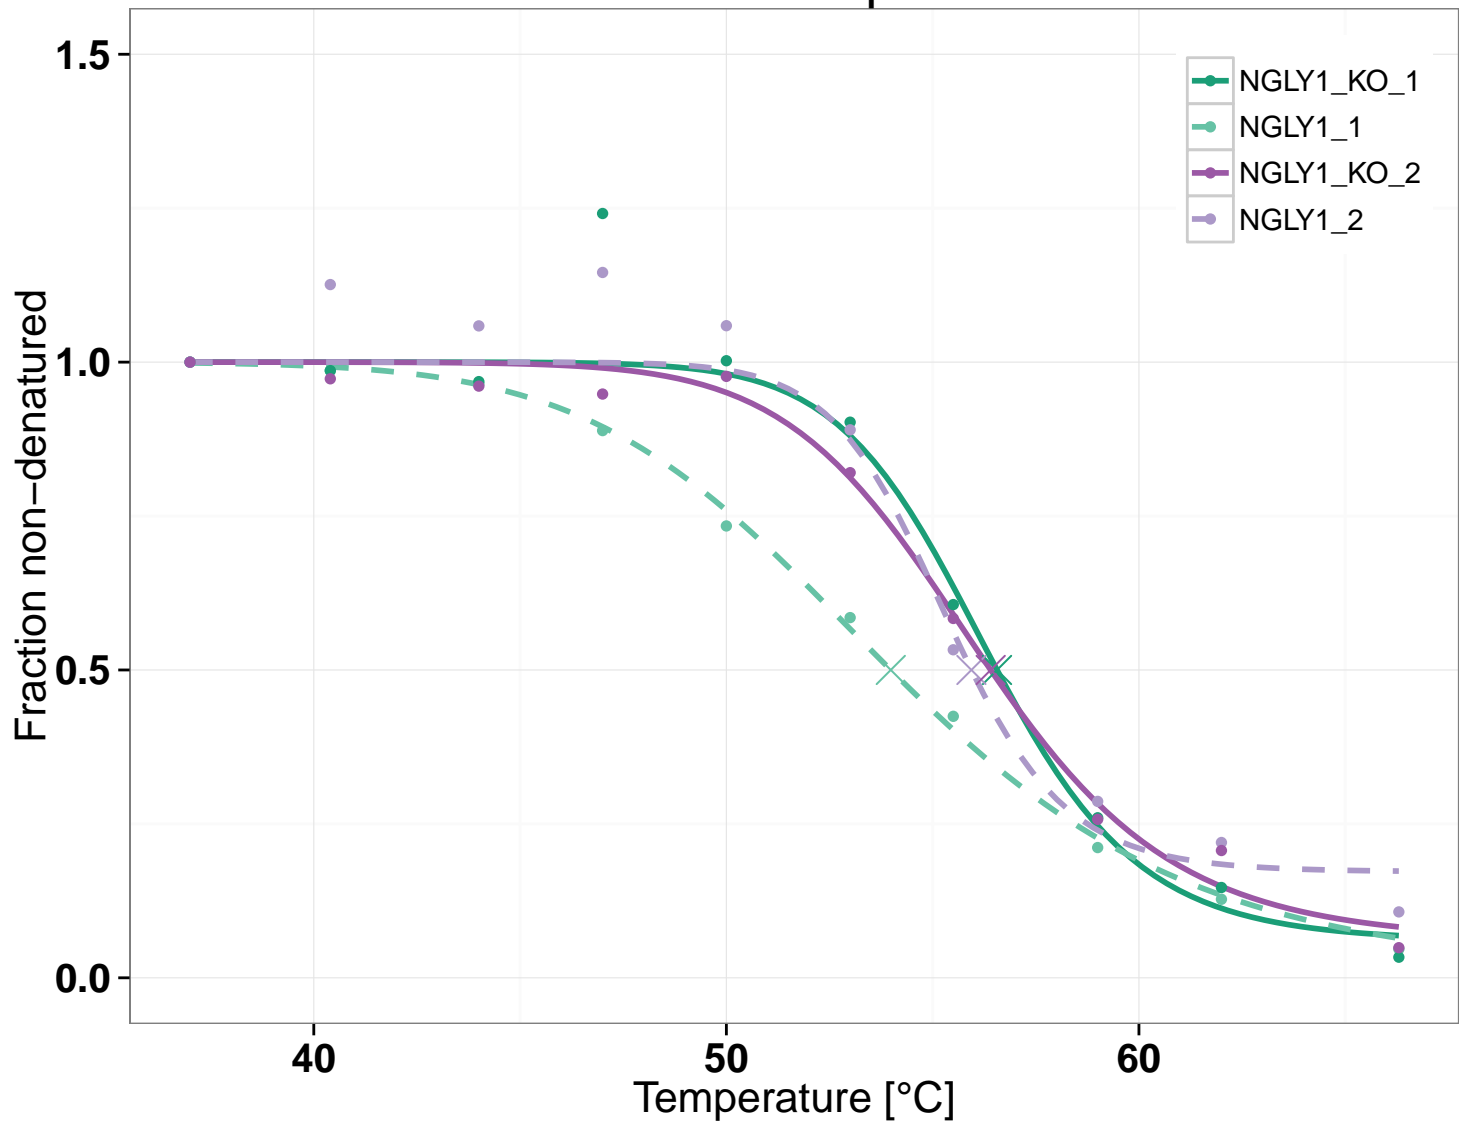

|            | meltPoint | slope  | plateau | R2   |
|------------|-----------|--------|---------|------|
| NGLY1_KO_1 | 56.56     | -0.13  | 0.06    | 0.96 |
| NGLY1_1    | 53.99     | -0.068 | 0       | 1    |
| NGLY1_KO_2 | 56.41     | -0.1   | 0.06    | 0.99 |
| NGLY1_2    | 55.94     | -0.15  | 0.17    | 0.96 |

Supplement: Supplementary file 1717 [file 1]

IPI00022055.2|KAT2B

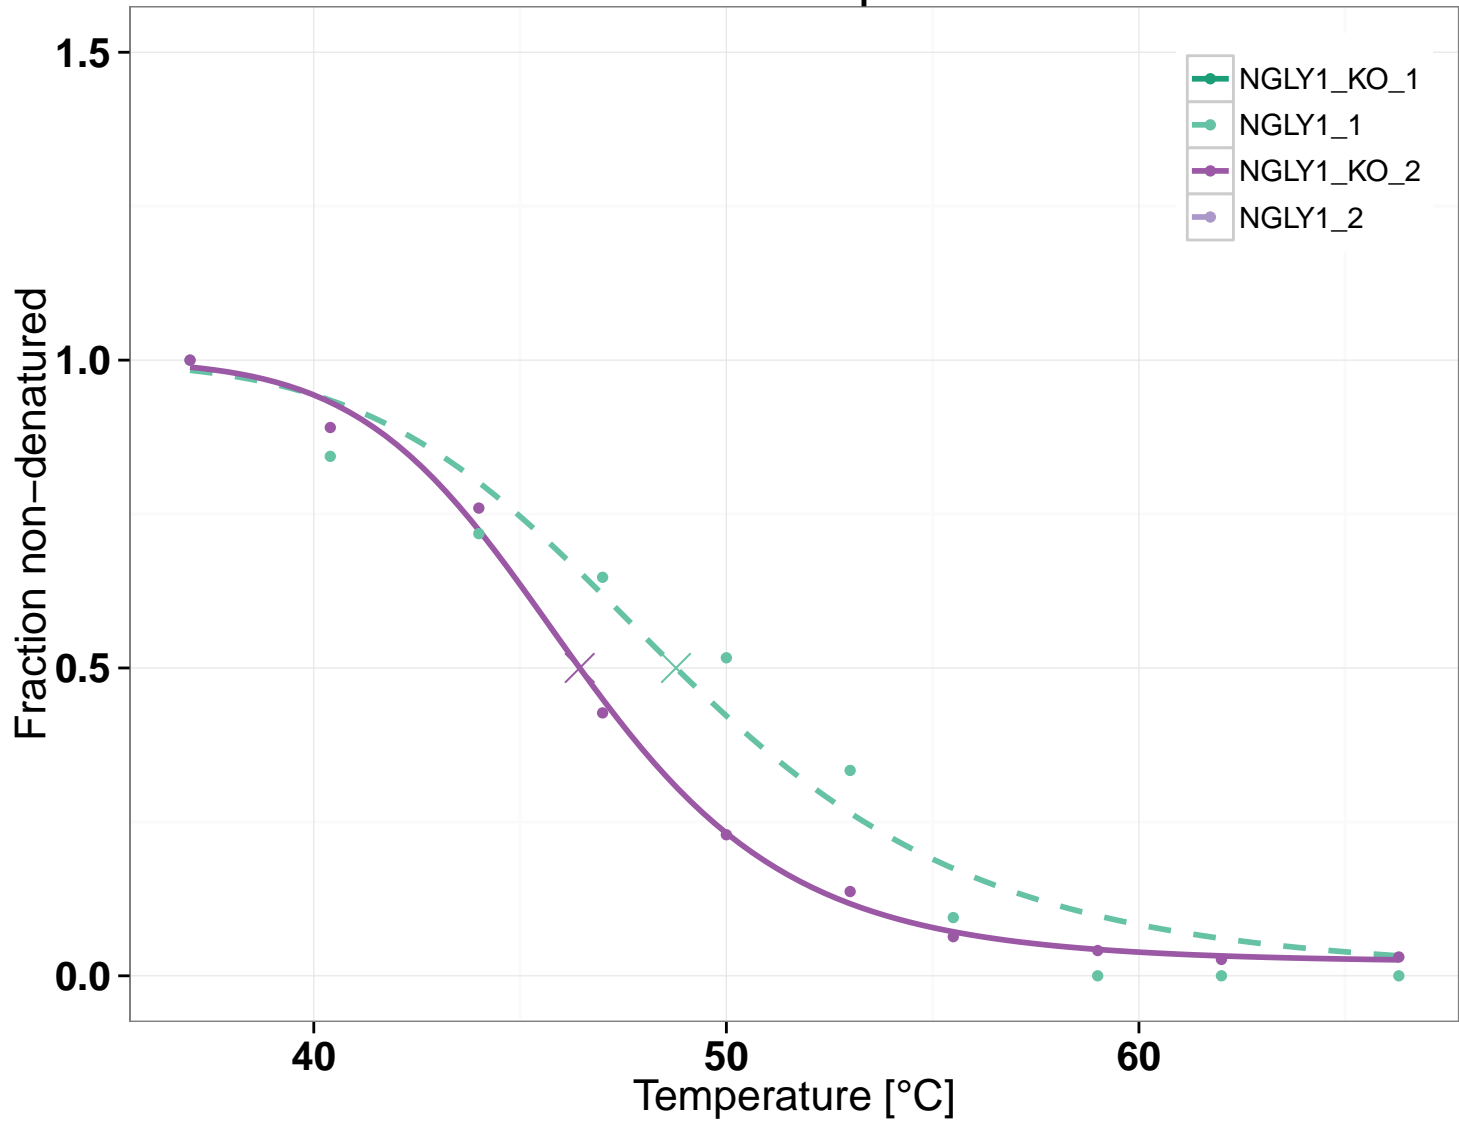

|            | meltPoint | slope  | plateau | R2   |
|------------|-----------|--------|---------|------|
| NGLY1_KO_1 | -         | -      | -       | -    |
| NGLY1_1    | 48.78     | -0.067 | 0       | 0.96 |
| NGLY1_KO_2 | 46.45     | -0.094 | 0.02    | 1    |
| NGLY1_2    | -         | -      | -       | -    |

Supplement: Supplementary file 1718 [file 1]

# IPI00023919.4|PSMC5

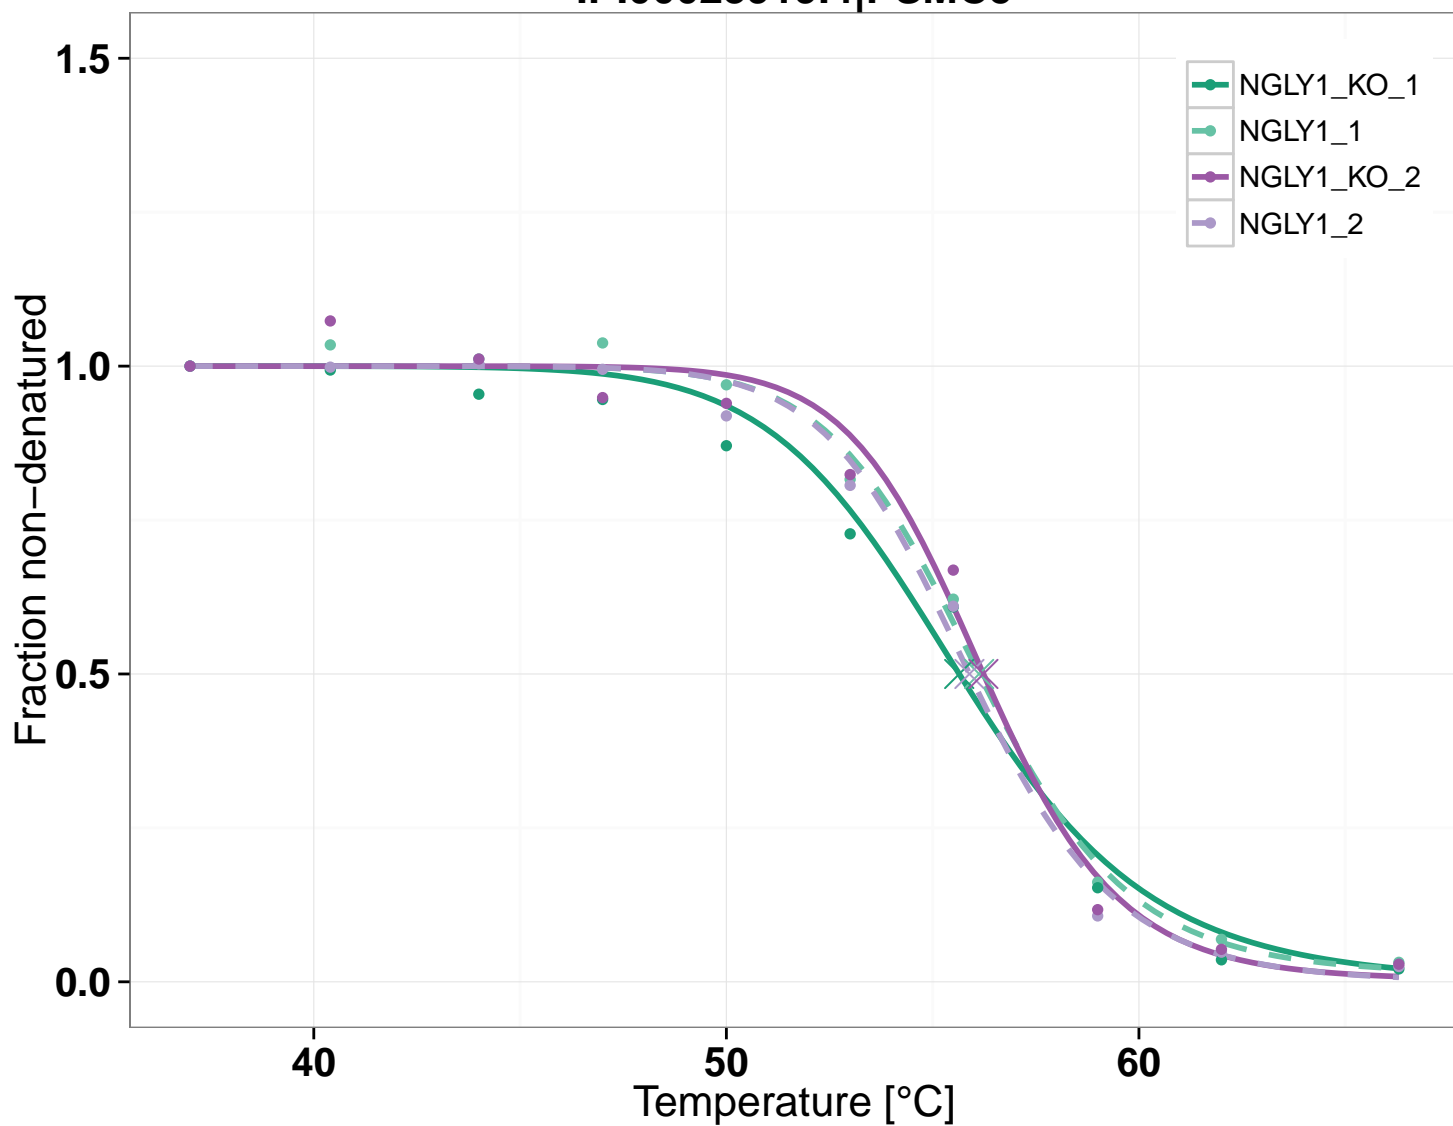

|            | meltPoint | slope | plateau | R2   |
|------------|-----------|-------|---------|------|
| NGLY1_KO_1 | 55.64     | -0.11 | 0       | 0.98 |
| NGLY1_1    | 56.13     | -0.13 | 0.01    | 1    |
| NGLY1_KO_2 | 56.23     | -0.15 | 0       | 0.99 |
| NGLY1_2    | 55.89     | -0.14 | 0       | 0.99 |

Supplement: Supplementary file 1719 [file 1]

IPI00167941.1|MDN1

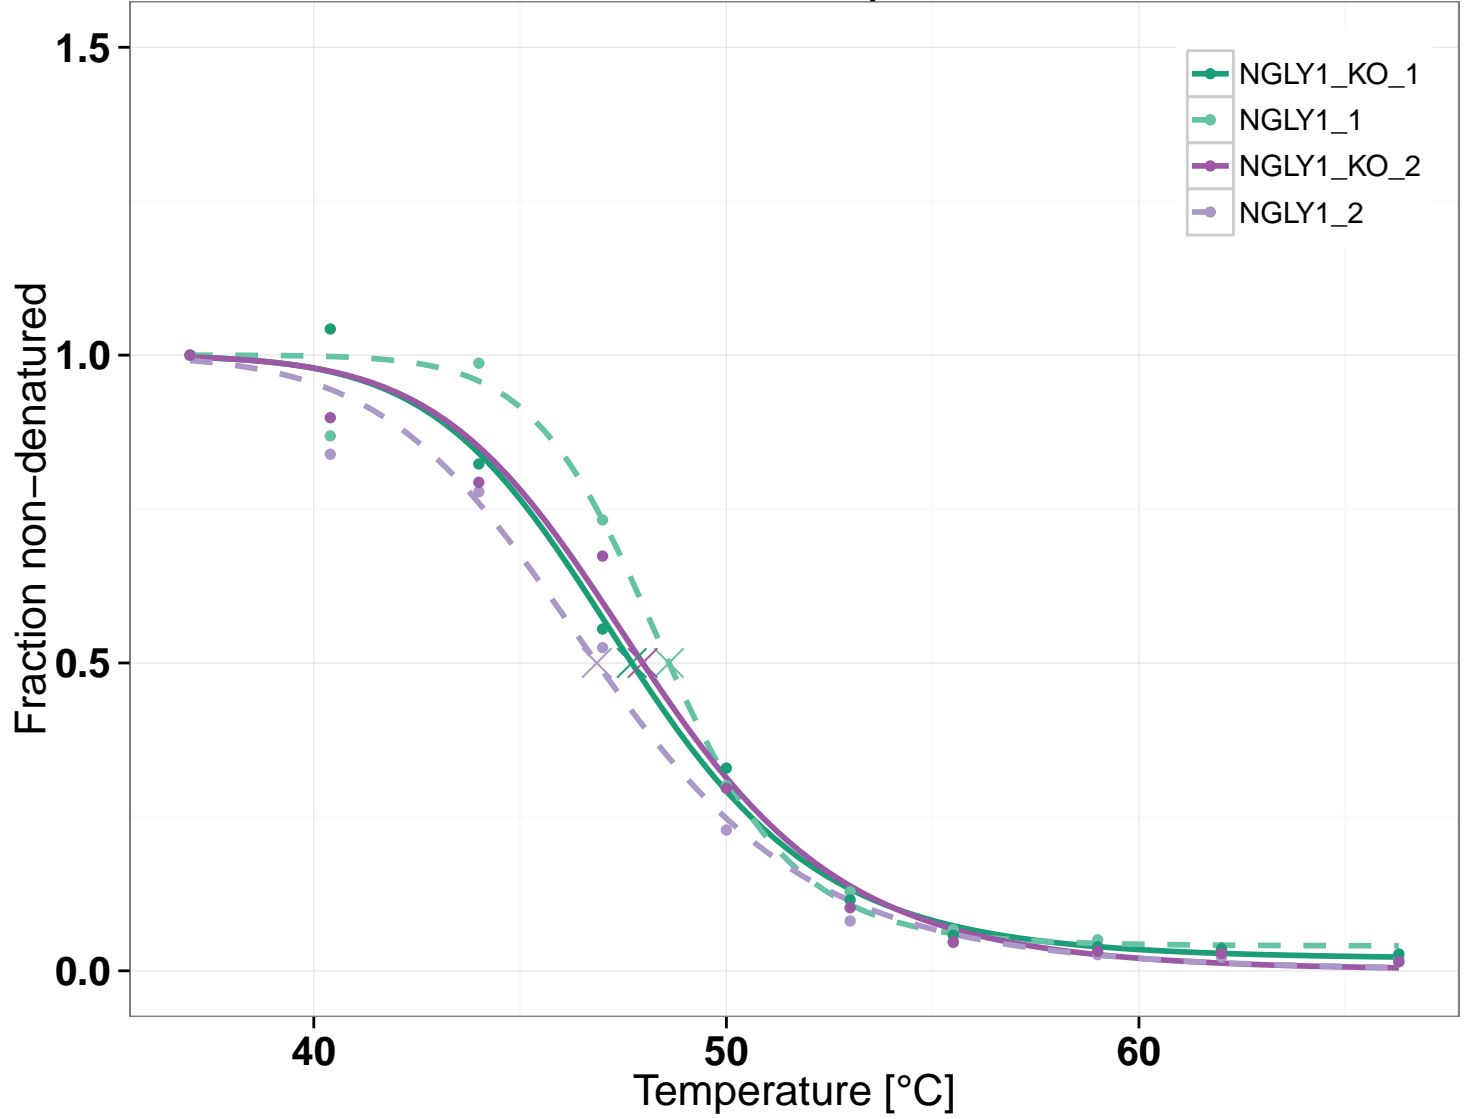

|            | meltPoint | slope  | plateau | R2   |
|------------|-----------|--------|---------|------|
| NGLY1_KO_1 | 47.71     | -0.1   | 0.02    | 1    |
| NGLY1_1    | 48.61     | -0.15  | 0.04    | 0.99 |
| NGLY1_KO_2 | 47.97     | -0.1   | 0       | 0.99 |
| NGLY1_2    | 46.86     | -0.096 | 0       | 0.99 |

Supplement: Supplementary file 1720 [file 1]

# IPI00301419.2|COPS7A

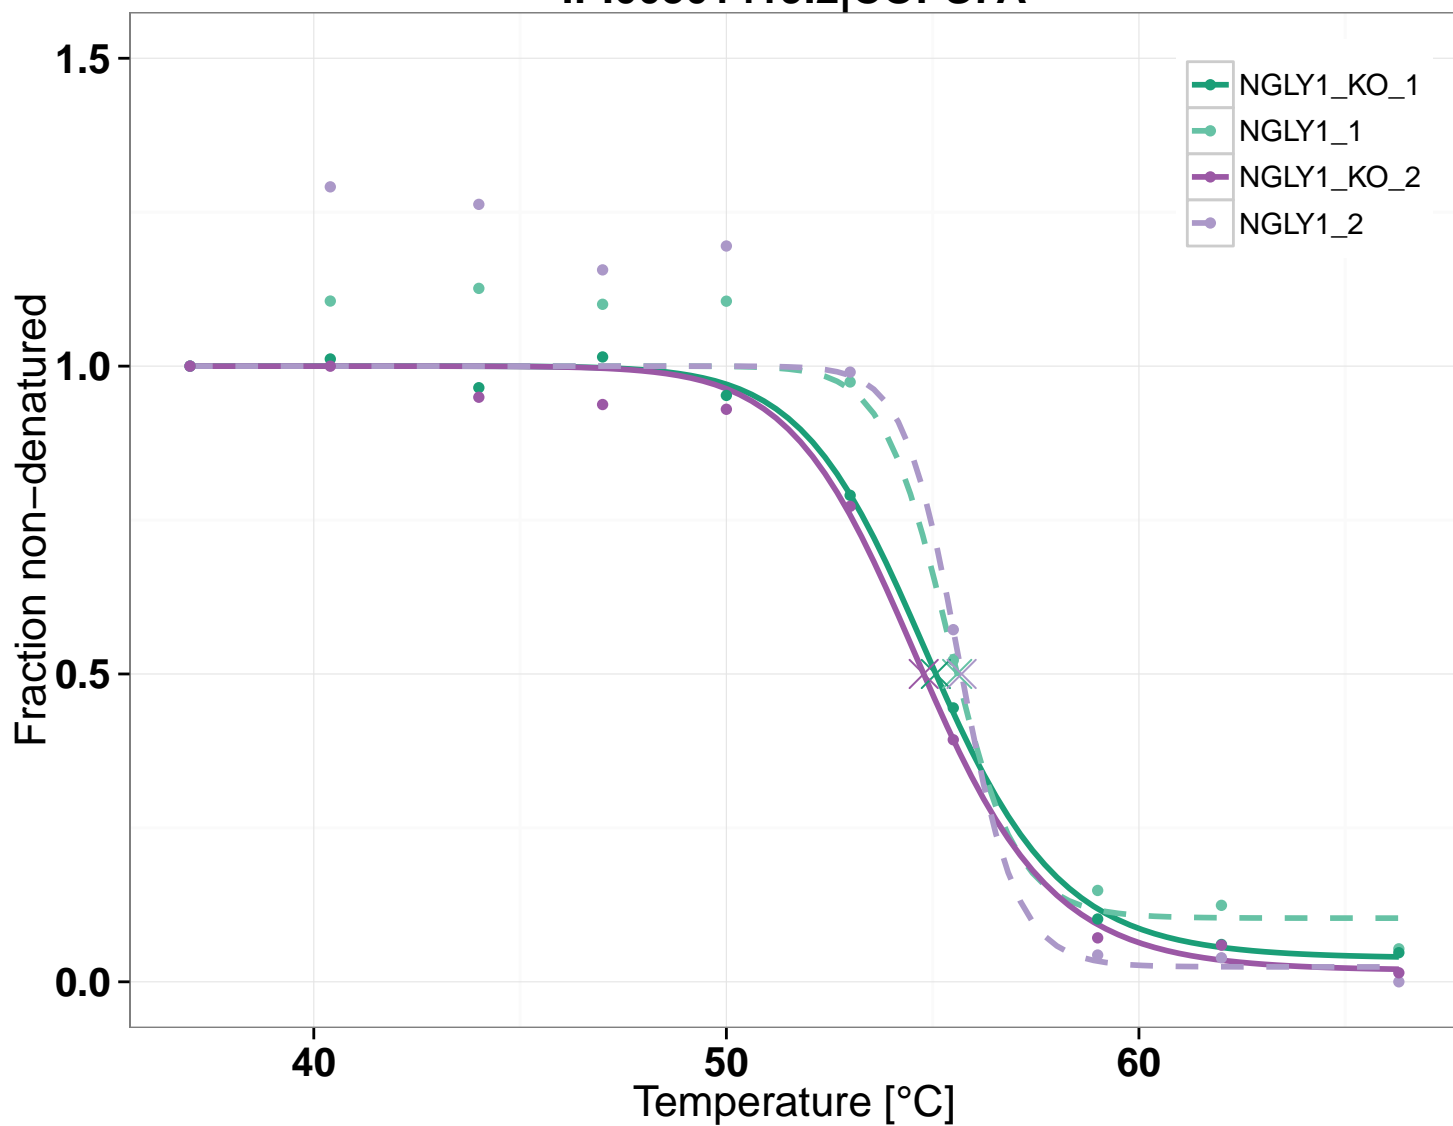

|            | meltPoint | slope | plateau | R2   |
|------------|-----------|-------|---------|------|
| NGLY1_KO_1 | 55.08     | -0.15 | 0.04    | 1    |
| NGLY1_1    | 55.59     | -0.28 | 0.1     | 0.97 |
| NGLY1_KO_2 | 54.78     | -0.15 | 0.02    | 0.99 |
| NGLY1_2    | 55.7      | -0.36 | 0.02    | 0.92 |

Supplement: Supplementary file 1721 [file 1]

IPI00829886.1|SLC22A5

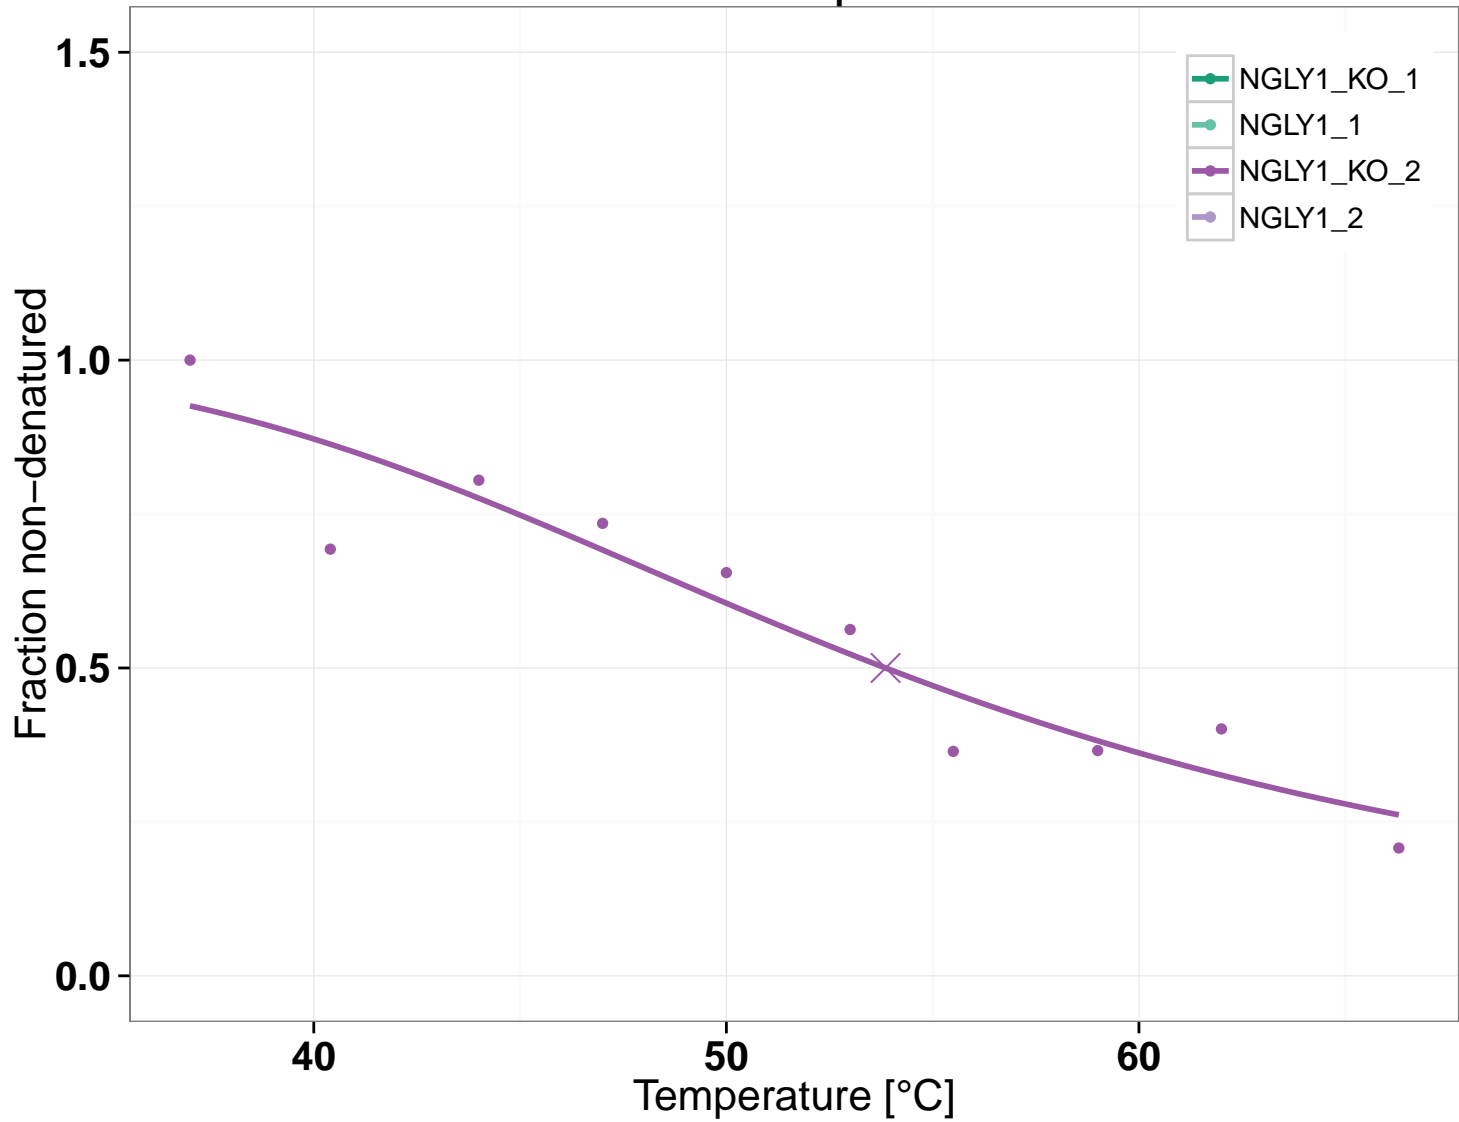

|            | meltPoint | slope  | plateau | R2   |
|------------|-----------|--------|---------|------|
| NGLY1_KO_1 | —         | —      | —       | —    |
| NGLY1_1    | —         | —      | —       | —    |
| NGLY1_KO_2 | 53.86     | -0.029 | 0       | 0.89 |
| NGLY1_2    | —         | —      | —       | —    |

Supplement: Supplementary file 1722 [file 1]

# IPI00550644.2|TTC38

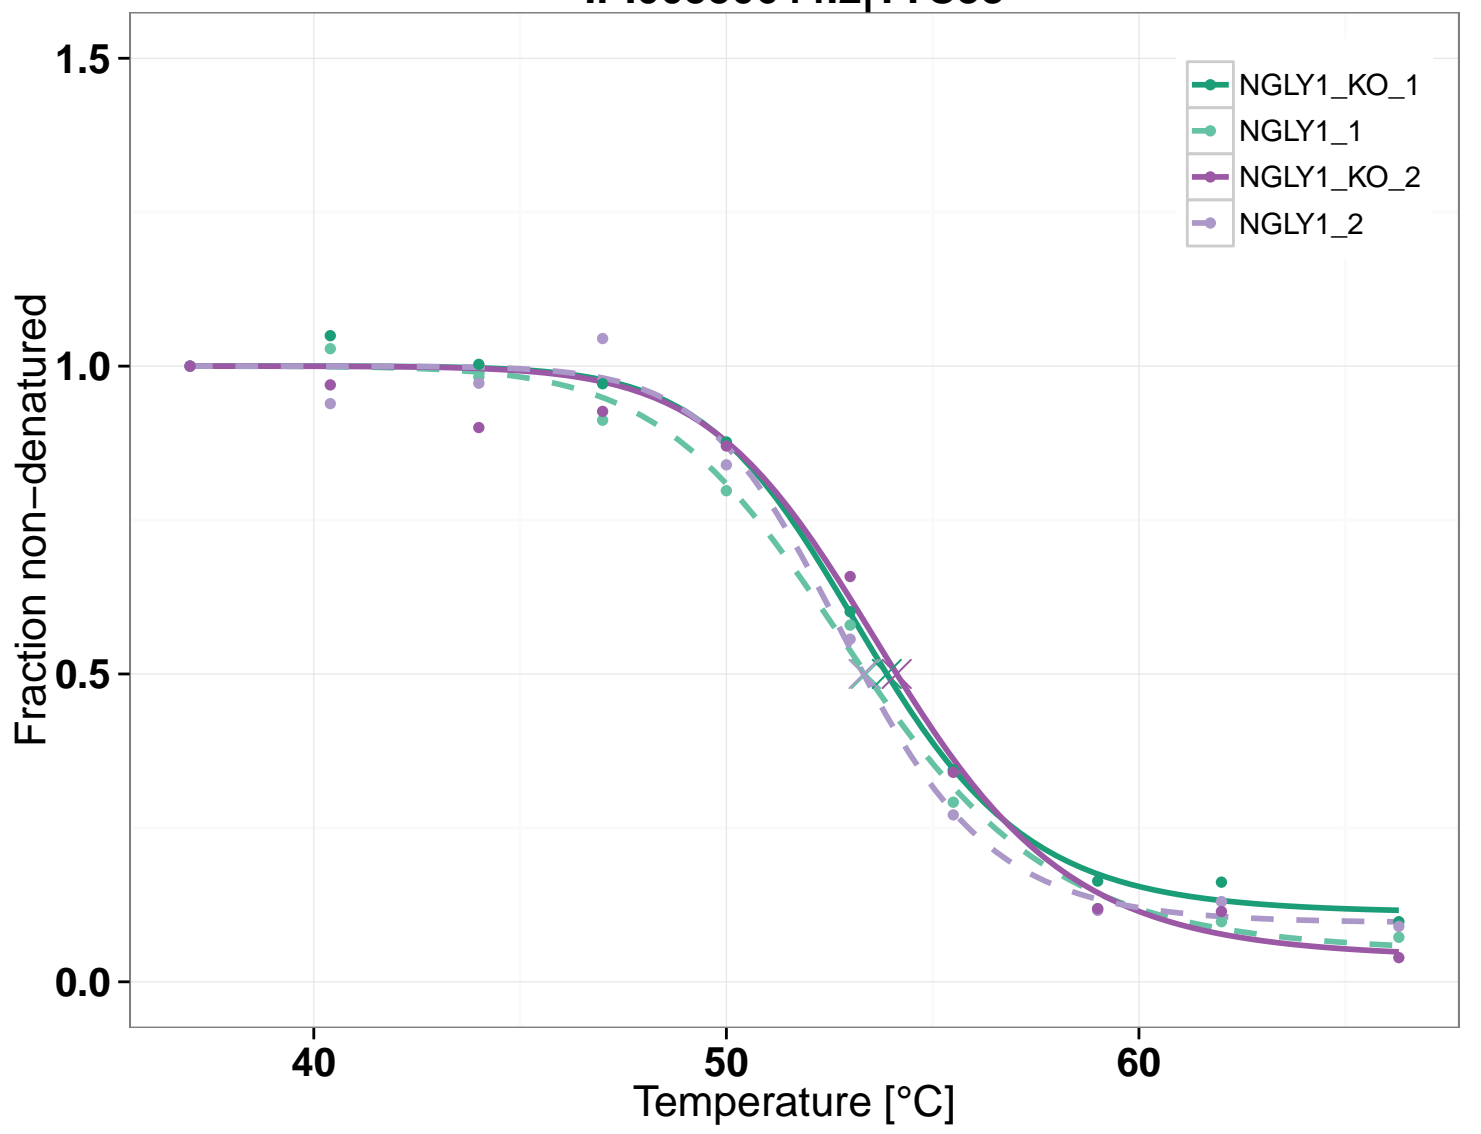

|            | meltPoint | slope  | plateau | R2   |
|------------|-----------|--------|---------|------|
| NGLY1_KO_1 | 53.89     | -0.11  | 0.11    | 1    |
| NGLY1_1    | 53.39     | -0.099 | 0.05    | 1    |
| NGLY1_KO_2 | 54.13     | -0.11  | 0.04    | 0.99 |
| NGLY1_2    | 53.33     | -0.13  | 0.1     | 0.99 |

Supplement: Supplementary file 1723 [file 1]

IPI00165171.1|DGCR14

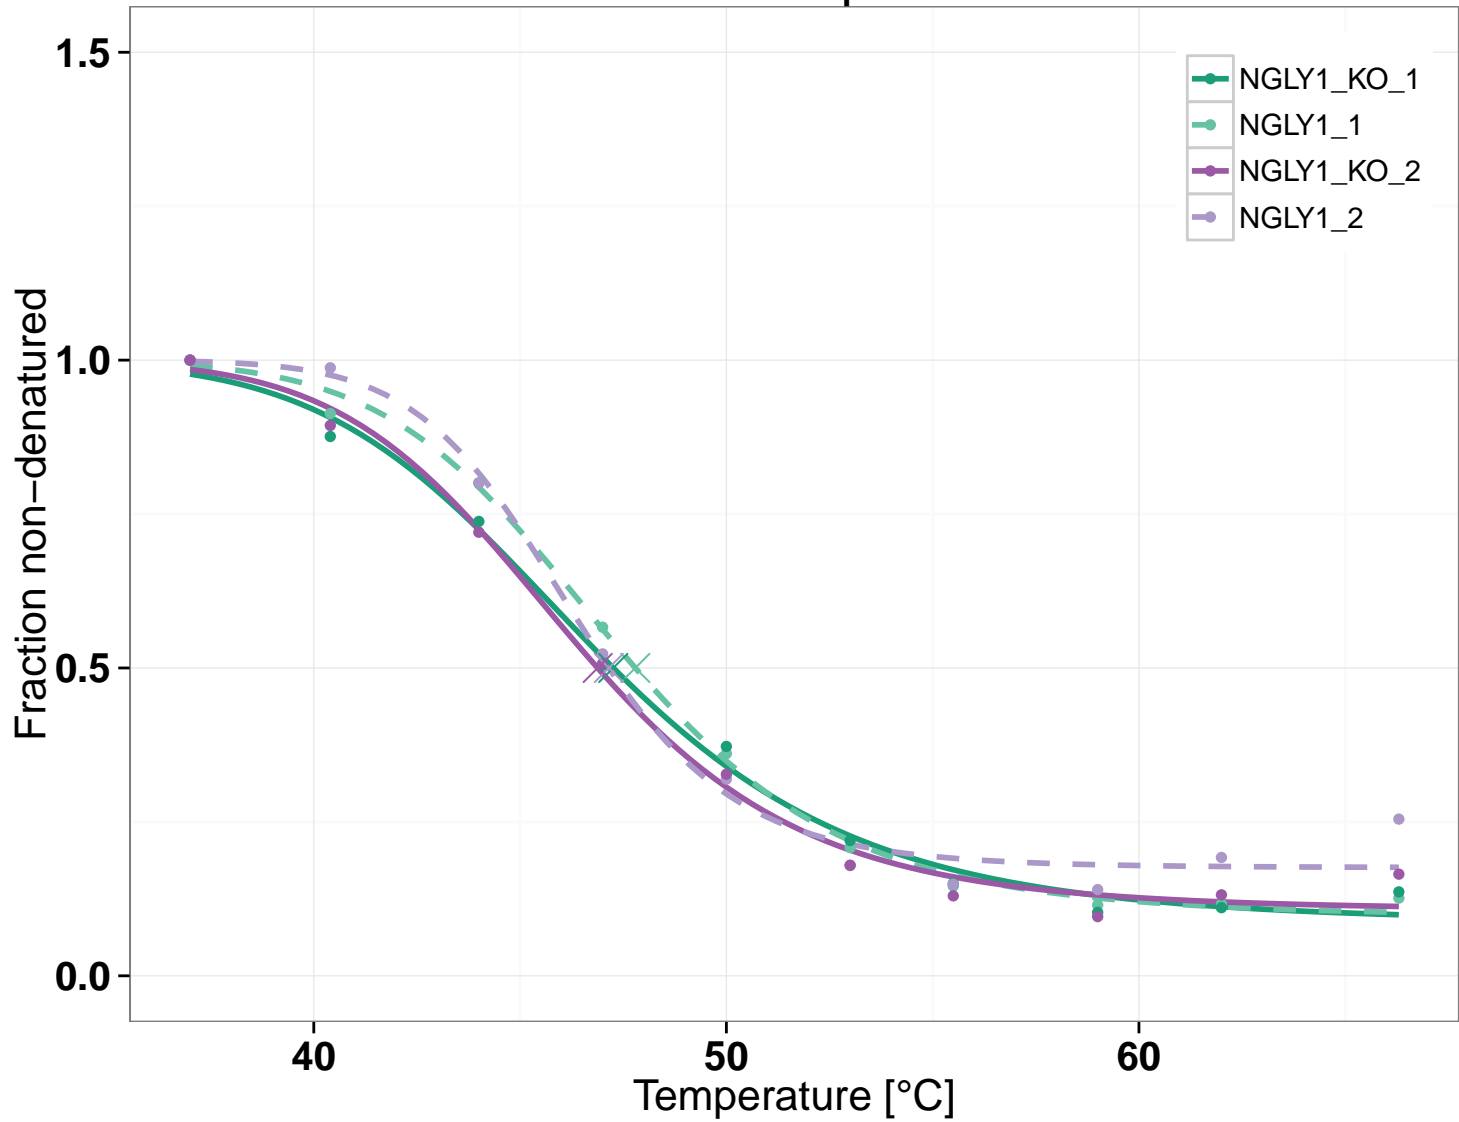

|            | meltPoint | slope  | plateau | R2   |
|------------|-----------|--------|---------|------|
| NGLY1_KO_1 | 47.26     | -0.071 | 0.09    | 0.99 |
| NGLY1_1    | 47.79     | -0.082 | 0.1     | 1    |
| NGLY1_KO_2 | 46.88     | -0.08  | 0.11    | 0.99 |
| NGLY1_2    | 47.15     | -0.11  | 0.18    | 0.99 |

Supplement: Supplementary file 1724 [file 1]

# IPI00059687.1|C18ORF25

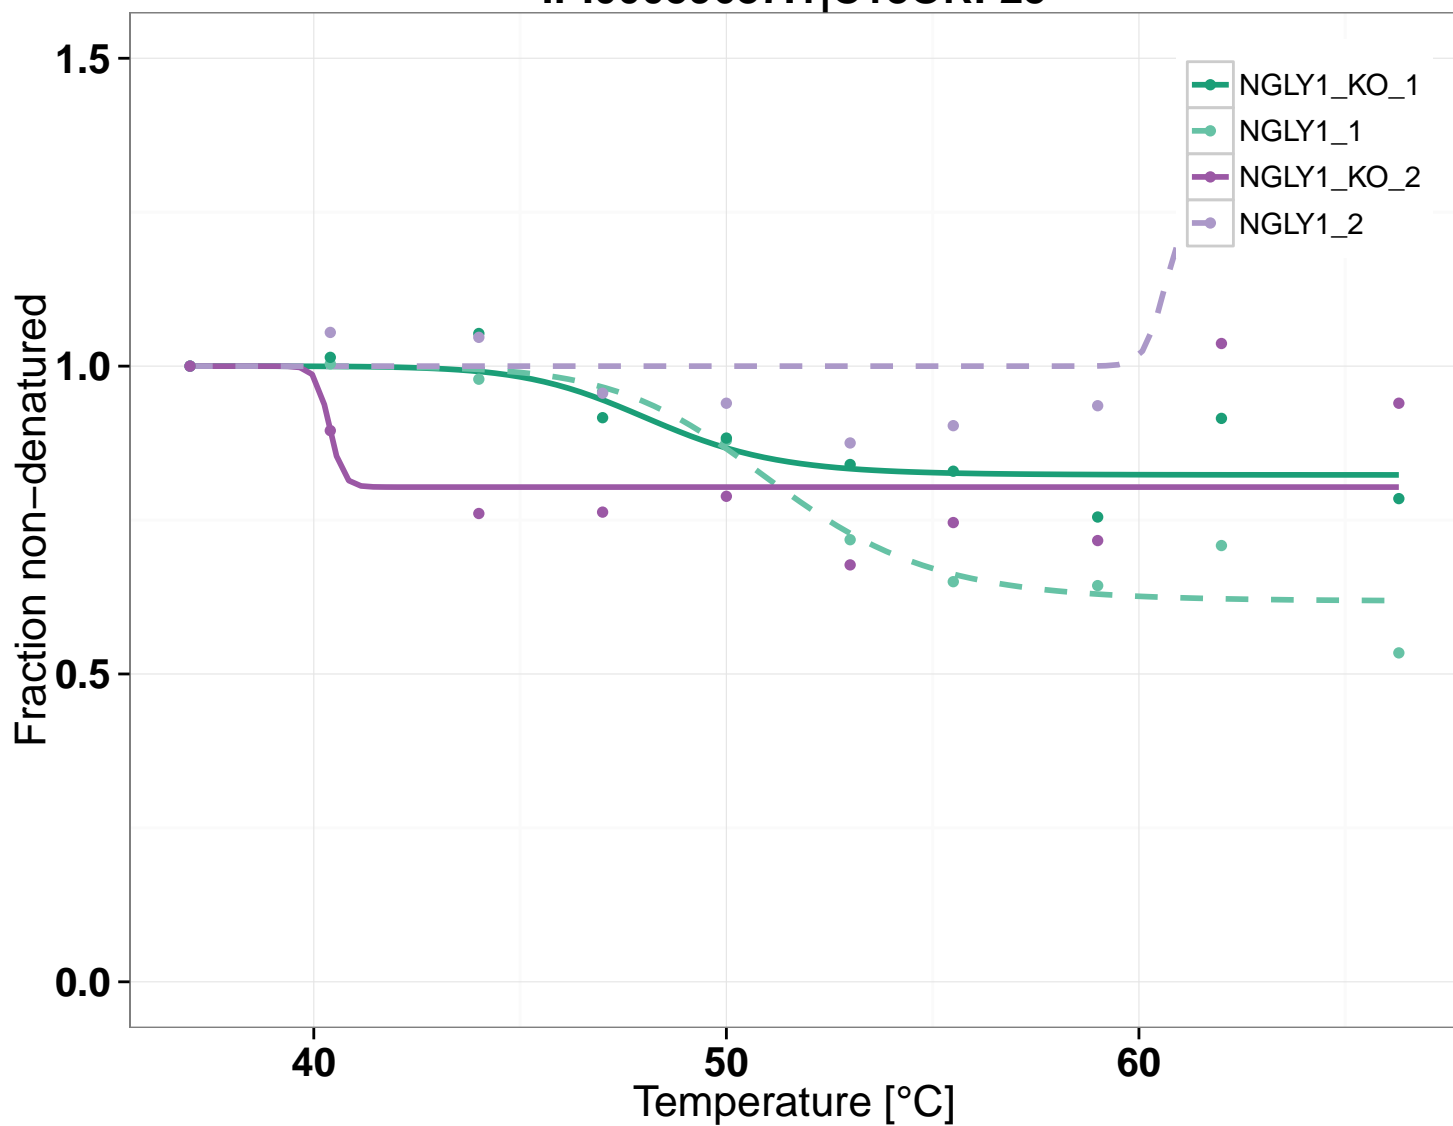

|            | meltPoint | slope  | plateau | R2   |
|------------|-----------|--------|---------|------|
| NGLY1_KO_1 | —         | -0.029 | 0.82    | 0.78 |
| NGLY1_1    | —         | -0.049 | 0.62    | 0.94 |
| NGLY1_KO_2 | —         | -0.3   | 0.8     | 0.27 |
| NGLY1_2    | —         | 0.26   | 1.26    | 0.76 |

Supplement: Supplementary file 1725 [file 1]

# IPI00007943.1|STAMBP

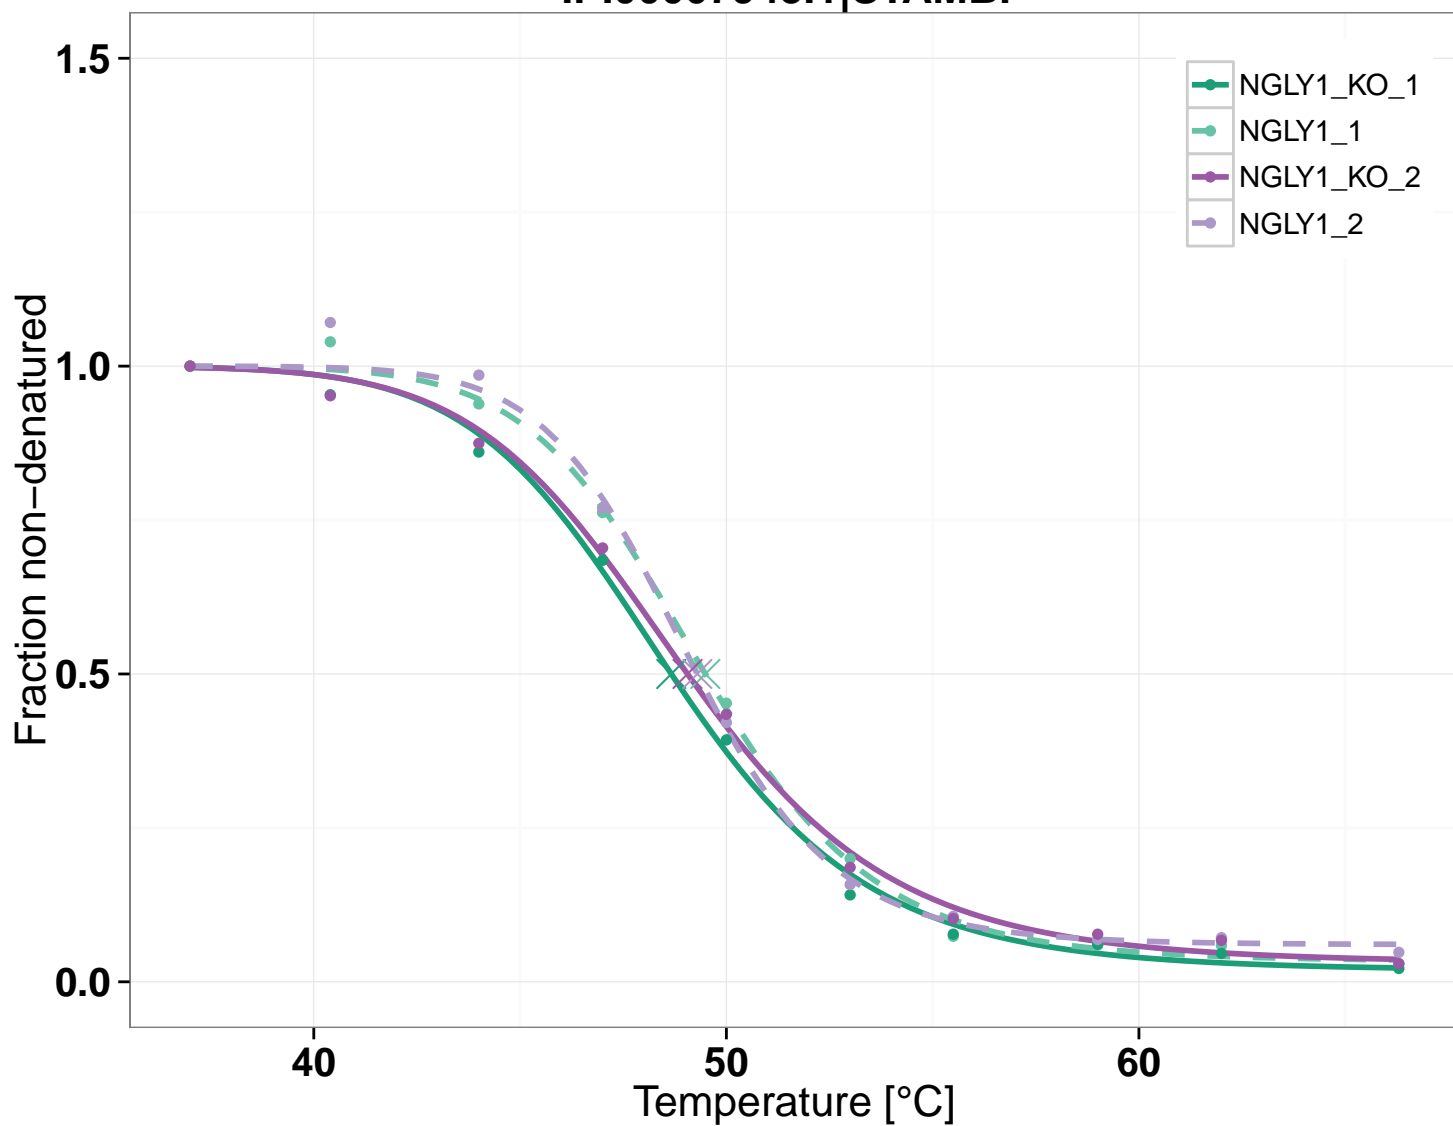

|            | meltPoint | slope  | plateau | R2 |
|------------|-----------|--------|---------|----|
| NGLY1_KO_1 | 48.67     | -0.1   | 0.02    | 1  |
| NGLY1_1    | 49.49     | -0.12  | 0.03    | 1  |
| NGLY1_KO_2 | 49.06     | -0.096 | 0.03    | 1  |
| NGLY1_2    | 49.3      | -0.13  | 0.06    | 1  |

Supplement: Supplementary file 1726 [file 1]

IPI00166121.2|CCDC52

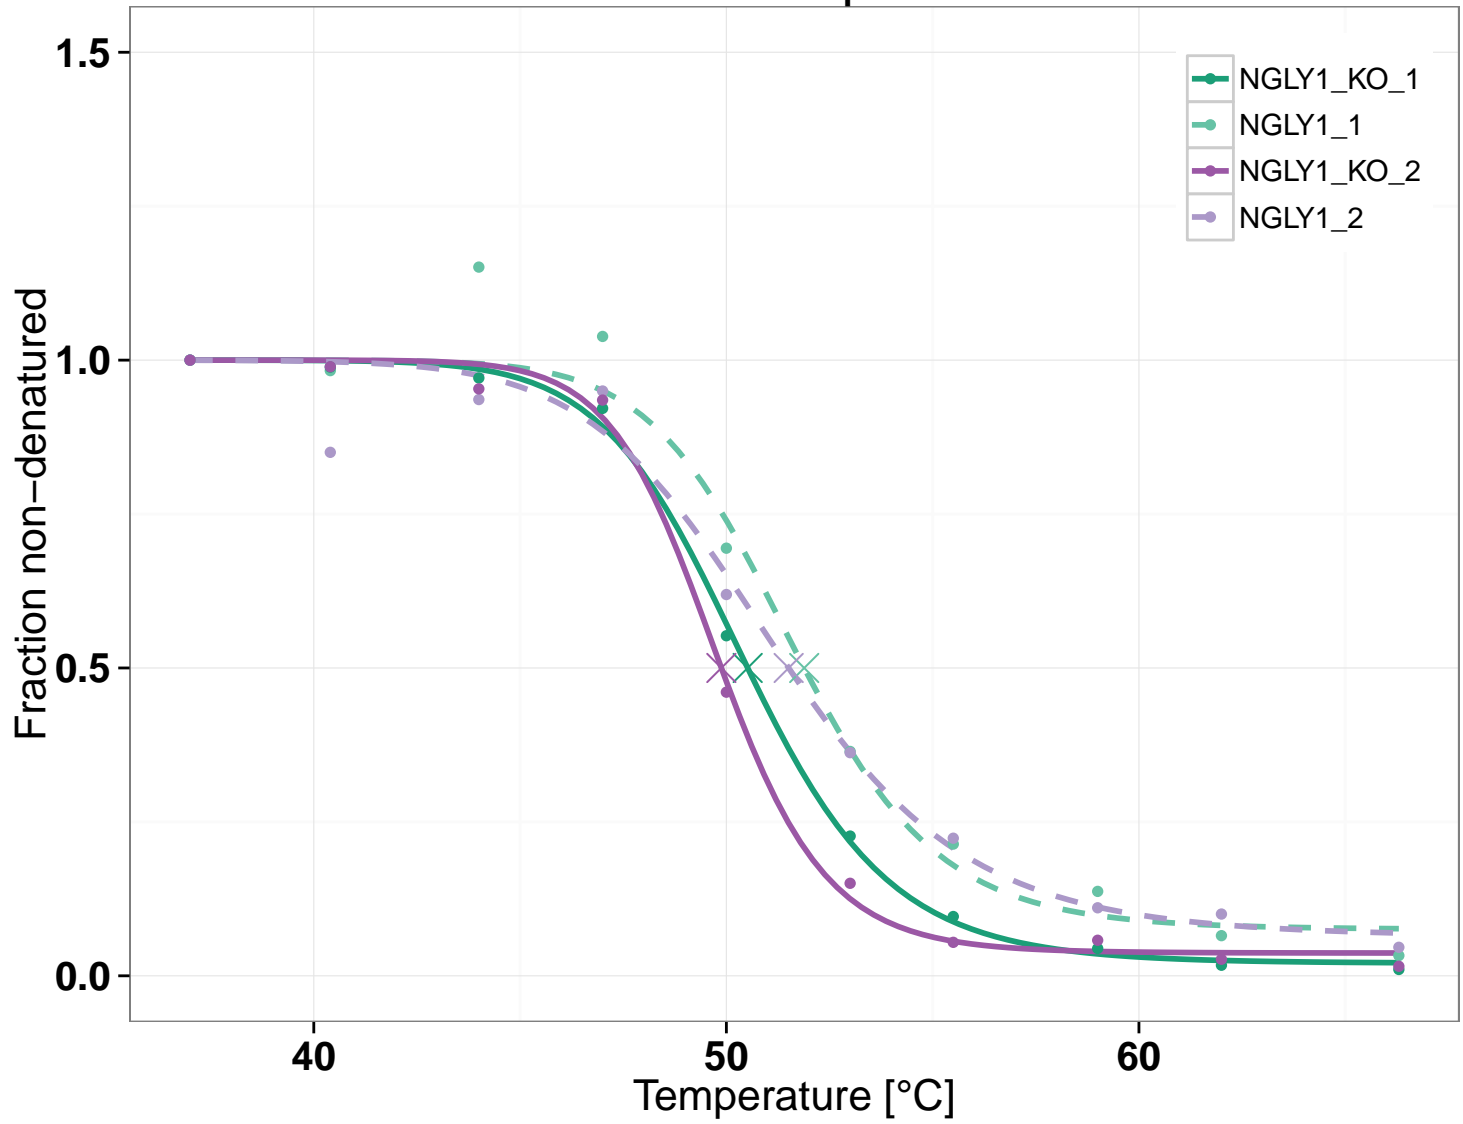

|            | meltPoint | slope | plateau | R2   |
|------------|-----------|-------|---------|------|
| NGLY1_KO_1 | 50.52     | -0.14 | 0.02    | 1    |
| NGLY1_1    | 51.89     | -0.13 | 0.08    | 0.98 |
| NGLY1_KO_2 | 49.88     | -0.18 | 0.04    | 1    |
| NGLY1_2    | 51.51     | -0.1  | 0.06    | 0.98 |

Supplement: Supplementary file 1727 [file 1]

IPI00059135.1|PPP1R14A

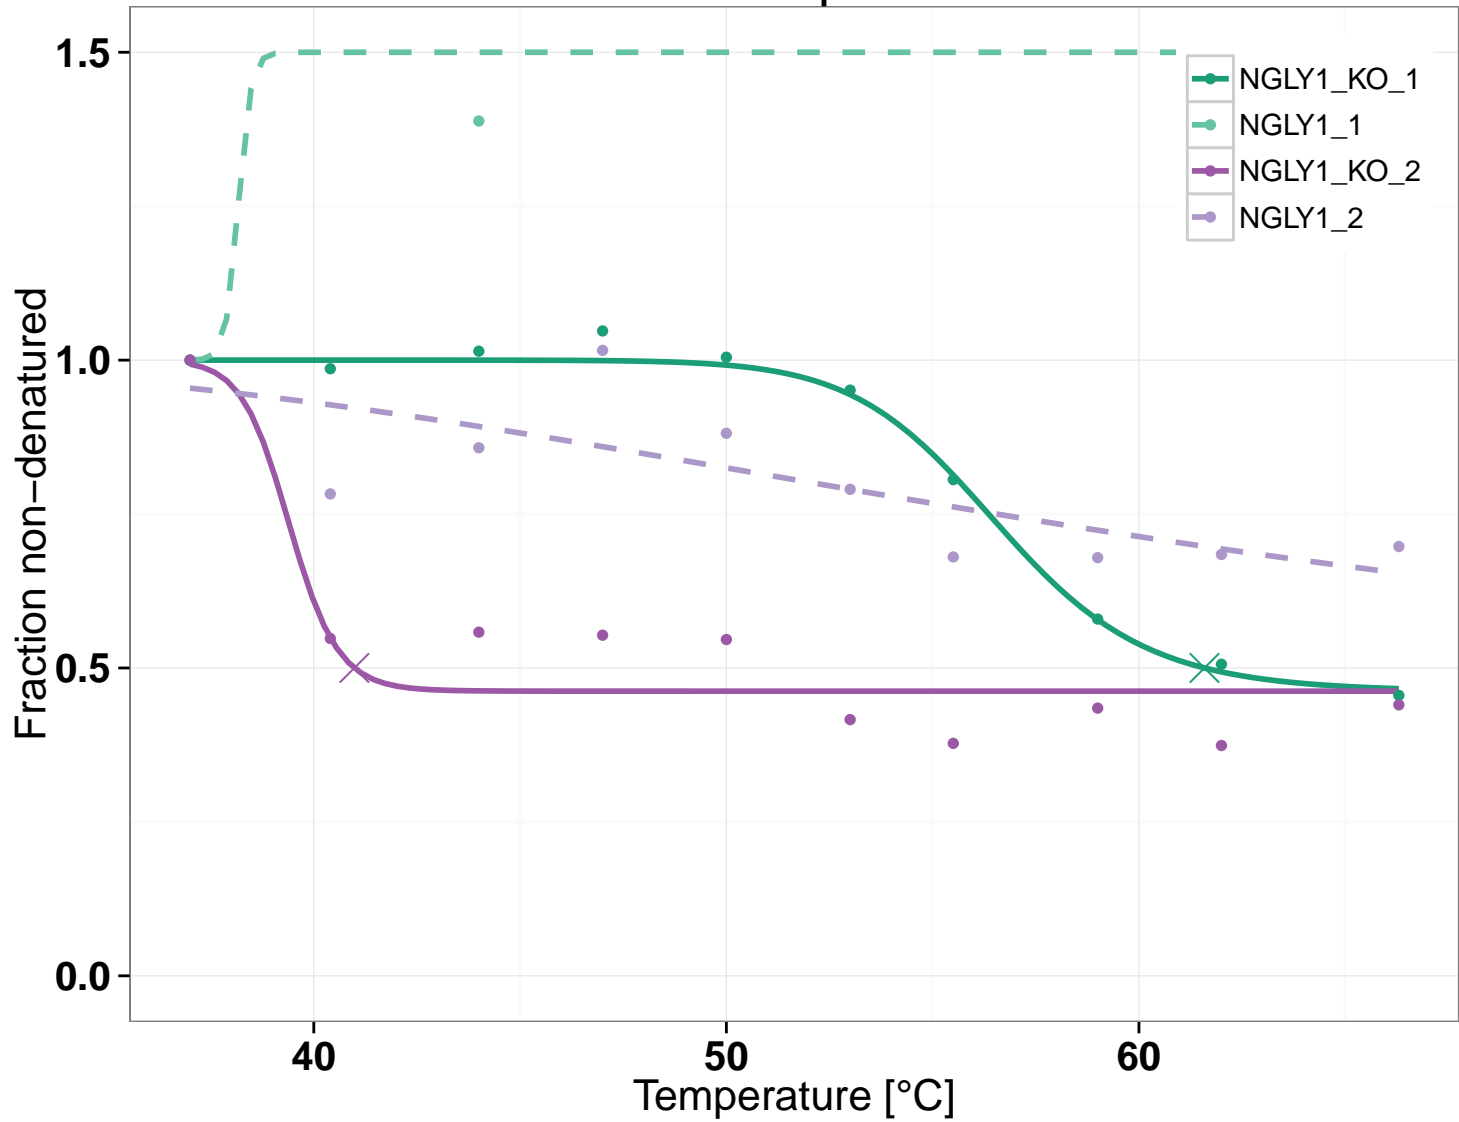

|            | meltPoint | slope  | plateau | R2    |
|------------|-----------|--------|---------|-------|
| NGLY1_KO_1 | 61.59     | -0.076 | 0.46    | 0.99  |
| NGLY1_1    | -         | 0.82   | 1.5     | -0.35 |
| NGLY1_KO_2 | 40.98     | -0.23  | 0.46    | 0.86  |
| NGLY1_2    | -         | -0.012 | 0.33    | 0.58  |

Supplement: Supplementary file 1728 [file 1]

IPI00654731.1|DDX58

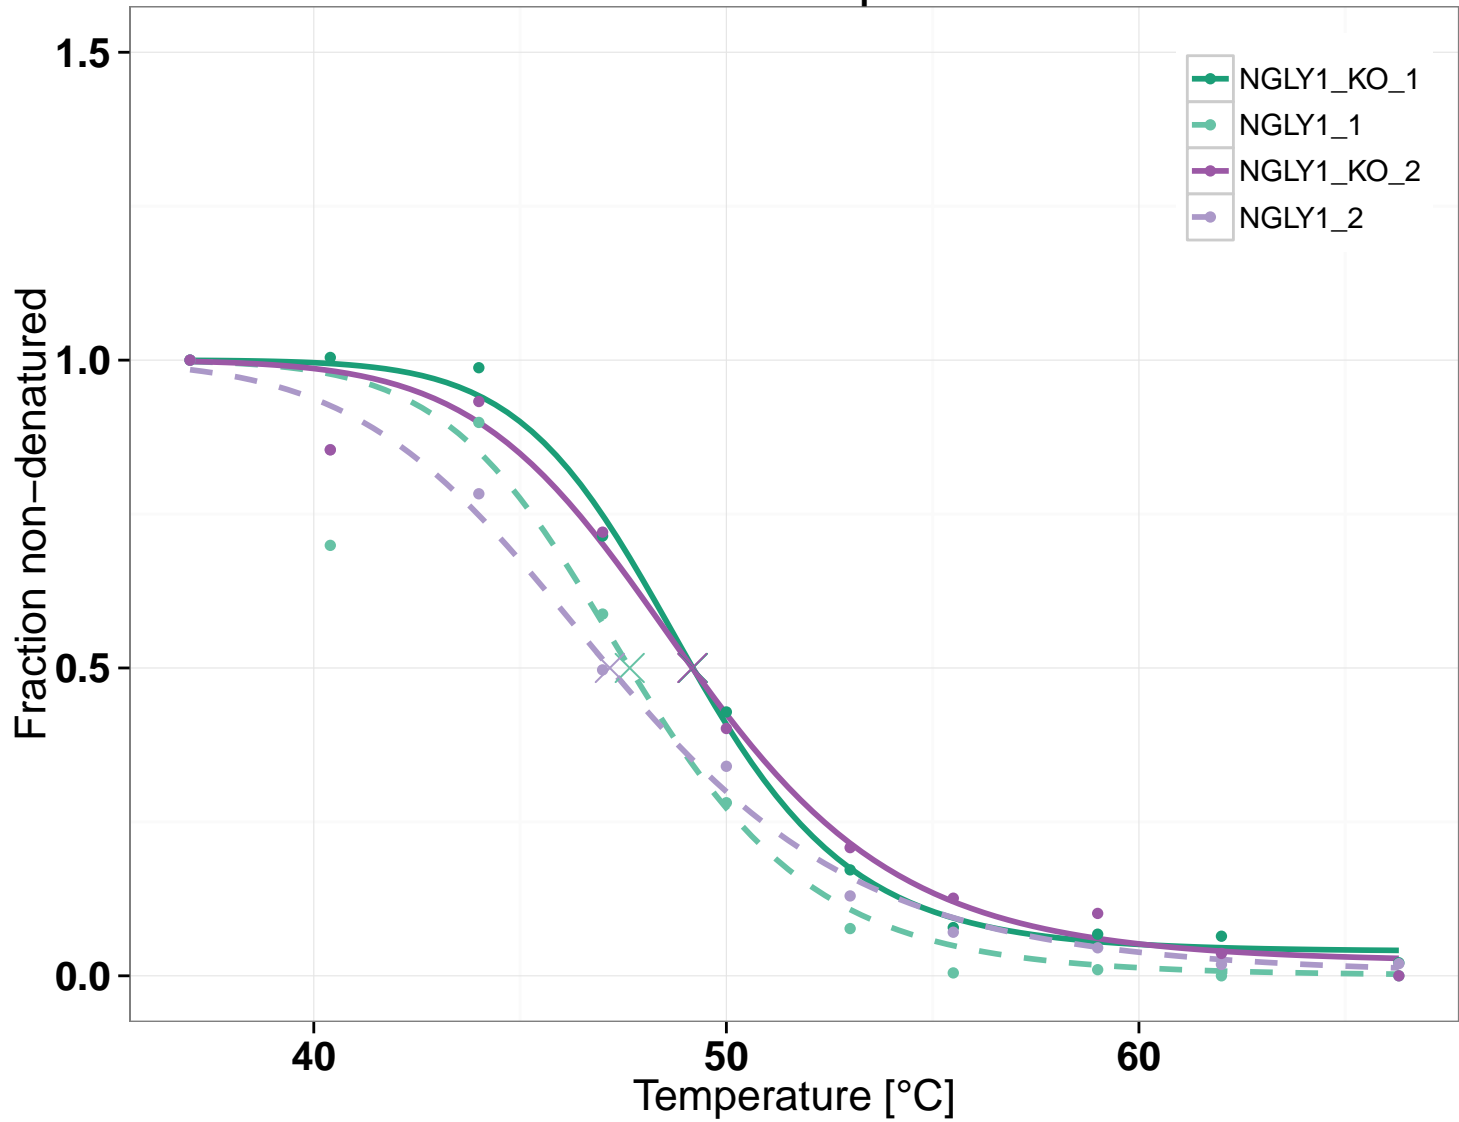

|            | meltPoint | slope  | plateau | R2   |
|------------|-----------|--------|---------|------|
| NGLY1_KO_1 | 49.19     | -0.12  | 0.04    | 1    |
| NGLY1_1    | 47.66     | -0.11  | 0       | 0.94 |
| NGLY1_KO_2 | 49.17     | -0.095 | 0.02    | 0.99 |
| NGLY1_2    | 47.18     | -0.081 | 0       | 0.99 |

Supplement: Supplementary file 1729 [file 1]

# IPI00024719.1|HAT1

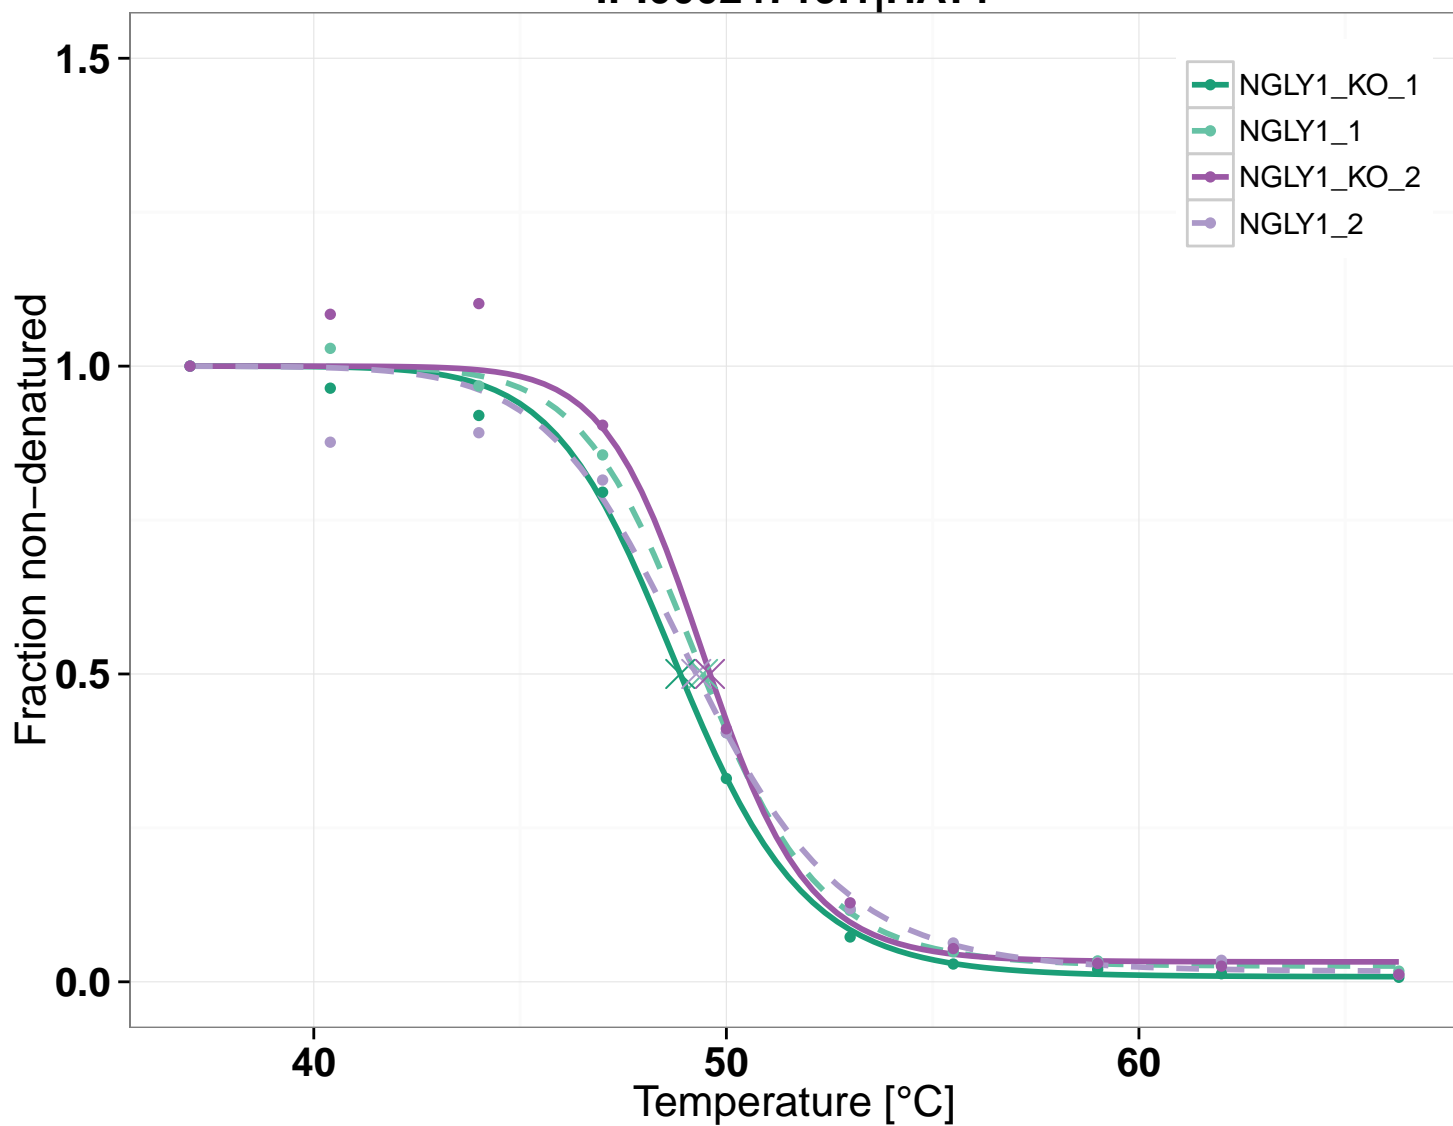

|            | meltPoint | slope | plateau | R2   |
|------------|-----------|-------|---------|------|
| NGLY1_KO_1 | 48.88     | -0.16 | 0.01    | 1    |
| NGLY1_1    | 49.43     | -0.17 | 0.03    | 1    |
| NGLY1_KO_2 | 49.6      | -0.2  | 0.03    | 0.99 |
| NGLY1_2    | 49.27     | -0.14 | 0.02    | 0.99 |

Supplement: Supplementary file 1730 [file 1]

IPI00375677.1|MRPL21

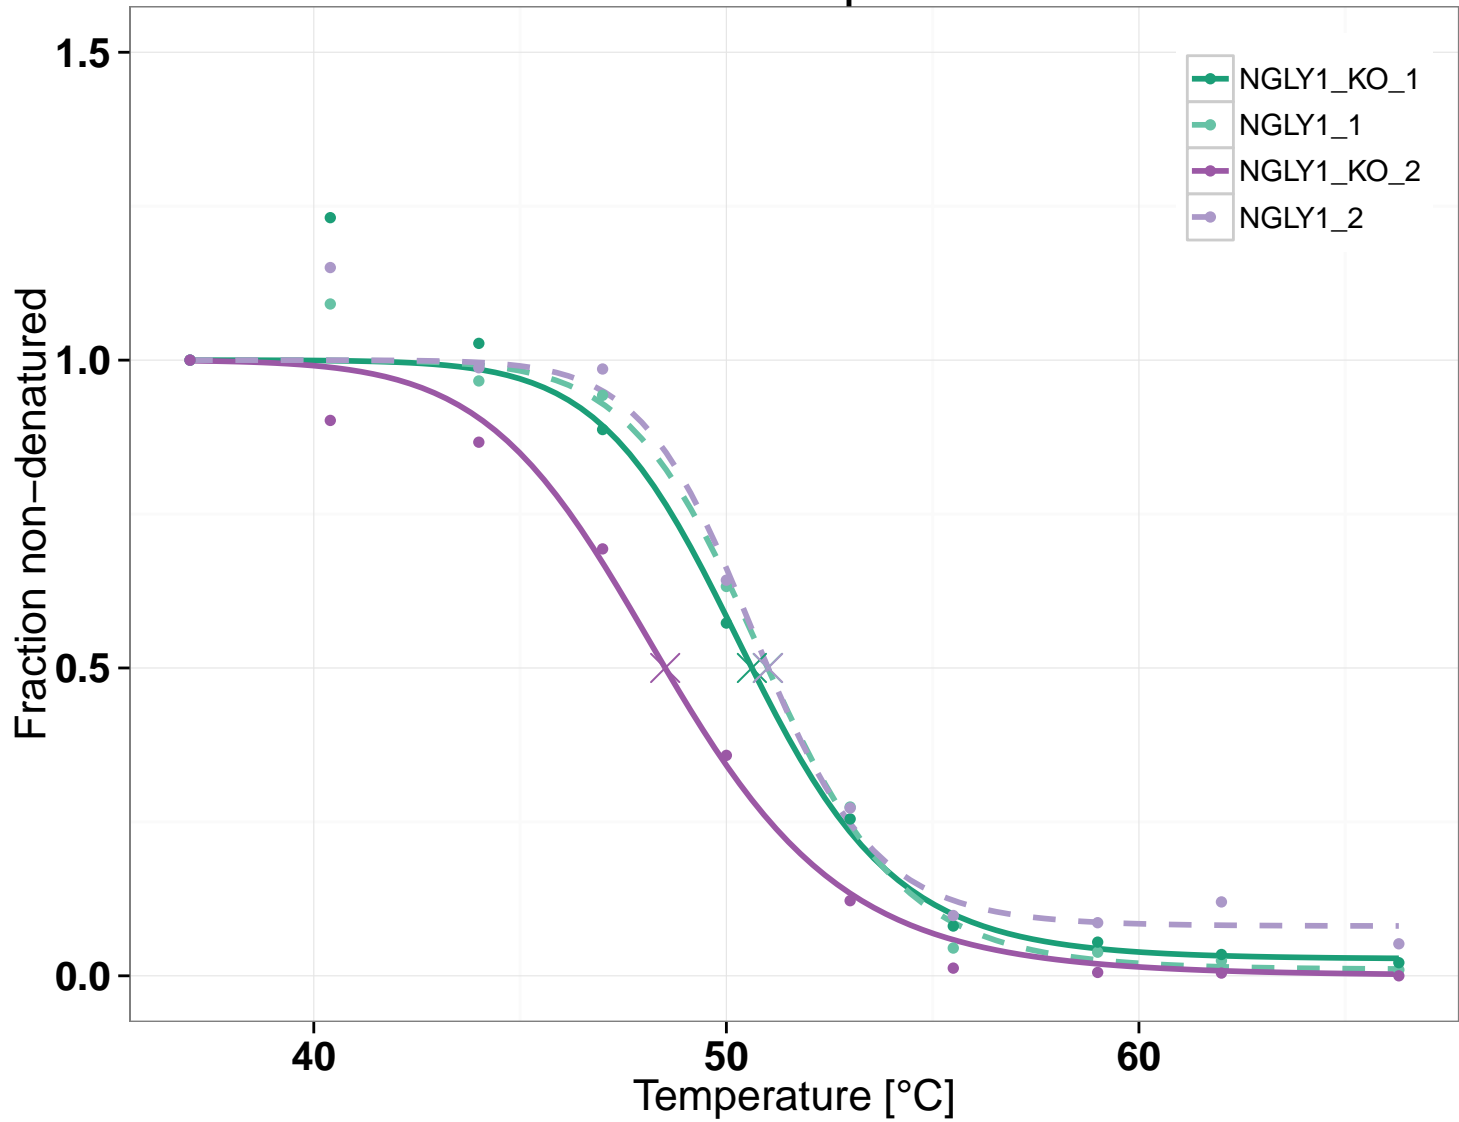

|            | meltPoint | slope | plateau | R2   |
|------------|-----------|-------|---------|------|
| NGLY1_KO_1 | 50.62     | -0.14 | 0.03    | 0.97 |
| NGLY1_1    | 51        | -0.15 | 0.01    | 0.99 |
| NGLY1_KO_2 | 48.52     | -0.11 | 0       | 0.99 |
| NGLY1_2    | 51.01     | -0.16 | 0.08    | 0.99 |

Supplement: Supplementary file 1731 [file 1]

# IPI00179473.9|SQSTM1

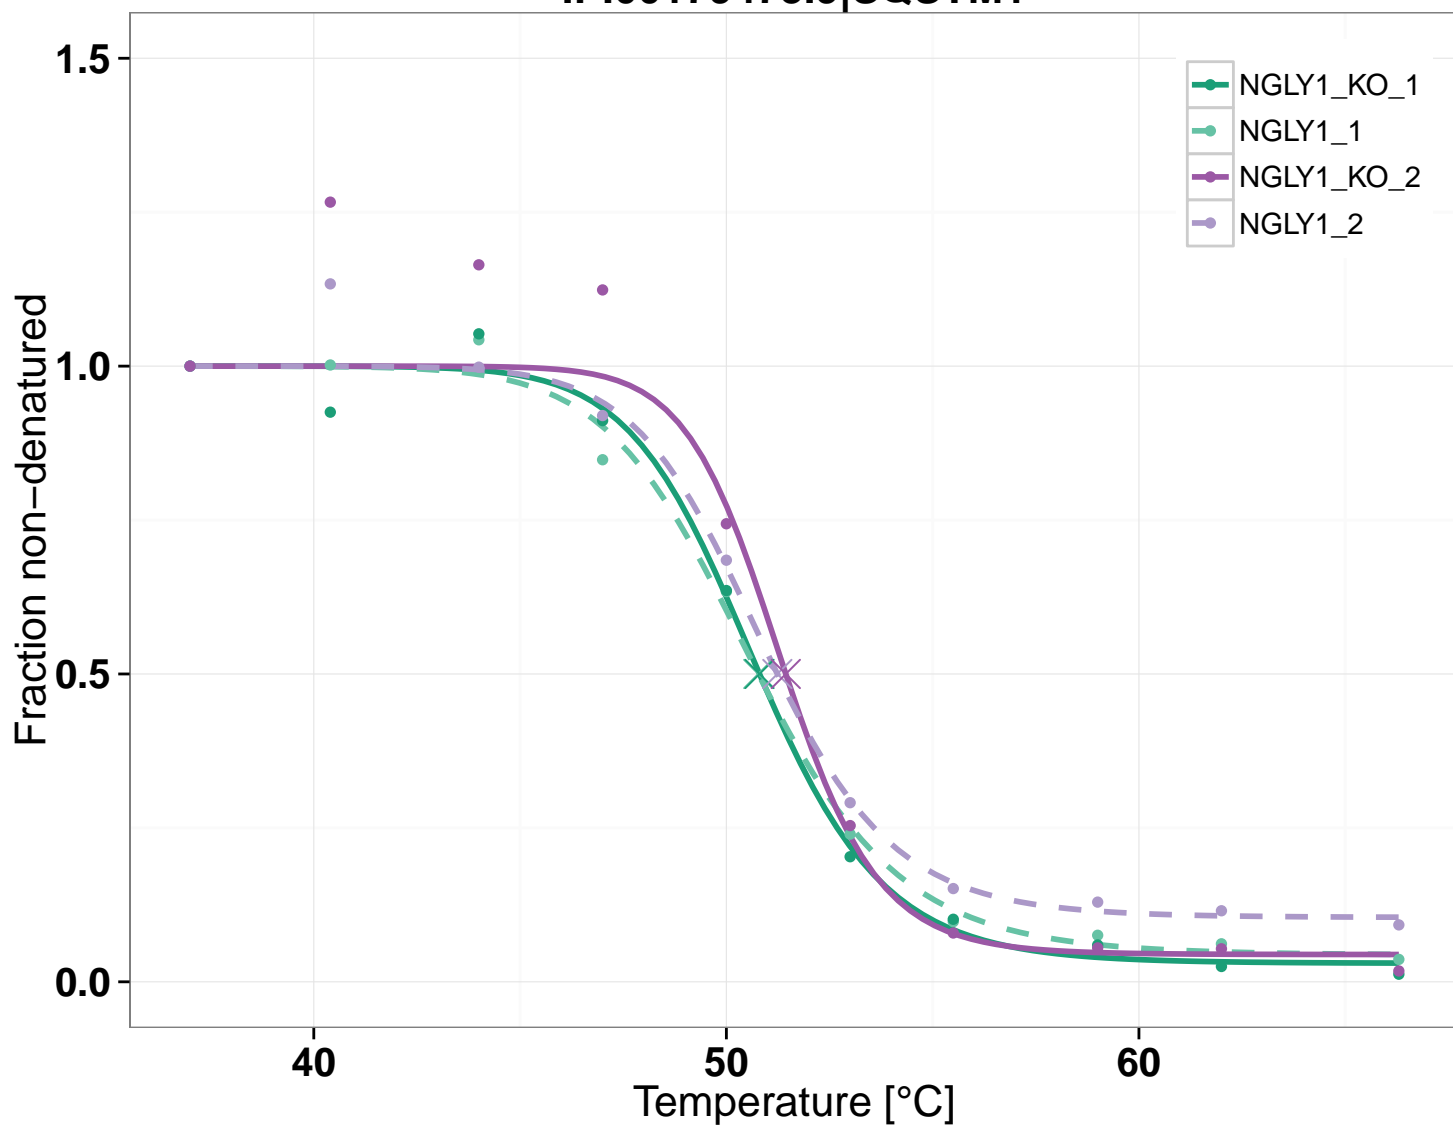

|            | meltPoint | slope | plateau | R2   |
|------------|-----------|-------|---------|------|
| NGLY1_KO_1 | 50.8      | -0.16 | 0.03    | 0.99 |
| NGLY1_1    | 50.77     | -0.13 | 0.04    | 1    |
| NGLY1_KO_2 | 51.44     | -0.2  | 0.04    | 0.95 |
| NGLY1_2    | 51.24     | -0.14 | 0.1     | 0.99 |

Supplement: Supplementary file 1732 [file 1]

IPI00783045.1|CRTC3

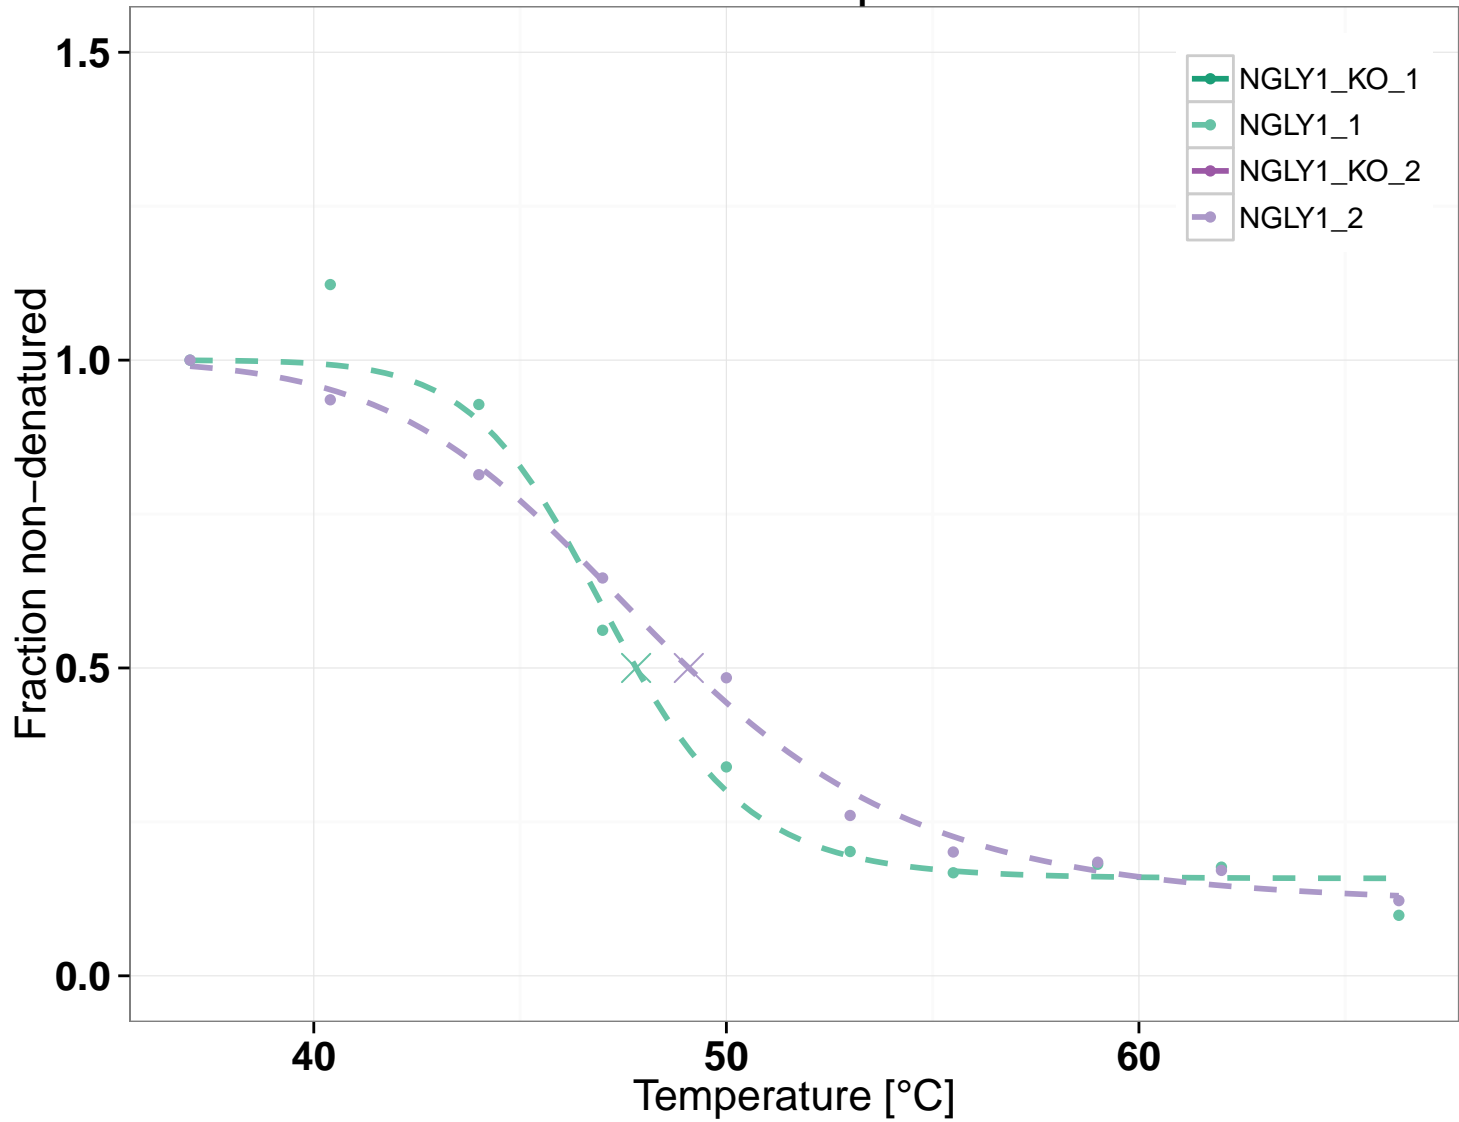

|            | meltPoint | slope  | plateau | R2   |
|------------|-----------|--------|---------|------|
| NGLY1_KO_1 | -         | -      | -       | -    |
| NGLY1_1    | 47.81     | -0.13  | 0.16    | 0.98 |
| NGLY1_KO_2 | -         | -      | -       | -    |
| NGLY1_2    | 49.09     | -0.069 | 0.11    | 1    |

Supplement: Supplementary file 1733 [file 1]

IPI00304577.3|AP2A1

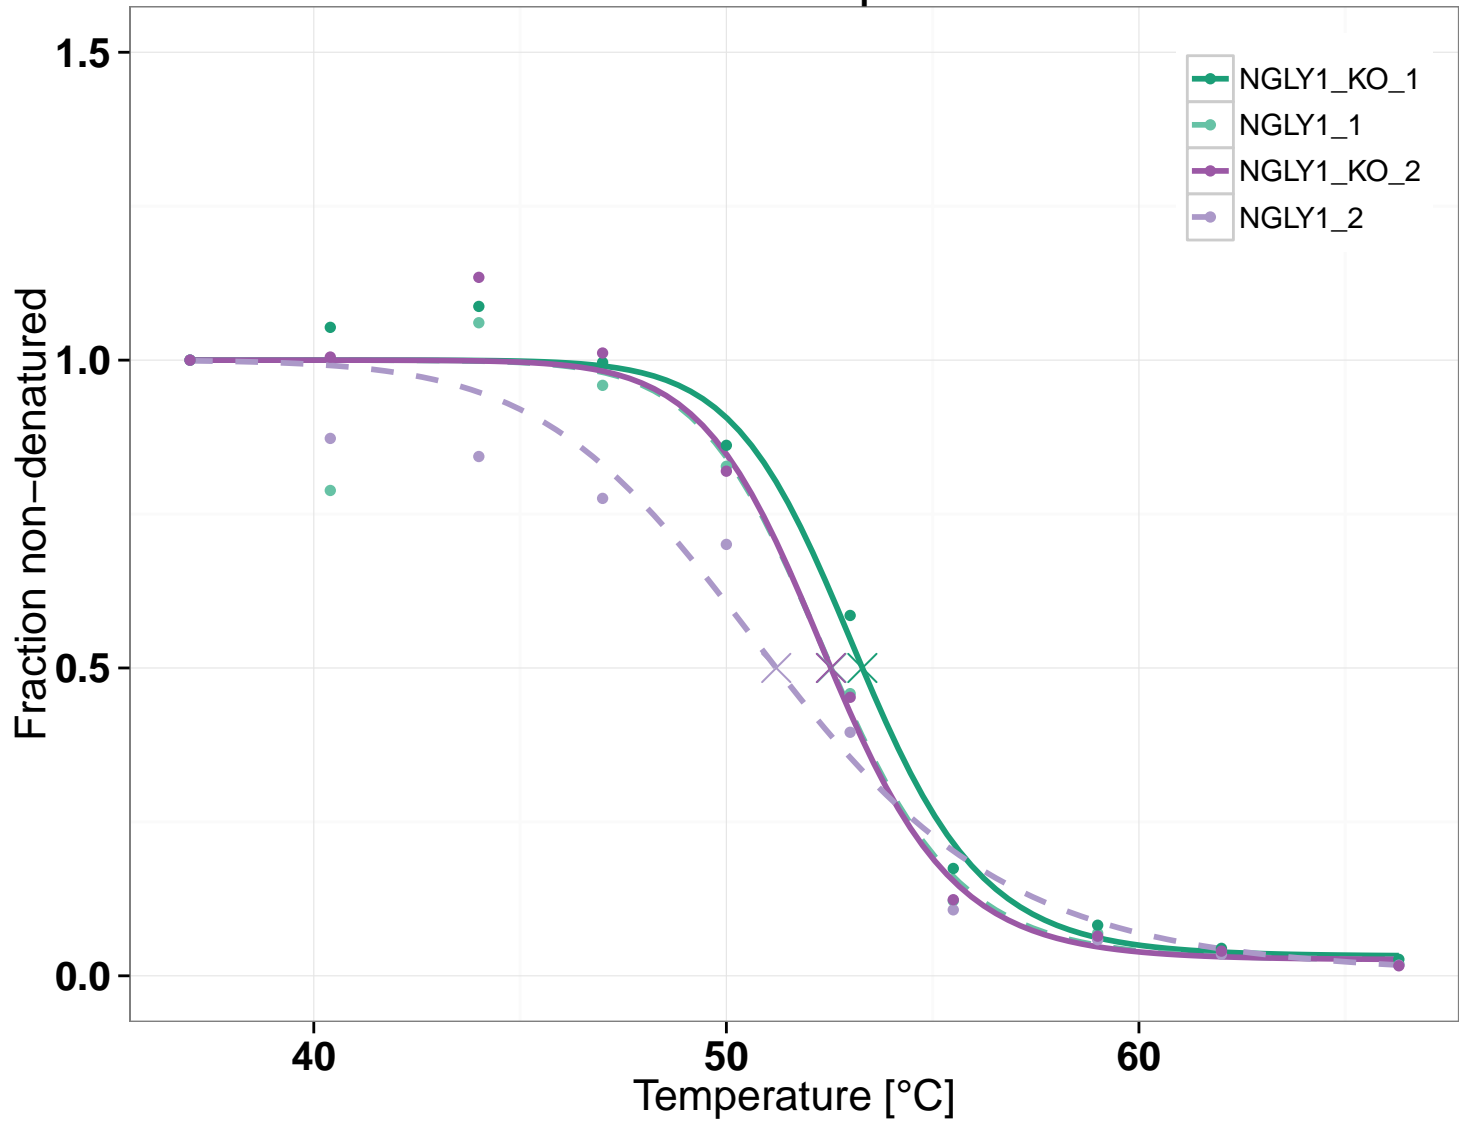

|            | meltPoint | slope  | plateau | R2   |
|------------|-----------|--------|---------|------|
| NGLY1_KO_1 | 53.3      | -0.16  | 0.03    | 0.99 |
| NGLY1_1    | 52.55     | -0.16  | 0.03    | 0.97 |
| NGLY1_KO_2 | 52.53     | -0.16  | 0.03    | 0.99 |
| NGLY1_2    | 51.21     | -0.088 | 0       | 0.97 |

Supplement: Supplementary file 1734 [file 1]

IPI00550793.3|UTP14C

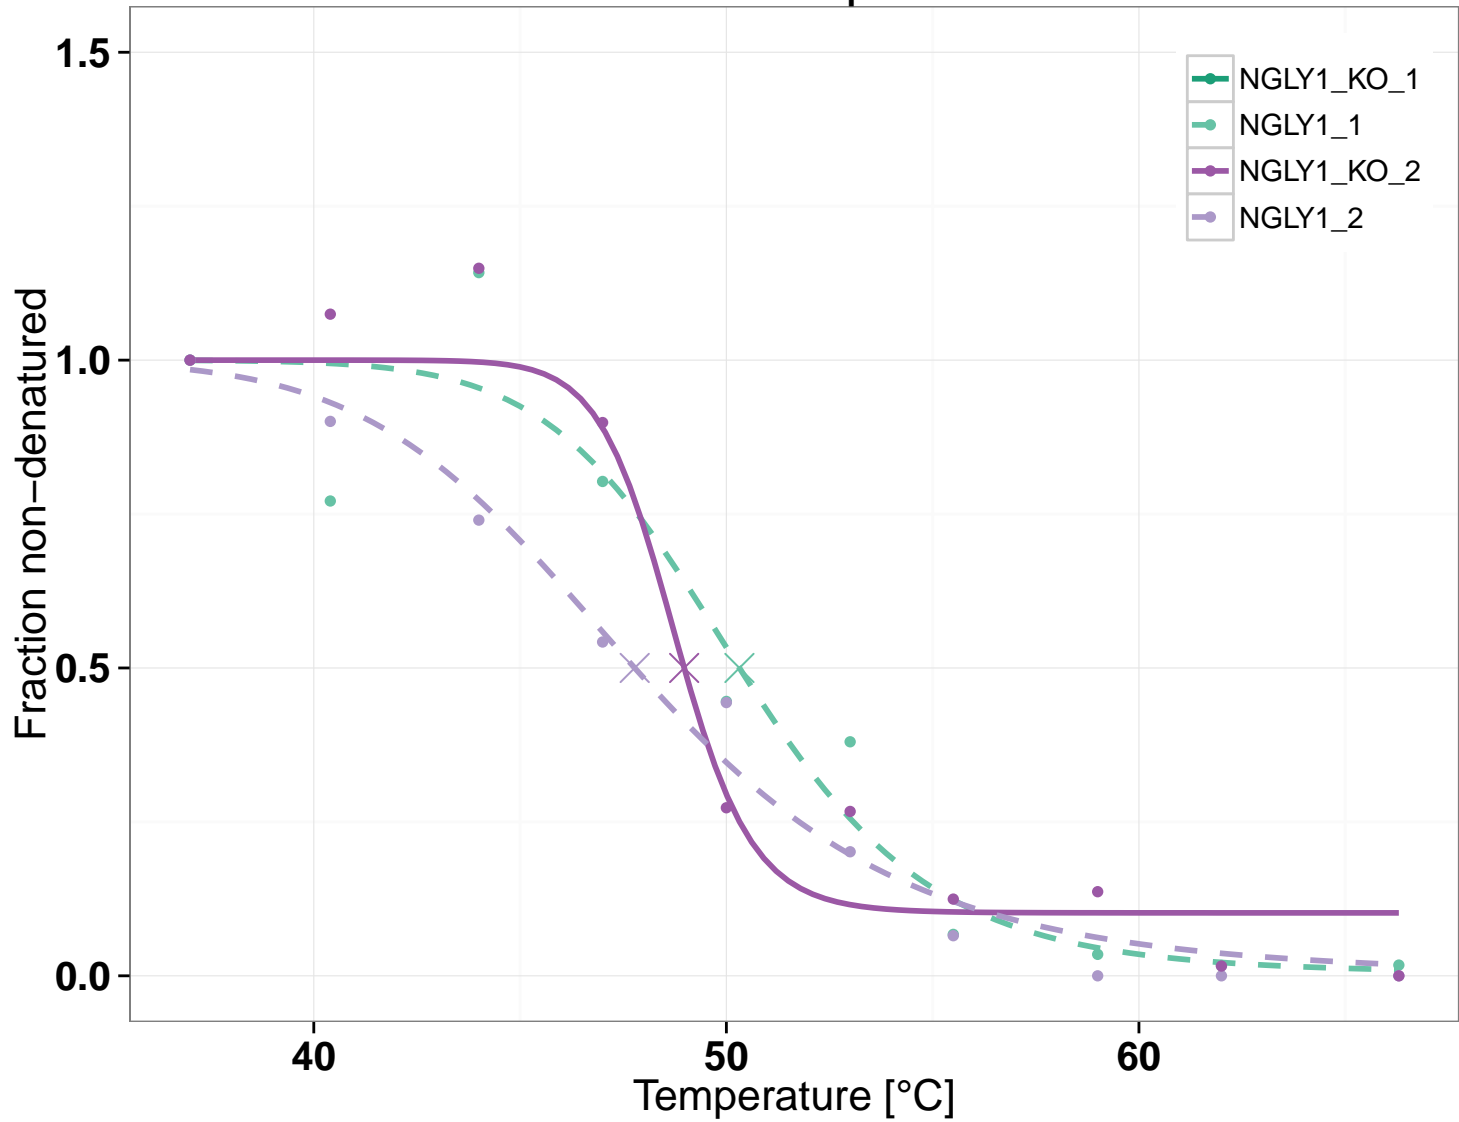

|            | meltPoint | slope  | plateau | R2   |
|------------|-----------|--------|---------|------|
| NGLY1_KO_1 | –         | –      | –       | –    |
| NGLY1_1    | 50.32     | –0.11  | 0       | 0.93 |
| NGLY1_KO_2 | 48.98     | –0.24  | 0.1     | 0.96 |
| NGLY1_2    | 47.78     | –0.076 | 0       | 0.99 |

Supplement: Supplementary file 1735 [file 1]

# IPI00024662.1|CBX5

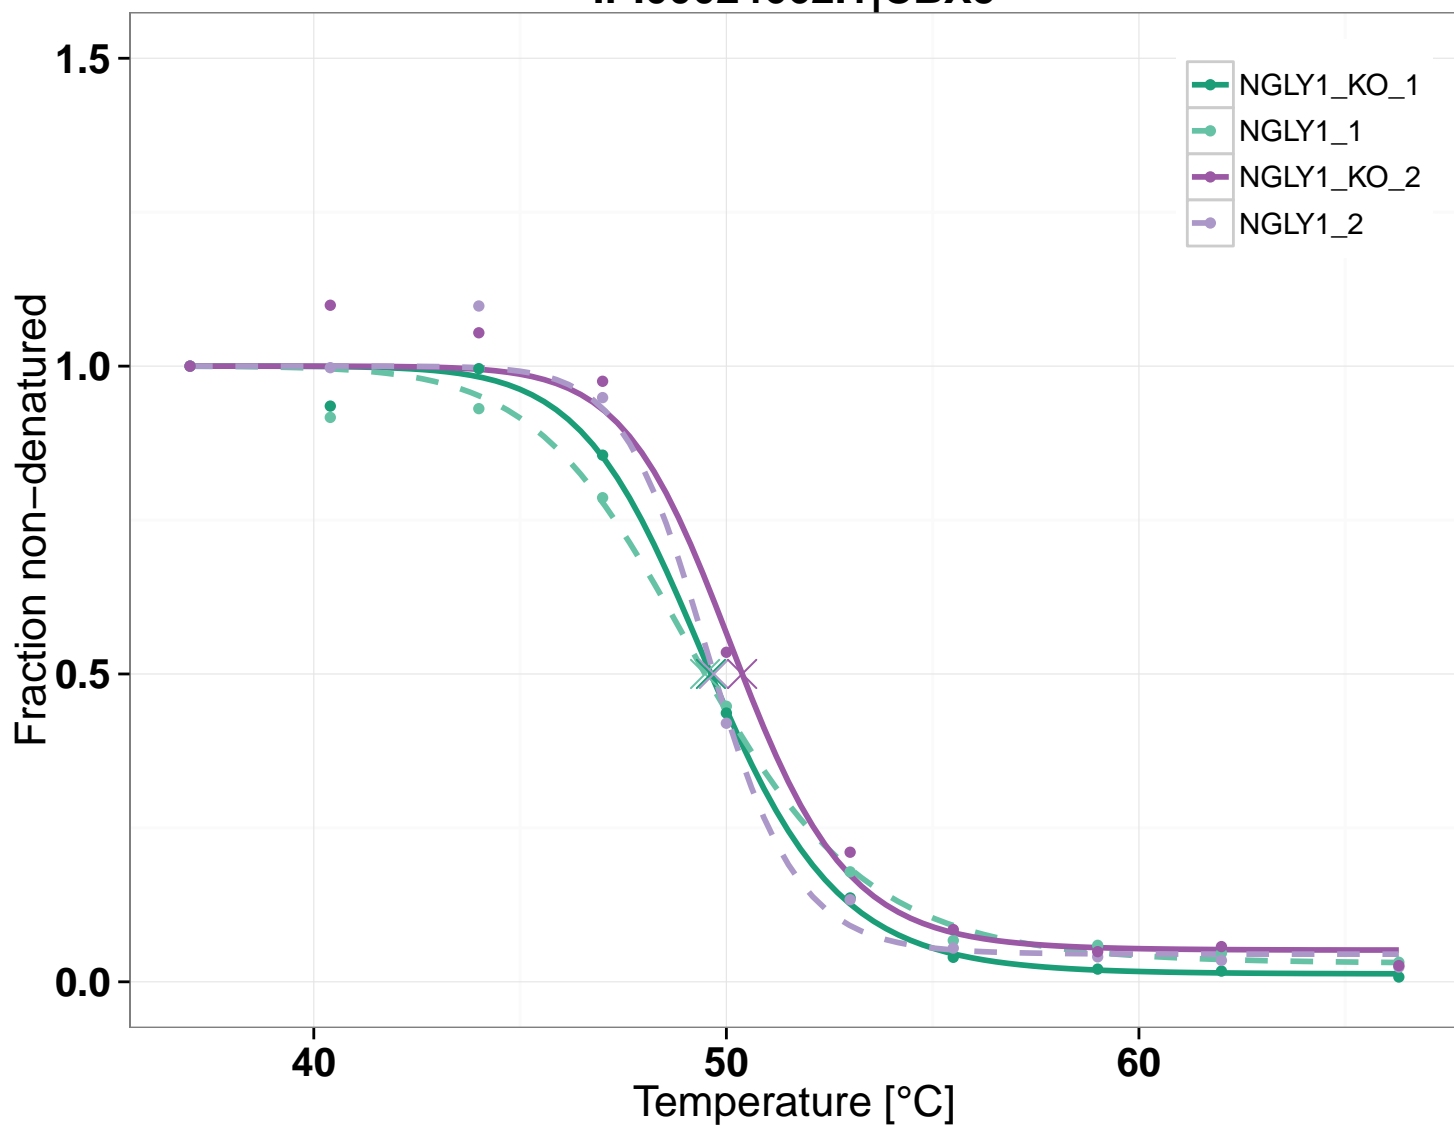

|            | meltPoint | slope | plateau | R2   |
|------------|-----------|-------|---------|------|
| NGLY1_KO_1 | 49.63     | -0.16 | 0.01    | 1    |
| NGLY1_1    | 49.48     | -0.12 | 0.03    | 1    |
| NGLY1_KO_2 | 50.38     | -0.17 | 0.05    | 0.99 |
| NGLY1_2    | 49.7      | -0.22 | 0.04    | 0.99 |

Supplement: Supplementary file 1736 [file 1]

IPI00070448.1|IPI00070448.1

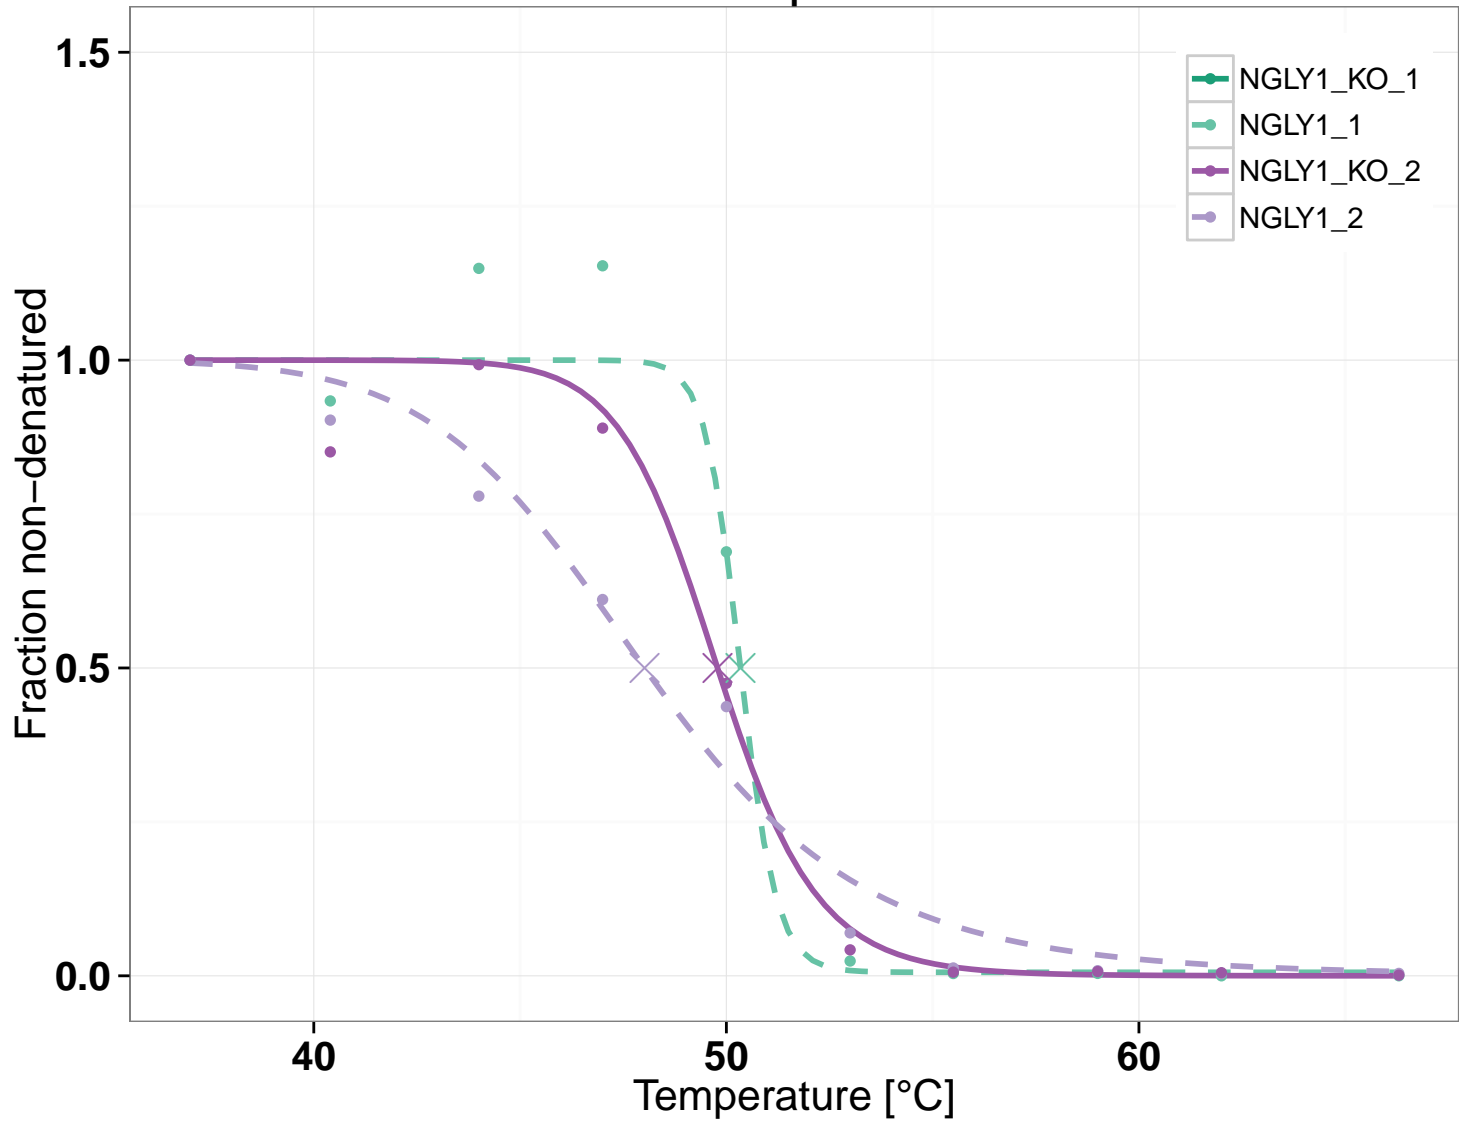

|            | meltPoint | slope  | plateau | R2   |
|------------|-----------|--------|---------|------|
| NGLY1_KO_1 | –         | –      | –       | –    |
| NGLY1_1    | 50.34     | –0.58  | 0.01    | 0.98 |
| NGLY1_KO_2 | 49.79     | –0.21  | 0       | 0.99 |
| NGLY1_2    | 48.02     | –0.095 | 0       | 0.98 |

Supplement: Supplementary file 1737 [file 1]

IPI00030236.4|TMEM222

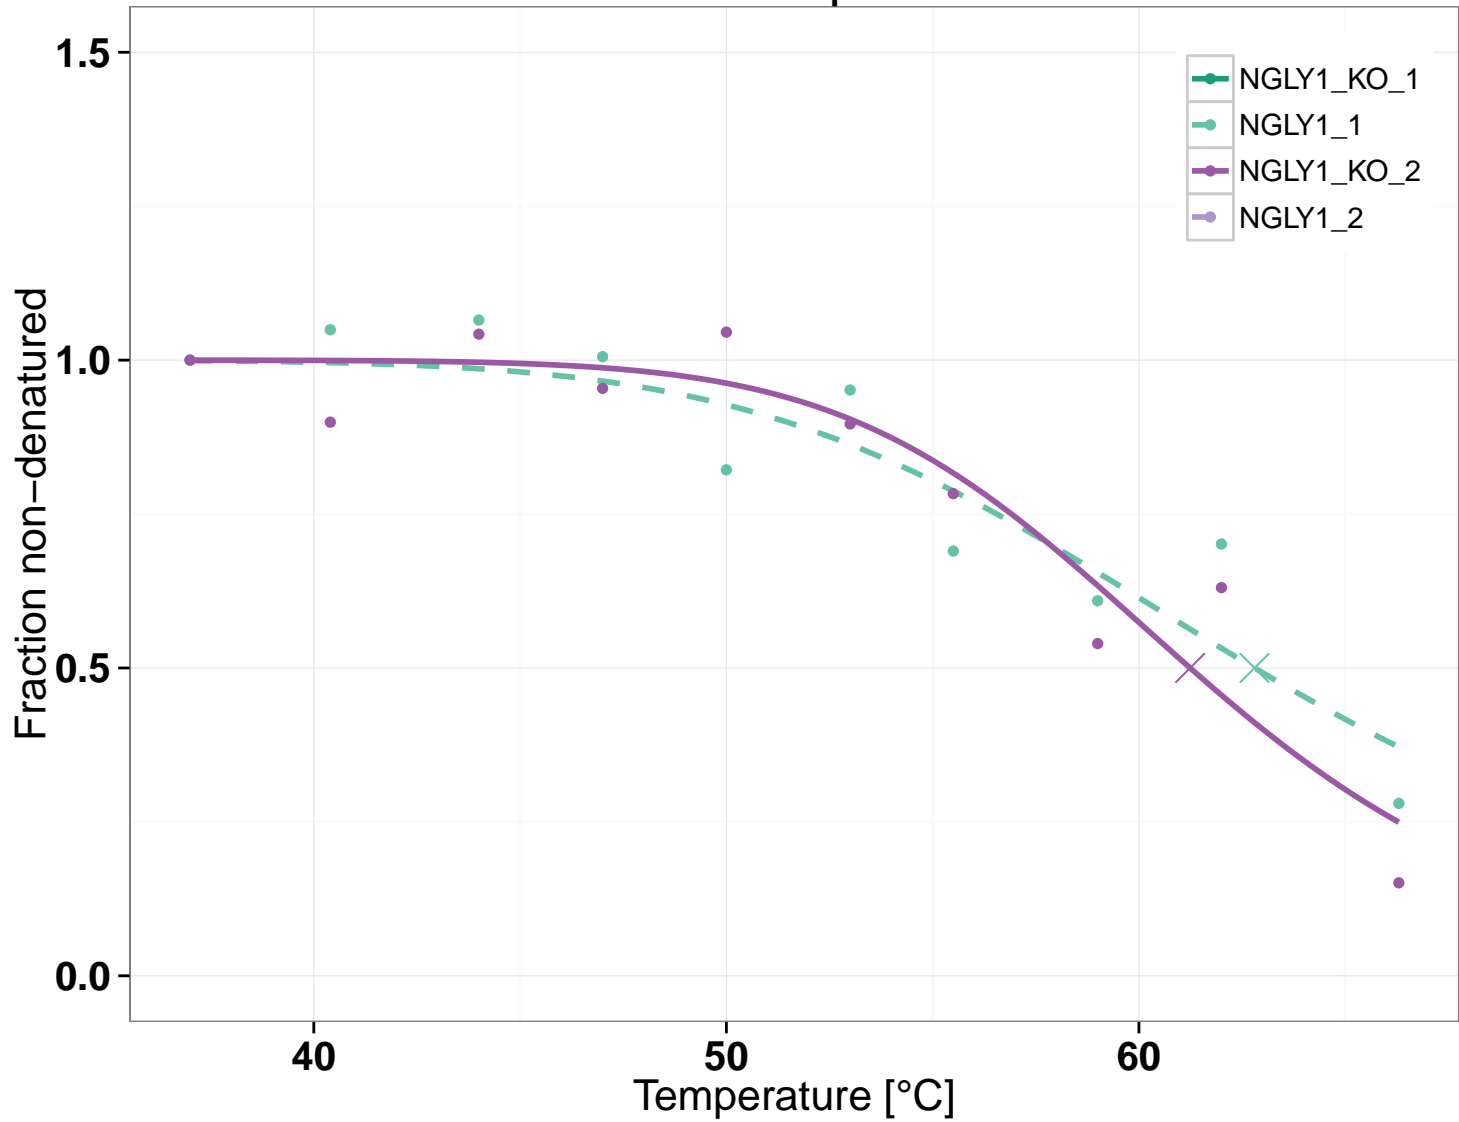

|            | meltPoint | slope  | plateau | R2   |
|------------|-----------|--------|---------|------|
| NGLY1_KO_1 | -         | -      | -       | -    |
| NGLY1_1    | 62.8      | -0.041 | 0       | 0.86 |
| NGLY1_KO_2 | 61.24     | -0.06  | 0       | 0.9  |
| NGLY1_2    | -         | -      | -       | -    |

Supplement: Supplementary file 1738 [file 1]

IPI00014437.4|SSNA1

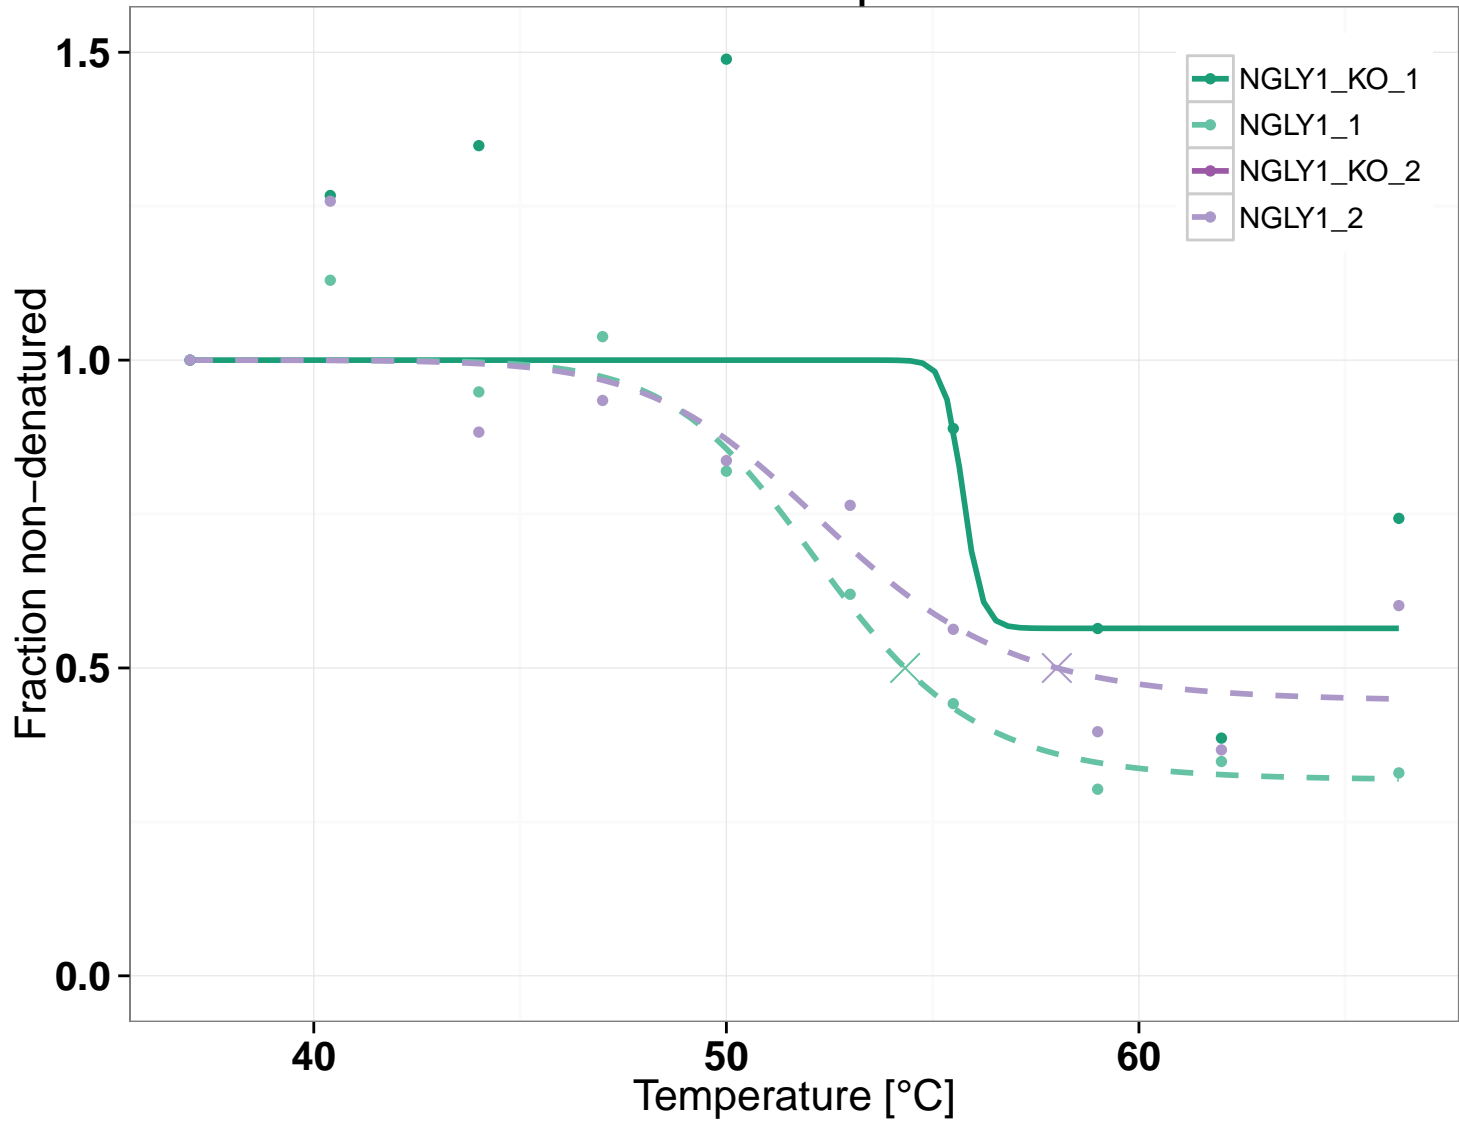

|            | meltPoint | slope  | plateau | R2   |
|------------|-----------|--------|---------|------|
| NGLY1_KO_1 | –         | –0.49  | 0.56    | 0.21 |
| NGLY1_1    | 54.33     | –0.091 | 0.32    | 0.97 |
| NGLY1_KO_2 | –         | –      | –       | –    |
| NGLY1_2    | 58.01     | –0.063 | 0.45    | 0.82 |

Supplement: Supplementary file 1739 [file 1]

IPI00216319.3|YWHAH

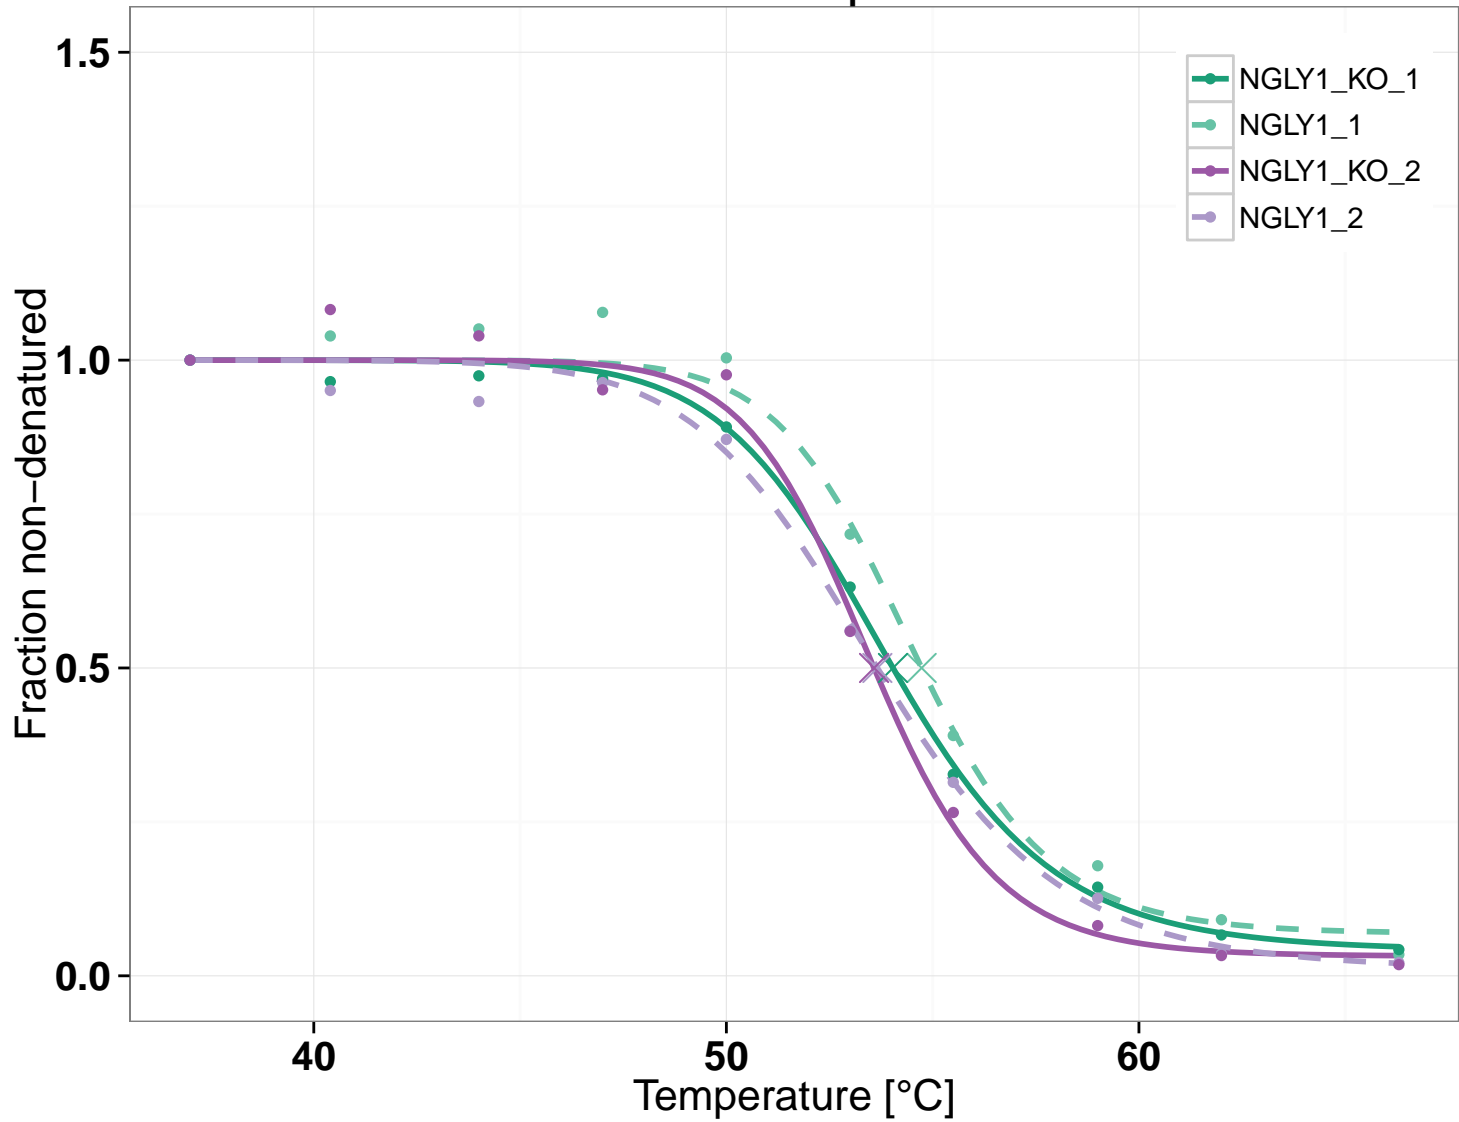

|            | meltPoint | slope | plateau | R2   |
|------------|-----------|-------|---------|------|
| NGLY1_KO_1 | 54.04     | -0.12 | 0.04    | 1    |
| NGLY1_1    | 54.73     | -0.14 | 0.07    | 0.99 |
| NGLY1_KO_2 | 53.58     | -0.16 | 0.03    | 0.99 |
| NGLY1_2    | 53.66     | -0.11 | 0.01    | 1    |

Supplement: Supplementary file 1740 [file 1]

IPI00010746.1|PTDSS1

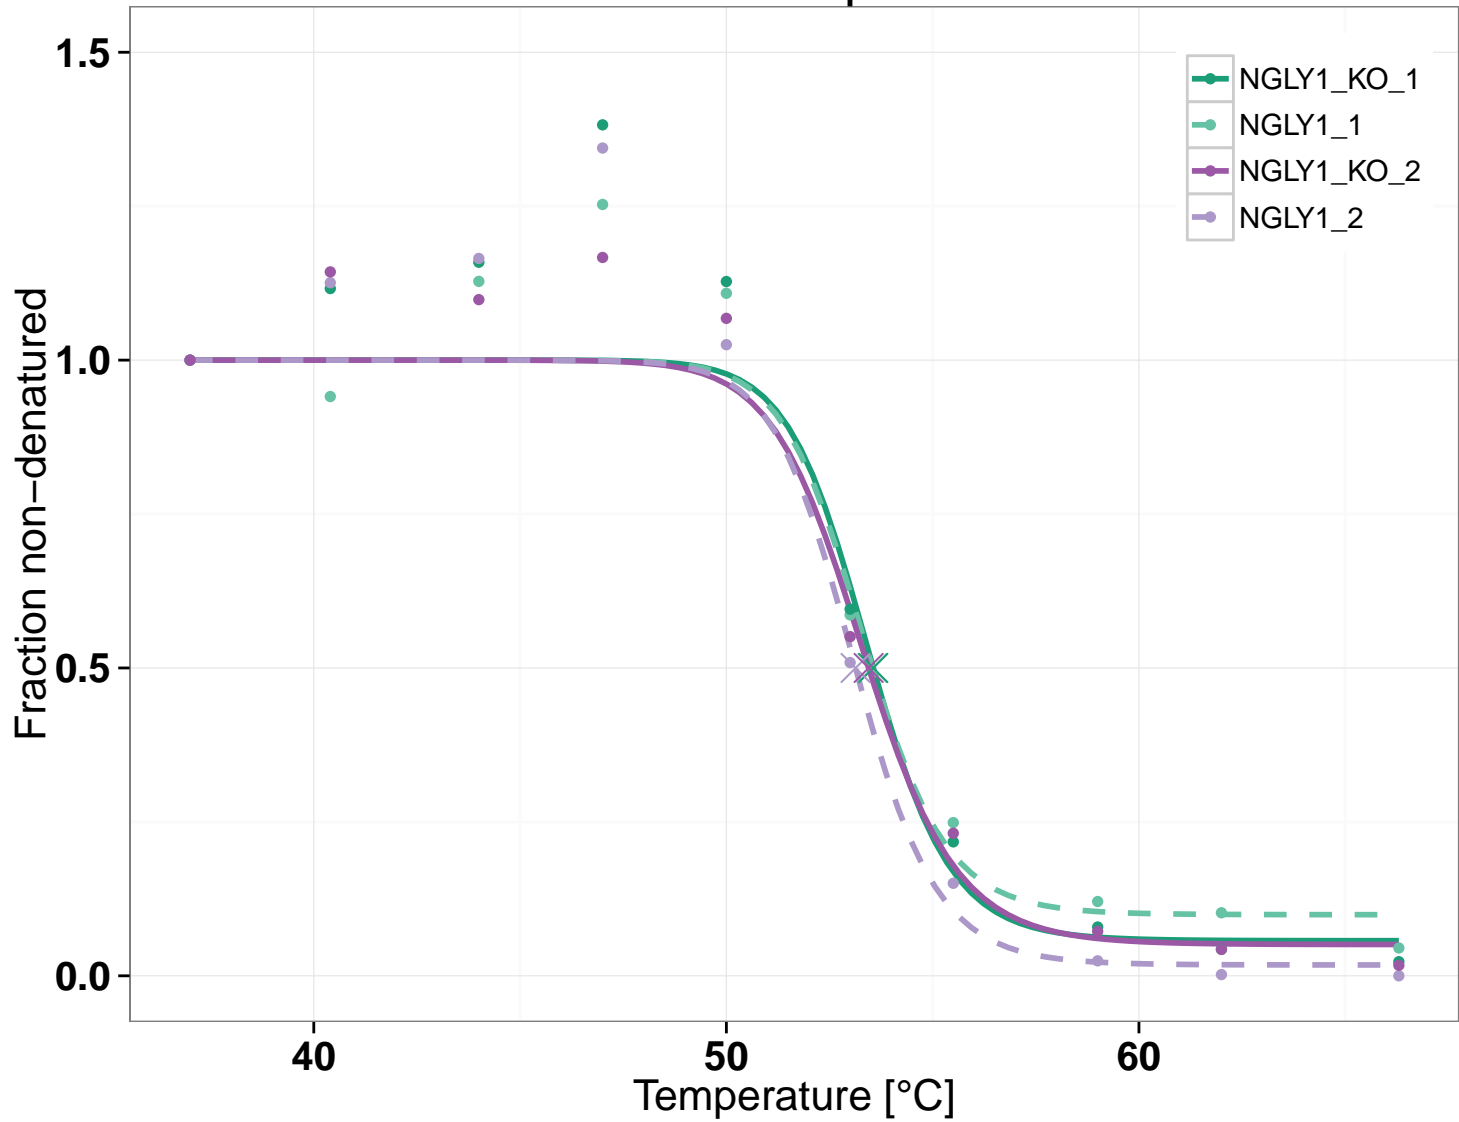

|            | meltPoint | slope | plateau | R2   |
|------------|-----------|-------|---------|------|
| NGLY1_KO_1 | 53.56     | -0.24 | 0.06    | 0.92 |
| NGLY1_1    | 53.54     | -0.23 | 0.1     | 0.95 |
| NGLY1_KO_2 | 53.45     | -0.21 | 0.05    | 0.97 |
| NGLY1_2    | 53.13     | -0.25 | 0.02    | 0.94 |

Supplement: Supplementary file 1741 [file 1]

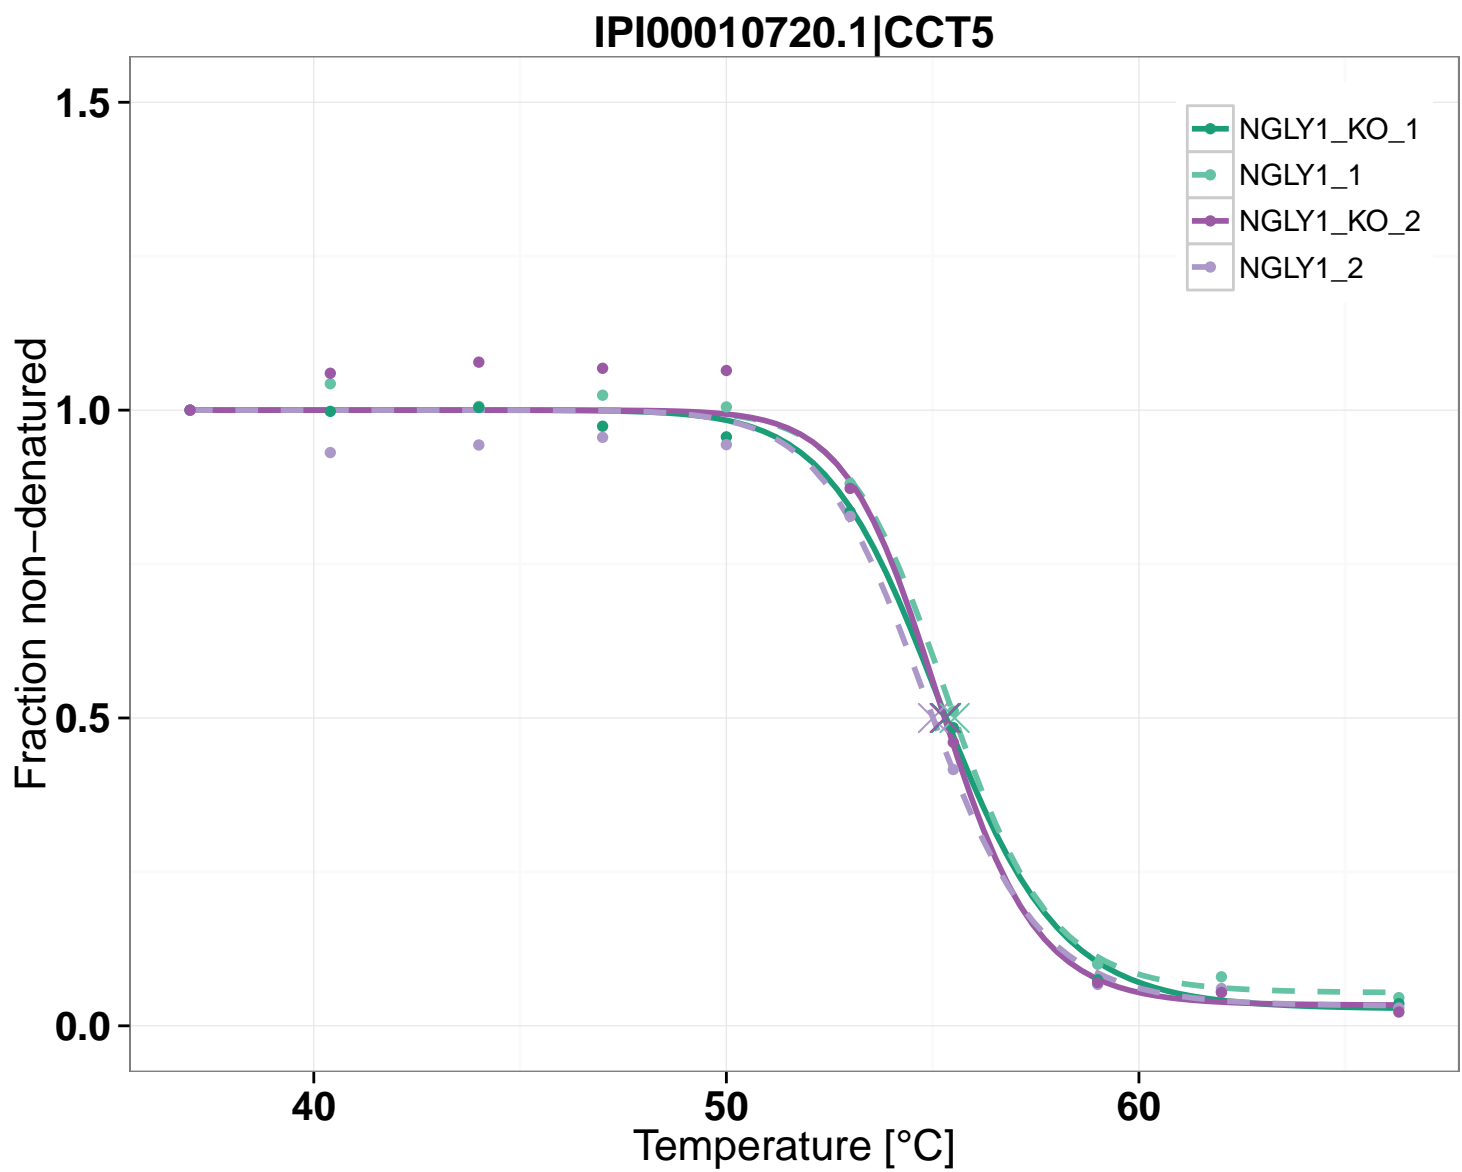

|            | meltPoint | slope | plateau | R2   |
|------------|-----------|-------|---------|------|
| NGLY1_KO_1 | 55.33     | -0.17 | 0.03    | 1    |
| NGLY1_1    | 55.53     | -0.19 | 0.05    | 1    |
| NGLY1_KO_2 | 55.29     | -0.21 | 0.03    | 0.99 |
| NGLY1_2    | 55.01     | -0.18 | 0.03    | 0.99 |

Supplement: Supplementary file 1742 [file 1]

# IPI00027701.3|ACADS

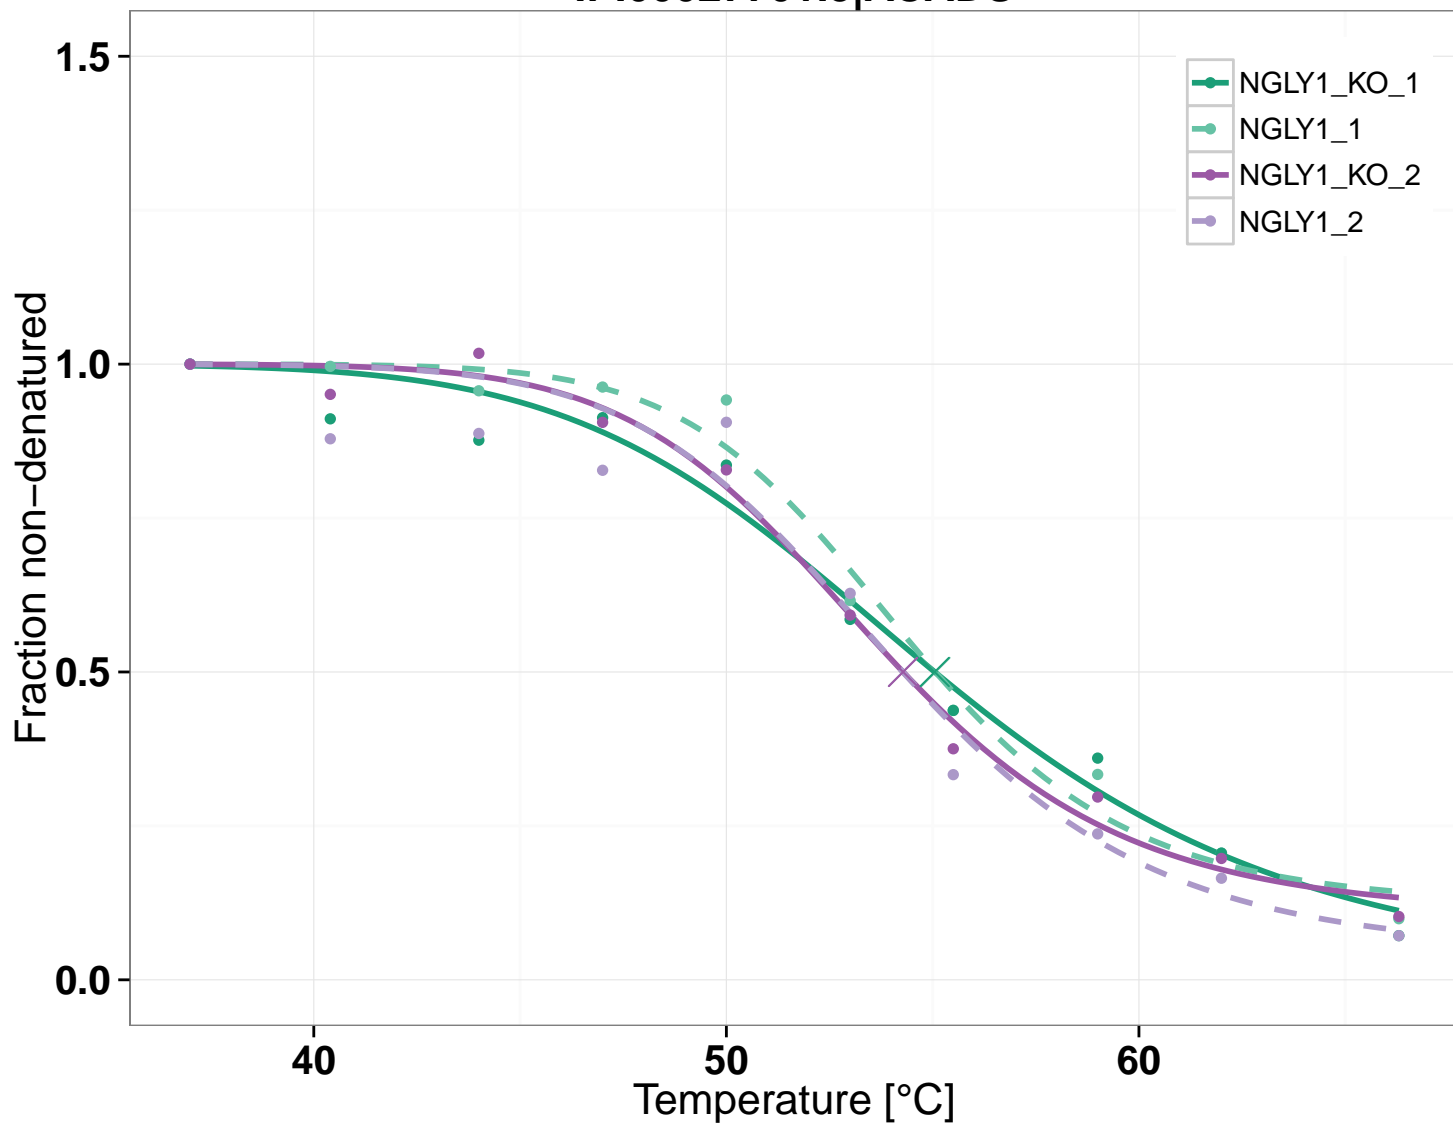

|            | meltPoint | slope  | plateau | R2   |
|------------|-----------|--------|---------|------|
| NGLY1_KO_1 | 55.05     | -0.057 | 0       | 0.98 |
| NGLY1_1    | 55.07     | -0.081 | 0.12    | 0.99 |
| NGLY1_KO_2 | 54.28     | -0.074 | 0.1     | 0.99 |
| NGLY1_2    | 54.28     | -0.076 | 0.04    | 0.95 |

Supplement: Supplementary file 1743 [file 1]

IPI00887286.1|LOC283788

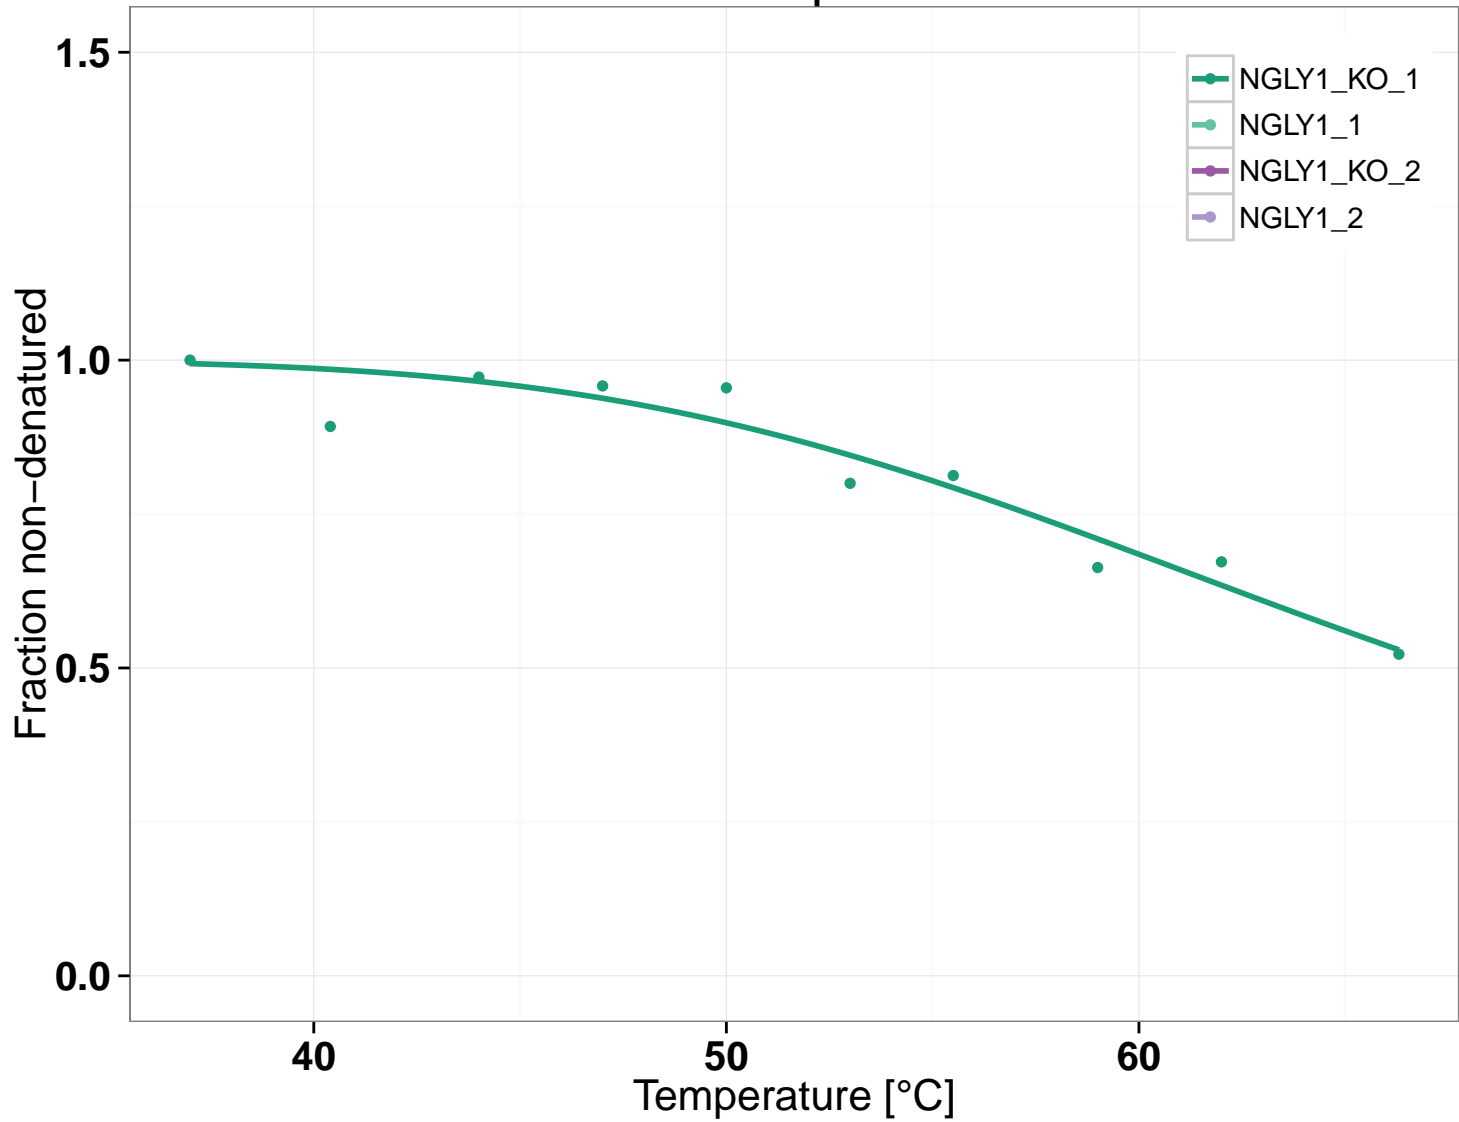

|            | meltPoint | slope  | plateau | R2   |
|------------|-----------|--------|---------|------|
| NGLY1_KO_1 | —         | −0.025 | 0.03    | 0.92 |
| NGLY1_1    | —         | —      | —       | —    |
| NGLY1_KO_2 | —         | —      | —       | —    |
| NGLY1_2    | —         | —      | —       | —    |

Supplement: Supplementary file 1744 [file 1]

IPI00015922.2|INTS6

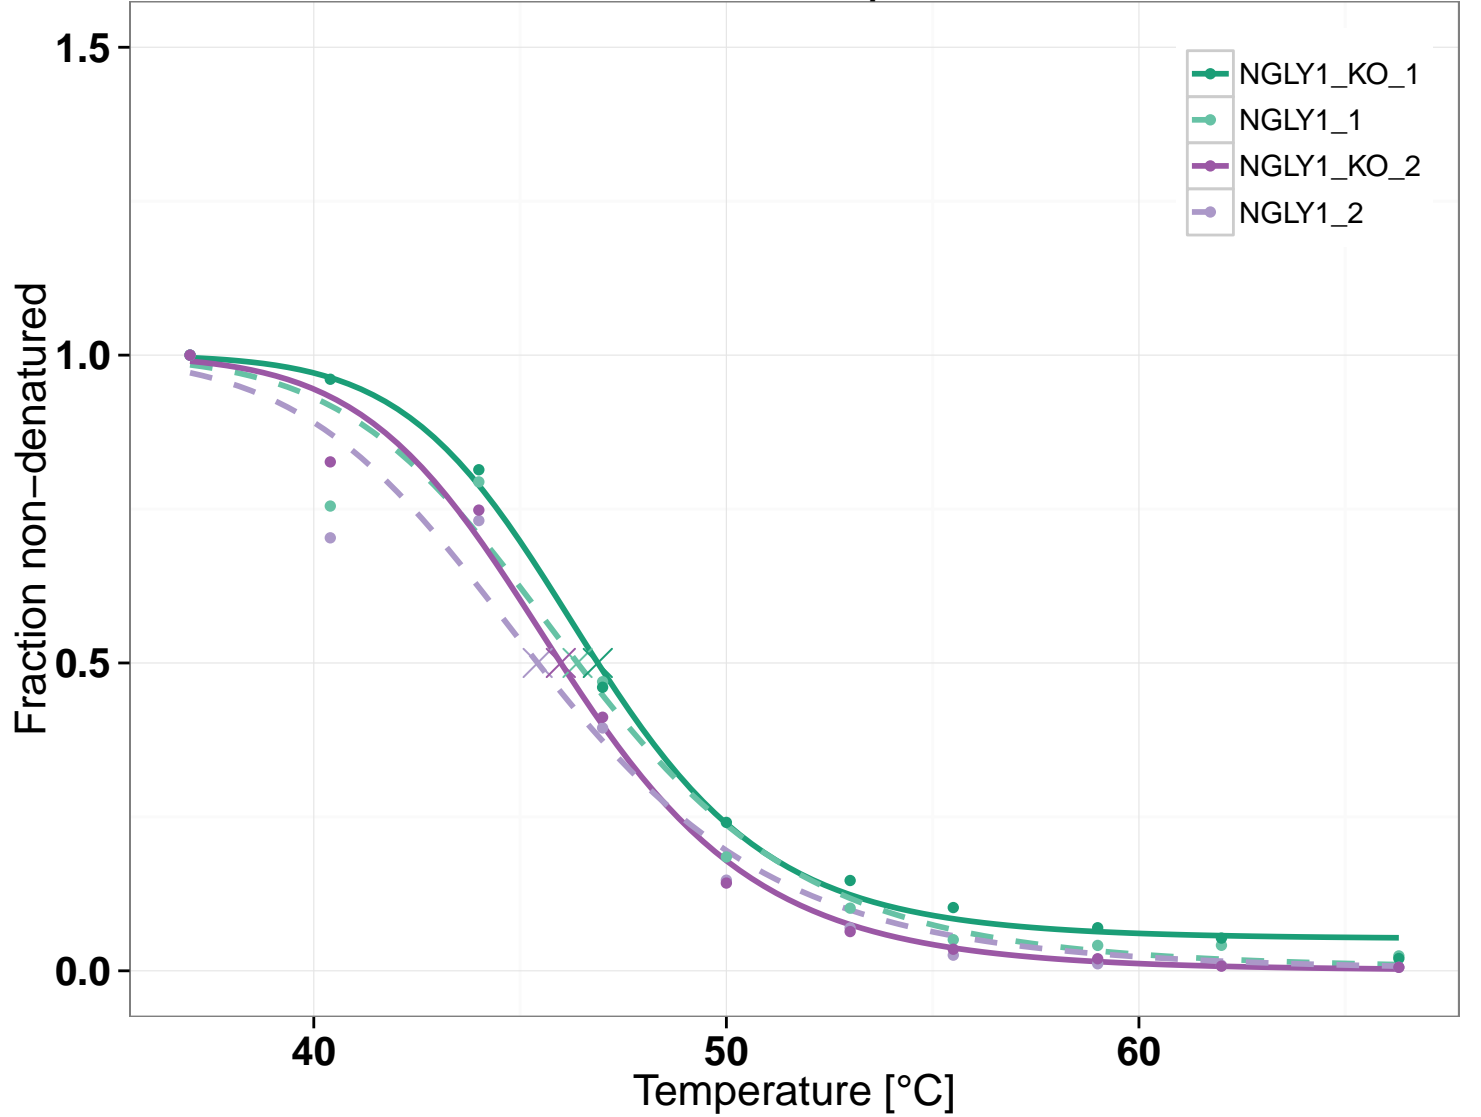

|            | meltPoint | slope  | plateau | R2   |
|------------|-----------|--------|---------|------|
| NGLY1_KO_1 | 46.88     | -0.11  | 0.05    | 1    |
| NGLY1_1    | 46.39     | -0.089 | 0       | 0.97 |
| NGLY1_KO_2 | 45.99     | -0.1   | 0       | 0.99 |
| NGLY1_2    | 45.43     | -0.087 | 0       | 0.96 |

Supplement: Supplementary file 1745 [file 1]

IPI00642888.2|CLCN6

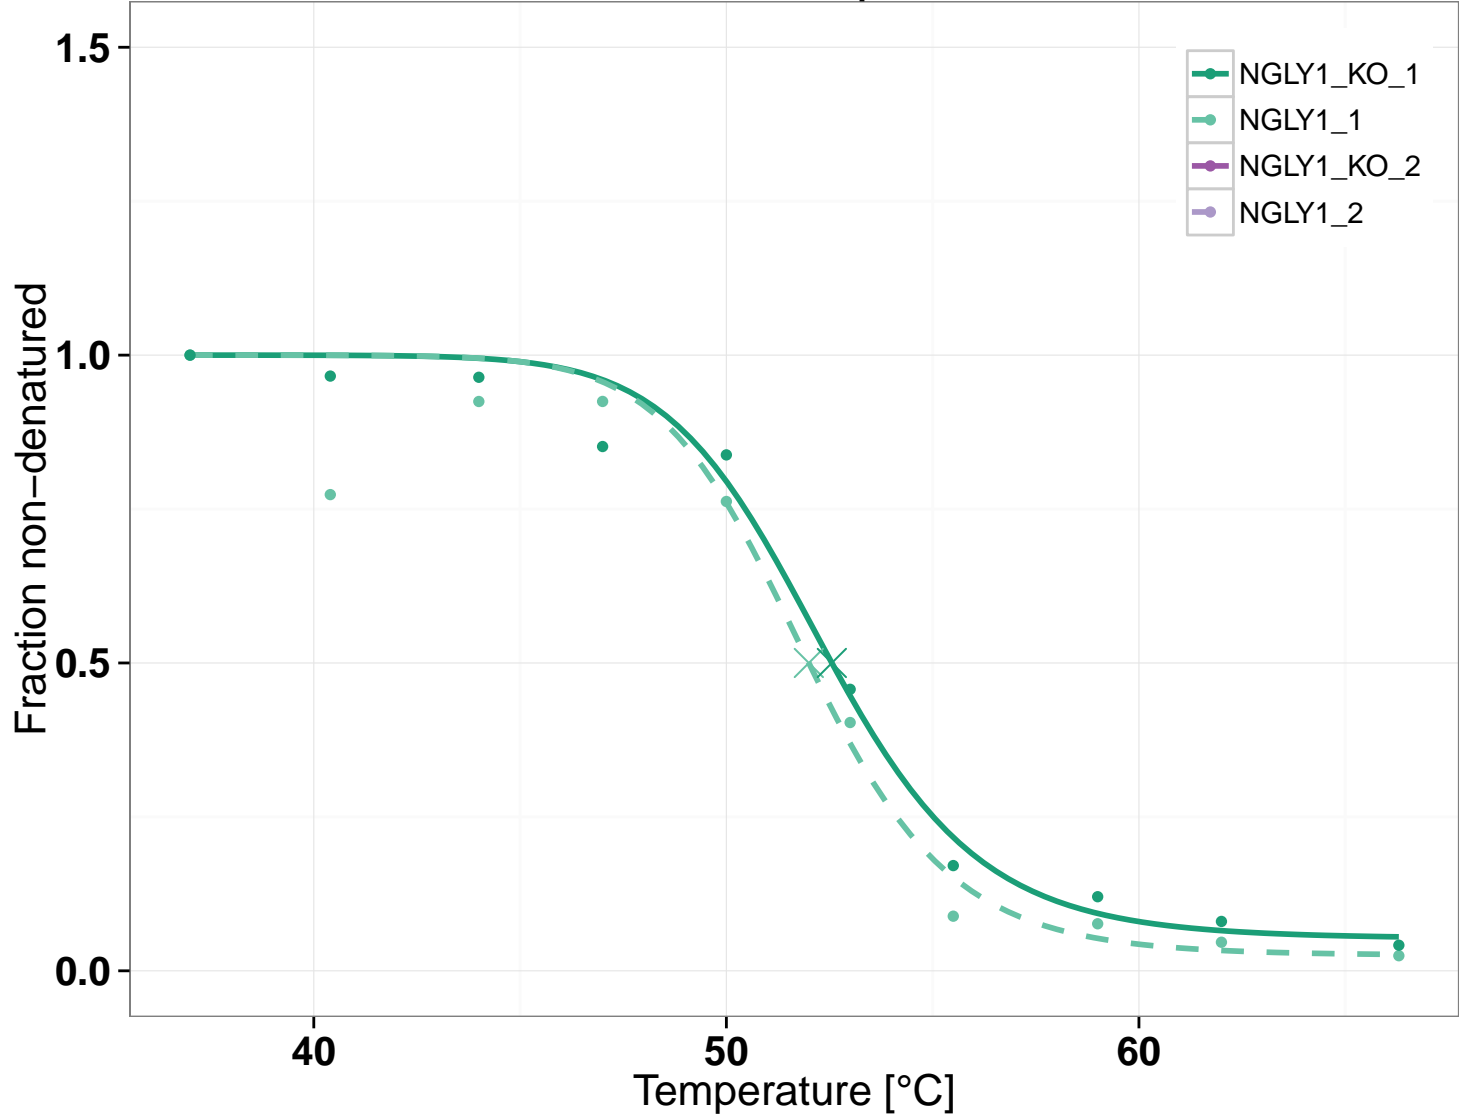

|            | meltPoint | slope | plateau | R2   |
|------------|-----------|-------|---------|------|
| NGLY1_KO_1 | 52.56     | -0.12 | 0.05    | 0.99 |
| NGLY1_1    | 52        | -0.14 | 0.02    | 0.96 |
| NGLY1_KO_2 | -         | -     | -       | -    |
| NGLY1_2    | -         | -     | -       | -    |

Supplement: Supplementary file 1746 [file 1]

IPI00219129.9|NQO2

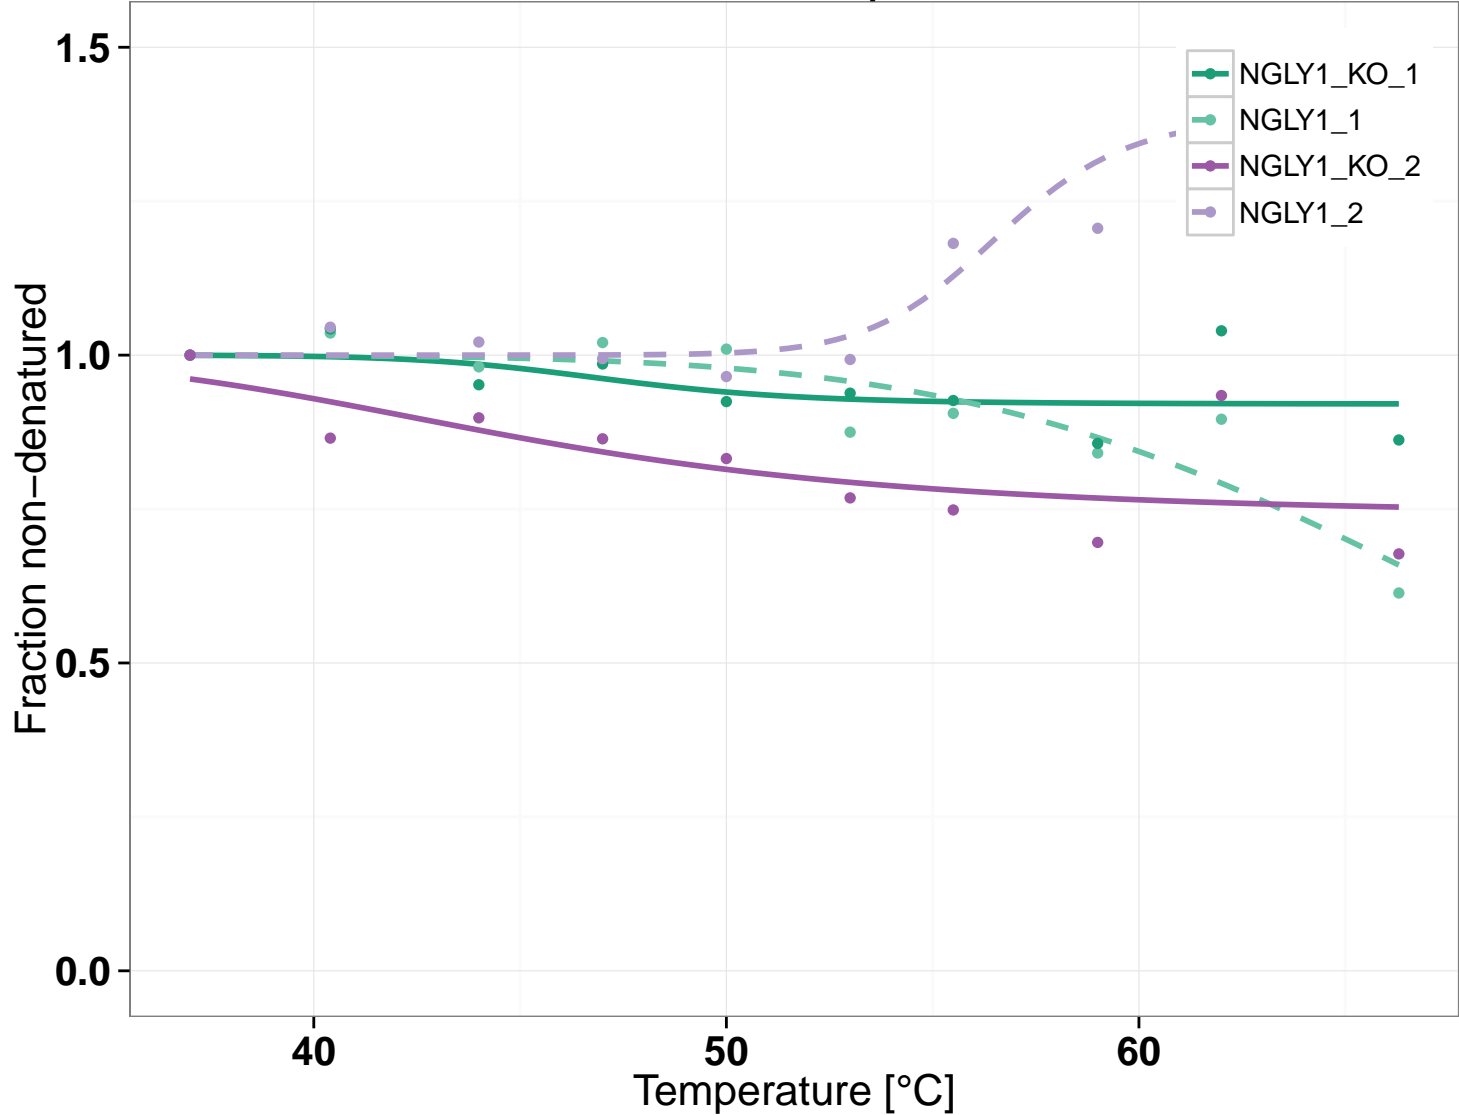

|            | meltPoint | slope   | plateau | R2   |
|------------|-----------|---------|---------|------|
| NGLY1_KO_1 | -         | -0.0085 | 0.92    | 0.32 |
| NGLY1_1    | -         | -       | 0       | 0.83 |
| NGLY1_KO_2 | -         | -0.013  | 0.74    | 0.5  |
| NGLY1_2    | -         | 0.061   | 1.39    | 0.74 |

Supplement: Supplementary file 1747 [file 1]

IPI00291510.3|IMPDH2

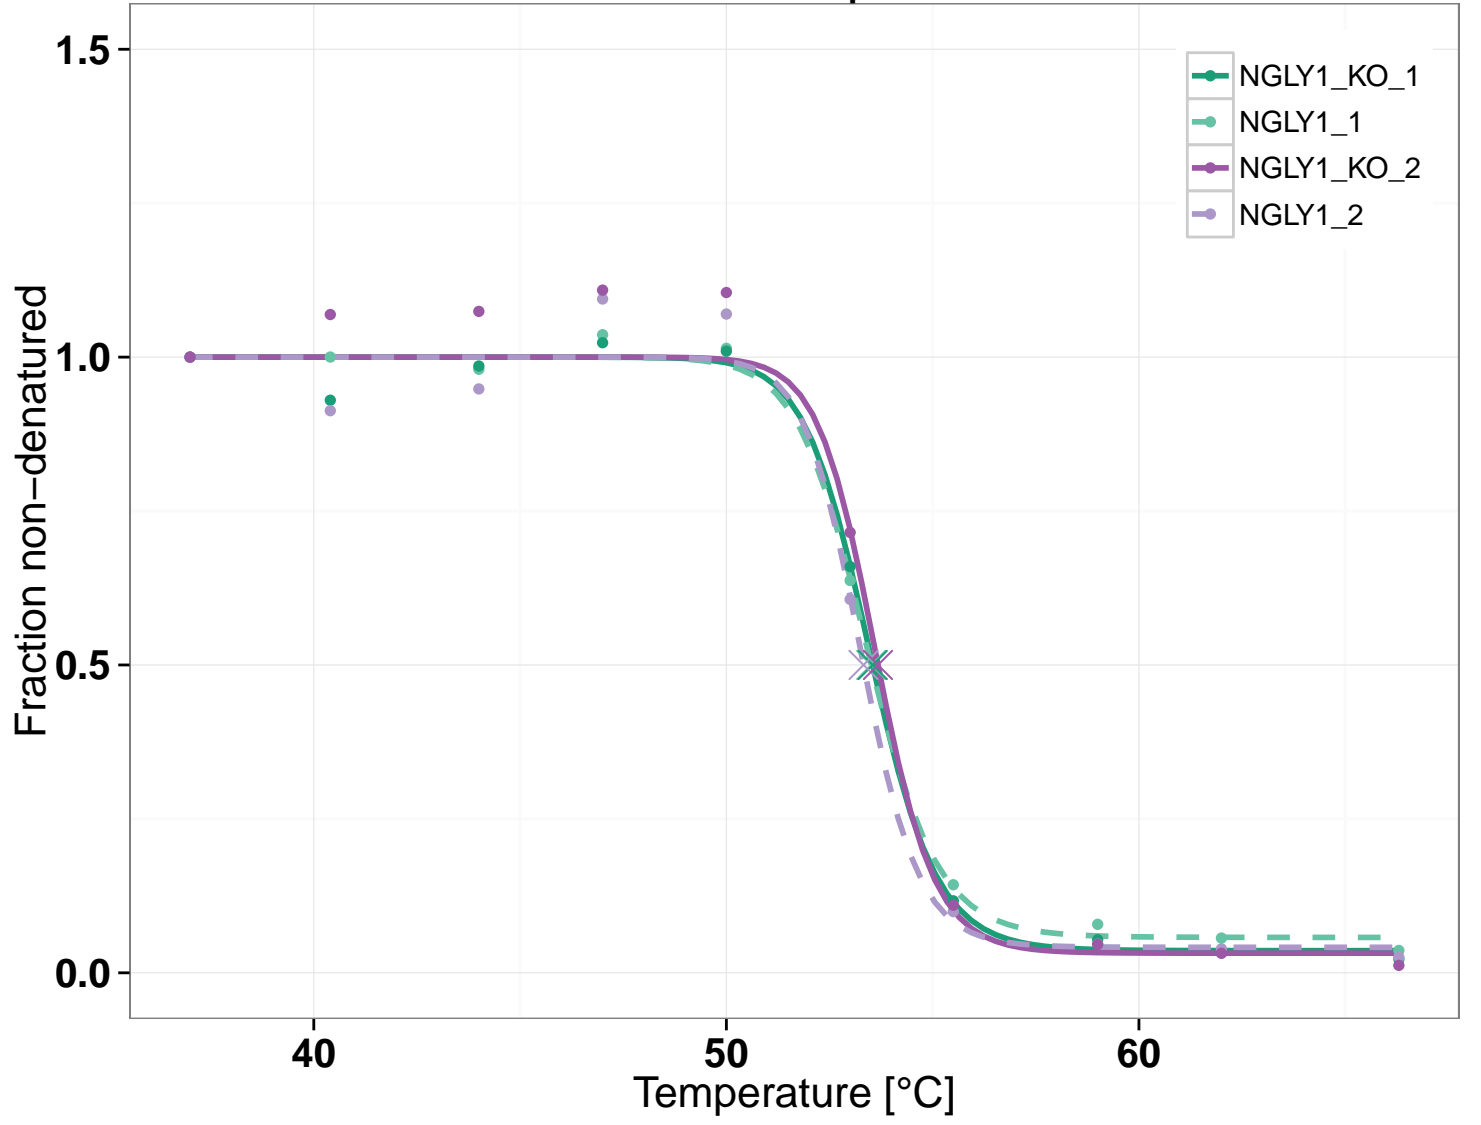

|            | meltPoint | slope | plateau | R2   |
|------------|-----------|-------|---------|------|
| NGLY1_KO_1 | 53.55     | -0.3  | 0.04    | 1    |
| NGLY1_1    | 53.51     | -0.28 | 0.06    | 1    |
| NGLY1_KO_2 | 53.67     | -0.34 | 0.03    | 0.99 |
| NGLY1_2    | 53.33     | -0.35 | 0.04    | 0.99 |

Supplement: Supplementary file 1748 [file 1]

IPI00894409.1|CPNE1

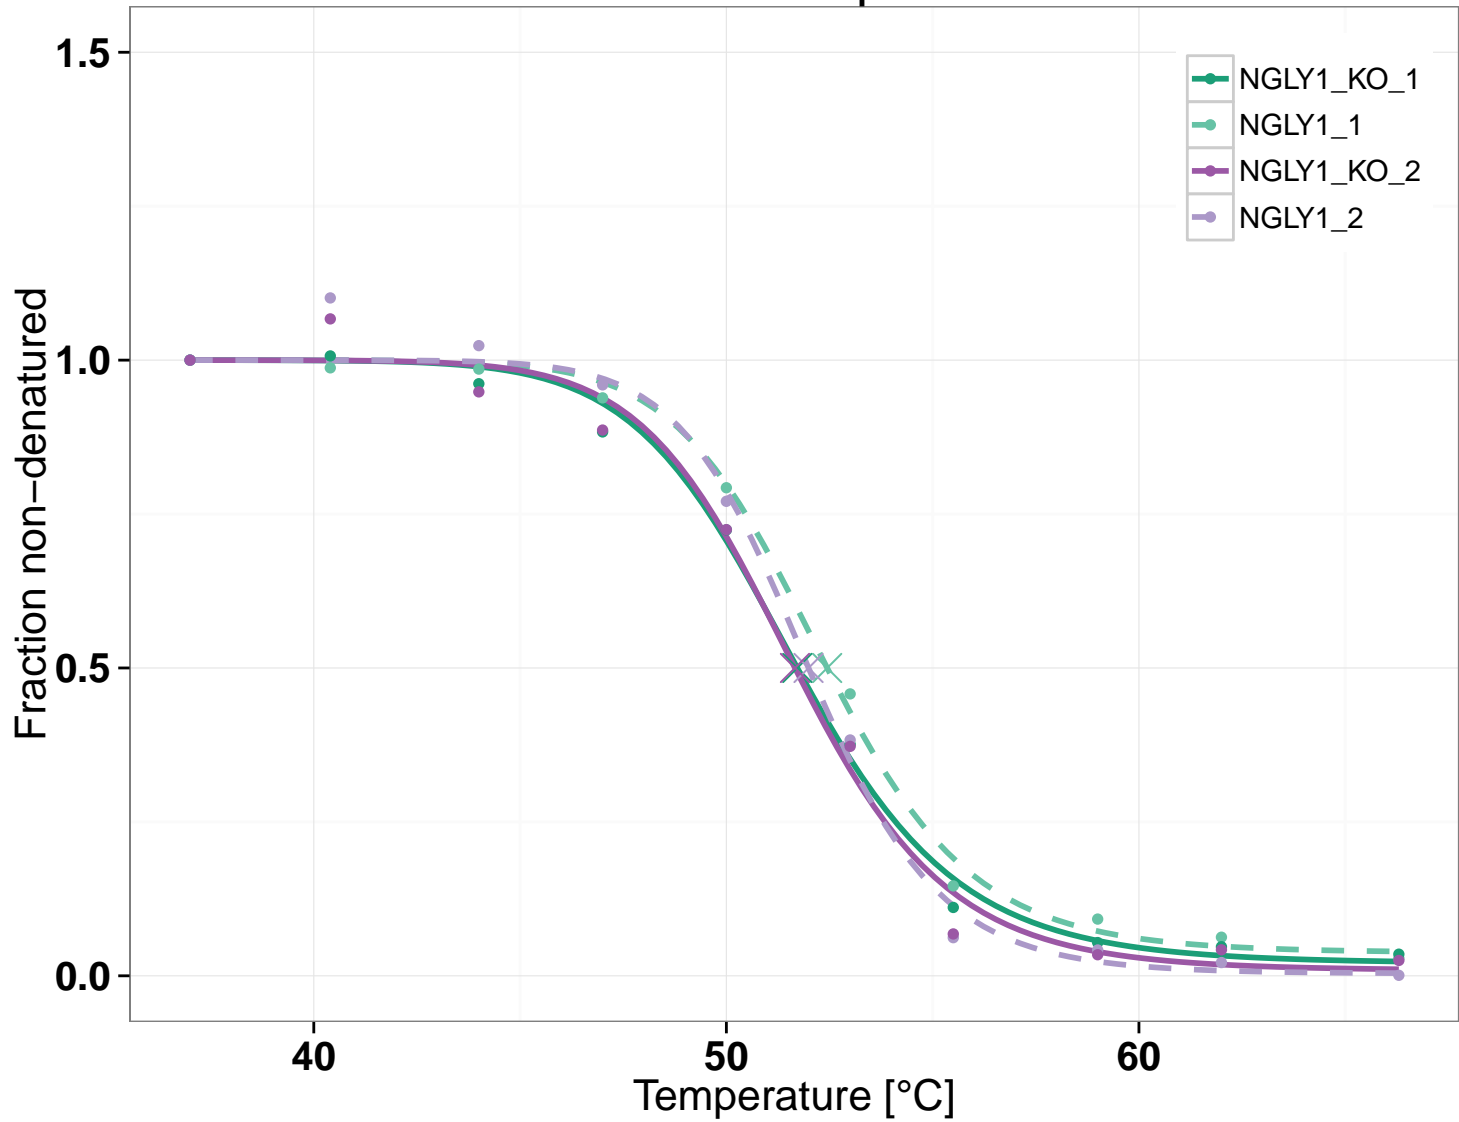

|            | meltPoint | slope | plateau | R2   |
|------------|-----------|-------|---------|------|
| NGLY1_KO_1 | 51.72     | -0.12 | 0.02    | 1    |
| NGLY1_1    | 52.44     | -0.13 | 0.04    | 1    |
| NGLY1_KO_2 | 51.66     | -0.13 | 0.01    | 0.99 |
| NGLY1_2    | 51.99     | -0.16 | 0       | 0.99 |

Supplement: Supplementary file 1749 [file 1]

IPI00066458.1|CCNL2

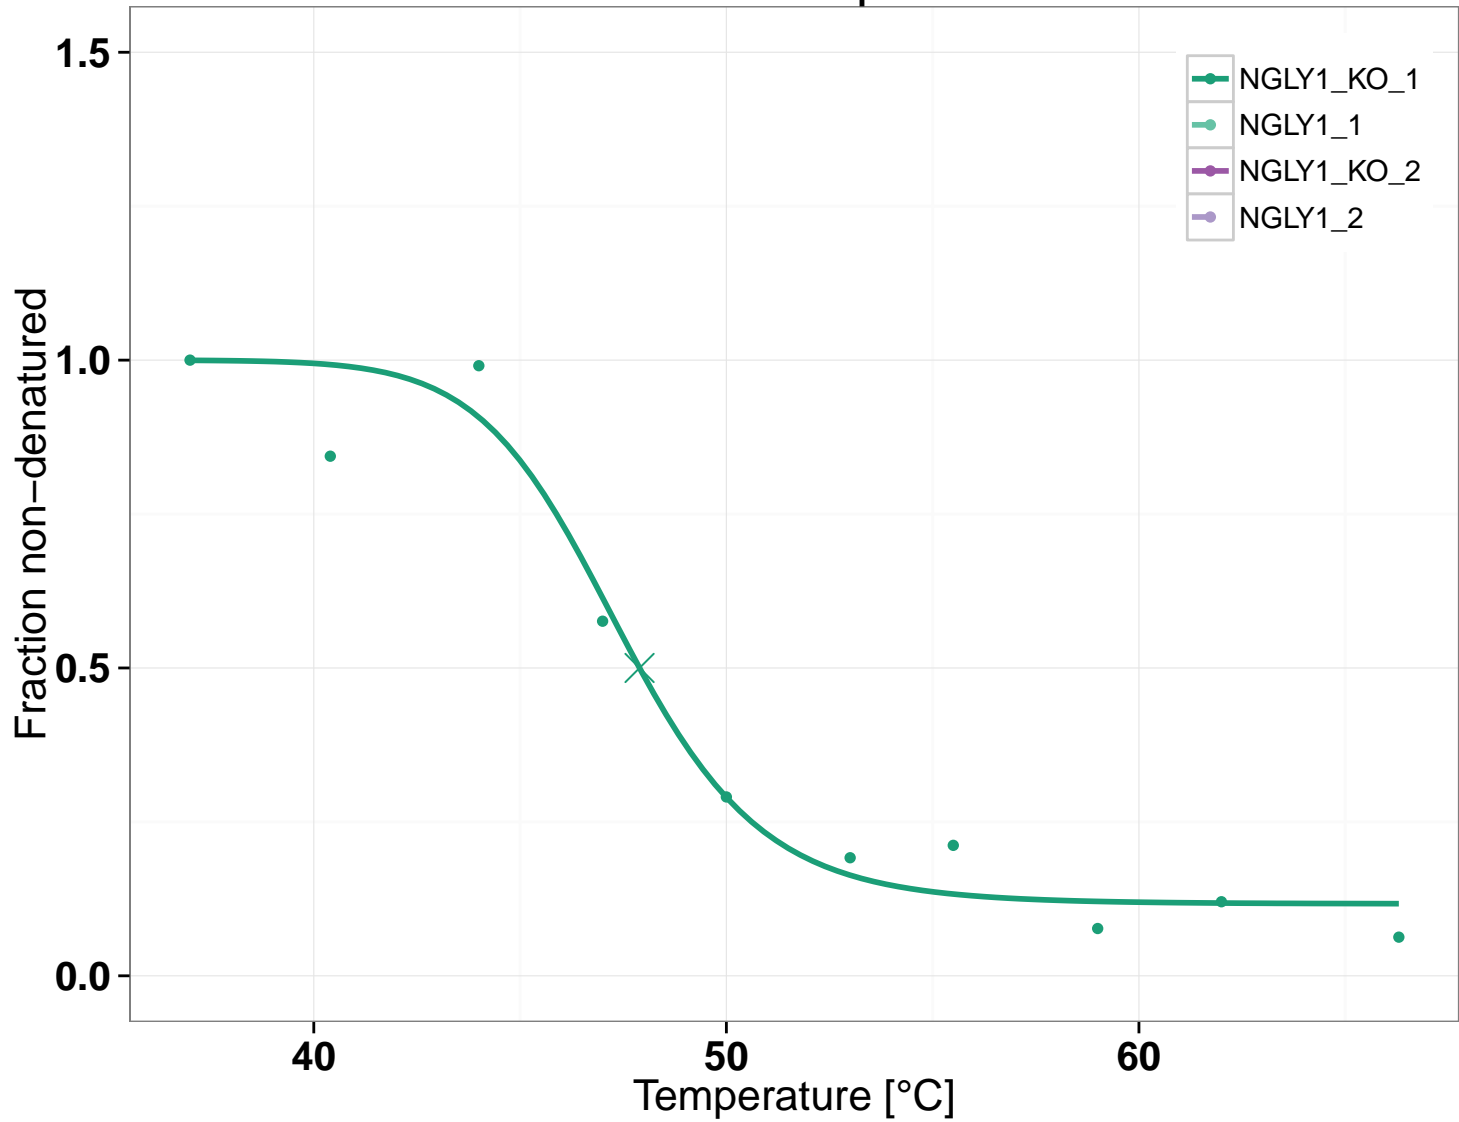

|            | meltPoint | slope | plateau | R2   |
|------------|-----------|-------|---------|------|
| NGLY1_KO_1 | 47.9      | -0.13 | 0.12    | 0.97 |
| NGLY1_1    | -         | -     | -       | -    |
| NGLY1_KO_2 | -         | -     | -       | -    |
| NGLY1_2    | -         | -     | -       | -    |

Supplement: Supplementary file 1750 [file 1]

IPI00556231.1|LOC644936

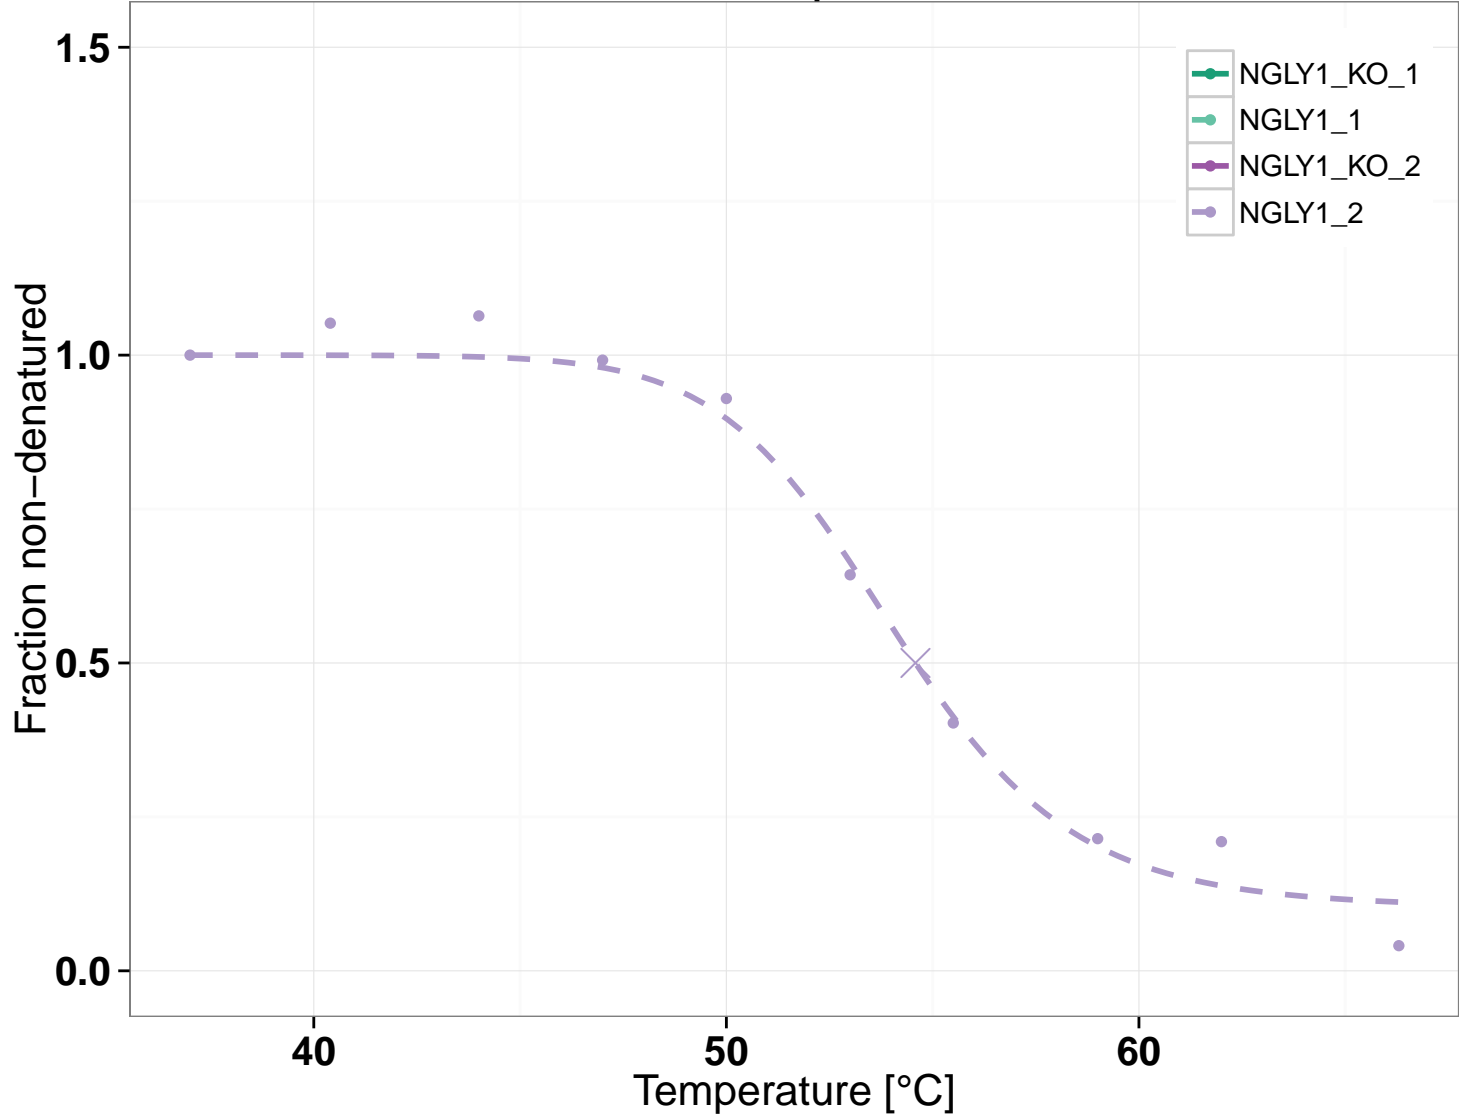

|            | meltPoint | slope | plateau | R2   |
|------------|-----------|-------|---------|------|
| NGLY1_KO_1 | —         | —     | —       | —    |
| NGLY1_1    | —         | —     | —       | —    |
| NGLY1_KO_2 | —         | —     | —       | —    |
| NGLY1_2    | 54.58     | -0.1  | 0.1     | 0.99 |

Supplement: Supplementary file 1751 [file 1]

IPI00872857.1|APOBEC3F

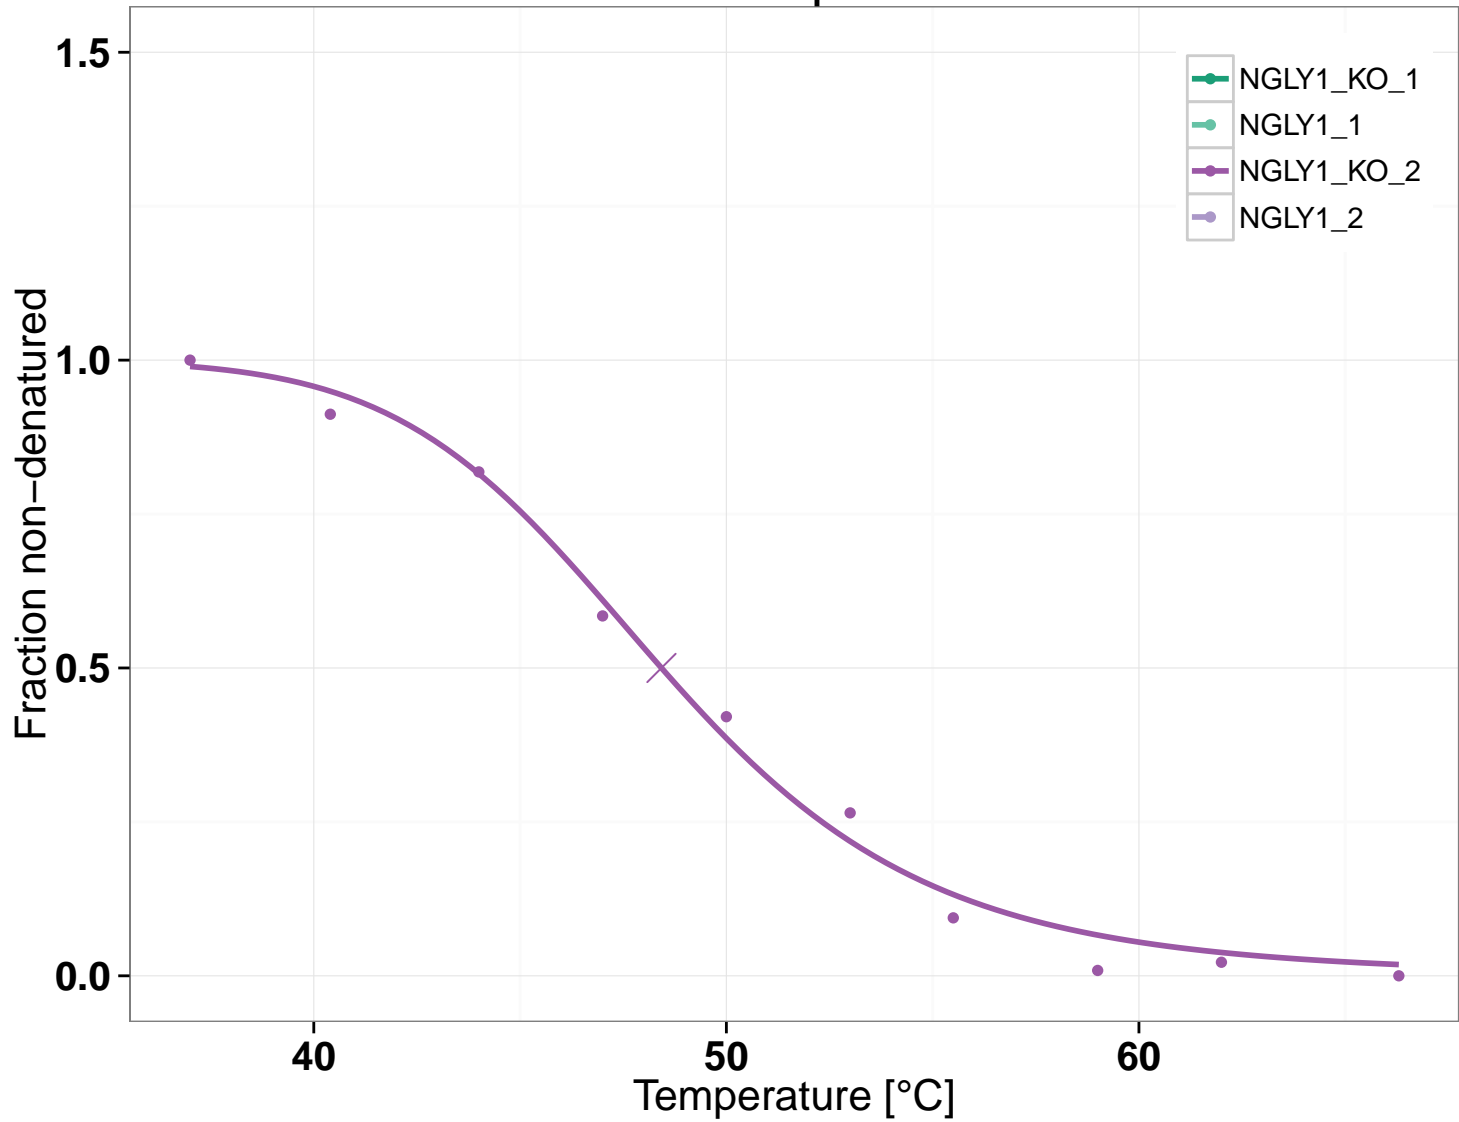

|            | meltPoint | slope  | plateau | R2   |
|------------|-----------|--------|---------|------|
| NGLY1_KO_1 | —         | —      | —       | —    |
| NGLY1_1    | —         | —      | —       | —    |
| NGLY1_KO_2 | 48.43     | -0.078 | 0       | 0.99 |
| NGLY1_2    | —         | —      | —       | —    |

Supplement: Supplementary file 1752 [file 1]

# IPI00410287.3|PRKAA1

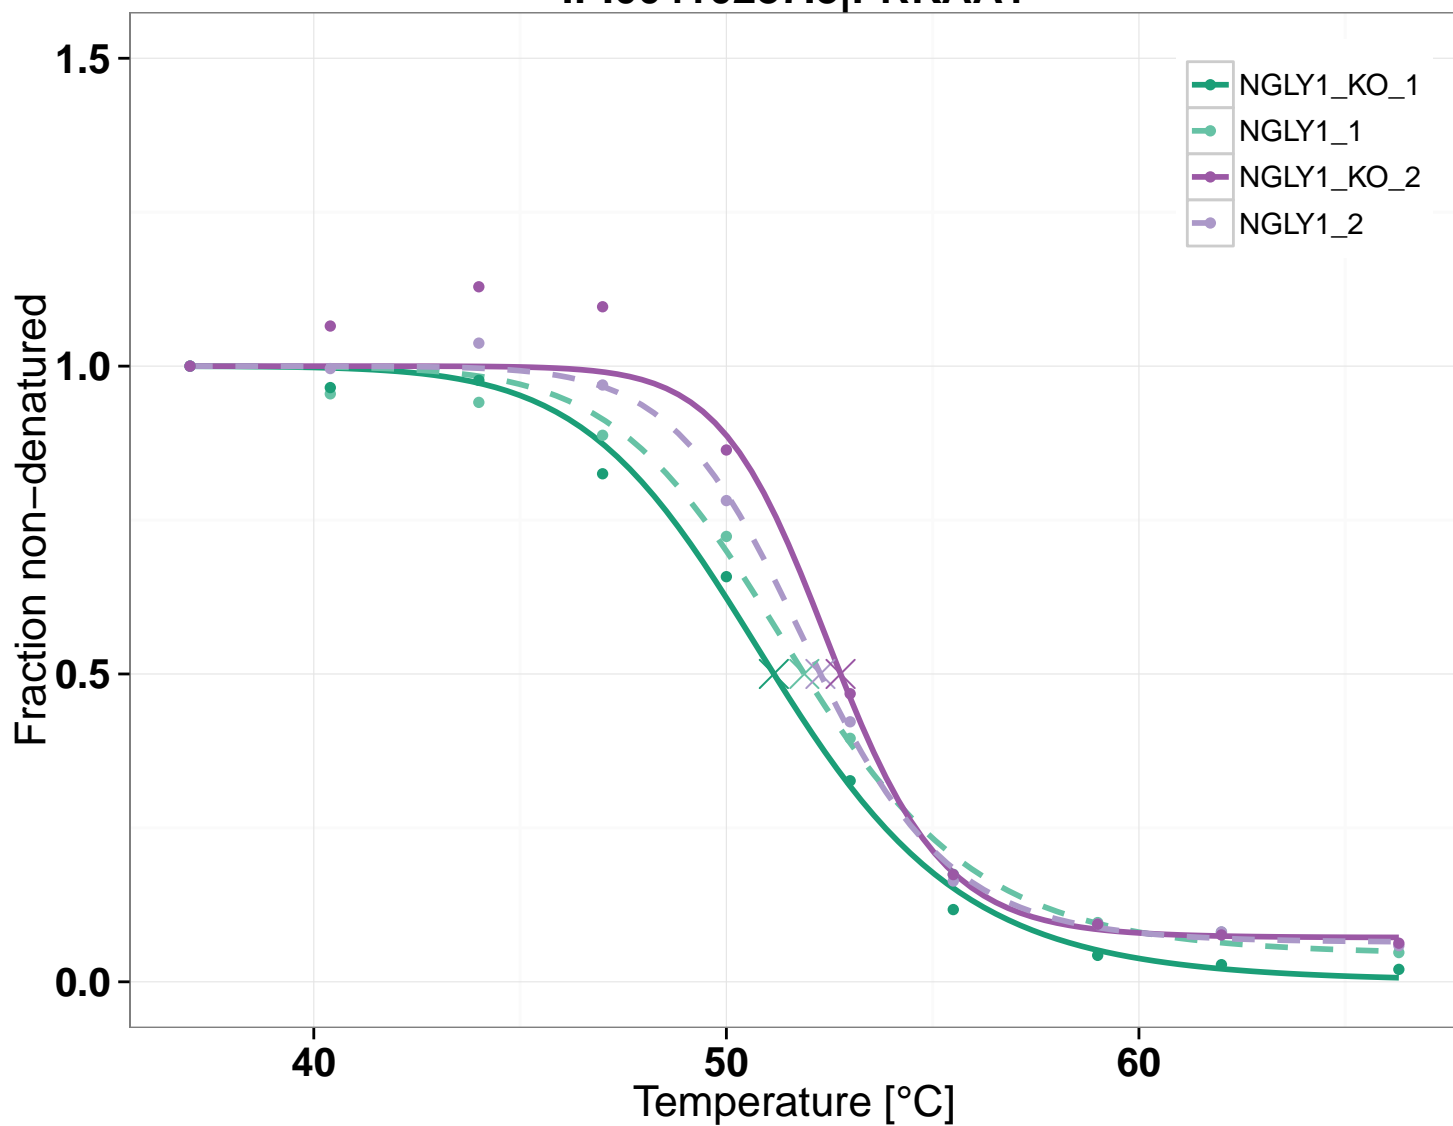

|            | meltPoint | slope | plateau | R2   |
|------------|-----------|-------|---------|------|
| NGLY1_KO_1 | 51.15     | -0.11 | 0       | 1    |
| NGLY1_1    | 51.89     | -0.11 | 0.04    | 1    |
| NGLY1_KO_2 | 52.77     | -0.17 | 0.07    | 0.98 |
| NGLY1_2    | 52.28     | -0.14 | 0.06    | 1    |

Supplement: Supplementary file 1753 [file 1]

IPI00854642.1|PDS5A

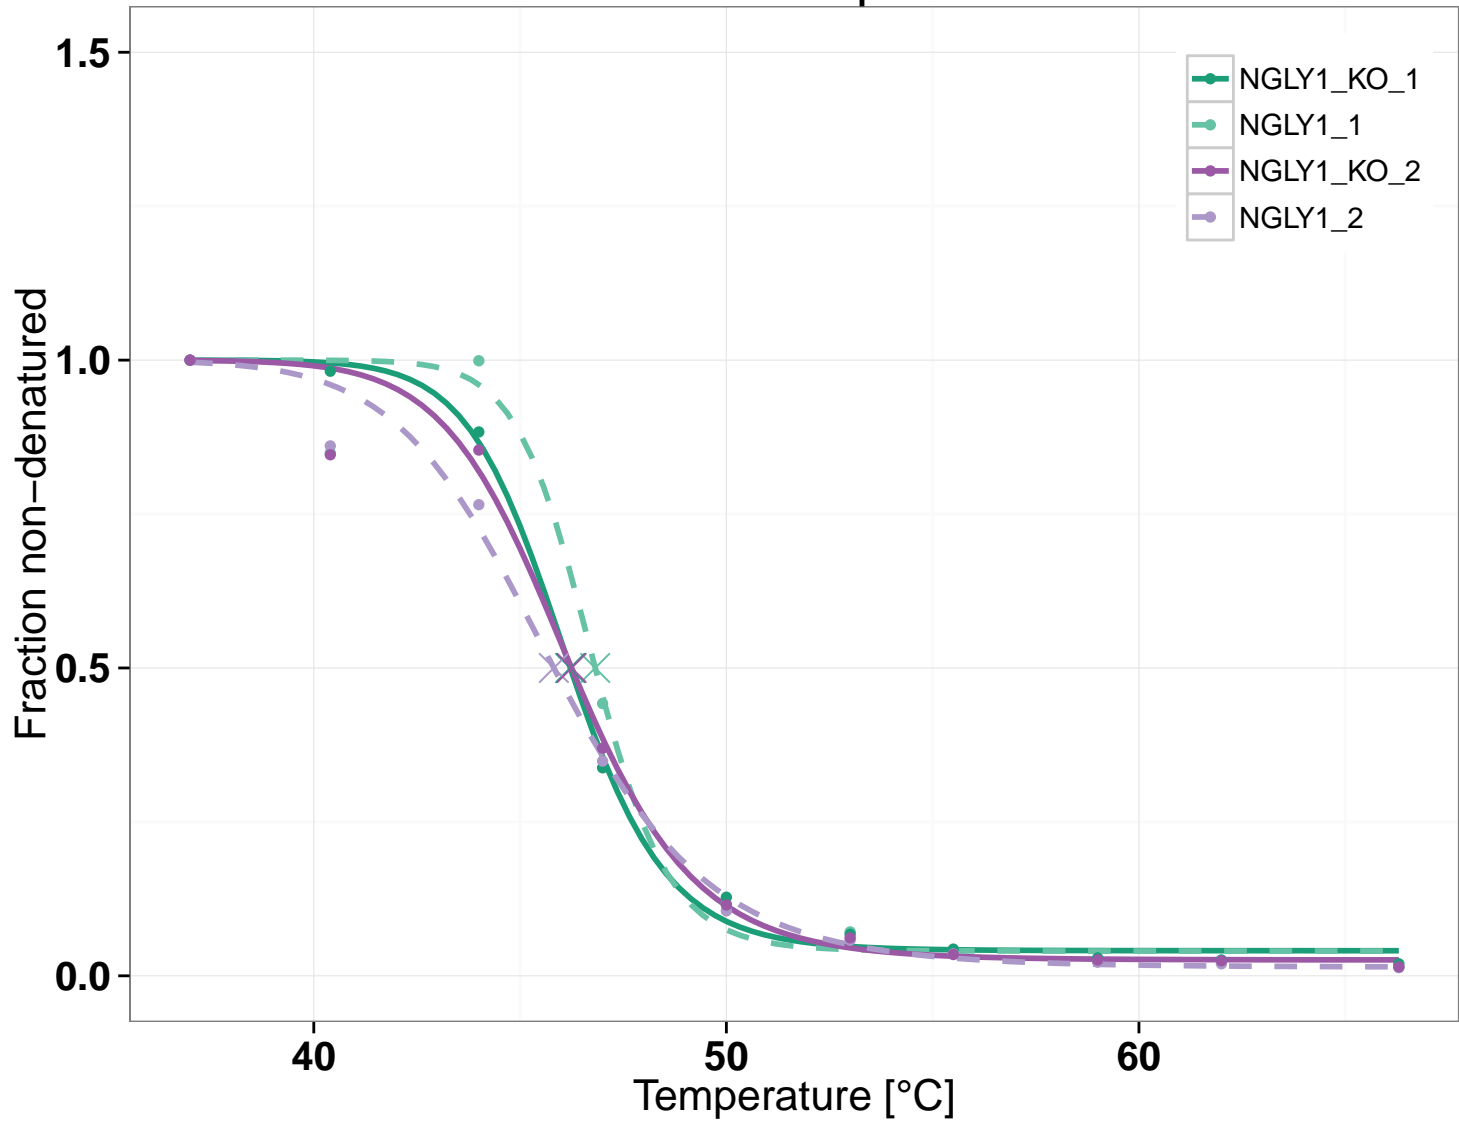

|            | meltPoint | slope | plateau | R2   |
|------------|-----------|-------|---------|------|
| NGLY1_KO_1 | 46.22     | -0.2  | 0.04    | 1    |
| NGLY1_1    | 46.82     | -0.26 | 0.04    | 0.98 |
| NGLY1_KO_2 | 46.25     | -0.16 | 0.03    | 0.99 |
| NGLY1_2    | 45.82     | -0.13 | 0.01    | 0.99 |

Supplement: Supplementary file 1754 [file 1]

IPI00420070.2|ADAM15

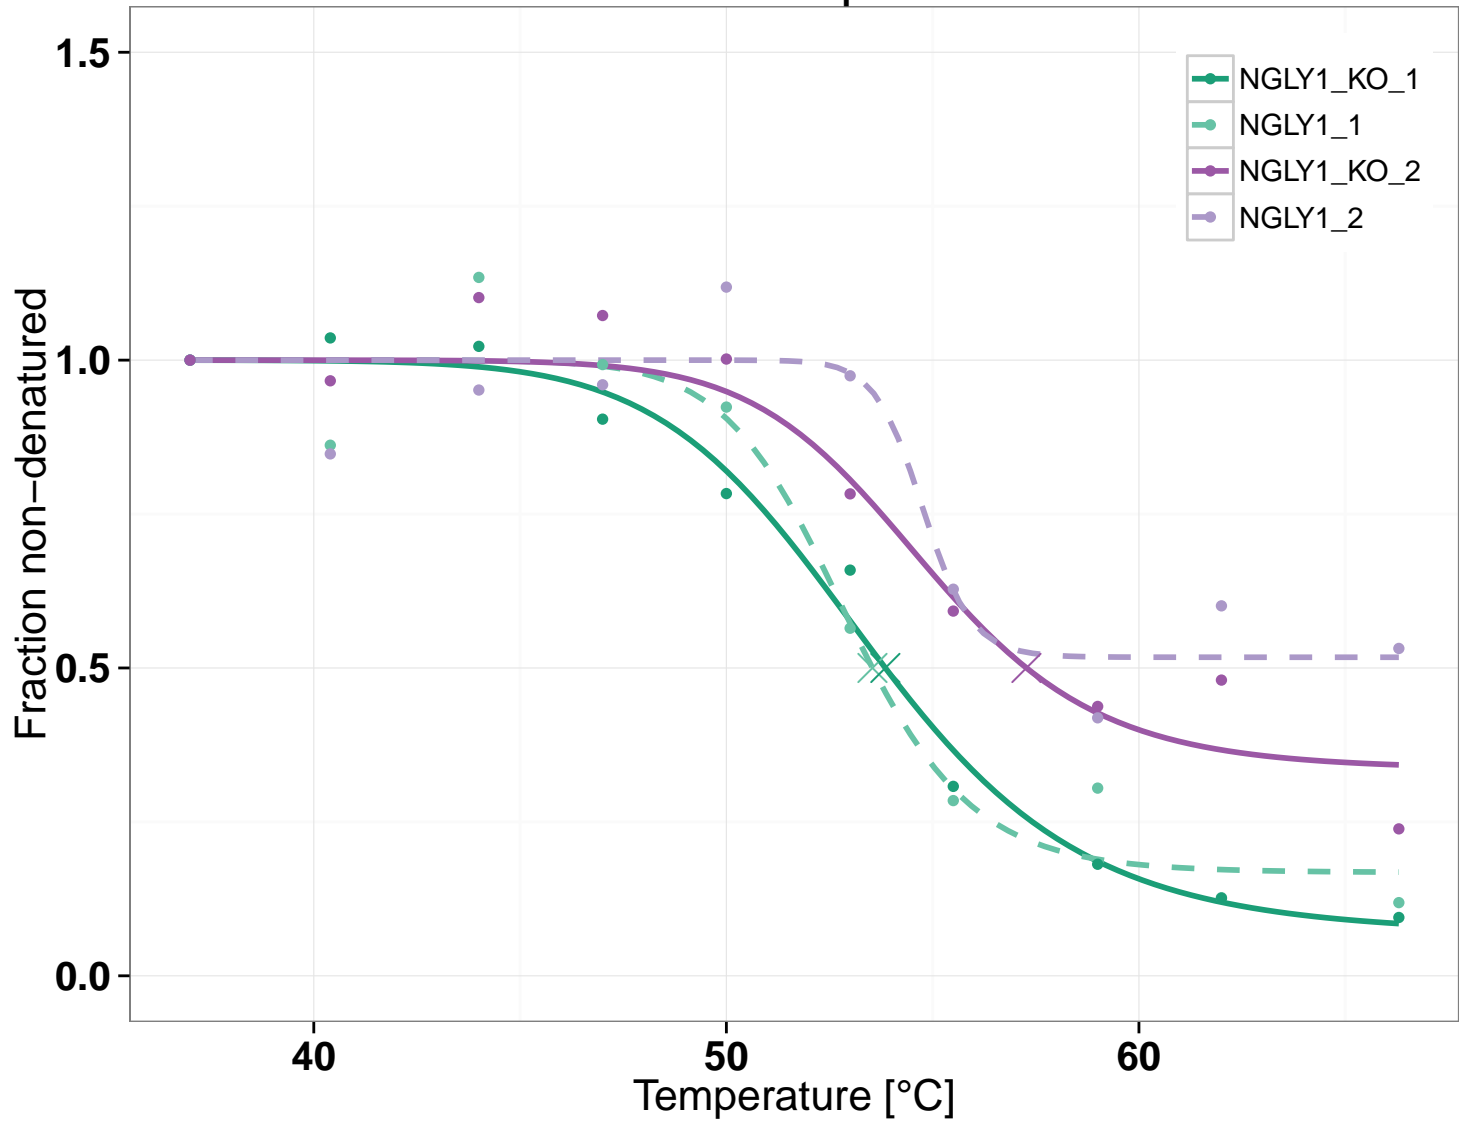

|            | meltPoint | slope  | plateau | R2   |
|------------|-----------|--------|---------|------|
| NGLY1_KO_1 | 53.85     | -0.091 | 0.07    | 0.99 |
| NGLY1_1    | 53.54     | -0.14  | 0.17    | 0.96 |
| NGLY1_KO_2 | 57.27     | -0.079 | 0.34    | 0.95 |
| NGLY1_2    | -         | -0.21  | 0.52    | 0.89 |

Supplement: Supplementary file 1755 [file 1]

IPI00003531.3|IGSF2

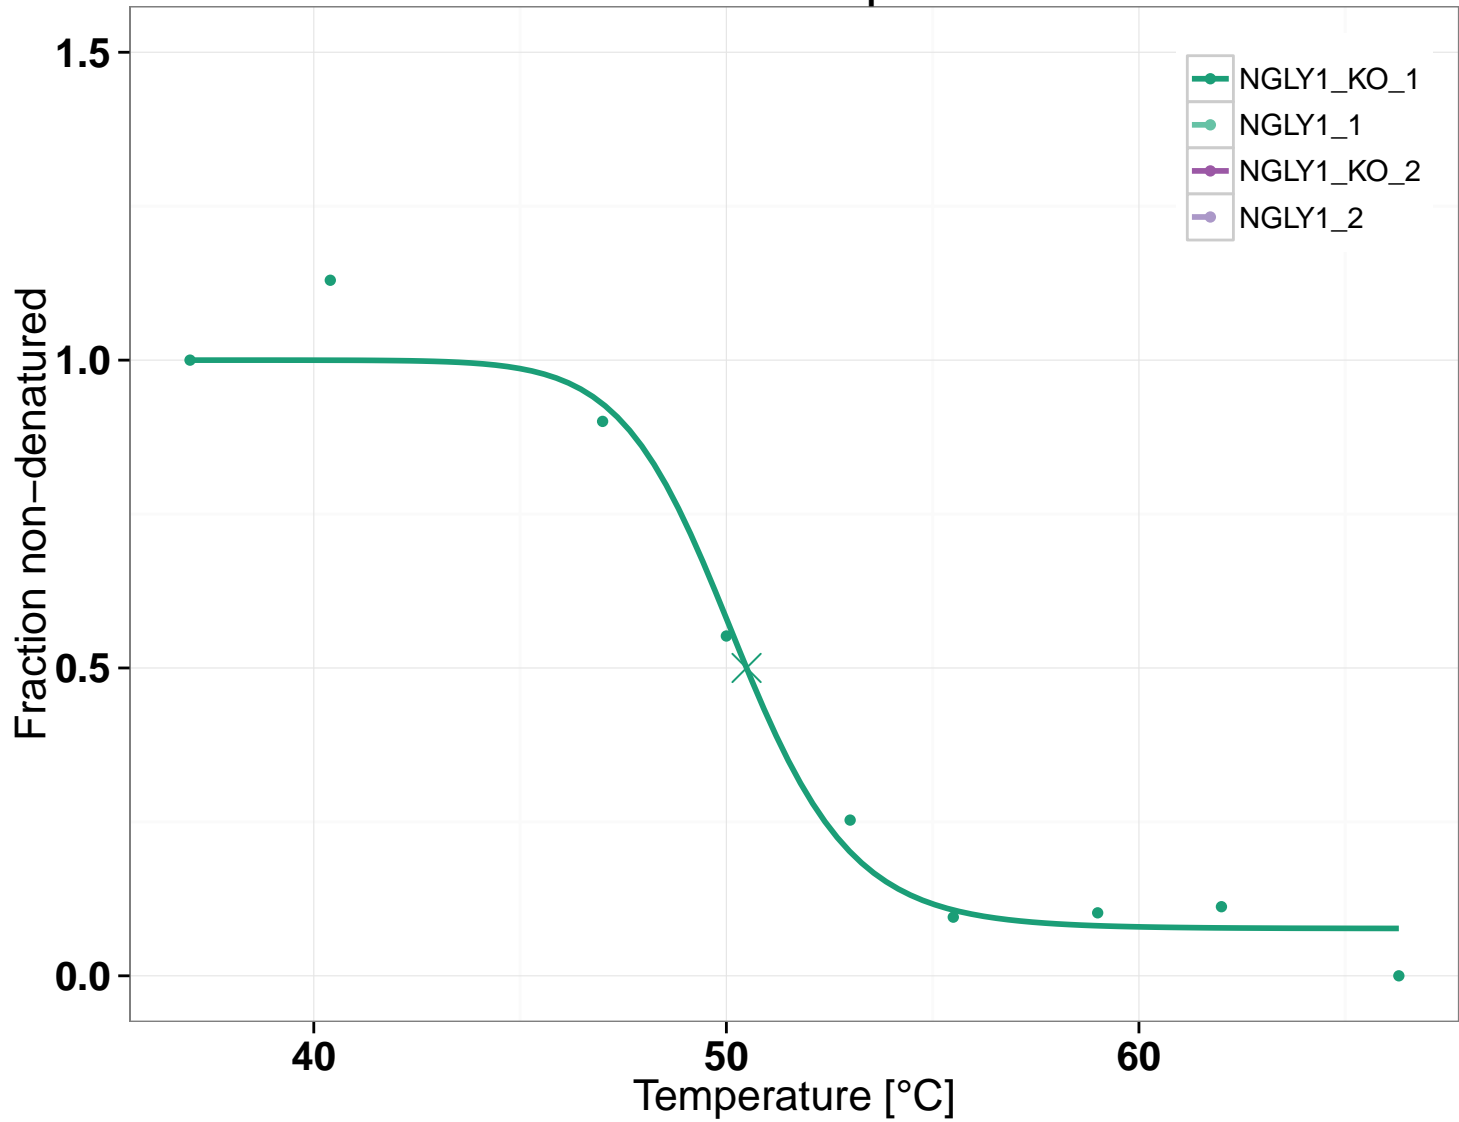

|            | meltPoint | slope | plateau | R2   |
|------------|-----------|-------|---------|------|
| NGLY1_KO_1 | 50.49     | -0.17 | 0.08    | 0.87 |
| NGLY1_1    | -         | -     | -       | -    |
| NGLY1_KO_2 | -         | -     | -       | -    |
| NGLY1_2    | -         | -     | -       | -    |

Supplement: Supplementary file 1756 [file 1]

IPI00885199.1|SLC25A23

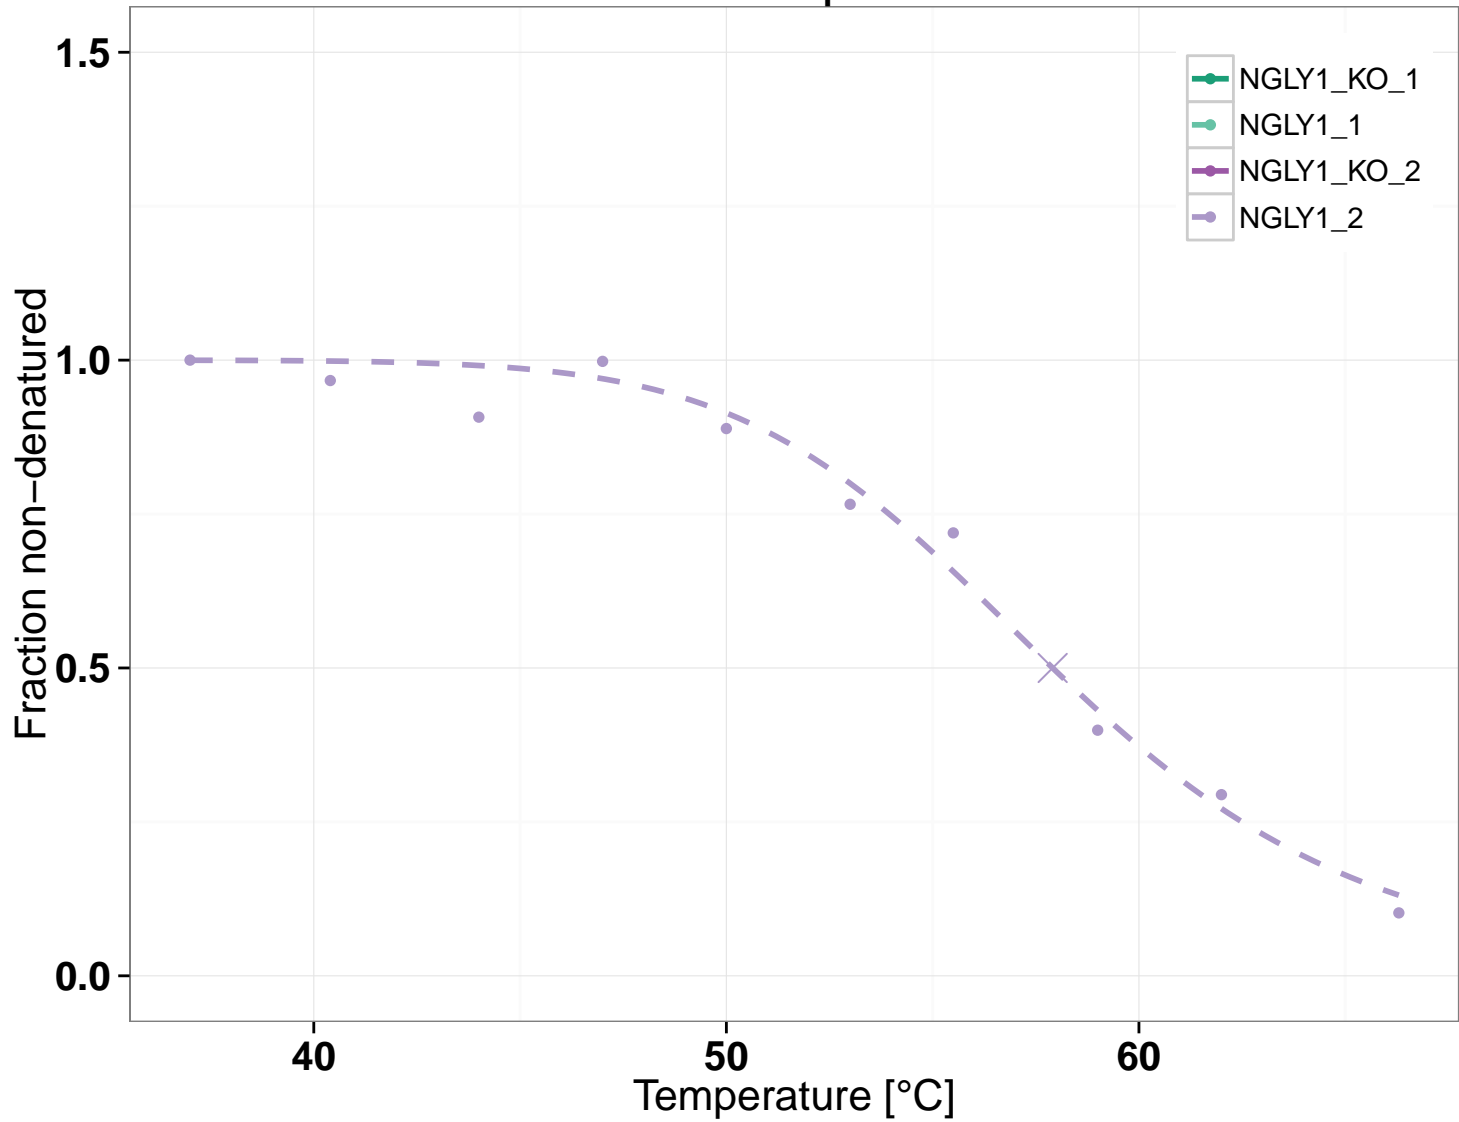

|            | meltPoint | slope  | plateau | R2   |
|------------|-----------|--------|---------|------|
| NGLY1_KO_1 | -         | -      | -       | -    |
| NGLY1_1    | -         | -      | -       | -    |
| NGLY1_KO_2 | -         | -      | -       | -    |
| NGLY1_2    | 57.91     | -0.066 | 0       | 0.98 |

Supplement: Supplementary file 1757 [file 1]

# IPI00789682.1|CSAD

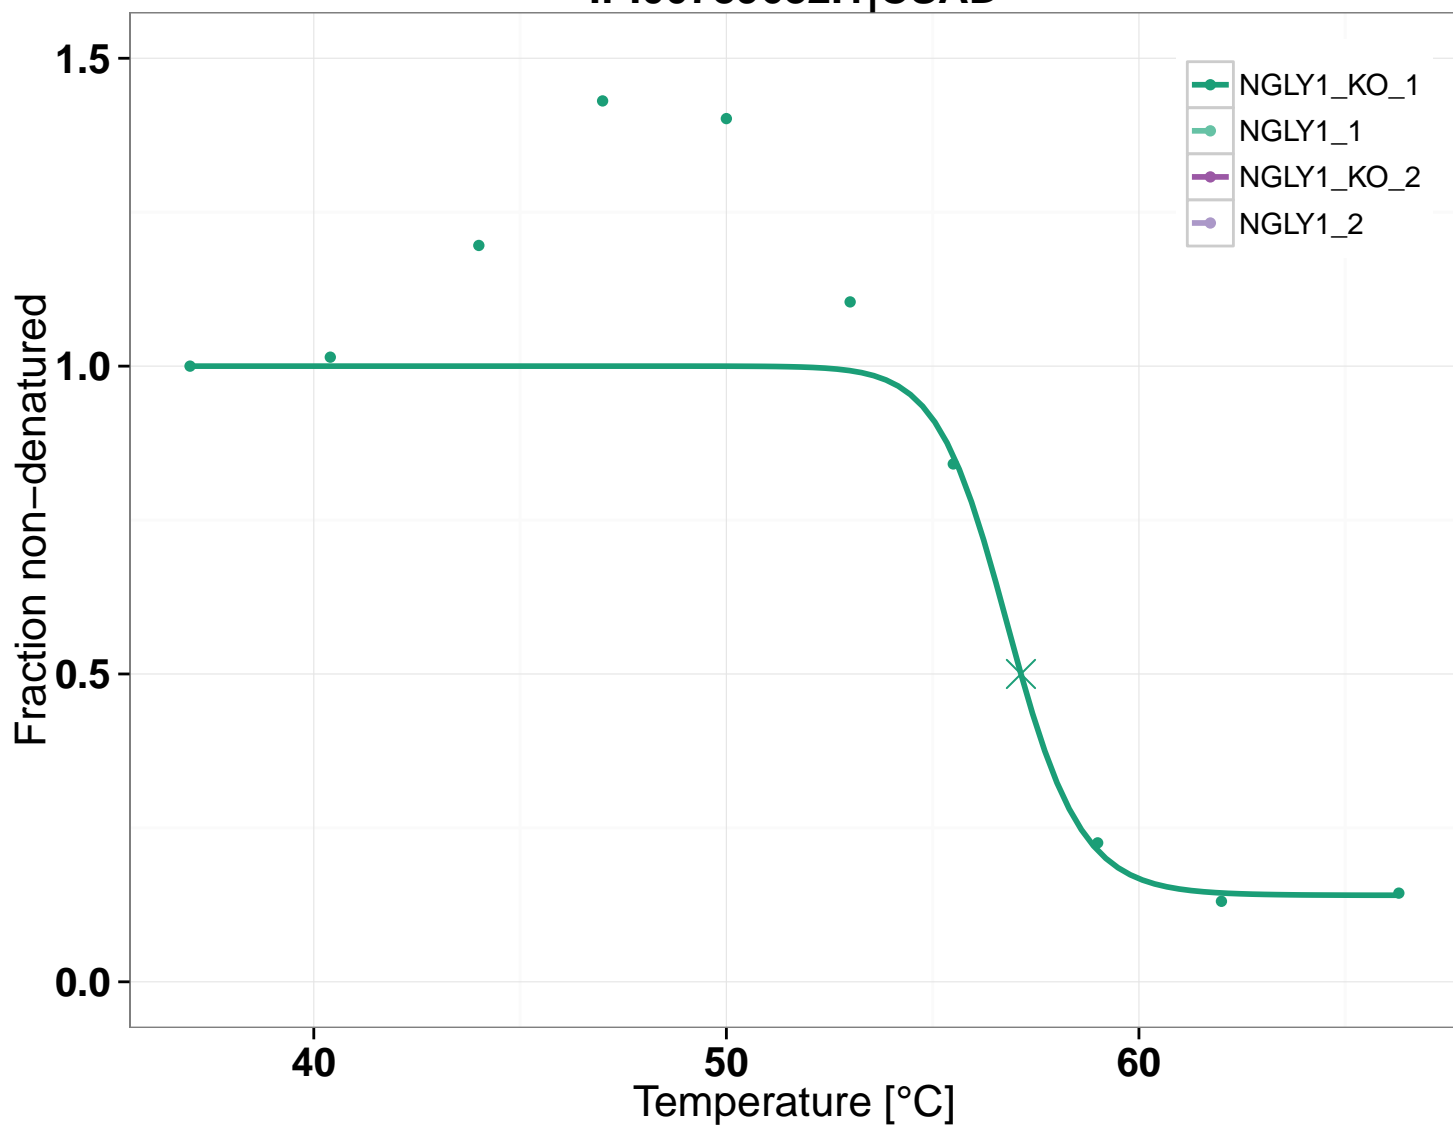

|            | meltPoint | slope | plateau | R2   |
|------------|-----------|-------|---------|------|
| NGLY1_KO_1 | 57.14     | -0.25 | 0.14    | 0.83 |
| NGLY1_1    | -         | -     | -       | -    |
| NGLY1_KO_2 | -         | -     | -       | -    |
| NGLY1_2    | -         | -     | -       | -    |

Supplement: Supplementary file 1758 [file 1]

IPI00045550.4|PPP1R9B

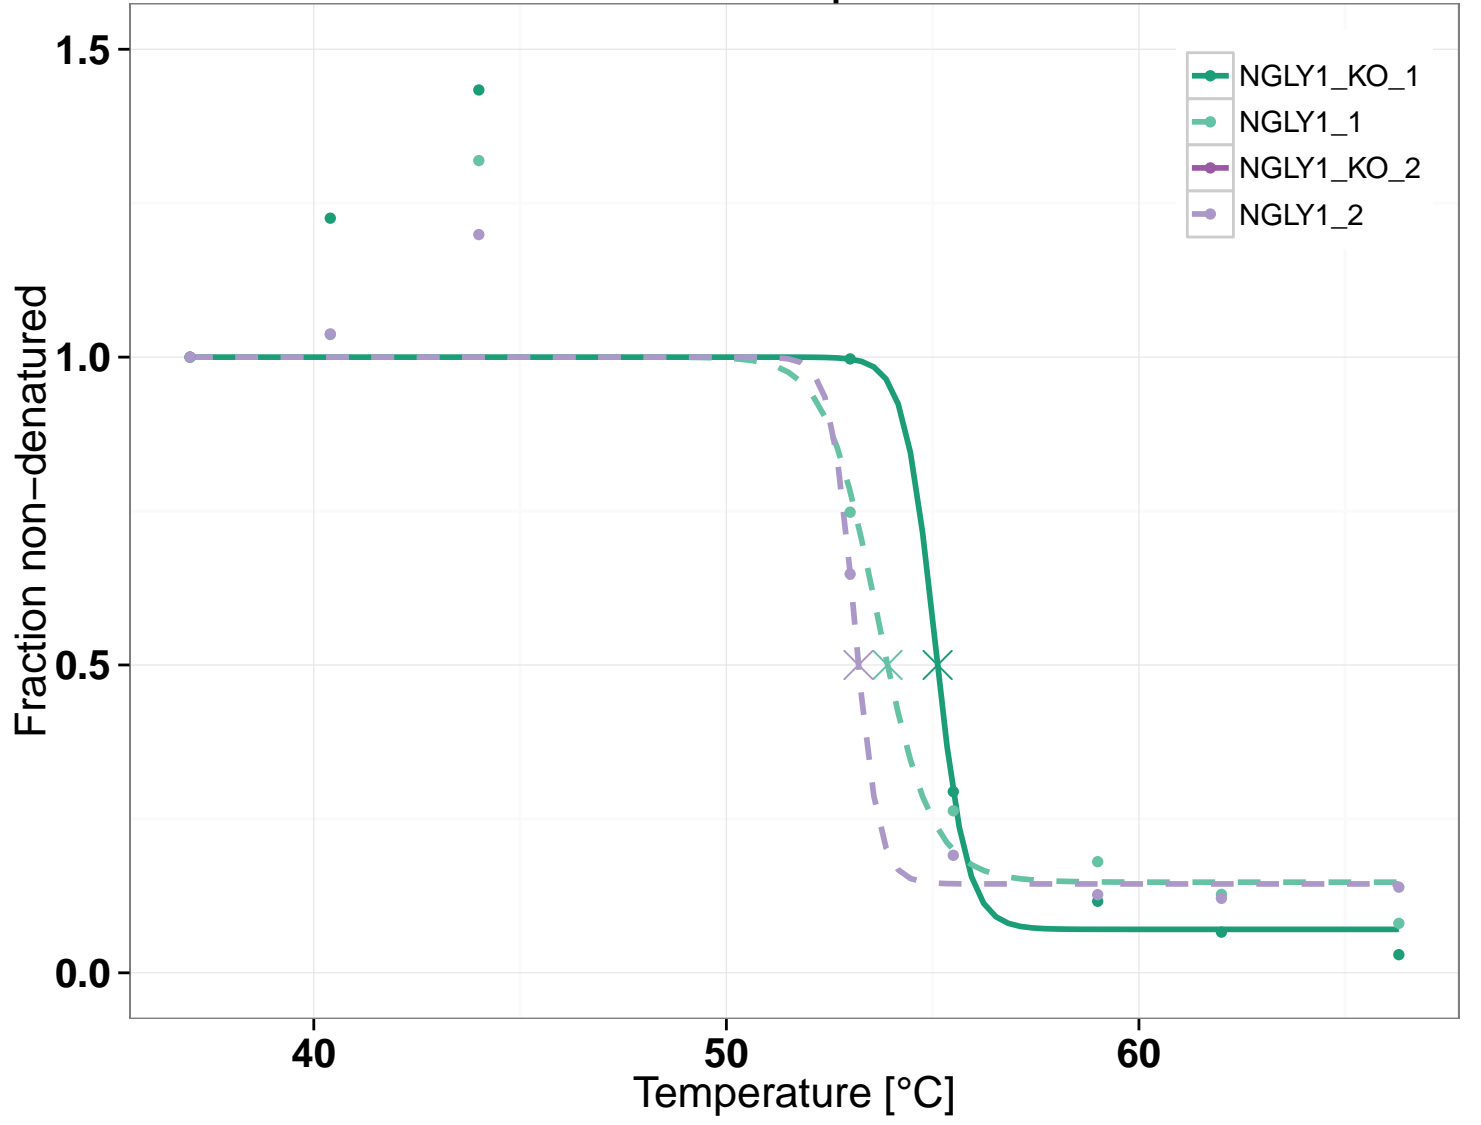

|            | meltPoint | slope | plateau | R2   |
|------------|-----------|-------|---------|------|
| NGLY1_KO_1 | 55.12     | -0.62 | 0.07    | 0.23 |
| NGLY1_1    | 53.91     | -0.33 | 0.15    | 0.52 |
| NGLY1_KO_2 | -         | -     | -       | -    |
| NGLY1_2    | 53.2      | -0.74 | 0.14    | 0.58 |

Supplement: Supplementary file 1759 [file 1]

# IPI00030968.4|C9ORF142

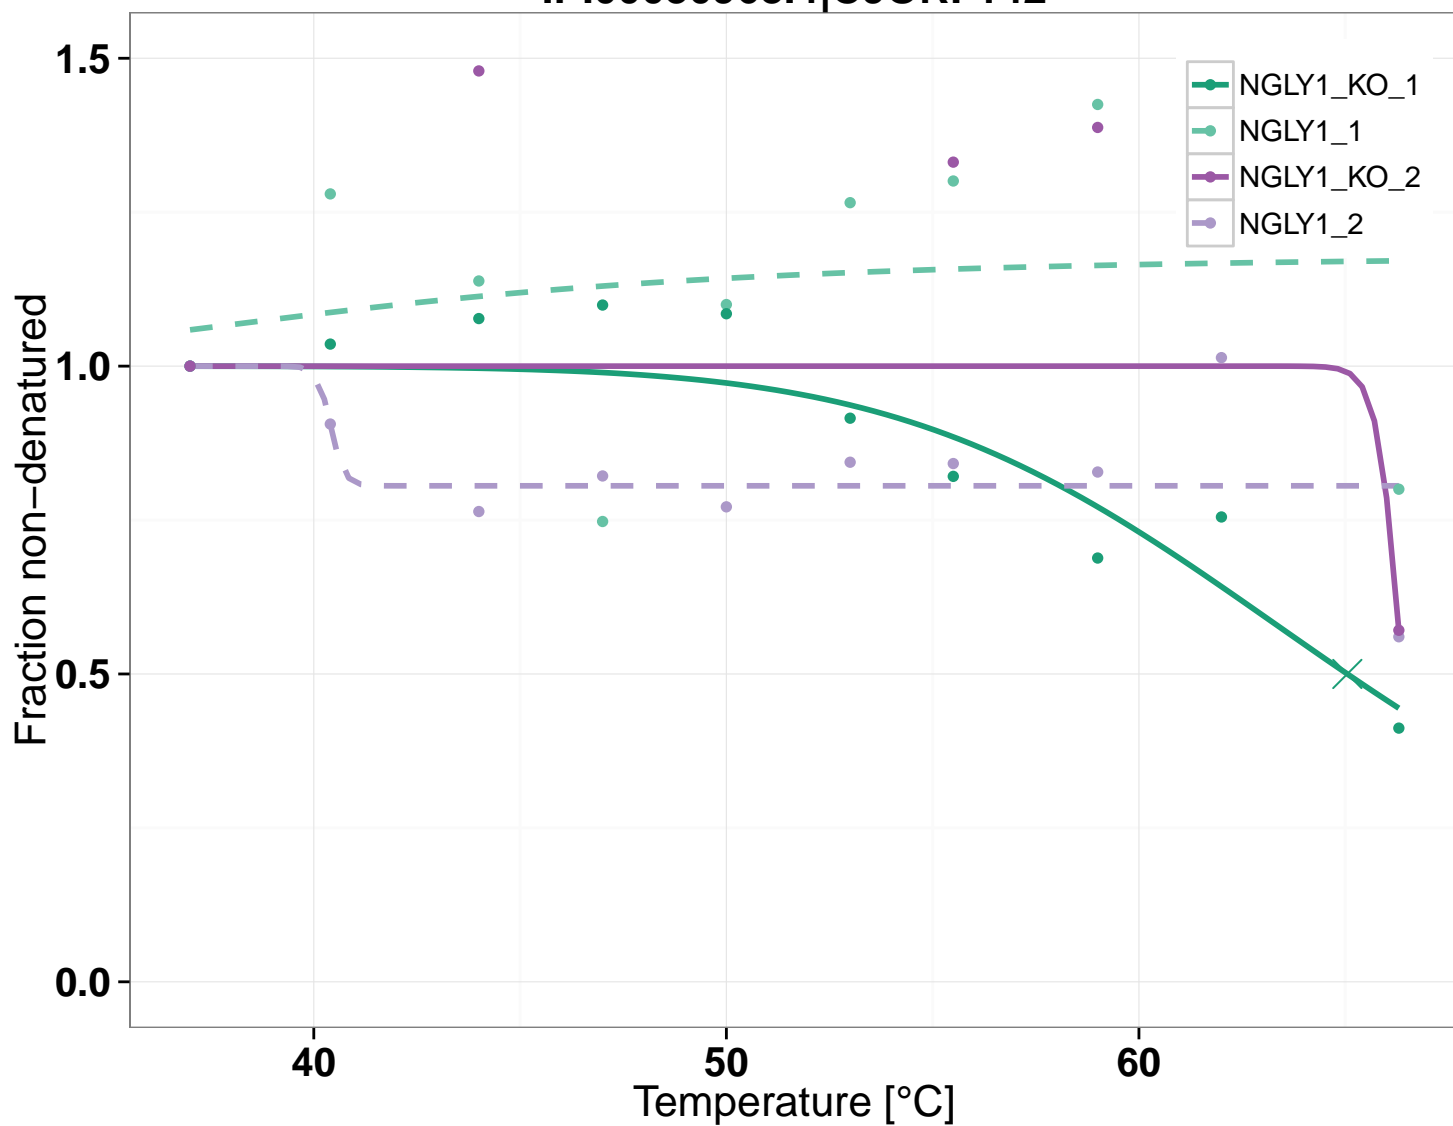

|            | meltPoint | slope  | plateau | R2   |
|------------|-----------|--------|---------|------|
| NGLY1_KO_1 | 65.05     | -0.047 | 0       | 0.87 |
| NGLY1_1    | -         | 0.0084 | 1.18    | 0.03 |
| NGLY1_KO_2 | -         | -      | 0       | -1.1 |
| NGLY1_2    | -         | -0.3   | 0.81    | 0.26 |

Supplement: Supplementary file 1760 [file 1]

# IPI00328272.2|ZDHHC5

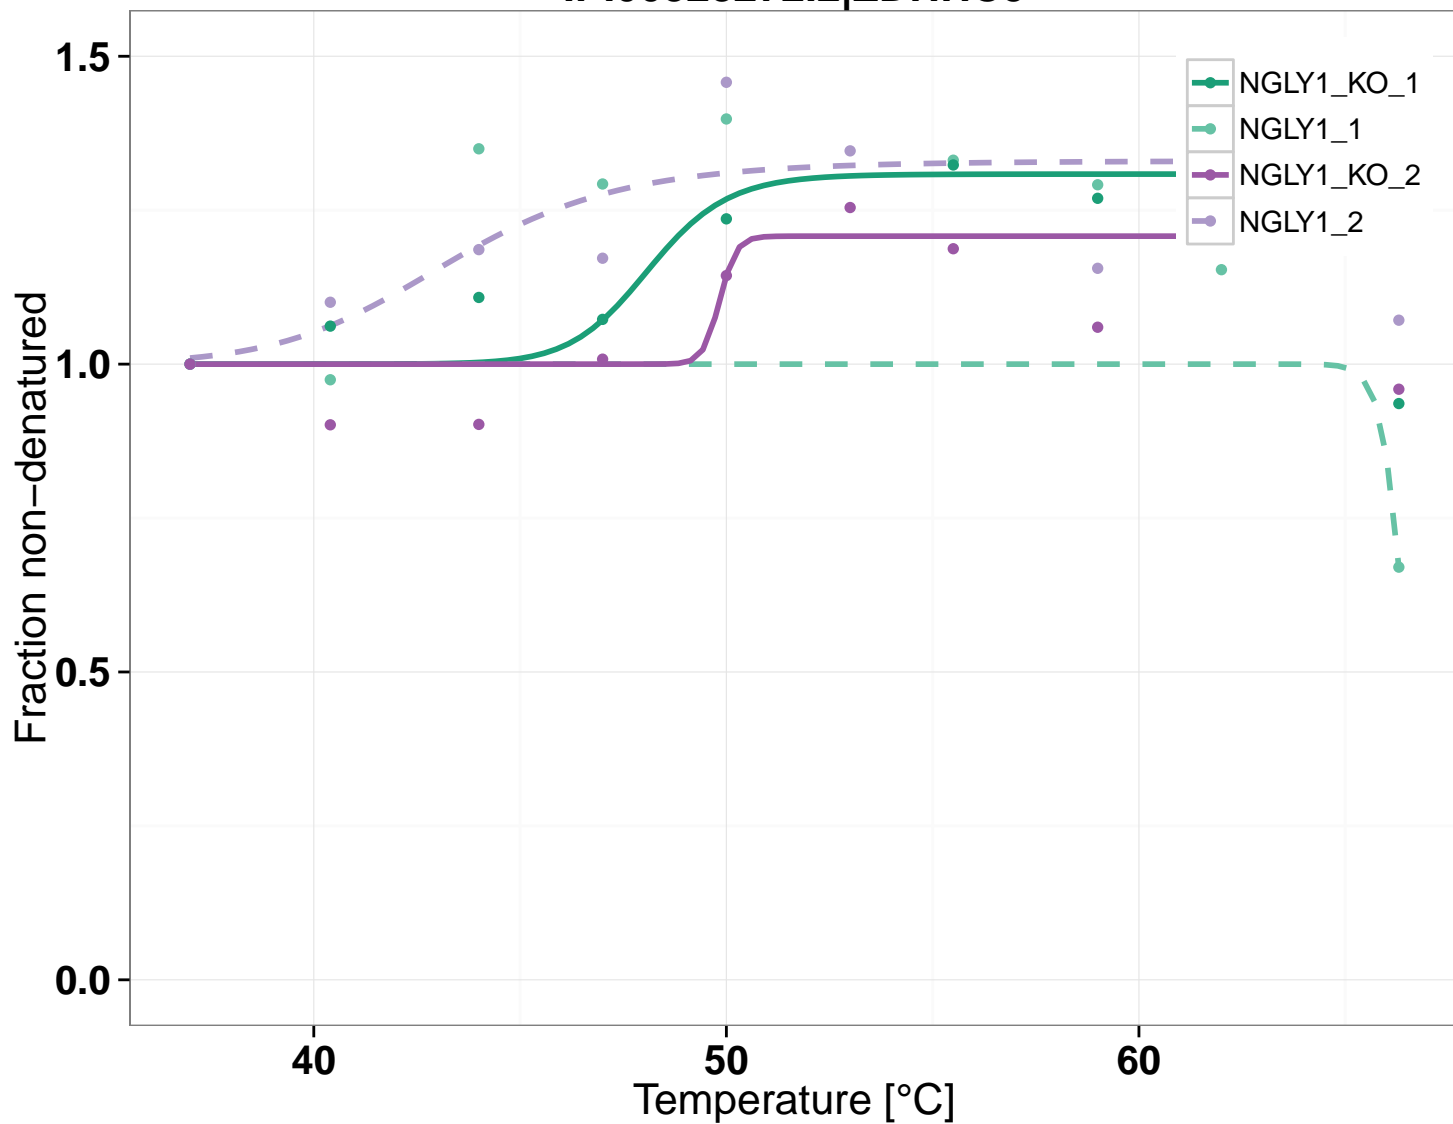

|            | meltPoint | slope | plateau | R2   |
|------------|-----------|-------|---------|------|
| NGLY1_KO_1 | –         | 0.081 | 1.31    | 0.34 |
| NGLY1_1    | –         | –     | 0       | –0.5 |
| NGLY1_KO_2 | –         | 0.26  | 1.21    | 0.36 |
| NGLY1_2    | –         | 0.04  | 1.33    | 0.39 |

Supplement: Supplementary file 1761 [file 1]

# IPI00024466.2|UGCGL1

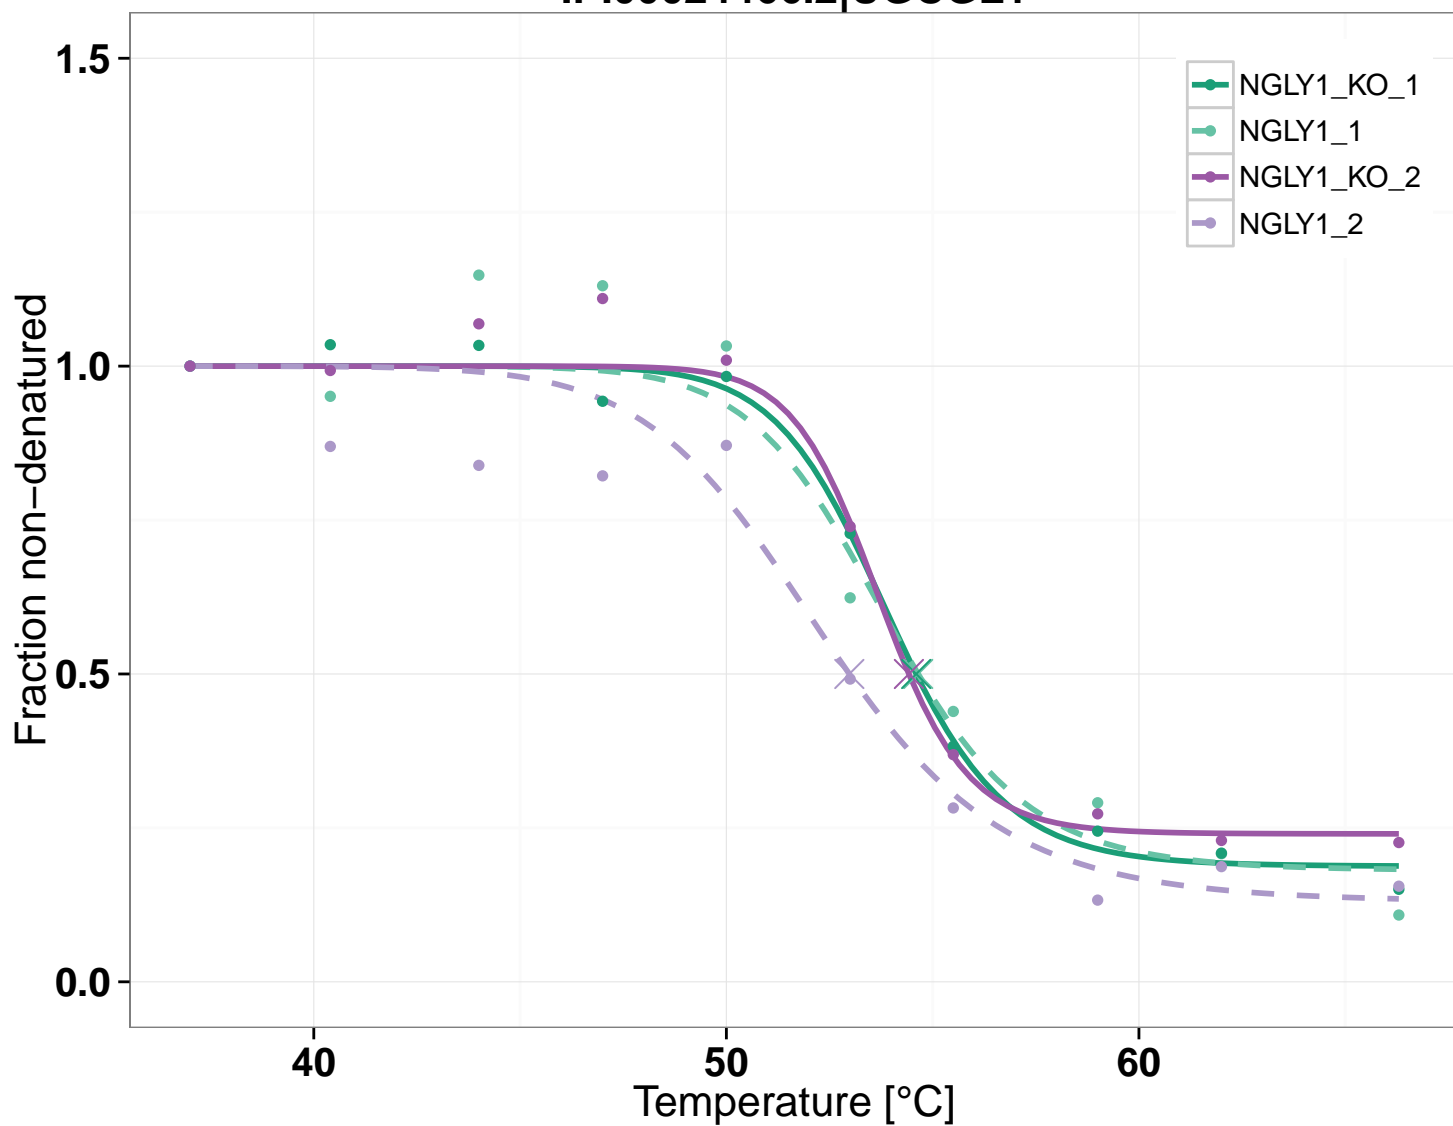

|            | meltPoint | slope | plateau | R2   |
|------------|-----------|-------|---------|------|
| NGLY1_KO_1 | 54.6      | -0.15 | 0.19    | 0.99 |
| NGLY1_1    | 54.65     | -0.12 | 0.18    | 0.95 |
| NGLY1_KO_2 | 54.42     | -0.18 | 0.24    | 0.99 |
| NGLY1_2    | 52.98     | -0.1  | 0.13    | 0.94 |

Supplement: Supplementary file 1762 [file 1]

# IPI00011736.3|PIK3R2

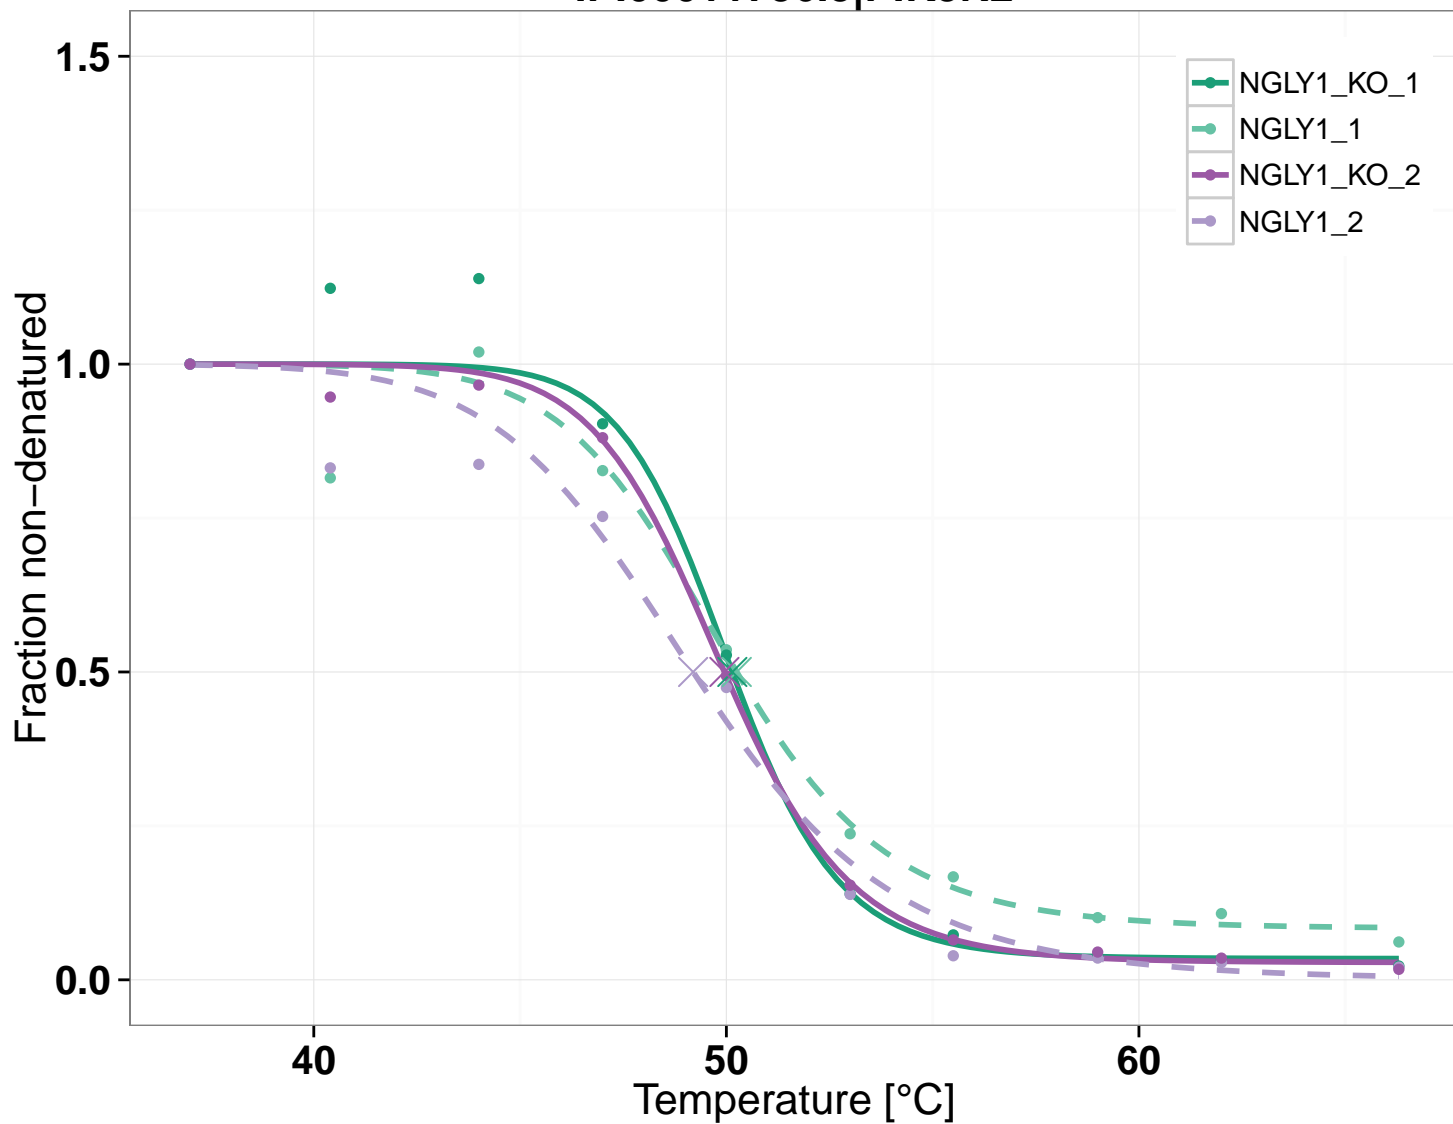

|            | meltPoint | slope | plateau | R2   |
|------------|-----------|-------|---------|------|
| NGLY1_KO_1 | 50.14     | -0.18 | 0.03    | 0.98 |
| NGLY1_1    | 50.25     | -0.12 | 0.08    | 0.97 |
| NGLY1_KO_2 | 49.95     | -0.15 | 0.03    | 1    |
| NGLY1_2    | 49.19     | -0.1  | 0       | 0.97 |

Supplement: Supplementary file 1763 [file 1]

IPI00220642.7|YWHAG

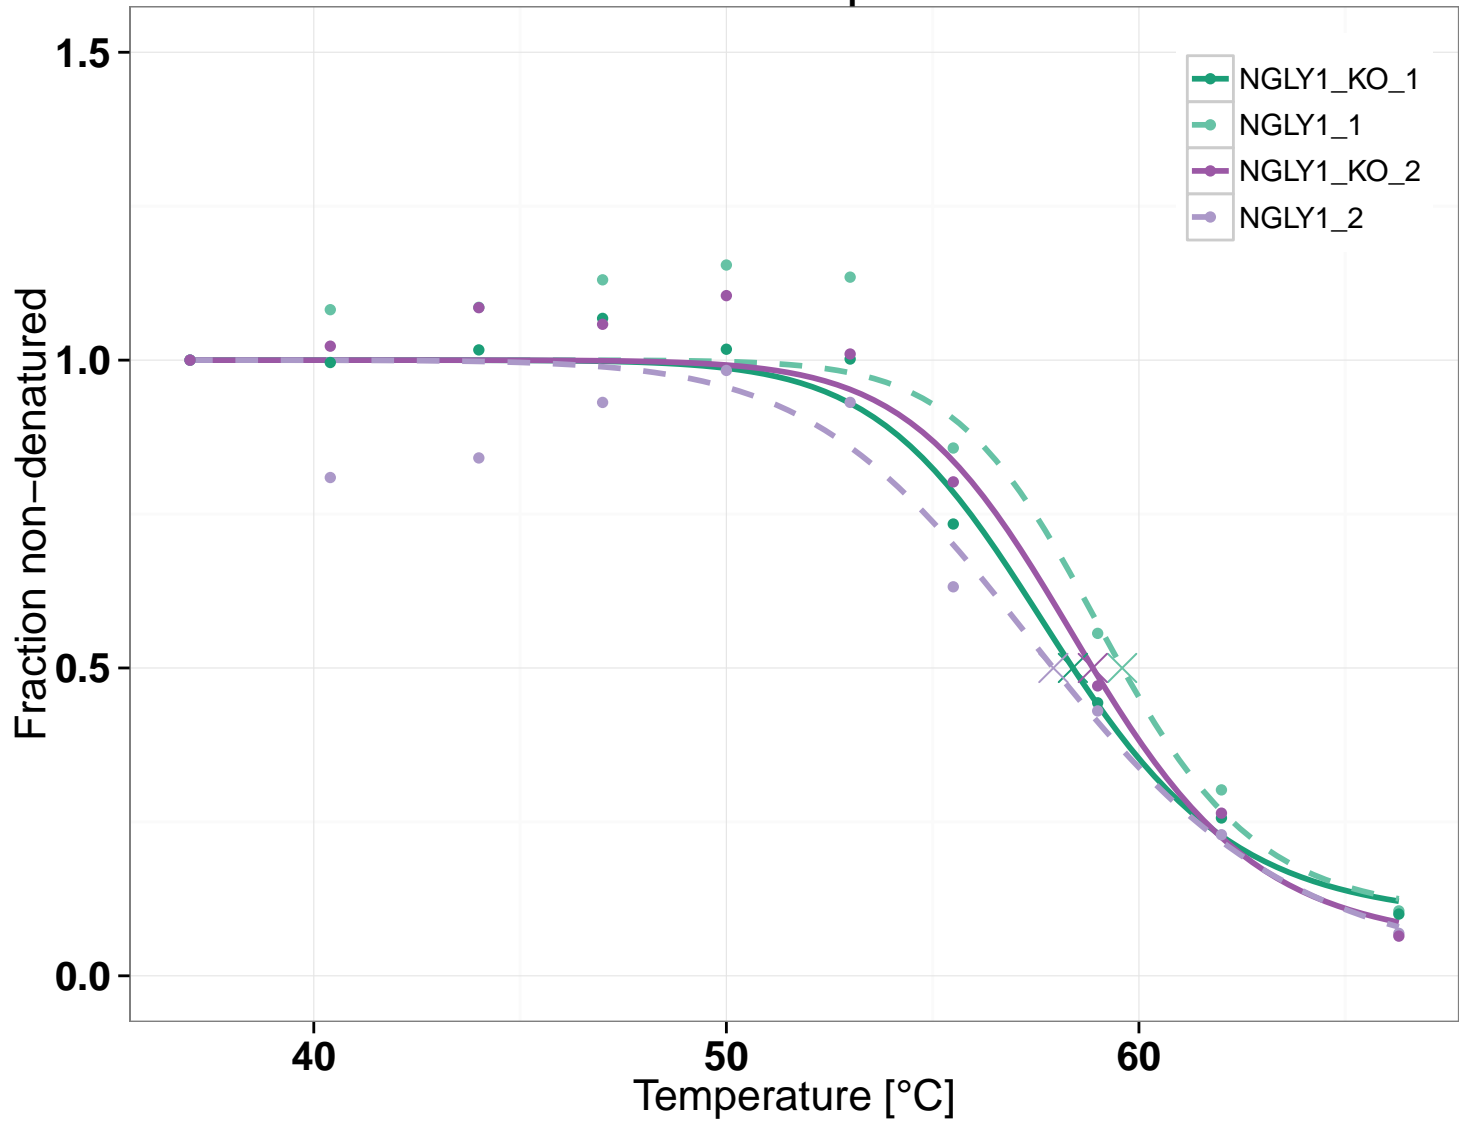

|            | meltPoint | slope  | plateau | R2   |
|------------|-----------|--------|---------|------|
| NGLY1_KO_1 | 58.4      | -0.1   | 0.09    | 0.99 |
| NGLY1_1    | 59.59     | -0.12  | 0.1     | 0.94 |
| NGLY1_KO_2 | 58.88     | -0.11  | 0.05    | 0.98 |
| NGLY1_2    | 57.93     | -0.085 | 0       | 0.92 |

Supplement: Supplementary file 1764 [file 1]

IPI00008708.5|RSL1D1

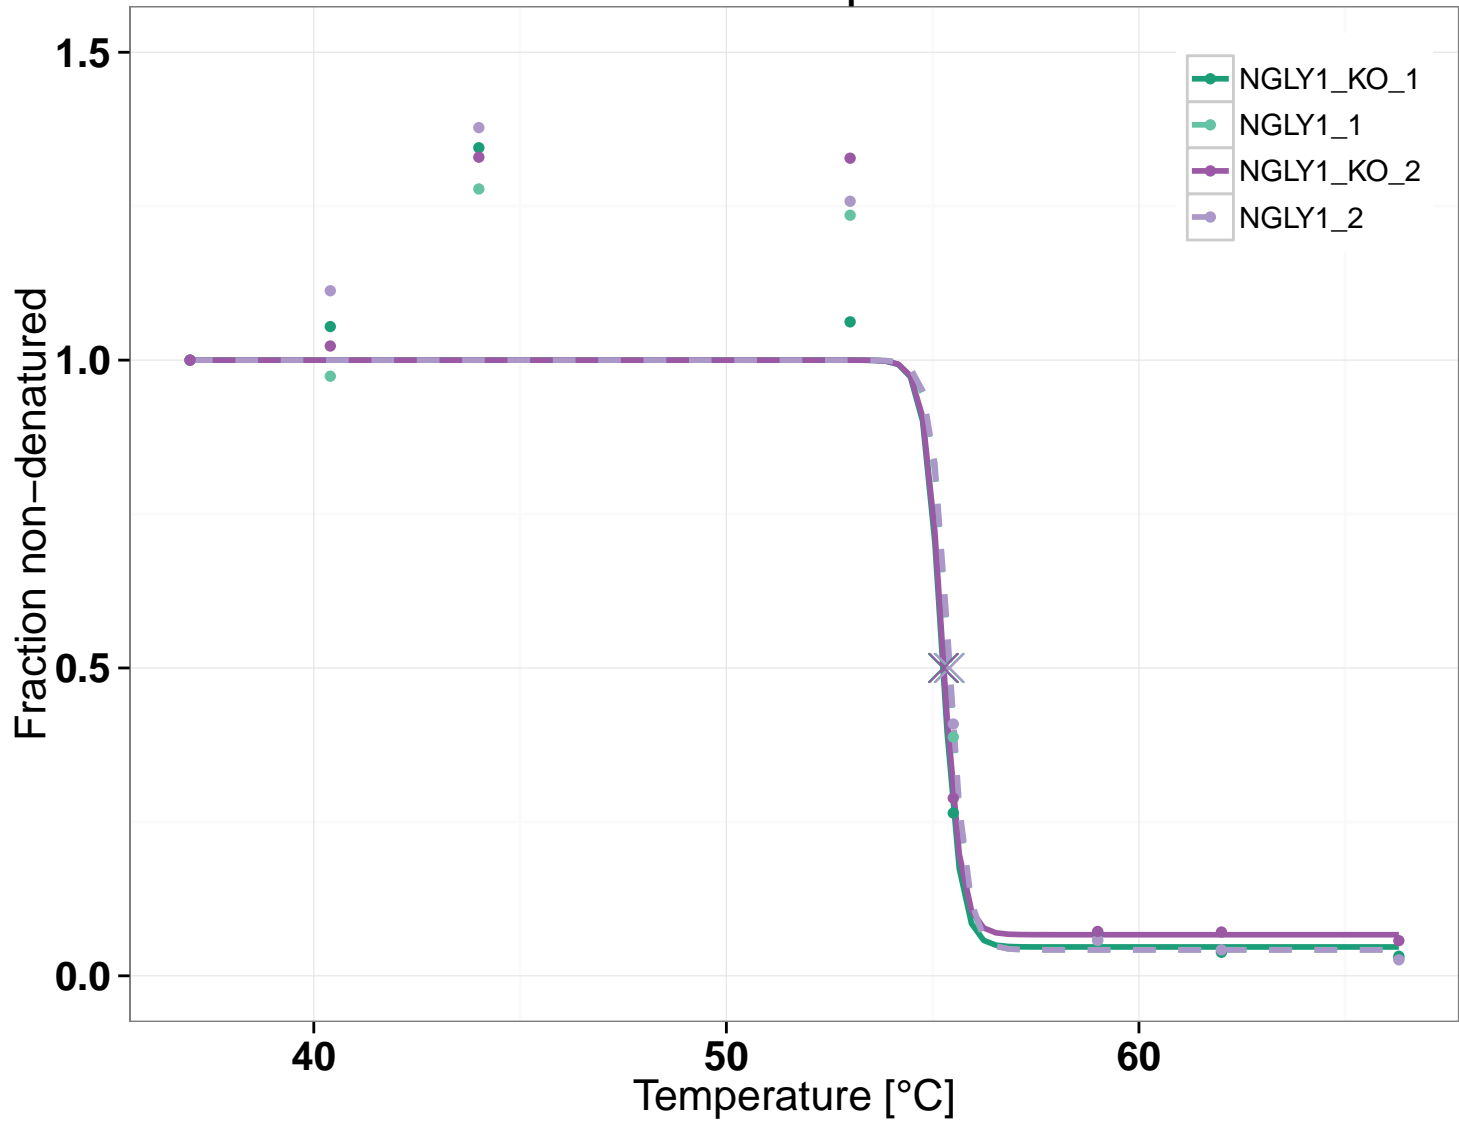

|            | meltPoint | slope | plateau | R2   |
|------------|-----------|-------|---------|------|
| NGLY1_KO_1 | 55.25     | -1.1  | 0.05    | 0.62 |
| NGLY1_1    | 55.39     | -1.1  | 0.04    | 0.71 |
| NGLY1_KO_2 | 55.27     | -1.1  | 0.07    | 0.5  |
| NGLY1_2    | 55.41     | -1.1  | 0.04    | 0.54 |

Supplement: Supplementary file 1765 [file 1]

IPI00289944.5|BRWD1

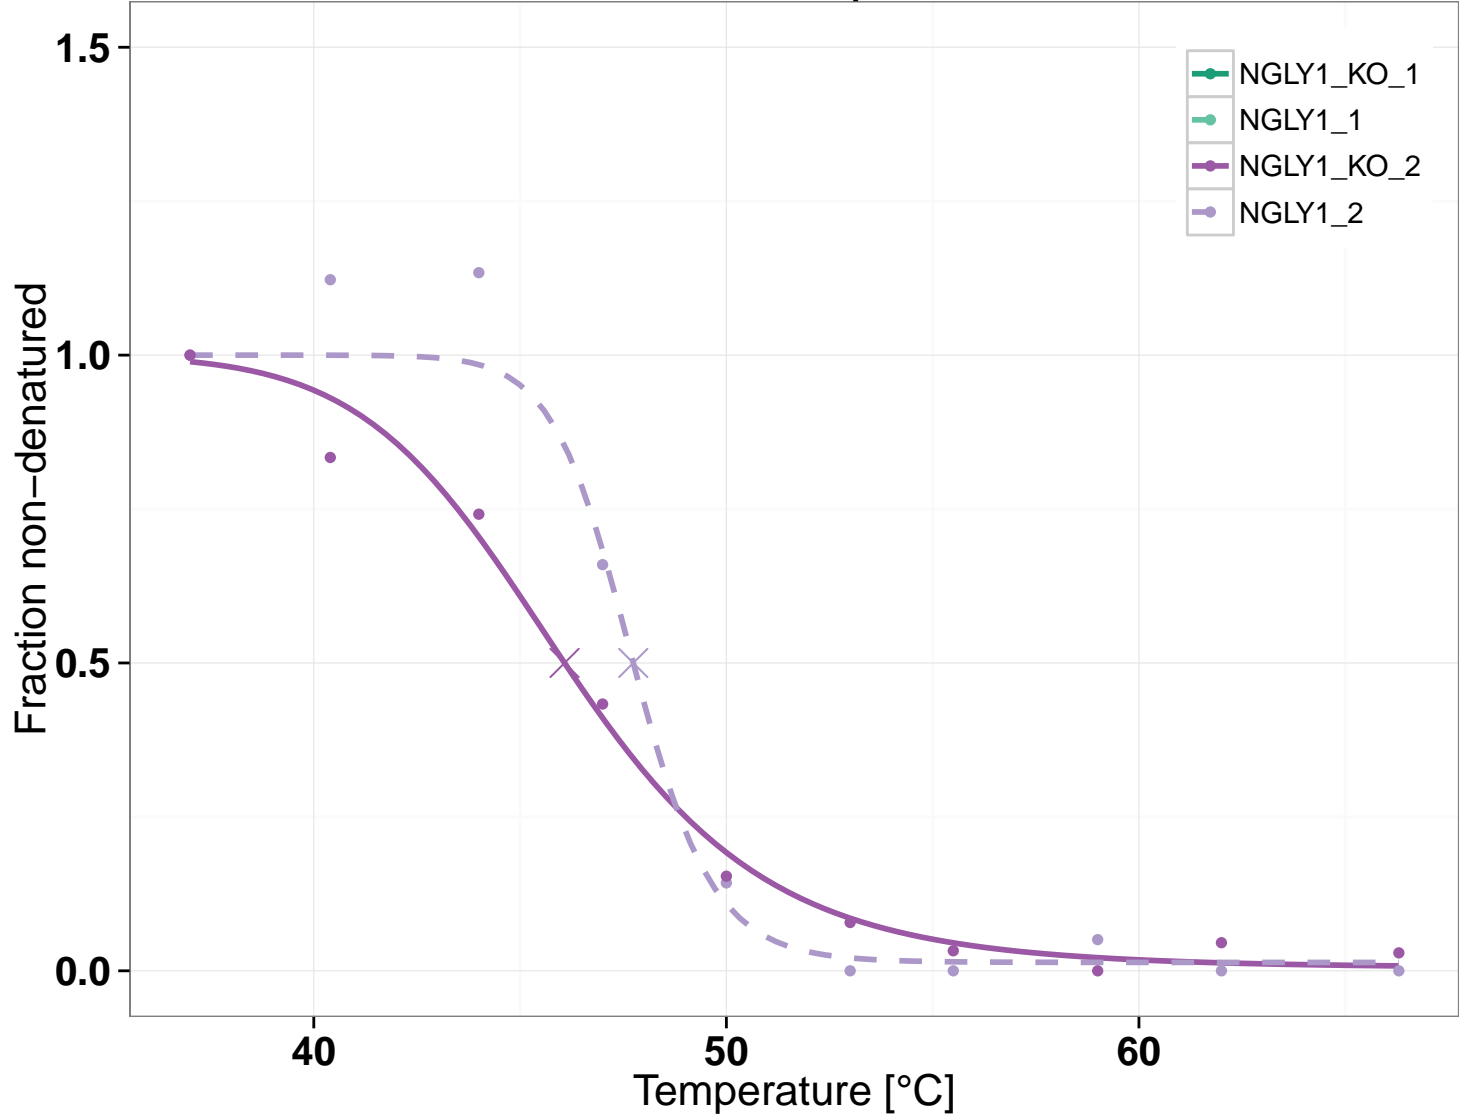

|            | meltPoint | slope | plateau | R2   |
|------------|-----------|-------|---------|------|
| NGLY1_KO_1 | -         | -     | -       | -    |
| NGLY1_1    | -         | -     | -       | -    |
| NGLY1_KO_2 | 46.08     | -0.1  | 0       | 0.99 |
| NGLY1_2    | 47.74     | -0.25 | 0.01    | 0.98 |

Supplement: Supplementary file 1766 [file 1]

IPI00418555.4|ZNF813

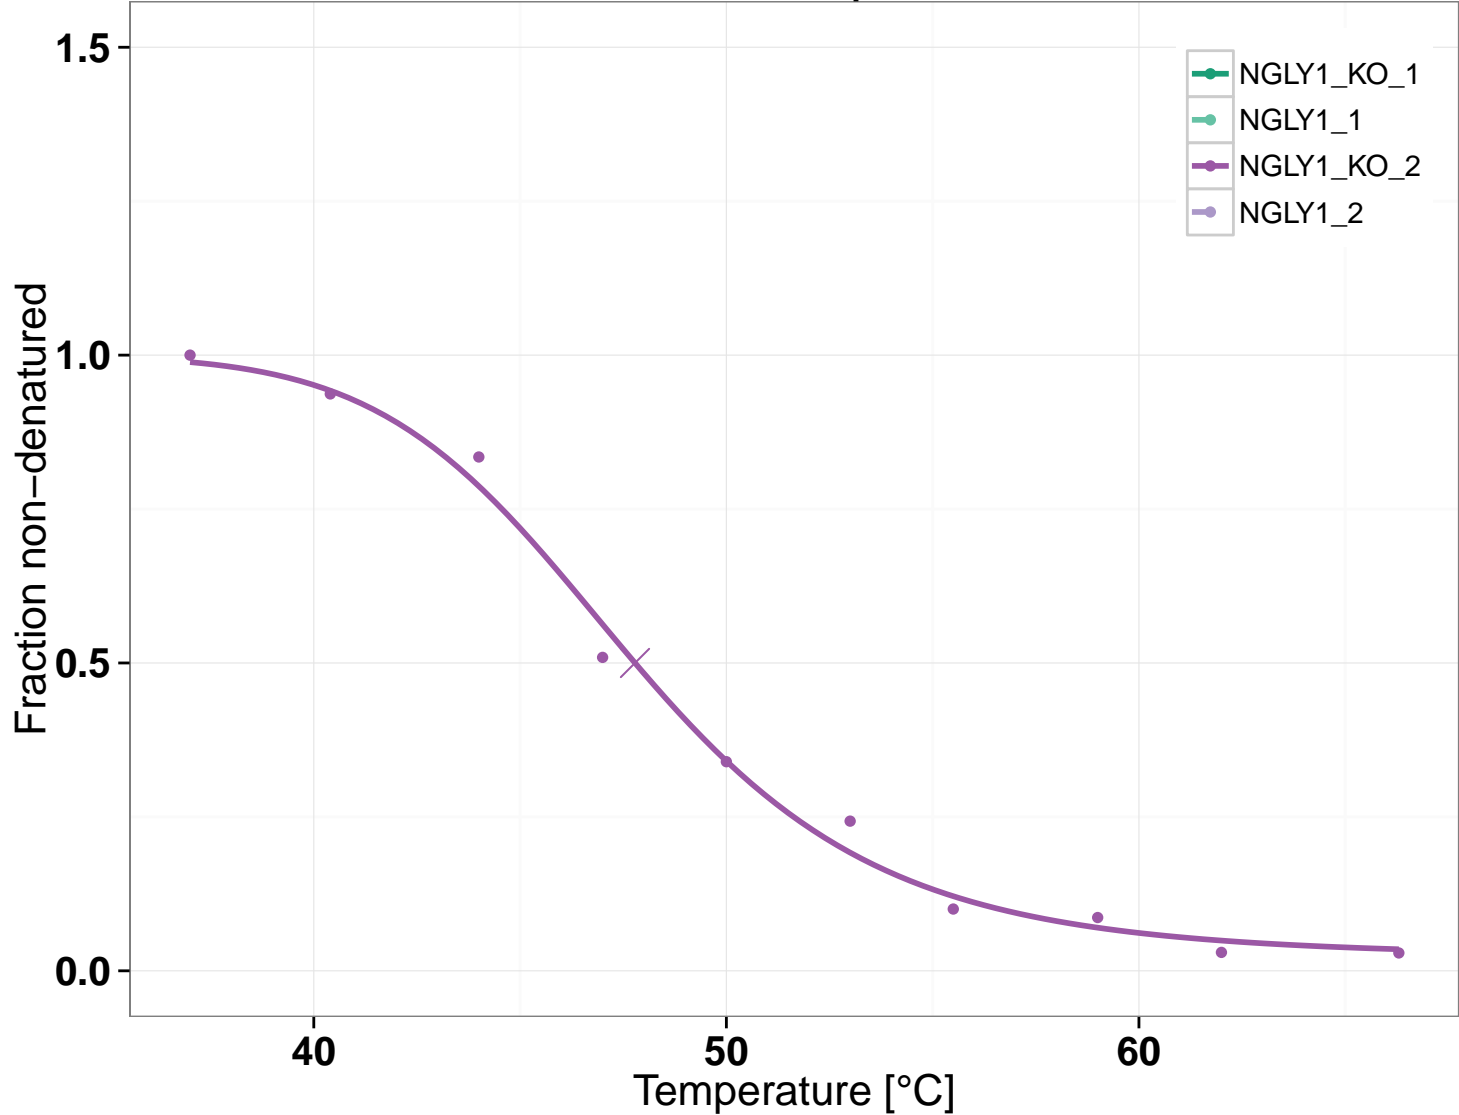

|            | meltPoint | slope  | plateau | R2   |
|------------|-----------|--------|---------|------|
| NGLY1_KO_1 | -         | -      | -       | -    |
| NGLY1_1    | -         | -      | -       | -    |
| NGLY1_KO_2 | 47.79     | -0.081 | 0.02    | 0.99 |
| NGLY1_2    | -         | -      | -       | -    |

Supplement: Supplementary file 1767 [file 1]

IPI00217669.1|LIG4

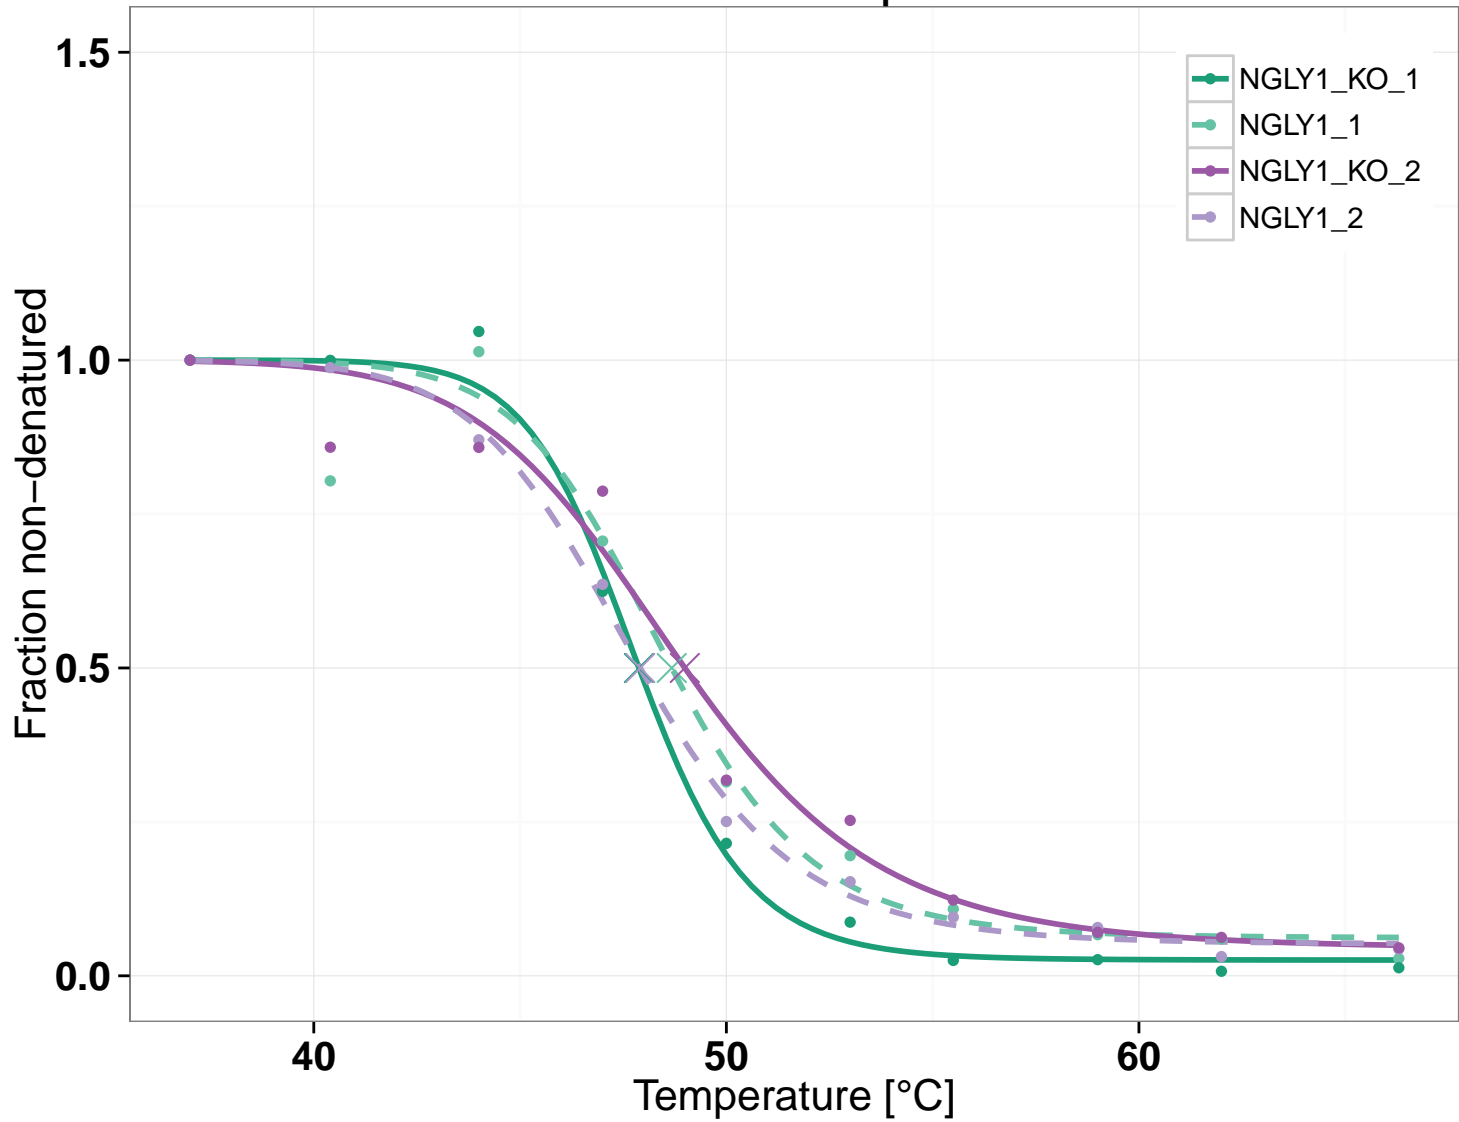

|            | meltPoint | slope  | plateau | R2   |
|------------|-----------|--------|---------|------|
| NGLY1_KO_1 | 47.88     | -0.18  | 0.03    | 0.99 |
| NGLY1_1    | 48.68     | -0.13  | 0.06    | 0.97 |
| NGLY1_KO_2 | 48.99     | -0.098 | 0.04    | 0.97 |
| NGLY1_2    | 47.91     | -0.12  | 0.05    | 1    |

Supplement: Supplementary file 1768 [file 1]

IPI00872733.1|POLE4

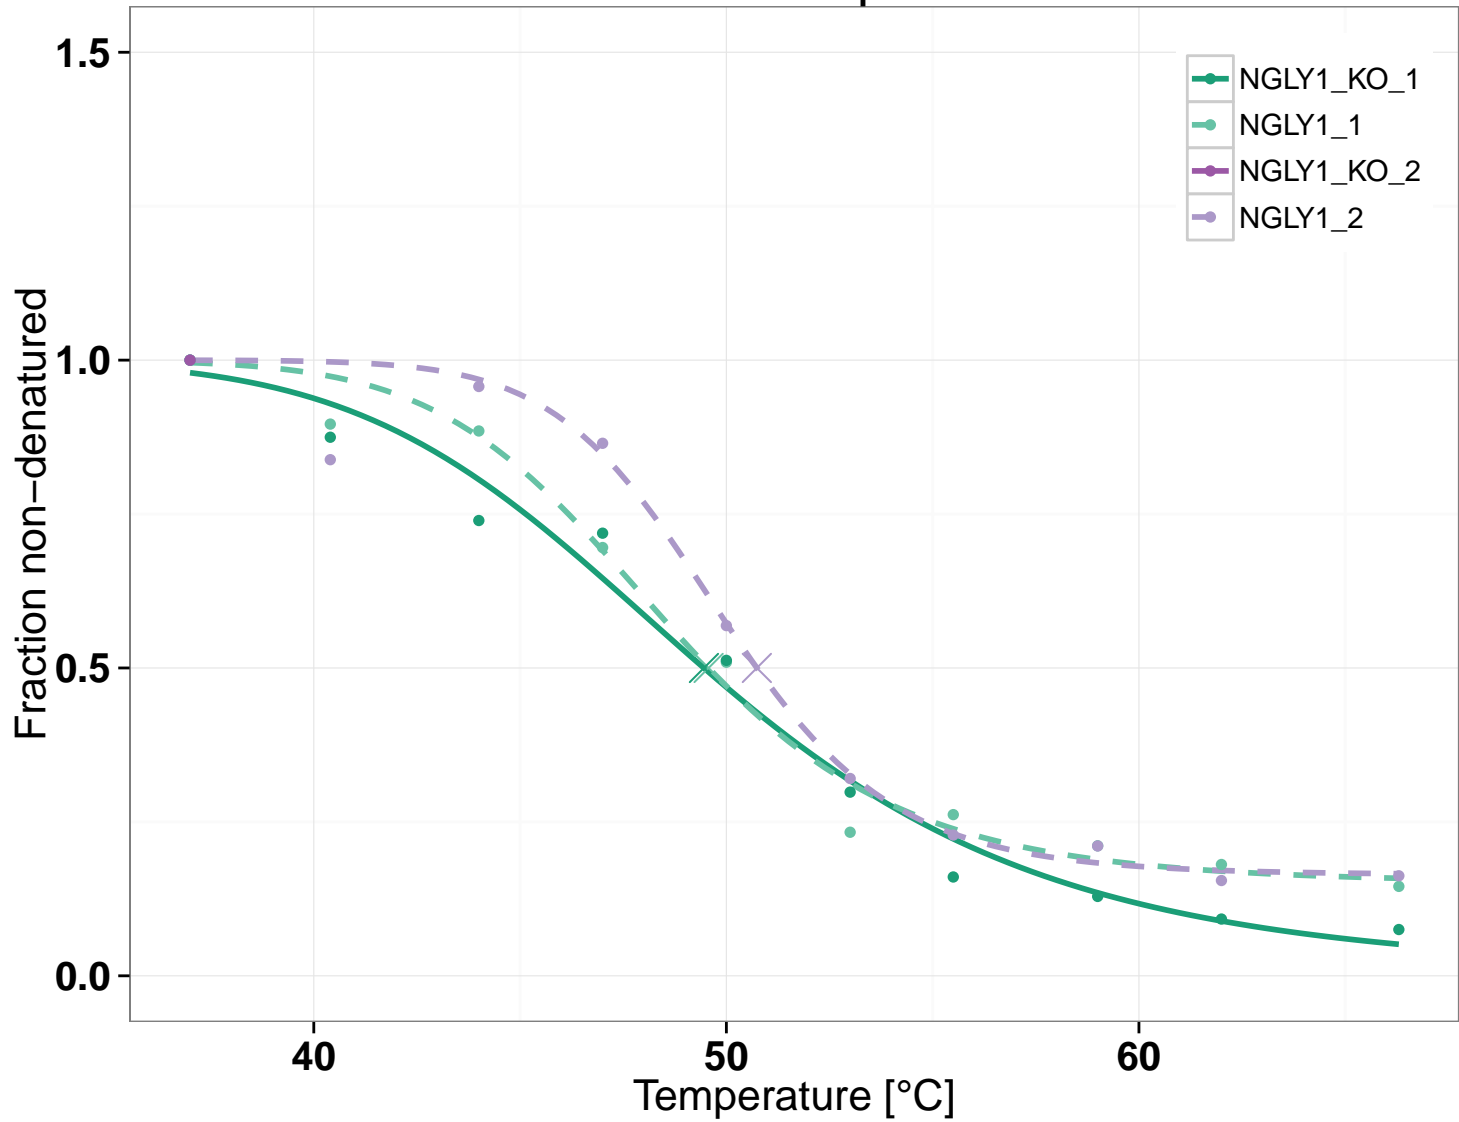

|            | meltPoint | slope  | plateau | R2   |
|------------|-----------|--------|---------|------|
| NGLY1_KO_1 | 49.46     | -0.06  | 0       | 0.98 |
| NGLY1_1    | 49.57     | -0.076 | 0.15    | 0.99 |
| NGLY1_KO_2 | -         | -      | -       | -    |
| NGLY1_2    | 50.74     | -0.1   | 0.16    | 0.98 |

Supplement: Supplementary file 1769 [file 1]

# IPI00018597.1|SYK

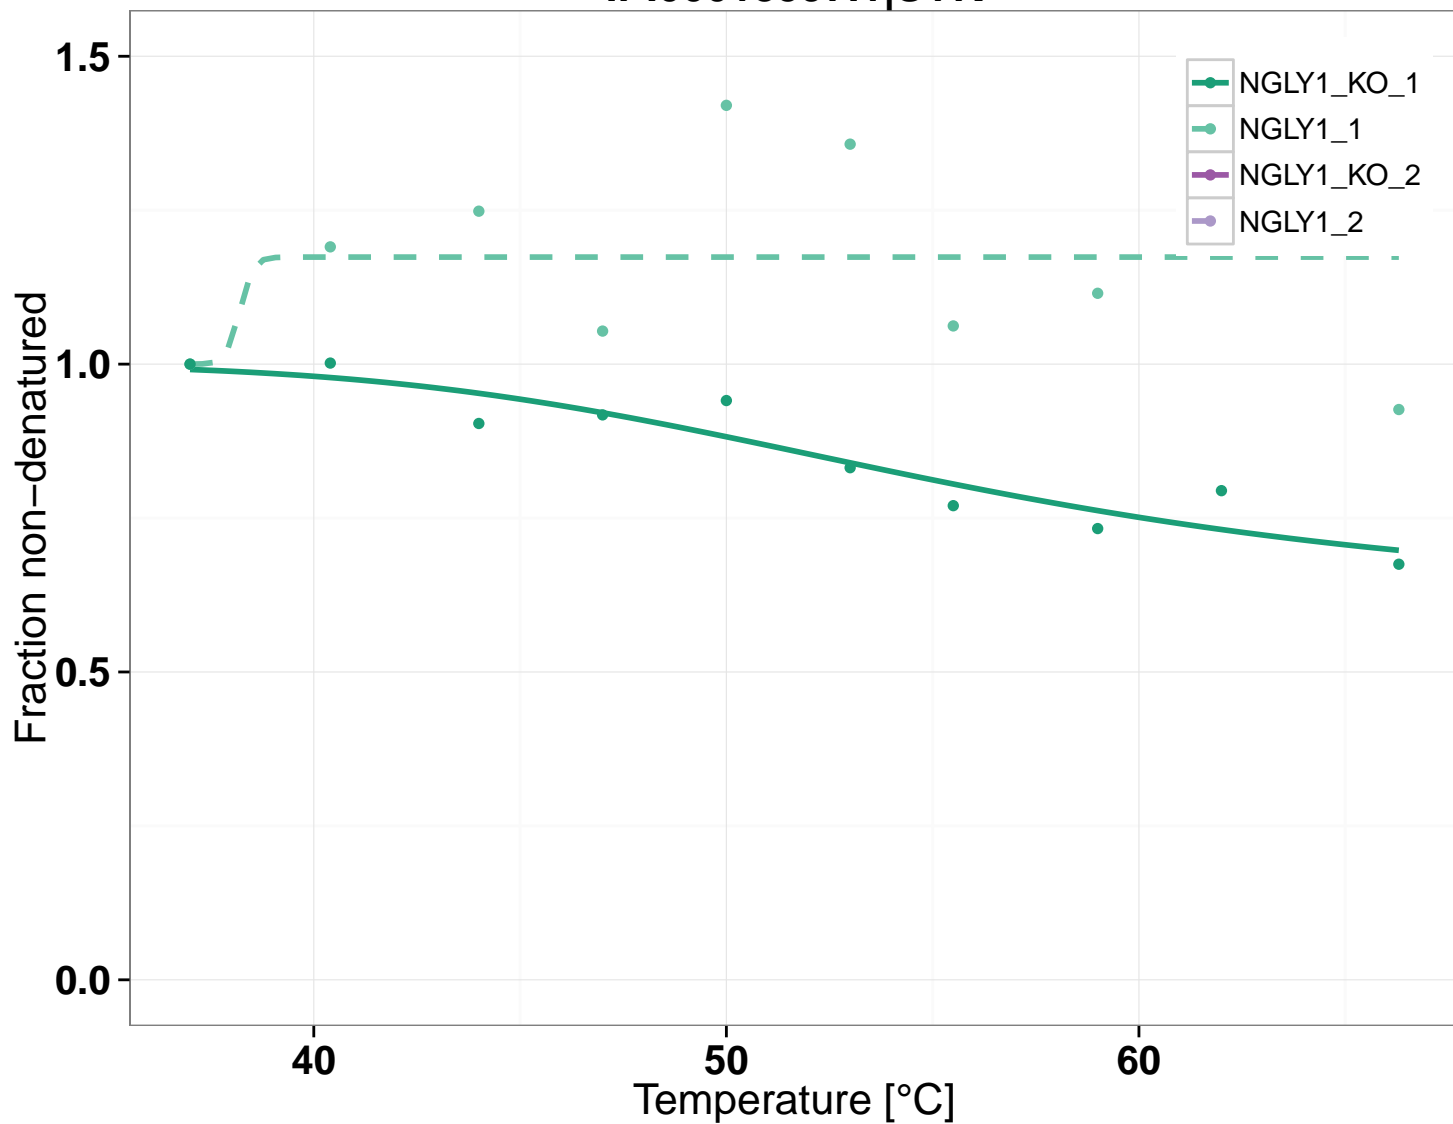

|            | meltPoint | slope  | plateau | R2   |
|------------|-----------|--------|---------|------|
| NGLY1_KO_1 | -         | -0.014 | 0.61    | 0.89 |
| NGLY1_1    | -         | 0.28   | 1.17    | 0.12 |
| NGLY1_KO_2 | -         | -      | -       | -    |
| NGLY1_2    | -         | -      | -       | -    |

Supplement: Supplementary file 1770 [file 1]

# IPI00176824.1|LOC100129086

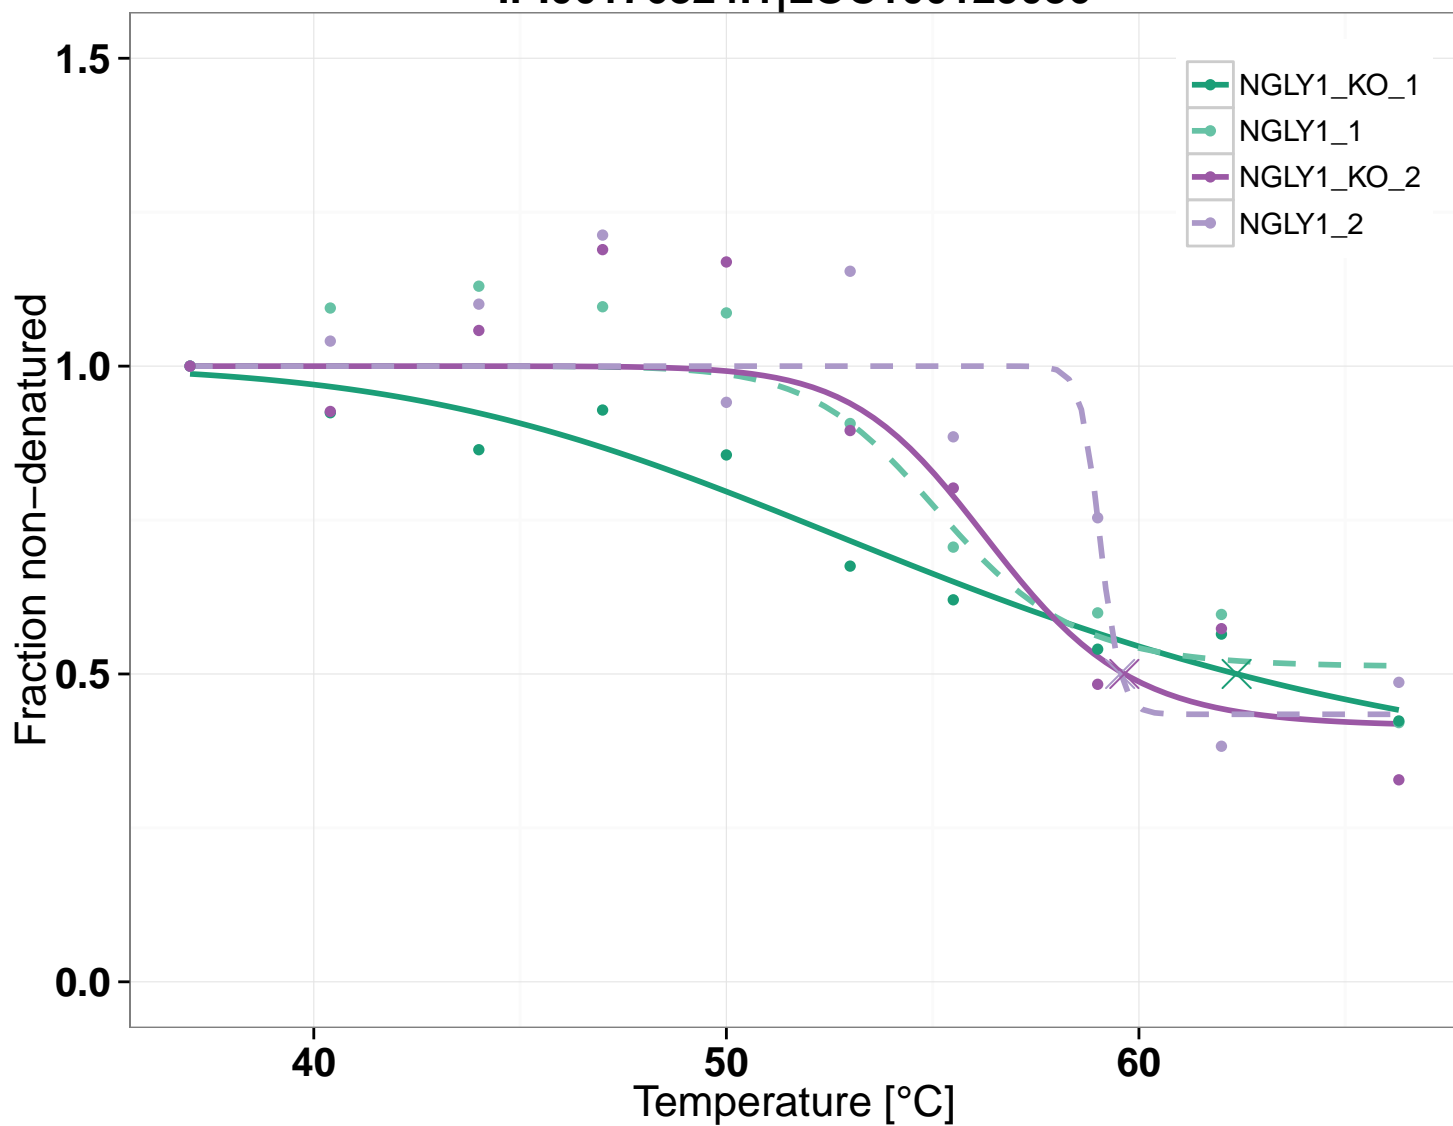

|            | meltPoint | slope  | plateau | R2   |
|------------|-----------|--------|---------|------|
| NGLY1_KO_1 | 62.37     | -0.027 | 0.28    | 0.94 |
| NGLY1_1    | -         | -0.076 | 0.51    | 0.9  |
| NGLY1_KO_2 | 59.65     | -0.086 | 0.41    | 0.86 |
| NGLY1_2    | 59.55     | -0.6   | 0.43    | 0.85 |

Supplement: Supplementary file 1771 [file 1]

IPI00002188.2|ARFGEF1

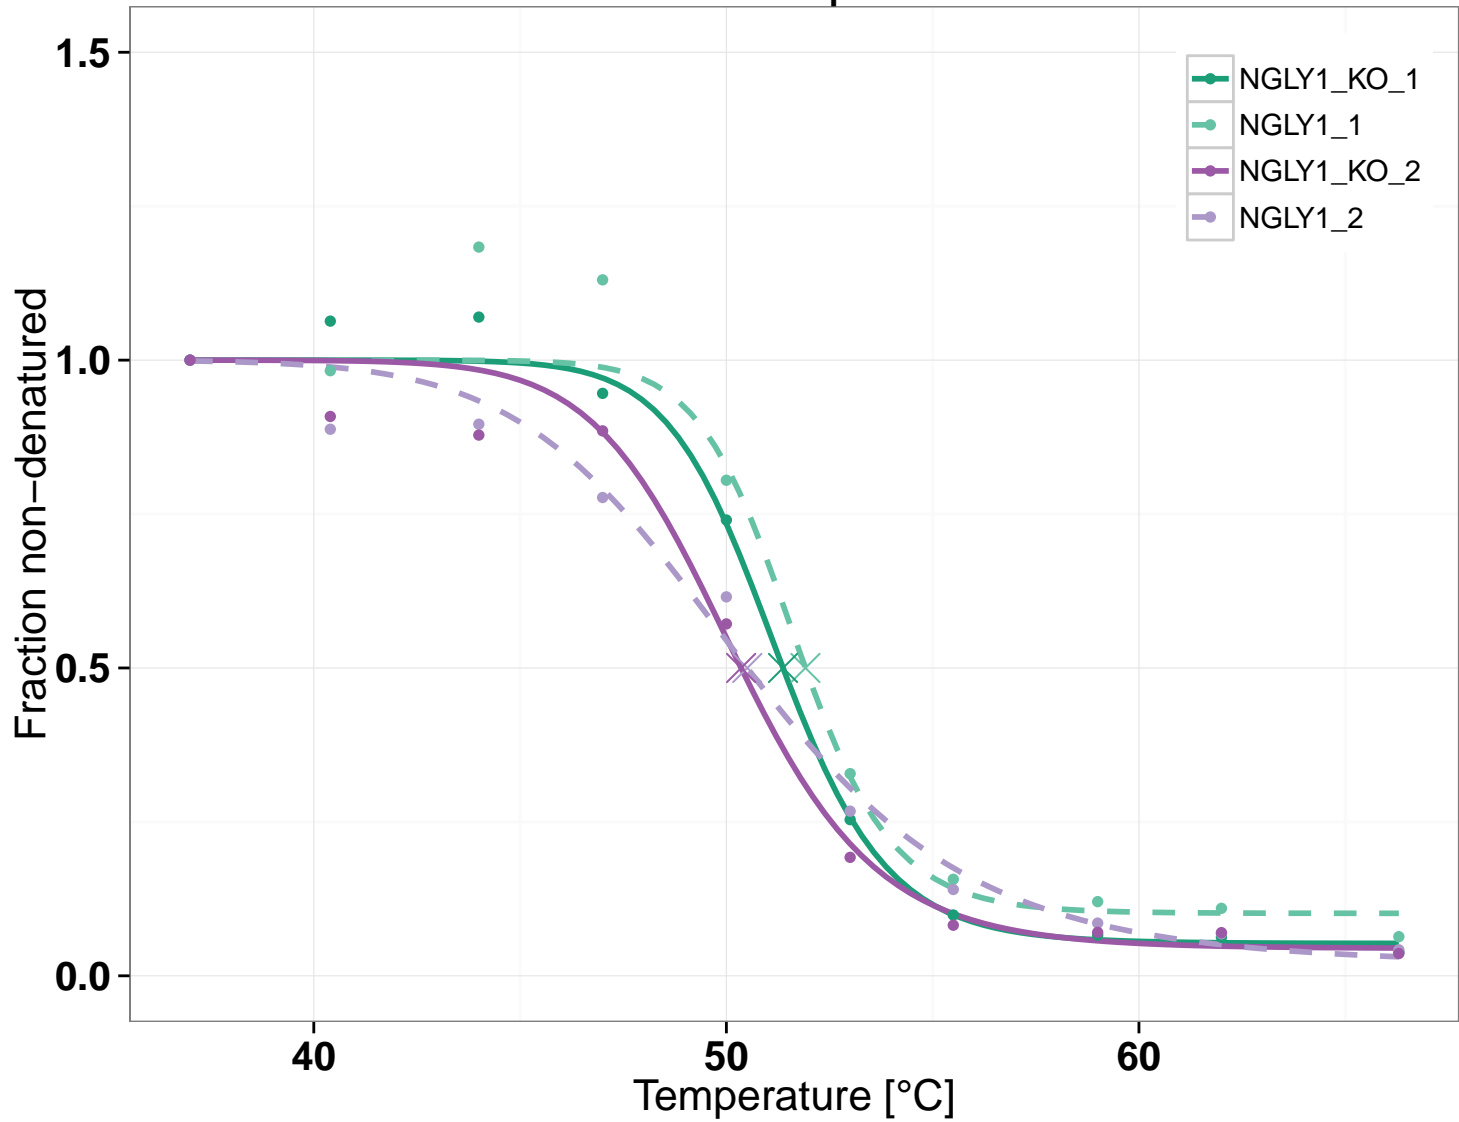

|            | meltPoint | slope  | plateau | R2   |
|------------|-----------|--------|---------|------|
| NGLY1_KO_1 | 51.37     | -0.18  | 0.05    | 0.99 |
| NGLY1_1    | 51.92     | -0.19  | 0.1     | 0.97 |
| NGLY1_KO_2 | 50.36     | -0.14  | 0.04    | 0.99 |
| NGLY1_2    | 50.51     | -0.089 | 0.02    | 0.99 |

Supplement: Supplementary file 1772 [file 1]

IPI00218624.1|SON

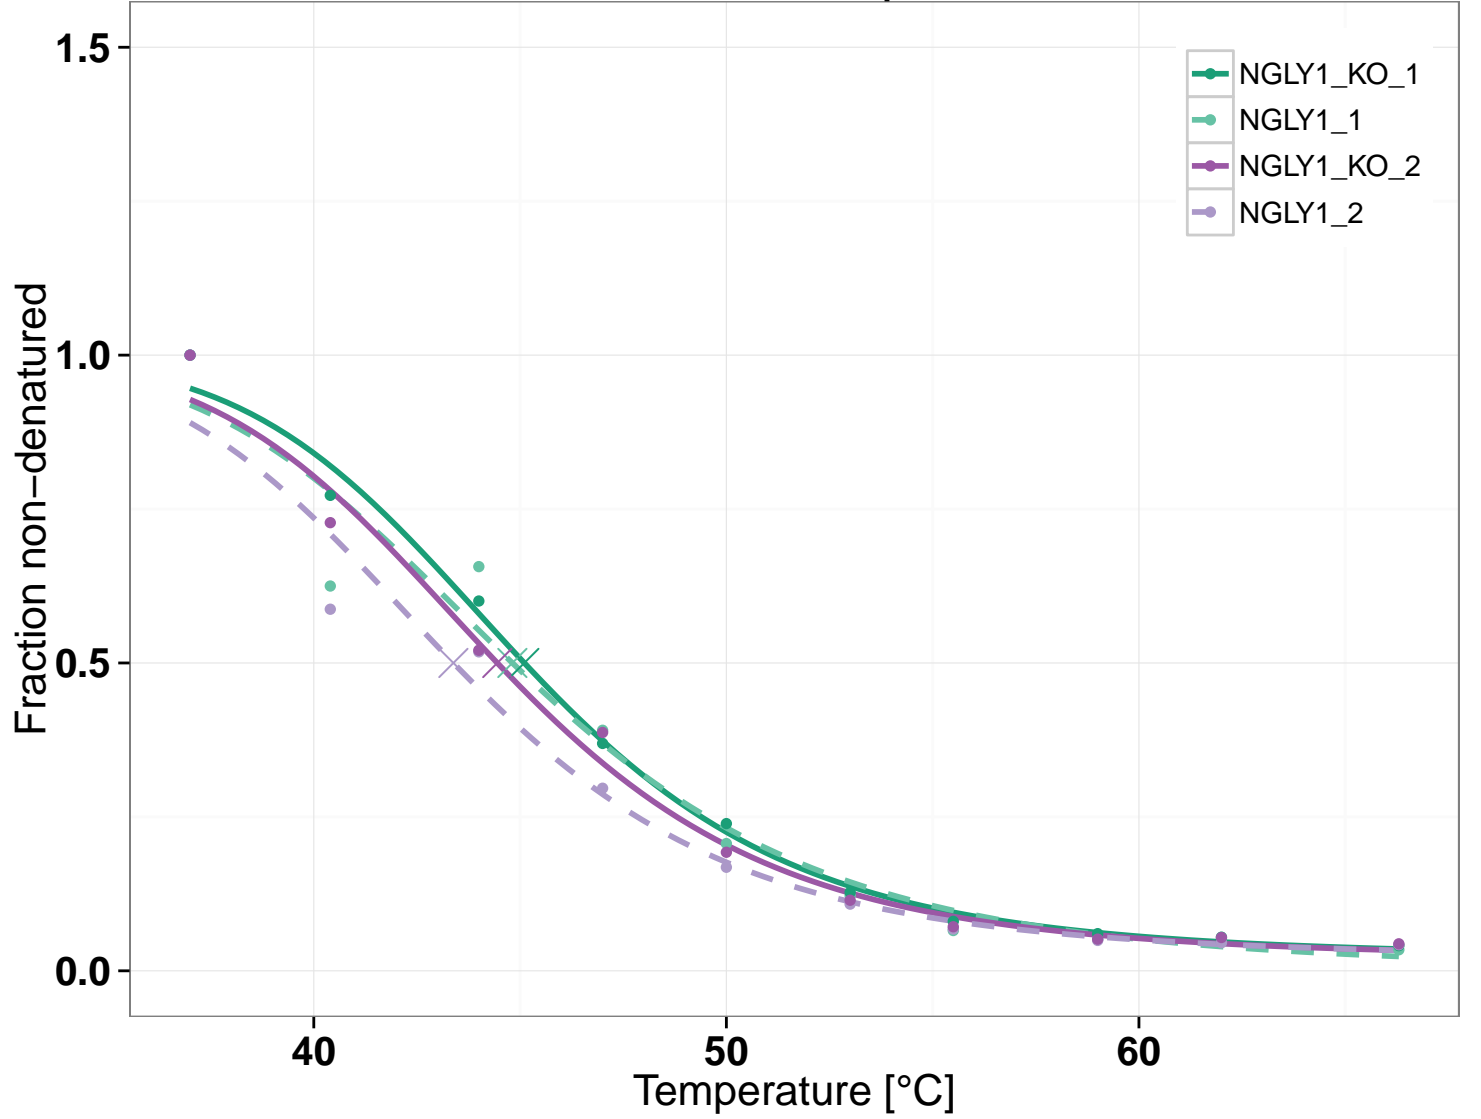

|            | meltPoint | slope  | plateau | R2   |
|------------|-----------|--------|---------|------|
| NGLY1_KO_1 | 45.1      | -0.074 | 0.02    | 0.99 |
| NGLY1_1    | 44.81     | -0.066 | 0       | 0.96 |
| NGLY1_KO_2 | 44.45     | -0.073 | 0.02    | 0.99 |
| NGLY1_2    | 43.38     | -0.071 | 0.02    | 0.97 |

Supplement: Supplementary file 1773 [file 1]

# IPI00477441.1|ROBLD3

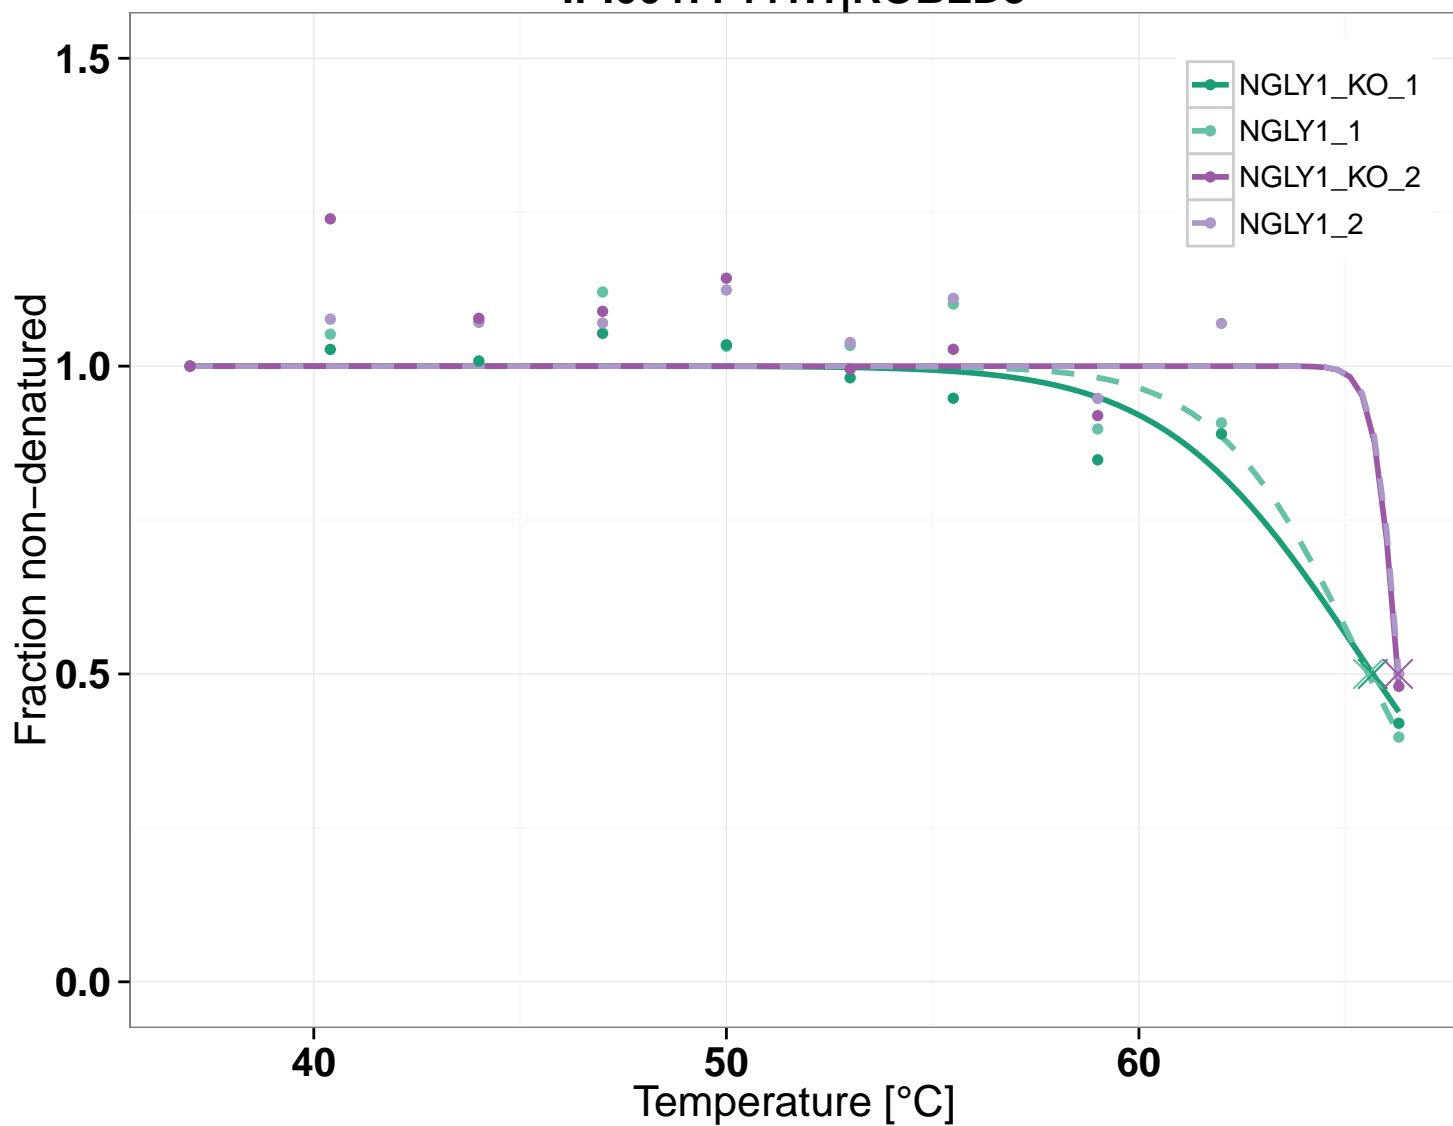

|            | meltPoint | slope  | plateau | R2   |
|------------|-----------|--------|---------|------|
| NGLY1_KO_1 | 65.67     | -0.099 | 0       | 0.93 |
| NGLY1_1    | 65.56     | -0.14  | 0       | 0.89 |
| NGLY1_KO_2 | 66.28     | -0.85  | 0       | 0.6  |
| NGLY1_2    | -         | -0.85  | 0       | 0.83 |

Supplement: Supplementary file 1774 [file 1]

IPI00478737.3|RFWD3

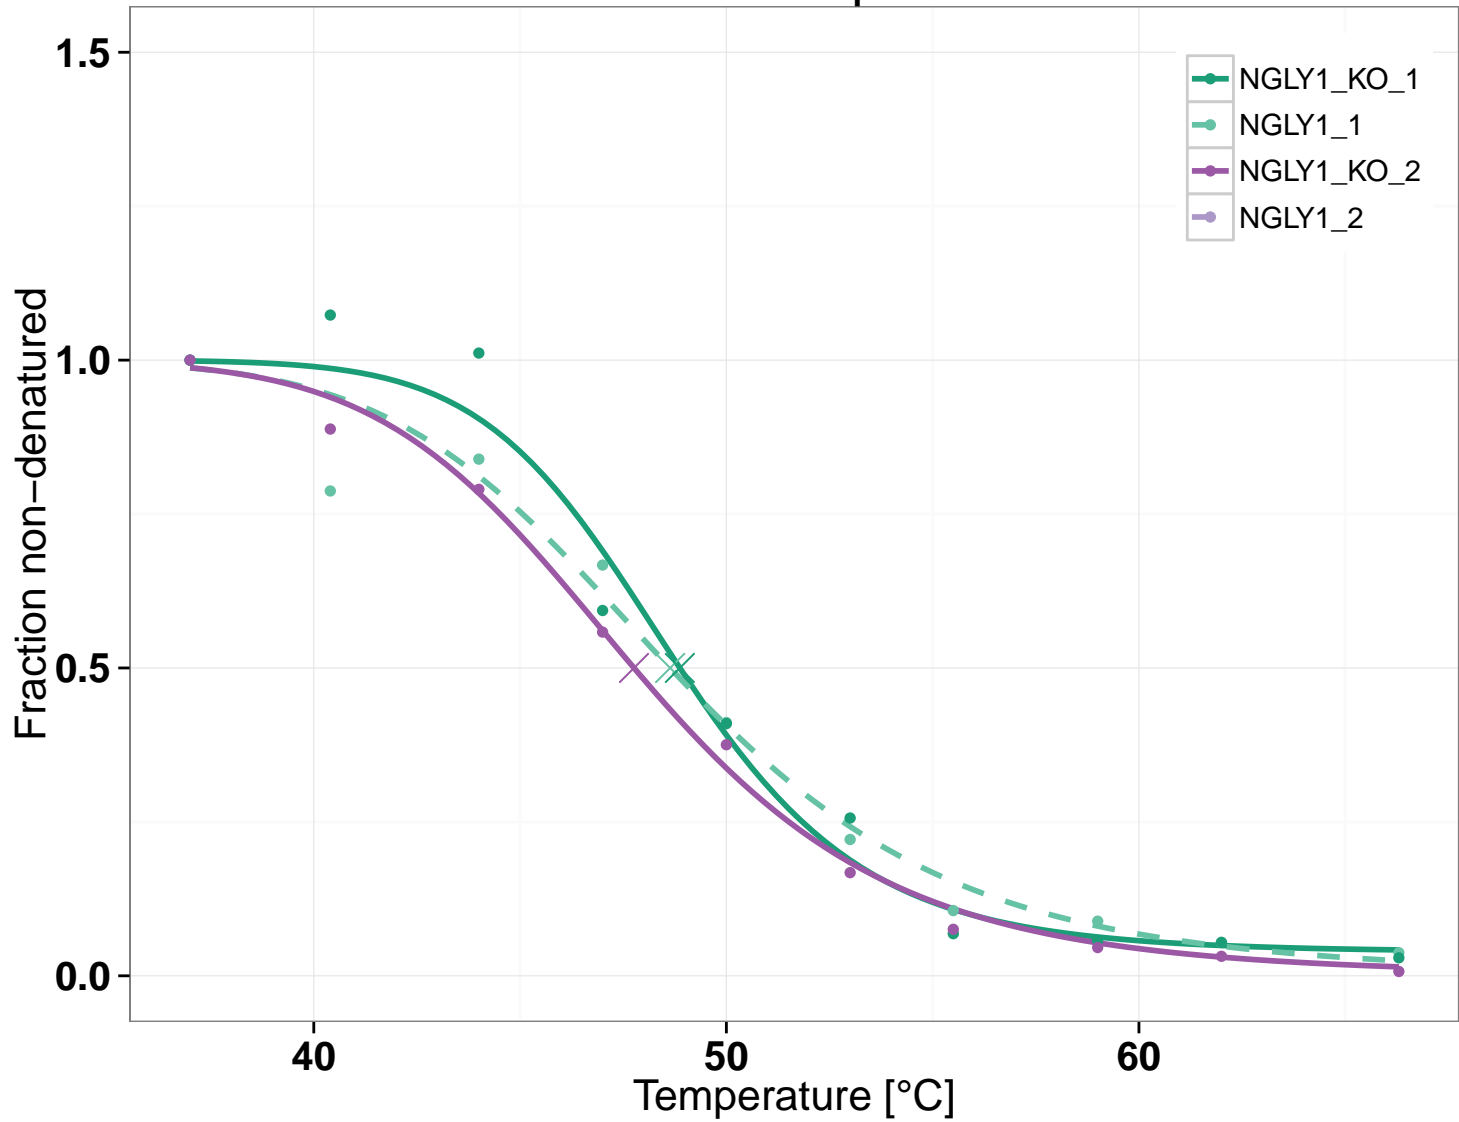

|            | meltPoint | slope  | plateau | R2   |
|------------|-----------|--------|---------|------|
| NGLY1_KO_1 | 48.87     | -0.1   | 0.04    | 0.98 |
| NGLY1_1    | 48.64     | -0.073 | 0       | 0.98 |
| NGLY1_KO_2 | 47.76     | -0.08  | 0       | 1    |
| NGLY1_2    | -         | -      | -       | -    |

Supplement: Supplementary file 1775 [file 1]

IPI00001960.4|CLIC4

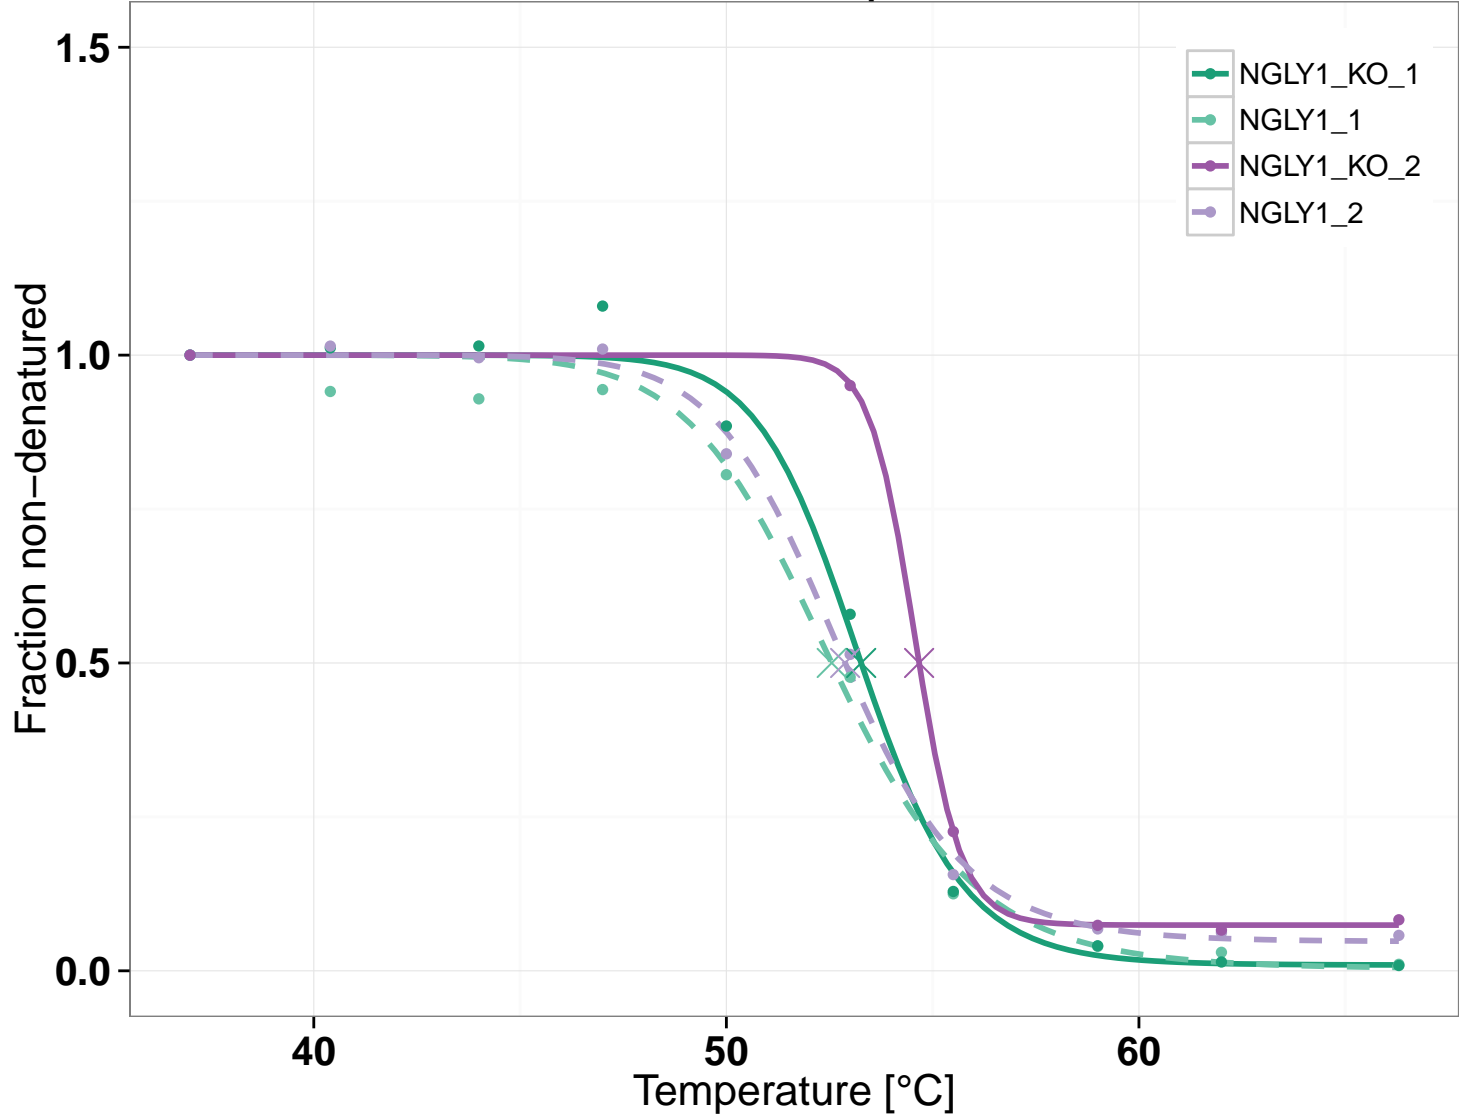

|            | meltPoint | slope | plateau | R2   |
|------------|-----------|-------|---------|------|
| NGLY1_KO_1 | 53.27     | -0.2  | 0.01    | 0.99 |
| NGLY1_1    | 52.55     | -0.14 | 0       | 0.99 |
| NGLY1_KO_2 | 54.67     | -0.42 | 0.07    | 0.54 |
| NGLY1_2    | 52.88     | -0.16 | 0.05    | 1    |

Supplement: Supplementary file 1776 [file 1]

IPI00010884.1|LOC390688

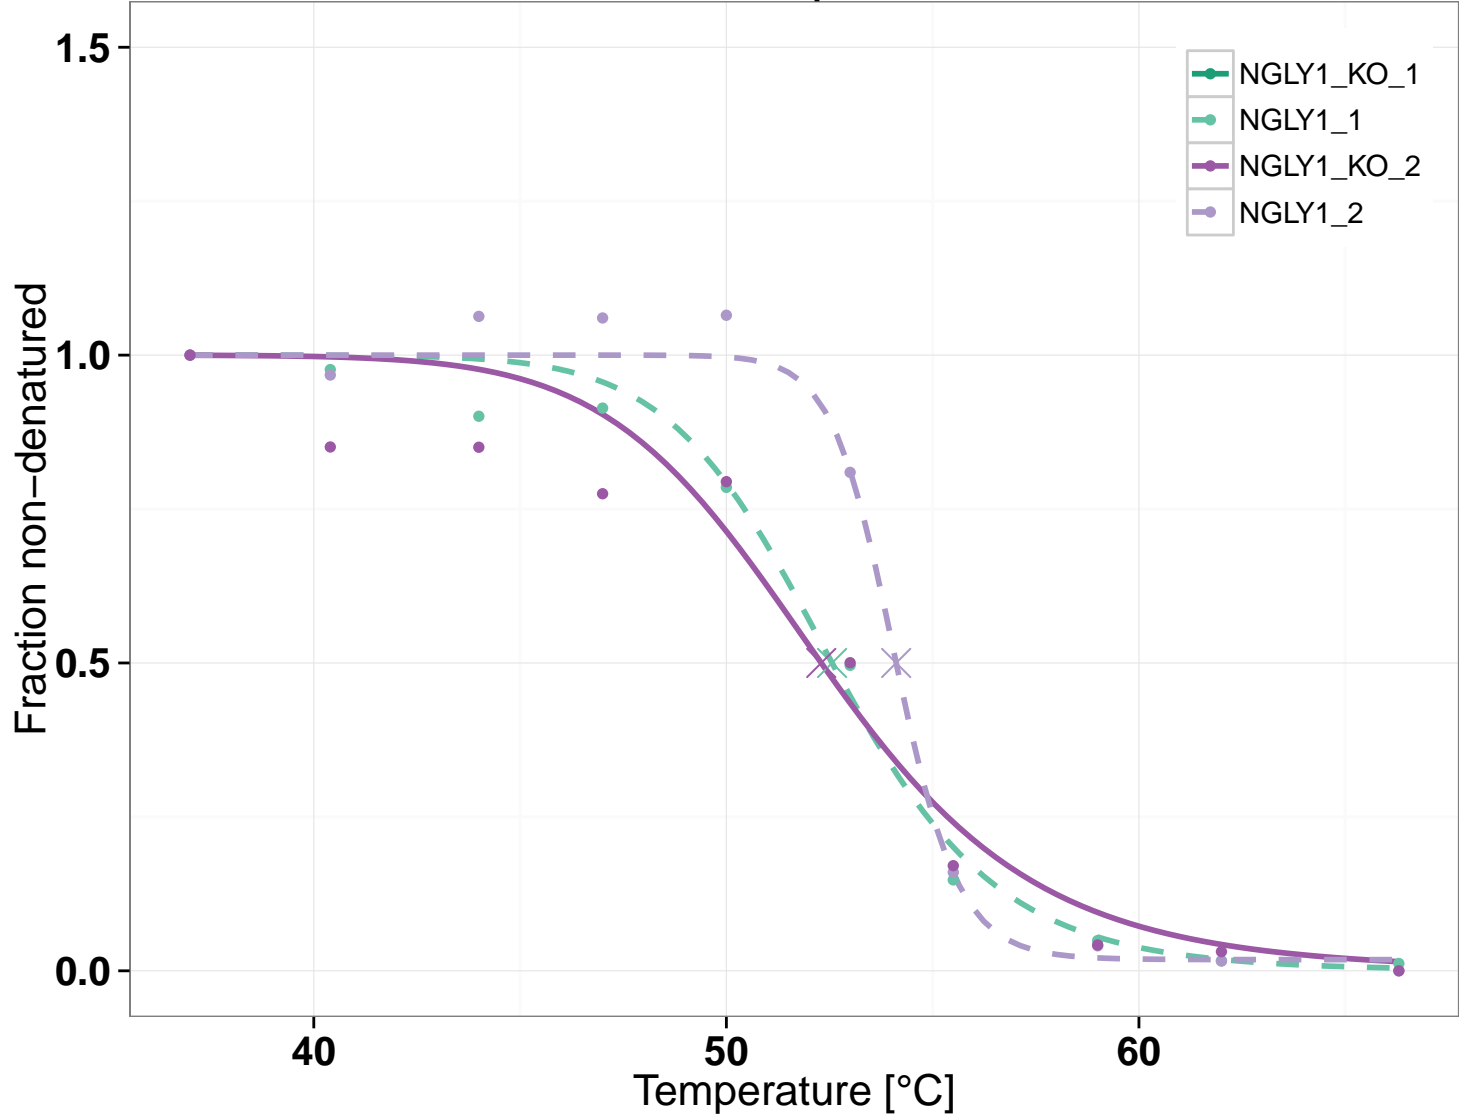

|            | meltPoint | slope  | plateau | R2   |
|------------|-----------|--------|---------|------|
| NGLY1_KO_1 | -         | -      | -       | -    |
| NGLY1_1    | 52.56     | -0.12  | 0       | 0.99 |
| NGLY1_KO_2 | 52.3      | -0.096 | 0       | 0.95 |
| NGLY1_2    | 54.12     | -0.32  | 0.02    | 0.99 |

Supplement: Supplementary file 1777 [file 1]

# IPI00514127.1|HDGF

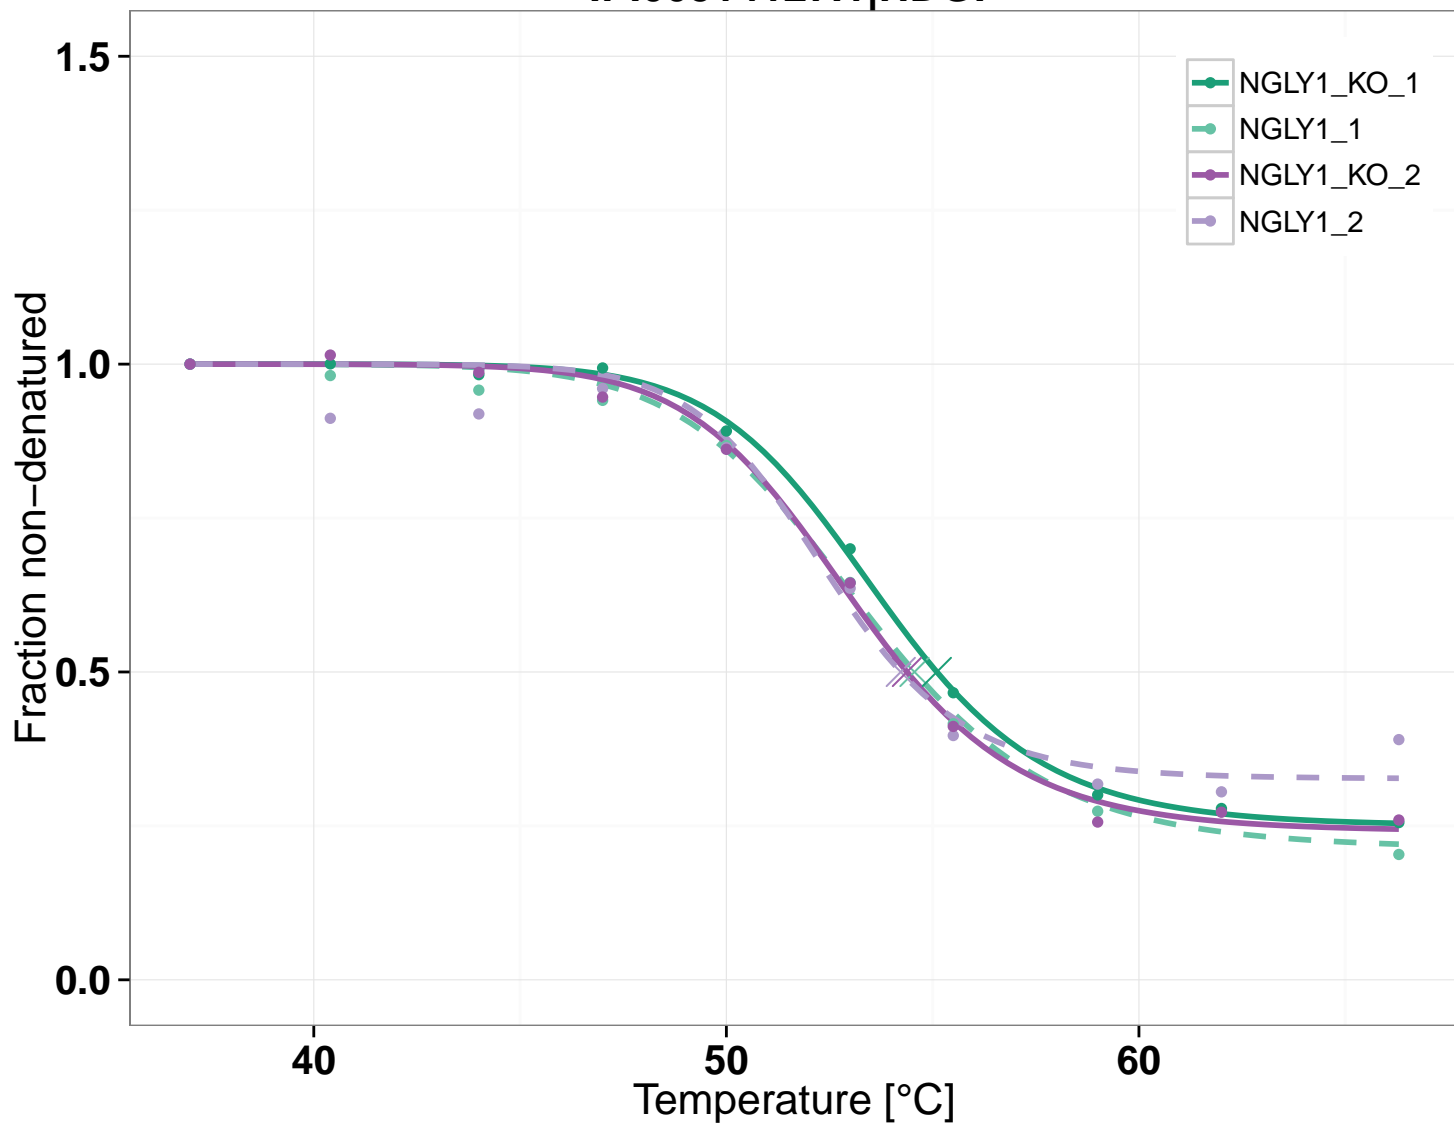

|            | meltPoint | slope  | plateau | R2   |
|------------|-----------|--------|---------|------|
| NGLY1_KO_1 | 55.1      | -0.094 | 0.25    | 1    |
| NGLY1_1    | 54.56     | -0.087 | 0.21    | 1    |
| NGLY1_KO_2 | 54.38     | -0.095 | 0.24    | 1    |
| NGLY1_2    | 54.23     | -0.1   | 0.33    | 0.97 |

Supplement: Supplementary file 1778 [file 1]

# IPI00871296.1|ATP2A3

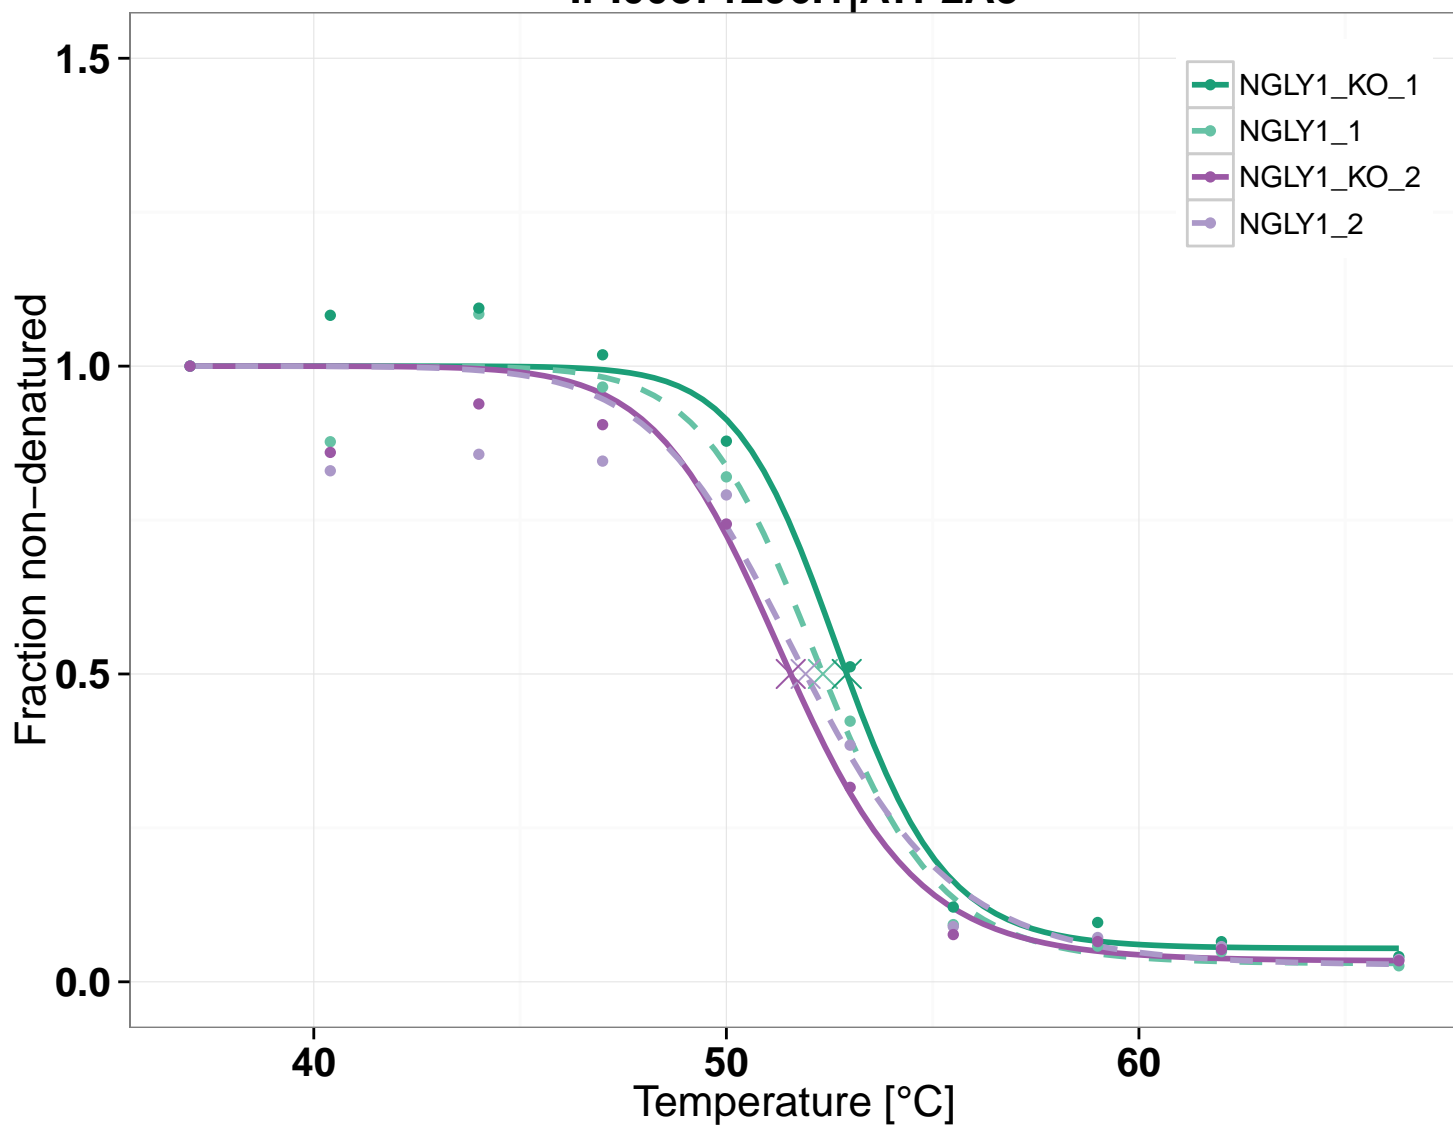

|            | meltPoint | slope | plateau | R2   |
|------------|-----------|-------|---------|------|
| NGLY1_KO_1 | 52.92     | -0.19 | 0.05    | 0.99 |
| NGLY1_1    | 52.34     | -0.17 | 0.03    | 0.99 |
| NGLY1_KO_2 | 51.56     | -0.15 | 0.03    | 0.98 |
| NGLY1_2    | 51.92     | -0.13 | 0.03    | 0.96 |

Supplement: Supplementary file 1779 [file 1]

IPI00220070.5|PFKFB4

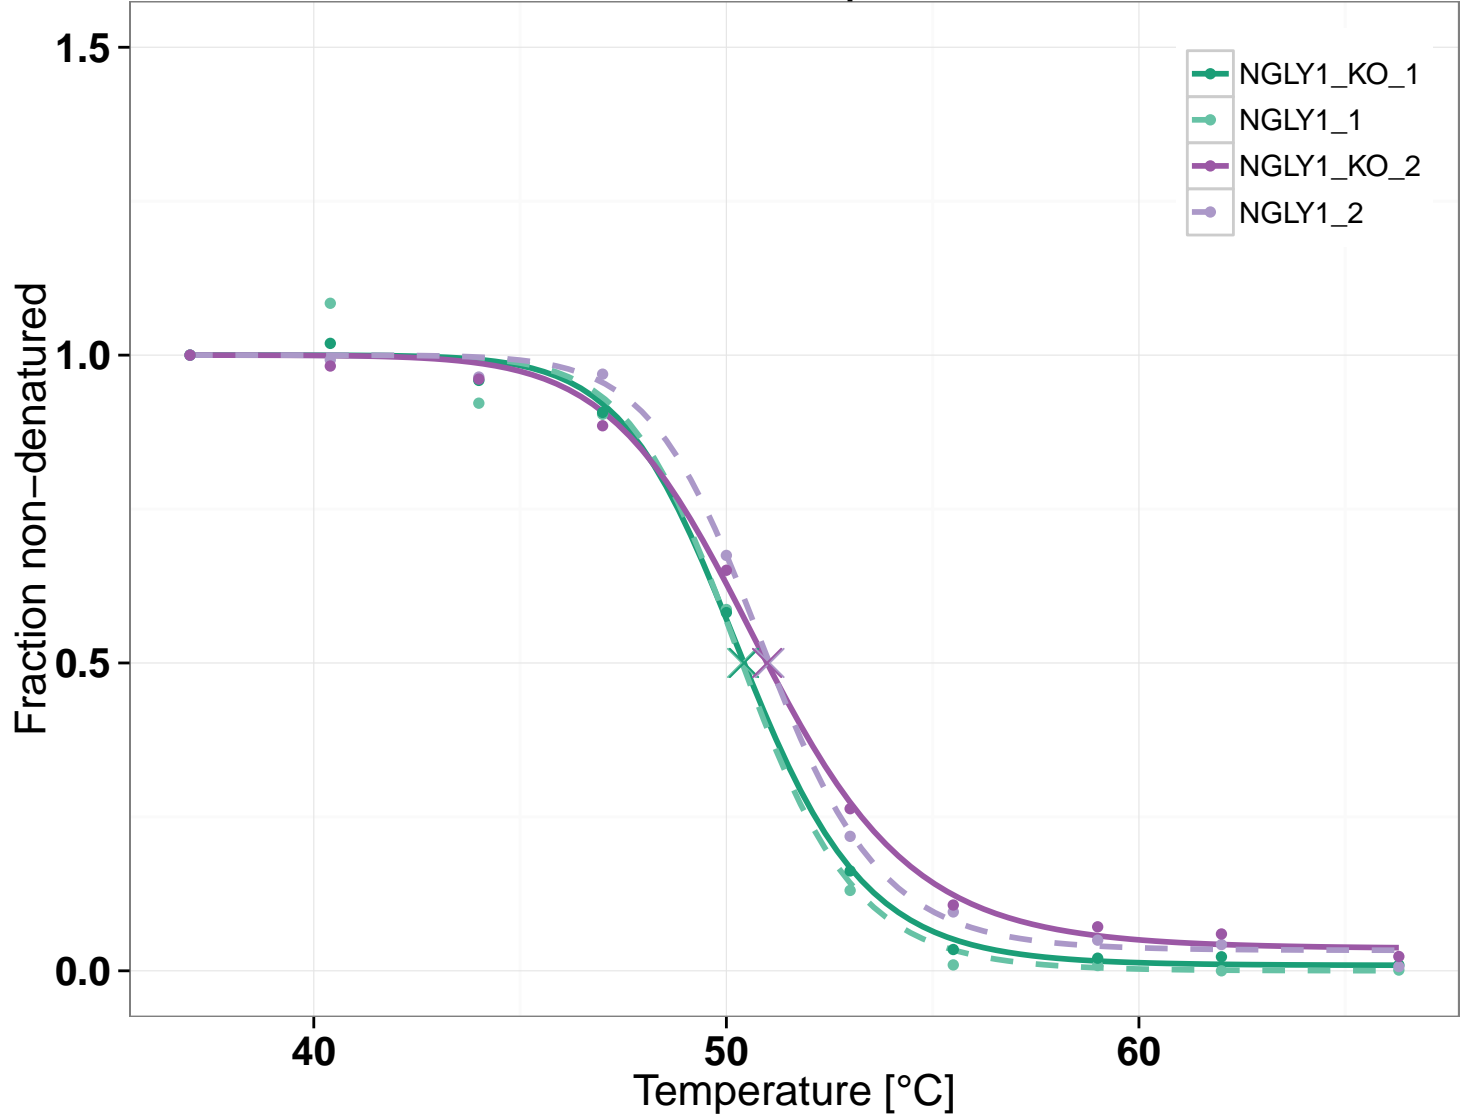

|            | meltPoint | slope | plateau | R2   |
|------------|-----------|-------|---------|------|
| NGLY1_KO_1 | 50.43     | -0.17 | 0.01    | 1    |
| NGLY1_1    | 50.38     | -0.18 | 0       | 0.99 |
| NGLY1_KO_2 | 50.99     | -0.13 | 0.04    | 1    |
| NGLY1_2    | 51.04     | -0.17 | 0.03    | 1    |

Supplement: Supplementary file 1780 [file 1]

IPI00795812.1|MIF4GD

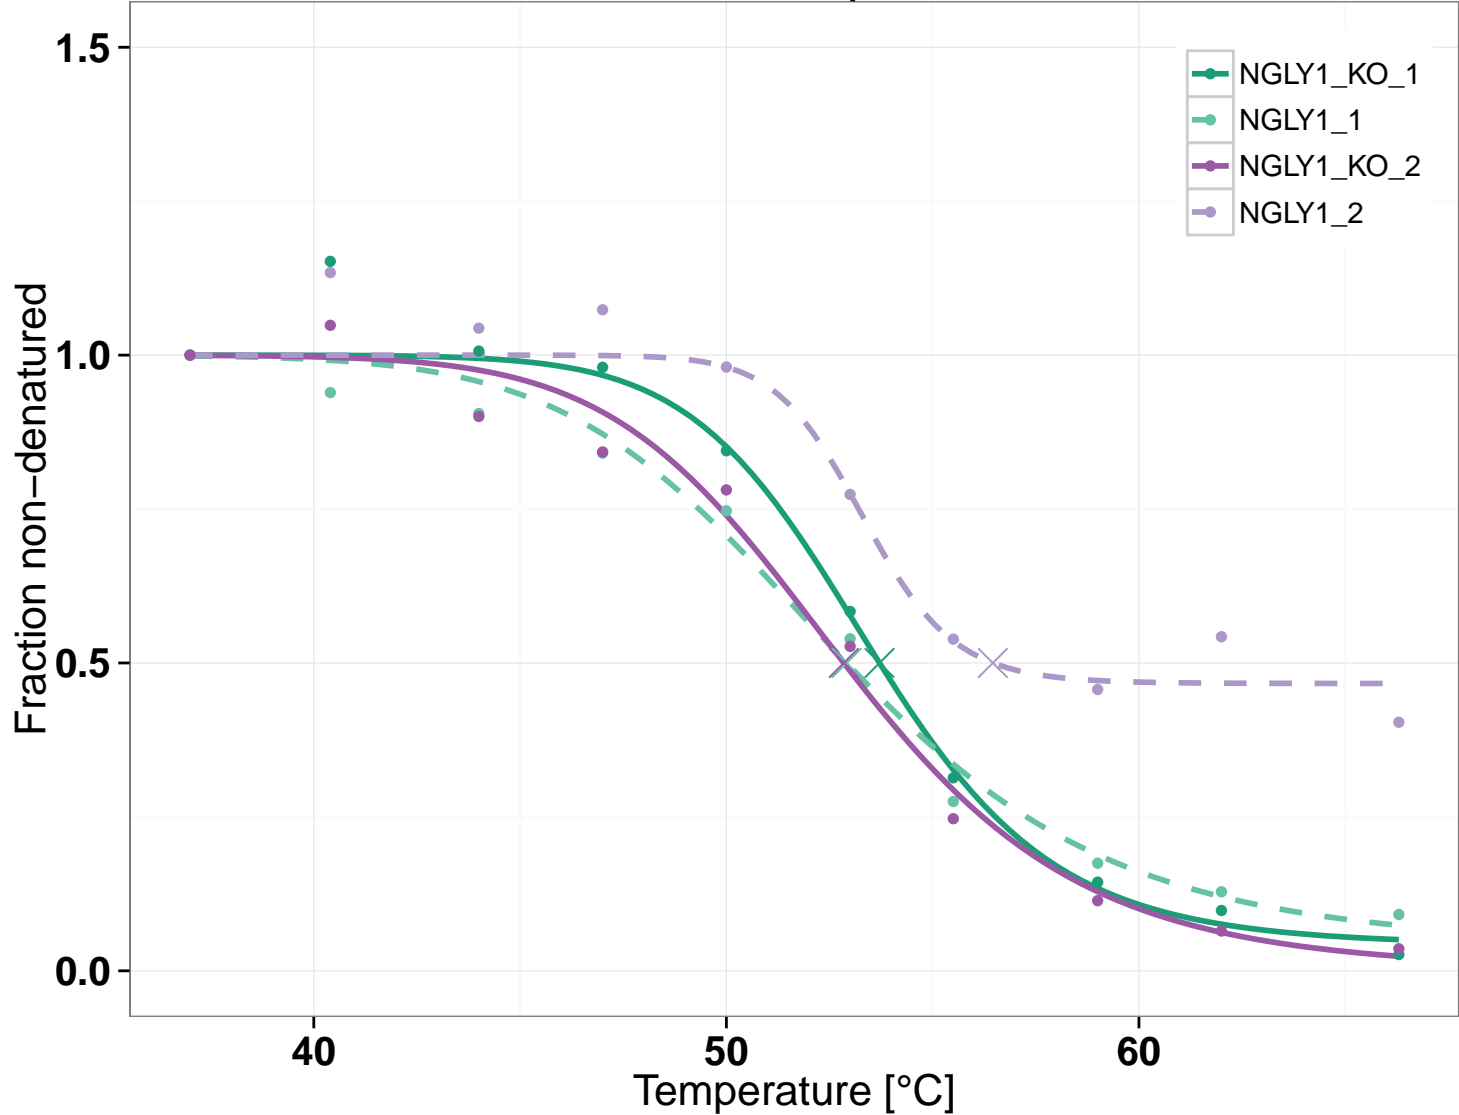

|            | meltPoint | slope  | plateau | R2   |
|------------|-----------|--------|---------|------|
| NGLY1_KO_1 | 53.71     | -0.11  | 0.04    | 0.99 |
| NGLY1_1    | 52.92     | -0.072 | 0.04    | 0.99 |
| NGLY1_KO_2 | 52.85     | -0.088 | 0       | 0.99 |
| NGLY1_2    | 56.46     | -0.12  | 0.47    | 0.95 |

Supplement: Supplementary file 1781 [file 1]

IPI00156979.1|ATG4C

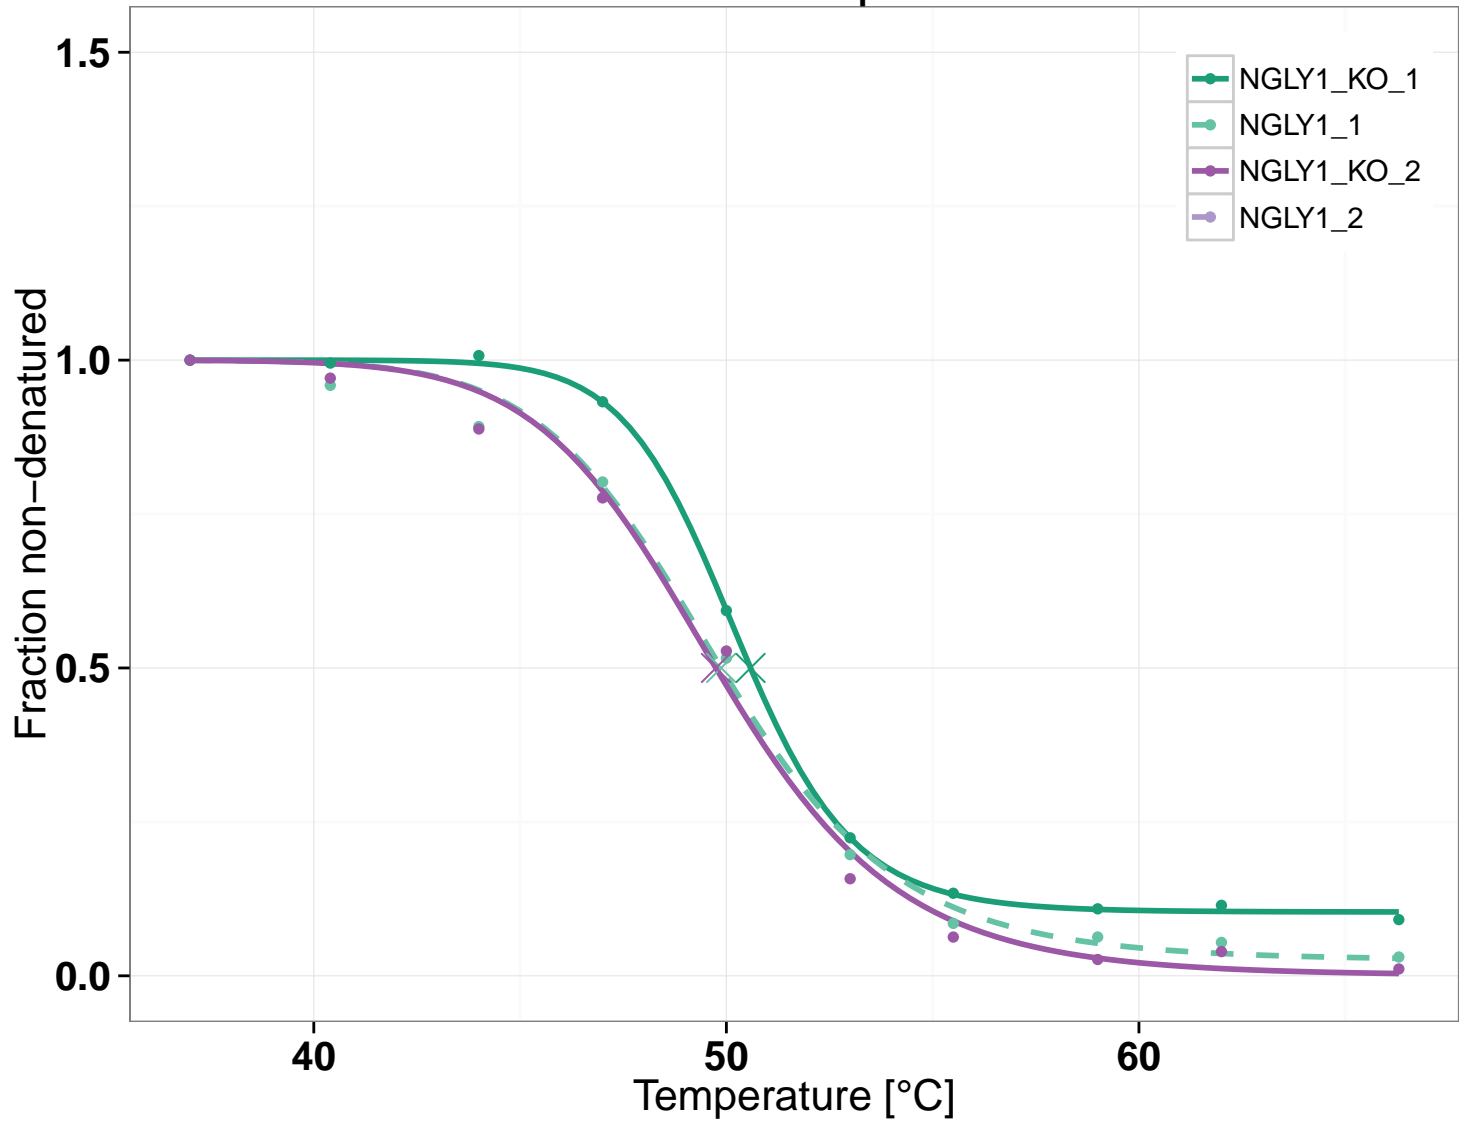

|            | meltPoint | slope | plateau | R2   |
|------------|-----------|-------|---------|------|
| NGLY1_KO_1 | 50.59     | -0.16 | 0.1     | 1    |
| NGLY1_1    | 49.87     | -0.11 | 0.02    | 1    |
| NGLY1_KO_2 | 49.75     | -0.11 | 0       | 0.99 |
| NGLY1_2    | -         | -     | -       | -    |

Supplement: Supplementary file 1782 [file 1]

IPI00012913.2|SPRY2

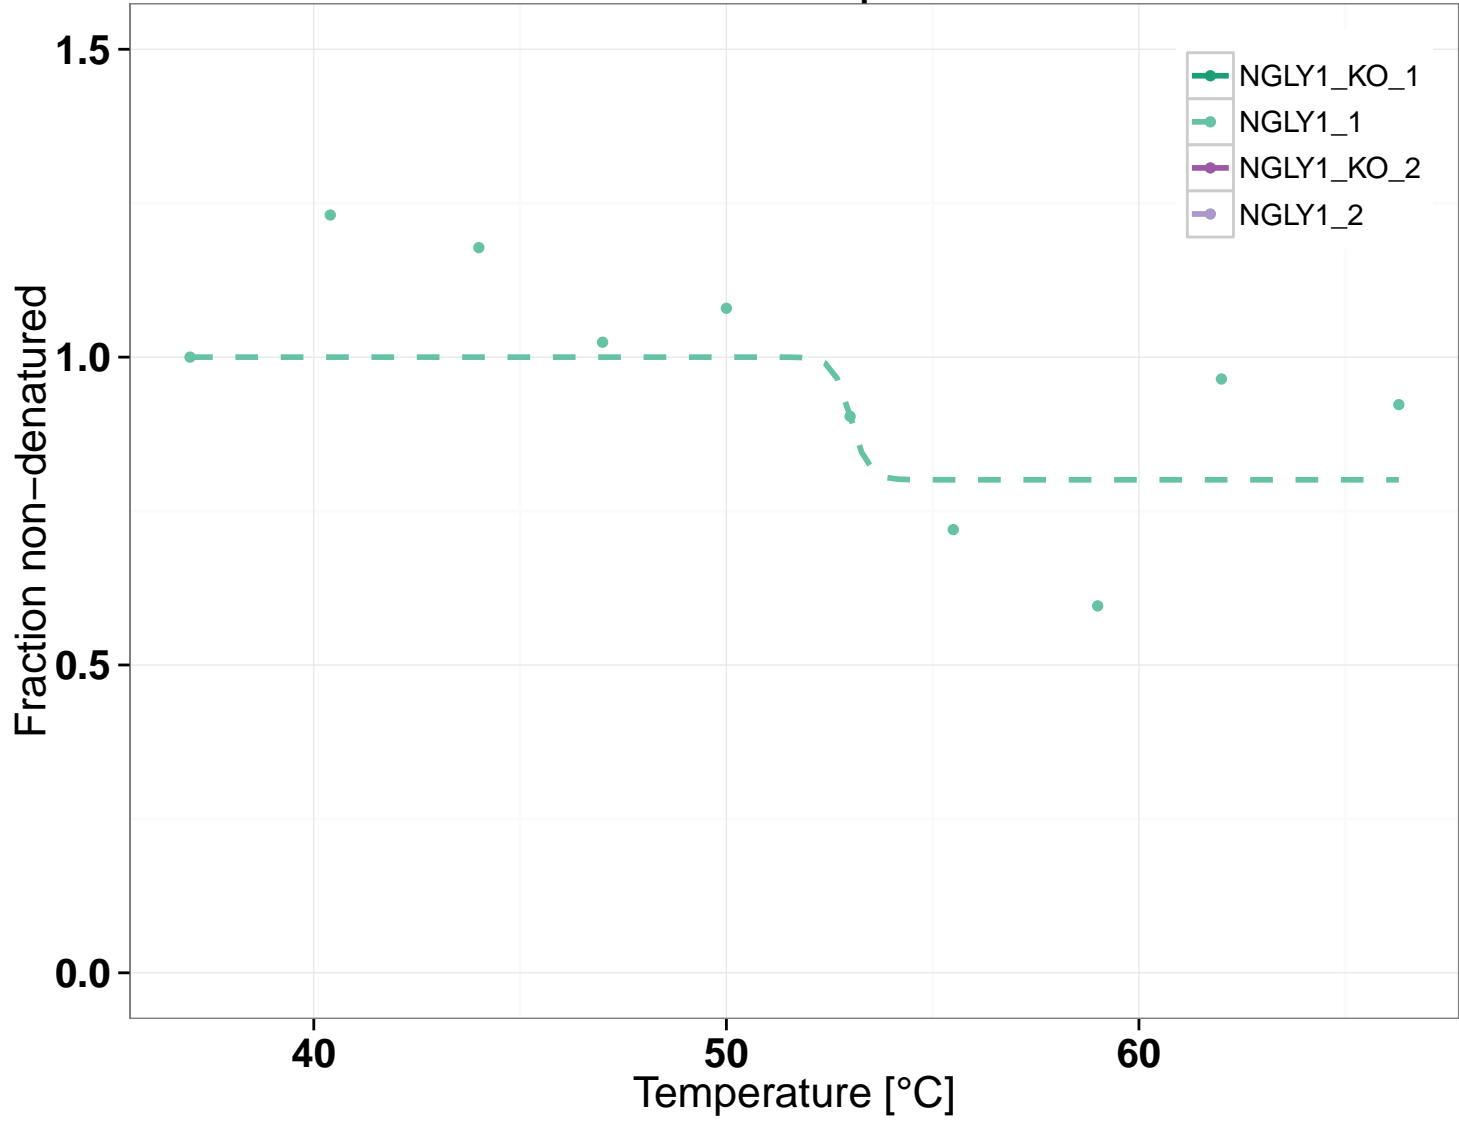

|            | meltPoint | slope | plateau | R2   |
|------------|-----------|-------|---------|------|
| NGLY1_KO_1 | -         | -     | -       | -    |
| NGLY1_1    | -         | -0.23 | 0.8     | 0.46 |
| NGLY1_KO_2 | -         | -     | -       | -    |
| NGLY1_2    | -         | -     | -       | -    |

Supplement: Supplementary file 1783 [file 1]

IPI00844303.1|UNC84A

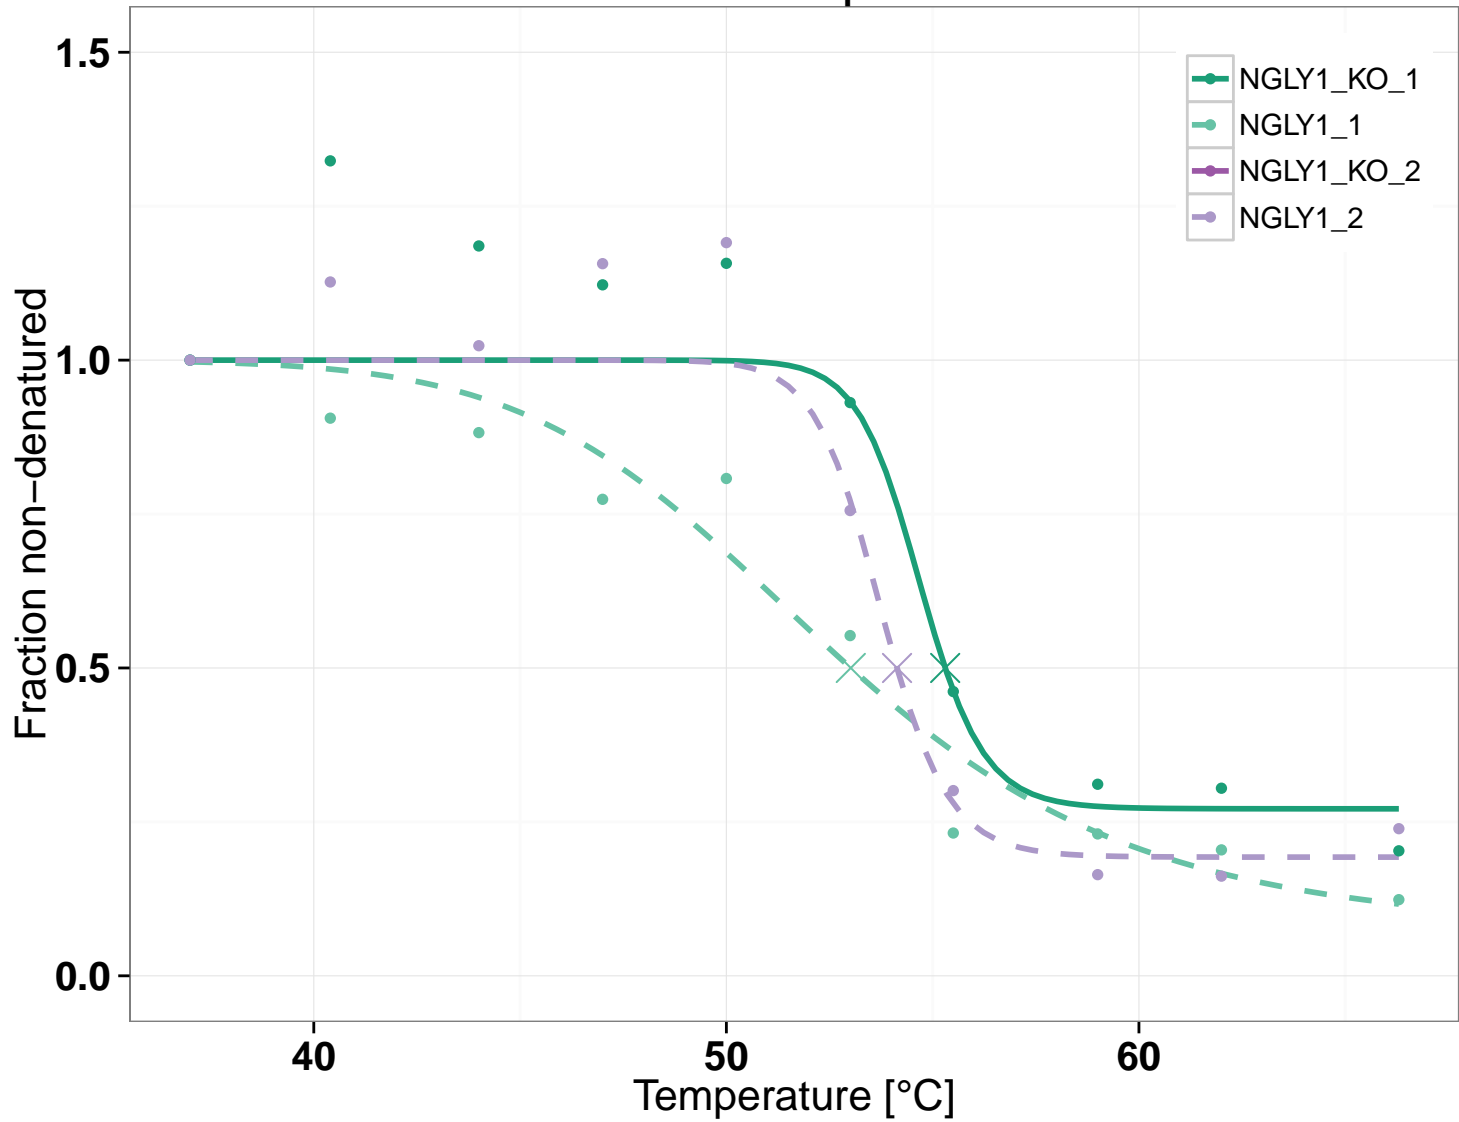

|            | meltPoint | slope  | plateau | R2   |
|------------|-----------|--------|---------|------|
| NGLY1_KO_1 | 55.3      | -0.24  | 0.27    | 0.89 |
| NGLY1_1    | 53.02     | -0.063 | 0.07    | 0.95 |
| NGLY1_KO_2 | -         | -      | -       | -    |
| NGLY1_2    | 54.14     | -0.25  | 0.19    | 0.95 |

Supplement: Supplementary file 1784 [file 1]

IPI00221117.3|ACYP1

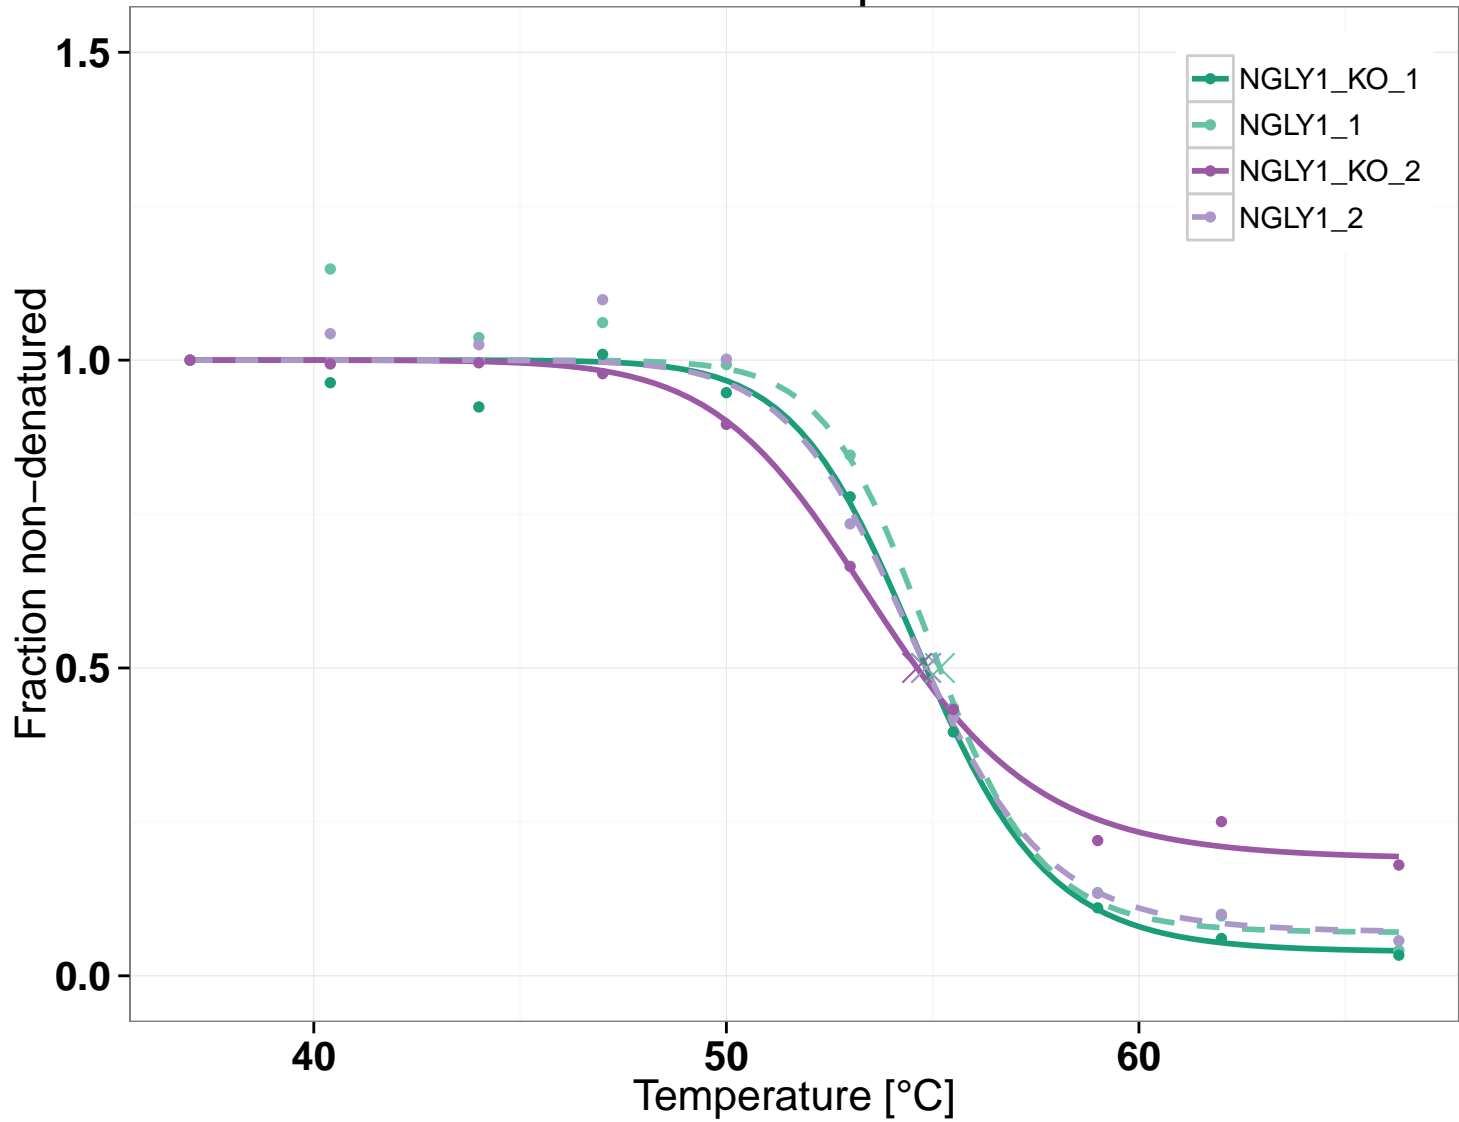

|            | meltPoint | slope | plateau | R2   |
|------------|-----------|-------|---------|------|
| NGLY1_KO_1 | 54.84     | -0.16 | 0.04    | 1    |
| NGLY1_1    | 55.17     | -0.18 | 0.07    | 0.98 |
| NGLY1_KO_2 | 54.62     | -0.1  | 0.19    | 1    |
| NGLY1_2    | 54.84     | -0.15 | 0.07    | 0.99 |

Supplement: Supplementary file 1785 [file 1]

# IPI00296934.3|NKAP

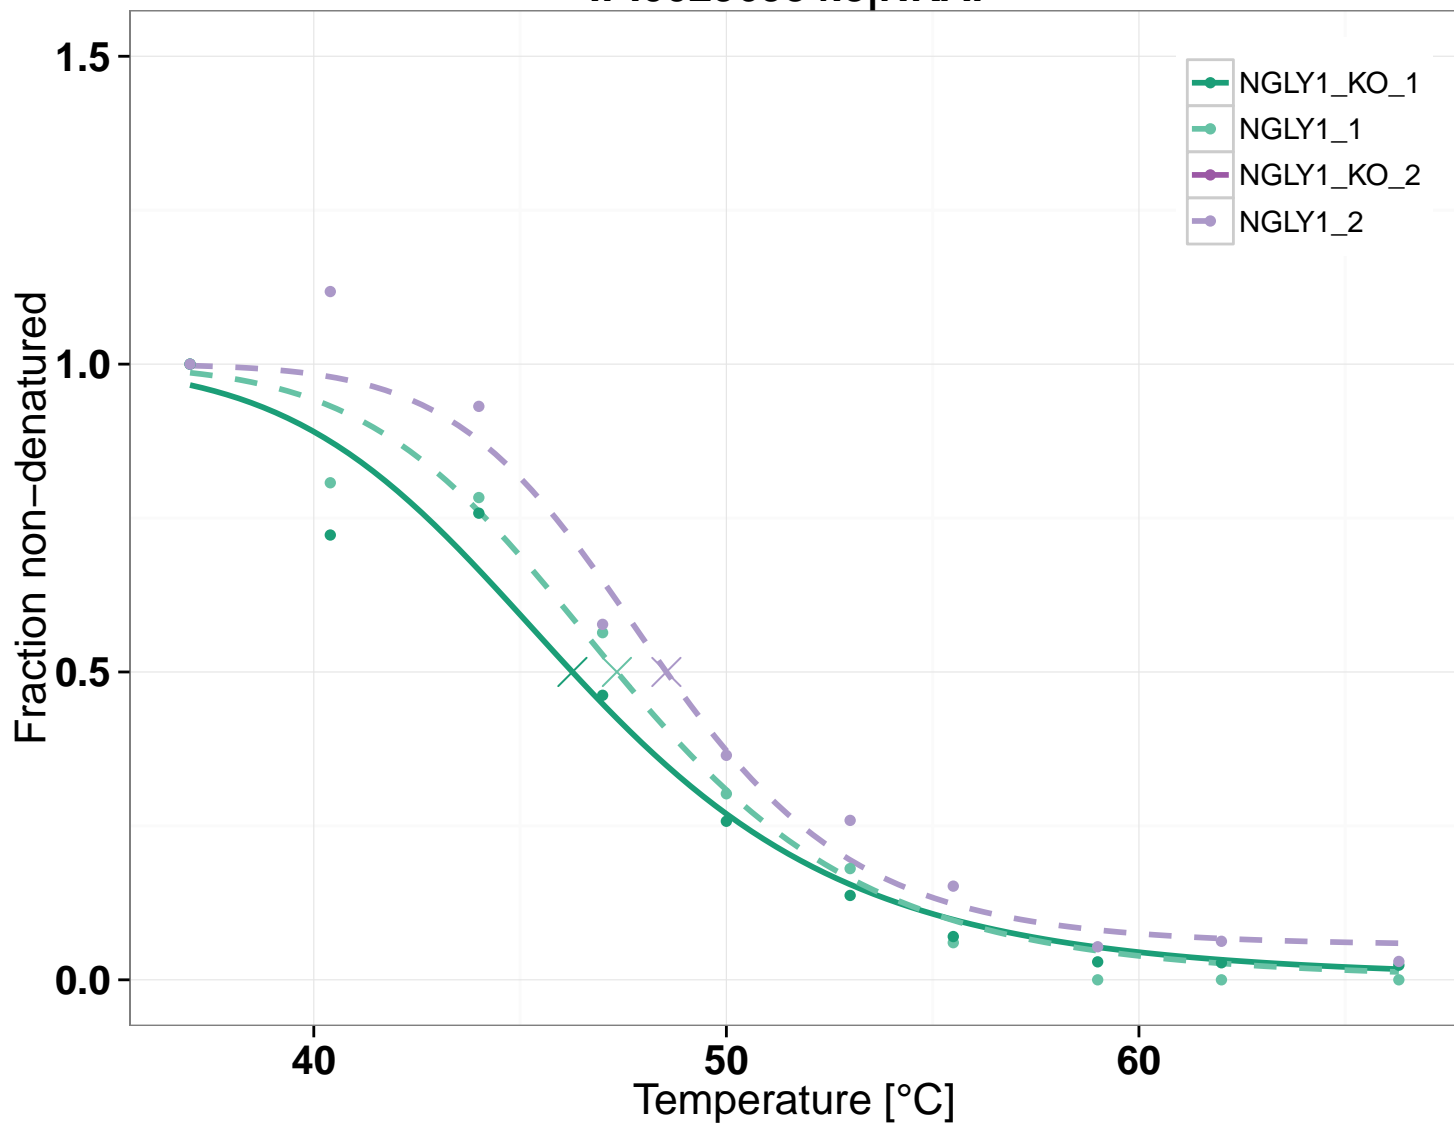

|            | meltPoint | slope  | plateau | R2   |
|------------|-----------|--------|---------|------|
| NGLY1_KO_1 | 46.27     | -0.074 | 0       | 0.97 |
| NGLY1_1    | 47.35     | -0.082 | 0       | 0.98 |
| NGLY1_KO_2 | —         | —      | —       | —    |
| NGLY1_2    | 48.55     | -0.097 | 0.05    | 0.98 |

Supplement: Supplementary file 1786 [file 1]

IPI00385928.2|C4ORF14

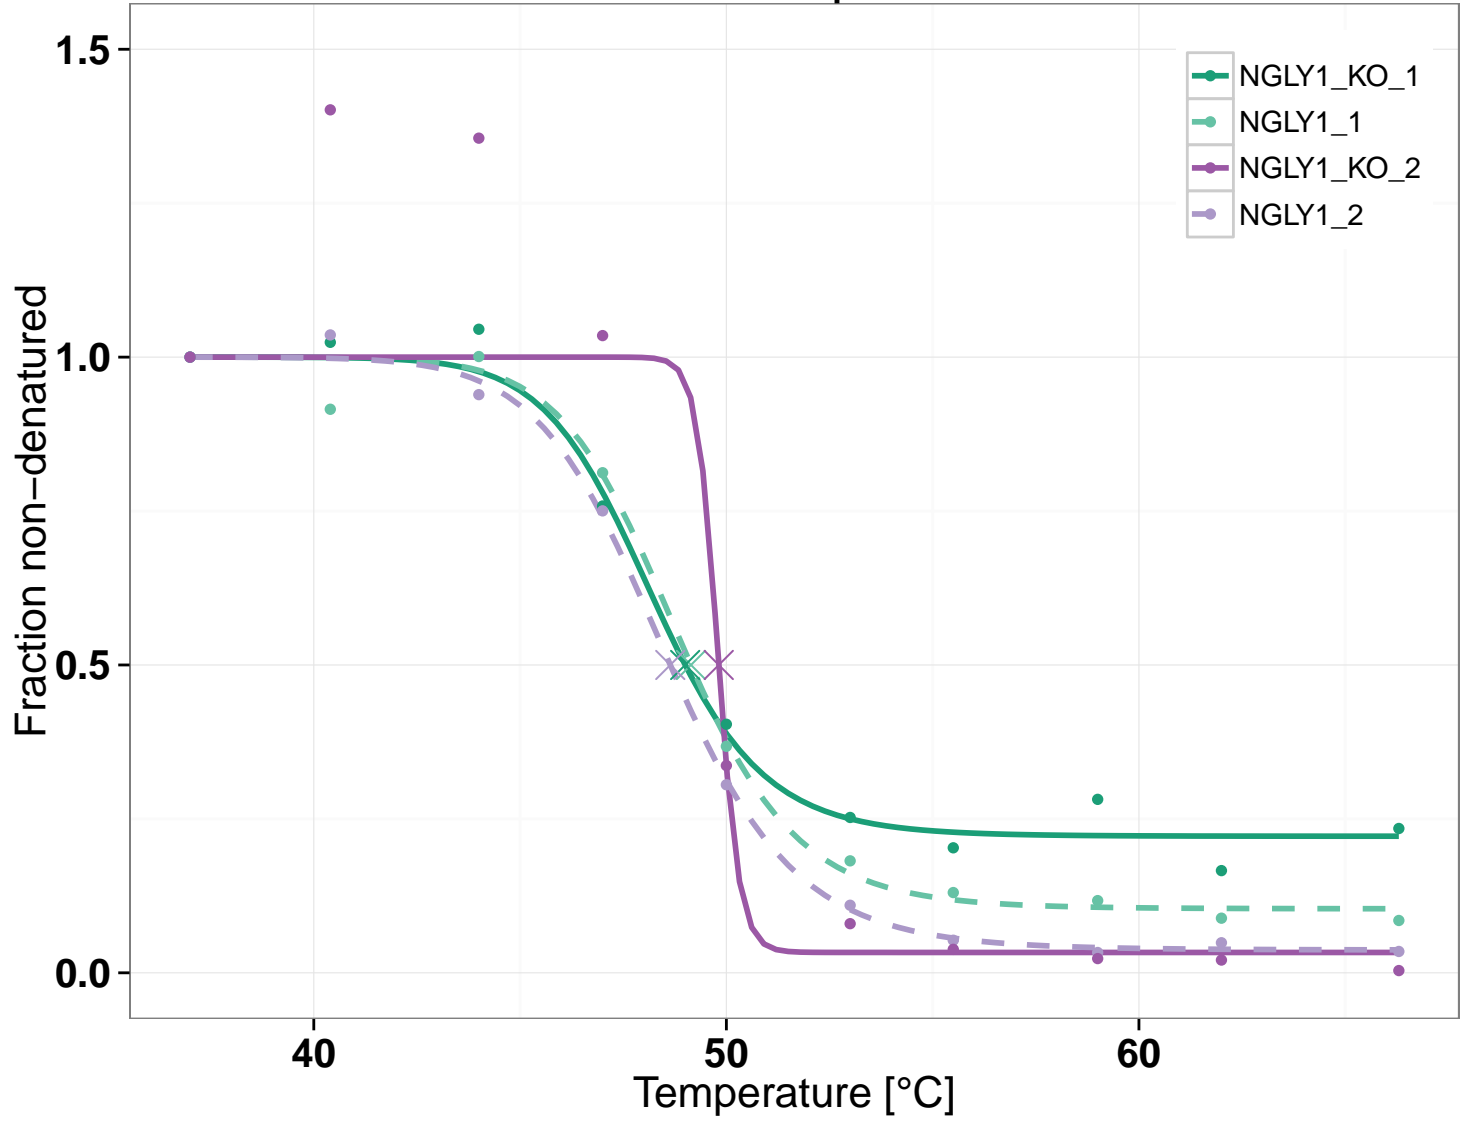

|            | meltPoint | slope | plateau | R2   |
|------------|-----------|-------|---------|------|
| NGLY1_KO_1 | 49        | -0.15 | 0.22    | 0.99 |
| NGLY1_1    | 49.14     | -0.16 | 0.1     | 0.99 |
| NGLY1_KO_2 | 49.82     | -0.94 | 0.03    | 0.91 |
| NGLY1_2    | 48.64     | -0.15 | 0.04    | 1    |

Supplement: Supplementary file 1787 [file 1]

# IPI00181116.4|IMP4

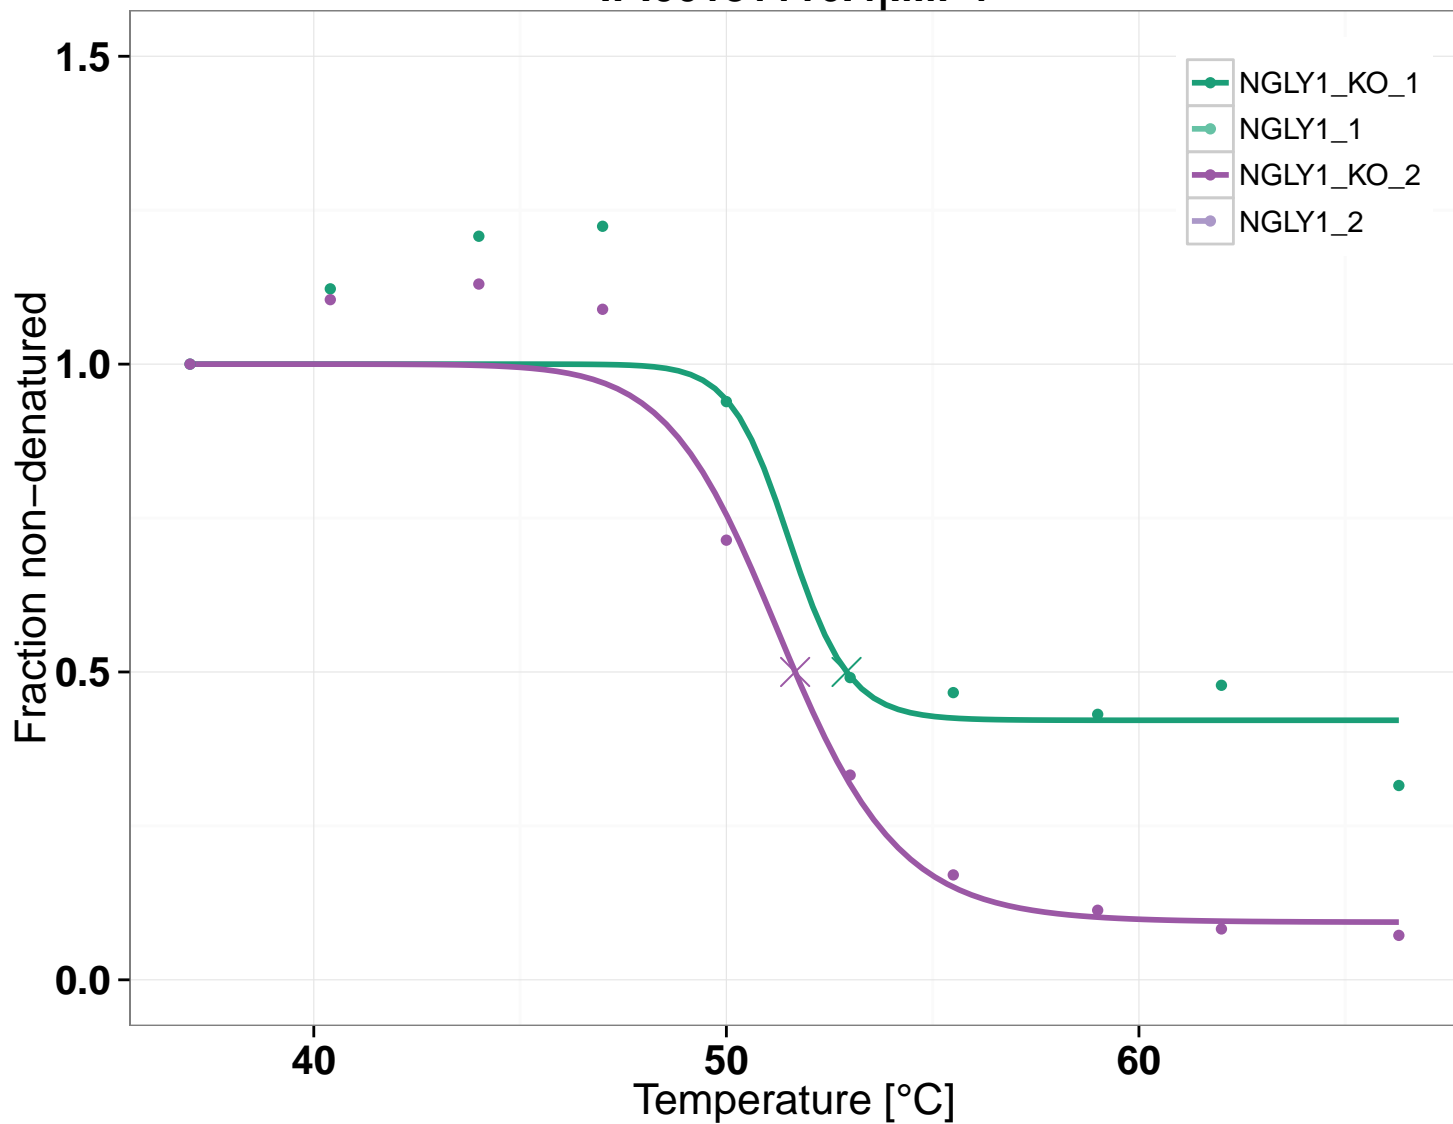

|            | meltPoint | slope | plateau | R2   |
|------------|-----------|-------|---------|------|
| NGLY1_KO_1 | 52.91     | -0.2  | 0.42    | 0.89 |
| NGLY1_1    | —         | —     | —       | —    |
| NGLY1_KO_2 | 51.67     | -0.16 | 0.09    | 0.98 |
| NGLY1_2    | —         | —     | —       | —    |

Supplement: Supplementary file 1788 [file 1]

# IPI00023647.4|UBA6

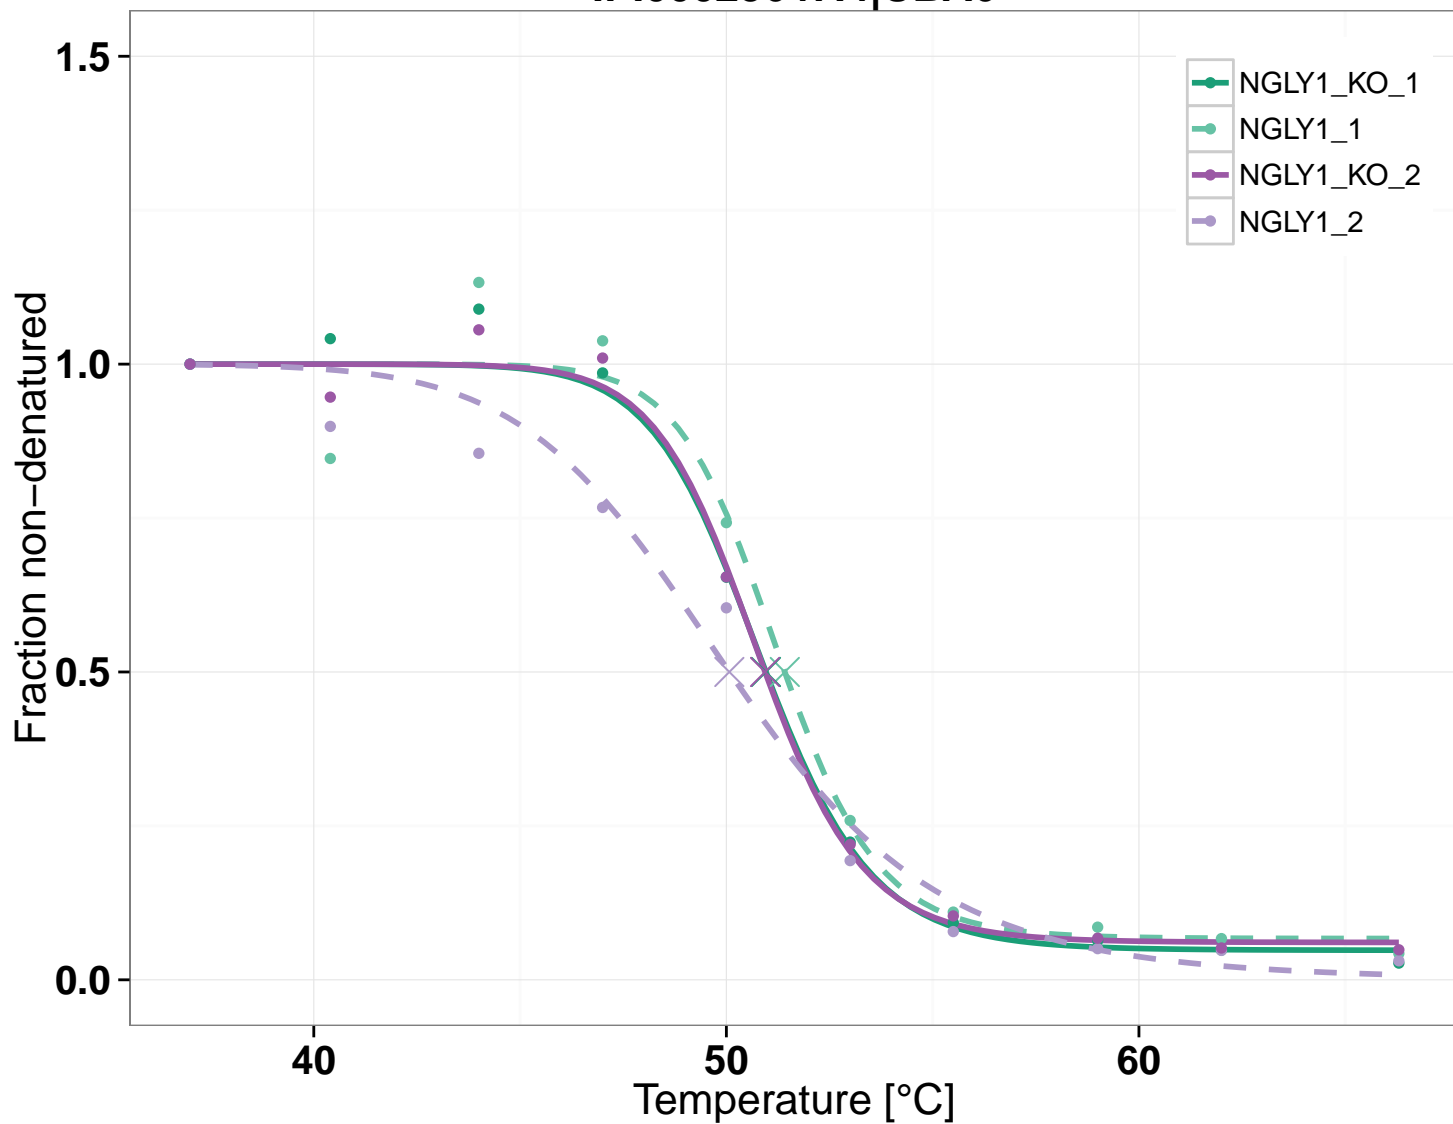

|            | meltPoint | slope  | plateau | R2   |
|------------|-----------|--------|---------|------|
| NGLY1_KO_1 | 50.96     | -0.18  | 0.05    | 0.99 |
| NGLY1_1    | 51.42     | -0.19  | 0.07    | 0.98 |
| NGLY1_KO_2 | 50.94     | -0.19  | 0.06    | 1    |
| NGLY1_2    | 50.07     | -0.099 | 0       | 0.98 |

Supplement: Supplementary file 1789 [file 1]

IPI00024403.1|CPNE3

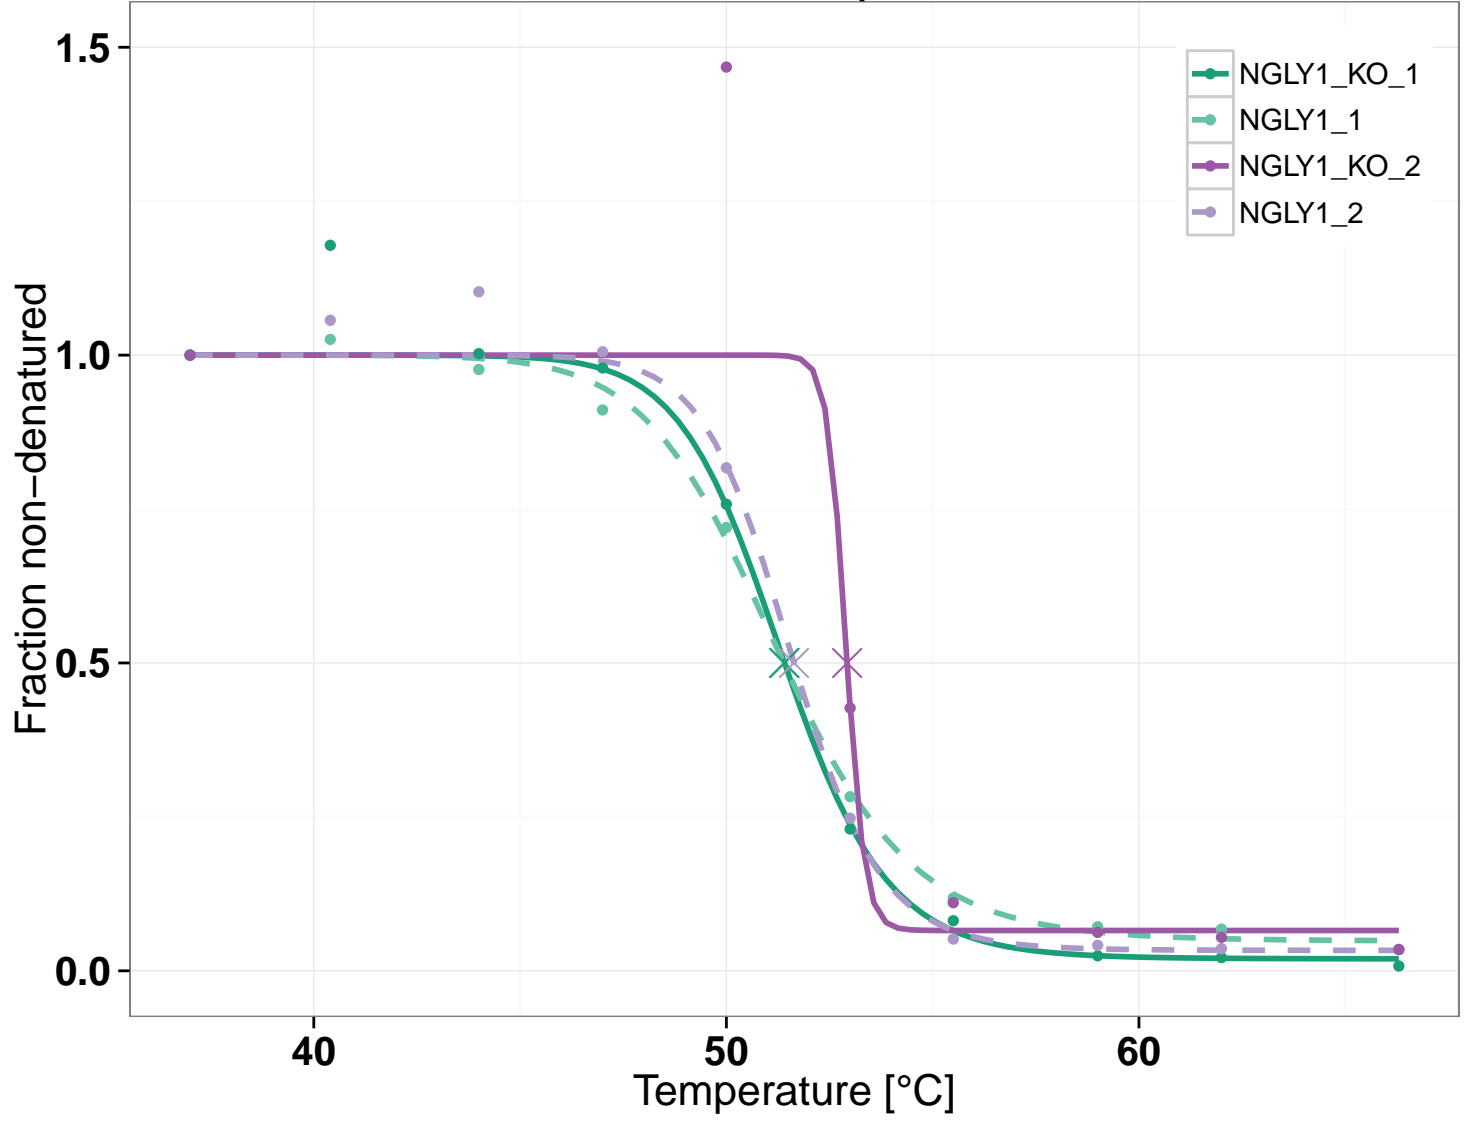

|            | meltPoint | slope | plateau | R2   |
|------------|-----------|-------|---------|------|
| NGLY1_KO_1 | 51.41     | -0.19 | 0.02    | 0.99 |
| NGLY1_1    | 51.39     | -0.15 | 0.05    | 1    |
| NGLY1_KO_2 | 52.93     | -1    | 0.07    | 0.51 |
| NGLY1_2    | 51.64     | -0.22 | 0.03    | 0.99 |

Supplement: Supplementary file 1790 [file 1]

IPI00328832.3|WDR7

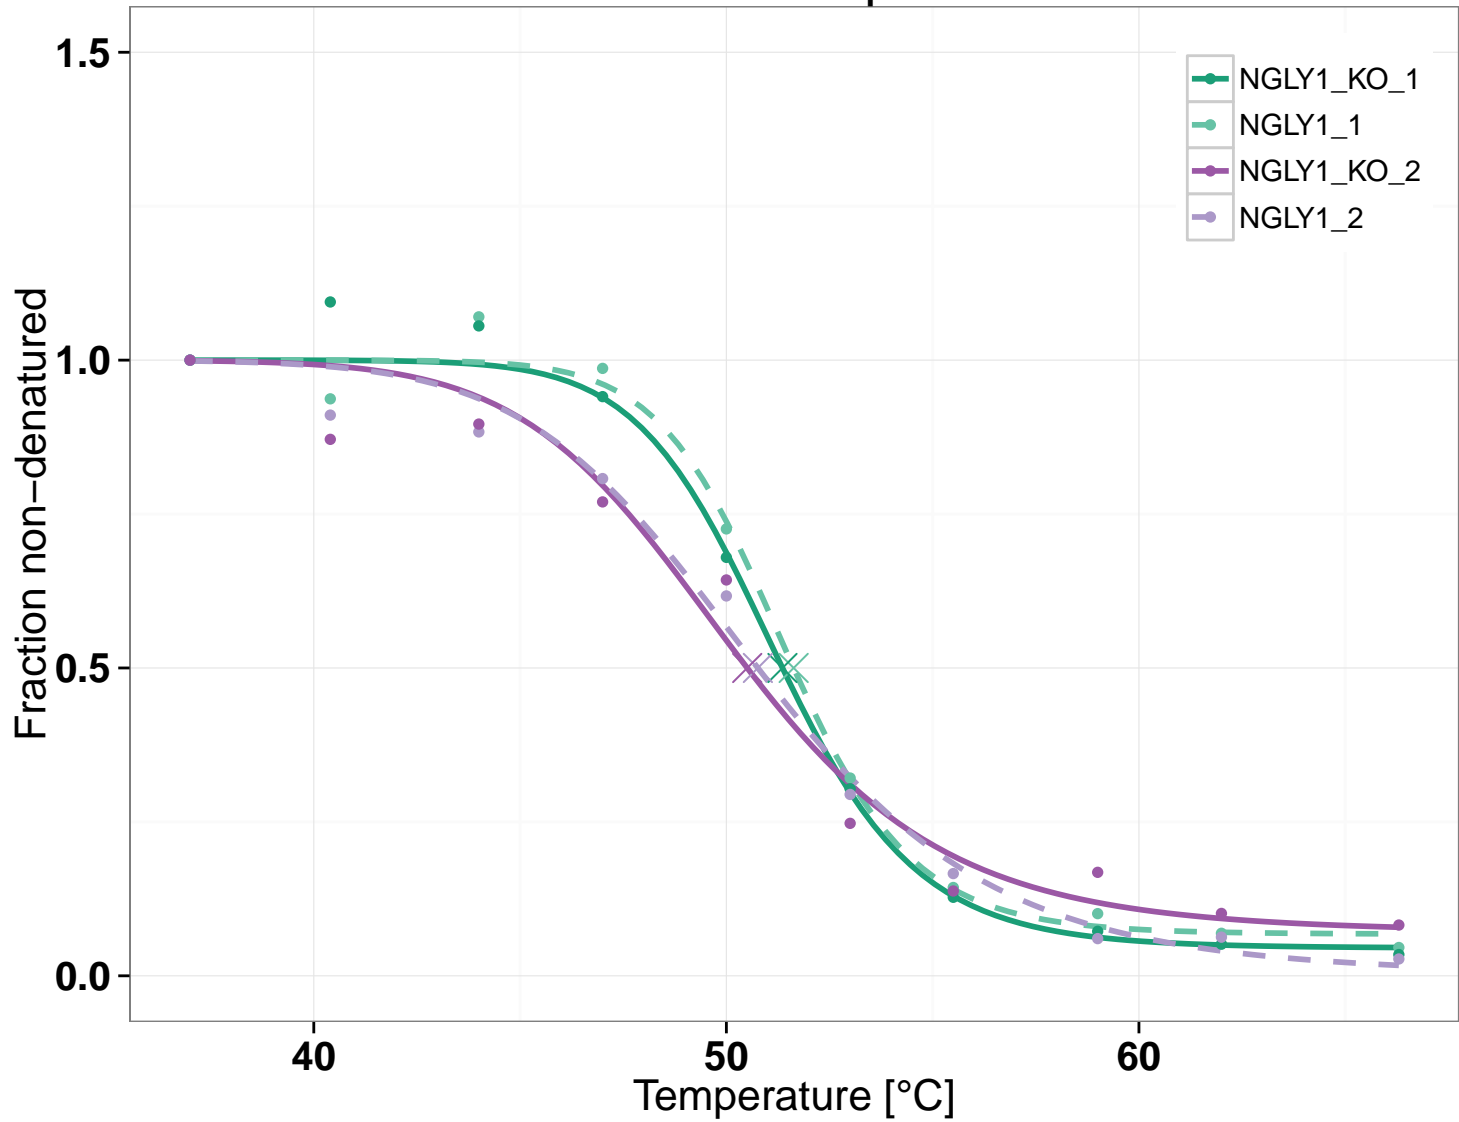

|            | meltPoint | slope  | plateau | R2   |
|------------|-----------|--------|---------|------|
| NGLY1_KO_1 | 51.36     | -0.14  | 0.04    | 0.99 |
| NGLY1_1    | 51.63     | -0.15  | 0.07    | 0.99 |
| NGLY1_KO_2 | 50.51     | -0.09  | 0.07    | 0.97 |
| NGLY1_2    | 50.76     | -0.088 | 0       | 0.99 |

Supplement: Supplementary file 1791 [file 1]

# IPI00878816.2|DNAH1

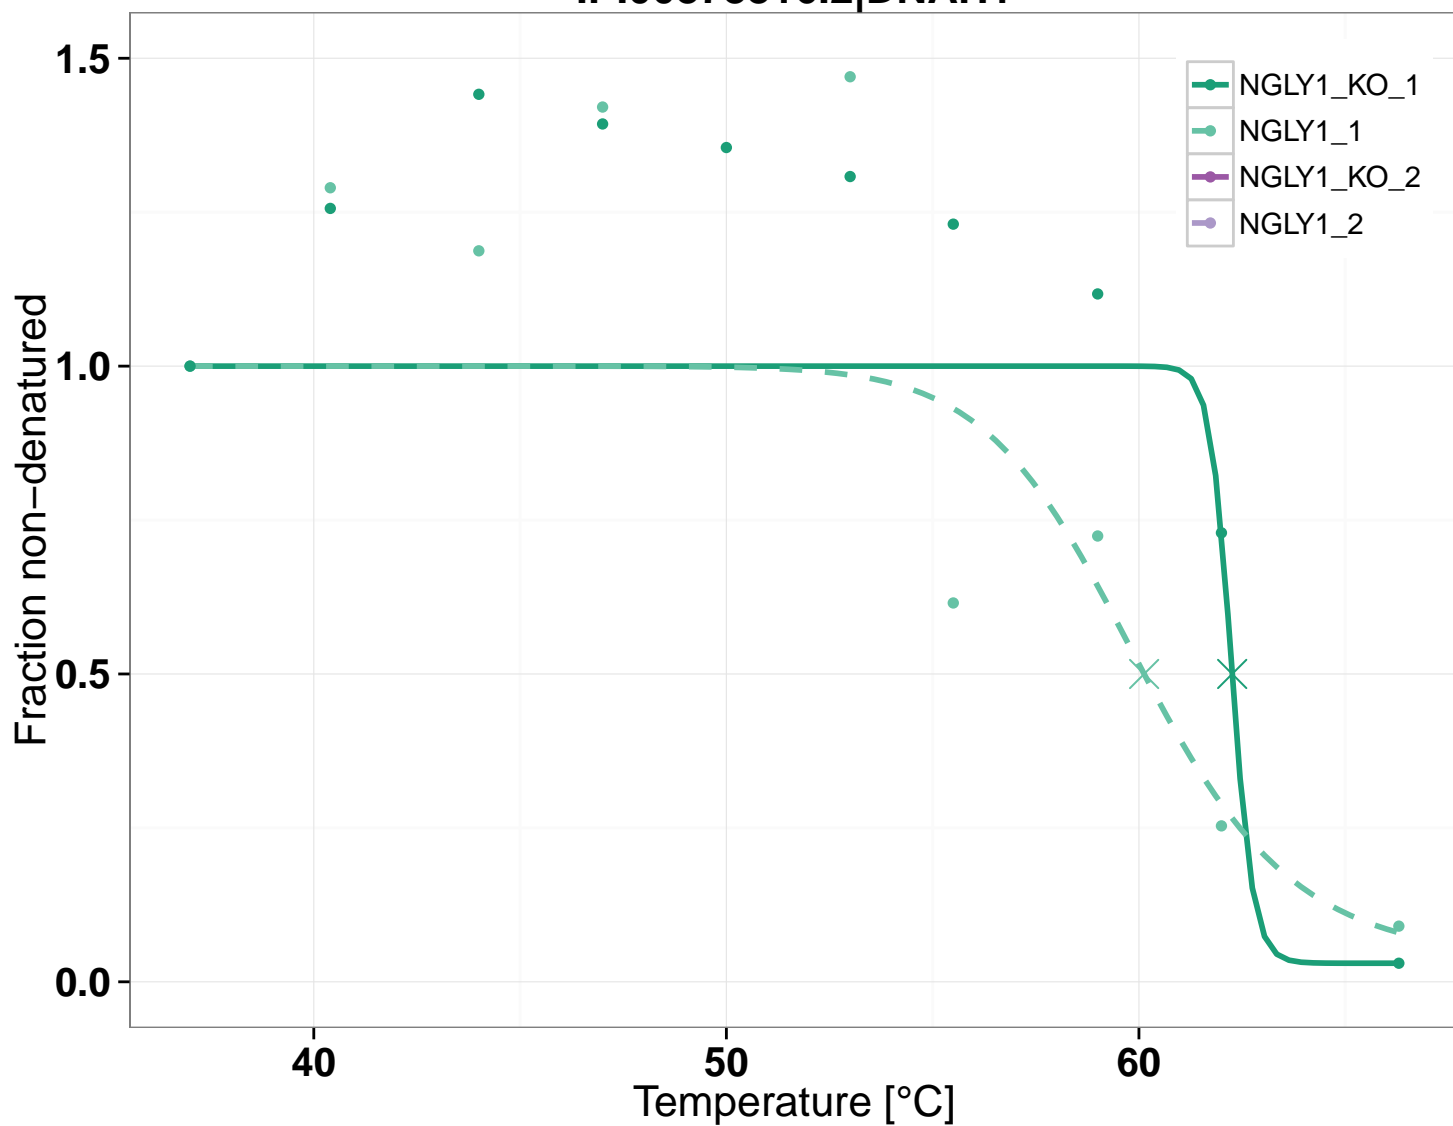

|            | meltPoint | slope | plateau | R2   |
|------------|-----------|-------|---------|------|
| NGLY1_KO_1 | 62.26     | -0.94 | 0.03    | 0.57 |
| NGLY1_1    | 60.13     | -0.13 | 0.04    | 0.57 |
| NGLY1_KO_2 | -         | -     | -       | -    |
| NGLY1_2    | -         | -     | -       | -    |

Supplement: Supplementary file 1792 [file 1]

# IPI00550069.3|RNH1

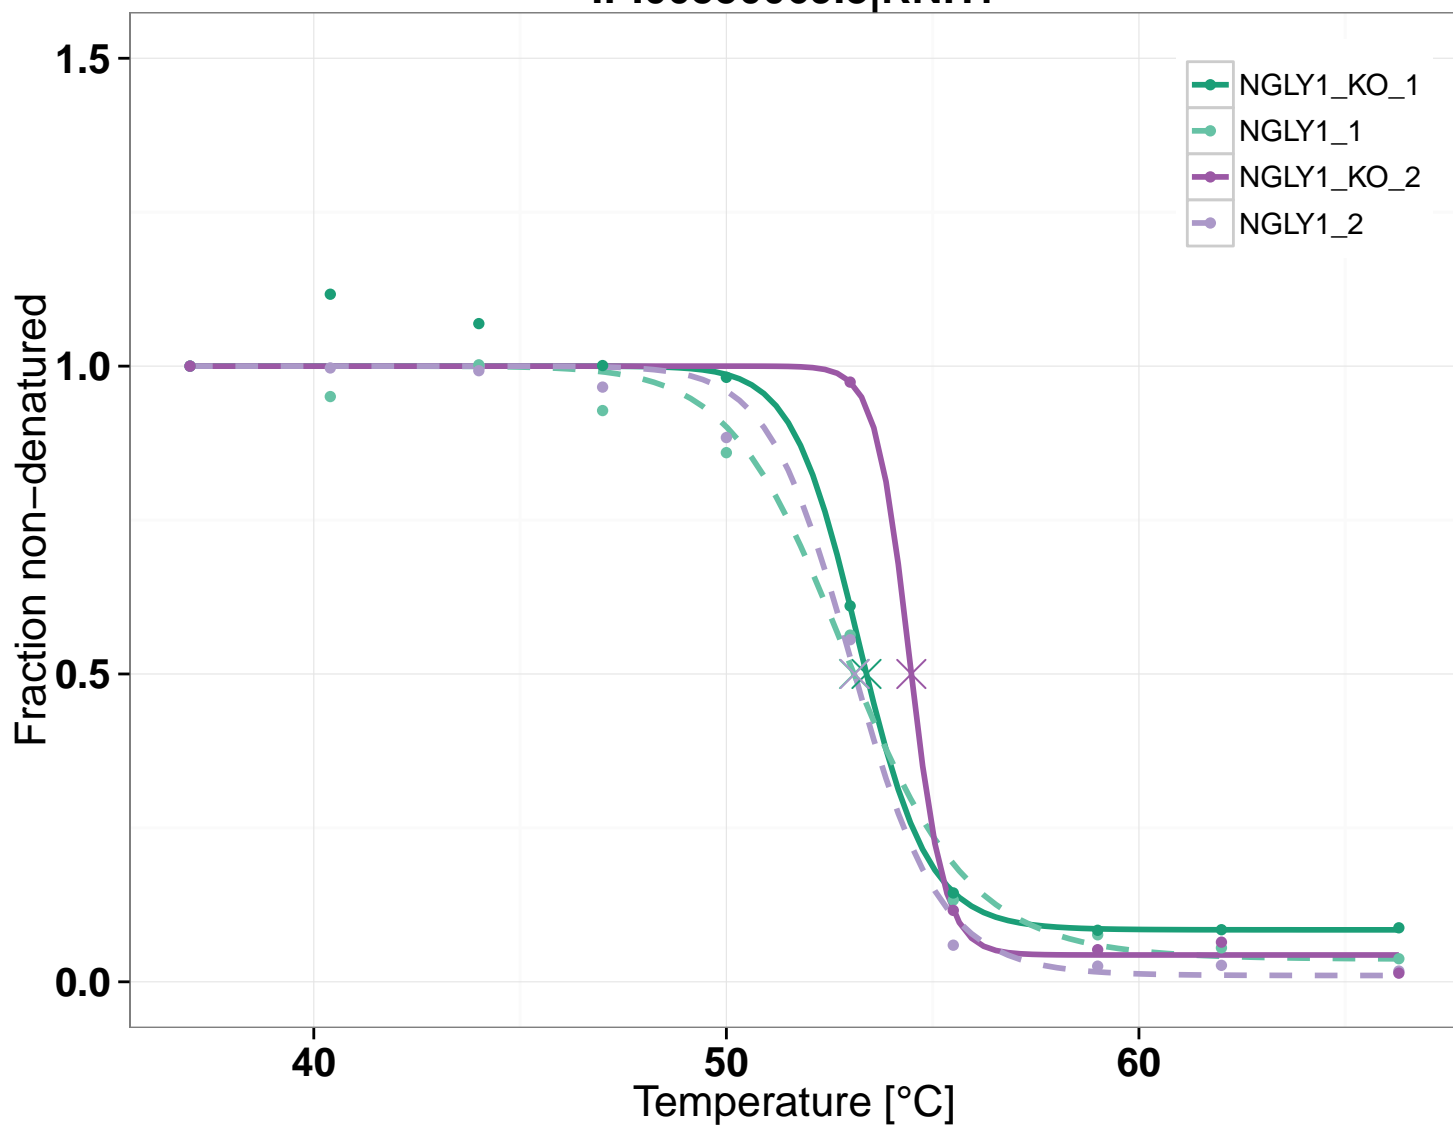

|            | meltPoint | slope | plateau | R2   |
|------------|-----------|-------|---------|------|
| NGLY1_KO_1 | 53.4      | -0.28 | 0.08    | 0.99 |
| NGLY1_1    | 53.09     | -0.17 | 0.04    | 0.99 |
| NGLY1_KO_2 | 54.48     | -0.58 | 0.04    | 0.61 |
| NGLY1_2    | 53.11     | -0.24 | 0.01    | 0.99 |

Supplement: Supplementary file 1793 [file 1]

IPI00010252.3|TRIM33

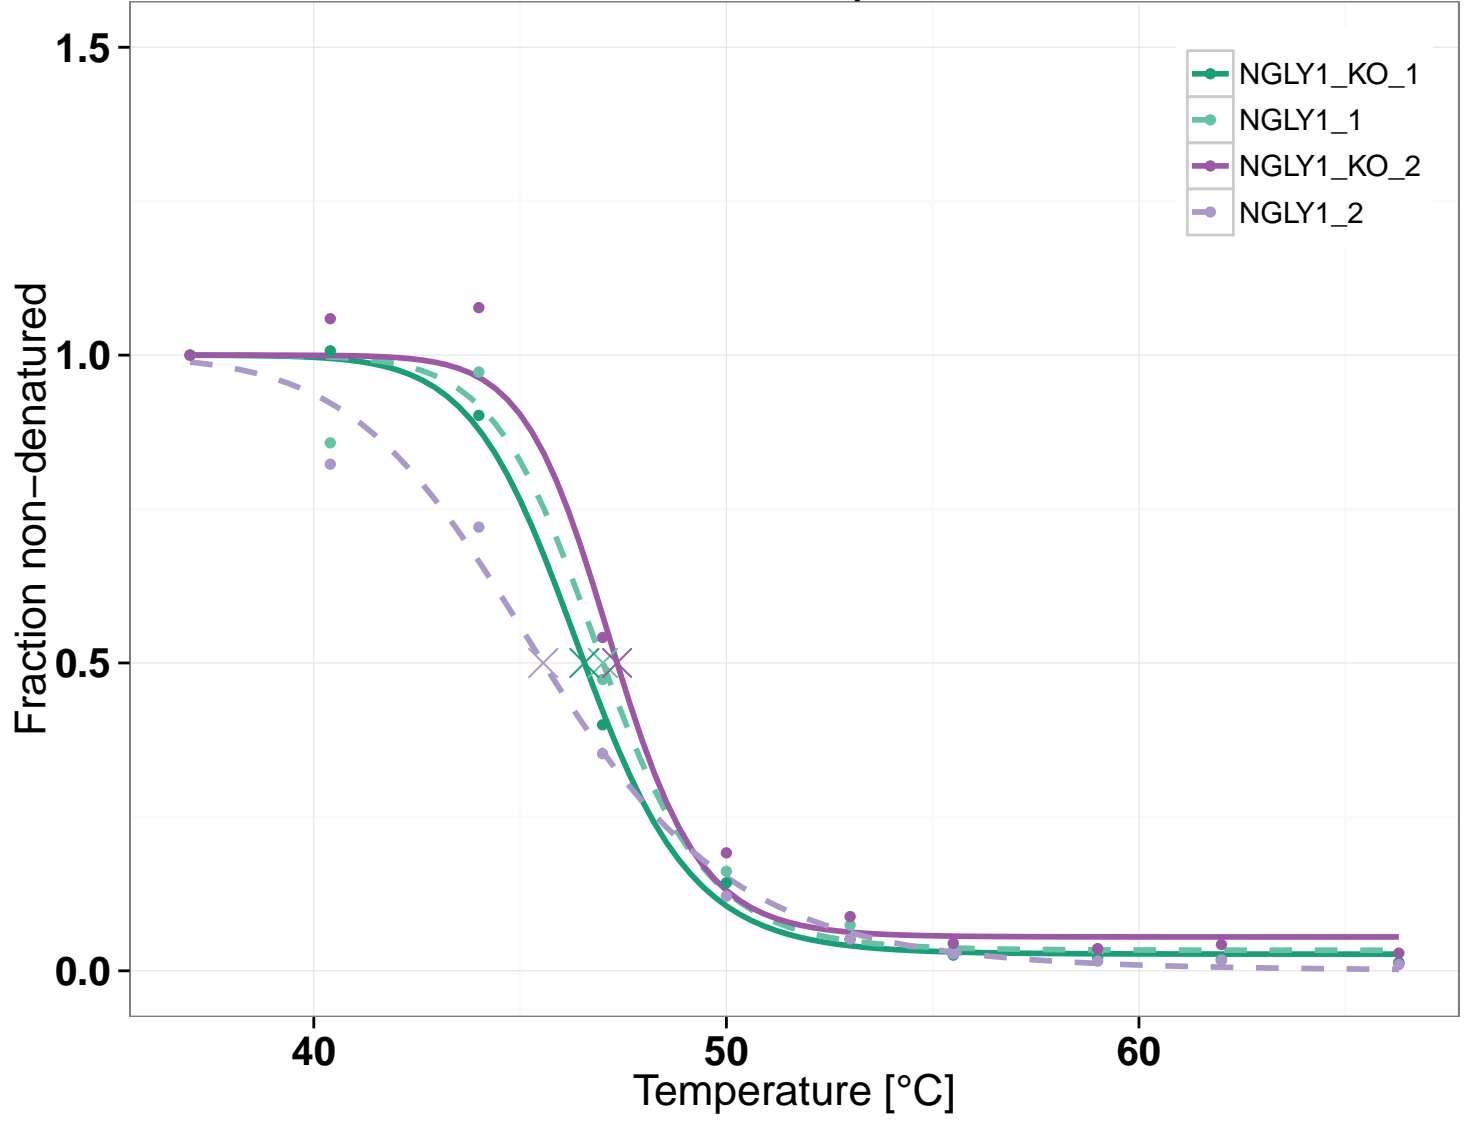

|            | meltPoint | slope | plateau | R2   |
|------------|-----------|-------|---------|------|
| NGLY1_KO_1 | 46.56     | -0.18 | 0.03    | 1    |
| NGLY1_1    | 47.01     | -0.19 | 0.03    | 0.98 |
| NGLY1_KO_2 | 47.35     | -0.22 | 0.06    | 0.99 |
| NGLY1_2    | 45.56     | -0.11 | 0       | 0.99 |

Supplement: Supplementary file 1794 [file 1]

# IPI00007778.1|CTBS

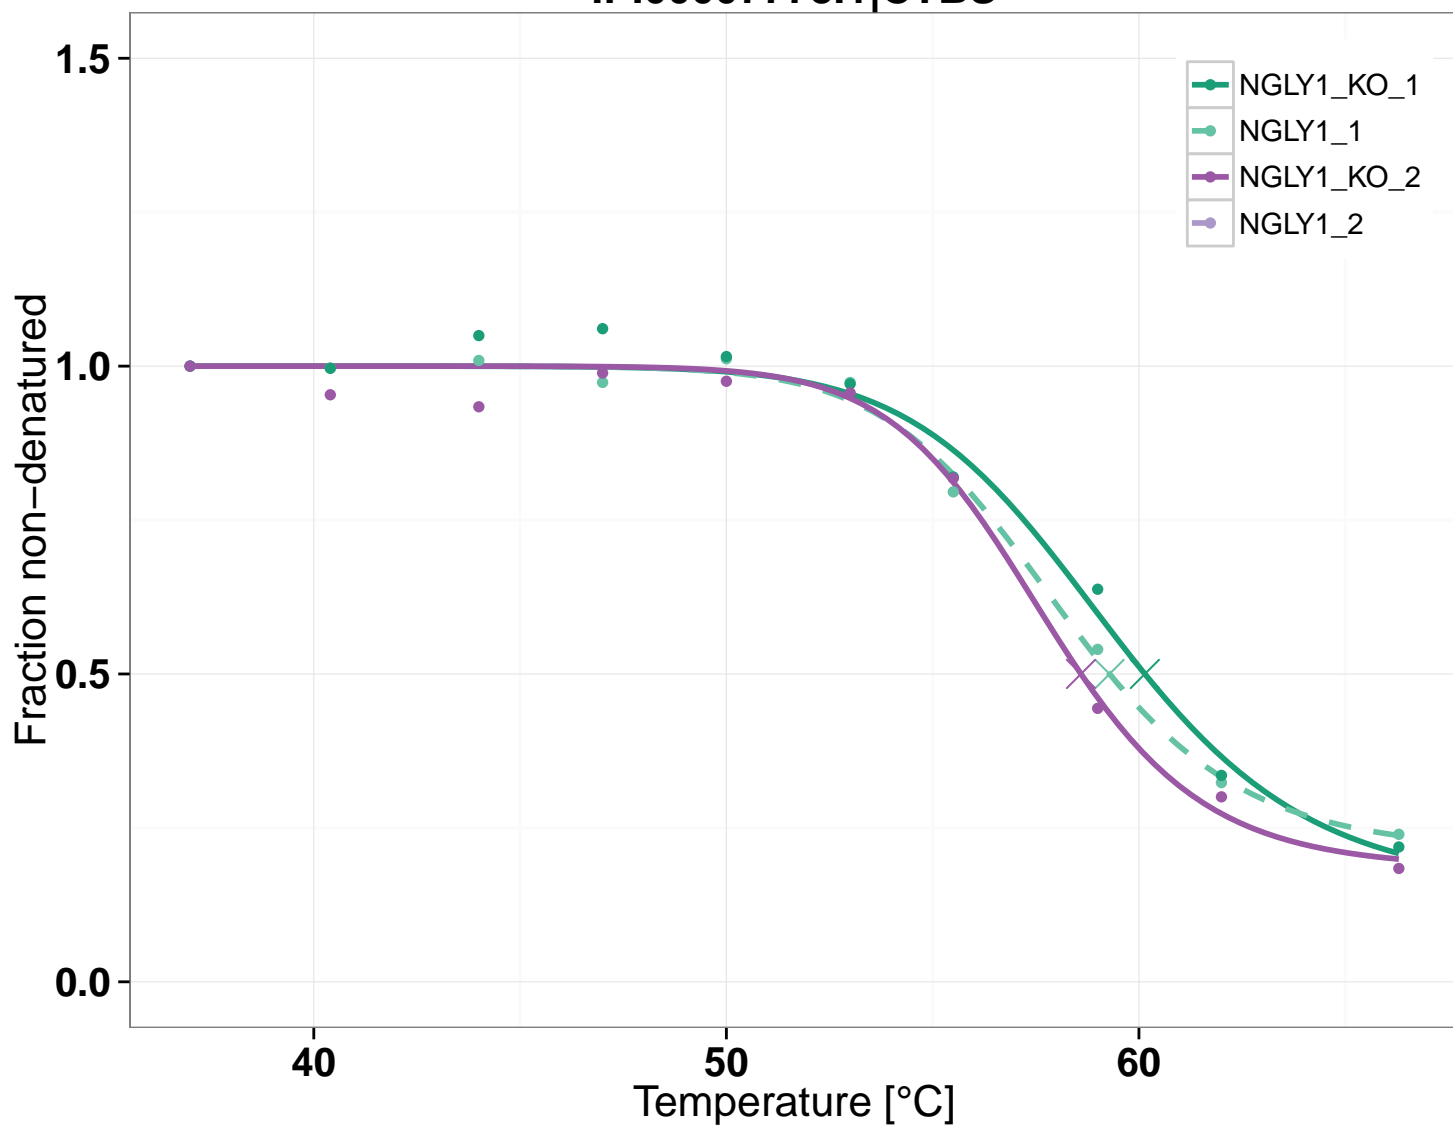

|            | meltPoint | slope  | plateau | R2   |
|------------|-----------|--------|---------|------|
| NGLY1_KO_1 | 60.14     | -0.088 | 0.15    | 0.99 |
| NGLY1_1    | 59.29     | -0.092 | 0.21    | 1    |
| NGLY1_KO_2 | 58.59     | -0.11  | 0.18    | 0.99 |
| NGLY1_2    | -         | -      | -       | -    |

Supplement: Supplementary file 1795 [file 1]

# IPI00873632.1|RAB2A

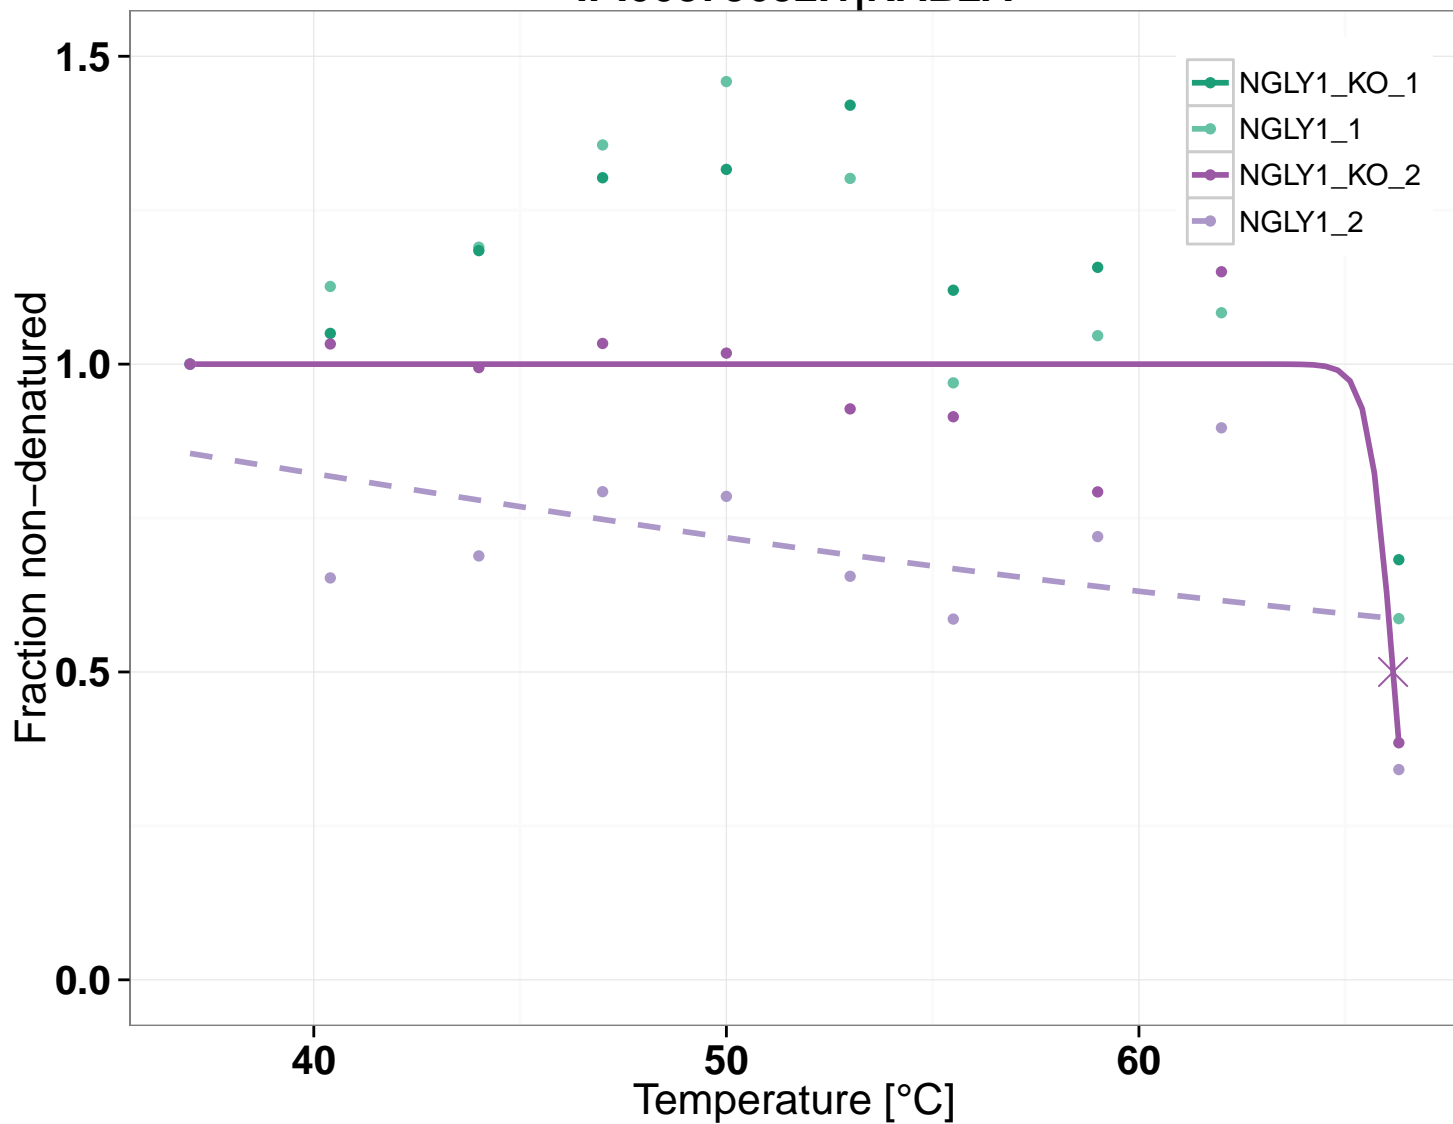

|            | meltPoint | slope  | plateau | R2   |
|------------|-----------|--------|---------|------|
| NGLY1_KO_1 | -         | -      | -       | -    |
| NGLY1_1    | -         | -      | -       | -    |
| NGLY1_KO_2 | 66.16     | -0.84  | 0       | 0.8  |
| NGLY1_2    | -         | -0.011 | 0       | 0.25 |

Supplement: Supplementary file 1796 [file 1]

# IPI00219173.2|EXO1

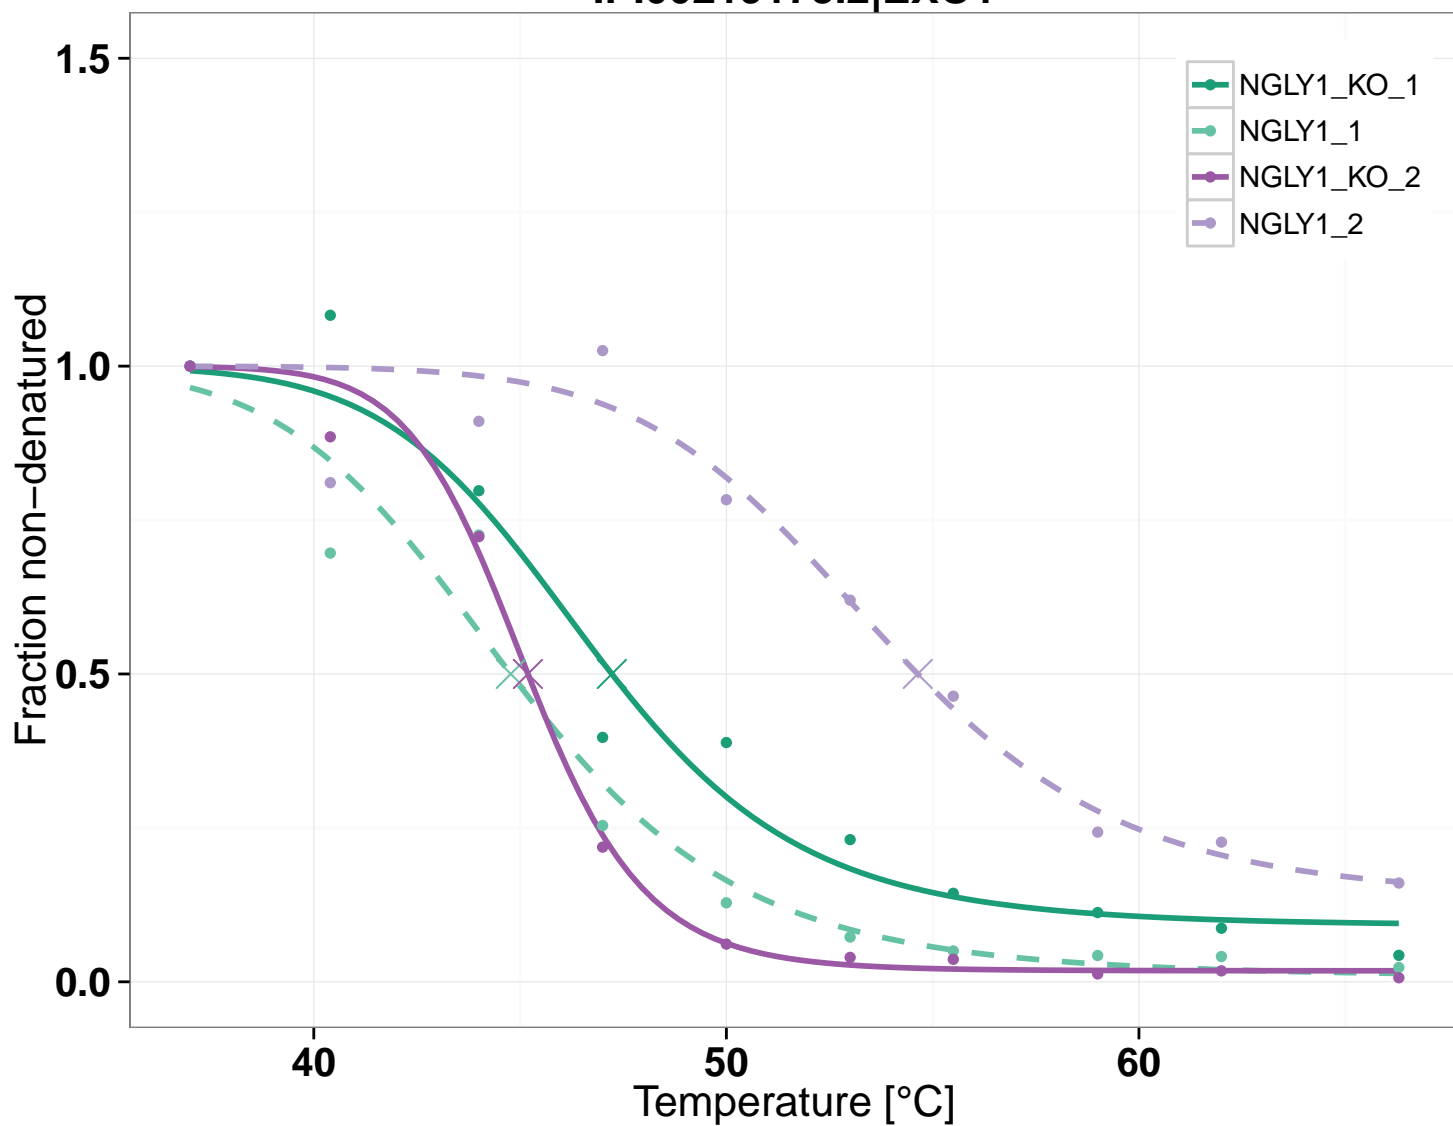

|            | meltPoint | slope  | plateau | R2   |
|------------|-----------|--------|---------|------|
| NGLY1_KO_1 | 47.22     | -0.09  | 0.09    | 0.97 |
| NGLY1_1    | 44.77     | -0.089 | 0.01    | 0.95 |
| NGLY1_KO_2 | 45.19     | -0.17  | 0.02    | 0.99 |
| NGLY1_2    | 54.64     | -0.074 | 0.14    | 0.95 |

Supplement: Supplementary file 1797 [file 1]

IPI00827920.1|FAM62B

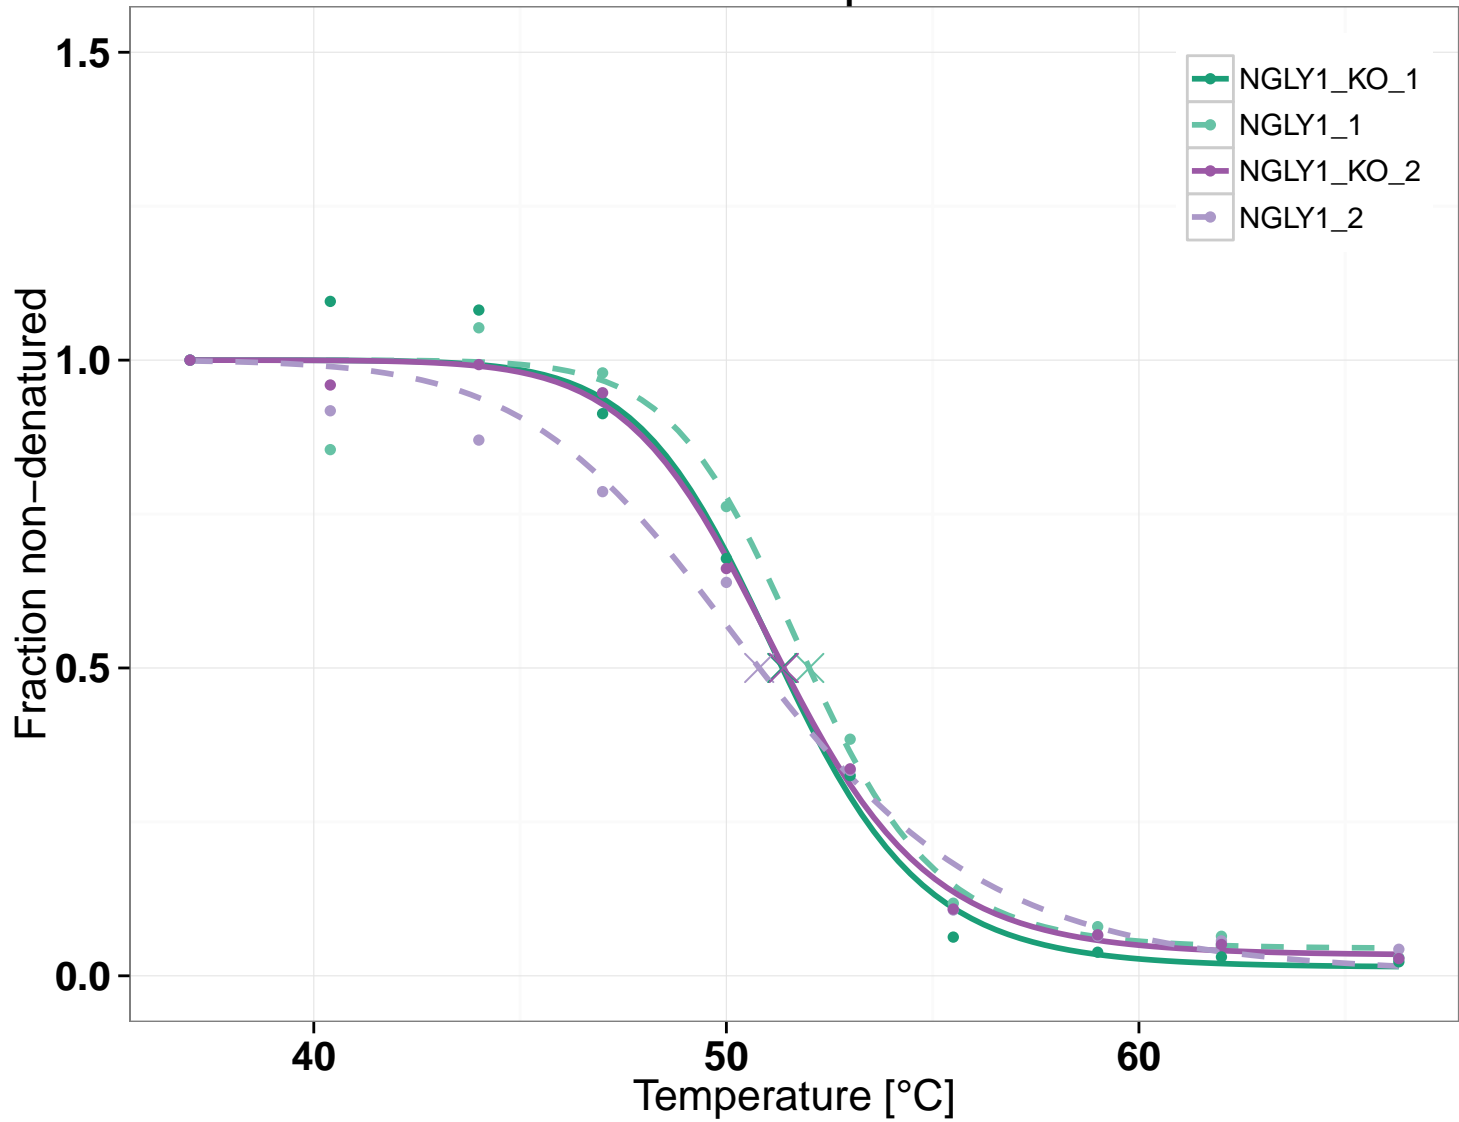

|            | meltPoint | slope  | plateau | R2   |
|------------|-----------|--------|---------|------|
| NGLY1_KO_1 | 51.36     | -0.14  | 0.01    | 0.99 |
| NGLY1_1    | 52.01     | -0.15  | 0.04    | 0.98 |
| NGLY1_KO_2 | 51.39     | -0.13  | 0.03    | 1    |
| NGLY1_2    | 50.8      | -0.088 | 0       | 0.98 |

Supplement: Supplementary file 1798 [file 1]

IPI00175096.1|TTC9C

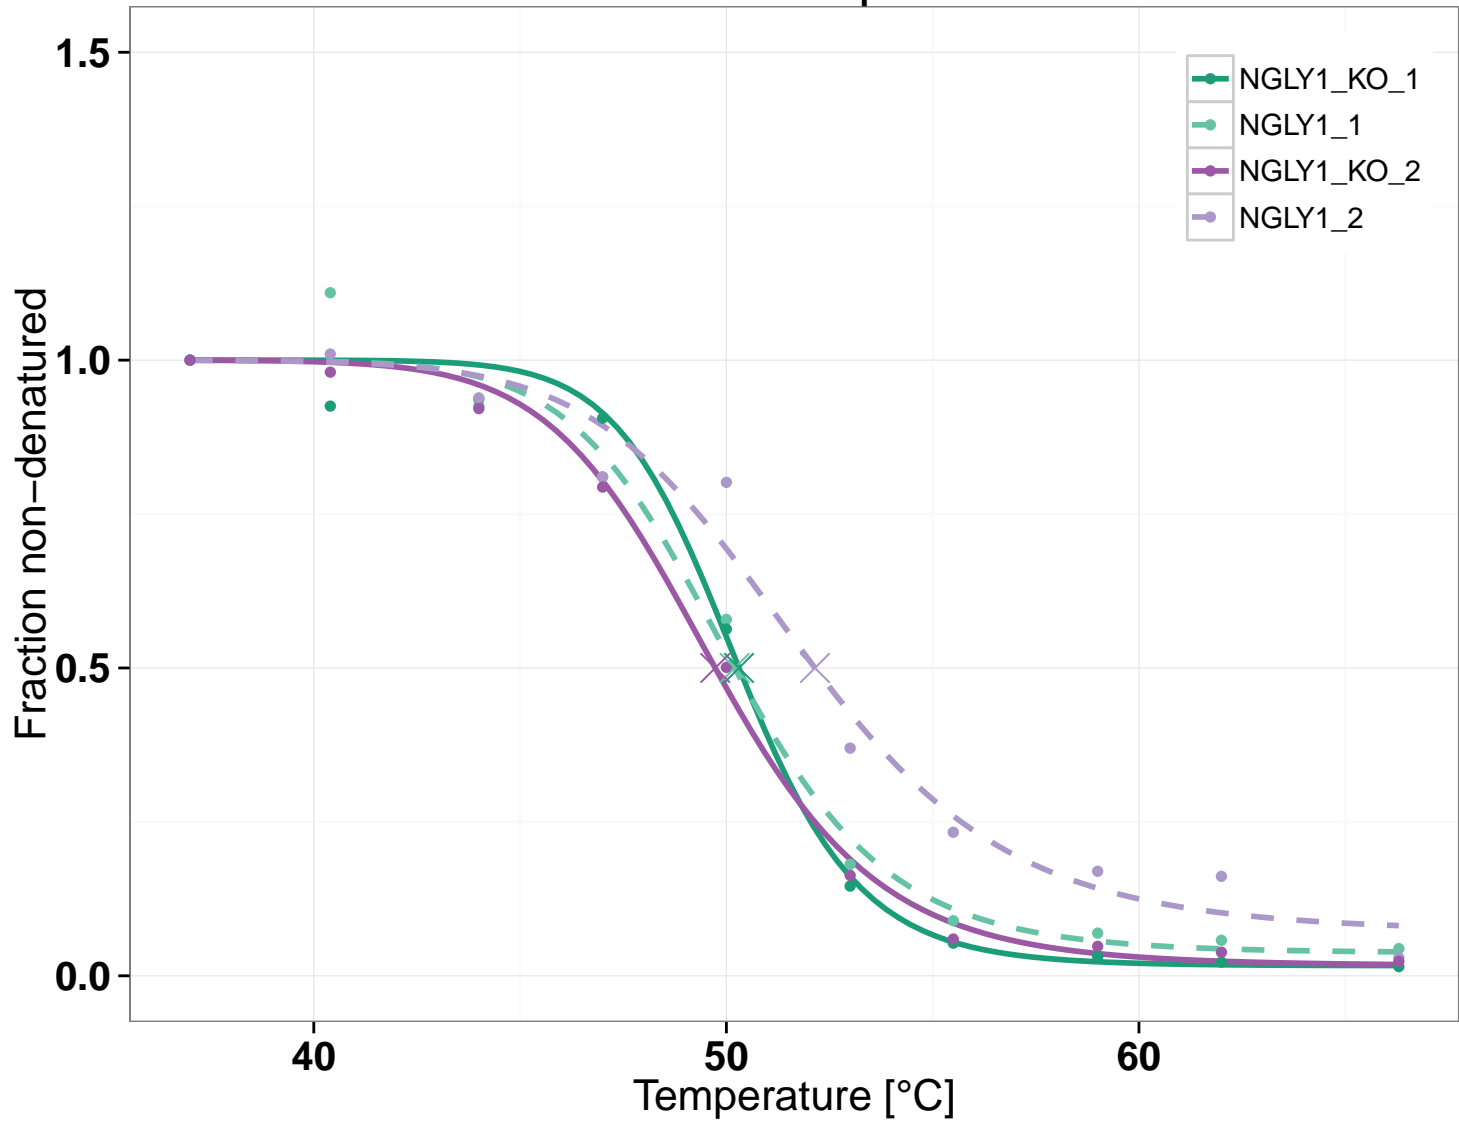

|            | meltPoint | slope  | plateau | R2   |
|------------|-----------|--------|---------|------|
| NGLY1_KO_1 | 50.31     | -0.17  | 0.02    | 0.99 |
| NGLY1_1    | 50.2      | -0.12  | 0.04    | 0.99 |
| NGLY1_KO_2 | 49.73     | -0.12  | 0.02    | 1    |
| NGLY1_2    | 52.15     | -0.092 | 0.07    | 0.98 |

Supplement: Supplementary file 1799 [file 1]

# IPI00641582.1|BAG3

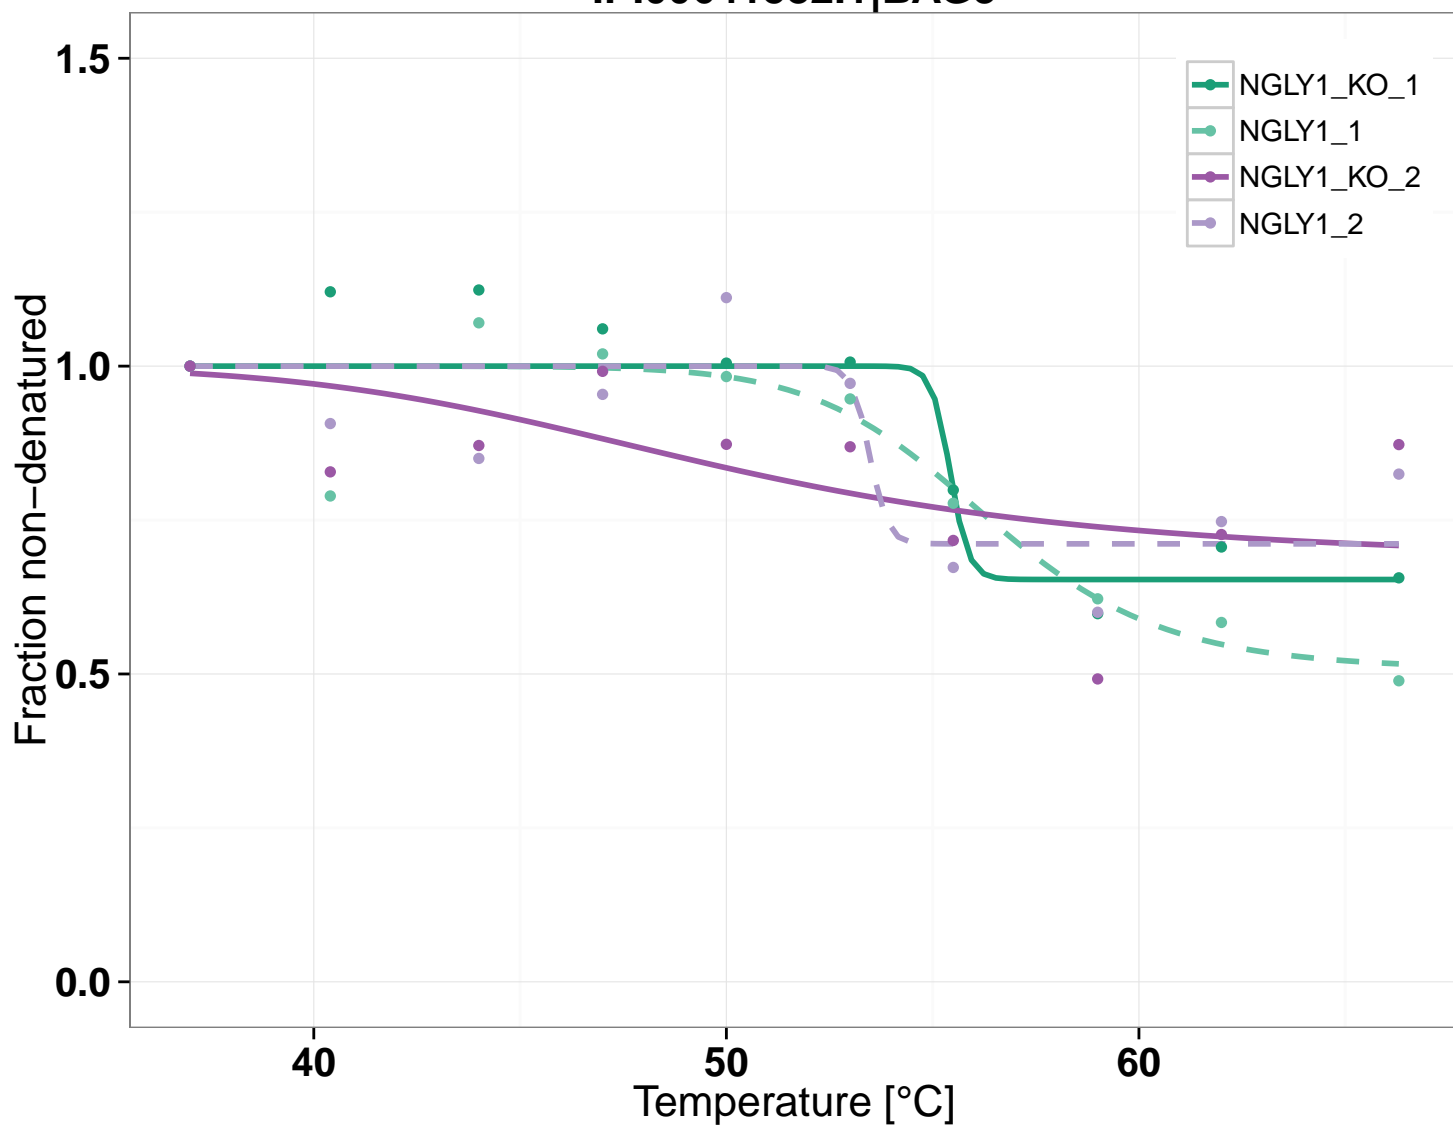

|            | meltPoint | slope  | plateau | R2   |
|------------|-----------|--------|---------|------|
| NGLY1_KO_1 | –         | –0.39  | 0.65    | 0.89 |
| NGLY1_1    | –         | –0.058 | 0.51    | 0.86 |
| NGLY1_KO_2 | –         | –0.016 | 0.68    | 0.34 |
| NGLY1_2    | –         | –0.34  | 0.71    | 0.67 |

Supplement: Supplementary file 1800 [file 1]

# IPI00219871.5|LSM8

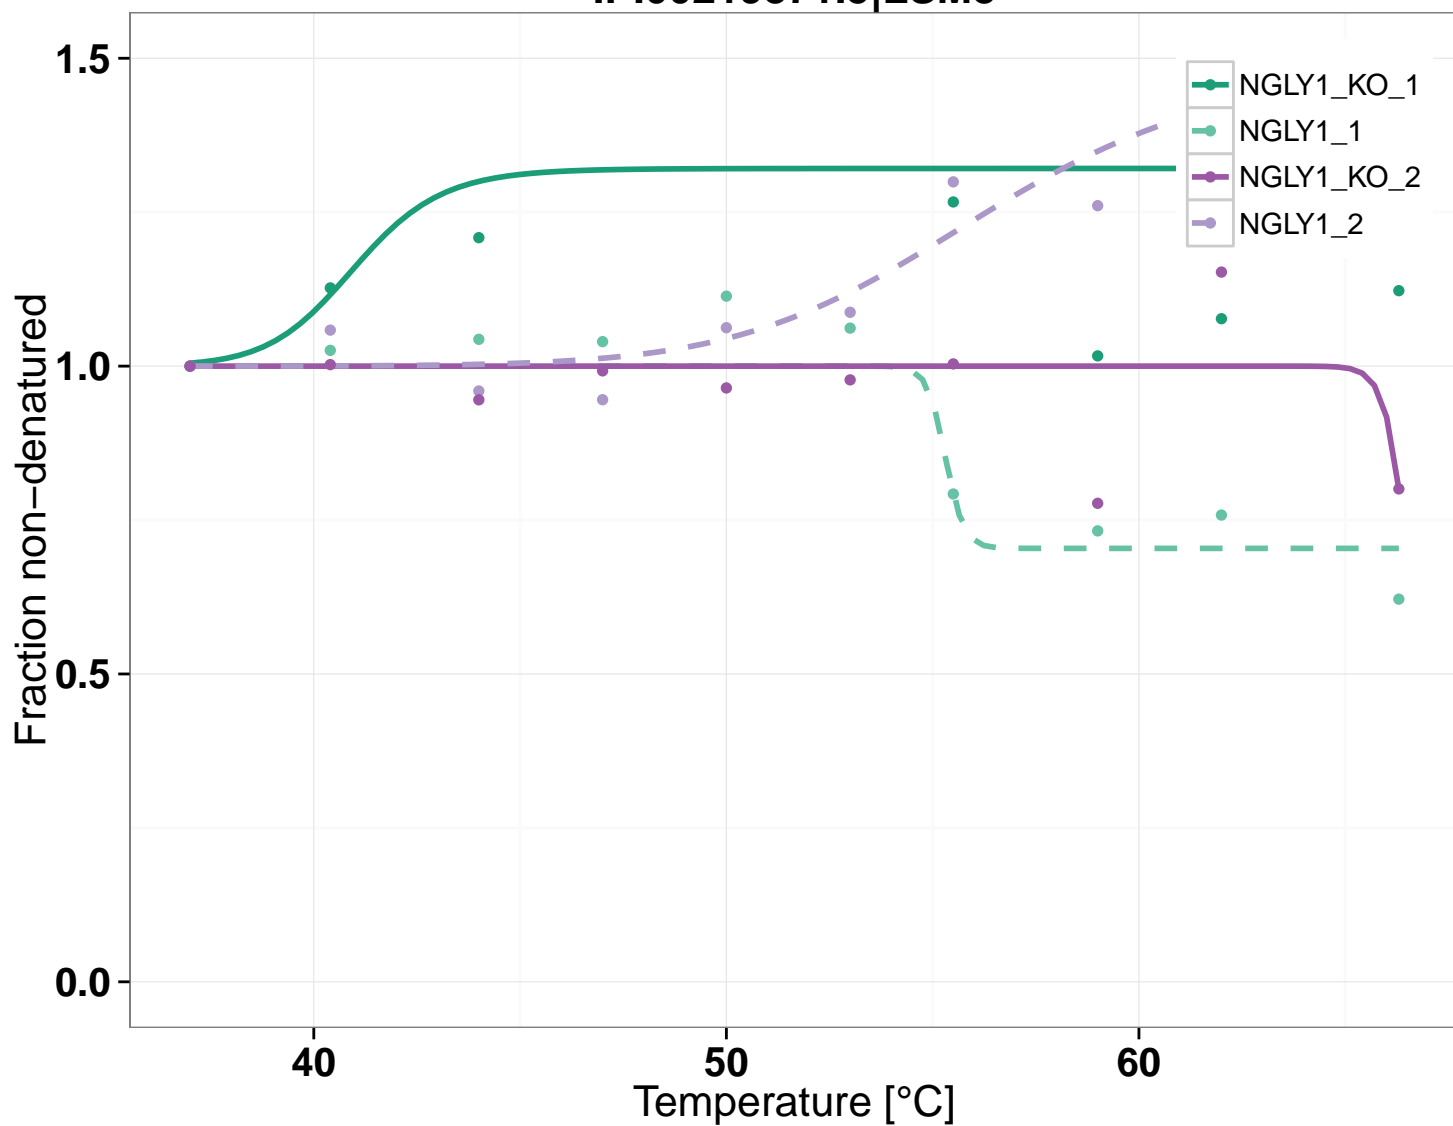

|            | meltPoint | slope | plateau | R2   |
|------------|-----------|-------|---------|------|
| NGLY1_KO_1 | —         | 0.076 | 1.32    | 0.19 |
| NGLY1_1    | —         | -0.33 | 0.7     | 0.88 |
| NGLY1_KO_2 | —         | —     | 0       | 0.24 |
| NGLY1_2    | —         | 0.041 | 1.5     | 0.92 |

Supplement: Supplementary file 1801 [file 1]

# IPI00180465.4|HEXIM2

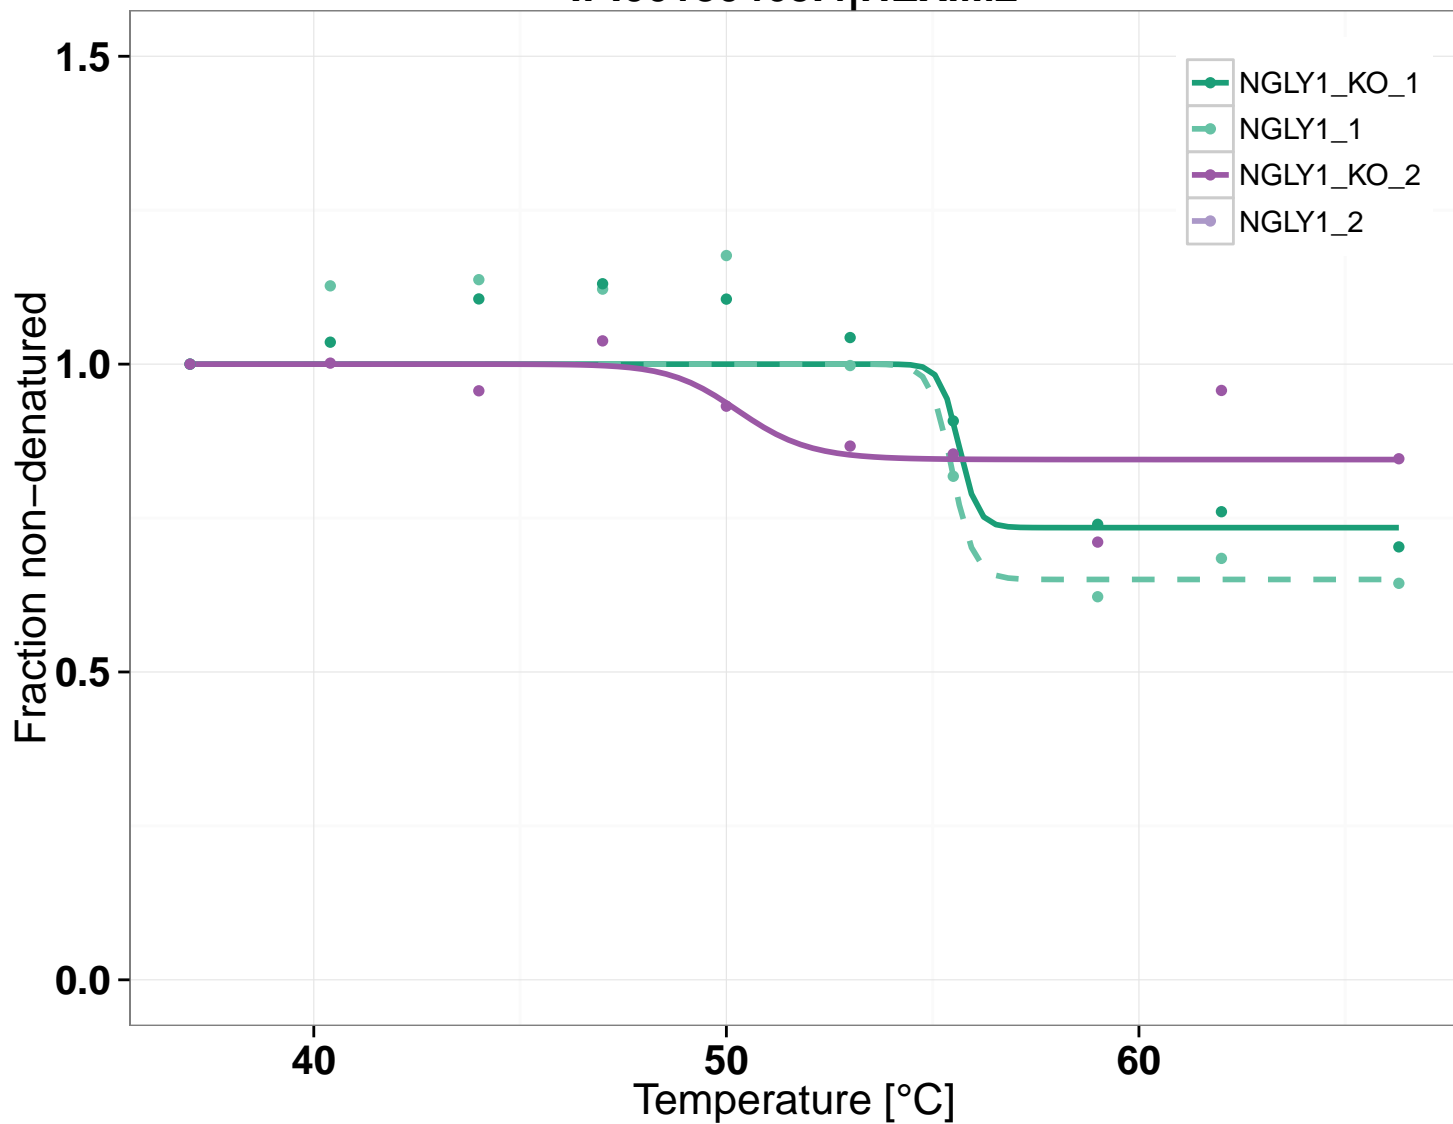

|            | meltPoint | slope  | plateau | R2   |
|------------|-----------|--------|---------|------|
| NGLY1_KO_1 | —         | −0.3   | 0.73    | 0.82 |
| NGLY1_1    | —         | −0.33  | 0.65    | 0.81 |
| NGLY1_KO_2 | —         | −0.045 | 0.84    | 0.6  |
| NGLY1_2    | —         | —      | —       | —    |

Supplement: Supplementary file 1802 [file 1]

IPI00290456.3|ICAM5

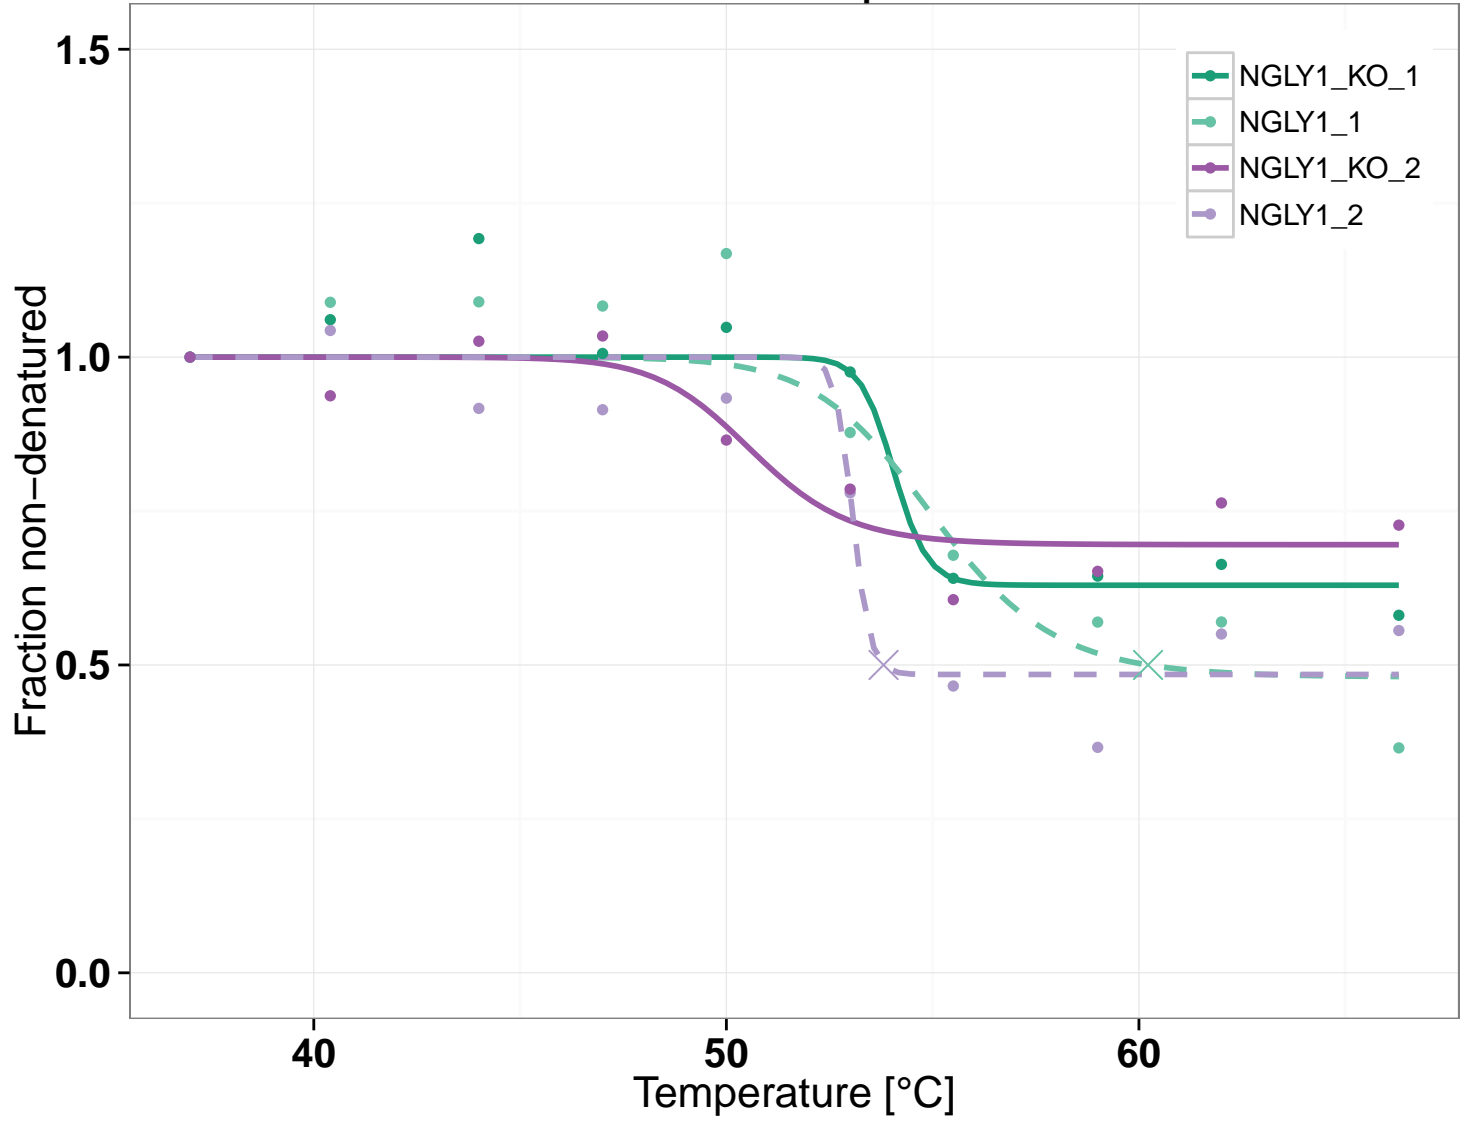

|            | meltPoint | slope  | plateau | R2   |
|------------|-----------|--------|---------|------|
| NGLY1_KO_1 | –         | –0.23  | 0.63    | 0.9  |
| NGLY1_1    | 60.22     | –0.089 | 0.48    | 0.89 |
| NGLY1_KO_2 | –         | –0.065 | 0.7     | 0.88 |
| NGLY1_2    | 53.81     | –0.61  | 0.48    | 0.92 |

Supplement: Supplementary file 1803 [file 1]

# IPI00031517.1|MCM6

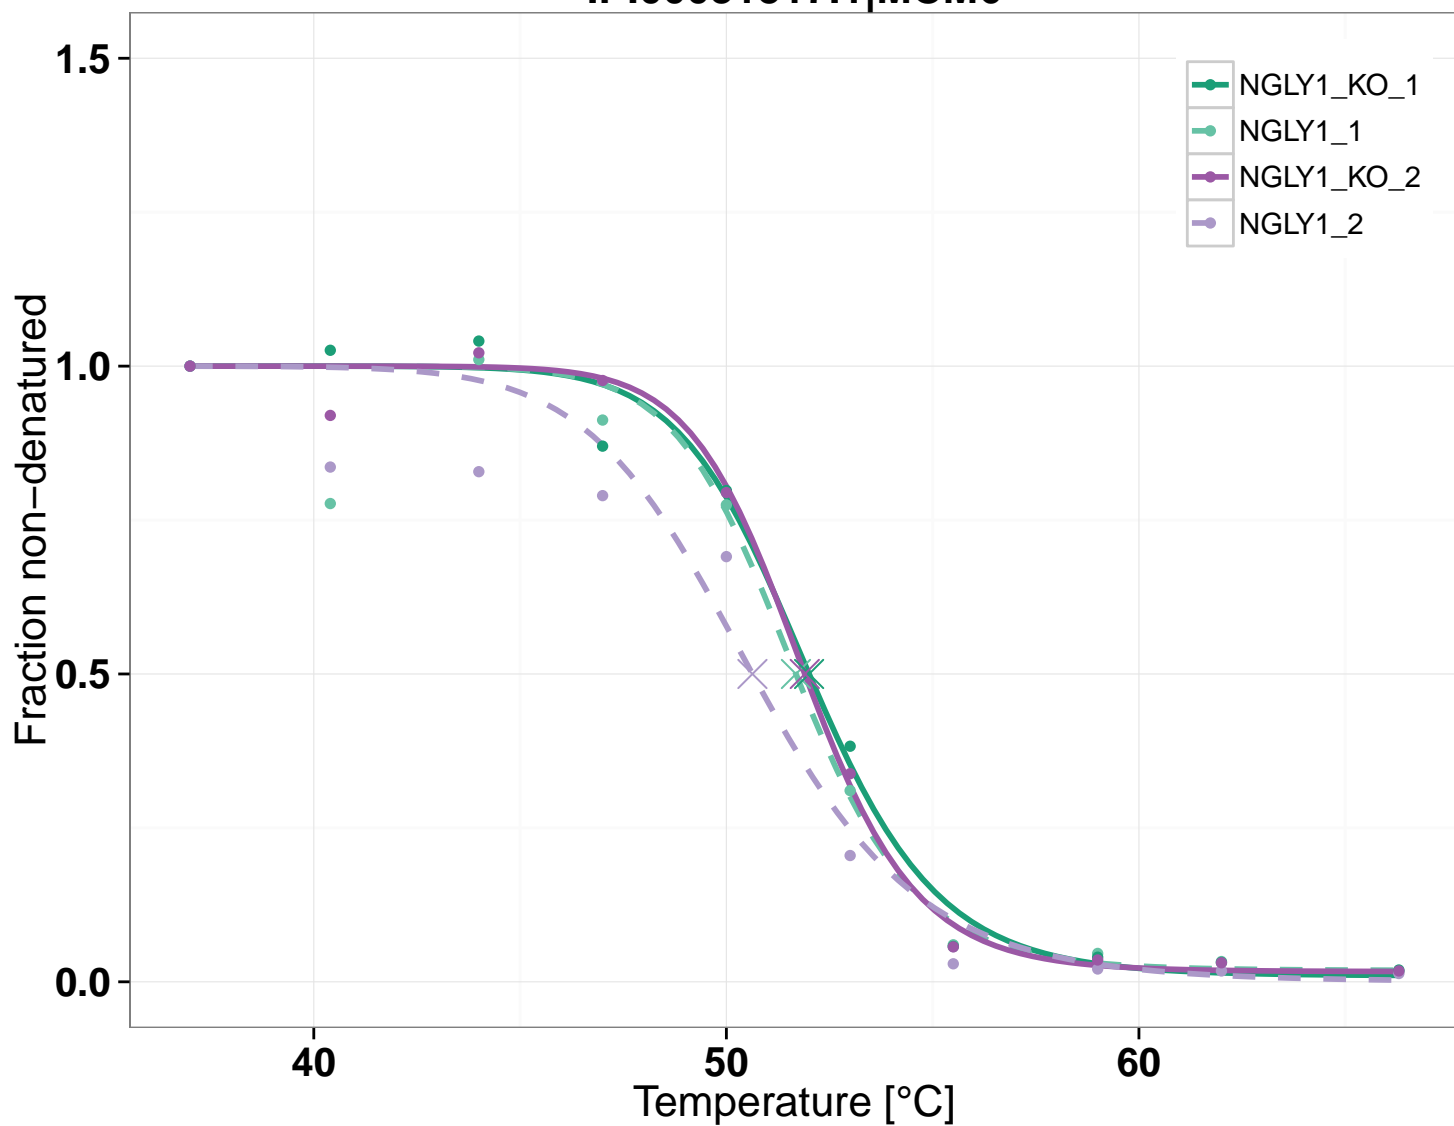

|            | meltPoint | slope | plateau | R2   |
|------------|-----------|-------|---------|------|
| NGLY1_KO_1 | 52.01     | -0.16 | 0.01    | 0.99 |
| NGLY1_1    | 51.69     | -0.17 | 0.02    | 0.97 |
| NGLY1_KO_2 | 51.9      | -0.18 | 0.02    | 1    |
| NGLY1_2    | 50.63     | -0.12 | 0       | 0.95 |

Supplement: Supplementary file 1804 [file 1]

IPI00290459.2|DCLRE1C

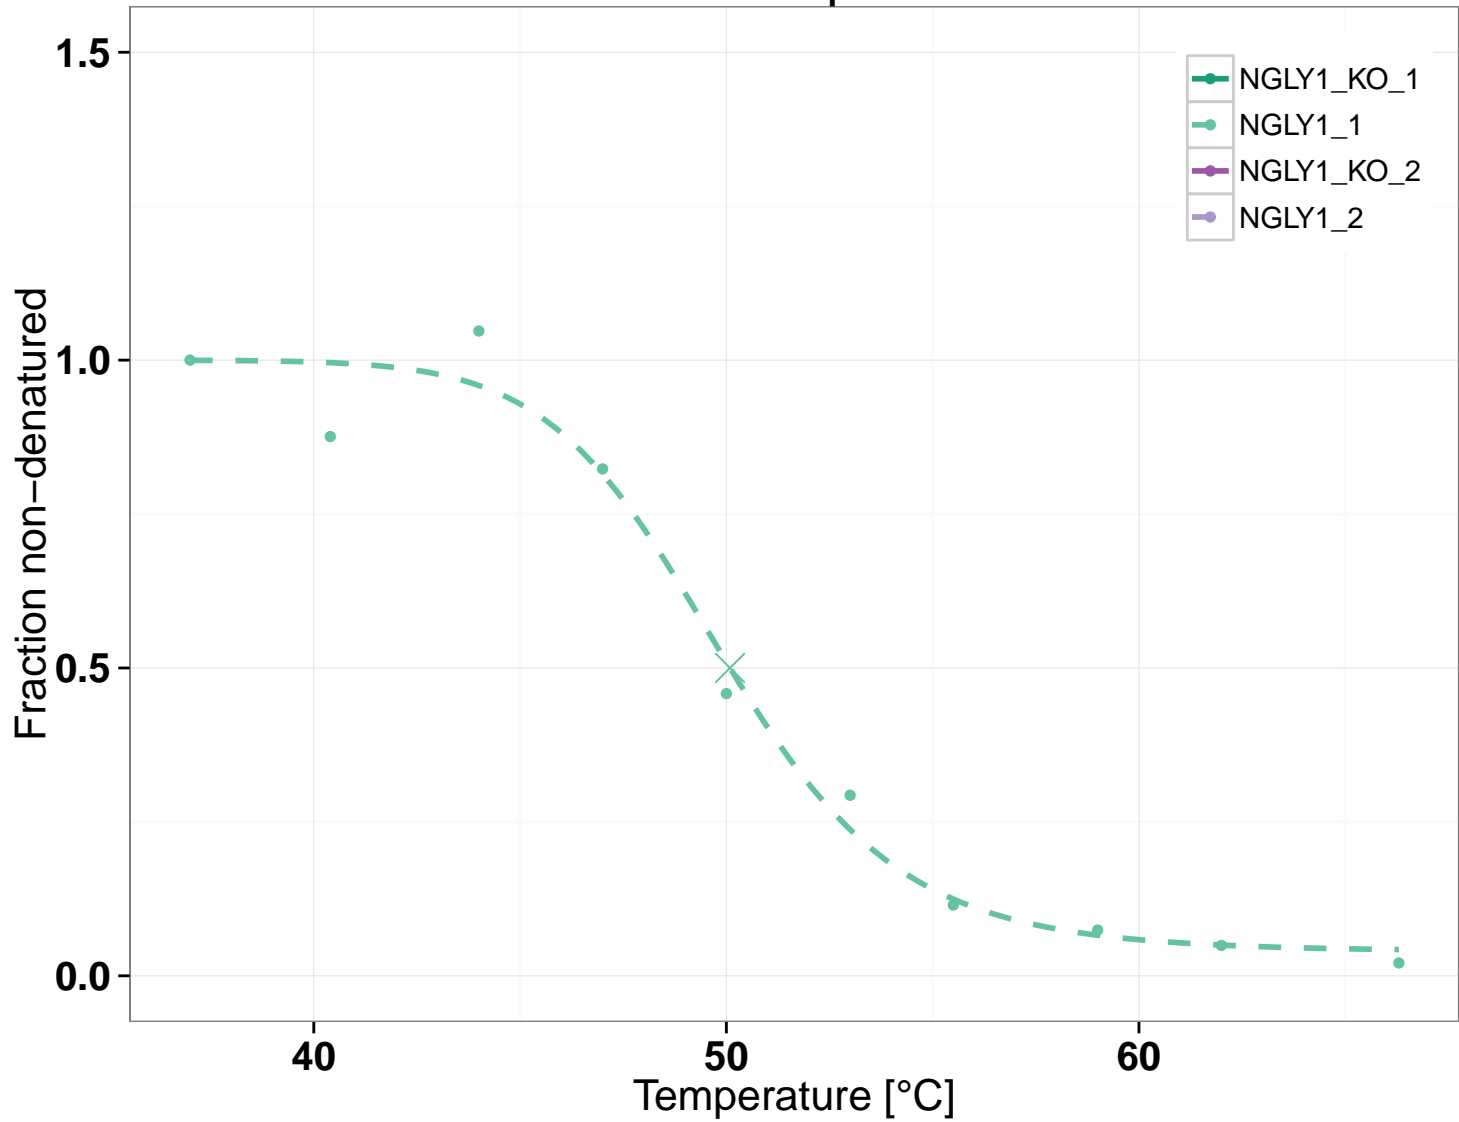

|            | meltPoint | slope | plateau | R2   |
|------------|-----------|-------|---------|------|
| NGLY1_KO_1 | -         | -     | -       | -    |
| NGLY1_1    | 50.09     | -0.11 | 0.04    | 0.98 |
| NGLY1_KO_2 | -         | -     | -       | -    |
| NGLY1_2    | -         | -     | -       | -    |

Supplement: Supplementary file 1805 [file 1]

# IPI00009010.3|HSPC152

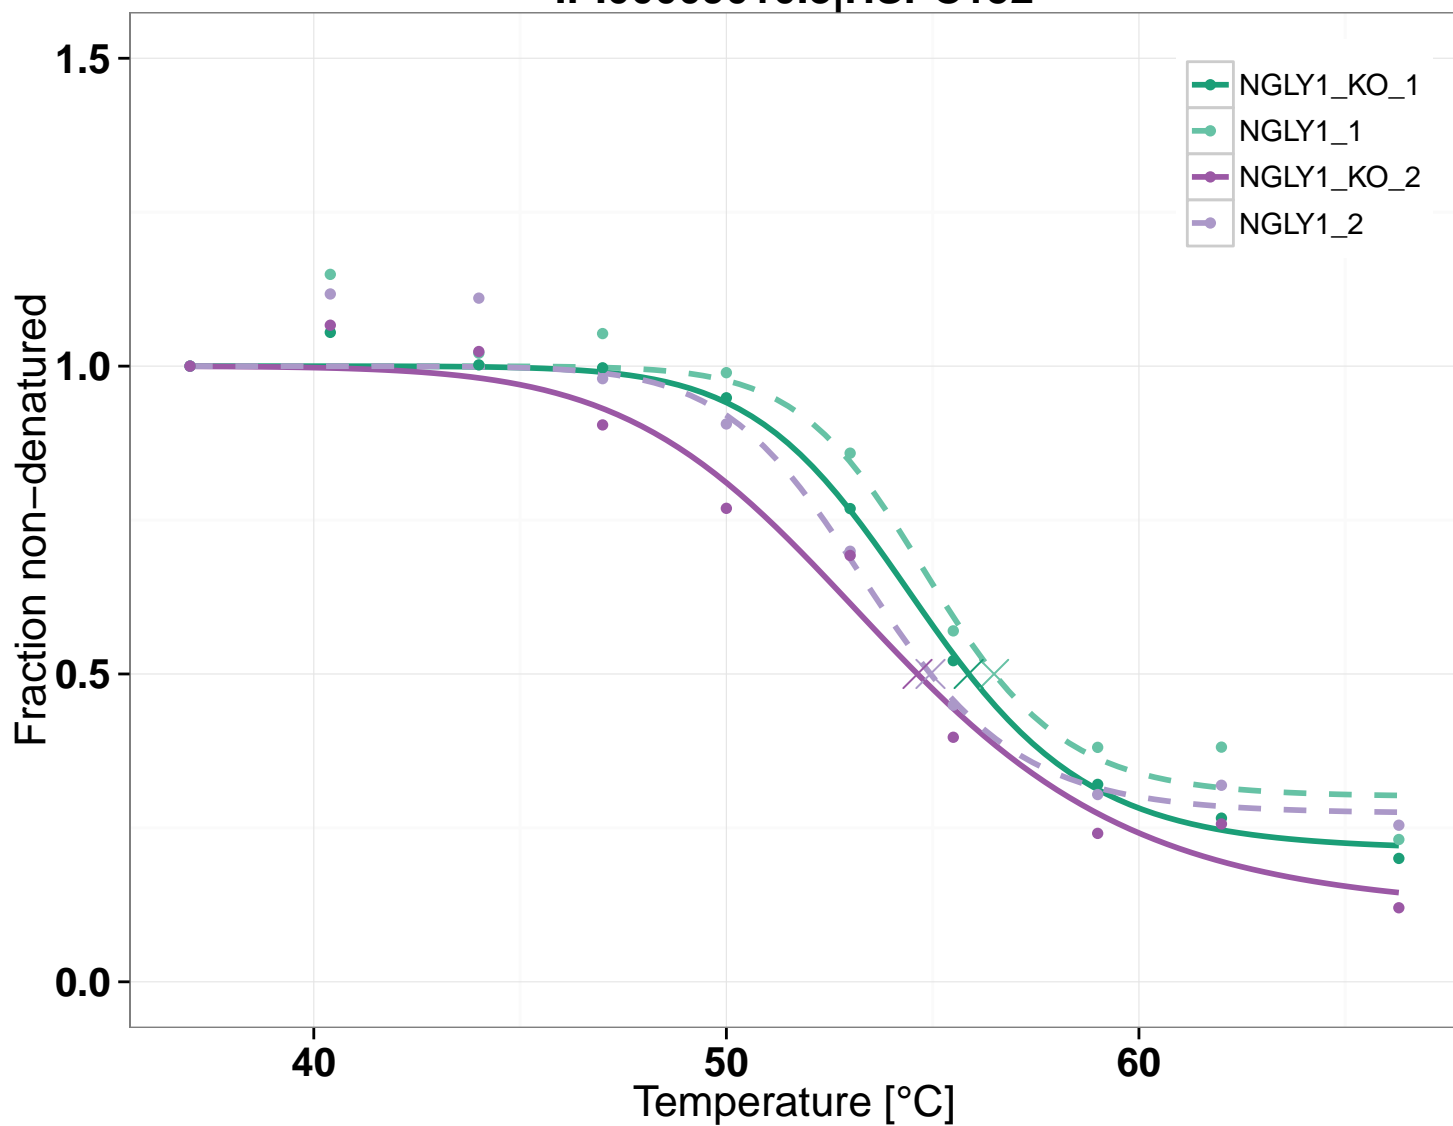

|            | meltPoint | slope  | plateau | R2   |
|------------|-----------|--------|---------|------|
| NGLY1_KO_1 | 55.87     | -0.096 | 0.21    | 1    |
| NGLY1_1    | 56.49     | -0.11  | 0.3     | 0.96 |
| NGLY1_KO_2 | 54.63     | -0.071 | 0.11    | 0.98 |
| NGLY1_2    | 54.95     | -0.1   | 0.27    | 0.97 |

Supplement: Supplementary file 1806 [file 1]

IPI00102580.1|MTMR9

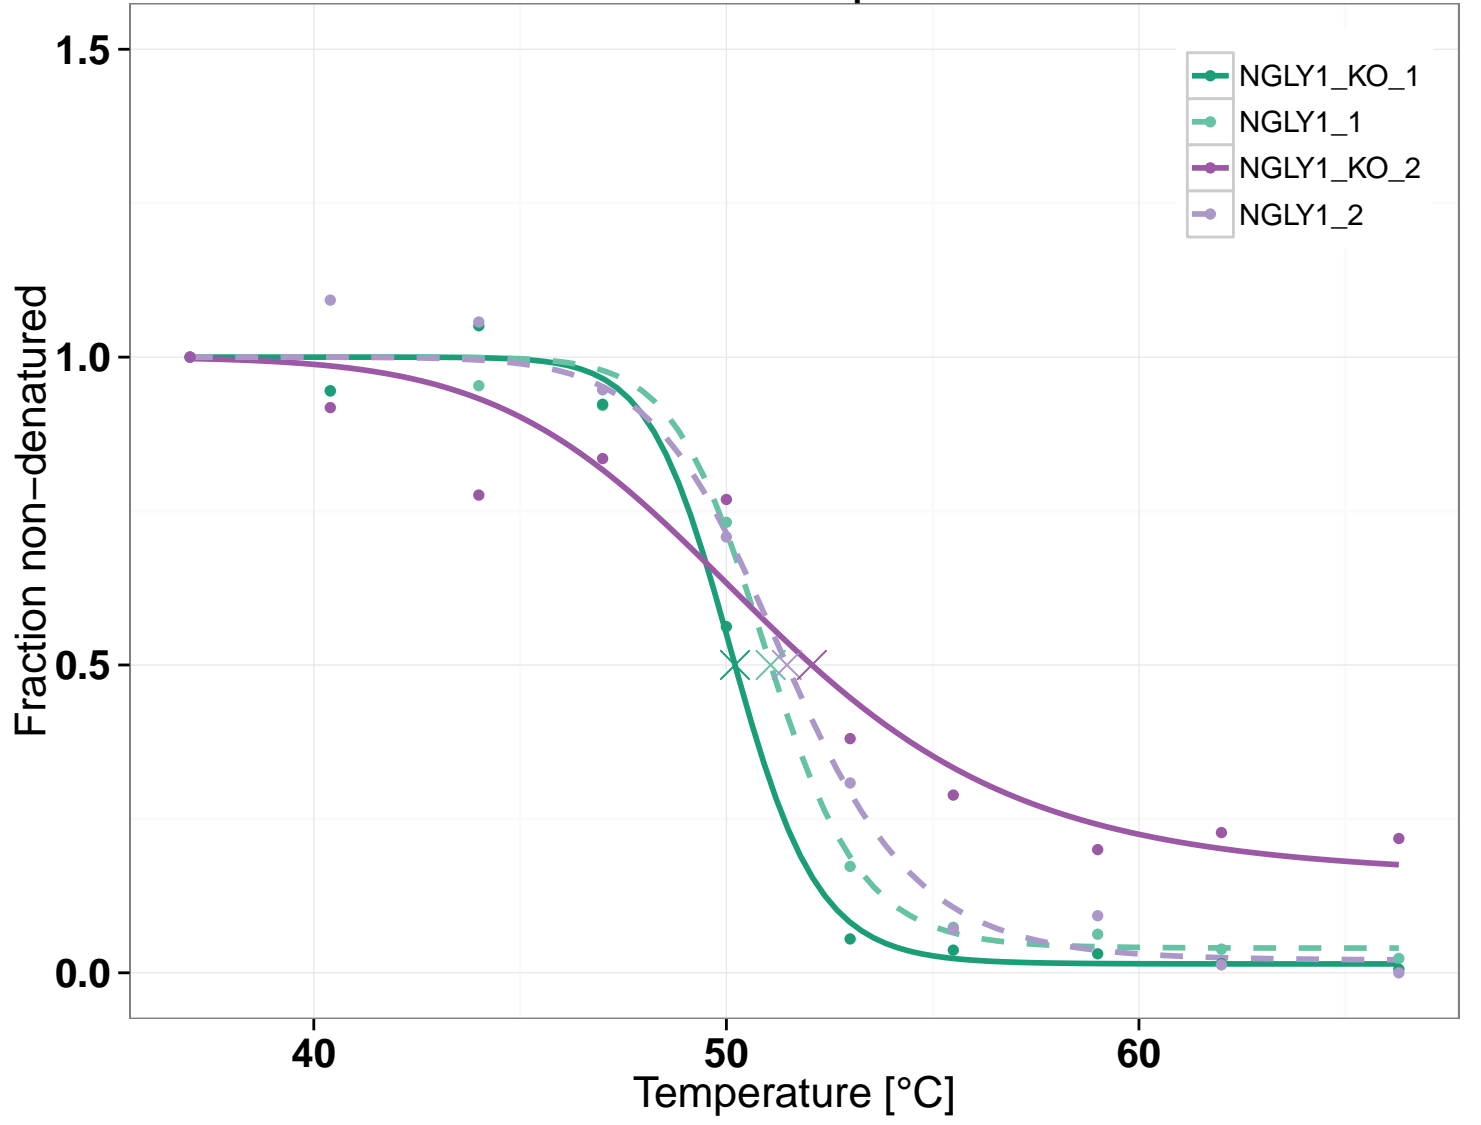

|            | meltPoint | slope  | plateau | R2   |
|------------|-----------|--------|---------|------|
| NGLY1_KO_1 | 50.21     | -0.24  | 0.01    | 1    |
| NGLY1_1    | 51.07     | -0.21  | 0.04    | 0.99 |
| NGLY1_KO_2 | 52.07     | -0.066 | 0.15    | 0.94 |
| NGLY1_2    | 51.47     | -0.15  | 0.02    | 0.99 |

Supplement: Supplementary file 1807 [file 1]

IPI00873975.1|C19ORF60

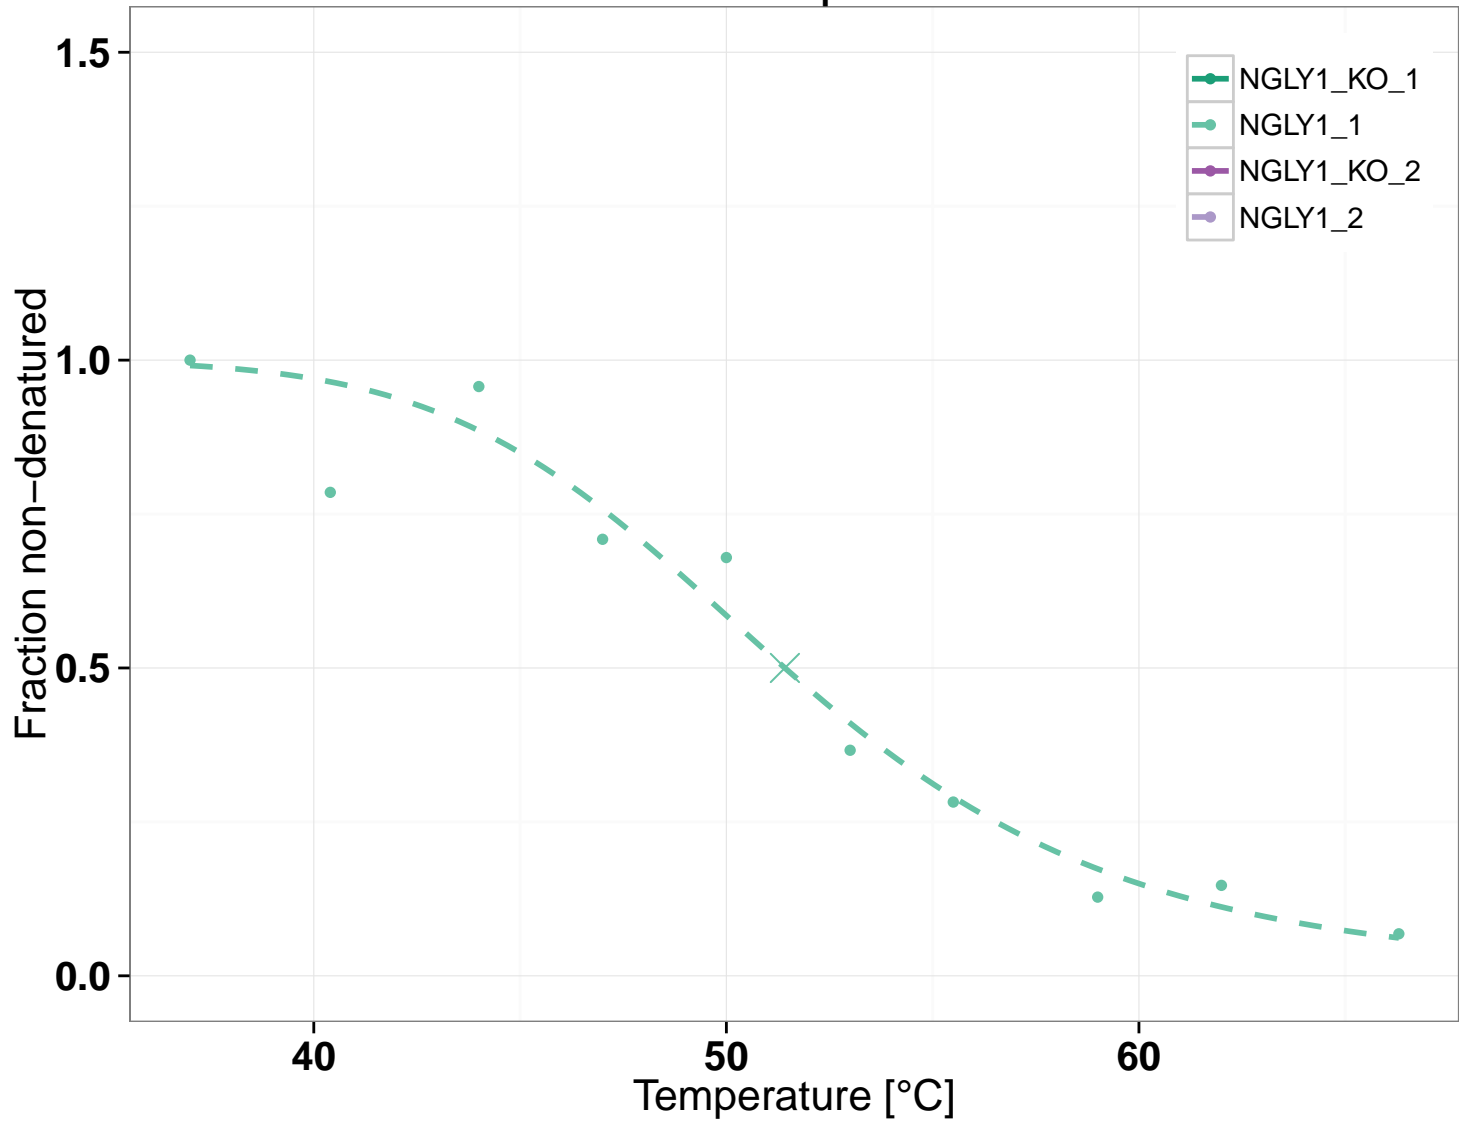

|            | meltPoint | slope  | plateau | R2   |
|------------|-----------|--------|---------|------|
| NGLY1_KO_1 | –         | –      | –       | –    |
| NGLY1_1    | 51.42     | –0.061 | 0       | 0.95 |
| NGLY1_KO_2 | –         | –      | –       | –    |
| NGLY1_2    | –         | –      | –       | –    |

Supplement: Supplementary file 1808 [file 1]
