# Supplementary material (part 19 of 85)
Source: publisher figshare collection journal article supplement (https://gsajournals.figshare.com/articles/dataset/_/12014913)

IPI00418797.4|POLR1B

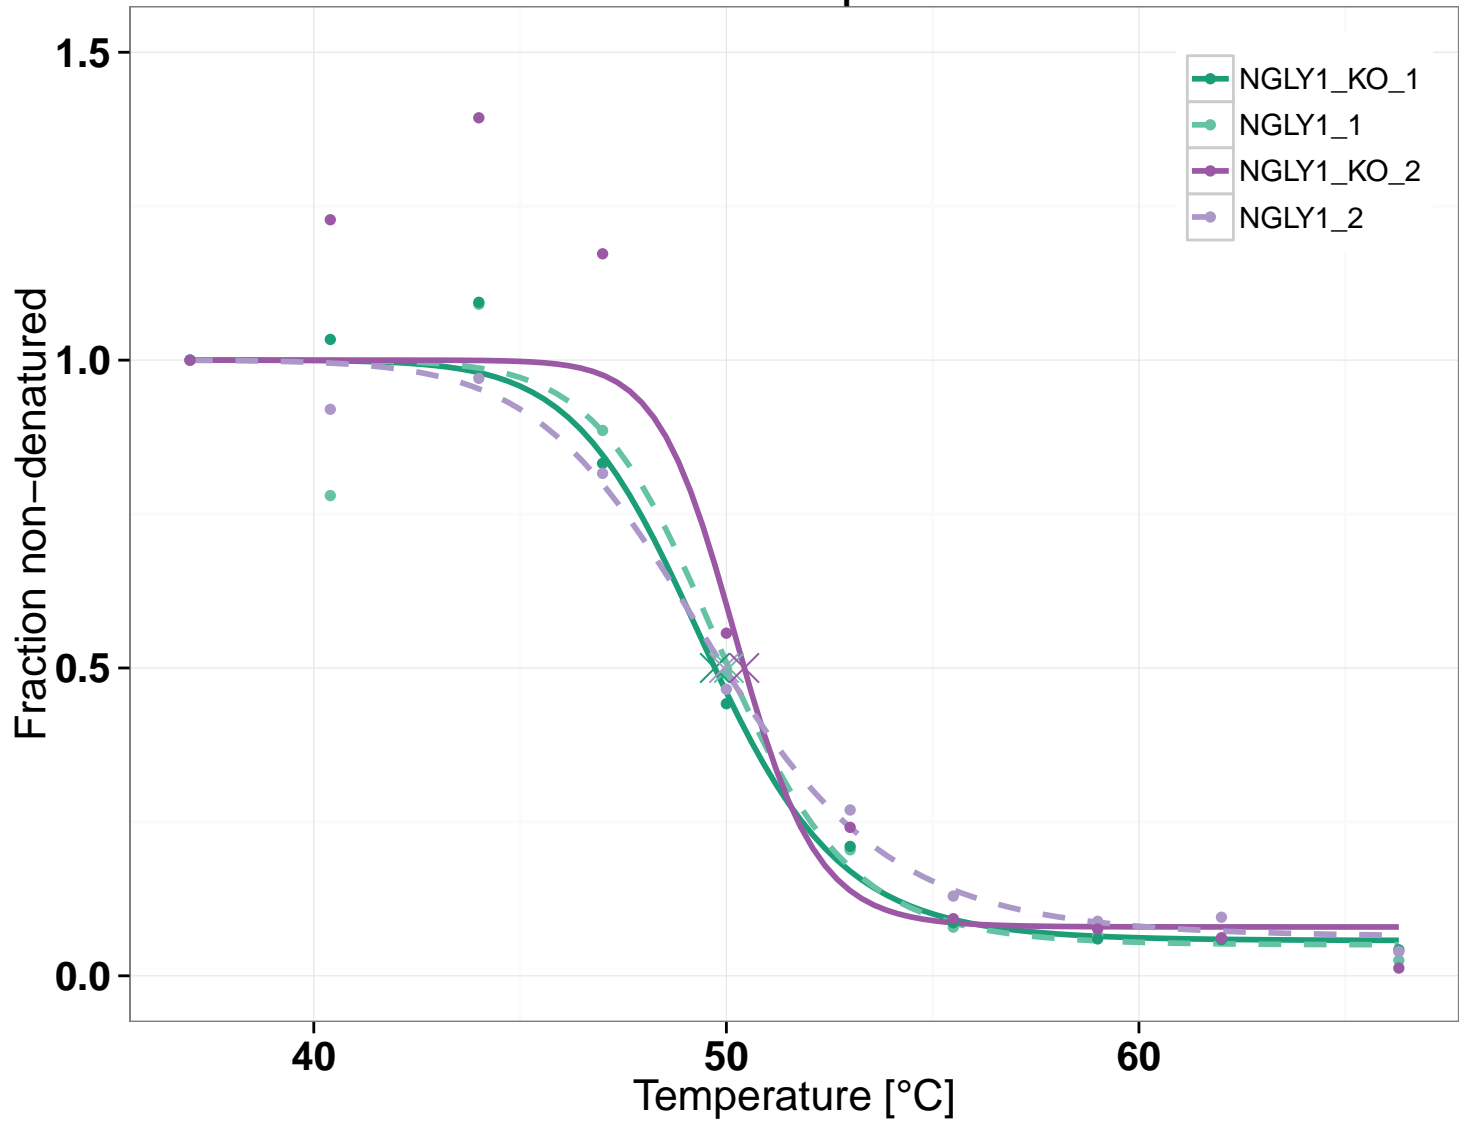

|            | meltPoint | slope | plateau | R2   |
|------------|-----------|-------|---------|------|
| NGLY1_KO_1 | 49.72     | -0.15 | 0.06    | 0.99 |
| NGLY1_1    | 50.06     | -0.15 | 0.05    | 0.96 |
| NGLY1_KO_2 | 50.43     | -0.24 | 0.08    | 0.91 |
| NGLY1_2    | 49.95     | -0.11 | 0.06    | 0.99 |

Supplement: Supplementary file 1809 [file 1]

IPI00879004.1|TOP2A

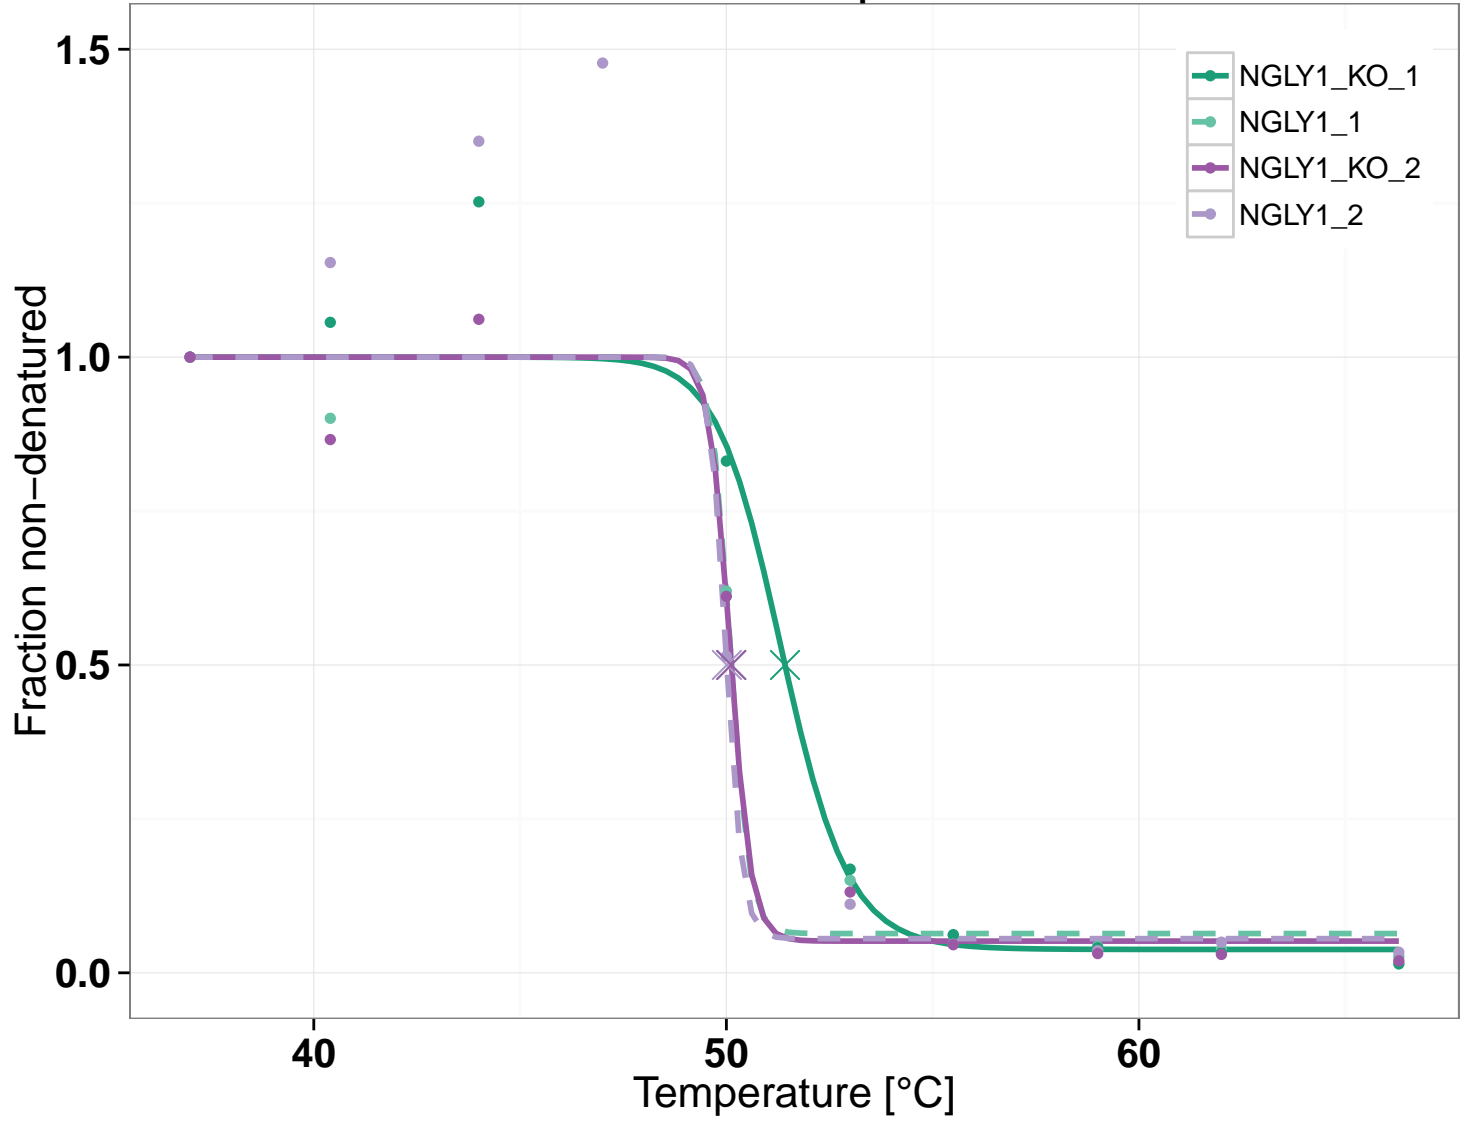

|            | meltPoint | slope | plateau | R2   |
|------------|-----------|-------|---------|------|
| NGLY1_KO_1 | 51.42     | -0.3  | 0.04    | 0.87 |
| NGLY1_1    | 50.12     | -1    | 0.06    | 0.75 |
| NGLY1_KO_2 | 50.12     | -0.94 | 0.05    | 0.86 |
| NGLY1_2    | 50.01     | -1.2  | 0.06    | 0.88 |

Supplement: Supplementary file 1810 [file 1]

IPI00550627.1|TACC1

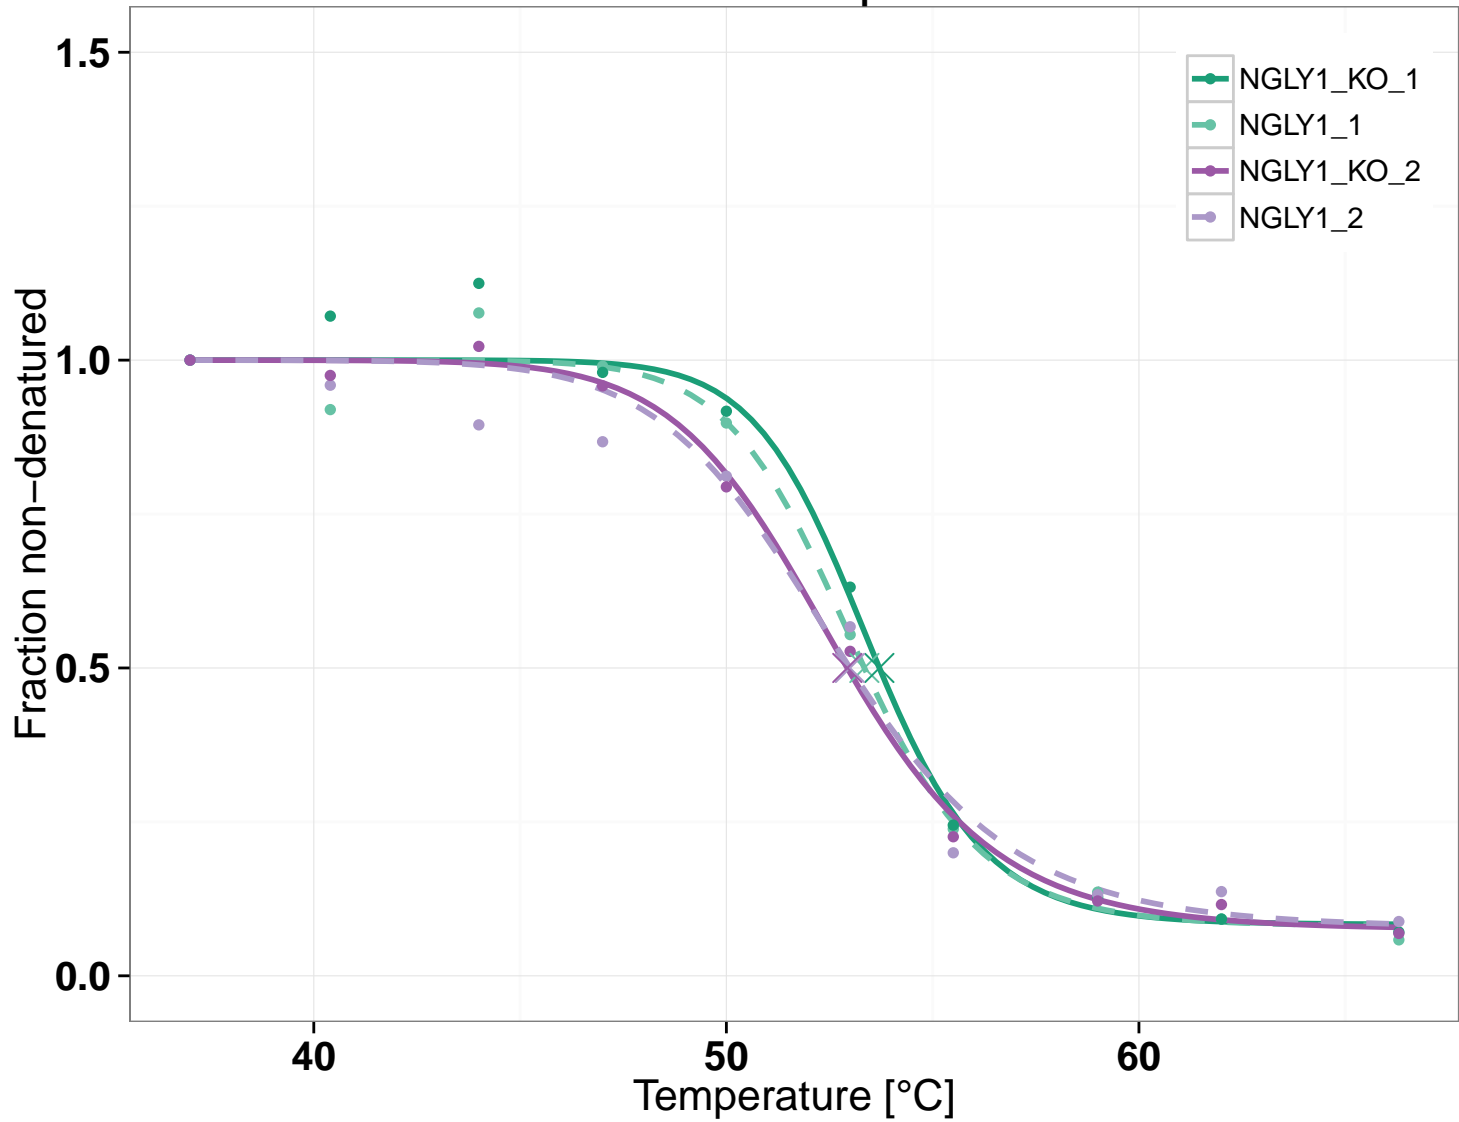

|            | meltPoint | slope | plateau | R2   |
|------------|-----------|-------|---------|------|
| NGLY1_KO_1 | 53.71     | -0.16 | 0.08    | 0.99 |
| NGLY1_1    | 53.35     | -0.15 | 0.08    | 0.99 |
| NGLY1_KO_2 | 52.93     | -0.12 | 0.07    | 1    |
| NGLY1_2    | 53        | -0.11 | 0.08    | 0.98 |

Supplement: Supplementary file 1811 [file 1]

IPI00333763.7|GLRX5

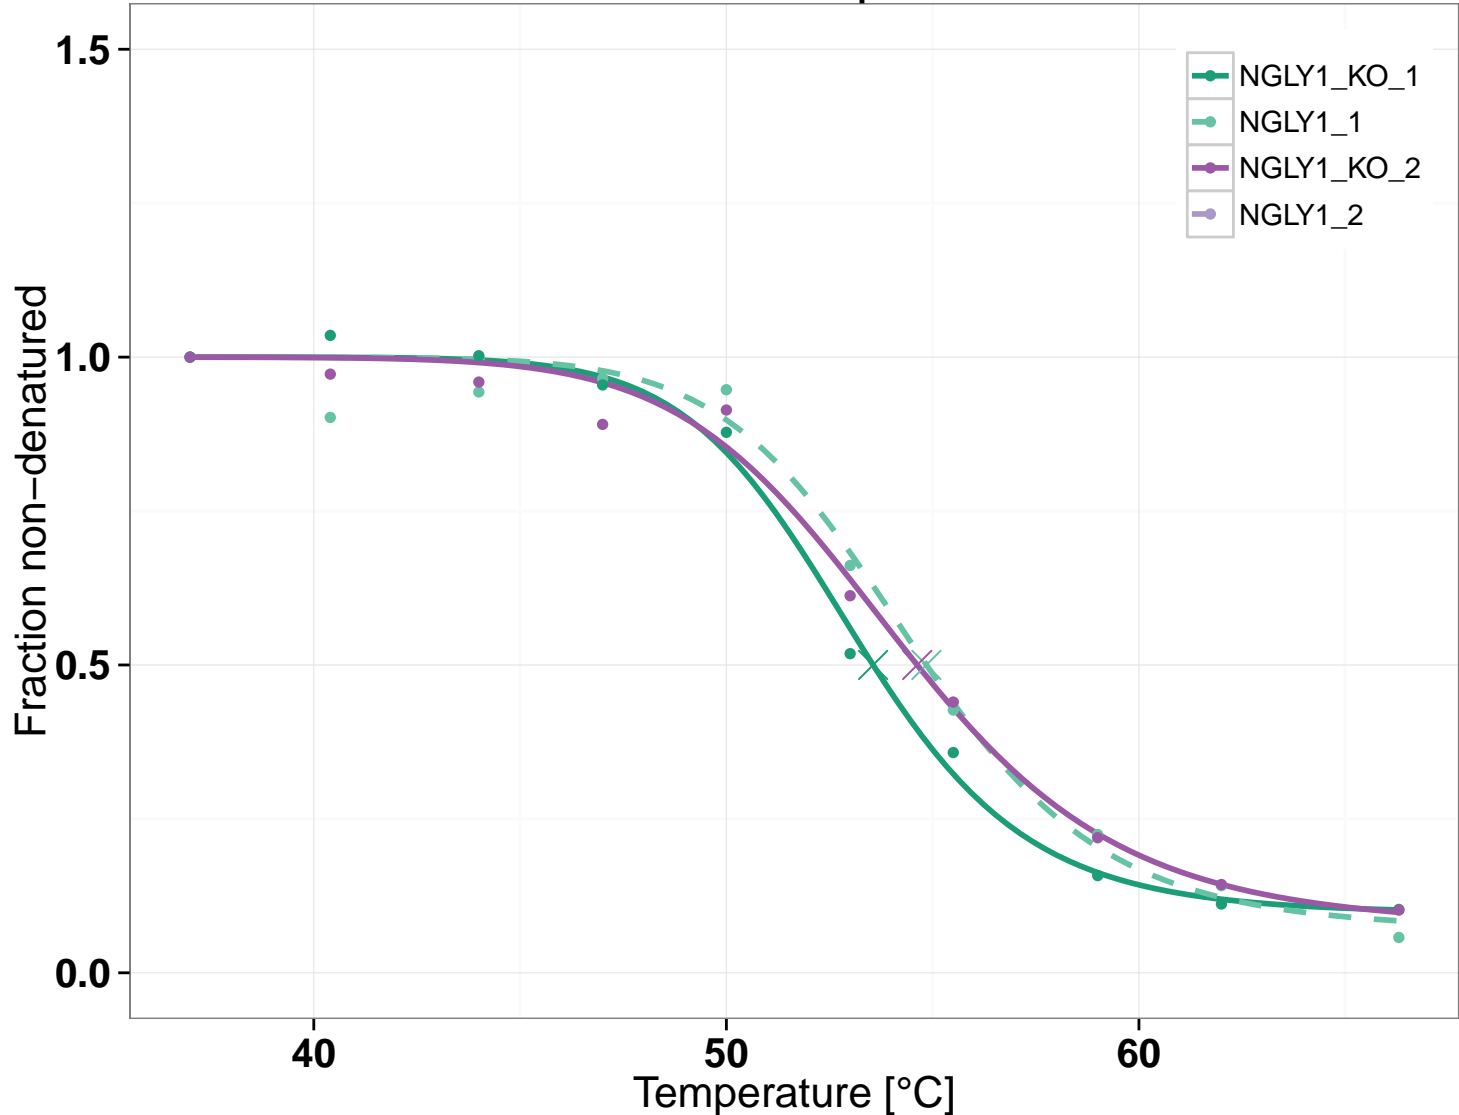

|            | meltPoint | slope  | plateau | R2   |
|------------|-----------|--------|---------|------|
| NGLY1_KO_1 | 53.56     | -0.11  | 0.1     | 1    |
| NGLY1_1    | 54.85     | -0.1   | 0.07    | 0.99 |
| NGLY1_KO_2 | 54.63     | -0.086 | 0.08    | 0.99 |
| NGLY1_2    | -         | -      | -       | -    |

Supplement: Supplementary file 1812 [file 1]

# IPI00005162.3|ARPC3

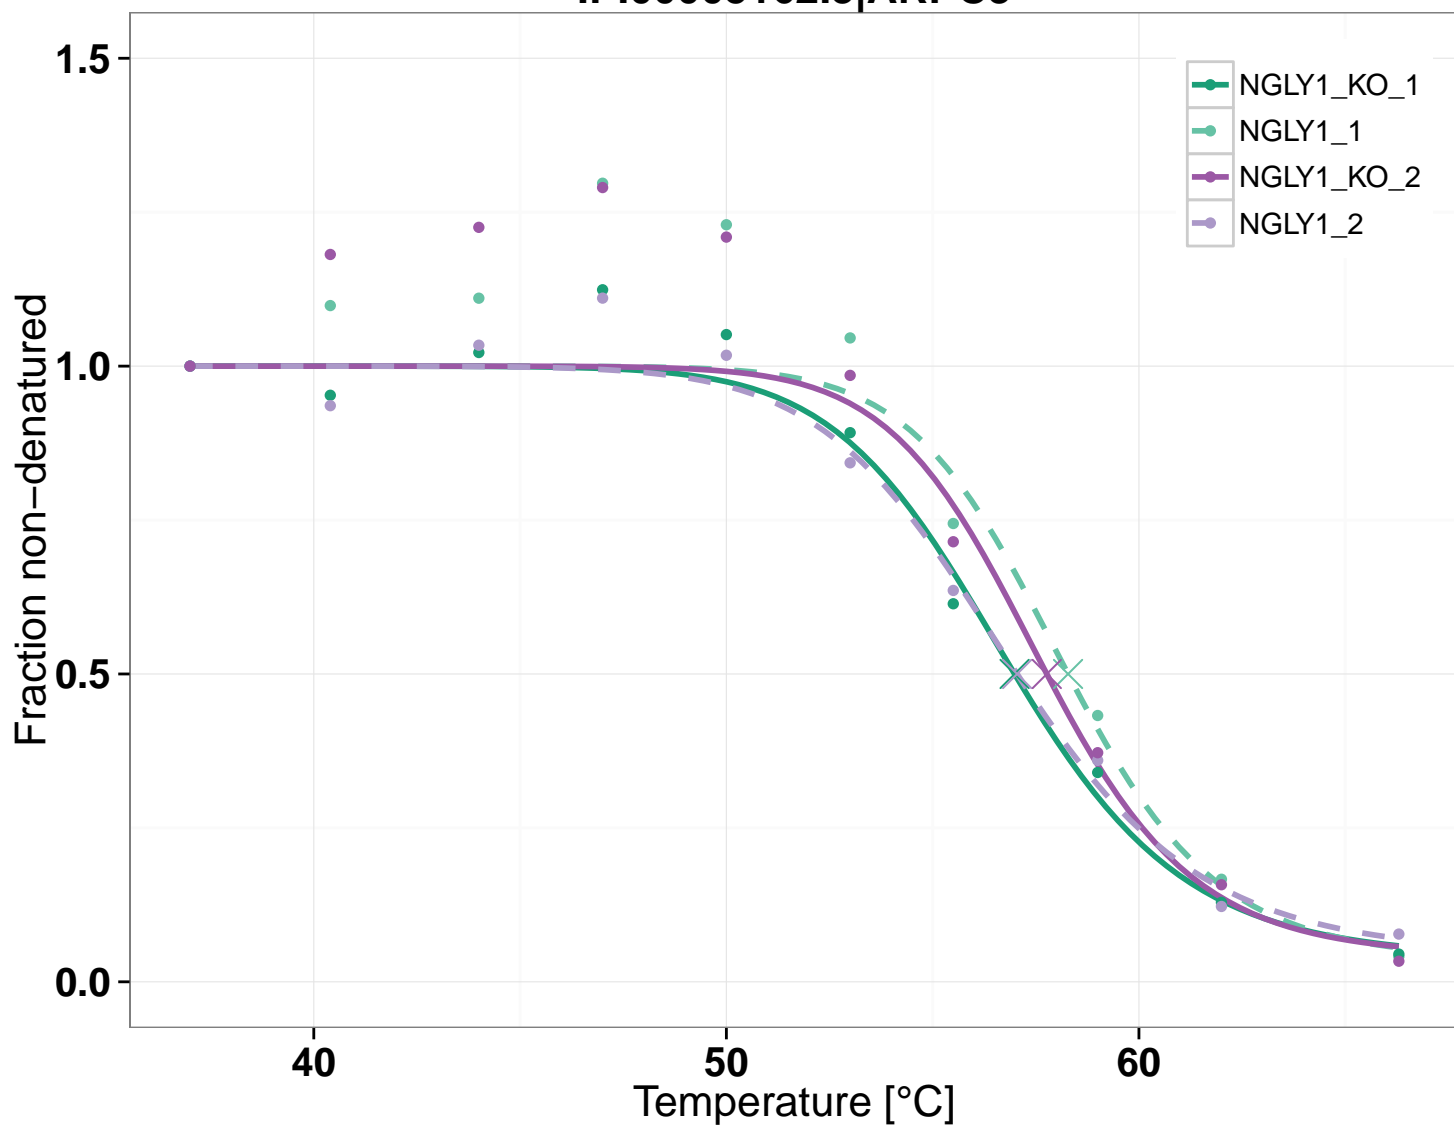

|            | meltPoint | slope | plateau | R2   |
|------------|-----------|-------|---------|------|
| NGLY1_KO_1 | 56.99     | -0.11 | 0.04    | 0.98 |
| NGLY1_1    | 58.28     | -0.13 | 0.03    | 0.9  |
| NGLY1_KO_2 | 57.77     | -0.13 | 0.04    | 0.89 |
| NGLY1_2    | 57.05     | -0.1  | 0.04    | 0.98 |

Supplement: Supplementary file 1813 [file 1]

# IPI00003774.1|TGDS

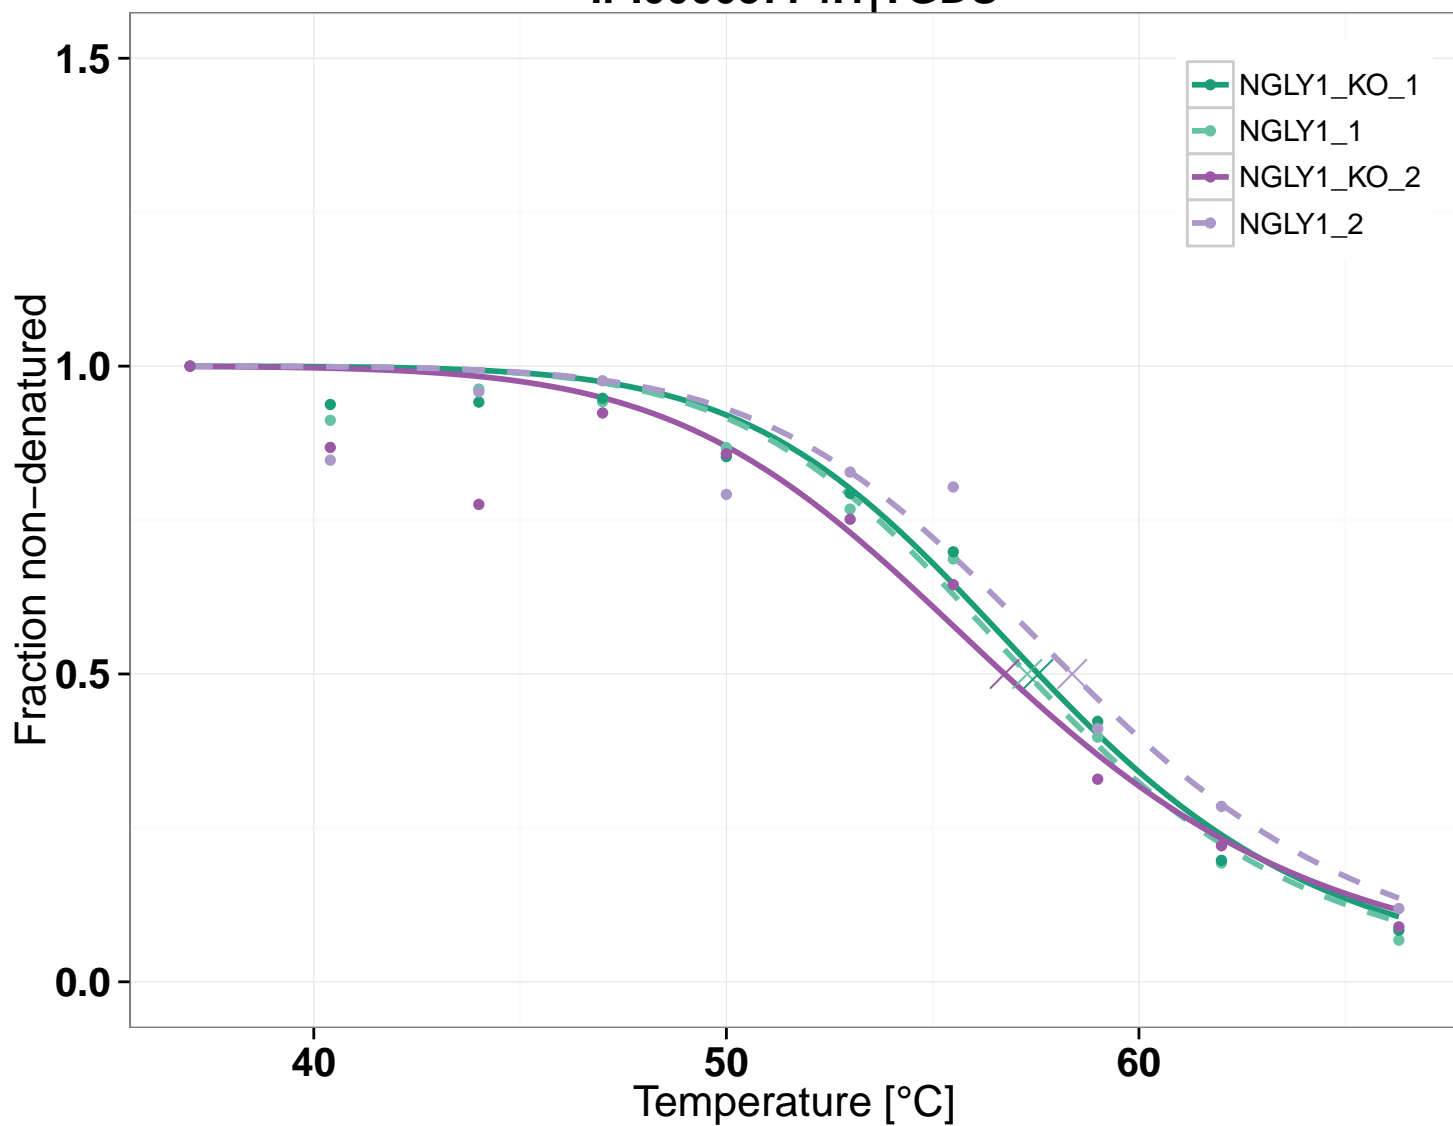

|            | meltPoint | slope  | plateau | R2   |
|------------|-----------|--------|---------|------|
| NGLY1_KO_1 | 57.56     | -0.071 | 0       | 0.98 |
| NGLY1_1    | 57.29     | -0.072 | 0       | 0.98 |
| NGLY1_KO_2 | 56.74     | -0.063 | 0       | 0.93 |
| NGLY1_2    | 58.38     | -0.067 | 0       | 0.93 |

Supplement: Supplementary file 1814 [file 1]

IPI00006176.3|HGS

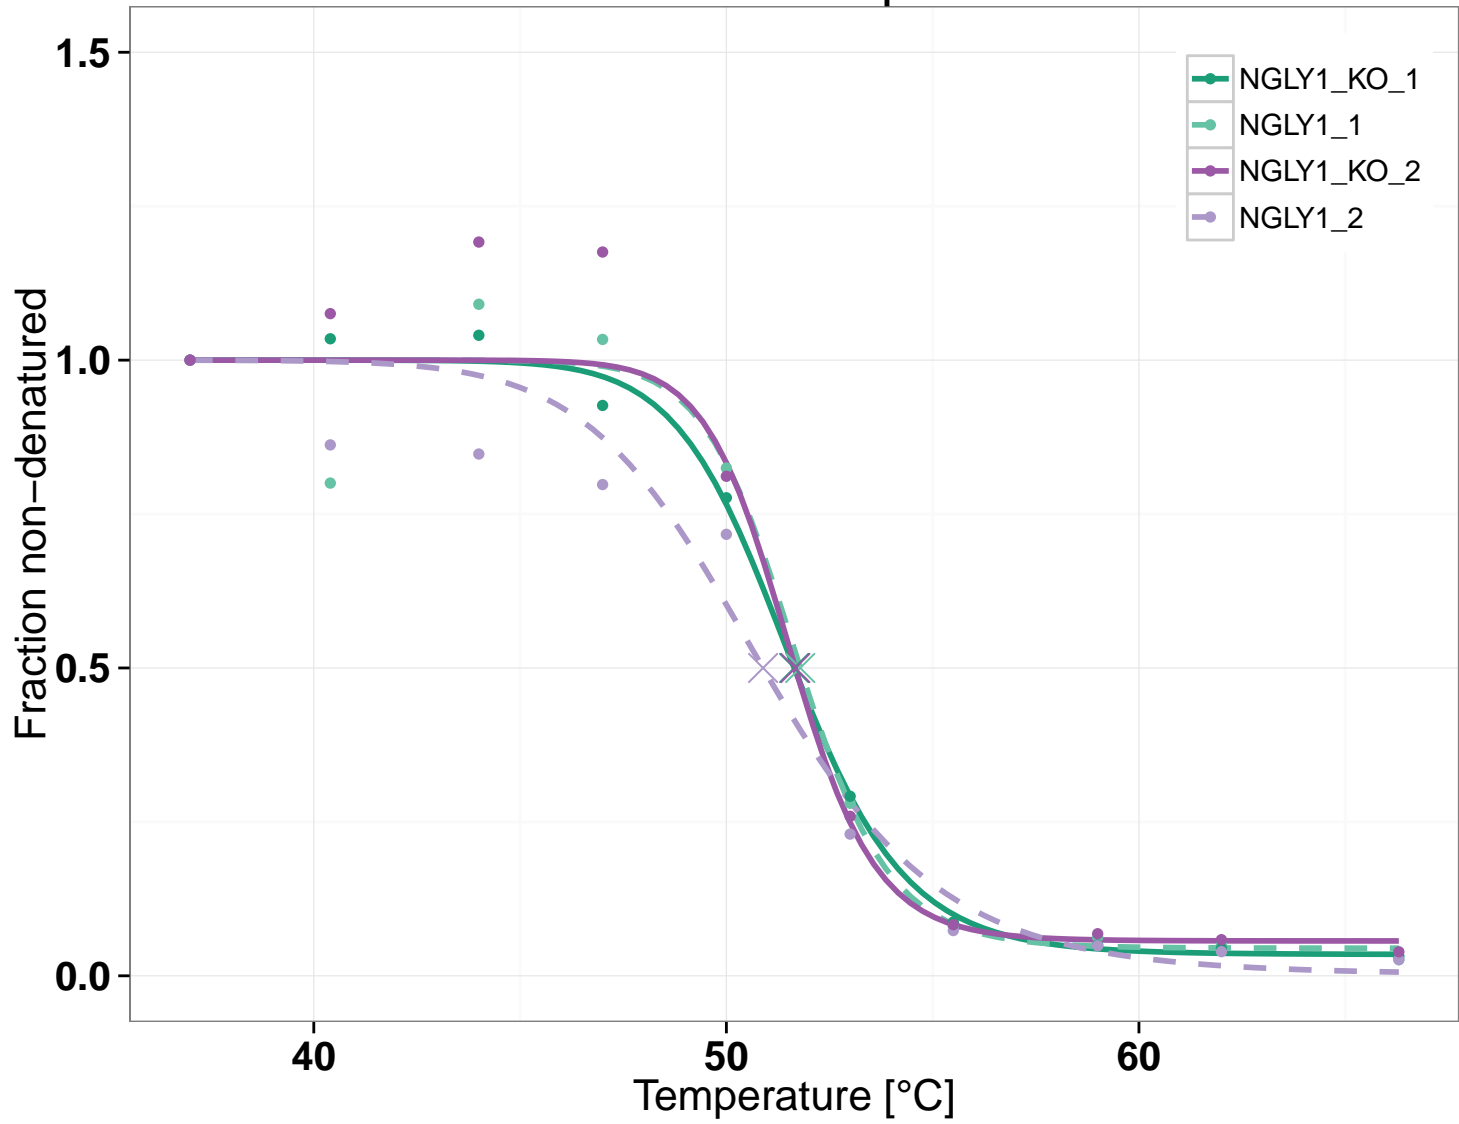

|            | meltPoint | slope | plateau | R2   |
|------------|-----------|-------|---------|------|
| NGLY1_KO_1 | 51.64     | -0.17 | 0.03    | 1    |
| NGLY1_1    | 51.79     | -0.21 | 0.04    | 0.97 |
| NGLY1_KO_2 | 51.67     | -0.23 | 0.06    | 0.97 |
| NGLY1_2    | 50.89     | -0.12 | 0       | 0.96 |

Supplement: Supplementary file 1815 [file 1]

IPI00910421.1|PCTK1

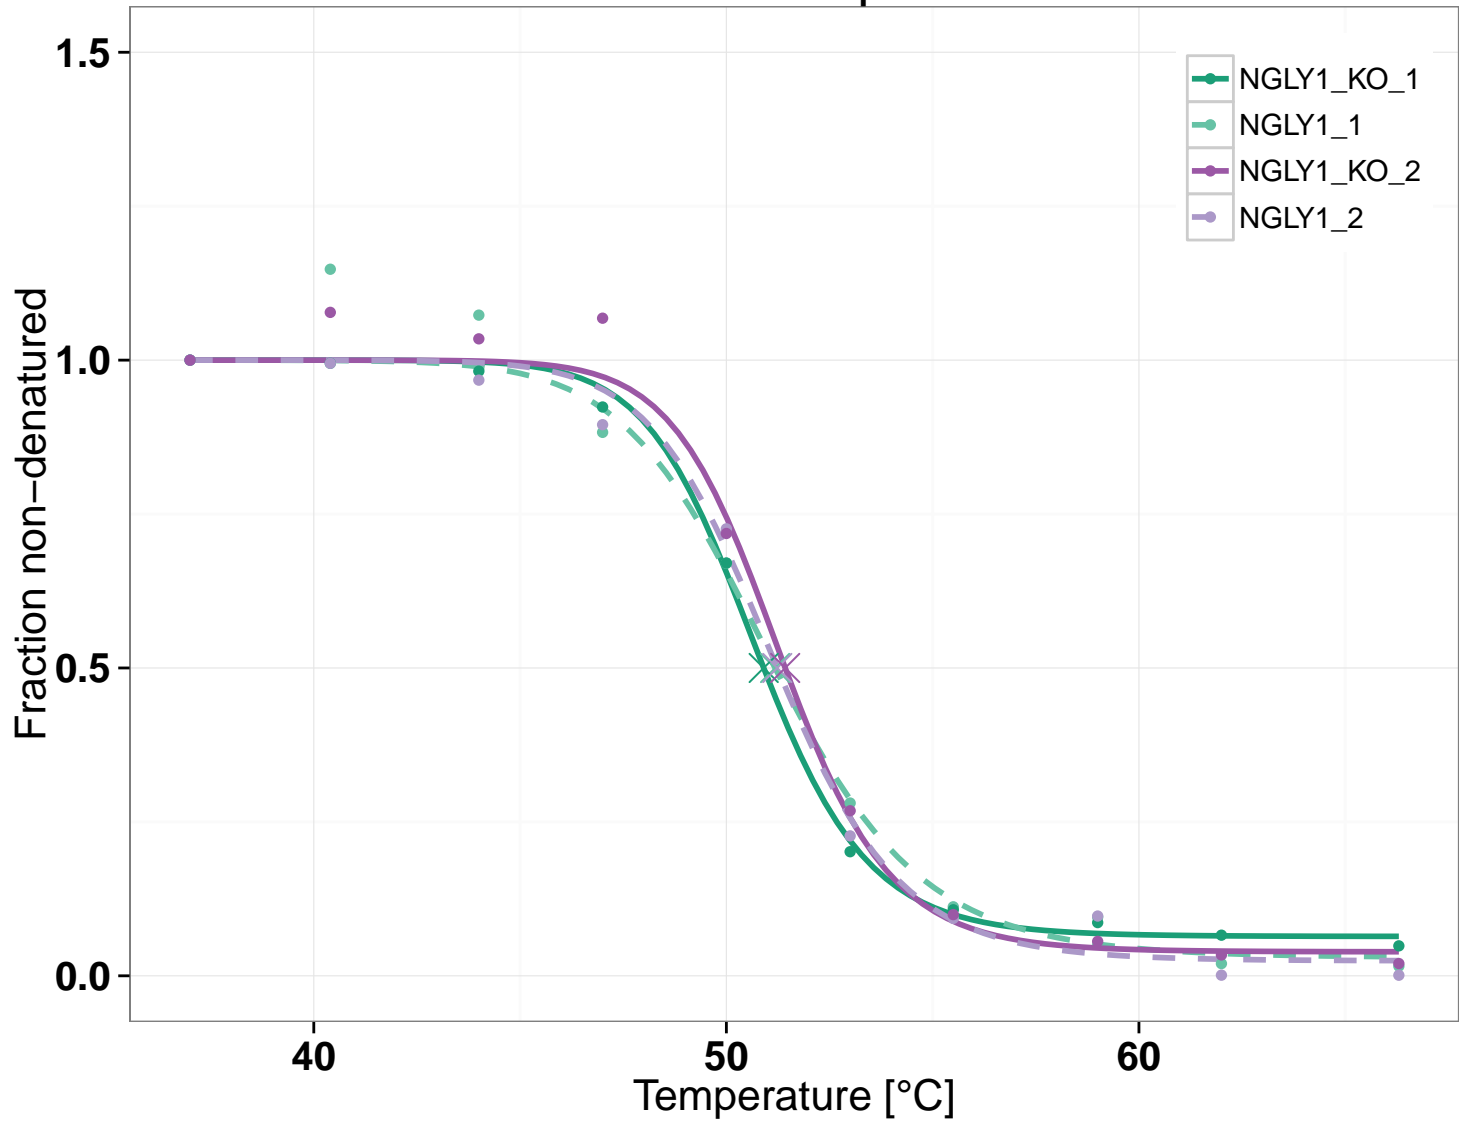

|            | meltPoint | slope | plateau | R2   |
|------------|-----------|-------|---------|------|
| NGLY1_KO_1 | 50.9      | -0.17 | 0.06    | 1    |
| NGLY1_1    | 51.18     | -0.13 | 0.03    | 0.98 |
| NGLY1_KO_2 | 51.43     | -0.18 | 0.04    | 0.99 |
| NGLY1_2    | 51.23     | -0.16 | 0.02    | 0.99 |

Supplement: Supplementary file 1816 [file 1]

# IPI00157215.5|C19ORF52

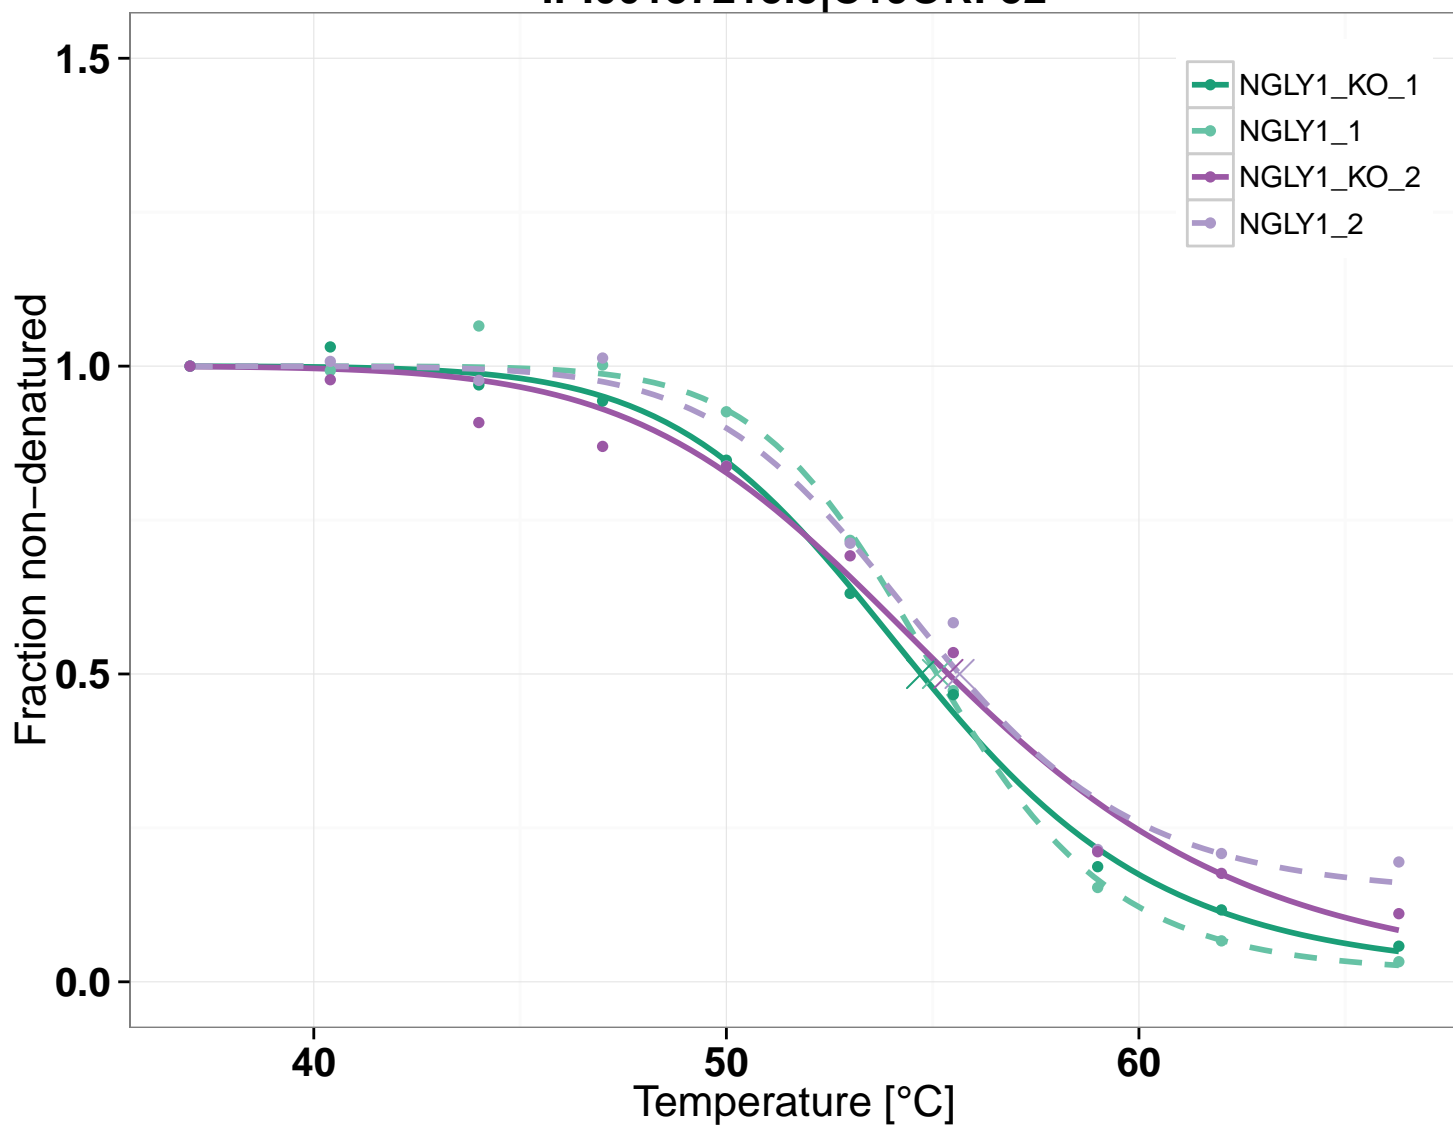

|            | meltPoint | slope  | plateau | R2   |
|------------|-----------|--------|---------|------|
| NGLY1_KO_1 | 54.72     | -0.083 | 0.01    | 1    |
| NGLY1_1    | 55.1      | -0.11  | 0.01    | 1    |
| NGLY1_KO_2 | 55.38     | -0.067 | 0       | 0.98 |
| NGLY1_2    | 55.65     | -0.084 | 0.14    | 0.98 |

Supplement: Supplementary file 1817 [file 1]

IPI00456887.2|HNRNPUL2

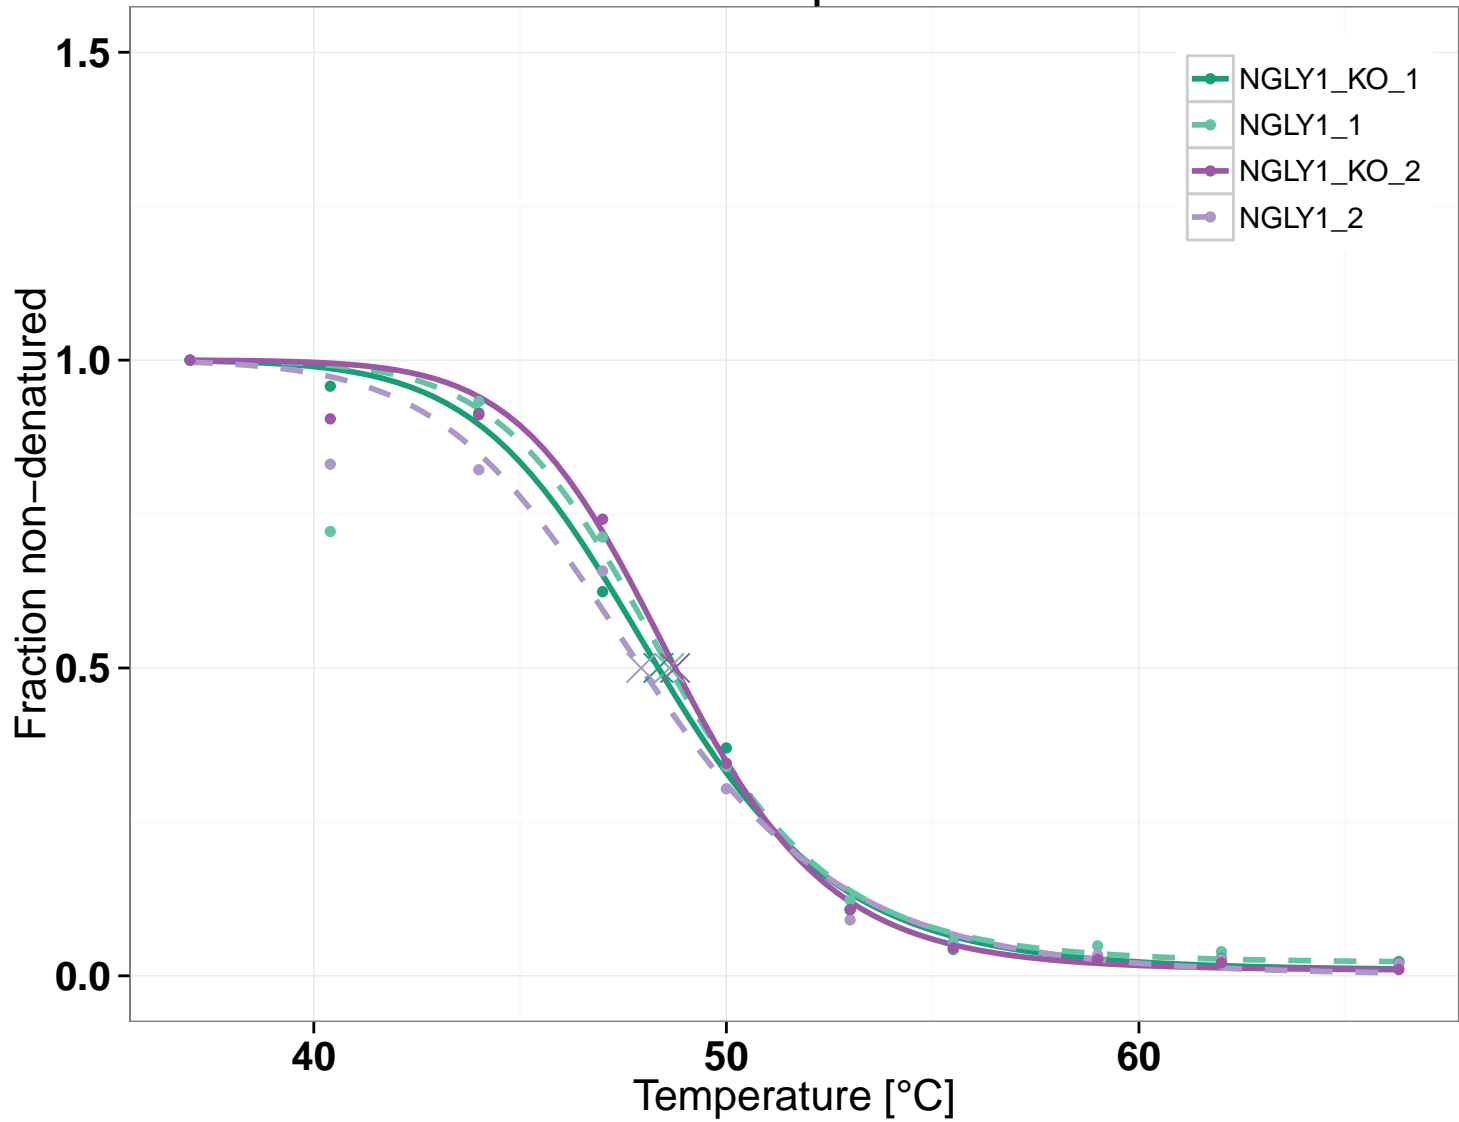

|            | meltPoint | slope | plateau | R2   |
|------------|-----------|-------|---------|------|
| NGLY1_KO_1 | 48.35     | -0.11 | 0.01    | 1    |
| NGLY1_1    | 48.62     | -0.12 | 0.02    | 0.95 |
| NGLY1_KO_2 | 48.76     | -0.13 | 0.01    | 0.99 |
| NGLY1_2    | 47.94     | -0.1  | 0       | 0.98 |

Supplement: Supplementary file 1818 [file 1]

IPI00657858.1|SGOL2

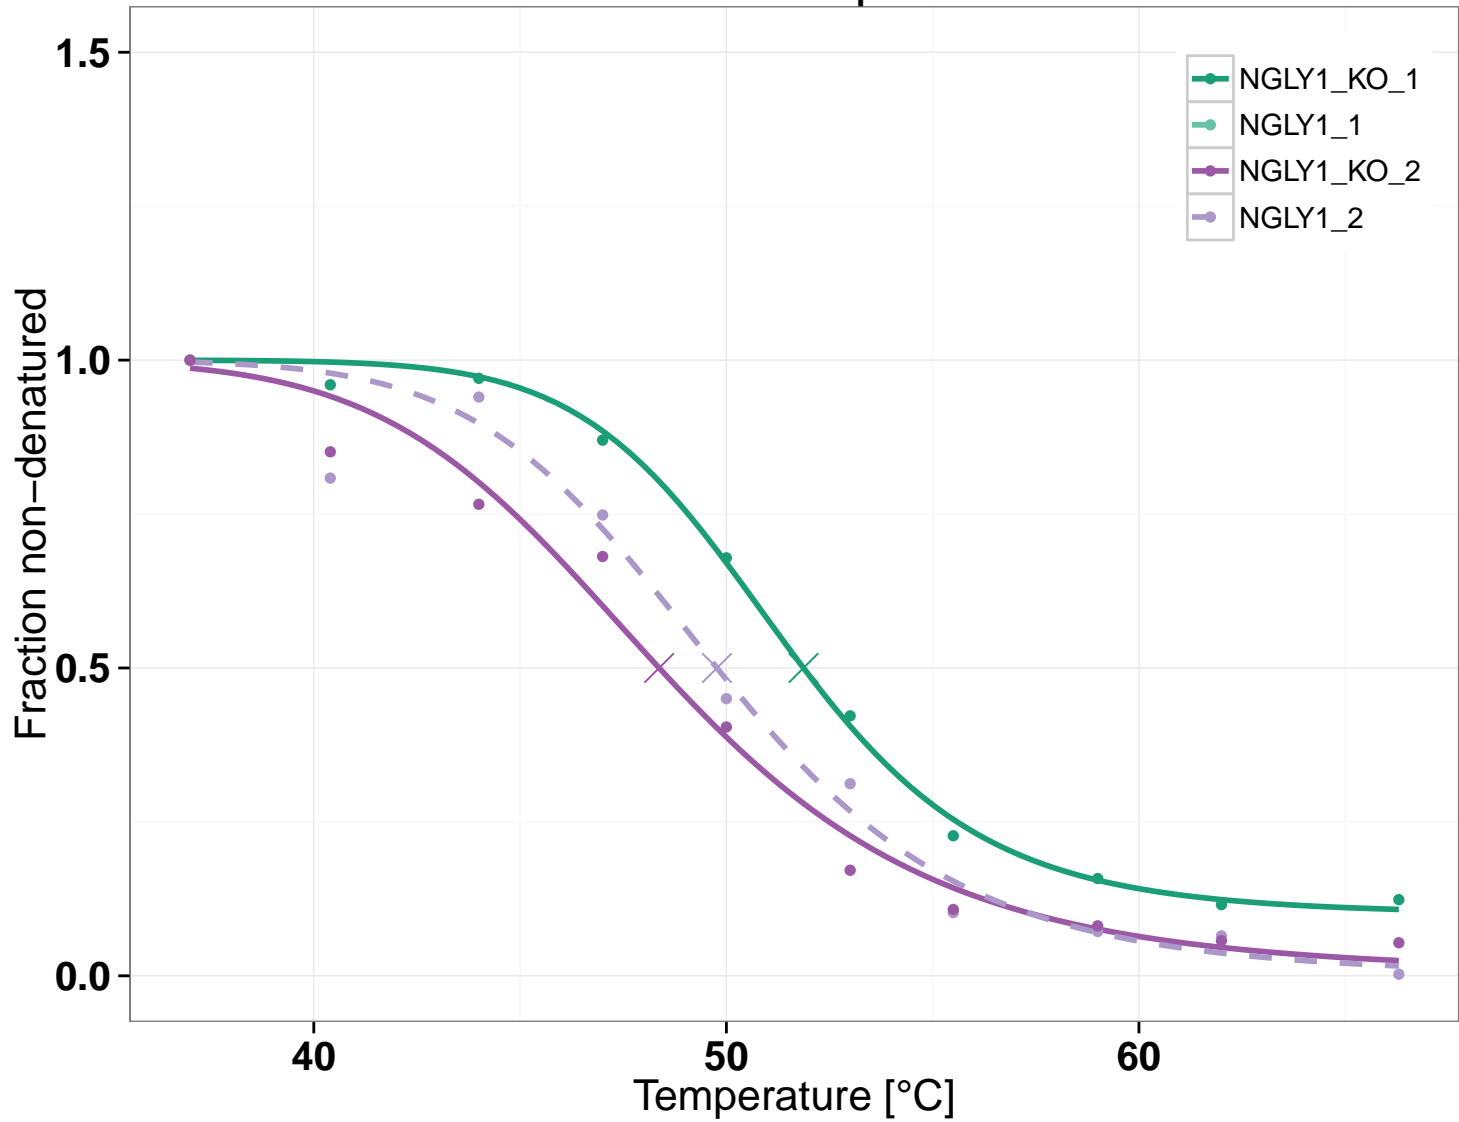

|            | meltPoint | slope  | plateau | R2   |
|------------|-----------|--------|---------|------|
| NGLY1_KO_1 | 51.87     | -0.093 | 0.1     | 1    |
| NGLY1_1    | -         | -      | -       | -    |
| NGLY1_KO_2 | 48.37     | -0.074 | 0       | 0.98 |
| NGLY1_2    | 49.77     | -0.084 | 0       | 0.97 |

Supplement: Supplementary file 1819 [file 1]

# IPI00290684.3|PNKP

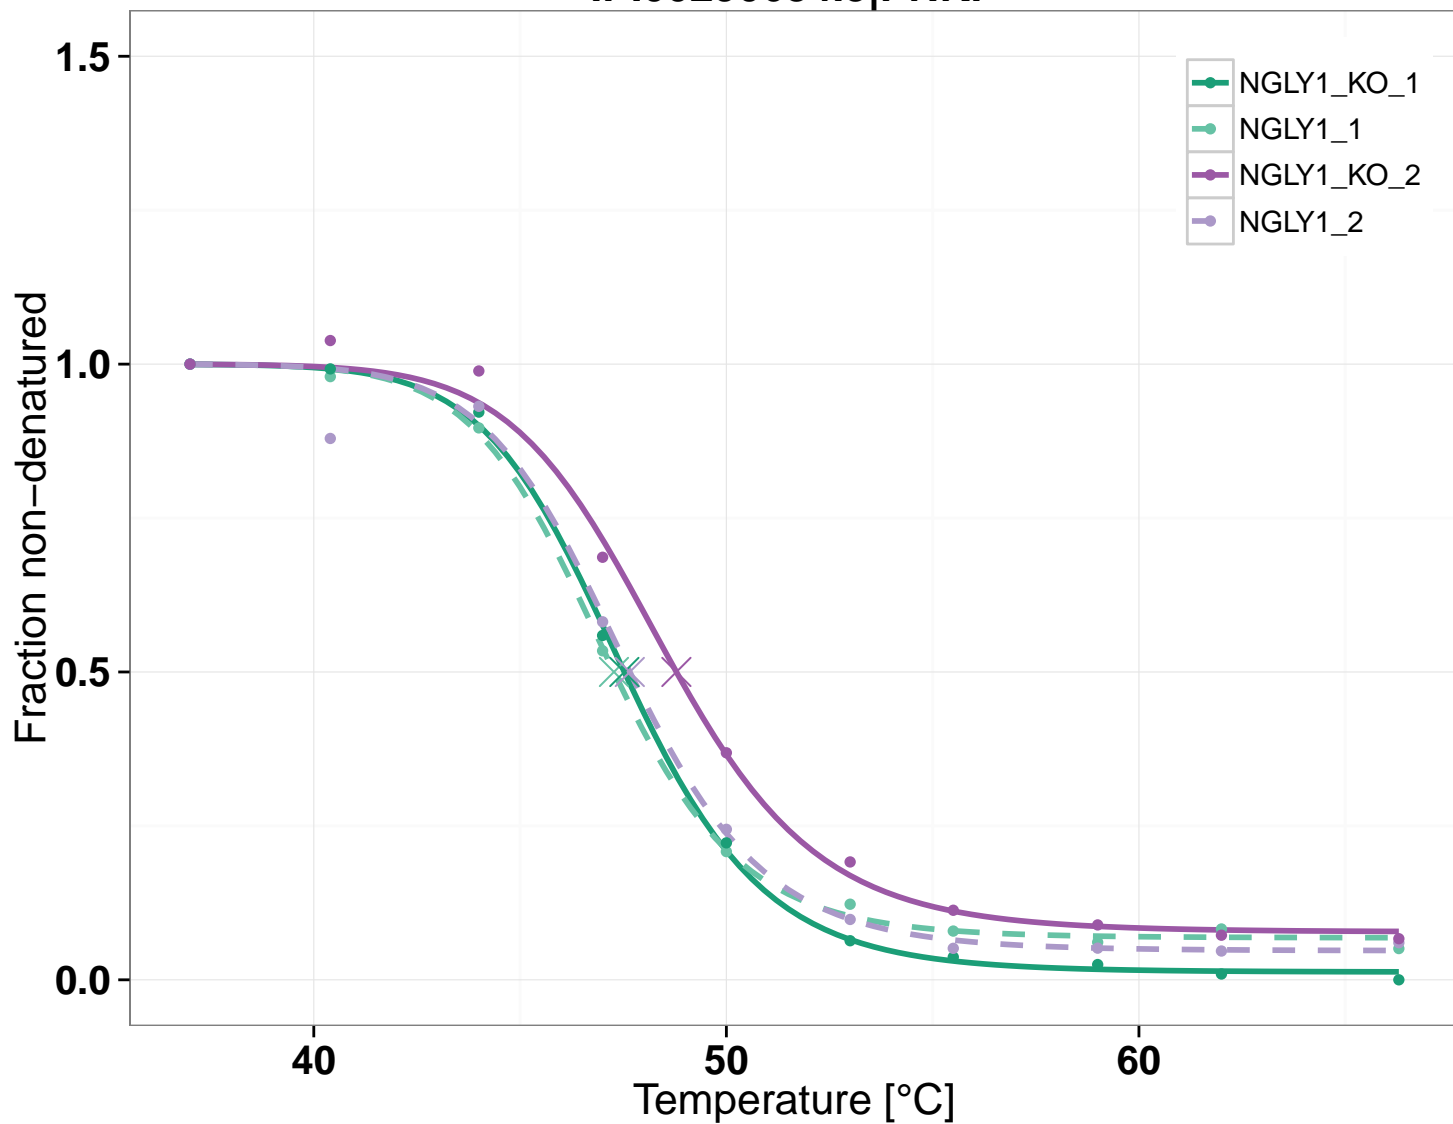

|            | meltPoint | slope | plateau | R2   |
|------------|-----------|-------|---------|------|
| NGLY1_KO_1 | 47.53     | -0.14 | 0.01    | 1    |
| NGLY1_1    | 47.27     | -0.14 | 0.07    | 1    |
| NGLY1_KO_2 | 48.79     | -0.12 | 0.08    | 1    |
| NGLY1_2    | 47.66     | -0.14 | 0.05    | 0.99 |

Supplement: Supplementary file 1820 [file 1]

# IPI00020178.1|STAM

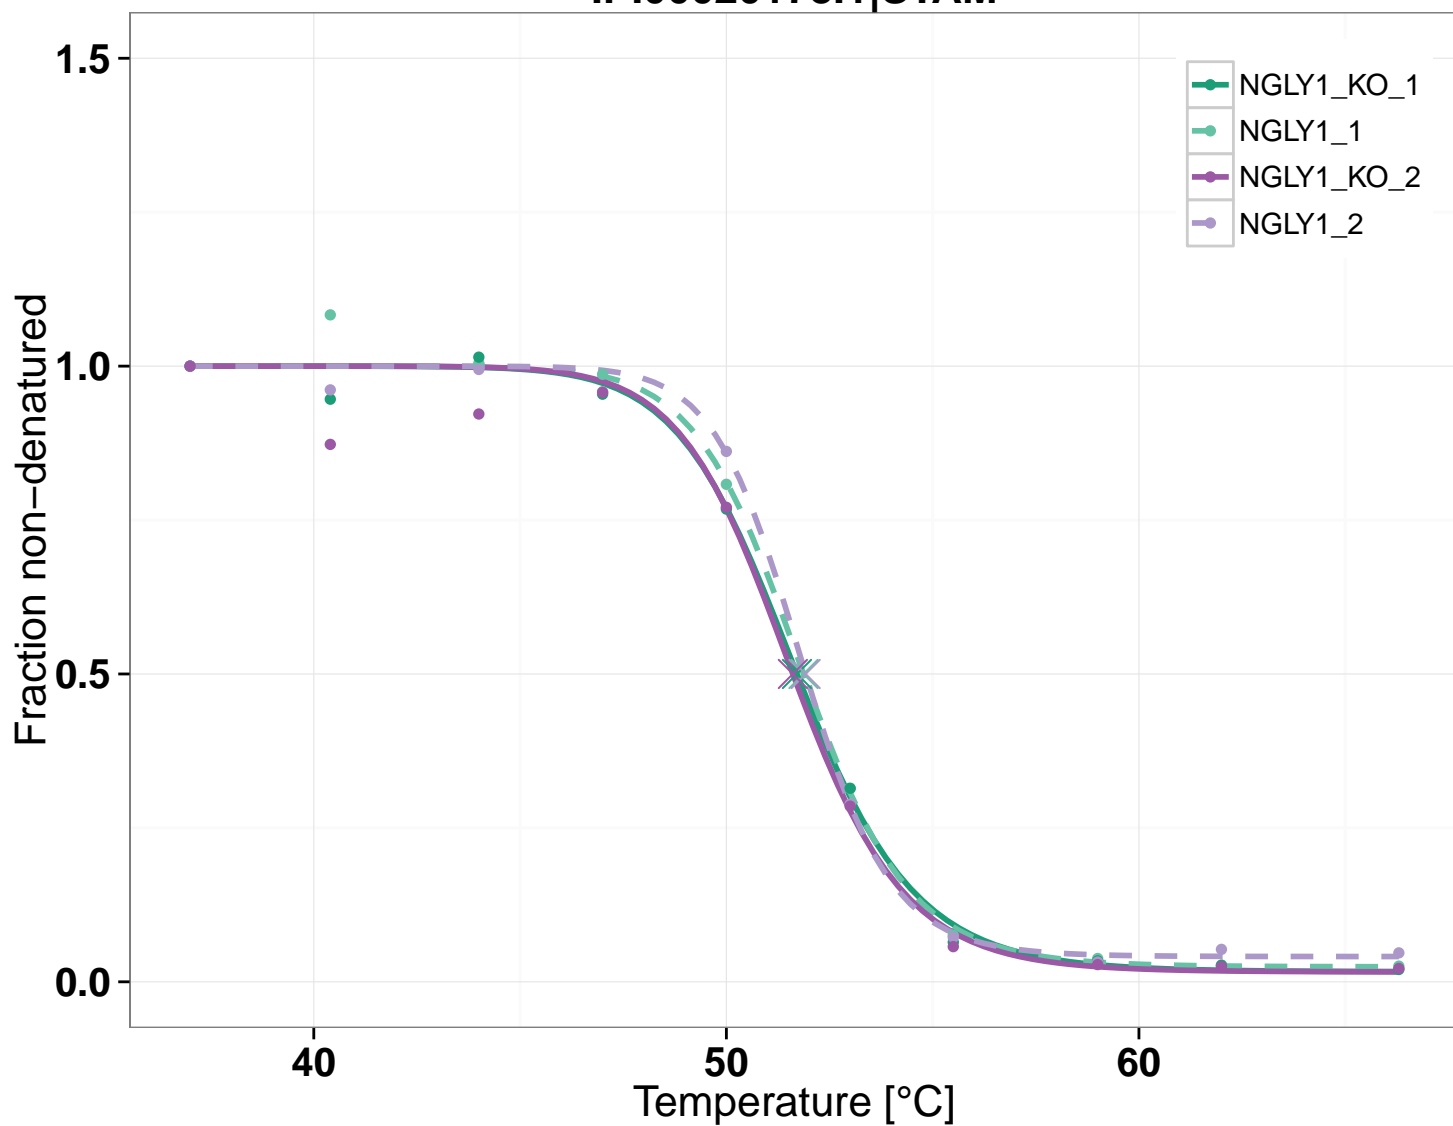

|            | meltPoint | slope | plateau | R2   |
|------------|-----------|-------|---------|------|
| NGLY1_KO_1 | 51.71     | -0.17 | 0.02    | 1    |
| NGLY1_1    | 51.87     | -0.19 | 0.02    | 1    |
| NGLY1_KO_2 | 51.61     | -0.18 | 0.02    | 0.99 |
| NGLY1_2    | 51.92     | -0.22 | 0.04    | 1    |

Supplement: Supplementary file 1821 [file 1]

IPI00871851.2|SEPT2

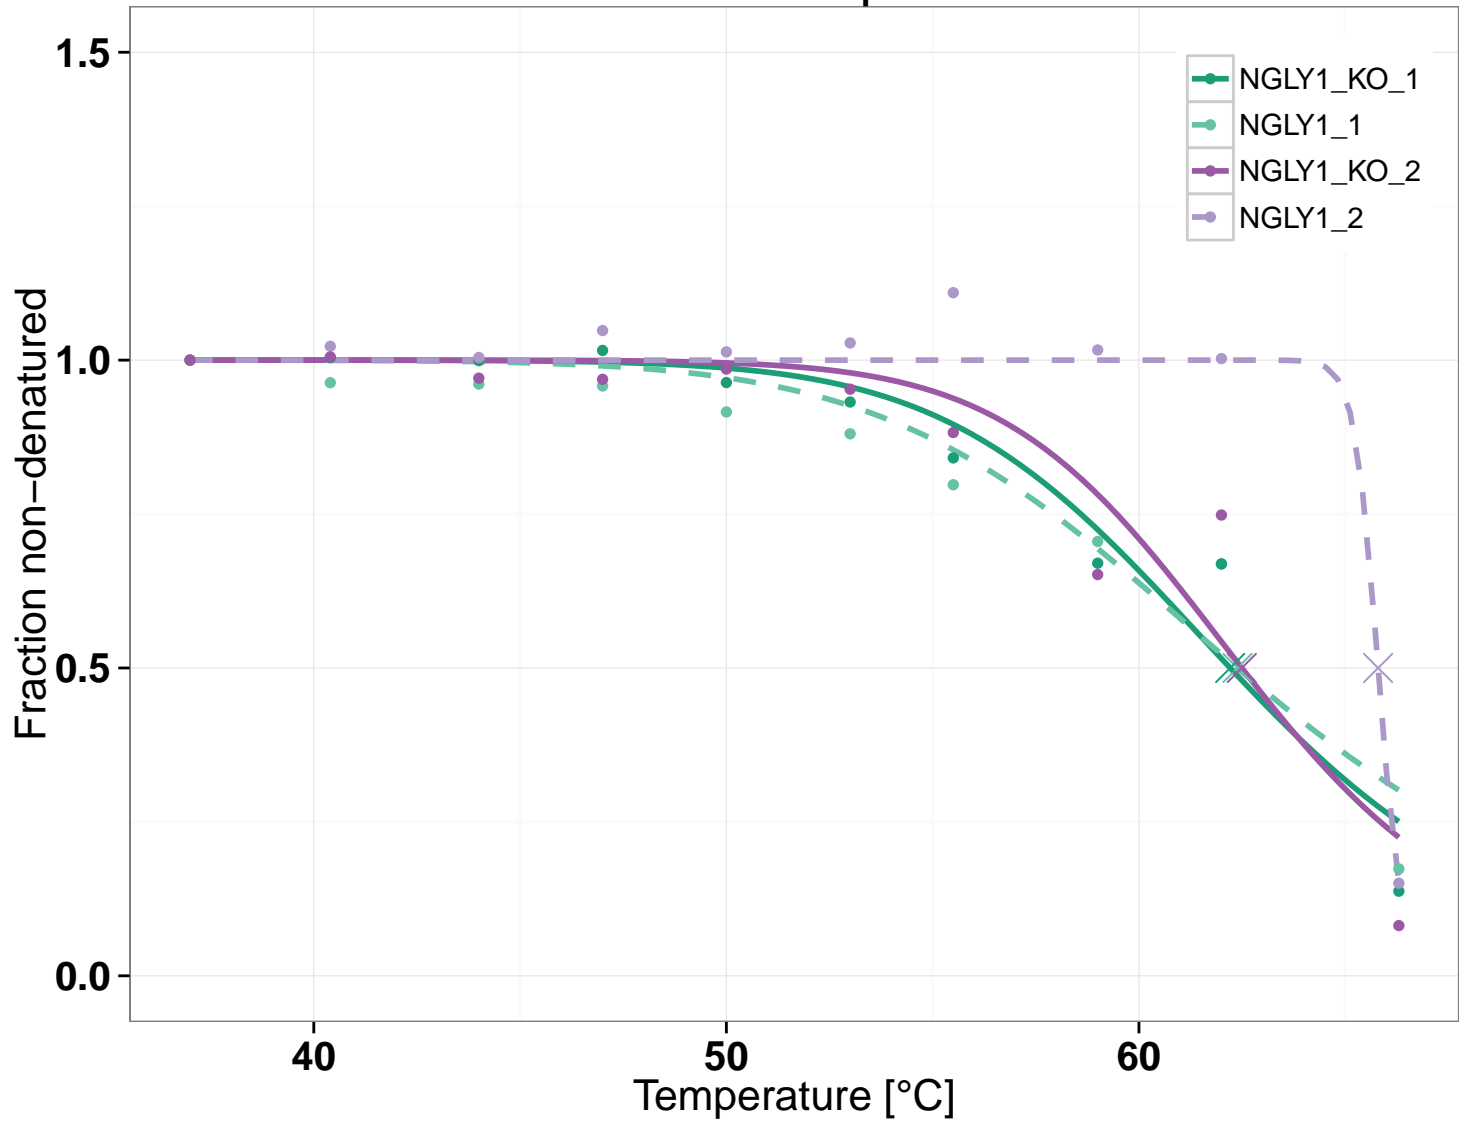

|            | meltPoint | slope  | plateau | R2   |
|------------|-----------|--------|---------|------|
| NGLY1_KO_1 | 62.21     | -0.072 | 0       | 0.94 |
| NGLY1_1    | 62.39     | -0.058 | 0       | 0.91 |
| NGLY1_KO_2 | 62.49     | -0.087 | 0       | 0.88 |
| NGLY1_2    | 65.8      | -0.87  | 0       | 0.98 |

Supplement: Supplementary file 1822 [file 1]

IPI00795611.1|GIT1

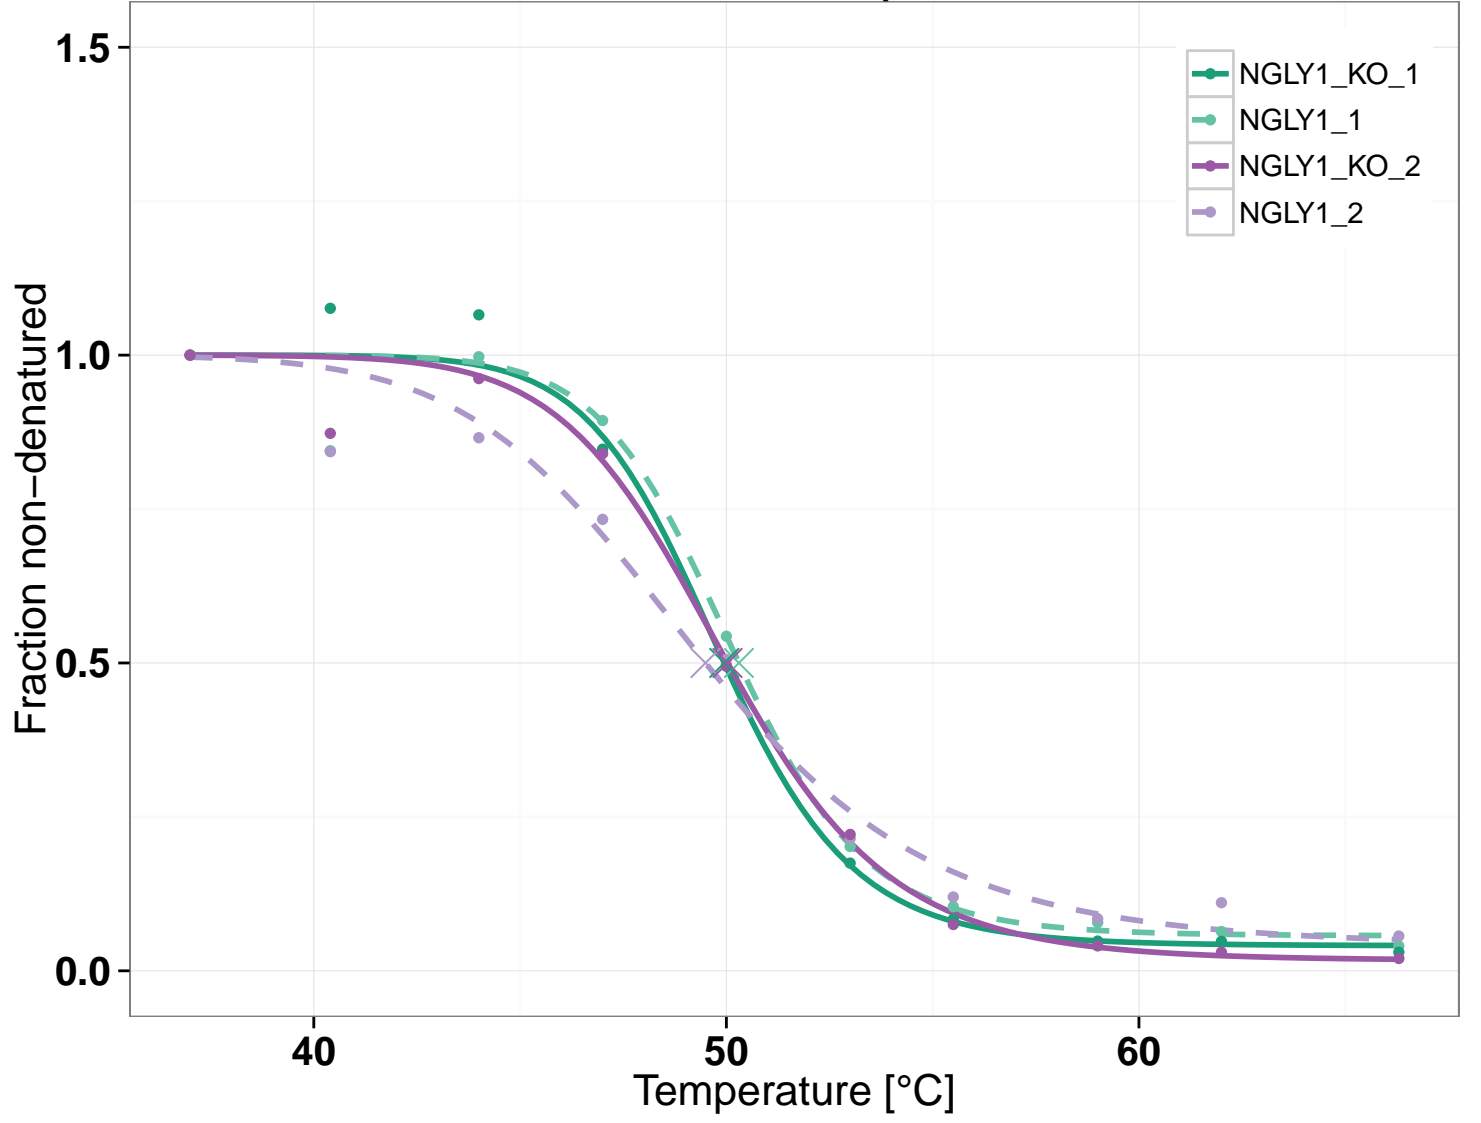

|            | meltPoint | slope  | plateau | R2   |
|------------|-----------|--------|---------|------|
| NGLY1_KO_1 | 49.95     | -0.15  | 0.04    | 0.99 |
| NGLY1_1    | 50.3      | -0.15  | 0.06    | 0.98 |
| NGLY1_KO_2 | 50.03     | -0.12  | 0.02    | 0.99 |
| NGLY1_2    | 49.49     | -0.085 | 0.04    | 0.98 |

Supplement: Supplementary file 1823 [file 1]

IPI00151036.1|RNF13

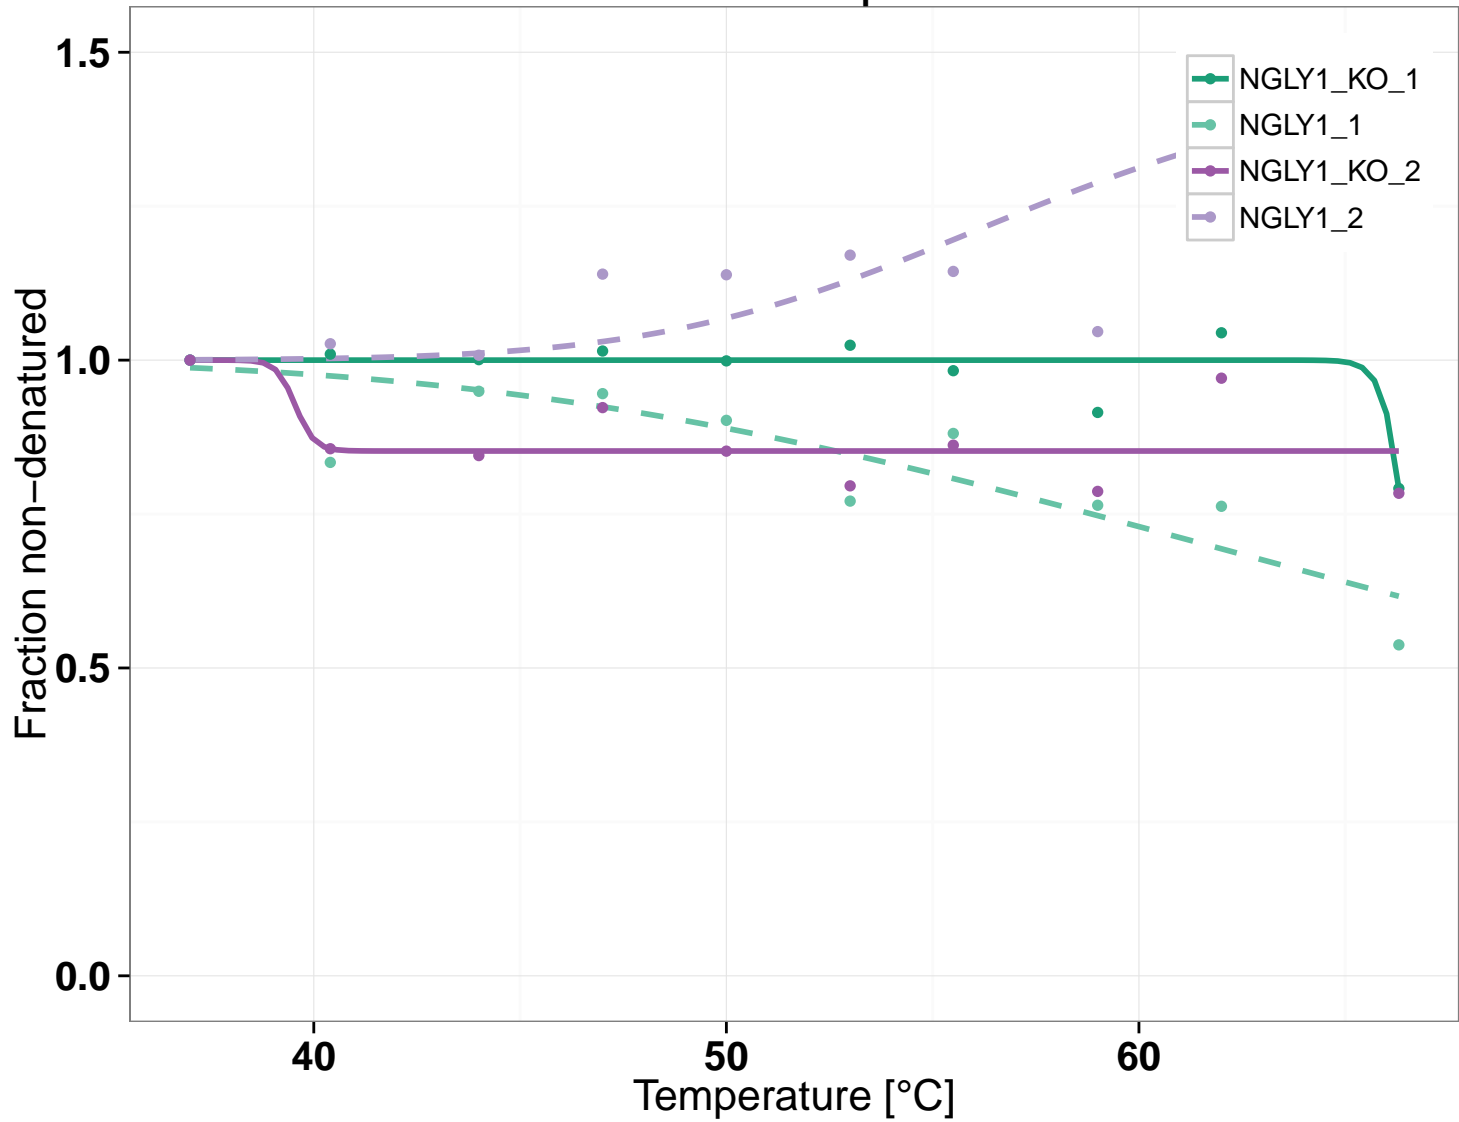

|            | meltPoint | slope  | plateau | R2   |
|------------|-----------|--------|---------|------|
| NGLY1_KO_1 | -         | -      | 0       | 0.79 |
| NGLY1_1    | -         | -0.018 | 0       | 0.73 |
| NGLY1_KO_2 | -         | -0.16  | 0.85    | 0.38 |
| NGLY1_2    | -         | 0.027  | 1.5     | 0.65 |

Supplement: Supplementary file 1824 [file 1]

# IPI00737228.2|B4DGR7\_HUMAN

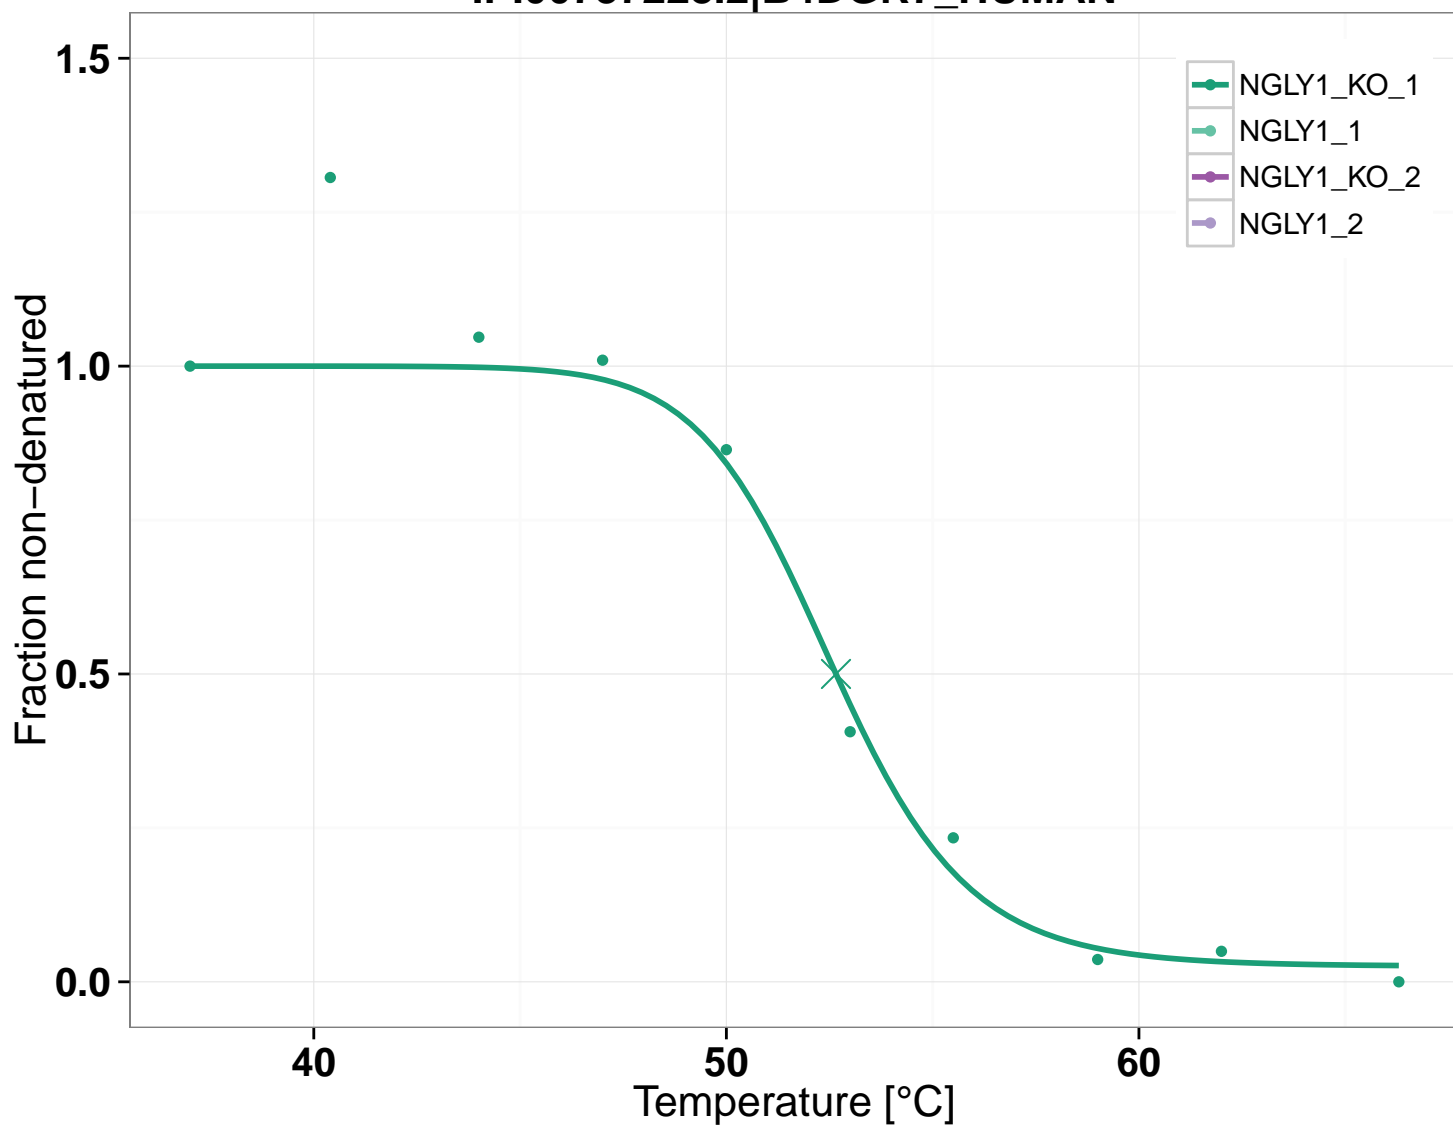

|            | meltPoint | slope | plateau | R2   |
|------------|-----------|-------|---------|------|
| NGLY1_KO_1 | 52.66     | -0.15 | 0.03    | 0.95 |
| NGLY1_1    | -         | -     | -       | -    |
| NGLY1_KO_2 | -         | -     | -       | -    |
| NGLY1_2    | -         | -     | -       | -    |

Supplement: Supplementary file 1825 [file 1]

IPI00030481.3|MED10

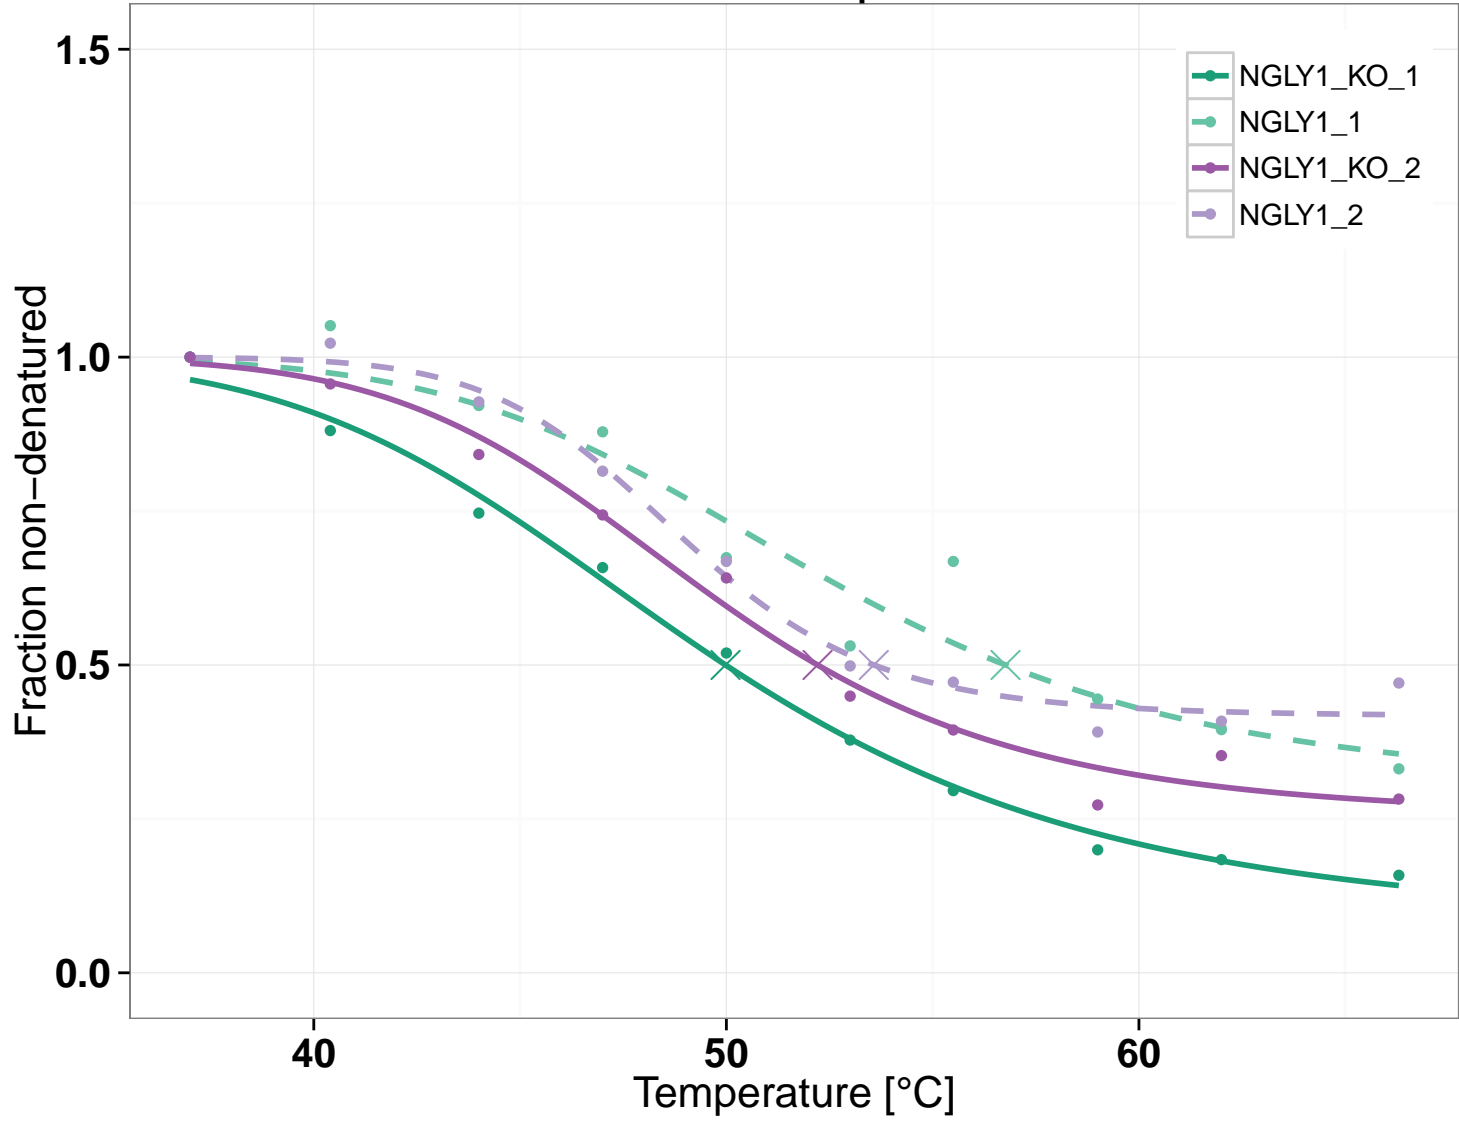

|            | meltPoint | slope  | plateau | R2   |
|------------|-----------|--------|---------|------|
| NGLY1_KO_1 | 49.98     | -0.048 | 0.07    | 0.99 |
| NGLY1_1    | 56.77     | -0.039 | 0.3     | 0.94 |
| NGLY1_KO_2 | 52.21     | -0.05  | 0.25    | 0.99 |
| NGLY1_2    | 53.57     | -0.062 | 0.42    | 0.99 |

Supplement: Supplementary file 1826 [file 1]

# IPI00101037.3|RCN3

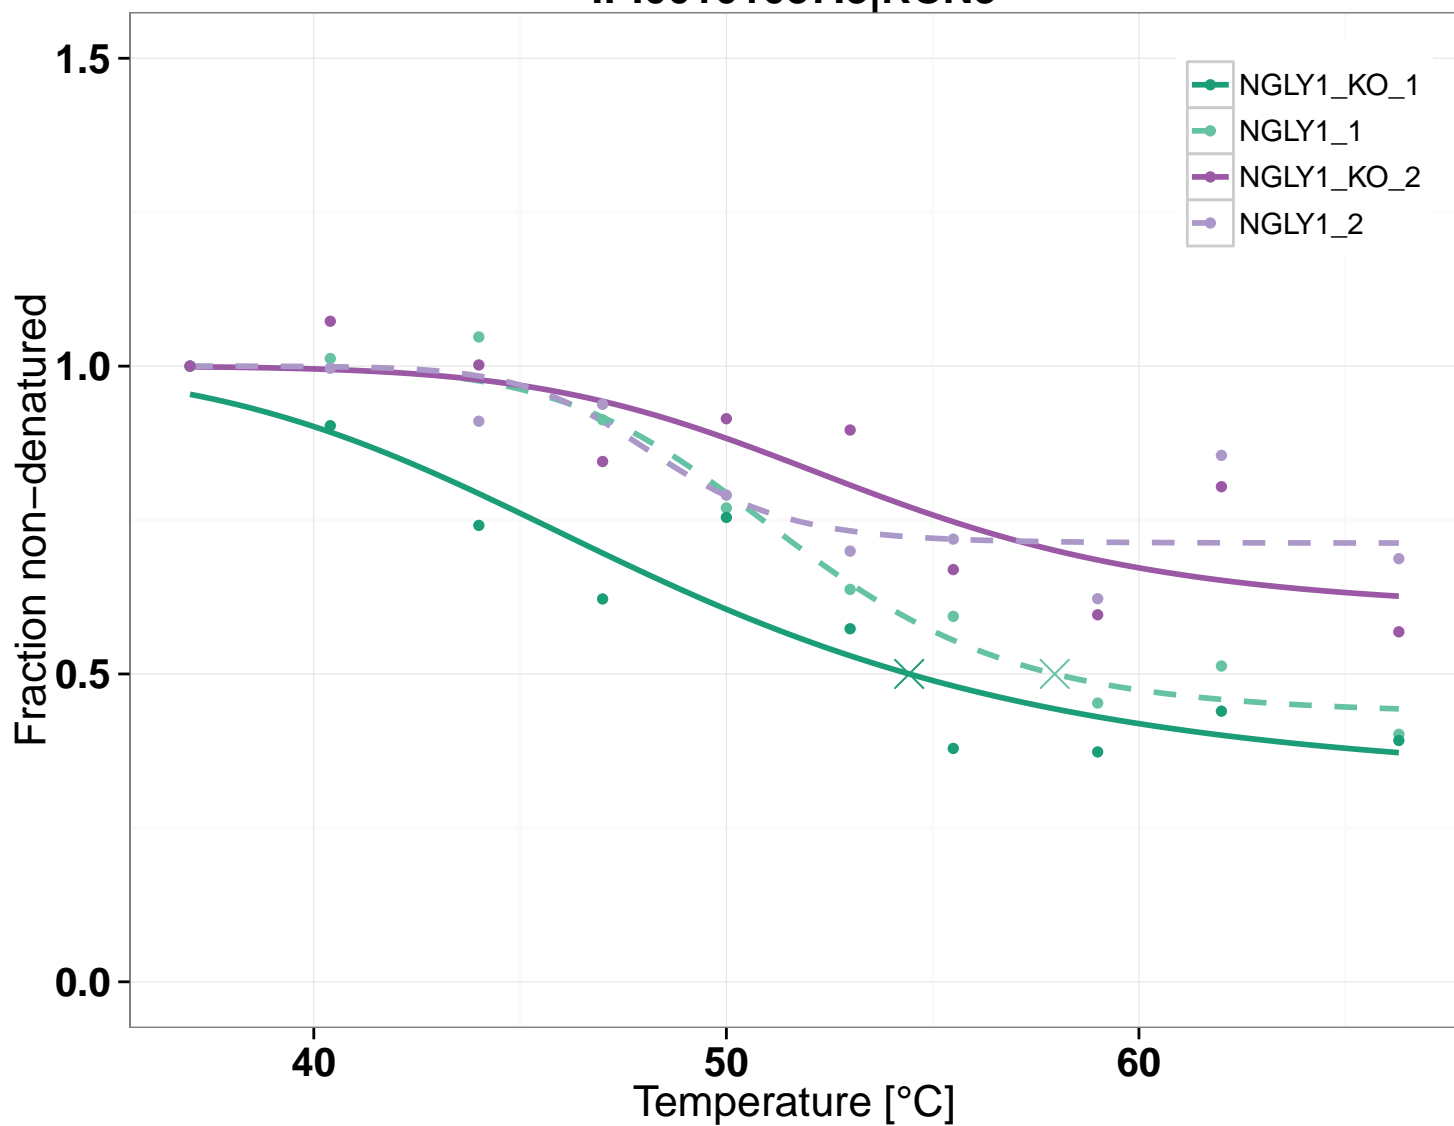

|            | meltPoint | slope  | plateau | R2   |
|------------|-----------|--------|---------|------|
| NGLY1_KO_1 | 54.43     | -0.032 | 0.31    | 0.89 |
| NGLY1_1    | 57.96     | -0.051 | 0.43    | 0.98 |
| NGLY1_KO_2 | -         | -0.026 | 0.6     | 0.76 |
| NGLY1_2    | -         | -0.044 | 0.71    | 0.78 |

Supplement: Supplementary file 1827 [file 1]

IPI00384972.3|KIAA1267

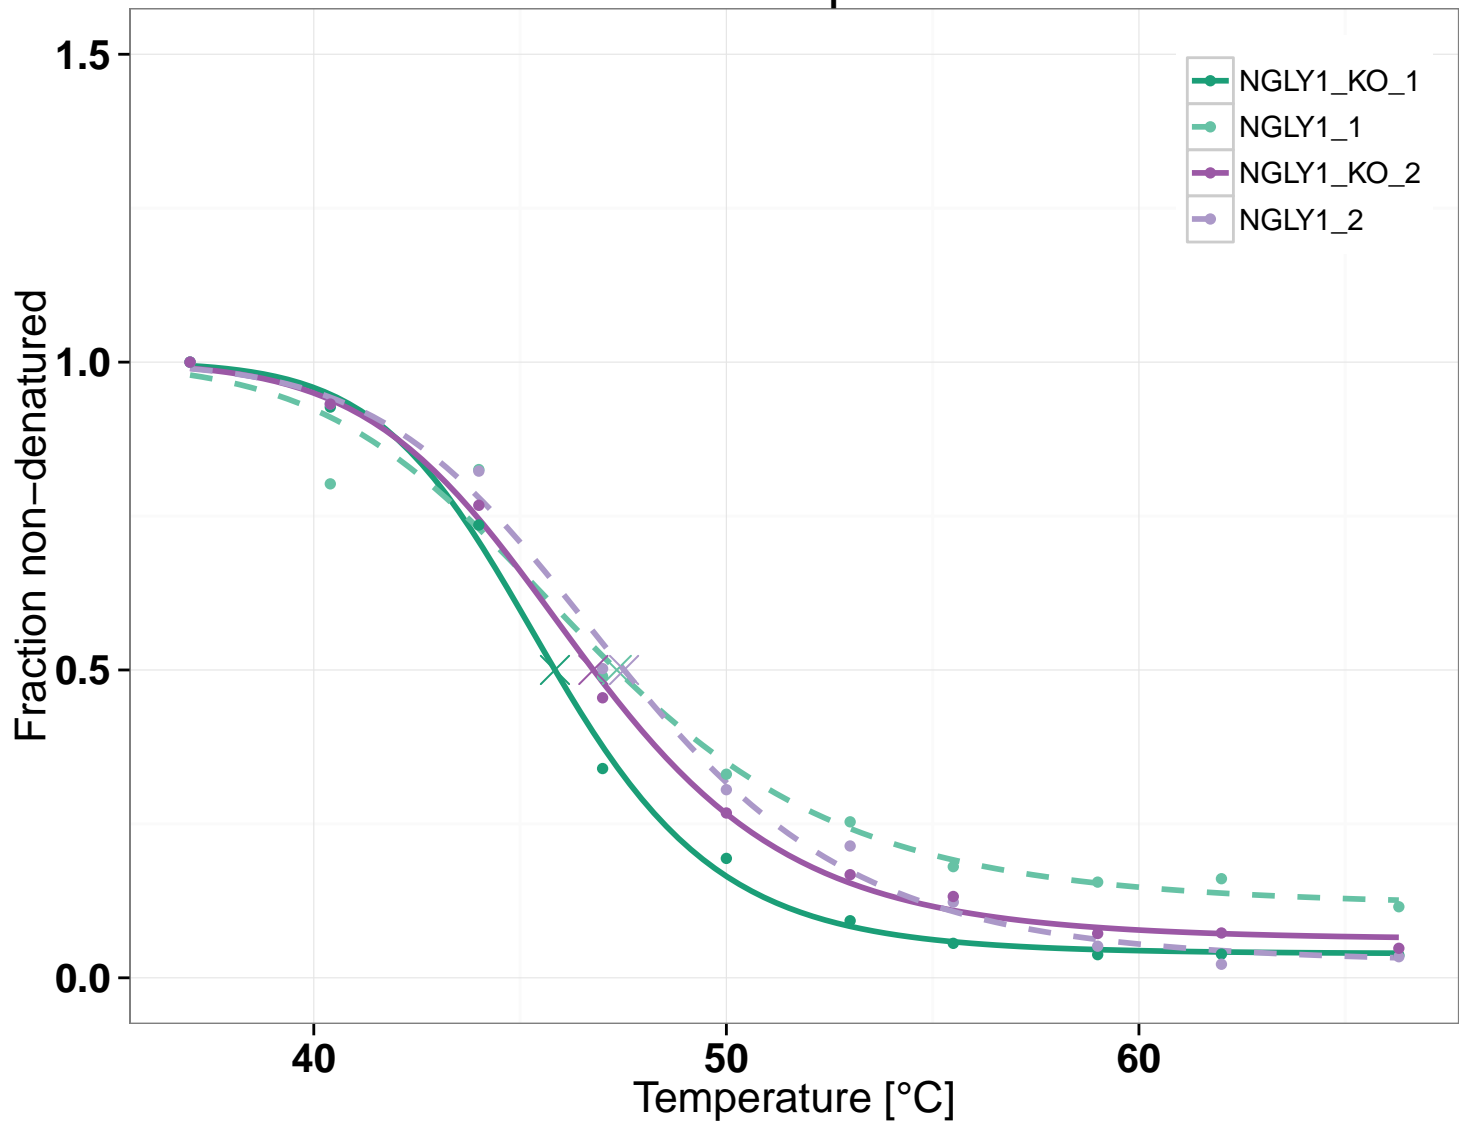

|            | meltPoint | slope  | plateau | R2   |
|------------|-----------|--------|---------|------|
| NGLY1_KO_1 | 45.85     | -0.12  | 0.04    | 1    |
| NGLY1_1    | 47.34     | -0.07  | 0.11    | 0.98 |
| NGLY1_KO_2 | 46.78     | -0.091 | 0.06    | 1    |
| NGLY1_2    | 47.52     | -0.084 | 0.02    | 1    |

Supplement: Supplementary file 1828 [file 1]

# IPI00432409.1|ZHX3

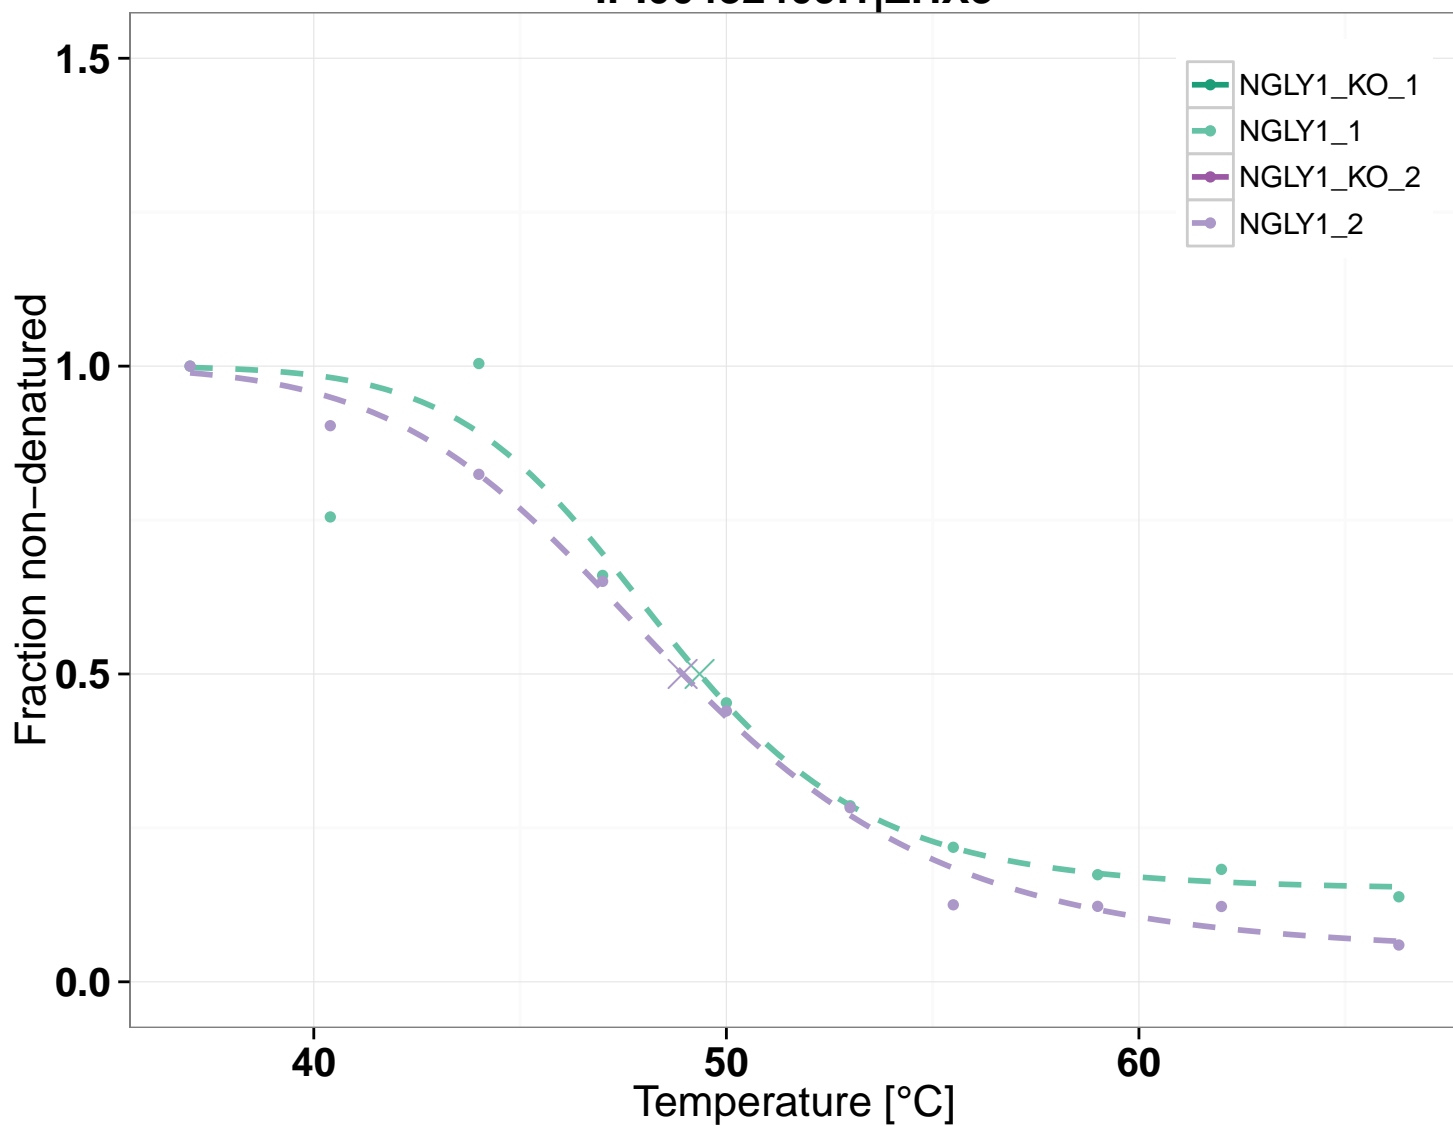

|            | meltPoint | slope  | plateau | R2   |
|------------|-----------|--------|---------|------|
| NGLY1_KO_1 | —         | —      | —       | —    |
| NGLY1_1    | 49.35     | -0.085 | 0.15    | 0.94 |
| NGLY1_KO_2 | —         | —      | —       | —    |
| NGLY1_2    | 48.94     | -0.071 | 0.04    | 0.99 |

Supplement: Supplementary file 1829 [file 1]

# IPI00306719.7|CHID1

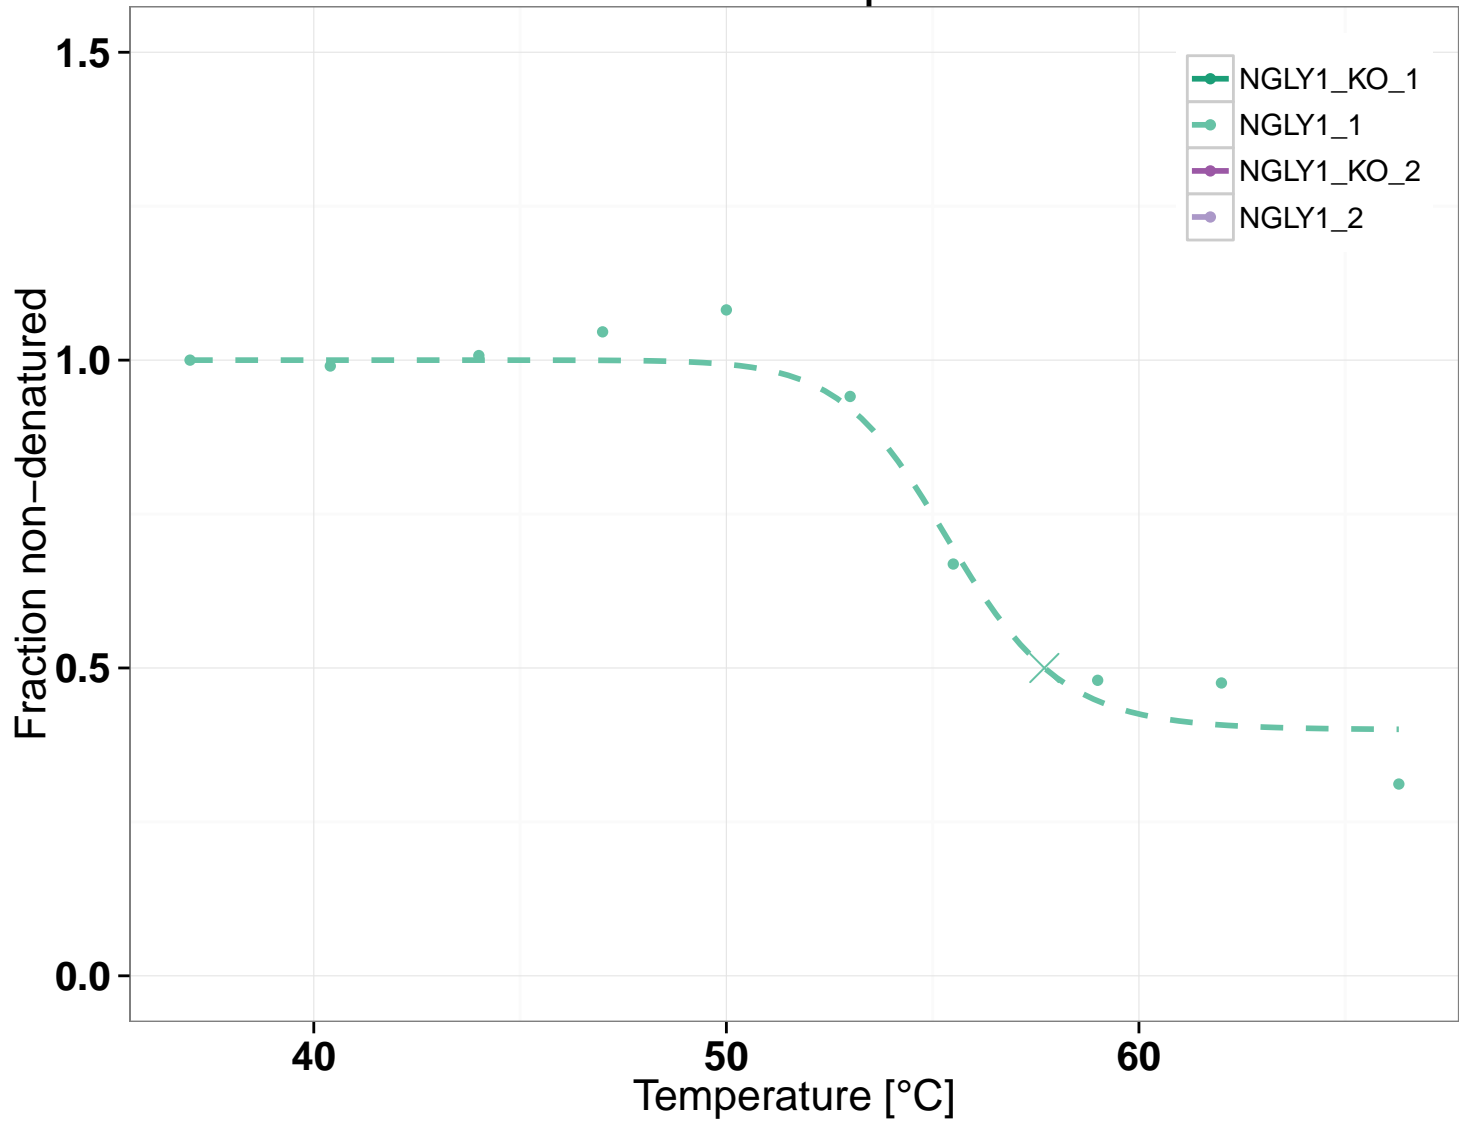

|            | meltPoint | slope | plateau | R2   |
|------------|-----------|-------|---------|------|
| NGLY1_KO_1 | -         | -     | -       | -    |
| NGLY1_1    | 57.71     | -0.11 | 0.4     | 0.97 |
| NGLY1_KO_2 | -         | -     | -       | -    |
| NGLY1_2    | -         | -     | -       | -    |

Supplement: Supplementary file 1830 [file 1]

IPI00470576.4|LRRC57

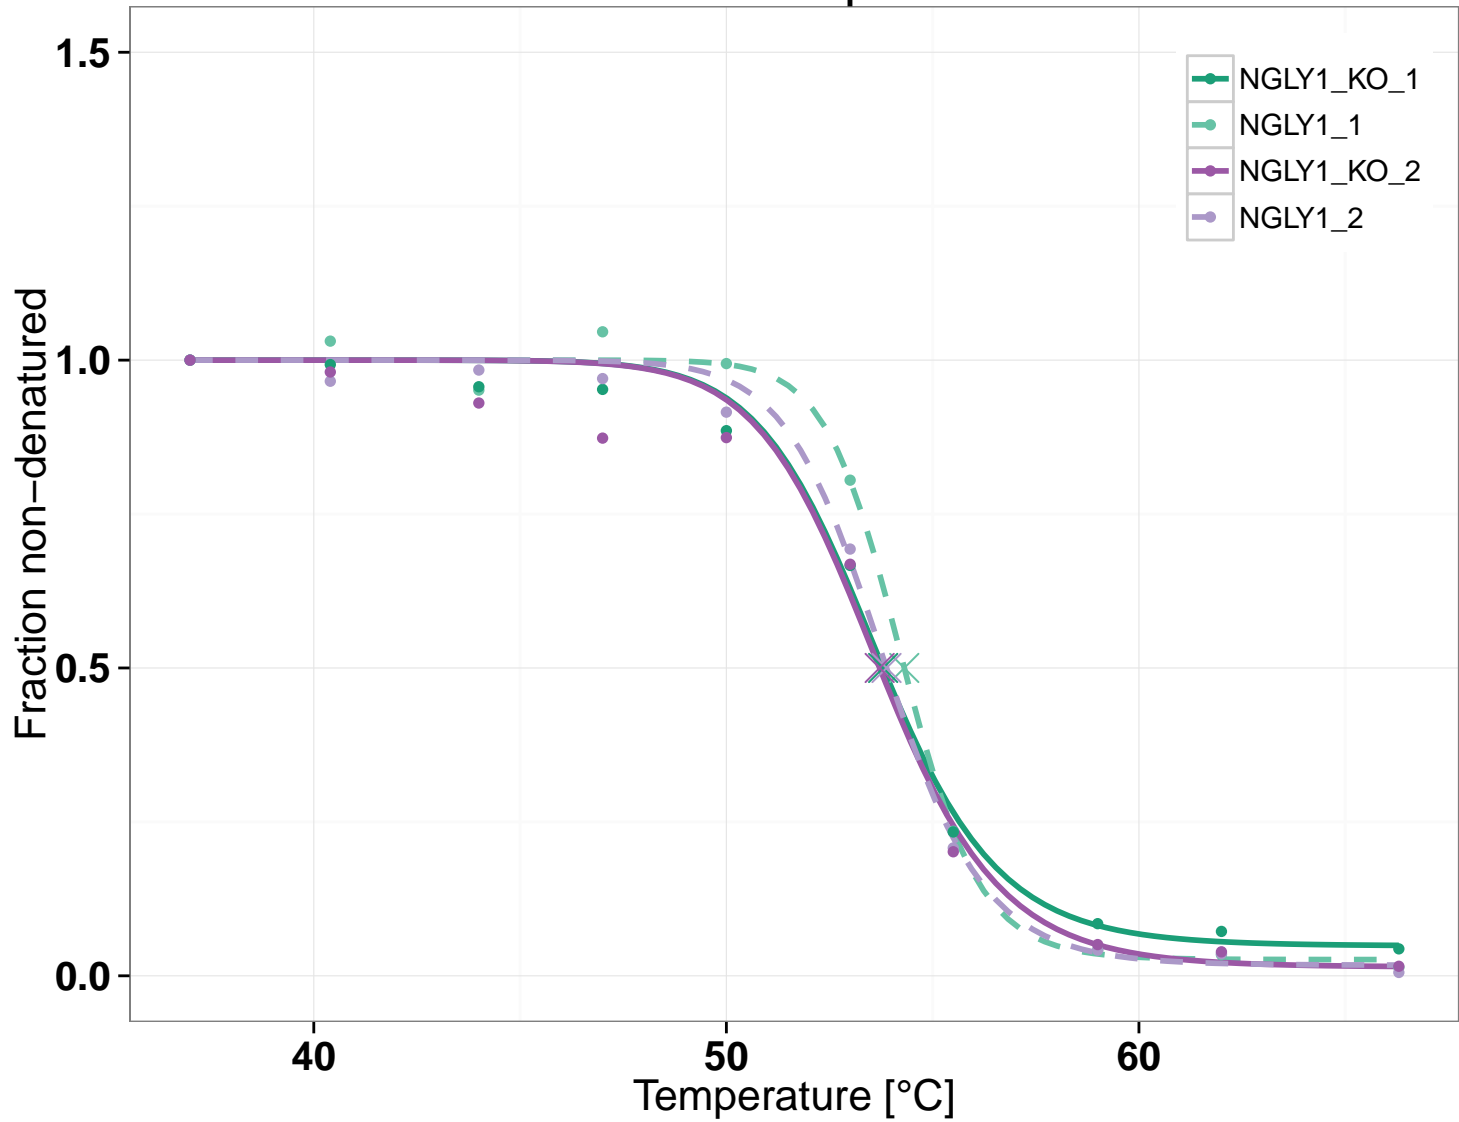

|            | meltPoint | slope | plateau | R2   |
|------------|-----------|-------|---------|------|
| NGLY1_KO_1 | 53.8      | -0.16 | 0.05    | 0.99 |
| NGLY1_1    | 54.31     | -0.26 | 0.03    | 1    |
| NGLY1_KO_2 | 53.72     | -0.17 | 0.01    | 0.98 |
| NGLY1_2    | 53.88     | -0.2  | 0.02    | 1    |

Supplement: Supplementary file 1831 [file 1]

# IPI00016580.6|DSN1

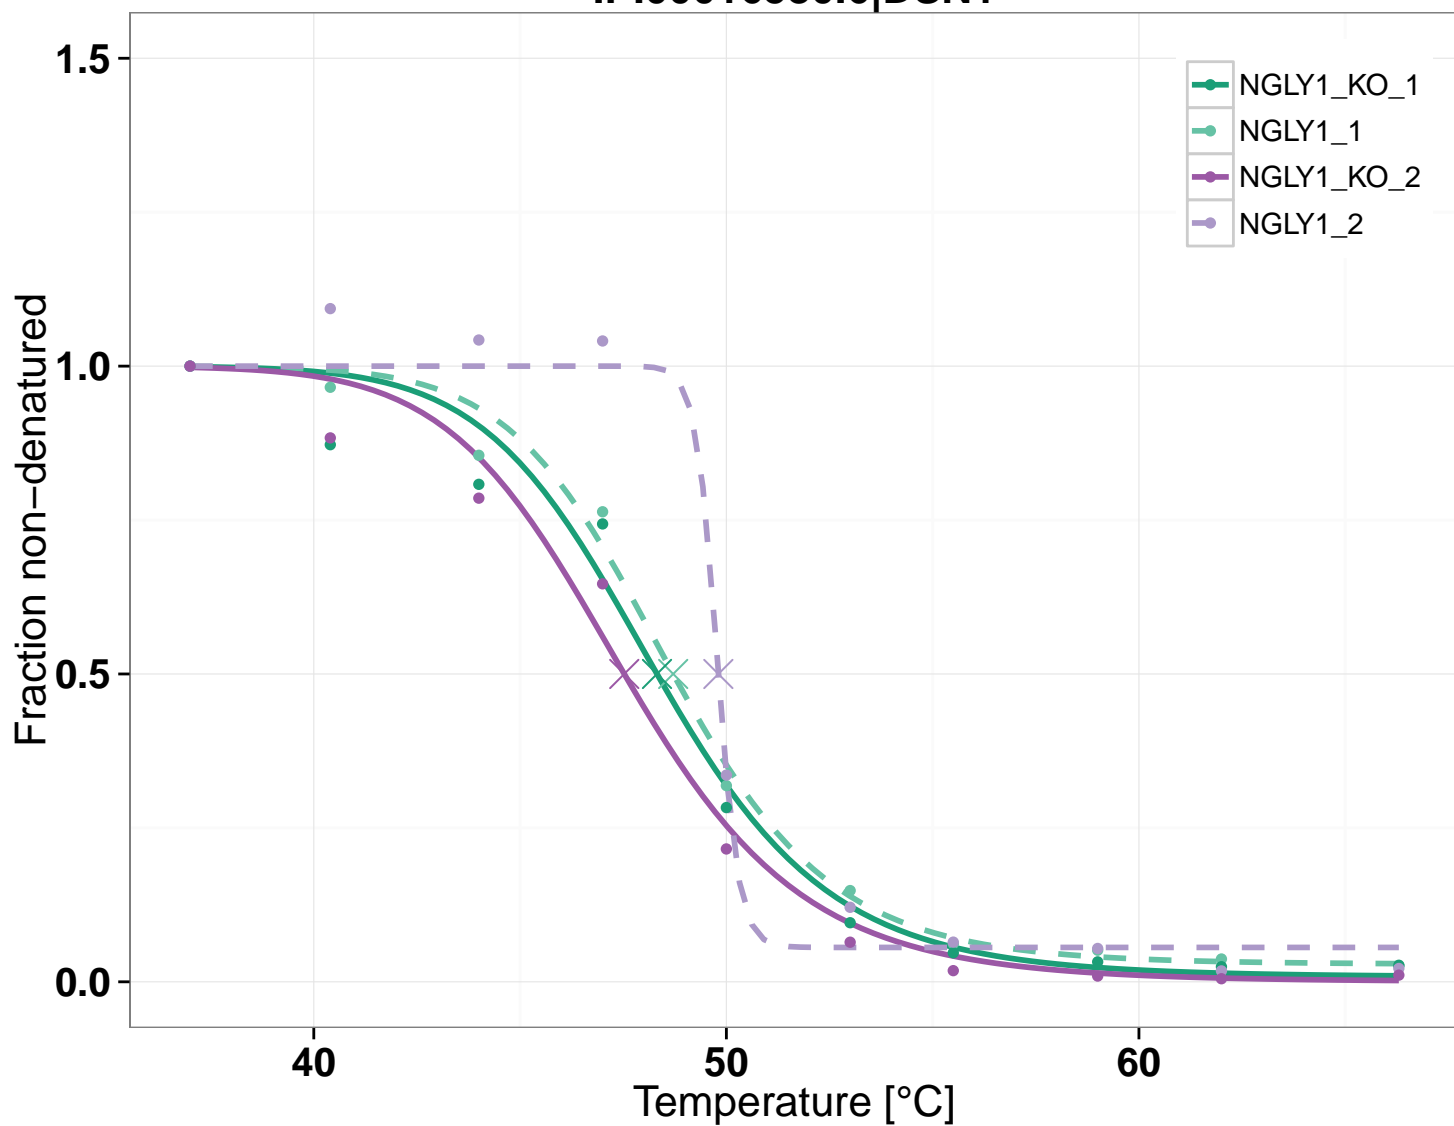

|            | meltPoint | slope | plateau | R2   |
|------------|-----------|-------|---------|------|
| NGLY1_KO_1 | 48.32     | -0.12 | 0.01    | 0.98 |
| NGLY1_1    | 48.71     | -0.12 | 0.03    | 0.99 |
| NGLY1_KO_2 | 47.53     | -0.12 | 0       | 0.98 |
| NGLY1_2    | 49.81     | -0.91 | 0.06    | 0.99 |

Supplement: Supplementary file 1832 [file 1]

IPI00914016.1|DCTN4

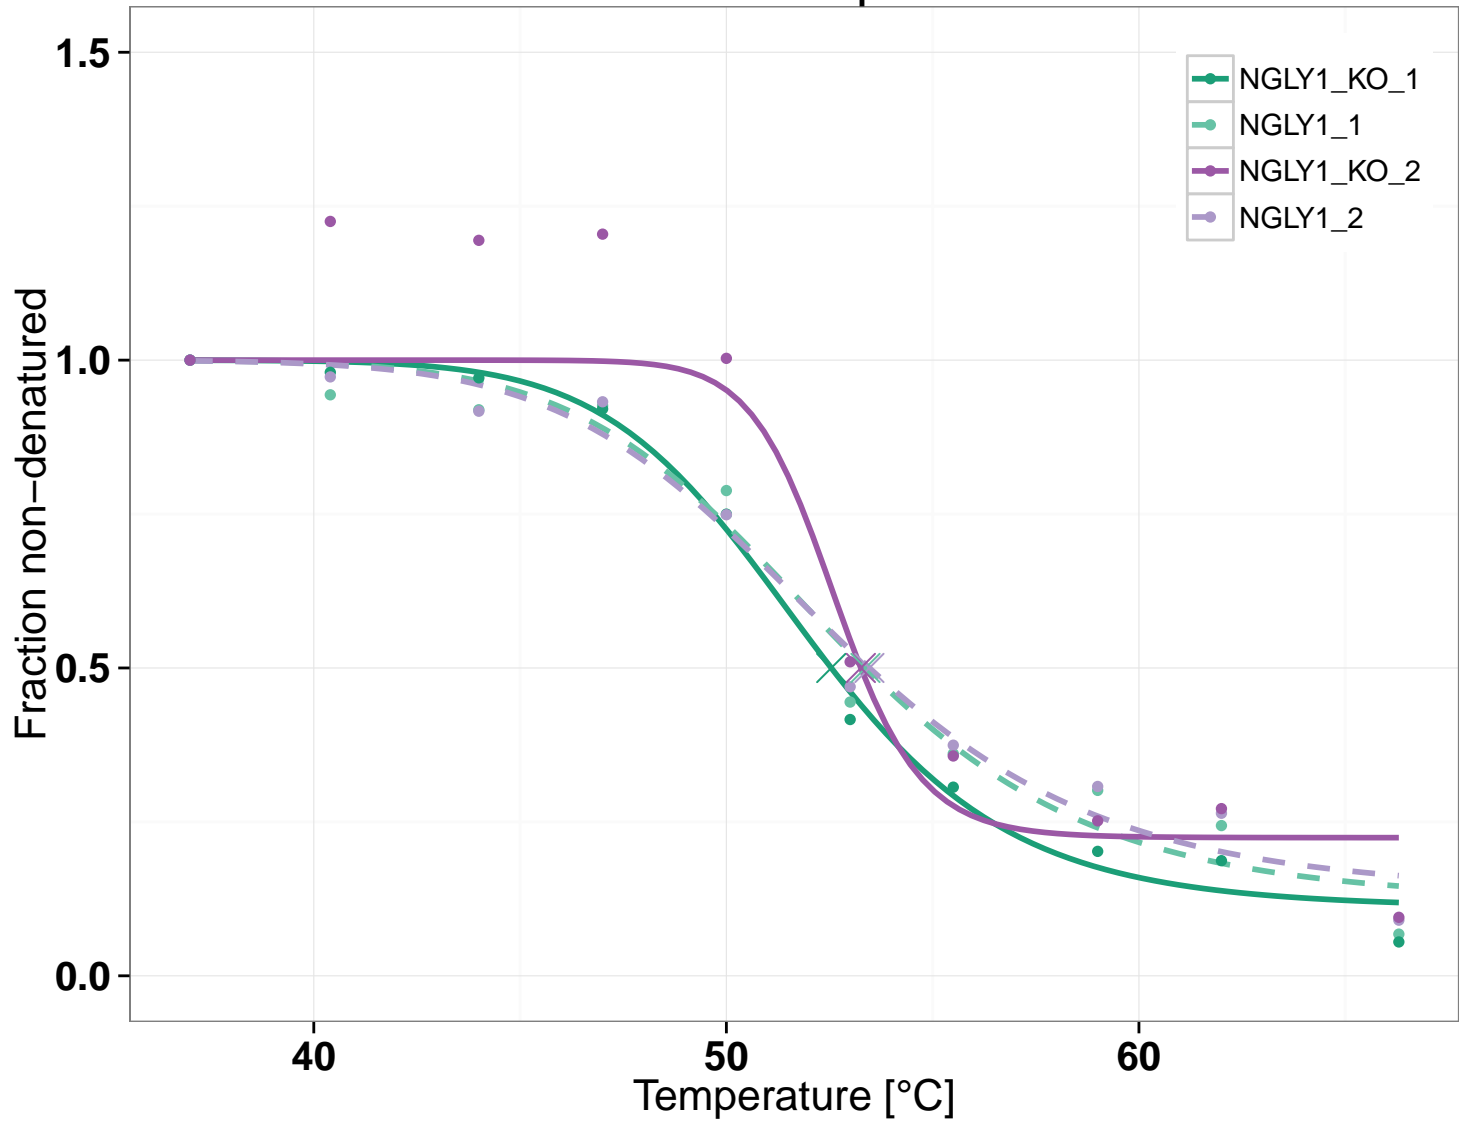

|            | meltPoint | slope  | plateau | R2   |
|------------|-----------|--------|---------|------|
| NGLY1_KO_1 | 52.54     | -0.091 | 0.11    | 0.99 |
| NGLY1_1    | 53.37     | -0.071 | 0.12    | 0.97 |
| NGLY1_KO_2 | 53.26     | -0.19  | 0.22    | 0.91 |
| NGLY1_2    | 53.47     | -0.067 | 0.13    | 0.98 |

Supplement: Supplementary file 1833 [file 1]

IPI00429178.4|C10ORF4

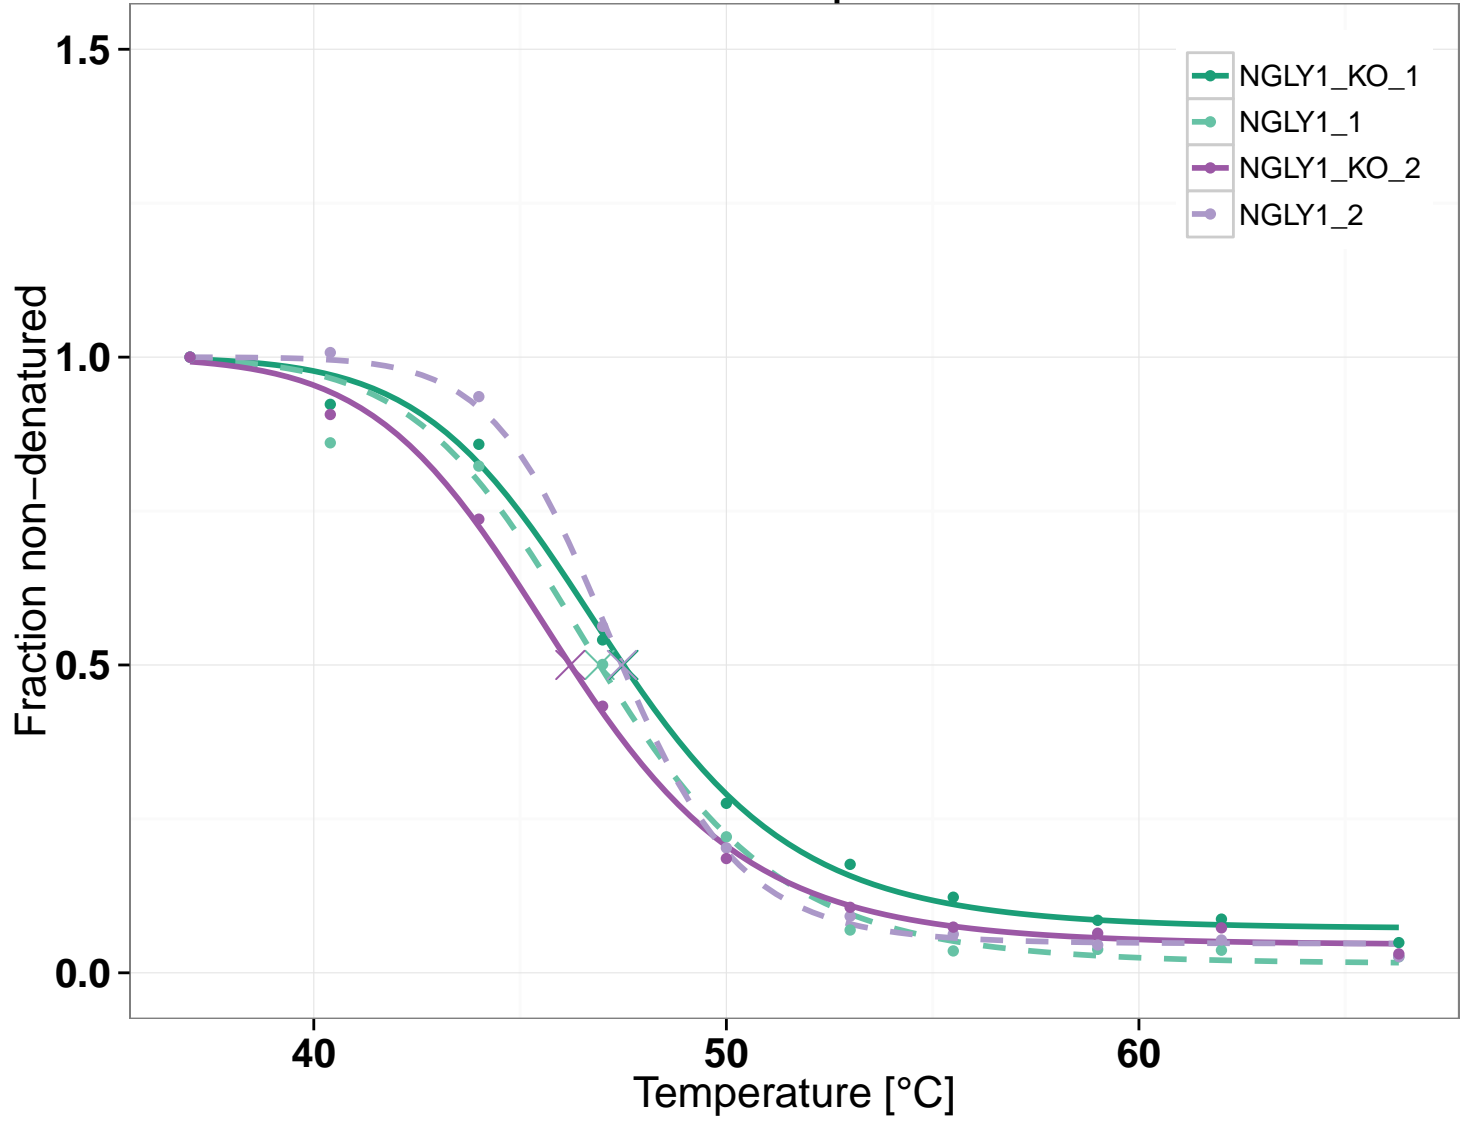

|            | meltPoint | slope | plateau | R2   |
|------------|-----------|-------|---------|------|
| NGLY1_KO_1 | 47.5      | -0.1  | 0.07    | 1    |
| NGLY1_1    | 46.93     | -0.11 | 0.01    | 0.99 |
| NGLY1_KO_2 | 46.22     | -0.1  | 0.05    | 1    |
| NGLY1_2    | 47.47     | -0.16 | 0.05    | 1    |

Supplement: Supplementary file 1834 [file 1]

# IPI00073580.1|ZNF689

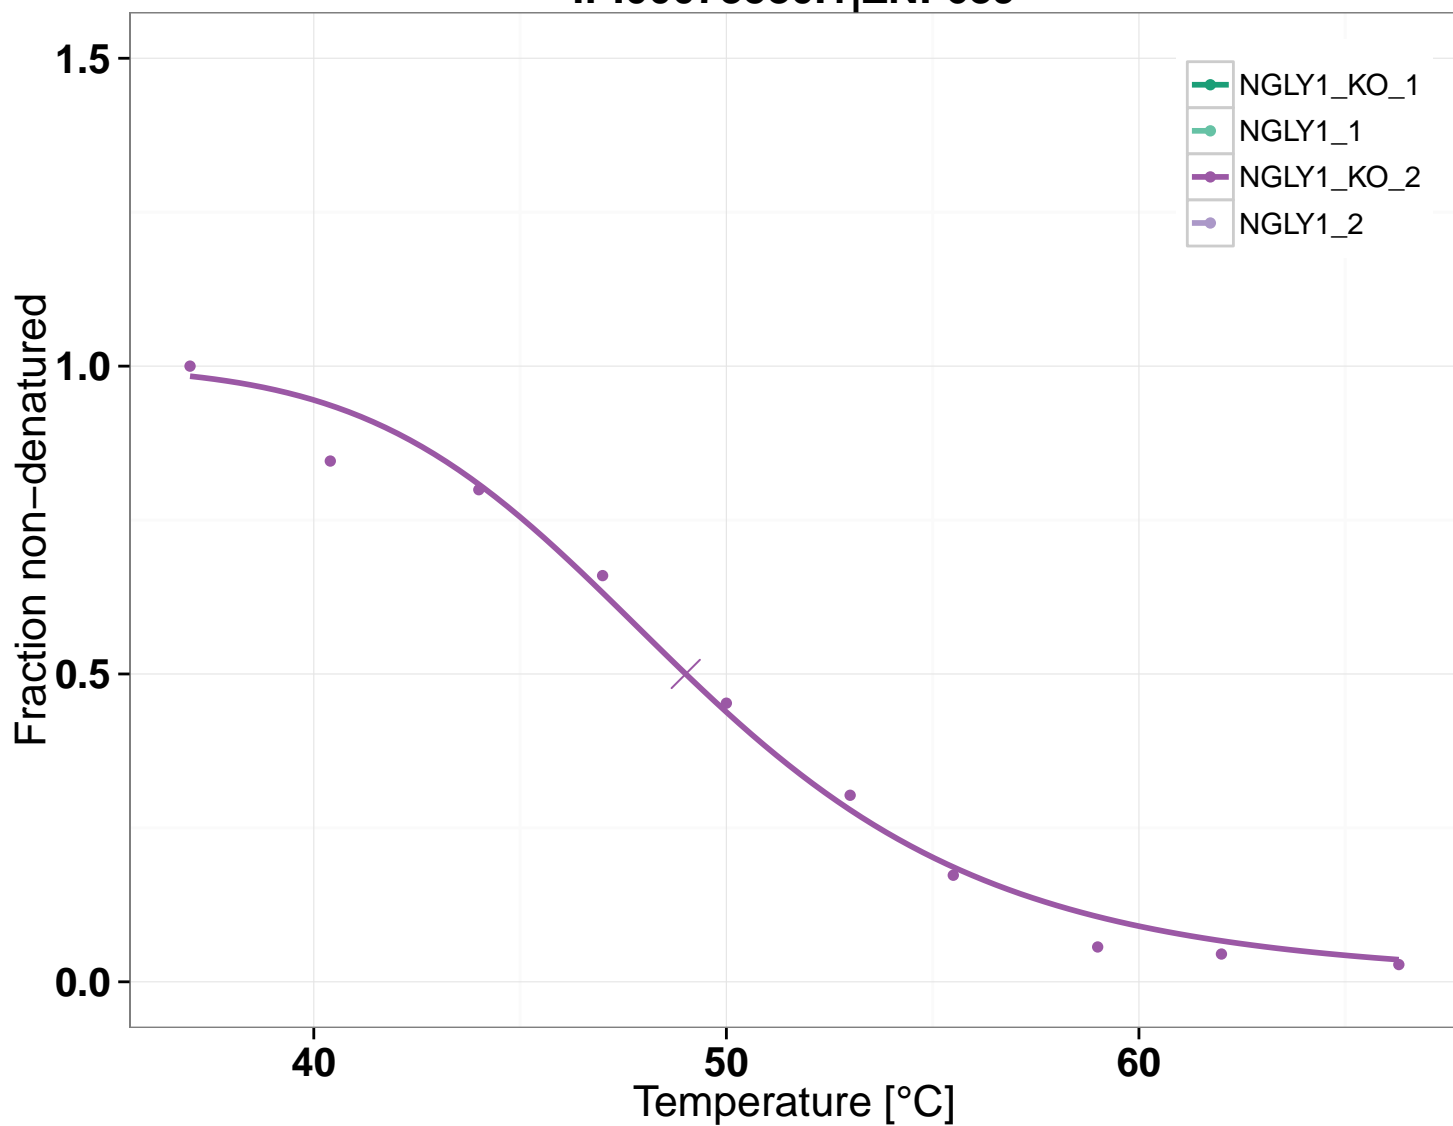

|            | meltPoint | slope  | plateau | R2   |
|------------|-----------|--------|---------|------|
| NGLY1_KO_1 | -         | -      | -       | -    |
| NGLY1_1    | -         | -      | -       | -    |
| NGLY1_KO_2 | 49.02     | -0.066 | 0       | 0.99 |
| NGLY1_2    | -         | -      | -       | -    |

Supplement: Supplementary file 1835 [file 1]

IPI00295519.6|C3ORF17

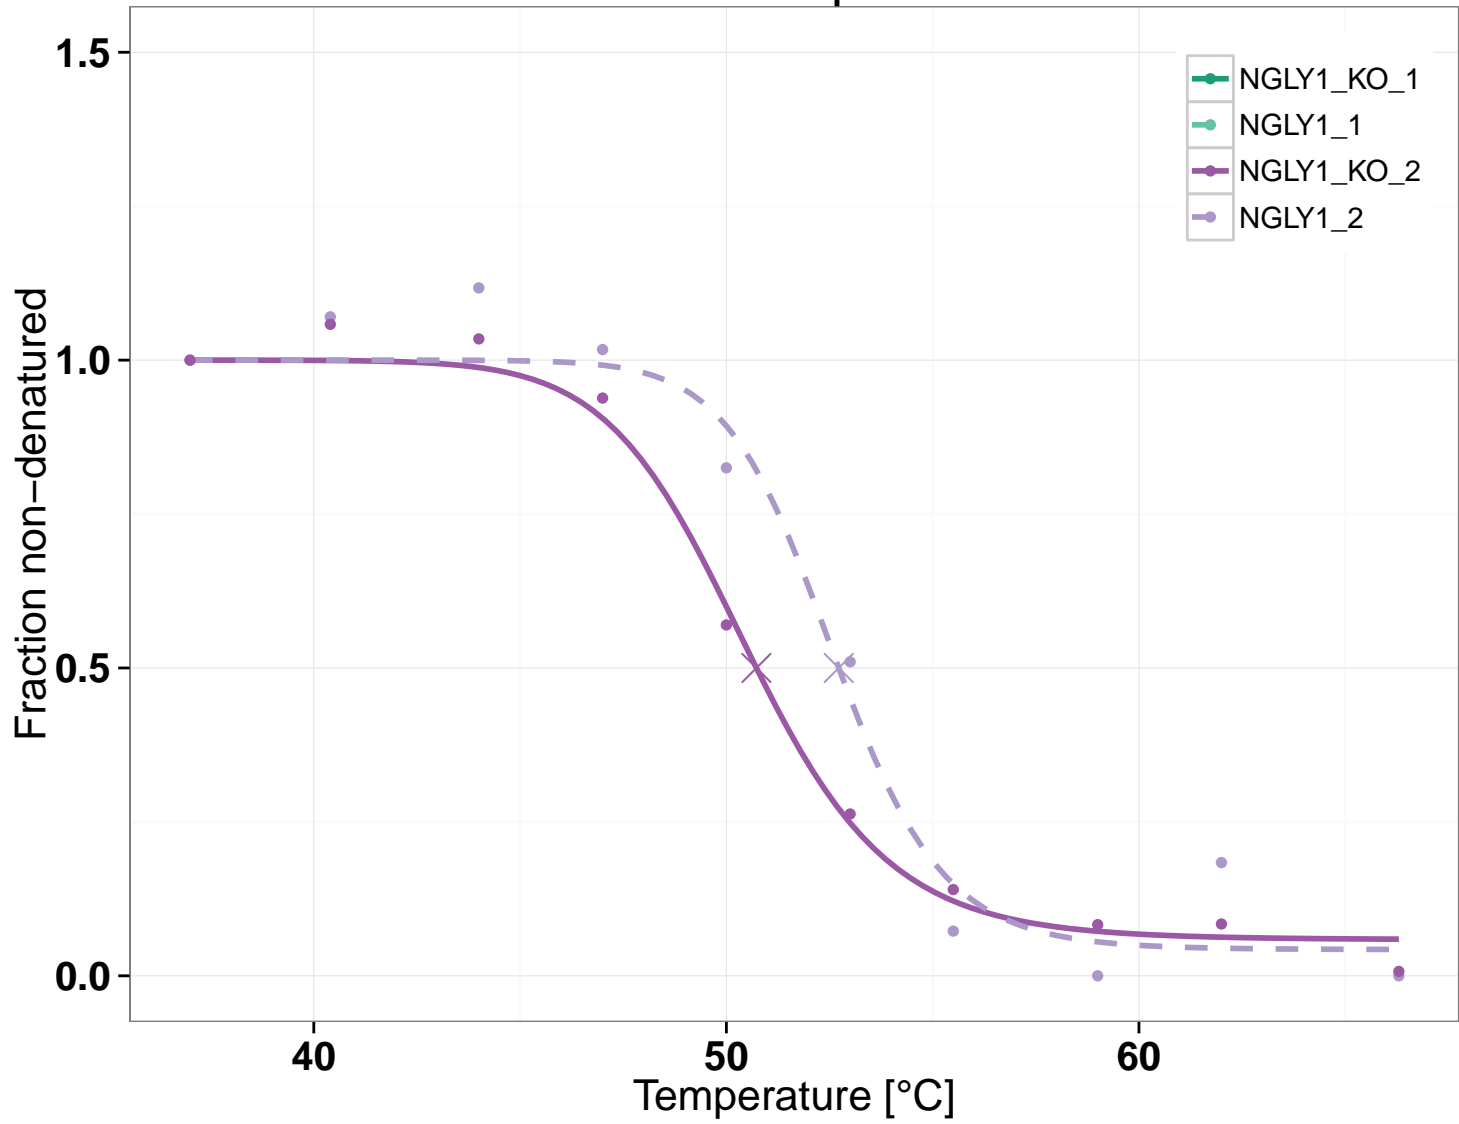

|            | meltPoint | slope | plateau | R2   |
|------------|-----------|-------|---------|------|
| NGLY1_KO_1 | —         | —     | —       | —    |
| NGLY1_1    | —         | —     | —       | —    |
| NGLY1_KO_2 | 50.73     | -0.14 | 0.06    | 0.99 |
| NGLY1_2    | 52.72     | -0.18 | 0.04    | 0.97 |

Supplement: Supplementary file 1836 [file 1]

IPI00878369.1|12 KDA PROTEIN.

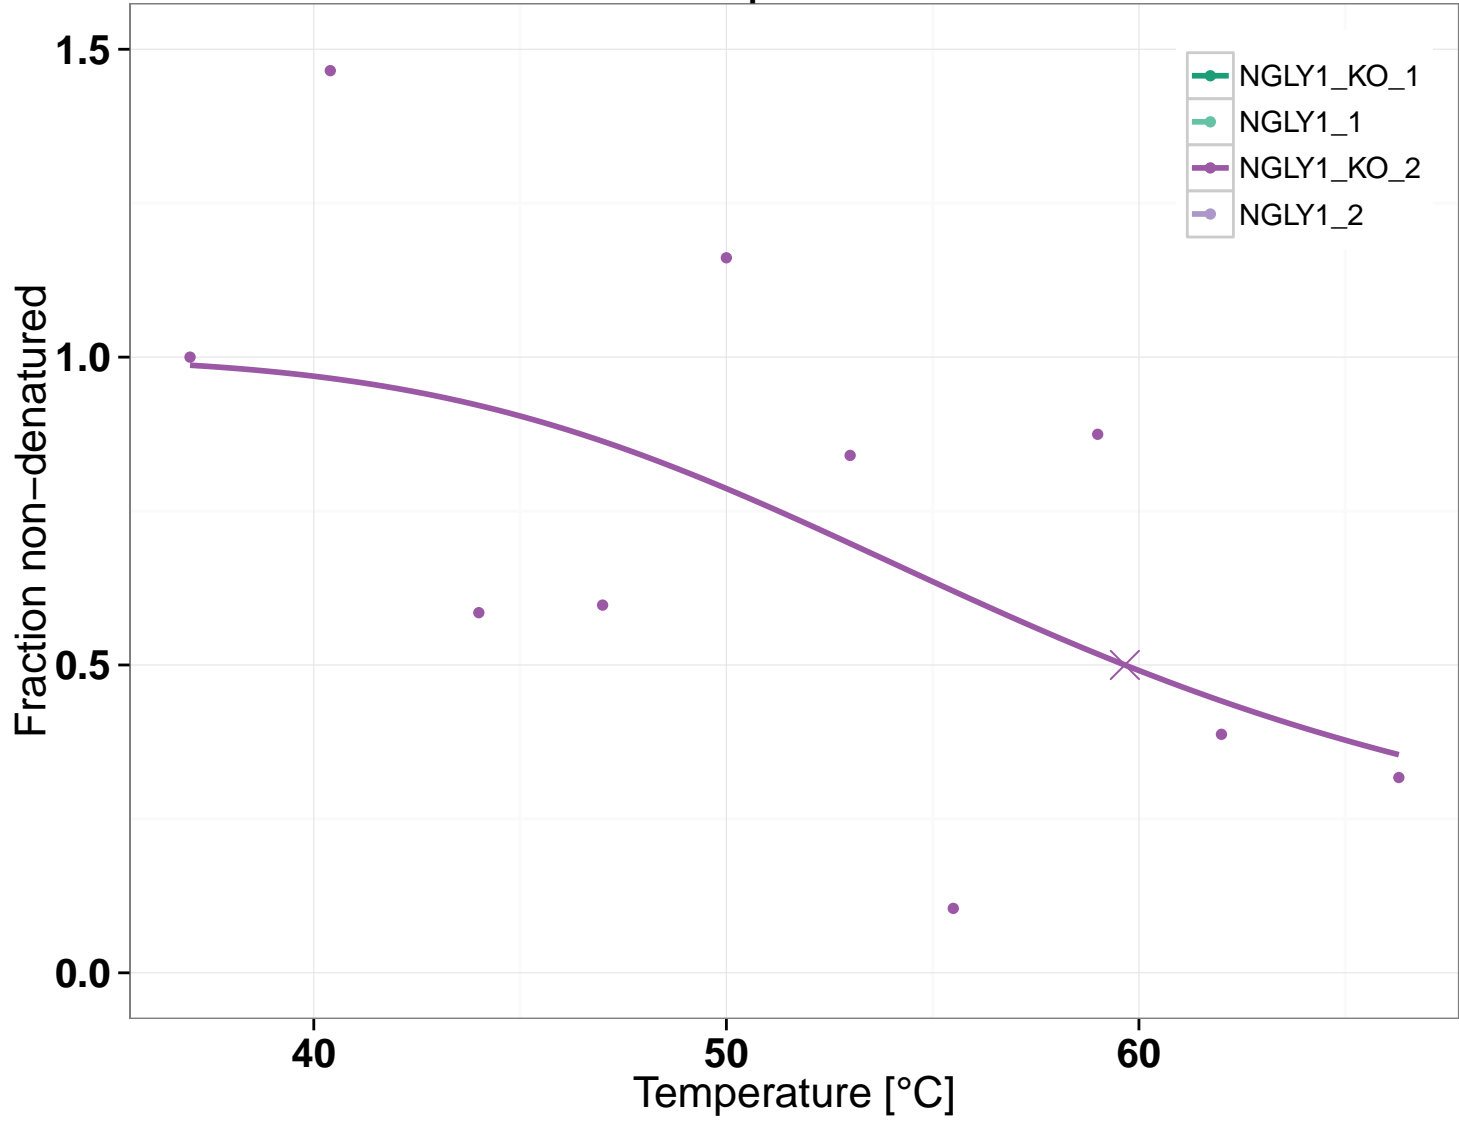

|            | meltPoint | slope  | plateau | R2   |
|------------|-----------|--------|---------|------|
| NGLY1_KO_1 | —         | —      | —       | —    |
| NGLY1_1    | —         | —      | —       | —    |
| NGLY1_KO_2 | 59.66     | -0.031 | 0.11    | 0.36 |
| NGLY1_2    | —         | —      | —       | —    |

Supplement: Supplementary file 1837 [file 1]

IPI00216889.5|DEAF1

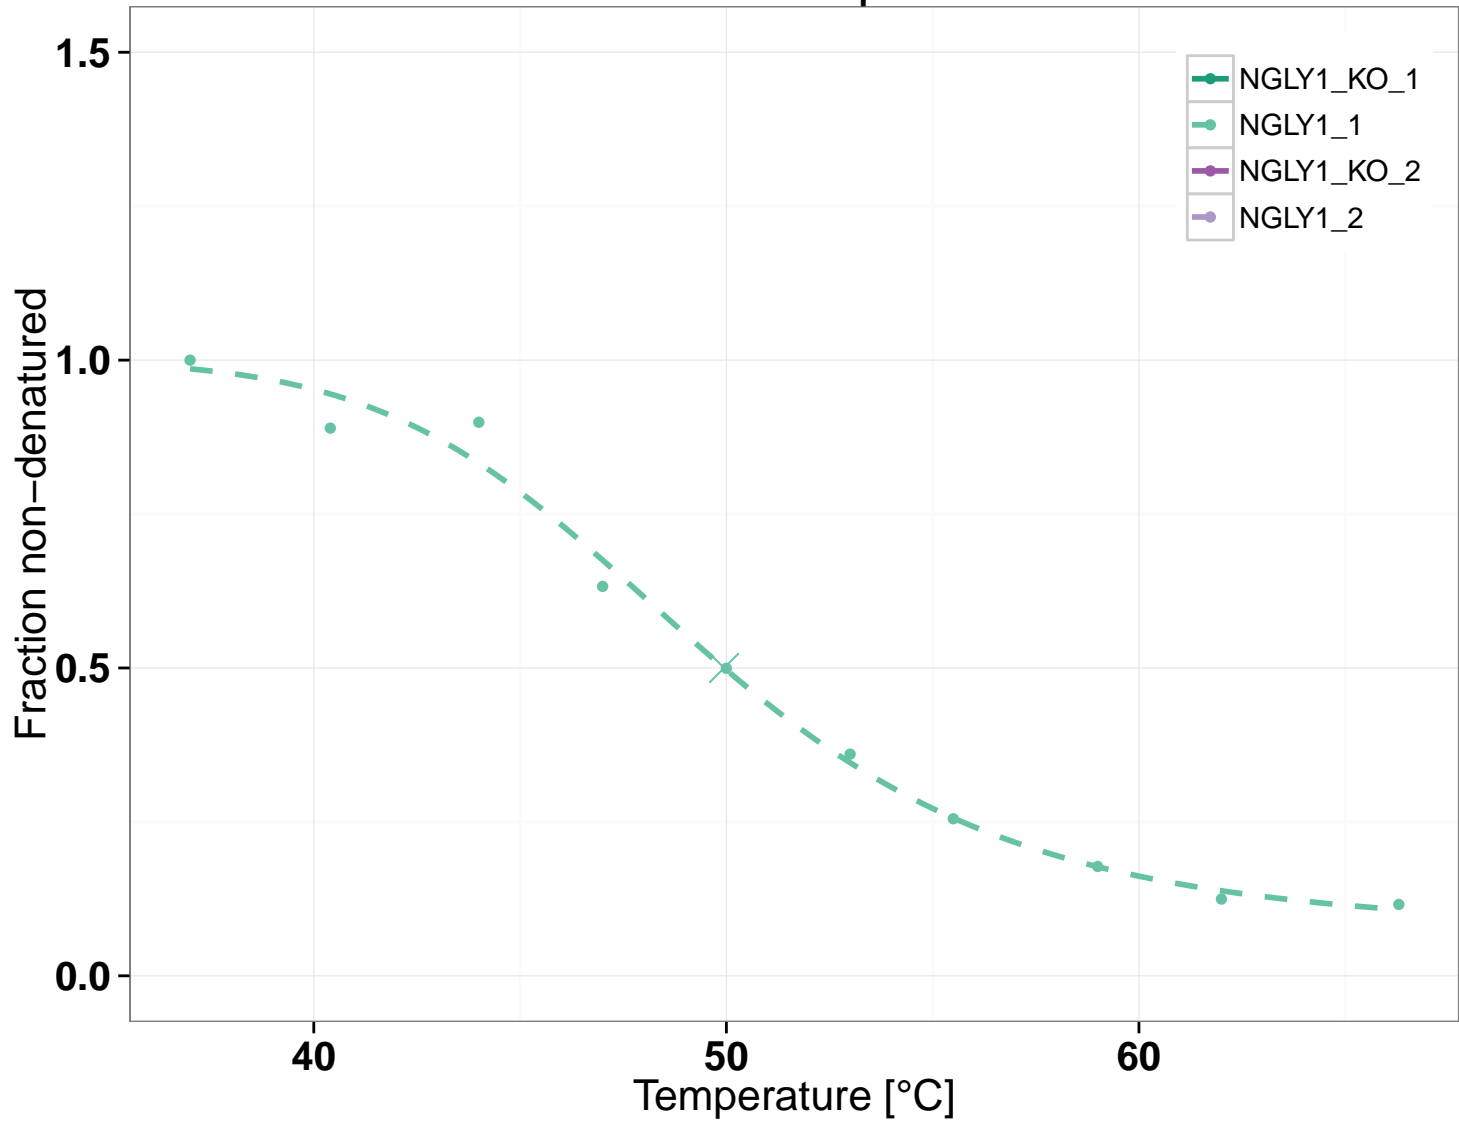

|            | meltPoint | slope | plateau | R2   |
|------------|-----------|-------|---------|------|
| NGLY1_KO_1 | –         | –     | –       | –    |
| NGLY1_1    | 49.94     | –0.06 | 0.07    | 0.99 |
| NGLY1_KO_2 | –         | –     | –       | –    |
| NGLY1_2    | –         | –     | –       | –    |

Supplement: Supplementary file 1838 [file 1]

IPI00019381.4|TMEM30A

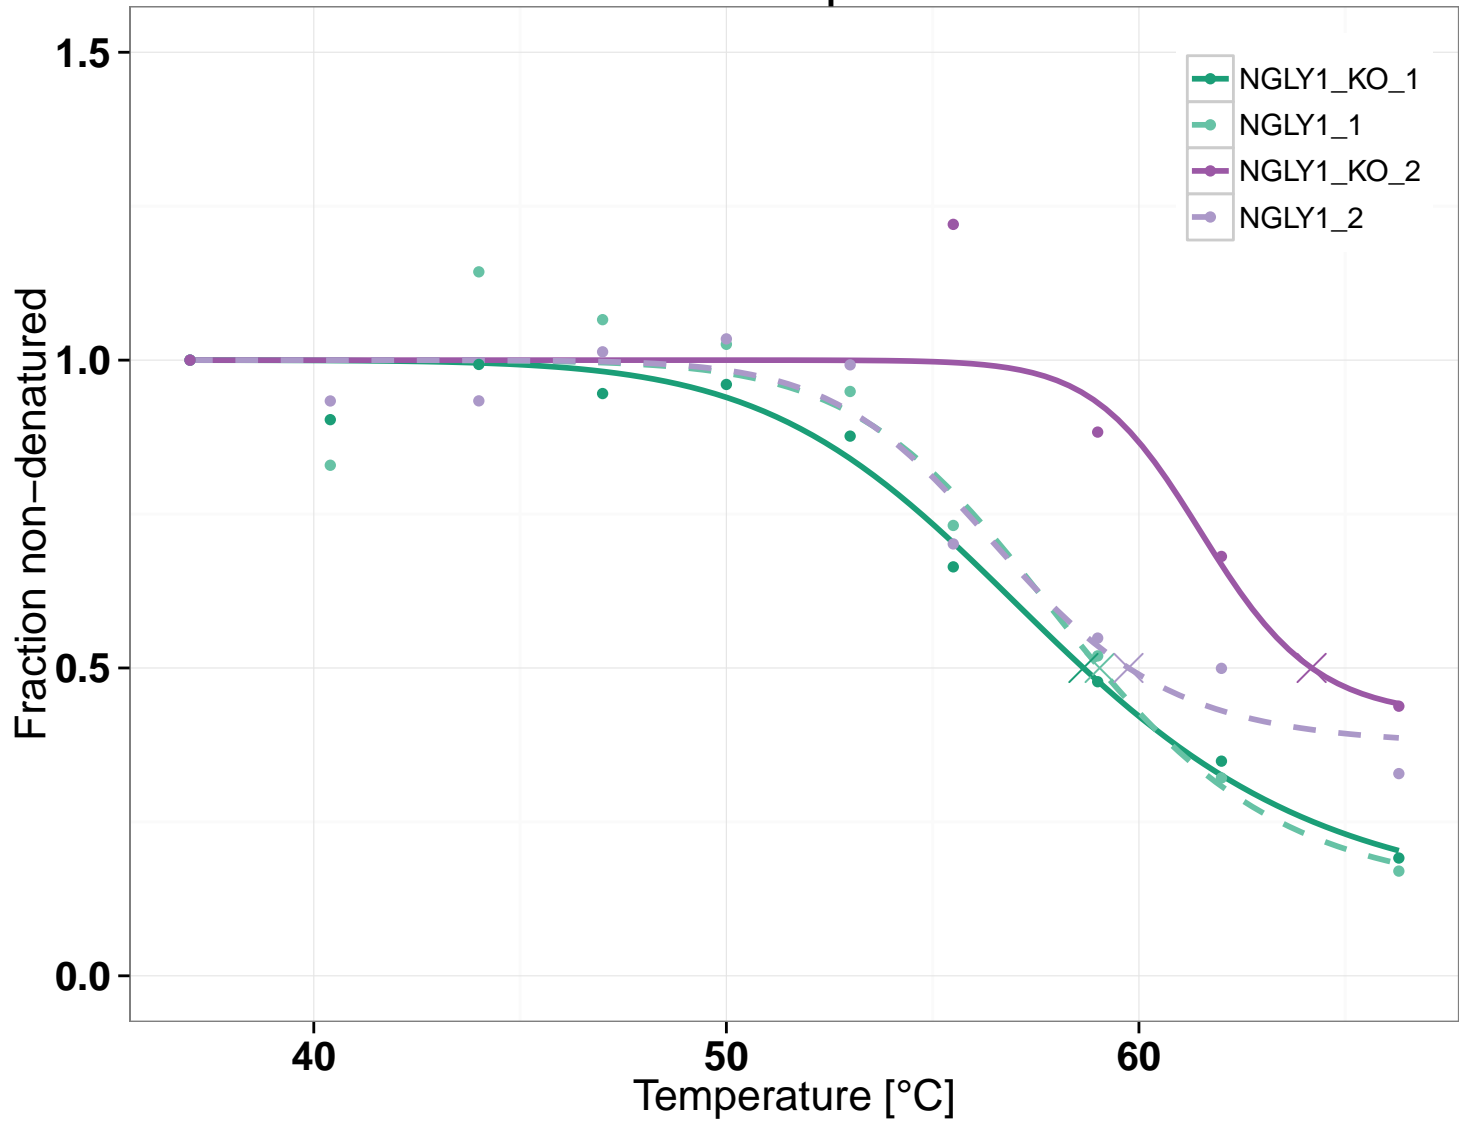

|            | meltPoint | slope  | plateau | R2    |
|------------|-----------|--------|---------|-------|
| NGLY1_KO_1 | 58.65     | -0.066 | 0.11    | 0.98  |
| NGLY1_1    | 59.05     | -0.084 | 0.13    | 0.94  |
| NGLY1_KO_2 | 64.19     | -0.11  | 0.42    | -0.22 |
| NGLY1_2    | 59.75     | -0.075 | 0.37    | 0.95  |

Supplement: Supplementary file 1839 [file 1]

IPI00465377.2|MXRA7

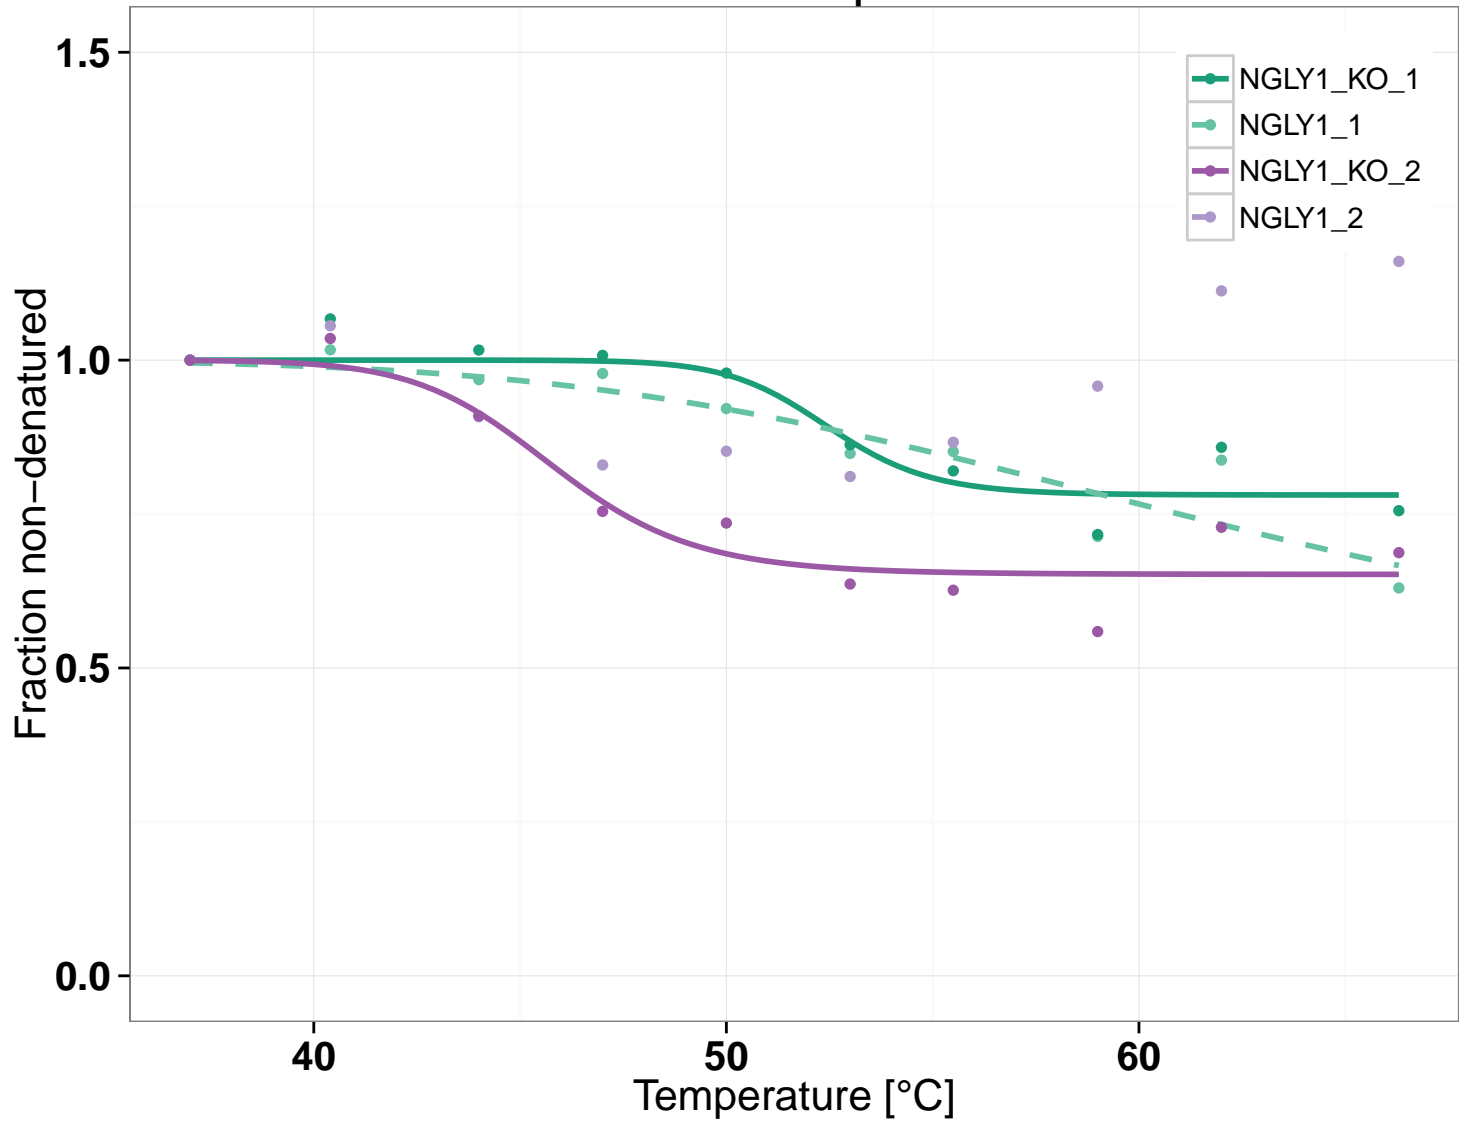

|            | meltPoint | slope  | plateau | R2   |
|------------|-----------|--------|---------|------|
| NGLY1_KO_1 | —         | −0.044 | 0.78    | 0.88 |
| NGLY1_1    | —         | −0.017 | 0.41    | 0.86 |
| NGLY1_KO_2 | —         | −0.051 | 0.65    | 0.91 |
| NGLY1_2    | —         | —      | —       | —    |

Supplement: Supplementary file 1840 [file 1]

IPI00016381.2|RAB27A

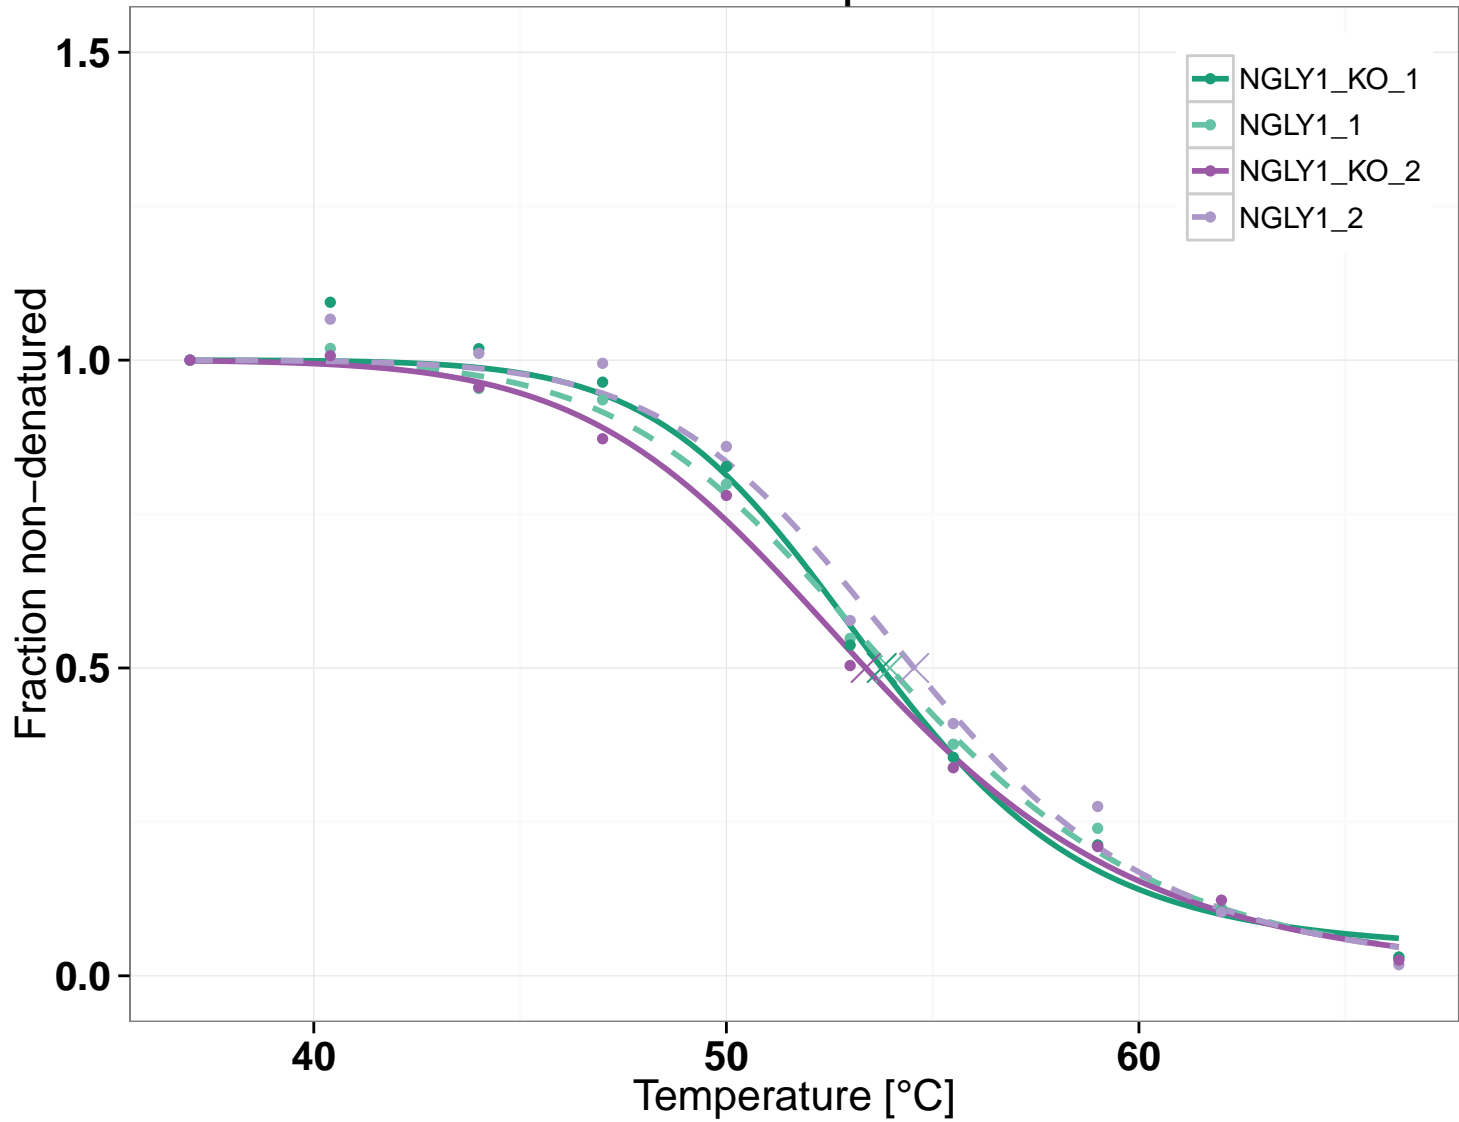

|            | meltPoint | slope  | plateau | R2   |
|------------|-----------|--------|---------|------|
| NGLY1_KO_1 | 53.77     | -0.091 | 0.04    | 0.99 |
| NGLY1_1    | 53.96     | -0.076 | 0       | 1    |
| NGLY1_KO_2 | 53.38     | -0.074 | 0       | 1    |
| NGLY1_2    | 54.55     | -0.083 | 0.01    | 0.99 |

Supplement: Supplementary file 1841 [file 1]

IPI00383904.3|FLJ37981

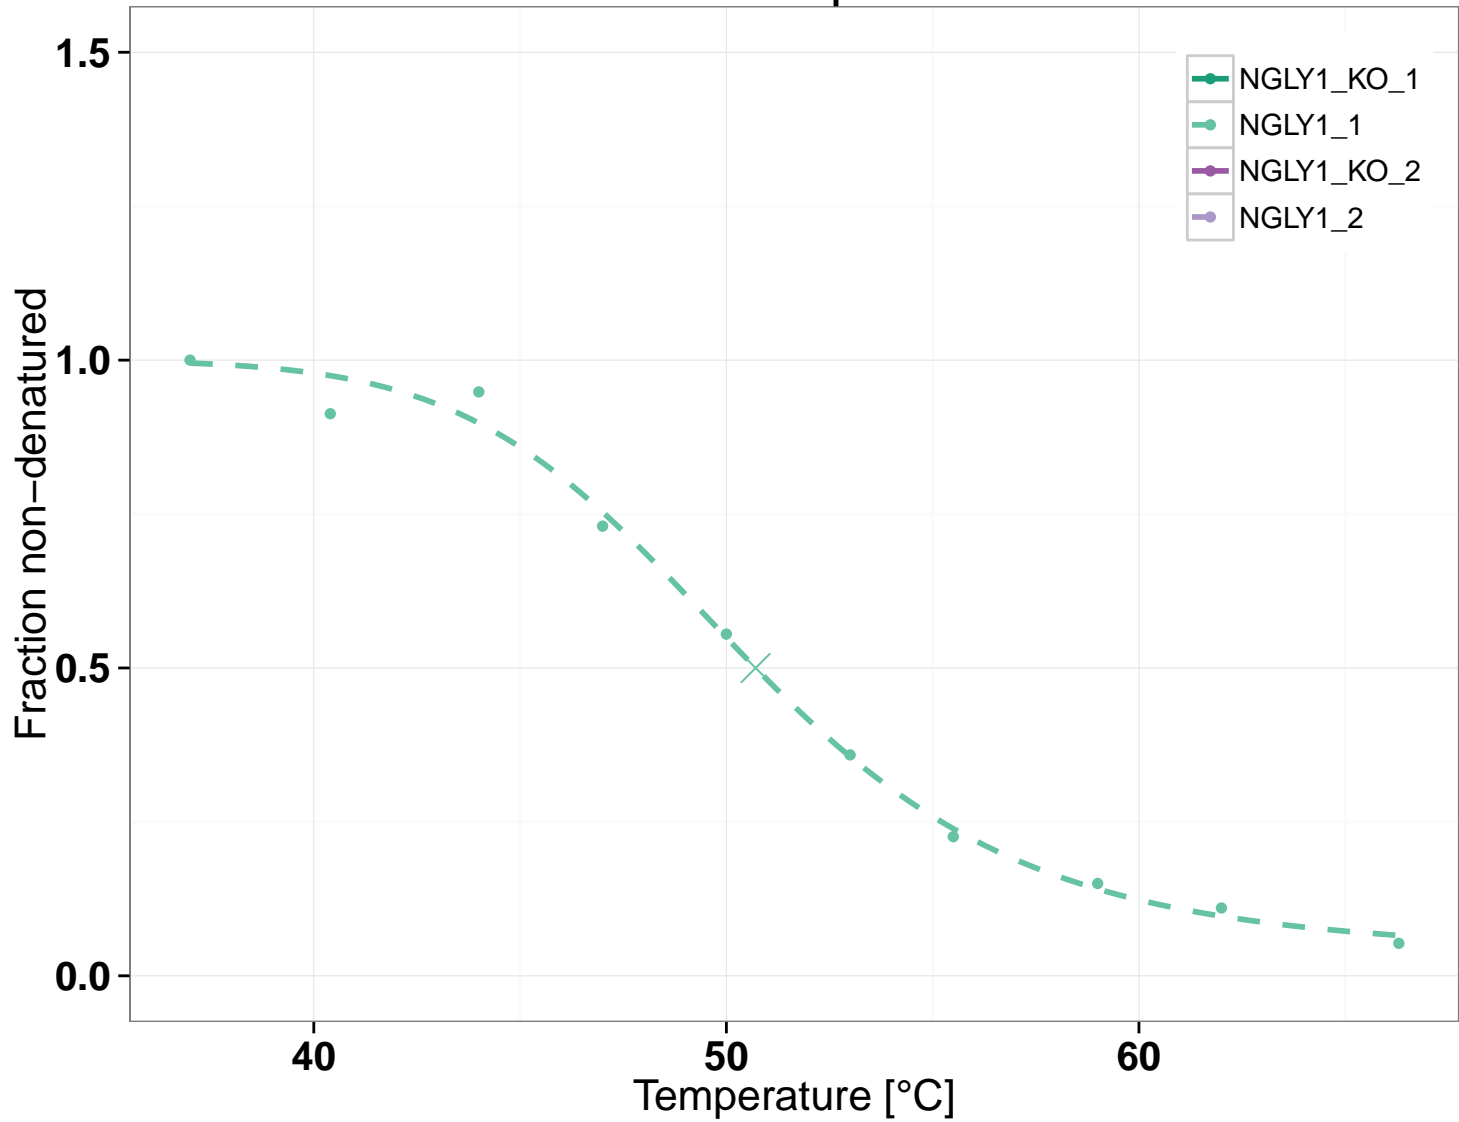

|            | meltPoint | slope  | plateau | R2   |
|------------|-----------|--------|---------|------|
| NGLY1_KO_1 | –         | –      | –       | –    |
| NGLY1_1    | 50.71     | –0.071 | 0.04    | 0.99 |
| NGLY1_KO_2 | –         | –      | –       | –    |
| NGLY1_2    | –         | –      | –       | –    |

Supplement: Supplementary file 1842 [file 1]

IPI00013891.1|TRA2A

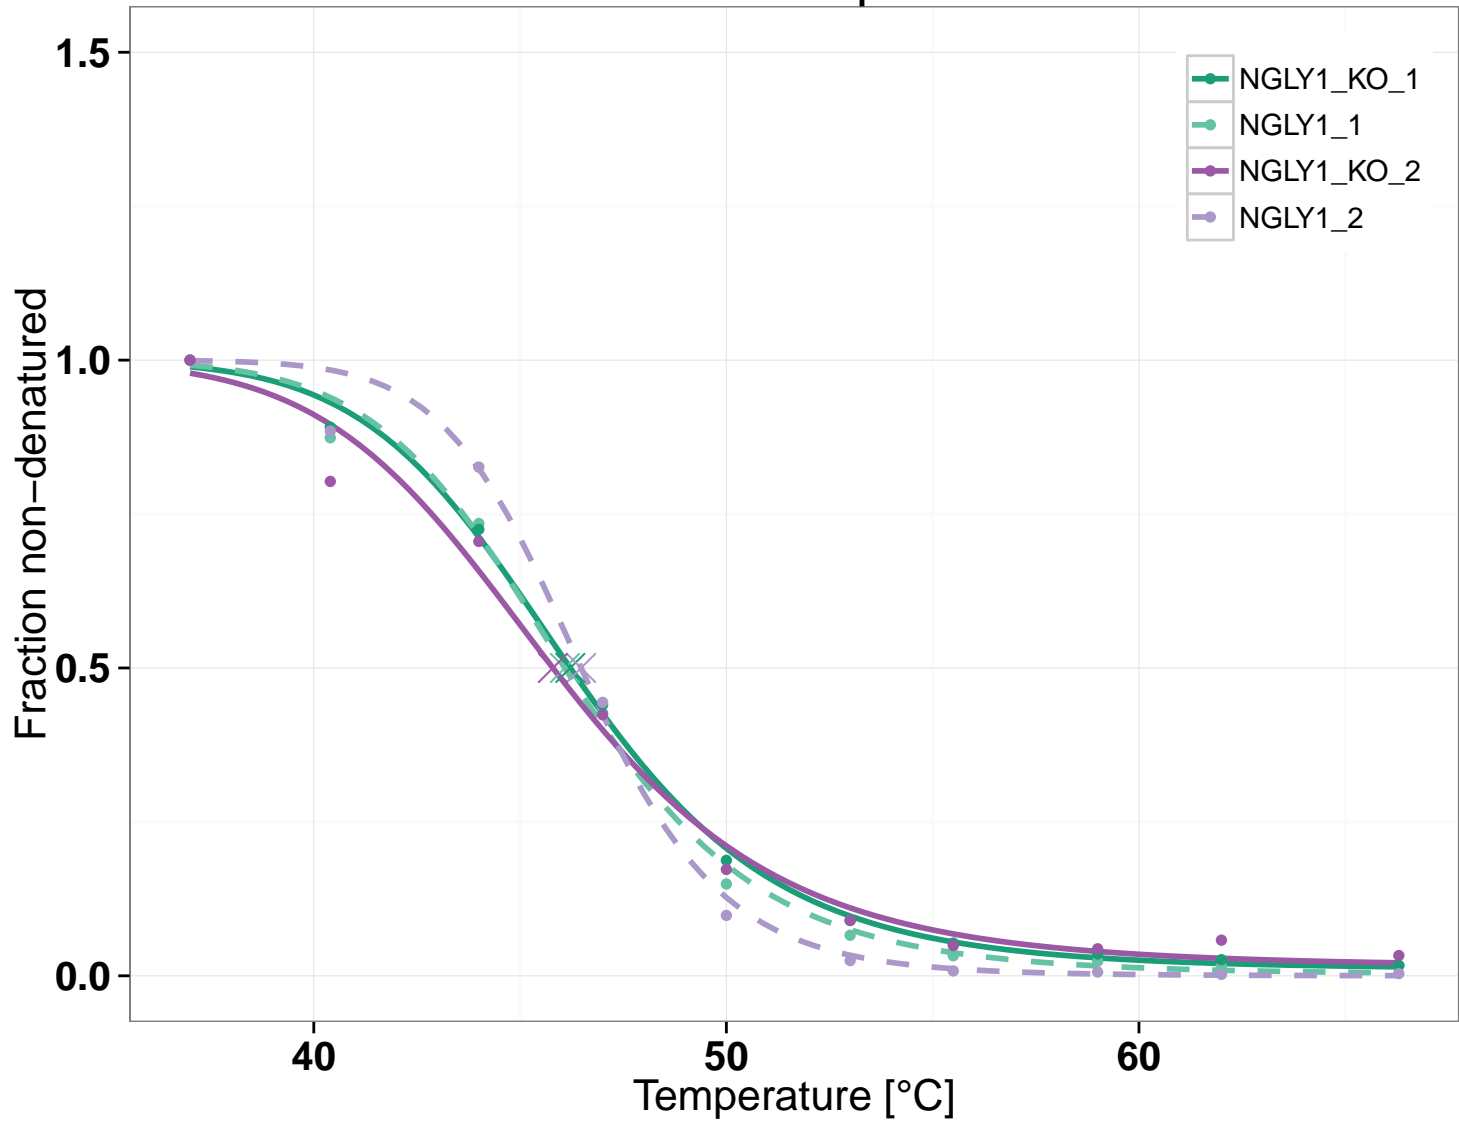

|            | meltPoint | slope  | plateau | R2   |
|------------|-----------|--------|---------|------|
| NGLY1_KO_1 | 46.22     | -0.099 | 0.01    | 1    |
| NGLY1_1    | 46.09     | -0.11  | 0       | 1    |
| NGLY1_KO_2 | 45.8      | -0.089 | 0.01    | 0.99 |
| NGLY1_2    | 46.48     | -0.15  | 0       | 0.99 |

Supplement: Supplementary file 1843 [file 1]

# IPI00028635.4|RPN2

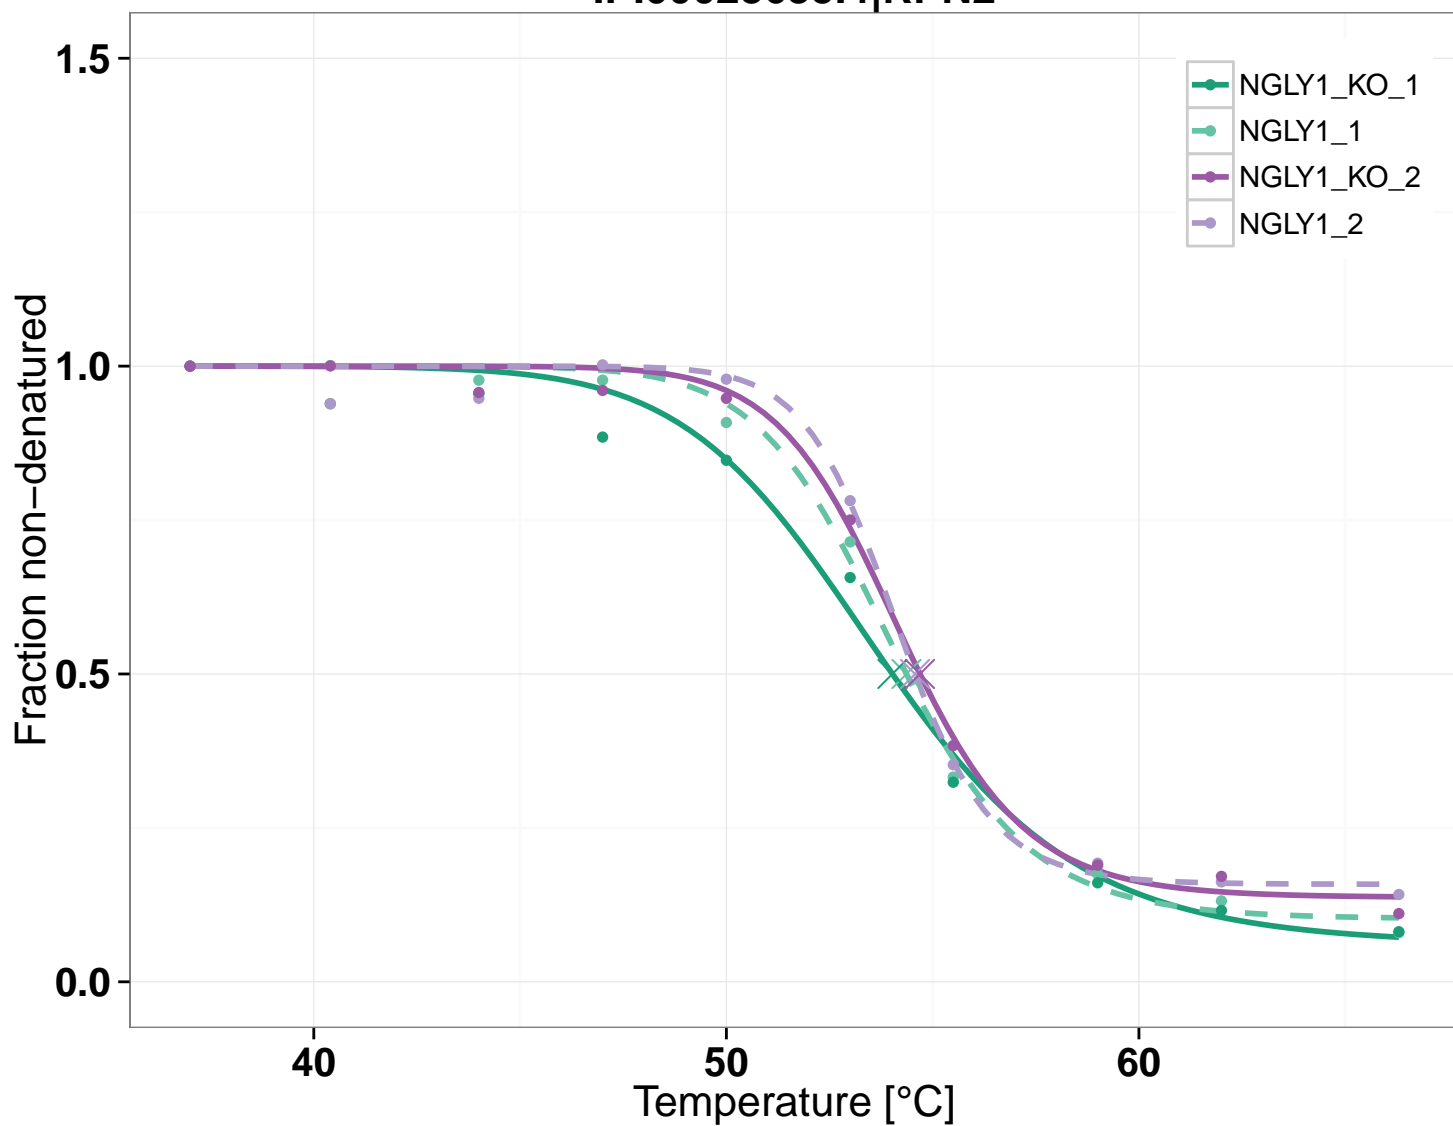

|            | meltPoint | slope  | plateau | R2   |
|------------|-----------|--------|---------|------|
| NGLY1_KO_1 | 54.02     | -0.098 | 0.06    | 0.99 |
| NGLY1_1    | 54.36     | -0.14  | 0.1     | 1    |
| NGLY1_KO_2 | 54.69     | -0.14  | 0.14    | 1    |
| NGLY1_2    | 54.57     | -0.19  | 0.16    | 0.99 |

Supplement: Supplementary file 1844 [file 1]

IPI00008444.3|CDADC1

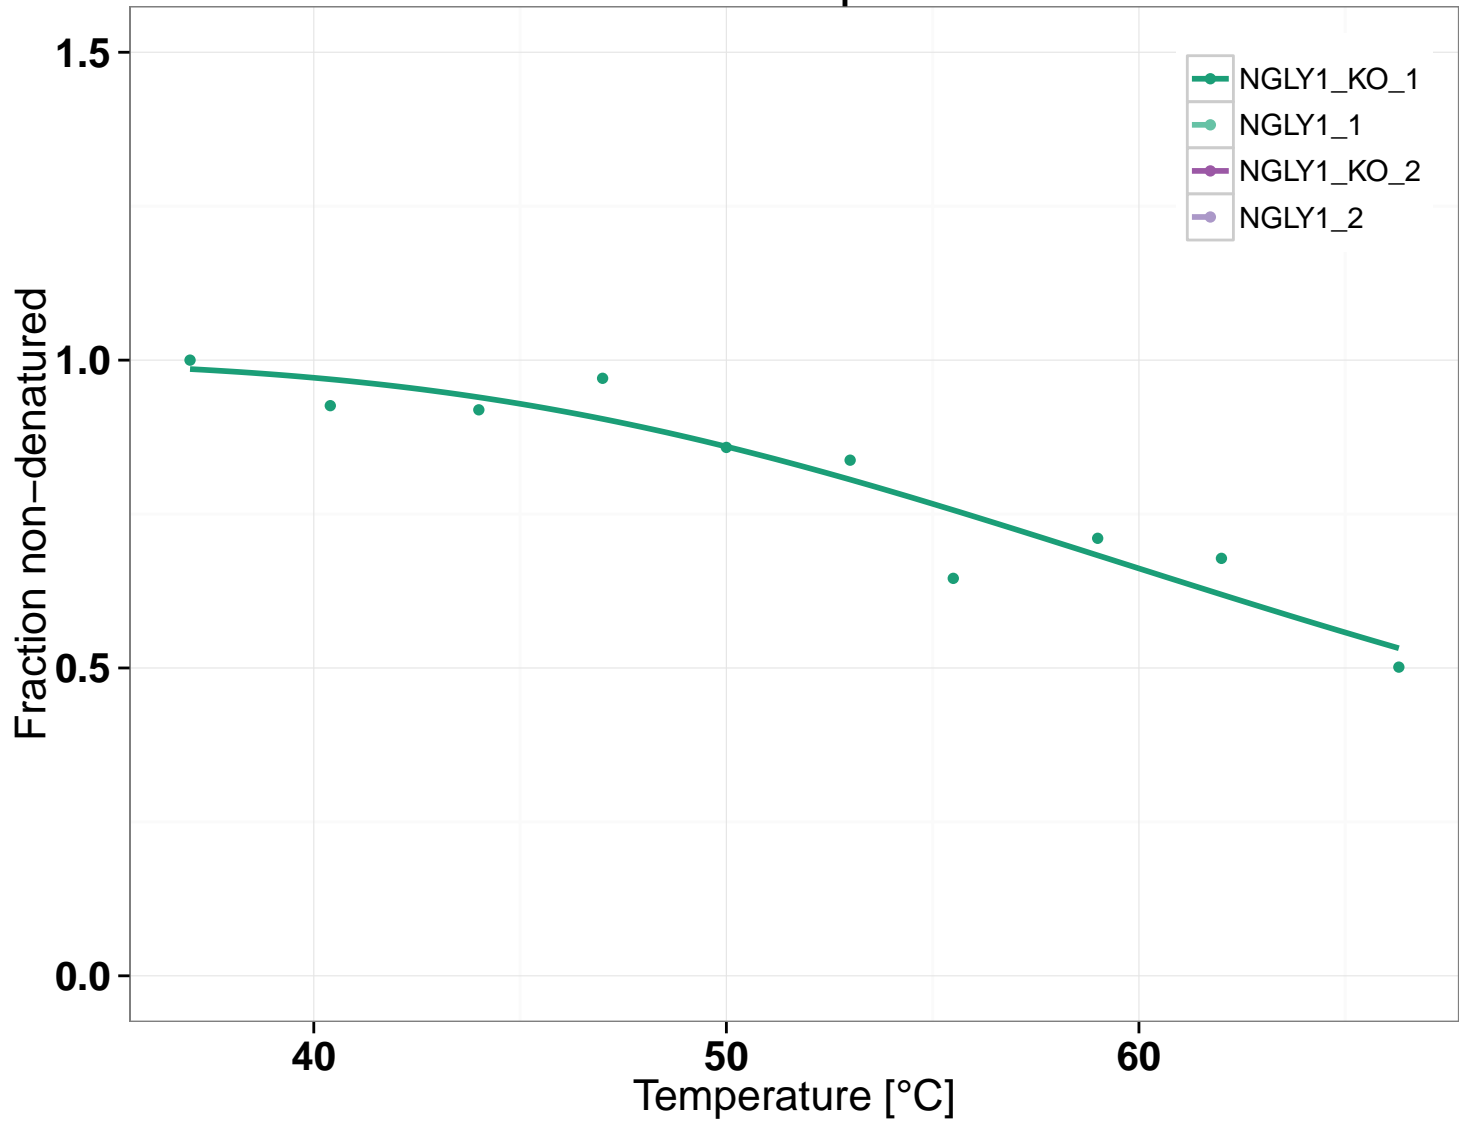

|            | meltPoint | slope  | plateau | R2   |
|------------|-----------|--------|---------|------|
| NGLY1_KO_1 | —         | −0.021 | 0       | 0.89 |
| NGLY1_1    | —         | —      | —       | —    |
| NGLY1_KO_2 | —         | —      | —       | —    |
| NGLY1_2    | —         | —      | —       | —    |

Supplement: Supplementary file 1845 [file 1]

# IPI00020153.3|BSN

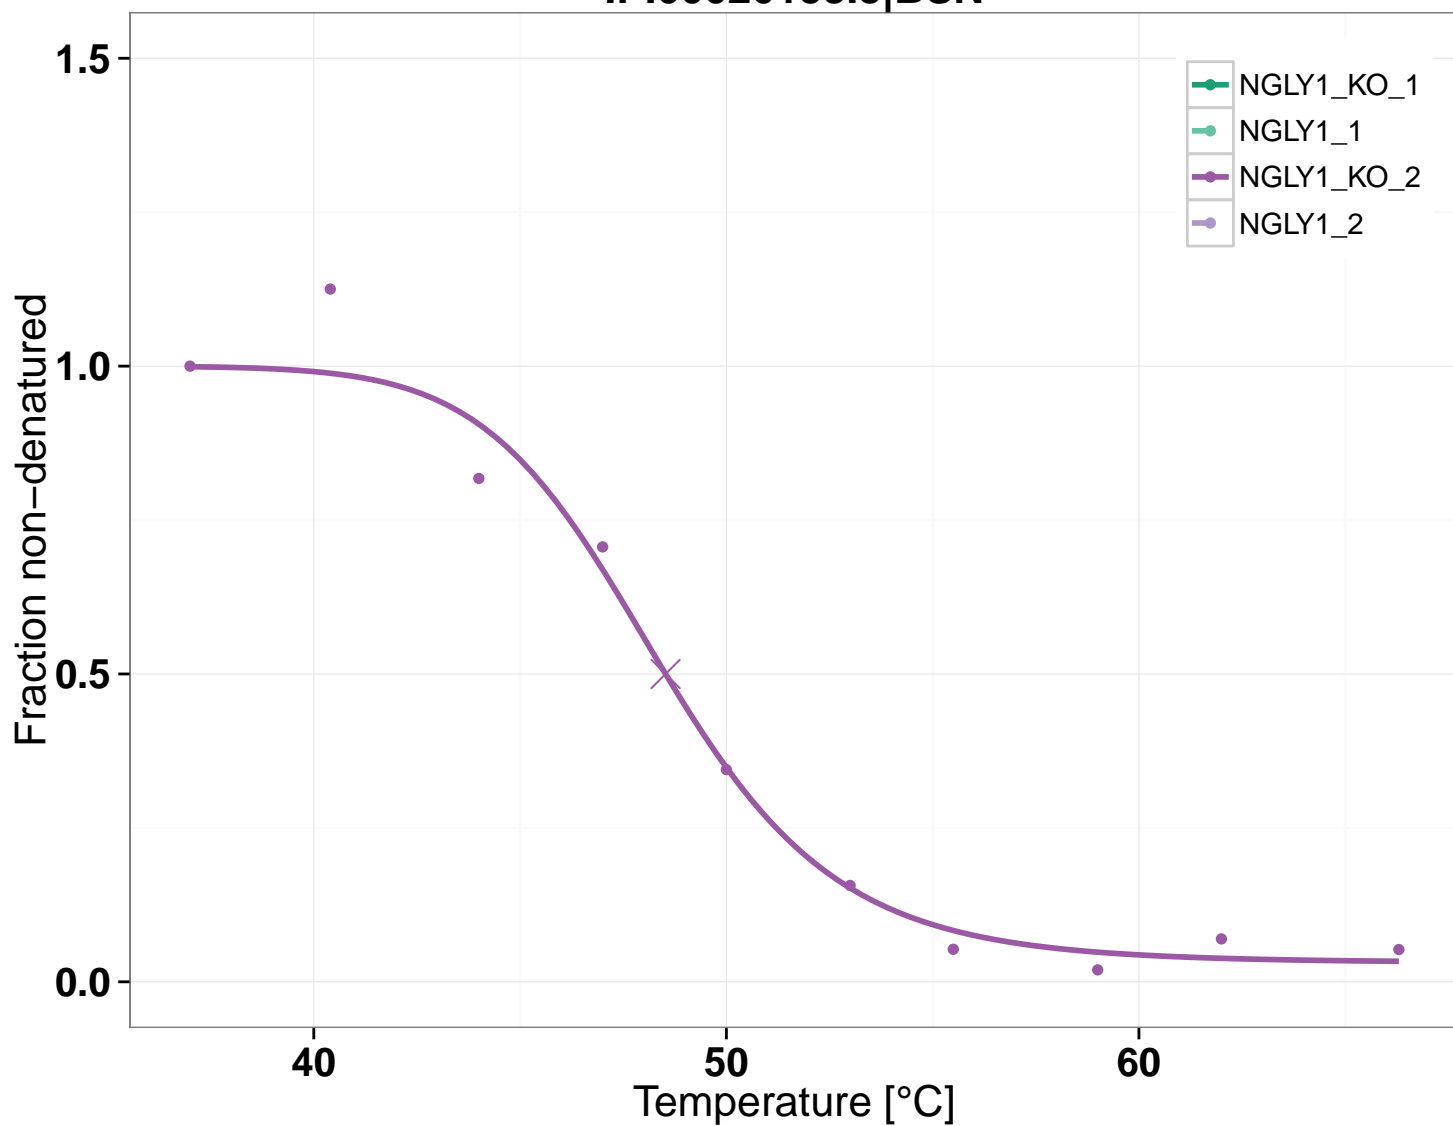

|            | meltPoint | slope | plateau | R2   |
|------------|-----------|-------|---------|------|
| NGLY1_KO_1 | —         | —     | —       | —    |
| NGLY1_1    | —         | —     | —       | —    |
| NGLY1_KO_2 | 48.53     | -0.11 | 0.03    | 0.98 |
| NGLY1_2    | —         | —     | —       | —    |

Supplement: Supplementary file 1846 [file 1]

# IPI00473047.2|PRKAG1

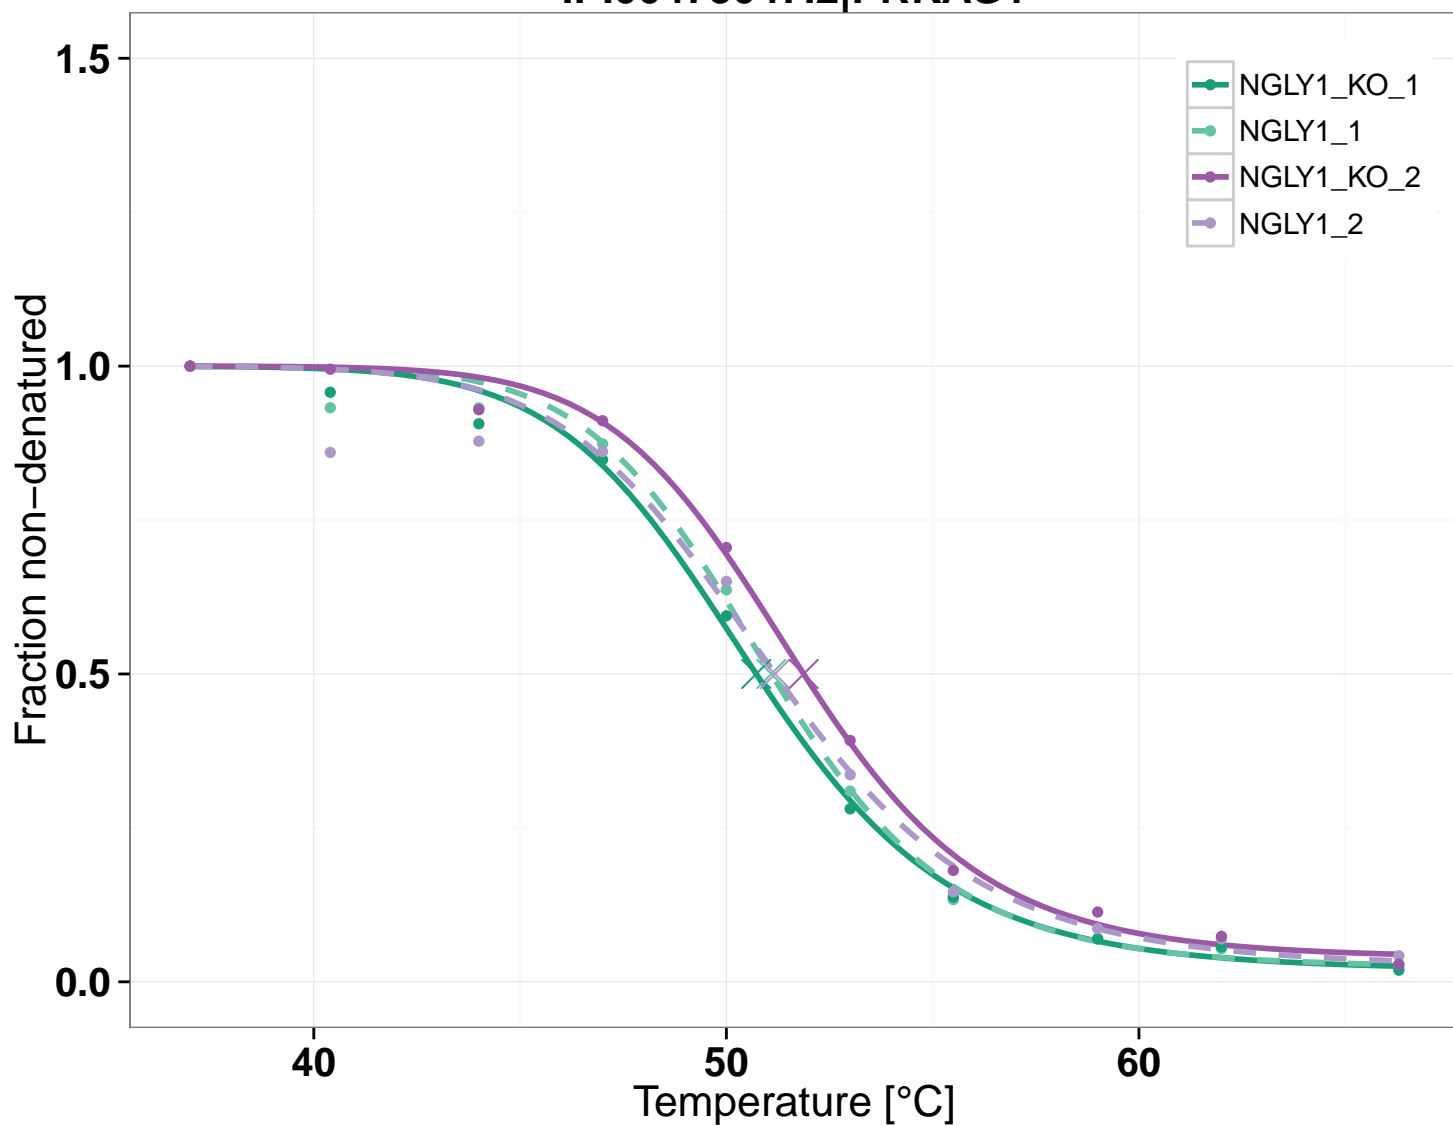

|            | meltPoint | slope  | plateau | R2   |
|------------|-----------|--------|---------|------|
| NGLY1_KO_1 | 50.72     | -0.1   | 0.02    | 1    |
| NGLY1_1    | 51.09     | -0.11  | 0.02    | 1    |
| NGLY1_KO_2 | 51.87     | -0.11  | 0.04    | 1    |
| NGLY1_2    | 51.18     | -0.096 | 0.02    | 0.98 |

Supplement: Supplementary file 1847 [file 1]

IPI00059279.5|EXOC4

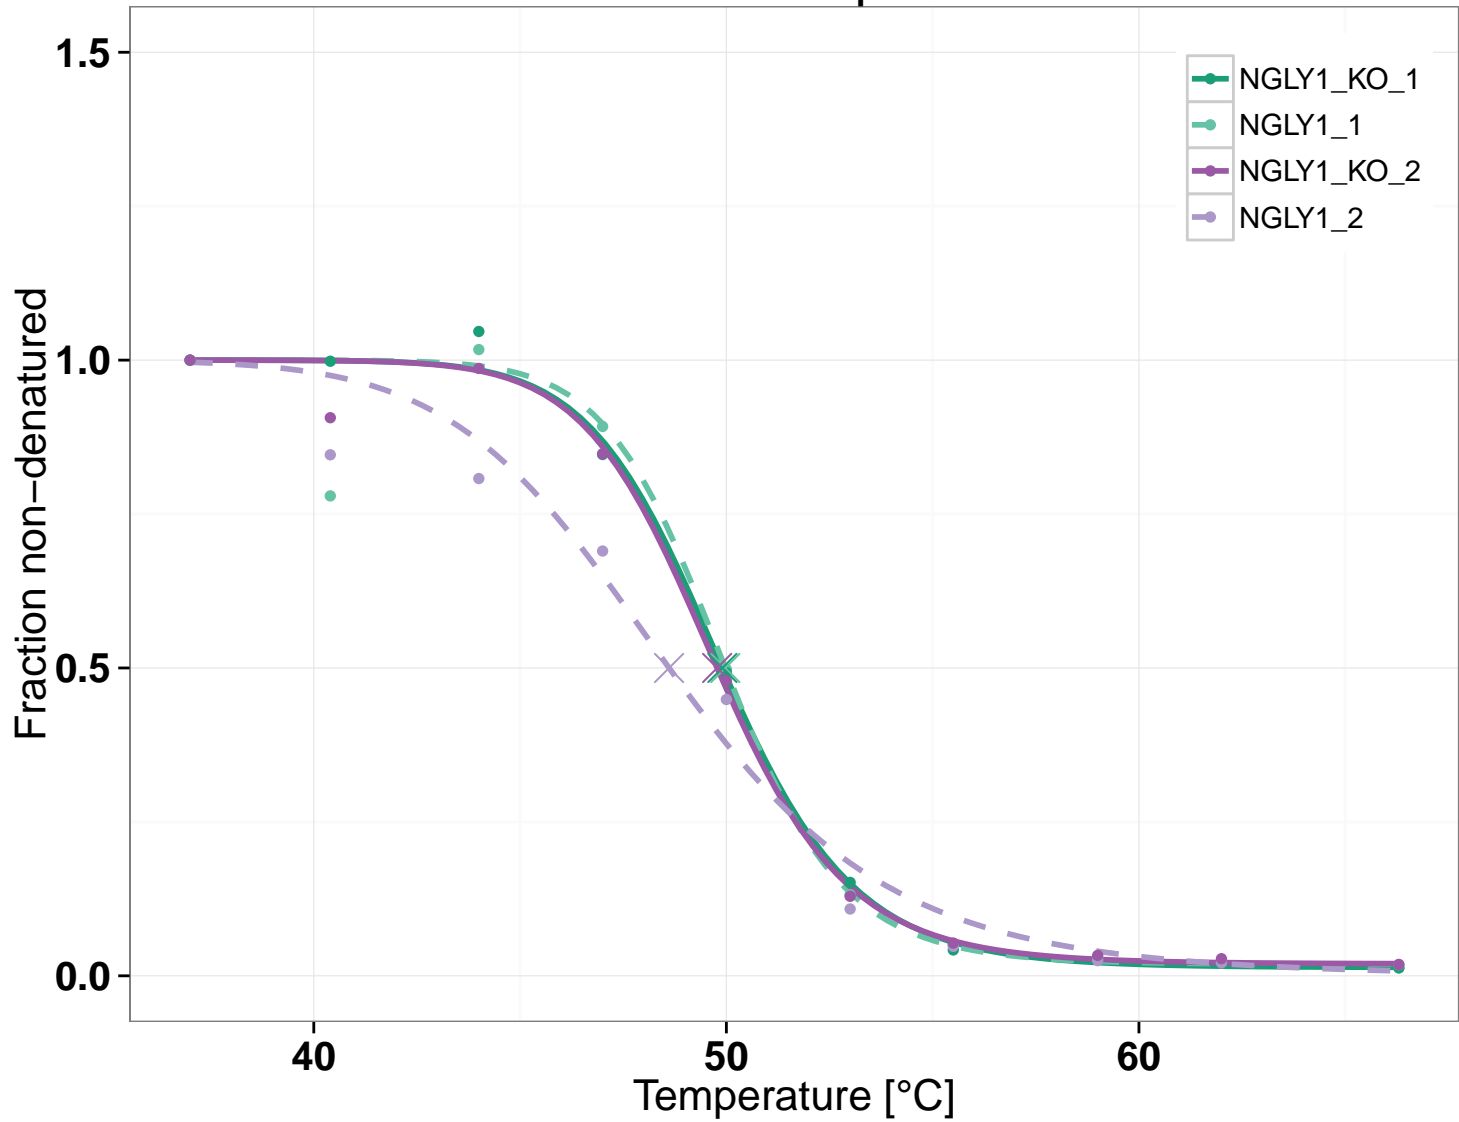

|            | meltPoint | slope  | plateau | R2   |
|------------|-----------|--------|---------|------|
| NGLY1_KO_1 | 49.9      | -0.15  | 0.01    | 1    |
| NGLY1_1    | 49.98     | -0.17  | 0.02    | 0.97 |
| NGLY1_KO_2 | 49.78     | -0.15  | 0.02    | 0.99 |
| NGLY1_2    | 48.61     | -0.094 | 0       | 0.98 |

Supplement: Supplementary file 1848 [file 1]

IPI00024893.5|LZTR1

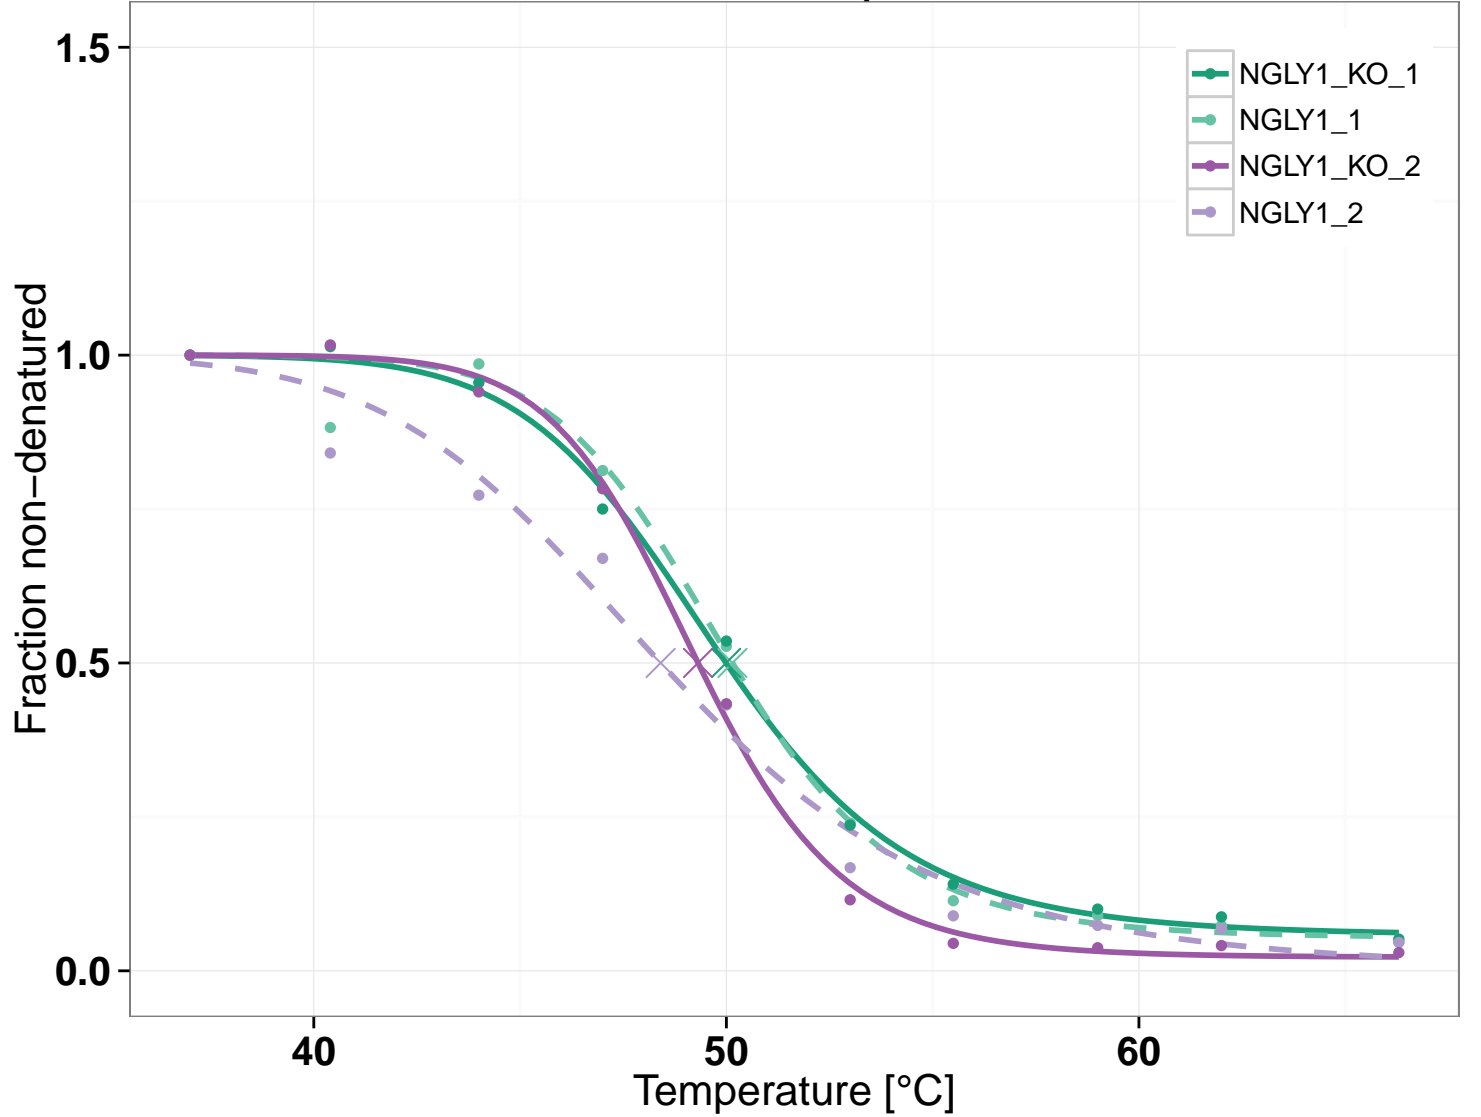

|            | meltPoint | slope  | plateau | R2   |
|------------|-----------|--------|---------|------|
| NGLY1_KO_1 | 49.99     | -0.1   | 0.06    | 1    |
| NGLY1_1    | 50.15     | -0.11  | 0.05    | 0.99 |
| NGLY1_KO_2 | 49.31     | -0.14  | 0.02    | 1    |
| NGLY1_2    | 48.41     | -0.074 | 0       | 0.98 |

Supplement: Supplementary file 1849 [file 1]

IPI00024920.1|ATP5D

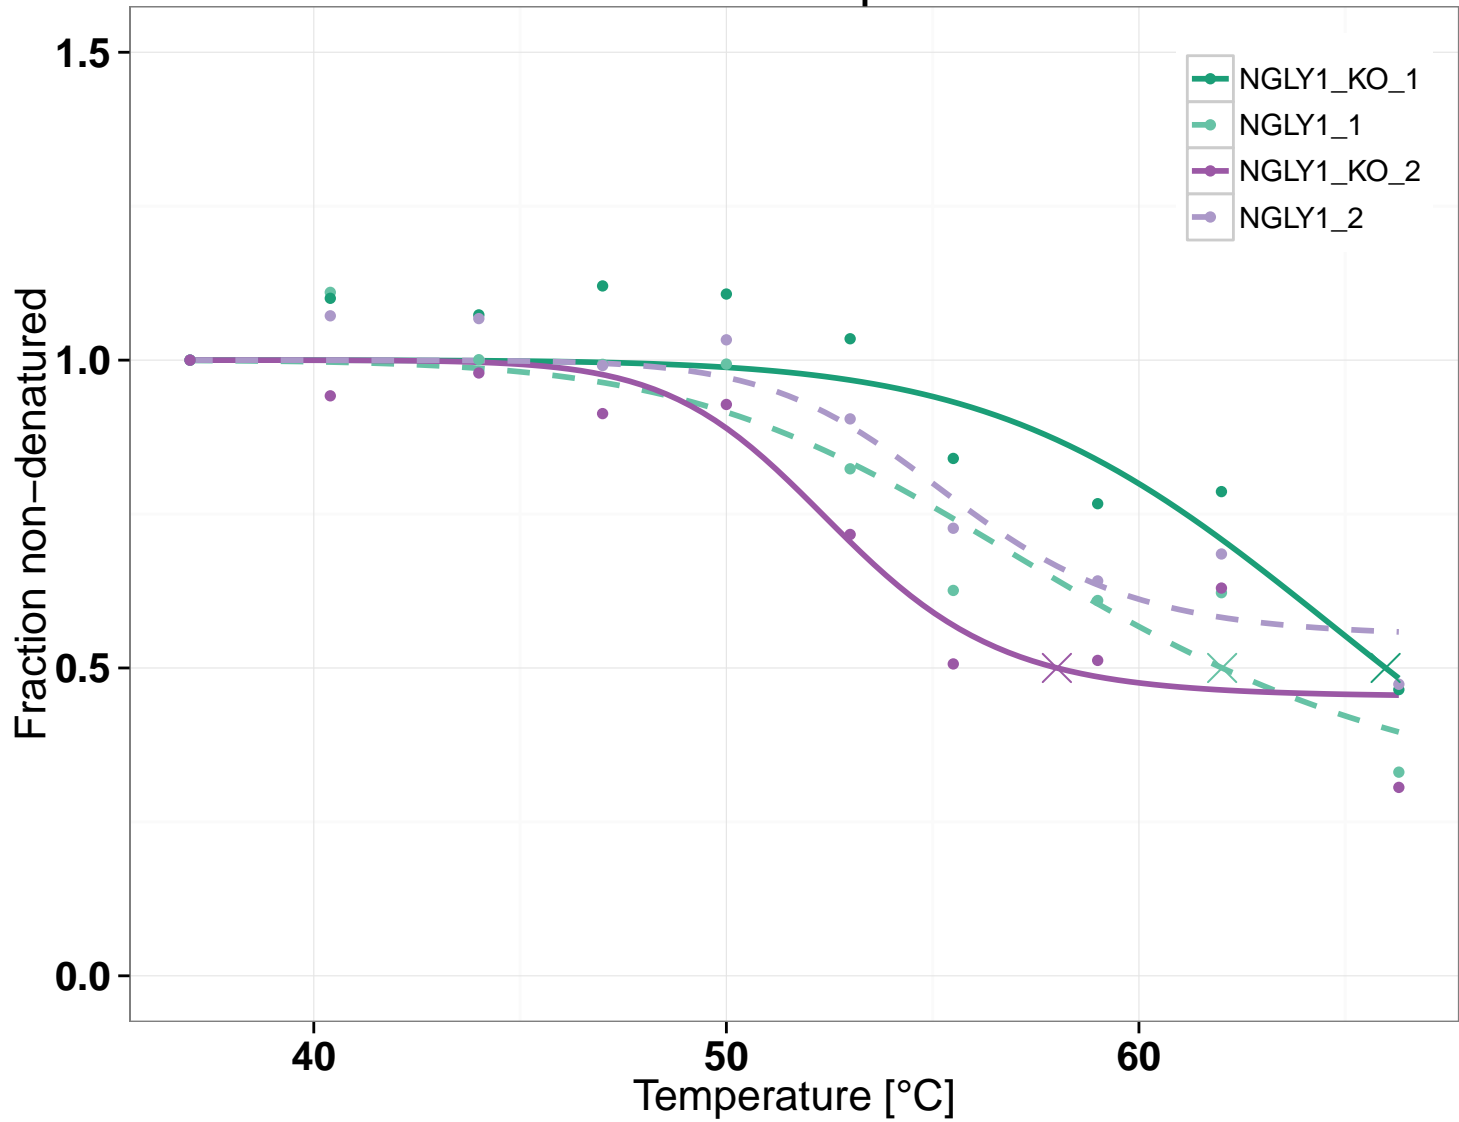

|            | meltPoint | slope  | plateau | R2   |
|------------|-----------|--------|---------|------|
| NGLY1_KO_1 | 65.98     | -0.054 | 0       | 0.83 |
| NGLY1_1    | 62.02     | -0.04  | 0.26    | 0.91 |
| NGLY1_KO_2 | 58.01     | -0.067 | 0.45    | 0.88 |
| NGLY1_2    | -         | -0.05  | 0.55    | 0.92 |

Supplement: Supplementary file 1850 [file 1]

IPI00848321.1|SMARCD2

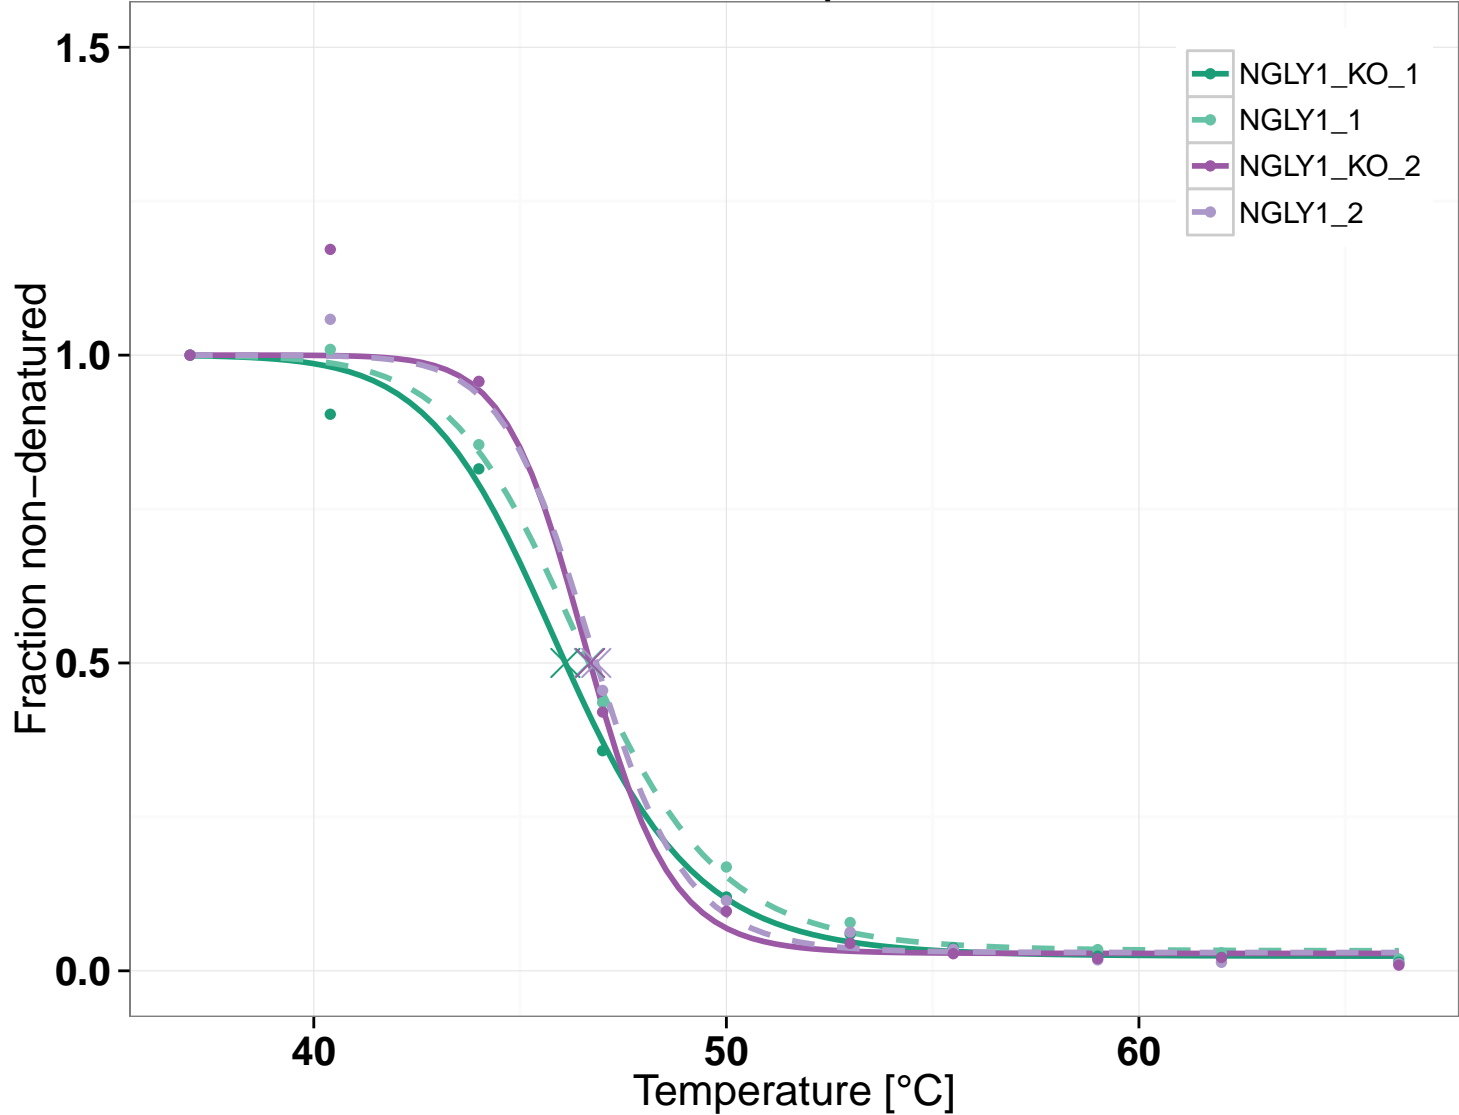

|            | meltPoint | slope | plateau | R2   |
|------------|-----------|-------|---------|------|
| NGLY1_KO_1 | 46.1      | -0.15 | 0.02    | 1    |
| NGLY1_1    | 46.67     | -0.15 | 0.03    | 1    |
| NGLY1_KO_2 | 46.7      | -0.24 | 0.03    | 0.98 |
| NGLY1_2    | 46.85     | -0.22 | 0.03    | 1    |

Supplement: Supplementary file 1851 [file 1]

# IPI00000816.1|YWHAE

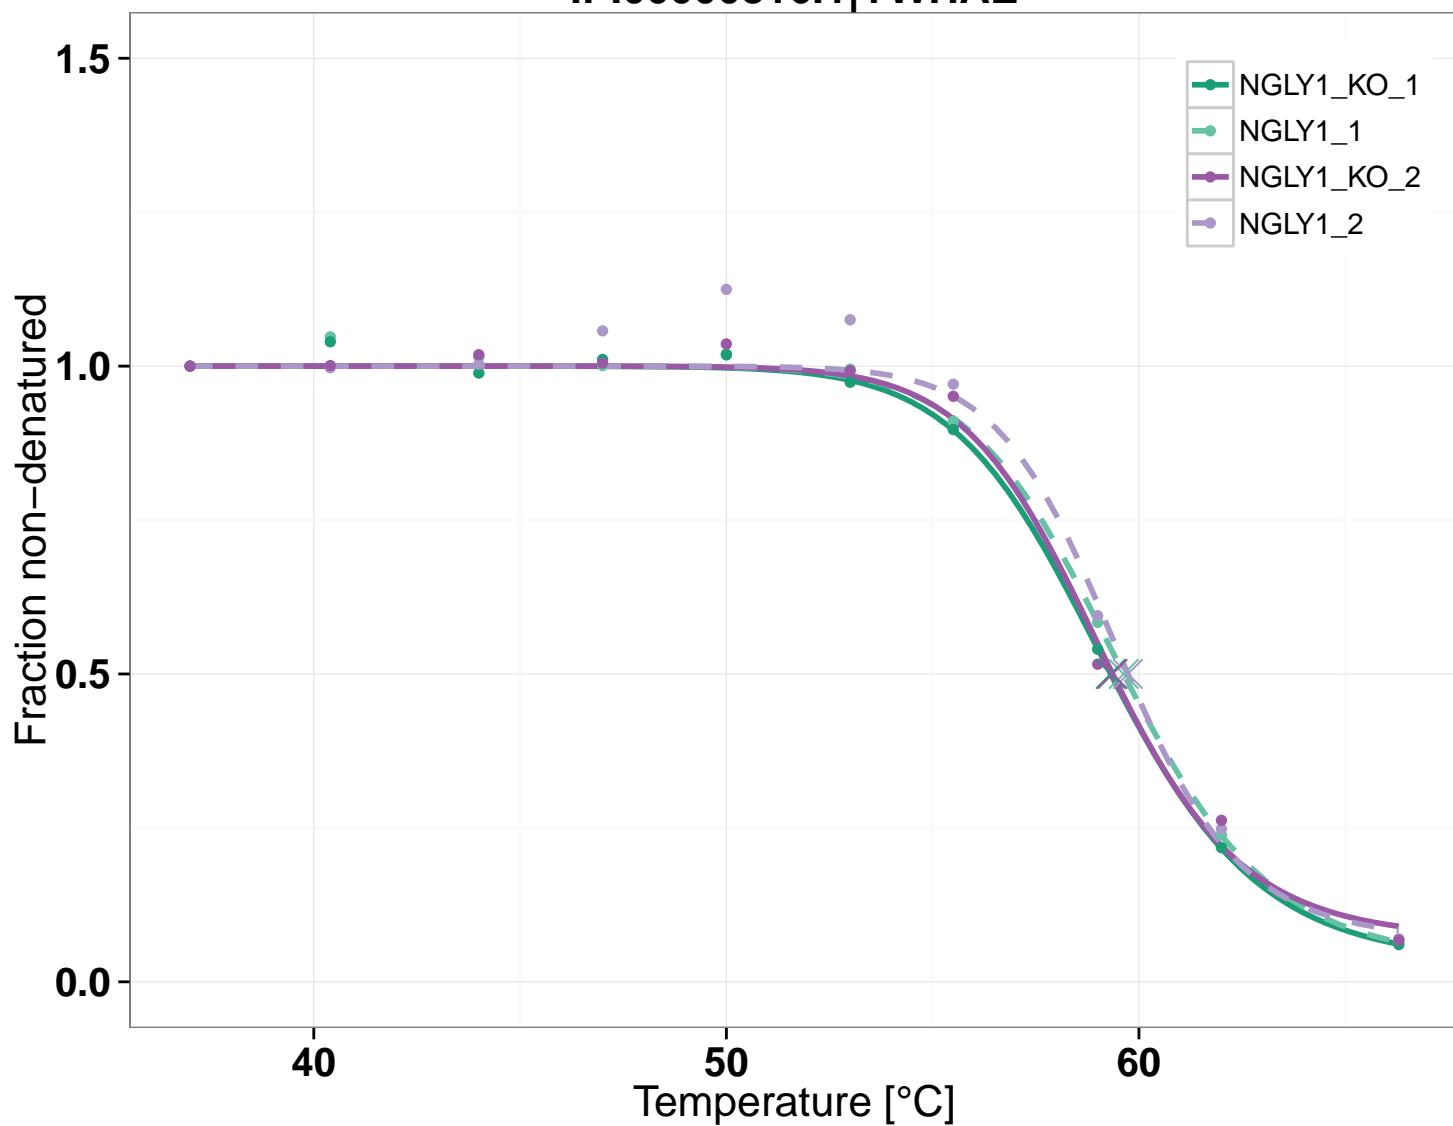

|            | meltPoint | slope | plateau | R2   |
|------------|-----------|-------|---------|------|
| NGLY1_KO_1 | 59.32     | -0.13 | 0.03    | 1    |
| NGLY1_1    | 59.63     | -0.13 | 0.03    | 1    |
| NGLY1_KO_2 | 59.36     | -0.14 | 0.07    | 0.99 |
| NGLY1_2    | 59.73     | -0.16 | 0.07    | 0.98 |

Supplement: Supplementary file 1852 [file 1]

IPI00103165.3|UBE2Q2

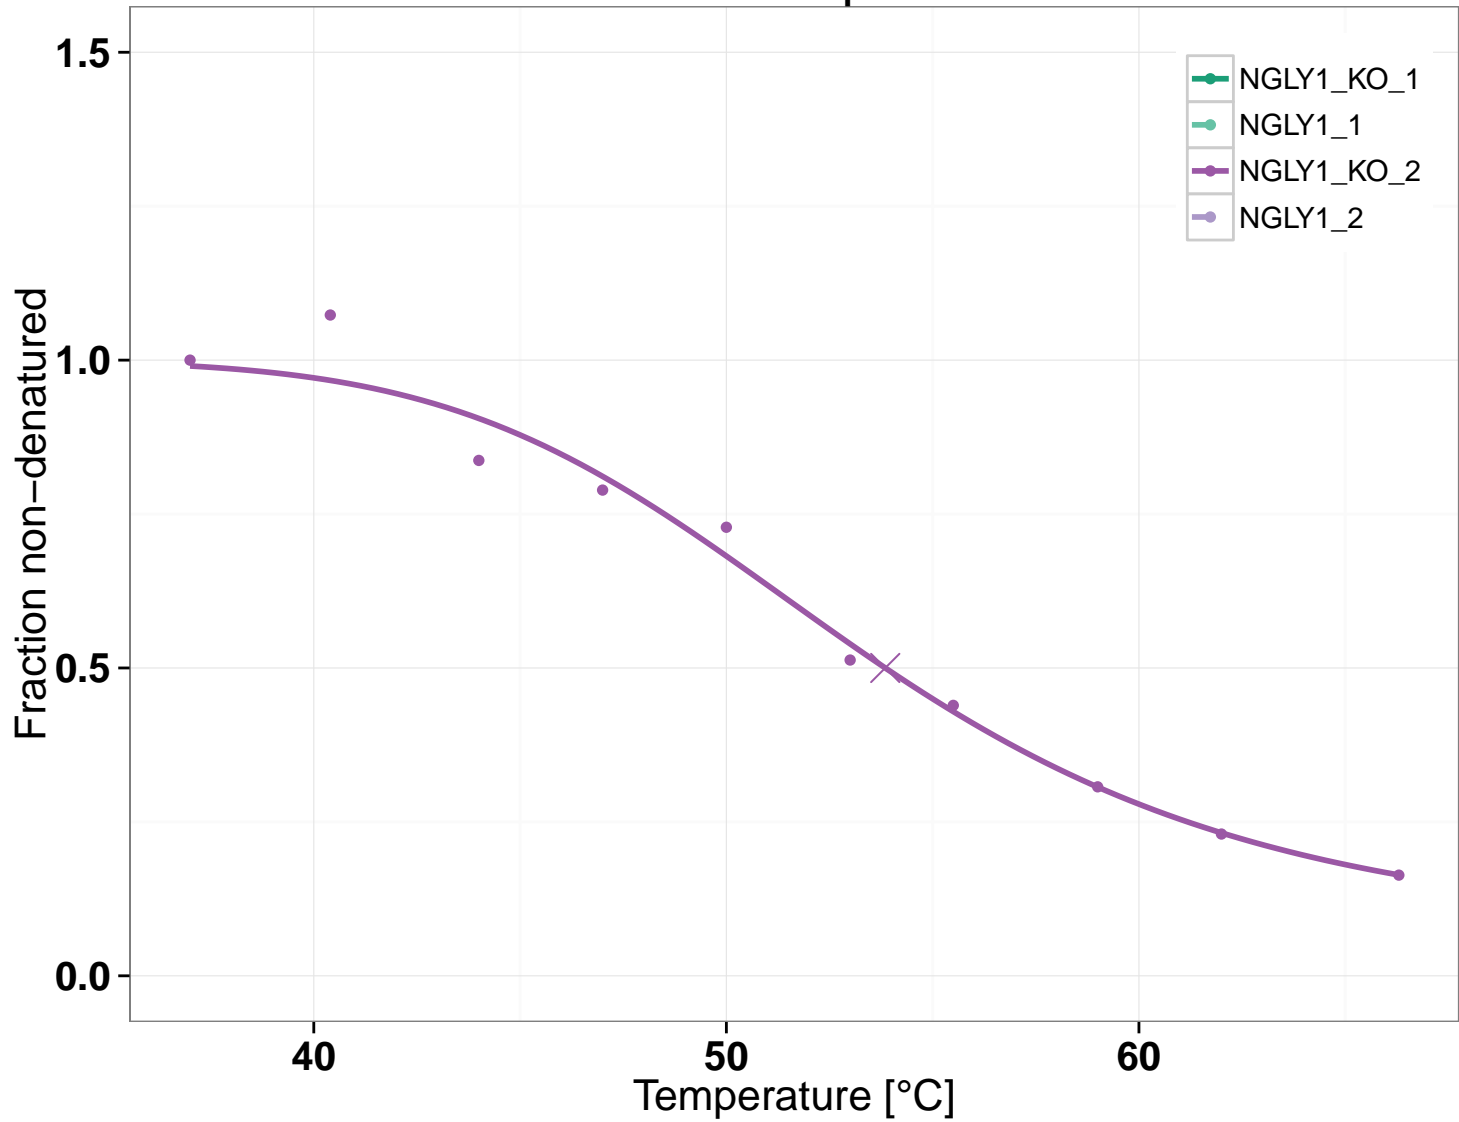

|            | meltPoint | slope  | plateau | R2   |
|------------|-----------|--------|---------|------|
| NGLY1_KO_1 | —         | —      | —       | —    |
| NGLY1_1    | —         | —      | —       | —    |
| NGLY1_KO_2 | 53.85     | -0.048 | 0.06    | 0.98 |
| NGLY1_2    | —         | —      | —       | —    |

Supplement: Supplementary file 1853 [file 1]

# IPI00647762.1|TCF3

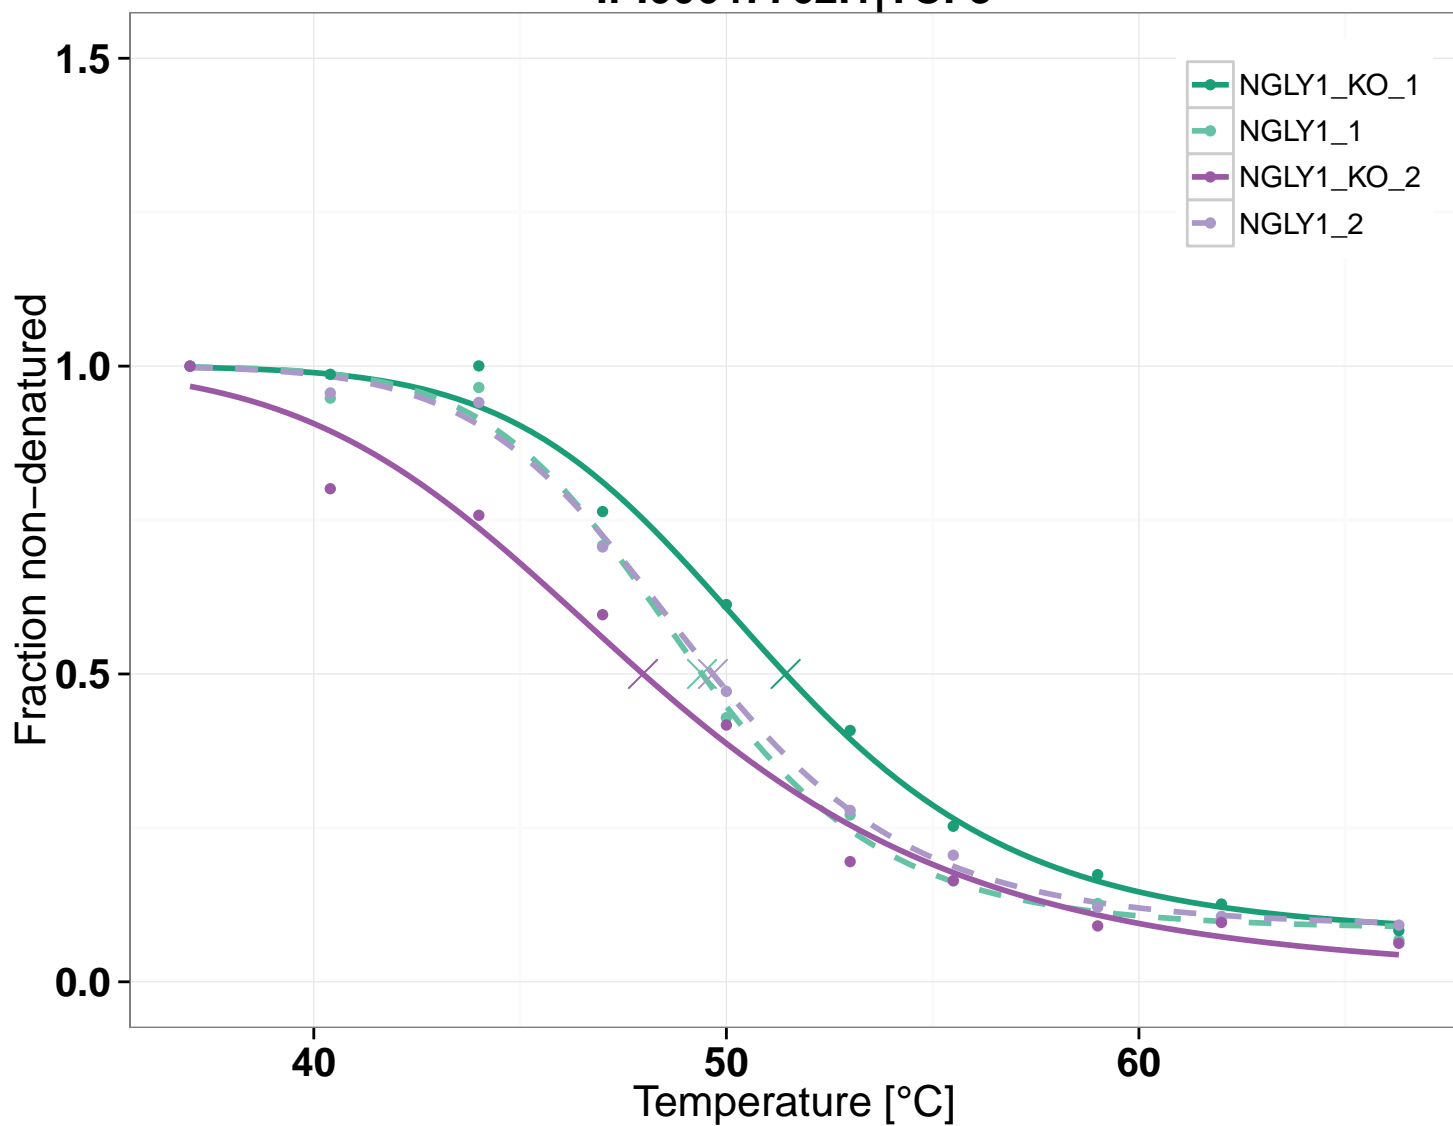

|            | meltPoint | slope  | plateau | R2   |
|------------|-----------|--------|---------|------|
| NGLY1_KO_1 | 51.44     | -0.075 | 0.07    | 0.99 |
| NGLY1_1    | 49.41     | -0.095 | 0.09    | 1    |
| NGLY1_KO_2 | 47.98     | -0.061 | 0       | 0.98 |
| NGLY1_2    | 49.67     | -0.086 | 0.09    | 1    |

Supplement: Supplementary file 1854 [file 1]

# IPI00426727.1|MBD4

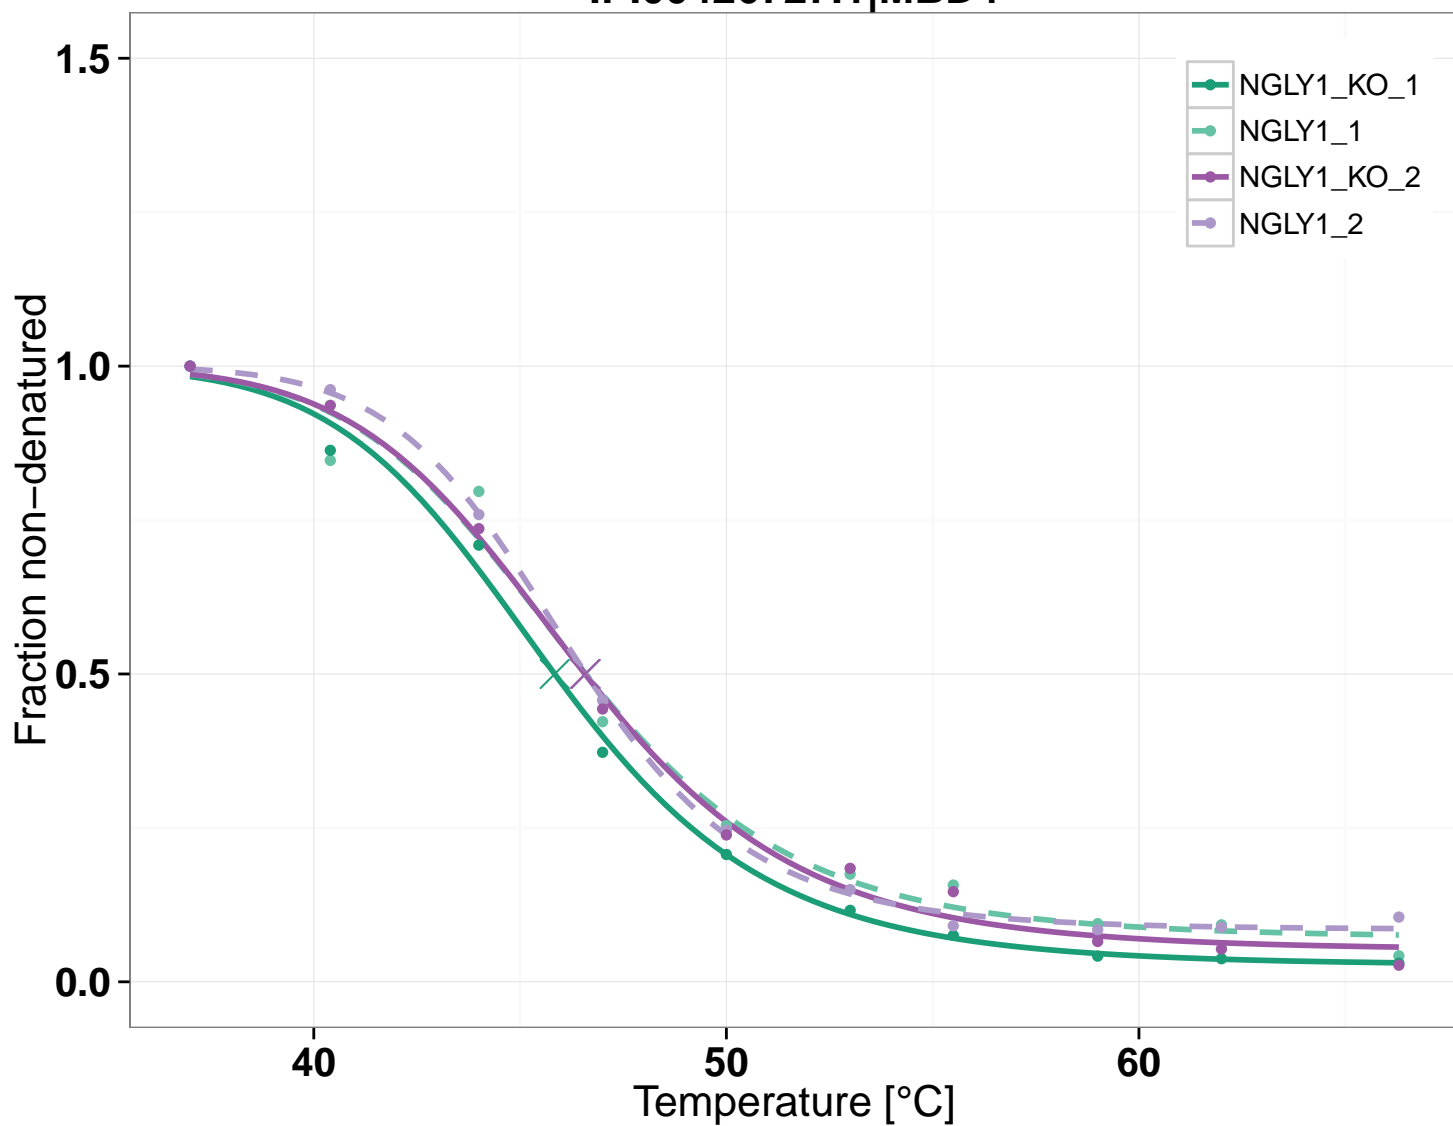

|            | meltPoint | slope  | plateau | R2   |
|------------|-----------|--------|---------|------|
| NGLY1_KO_1 | 45.84     | -0.093 | 0.03    | 1    |
| NGLY1_1    | 46.59     | -0.087 | 0.07    | 0.99 |
| NGLY1_KO_2 | 46.57     | -0.088 | 0.05    | 1    |
| NGLY1_2    | 46.6      | -0.1   | 0.08    | 1    |

Supplement: Supplementary file 1855 [file 1]

IPI00219833.2|TIMM17B

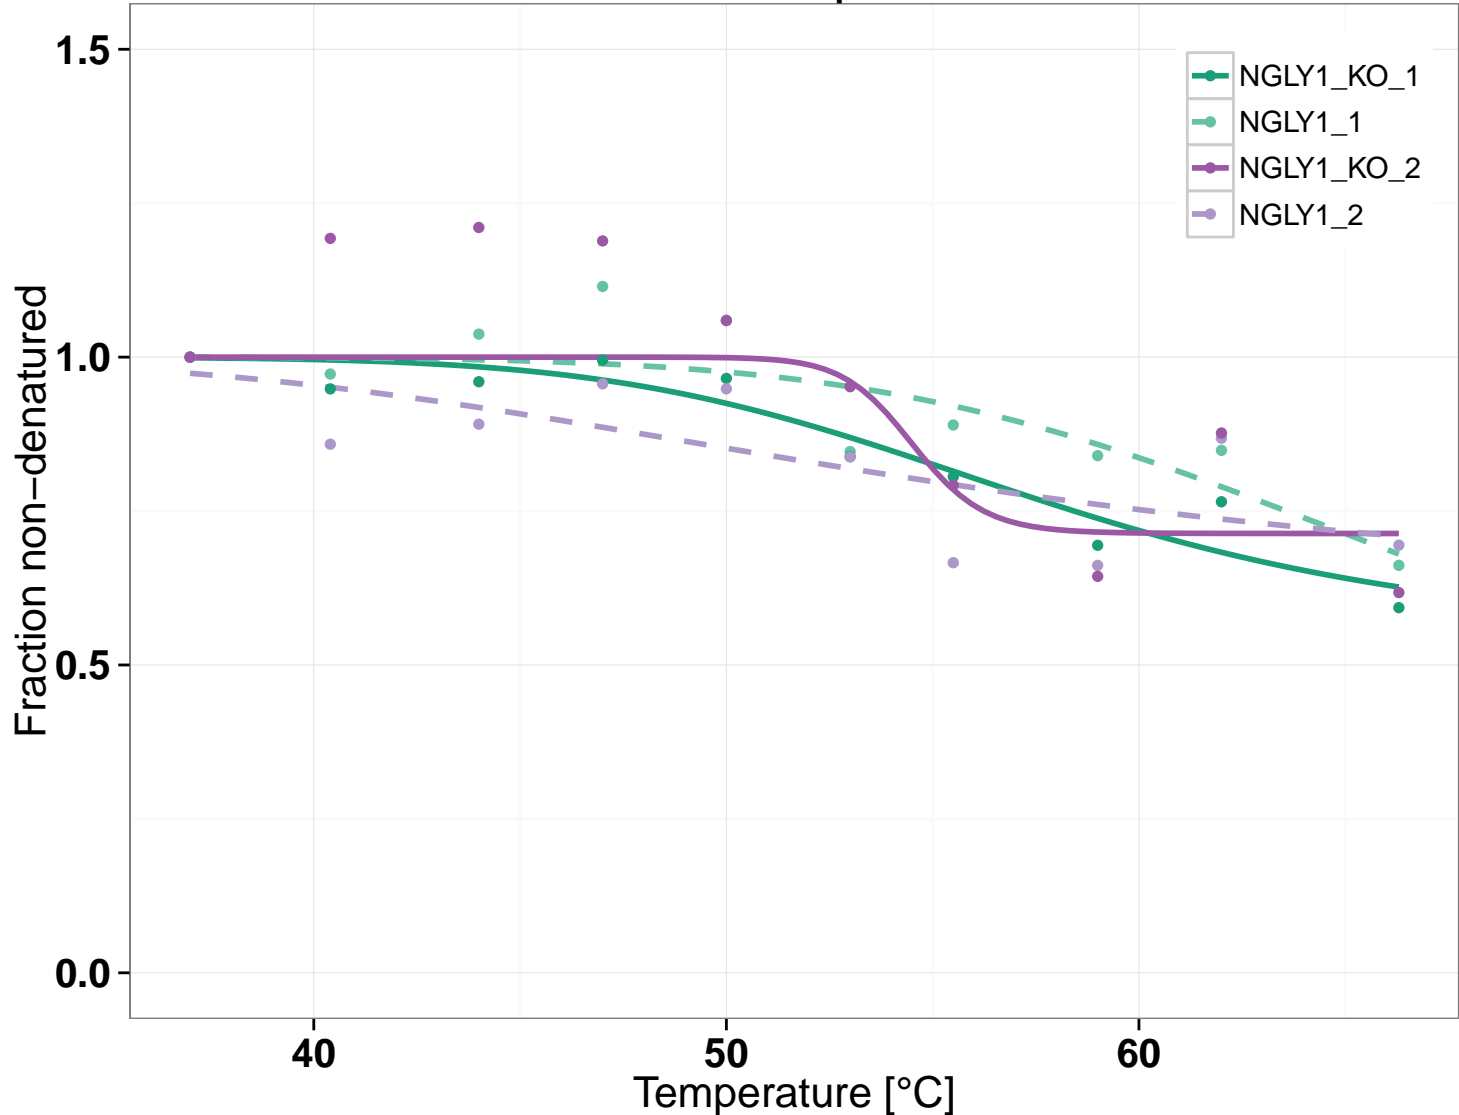

|            | meltPoint | slope  | plateau | R2   |
|------------|-----------|--------|---------|------|
| NGLY1_KO_1 | –         | –0.023 | 0.54    | 0.91 |
| NGLY1_1    | –         | –0.026 | 0.3     | 0.75 |
| NGLY1_KO_2 | –         | –0.083 | 0.71    | 0.63 |
| NGLY1_2    | –         | –0.011 | 0.59    | 0.51 |

Supplement: Supplementary file 1856 [file 1]

IPI00748502.2|CRTAP

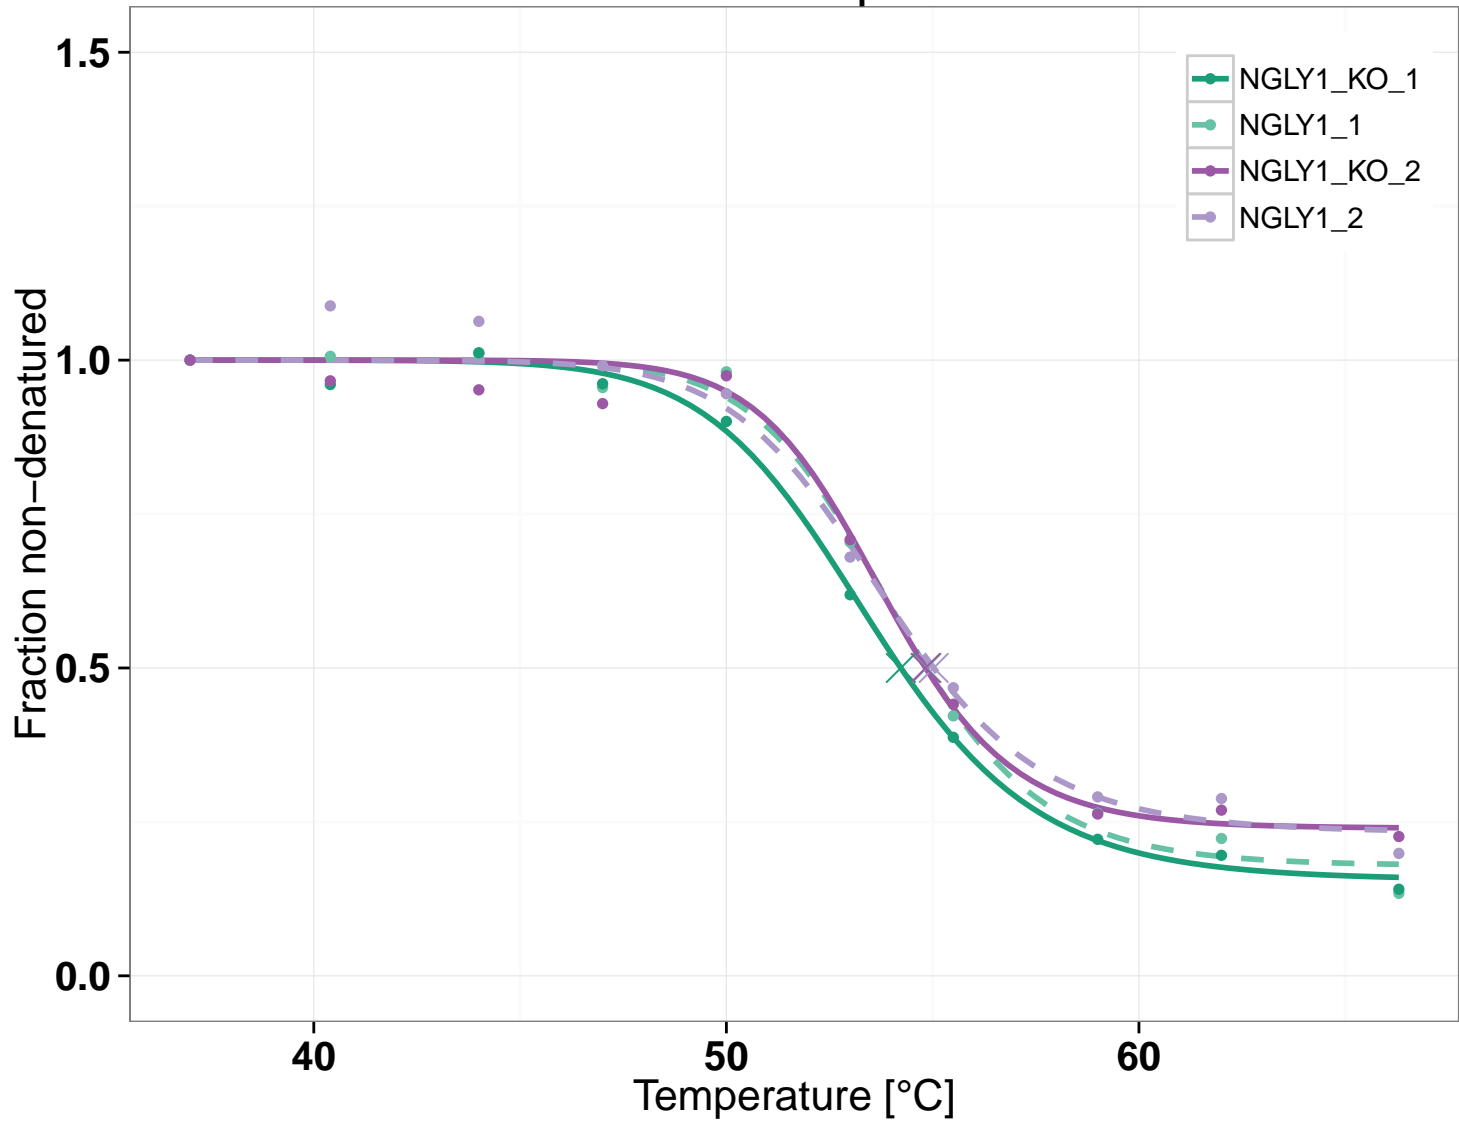

|            | meltPoint | slope | plateau | R2   |
|------------|-----------|-------|---------|------|
| NGLY1_KO_1 | 54.23     | -0.11 | 0.16    | 1    |
| NGLY1_1    | 54.85     | -0.12 | 0.18    | 0.99 |
| NGLY1_KO_2 | 54.83     | -0.12 | 0.24    | 0.99 |
| NGLY1_2    | 55.03     | -0.1  | 0.23    | 0.99 |

Supplement: Supplementary file 1857 [file 1]

# IPI00299010.4|SPG7

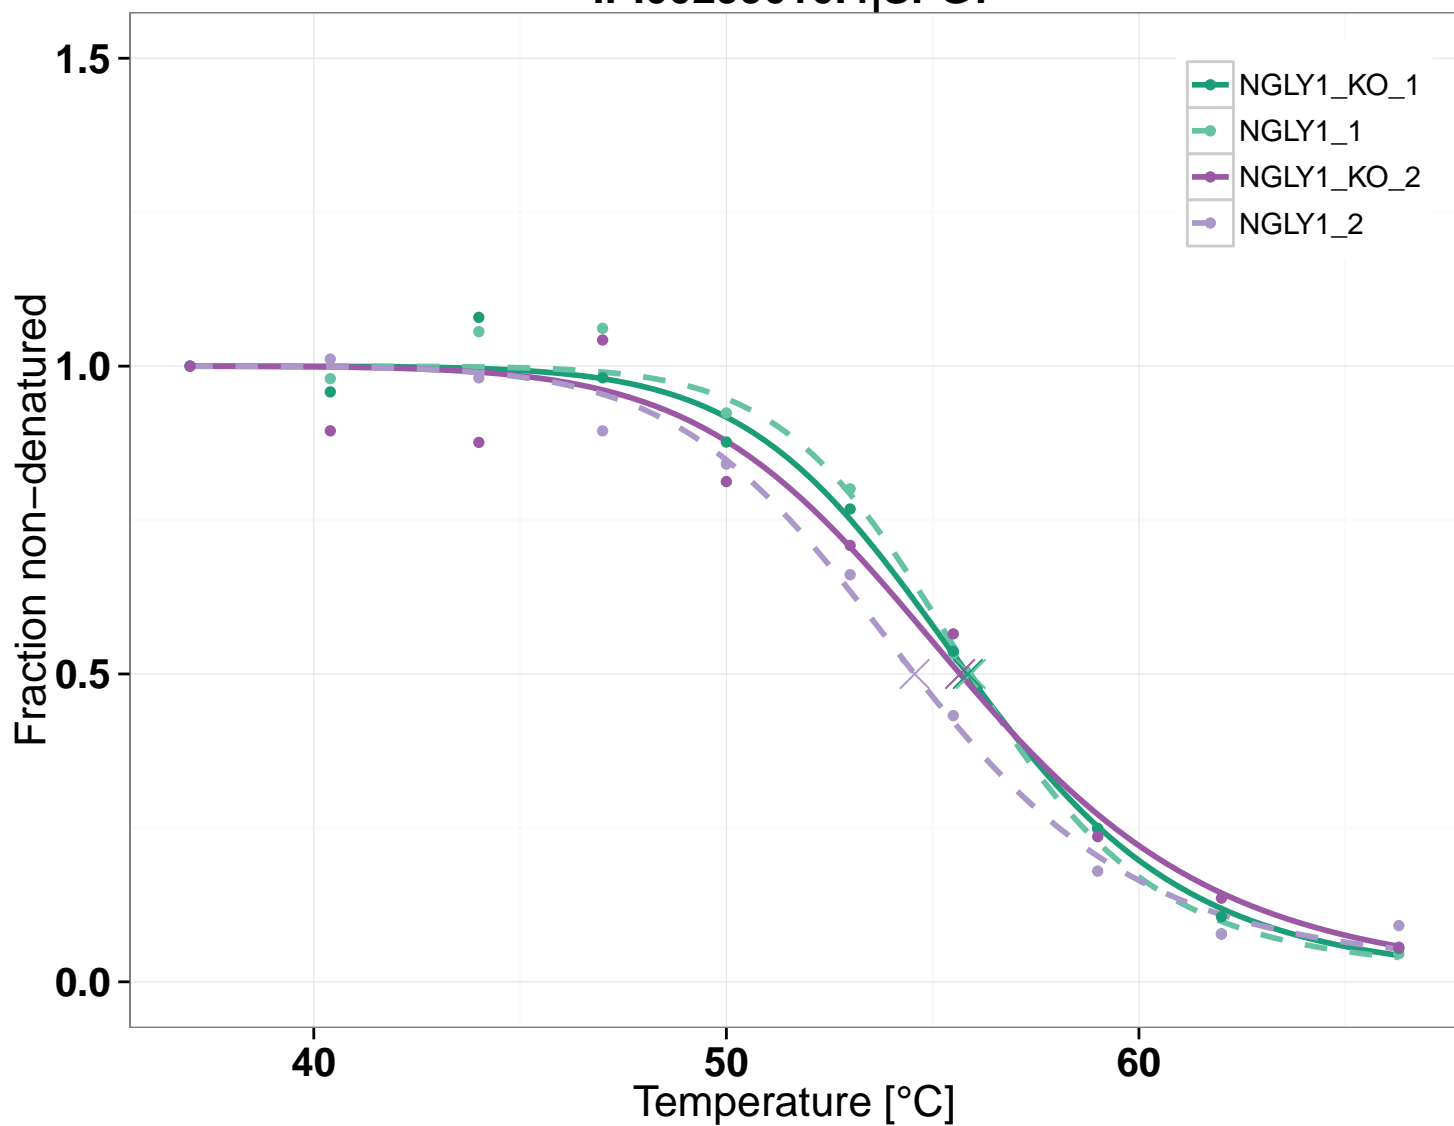

|            | meltPoint | slope  | plateau | R2   |
|------------|-----------|--------|---------|------|
| NGLY1_KO_1 | 55.85     | -0.093 | 0.01    | 0.99 |
| NGLY1_1    | 55.93     | -0.11  | 0.02    | 0.99 |
| NGLY1_KO_2 | 55.67     | -0.079 | 0       | 0.97 |
| NGLY1_2    | 54.56     | -0.087 | 0.02    | 0.99 |

Supplement: Supplementary file 1858 [file 1]

# IPI00879359.1|YWHAZ

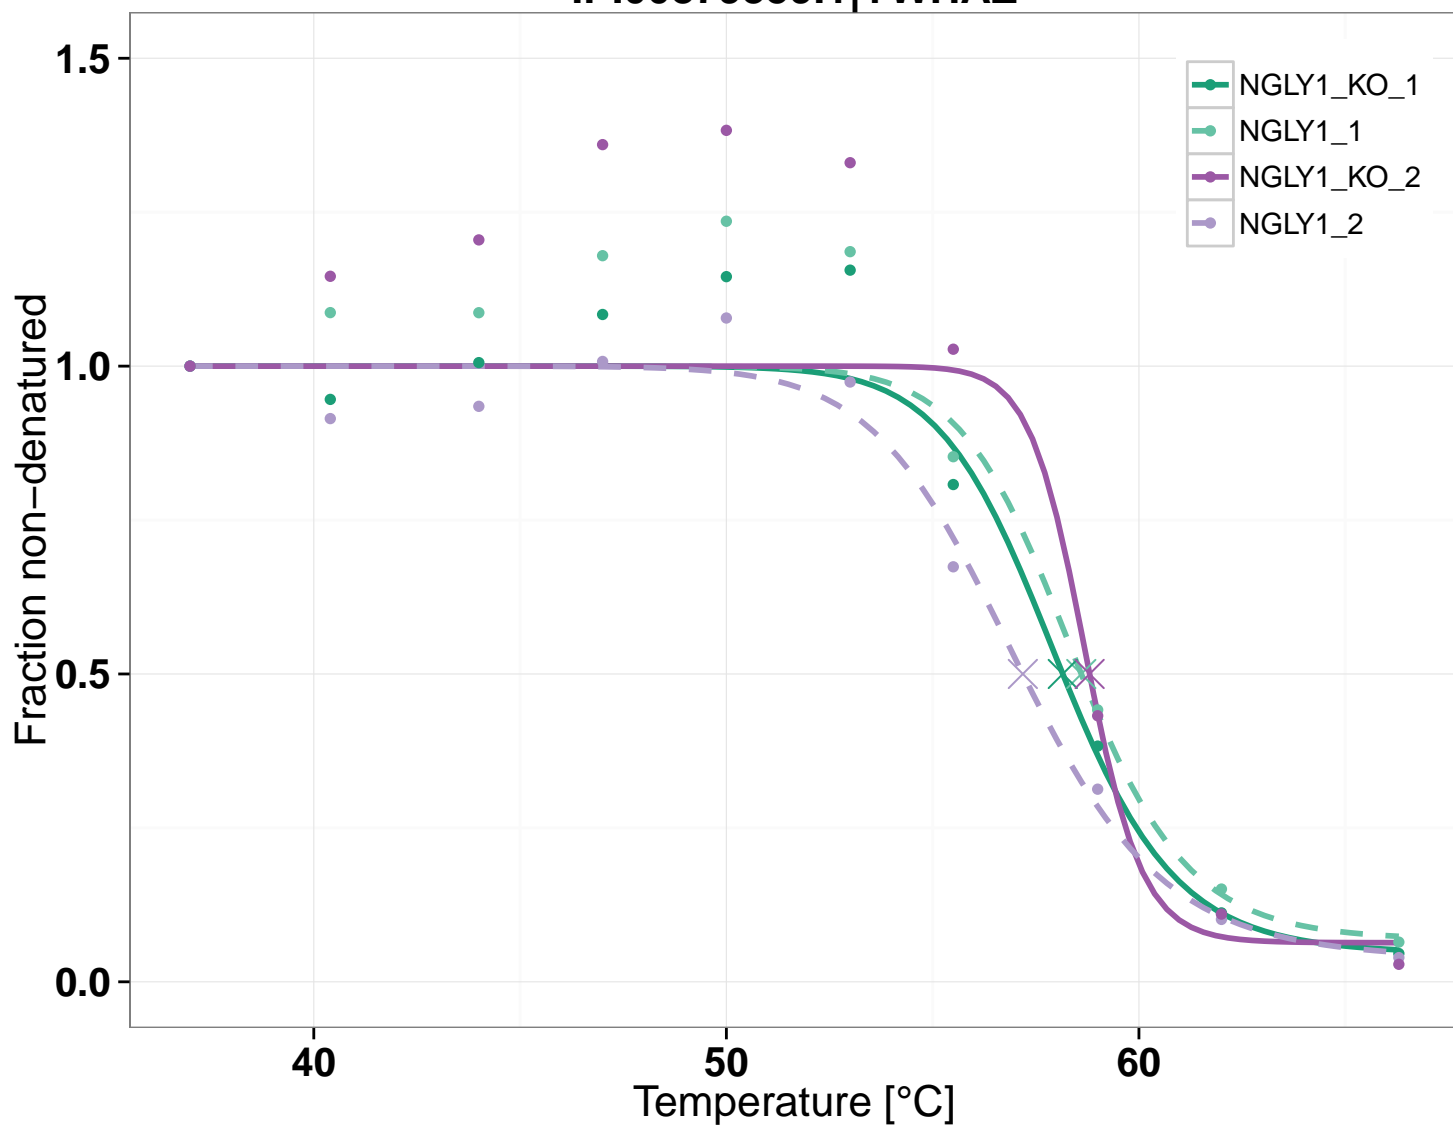

|            | meltPoint | slope | plateau | R2   |
|------------|-----------|-------|---------|------|
| NGLY1_KO_1 | 58.15     | -0.17 | 0.05    | 0.96 |
| NGLY1_1    | 58.6      | -0.17 | 0.07    | 0.92 |
| NGLY1_KO_2 | 58.8      | -0.34 | 0.06    | 0.81 |
| NGLY1_2    | 57.19     | -0.14 | 0.04    | 0.98 |

Supplement: Supplementary file 1859 [file 1]

IPI00292690.1|PIK3CG

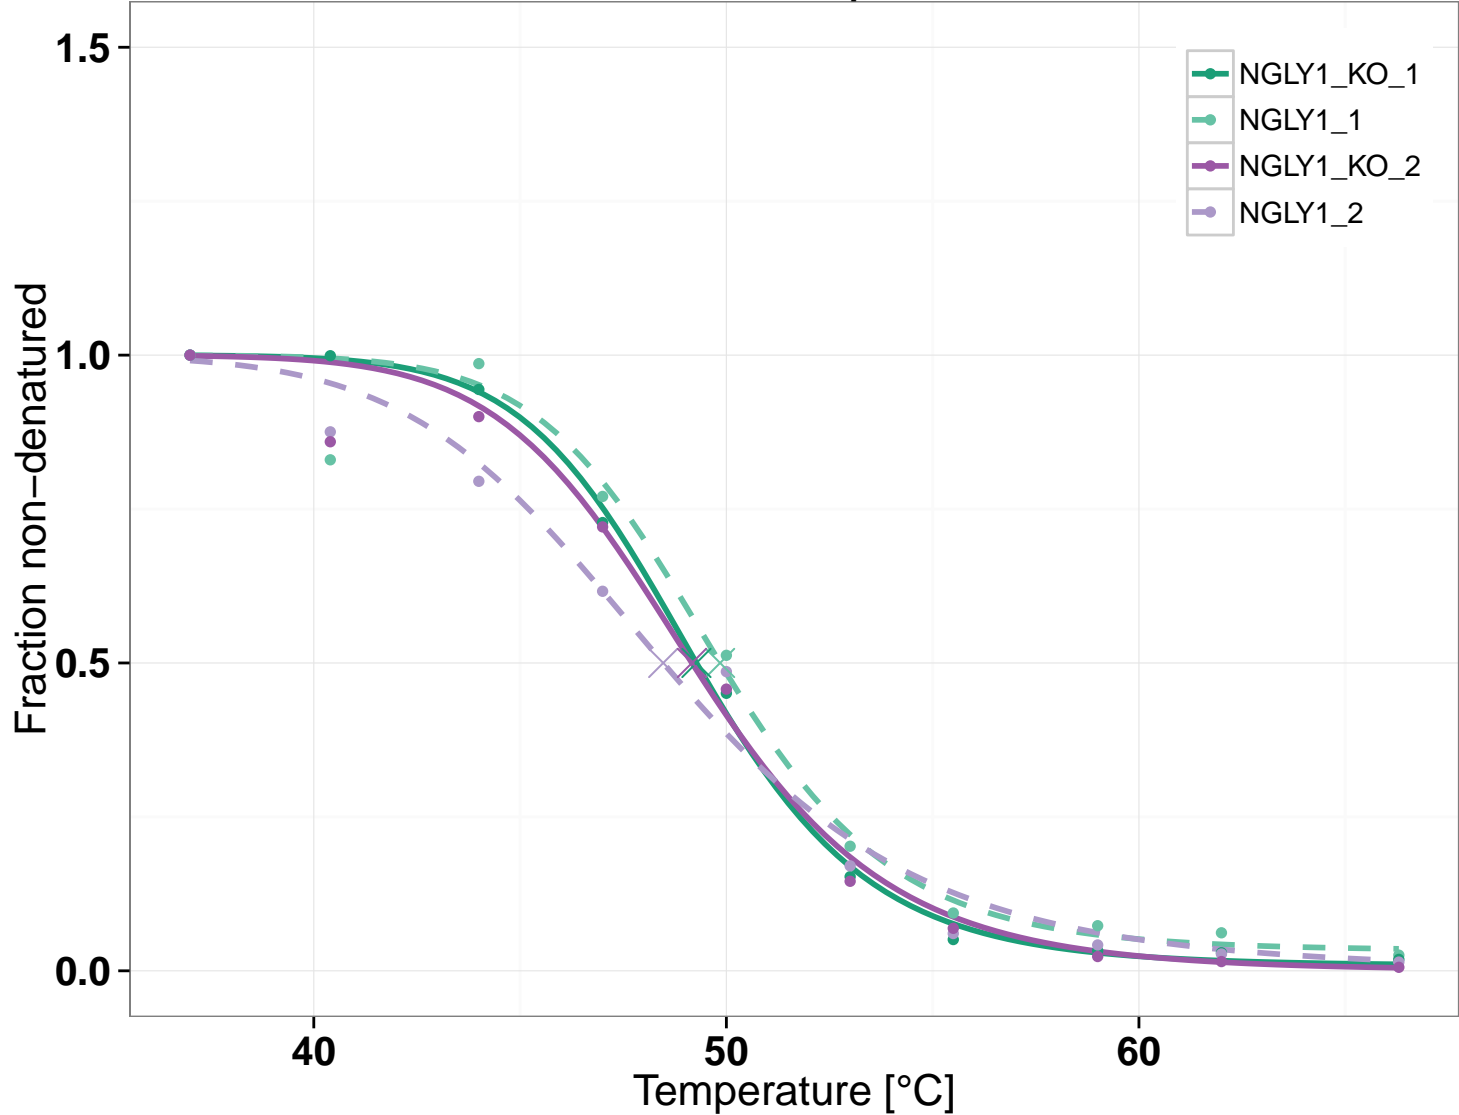

|            | meltPoint | slope | plateau | R2   |
|------------|-----------|-------|---------|------|
| NGLY1_KO_1 | 49.27     | -0.12 | 0.01    | 1    |
| NGLY1_1    | 49.85     | -0.11 | 0.03    | 0.98 |
| NGLY1_KO_2 | 49.17     | -0.11 | 0       | 0.99 |
| NGLY1_2    | 48.47     | -0.08 | 0       | 0.98 |

Supplement: Supplementary file 1860 [file 1]

IPI00296736.6|TBC1D25

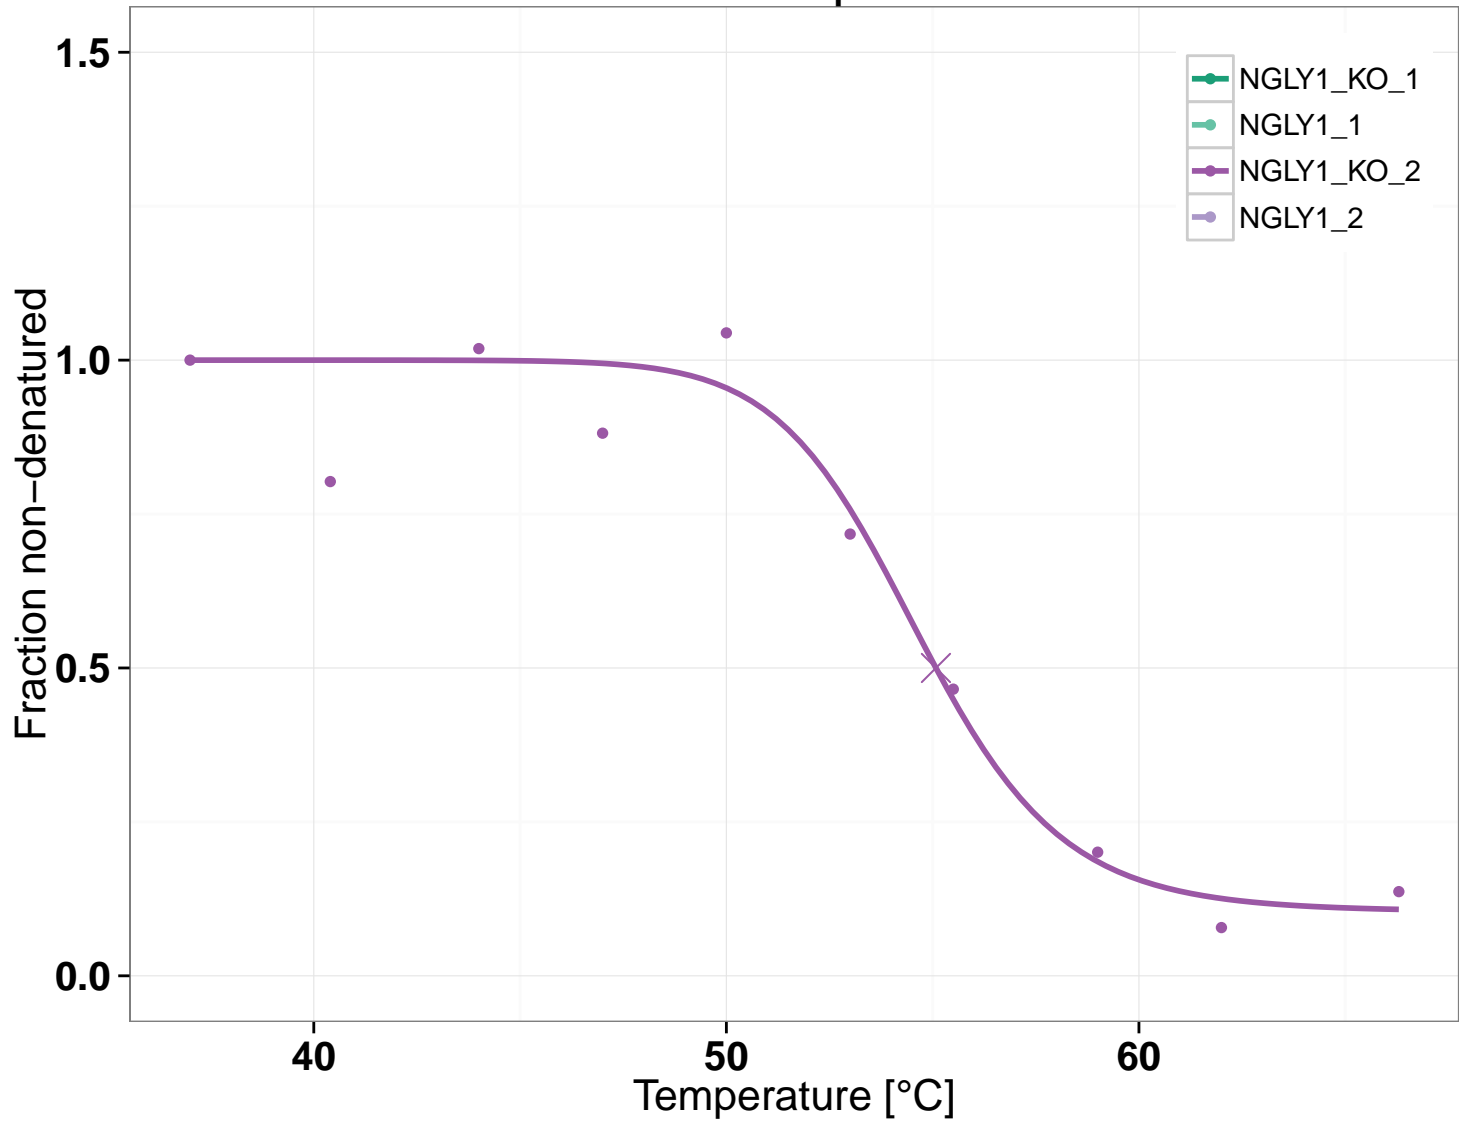

|            | meltPoint | slope | plateau | R2   |
|------------|-----------|-------|---------|------|
| NGLY1_KO_1 | -         | -     | -       | -    |
| NGLY1_1    | -         | -     | -       | -    |
| NGLY1_KO_2 | 55.08     | -0.13 | 0.1     | 0.95 |
| NGLY1_2    | -         | -     | -       | -    |

Supplement: Supplementary file 1861 [file 1]

IPI00216811.1|TBC1D10C

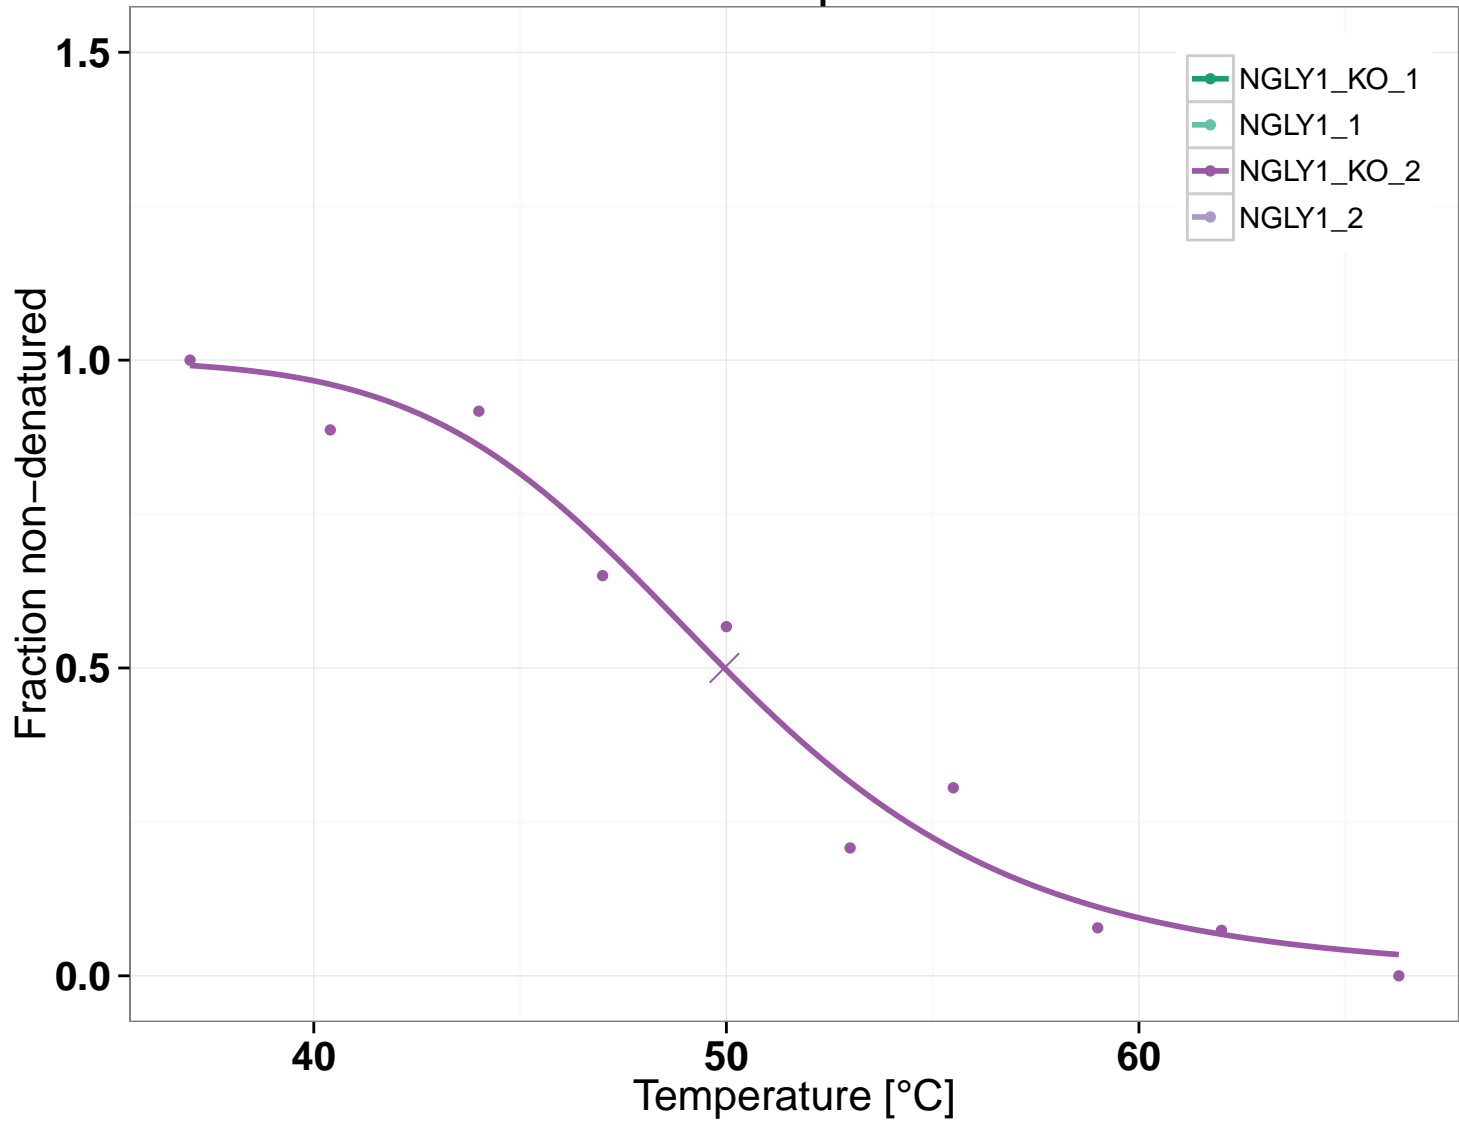

|            | meltPoint | slope  | plateau | R2   |
|------------|-----------|--------|---------|------|
| NGLY1_KO_1 | —         | —      | —       | —    |
| NGLY1_1    | —         | —      | —       | —    |
| NGLY1_KO_2 | 49.95     | -0.069 | 0       | 0.97 |
| NGLY1_2    | —         | —      | —       | —    |

Supplement: Supplementary file 1862 [file 1]

IPI00010204.1|SFRS3

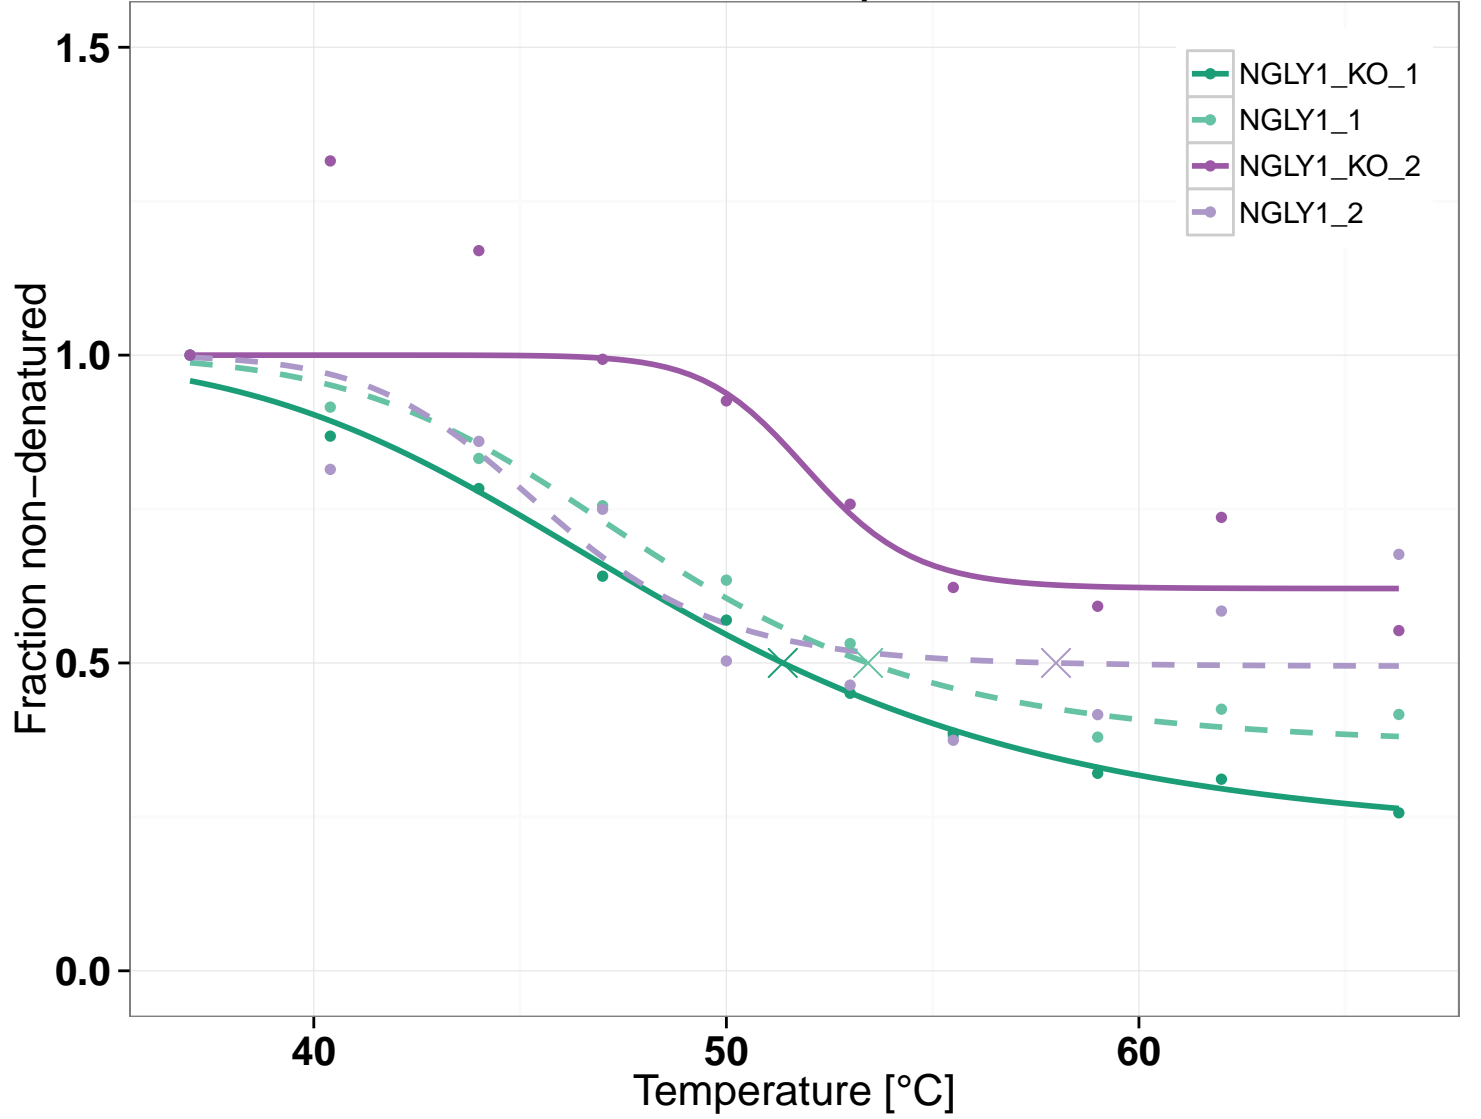

|            | meltPoint | slope  | plateau | R2   |
|------------|-----------|--------|---------|------|
| NGLY1_KO_1 | 51.37     | -0.04  | 0.2     | 0.99 |
| NGLY1_1    | 53.43     | -0.044 | 0.36    | 0.97 |
| NGLY1_KO_2 | -         | -0.074 | 0.62    | 0.75 |
| NGLY1_2    | 57.99     | -0.059 | 0.49    | 0.74 |

Supplement: Supplementary file 1863 [file 1]

# IPI00008895.1|EMP2

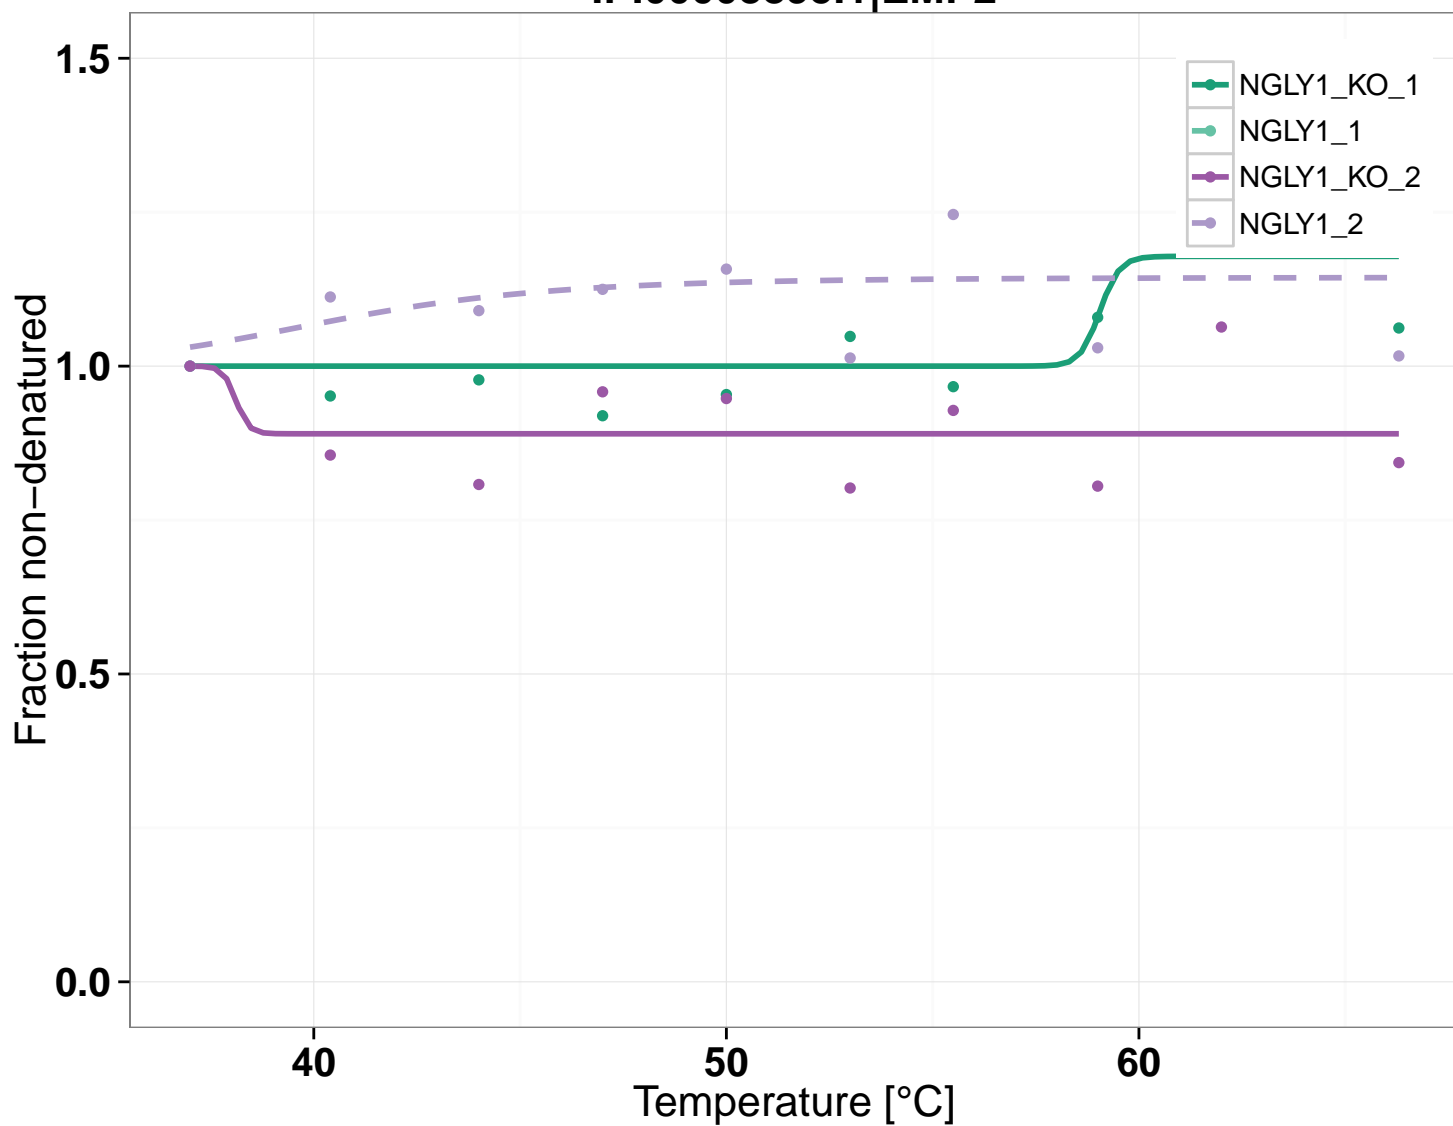

|            | meltPoint | slope | plateau | R2   |
|------------|-----------|-------|---------|------|
| NGLY1_KO_1 | —         | 0.19  | 1.18    | 0.6  |
| NGLY1_1    | —         | —     | —       | —    |
| NGLY1_KO_2 | —         | -0.18 | 0.89    | 0.14 |
| NGLY1_2    | —         | 0.013 | 1.14    | 0.12 |

Supplement: Supplementary file 1864 [file 1]

IPI00410108.3|TUSC4

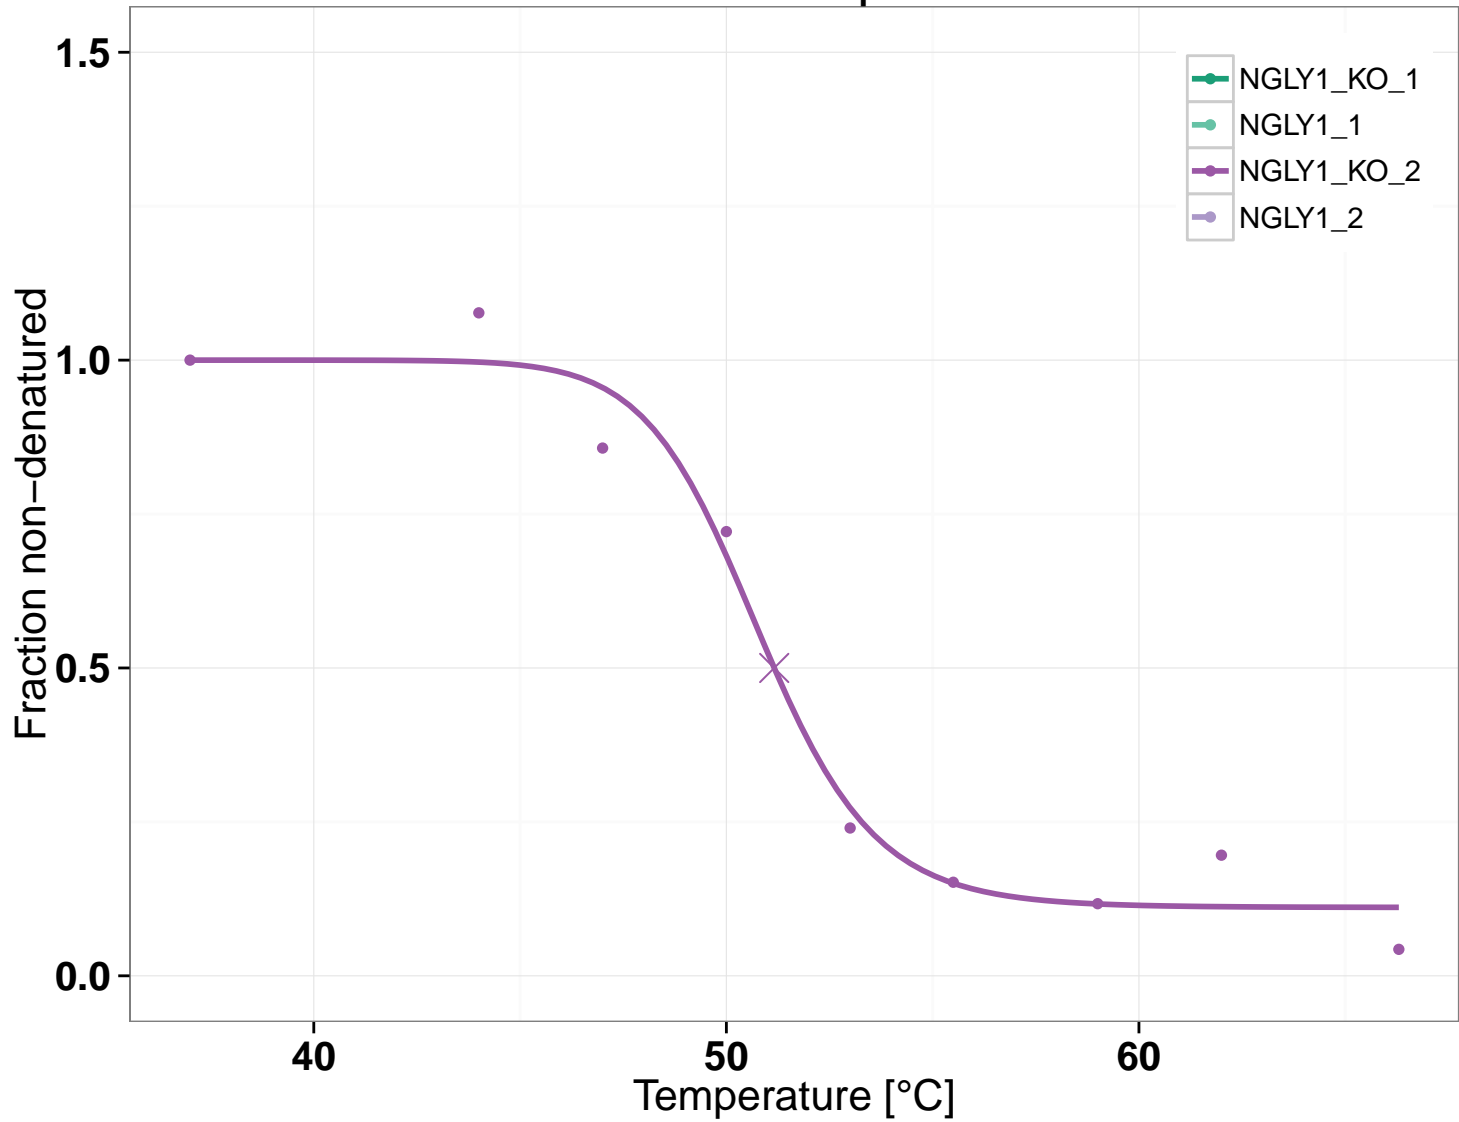

|            | meltPoint | slope | plateau | R2   |
|------------|-----------|-------|---------|------|
| NGLY1_KO_1 | -         | -     | -       | -    |
| NGLY1_1    | -         | -     | -       | -    |
| NGLY1_KO_2 | 51.16     | -0.16 | 0.11    | 0.86 |
| NGLY1_2    | -         | -     | -       | -    |

Supplement: Supplementary file 1865 [file 1]

IPI00018576.4|TMEM134

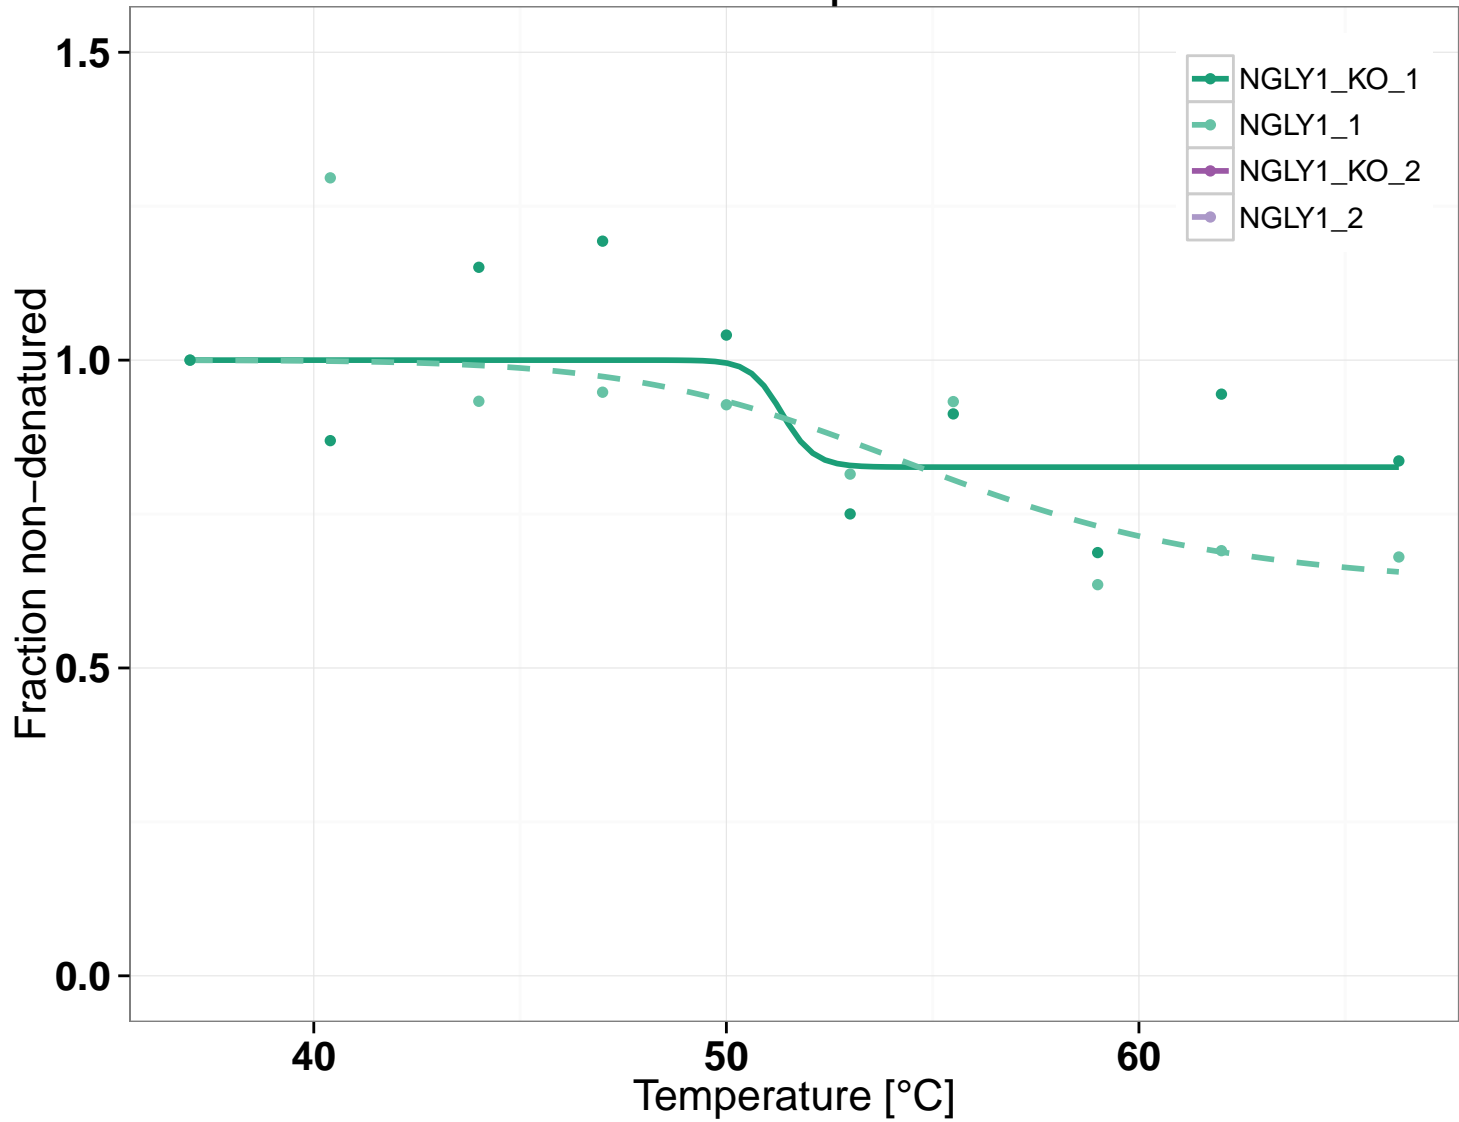

|            | meltPoint | slope  | plateau | R2   |
|------------|-----------|--------|---------|------|
| NGLY1_KO_1 | —         | −0.11  | 0.83    | 0.47 |
| NGLY1_1    | —         | −0.025 | 0.63    | 0.64 |
| NGLY1_KO_2 | —         | —      | —       | —    |
| NGLY1_2    | —         | —      | —       | —    |

Supplement: Supplementary file 1866 [file 1]

IPI00847648.2|TAF4B

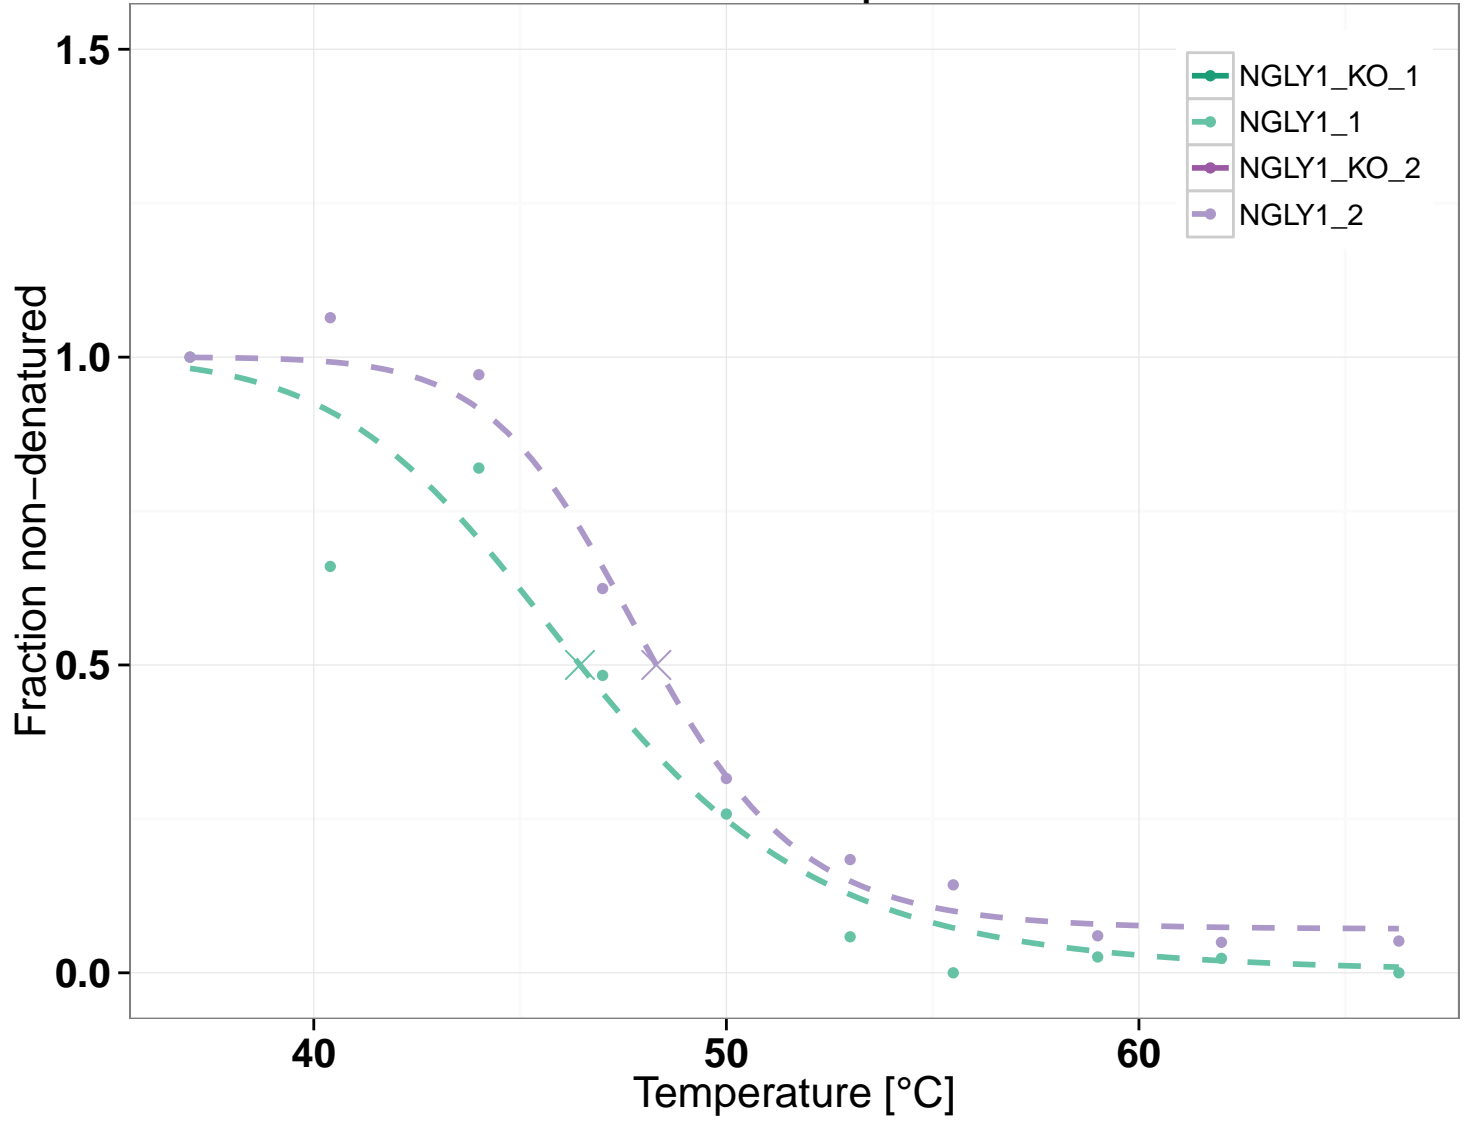

|            | meltPoint | slope  | plateau | R2   |
|------------|-----------|--------|---------|------|
| NGLY1_KO_1 | -         | -      | -       | -    |
| NGLY1_1    | 46.45     | -0.085 | 0       | 0.93 |
| NGLY1_KO_2 | -         | -      | -       | -    |
| NGLY1_2    | 48.3      | -0.12  | 0.07    | 0.99 |

Supplement: Supplementary file 1867 [file 1]

# IPI00478596.2|NLE1

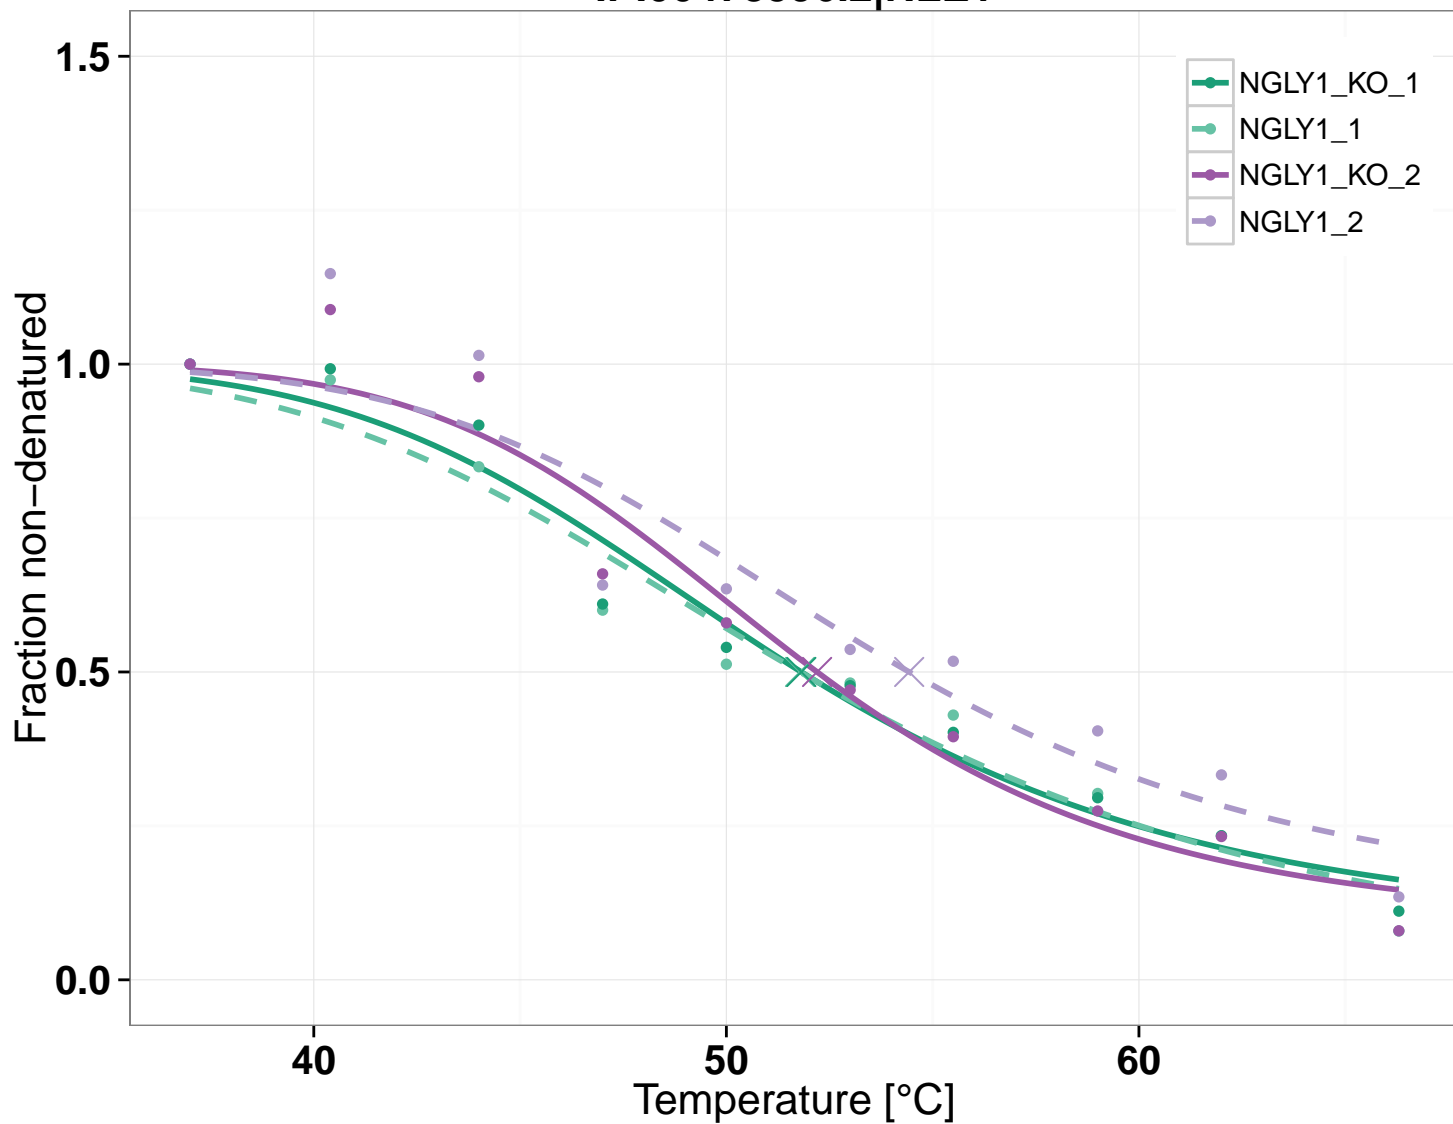

|            | meltPoint | slope  | plateau | R2   |
|------------|-----------|--------|---------|------|
| NGLY1_KO_1 | 51.82     | -0.045 | 0.07    | 0.97 |
| NGLY1_1    | 51.79     | -0.041 | 0       | 0.97 |
| NGLY1_KO_2 | 52.2      | -0.053 | 0.08    | 0.96 |
| NGLY1_2    | 54.43     | -0.043 | 0.1     | 0.9  |

Supplement: Supplementary file 1868 [file 1]

# IPI00031527.1|MIS12

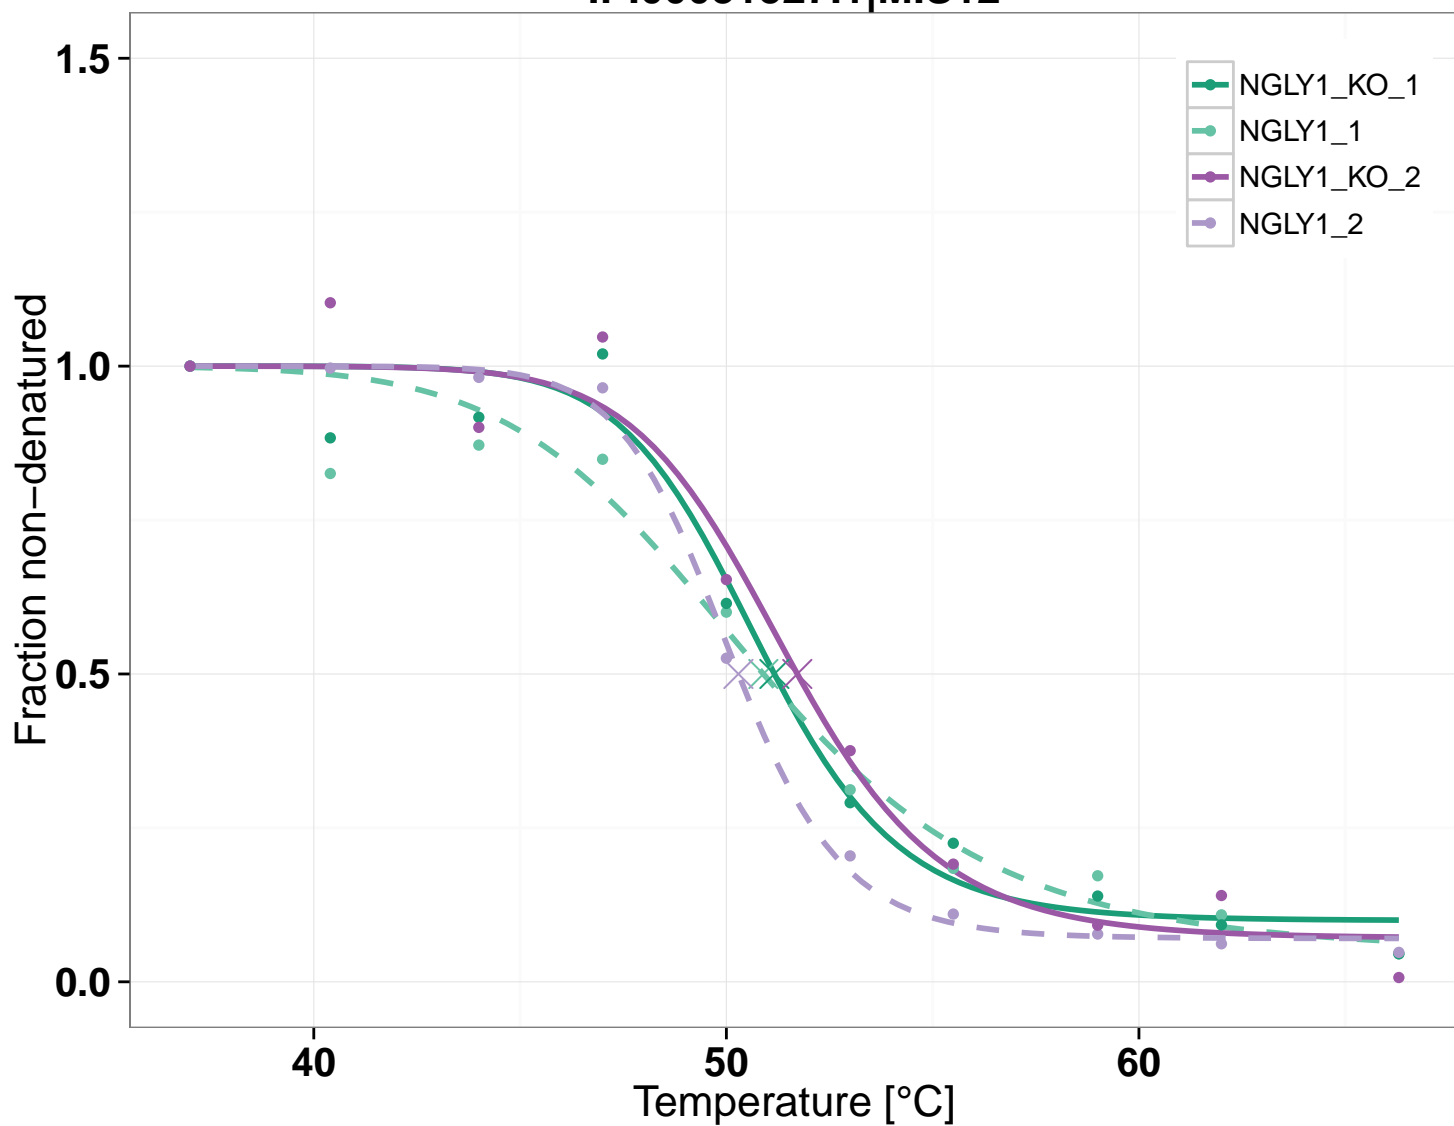

|            | meltPoint | slope | plateau | R2   |
|------------|-----------|-------|---------|------|
| NGLY1_KO_1 | 51.16     | -0.13 | 0.1     | 0.97 |
| NGLY1_1    | 50.9      | -0.08 | 0.05    | 0.97 |
| NGLY1_KO_2 | 51.72     | -0.12 | 0.07    | 0.97 |
| NGLY1_2    | 50.29     | -0.17 | 0.07    | 1    |

Supplement: Supplementary file 1869 [file 1]

IPI00746256.2|KATNB1

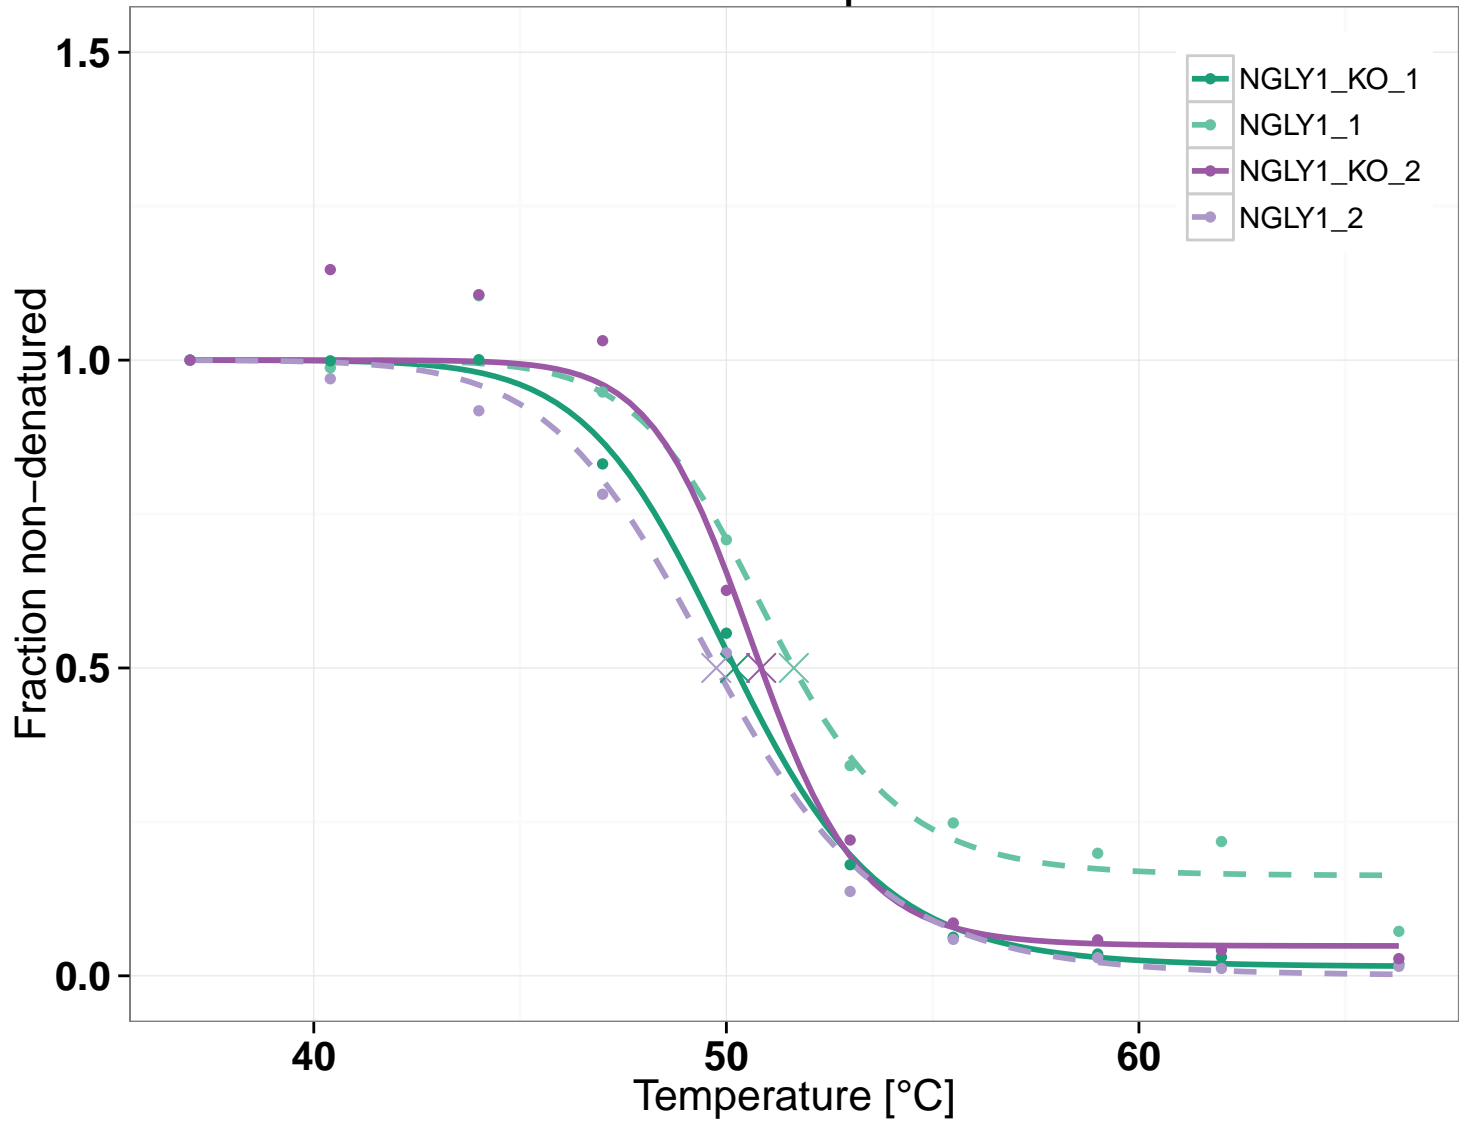

|            | meltPoint | slope | plateau | R2   |
|------------|-----------|-------|---------|------|
| NGLY1_KO_1 | 50.21     | -0.14 | 0.01    | 1    |
| NGLY1_1    | 51.63     | -0.13 | 0.16    | 0.98 |
| NGLY1_KO_2 | 50.84     | -0.19 | 0.05    | 0.98 |
| NGLY1_2    | 49.76     | -0.12 | 0       | 0.99 |

Supplement: Supplementary file 1870 [file 1]

IPI00941238.1|HIF1AN

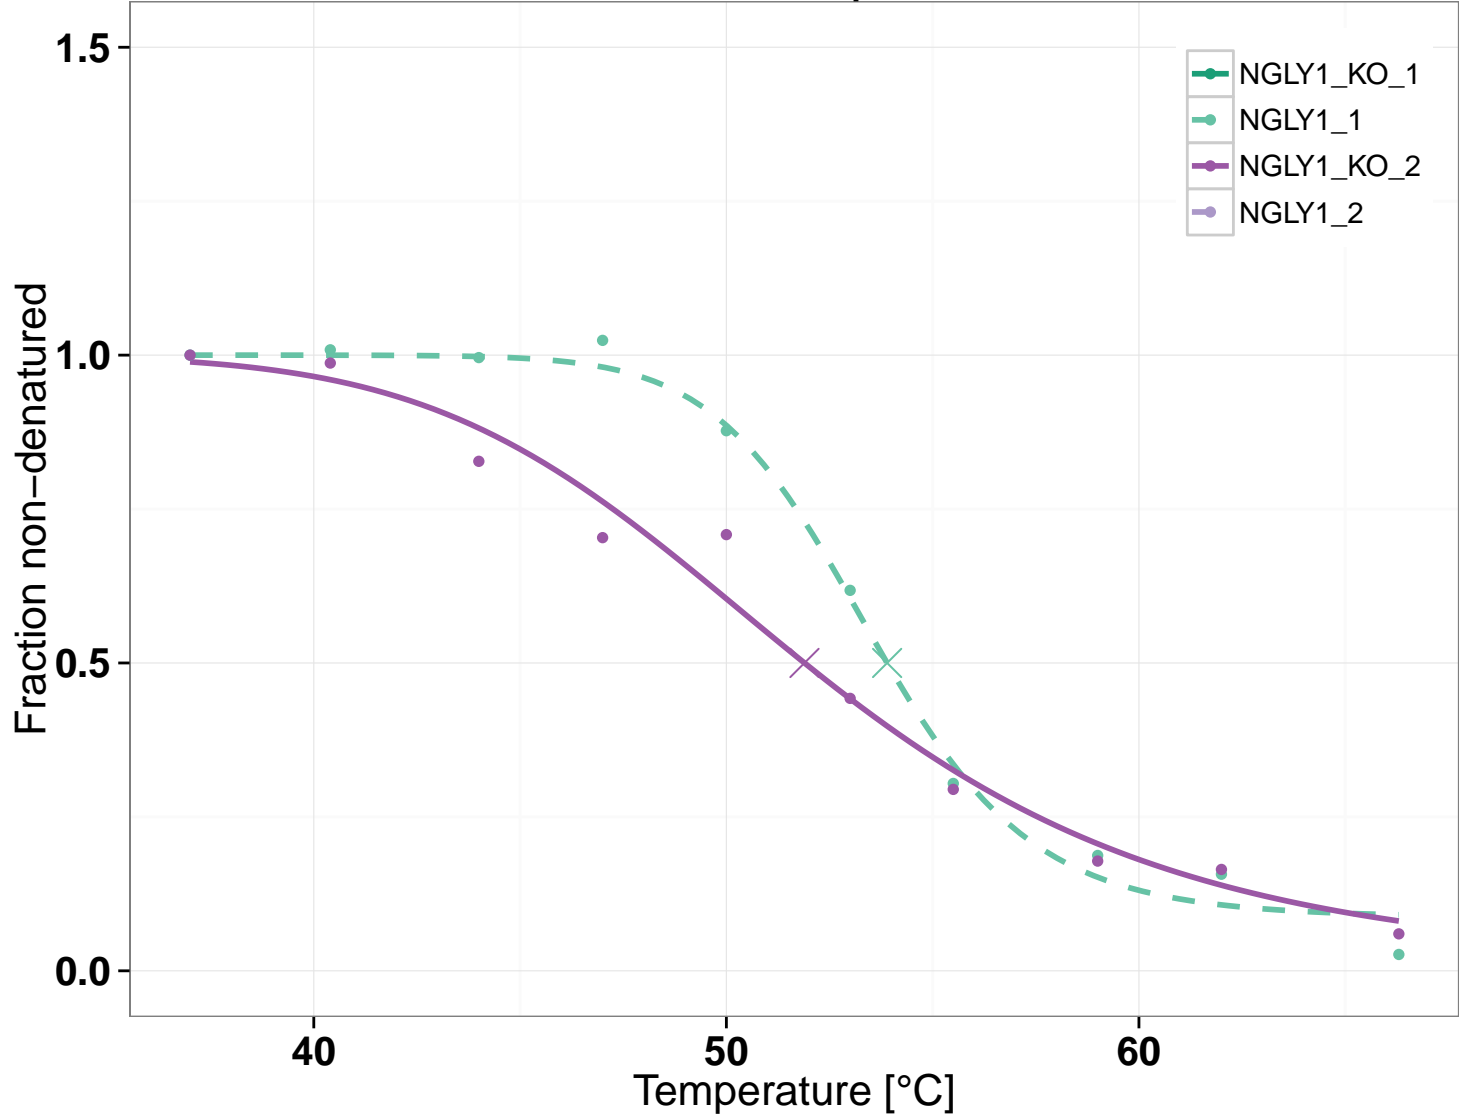

|            | meltPoint | slope  | plateau | R2   |
|------------|-----------|--------|---------|------|
| NGLY1_KO_1 | -         | -      | -       | -    |
| NGLY1_1    | 53.9      | -0.12  | 0.09    | 0.99 |
| NGLY1_KO_2 | 51.89     | -0.056 | 0       | 0.98 |
| NGLY1_2    | -         | -      | -       | -    |

Supplement: Supplementary file 1871 [file 1]

# IPI00007641.2|IRAK4

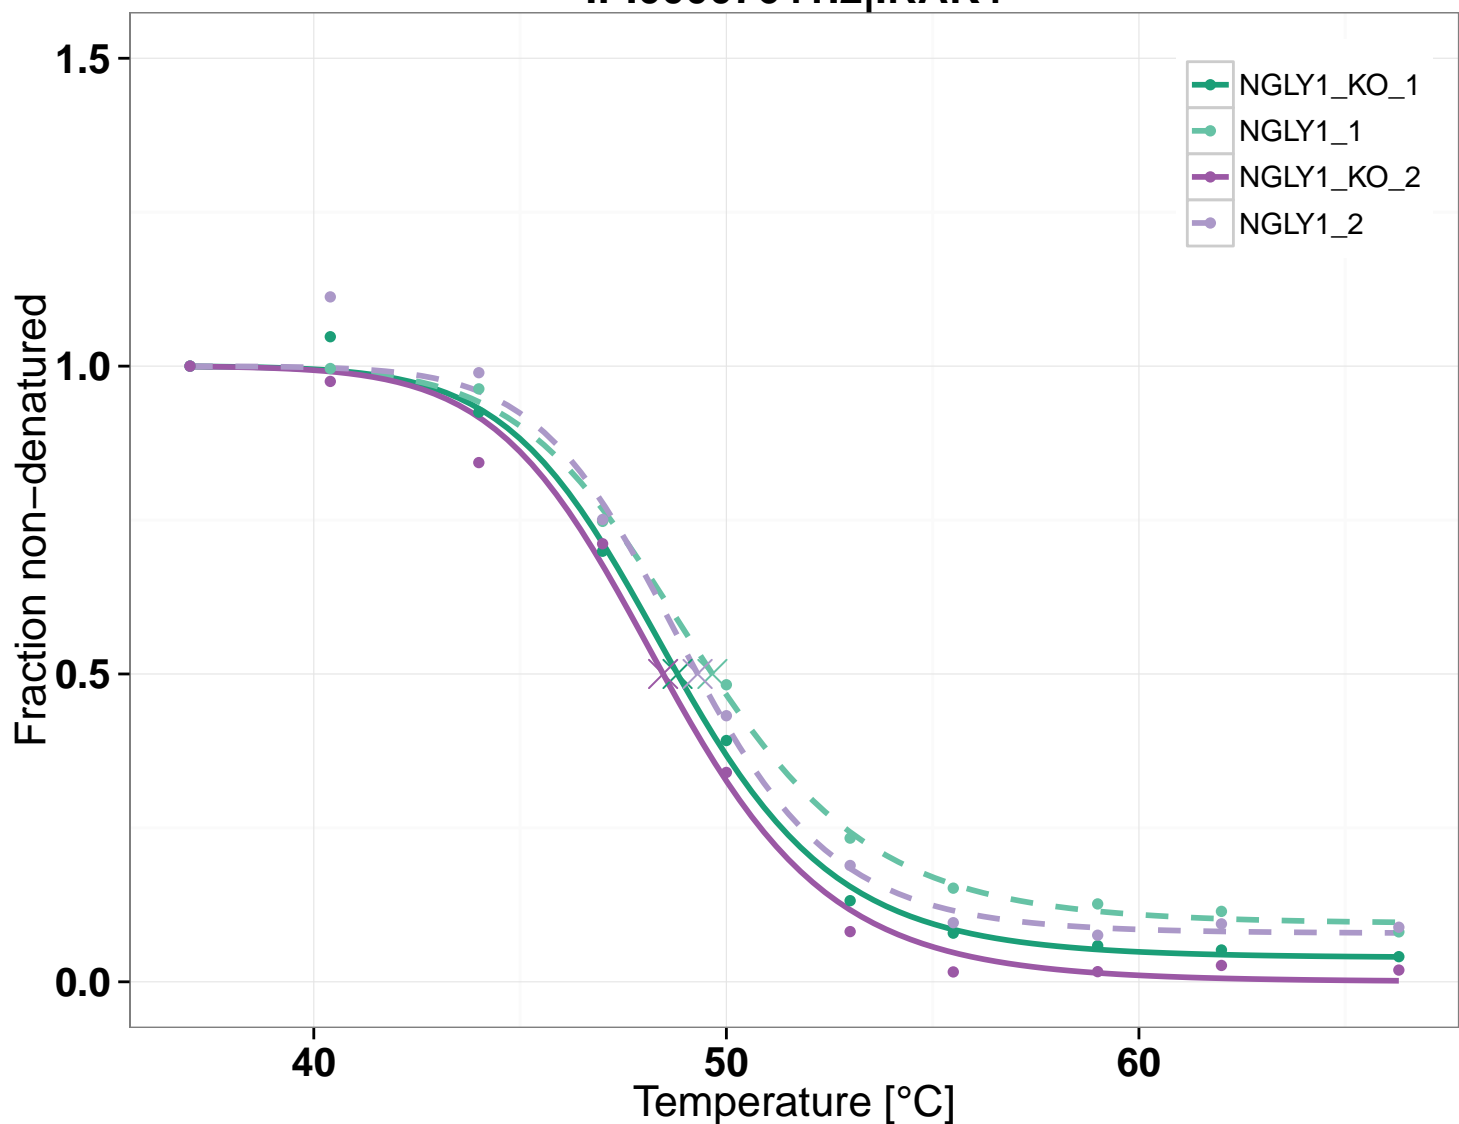

|            | meltPoint | slope | plateau | R2   |
|------------|-----------|-------|---------|------|
| NGLY1_KO_1 | 48.82     | -0.12 | 0.04    | 1    |
| NGLY1_1    | 49.66     | -0.11 | 0.09    | 1    |
| NGLY1_KO_2 | 48.47     | -0.12 | 0       | 0.99 |
| NGLY1_2    | 49.3      | -0.13 | 0.08    | 0.99 |

Supplement: Supplementary file 1872 [file 1]

# IPI00913873.1|ECD

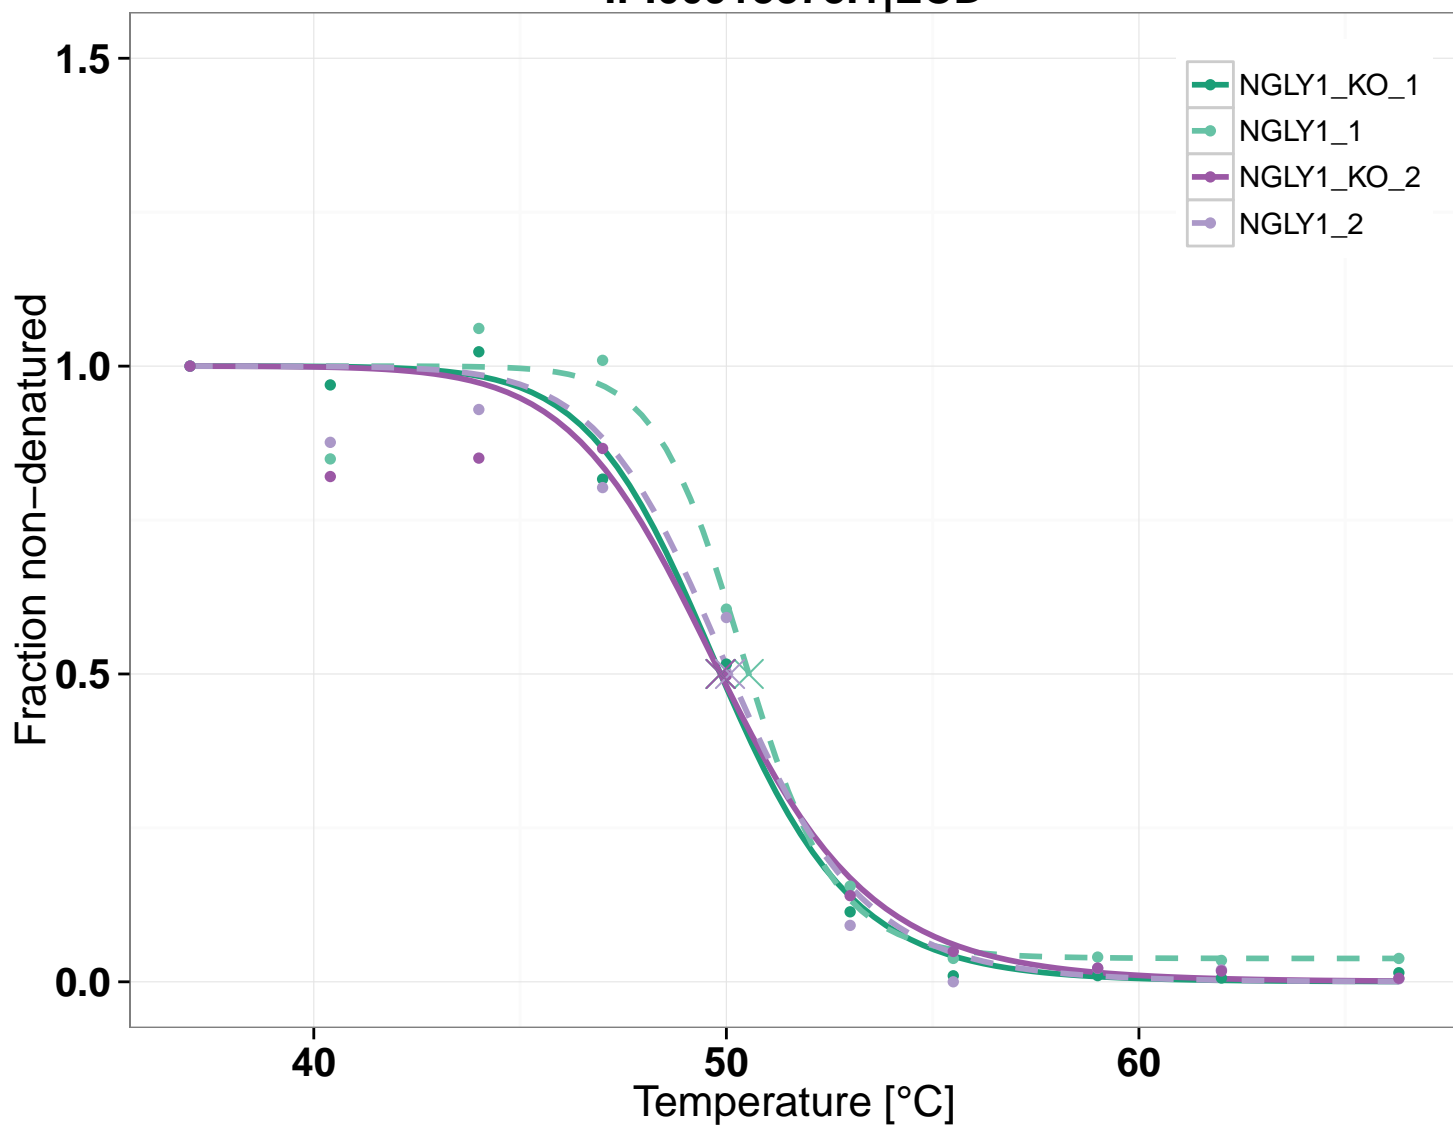

|            | meltPoint | slope | plateau | R2   |
|------------|-----------|-------|---------|------|
| NGLY1_KO_1 | 49.86     | -0.16 | 0       | 1    |
| NGLY1_1    | 50.54     | -0.22 | 0.04    | 0.98 |
| NGLY1_KO_2 | 49.86     | -0.14 | 0       | 0.97 |
| NGLY1_2    | 50.09     | -0.15 | 0       | 0.98 |

Supplement: Supplementary file 1873 [file 1]

# IPI00411937.4|NOL5A

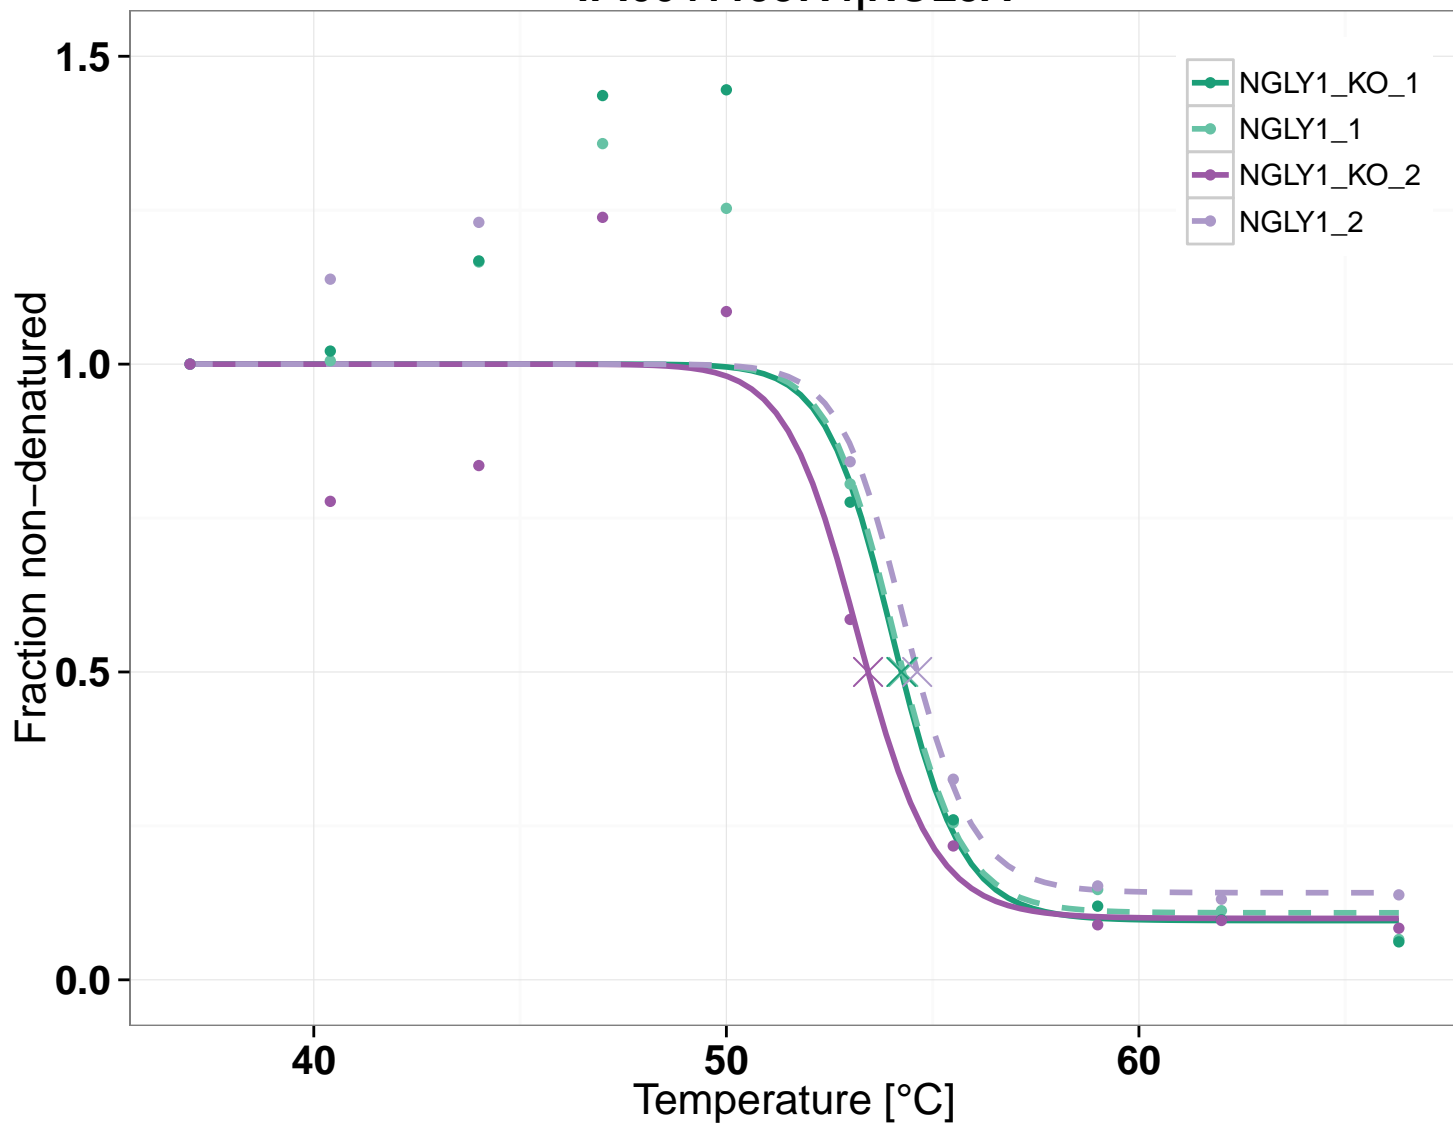

|            | meltPoint | slope | plateau | R2   |
|------------|-----------|-------|---------|------|
| NGLY1_KO_1 | 54.24     | -0.27 | 0.1     | 0.85 |
| NGLY1_1    | 54.29     | -0.28 | 0.11    | 0.91 |
| NGLY1_KO_2 | 53.43     | -0.25 | 0.1     | 0.92 |
| NGLY1_2    | 54.63     | -0.27 | 0.14    | 0.76 |

Supplement: Supplementary file 1874 [file 1]

IPI00006682.1|PPP1R3D

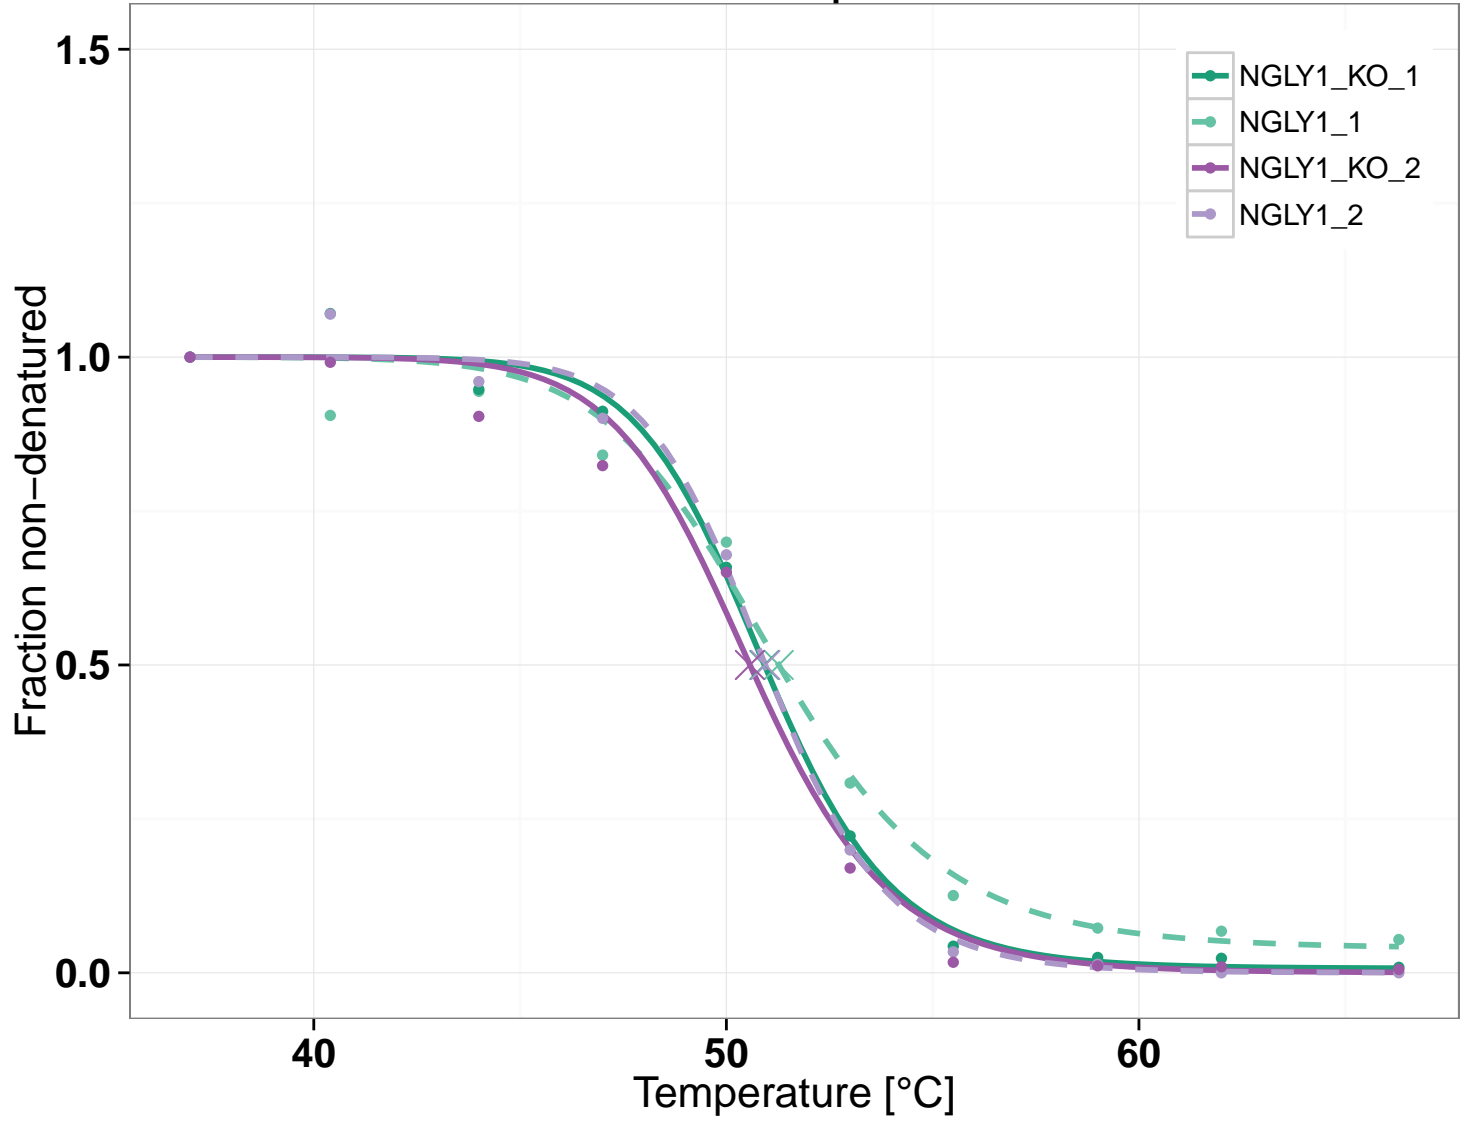

|            | meltPoint | slope | plateau | R2   |
|------------|-----------|-------|---------|------|
| NGLY1_KO_1 | 50.92     | -0.16 | 0.01    | 1    |
| NGLY1_1    | 51.27     | -0.12 | 0.04    | 0.99 |
| NGLY1_KO_2 | 50.57     | -0.15 | 0       | 0.99 |
| NGLY1_2    | 50.94     | -0.17 | 0       | 1    |

Supplement: Supplementary file 1875 [file 1]

IPI00790098.2|C3ORF63

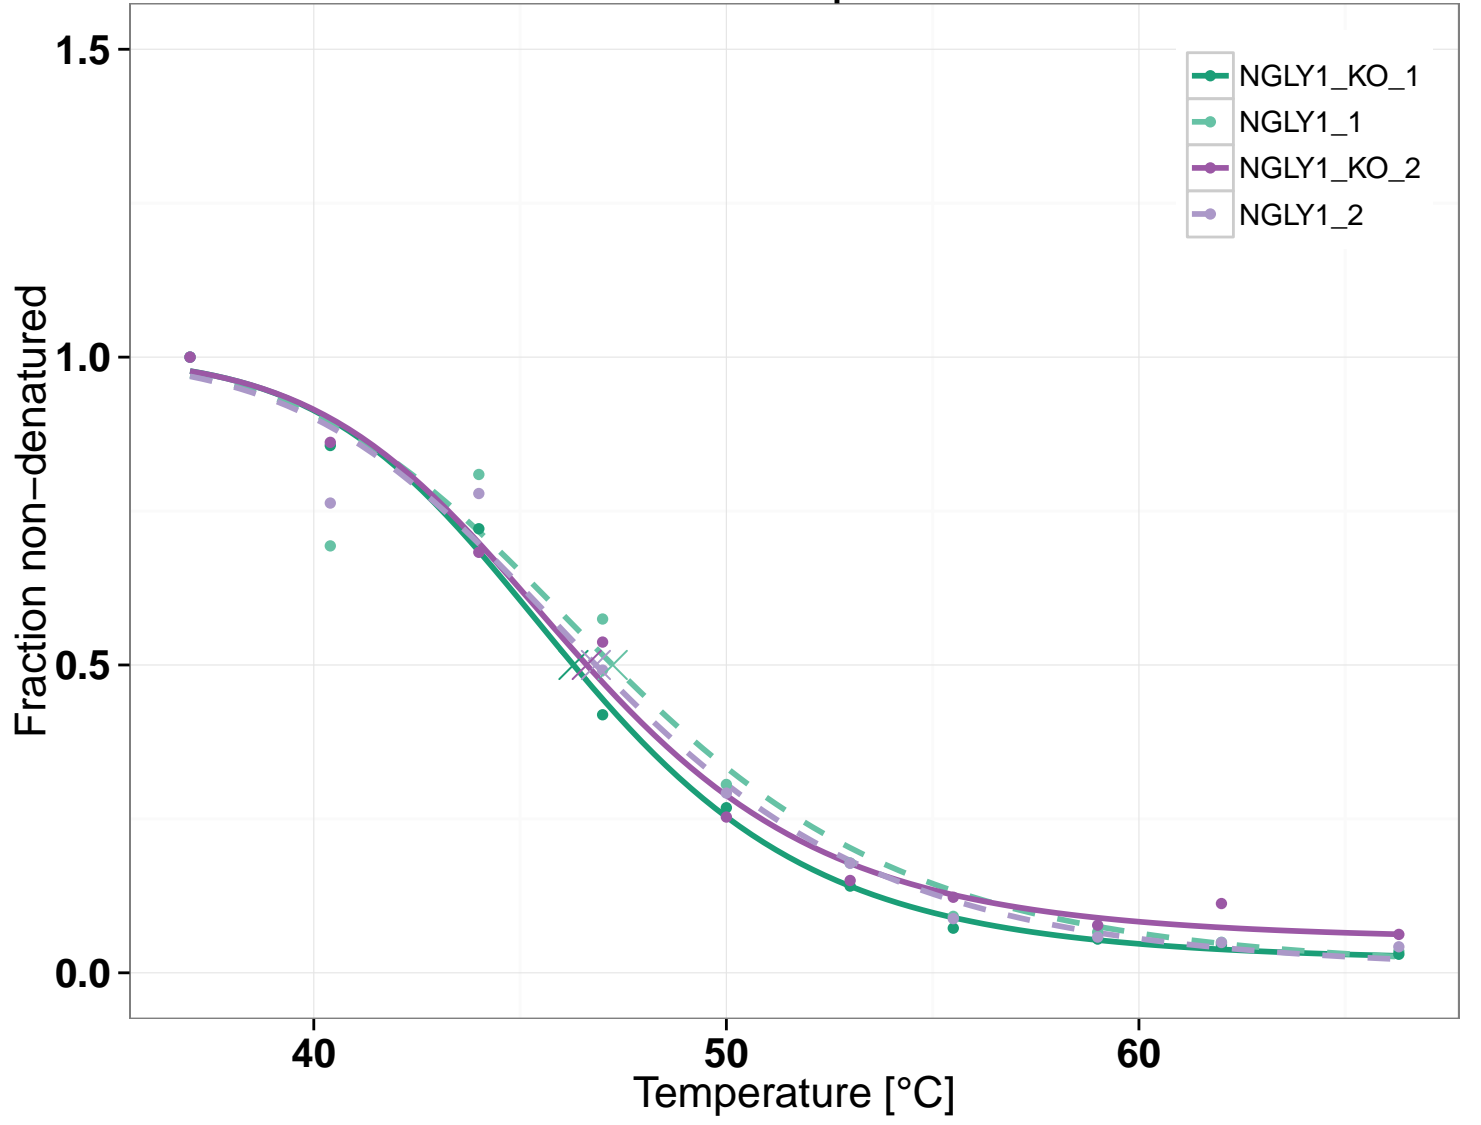

|            | meltPoint | slope  | plateau | R2   |
|------------|-----------|--------|---------|------|
| NGLY1_KO_1 | 46.29     | -0.082 | 0.02    | 1    |
| NGLY1_1    | 47.25     | -0.068 | 0       | 0.95 |
| NGLY1_KO_2 | 46.62     | -0.077 | 0.05    | 0.99 |
| NGLY1_2    | 46.84     | -0.071 | 0       | 0.98 |

Supplement: Supplementary file 1876 [file 1]

# IPI00748788.2|MTM1

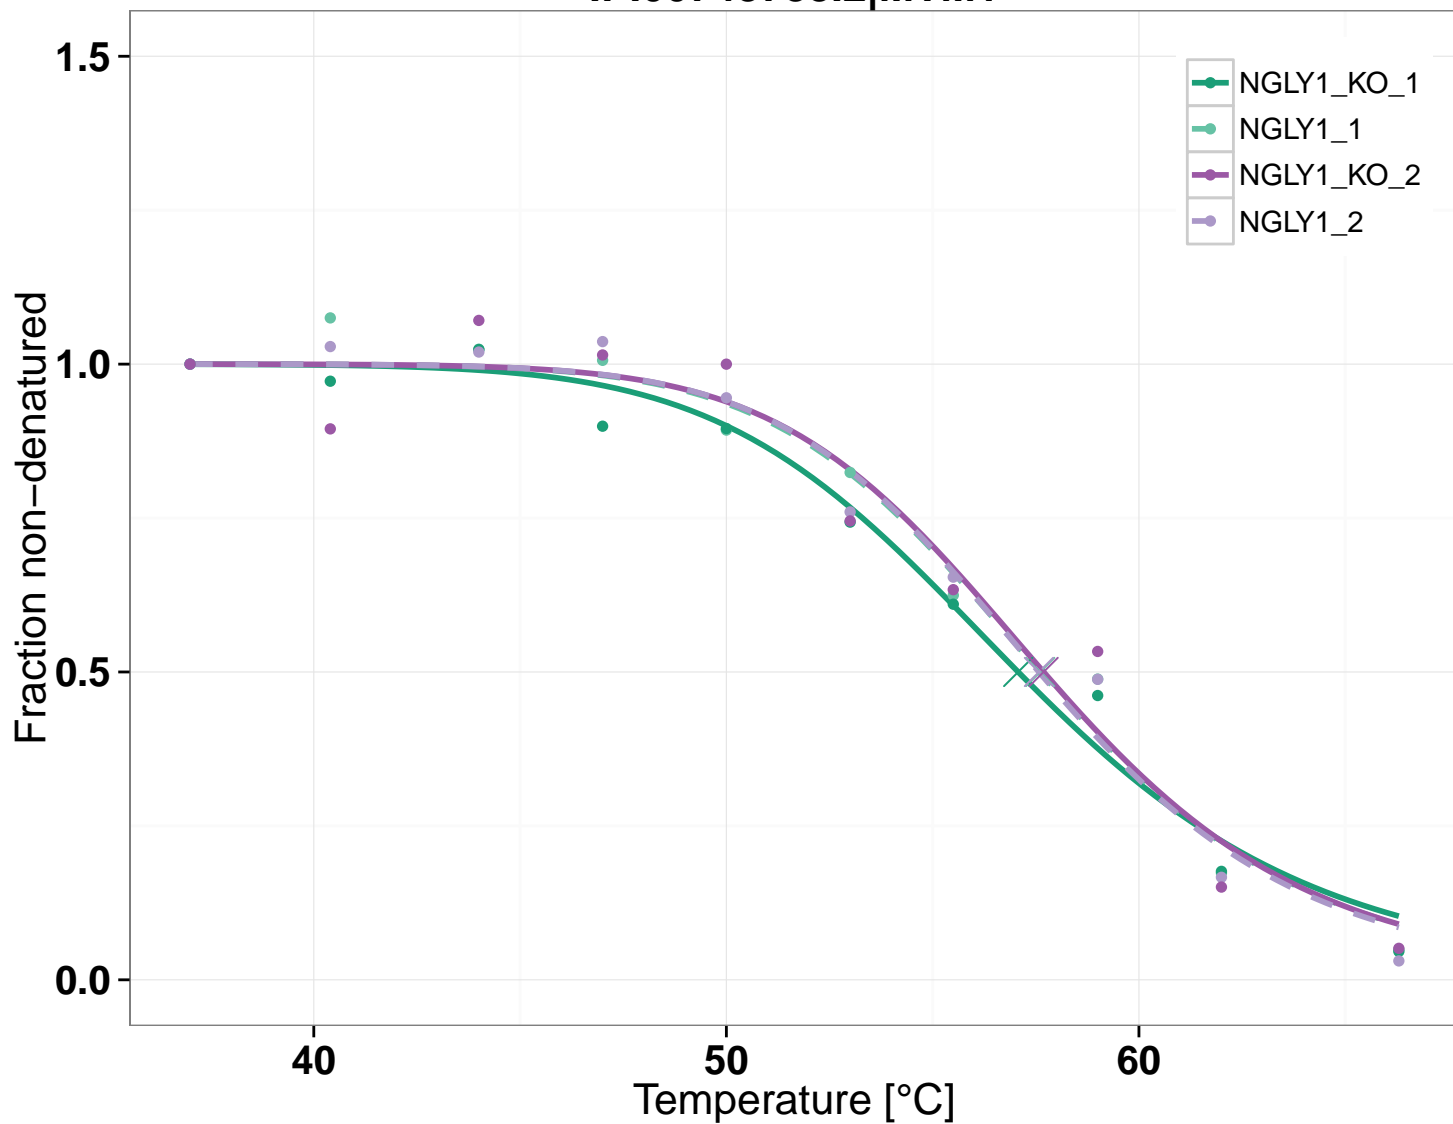

|            | meltPoint | slope  | plateau | R2   |
|------------|-----------|--------|---------|------|
| NGLY1_KO_1 | 57.07     | -0.069 | 0       | 0.98 |
| NGLY1_1    | 57.6      | -0.078 | 0       | 0.98 |
| NGLY1_KO_2 | 57.69     | -0.078 | 0       | 0.96 |
| NGLY1_2    | 57.58     | -0.079 | 0       | 0.98 |

Supplement: Supplementary file 1877 [file 1]

IPI00165008.2|KLHL24

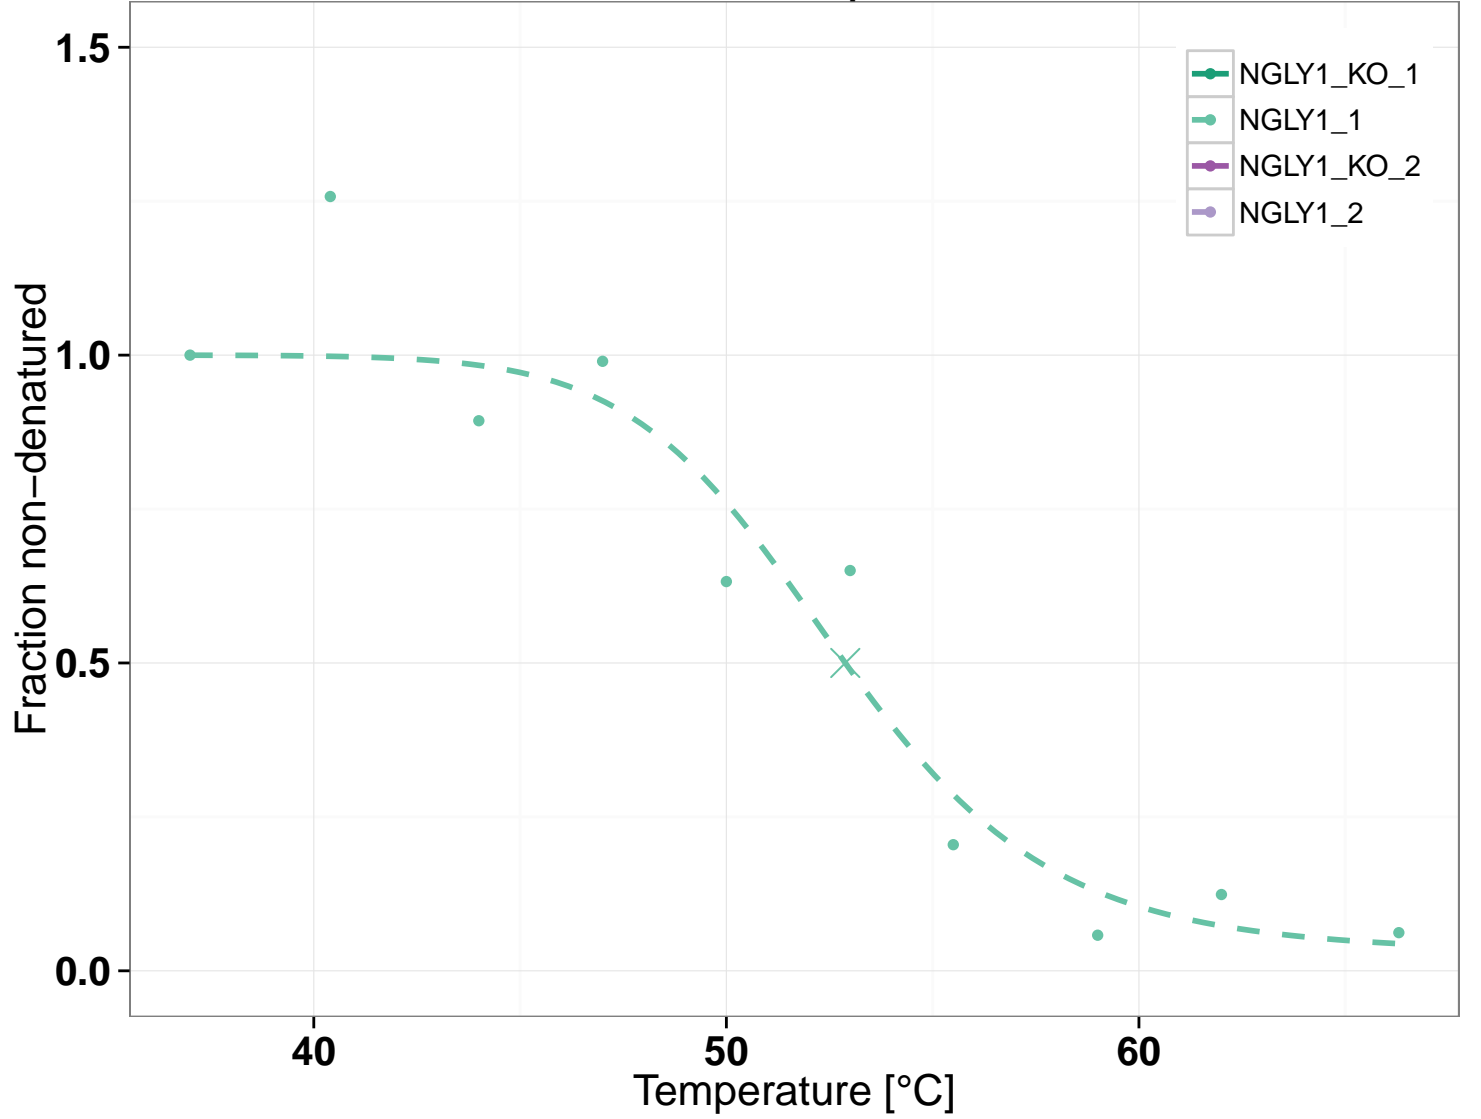

|            | meltPoint | slope  | plateau | R2   |
|------------|-----------|--------|---------|------|
| NGLY1_KO_1 | -         | -      | -       | -    |
| NGLY1_1    | 52.88     | -0.095 | 0.03    | 0.92 |
| NGLY1_KO_2 | -         | -      | -       | -    |
| NGLY1_2    | -         | -      | -       | -    |

Supplement: Supplementary file 1878 [file 1]

IPI00011619.4|PAPSS1

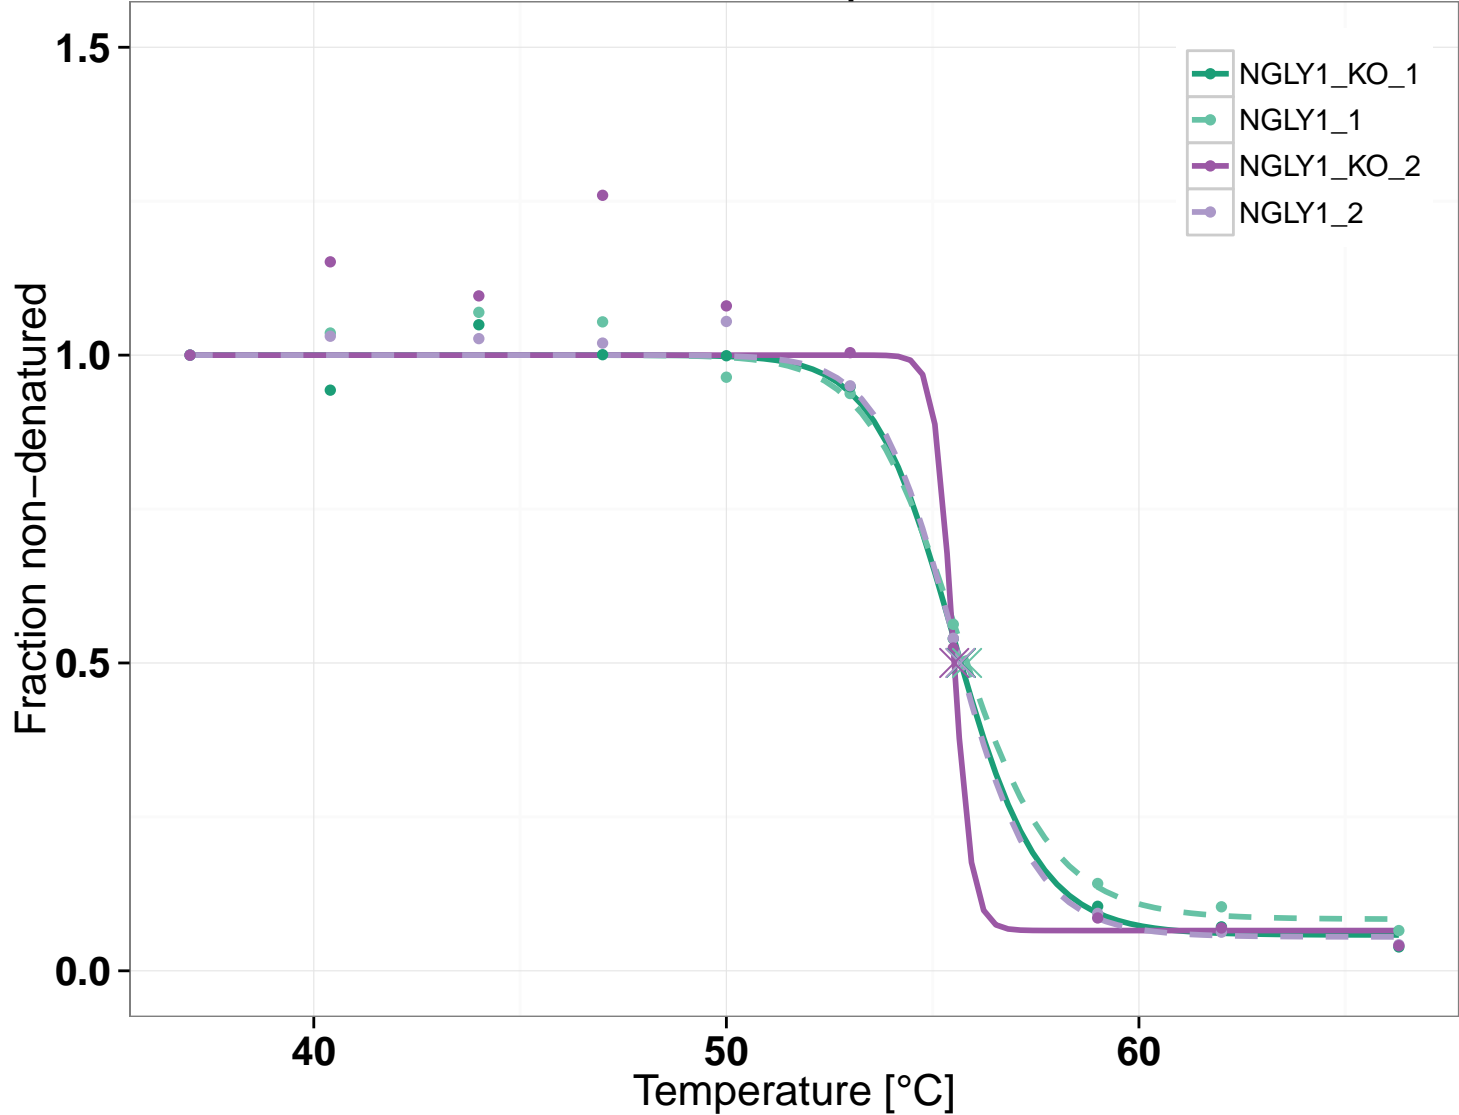

|            | meltPoint | slope | plateau | R2   |
|------------|-----------|-------|---------|------|
| NGLY1_KO_1 | 55.68     | -0.24 | 0.06    | 1    |
| NGLY1_1    | 55.83     | -0.2  | 0.08    | 0.99 |
| NGLY1_KO_2 | 55.52     | -1.1  | 0.07    | 0.95 |
| NGLY1_2    | 55.67     | -0.25 | 0.06    | 1    |

Supplement: Supplementary file 1879 [file 1]

# IPI00385324.9|WDR21A

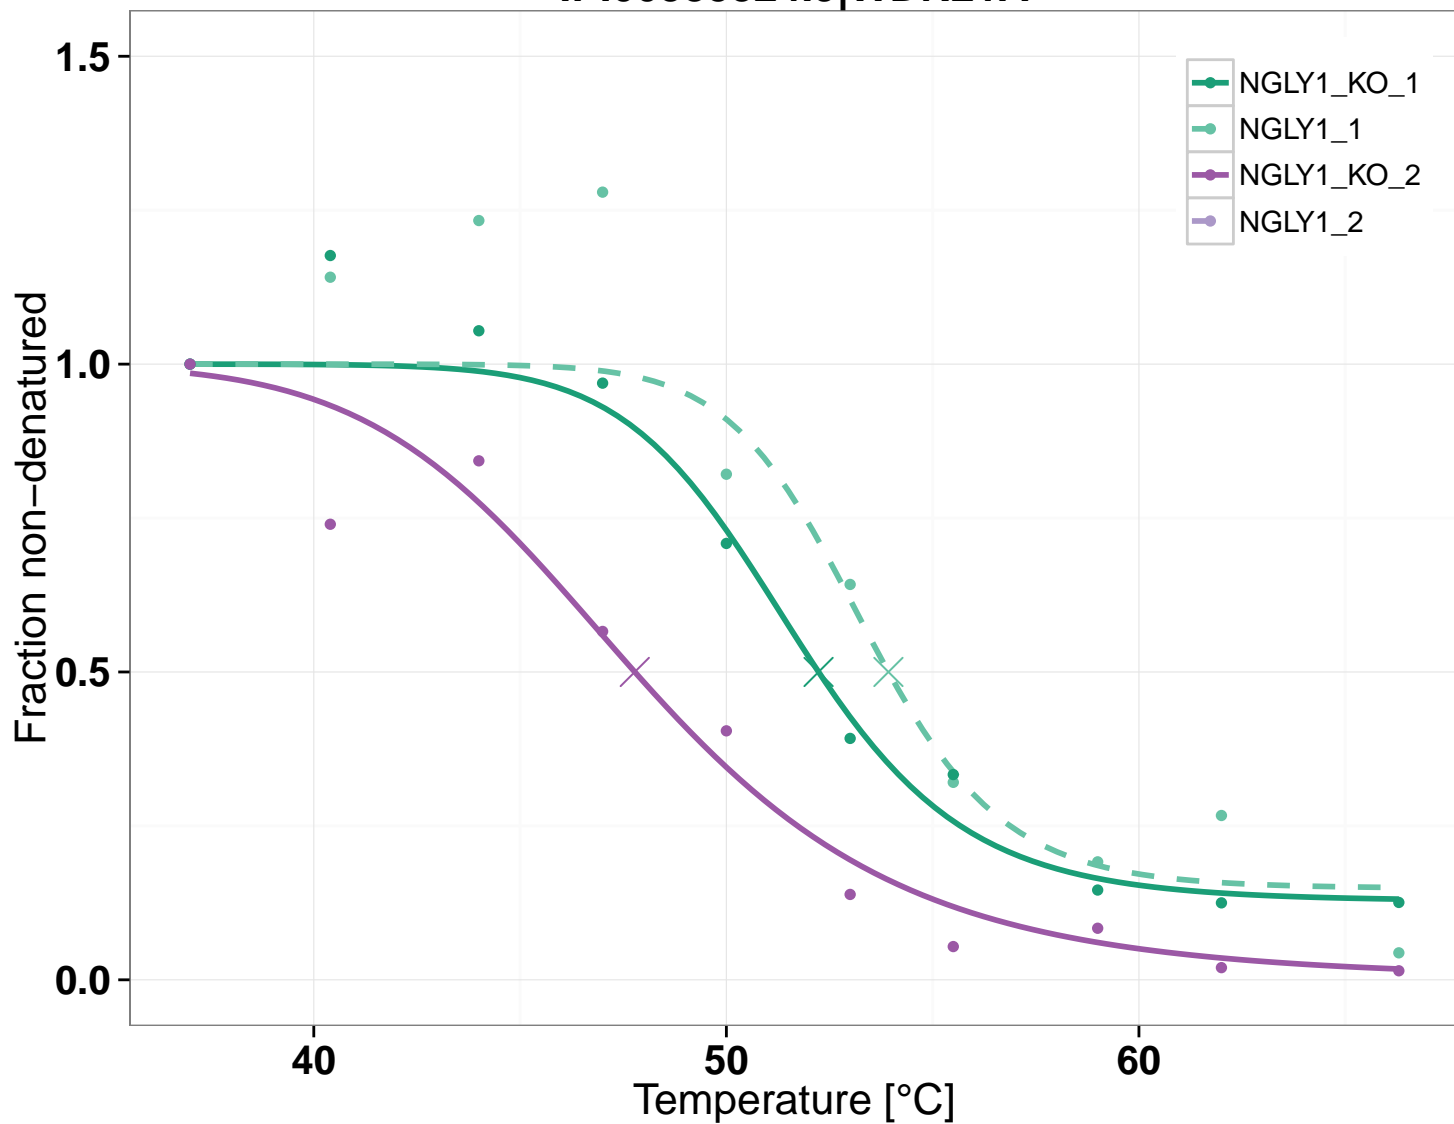

|            | meltPoint | slope  | plateau | R2   |
|------------|-----------|--------|---------|------|
| NGLY1_KO_1 | 52.23     | -0.11  | 0.13    | 0.97 |
| NGLY1_1    | 53.93     | -0.13  | 0.15    | 0.9  |
| NGLY1_KO_2 | 47.78     | -0.077 | 0       | 0.96 |
| NGLY1_2    | -         | -      | -       | -    |

Supplement: Supplementary file 1880 [file 1]

IPI00008439.3|SS18L2

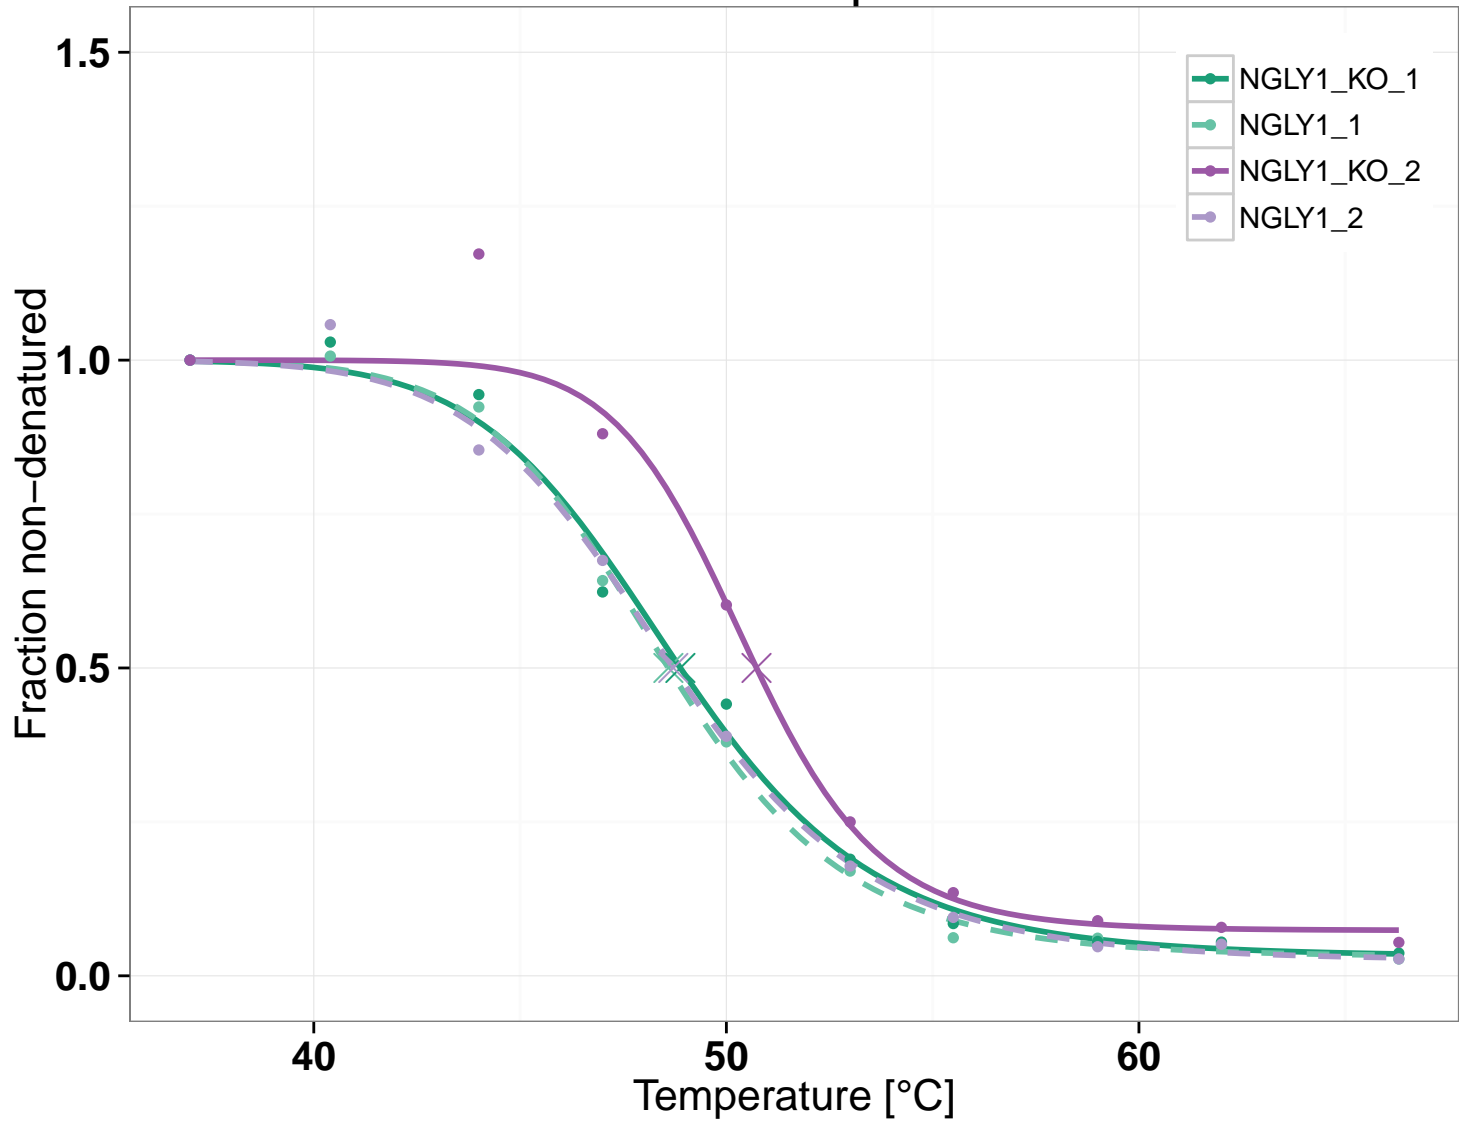

|            | meltPoint | slope | plateau | R2   |
|------------|-----------|-------|---------|------|
| NGLY1_KO_1 | 48.89     | -0.1  | 0.03    | 0.99 |
| NGLY1_1    | 48.59     | -0.11 | 0.03    | 1    |
| NGLY1_KO_2 | 50.73     | -0.14 | 0.07    | 0.88 |
| NGLY1_2    | 48.71     | -0.1  | 0.02    | 1    |

Supplement: Supplementary file 1881 [file 1]

# IPI00441473.3|PRMT5

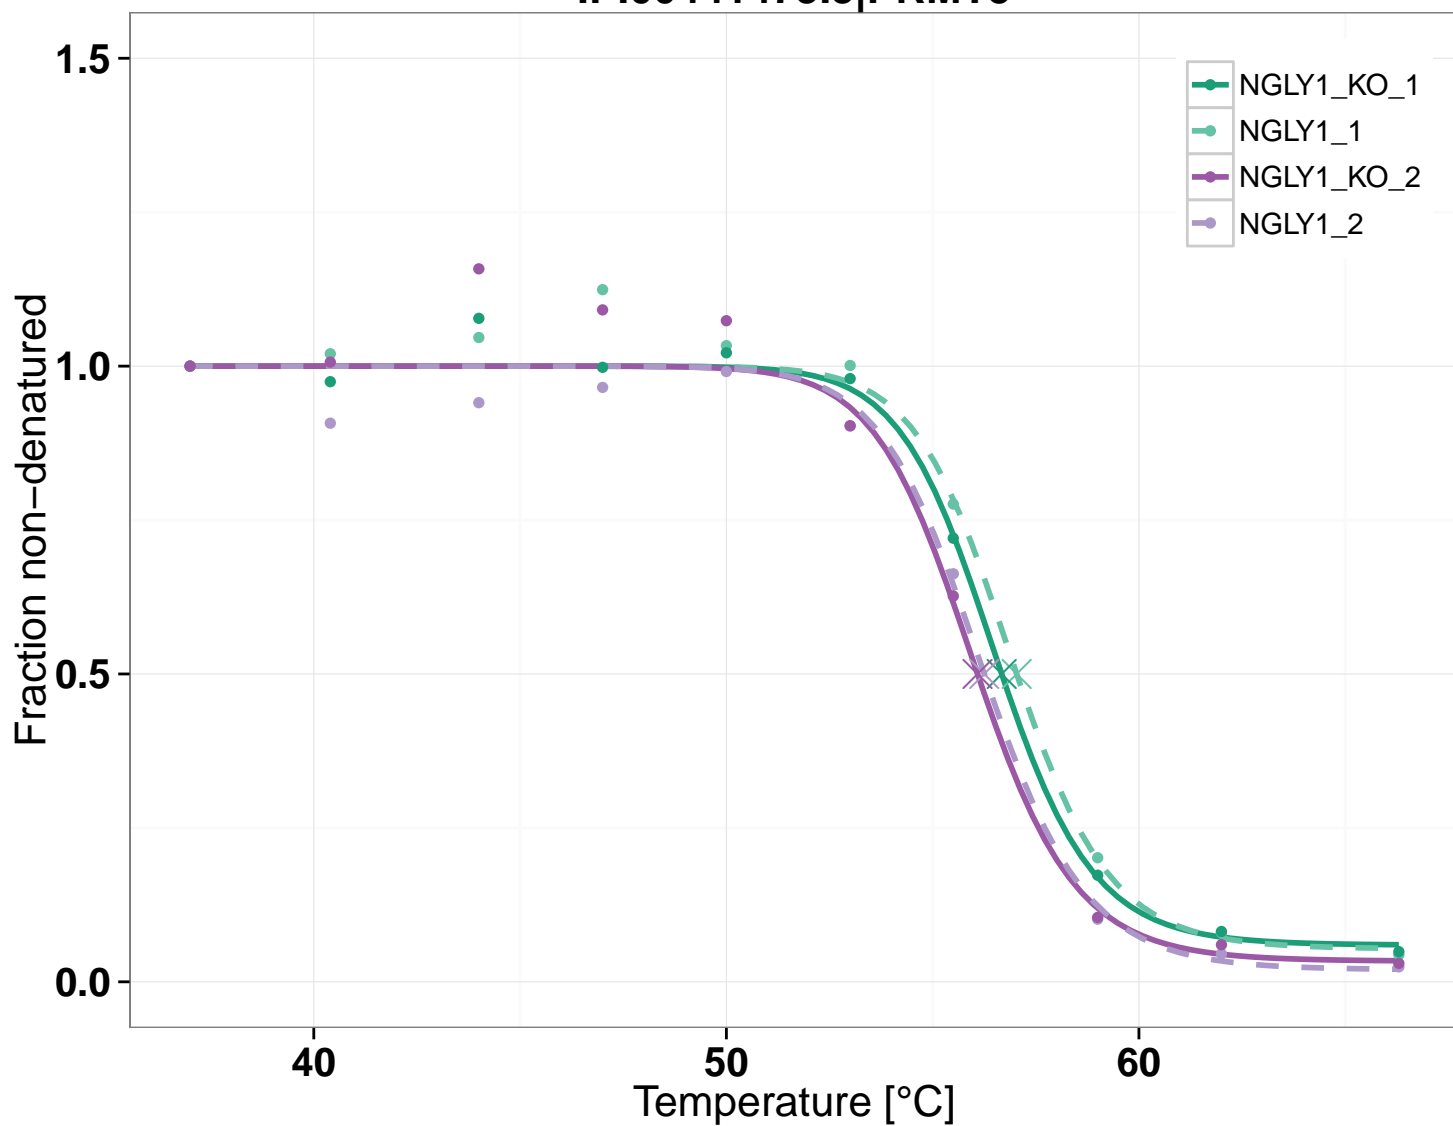

|            | meltPoint | slope | plateau | R2   |
|------------|-----------|-------|---------|------|
| NGLY1_KO_1 | 56.67     | -0.2  | 0.06    | 1    |
| NGLY1_1    | 57.04     | -0.2  | 0.05    | 0.99 |
| NGLY1_KO_2 | 56.09     | -0.2  | 0.03    | 0.98 |
| NGLY1_2    | 56.25     | -0.2  | 0.02    | 0.99 |

Supplement: Supplementary file 1882 [file 1]

IPI00856117.1|TUBGCP5

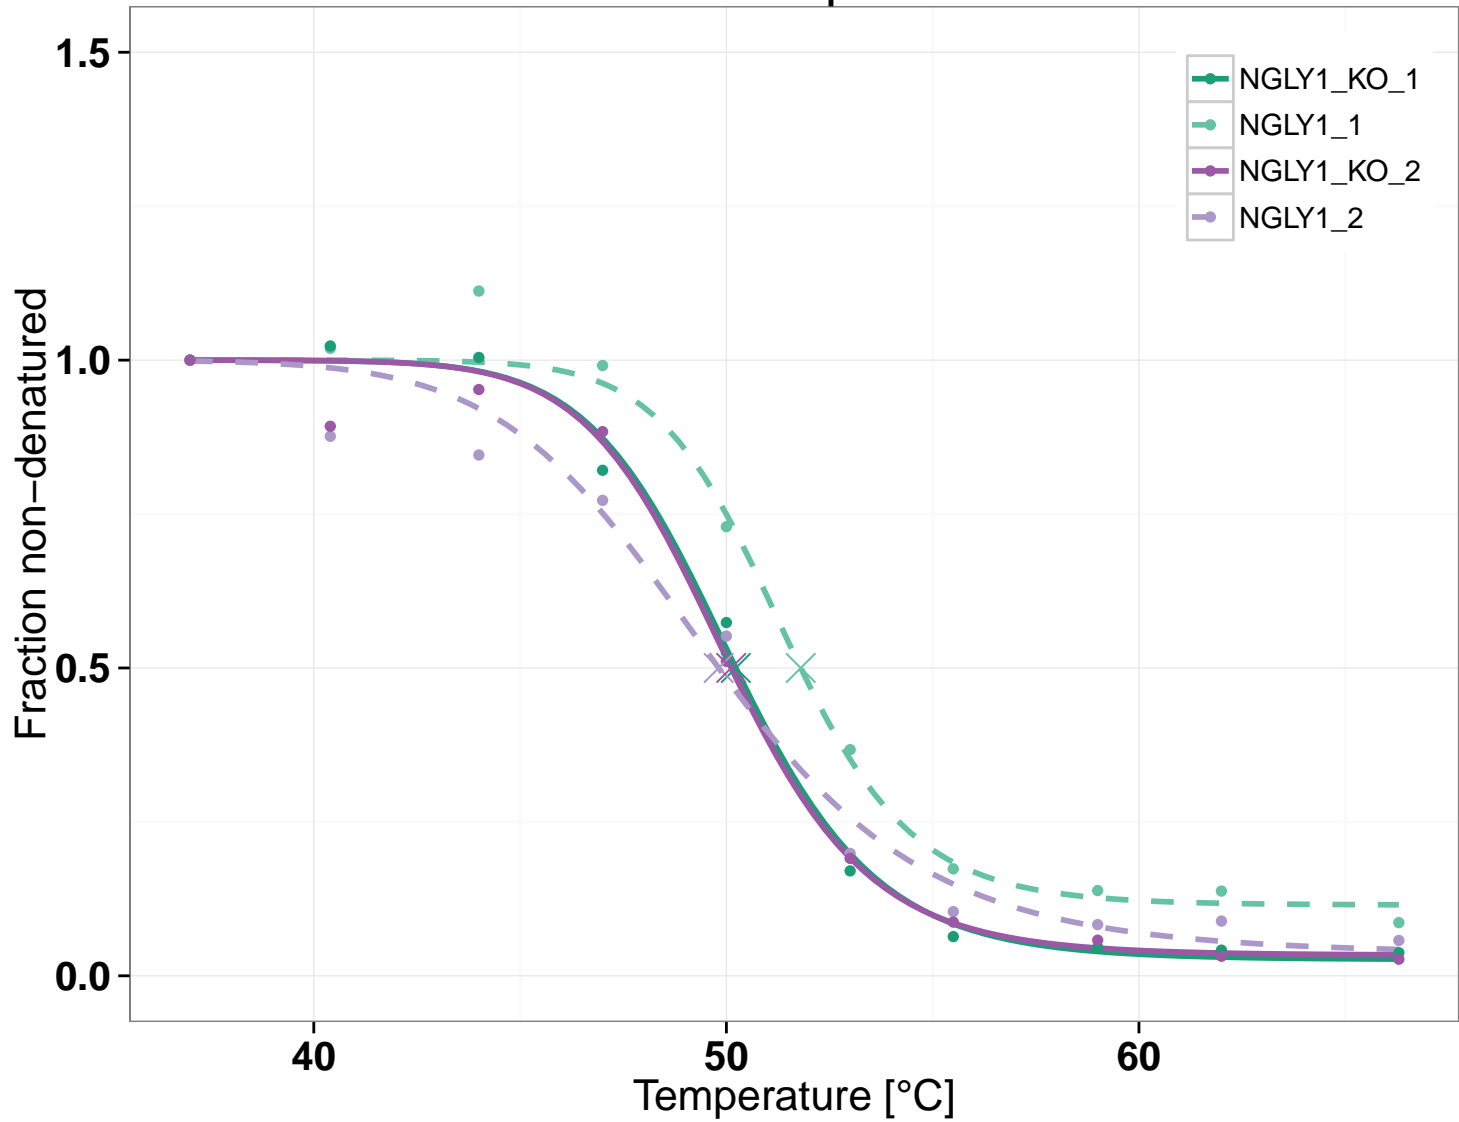

|            | meltPoint | slope  | plateau | R2   |
|------------|-----------|--------|---------|------|
| NGLY1_KO_1 | 50.23     | -0.14  | 0.03    | 1    |
| NGLY1_1    | 51.8      | -0.14  | 0.11    | 0.99 |
| NGLY1_KO_2 | 50.12     | -0.14  | 0.03    | 0.99 |
| NGLY1_2    | 49.81     | -0.093 | 0.03    | 0.98 |

Supplement: Supplementary file 1883 [file 1]

# IPI00014533.1|UBTF

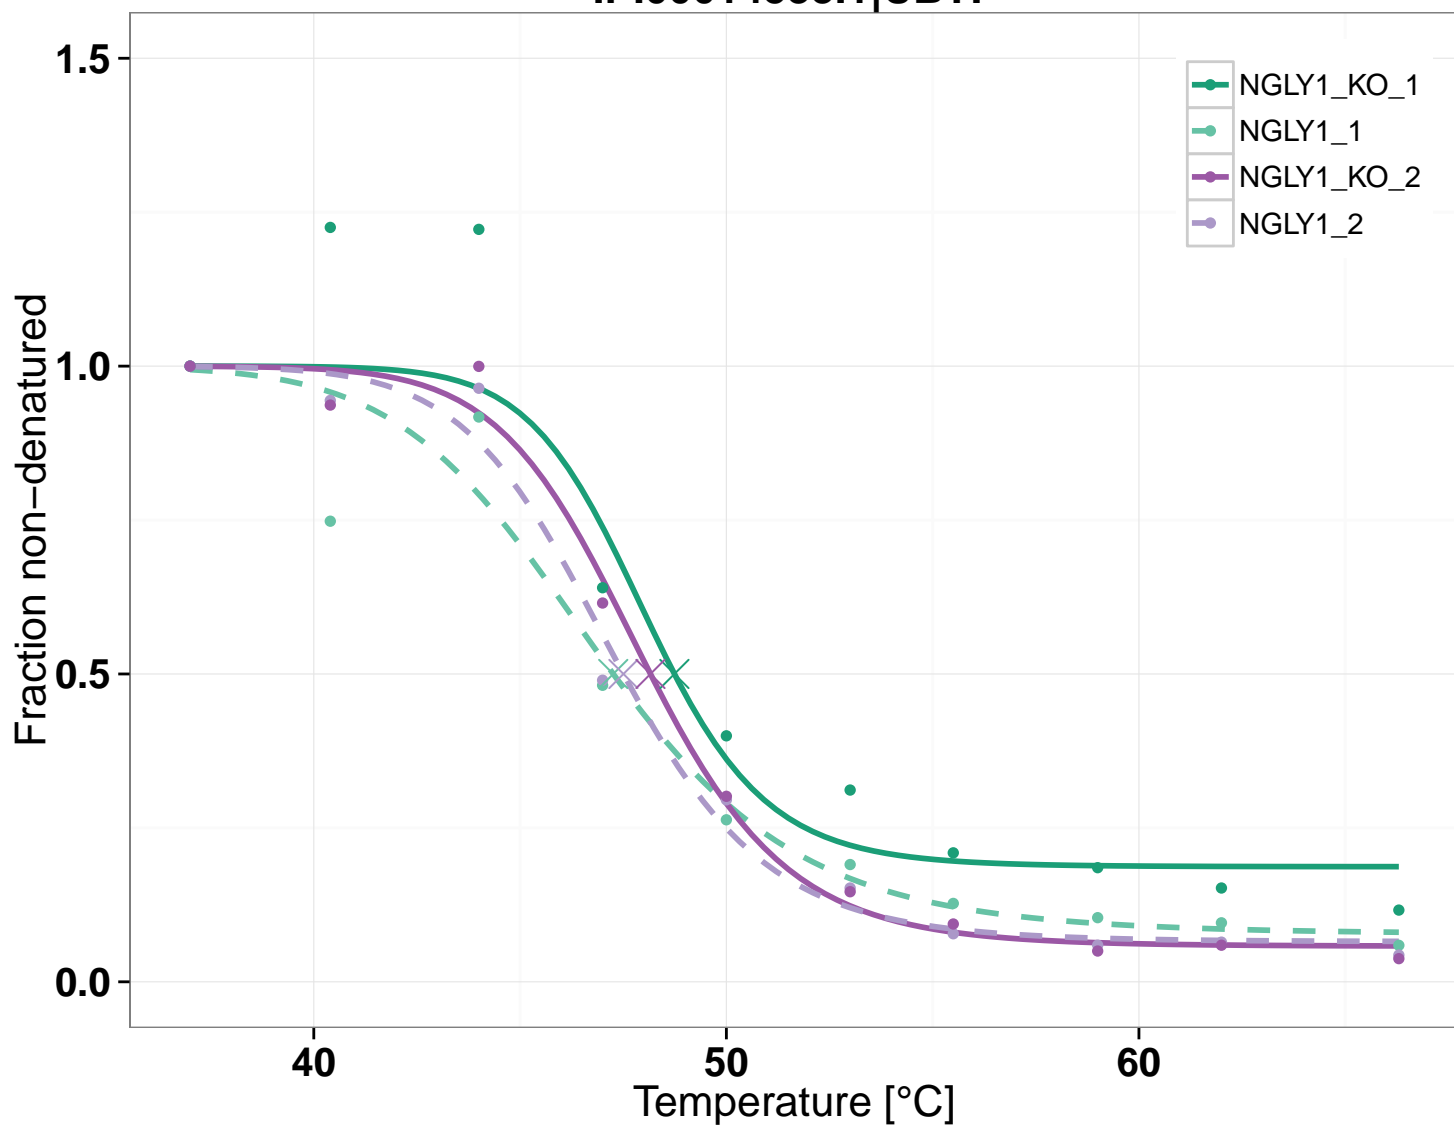

|            | meltPoint | slope  | plateau | R2   |
|------------|-----------|--------|---------|------|
| NGLY1_KO_1 | 48.74     | -0.14  | 0.19    | 0.92 |
| NGLY1_1    | 47.26     | -0.095 | 0.08    | 0.95 |
| NGLY1_KO_2 | 48.16     | -0.13  | 0.06    | 0.99 |
| NGLY1_2    | 47.51     | -0.13  | 0.07    | 0.99 |

Supplement: Supplementary file 1884 [file 1]

# IPI00043360.4|RNF145

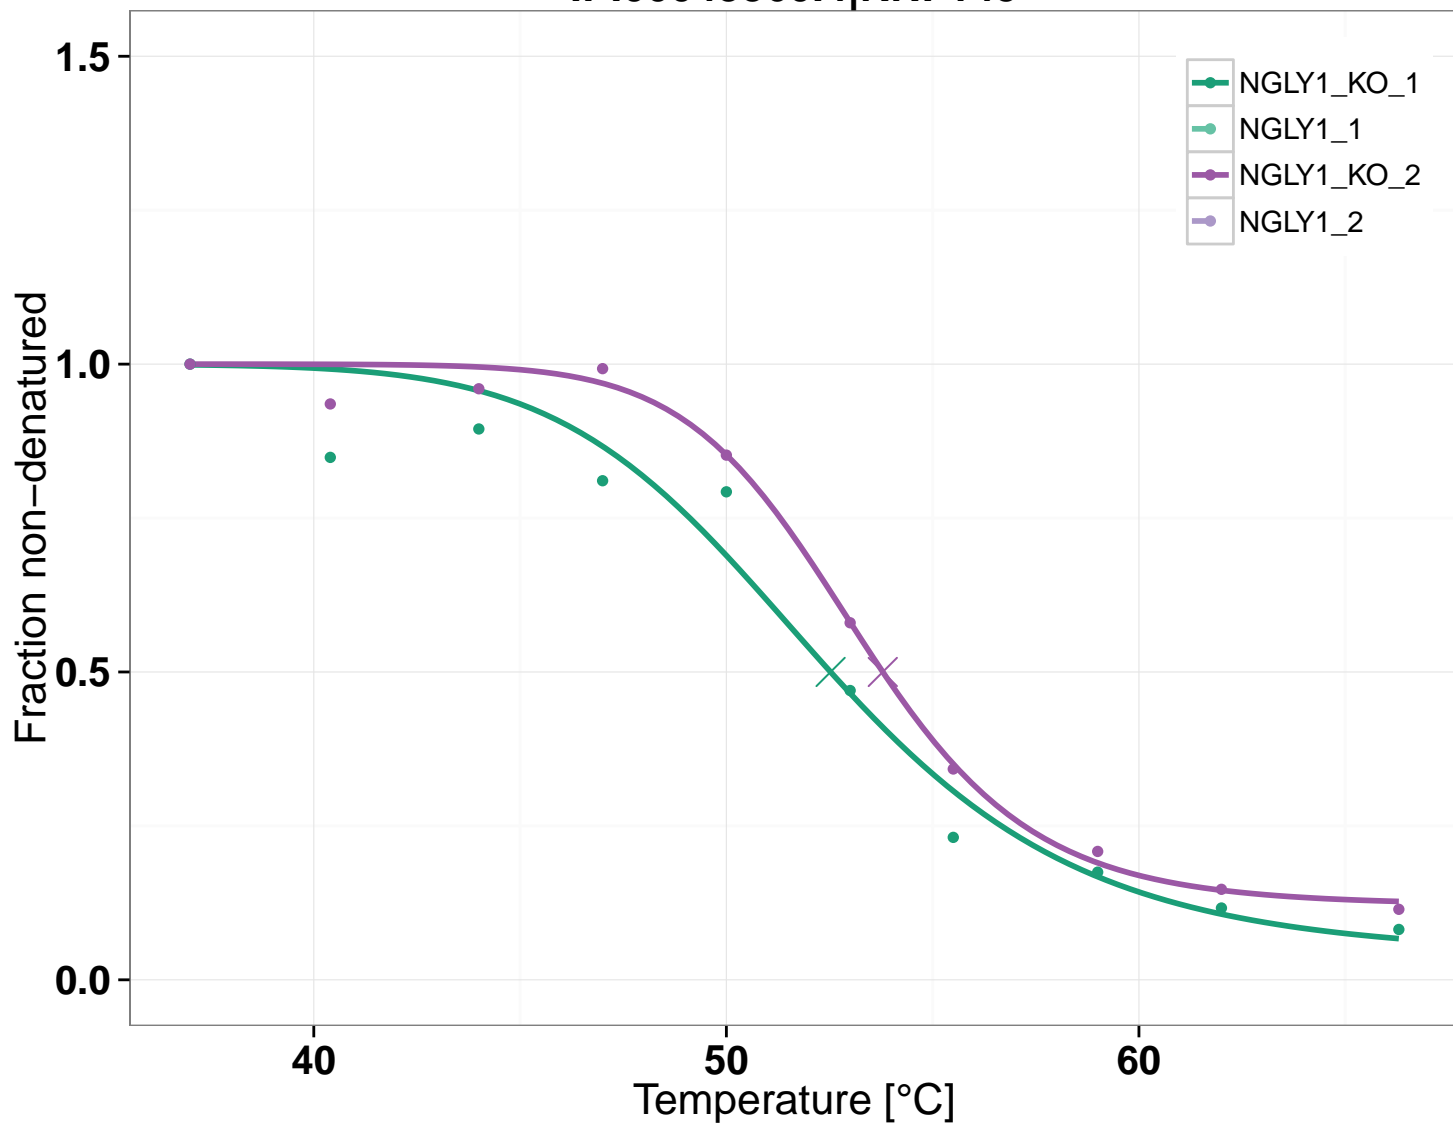

|            | meltPoint | slope  | plateau | R2   |
|------------|-----------|--------|---------|------|
| NGLY1_KO_1 | 52.53     | -0.076 | 0.04    | 0.96 |
| NGLY1_1    | -         | -      | -       | -    |
| NGLY1_KO_2 | 53.79     | -0.1   | 0.12    | 0.99 |
| NGLY1_2    | -         | -      | -       | -    |

Supplement: Supplementary file 1885 [file 1]

IPI00295774.1|SLC23A2

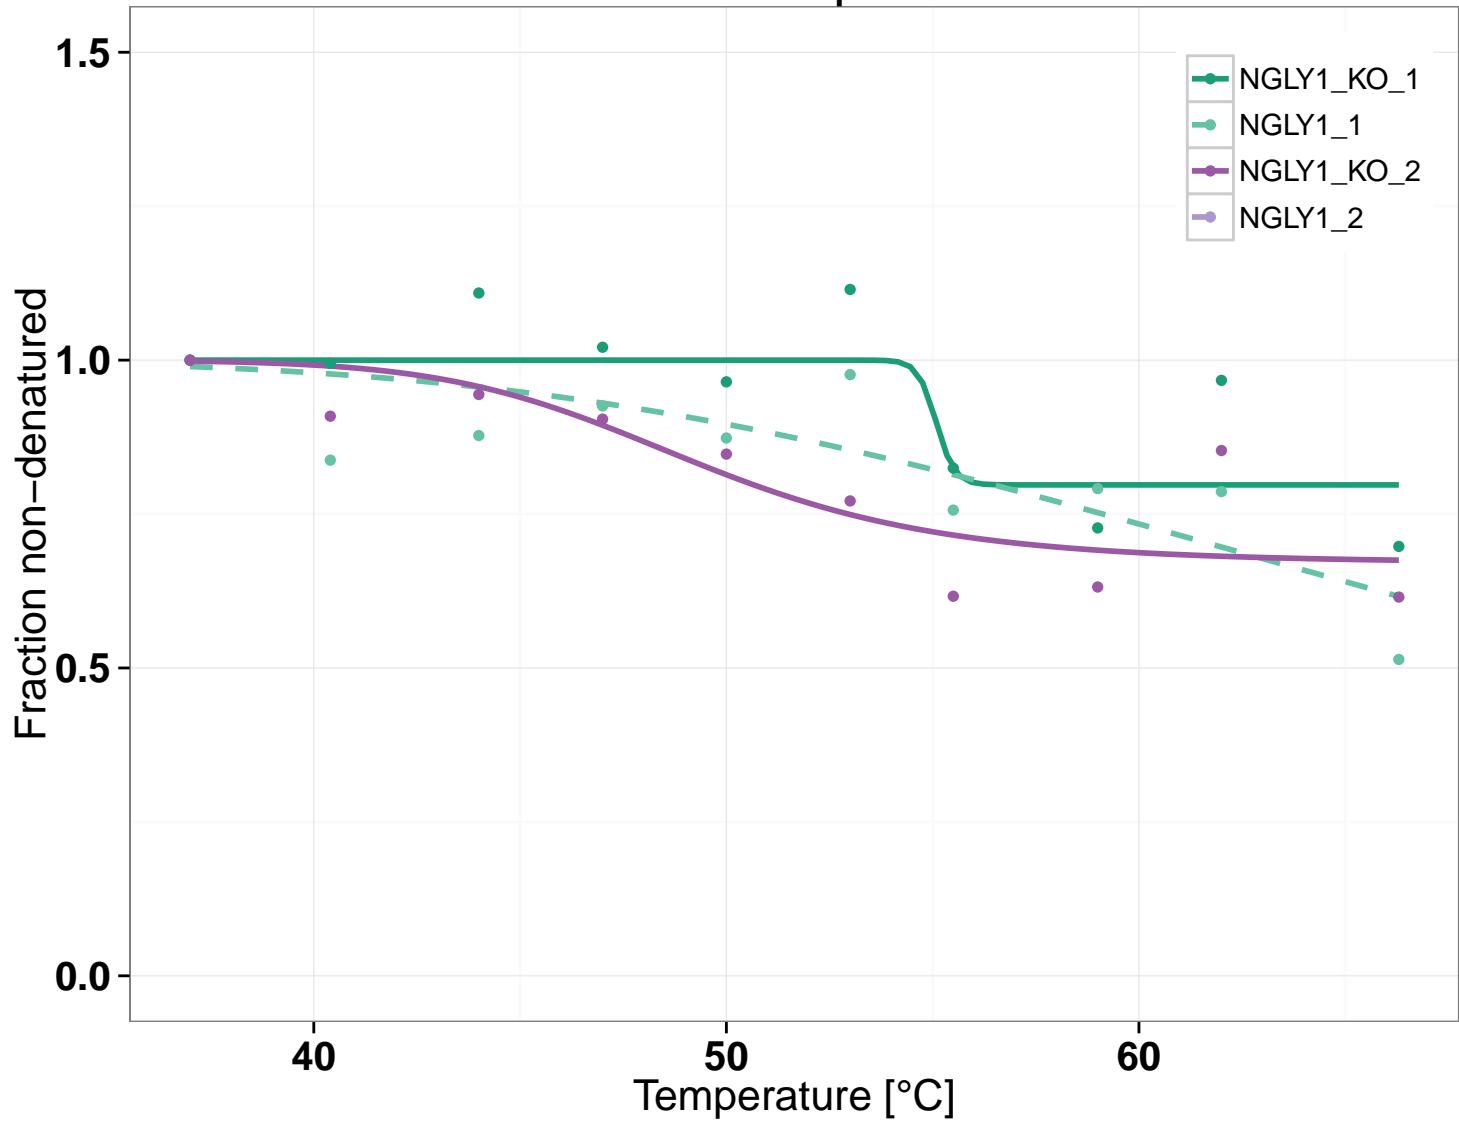

|            | meltPoint | slope  | plateau | R2   |
|------------|-----------|--------|---------|------|
| NGLY1_KO_1 | —         | −0.23  | 0.8     | 0.63 |
| NGLY1_1    | —         | −0.019 | 0       | 0.62 |
| NGLY1_KO_2 | —         | −0.027 | 0.67    | 0.7  |
| NGLY1_2    | —         | —      | —       | —    |

Supplement: Supplementary file 1886 [file 1]

IPI00478351.2|C15ORF57

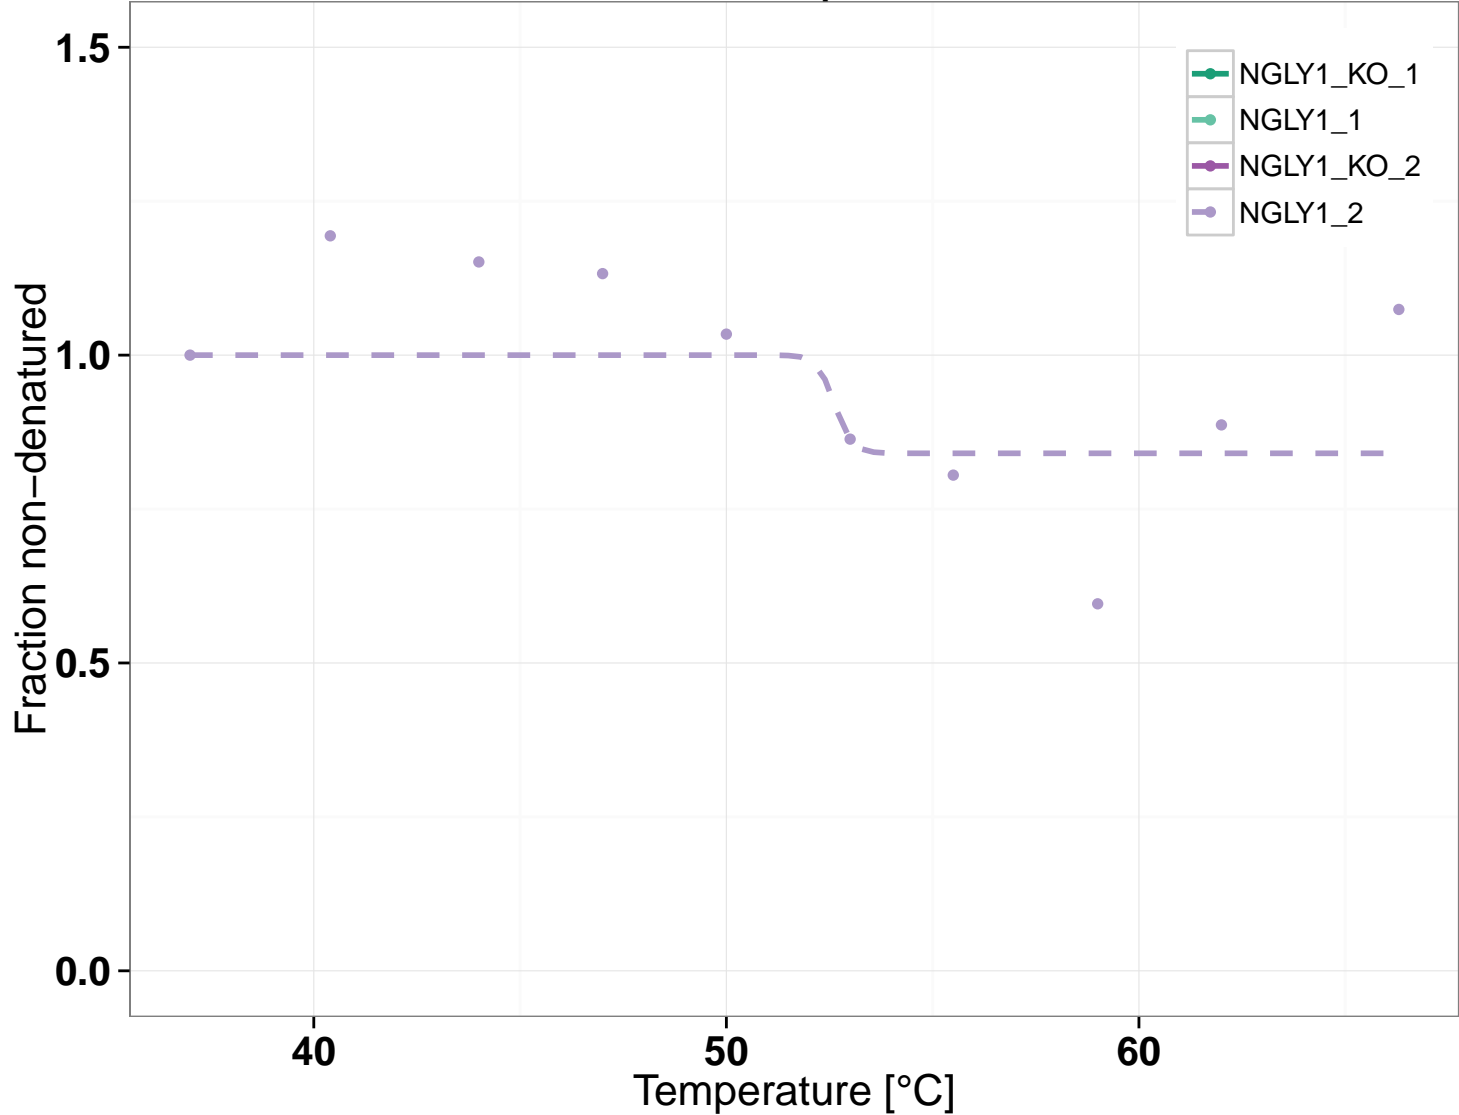

|            | meltPoint | slope | plateau | R2   |
|------------|-----------|-------|---------|------|
| NGLY1_KO_1 | —         | —     | —       | —    |
| NGLY1_1    | —         | —     | —       | —    |
| NGLY1_KO_2 | —         | —     | —       | —    |
| NGLY1_2    | —         | -0.19 | 0.84    | 0.37 |

Supplement: Supplementary file 1887 [file 1]

# IPI00550021.4|RPL3

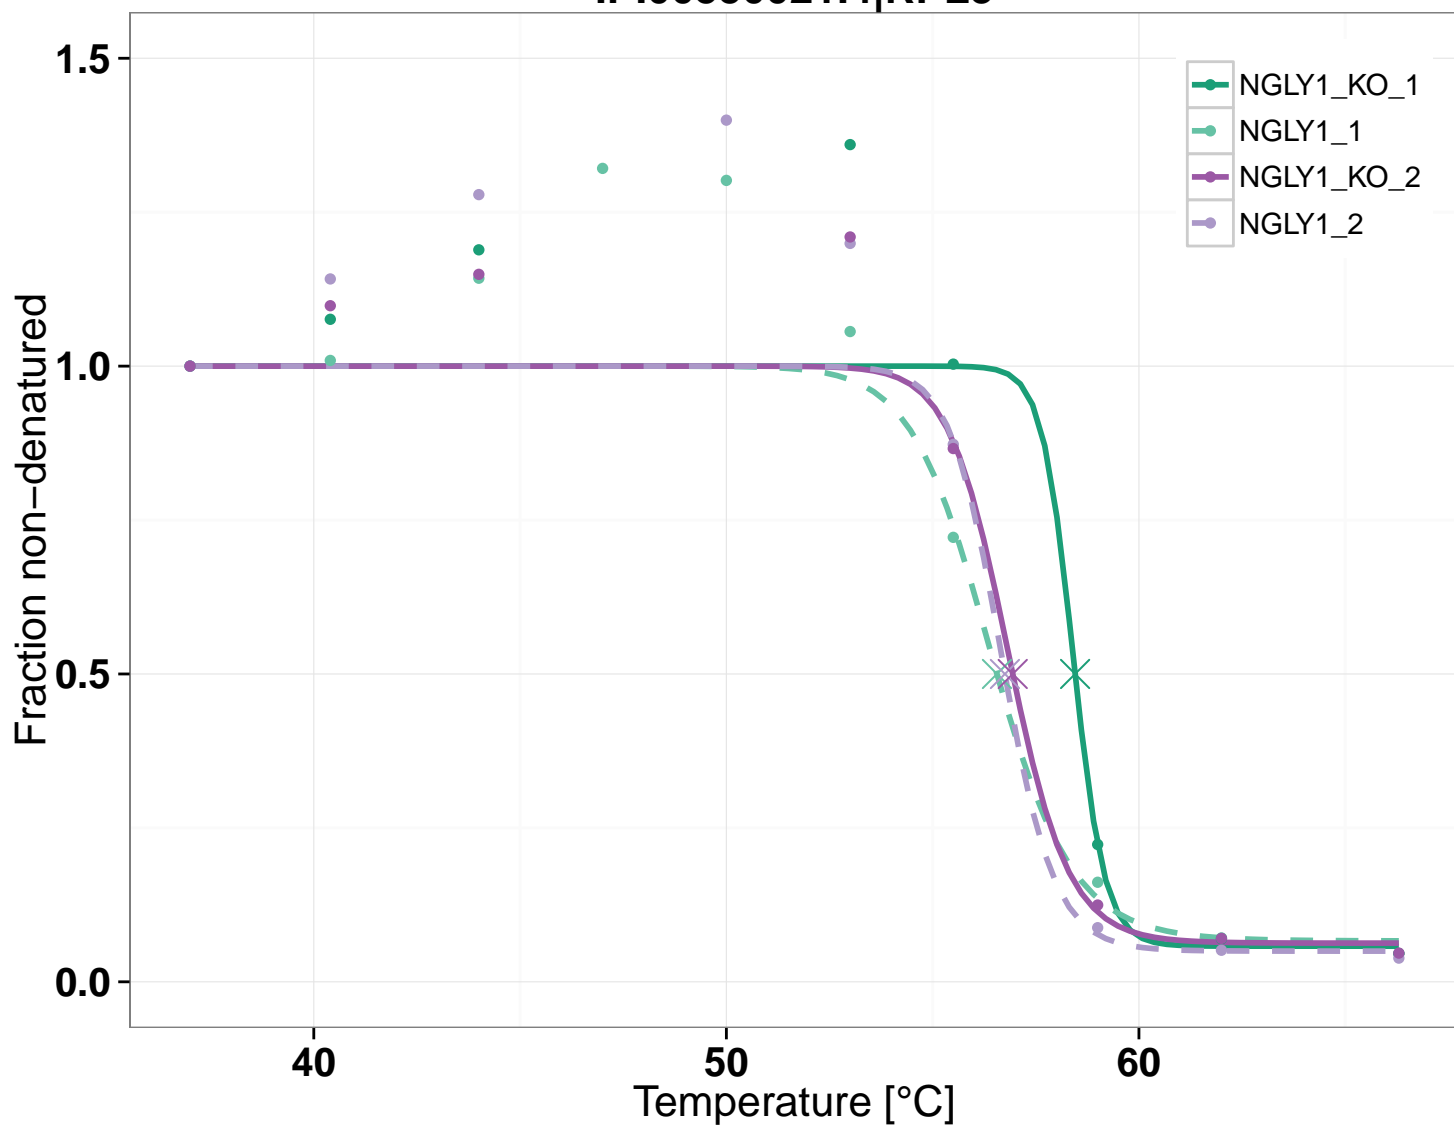

|            | meltPoint | slope | plateau | R2   |
|------------|-----------|-------|---------|------|
| NGLY1_KO_1 | 58.45     | -0.62 | 0.06    | 0.73 |
| NGLY1_1    | 56.56     | -0.24 | 0.07    | 0.9  |
| NGLY1_KO_2 | 56.94     | -0.32 | 0.06    | 0.77 |
| NGLY1_2    | 56.75     | -0.38 | 0.05    | 0.81 |

Supplement: Supplementary file 1888 [file 1]

IPI00477759.1|INTS2

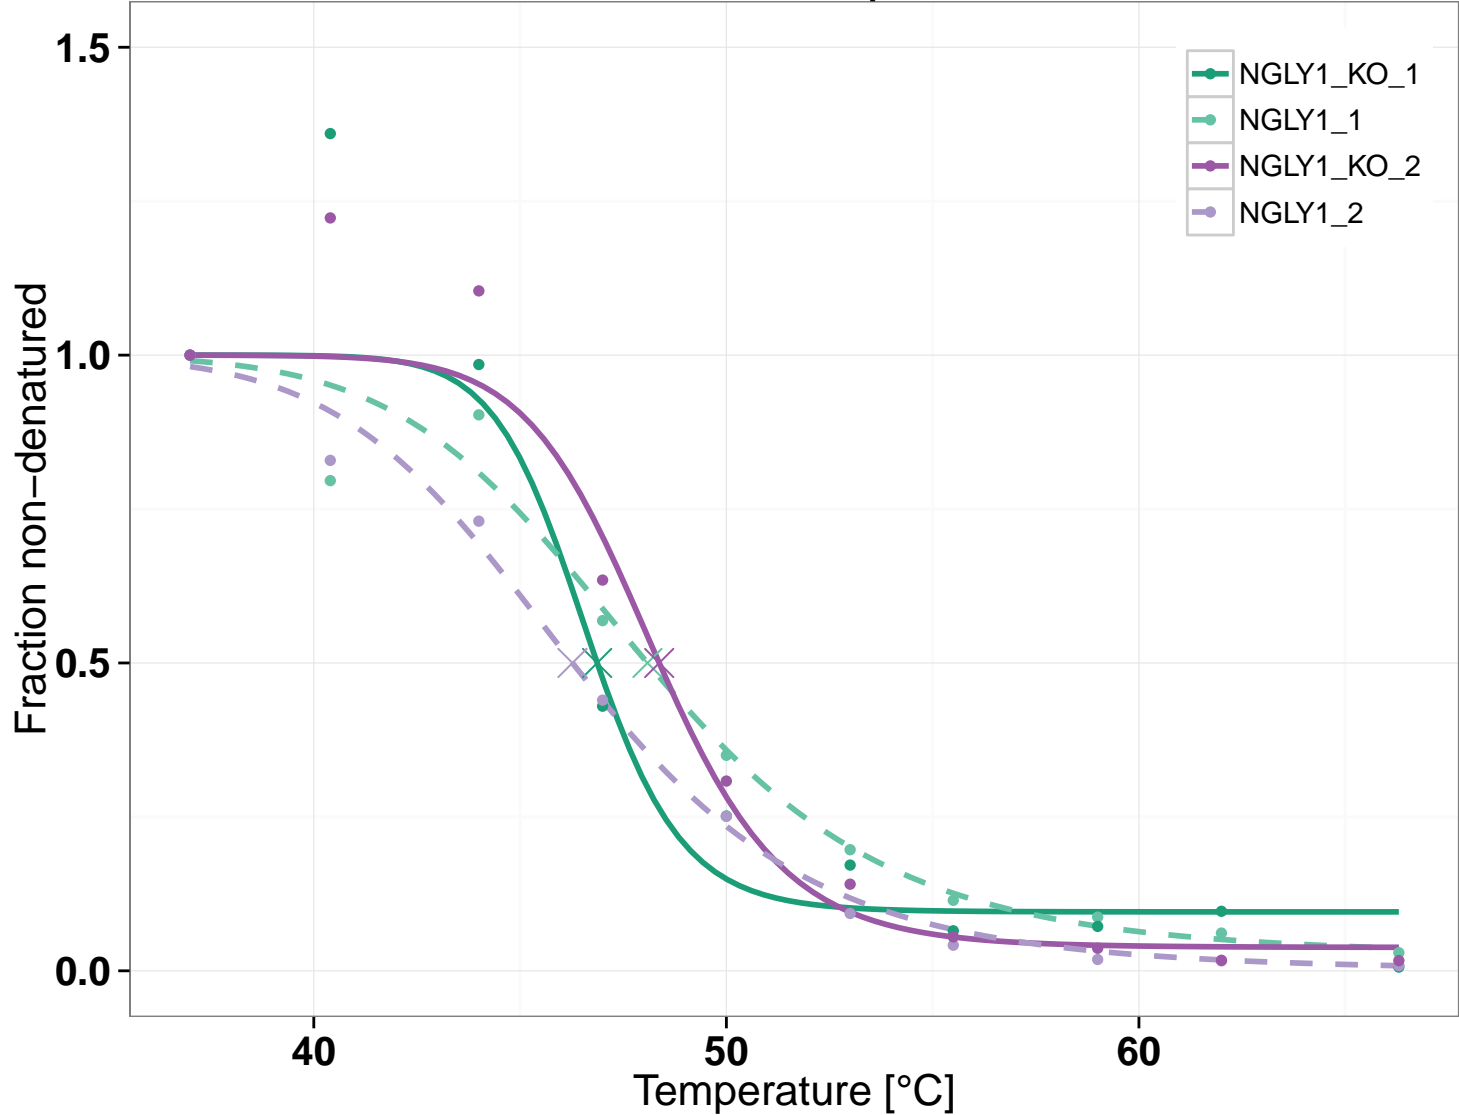

Supplement: Supplementary file 1889 [file 1]

# IPI00916402.1|AAK1

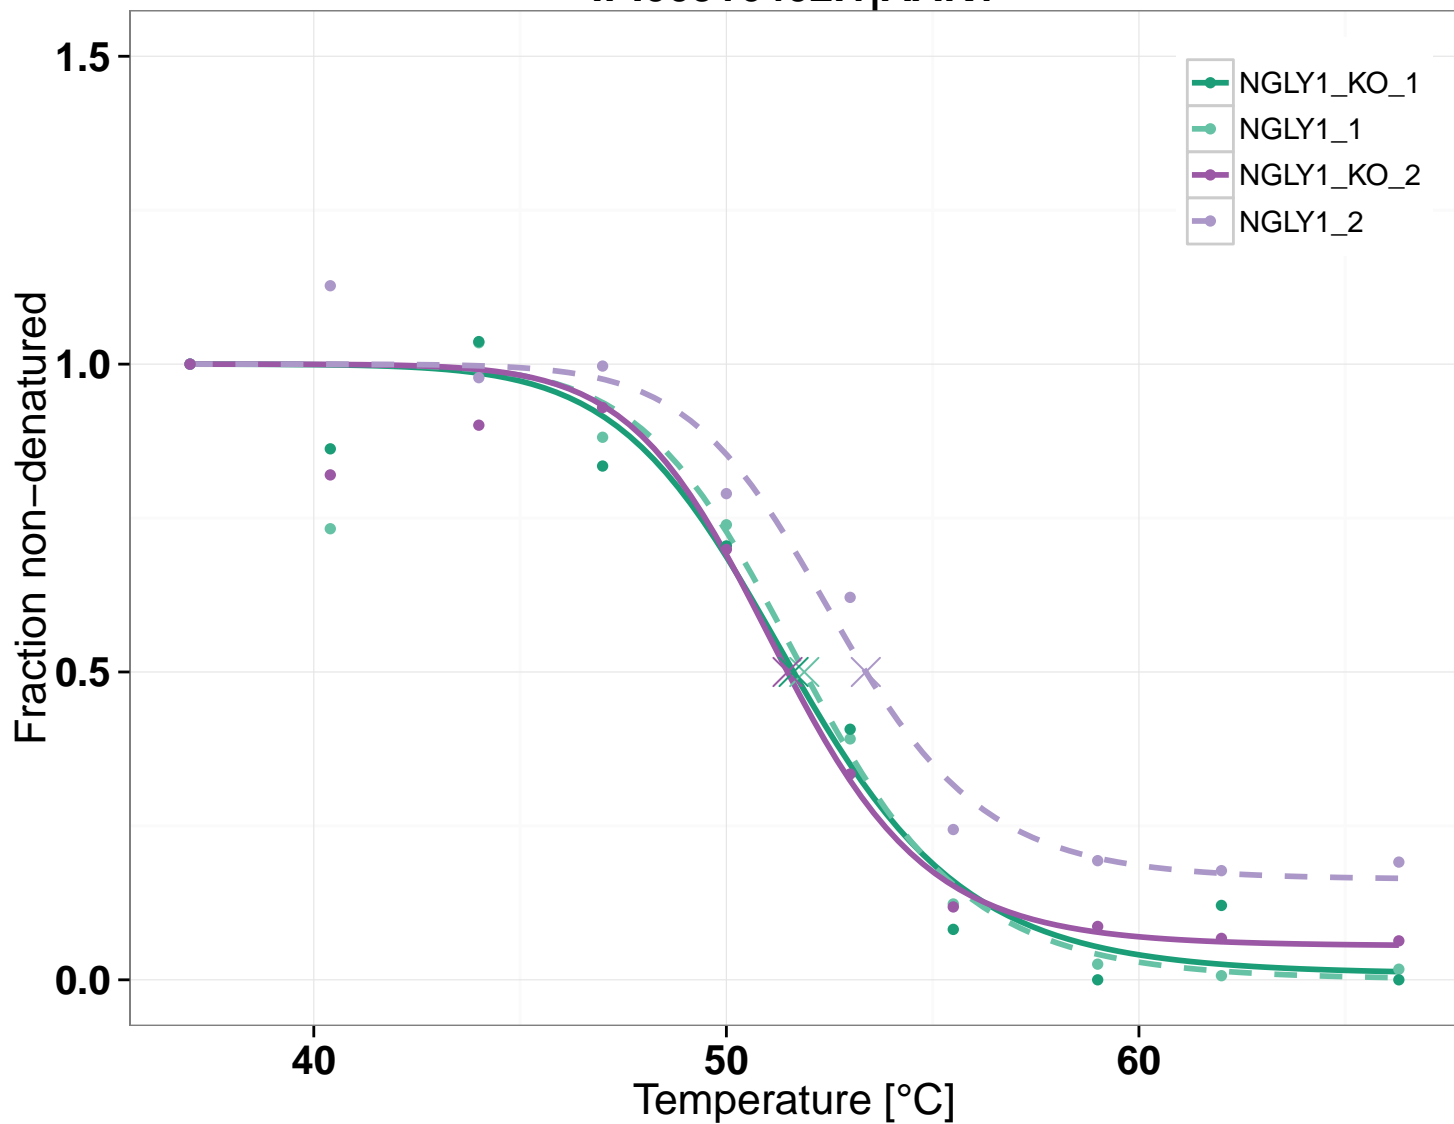

|            | meltPoint | slope | plateau | R2   |
|------------|-----------|-------|---------|------|
| NGLY1_KO_1 | 51.63     | -0.12 | 0.01    | 0.97 |
| NGLY1_1    | 51.89     | -0.13 | 0       | 0.95 |
| NGLY1_KO_2 | 51.48     | -0.13 | 0.05    | 0.97 |
| NGLY1_2    | 53.38     | -0.12 | 0.16    | 0.98 |

Supplement: Supplementary file 1890 [file 1]

IPI00220486.1|TADA3L

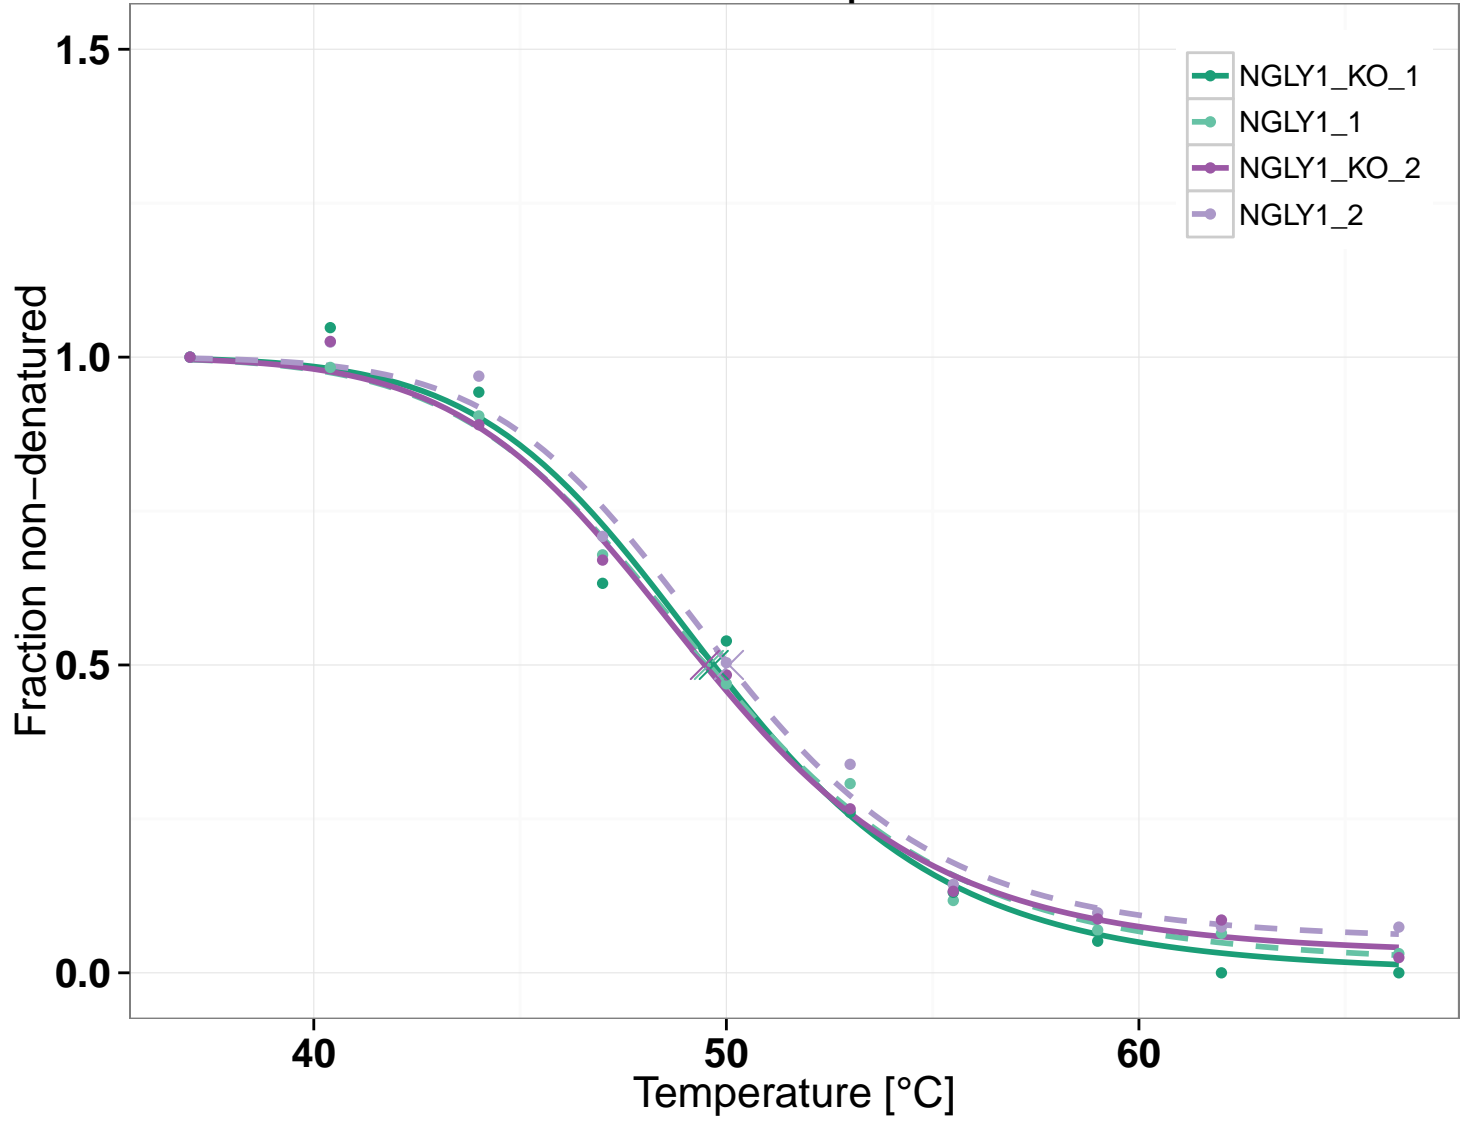

|            | meltPoint | slope  | plateau | R2   |
|------------|-----------|--------|---------|------|
| NGLY1_KO_1 | 49.69     | -0.088 | 0       | 0.99 |
| NGLY1_1    | 49.58     | -0.082 | 0.01    | 1    |
| NGLY1_KO_2 | 49.48     | -0.084 | 0.03    | 1    |
| NGLY1_2    | 50.06     | -0.087 | 0.05    | 0.99 |

Supplement: Supplementary file 1891 [file 1]

IPI00427739.1|LRRC1

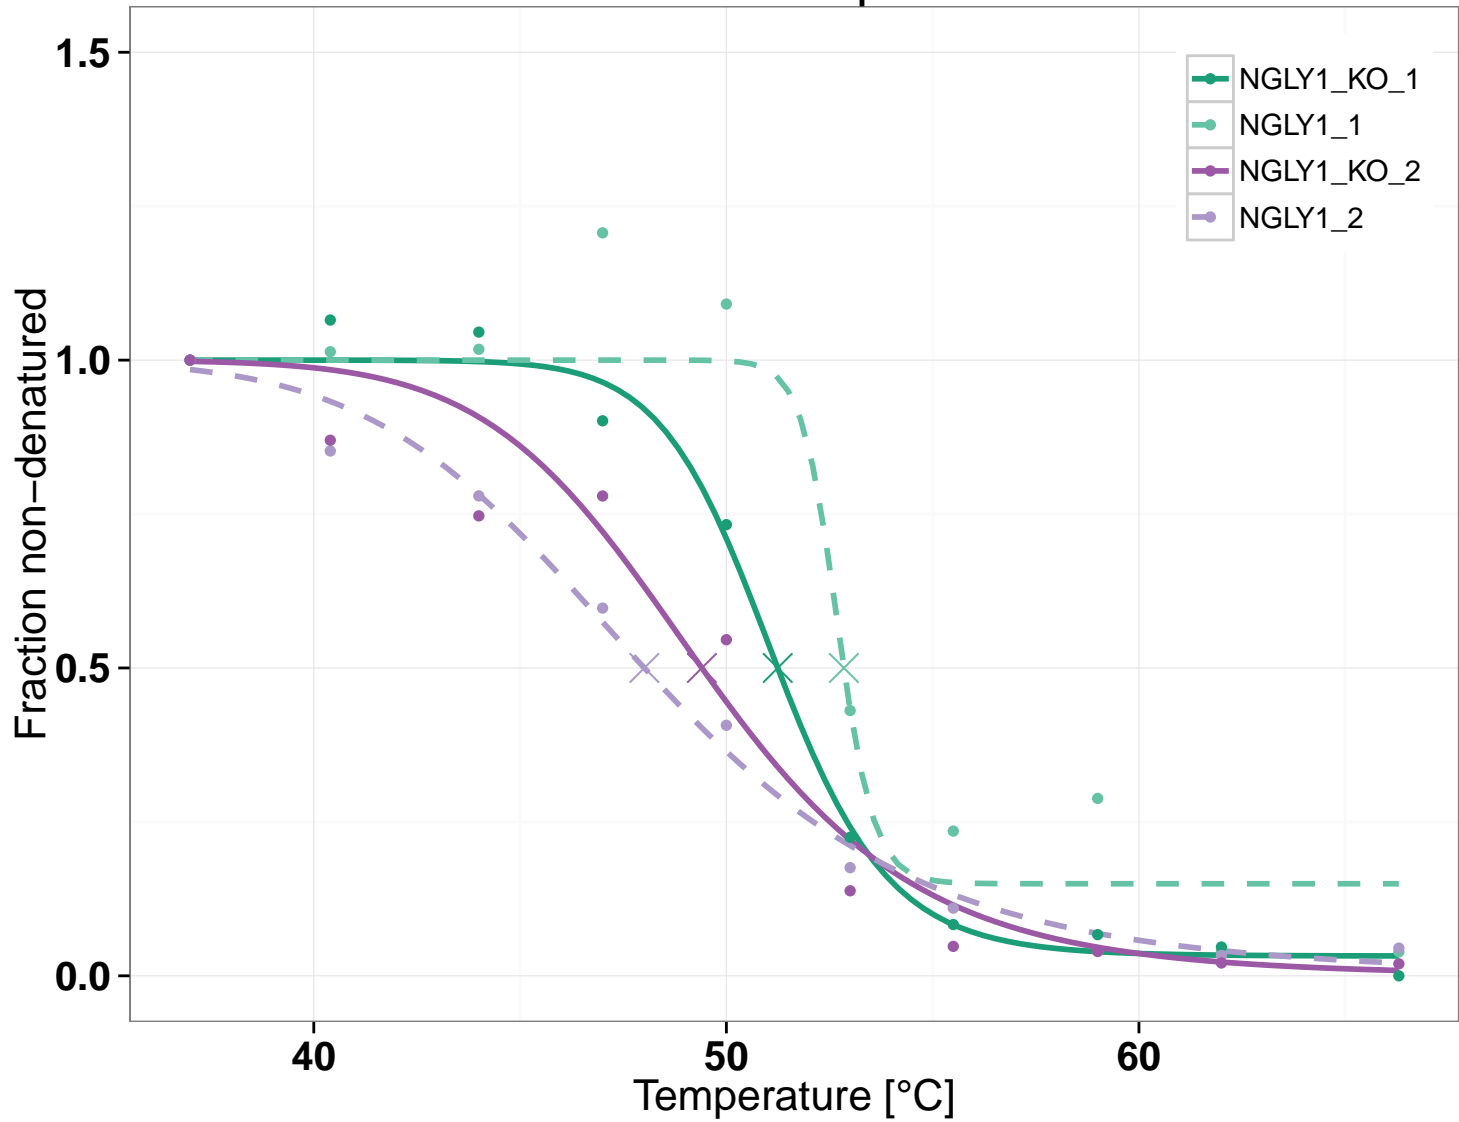

|            | meltPoint | slope  | plateau | R2   |
|------------|-----------|--------|---------|------|
| NGLY1_KO_1 | 51.24     | -0.18  | 0.03    | 0.99 |
| NGLY1_1    | 52.85     | -0.48  | 0.15    | 0.95 |
| NGLY1_KO_2 | 49.41     | -0.095 | 0       | 0.96 |
| NGLY1_2    | 48.01     | -0.074 | 0       | 0.99 |

Supplement: Supplementary file 1892 [file 1]

IPI00477518.1|EBAG9

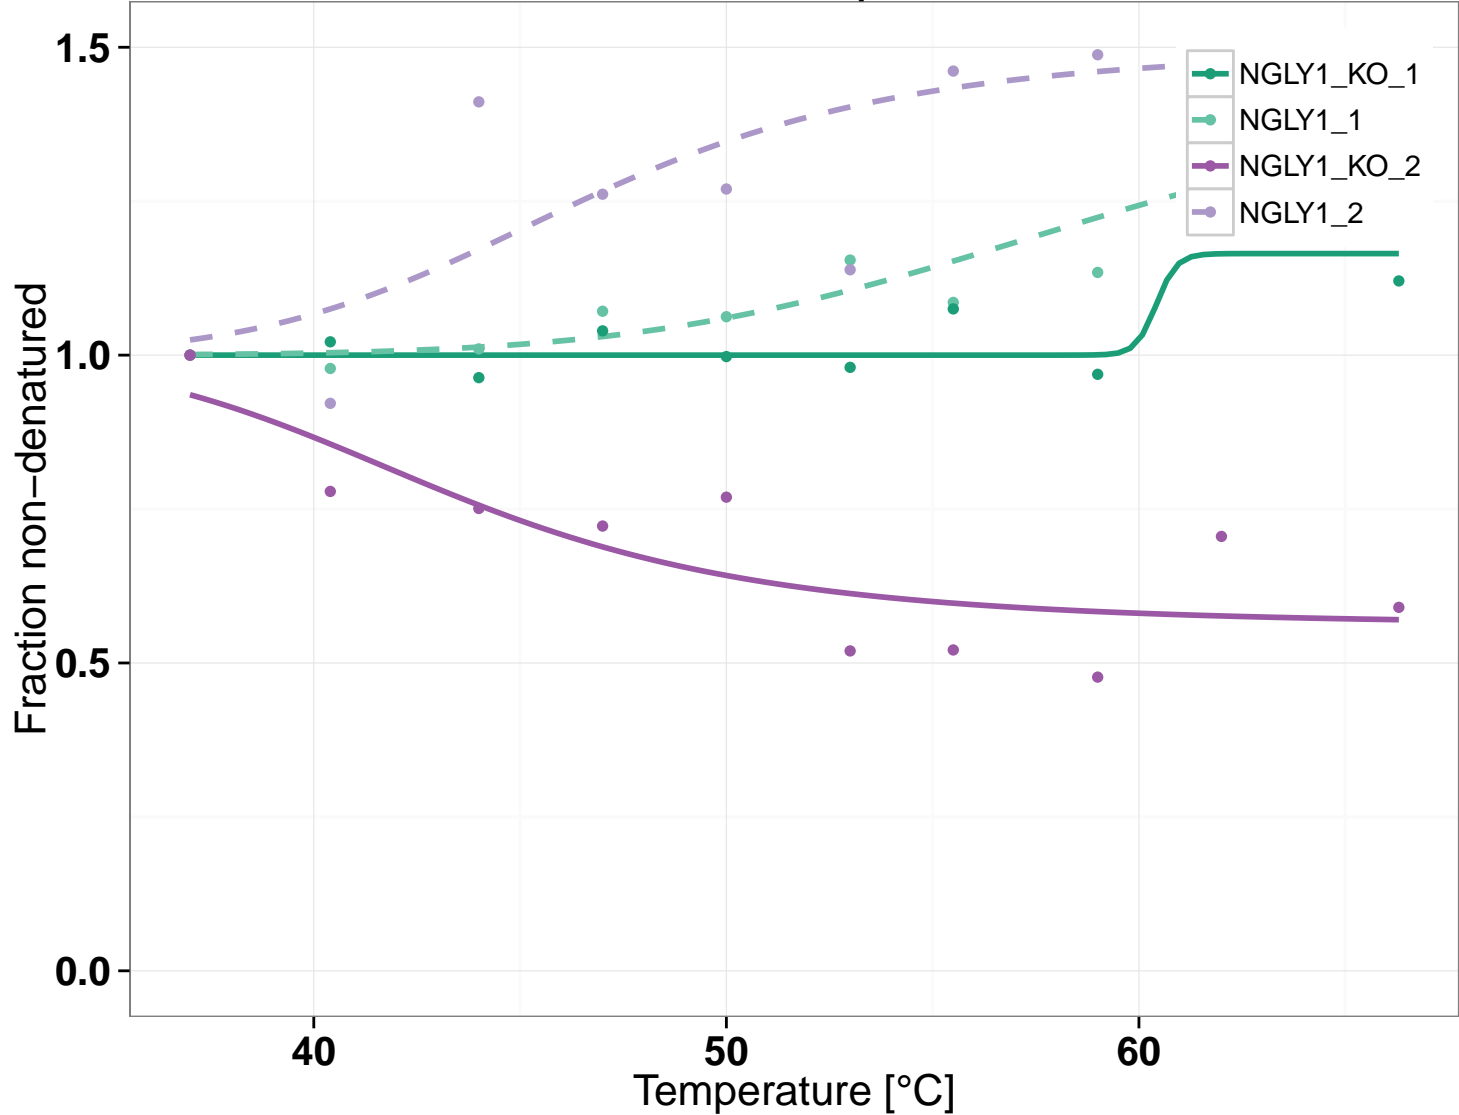

|            | meltPoint | slope  | plateau | R2   |
|------------|-----------|--------|---------|------|
| NGLY1_KO_1 | –         | 0.17   | 1.16    | 0.74 |
| NGLY1_1    | –         | 0.02   | 1.46    | 0.76 |
| NGLY1_KO_2 | –         | –0.028 | 0.56    | 0.69 |
| NGLY1_2    | –         | 0.032  | 1.5     | 0.53 |

Supplement: Supplementary file 1893 [file 1]

IPI00883647.1|IK

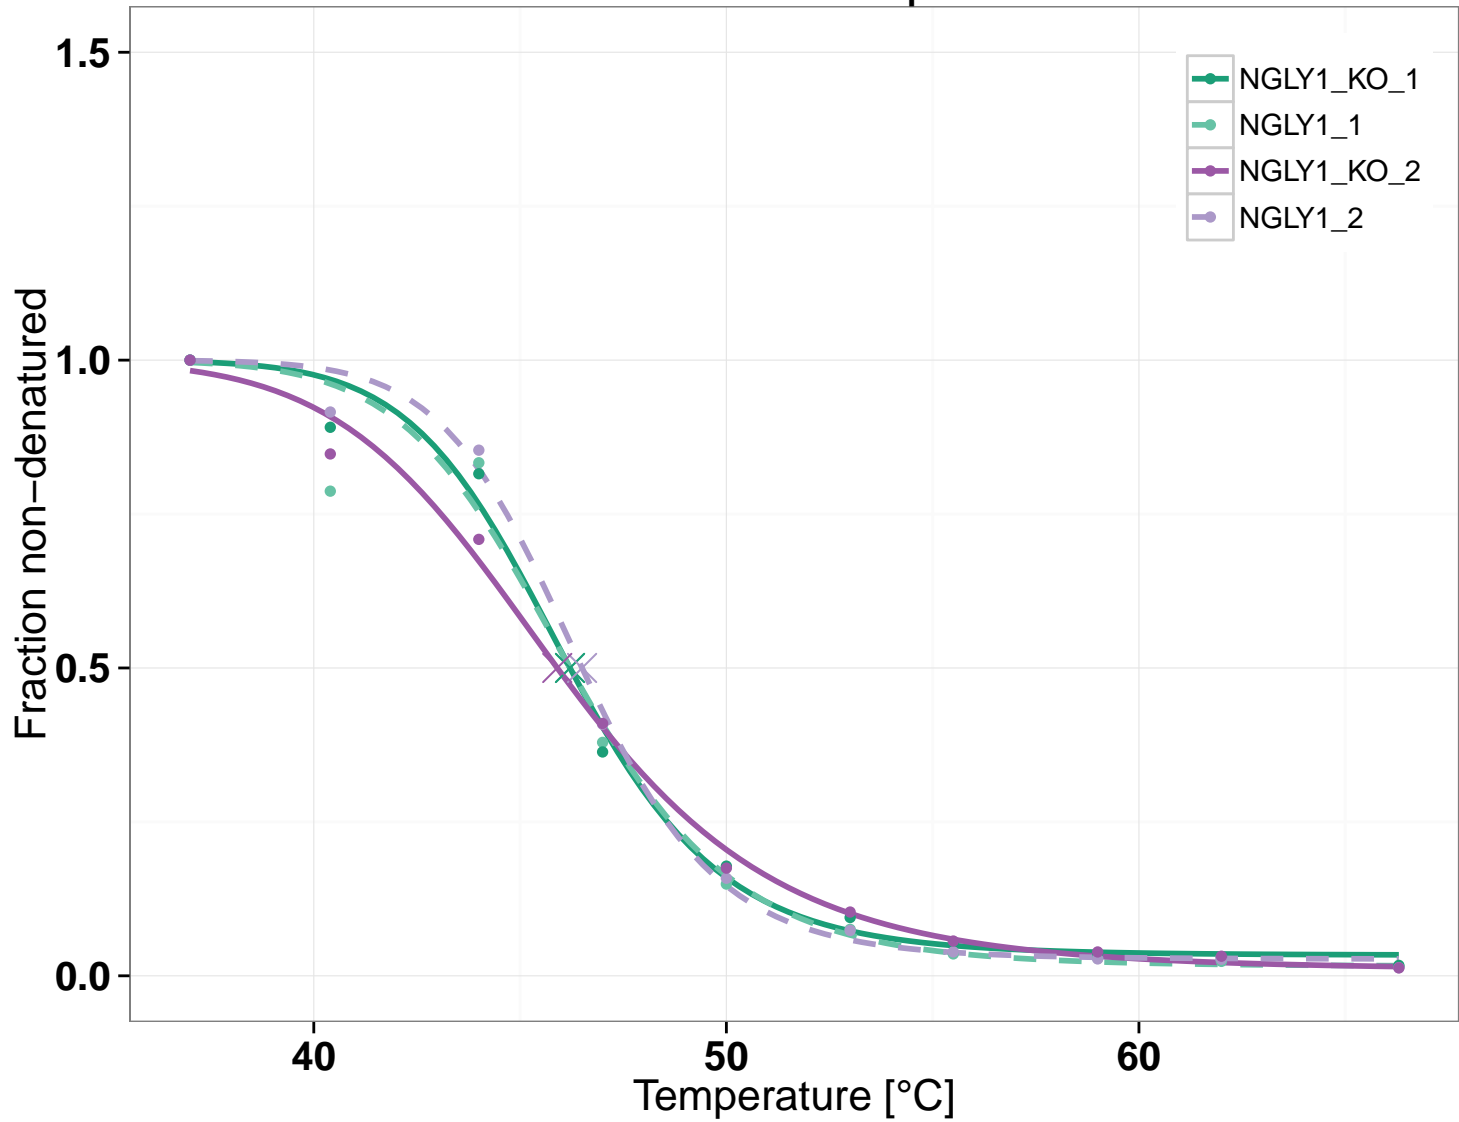

|            | meltPoint | slope  | plateau | R2   |
|------------|-----------|--------|---------|------|
| NGLY1_KO_1 | 46.21     | -0.13  | 0.03    | 0.99 |
| NGLY1_1    | 46.21     | -0.12  | 0.02    | 0.97 |
| NGLY1_KO_2 | 45.9      | -0.093 | 0.01    | 1    |
| NGLY1_2    | 46.5      | -0.14  | 0.03    | 1    |

Supplement: Supplementary file 1894 [file 1]

IPI00855943.1|C7ORF25

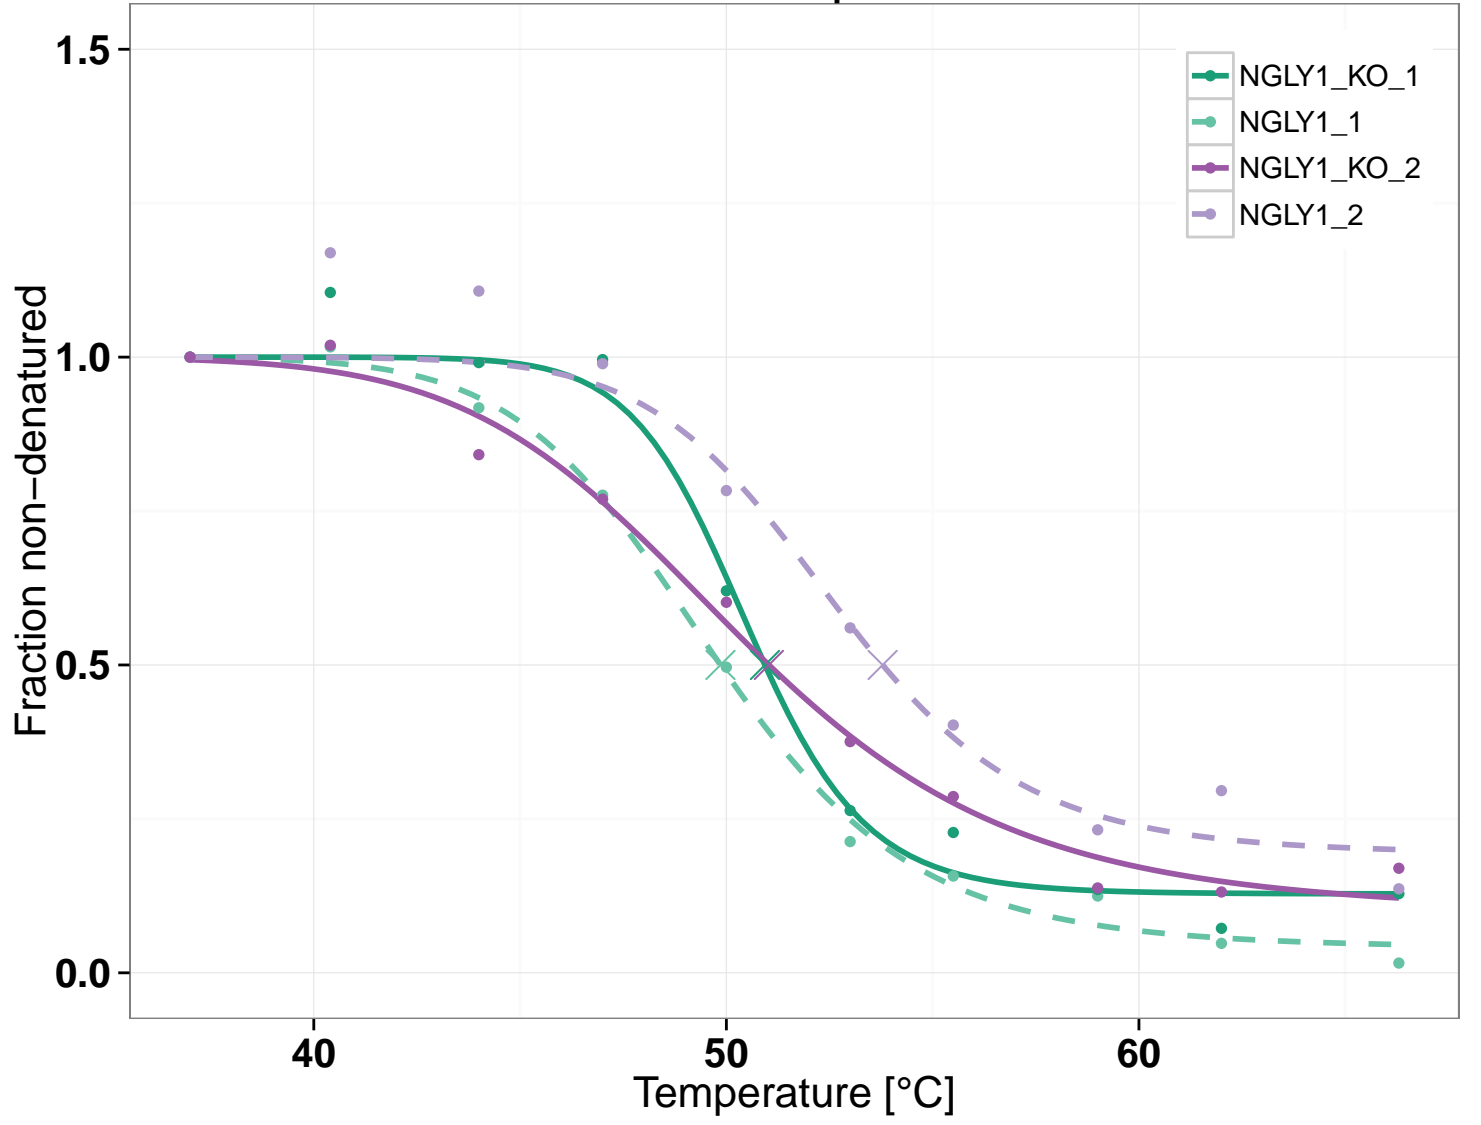

|            | meltPoint | slope  | plateau | R2   |
|------------|-----------|--------|---------|------|
| NGLY1_KO_1 | 50.94     | -0.15  | 0.13    | 0.99 |
| NGLY1_1    | 49.86     | -0.099 | 0.04    | 1    |
| NGLY1_KO_2 | 51.03     | -0.068 | 0.1     | 0.99 |
| NGLY1_2    | 53.79     | -0.089 | 0.19    | 0.96 |

Supplement: Supplementary file 1895 [file 1]

IPI00030334.1|PCGF6

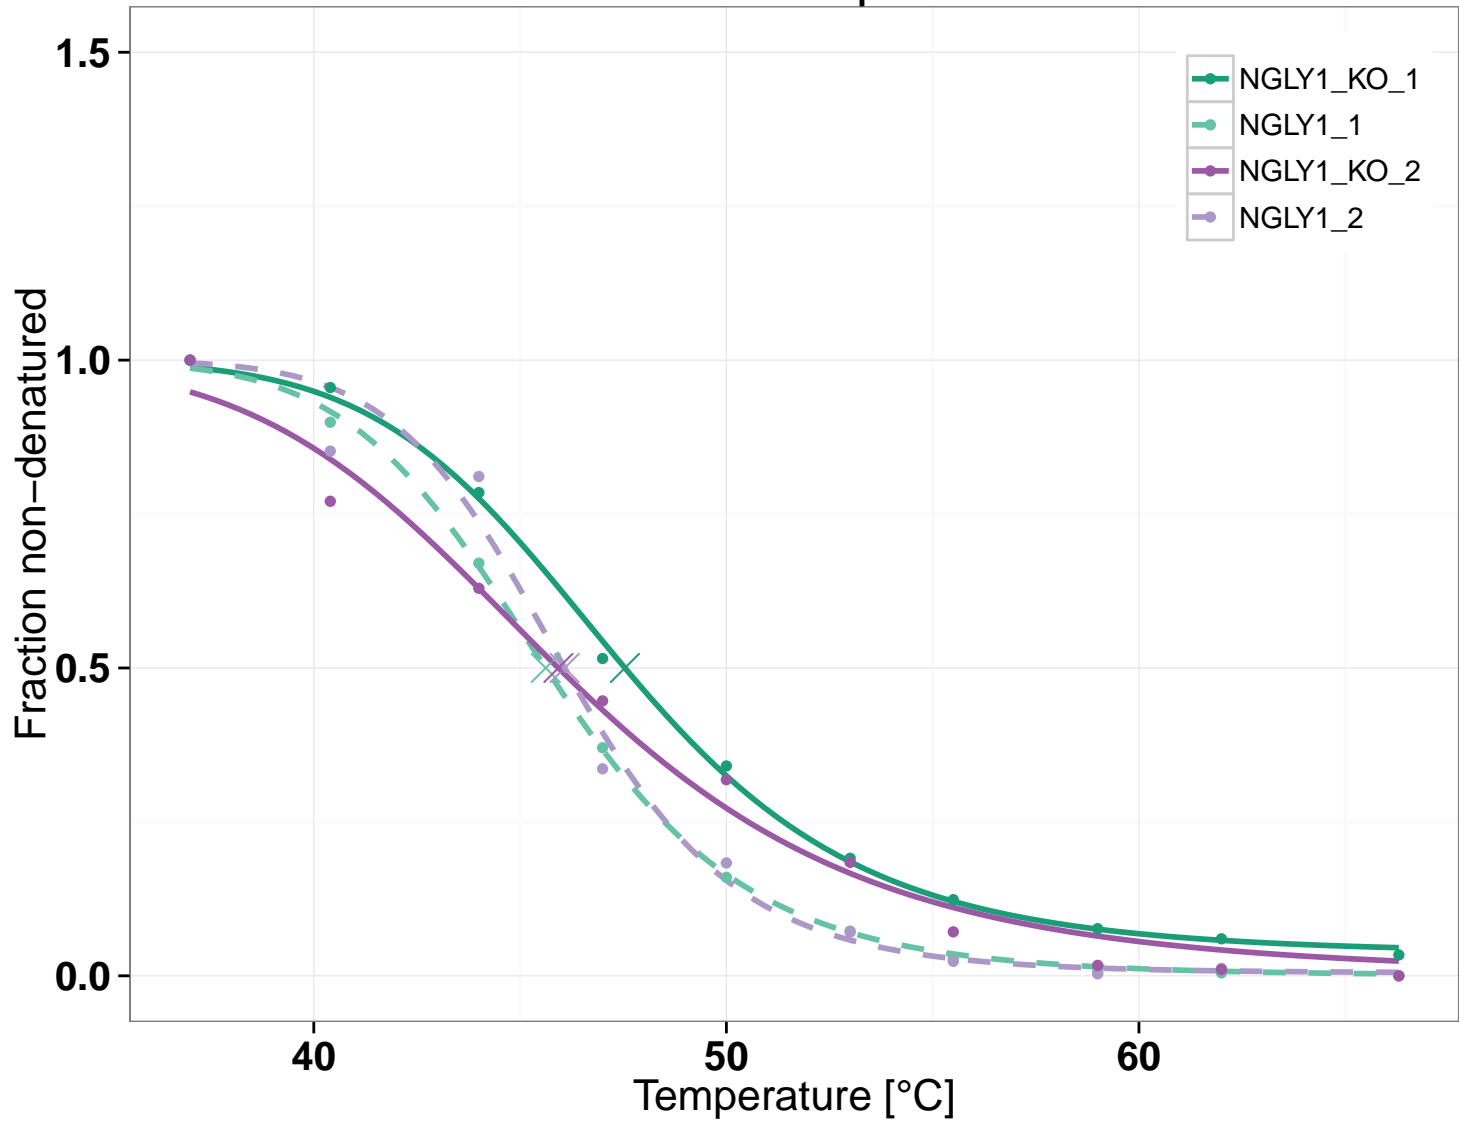

|            | meltPoint | slope  | plateau | R2   |
|------------|-----------|--------|---------|------|
| NGLY1_KO_1 | 47.54     | -0.082 | 0.04    | 1    |
| NGLY1_1    | 45.62     | -0.1   | 0       | 1    |
| NGLY1_KO_2 | 45.93     | -0.067 | 0       | 0.99 |
| NGLY1_2    | 46.08     | -0.12  | 0       | 0.99 |

Supplement: Supplementary file 1896 [file 1]

# IPI00328985.1|THOC6

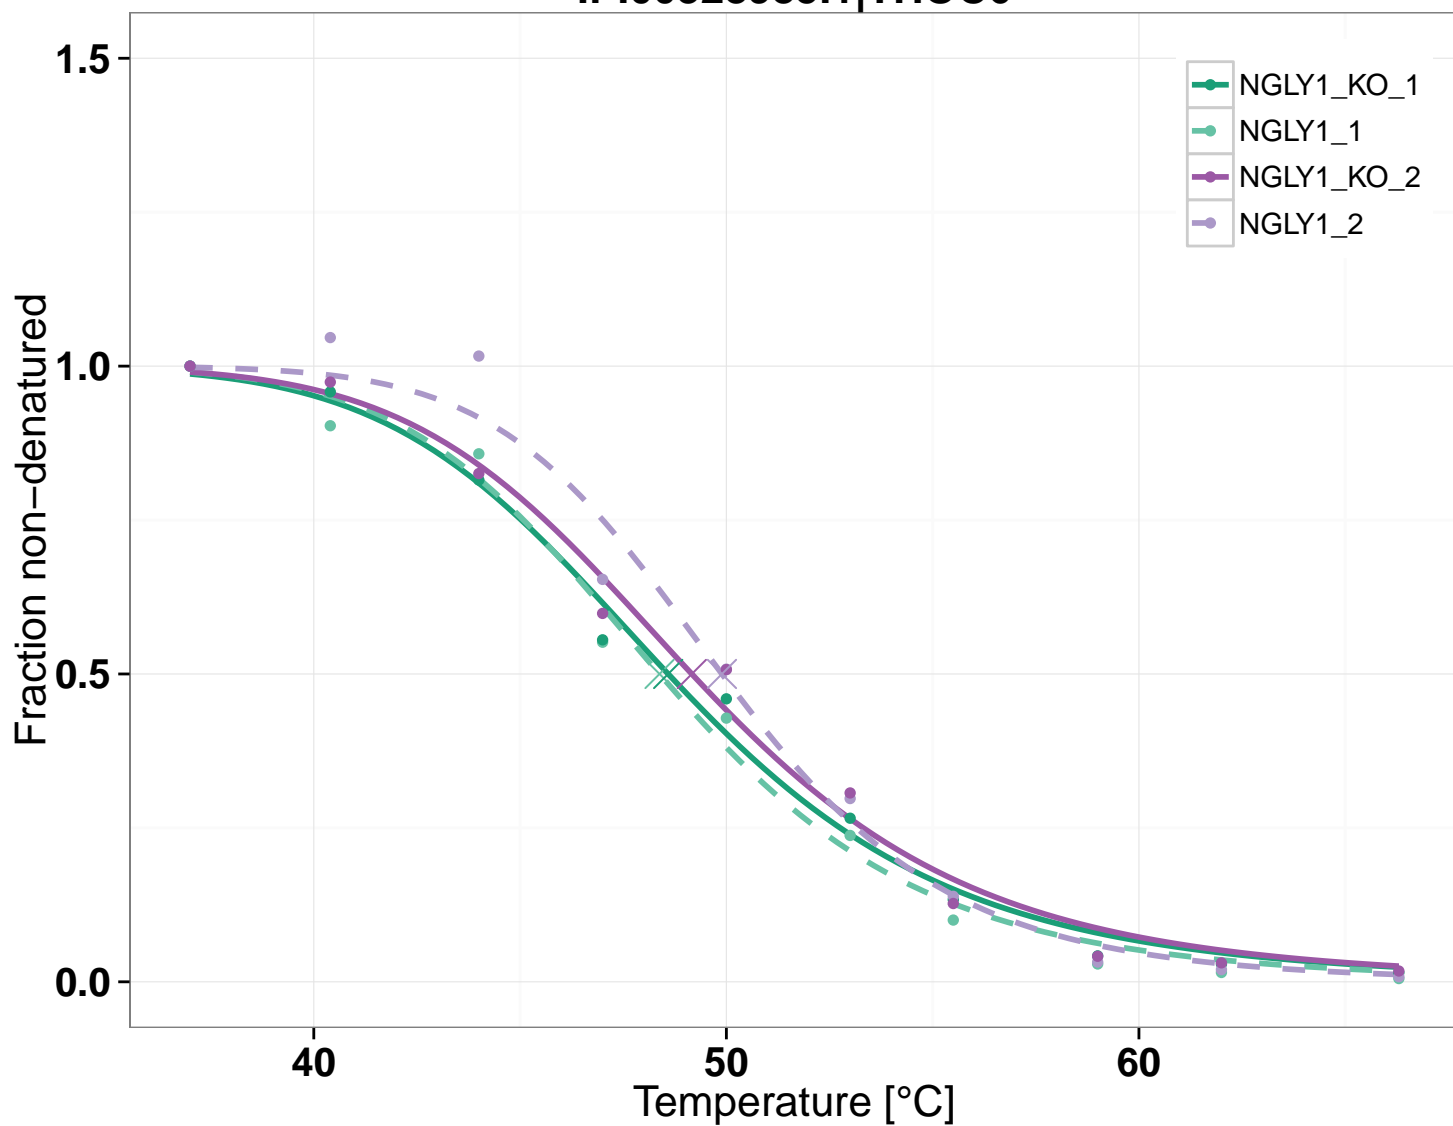

|            | meltPoint | slope  | plateau | R2   |
|------------|-----------|--------|---------|------|
| NGLY1_KO_1 | 48.59     | -0.073 | 0       | 0.99 |
| NGLY1_1    | 48.38     | -0.079 | 0       | 0.99 |
| NGLY1_KO_2 | 49.16     | -0.073 | 0       | 0.99 |
| NGLY1_2    | 49.89     | -0.091 | 0       | 0.98 |

Supplement: Supplementary file 1897 [file 1]

IPI00419626.2|MRPL55

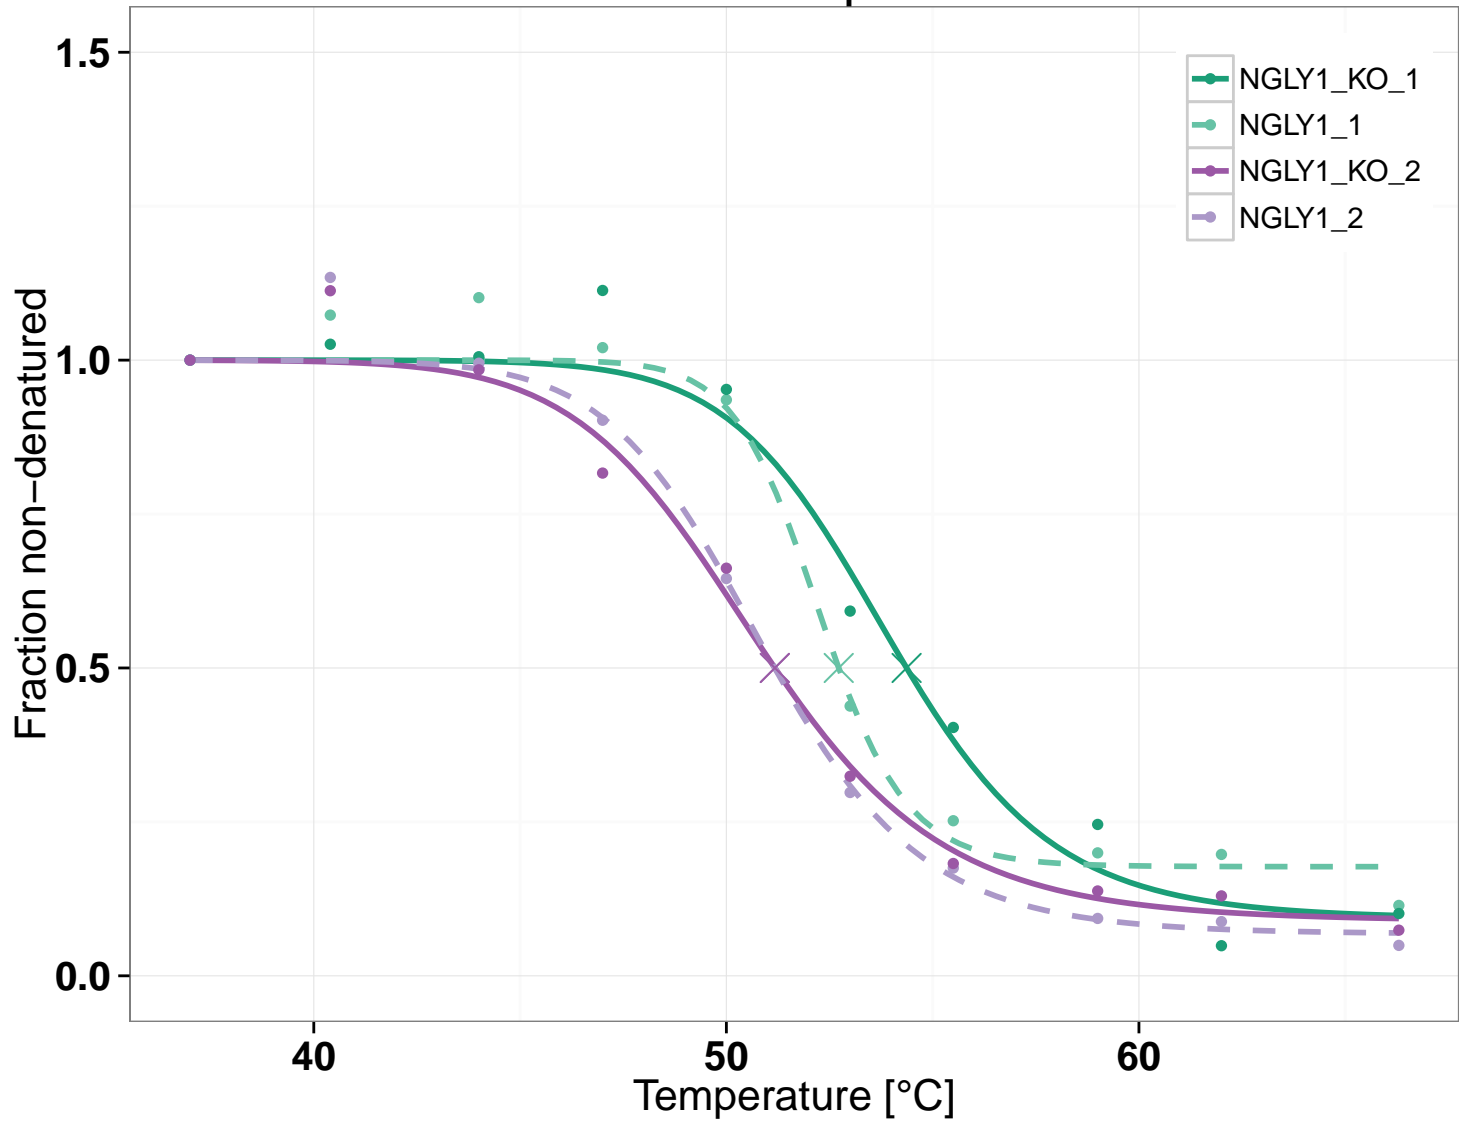

|            | meltPoint | slope | plateau | R2   |
|------------|-----------|-------|---------|------|
| NGLY1_KO_1 | 54.37     | -0.12 | 0.09    | 0.98 |
| NGLY1_1    | 52.72     | -0.2  | 0.18    | 0.99 |
| NGLY1_KO_2 | 51.18     | -0.1  | 0.09    | 0.99 |
| NGLY1_2    | 51.17     | -0.12 | 0.07    | 0.99 |

Supplement: Supplementary file 1898 [file 1]

# IPI00024283.2|WDFY1

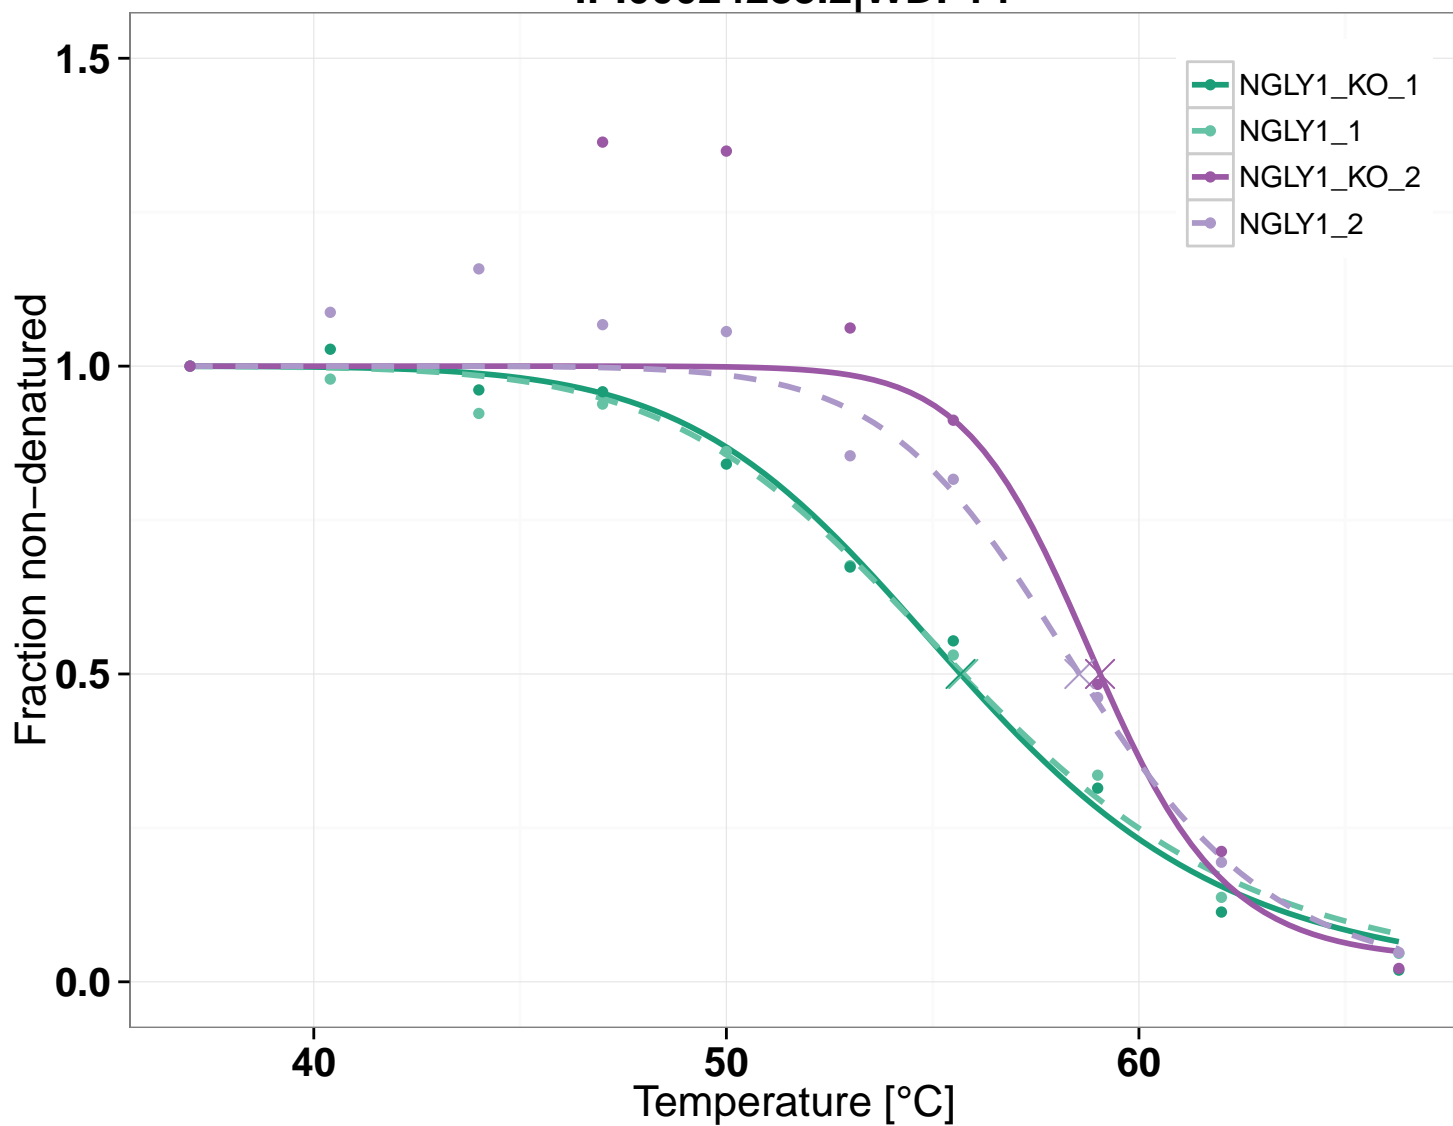

|            | meltPoint | slope  | plateau | R2   |
|------------|-----------|--------|---------|------|
| NGLY1_KO_1 | 55.68     | -0.076 | 0       | 0.99 |
| NGLY1_1    | 55.74     | -0.071 | 0       | 0.99 |
| NGLY1_KO_2 | 59.06     | -0.15  | 0.03    | 0.68 |
| NGLY1_2    | 58.56     | -0.11  | 0       | 0.97 |

Supplement: Supplementary file 1899 [file 1]

# IPI00419979.3|PAK2

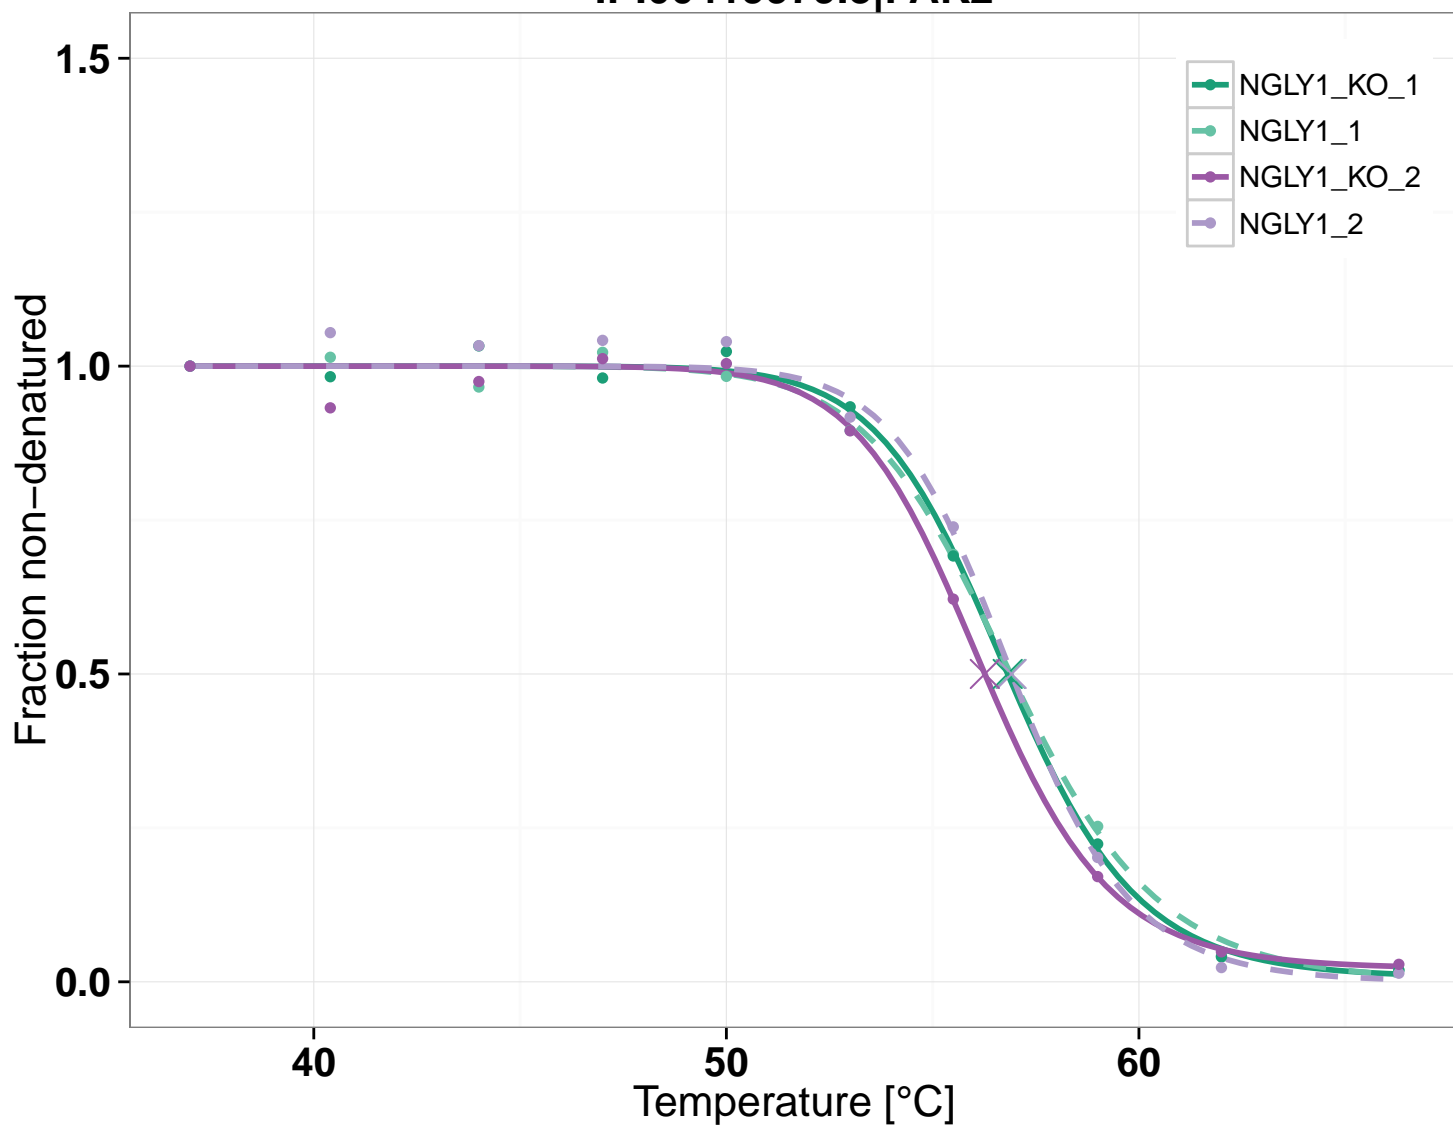

|            | meltPoint | slope | plateau | R2   |
|------------|-----------|-------|---------|------|
| NGLY1_KO_1 | 56.82     | -0.16 | 0.01    | 1    |
| NGLY1_1    | 56.89     | -0.14 | 0       | 1    |
| NGLY1_KO_2 | 56.26     | -0.16 | 0.02    | 1    |
| NGLY1_2    | 56.92     | -0.17 | 0       | 0.99 |

Supplement: Supplementary file 1900 [file 1]

# IPI00219628.3|PRKCB

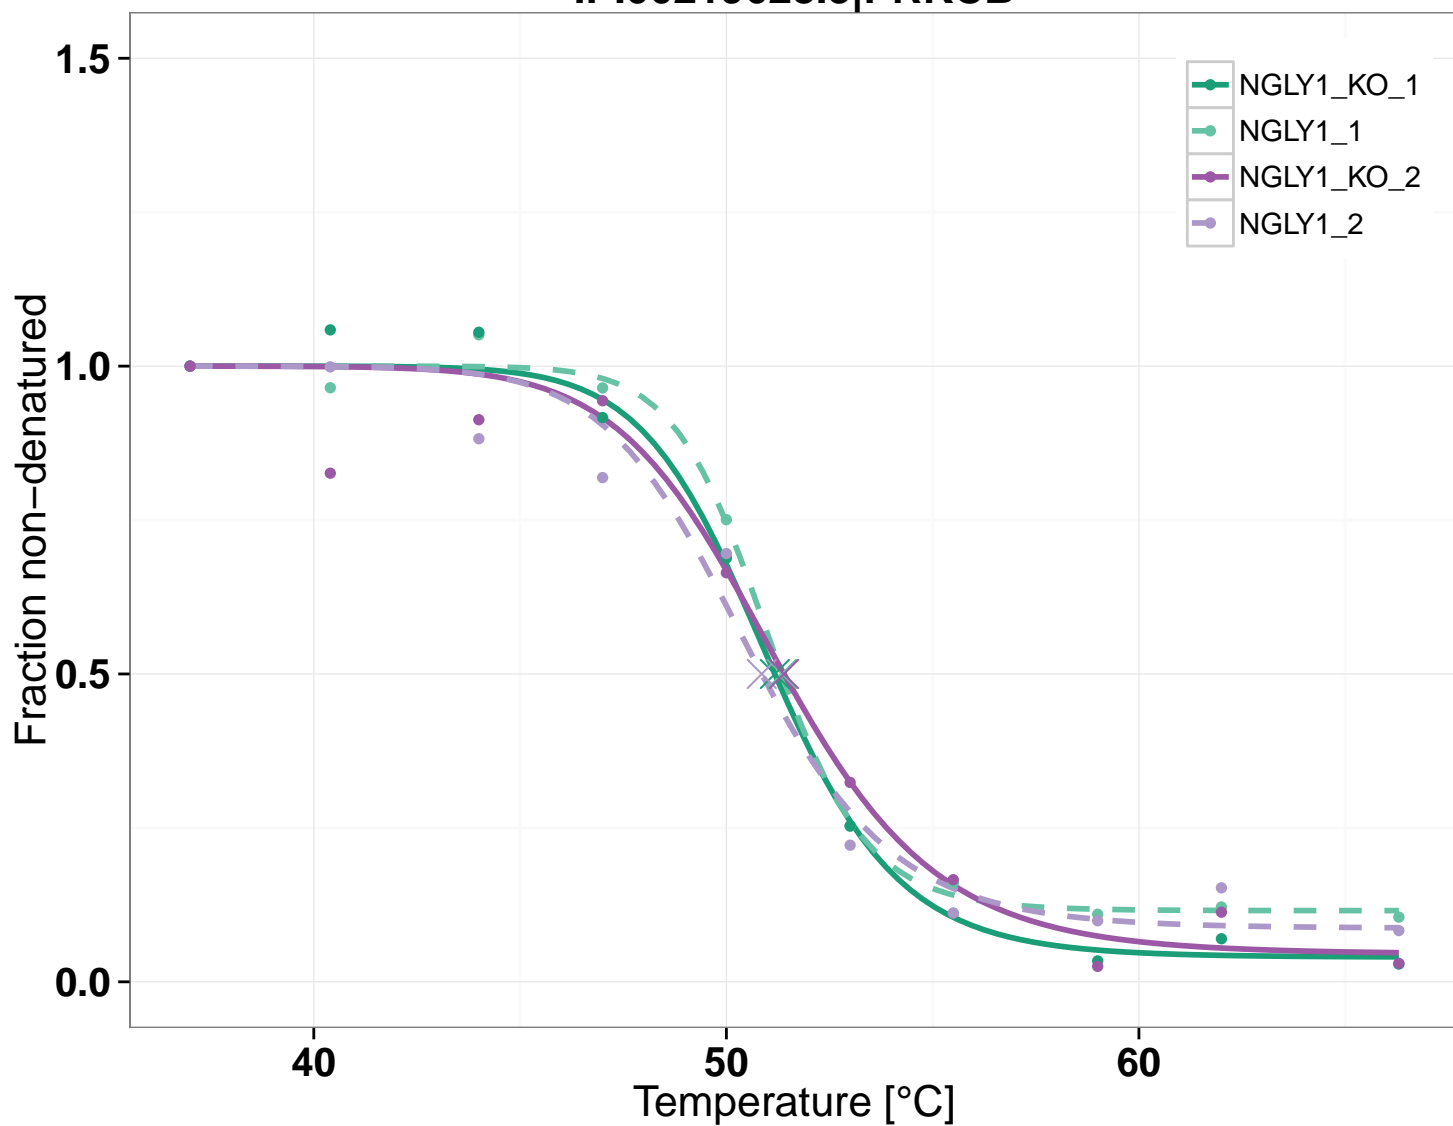

|            | meltPoint | slope | plateau | R2   |
|------------|-----------|-------|---------|------|
| NGLY1_KO_1 | 51.17     | -0.15 | 0.04    | 1    |
| NGLY1_1    | 51.34     | -0.19 | 0.12    | 1    |
| NGLY1_KO_2 | 51.4      | -0.12 | 0.04    | 0.97 |
| NGLY1_2    | 50.86     | -0.13 | 0.09    | 0.98 |

Supplement: Supplementary file 1901 [file 1]

IPI00305858.6|C9ORF156

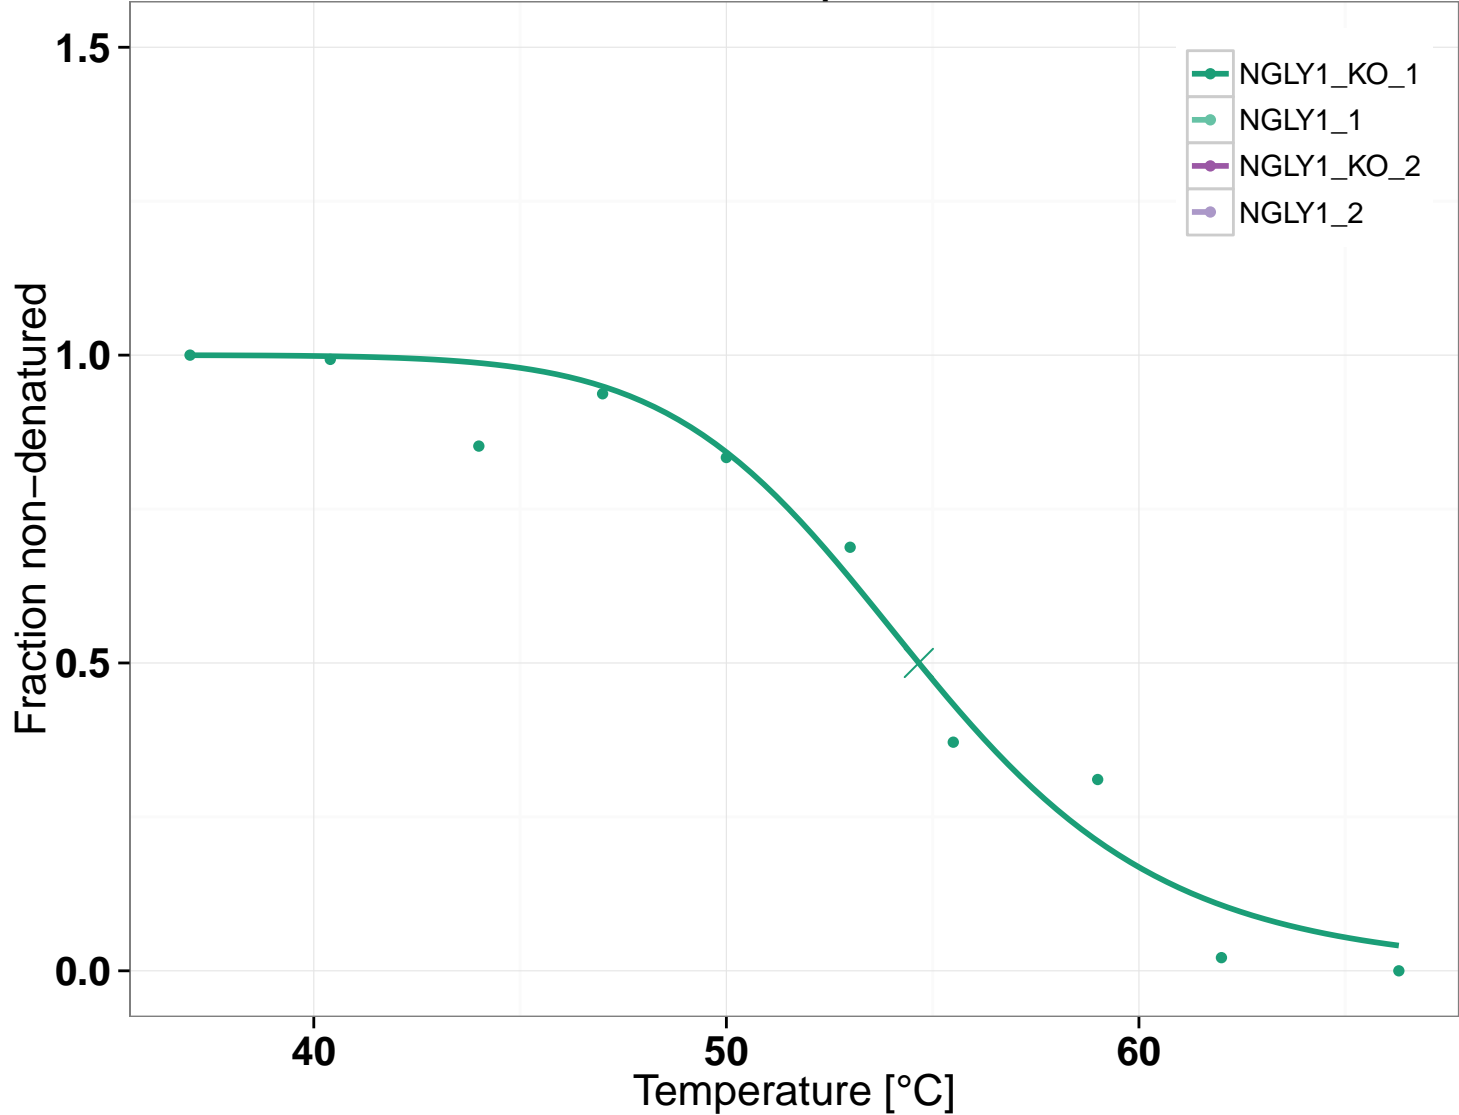

|            | meltPoint | slope  | plateau | R2   |
|------------|-----------|--------|---------|------|
| NGLY1_KO_1 | 54.67     | -0.083 | 0       | 0.97 |
| NGLY1_1    | -         | -      | -       | -    |
| NGLY1_KO_2 | -         | -      | -       | -    |
| NGLY1_2    | -         | -      | -       | -    |

Supplement: Supplementary file 1902 [file 1]

# IPI00409659.2|UBQLN2

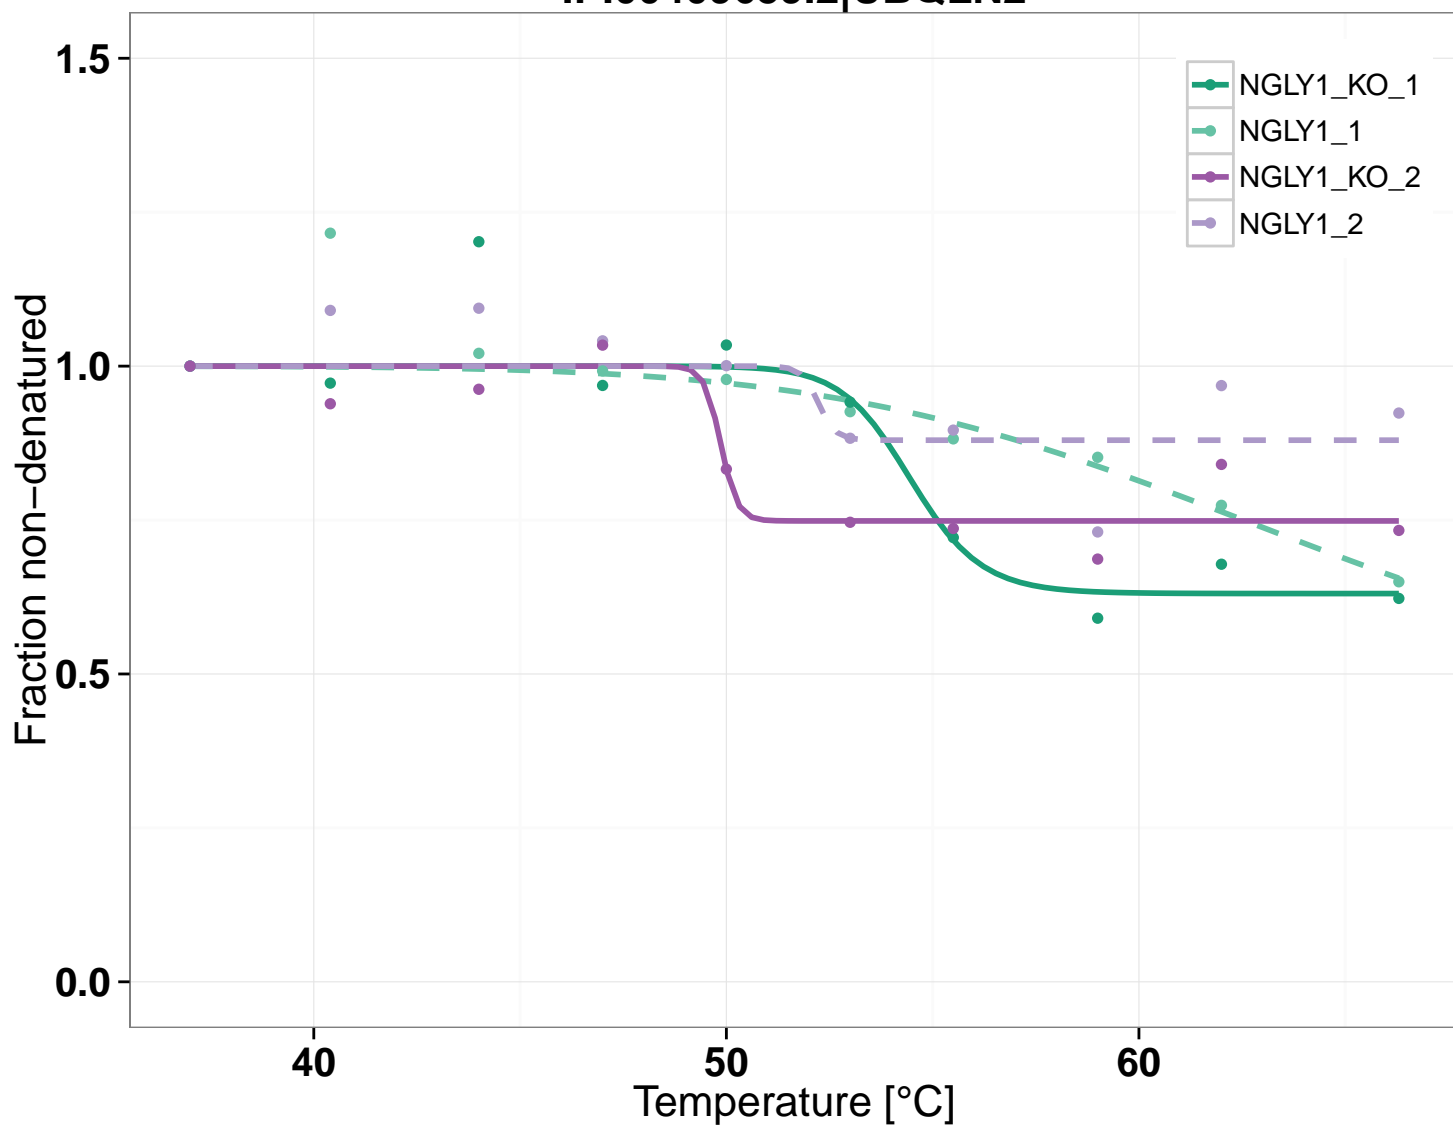

|            | meltPoint | slope  | plateau | R2   |
|------------|-----------|--------|---------|------|
| NGLY1_KO_1 | —         | -0.11  | 0.63    | 0.87 |
| NGLY1_1    | —         | -0.026 | 0.36    | 0.77 |
| NGLY1_KO_2 | —         | -0.32  | 0.75    | 0.87 |
| NGLY1_2    | —         | -0.14  | 0.88    | 0.53 |

Supplement: Supplementary file 1903 [file 1]

# IPI00333143.3|DGKA

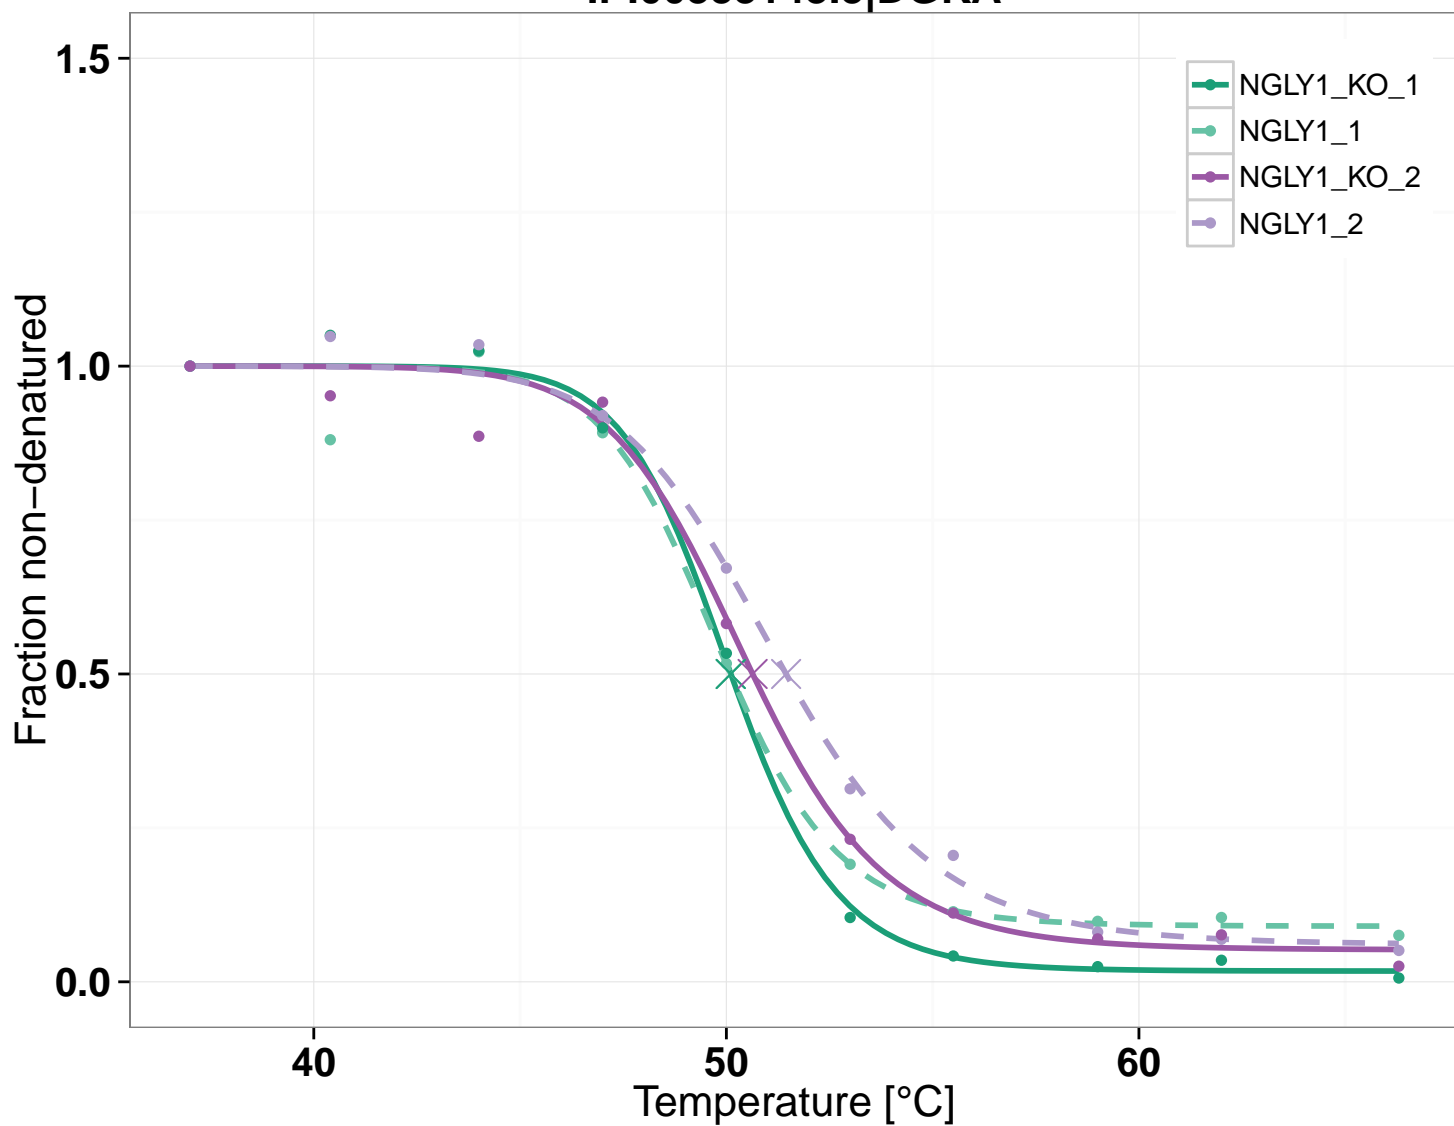

|            | meltPoint | slope | plateau | R2   |
|------------|-----------|-------|---------|------|
| NGLY1_KO_1 | 50.11     | -0.19 | 0.02    | 1    |
| NGLY1_1    | 50.1      | -0.16 | 0.09    | 0.99 |
| NGLY1_KO_2 | 50.64     | -0.14 | 0.05    | 0.99 |
| NGLY1_2    | 51.45     | -0.12 | 0.06    | 1    |

Supplement: Supplementary file 1904 [file 1]

# IPI00027252.6|PHB2

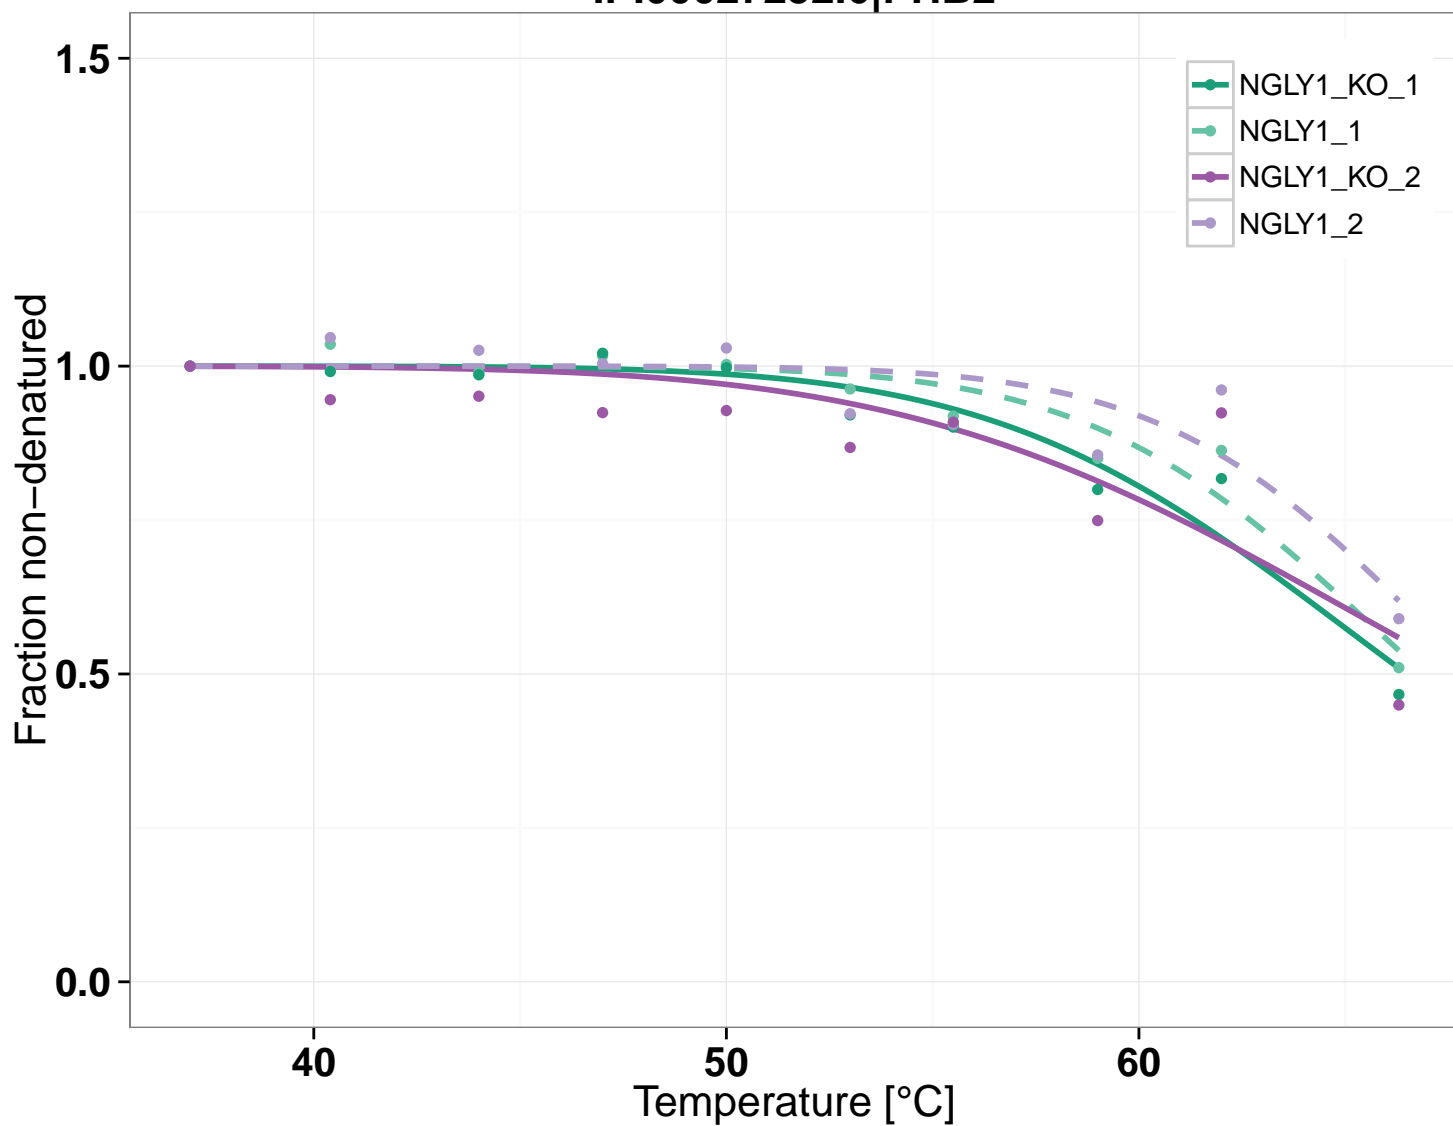

|            | meltPoint | slope  | plateau | R2   |
|------------|-----------|--------|---------|------|
| NGLY1_KO_1 | —         | −0.05  | 0       | 0.93 |
| NGLY1_1    | —         | −0.062 | 0       | 0.94 |
| NGLY1_KO_2 | —         | −0.037 | 0       | 0.68 |
| NGLY1_2    | —         | —      | 0       | 0.79 |

Supplement: Supplementary file 1905 [file 1]

# IPI00645608.2|IRF2BP1

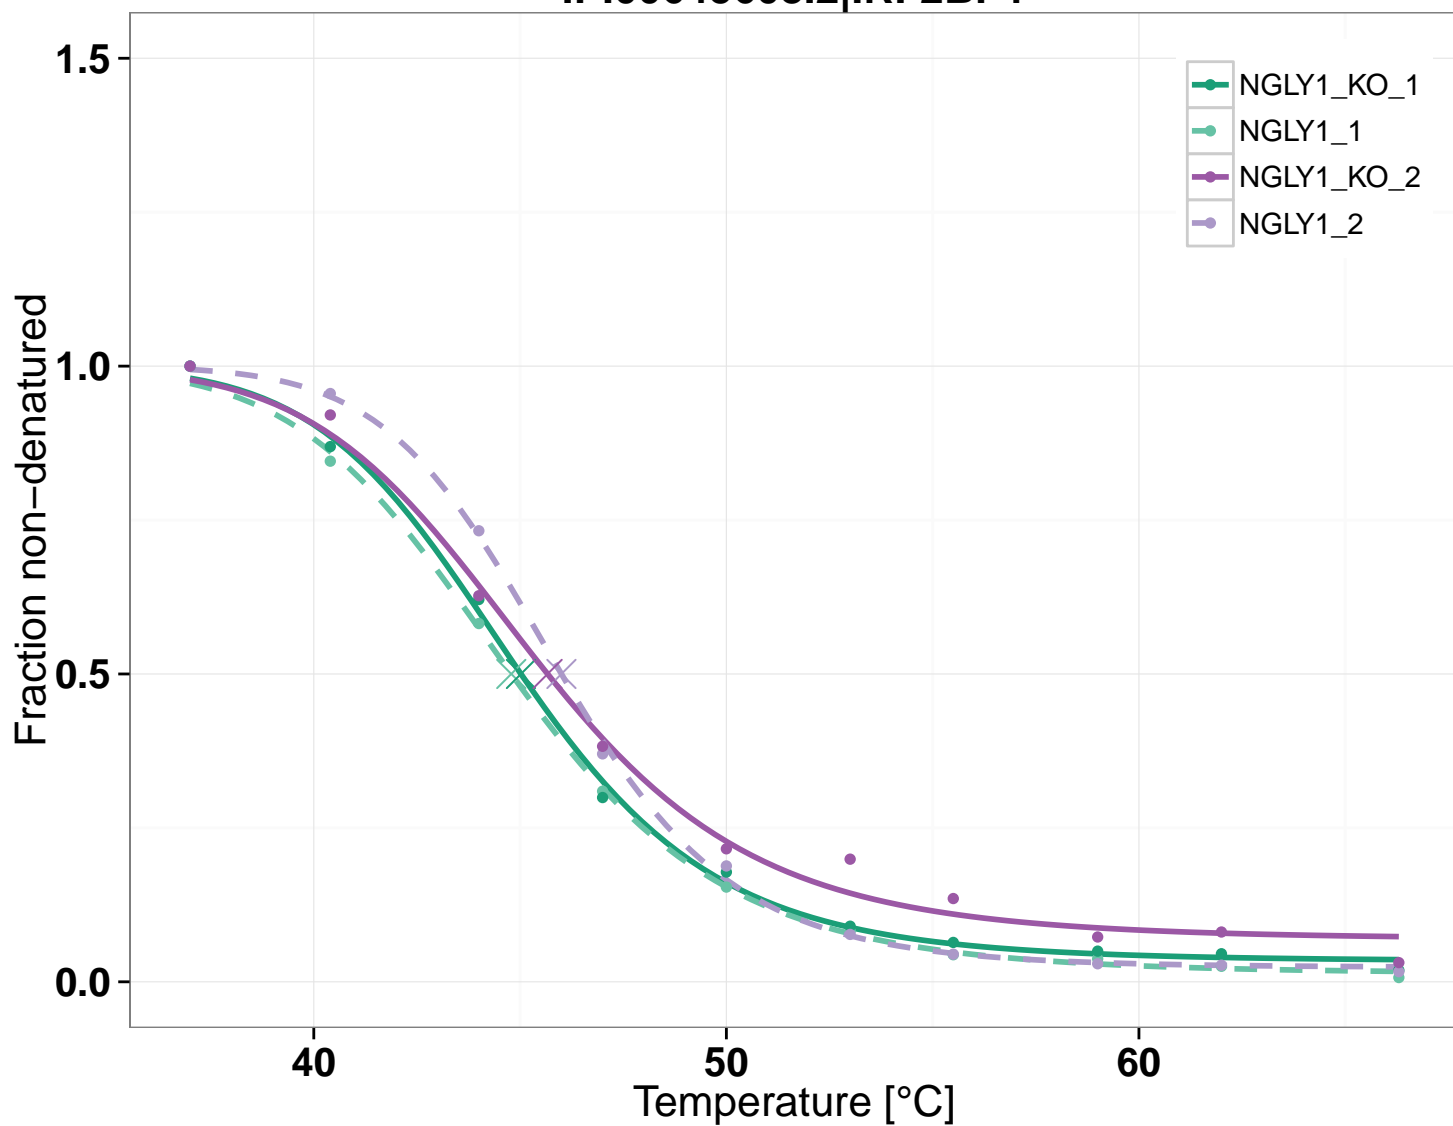

|            | meltPoint | slope  | plateau | R2   |
|------------|-----------|--------|---------|------|
| NGLY1_KO_1 | 45.02     | -0.1   | 0.03    | 1    |
| NGLY1_1    | 44.79     | -0.095 | 0.01    | 1    |
| NGLY1_KO_2 | 45.67     | -0.087 | 0.07    | 0.99 |
| NGLY1_2    | 46        | -0.12  | 0.02    | 1    |

Supplement: Supplementary file 1906 [file 1]

# IPI00065435.2|FGD4

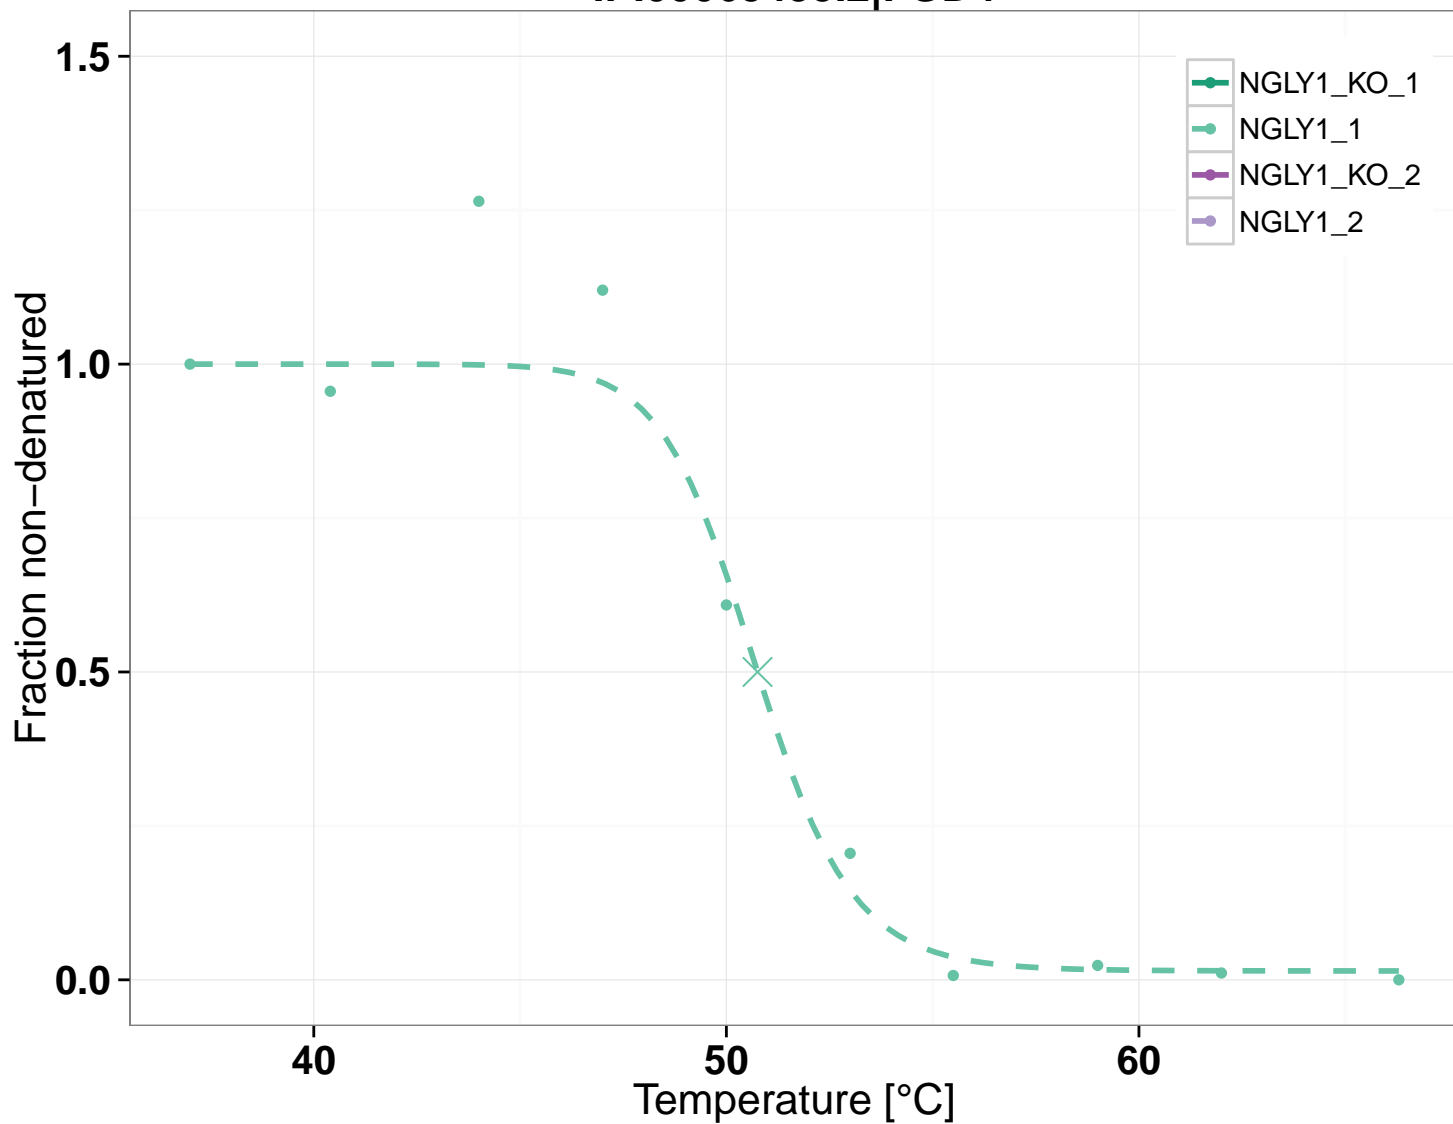

|            | meltPoint | slope | plateau | R2   |
|------------|-----------|-------|---------|------|
| NGLY1_KO_1 | —         | —     | —       | —    |
| NGLY1_1    | 50.76     | -0.21 | 0.01    | 0.96 |
| NGLY1_KO_2 | —         | —     | —       | —    |
| NGLY1_2    | —         | —     | —       | —    |

Supplement: Supplementary file 1907 [file 1]

# IPI00871828.1|CTNNBIP1

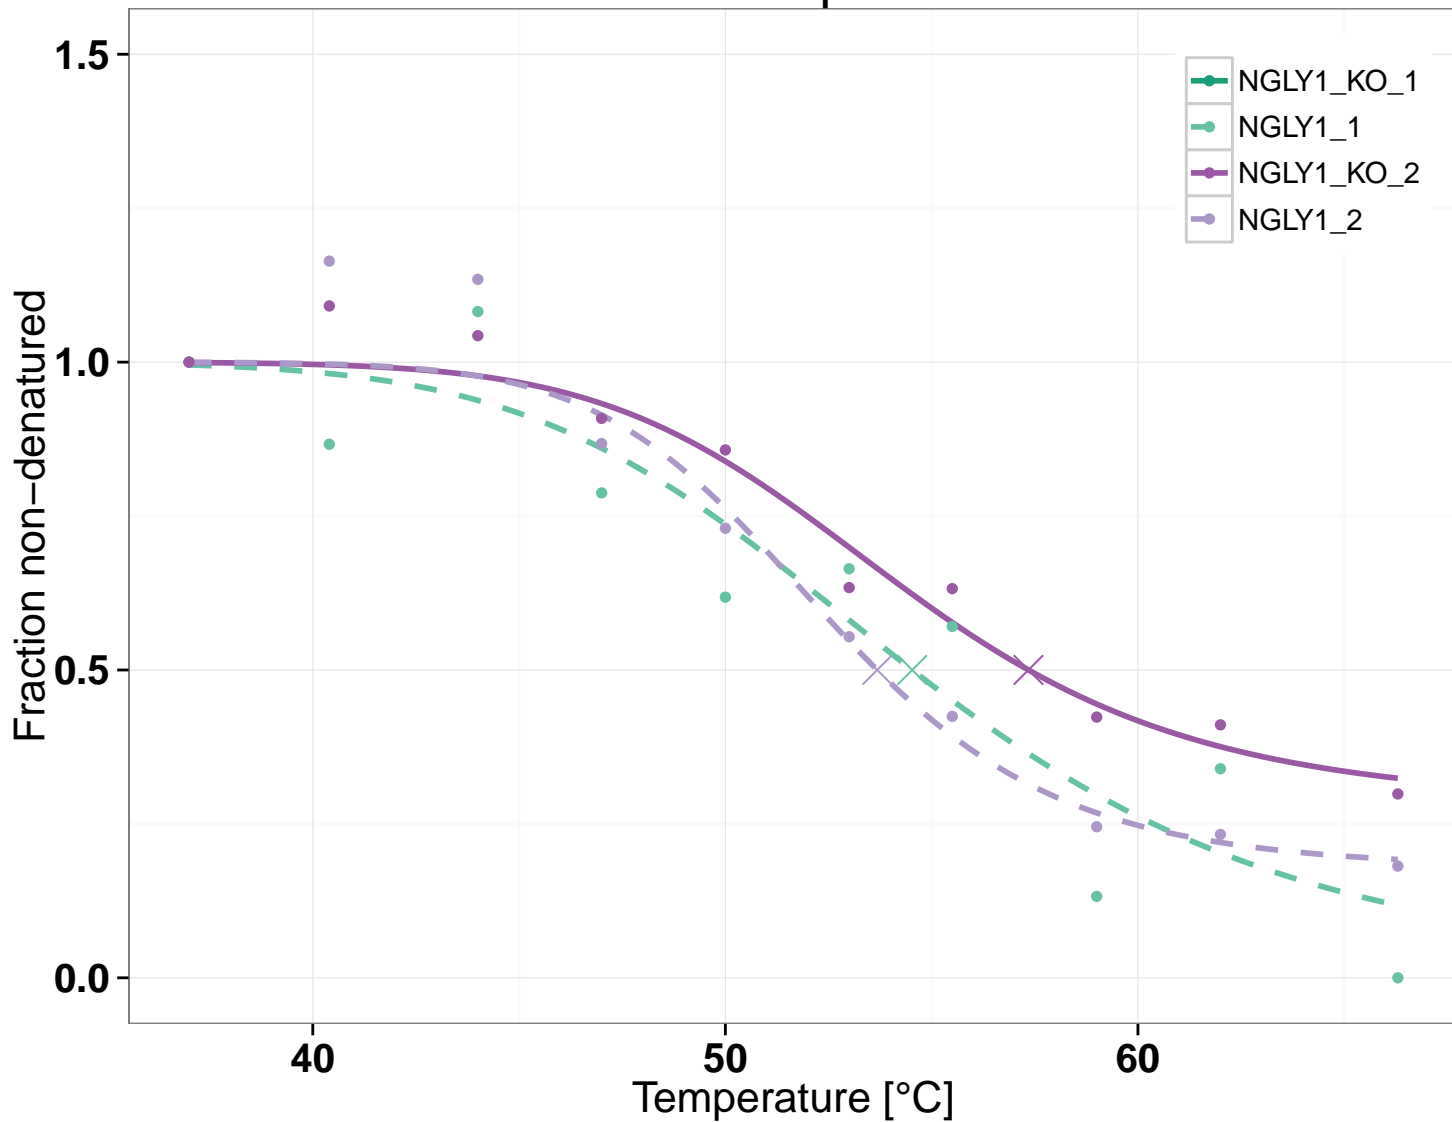

|            | meltPoint | slope  | plateau | R2   |
|------------|-----------|--------|---------|------|
| NGLY1_KO_1 | -         | -      | -       | -    |
| NGLY1_1    | 54.53     | -0.054 | 0       | 0.88 |
| NGLY1_KO_2 | 57.35     | -0.05  | 0.28    | 0.97 |
| NGLY1_2    | 53.68     | -0.074 | 0.18    | 0.96 |

Supplement: Supplementary file 1908 [file 1]
