# Supplementary material (part 20 of 85)
Source: publisher figshare collection journal article supplement (https://gsajournals.figshare.com/articles/dataset/_/12014913)

# IPI00010201.4|PSMD8

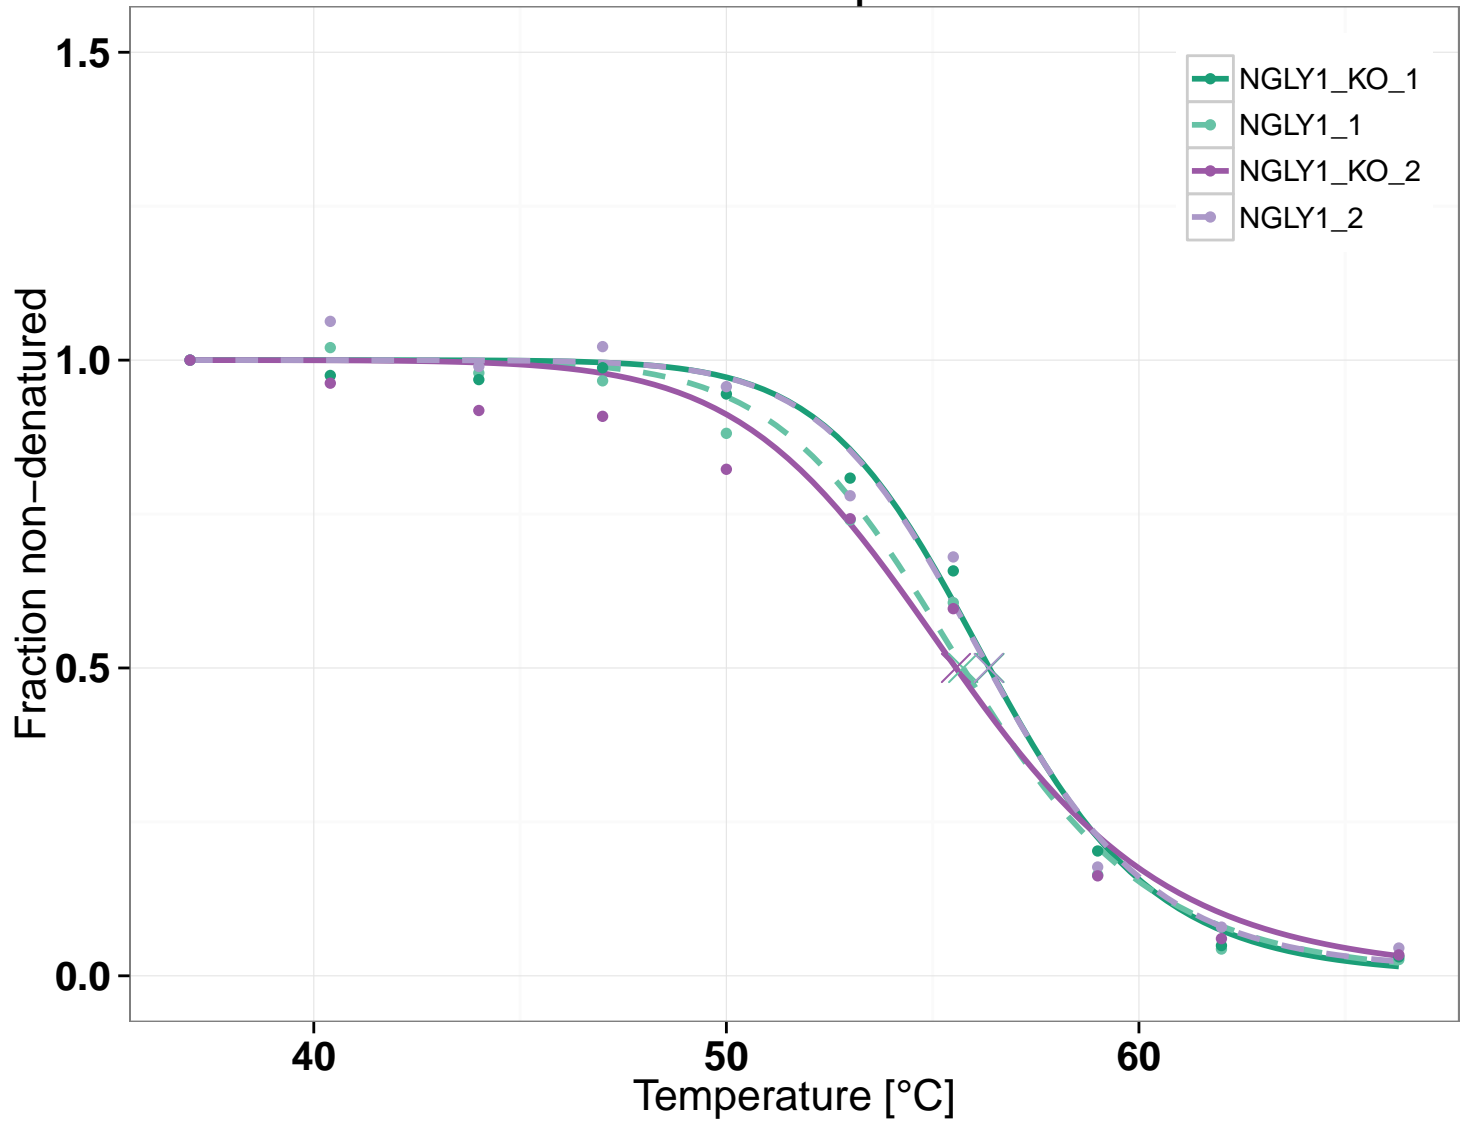

|            | meltPoint | slope  | plateau | R2   |
|------------|-----------|--------|---------|------|
| NGLY1_KO_1 | 56.38     | -0.12  | 0       | 0.99 |
| NGLY1_1    | 55.74     | -0.11  | 0       | 0.99 |
| NGLY1_KO_2 | 55.57     | -0.095 | 0       | 0.97 |
| NGLY1_2    | 56.36     | -0.12  | 0.01    | 0.99 |

Supplement: Supplementary file 1909 [file 1]

# IPI00166704.1|TOMM5

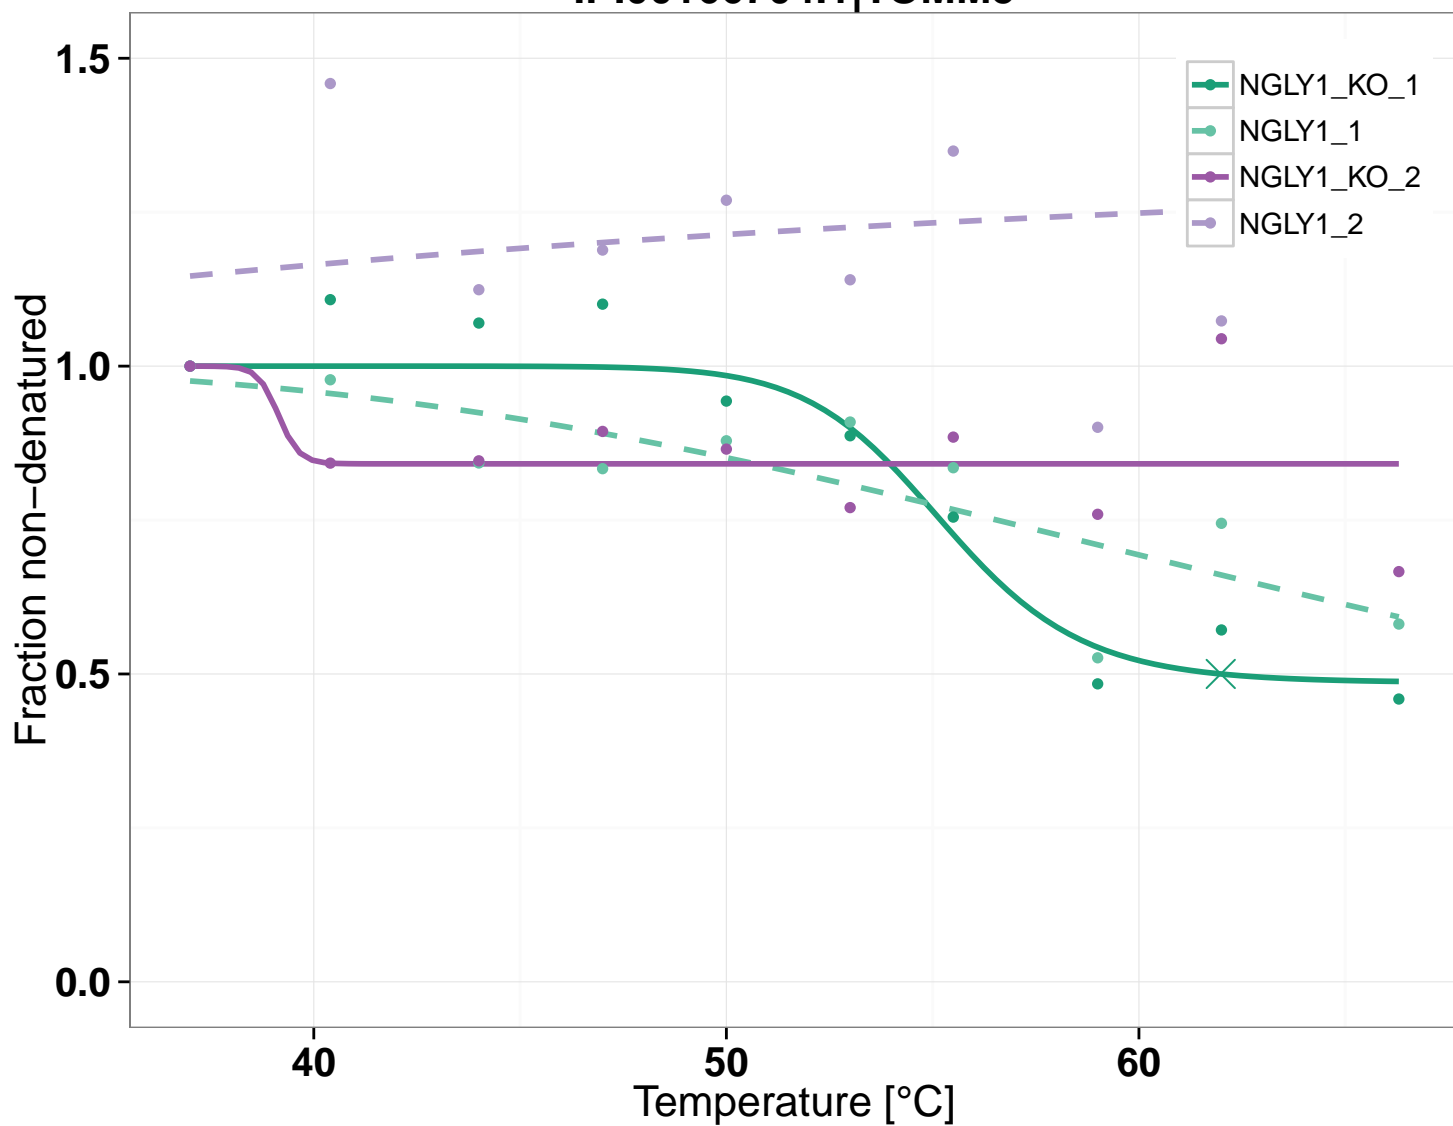

|            | meltPoint | slope  | plateau | R2   |
|------------|-----------|--------|---------|------|
| NGLY1_KO_1 | 61.98     | -0.077 | 0.49    | 0.93 |
| NGLY1_1    | -         | -0.016 | 0       | 0.69 |
| NGLY1_KO_2 | -         | -0.16  | 0.84    | 0.2  |
| NGLY1_2    | -         | -      | 1.5     | 0.03 |

Supplement: Supplementary file 1910 [file 1]

IPI00394926.1|POLD3

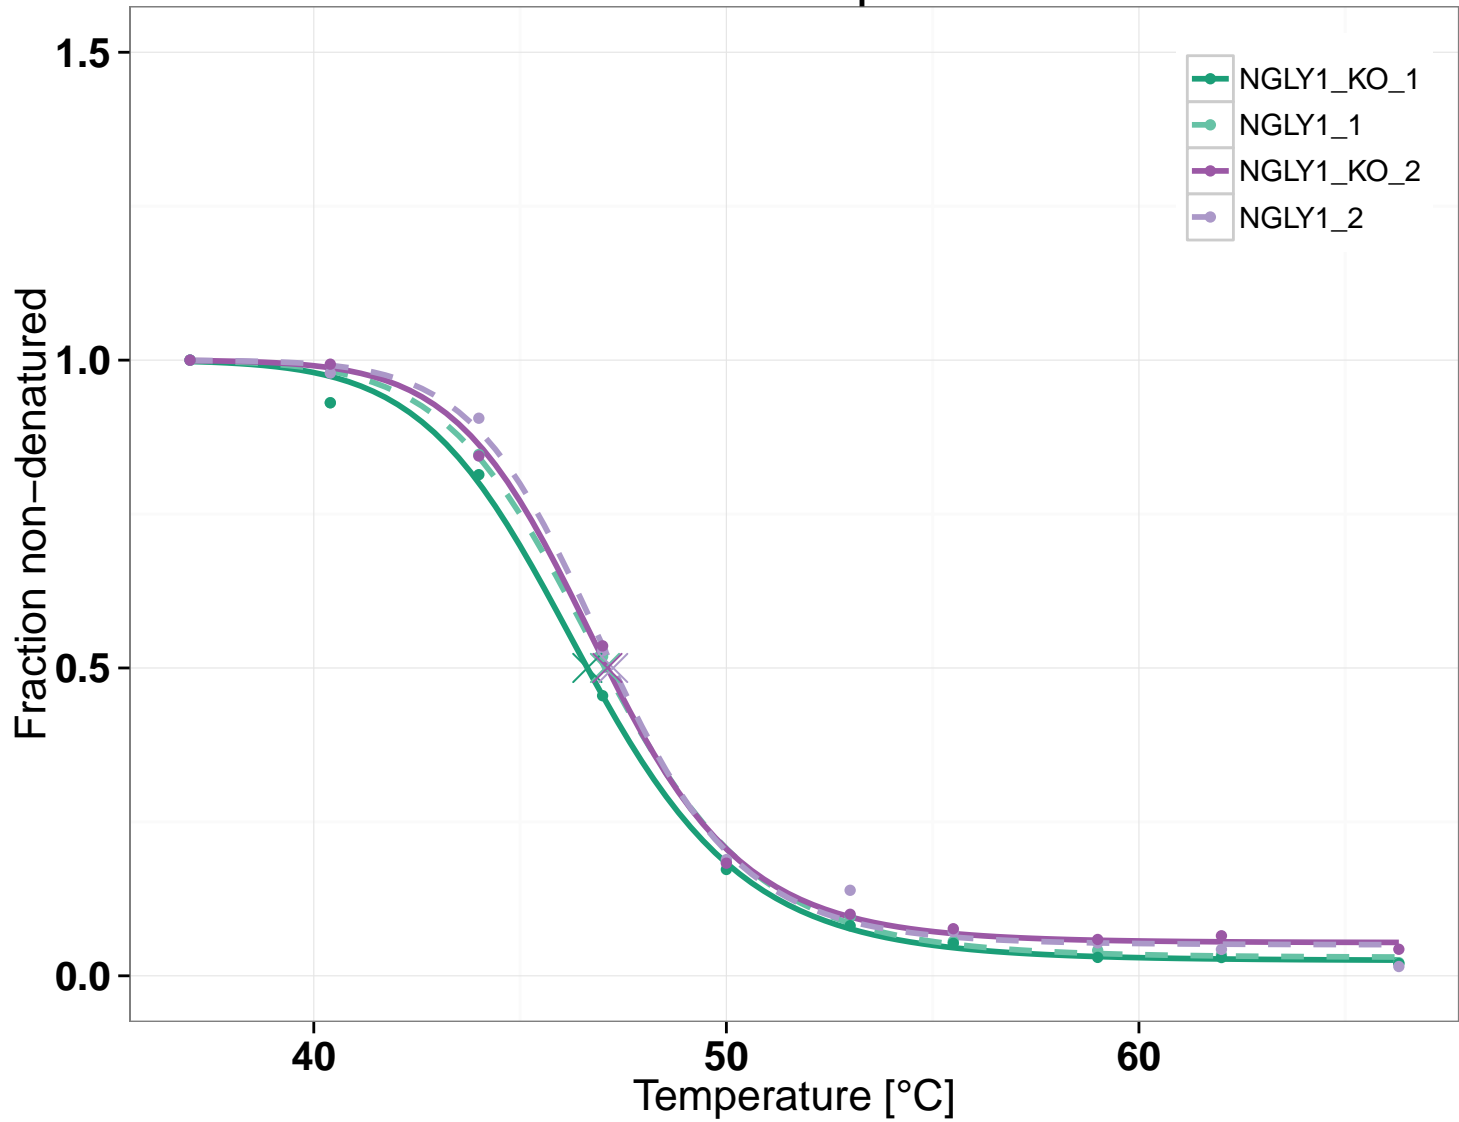

|            | meltPoint | slope | plateau | R2 |
|------------|-----------|-------|---------|----|
| NGLY1_KO_1 | 46.63     | -0.12 | 0.02    | 1  |
| NGLY1_1    | 47.06     | -0.13 | 0.03    | 1  |
| NGLY1_KO_2 | 47.12     | -0.14 | 0.05    | 1  |
| NGLY1_2    | 47.26     | -0.14 | 0.05    | 1  |

Supplement: Supplementary file 1911 [file 1]

IPI00329626.3|RCBTB1

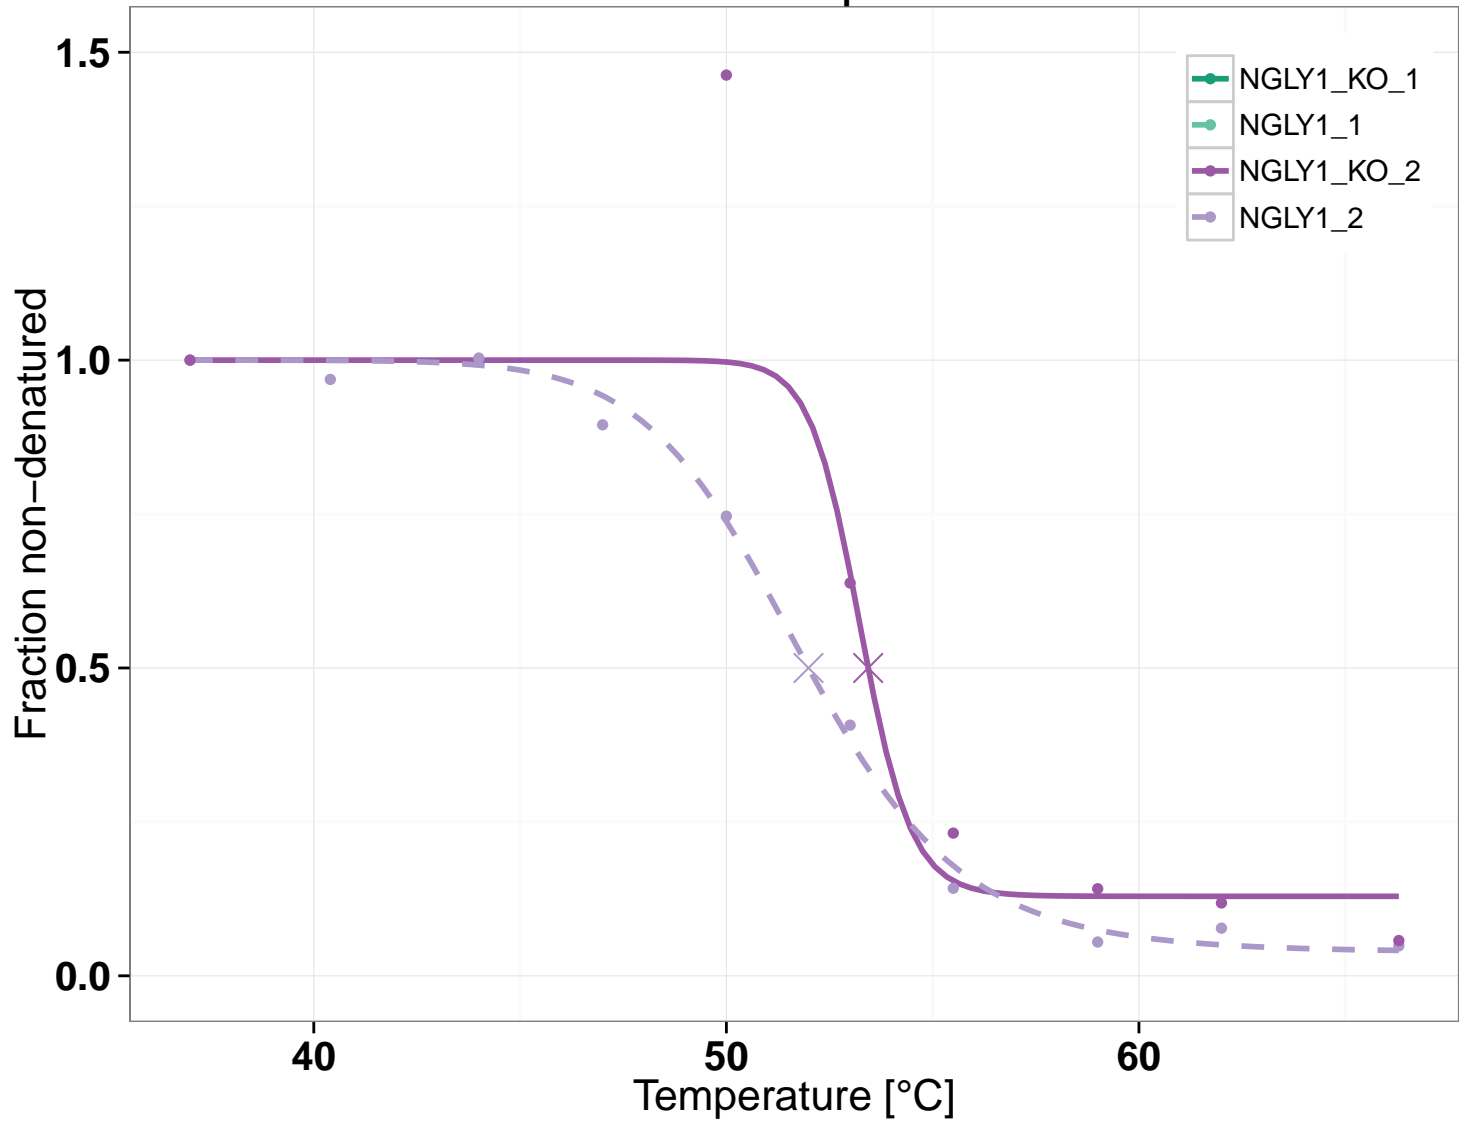

|            | meltPoint | slope | plateau | R2  |
|------------|-----------|-------|---------|-----|
| NGLY1_KO_1 | —         | —     | —       | —   |
| NGLY1_1    | —         | —     | —       | —   |
| NGLY1_KO_2 | 53.44     | -0.36 | 0.13    | 0.5 |
| NGLY1_2    | 51.99     | -0.12 | 0.04    | 1   |

Supplement: Supplementary file 1912 [file 1]

# IPI00002506.1|ALG5

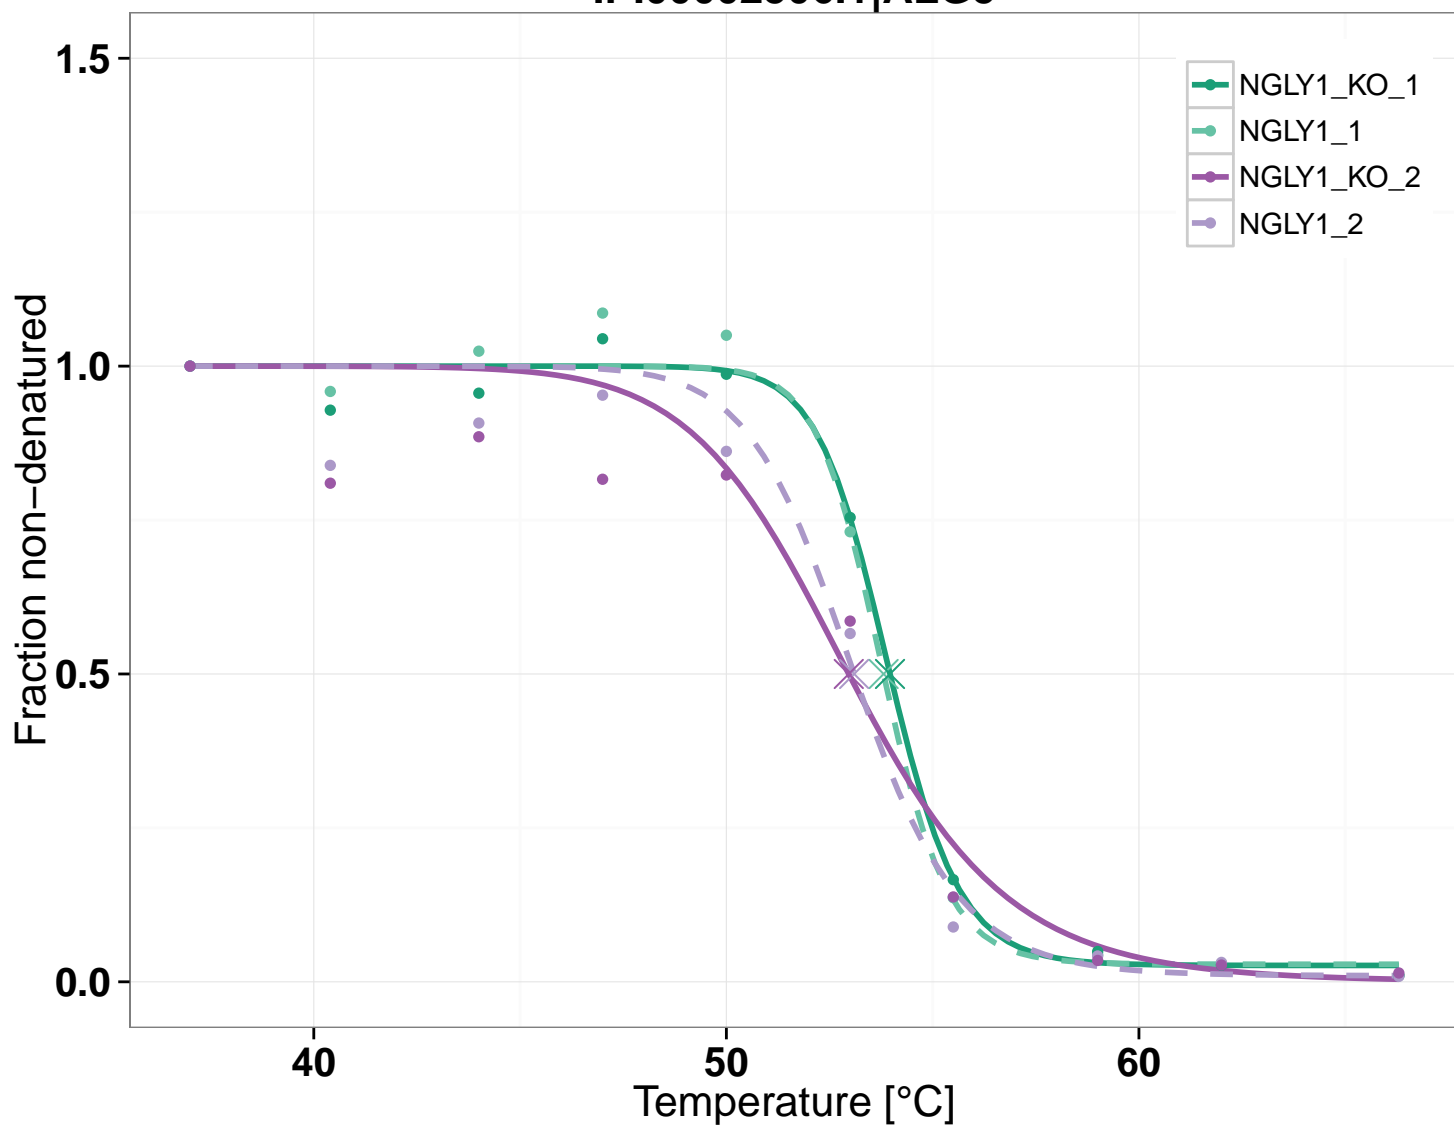

|            | meltPoint | slope | plateau | R2   |
|------------|-----------|-------|---------|------|
| NGLY1_KO_1 | 53.97     | -0.28 | 0.03    | 0.99 |
| NGLY1_1    | 53.81     | -0.31 | 0.03    | 0.99 |
| NGLY1_KO_2 | 52.97     | -0.13 | 0       | 0.94 |
| NGLY1_2    | 53.1      | -0.19 | 0.01    | 0.97 |

Supplement: Supplementary file 1913 [file 1]

IPI00006080.1|KIAA0652

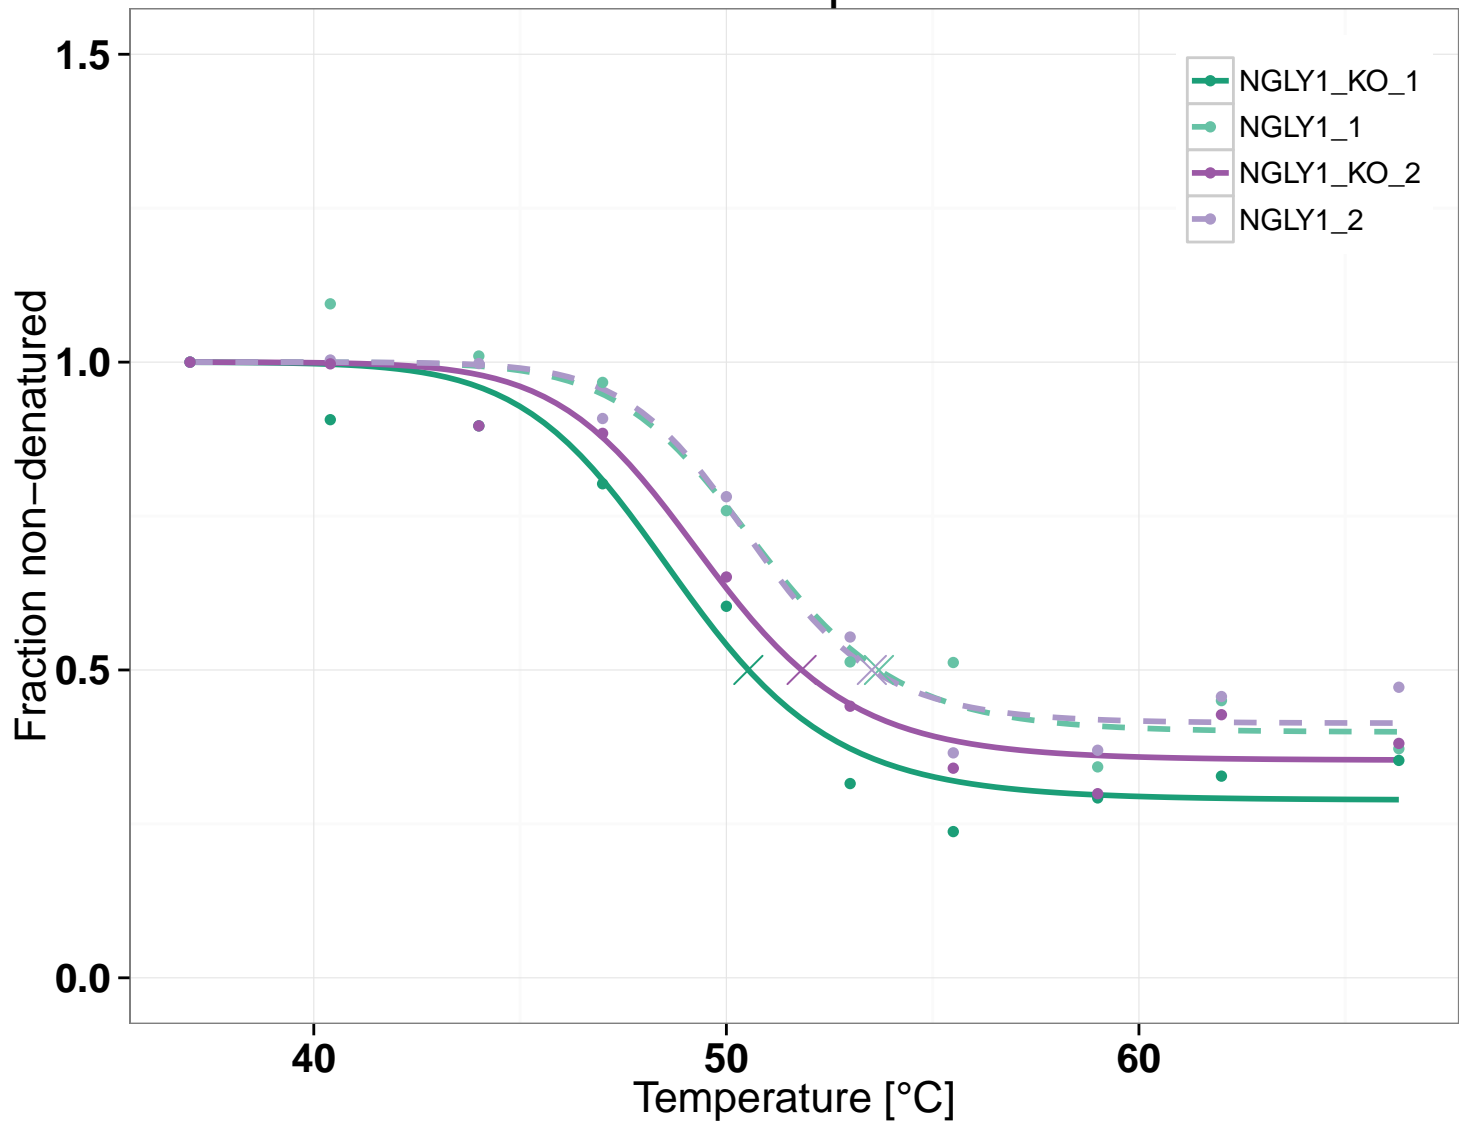

|            | meltPoint | slope  | plateau | R2   |
|------------|-----------|--------|---------|------|
| NGLY1_KO_1 | 50.53     | -0.094 | 0.29    | 0.96 |
| NGLY1_1    | 53.7      | -0.087 | 0.4     | 0.97 |
| NGLY1_KO_2 | 51.82     | -0.09  | 0.35    | 0.97 |
| NGLY1_2    | 53.53     | -0.095 | 0.41    | 0.97 |

Supplement: Supplementary file 1914 [file 1]

IPI00759562.1|ALKBH5

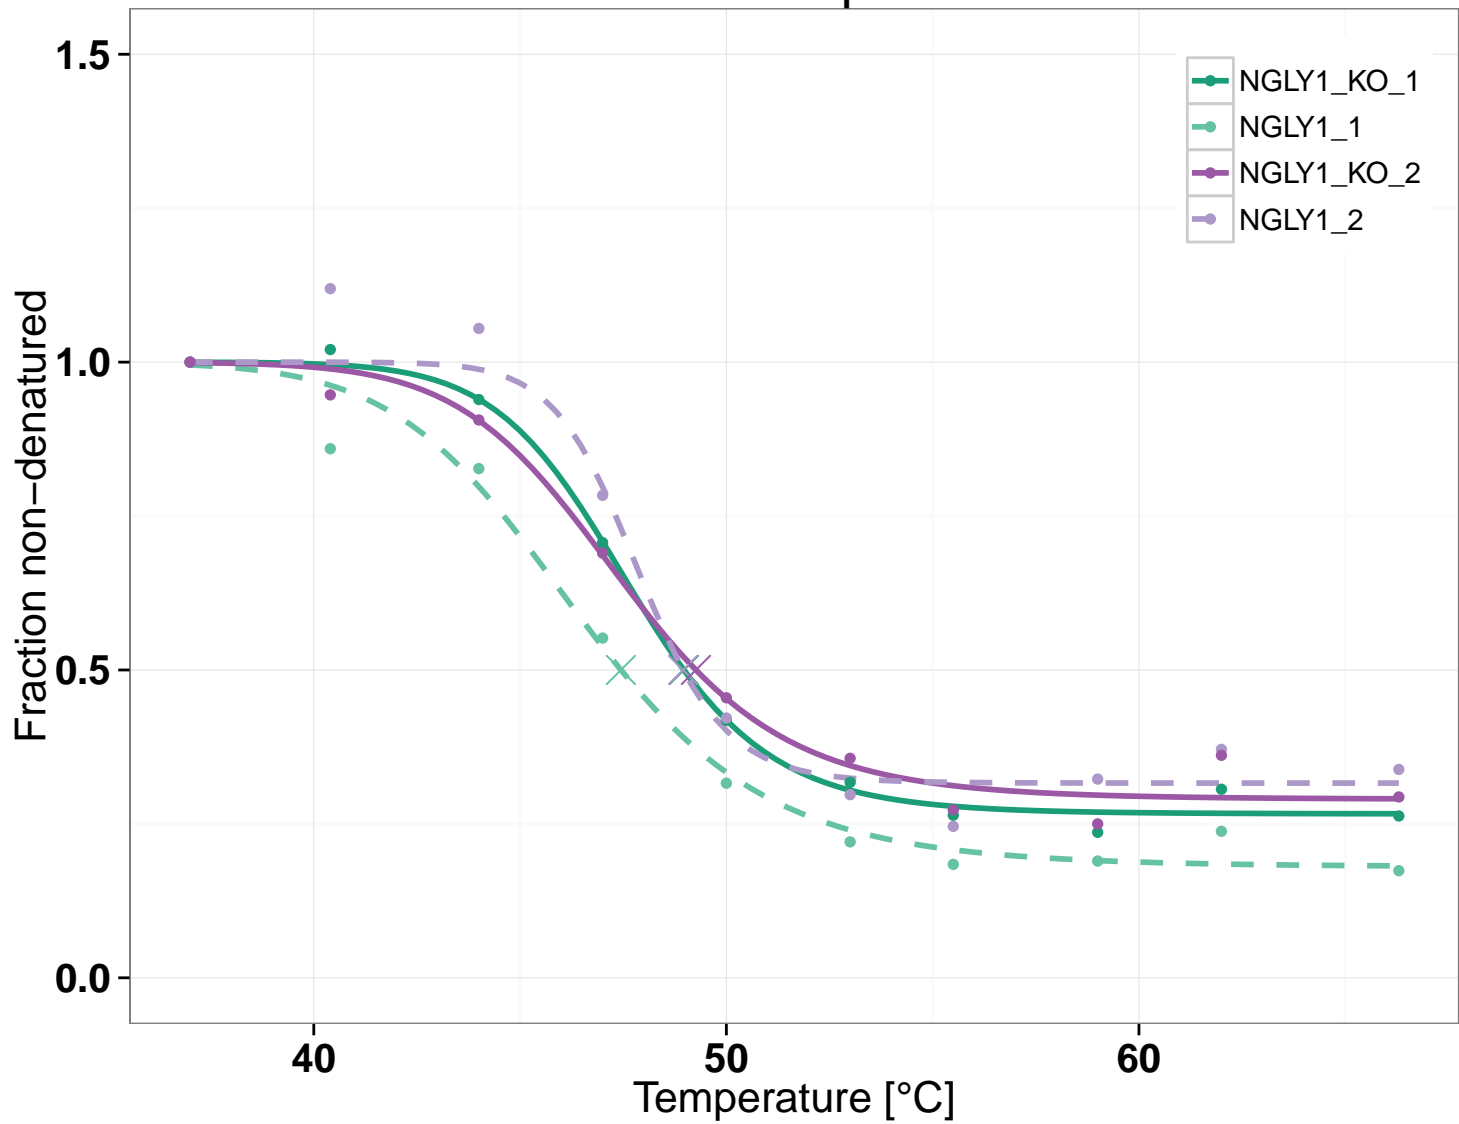

|            | meltPoint | slope  | plateau | R2   |
|------------|-----------|--------|---------|------|
| NGLY1_KO_1 | 48.97     | -0.11  | 0.27    | 1    |
| NGLY1_1    | 47.44     | -0.091 | 0.18    | 0.98 |
| NGLY1_KO_2 | 49.26     | -0.09  | 0.29    | 0.99 |
| NGLY1_2    | 48.95     | -0.16  | 0.32    | 0.97 |

Supplement: Supplementary file 1915 [file 1]

# IPI00025039.1|FBL

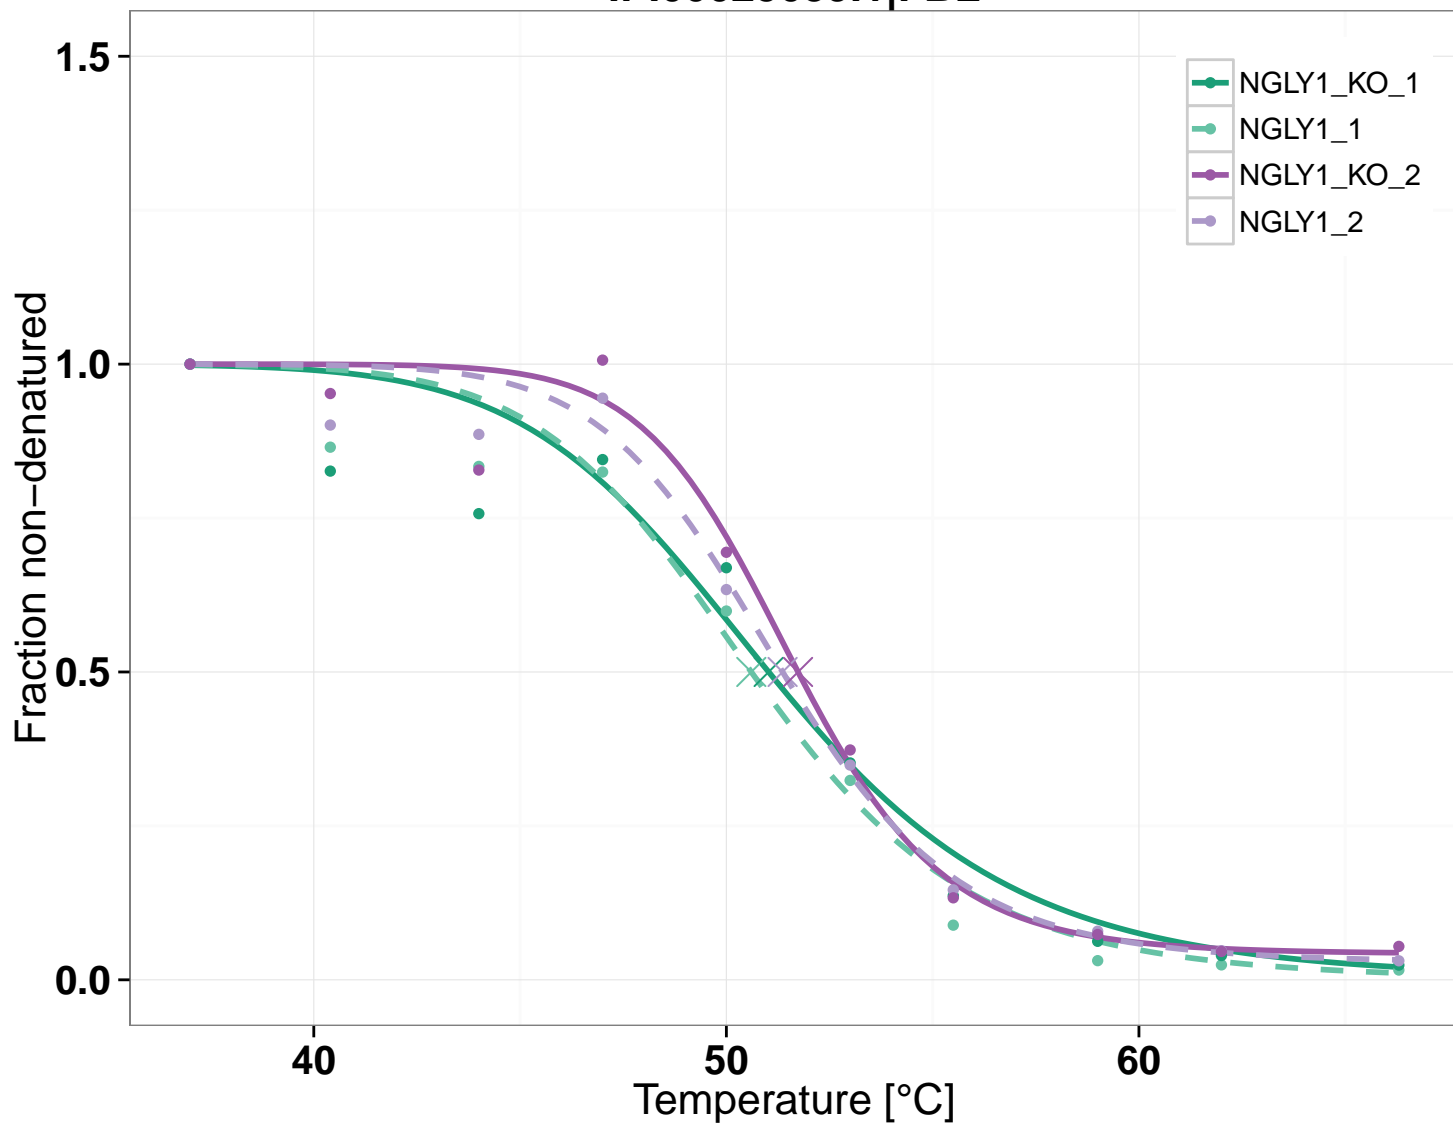

|            | meltPoint | slope  | plateau | R2   |
|------------|-----------|--------|---------|------|
| NGLY1_KO_1 | 51.03     | -0.083 | 0       | 0.95 |
| NGLY1_1    | 50.6      | -0.095 | 0       | 0.97 |
| NGLY1_KO_2 | 51.74     | -0.13  | 0.04    | 0.98 |
| NGLY1_2    | 51.36     | -0.11  | 0.03    | 0.99 |

Supplement: Supplementary file 1916 [file 1]

IPI00552849.2|FAM76B

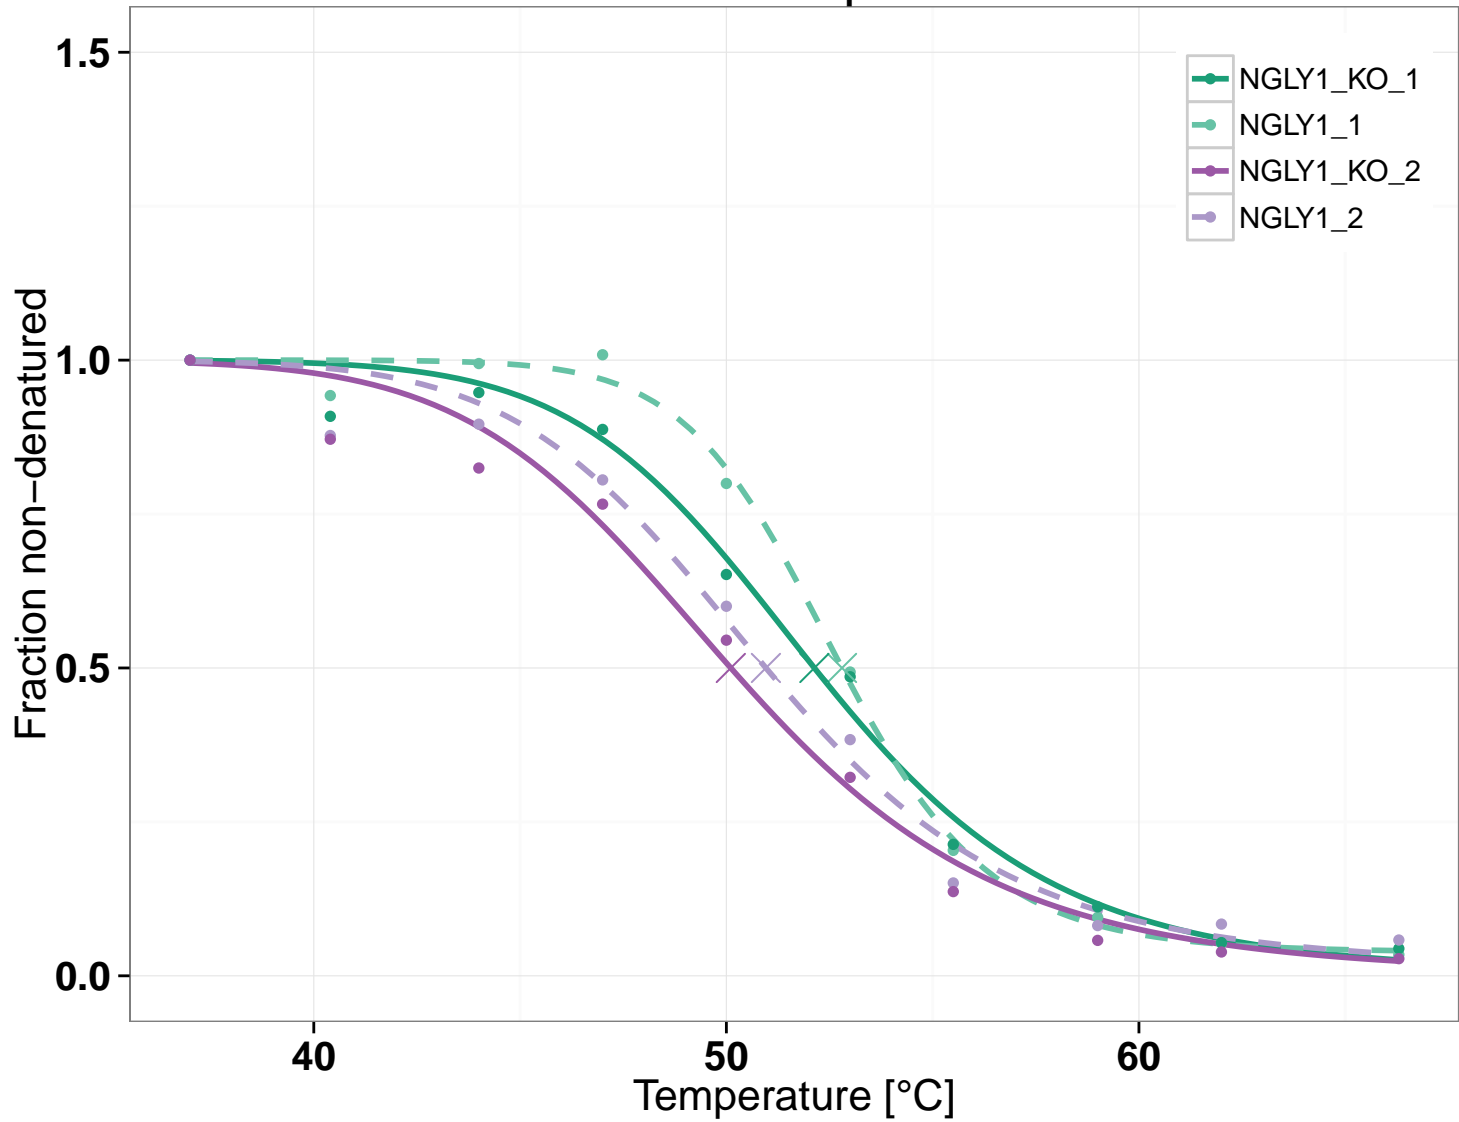

|            | meltPoint | slope  | plateau | R2   |
|------------|-----------|--------|---------|------|
| NGLY1_KO_1 | 52.13     | -0.085 | 0       | 0.99 |
| NGLY1_1    | 52.8      | -0.13  | 0.04    | 1    |
| NGLY1_KO_2 | 50.11     | -0.077 | 0       | 0.98 |
| NGLY1_2    | 50.96     | -0.081 | 0.01    | 0.98 |

Supplement: Supplementary file 1917 [file 1]

IPI00165434.4|YLPM1

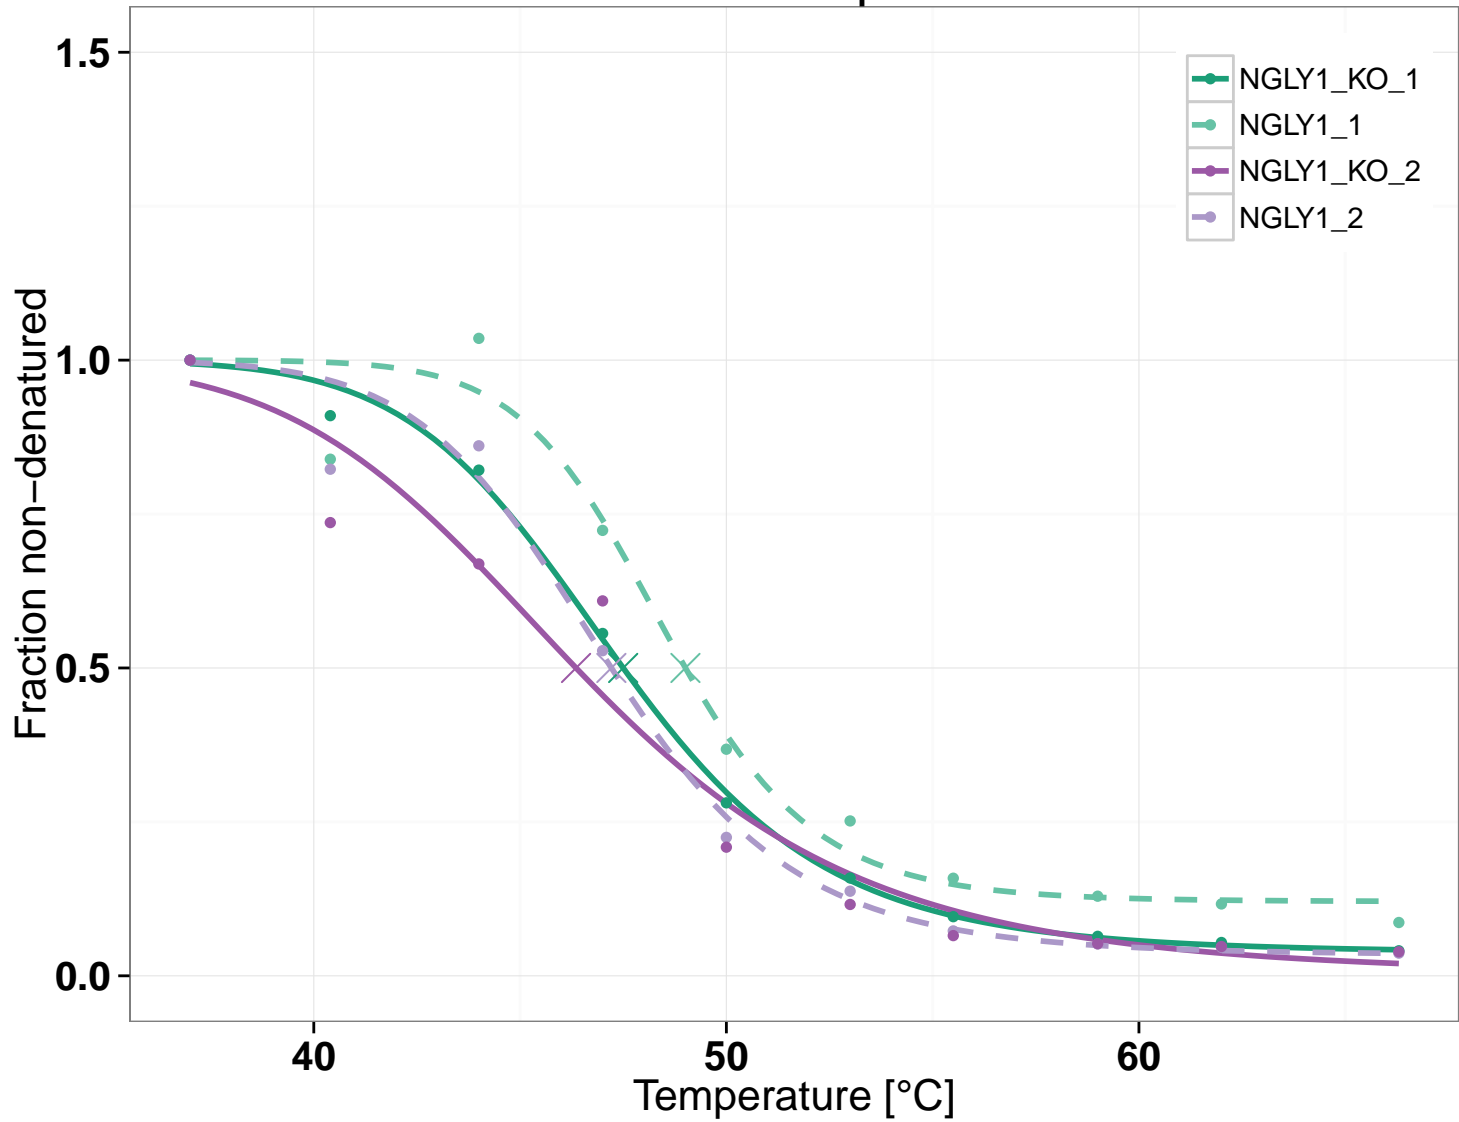

|            | meltPoint | slope  | plateau | R2   |
|------------|-----------|--------|---------|------|
| NGLY1_KO_1 | 47.5      | -0.094 | 0.04    | 1    |
| NGLY1_1    | 49.01     | -0.12  | 0.12    | 0.97 |
| NGLY1_KO_2 | 46.36     | -0.071 | 0       | 0.96 |
| NGLY1_2    | 47.21     | -0.11  | 0.03    | 0.98 |

Supplement: Supplementary file 1918 [file 1]

IPI00426252.1|TRIM27

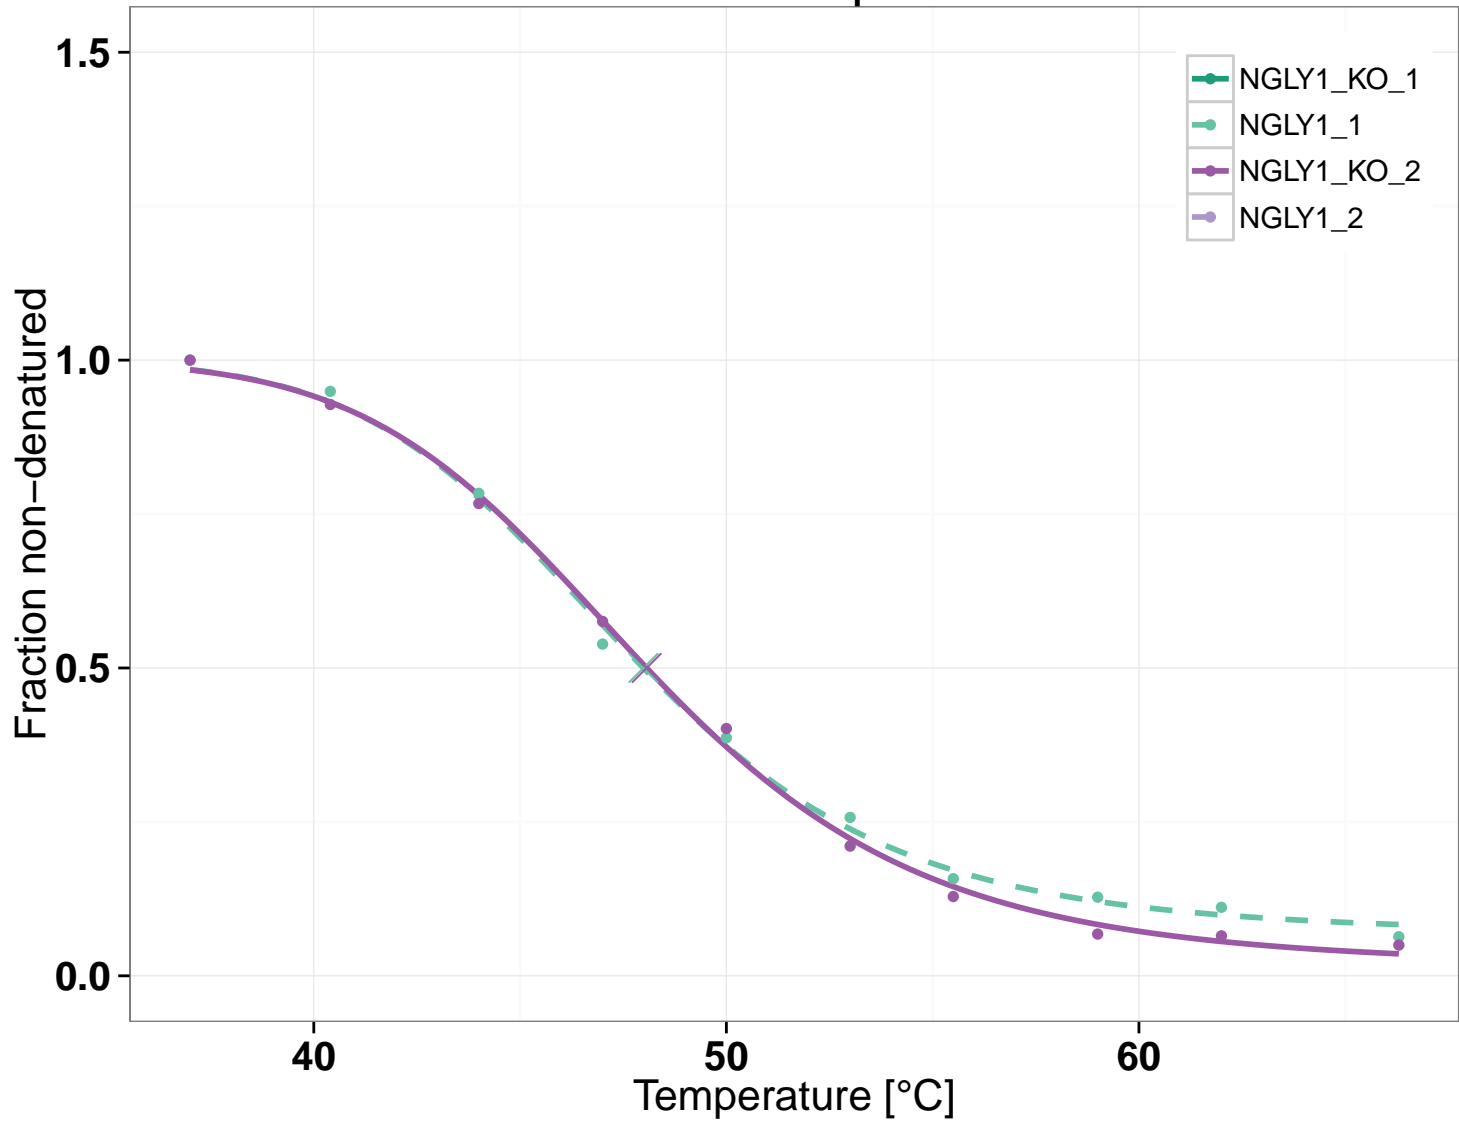

|            | meltPoint | slope  | plateau | R2 |
|------------|-----------|--------|---------|----|
| NGLY1_KO_1 | -         | -      | -       | -  |
| NGLY1_1    | 47.99     | -0.072 | 0.07    | 1  |
| NGLY1_KO_2 | 48.07     | -0.073 | 0.01    | 1  |
| NGLY1_2    | -         | -      | -       | -  |

Supplement: Supplementary file 1919 [file 1]

IPI00220299.1|FLAD1

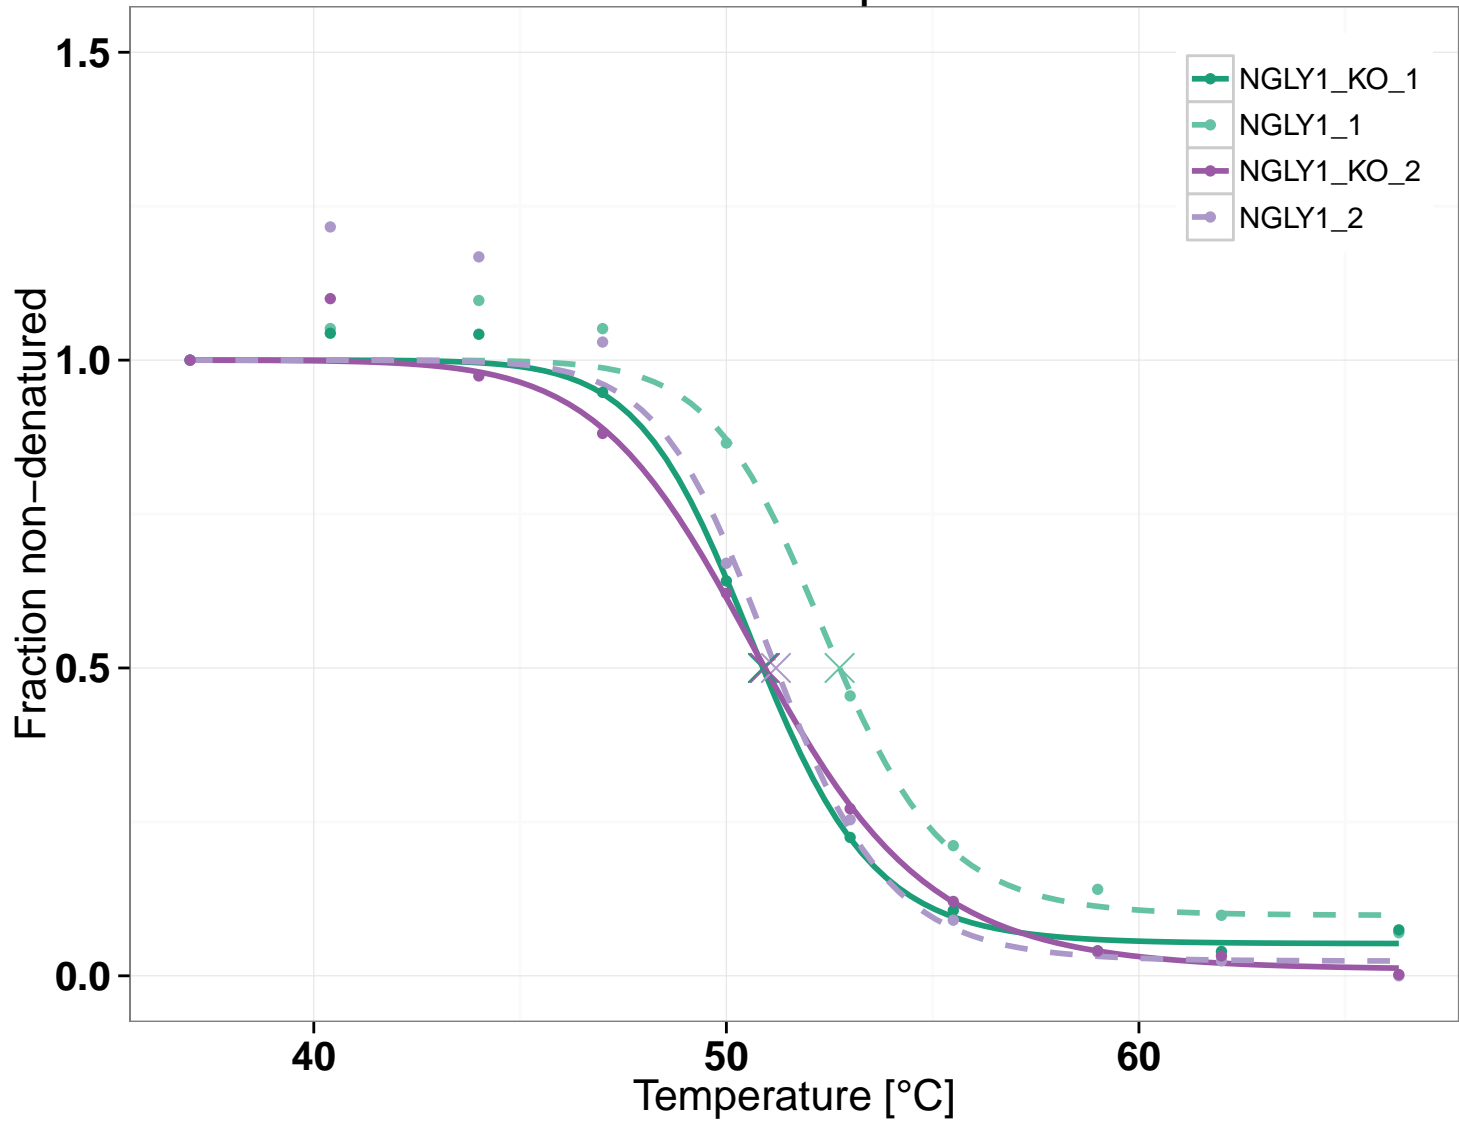

|            | meltPoint | slope | plateau | R2   |
|------------|-----------|-------|---------|------|
| NGLY1_KO_1 | 50.89     | -0.17 | 0.05    | 1    |
| NGLY1_1    | 52.75     | -0.16 | 0.1     | 0.99 |
| NGLY1_KO_2 | 50.93     | -0.12 | 0.01    | 0.99 |
| NGLY1_2    | 51.2      | -0.17 | 0.02    | 0.97 |

Supplement: Supplementary file 1920 [file 1]

IPI00010248.3|SPG21

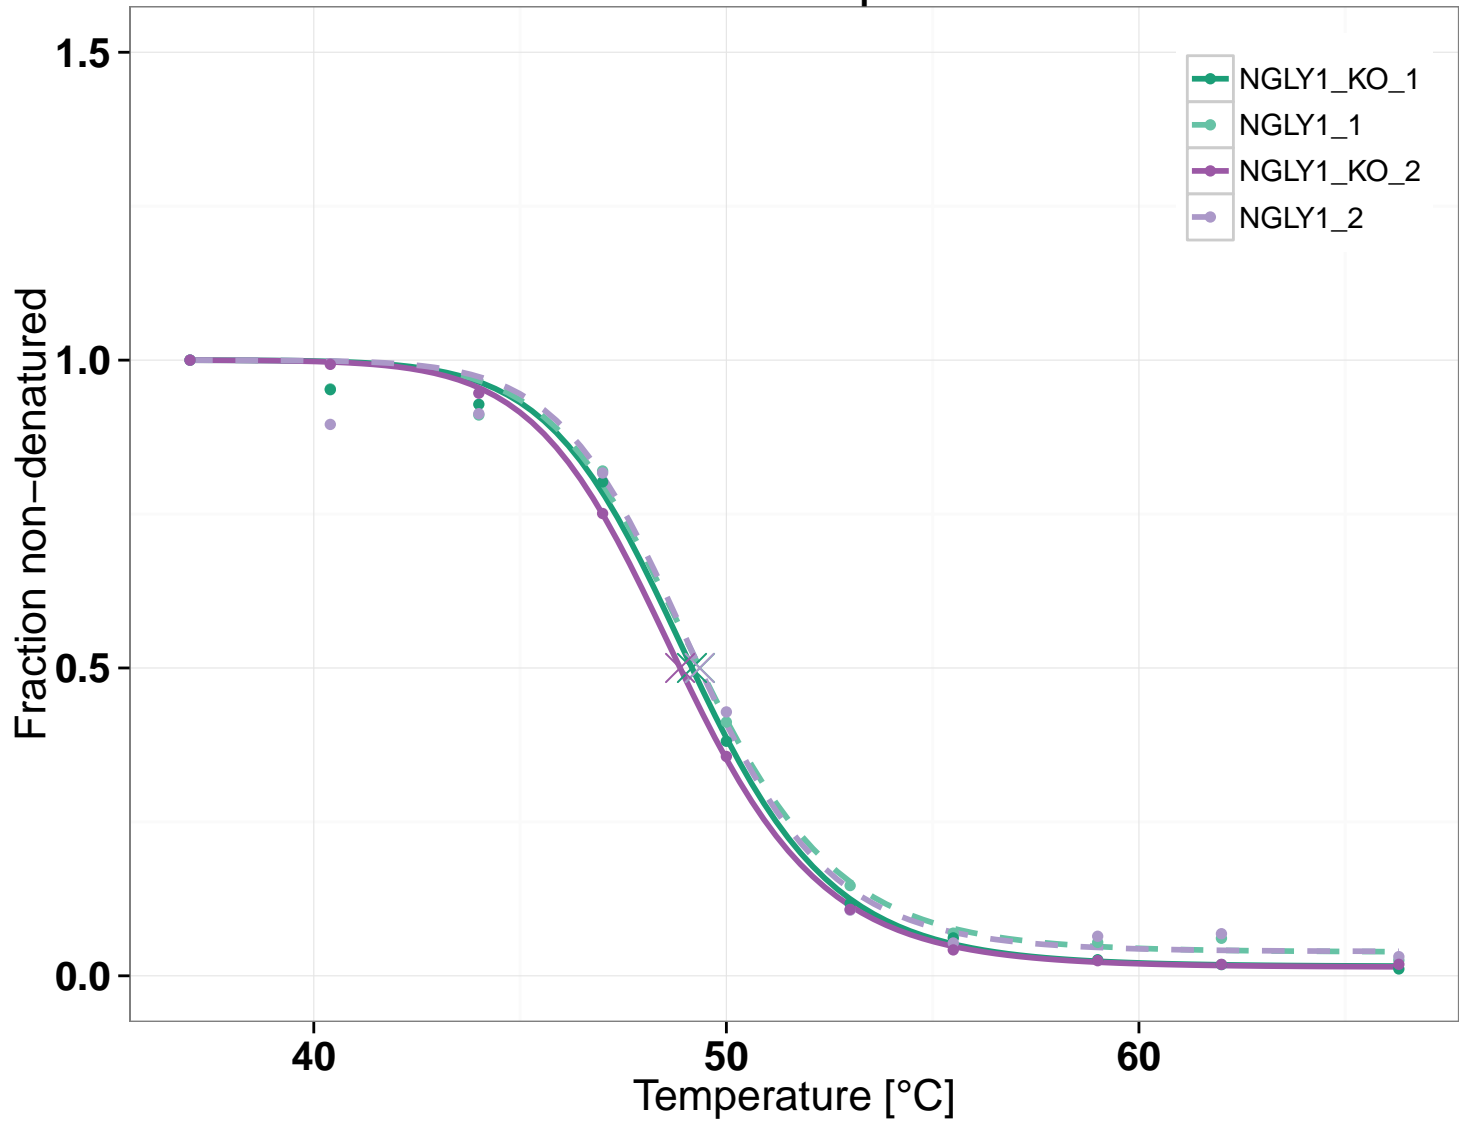

|            | meltPoint | slope | plateau | R2   |
|------------|-----------|-------|---------|------|
| NGLY1_KO_1 | 49.17     | -0.14 | 0.02    | 1    |
| NGLY1_1    | 49.36     | -0.14 | 0.04    | 1    |
| NGLY1_KO_2 | 48.88     | -0.14 | 0.01    | 1    |
| NGLY1_2    | 49.35     | -0.15 | 0.04    | 0.99 |

Supplement: Supplementary file 1921 [file 1]

IPI00166861.3|C12ORF45

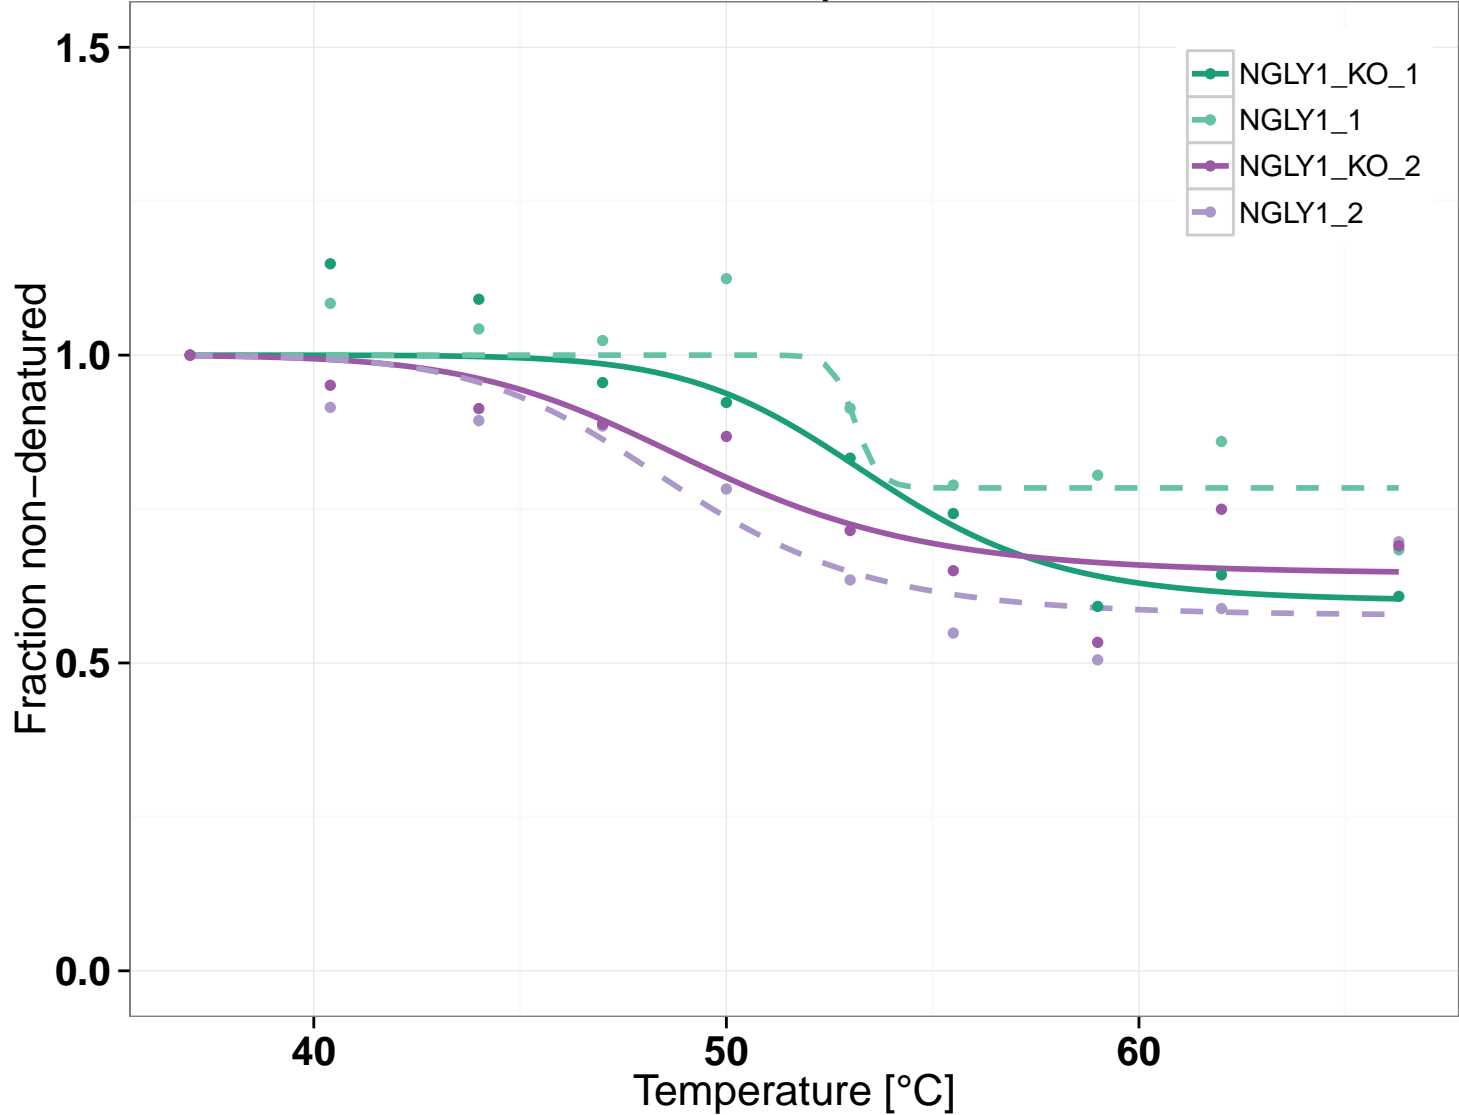

|            | meltPoint | slope  | plateau | R2   |
|------------|-----------|--------|---------|------|
| NGLY1_KO_1 | –         | –0.044 | 0.6     | 0.9  |
| NGLY1_1    | –         | –0.19  | 0.78    | 0.78 |
| NGLY1_KO_2 | –         | –0.032 | 0.64    | 0.81 |
| NGLY1_2    | –         | –0.044 | 0.58    | 0.86 |

Supplement: Supplementary file 1922 [file 1]

IPI00032560.2|NDUFAF1

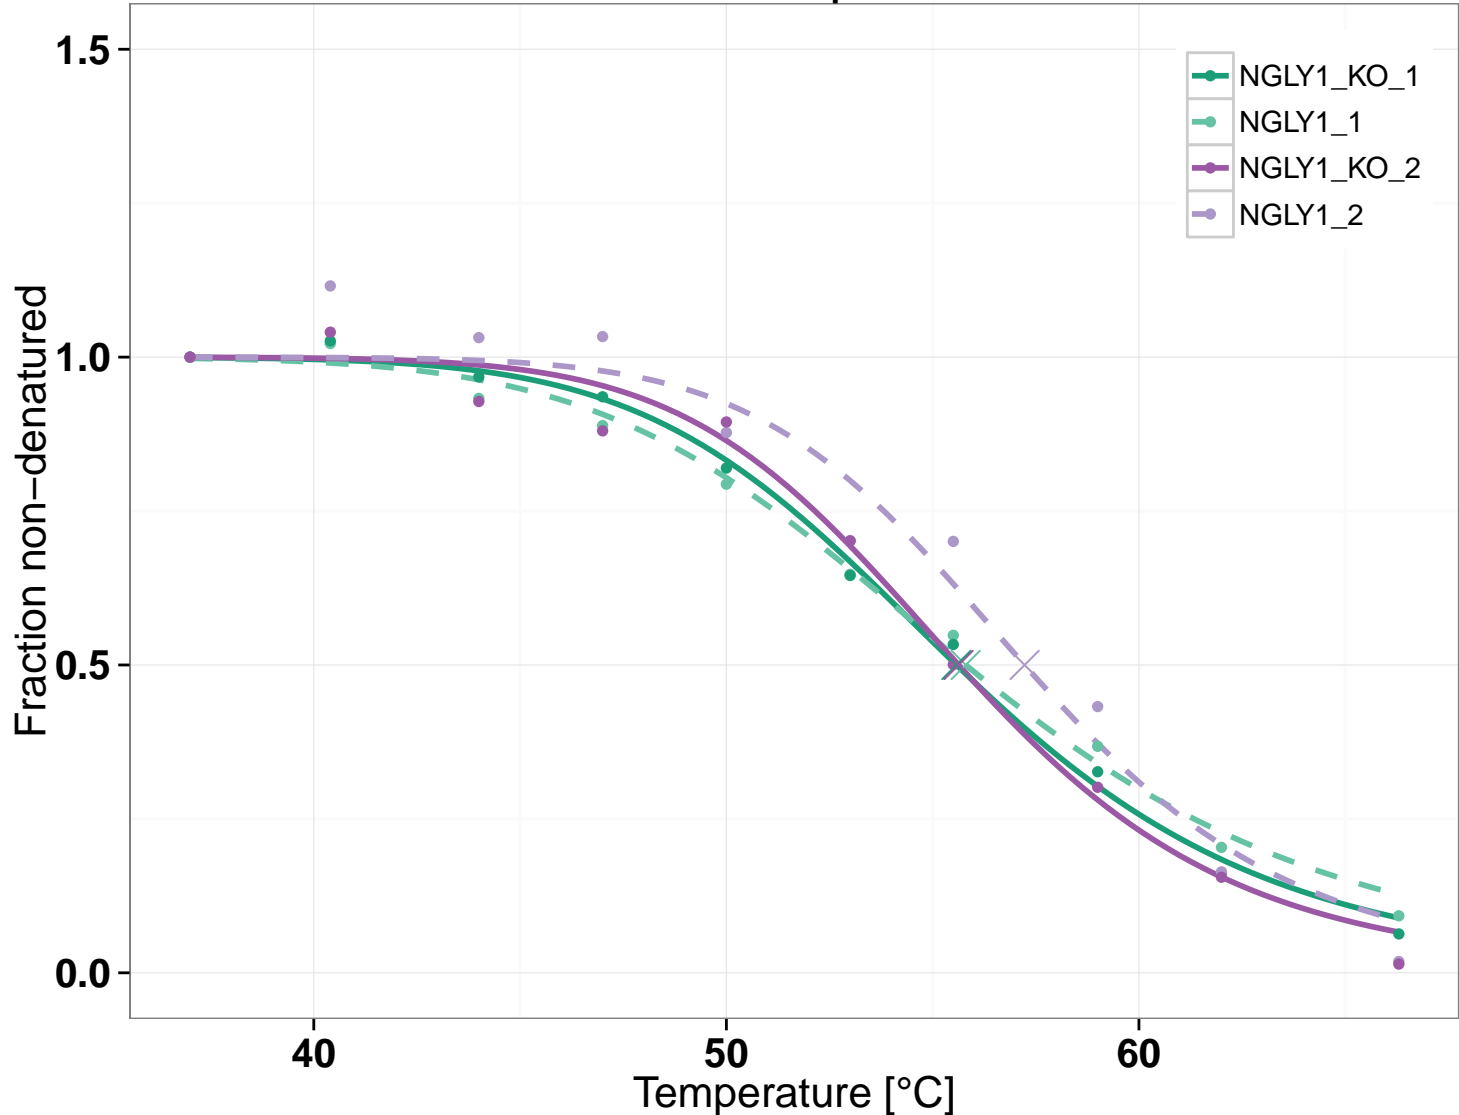

|            | meltPoint | slope  | plateau | R2   |
|------------|-----------|--------|---------|------|
| NGLY1_KO_1 | 55.58     | -0.066 | 0       | 1    |
| NGLY1_1    | 55.8      | -0.056 | 0       | 0.99 |
| NGLY1_KO_2 | 55.63     | -0.075 | 0       | 0.99 |
| NGLY1_2    | 57.23     | -0.077 | 0       | 0.97 |

Supplement: Supplementary file 1923 [file 1]

IPI00025849.1|ANP32A

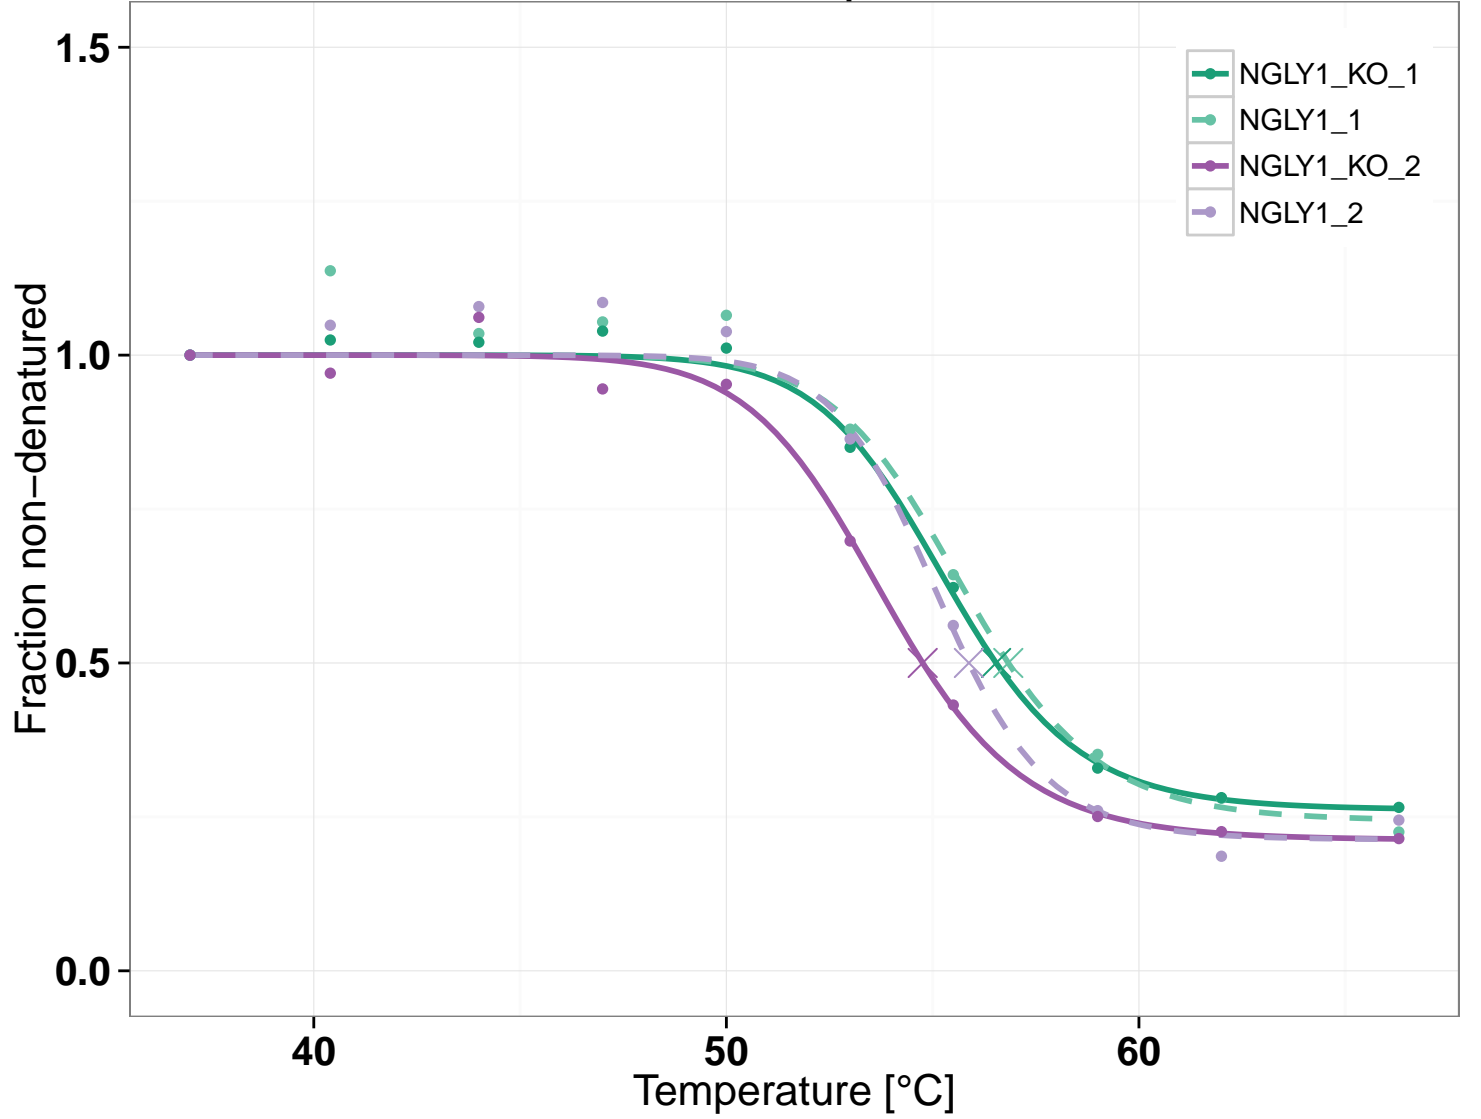

|            | meltPoint | slope | plateau | R2   |
|------------|-----------|-------|---------|------|
| NGLY1_KO_1 | 56.54     | -0.12 | 0.26    | 1    |
| NGLY1_1    | 56.83     | -0.12 | 0.24    | 0.97 |
| NGLY1_KO_2 | 54.76     | -0.12 | 0.21    | 0.99 |
| NGLY1_2    | 55.88     | -0.15 | 0.21    | 0.98 |

Supplement: Supplementary file 1924 [file 1]

# IPI00910392.1|RNF5

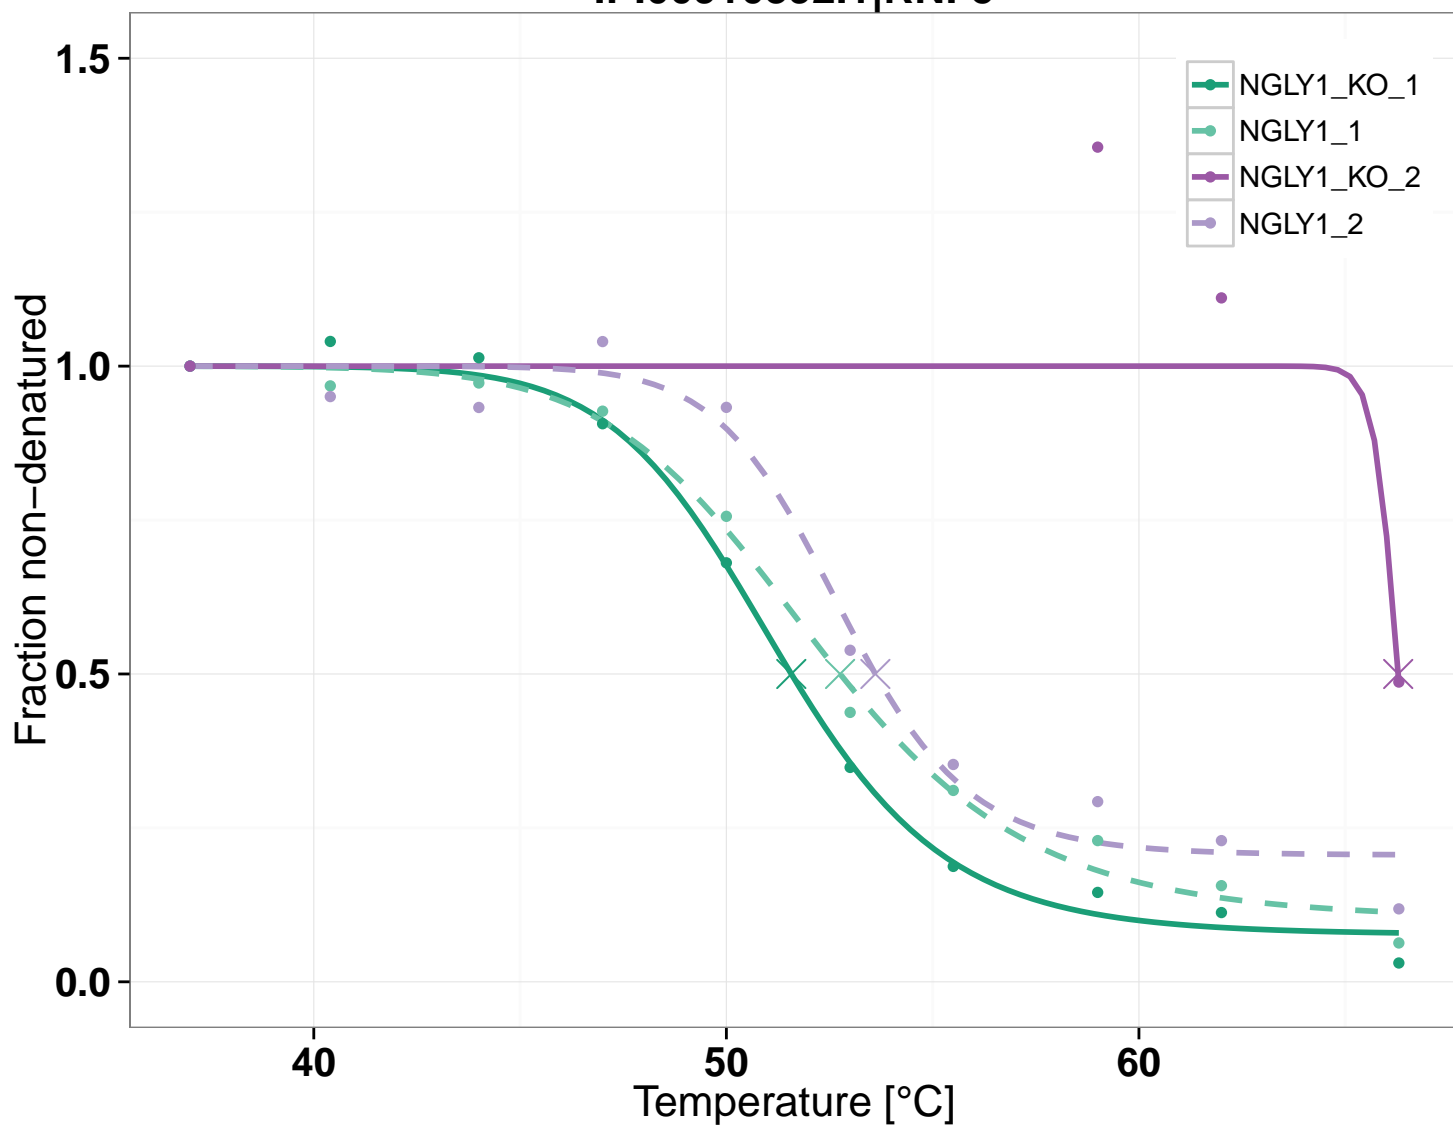

|            | meltPoint | slope  | plateau | R2    |
|------------|-----------|--------|---------|-------|
| NGLY1_KO_1 | 51.57     | -0.11  | 0.08    | 1     |
| NGLY1_1    | 52.76     | -0.087 | 0.1     | 0.99  |
| NGLY1_KO_2 | 66.28     | -0.85  | 0       | -1.05 |
| NGLY1_2    | 53.61     | -0.13  | 0.21    | 0.98  |

Supplement: Supplementary file 1925 [file 1]

IPI00218858.1|MAP2K3

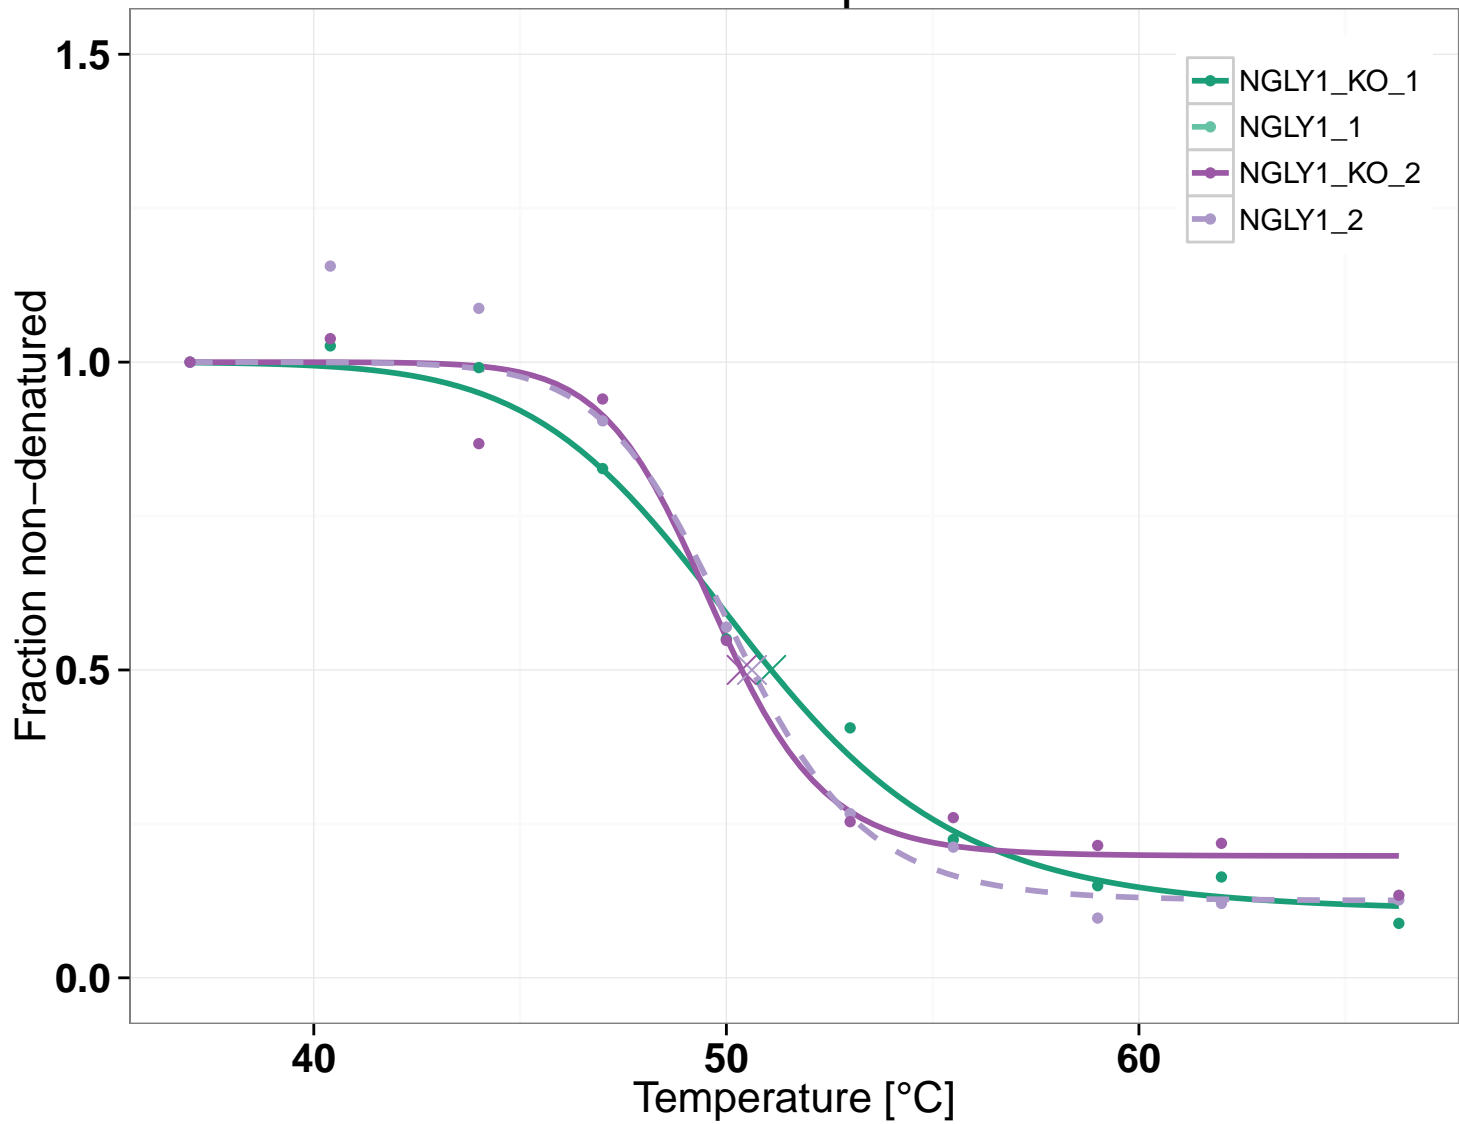

|            | meltPoint | slope  | plateau | R2   |
|------------|-----------|--------|---------|------|
| NGLY1_KO_1 | 51.09     | -0.086 | 0.11    | 0.99 |
| NGLY1_1    | -         | -      | -       | -    |
| NGLY1_KO_2 | 50.37     | -0.15  | 0.2     | 0.98 |
| NGLY1_2    | 50.62     | -0.14  | 0.13    | 0.98 |

Supplement: Supplementary file 1926 [file 1]

# IPI00006535.3|IFT52

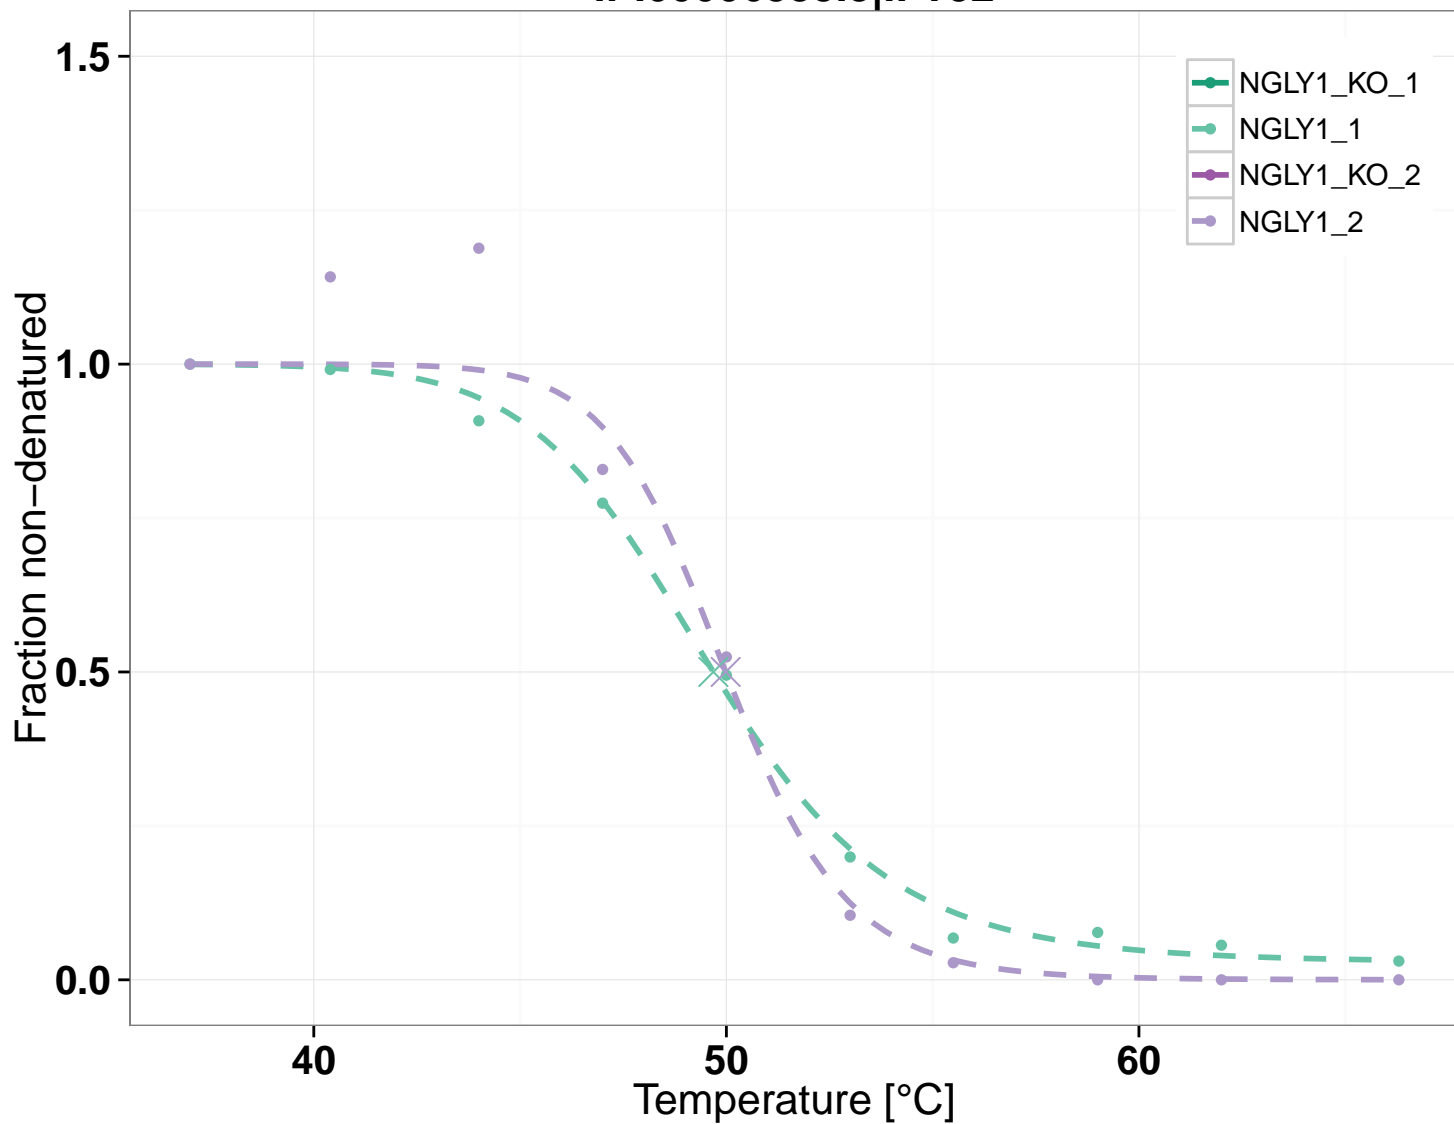

|            | meltPoint | slope | plateau | R2   |
|------------|-----------|-------|---------|------|
| NGLY1_KO_1 | -         | -     | -       | -    |
| NGLY1_1    | 49.69     | -0.11 | 0.03    | 1    |
| NGLY1_KO_2 | -         | -     | -       | -    |
| NGLY1_2    | 49.98     | -0.17 | 0       | 0.97 |

Supplement: Supplementary file 1927 [file 1]

IPI00218144.3|COX17

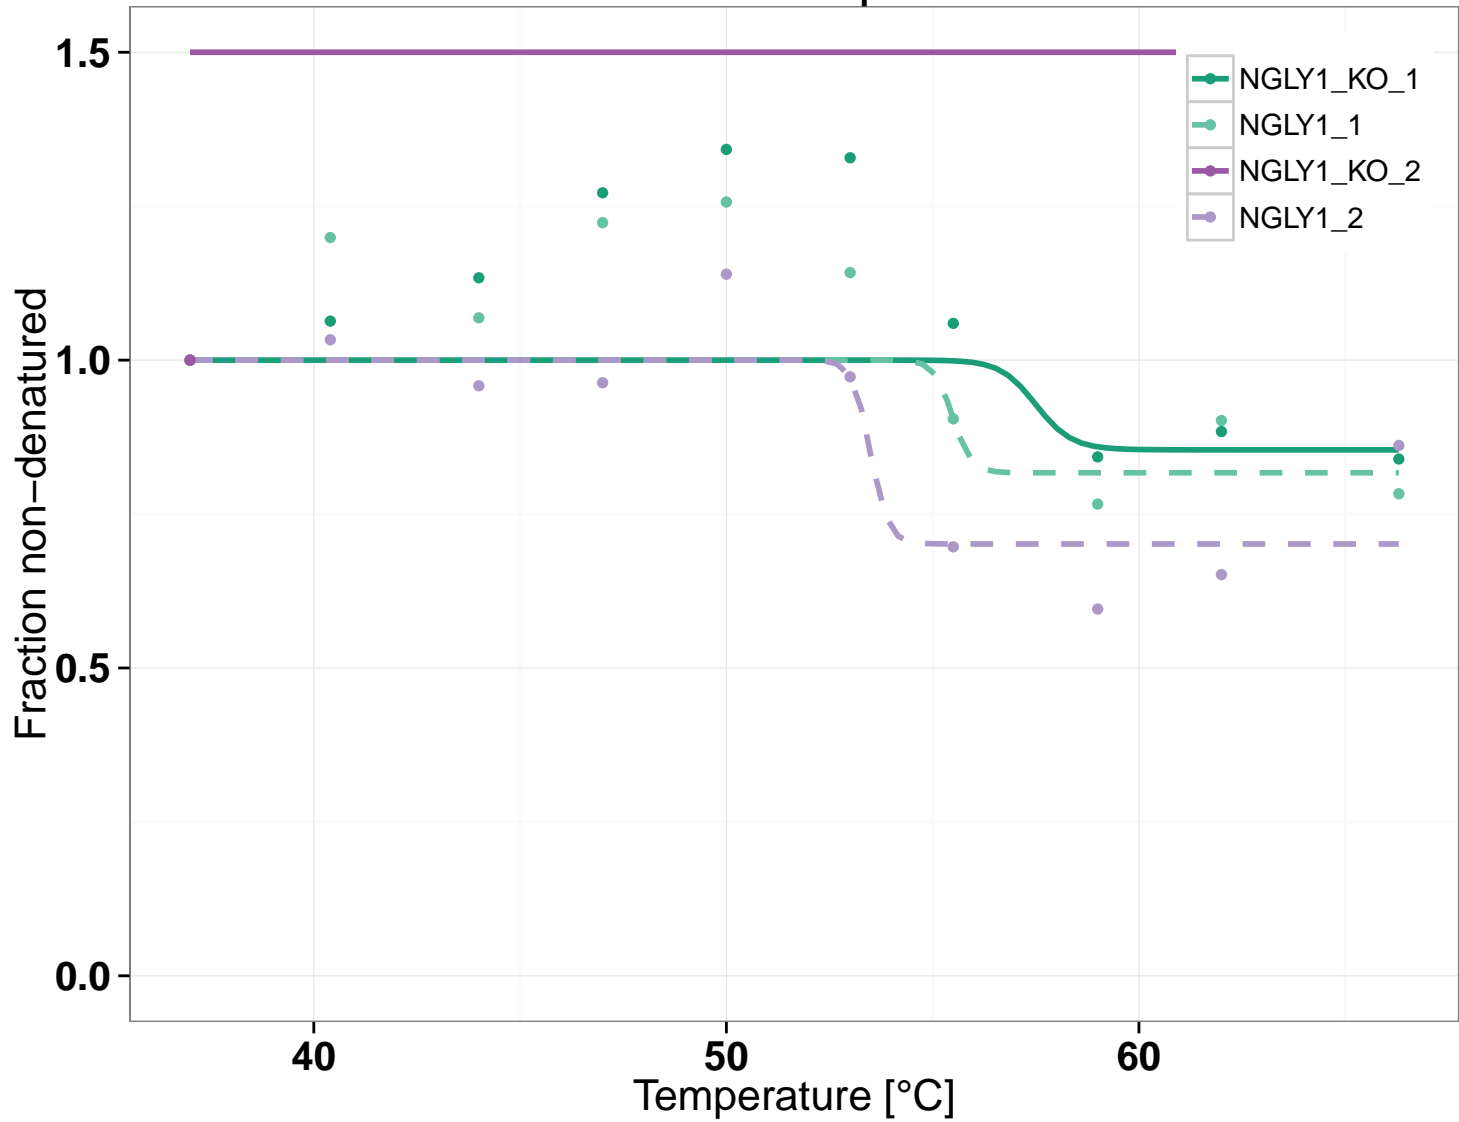

|            | meltPoint | slope  | plateau | R2    |
|------------|-----------|--------|---------|-------|
| NGLY1_KO_1 | -         | -0.084 | 0.85    | 0.01  |
| NGLY1_1    | -         | -0.21  | 0.82    | 0.35  |
| NGLY1_KO_2 | -         | -      | 1.5     | -1.52 |
| NGLY1_2    | -         | -0.35  | 0.7     | 0.79  |

Supplement: Supplementary file 1928 [file 1]

# IPI00783736.1|PTMS

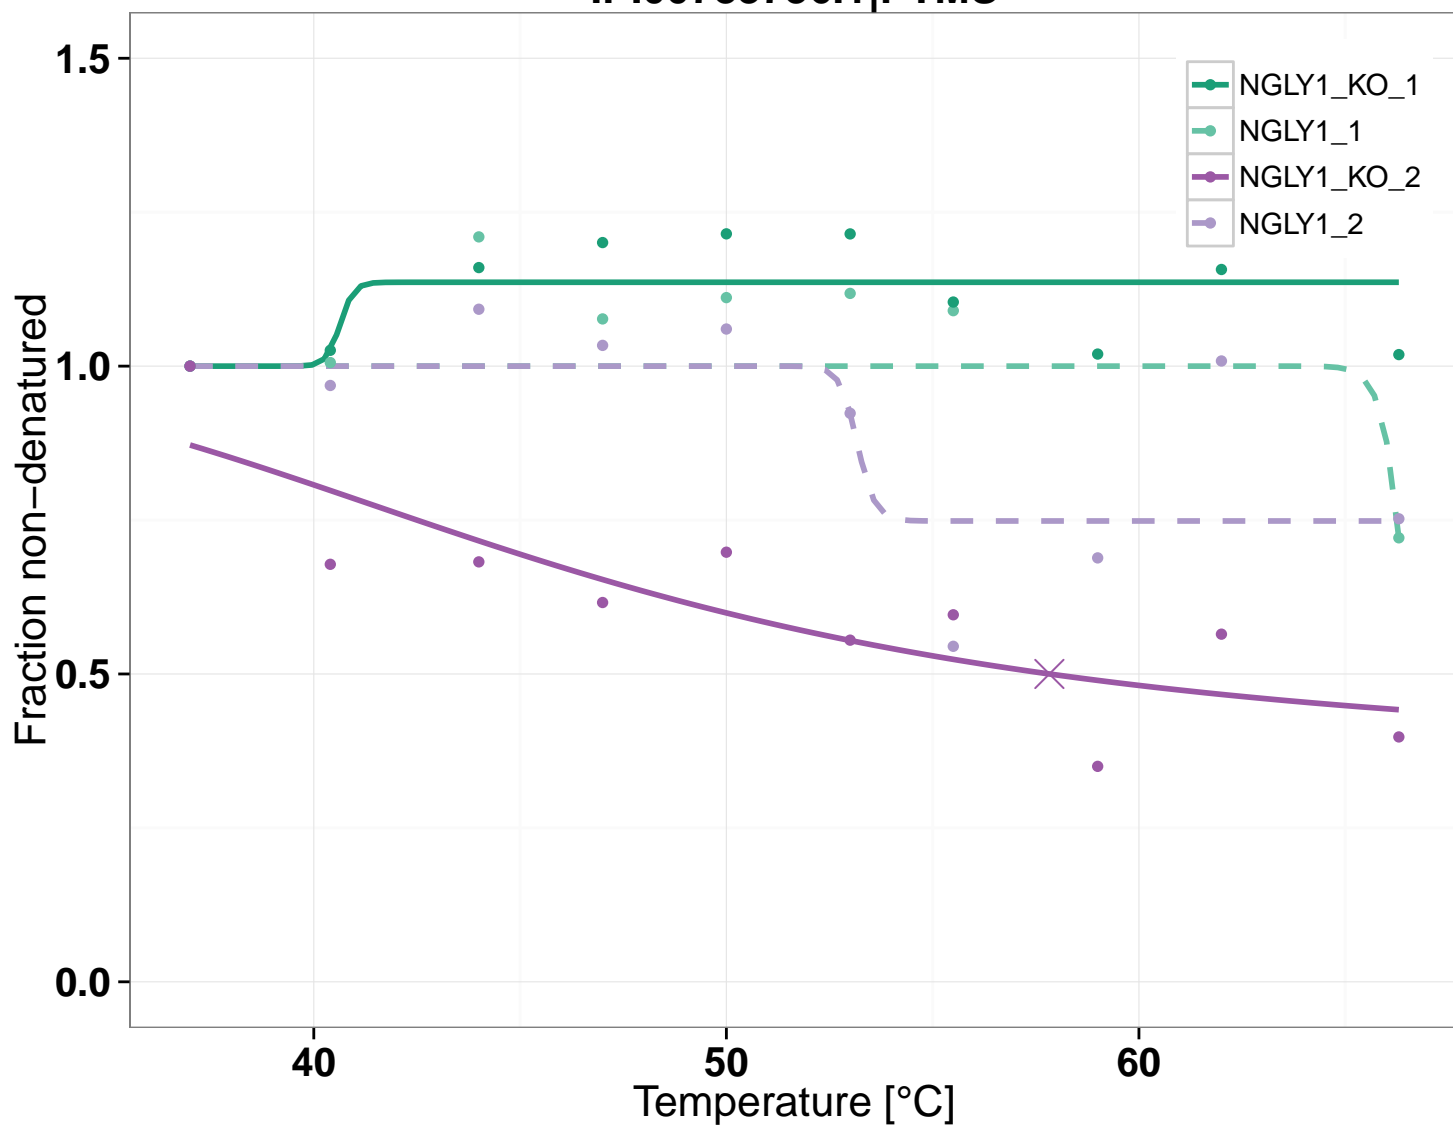

|            | meltPoint | slope  | plateau | R2    |
|------------|-----------|--------|---------|-------|
| NGLY1_KO_1 | –         | 0.21   | 1.14    | 0.35  |
| NGLY1_1    | –         | –      | 0       | –0.12 |
| NGLY1_KO_2 | 57.83     | –0.023 | 0.35    | 0.72  |
| NGLY1_2    | –         | –0.3   | 0.75    | 0.58  |

Supplement: Supplementary file 1929 [file 1]

IPI00299263.5|ARFGAP3

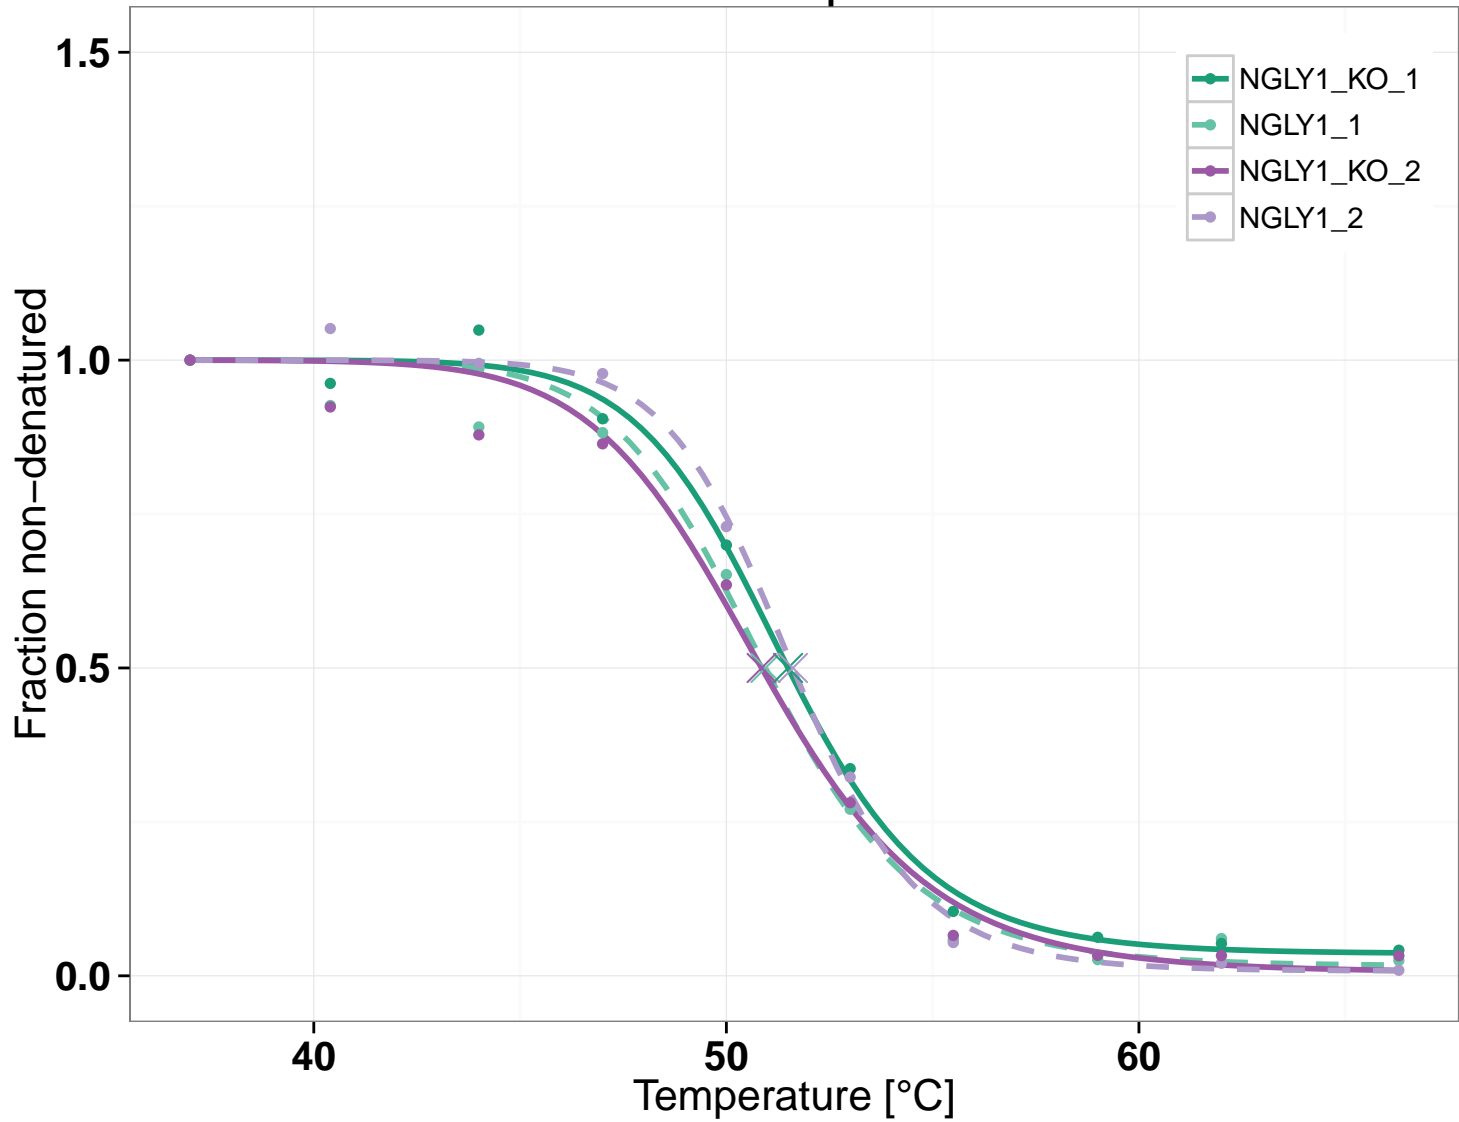

|            | meltPoint | slope | plateau | R2   |
|------------|-----------|-------|---------|------|
| NGLY1_KO_1 | 51.5      | -0.13 | 0.04    | 1    |
| NGLY1_1    | 50.95     | -0.13 | 0.02    | 0.99 |
| NGLY1_KO_2 | 50.86     | -0.12 | 0.01    | 0.99 |
| NGLY1_2    | 51.61     | -0.16 | 0.01    | 1    |

Supplement: Supplementary file 1930 [file 1]

# IPI00033488.2|ZNF121

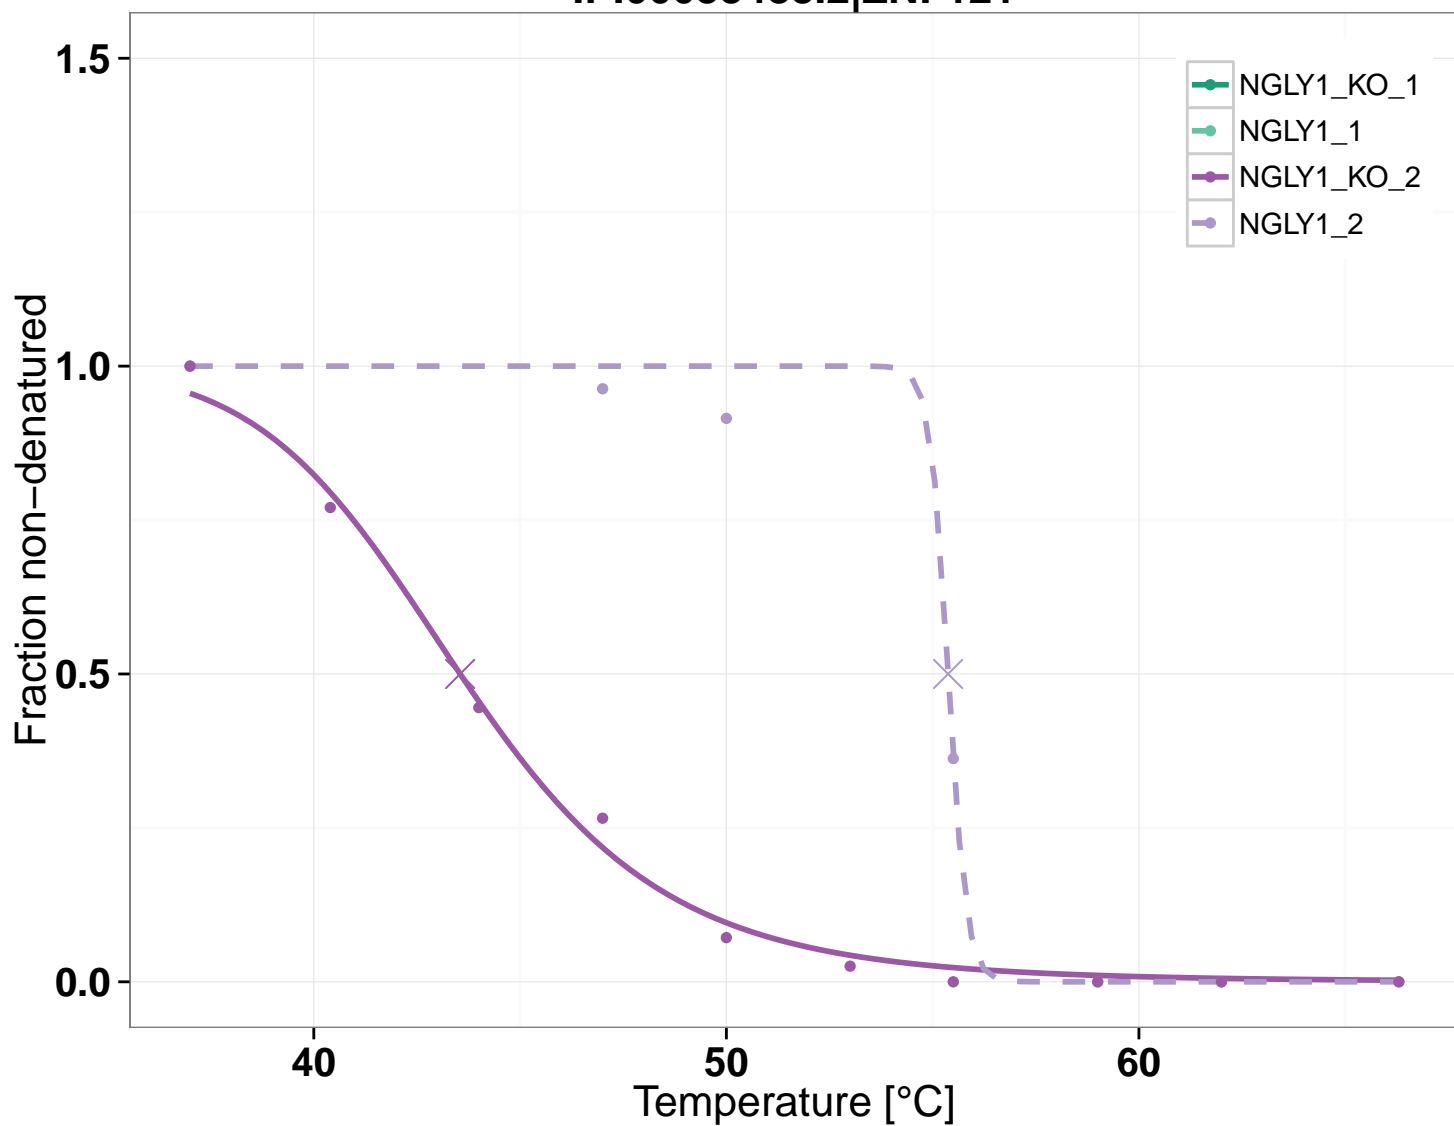

|            | meltPoint | slope | plateau | R2   |
|------------|-----------|-------|---------|------|
| NGLY1_KO_1 | —         | —     | —       | —    |
| NGLY1_1    | —         | —     | —       | —    |
| NGLY1_KO_2 | 43.55     | -0.1  | 0       | 0.99 |
| NGLY1_2    | 55.37     | -1.1  | 0       | 0.13 |

Supplement: Supplementary file 1931 [file 1]

# IPI00016968.1|SDHC

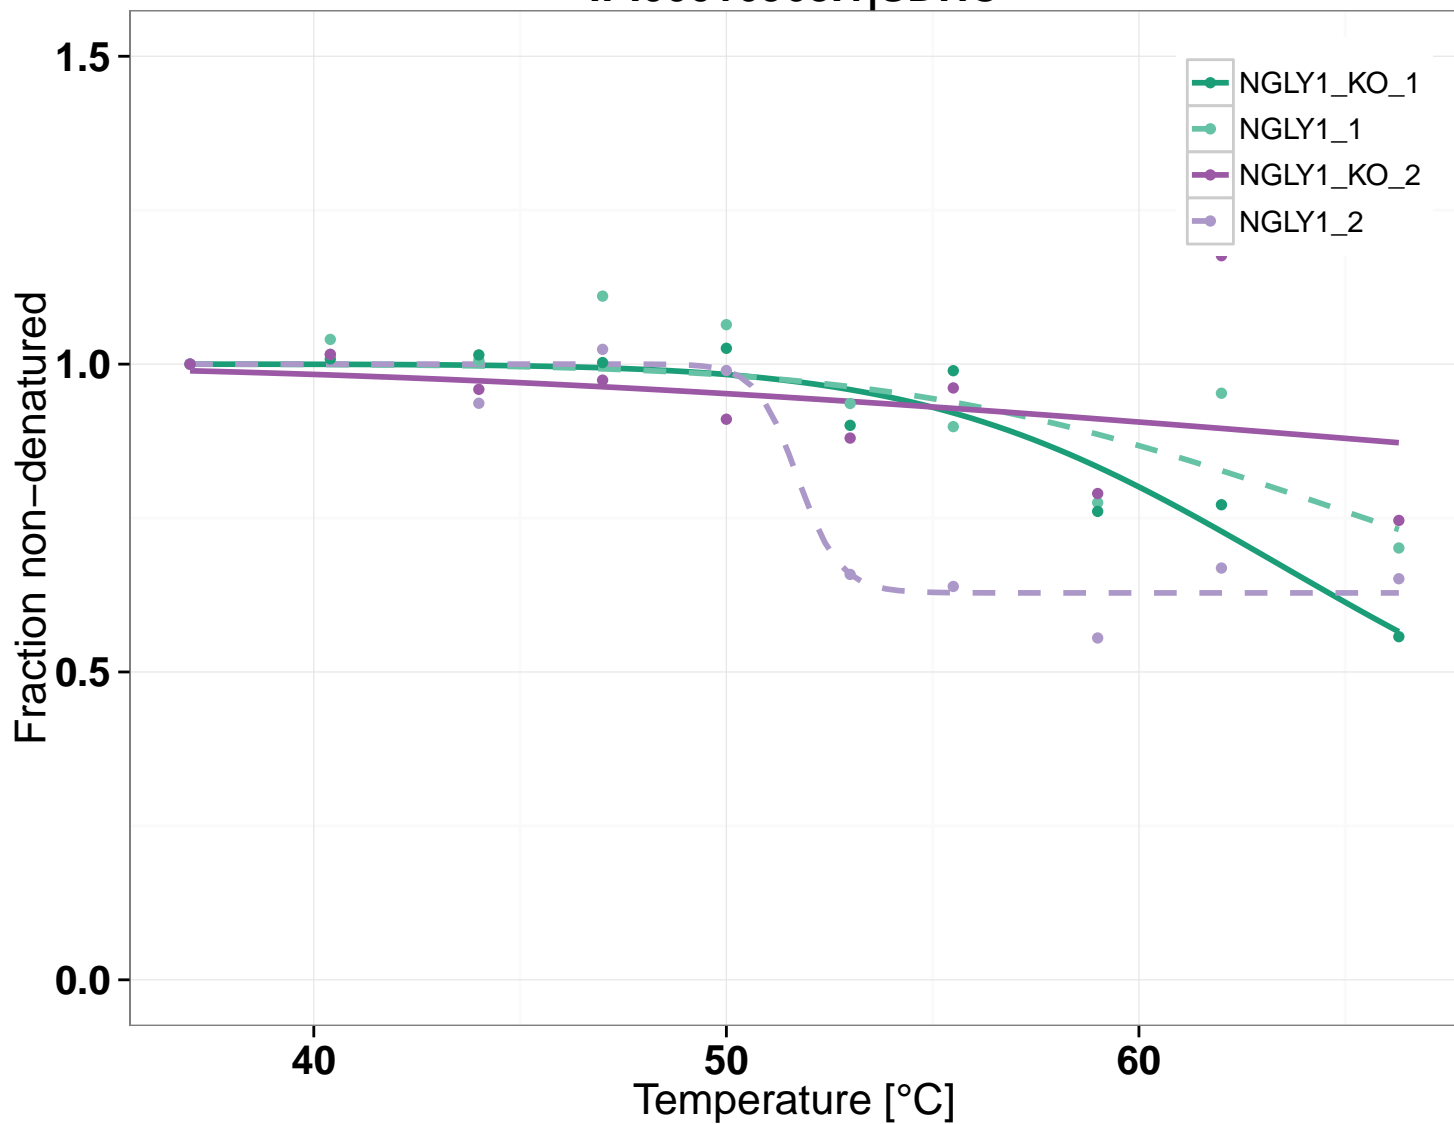

|            | meltPoint | slope  | plateau | R2   |
|------------|-----------|--------|---------|------|
| NGLY1_KO_1 | —         | −0.039 | 0.22    | 0.92 |
| NGLY1_1    | —         | −0.023 | 0.41    | 0.64 |
| NGLY1_KO_2 | —         | —      | 0       | 0.11 |
| NGLY1_2    | —         | −0.18  | 0.63    | 0.96 |

Supplement: Supplementary file 1932 [file 1]

# IPI00009668.3|CENPH

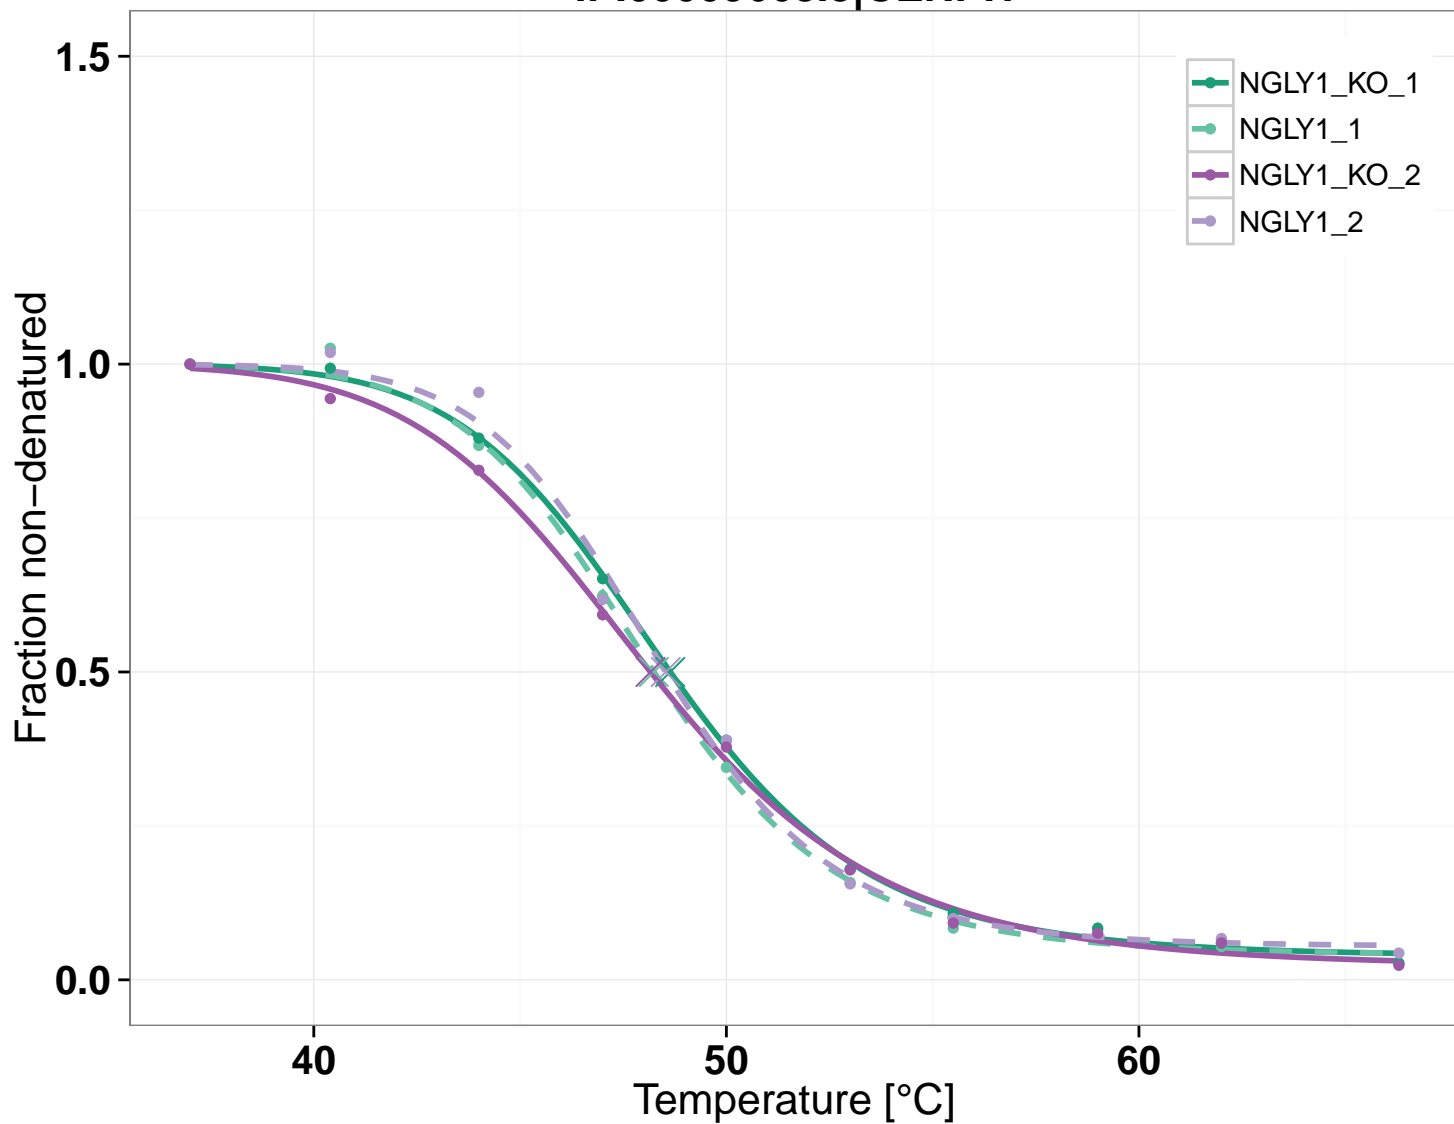

|            | meltPoint | slope  | plateau | R2 |
|------------|-----------|--------|---------|----|
| NGLY1_KO_1 | 48.64     | -0.097 | 0.04    | 1  |
| NGLY1_1    | 48.24     | -0.1   | 0.04    | 1  |
| NGLY1_KO_2 | 48.16     | -0.086 | 0.02    | 1  |
| NGLY1_2    | 48.53     | -0.11  | 0.05    | 1  |

Supplement: Supplementary file 1933 [file 1]

# IPI00657962.1|CEP110

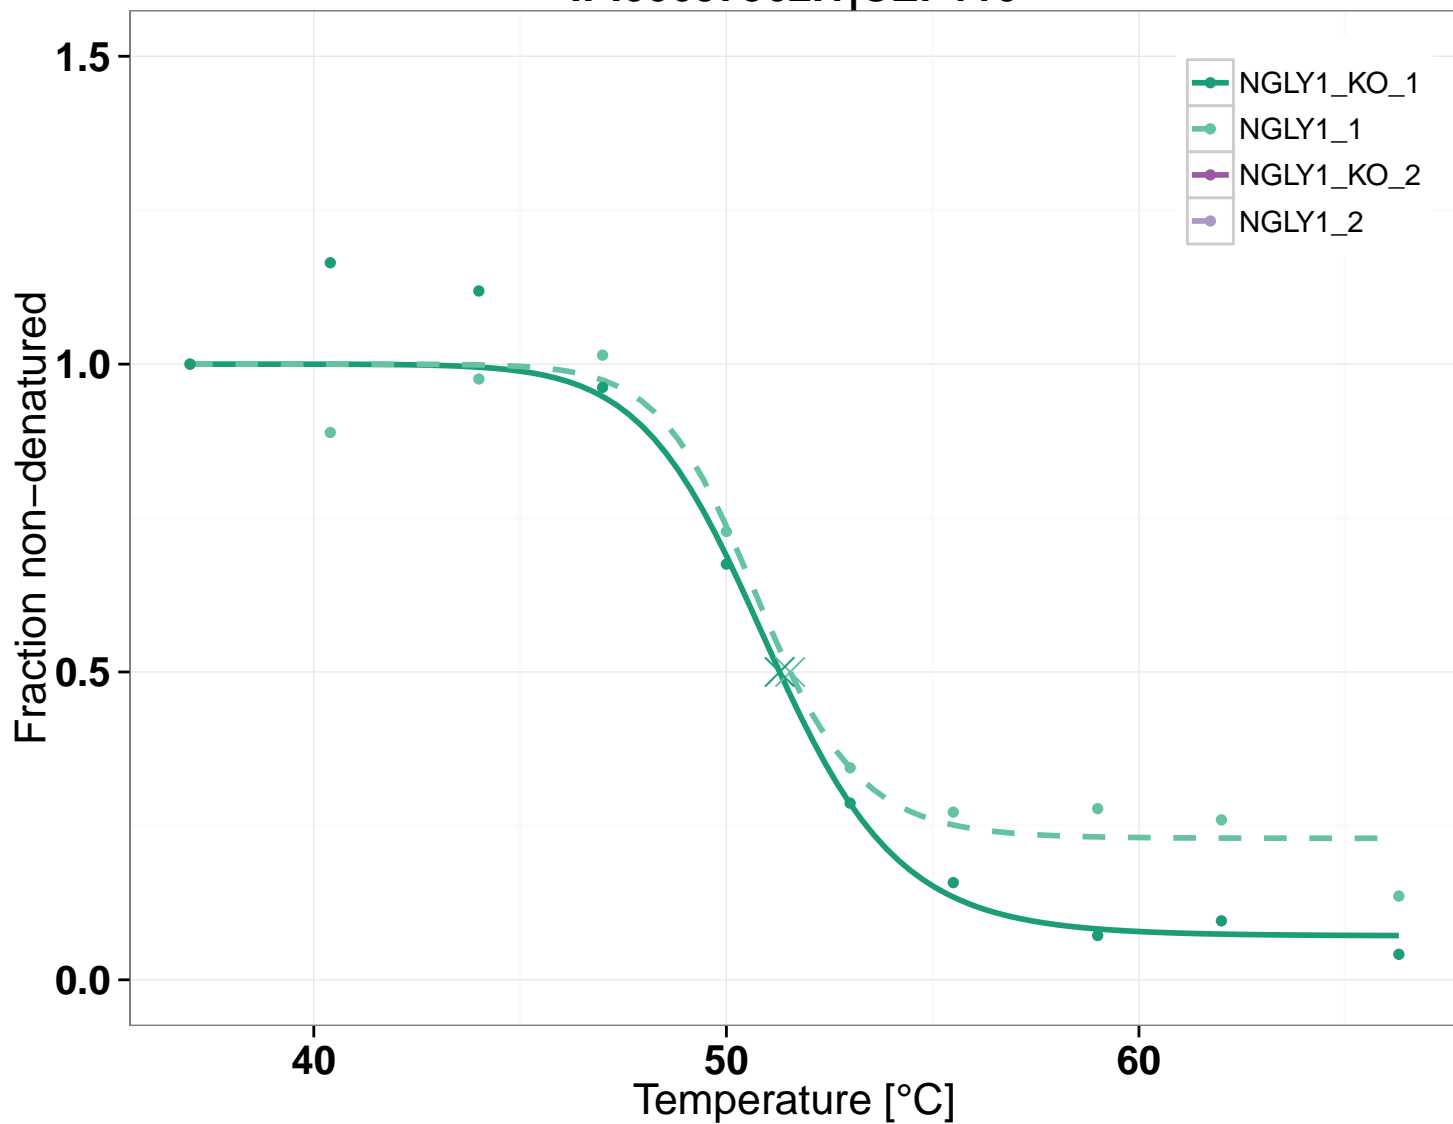

|            | meltPoint | slope | plateau | R2   |
|------------|-----------|-------|---------|------|
| NGLY1_KO_1 | 51.29     | -0.15 | 0.07    | 0.98 |
| NGLY1_1    | 51.55     | -0.16 | 0.23    | 0.98 |
| NGLY1_KO_2 | -         | -     | -       | -    |
| NGLY1_2    | -         | -     | -       | -    |

Supplement: Supplementary file 1934 [file 1]

IPI00514295.1|CIZ1

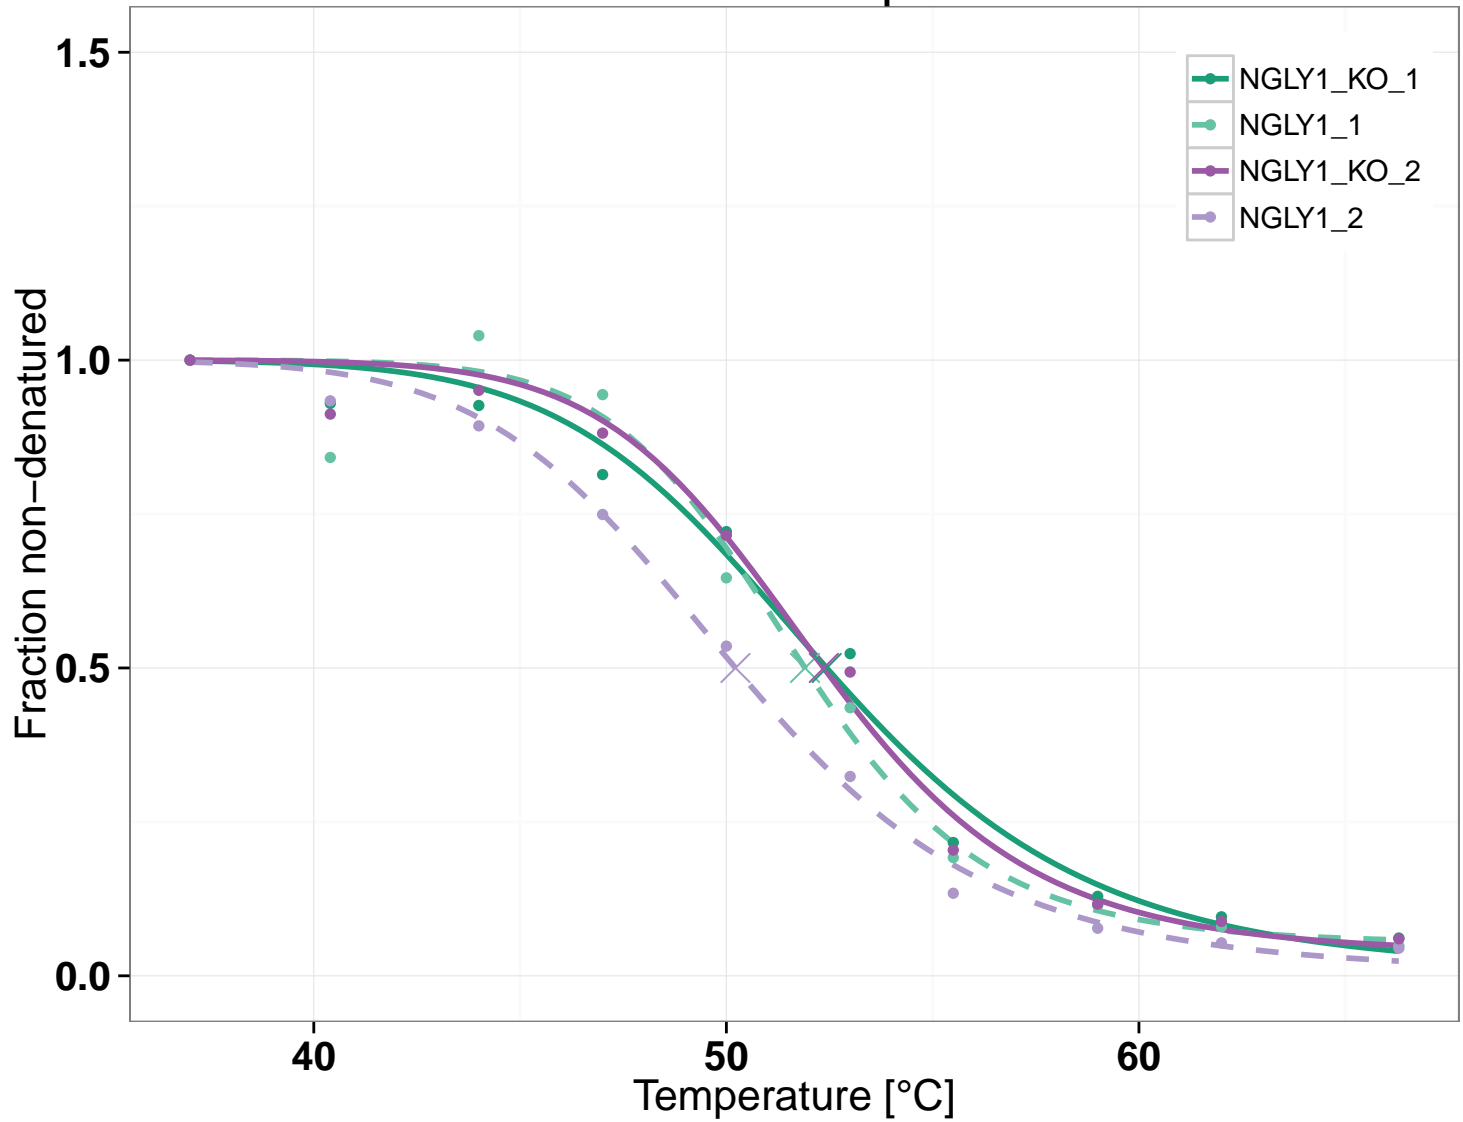

|            | meltPoint | slope  | plateau | R2   |
|------------|-----------|--------|---------|------|
| NGLY1_KO_1 | 52.43     | -0.077 | 0.01    | 0.99 |
| NGLY1_1    | 51.91     | -0.1   | 0.05    | 0.98 |
| NGLY1_KO_2 | 52.36     | -0.092 | 0.04    | 0.99 |
| NGLY1_2    | 50.22     | -0.081 | 0       | 1    |

Supplement: Supplementary file 1935 [file 1]

# IPI00012268.3|PSMD2

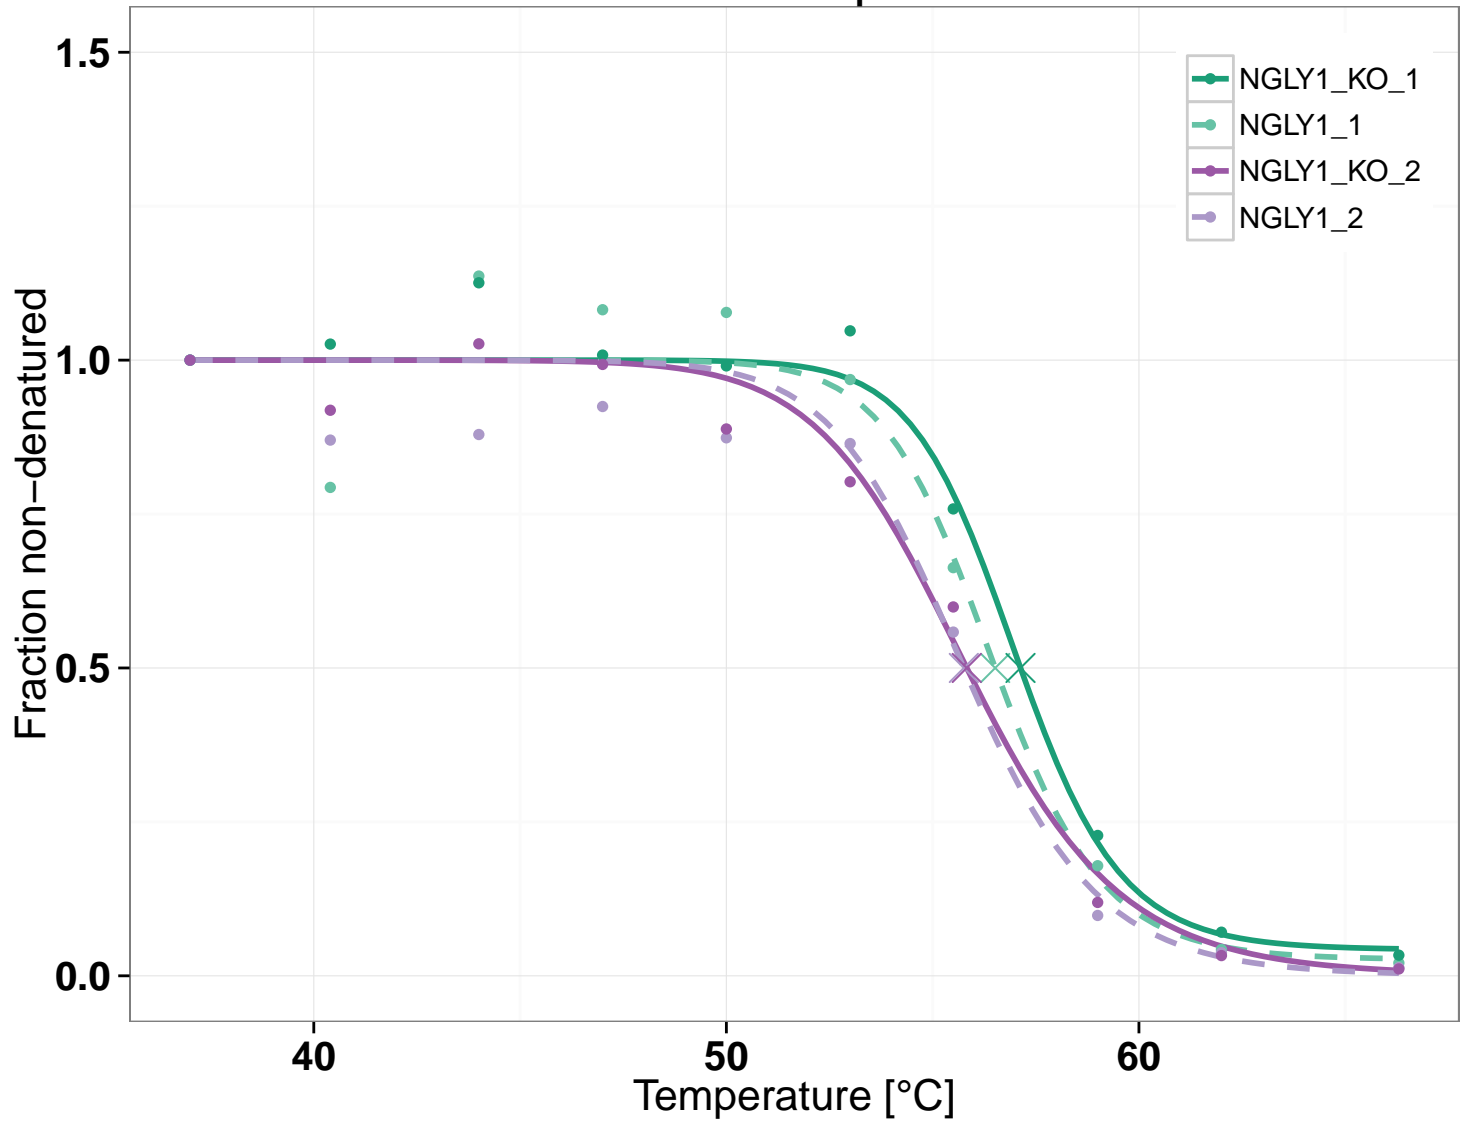

|            | meltPoint | slope | plateau | R2   |
|------------|-----------|-------|---------|------|
| NGLY1_KO_1 | 57.13     | -0.19 | 0.04    | 0.99 |
| NGLY1_1    | 56.52     | -0.18 | 0.03    | 0.96 |
| NGLY1_KO_2 | 55.83     | -0.13 | 0       | 0.99 |
| NGLY1_2    | 55.76     | -0.15 | 0       | 0.97 |

Supplement: Supplementary file 1936 [file 1]

IPI00298662.5|C19ORF25

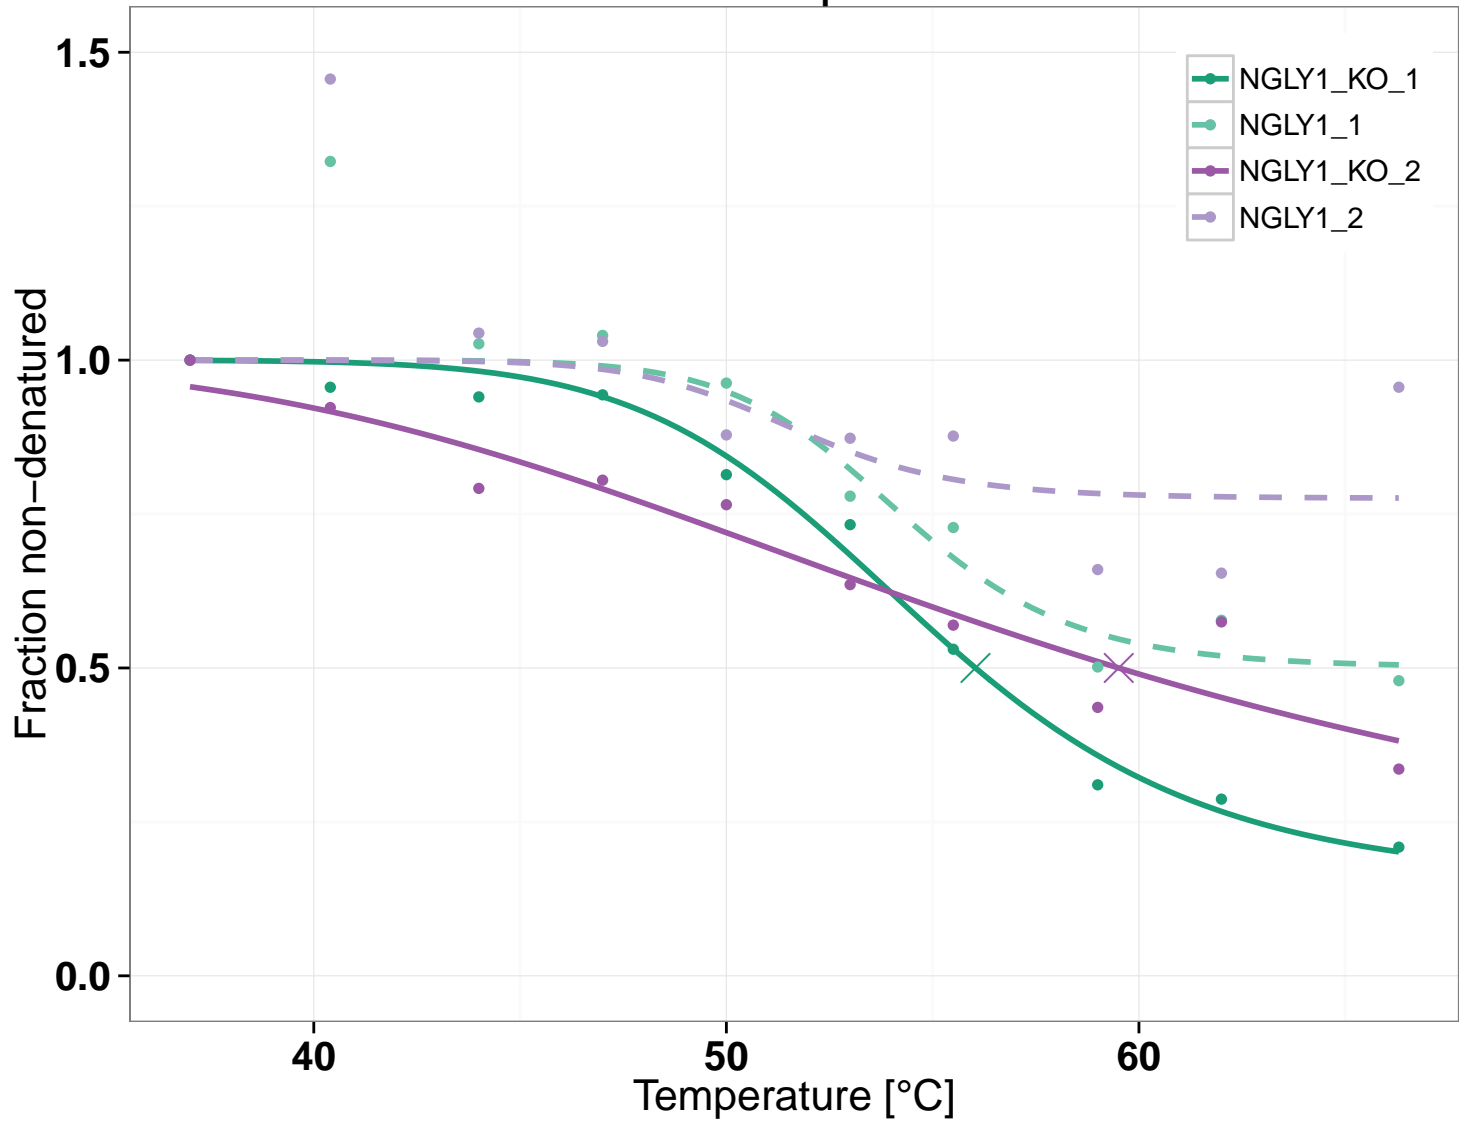

|            | meltPoint | slope  | plateau | R2   |
|------------|-----------|--------|---------|------|
| NGLY1_KO_1 | 56.04     | -0.062 | 0.15    | 0.99 |
| NGLY1_1    | -         | -0.06  | 0.5     | 0.82 |
| NGLY1_KO_2 | 59.51     | -0.024 | 0.07    | 0.92 |
| NGLY1_2    | -         | -0.029 | 0.78    | 0.38 |

Supplement: Supplementary file 1937 [file 1]

IPI00001780.1|USP16

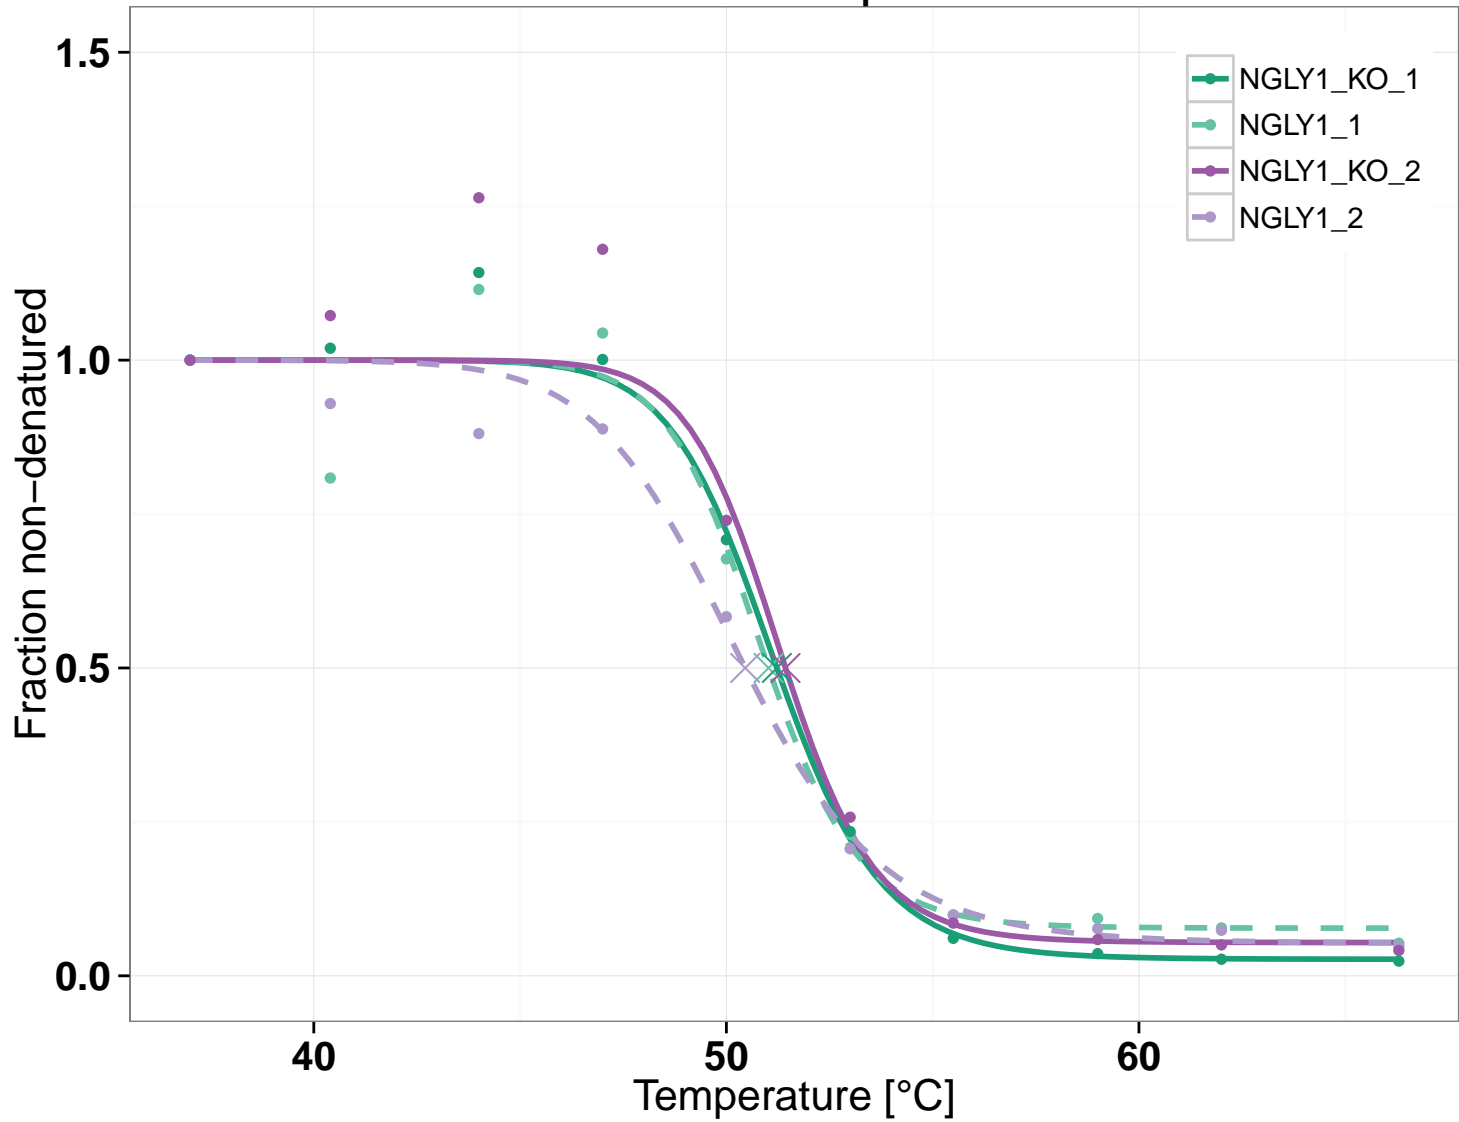

|            | meltPoint | slope | plateau | R2   |
|------------|-----------|-------|---------|------|
| NGLY1_KO_1 | 51.22     | -0.19 | 0.03    | 0.99 |
| NGLY1_1    | 51.02     | -0.2  | 0.08    | 0.97 |
| NGLY1_KO_2 | 51.43     | -0.21 | 0.05    | 0.95 |
| NGLY1_2    | 50.46     | -0.14 | 0.05    | 0.99 |

Supplement: Supplementary file 1938 [file 1]

IPI00290328.3|PTPRJ

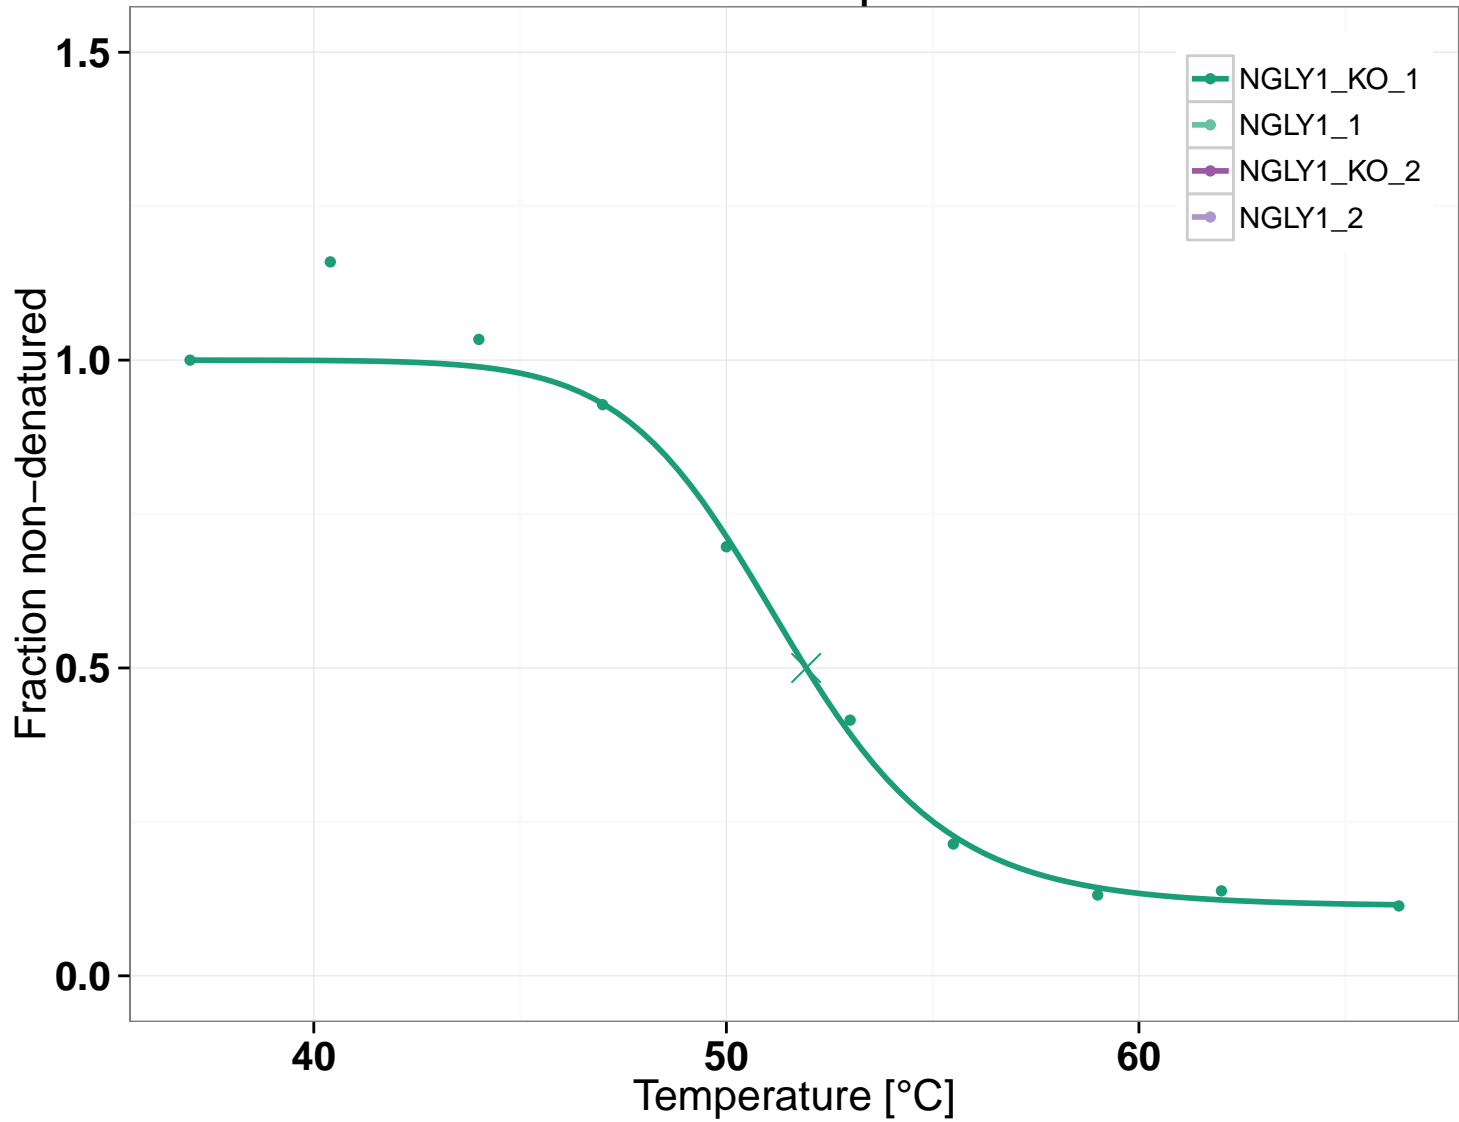

|            | meltPoint | slope | plateau | R2   |
|------------|-----------|-------|---------|------|
| NGLY1_KO_1 | 51.93     | -0.11 | 0.11    | 0.98 |
| NGLY1_1    | -         | -     | -       | -    |
| NGLY1_KO_2 | -         | -     | -       | -    |
| NGLY1_2    | -         | -     | -       | -    |

Supplement: Supplementary file 1939 [file 1]

# IPI00026833.4|ADSS

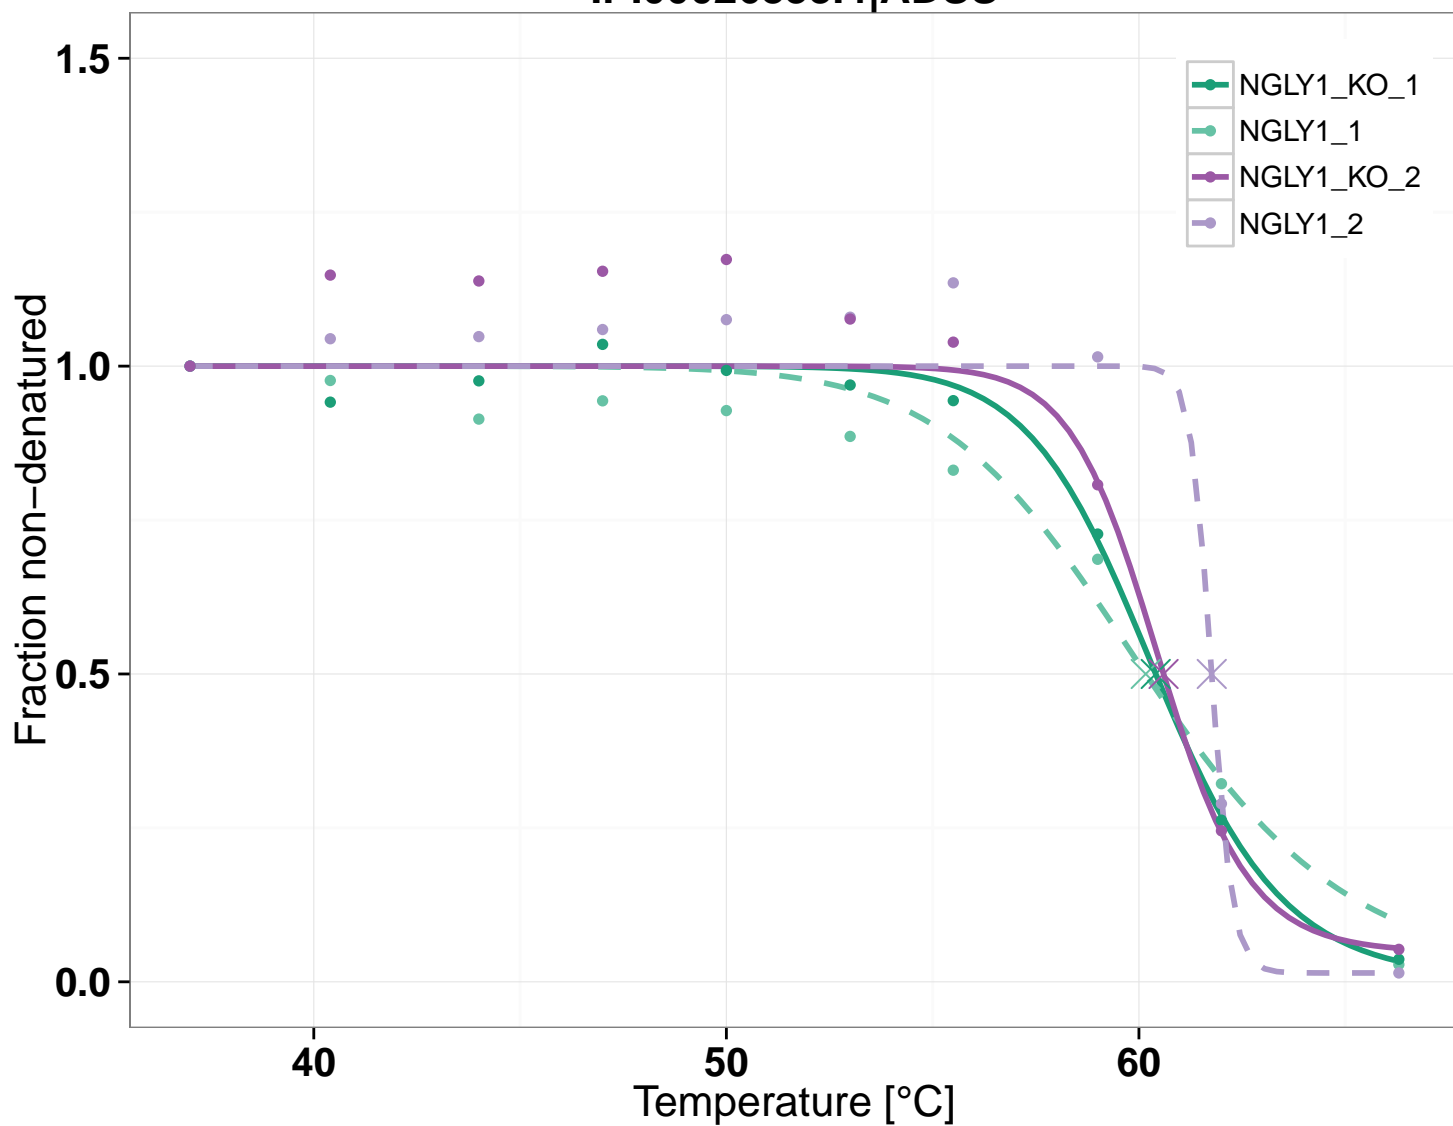

|            | meltPoint | slope | plateau | R2   |
|------------|-----------|-------|---------|------|
| NGLY1_KO_1 | 60.41     | -0.16 | 0       | 0.99 |
| NGLY1_1    | 60.16     | -0.1  | 0       | 0.96 |
| NGLY1_KO_2 | 60.6      | -0.22 | 0.05    | 0.93 |
| NGLY1_2    | 61.76     | -0.97 | 0.01    | 0.97 |

Supplement: Supplementary file 1940 [file 1]

IPI00607632.1|ZNF124

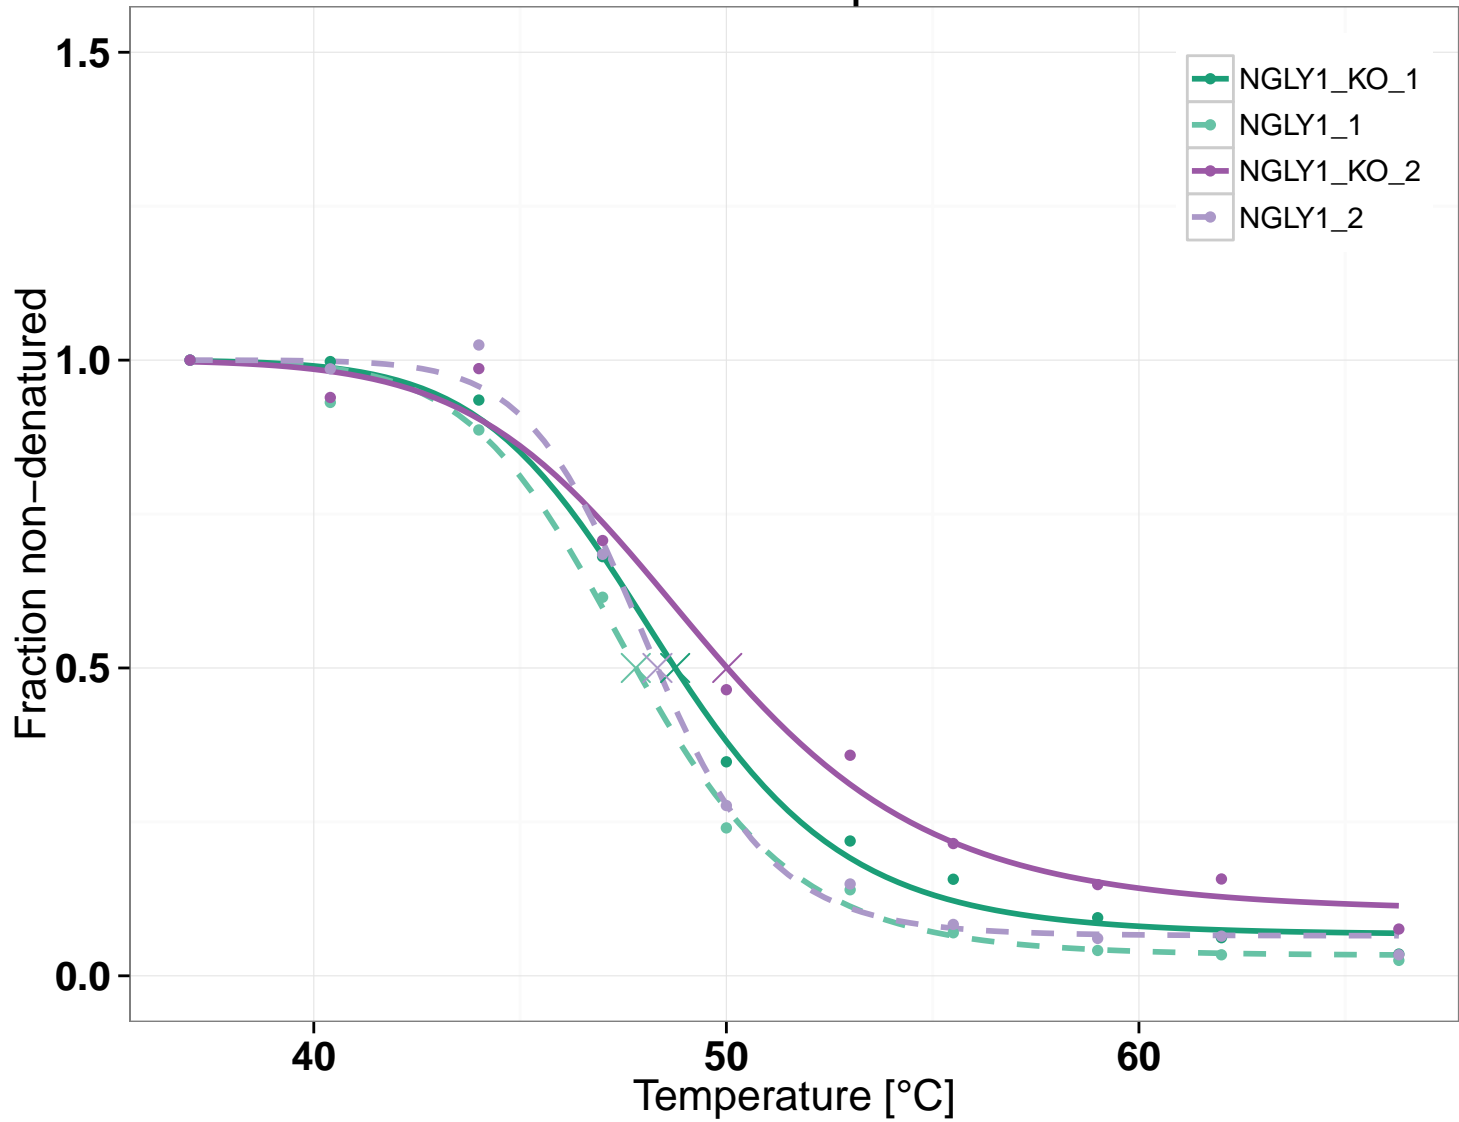

|            | meltPoint | slope | plateau | R2   |
|------------|-----------|-------|---------|------|
| NGLY1_KO_1 | 48.76     | -0.11 | 0.07    | 1    |
| NGLY1_1    | 47.8      | -0.12 | 0.03    | 1    |
| NGLY1_KO_2 | 50.02     | -0.08 | 0.1     | 0.99 |
| NGLY1_2    | 48.33     | -0.16 | 0.07    | 1    |

Supplement: Supplementary file 1941 [file 1]

# IPI00465101.5|NEK3

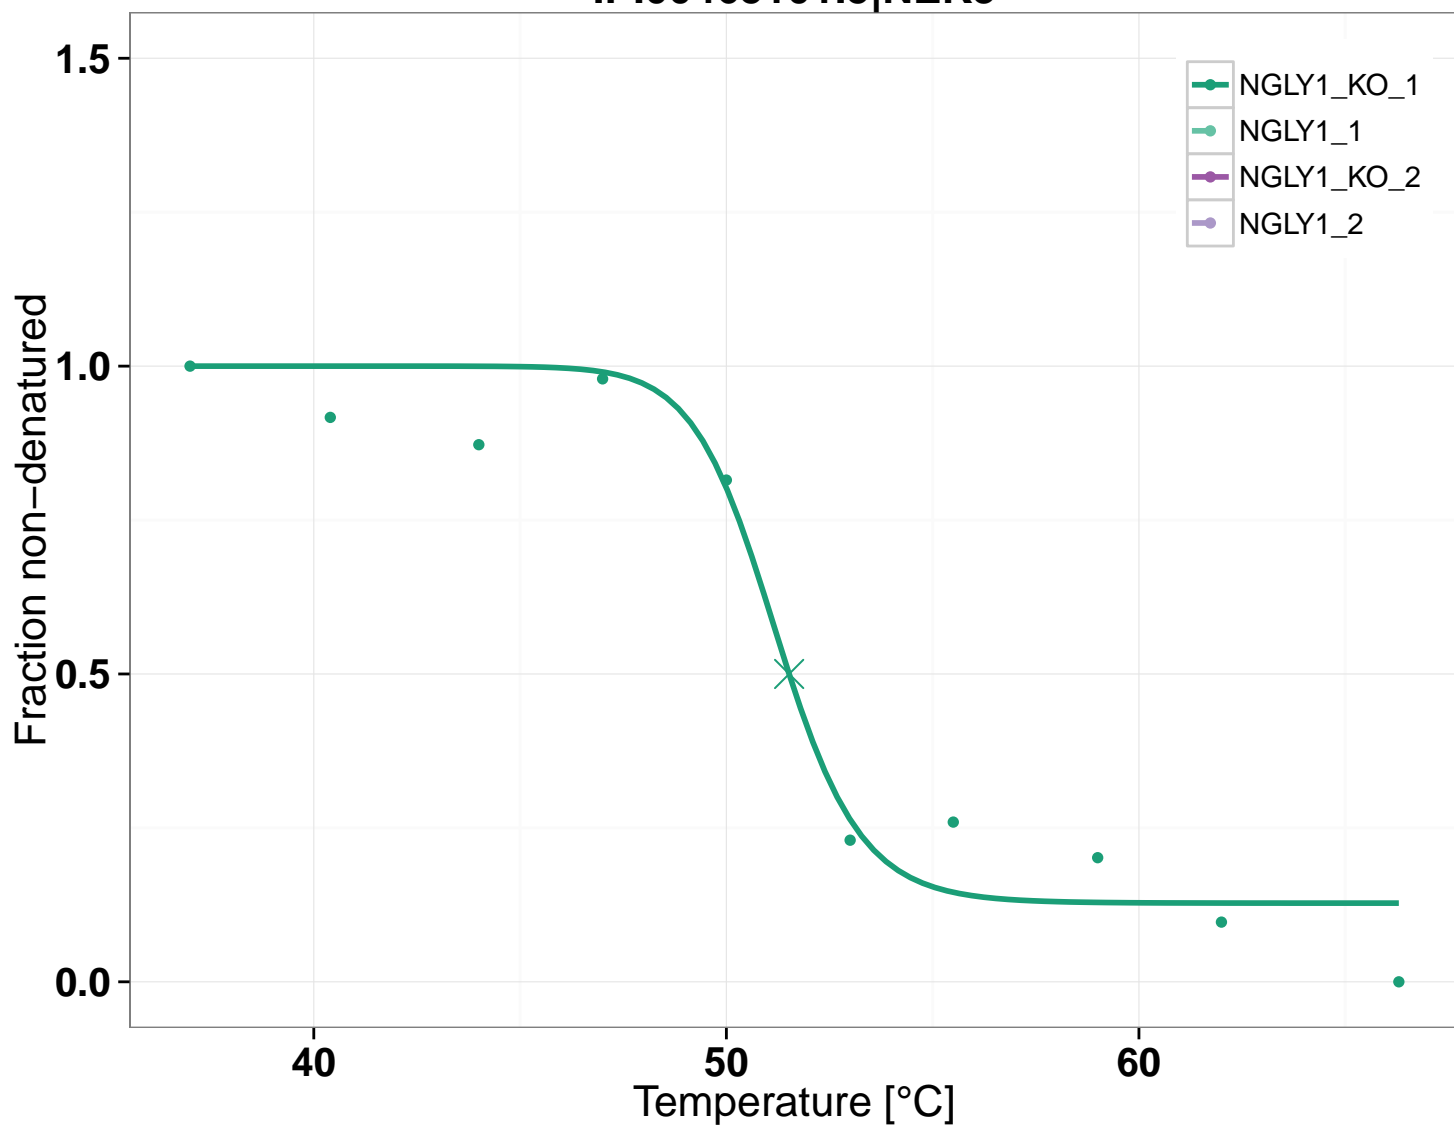

|            | meltPoint | slope | plateau | R2   |
|------------|-----------|-------|---------|------|
| NGLY1_KO_1 | 51.52     | -0.21 | 0.13    | 0.96 |
| NGLY1_1    | -         | -     | -       | -    |
| NGLY1_KO_2 | -         | -     | -       | -    |
| NGLY1_2    | -         | -     | -       | -    |

Supplement: Supplementary file 1942 [file 1]

IPI00018321.5|SETDB1

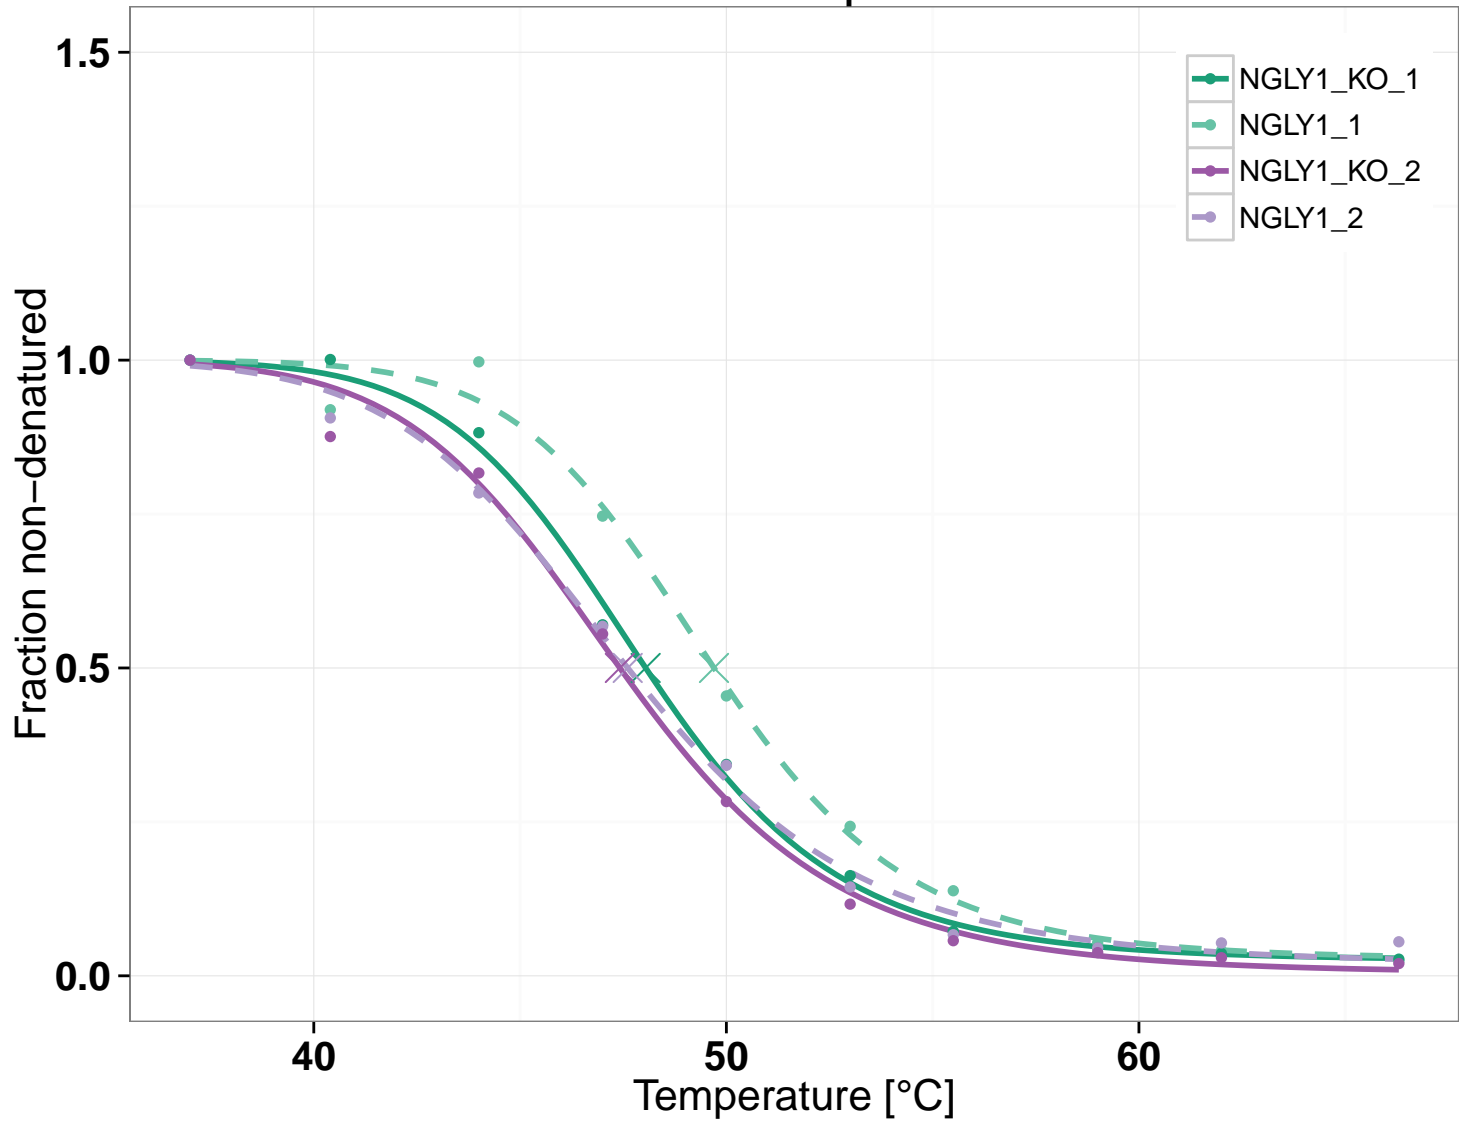

|            | meltPoint | slope  | plateau | R2   |
|------------|-----------|--------|---------|------|
| NGLY1_KO_1 | 48.04     | -0.1   | 0.02    | 1    |
| NGLY1_1    | 49.7      | -0.1   | 0.03    | 0.99 |
| NGLY1_KO_2 | 47.42     | -0.095 | 0       | 0.99 |
| NGLY1_2    | 47.61     | -0.086 | 0.02    | 1    |

Supplement: Supplementary file 1943 [file 1]

IPI00019966.5|C5ORF22

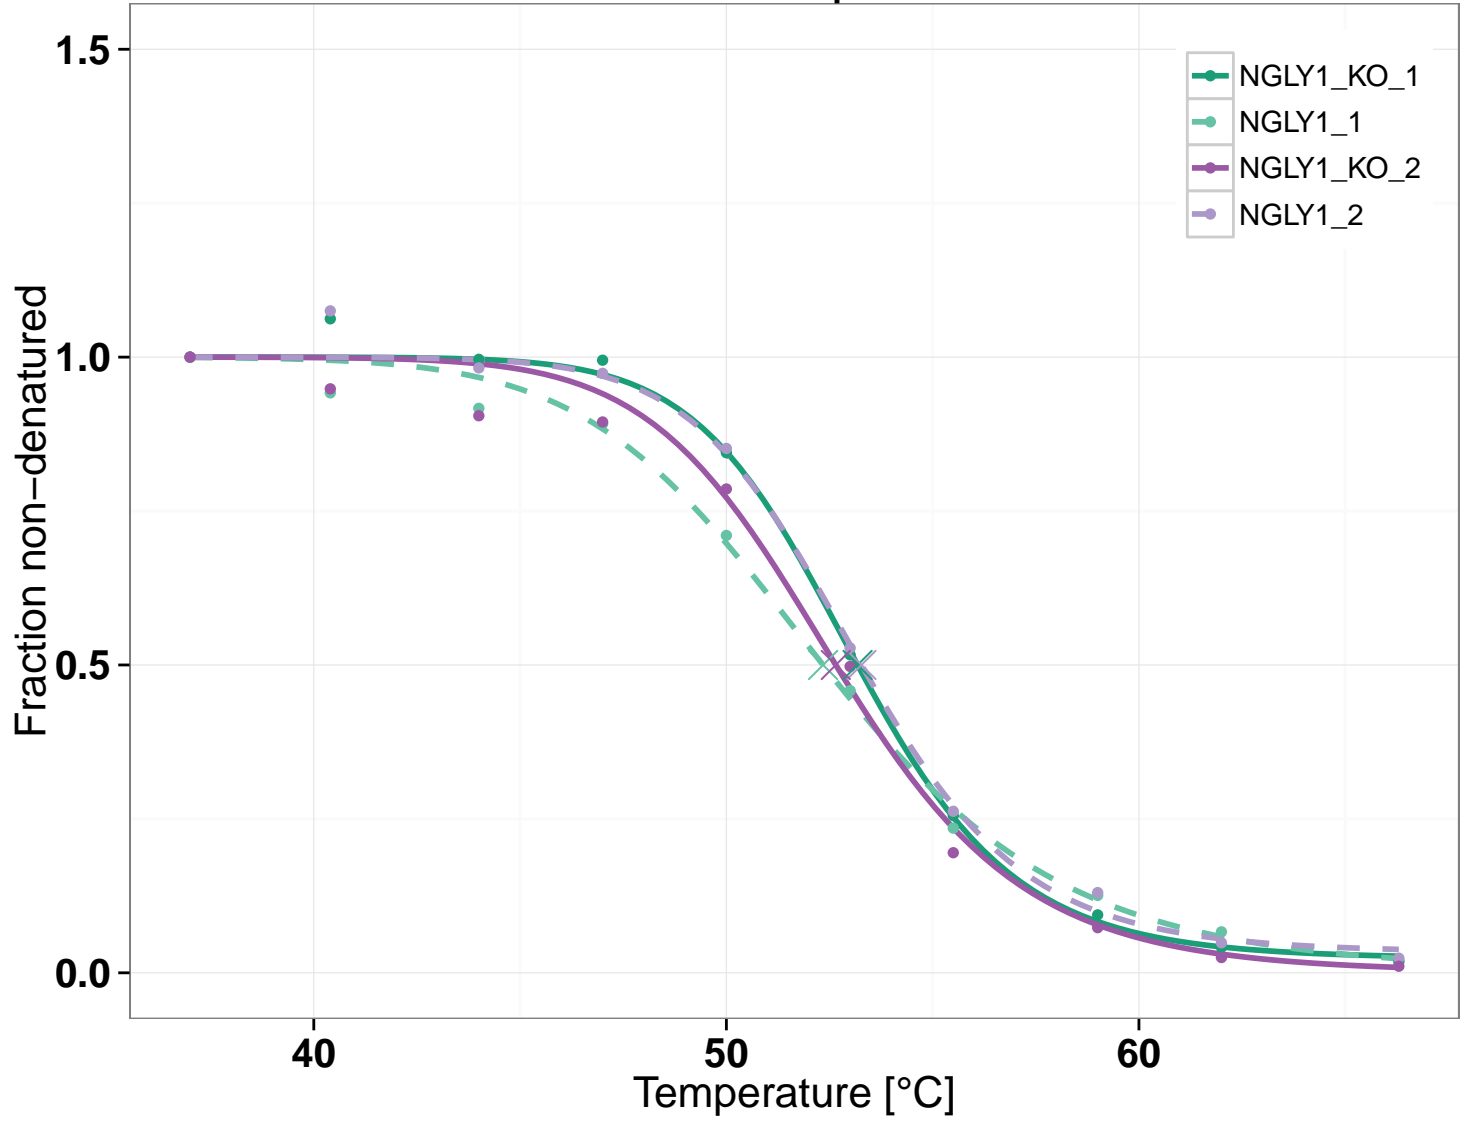

|            | meltPoint | slope  | plateau | R2   |
|------------|-----------|--------|---------|------|
| NGLY1_KO_1 | 53.18     | -0.13  | 0.02    | 1    |
| NGLY1_1    | 52.34     | -0.086 | 0       | 1    |
| NGLY1_KO_2 | 52.65     | -0.11  | 0       | 0.99 |
| NGLY1_2    | 53.27     | -0.12  | 0.03    | 1    |

Supplement: Supplementary file 1944 [file 1]

IPI00873027.2|CARKD

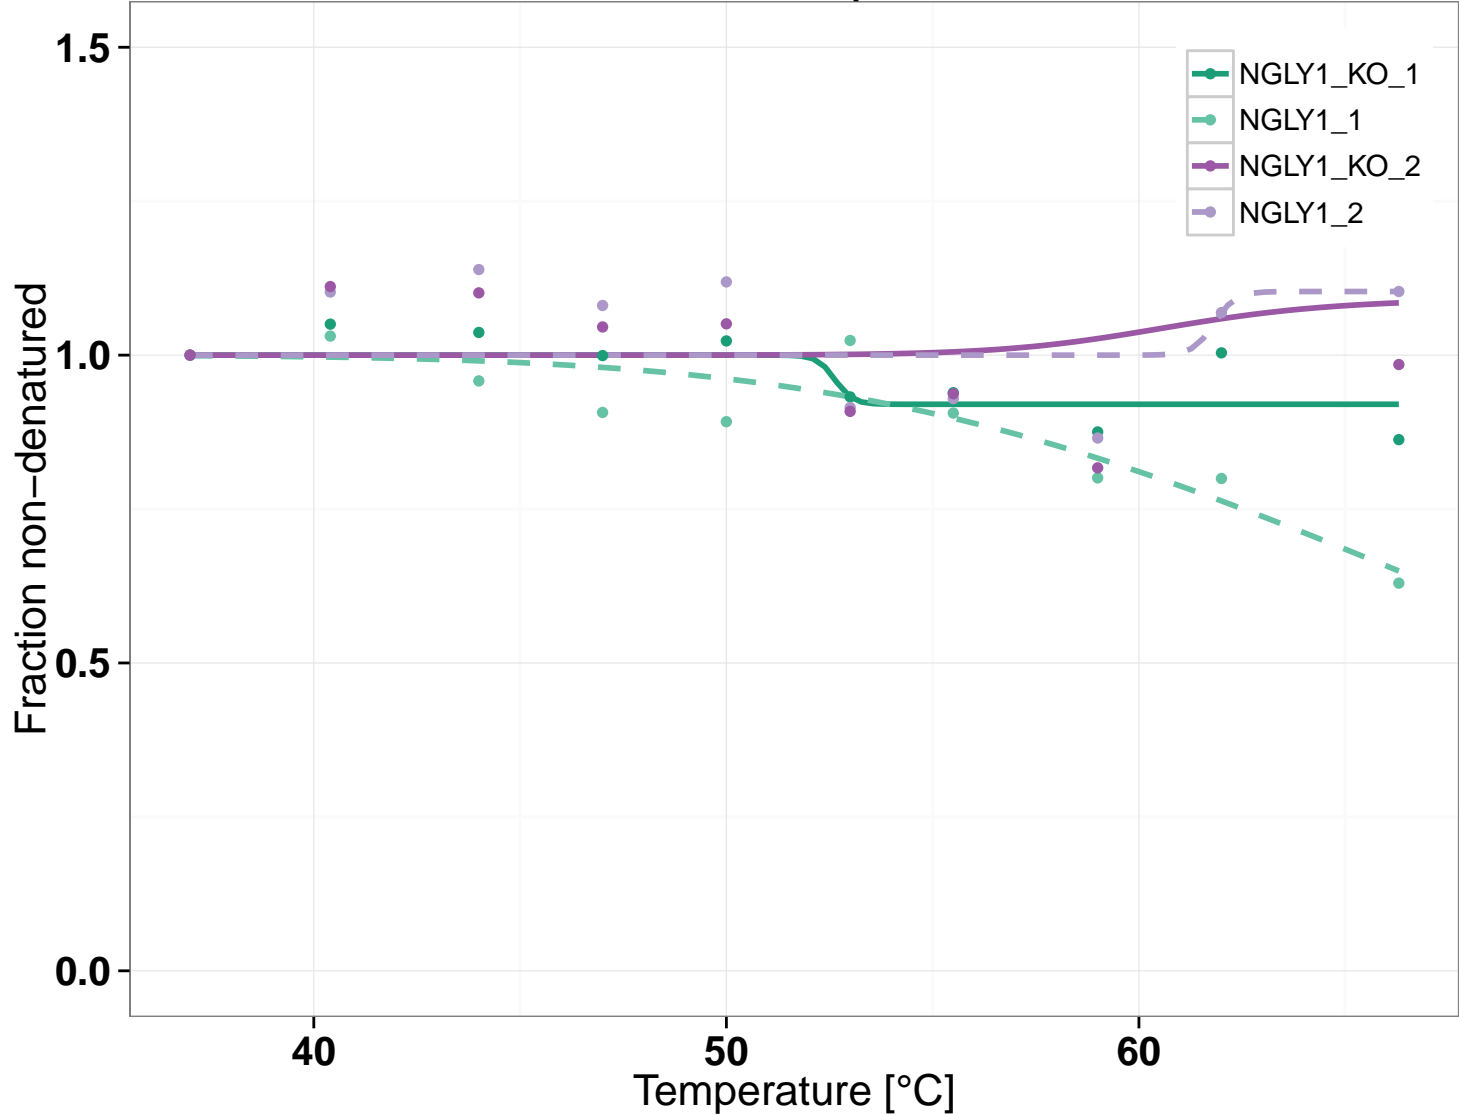

|            | meltPoint | slope  | plateau | R2   |
|------------|-----------|--------|---------|------|
| NGLY1_KO_1 | -         | -0.095 | 0.92    | 0.57 |
| NGLY1_1    | -         | -      | 0       | 0.83 |
| NGLY1_KO_2 | -         | 0.011  | 1.09    | 0.03 |
| NGLY1_2    | -         | 0.1    | 1.1     | 0.06 |

Supplement: Supplementary file 1945 [file 1]

# IPI00021518.1|DDB2

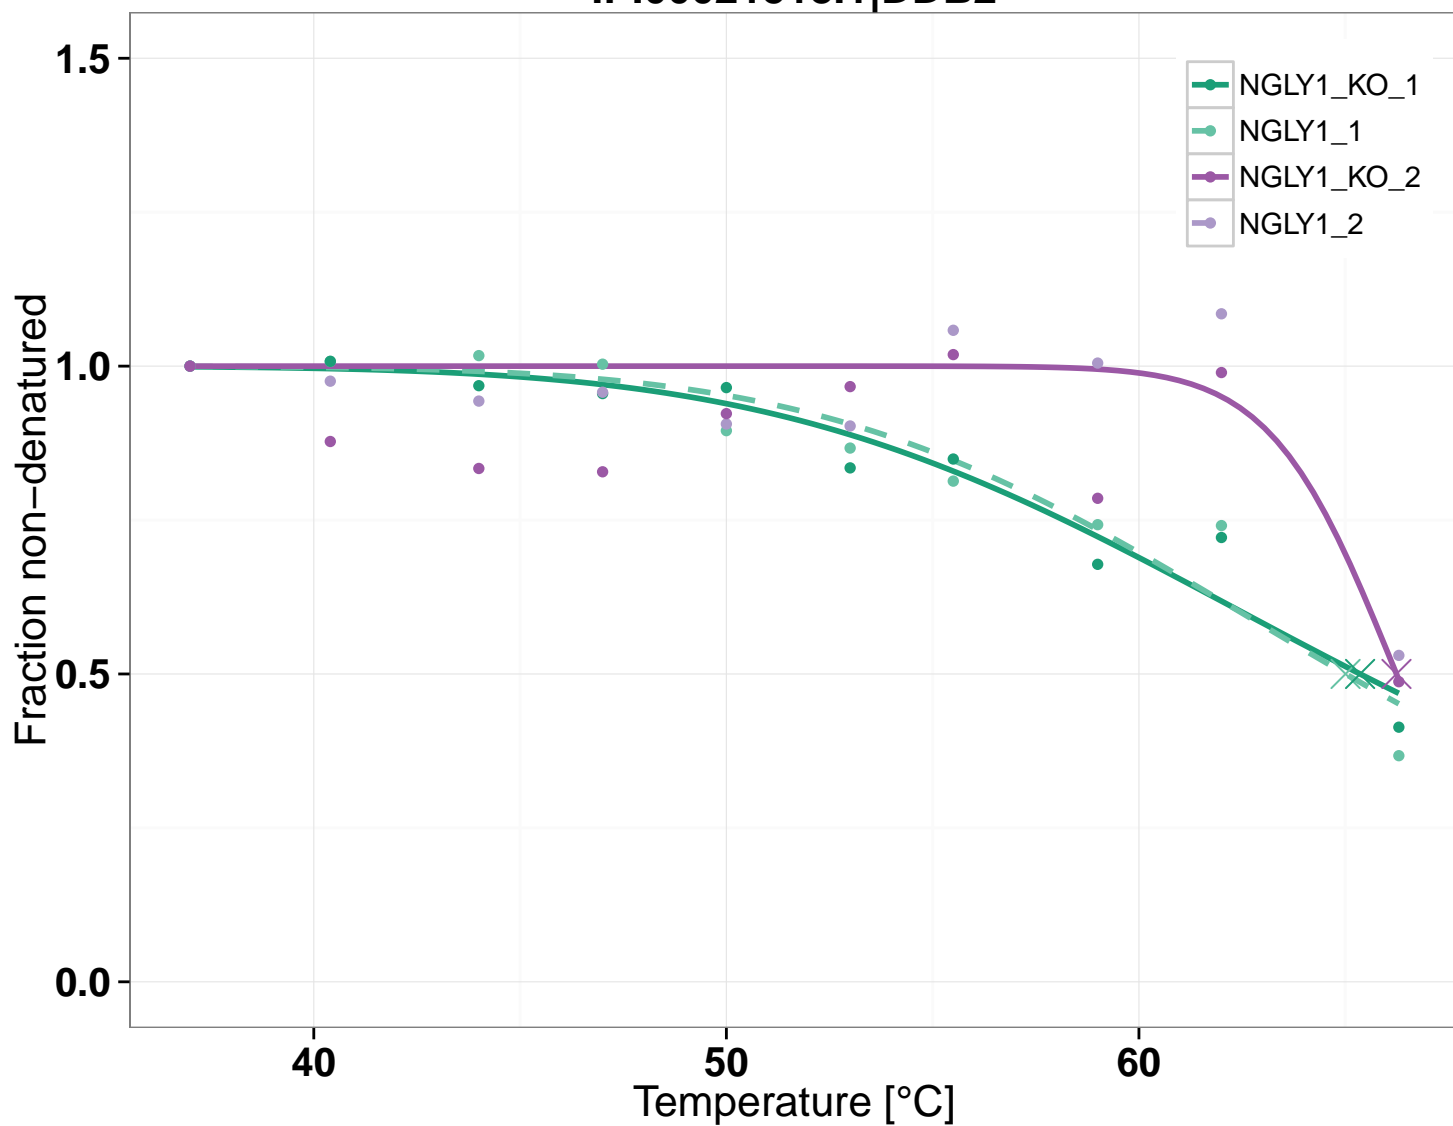

|            | meltPoint | slope  | plateau | R2   |
|------------|-----------|--------|---------|------|
| NGLY1_KO_1 | 65.36     | -0.036 | 0       | 0.94 |
| NGLY1_1    | 65.01     | -0.04  | 0       | 0.92 |
| NGLY1_KO_2 | 66.24     | -0.16  | 0       | 0.44 |
| NGLY1_2    | —         | —      | —       | —    |

Supplement: Supplementary file 1946 [file 1]

IPI00328342.6|SLC4A7

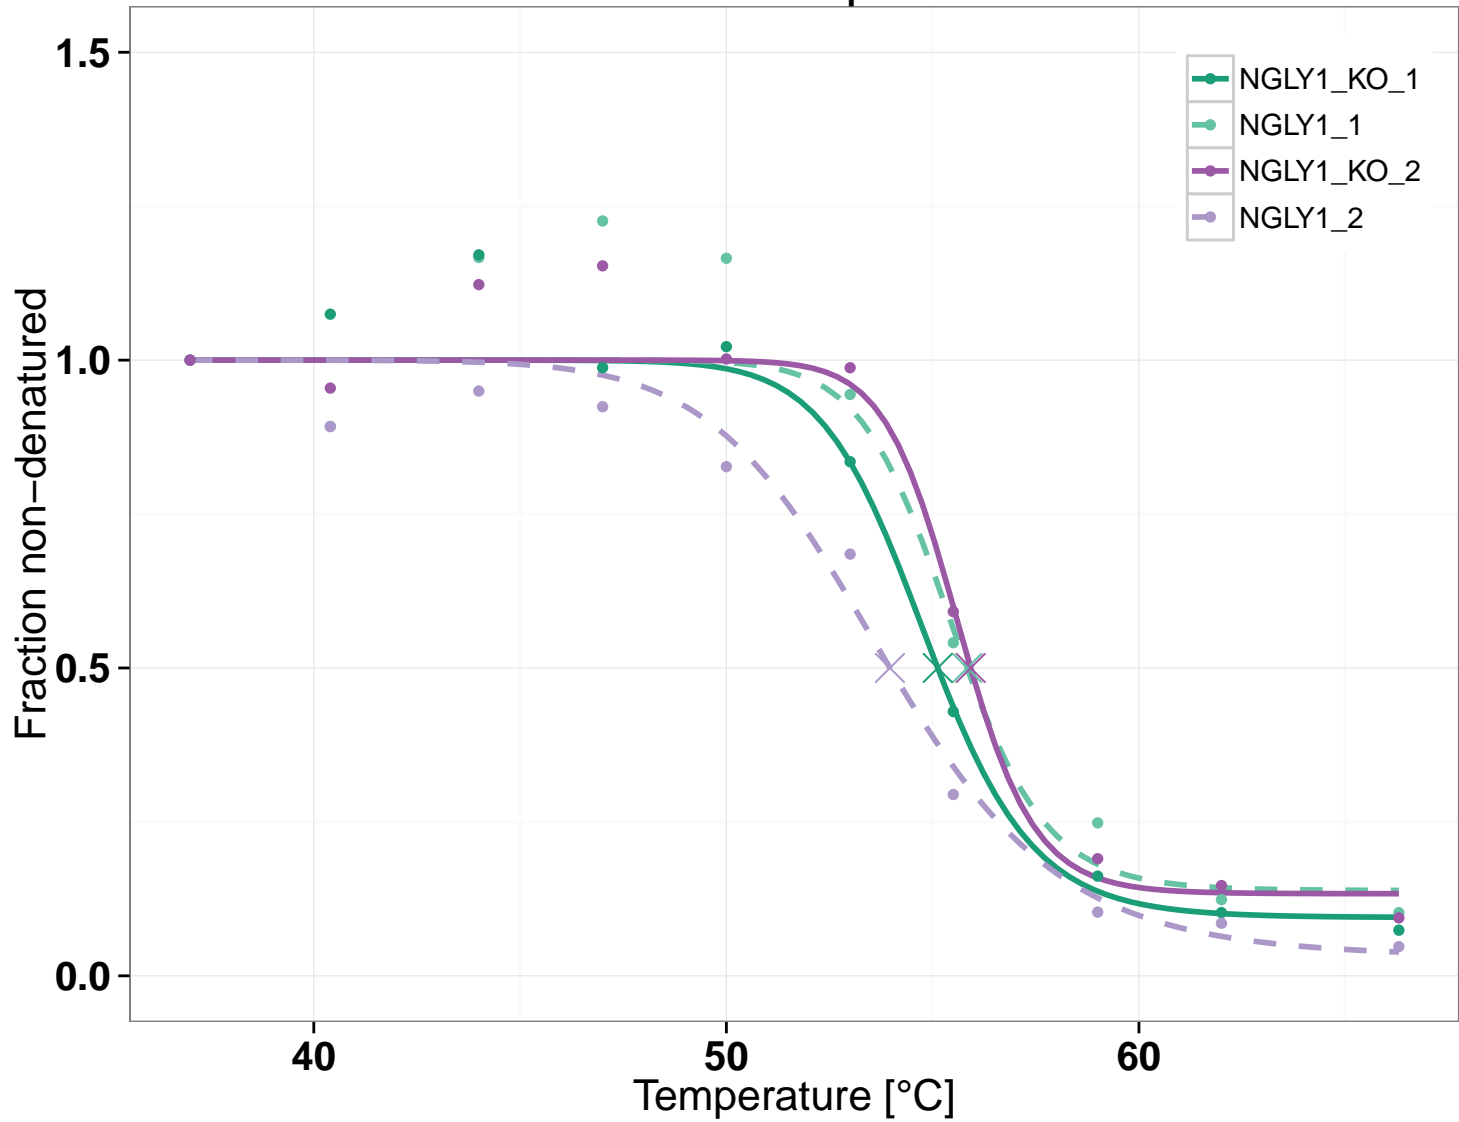

|            | meltPoint | slope | plateau | R2   |
|------------|-----------|-------|---------|------|
| NGLY1_KO_1 | 55.12     | -0.18 | 0.09    | 0.98 |
| NGLY1_1    | 55.84     | -0.19 | 0.14    | 0.93 |
| NGLY1_KO_2 | 55.92     | -0.24 | 0.13    | 0.97 |
| NGLY1_2    | 53.96     | -0.11 | 0.03    | 0.98 |

Supplement: Supplementary file 1947 [file 1]

# IPI00335001.2|HYPK

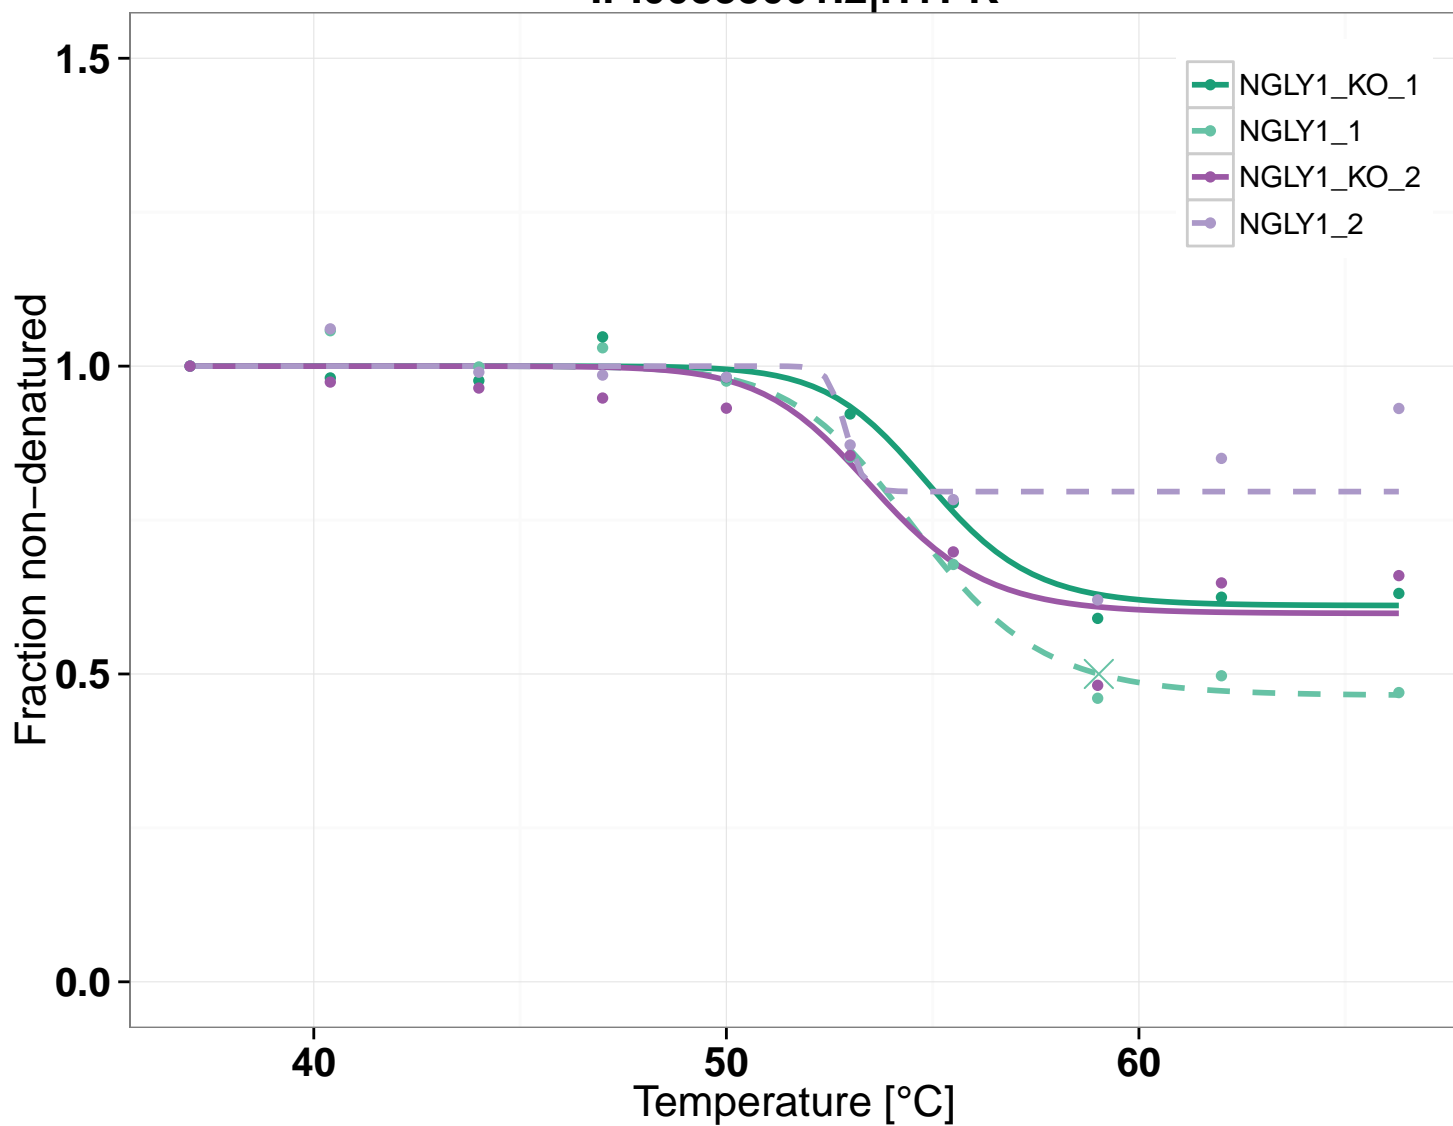

|            | meltPoint | slope  | plateau | R2   |
|------------|-----------|--------|---------|------|
| NGLY1_KO_1 | –         | –0.077 | 0.61    | 0.98 |
| NGLY1_1    | 59.03     | –0.087 | 0.46    | 0.99 |
| NGLY1_KO_2 | –         | –0.074 | 0.6     | 0.9  |
| NGLY1_2    | –         | –0.24  | 0.8     | 0.63 |

Supplement: Supplementary file 1948 [file 1]

# IPI00171903.2|HNRNPM

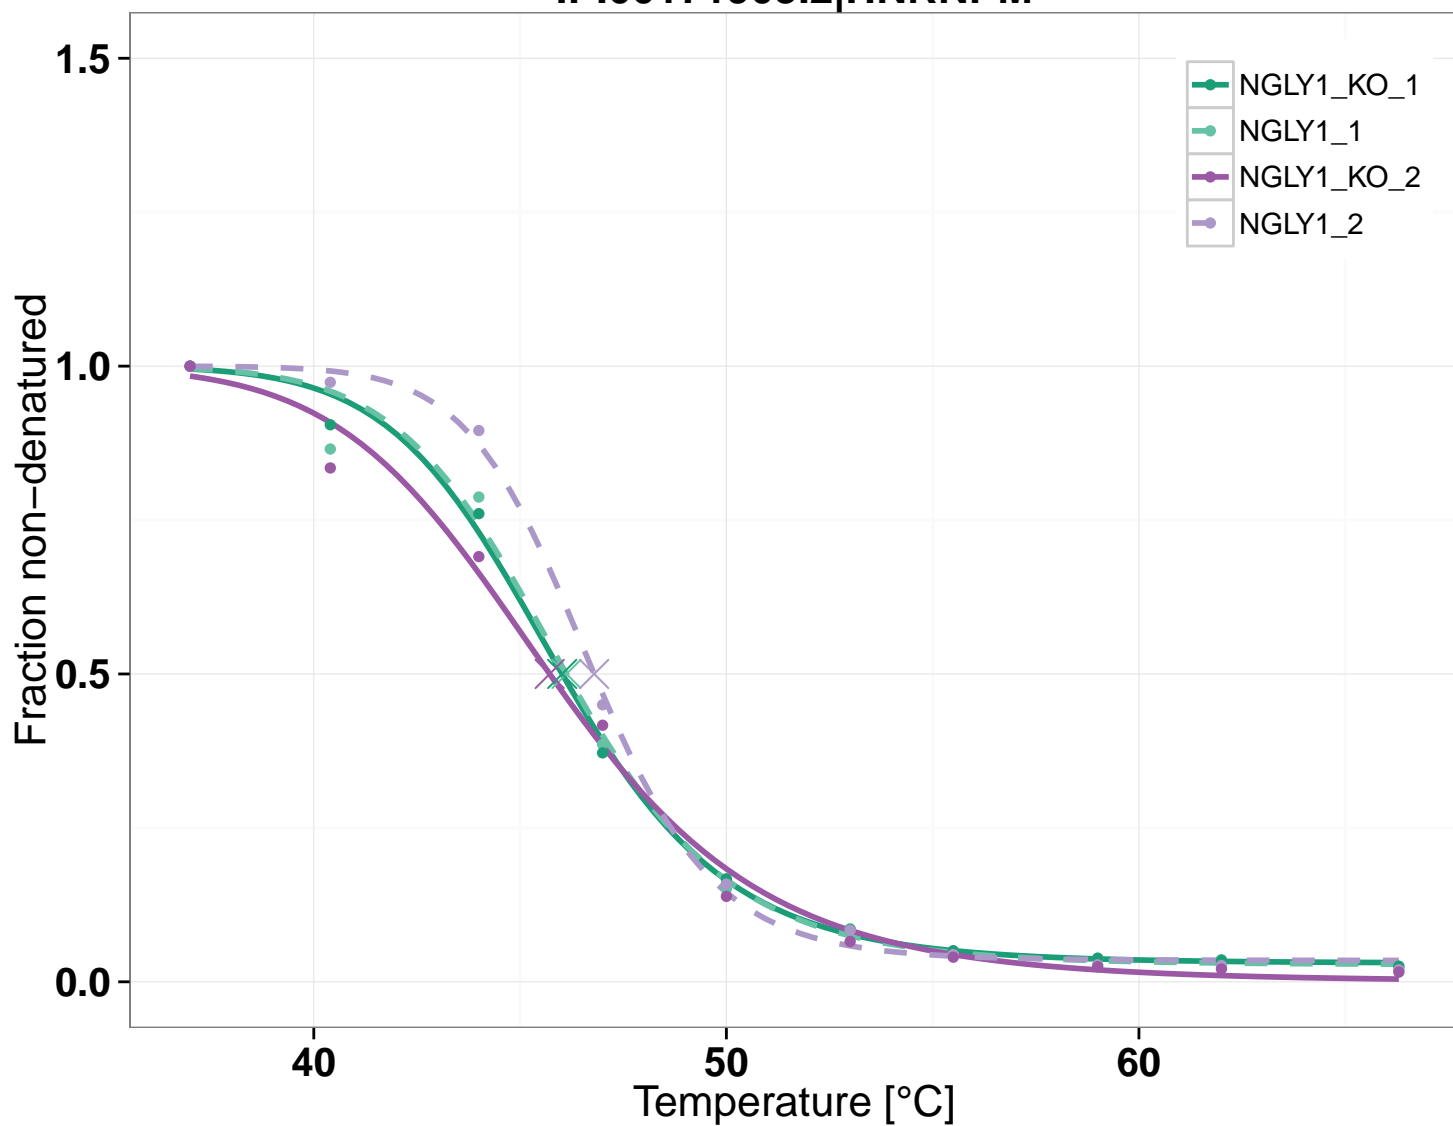

|            | meltPoint | slope  | plateau | R2   |
|------------|-----------|--------|---------|------|
| NGLY1_KO_1 | 46.02     | -0.12  | 0.03    | 1    |
| NGLY1_1    | 46.12     | -0.12  | 0.03    | 0.99 |
| NGLY1_KO_2 | 45.72     | -0.097 | 0       | 0.99 |
| NGLY1_2    | 46.8      | -0.16  | 0.03    | 1    |

Supplement: Supplementary file 1949 [file 1]

# IPI00031617.3|C6ORF125

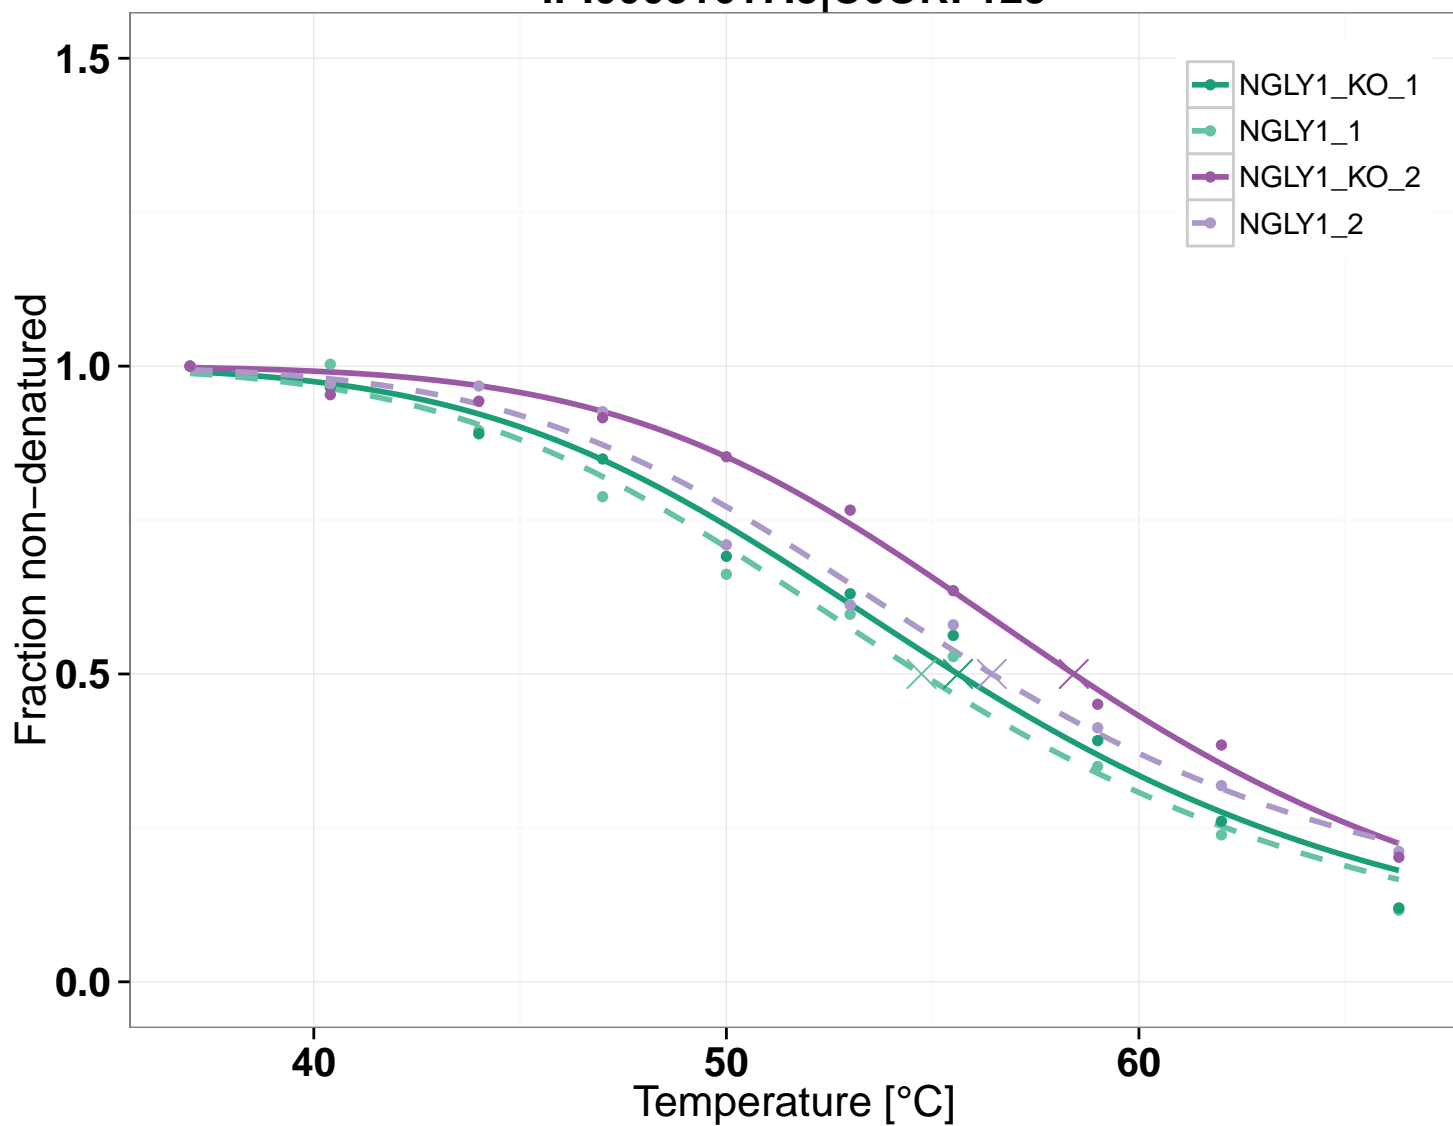

|            | meltPoint | slope  | plateau | R2   |
|------------|-----------|--------|---------|------|
| NGLY1_KO_1 | 55.61     | -0.044 | 0       | 0.99 |
| NGLY1_1    | 54.73     | -0.044 | 0       | 0.99 |
| NGLY1_KO_2 | 58.42     | -0.046 | 0       | 0.99 |
| NGLY1_2    | 56.43     | -0.044 | 0.07    | 0.99 |

Supplement: Supplementary file 1950 [file 1]

IPI00008418.6|DIABLO

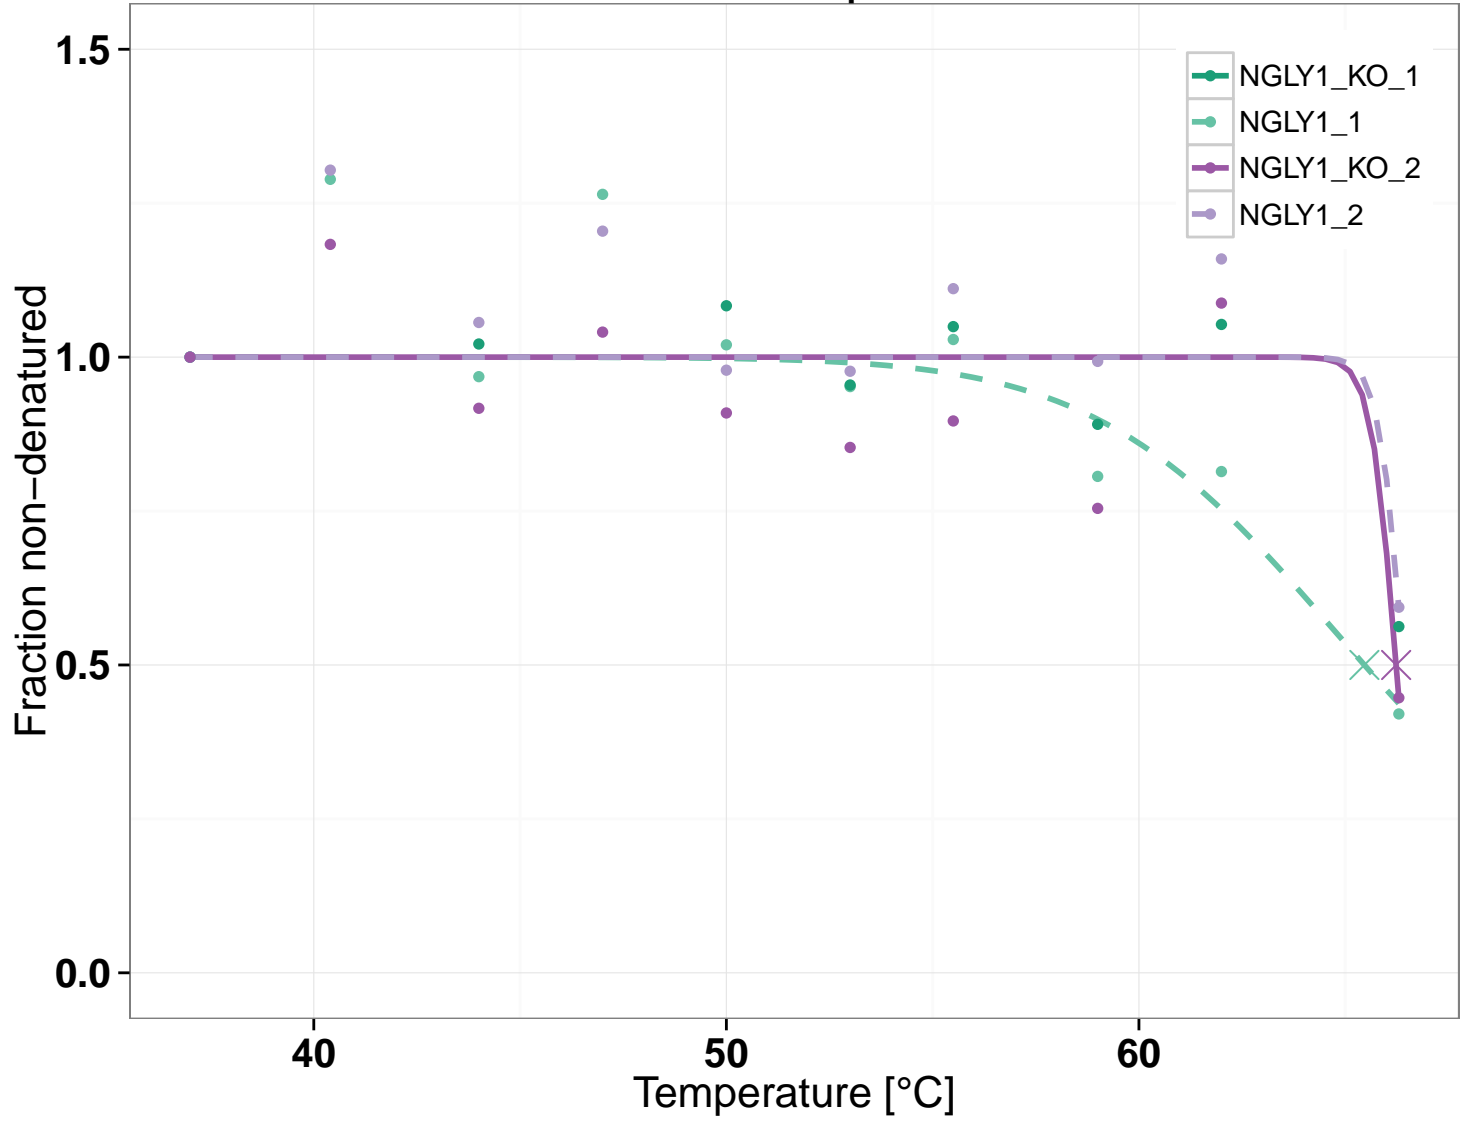

|            | meltPoint | slope  | plateau | R2   |
|------------|-----------|--------|---------|------|
| NGLY1_KO_1 | -         | -      | -       | -    |
| NGLY1_1    | 65.46     | -0.077 | 0       | 0.68 |
| NGLY1_KO_2 | 66.23     | -0.82  | 0       | 0.6  |
| NGLY1_2    | -         | -      | 0       | 0.46 |

Supplement: Supplementary file 1951 [file 1]

# IPI00009477.4|ICAM2

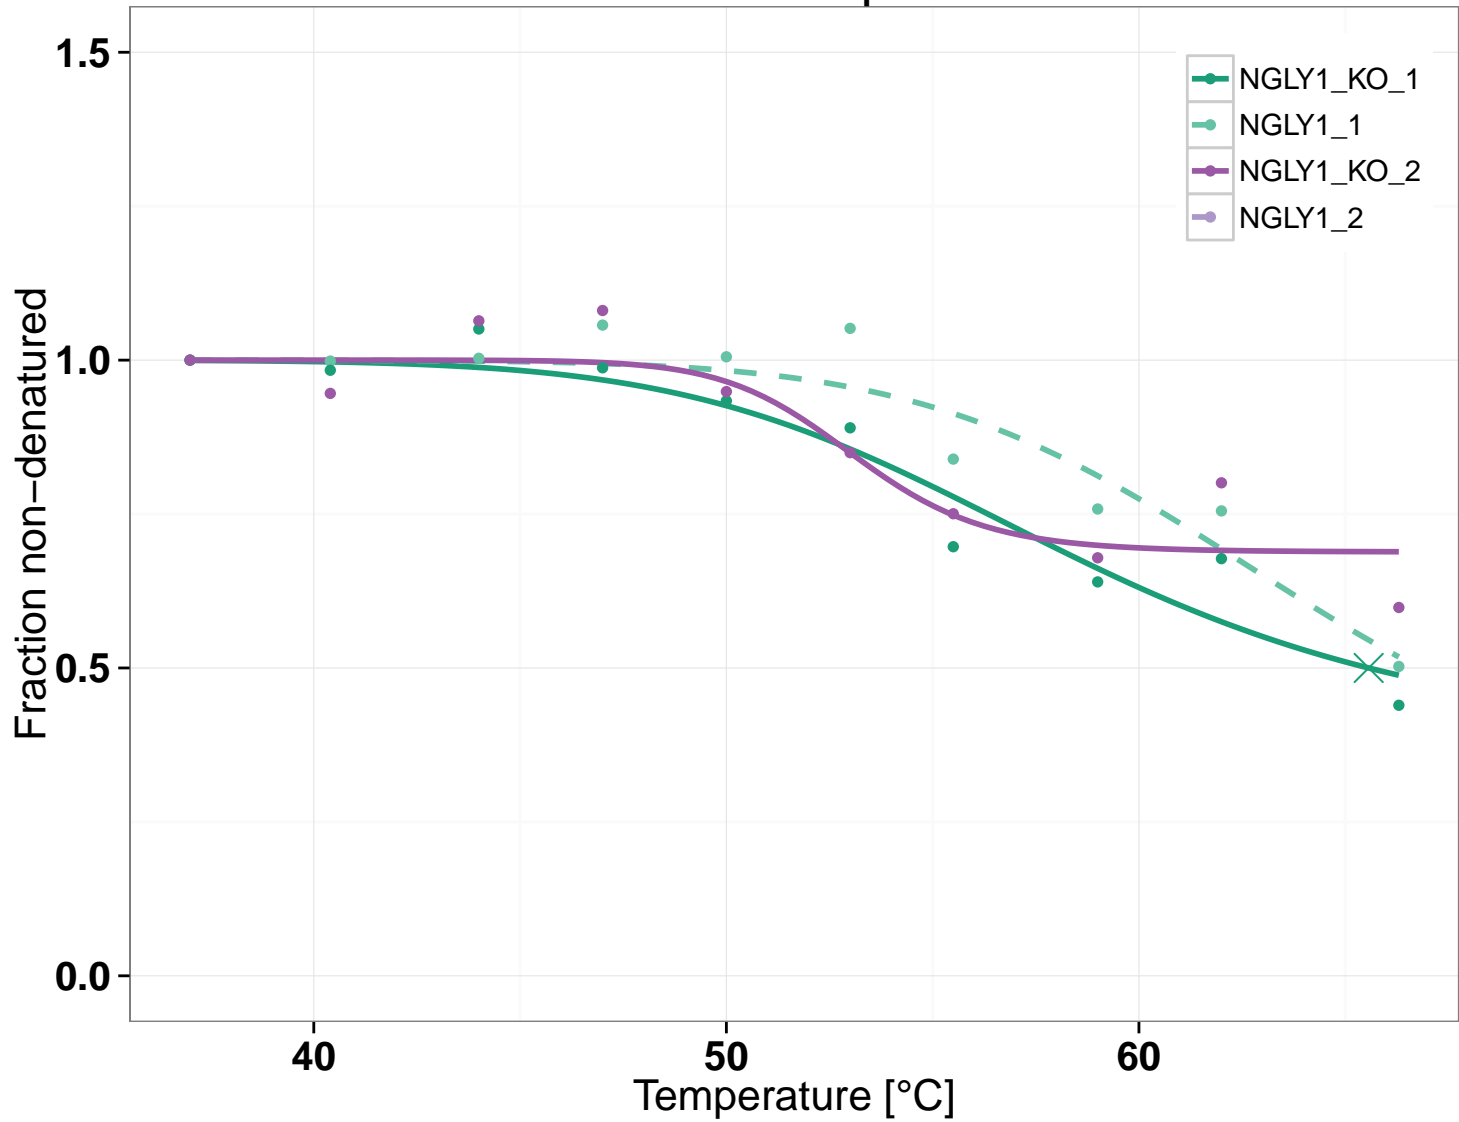

|            | meltPoint | slope  | plateau | R2   |
|------------|-----------|--------|---------|------|
| NGLY1_KO_1 | 65.57     | -0.034 | 0.37    | 0.93 |
| NGLY1_1    | -         | -0.042 | 0.22    | 0.91 |
| NGLY1_KO_2 | -         | -0.049 | 0.69    | 0.85 |
| NGLY1_2    | -         | -      | -       | -    |

Supplement: Supplementary file 1952 [file 1]

IPI00014873.2|CDK10

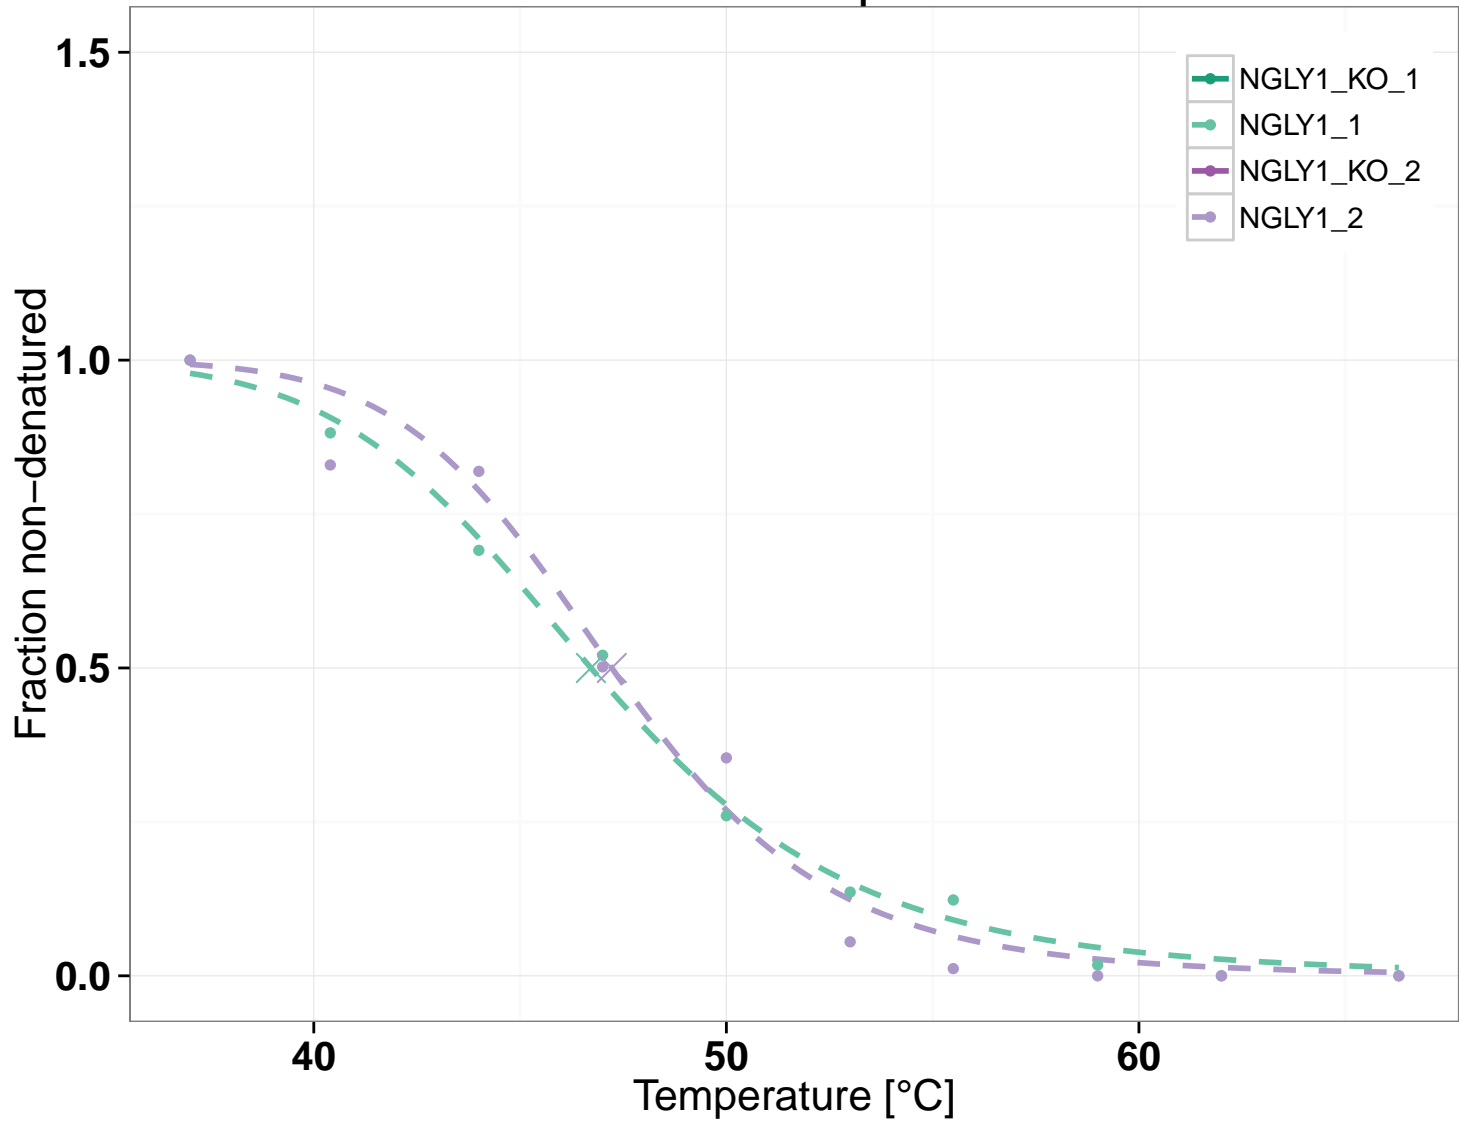

|            | meltPoint | slope  | plateau | R2   |
|------------|-----------|--------|---------|------|
| NGLY1_KO_1 | —         | —      | —       | —    |
| NGLY1_1    | 46.72     | -0.079 | 0       | 0.99 |
| NGLY1_KO_2 | —         | —      | —       | —    |
| NGLY1_2    | 47.22     | -0.096 | 0       | 0.98 |

Supplement: Supplementary file 1953 [file 1]

IPI00029737.1|ACSL4

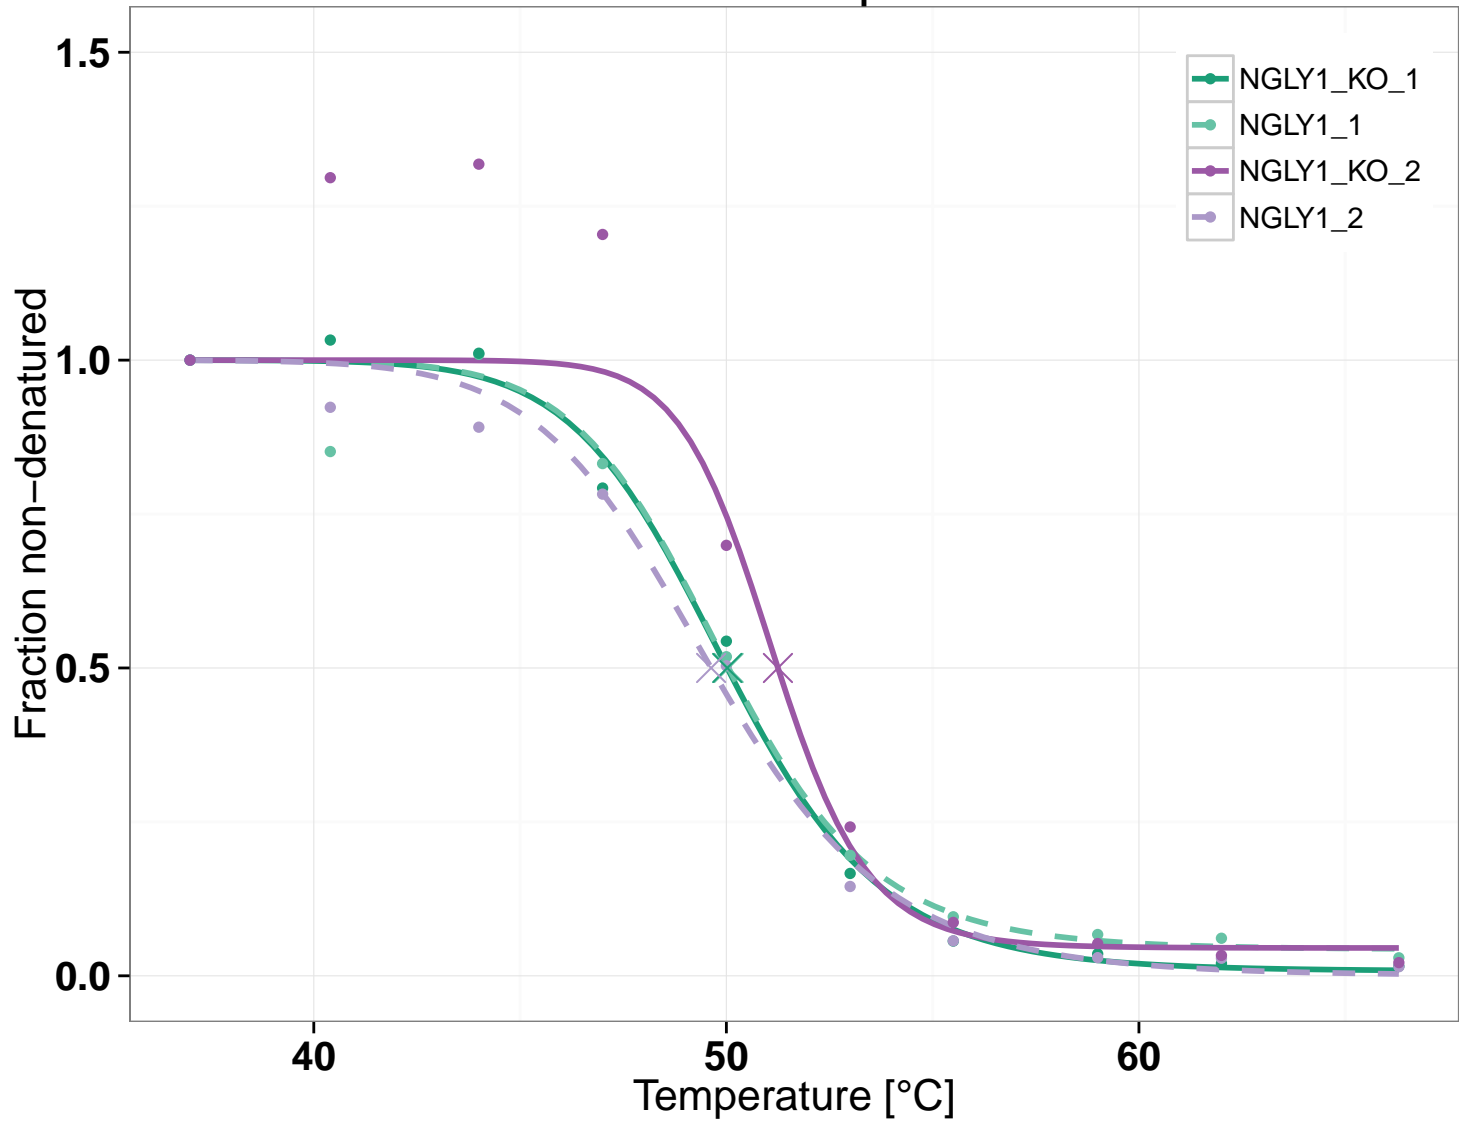

|            | meltPoint | slope | plateau | R2   |
|------------|-----------|-------|---------|------|
| NGLY1_KO_1 | 50.02     | -0.13 | 0.01    | 1    |
| NGLY1_1    | 50.05     | -0.13 | 0.04    | 0.99 |
| NGLY1_KO_2 | 51.25     | -0.21 | 0.05    | 0.92 |
| NGLY1_2    | 49.63     | -0.12 | 0       | 0.99 |

Supplement: Supplementary file 1954 [file 1]

# IPI00291939.1|SMC1A

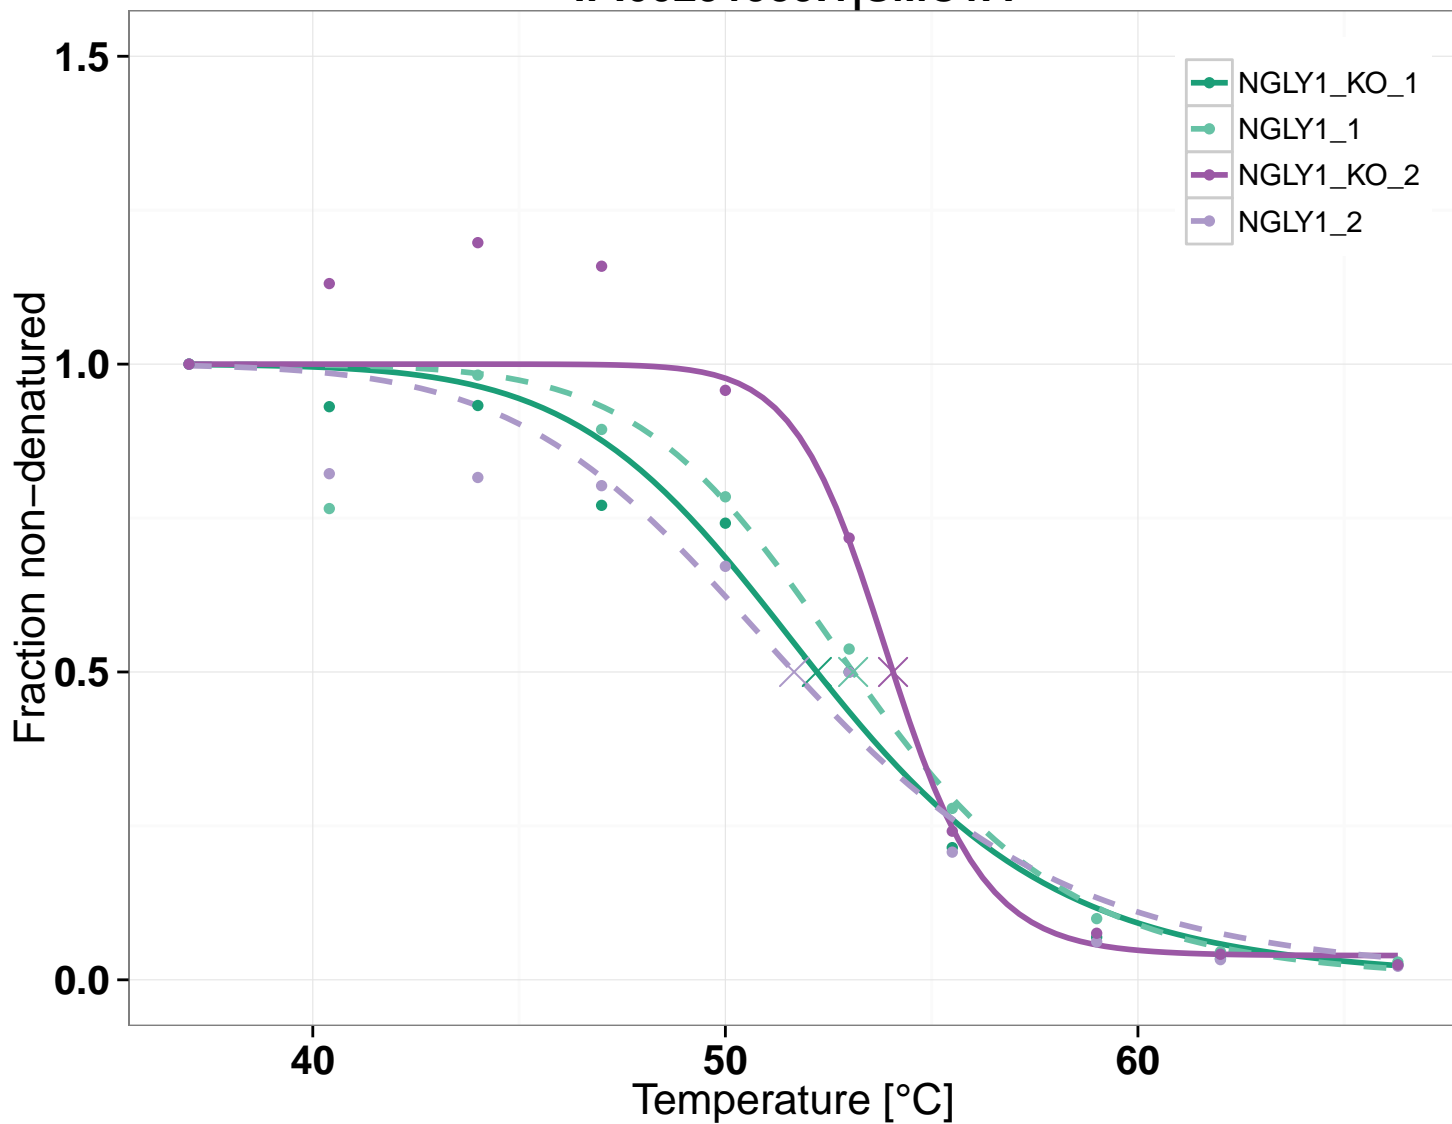

|            | meltPoint | slope  | plateau | R2   |
|------------|-----------|--------|---------|------|
| NGLY1_KO_1 | 52.22     | -0.085 | 0       | 0.98 |
| NGLY1_1    | 53.1      | -0.096 | 0       | 0.96 |
| NGLY1_KO_2 | 54.06     | -0.21  | 0.04    | 0.96 |
| NGLY1_2    | 51.67     | -0.074 | 0       | 0.95 |

Supplement: Supplementary file 1955 [file 1]

IPI00328603.2|FBXO33

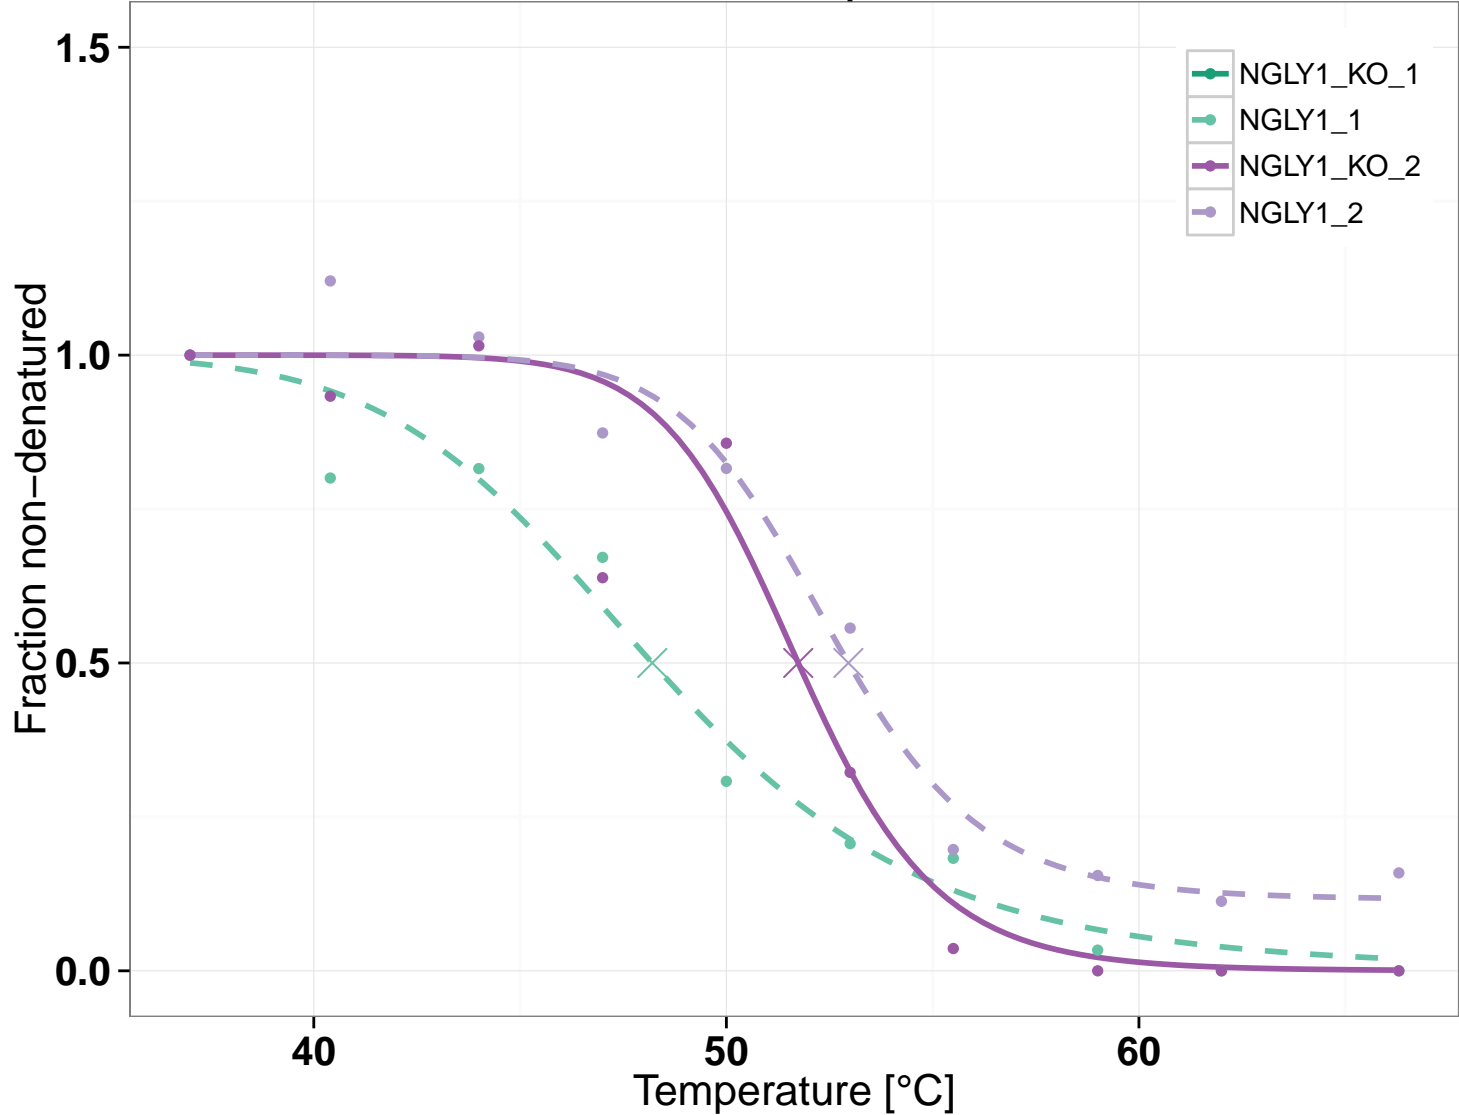

|            | meltPoint | slope  | plateau | R2   |
|------------|-----------|--------|---------|------|
| NGLY1_KO_1 | —         | —      | —       | —    |
| NGLY1_1    | 48.2      | -0.076 | 0       | 0.97 |
| NGLY1_KO_2 | 51.74     | -0.15  | 0       | 0.93 |
| NGLY1_2    | 52.96     | -0.12  | 0.12    | 0.98 |

Supplement: Supplementary file 1956 [file 1]

IPI00293375.4|RPAP2

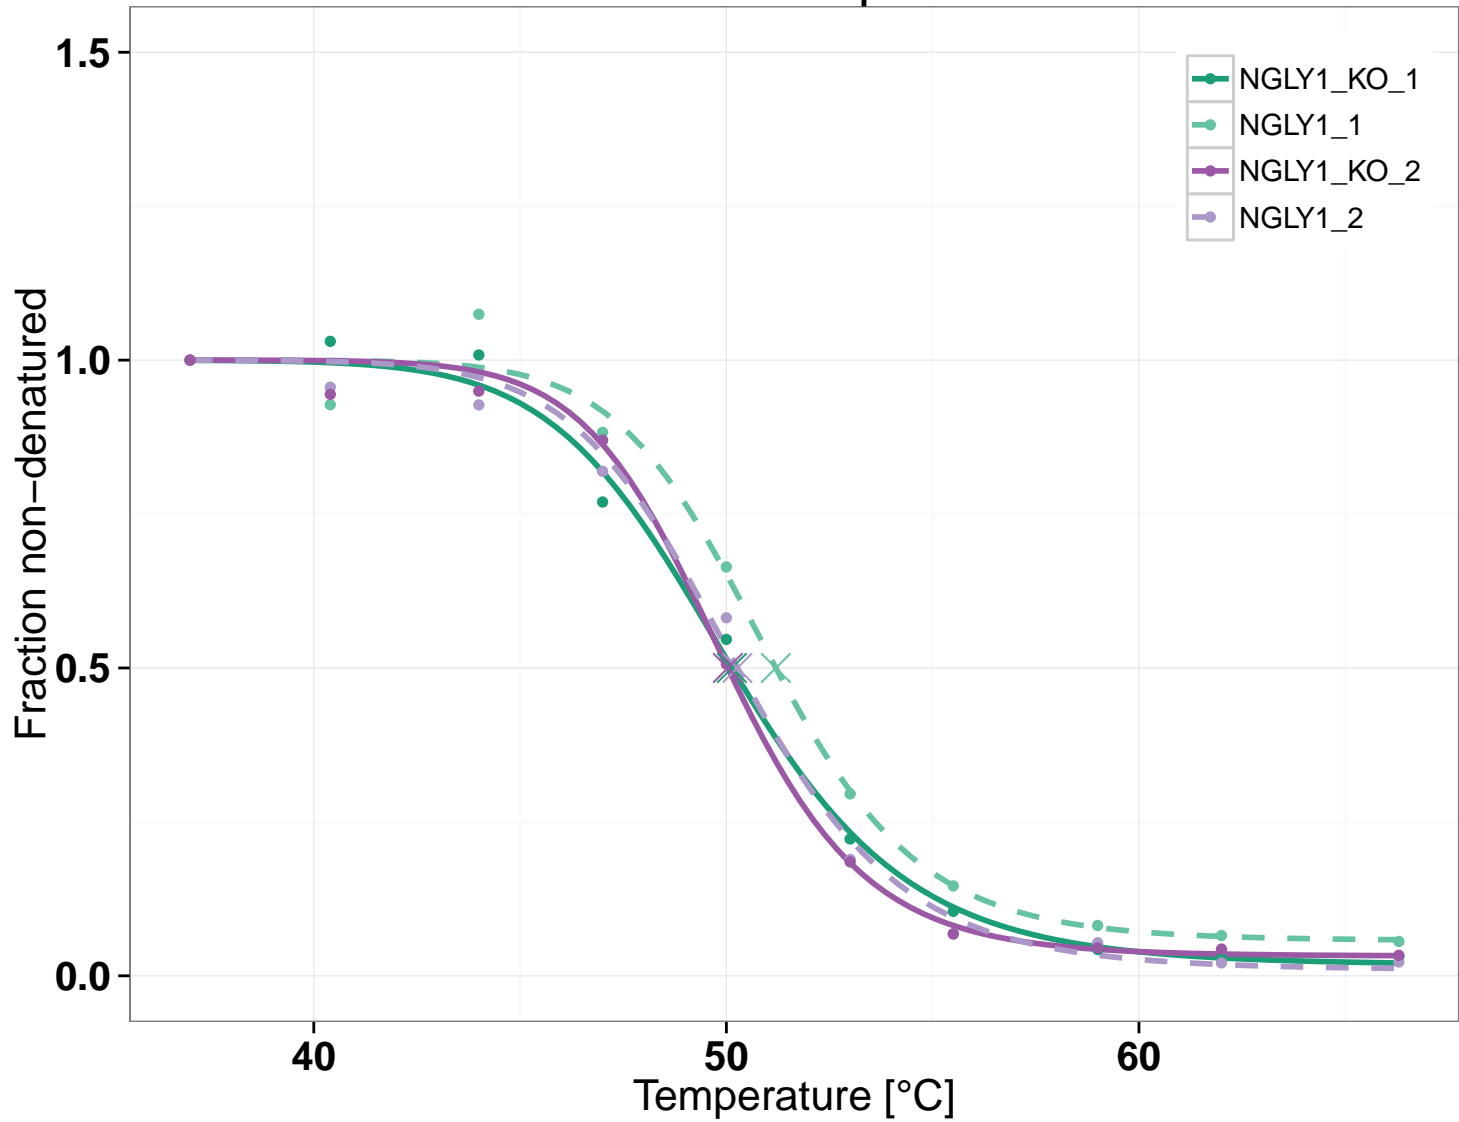

|            | meltPoint | slope | plateau | R2   |
|------------|-----------|-------|---------|------|
| NGLY1_KO_1 | 50.13     | -0.11 | 0.02    | 1    |
| NGLY1_1    | 51.2      | -0.13 | 0.06    | 0.99 |
| NGLY1_KO_2 | 50.04     | -0.14 | 0.03    | 1    |
| NGLY1_2    | 50.27     | -0.12 | 0.01    | 0.99 |

Supplement: Supplementary file 1957 [file 1]

IPI00102928.2|CYB5D2

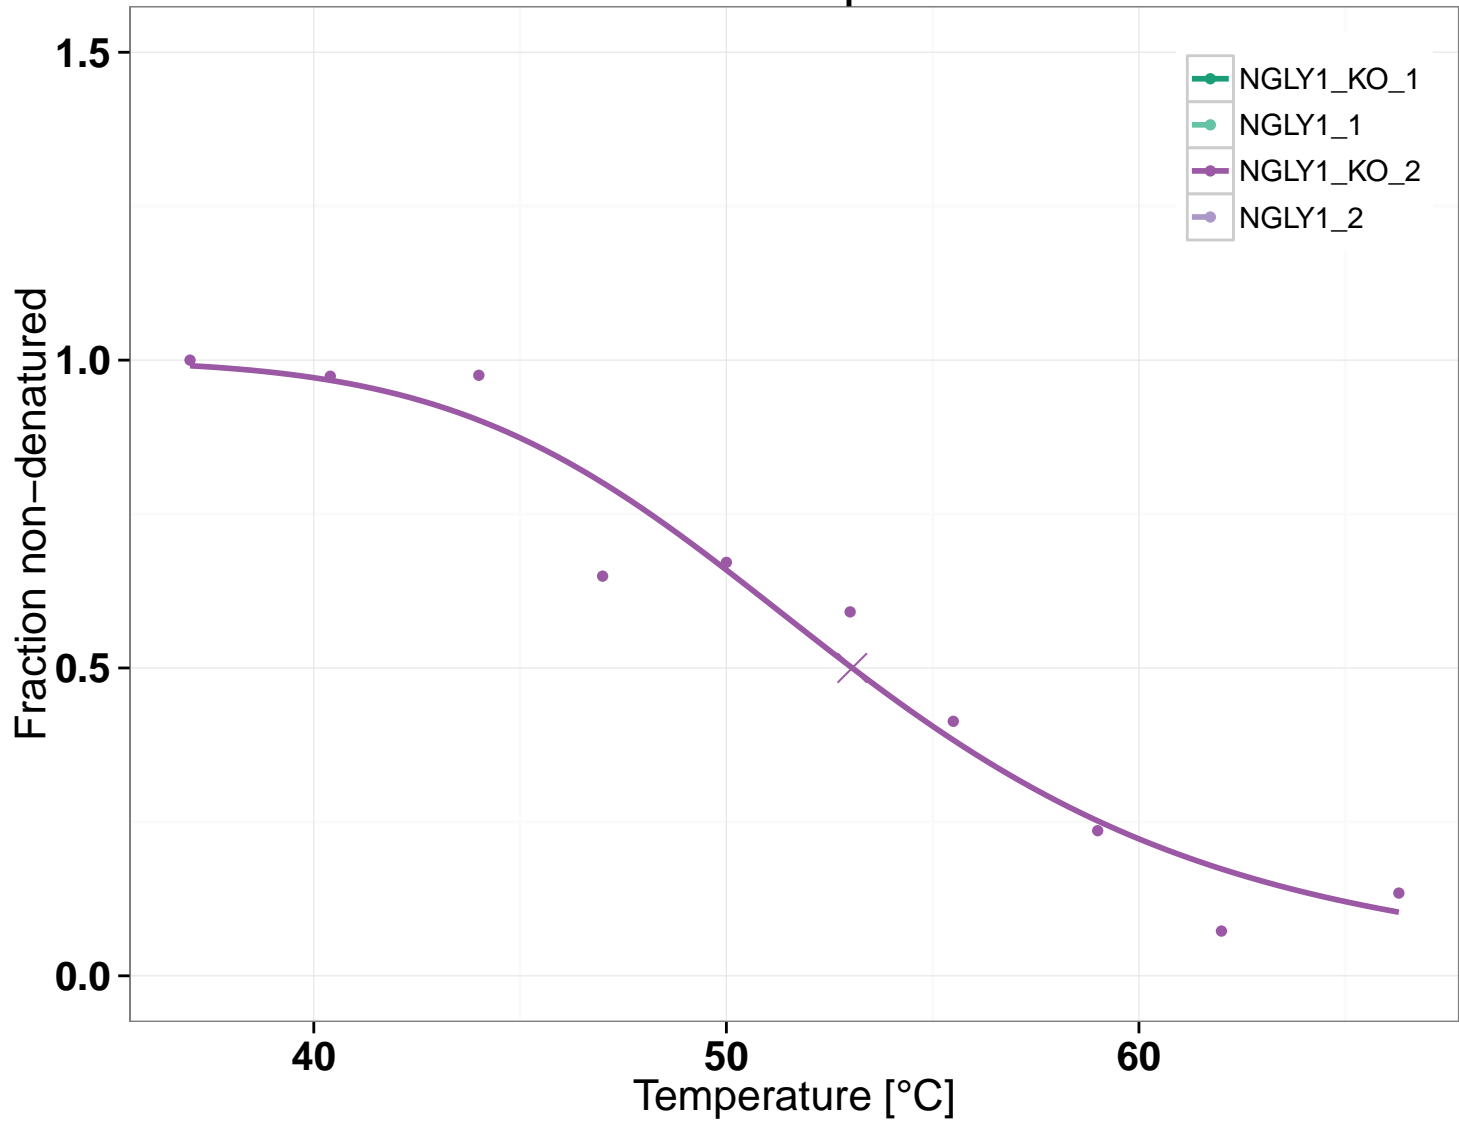

|            | meltPoint | slope  | plateau | R2   |
|------------|-----------|--------|---------|------|
| NGLY1_KO_1 | —         | —      | —       | —    |
| NGLY1_1    | —         | —      | —       | —    |
| NGLY1_KO_2 | 53.05     | -0.053 | 0       | 0.96 |
| NGLY1_2    | —         | —      | —       | —    |

Supplement: Supplementary file 1958 [file 1]

IPI00012887.1|CTSL1

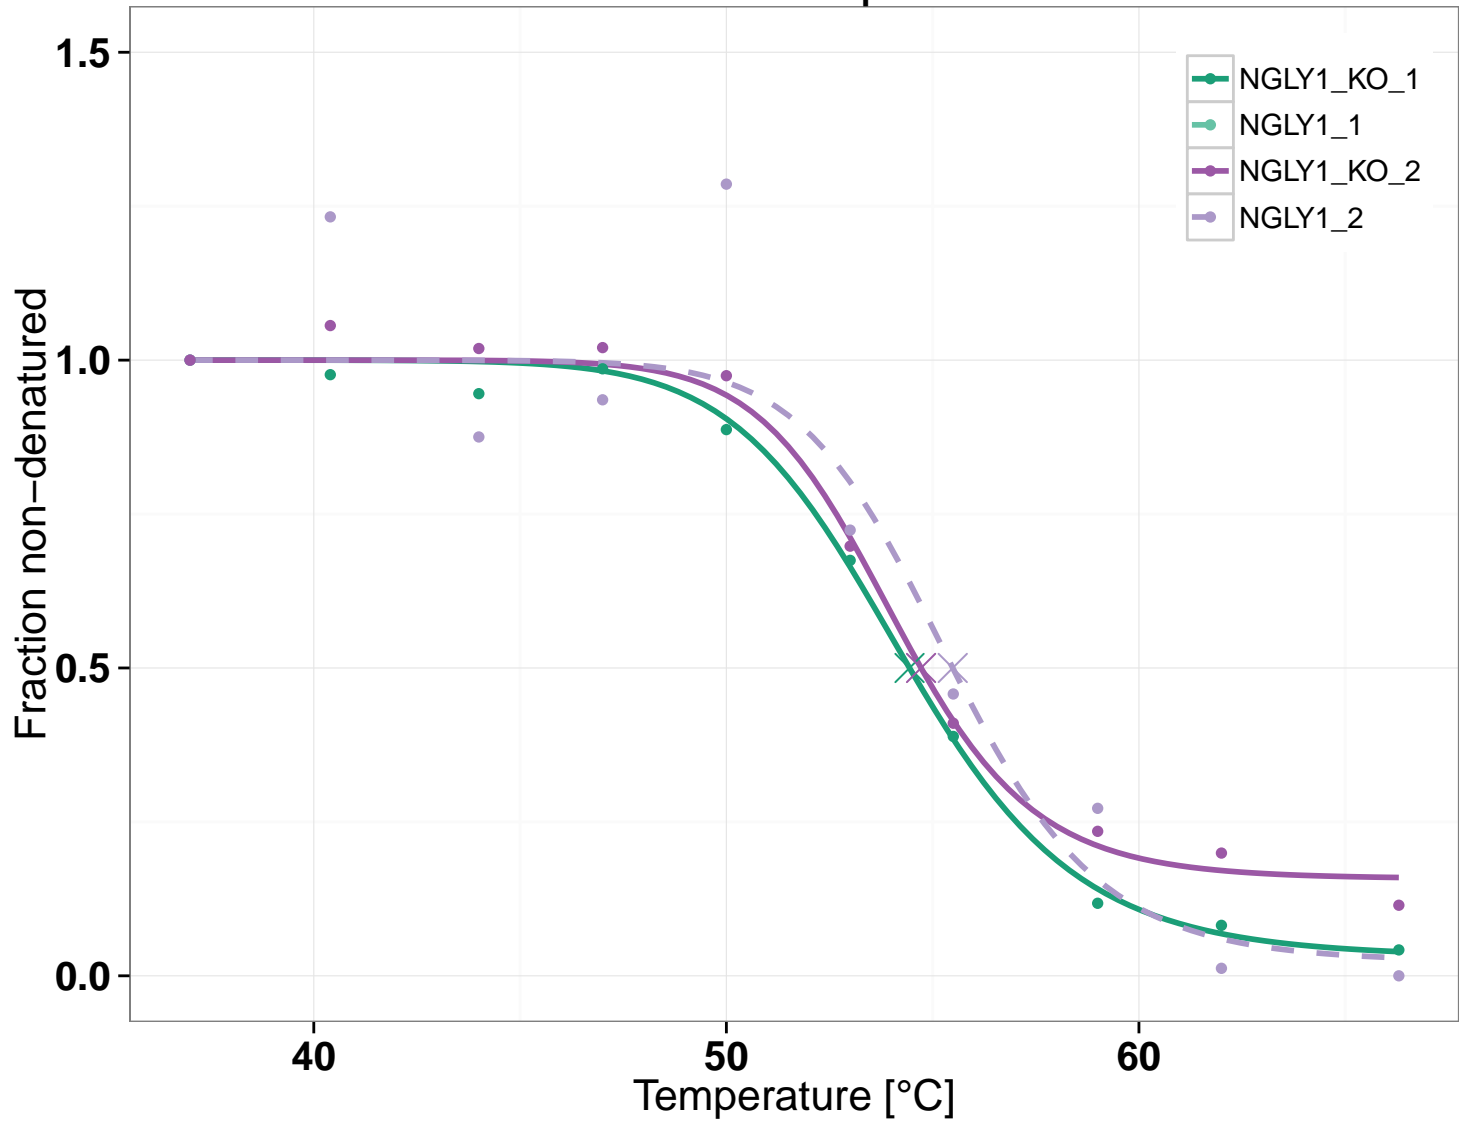

|            | meltPoint | slope | plateau | R2   |
|------------|-----------|-------|---------|------|
| NGLY1_KO_1 | 54.44     | -0.12 | 0.03    | 1    |
| NGLY1_1    | -         | -     | -       | -    |
| NGLY1_KO_2 | 54.72     | -0.13 | 0.16    | 0.99 |
| NGLY1_2    | 55.49     | -0.13 | 0.02    | 0.9  |

Supplement: Supplementary file 1959 [file 1]

# IPI00554811.2|ARPC4

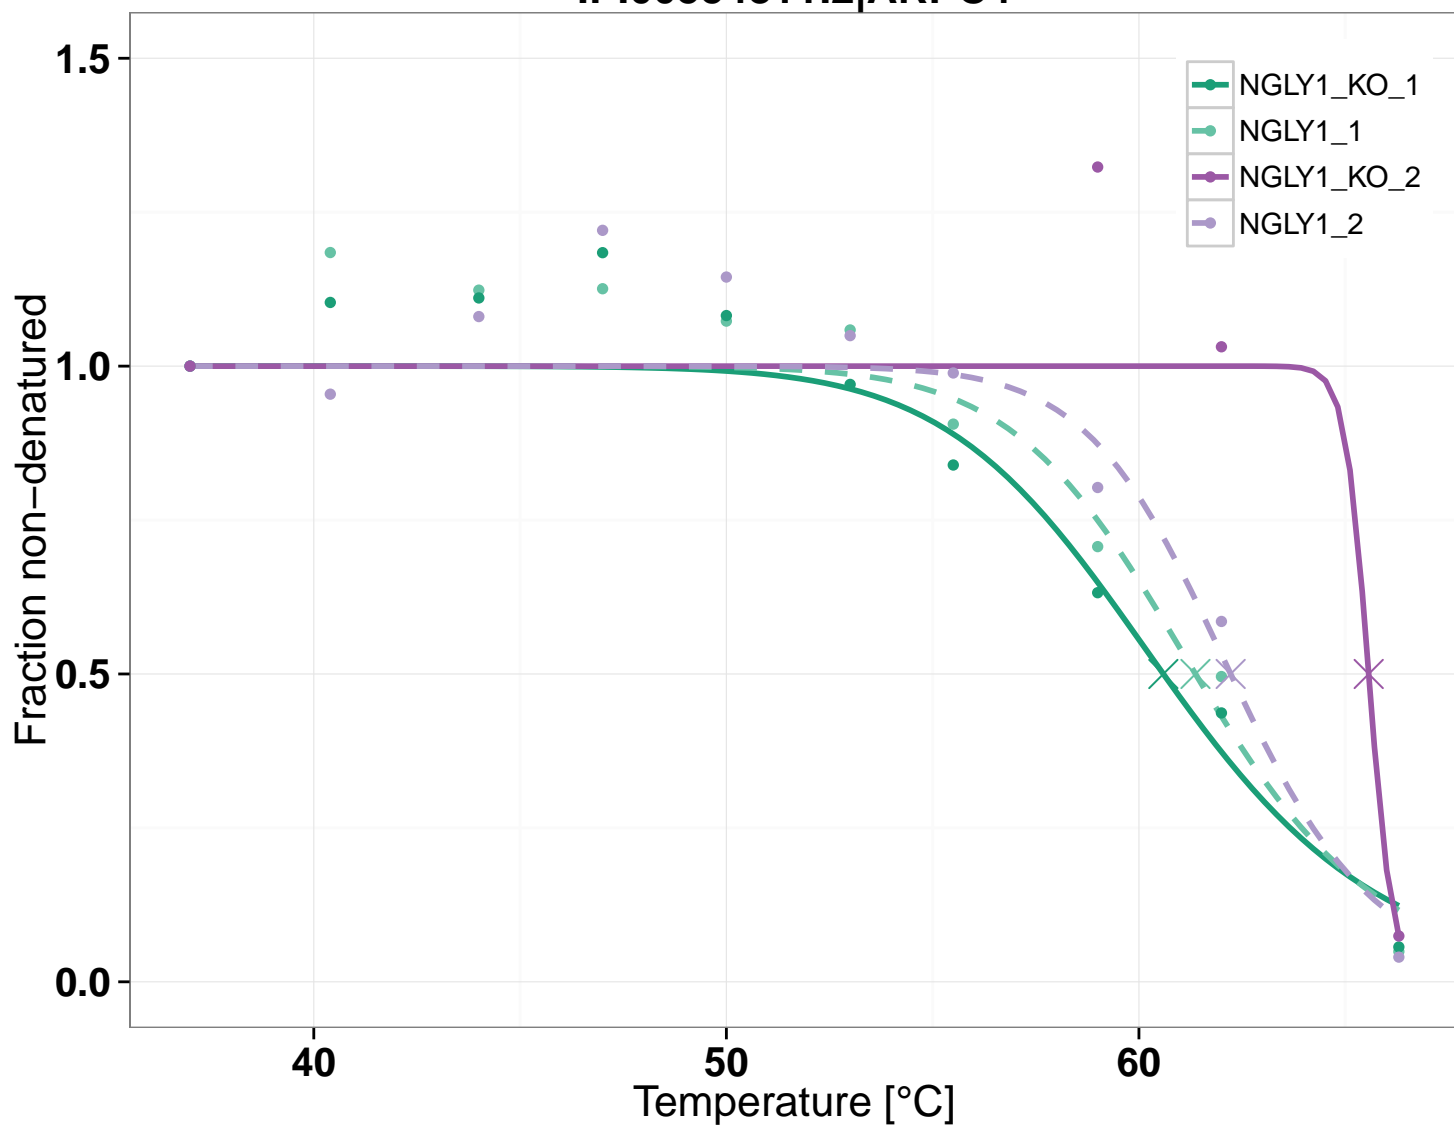

|            | meltPoint | slope  | plateau | R2    |
|------------|-----------|--------|---------|-------|
| NGLY1_KO_1 | 60.59     | -0.095 | 0       | 0.93  |
| NGLY1_1    | 61.37     | -0.11  | 0       | 0.92  |
| NGLY1_KO_2 | 65.57     | -0.87  | 0       | -0.64 |
| NGLY1_2    | 62.22     | -0.14  | 0       | 0.91  |

Supplement: Supplementary file 1960 [file 1]

IPI00167466.1|TSPYL1

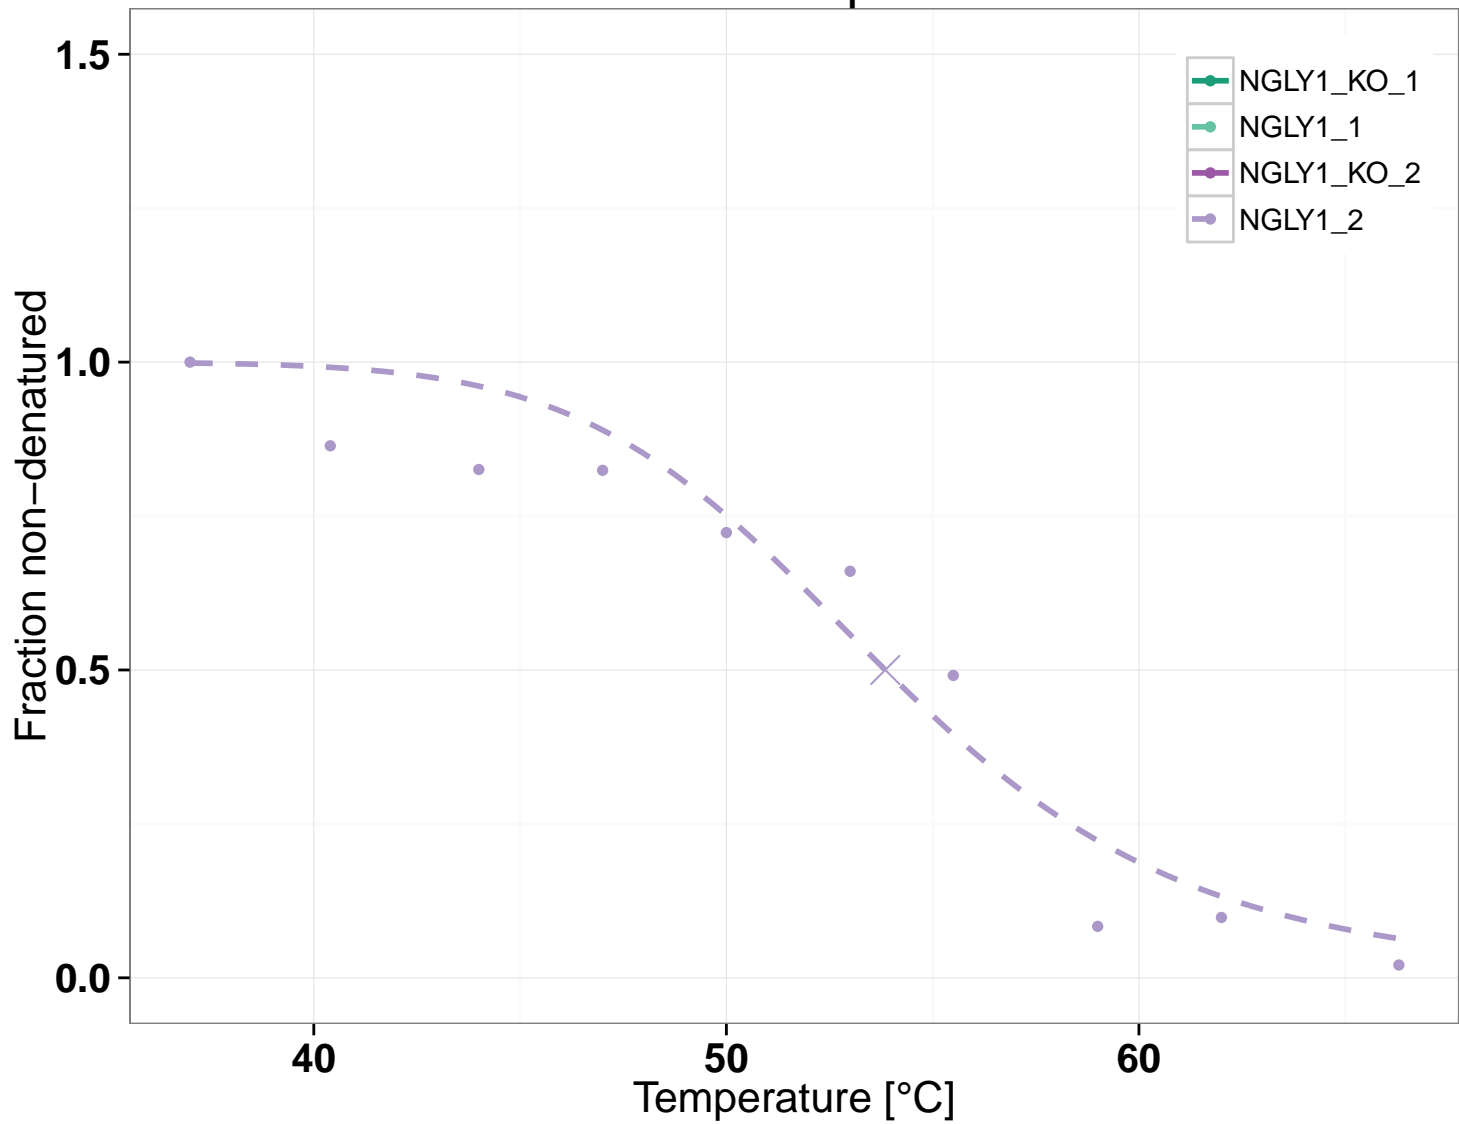

|            | meltPoint | slope  | plateau | R2   |
|------------|-----------|--------|---------|------|
| NGLY1_KO_1 | -         | -      | -       | -    |
| NGLY1_1    | -         | -      | -       | -    |
| NGLY1_KO_2 | -         | -      | -       | -    |
| NGLY1_2    | 53.85     | -0.068 | 0       | 0.93 |

Supplement: Supplementary file 1961 [file 1]

IPI00917683.1|SUMO1

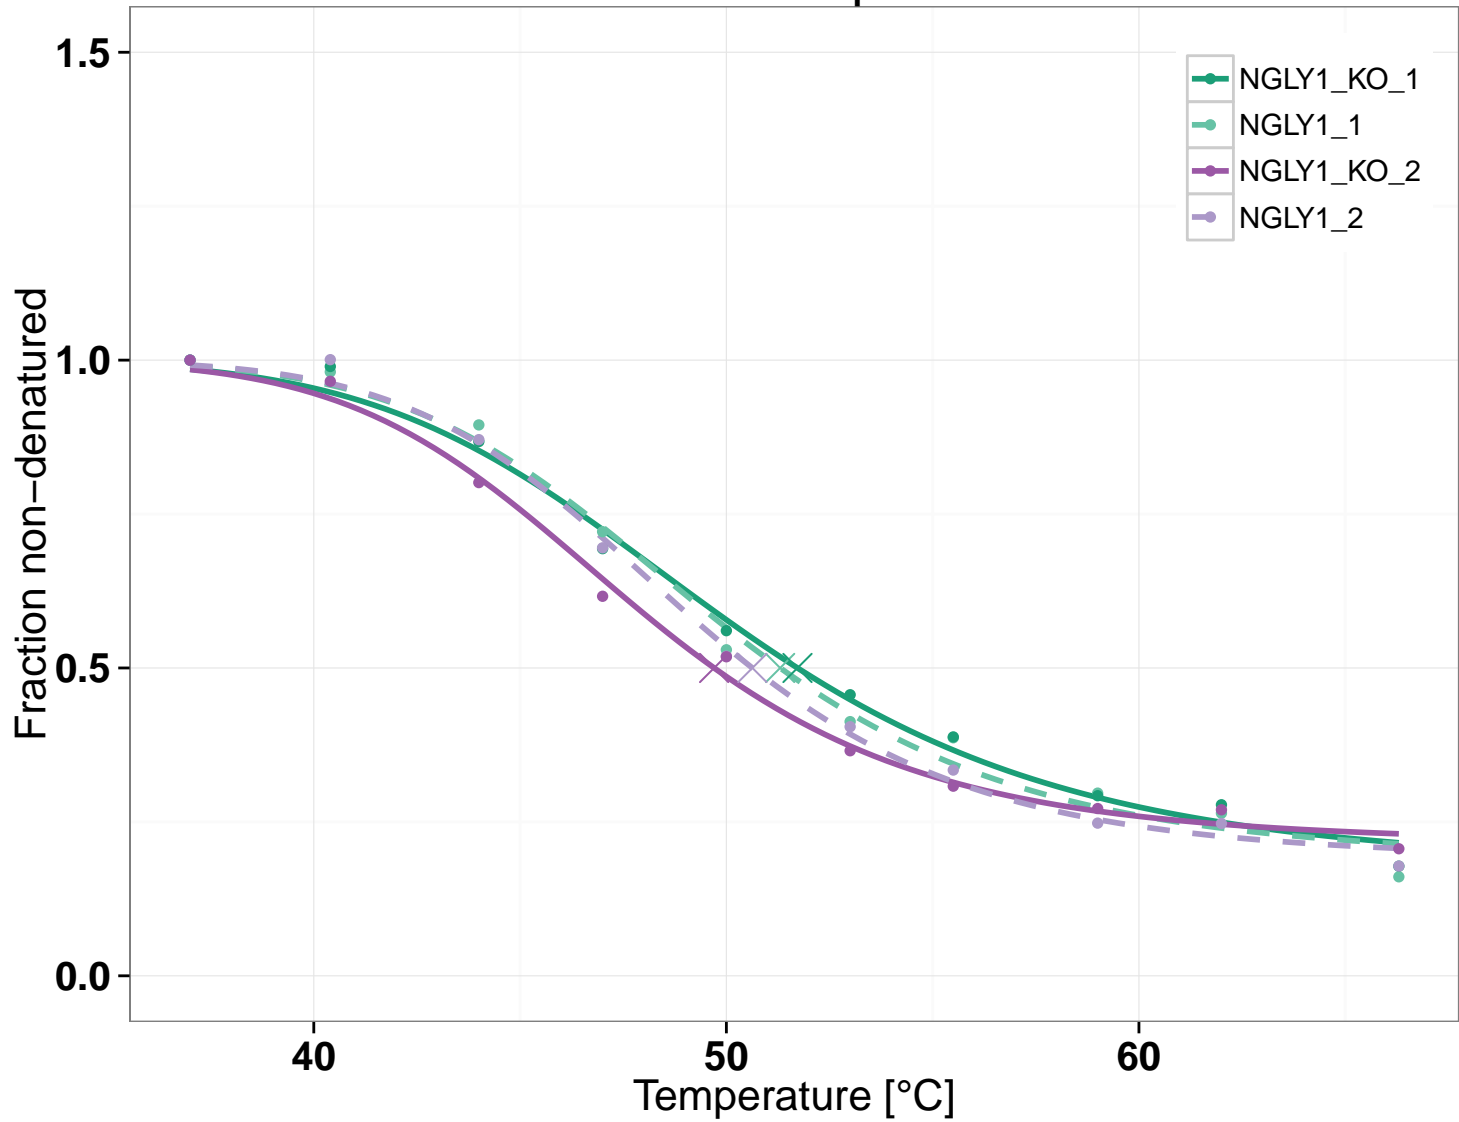

|            | meltPoint | slope  | plateau | R2   |
|------------|-----------|--------|---------|------|
| NGLY1_KO_1 | 51.72     | -0.049 | 0.17    | 0.99 |
| NGLY1_1    | 51.3      | -0.055 | 0.19    | 0.99 |
| NGLY1_KO_2 | 49.7      | -0.057 | 0.21    | 0.99 |
| NGLY1_2    | 50.63     | -0.06  | 0.19    | 1    |

Supplement: Supplementary file 1962 [file 1]

IPI00023334.1|MRPL4

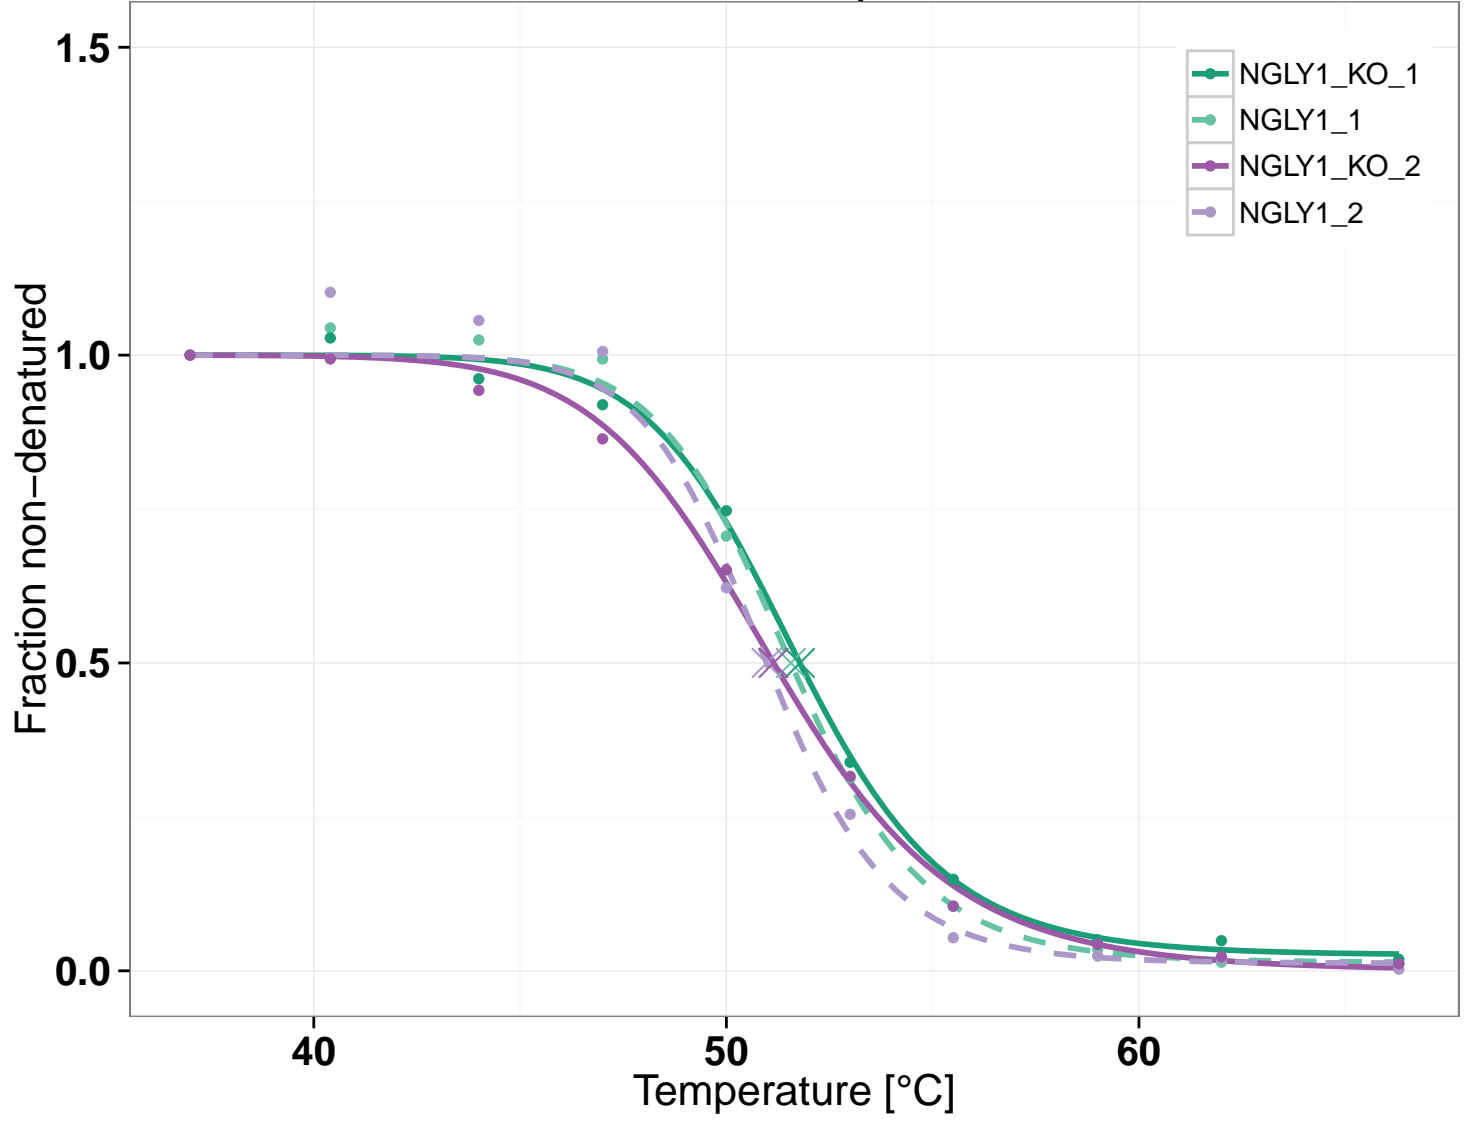

|            | meltPoint | slope | plateau | R2   |
|------------|-----------|-------|---------|------|
| NGLY1_KO_1 | 51.78     | -0.13 | 0.03    | 1    |
| NGLY1_1    | 51.56     | -0.15 | 0.01    | 1    |
| NGLY1_KO_2 | 51.14     | -0.11 | 0       | 1    |
| NGLY1_2    | 50.98     | -0.17 | 0.01    | 0.99 |

Supplement: Supplementary file 1963 [file 1]

IPI00032970.2|OSBPL11

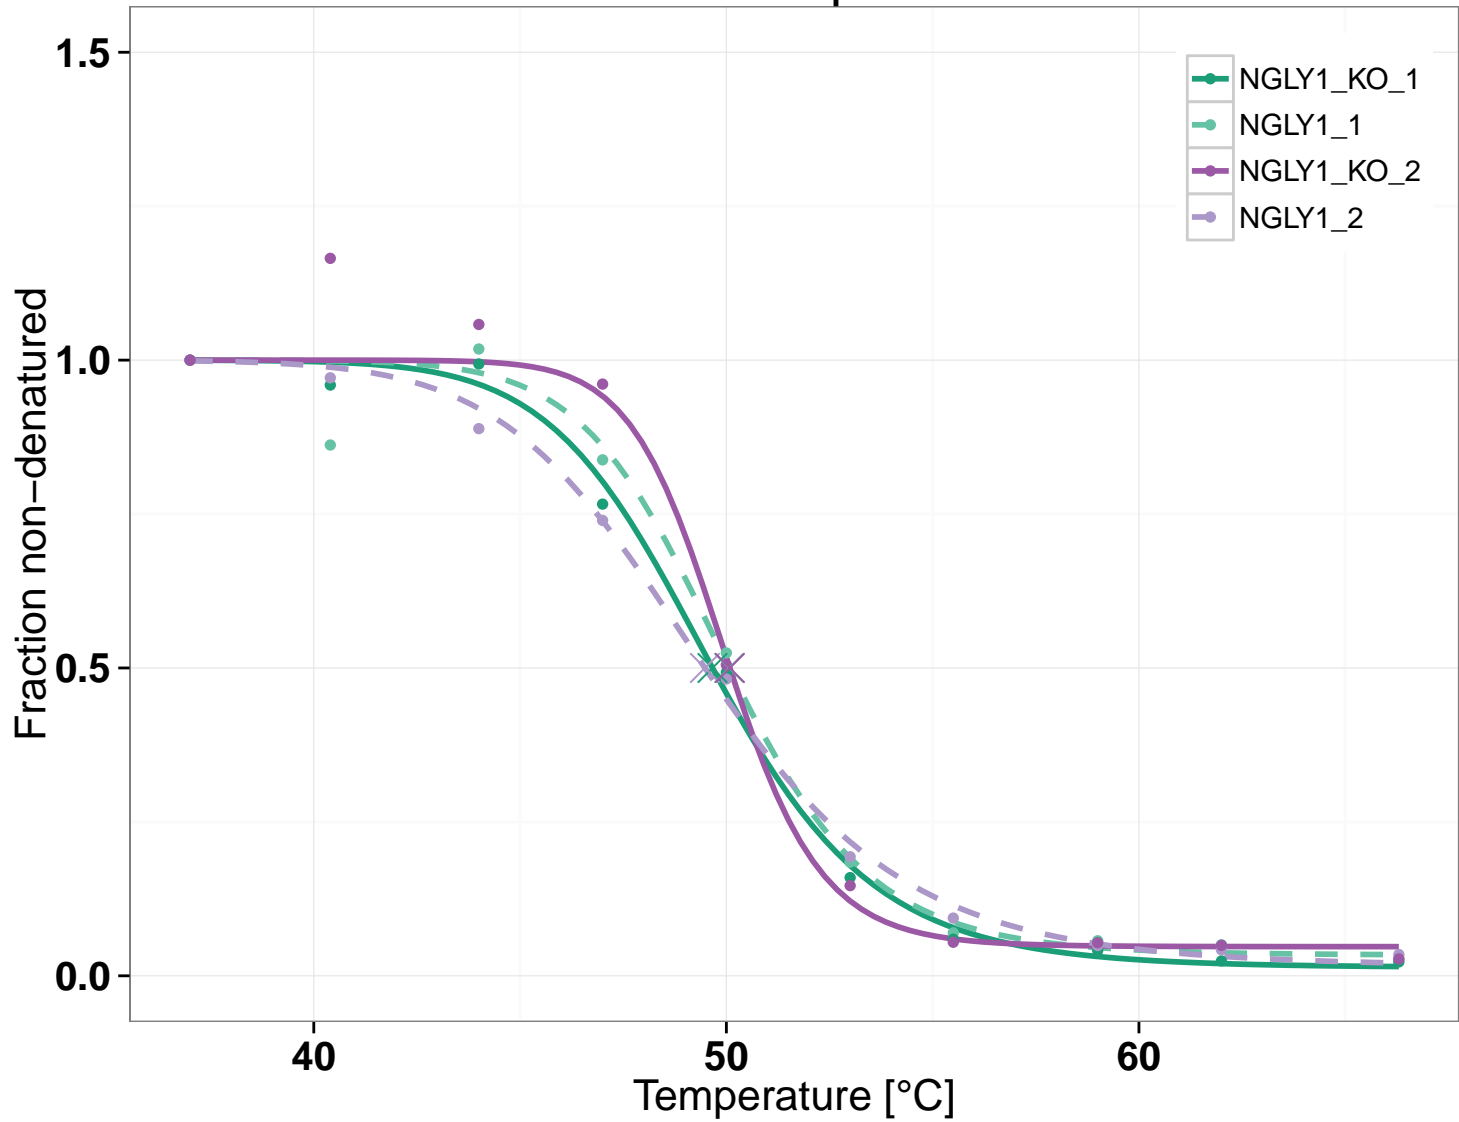

|            | meltPoint | slope | plateau | R2   |
|------------|-----------|-------|---------|------|
| NGLY1_KO_1 | 49.66     | -0.13 | 0.01    | 1    |
| NGLY1_1    | 50.07     | -0.14 | 0.03    | 0.99 |
| NGLY1_KO_2 | 50.08     | -0.21 | 0.05    | 0.98 |
| NGLY1_2    | 49.48     | -0.1  | 0.01    | 1    |

Supplement: Supplementary file 1964 [file 1]

# IPI00152642.3|LRRC8C

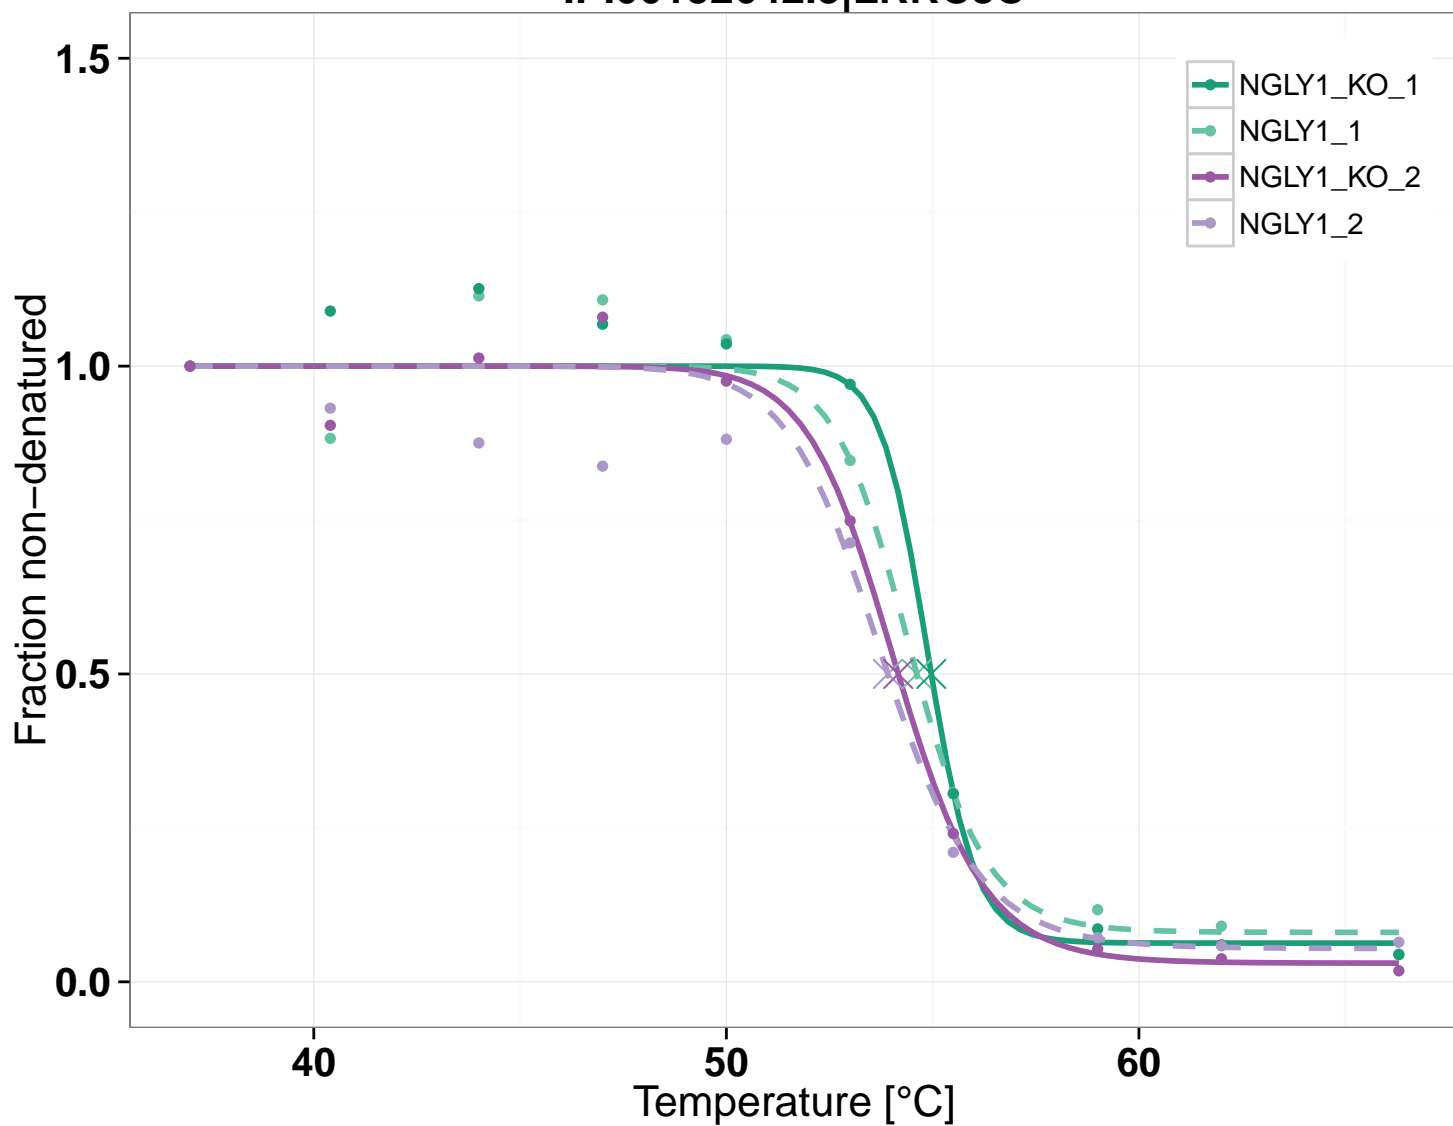

|            | meltPoint | slope | plateau | R2   |
|------------|-----------|-------|---------|------|
| NGLY1_KO_1 | 54.97     | -0.41 | 0.06    | 0.99 |
| NGLY1_1    | 54.62     | -0.25 | 0.08    | 0.98 |
| NGLY1_KO_2 | 54.17     | -0.23 | 0.03    | 0.99 |
| NGLY1_2    | 53.91     | -0.2  | 0.05    | 0.96 |

Supplement: Supplementary file 1965 [file 1]

IPI00644937.1|RHOF2

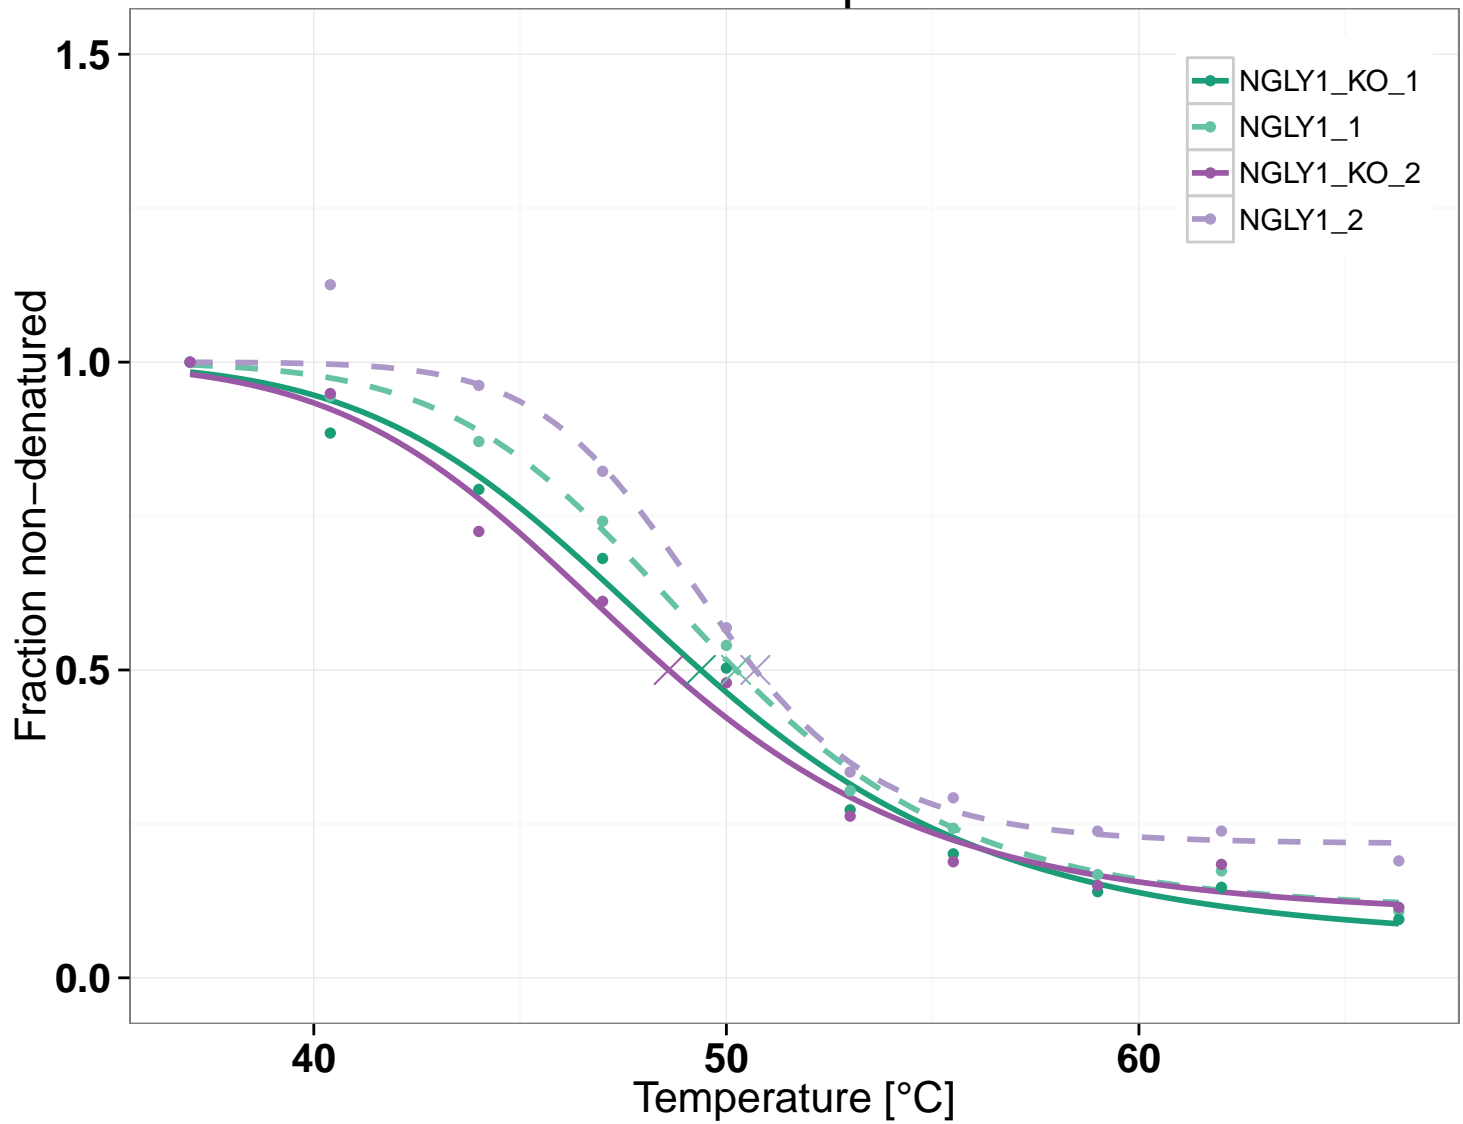

|            | meltPoint | slope  | plateau | R2   |
|------------|-----------|--------|---------|------|
| NGLY1_KO_1 | 49.38     | -0.062 | 0.05    | 0.99 |
| NGLY1_1    | 50.24     | -0.072 | 0.11    | 1    |
| NGLY1_KO_2 | 48.6      | -0.063 | 0.1     | 0.99 |
| NGLY1_2    | 50.7      | -0.096 | 0.22    | 0.98 |

Supplement: Supplementary file 1966 [file 1]

IPI00555703.1|TMEM41B

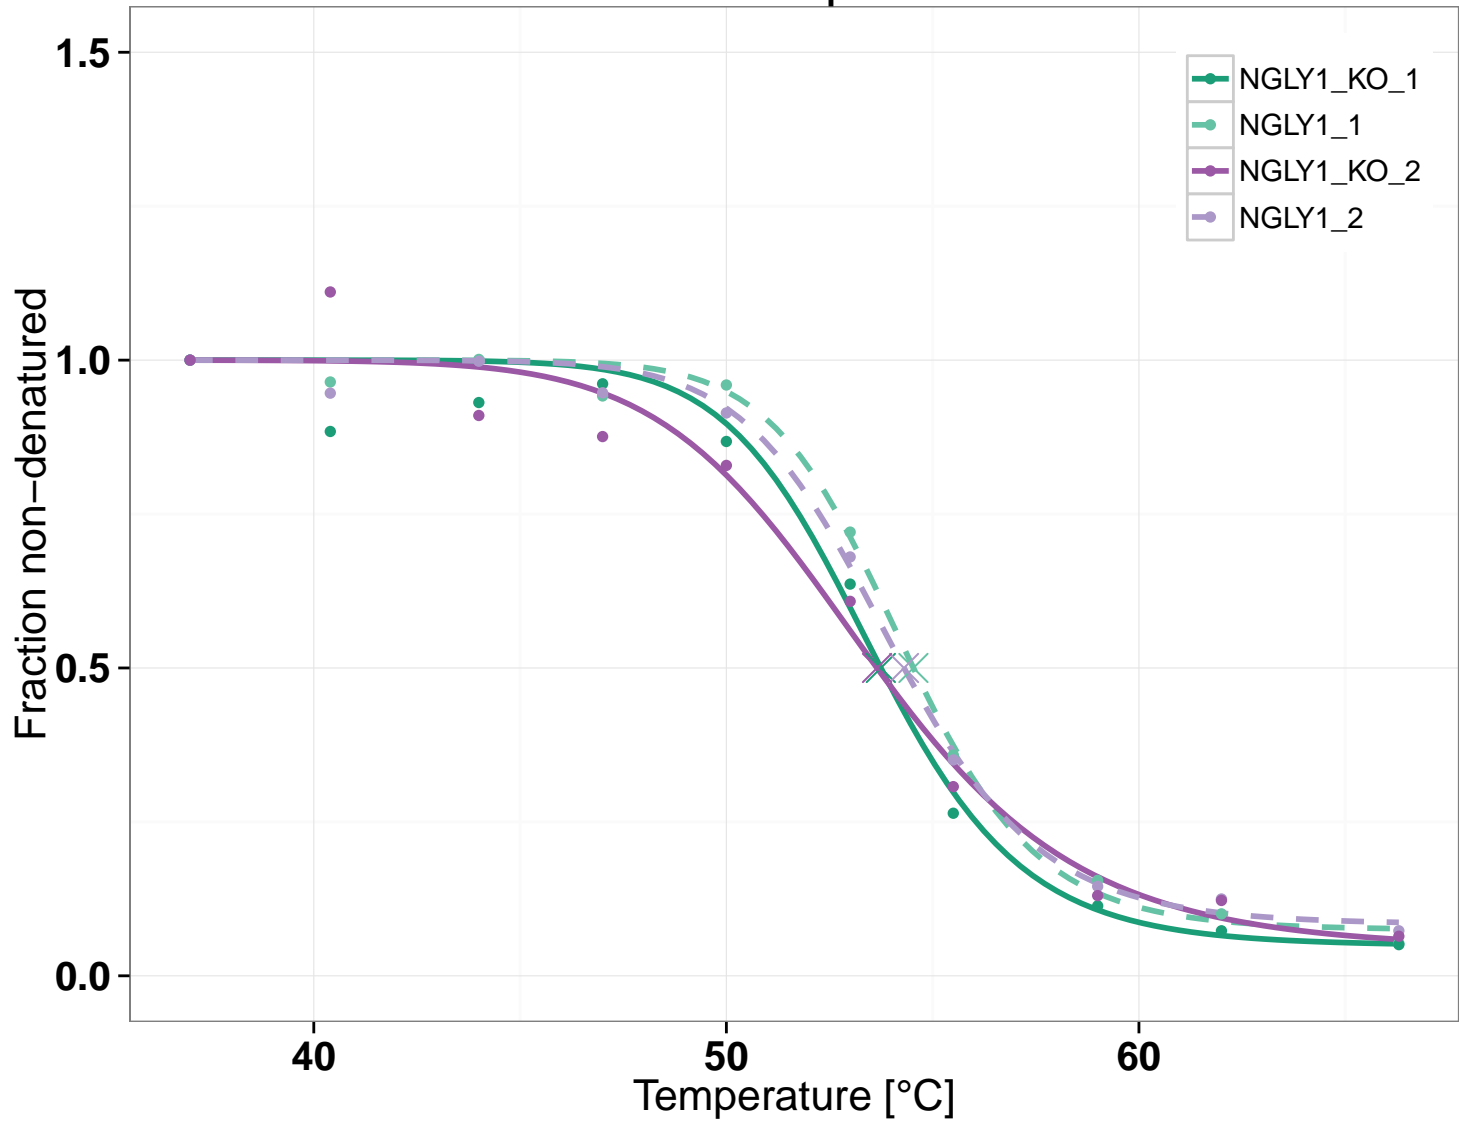

|            | meltPoint | slope  | plateau | R2   |
|------------|-----------|--------|---------|------|
| NGLY1_KO_1 | 53.74     | -0.13  | 0.05    | 0.99 |
| NGLY1_1    | 54.53     | -0.14  | 0.07    | 1    |
| NGLY1_KO_2 | 53.65     | -0.094 | 0.04    | 0.98 |
| NGLY1_2    | 54.31     | -0.13  | 0.08    | 1    |

Supplement: Supplementary file 1967 [file 1]

# IPI00218474.5|ENO3

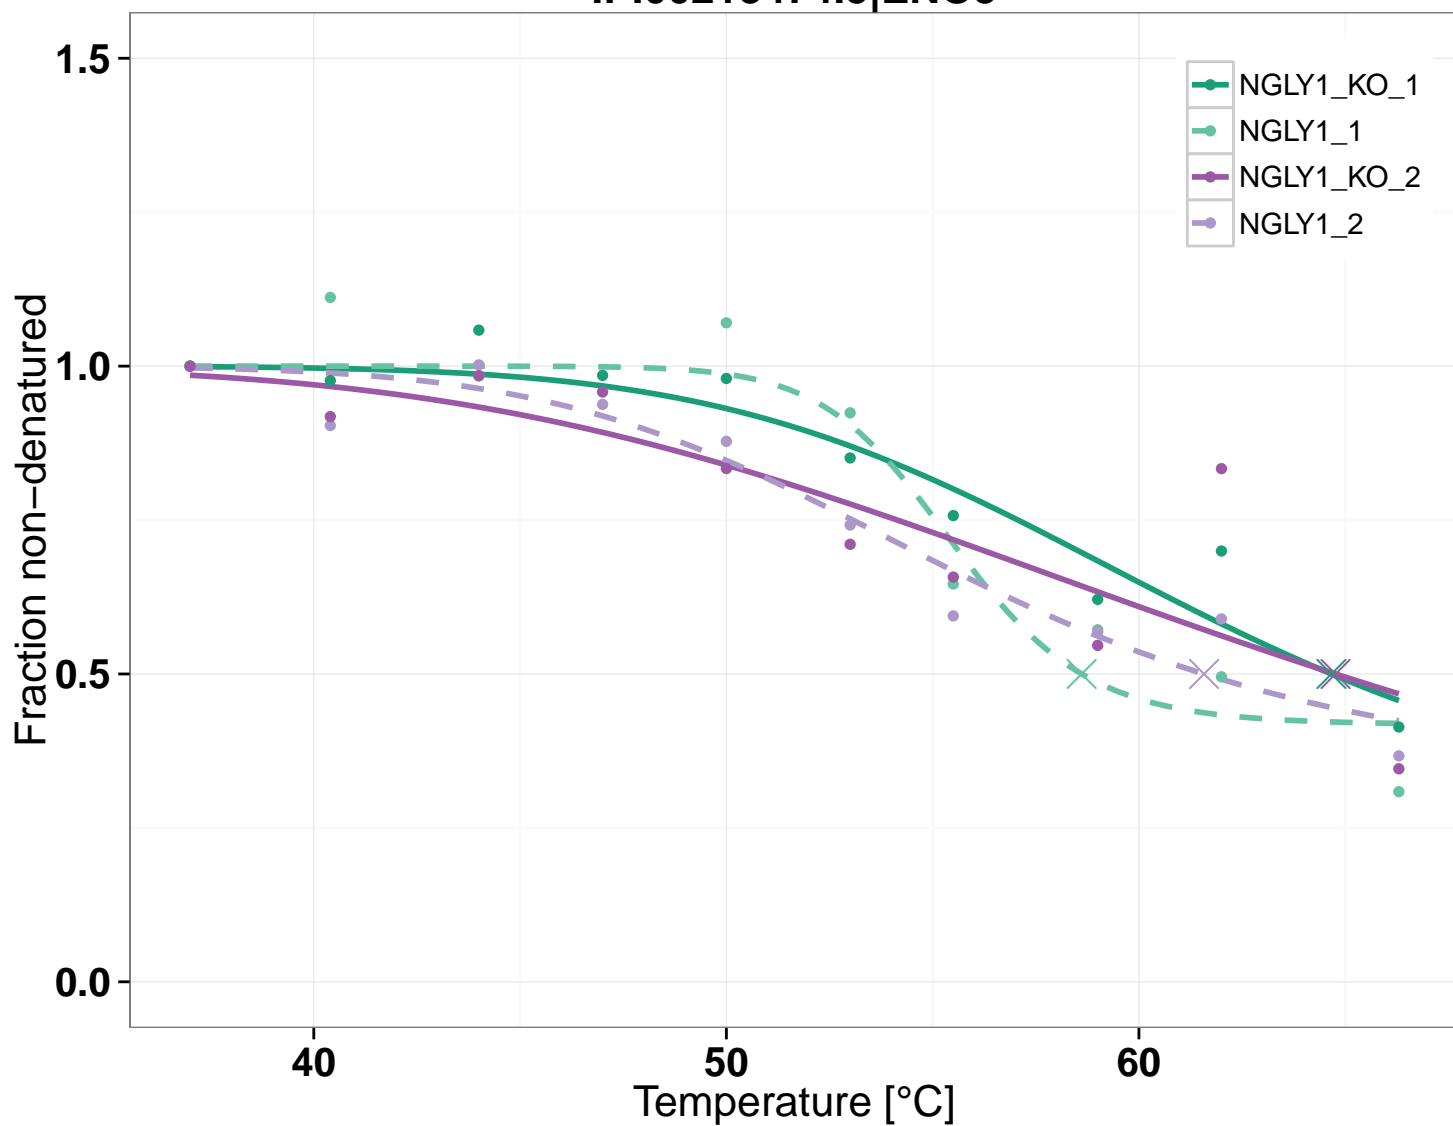

|            | meltPoint | slope  | plateau | R2   |
|------------|-----------|--------|---------|------|
| NGLY1_KO_1 | 64.67     | -0.035 | 0.21    | 0.92 |
| NGLY1_1    | 58.61     | -0.09  | 0.42    | 0.54 |
| NGLY1_KO_2 | 64.77     | -0.024 | 0       | 0.72 |
| NGLY1_2    | 61.58     | -0.034 | 0.32    | 0.93 |

Supplement: Supplementary file 1968 [file 1]

IPI00023876.4|CASP6

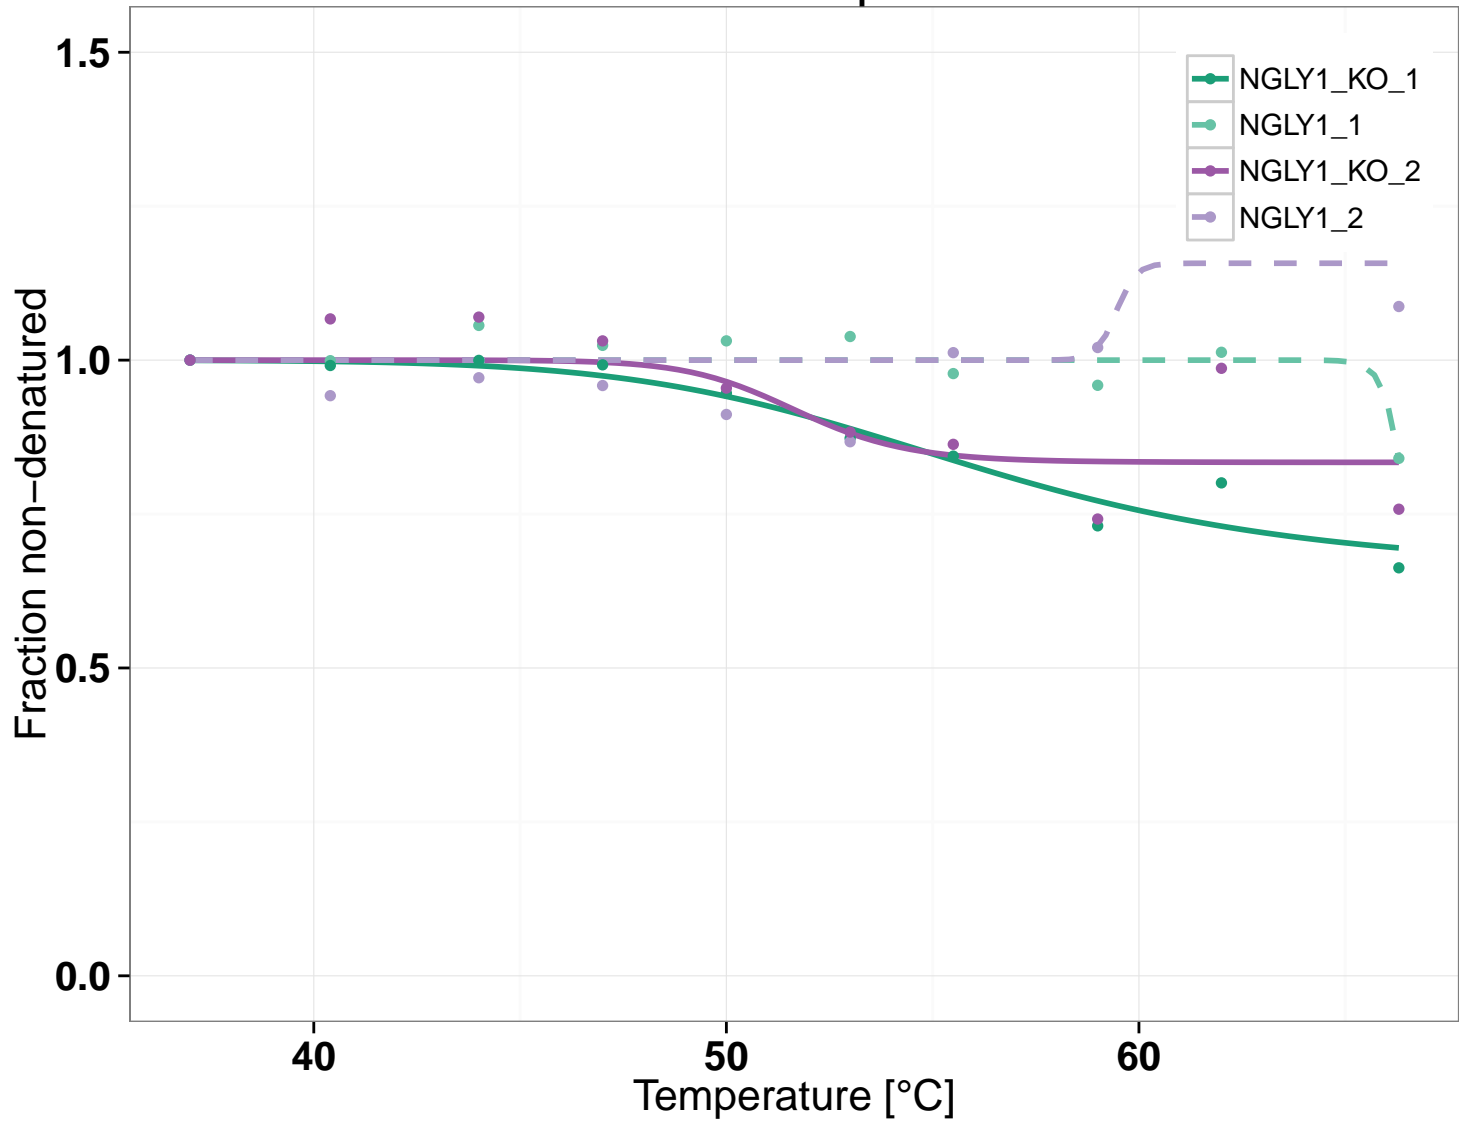

|            | meltPoint | slope  | plateau | R2   |
|------------|-----------|--------|---------|------|
| NGLY1_KO_1 | -         | -0.021 | 0.66    | 0.94 |
| NGLY1_1    | -         | -      | 0       | 0.75 |
| NGLY1_KO_2 | -         | -0.031 | 0.83    | 0.62 |
| NGLY1_2    | -         | 0.17   | 1.16    | 0.55 |

Supplement: Supplementary file 1969 [file 1]

# IPI00419100.2|FGD6

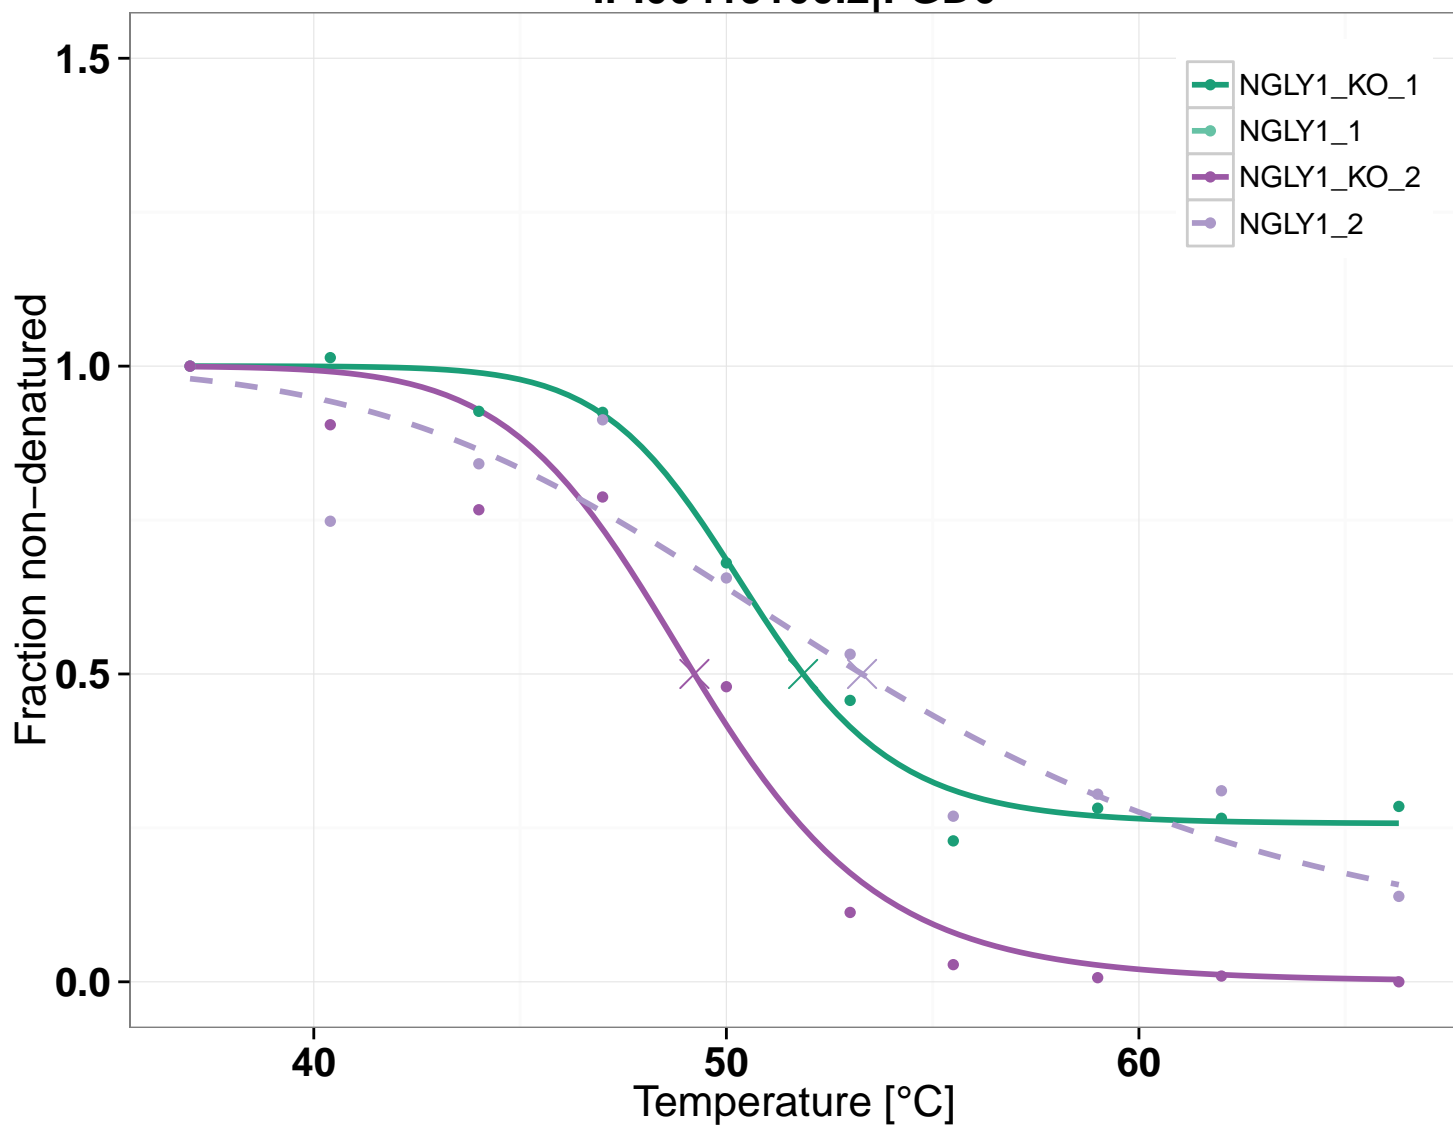

|            | meltPoint | slope  | plateau | R2   |
|------------|-----------|--------|---------|------|
| NGLY1_KO_1 | 51.86     | -0.11  | 0.26    | 0.99 |
| NGLY1_1    | -         | -      | -       | -    |
| NGLY1_KO_2 | 49.23     | -0.11  | 0       | 0.97 |
| NGLY1_2    | 53.29     | -0.043 | 0.01    | 0.89 |

Supplement: Supplementary file 1970 [file 1]

# IPI00031516.2|GABPB1

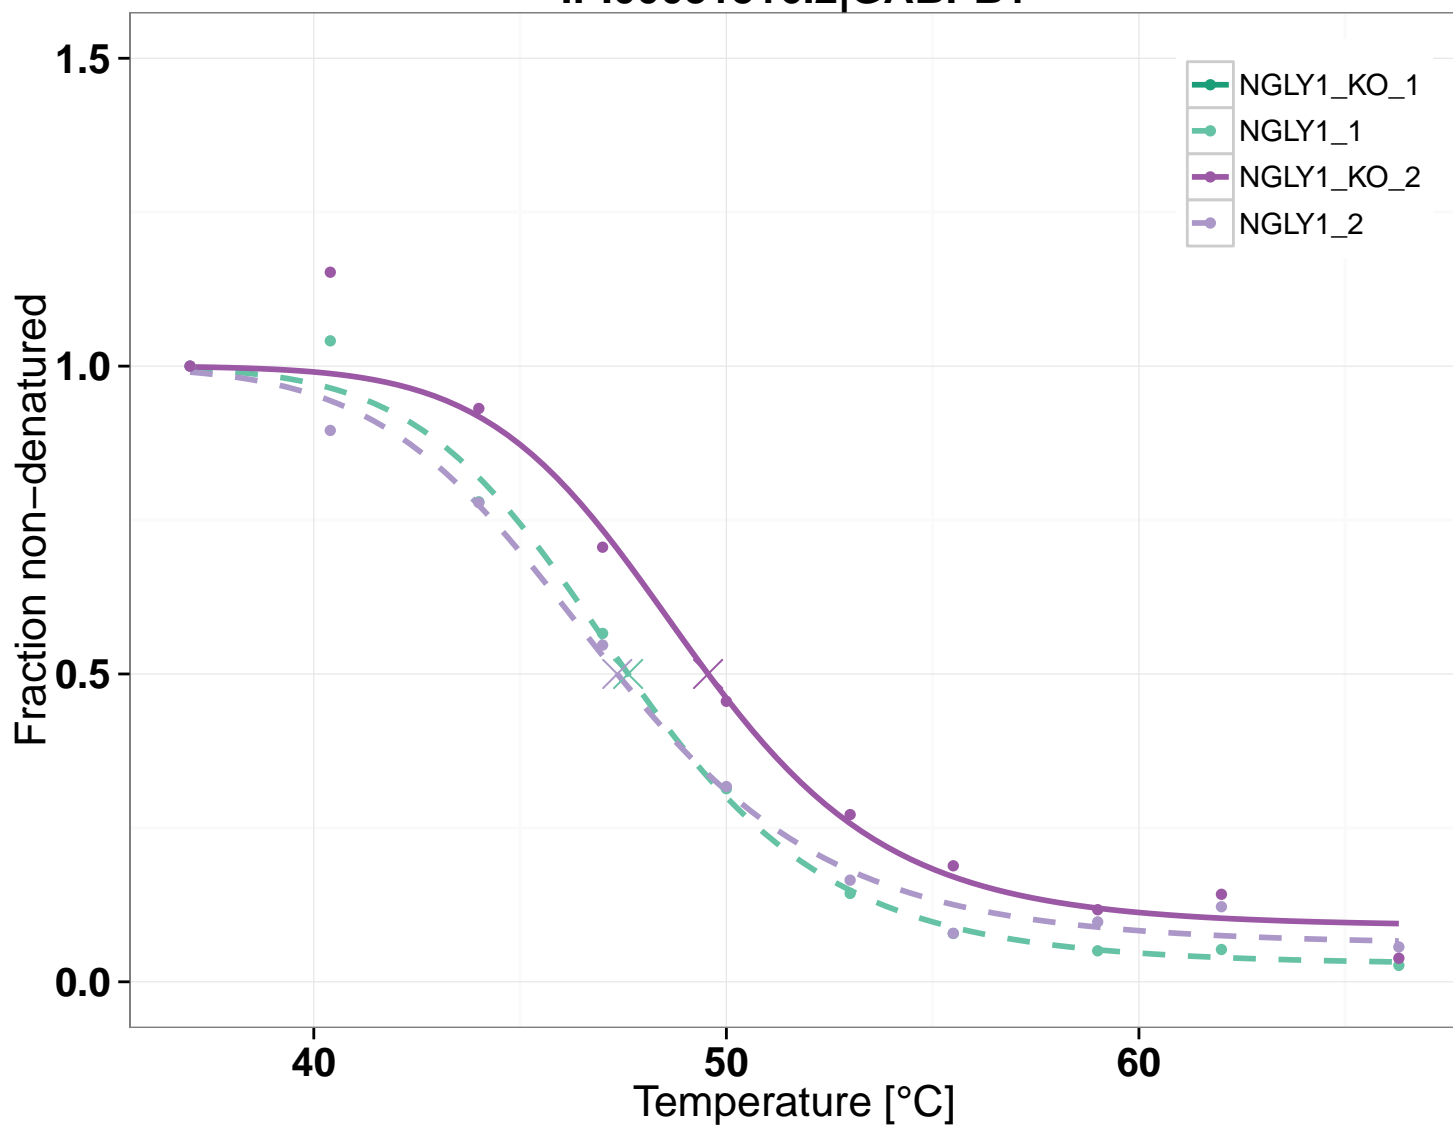

|            | meltPoint | slope  | plateau | R2   |
|------------|-----------|--------|---------|------|
| NGLY1_KO_1 | –         | –      | –       | –    |
| NGLY1_1    | 47.62     | –0.097 | 0.03    | 0.99 |
| NGLY1_KO_2 | 49.56     | –0.094 | 0.09    | 0.98 |
| NGLY1_2    | 47.36     | –0.086 | 0.06    | 0.99 |

Supplement: Supplementary file 1971 [file 1]

# IPI00026964.2|UQCRFS1

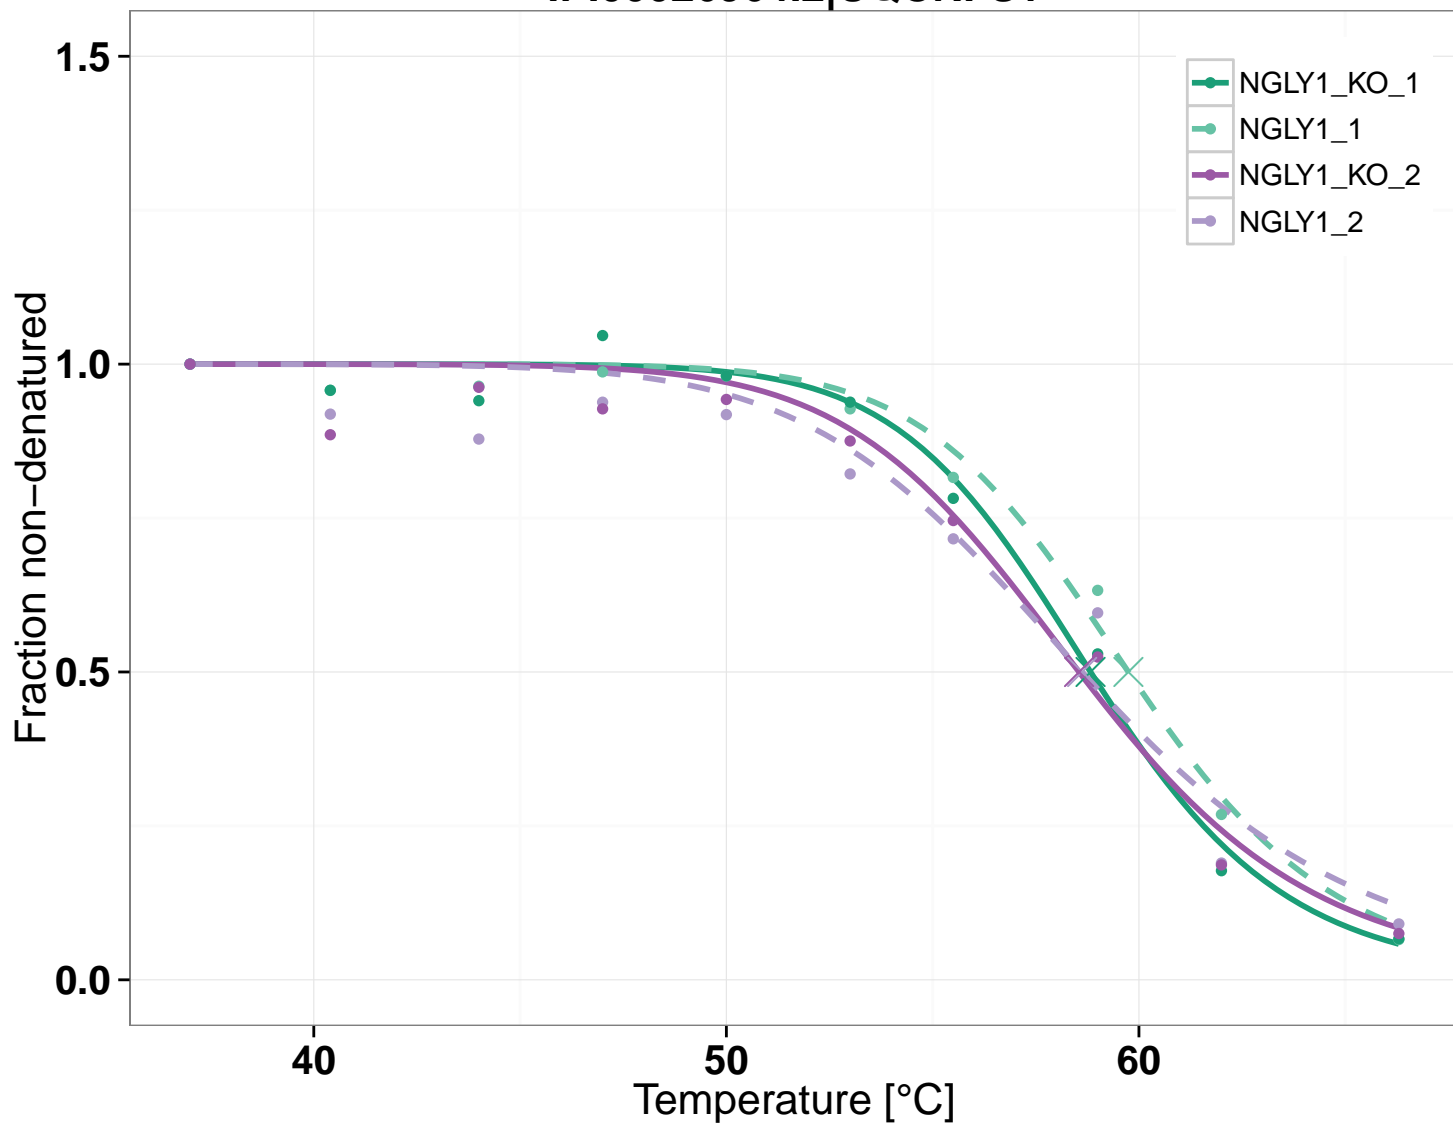

|            | meltPoint | slope  | plateau | R2   |
|------------|-----------|--------|---------|------|
| NGLY1_KO_1 | 58.83     | -0.11  | 0       | 0.99 |
| NGLY1_1    | 59.74     | -0.1   | 0       | 0.99 |
| NGLY1_KO_2 | 58.55     | -0.088 | 0       | 0.97 |
| NGLY1_2    | 58.62     | -0.074 | 0       | 0.95 |

Supplement: Supplementary file 1972 [file 1]

# IPI00448121.1|CDC7

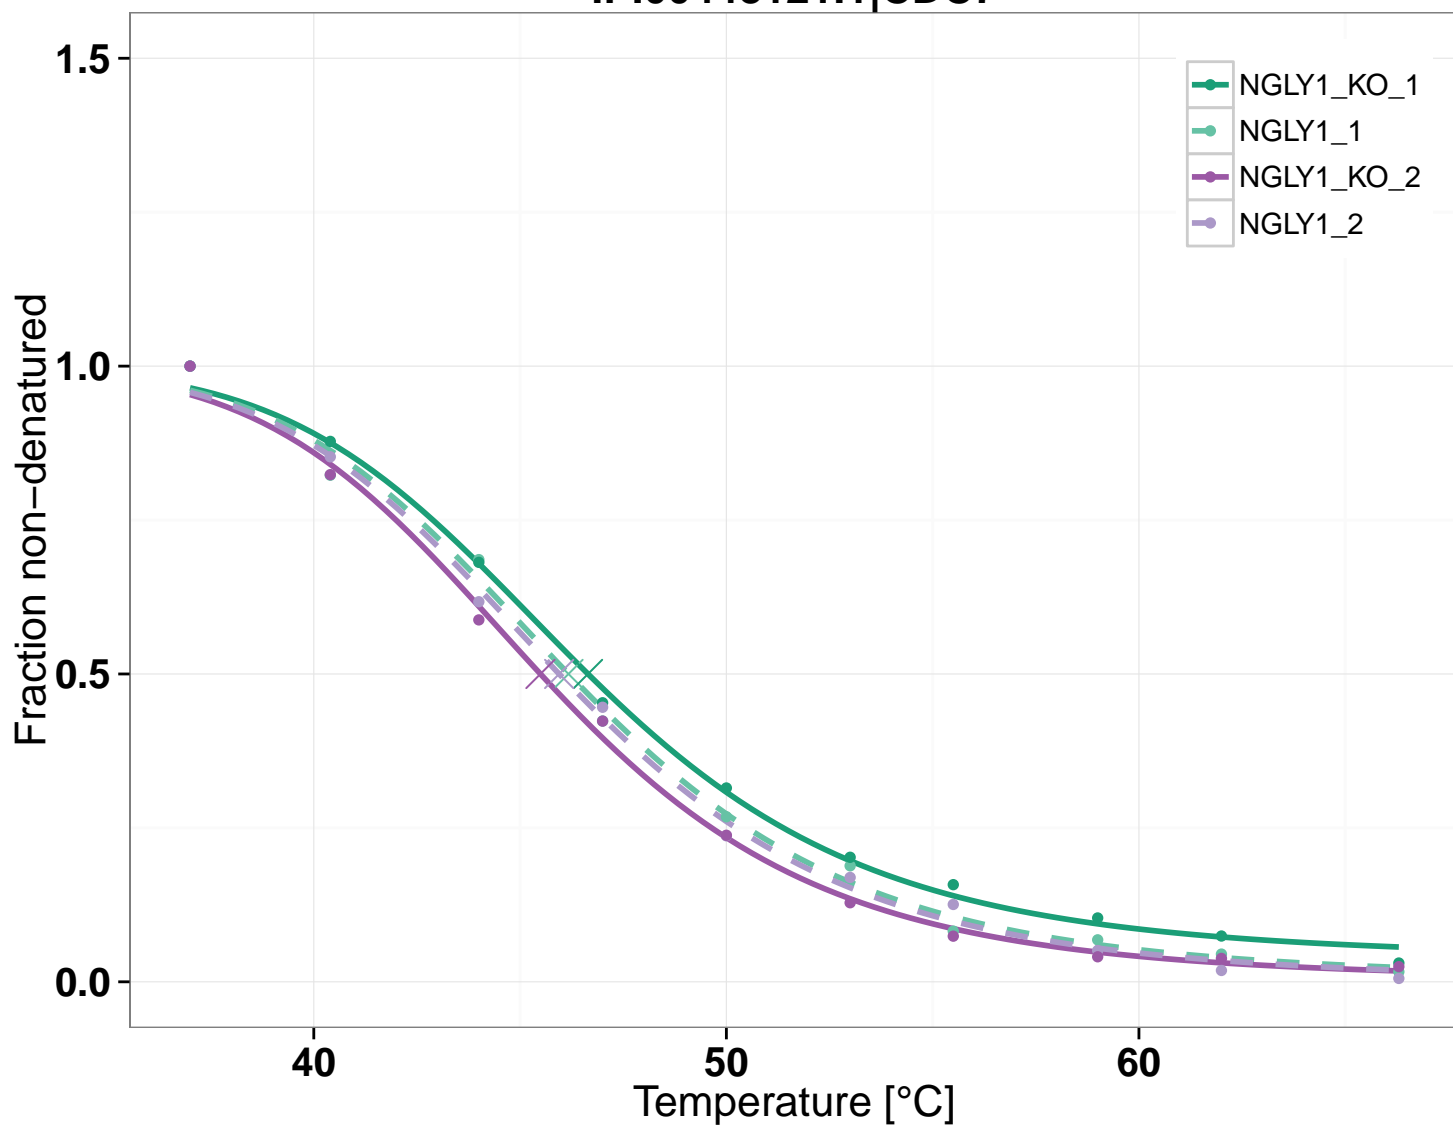

|            | meltPoint | slope  | plateau | R2   |
|------------|-----------|--------|---------|------|
| NGLY1_KO_1 | 46.65     | -0.069 | 0.04    | 1    |
| NGLY1_1    | 46.17     | -0.071 | 0       | 0.99 |
| NGLY1_KO_2 | 45.49     | -0.074 | 0       | 1    |
| NGLY1_2    | 45.95     | -0.072 | 0       | 1    |

Supplement: Supplementary file 1973 [file 1]

IPI00788596.1|C19ORF46

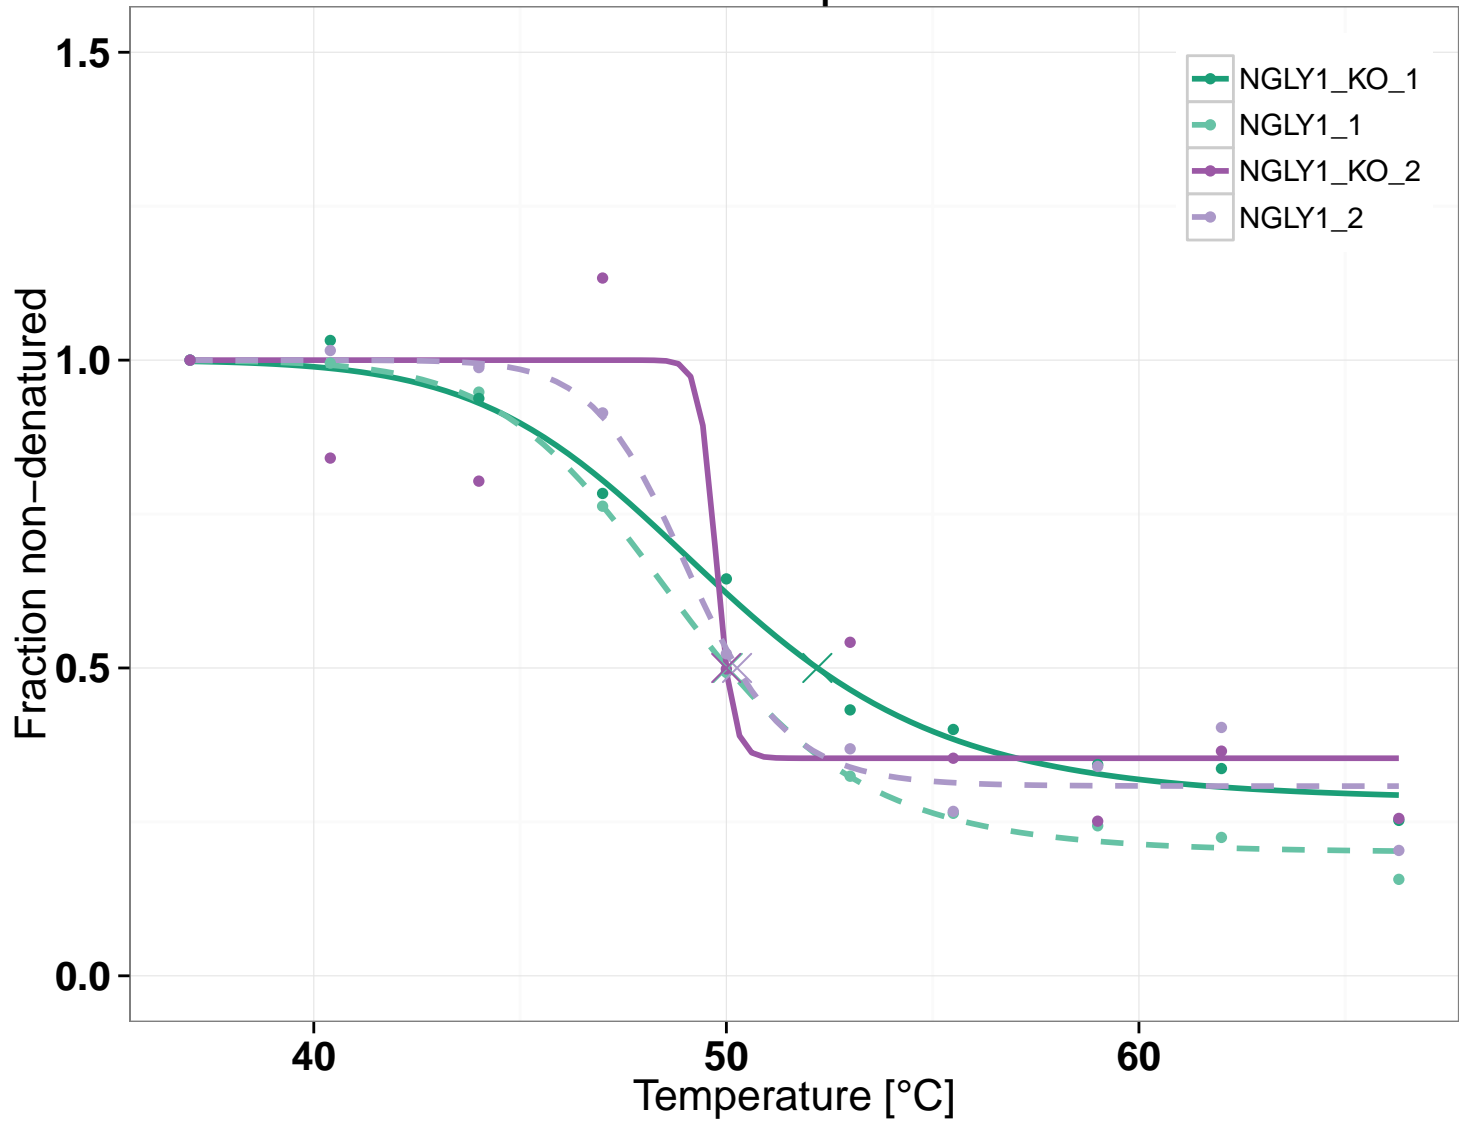

|            | meltPoint | slope  | plateau | R2   |
|------------|-----------|--------|---------|------|
| NGLY1_KO_1 | 52.2      | -0.063 | 0.28    | 0.99 |
| NGLY1_1    | 50.03     | -0.09  | 0.2     | 1    |
| NGLY1_KO_2 | 50        | -0.81  | 0.35    | 0.85 |
| NGLY1_2    | 50.26     | -0.15  | 0.31    | 0.98 |

Supplement: Supplementary file 1974 [file 1]

IPI00039864.5|RANBP10

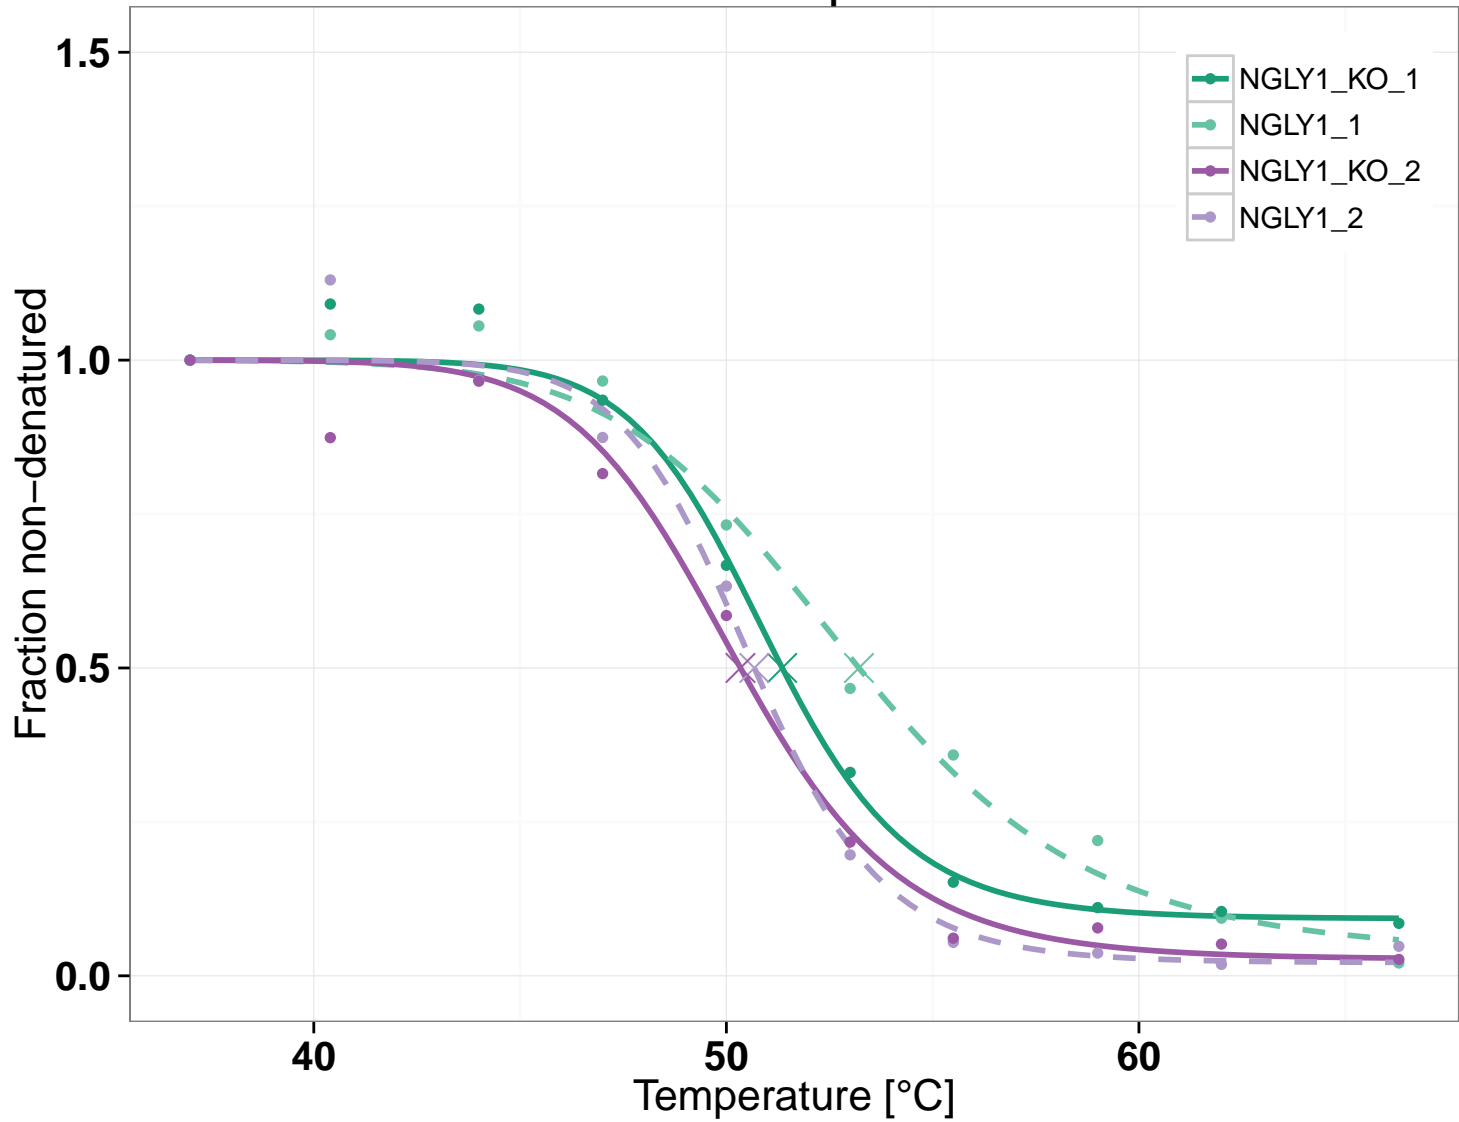

|            | meltPoint | slope  | plateau | R2   |
|------------|-----------|--------|---------|------|
| NGLY1_KO_1 | 51.35     | -0.14  | 0.09    | 0.99 |
| NGLY1_1    | 53.21     | -0.084 | 0.03    | 0.99 |
| NGLY1_KO_2 | 50.34     | -0.12  | 0.03    | 0.99 |
| NGLY1_2    | 50.68     | -0.15  | 0.02    | 0.99 |

Supplement: Supplementary file 1975 [file 1]

IPI00375578.1|SASS6

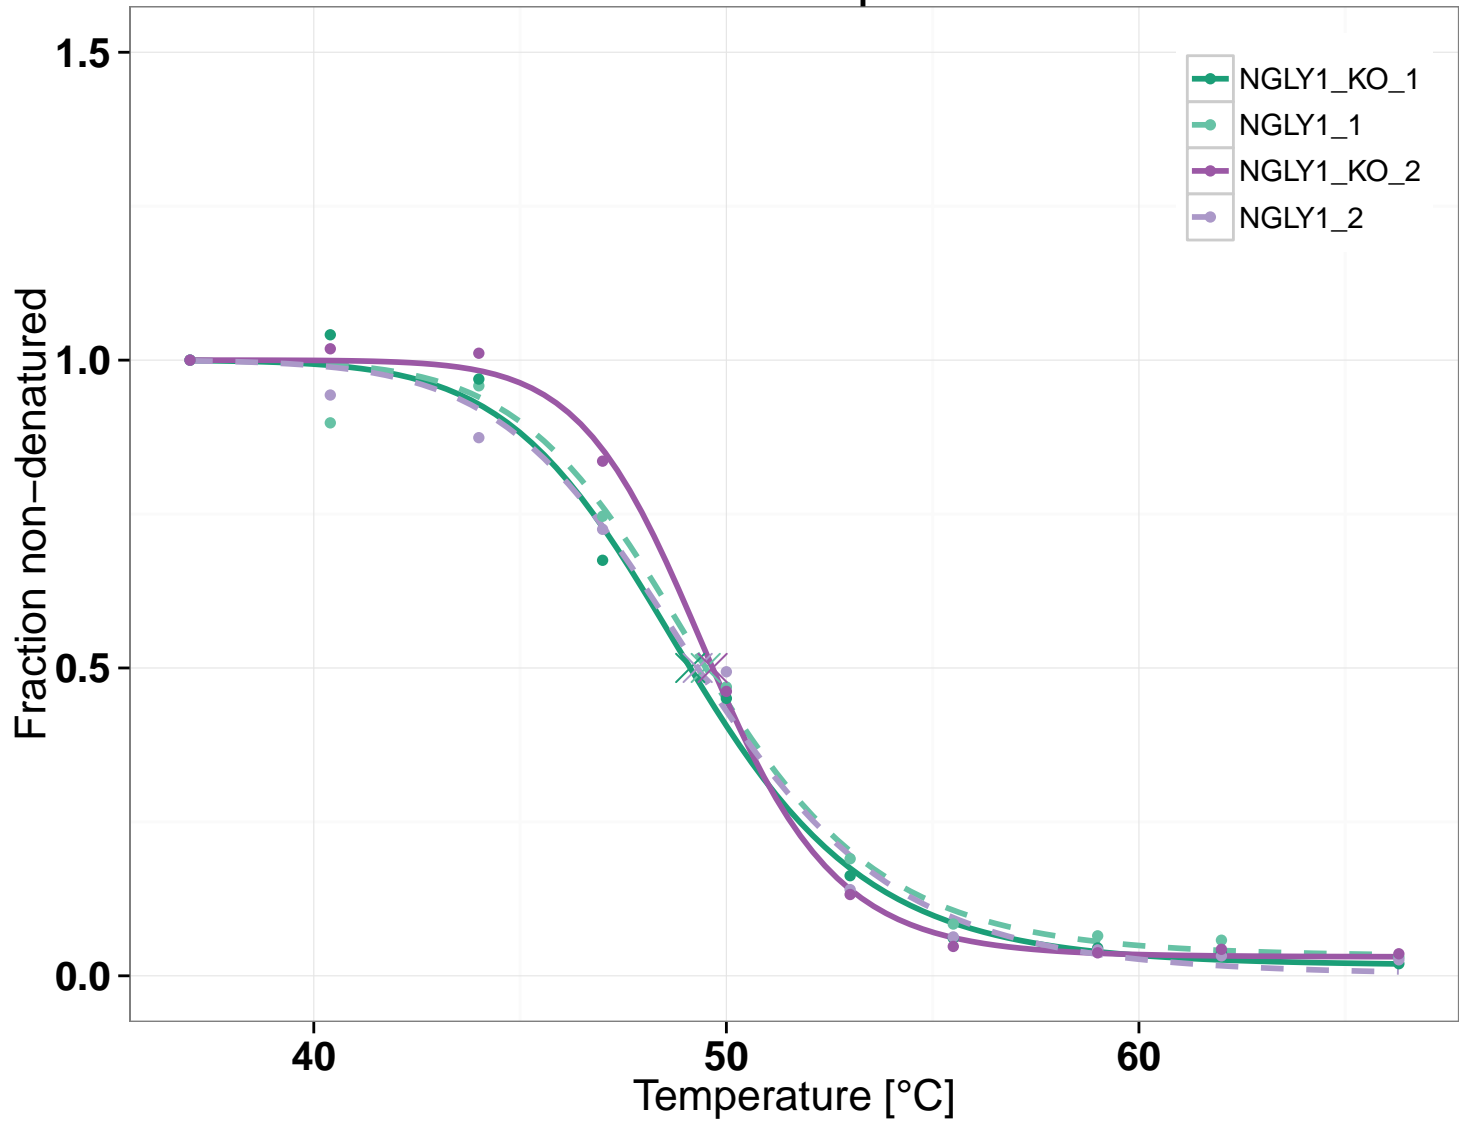

|            | meltPoint | slope | plateau | R2   |
|------------|-----------|-------|---------|------|
| NGLY1_KO_1 | 49.12     | -0.11 | 0.02    | 0.99 |
| NGLY1_1    | 49.5      | -0.11 | 0.03    | 0.99 |
| NGLY1_KO_2 | 49.67     | -0.16 | 0.03    | 1    |
| NGLY1_2    | 49.3      | -0.1  | 0       | 0.99 |

Supplement: Supplementary file 1976 [file 1]

IPI00386250.6|RP6-213H19 1

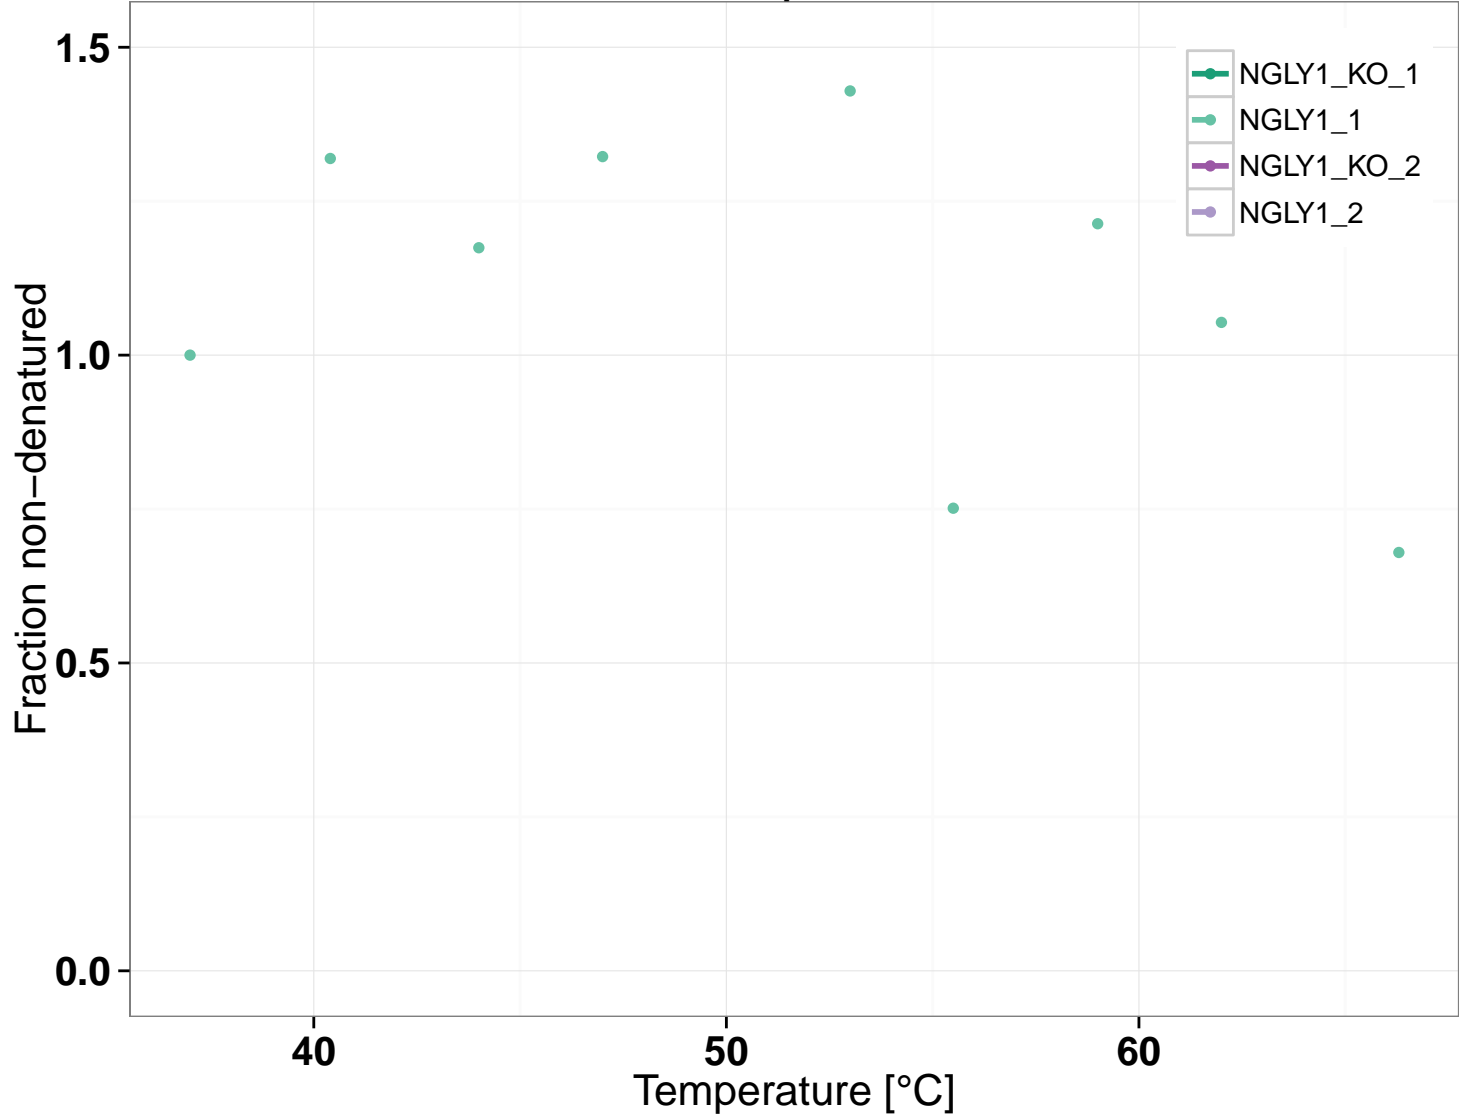

|            | meltPoint | slope | plateau | R2 |
|------------|-----------|-------|---------|----|
| NGLY1_KO_1 | -         | -     | -       | -  |
| NGLY1_1    | -         | -     | -       | -  |
| NGLY1_KO_2 | -         | -     | -       | -  |
| NGLY1_2    | -         | -     | -       | -  |

Supplement: Supplementary file 1977 [file 1]

IPI00375653.5|INTS8

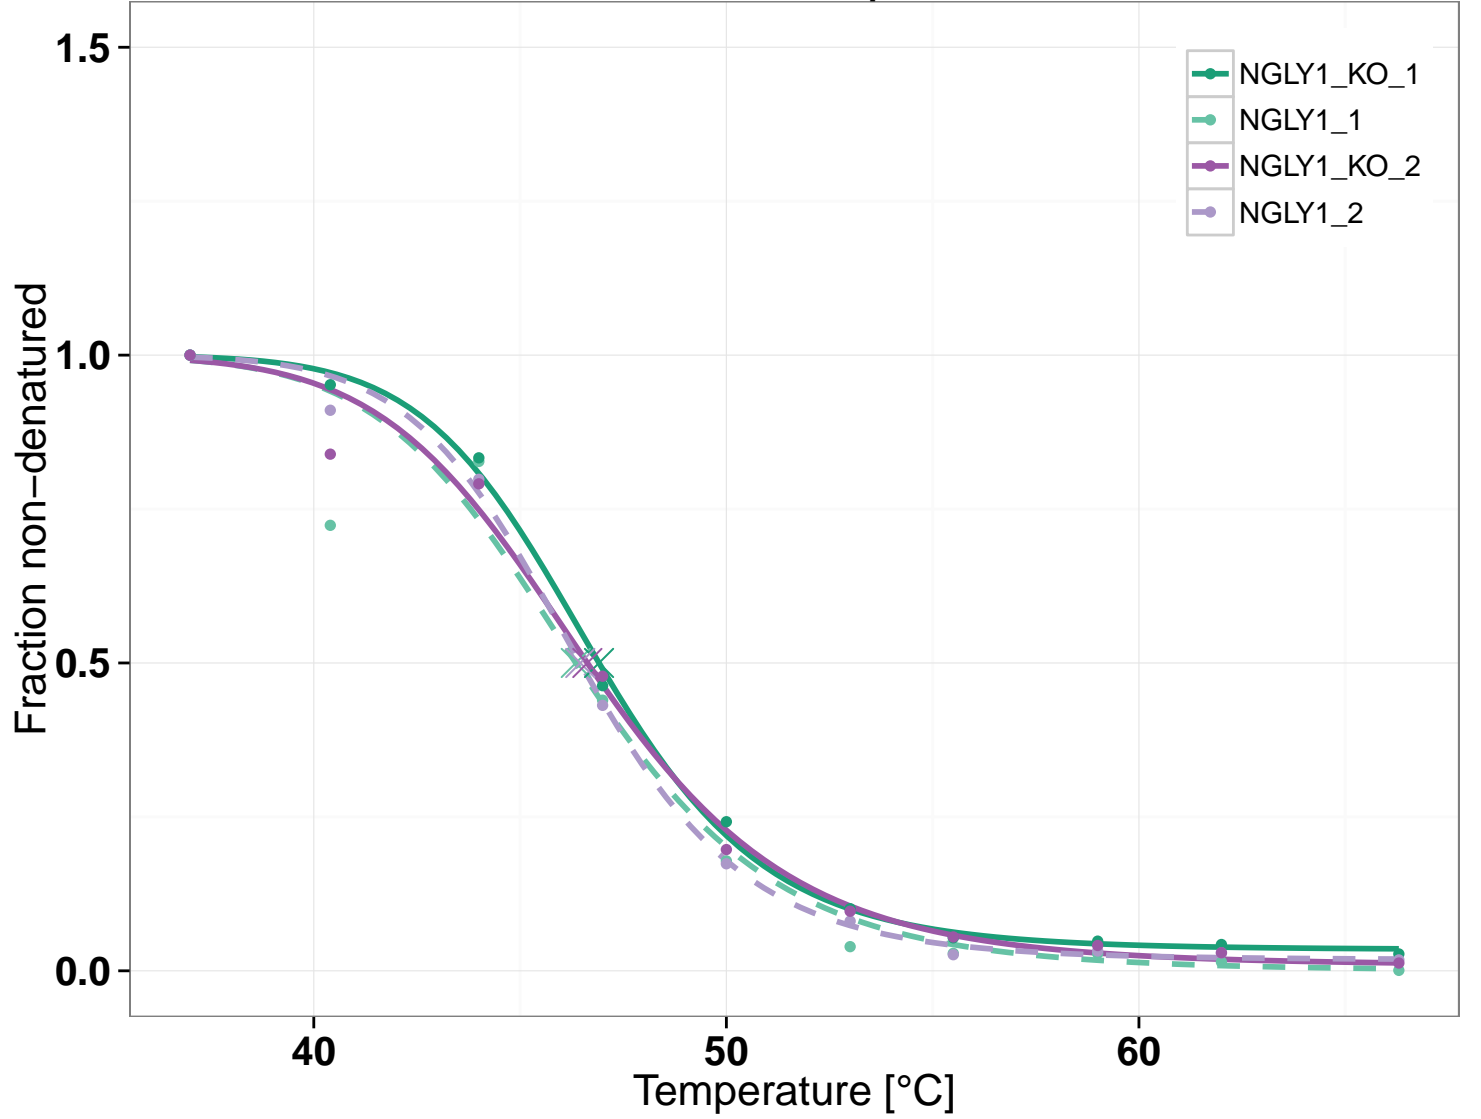

|            | meltPoint | slope  | plateau | R2   |
|------------|-----------|--------|---------|------|
| NGLY1_KO_1 | 46.91     | -0.12  | 0.03    | 1    |
| NGLY1_1    | 46.35     | -0.1   | 0       | 0.96 |
| NGLY1_KO_2 | 46.63     | -0.099 | 0.01    | 0.99 |
| NGLY1_2    | 46.46     | -0.12  | 0.02    | 1    |

Supplement: Supplementary file 1978 [file 1]

IPI00784159.3|ANKRD13D

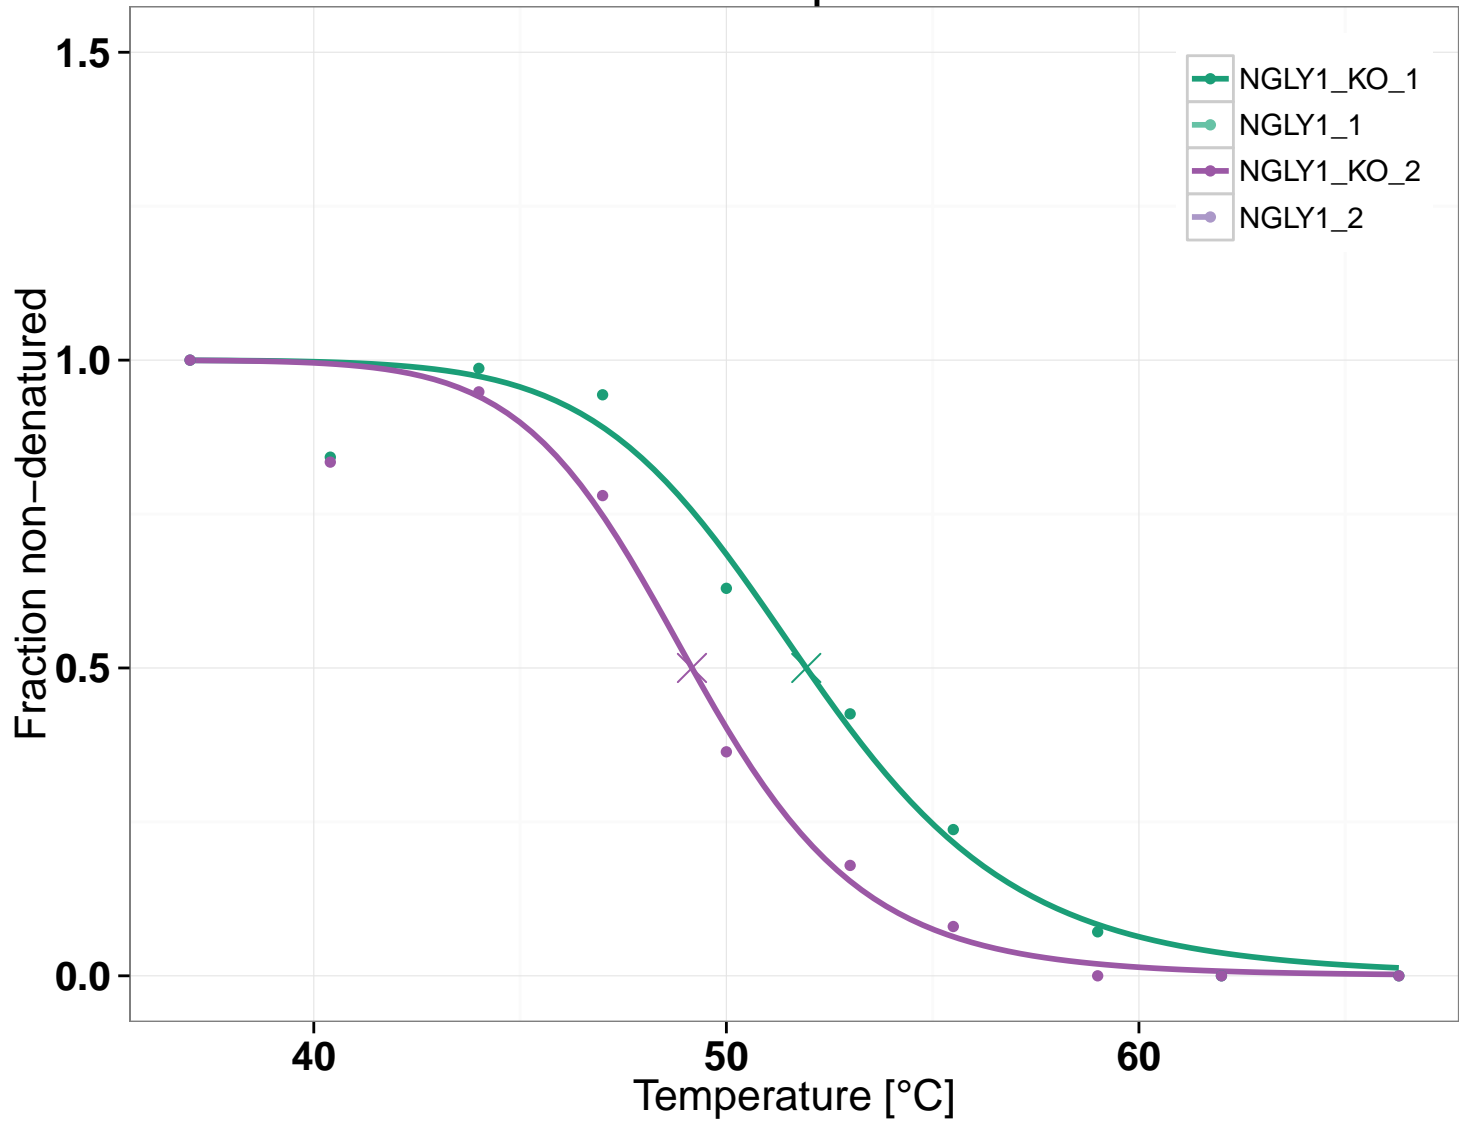

|            | meltPoint | slope  | plateau | R2   |
|------------|-----------|--------|---------|------|
| NGLY1_KO_1 | 51.94     | -0.097 | 0       | 0.98 |
| NGLY1_1    | -         | -      | -       | -    |
| NGLY1_KO_2 | 49.17     | -0.12  | 0       | 0.98 |
| NGLY1_2    | -         | -      | -       | -    |

Supplement: Supplementary file 1979 [file 1]

# IPI00297396.5|REXO1

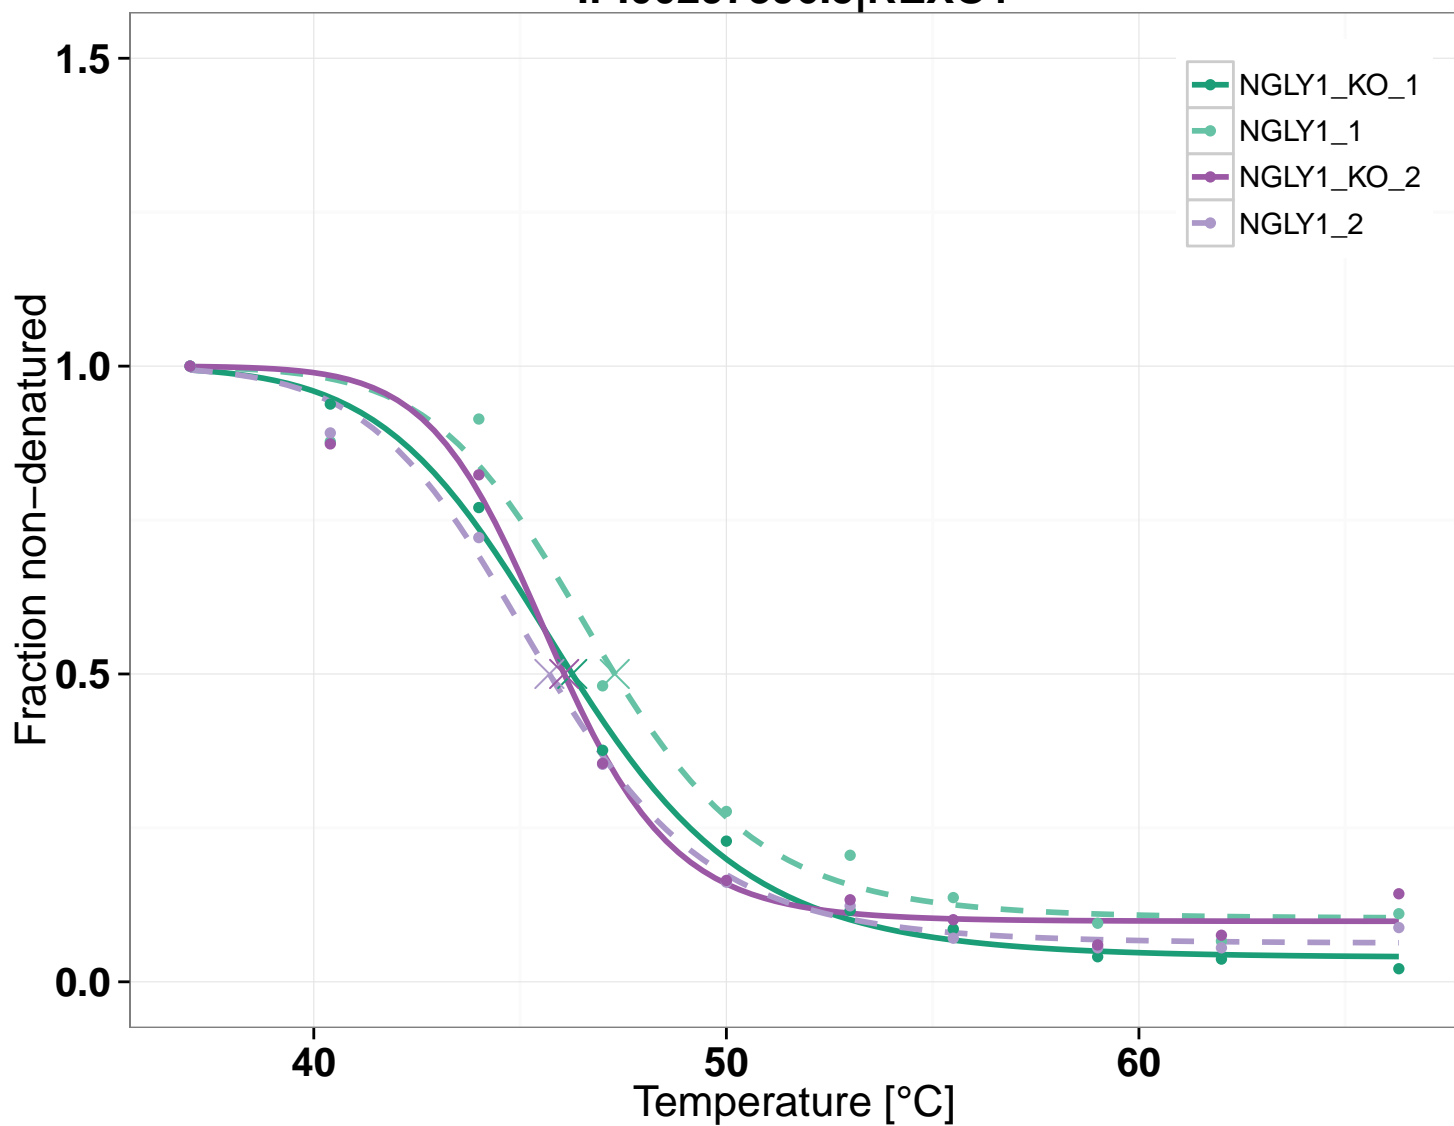

|            | meltPoint | slope | plateau | R2   |
|------------|-----------|-------|---------|------|
| NGLY1_KO_1 | 46.26     | -0.11 | 0.04    | 1    |
| NGLY1_1    | 47.29     | -0.11 | 0.1     | 0.98 |
| NGLY1_KO_2 | 46.07     | -0.15 | 0.1     | 0.99 |
| NGLY1_2    | 45.71     | -0.11 | 0.06    | 1    |

Supplement: Supplementary file 1980 [file 1]

IPI00014194.3|C2ORF29

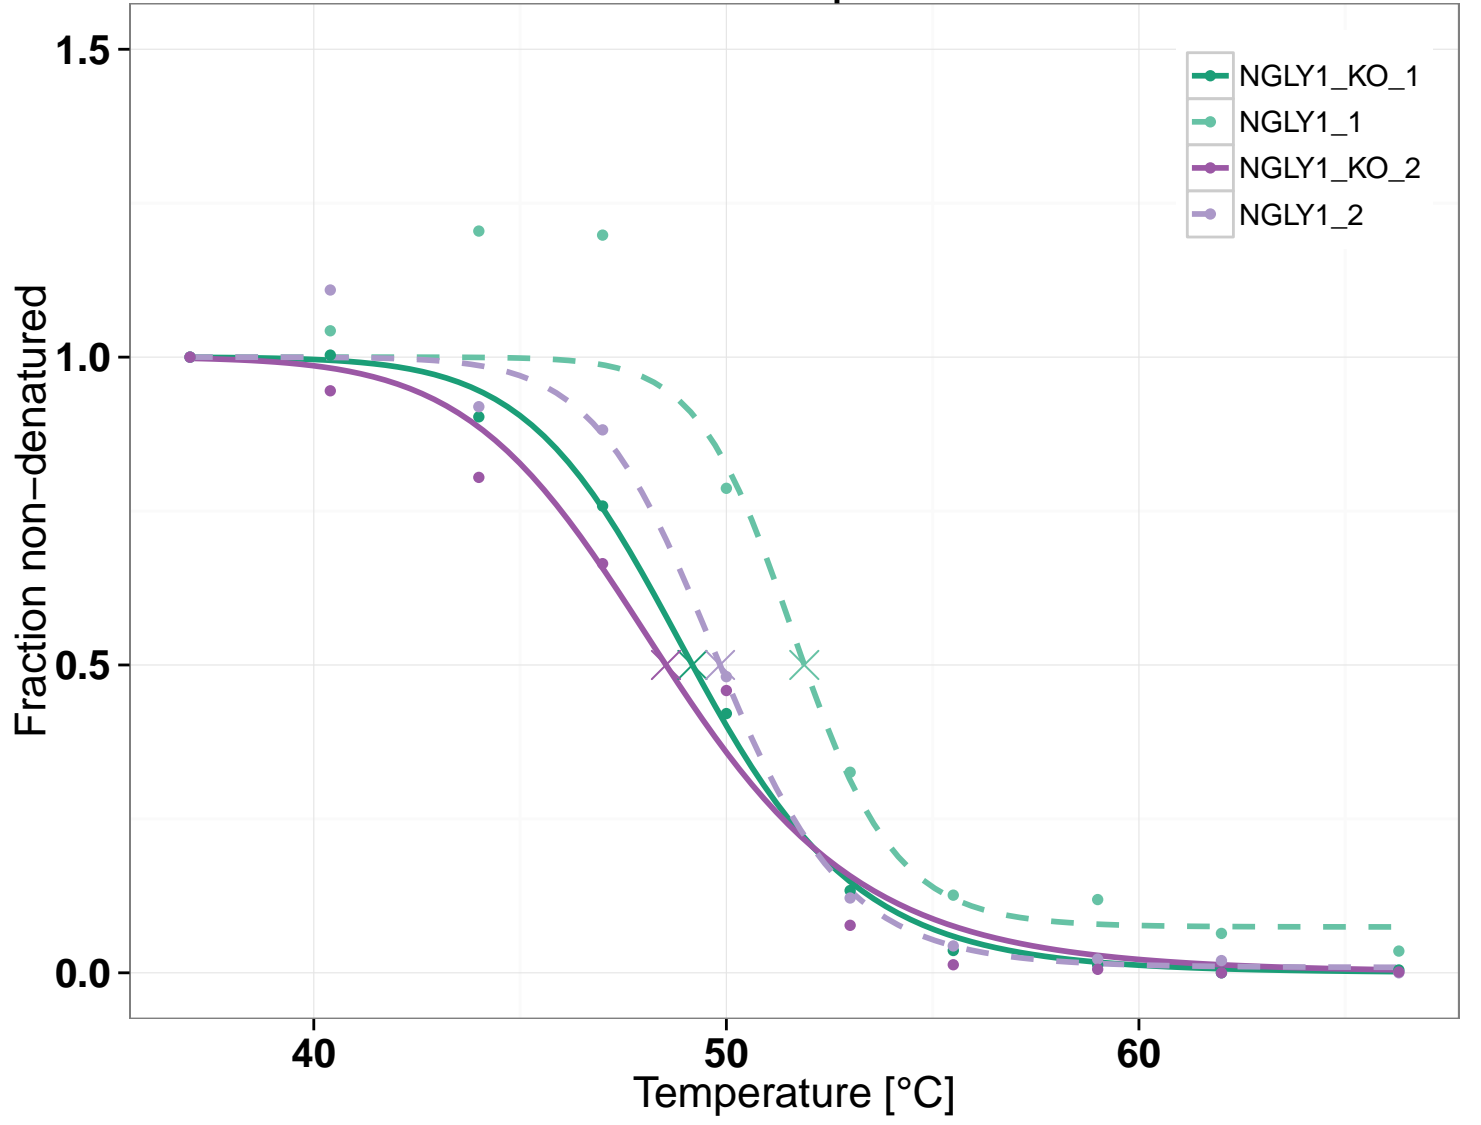

|            | meltPoint | slope | plateau | R2   |
|------------|-----------|-------|---------|------|
| NGLY1_KO_1 | 49.18     | -0.12 | 0       | 1    |
| NGLY1_1    | 51.89     | -0.19 | 0.07    | 0.96 |
| NGLY1_KO_2 | 48.54     | -0.1  | 0       | 0.98 |
| NGLY1_2    | 49.85     | -0.16 | 0.01    | 0.99 |

Supplement: Supplementary file 1981 [file 1]

# IPI00009958.6|COPS5

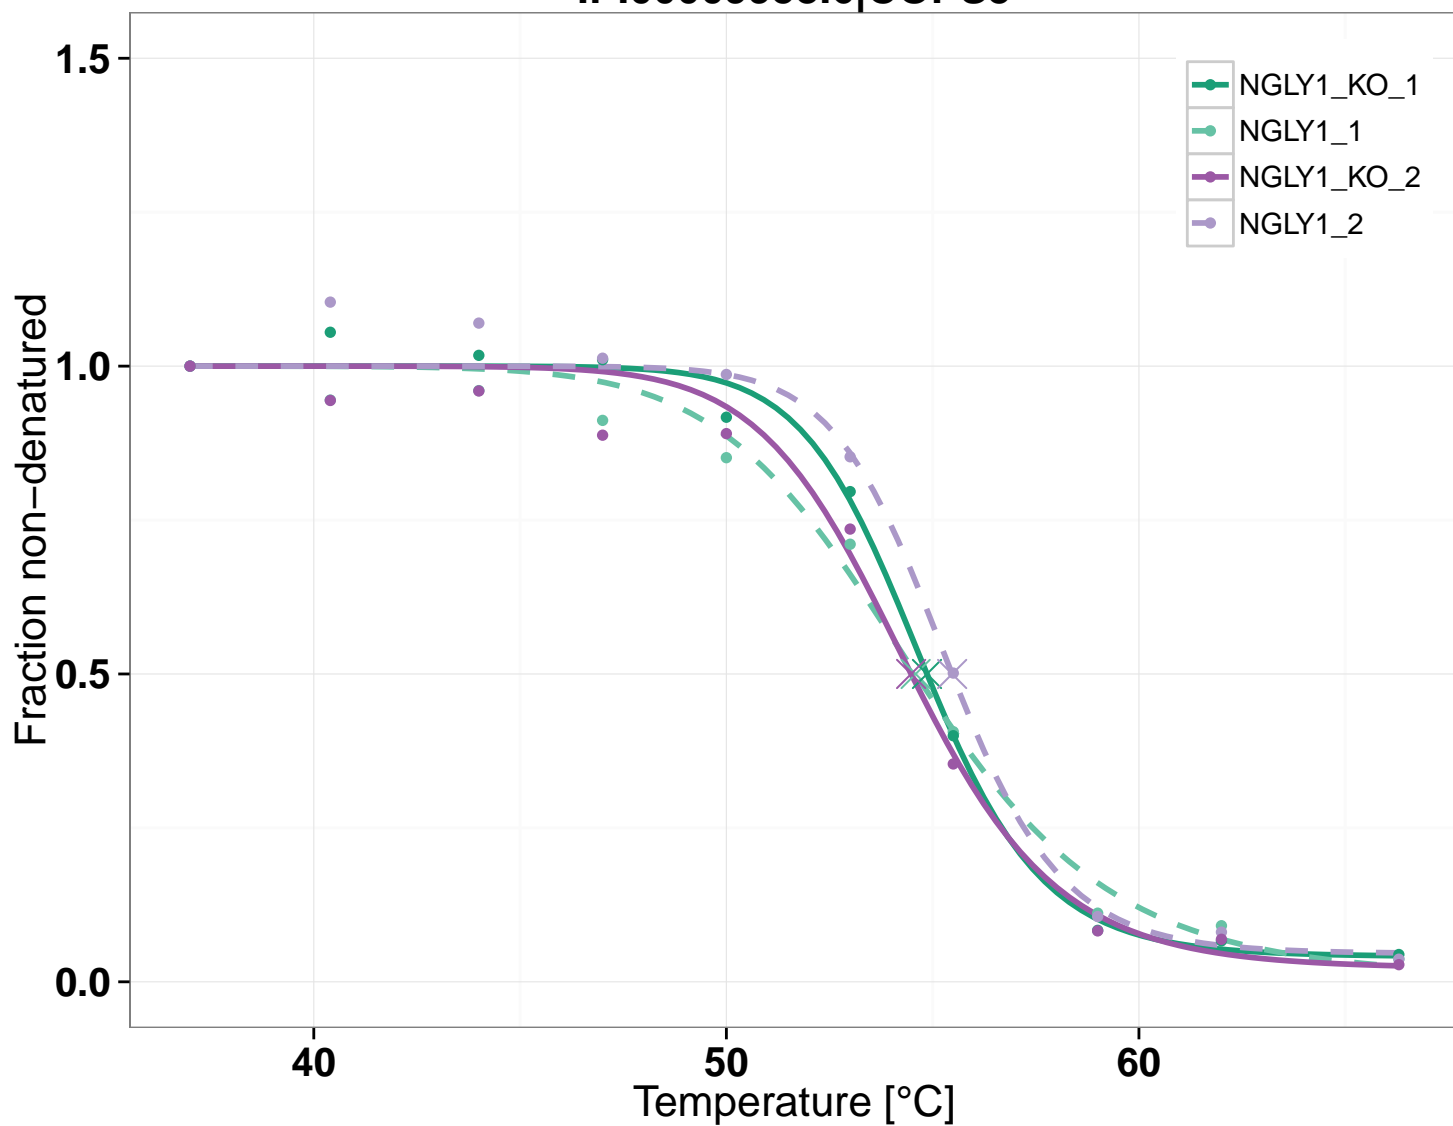

|            | meltPoint | slope | plateau | R2   |
|------------|-----------|-------|---------|------|
| NGLY1_KO_1 | 54.86     | -0.16 | 0.04    | 1    |
| NGLY1_1    | 54.59     | -0.1  | 0.01    | 0.99 |
| NGLY1_KO_2 | 54.48     | -0.13 | 0.02    | 0.99 |
| NGLY1_2    | 55.47     | -0.17 | 0.05    | 0.99 |

Supplement: Supplementary file 1982 [file 1]

# IPI00170786.1|WBP11

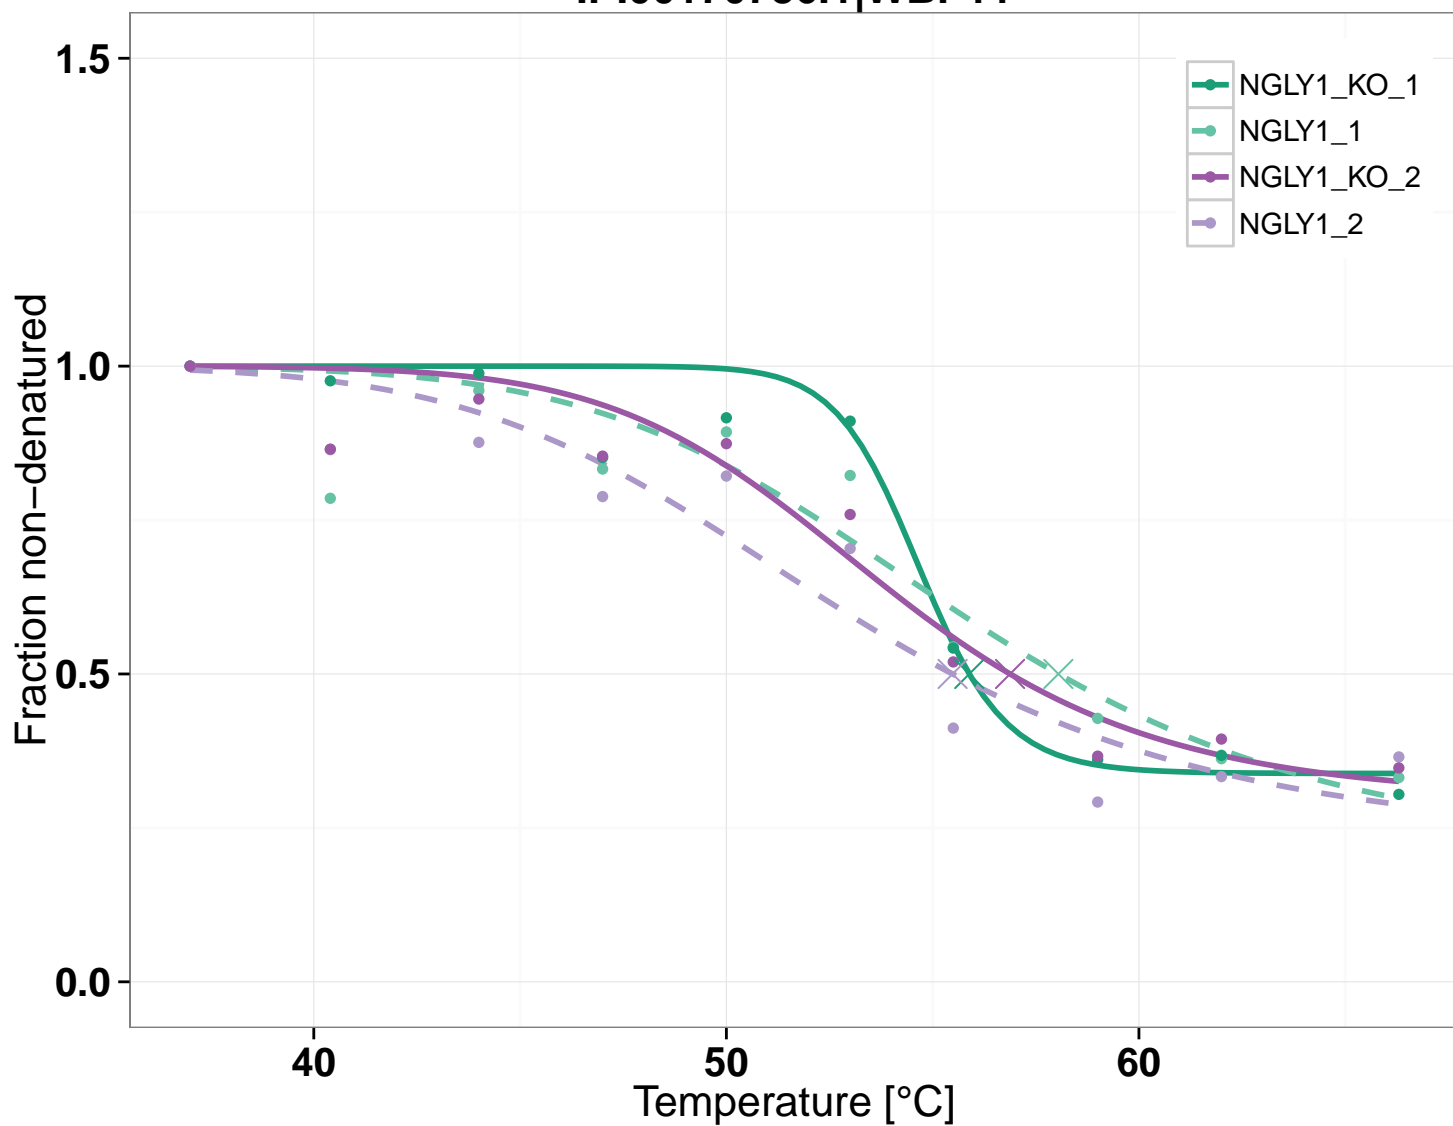

|            | meltPoint | slope  | plateau | R2   |
|------------|-----------|--------|---------|------|
| NGLY1_KO_1 | 55.89     | -0.16  | 0.34    | 0.96 |
| NGLY1_1    | 58.05     | -0.045 | 0.2     | 0.88 |
| NGLY1_KO_2 | 56.88     | -0.054 | 0.29    | 0.94 |
| NGLY1_2    | 55.48     | -0.043 | 0.22    | 0.9  |

Supplement: Supplementary file 1983 [file 1]

IPI00304264.3|DERL2

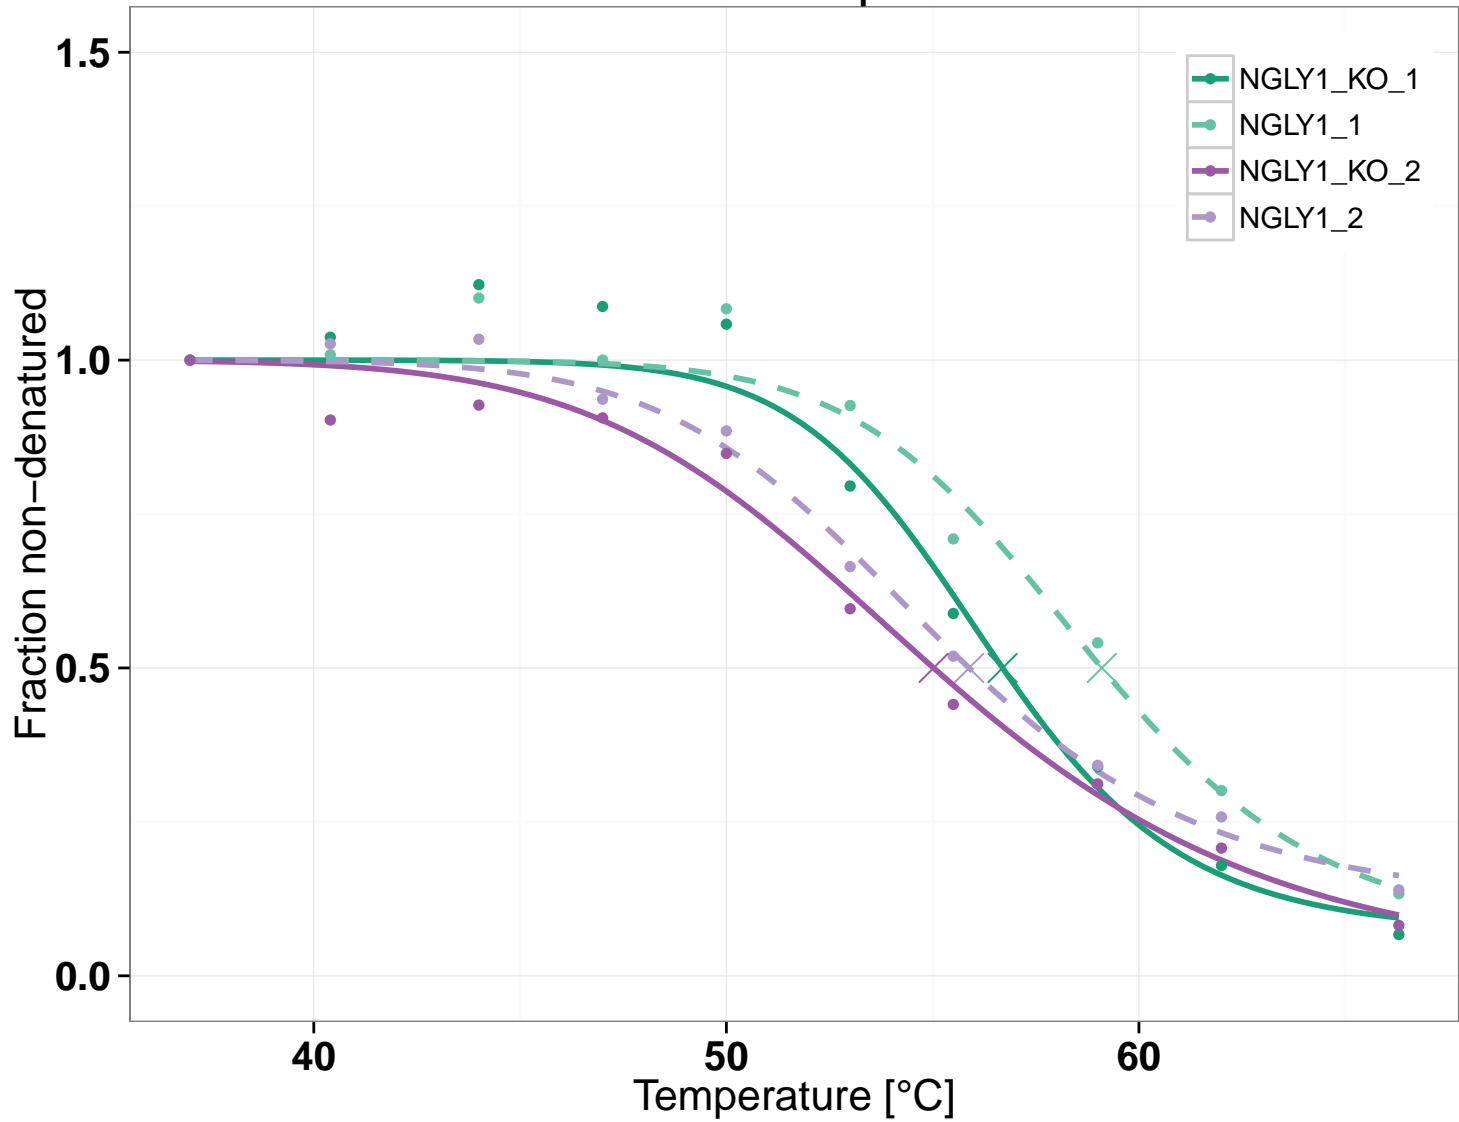

|            | meltPoint | slope  | plateau | R2   |
|------------|-----------|--------|---------|------|
| NGLY1_KO_1 | 56.7      | -0.1   | 0.07    | 0.97 |
| NGLY1_1    | 59.1      | -0.083 | 0.06    | 0.97 |
| NGLY1_KO_2 | 55.02     | -0.06  | 0       | 0.99 |
| NGLY1_2    | 55.88     | -0.067 | 0.11    | 0.99 |

Supplement: Supplementary file 1984 [file 1]

# IPI00289547.3|JUND

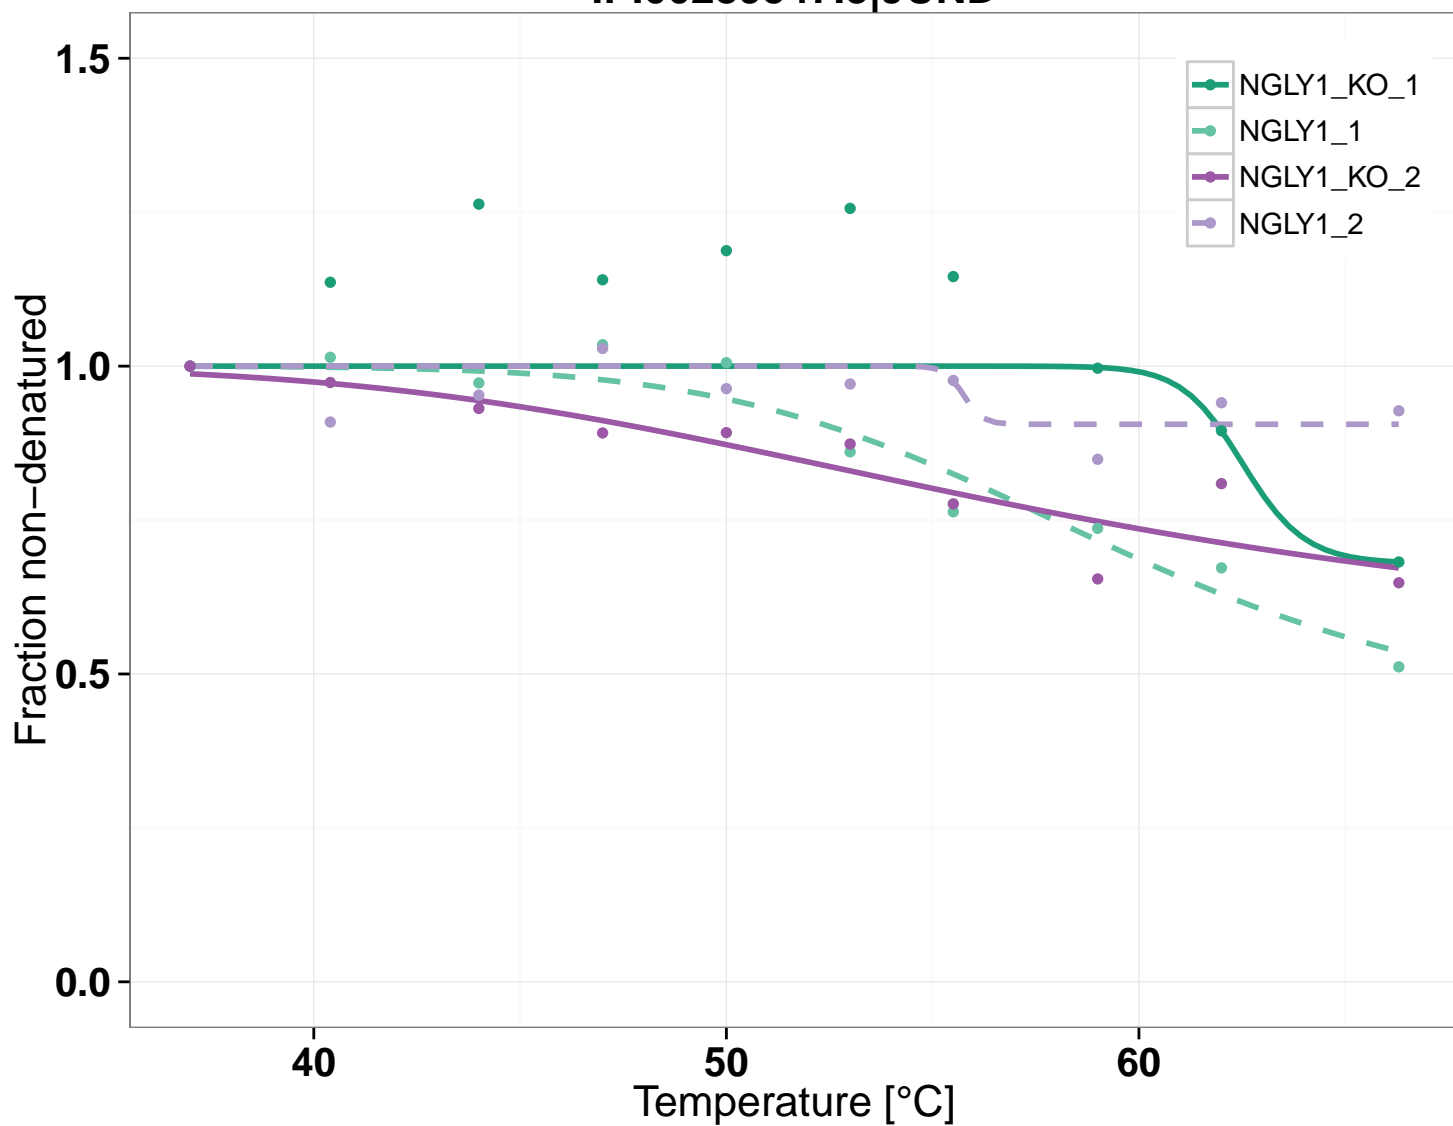

|            | meltPoint | slope  | plateau | R2   |
|------------|-----------|--------|---------|------|
| NGLY1_KO_1 | –         | –0.11  | 0.68    | 0.22 |
| NGLY1_1    | –         | –0.031 | 0.41    | 0.95 |
| NGLY1_KO_2 | –         | –0.014 | 0.53    | 0.84 |
| NGLY1_2    | –         | –0.11  | 0.91    | 0.18 |

Supplement: Supplementary file 1985 [file 1]

# IPI00748342.2|BECN1

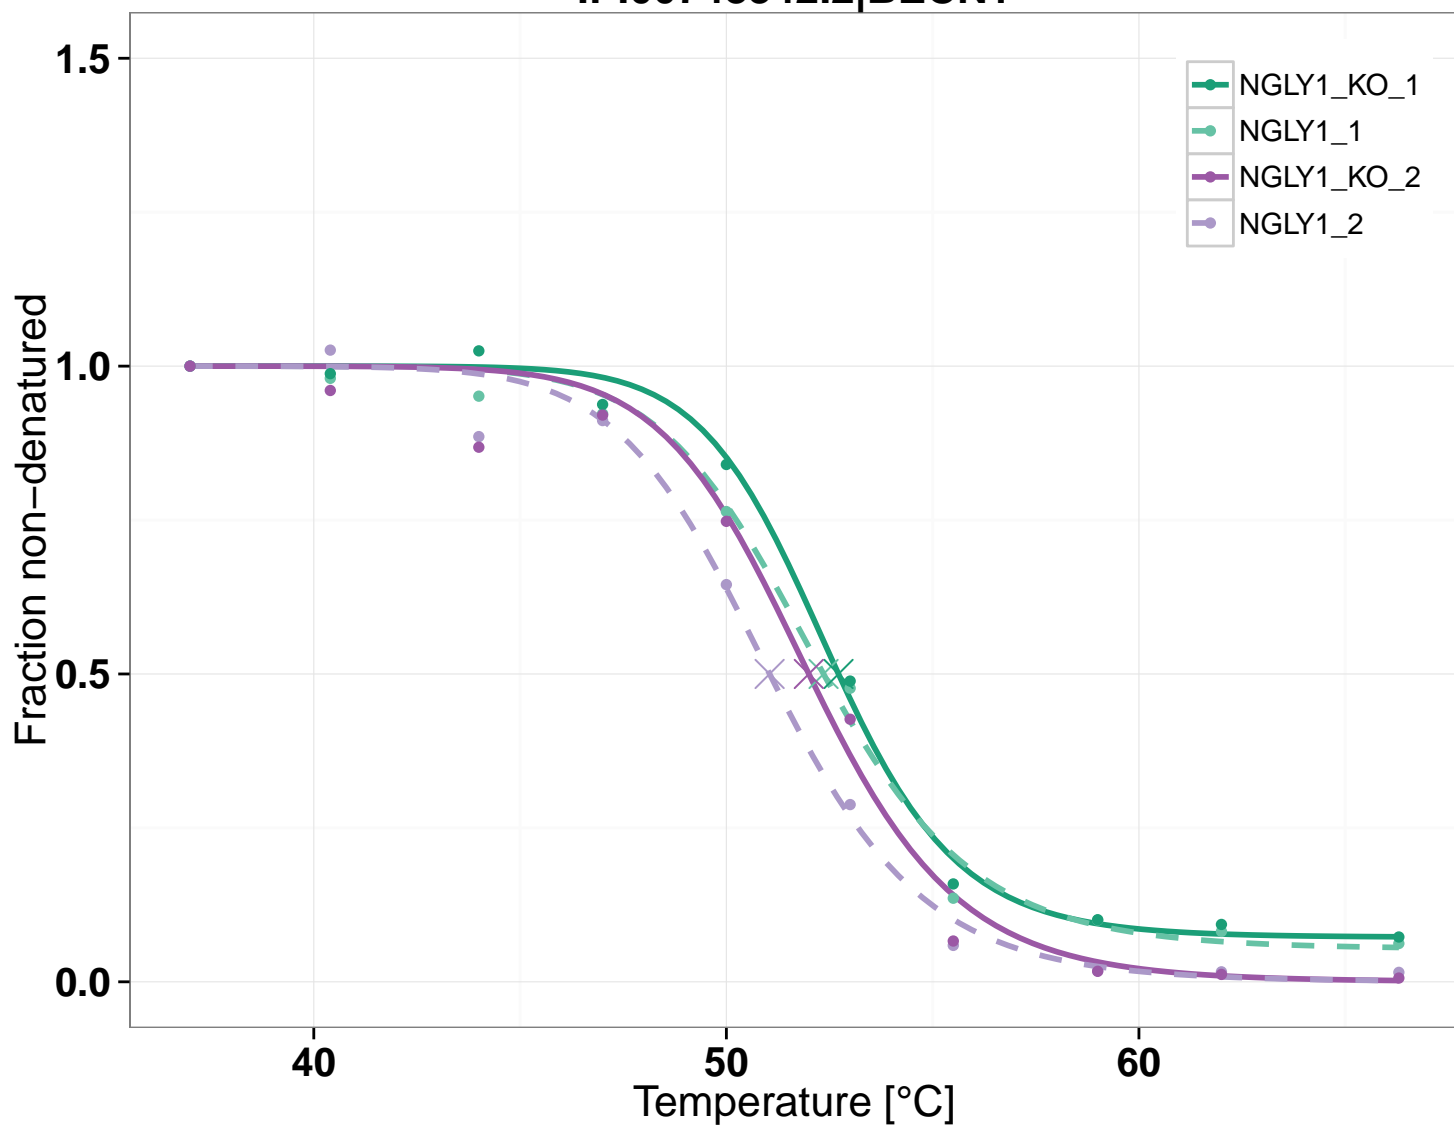

|            | meltPoint | slope | plateau | R2   |
|------------|-----------|-------|---------|------|
| NGLY1_KO_1 | 52.72     | -0.15 | 0.07    | 1    |
| NGLY1_1    | 52.36     | -0.12 | 0.05    | 0.99 |
| NGLY1_KO_2 | 52        | -0.14 | 0       | 0.98 |
| NGLY1_2    | 51.05     | -0.13 | 0       | 0.99 |

Supplement: Supplementary file 1986 [file 1]

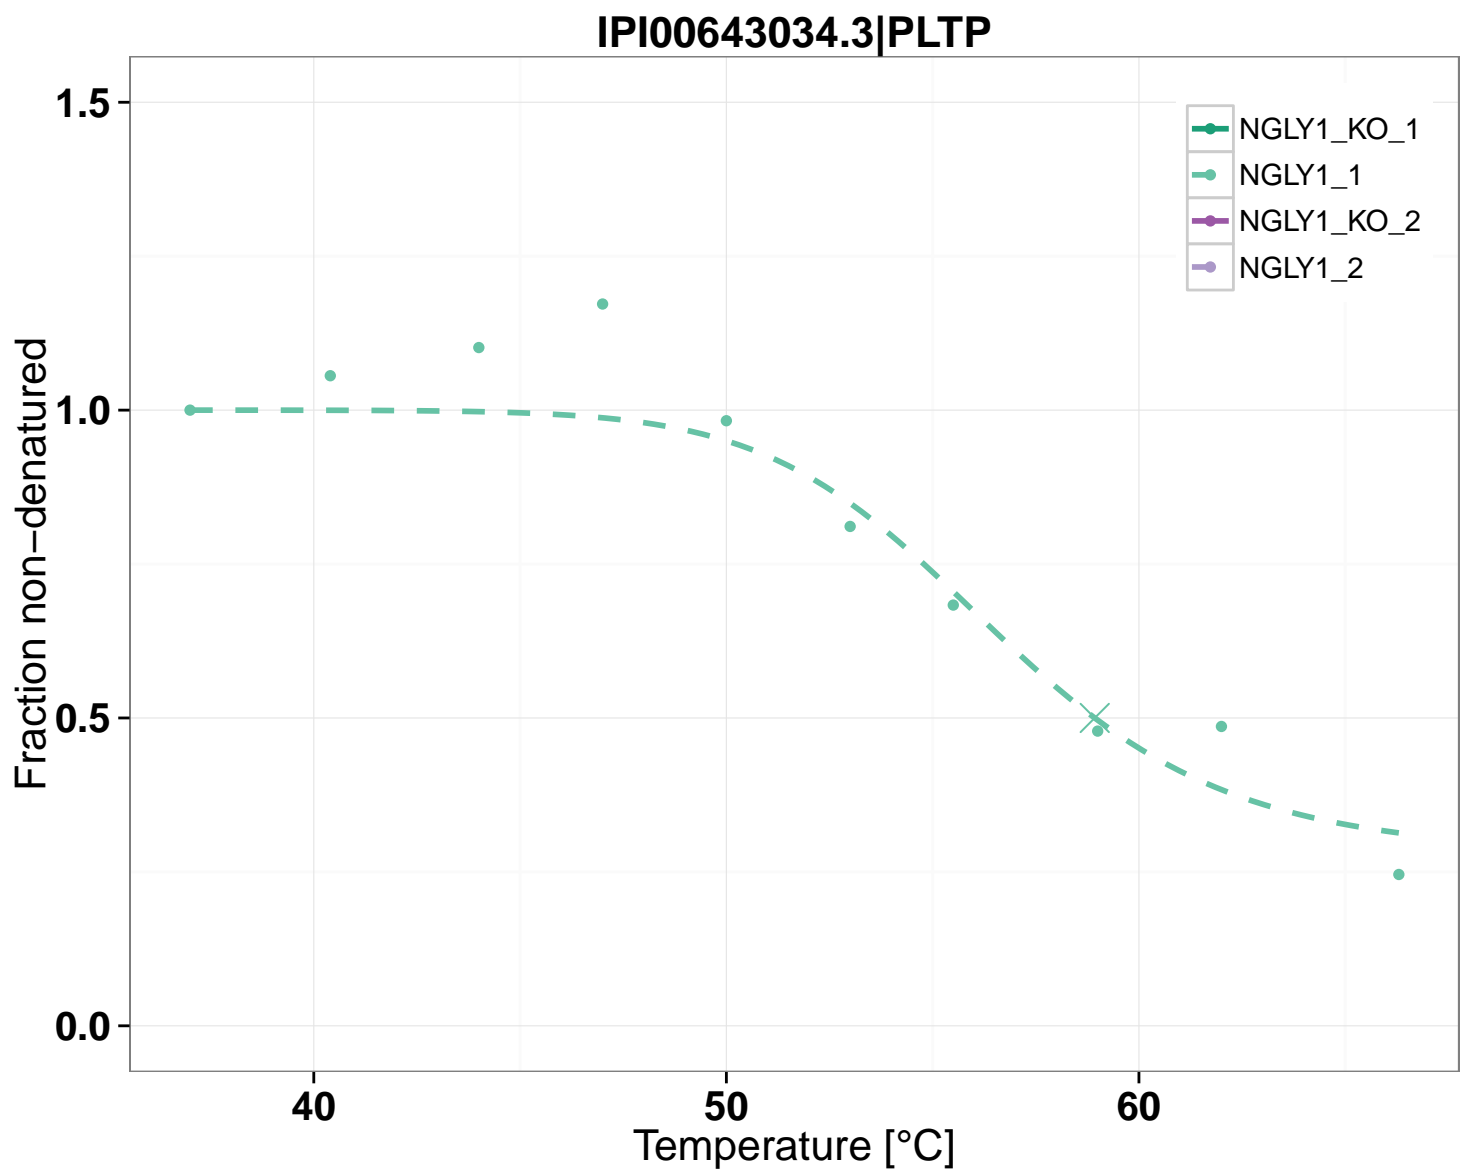

|            | meltPoint | slope  | plateau | R2   |
|------------|-----------|--------|---------|------|
| NGLY1_KO_1 | —         | —      | —       | —    |
| NGLY1_1    | 58.93     | -0.064 | 0.28    | 0.93 |
| NGLY1_KO_2 | —         | —      | —       | —    |
| NGLY1_2    | —         | —      | —       | —    |

Supplement: Supplementary file 1987 [file 1]

IPI00141925.3|ZNF296

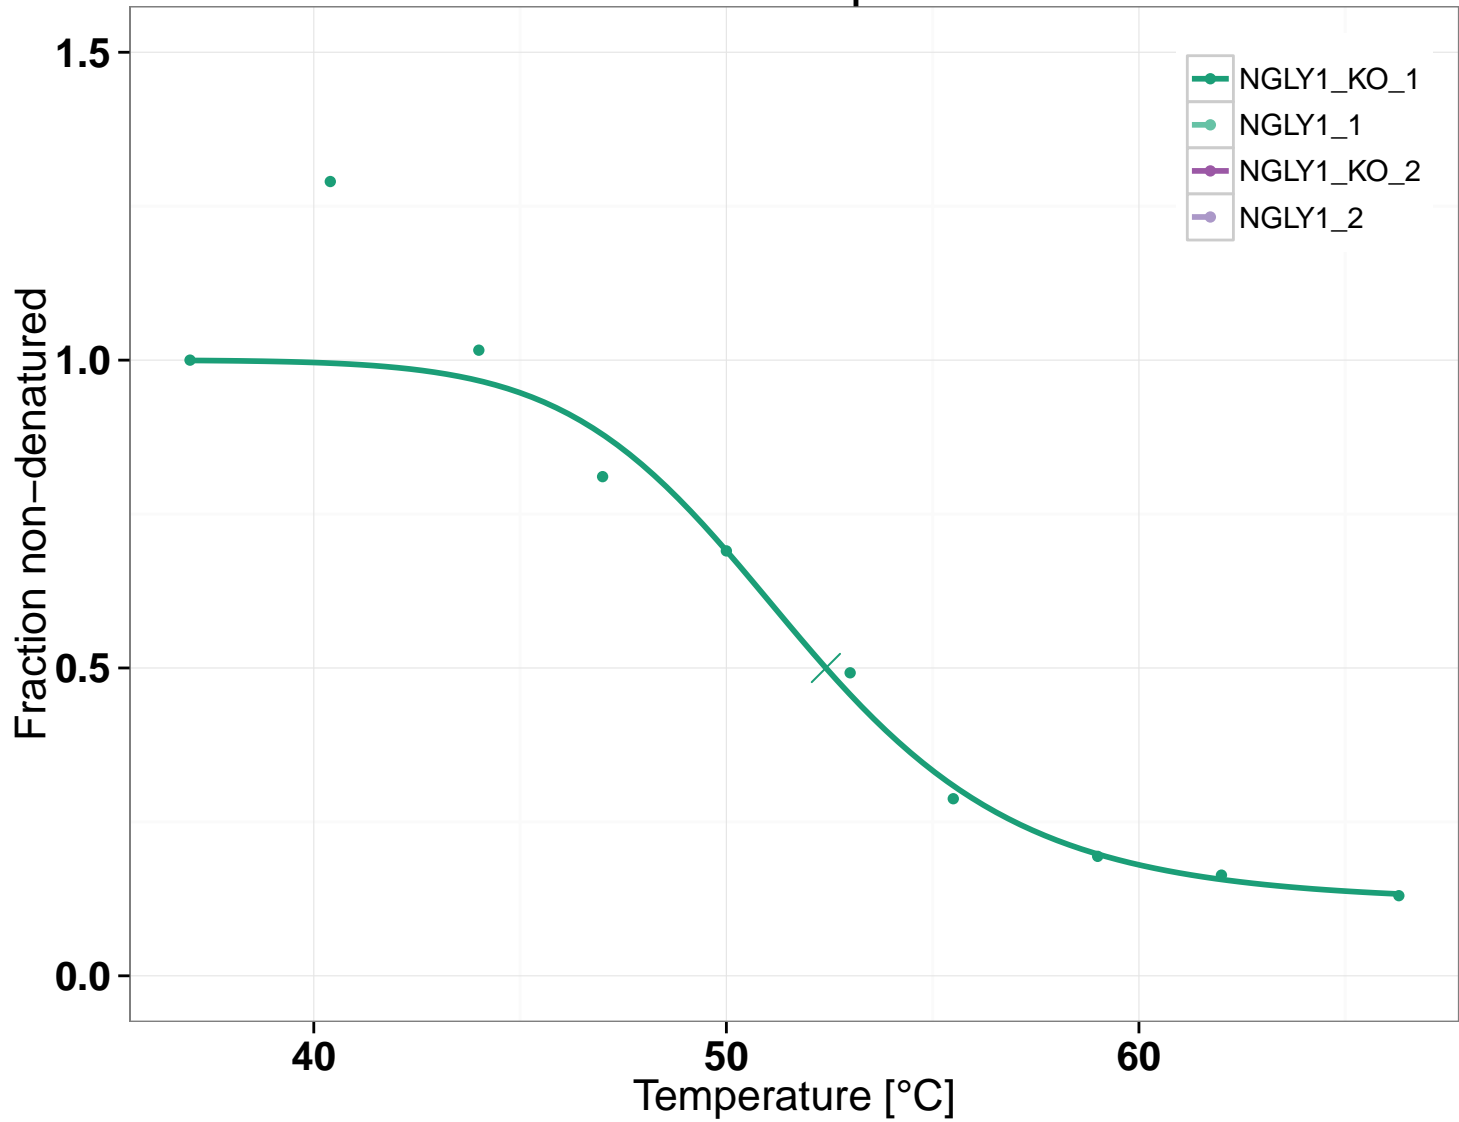

|            | meltPoint | slope | plateau | R2   |
|------------|-----------|-------|---------|------|
| NGLY1_KO_1 | 52.41     | -0.08 | 0.12    | 0.94 |
| NGLY1_1    | -         | -     | -       | -    |
| NGLY1_KO_2 | -         | -     | -       | -    |
| NGLY1_2    | -         | -     | -       | -    |

Supplement: Supplementary file 1988 [file 1]

# IPI00747391.3|USP3

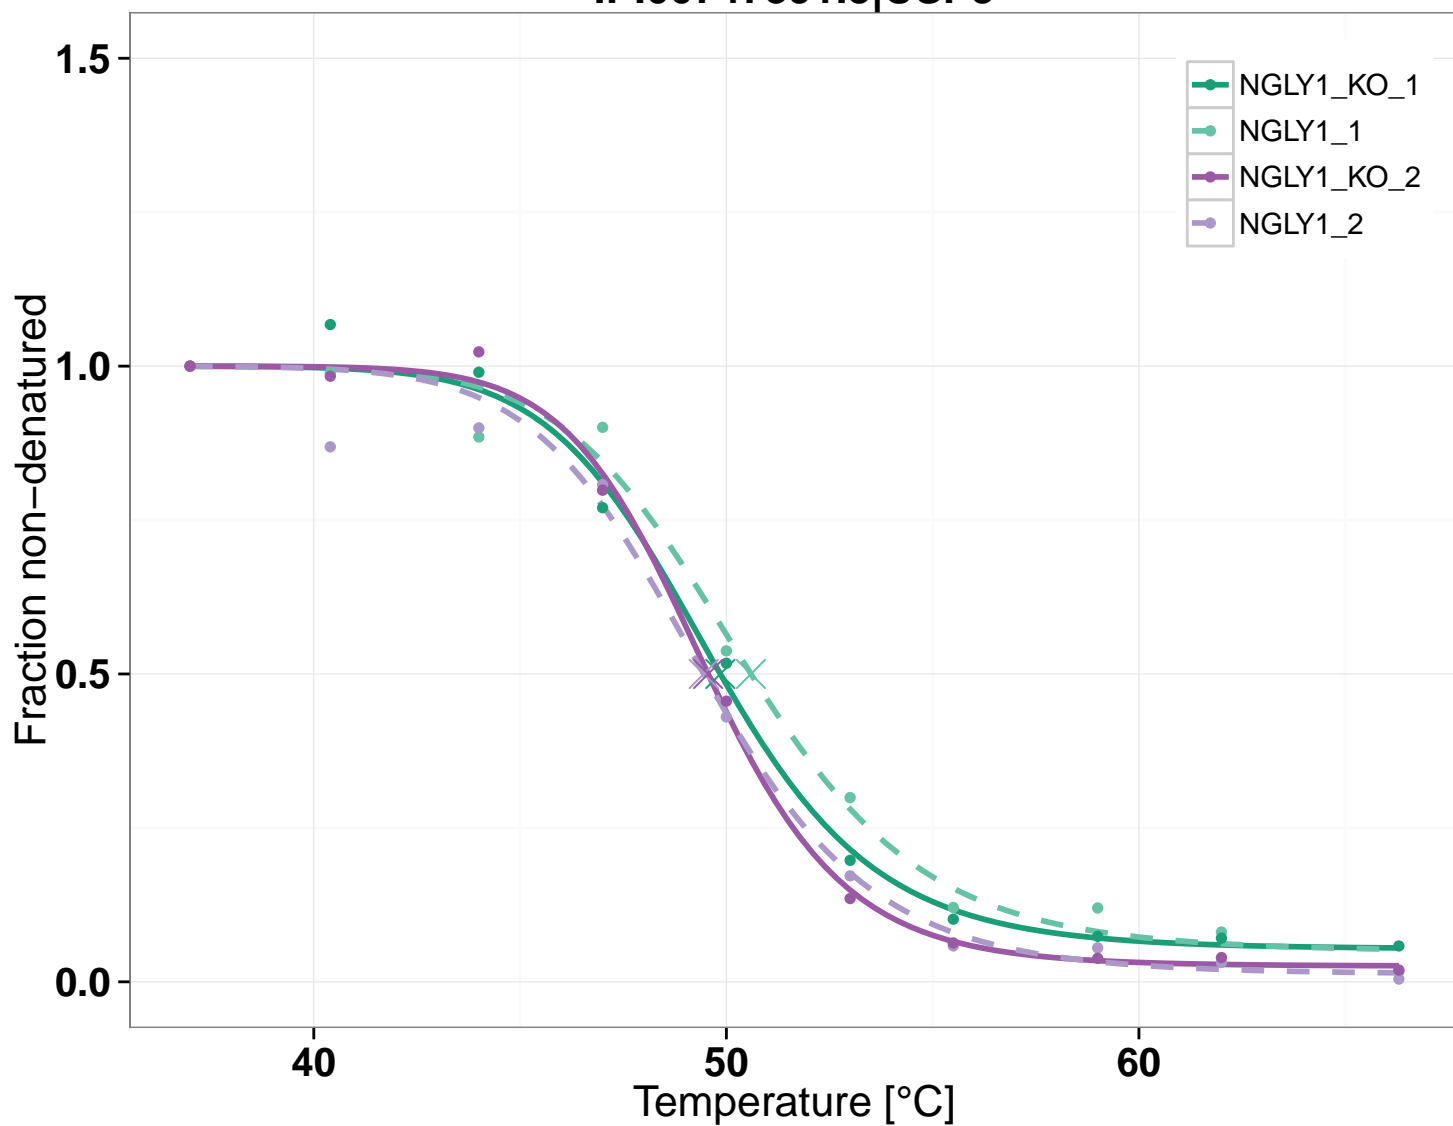

|            | meltPoint | slope | plateau | R2   |
|------------|-----------|-------|---------|------|
| NGLY1_KO_1 | 49.85     | -0.12 | 0.05    | 0.99 |
| NGLY1_1    | 50.6      | -0.11 | 0.05    | 0.99 |
| NGLY1_KO_2 | 49.56     | -0.14 | 0.03    | 1    |
| NGLY1_2    | 49.45     | -0.12 | 0.01    | 0.99 |

Supplement: Supplementary file 1989 [file 1]

IPI00784473.1|VPS13D

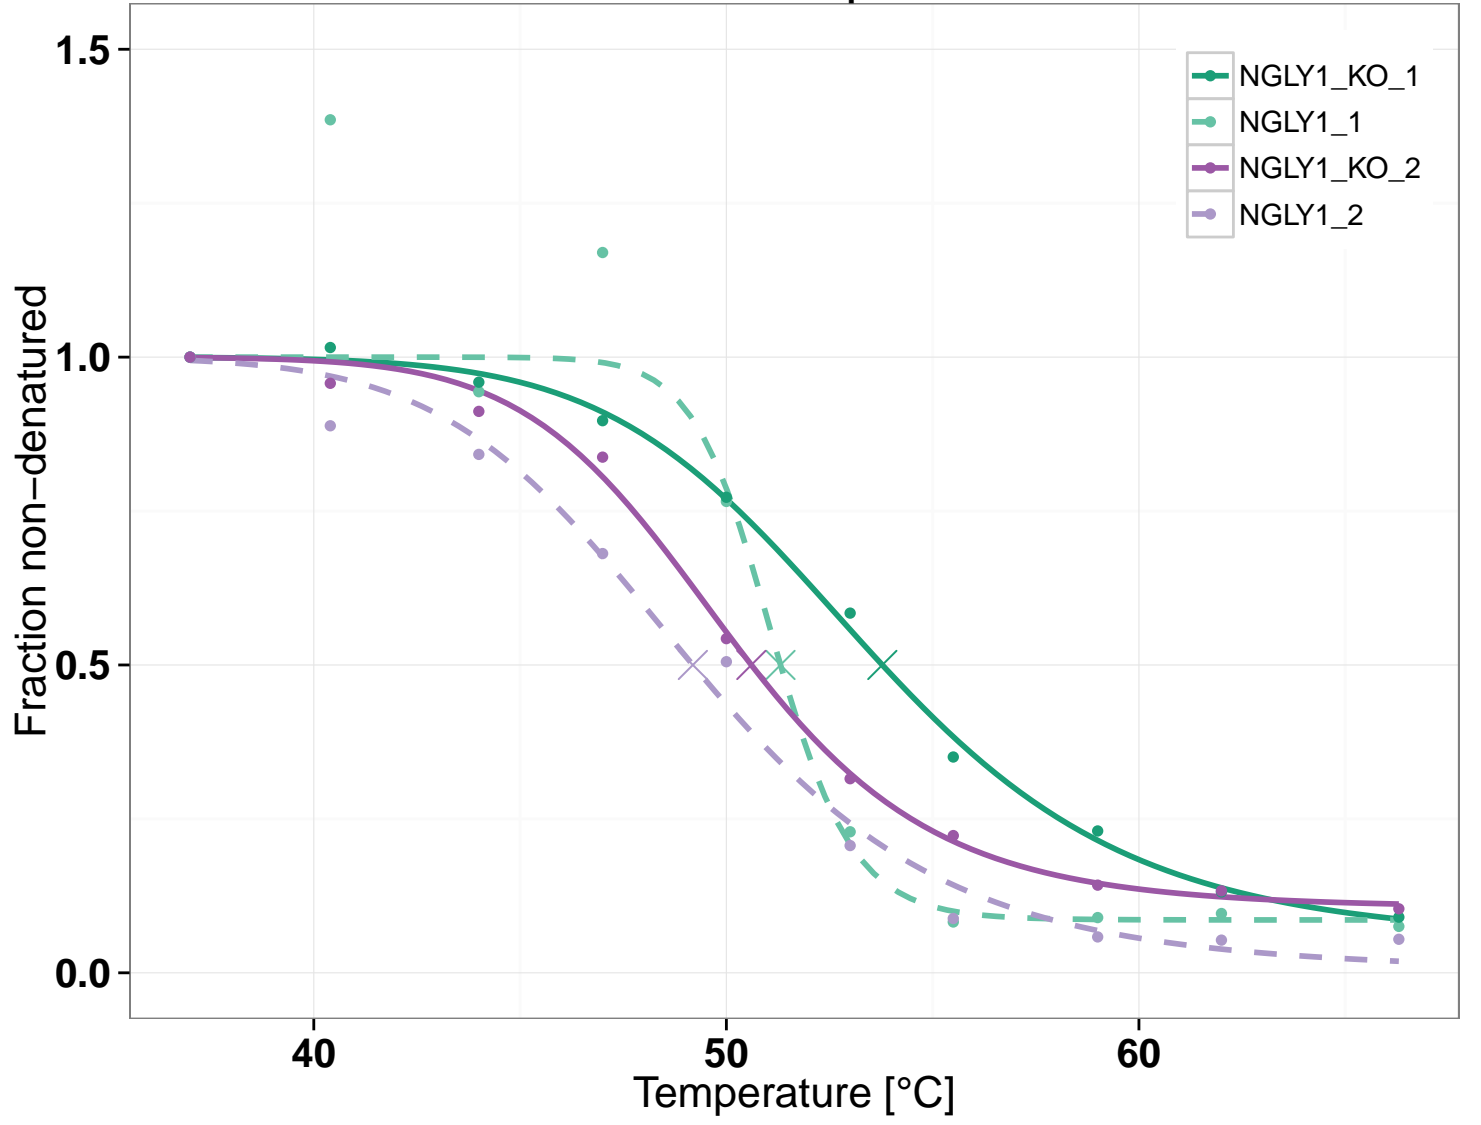

|            | meltPoint | slope  | plateau | R2   |
|------------|-----------|--------|---------|------|
| NGLY1_KO_1 | 53.78     | -0.075 | 0.05    | 1    |
| NGLY1_1    | 51.31     | -0.24  | 0.09    | 0.92 |
| NGLY1_KO_2 | 50.61     | -0.09  | 0.11    | 1    |
| NGLY1_2    | 49.19     | -0.082 | 0       | 0.99 |

Supplement: Supplementary file 1990 [file 1]

IPI00022602.2|DOK2

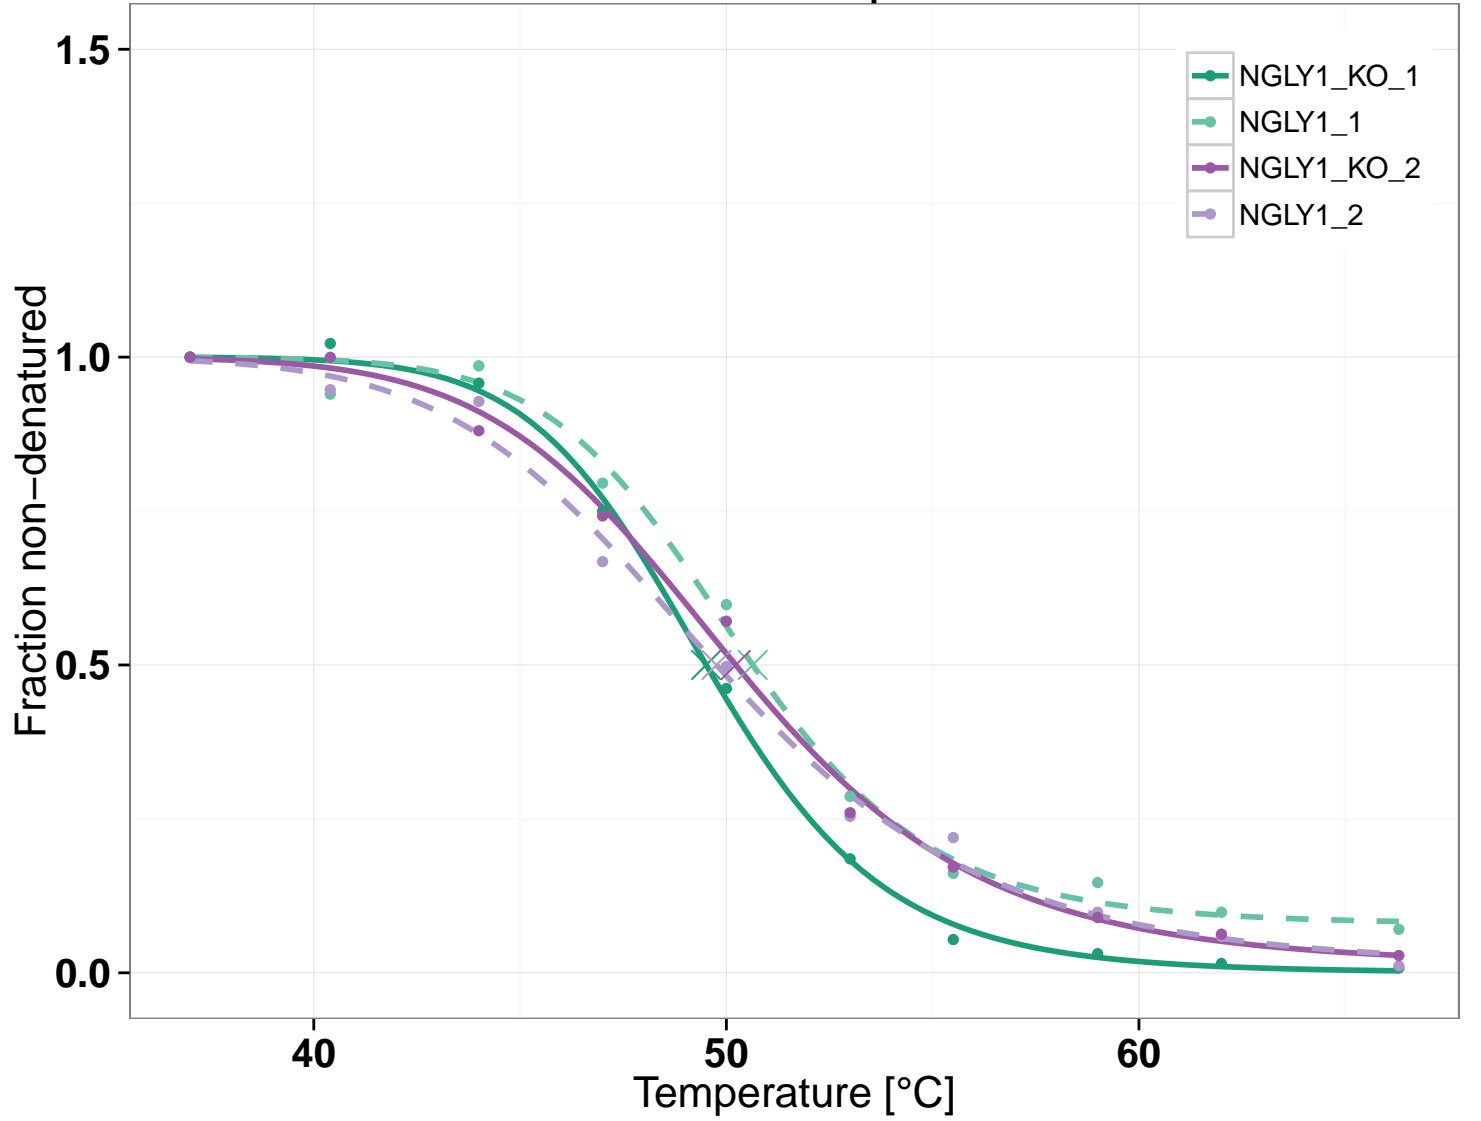

|            | meltPoint | slope  | plateau | R2   |
|------------|-----------|--------|---------|------|
| NGLY1_KO_1 | 49.51     | -0.12  | 0       | 1    |
| NGLY1_1    | 50.64     | -0.1   | 0.08    | 0.99 |
| NGLY1_KO_2 | 50.23     | -0.083 | 0.01    | 1    |
| NGLY1_2    | 49.76     | -0.076 | 0.01    | 0.99 |

Supplement: Supplementary file 1991 [file 1]

IPI00156804.5|ZNF665

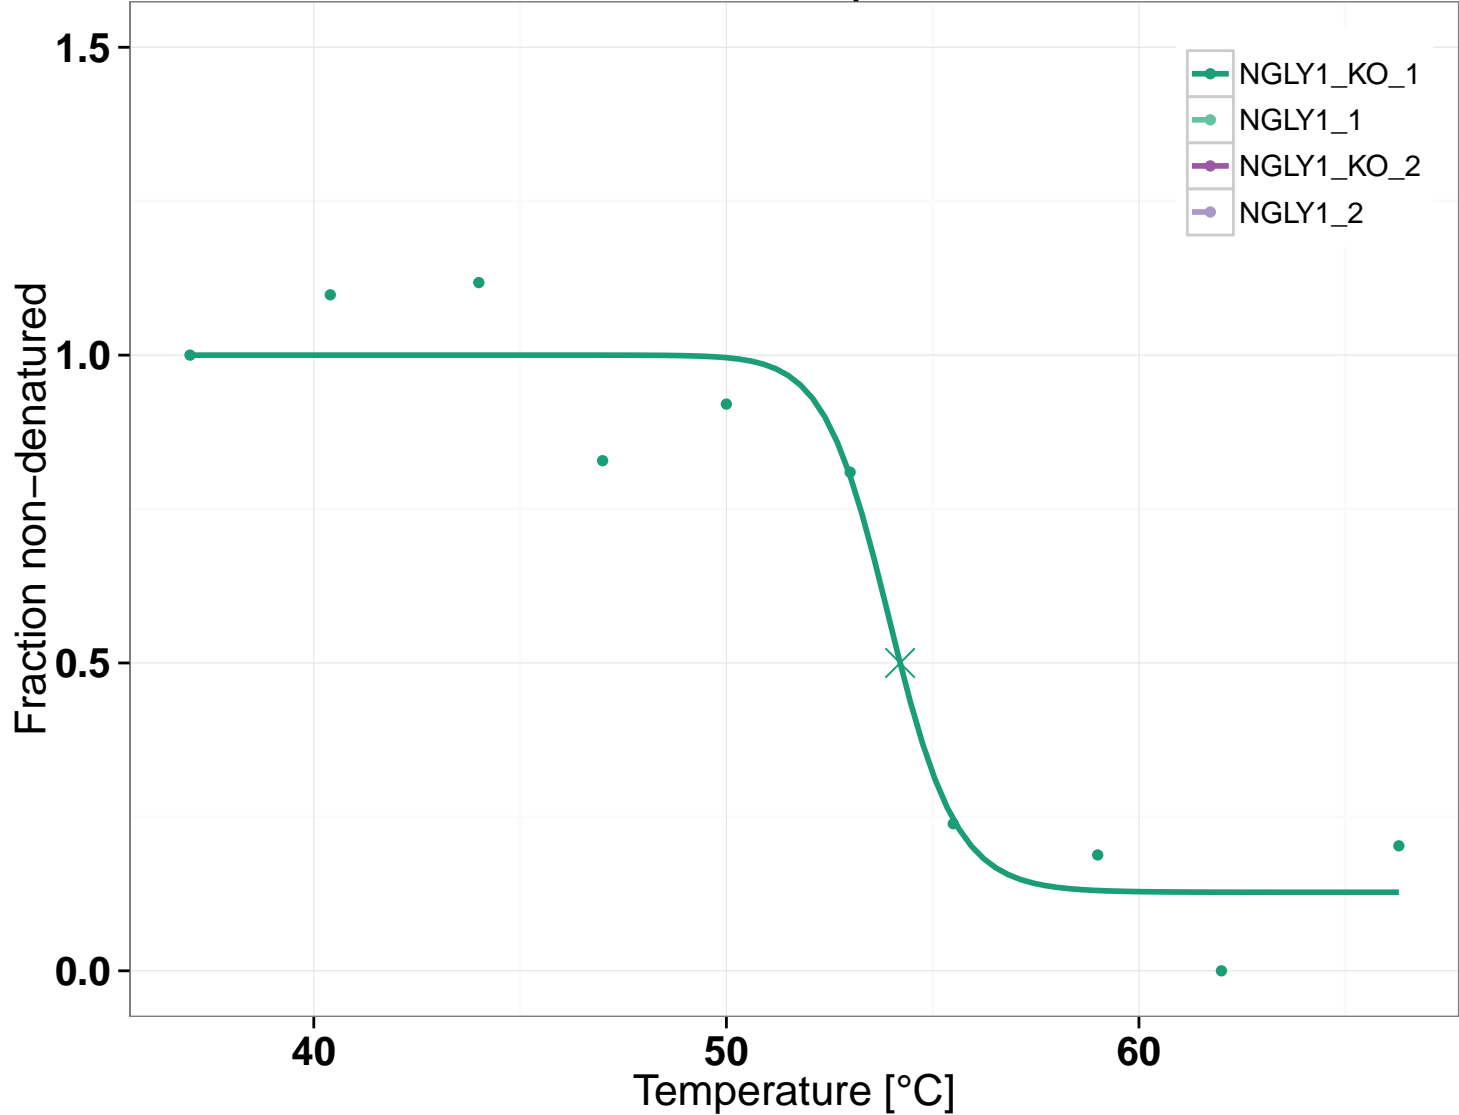

|            | meltPoint | slope | plateau | R2   |
|------------|-----------|-------|---------|------|
| NGLY1_KO_1 | 54.21     | -0.27 | 0.13    | 0.95 |
| NGLY1_1    | -         | -     | -       | -    |
| NGLY1_KO_2 | -         | -     | -       | -    |
| NGLY1_2    | -         | -     | -       | -    |

Supplement: Supplementary file 1992 [file 1]

# IPI00185027.4|RERE

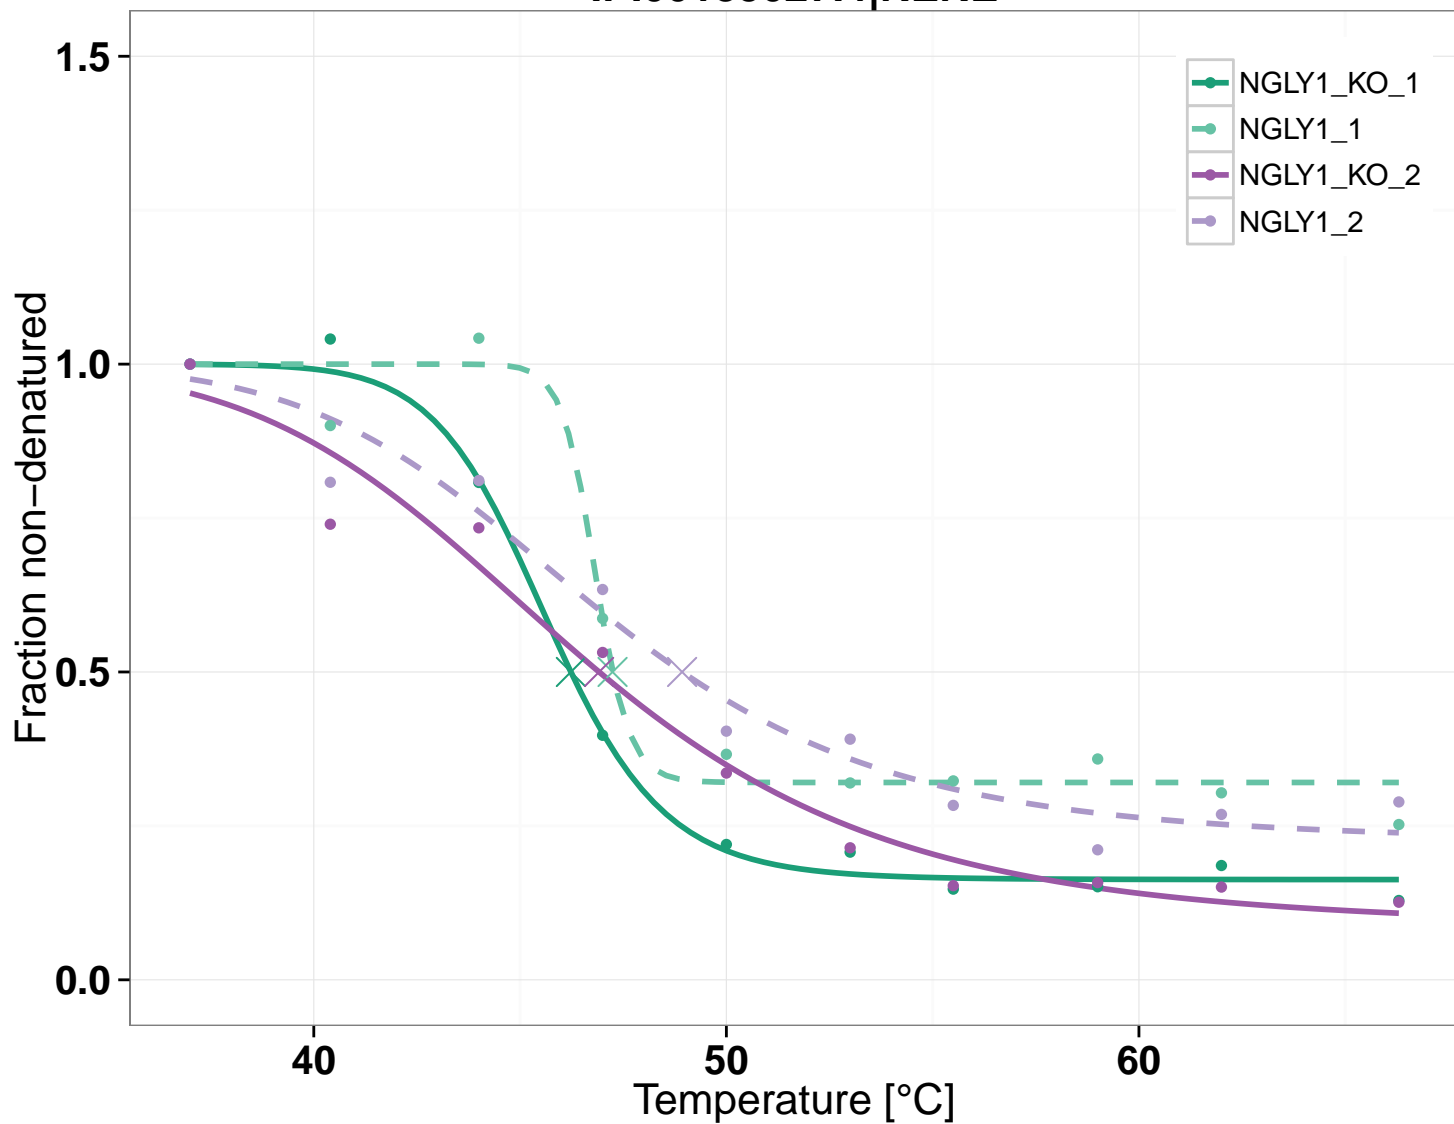

|            | meltPoint | slope  | plateau | R2   |
|------------|-----------|--------|---------|------|
| NGLY1_KO_1 | 46.23     | -0.15  | 0.16    | 0.99 |
| NGLY1_1    | 47.24     | -0.42  | 0.32    | 0.98 |
| NGLY1_KO_2 | 46.92     | -0.06  | 0.08    | 0.97 |
| NGLY1_2    | 48.93     | -0.056 | 0.22    | 0.96 |

Supplement: Supplementary file 1993 [file 1]

# IPI00479065.2|GPSM1

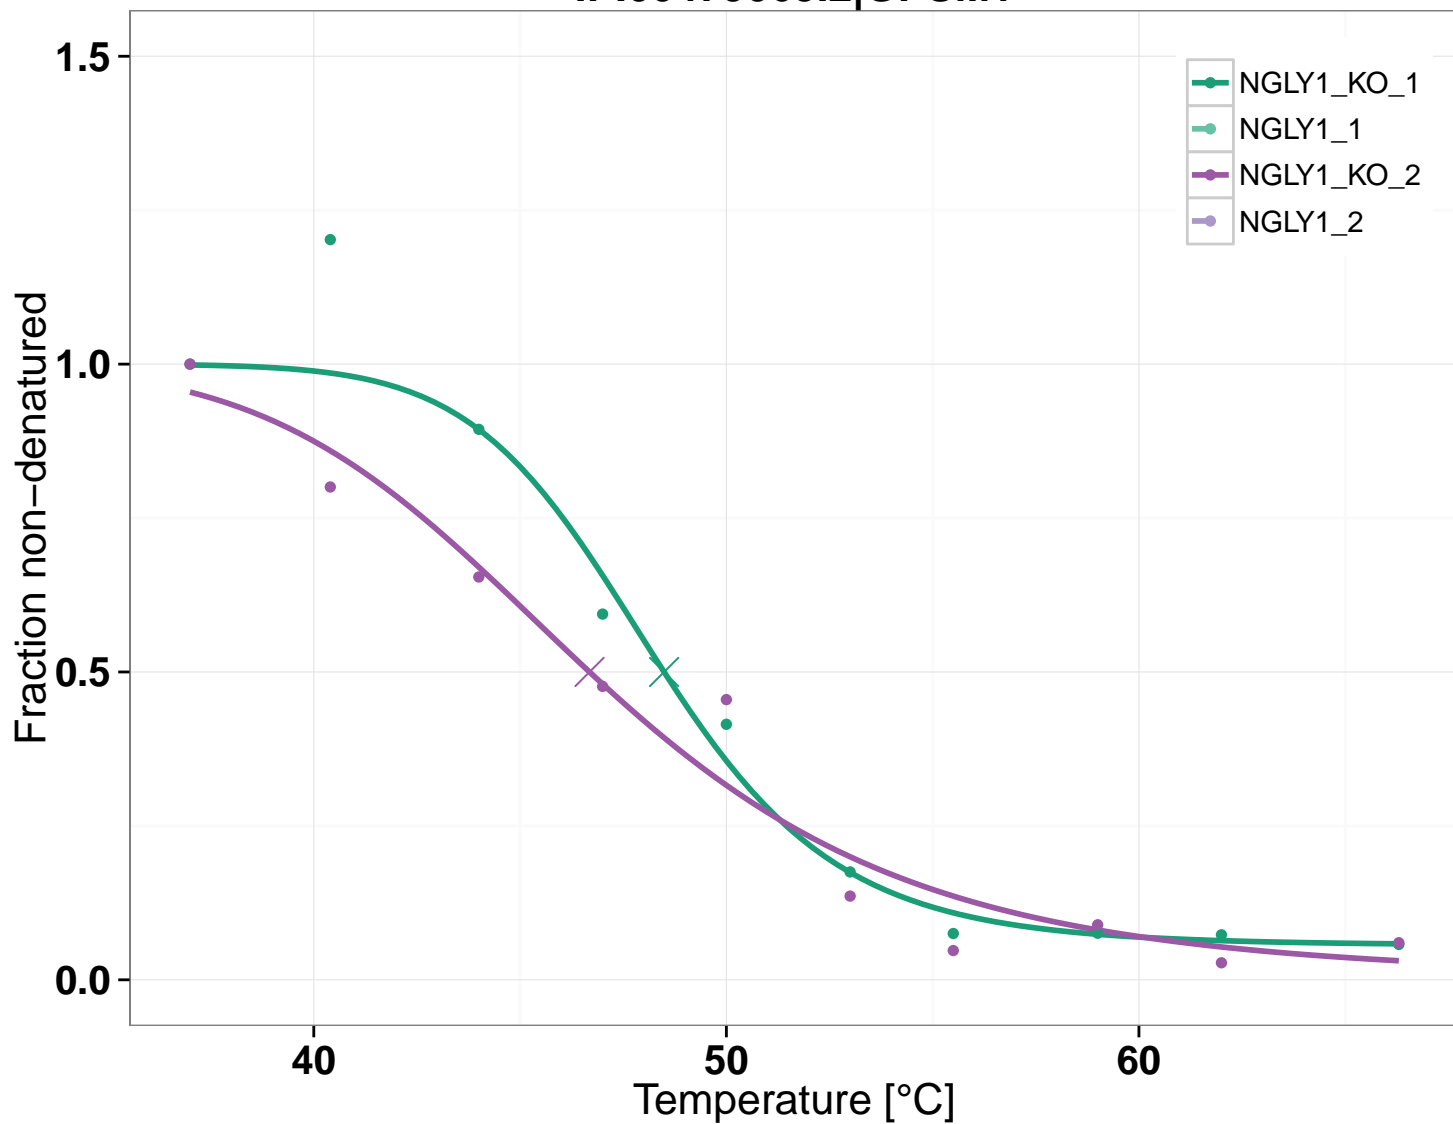

|            | meltPoint | slope  | plateau | R2   |
|------------|-----------|--------|---------|------|
| NGLY1_KO_1 | 48.49     | -0.11  | 0.06    | 0.97 |
| NGLY1_1    | -         | -      | -       | -    |
| NGLY1_KO_2 | 46.68     | -0.064 | 0       | 0.97 |
| NGLY1_2    | -         | -      | -       | -    |

Supplement: Supplementary file 1994 [file 1]

# IPI00246975.8|GSTM3

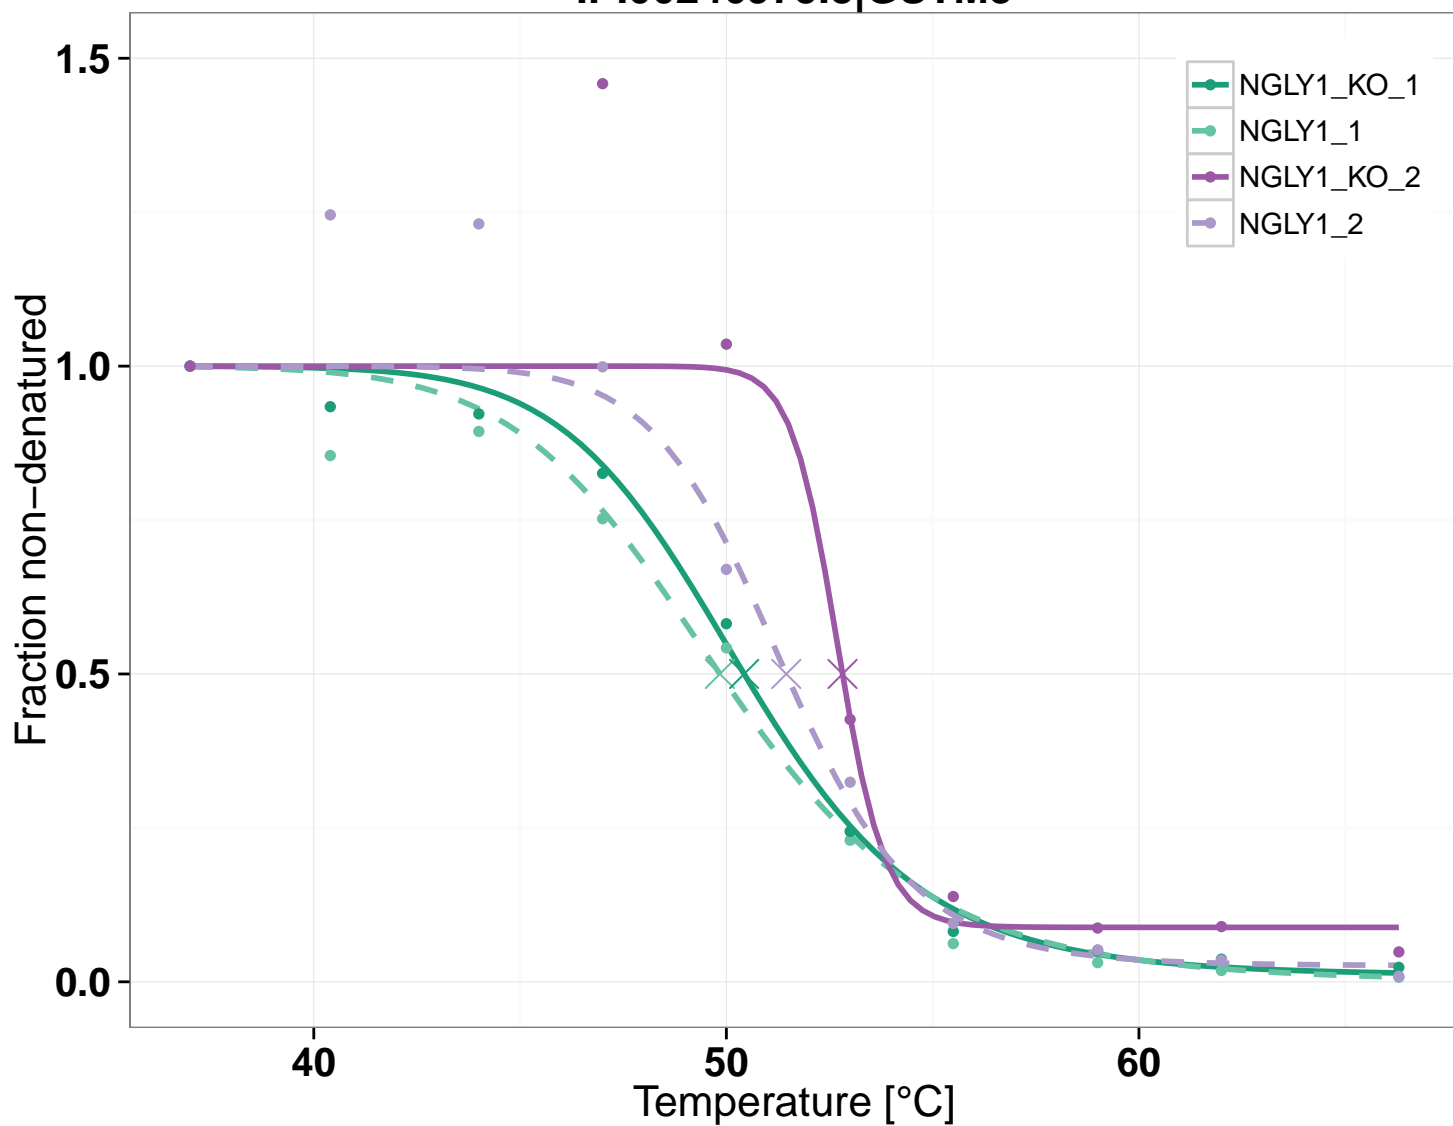

|            | meltPoint | slope  | plateau | R2   |
|------------|-----------|--------|---------|------|
| NGLY1_KO_1 | 50.43     | -0.11  | 0.01    | 0.99 |
| NGLY1_1    | 49.84     | -0.099 | 0       | 0.98 |
| NGLY1_KO_2 | 52.82     | -0.4   | 0.09    | 0.67 |
| NGLY1_2    | 51.45     | -0.15  | 0.03    | 0.95 |

Supplement: Supplementary file 1995 [file 1]

IPI00295425.4|CCDC61

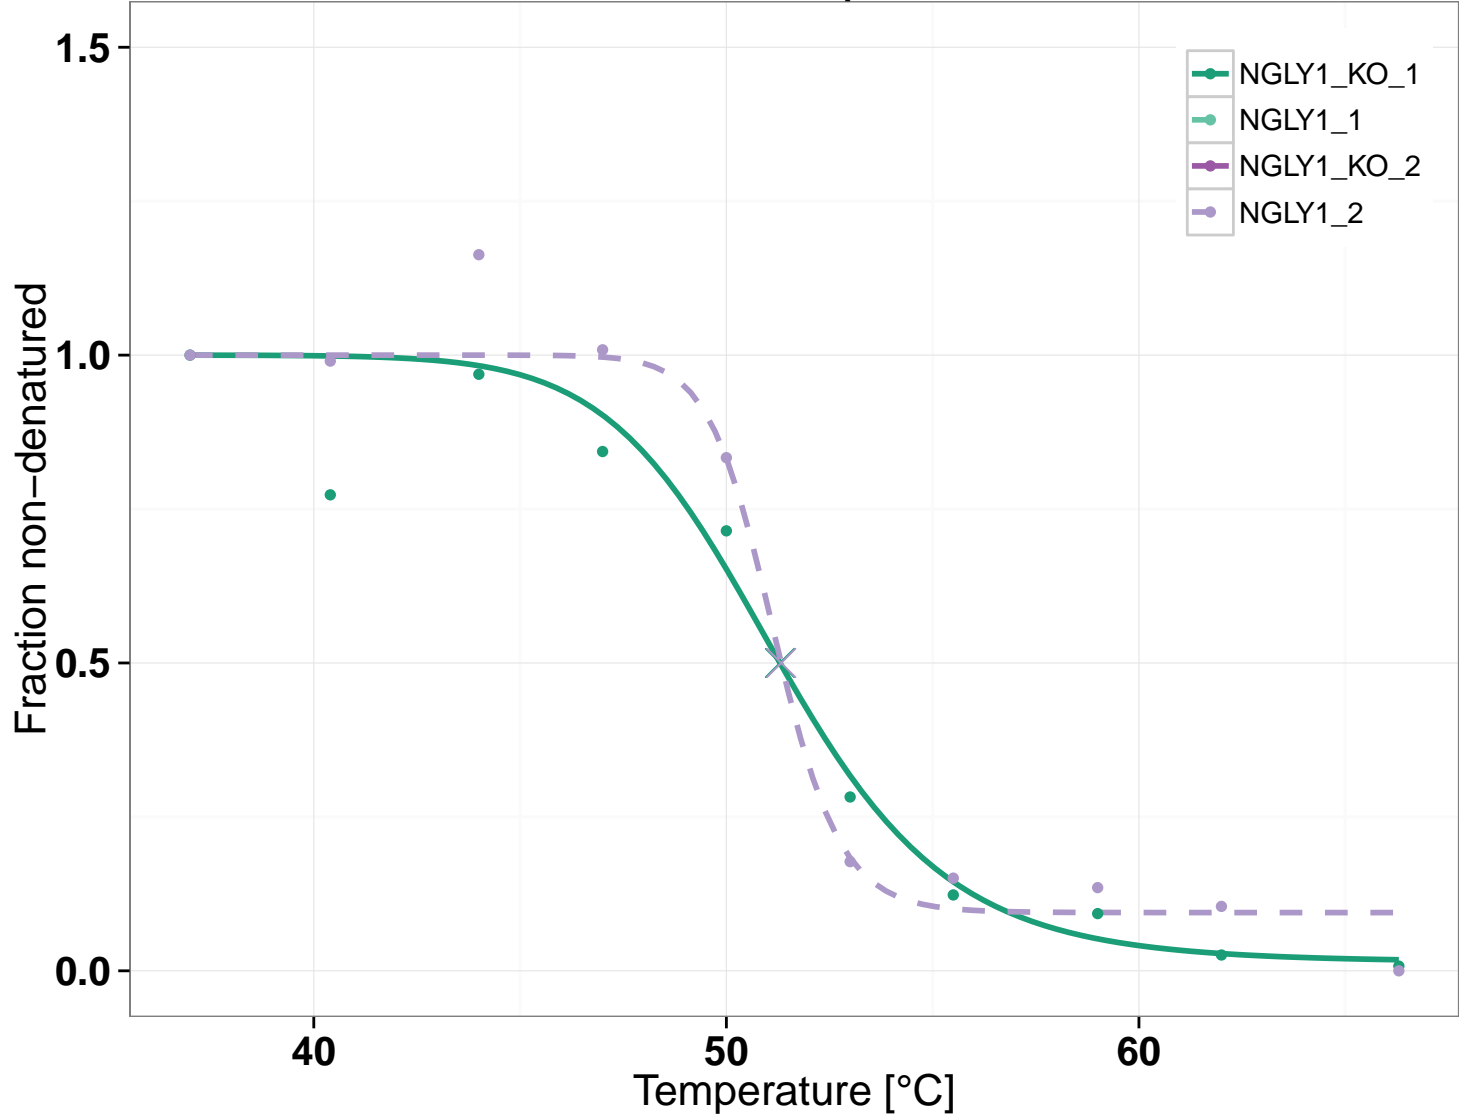

|            | meltPoint | slope | plateau | R2   |
|------------|-----------|-------|---------|------|
| NGLY1_KO_1 | 51.3      | -0.12 | 0.01    | 0.96 |
| NGLY1_1    | -         | -     | -       | -    |
| NGLY1_KO_2 | -         | -     | -       | -    |
| NGLY1_2    | 51.33     | -0.28 | 0.09    | 0.98 |

Supplement: Supplementary file 1996 [file 1]

IPI00791893.1|CSNK1G1

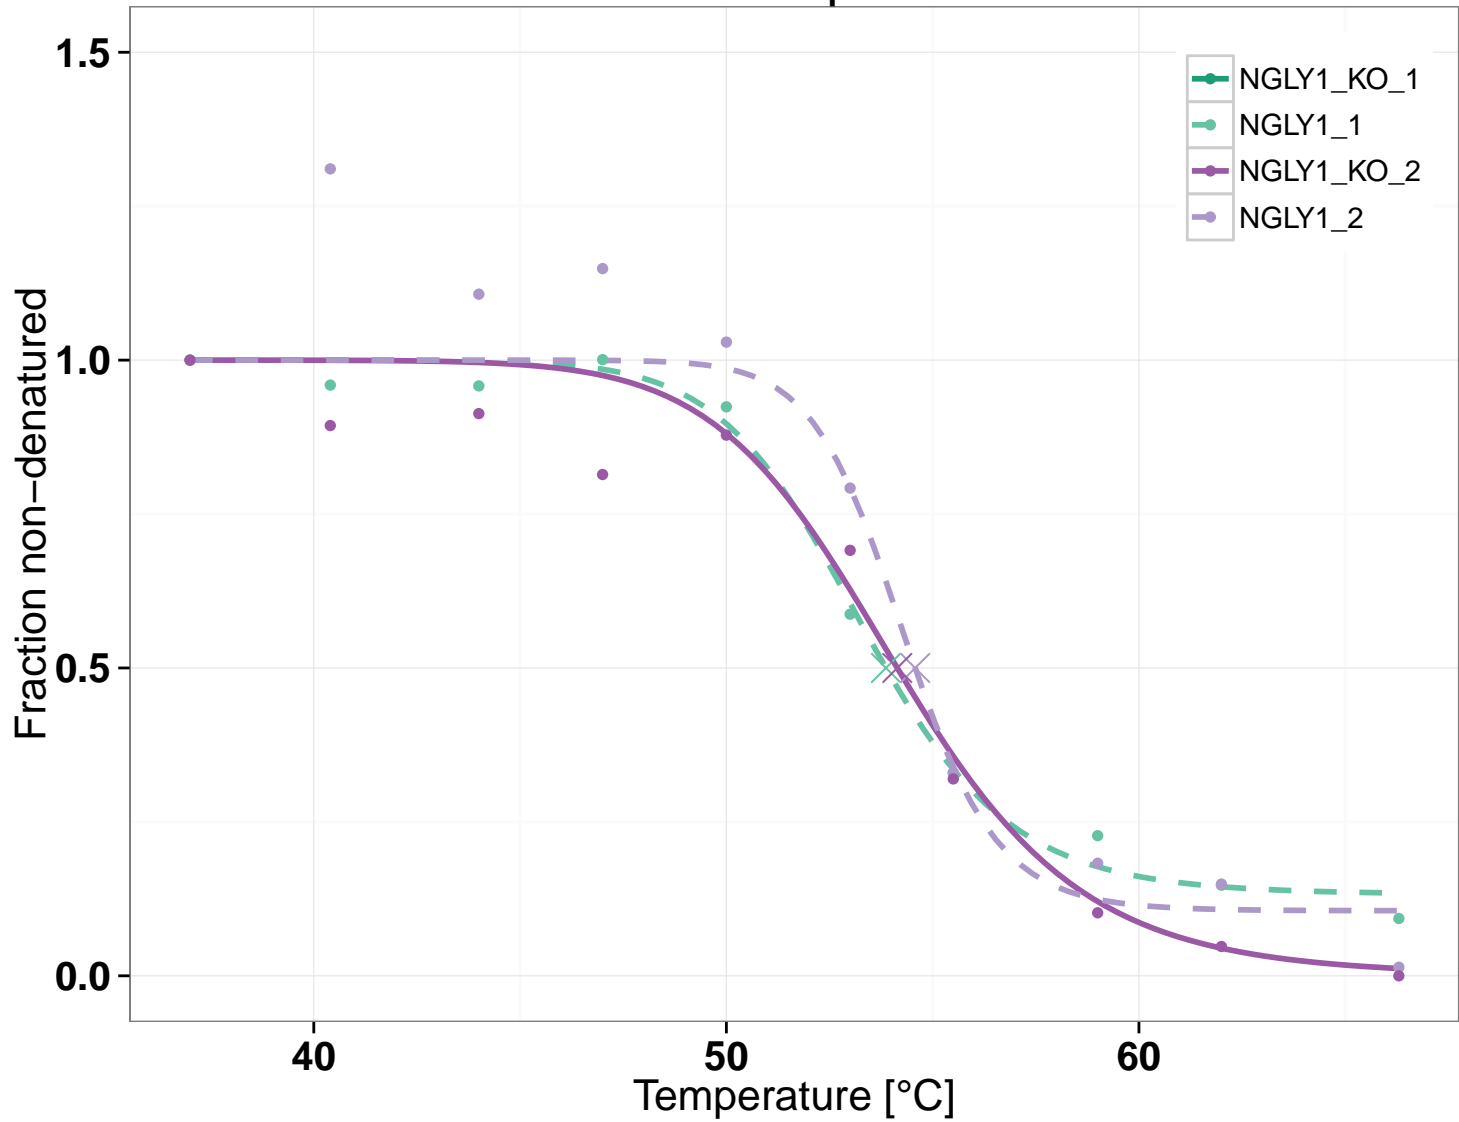

|            | meltPoint | slope | plateau | R2   |
|------------|-----------|-------|---------|------|
| NGLY1_KO_1 | -         | -     | -       | -    |
| NGLY1_1    | 53.87     | -0.12 | 0.13    | 0.99 |
| NGLY1_KO_2 | 54.14     | -0.11 | 0       | 0.97 |
| NGLY1_2    | 54.58     | -0.2  | 0.11    | 0.93 |

Supplement: Supplementary file 1997 [file 1]

# IPI00177428.1|CHCHD4

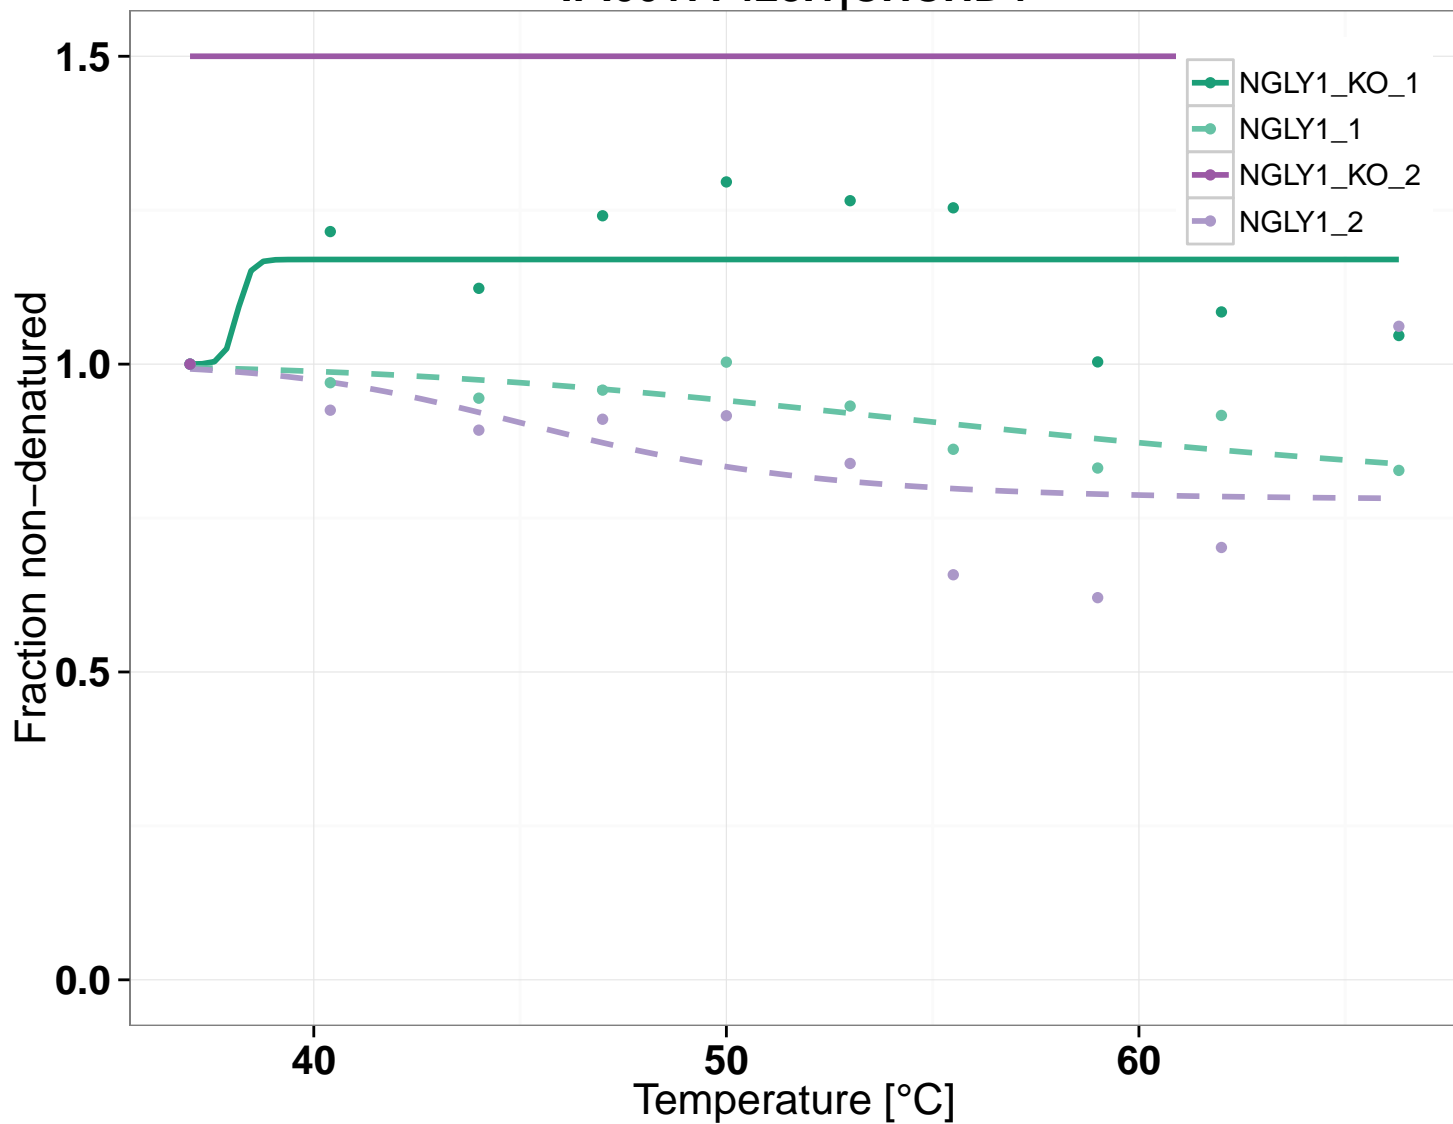

|            | meltPoint | slope   | plateau | R2    |
|------------|-----------|---------|---------|-------|
| NGLY1_KO_1 | –         | 0.28    | 1.17    | 0.22  |
| NGLY1_1    | –         | –0.0071 | 0.75    | 0.67  |
| NGLY1_KO_2 | –         | –       | 1.5     | –1.44 |
| NGLY1_2    | –         | –0.017  | 0.78    | 0.25  |

Supplement: Supplementary file 1998 [file 1]

# IPI00163851.5|EIF2AK4

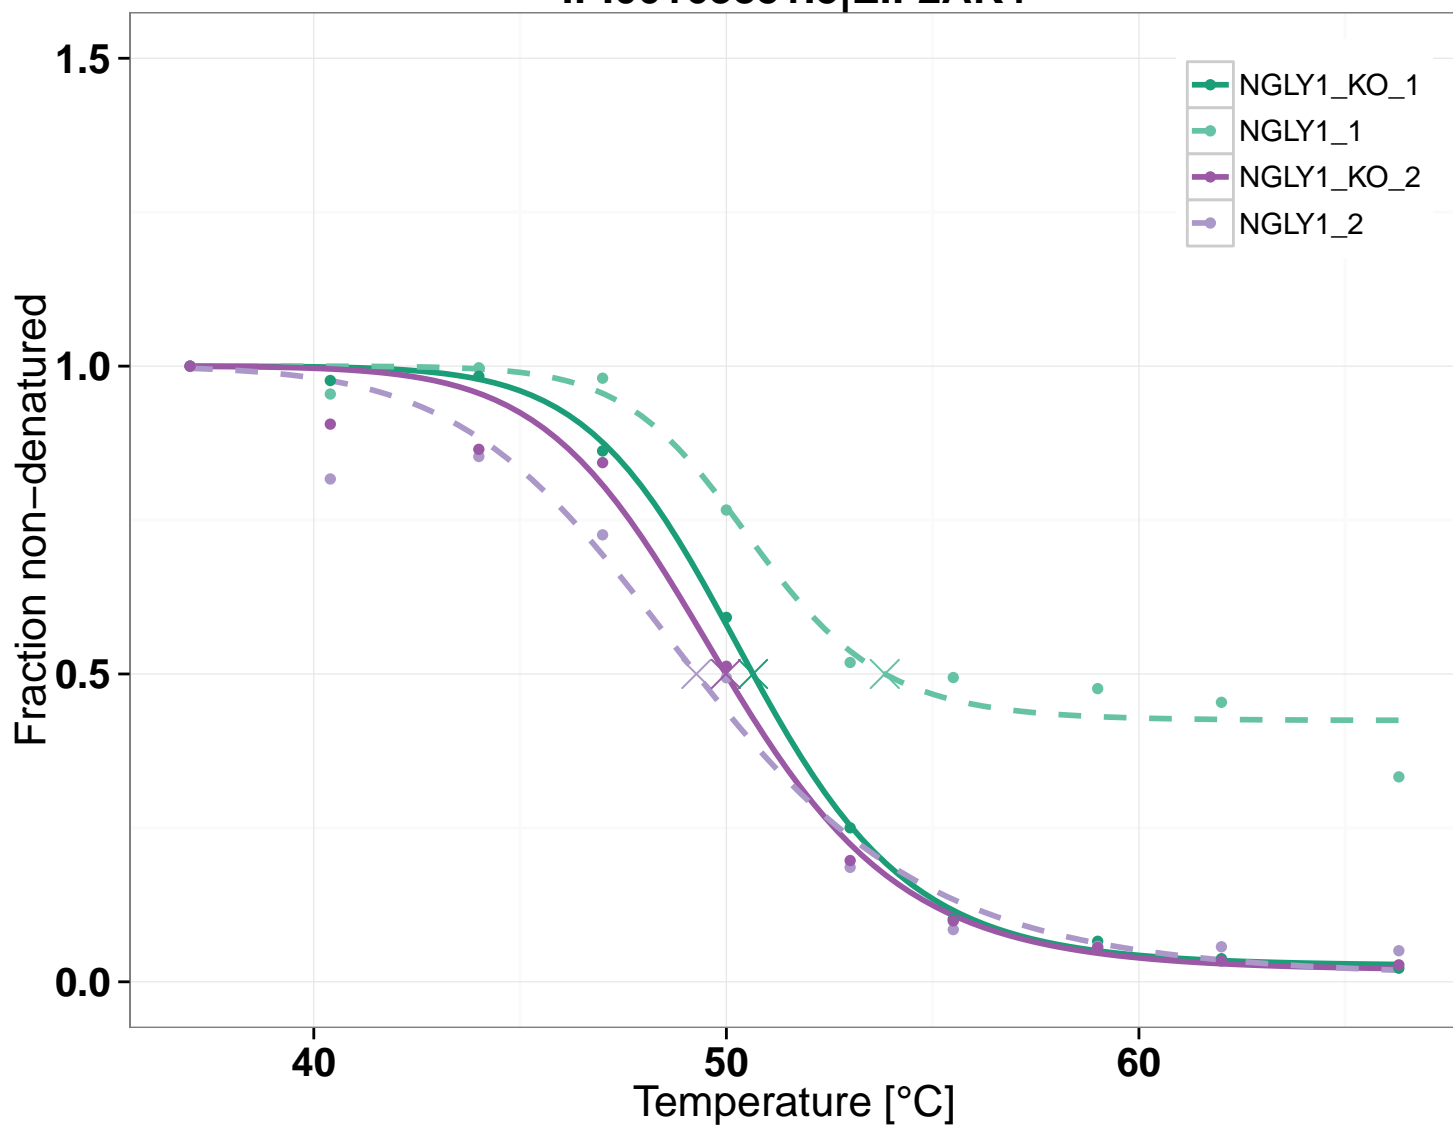

|            | meltPoint | slope  | plateau | R2   |
|------------|-----------|--------|---------|------|
| NGLY1_KO_1 | 50.65     | -0.12  | 0.03    | 1    |
| NGLY1_1    | 53.84     | -0.091 | 0.42    | 0.98 |
| NGLY1_KO_2 | 49.99     | -0.11  | 0.02    | 0.99 |
| NGLY1_2    | 49.27     | -0.087 | 0.01    | 0.97 |

Supplement: Supplementary file 1999 [file 1]

IPI00152196.3|NANP

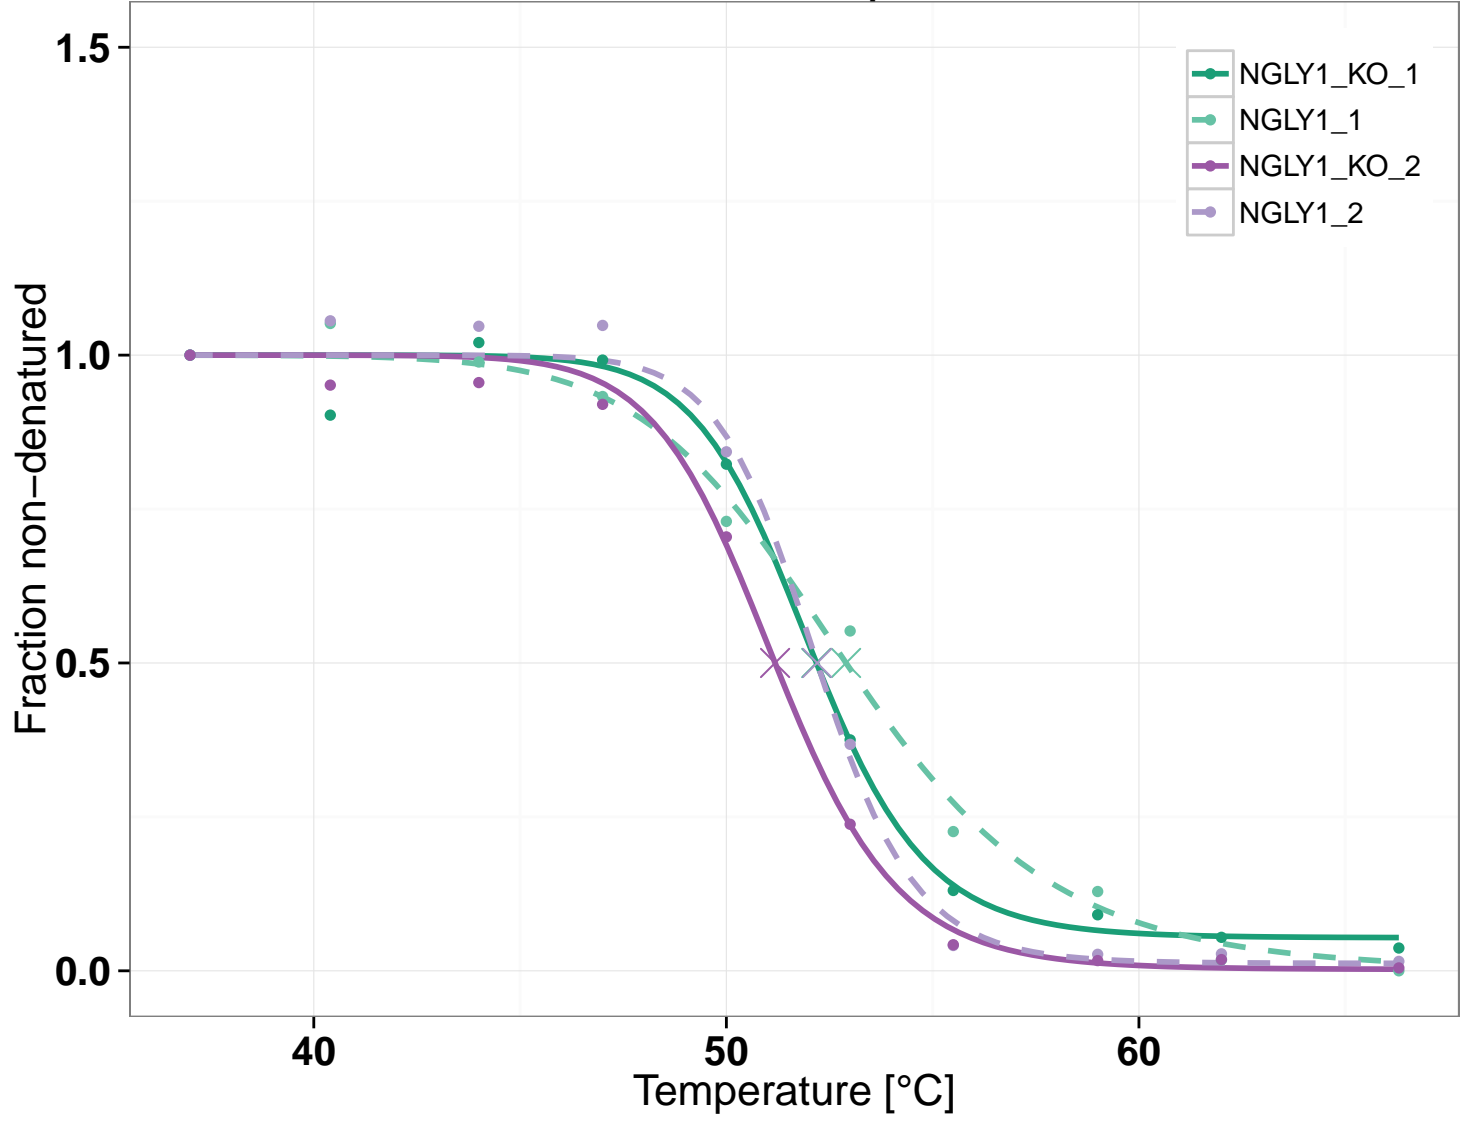

|            | meltPoint | slope | plateau | R2   |
|------------|-----------|-------|---------|------|
| NGLY1_KO_1 | 52.18     | -0.17 | 0.05    | 0.99 |
| NGLY1_1    | 52.9      | -0.1  | 0       | 0.99 |
| NGLY1_KO_2 | 51.18     | -0.17 | 0       | 1    |
| NGLY1_2    | 52.2      | -0.2  | 0.01    | 0.99 |

Supplement: Supplementary file 2000 [file 1]

IPI00017339.1|SF3B4

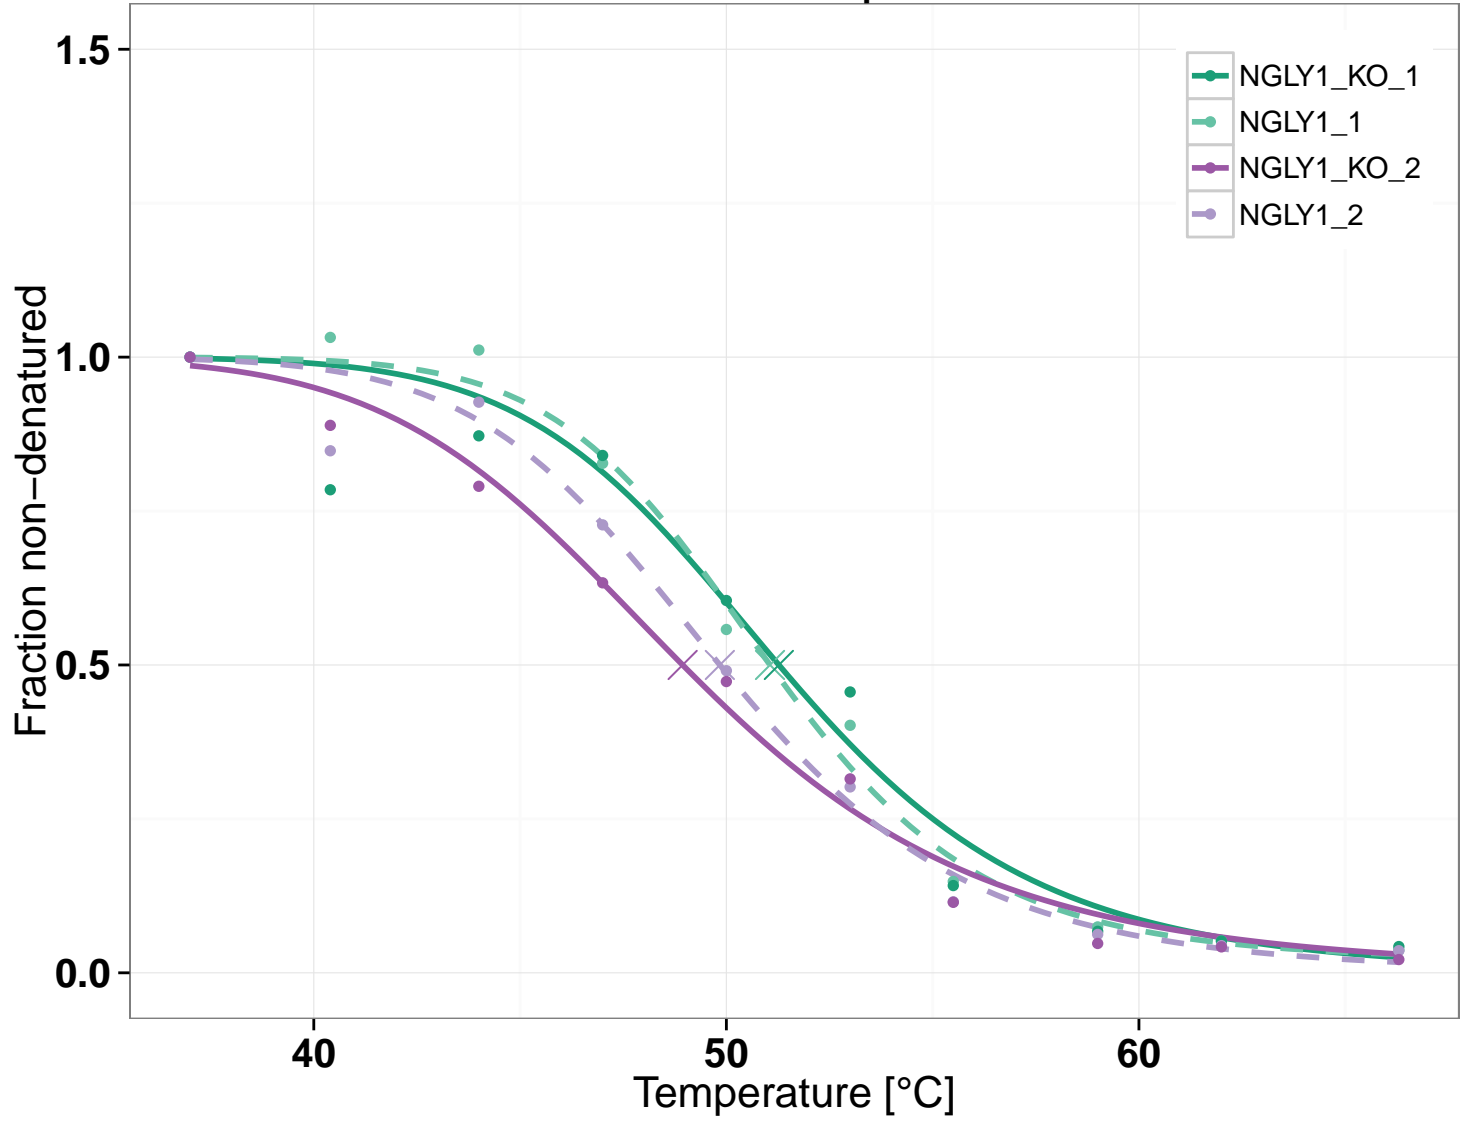

|            | meltPoint | slope  | plateau | R2   |
|------------|-----------|--------|---------|------|
| NGLY1_KO_1 | 51.27     | -0.08  | 0       | 0.95 |
| NGLY1_1    | 51.06     | -0.094 | 0.02    | 0.99 |
| NGLY1_KO_2 | 48.94     | -0.069 | 0       | 0.99 |
| NGLY1_2    | 49.84     | -0.083 | 0       | 0.98 |

Supplement: Supplementary file 2001 [file 1]

# IPI00010190.3|DECR2

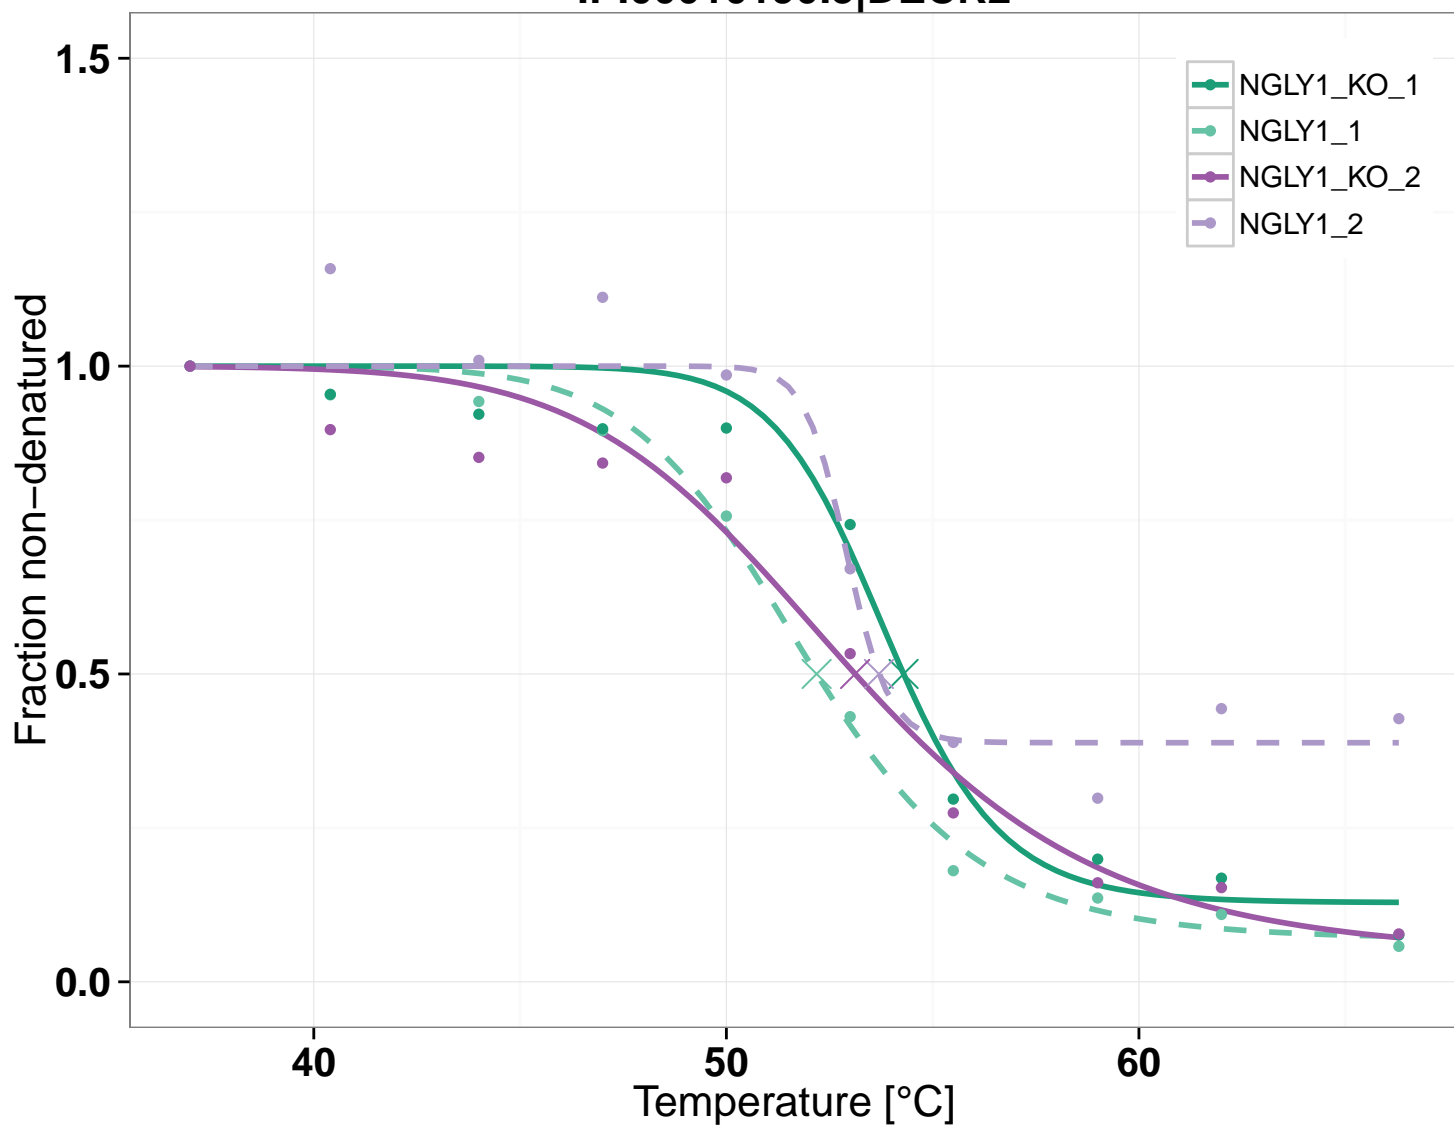

|            | meltPoint | slope  | plateau | R2   |
|------------|-----------|--------|---------|------|
| NGLY1_KO_1 | 54.3      | -0.16  | 0.13    | 0.98 |
| NGLY1_1    | 52.19     | -0.11  | 0.07    | 0.99 |
| NGLY1_KO_2 | 53.12     | -0.076 | 0.04    | 0.97 |
| NGLY1_2    | 53.7      | -0.3   | 0.39    | 0.95 |

Supplement: Supplementary file 2002 [file 1]

# IPI00306934.4|WDR41

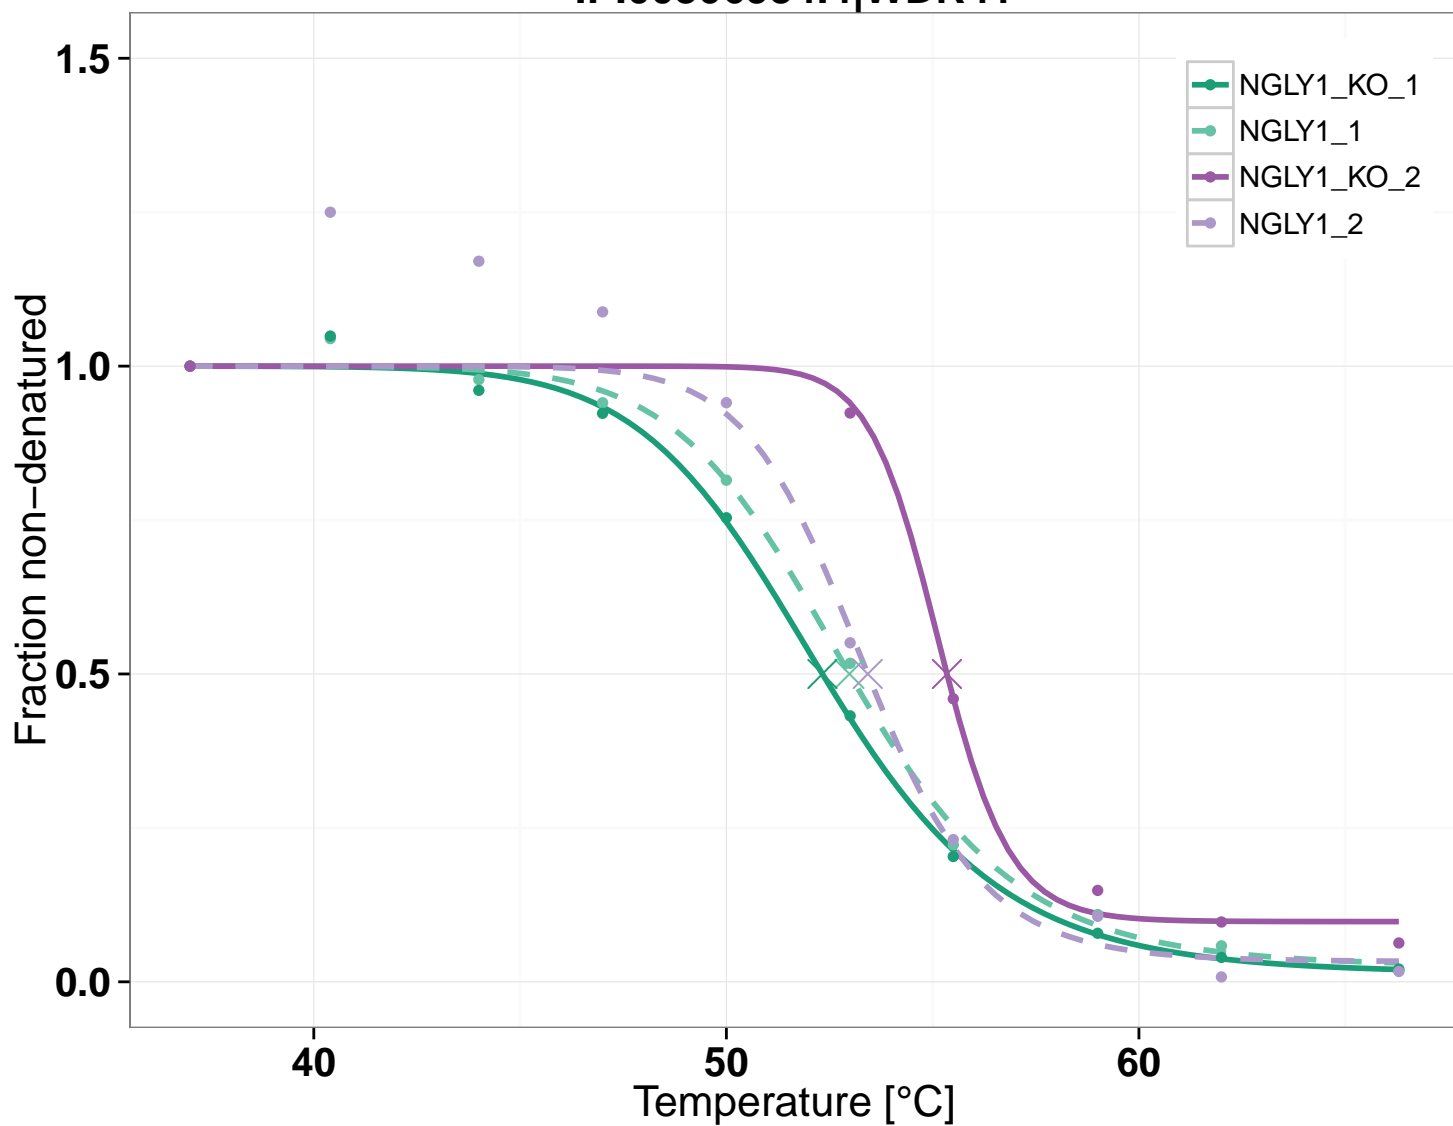

|            | meltPoint | slope | plateau | R2   |
|------------|-----------|-------|---------|------|
| NGLY1_KO_1 | 52.33     | -0.11 | 0.01    | 1    |
| NGLY1_1    | 52.98     | -0.12 | 0.02    | 1    |
| NGLY1_KO_2 | 55.35     | -0.27 | 0.1     | 0.46 |
| NGLY1_2    | 53.43     | -0.17 | 0.03    | 0.95 |

Supplement: Supplementary file 2003 [file 1]

# IPI00007247.4|PCCB

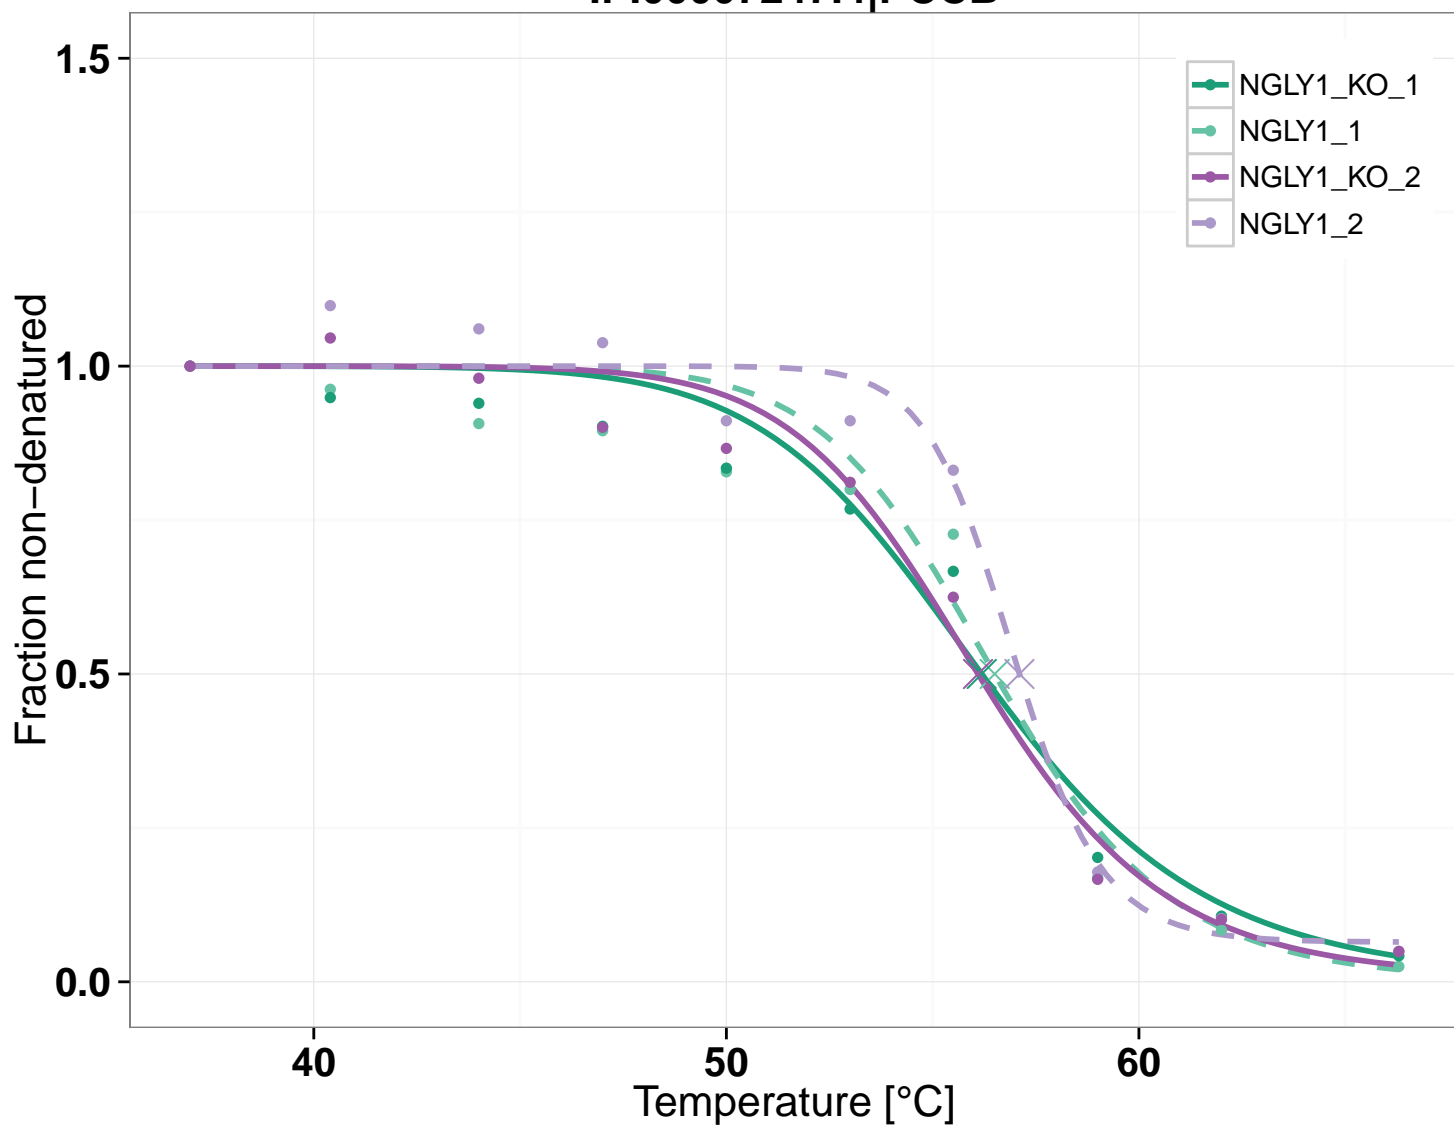

|            | meltPoint | slope  | plateau | R2   |
|------------|-----------|--------|---------|------|
| NGLY1_KO_1 | 56.19     | -0.093 | 0       | 0.97 |
| NGLY1_1    | 56.5      | -0.12  | 0       | 0.96 |
| NGLY1_KO_2 | 56.1      | -0.11  | 0.01    | 0.98 |
| NGLY1_2    | 57.1      | -0.22  | 0.06    | 0.98 |

Supplement: Supplementary file 2004 [file 1]

# IPI00006114.4|SERPINF1

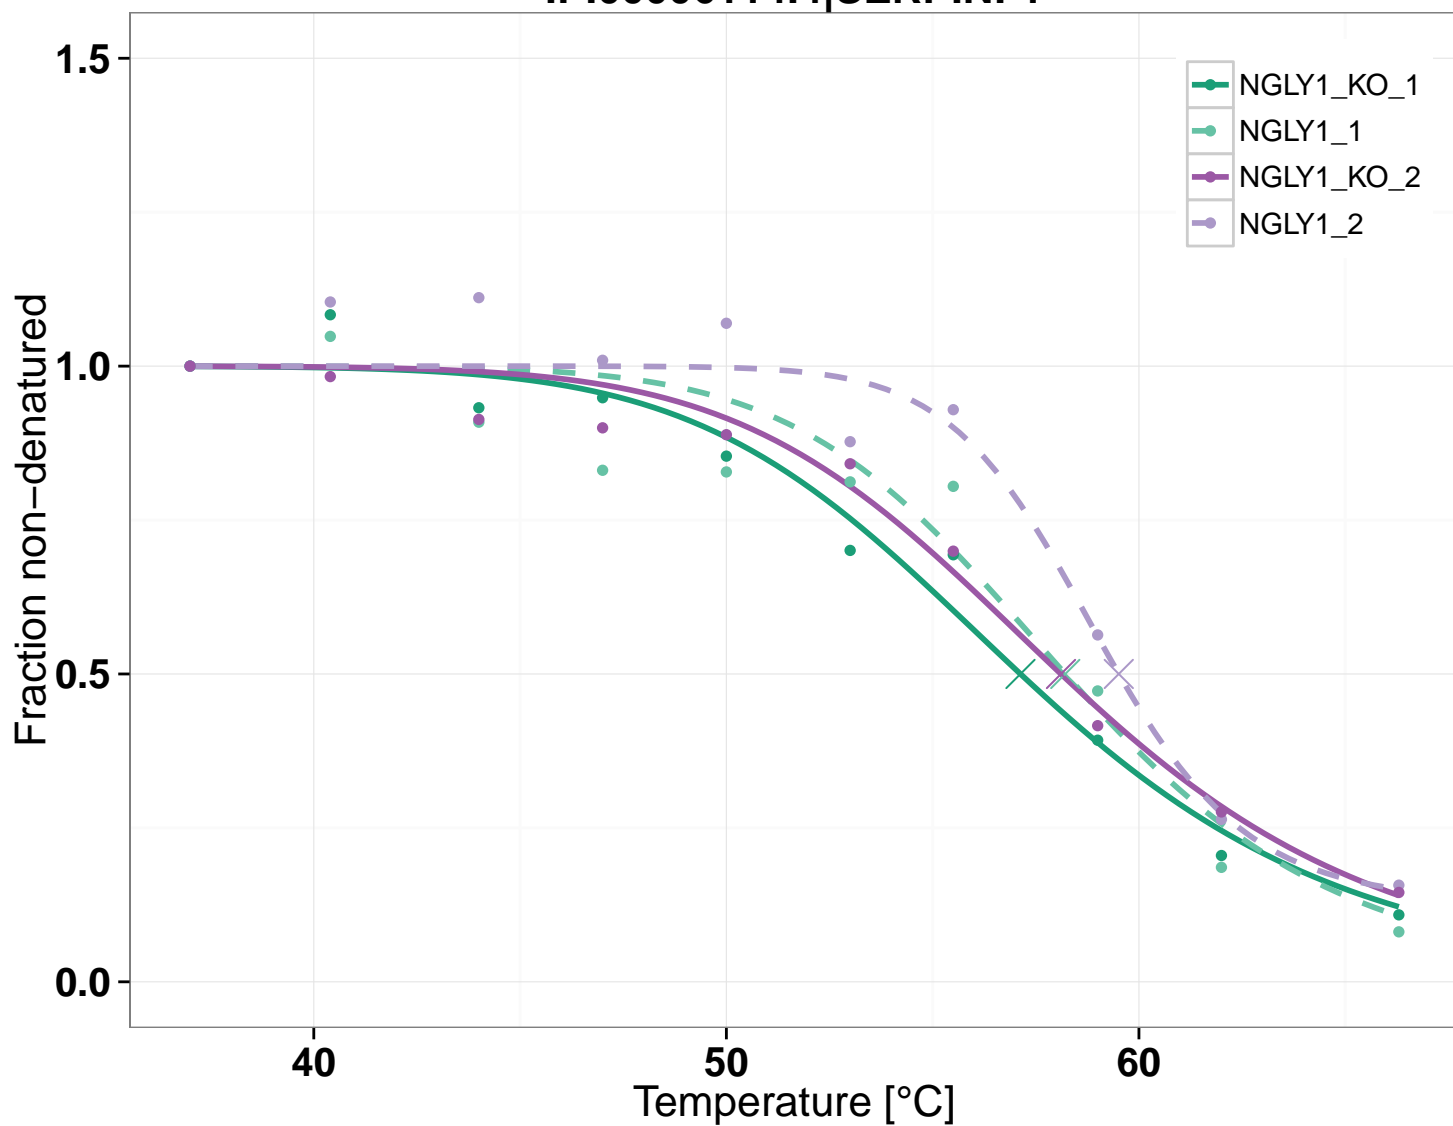

|            | meltPoint | slope  | plateau | R2   |
|------------|-----------|--------|---------|------|
| NGLY1_KO_1 | 57.13     | -0.064 | 0       | 0.98 |
| NGLY1_1    | 58.22     | -0.076 | 0       | 0.93 |
| NGLY1_KO_2 | 58.11     | -0.064 | 0       | 0.98 |
| NGLY1_2    | 59.51     | -0.12  | 0.13    | 0.96 |

Supplement: Supplementary file 2005 [file 1]

# IPI00328555.3|MFSD6

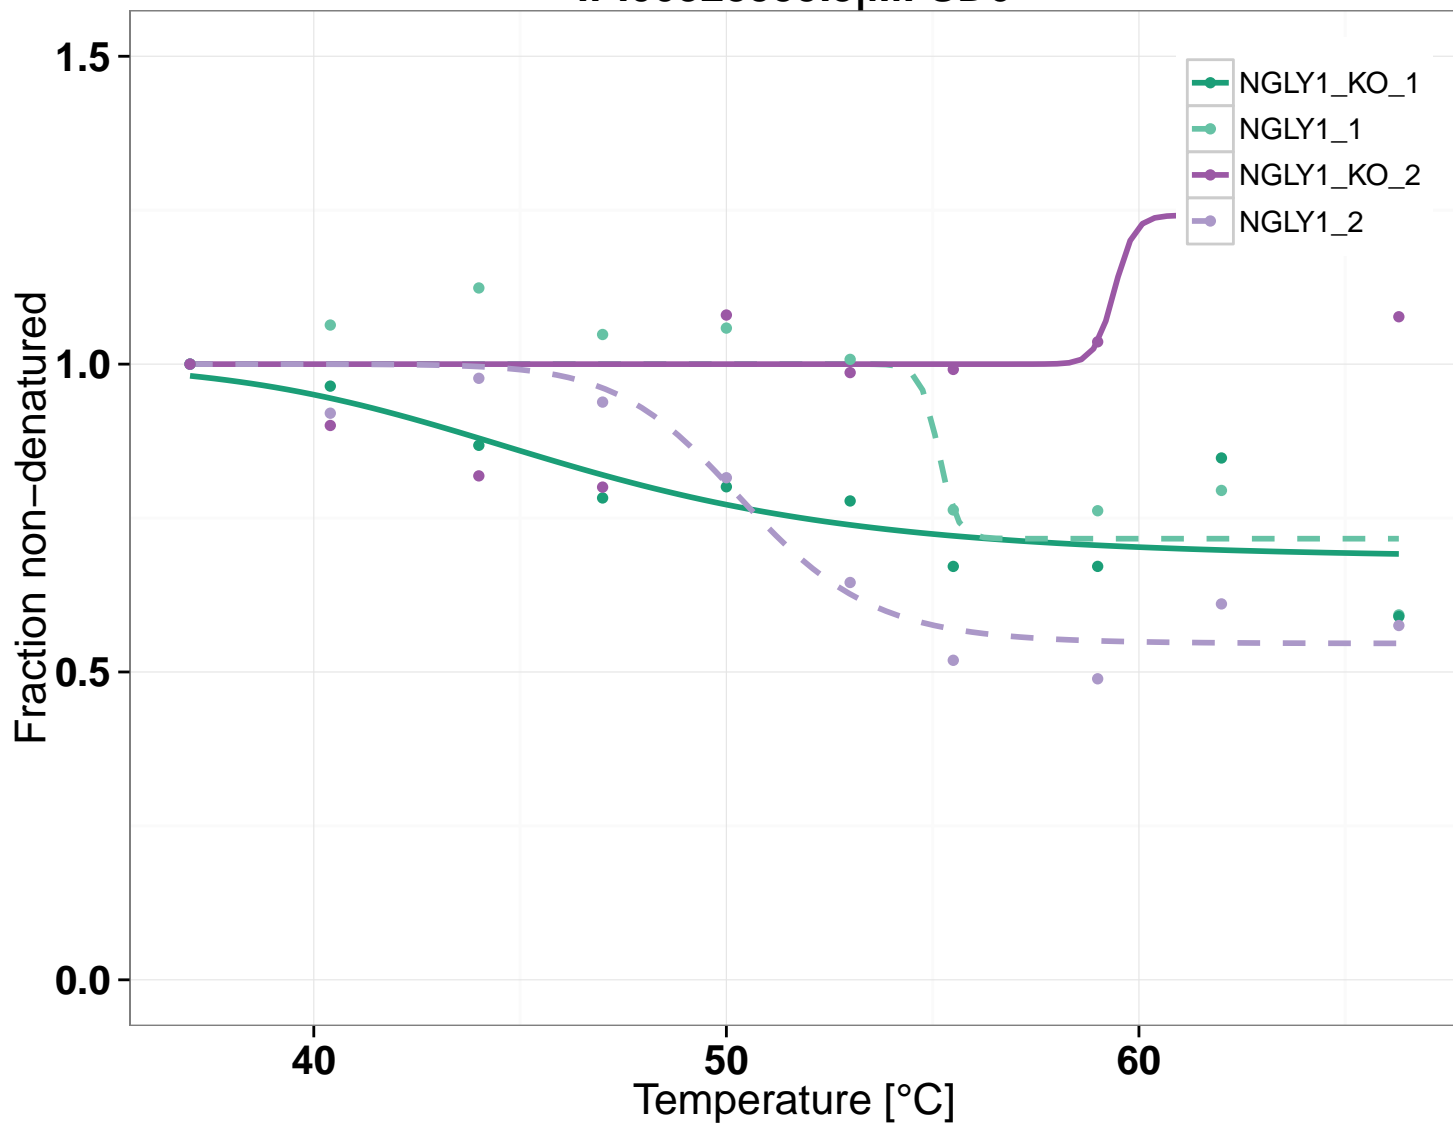

|            | meltPoint | slope  | plateau | R2   |
|------------|-----------|--------|---------|------|
| NGLY1_KO_1 | —         | -0.02  | 0.68    | 0.73 |
| NGLY1_1    | —         | -0.32  | 0.72    | 0.83 |
| NGLY1_KO_2 | —         | 0.25   | 1.24    | 0.45 |
| NGLY1_2    | —         | -0.073 | 0.55    | 0.95 |

Supplement: Supplementary file 2006 [file 1]

IPI00551070.3|RP5-1077B9 4

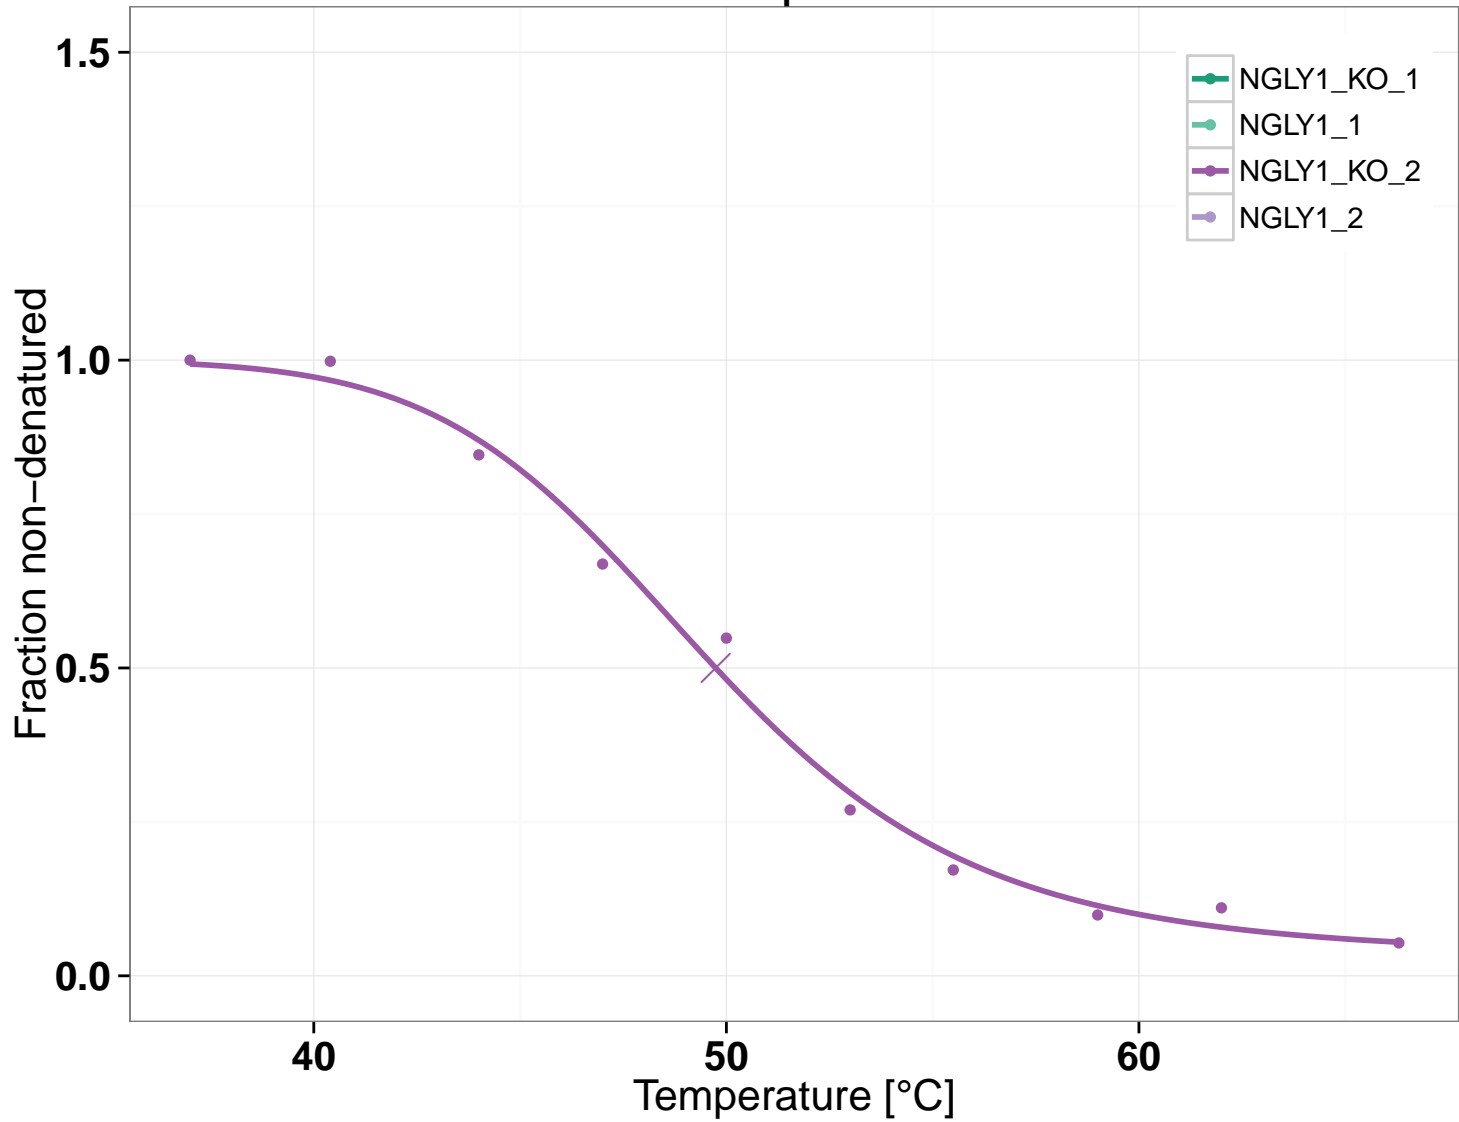

|            | meltPoint | slope  | plateau | R2   |
|------------|-----------|--------|---------|------|
| NGLY1_KO_1 | —         | —      | —       | —    |
| NGLY1_1    | —         | —      | —       | —    |
| NGLY1_KO_2 | 49.74     | -0.074 | 0.03    | 0.99 |
| NGLY1_2    | —         | —      | —       | —    |

Supplement: Supplementary file 2007 [file 1]

# IPI00292975.4|RBM27

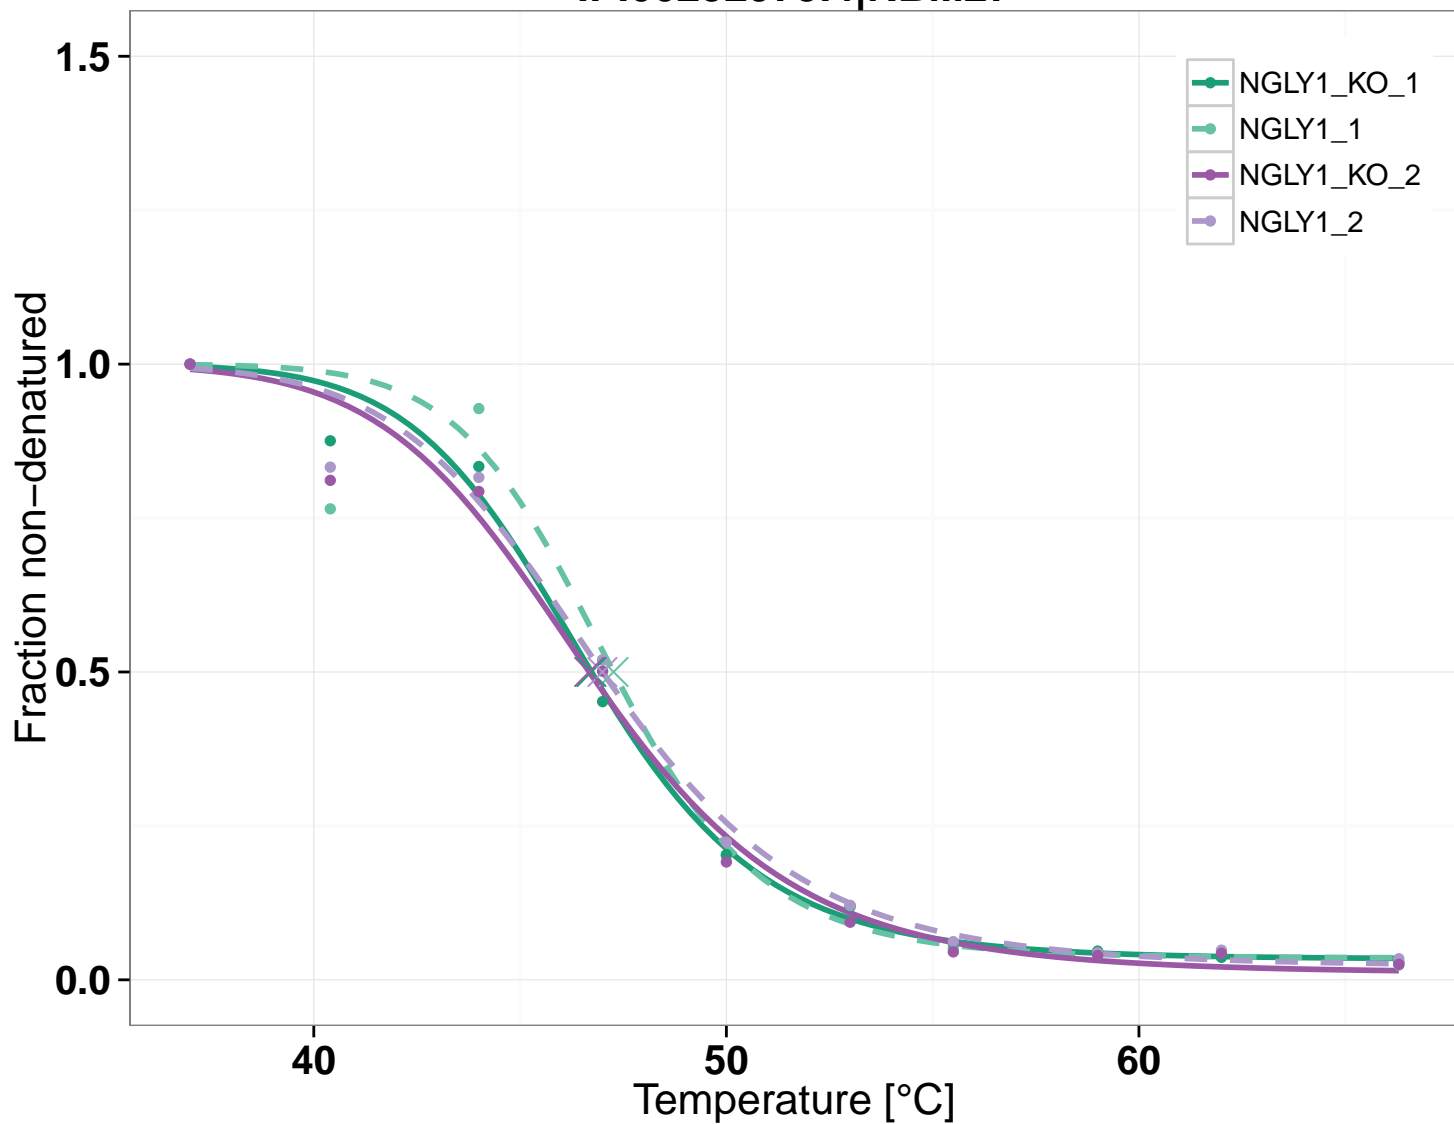

|            | meltPoint | slope  | plateau | R2   |
|------------|-----------|--------|---------|------|
| NGLY1_KO_1 | 46.73     | -0.11  | 0.03    | 0.99 |
| NGLY1_1    | 47.27     | -0.13  | 0.04    | 0.96 |
| NGLY1_KO_2 | 46.68     | -0.098 | 0.01    | 0.98 |
| NGLY1_2    | 47        | -0.098 | 0.02    | 0.99 |

Supplement: Supplementary file 2008 [file 1]
