# Supplementary material (part 21 of 85)
Source: publisher figshare collection journal article supplement (https://gsajournals.figshare.com/articles/dataset/_/12014913)

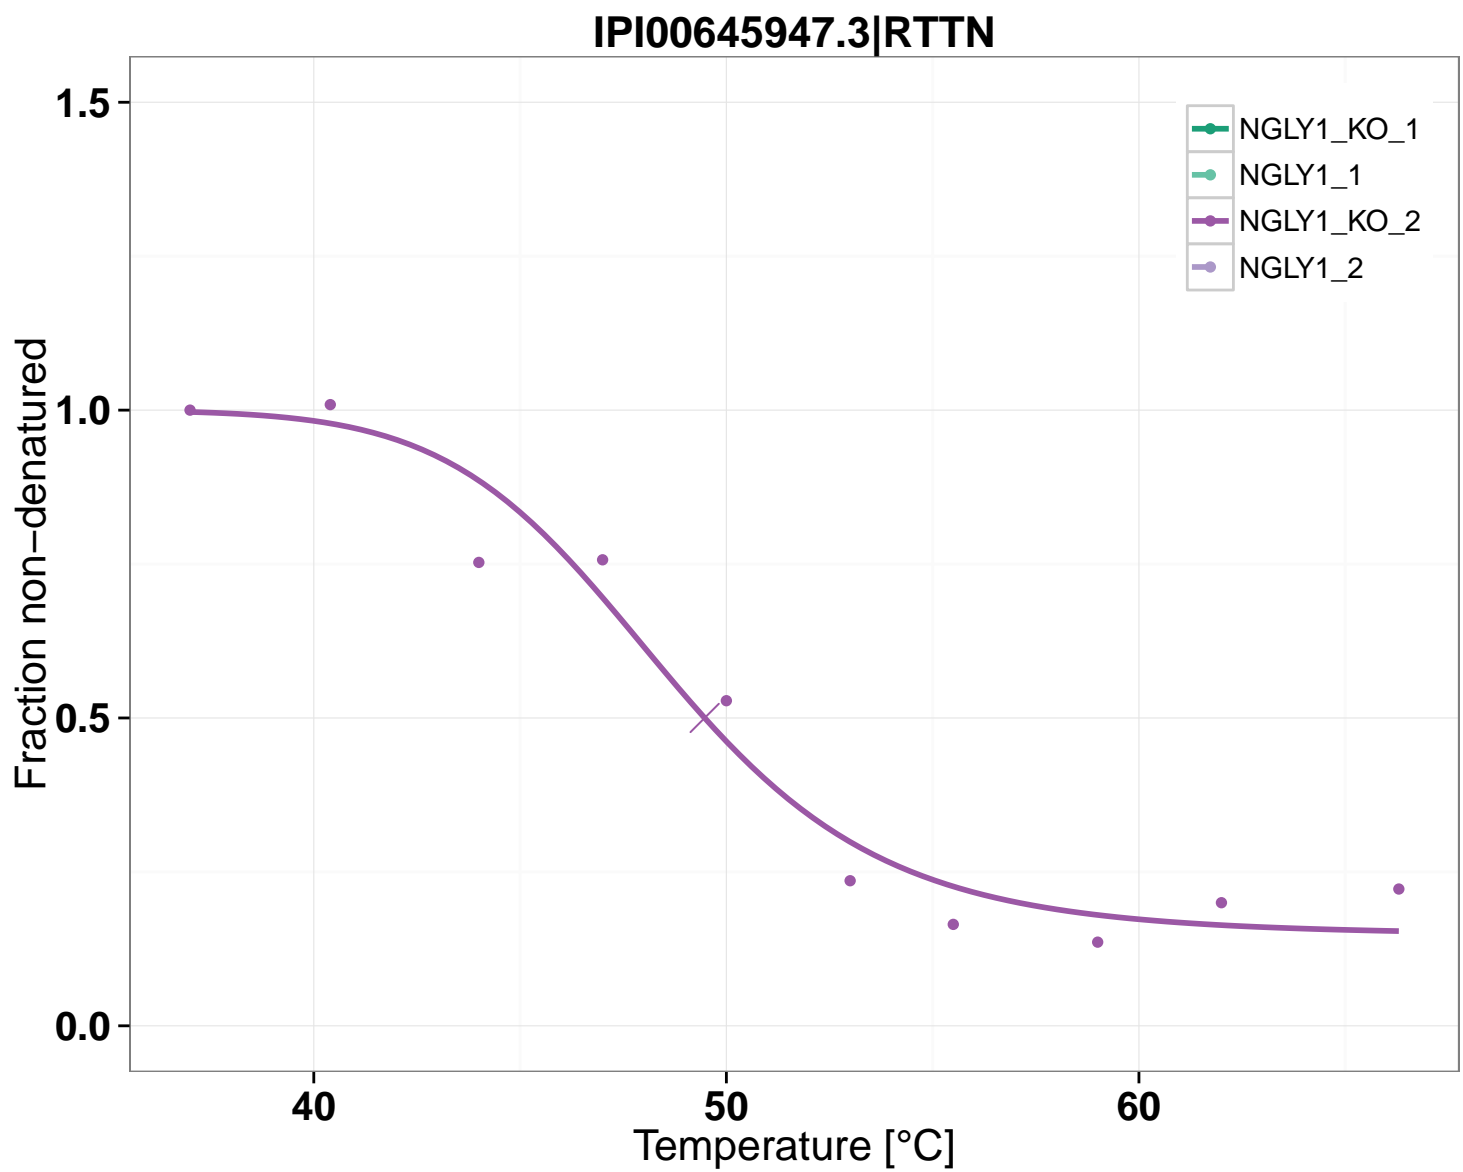

|            | meltPoint | slope  | plateau | R2   |
|------------|-----------|--------|---------|------|
| NGLY1_KO_1 | —         | —      | —       | —    |
| NGLY1_1    | —         | —      | —       | —    |
| NGLY1_KO_2 | 49.47     | -0.081 | 0.15    | 0.96 |
| NGLY1_2    | —         | —      | —       | —    |

Supplement: Supplementary file 2009 [file 1]

# IPI00001543.1|TIMM10

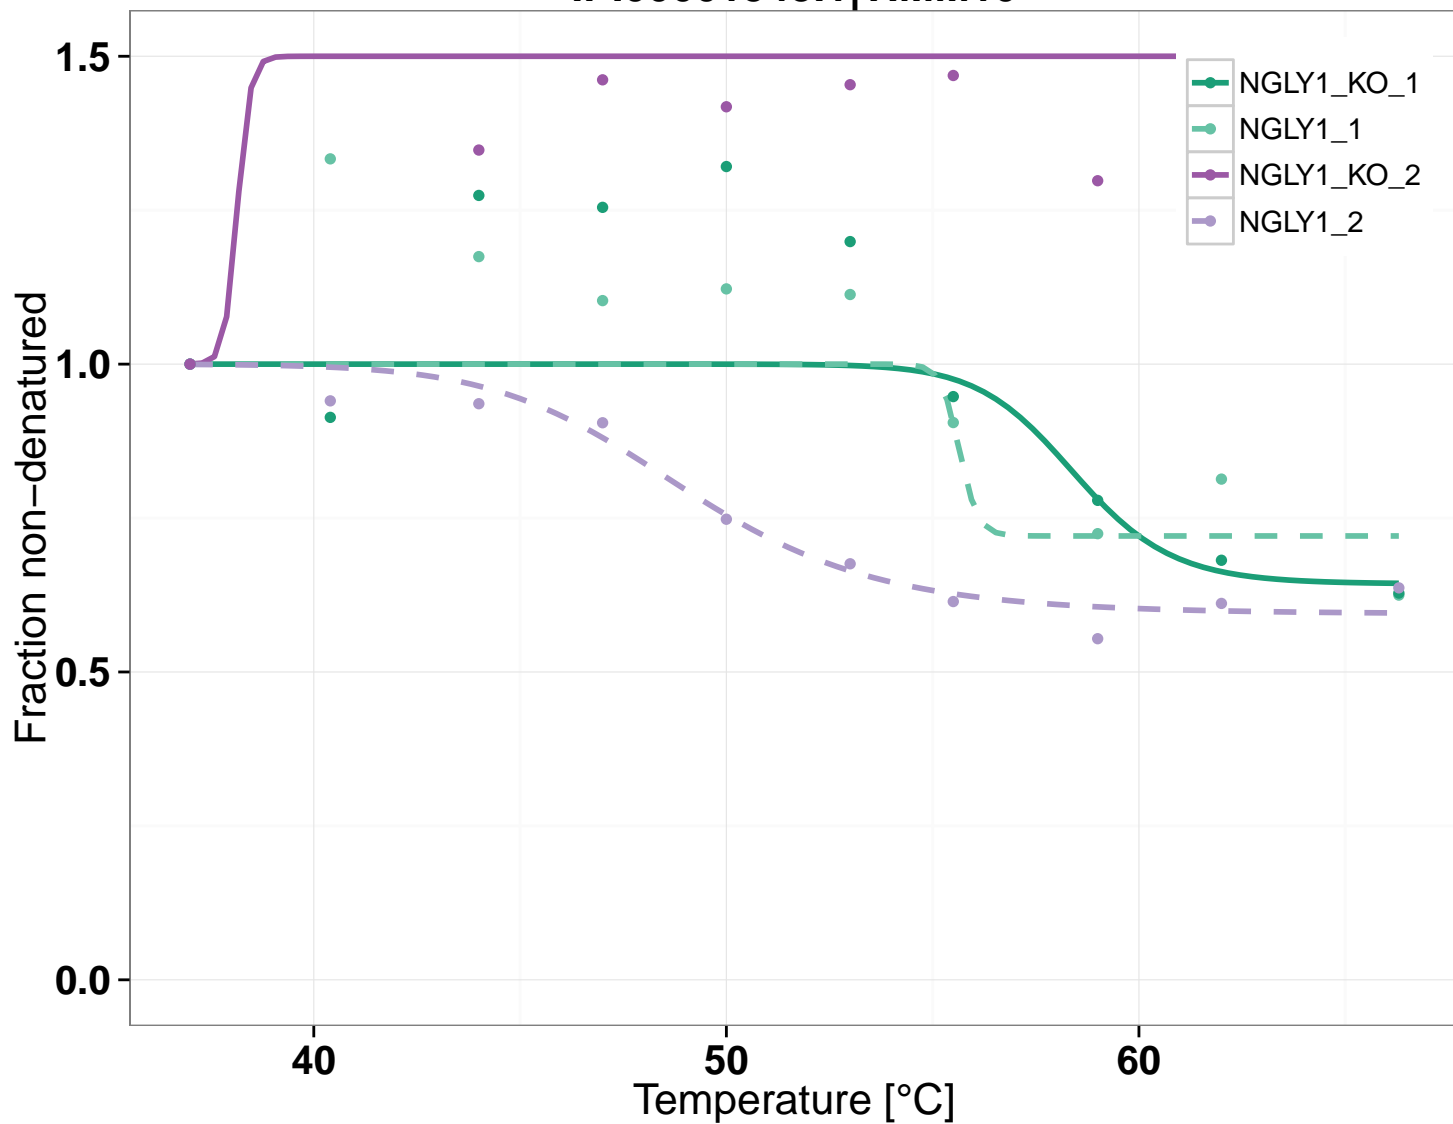

|            | meltPoint | slope  | plateau | R2   |
|------------|-----------|--------|---------|------|
| NGLY1_KO_1 | —         | -0.075 | 0.64    | 0.5  |
| NGLY1_1    | —         | -0.31  | 0.72    | 0.55 |
| NGLY1_KO_2 | —         | 0.82   | 1.5     | 0.5  |
| NGLY1_2    | —         | -0.043 | 0.59    | 0.96 |

Supplement: Supplementary file 2010 [file 1]

IPI00166738.1|ZADH2

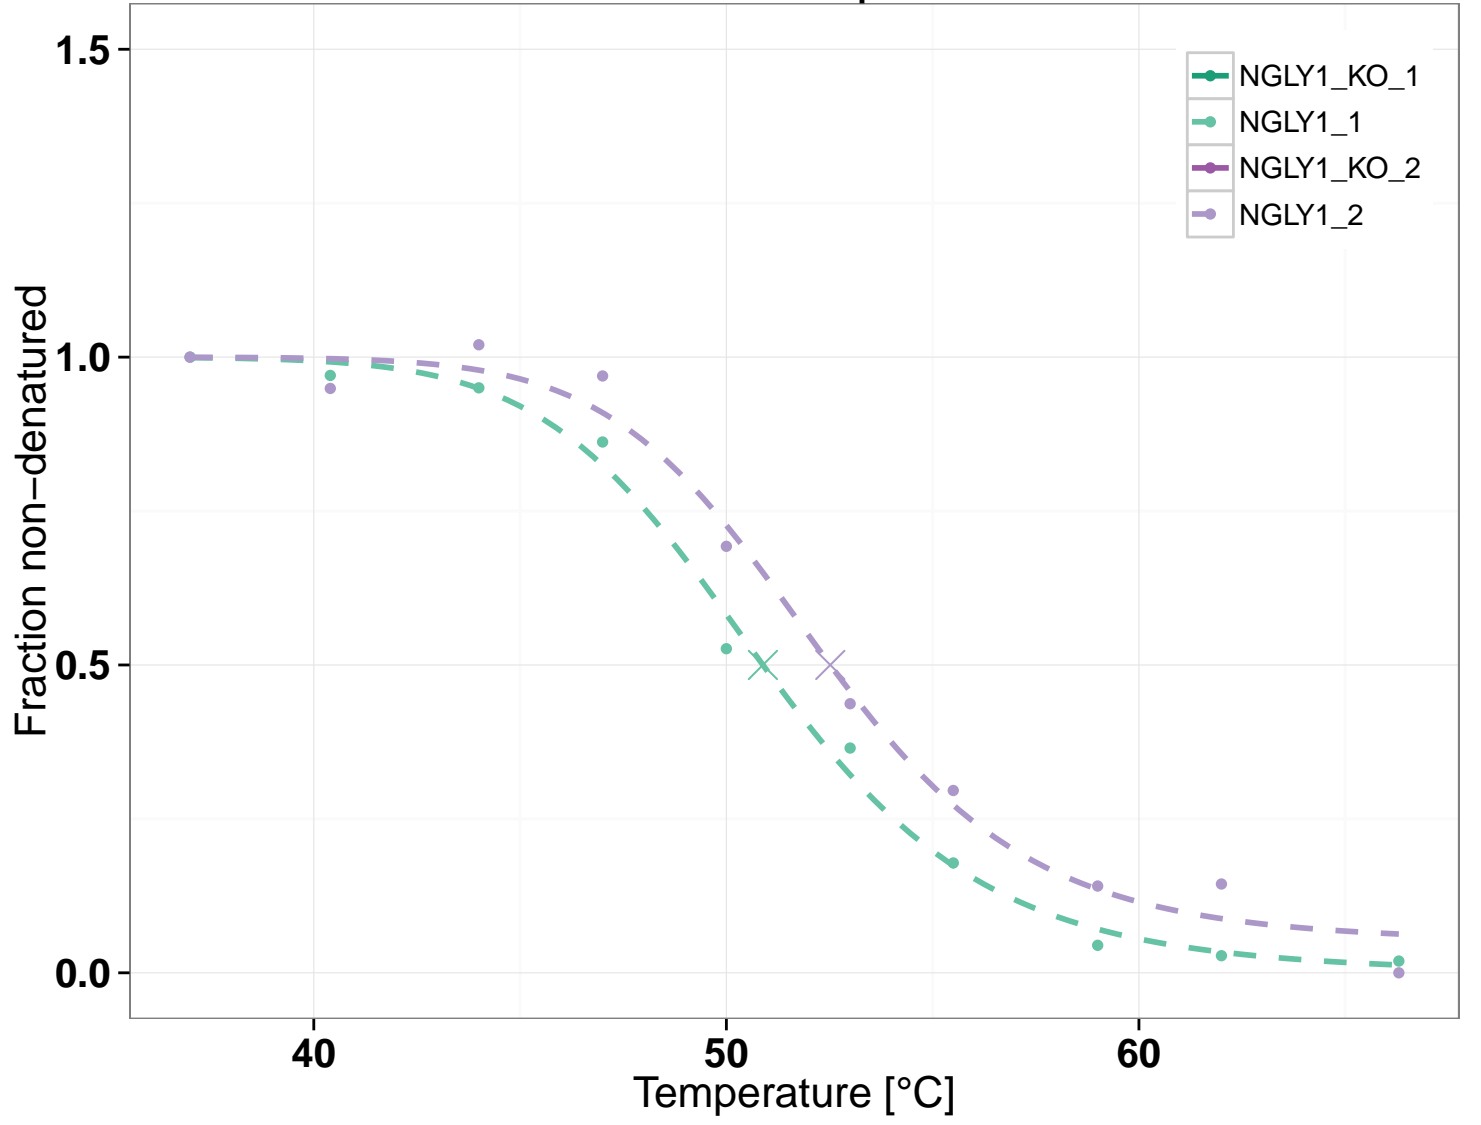

|            | meltPoint | slope  | plateau | R2   |
|------------|-----------|--------|---------|------|
| NGLY1_KO_1 | -         | -      | -       | -    |
| NGLY1_1    | 50.89     | -0.093 | 0       | 1    |
| NGLY1_KO_2 | -         | -      | -       | -    |
| NGLY1_2    | 52.52     | -0.093 | 0.05    | 0.99 |

Supplement: Supplementary file 2011 [file 1]

IPI00296337.2|PRKDC

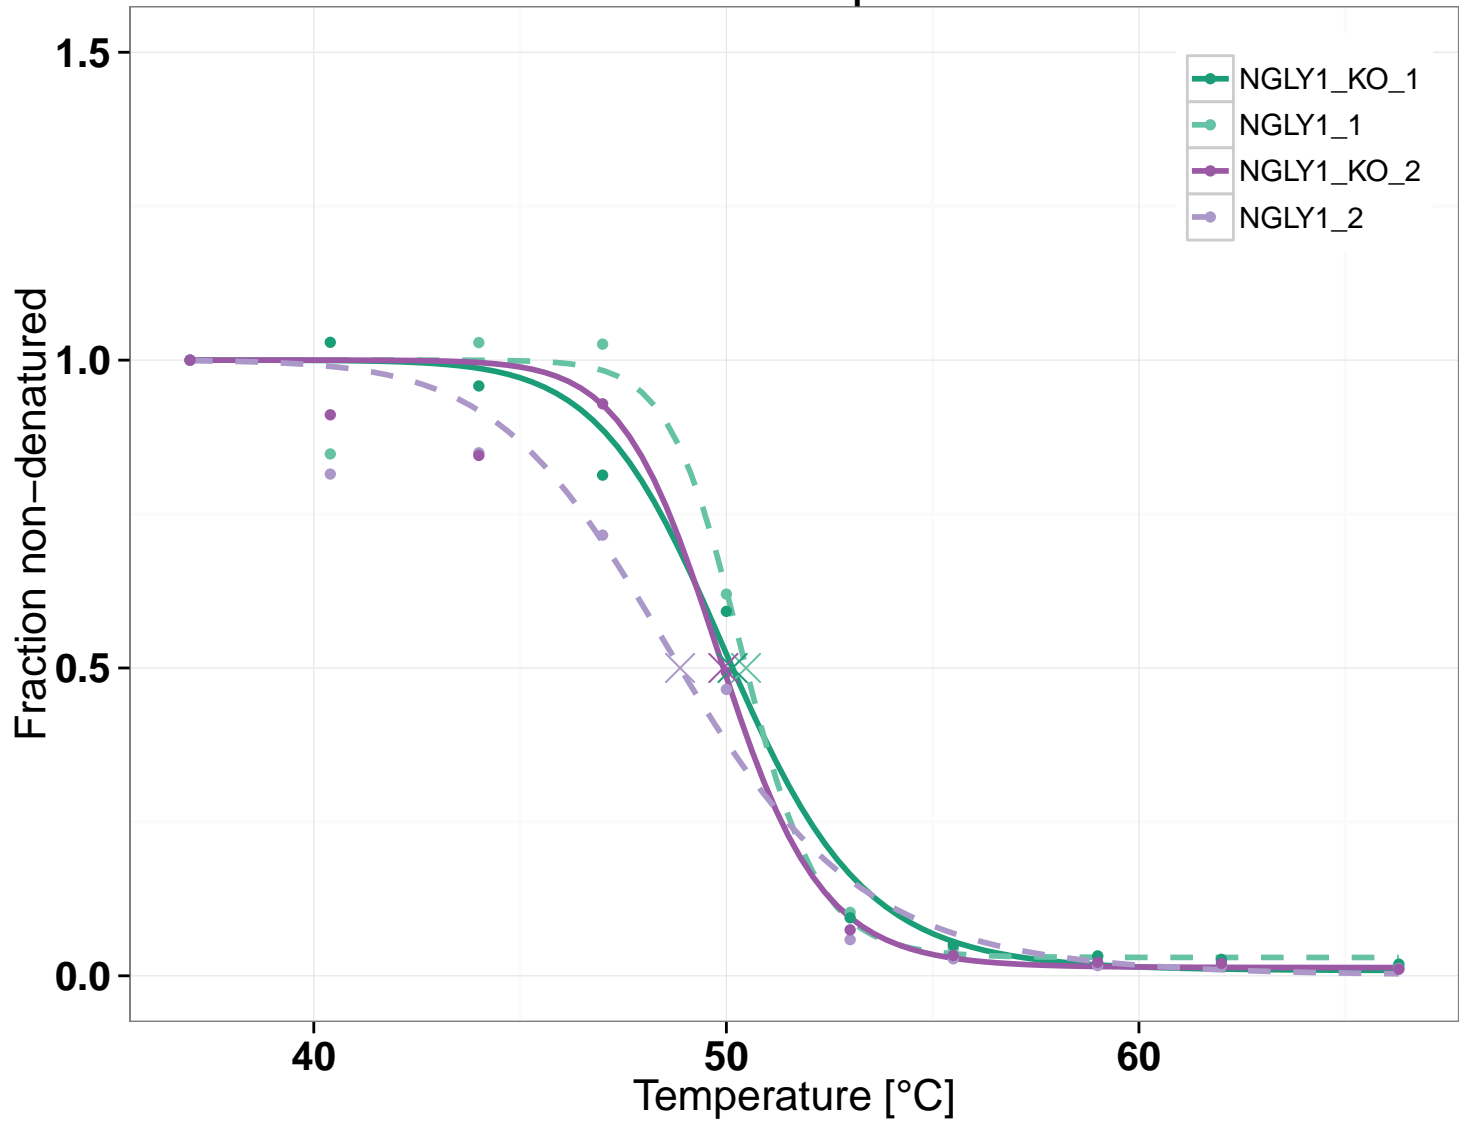

|            | meltPoint | slope | plateau | R2   |
|------------|-----------|-------|---------|------|
| NGLY1_KO_1 | 50.15     | -0.15 | 0.01    | 0.99 |
| NGLY1_1    | 50.48     | -0.27 | 0.03    | 0.99 |
| NGLY1_KO_2 | 49.93     | -0.2  | 0.01    | 0.98 |
| NGLY1_2    | 48.88     | -0.11 | 0       | 0.96 |

Supplement: Supplementary file 2012 [file 1]

# IPI00001568.1|ATP6V1D

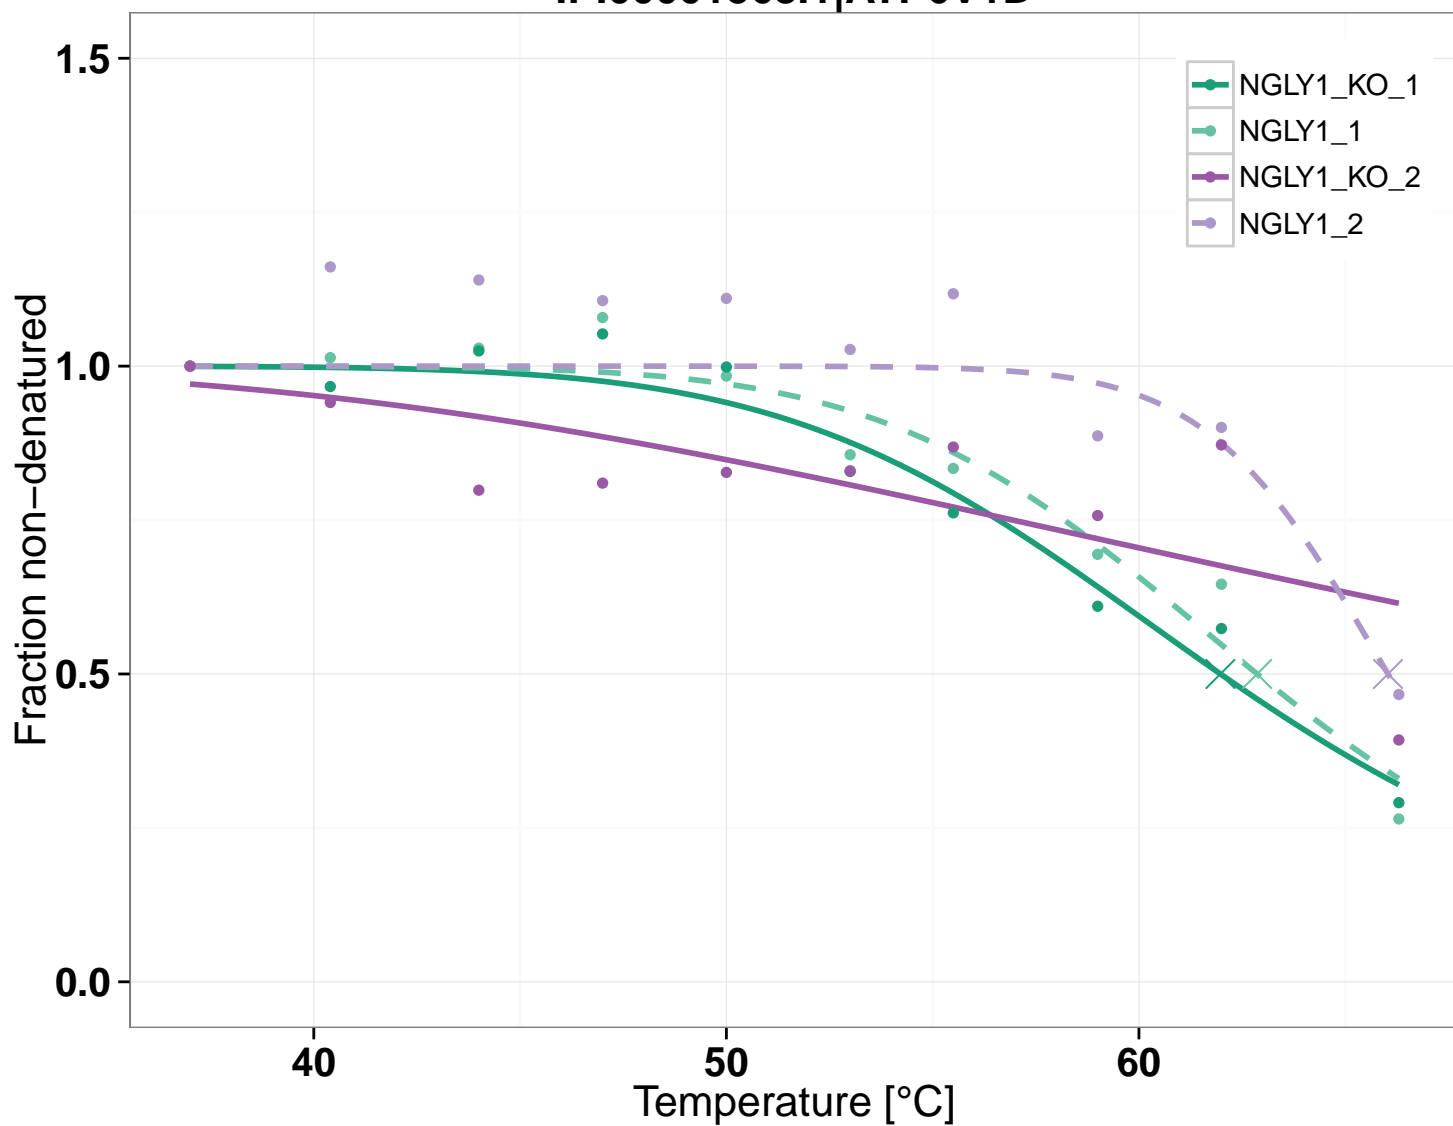

|            | meltPoint | slope  | plateau | R2   |
|------------|-----------|--------|---------|------|
| NGLY1_KO_1 | 61.98     | -0.048 | 0       | 0.96 |
| NGLY1_1    | 62.87     | -0.055 | 0       | 0.95 |
| NGLY1_KO_2 | -         | -0.015 | 0       | 0.49 |
| NGLY1_2    | 66.04     | -0.11  | 0       | 0.76 |

Supplement: Supplementary file 2014 [file 1]

# IPI00019997.1|LIN7C

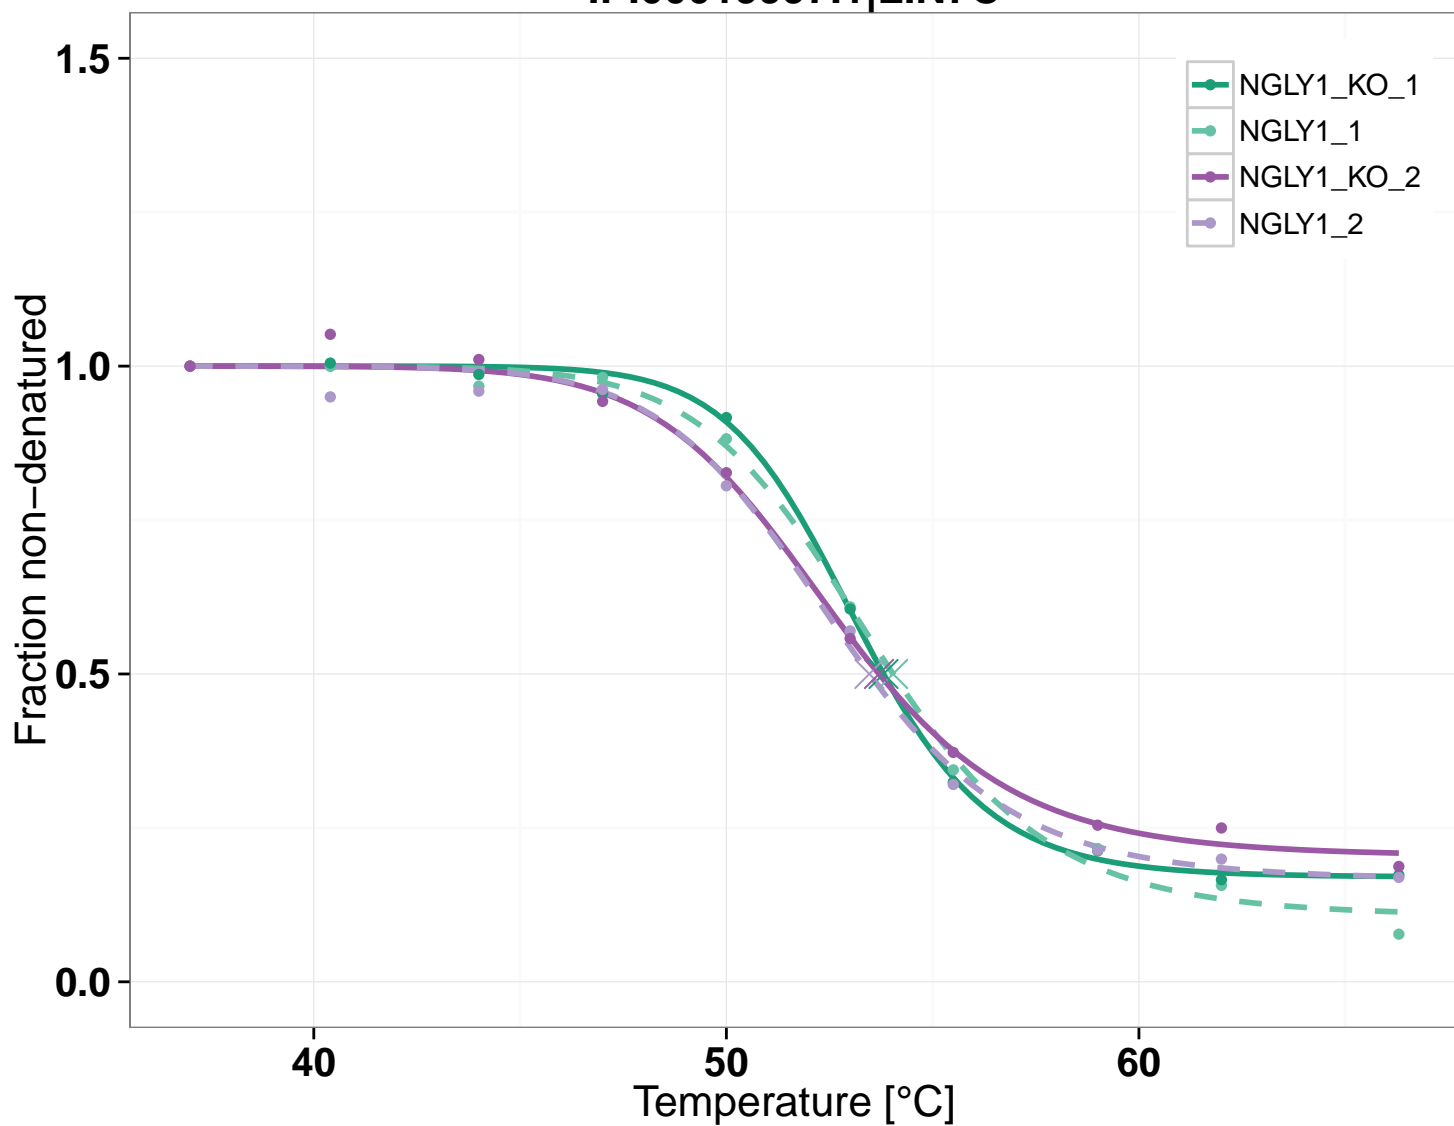

|            | meltPoint | slope  | plateau | R2 |
|------------|-----------|--------|---------|----|
| NGLY1_KO_1 | 53.81     | -0.13  | 0.17    | 1  |
| NGLY1_1    | 54.04     | -0.11  | 0.11    | 1  |
| NGLY1_KO_2 | 53.7      | -0.092 | 0.2     | 1  |
| NGLY1_2    | 53.47     | -0.099 | 0.17    | 1  |

Supplement: Supplementary file 2015 [file 1]

IPI00456642.3|HECTD3

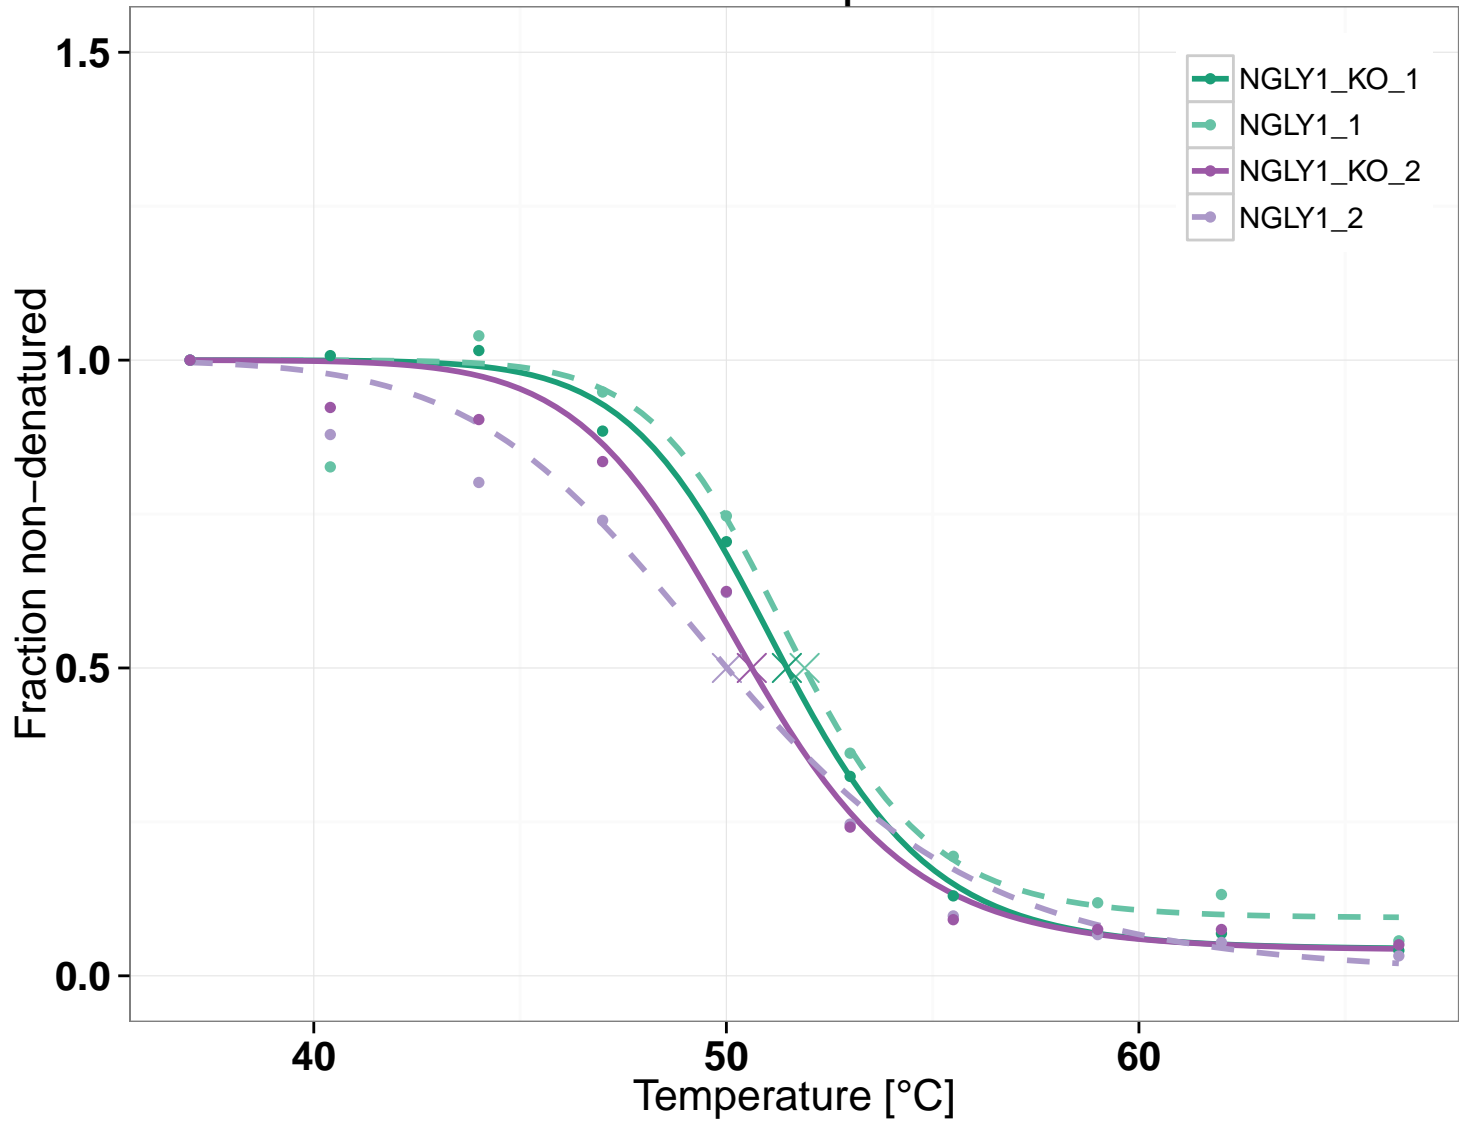

|            | meltPoint | slope | plateau | R2   |
|------------|-----------|-------|---------|------|
| NGLY1_KO_1 | 51.47     | -0.13 | 0.04    | 1    |
| NGLY1_1    | 51.9      | -0.13 | 0.09    | 0.98 |
| NGLY1_KO_2 | 50.62     | -0.12 | 0.04    | 0.99 |
| NGLY1_2    | 50.01     | -0.08 | 0       | 0.97 |

Supplement: Supplementary file 2016 [file 1]

# IPI00186166.1|KPTN

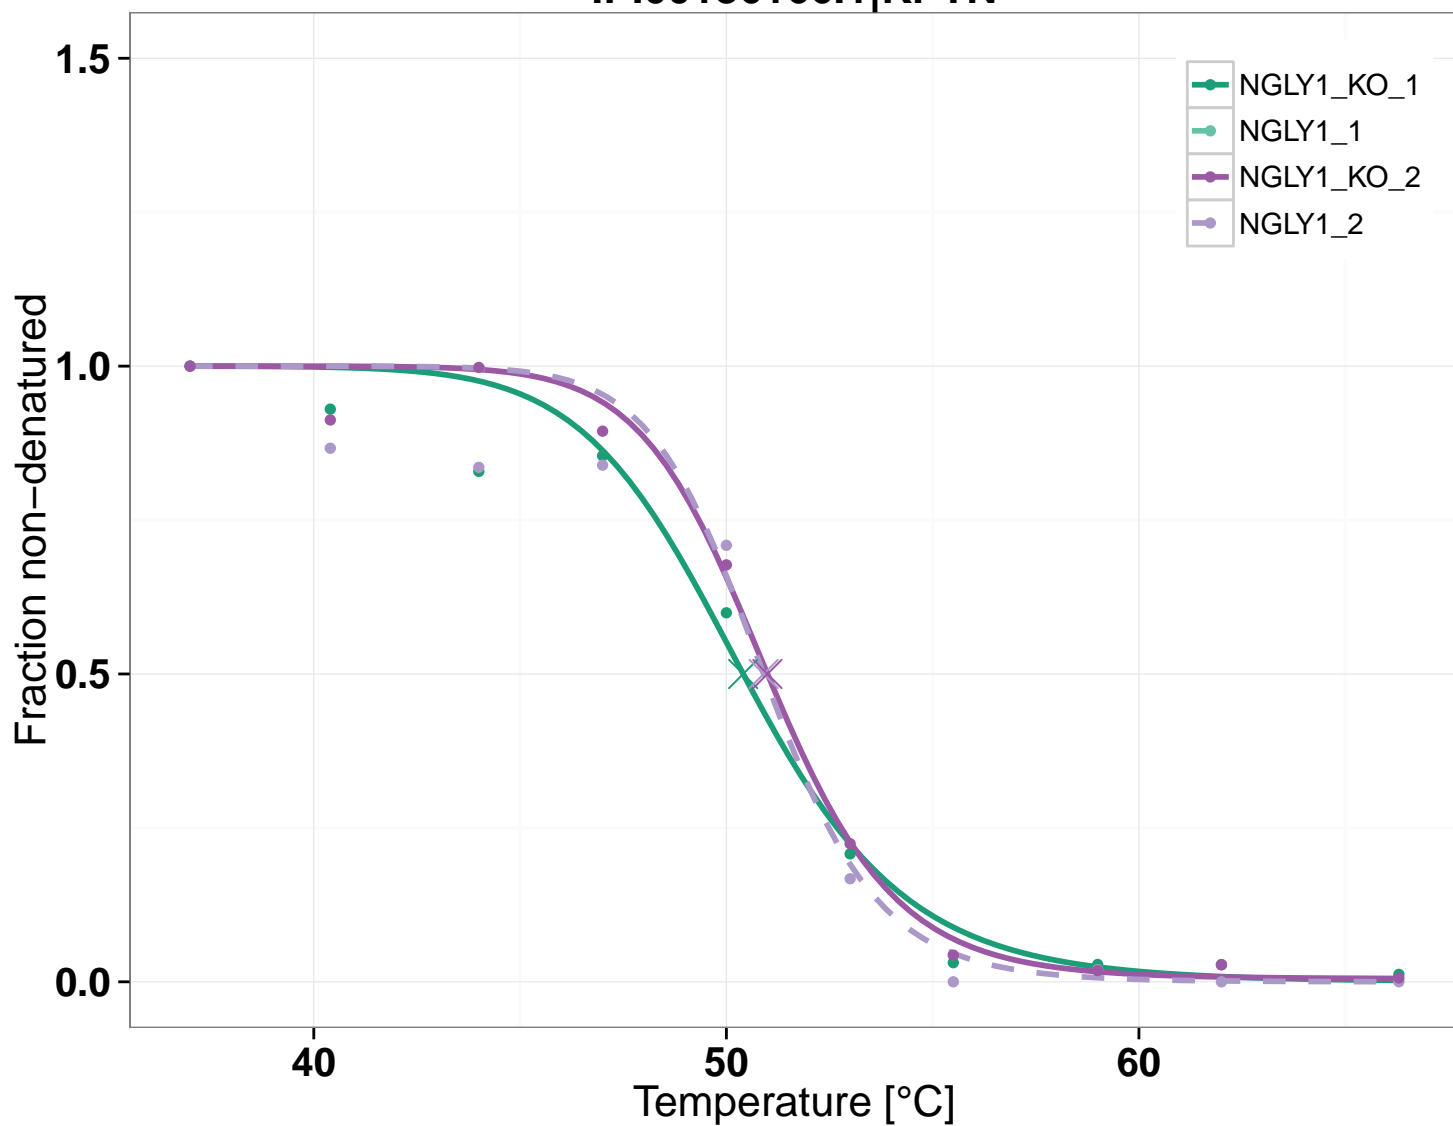

|            | meltPoint | slope | plateau | R2   |
|------------|-----------|-------|---------|------|
| NGLY1_KO_1 | 50.41     | -0.13 | 0       | 0.98 |
| NGLY1_1    | -         | -     | -       | -    |
| NGLY1_KO_2 | 51        | -0.16 | 0       | 0.99 |
| NGLY1_2    | 50.9      | -0.18 | 0       | 0.96 |

Supplement: Supplementary file 2017 [file 1]

IPI00106502.5|KEAP1

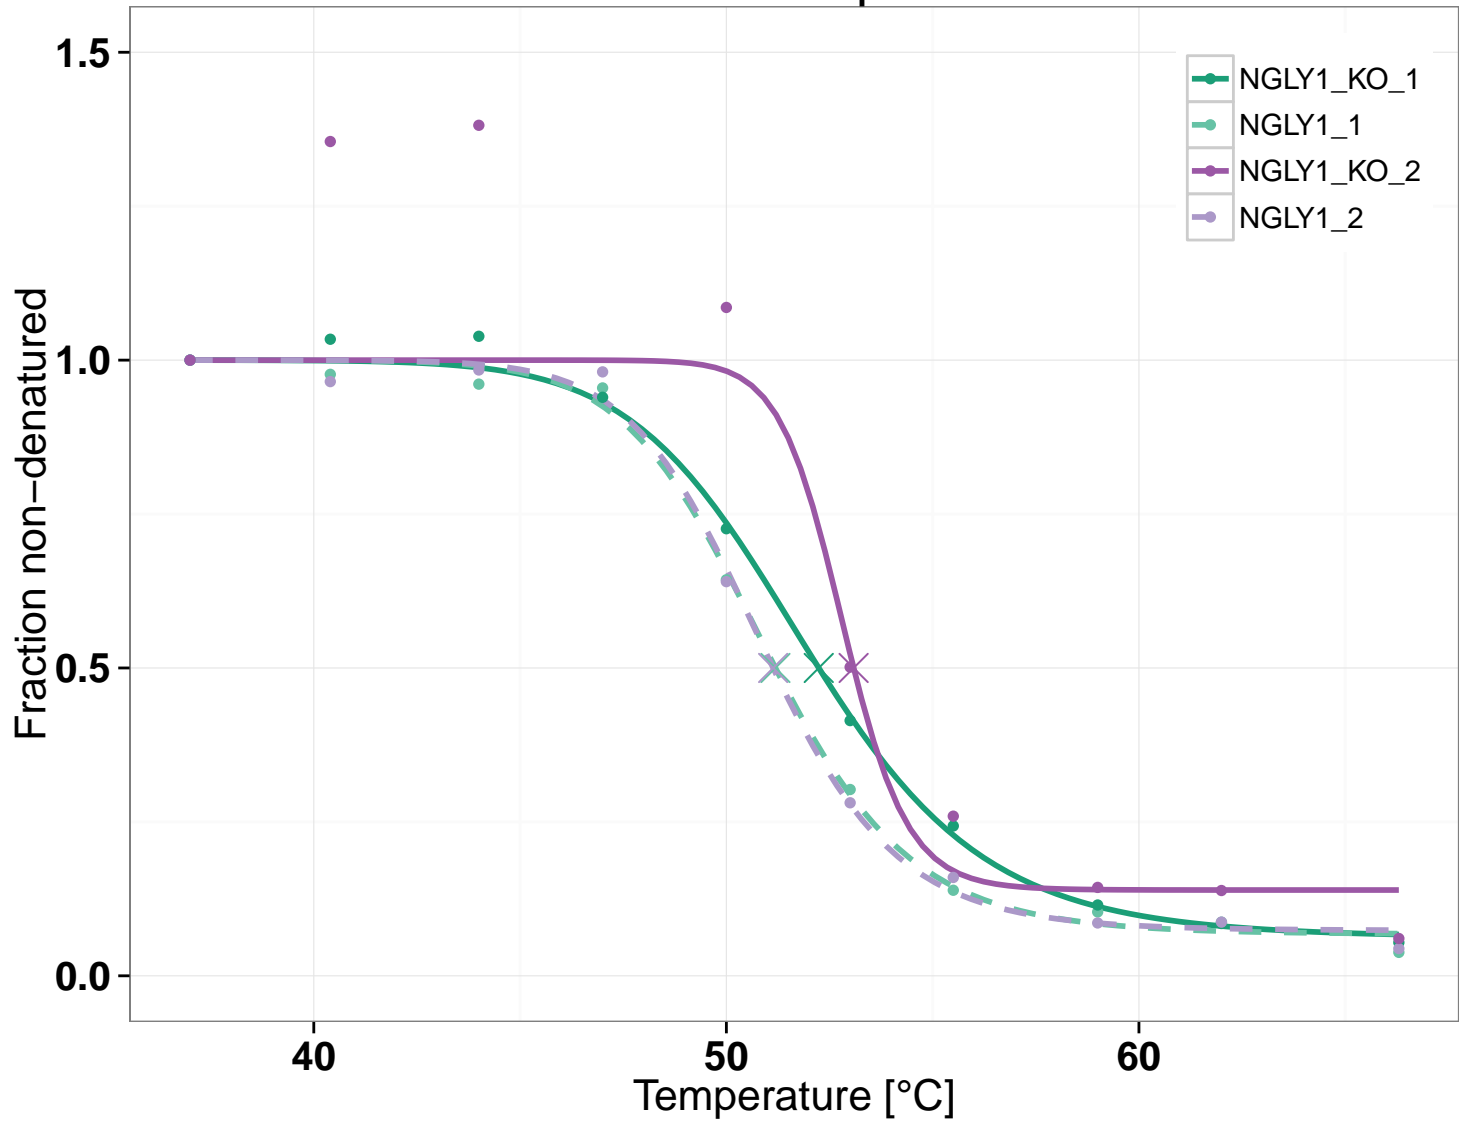

|            | meltPoint | slope | plateau | R2   |
|------------|-----------|-------|---------|------|
| NGLY1_KO_1 | 52.24     | -0.11 | 0.06    | 1    |
| NGLY1_1    | 51.19     | -0.13 | 0.07    | 1    |
| NGLY1_KO_2 | 53.08     | -0.28 | 0.14    | 0.81 |
| NGLY1_2    | 51.13     | -0.14 | 0.07    | 1    |

Supplement: Supplementary file 2018 [file 1]

# IPI00006280.4|SCAP

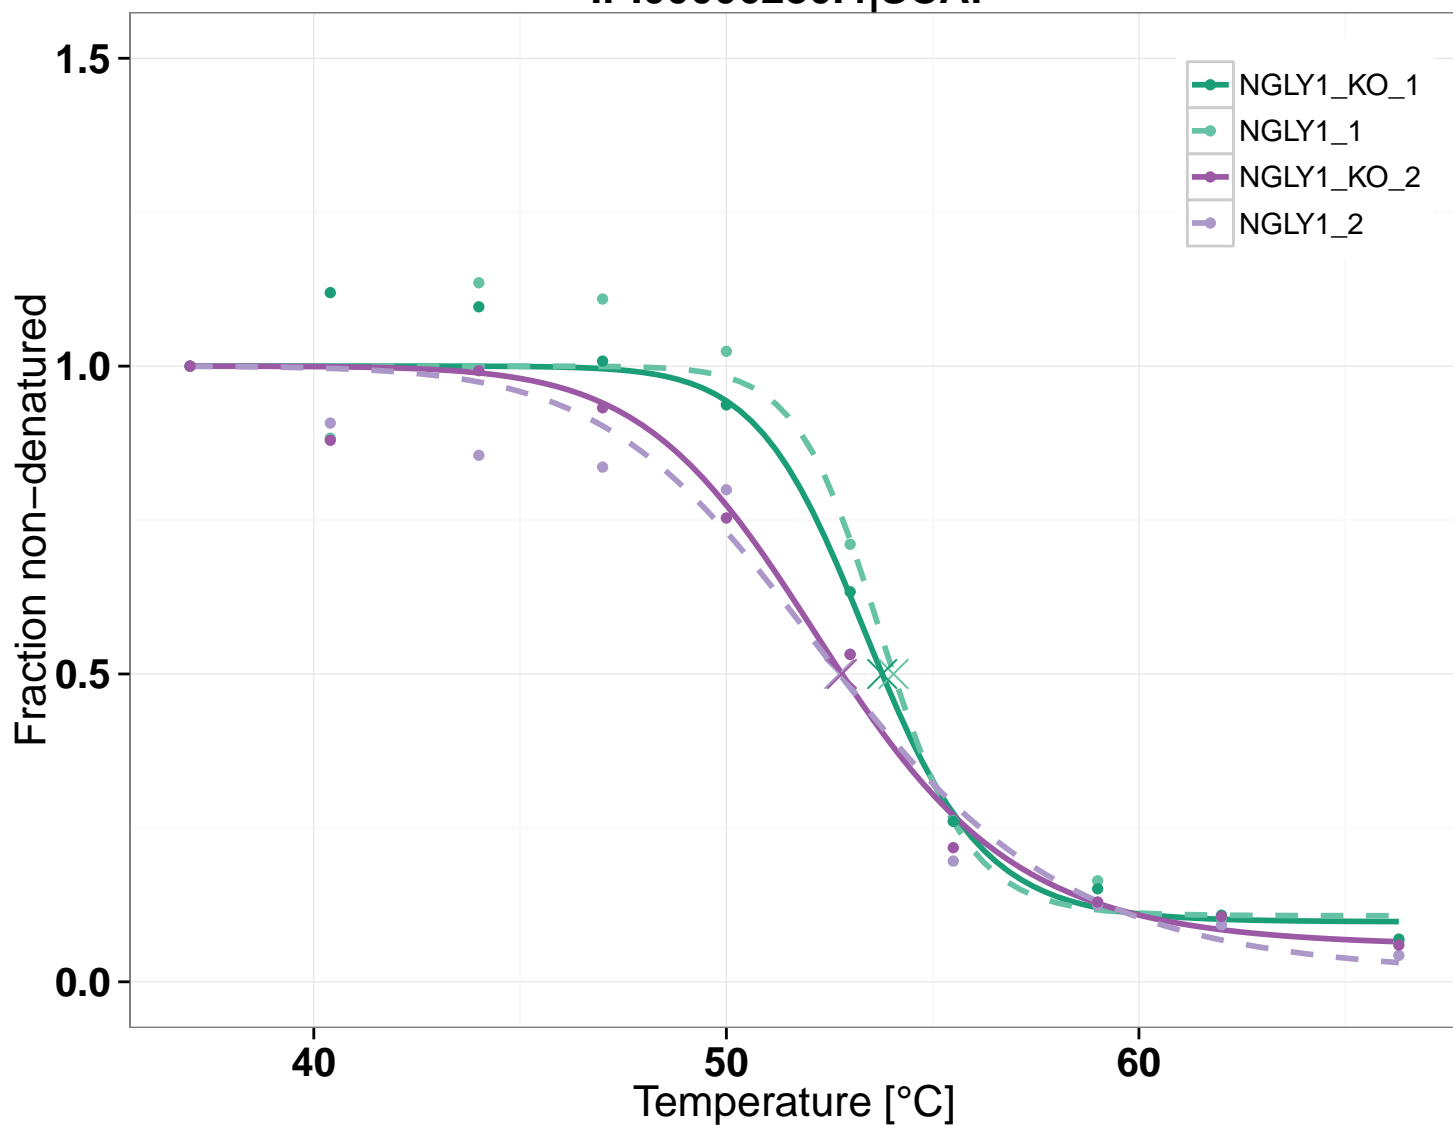

|            | meltPoint | slope  | plateau | R2   |
|------------|-----------|--------|---------|------|
| NGLY1_KO_1 | 53.78     | -0.16  | 0.1     | 0.99 |
| NGLY1_1    | 54.05     | -0.21  | 0.11    | 0.97 |
| NGLY1_KO_2 | 52.8      | -0.1   | 0.06    | 0.99 |
| NGLY1_2    | 52.74     | -0.087 | 0.01    | 0.97 |

Supplement: Supplementary file 2019 [file 1]

IPI00646291.1|GPR180

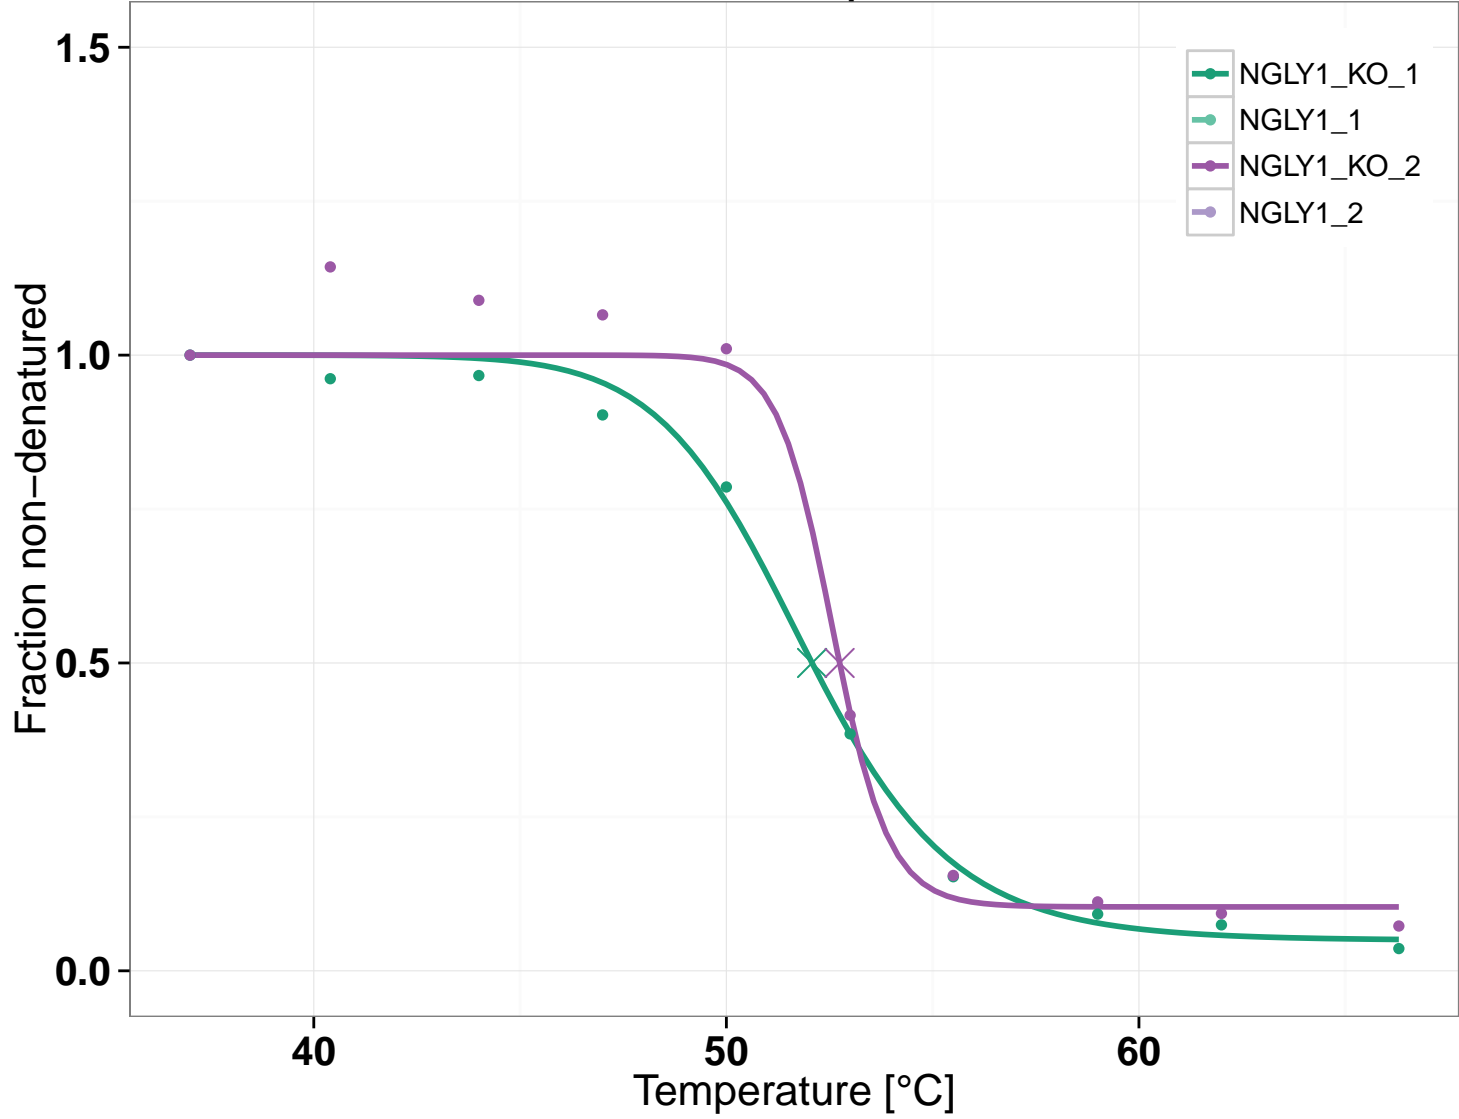

|            | meltPoint | slope | plateau | R2   |
|------------|-----------|-------|---------|------|
| NGLY1_KO_1 | 52.08     | -0.13 | 0.05    | 1    |
| NGLY1_1    | -         | -     | -       | -    |
| NGLY1_KO_2 | 52.74     | -0.33 | 0.1     | 0.98 |
| NGLY1_2    | -         | -     | -       | -    |

Supplement: Supplementary file 2020 [file 1]

IPI00647672.1|C1ORF85

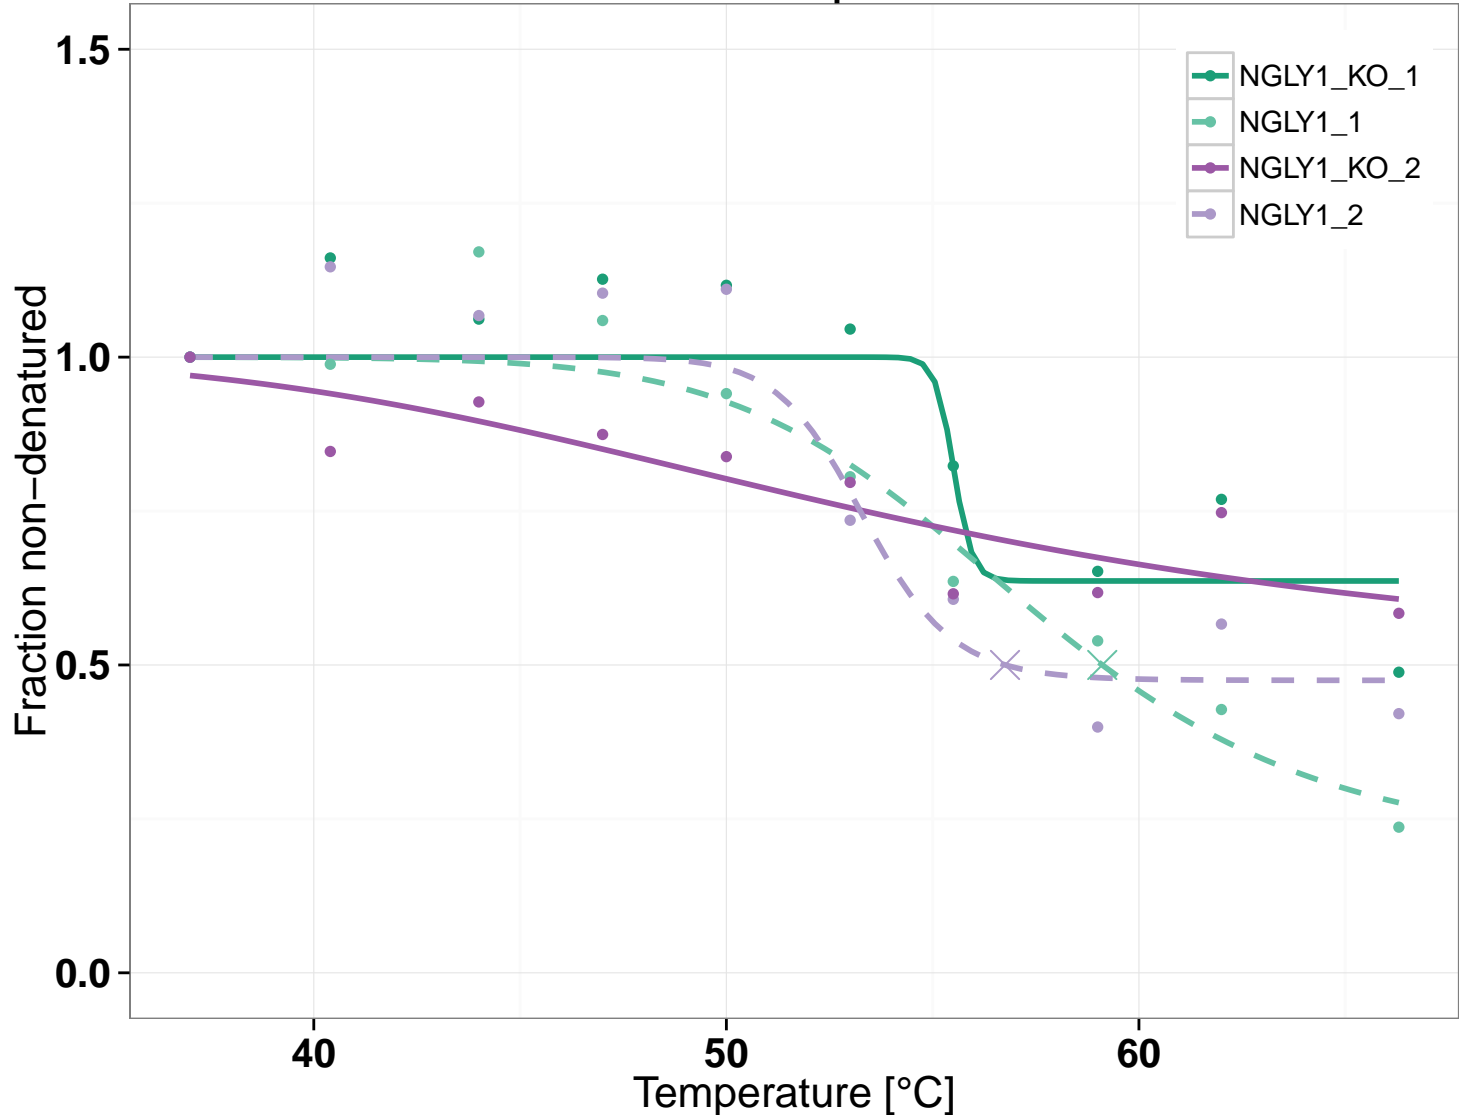

|            | meltPoint | slope  | plateau | R2   |
|------------|-----------|--------|---------|------|
| NGLY1_KO_1 | -         | -0.41  | 0.64    | 0.79 |
| NGLY1_1    | 59.11     | -0.057 | 0.19    | 0.94 |
| NGLY1_KO_2 | -         | -0.016 | 0.48    | 0.78 |
| NGLY1_2    | 56.75     | -0.12  | 0.48    | 0.91 |

Supplement: Supplementary file 2021 [file 1]

IPI00013860.3|HIBADH

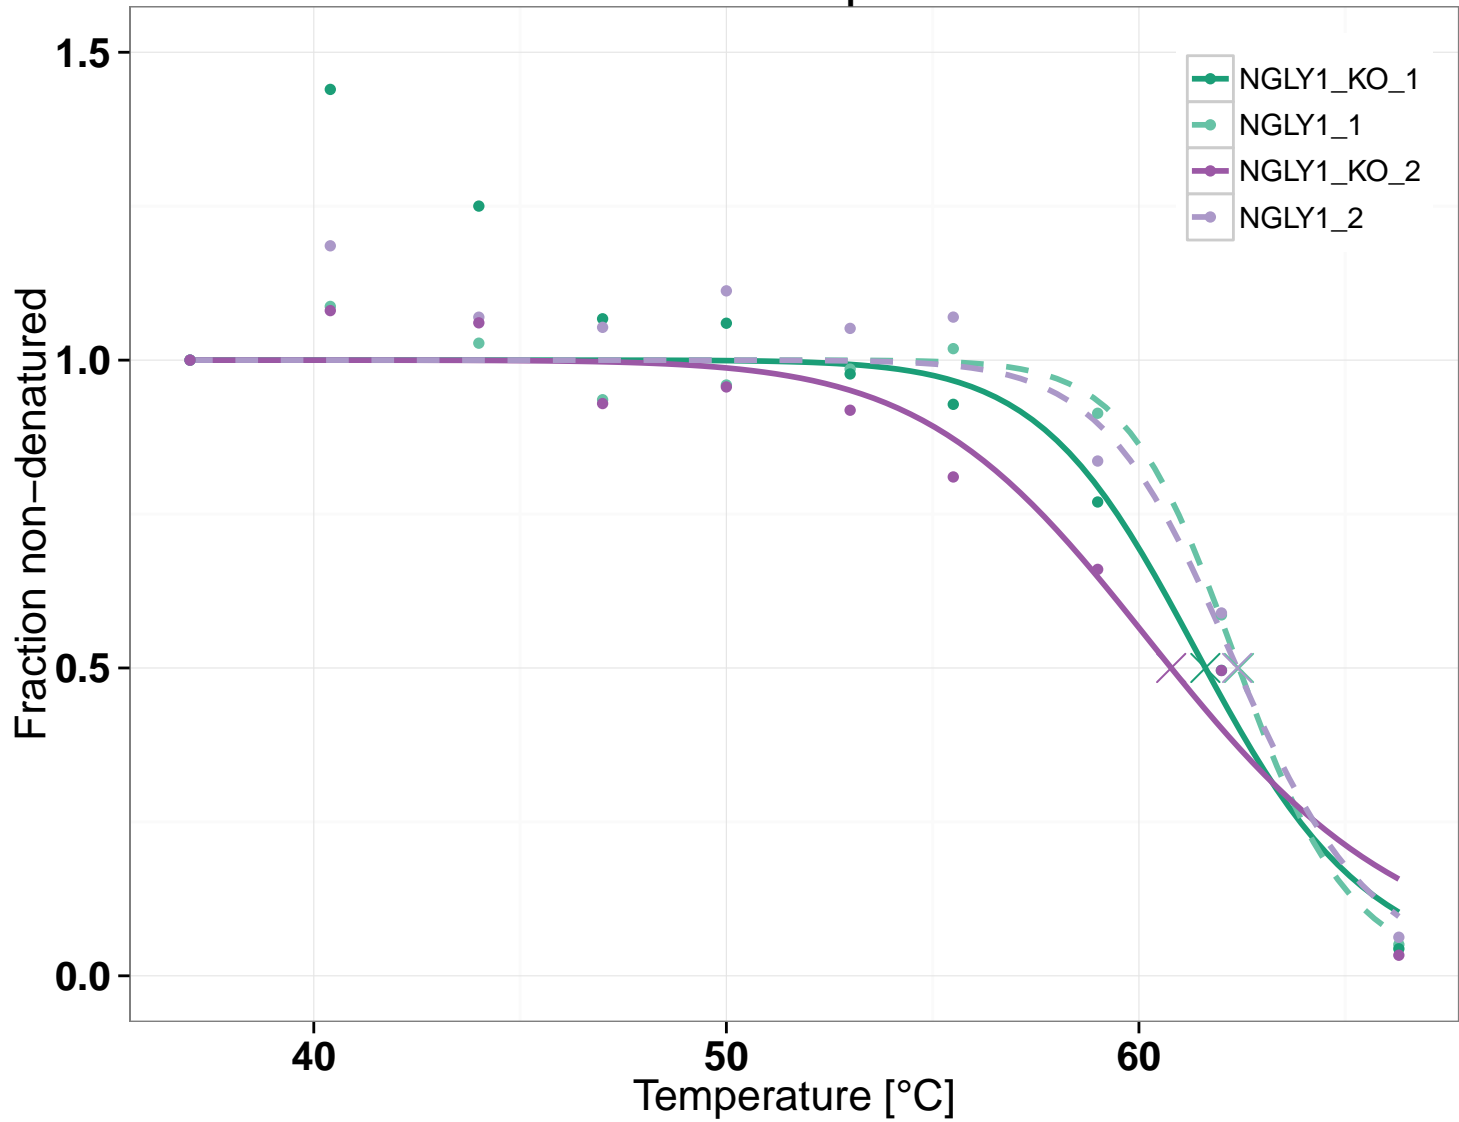

|            | meltPoint | slope  | plateau | R2   |
|------------|-----------|--------|---------|------|
| NGLY1_KO_1 | 61.61     | -0.12  | 0       | 0.81 |
| NGLY1_1    | 62.43     | -0.18  | 0       | 0.98 |
| NGLY1_KO_2 | 60.78     | -0.084 | 0       | 0.95 |
| NGLY1_2    | 62.38     | -0.15  | 0       | 0.93 |

Supplement: Supplementary file 2022 [file 1]

# IPI00479241.4|ARV1

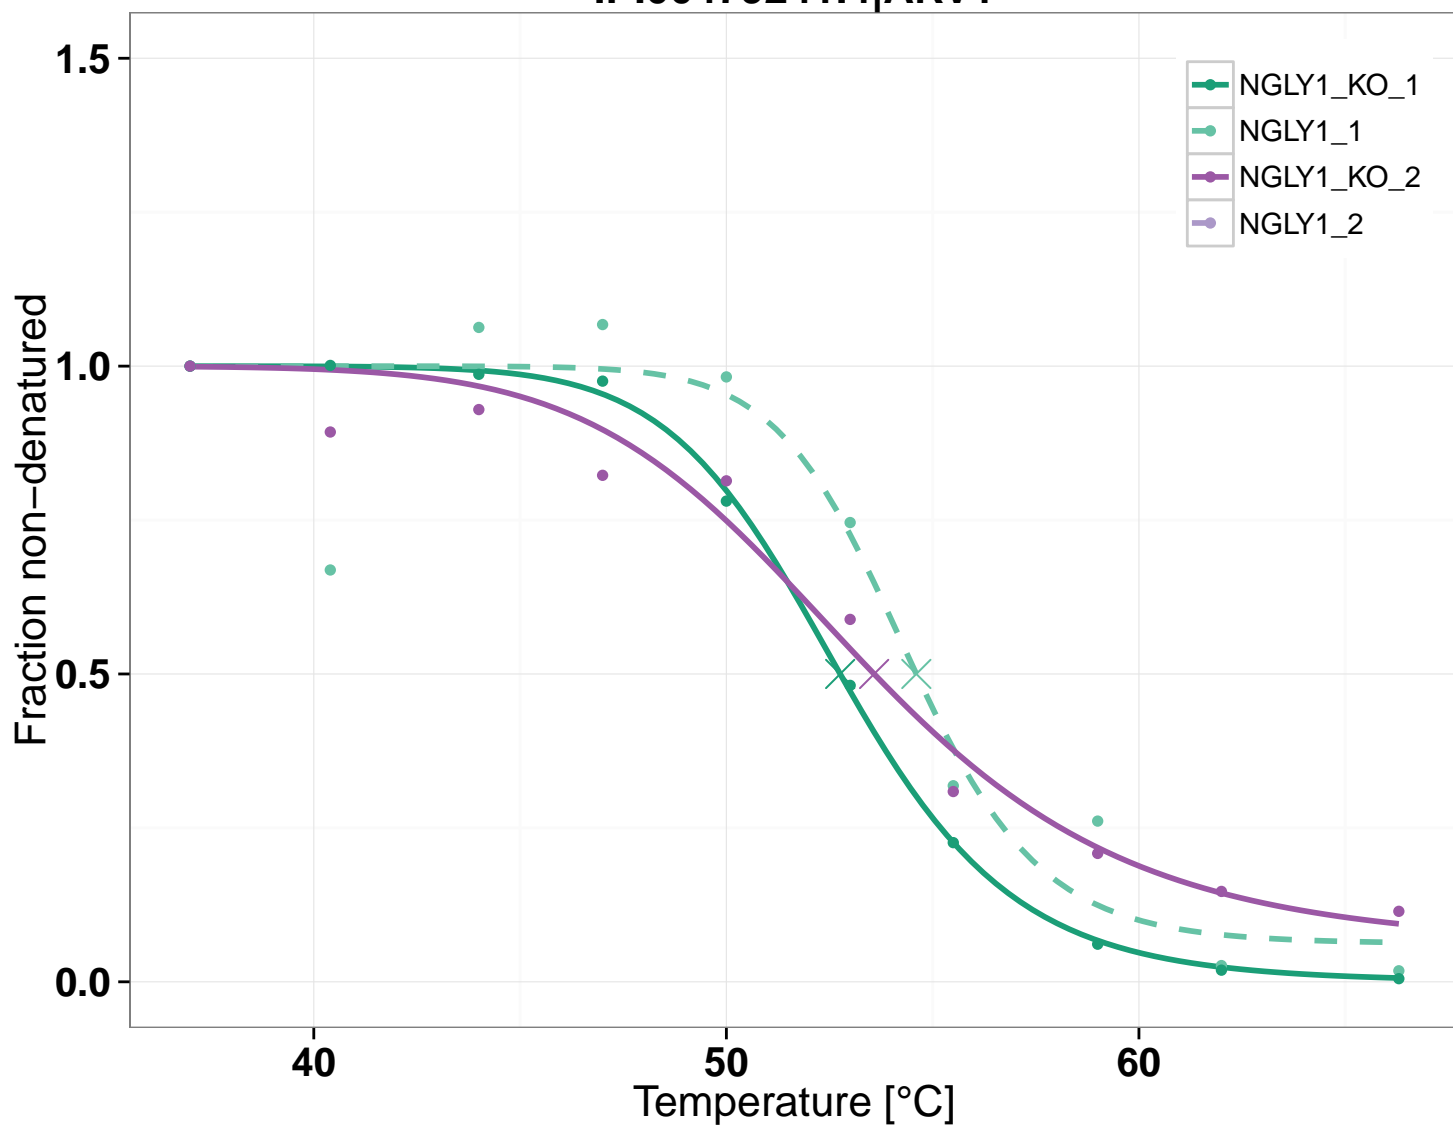

|            | meltPoint | slope  | plateau | R2   |
|------------|-----------|--------|---------|------|
| NGLY1_KO_1 | 52.76     | -0.12  | 0       | 1    |
| NGLY1_1    | 54.6      | -0.15  | 0.06    | 0.91 |
| NGLY1_KO_2 | 53.58     | -0.072 | 0.06    | 0.97 |
| NGLY1_2    | -         | -      | -       | -    |

Supplement: Supplementary file 2023 [file 1]

IPI00429191.3|ETF1

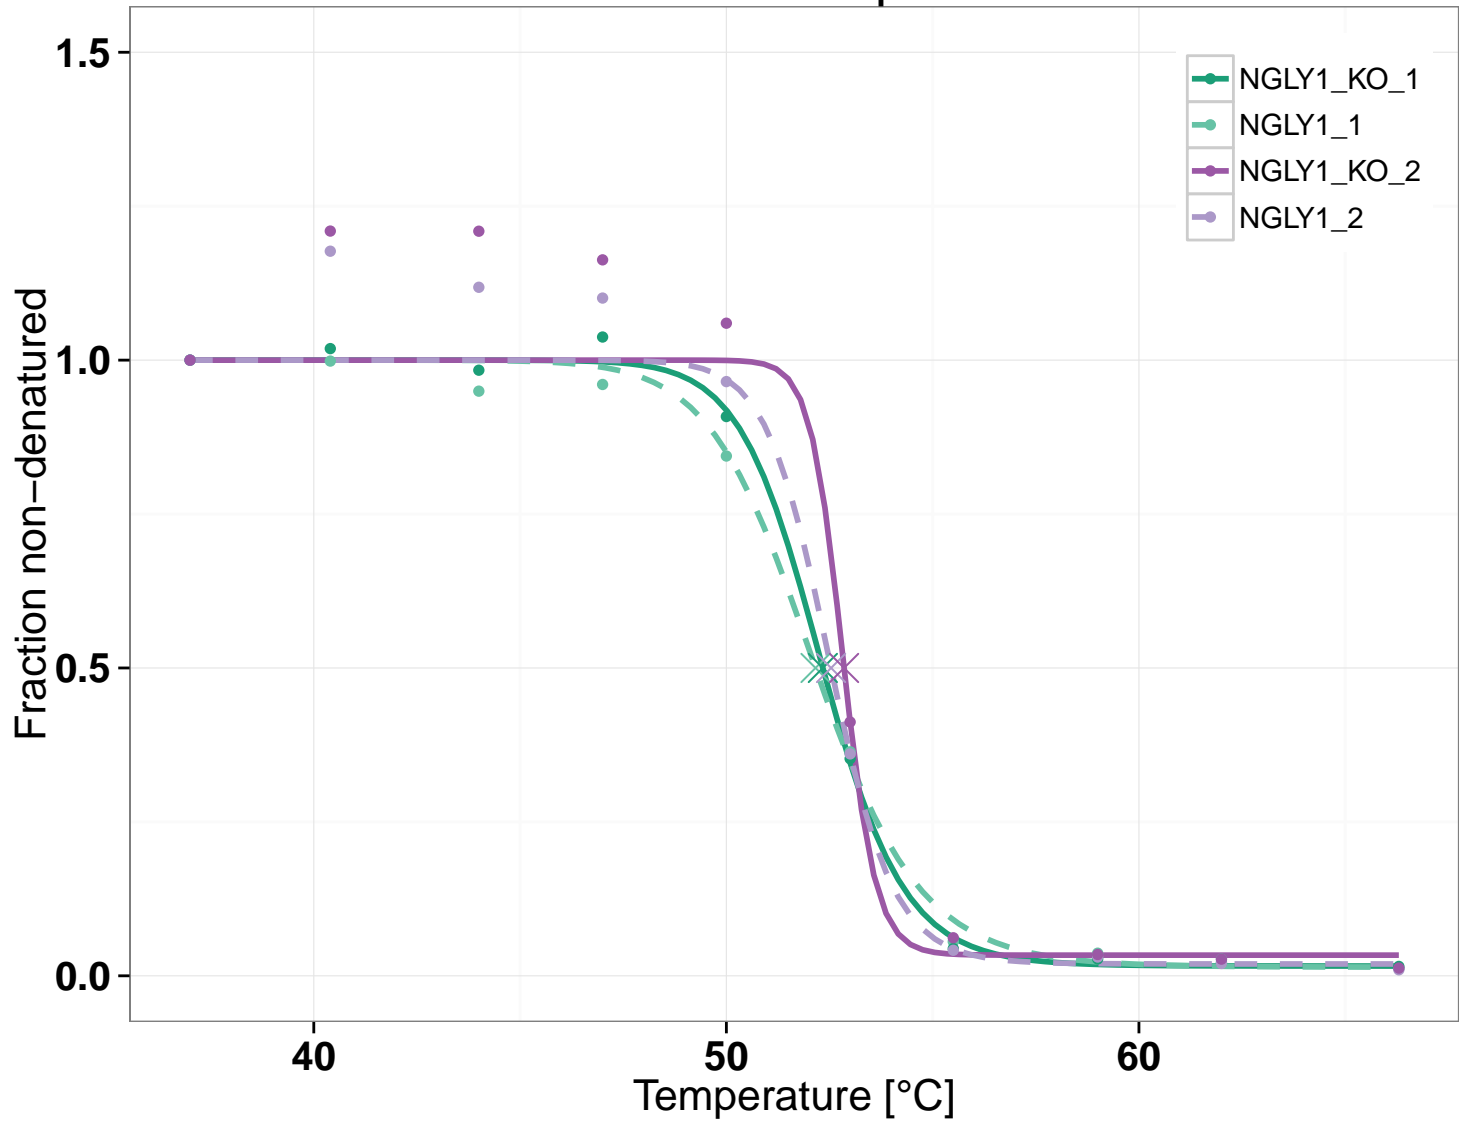

|            | meltPoint | slope | plateau | R2   |
|------------|-----------|-------|---------|------|
| NGLY1_KO_1 | 52.34     | -0.25 | 0.02    | 1    |
| NGLY1_1    | 52.16     | -0.19 | 0.01    | 1    |
| NGLY1_KO_2 | 52.85     | -0.61 | 0.03    | 0.96 |
| NGLY1_2    | 52.54     | -0.32 | 0.02    | 0.98 |

Supplement: Supplementary file 2024 [file 1]

IPI00067538.1|C16ORF87

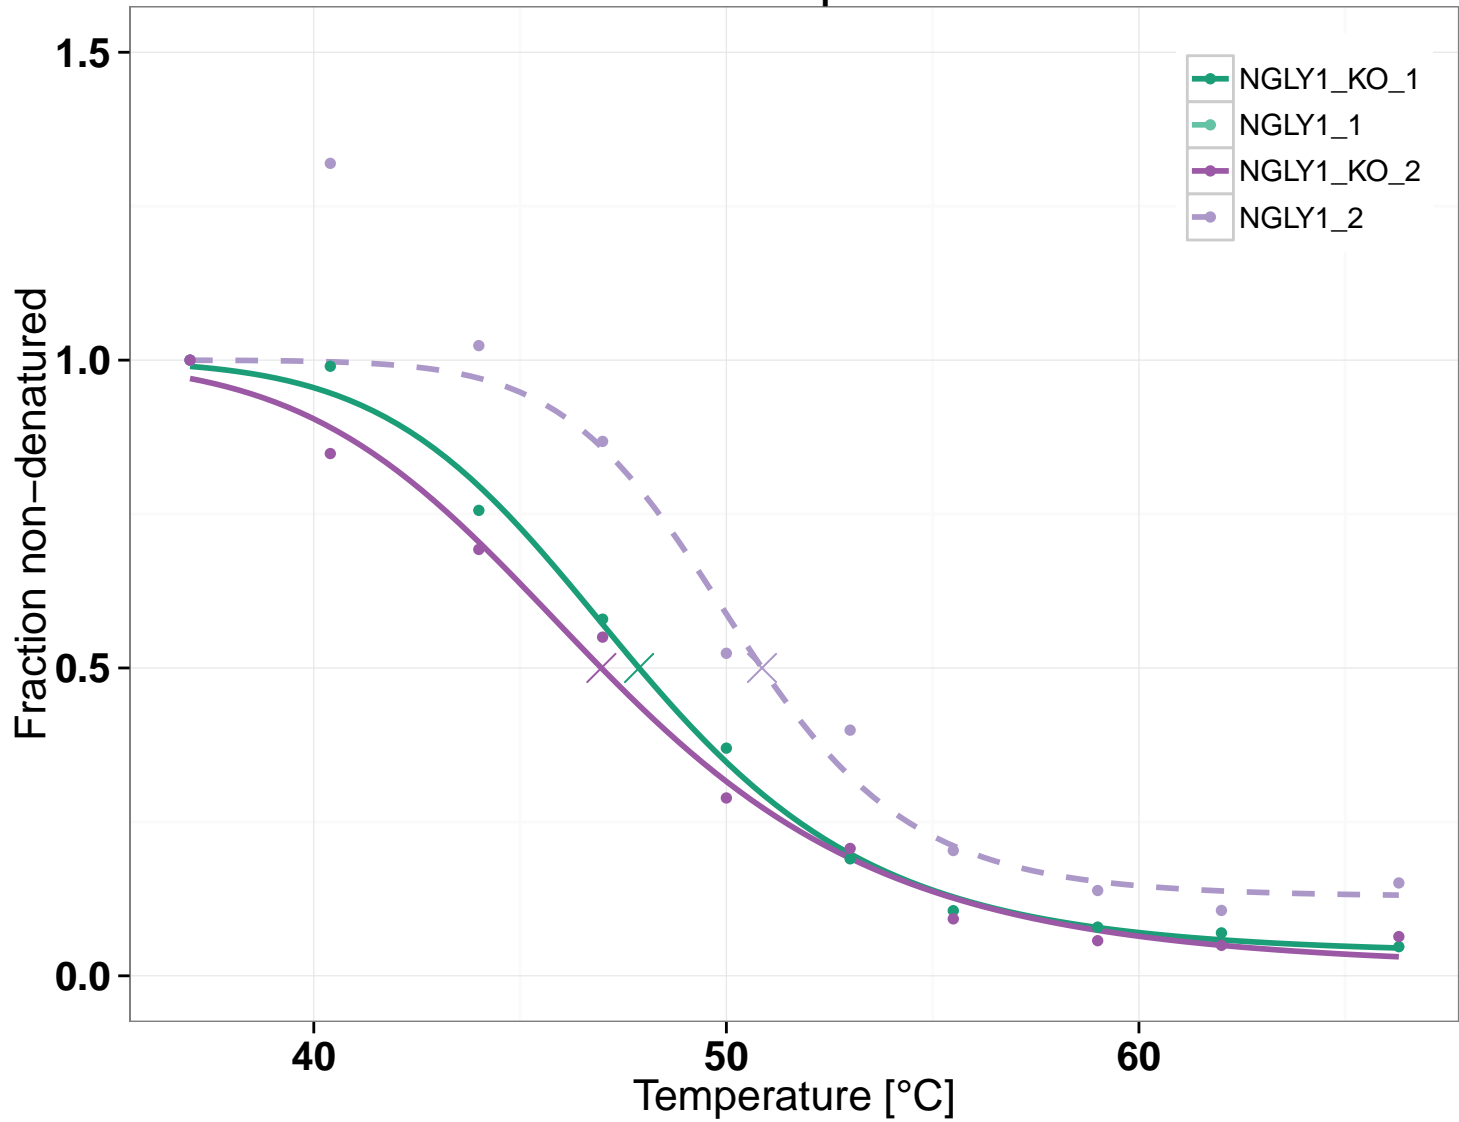

|            | meltPoint | slope  | plateau | R2   |
|------------|-----------|--------|---------|------|
| NGLY1_KO_1 | 47.88     | -0.081 | 0.03    | 1    |
| NGLY1_1    | -         | -      | -       | -    |
| NGLY1_KO_2 | 46.97     | -0.07  | 0.01    | 0.99 |
| NGLY1_2    | 50.86     | -0.1   | 0.13    | 0.93 |

Supplement: Supplementary file 2025 [file 1]

IPI00095891.2|GNAS

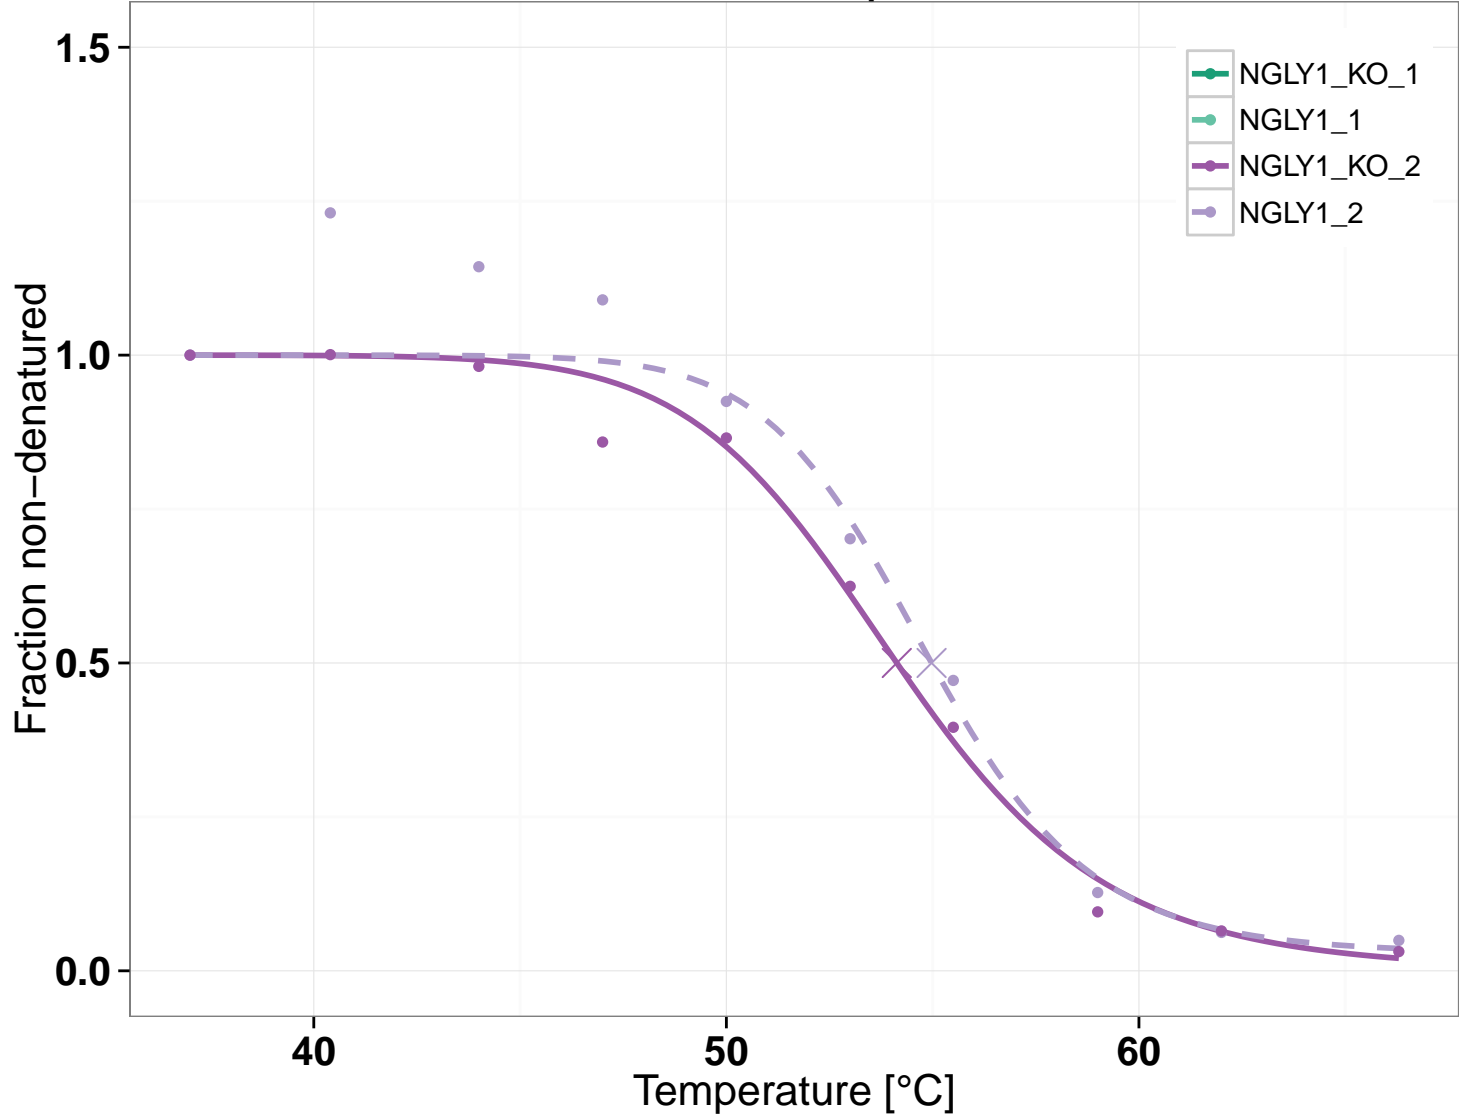

|            | meltPoint | slope  | plateau | R2   |
|------------|-----------|--------|---------|------|
| NGLY1_KO_1 | —         | —      | —       | —    |
| NGLY1_1    | —         | —      | —       | —    |
| NGLY1_KO_2 | 54.13     | -0.098 | 0       | 0.99 |
| NGLY1_2    | 54.97     | -0.12  | 0.03    | 0.96 |

Supplement: Supplementary file 2026 [file 1]

IPI00021999.1|IL18R1

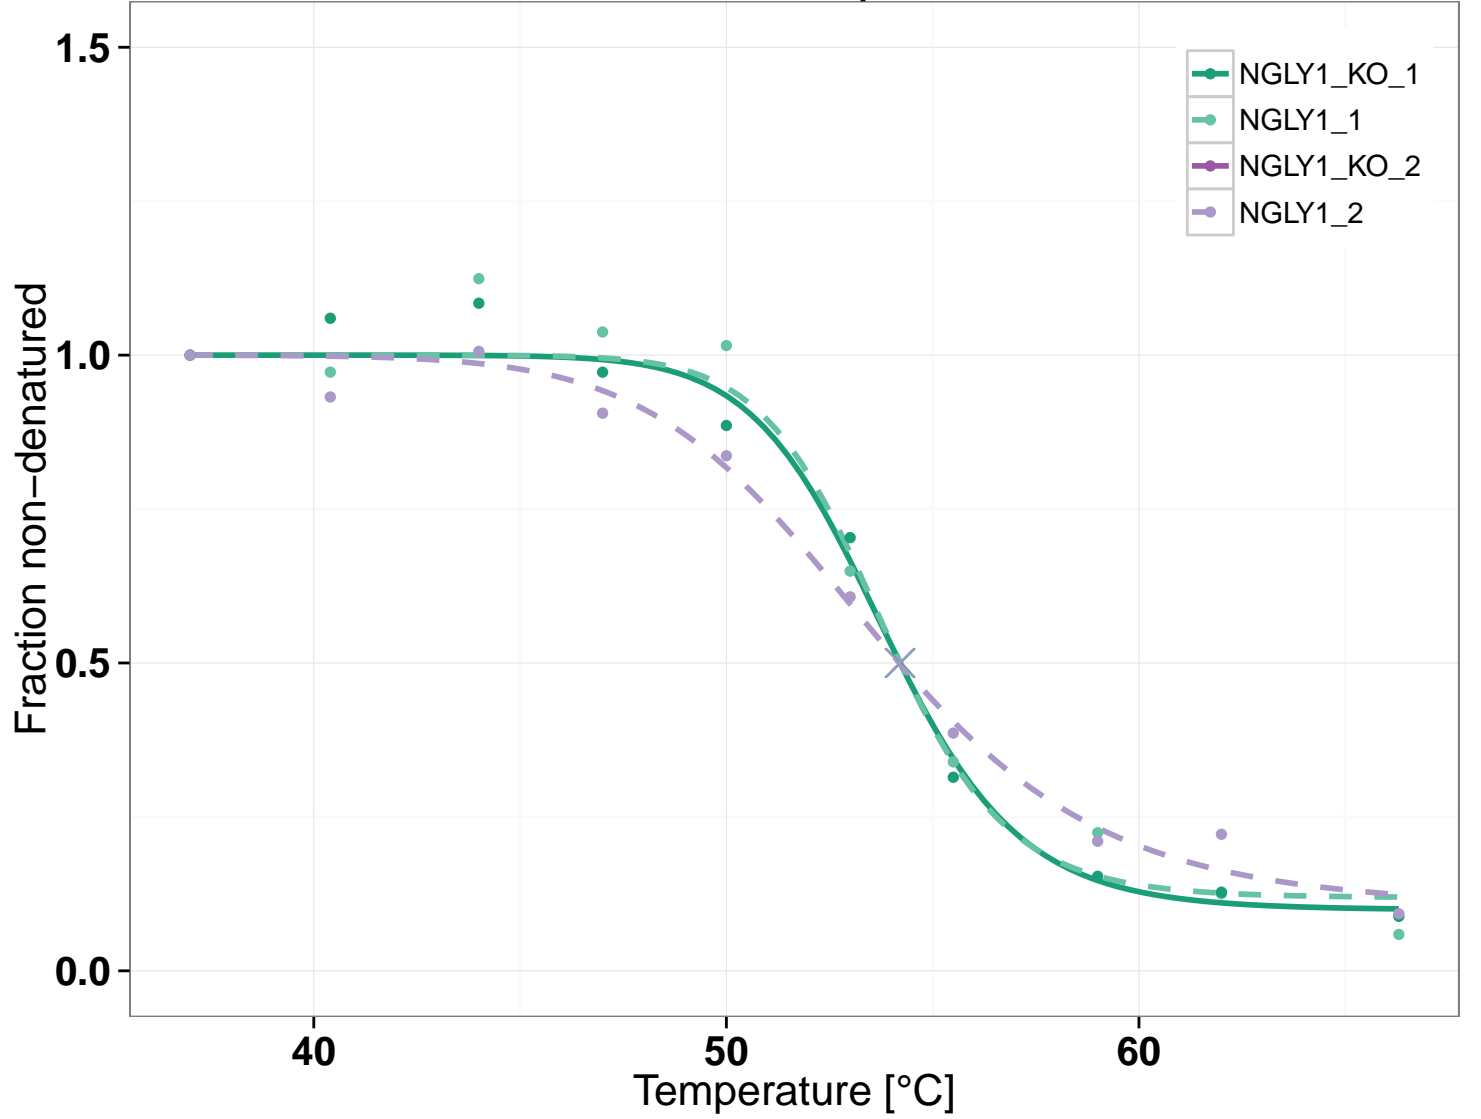

|            | meltPoint | slope  | plateau | R2   |
|------------|-----------|--------|---------|------|
| NGLY1_KO_1 | 54.21     | -0.14  | 0.1     | 0.99 |
| NGLY1_1    | 54.22     | -0.15  | 0.12    | 0.98 |
| NGLY1_KO_2 | -         | -      | -       | -    |
| NGLY1_2    | 54.2      | -0.081 | 0.1     | 0.99 |

Supplement: Supplementary file 2027 [file 1]

# IPI00872152.1|RCSD1

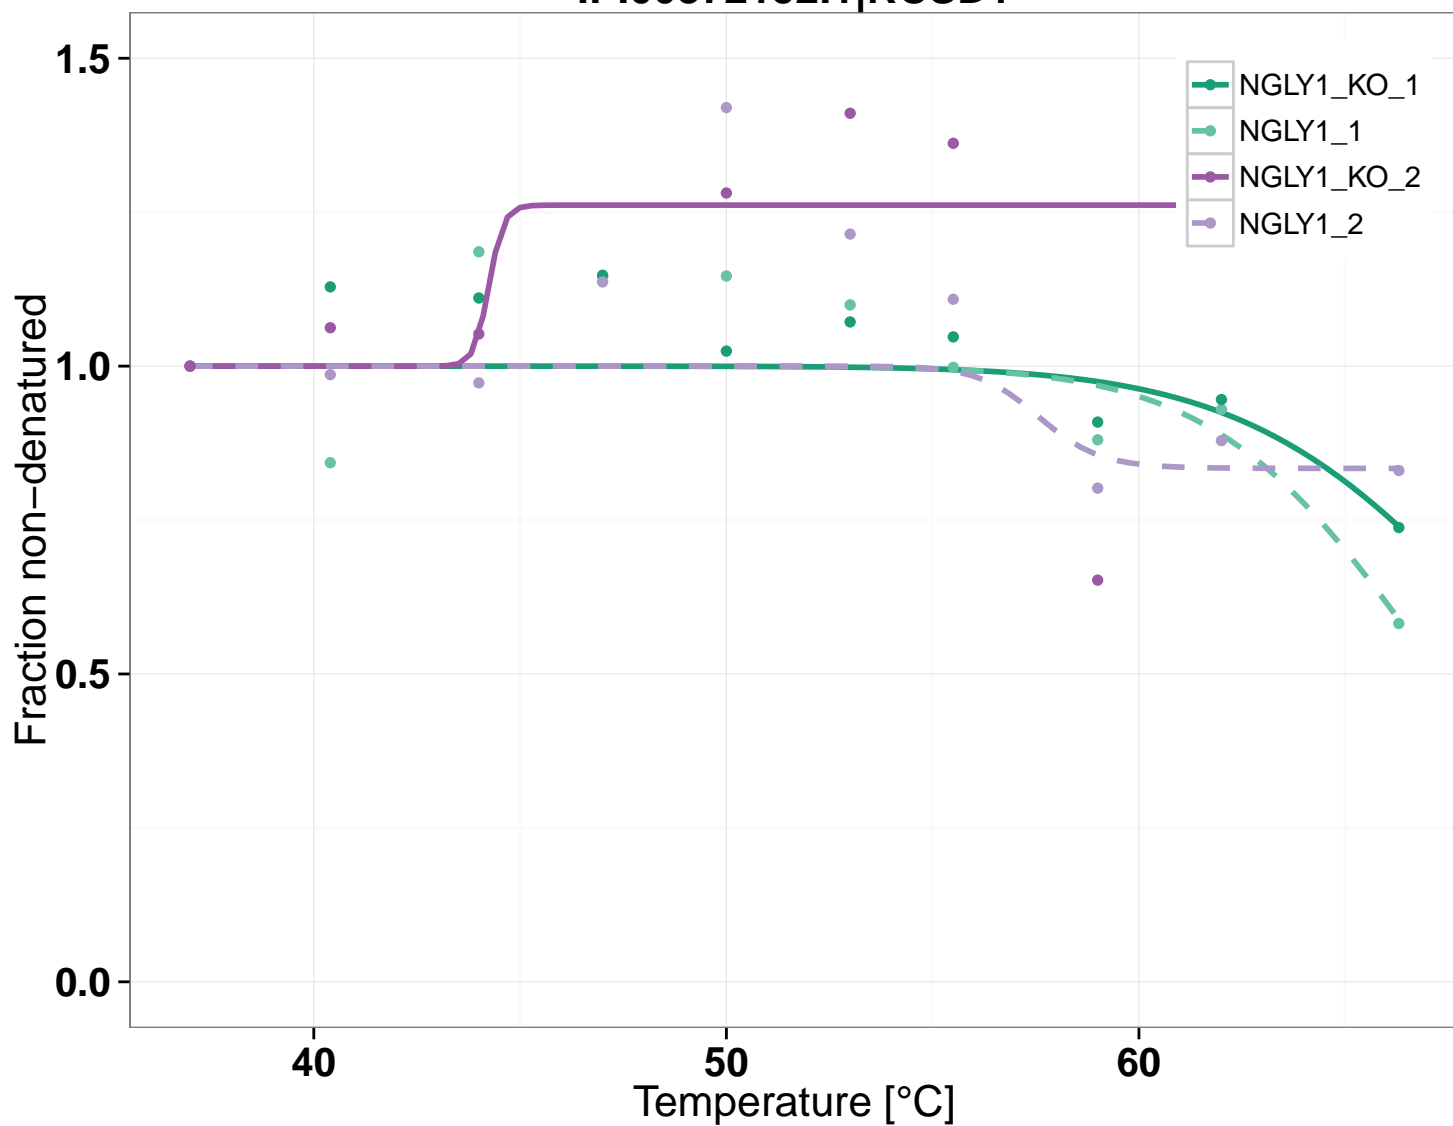

|            | meltPoint | slope  | plateau | R2   |
|------------|-----------|--------|---------|------|
| NGLY1_KO_1 | 45        | -0.001 | 0       | 0.53 |
| NGLY1_1    | 45        | -0.001 | 0       | 0.6  |
| NGLY1_KO_2 | 55        | 0.37   | 1.26    | 0.17 |
| NGLY1_2    | 55        | -0.056 | 0.83    | 0.2  |

Supplement: Supplementary file 2028 [file 1]

IPI00017630.6|NUFIP1

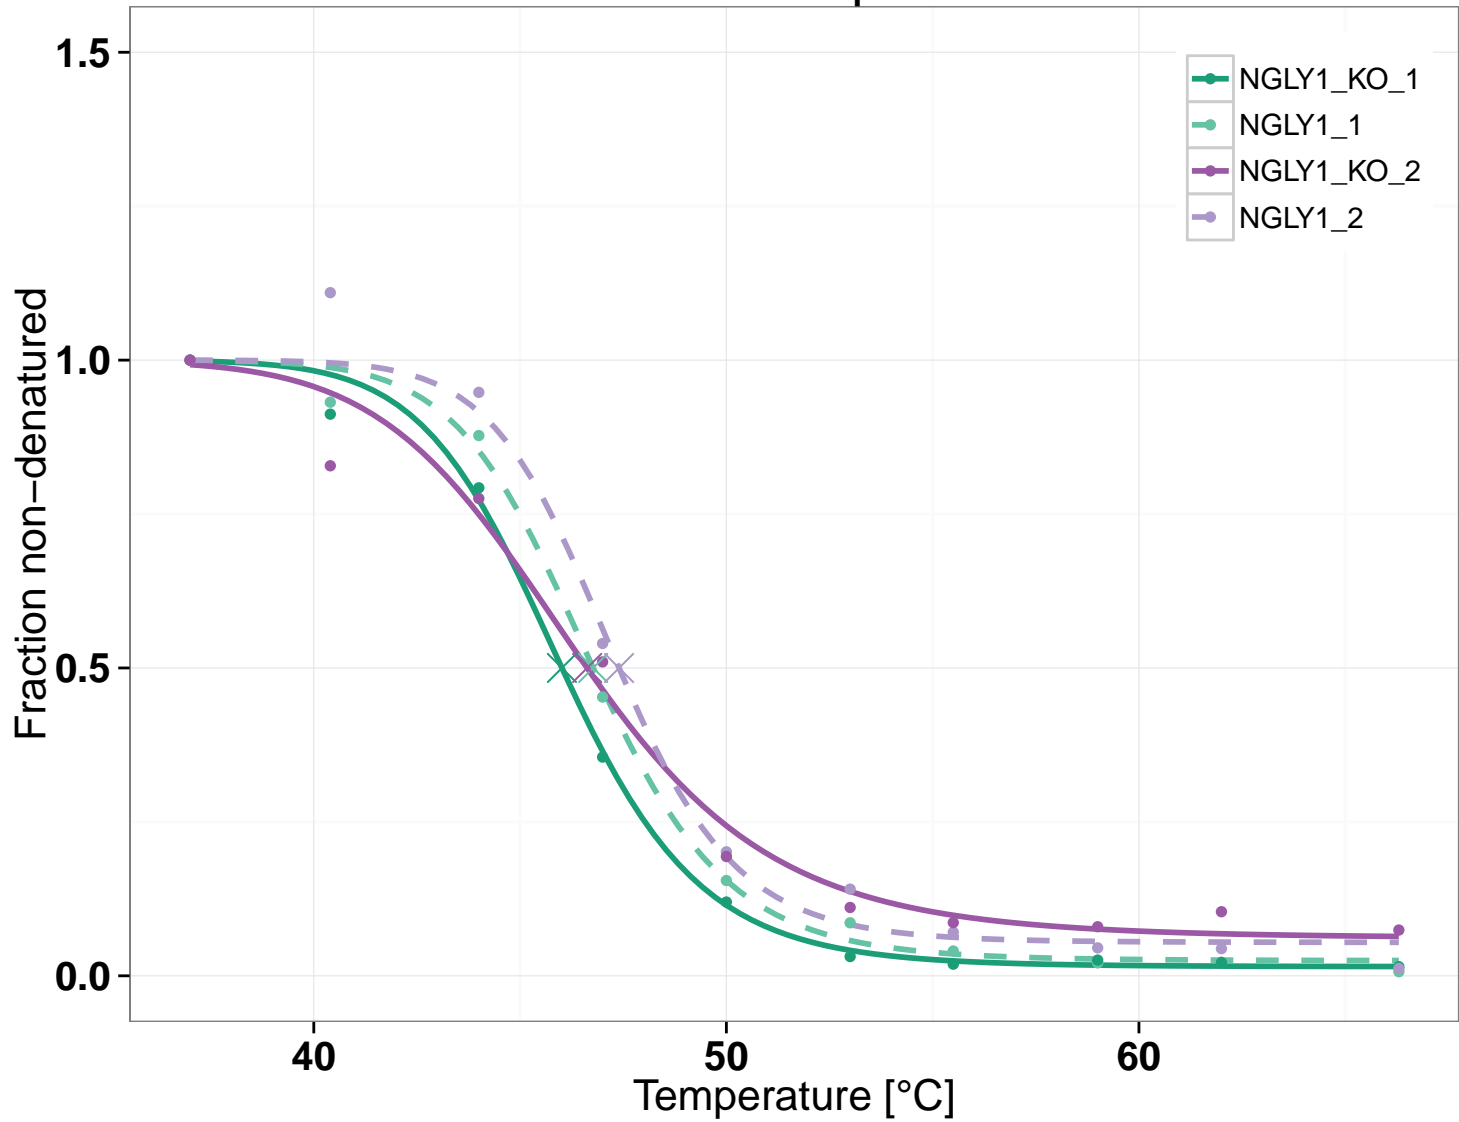

|            | meltPoint | slope  | plateau | R2   |
|------------|-----------|--------|---------|------|
| NGLY1_KO_1 | 46.01     | -0.15  | 0.01    | 1    |
| NGLY1_1    | 46.77     | -0.15  | 0.02    | 1    |
| NGLY1_KO_2 | 46.63     | -0.099 | 0.06    | 0.98 |
| NGLY1_2    | 47.4      | -0.16  | 0.05    | 0.99 |

Supplement: Supplementary file 2029 [file 1]

# IPI00023729.1|FN3K

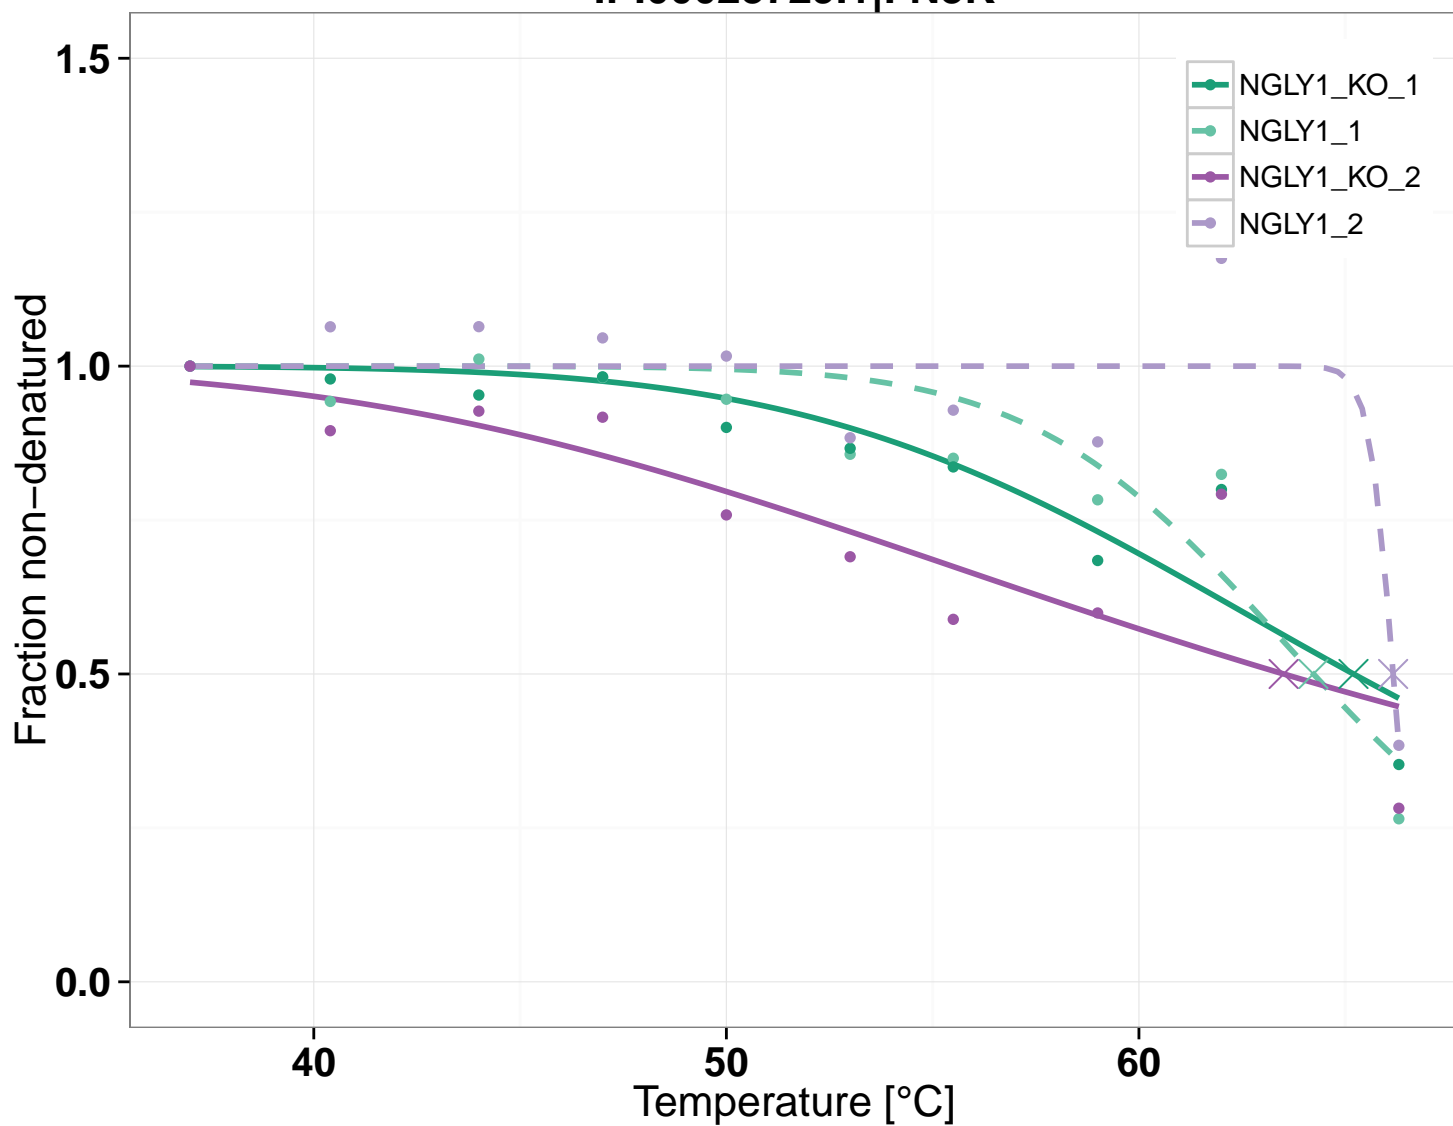

|            | meltPoint | slope  | plateau | R2   |
|------------|-----------|--------|---------|------|
| NGLY1_KO_1 | 65.2      | -0.038 | 0       | 0.85 |
| NGLY1_1    | 64.23     | -0.073 | 0       | 0.84 |
| NGLY1_KO_2 | 63.51     | -0.023 | 0       | 0.73 |
| NGLY1_2    | 66.16     | -0.86  | 0       | 0.82 |

Supplement: Supplementary file 2030 [file 1]

# IPI00014298.3|PWP1

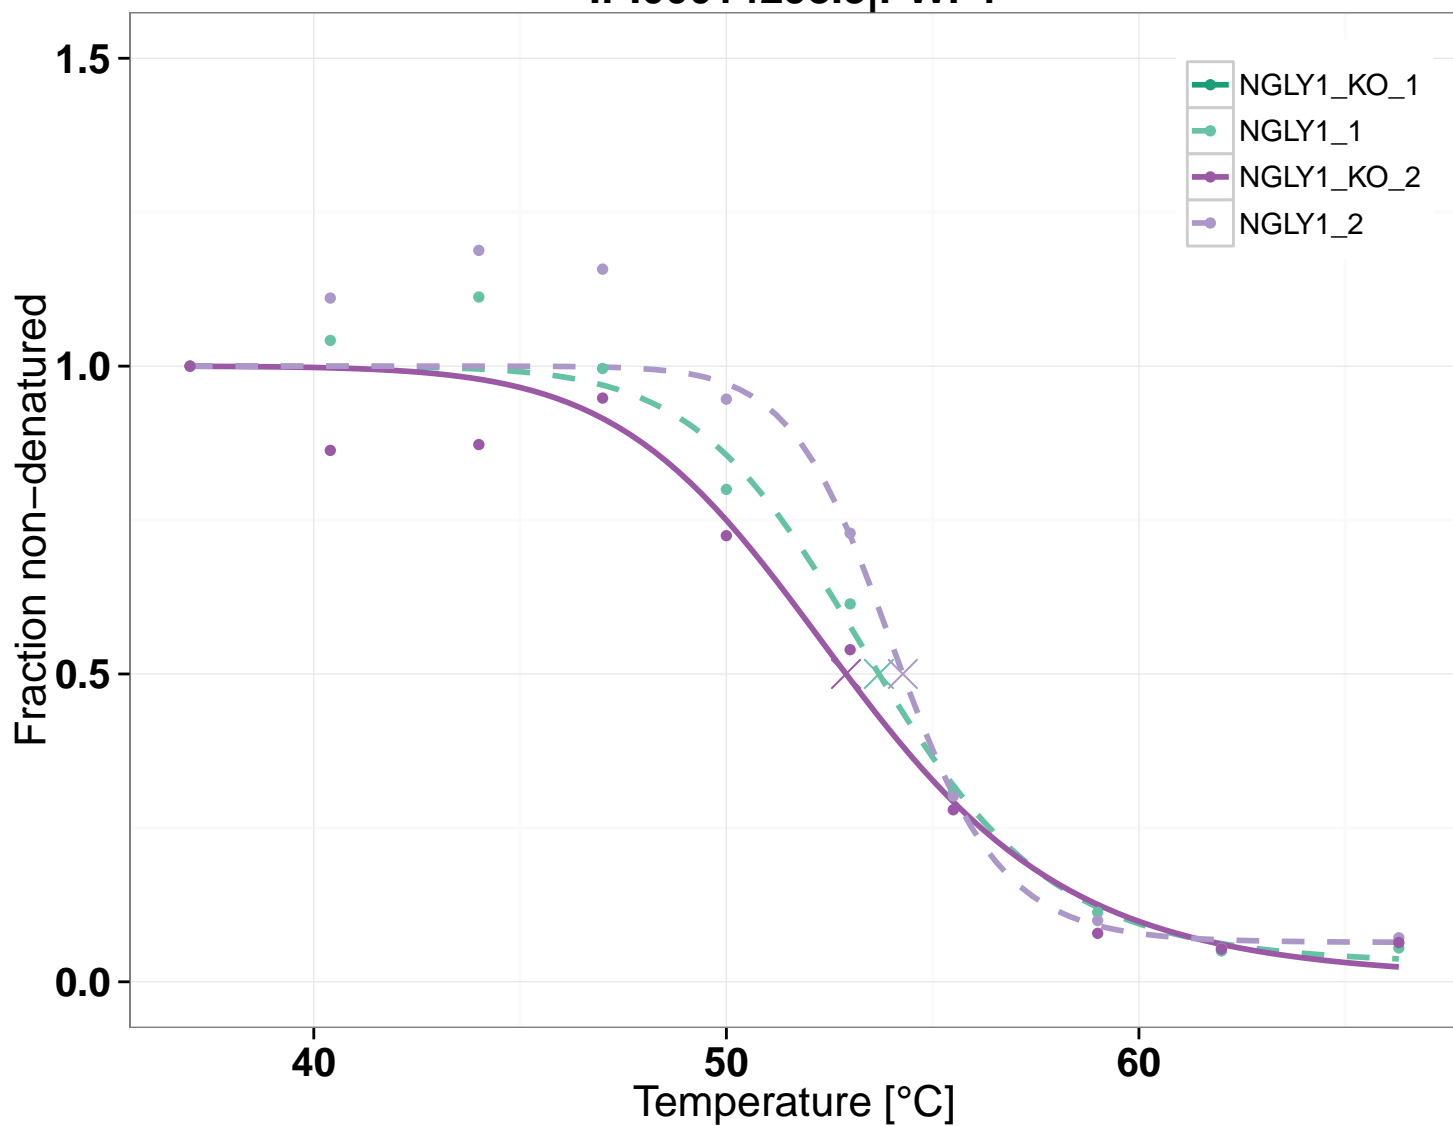

|            | meltPoint | slope | plateau | R2   |
|------------|-----------|-------|---------|------|
| NGLY1_KO_1 | —         | —     | —       | —    |
| NGLY1_1    | 53.7      | -0.11 | 0.03    | 0.99 |
| NGLY1_KO_2 | 52.9      | -0.09 | 0       | 0.97 |
| NGLY1_2    | 54.28     | -0.18 | 0.06    | 0.96 |

Supplement: Supplementary file 2031 [file 1]

IPI00871932.1|SPTBN1

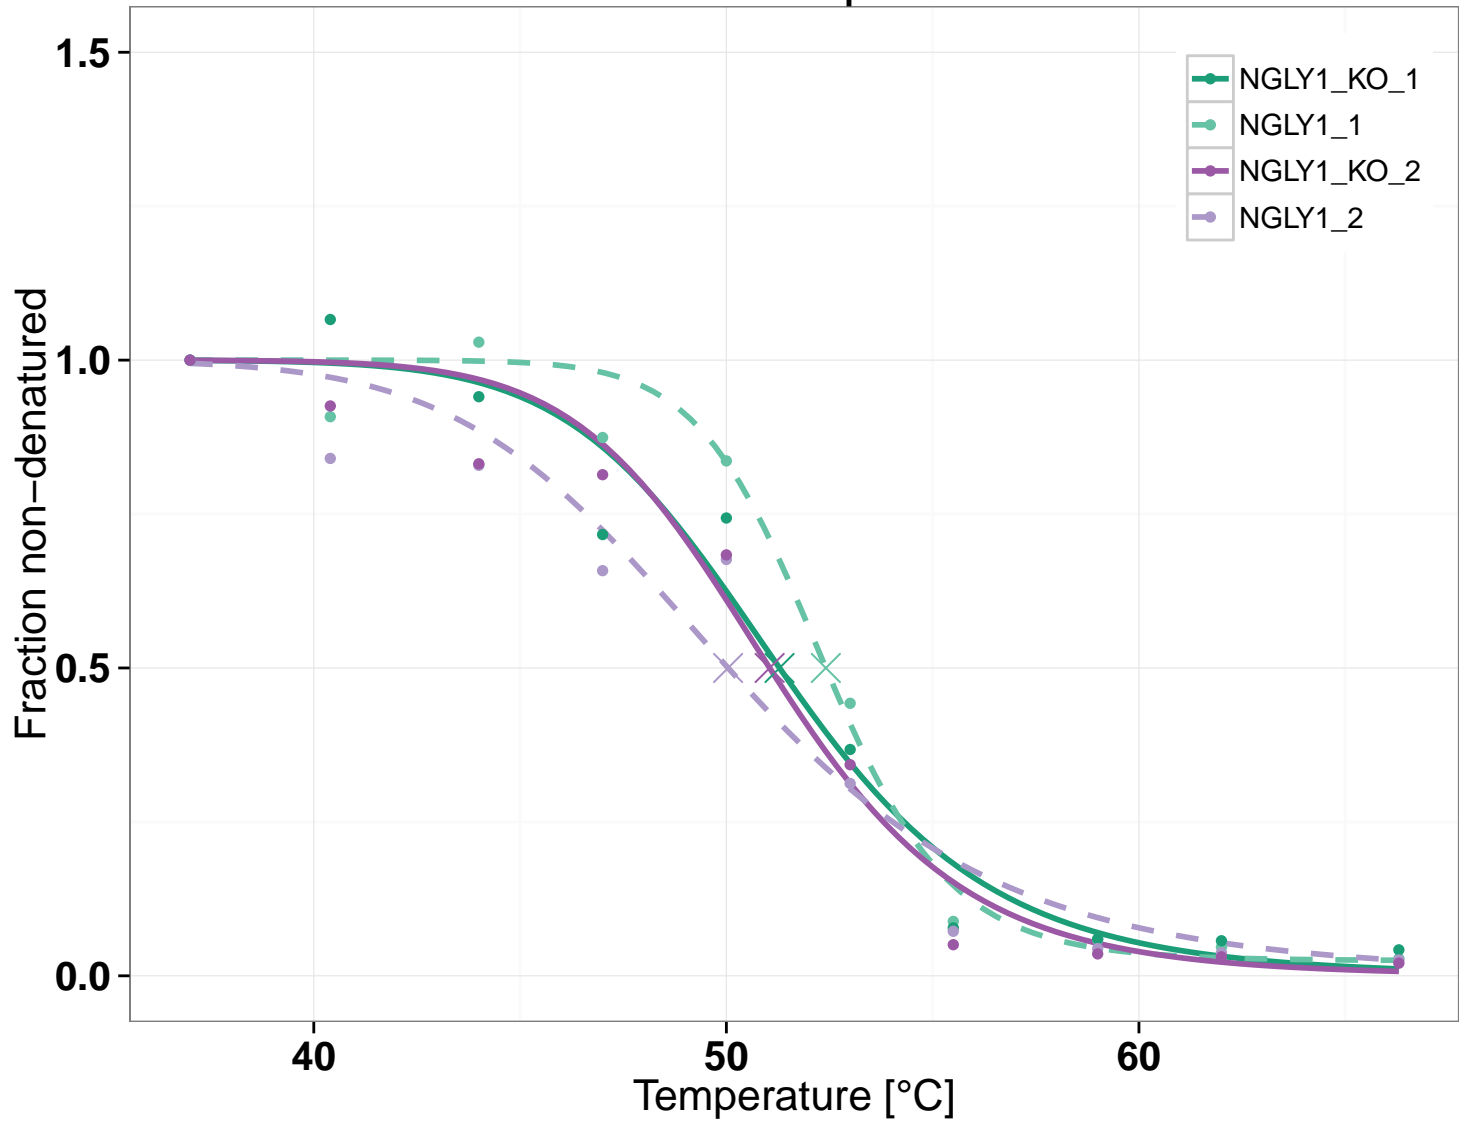

|            | meltPoint | slope  | plateau | R2   |
|------------|-----------|--------|---------|------|
| NGLY1_KO_1 | 51.29     | -0.097 | 0       | 0.97 |
| NGLY1_1    | 52.41     | -0.16  | 0.02    | 0.99 |
| NGLY1_KO_2 | 51.05     | -0.11  | 0       | 0.97 |
| NGLY1_2    | 50.04     | -0.076 | 0       | 0.95 |

Supplement: Supplementary file 2032 [file 1]

# IPI00743203.2|LAMB2

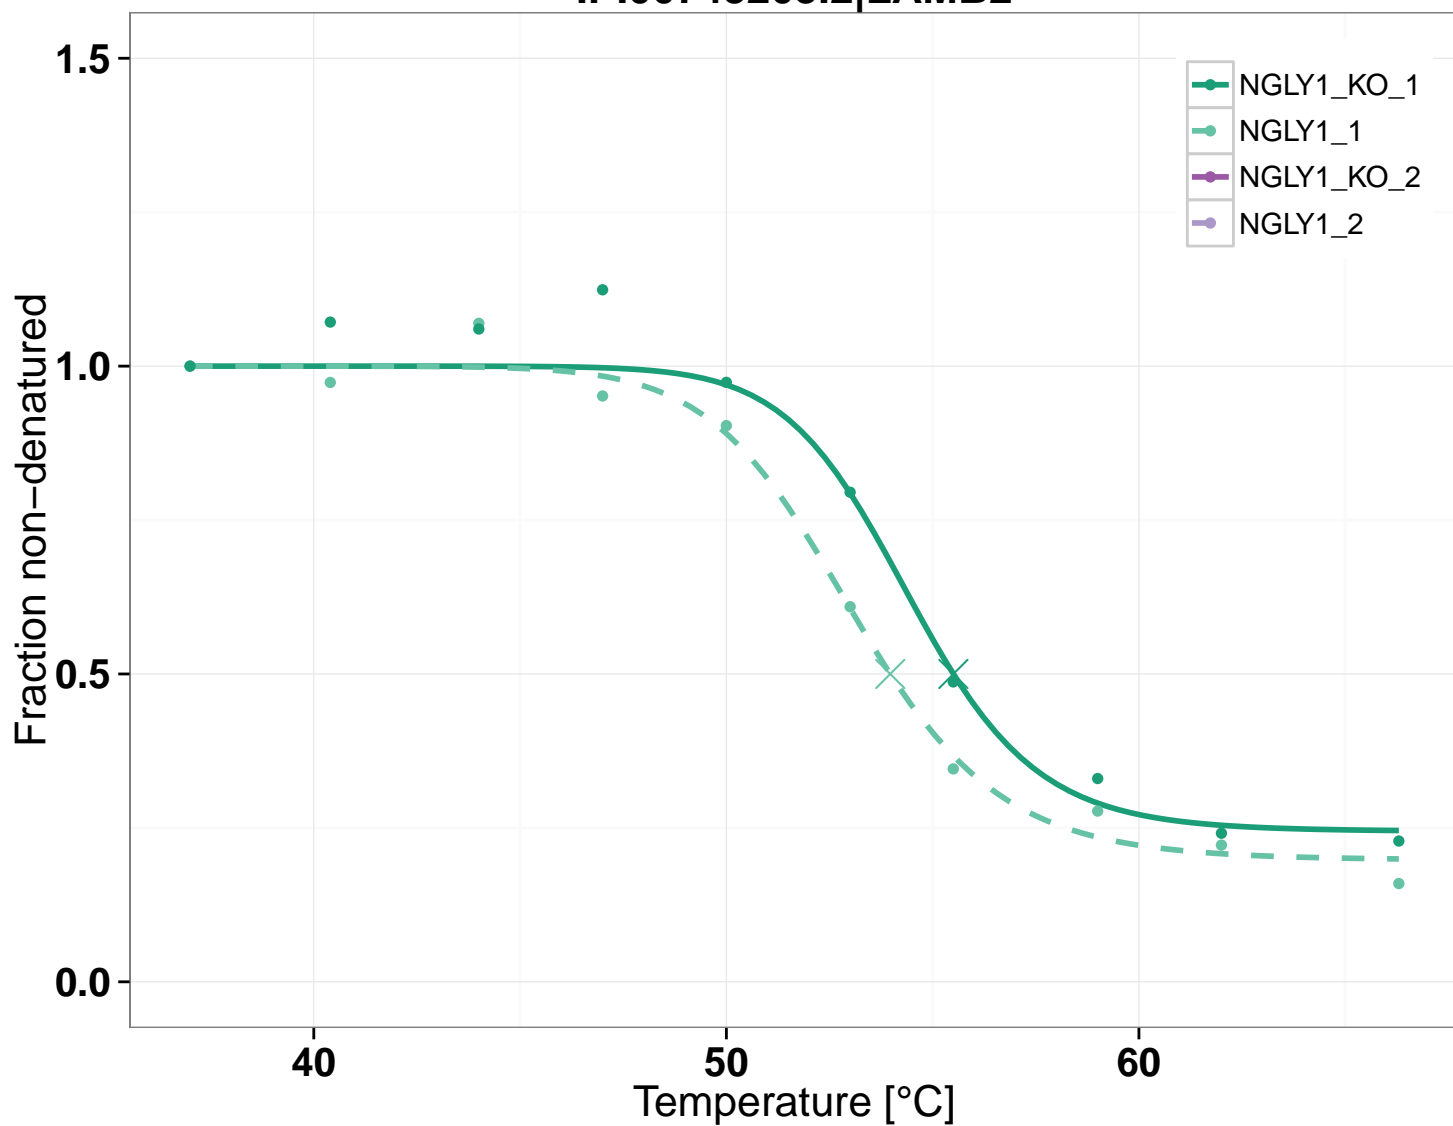

|            | meltPoint | slope | plateau | R2   |
|------------|-----------|-------|---------|------|
| NGLY1_KO_1 | 55.5      | -0.12 | 0.24    | 0.98 |
| NGLY1_1    | 53.97     | -0.11 | 0.2     | 0.99 |
| NGLY1_KO_2 | -         | -     | -       | -    |
| NGLY1_2    | -         | -     | -       | -    |

Supplement: Supplementary file 2033 [file 1]

IPI00478209.6|RAB19

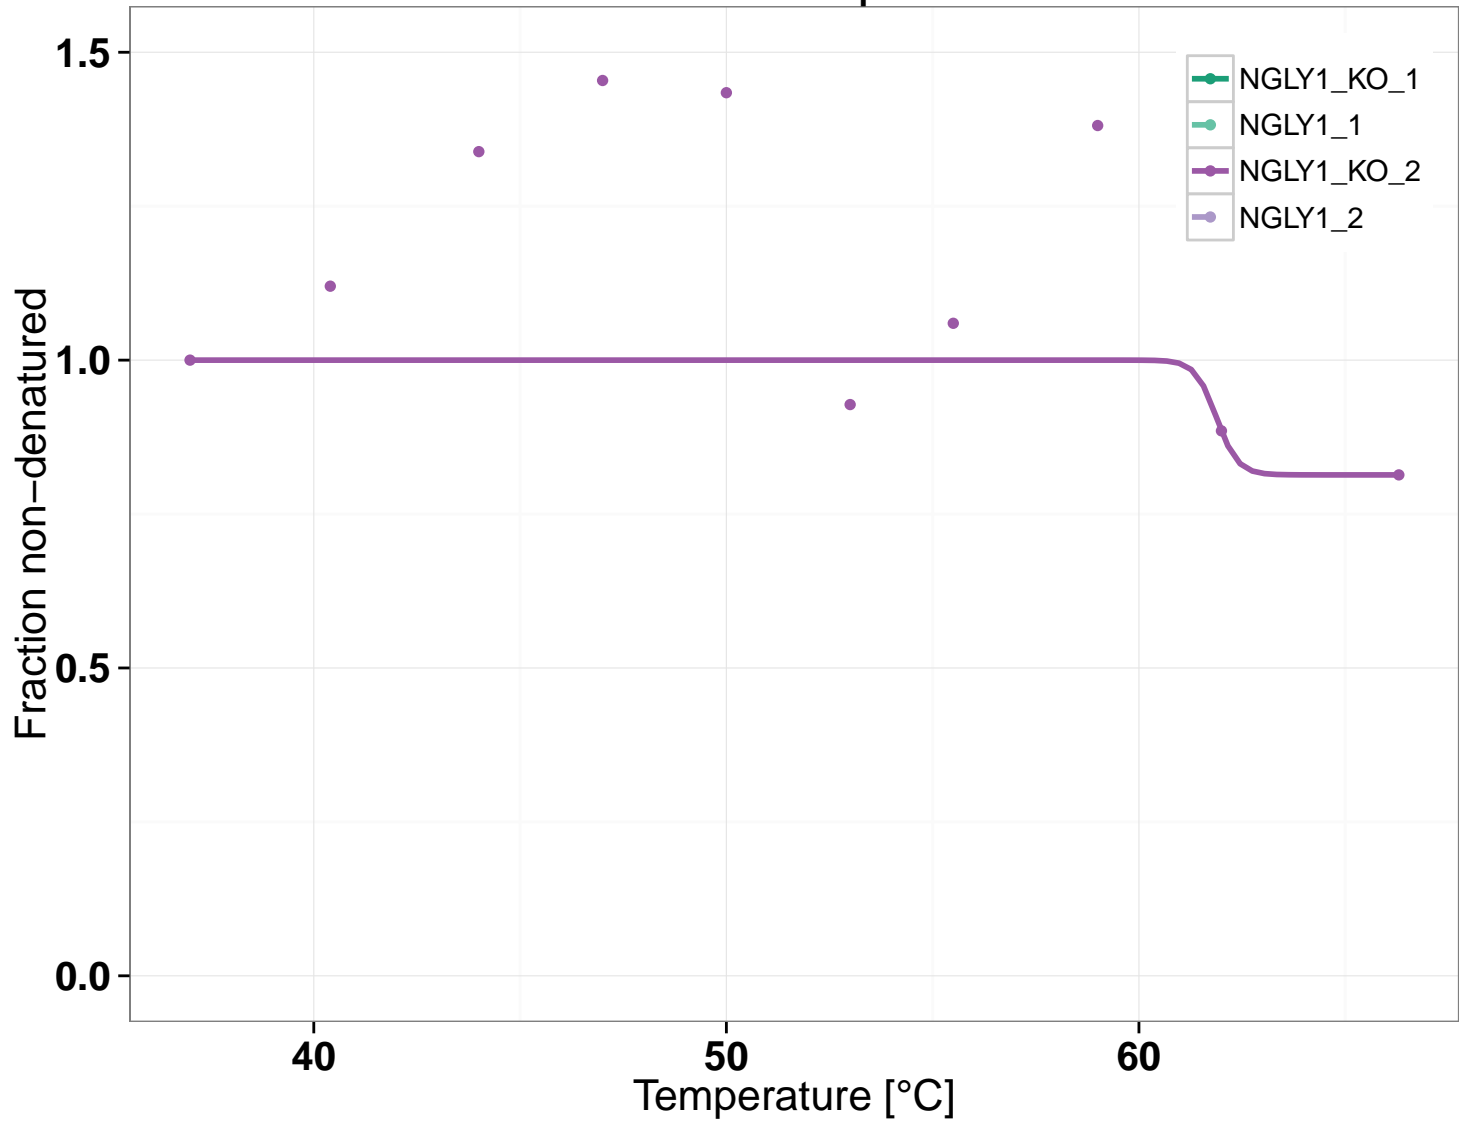

|            | meltPoint | slope | plateau | R2    |
|------------|-----------|-------|---------|-------|
| NGLY1_KO_1 | -         | -     | -       | -     |
| NGLY1_1    | -         | -     | -       | -     |
| NGLY1_KO_2 | -         | -0.18 | 0.81    | -0.29 |
| NGLY1_2    | -         | -     | -       | -     |

Supplement: Supplementary file 2034 [file 1]

IPI00005732.1|ACVR1B

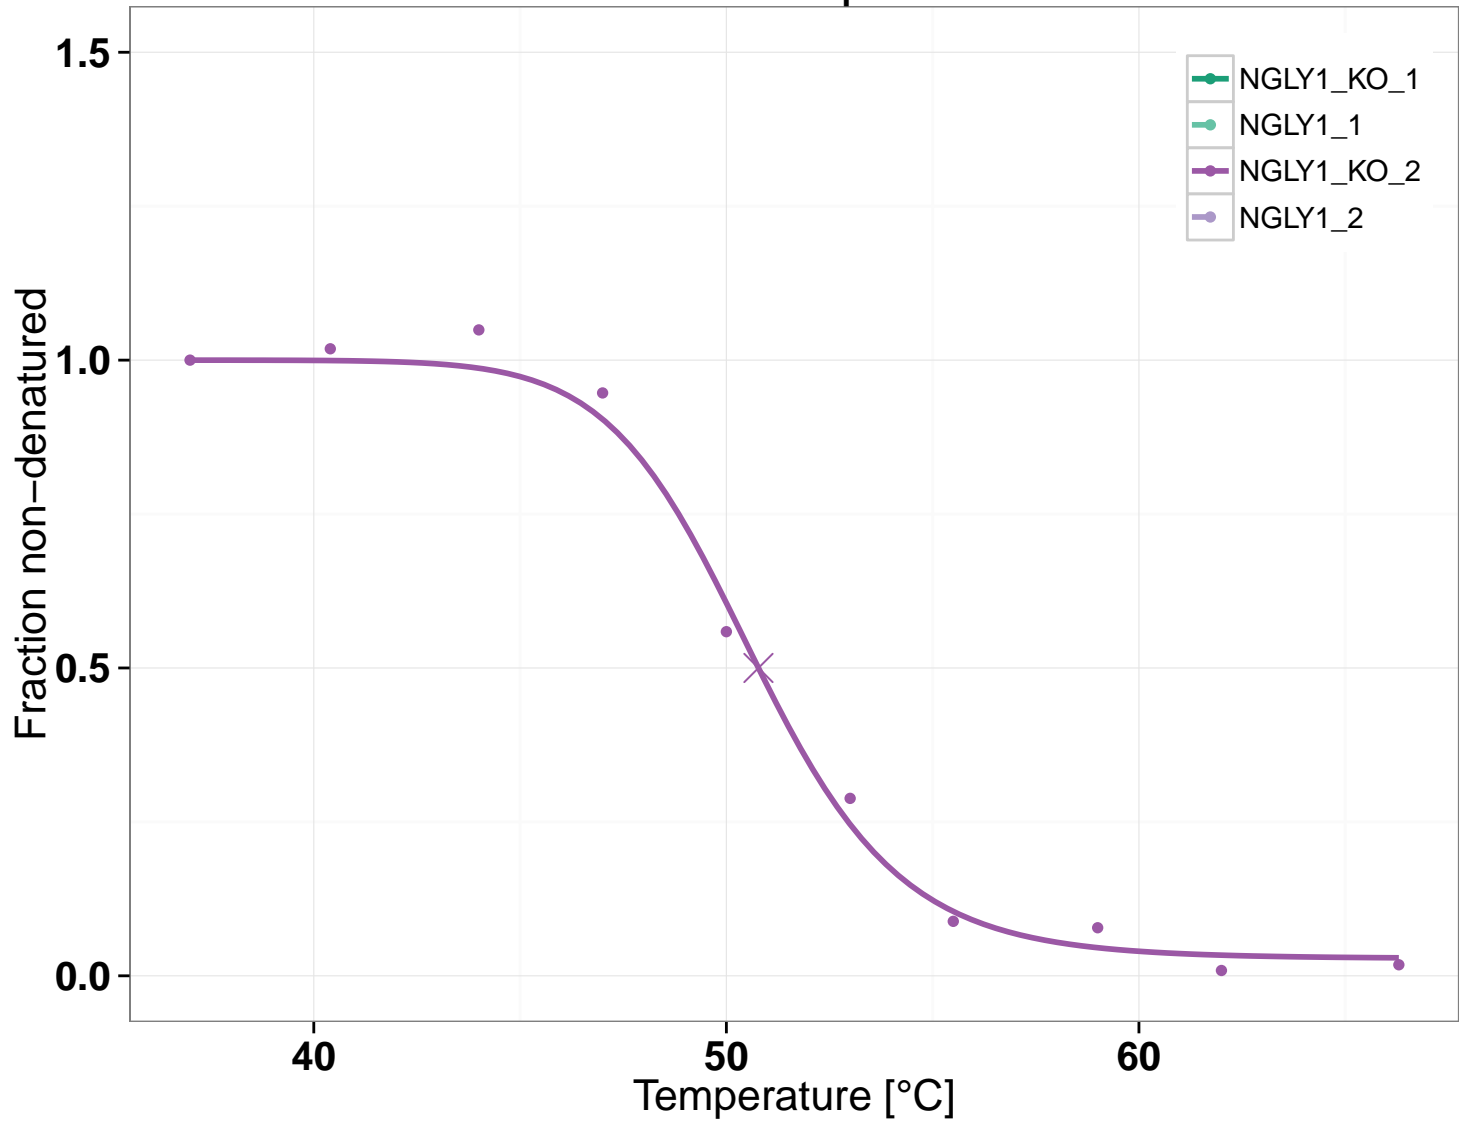

|            | meltPoint | slope | plateau | R2   |
|------------|-----------|-------|---------|------|
| NGLY1_KO_1 | —         | —     | —       | —    |
| NGLY1_1    | —         | —     | —       | —    |
| NGLY1_KO_2 | 50.78     | -0.14 | 0.03    | 0.99 |
| NGLY1_2    | —         | —     | —       | —    |

Supplement: Supplementary file 2035 [file 1]

# IPI00021327.3|GRB2

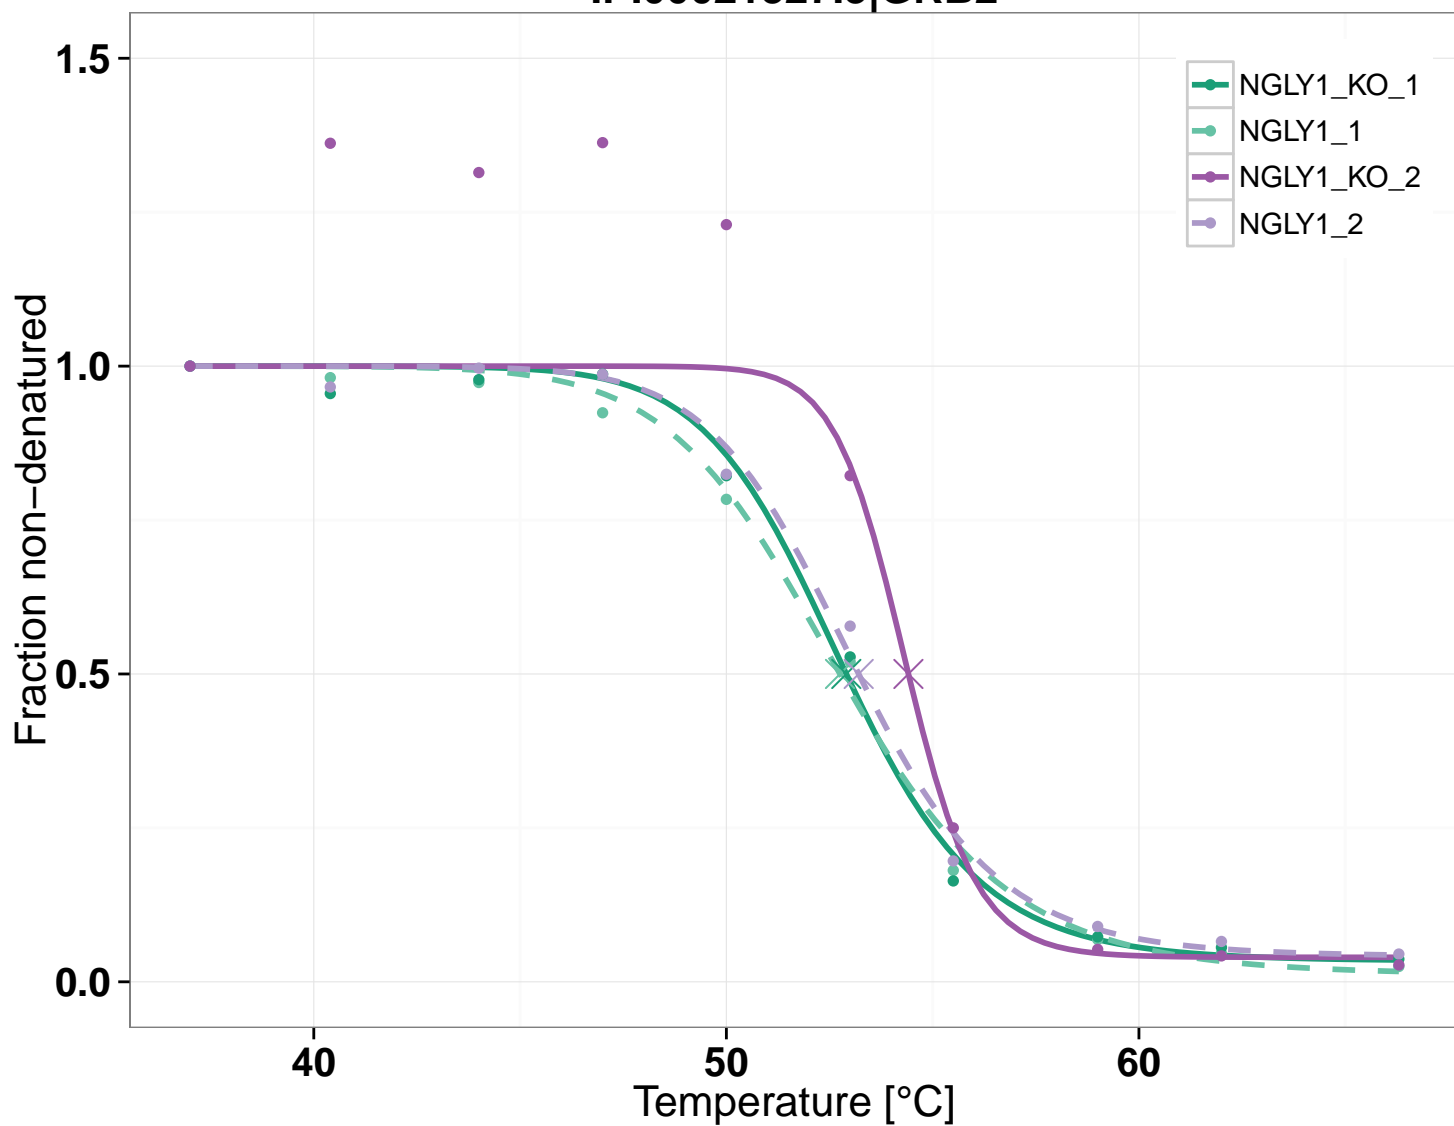

|            | meltPoint | slope | plateau | R2   |
|------------|-----------|-------|---------|------|
| NGLY1_KO_1 | 52.91     | -0.14 | 0.03    | 1    |
| NGLY1_1    | 52.75     | -0.12 | 0.01    | 1    |
| NGLY1_KO_2 | 54.41     | -0.28 | 0.04    | 0.87 |
| NGLY1_2    | 53.21     | -0.14 | 0.04    | 1    |

Supplement: Supplementary file 2036 [file 1]

IPI00220871.4|RPL37

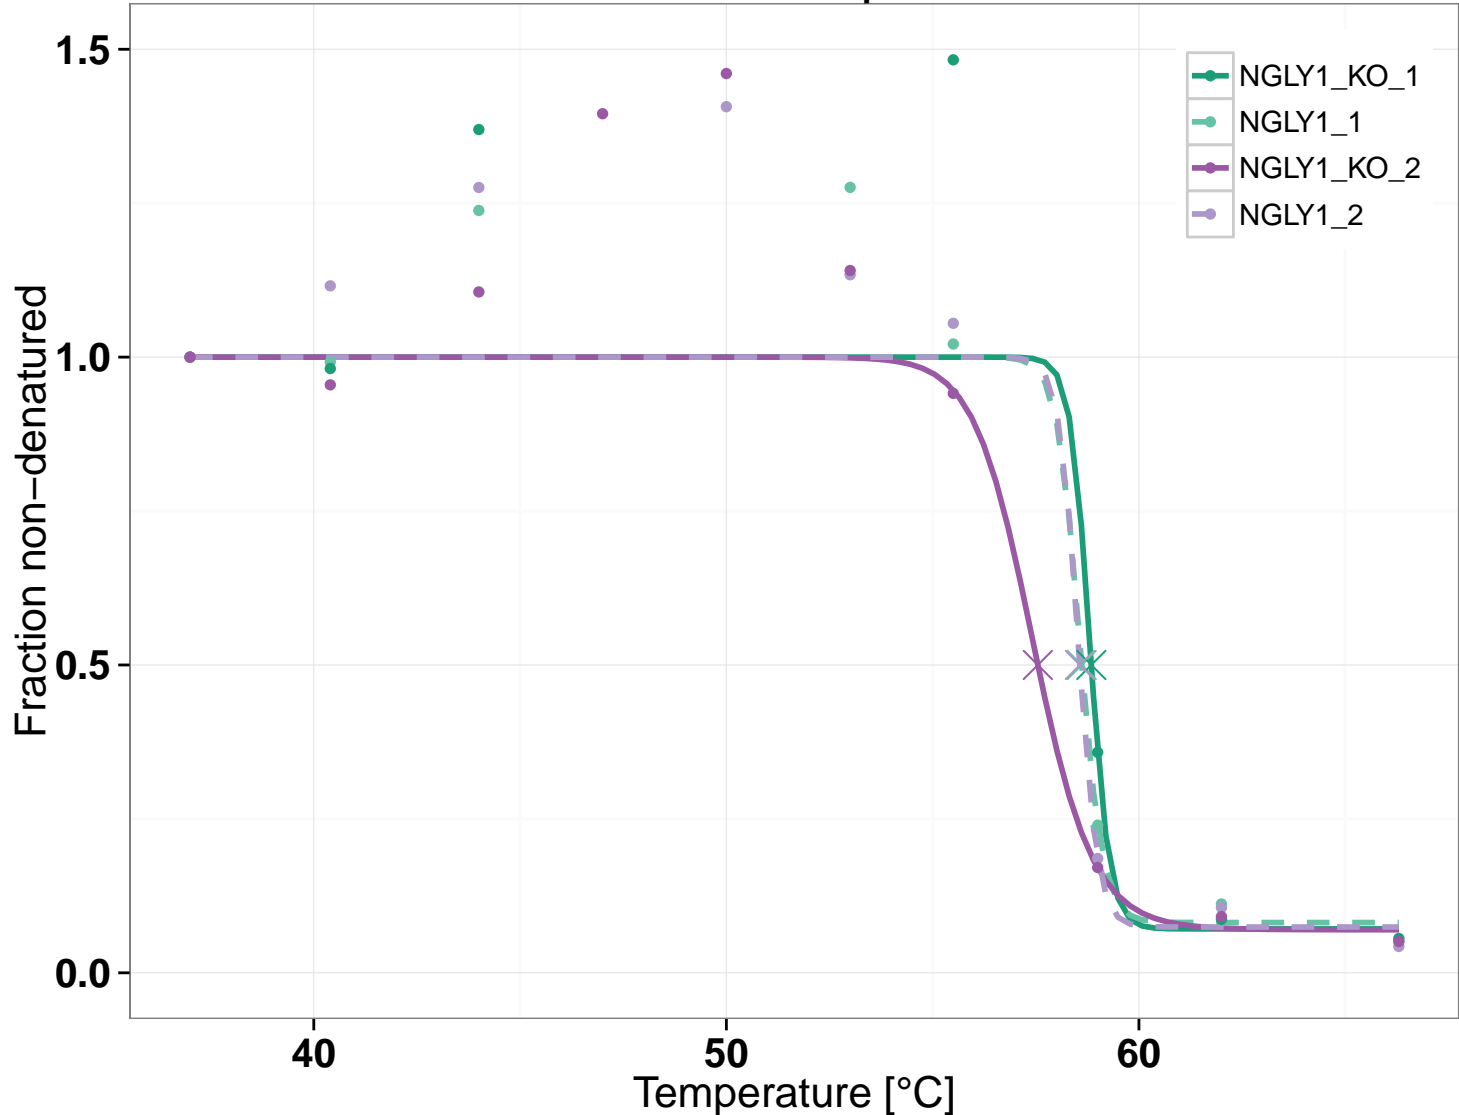

|            | meltPoint | slope | plateau | R2   |
|------------|-----------|-------|---------|------|
| NGLY1_KO_1 | 58.85     | -0.99 | 0.07    | 0.47 |
| NGLY1_1    | 58.61     | -0.83 | 0.08    | 0.75 |
| NGLY1_KO_2 | 57.55     | -0.32 | 0.07    | 0.84 |
| NGLY1_2    | 58.57     | -0.99 | 0.07    | 0.81 |

Supplement: Supplementary file 2037 [file 1]

IPI00164434.5|REEP3

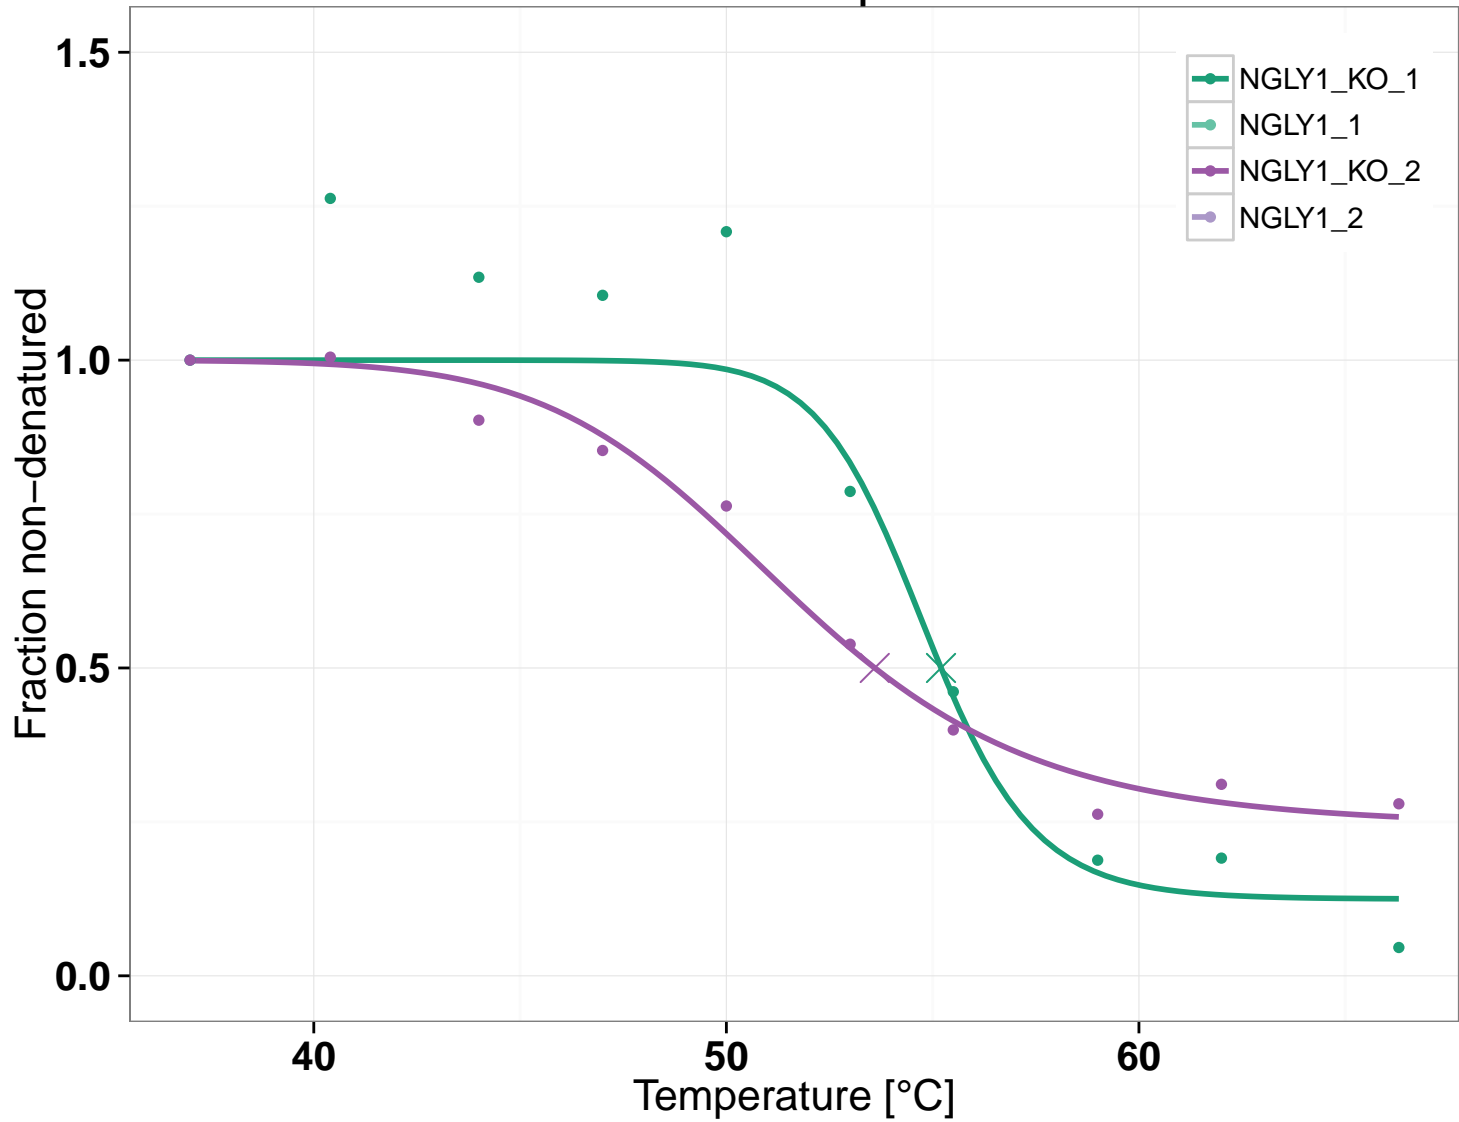

|            | meltPoint | slope  | plateau | R2   |
|------------|-----------|--------|---------|------|
| NGLY1_KO_1 | 55.2      | -0.17  | 0.12    | 0.92 |
| NGLY1_1    | -         | -      | -       | -    |
| NGLY1_KO_2 | 53.6      | -0.064 | 0.24    | 0.99 |
| NGLY1_2    | -         | -      | -       | -    |

Supplement: Supplementary file 2038 [file 1]

IPI00306265.2|AKAP10

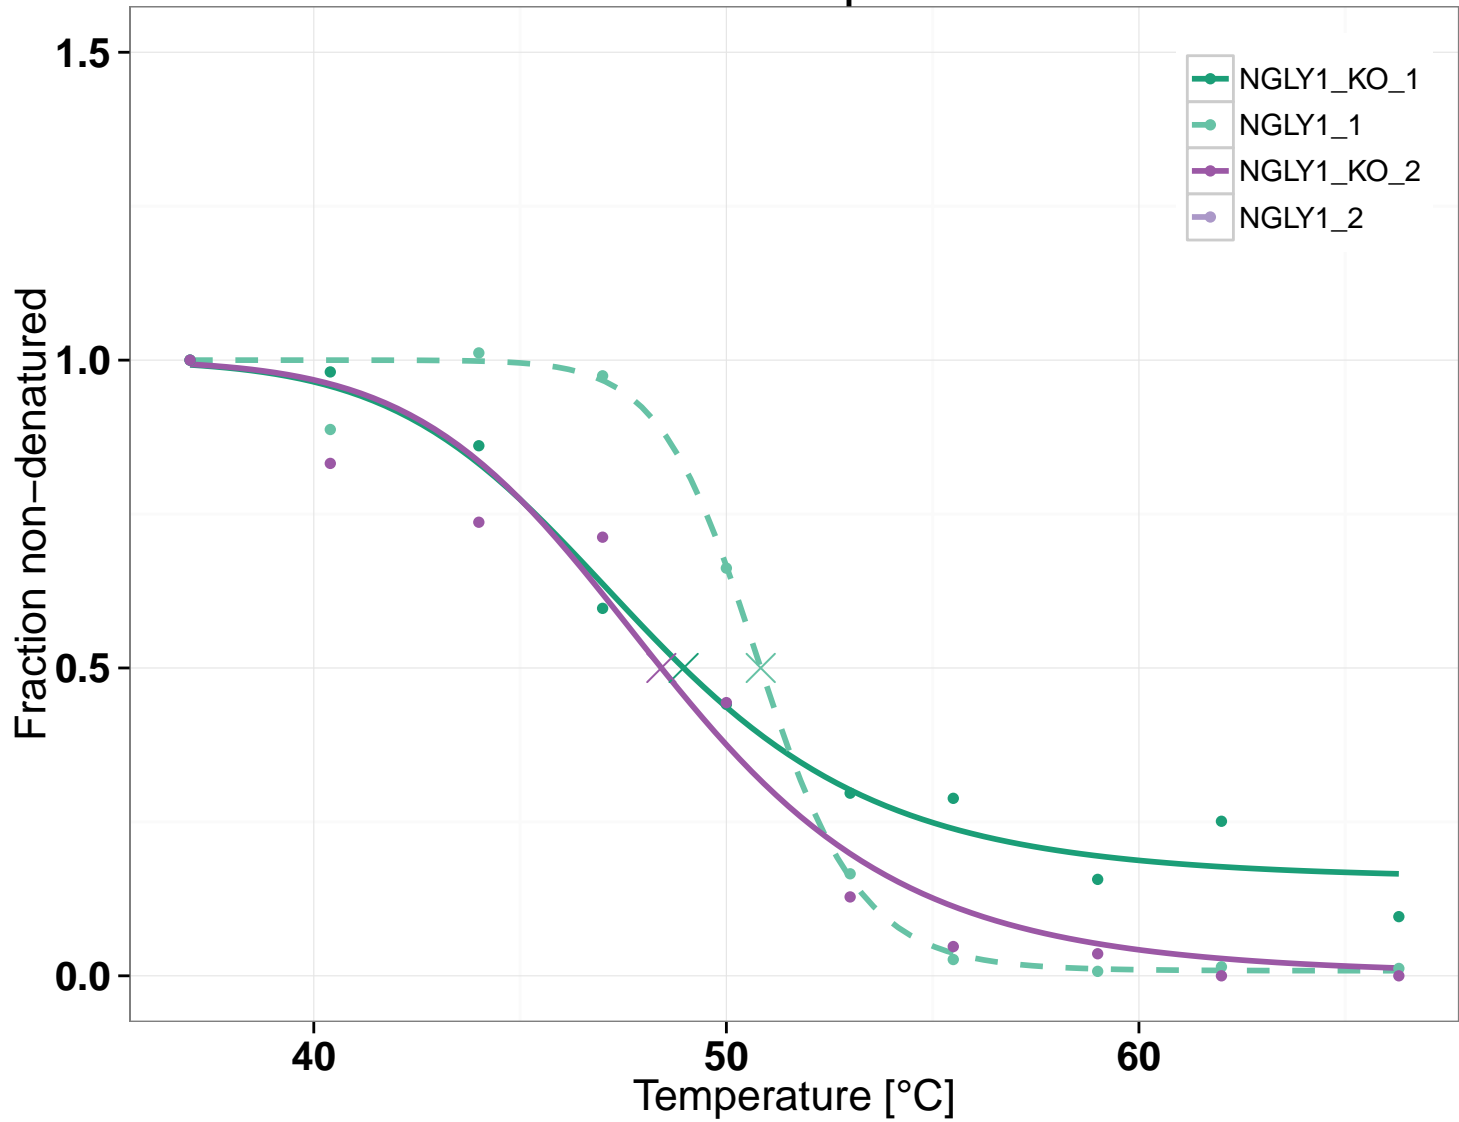

|            | meltPoint | slope  | plateau | R2   |
|------------|-----------|--------|---------|------|
| NGLY1_KO_1 | 48.96     | -0.072 | 0.16    | 0.98 |
| NGLY1_1    | 50.83     | -0.2   | 0.01    | 0.99 |
| NGLY1_KO_2 | 48.42     | -0.085 | 0       | 0.96 |
| NGLY1_2    | -         | -      | -       | -    |

Supplement: Supplementary file 2039 [file 1]

# IPI00171540.2|CTF8

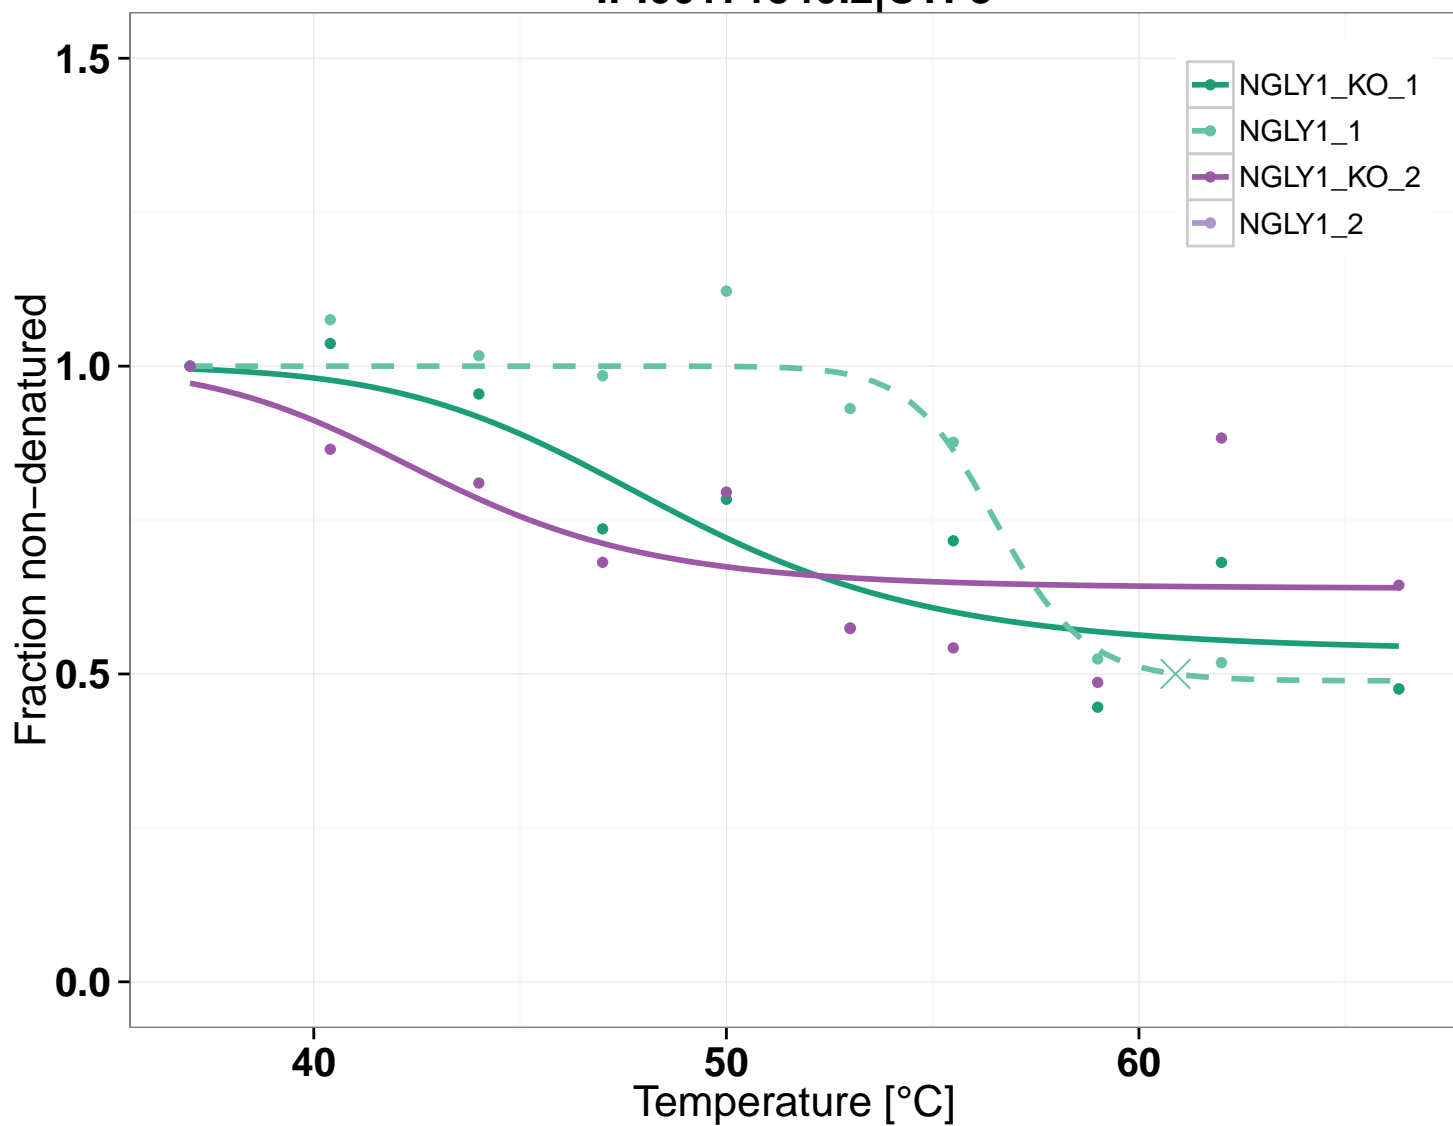

|            | meltPoint | slope  | plateau | R2   |
|------------|-----------|--------|---------|------|
| NGLY1_KO_1 | –         | –0.036 | 0.54    | 0.82 |
| NGLY1_1    | 60.89     | –0.12  | 0.49    | 0.95 |
| NGLY1_KO_2 | –         | –0.033 | 0.64    | 0.53 |
| NGLY1_2    | –         | –      | –       | –    |

Supplement: Supplementary file 2040 [file 1]

IPI00152977.4|PLEKHH3

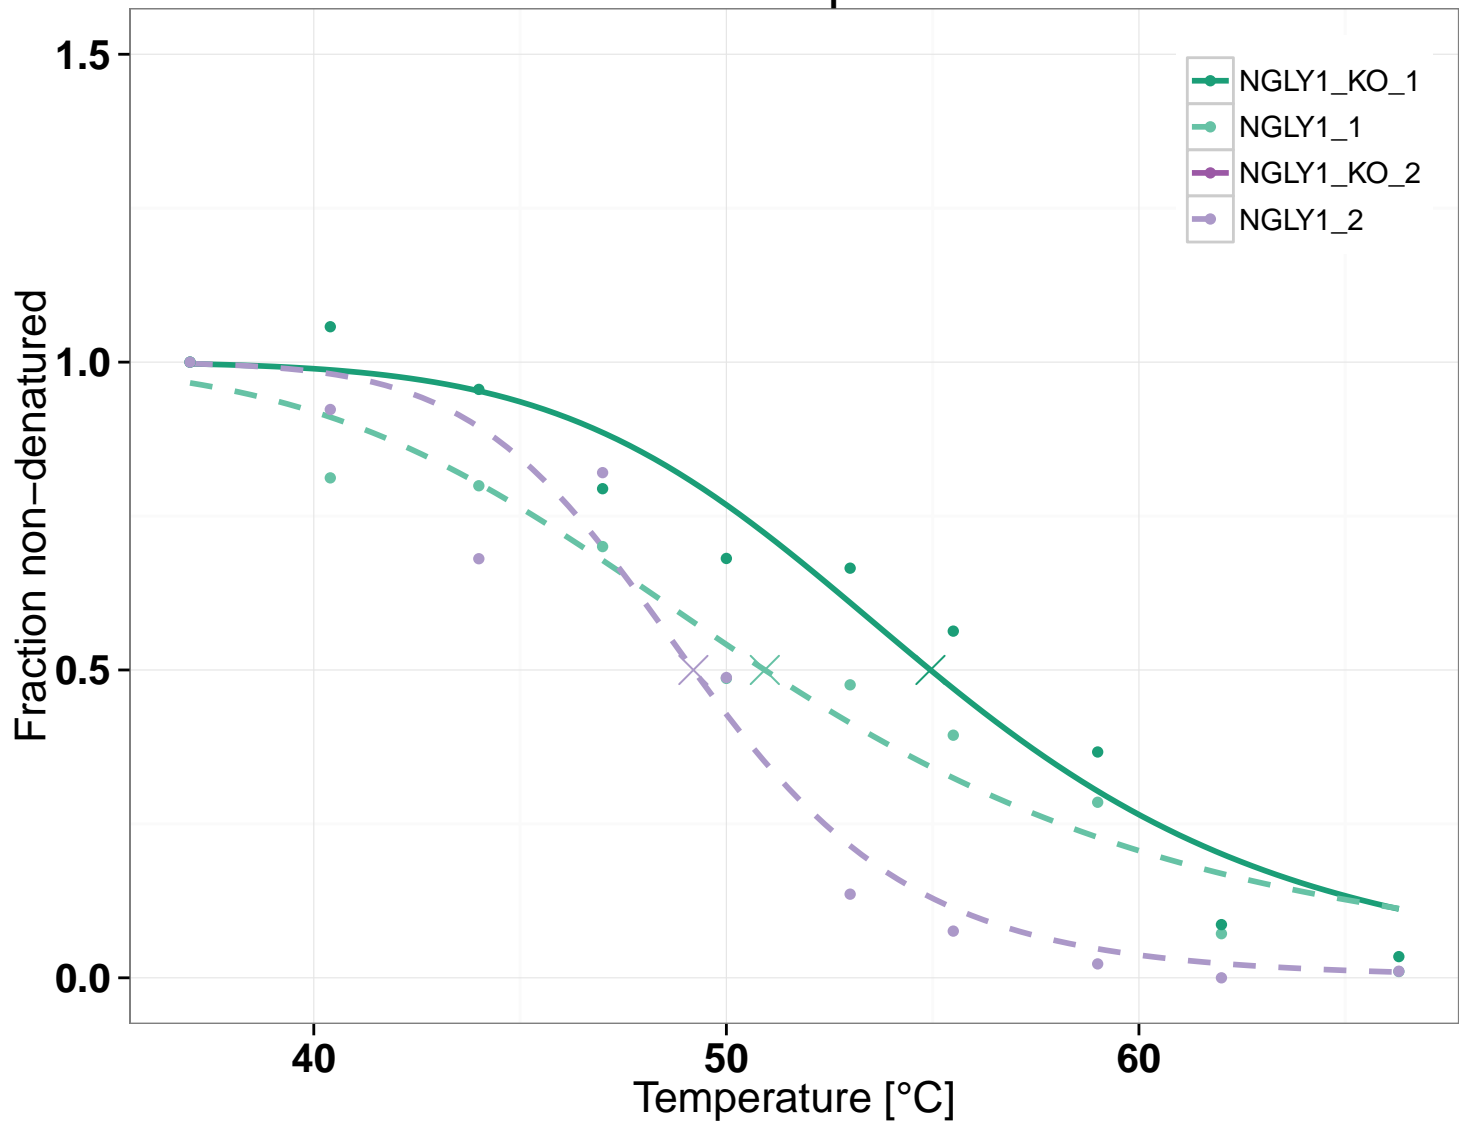

|            | meltPoint | slope  | plateau | R2   |
|------------|-----------|--------|---------|------|
| NGLY1_KO_1 | 54.95     | -0.057 | 0       | 0.95 |
| NGLY1_1    | 50.93     | -0.046 | 0       | 0.95 |
| NGLY1_KO_2 | -         | -      | -       | -    |
| NGLY1_2    | 49.2      | -0.093 | 0       | 0.95 |

Supplement: Supplementary file 2041 [file 1]

# IPI00456965.5|COQ5

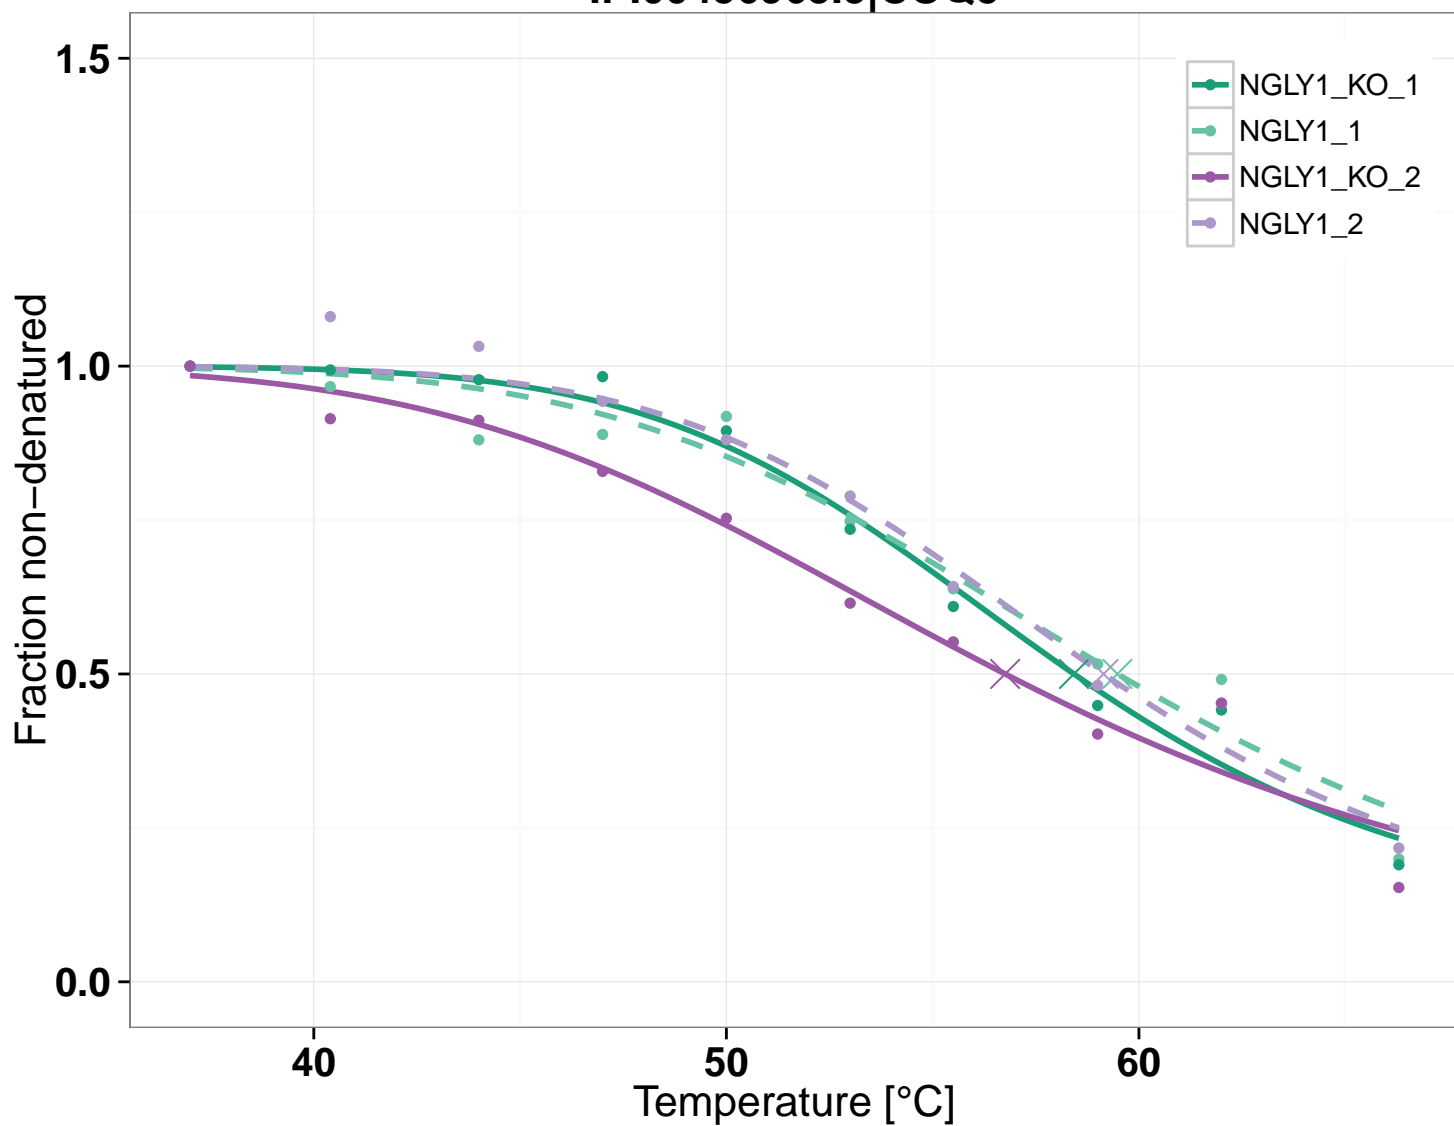

|            | meltPoint | slope  | plateau | R2   |
|------------|-----------|--------|---------|------|
| NGLY1_KO_1 | 58.43     | -0.049 | 0.07    | 0.98 |
| NGLY1_1    | 59.48     | -0.041 | 0       | 0.96 |
| NGLY1_KO_2 | 56.76     | -0.037 | 0       | 0.96 |
| NGLY1_2    | 59.14     | -0.048 | 0.05    | 0.98 |

Supplement: Supplementary file 2042 [file 1]

IPI00376478.4|CMC1

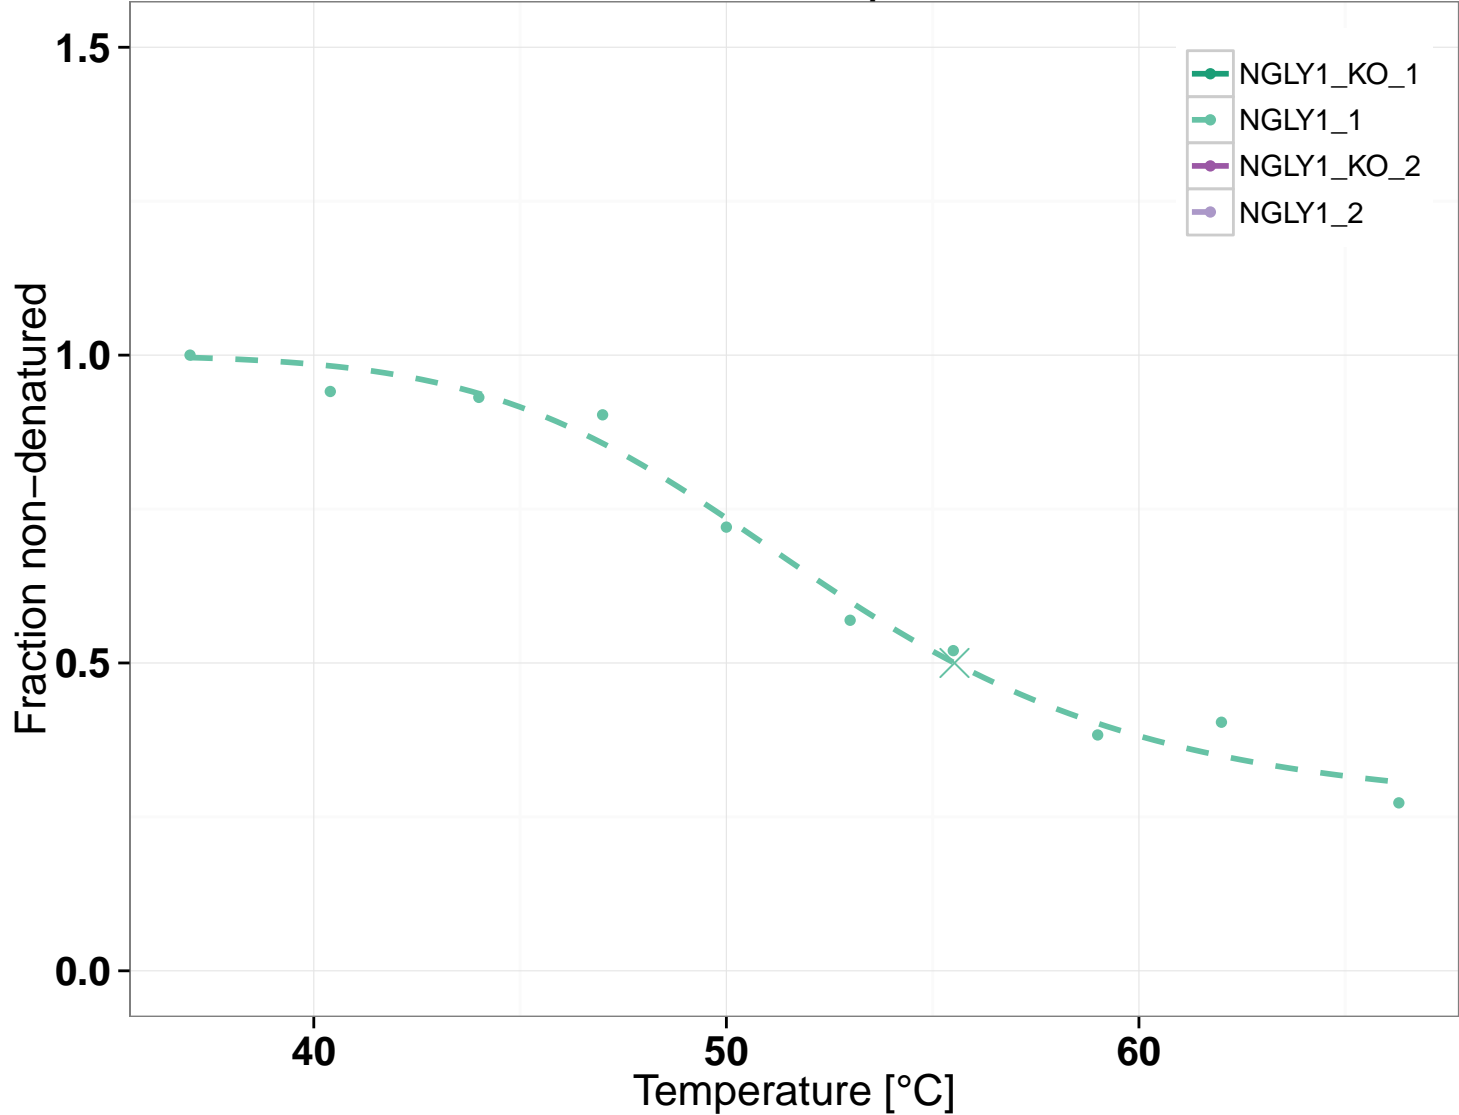

|            | meltPoint | slope  | plateau | R2   |
|------------|-----------|--------|---------|------|
| NGLY1_KO_1 | —         | —      | —       | —    |
| NGLY1_1    | 55.53     | -0.046 | 0.26    | 0.98 |
| NGLY1_KO_2 | —         | —      | —       | —    |
| NGLY1_2    | —         | —      | —       | —    |

Supplement: Supplementary file 2043 [file 1]

IPI00018946.4|PANK4

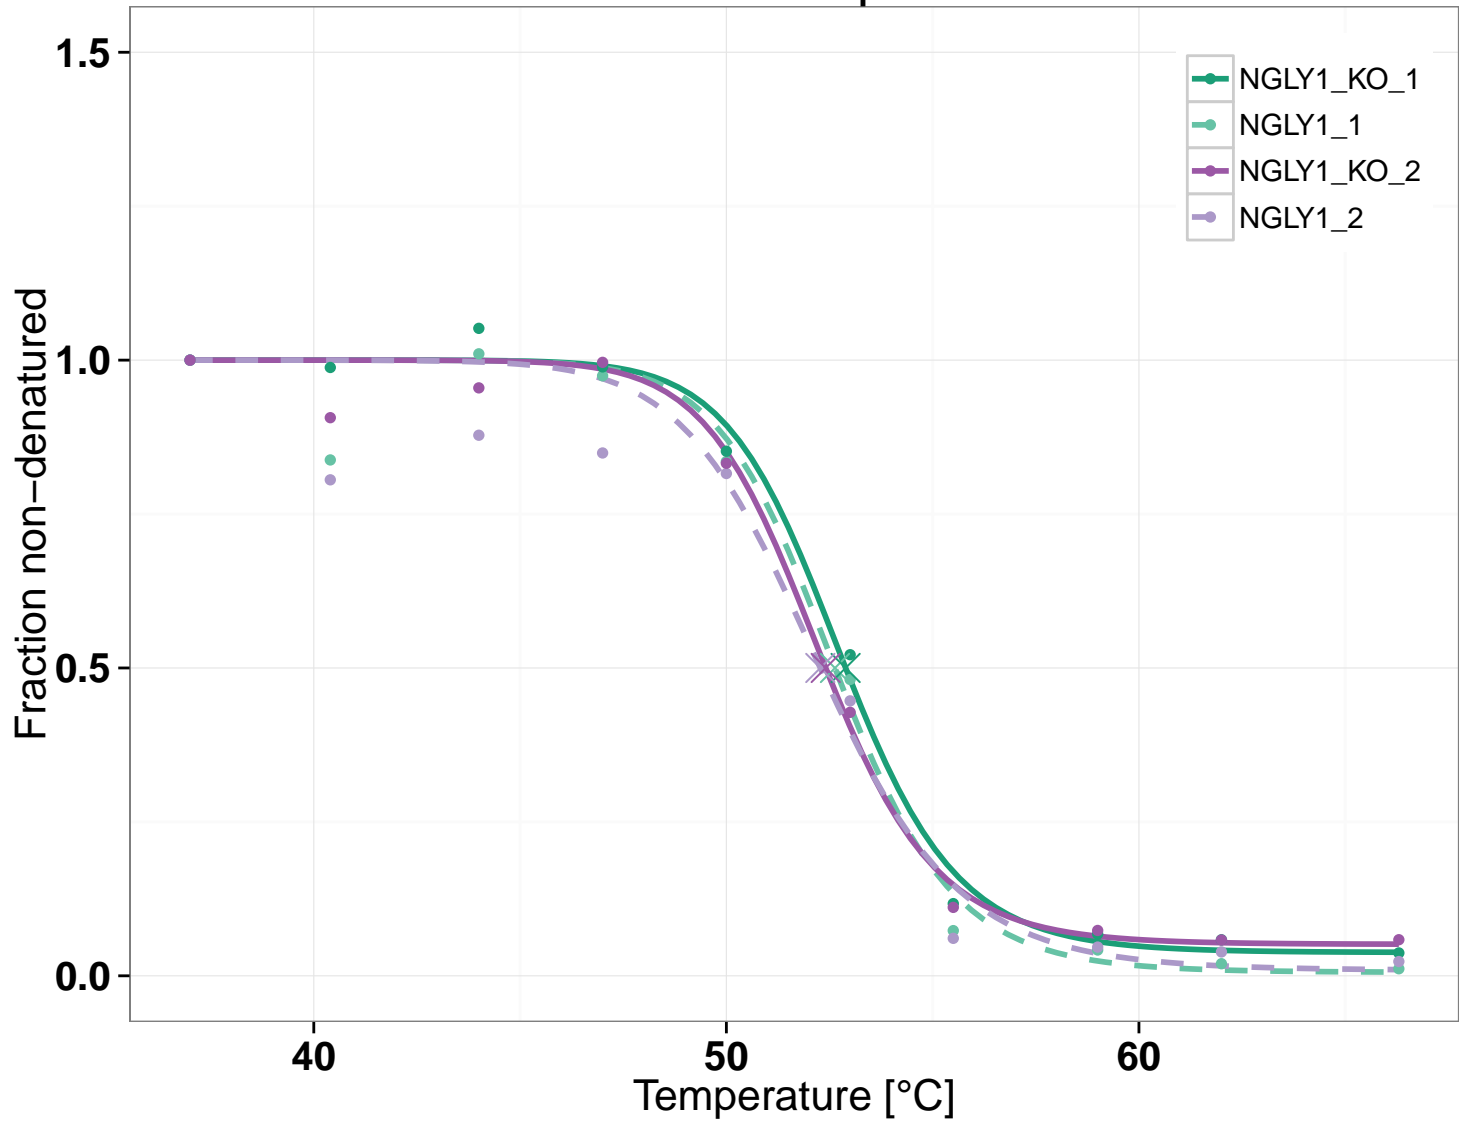

|            | meltPoint | slope | plateau | R2   |
|------------|-----------|-------|---------|------|
| NGLY1_KO_1 | 52.89     | -0.17 | 0.04    | 0.99 |
| NGLY1_1    | 52.63     | -0.17 | 0.01    | 0.98 |
| NGLY1_KO_2 | 52.41     | -0.17 | 0.05    | 0.99 |
| NGLY1_2    | 52.28     | -0.15 | 0.01    | 0.95 |

Supplement: Supplementary file 2044 [file 1]

IPI00007287.1|CFLAR

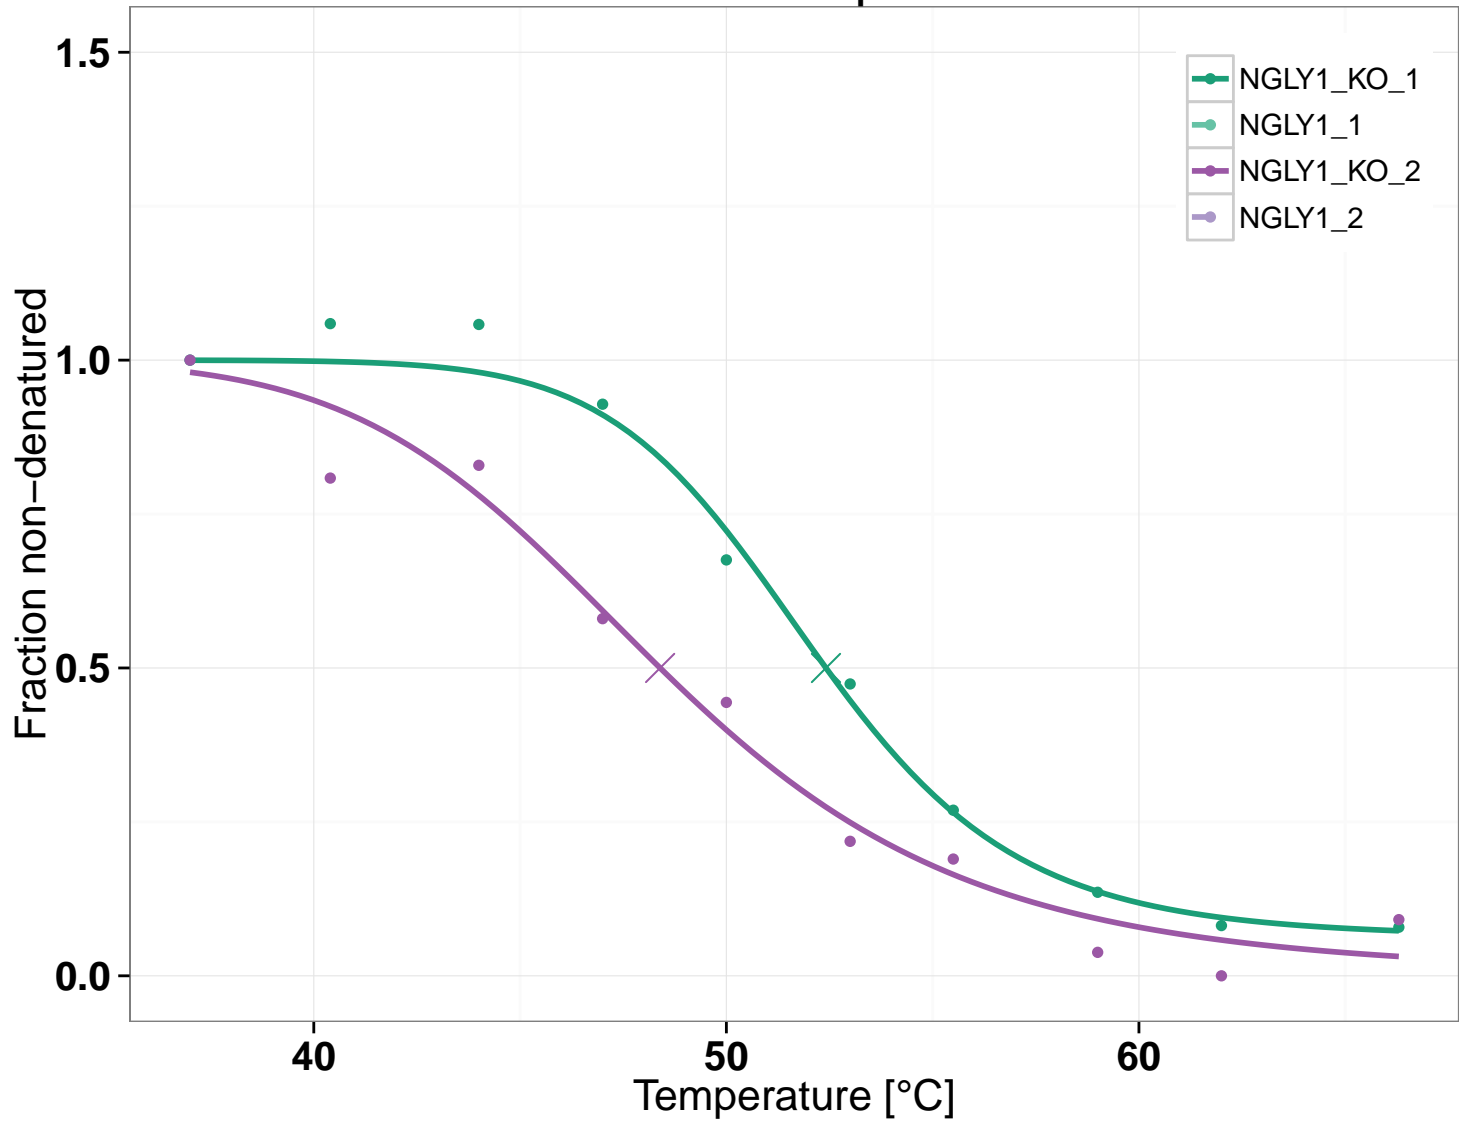

|            | meltPoint | slope  | plateau | R2   |
|------------|-----------|--------|---------|------|
| NGLY1_KO_1 | 52.41     | -0.095 | 0.06    | 0.99 |
| NGLY1_1    | -         | -      | -       | -    |
| NGLY1_KO_2 | 48.39     | -0.067 | 0       | 0.98 |
| NGLY1_2    | -         | -      | -       | -    |

Supplement: Supplementary file 2045 [file 1]

# IPI00514774.4|PAN3

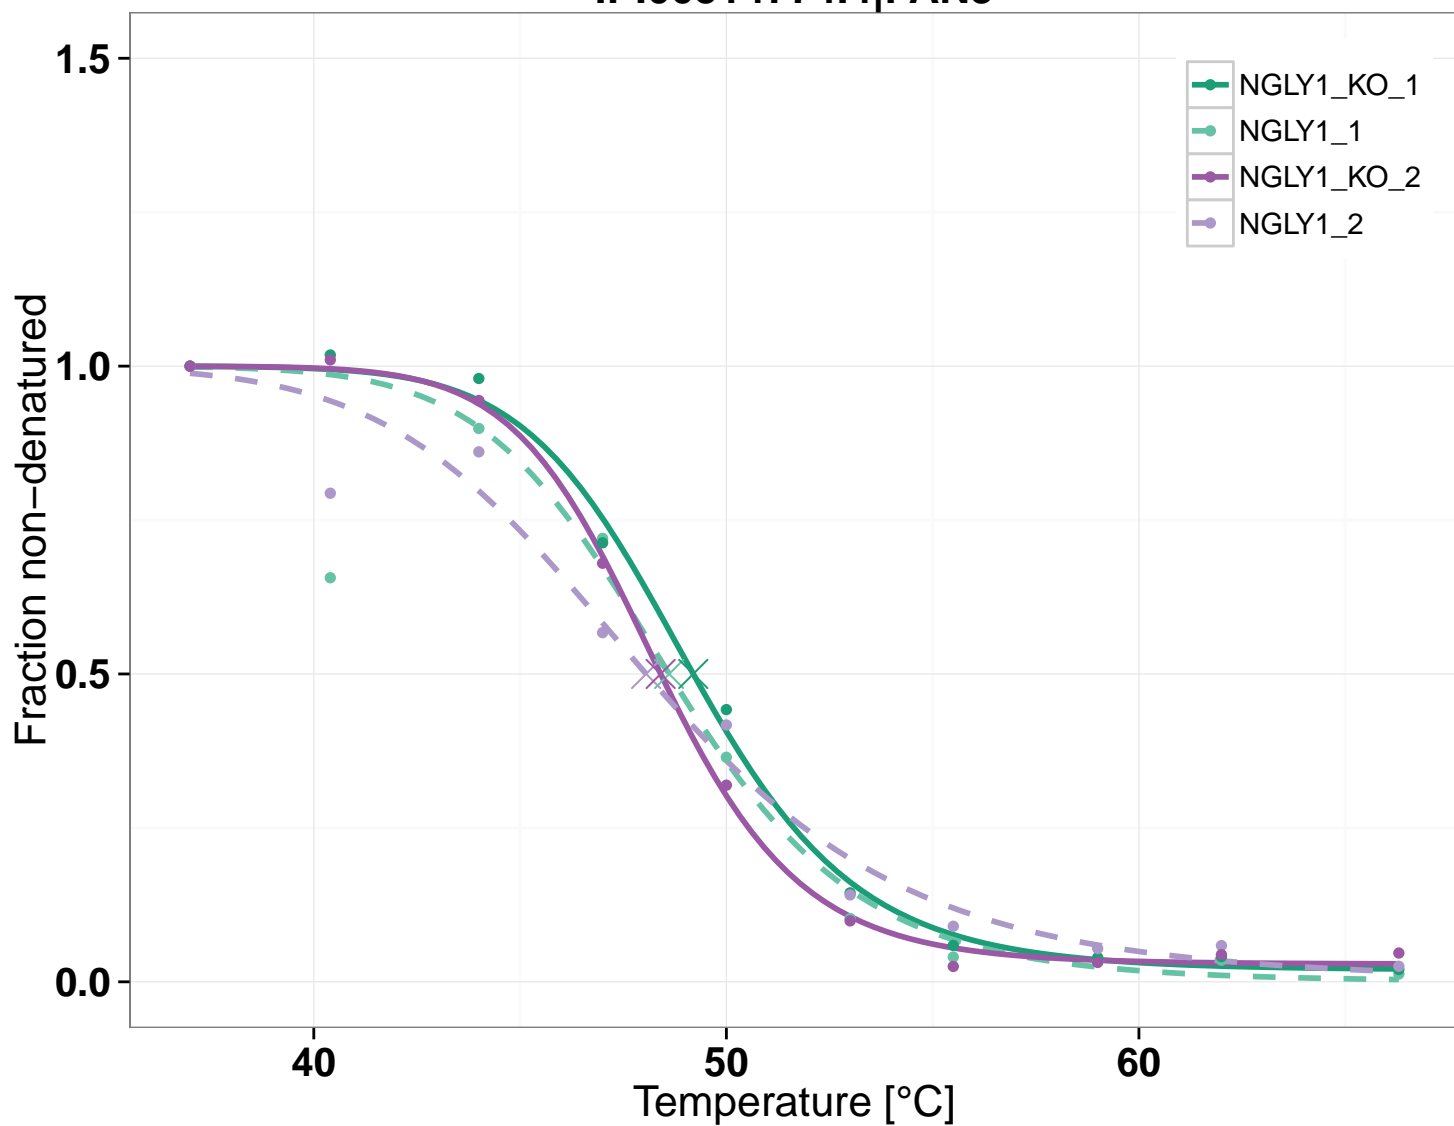

|            | meltPoint | slope  | plateau | R2   |
|------------|-----------|--------|---------|------|
| NGLY1_KO_1 | 49.2      | -0.12  | 0.02    | 1    |
| NGLY1_1    | 48.61     | -0.11  | 0       | 0.92 |
| NGLY1_KO_2 | 48.41     | -0.14  | 0.03    | 1    |
| NGLY1_2    | 48.06     | -0.079 | 0       | 0.97 |

Supplement: Supplementary file 2046 [file 1]

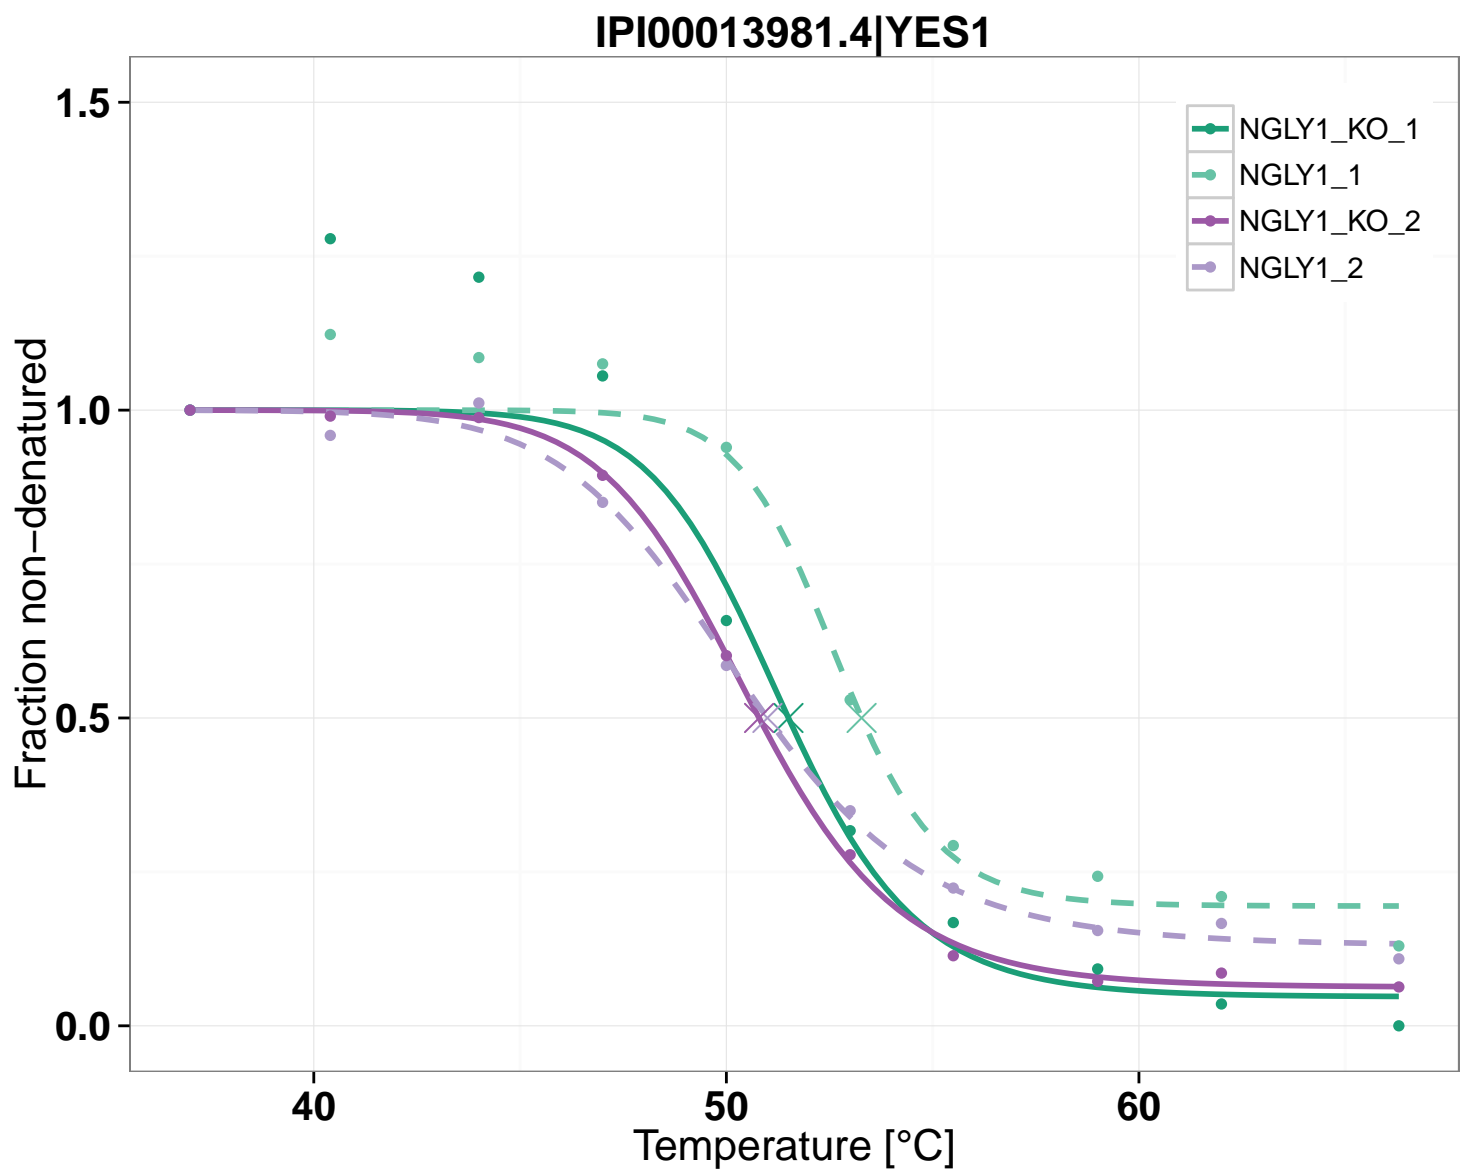

|            | meltPoint | slope  | plateau | R2   |
|------------|-----------|--------|---------|------|
| NGLY1_KO_1 | 51.51     | -0.15  | 0.05    | 0.94 |
| NGLY1_1    | 53.28     | -0.17  | 0.19    | 0.98 |
| NGLY1_KO_2 | 50.79     | -0.13  | 0.06    | 1    |
| NGLY1_2    | 50.99     | -0.099 | 0.13    | 1    |

Supplement: Supplementary file 2047 [file 1]

IPI00301248.3|EVI2B

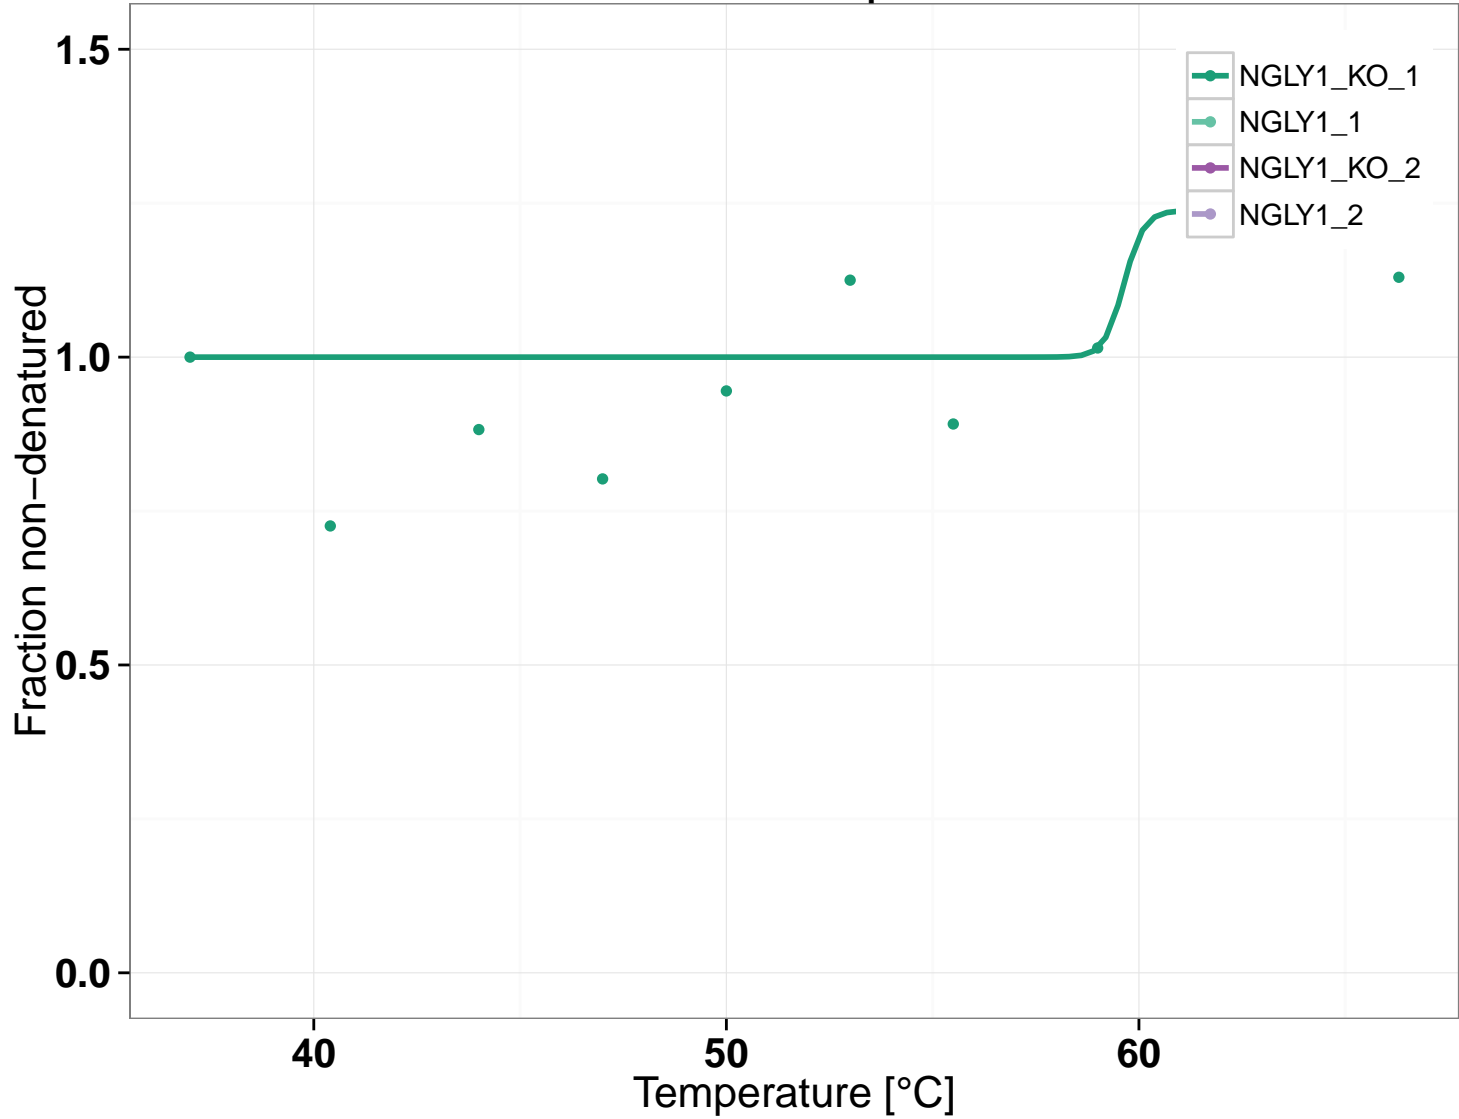

|            | meltPoint | slope | plateau | R2   |
|------------|-----------|-------|---------|------|
| NGLY1_KO_1 | —         | 0.25  | 1.24    | 0.38 |
| NGLY1_1    | —         | —     | —       | —    |
| NGLY1_KO_2 | —         | —     | —       | —    |
| NGLY1_2    | —         | —     | —       | —    |

Supplement: Supplementary file 2048 [file 1]

# IPI00026320.1|EDD1

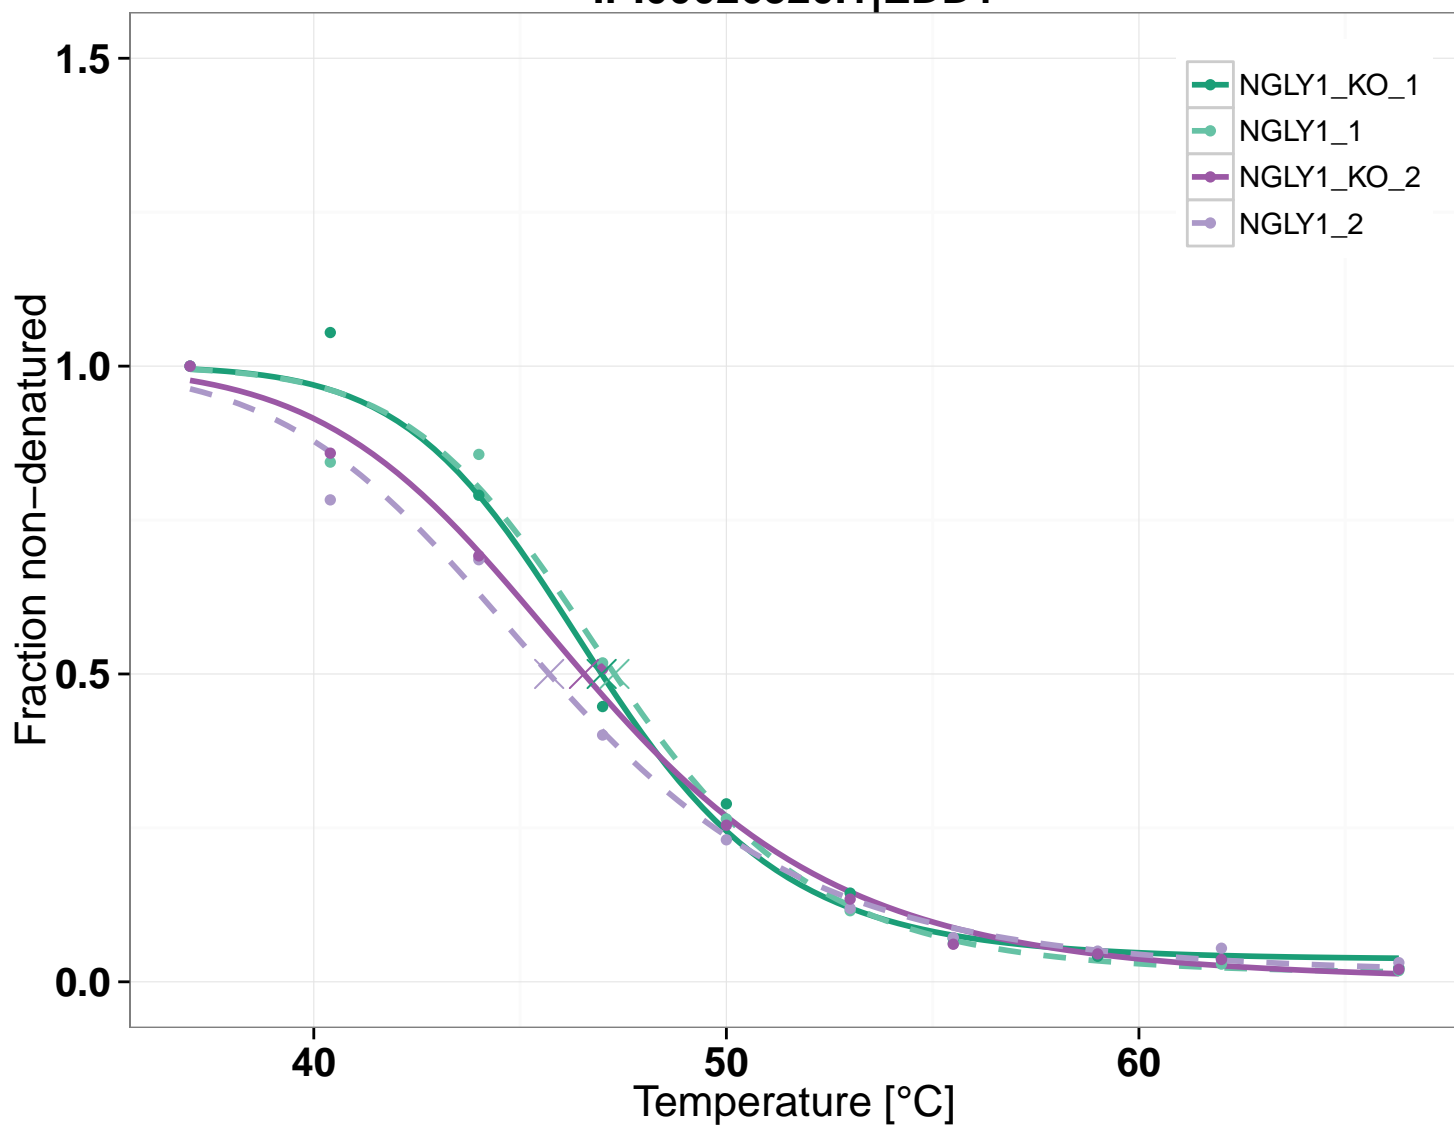

|            | meltPoint | slope  | plateau | R2   |
|------------|-----------|--------|---------|------|
| NGLY1_KO_1 | 46.98     | -0.1   | 0.04    | 0.99 |
| NGLY1_1    | 47.29     | -0.1   | 0.01    | 0.99 |
| NGLY1_KO_2 | 46.55     | -0.079 | 0       | 1    |
| NGLY1_2    | 45.7      | -0.077 | 0.01    | 0.99 |

Supplement: Supplementary file 2049 [file 1]

IPI00395903.1|TMEM106B

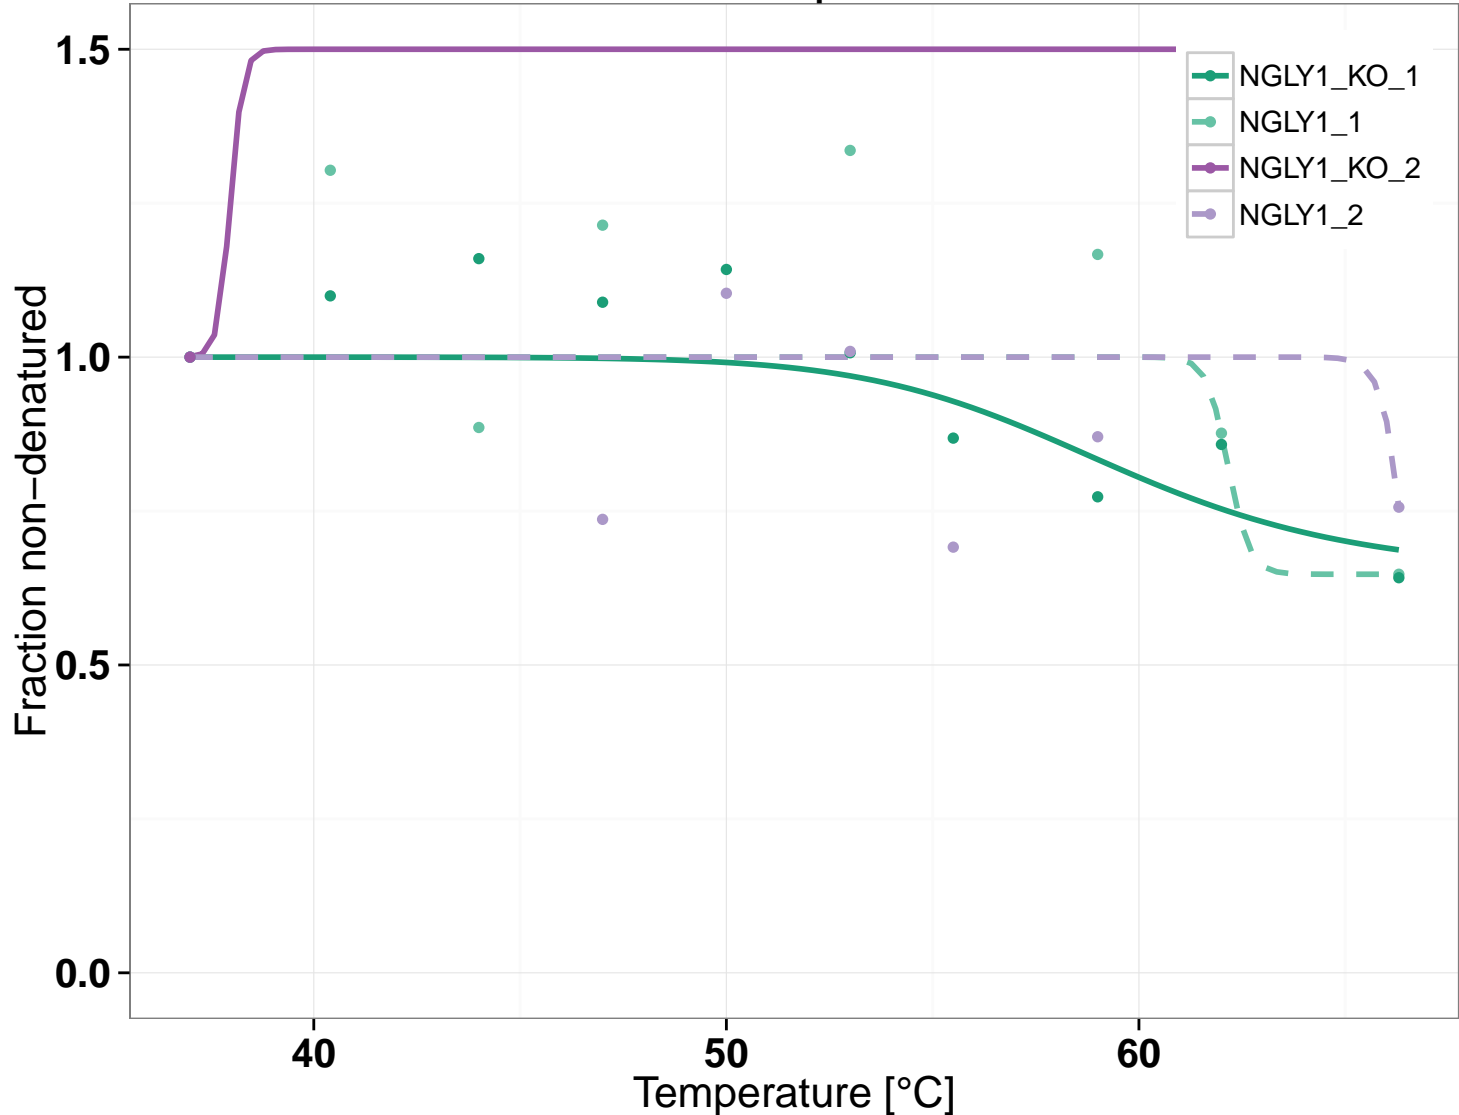

|            | meltPoint | slope | plateau | R2    |
|------------|-----------|-------|---------|-------|
| NGLY1_KO_1 | -         | -0.03 | 0.65    | 0.67  |
| NGLY1_1    | -         | -0.34 | 0.65    | -0.13 |
| NGLY1_KO_2 | -         | 0.82  | 1.5     | -1.34 |
| NGLY1_2    | -         | -     | 0       | -0.11 |

Supplement: Supplementary file 2050 [file 1]

IPI00034069.1|TFB2M

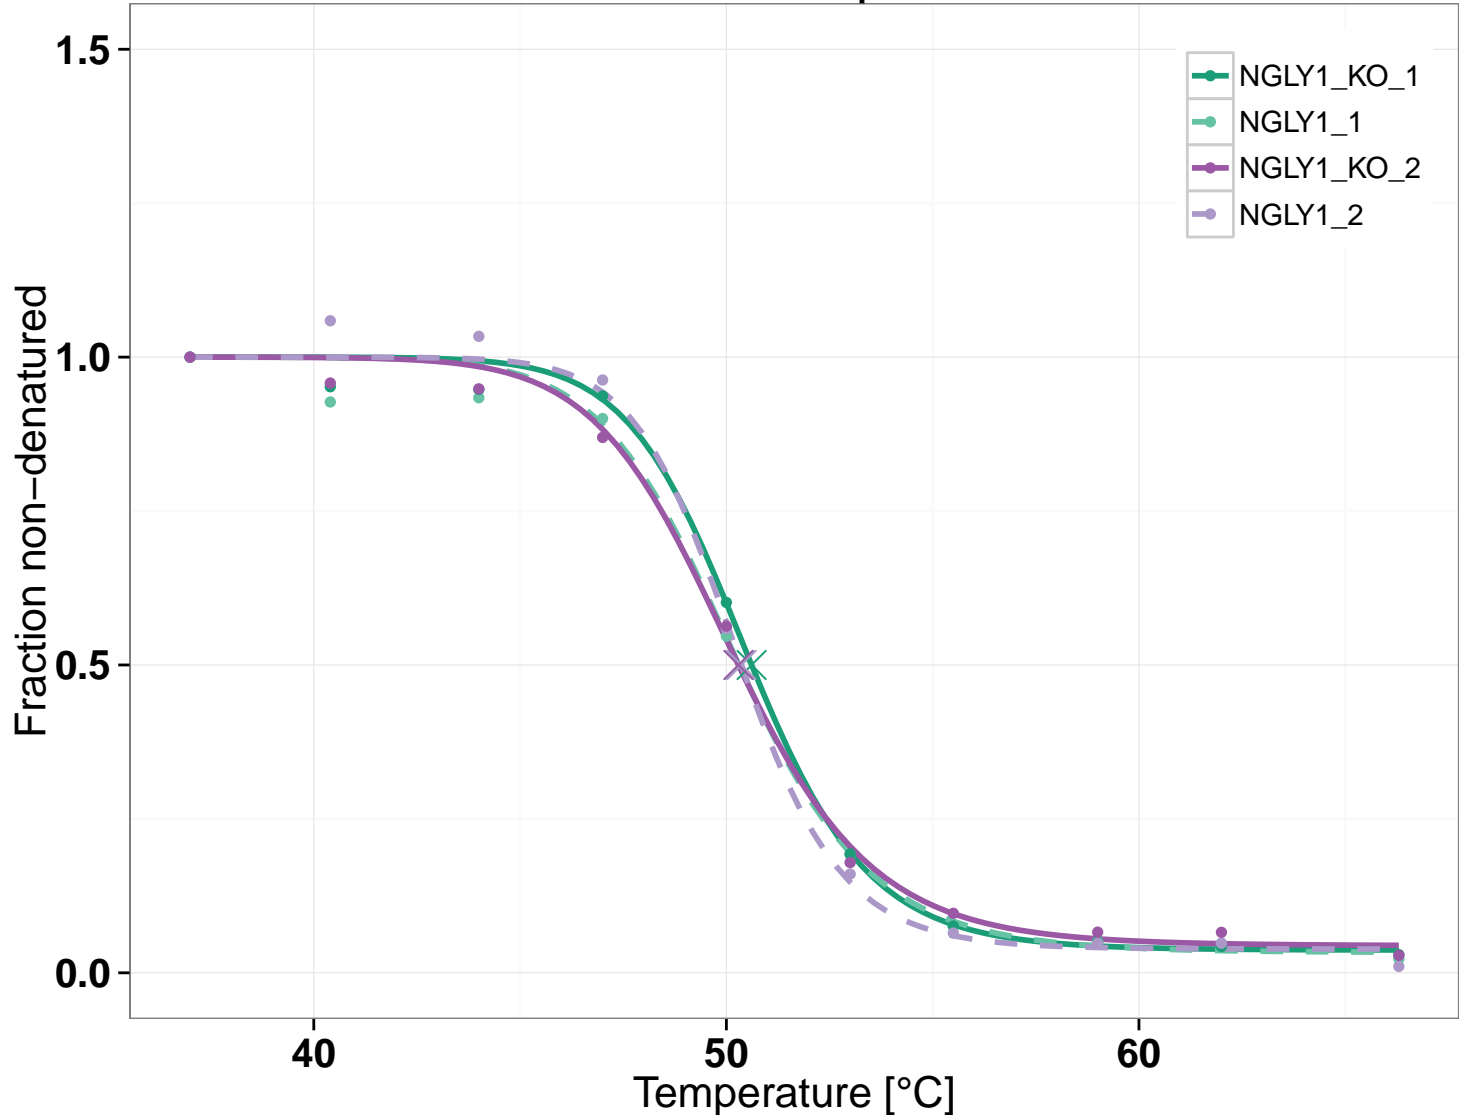

|            | meltPoint | slope | plateau | R2   |
|------------|-----------|-------|---------|------|
| NGLY1_KO_1 | 50.61     | -0.16 | 0.04    | 1    |
| NGLY1_1    | 50.31     | -0.15 | 0.03    | 0.99 |
| NGLY1_KO_2 | 50.29     | -0.14 | 0.04    | 1    |
| NGLY1_2    | 50.37     | -0.19 | 0.04    | 1    |

Supplement: Supplementary file 2051 [file 1]

# IPI00006658.4|PIN4

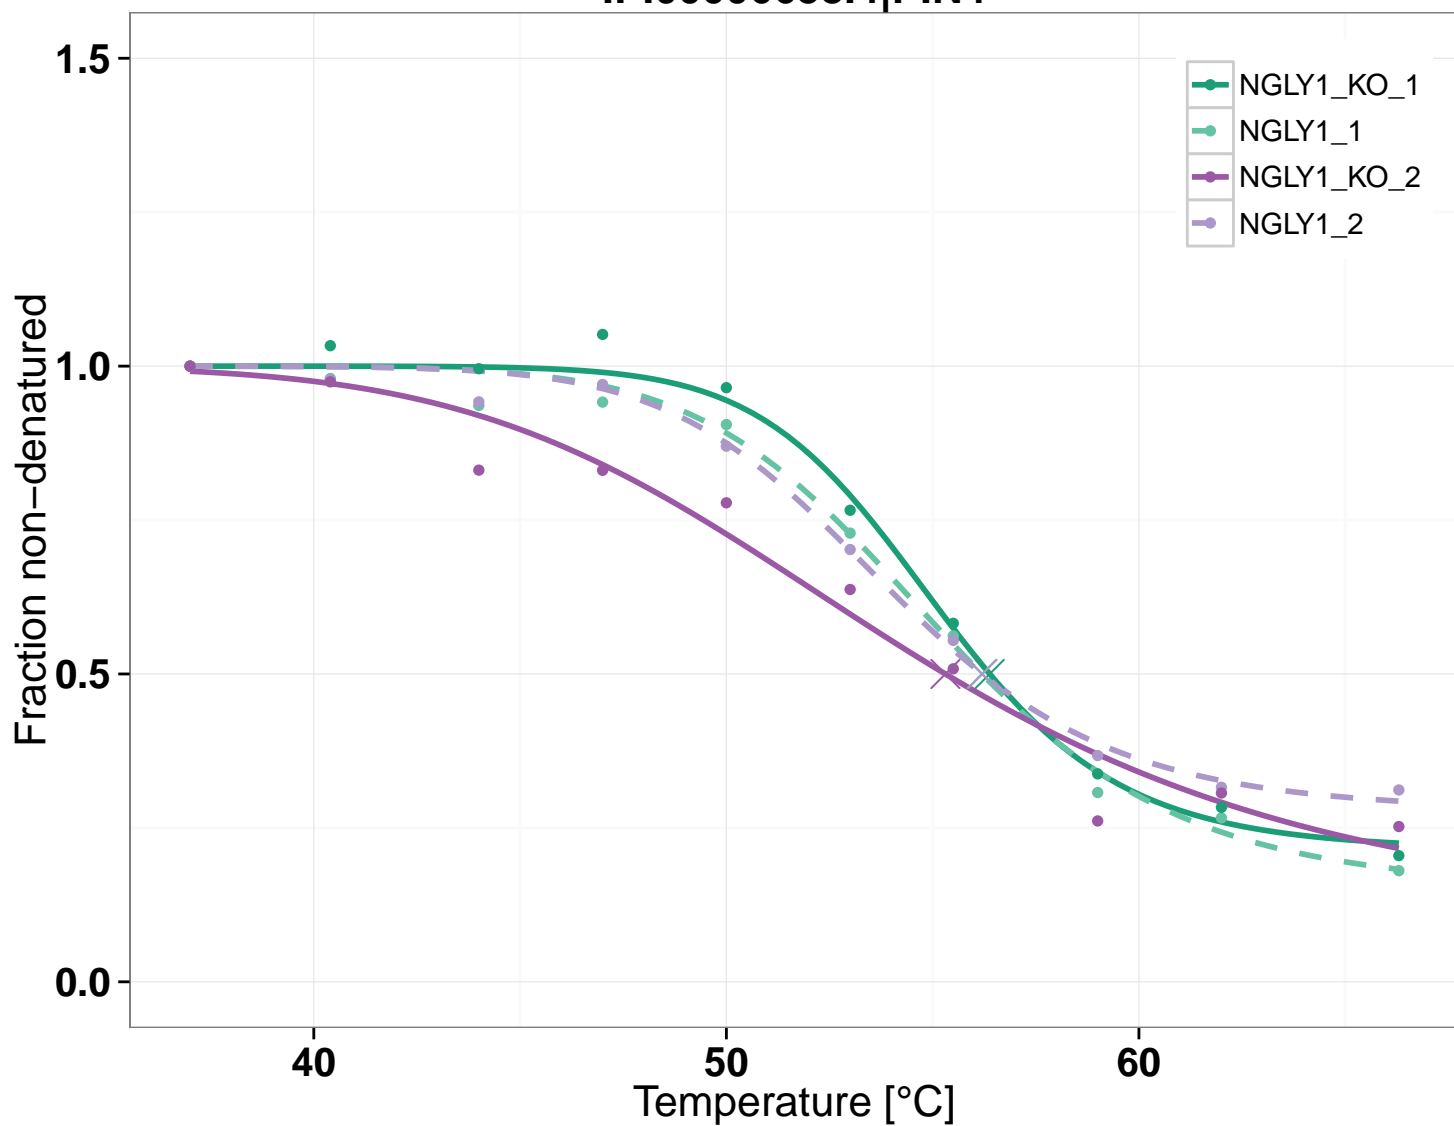

|            | meltPoint | slope  | plateau | R2   |
|------------|-----------|--------|---------|------|
| NGLY1_KO_1 | 56.38     | -0.09  | 0.21    | 0.99 |
| NGLY1_1    | 56.19     | -0.073 | 0.15    | 0.99 |
| NGLY1_KO_2 | 55.31     | -0.044 | 0.09    | 0.97 |
| NGLY1_2    | 56.21     | -0.067 | 0.28    | 0.99 |

Supplement: Supplementary file 2052 [file 1]

IPI00183821.8|RMND5B

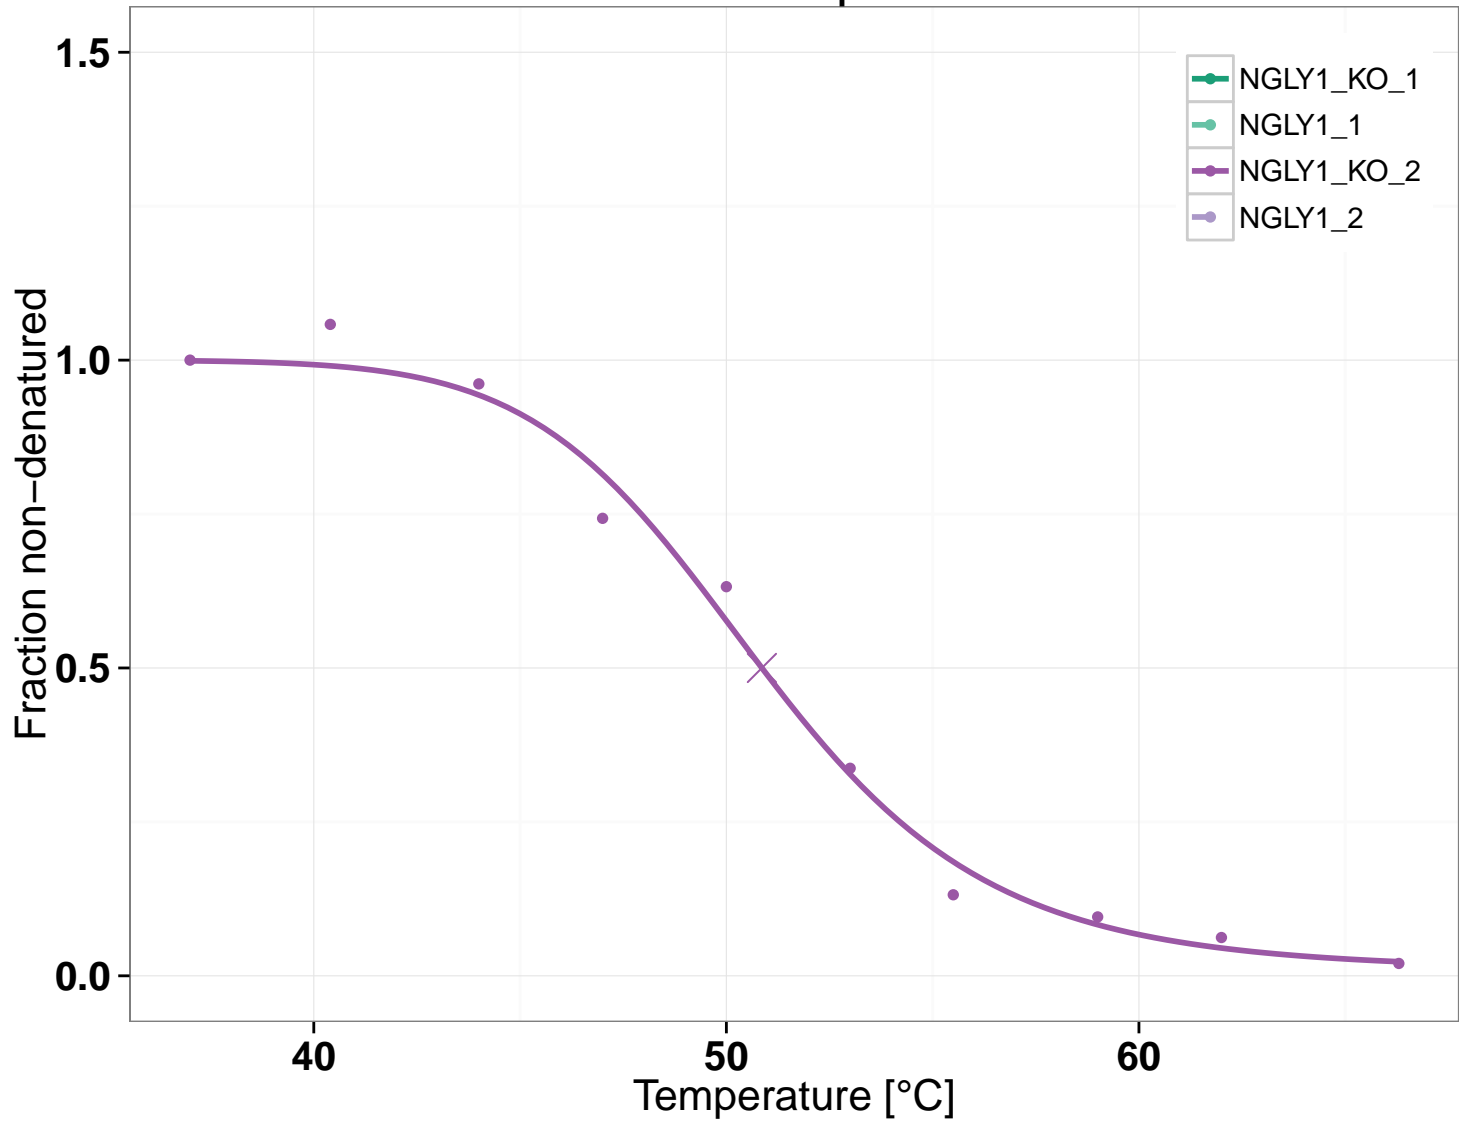

|            | meltPoint | slope  | plateau | R2   |
|------------|-----------|--------|---------|------|
| NGLY1_KO_1 | -         | -      | -       | -    |
| NGLY1_1    | -         | -      | -       | -    |
| NGLY1_KO_2 | 50.86     | -0.089 | 0.01    | 0.99 |
| NGLY1_2    | -         | -      | -       | -    |

Supplement: Supplementary file 2053 [file 1]

# IPI00290192.1|RNASEH2A

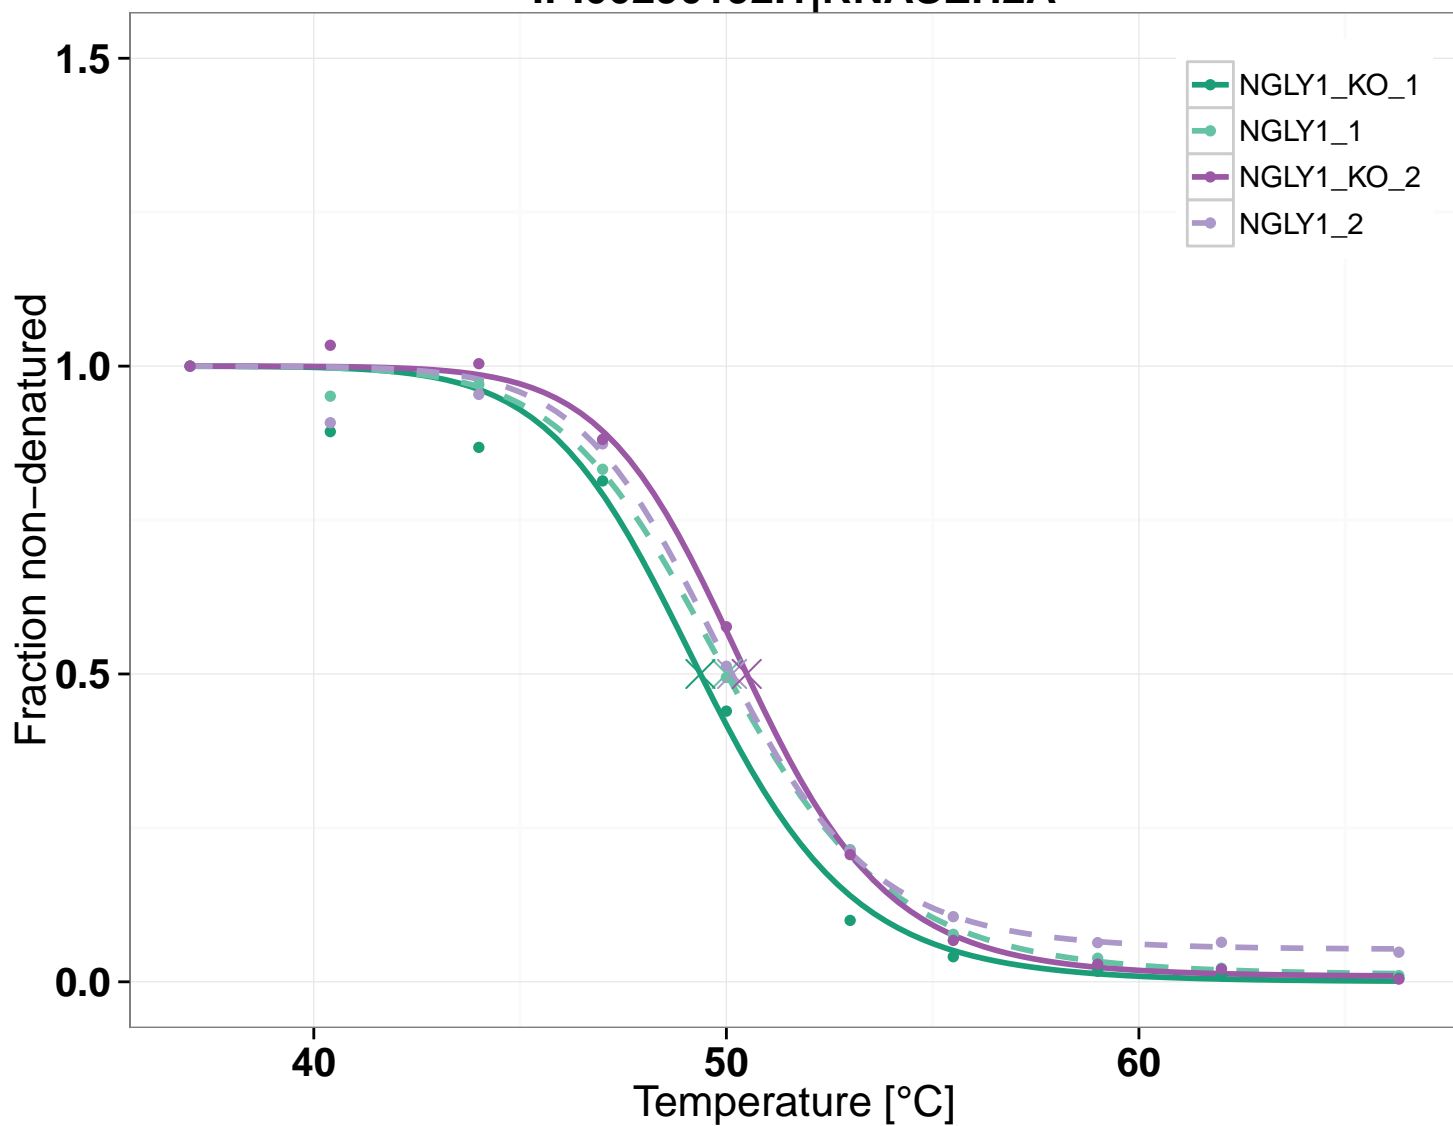

|            | meltPoint | slope | plateau | R2   |
|------------|-----------|-------|---------|------|
| NGLY1_KO_1 | 49.37     | -0.13 | 0       | 0.99 |
| NGLY1_1    | 50.01     | -0.12 | 0.01    | 1    |
| NGLY1_KO_2 | 50.49     | -0.14 | 0.01    | 1    |
| NGLY1_2    | 50.14     | -0.13 | 0.05    | 0.99 |

Supplement: Supplementary file 2054 [file 1]

IPI00099311.3|TRMT6

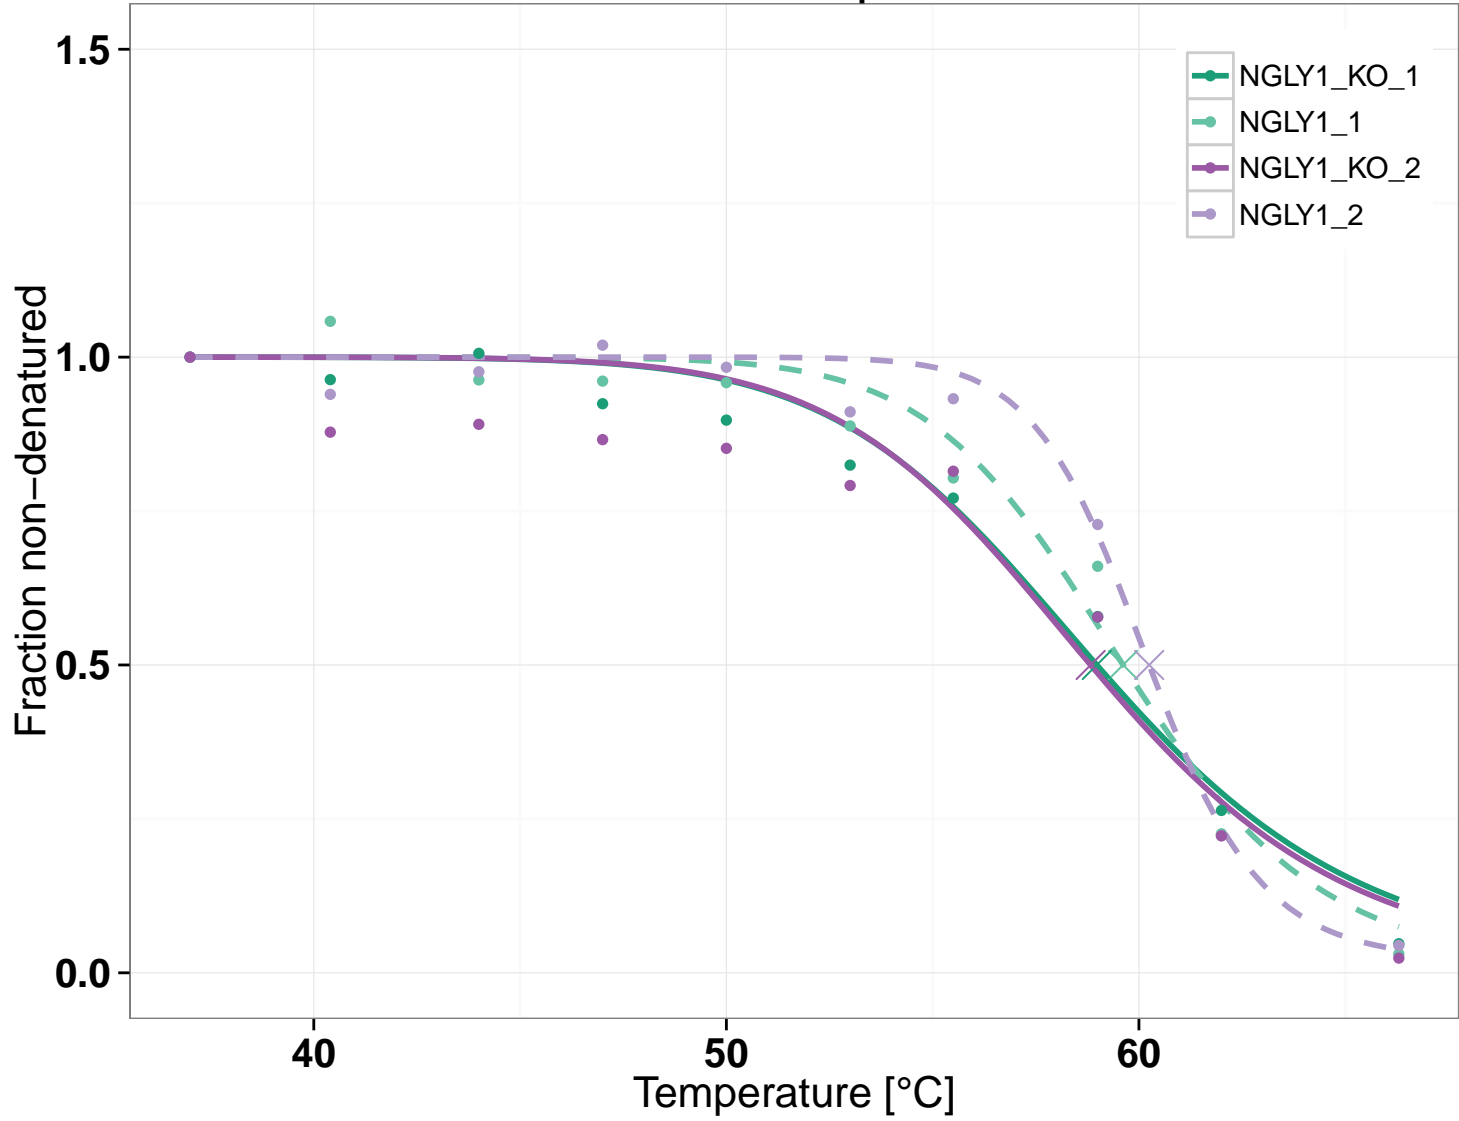

|            | meltPoint | slope  | plateau | R2   |
|------------|-----------|--------|---------|------|
| NGLY1_KO_1 | 58.98     | -0.078 | 0       | 0.97 |
| NGLY1_1    | 59.62     | -0.11  | 0       | 0.97 |
| NGLY1_KO_2 | 58.83     | -0.08  | 0       | 0.91 |
| NGLY1_2    | 60.25     | -0.18  | 0.02    | 0.99 |

Supplement: Supplementary file 2055 [file 1]

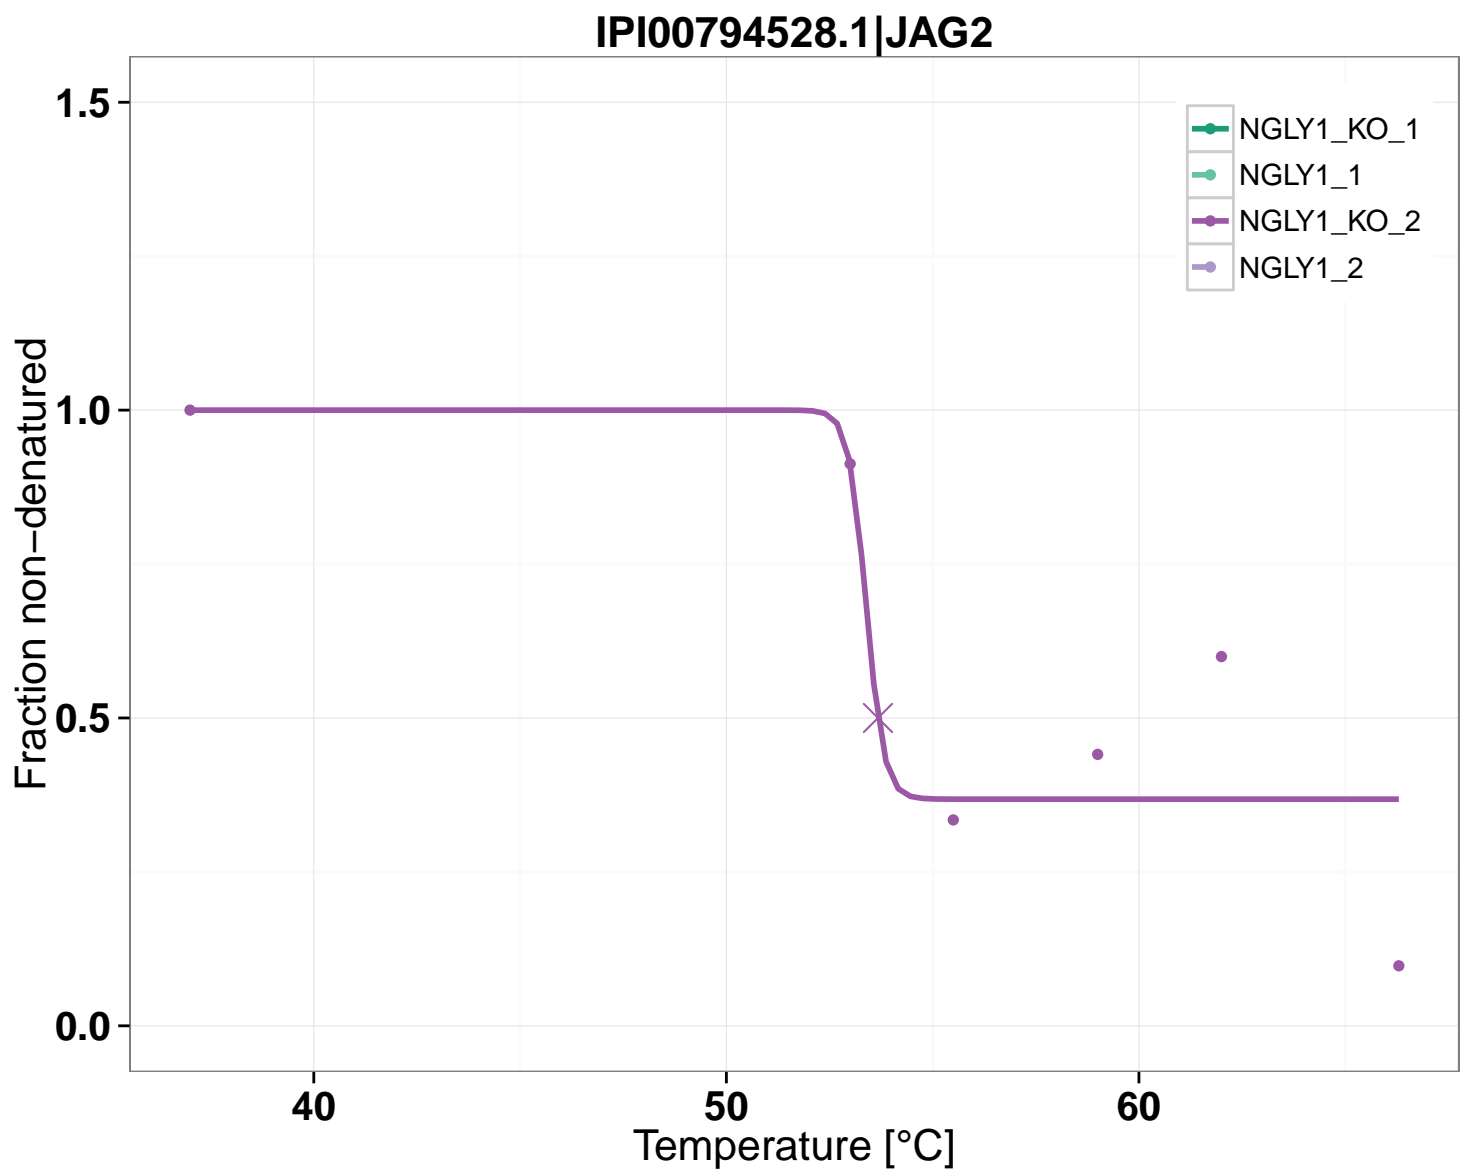

|            | meltPoint | slope | plateau | R2   |
|------------|-----------|-------|---------|------|
| NGLY1_KO_1 | —         | —     | —       | —    |
| NGLY1_1    | —         | —     | —       | —    |
| NGLY1_KO_2 | 53.67     | -0.74 | 0.37    | 0.07 |
| NGLY1_2    | —         | —     | —       | —    |

Supplement: Supplementary file 2056 [file 1]

# IPI00550766.1|RRP1

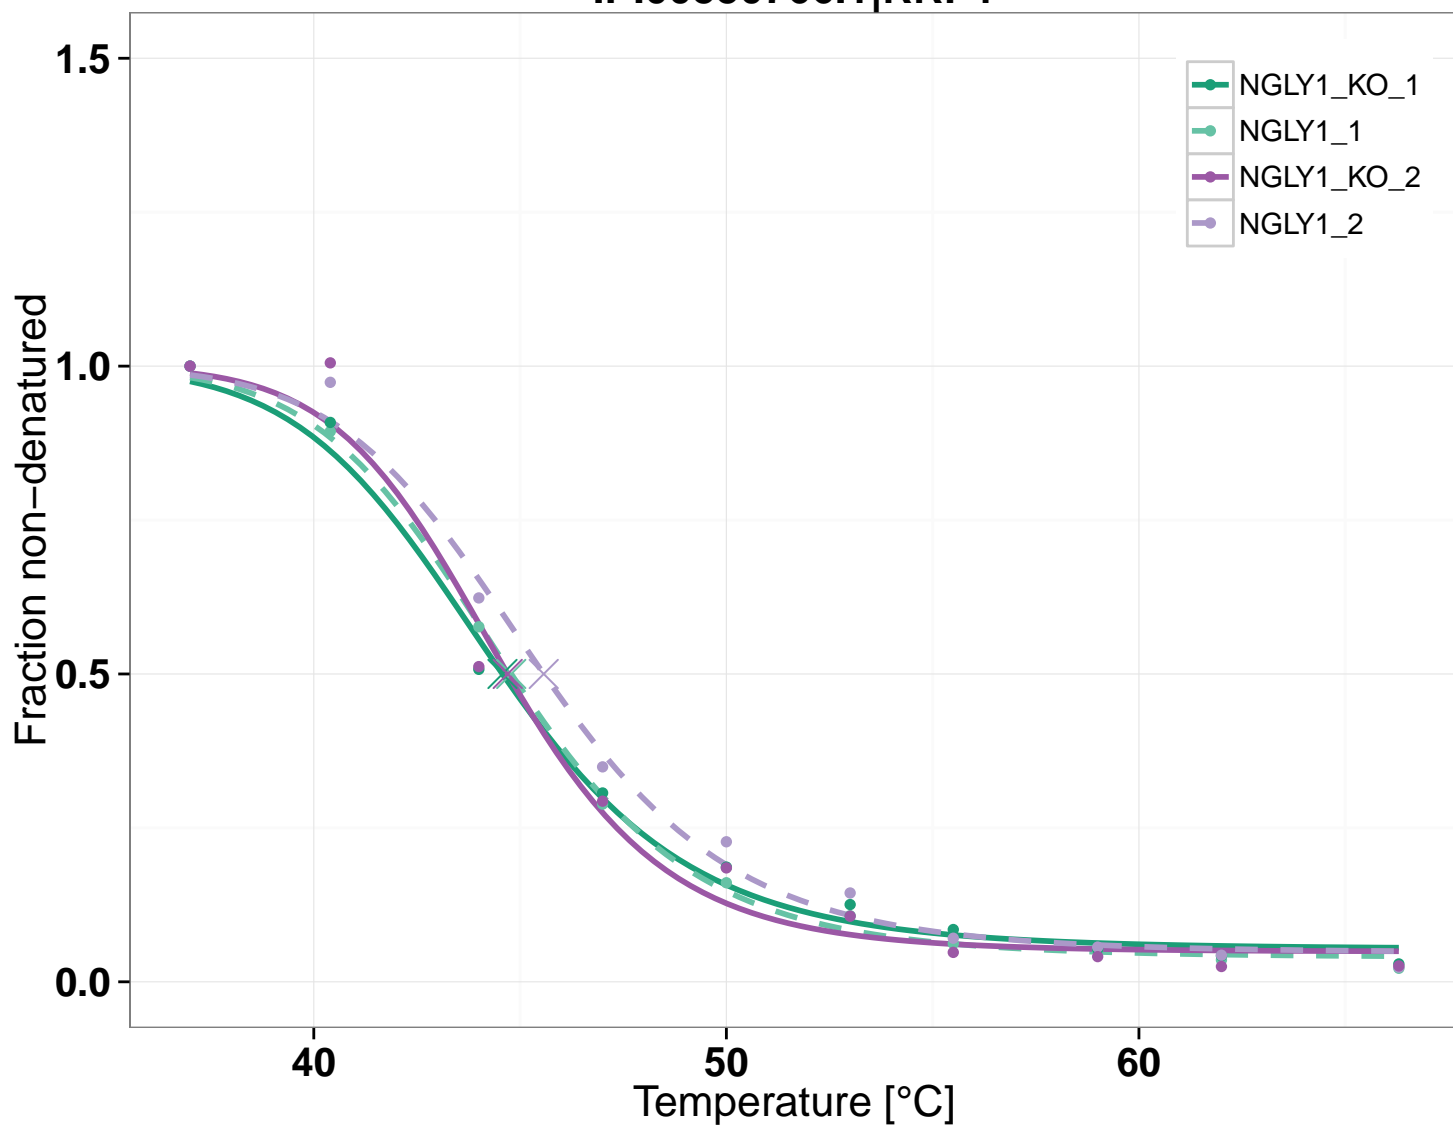

|            | meltPoint | slope  | plateau | R2   |
|------------|-----------|--------|---------|------|
| NGLY1_KO_1 | 44.57     | -0.099 | 0.05    | 0.99 |
| NGLY1_1    | 44.79     | -0.1   | 0.04    | 1    |
| NGLY1_KO_2 | 44.7      | -0.12  | 0.05    | 0.98 |
| NGLY1_2    | 45.57     | -0.099 | 0.05    | 0.99 |

Supplement: Supplementary file 2057 [file 1]

# IPI00100930.2|C12ORF43

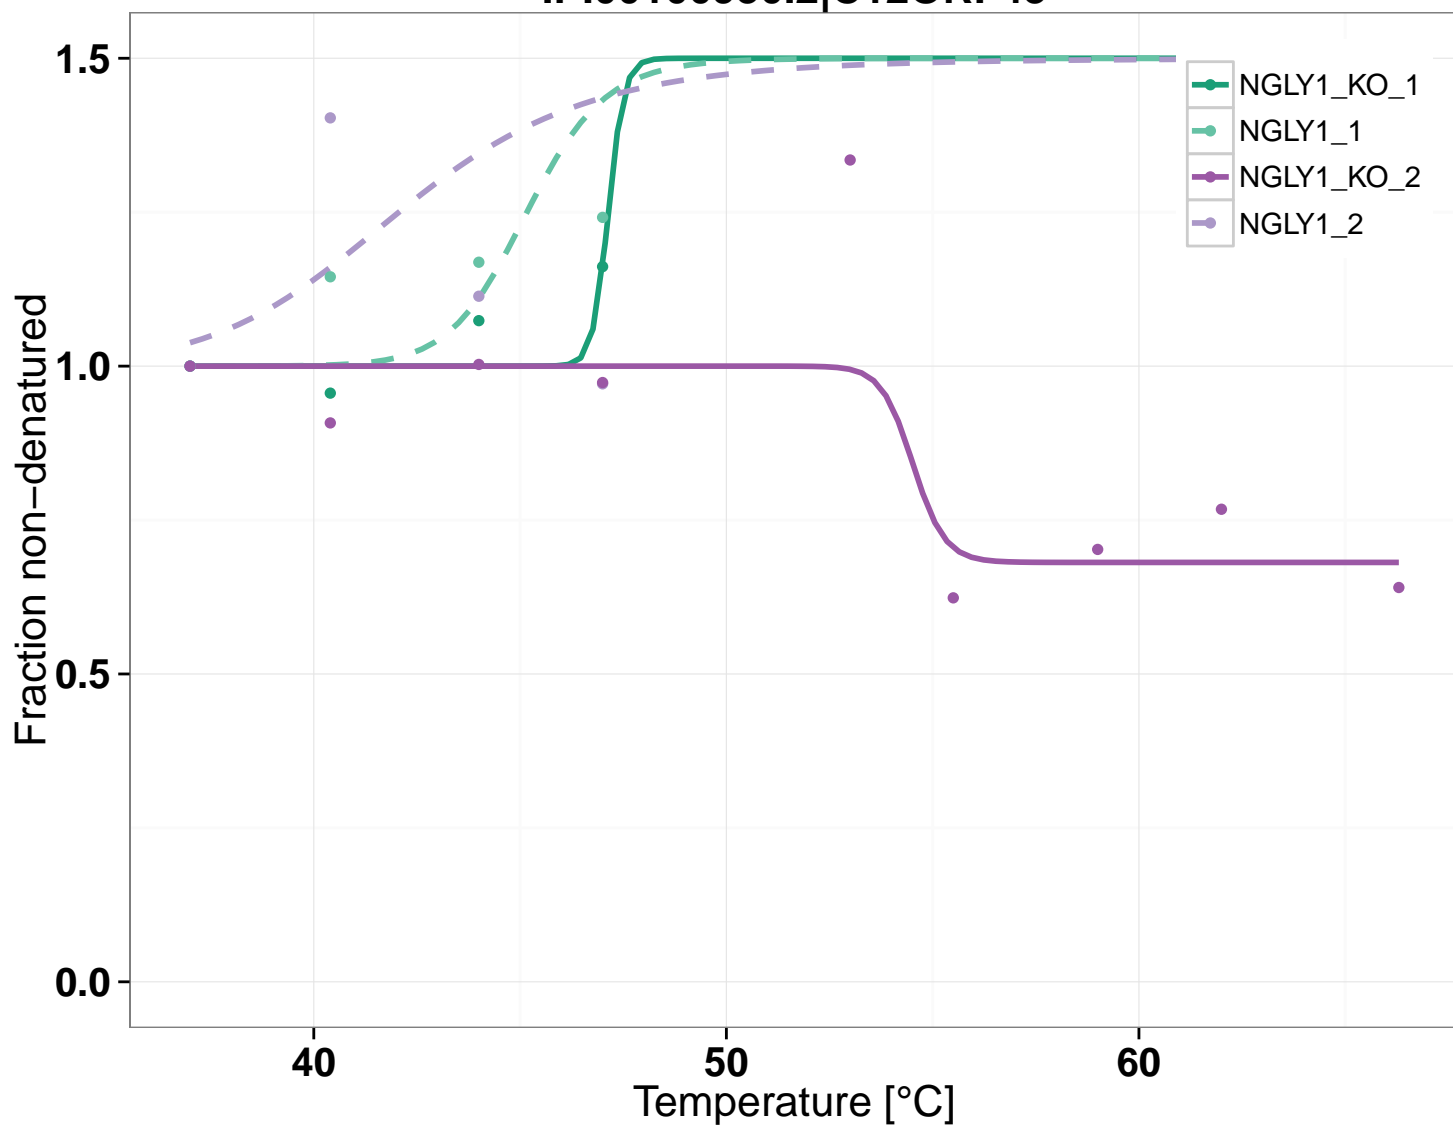

|            | meltPoint | slope | plateau | R2    |
|------------|-----------|-------|---------|-------|
| NGLY1_KO_1 | —         | 0.66  | 1.5     | 0.14  |
| NGLY1_1    | —         | 0.13  | 1.5     | -0.06 |
| NGLY1_KO_2 | —         | -0.21 | 0.68    | 0.26  |
| NGLY1_2    | —         | 0.055 | 1.5     | 0.08  |

Supplement: Supplementary file 2058 [file 1]

IPI00413362.1|SIPA1L1

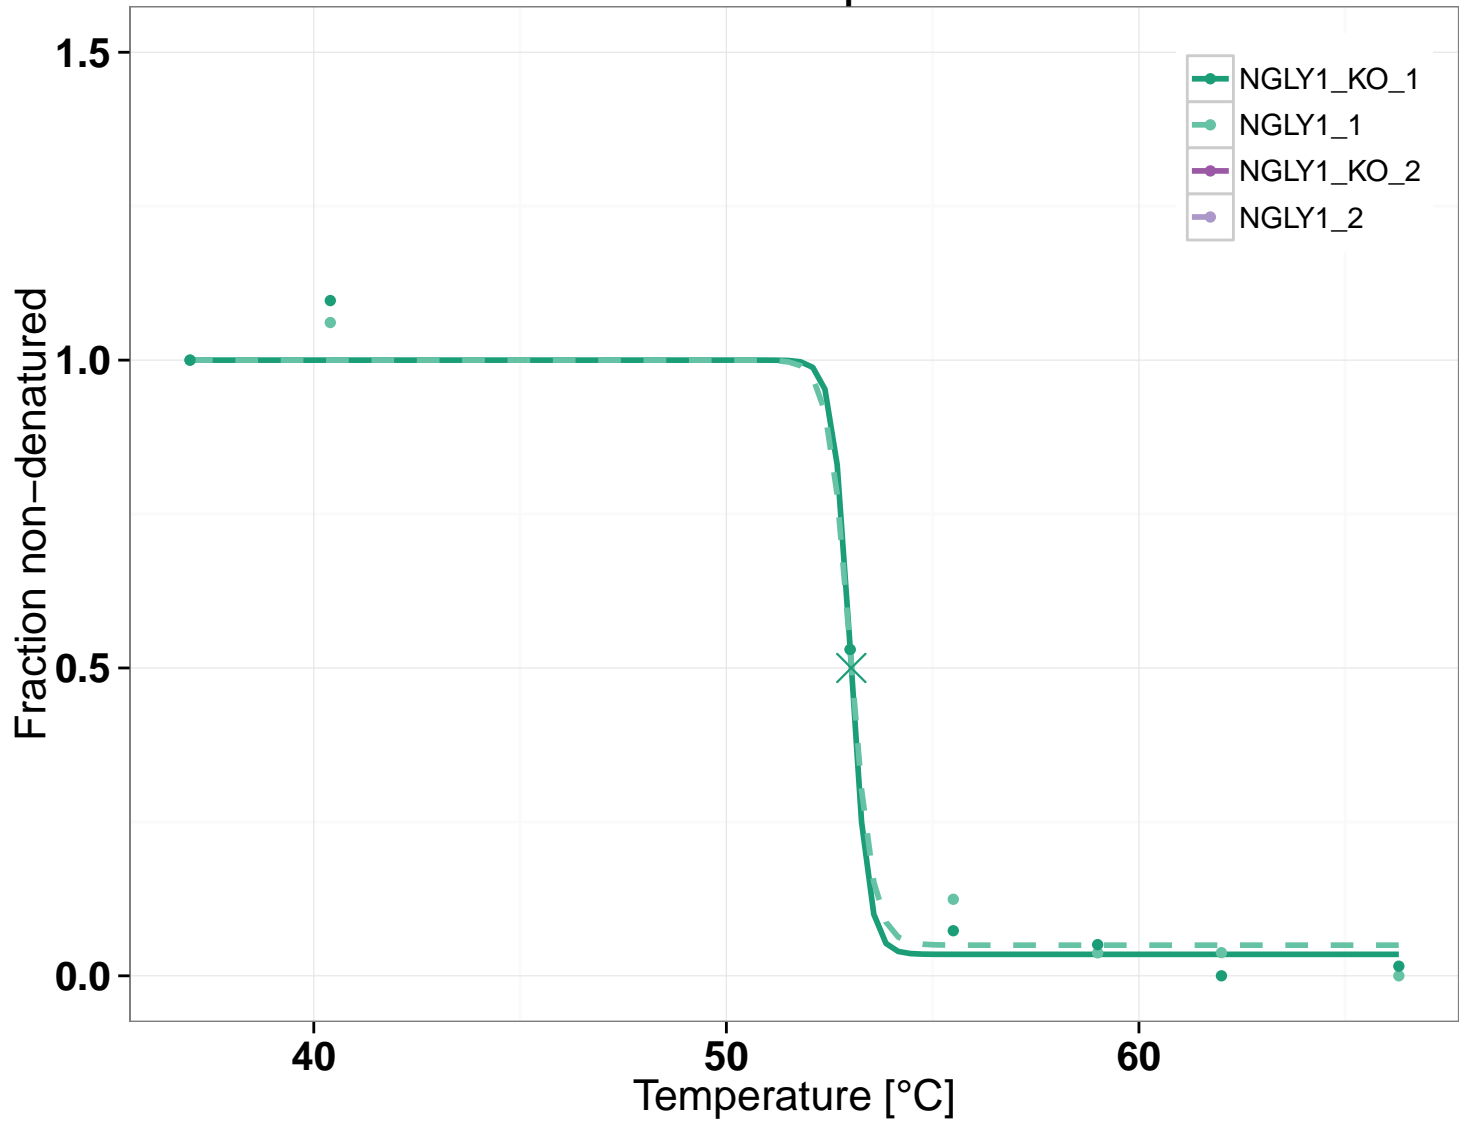

|            | meltPoint | slope | plateau | R2   |
|------------|-----------|-------|---------|------|
| NGLY1_KO_1 | 53.03     | -1.1  | 0.03    | 0.36 |
| NGLY1_1    | 53.03     | -0.89 | 0.05    | 0.43 |
| NGLY1_KO_2 | -         | -     | -       | -    |
| NGLY1_2    | -         | -     | -       | -    |

Supplement: Supplementary file 2059 [file 1]

# IPI00030360.5|RUNDC2A

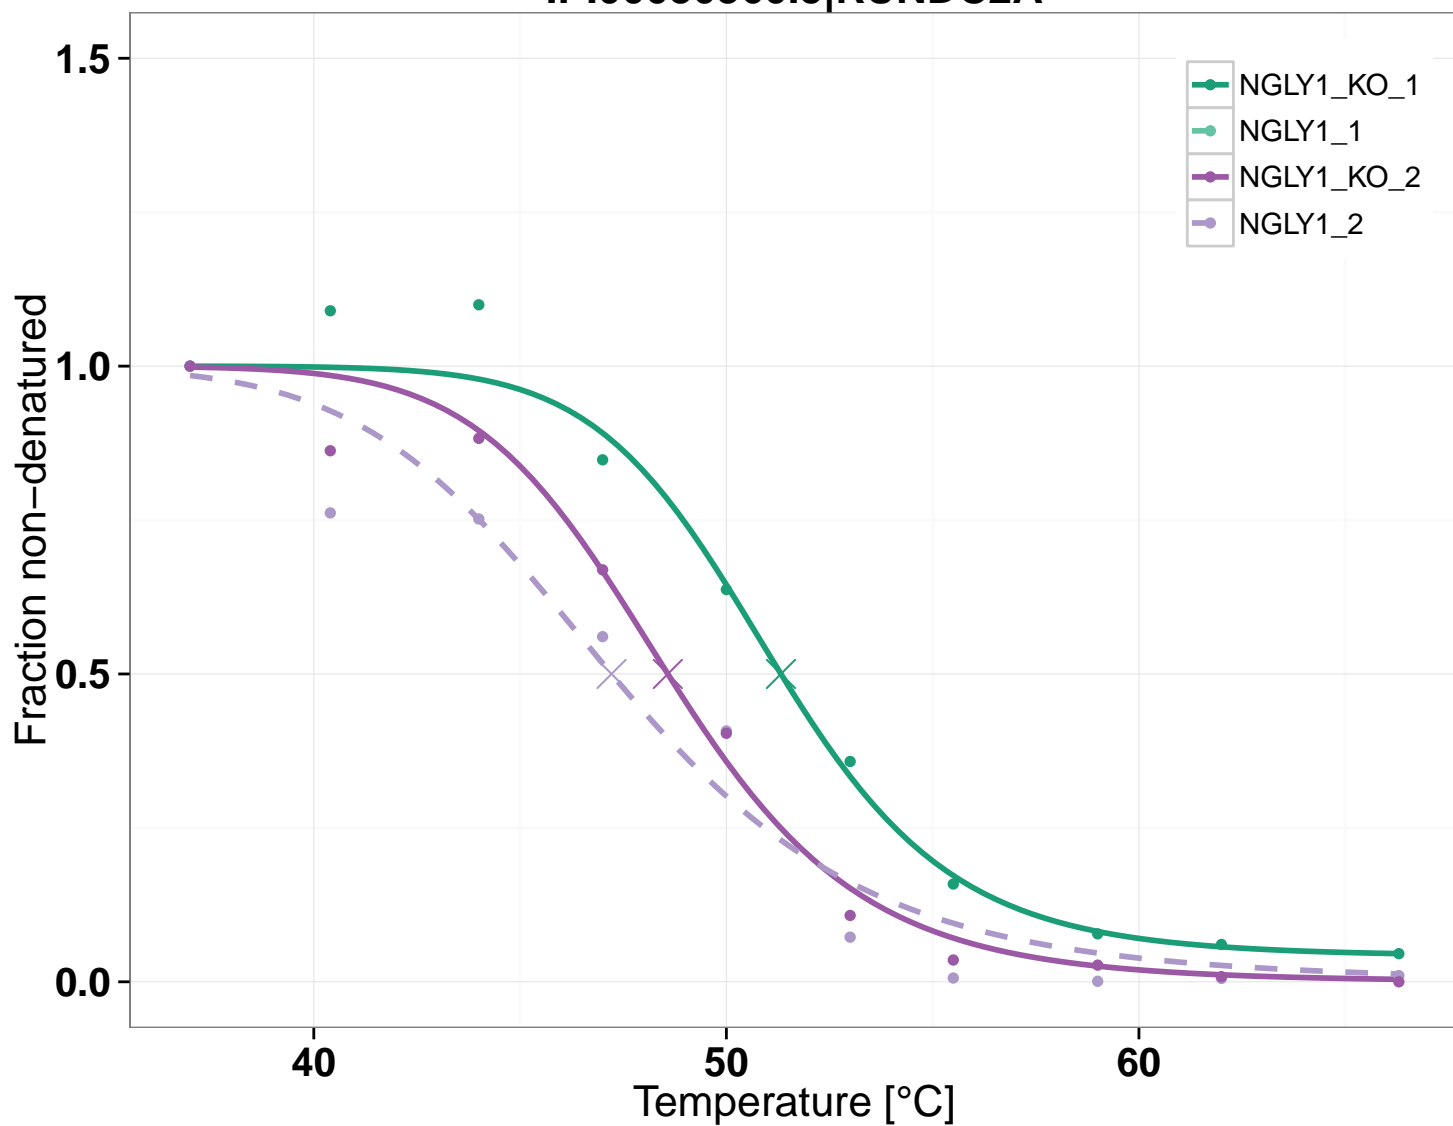

|            | meltPoint | slope  | plateau | R2   |
|------------|-----------|--------|---------|------|
| NGLY1_KO_1 | 51.32     | -0.11  | 0.04    | 0.99 |
| NGLY1_1    | -         | -      | -       | -    |
| NGLY1_KO_2 | 48.58     | -0.11  | 0       | 0.99 |
| NGLY1_2    | 47.22     | -0.081 | 0       | 0.96 |

Supplement: Supplementary file 2060 [file 1]

IPI00303120.5|TMEM143

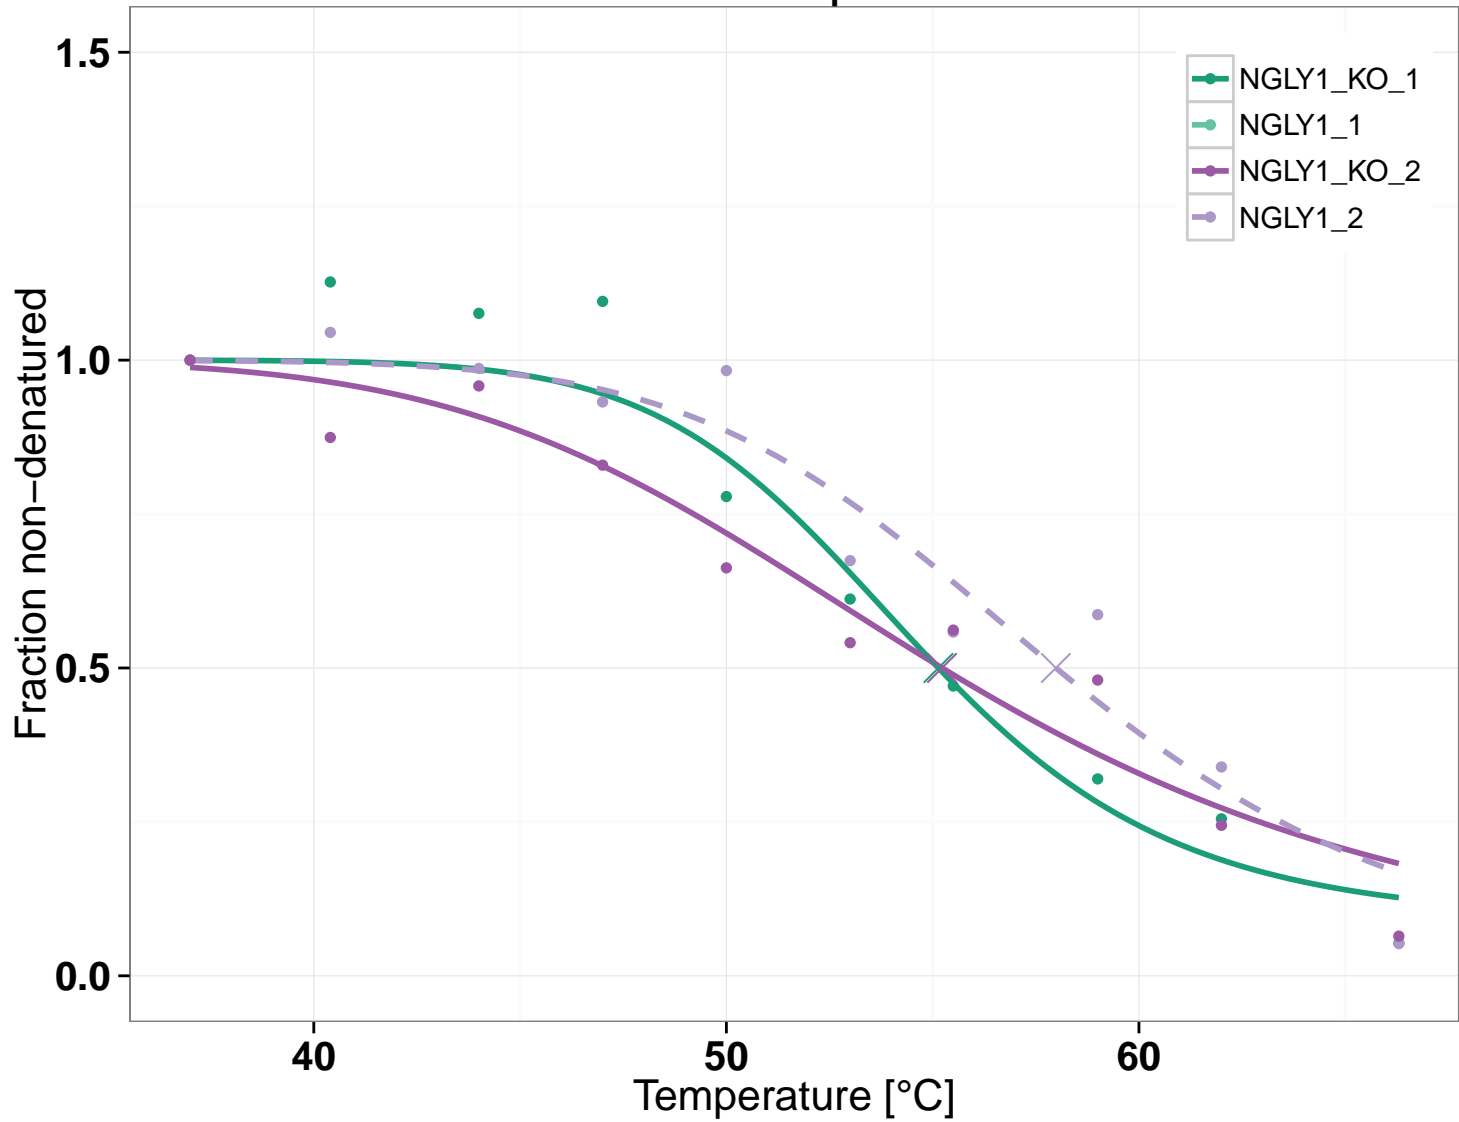

|            | meltPoint | slope  | plateau | R2   |
|------------|-----------|--------|---------|------|
| NGLY1_KO_1 | 55.14     | -0.073 | 0.09    | 0.95 |
| NGLY1_1    | -         | -      | -       | -    |
| NGLY1_KO_2 | 55.23     | -0.043 | 0       | 0.94 |
| NGLY1_2    | 57.99     | -0.056 | 0       | 0.94 |

Supplement: Supplementary file 2061 [file 1]

# IPI00217277.1|SLC25A10

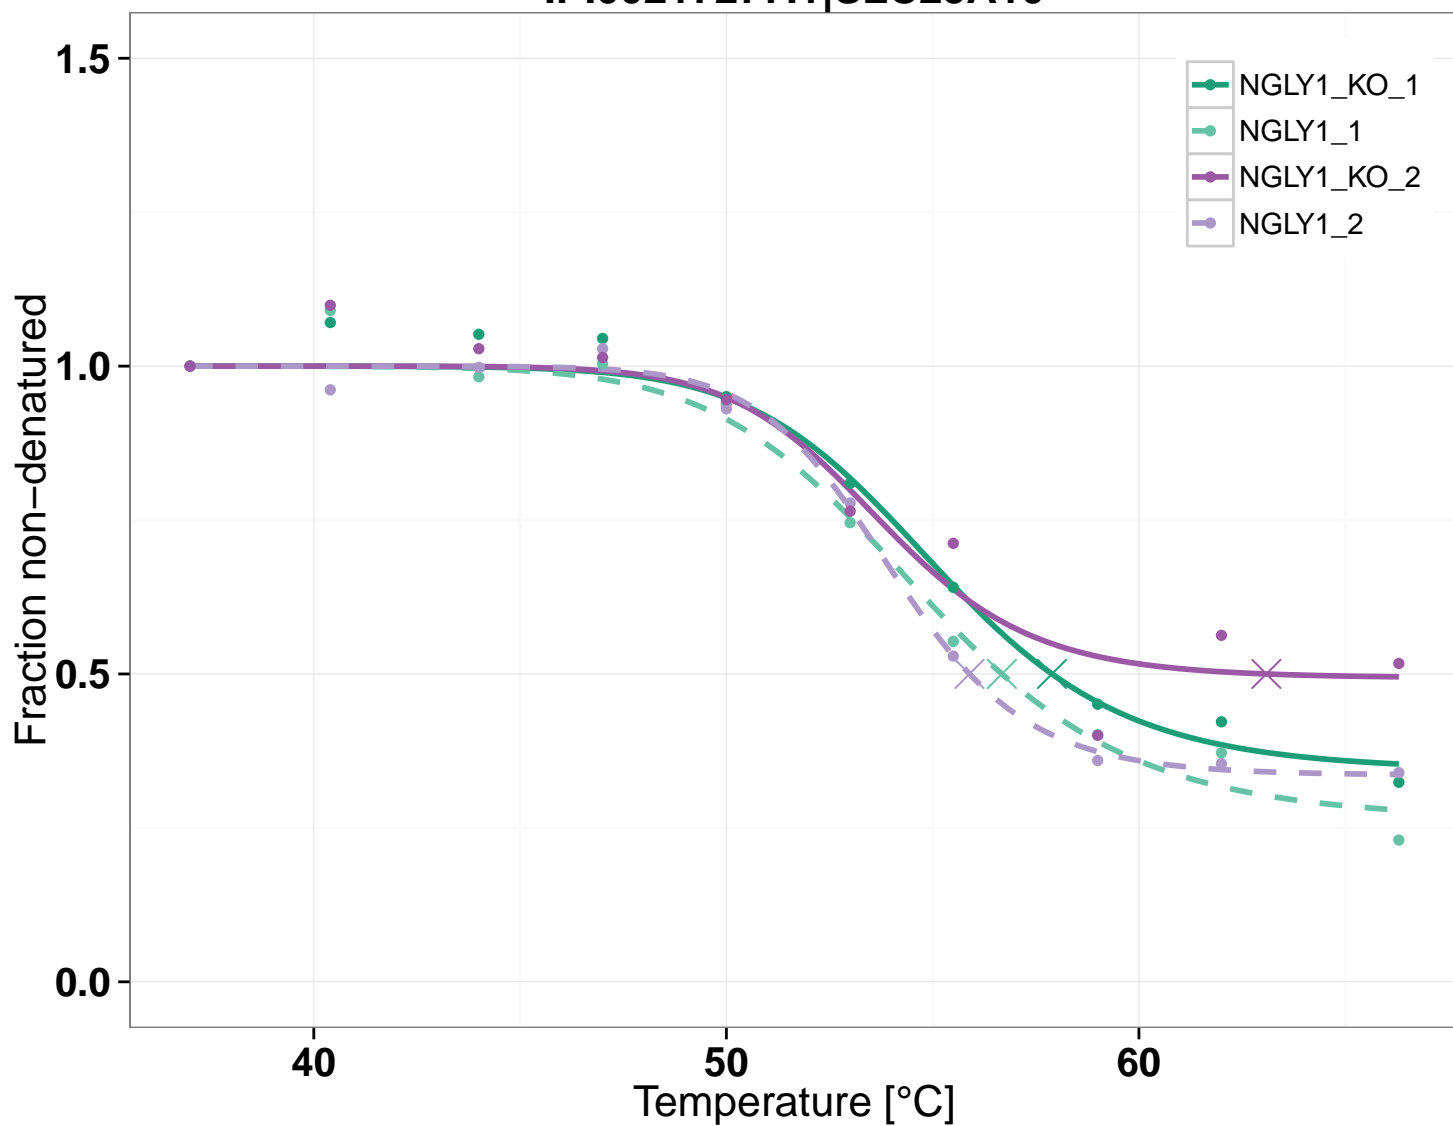

|            | meltPoint | slope  | plateau | R2   |
|------------|-----------|--------|---------|------|
| NGLY1_KO_1 | 57.89     | -0.072 | 0.34    | 0.98 |
| NGLY1_1    | 56.68     | -0.073 | 0.26    | 0.98 |
| NGLY1_KO_2 | 63.09     | -0.069 | 0.49    | 0.93 |
| NGLY1_2    | 55.89     | -0.1   | 0.34    | 1    |

Supplement: Supplementary file 2062 [file 1]

IPI00328794.1|CCDC84

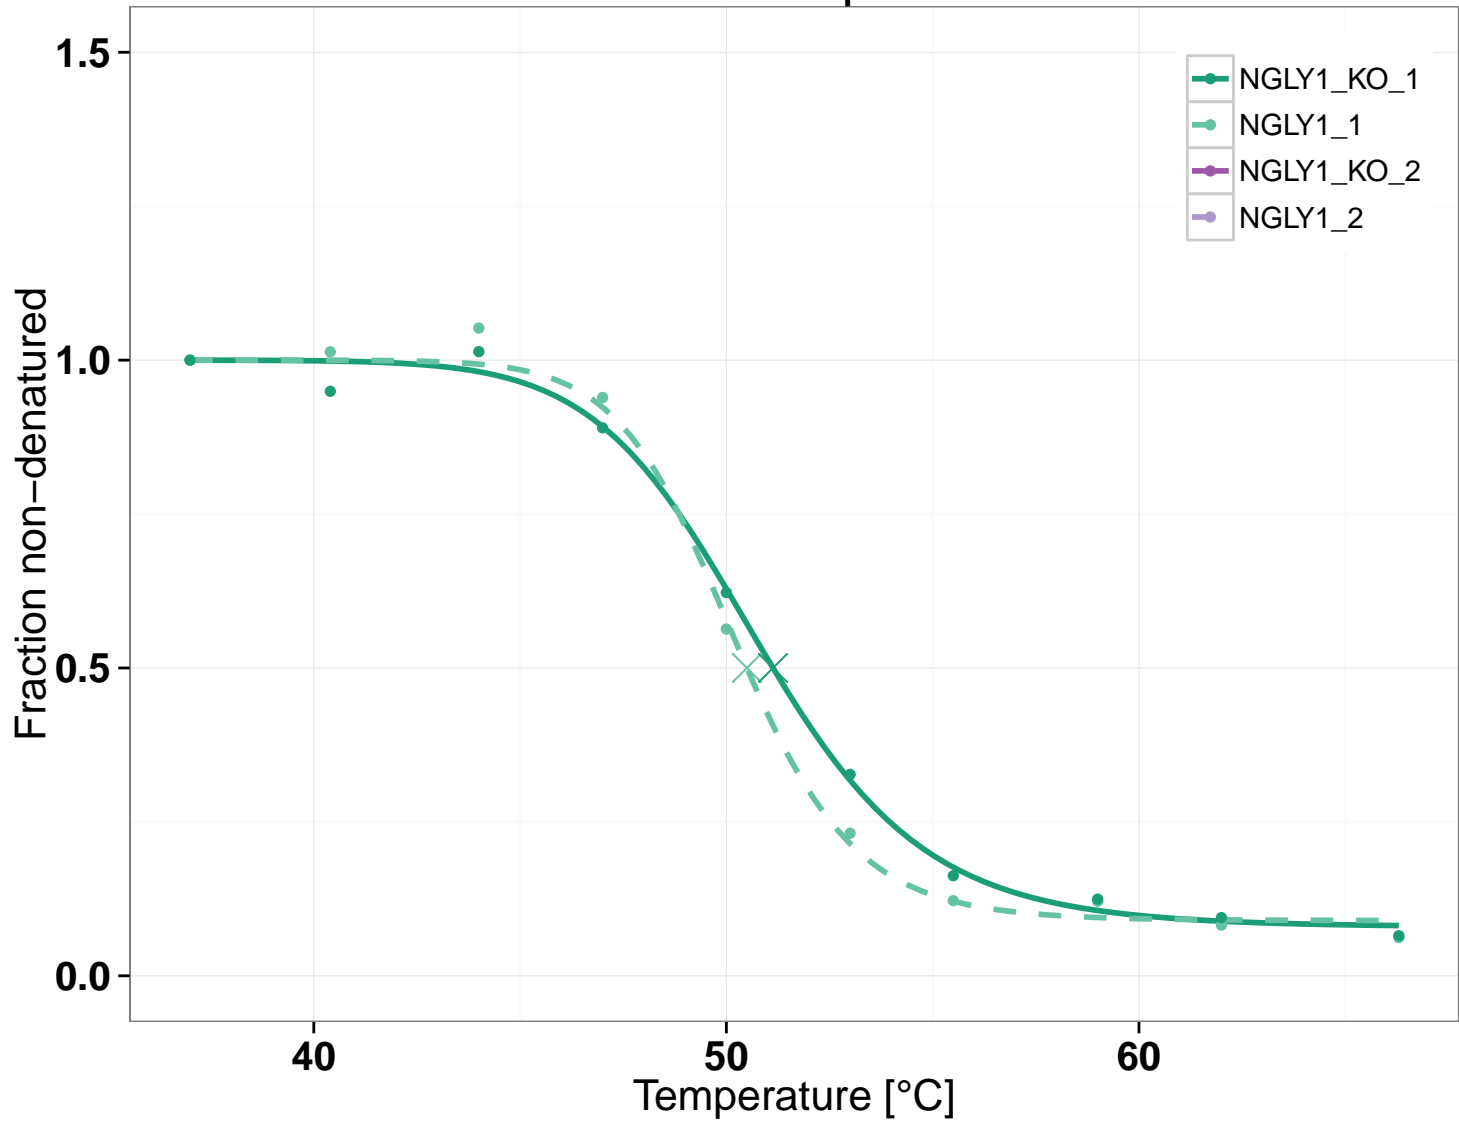

|            | meltPoint | slope | plateau | R2 |
|------------|-----------|-------|---------|----|
| NGLY1_KO_1 | 51.13     | -0.11 | 0.08    | 1  |
| NGLY1_1    | 50.5      | -0.16 | 0.09    | 1  |
| NGLY1_KO_2 | -         | -     | -       | -  |
| NGLY1_2    | -         | -     | -       | -  |

Supplement: Supplementary file 2063 [file 1]

IPI00031052.6|G6PC3

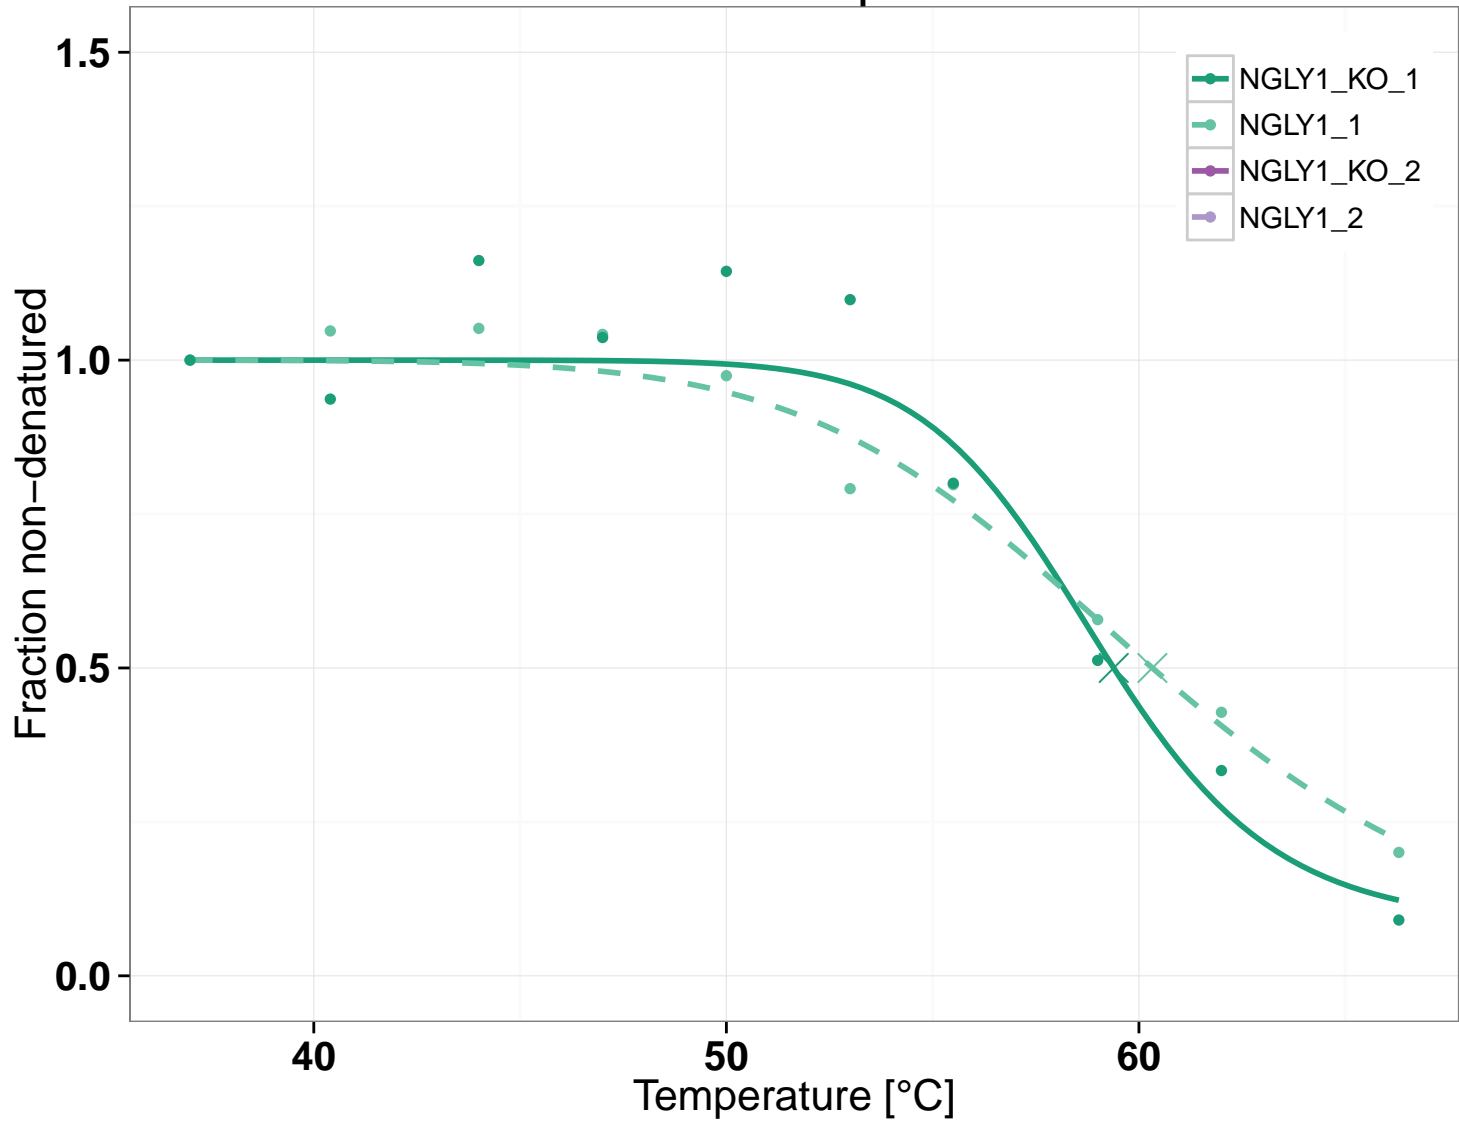

|            | meltPoint | slope  | plateau | R2   |
|------------|-----------|--------|---------|------|
| NGLY1_KO_1 | 59.39     | -0.11  | 0.08    | 0.93 |
| NGLY1_1    | 60.33     | -0.059 | 0       | 0.98 |
| NGLY1_KO_2 | -         | -      | -       | -    |
| NGLY1_2    | -         | -      | -       | -    |

Supplement: Supplementary file 2064 [file 1]

IPI00398964.2|LOC728658

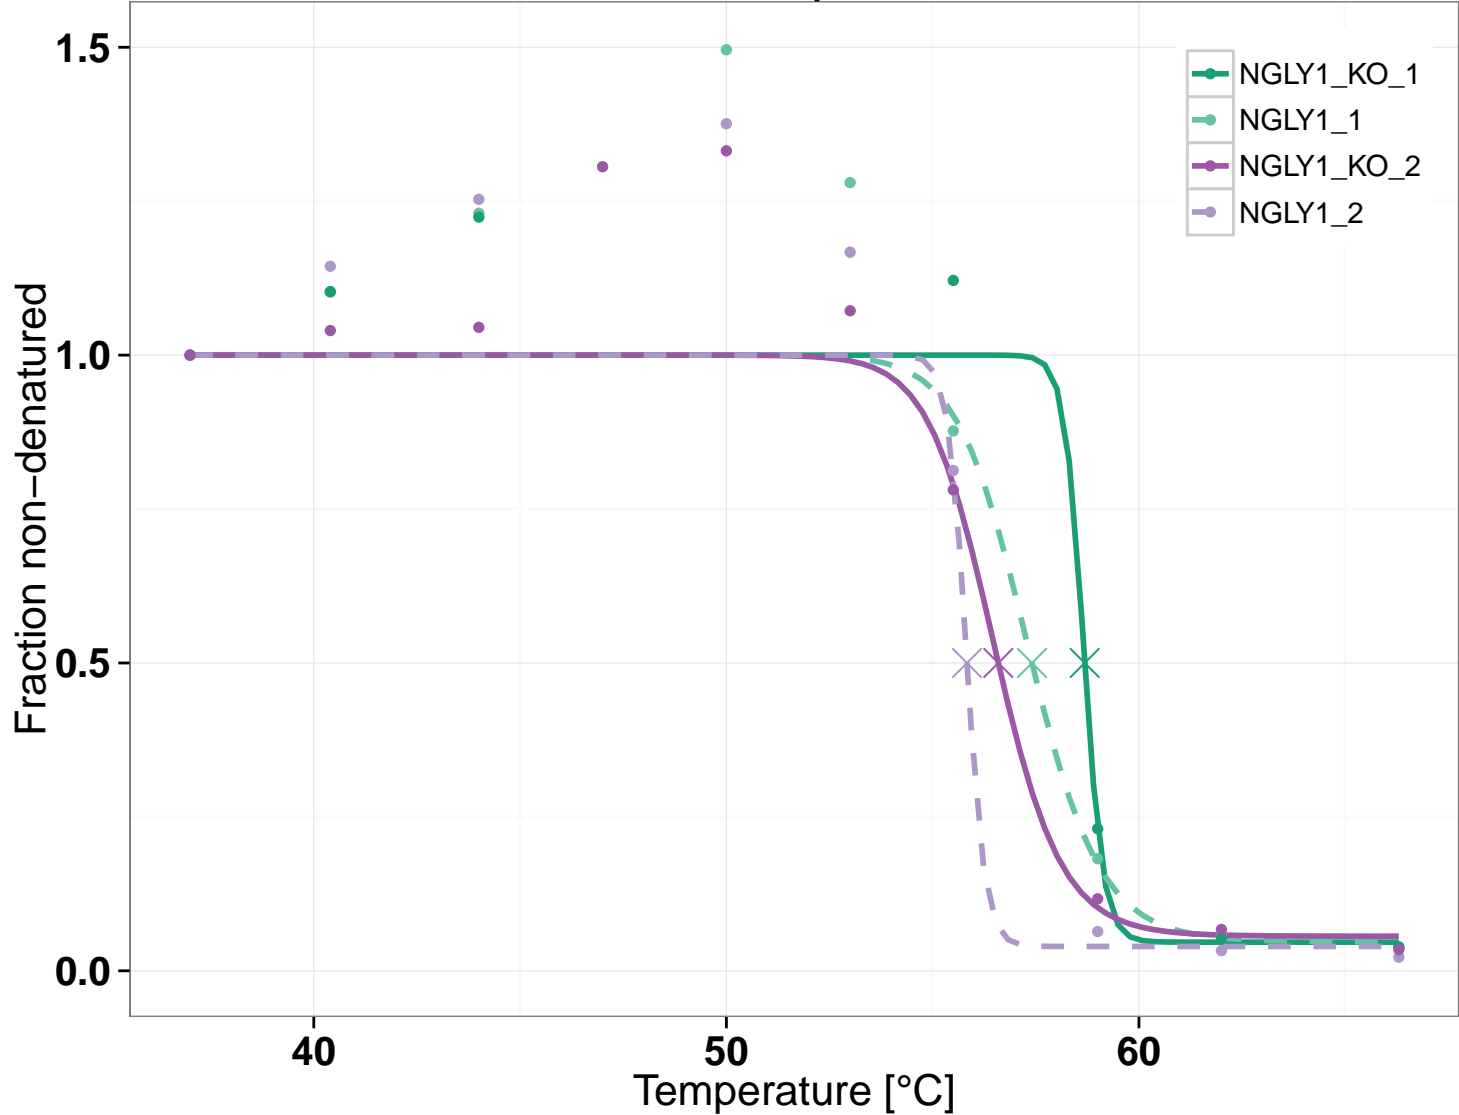

|            | meltPoint | slope | plateau | R2   |
|------------|-----------|-------|---------|------|
| NGLY1_KO_1 | 58.69     | -1    | 0.05    | 0.63 |
| NGLY1_1    | 57.41     | -0.28 | 0.05    | 0.77 |
| NGLY1_KO_2 | 56.59     | -0.29 | 0.06    | 0.91 |
| NGLY1_2    | 55.83     | -1.1  | 0.04    | 0.83 |

Supplement: Supplementary file 2065 [file 1]

IPI00645149.1|C6ORF47

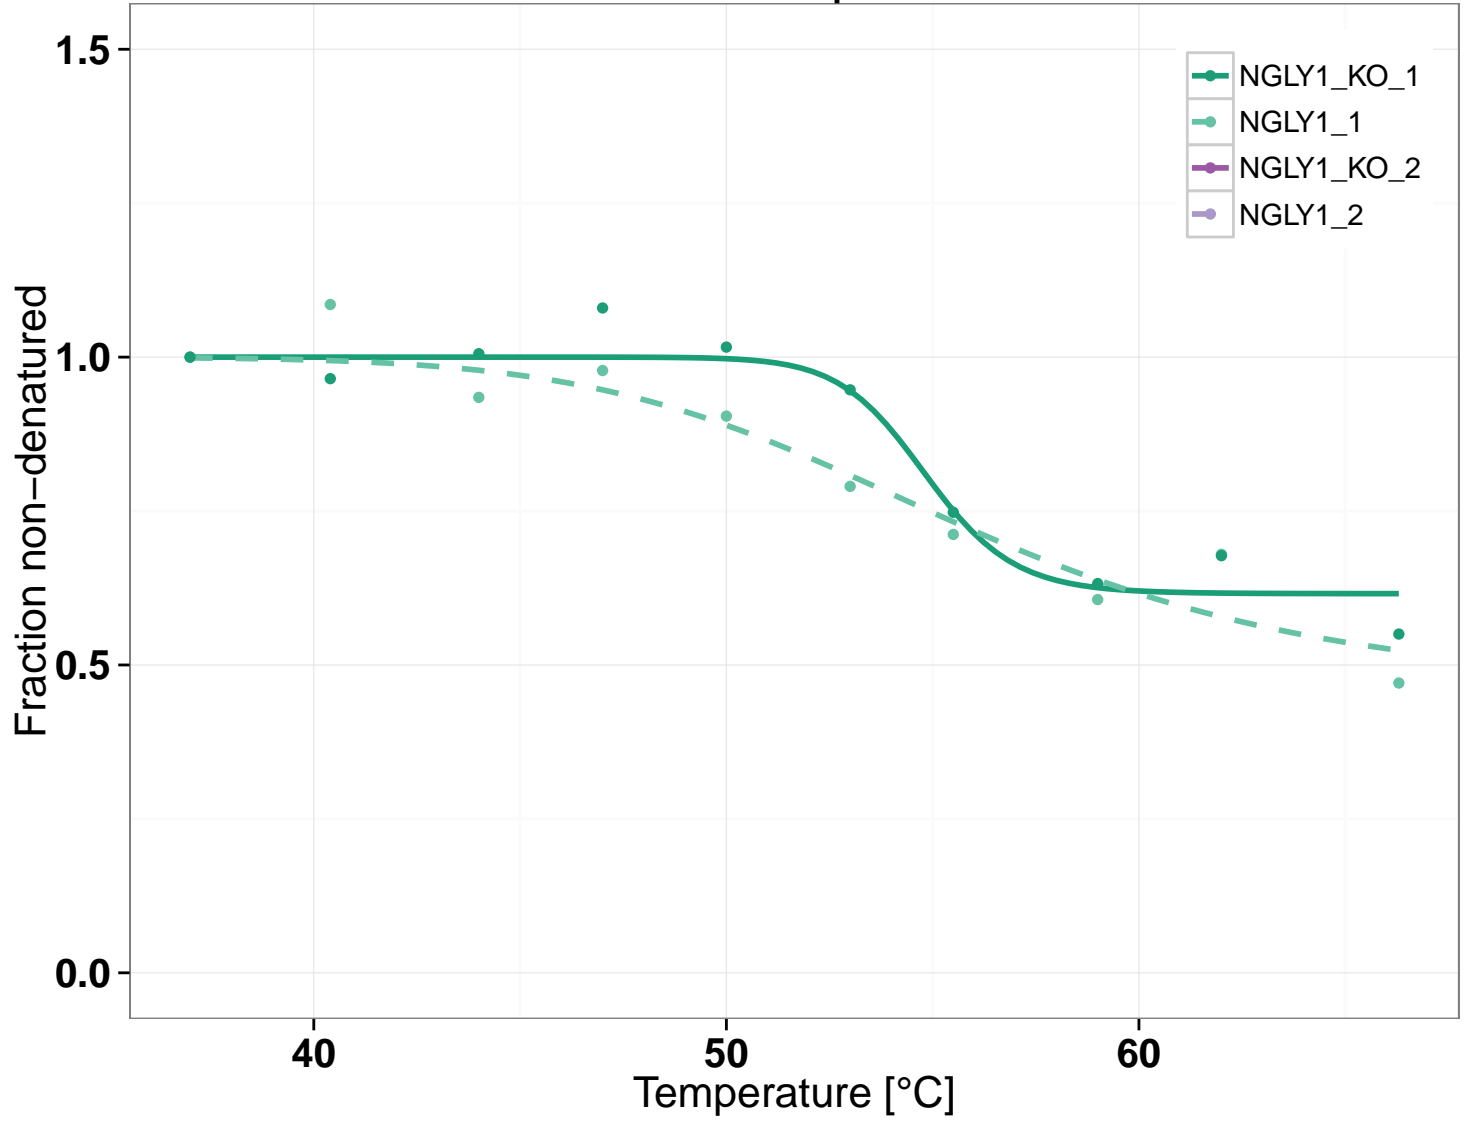

|            | meltPoint | slope  | plateau | R2   |
|------------|-----------|--------|---------|------|
| NGLY1_KO_1 | -         | -0.091 | 0.62    | 0.95 |
| NGLY1_1    | -         | -0.03  | 0.45    | 0.92 |
| NGLY1_KO_2 | -         | -      | -       | -    |
| NGLY1_2    | -         | -      | -       | -    |

Supplement: Supplementary file 2066 [file 1]

IPI00913912.1|Ataxin-10

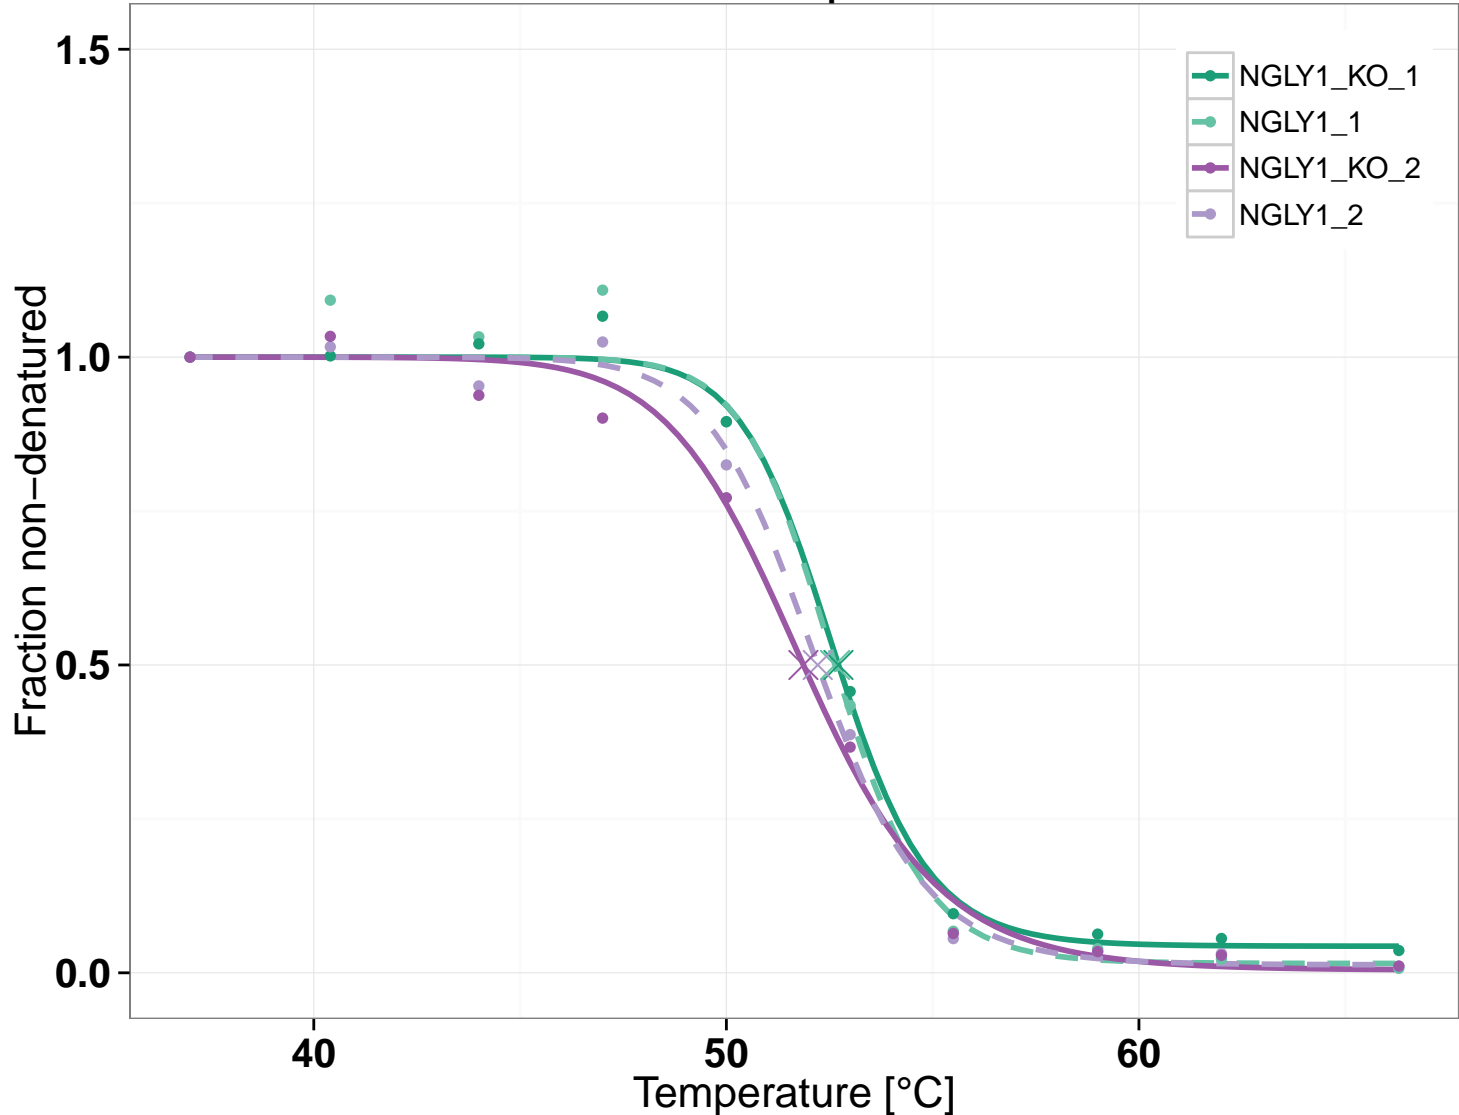

|            | meltPoint | slope | plateau | R2   |
|------------|-----------|-------|---------|------|
| NGLY1_KO_1 | 52.72     | -0.21 | 0.04    | 1    |
| NGLY1_1    | 52.64     | -0.22 | 0.02    | 0.99 |
| NGLY1_KO_2 | 51.87     | -0.15 | 0       | 0.99 |
| NGLY1_2    | 52.21     | -0.19 | 0.01    | 1    |

Supplement: Supplementary file 2067 [file 1]

IPI00007266.2|ALAS1

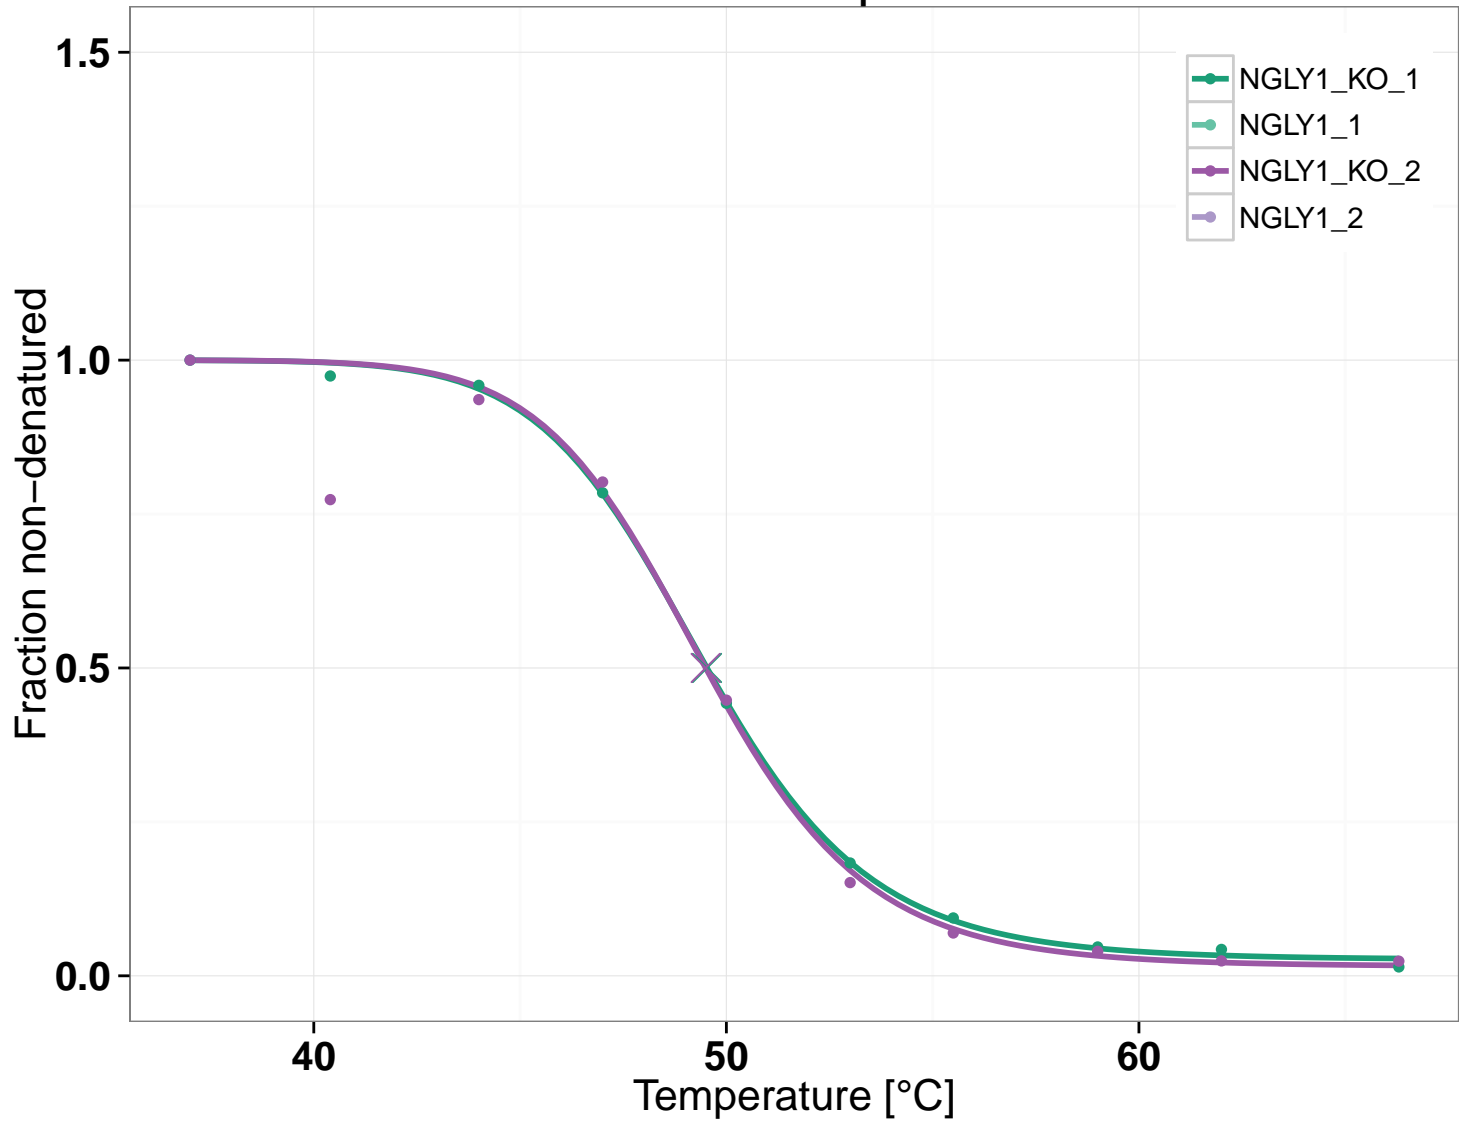

|            | meltPoint | slope | plateau | R2   |
|------------|-----------|-------|---------|------|
| NGLY1_KO_1 | 49.53     | -0.12 | 0.03    | 1    |
| NGLY1_1    | -         | -     | -       | -    |
| NGLY1_KO_2 | 49.5      | -0.12 | 0.02    | 0.97 |
| NGLY1_2    | -         | -     | -       | -    |

Supplement: Supplementary file 2069 [file 1]

IPI00029810.1|MND1

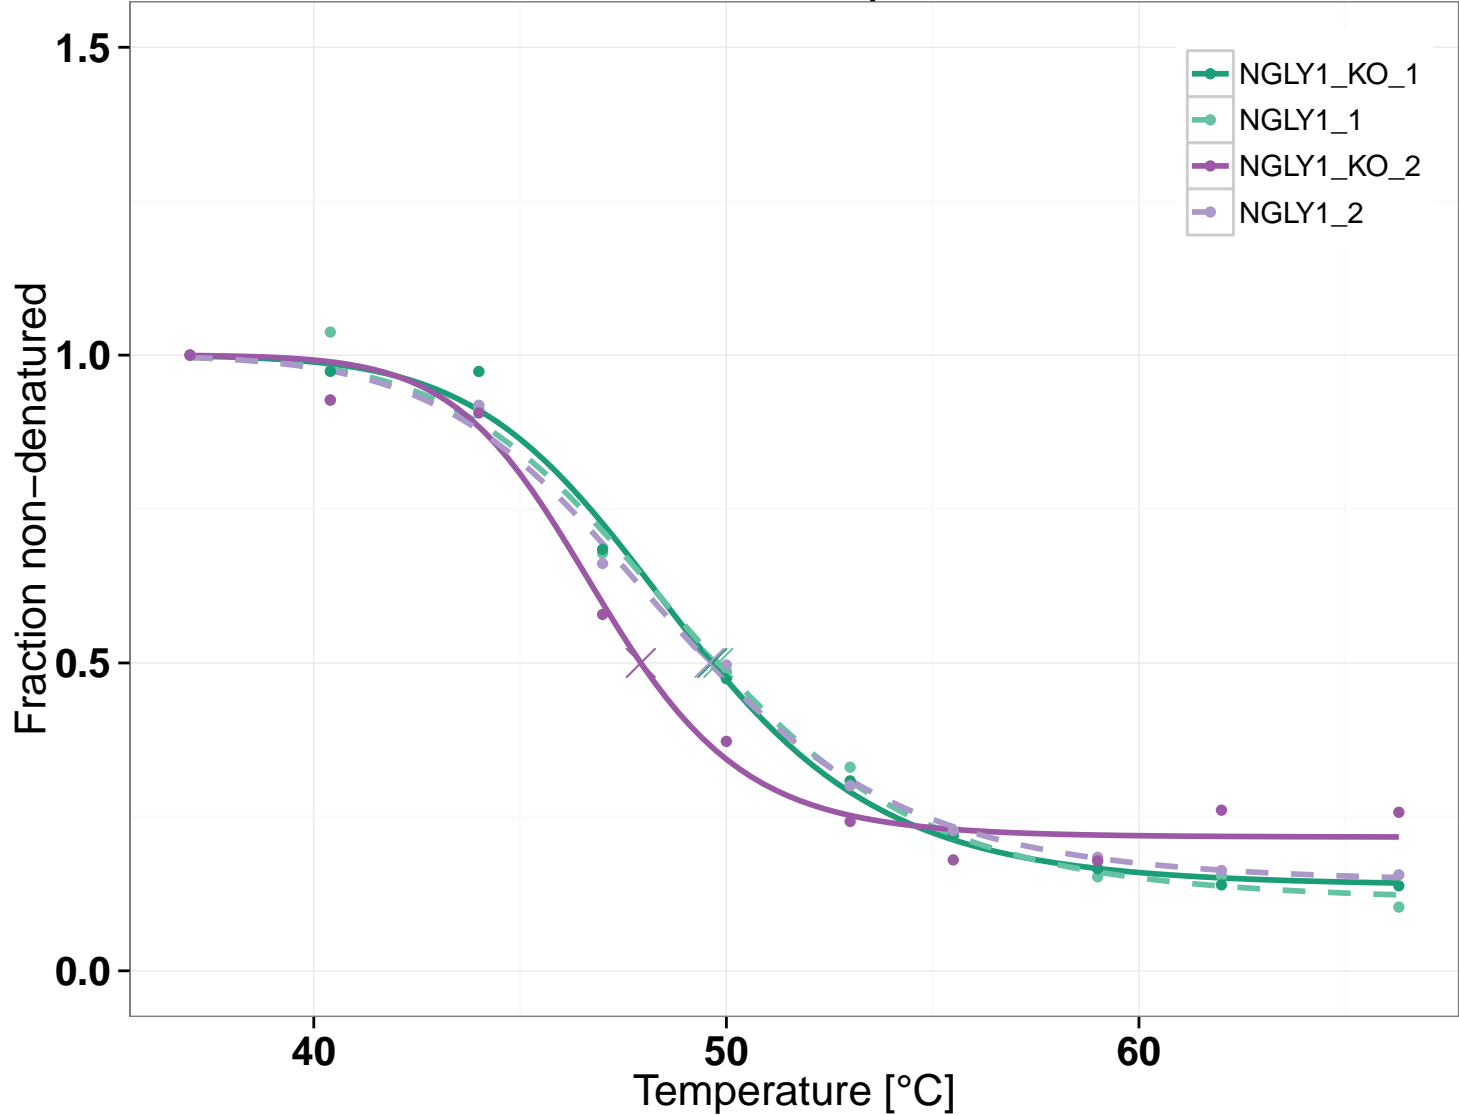

|            | meltPoint | slope  | plateau | R2   |
|------------|-----------|--------|---------|------|
| NGLY1_KO_1 | 49.66     | -0.087 | 0.14    | 0.99 |
| NGLY1_1    | 49.8      | -0.078 | 0.11    | 0.99 |
| NGLY1_KO_2 | 47.93     | -0.11  | 0.22    | 0.99 |
| NGLY1_2    | 49.59     | -0.077 | 0.14    | 0.99 |

Supplement: Supplementary file 2070 [file 1]

IPI00465291.3|SIK2

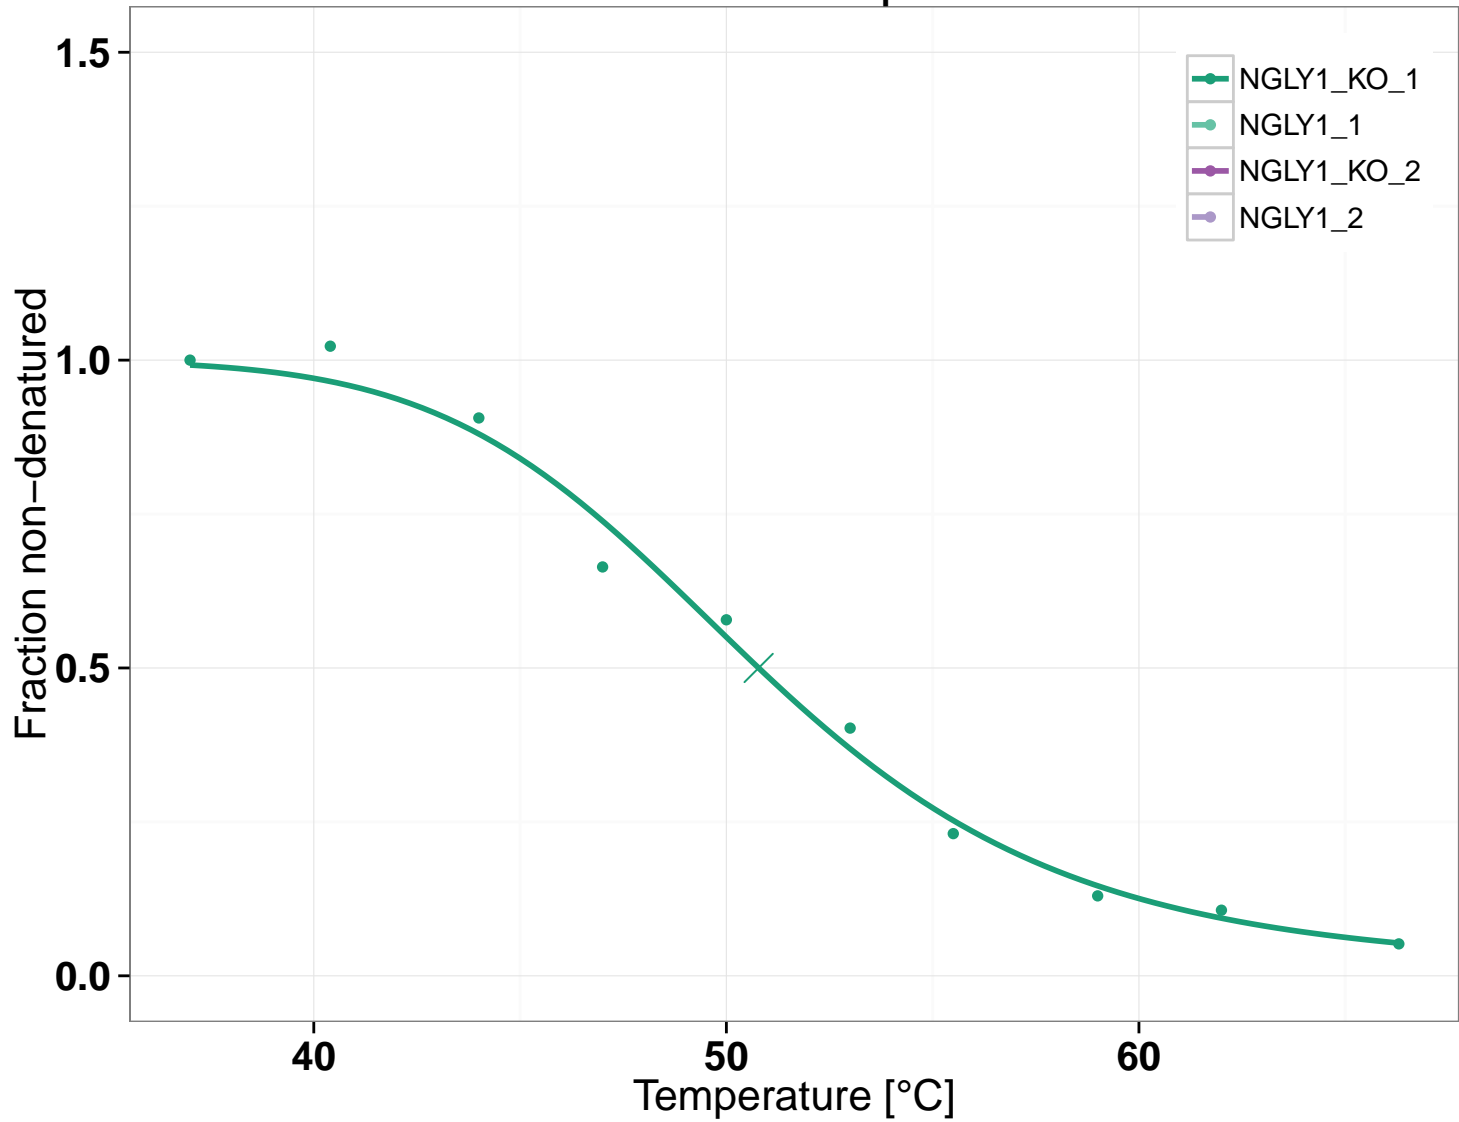

|            | meltPoint | slope  | plateau | R2   |
|------------|-----------|--------|---------|------|
| NGLY1_KO_1 | 50.78     | -0.065 | 0.01    | 0.99 |
| NGLY1_1    | -         | -      | -       | -    |
| NGLY1_KO_2 | -         | -      | -       | -    |
| NGLY1_2    | -         | -      | -       | -    |

Supplement: Supplementary file 2071 [file 1]

IPI00328279.1|ARHGAP12

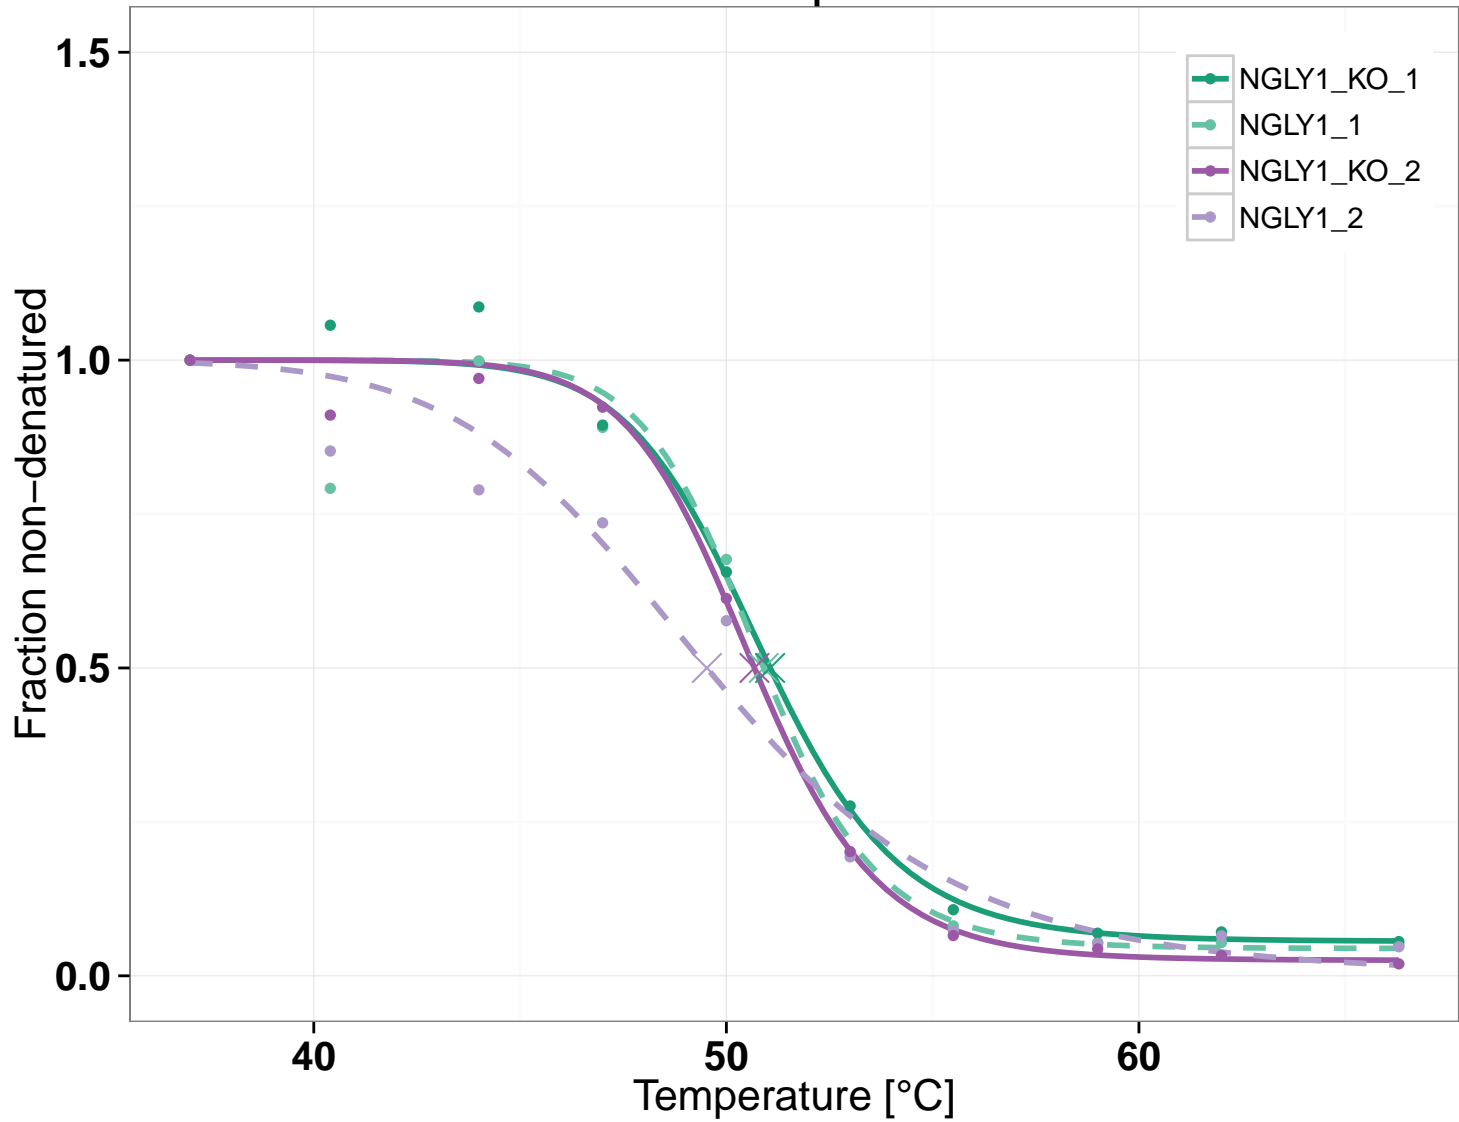

|            | meltPoint | slope  | plateau | R2   |
|------------|-----------|--------|---------|------|
| NGLY1_KO_1 | 51.06     | -0.14  | 0.06    | 0.99 |
| NGLY1_1    | 50.9      | -0.17  | 0.04    | 0.97 |
| NGLY1_KO_2 | 50.68     | -0.16  | 0.03    | 1    |
| NGLY1_2    | 49.53     | -0.082 | 0       | 0.96 |

Supplement: Supplementary file 2072 [file 1]

IPI00414973.1|FASTKD5

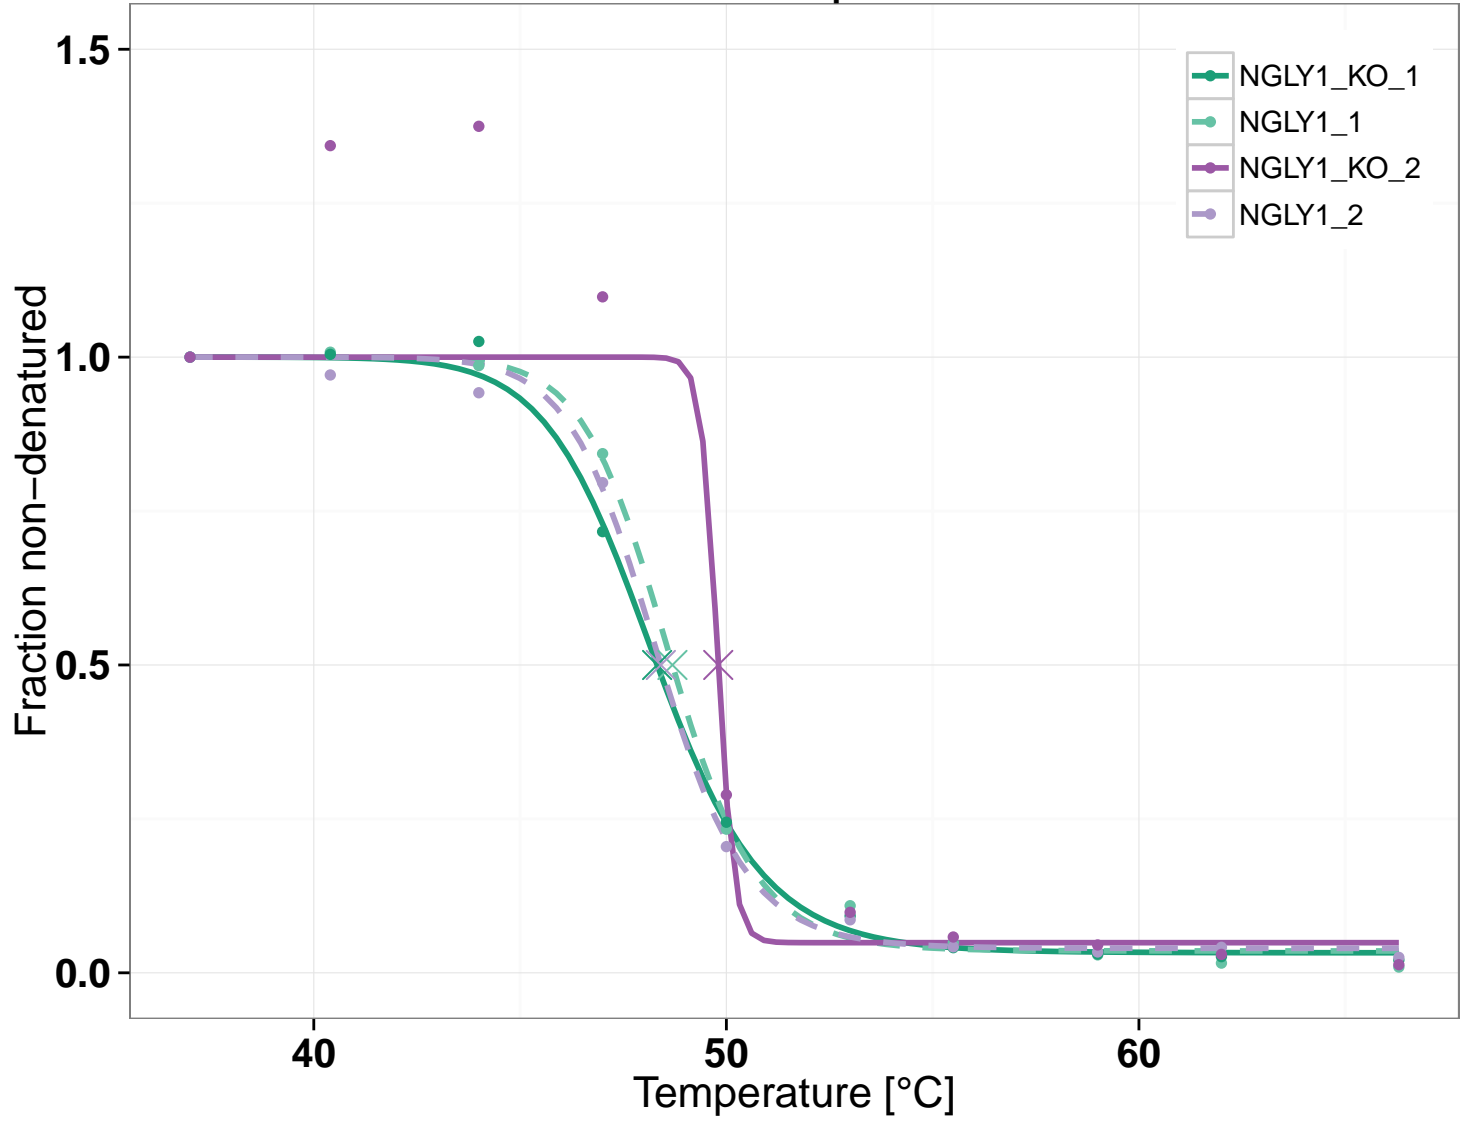

|            | meltPoint | slope | plateau | R2   |
|------------|-----------|-------|---------|------|
| NGLY1_KO_1 | 48.32     | -0.18 | 0.03    | 1    |
| NGLY1_1    | 48.69     | -0.23 | 0.04    | 1    |
| NGLY1_KO_2 | 49.8      | -1.2  | 0.05    | 0.91 |
| NGLY1_2    | 48.41     | -0.22 | 0.04    | 1    |

Supplement: Supplementary file 2073 [file 1]

IPI00100775.1|C11ORF67

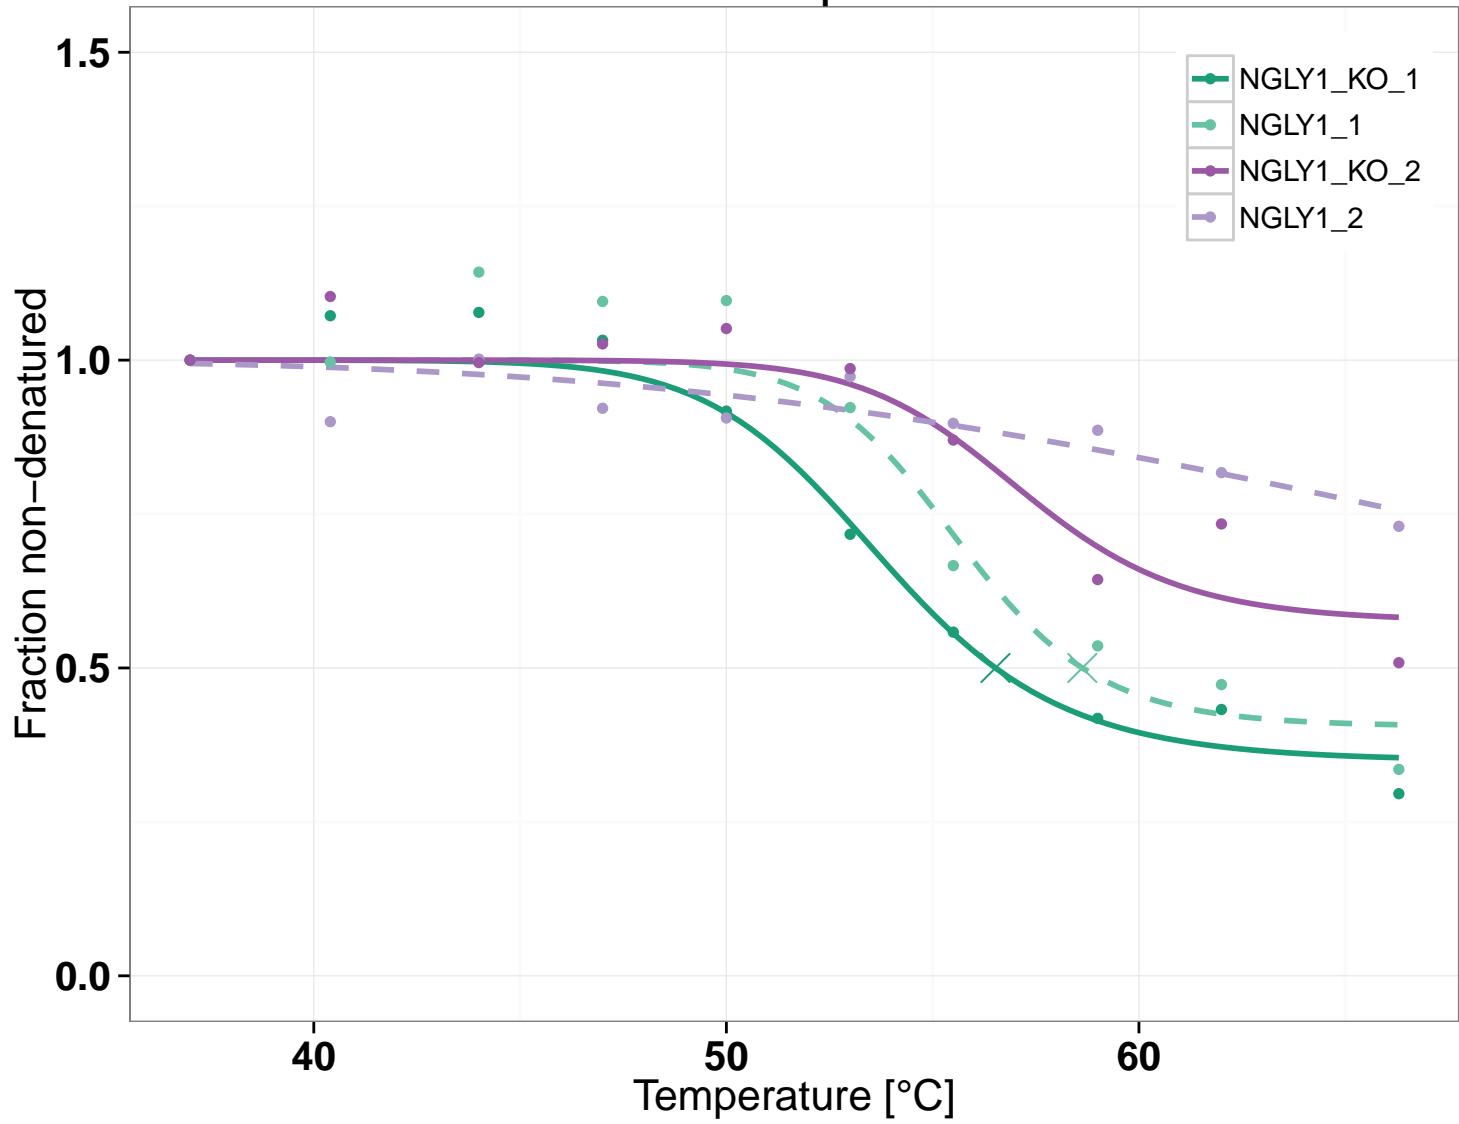

|            | meltPoint | slope  | plateau | R2   |
|------------|-----------|--------|---------|------|
| NGLY1_KO_1 | 56.52     | -0.076 | 0.35    | 0.97 |
| NGLY1_1    | 58.63     | -0.088 | 0.4     | 0.93 |
| NGLY1_KO_2 | -         | -0.055 | 0.57    | 0.89 |
| NGLY1_2    | -         | -      | 0       | 0.74 |

Supplement: Supplementary file 2074 [file 1]

IPI00219255.1|MEF2A

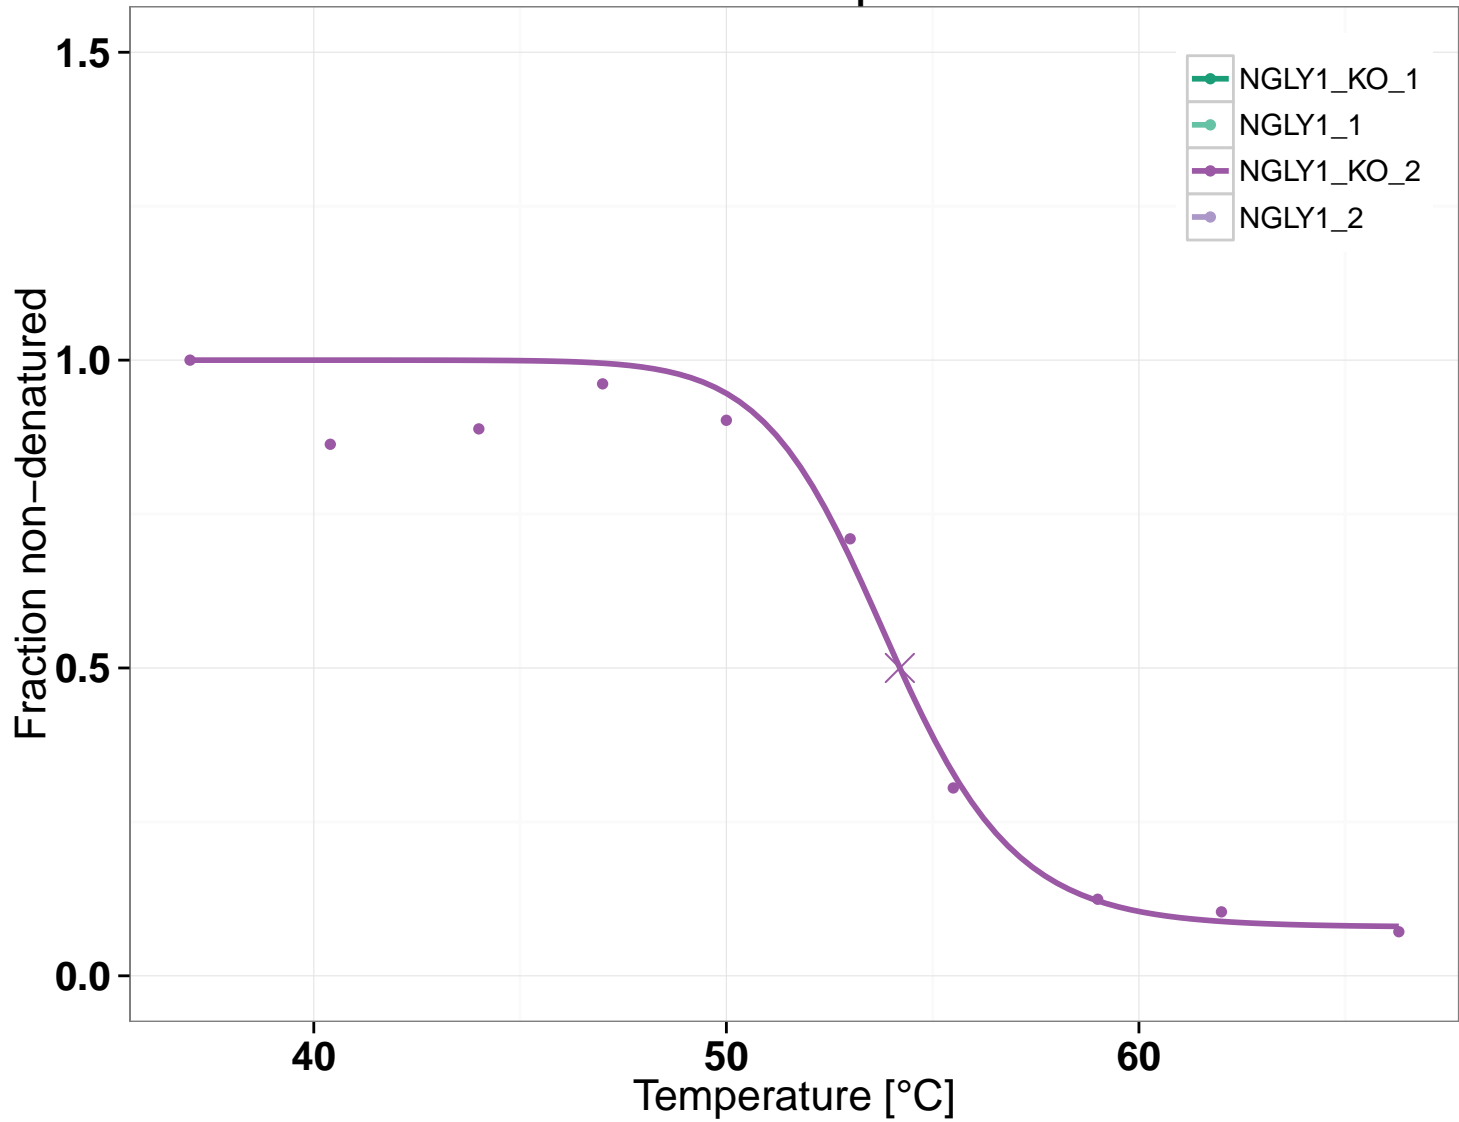

|            | meltPoint | slope | plateau | R2   |
|------------|-----------|-------|---------|------|
| NGLY1_KO_1 | -         | -     | -       | -    |
| NGLY1_1    | -         | -     | -       | -    |
| NGLY1_KO_2 | 54.21     | -0.15 | 0.08    | 0.97 |
| NGLY1_2    | -         | -     | -       | -    |

Supplement: Supplementary file 2075 [file 1]

IPI00472718.6|A8MSH2\_HUMAN

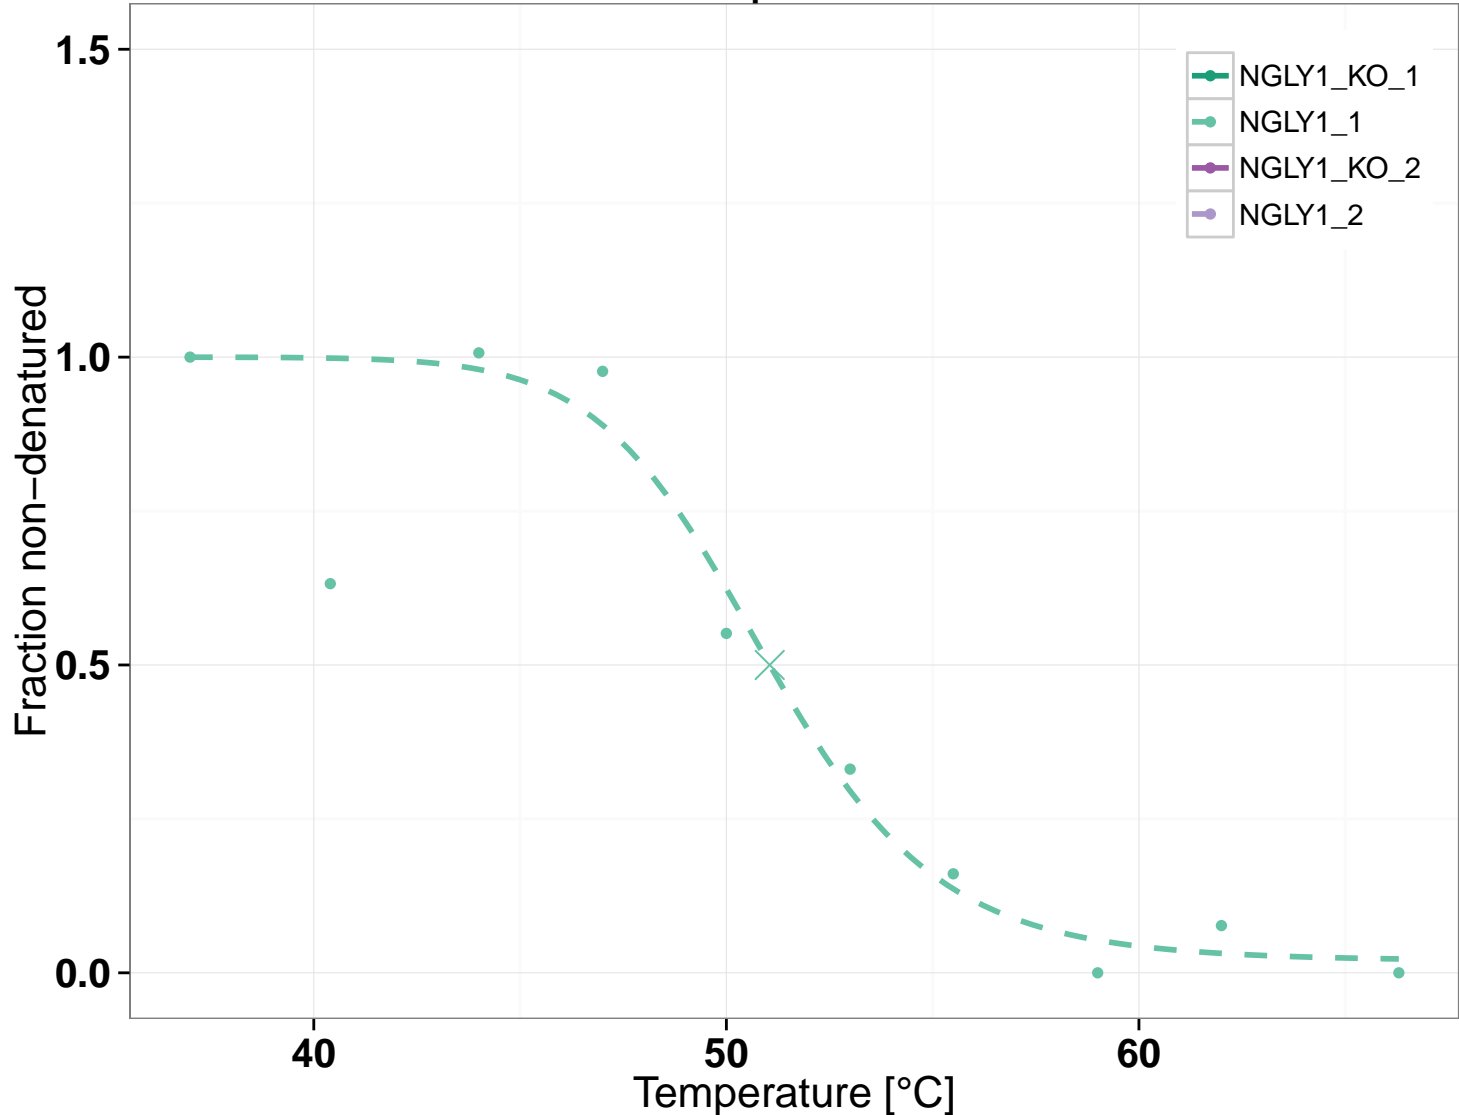

|            | meltPoint | slope | plateau | R2  |
|------------|-----------|-------|---------|-----|
| NGLY1_KO_1 | -         | -     | -       | -   |
| NGLY1_1    | 51.05     | -0.12 | 0.02    | 0.9 |
| NGLY1_KO_2 | -         | -     | -       | -   |
| NGLY1_2    | -         | -     | -       | -   |

Supplement: Supplementary file 2076 [file 1]

IPI00296907.4|ACOX1

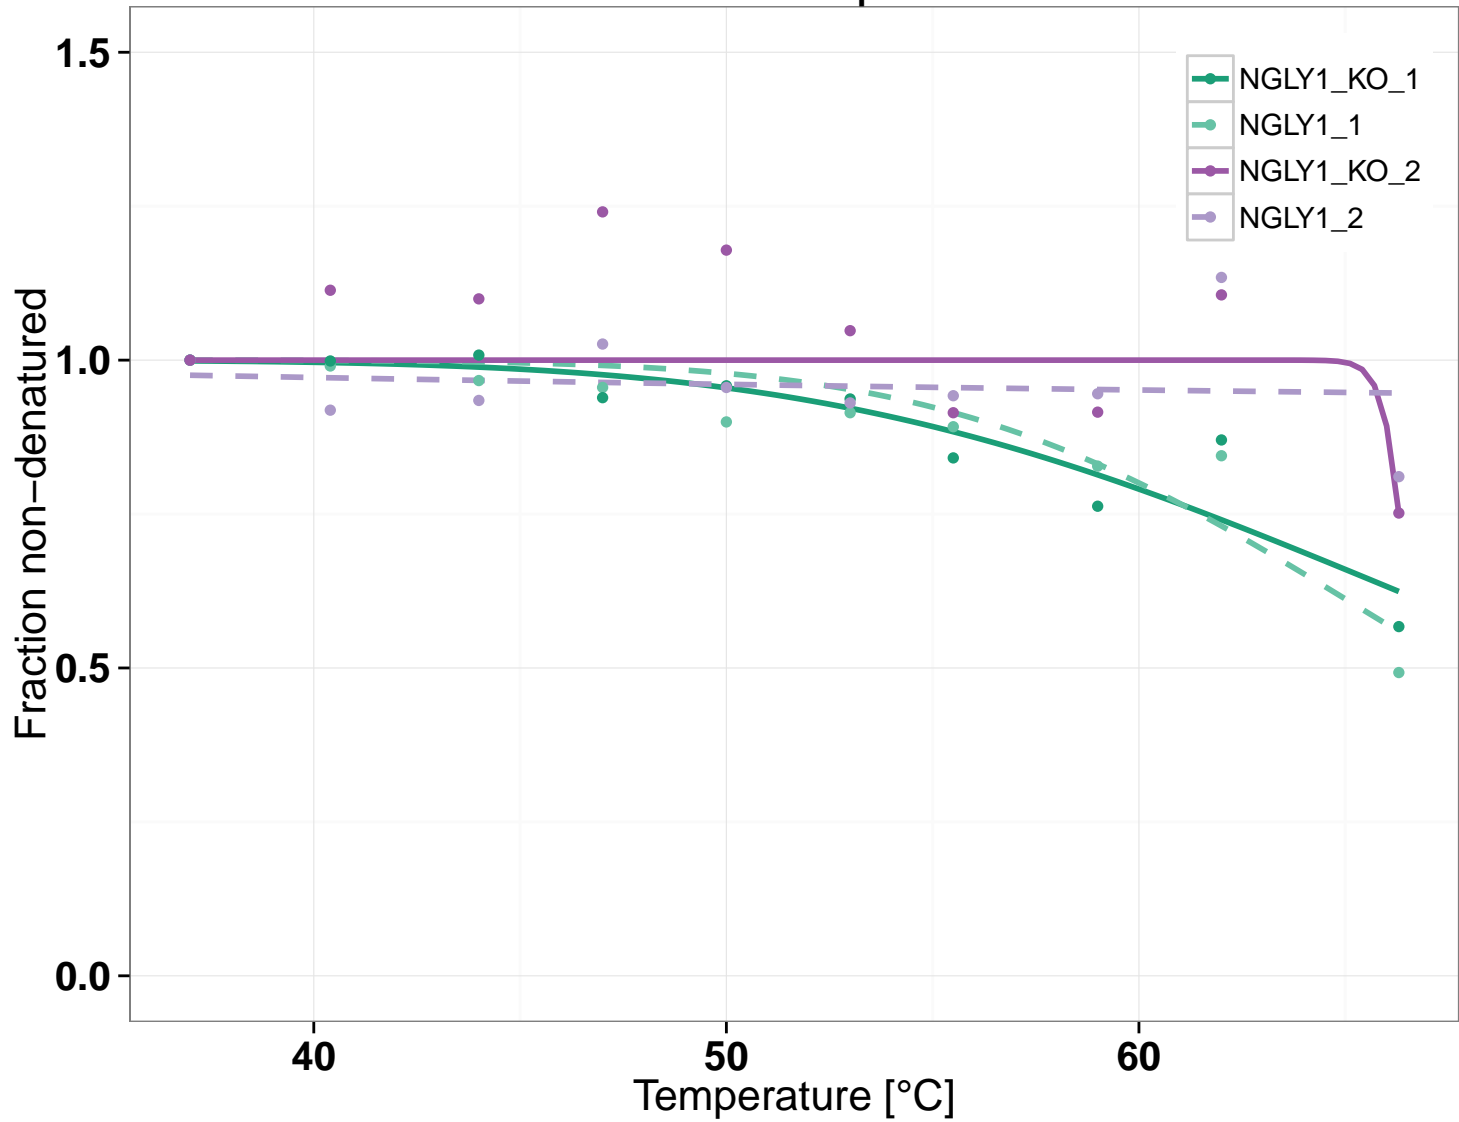

|            | meltPoint | slope  | plateau | R2   |
|------------|-----------|--------|---------|------|
| NGLY1_KO_1 | —         | −0.028 | 0       | 0.84 |
| NGLY1_1    | —         | −0.041 | 0       | 0.86 |
| NGLY1_KO_2 | —         | —      | 0       | 0.26 |
| NGLY1_2    | —         | —      | 0.77    | 0.01 |

Supplement: Supplementary file 2077 [file 1]

# IPI00413293.6|TOR1A

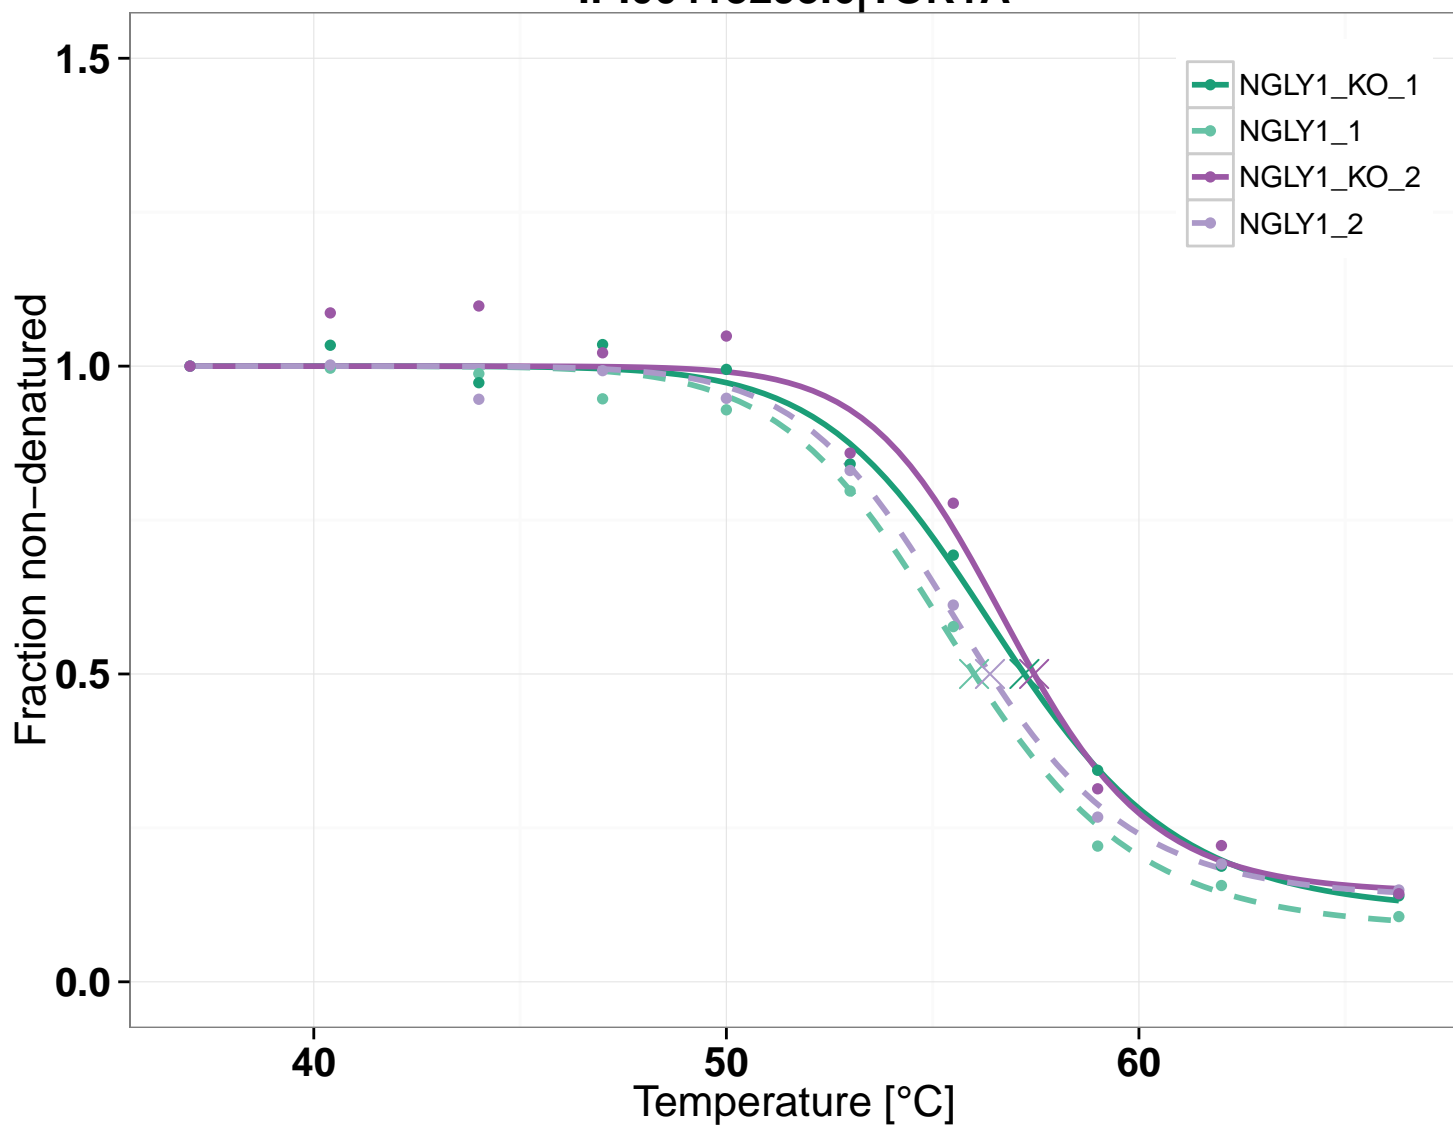

|            | meltPoint | slope | plateau | R2   |
|------------|-----------|-------|---------|------|
| NGLY1_KO_1 | 57.22     | -0.1  | 0.11    | 1    |
| NGLY1_1    | 56        | -0.11 | 0.09    | 1    |
| NGLY1_KO_2 | 57.46     | -0.12 | 0.14    | 0.98 |
| NGLY1_2    | 56.39     | -0.11 | 0.14    | 1    |

Supplement: Supplementary file 2078 [file 1]

IPI00020546.2|ASH1L

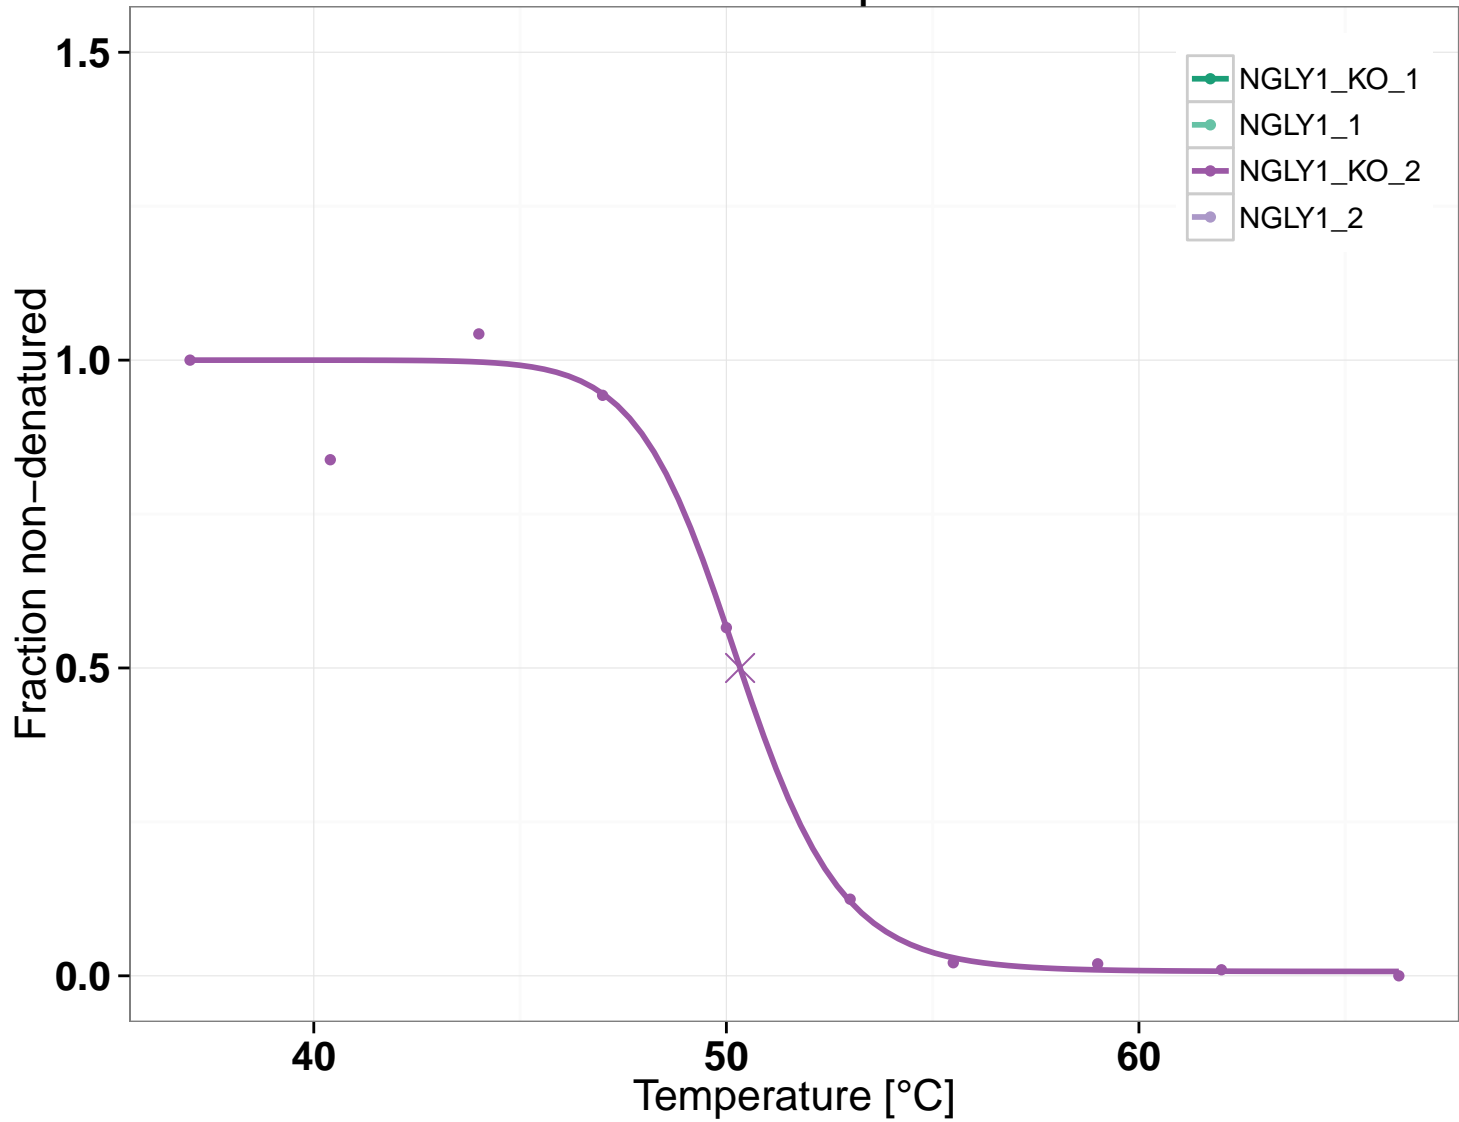

|            | meltPoint | slope | plateau | R2   |
|------------|-----------|-------|---------|------|
| NGLY1_KO_1 | -         | -     | -       | -    |
| NGLY1_1    | -         | -     | -       | -    |
| NGLY1_KO_2 | 50.33     | -0.2  | 0.01    | 0.99 |
| NGLY1_2    | -         | -     | -       | -    |

Supplement: Supplementary file 2079 [file 1]

IPI00302660.4|VPS37A

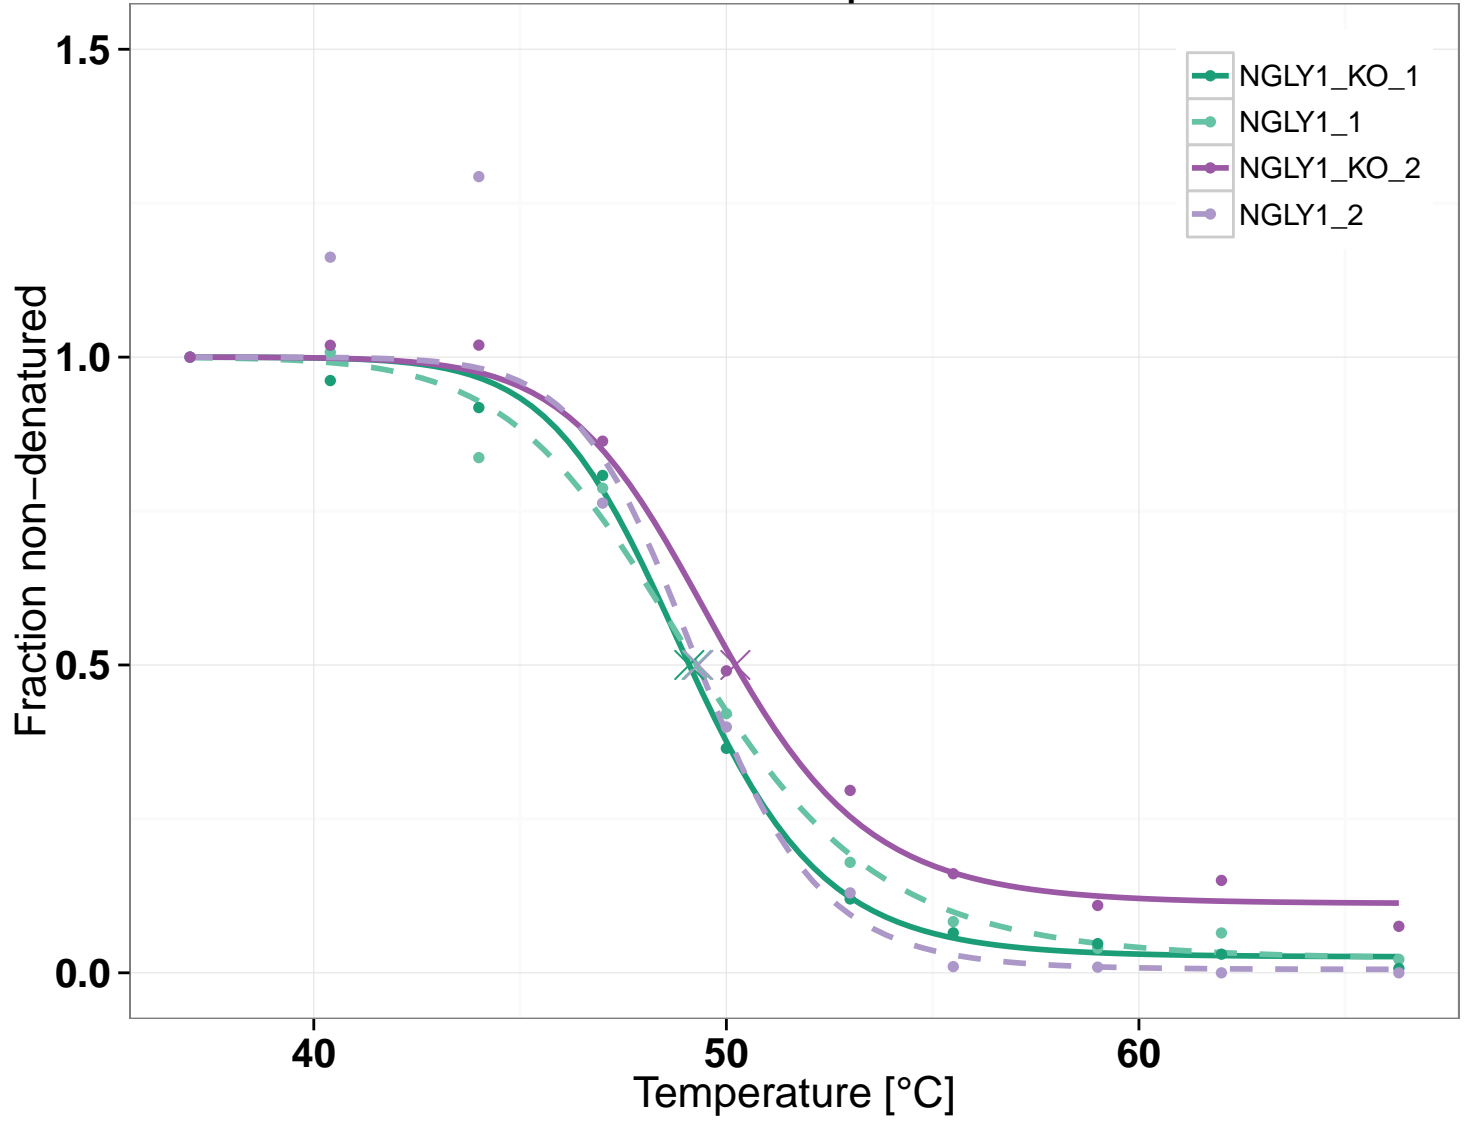

|            | meltPoint | slope | plateau | R2   |
|------------|-----------|-------|---------|------|
| NGLY1_KO_1 | 49.1      | -0.15 | 0.03    | 1    |
| NGLY1_1    | 49.28     | -0.11 | 0.02    | 0.99 |
| NGLY1_KO_2 | 50.22     | -0.12 | 0.11    | 0.99 |
| NGLY1_2    | 49.32     | -0.17 | 0.01    | 0.95 |

Supplement: Supplementary file 2080 [file 1]

# IPI00004325.1|TAF5L

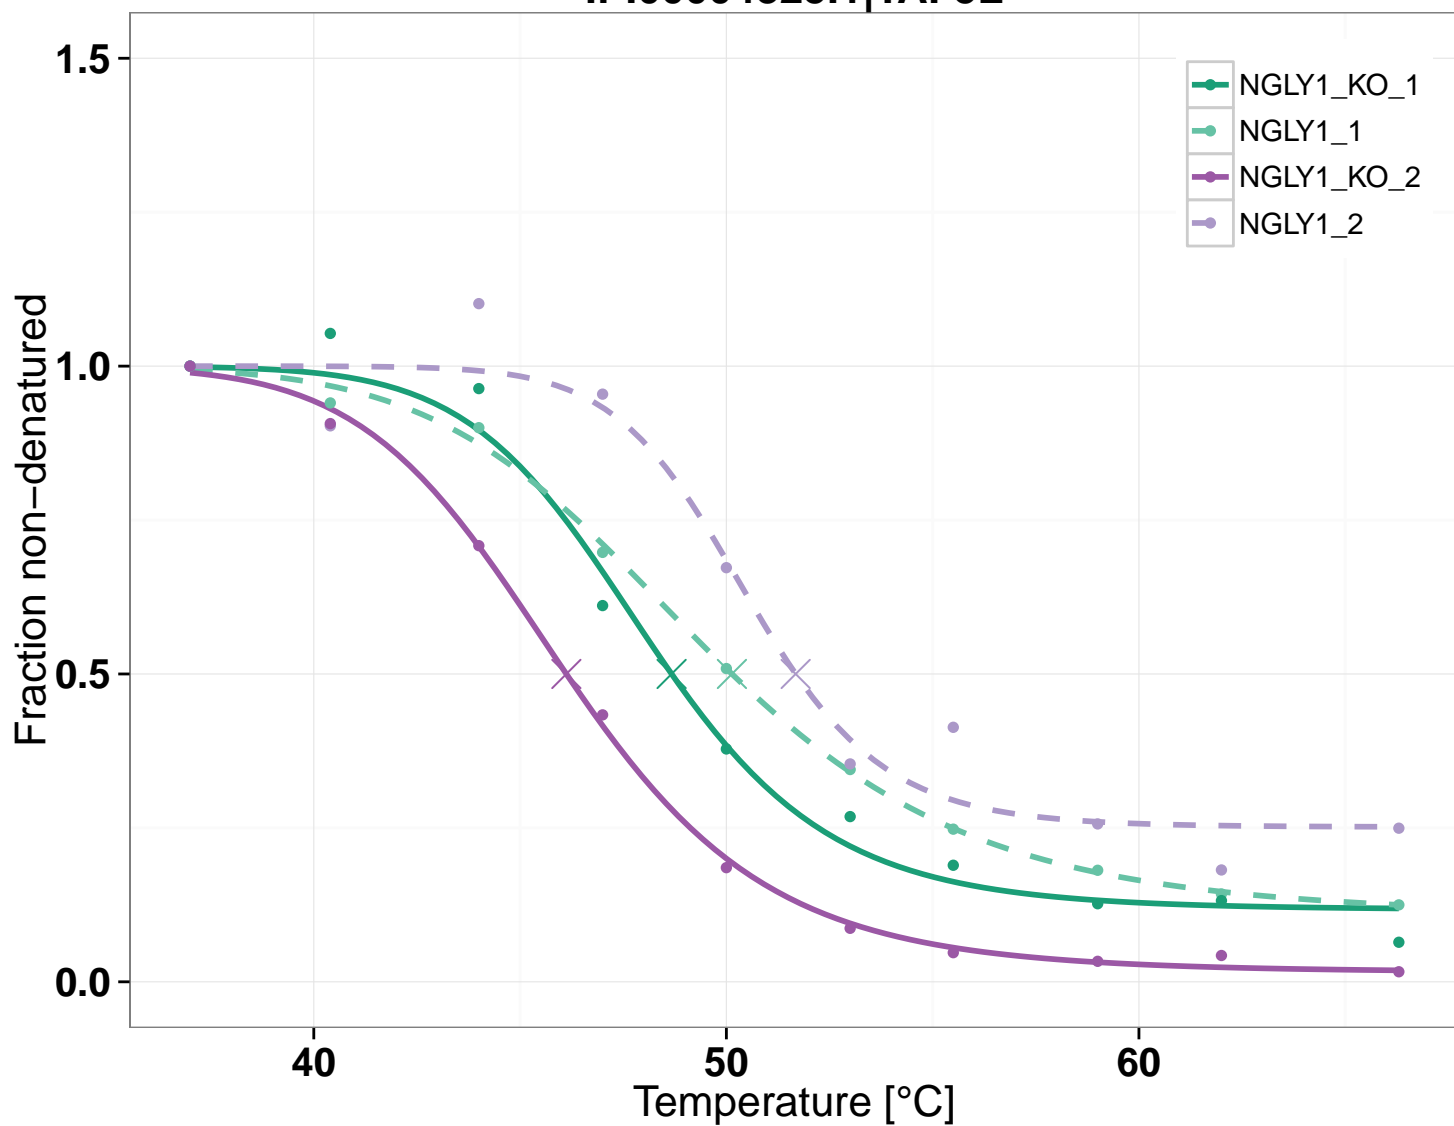

|            | meltPoint | slope  | plateau | R2   |
|------------|-----------|--------|---------|------|
| NGLY1_KO_1 | 48.67     | -0.1   | 0.12    | 0.99 |
| NGLY1_1    | 50.13     | -0.069 | 0.11    | 1    |
| NGLY1_KO_2 | 46.12     | -0.1   | 0.02    | 1    |
| NGLY1_2    | 51.68     | -0.12  | 0.25    | 0.96 |

Supplement: Supplementary file 2081 [file 1]

IPI00016605.3|C1ORF123

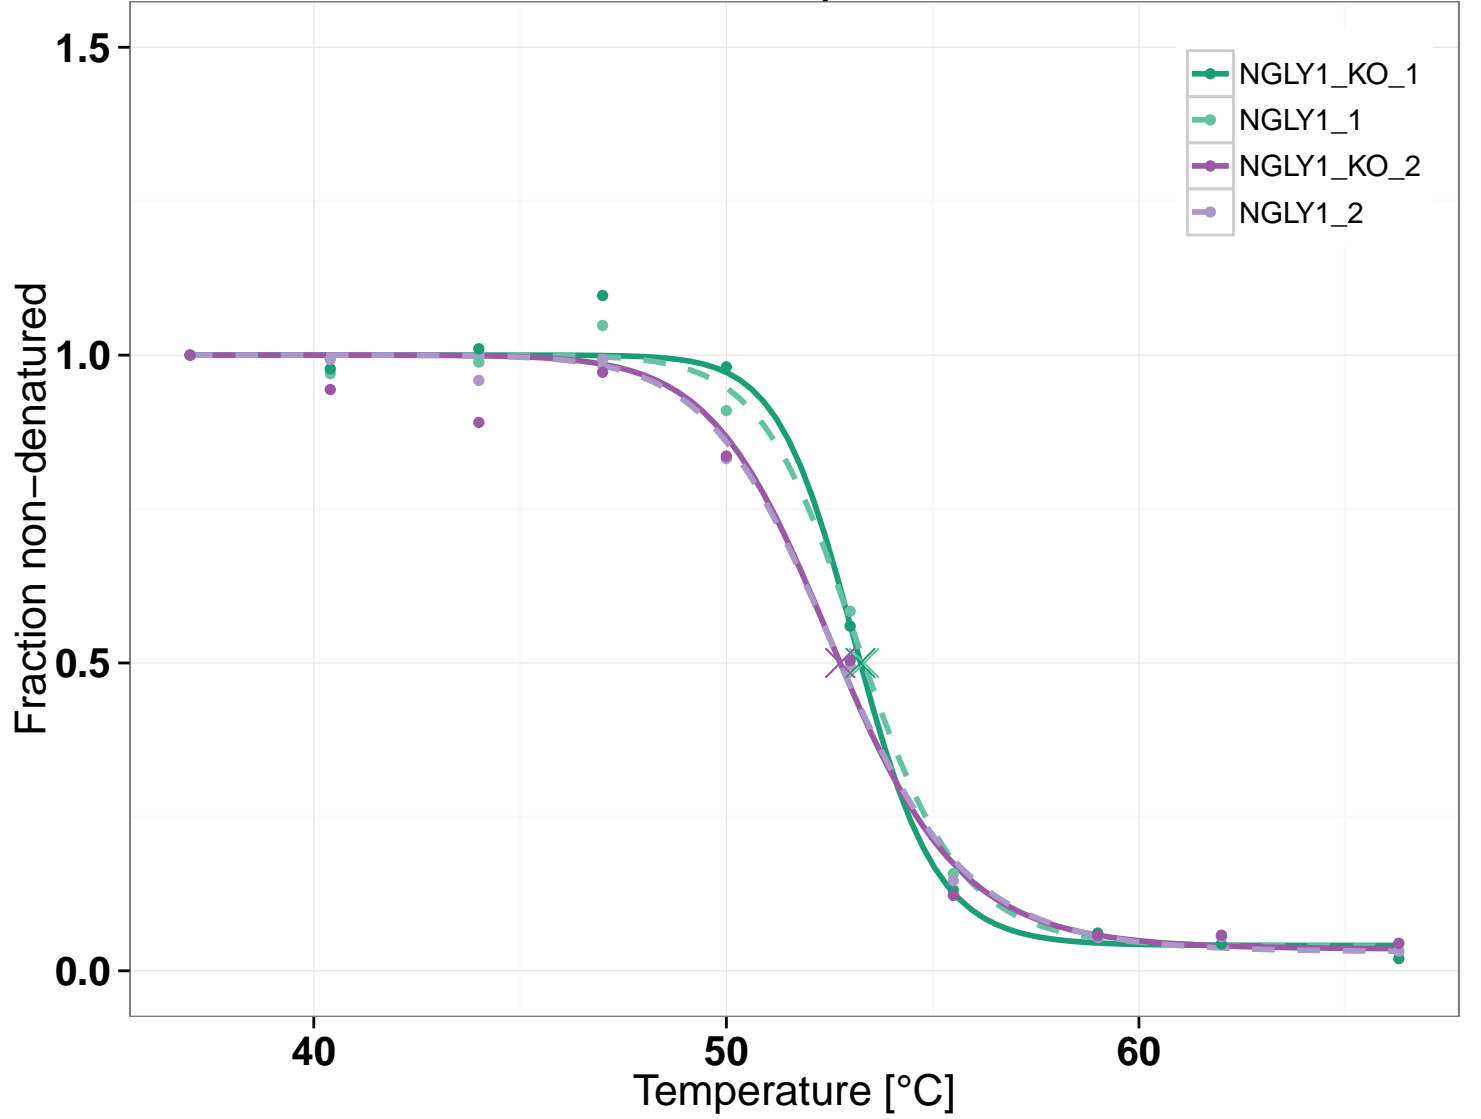

|            | meltPoint | slope | plateau | R2   |
|------------|-----------|-------|---------|------|
| NGLY1_KO_1 | 53.25     | -0.25 | 0.04    | 0.99 |
| NGLY1_1    | 53.34     | -0.2  | 0.04    | 1    |
| NGLY1_KO_2 | 52.76     | -0.16 | 0.04    | 0.99 |
| NGLY1_2    | 52.76     | -0.15 | 0.03    | 1    |

Supplement: Supplementary file 2082 [file 1]

# IPI00419240.2|ACP5

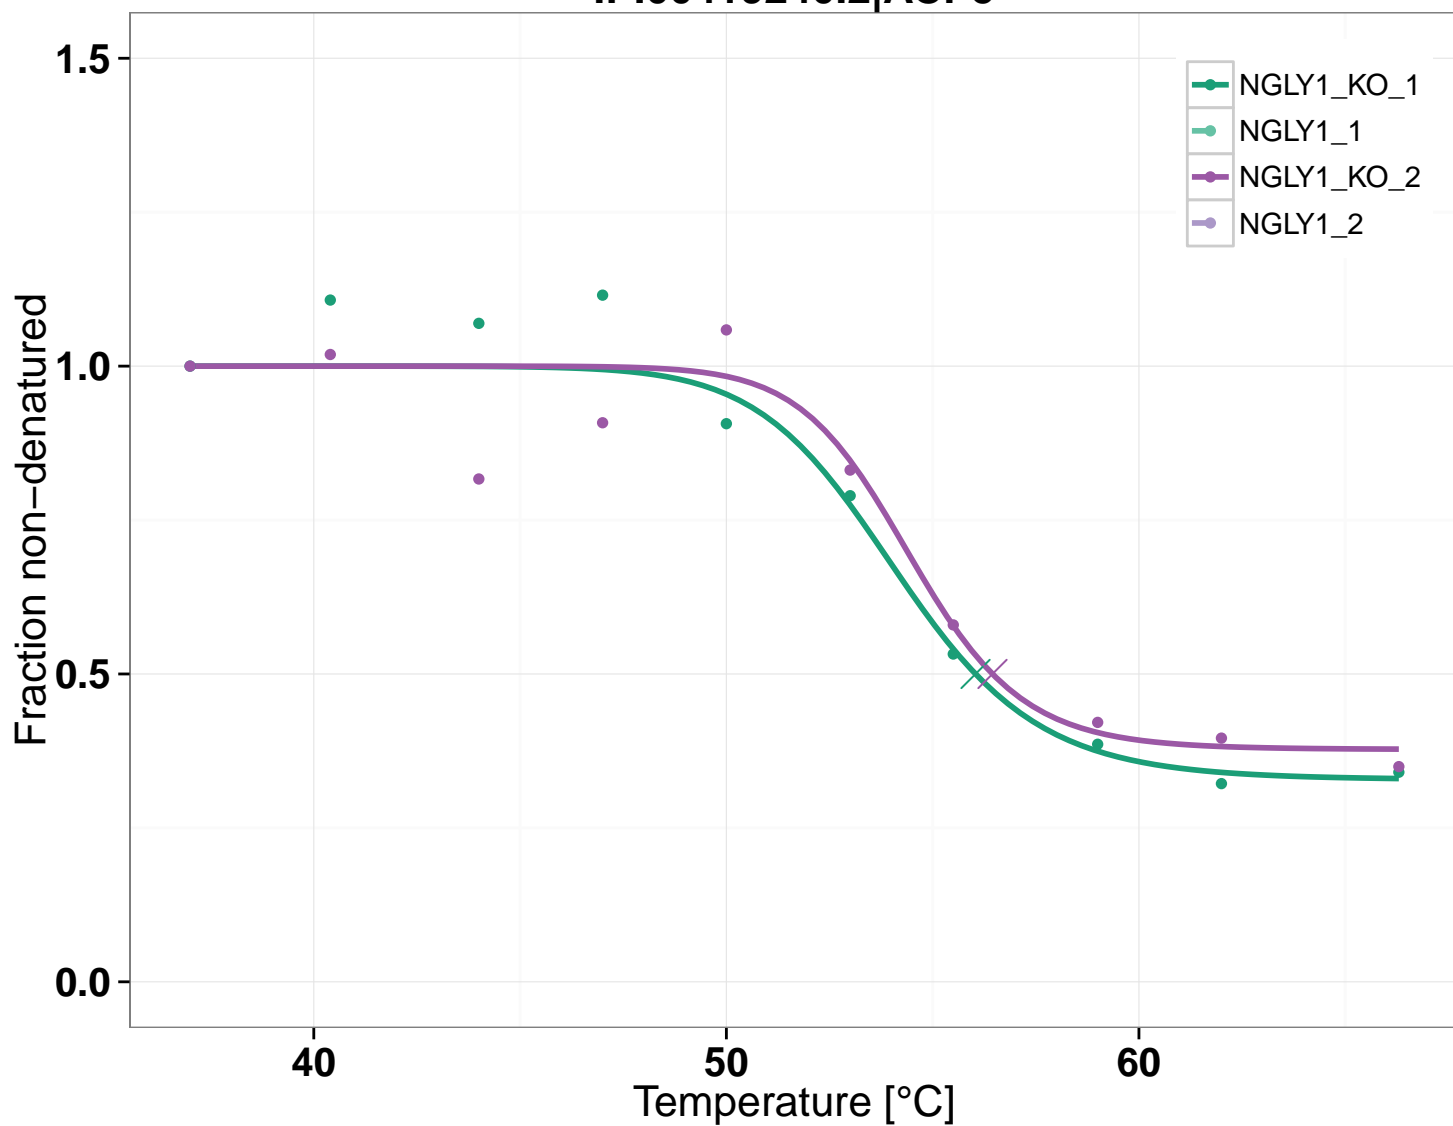

|            | meltPoint | slope  | plateau | R2   |
|------------|-----------|--------|---------|------|
| NGLY1_KO_1 | 56.04     | -0.098 | 0.33    | 0.97 |
| NGLY1_1    | -         | -      | -       | -    |
| NGLY1_KO_2 | 56.45     | -0.12  | 0.38    | 0.93 |
| NGLY1_2    | -         | -      | -       | -    |

Supplement: Supplementary file 2083 [file 1]

# IPI00783519.1|PIK3AP1

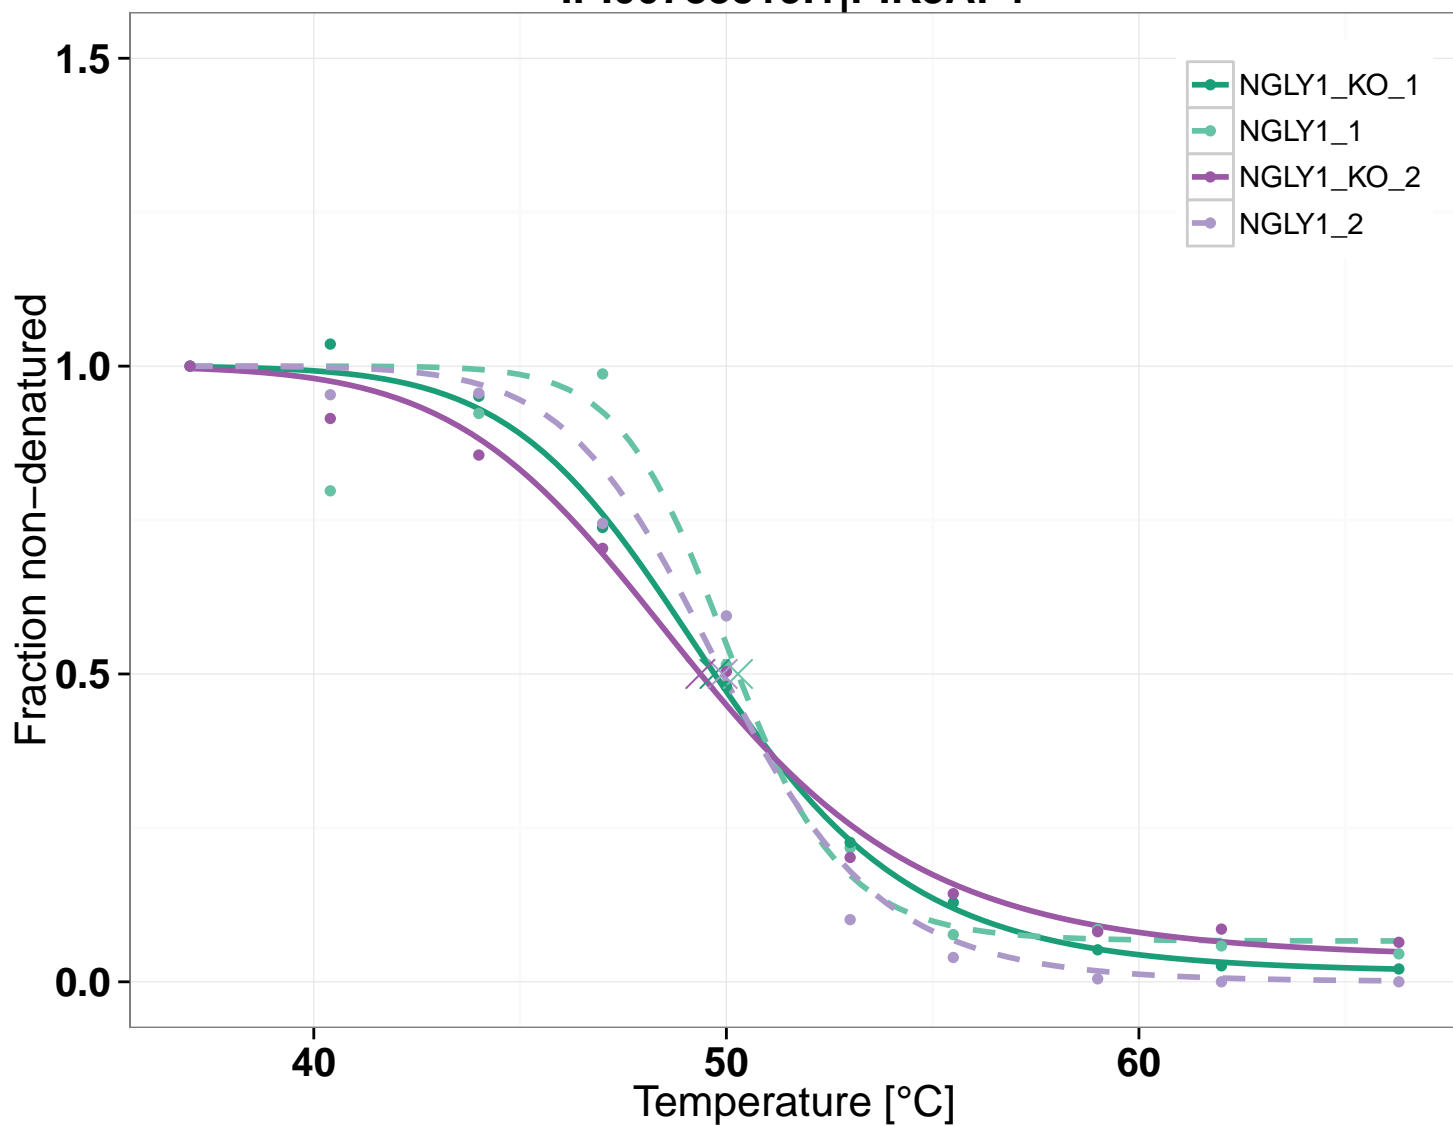

|            | meltPoint | slope  | plateau | R2   |
|------------|-----------|--------|---------|------|
| NGLY1_KO_1 | 49.71     | -0.1   | 0.01    | 1    |
| NGLY1_1    | 50.28     | -0.17  | 0.07    | 0.97 |
| NGLY1_KO_2 | 49.37     | -0.084 | 0.04    | 0.99 |
| NGLY1_2    | 49.91     | -0.13  | 0       | 0.98 |

Supplement: Supplementary file 2084 [file 1]

IPI00168463.2|DEPDC7

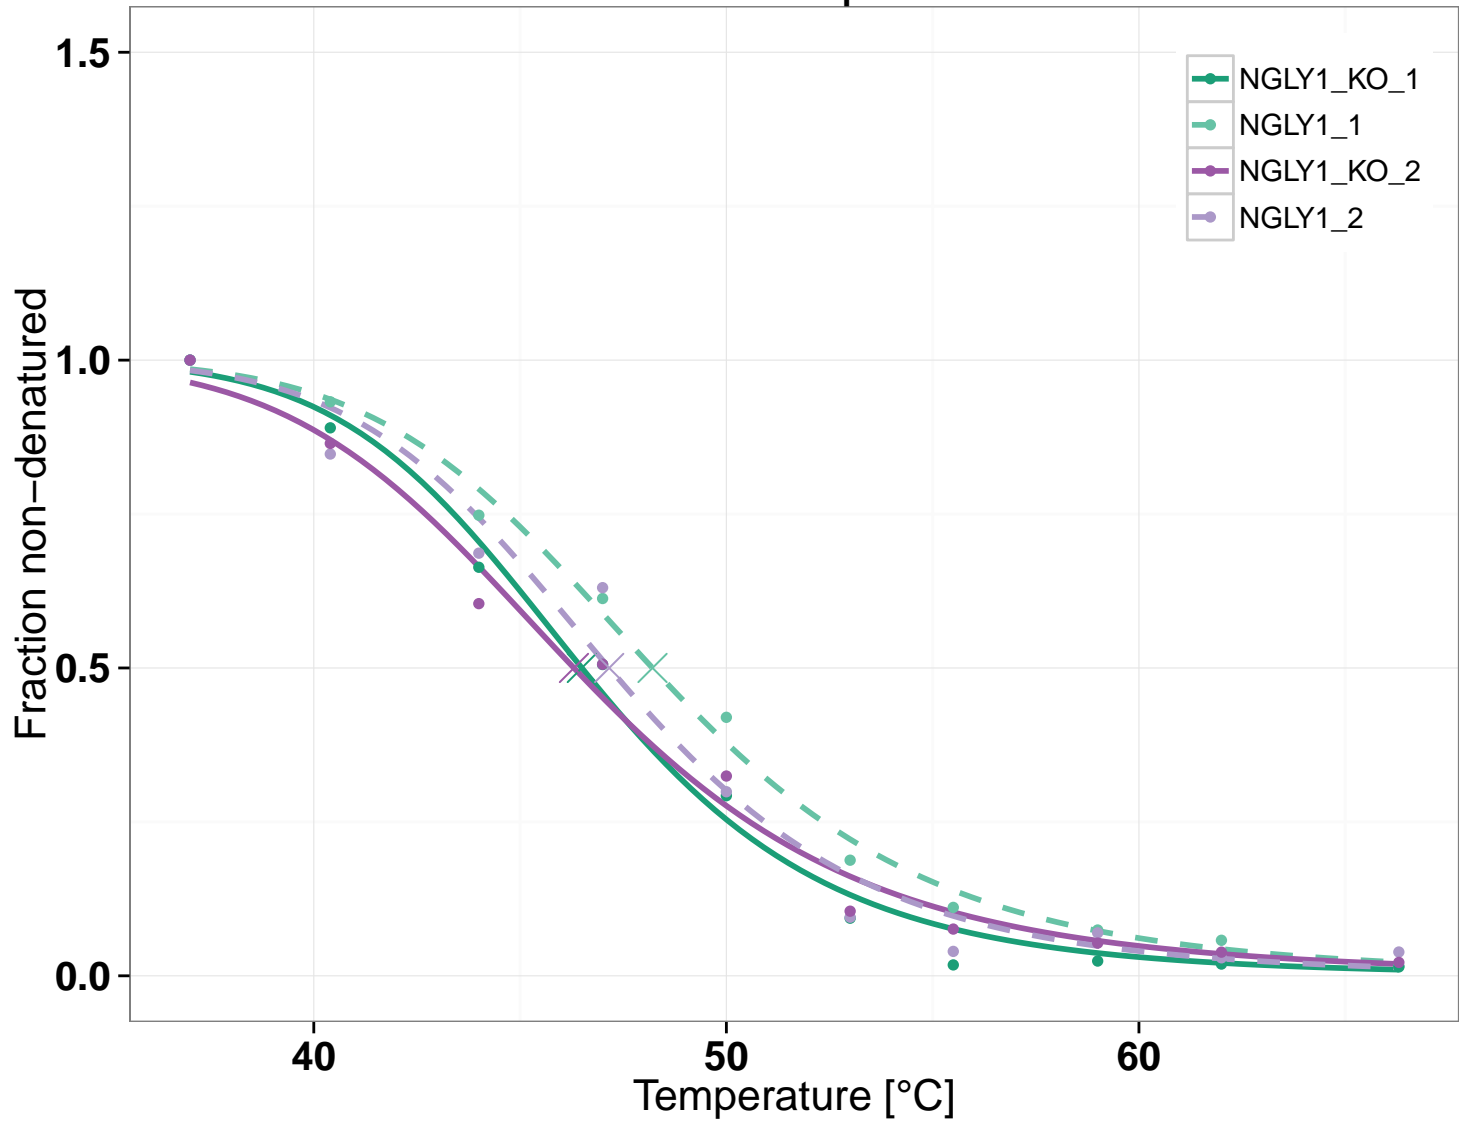

|            | meltPoint | slope  | plateau | R2   |
|------------|-----------|--------|---------|------|
| NGLY1_KO_1 | 46.5      | -0.084 | 0       | 0.99 |
| NGLY1_1    | 48.21     | -0.074 | 0       | 0.99 |
| NGLY1_KO_2 | 46.31     | -0.072 | 0       | 0.99 |
| NGLY1_2    | 47.16     | -0.08  | 0       | 0.98 |

Supplement: Supplementary file 2085 [file 1]

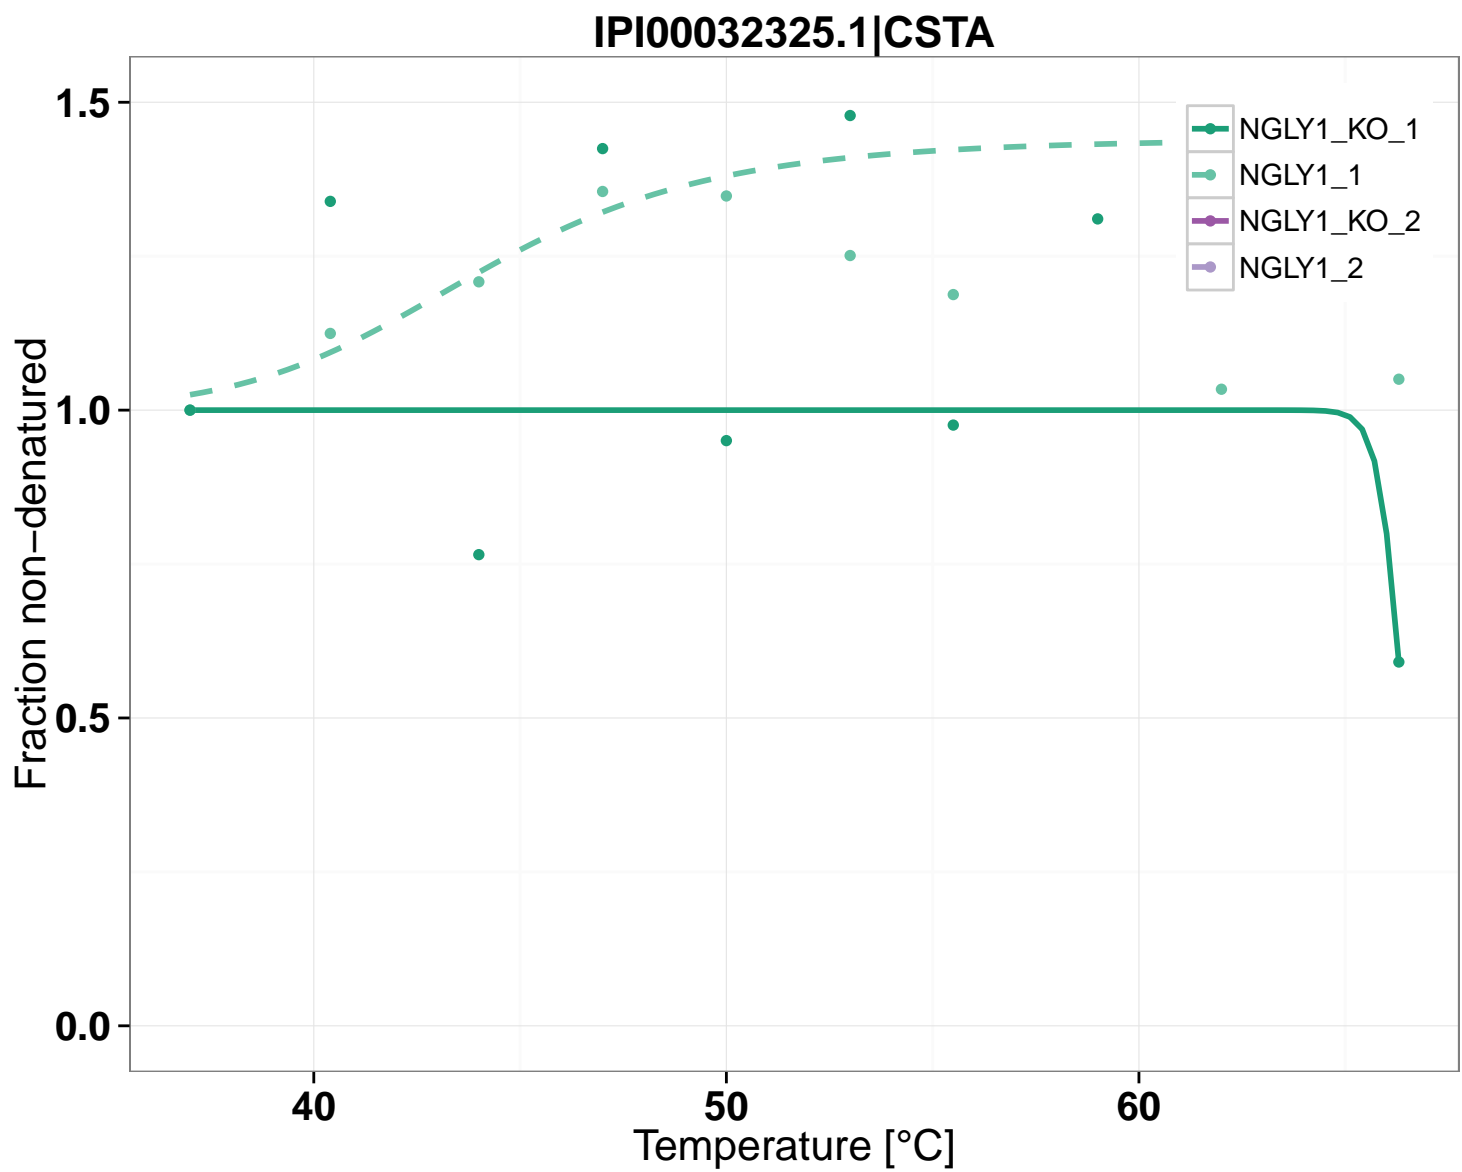

|            | meltPoint | slope | plateau | R2    |
|------------|-----------|-------|---------|-------|
| NGLY1_KO_1 | —         | —     | 0       | −0.04 |
| NGLY1_1    | —         | 0.038 | 1.44    | 0.11  |
| NGLY1_KO_2 | —         | —     | —       | —     |
| NGLY1_2    | —         | —     | —       | —     |

Supplement: Supplementary file 2086 [file 1]

IPI00880079.1|POLR2F

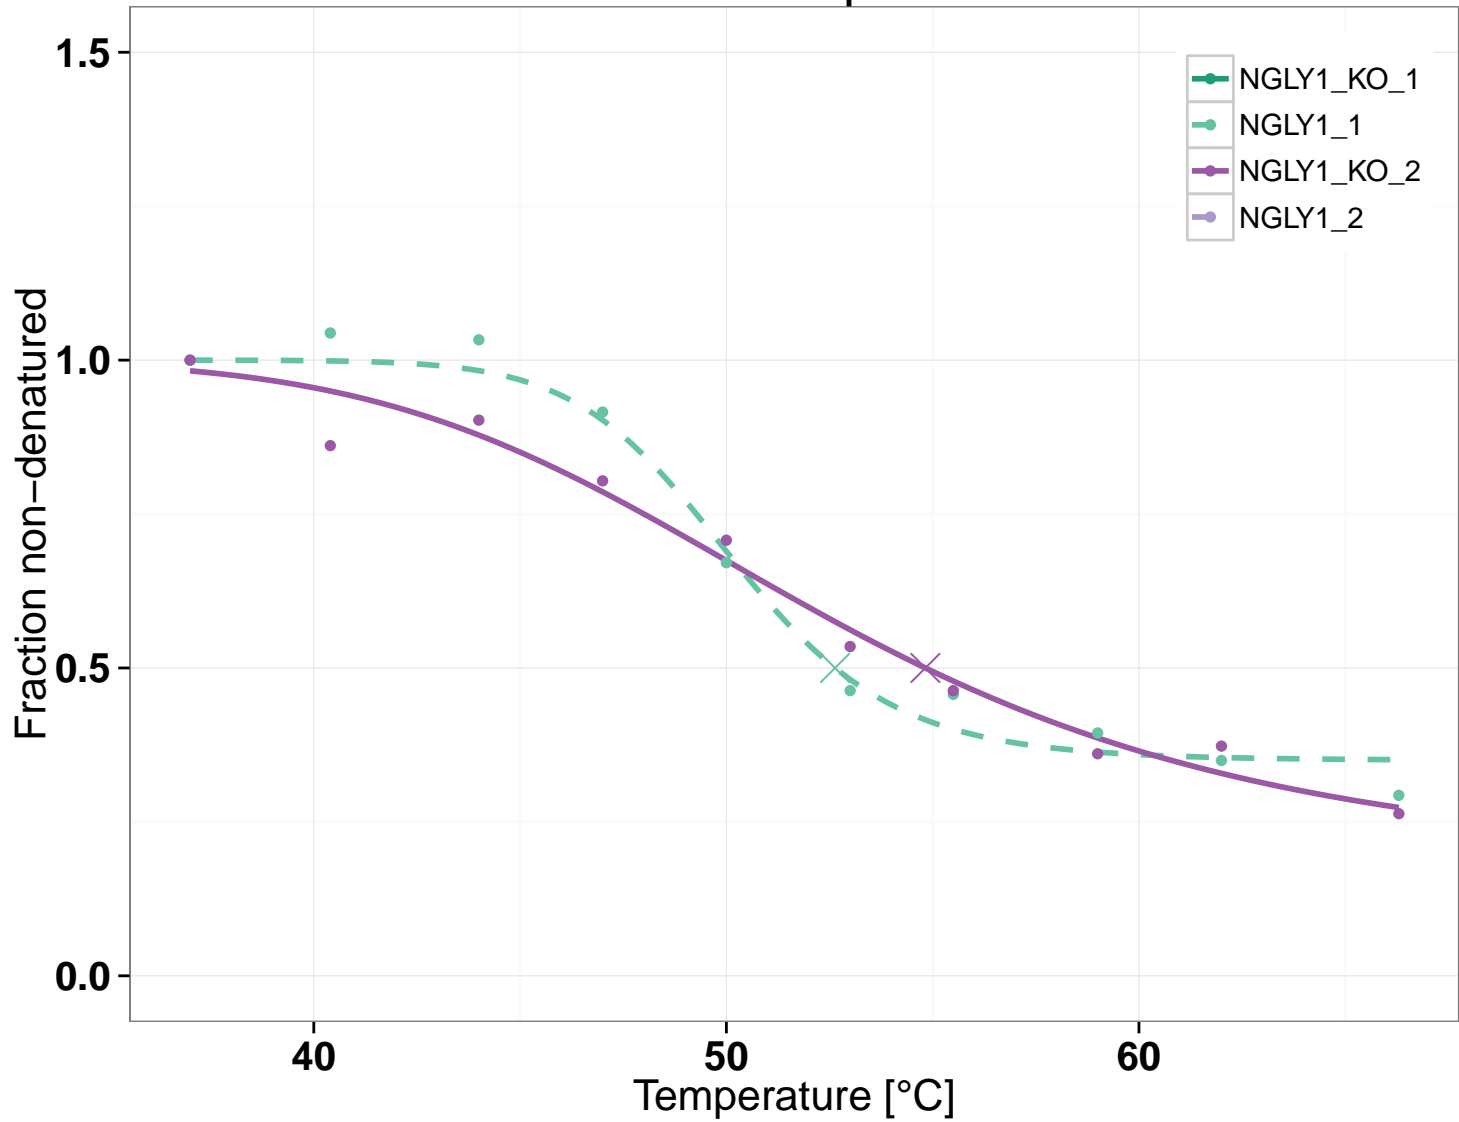

|            | meltPoint | slope  | plateau | R2   |
|------------|-----------|--------|---------|------|
| NGLY1_KO_1 | -         | -      | -       | -    |
| NGLY1_1    | 52.63     | -0.084 | 0.35    | 0.98 |
| NGLY1_KO_2 | 54.82     | -0.038 | 0.17    | 0.98 |
| NGLY1_2    | -         | -      | -       | -    |

Supplement: Supplementary file 2087 [file 1]

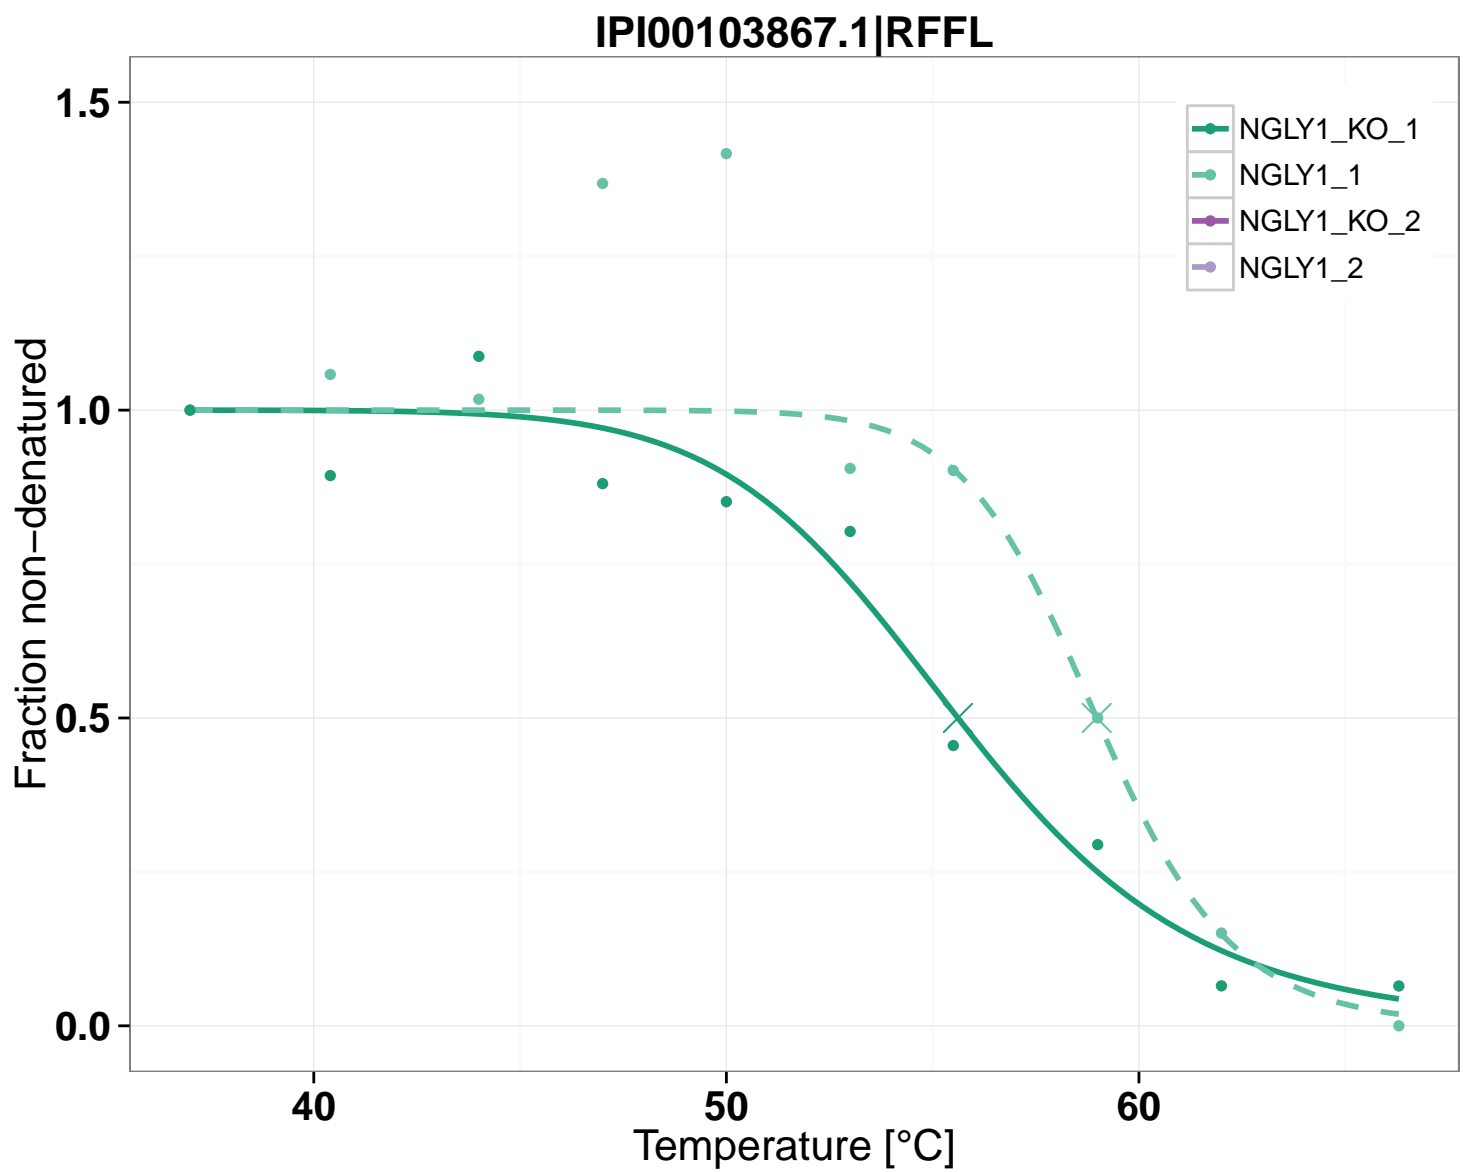

|            | meltPoint | slope  | plateau | R2   |
|------------|-----------|--------|---------|------|
| NGLY1_KO_1 | 55.61     | -0.087 | 0       | 0.97 |
| NGLY1_1    | 58.98     | -0.15  | 0       | 0.84 |
| NGLY1_KO_2 | -         | -      | -       | -    |
| NGLY1_2    | -         | -      | -       | -    |

Supplement: Supplementary file 2088 [file 1]

IPI00798193.1|SNX24

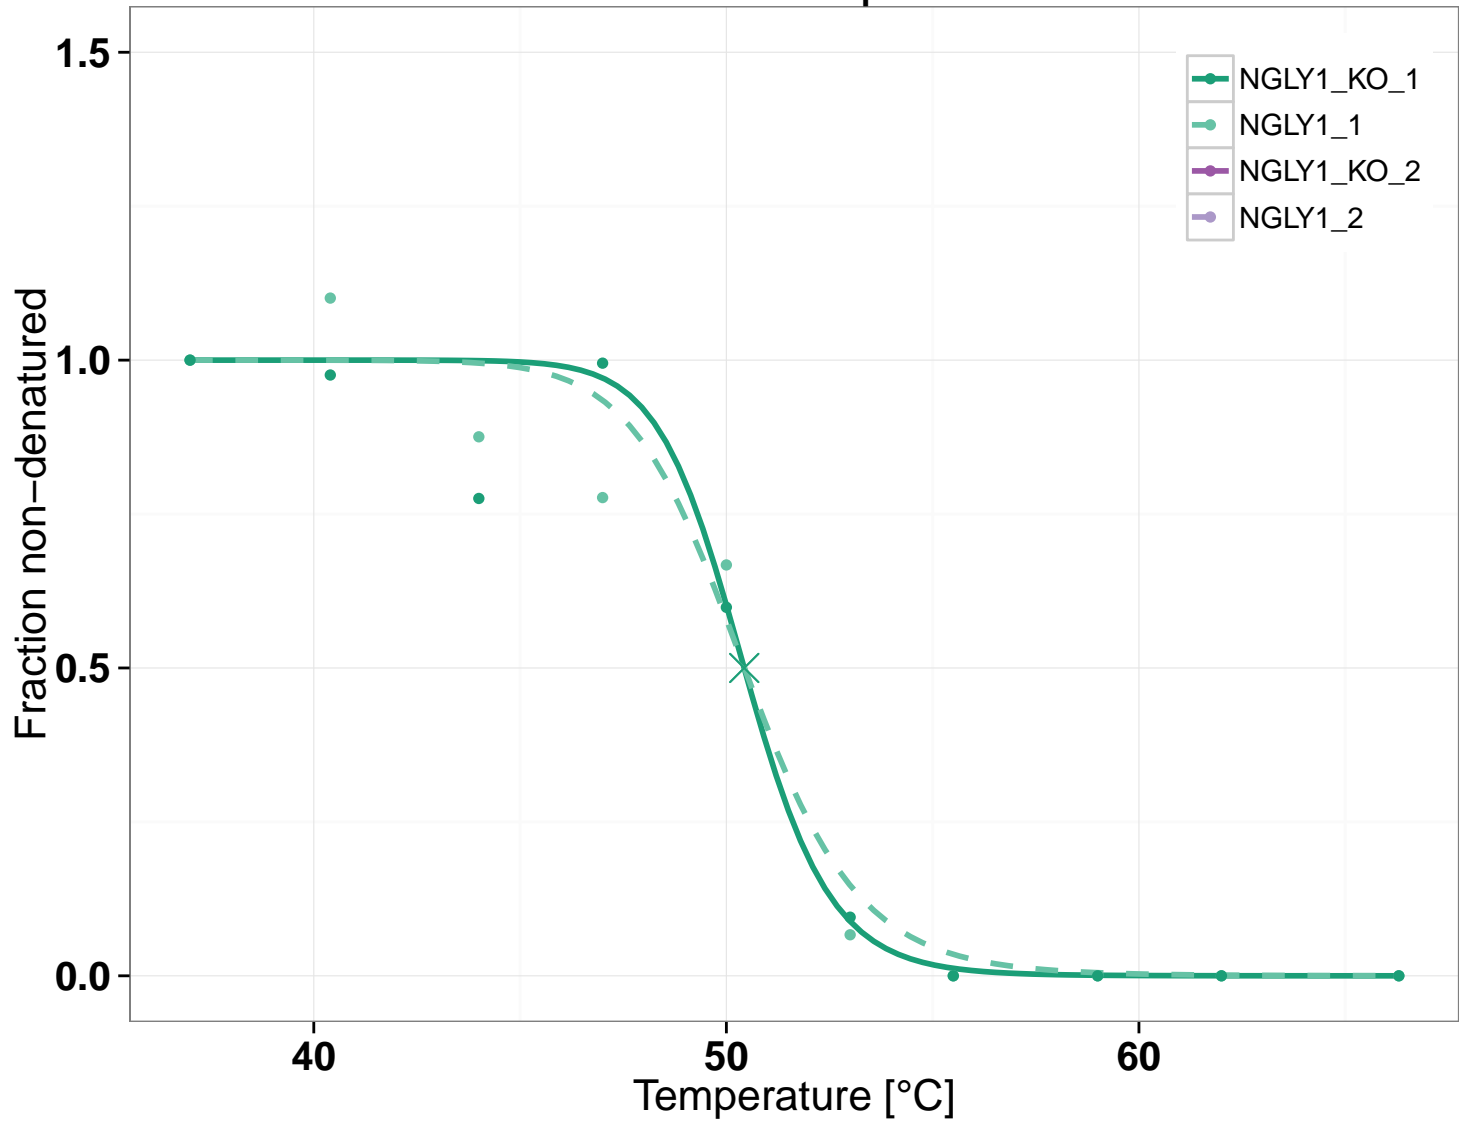

|            | meltPoint | slope | plateau | R2   |
|------------|-----------|-------|---------|------|
| NGLY1_KO_1 | 50.43     | -0.24 | 0       | 0.97 |
| NGLY1_1    | 50.44     | -0.18 | 0       | 0.97 |
| NGLY1_KO_2 | -         | -     | -       | -    |
| NGLY1_2    | -         | -     | -       | -    |

Supplement: Supplementary file 2089 [file 1]

# IPI00329685.10|ARSA

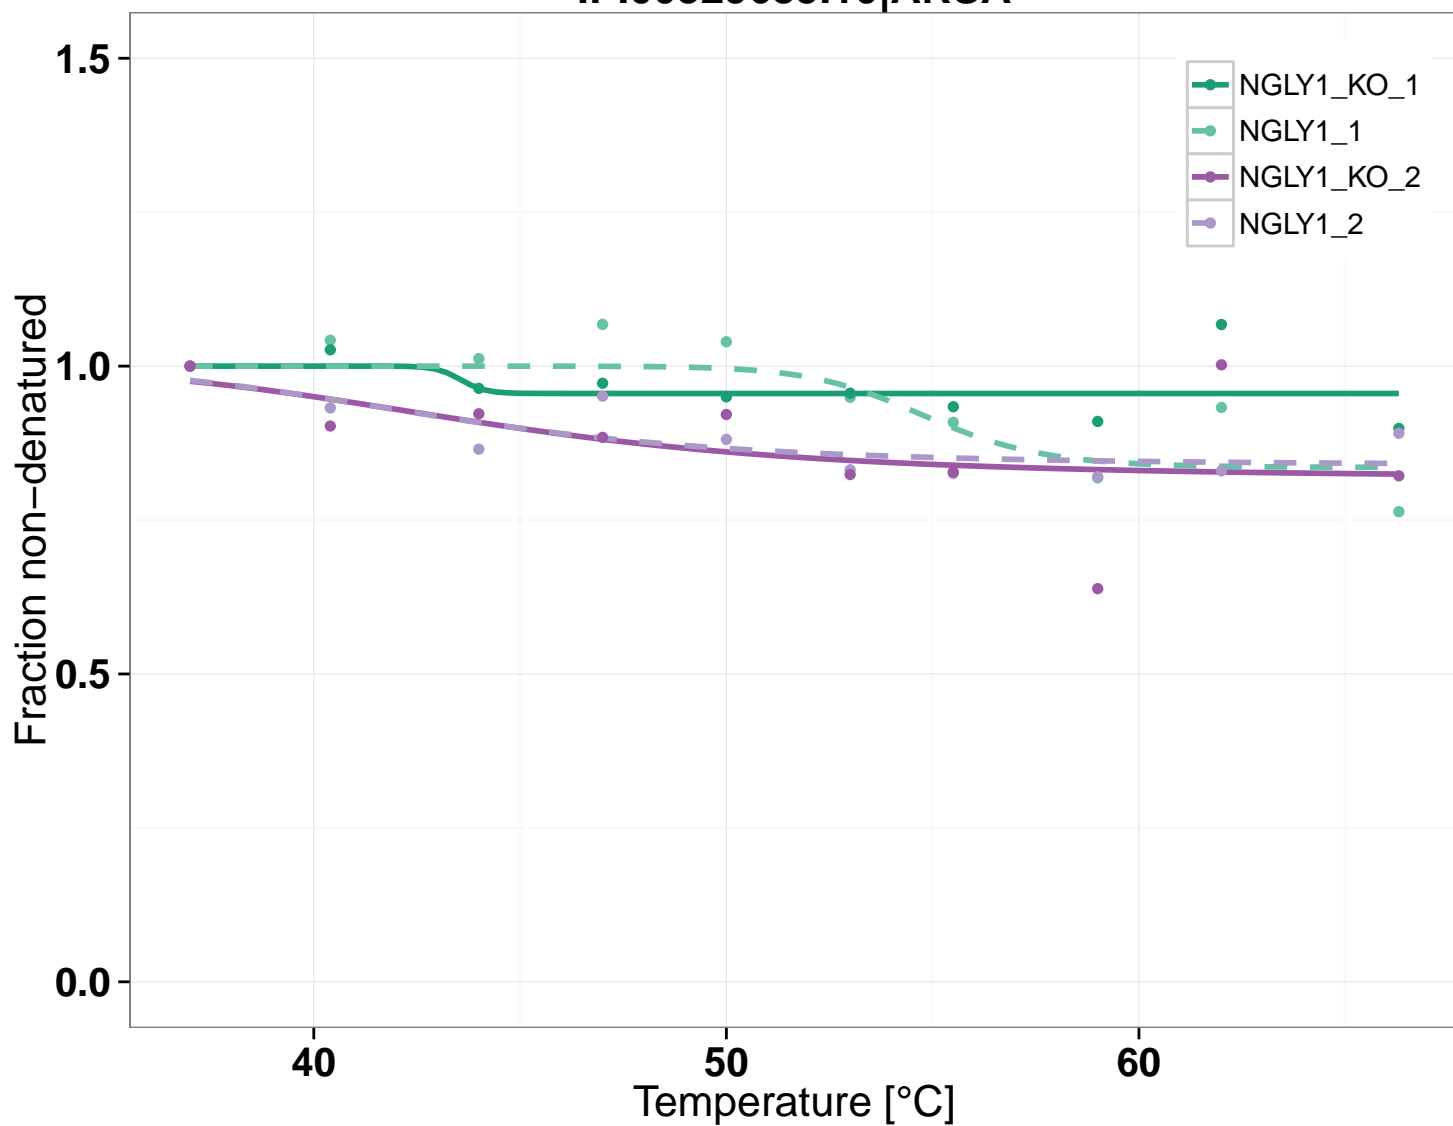

|            | meltPoint | slope  | plateau | R2   |
|------------|-----------|--------|---------|------|
| NGLY1_KO_1 | —         | -0.038 | 0.96    | 0.2  |
| NGLY1_1    | —         | -0.029 | 0.84    | 0.74 |
| NGLY1_KO_2 | —         | -0.011 | 0.82    | 0.26 |
| NGLY1_2    | —         | -0.011 | 0.84    | 0.65 |

Supplement: Supplementary file 2090 [file 1]

# IPI00291792.2|ITGB2

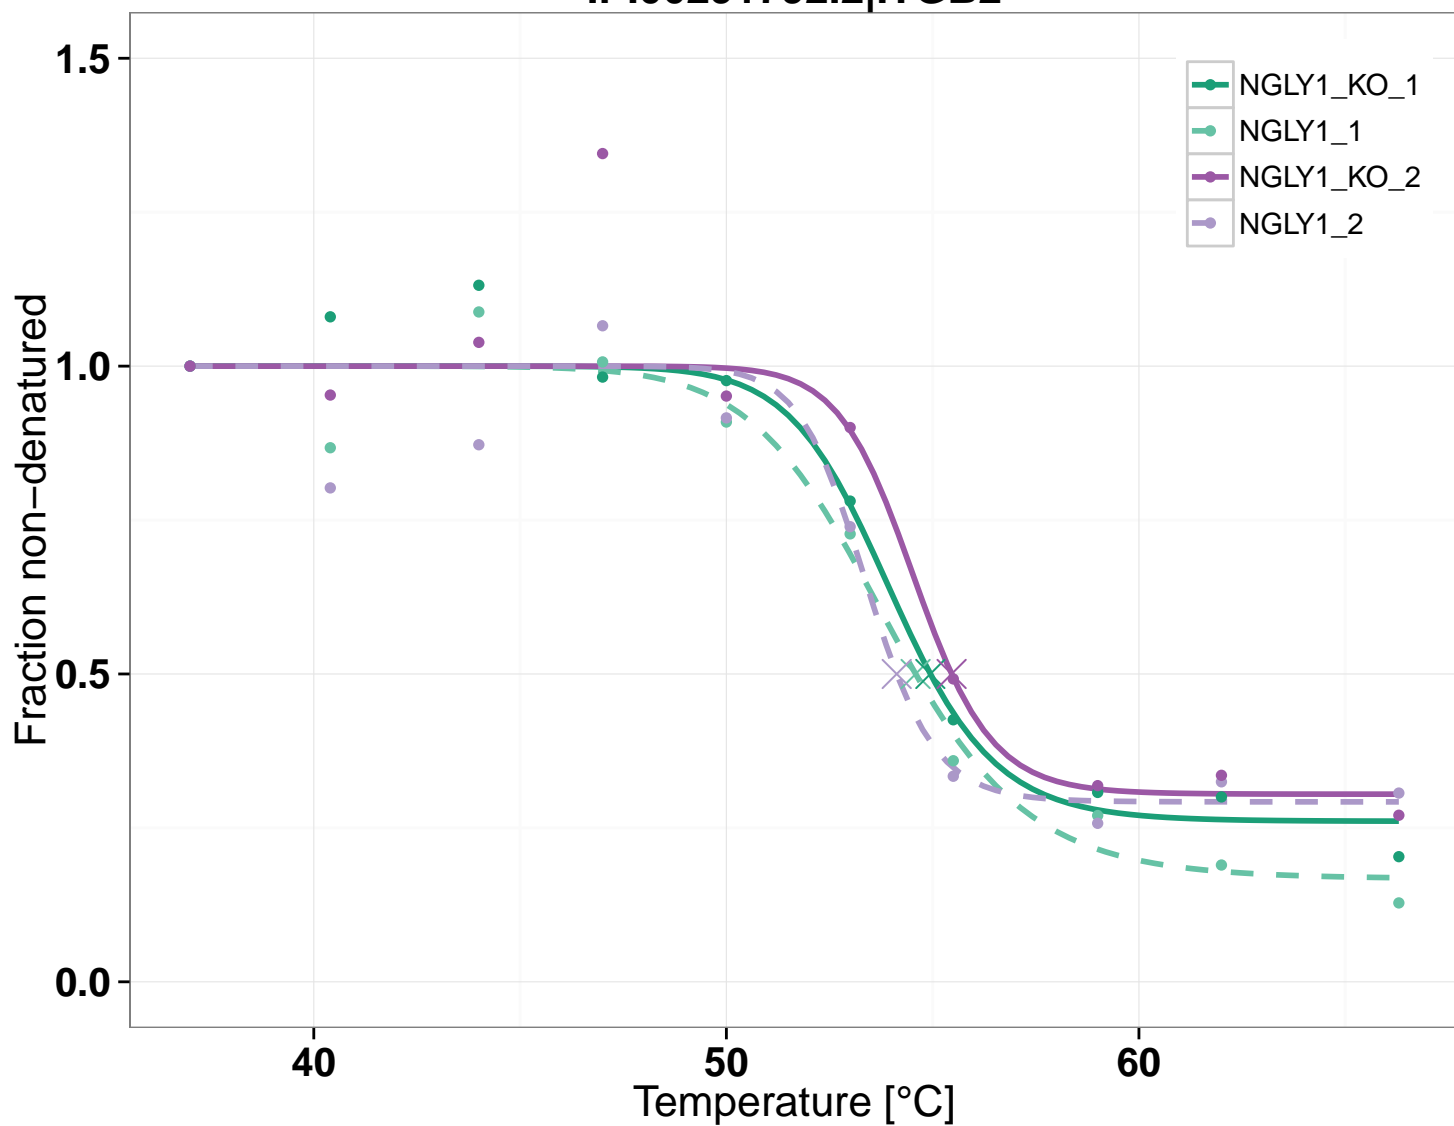

|            | meltPoint | slope | plateau | R2   |
|------------|-----------|-------|---------|------|
| NGLY1_KO_1 | 54.94     | -0.15 | 0.26    | 0.98 |
| NGLY1_1    | 54.59     | -0.13 | 0.17    | 0.97 |
| NGLY1_KO_2 | 55.46     | -0.19 | 0.3     | 0.9  |
| NGLY1_2    | 54.13     | -0.22 | 0.29    | 0.93 |

Supplement: Supplementary file 2091 [file 1]

IPI00102377.3|ANKRD27

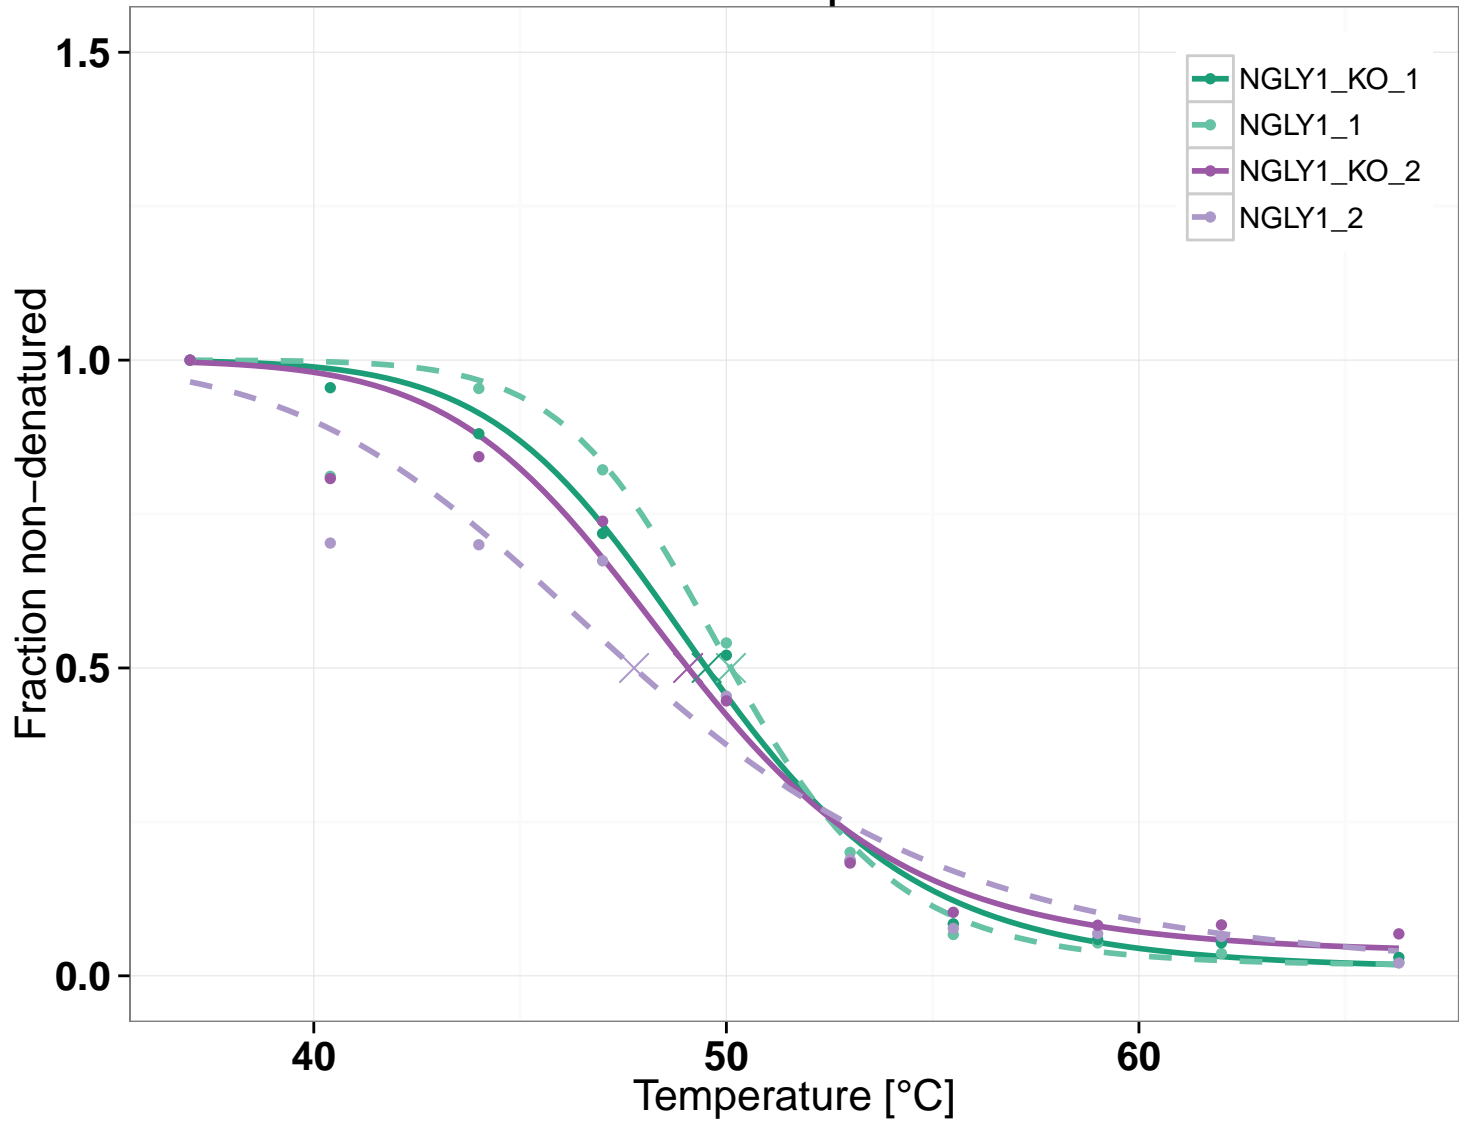

|            | meltPoint | slope  | plateau | R2   |
|------------|-----------|--------|---------|------|
| NGLY1_KO_1 | 49.52     | -0.096 | 0.01    | 0.99 |
| NGLY1_1    | 50.11     | -0.12  | 0.02    | 0.98 |
| NGLY1_KO_2 | 49.07     | -0.087 | 0.03    | 0.97 |
| NGLY1_2    | 47.76     | -0.061 | 0       | 0.94 |

Supplement: Supplementary file 2092 [file 1]

IPI00644127.1|IARS

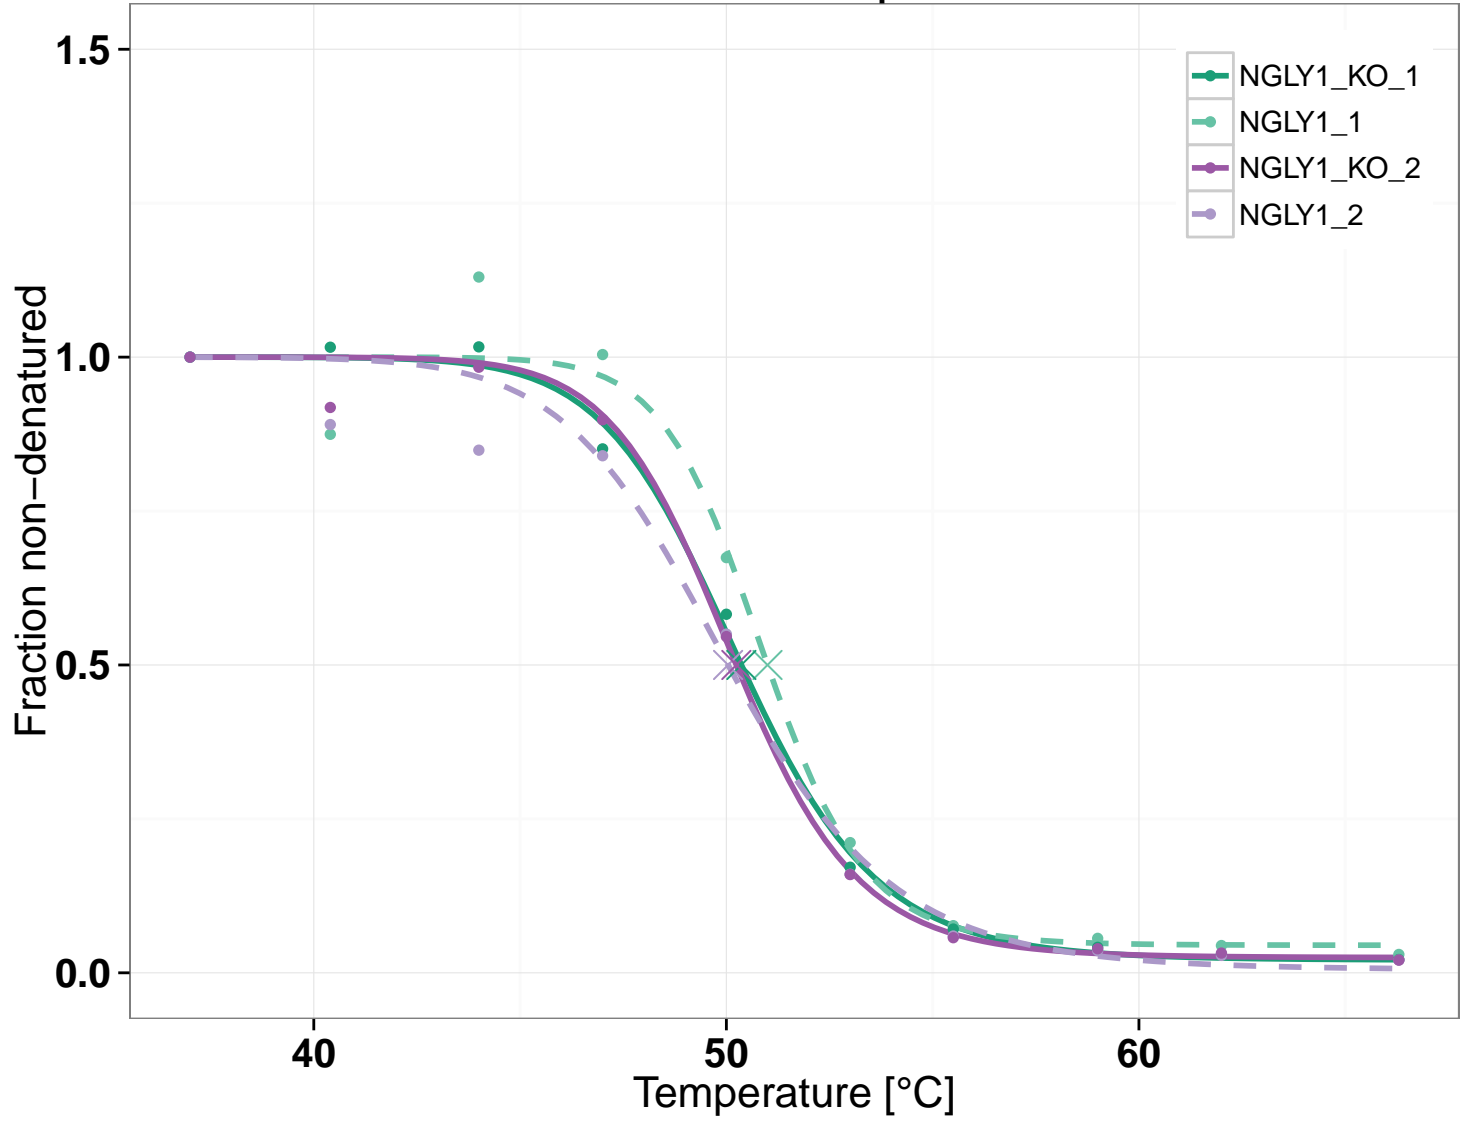

|            | meltPoint | slope | plateau | R2   |
|------------|-----------|-------|---------|------|
| NGLY1_KO_1 | 50.36     | -0.15 | 0.02    | 1    |
| NGLY1_1    | 51        | -0.19 | 0.04    | 0.98 |
| NGLY1_KO_2 | 50.24     | -0.16 | 0.02    | 1    |
| NGLY1_2    | 50.04     | -0.12 | 0       | 0.98 |

Supplement: Supplementary file 2093 [file 1]

IPI00745105.1|C16ORF13

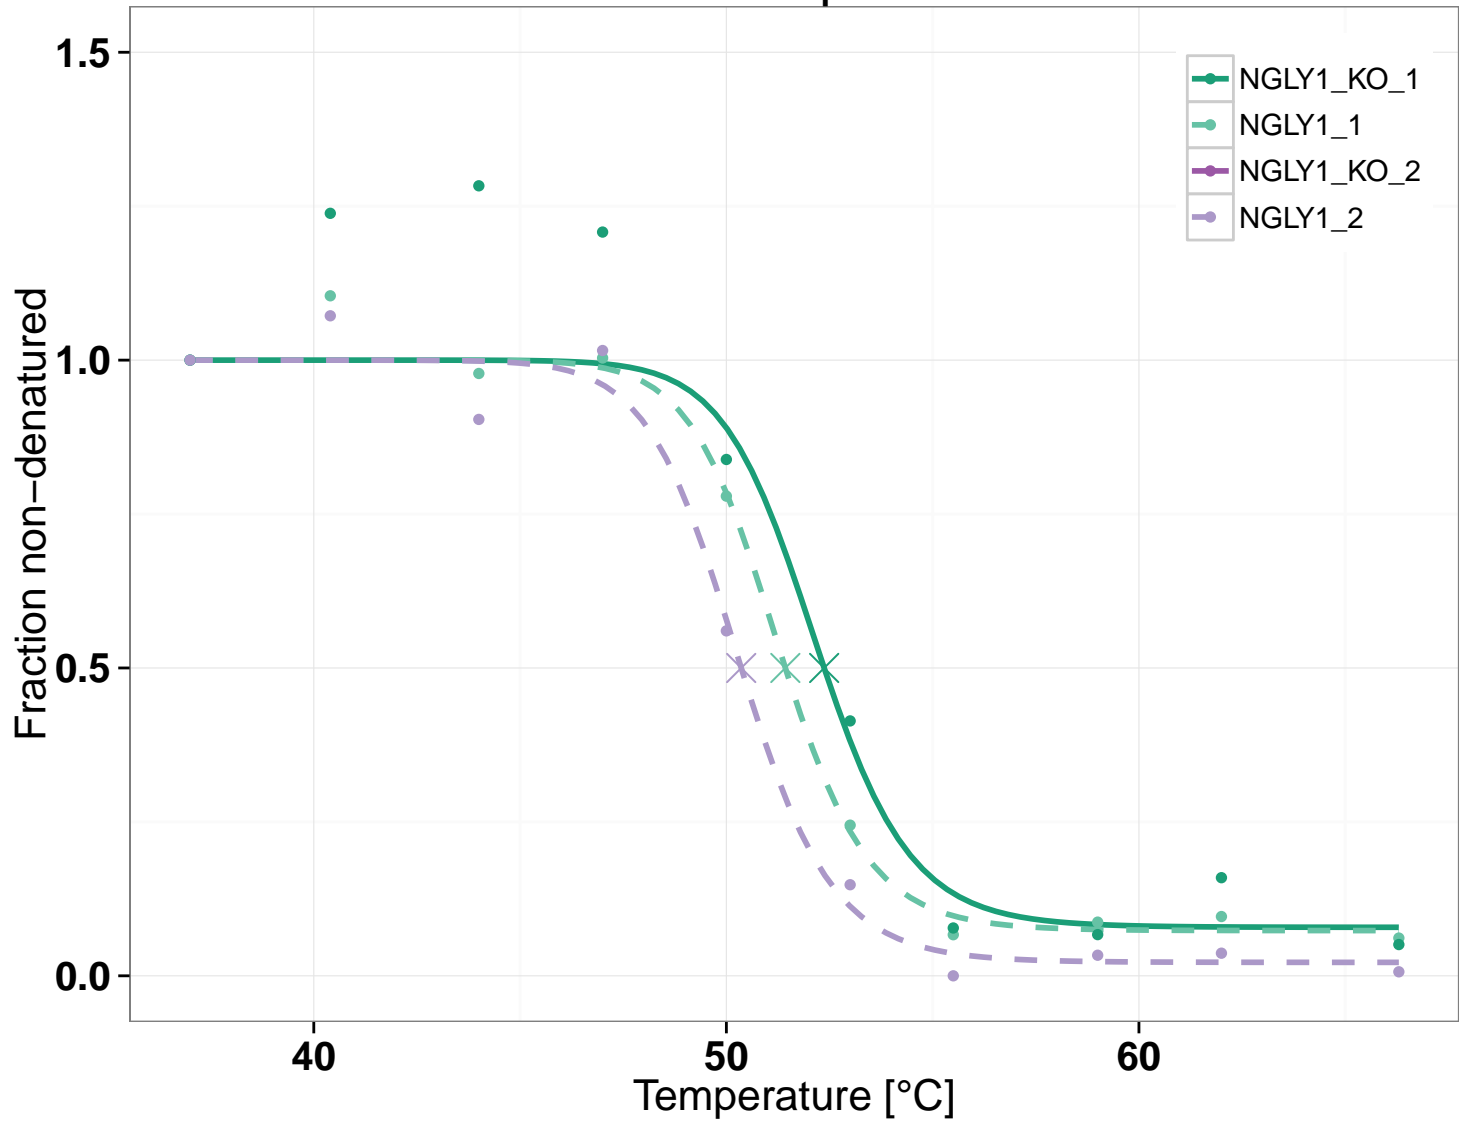

|            | meltPoint | slope | plateau | R2   |
|------------|-----------|-------|---------|------|
| NGLY1_KO_1 | 52.37     | -0.2  | 0.08    | 0.92 |
| NGLY1_1    | 51.43     | -0.21 | 0.07    | 0.99 |
| NGLY1_KO_2 | -         | -     | -       | -    |
| NGLY1_2    | 50.36     | -0.22 | 0.02    | 0.99 |

Supplement: Supplementary file 2094 [file 1]

IPI00154813.1|TRAF3IP1

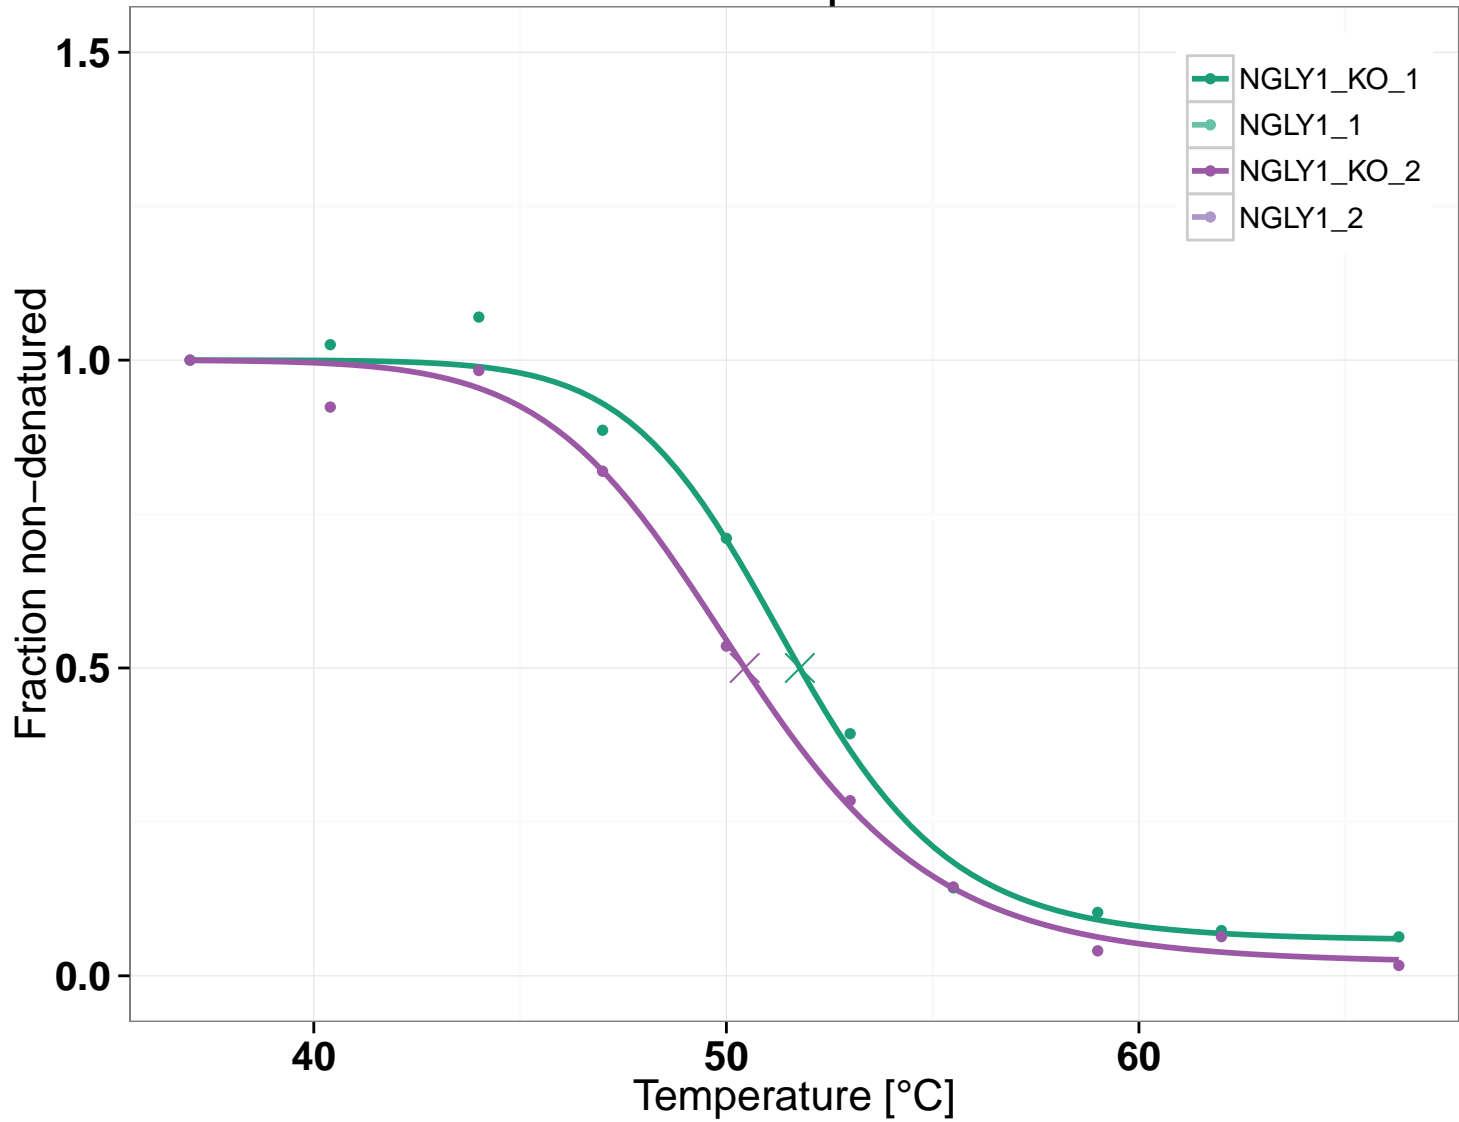

|            | meltPoint | slope | plateau | R2   |
|------------|-----------|-------|---------|------|
| NGLY1_KO_1 | 51.78     | -0.12 | 0.06    | 0.99 |
| NGLY1_1    | -         | -     | -       | -    |
| NGLY1_KO_2 | 50.44     | -0.1  | 0.02    | 1    |
| NGLY1_2    | -         | -     | -       | -    |

Supplement: Supplementary file 2095 [file 1]

IPI00217428.4|UNC45B

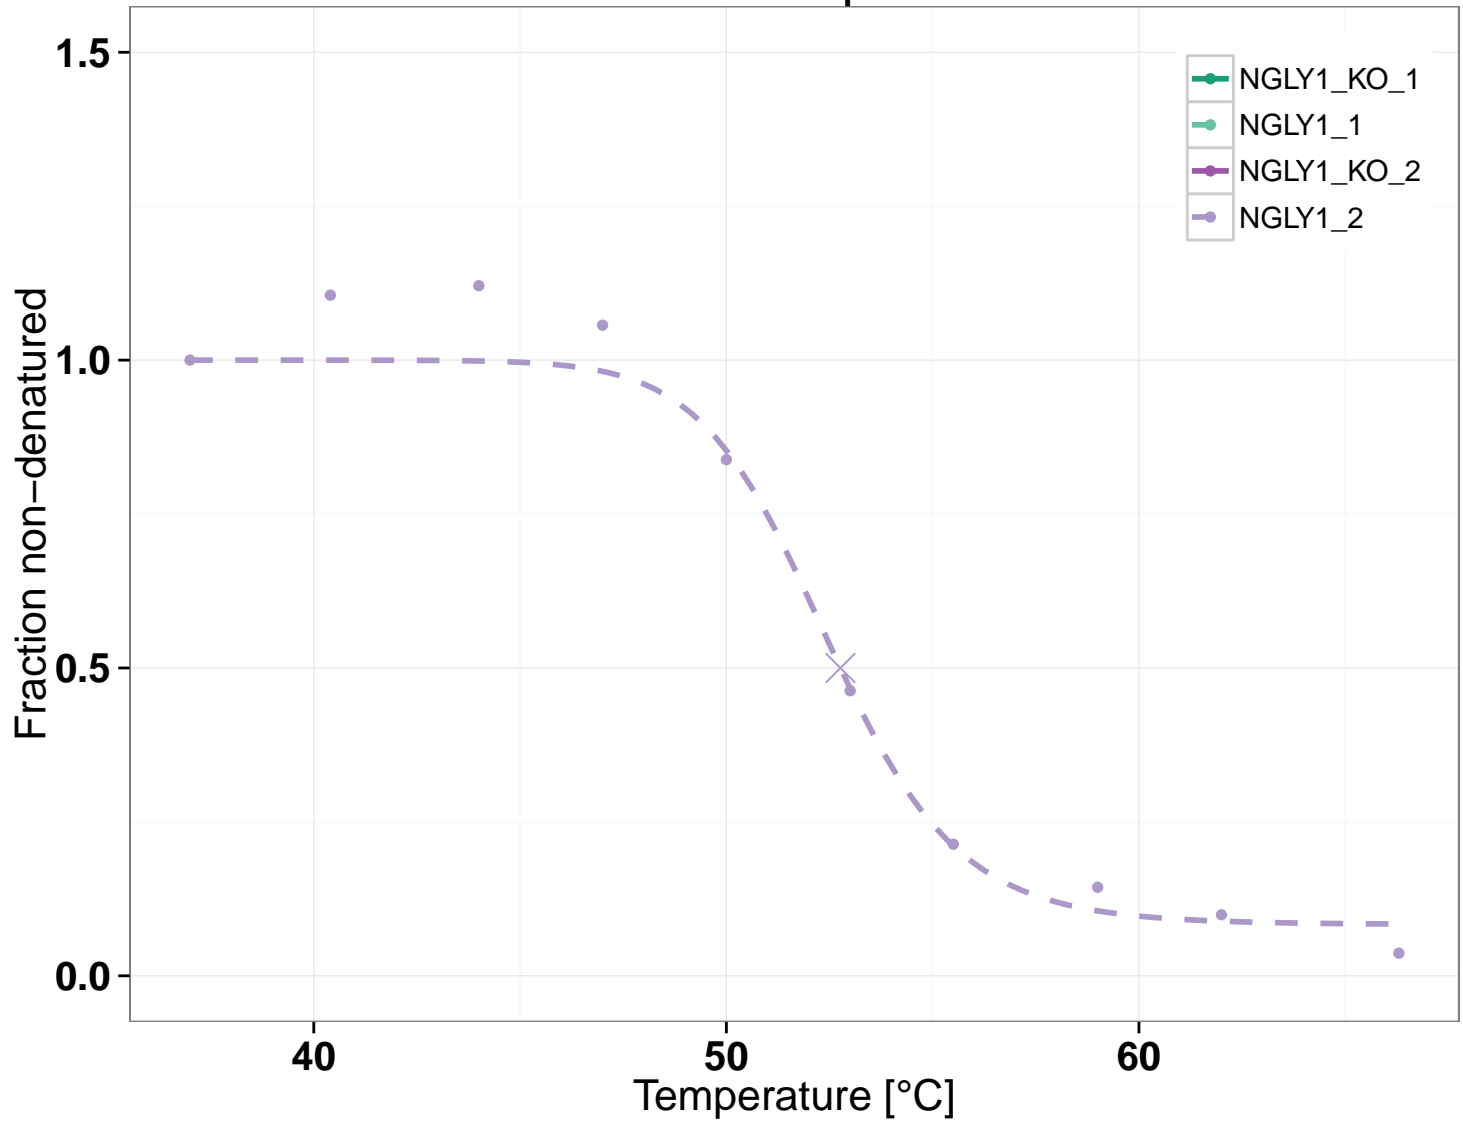

|            | meltPoint | slope | plateau | R2   |
|------------|-----------|-------|---------|------|
| NGLY1_KO_1 | —         | —     | —       | —    |
| NGLY1_1    | —         | —     | —       | —    |
| NGLY1_KO_2 | —         | —     | —       | —    |
| NGLY1_2    | 52.77     | -0.15 | 0.08    | 0.98 |

Supplement: Supplementary file 2096 [file 1]

# IPI00004408.1|ADD3

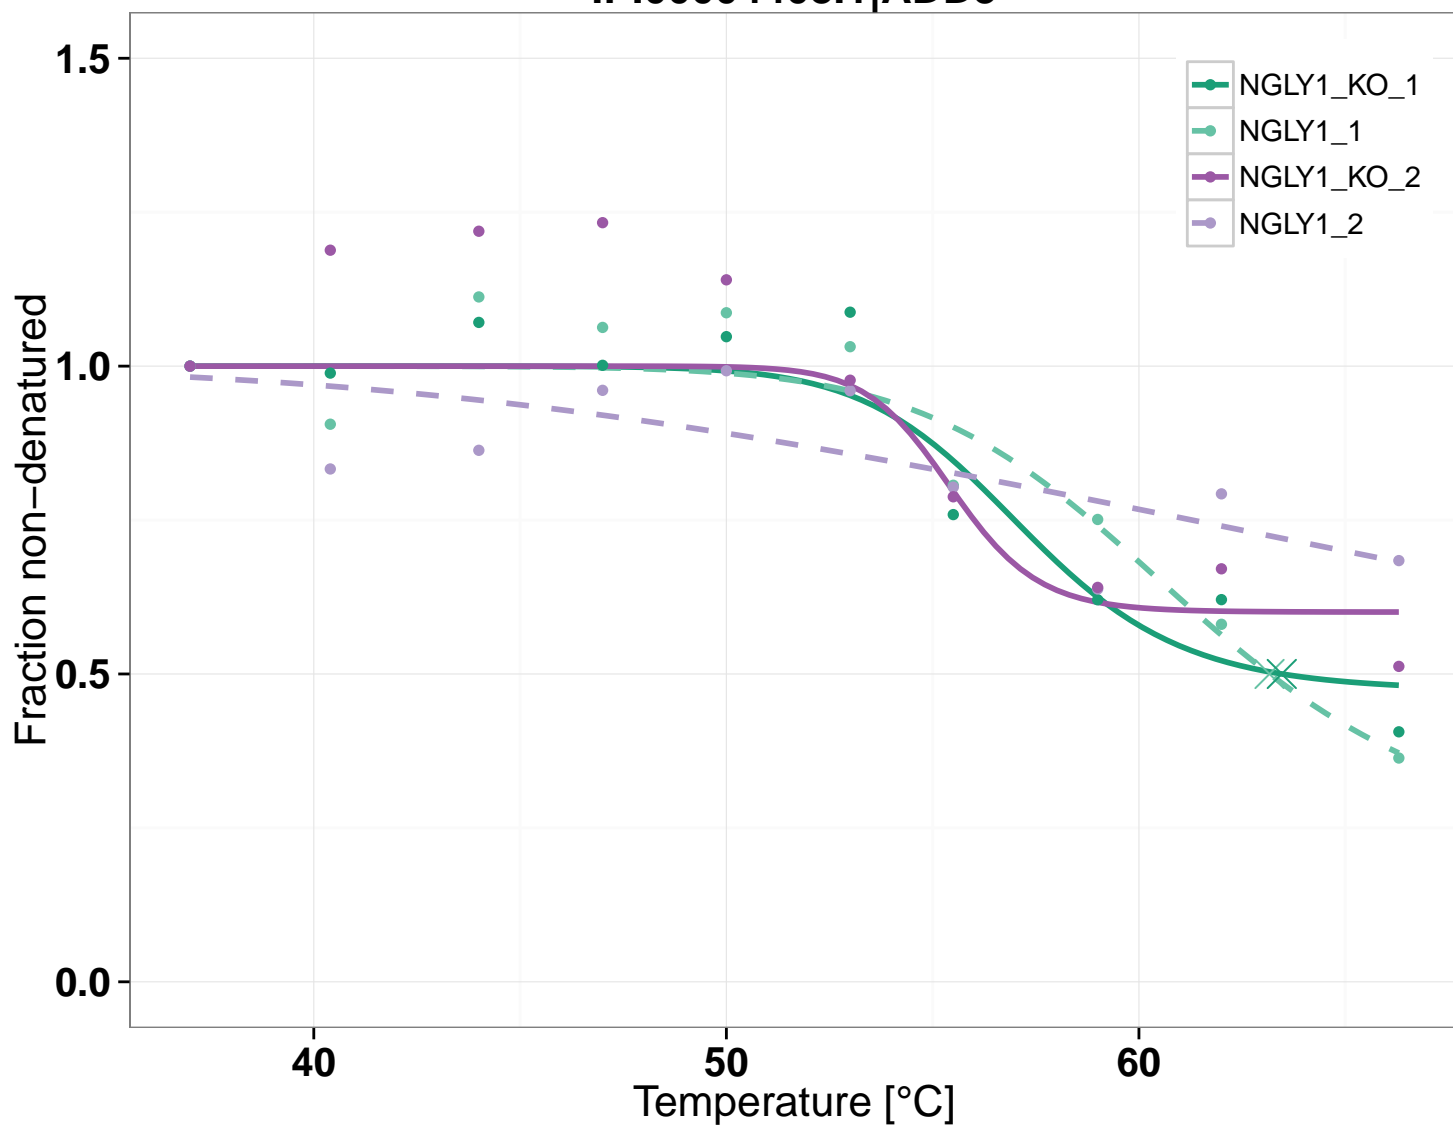

|            | meltPoint | slope  | plateau | R2   |
|------------|-----------|--------|---------|------|
| NGLY1_KO_1 | 63.46     | -0.068 | 0.47    | 0.9  |
| NGLY1_1    | 63.17     | -0.06  | 0.23    | 0.91 |
| NGLY1_KO_2 | -         | -0.096 | 0.6     | 0.73 |
| NGLY1_2    | -         | -0.014 | 0       | 0.51 |

Supplement: Supplementary file 2097 [file 1]

IPI00410717.2|POGZ

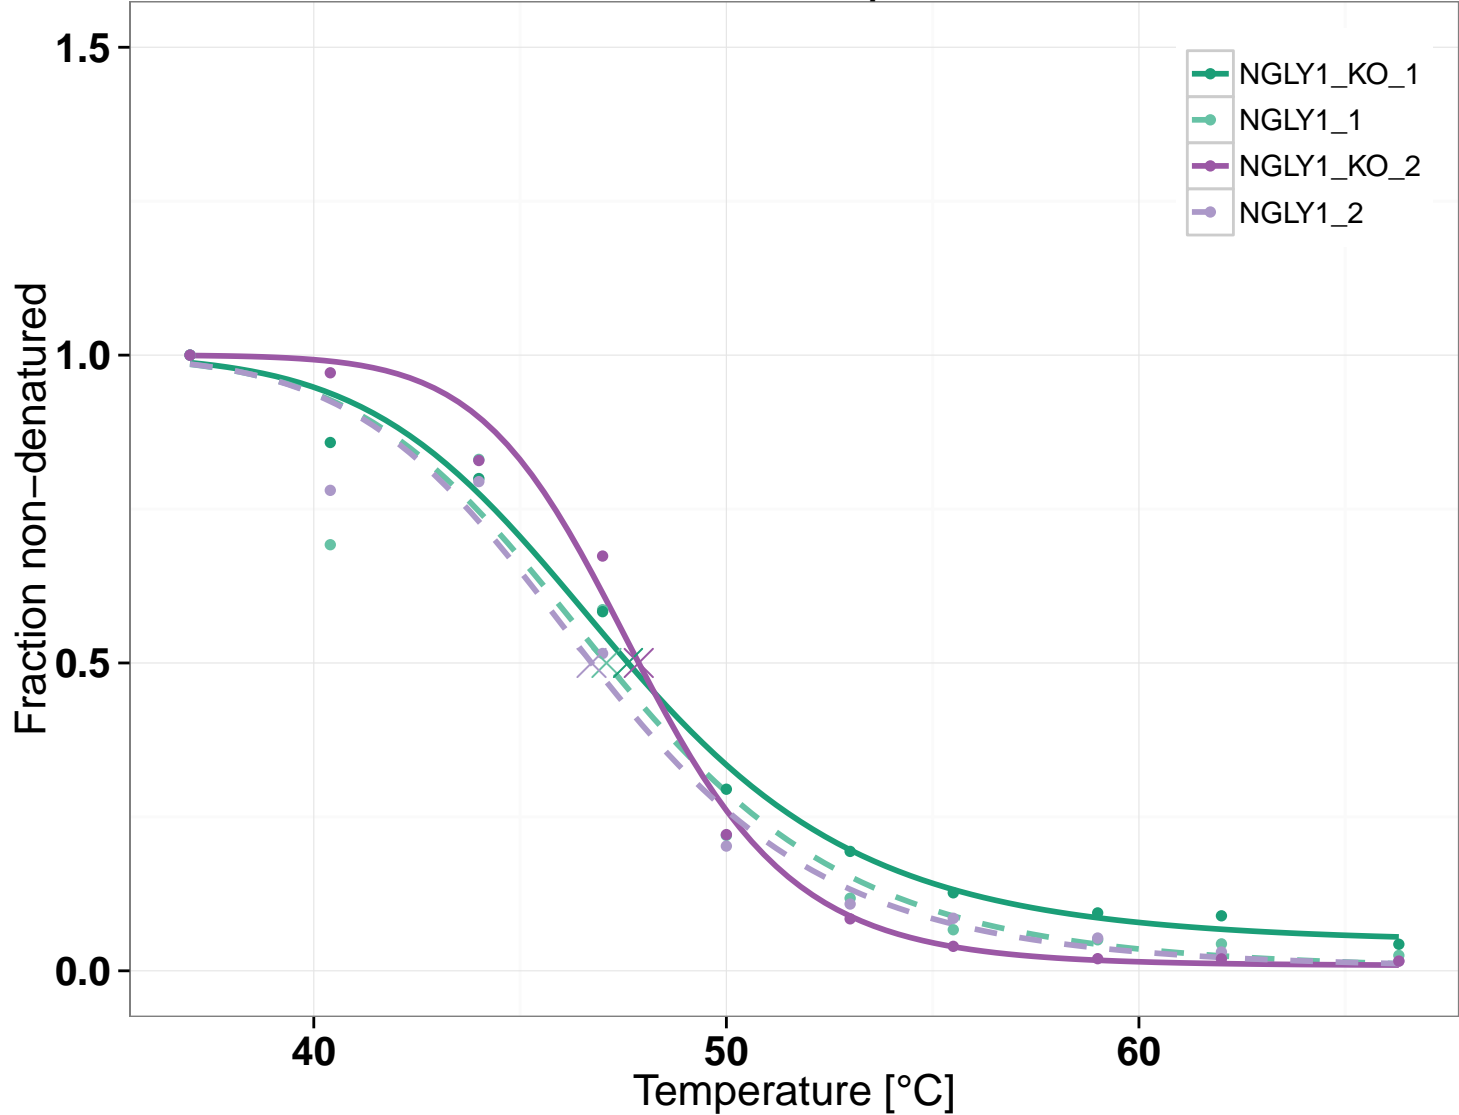

|            | meltPoint | slope  | plateau | R2   |
|------------|-----------|--------|---------|------|
| NGLY1_KO_1 | 47.62     | -0.08  | 0.04    | 0.99 |
| NGLY1_1    | 47.09     | -0.083 | 0       | 0.94 |
| NGLY1_KO_2 | 47.88     | -0.13  | 0.01    | 0.99 |
| NGLY1_2    | 46.73     | -0.087 | 0       | 0.98 |

Supplement: Supplementary file 2098 [file 1]

IPI00816132.1|TIMELESS

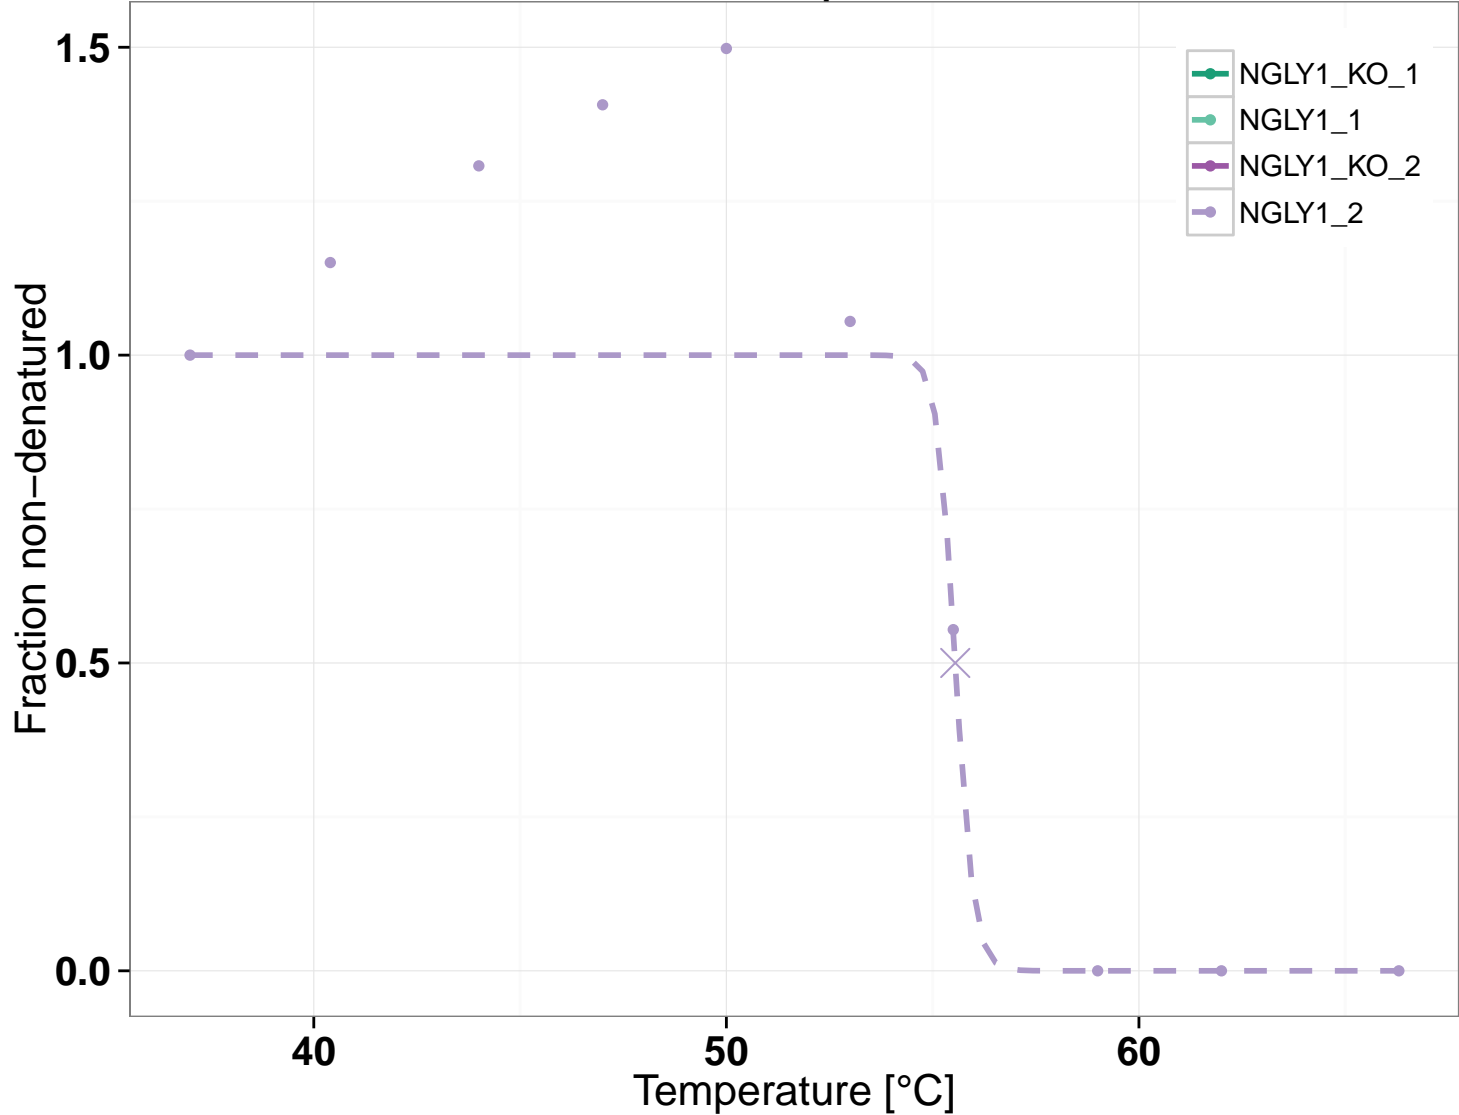

|            | meltPoint | slope | plateau | R2   |
|------------|-----------|-------|---------|------|
| NGLY1_KO_1 | -         | -     | -       | -    |
| NGLY1_1    | -         | -     | -       | -    |
| NGLY1_KO_2 | -         | -     | -       | -    |
| NGLY1_2    | 55.55     | -1.1  | 0       | 0.84 |

Supplement: Supplementary file 2099 [file 1]

IPI00018214.1|MAX

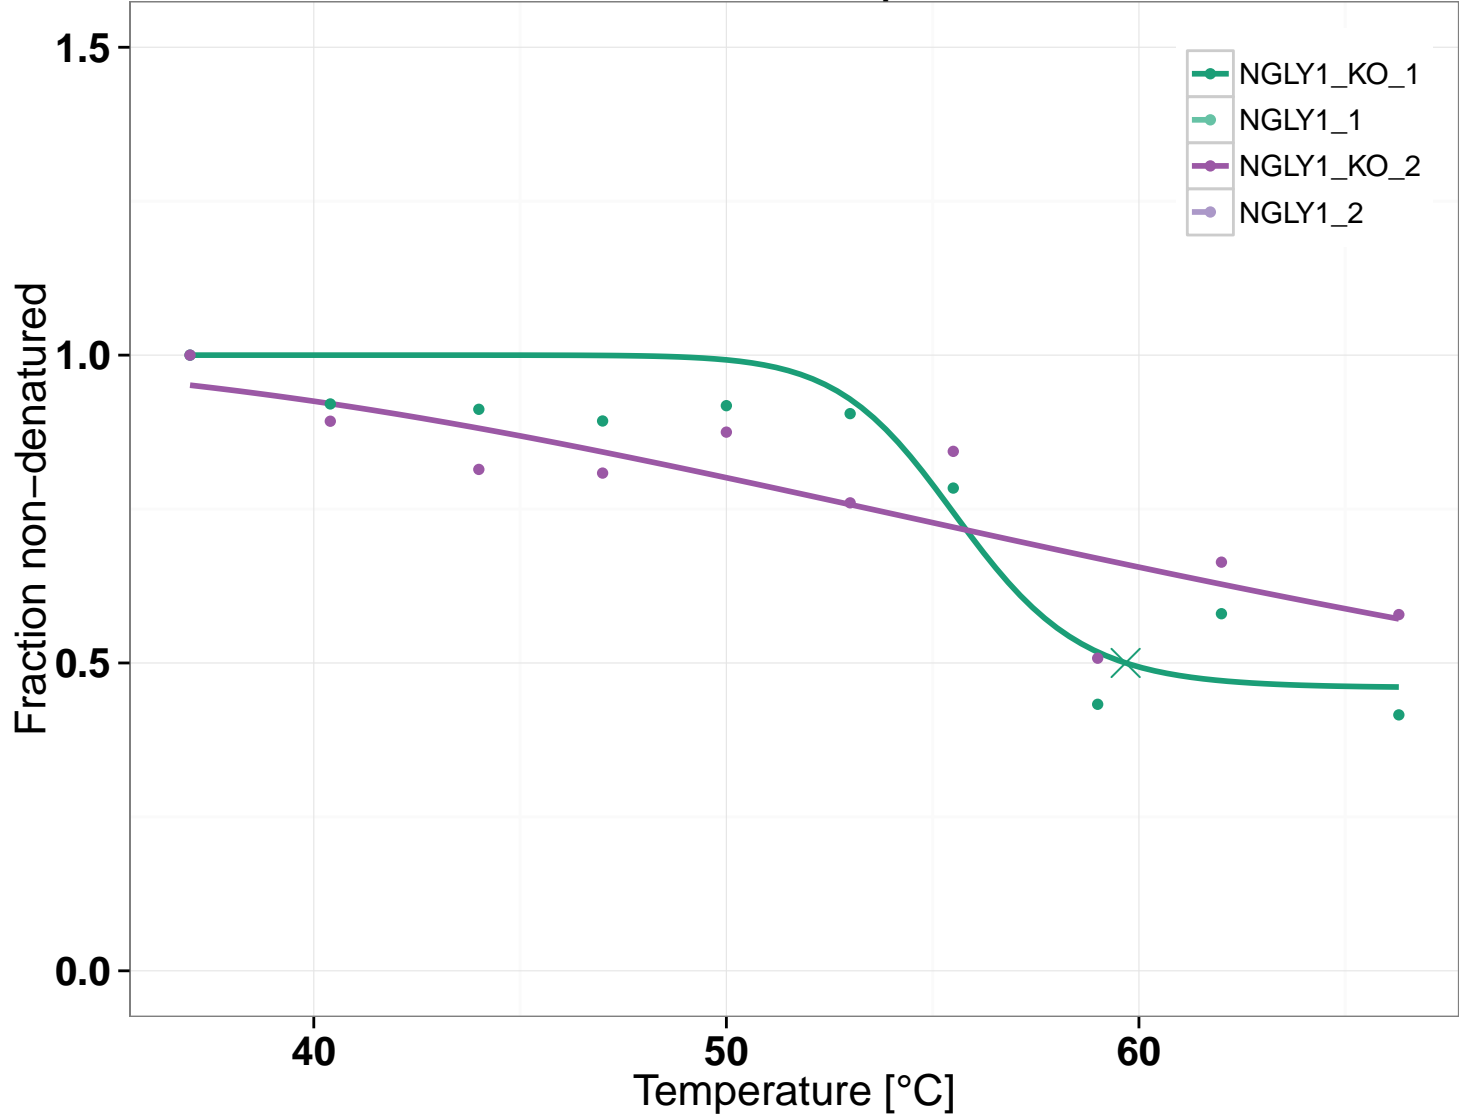

|            | meltPoint | slope  | plateau | R2   |
|------------|-----------|--------|---------|------|
| NGLY1_KO_1 | 59.68     | -0.091 | 0.46    | 0.87 |
| NGLY1_1    | -         | -      | -       | -    |
| NGLY1_KO_2 | -         | -0.015 | 0       | 0.72 |
| NGLY1_2    | -         | -      | -       | -    |

Supplement: Supplementary file 2100 [file 1]

IPI00022164.3|ARHGEF12

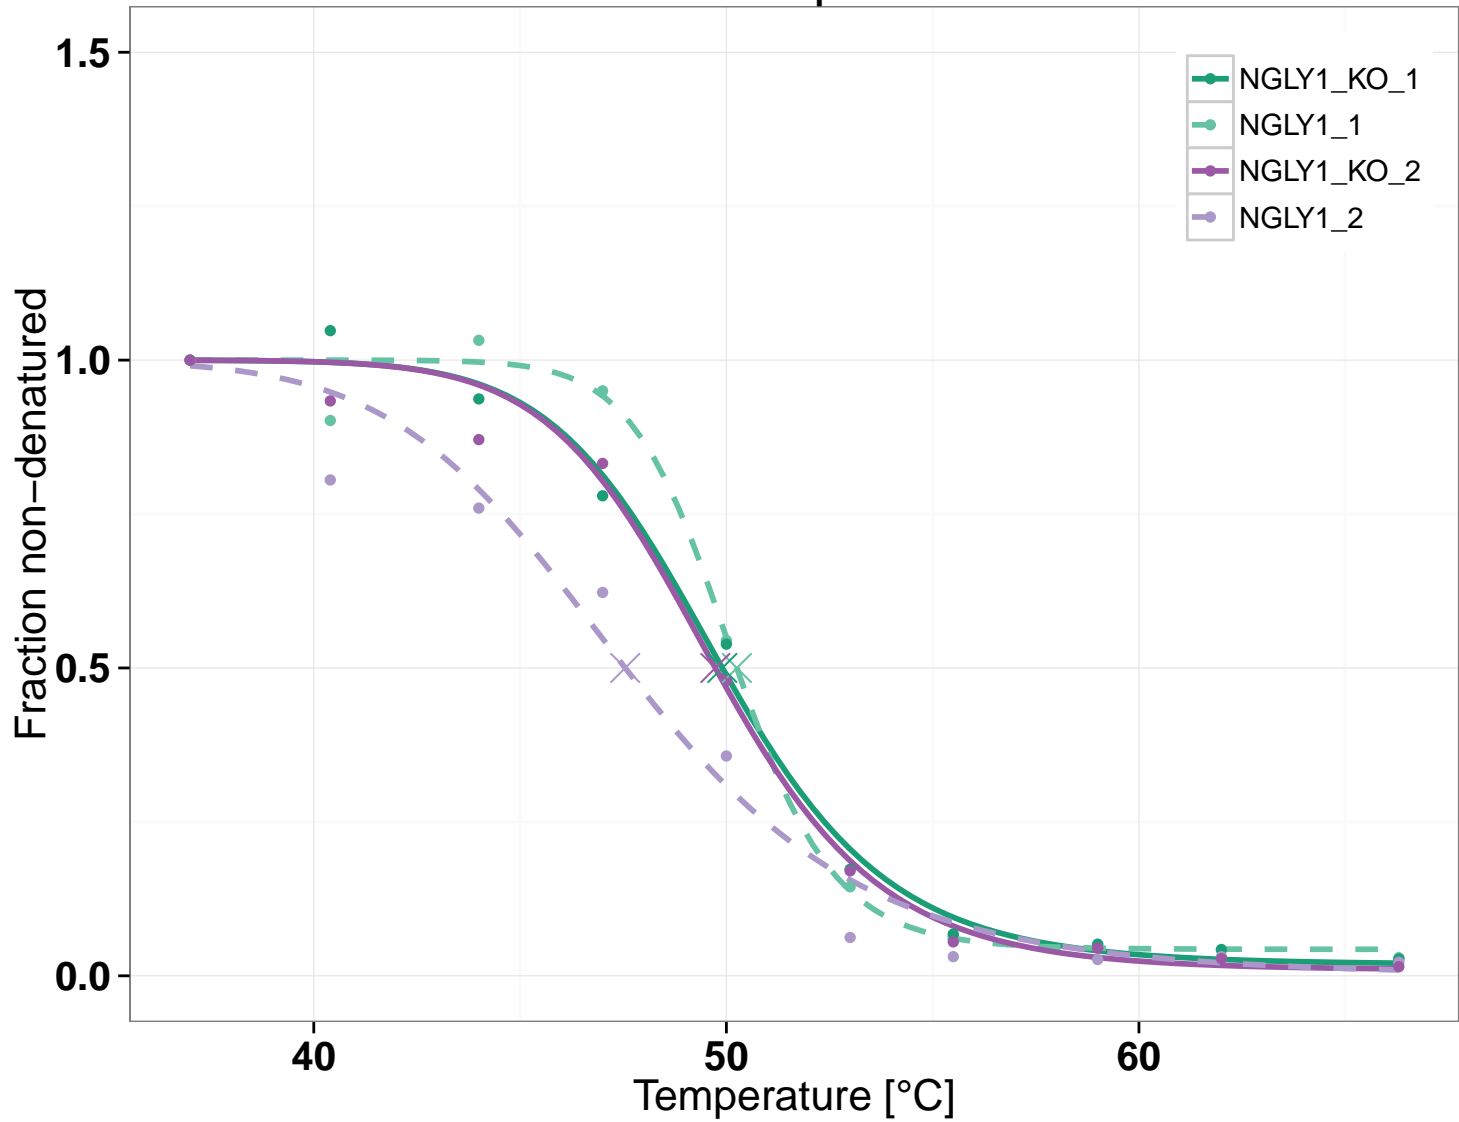

|            | meltPoint | slope  | plateau | R2   |
|------------|-----------|--------|---------|------|
| NGLY1_KO_1 | 49.9      | -0.12  | 0.02    | 0.99 |
| NGLY1_1    | 50.25     | -0.2   | 0.04    | 0.99 |
| NGLY1_KO_2 | 49.73     | -0.12  | 0.01    | 0.99 |
| NGLY1_2    | 47.55     | -0.088 | 0       | 0.97 |

Supplement: Supplementary file 2101 [file 1]

IPI00304932.2|KIAA0409

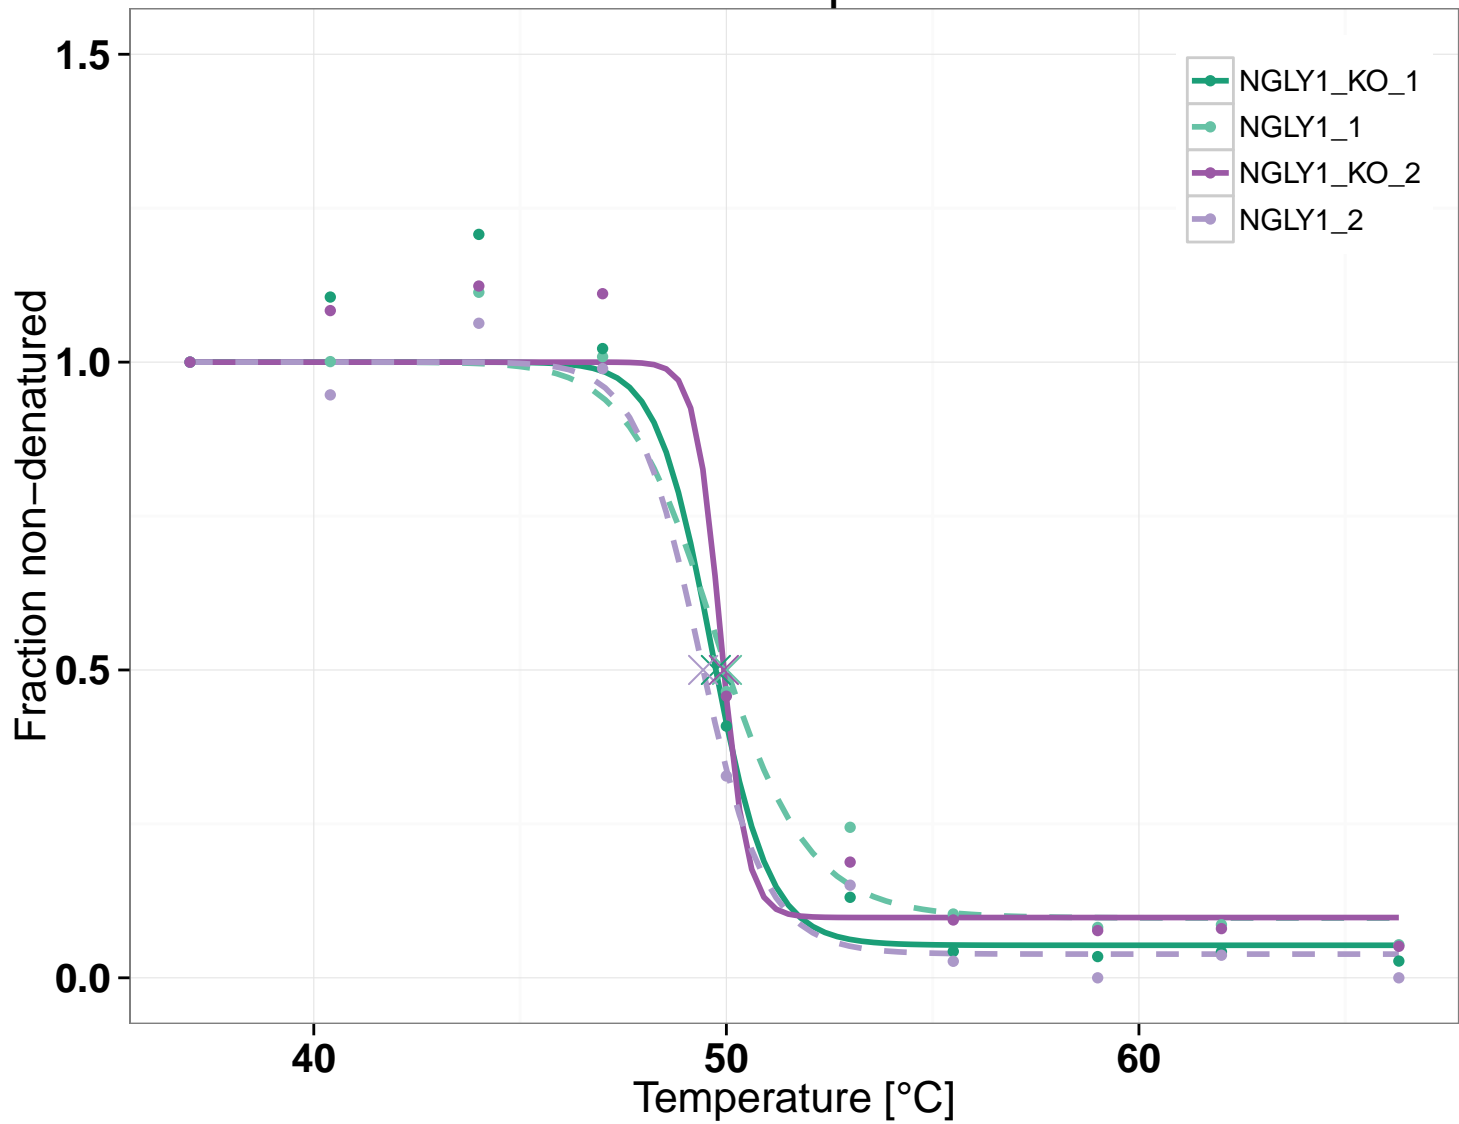

|            | meltPoint | slope | plateau | R2   |
|------------|-----------|-------|---------|------|
| NGLY1_KO_1 | 49.75     | -0.35 | 0.05    | 0.97 |
| NGLY1_1    | 50.02     | -0.21 | 0.1     | 0.98 |
| NGLY1_KO_2 | 49.94     | -0.72 | 0.1     | 0.98 |
| NGLY1_2    | 49.44     | -0.31 | 0.04    | 0.99 |

Supplement: Supplementary file 2102 [file 1]

# IPI00479385.4|ASMTL

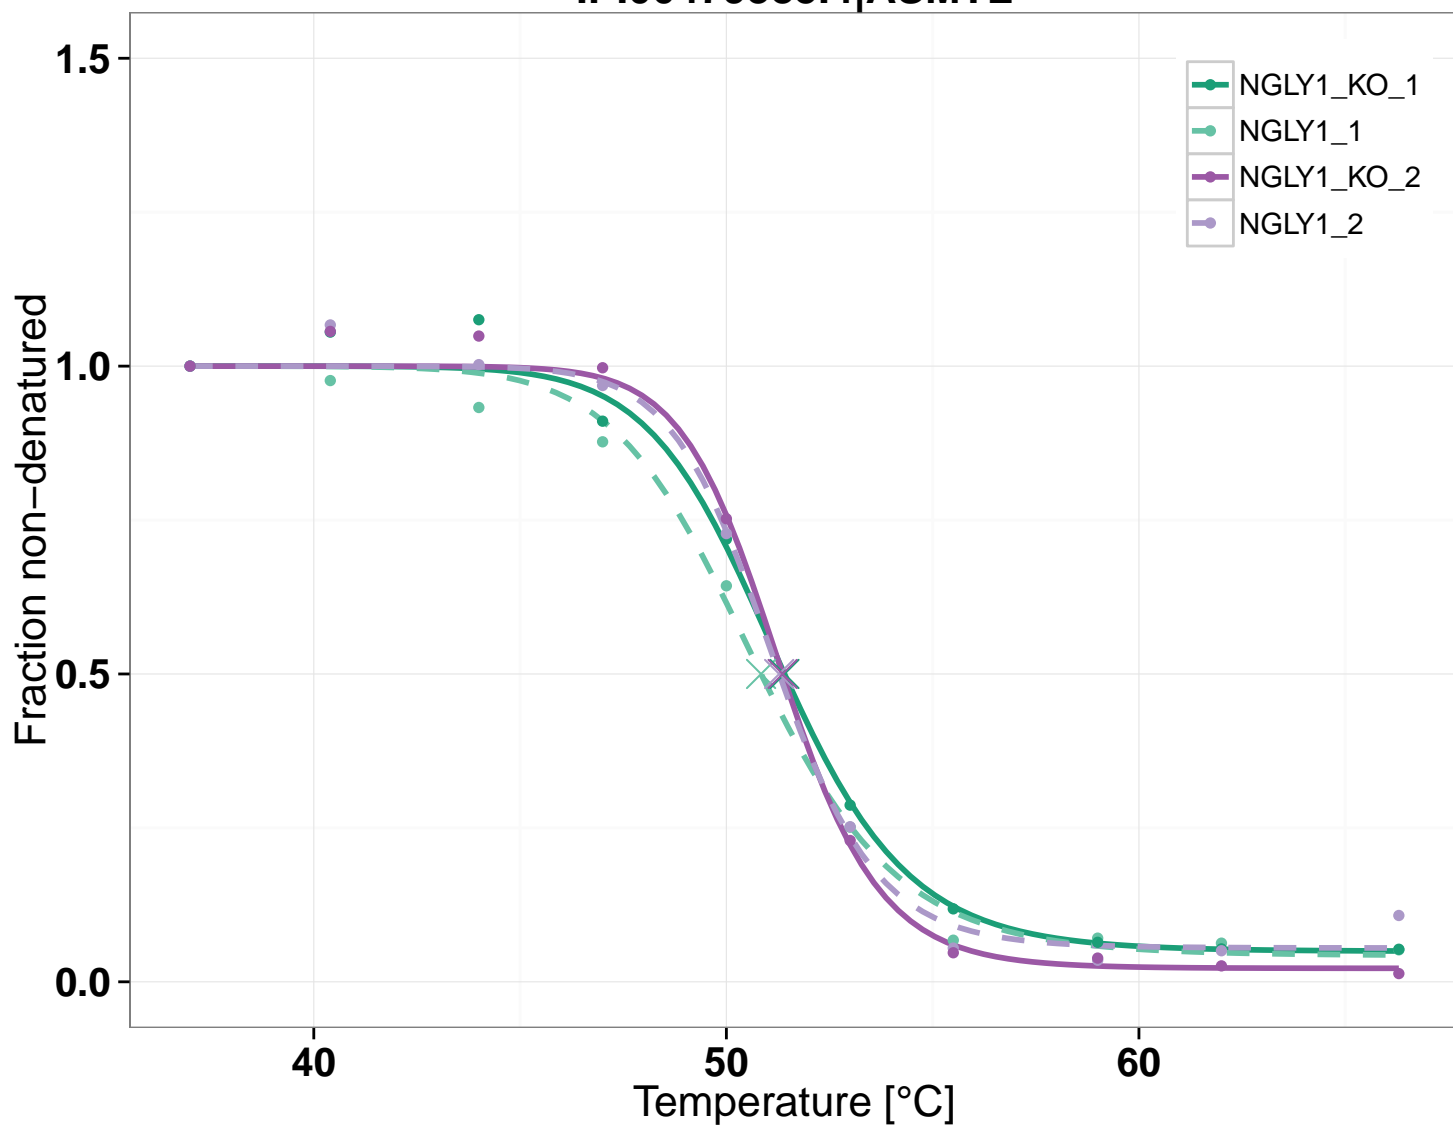

|            | meltPoint | slope | plateau | R2   |
|------------|-----------|-------|---------|------|
| NGLY1_KO_1 | 51.41     | -0.15 | 0.05    | 0.99 |
| NGLY1_1    | 50.84     | -0.14 | 0.04    | 1    |
| NGLY1_KO_2 | 51.36     | -0.2  | 0.02    | 1    |
| NGLY1_2    | 51.28     | -0.19 | 0.05    | 1    |

Supplement: Supplementary file 2103 [file 1]

IPI00902575.1|KIAA0427

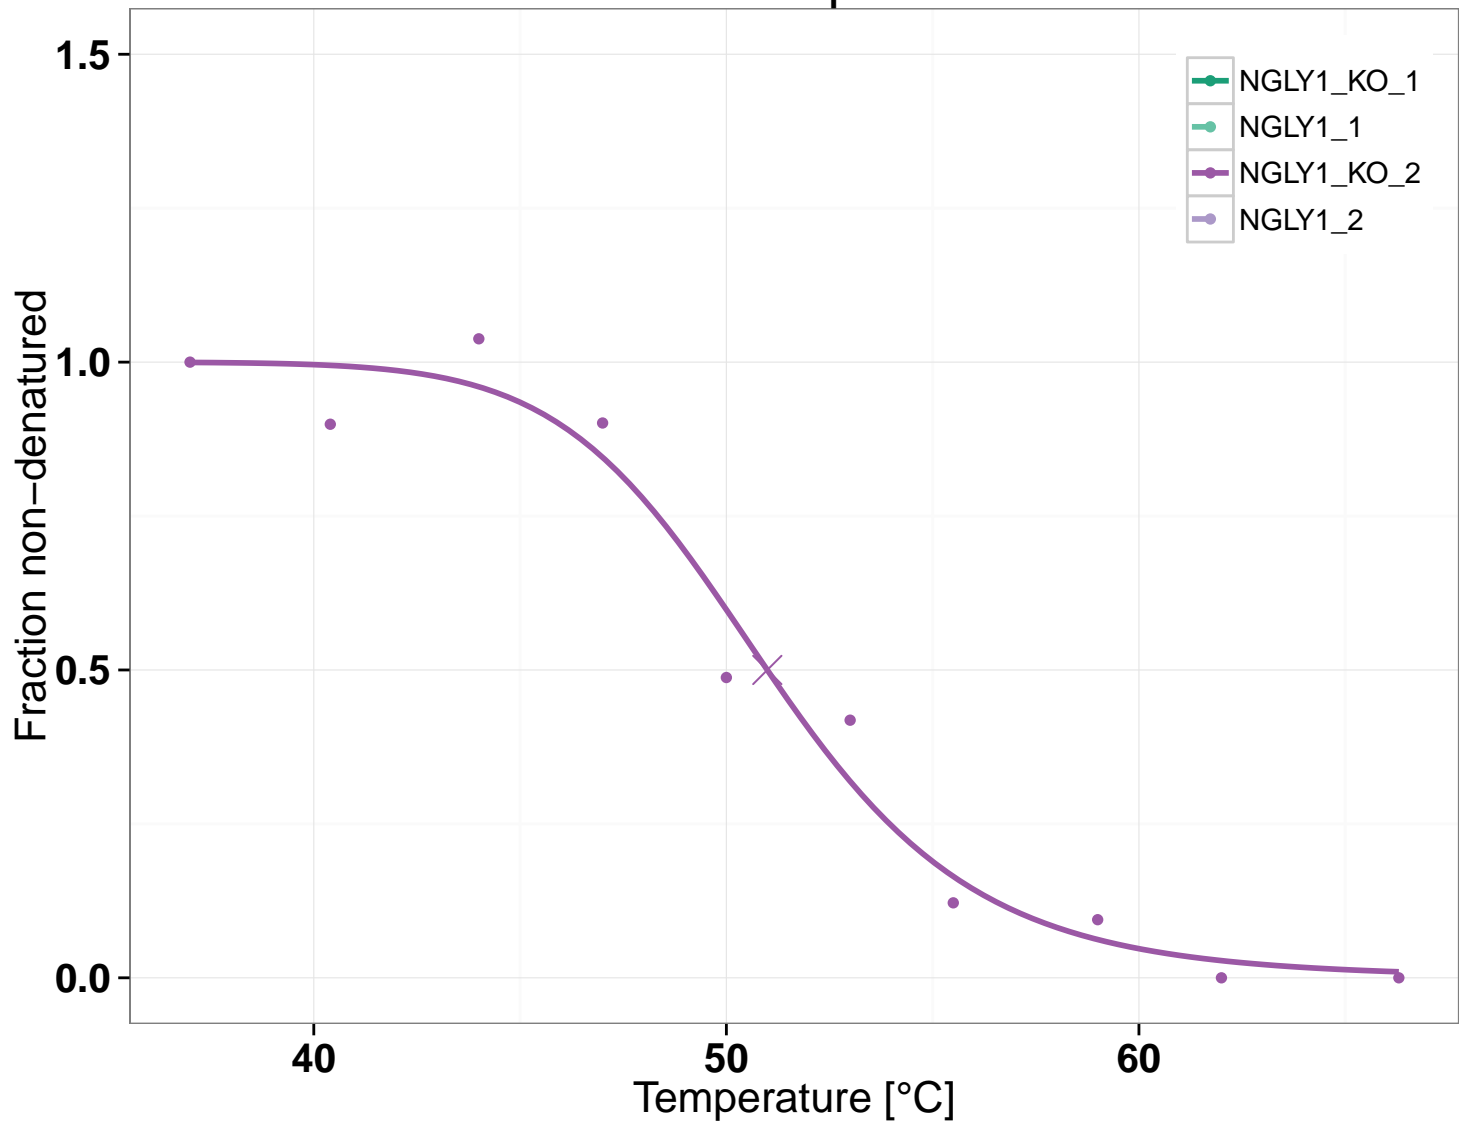

|            | meltPoint | slope  | plateau | R2   |
|------------|-----------|--------|---------|------|
| NGLY1_KO_1 | —         | —      | —       | —    |
| NGLY1_1    | —         | —      | —       | —    |
| NGLY1_KO_2 | 50.99     | -0.099 | 0       | 0.97 |
| NGLY1_2    | —         | —      | —       | —    |

Supplement: Supplementary file 2104 [file 1]

IPI00014235.3|RAB3GAP

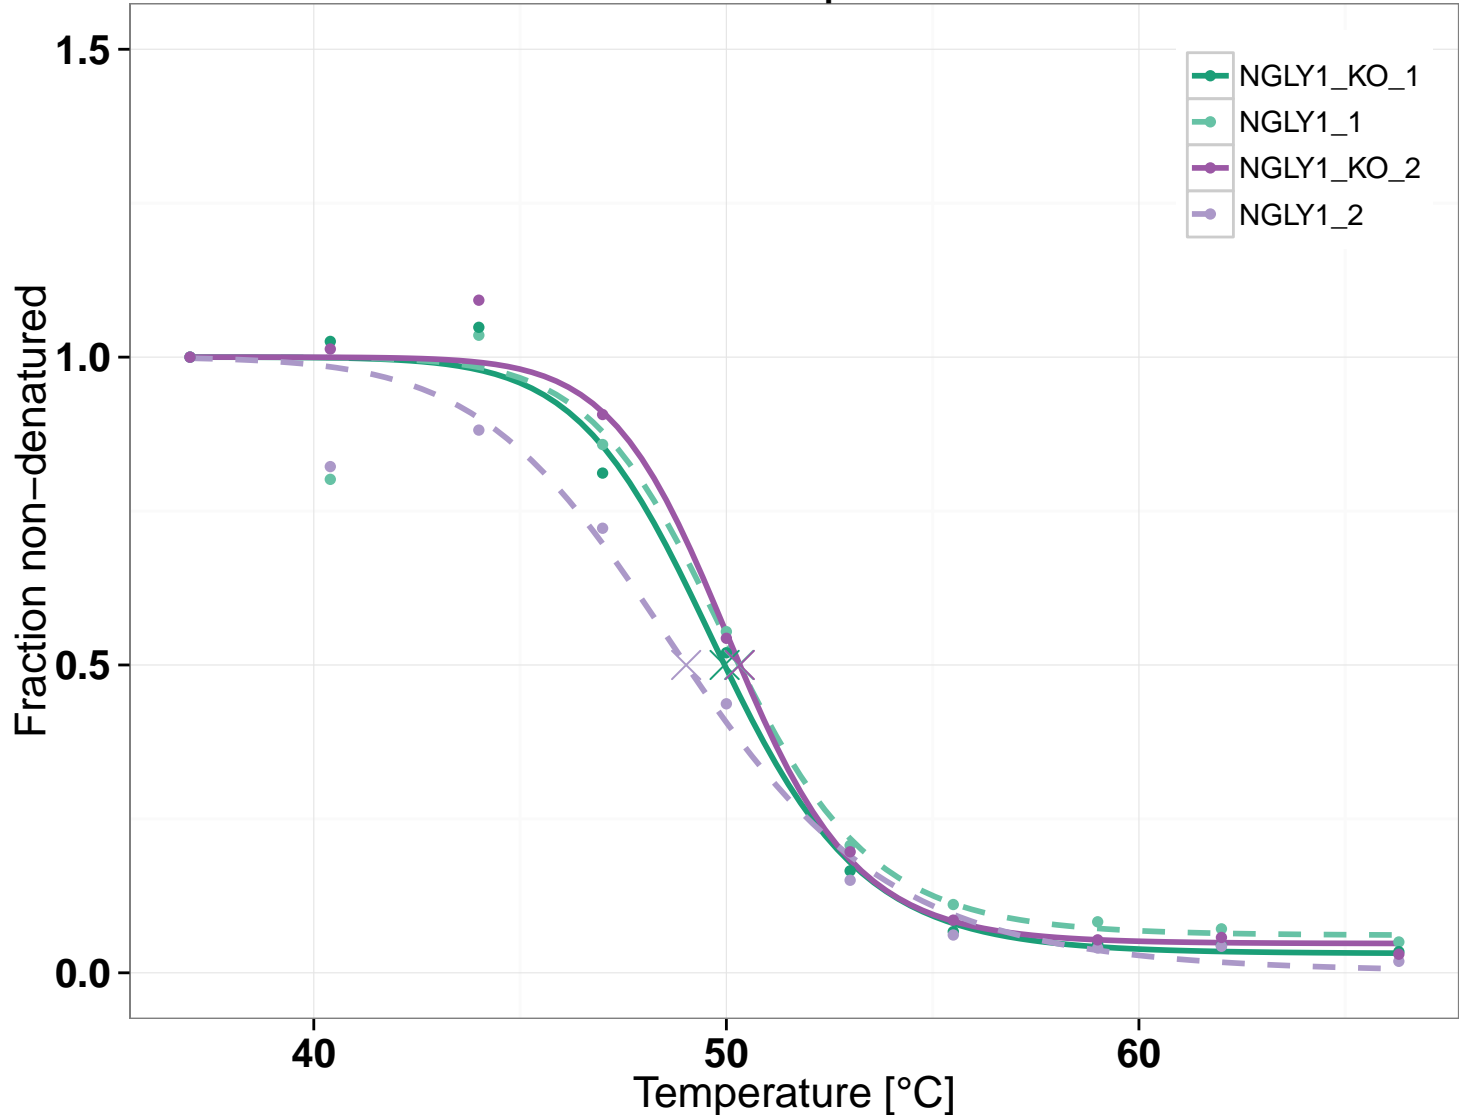

|            | meltPoint | slope | plateau | R2   |
|------------|-----------|-------|---------|------|
| NGLY1_KO_1 | 49.96     | -0.14 | 0.03    | 1    |
| NGLY1_1    | 50.31     | -0.14 | 0.06    | 0.97 |
| NGLY1_KO_2 | 50.33     | -0.16 | 0.05    | 0.99 |
| NGLY1_2    | 49.03     | -0.1  | 0       | 0.98 |

Supplement: Supplementary file 2105 [file 1]

IPI00105532.3|LLGL1

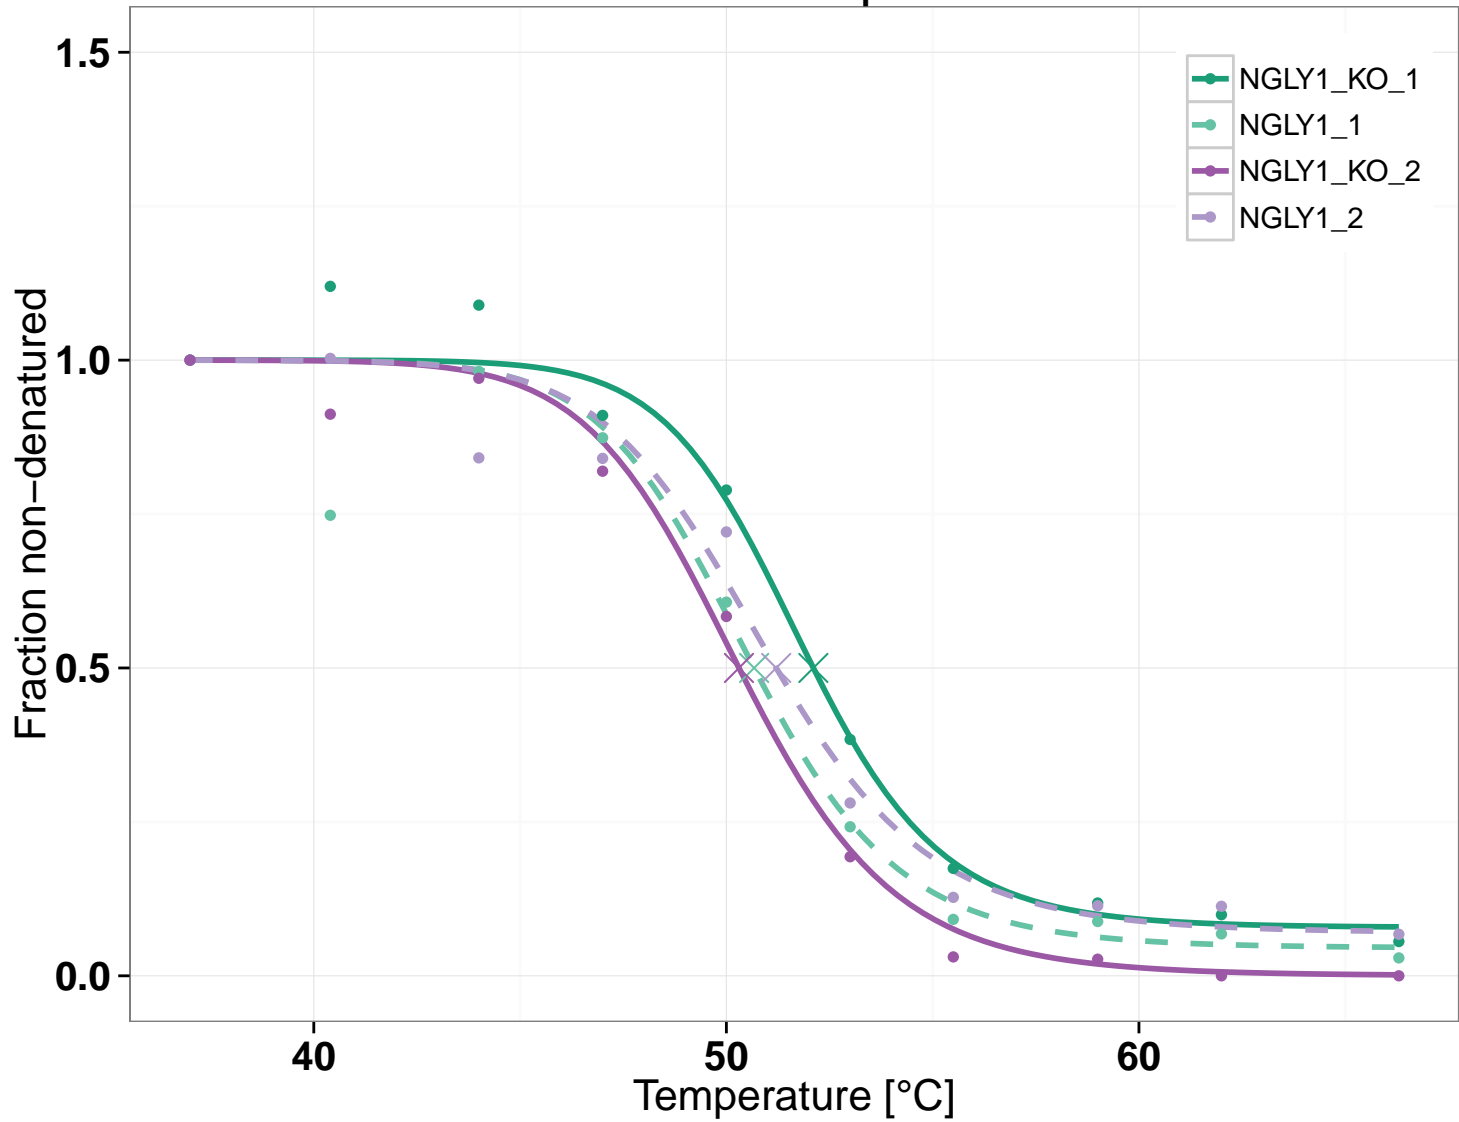

|            | meltPoint | slope | plateau | R2   |
|------------|-----------|-------|---------|------|
| NGLY1_KO_1 | 52.11     | -0.14 | 0.08    | 0.98 |
| NGLY1_1    | 50.67     | -0.13 | 0.05    | 0.96 |
| NGLY1_KO_2 | 50.31     | -0.13 | 0       | 0.99 |
| NGLY1_2    | 51.21     | -0.12 | 0.07    | 0.98 |

Supplement: Supplementary file 2106 [file 1]

IPI00032905.2|VPS33B

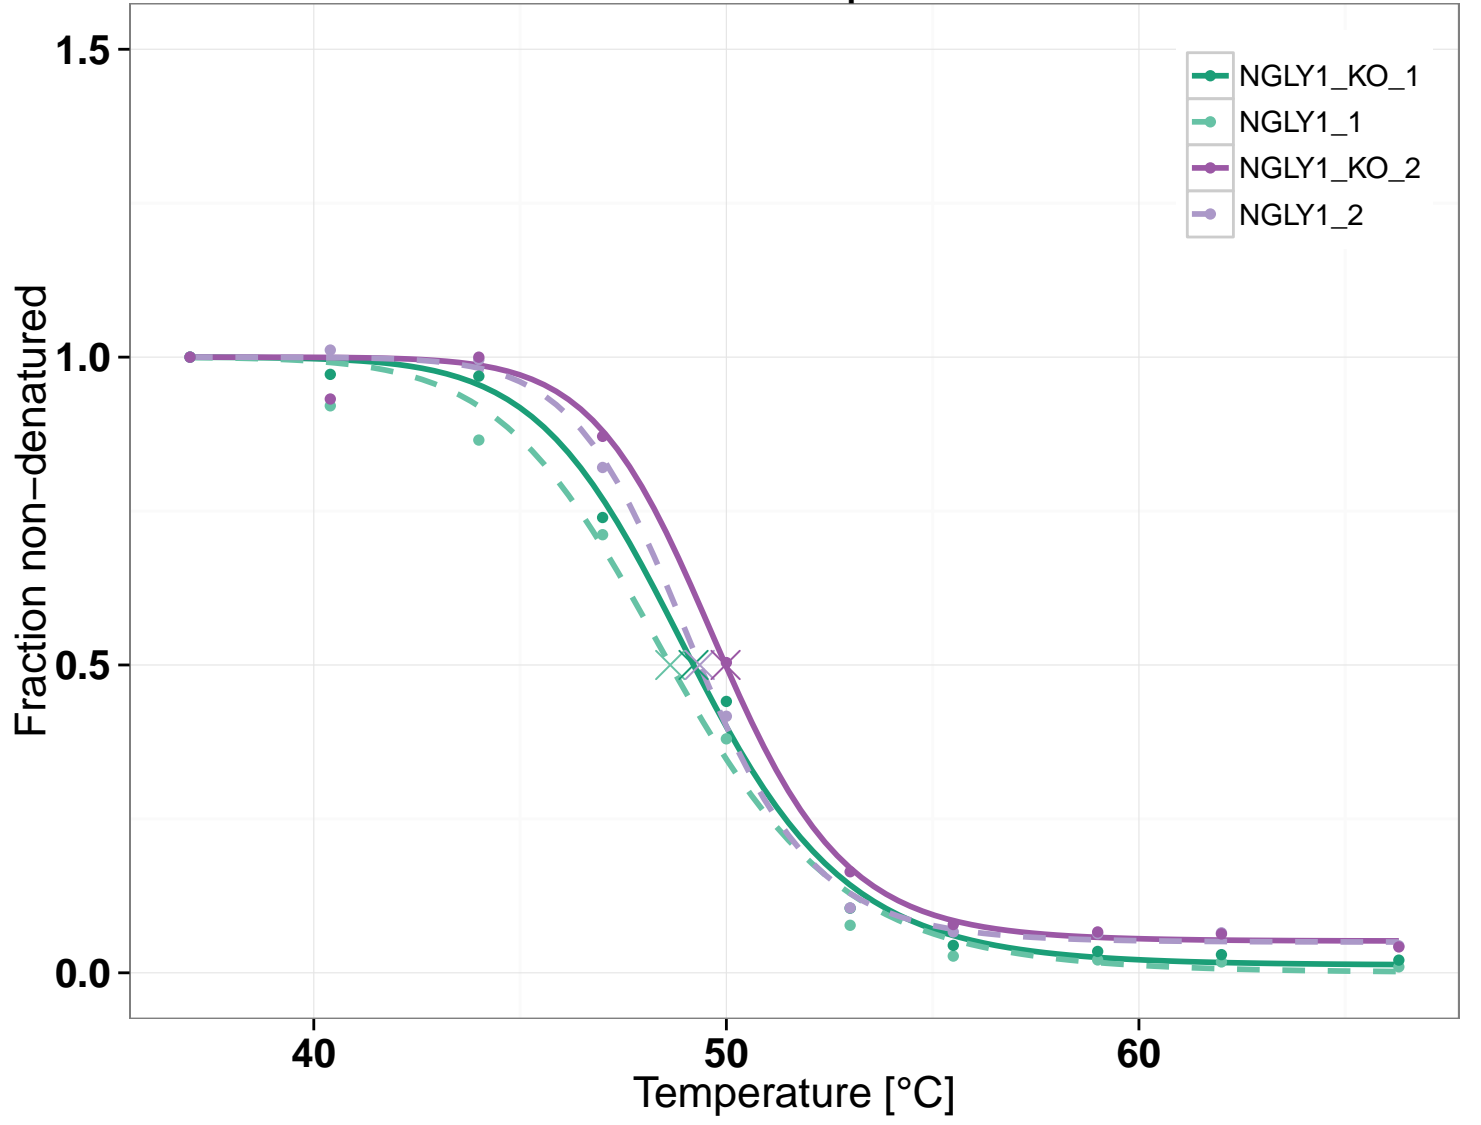

|            | meltPoint | slope | plateau | R2   |
|------------|-----------|-------|---------|------|
| NGLY1_KO_1 | 49.2      | -0.13 | 0.01    | 1    |
| NGLY1_1    | 48.64     | -0.12 | 0       | 0.99 |
| NGLY1_KO_2 | 49.98     | -0.15 | 0.05    | 1    |
| NGLY1_2    | 49.35     | -0.16 | 0.05    | 1    |

Supplement: Supplementary file 2107 [file 1]

# IPI00031519.3|DNMT1

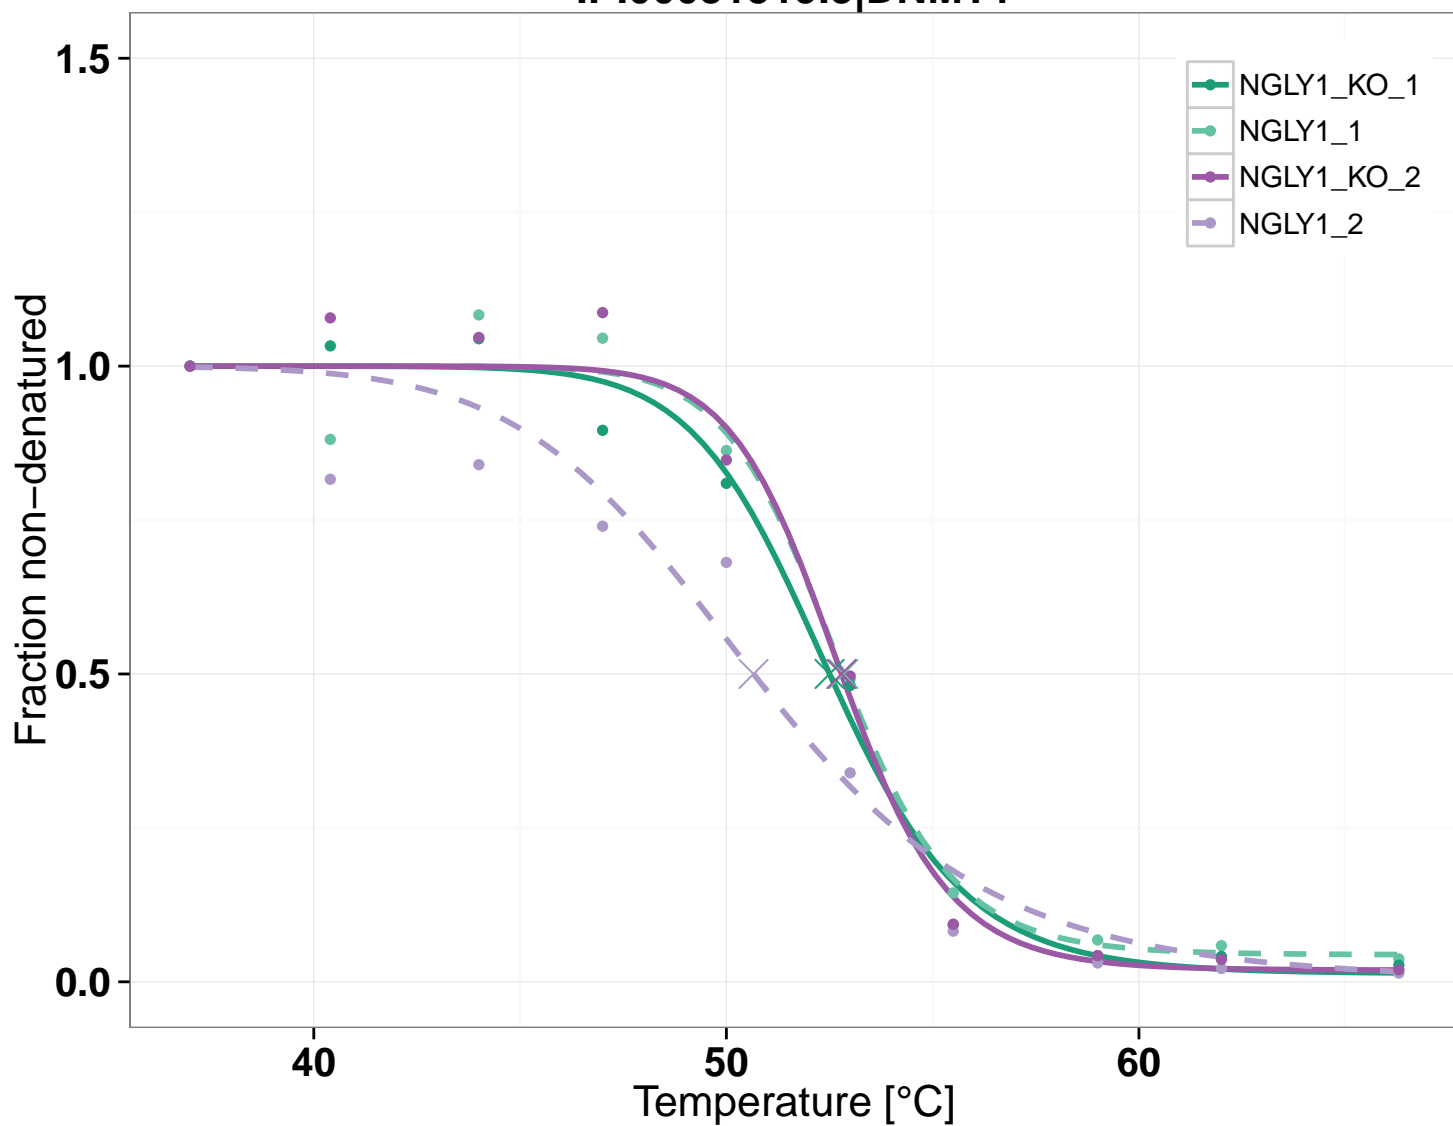

|            | meltPoint | slope  | plateau | R2   |
|------------|-----------|--------|---------|------|
| NGLY1_KO_1 | 52.5      | -0.15  | 0.01    | 0.99 |
| NGLY1_1    | 52.84     | -0.17  | 0.04    | 0.99 |
| NGLY1_KO_2 | 52.79     | -0.19  | 0.02    | 0.99 |
| NGLY1_2    | 50.66     | -0.087 | 0       | 0.95 |

Supplement: Supplementary file 2108 [file 1]

IPI00333753.4|ITPR1

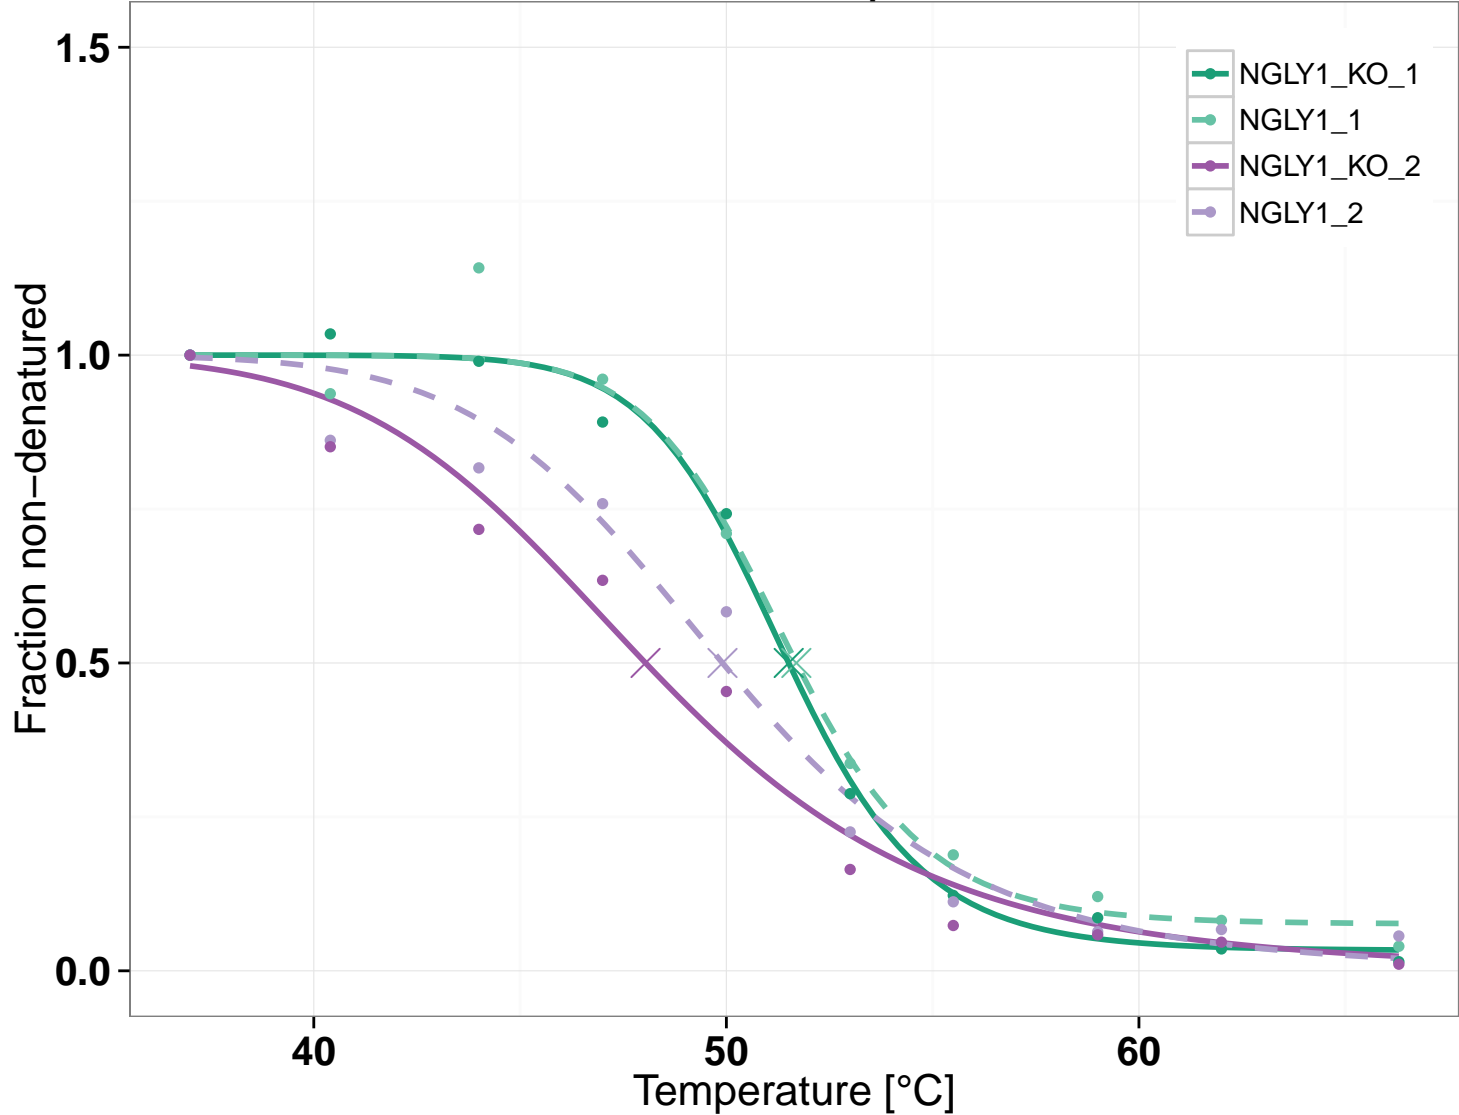

|            | meltPoint | slope  | plateau | R2   |
|------------|-----------|--------|---------|------|
| NGLY1_KO_1 | 51.51     | -0.14  | 0.03    | 1    |
| NGLY1_1    | 51.7      | -0.13  | 0.08    | 0.98 |
| NGLY1_KO_2 | 48.04     | -0.072 | 0       | 0.98 |
| NGLY1_2    | 49.91     | -0.081 | 0       | 0.97 |

Supplement: Supplementary file 2109 [file 1]

IPI00005401.3|GALNT5

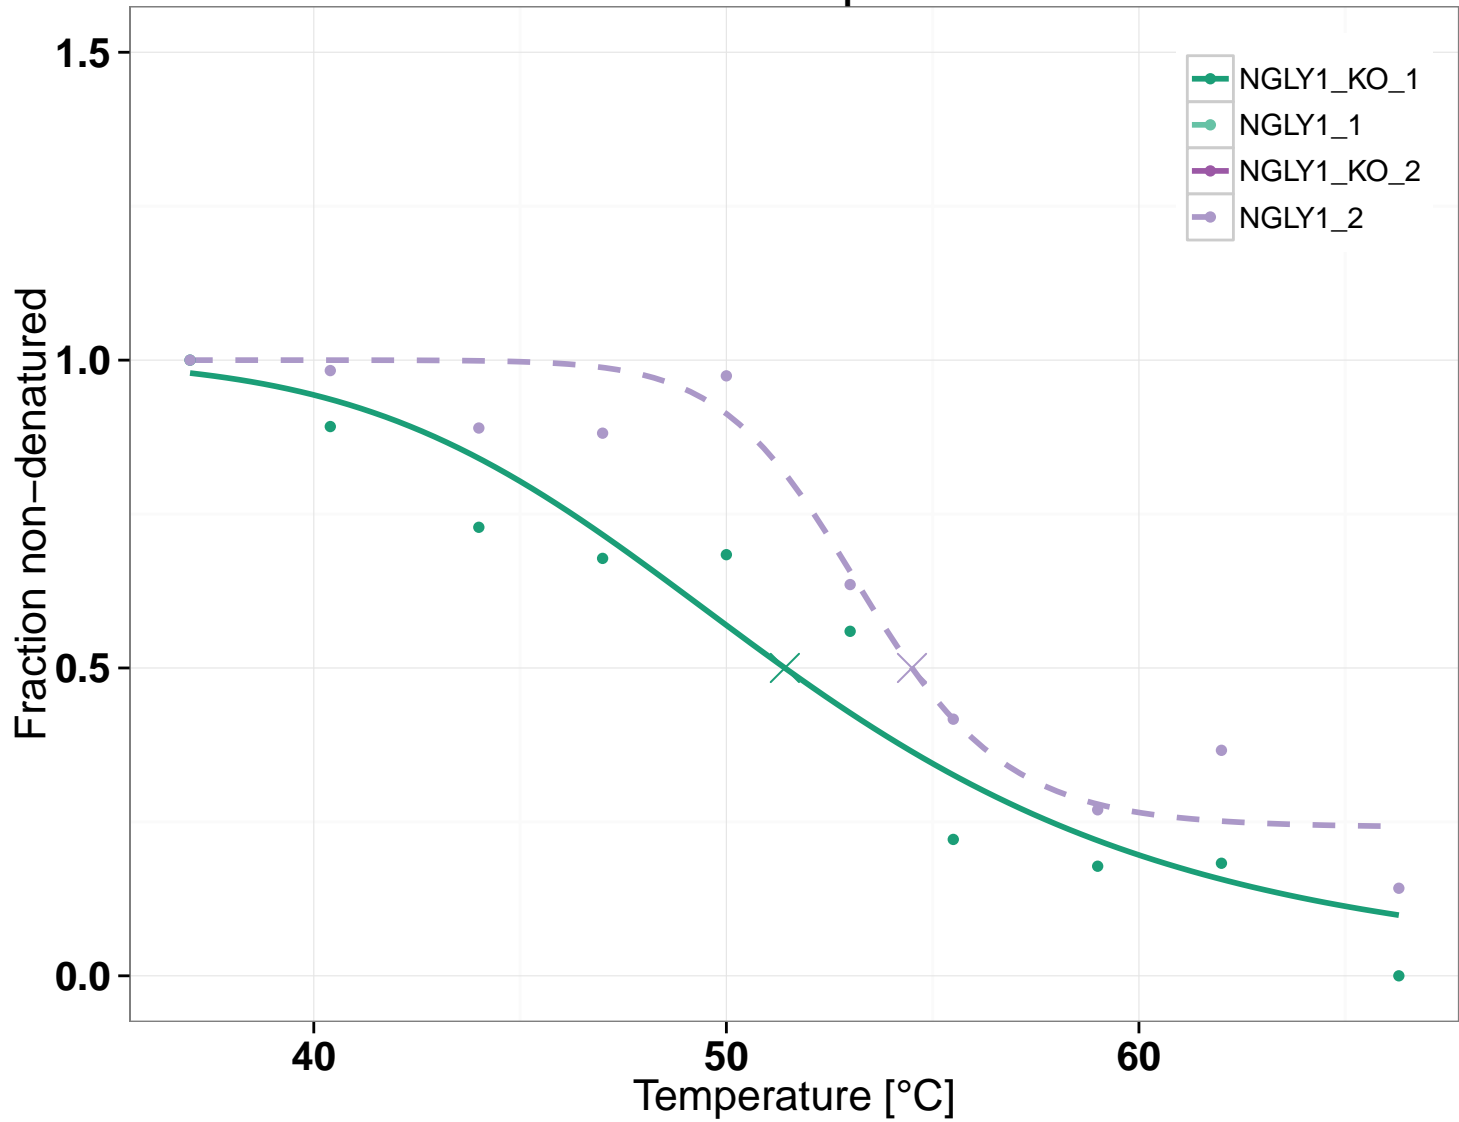

|            | meltPoint | slope | plateau | R2   |
|------------|-----------|-------|---------|------|
| NGLY1_KO_1 | 51.42     | -0.05 | 0       | 0.93 |
| NGLY1_1    | -         | -     | -       | -    |
| NGLY1_KO_2 | -         | -     | -       | -    |
| NGLY1_2    | 54.5      | -0.11 | 0.24    | 0.95 |

Supplement: Supplementary file 2110 [file 1]
