# Supplementary material (part 22 of 85)
Source: publisher figshare collection journal article supplement (https://gsajournals.figshare.com/articles/dataset/_/12014913)

# IPI00910170.1|RAB3A

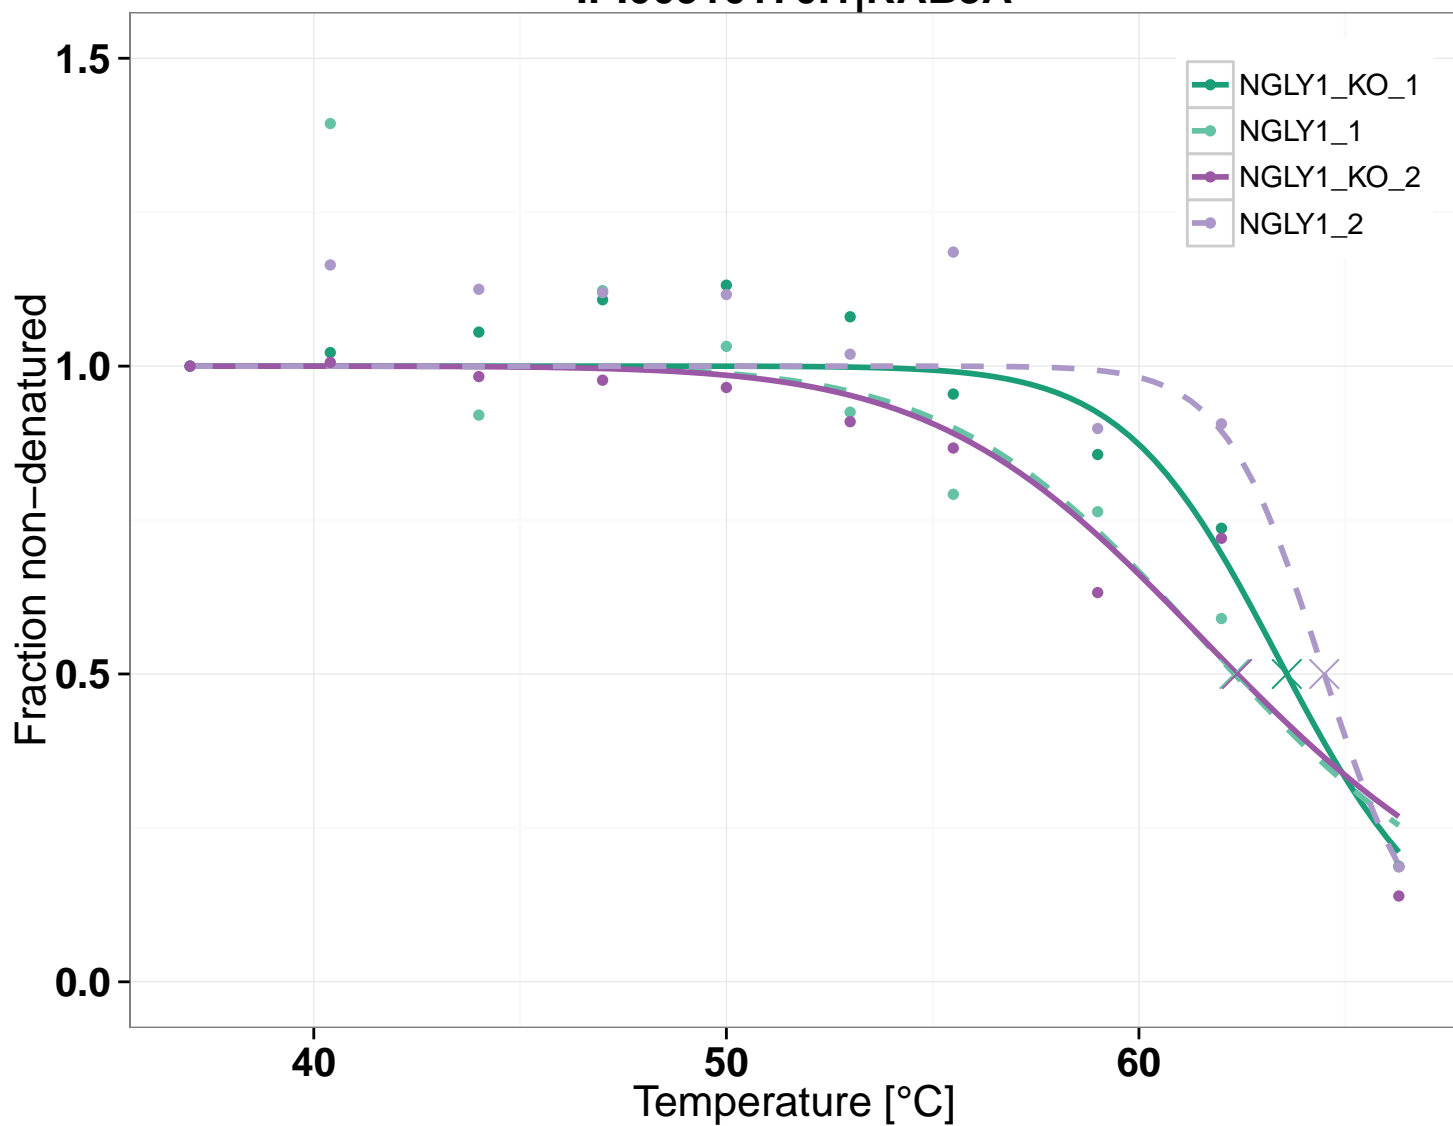

|            | meltPoint | slope  | plateau | R2   |
|------------|-----------|--------|---------|------|
| NGLY1_KO_1 | 63.58     | -0.13  | 0       | 0.93 |
| NGLY1_1    | 62.32     | -0.073 | 0       | 0.79 |
| NGLY1_KO_2 | 62.38     | -0.069 | 0       | 0.9  |
| NGLY1_2    | 64.49     | -0.21  | 0       | 0.85 |

Supplement: Supplementary file 2111 [file 1]

IPI00647491.1|KIAA0391

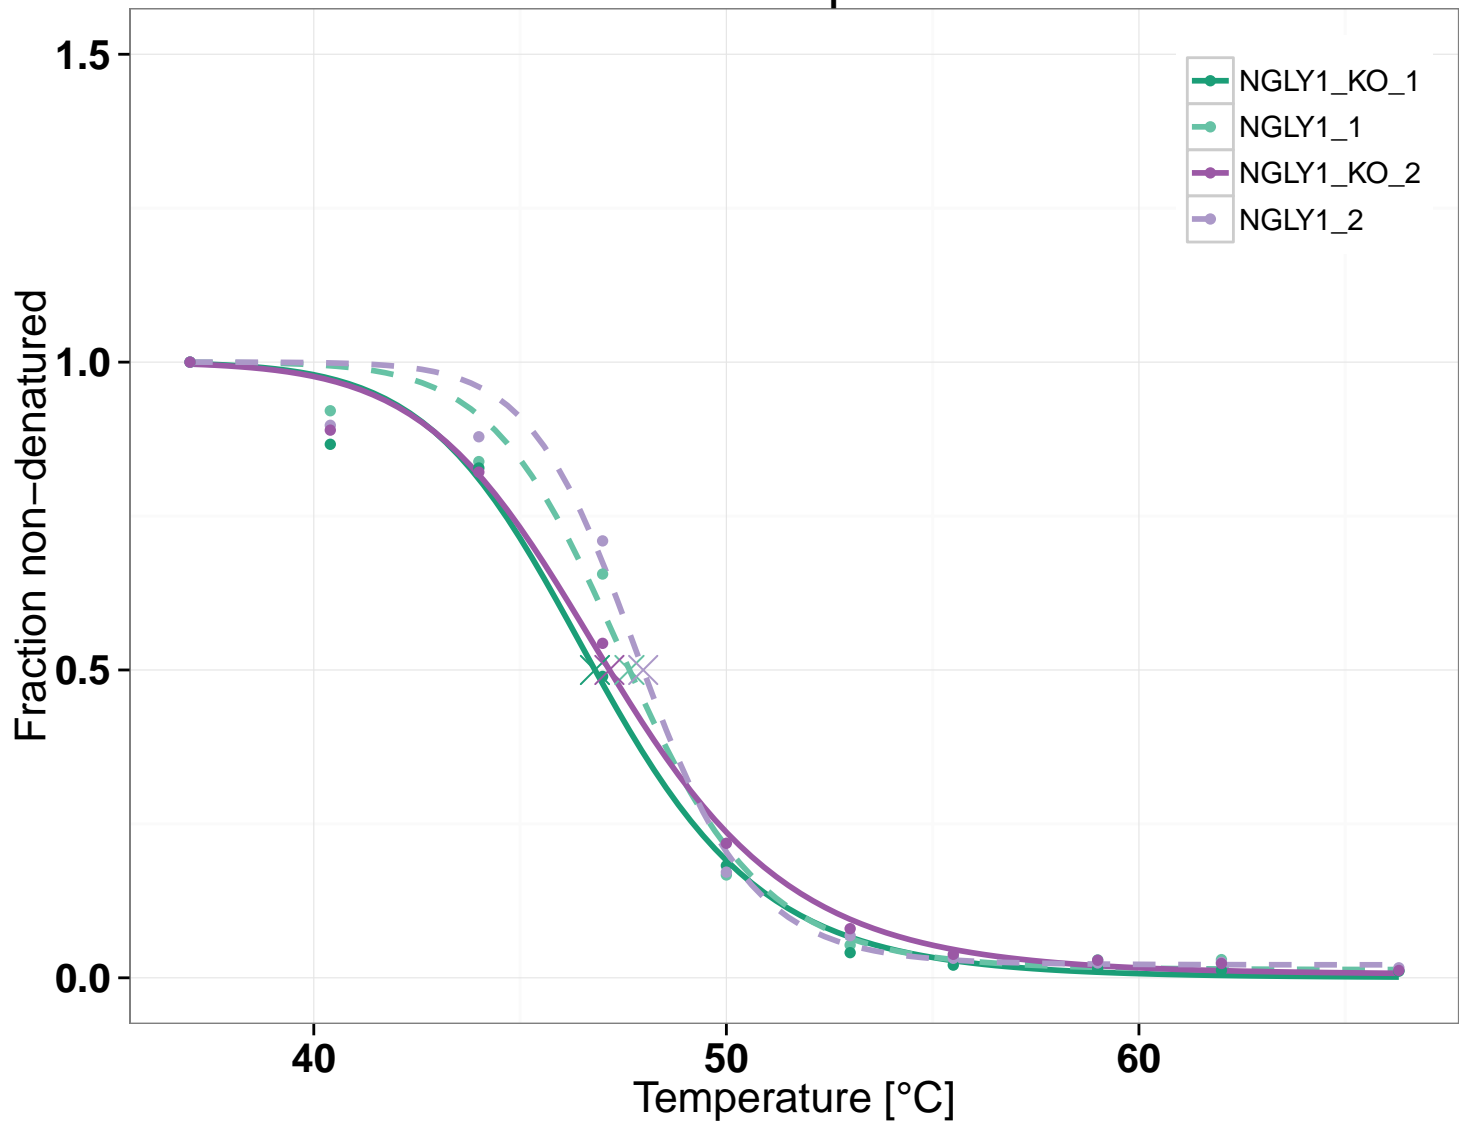

|            | meltPoint | slope | plateau | R2   |
|------------|-----------|-------|---------|------|
| NGLY1_KO_1 | 46.81     | -0.12 | 0       | 0.99 |
| NGLY1_1    | 47.65     | -0.15 | 0.01    | 0.99 |
| NGLY1_KO_2 | 47.16     | -0.11 | 0       | 0.99 |
| NGLY1_2    | 47.98     | -0.18 | 0.02    | 0.99 |

Supplement: Supplementary file 2112 [file 1]

# IPI00815773.1|NCF2

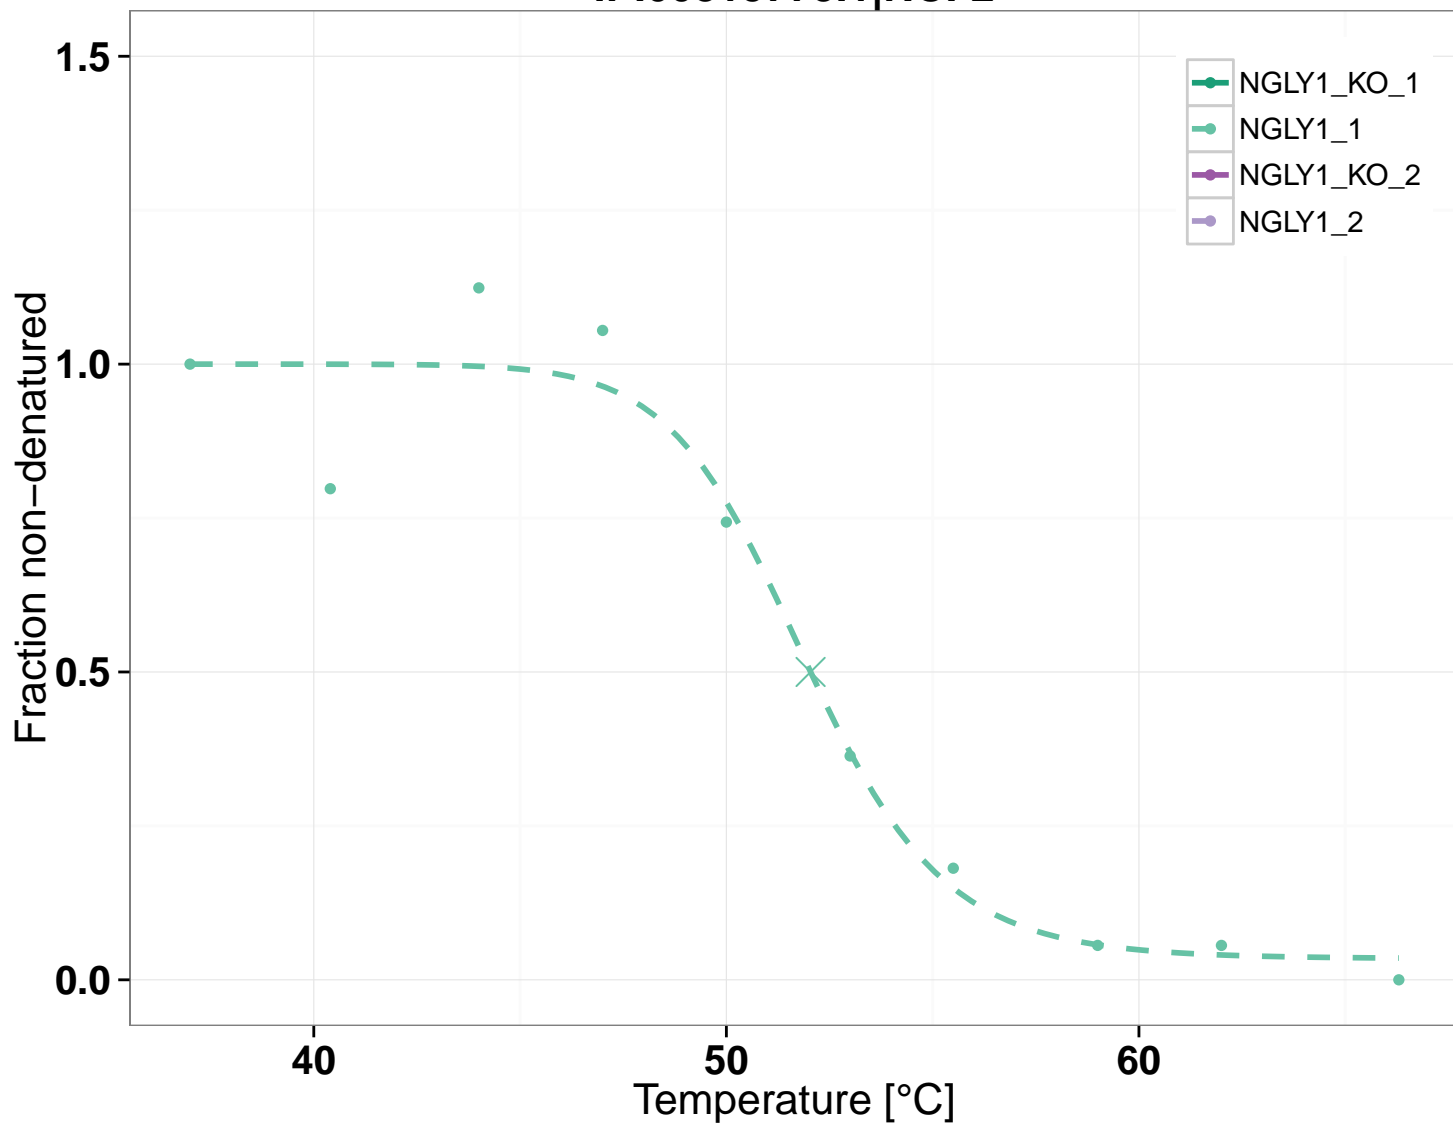

|            | meltPoint | slope | plateau | R2   |
|------------|-----------|-------|---------|------|
| NGLY1_KO_1 | -         | -     | -       | -    |
| NGLY1_1    | 52.04     | -0.15 | 0.03    | 0.96 |
| NGLY1_KO_2 | -         | -     | -       | -    |
| NGLY1_2    | -         | -     | -       | -    |

Supplement: Supplementary file 2113 [file 1]

# IPI00022150.1|PIP5K1A

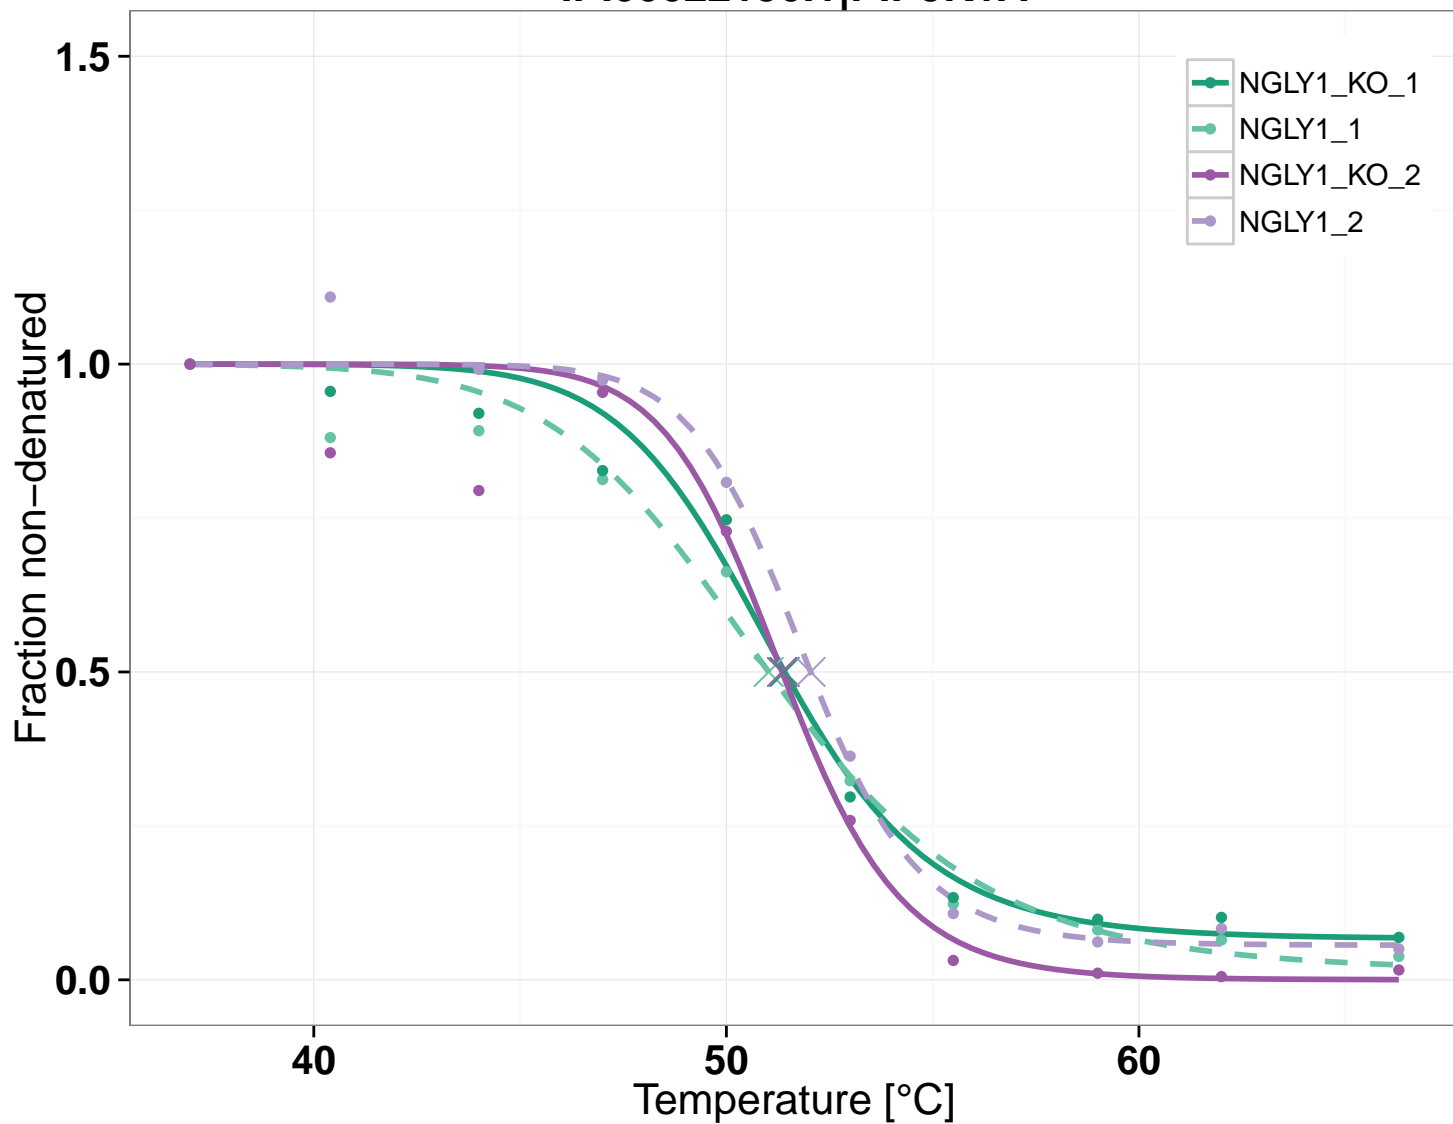

|            | meltPoint | slope  | plateau | R2   |
|------------|-----------|--------|---------|------|
| NGLY1_KO_1 | 51.41     | -0.12  | 0.07    | 0.98 |
| NGLY1_1    | 51.03     | -0.094 | 0.01    | 0.98 |
| NGLY1_KO_2 | 51.35     | -0.17  | 0       | 0.96 |
| NGLY1_2    | 52.04     | -0.17  | 0.06    | 0.99 |

Supplement: Supplementary file 2114 [file 1]

IPI00394751.1|FAM120C

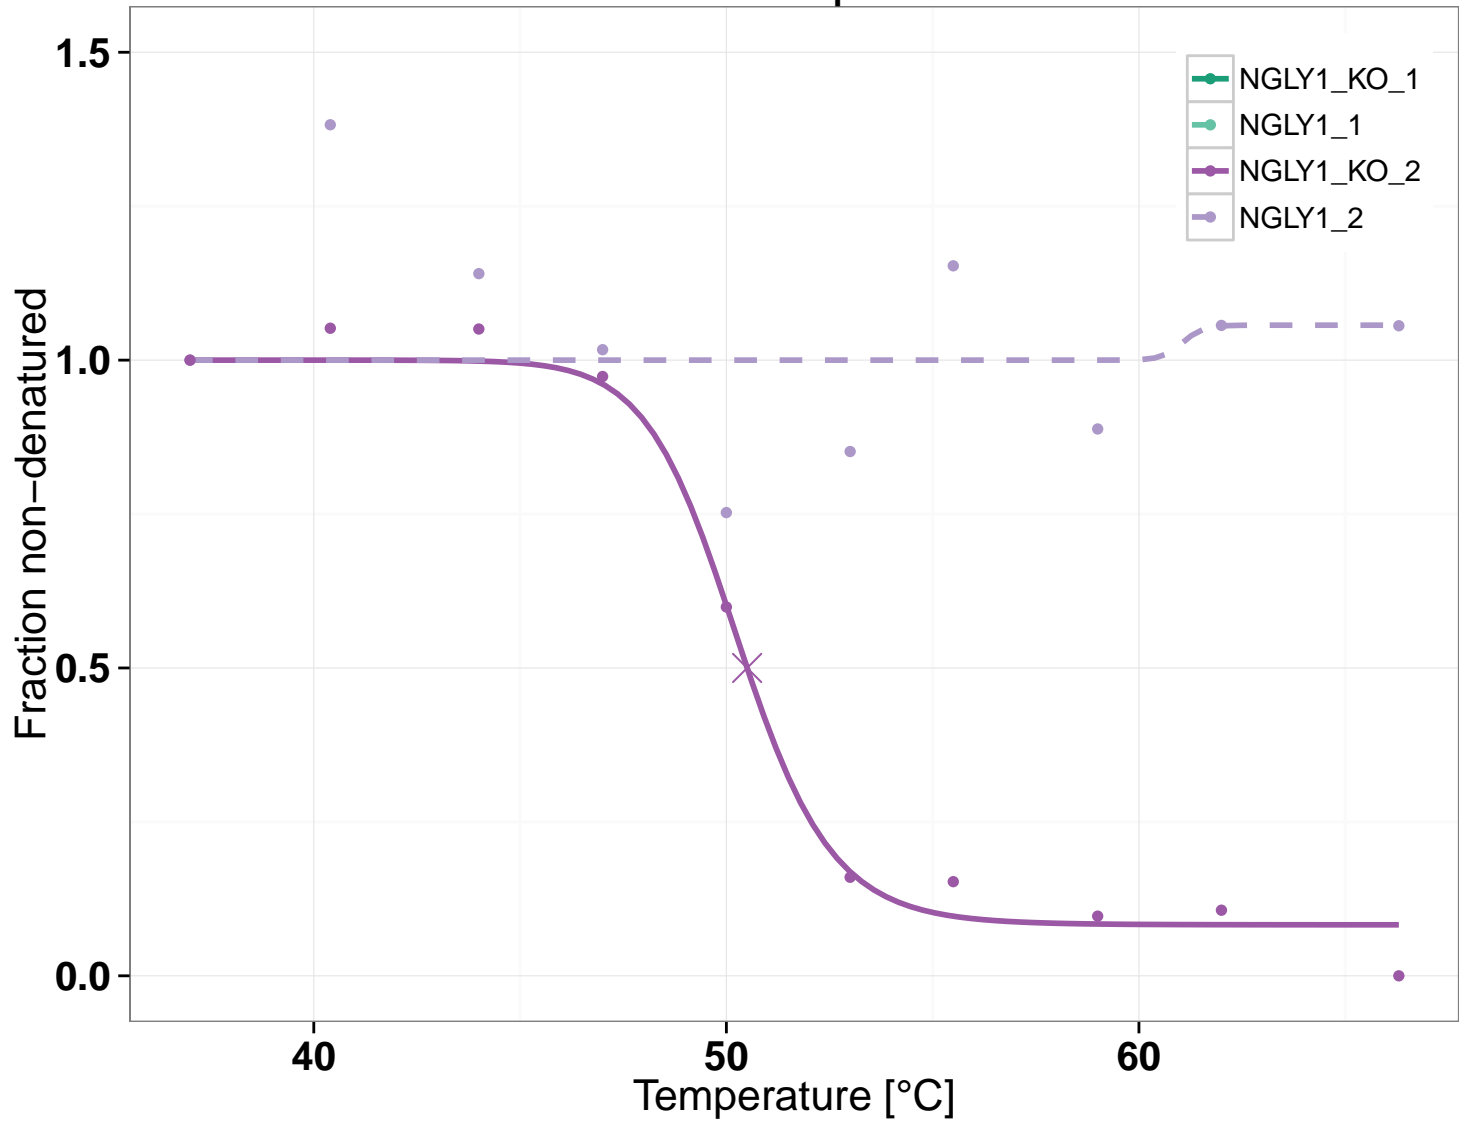

|            | meltPoint | slope | plateau | R2    |
|------------|-----------|-------|---------|-------|
| NGLY1_KO_1 | -         | -     | -       | -     |
| NGLY1_1    | -         | -     | -       | -     |
| NGLY1_KO_2 | 50.5      | -0.2  | 0.08    | 0.99  |
| NGLY1_2    | -         | 0.057 | 1.06    | -0.01 |

Supplement: Supplementary file 2115 [file 1]

IPI00329696.1|FAM82B

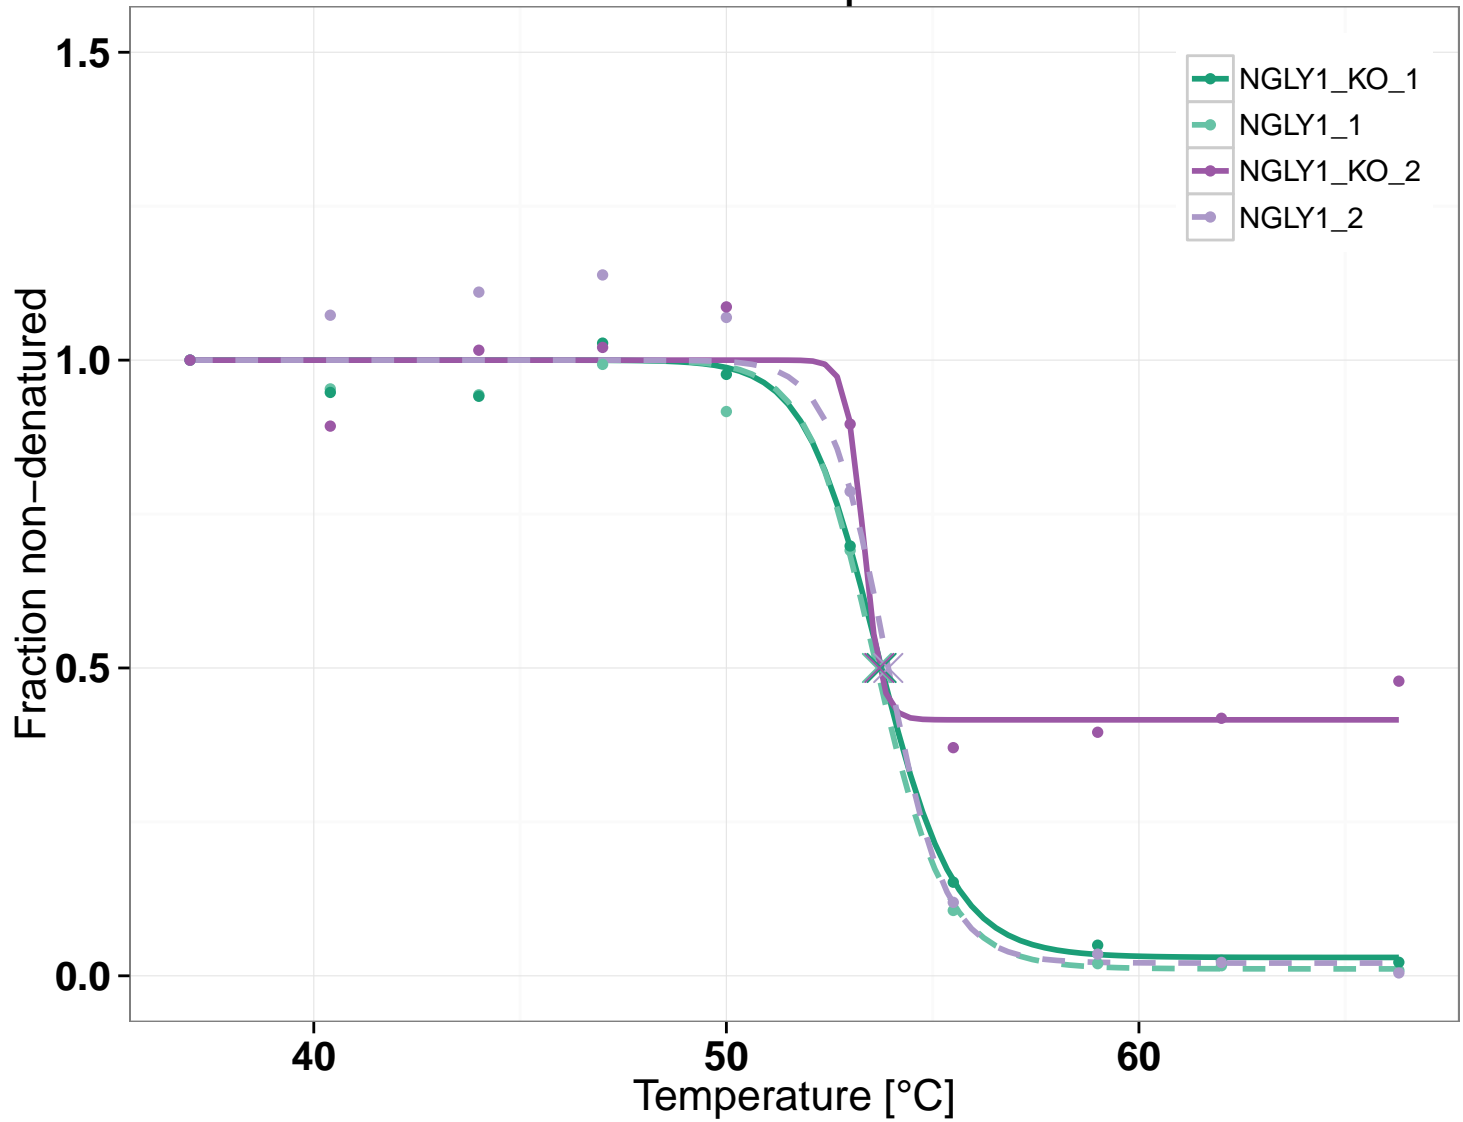

|            | meltPoint | slope | plateau | R2   |
|------------|-----------|-------|---------|------|
| NGLY1_KO_1 | 53.76     | -0.27 | 0.03    | 1    |
| NGLY1_1    | 53.65     | -0.29 | 0.01    | 0.99 |
| NGLY1_KO_2 | 53.71     | -0.68 | 0.42    | 0.97 |
| NGLY1_2    | 53.92     | -0.35 | 0.02    | 0.98 |

Supplement: Supplementary file 2116 [file 1]

# IPI00027233.3|SCO1

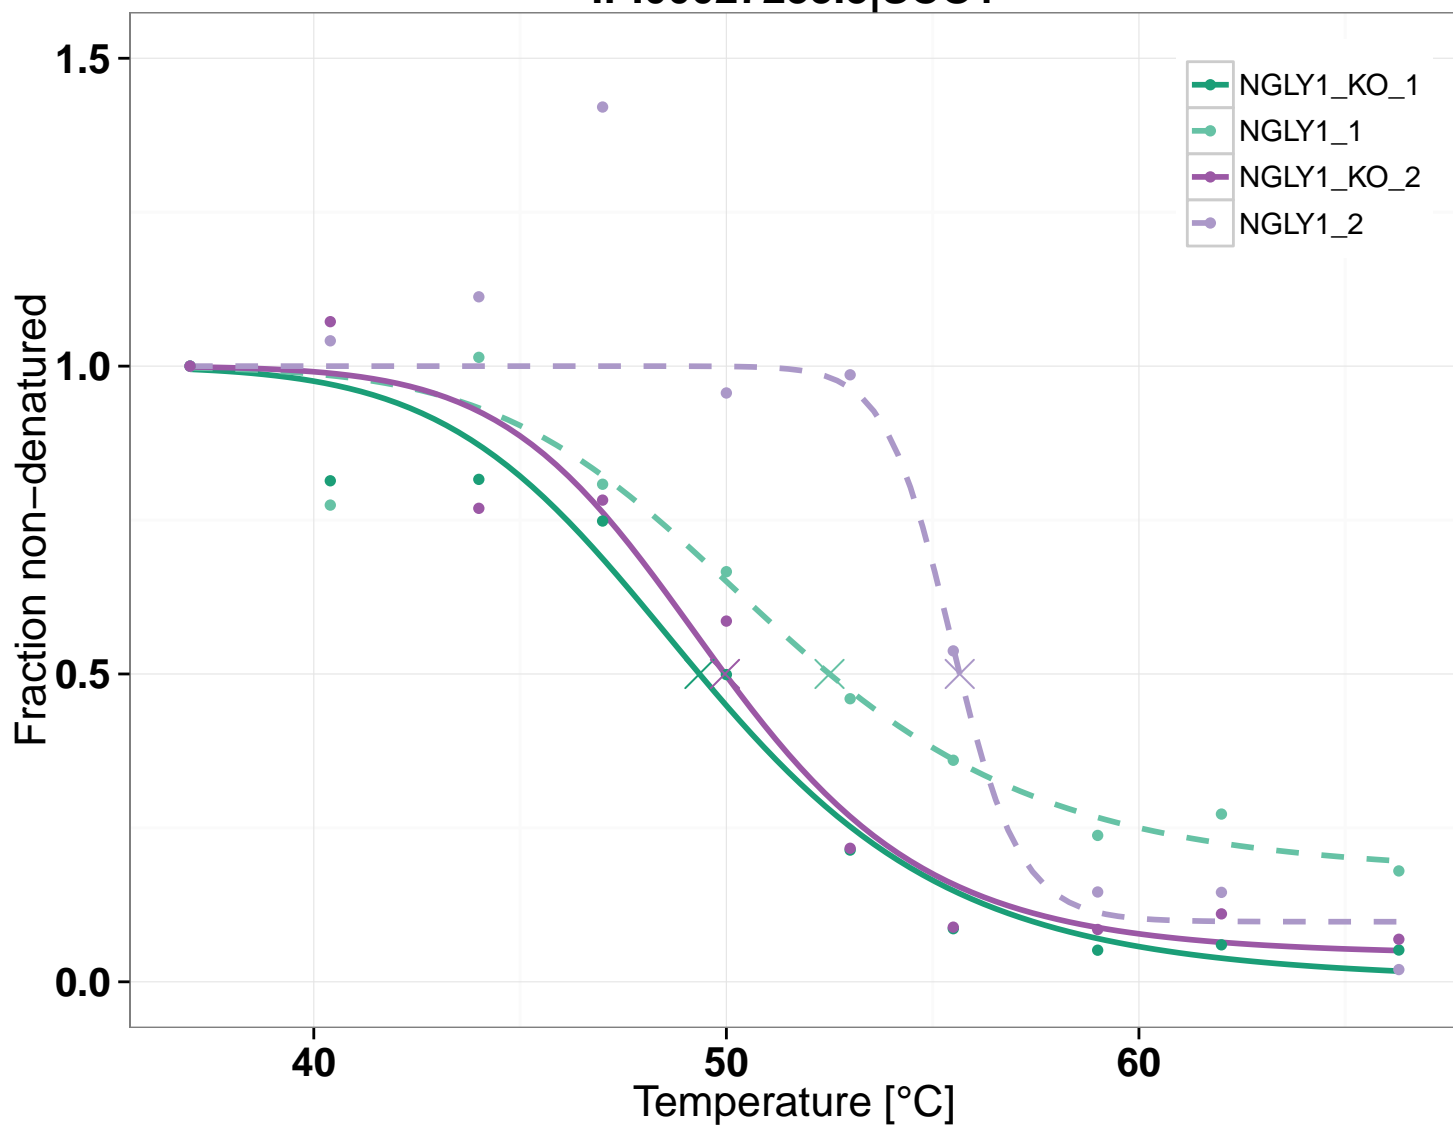

|            | meltPoint | slope  | plateau | R2   |
|------------|-----------|--------|---------|------|
| NGLY1_KO_1 | 49.35     | -0.081 | 0       | 0.97 |
| NGLY1_1    | 52.5      | -0.062 | 0.17    | 0.94 |
| NGLY1_KO_2 | 49.97     | -0.093 | 0.04    | 0.97 |
| NGLY1_2    | 55.66     | -0.28  | 0.1     | 0.9  |

Supplement: Supplementary file 2117 [file 1]

IPI00400948.2|C2ORF64

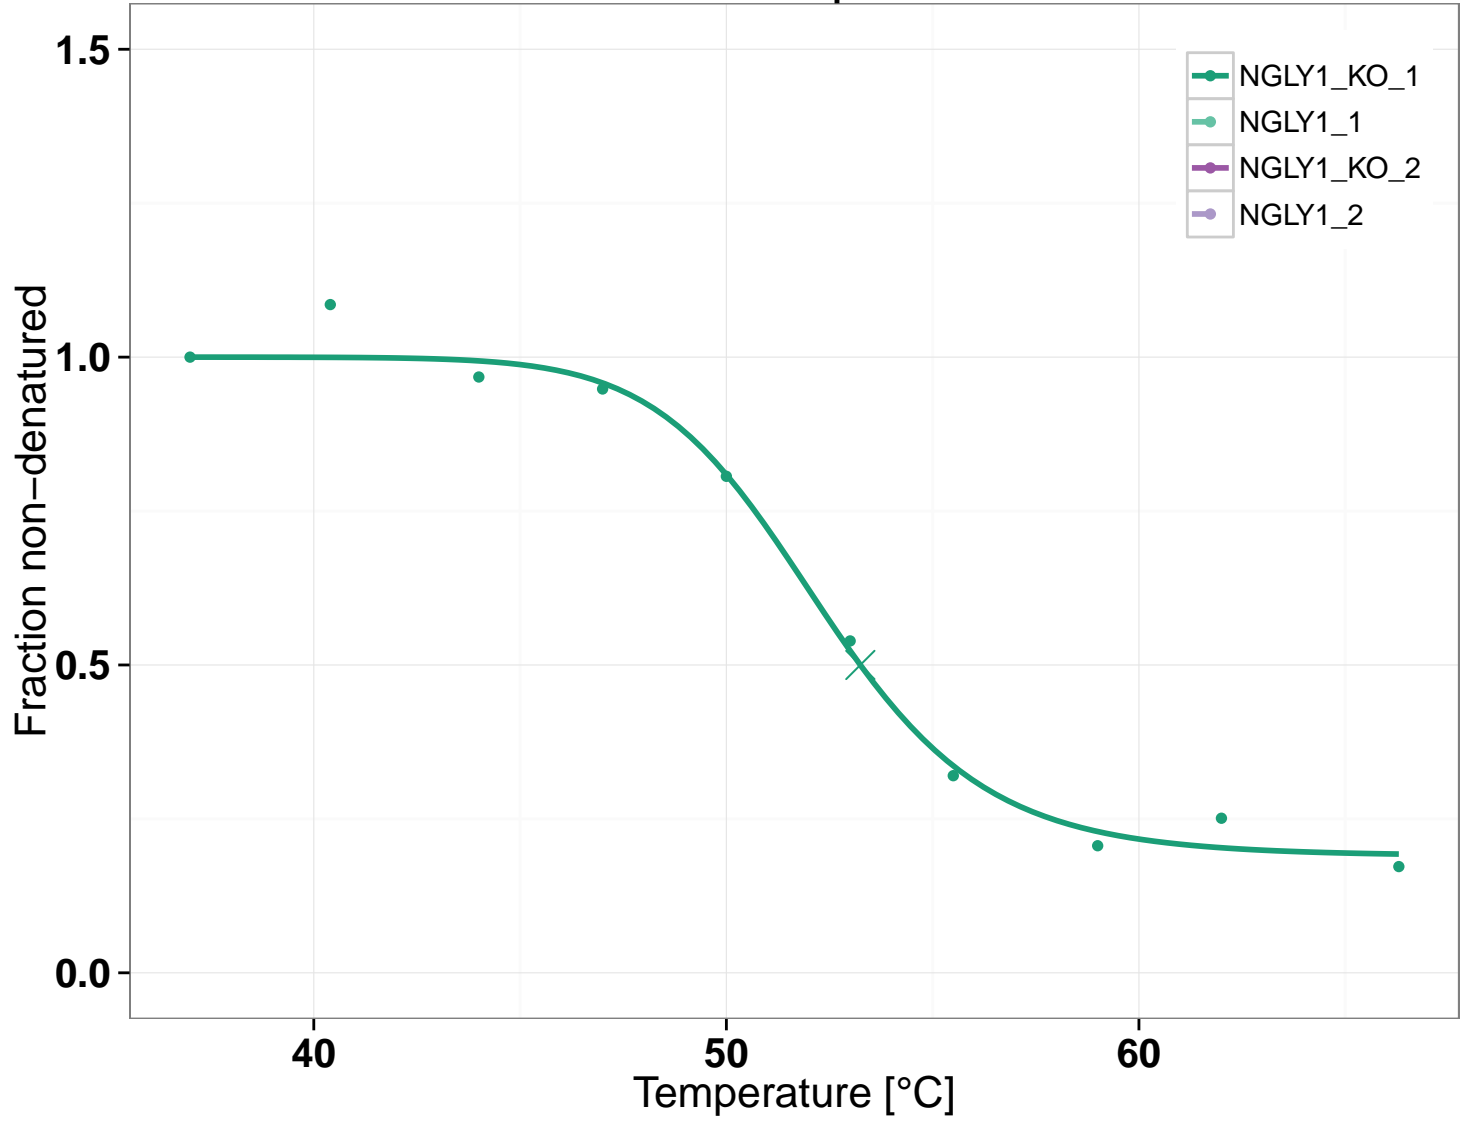

|            | meltPoint | slope | plateau | R2   |
|------------|-----------|-------|---------|------|
| NGLY1_KO_1 | 53.25     | -0.1  | 0.19    | 0.99 |
| NGLY1_1    | -         | -     | -       | -    |
| NGLY1_KO_2 | -         | -     | -       | -    |
| NGLY1_2    | -         | -     | -       | -    |

Supplement: Supplementary file 2118 [file 1]

# IPI00453458.3|NCOA7

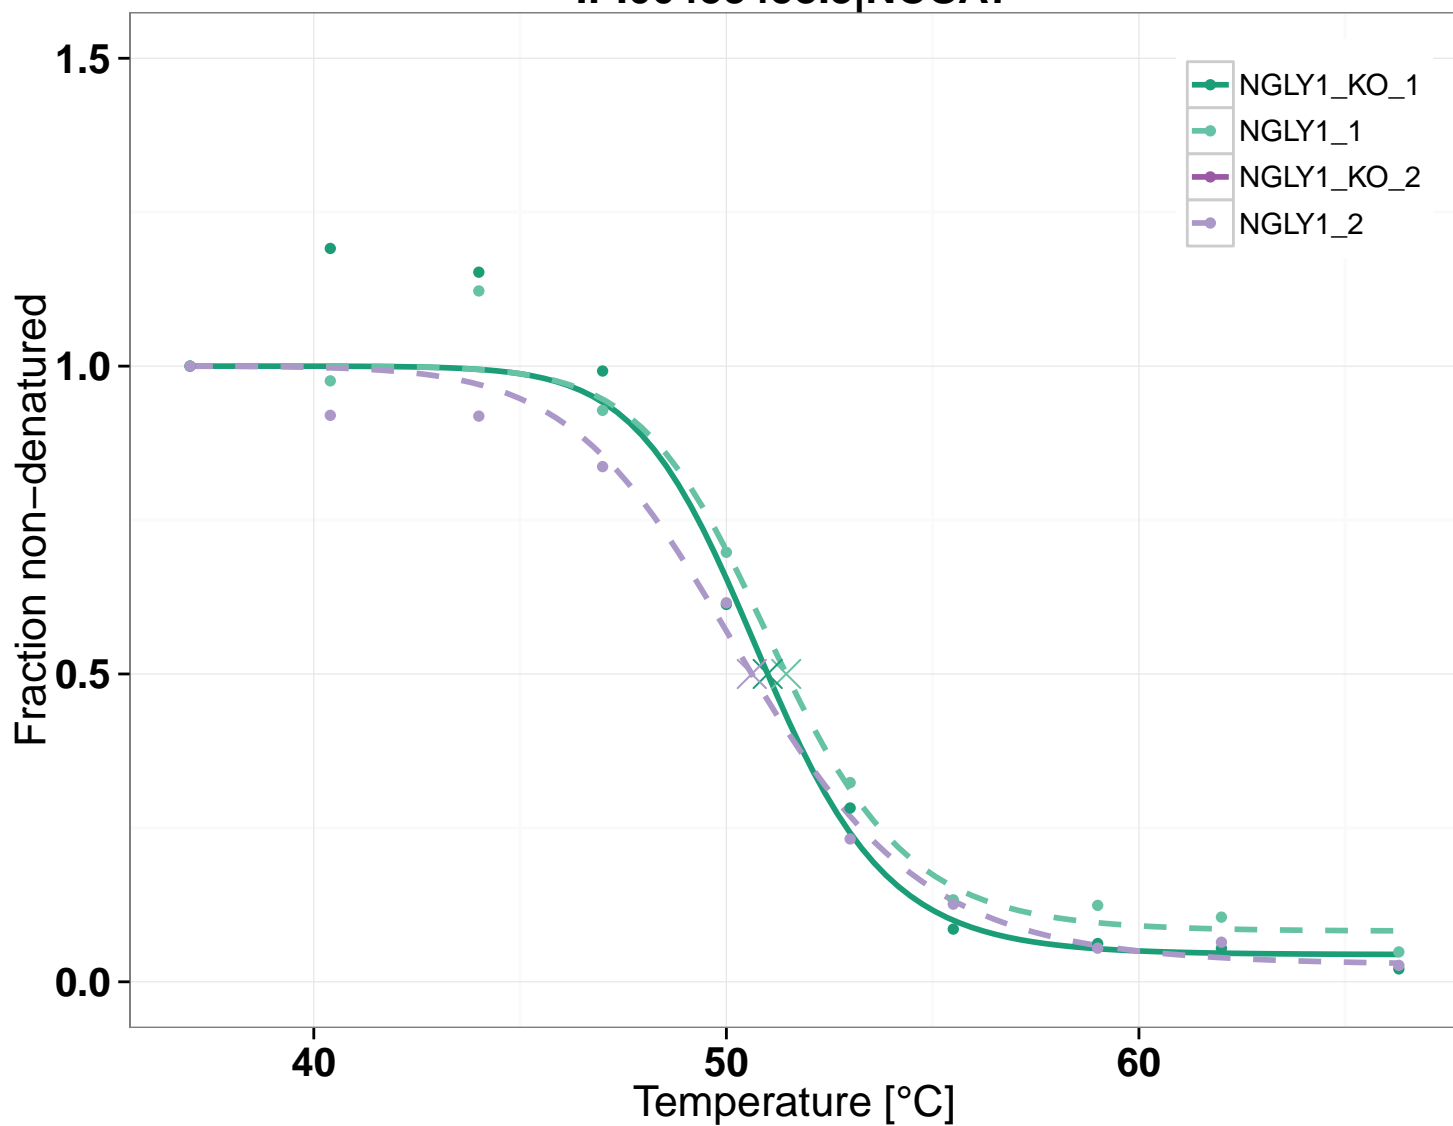

|            | meltPoint | slope | plateau | R2   |
|------------|-----------|-------|---------|------|
| NGLY1_KO_1 | 51        | -0.16 | 0.04    | 0.97 |
| NGLY1_1    | 51.45     | -0.14 | 0.08    | 0.99 |
| NGLY1_KO_2 | -         | -     | -       | -    |
| NGLY1_2    | 50.62     | -0.11 | 0.03    | 0.99 |

Supplement: Supplementary file 2119 [file 1]

IPI00098769.2|CHST2

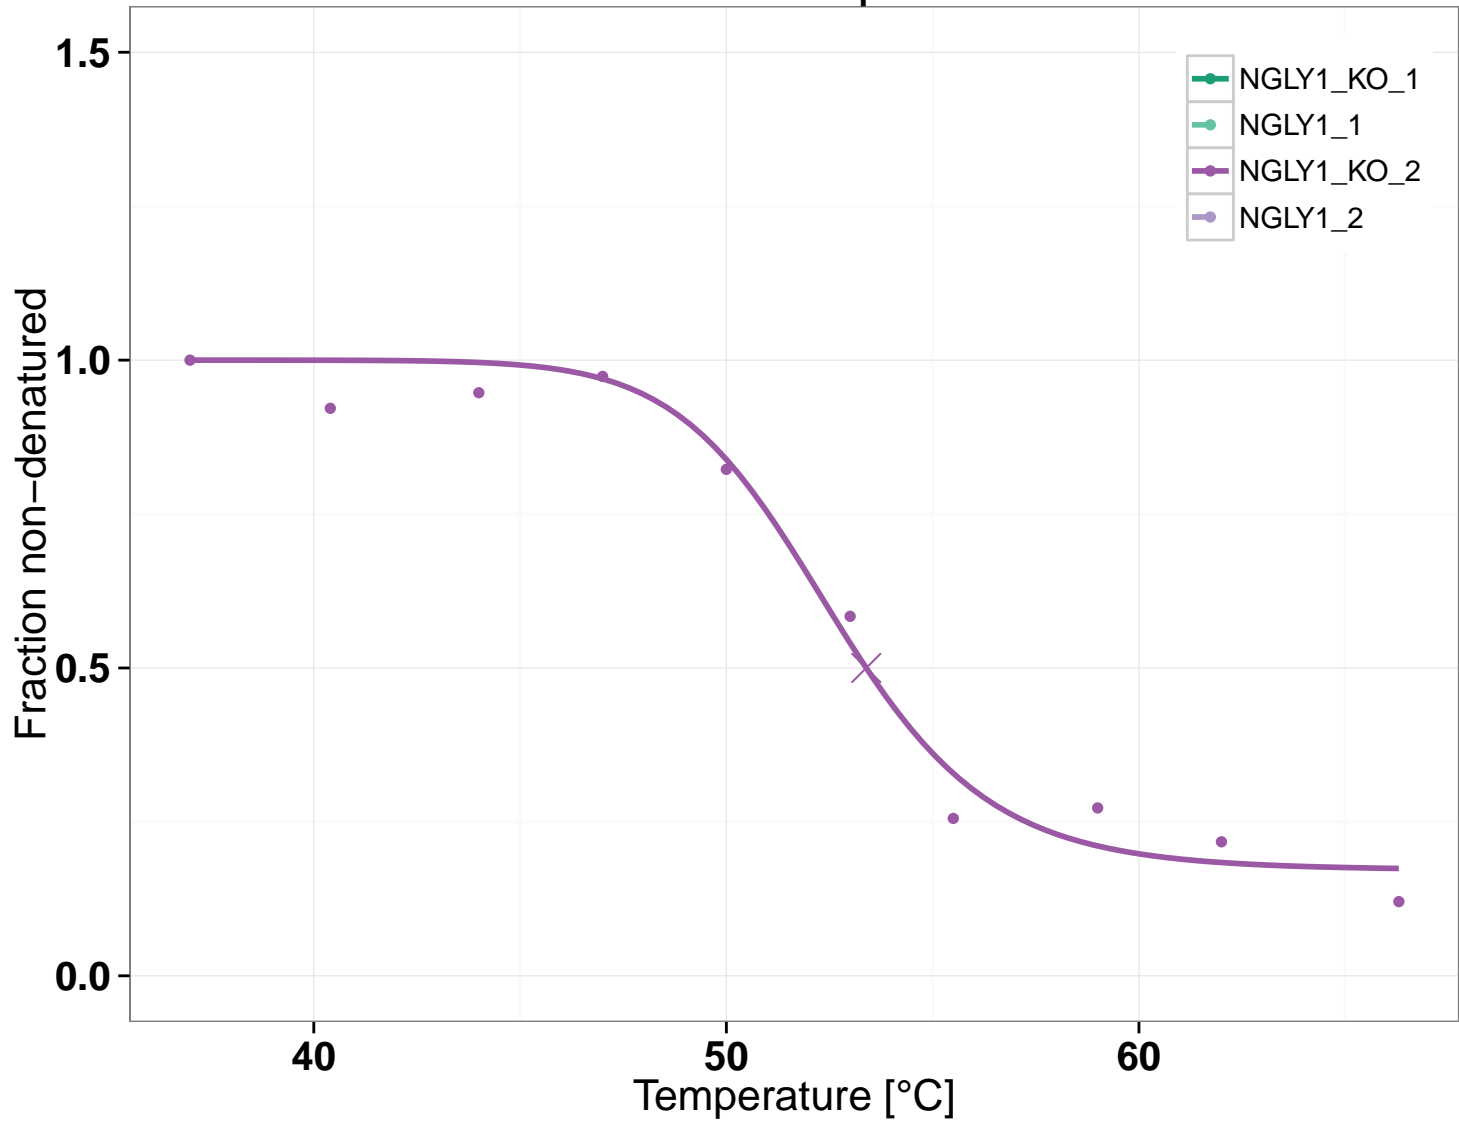

|            | meltPoint | slope | plateau | R2   |
|------------|-----------|-------|---------|------|
| NGLY1_KO_1 | —         | —     | —       | —    |
| NGLY1_1    | —         | —     | —       | —    |
| NGLY1_KO_2 | 53.39     | -0.11 | 0.17    | 0.98 |
| NGLY1_2    | —         | —     | —       | —    |

Supplement: Supplementary file 2120 [file 1]

# IPI00033130.3|SAE1

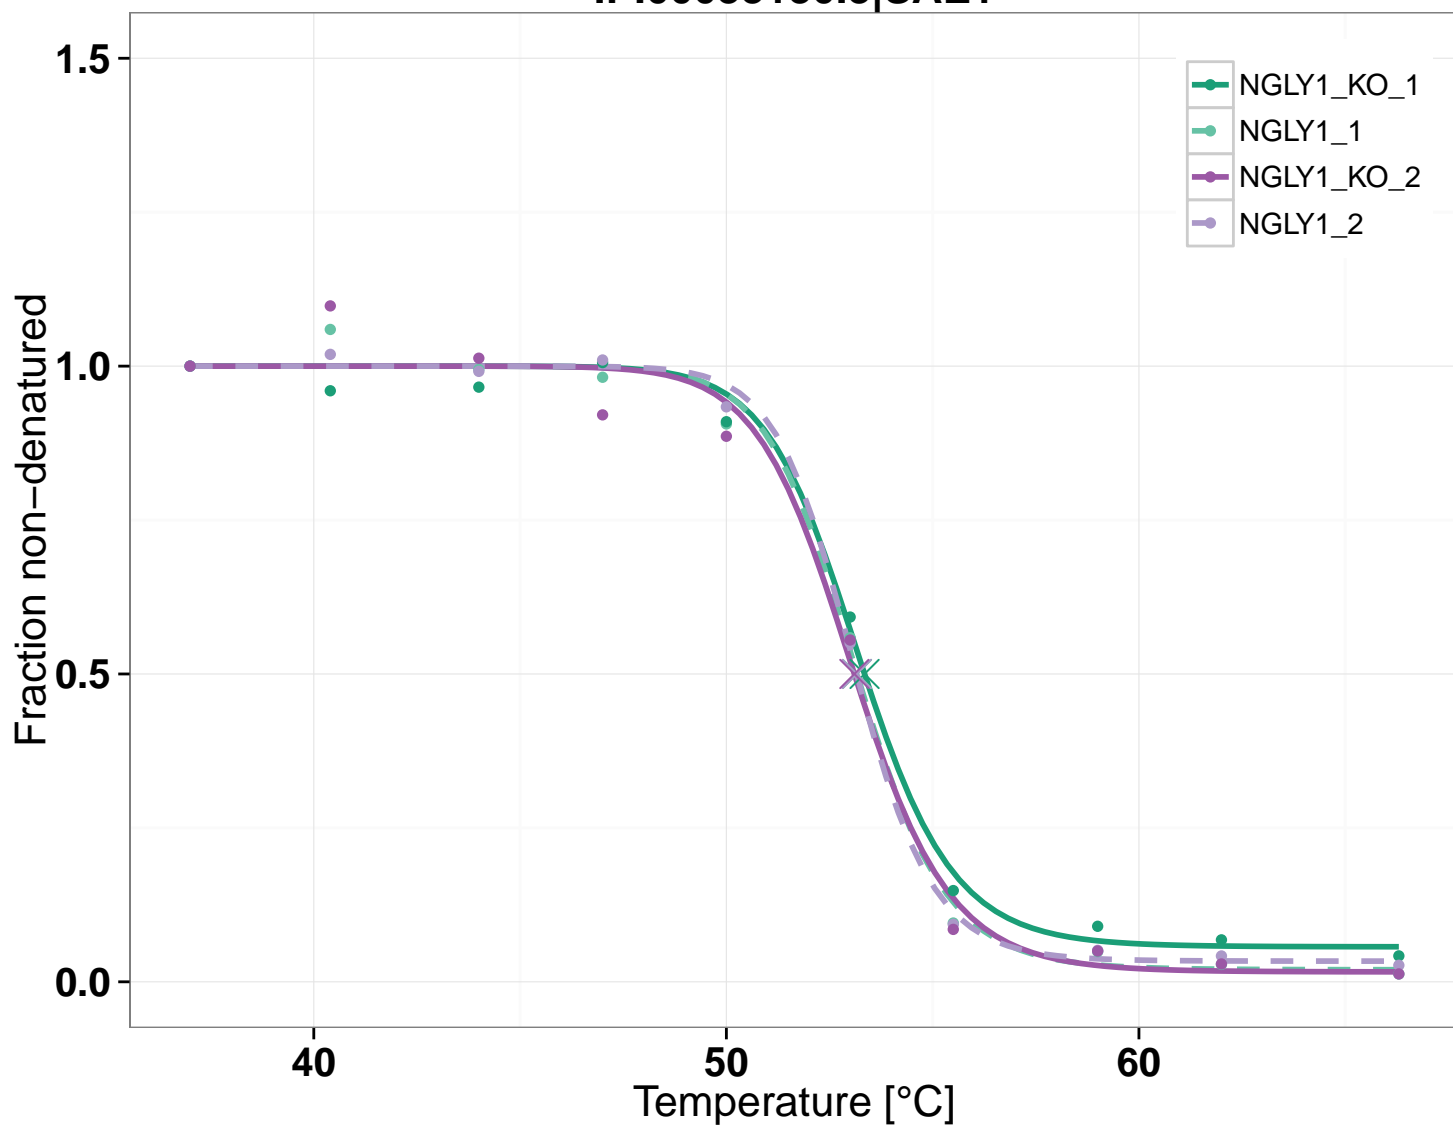

|            | meltPoint | slope | plateau | R2   |
|------------|-----------|-------|---------|------|
| NGLY1_KO_1 | 53.35     | -0.21 | 0.06    | 1    |
| NGLY1_1    | 53.17     | -0.22 | 0.02    | 1    |
| NGLY1_KO_2 | 53.1      | -0.21 | 0.02    | 0.99 |
| NGLY1_2    | 53.16     | -0.25 | 0.03    | 1    |

Supplement: Supplementary file 2121 [file 1]

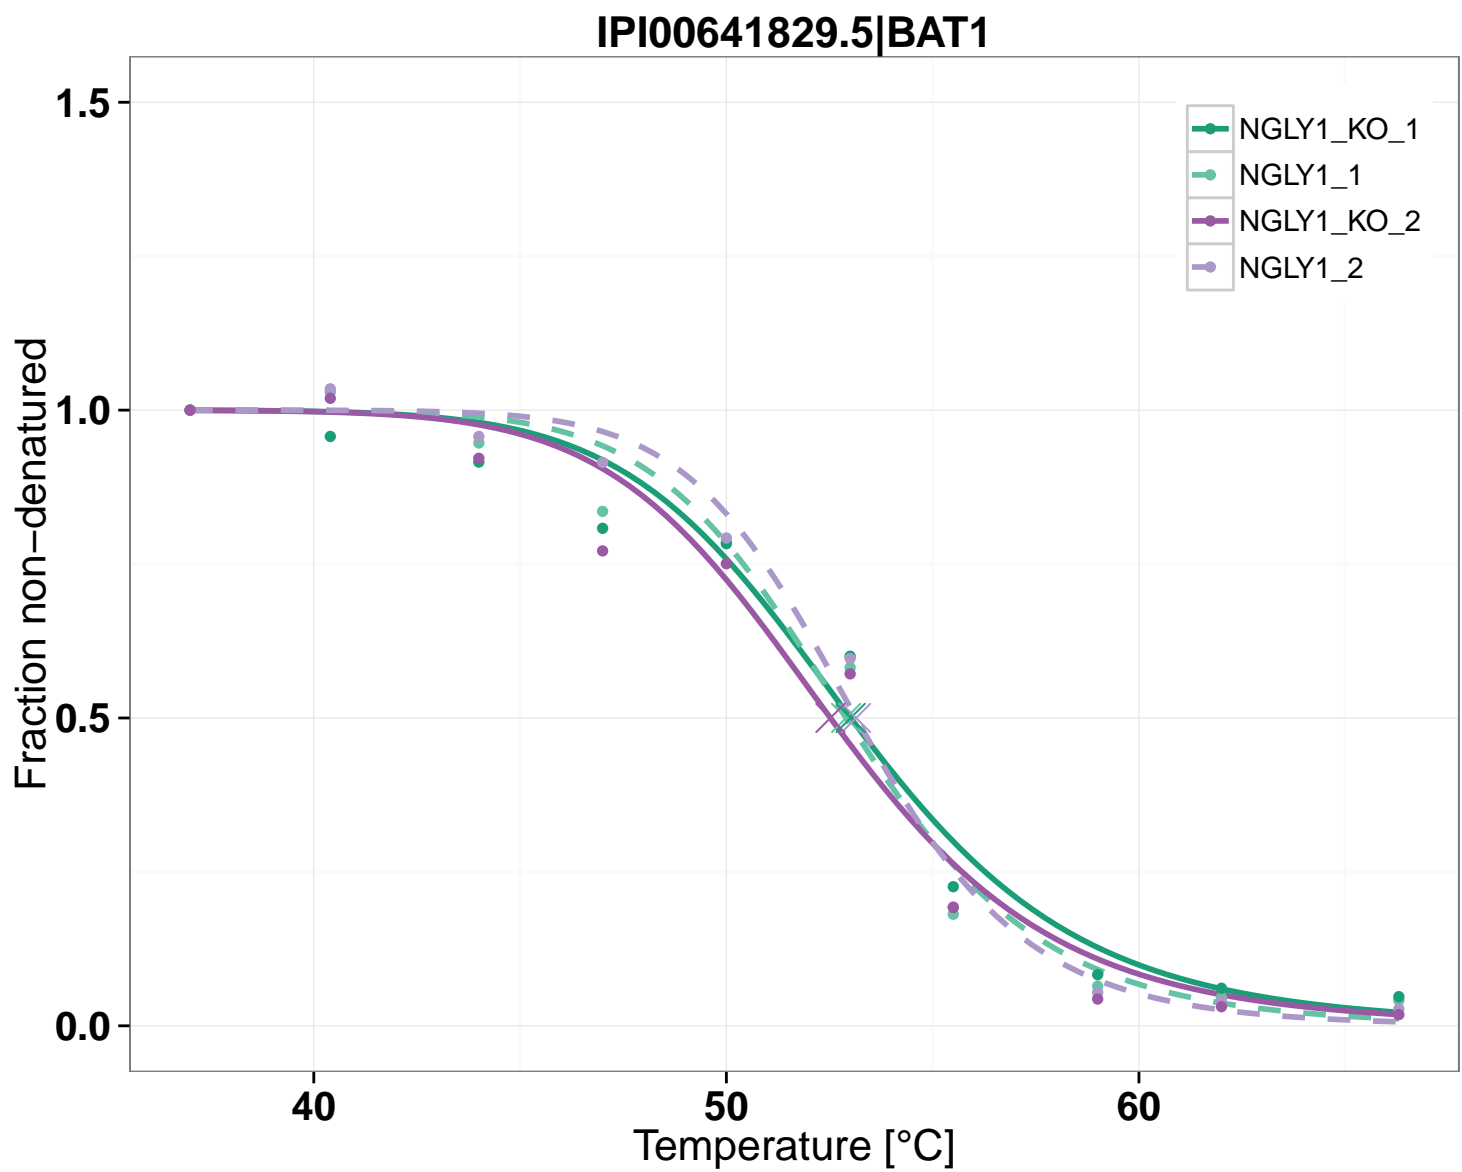

|            | meltPoint | slope  | plateau | R2   |
|------------|-----------|--------|---------|------|
| NGLY1_KO_1 | 53.01     | -0.09  | 0       | 0.97 |
| NGLY1_1    | 52.9      | -0.11  | 0       | 0.98 |
| NGLY1_KO_2 | 52.52     | -0.092 | 0       | 0.97 |
| NGLY1_2    | 53.14     | -0.12  | 0       | 0.99 |

Supplement: Supplementary file 2122 [file 1]

IPI00170877.2|MRPL10

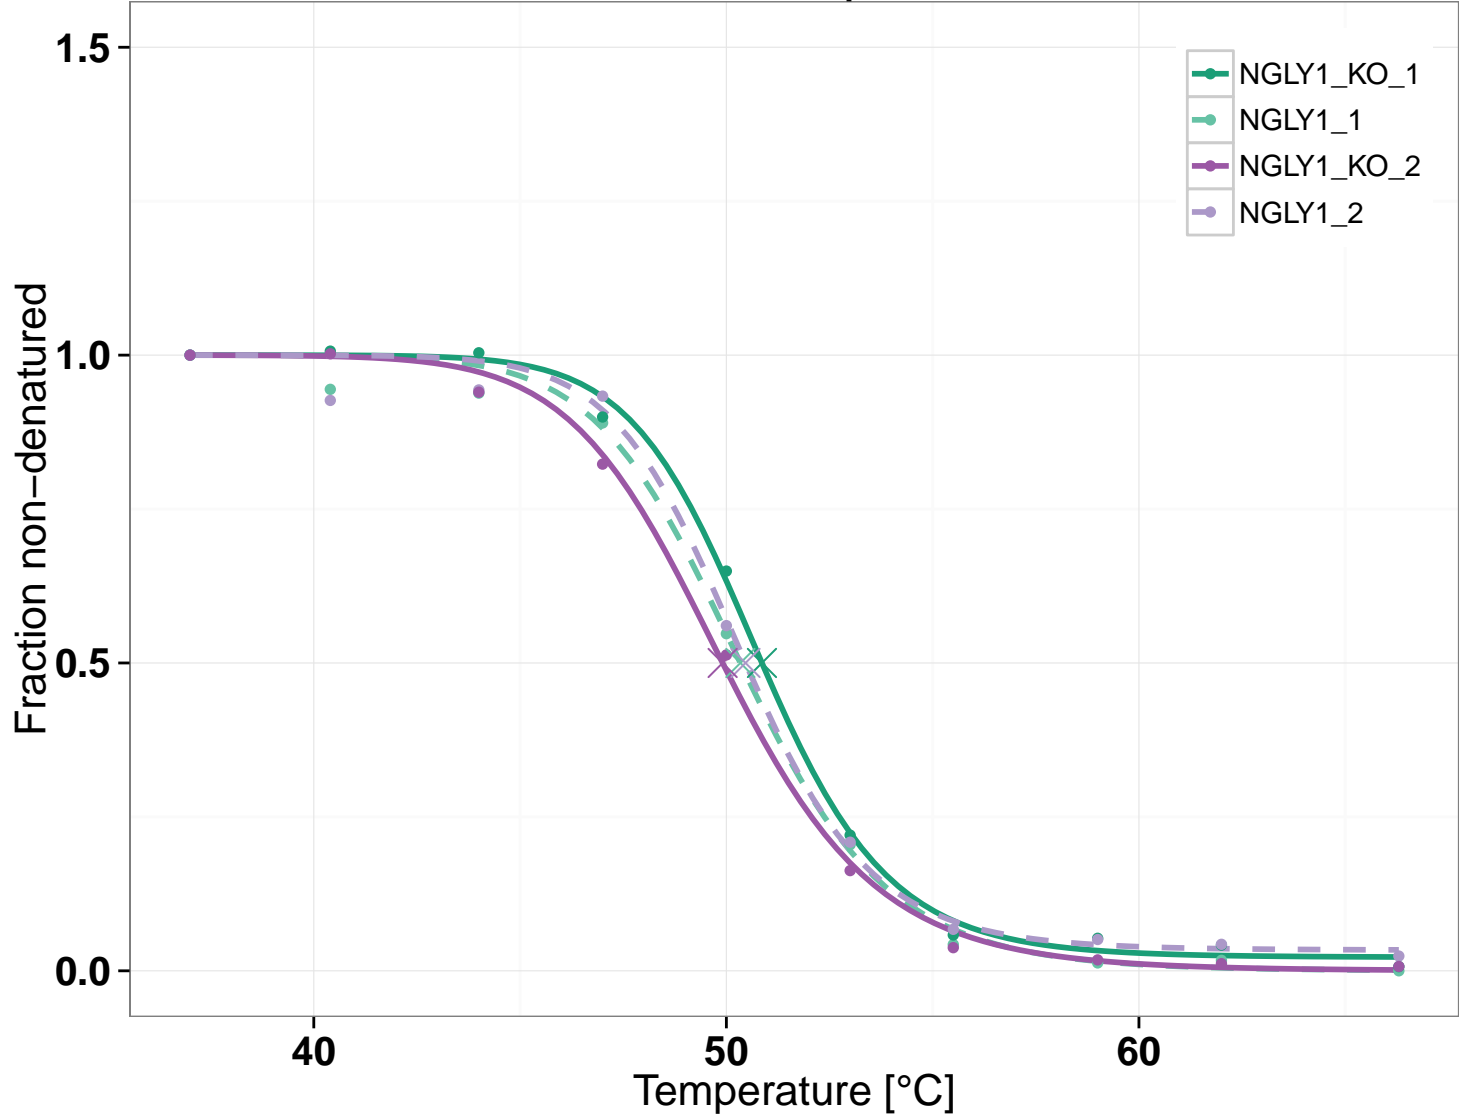

|            | meltPoint | slope | plateau | R2   |
|------------|-----------|-------|---------|------|
| NGLY1_KO_1 | 50.86     | -0.16 | 0.02    | 1    |
| NGLY1_1    | 50.34     | -0.14 | 0       | 1    |
| NGLY1_KO_2 | 49.91     | -0.13 | 0       | 1    |
| NGLY1_2    | 50.46     | -0.15 | 0.03    | 0.99 |

Supplement: Supplementary file 2123 [file 1]

# IPI00149276.1|BRE

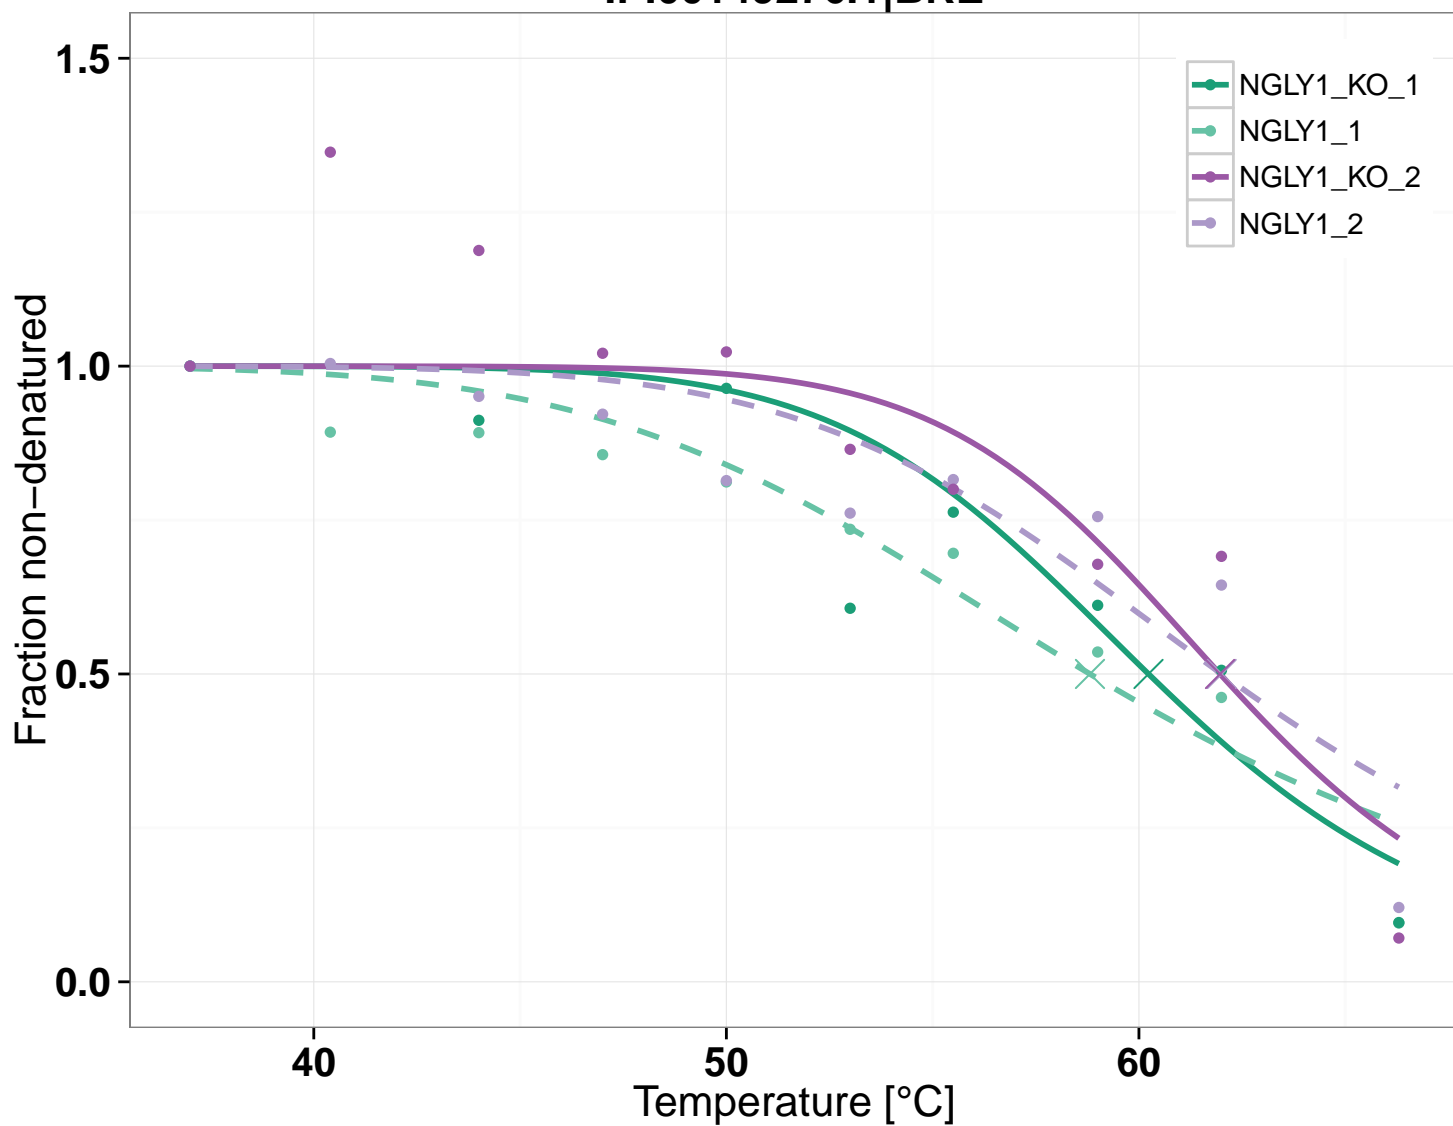

|            | meltPoint | slope  | plateau | R2   |
|------------|-----------|--------|---------|------|
| NGLY1_KO_1 | 60.23     | -0.066 | 0       | 0.39 |
| NGLY1_1    | 58.81     | -0.042 | 0       | 0.91 |
| NGLY1_KO_2 | 61.97     | -0.074 | 0       | 0.78 |
| NGLY1_2    | 62        | -0.049 | 0       | 0.82 |

Supplement: Supplementary file 2124 [file 1]

IPI00220045.3|POLR3E

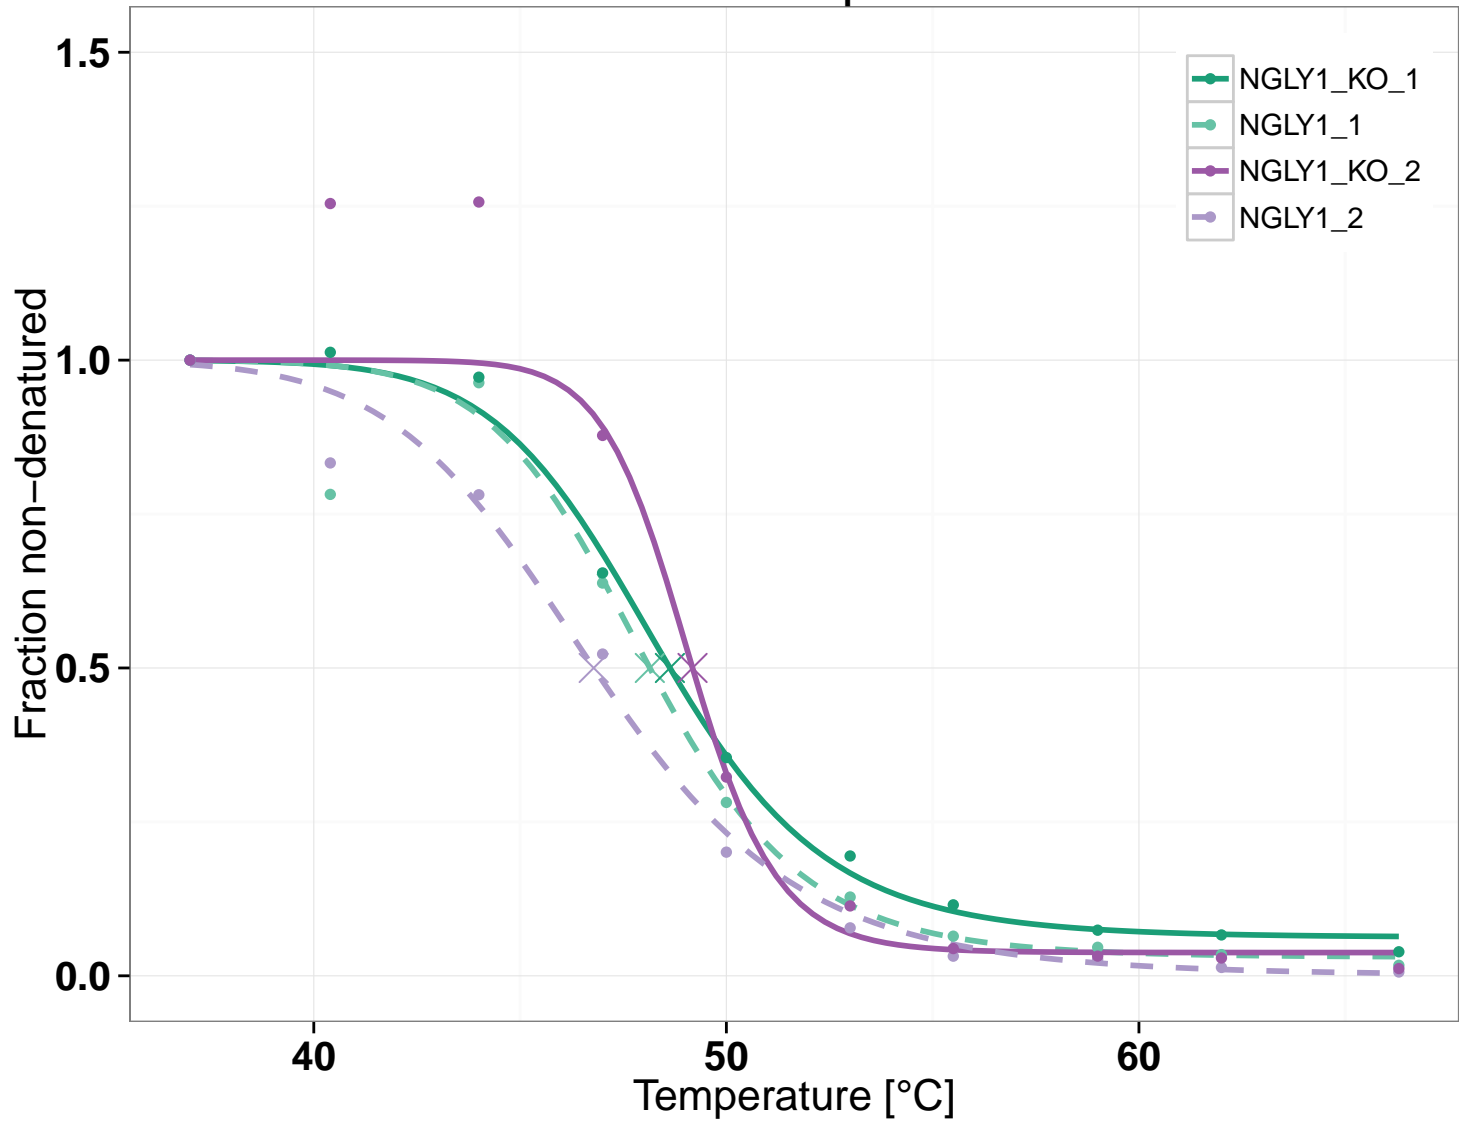

|            | meltPoint | slope | plateau | R2   |
|------------|-----------|-------|---------|------|
| NGLY1_KO_1 | 48.63     | -0.12 | 0.06    | 1    |
| NGLY1_1    | 48.14     | -0.13 | 0.03    | 0.97 |
| NGLY1_KO_2 | 49.18     | -0.23 | 0.04    | 0.95 |
| NGLY1_2    | 46.78     | -0.1  | 0       | 0.99 |

Supplement: Supplementary file 2125 [file 1]

# IPI00179713.6|IGF2BP2

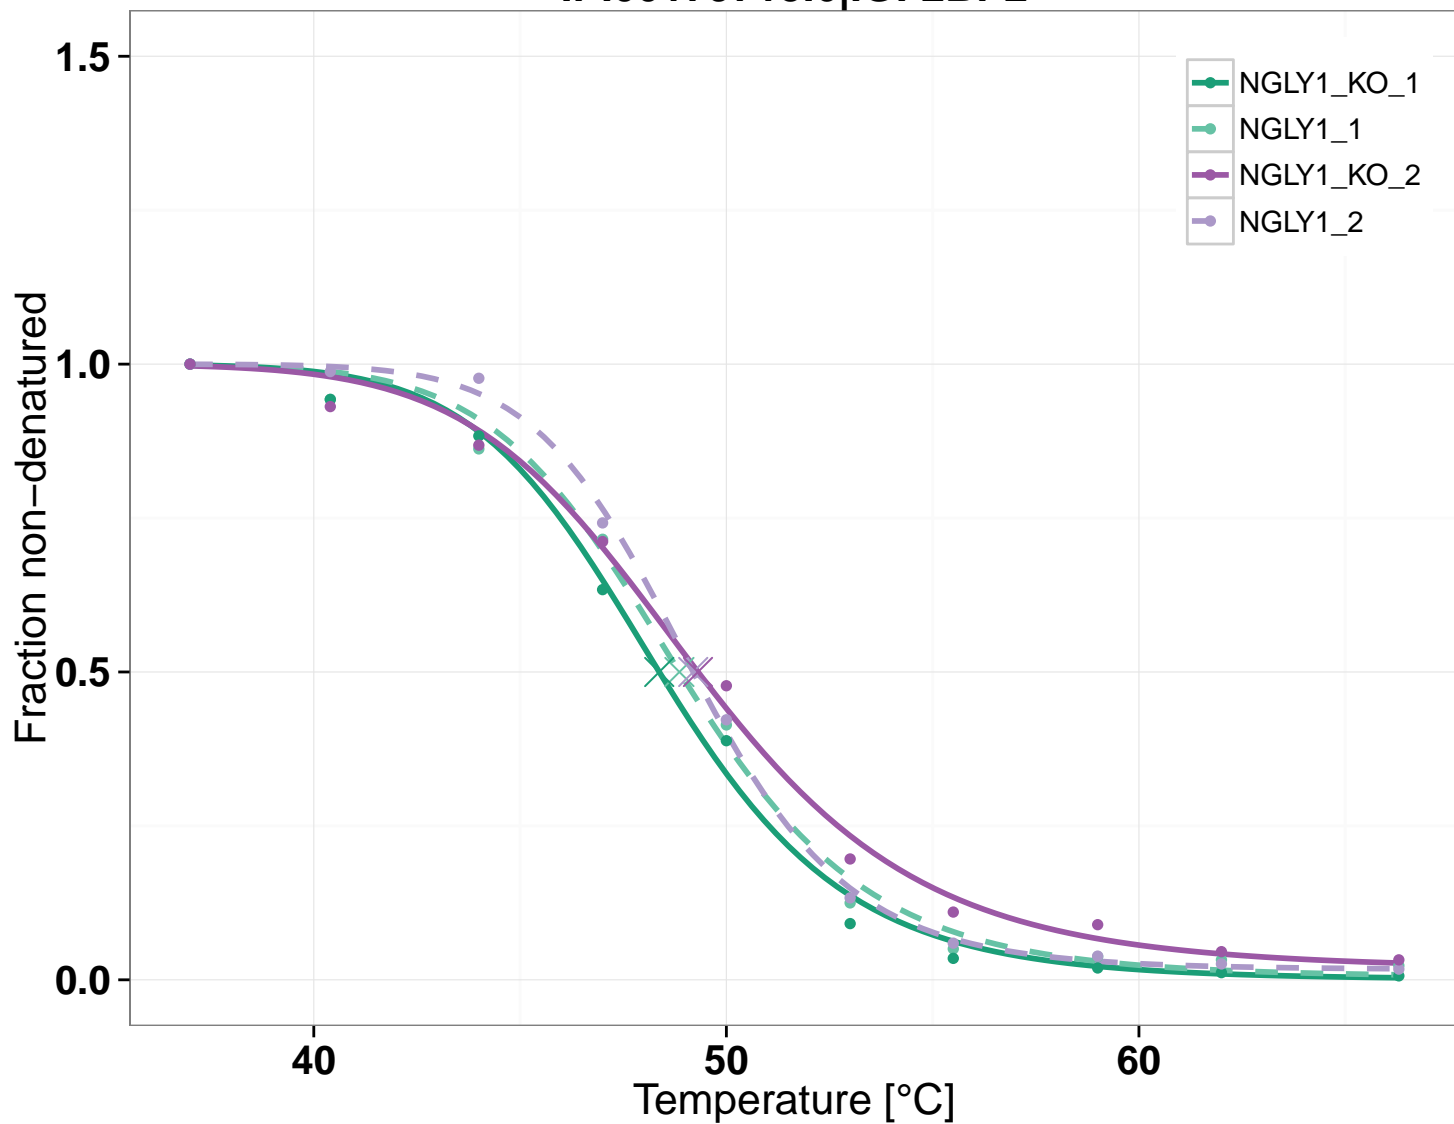

|            | meltPoint | slope  | plateau | R2   |
|------------|-----------|--------|---------|------|
| NGLY1_KO_1 | 48.37     | -0.11  | 0       | 1    |
| NGLY1_1    | 48.86     | -0.11  | 0       | 0.99 |
| NGLY1_KO_2 | 49.31     | -0.089 | 0.02    | 1    |
| NGLY1_2    | 49.2      | -0.13  | 0.02    | 1    |

Supplement: Supplementary file 2126 [file 1]

IPI00166638.3|C8ORF82

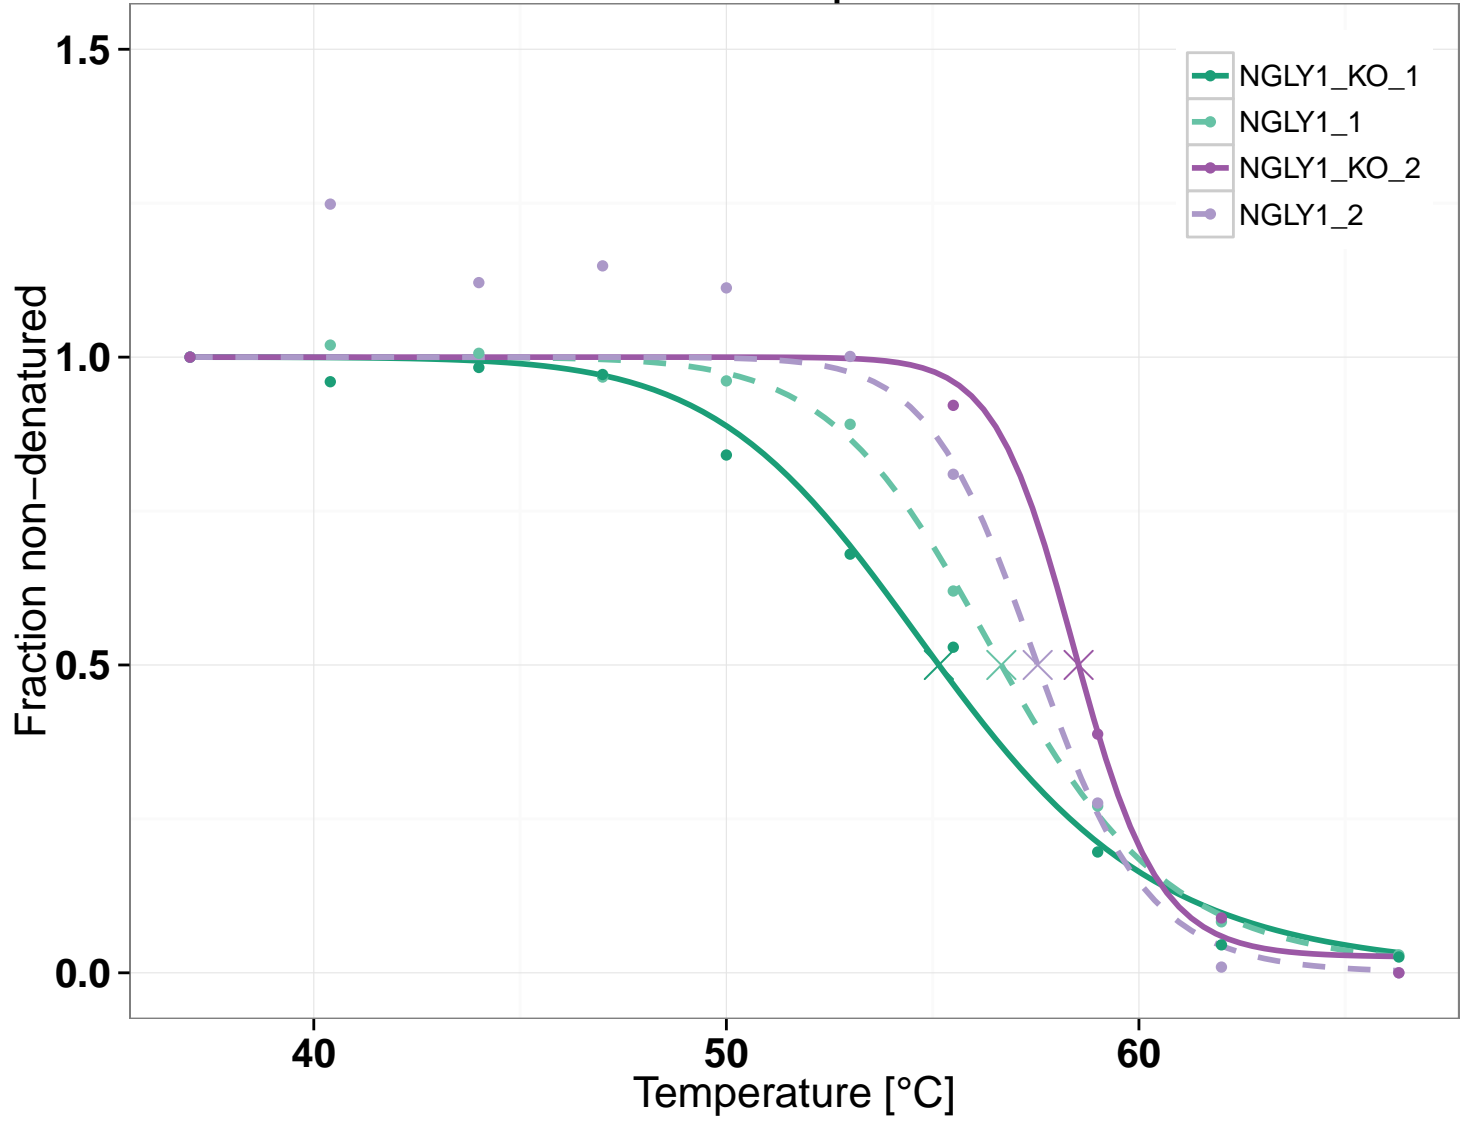

|            | meltPoint | slope  | plateau | R2   |
|------------|-----------|--------|---------|------|
| NGLY1_KO_1 | 55.15     | -0.092 | 0       | 0.99 |
| NGLY1_1    | 56.67     | -0.12  | 0.01    | 1    |
| NGLY1_KO_2 | 58.54     | -0.24  | 0.03    | 0.44 |
| NGLY1_2    | 57.55     | -0.19  | 0       | 0.95 |

Supplement: Supplementary file 2127 [file 1]

IPI00018281.1|RAD54B

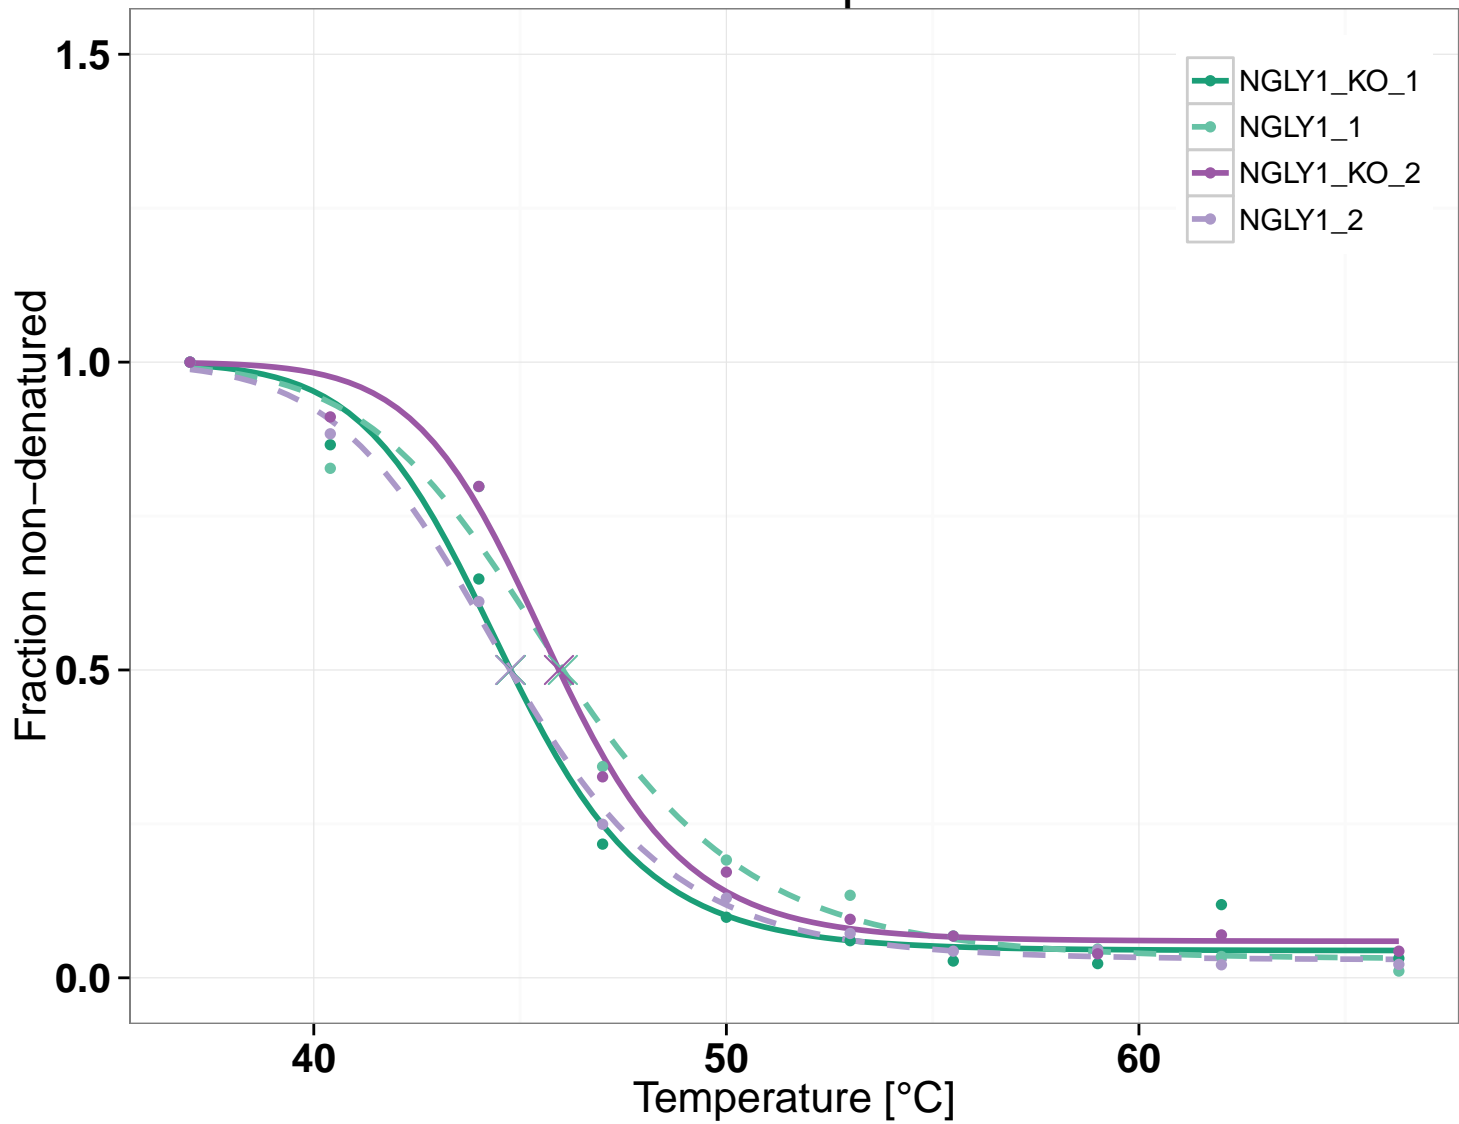

|            | meltPoint | slope | plateau | R2   |
|------------|-----------|-------|---------|------|
| NGLY1_KO_1 | 44.77     | -0.14 | 0.04    | 0.99 |
| NGLY1_1    | 46.04     | -0.1  | 0.03    | 0.98 |
| NGLY1_KO_2 | 45.94     | -0.14 | 0.06    | 0.99 |
| NGLY1_2    | 44.76     | -0.12 | 0.03    | 1    |

Supplement: Supplementary file 2128 [file 1]

# IPI00000070.1|LDLR

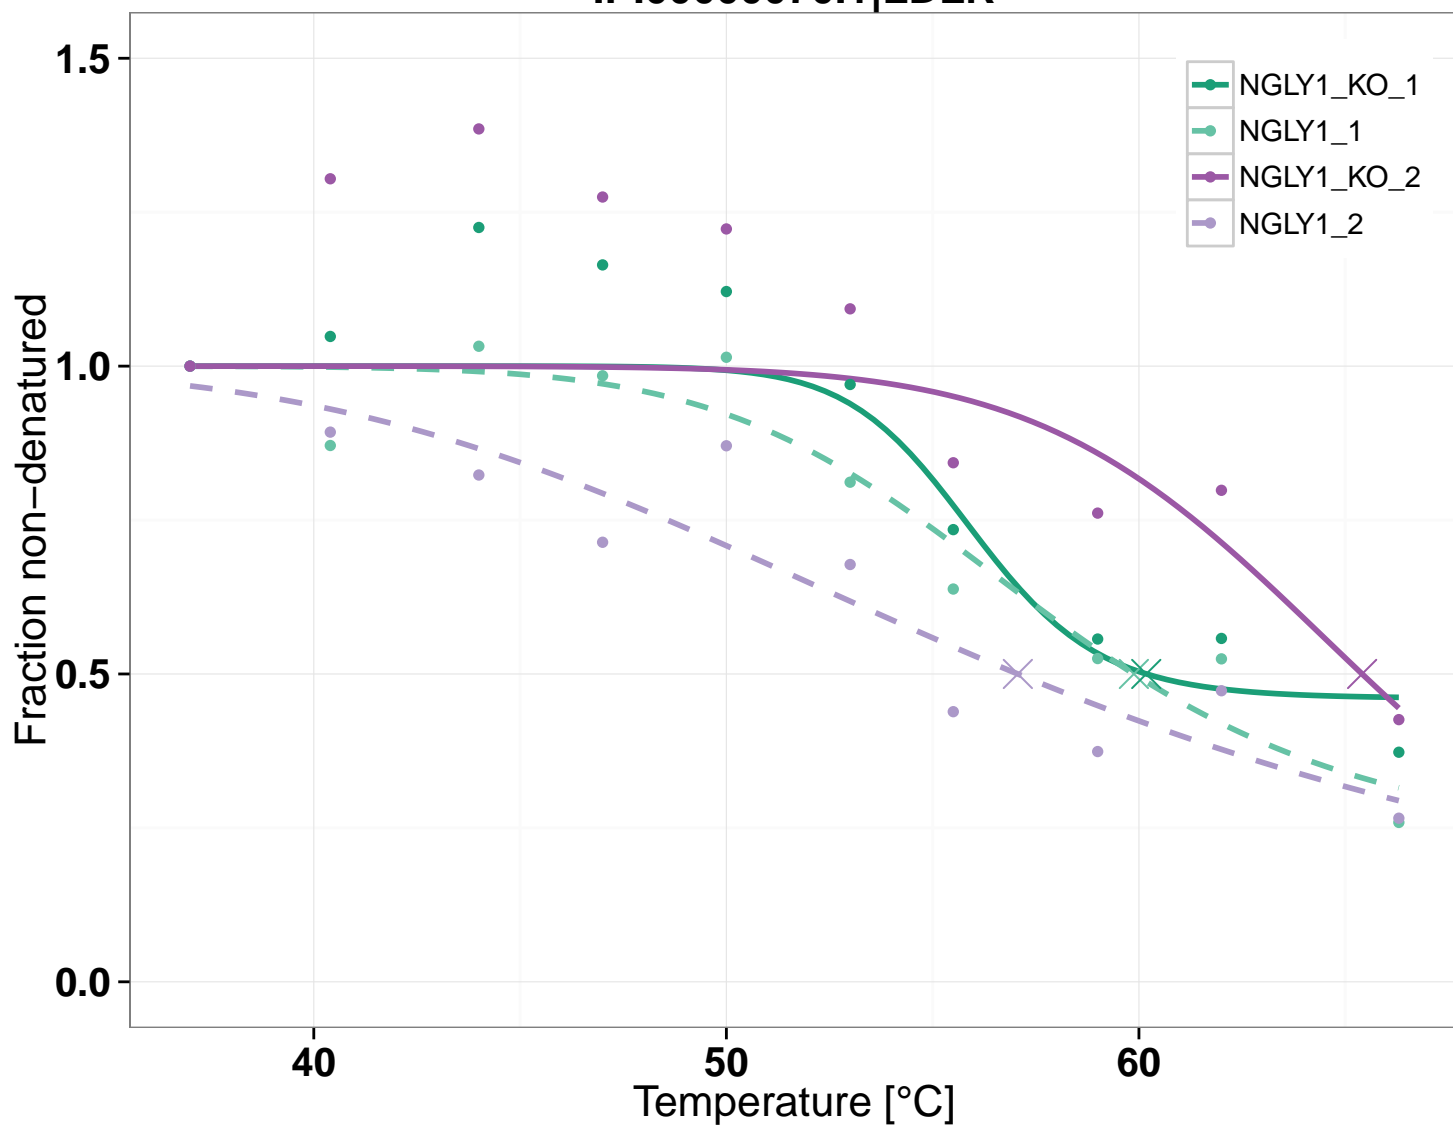

|            | meltPoint | slope  | plateau | R2   |
|------------|-----------|--------|---------|------|
| NGLY1_KO_1 | 60.18     | -0.088 | 0.46    | 0.86 |
| NGLY1_1    | 59.88     | -0.051 | 0.21    | 0.93 |
| NGLY1_KO_2 | 65.41     | -0.064 | 0       | 0.5  |
| NGLY1_2    | 57.06     | -0.03  | 0       | 0.88 |

Supplement: Supplementary file 2129 [file 1]

# IPI00300386.7|GPS1

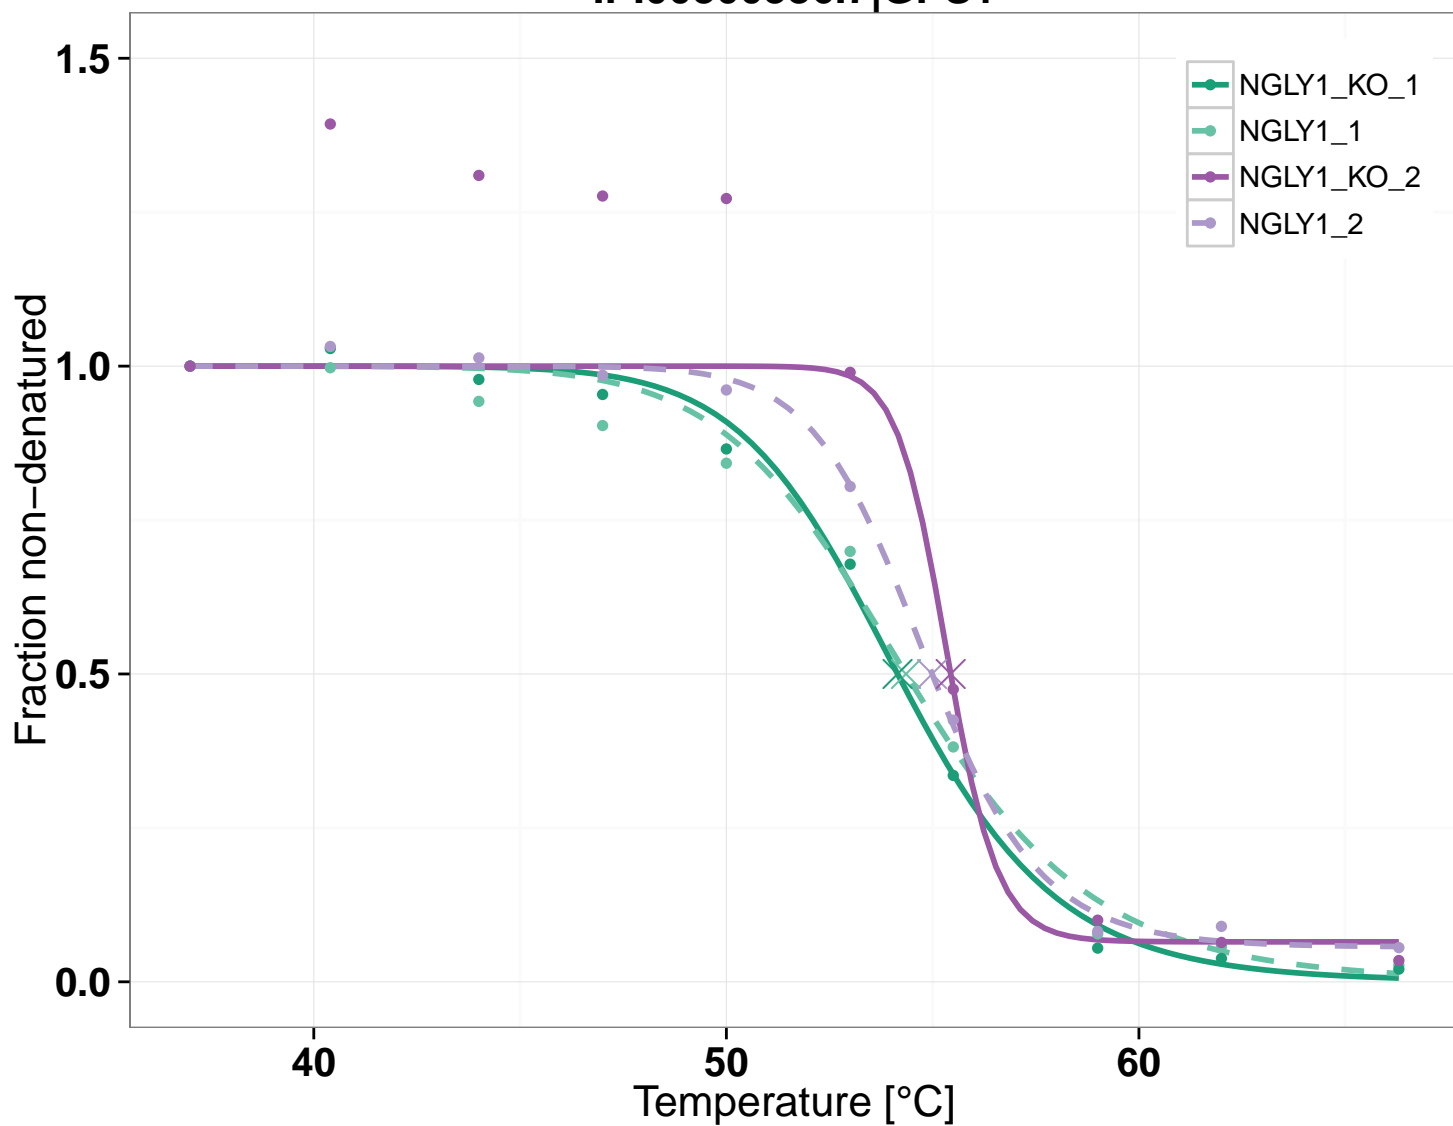

|            | meltPoint | slope | plateau | R2   |
|------------|-----------|-------|---------|------|
| NGLY1_KO_1 | 54.15     | -0.13 | 0       | 1    |
| NGLY1_1    | 54.35     | -0.11 | 0       | 0.99 |
| NGLY1_KO_2 | 55.44     | -0.38 | 0.06    | 0.86 |
| NGLY1_2    | 54.99     | -0.17 | 0.06    | 1    |

Supplement: Supplementary file 2130 [file 1]

IPI00549783.2|NOSTRIN

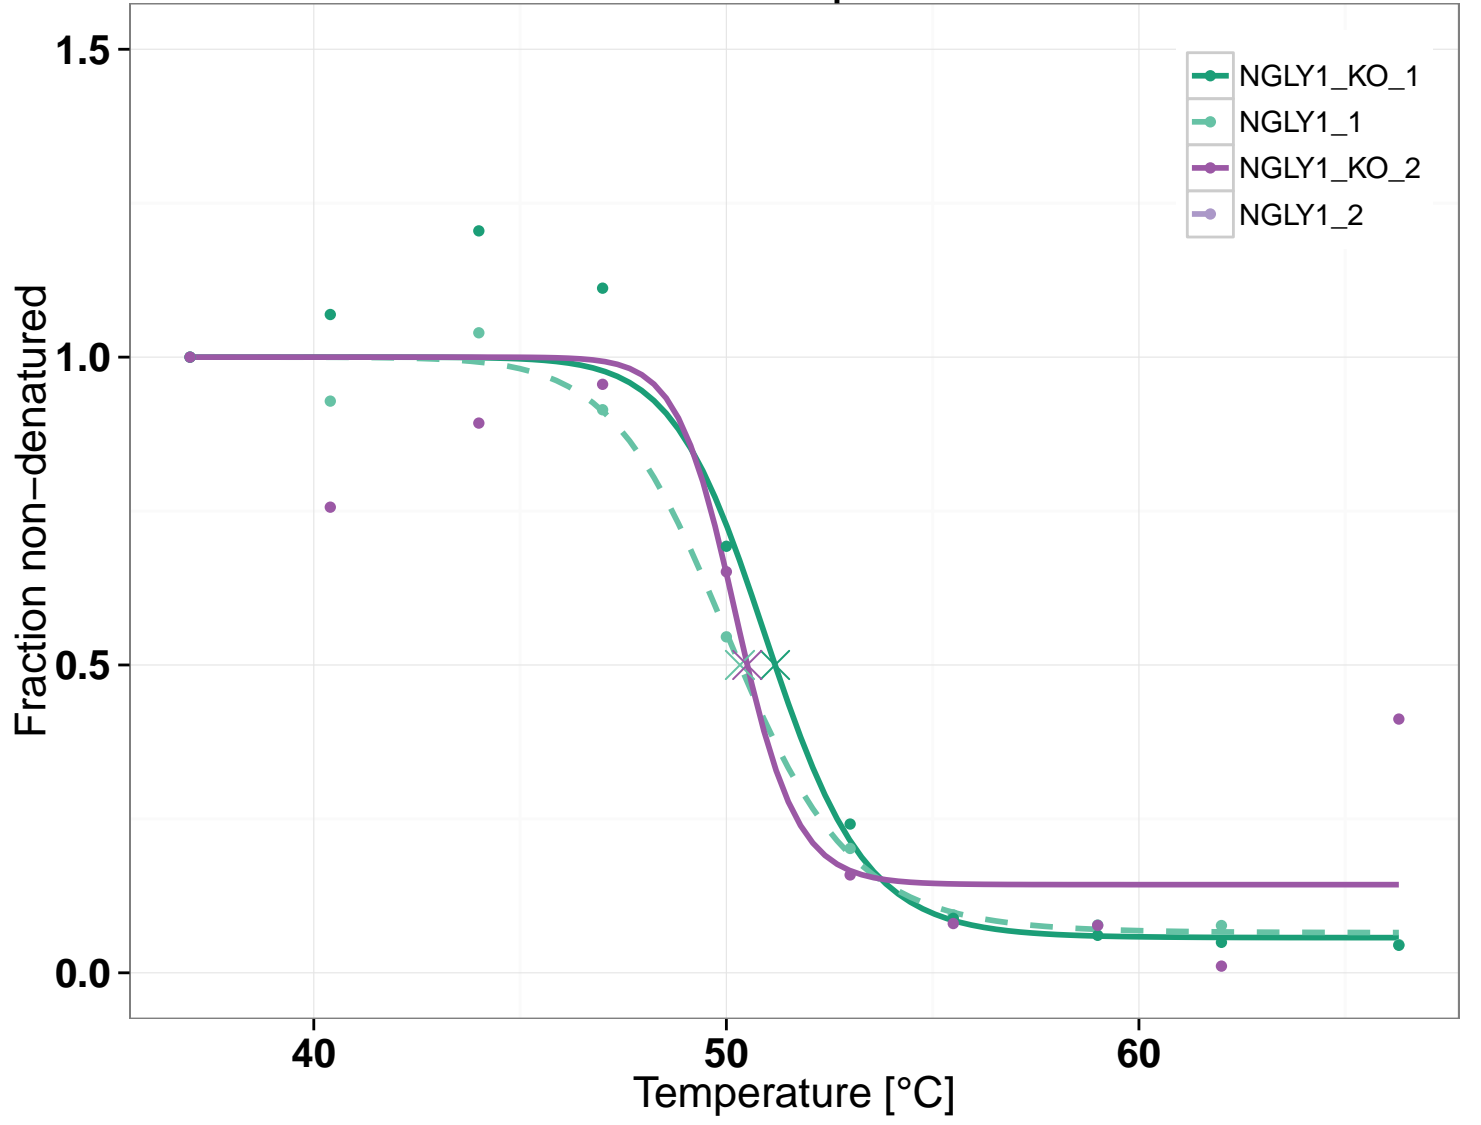

|            | meltPoint | slope | plateau | R2   |
|------------|-----------|-------|---------|------|
| NGLY1_KO_1 | 51.18     | -0.2  | 0.06    | 0.97 |
| NGLY1_1    | 50.33     | -0.16 | 0.07    | 1    |
| NGLY1_KO_2 | 50.51     | -0.3  | 0.14    | 0.88 |
| NGLY1_2    | -         | -     | -       | -    |

Supplement: Supplementary file 2131 [file 1]

IPI00088774.1|SIMILAR TO HEAT SHOCK 70KD PROTEIN 8.

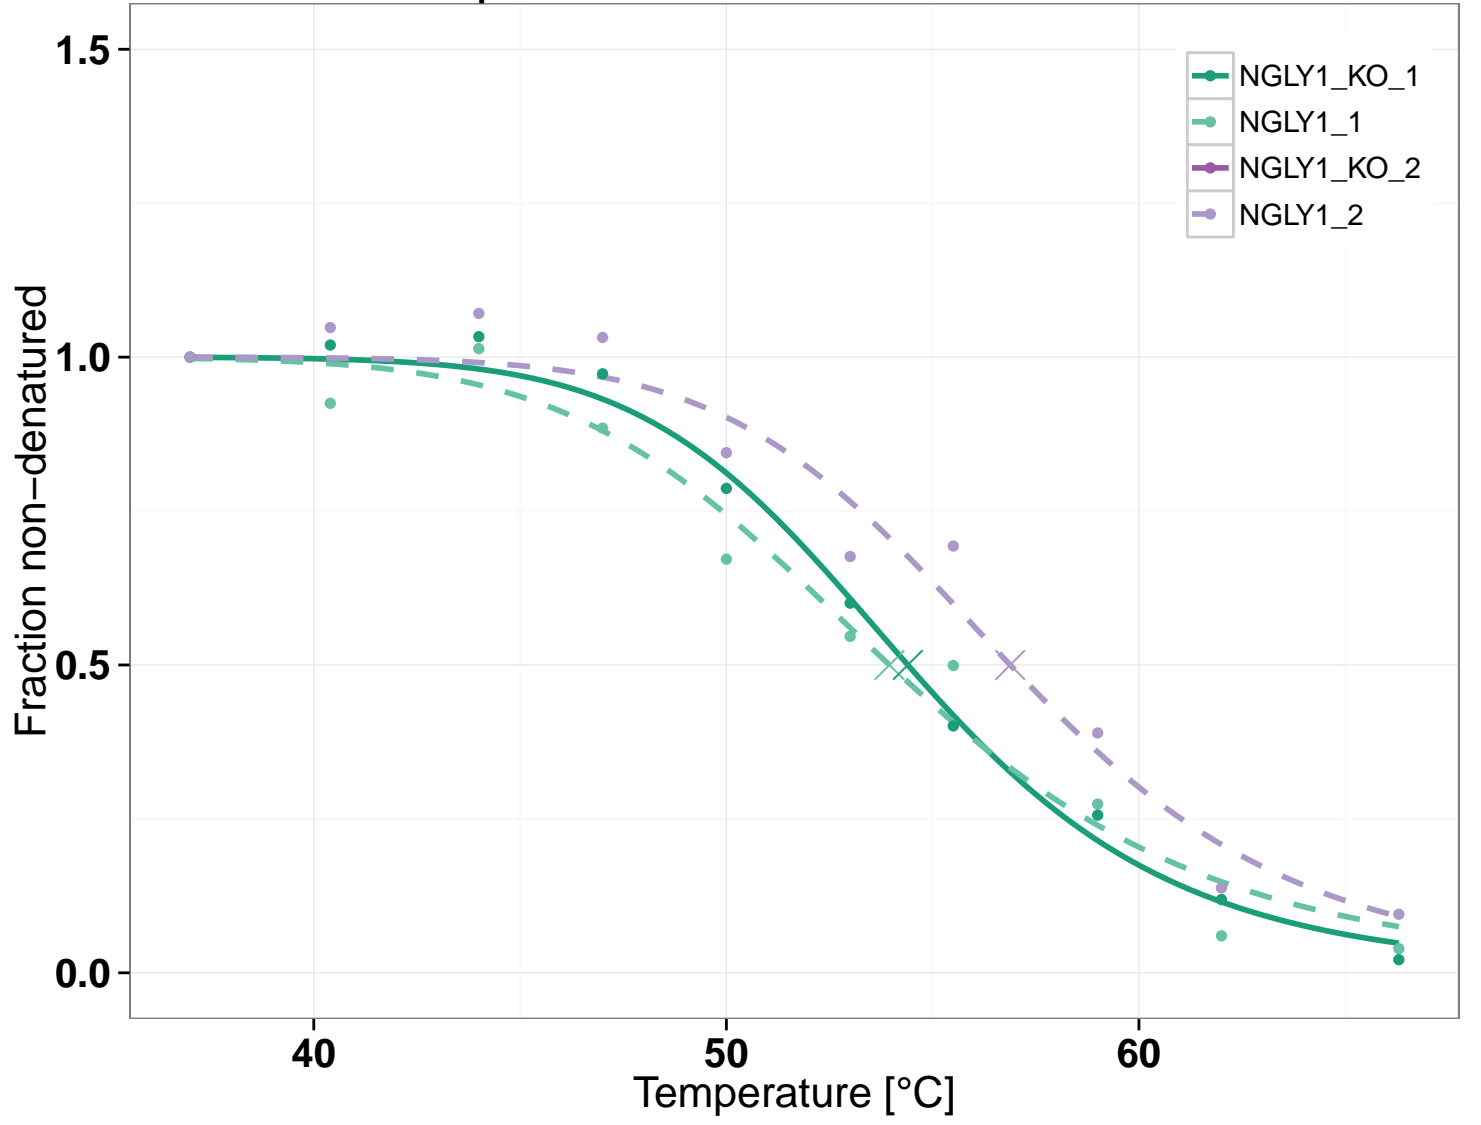

|            | meltPoint | slope  | plateau | R2   |
|------------|-----------|--------|---------|------|
| NGLY1_KO_1 | 54.4      | -0.077 | 0       | 0.99 |
| NGLY1_1    | 53.95     | -0.064 | 0       | 0.97 |
| NGLY1_KO_2 | -         | -      | -       | -    |
| NGLY1_2    | 56.88     | -0.072 | 0       | 0.97 |

Supplement: Supplementary file 2132 [file 1]

IPI00790503.3|MYH10

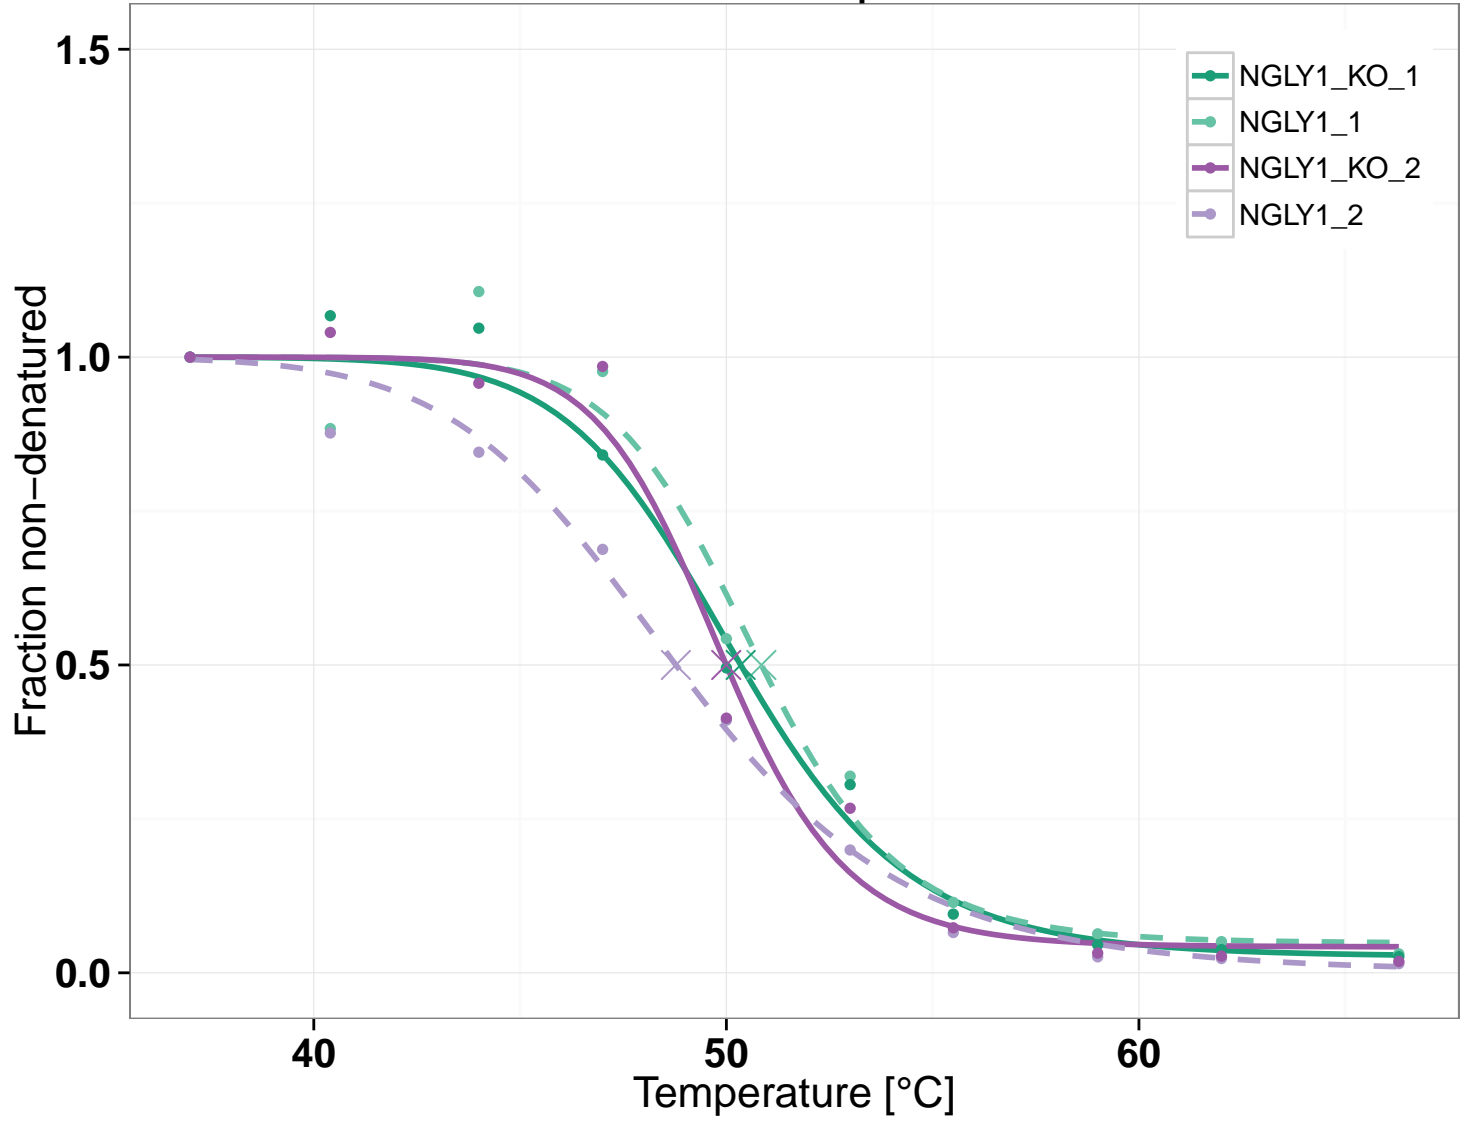

|            | meltPoint | slope  | plateau | R2   |
|------------|-----------|--------|---------|------|
| NGLY1_KO_1 | 50.35     | -0.12  | 0.03    | 0.99 |
| NGLY1_1    | 50.85     | -0.14  | 0.05    | 0.98 |
| NGLY1_KO_2 | 50        | -0.16  | 0.04    | 0.98 |
| NGLY1_2    | 48.78     | -0.091 | 0       | 0.99 |

Supplement: Supplementary file 2133 [file 1]

IPI00789672.1|USP19

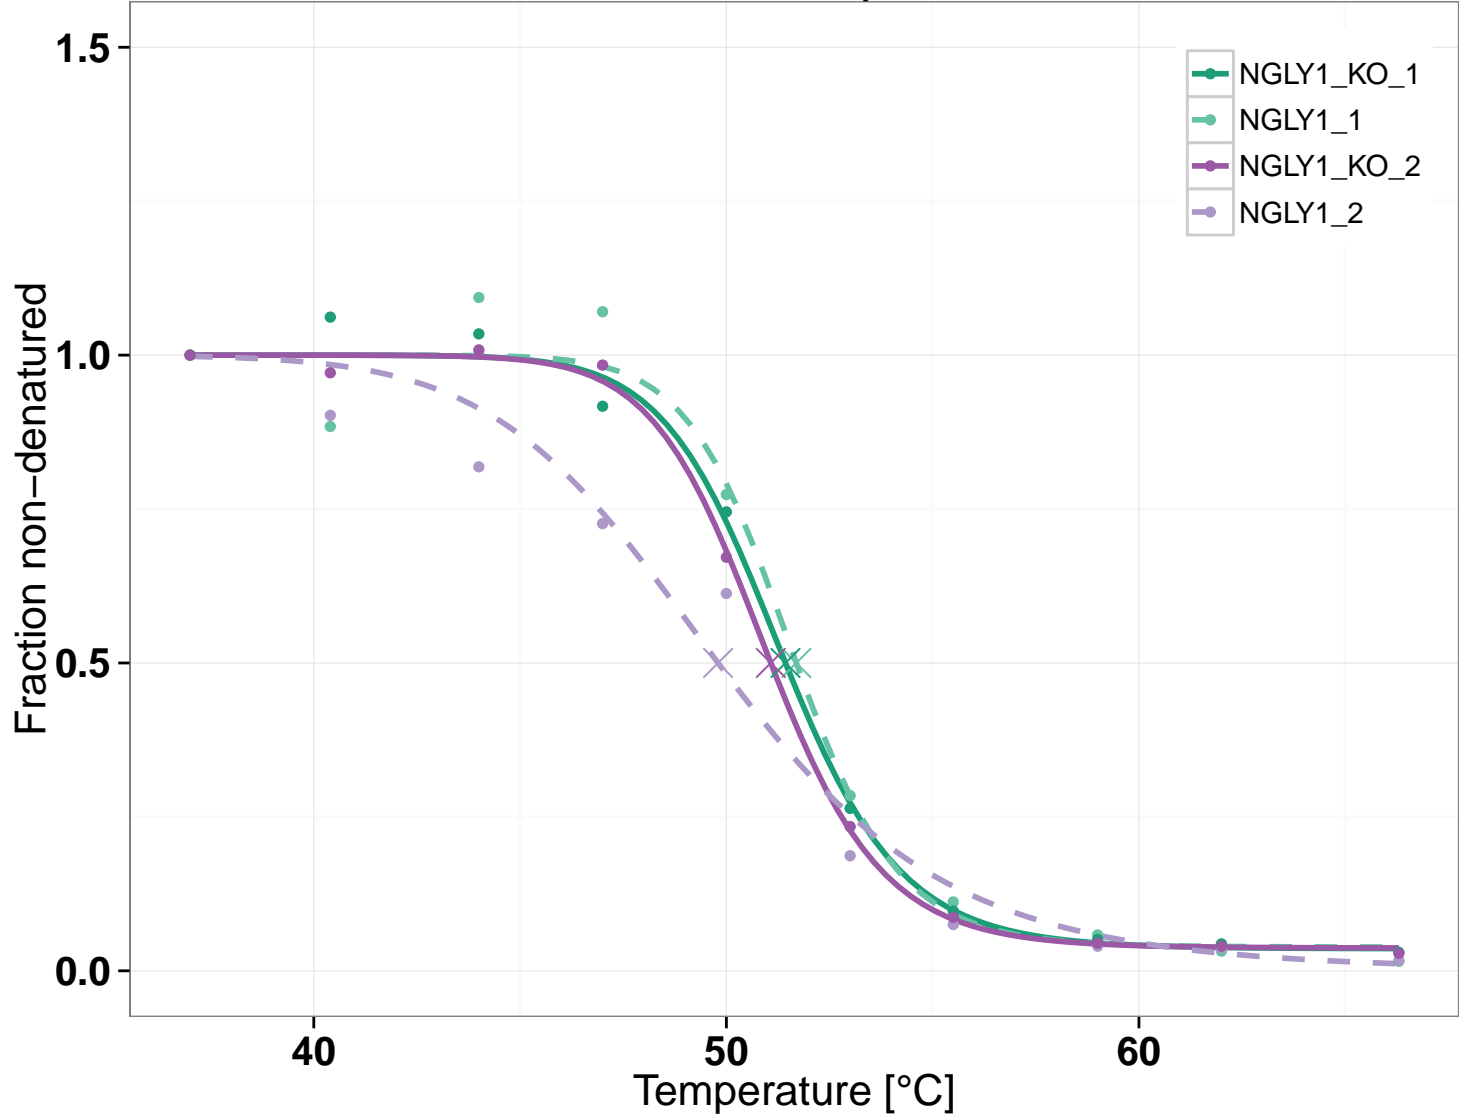

|            | meltPoint | slope  | plateau | R2   |
|------------|-----------|--------|---------|------|
| NGLY1_KO_1 | 51.43     | -0.17  | 0.04    | 1    |
| NGLY1_1    | 51.69     | -0.19  | 0.04    | 0.98 |
| NGLY1_KO_2 | 51.08     | -0.17  | 0.04    | 1    |
| NGLY1_2    | 49.8      | -0.091 | 0       | 0.97 |

Supplement: Supplementary file 2134 [file 1]

IPI00018415.1|TM9SF2

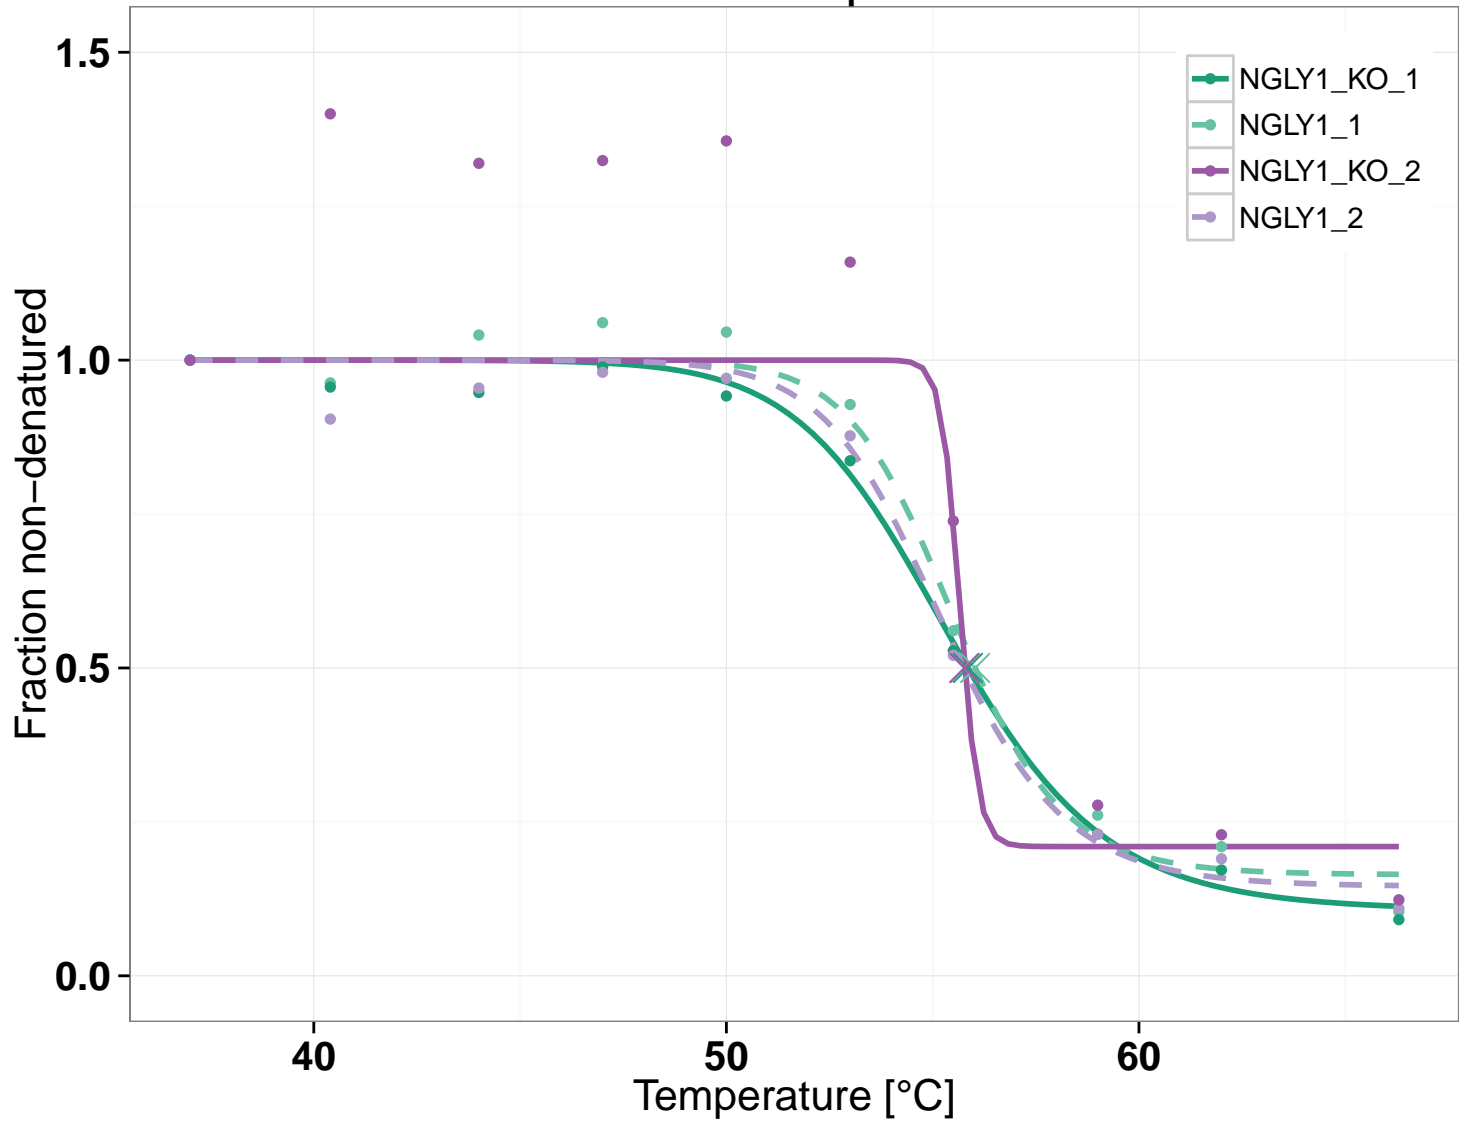

|            | meltPoint | slope | plateau | R2   |
|------------|-----------|-------|---------|------|
| NGLY1_KO_1 | 55.86     | -0.12 | 0.11    | 0.99 |
| NGLY1_1    | 56.03     | -0.16 | 0.16    | 0.99 |
| NGLY1_KO_2 | 55.78     | -0.89 | 0.21    | 0.77 |
| NGLY1_2    | 55.76     | -0.15 | 0.15    | 0.99 |

Supplement: Supplementary file 2135 [file 1]

# IPI00061111.5|C16ORF75

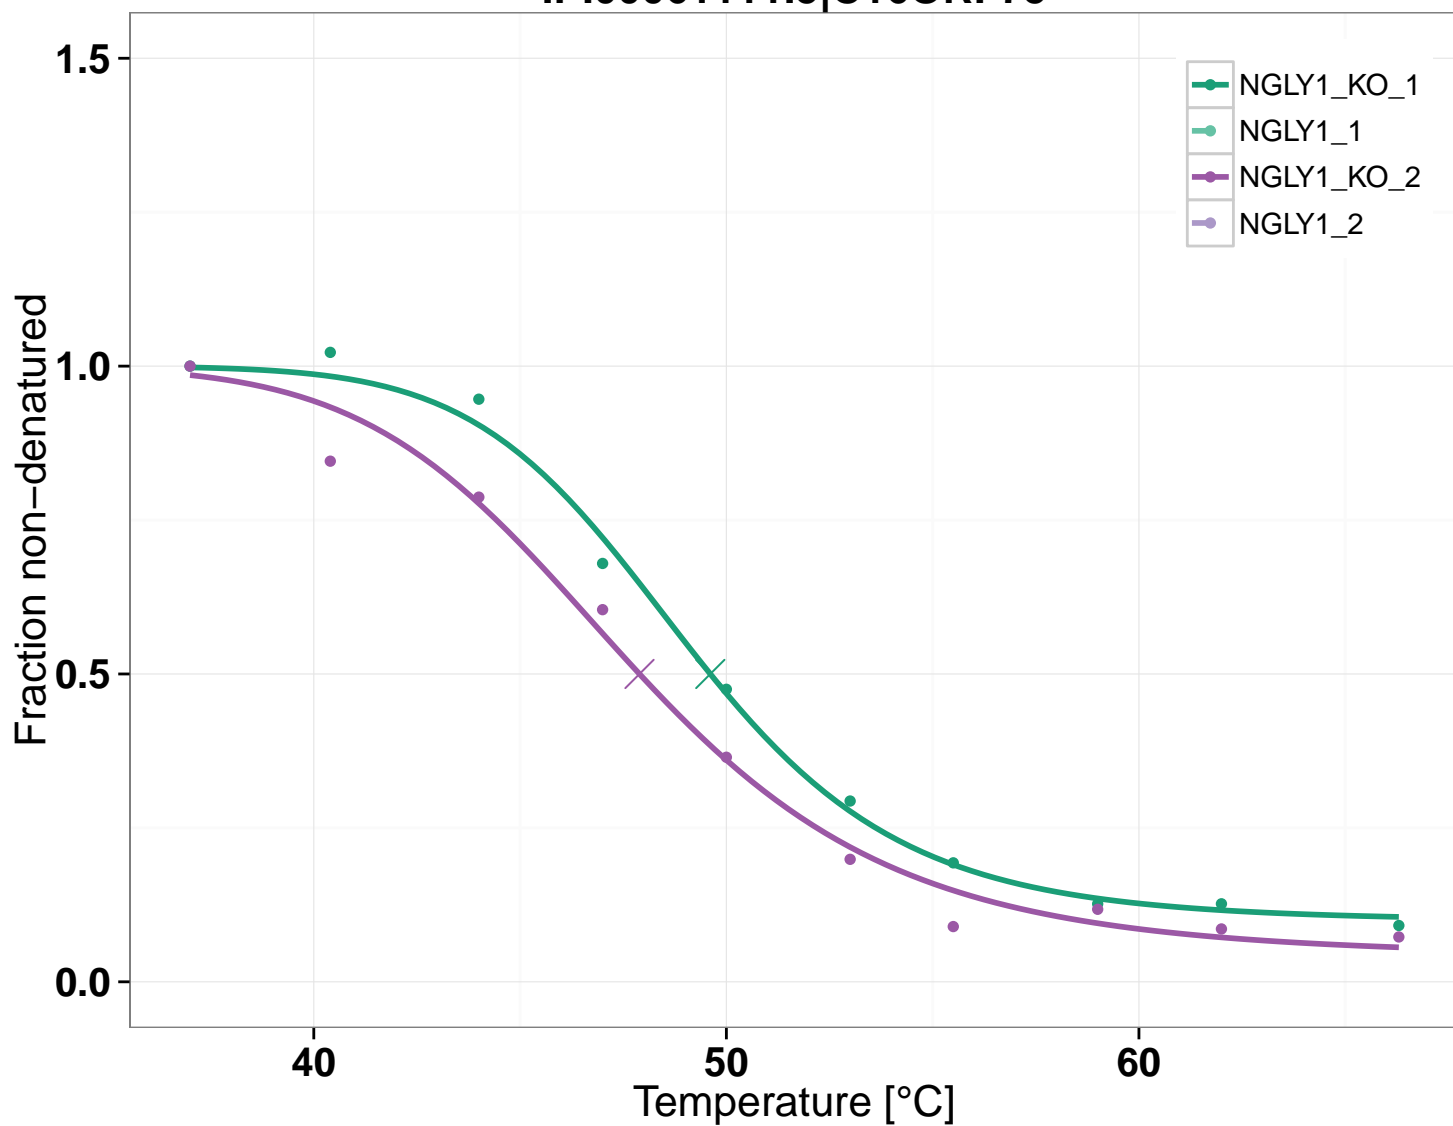

|            | meltPoint | slope  | plateau | R2   |
|------------|-----------|--------|---------|------|
| NGLY1_KO_1 | 49.61     | -0.087 | 0.1     | 1    |
| NGLY1_1    | -         | -      | -       | -    |
| NGLY1_KO_2 | 47.89     | -0.075 | 0.04    | 0.99 |
| NGLY1_2    | -         | -      | -       | -    |

Supplement: Supplementary file 2136 [file 1]

# IPI00032140.4|SERPINH1

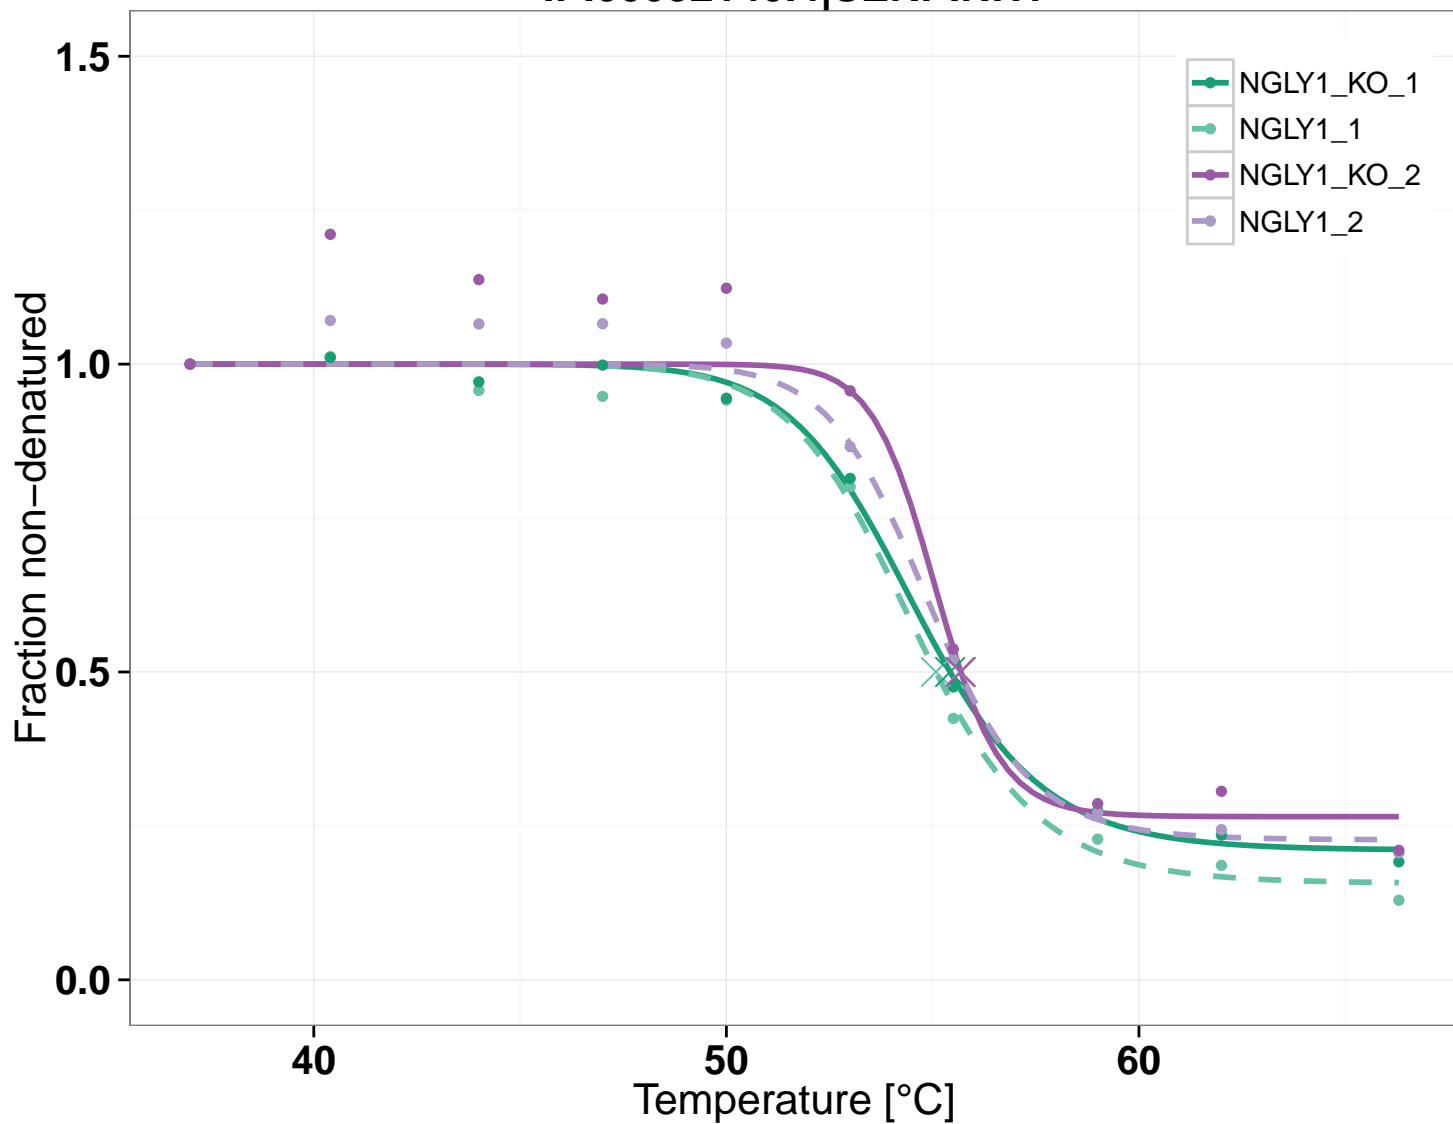

|            | meltPoint | slope | plateau | R2   |
|------------|-----------|-------|---------|------|
| NGLY1_KO_1 | 55.42     | -0.13 | 0.21    | 1    |
| NGLY1_1    | 55.08     | -0.14 | 0.16    | 0.99 |
| NGLY1_KO_2 | 55.68     | -0.24 | 0.26    | 0.94 |
| NGLY1_2    | 55.65     | -0.16 | 0.23    | 0.99 |

Supplement: Supplementary file 2137 [file 1]

IPI00032423.2|DDX52

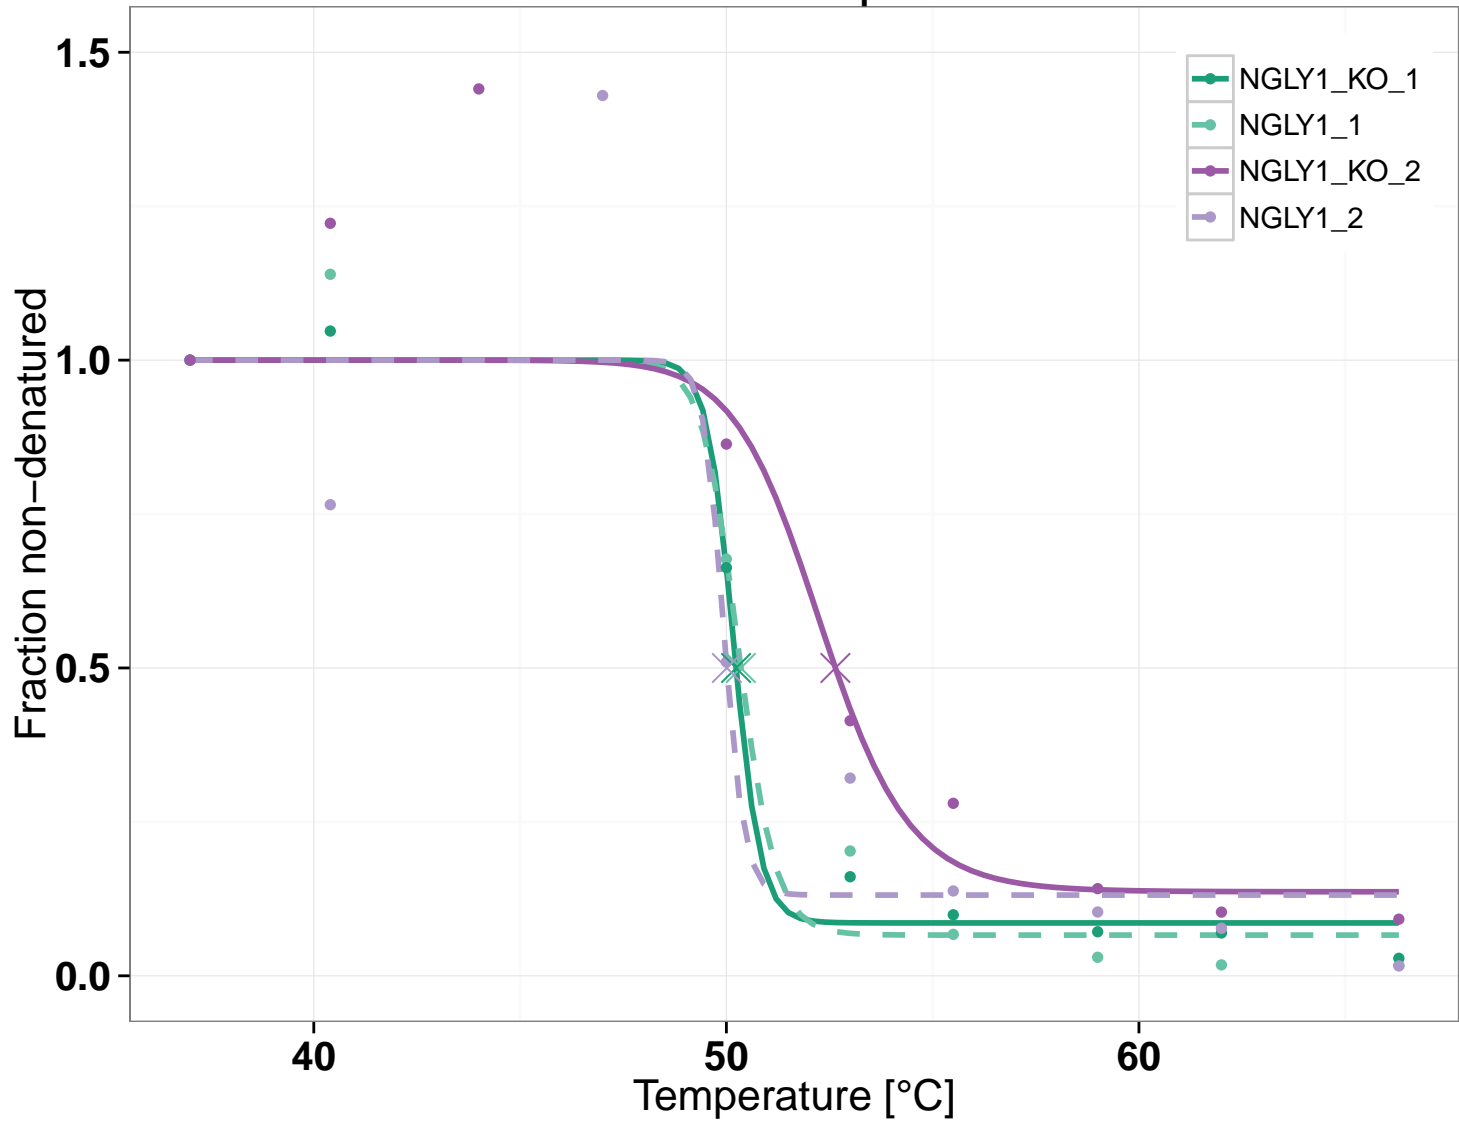

|            | meltPoint | slope | plateau | R2   |
|------------|-----------|-------|---------|------|
| NGLY1_KO_1 | 50.24     | -0.7  | 0.09    | 0.8  |
| NGLY1_1    | 50.35     | -0.53 | 0.07    | 0.68 |
| NGLY1_KO_2 | 52.64     | -0.2  | 0.14    | 0.68 |
| NGLY1_2    | 50.01     | -0.88 | 0.13    | 0.78 |

Supplement: Supplementary file 2138 [file 1]

IPI00218549.1|ASB17

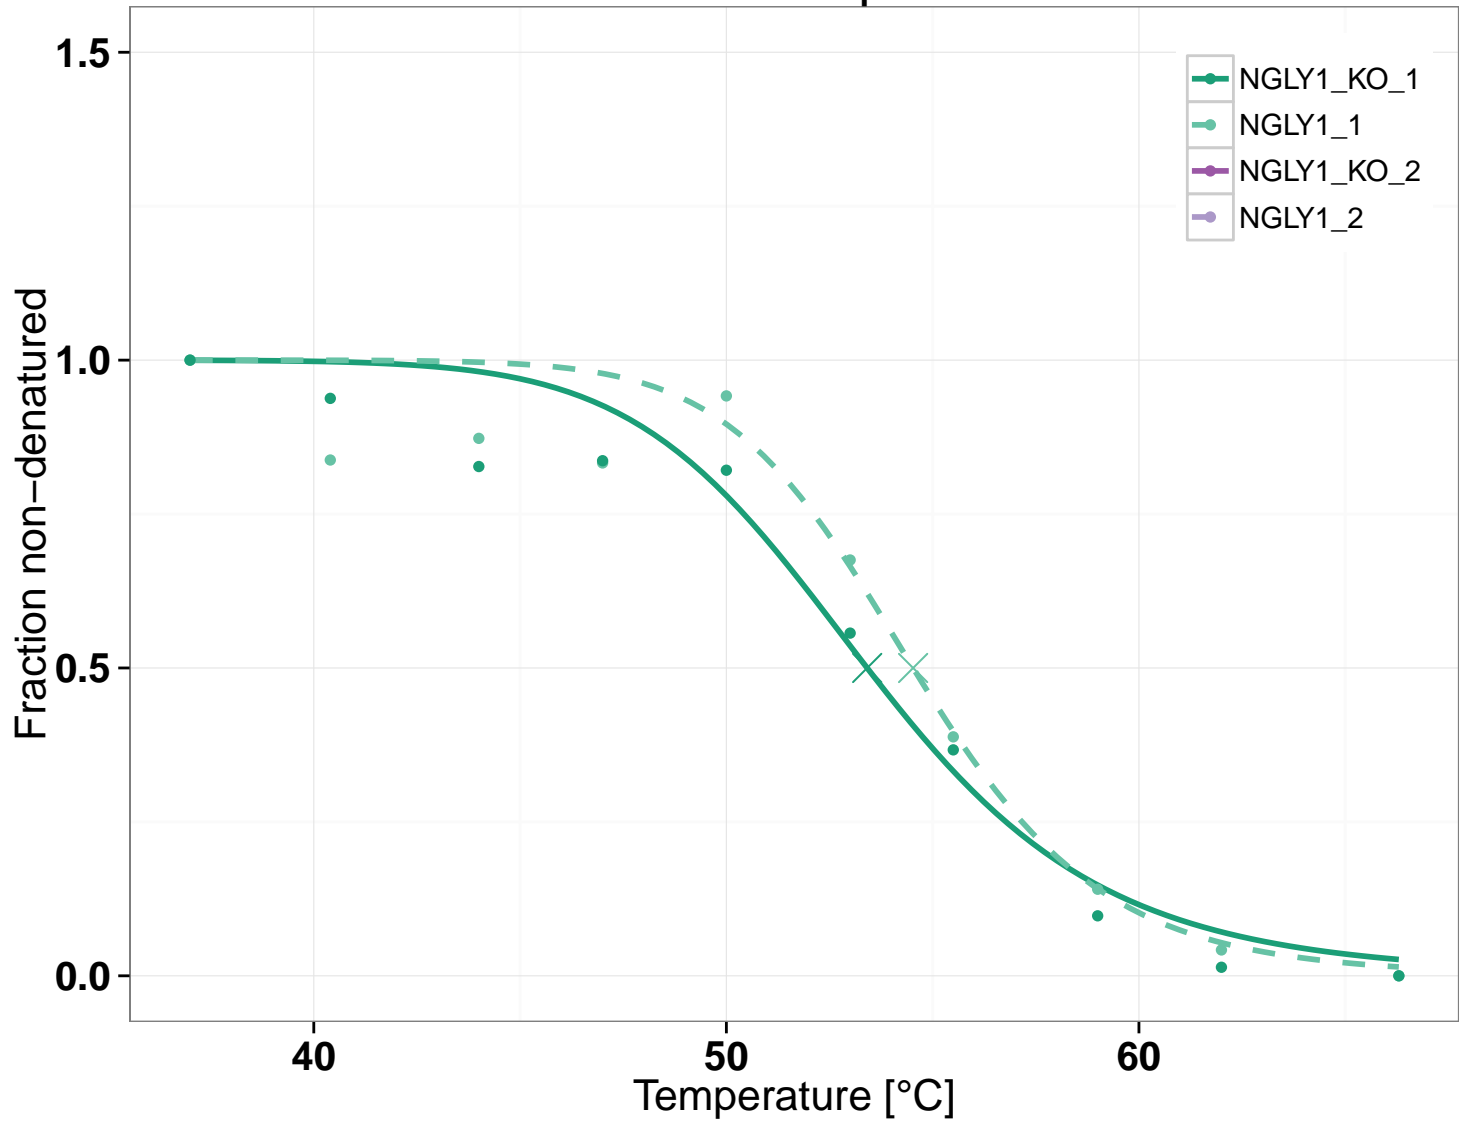

|            | meltPoint | slope  | plateau | R2   |
|------------|-----------|--------|---------|------|
| NGLY1_KO_1 | 53.41     | -0.088 | 0       | 0.97 |
| NGLY1_1    | 54.53     | -0.11  | 0       | 0.95 |
| NGLY1_KO_2 | -         | -      | -       | -    |
| NGLY1_2    | -         | -      | -       | -    |

Supplement: Supplementary file 2139 [file 1]

# IPI00428100.2|SELK

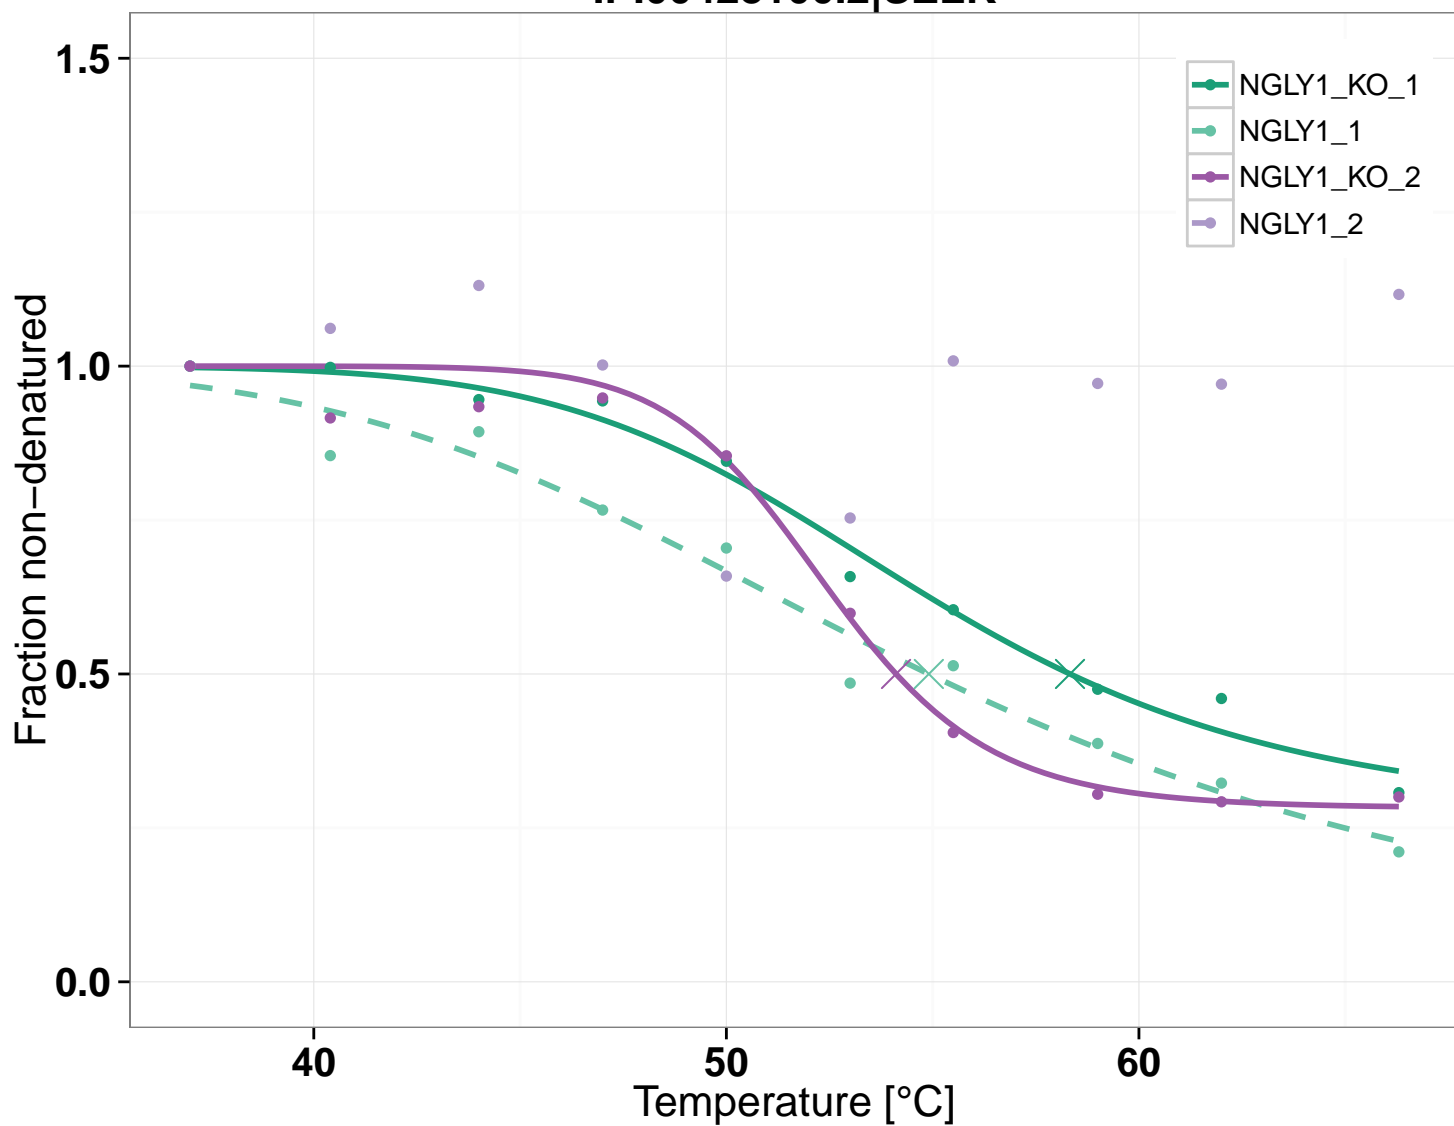

|            | meltPoint | slope  | plateau | R2   |
|------------|-----------|--------|---------|------|
| NGLY1_KO_1 | 58.33     | -0.042 | 0.26    | 0.99 |
| NGLY1_1    | 54.91     | -0.035 | 0       | 0.97 |
| NGLY1_KO_2 | 54.11     | -0.092 | 0.28    | 0.99 |
| NGLY1_2    | -         | -      | -       | -    |

Supplement: Supplementary file 2140 [file 1]

IPI00292499.4|HSPA14

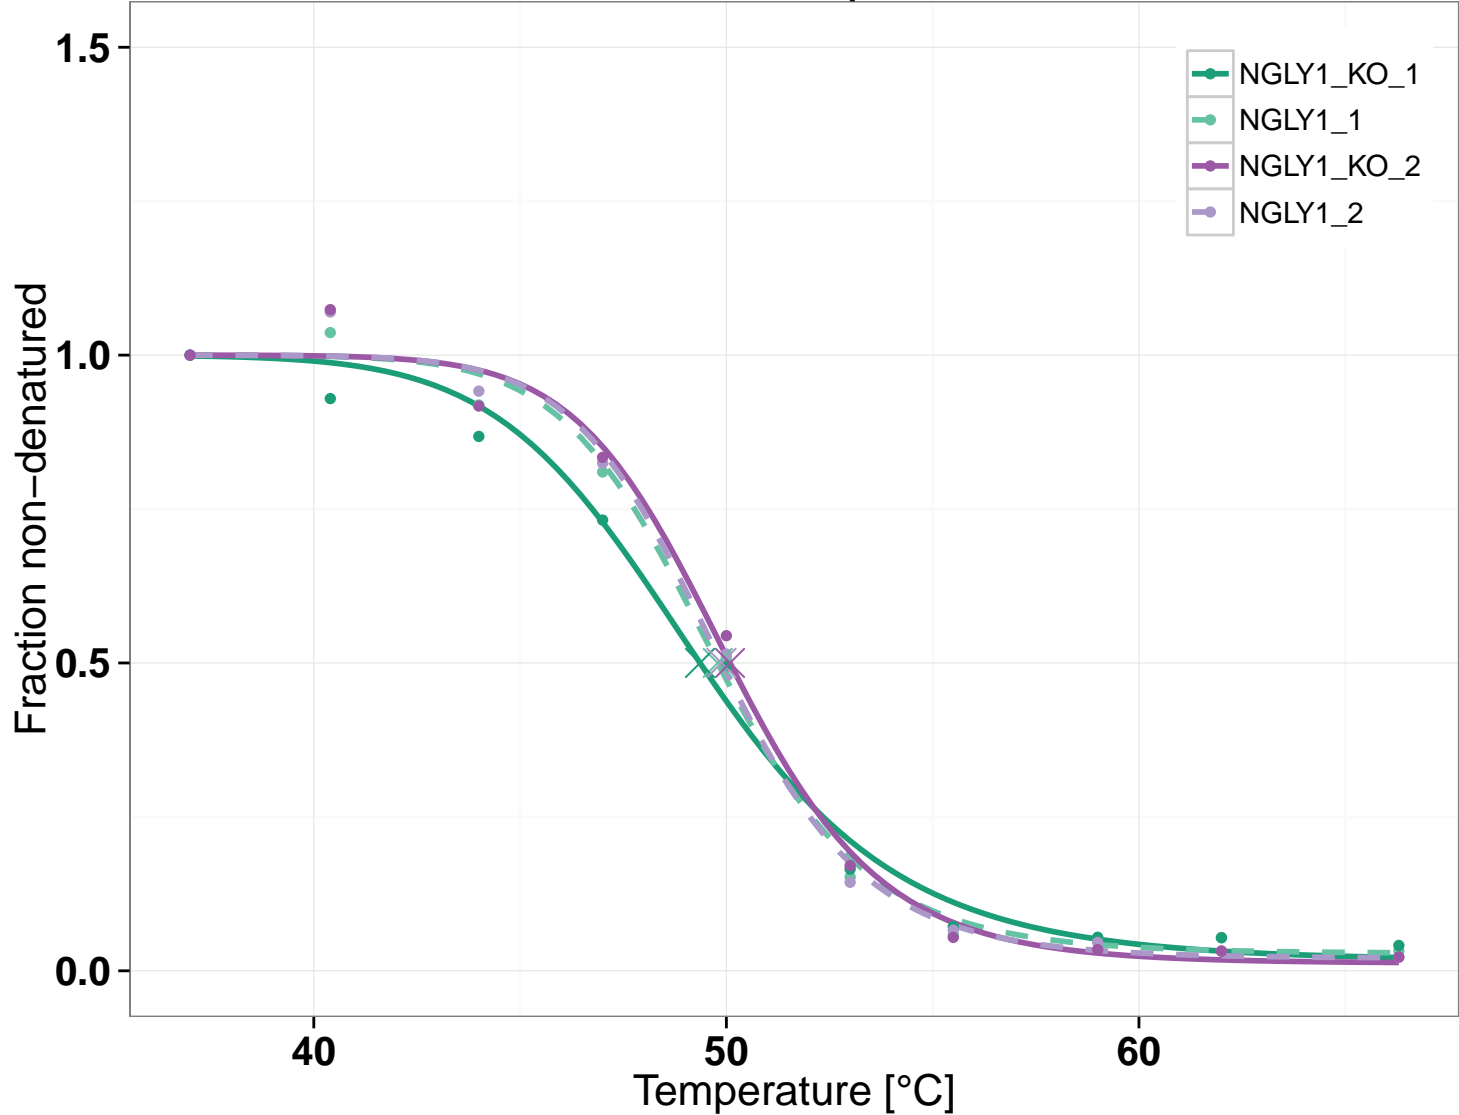

|            | meltPoint | slope | plateau | R2   |
|------------|-----------|-------|---------|------|
| NGLY1_KO_1 | 49.36     | -0.1  | 0.02    | 0.99 |
| NGLY1_1    | 49.79     | -0.13 | 0.03    | 1    |
| NGLY1_KO_2 | 50.09     | -0.13 | 0.01    | 0.99 |
| NGLY1_2    | 49.88     | -0.14 | 0.02    | 1    |

Supplement: Supplementary file 2141 [file 1]

IPI00401151.6|TCAG7 903

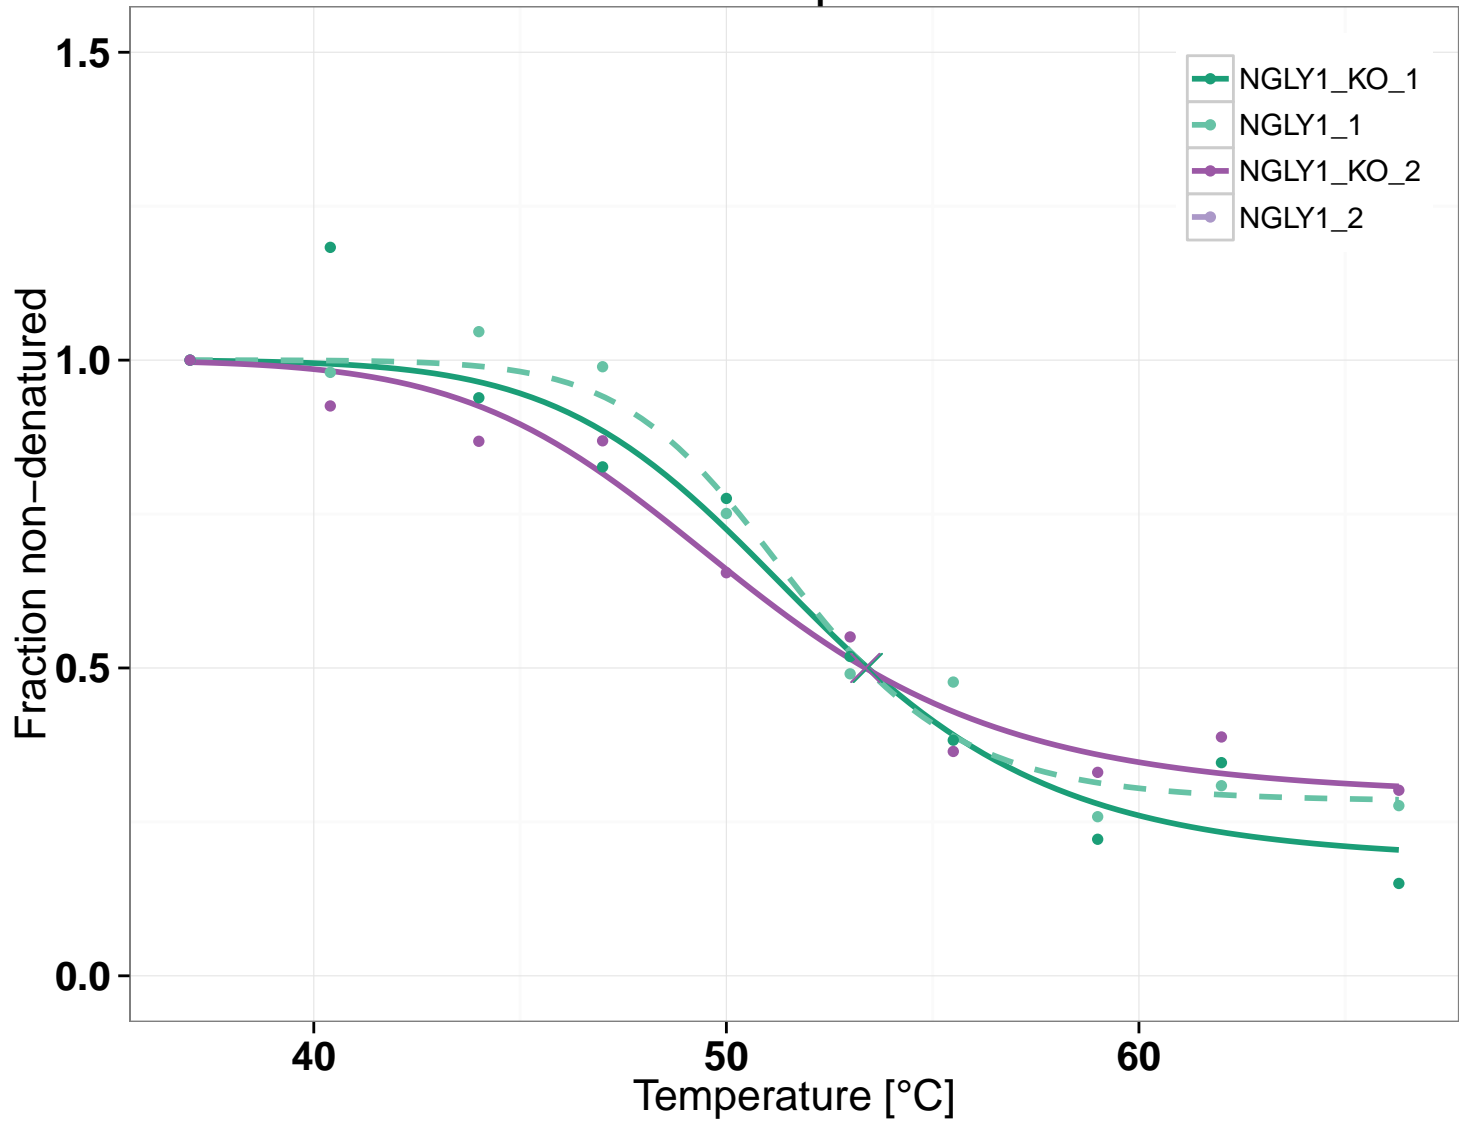

|            | meltPoint | slope  | plateau | R2   |
|------------|-----------|--------|---------|------|
| NGLY1_KO_1 | 53.43     | -0.068 | 0.18    | 0.95 |
| NGLY1_1    | 53.38     | -0.087 | 0.28    | 0.98 |
| NGLY1_KO_2 | 53.37     | -0.054 | 0.29    | 0.97 |
| NGLY1_2    | -         | -      | -       | -    |

Supplement: Supplementary file 2142 [file 1]

# IPI00000335.1|HINT2

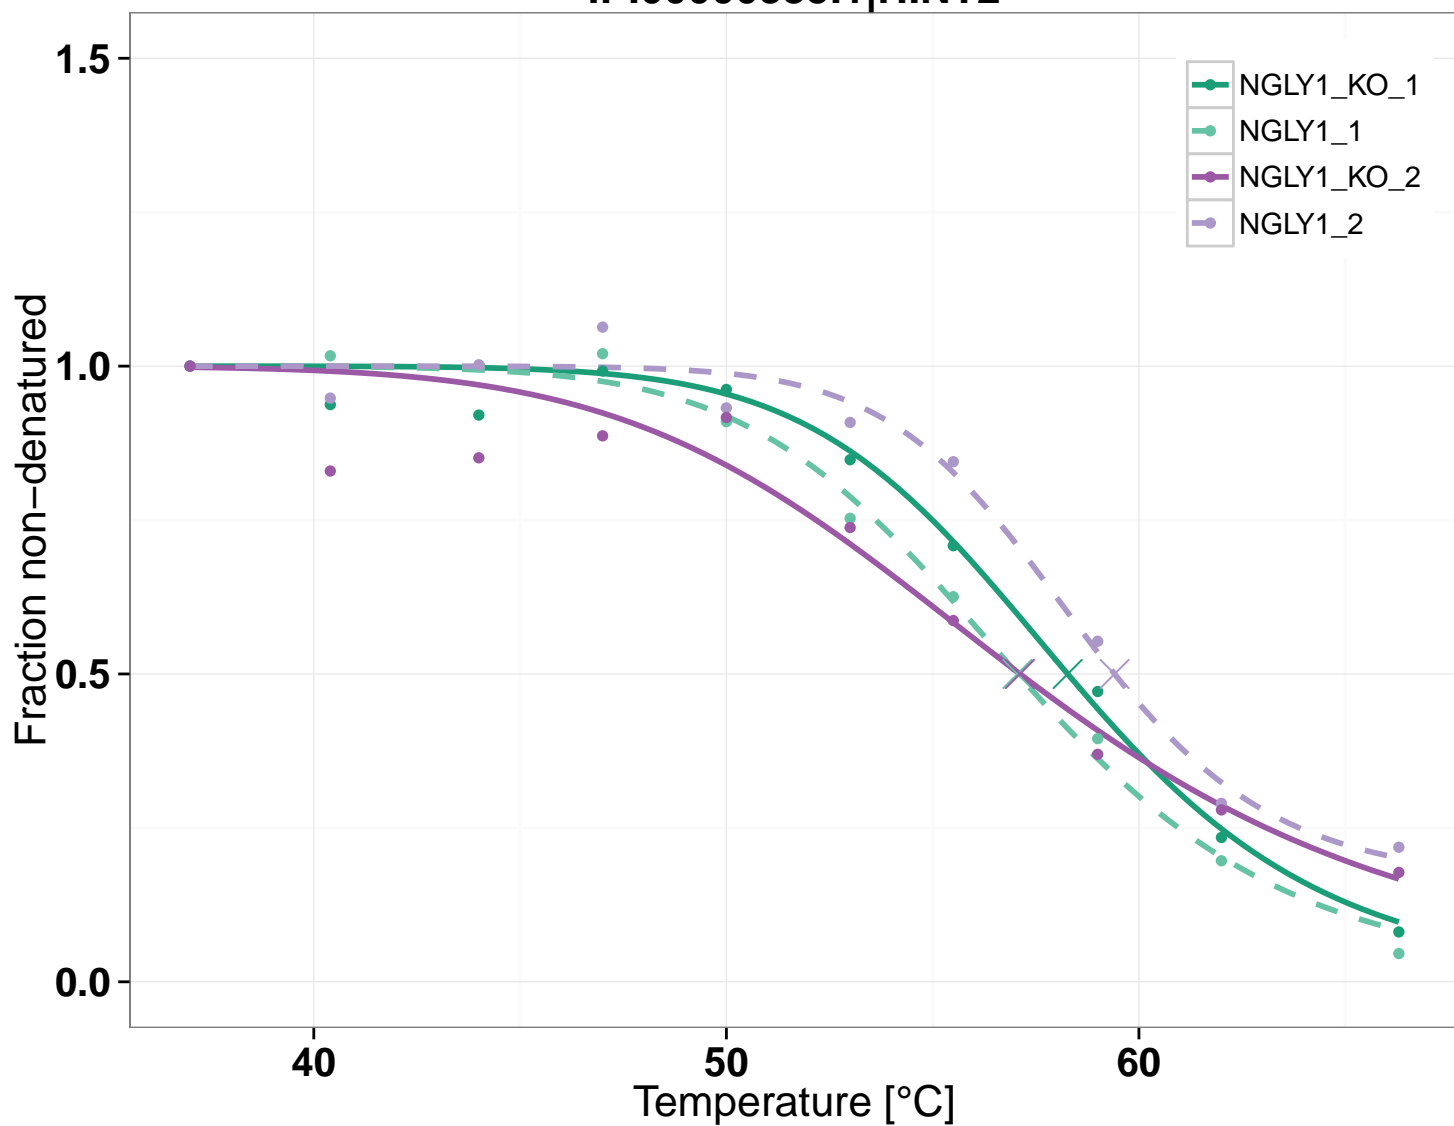

|            | meltPoint | slope  | plateau | R2   |
|------------|-----------|--------|---------|------|
| NGLY1_KO_1 | 58.27     | -0.08  | 0       | 0.99 |
| NGLY1_1    | 57.06     | -0.076 | 0       | 0.99 |
| NGLY1_KO_2 | 57.12     | -0.052 | 0       | 0.94 |
| NGLY1_2    | 59.41     | -0.091 | 0.16    | 0.98 |

Supplement: Supplementary file 2143 [file 1]

IPI00887544.1|LOC652665

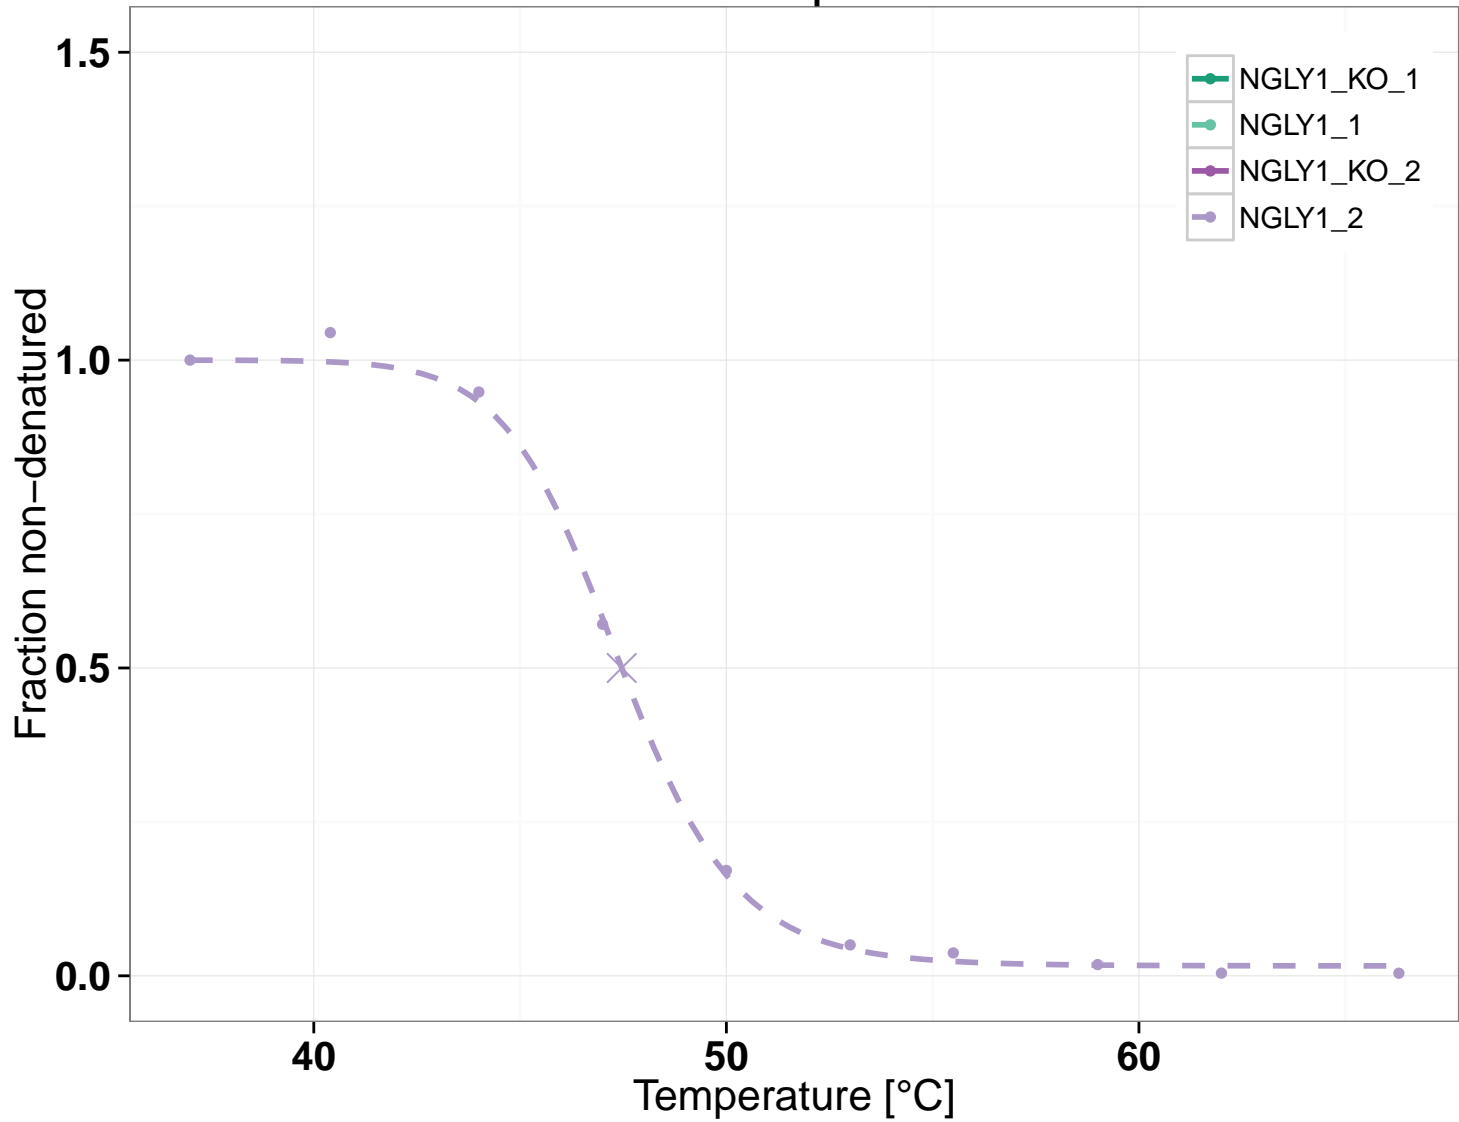

|            | meltPoint | slope | plateau | R2 |
|------------|-----------|-------|---------|----|
| NGLY1_KO_1 | -         | -     | -       | -  |
| NGLY1_1    | -         | -     | -       | -  |
| NGLY1_KO_2 | -         | -     | -       | -  |
| NGLY1_2    | 47.46     | -0.17 | 0.02    | 1  |

Supplement: Supplementary file 2144 [file 1]

# IPI00031587.2|CHML

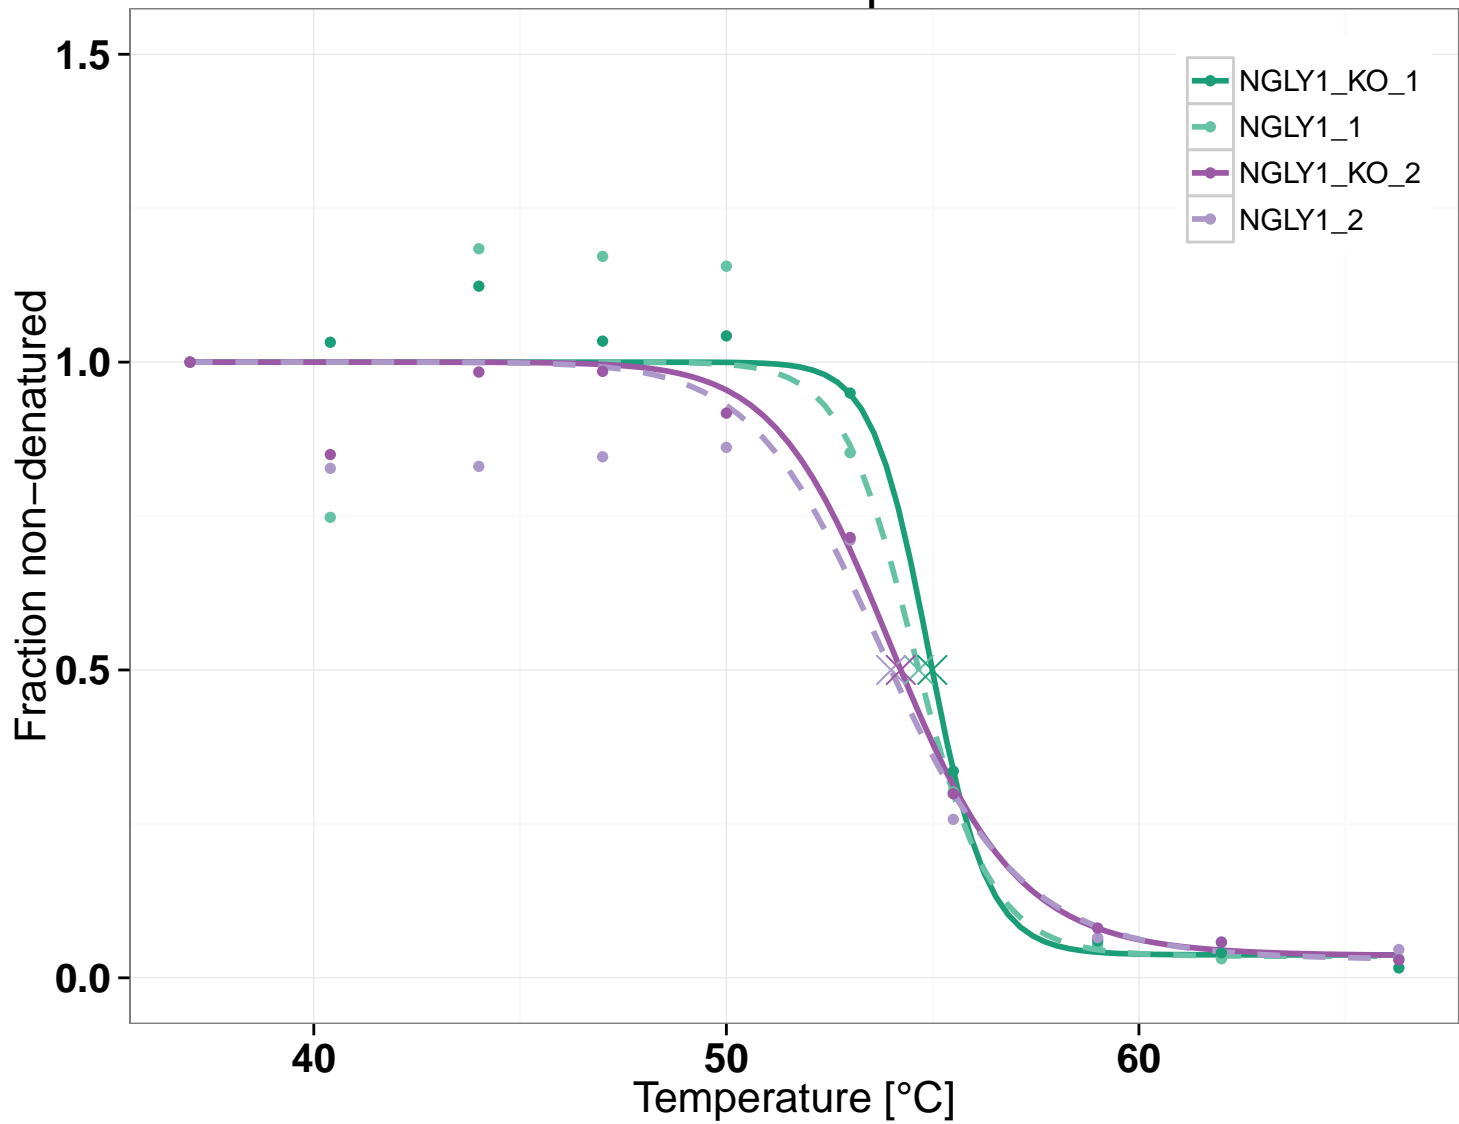

|            | meltPoint | slope | plateau | R2   |
|------------|-----------|-------|---------|------|
| NGLY1_KO_1 | 54.99     | -0.34 | 0.04    | 0.99 |
| NGLY1_1    | 54.66     | -0.27 | 0.03    | 0.93 |
| NGLY1_KO_2 | 54.23     | -0.16 | 0.04    | 0.98 |
| NGLY1_2    | 53.99     | -0.15 | 0.03    | 0.93 |

Supplement: Supplementary file 2145 [file 1]

# IPI00478648.3|MUSTN1

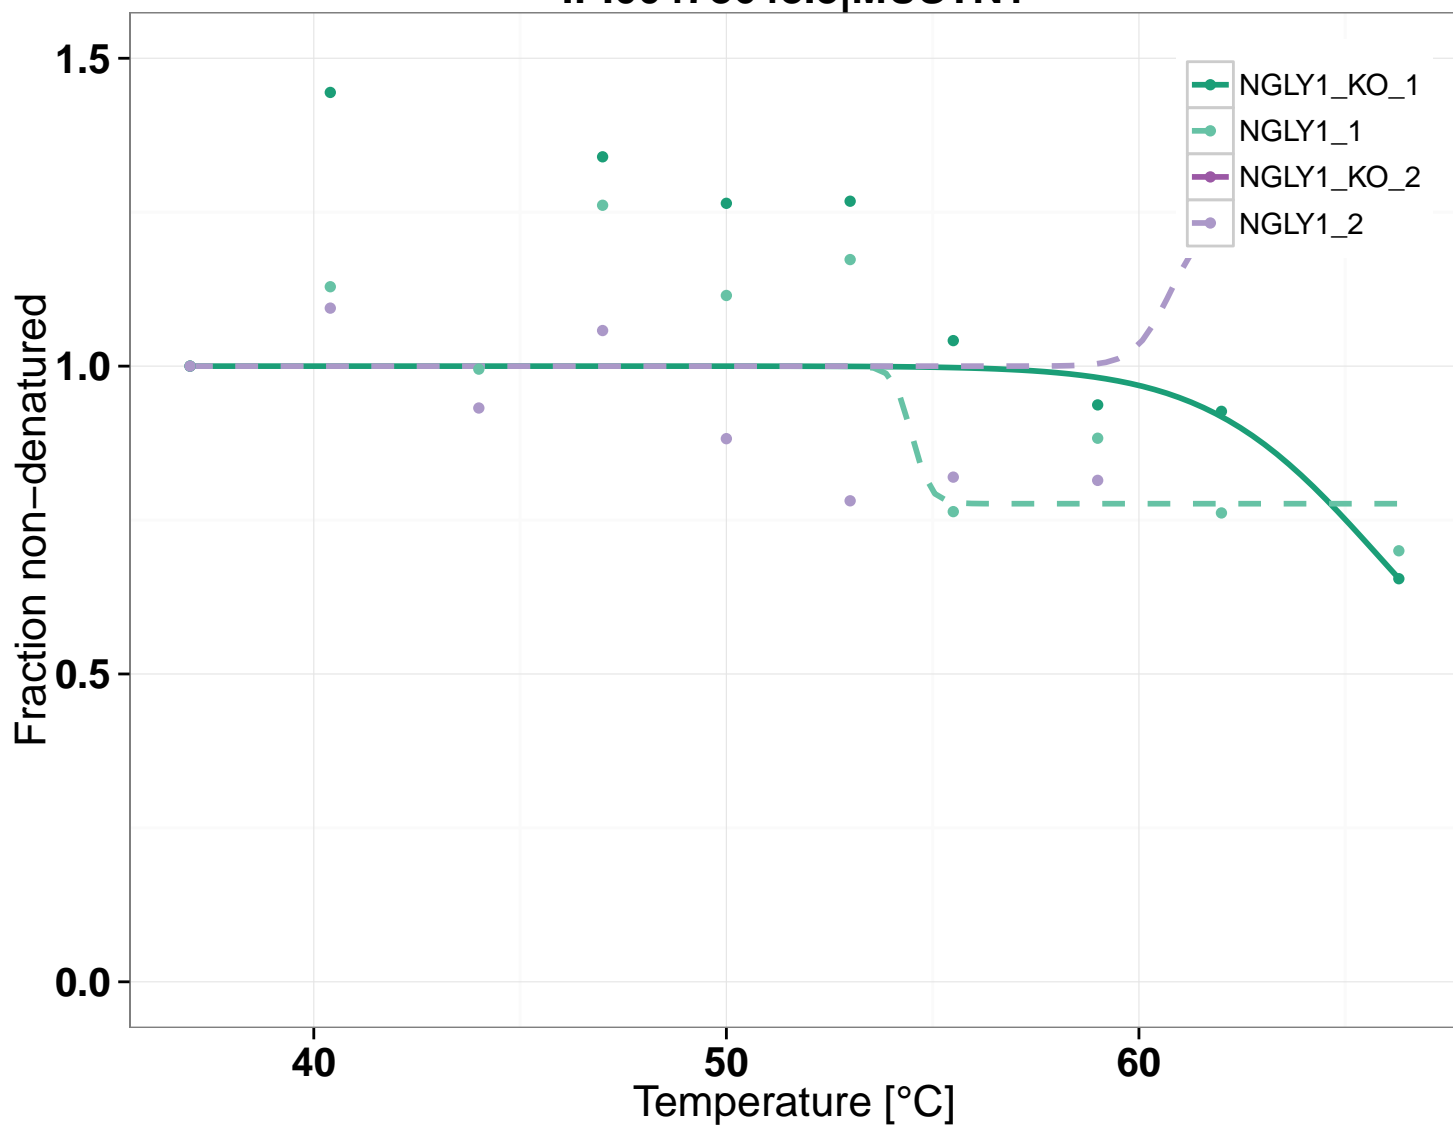

|            | meltPoint | slope  | plateau | R2   |
|------------|-----------|--------|---------|------|
| NGLY1_KO_1 | —         | −0.074 | 0.33    | −0.1 |
| NGLY1_1    | —         | −0.26  | 0.78    | 0.57 |
| NGLY1_KO_2 | —         | —      | —       | —    |
| NGLY1_2    | —         | 0.14   | 1.24    | 0.42 |

Supplement: Supplementary file 2146 [file 1]

# IPI00002335.1|HTT

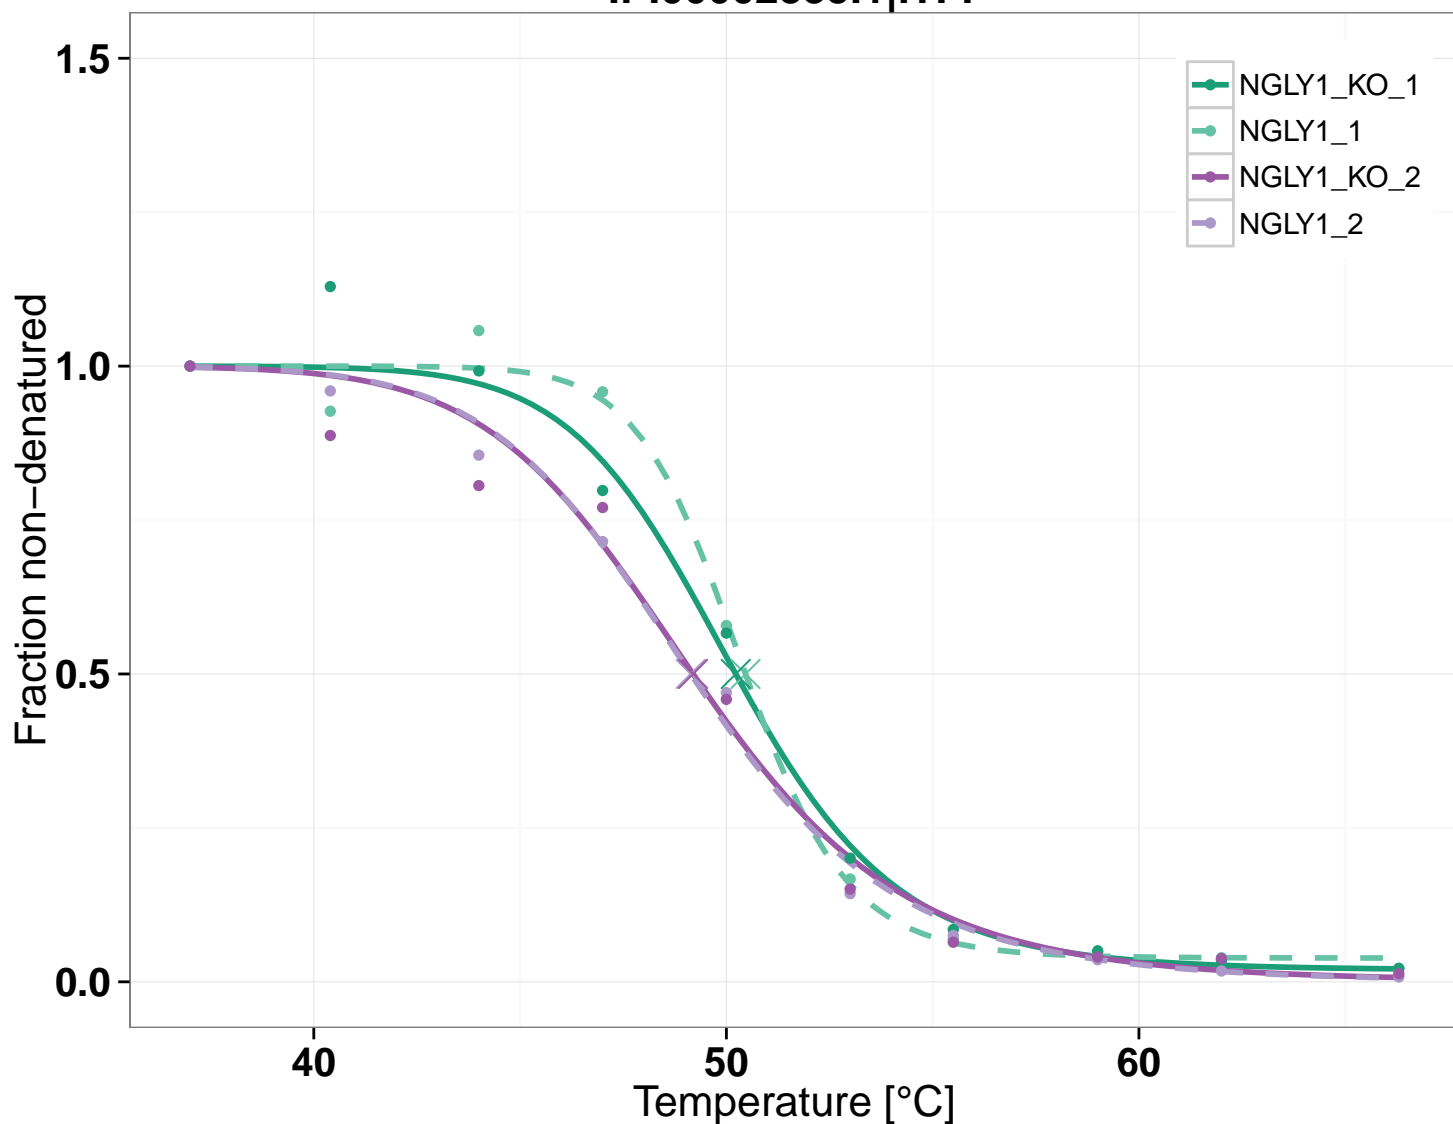

|            | meltPoint | slope  | plateau | R2   |
|------------|-----------|--------|---------|------|
| NGLY1_KO_1 | 50.23     | -0.12  | 0.02    | 0.99 |
| NGLY1_1    | 50.47     | -0.19  | 0.04    | 0.99 |
| NGLY1_KO_2 | 49.19     | -0.099 | 0       | 0.98 |
| NGLY1_2    | 49.14     | -0.1   | 0       | 0.99 |

Supplement: Supplementary file 2147 [file 1]

# IPI00106642.4|SDF2L1

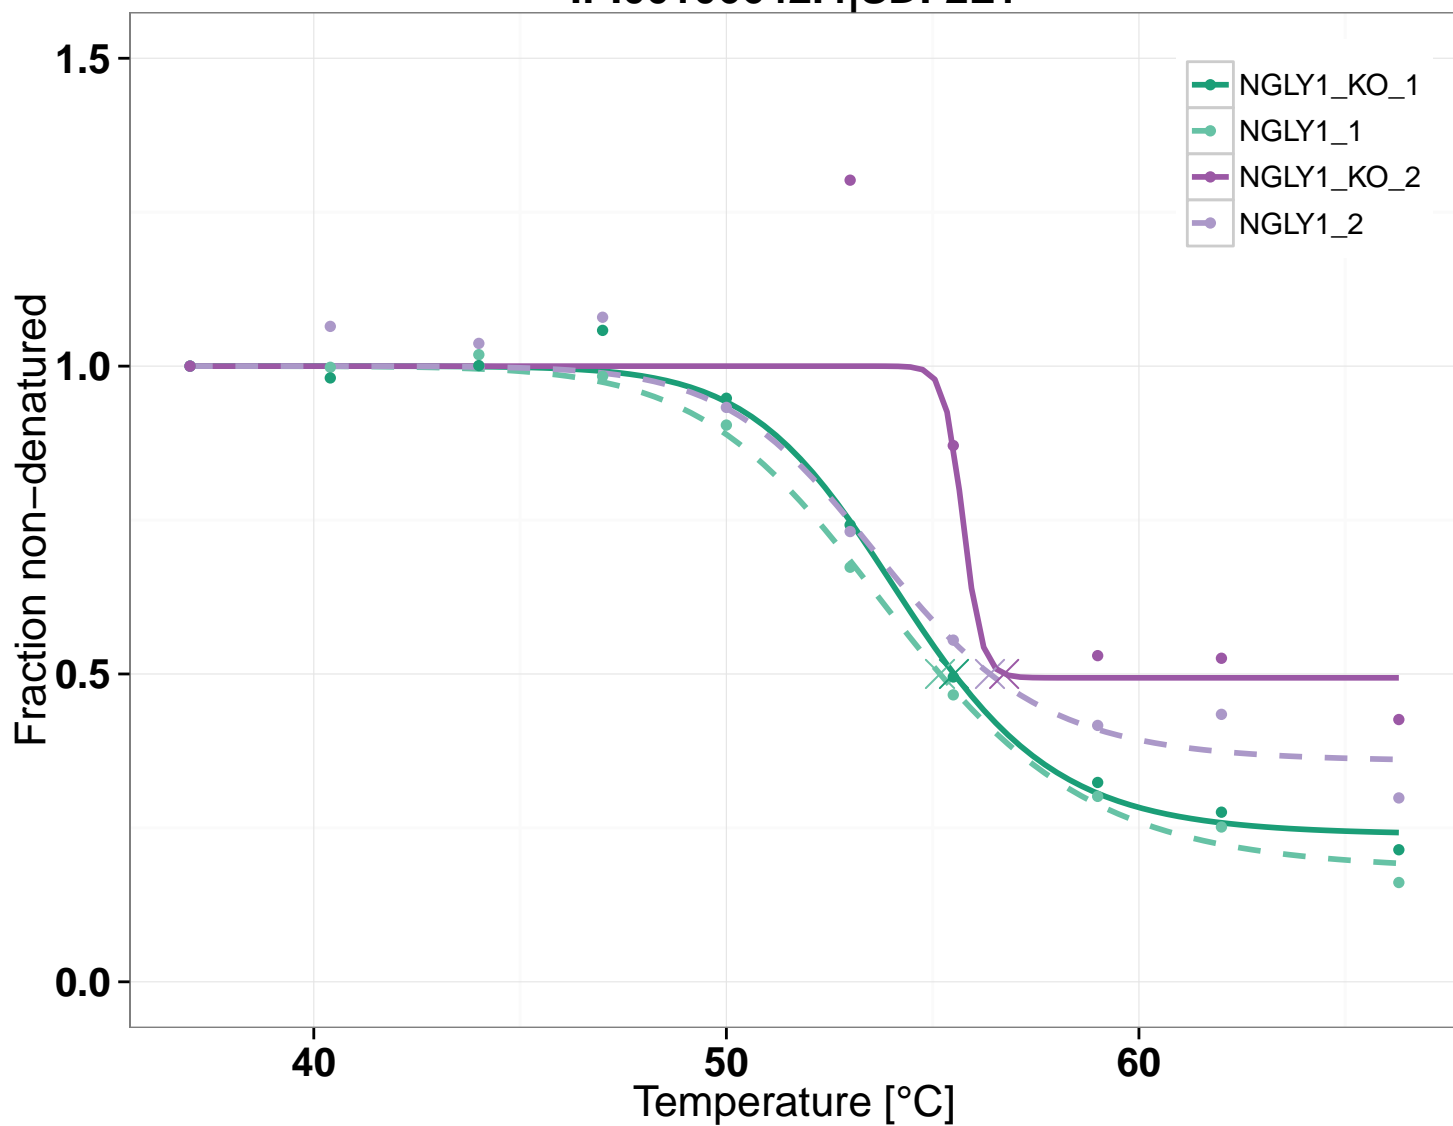

|            | meltPoint | slope  | plateau | R2   |
|------------|-----------|--------|---------|------|
| NGLY1_KO_1 | 55.52     | -0.1   | 0.24    | 0.99 |
| NGLY1_1    | 55.18     | -0.087 | 0.18    | 1    |
| NGLY1_KO_2 | 56.73     | -0.57  | 0.49    | 0.1  |
| NGLY1_2    | 56.39     | -0.083 | 0.36    | 0.97 |

Supplement: Supplementary file 2148 [file 1]

IPI00005613.3|U2AF1

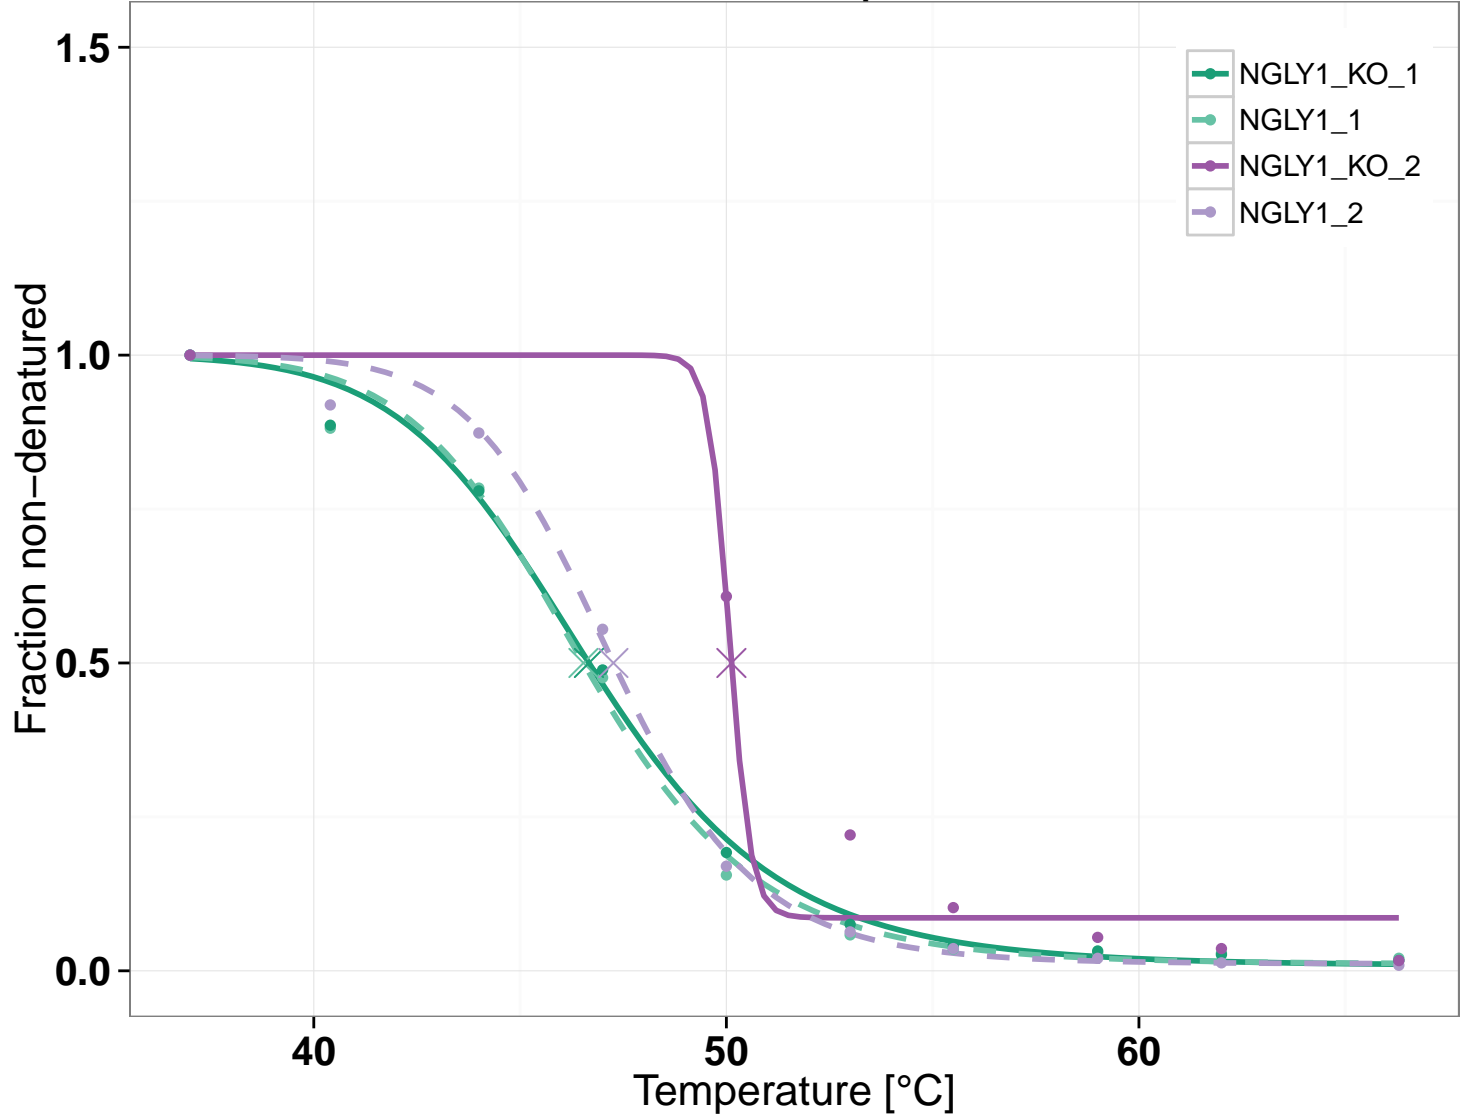

|            | meltPoint | slope | plateau | R2   |
|------------|-----------|-------|---------|------|
| NGLY1_KO_1 | 46.67     | -0.11 | 0.01    | 1    |
| NGLY1_1    | 46.54     | -0.12 | 0.01    | 0.99 |
| NGLY1_KO_2 | 50.12     | -0.89 | 0.09    | 0.3  |
| NGLY1_2    | 47.26     | -0.14 | 0.01    | 1    |

Supplement: Supplementary file 2149 [file 1]

IPI00385141.1|TMEM50A

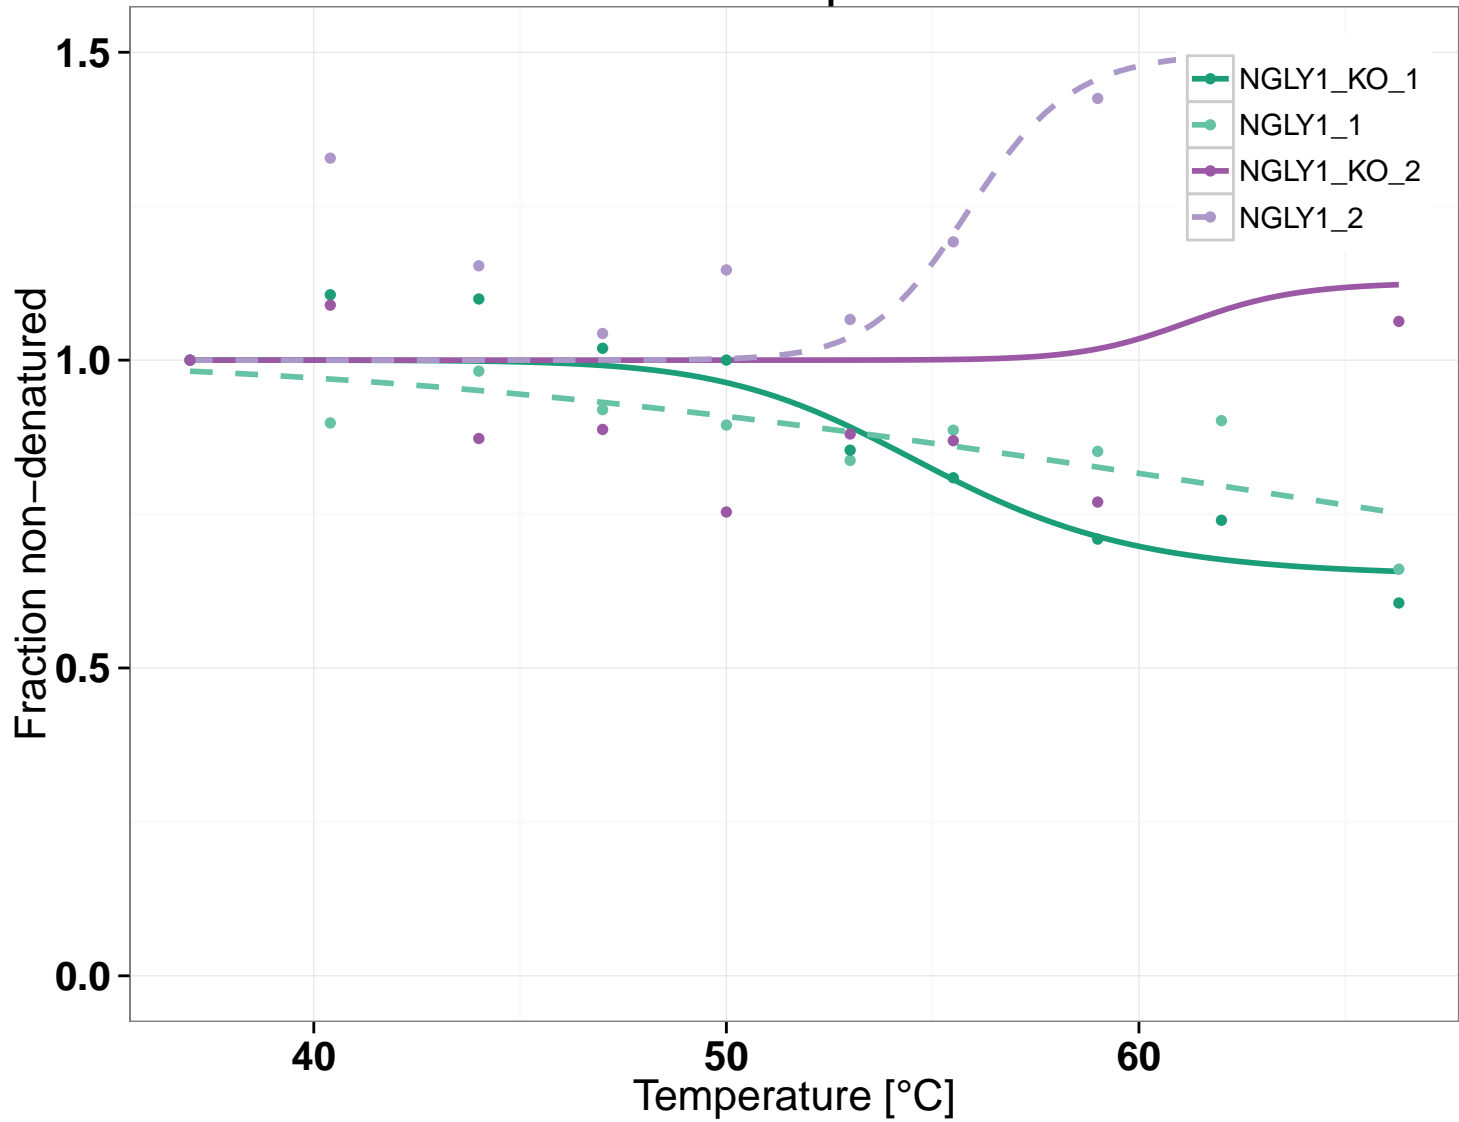

|            | meltPoint | slope  | plateau | R2    |
|------------|-----------|--------|---------|-------|
| NGLY1_KO_1 | -         | -0.035 | 0.65    | 0.88  |
| NGLY1_1    | -         | -0.01  | 0       | 0.62  |
| NGLY1_KO_2 | -         | 0.024  | 1.13    | -0.05 |
| NGLY1_2    | -         | 0.1    | 1.5     | 0.39  |

Supplement: Supplementary file 2150 [file 1]

IPI00383960.5|EGFL7

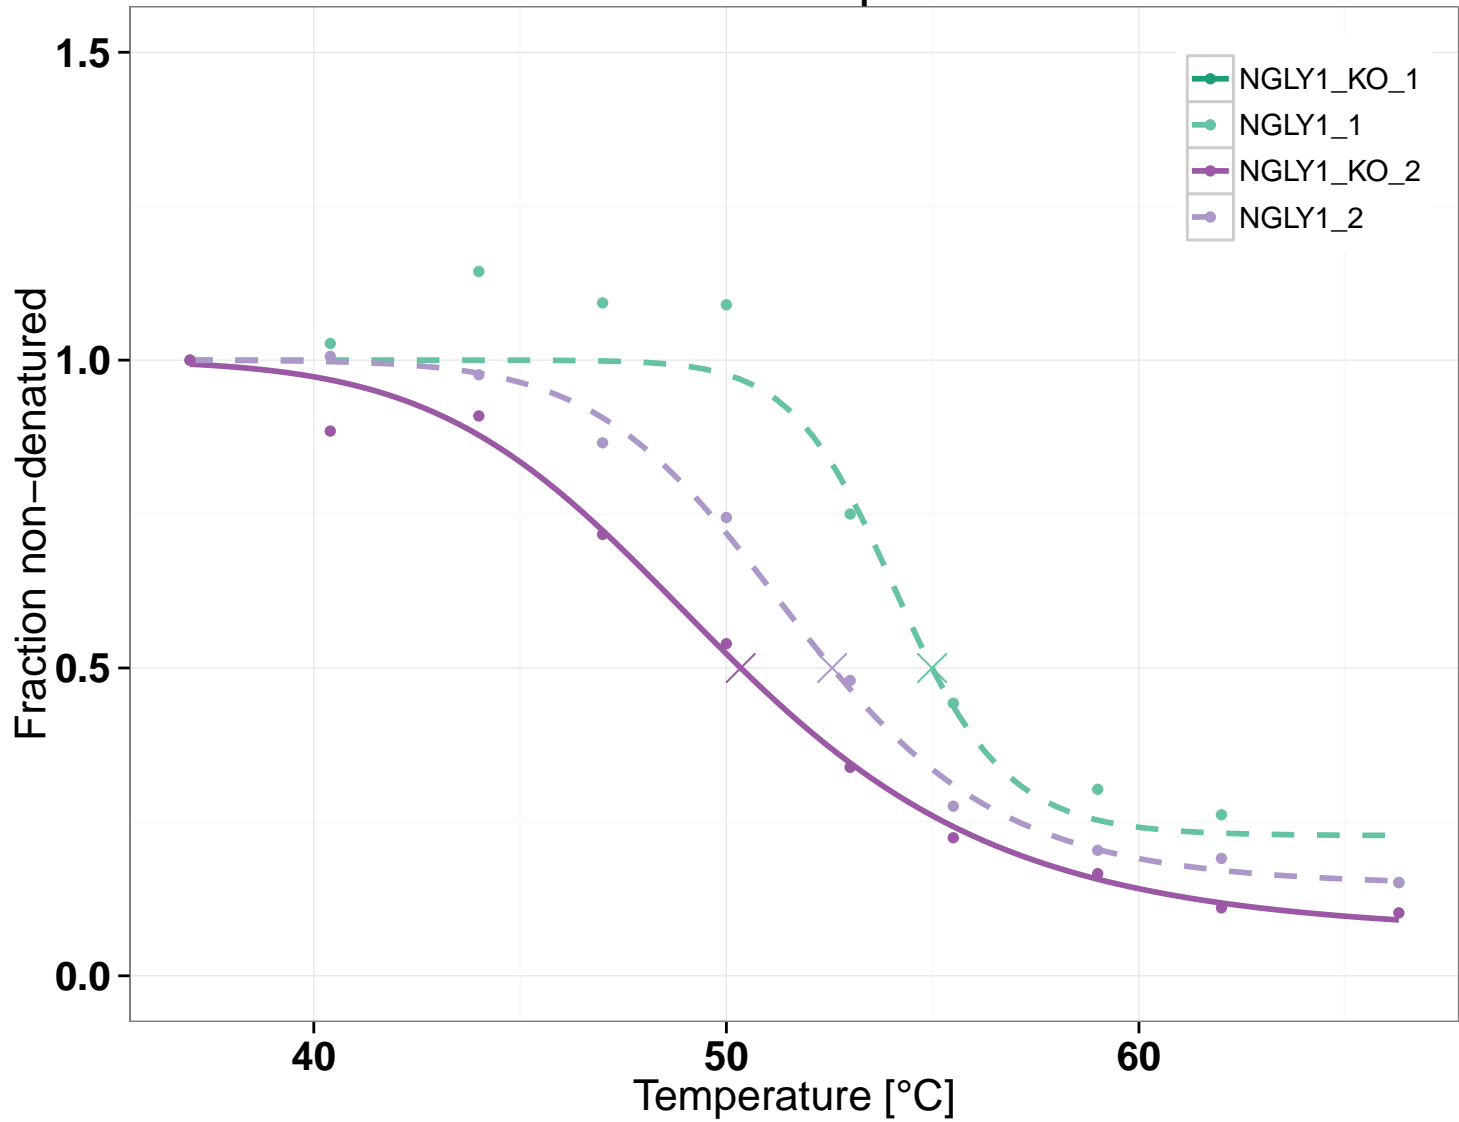

|            | meltPoint | slope  | plateau | R2   |
|------------|-----------|--------|---------|------|
| NGLY1_KO_1 | -         | -      | -       | -    |
| NGLY1_1    | 54.99     | -0.15  | 0.23    | 0.96 |
| NGLY1_KO_2 | 50.35     | -0.068 | 0.06    | 0.99 |
| NGLY1_2    | 52.56     | -0.087 | 0.15    | 1    |

Supplement: Supplementary file 2151 [file 1]

IPI00024547.1|MMADHC

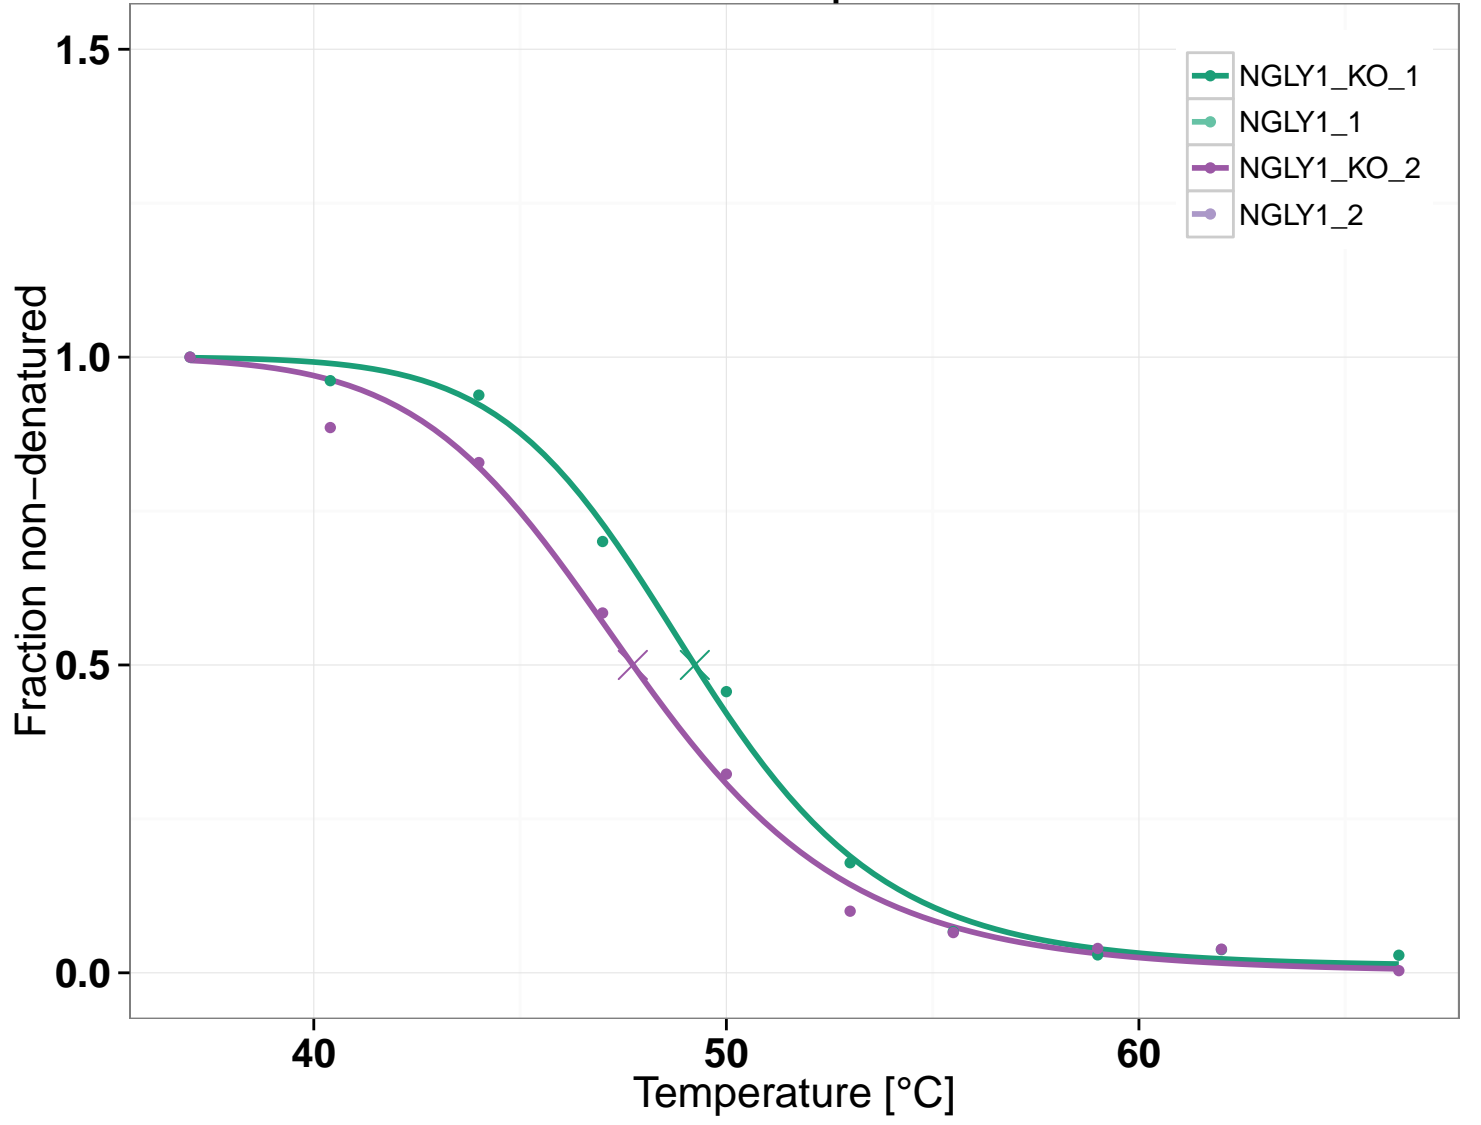

|            | meltPoint | slope  | plateau | R2   |
|------------|-----------|--------|---------|------|
| NGLY1_KO_1 | 49.24     | -0.11  | 0.01    | 1    |
| NGLY1_1    | -         | -      | -       | -    |
| NGLY1_KO_2 | 47.73     | -0.095 | 0       | 0.99 |
| NGLY1_2    | -         | -      | -       | -    |

Supplement: Supplementary file 2152 [file 1]

# IPI00008728.1|CLPX

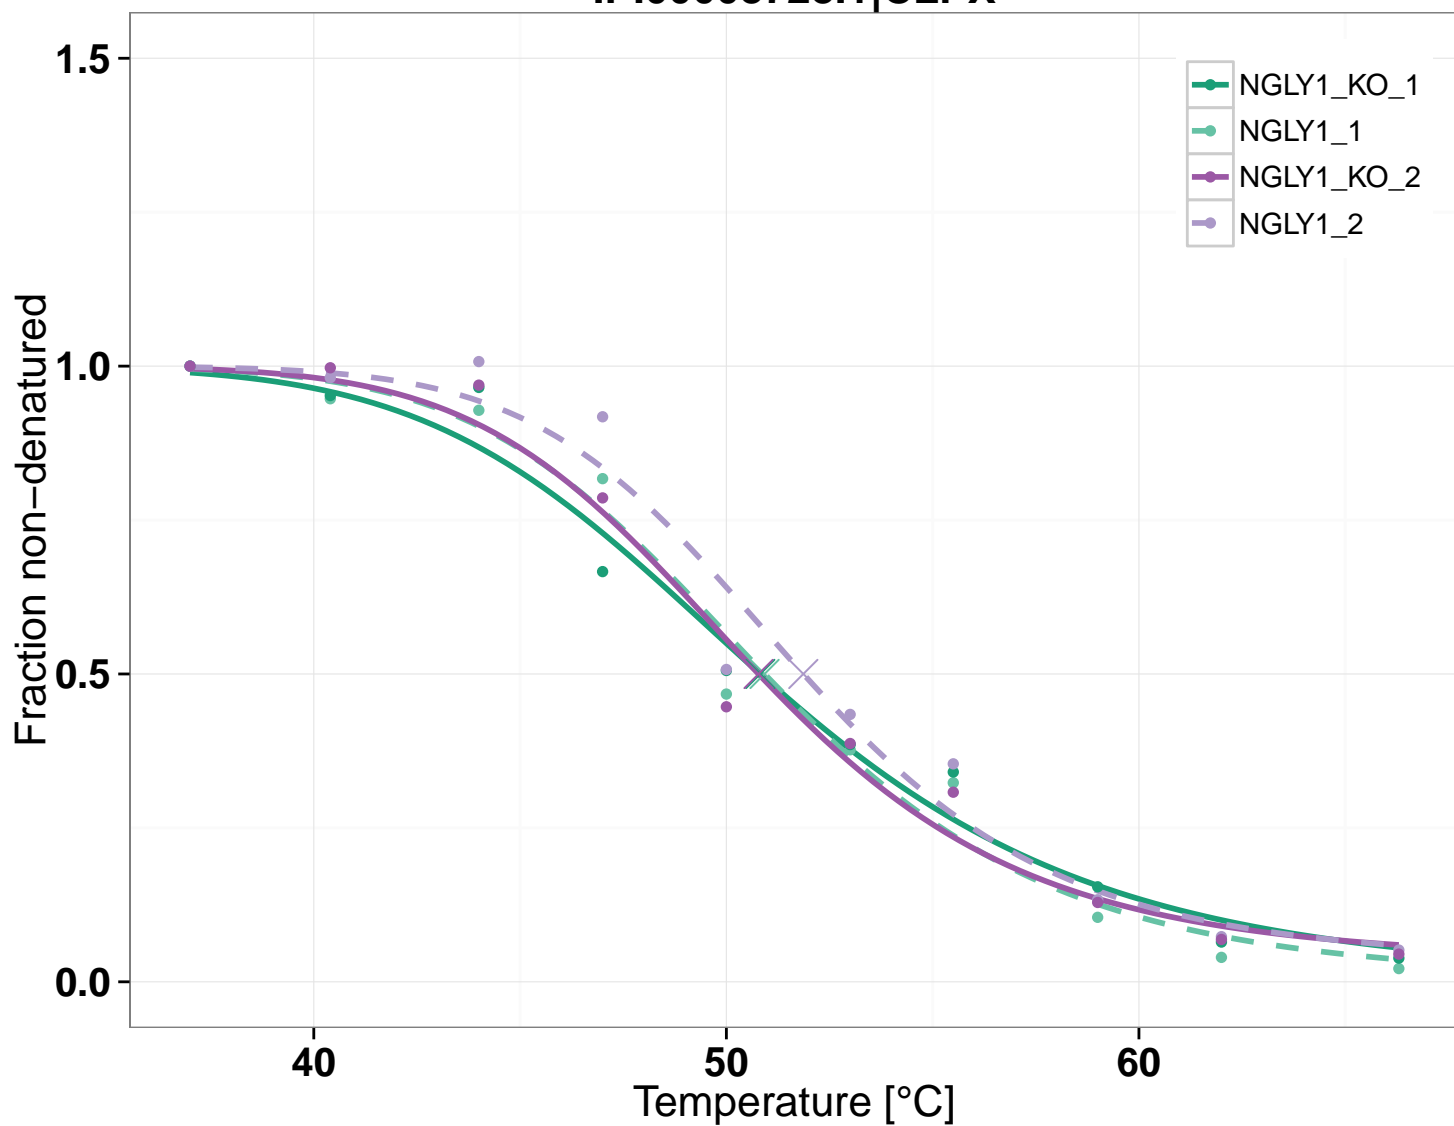

|            | meltPoint | slope  | plateau | R2   |
|------------|-----------|--------|---------|------|
| NGLY1_KO_1 | 50.82     | -0.061 | 0       | 0.98 |
| NGLY1_1    | 50.93     | -0.071 | 0       | 0.98 |
| NGLY1_KO_2 | 50.78     | -0.073 | 0.03    | 0.98 |
| NGLY1_2    | 51.87     | -0.076 | 0.03    | 0.97 |

Supplement: Supplementary file 2153 [file 1]

IPI00217809.1|ZNF100

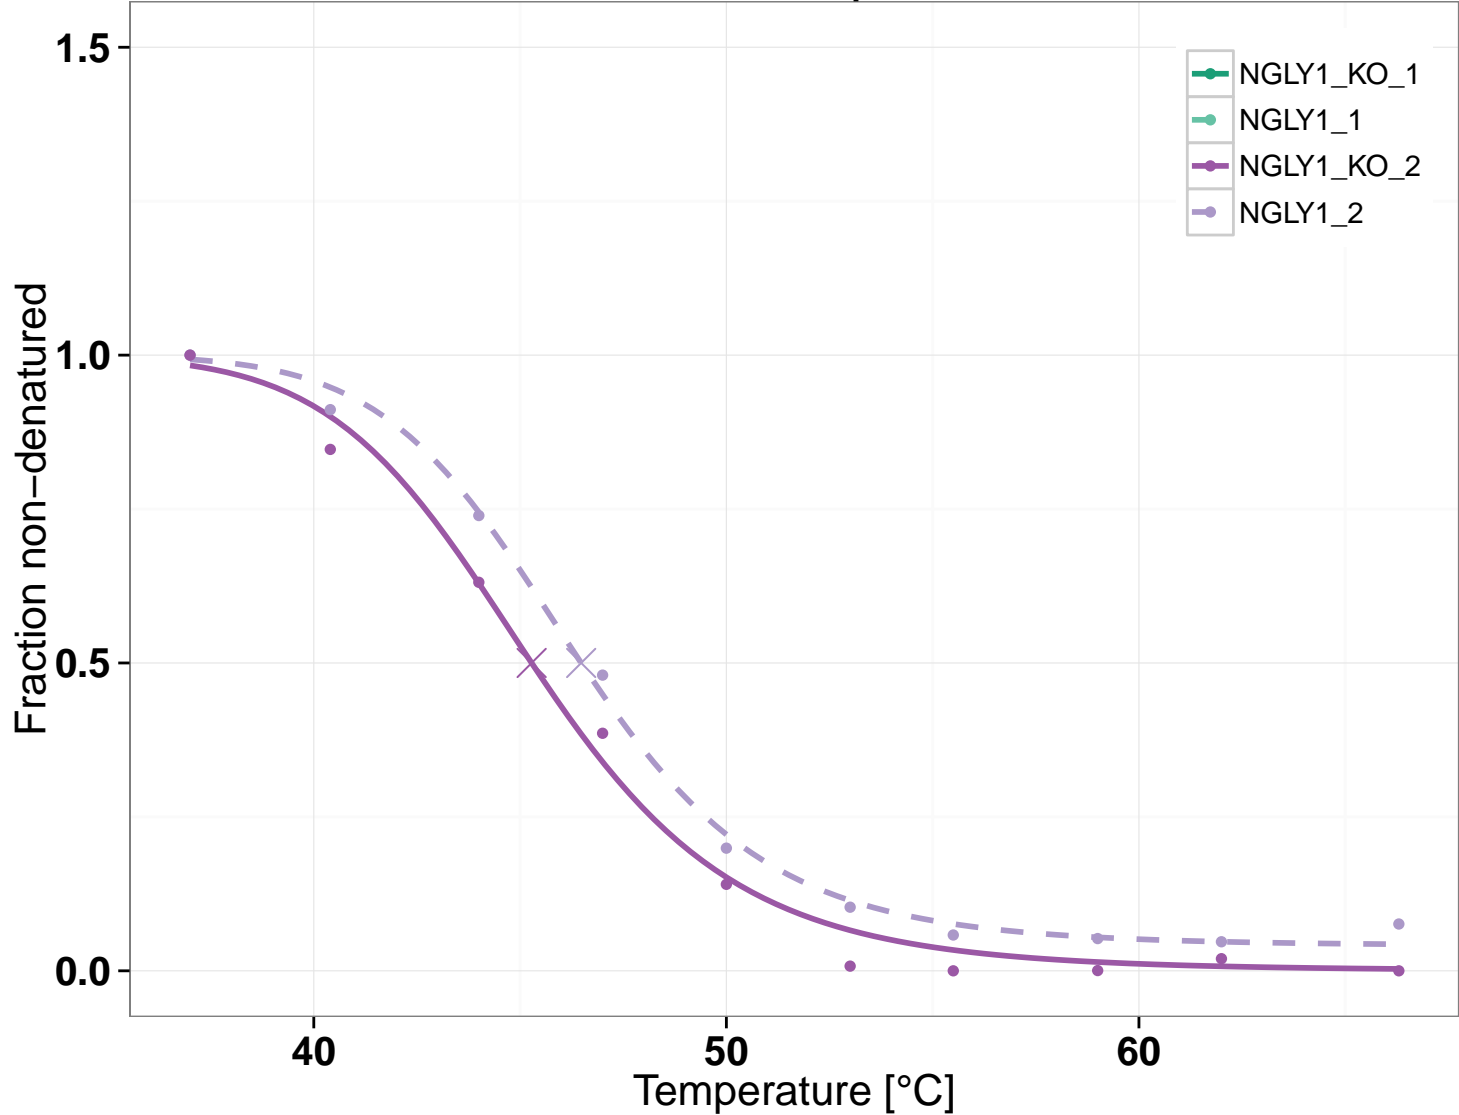

|            | meltPoint | slope | plateau | R2   |
|------------|-----------|-------|---------|------|
| NGLY1_KO_1 | —         | —     | —       | —    |
| NGLY1_1    | —         | —     | —       | —    |
| NGLY1_KO_2 | 45.28     | -0.1  | 0       | 0.99 |
| NGLY1_2    | 46.48     | -0.1  | 0.04    | 1    |

Supplement: Supplementary file 2154 [file 1]

IPI00008529.1|RPLP2

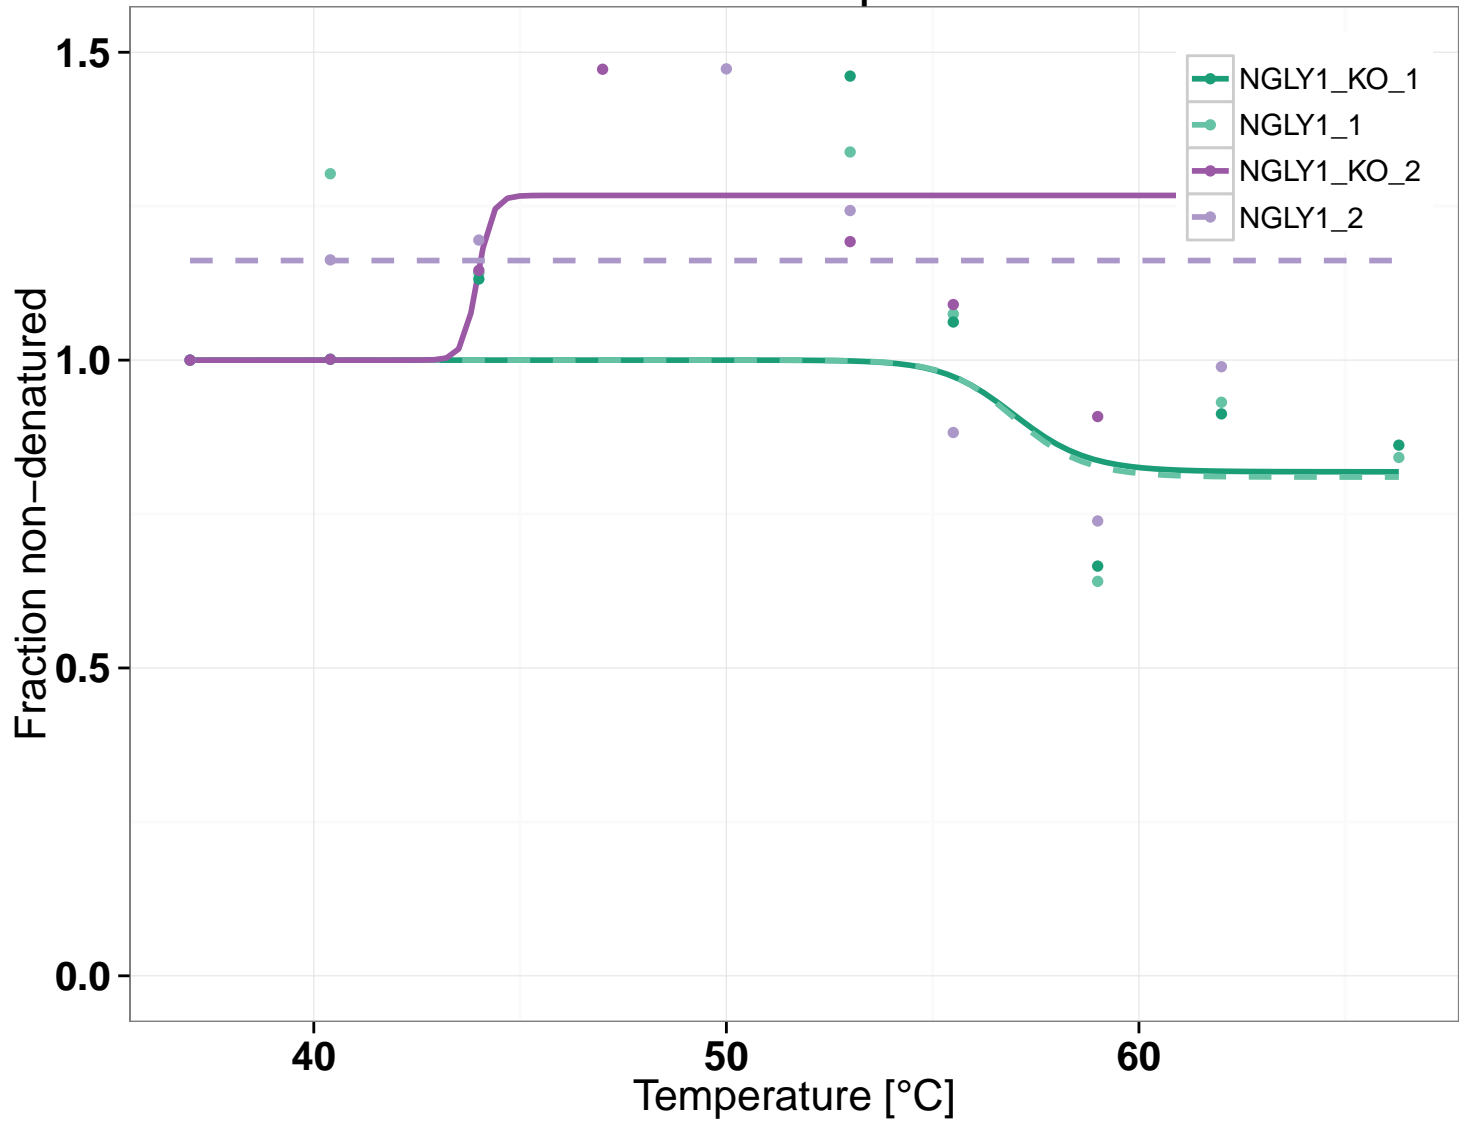

|            | meltPoint | slope  | plateau | R2    |
|------------|-----------|--------|---------|-------|
| NGLY1_KO_1 | -         | -0.051 | 0.82    | -0.07 |
| NGLY1_1    | -         | -0.057 | 0.81    | -0.14 |
| NGLY1_KO_2 | -         | 0.38   | 1.27    | 0.24  |
| NGLY1_2    | -         | -      | 1.32    | 0     |

Supplement: Supplementary file 2155 [file 1]

# IPI00016862.1|GSR

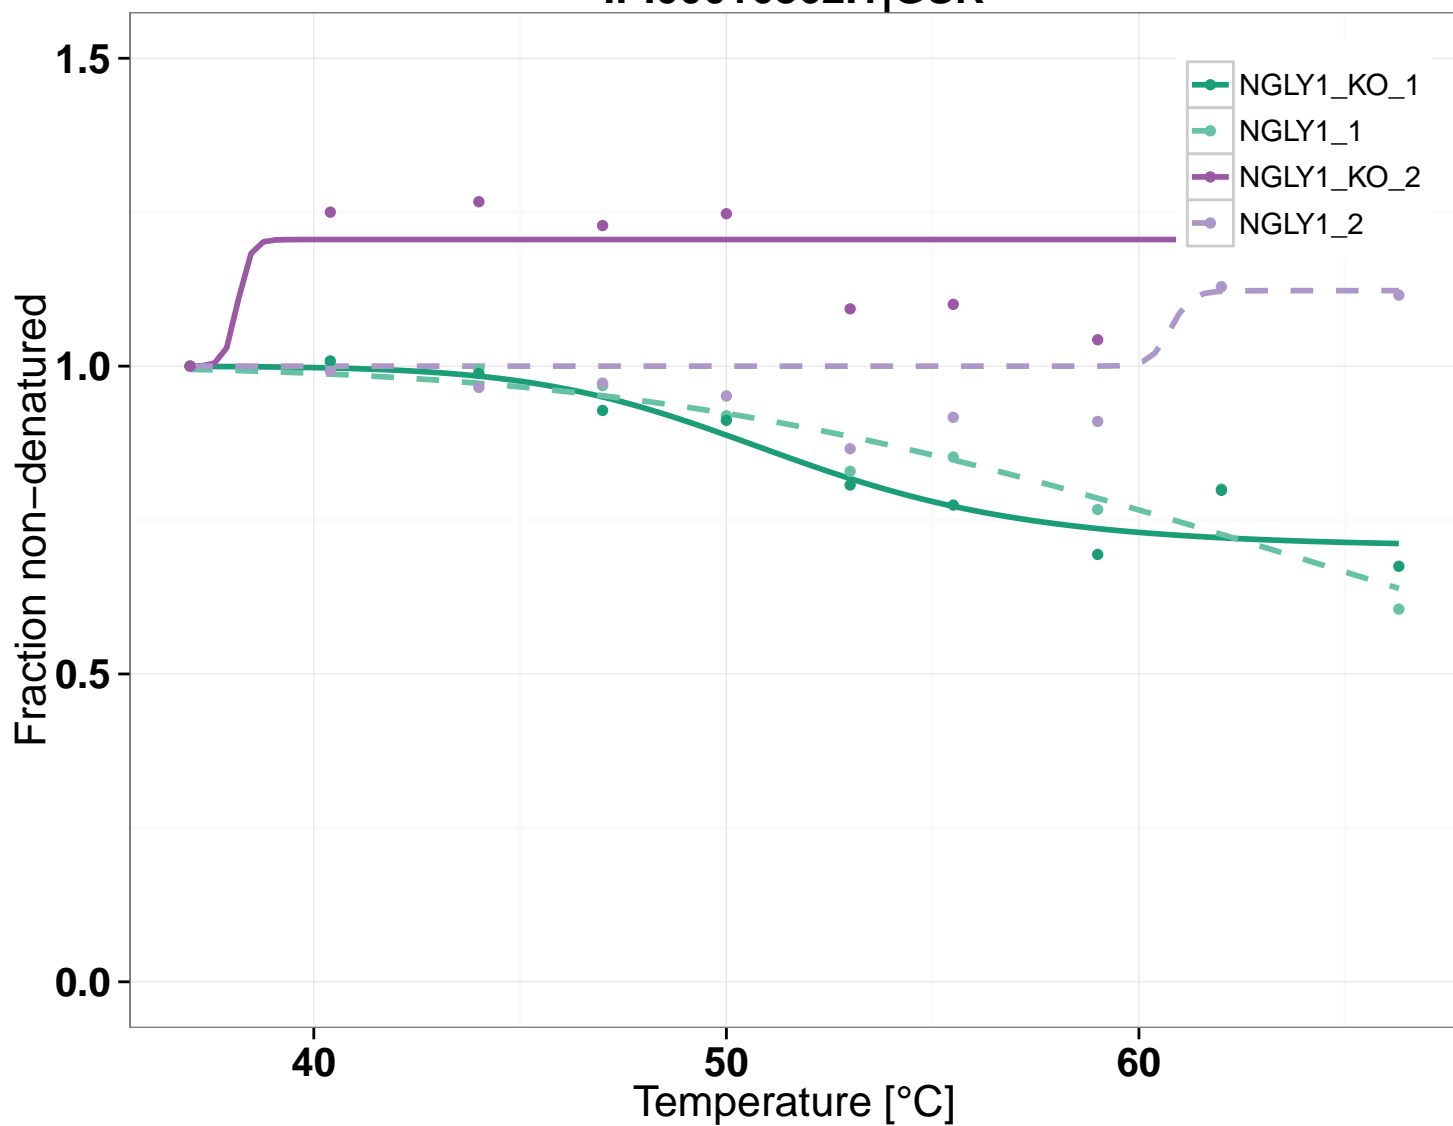

|            | meltPoint | slope  | plateau | R2   |
|------------|-----------|--------|---------|------|
| NGLY1_KO_1 | –         | –0.024 | 0.71    | 0.93 |
| NGLY1_1    | –         | –0.021 | 0       | 0.93 |
| NGLY1_KO_2 | –         | 0.34   | 1.21    | 0.29 |
| NGLY1_2    | –         | 0.12   | 1.12    | 0.41 |

Supplement: Supplementary file 2156 [file 1]

IPI00641124.3|DCUN1D4

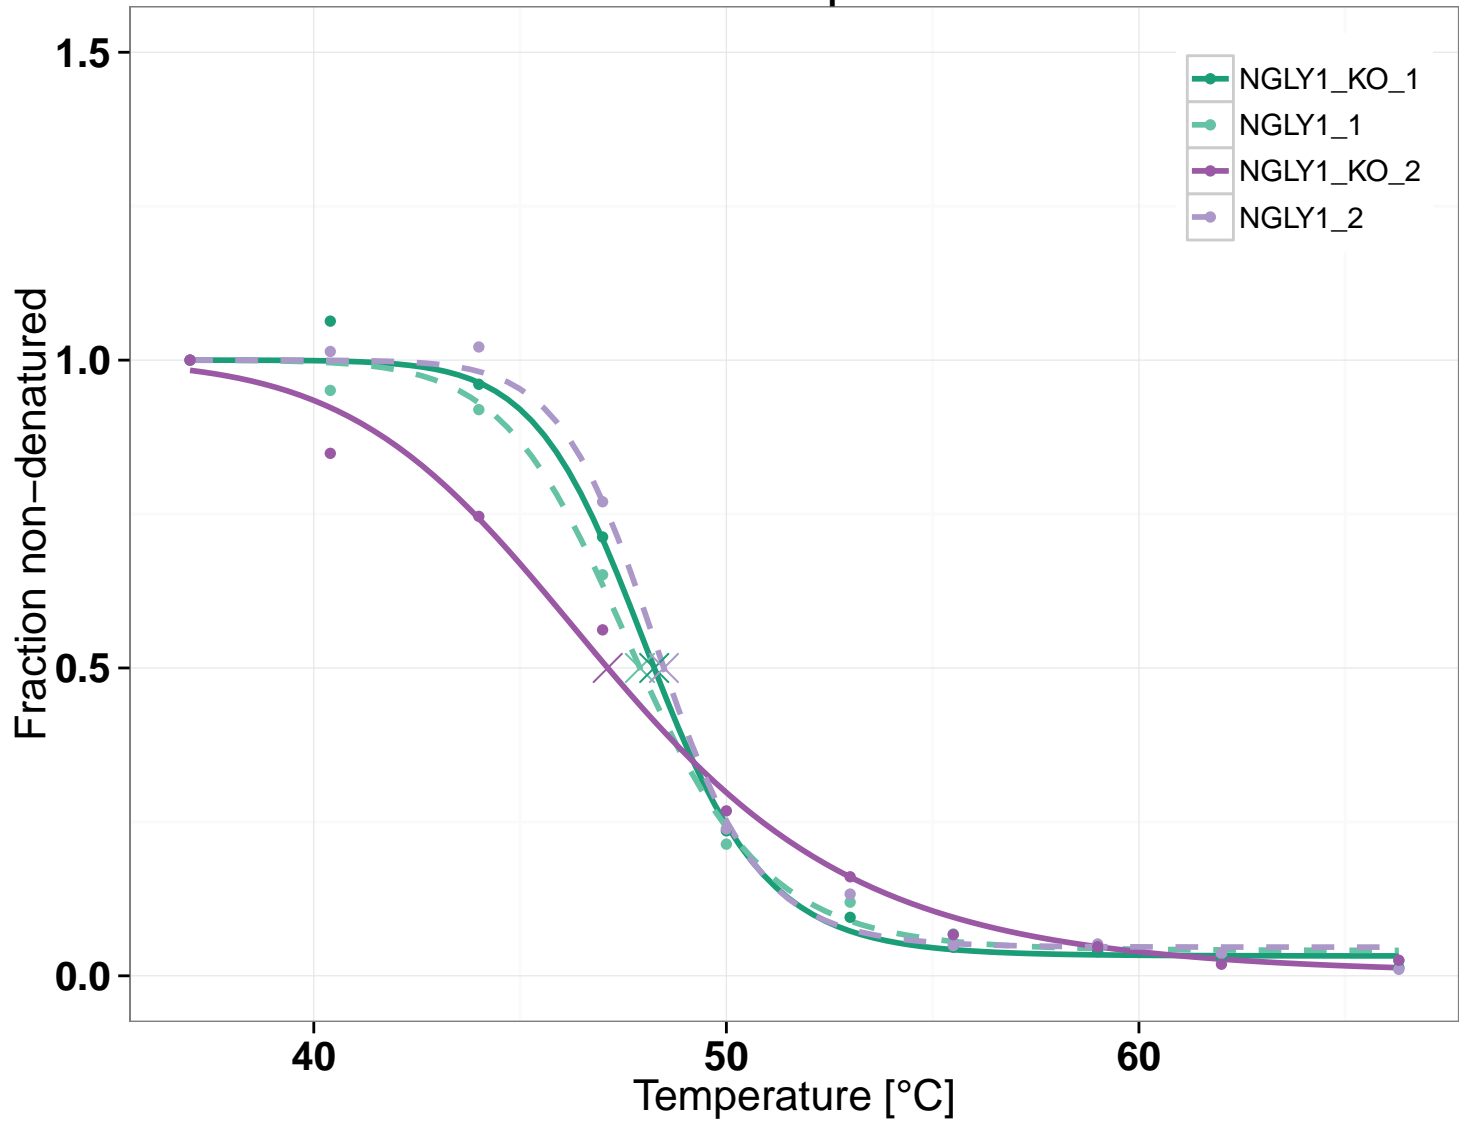

|            | meltPoint | slope  | plateau | R2   |
|------------|-----------|--------|---------|------|
| NGLY1_KO_1 | 48.25     | -0.17  | 0.03    | 1    |
| NGLY1_1    | 47.91     | -0.15  | 0.04    | 1    |
| NGLY1_KO_2 | 47.12     | -0.081 | 0       | 0.99 |
| NGLY1_2    | 48.49     | -0.2   | 0.05    | 1    |

Supplement: Supplementary file 2157 [file 1]

IPI00645737.1|CBWD6

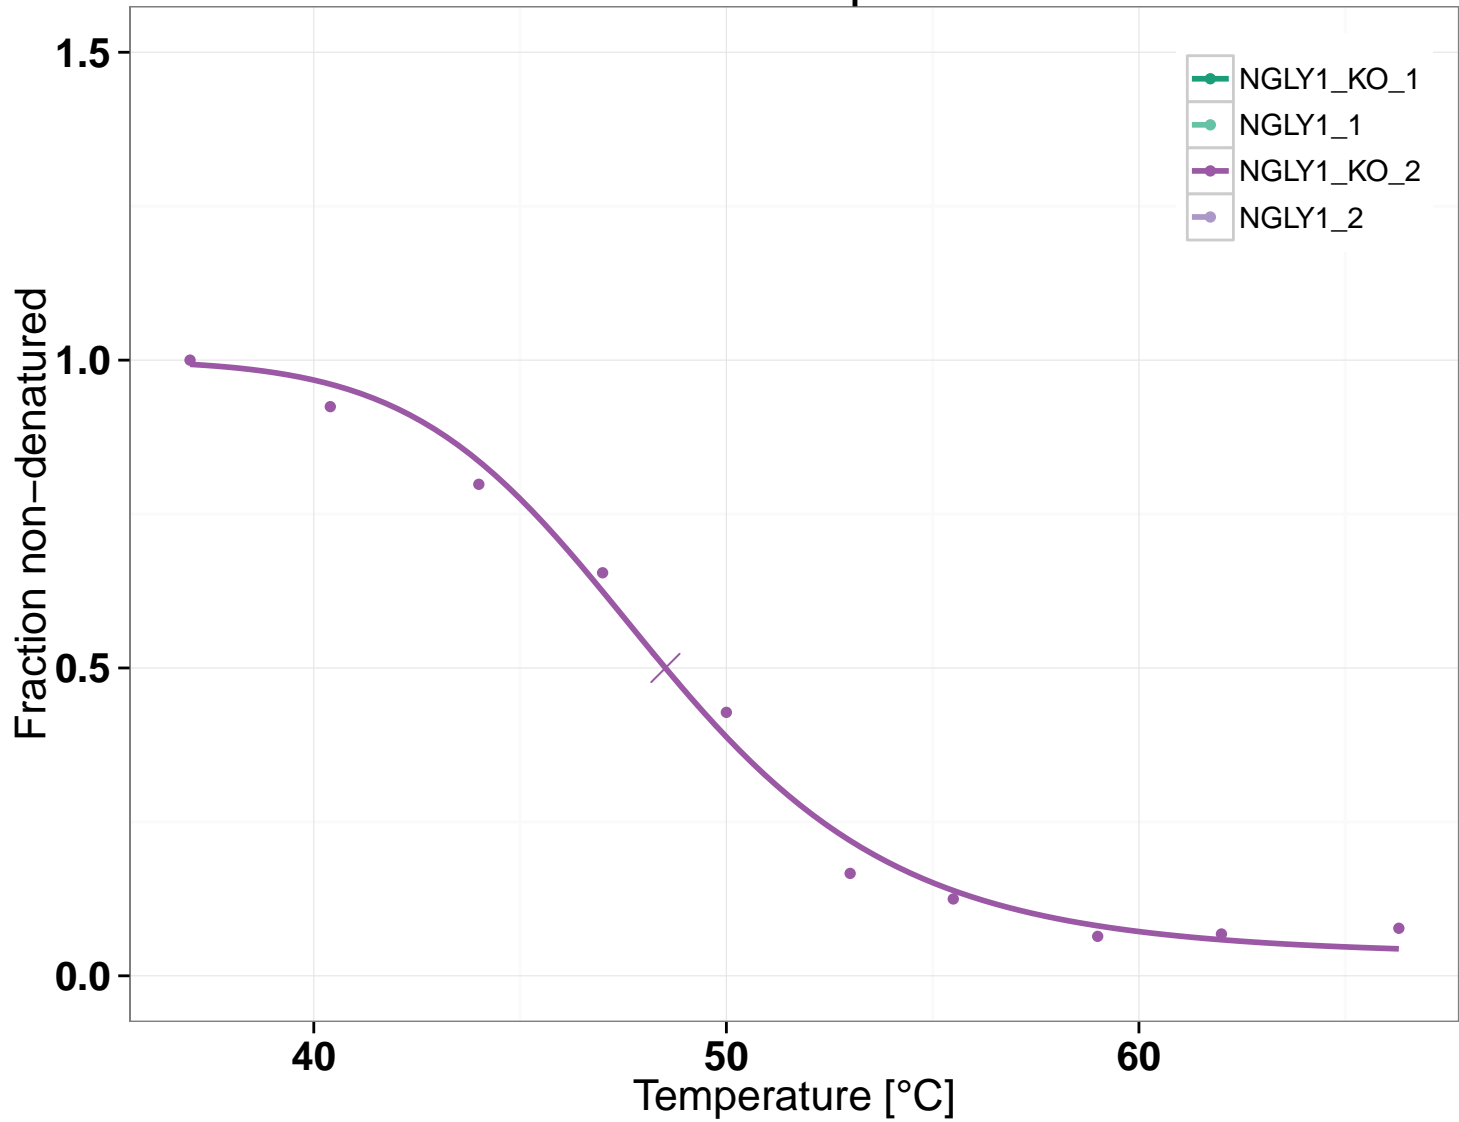

|            | meltPoint | slope  | plateau | R2   |
|------------|-----------|--------|---------|------|
| NGLY1_KO_1 | —         | —      | —       | —    |
| NGLY1_1    | —         | —      | —       | —    |
| NGLY1_KO_2 | 48.52     | -0.082 | 0.03    | 0.99 |
| NGLY1_2    | —         | —      | —       | —    |

Supplement: Supplementary file 2158 [file 1]

# IPI00657805.1|XRN1

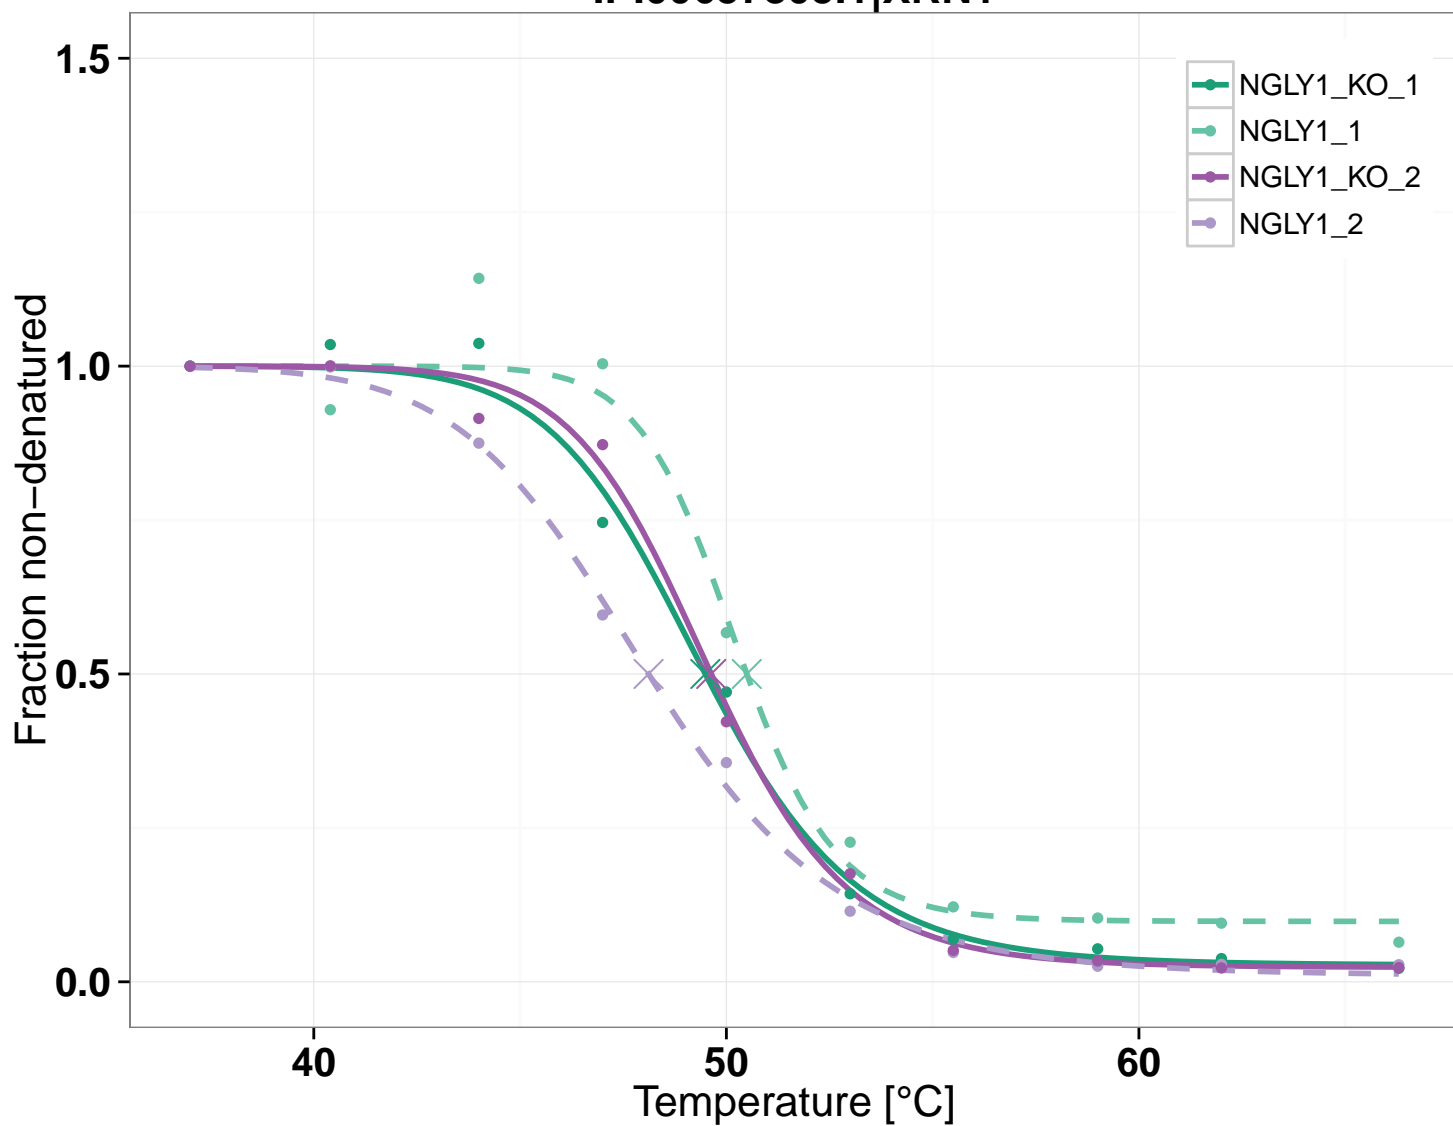

|            | meltPoint | slope | plateau | R2   |
|------------|-----------|-------|---------|------|
| NGLY1_KO_1 | 49.49     | -0.13 | 0.03    | 0.99 |
| NGLY1_1    | 50.49     | -0.19 | 0.1     | 0.98 |
| NGLY1_KO_2 | 49.63     | -0.15 | 0.02    | 1    |
| NGLY1_2    | 48.11     | -0.11 | 0.01    | 1    |

Supplement: Supplementary file 2159 [file 1]

IPI00015865.6|ADPRHL2

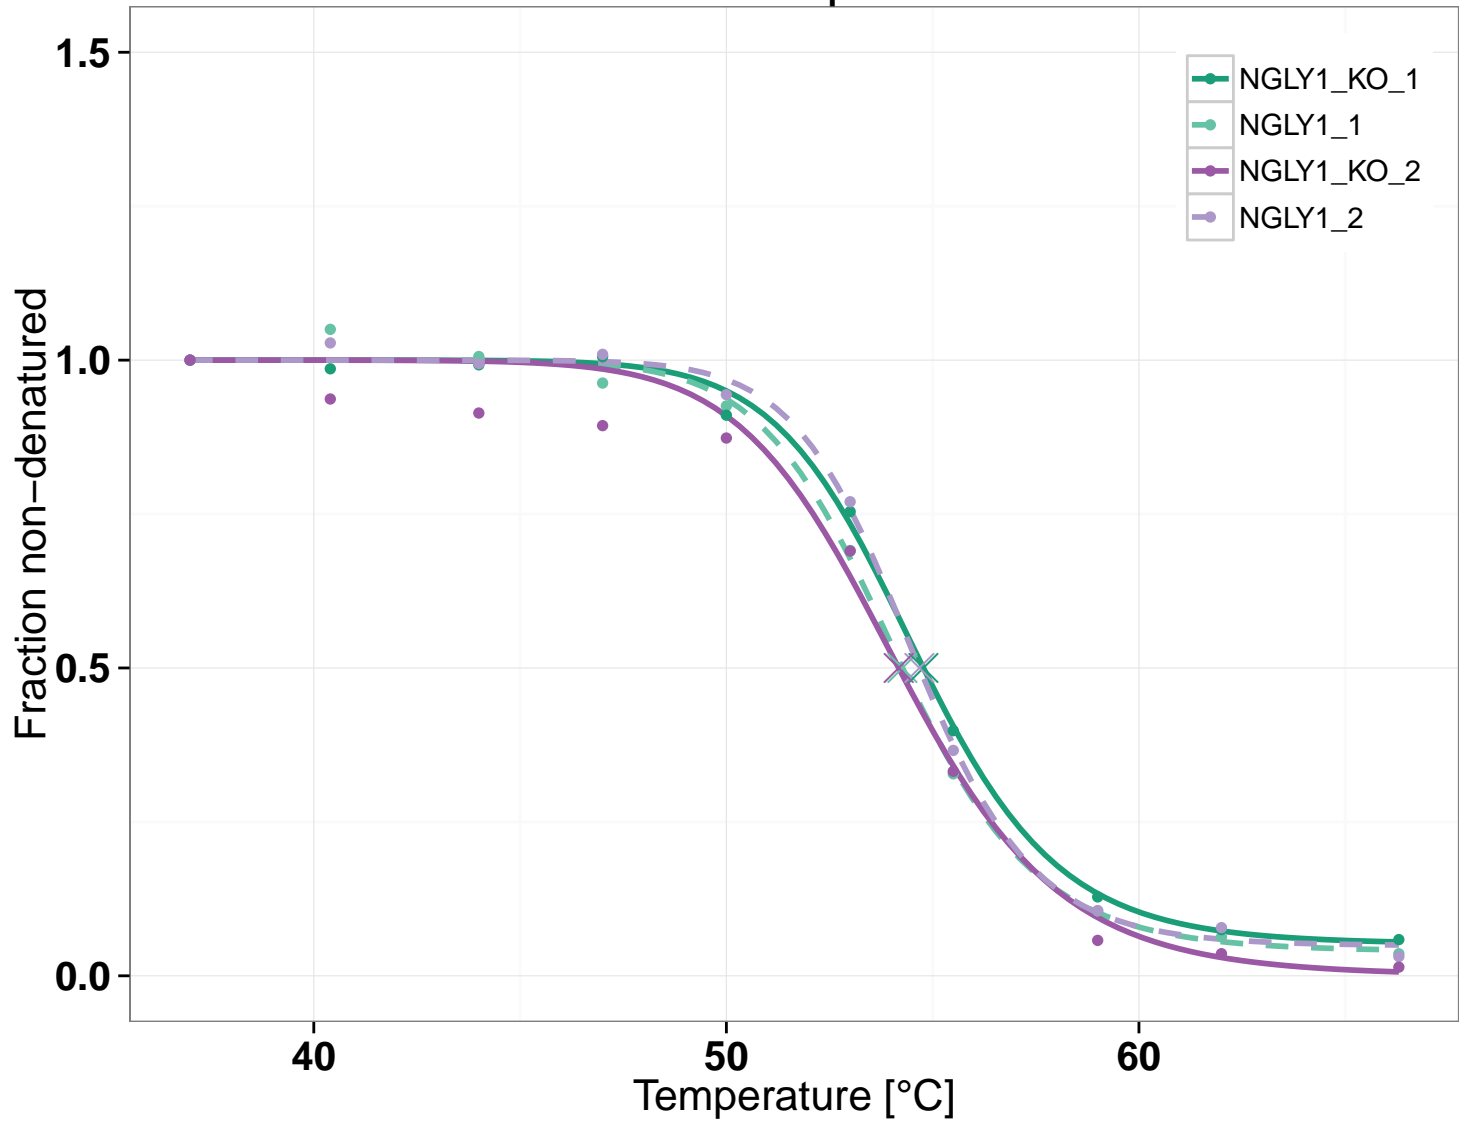

|            | meltPoint | slope | plateau | R2   |
|------------|-----------|-------|---------|------|
| NGLY1_KO_1 | 54.78     | -0.14 | 0.05    | 1    |
| NGLY1_1    | 54.27     | -0.14 | 0.04    | 1    |
| NGLY1_KO_2 | 54.18     | -0.13 | 0       | 0.98 |
| NGLY1_2    | 54.68     | -0.16 | 0.05    | 1    |

Supplement: Supplementary file 2160 [file 1]

IPI00434706.1|FAM100A

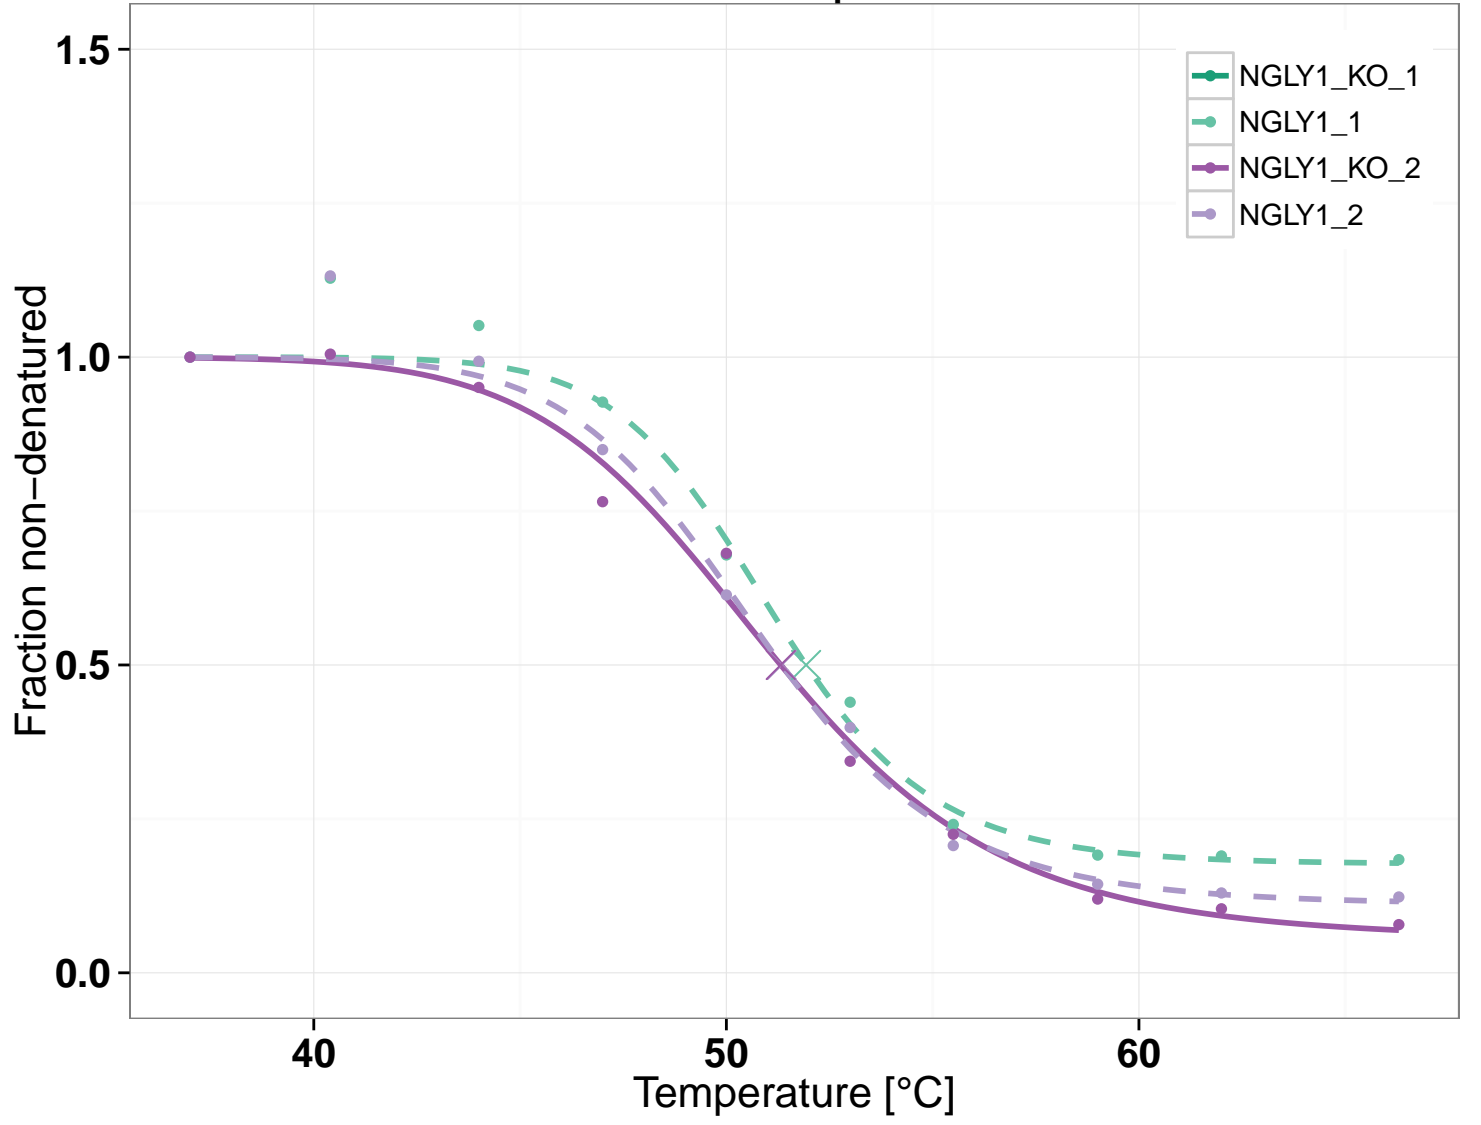

|            | meltPoint | slope  | plateau | R2   |
|------------|-----------|--------|---------|------|
| NGLY1_KO_1 | -         | -      | -       | -    |
| NGLY1_1    | 51.93     | -0.11  | 0.18    | 0.98 |
| NGLY1_KO_2 | 51.32     | -0.083 | 0.05    | 0.99 |
| NGLY1_2    | 51.34     | -0.096 | 0.11    | 0.99 |

Supplement: Supplementary file 2161 [file 1]

# IPI00916452.1|RHBDD1

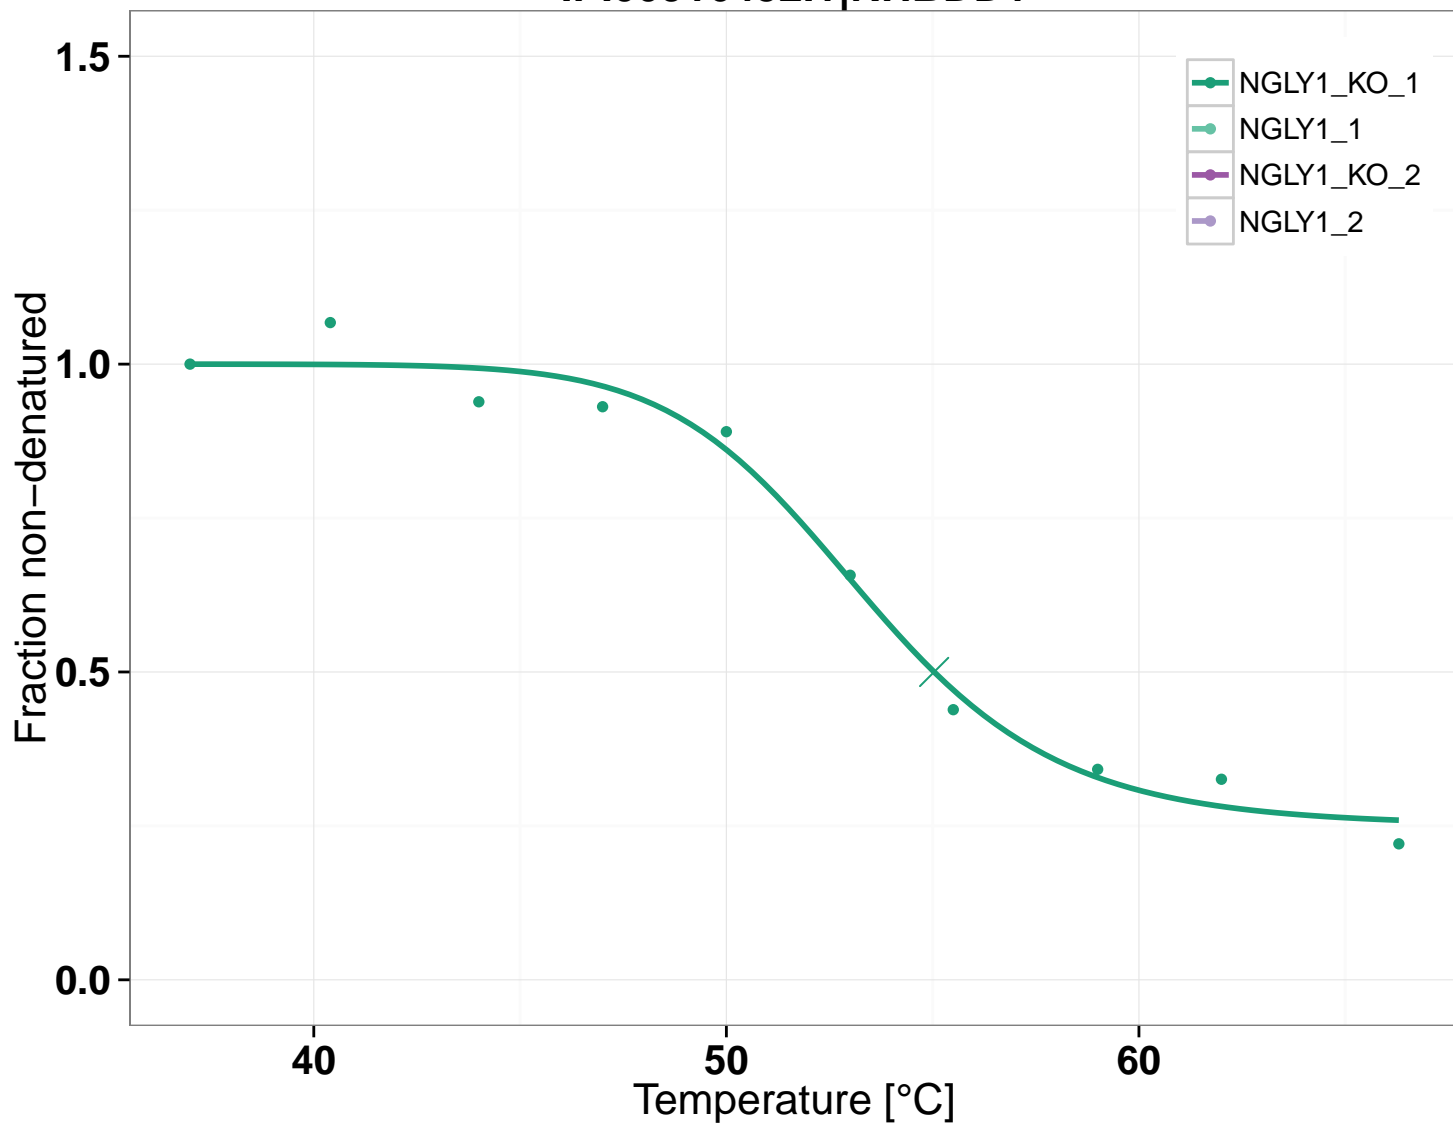

|            | meltPoint | slope  | plateau | R2   |
|------------|-----------|--------|---------|------|
| NGLY1_KO_1 | 55.04     | -0.079 | 0.25    | 0.98 |
| NGLY1_1    | -         | -      | -       | -    |
| NGLY1_KO_2 | -         | -      | -       | -    |
| NGLY1_2    | -         | -      | -       | -    |

Supplement: Supplementary file 2162 [file 1]

IPI00375563.1|RNF34

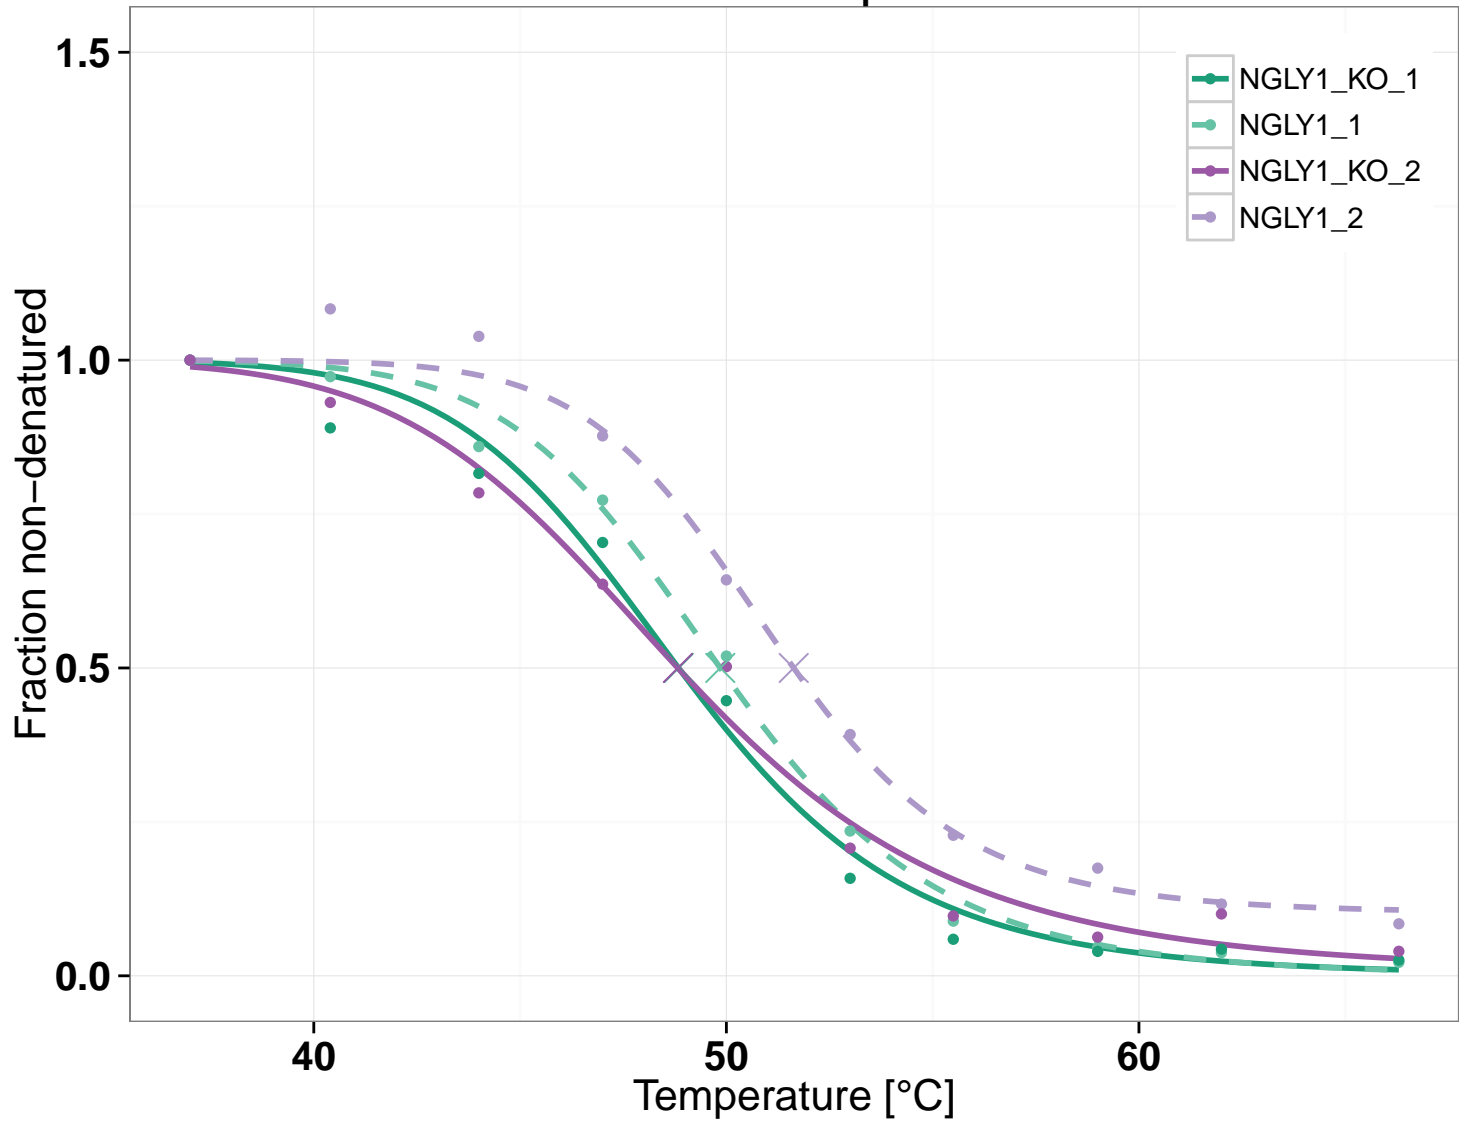

|            | meltPoint | slope  | plateau | R2   |
|------------|-----------|--------|---------|------|
| NGLY1_KO_1 | 48.84     | -0.091 | 0       | 0.99 |
| NGLY1_1    | 49.85     | -0.096 | 0       | 0.99 |
| NGLY1_KO_2 | 48.82     | -0.074 | 0       | 0.99 |
| NGLY1_2    | 51.63     | -0.098 | 0.1     | 0.99 |

Supplement: Supplementary file 2163 [file 1]

IPI00007279.3|PCGF3

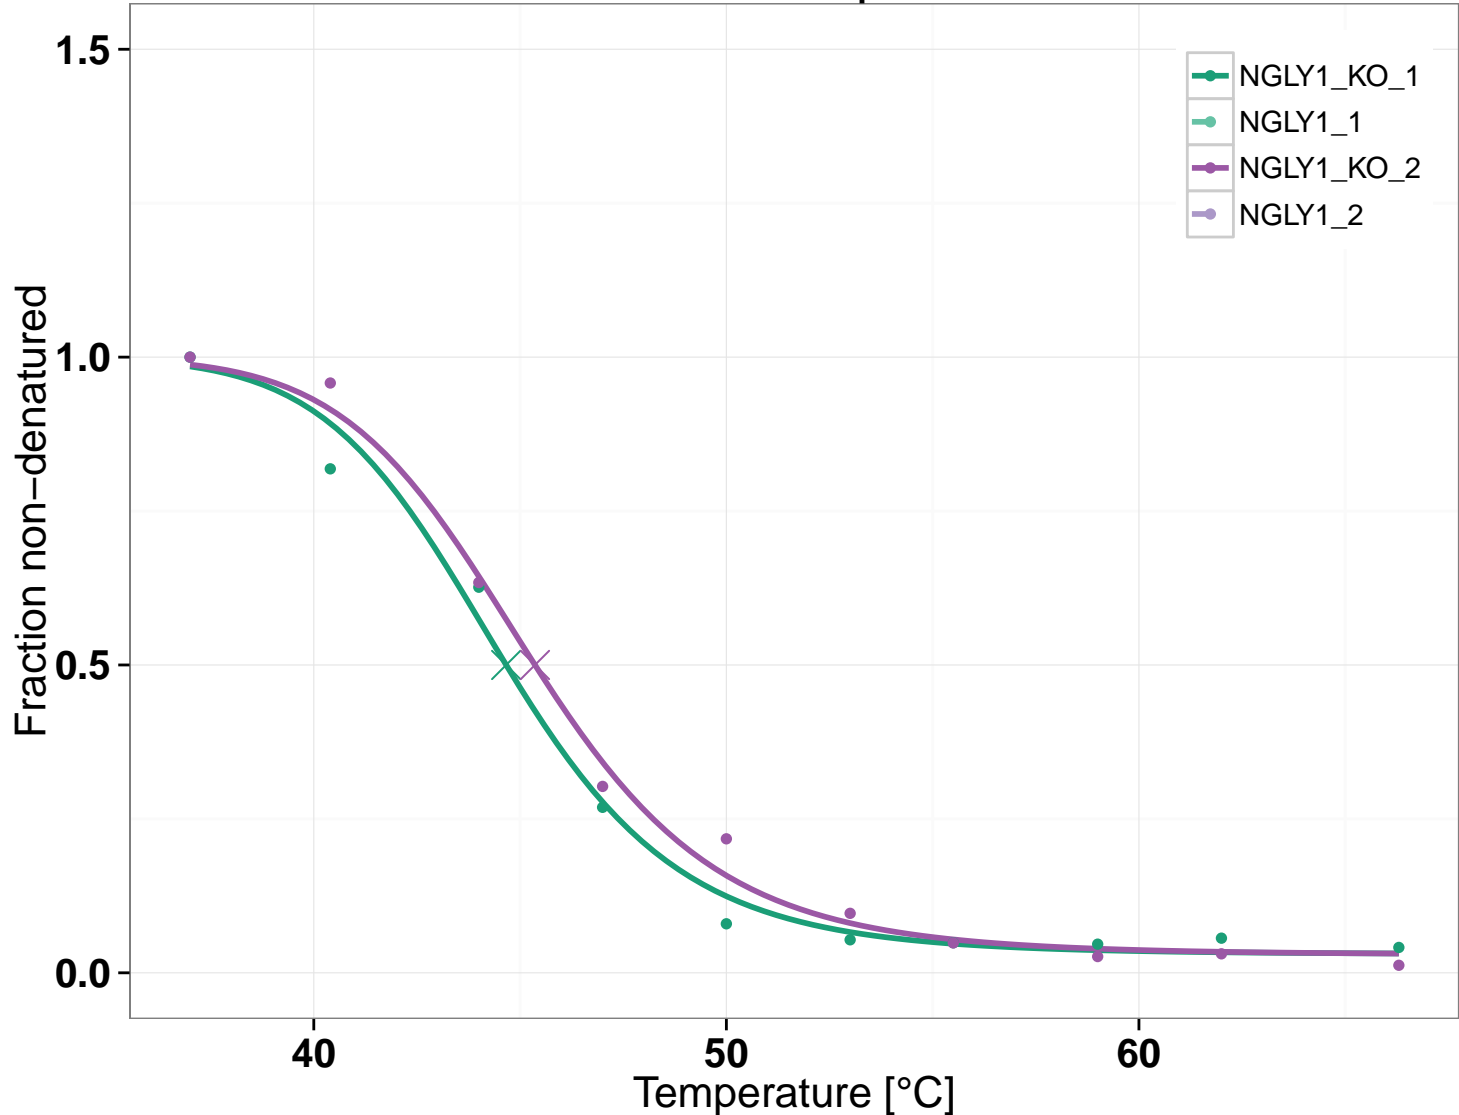

|            | meltPoint | slope | plateau | R2   |
|------------|-----------|-------|---------|------|
| NGLY1_KO_1 | 44.66     | -0.11 | 0.03    | 0.99 |
| NGLY1_1    | -         | -     | -       | -    |
| NGLY1_KO_2 | 45.36     | -0.11 | 0.03    | 0.99 |
| NGLY1_2    | -         | -     | -       | -    |

Supplement: Supplementary file 2164 [file 1]

IPI00413517.6|ARHGEF10

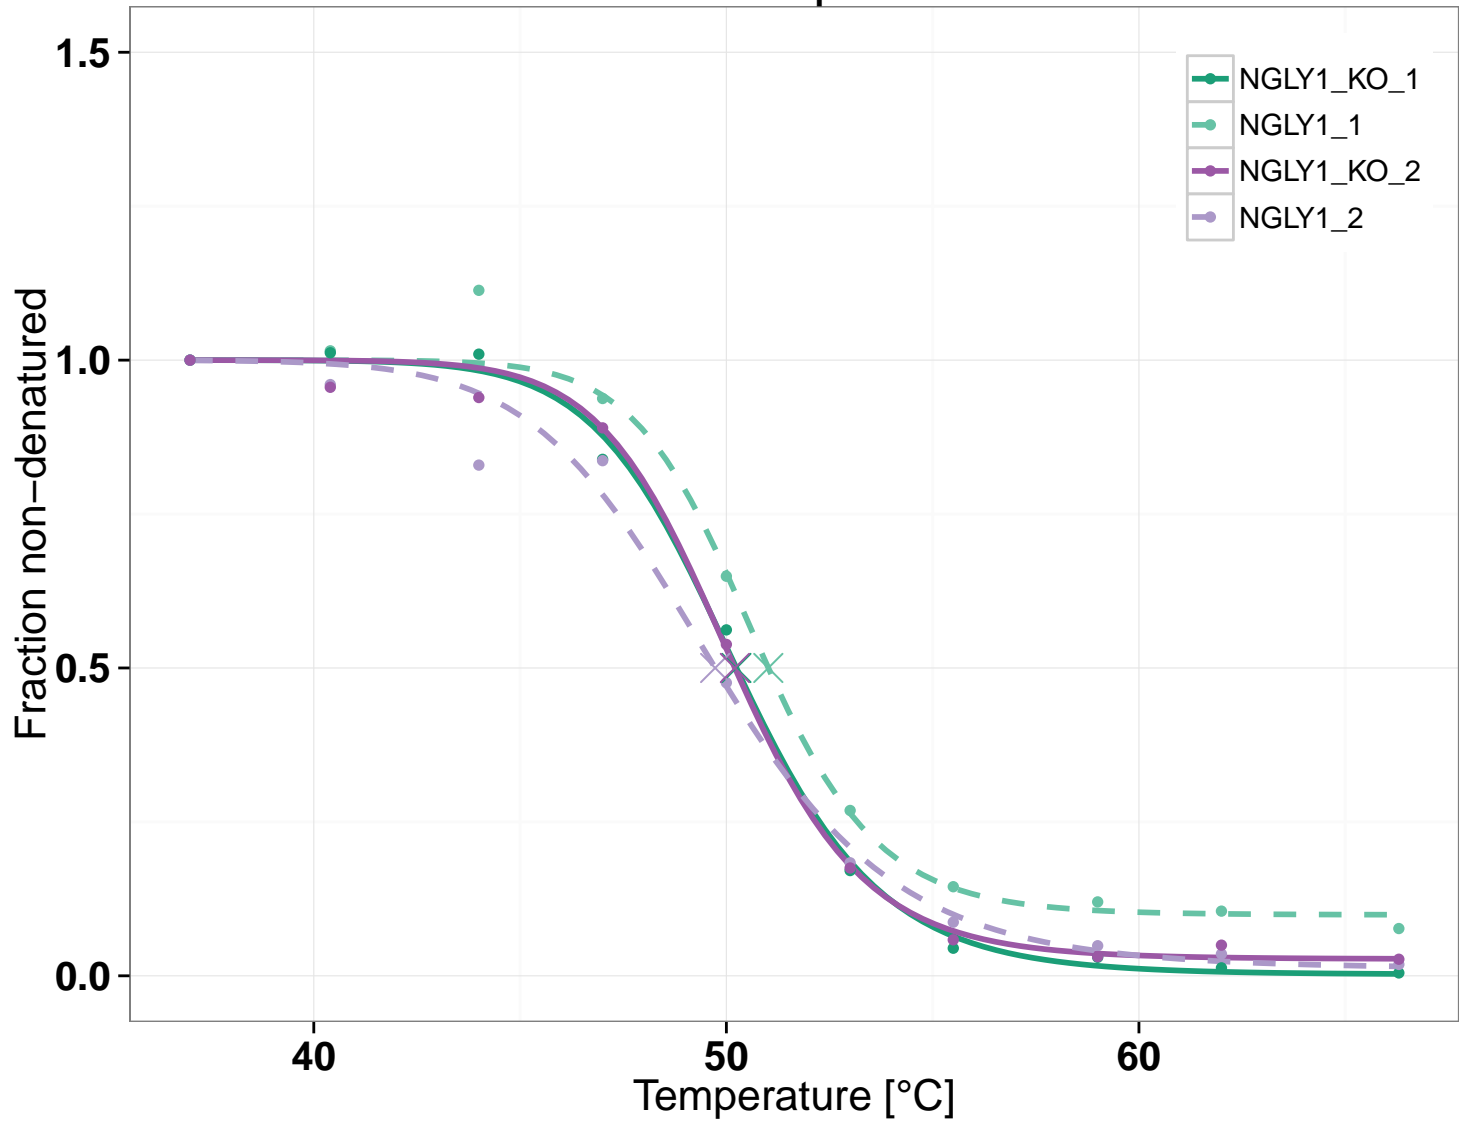

|            | meltPoint | slope | plateau | R2   |
|------------|-----------|-------|---------|------|
| NGLY1_KO_1 | 50.24     | -0.14 | 0       | 1    |
| NGLY1_1    | 51.02     | -0.15 | 0.1     | 0.99 |
| NGLY1_KO_2 | 50.21     | -0.15 | 0.03    | 1    |
| NGLY1_2    | 49.73     | -0.11 | 0.01    | 0.99 |

Supplement: Supplementary file 2165 [file 1]

IPI00025158.2|STAG1

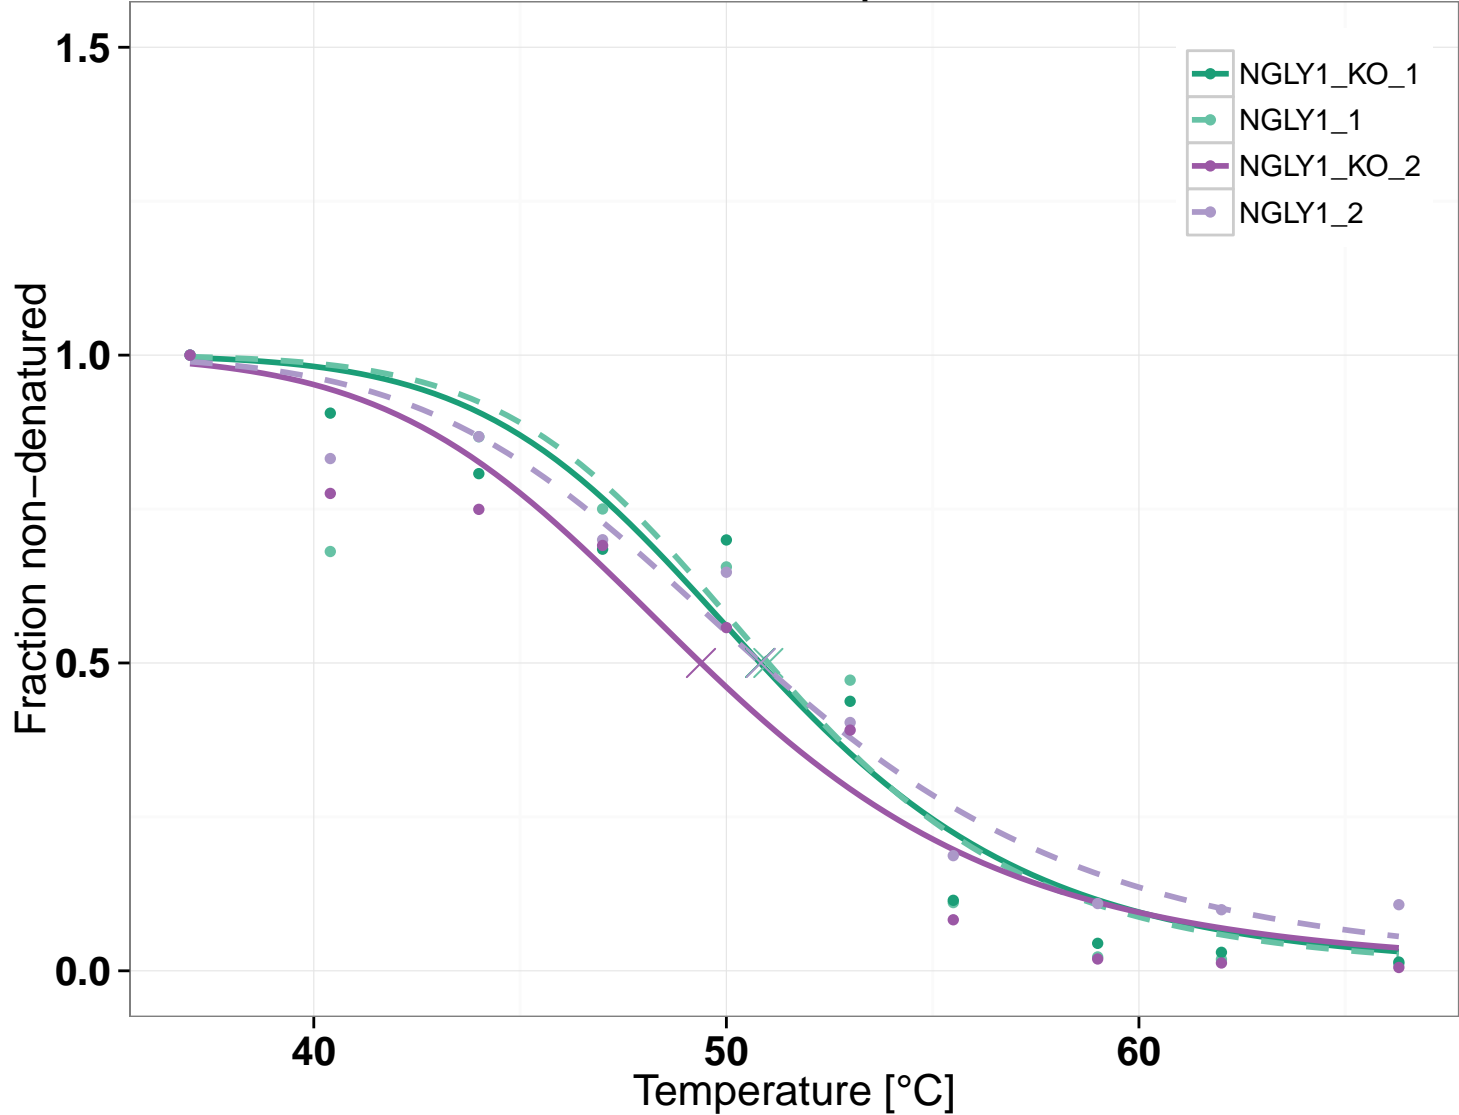

|            | meltPoint | slope  | plateau | R2   |
|------------|-----------|--------|---------|------|
| NGLY1_KO_1 | 50.82     | -0.074 | 0       | 0.95 |
| NGLY1_1    | 51.02     | -0.078 | 0       | 0.9  |
| NGLY1_KO_2 | 49.38     | -0.066 | 0       | 0.94 |
| NGLY1_2    | 50.83     | -0.061 | 0       | 0.97 |

Supplement: Supplementary file 2166 [file 1]

**IPI00478229.2|RPP30**

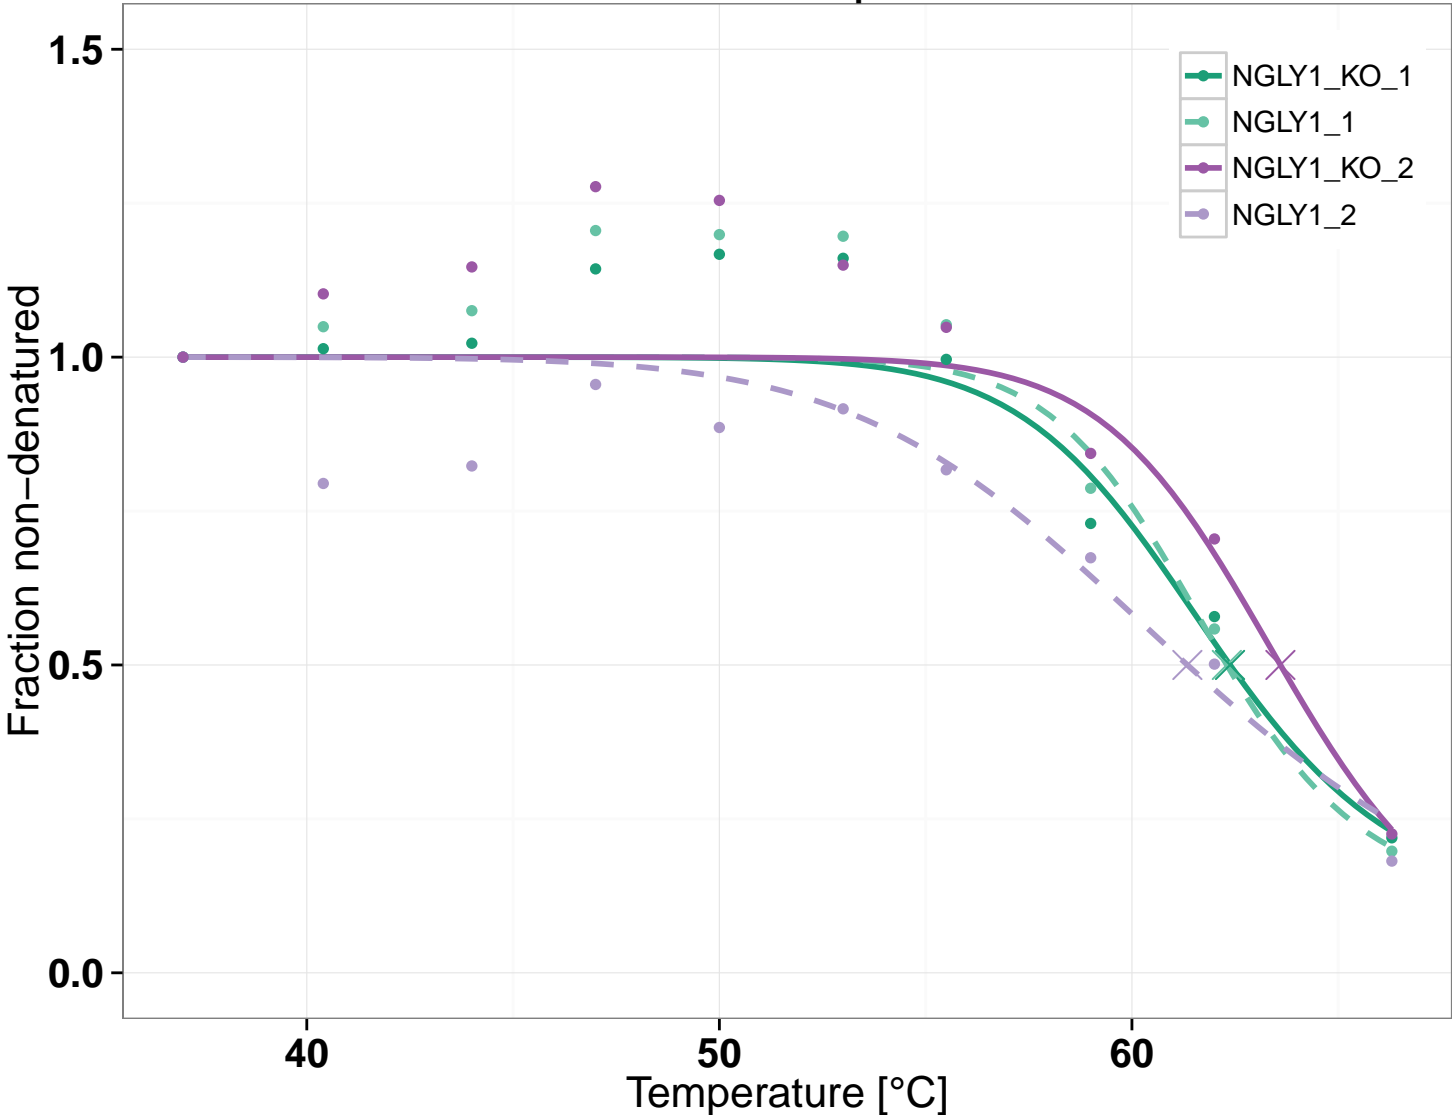

|            | meltPoint | slope  | plateau | R2   |
|------------|-----------|--------|---------|------|
| NGLY1_KO_1 | 62.38     | −0.098 | 0.1     | 0.9  |
| NGLY1_1    | 62.3      | −0.12  | 0.12    | 0.86 |
| NGLY1_KO_2 | 63.6      | −0.12  | 0       | 0.77 |
| NGLY1_2    | 61.34     | −0.062 | 0       | 0.84 |

Supplement: Supplementary file 2167 [file 1]

IPI00374018.8|FAM102B

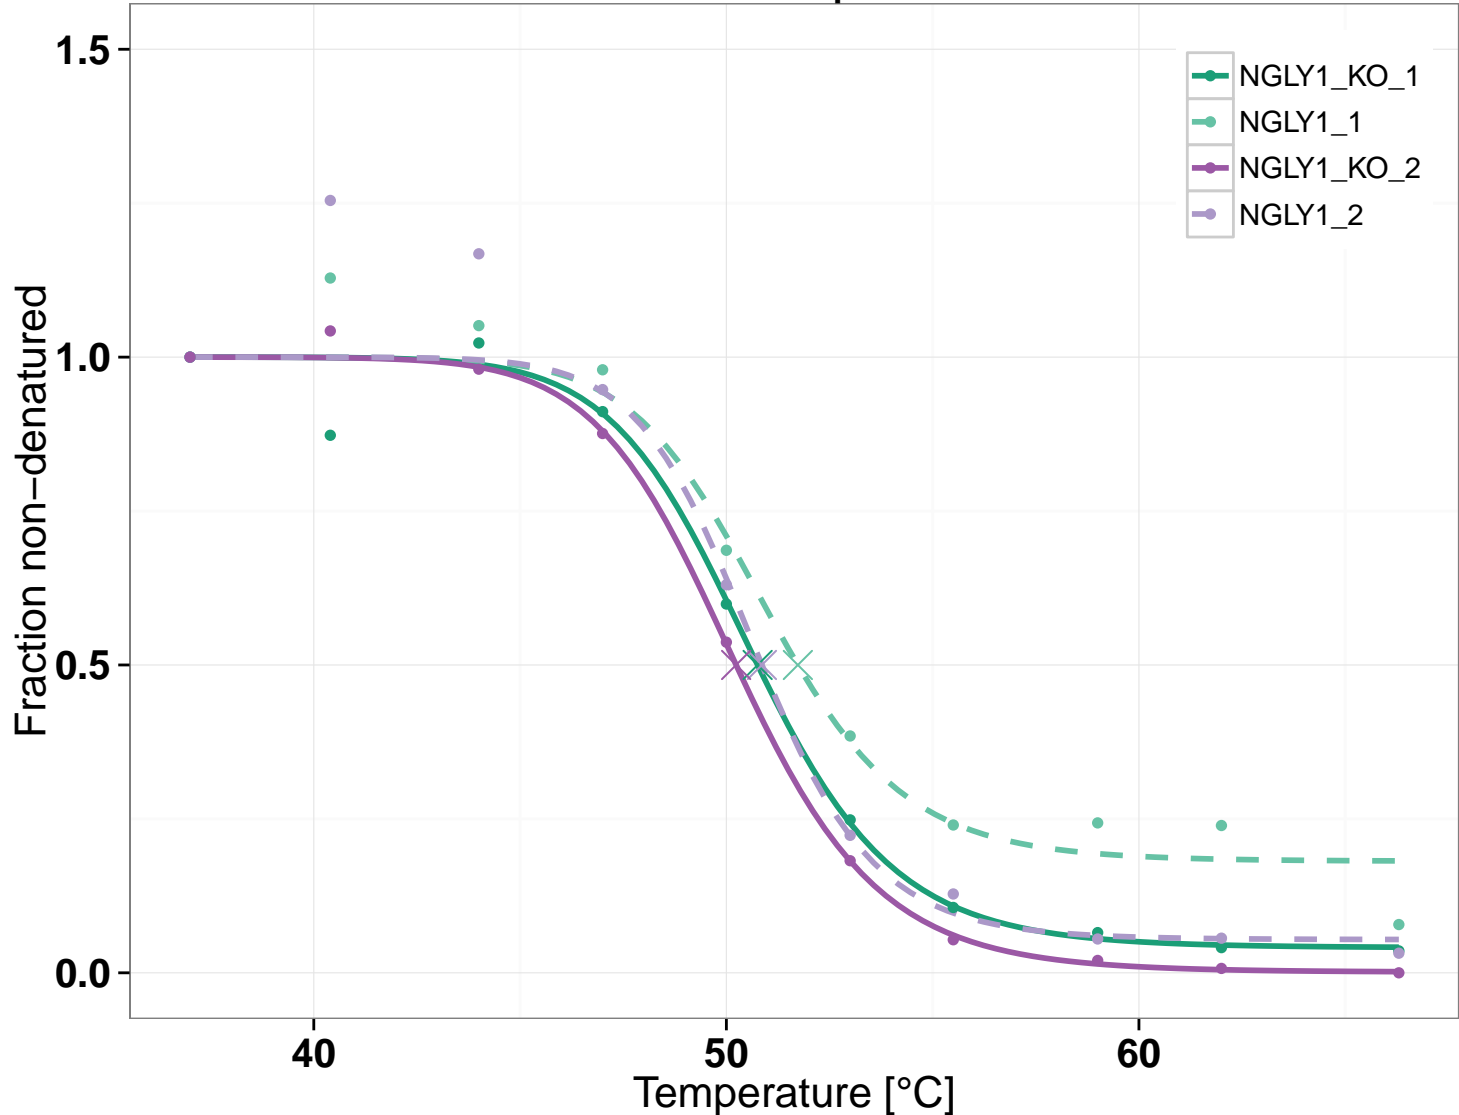

|            | meltPoint | slope | plateau | R2   |
|------------|-----------|-------|---------|------|
| NGLY1_KO_1 | 50.76     | -0.14 | 0.04    | 0.99 |
| NGLY1_1    | 51.73     | -0.12 | 0.18    | 0.97 |
| NGLY1_KO_2 | 50.24     | -0.14 | 0       | 1    |
| NGLY1_2    | 50.86     | -0.16 | 0.05    | 0.96 |

Supplement: Supplementary file 2168 [file 1]

# IPI00027107.5|TUFM

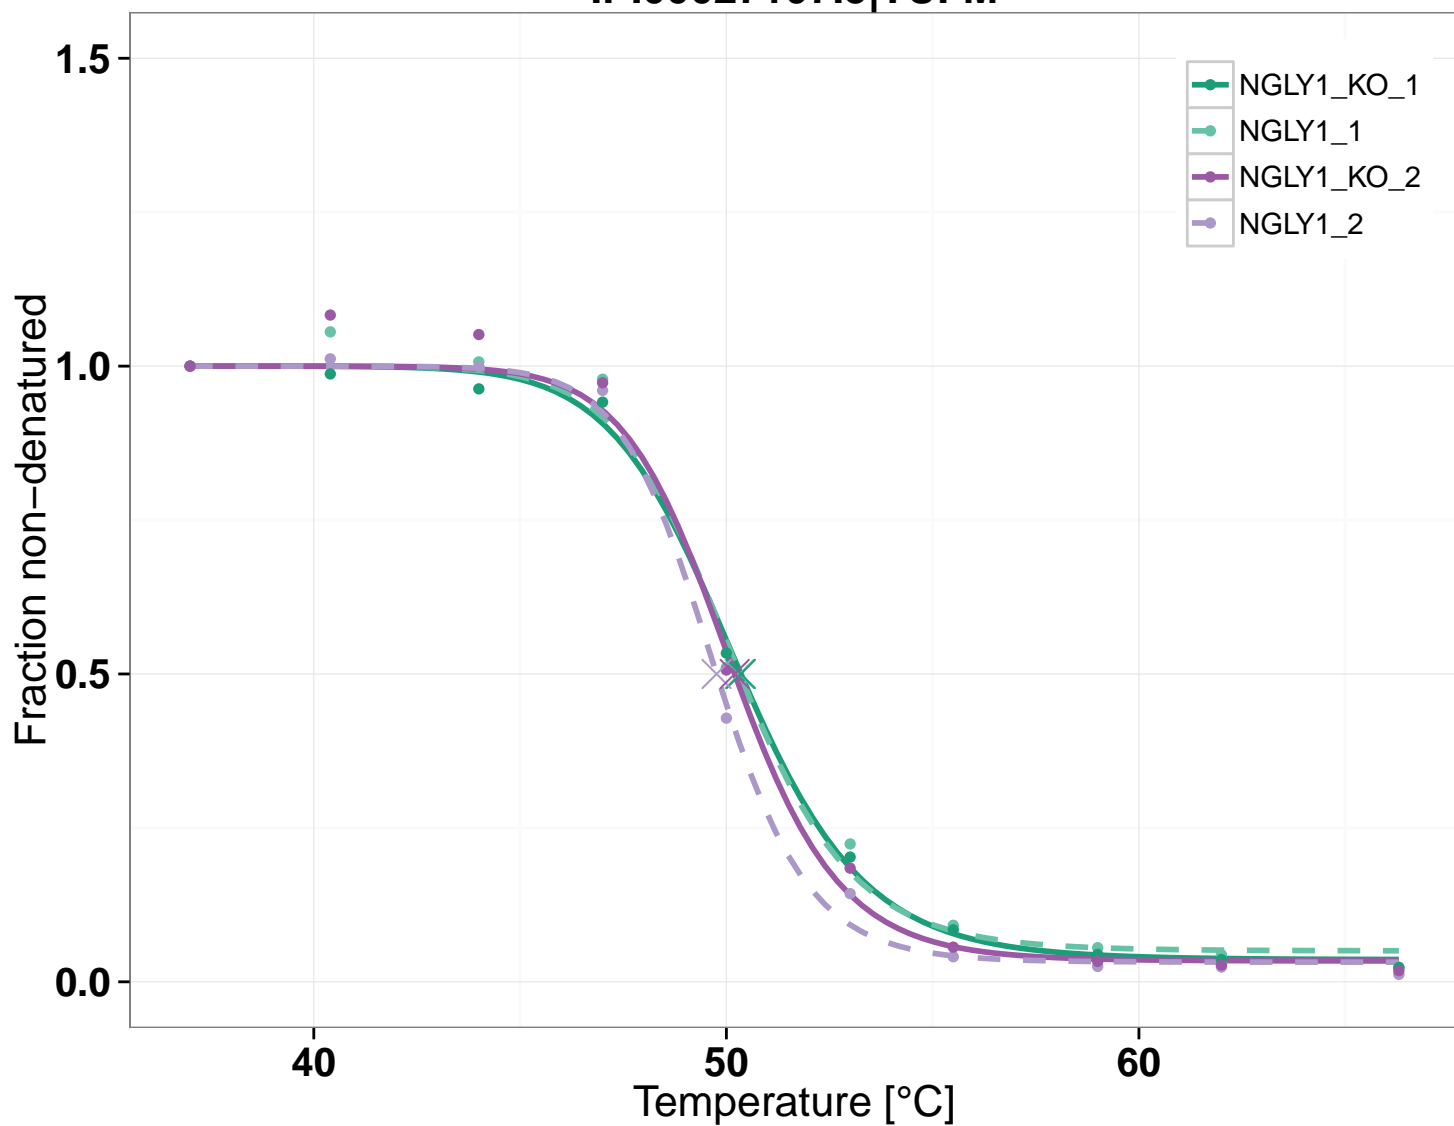

|            | meltPoint | slope | plateau | R2   |
|------------|-----------|-------|---------|------|
| NGLY1_KO_1 | 50.35     | -0.16 | 0.04    | 1    |
| NGLY1_1    | 50.32     | -0.17 | 0.05    | 0.99 |
| NGLY1_KO_2 | 50.2      | -0.18 | 0.03    | 0.99 |
| NGLY1_2    | 49.76     | -0.21 | 0.03    | 1    |

Supplement: Supplementary file 2169 [file 1]

IPI00061087.3|FAM122A

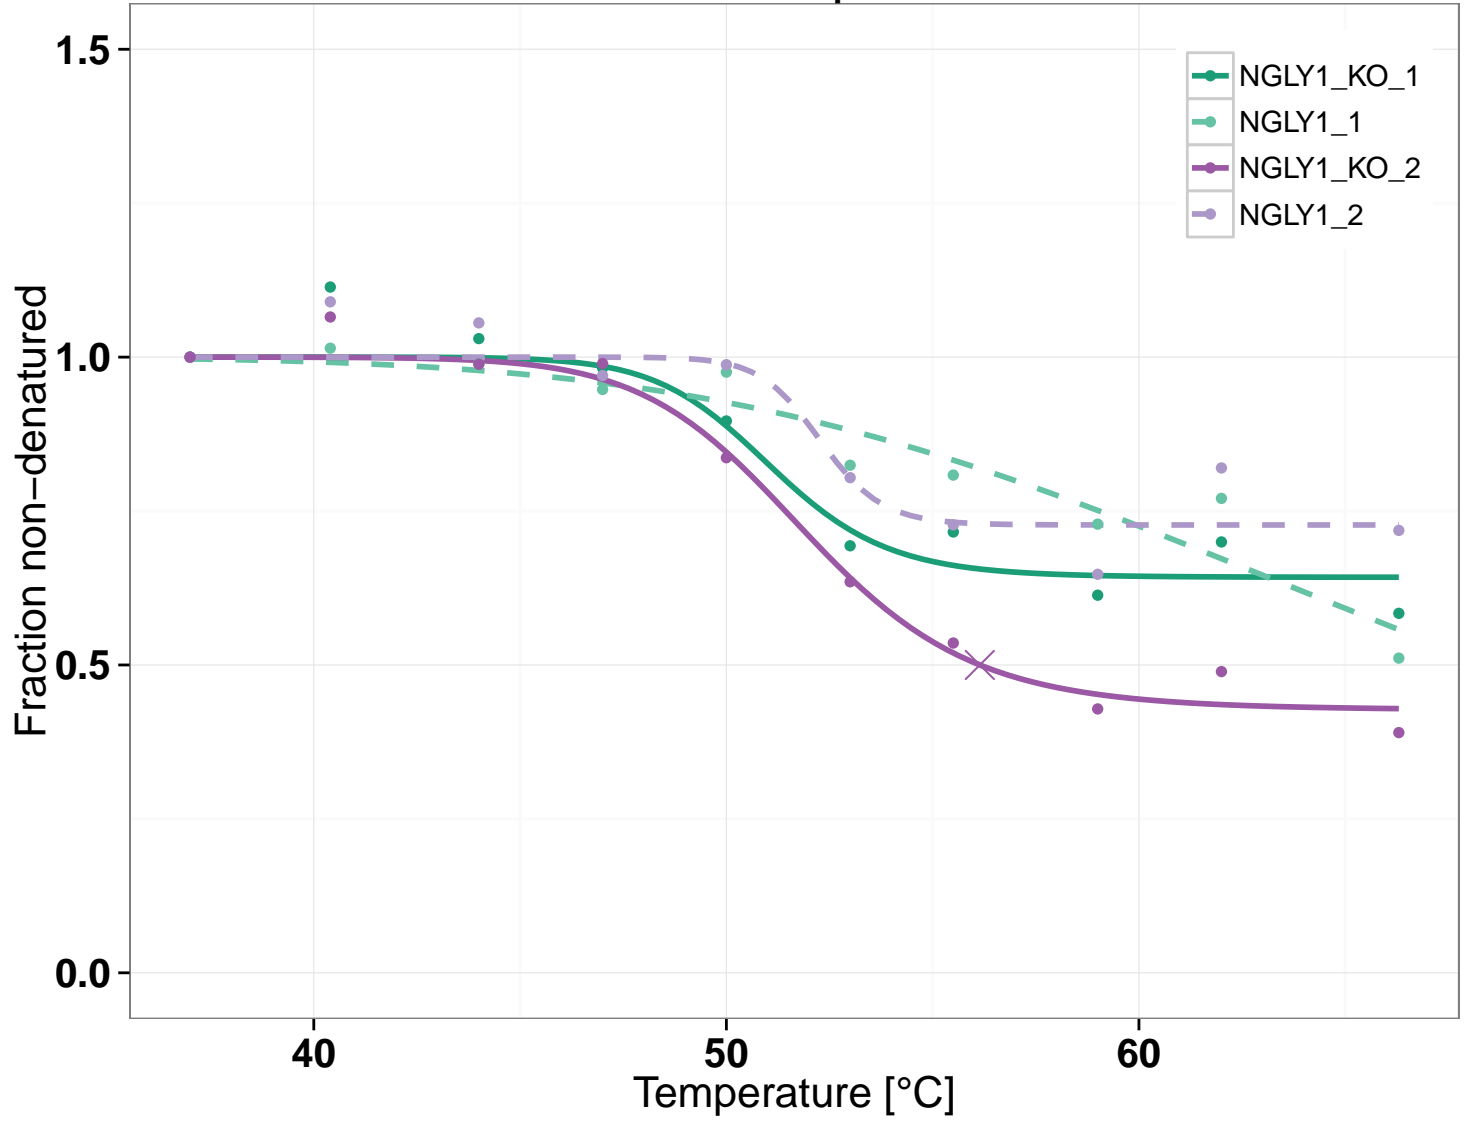

|            | meltPoint | slope  | plateau | R2   |
|------------|-----------|--------|---------|------|
| NGLY1_KO_1 | –         | –0.063 | 0.64    | 0.92 |
| NGLY1_1    | –         | –0.027 | 0       | 0.92 |
| NGLY1_KO_2 | 56.14     | –0.071 | 0.43    | 0.98 |
| NGLY1_2    | –         | –0.092 | 0.73    | 0.88 |

Supplement: Supplementary file 2170 [file 1]

# IPI00009817.5|CHCHD8

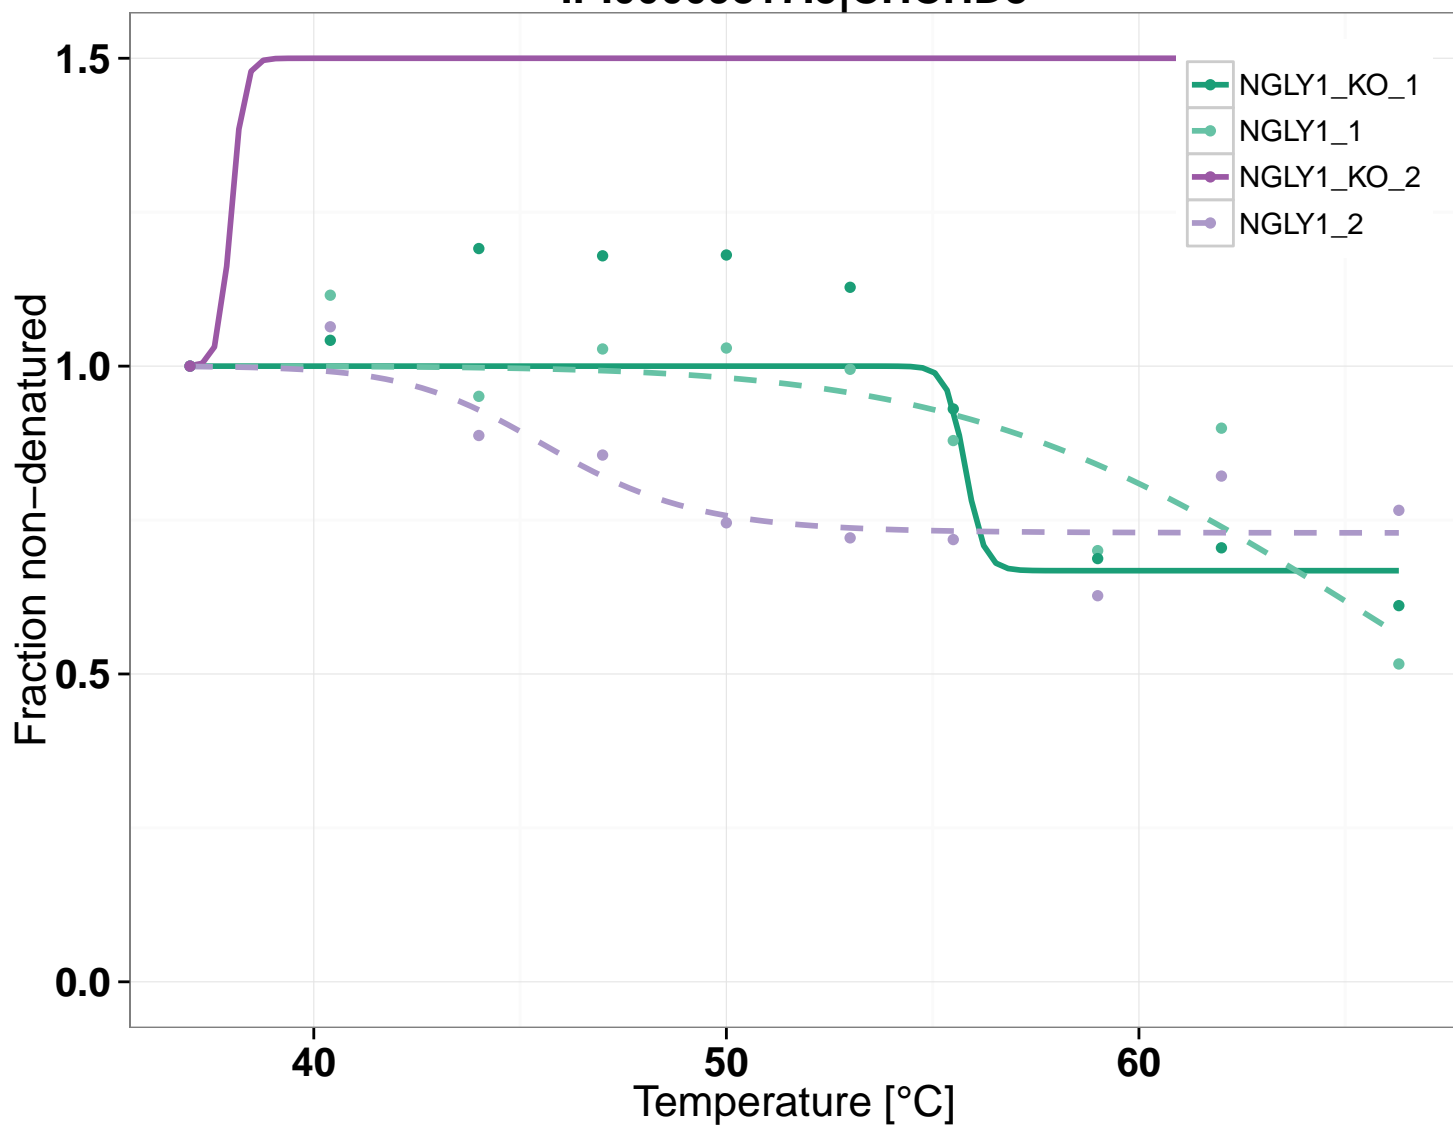

|            | meltPoint | slope  | plateau | R2   |
|------------|-----------|--------|---------|------|
| NGLY1_KO_1 | –         | –0.37  | 0.67    | 0.72 |
| NGLY1_1    | –         | –0.042 | 0       | 0.76 |
| NGLY1_KO_2 | –         | 0.82   | 1.5     | –5.4 |
| NGLY1_2    | –         | –0.038 | 0.73    | 0.82 |

Supplement: Supplementary file 2171 [file 1]

IPI00298373.9|FAM117B

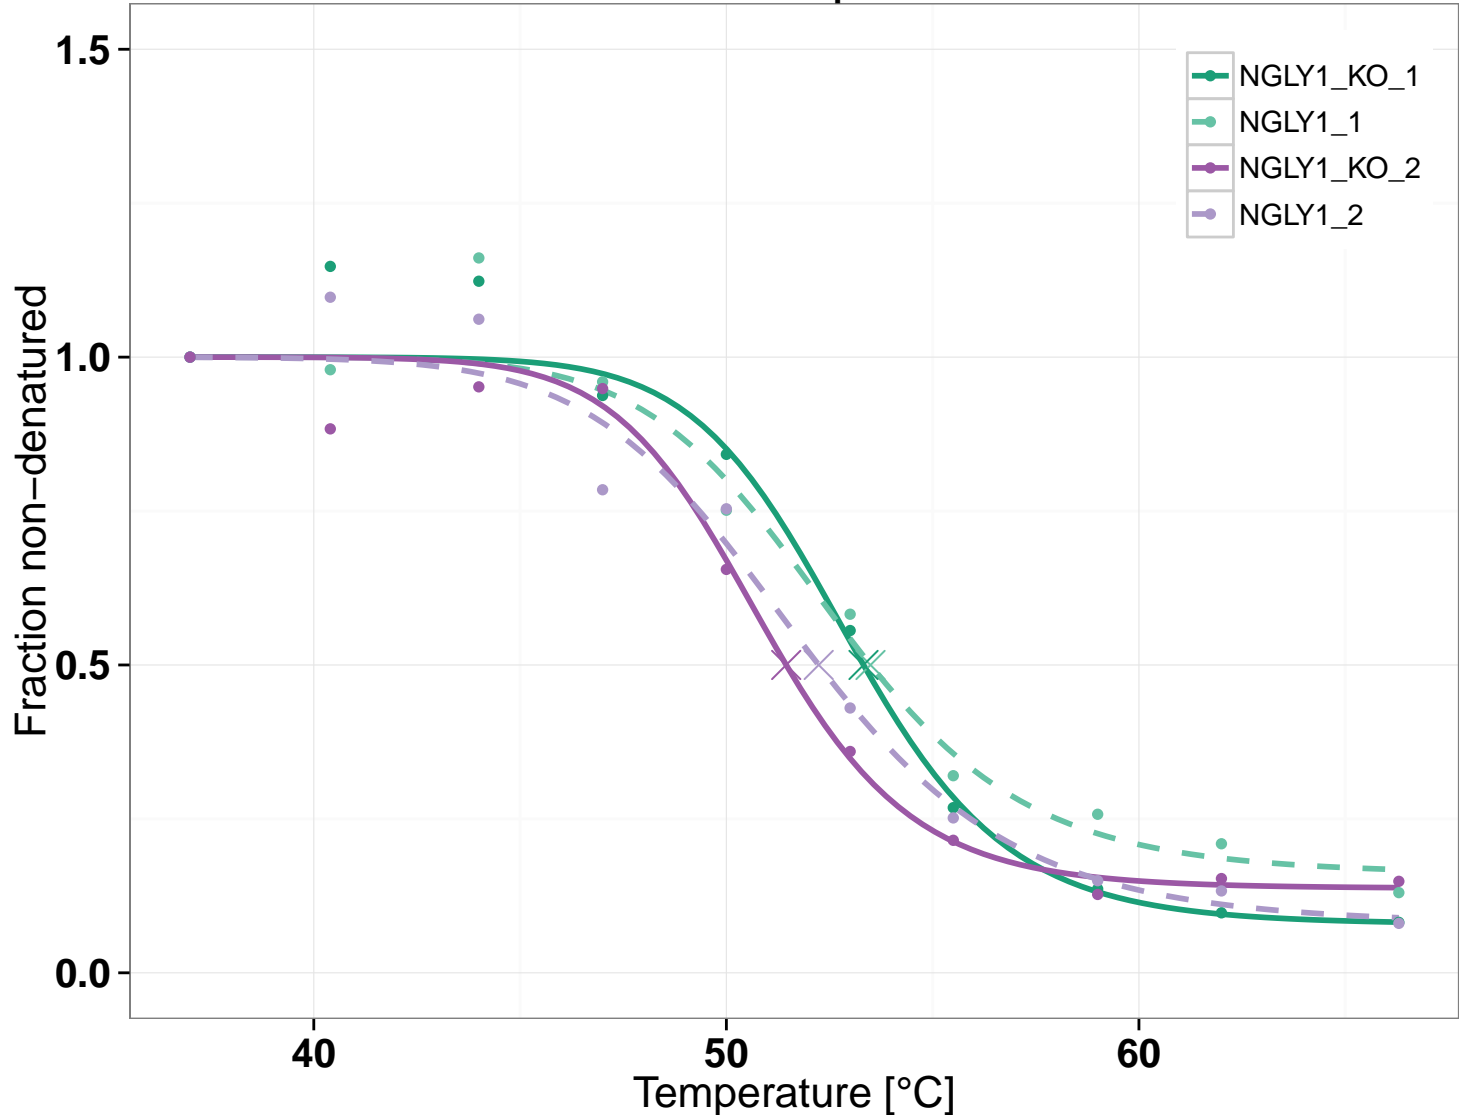

|            | meltPoint | slope  | plateau | R2   |
|------------|-----------|--------|---------|------|
| NGLY1_KO_1 | 53.32     | -0.12  | 0.08    | 0.98 |
| NGLY1_1    | 53.49     | -0.091 | 0.16    | 0.97 |
| NGLY1_KO_2 | 51.45     | -0.12  | 0.14    | 0.99 |
| NGLY1_2    | 52.24     | -0.09  | 0.08    | 0.98 |

Supplement: Supplementary file 2172 [file 1]

IPI00304048.6|MKNK1

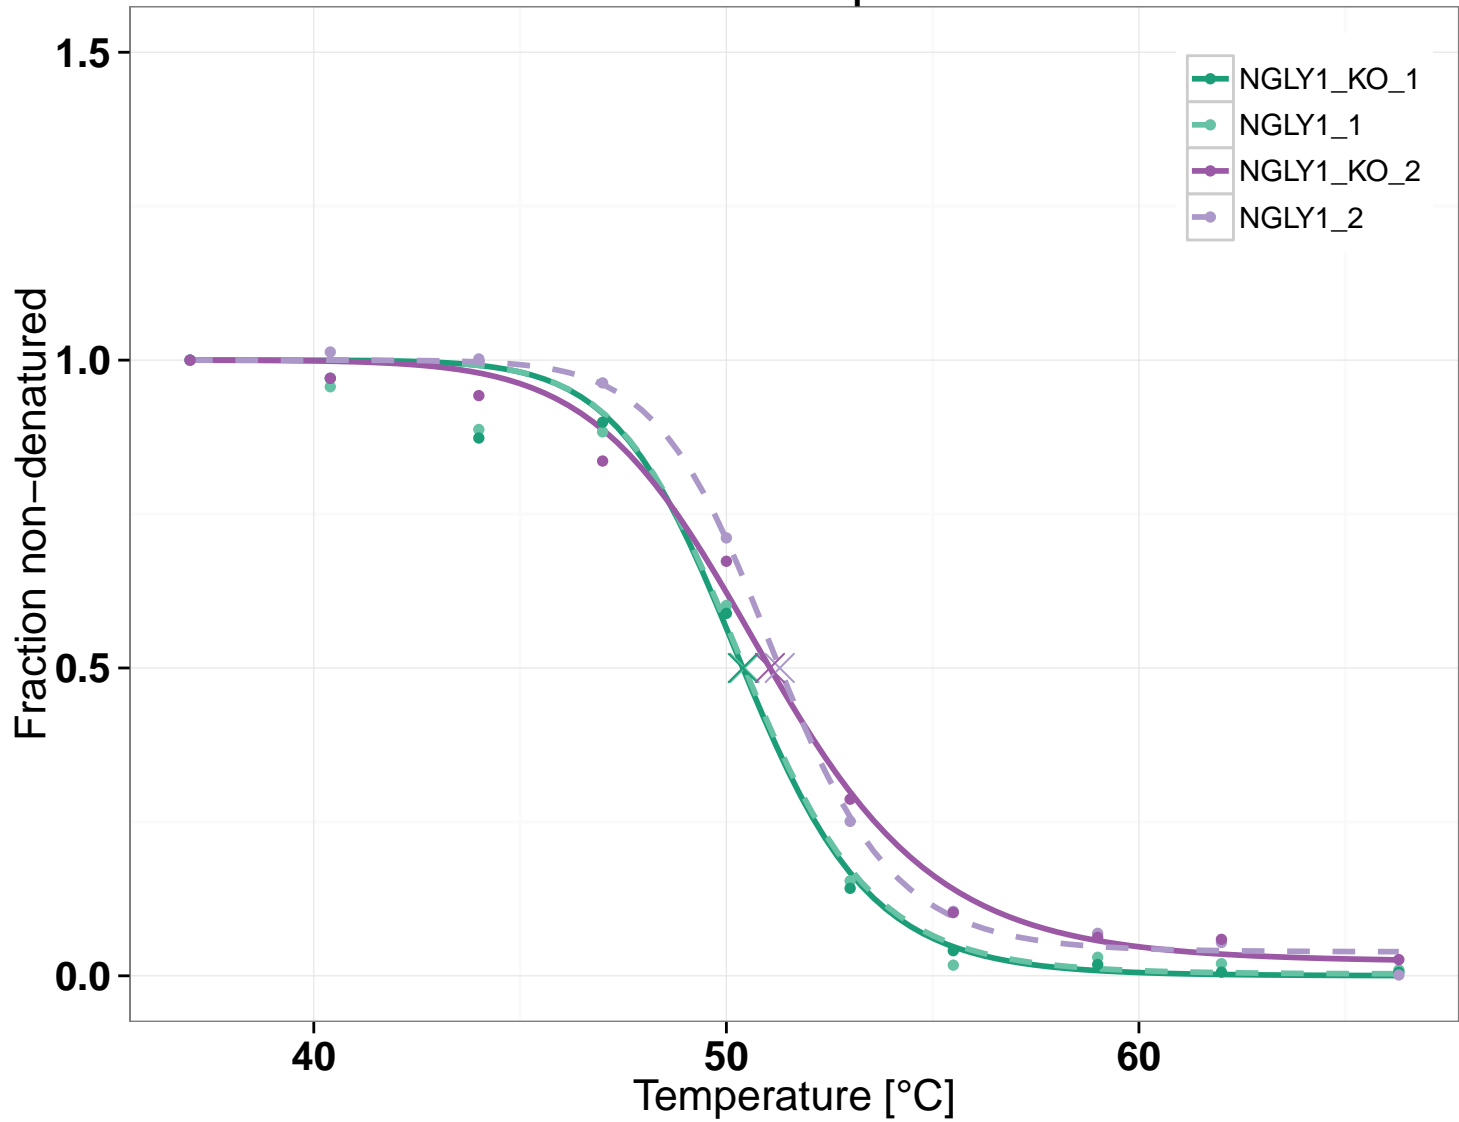

|            | meltPoint | slope | plateau | R2   |
|------------|-----------|-------|---------|------|
| NGLY1_KO_1 | 50.4      | -0.16 | 0       | 0.99 |
| NGLY1_1    | 50.44     | -0.16 | 0       | 0.99 |
| NGLY1_KO_2 | 51.06     | -0.12 | 0.02    | 0.99 |
| NGLY1_2    | 51.29     | -0.17 | 0.04    | 1    |

Supplement: Supplementary file 2173 [file 1]

# IPI00102923.3|FAM108A1

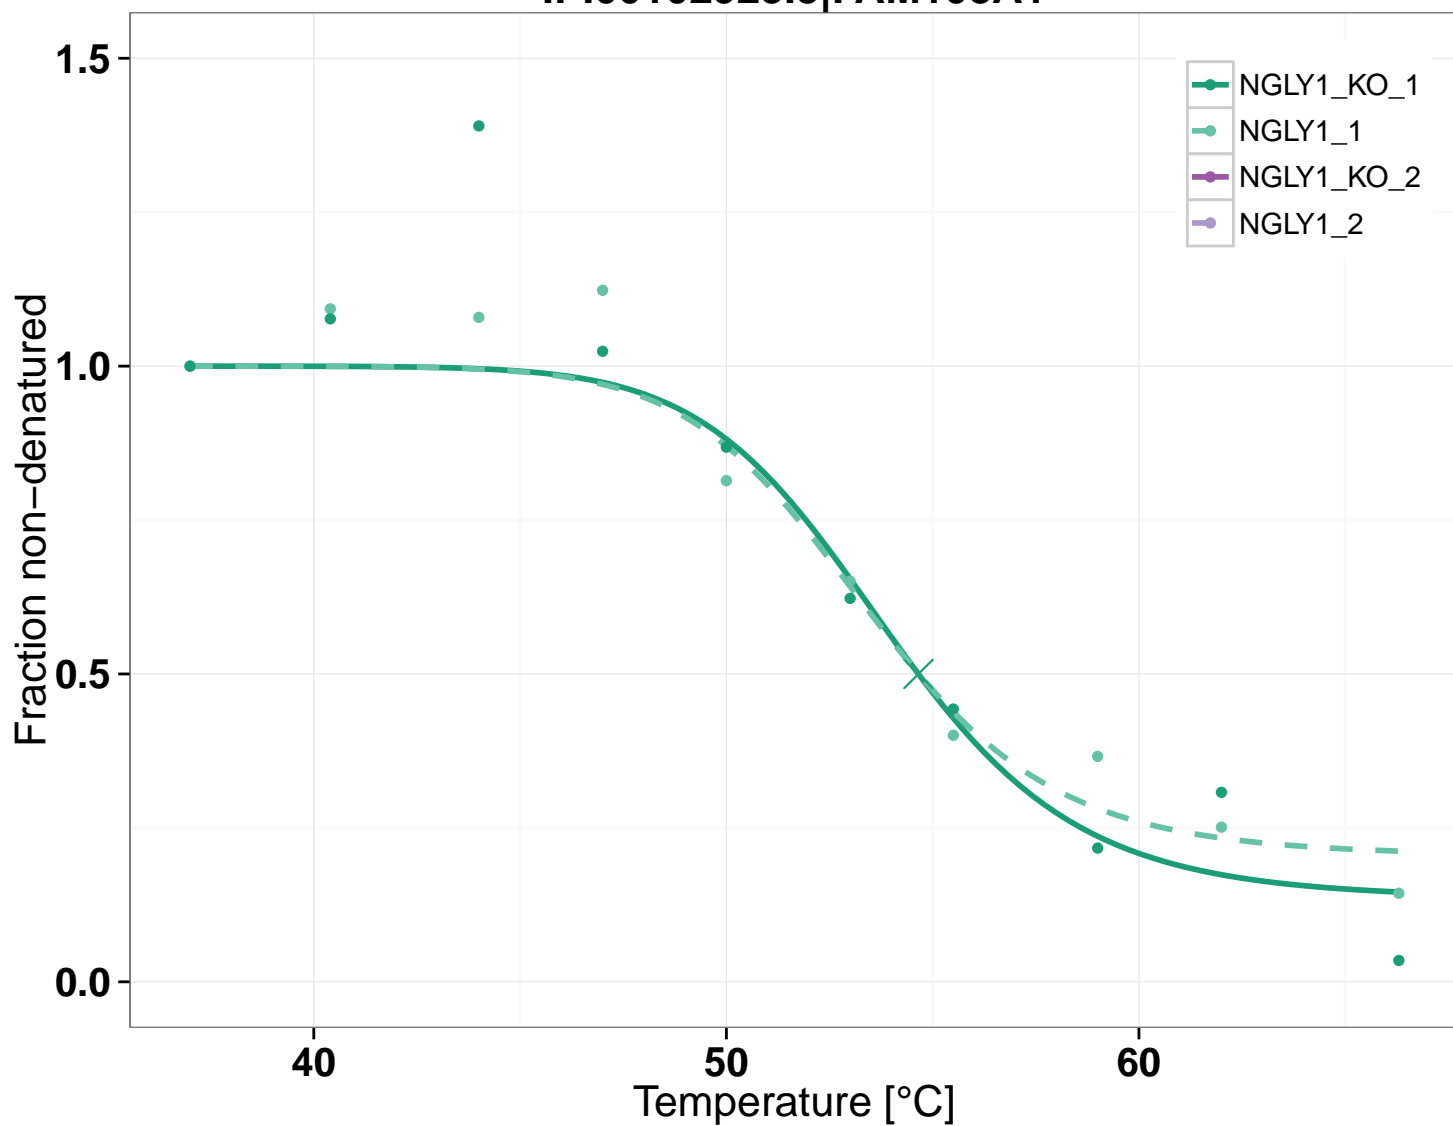

|            | meltPoint | slope  | plateau | R2   |
|------------|-----------|--------|---------|------|
| NGLY1_KO_1 | 54.65     | -0.095 | 0.14    | 0.89 |
| NGLY1_1    | 54.66     | -0.089 | 0.2     | 0.96 |
| NGLY1_KO_2 | -         | -      | -       | -    |
| NGLY1_2    | -         | -      | -       | -    |

Supplement: Supplementary file 2174 [file 1]

# IPI00008787.3|NAGLU

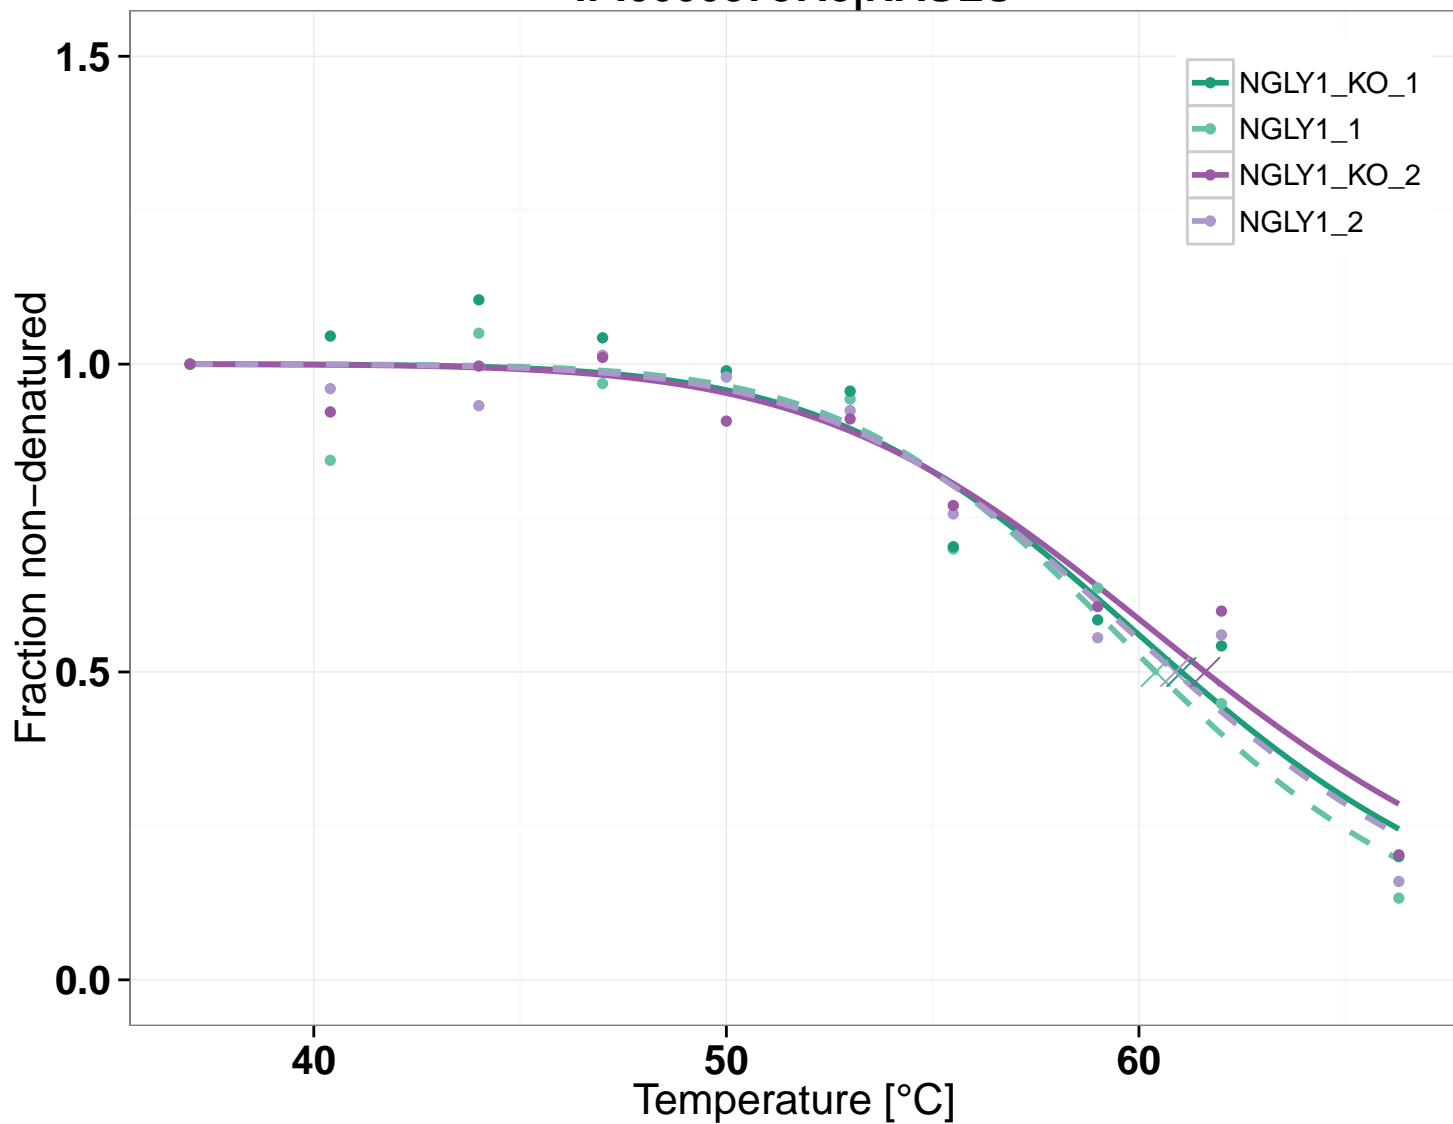

|            | meltPoint | slope  | plateau | R2   |
|------------|-----------|--------|---------|------|
| NGLY1_KO_1 | 61.03     | -0.059 | 0       | 0.94 |
| NGLY1_1    | 60.41     | -0.067 | 0       | 0.94 |
| NGLY1_KO_2 | 61.61     | -0.054 | 0       | 0.95 |
| NGLY1_2    | 60.88     | -0.06  | 0       | 0.95 |

Supplement: Supplementary file 2175 [file 1]

IPI00794397.1|CHMP4A

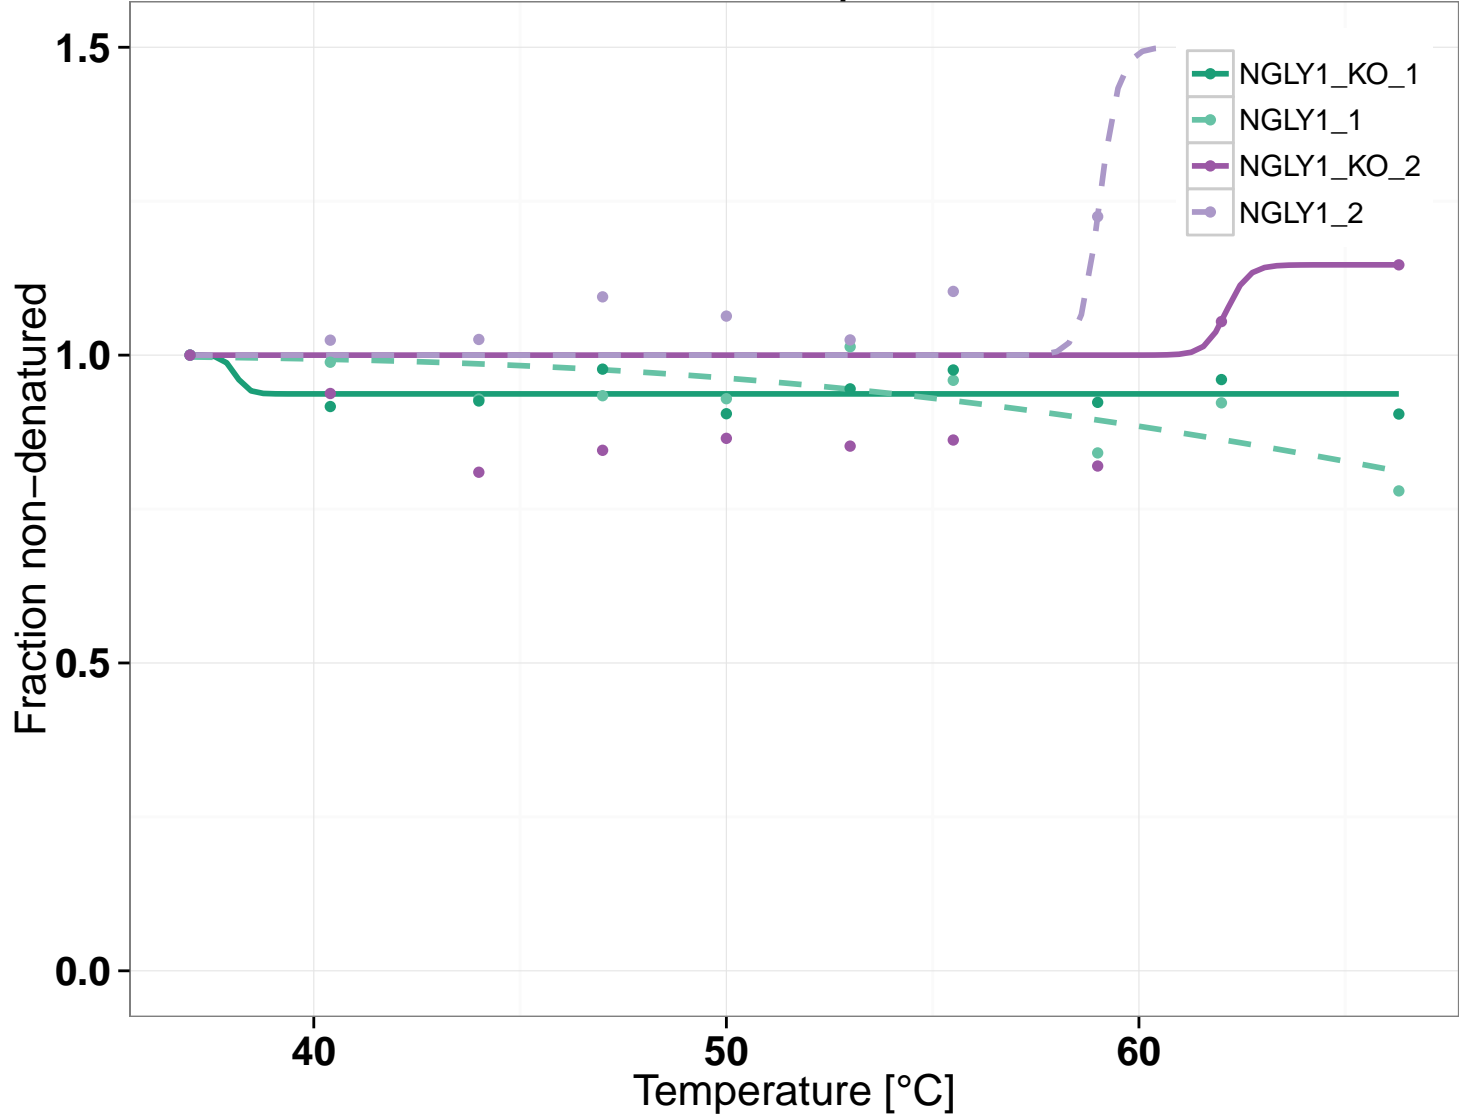

|            | meltPoint | slope | plateau | R2    |
|------------|-----------|-------|---------|-------|
| NGLY1_KO_1 | -         | -0.1  | 0.94    | 0.35  |
| NGLY1_1    | -         | -     | 0       | 0.58  |
| NGLY1_KO_2 | -         | 0.14  | 1.15    | -0.35 |
| NGLY1_2    | -         | 0.53  | 1.5     | 0.82  |

Supplement: Supplementary file 2176 [file 1]

IPI00329563.10|UBE2L6

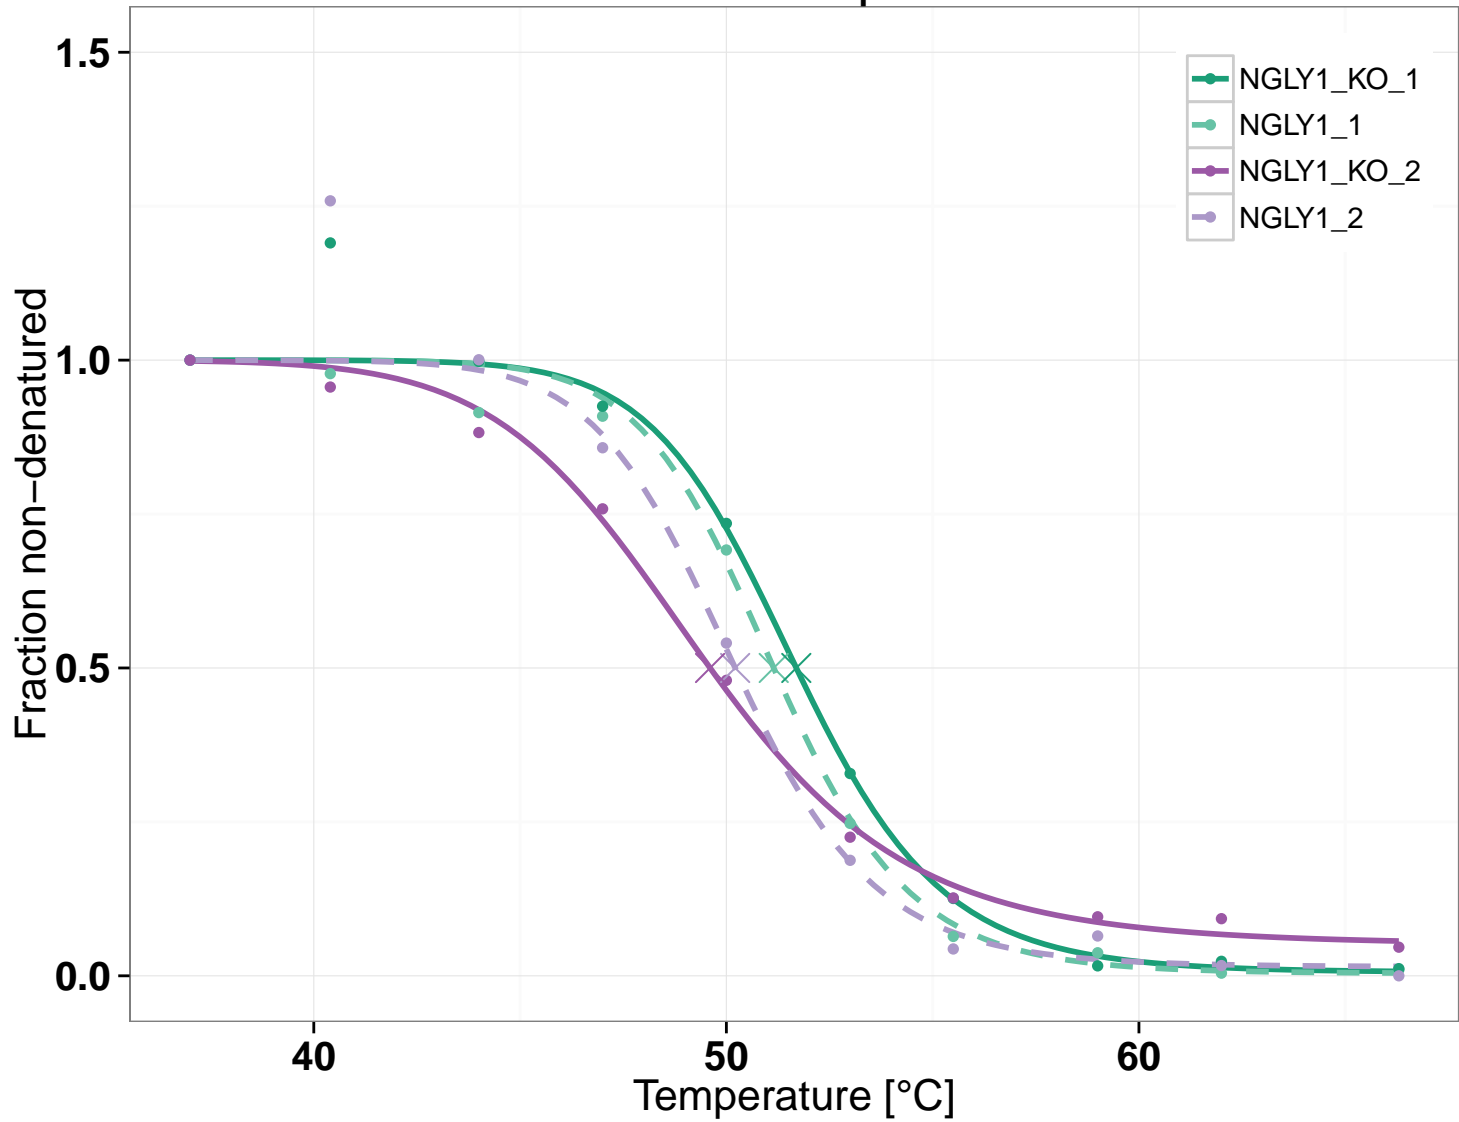

|            | meltPoint | slope  | plateau | R2   |
|------------|-----------|--------|---------|------|
| NGLY1_KO_1 | 51.7      | -0.14  | 0.01    | 0.98 |
| NGLY1_1    | 51.15     | -0.15  | 0       | 1    |
| NGLY1_KO_2 | 49.61     | -0.095 | 0.05    | 1    |
| NGLY1_2    | 50.21     | -0.14  | 0.01    | 0.97 |

Supplement: Supplementary file 2177 [file 1]

# IPI00337667.1|BICD2

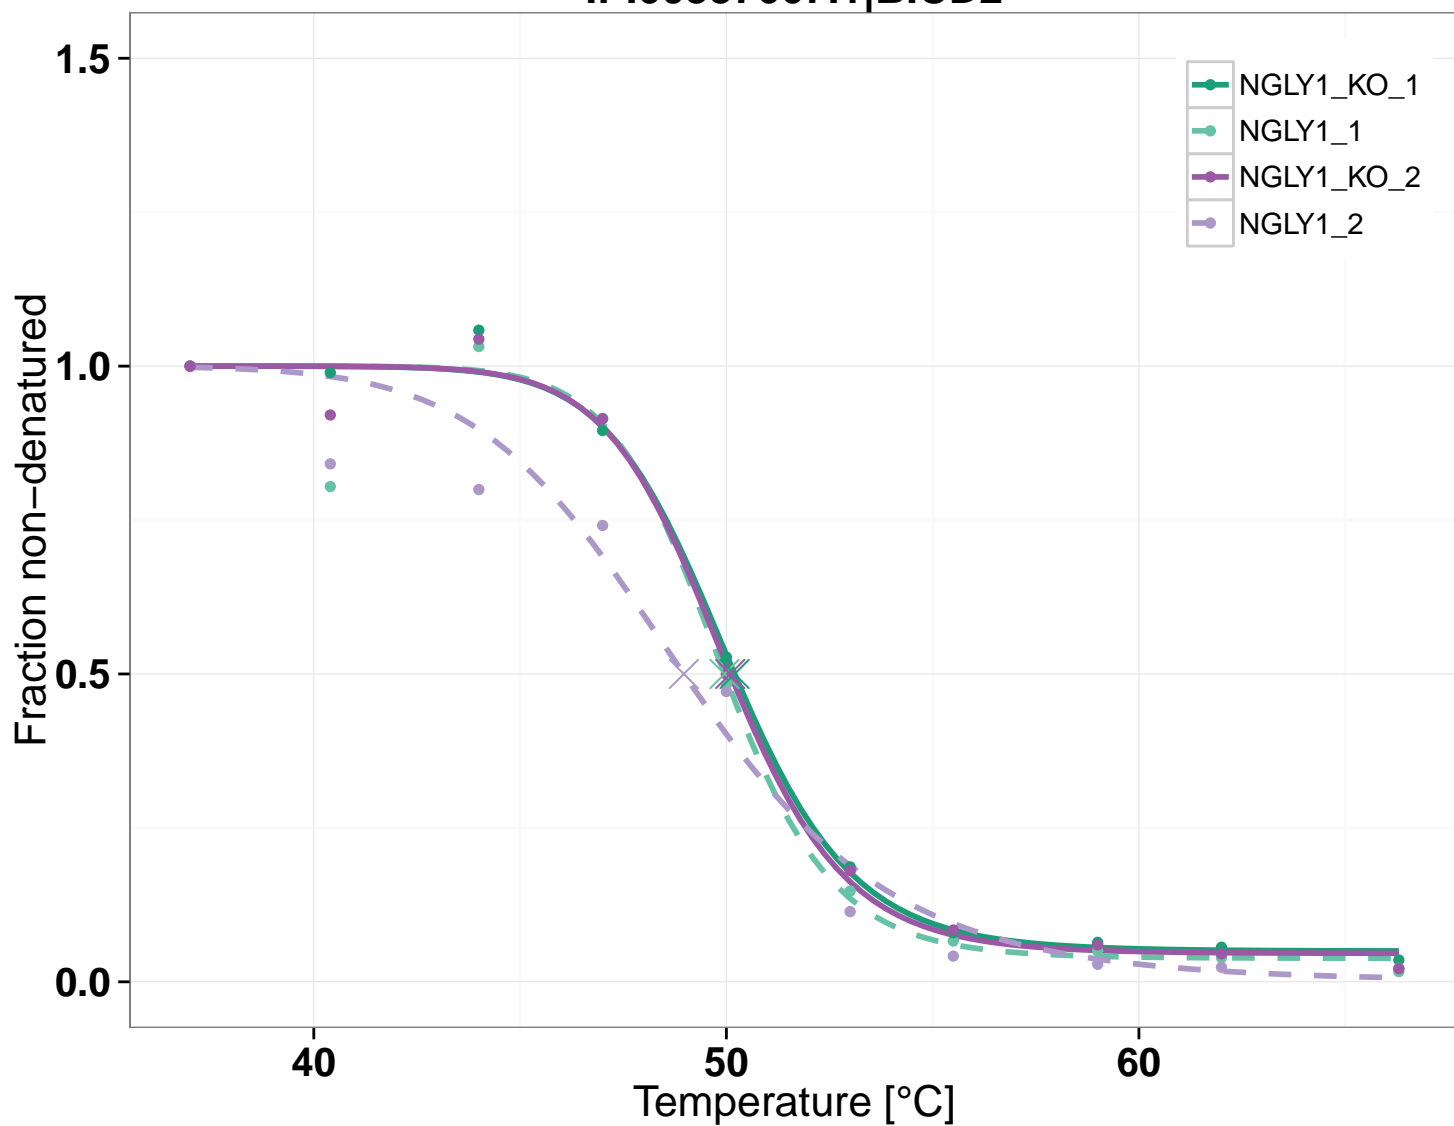

|            | meltPoint | slope  | plateau | R2   |
|------------|-----------|--------|---------|------|
| NGLY1_KO_1 | 50.2      | -0.16  | 0.05    | 1    |
| NGLY1_1    | 49.96     | -0.18  | 0.04    | 0.98 |
| NGLY1_KO_2 | 50.09     | -0.16  | 0.05    | 0.99 |
| NGLY1_2    | 48.97     | -0.099 | 0       | 0.97 |

Supplement: Supplementary file 2178 [file 1]

IPI00888005.1|LOC100132973

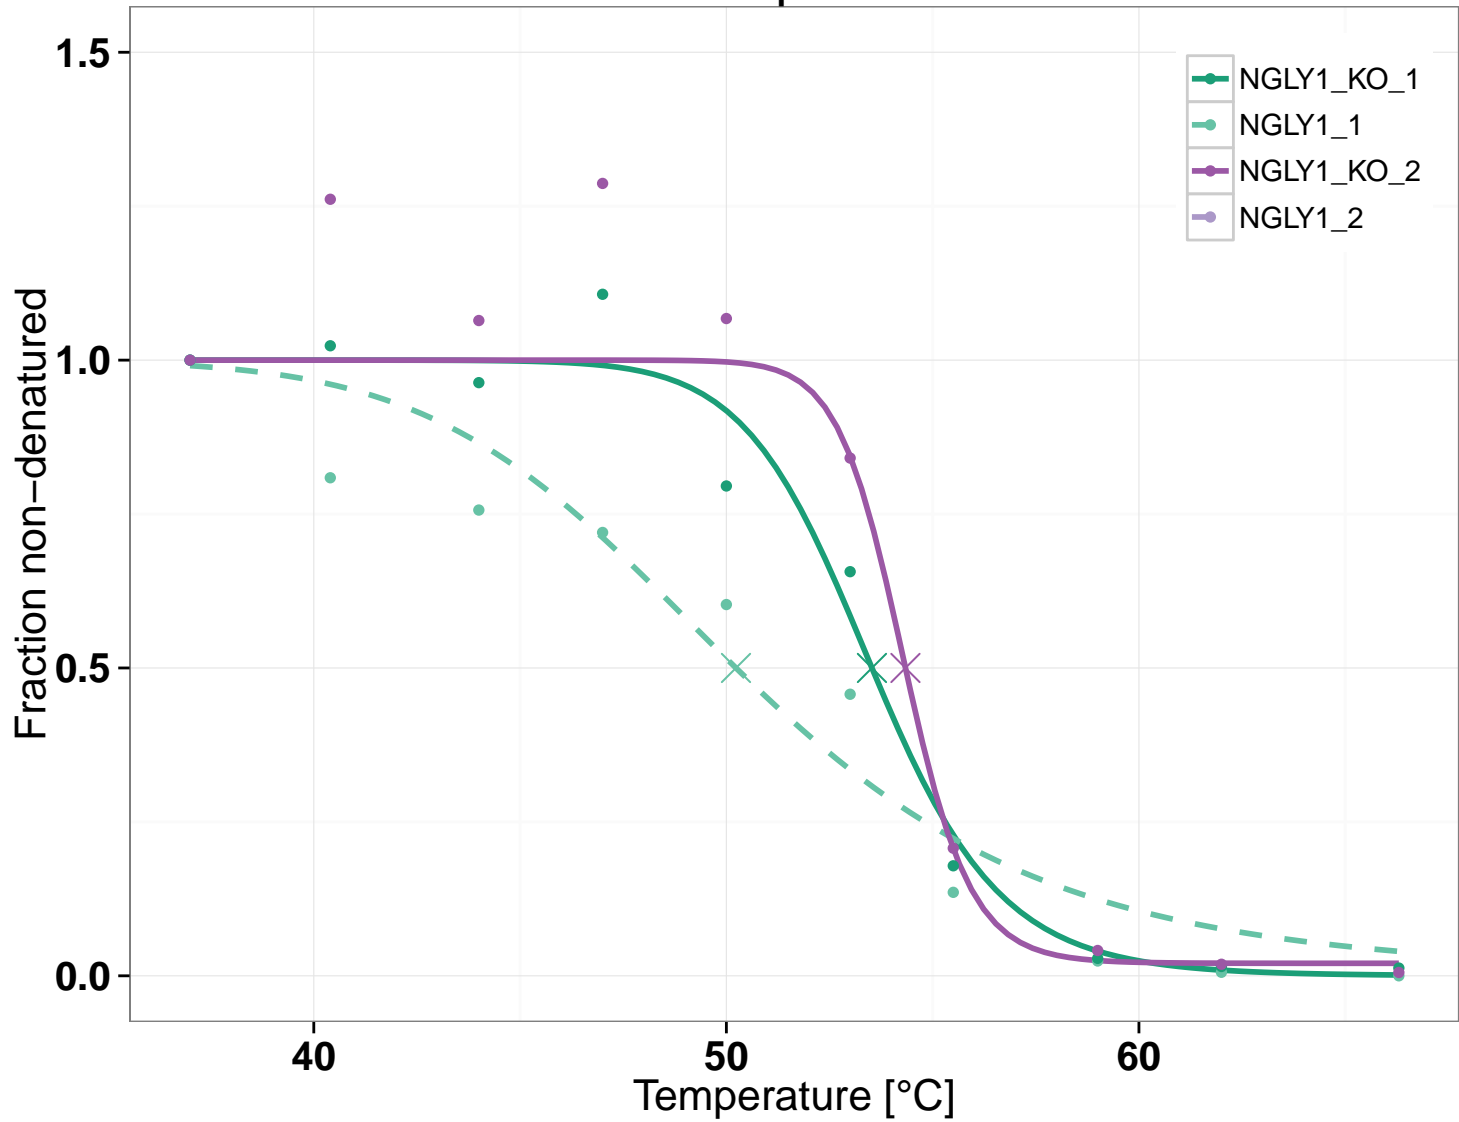

|            | meltPoint | slope  | plateau | R2   |
|------------|-----------|--------|---------|------|
| NGLY1_KO_1 | 53.53     | -0.16  | 0       | 0.98 |
| NGLY1_1    | 50.23     | -0.067 | 0       | 0.94 |
| NGLY1_KO_2 | 54.34     | -0.3   | 0.02    | 0.94 |
| NGLY1_2    | -         | -      | -       | -    |

Supplement: Supplementary file 2179 [file 1]

IPI00514393.1|RNPC3

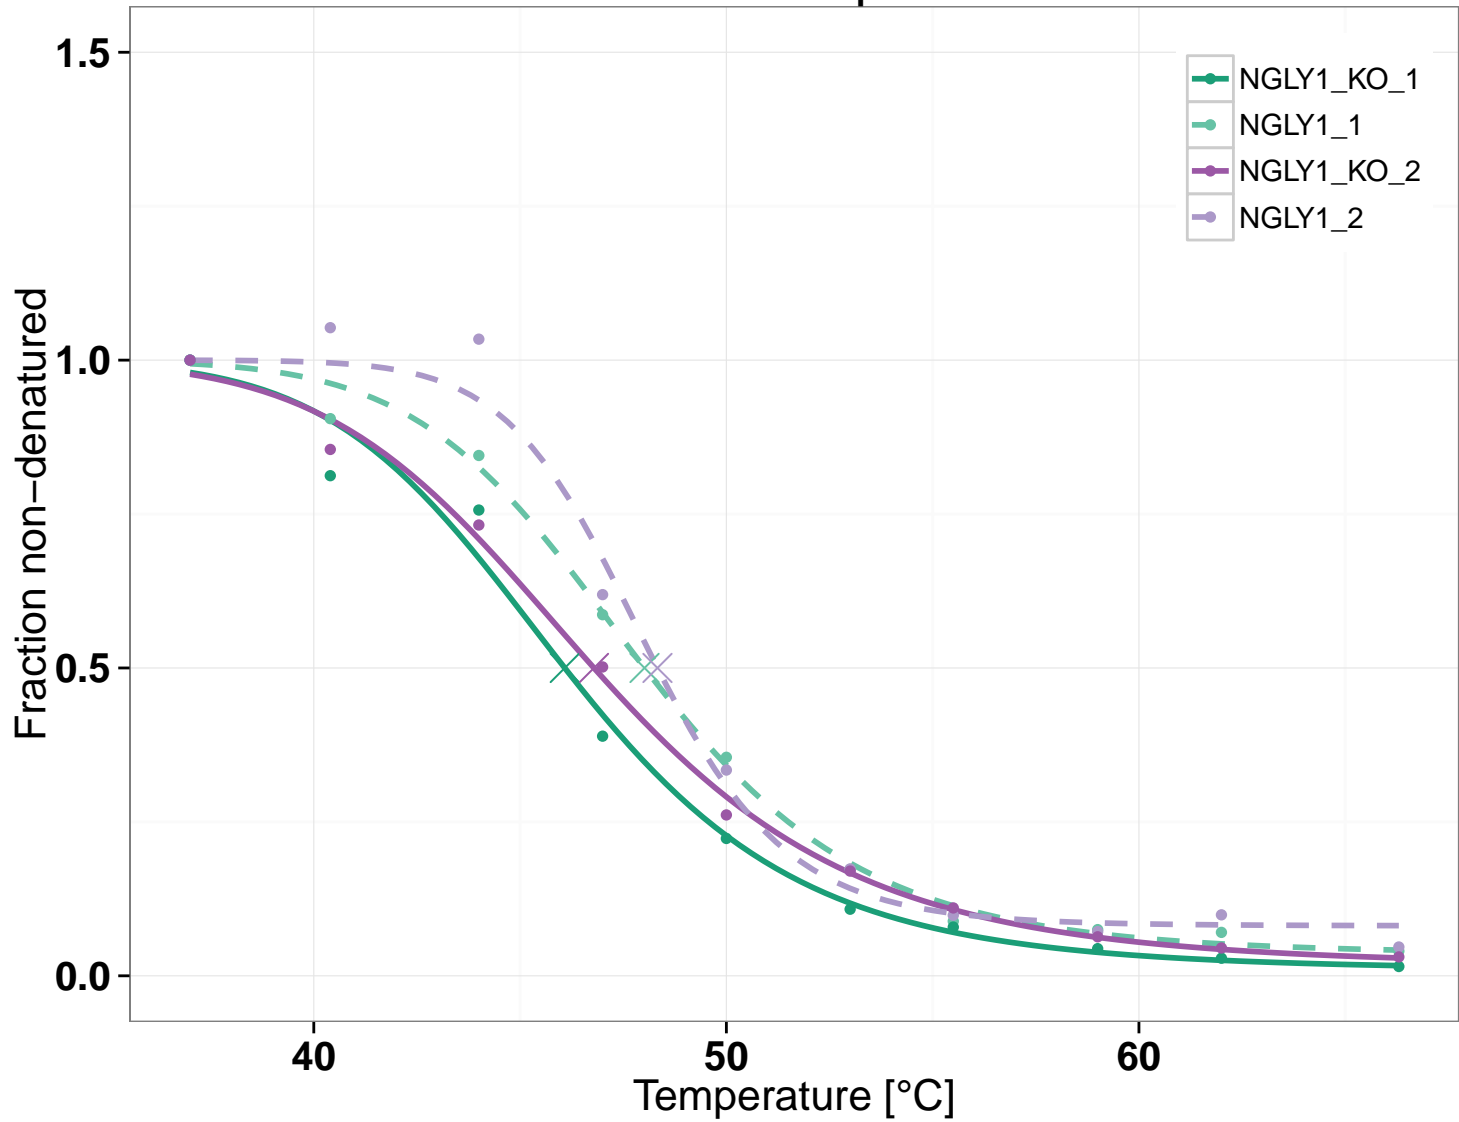

|            | meltPoint | slope  | plateau | R2   |
|------------|-----------|--------|---------|------|
| NGLY1_KO_1 | 46.08     | -0.087 | 0.01    | 0.99 |
| NGLY1_1    | 48.02     | -0.089 | 0.03    | 1    |
| NGLY1_KO_2 | 46.79     | -0.077 | 0.01    | 1    |
| NGLY1_2    | 48.33     | -0.14  | 0.08    | 0.99 |

Supplement: Supplementary file 2180 [file 1]

IPI00169387.1|CDC26

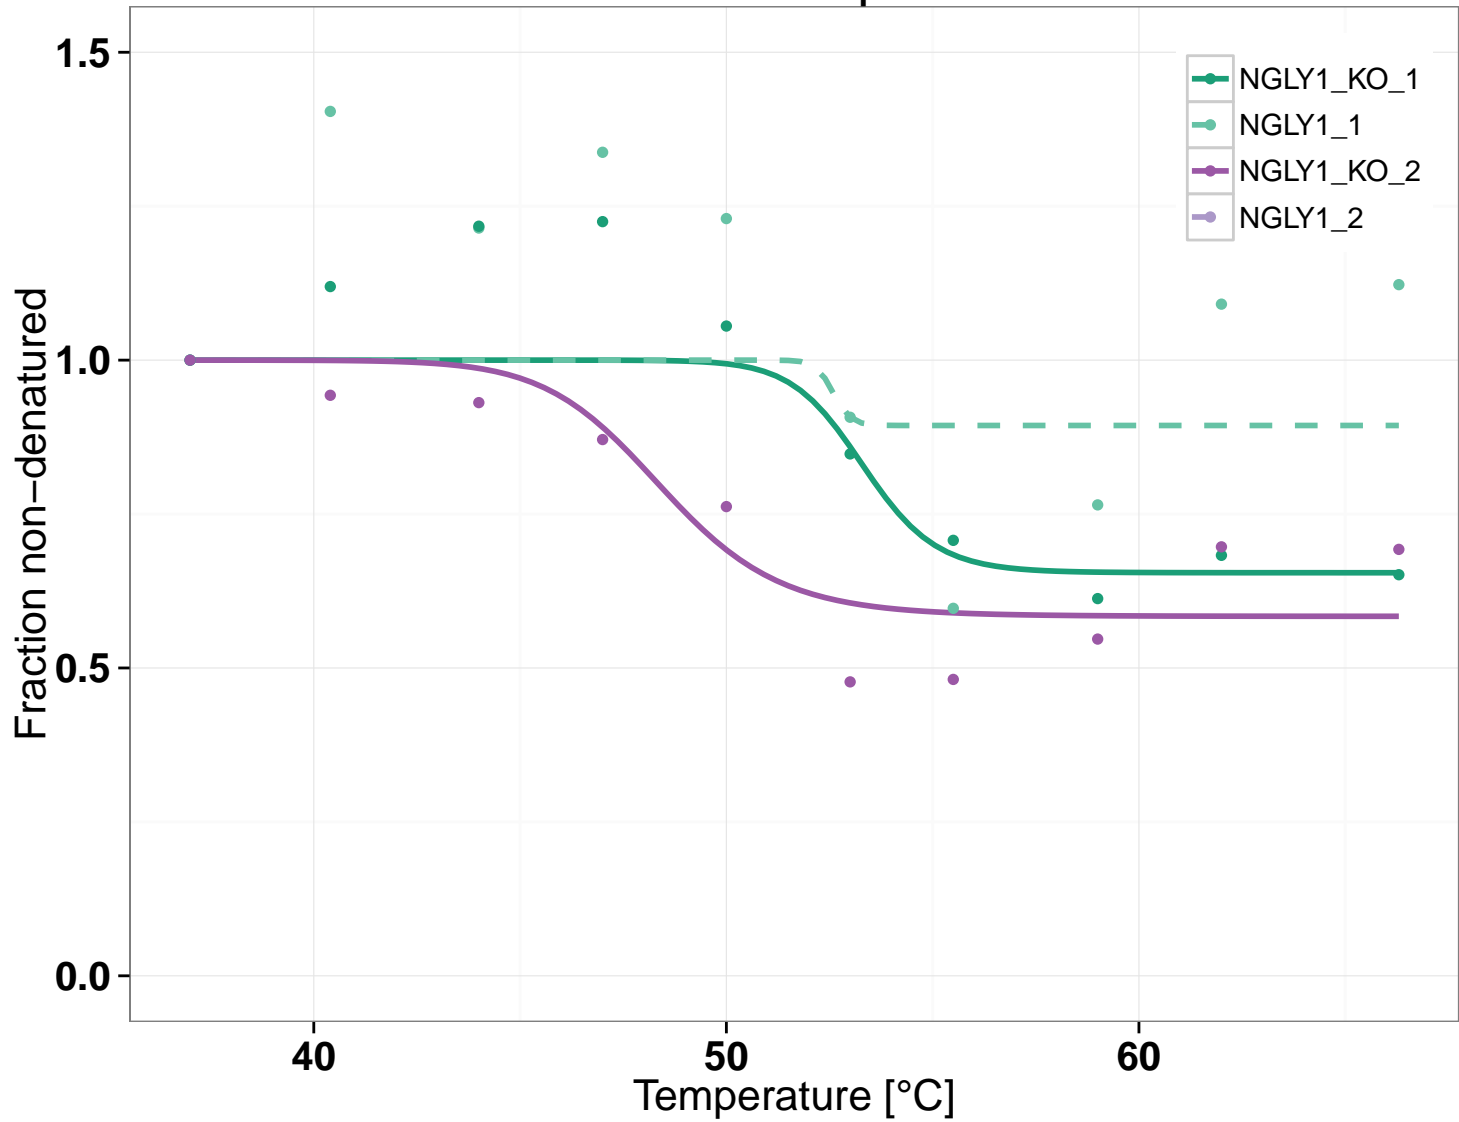

|            | meltPoint | slope  | plateau | R2   |
|------------|-----------|--------|---------|------|
| NGLY1_KO_1 | -         | -0.099 | 0.65    | 0.77 |
| NGLY1_1    | -         | -0.13  | 0.89    | 0.02 |
| NGLY1_KO_2 | -         | -0.073 | 0.58    | 0.81 |
| NGLY1_2    | -         | -      | -       | -    |

Supplement: Supplementary file 2181 [file 1]

IPI00783392.2|RB1CC1

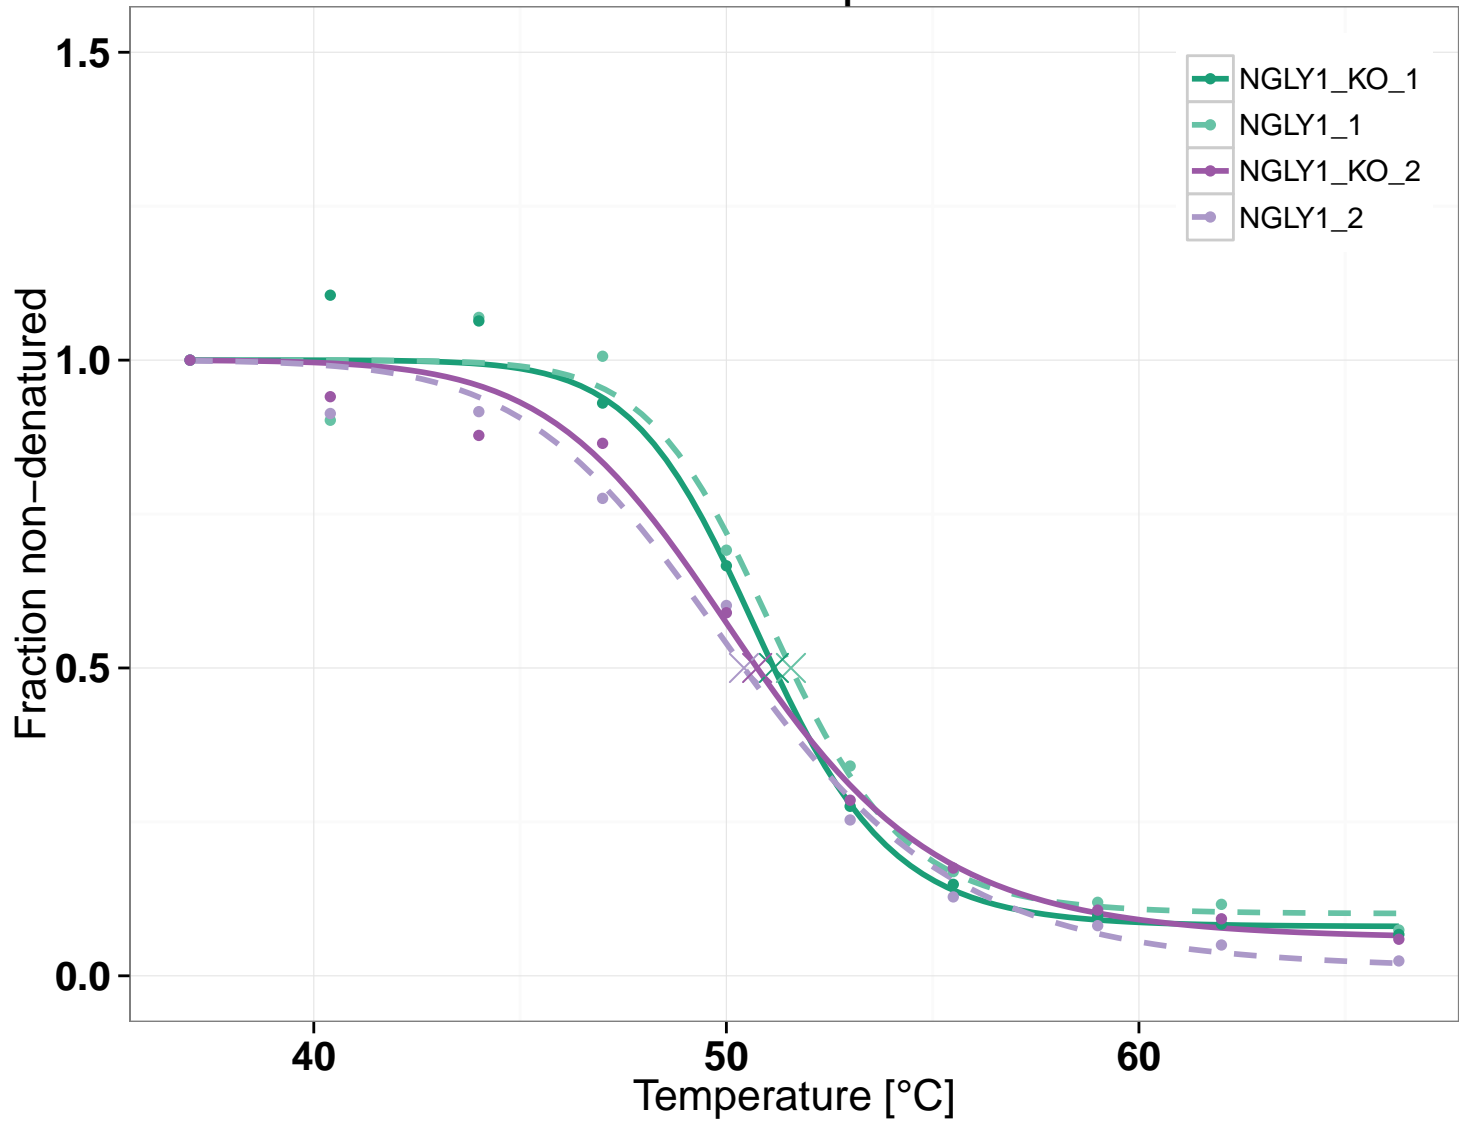

|            | meltPoint | slope  | plateau | R2   |
|------------|-----------|--------|---------|------|
| NGLY1_KO_1 | 51.15     | -0.15  | 0.08    | 0.99 |
| NGLY1_1    | 51.57     | -0.14  | 0.1     | 0.99 |
| NGLY1_KO_2 | 50.75     | -0.099 | 0.06    | 0.99 |
| NGLY1_2    | 50.43     | -0.094 | 0.01    | 0.99 |

Supplement: Supplementary file 2182 [file 1]

# IPI00329635.4|FLCN

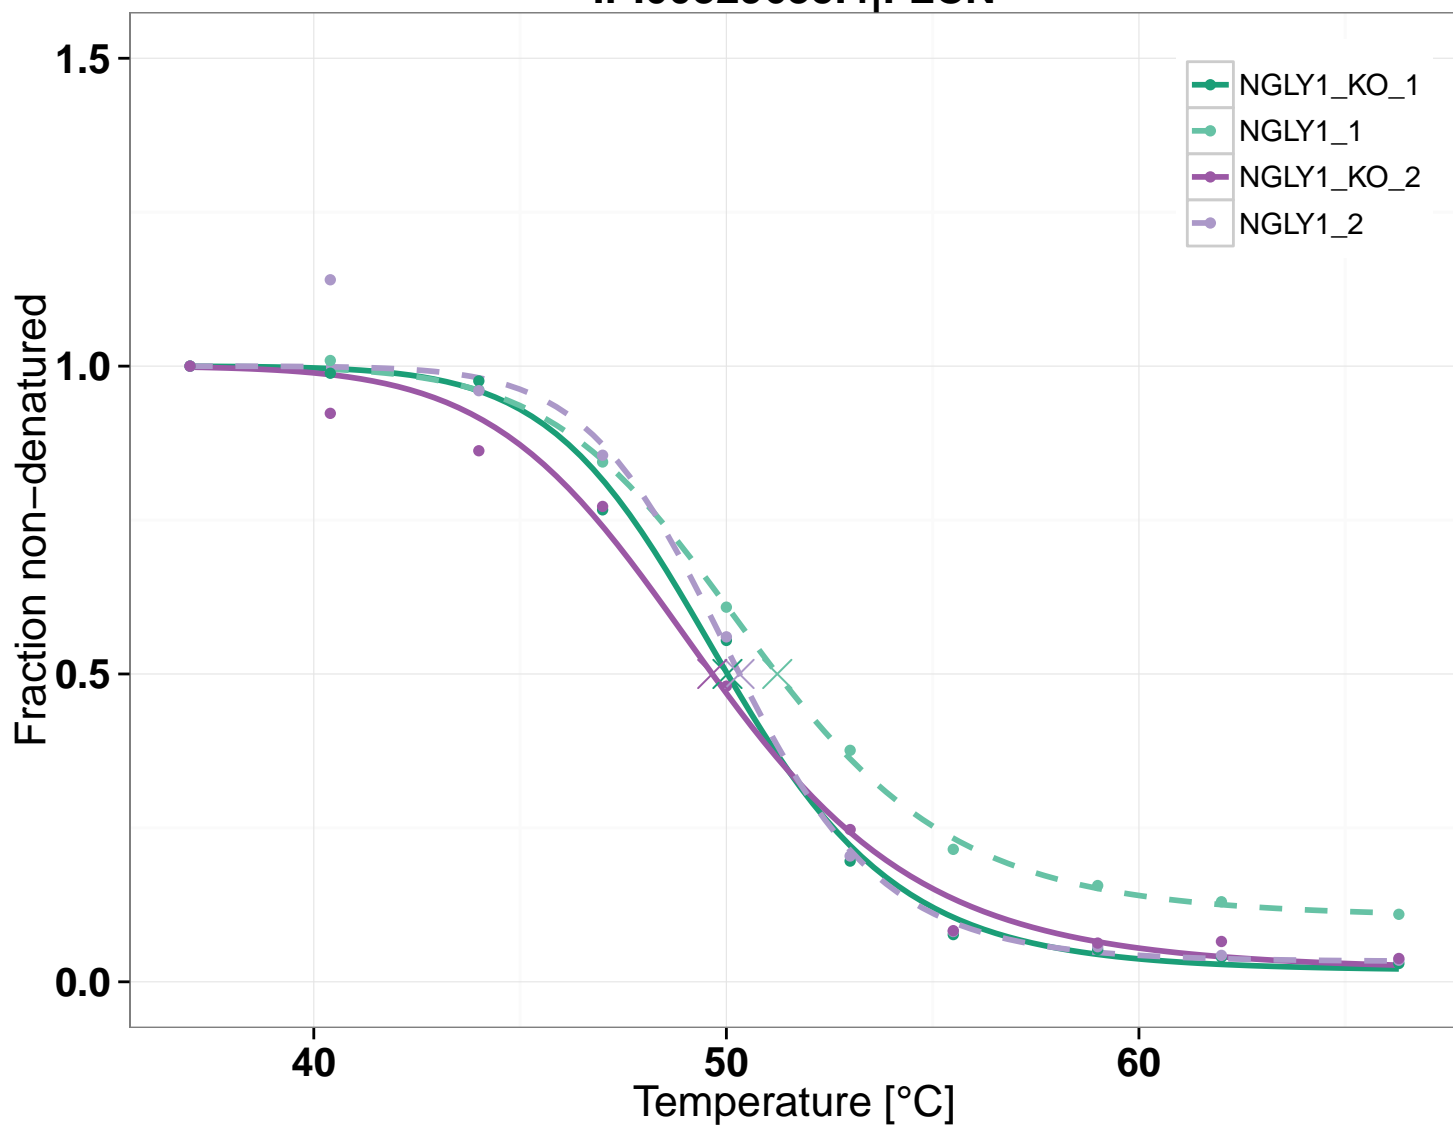

|            | meltPoint | slope  | plateau | R2   |
|------------|-----------|--------|---------|------|
| NGLY1_KO_1 | 50.03     | -0.12  | 0.02    | 1    |
| NGLY1_1    | 51.23     | -0.091 | 0.1     | 1    |
| NGLY1_KO_2 | 49.66     | -0.094 | 0.02    | 0.99 |
| NGLY1_2    | 50.32     | -0.13  | 0.03    | 0.99 |

Supplement: Supplementary file 2183 [file 1]

IPI00063667.3|FAM44B

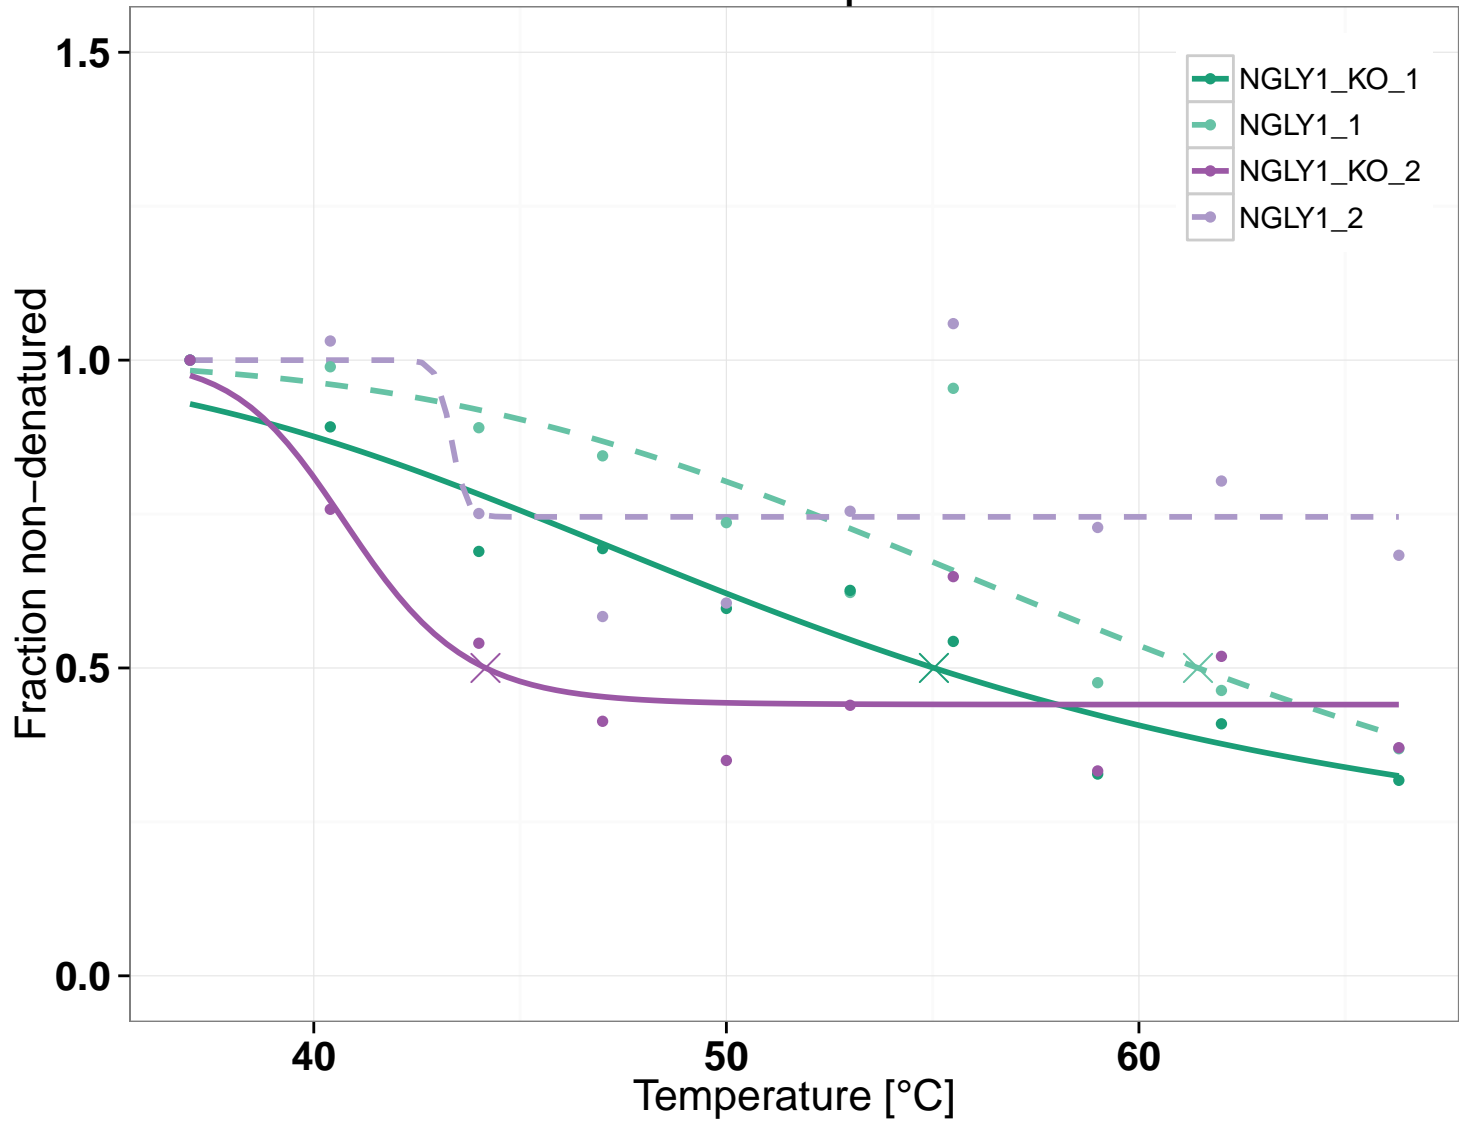

|            | meltPoint | slope  | plateau | R2   |
|------------|-----------|--------|---------|------|
| NGLY1_KO_1 | 55.03     | -0.027 | 0.13    | 0.92 |
| NGLY1_1    | 61.43     | -0.028 | 0       | 0.78 |
| NGLY1_KO_2 | 44.16     | -0.1   | 0.44    | 0.81 |
| NGLY1_2    | -         | -0.37  | 0.75    | 0.43 |

Supplement: Supplementary file 2184 [file 1]

IPI00828080.1|ARAP1

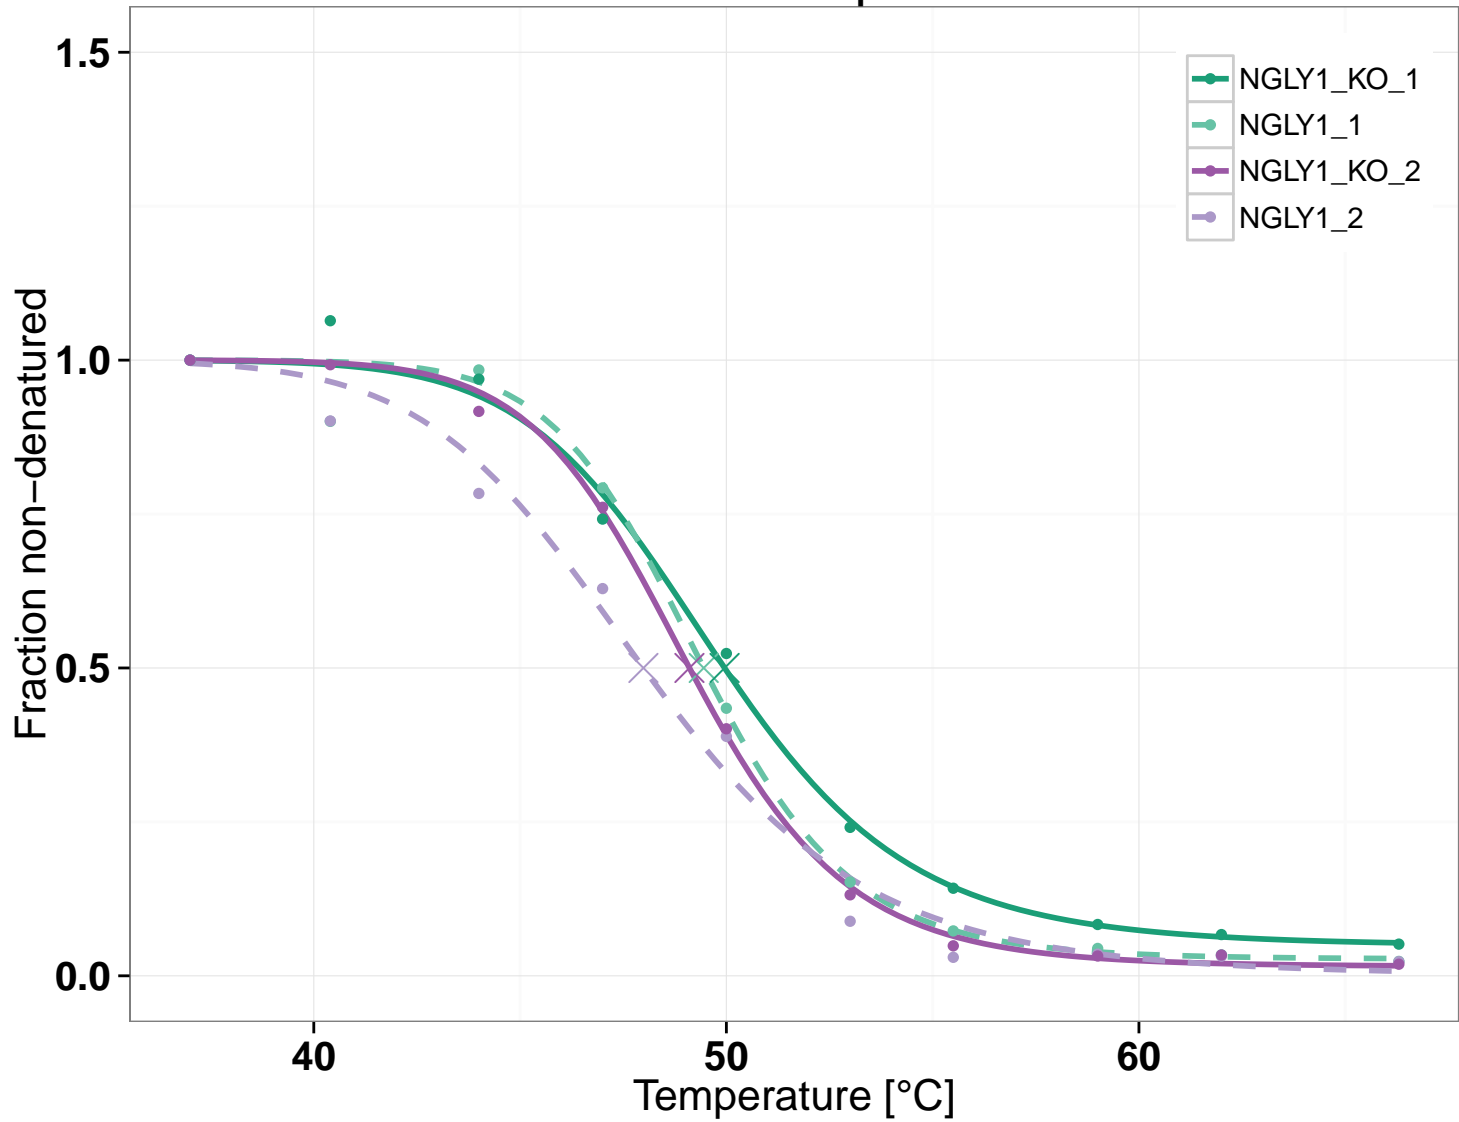

|            | meltPoint | slope  | plateau | R2   |
|------------|-----------|--------|---------|------|
| NGLY1_KO_1 | 49.96     | -0.1   | 0.05    | 0.99 |
| NGLY1_1    | 49.45     | -0.13  | 0.03    | 0.99 |
| NGLY1_KO_2 | 49.11     | -0.13  | 0.01    | 1    |
| NGLY1_2    | 47.99     | -0.093 | 0       | 0.99 |

Supplement: Supplementary file 2185 [file 1]

# IPI00025019.3|PSMB1

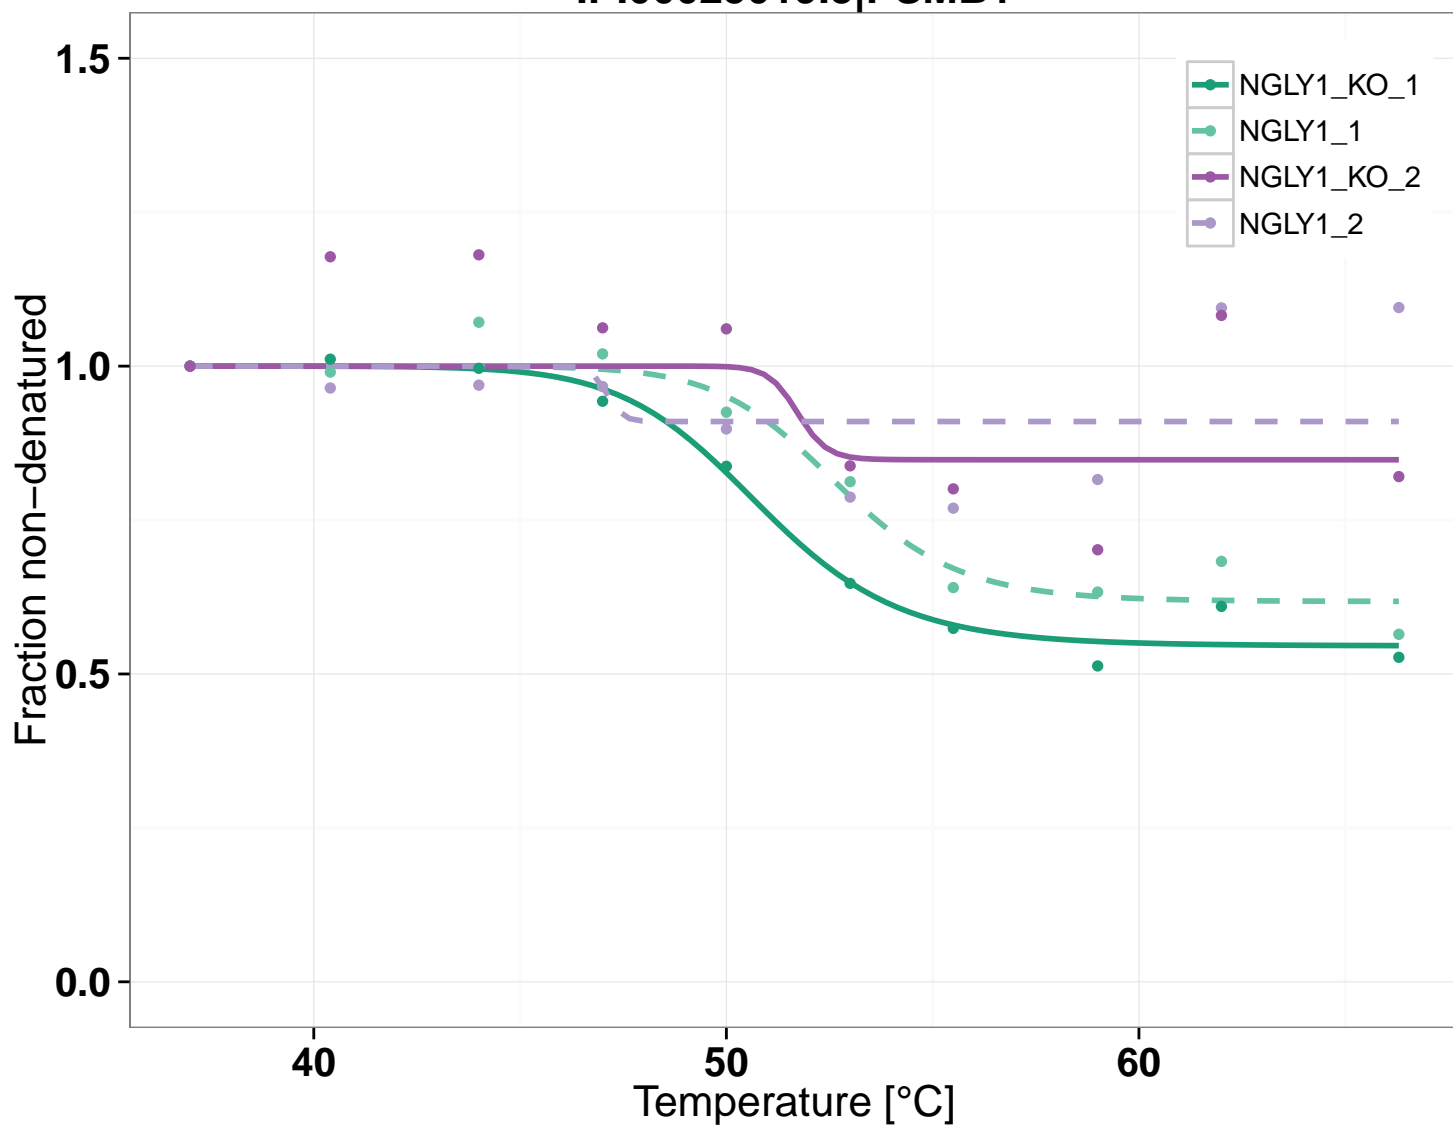

|            | meltPoint | slope  | plateau | R2   |
|------------|-----------|--------|---------|------|
| NGLY1_KO_1 | —         | −0.067 | 0.55    | 0.98 |
| NGLY1_1    | —         | −0.065 | 0.62    | 0.95 |
| NGLY1_KO_2 | —         | −0.11  | 0.85    | 0.41 |
| NGLY1_2    | —         | −0.12  | 0.91    | 0.07 |

Supplement: Supplementary file 2186 [file 1]

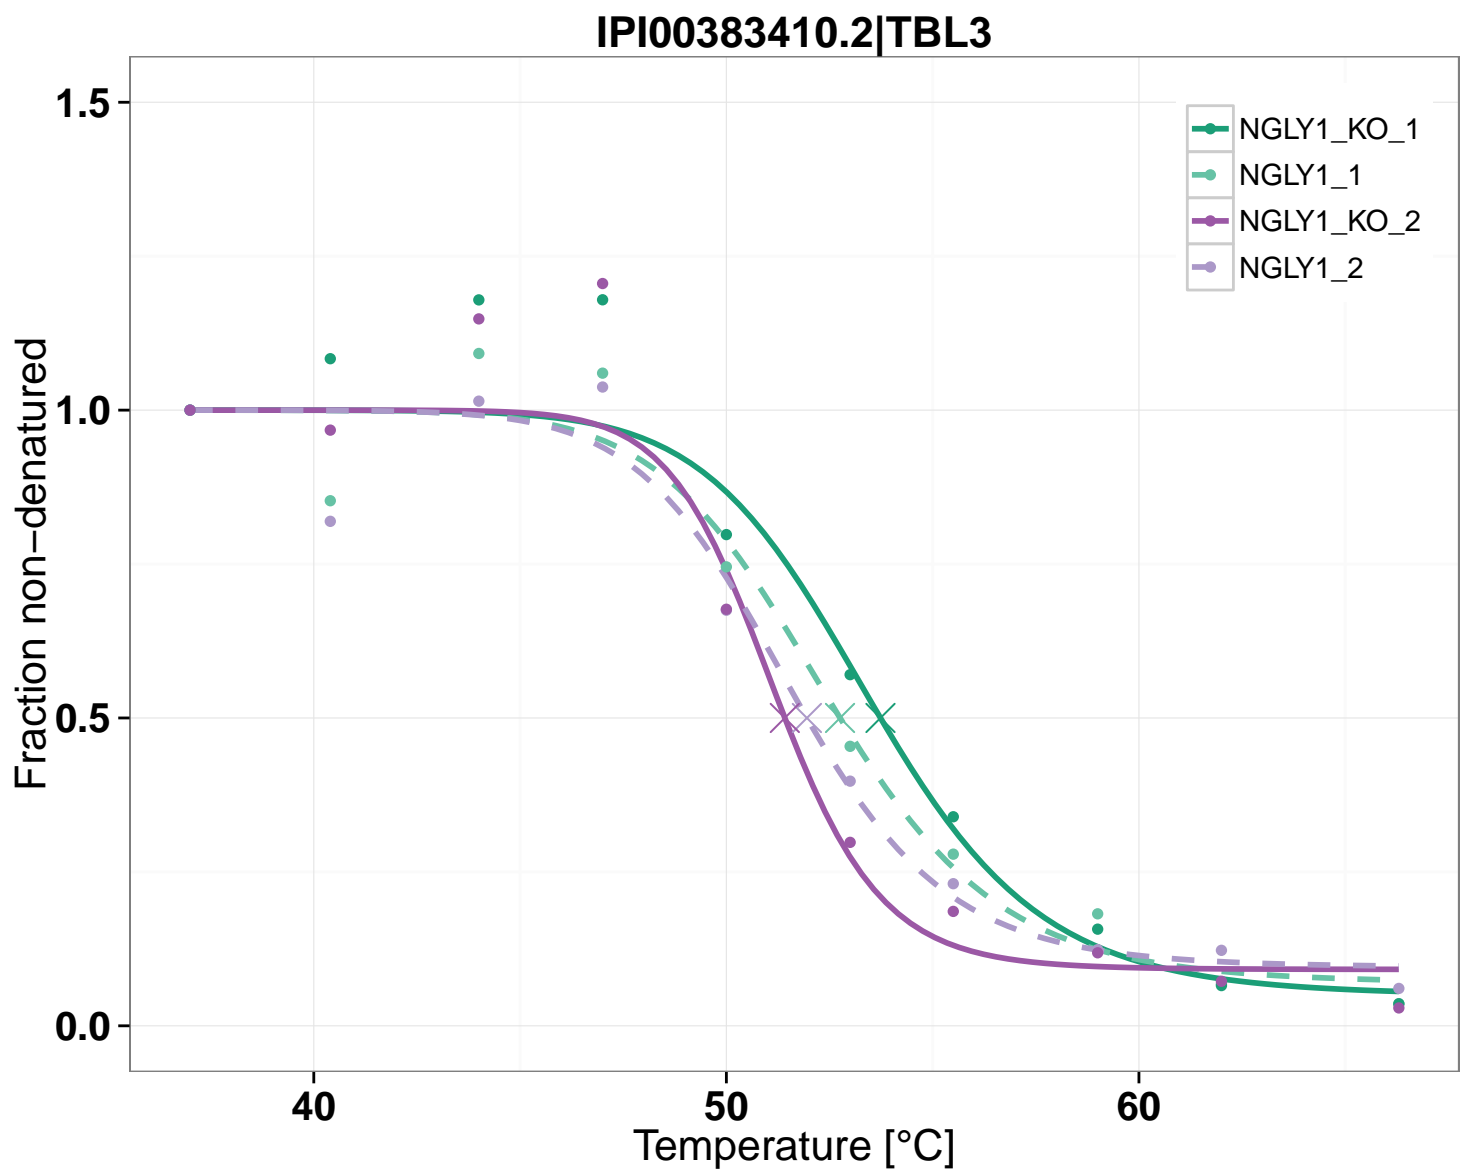

|            | meltPoint | slope | plateau | R2   |
|------------|-----------|-------|---------|------|
| NGLY1_KO_1 | 53.74     | -0.12 | 0.05    | 0.95 |
| NGLY1_1    | 52.76     | -0.11 | 0.07    | 0.97 |
| NGLY1_KO_2 | 51.42     | -0.18 | 0.09    | 0.96 |
| NGLY1_2    | 51.95     | -0.12 | 0.1     | 0.97 |

Supplement: Supplementary file 2187 [file 1]

IPI00305163.4|CBWD1

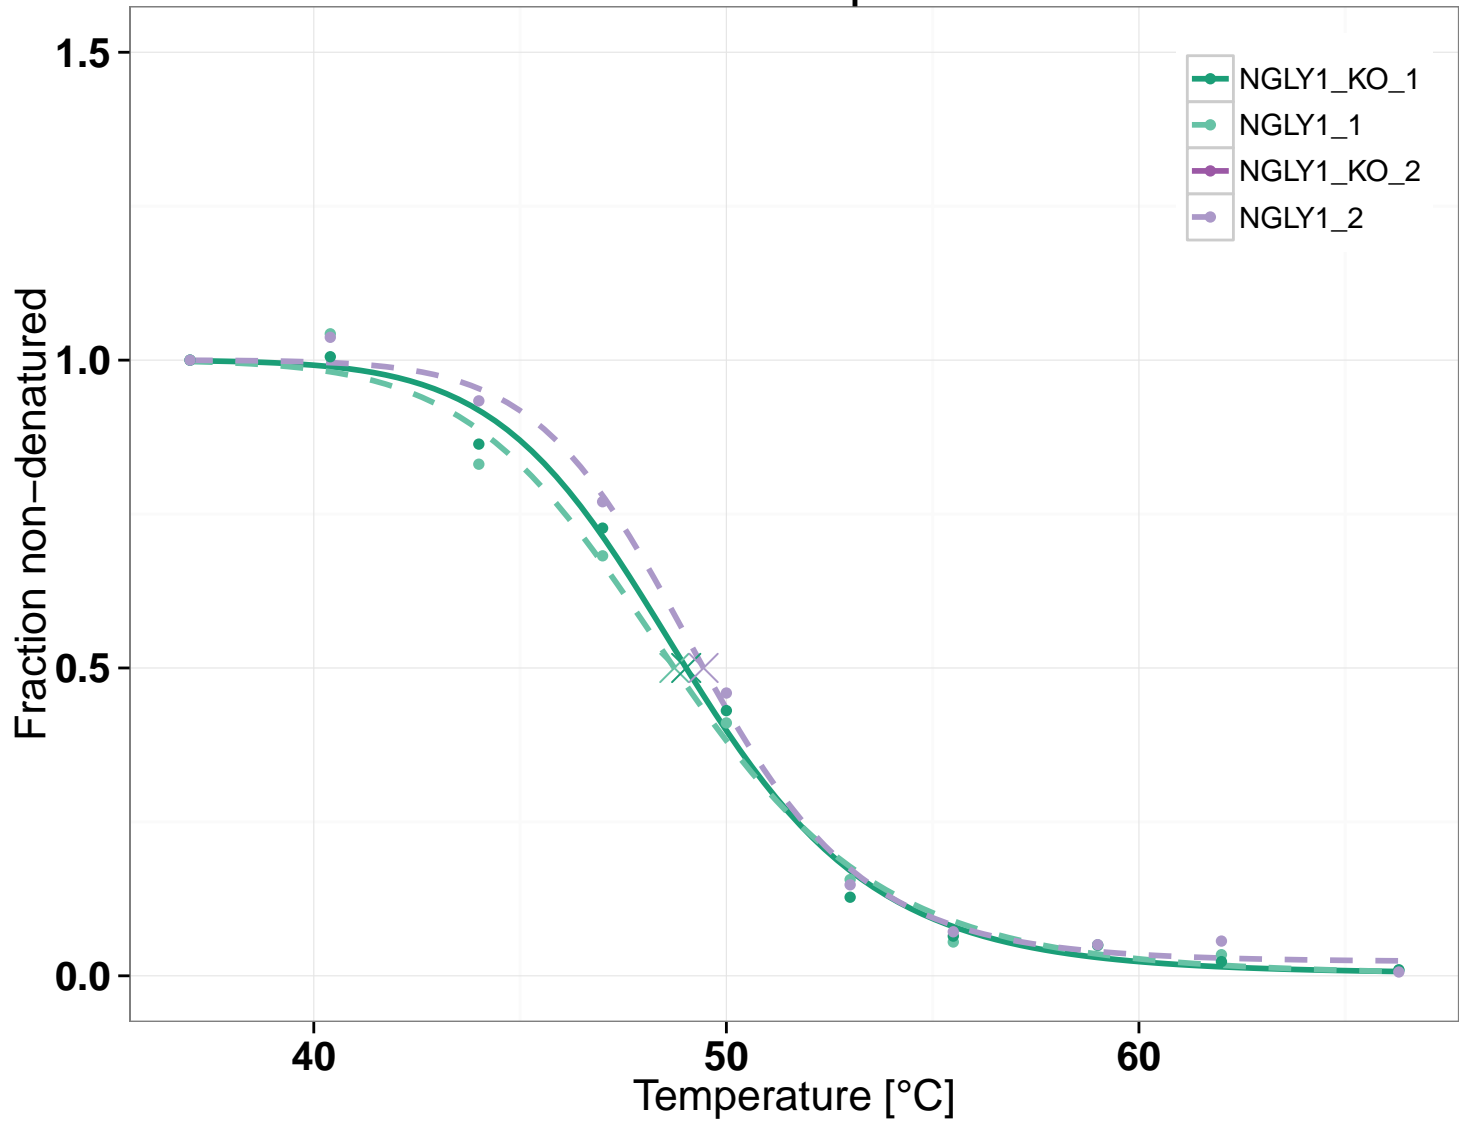

|            | meltPoint | slope  | plateau | R2   |
|------------|-----------|--------|---------|------|
| NGLY1_KO_1 | 49.03     | -0.11  | 0       | 1    |
| NGLY1_1    | 48.74     | -0.099 | 0       | 0.99 |
| NGLY1_KO_2 | -         | -      | -       | -    |
| NGLY1_2    | 49.45     | -0.12  | 0.02    | 1    |

Supplement: Supplementary file 2188 [file 1]

IPI00009896.1|EPHX1

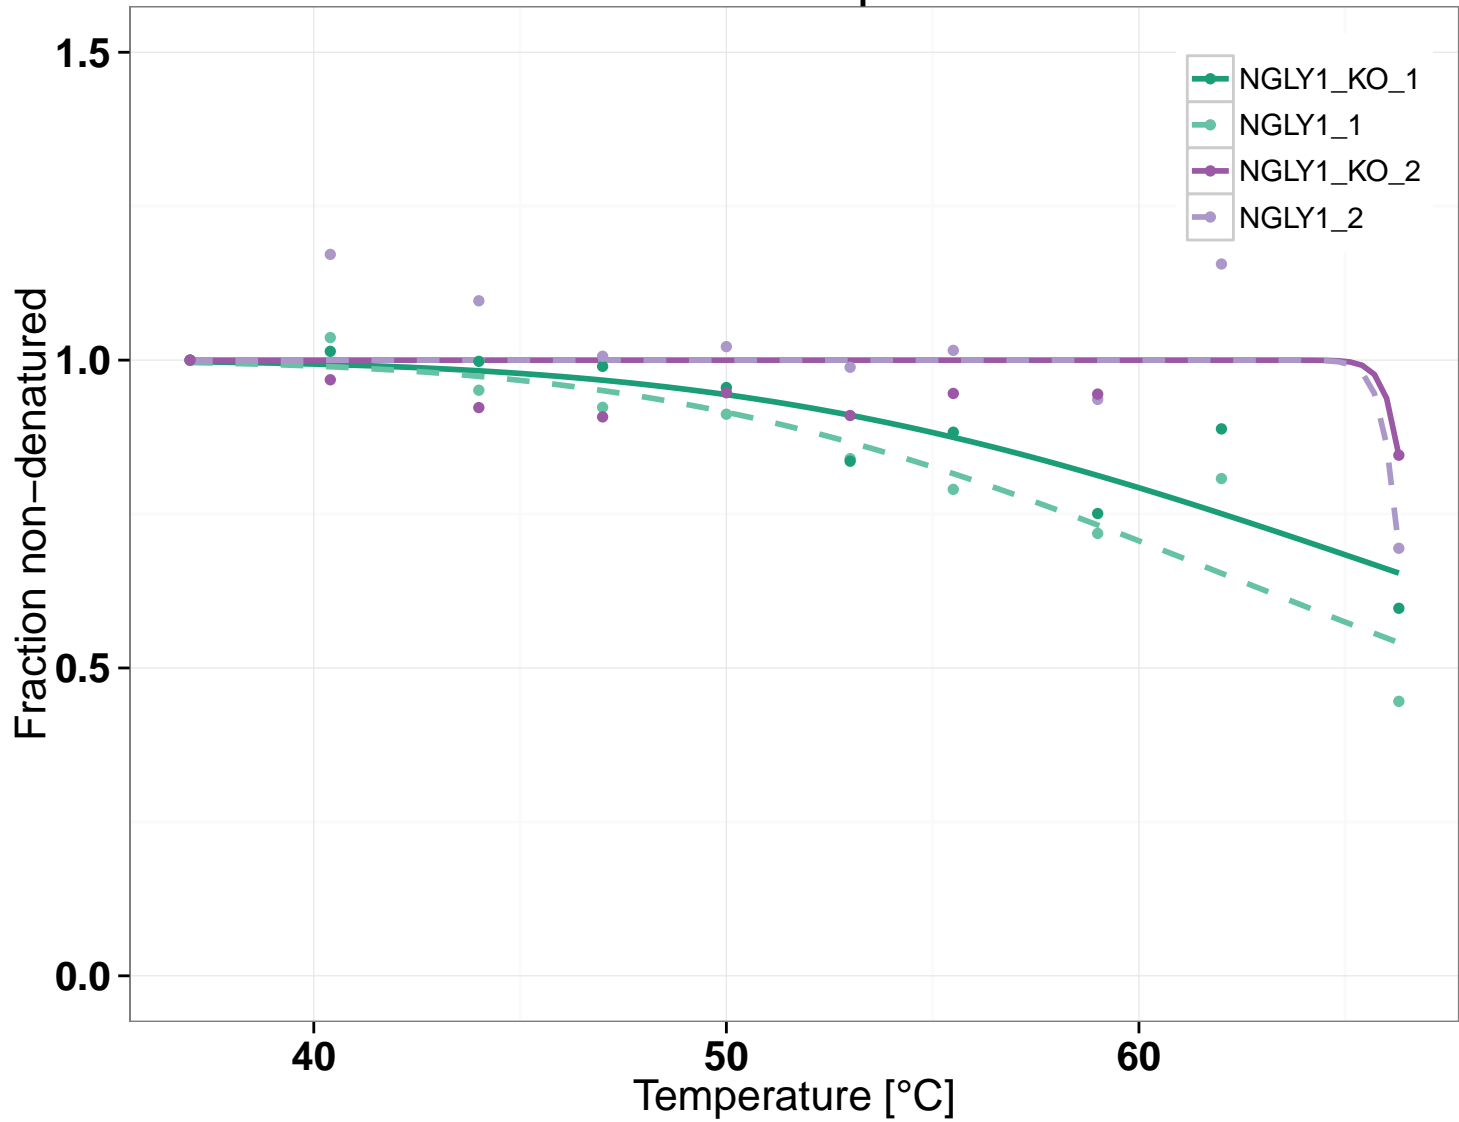

|            | meltPoint | slope  | plateau | R2   |
|------------|-----------|--------|---------|------|
| NGLY1_KO_1 | -         | -      | 0       | 0.8  |
| NGLY1_1    | -         | -0.027 | 0       | 0.86 |
| NGLY1_KO_2 | -         | -      | 0       | 0.1  |
| NGLY1_2    | -         | -      | 0       | 0.58 |

Supplement: Supplementary file 2189 [file 1]

# IPI00219669.5|CA8

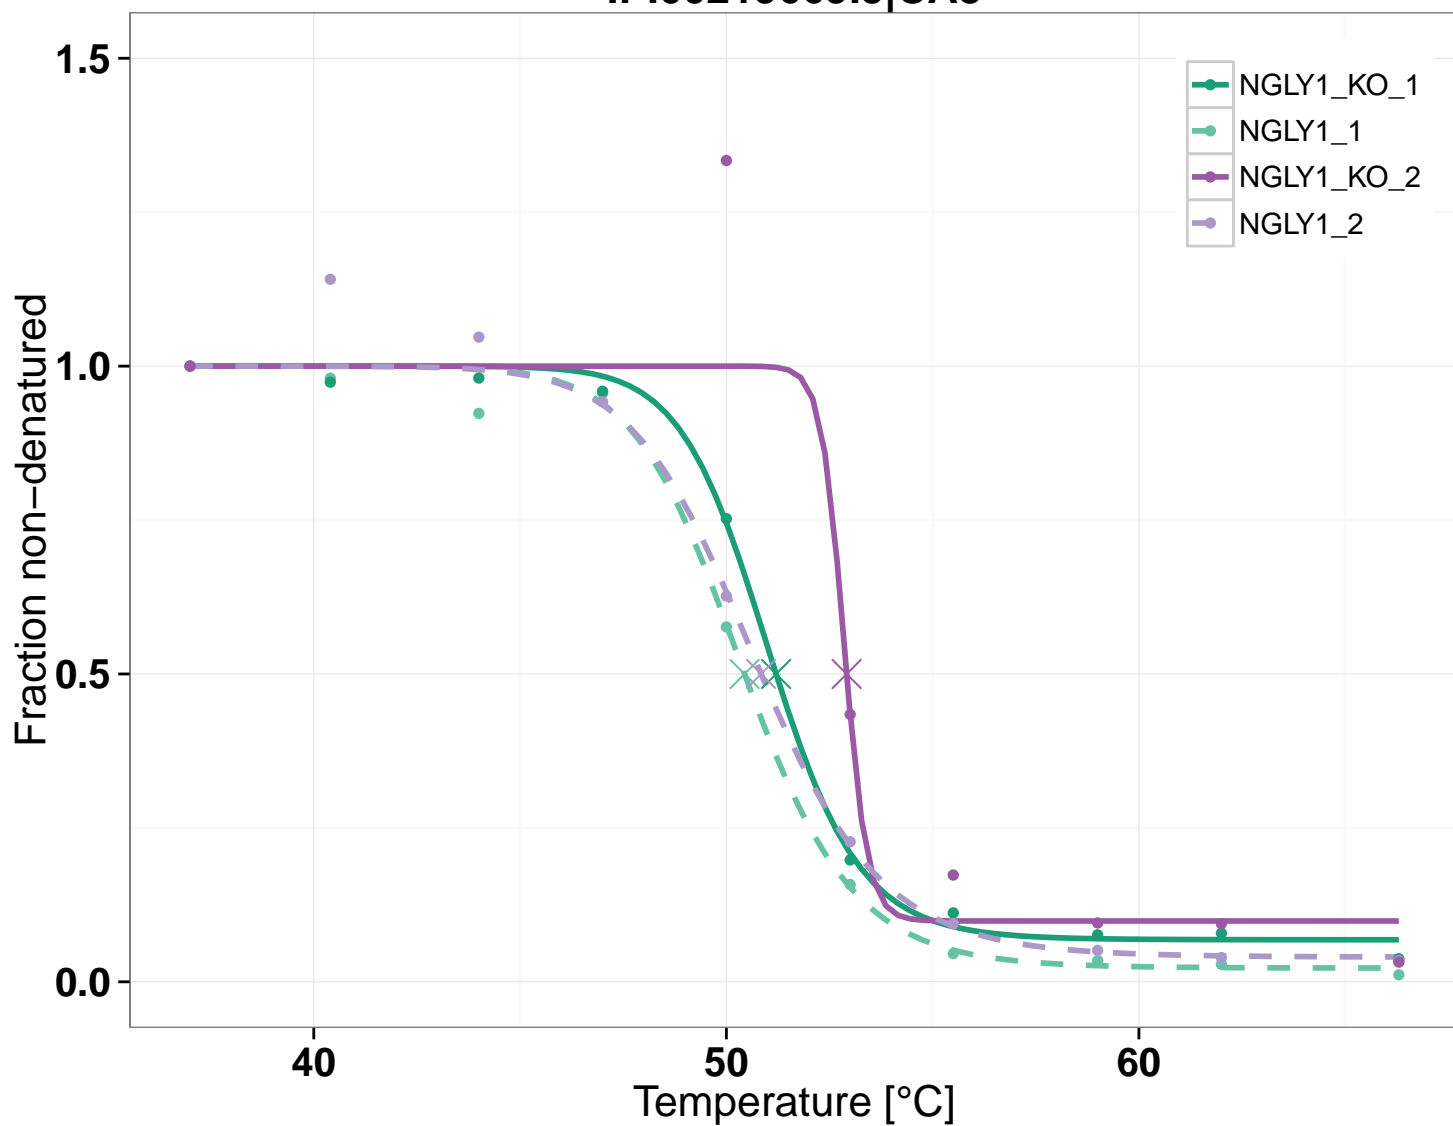

|            | meltPoint | slope | plateau | R2   |
|------------|-----------|-------|---------|------|
| NGLY1_KO_1 | 51.21     | -0.21 | 0.07    | 1    |
| NGLY1_1    | 50.44     | -0.18 | 0.02    | 1    |
| NGLY1_KO_2 | 52.92     | -0.81 | 0.1     | 0.43 |
| NGLY1_2    | 50.84     | -0.16 | 0.04    | 0.99 |

Supplement: Supplementary file 2190 [file 1]

# IPI00079406.4|C15ORF61

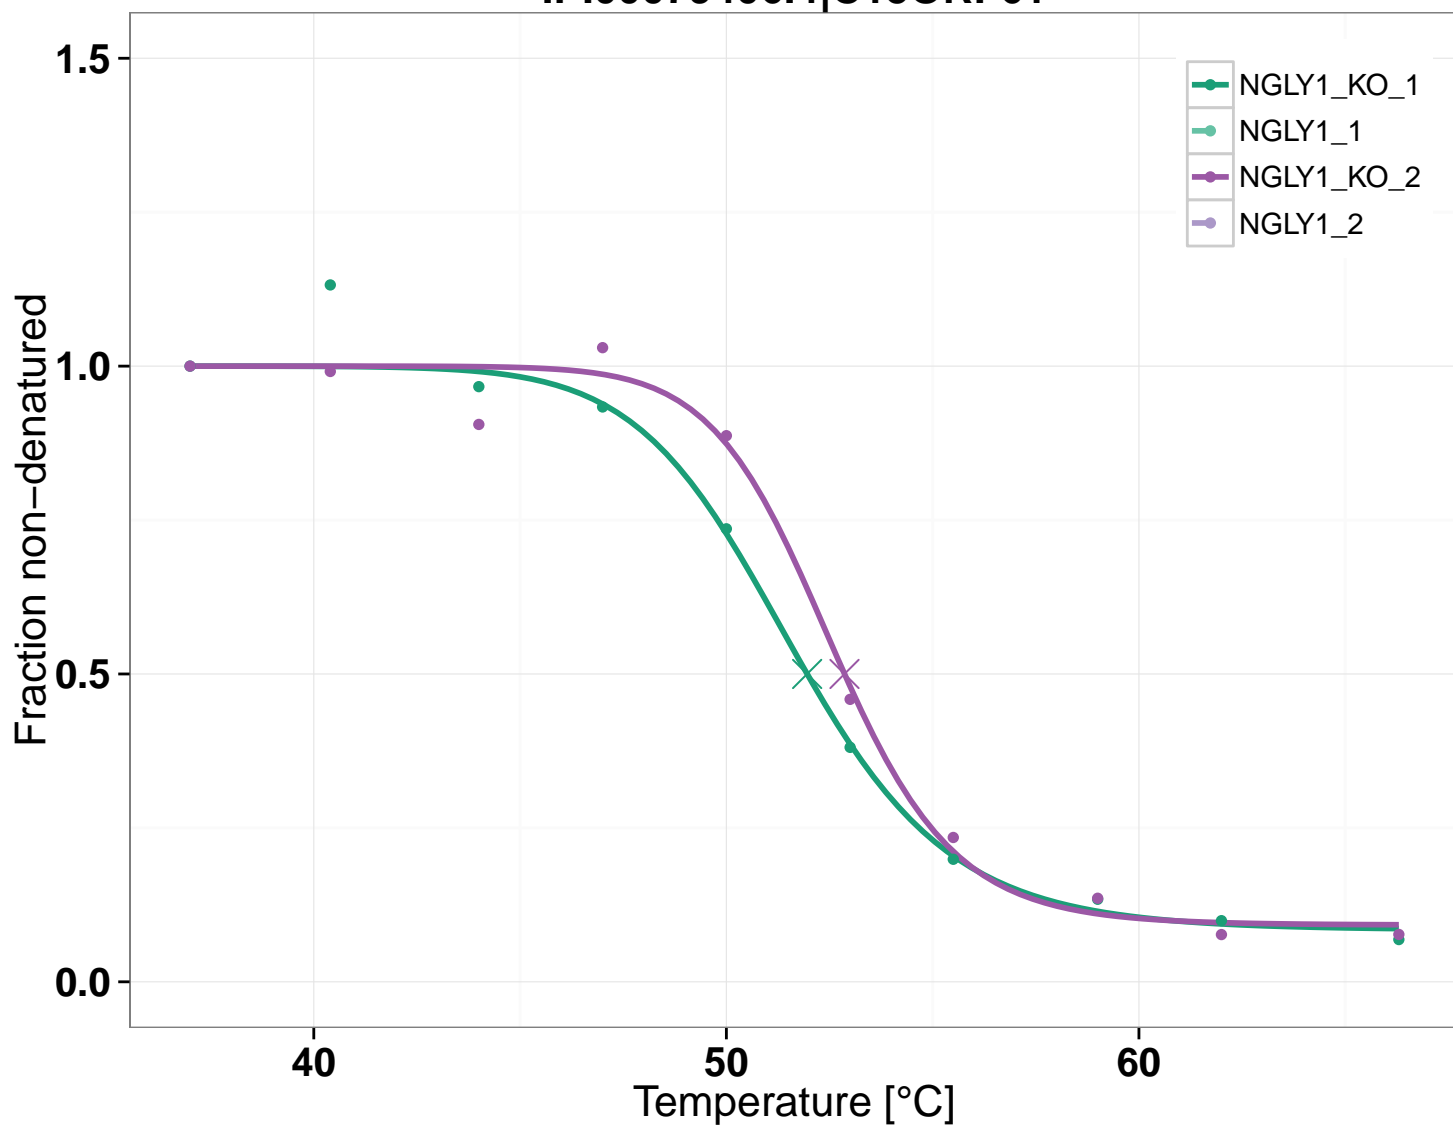

|            | meltPoint | slope | plateau | R2   |
|------------|-----------|-------|---------|------|
| NGLY1_KO_1 | 51.96     | -0.12 | 0.08    | 0.99 |
| NGLY1_1    | -         | -     | -       | -    |
| NGLY1_KO_2 | 52.86     | -0.15 | 0.09    | 0.99 |
| NGLY1_2    | -         | -     | -       | -    |

Supplement: Supplementary file 2191 [file 1]

IPI00879045.1|EID2

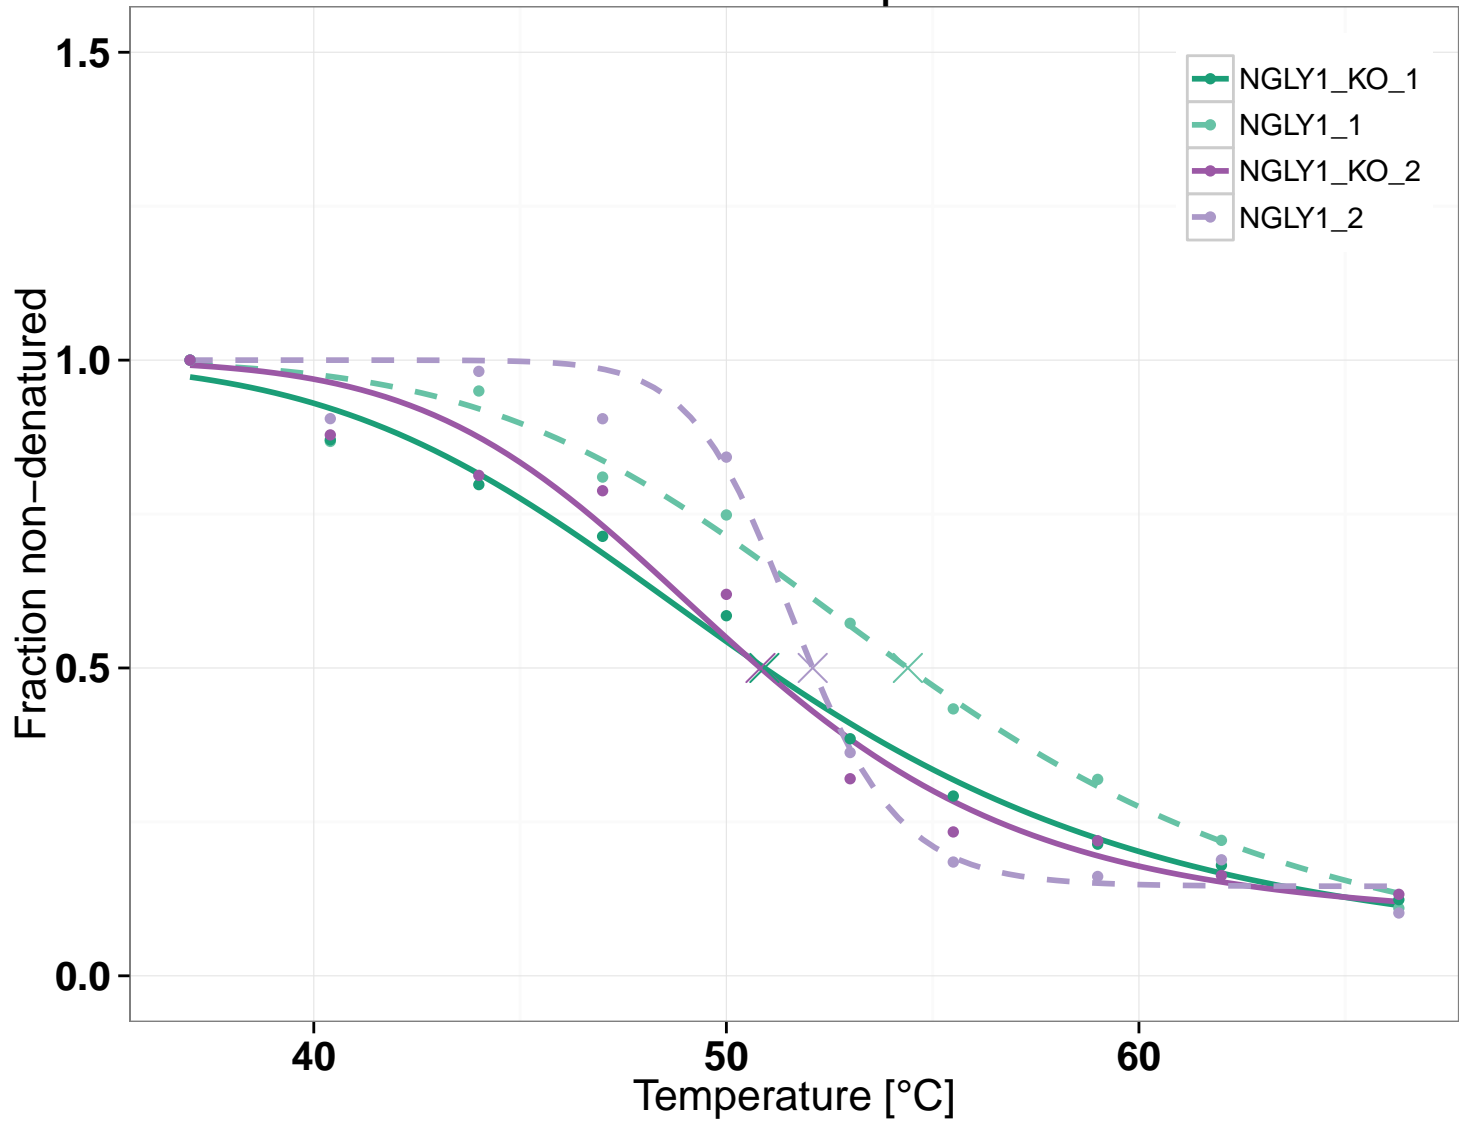

|            | meltPoint | slope  | plateau | R2   |
|------------|-----------|--------|---------|------|
| NGLY1_KO_1 | 50.92     | -0.048 | 0.02    | 0.99 |
| NGLY1_1    | 54.4      | -0.05  | 0       | 0.98 |
| NGLY1_KO_2 | 50.83     | -0.062 | 0.09    | 0.97 |
| NGLY1_2    | 52.09     | -0.17  | 0.15    | 0.99 |

Supplement: Supplementary file 2192 [file 1]

IPI00514108.3|PTPN7

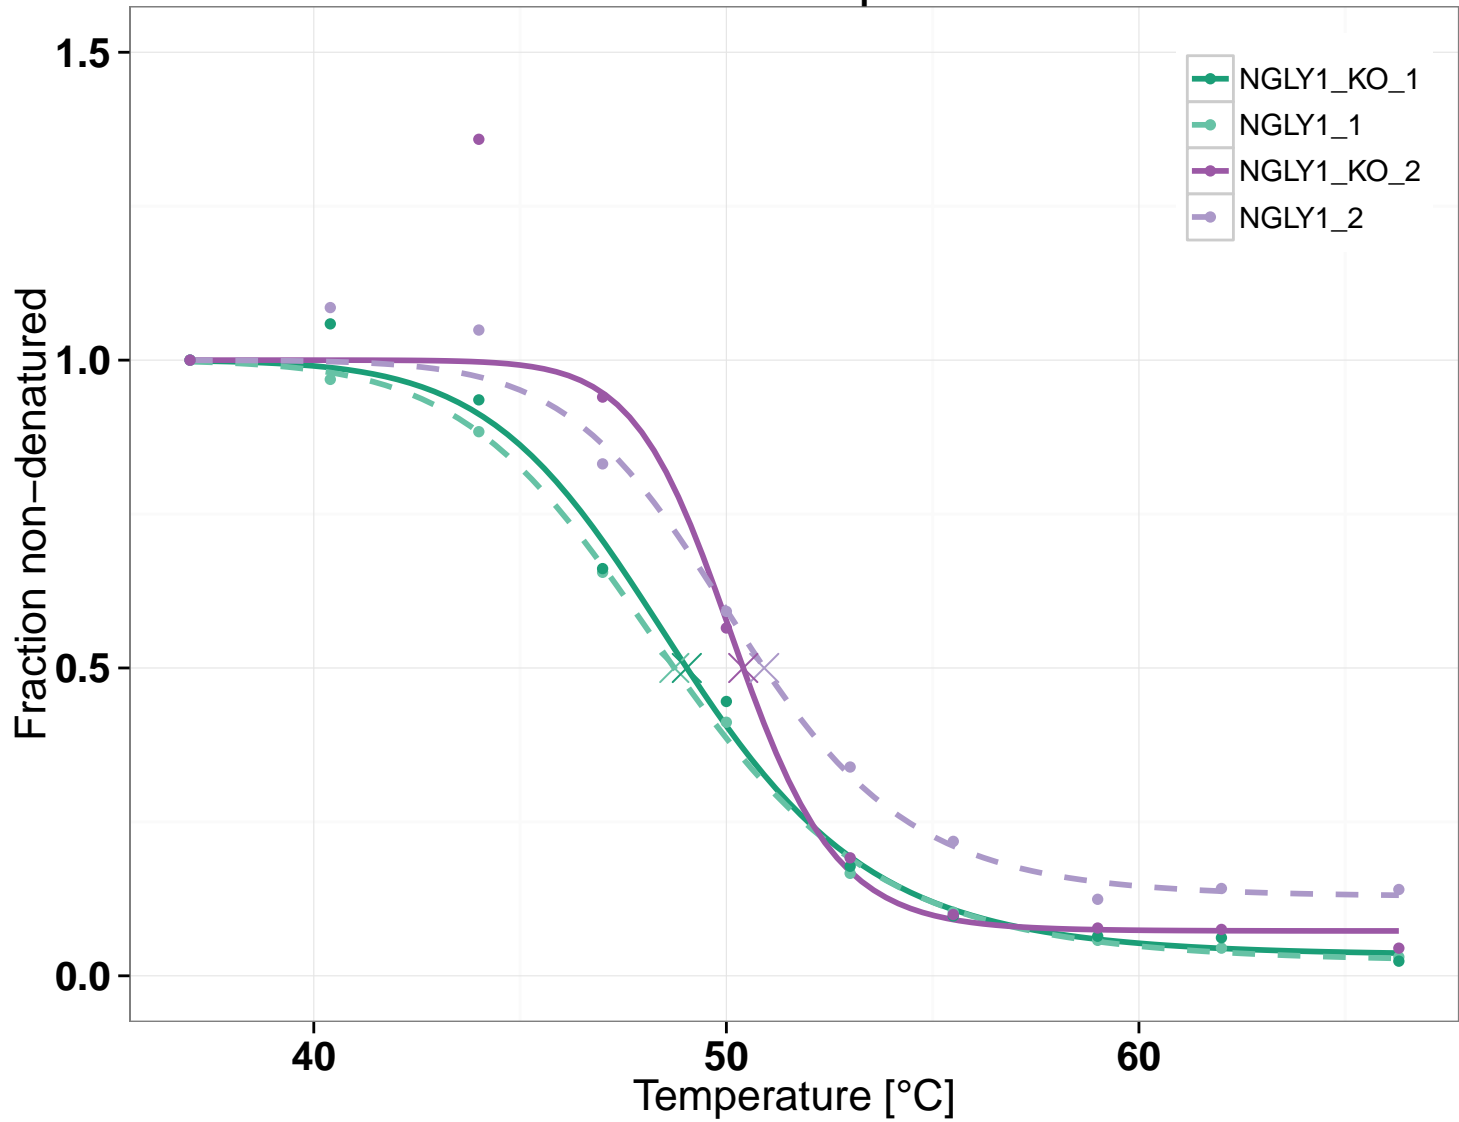

|            | meltPoint | slope  | plateau | R2   |
|------------|-----------|--------|---------|------|
| NGLY1_KO_1 | 49.04     | -0.1   | 0.03    | 0.99 |
| NGLY1_1    | 48.74     | -0.097 | 0.02    | 1    |
| NGLY1_KO_2 | 50.41     | -0.19  | 0.07    | 0.85 |
| NGLY1_2    | 50.92     | -0.1   | 0.13    | 0.99 |

Supplement: Supplementary file 2193 [file 1]

# IPI00022585.2|AKAP1

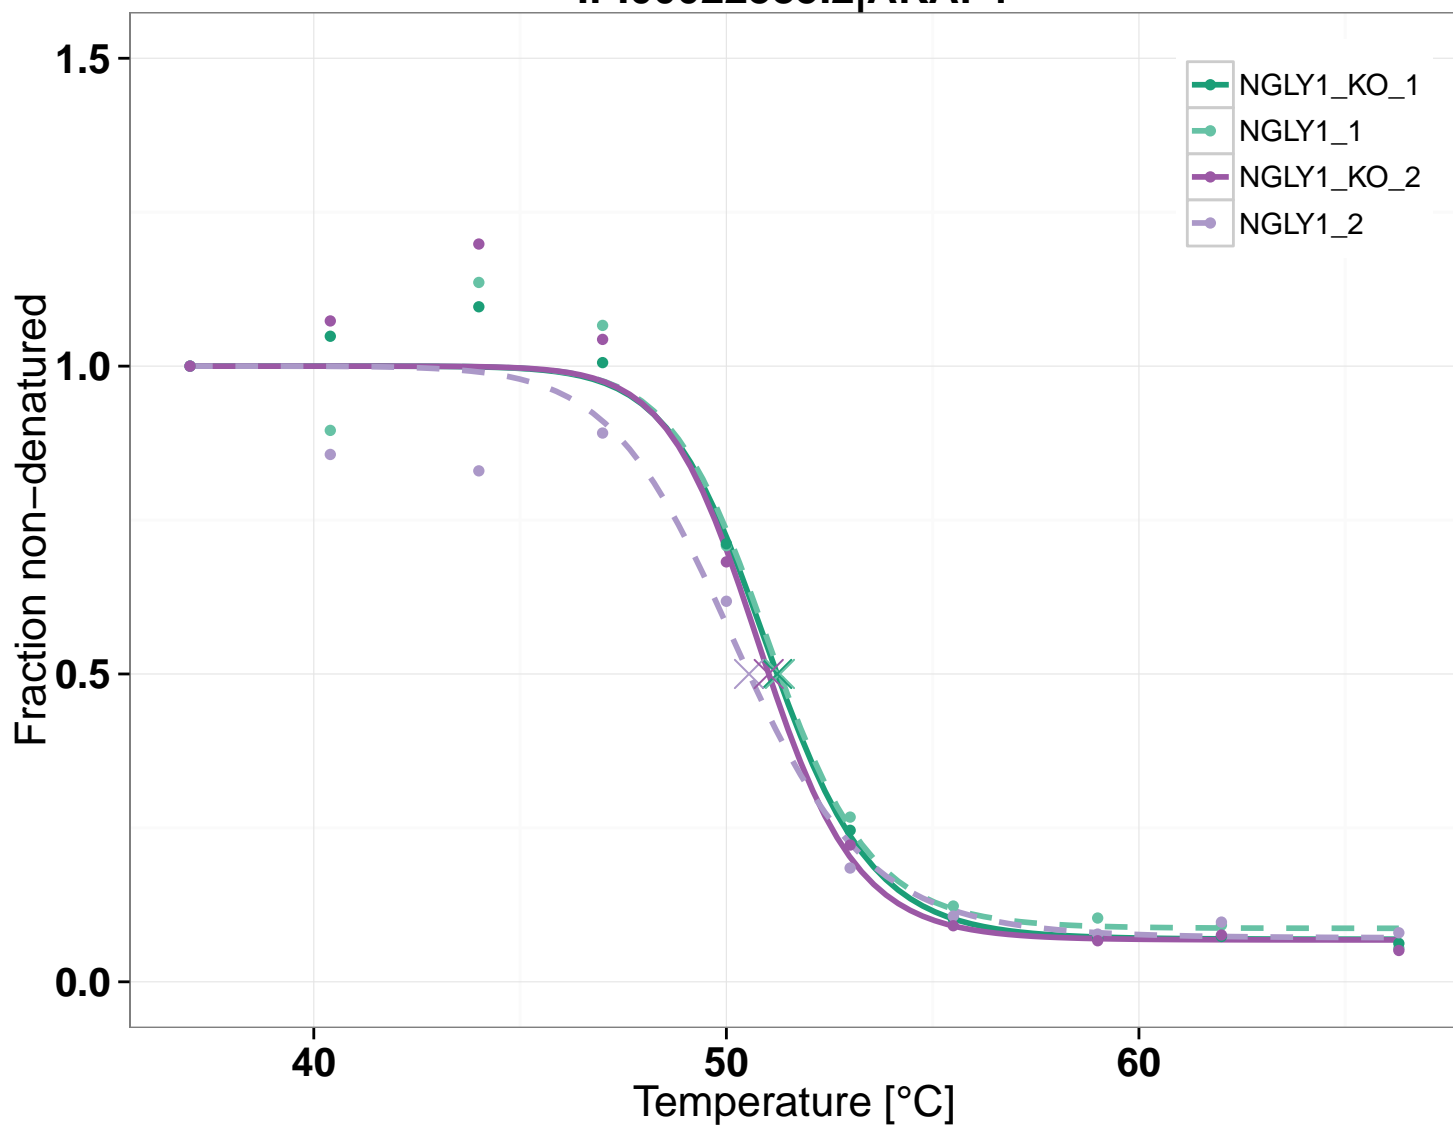

|            | meltPoint | slope | plateau | R2   |
|------------|-----------|-------|---------|------|
| NGLY1_KO_1 | 51.23     | -0.19 | 0.07    | 0.99 |
| NGLY1_1    | 51.3      | -0.19 | 0.09    | 0.98 |
| NGLY1_KO_2 | 51.03     | -0.2  | 0.07    | 0.98 |
| NGLY1_2    | 50.55     | -0.15 | 0.07    | 0.96 |

Supplement: Supplementary file 2194 [file 1]

IPI00419433.2|RAB11FIP1

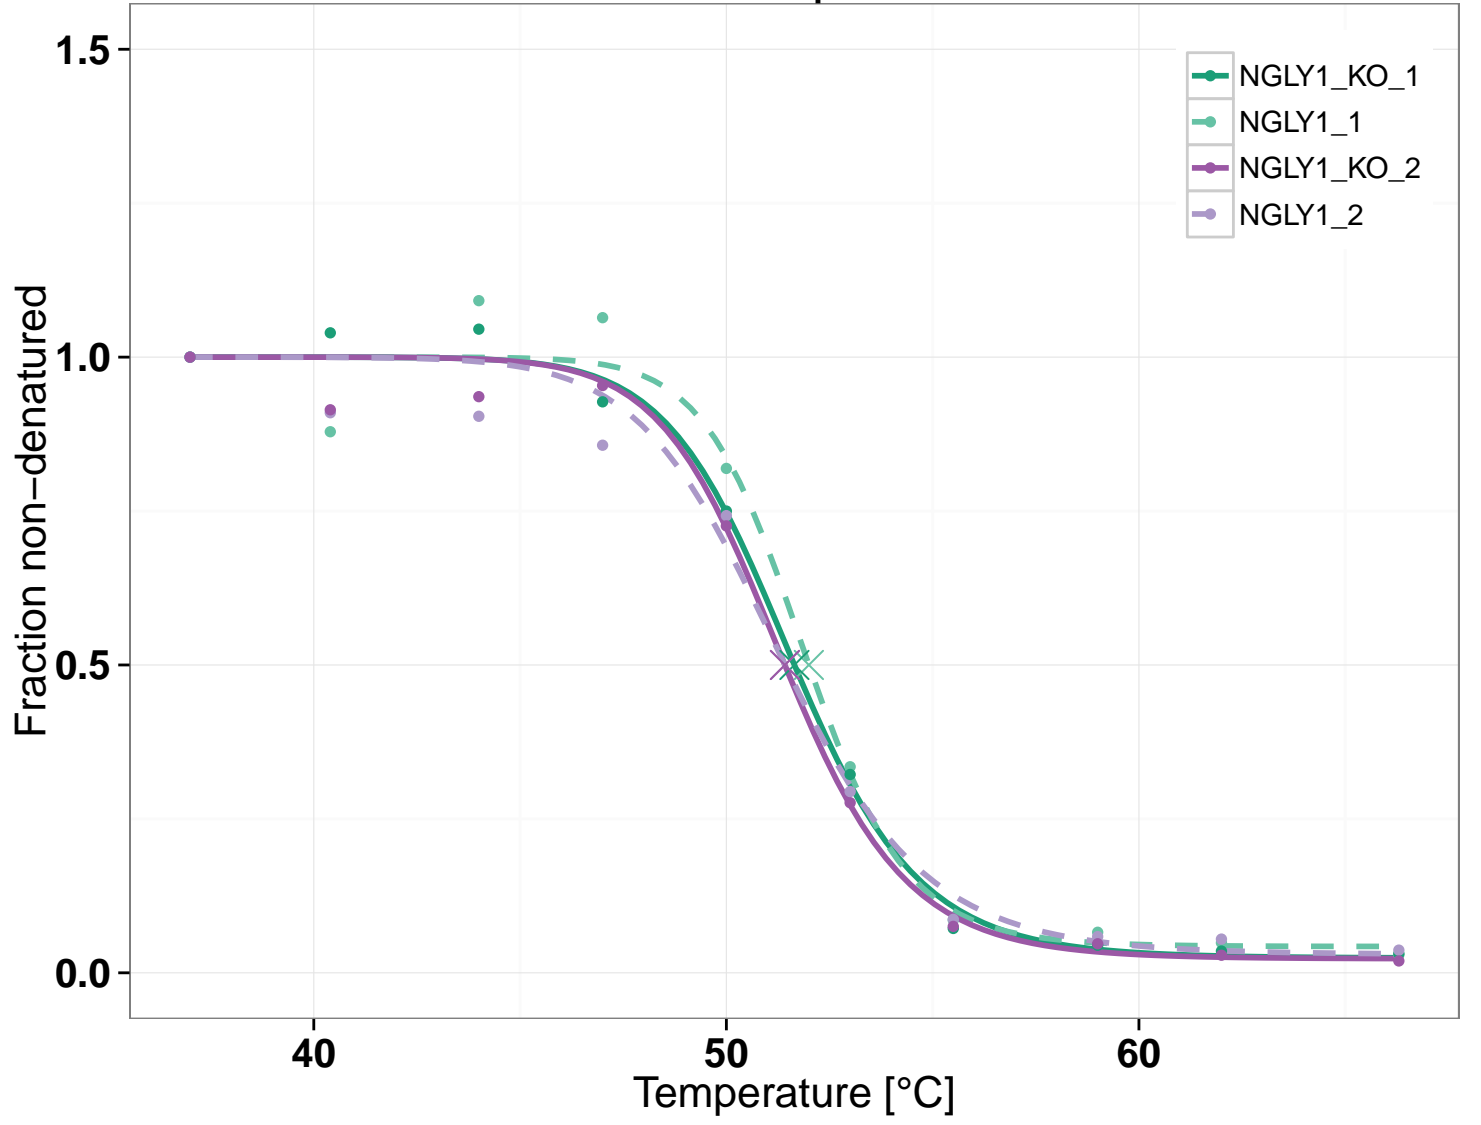

|            | meltPoint | slope | plateau | R2   |
|------------|-----------|-------|---------|------|
| NGLY1_KO_1 | 51.65     | -0.16 | 0.02    | 1    |
| NGLY1_1    | 52        | -0.19 | 0.04    | 0.98 |
| NGLY1_KO_2 | 51.42     | -0.16 | 0.02    | 0.99 |
| NGLY1_2    | 51.42     | -0.14 | 0.03    | 0.98 |

Supplement: Supplementary file 2195 [file 1]

IPI00552671.2|PLXNA1

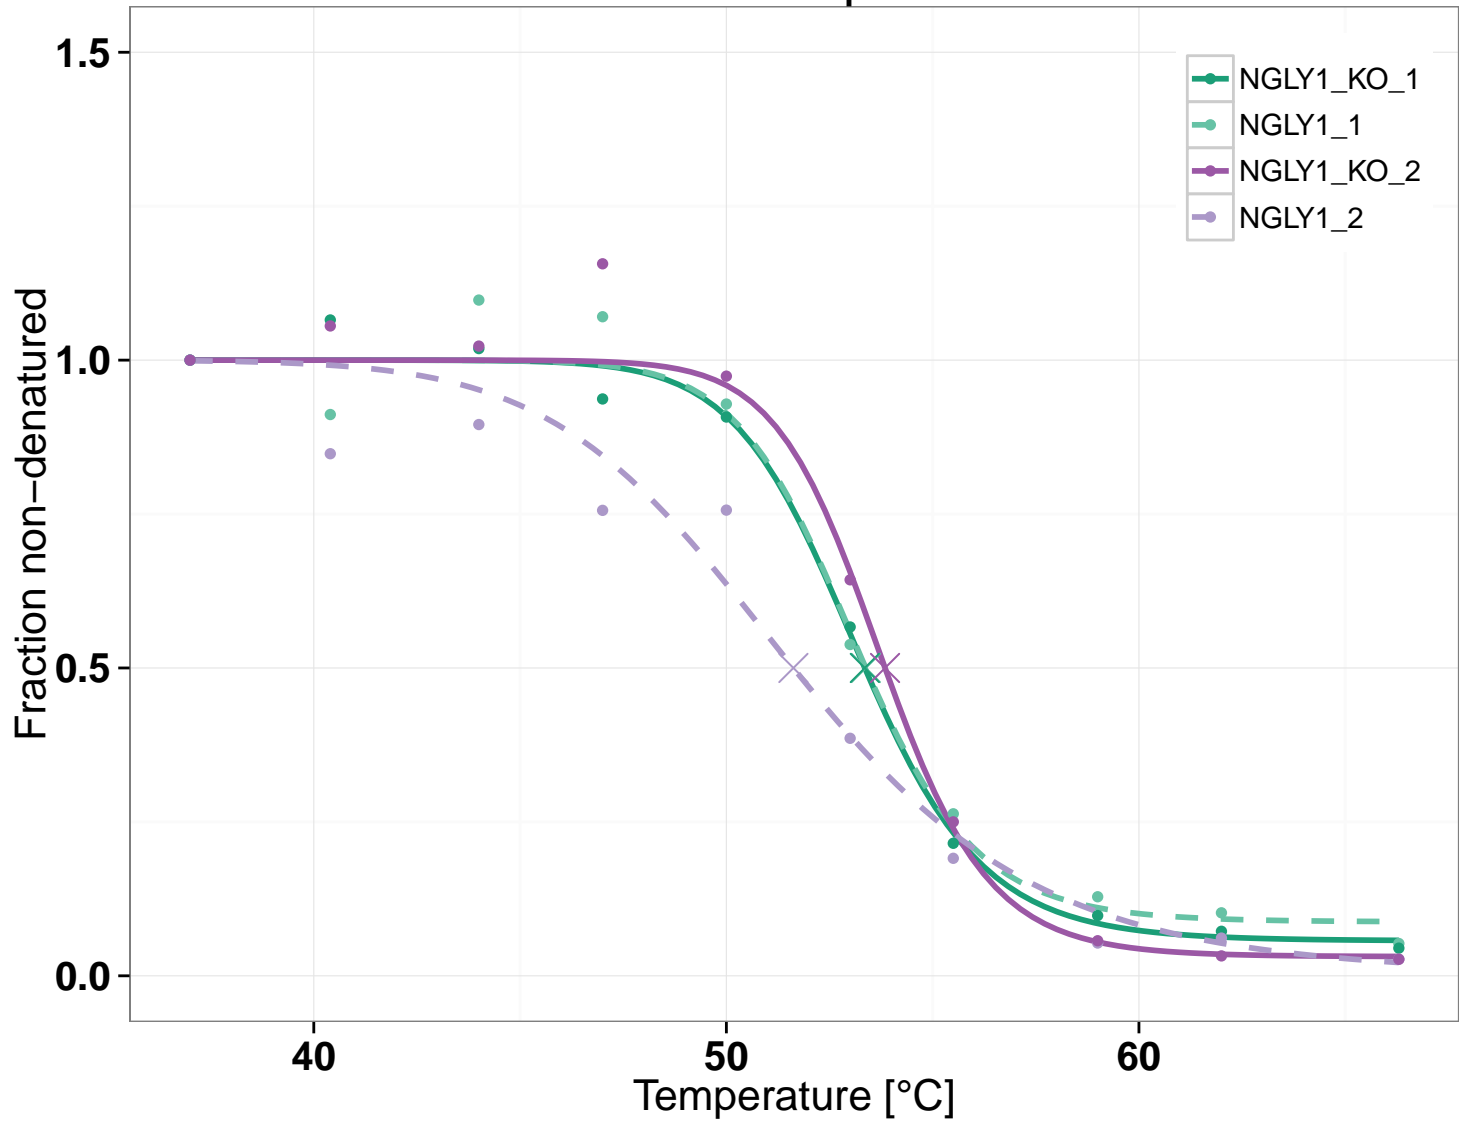

|            | meltPoint | slope  | plateau | R2   |
|------------|-----------|--------|---------|------|
| NGLY1_KO_1 | 53.36     | -0.16  | 0.06    | 1    |
| NGLY1_1    | 53.38     | -0.16  | 0.09    | 0.98 |
| NGLY1_KO_2 | 53.85     | -0.19  | 0.03    | 0.99 |
| NGLY1_2    | 51.62     | -0.085 | 0       | 0.96 |

Supplement: Supplementary file 2196 [file 1]

# IPI00021807.2|GBA

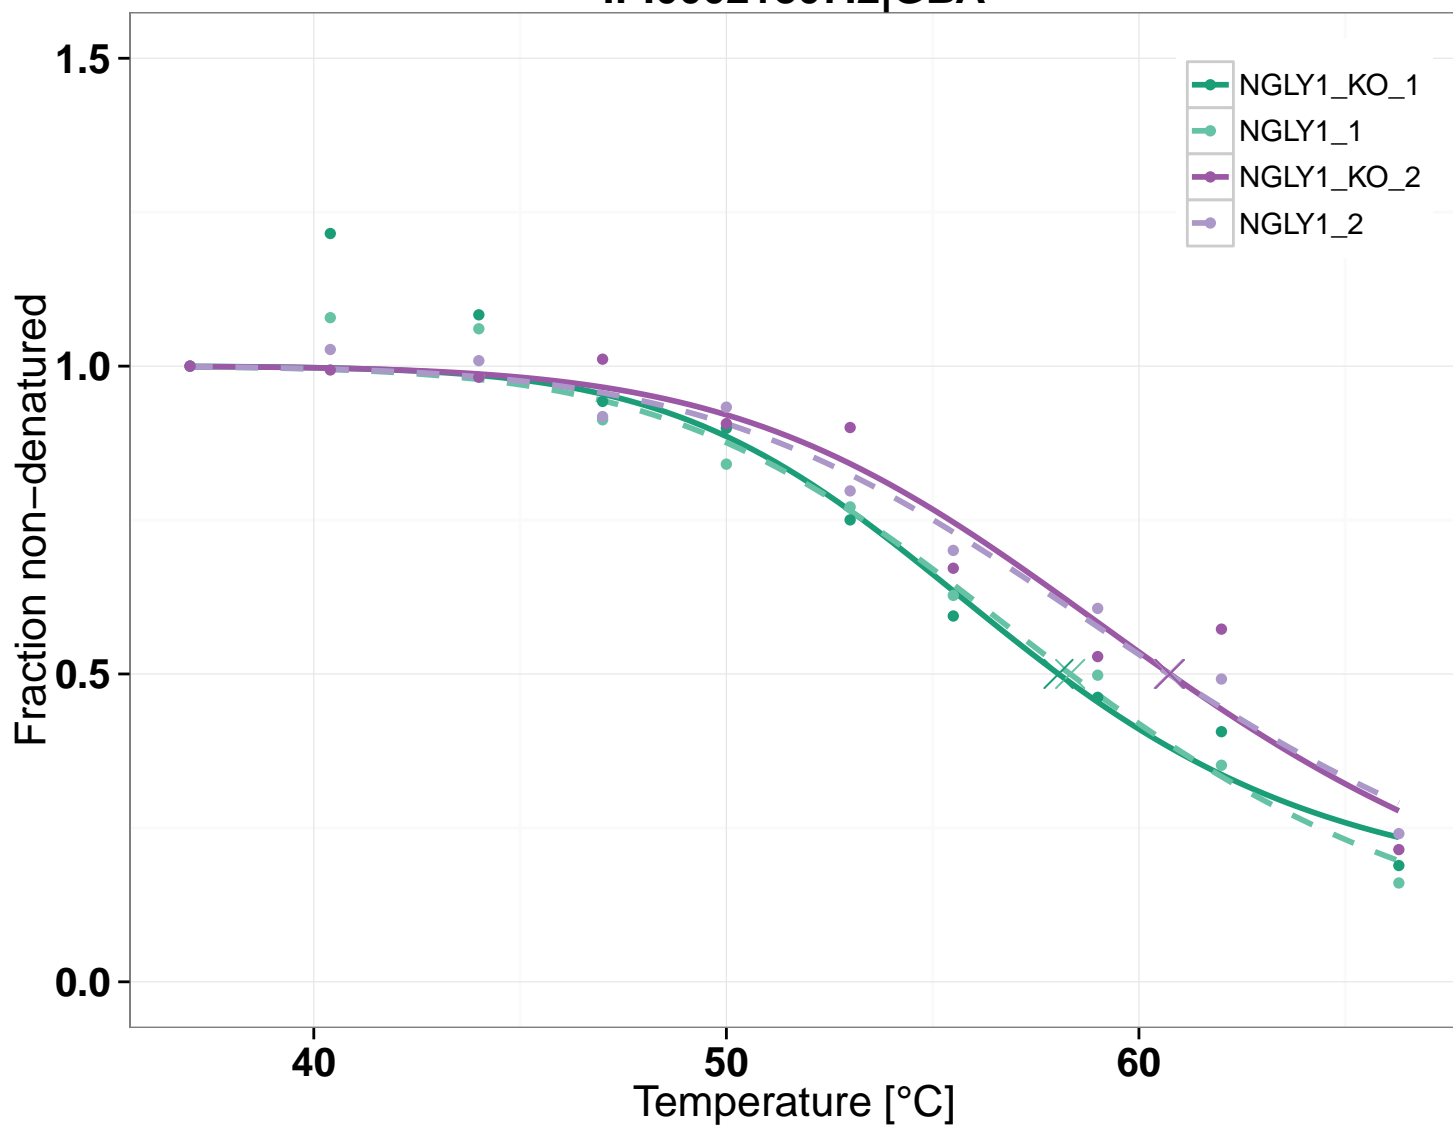

|            | meltPoint | slope  | plateau | R2   |
|------------|-----------|--------|---------|------|
| NGLY1_KO_1 | 58.05     | -0.054 | 0.13    | 0.93 |
| NGLY1_1    | 58.33     | -0.052 | 0       | 0.98 |
| NGLY1_KO_2 | 60.75     | -0.048 | 0       | 0.95 |
| NGLY1_2    | 60.72     | -0.045 | 0       | 0.98 |

Supplement: Supplementary file 2197 [file 1]

# IPI00291005.8|MDH1

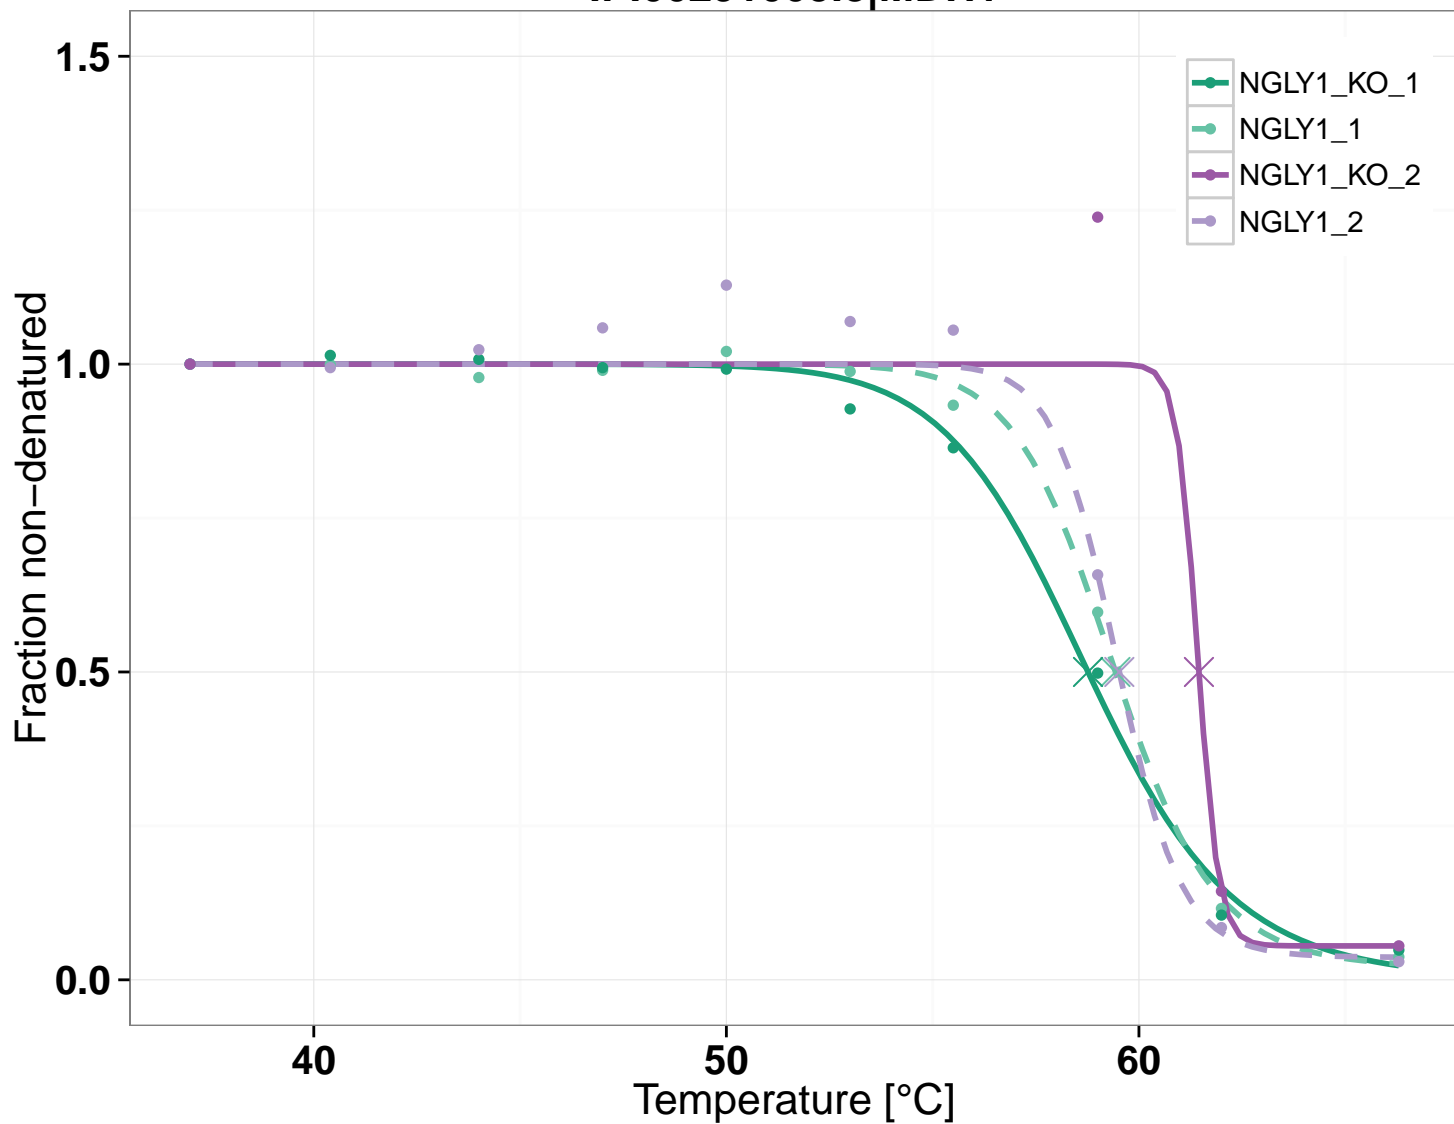

|            | meltPoint | slope | plateau | R2    |
|------------|-----------|-------|---------|-------|
| NGLY1_KO_1 | 58.77     | -0.14 | 0       | 1     |
| NGLY1_1    | 59.43     | -0.2  | 0.02    | 1     |
| NGLY1_KO_2 | 61.45     | -0.94 | 0.06    | -0.46 |
| NGLY1_2    | 59.53     | -0.31 | 0.04    | 0.98  |

Supplement: Supplementary file 2198 [file 1]

# IPI00877642.1|NCF4

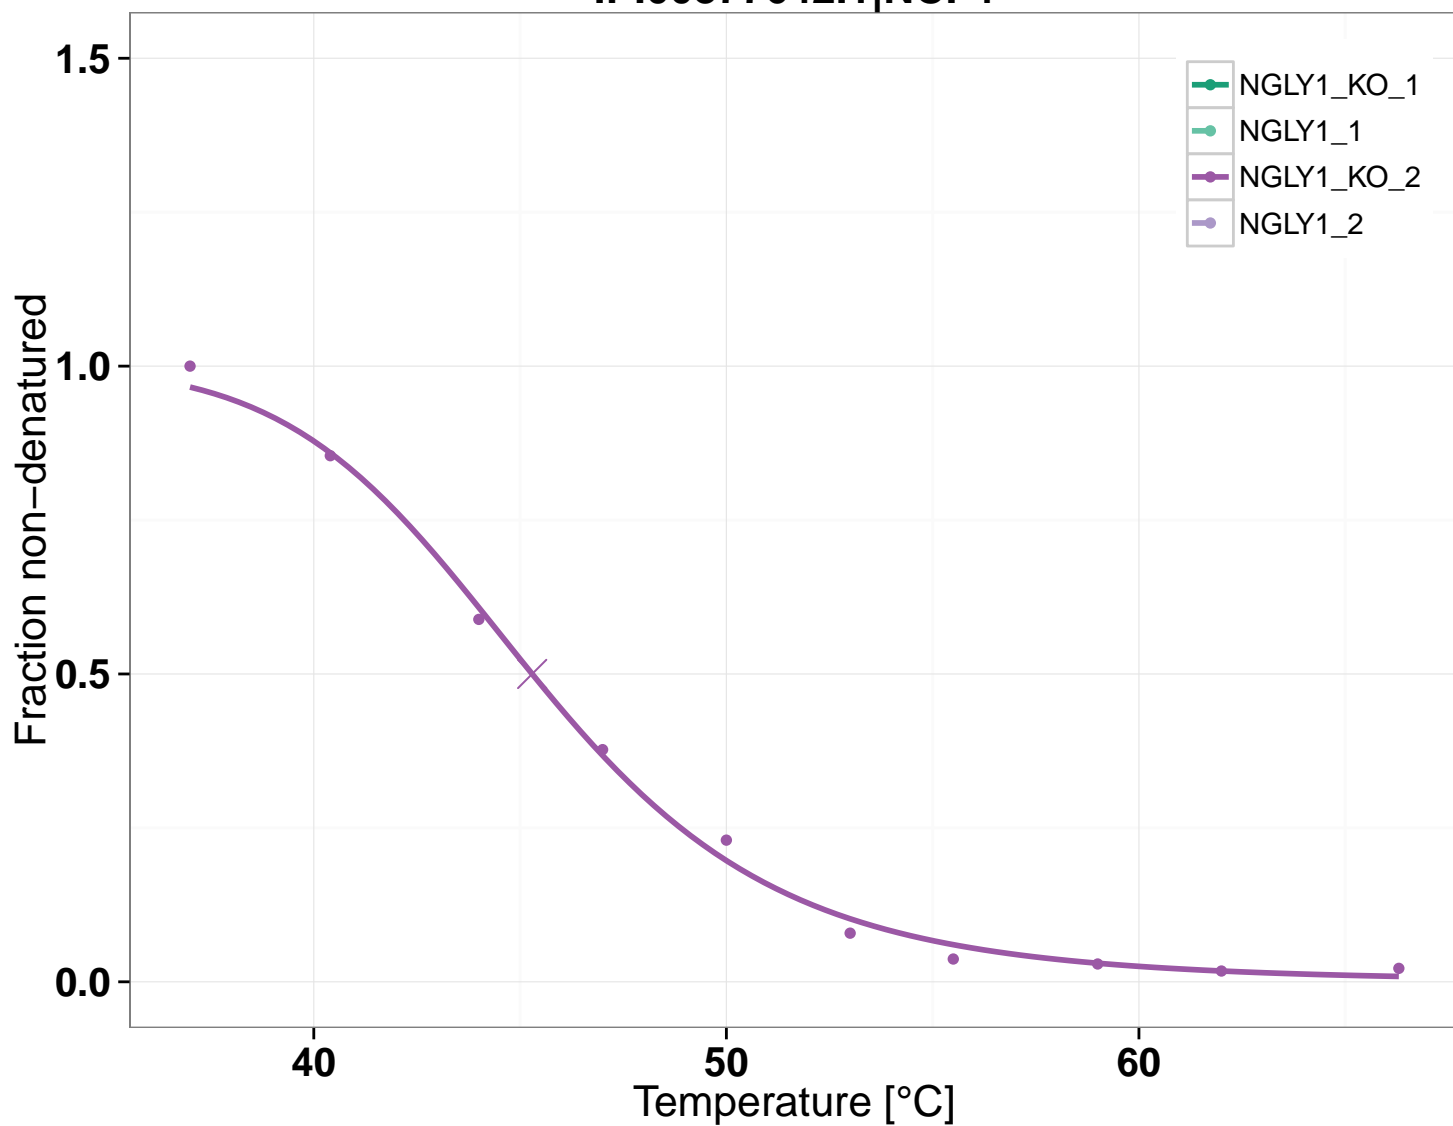

|            | meltPoint | slope  | plateau | R2 |
|------------|-----------|--------|---------|----|
| NGLY1_KO_1 | —         | —      | —       | —  |
| NGLY1_1    | —         | —      | —       | —  |
| NGLY1_KO_2 | 45.29     | -0.084 | 0       | 1  |
| NGLY1_2    | —         | —      | —       | —  |

Supplement: Supplementary file 2199 [file 1]

IPI00016285.3|ZNF672

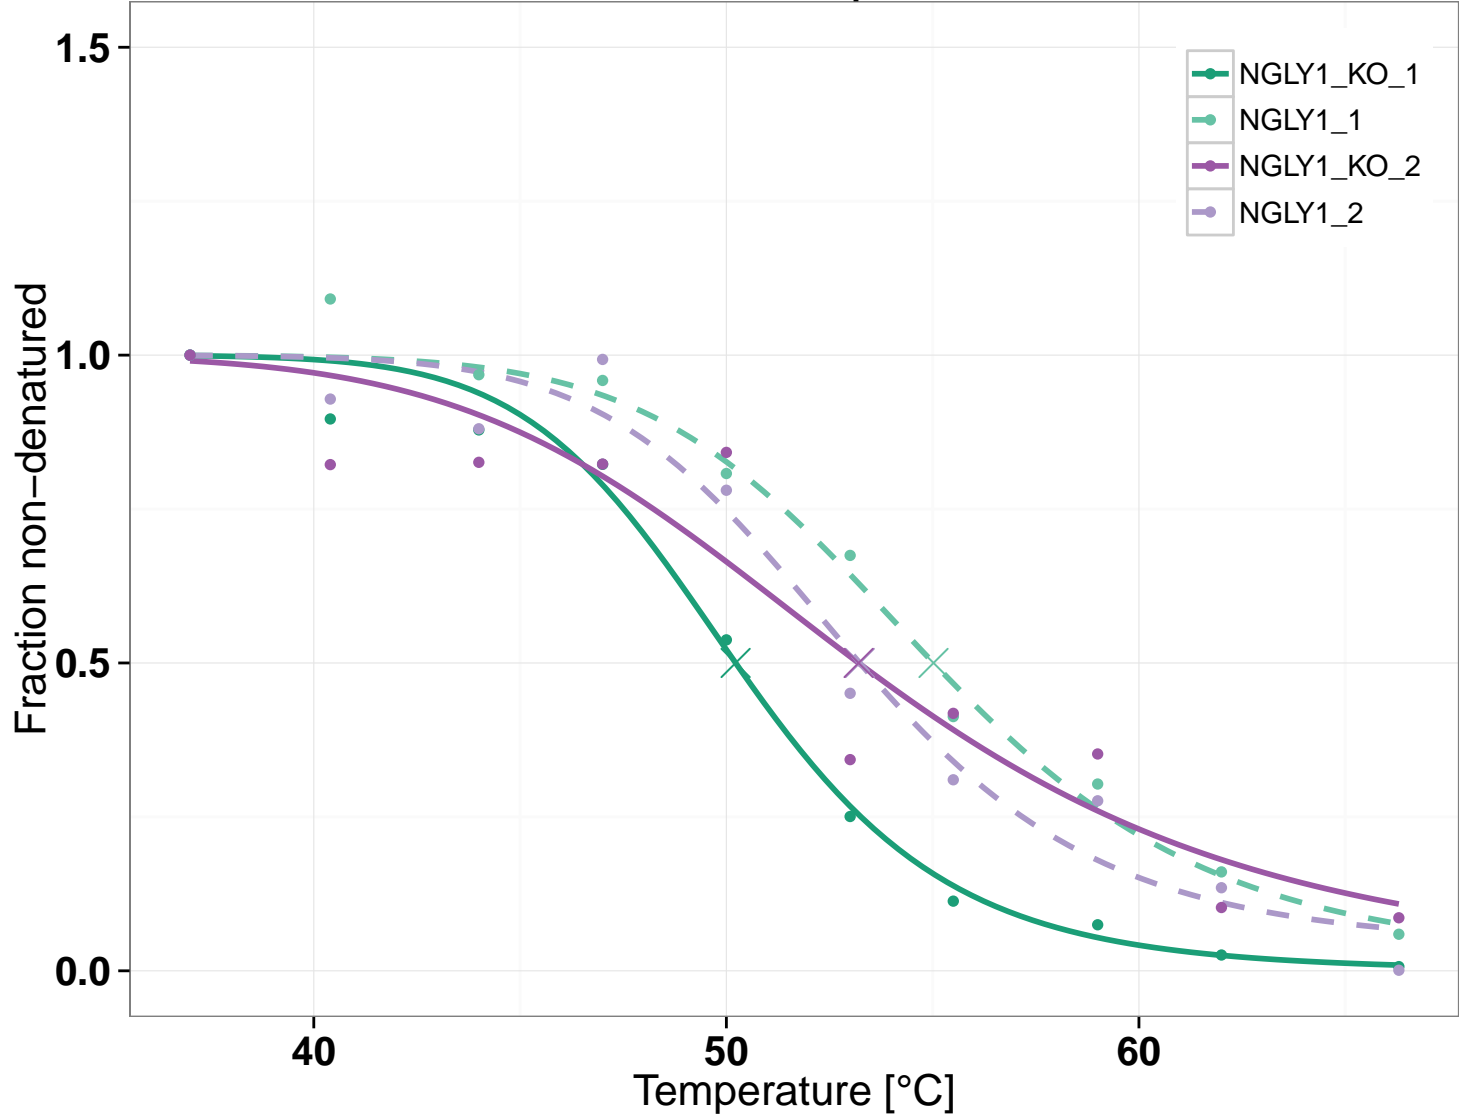

|            | meltPoint | slope  | plateau | R2   |
|------------|-----------|--------|---------|------|
| NGLY1_KO_1 | 50.22     | -0.097 | 0       | 0.99 |
| NGLY1_1    | 55.02     | -0.072 | 0.01    | 0.99 |
| NGLY1_KO_2 | 53.21     | -0.052 | 0       | 0.9  |
| NGLY1_2    | 53.23     | -0.079 | 0.04    | 0.97 |

Supplement: Supplementary file 2200 [file 1]

IPI00014625.3|CLCA1

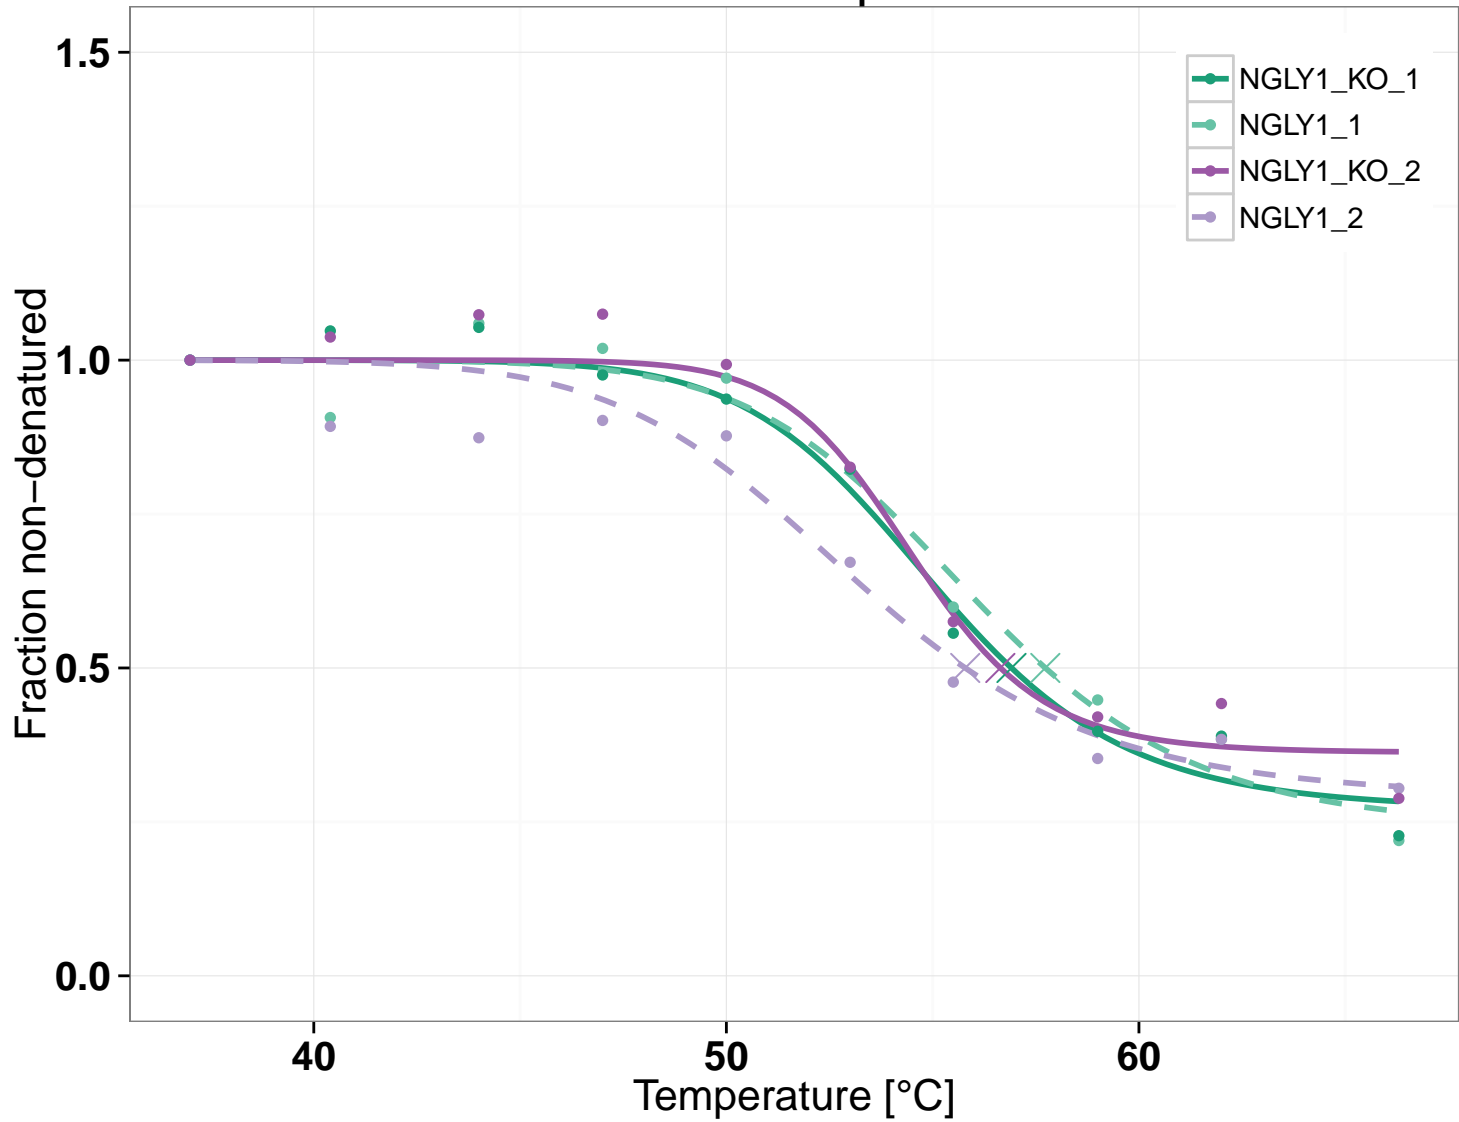

|            | meltPoint | slope  | plateau | R2   |
|------------|-----------|--------|---------|------|
| NGLY1_KO_1 | 56.91     | -0.079 | 0.27    | 0.98 |
| NGLY1_1    | 57.73     | -0.071 | 0.24    | 0.97 |
| NGLY1_KO_2 | 56.64     | -0.1   | 0.36    | 0.97 |
| NGLY1_2    | 55.79     | -0.061 | 0.29    | 0.95 |

Supplement: Supplementary file 2201 [file 1]

IPI00784201.1|CEP290

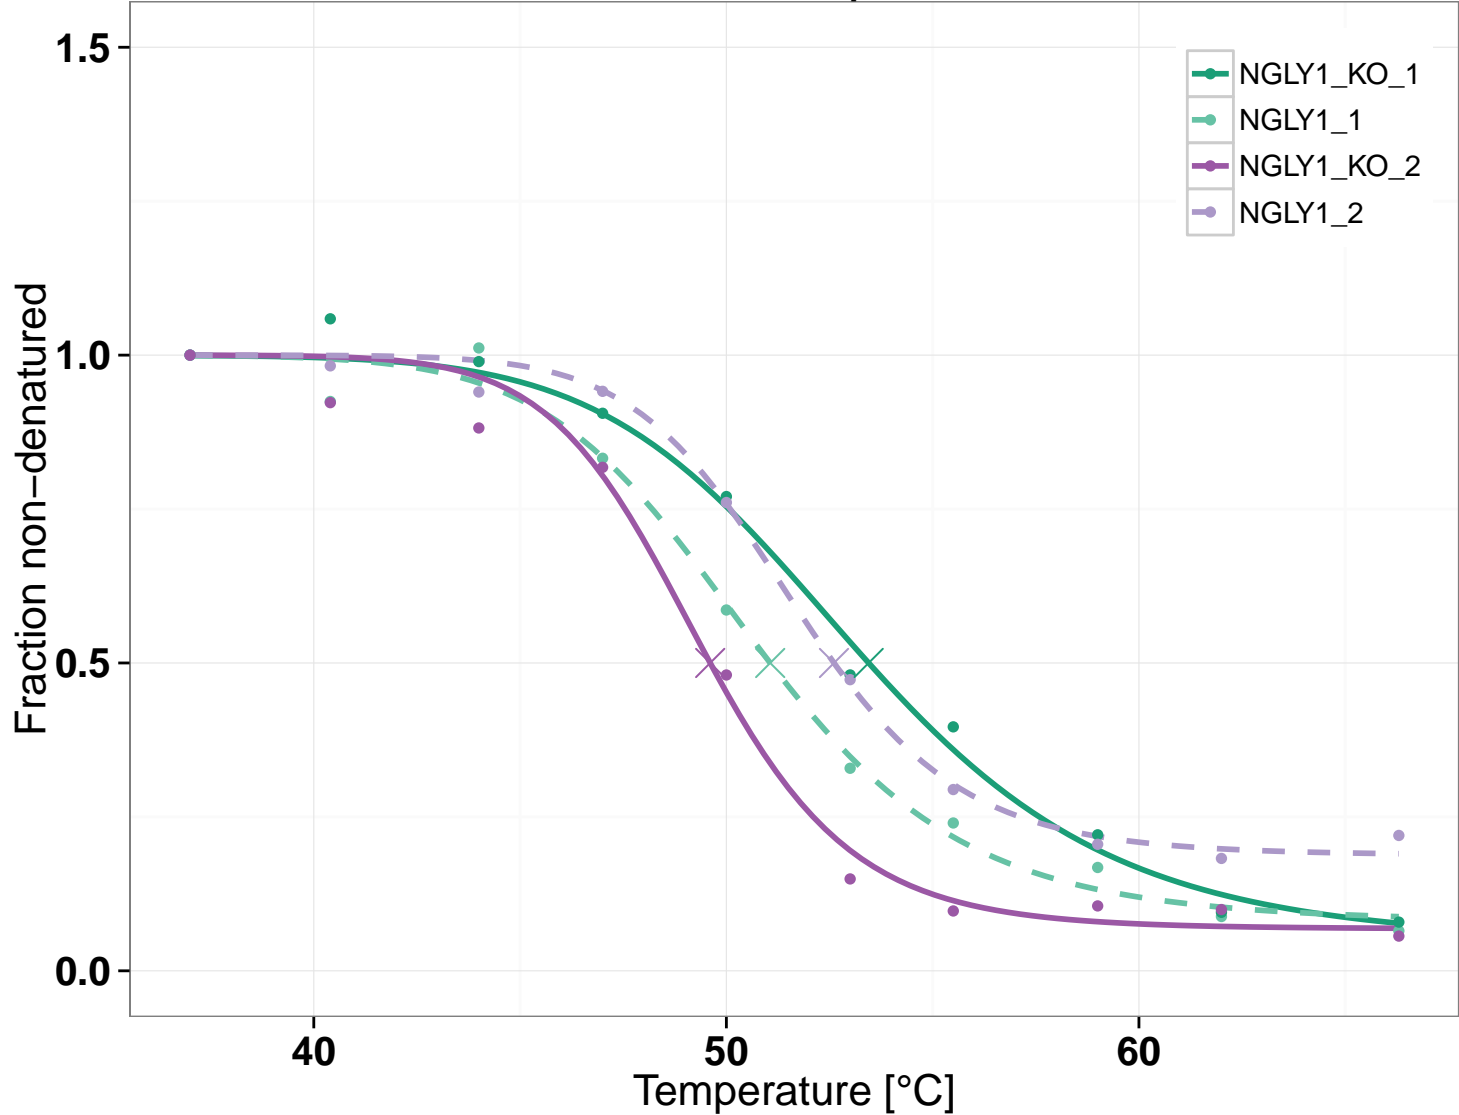

|            | meltPoint | slope  | plateau | R2   |
|------------|-----------|--------|---------|------|
| NGLY1_KO_1 | 53.45     | -0.077 | 0.04    | 0.99 |
| NGLY1_1    | 51.06     | -0.091 | 0.08    | 0.99 |
| NGLY1_KO_2 | 49.61     | -0.13  | 0.07    | 0.99 |
| NGLY1_2    | 52.61     | -0.1   | 0.19    | 1    |

Supplement: Supplementary file 2202 [file 1]

# IPI00166865.3|CISD2

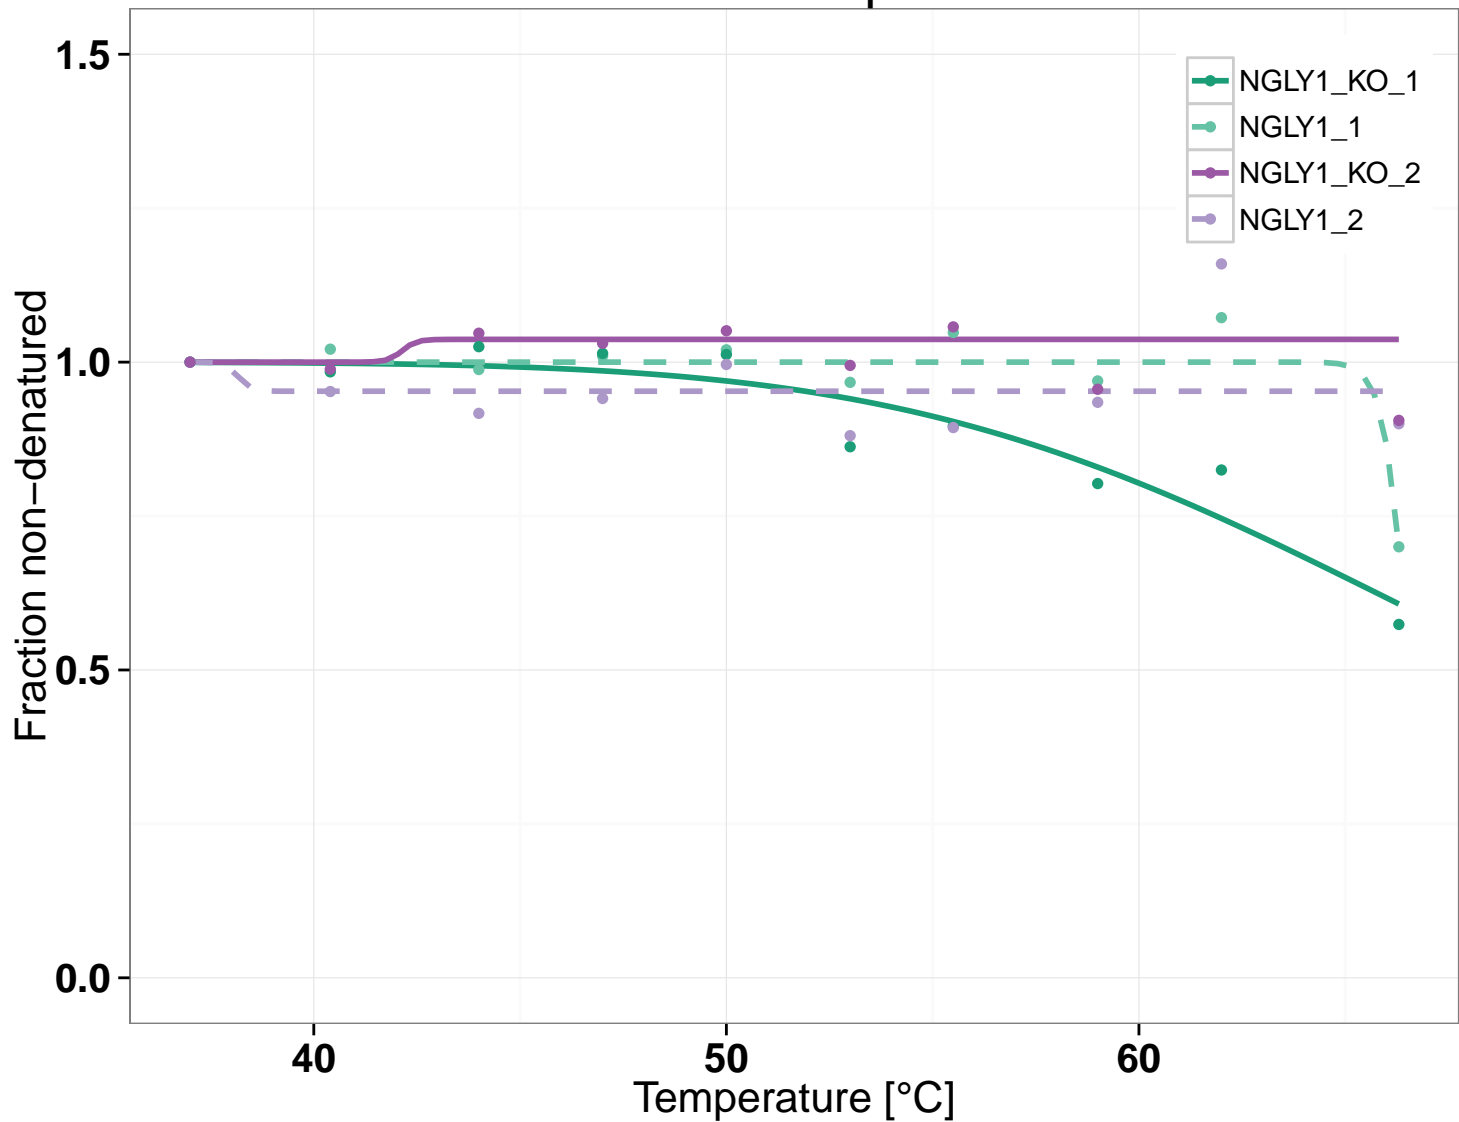

|            | meltPoint | slope  | plateau | R2   |
|------------|-----------|--------|---------|------|
| NGLY1_KO_1 | -         | -0.033 | 0       | 0.9  |
| NGLY1_1    | -         | -      | 0       | 0.89 |
| NGLY1_KO_2 | -         | 0.055  | 1.04    | 0.04 |
| NGLY1_2    | -         | -0.077 | 0.95    | 0.03 |

Supplement: Supplementary file 2203 [file 1]

# IPI00023103.1|DVL2

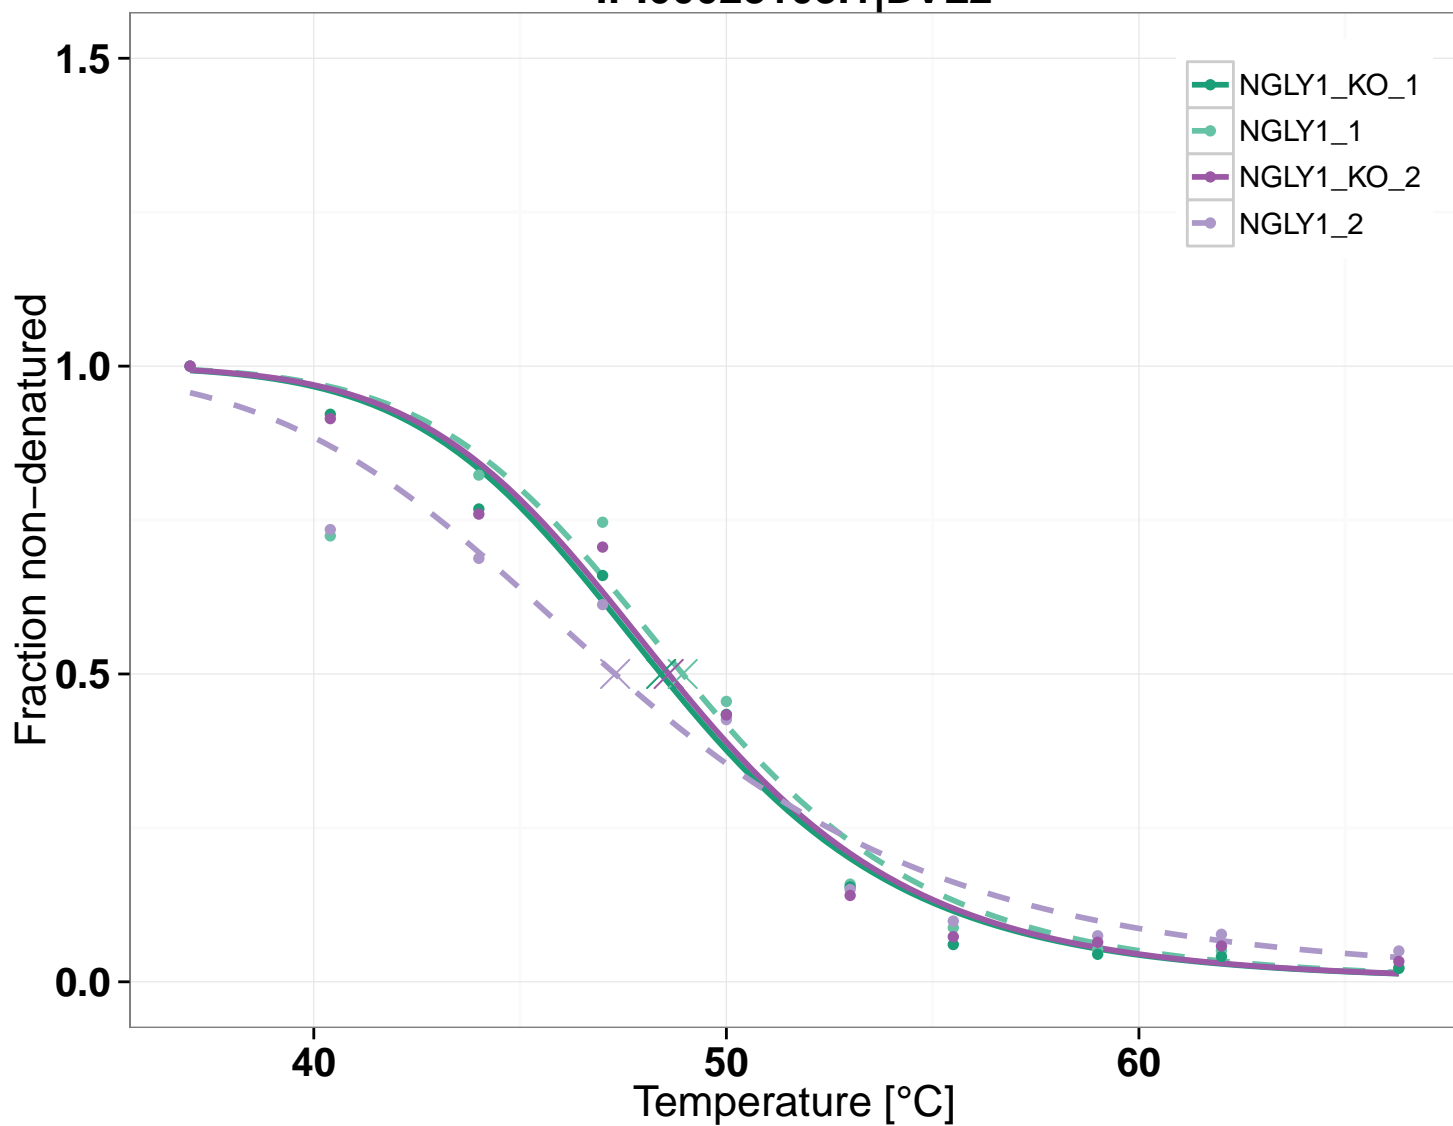

|            | meltPoint | slope  | plateau | R2   |
|------------|-----------|--------|---------|------|
| NGLY1_KO_1 | 48.42     | -0.084 | 0       | 0.99 |
| NGLY1_1    | 48.94     | -0.083 | 0       | 0.94 |
| NGLY1_KO_2 | 48.6      | -0.084 | 0       | 0.98 |
| NGLY1_2    | 47.3      | -0.061 | 0       | 0.96 |

Supplement: Supplementary file 2204 [file 1]

IPI00742698.3|C4ORF23

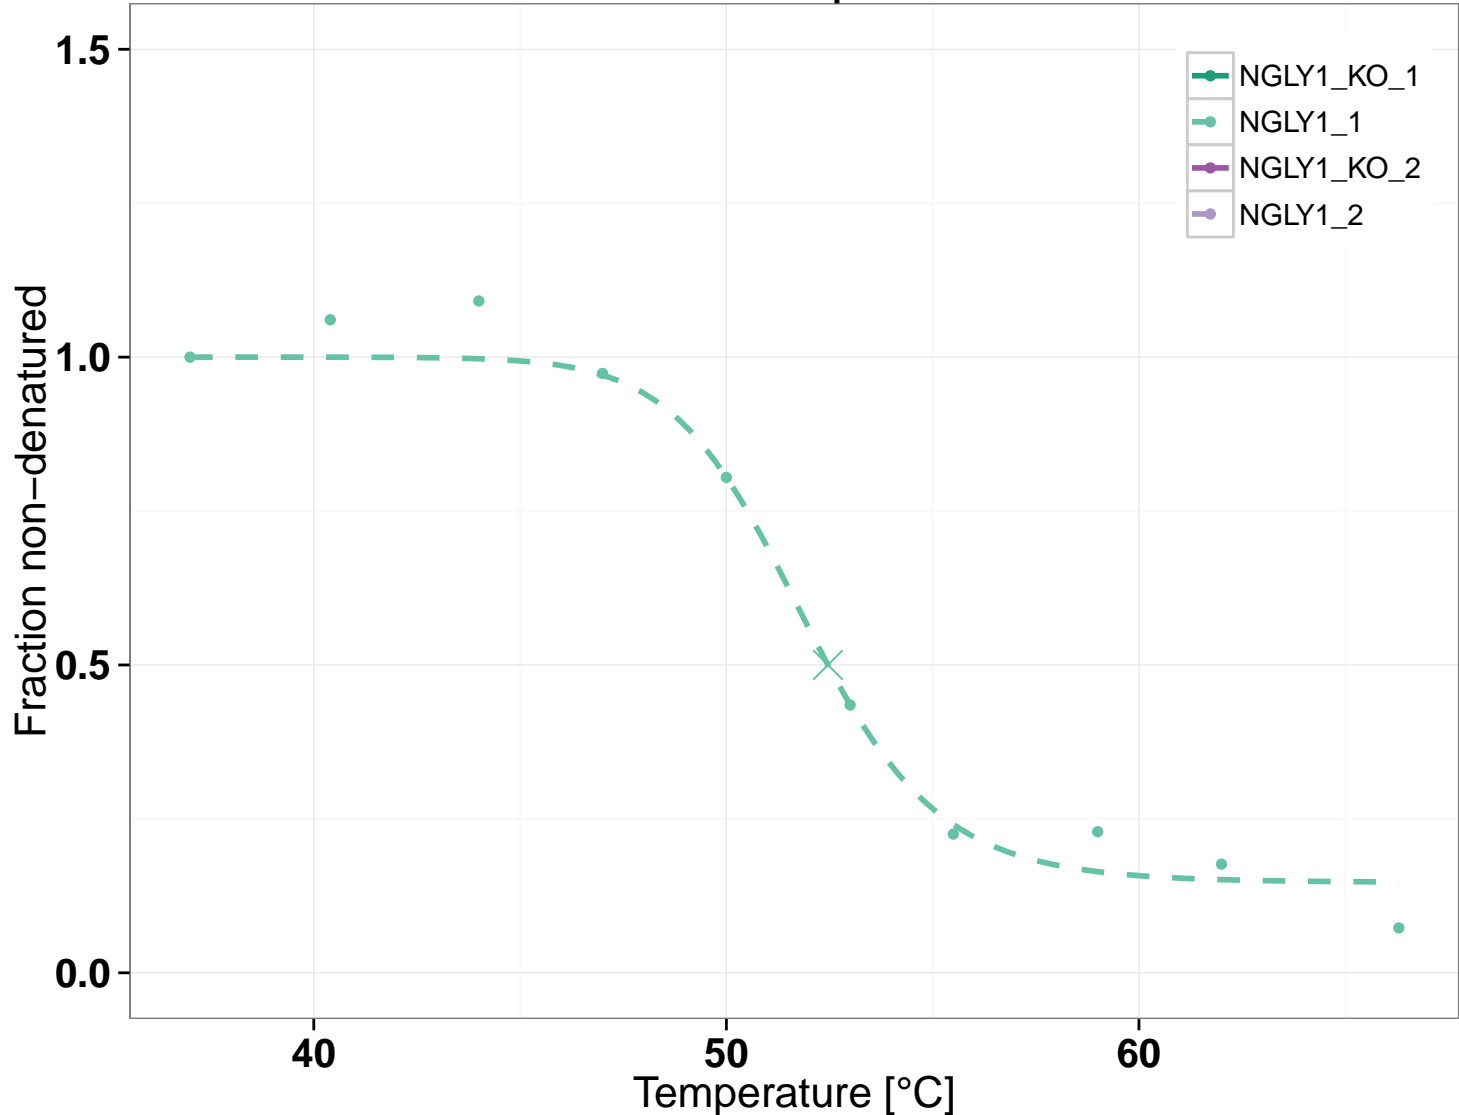

|            | meltPoint | slope | plateau | R2   |
|------------|-----------|-------|---------|------|
| NGLY1_KO_1 | -         | -     | -       | -    |
| NGLY1_1    | 52.46     | -0.13 | 0.15    | 0.99 |
| NGLY1_KO_2 | -         | -     | -       | -    |
| NGLY1_2    | -         | -     | -       | -    |

Supplement: Supplementary file 2205 [file 1]

# IPI00220416.3|UQCRB

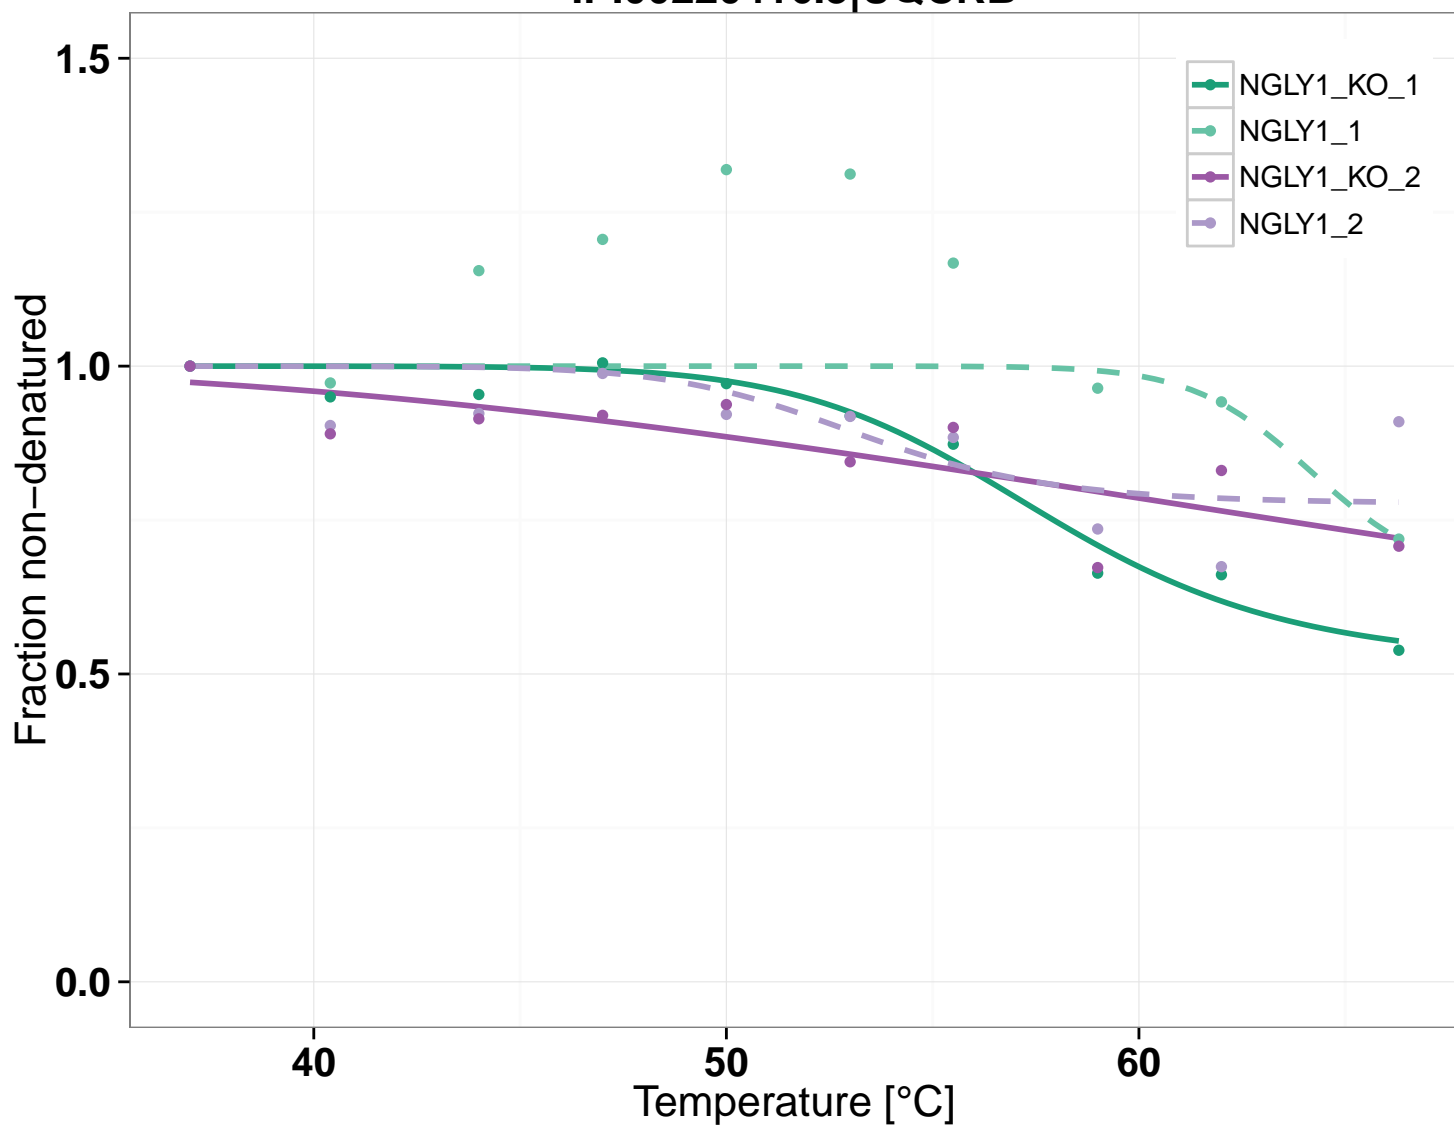

|            | meltPoint | slope  | plateau | R2   |
|------------|-----------|--------|---------|------|
| NGLY1_KO_1 | –         | –0.04  | 0.52    | 0.96 |
| NGLY1_1    | –         | –0.06  | 0.64    | 0.08 |
| NGLY1_KO_2 | –         | –0.01  | 0       | 0.65 |
| NGLY1_2    | –         | –0.024 | 0.78    | 0.45 |

Supplement: Supplementary file 2206 [file 1]

IPI00741537.3|BAT2L

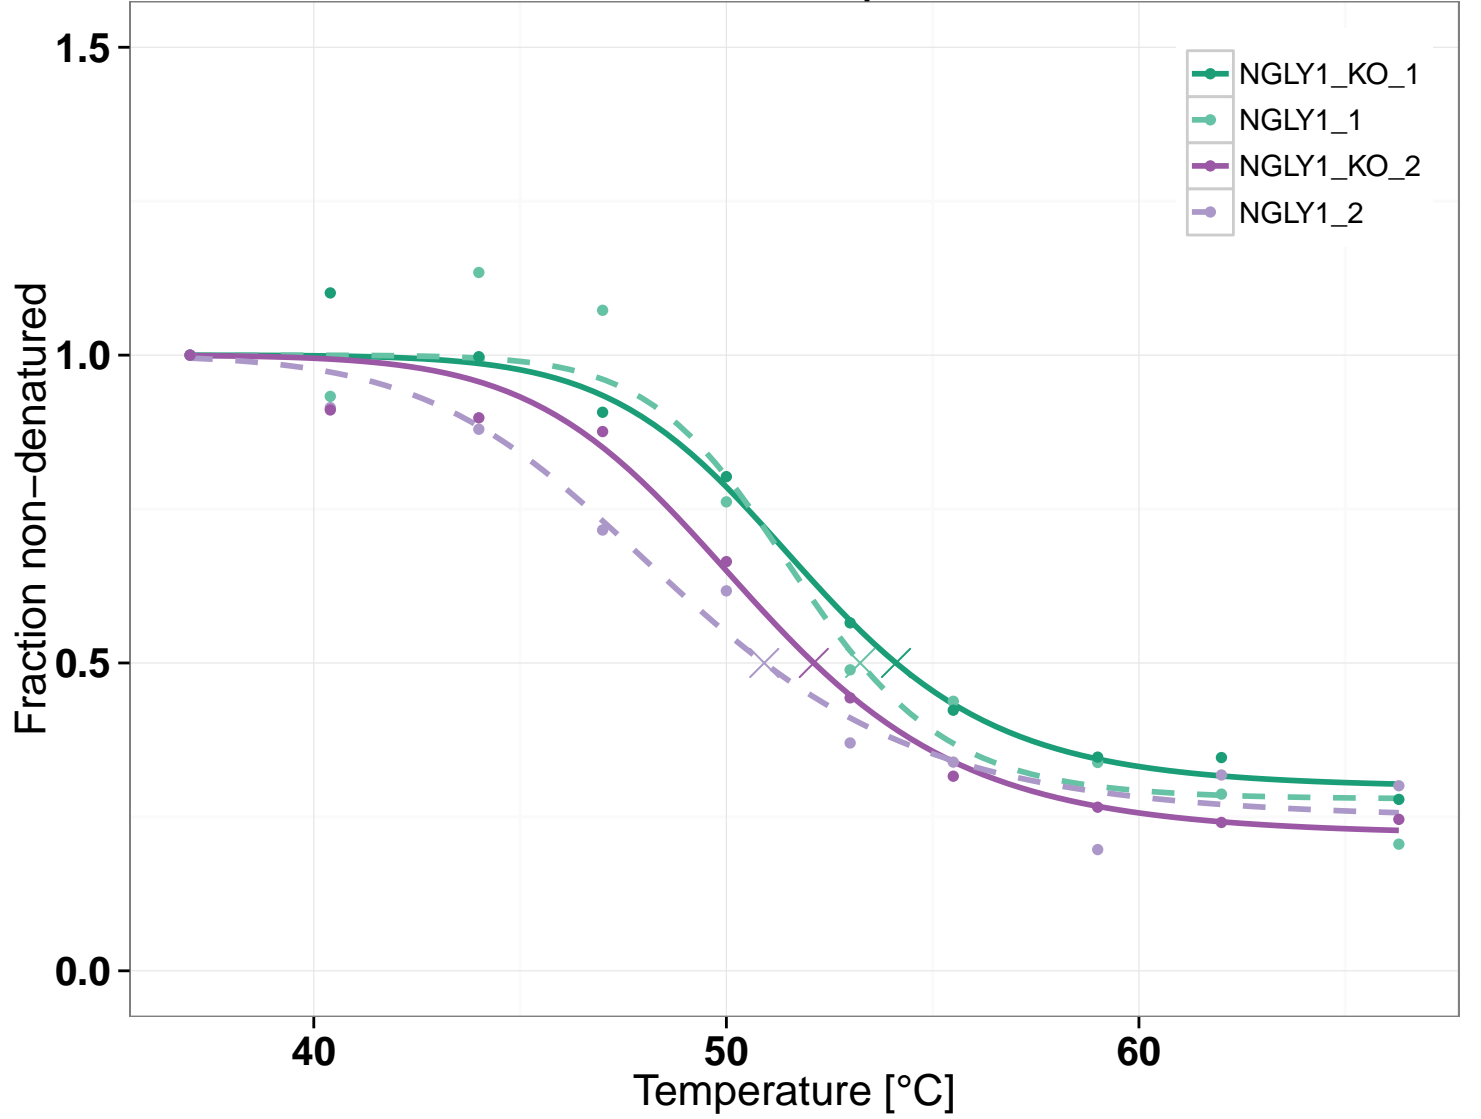

|            | meltPoint | slope  | plateau | R2   |
|------------|-----------|--------|---------|------|
| NGLY1_KO_1 | 54.11     | -0.075 | 0.3     | 0.99 |
| NGLY1_1    | 53.24     | -0.1   | 0.28    | 0.95 |
| NGLY1_KO_2 | 52.12     | -0.075 | 0.22    | 0.99 |
| NGLY1_2    | 50.92     | -0.062 | 0.25    | 0.97 |

Supplement: Supplementary file 2207 [file 1]

IPI00302030.2|RAB30

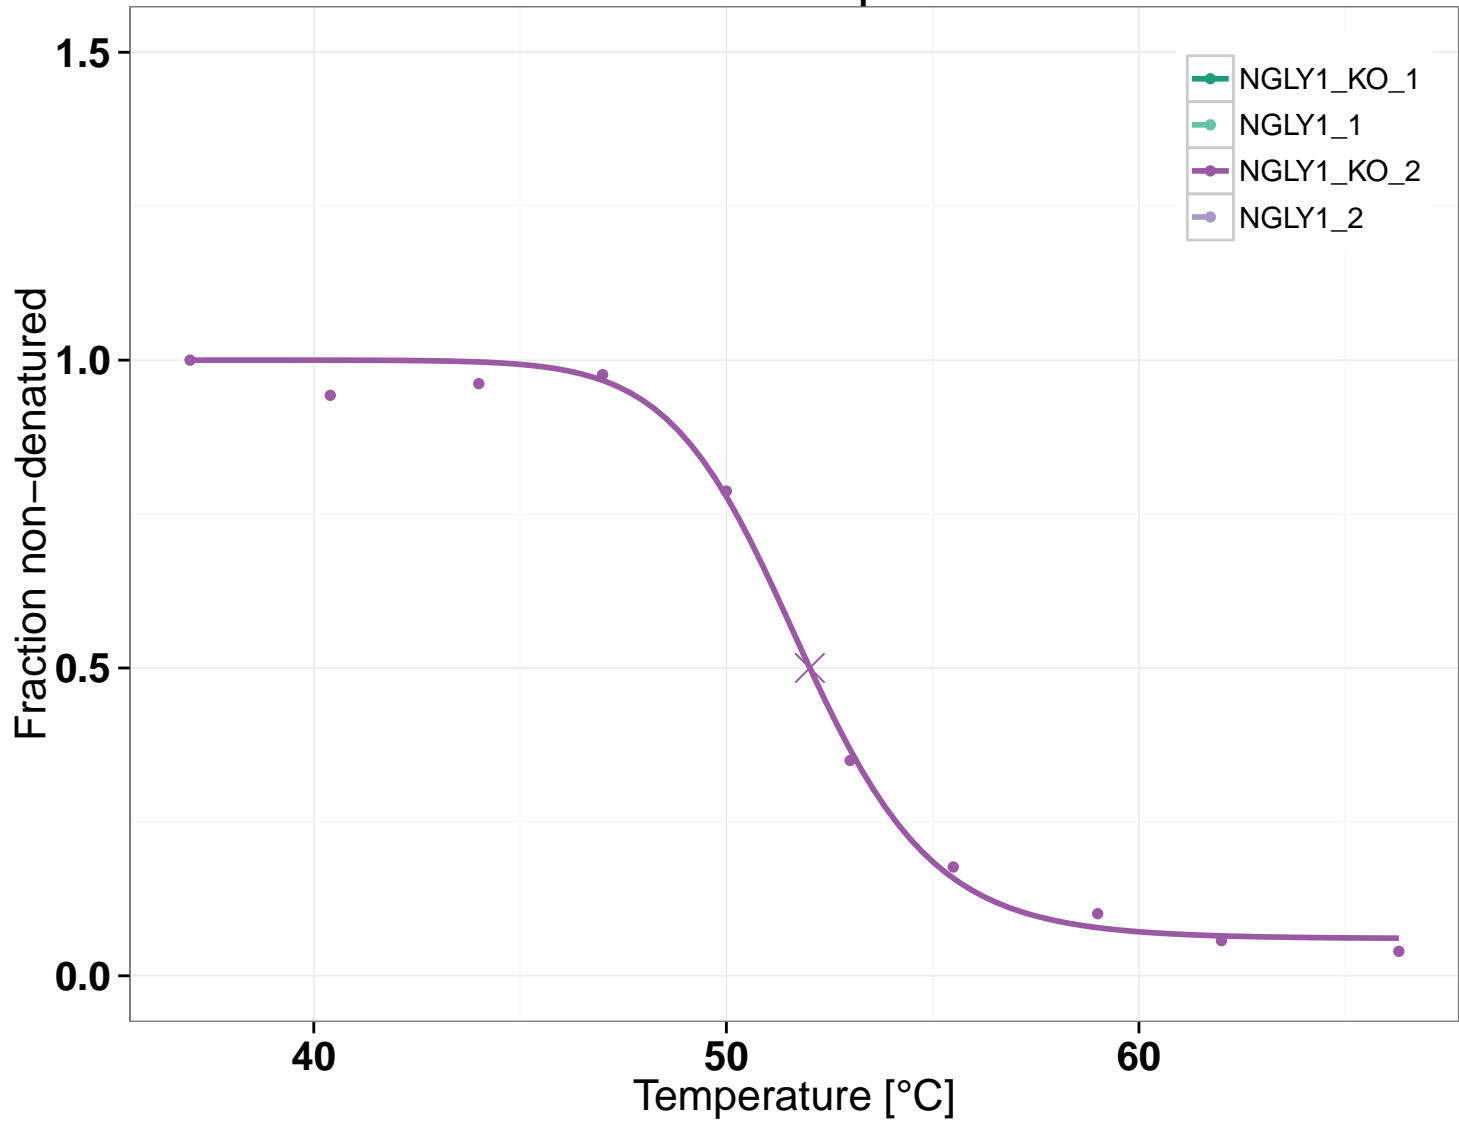

|            | meltPoint | slope | plateau | R2 |
|------------|-----------|-------|---------|----|
| NGLY1_KO_1 | -         | -     | -       | -  |
| NGLY1_1    | -         | -     | -       | -  |
| NGLY1_KO_2 | 52.02     | -0.15 | 0.06    | 1  |
| NGLY1_2    | -         | -     | -       | -  |

Supplement: Supplementary file 2208 [file 1]

IPI00384573.1|Q86XN4\_HUMAN

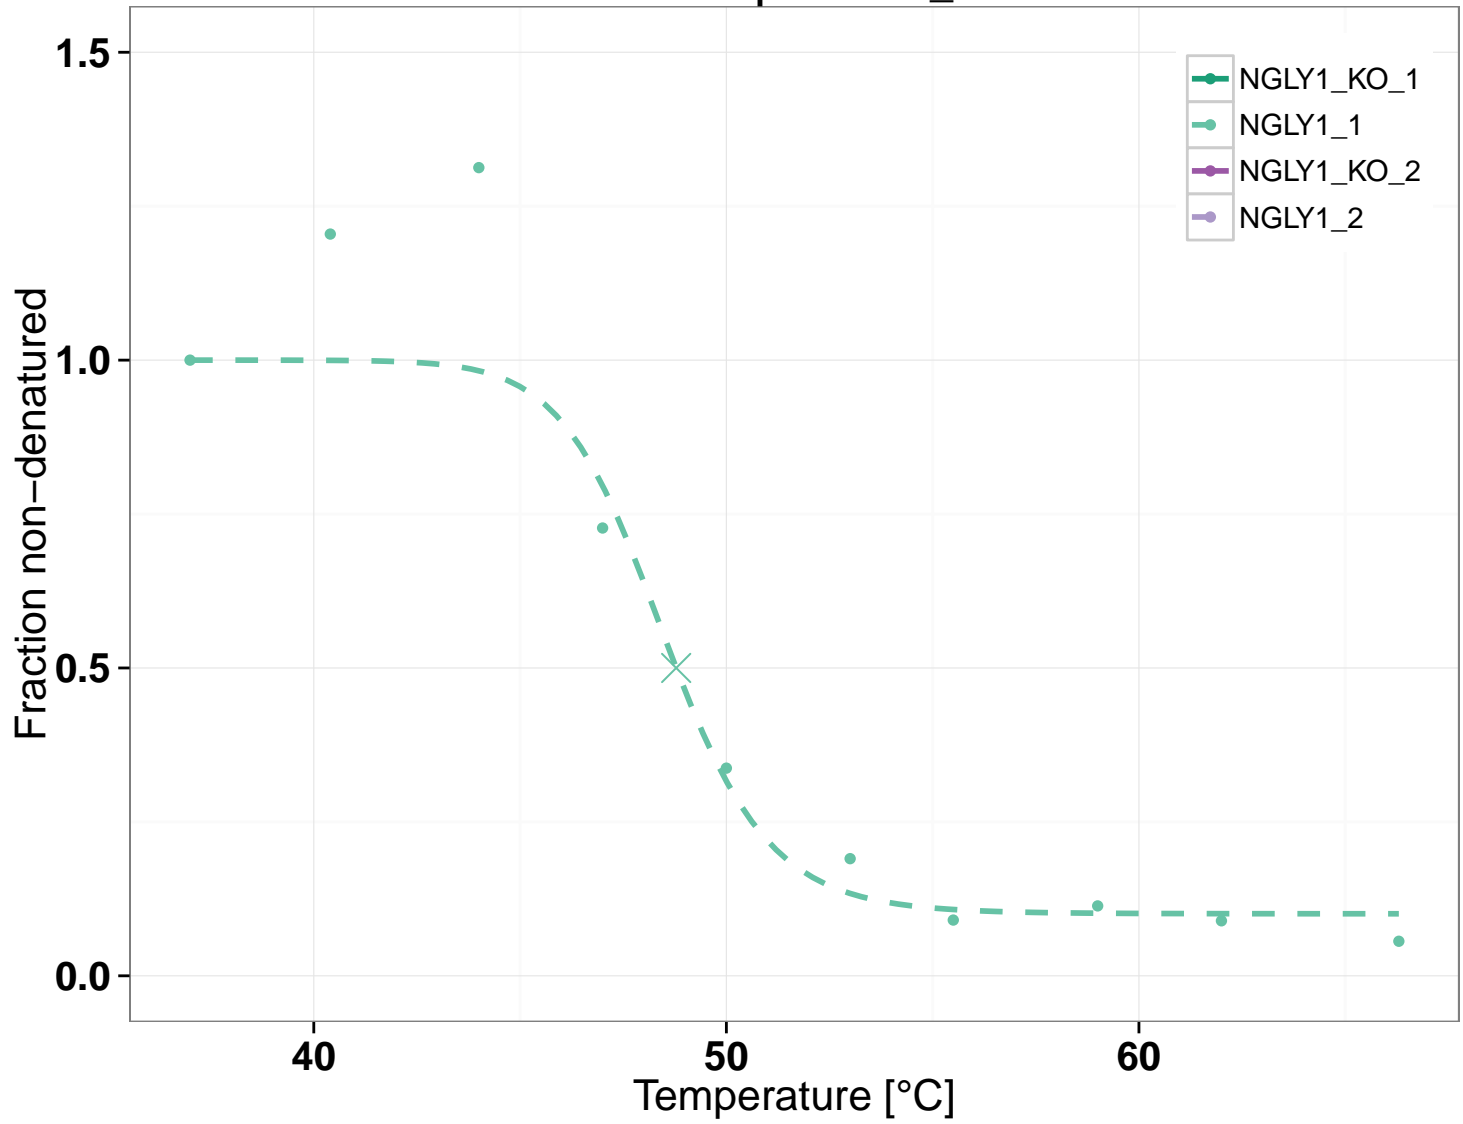

|            | meltPoint | slope | plateau | R2   |
|------------|-----------|-------|---------|------|
| NGLY1_KO_1 | -         | -     | -       | -    |
| NGLY1_1    | 48.78     | -0.18 | 0.1     | 0.93 |
| NGLY1_KO_2 | -         | -     | -       | -    |
| NGLY1_2    | -         | -     | -       | -    |

Supplement: Supplementary file 2209 [file 1]

# IPI00216172.2|LAMP2

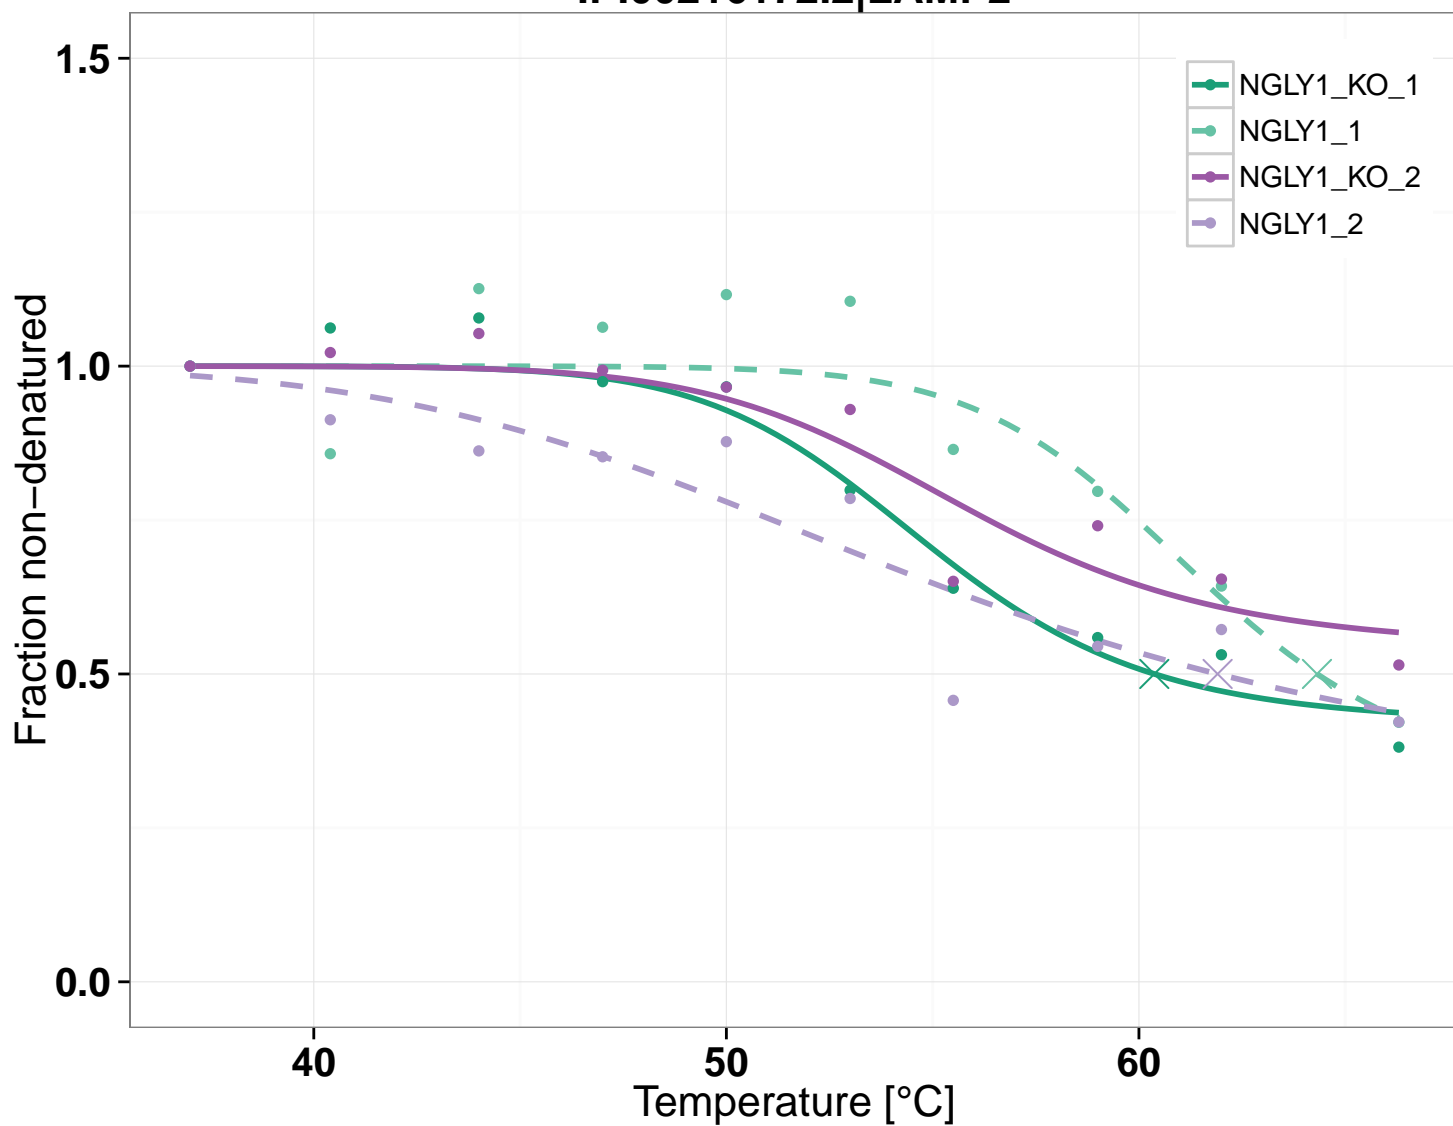

|            | meltPoint | slope  | plateau | R2   |
|------------|-----------|--------|---------|------|
| NGLY1_KO_1 | 60.37     | -0.054 | 0.42    | 0.96 |
| NGLY1_1    | 64.32     | -0.063 | 0.32    | 0.84 |
| NGLY1_KO_2 | -         | -0.037 | 0.54    | 0.9  |
| NGLY1_2    | 61.91     | -0.027 | 0.28    | 0.85 |

Supplement: Supplementary file 2210 [file 1]
