# Supplementary material (part 23 of 85)
Source: publisher figshare collection journal article supplement (https://gsajournals.figshare.com/articles/dataset/_/12014913)

IPI00032780.2|MED29

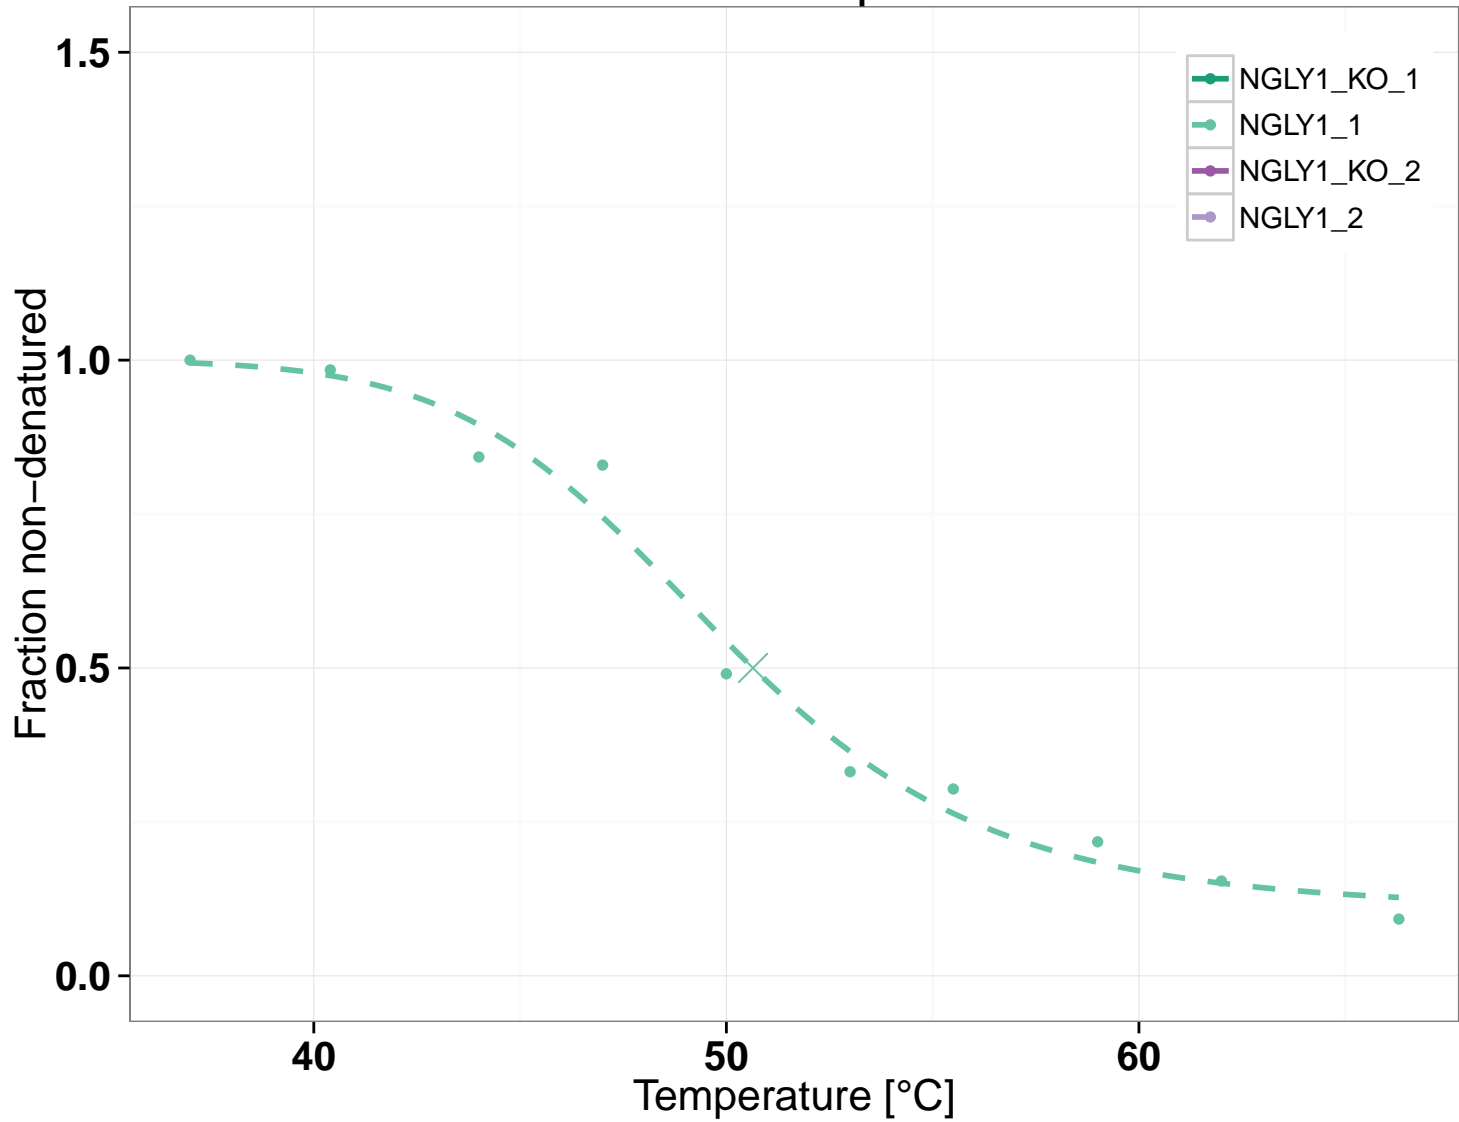

|            | meltPoint | slope  | plateau | R2   |
|------------|-----------|--------|---------|------|
| NGLY1_KO_1 | -         | -      | -       | -    |
| NGLY1_1    | 50.65     | -0.069 | 0.11    | 0.98 |
| NGLY1_KO_2 | -         | -      | -       | -    |
| NGLY1_2    | -         | -      | -       | -    |

Supplement: Supplementary file 2211 [file 1]

# IPI00003588.1|EEF1E1

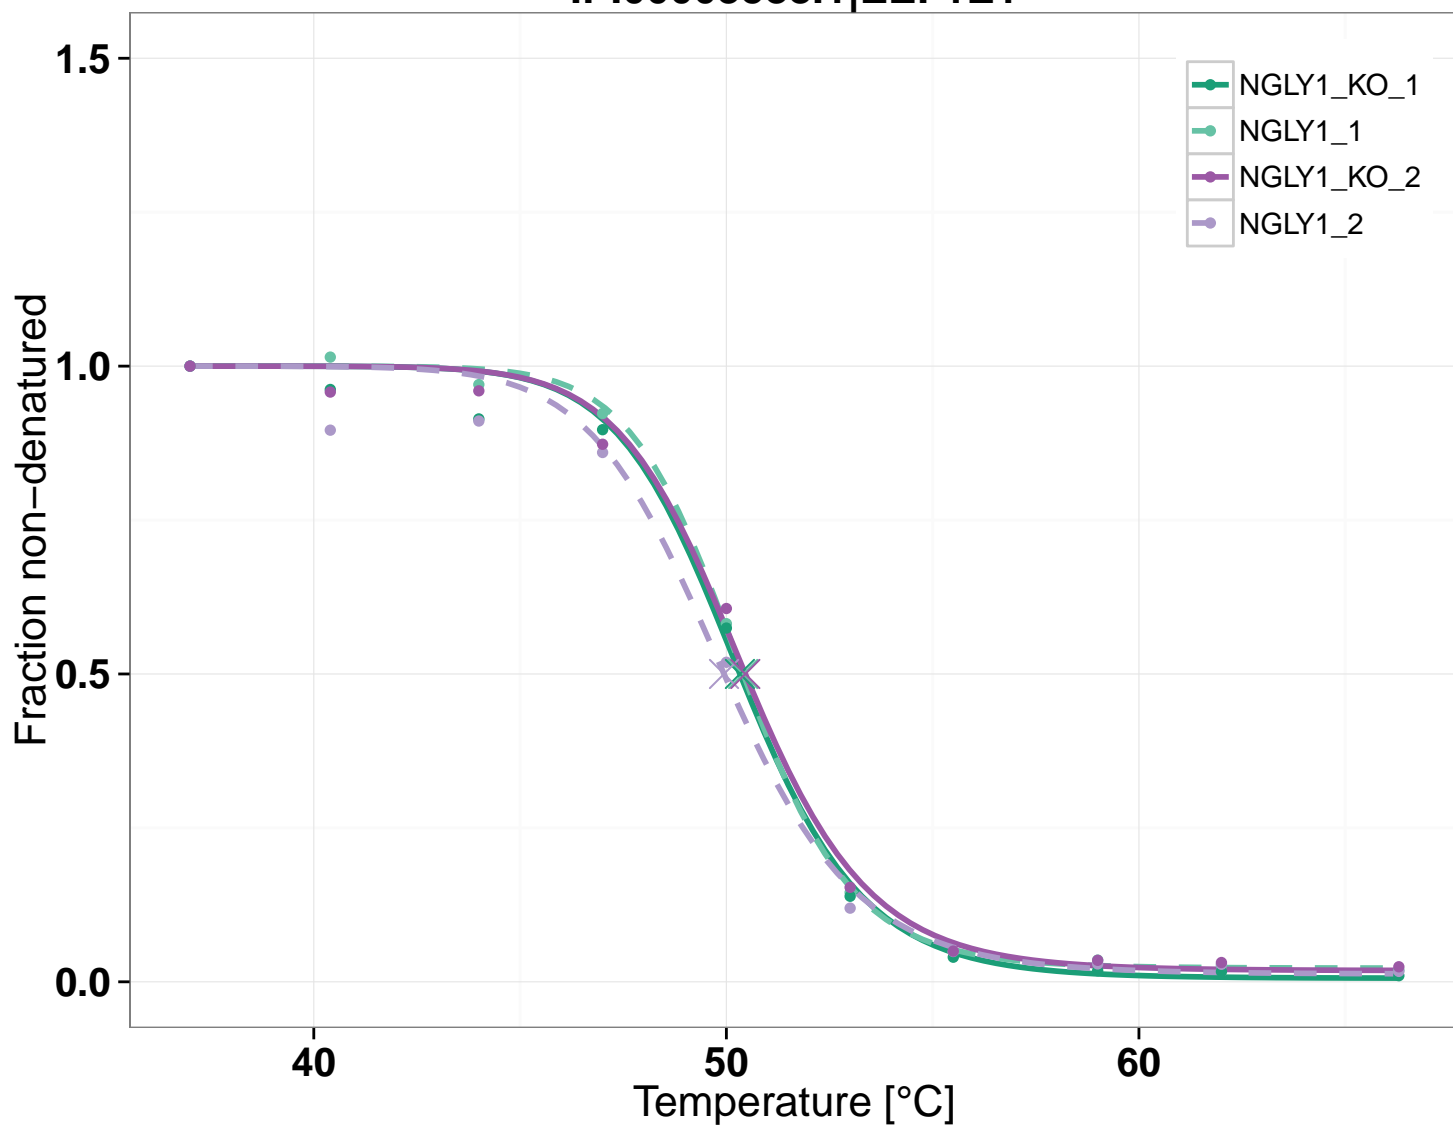

|            | meltPoint | slope | plateau | R2   |
|------------|-----------|-------|---------|------|
| NGLY1_KO_1 | 50.33     | -0.17 | 0.01    | 1    |
| NGLY1_1    | 50.41     | -0.18 | 0.02    | 1    |
| NGLY1_KO_2 | 50.46     | -0.16 | 0.02    | 1    |
| NGLY1_2    | 49.94     | -0.15 | 0.01    | 0.99 |

Supplement: Supplementary file 2212 [file 1]

# IPI00903213.1|IGF2R

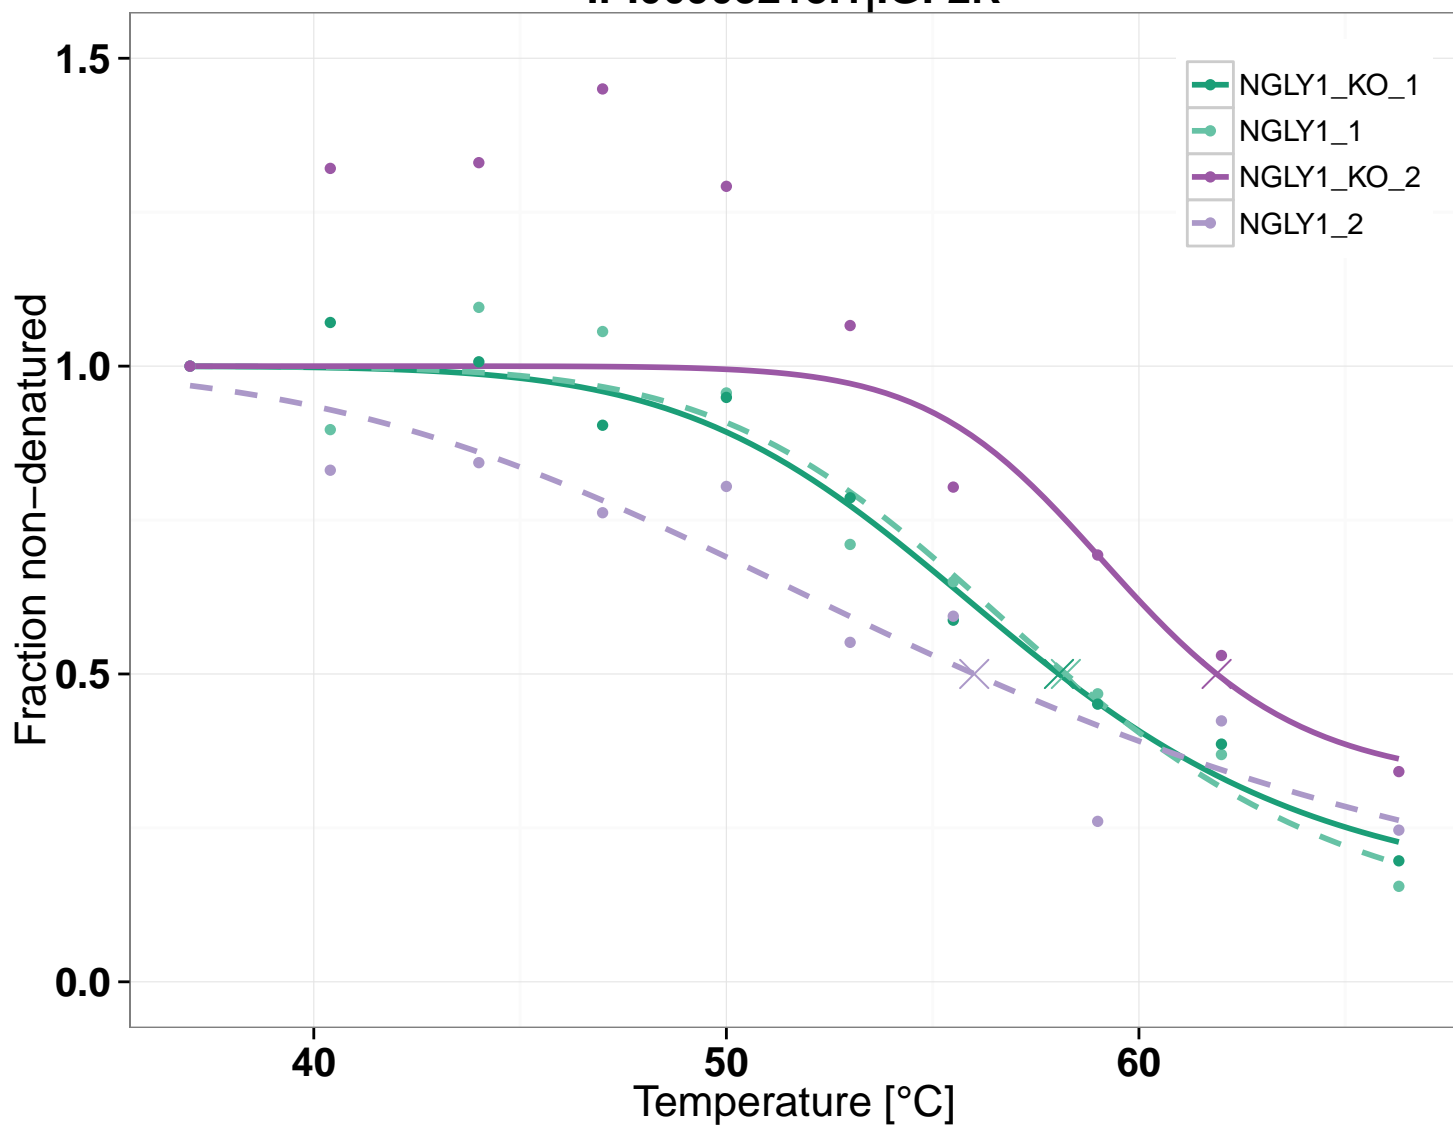

|            | meltPoint | slope  | plateau | R2   |
|------------|-----------|--------|---------|------|
| NGLY1_KO_1 | 58.06     | -0.056 | 0.13    | 0.98 |
| NGLY1_1    | 58.23     | -0.06  | 0.07    | 0.95 |
| NGLY1_KO_2 | 61.88     | -0.074 | 0.32    | 0.59 |
| NGLY1_2    | 56.01     | -0.032 | 0       | 0.9  |

Supplement: Supplementary file 2213 [file 1]

# IPI00746777.3|ADH5

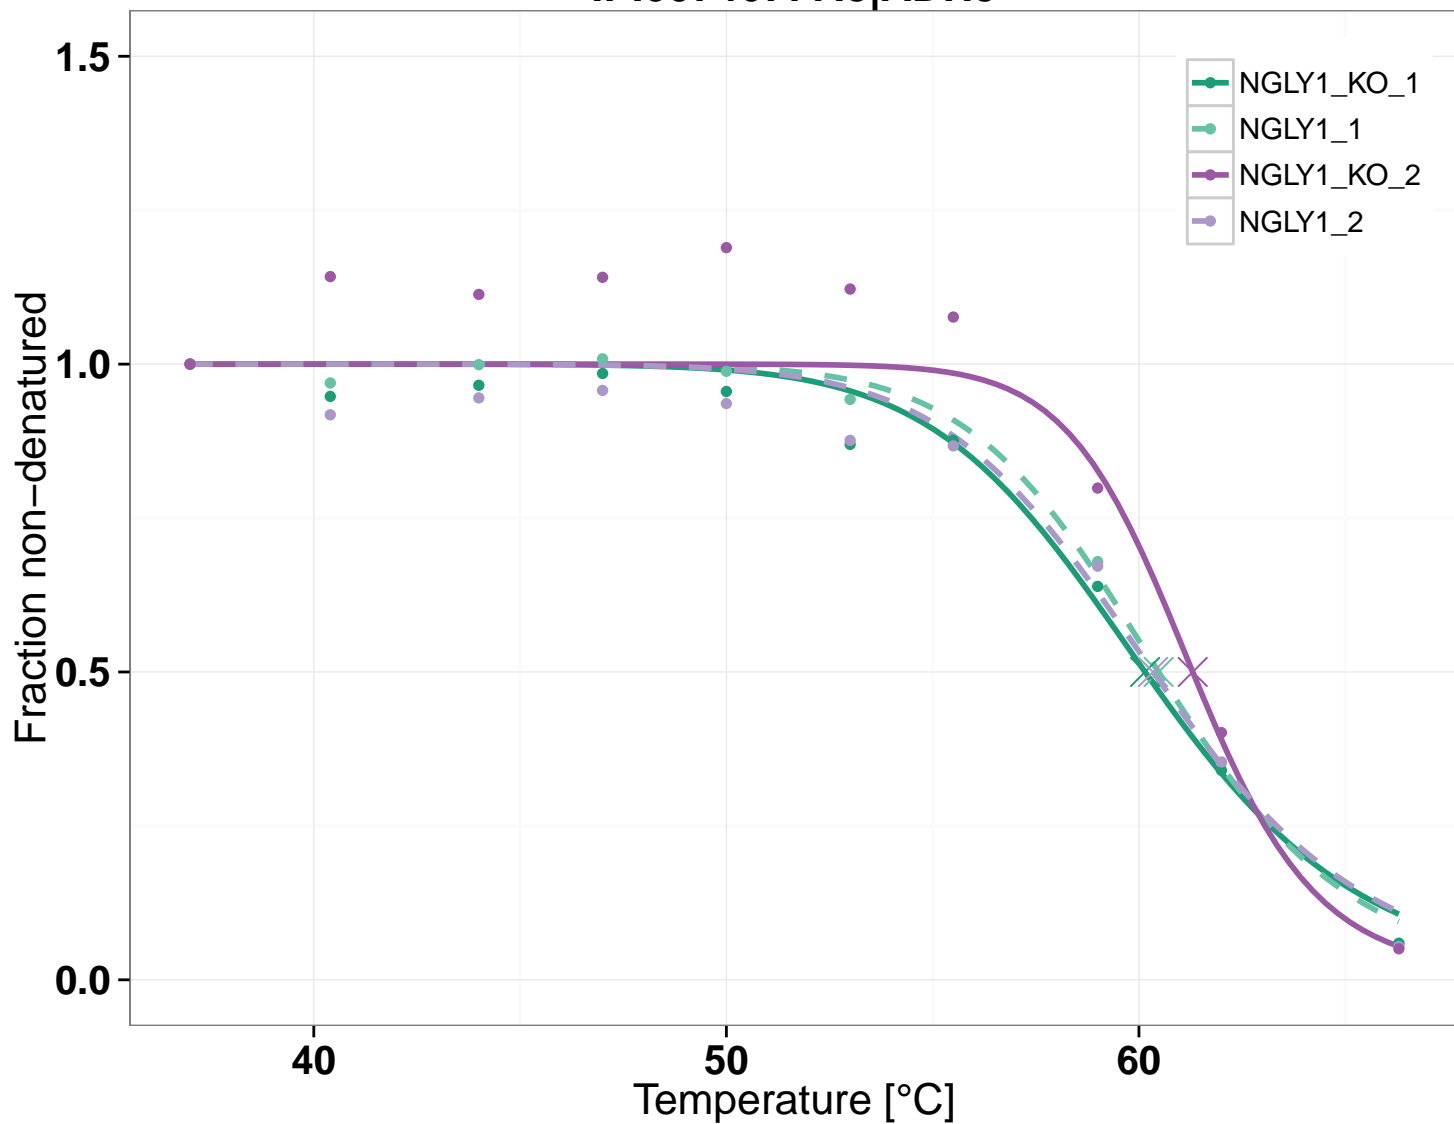

|            | meltPoint | slope  | plateau | R2   |
|------------|-----------|--------|---------|------|
| NGLY1_KO_1 | 60.15     | -0.096 | 0       | 0.98 |
| NGLY1_1    | 60.48     | -0.11  | 0       | 0.99 |
| NGLY1_KO_2 | 61.3      | -0.16  | 0.01    | 0.91 |
| NGLY1_2    | 60.34     | -0.097 | 0       | 0.97 |

Supplement: Supplementary file 2214 [file 1]

IPI00013466.4|ASNA1

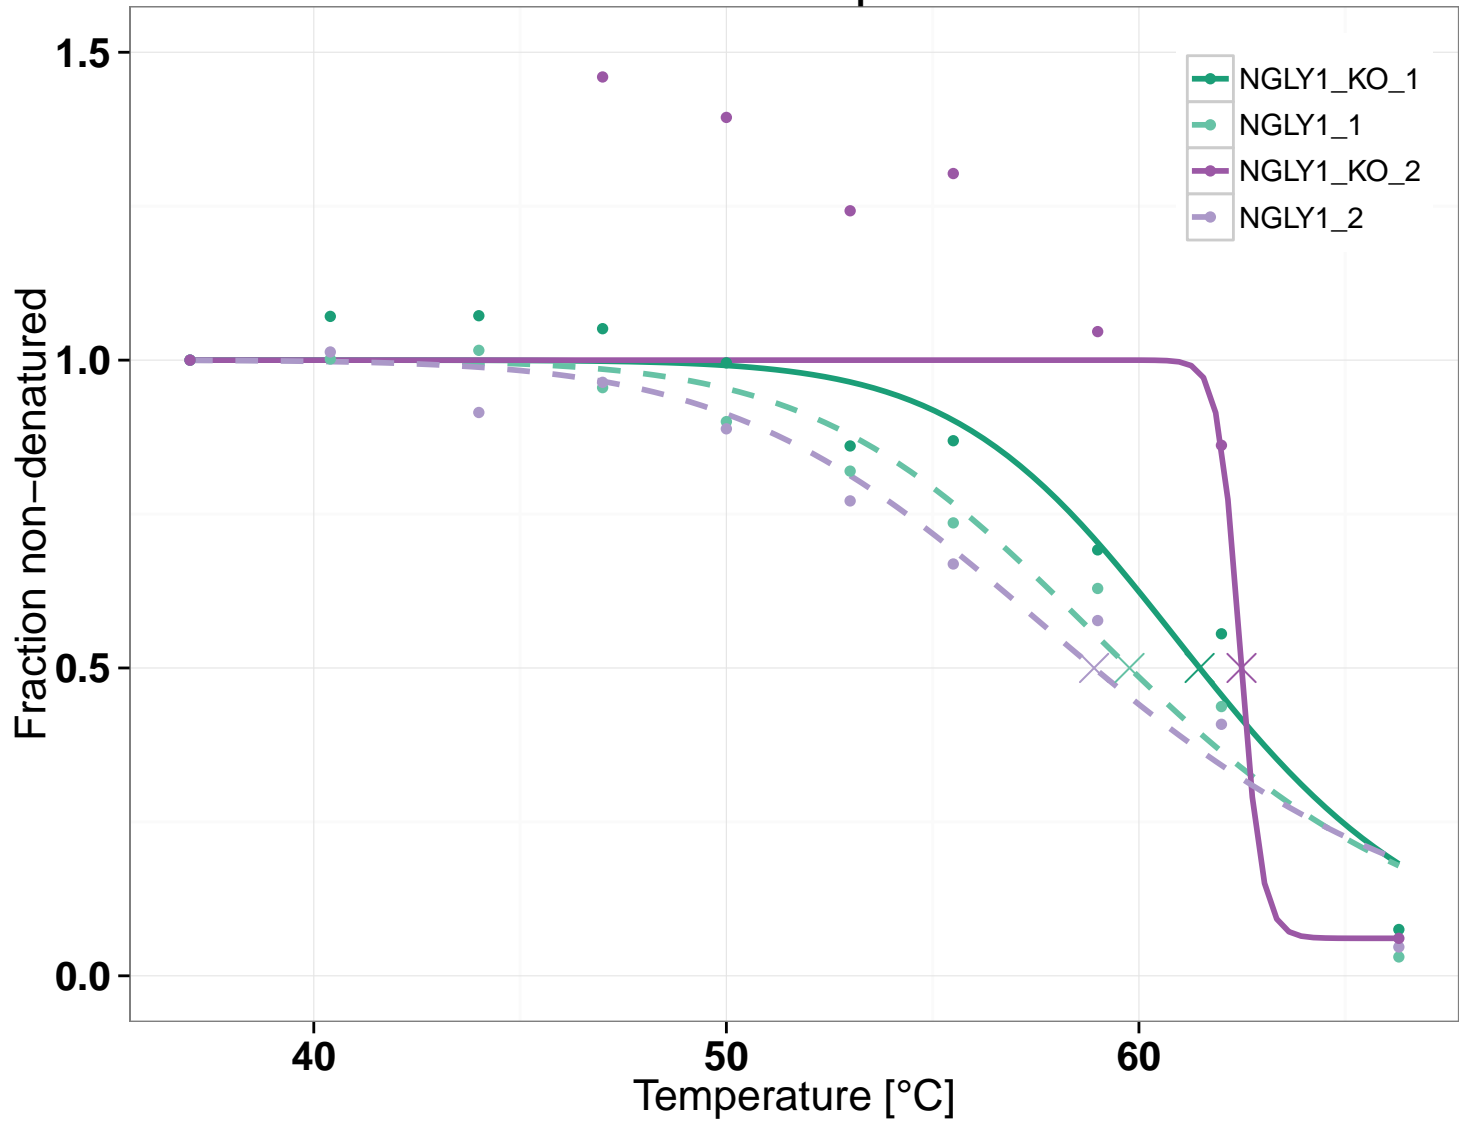

|            | meltPoint | slope  | plateau | R2   |
|------------|-----------|--------|---------|------|
| NGLY1_KO_1 | 61.47     | -0.085 | 0       | 0.95 |
| NGLY1_1    | 59.77     | -0.066 | 0       | 0.95 |
| NGLY1_KO_2 | 62.49     | -0.9   | 0.06    | 0.36 |
| NGLY1_2    | 58.91     | -0.057 | 0       | 0.95 |

Supplement: Supplementary file 2215 [file 1]

IPI00013892.1|CYTH3

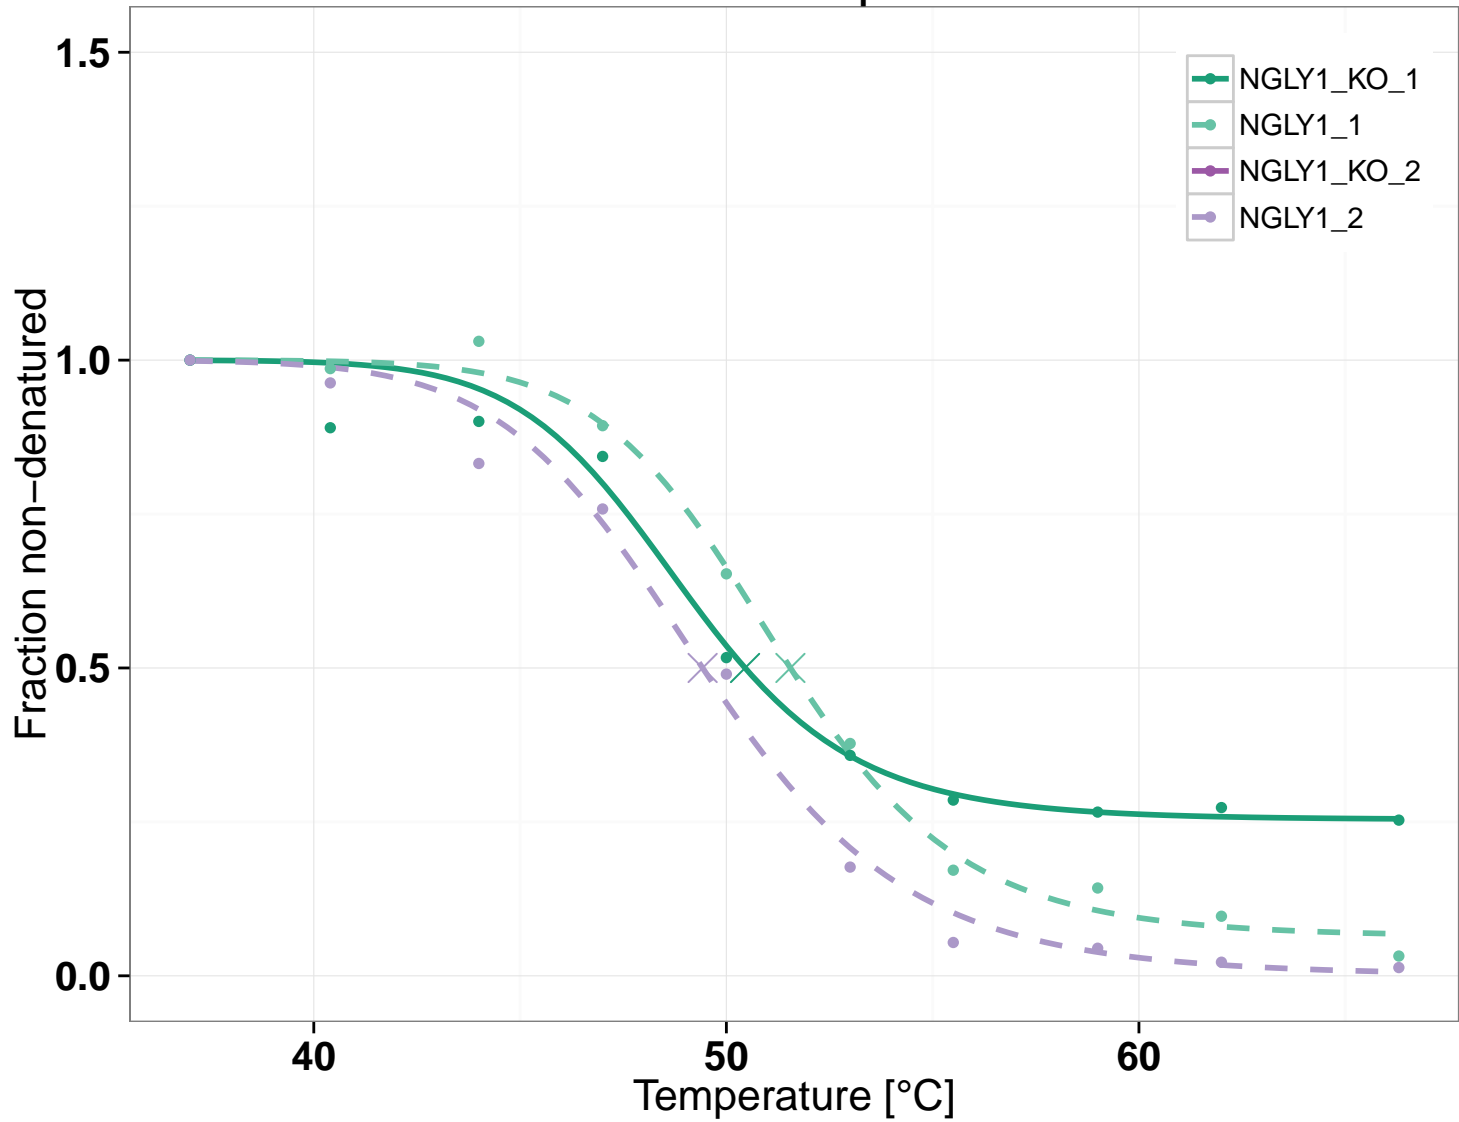

|            | meltPoint | slope  | plateau | R2   |
|------------|-----------|--------|---------|------|
| NGLY1_KO_1 | 50.45     | -0.092 | 0.25    | 0.98 |
| NGLY1_1    | 51.55     | -0.11  | 0.06    | 1    |
| NGLY1_KO_2 | -         | -      | -       | -    |
| NGLY1_2    | 49.42     | -0.1   | 0       | 0.99 |

Supplement: Supplementary file 2216 [file 1]

# IPI00783271.1|LRPPRC

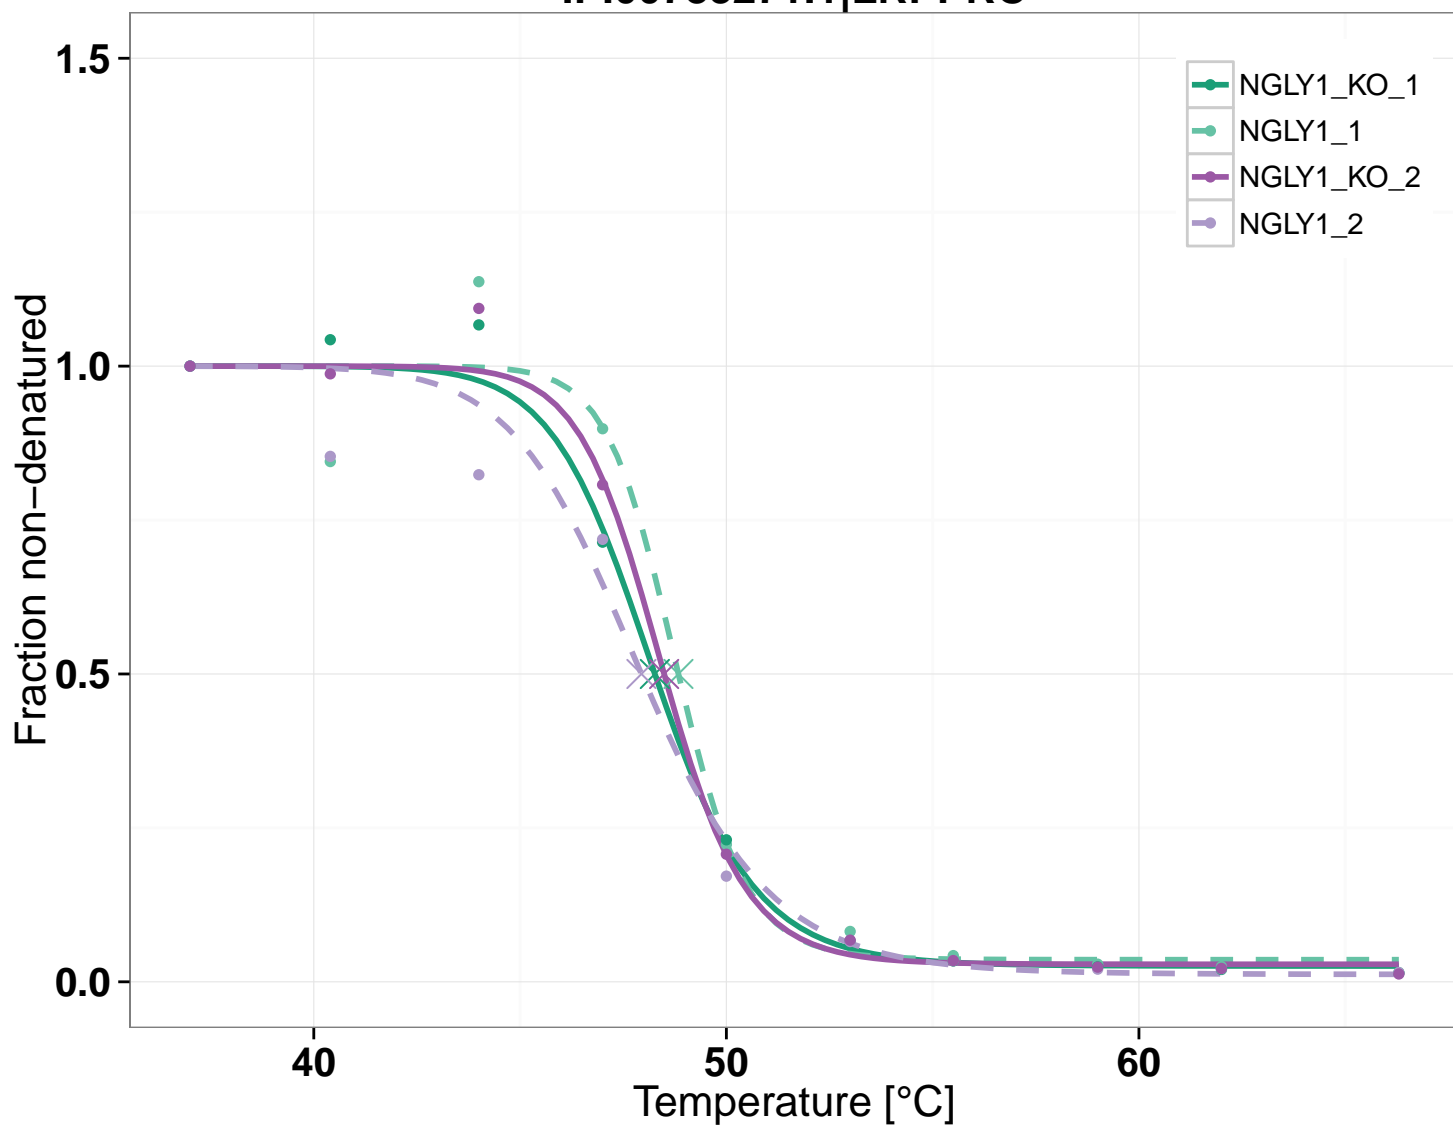

|            | meltPoint | slope | plateau | R2   |
|------------|-----------|-------|---------|------|
| NGLY1_KO_1 | 48.27     | -0.2  | 0.03    | 0.99 |
| NGLY1_1    | 48.84     | -0.28 | 0.04    | 0.98 |
| NGLY1_KO_2 | 48.49     | -0.24 | 0.03    | 0.99 |
| NGLY1_2    | 47.94     | -0.16 | 0.01    | 0.97 |

Supplement: Supplementary file 2217 [file 1]

IPI00386243.3|DKFZP761E198

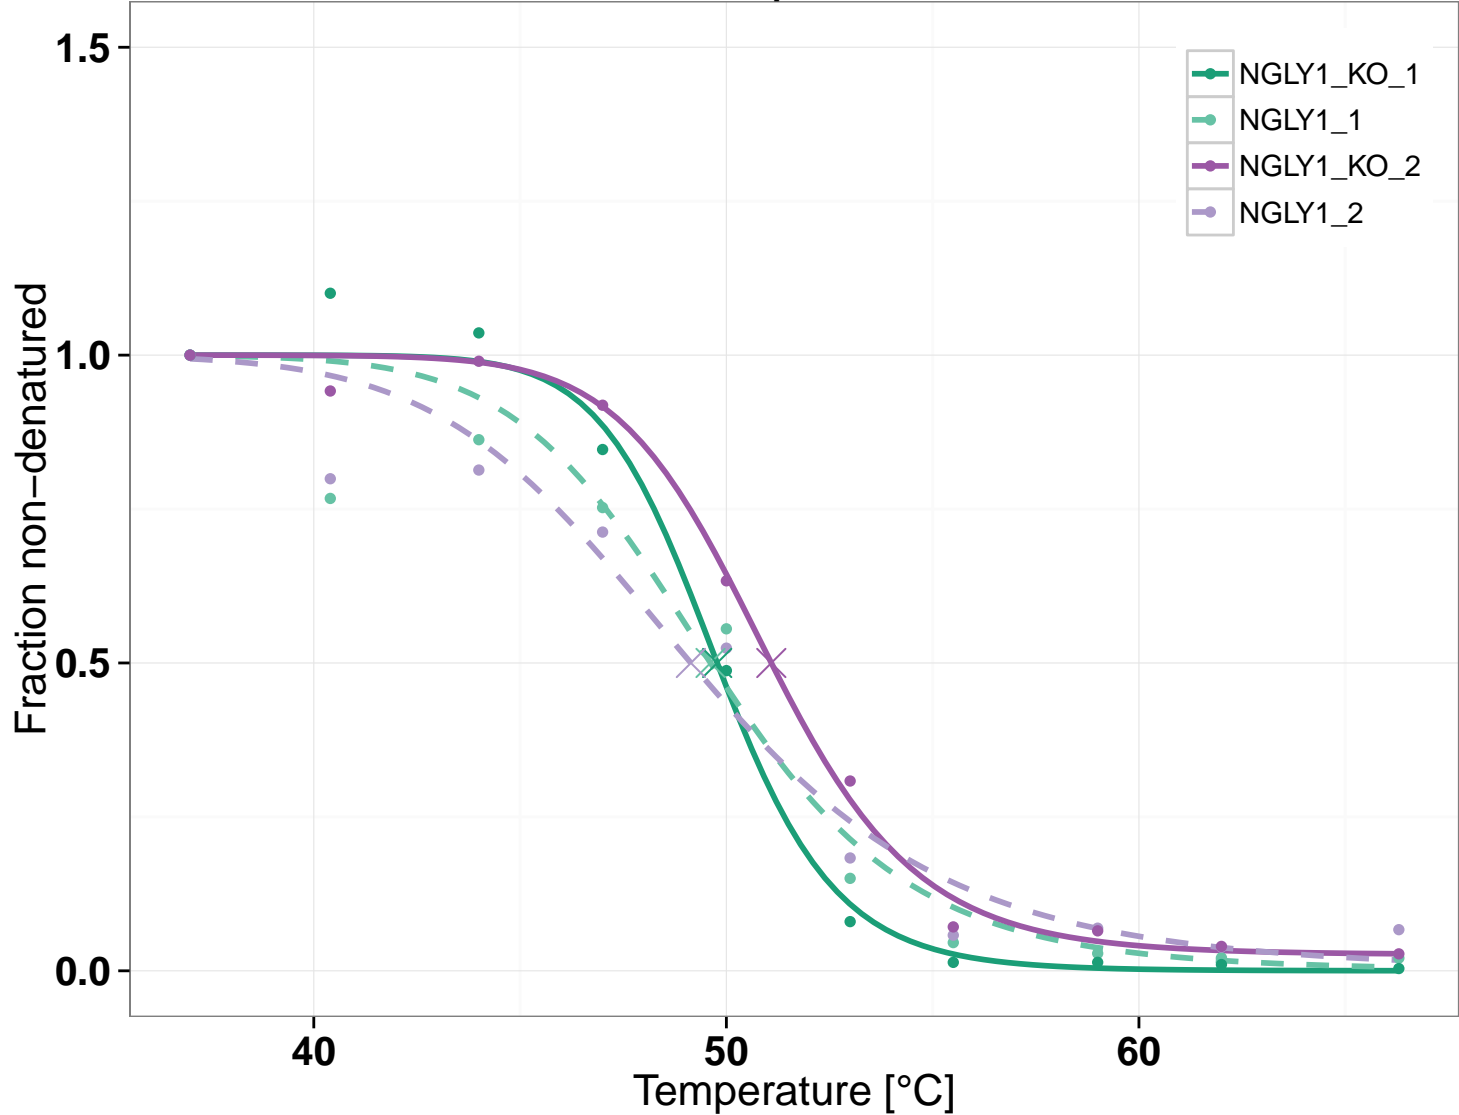

|            | meltPoint | slope  | plateau | R2   |
|------------|-----------|--------|---------|------|
| NGLY1_KO_1 | 49.78     | -0.17  | 0       | 0.99 |
| NGLY1_1    | 49.62     | -0.1   | 0       | 0.95 |
| NGLY1_KO_2 | 51.09     | -0.13  | 0.03    | 1    |
| NGLY1_2    | 49.14     | -0.081 | 0       | 0.96 |

Supplement: Supplementary file 2218 [file 1]

# IPI00386797.3|FNIP1

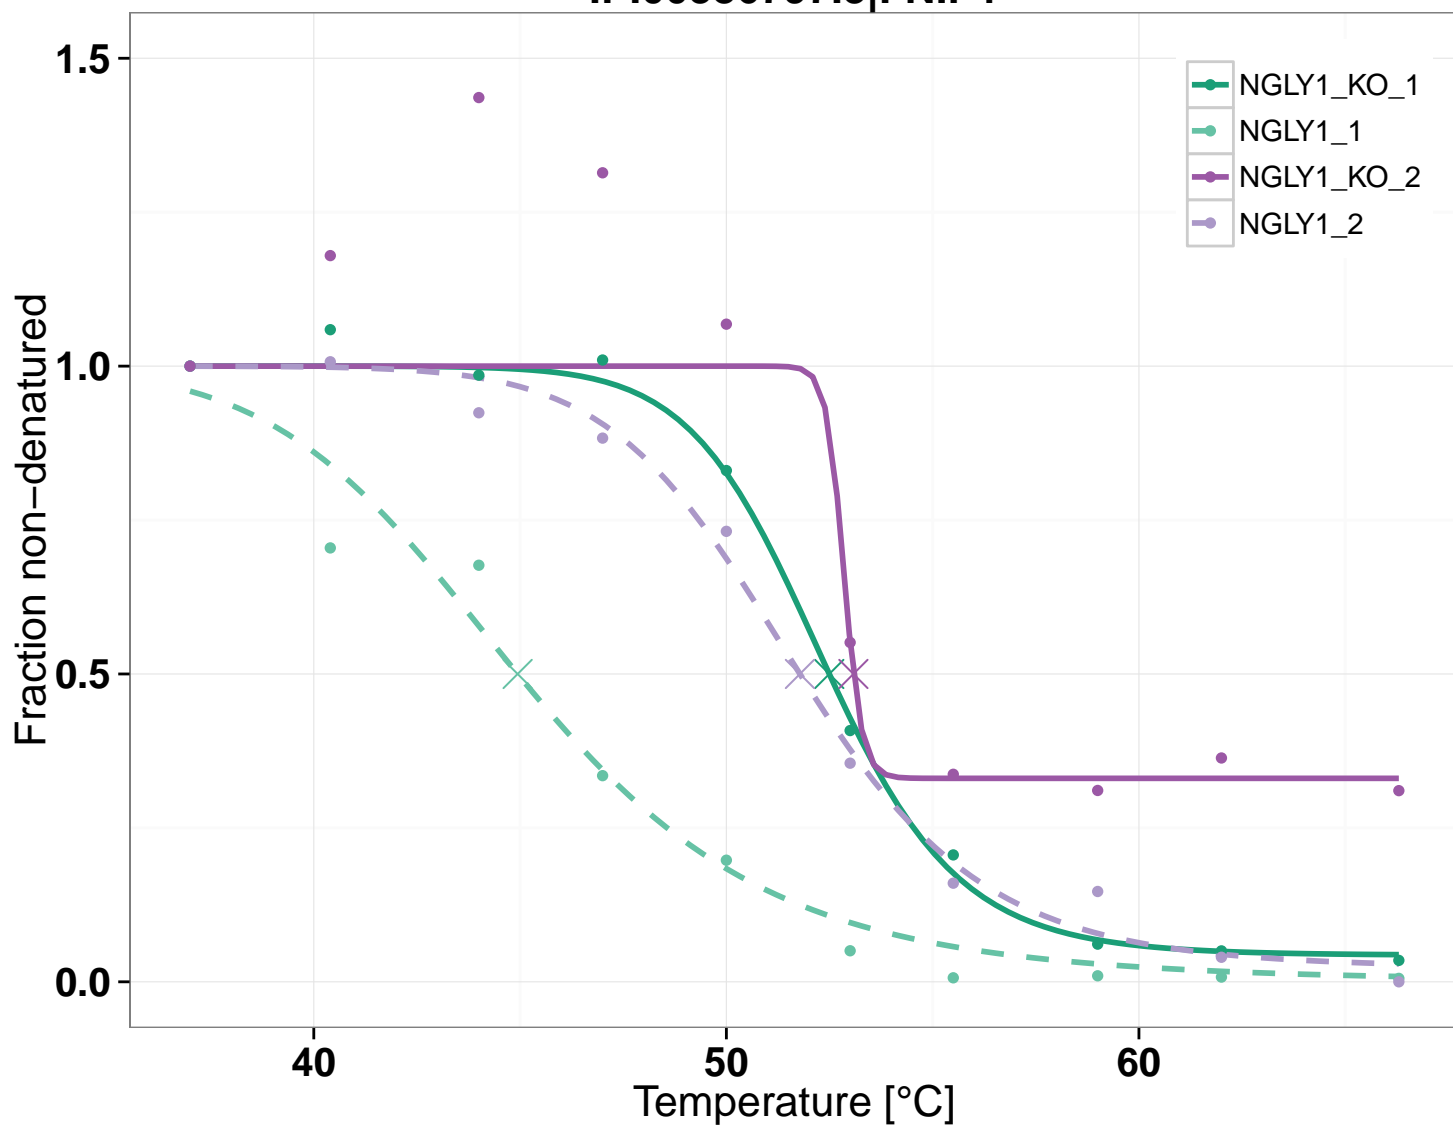

Supplement: Supplementary file 2219 [file 1]

IPI00177655.3|LRRC42

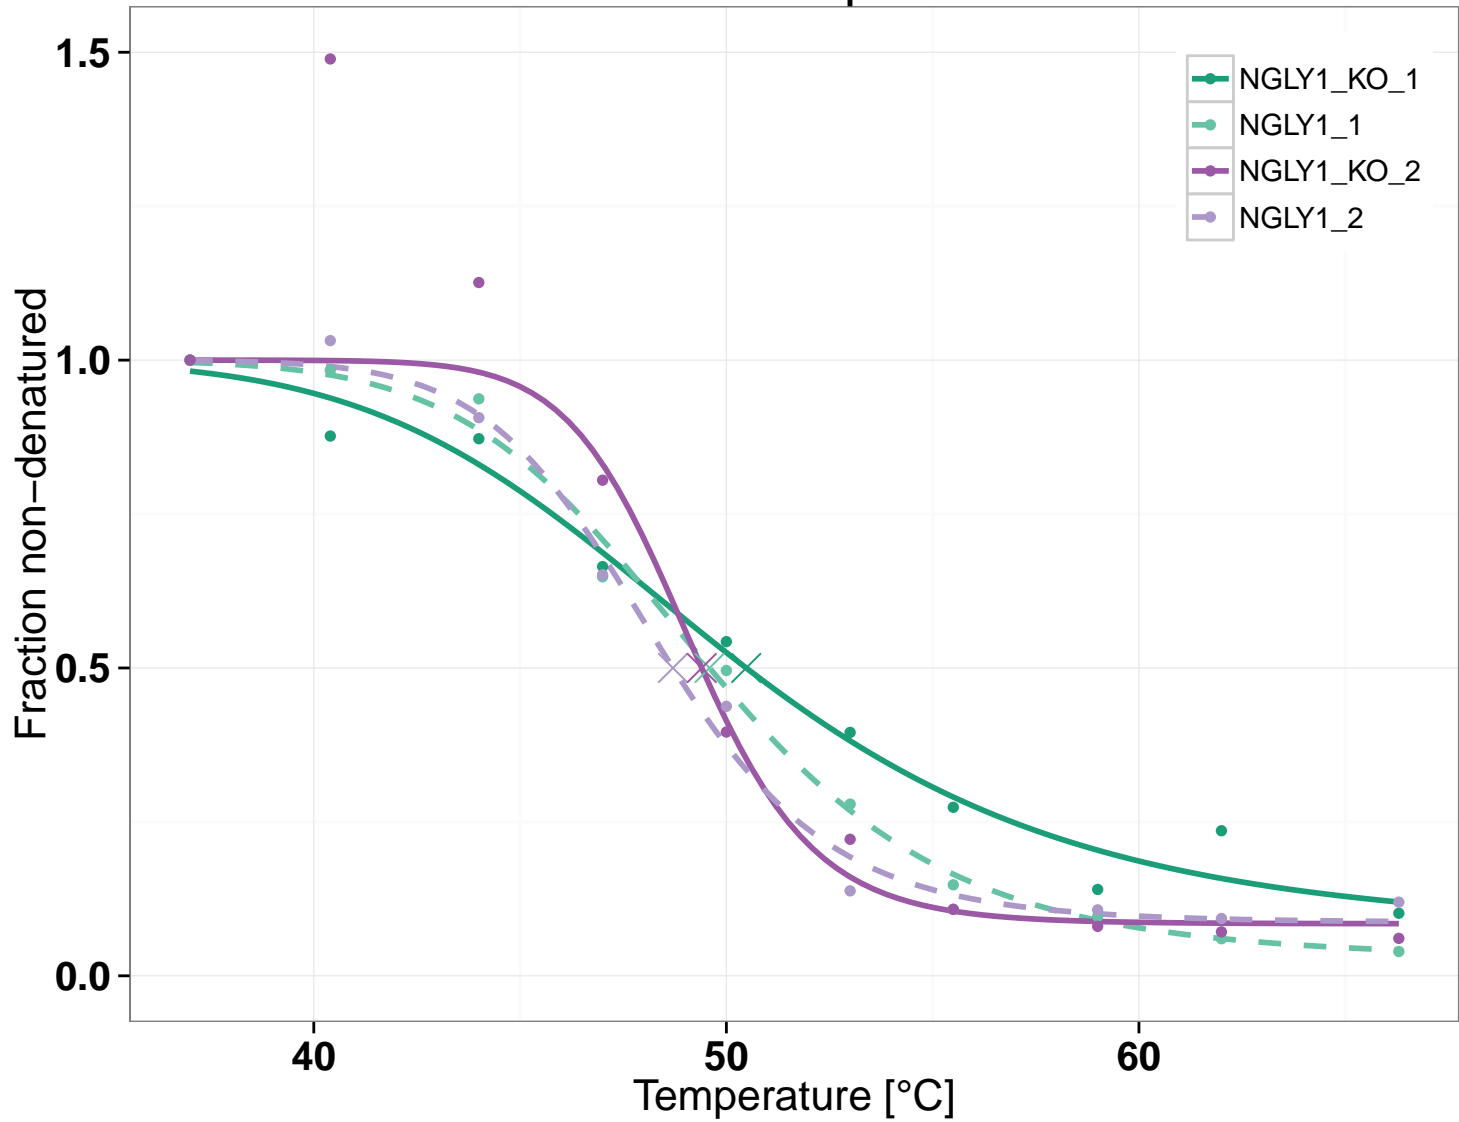

|            | meltPoint | slope  | plateau | R2   |
|------------|-----------|--------|---------|------|
| NGLY1_KO_1 | 50.48     | -0.055 | 0.07    | 0.98 |
| NGLY1_1    | 49.59     | -0.082 | 0.03    | 0.99 |
| NGLY1_KO_2 | 49.4      | -0.15  | 0.08    | 0.89 |
| NGLY1_2    | 48.71     | -0.11  | 0.09    | 0.99 |

Supplement: Supplementary file 2220 [file 1]

IPI00328658.3|ASH2L

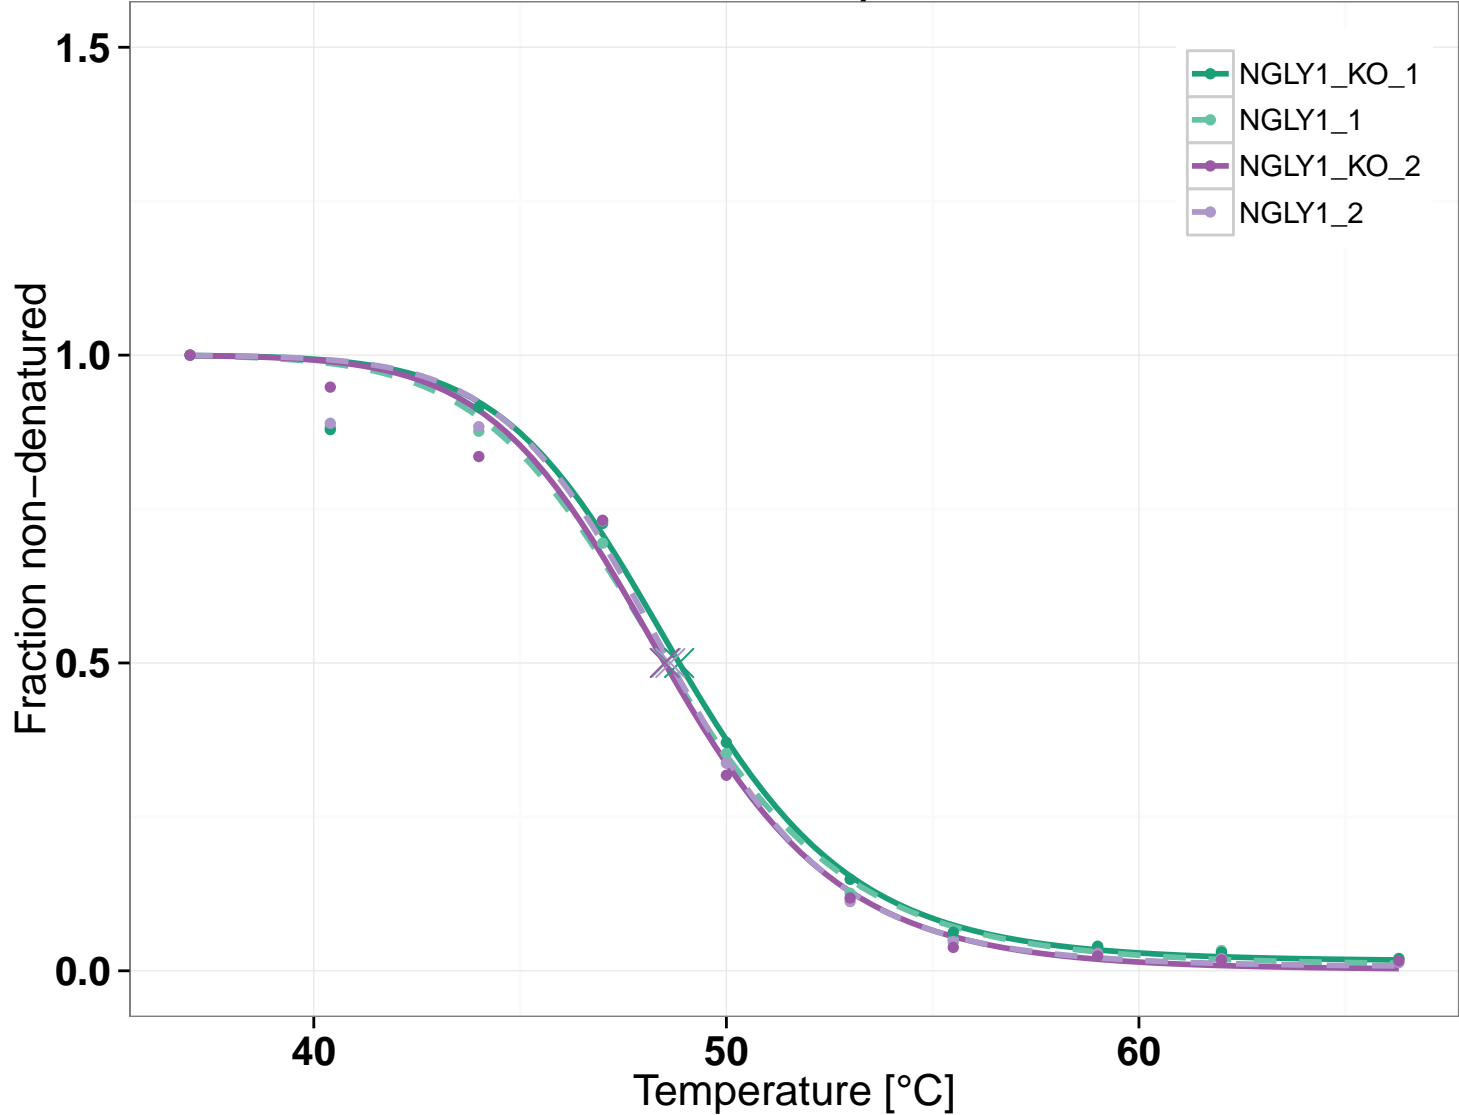

|            | meltPoint | slope | plateau | R2   |
|------------|-----------|-------|---------|------|
| NGLY1_KO_1 | 48.86     | -0.12 | 0.02    | 0.99 |
| NGLY1_1    | 48.53     | -0.11 | 0.01    | 0.99 |
| NGLY1_KO_2 | 48.51     | -0.12 | 0       | 0.99 |
| NGLY1_2    | 48.64     | -0.12 | 0.01    | 0.99 |

Supplement: Supplementary file 2221 [file 1]

IPI00301936.4|ELAVL1

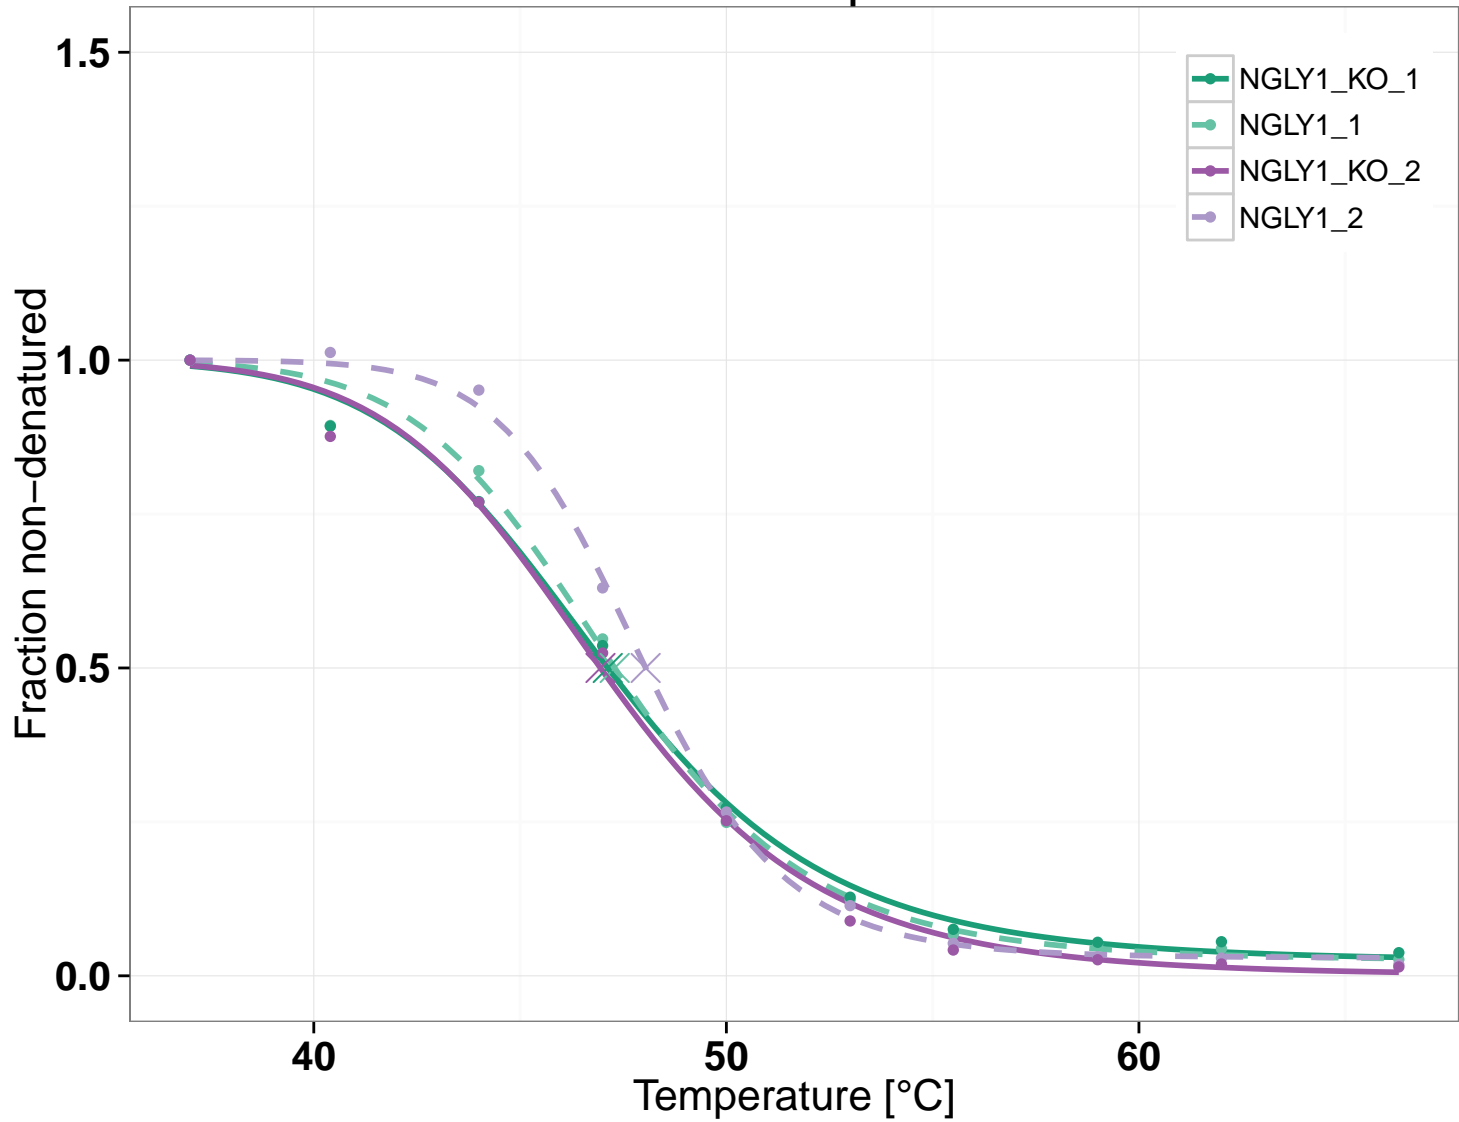

|            | meltPoint | slope  | plateau | R2   |
|------------|-----------|--------|---------|------|
| NGLY1_KO_1 | 47.13     | -0.09  | 0.02    | 1    |
| NGLY1_1    | 47.29     | -0.1   | 0.02    | 1    |
| NGLY1_KO_2 | 46.95     | -0.095 | 0       | 0.99 |
| NGLY1_2    | 48.04     | -0.14  | 0.03    | 1    |

Supplement: Supplementary file 2222 [file 1]

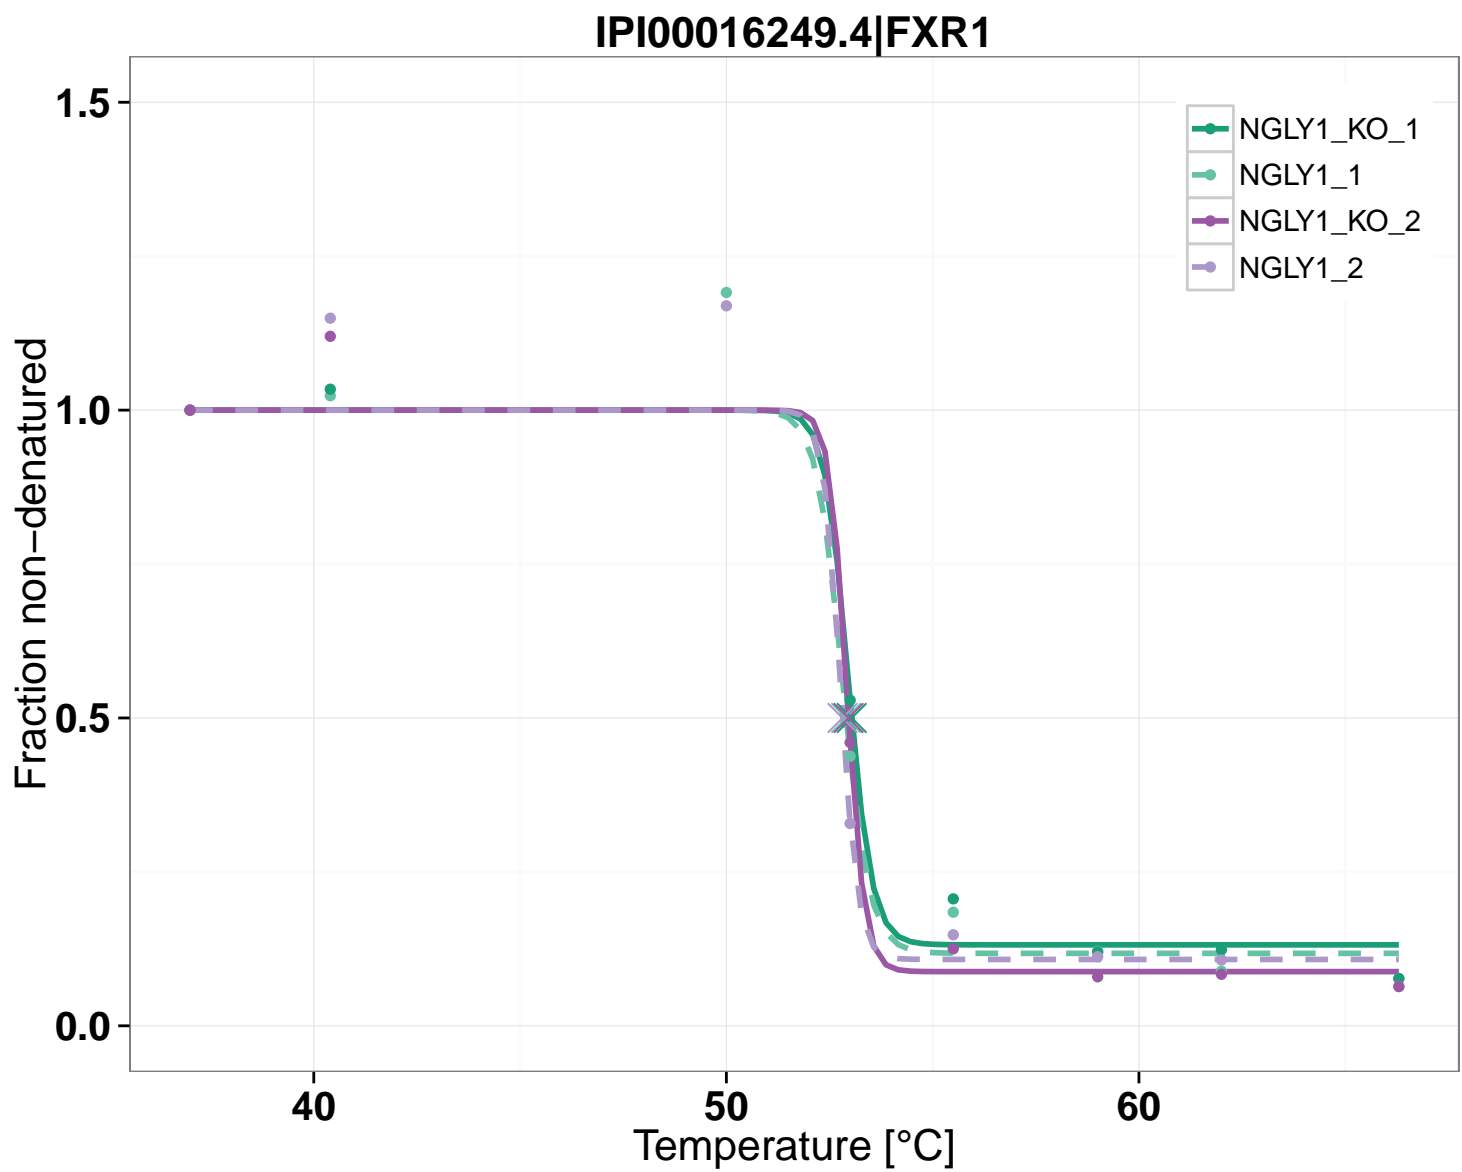

|            | meltPoint | slope | plateau | R2   |
|------------|-----------|-------|---------|------|
| NGLY1_KO_1 | 53.04     | -0.76 | 0.13    | 0.55 |
| NGLY1_1    | 52.91     | -0.69 | 0.12    | 0.69 |
| NGLY1_KO_2 | 52.96     | -1.1  | 0.09    | 0.42 |
| NGLY1_2    | 52.82     | -1.1  | 0.11    | 0.76 |

Supplement: Supplementary file 2223 [file 1]

# IPI00027230.3|HSP90B1

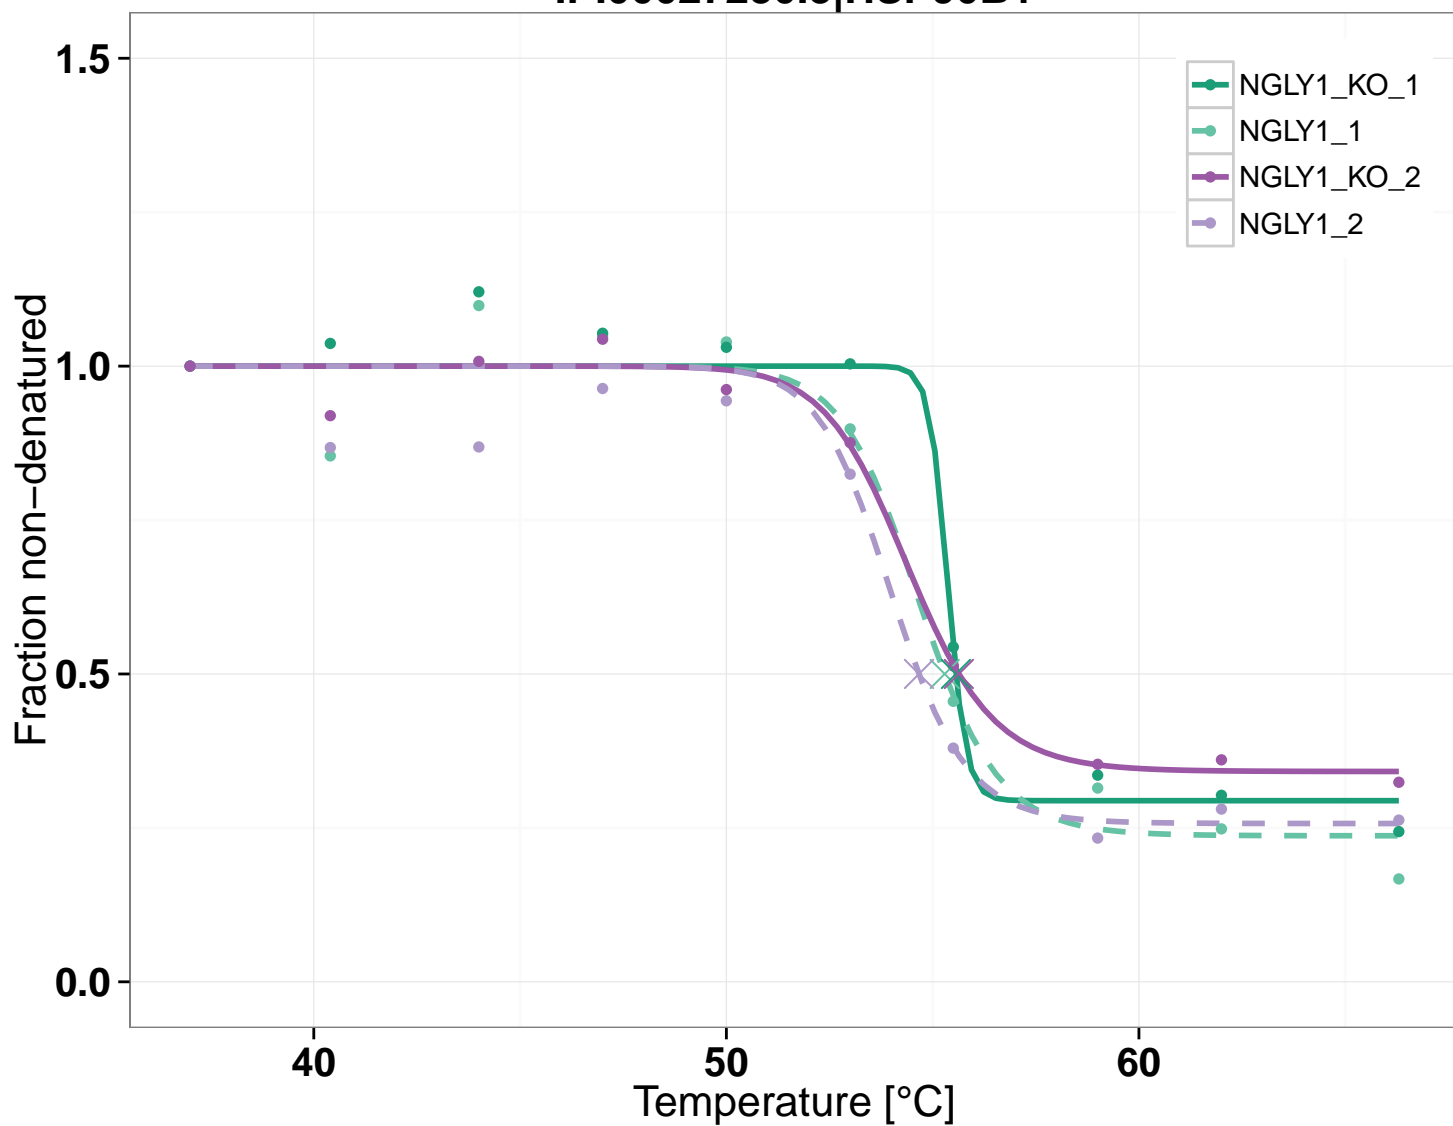

|            | meltPoint | slope | plateau | R2   |
|------------|-----------|-------|---------|------|
| NGLY1_KO_1 | 55.56     | -0.8  | 0.29    | 0.98 |
| NGLY1_1    | 55.29     | -0.2  | 0.24    | 0.96 |
| NGLY1_KO_2 | 55.64     | -0.16 | 0.34    | 0.99 |
| NGLY1_2    | 54.67     | -0.21 | 0.26    | 0.96 |

Supplement: Supplementary file 2224 [file 1]

IPI00395436.1|ZCCHC10

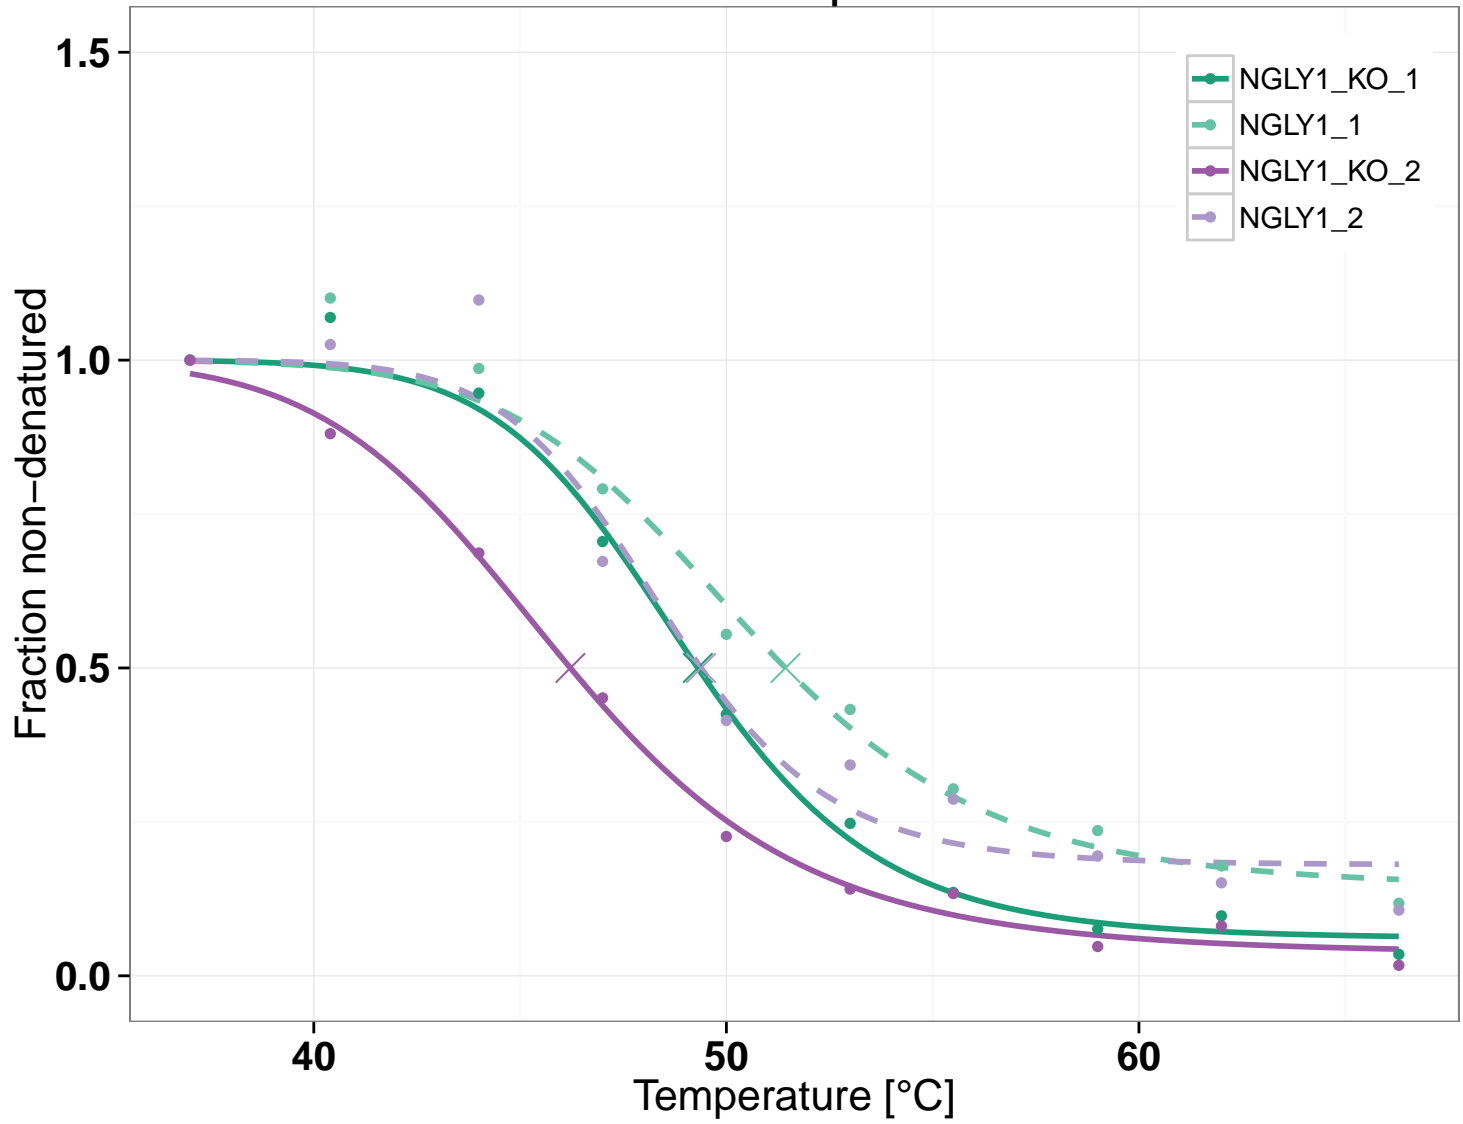

|            | meltPoint | slope  | plateau | R2   |
|------------|-----------|--------|---------|------|
| NGLY1_KO_1 | 49.31     | -0.1   | 0.06    | 0.99 |
| NGLY1_1    | 51.43     | -0.074 | 0.14    | 0.98 |
| NGLY1_KO_2 | 46.22     | -0.082 | 0.03    | 1    |
| NGLY1_2    | 49.39     | -0.1   | 0.18    | 0.96 |

Supplement: Supplementary file 2225 [file 1]

IPI00096066.2|SUCLG2

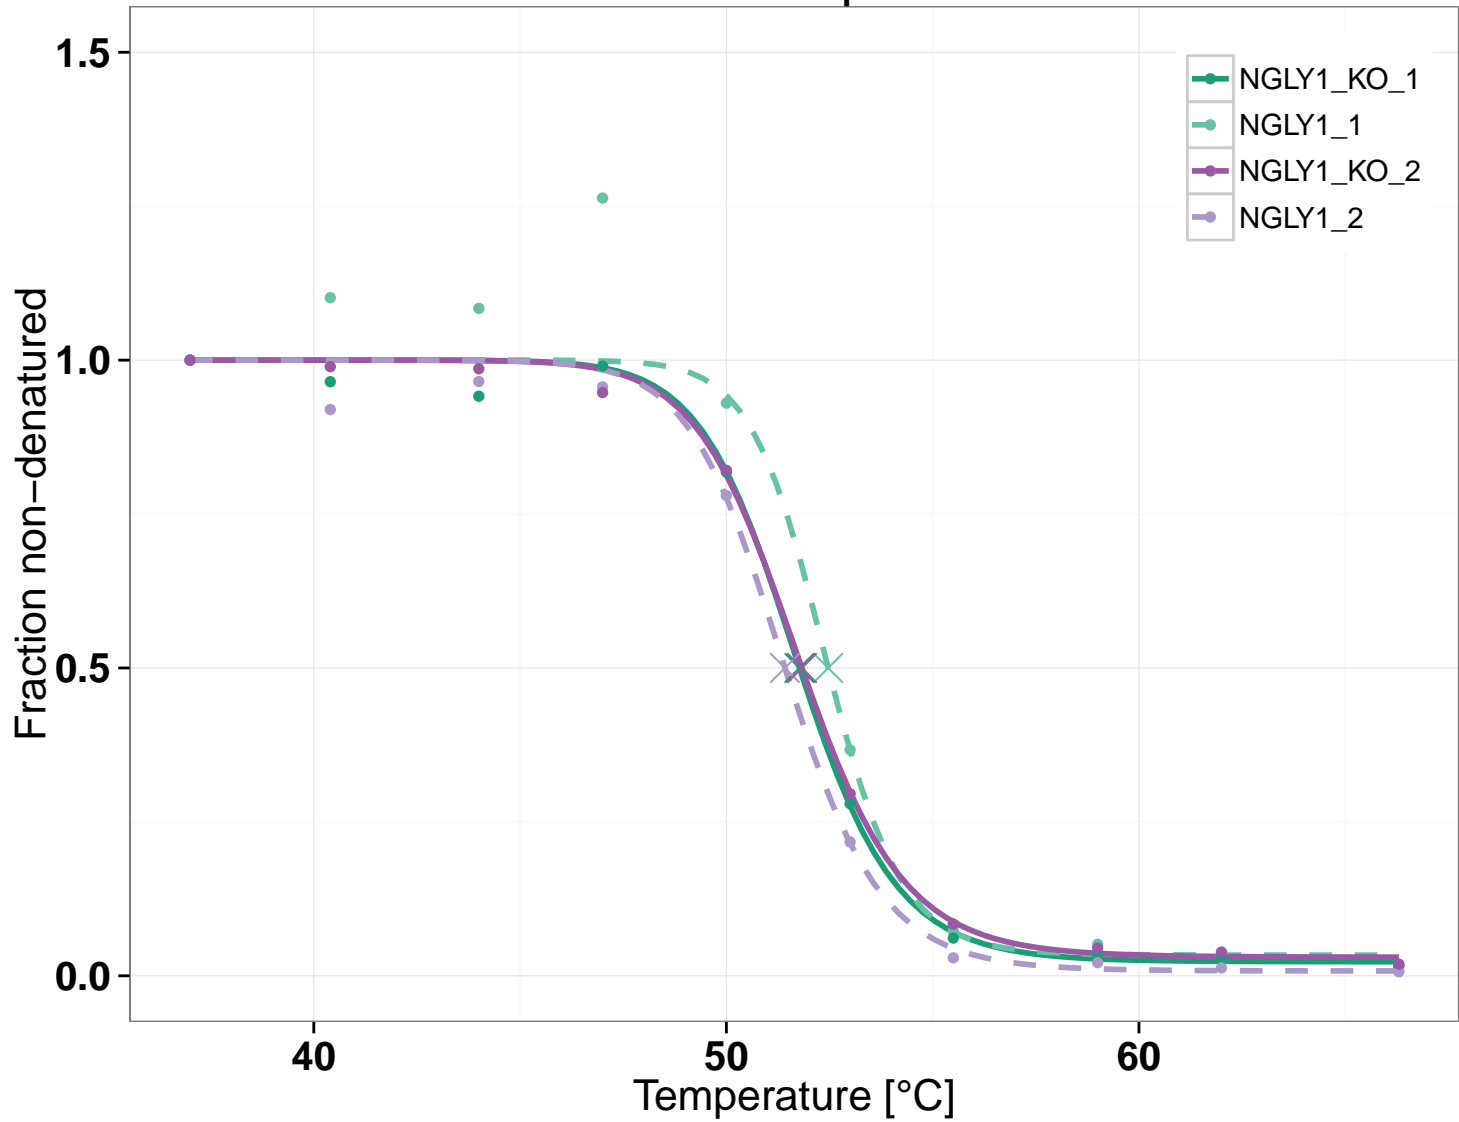

|            | meltPoint | slope | plateau | R2   |
|------------|-----------|-------|---------|------|
| NGLY1_KO_1 | 51.77     | -0.21 | 0.02    | 1    |
| NGLY1_1    | 52.47     | -0.27 | 0.03    | 0.96 |
| NGLY1_KO_2 | 51.83     | -0.19 | 0.03    | 1    |
| NGLY1_2    | 51.42     | -0.21 | 0.01    | 1    |

Supplement: Supplementary file 2226 [file 1]

IPI00465040.3|CEP72

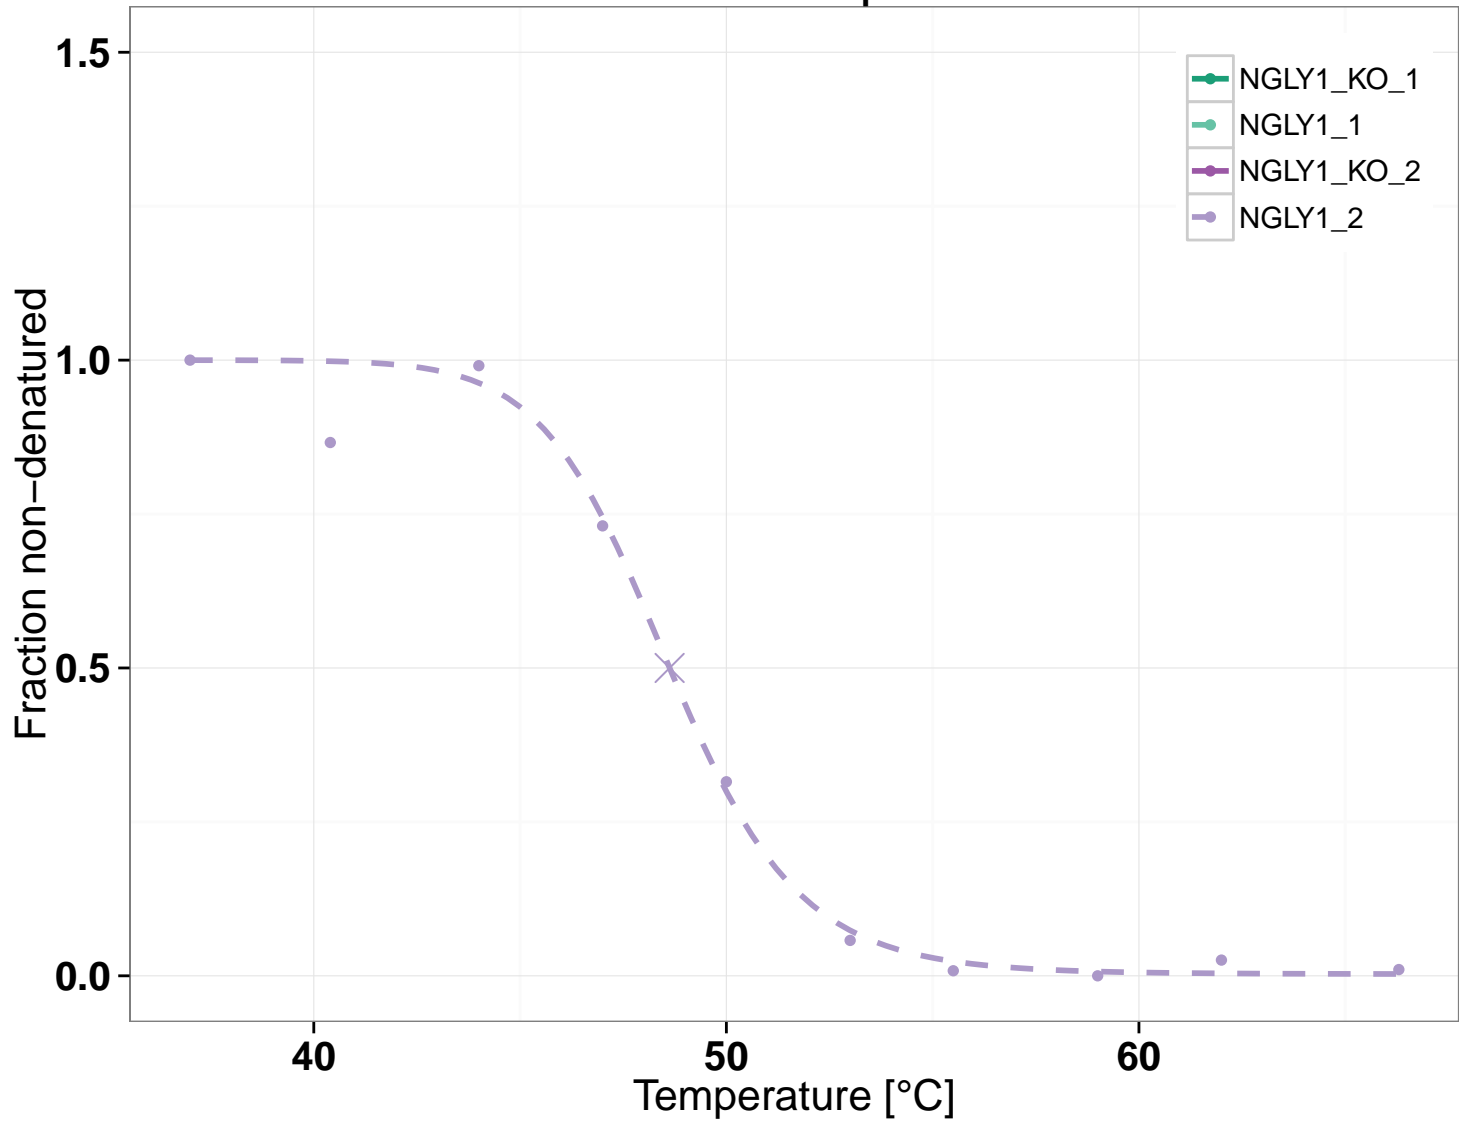

|            | meltPoint | slope | plateau | R2   |
|------------|-----------|-------|---------|------|
| NGLY1_KO_1 | -         | -     | -       | -    |
| NGLY1_1    | -         | -     | -       | -    |
| NGLY1_KO_2 | -         | -     | -       | -    |
| NGLY1_2    | 48.62     | -0.16 | 0       | 0.99 |

Supplement: Supplementary file 2227 [file 1]

IPI00844216.2|ARMC5

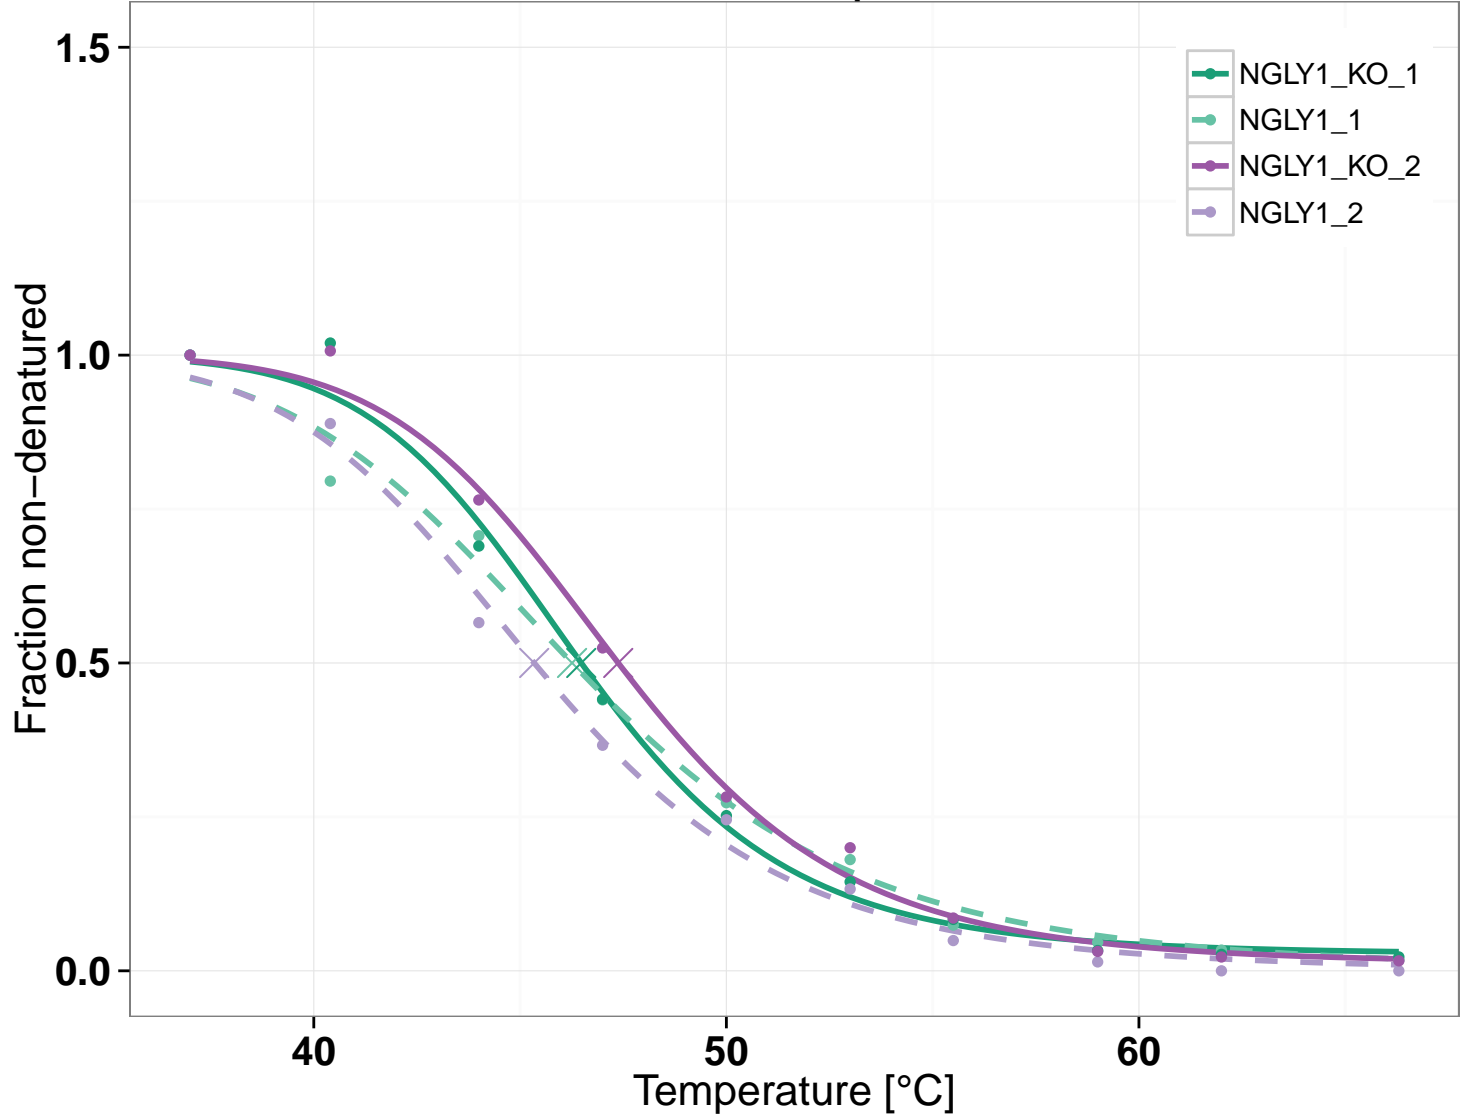

|            | meltPoint | slope  | plateau | R2   |
|------------|-----------|--------|---------|------|
| NGLY1_KO_1 | 46.48     | -0.095 | 0.03    | 0.99 |
| NGLY1_1    | 46.26     | -0.072 | 0       | 0.99 |
| NGLY1_KO_2 | 47.38     | -0.089 | 0.01    | 1    |
| NGLY1_2    | 45.34     | -0.082 | 0       | 0.99 |

Supplement: Supplementary file 2228 [file 1]

IPI00009355.1|PARP12

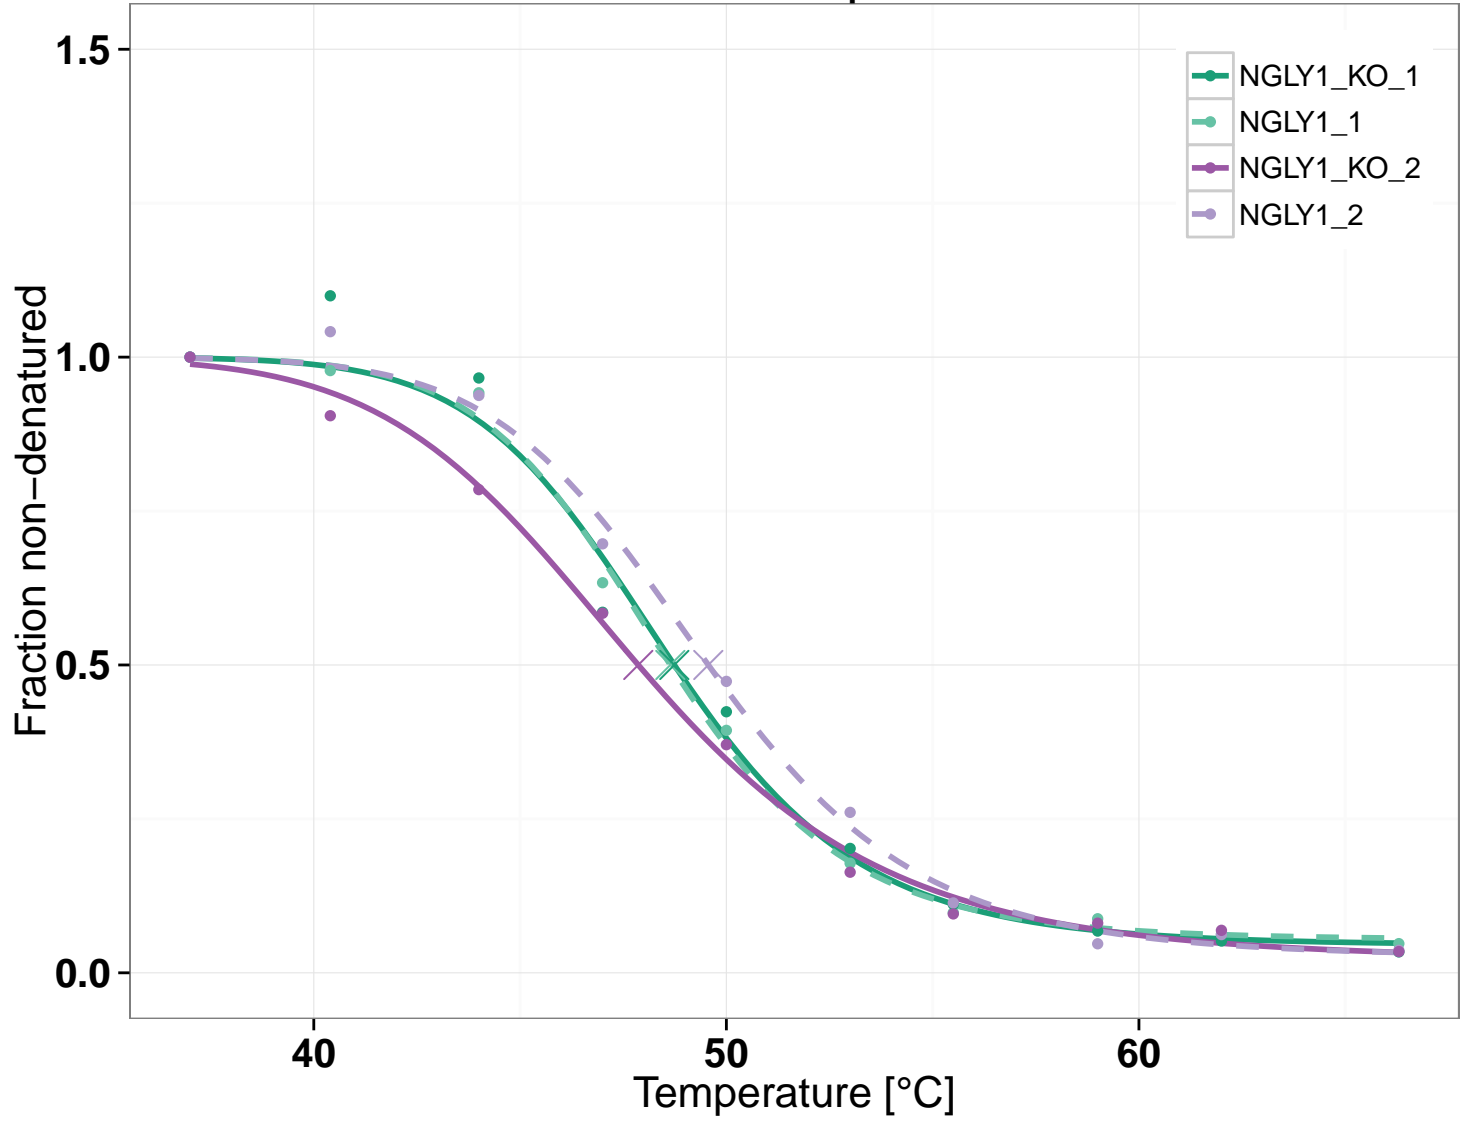

|            | meltPoint | slope  | plateau | R2   |
|------------|-----------|--------|---------|------|
| NGLY1_KO_1 | 48.74     | -0.1   | 0.04    | 0.98 |
| NGLY1_1    | 48.64     | -0.11  | 0.05    | 1    |
| NGLY1_KO_2 | 47.87     | -0.08  | 0.02    | 1    |
| NGLY1_2    | 49.56     | -0.095 | 0.03    | 1    |

Supplement: Supplementary file 2229 [file 1]

# IPI00006970.2|MRPS2

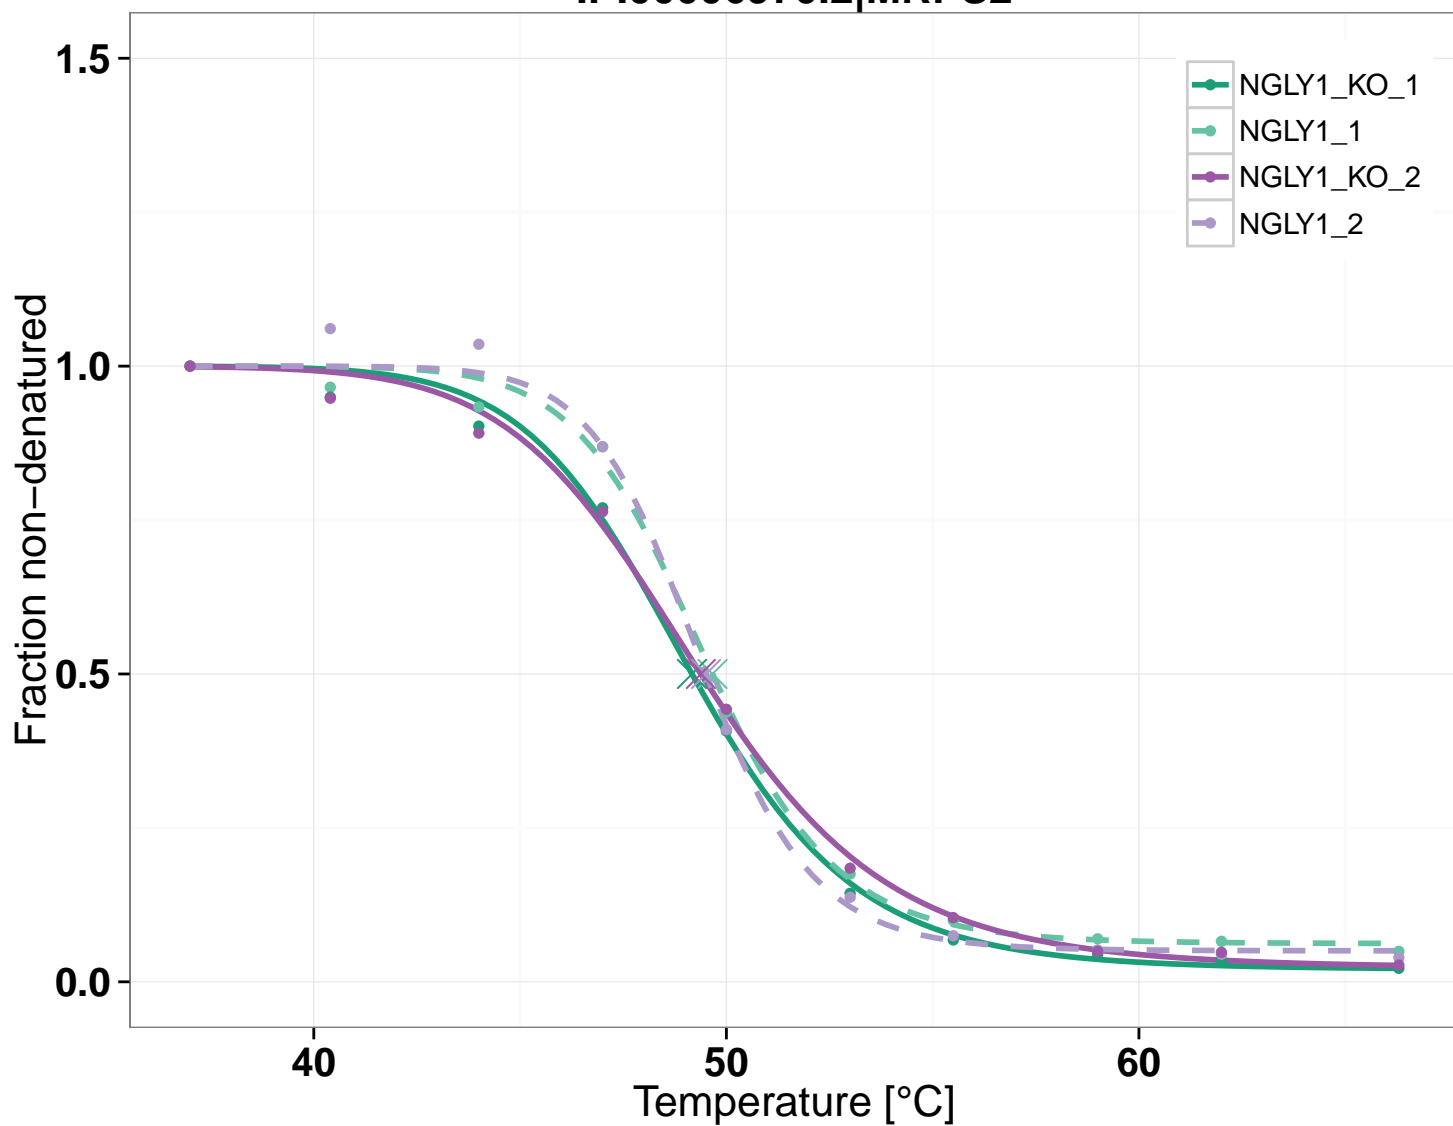

|            | meltPoint | slope | plateau | R2 |
|------------|-----------|-------|---------|----|
| NGLY1_KO_1 | 49.17     | -0.12 | 0.02    | 1  |
| NGLY1_1    | 49.66     | -0.15 | 0.06    | 1  |
| NGLY1_KO_2 | 49.38     | -0.11 | 0.02    | 1  |
| NGLY1_2    | 49.51     | -0.18 | 0.05    | 1  |

Supplement: Supplementary file 2230 [file 1]

IPI00293369.1|KLHDC8B

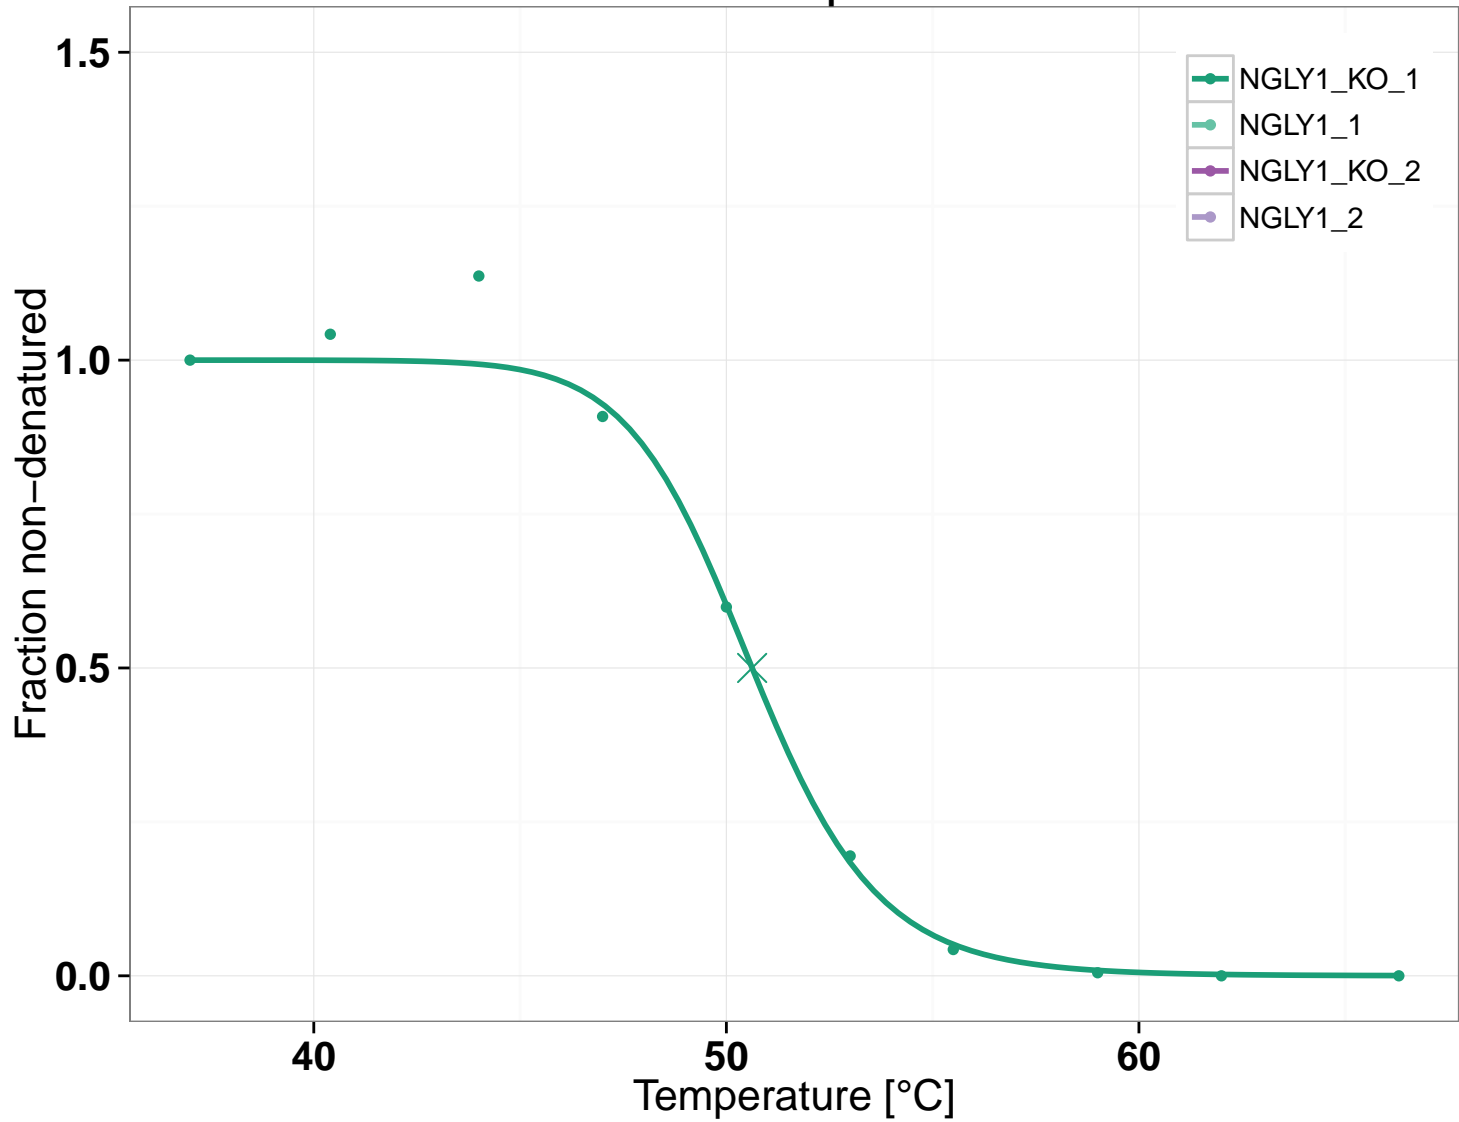

|            | meltPoint | slope | plateau | R2   |
|------------|-----------|-------|---------|------|
| NGLY1_KO_1 | 50.62     | -0.16 | 0       | 0.99 |
| NGLY1_1    | -         | -     | -       | -    |
| NGLY1_KO_2 | -         | -     | -       | -    |
| NGLY1_2    | -         | -     | -       | -    |

Supplement: Supplementary file 2231 [file 1]

IPI00064351.5|C8ORF76

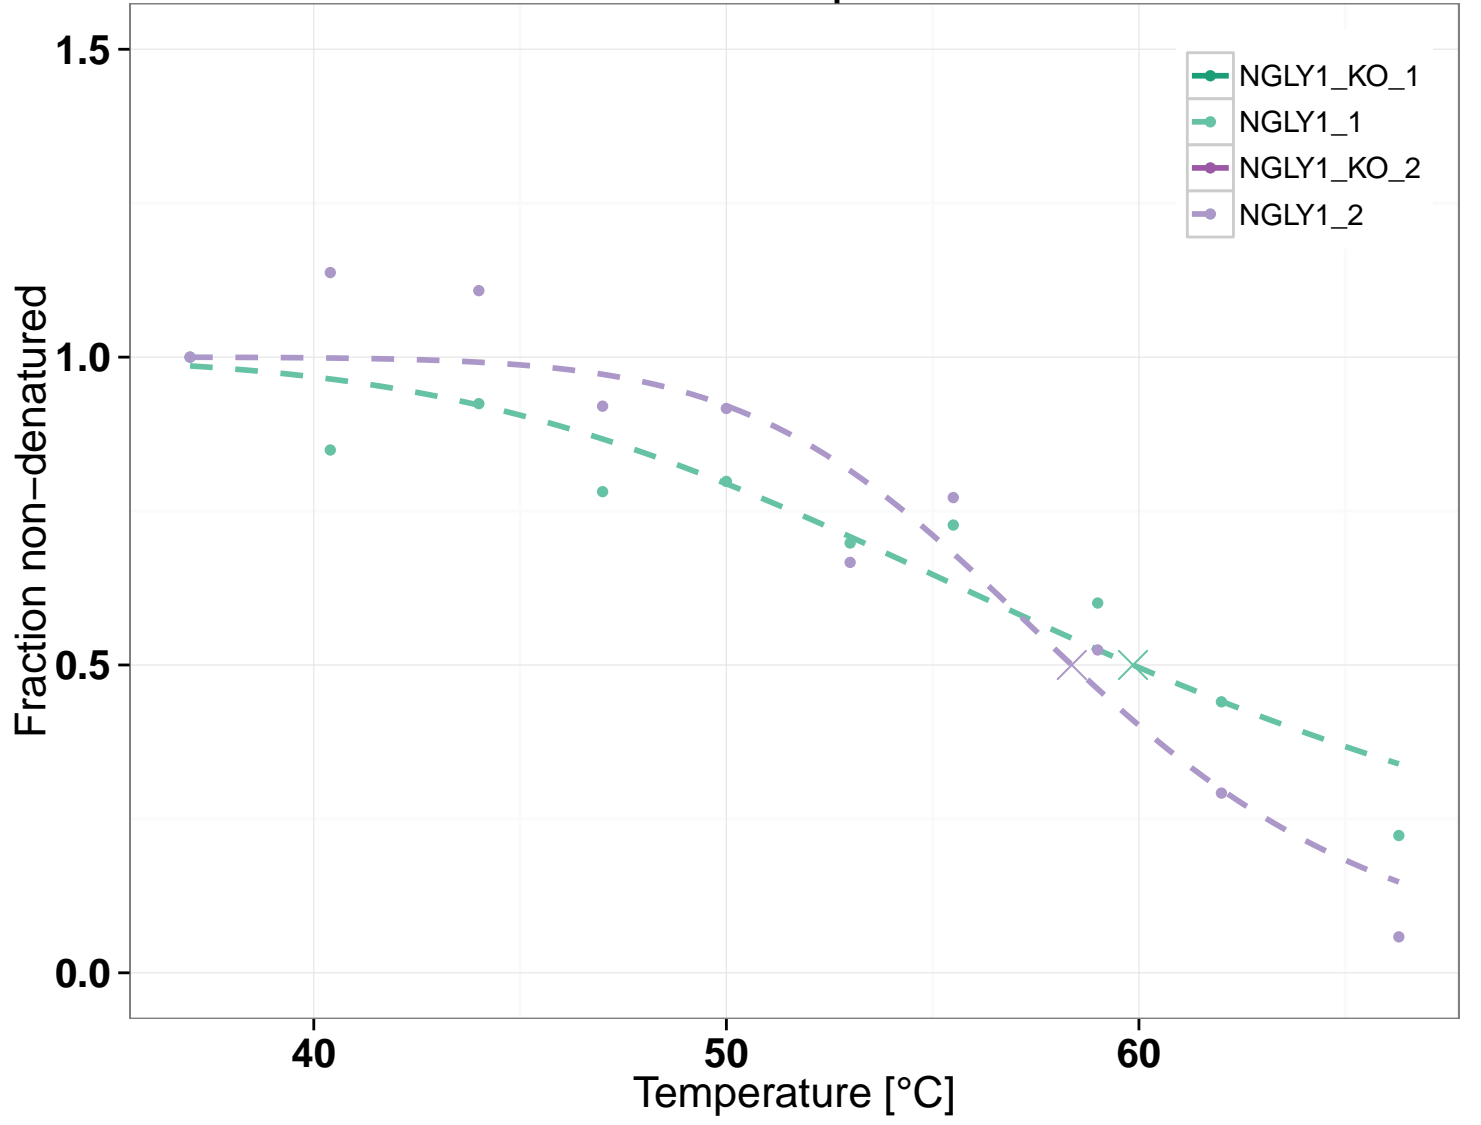

|            | meltPoint | slope  | plateau | R2   |
|------------|-----------|--------|---------|------|
| NGLY1_KO_1 | -         | -      | -       | -    |
| NGLY1_1    | 59.86     | -0.031 | 0       | 0.9  |
| NGLY1_KO_2 | -         | -      | -       | -    |
| NGLY1_2    | 58.37     | -0.064 | 0       | 0.93 |

Supplement: Supplementary file 2232 [file 1]

# IPI00008531.1|RCOR1

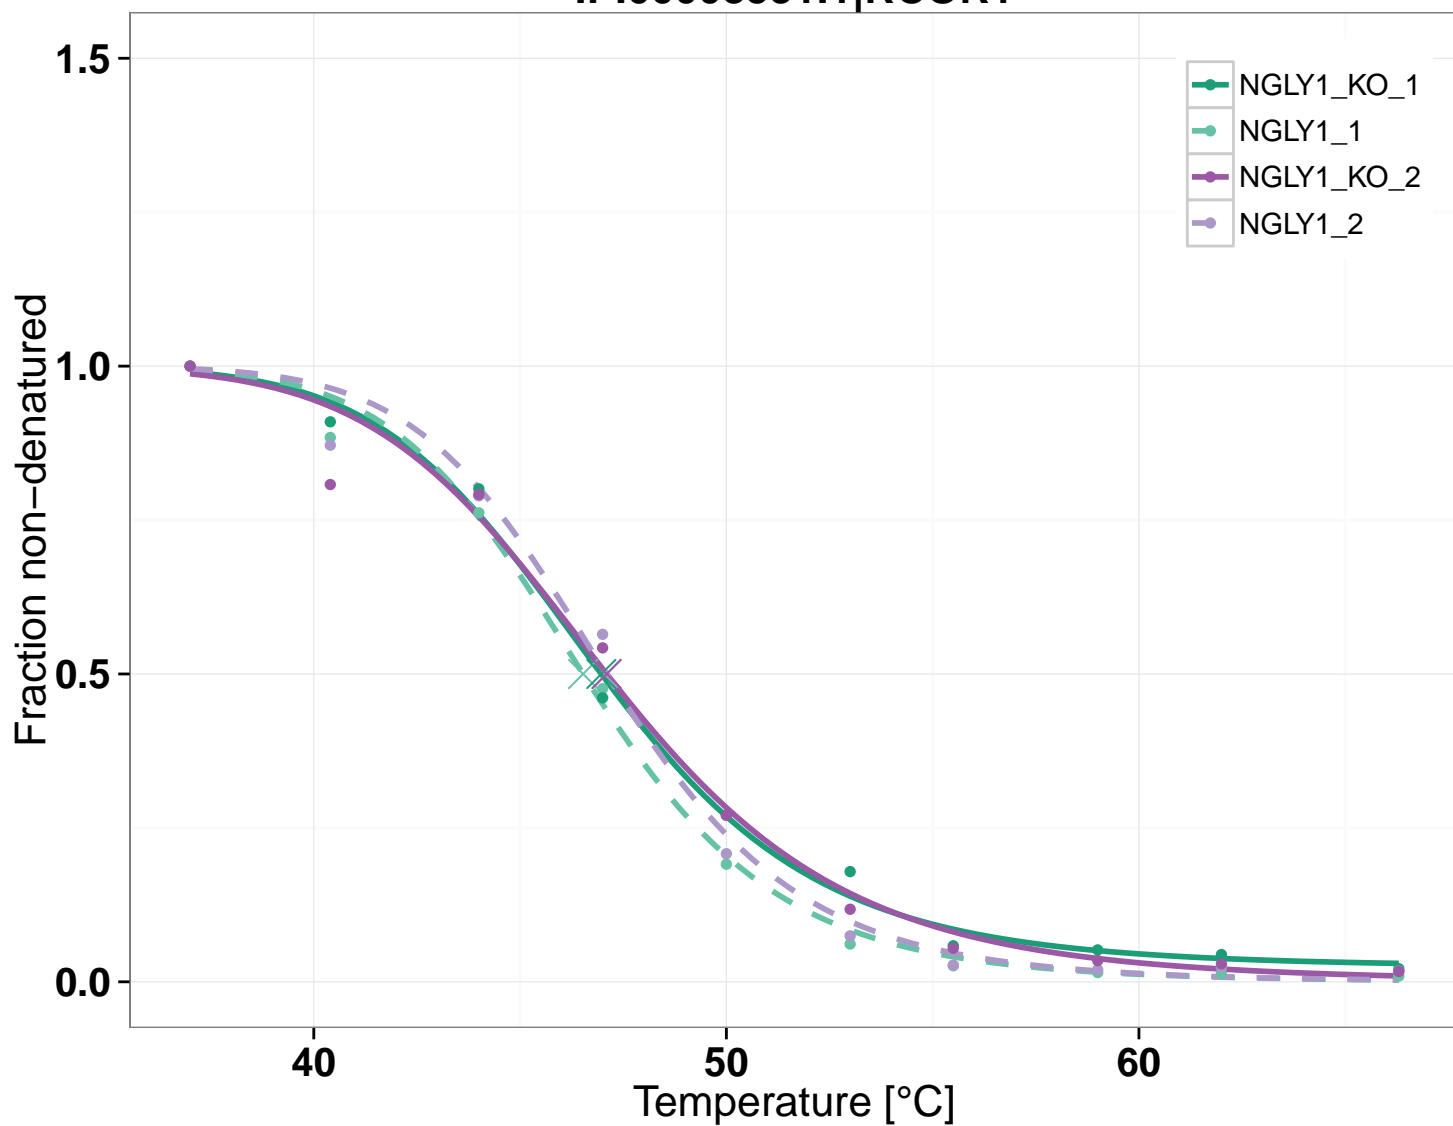

|            | meltPoint | slope  | plateau | R2   |
|------------|-----------|--------|---------|------|
| NGLY1_KO_1 | 46.97     | -0.091 | 0.02    | 1    |
| NGLY1_1    | 46.53     | -0.11  | 0       | 1    |
| NGLY1_KO_2 | 47.1      | -0.086 | 0       | 0.98 |
| NGLY1_2    | 47.09     | -0.11  | 0       | 0.99 |

Supplement: Supplementary file 2233 [file 1]

# IPI00217013.2|SMEK1

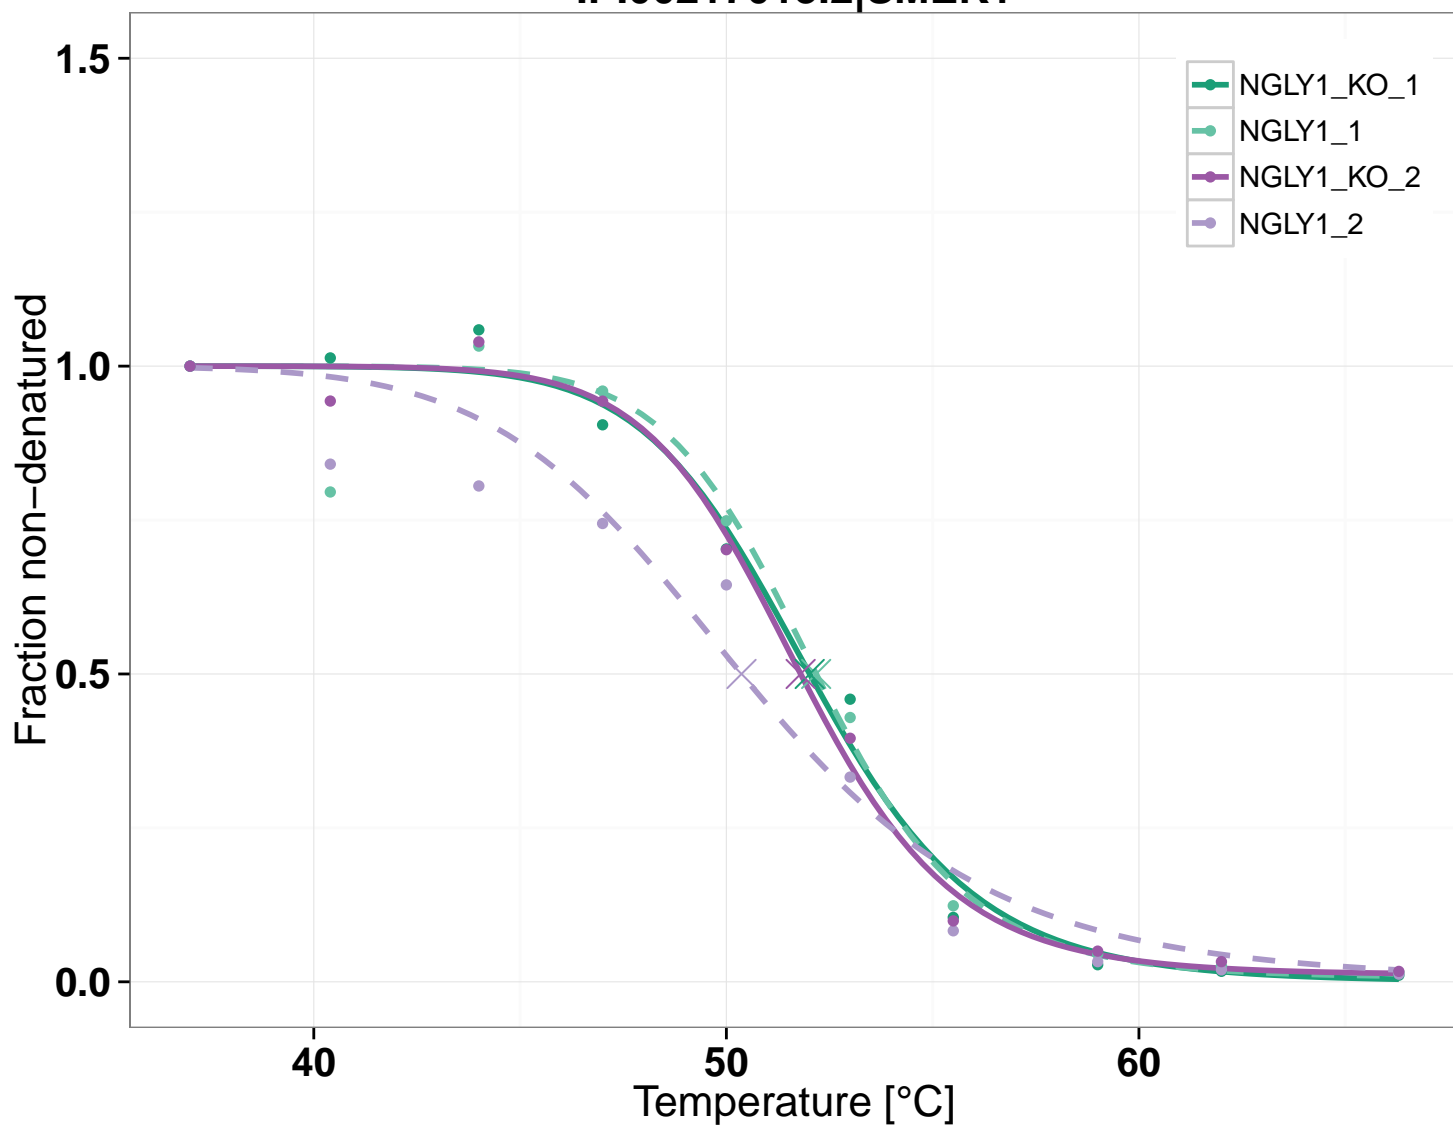

|            | meltPoint | slope  | plateau | R2   |
|------------|-----------|--------|---------|------|
| NGLY1_KO_1 | 52.02     | -0.12  | 0       | 0.99 |
| NGLY1_1    | 52.18     | -0.13  | 0.01    | 0.97 |
| NGLY1_KO_2 | 51.8      | -0.13  | 0.01    | 0.99 |
| NGLY1_2    | 50.37     | -0.082 | 0       | 0.96 |

Supplement: Supplementary file 2234 [file 1]

IPI00657706.1|MBOAT7

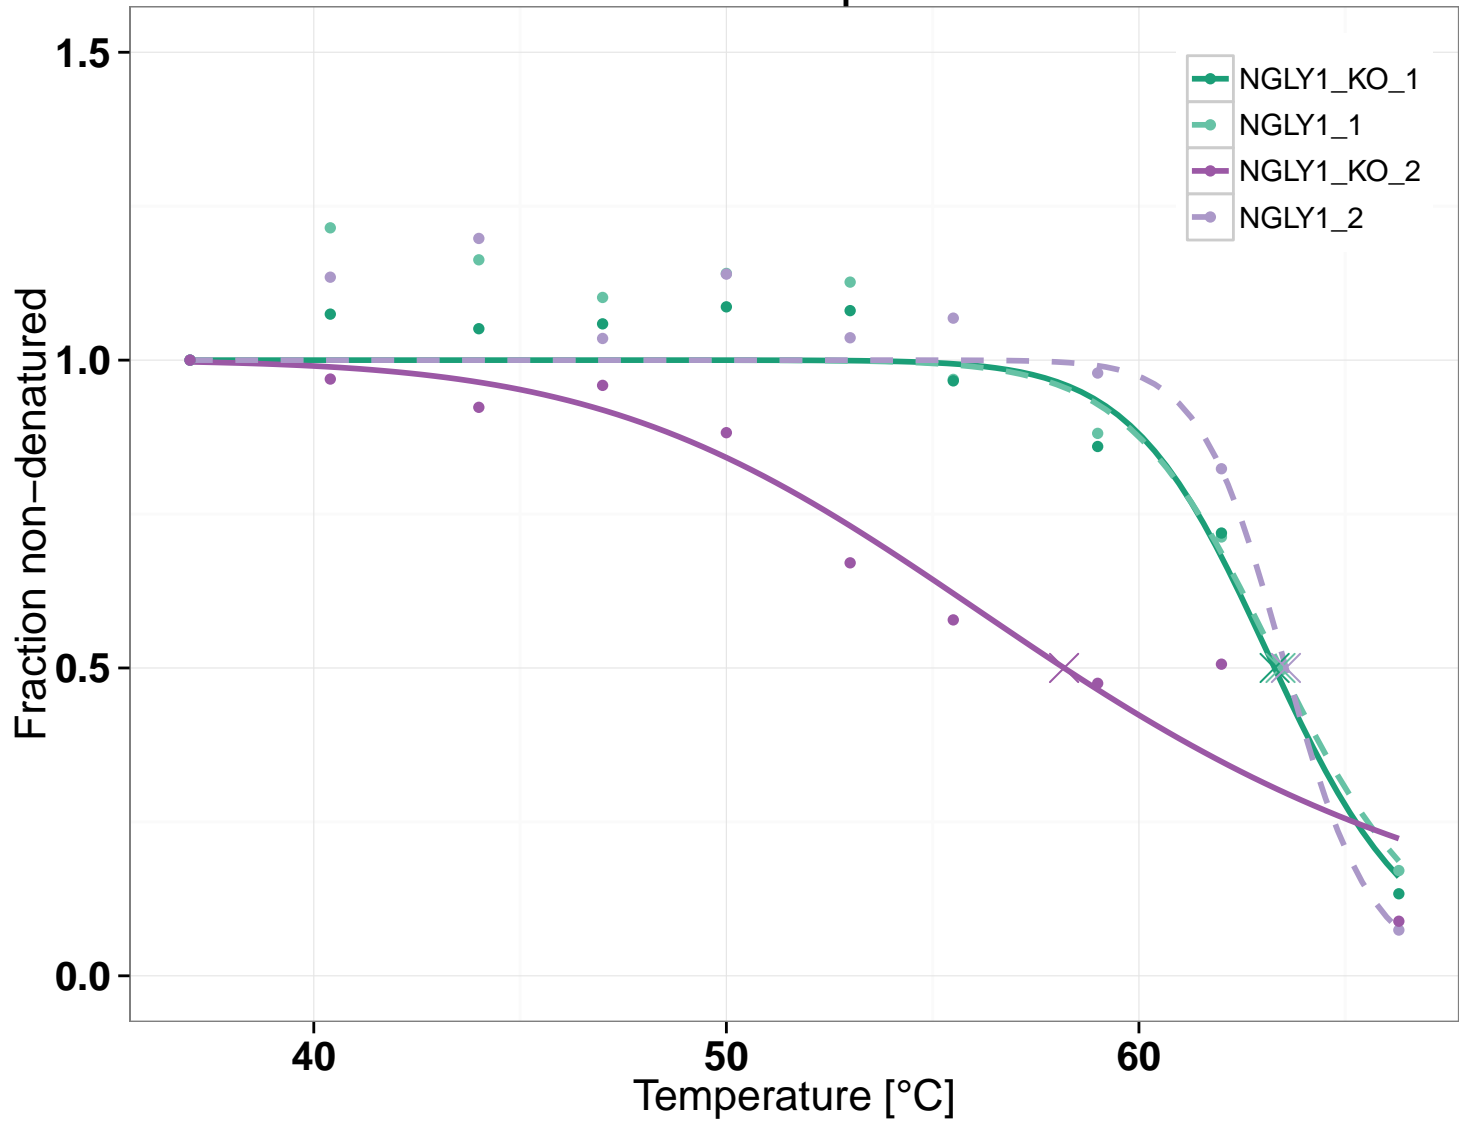

|            | meltPoint | slope  | plateau | R2   |
|------------|-----------|--------|---------|------|
| NGLY1_KO_1 | 63.29     | -0.14  | 0       | 0.96 |
| NGLY1_1    | 63.43     | -0.13  | 0       | 0.86 |
| NGLY1_KO_2 | 58.19     | -0.046 | 0       | 0.93 |
| NGLY1_2    | 63.56     | -0.24  | 0       | 0.91 |

Supplement: Supplementary file 2235 [file 1]

# IPI00031526.3|C19ORF43

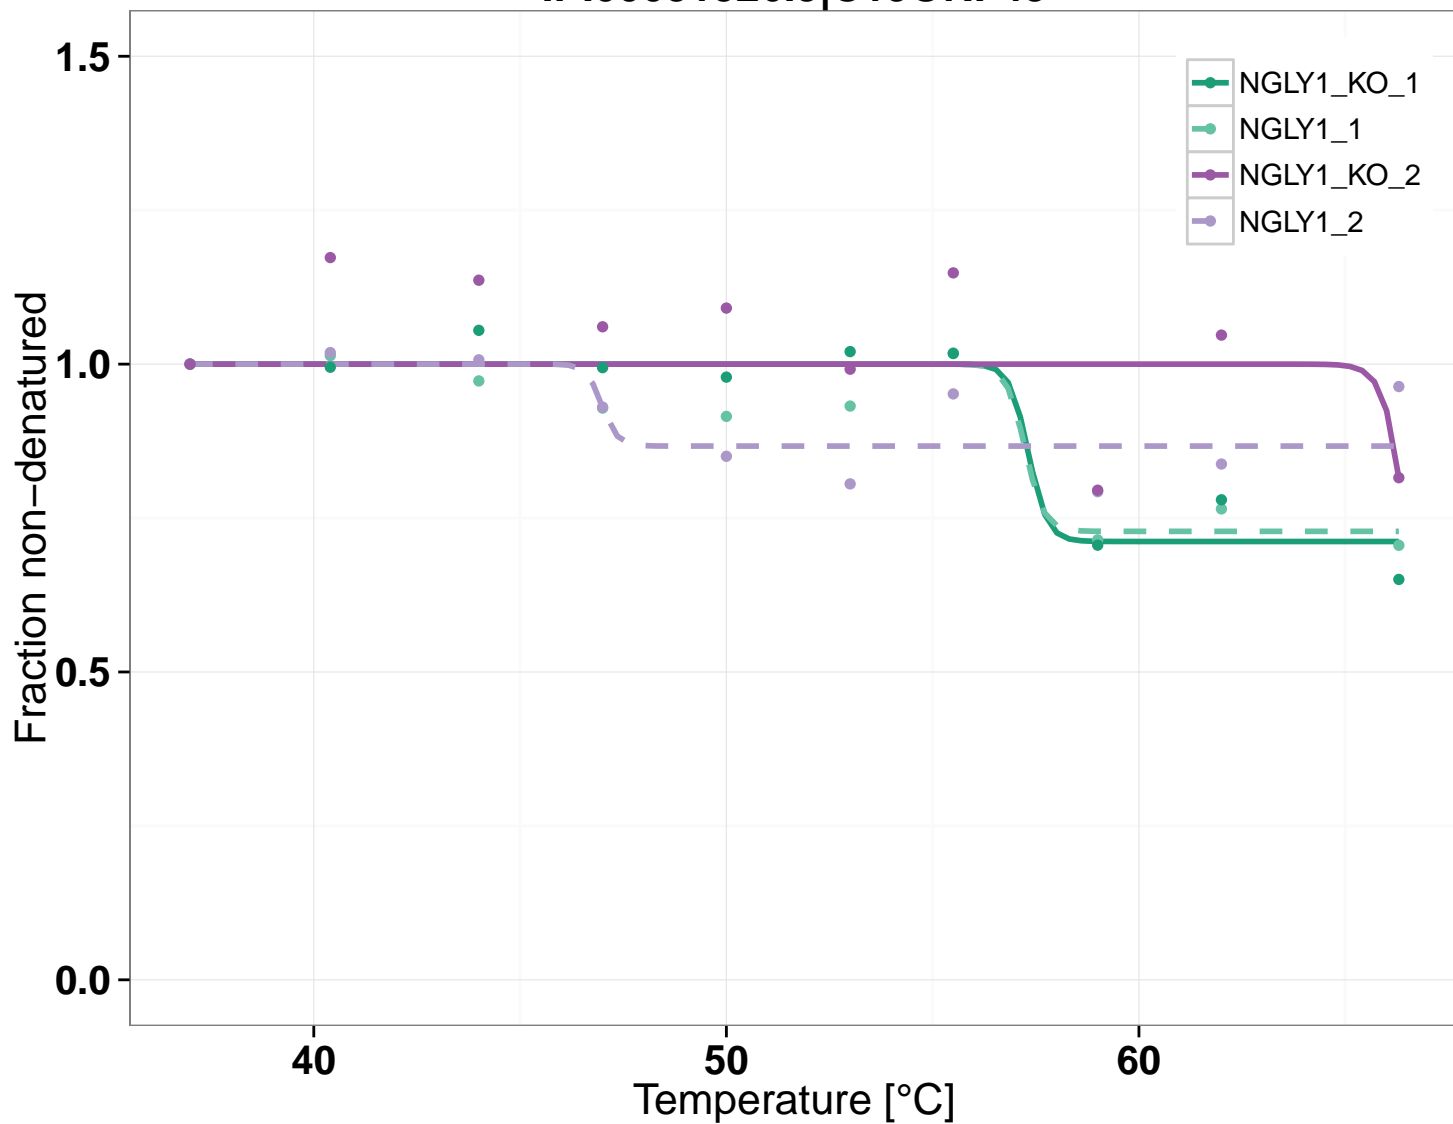

|            | meltPoint | slope | plateau | R2   |
|------------|-----------|-------|---------|------|
| NGLY1_KO_1 | —         | −0.31 | 0.71    | 0.94 |
| NGLY1_1    | —         | −0.3  | 0.73    | 0.85 |
| NGLY1_KO_2 | —         | —     | 0       | 0.18 |
| NGLY1_2    | —         | −0.18 | 0.87    | 0.6  |

Supplement: Supplementary file 2236 [file 1]

# IPI00010544.3|TJAP1

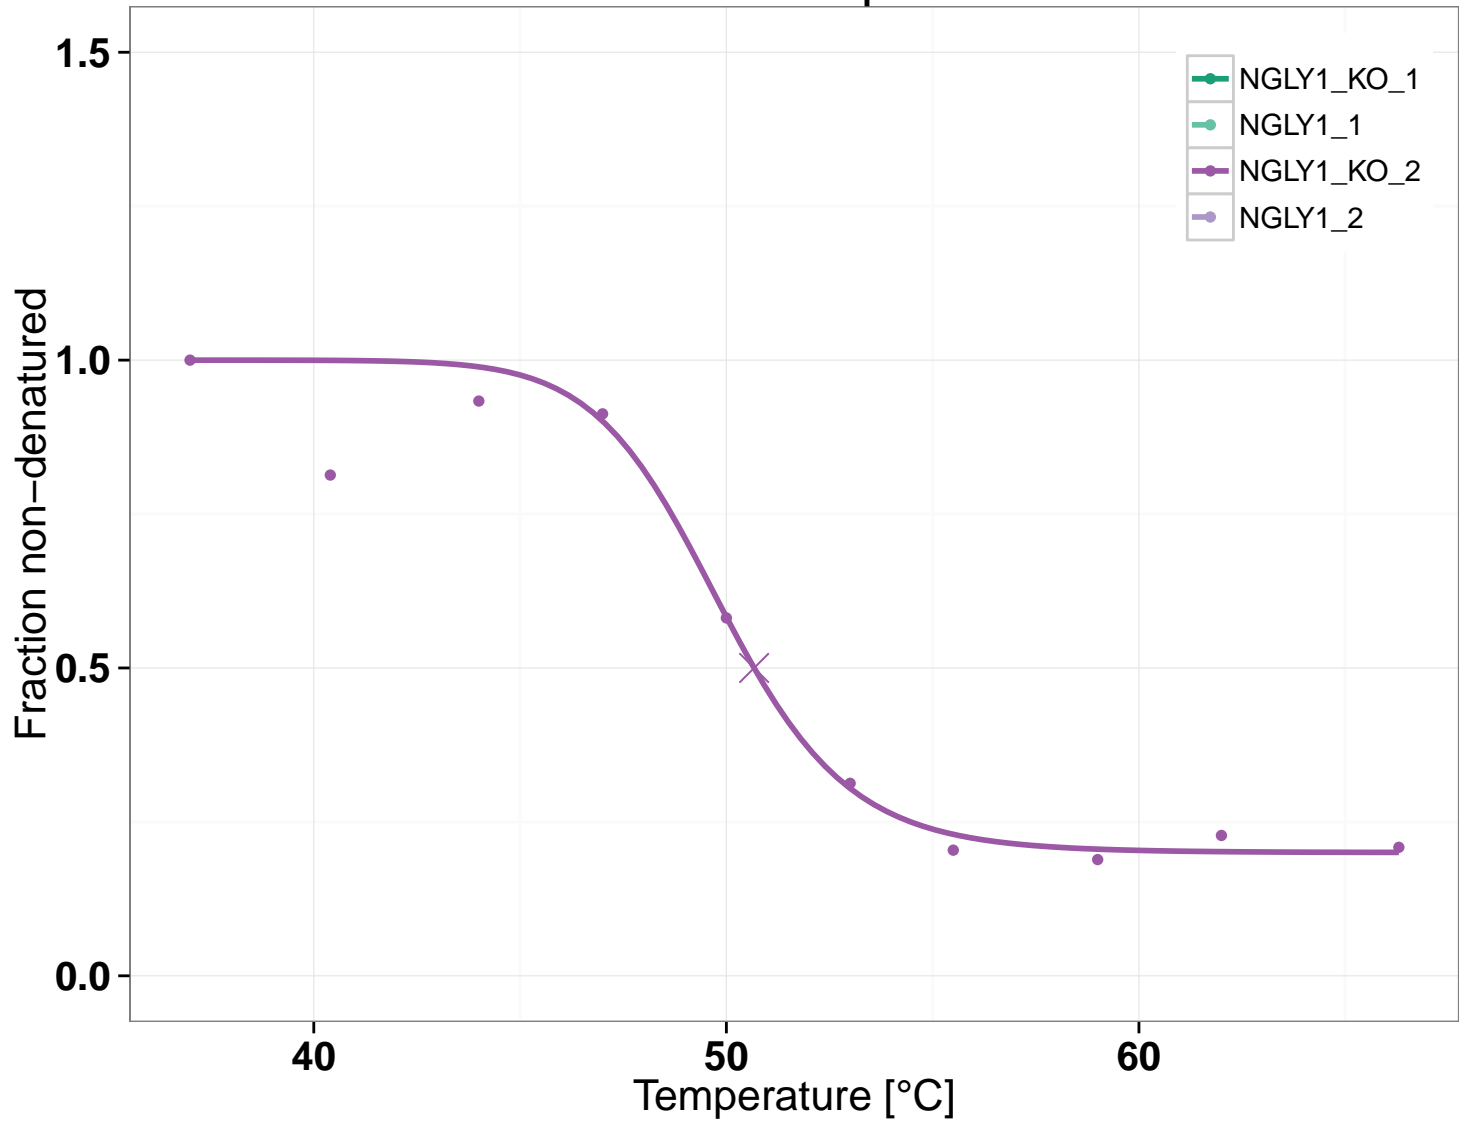

|            | meltPoint | slope | plateau | R2   |
|------------|-----------|-------|---------|------|
| NGLY1_KO_1 | -         | -     | -       | -    |
| NGLY1_1    | -         | -     | -       | -    |
| NGLY1_KO_2 | 50.67     | -0.13 | 0.2     | 0.96 |
| NGLY1_2    | -         | -     | -       | -    |

Supplement: Supplementary file 2237 [file 1]

IPI00219005.3|FKBP4

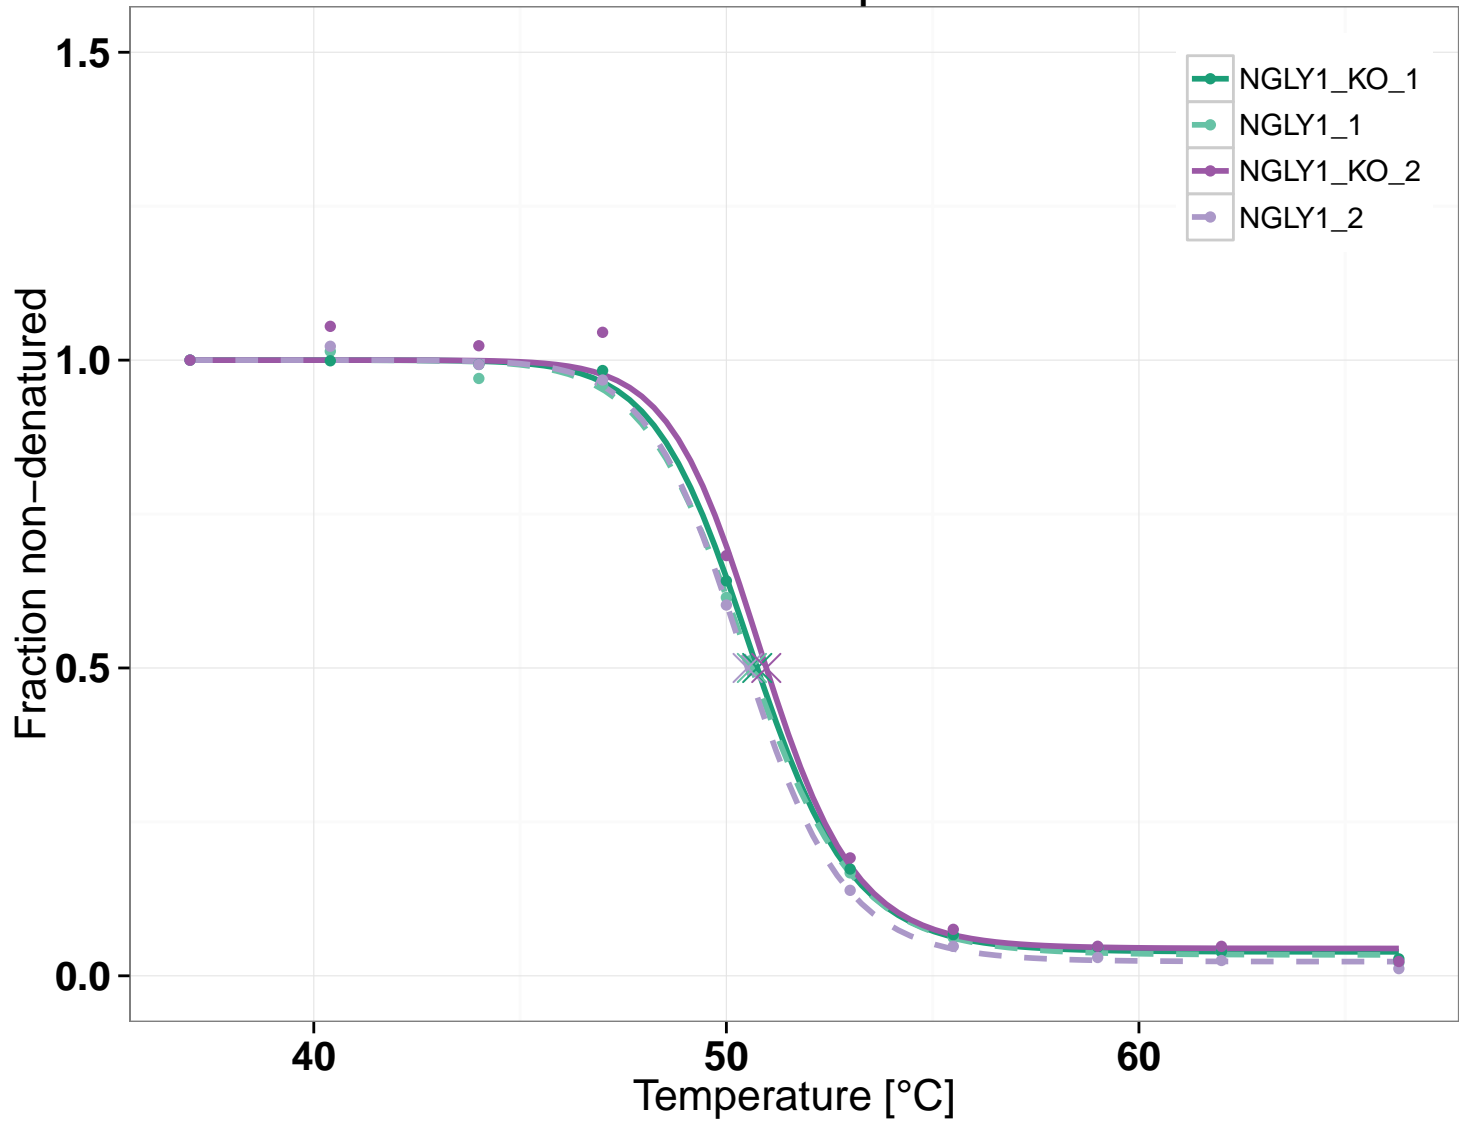

|            | meltPoint | slope | plateau | R2 |
|------------|-----------|-------|---------|----|
| NGLY1_KO_1 | 50.75     | -0.2  | 0.04    | 1  |
| NGLY1_1    | 50.62     | -0.19 | 0.03    | 1  |
| NGLY1_KO_2 | 50.97     | -0.21 | 0.04    | 1  |
| NGLY1_2    | 50.52     | -0.21 | 0.02    | 1  |

Supplement: Supplementary file 2238 [file 1]

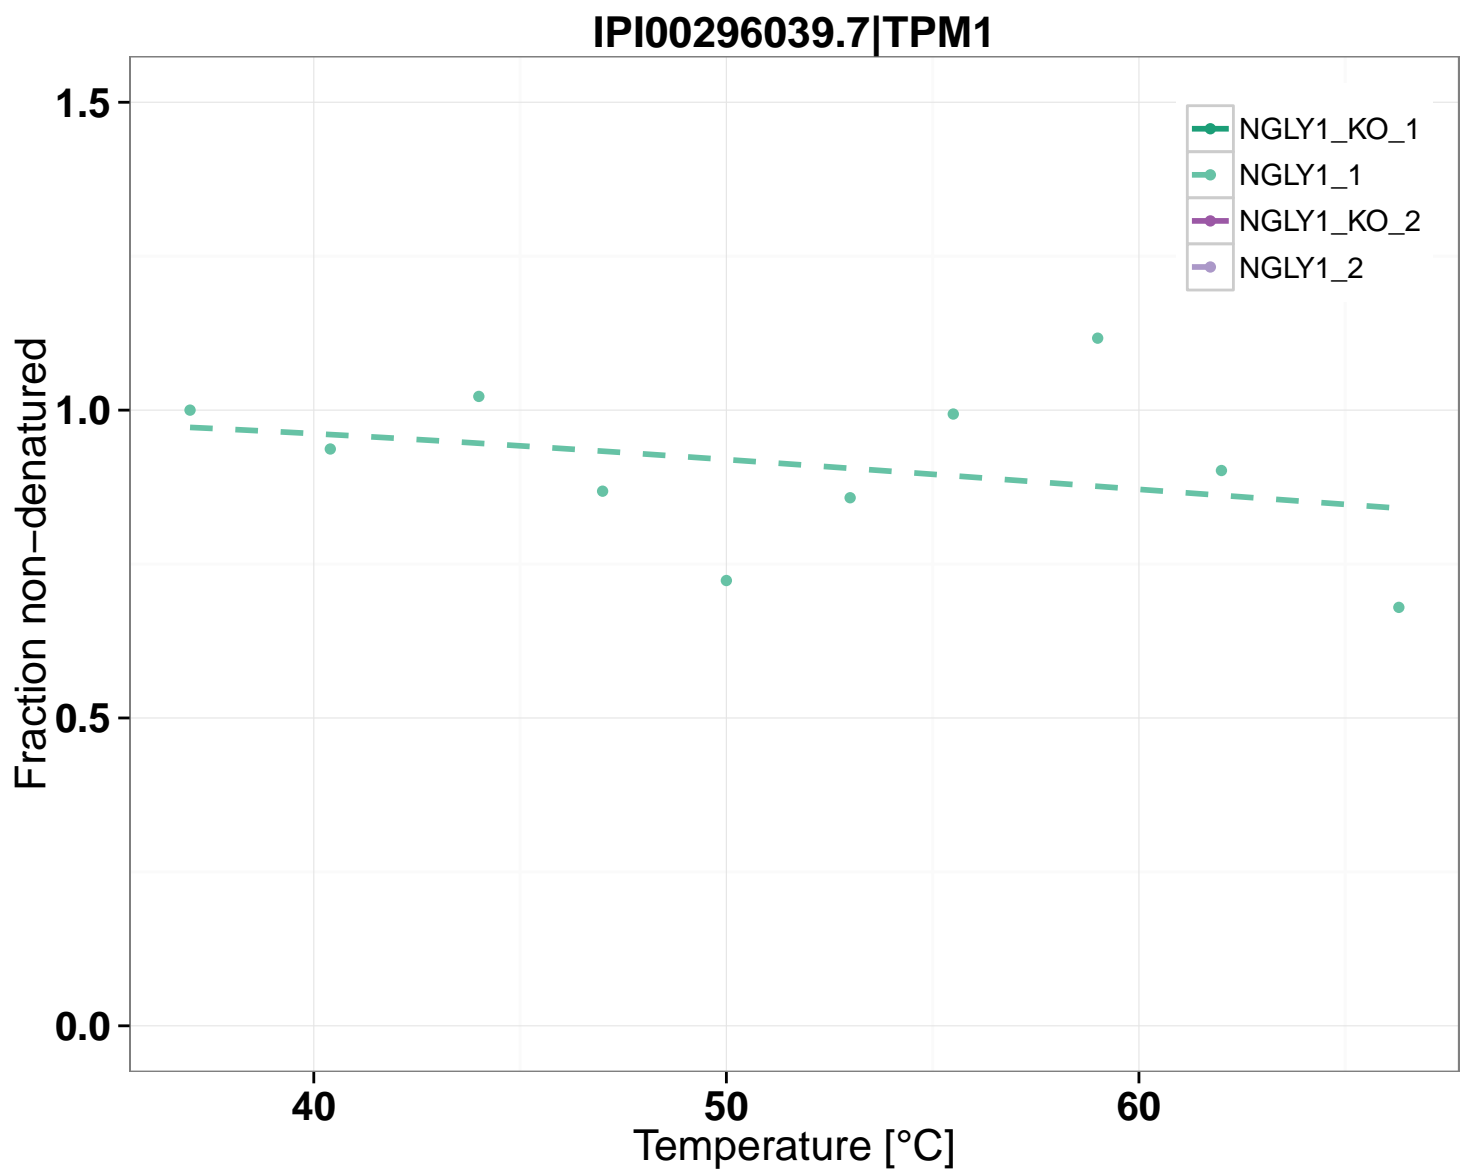

|            | meltPoint | slope   | plateau | R2  |
|------------|-----------|---------|---------|-----|
| NGLY1_KO_1 | —         | —       | —       | —   |
| NGLY1_1    | —         | −0.0049 | 0       | 0.1 |
| NGLY1_KO_2 | —         | —       | —       | —   |
| NGLY1_2    | —         | —       | —       | —   |

Supplement: Supplementary file 2239 [file 1]

IPI00012622.6|ARHGAP20

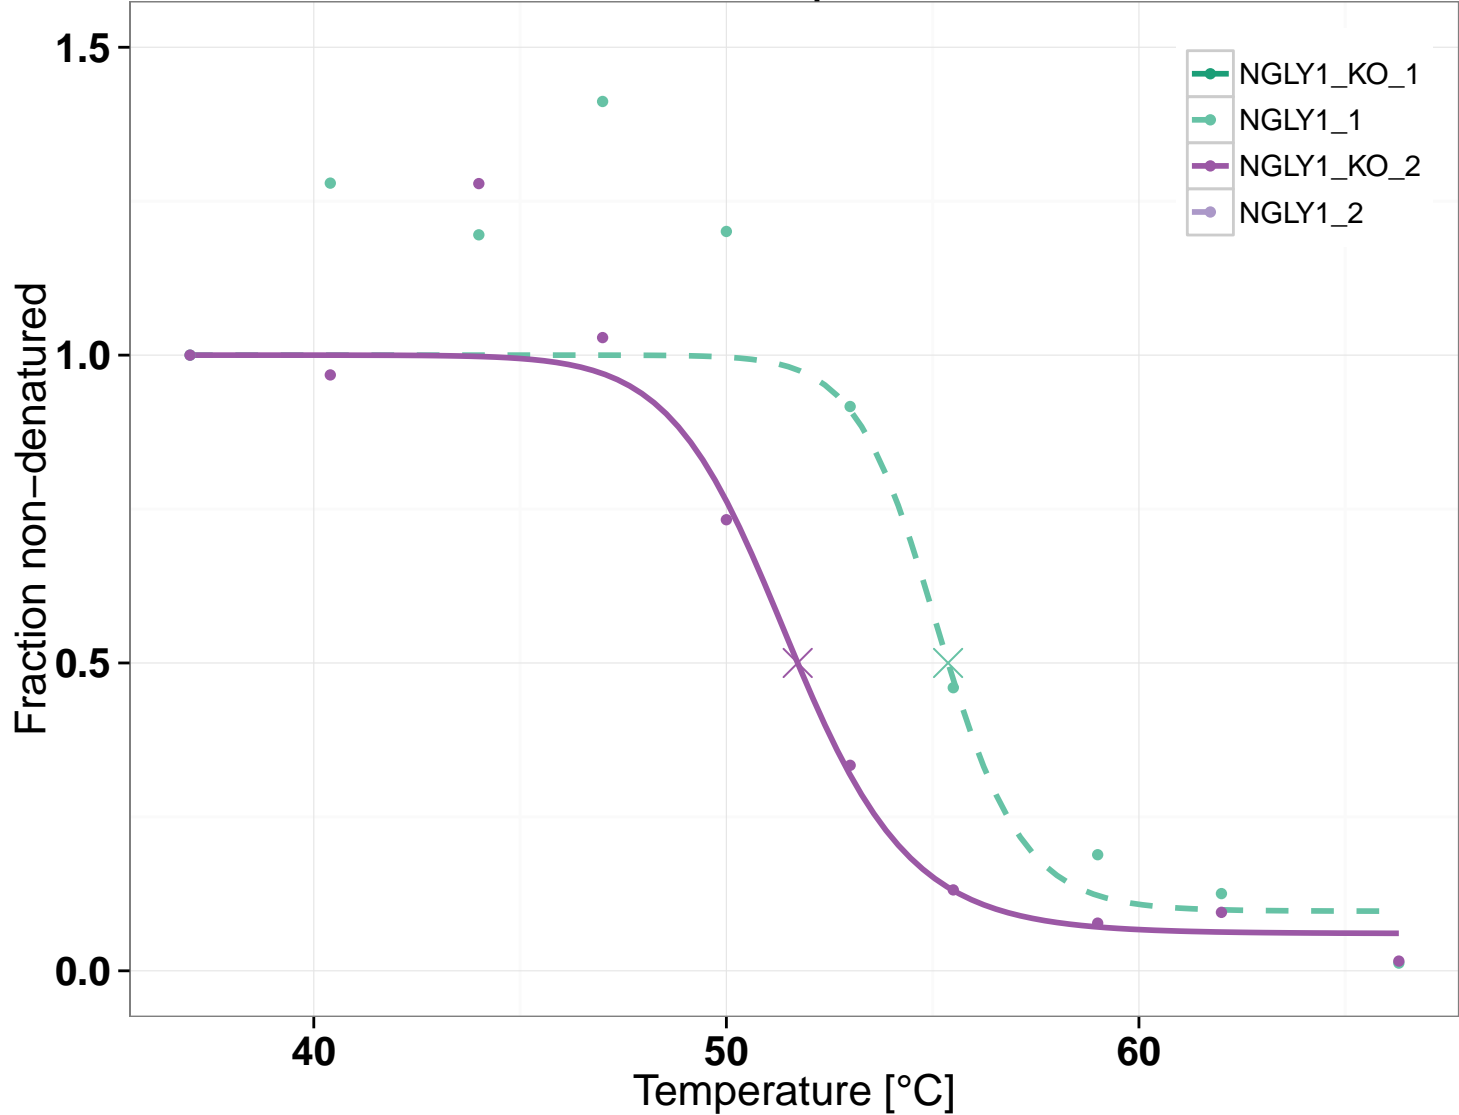

|            | meltPoint | slope | plateau | R2   |
|------------|-----------|-------|---------|------|
| NGLY1_KO_1 | -         | -     | -       | -    |
| NGLY1_1    | 55.37     | -0.22 | 0.1     | 0.87 |
| NGLY1_KO_2 | 51.73     | -0.16 | 0.06    | 0.96 |
| NGLY1_2    | -         | -     | -       | -    |

Supplement: Supplementary file 2240 [file 1]

# IPI00298618.1|EIF1AD

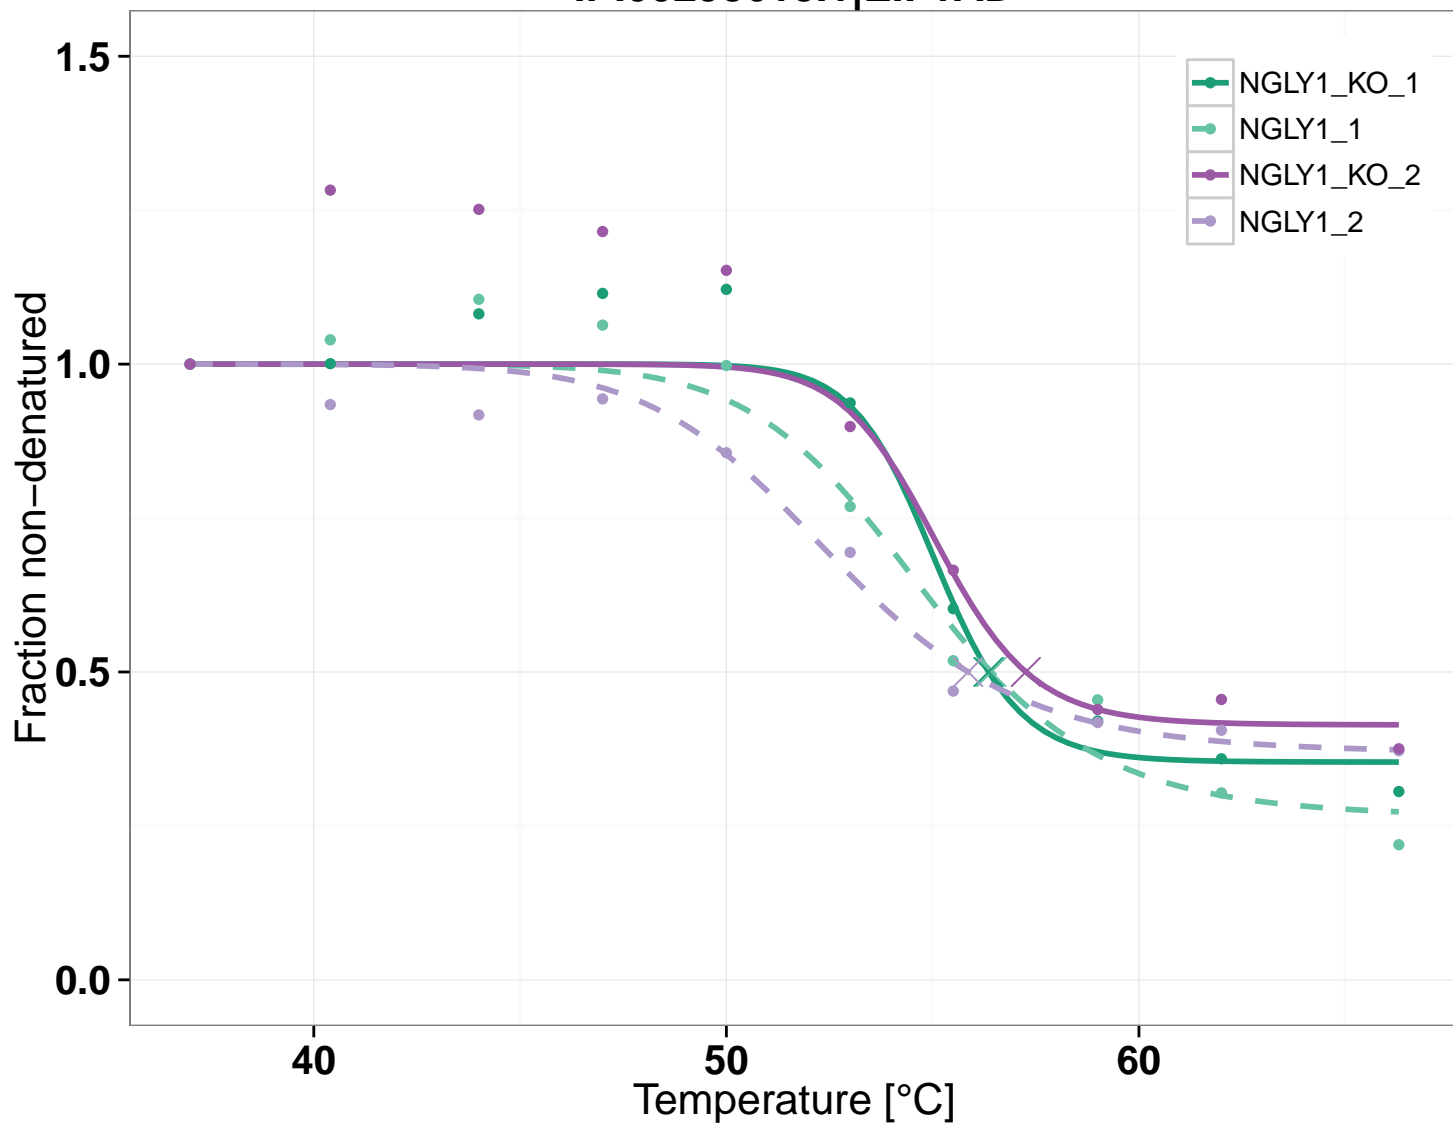

|            | meltPoint | slope  | plateau | R2   |
|------------|-----------|--------|---------|------|
| NGLY1_KO_1 | 56.35     | -0.16  | 0.35    | 0.96 |
| NGLY1_1    | 56.42     | -0.087 | 0.26    | 0.97 |
| NGLY1_KO_2 | 57.26     | -0.13  | 0.41    | 0.81 |
| NGLY1_2    | 55.86     | -0.069 | 0.37    | 0.98 |

Supplement: Supplementary file 2241 [file 1]

# IPI00871286.1|MTF2

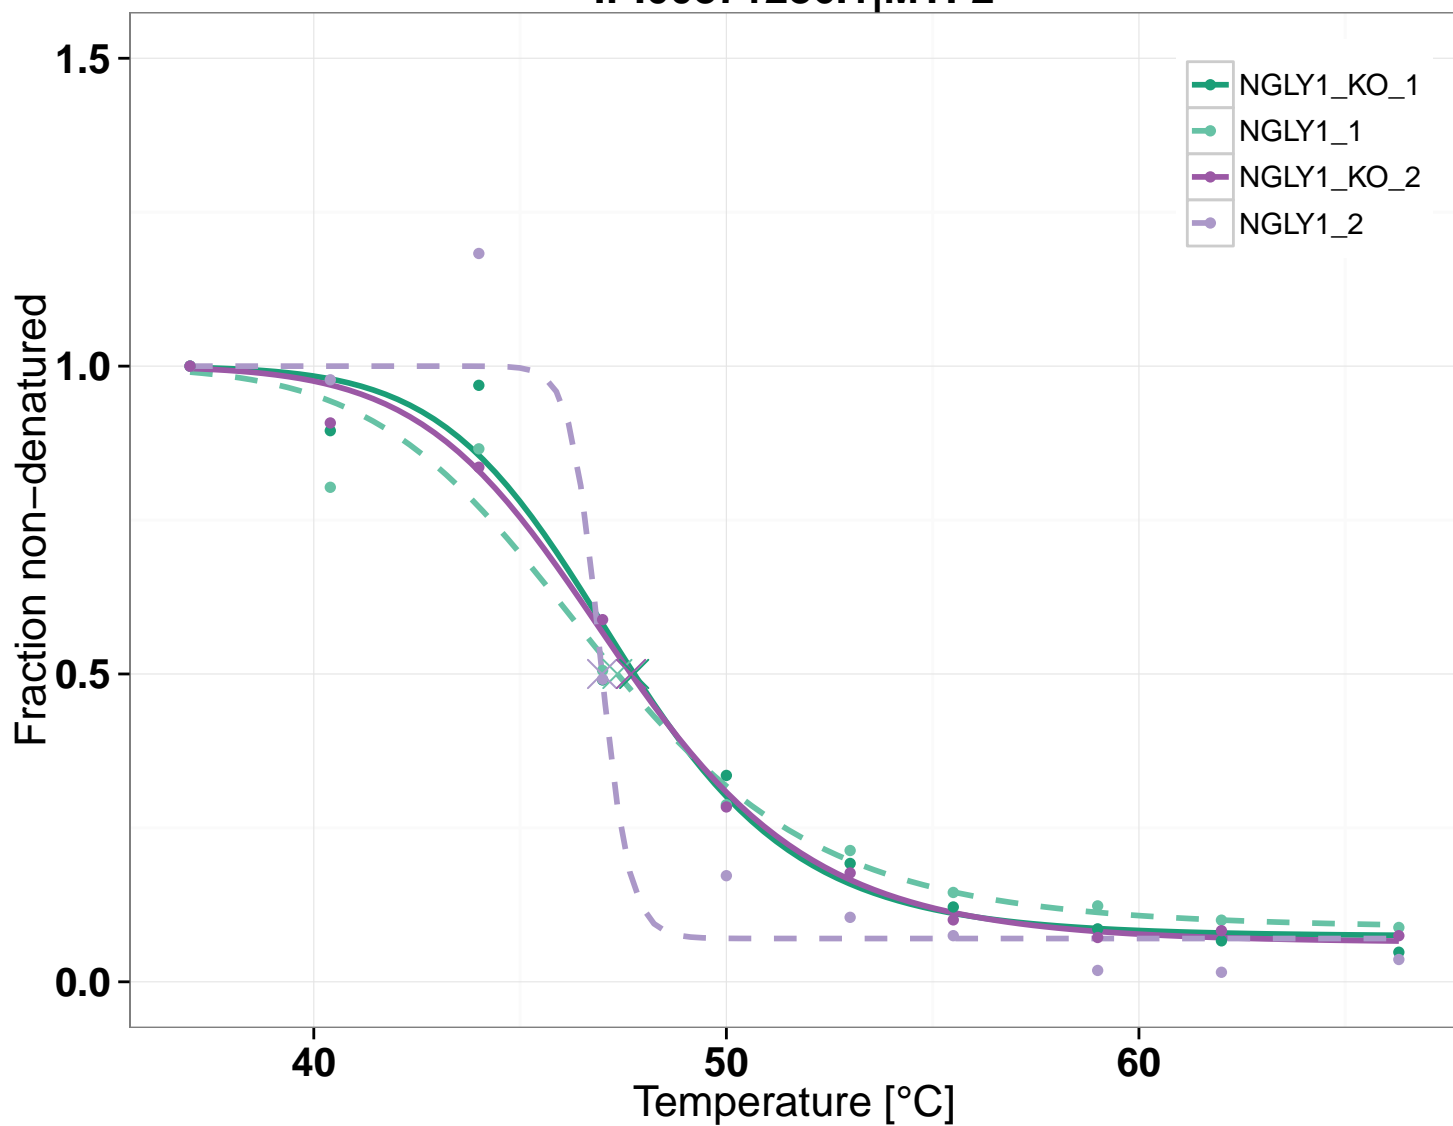

|            | meltPoint | slope  | plateau | R2   |
|------------|-----------|--------|---------|------|
| NGLY1_KO_1 | 47.77     | -0.11  | 0.07    | 0.98 |
| NGLY1_1    | 47.36     | -0.084 | 0.09    | 0.97 |
| NGLY1_KO_2 | 47.69     | -0.098 | 0.06    | 1    |
| NGLY1_2    | 46.99     | -0.66  | 0.07    | 0.97 |

Supplement: Supplementary file 2242 [file 1]

IPI00410143.1|CENPM

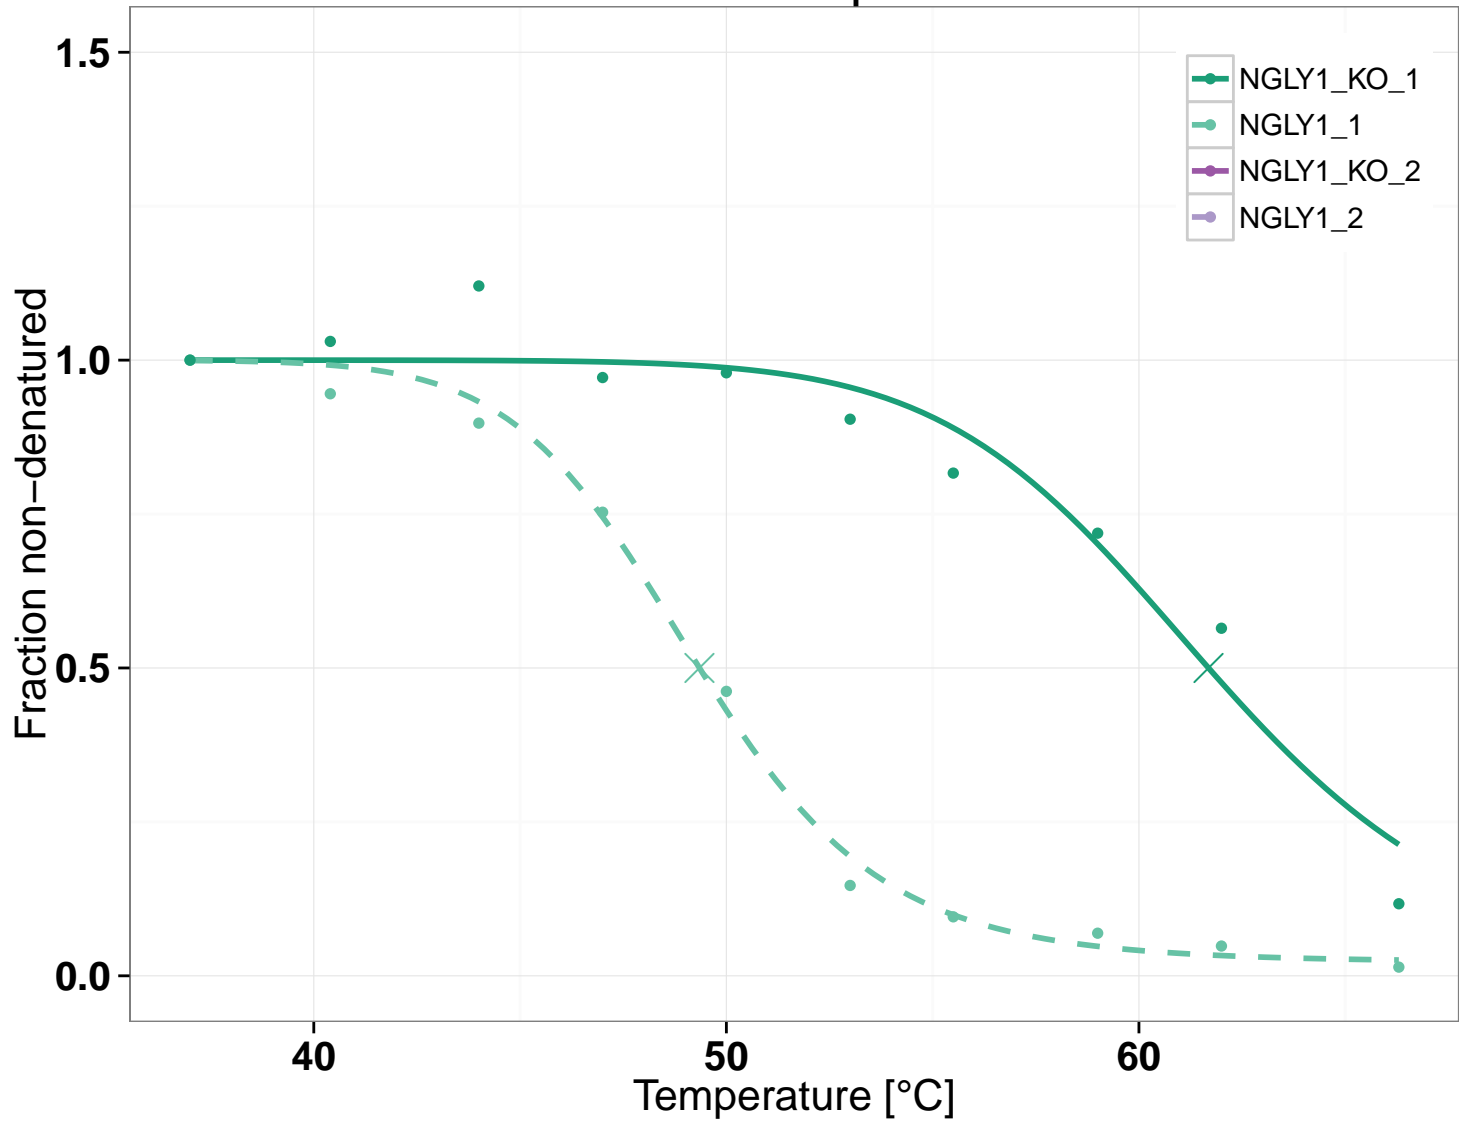

|            | meltPoint | slope  | plateau | R2   |
|------------|-----------|--------|---------|------|
| NGLY1_KO_1 | 61.69     | -0.077 | 0       | 0.95 |
| NGLY1_1    | 49.35     | -0.11  | 0.02    | 1    |
| NGLY1_KO_2 | -         | -      | -       | -    |
| NGLY1_2    | -         | -      | -       | -    |

Supplement: Supplementary file 2243 [file 1]

# IPI00006181.1|EIF3D

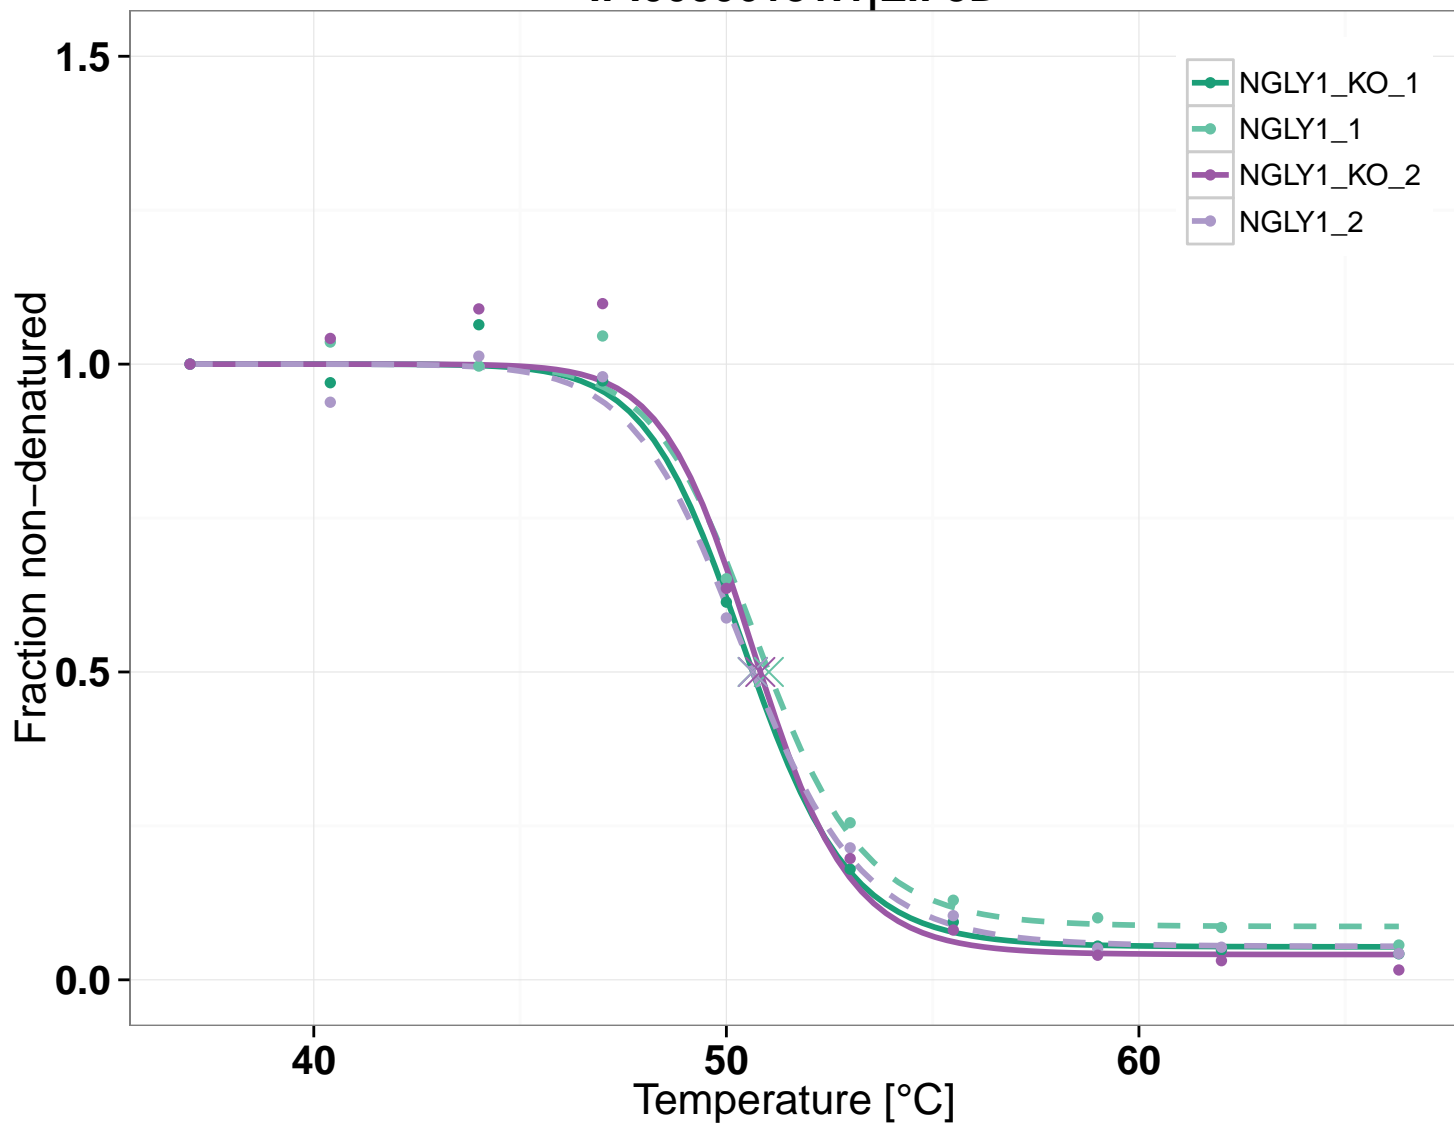

|            | meltPoint | slope | plateau | R2   |
|------------|-----------|-------|---------|------|
| NGLY1_KO_1 | 50.64     | -0.19 | 0.05    | 1    |
| NGLY1_1    | 51.03     | -0.18 | 0.09    | 0.99 |
| NGLY1_KO_2 | 50.82     | -0.21 | 0.04    | 0.99 |
| NGLY1_2    | 50.64     | -0.17 | 0.05    | 1    |

Supplement: Supplementary file 2244 [file 1]

IPI00003843.1|TJP2

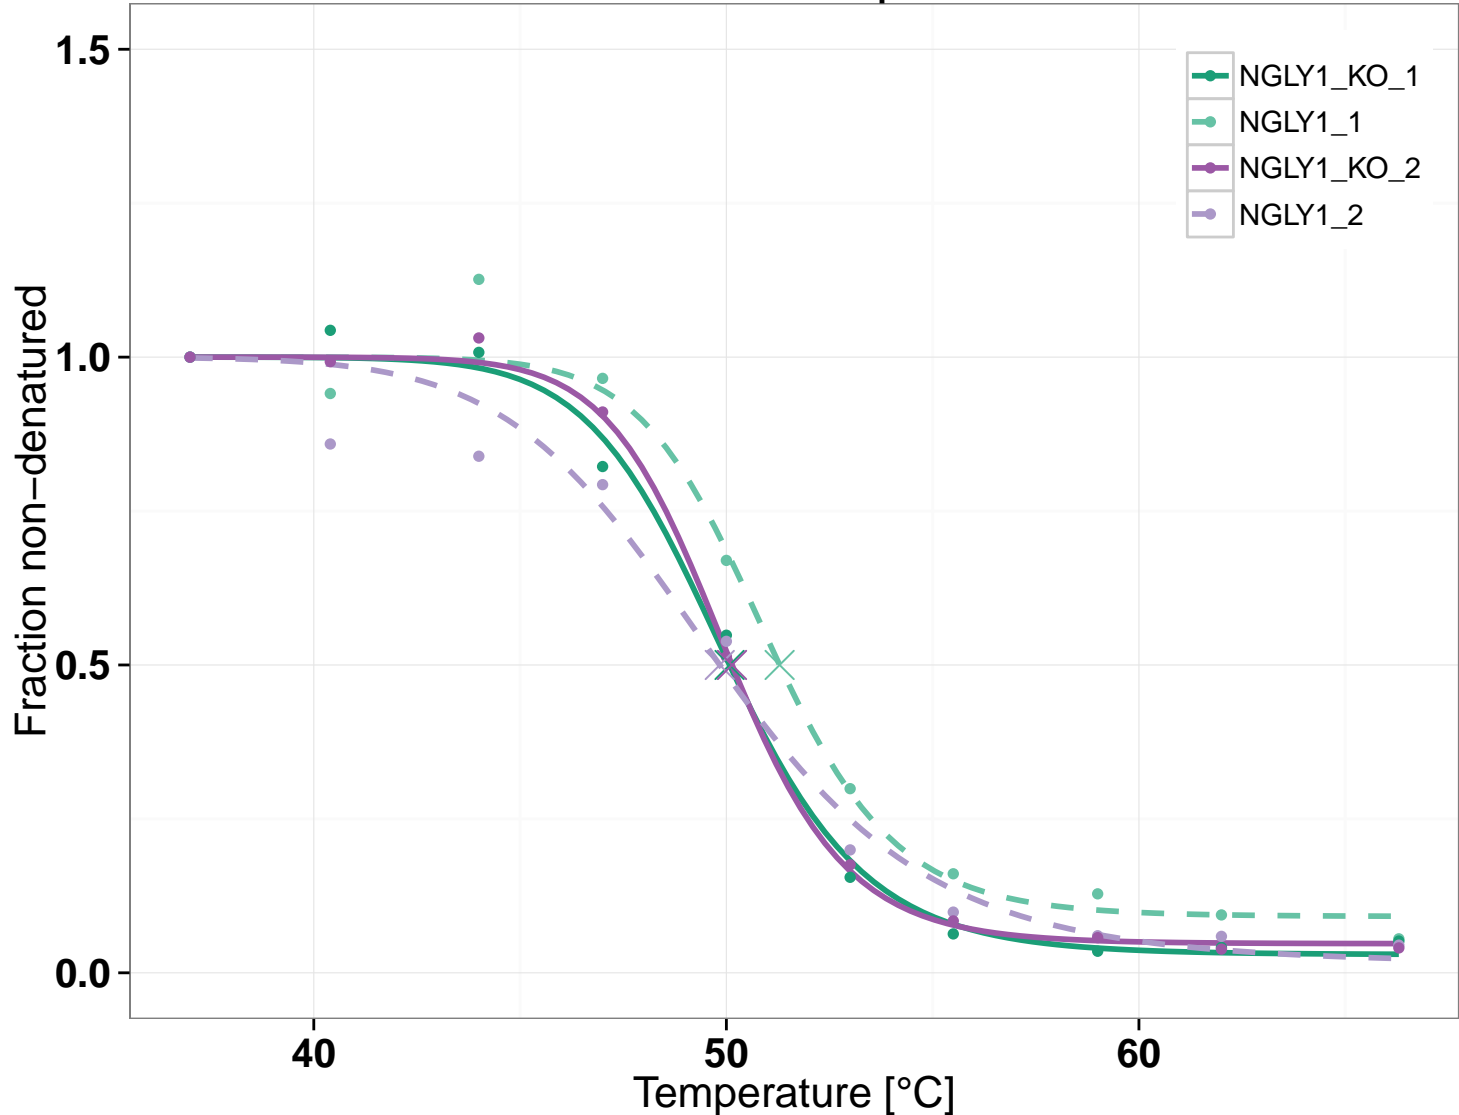

|            | meltPoint | slope  | plateau | R2   |
|------------|-----------|--------|---------|------|
| NGLY1_KO_1 | 50.08     | -0.14  | 0.03    | 1    |
| NGLY1_1    | 51.29     | -0.15  | 0.09    | 0.99 |
| NGLY1_KO_2 | 50.14     | -0.16  | 0.05    | 1    |
| NGLY1_2    | 49.84     | -0.095 | 0.01    | 0.98 |

Supplement: Supplementary file 2245 [file 1]

IPI00220834.8|XRCC5

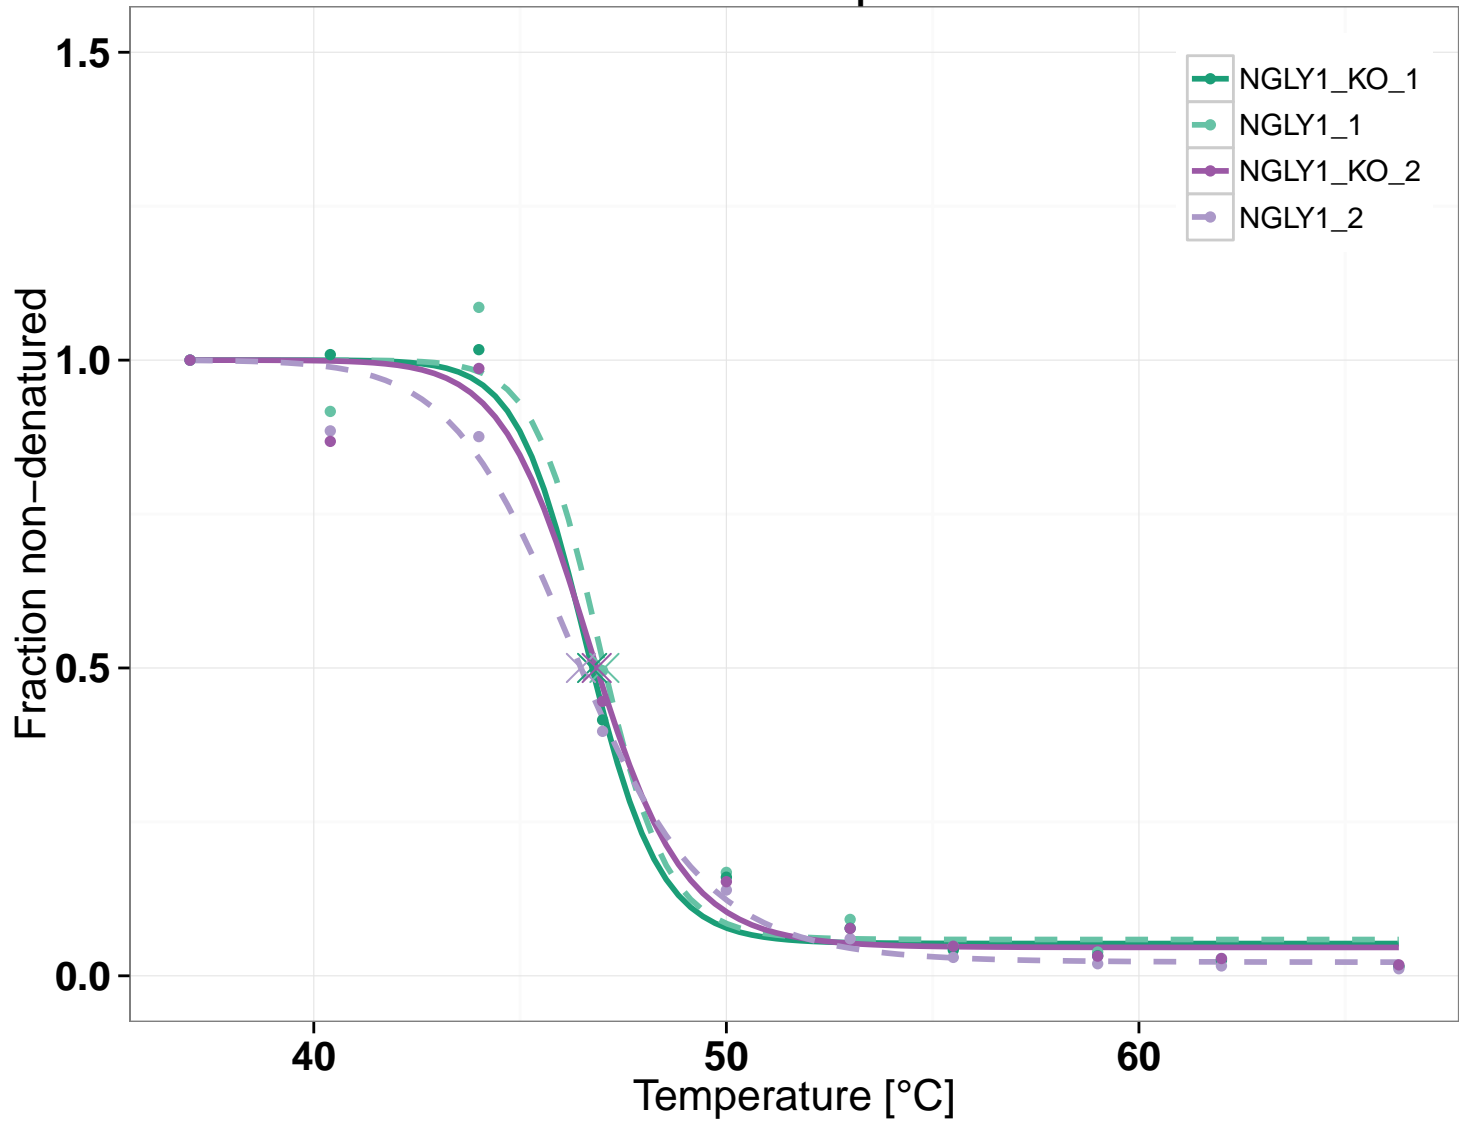

|            | meltPoint | slope | plateau | R2   |
|------------|-----------|-------|---------|------|
| NGLY1_KO_1 | 46.75     | -0.27 | 0.05    | 0.99 |
| NGLY1_1    | 47.04     | -0.29 | 0.06    | 0.98 |
| NGLY1_KO_2 | 46.86     | -0.22 | 0.05    | 0.98 |
| NGLY1_2    | 46.48     | -0.16 | 0.02    | 0.99 |

Supplement: Supplementary file 2246 [file 1]

IPI00305303.3|UFSP2

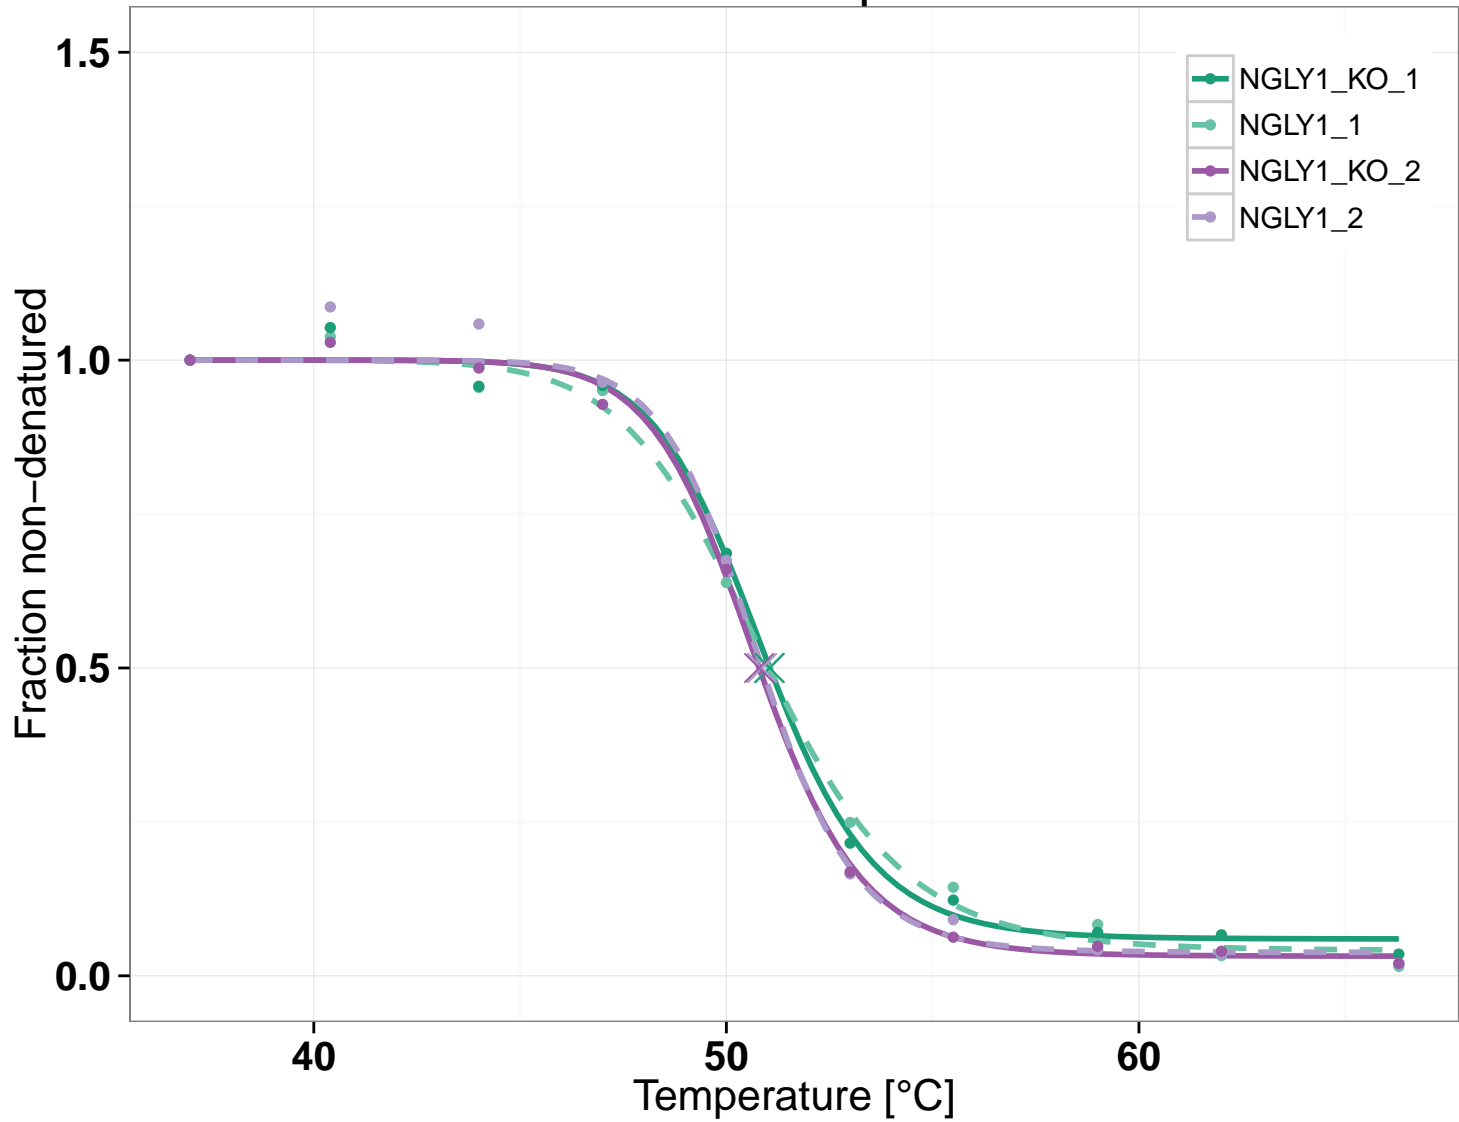

|            | meltPoint | slope | plateau | R2   |
|------------|-----------|-------|---------|------|
| NGLY1_KO_1 | 51.05     | -0.18 | 0.06    | 1    |
| NGLY1_1    | 51.03     | -0.14 | 0.04    | 1    |
| NGLY1_KO_2 | 50.79     | -0.19 | 0.03    | 1    |
| NGLY1_2    | 50.87     | -0.2  | 0.04    | 0.99 |

Supplement: Supplementary file 2247 [file 1]

# IPI00908307.1|ARRB2

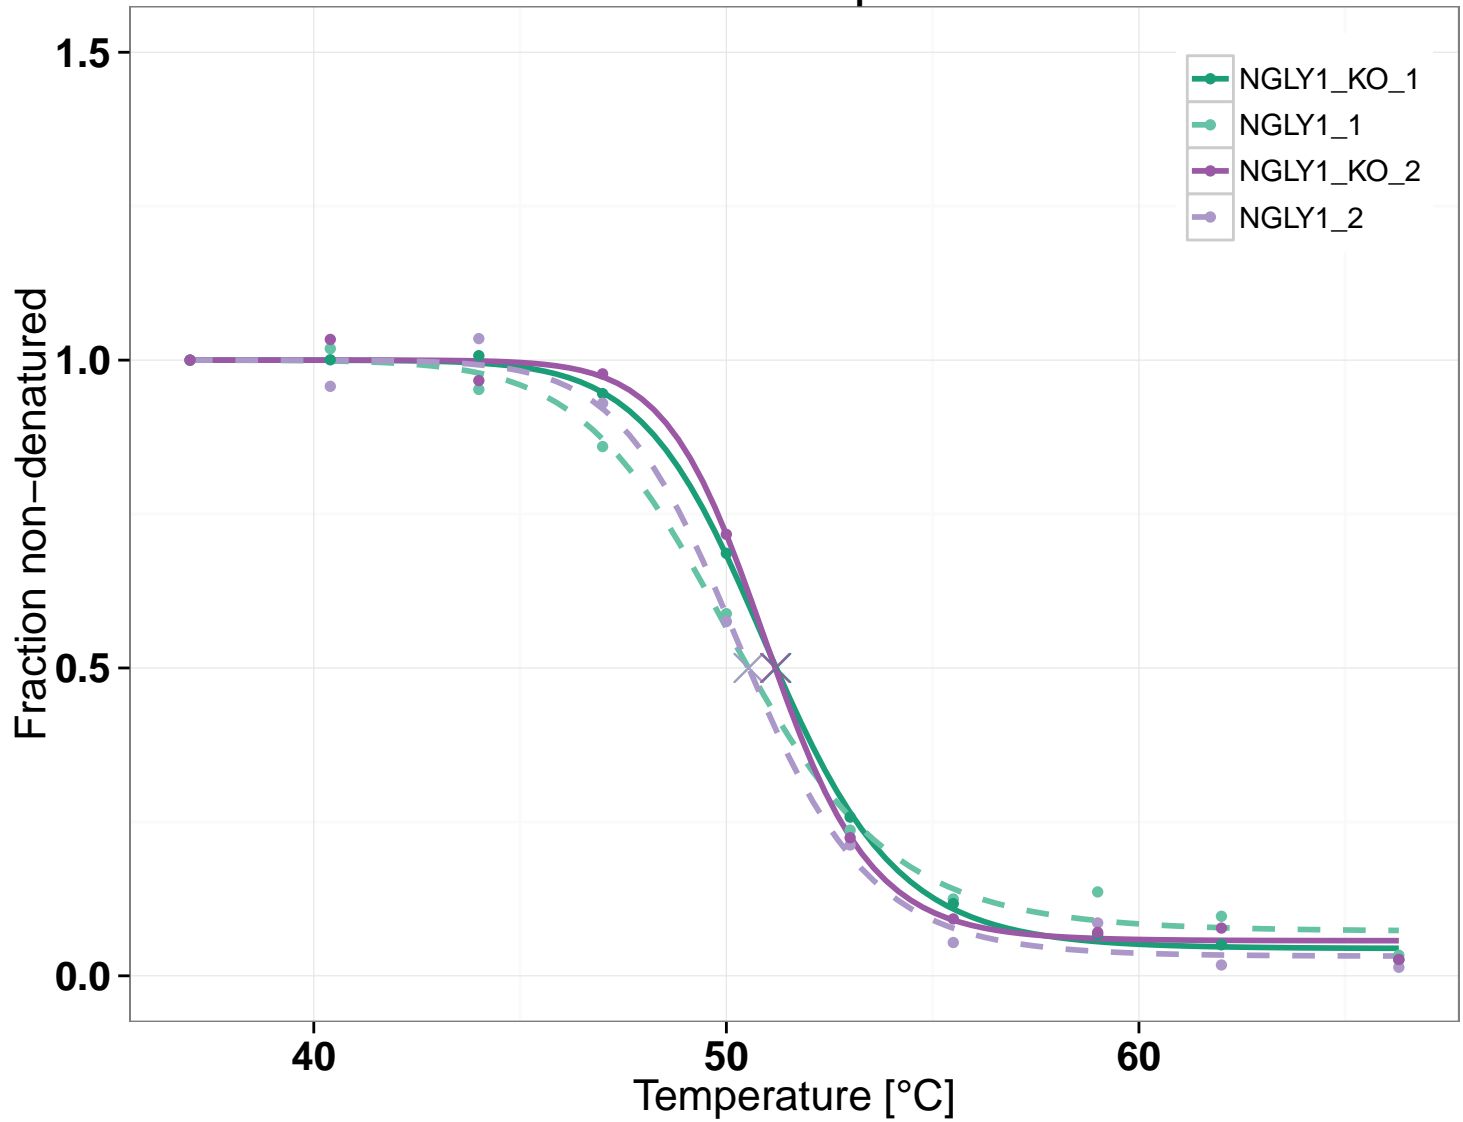

|            | meltPoint | slope | plateau | R2 |
|------------|-----------|-------|---------|----|
| NGLY1_KO_1 | 51.21     | -0.15 | 0.04    | 1  |
| NGLY1_1    | 50.53     | -0.12 | 0.07    | 1  |
| NGLY1_KO_2 | 51.18     | -0.19 | 0.06    | 1  |
| NGLY1_2    | 50.54     | -0.16 | 0.03    | 1  |

Supplement: Supplementary file 2248 [file 1]

# IPI00452669.2|IP6K1

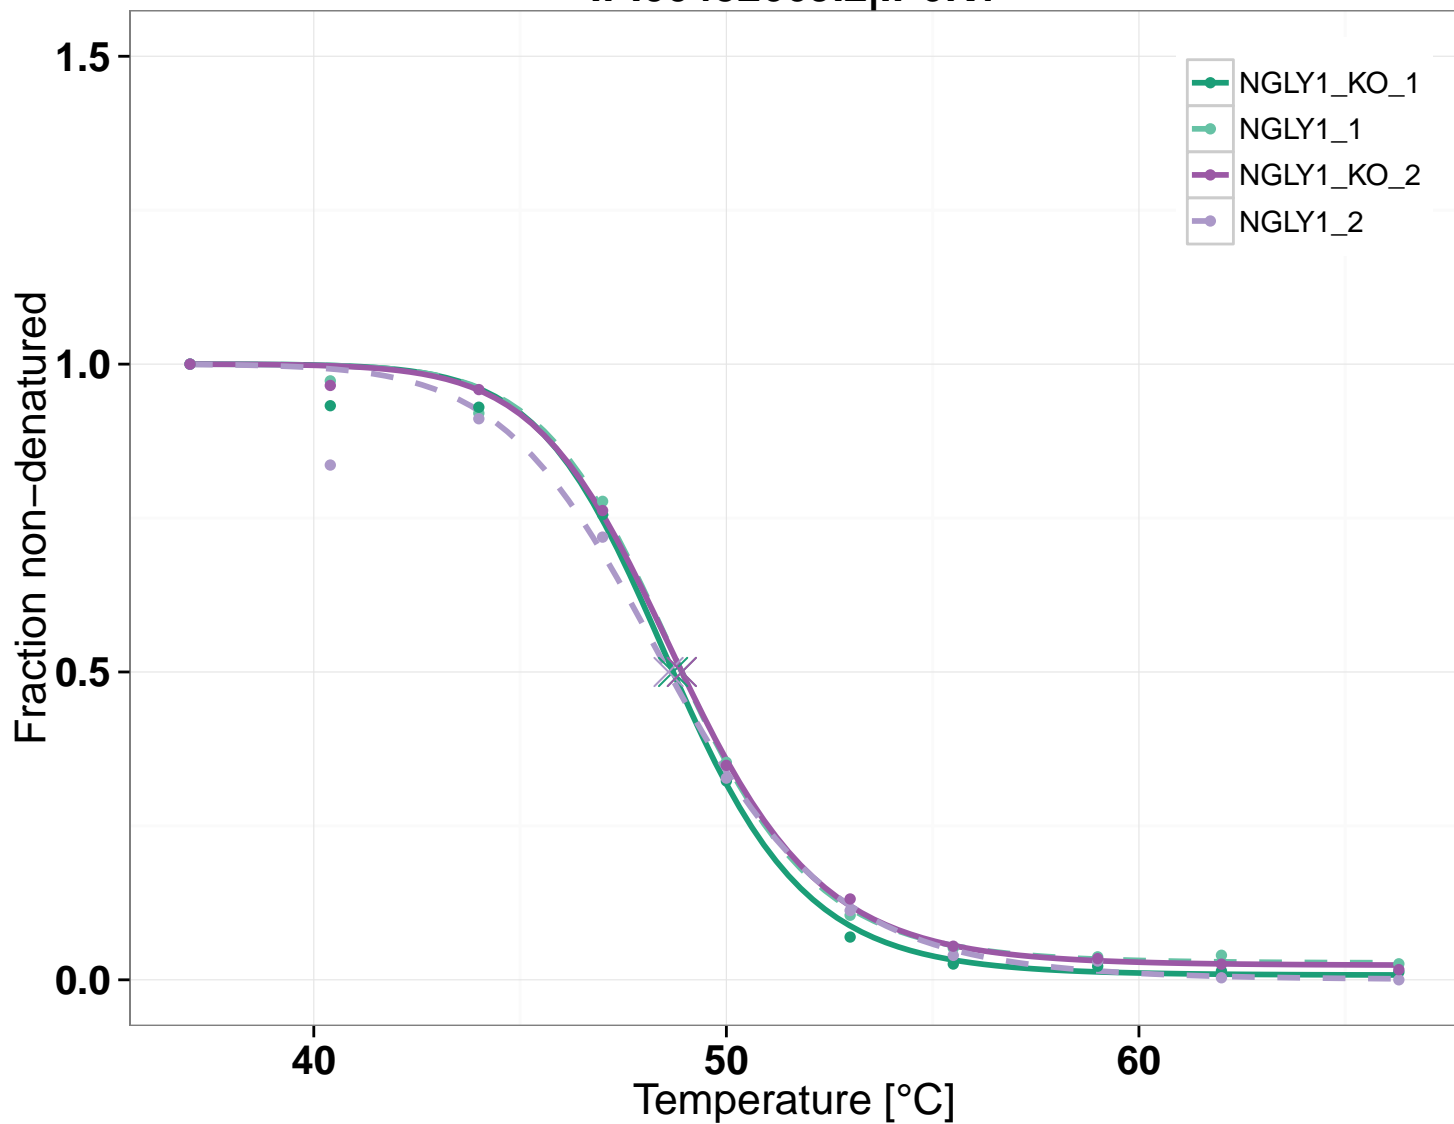

|            | meltPoint | slope | plateau | R2   |
|------------|-----------|-------|---------|------|
| NGLY1_KO_1 | 48.71     | -0.15 | 0.01    | 1    |
| NGLY1_1    | 48.92     | -0.15 | 0.03    | 1    |
| NGLY1_KO_2 | 48.92     | -0.14 | 0.02    | 1    |
| NGLY1_2    | 48.6      | -0.12 | 0       | 0.98 |

Supplement: Supplementary file 2249 [file 1]

IPI00026182.5|CAPZA2

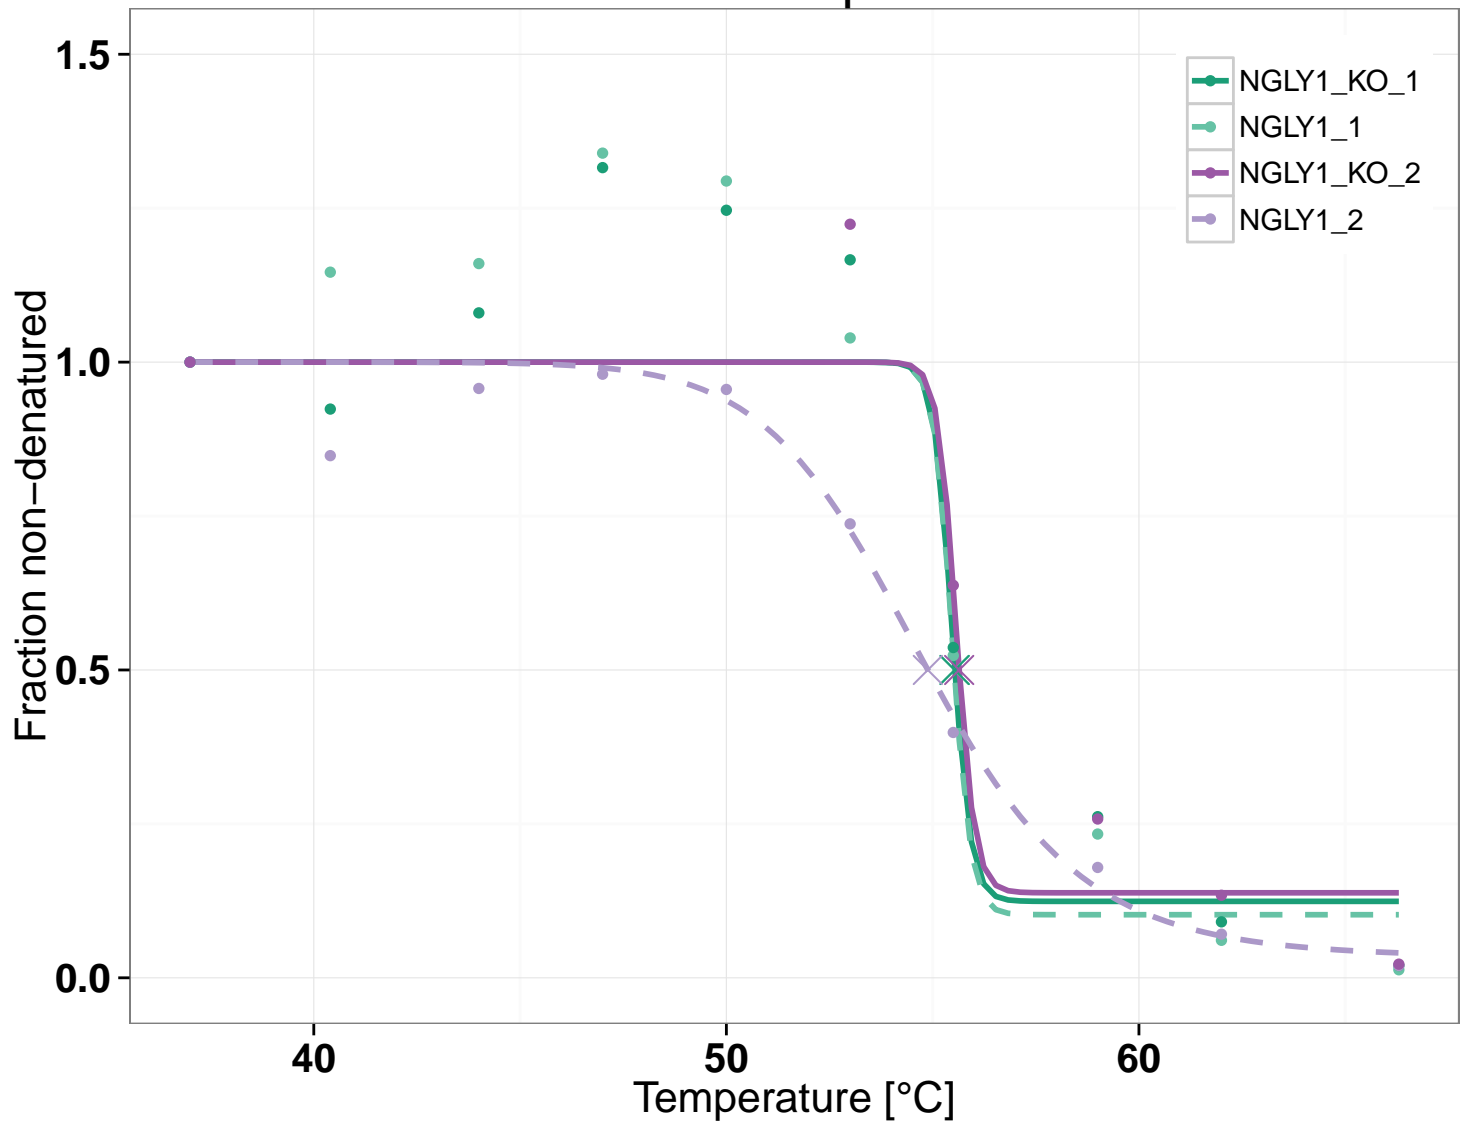

|            | meltPoint | slope | plateau | R2   |
|------------|-----------|-------|---------|------|
| NGLY1_KO_1 | 55.54     | -0.99 | 0.12    | 0.89 |
| NGLY1_1    | 55.52     | -1    | 0.1     | 0.89 |
| NGLY1_KO_2 | 55.64     | -0.97 | 0.14    | 0.56 |
| NGLY1_2    | 54.88     | -0.12 | 0.03    | 0.98 |

Supplement: Supplementary file 2250 [file 1]

# IPI00009054.1|BMP1

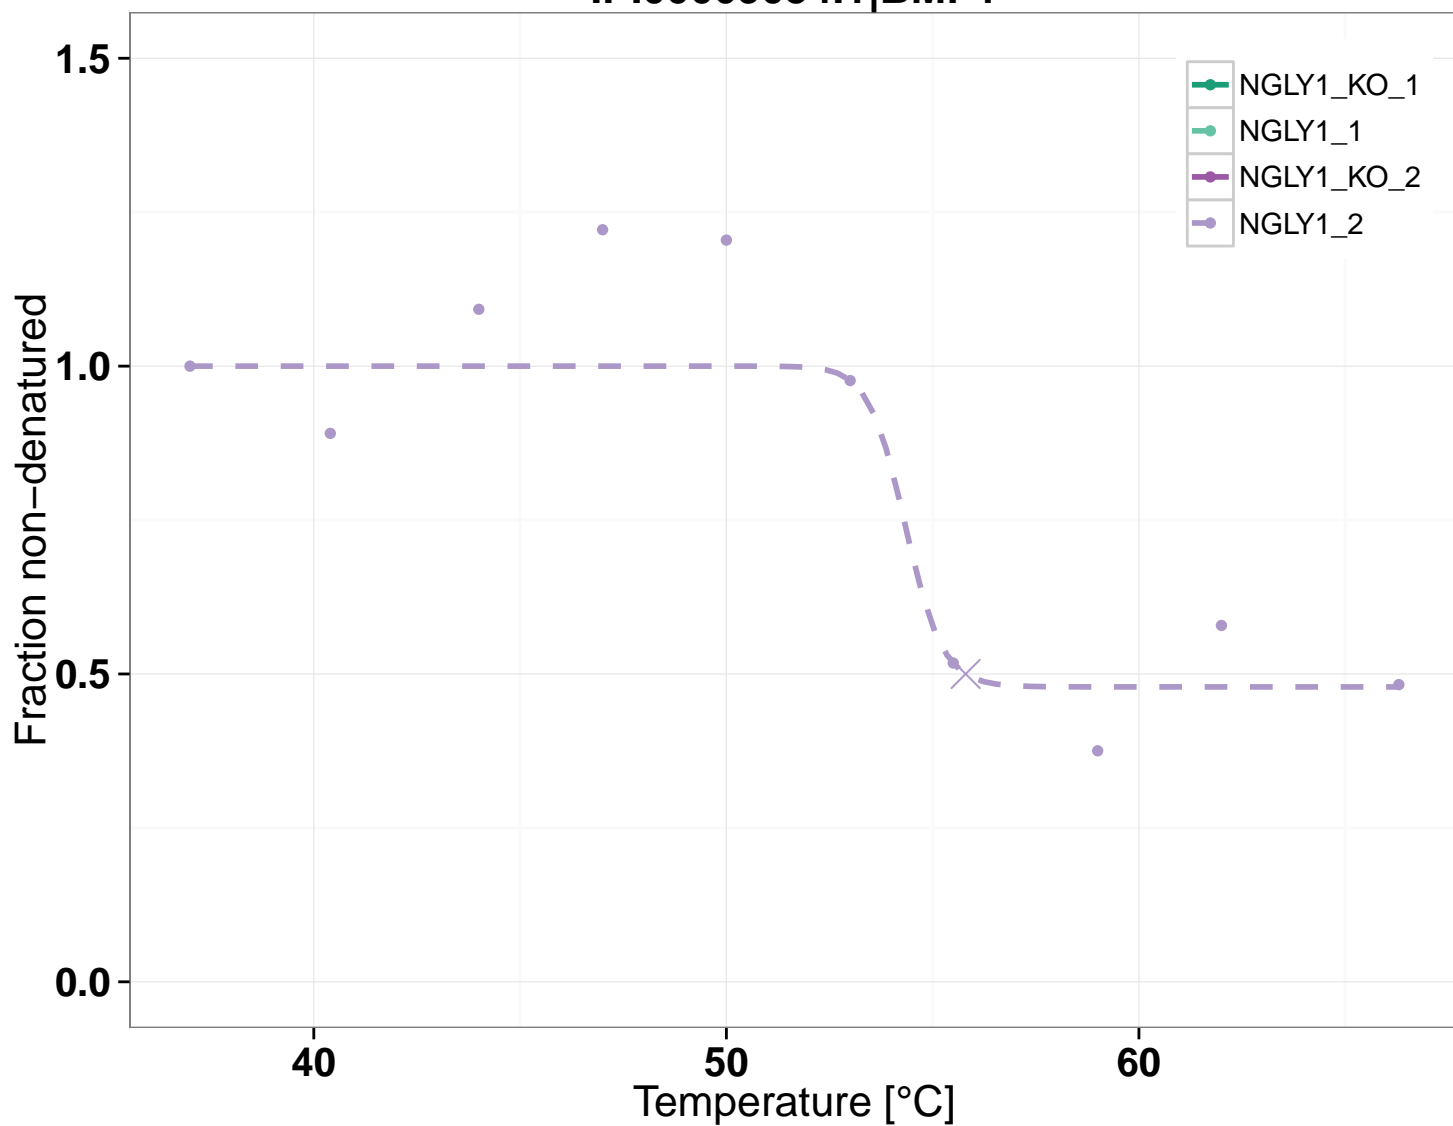

|            | meltPoint | slope | plateau | R2   |
|------------|-----------|-------|---------|------|
| NGLY1_KO_1 | —         | —     | —       | —    |
| NGLY1_1    | —         | —     | —       | —    |
| NGLY1_KO_2 | —         | —     | —       | —    |
| NGLY1_2    | 55.8      | -0.29 | 0.48    | 0.85 |

Supplement: Supplementary file 2251 [file 1]

IPI00410034.2|SLC38A2

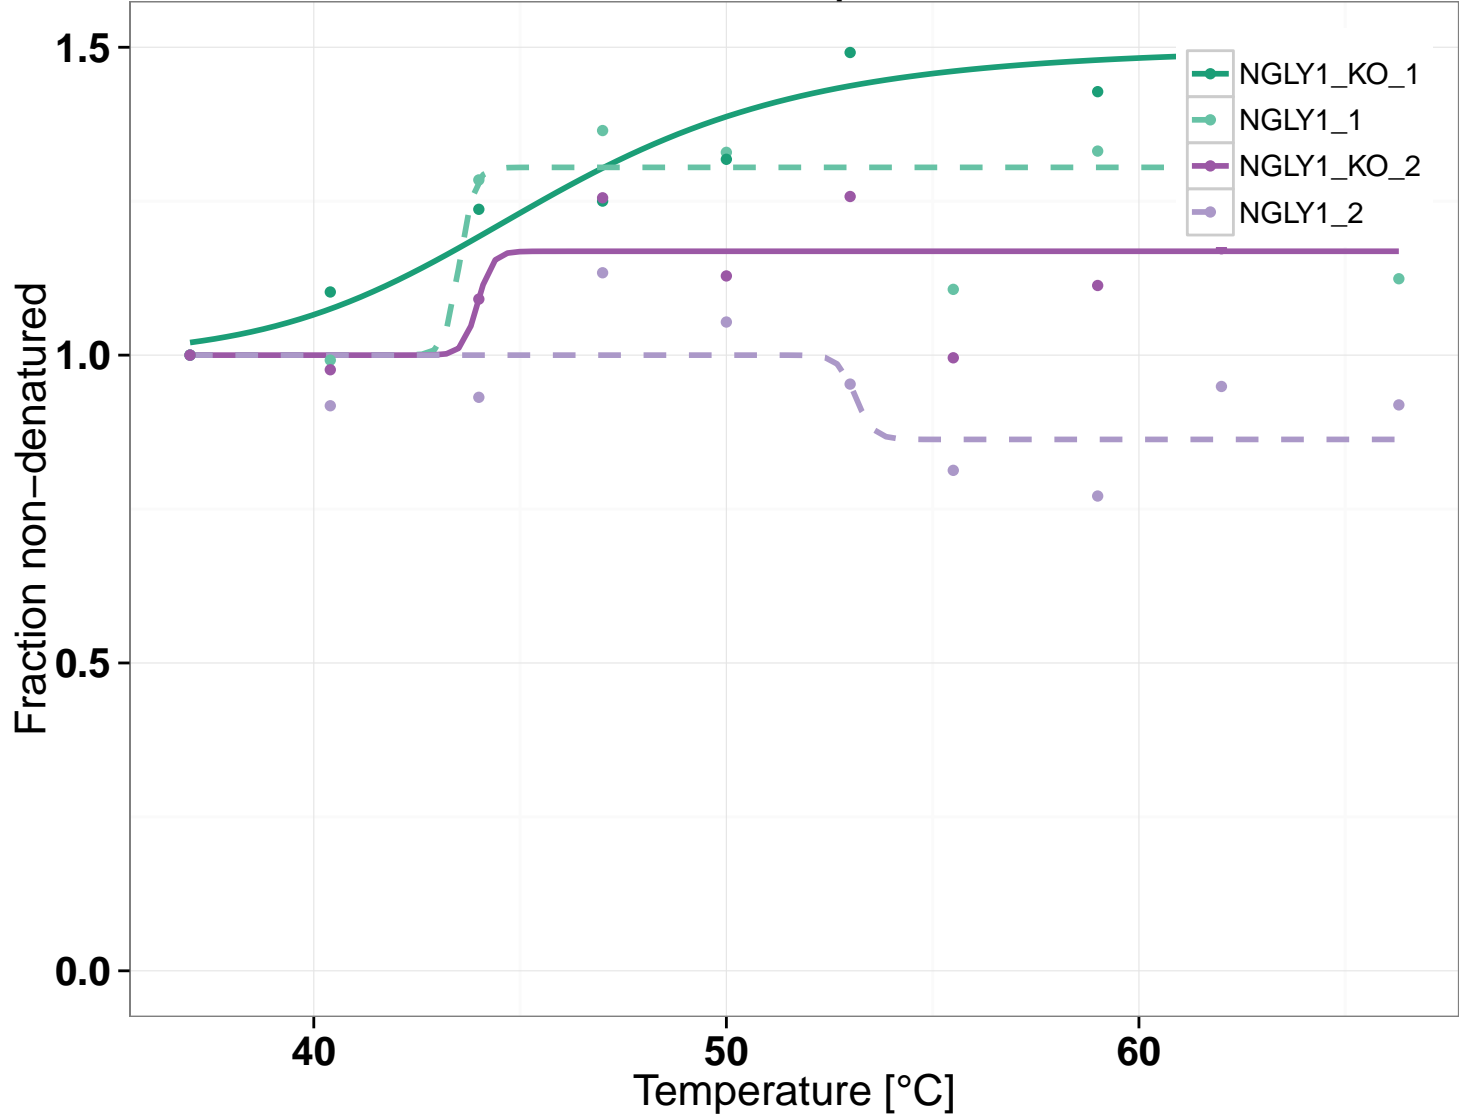

|            | meltPoint | slope | plateau | R2   |
|------------|-----------|-------|---------|------|
| NGLY1_KO_1 | -         | 0.039 | 1.5     | 0.89 |
| NGLY1_1    | -         | 0.44  | 1.3     | 0.4  |
| NGLY1_KO_2 | -         | 0.24  | 1.17    | 0.47 |
| NGLY1_2    | -         | -0.16 | 0.86    | 0.46 |

Supplement: Supplementary file 2252 [file 1]

IPI00470920.1|PPP2R2D

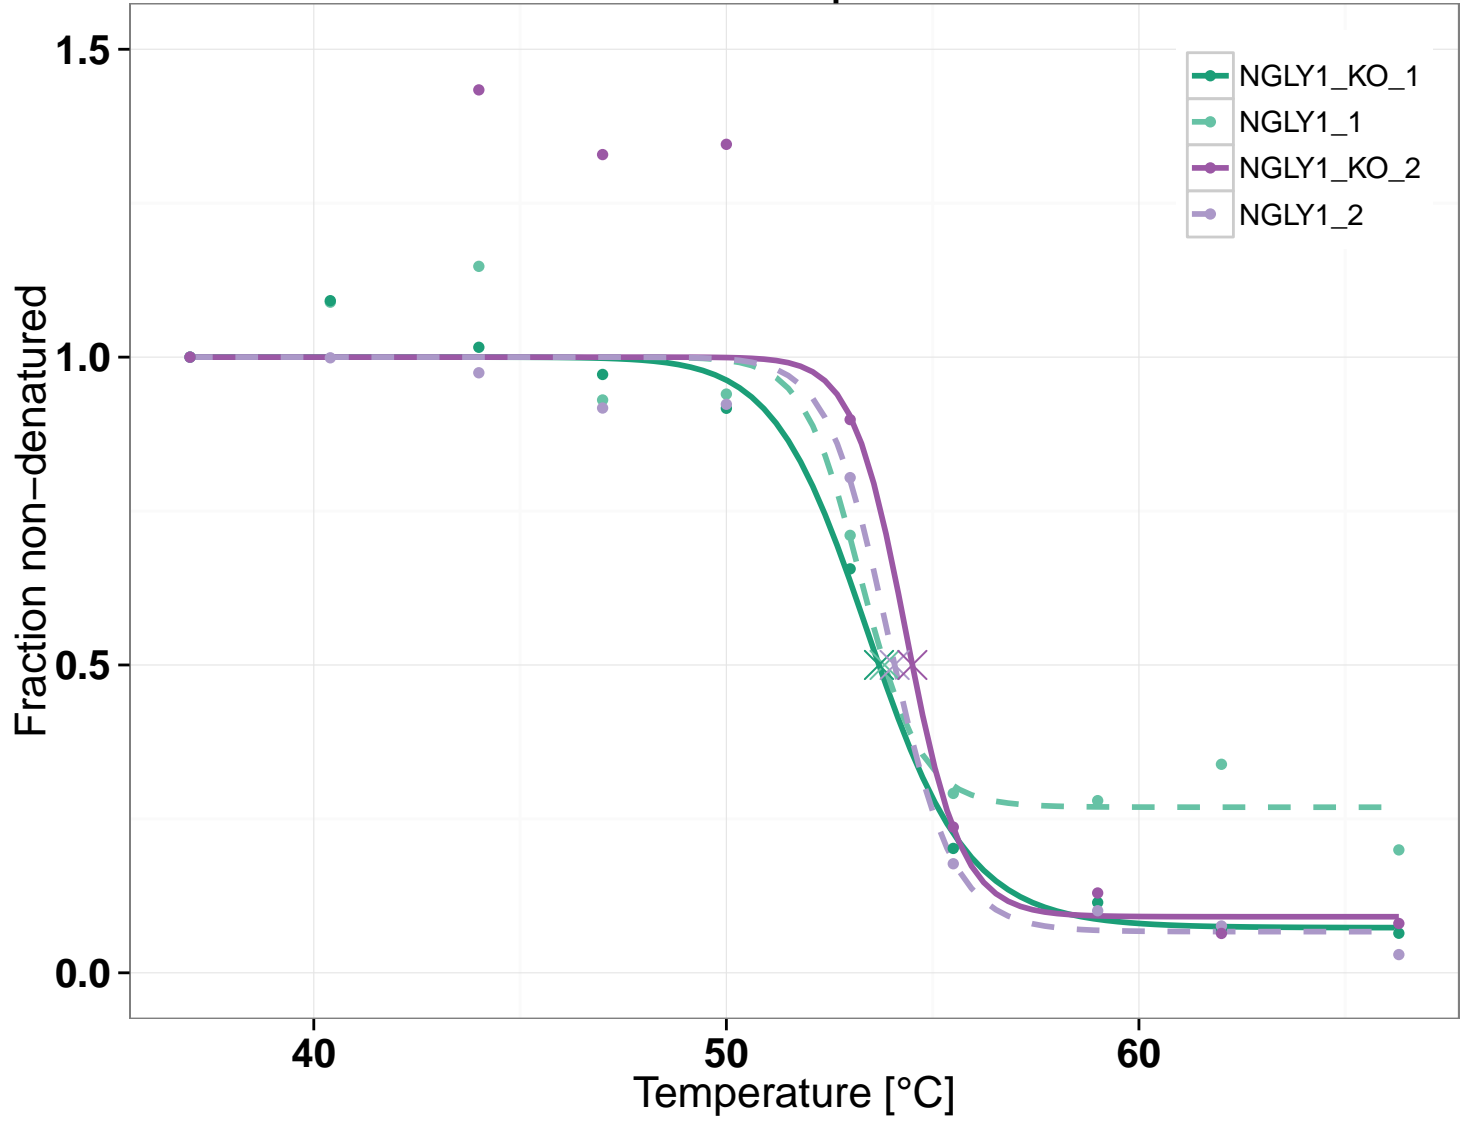

|            | meltPoint | slope | plateau | R2   |
|------------|-----------|-------|---------|------|
| NGLY1_KO_1 | 53.7      | -0.2  | 0.07    | 0.99 |
| NGLY1_1    | 53.84     | -0.26 | 0.27    | 0.96 |
| NGLY1_KO_2 | 54.51     | -0.34 | 0.09    | 0.77 |
| NGLY1_2    | 54.08     | -0.31 | 0.07    | 0.99 |

Supplement: Supplementary file 2253 [file 1]

IPI00871745.2|JARID1A

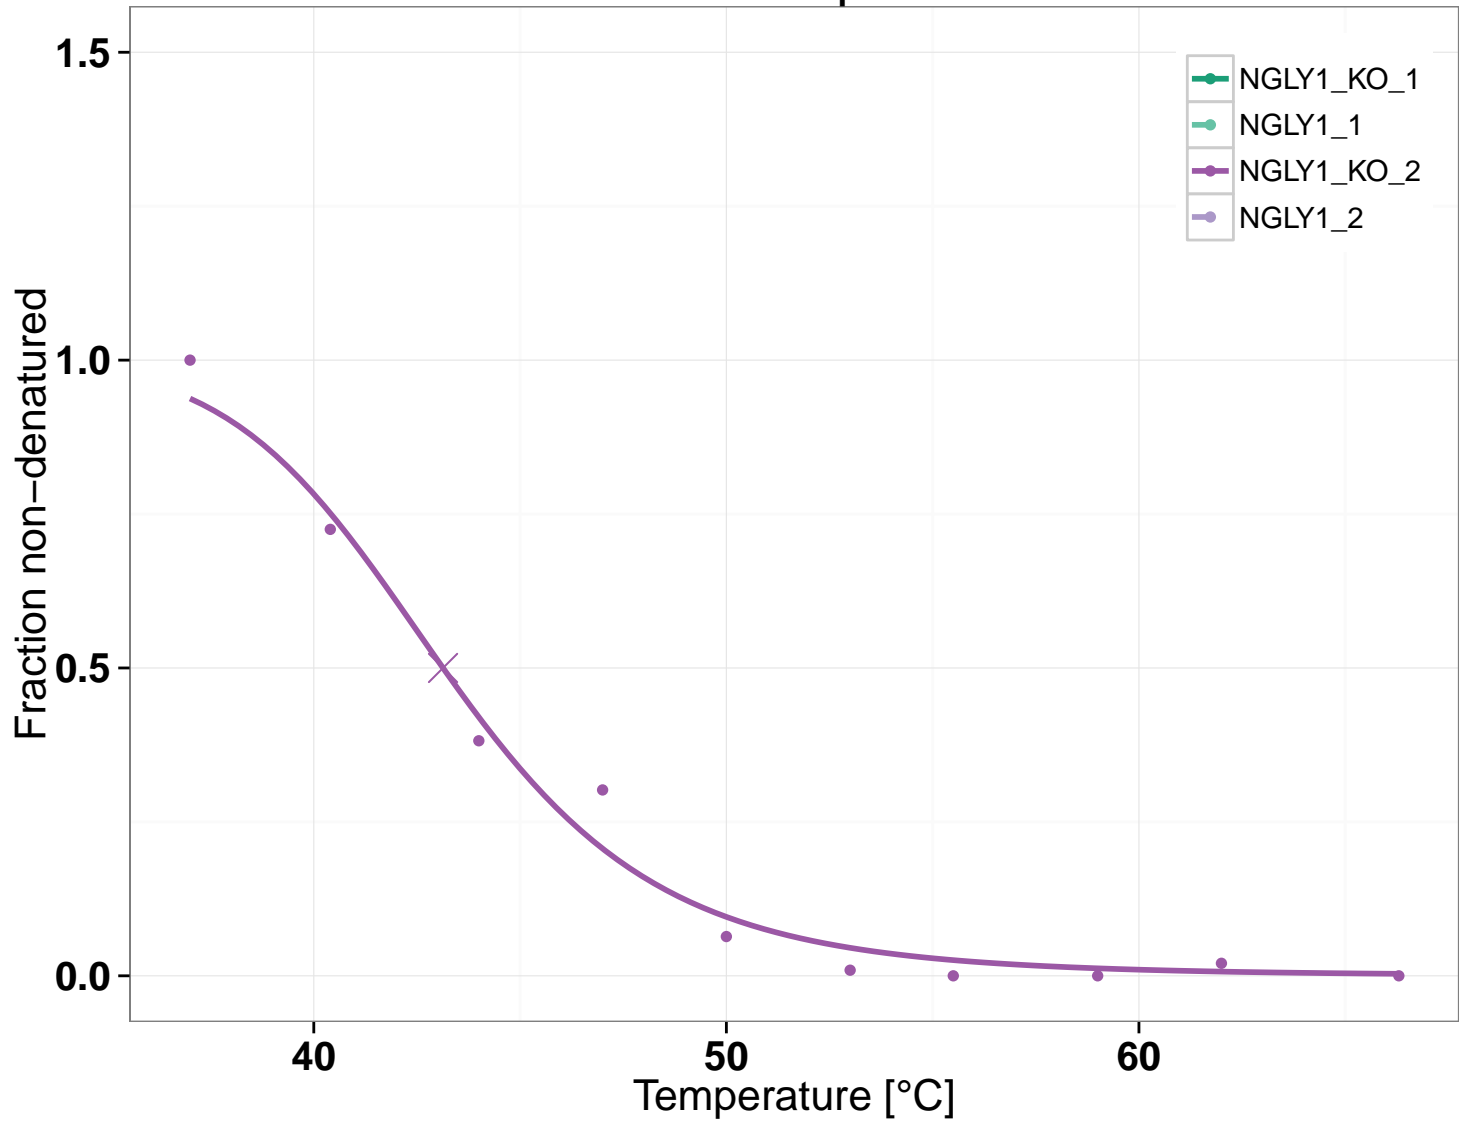

|            | meltPoint | slope  | plateau | R2   |
|------------|-----------|--------|---------|------|
| NGLY1_KO_1 | —         | —      | —       | —    |
| NGLY1_1    | —         | —      | —       | —    |
| NGLY1_KO_2 | 43.13     | -0.096 | 0       | 0.98 |
| NGLY1_2    | —         | —      | —       | —    |

Supplement: Supplementary file 2254 [file 1]

# IPI00873752.1|EIF2C4

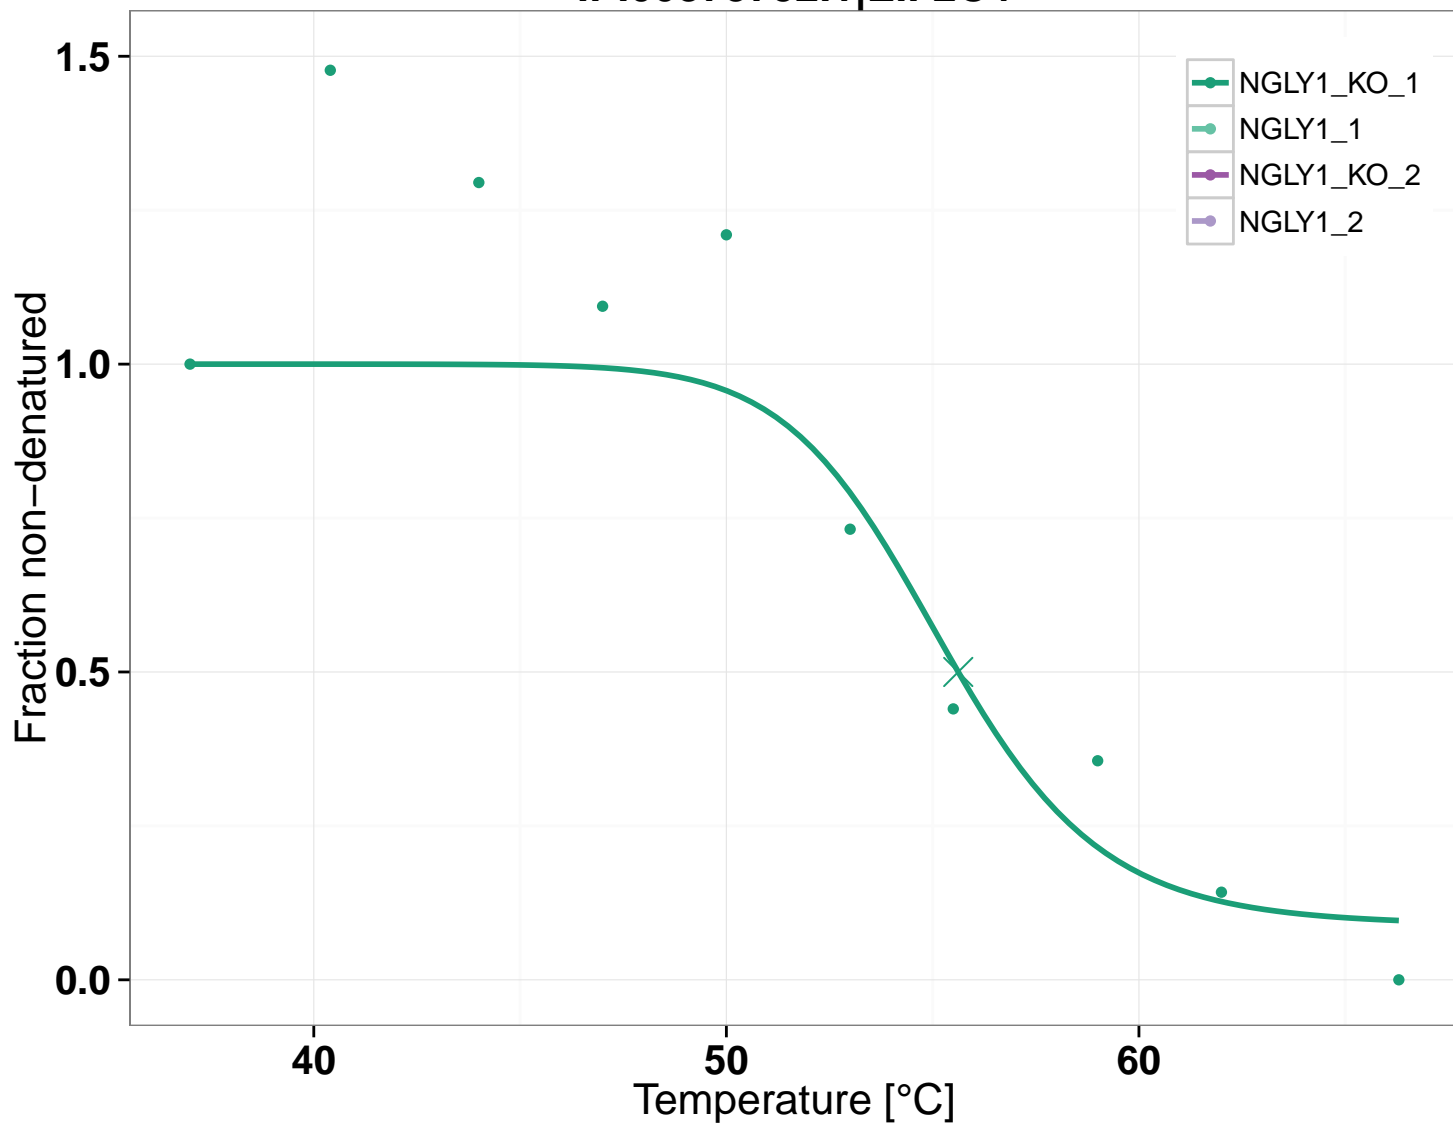

|            | meltPoint | slope | plateau | R2   |
|------------|-----------|-------|---------|------|
| NGLY1_KO_1 | 55.62     | -0.12 | 0.09    | 0.82 |
| NGLY1_1    | —         | —     | —       | —    |
| NGLY1_KO_2 | —         | —     | —       | —    |
| NGLY1_2    | —         | —     | —       | —    |

Supplement: Supplementary file 2255 [file 1]

# IPI00292382.5|DCP2

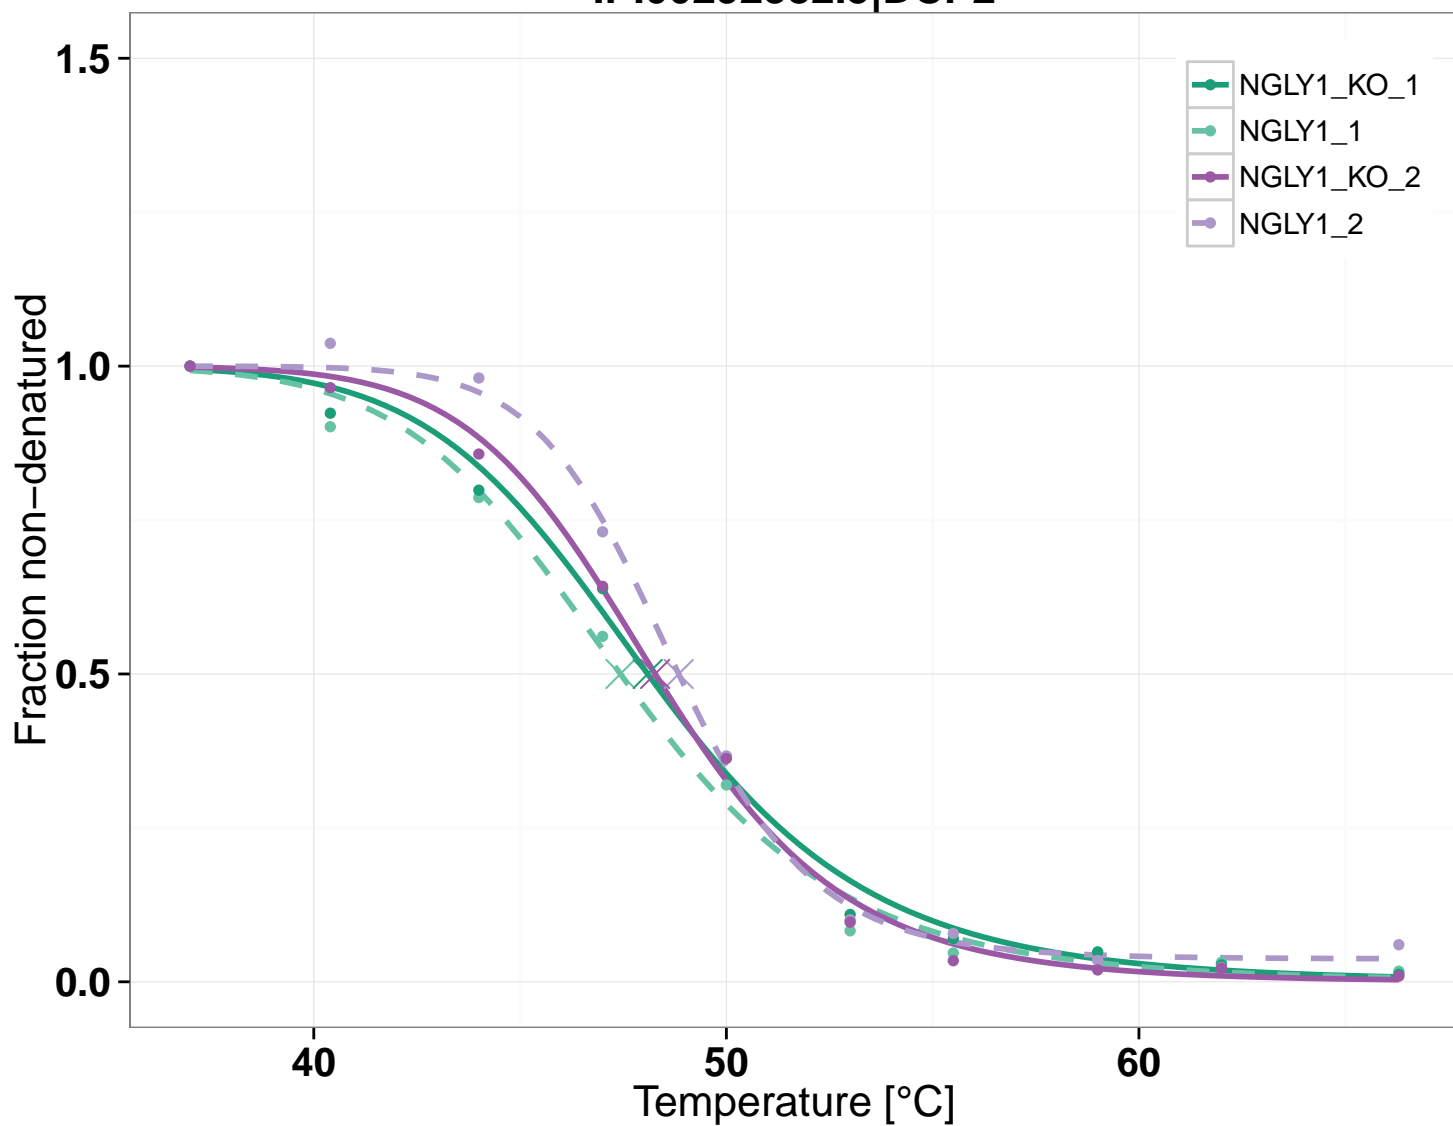

|            | meltPoint | slope  | plateau | R2   |
|------------|-----------|--------|---------|------|
| NGLY1_KO_1 | 48.09     | -0.093 | 0       | 0.99 |
| NGLY1_1    | 47.43     | -0.094 | 0       | 0.99 |
| NGLY1_KO_2 | 48.27     | -0.11  | 0       | 1    |
| NGLY1_2    | 48.84     | -0.14  | 0.04    | 1    |

Supplement: Supplementary file 2256 [file 1]

IPI00152240.3|TMEM167A

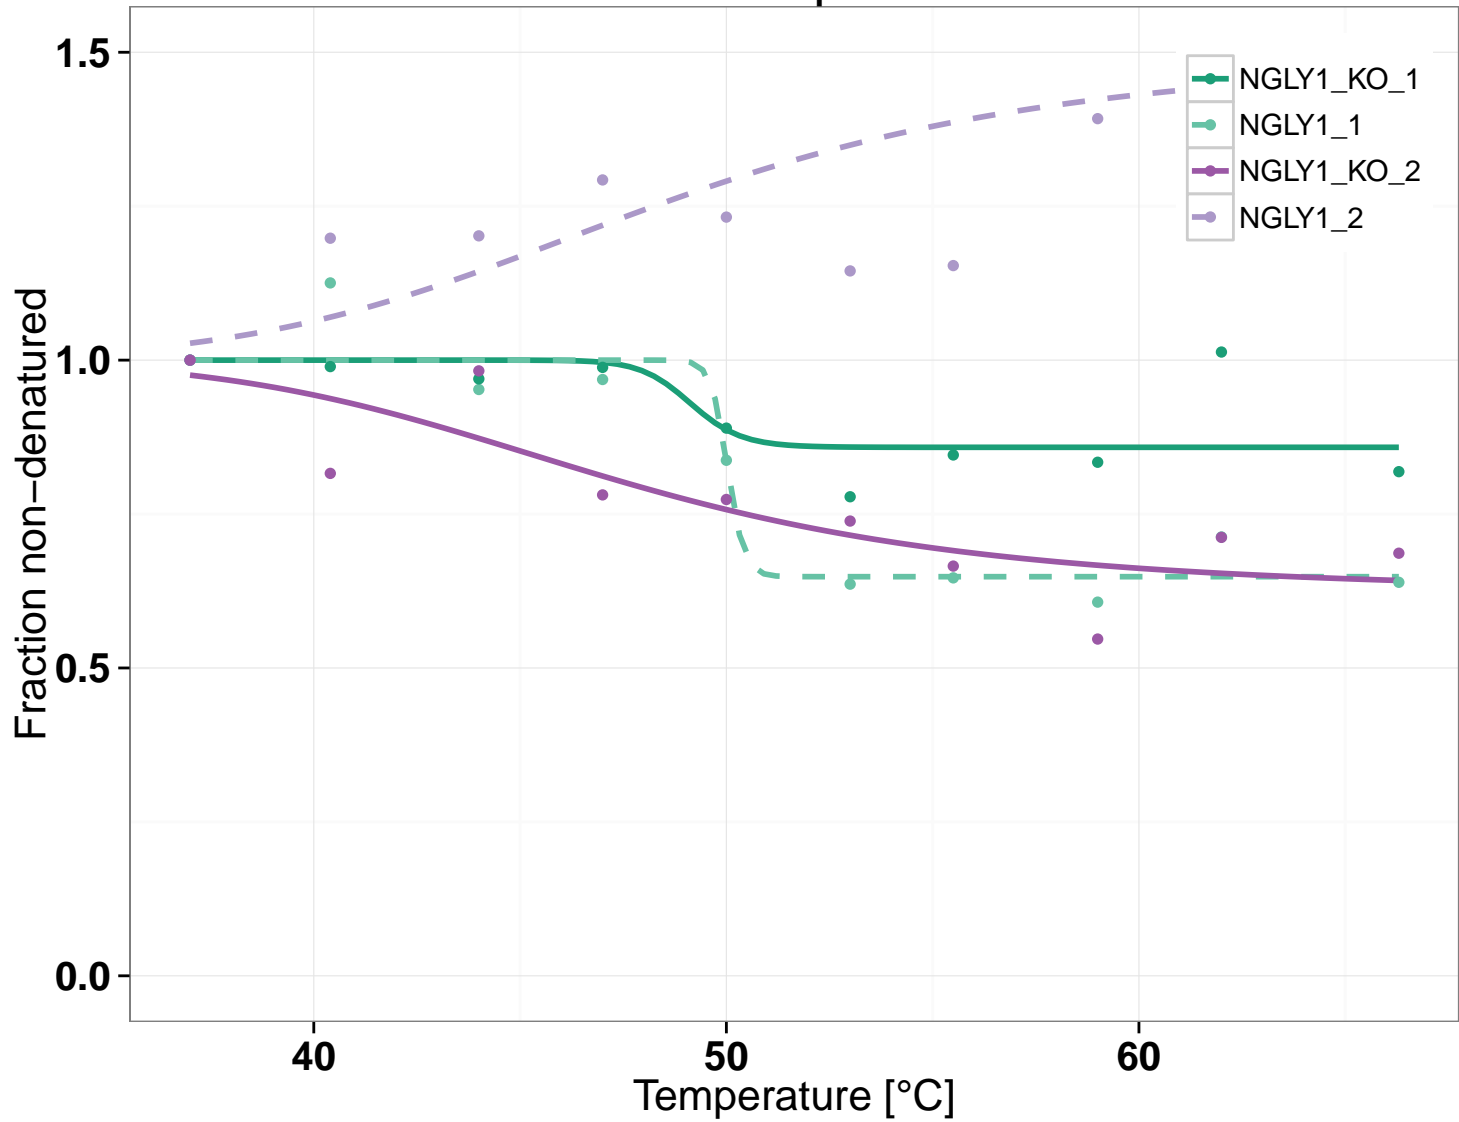

|            | meltPoint | slope  | plateau | R2   |
|------------|-----------|--------|---------|------|
| NGLY1_KO_1 | —         | -0.058 | 0.86    | 0.52 |
| NGLY1_1    | —         | -0.44  | 0.65    | 0.92 |
| NGLY1_KO_2 | —         | -0.021 | 0.62    | 0.71 |
| NGLY1_2    | —         | 0.025  | 1.5     | 0.44 |

Supplement: Supplementary file 2257 [file 1]

# IPI00220300.5|ATP5J2

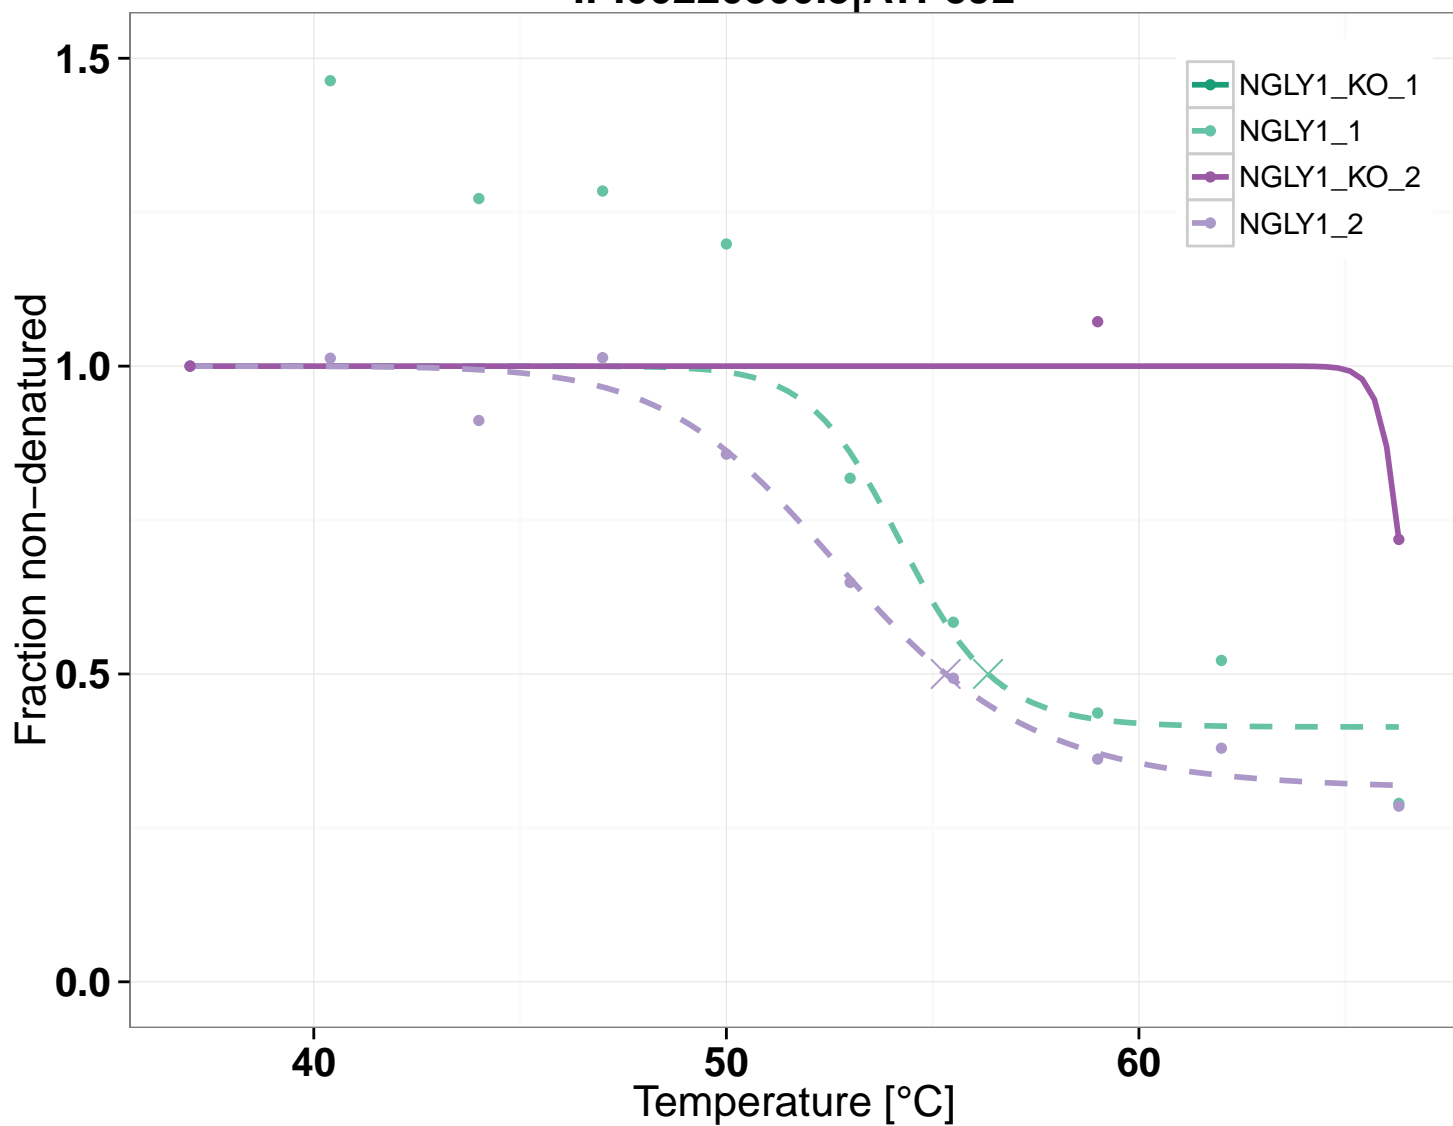

|            | meltPoint | slope  | plateau | R2    |
|------------|-----------|--------|---------|-------|
| NGLY1_KO_1 | –         | –      | –       | –     |
| NGLY1_1    | 56.34     | –0.13  | 0.41    | 0.71  |
| NGLY1_KO_2 | –         | –      | 0       | –1.36 |
| NGLY1_2    | 55.32     | –0.076 | 0.31    | 0.98  |

Supplement: Supplementary file 2258 [file 1]

IPI00328350.6|FAM129A

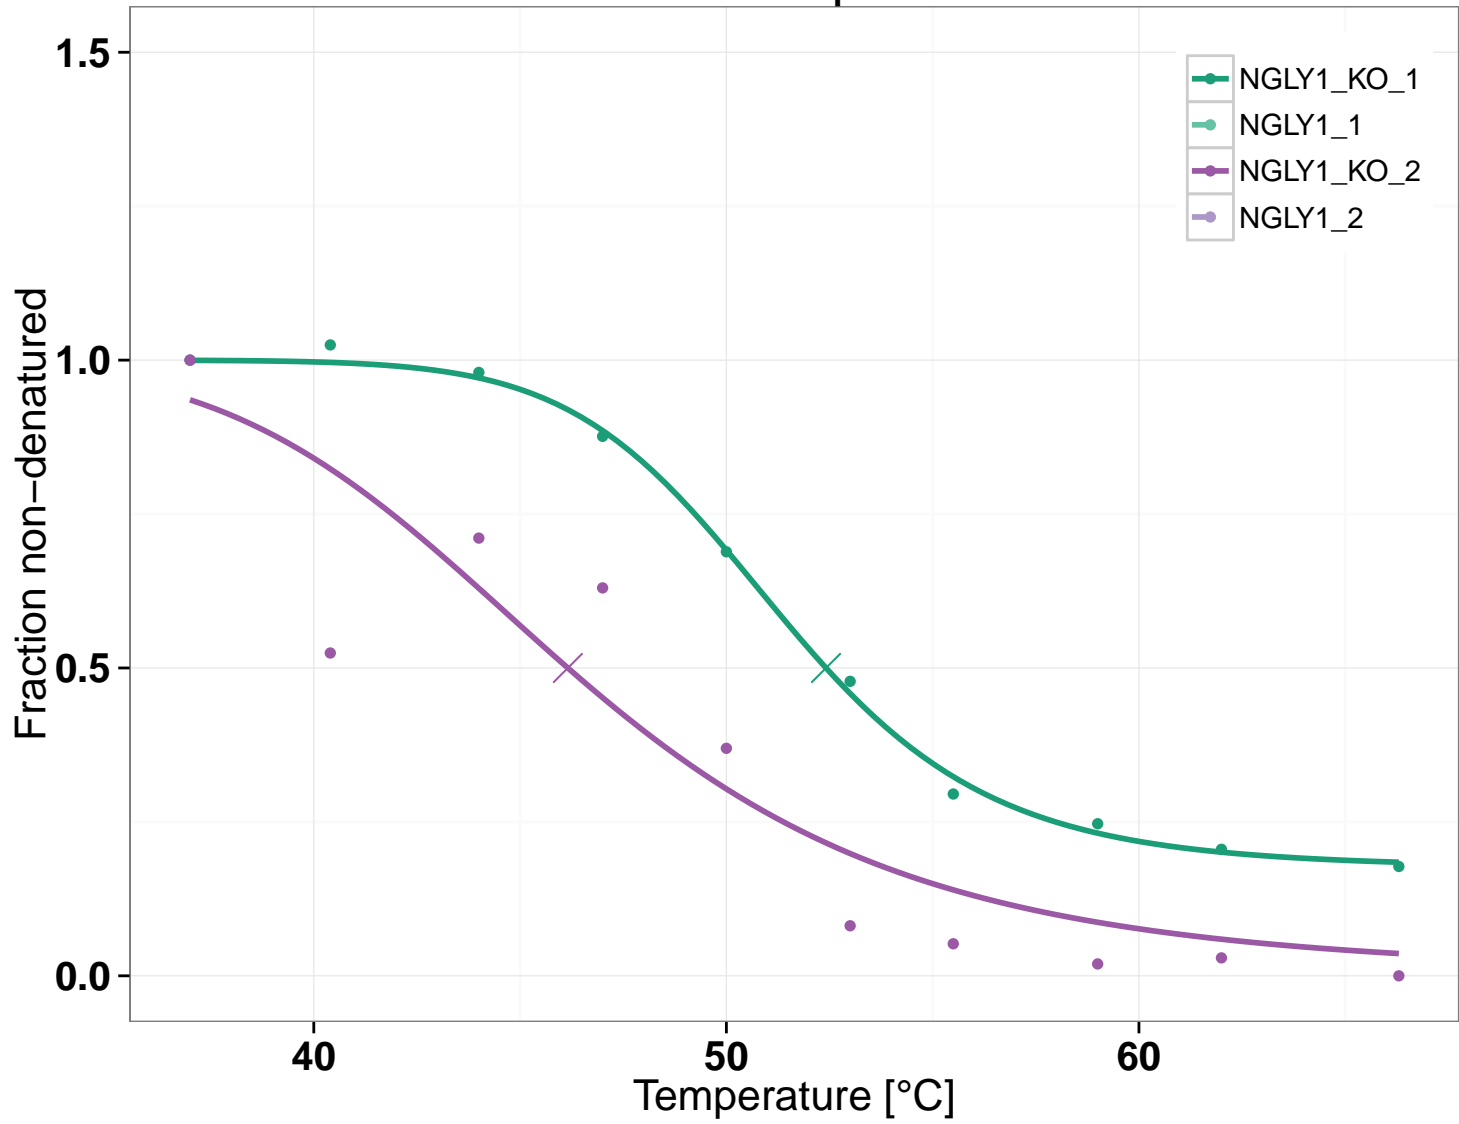

|            | meltPoint | slope  | plateau | R2   |
|------------|-----------|--------|---------|------|
| NGLY1_KO_1 | 52.42     | -0.081 | 0.18    | 1    |
| NGLY1_1    | -         | -      | -       | -    |
| NGLY1_KO_2 | 46.16     | -0.061 | 0       | 0.86 |
| NGLY1_2    | -         | -      | -       | -    |

Supplement: Supplementary file 2259 [file 1]

IPI00009803.1|ITGA4

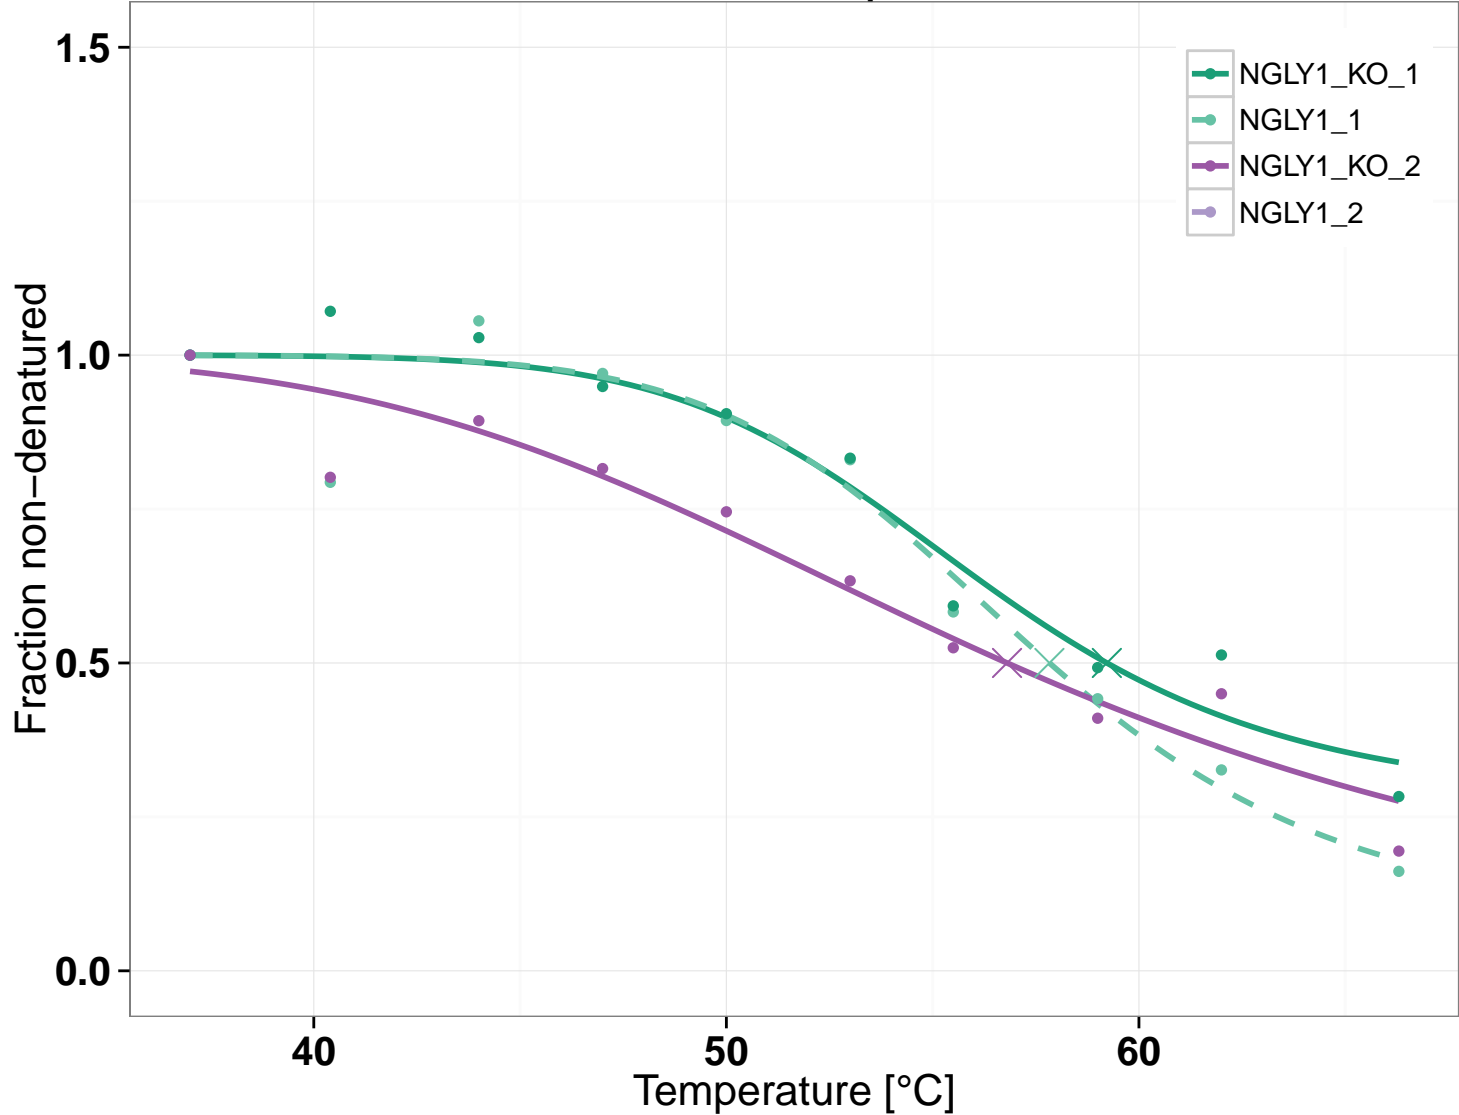

|            | meltPoint | slope  | plateau | R2   |
|------------|-----------|--------|---------|------|
| NGLY1_KO_1 | 59.22     | -0.049 | 0.27    | 0.96 |
| NGLY1_1    | 57.83     | -0.061 | 0.07    | 0.94 |
| NGLY1_KO_2 | 56.8      | -0.032 | 0       | 0.94 |
| NGLY1_2    | -         | -      | -       | -    |

Supplement: Supplementary file 2260 [file 1]

# IPI00479918.2|SLC39A14

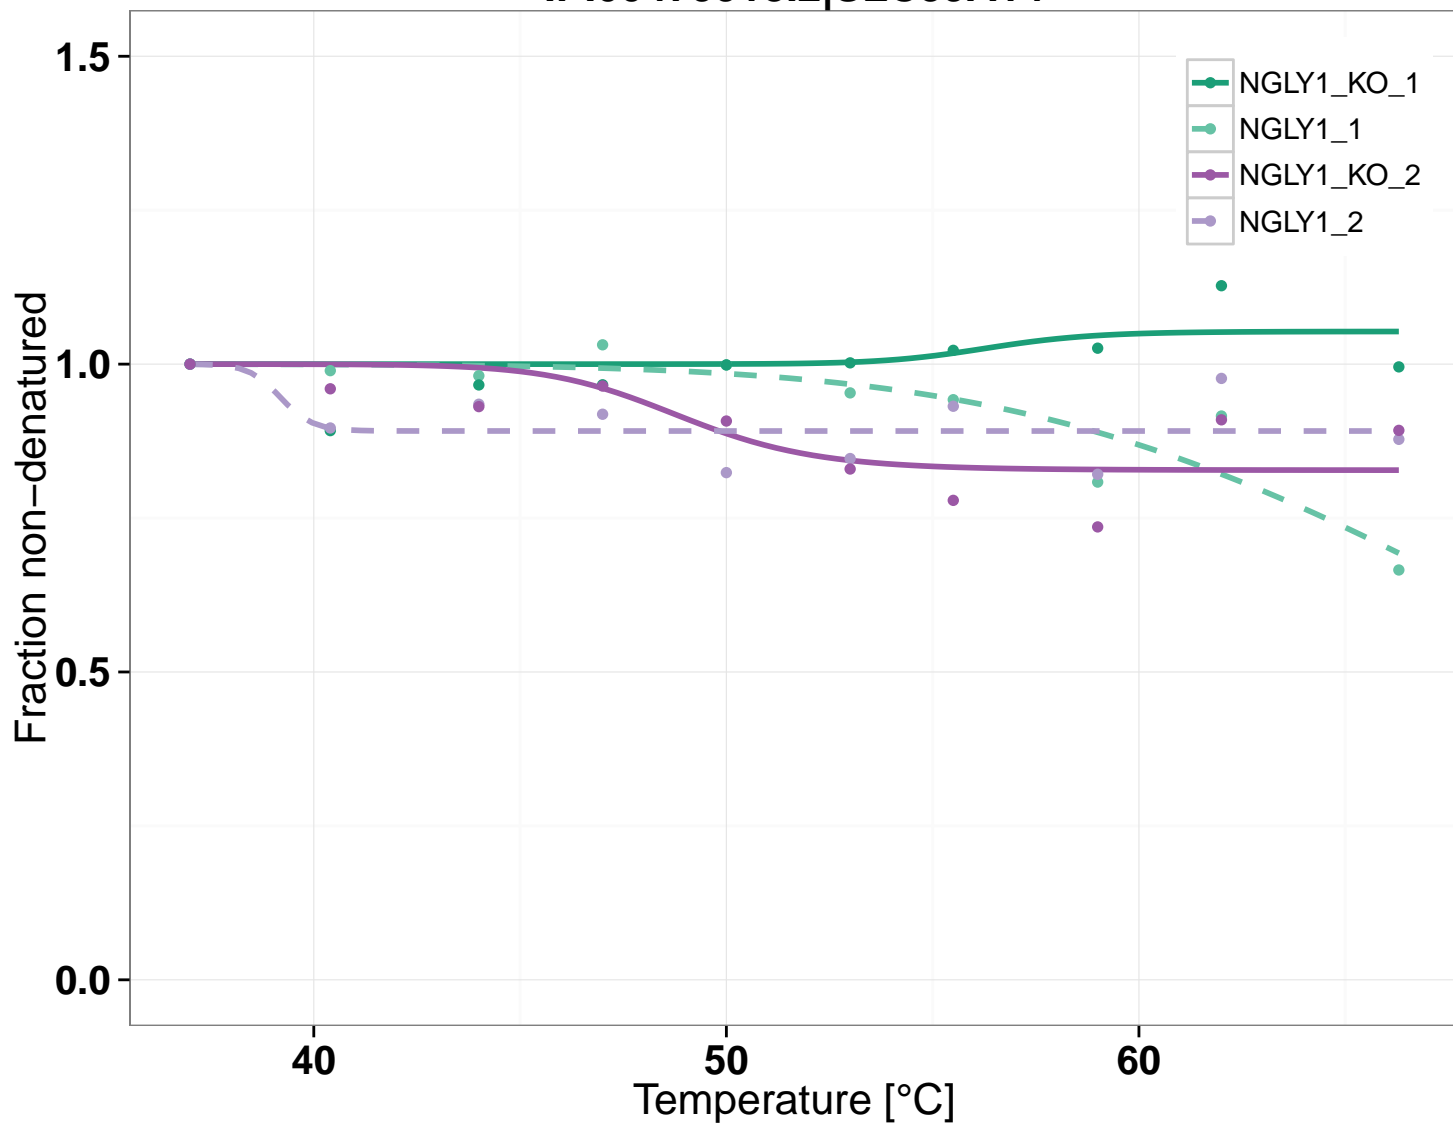

|            | meltPoint | slope  | plateau | R2   |
|------------|-----------|--------|---------|------|
| NGLY1_KO_1 | –         | 0.01   | 1.05    | 0.26 |
| NGLY1_1    | –         | –      | 0       | 0.84 |
| NGLY1_KO_2 | –         | –0.026 | 0.83    | 0.56 |
| NGLY1_2    | –         | –0.071 | 0.89    | 0.31 |

Supplement: Supplementary file 2261 [file 1]

# IPI00465121.1|GNAI2

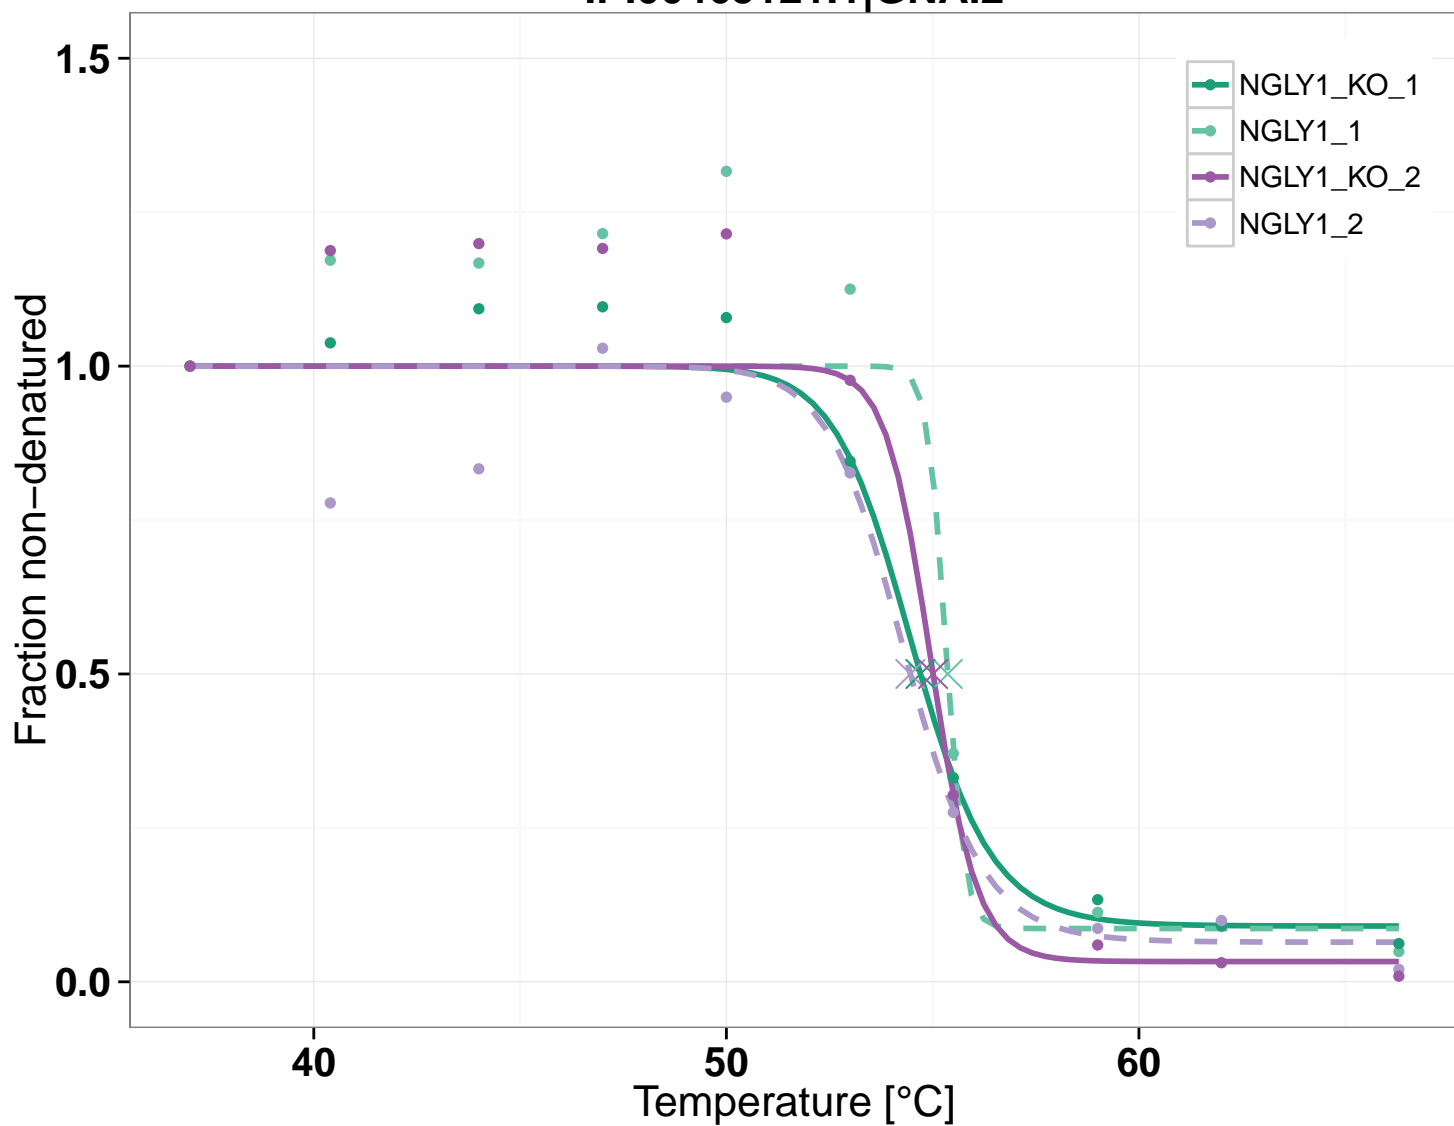

|            | meltPoint | slope | plateau | R2   |
|------------|-----------|-------|---------|------|
| NGLY1_KO_1 | 54.7      | -0.24 | 0.09    | 0.99 |
| NGLY1_1    | 55.37     | -1    | 0.09    | 0.91 |
| NGLY1_KO_2 | 55.01     | -0.44 | 0.03    | 0.94 |
| NGLY1_2    | 54.46     | -0.25 | 0.06    | 0.95 |

Supplement: Supplementary file 2262 [file 1]

IPI00026512.2|ERAL1

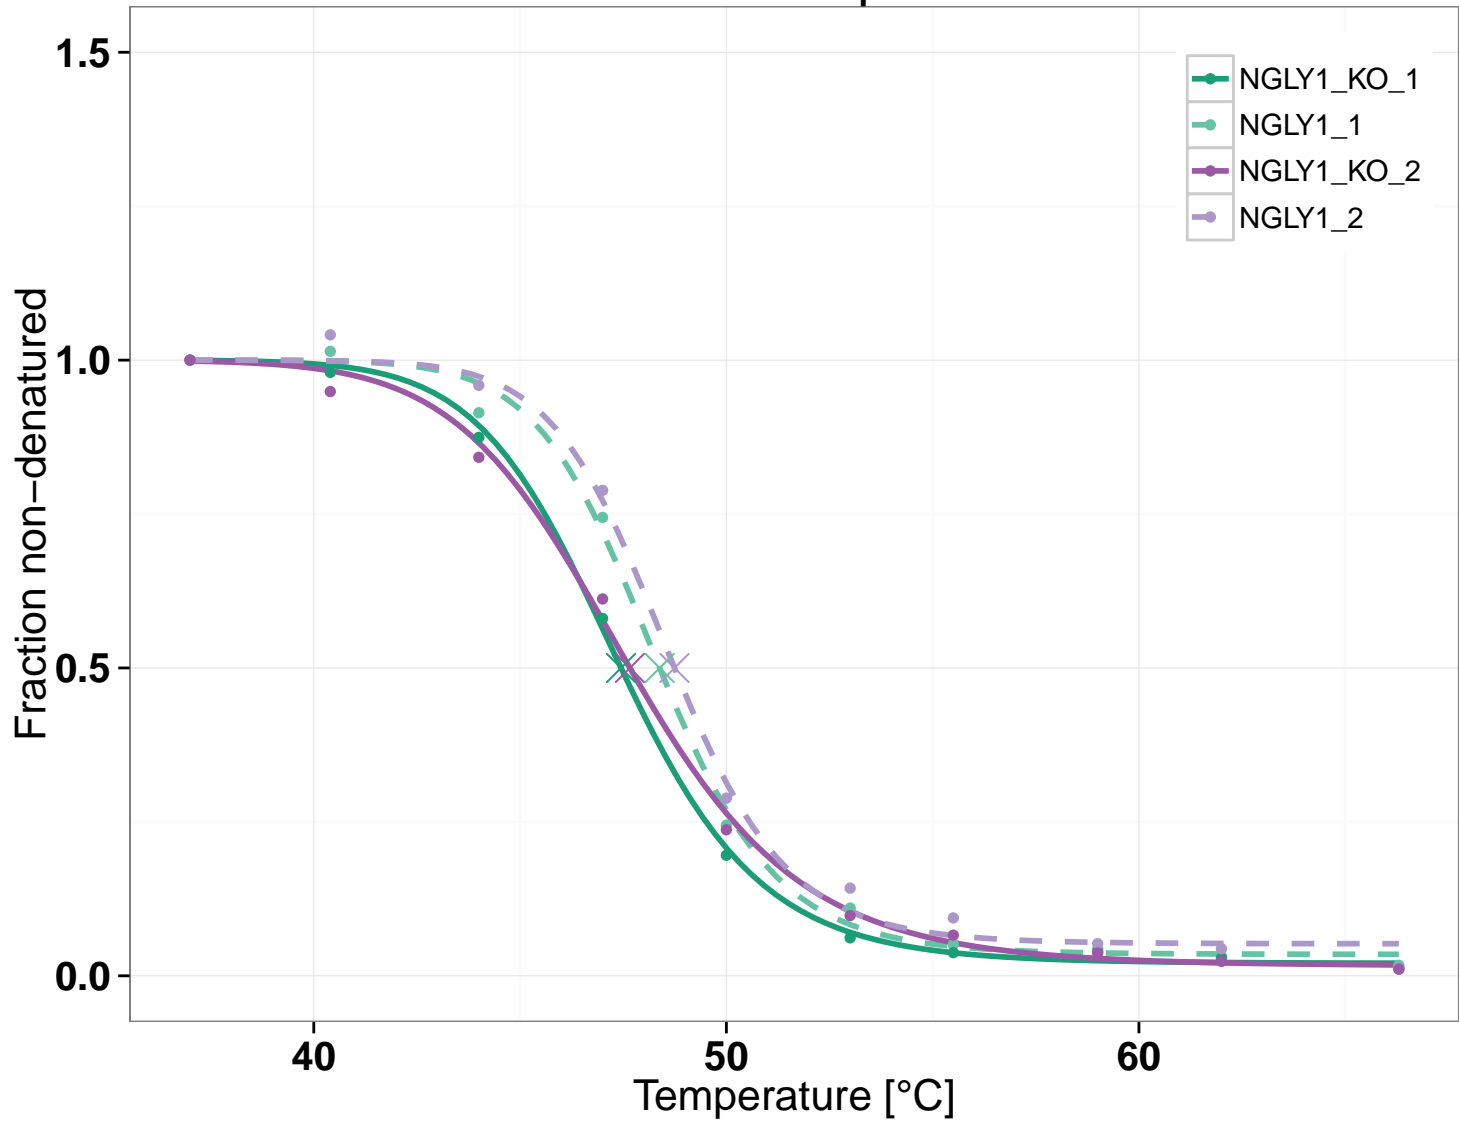

|            | meltPoint | slope | plateau | R2 |
|------------|-----------|-------|---------|----|
| NGLY1_KO_1 | 47.45     | -0.14 | 0.02    | 1  |
| NGLY1_1    | 48.38     | -0.17 | 0.03    | 1  |
| NGLY1_KO_2 | 47.66     | -0.12 | 0.02    | 1  |
| NGLY1_2    | 48.74     | -0.17 | 0.05    | 1  |

Supplement: Supplementary file 2263 [file 1]

IPI00396593.4|PDLIM2

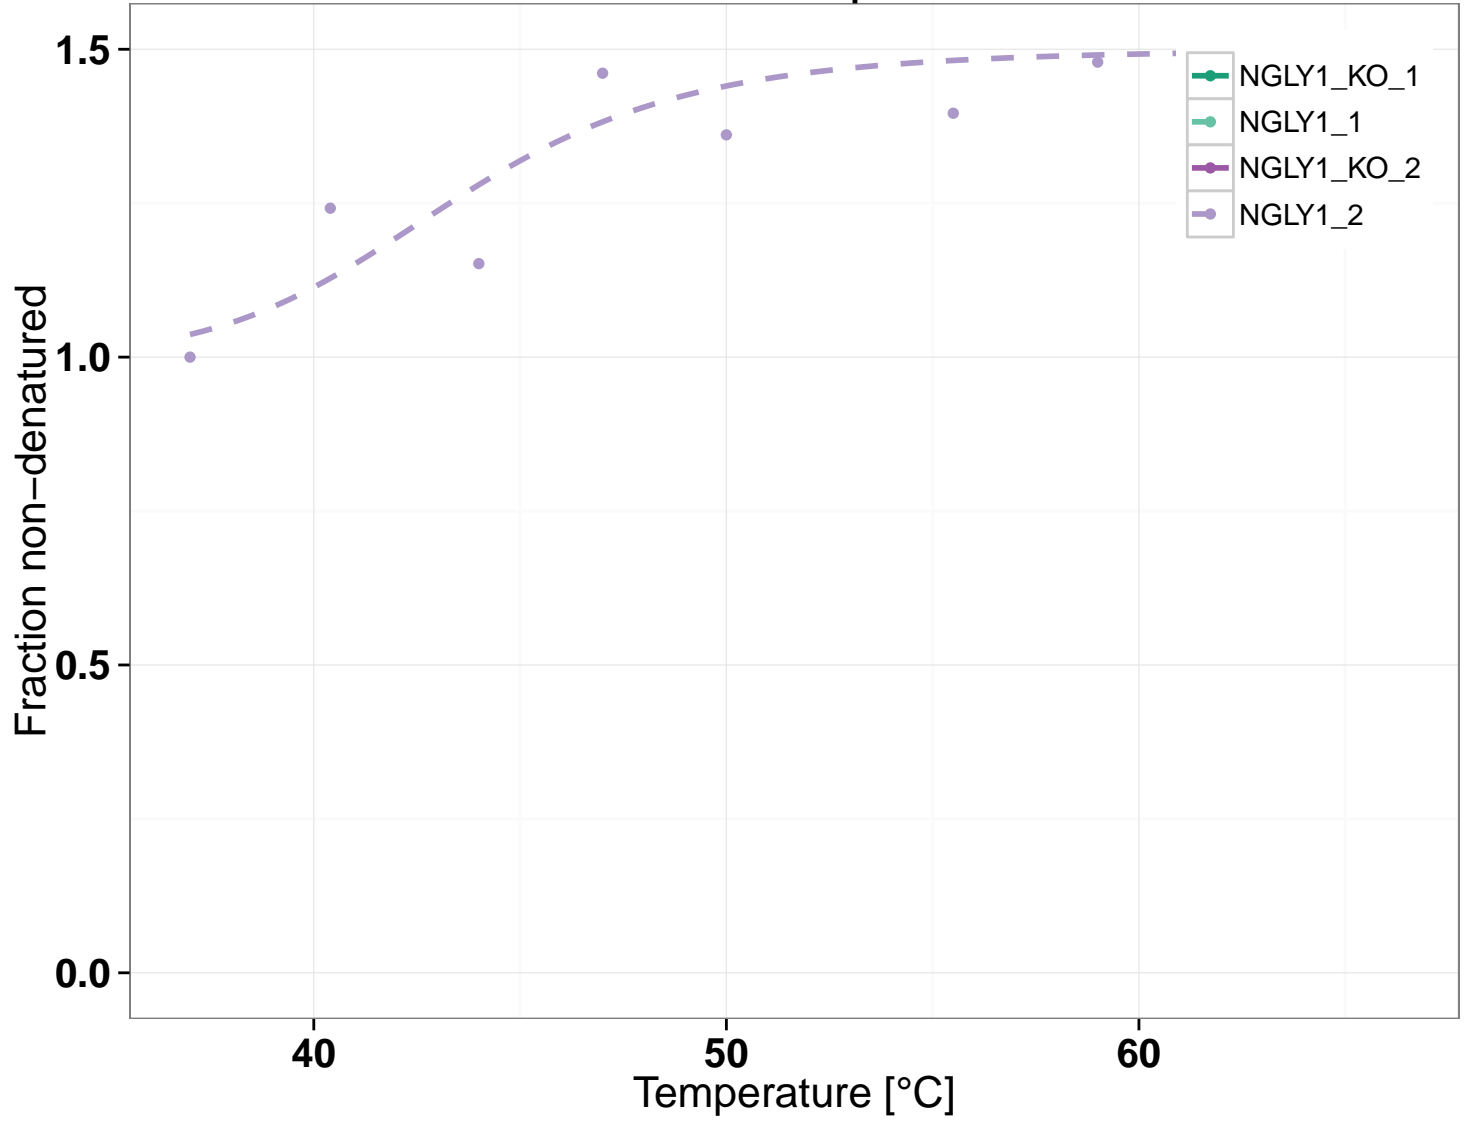

|            | meltPoint | slope | plateau | R2   |
|------------|-----------|-------|---------|------|
| NGLY1_KO_1 | —         | —     | —       | —    |
| NGLY1_1    | —         | —     | —       | —    |
| NGLY1_KO_2 | —         | —     | —       | —    |
| NGLY1_2    | —         | 0.044 | 1.5     | 0.62 |

Supplement: Supplementary file 2264 [file 1]

IPI00004358.4|PYGB

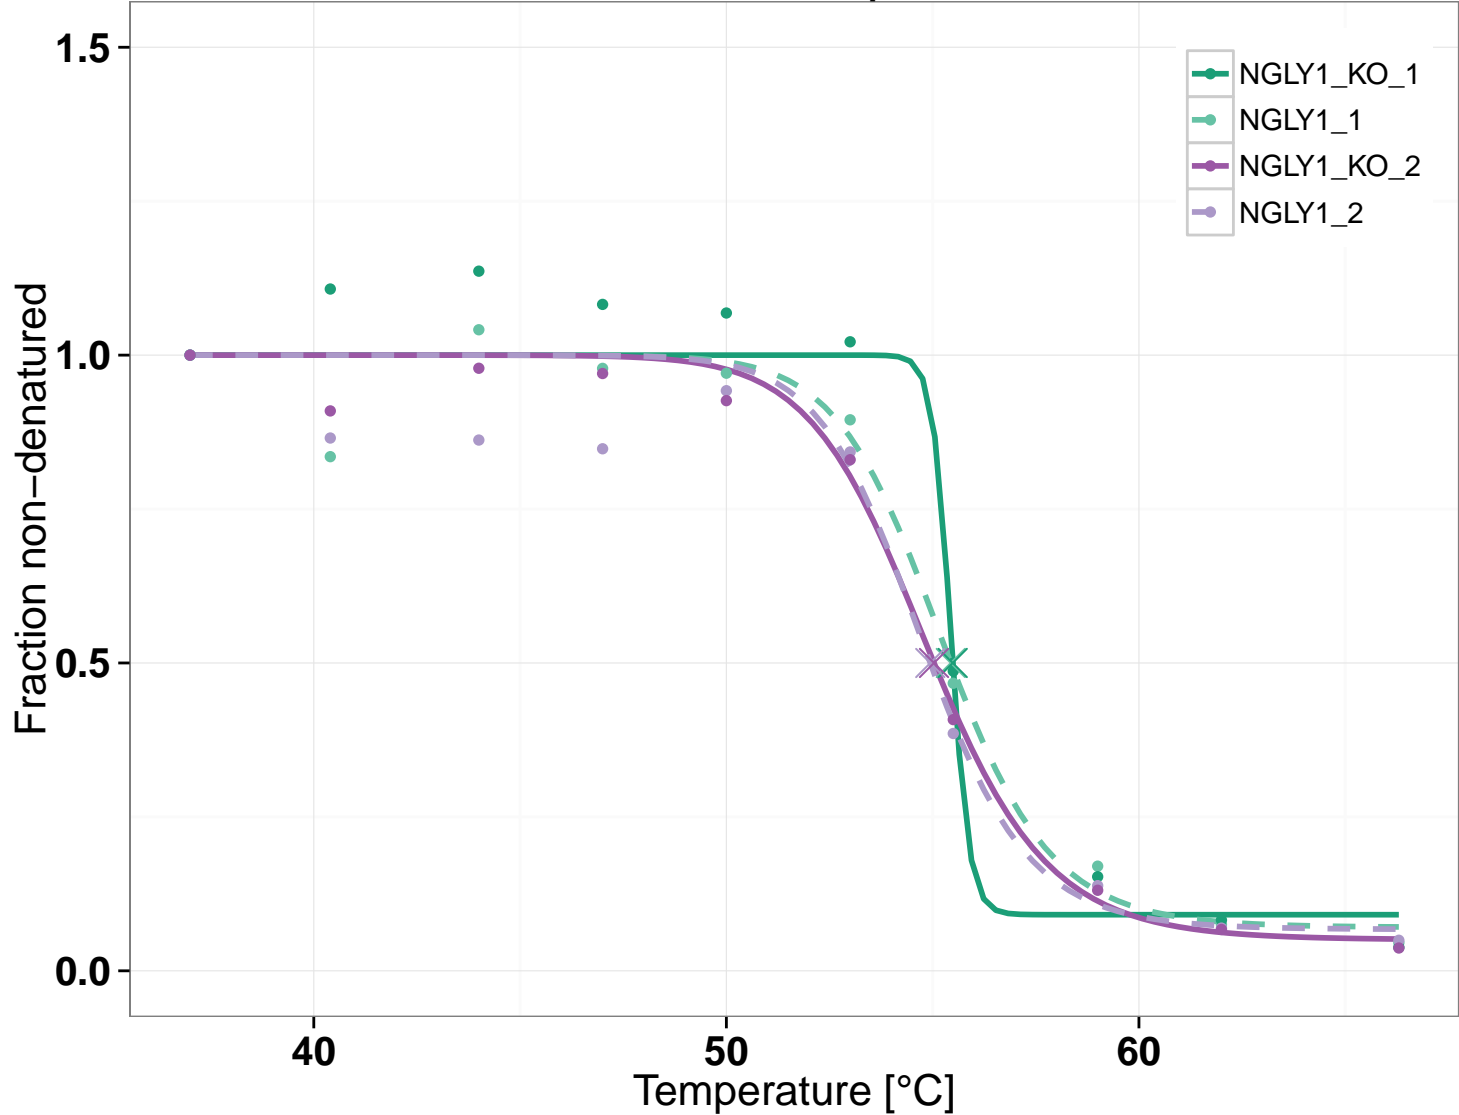

|            | meltPoint | slope | plateau | R2   |
|------------|-----------|-------|---------|------|
| NGLY1_KO_1 | 55.49     | -1    | 0.09    | 0.98 |
| NGLY1_1    | 55.44     | -0.18 | 0.07    | 0.98 |
| NGLY1_KO_2 | 55.03     | -0.16 | 0.05    | 0.99 |
| NGLY1_2    | 54.94     | -0.18 | 0.07    | 0.95 |

Supplement: Supplementary file 2265 [file 1]

IPI00073779.1|MRPS35

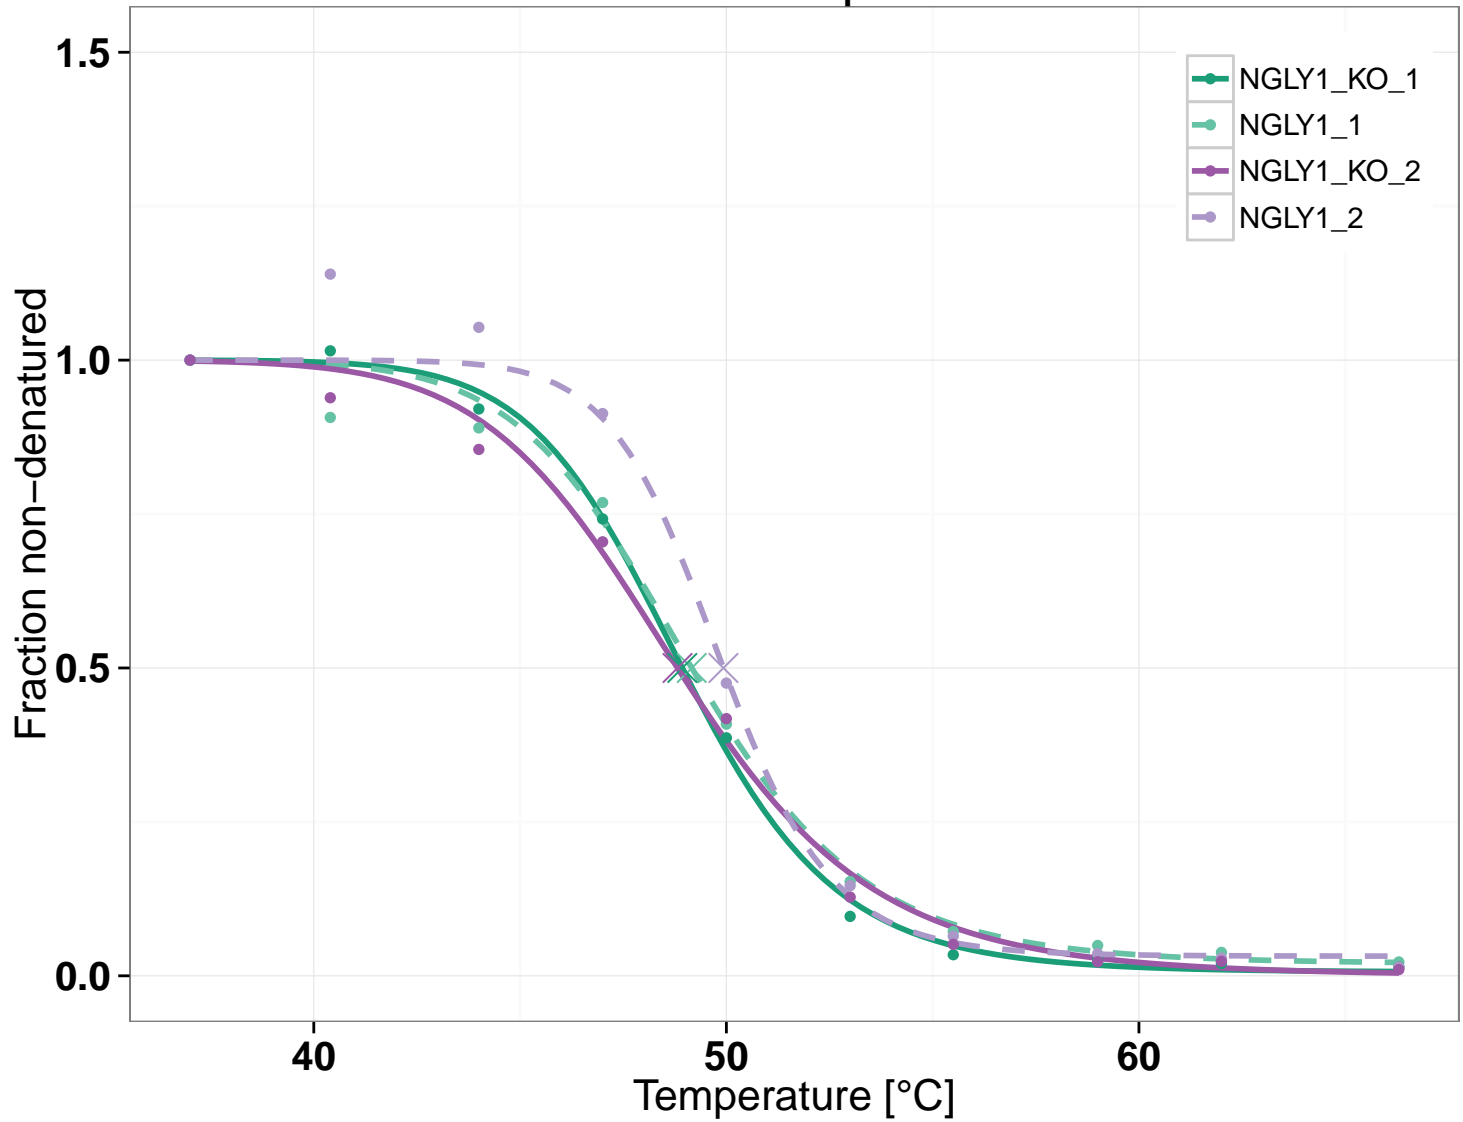

|            | meltPoint | slope | plateau | R2   |
|------------|-----------|-------|---------|------|
| NGLY1_KO_1 | 48.93     | -0.13 | 0.01    | 1    |
| NGLY1_1    | 49.16     | -0.12 | 0.02    | 0.99 |
| NGLY1_KO_2 | 48.82     | -0.11 | 0       | 0.99 |
| NGLY1_2    | 49.93     | -0.18 | 0.03    | 0.99 |

Supplement: Supplementary file 2266 [file 1]

IPI00328144.6|TAF2

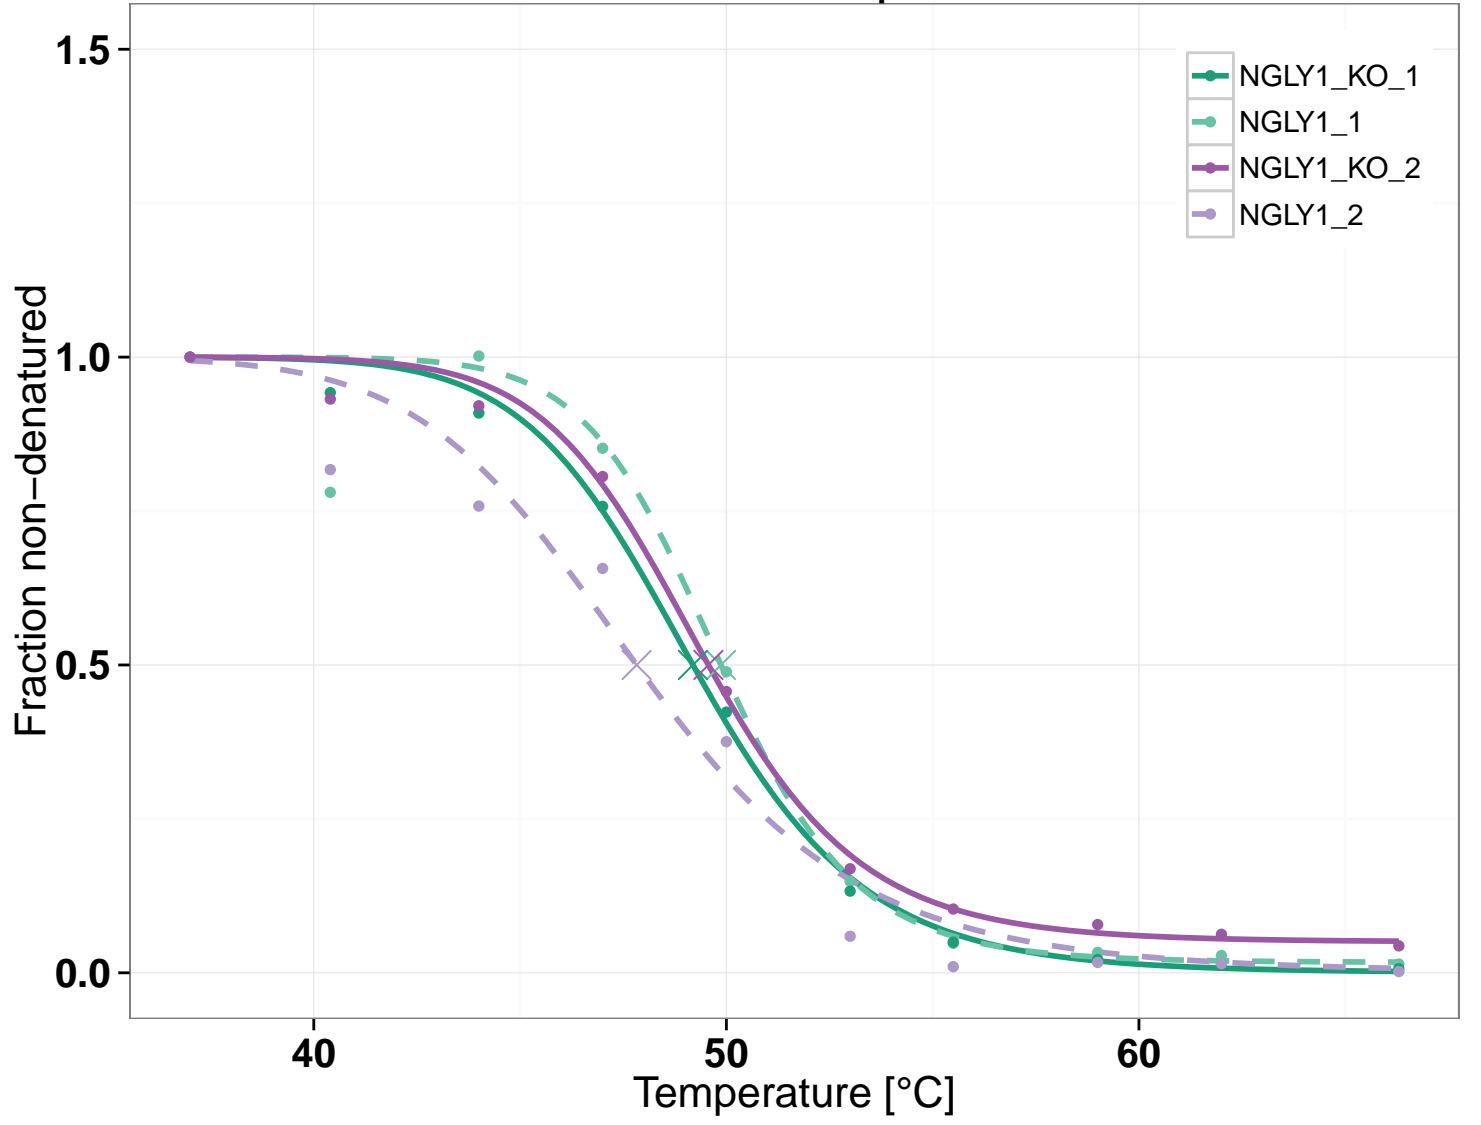

|            | meltPoint | slope  | plateau | R2   |
|------------|-----------|--------|---------|------|
| NGLY1_KO_1 | 49.19     | -0.12  | 0       | 1    |
| NGLY1_1    | 49.87     | -0.15  | 0.02    | 0.97 |
| NGLY1_KO_2 | 49.56     | -0.12  | 0.05    | 1    |
| NGLY1_2    | 47.83     | -0.094 | 0       | 0.97 |

Supplement: Supplementary file 2267 [file 1]

IPI00397474.1|ESPL1

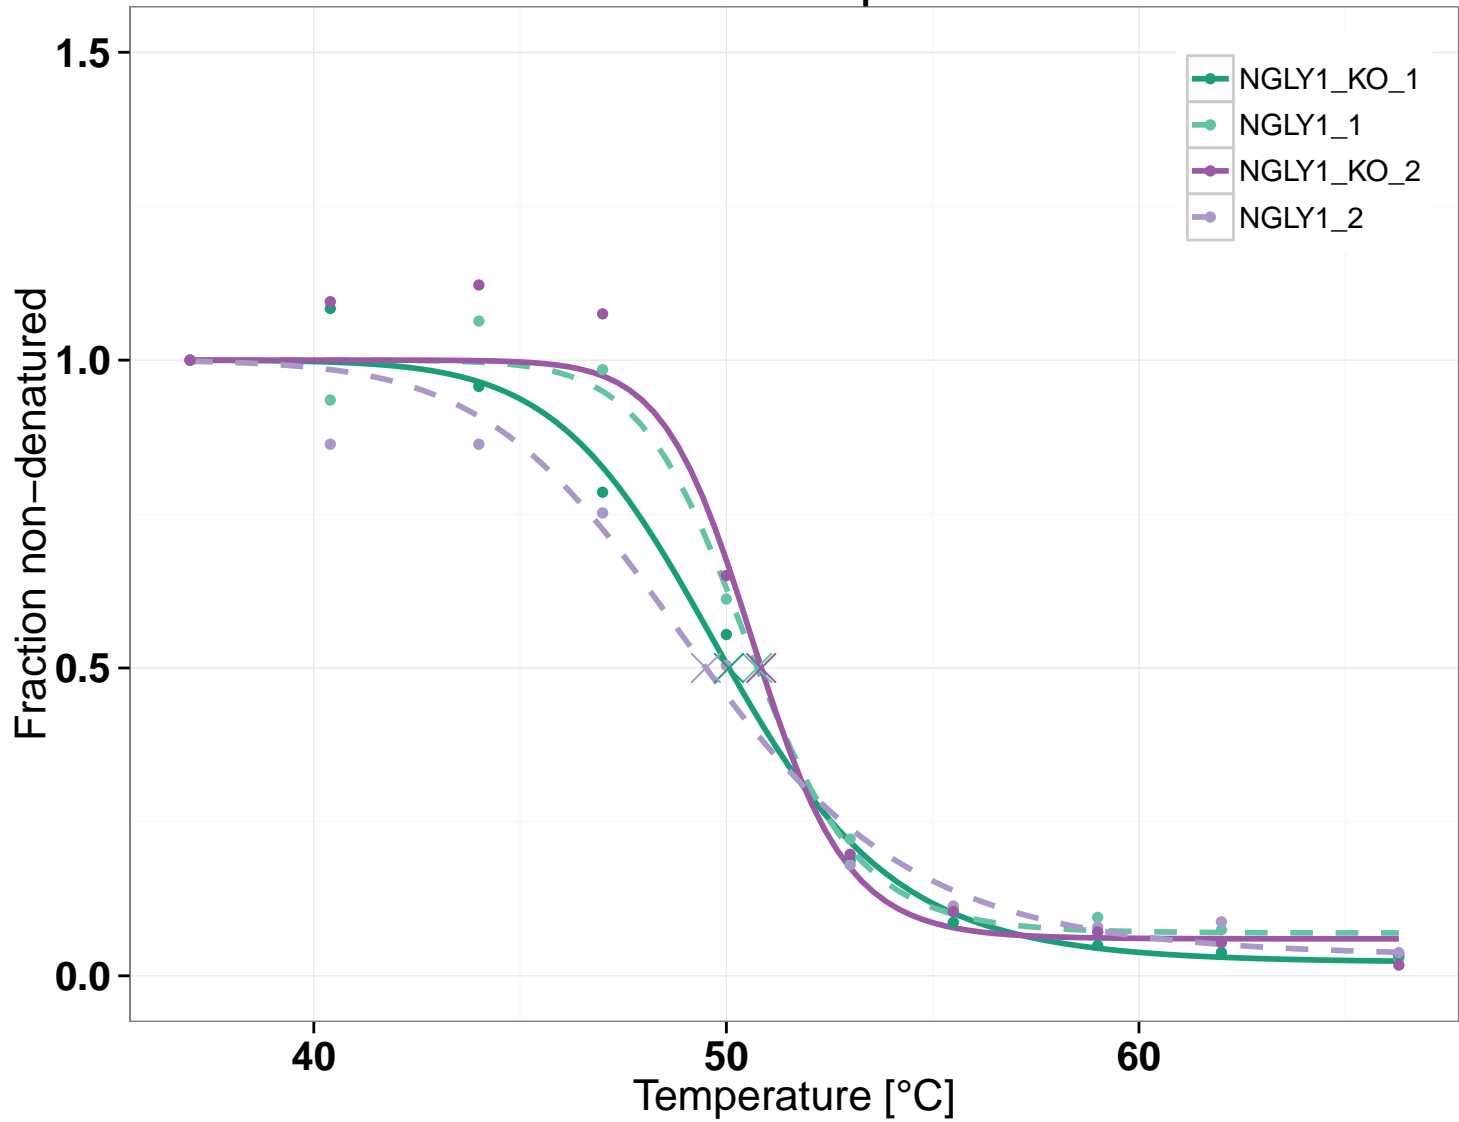

|            | meltPoint | slope  | plateau | R2   |
|------------|-----------|--------|---------|------|
| NGLY1_KO_1 | 50.06     | -0.12  | 0.02    | 0.99 |
| NGLY1_1    | 50.75     | -0.17  | 0.07    | 0.99 |
| NGLY1_KO_2 | 50.85     | -0.21  | 0.06    | 0.98 |
| NGLY1_2    | 49.5      | -0.093 | 0.03    | 0.98 |

Supplement: Supplementary file 2268 [file 1]

# IPI00793209.1|UBL7

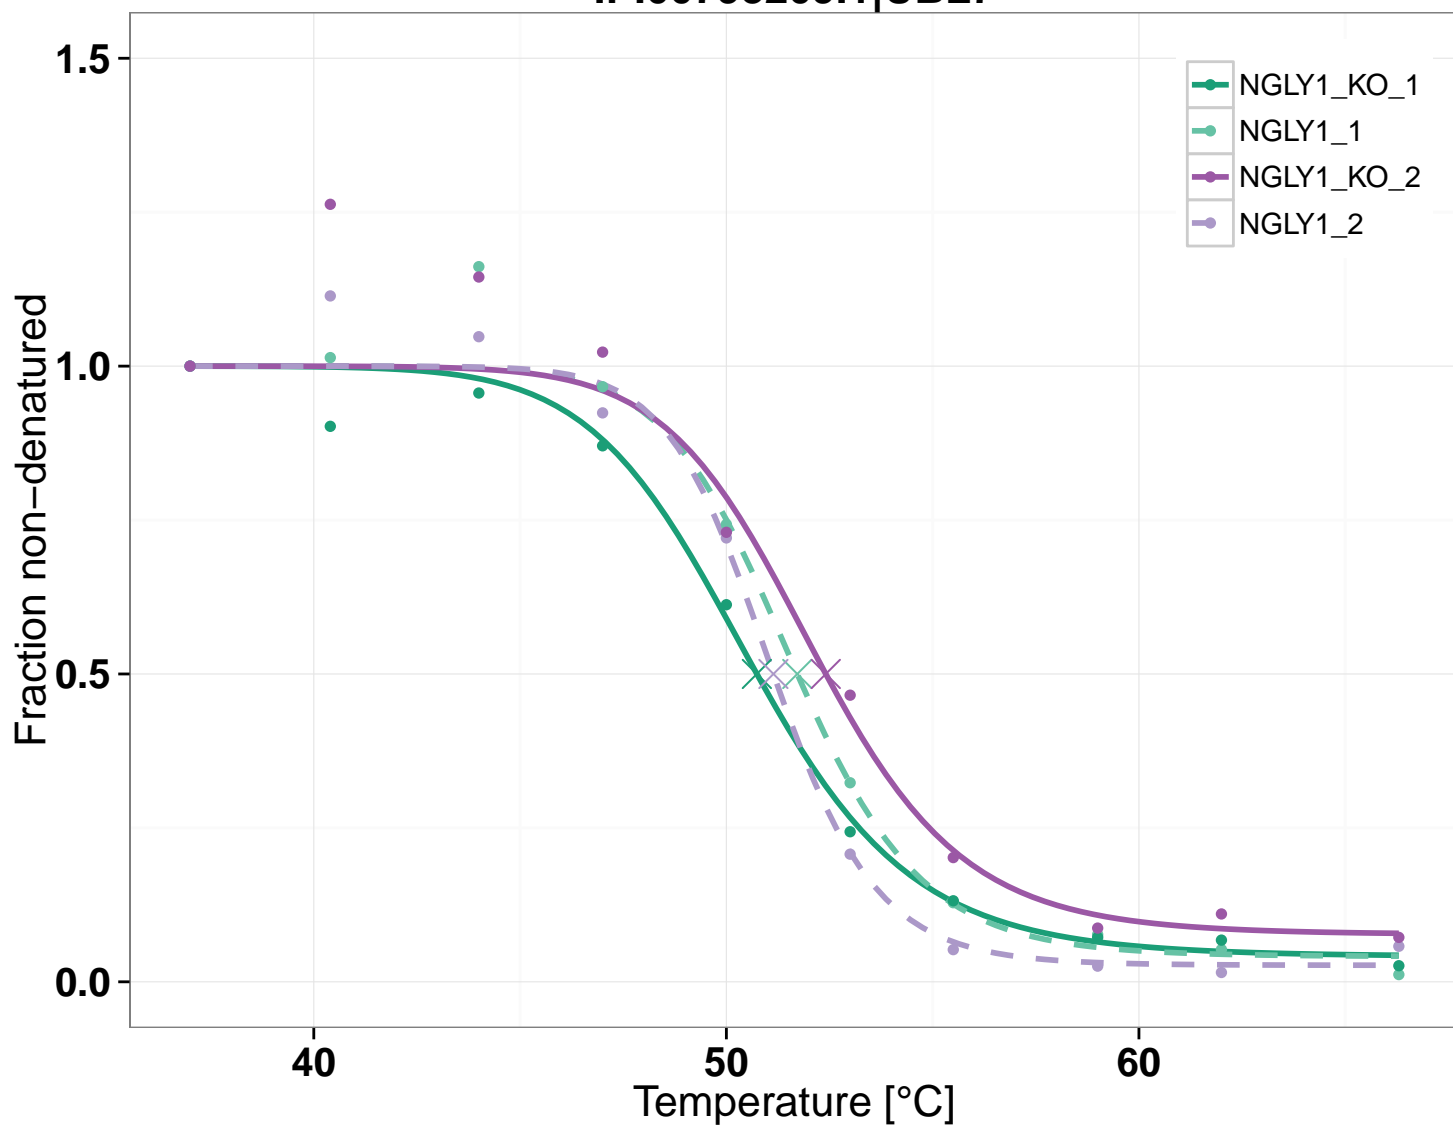

|            | meltPoint | slope | plateau | R2   |
|------------|-----------|-------|---------|------|
| NGLY1_KO_1 | 50.74     | -0.12 | 0.04    | 0.99 |
| NGLY1_1    | 51.72     | -0.15 | 0.04    | 0.99 |
| NGLY1_KO_2 | 52.41     | -0.13 | 0.08    | 0.95 |
| NGLY1_2    | 51.14     | -0.19 | 0.03    | 0.99 |

Supplement: Supplementary file 2269 [file 1]

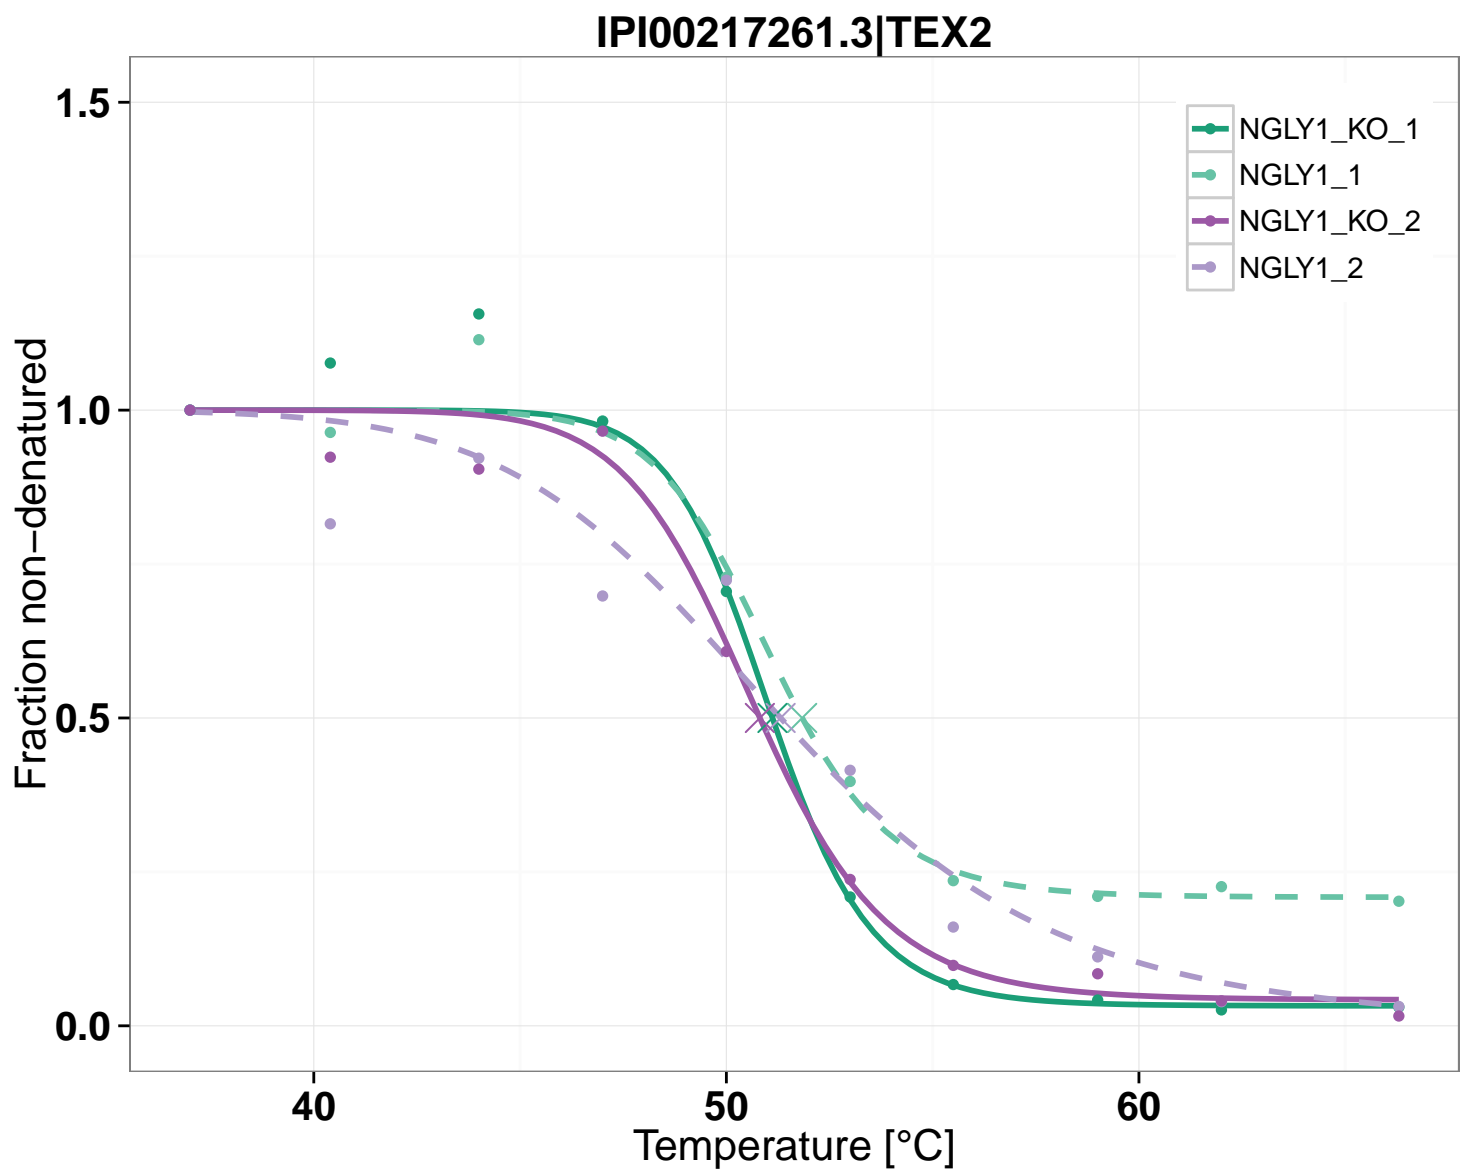

|            | meltPoint | slope  | plateau | R2   |
|------------|-----------|--------|---------|------|
| NGLY1_KO_1 | 51.12     | -0.2   | 0.03    | 0.99 |
| NGLY1_1    | 51.84     | -0.14  | 0.21    | 0.99 |
| NGLY1_KO_2 | 50.81     | -0.15  | 0.04    | 0.99 |
| NGLY1_2    | 51.32     | -0.074 | 0       | 0.95 |

Supplement: Supplementary file 2270 [file 1]

# IPI00871975.2|DHRS7B

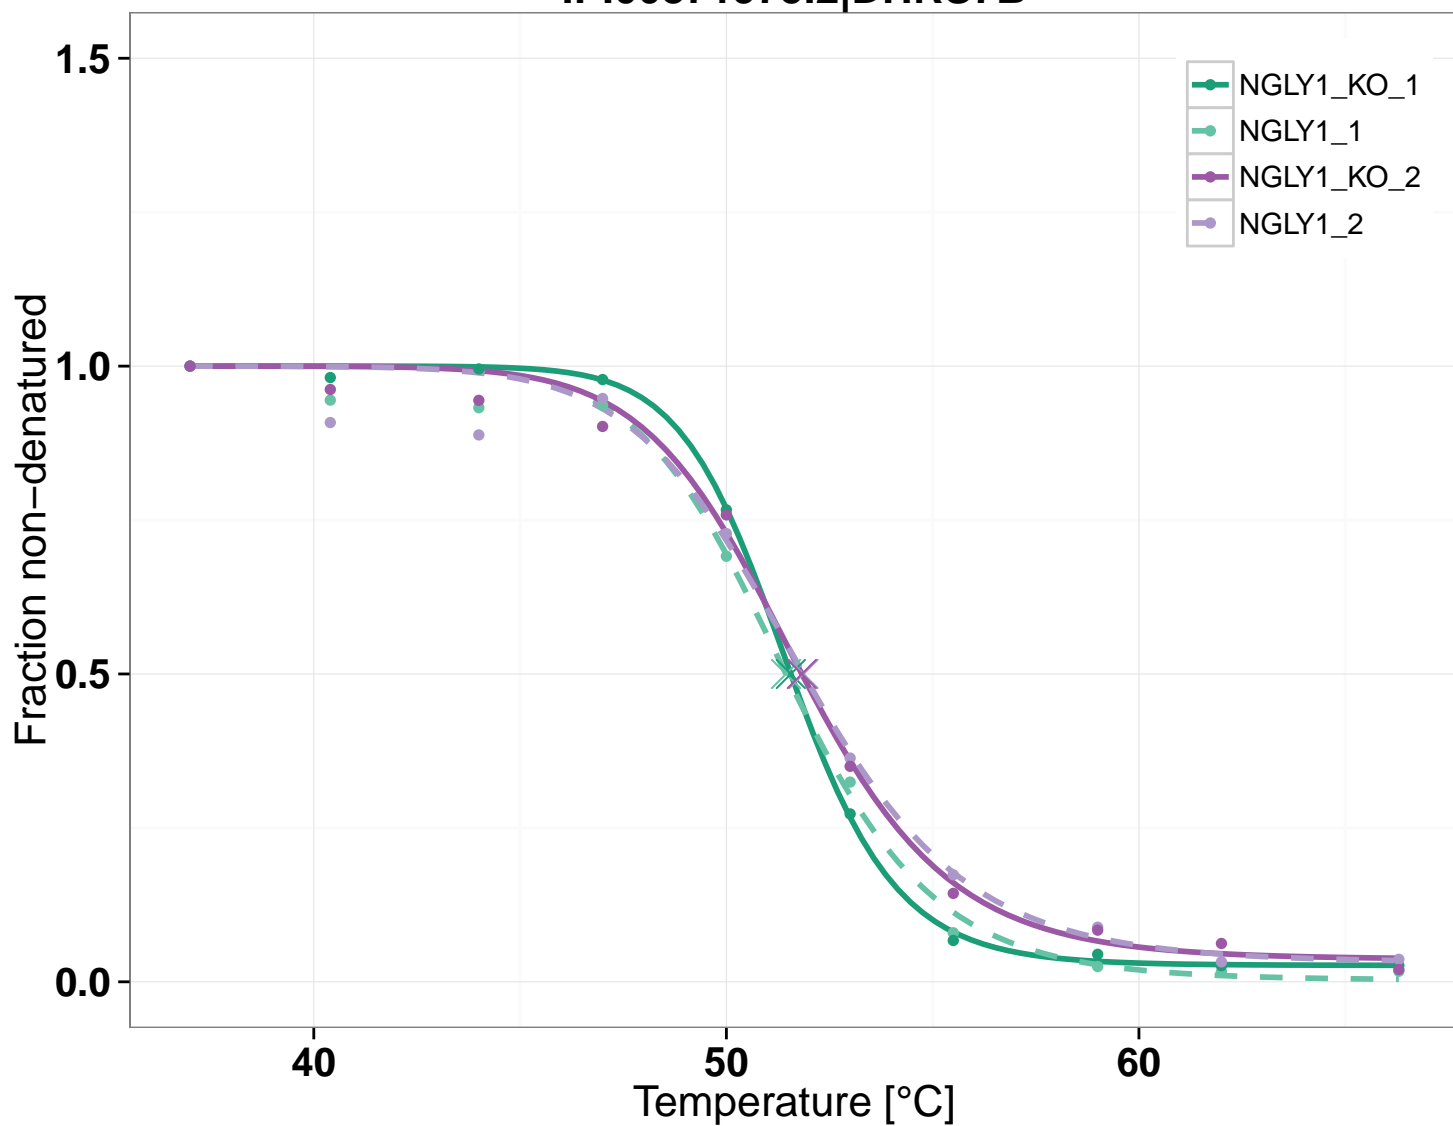

|            | meltPoint | slope | plateau | R2   |
|------------|-----------|-------|---------|------|
| NGLY1_KO_1 | 51.56     | -0.19 | 0.03    | 1    |
| NGLY1_1    | 51.45     | -0.14 | 0       | 1    |
| NGLY1_KO_2 | 51.83     | -0.13 | 0.04    | 1    |
| NGLY1_2    | 51.87     | -0.12 | 0.03    | 0.99 |

Supplement: Supplementary file 2271 [file 1]

# IPI00026850.1|TSPO

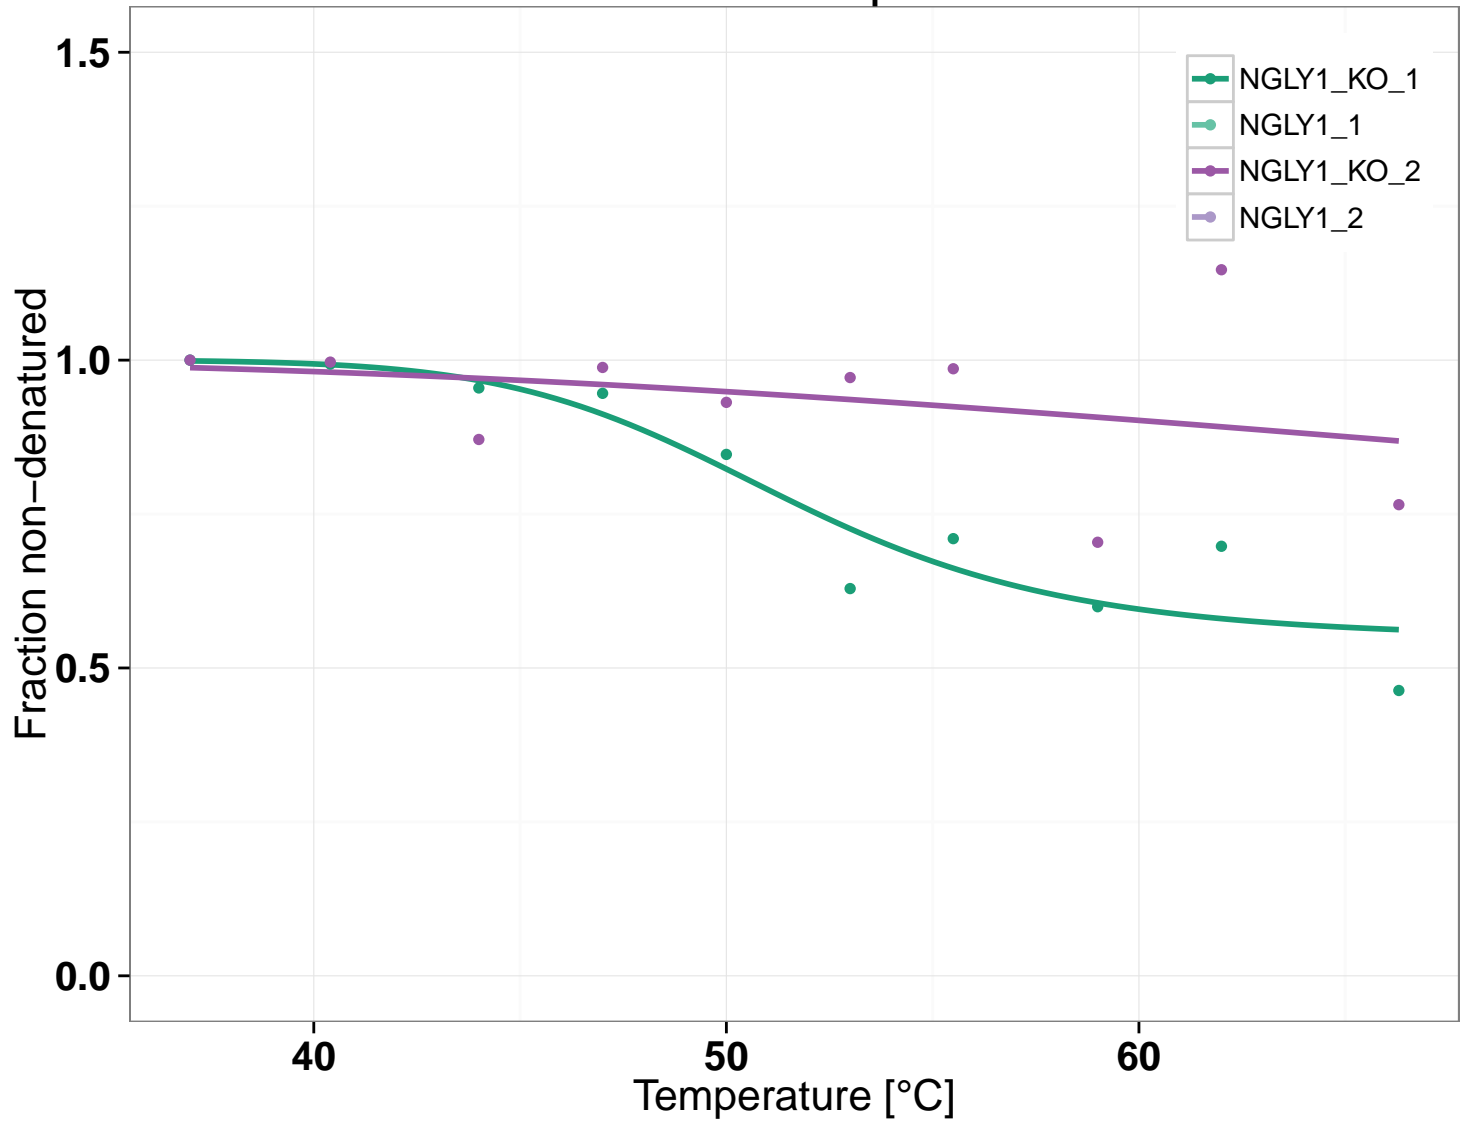

|            | meltPoint | slope  | plateau | R2   |
|------------|-----------|--------|---------|------|
| NGLY1_KO_1 | —         | -0.033 | 0.55    | 0.89 |
| NGLY1_1    | —         | —      | —       | —    |
| NGLY1_KO_2 | —         | —      | 0       | 0.09 |
| NGLY1_2    | —         | —      | —       | —    |

Supplement: Supplementary file 2272 [file 1]

IPI00217069.6|RPS6KB2

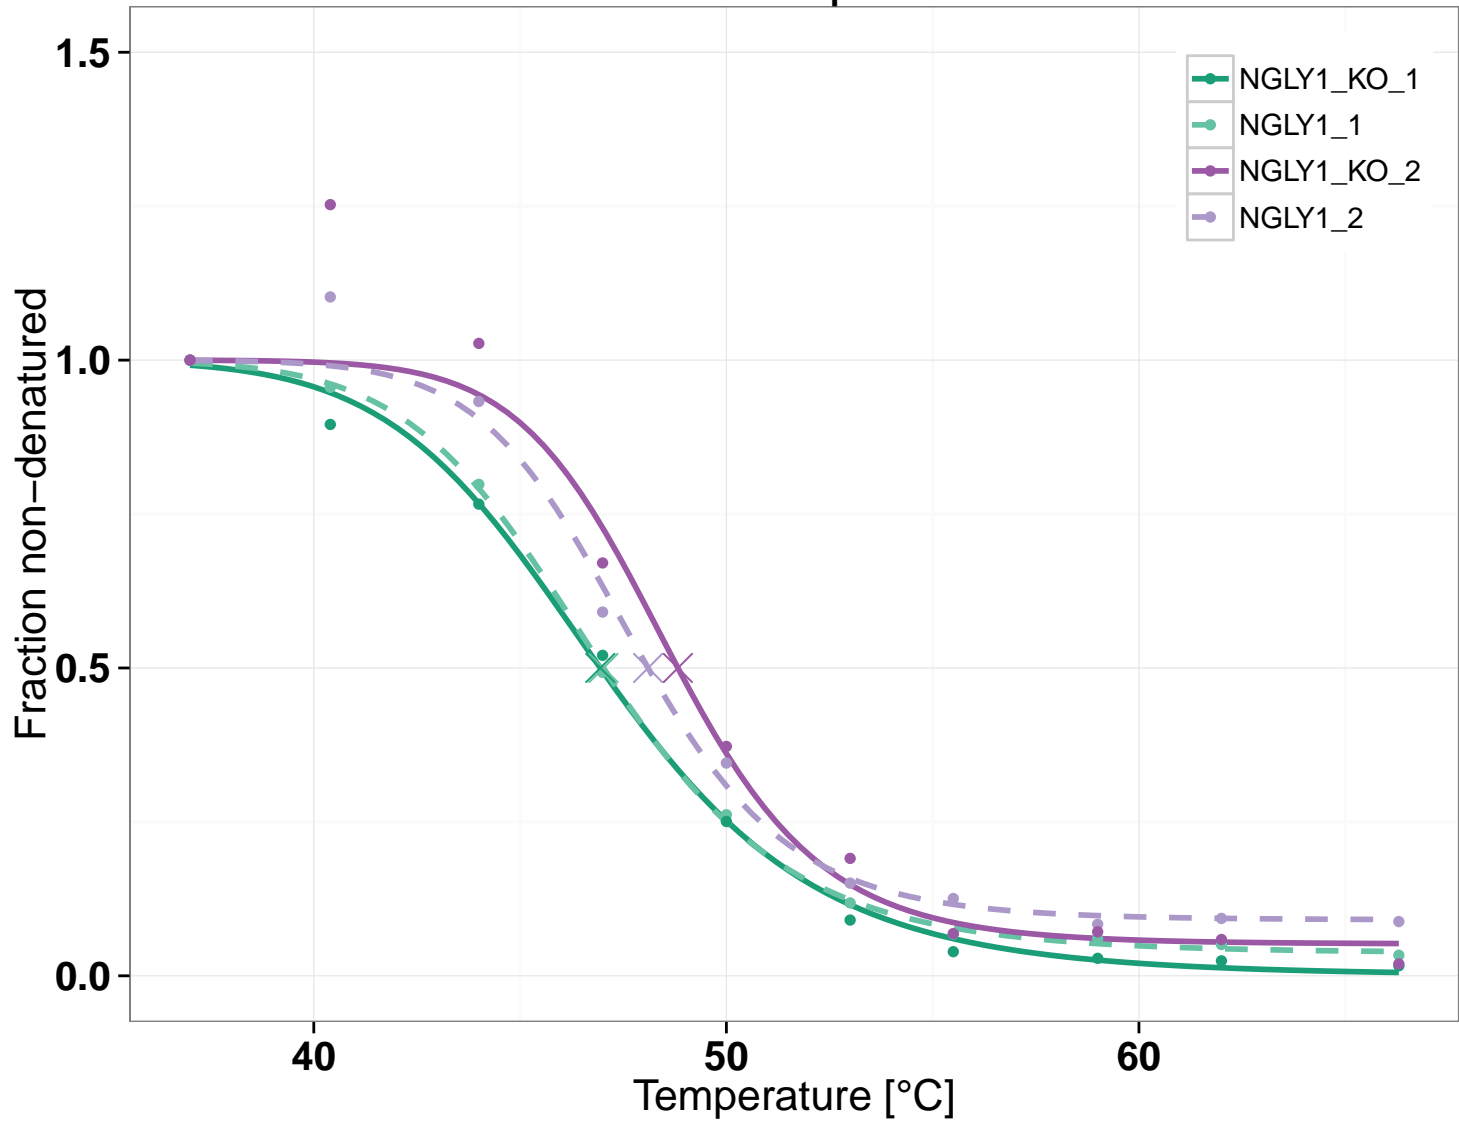

|            | meltPoint | slope  | plateau | R2   |
|------------|-----------|--------|---------|------|
| NGLY1_KO_1 | 46.95     | -0.096 | 0       | 1    |
| NGLY1_1    | 47.02     | -0.1   | 0.04    | 1    |
| NGLY1_KO_2 | 48.83     | -0.13  | 0.05    | 0.96 |
| NGLY1_2    | 48.1      | -0.12  | 0.09    | 0.99 |

Supplement: Supplementary file 2273 [file 1]

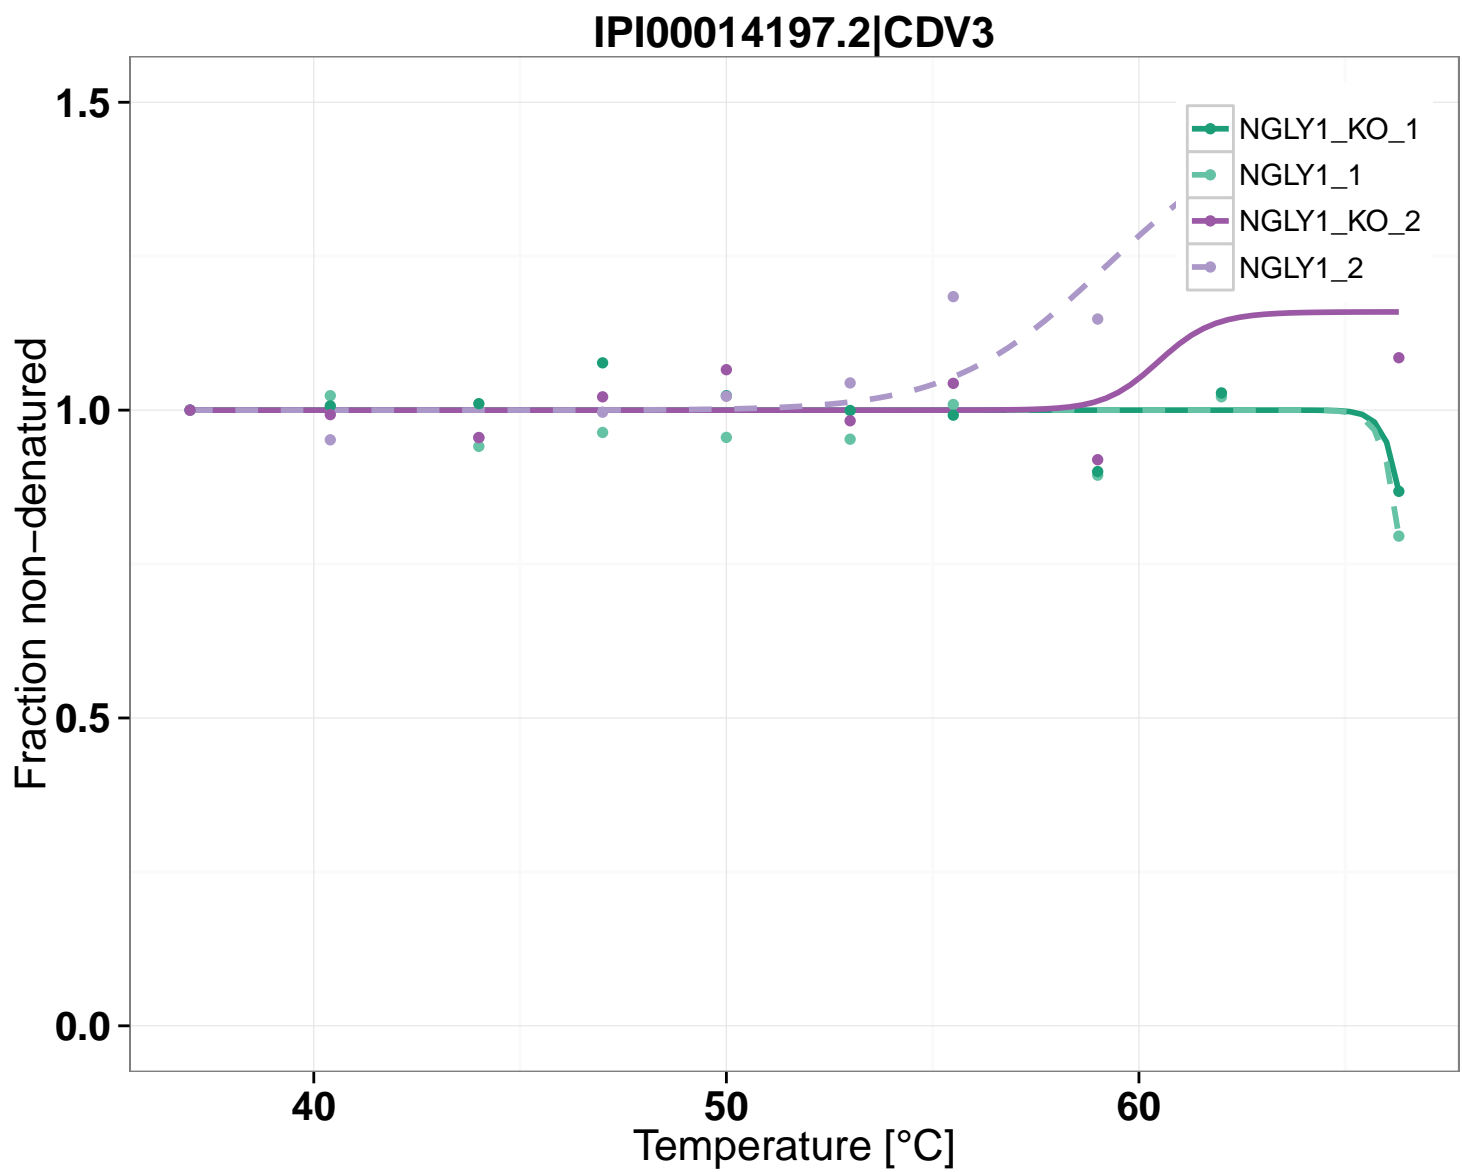

|            | meltPoint | slope | plateau | R2   |
|------------|-----------|-------|---------|------|
| NGLY1_KO_1 | —         | —     | 0       | 0.49 |
| NGLY1_1    | —         | —     | 0       | 0.51 |
| NGLY1_KO_2 | —         | 0.06  | 1.16    | 0.54 |
| NGLY1_2    | —         | 0.063 | 1.5     | 0.82 |

Supplement: Supplementary file 2274 [file 1]

# IPI00016447.5|COMMD8

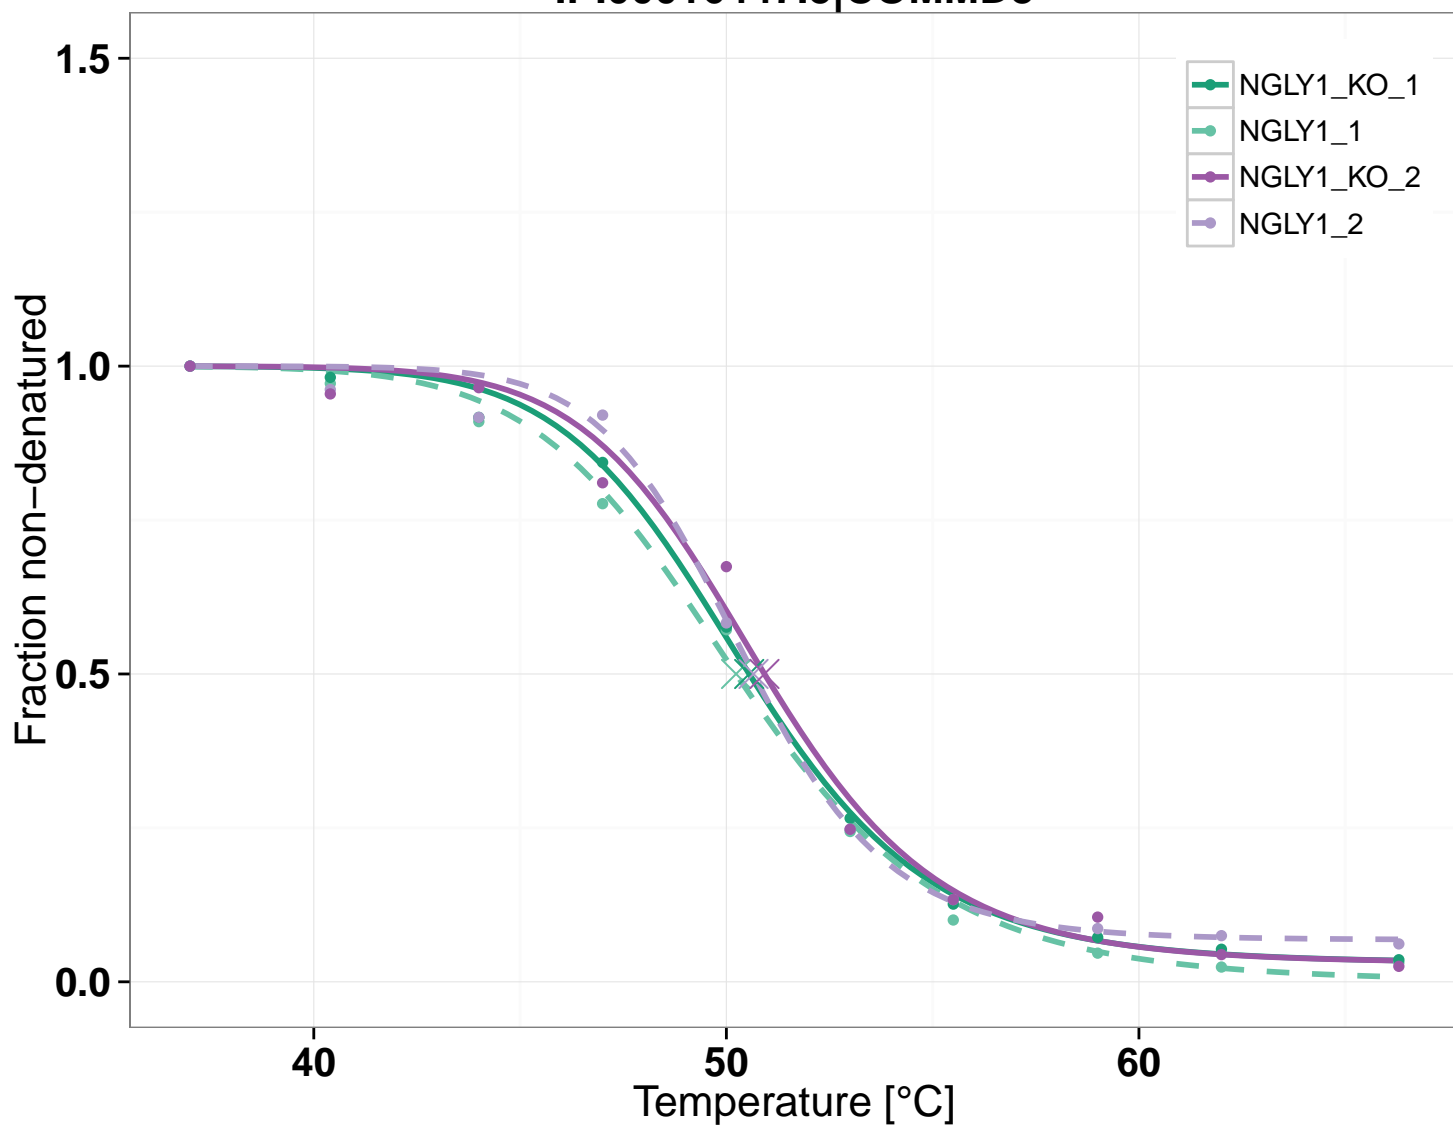

|            | meltPoint | slope | plateau | R2   |
|------------|-----------|-------|---------|------|
| NGLY1_KO_1 | 50.55     | -0.11 | 0.03    | 1    |
| NGLY1_1    | 50.24     | -0.1  | 0       | 1    |
| NGLY1_KO_2 | 50.92     | -0.11 | 0.03    | 0.99 |
| NGLY1_2    | 50.66     | -0.13 | 0.07    | 1    |

Supplement: Supplementary file 2275 [file 1]

IPI00514856.4|UBAP2L

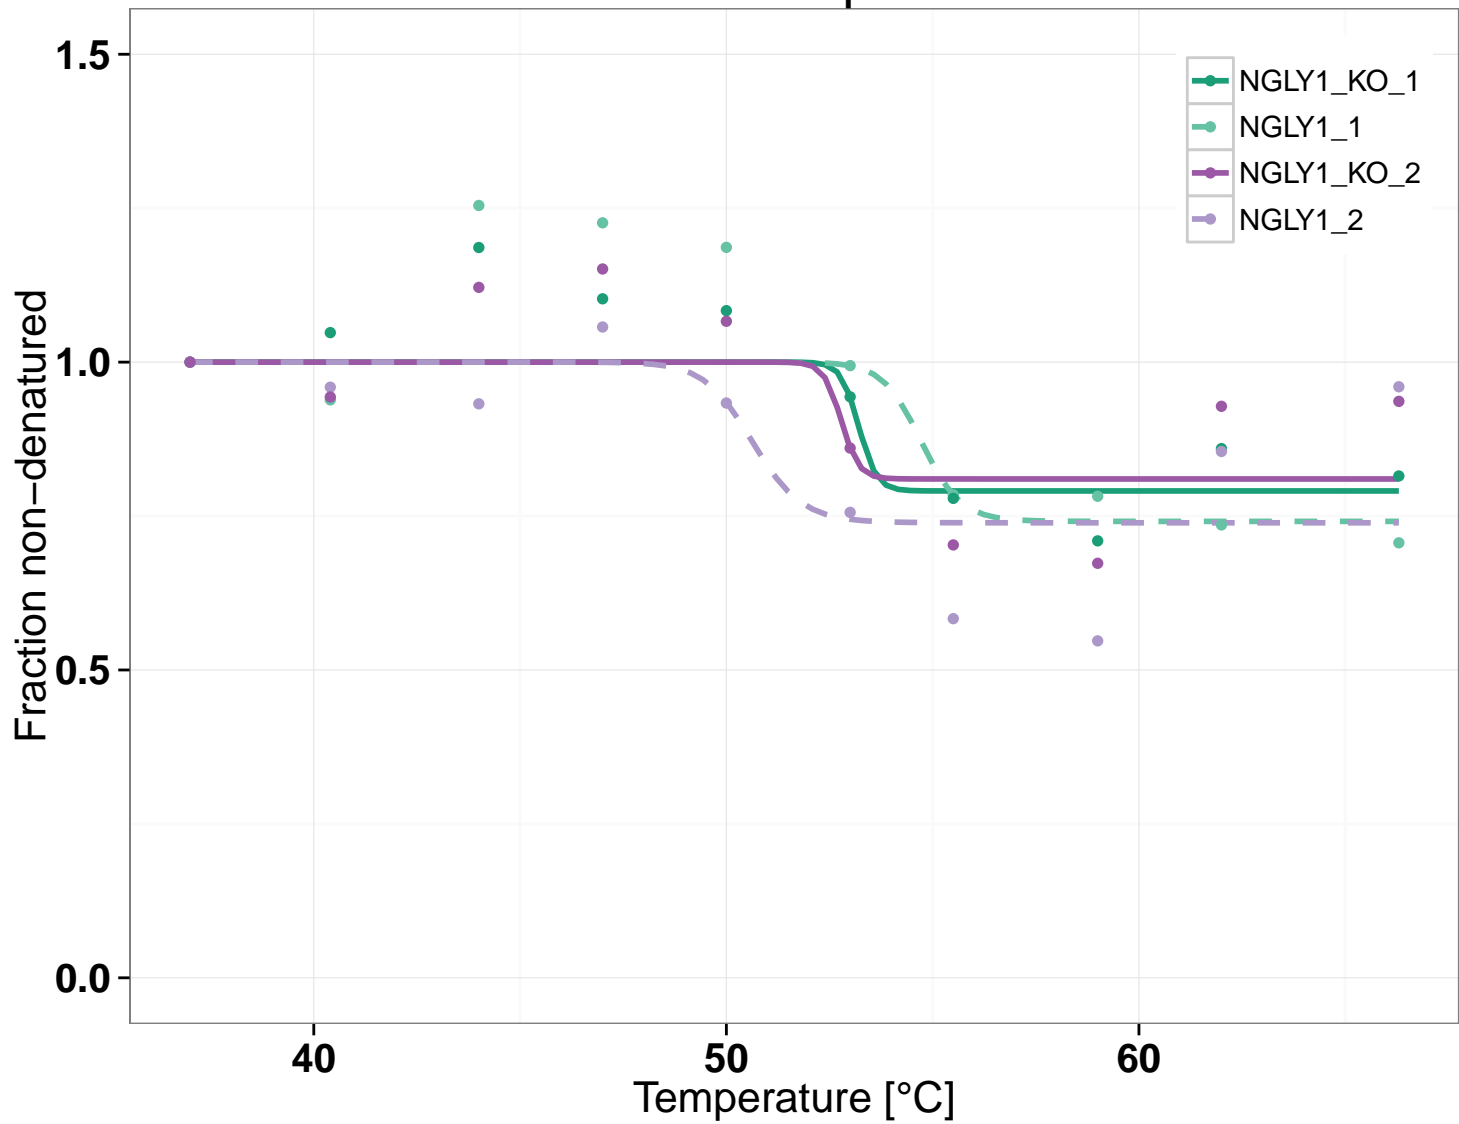

|            | meltPoint | slope | plateau | R2   |
|------------|-----------|-------|---------|------|
| NGLY1_KO_1 | —         | -0.25 | 0.79    | 0.7  |
| NGLY1_1    | —         | -0.14 | 0.74    | 0.6  |
| NGLY1_KO_2 | —         | -0.22 | 0.81    | 0.54 |
| NGLY1_2    | —         | -0.11 | 0.74    | 0.51 |

Supplement: Supplementary file 2276 [file 1]

IPI00640088.1|CSNK2B

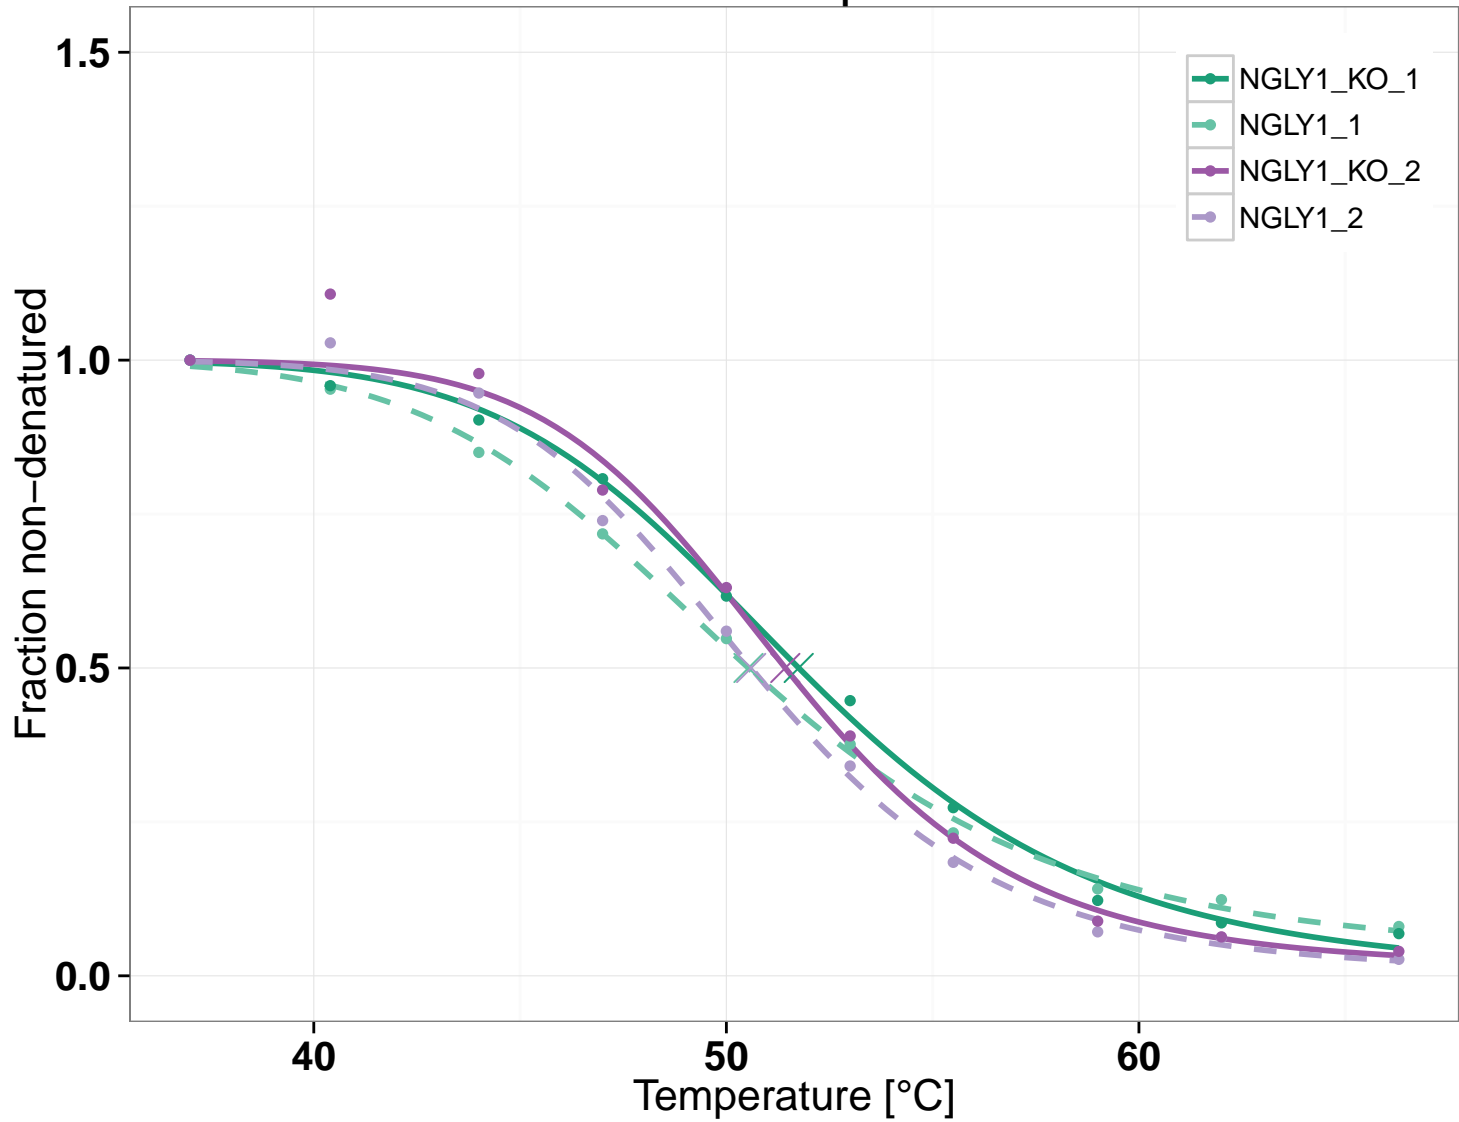

|            | meltPoint | slope  | plateau | R2   |
|------------|-----------|--------|---------|------|
| NGLY1_KO_1 | 51.75     | -0.069 | 0       | 1    |
| NGLY1_1    | 50.54     | -0.063 | 0.03    | 1    |
| NGLY1_KO_2 | 51.43     | -0.085 | 0.01    | 0.99 |
| NGLY1_2    | 50.6      | -0.082 | 0       | 1    |

Supplement: Supplementary file 2277 [file 1]

# IPI00008164.2|PREP

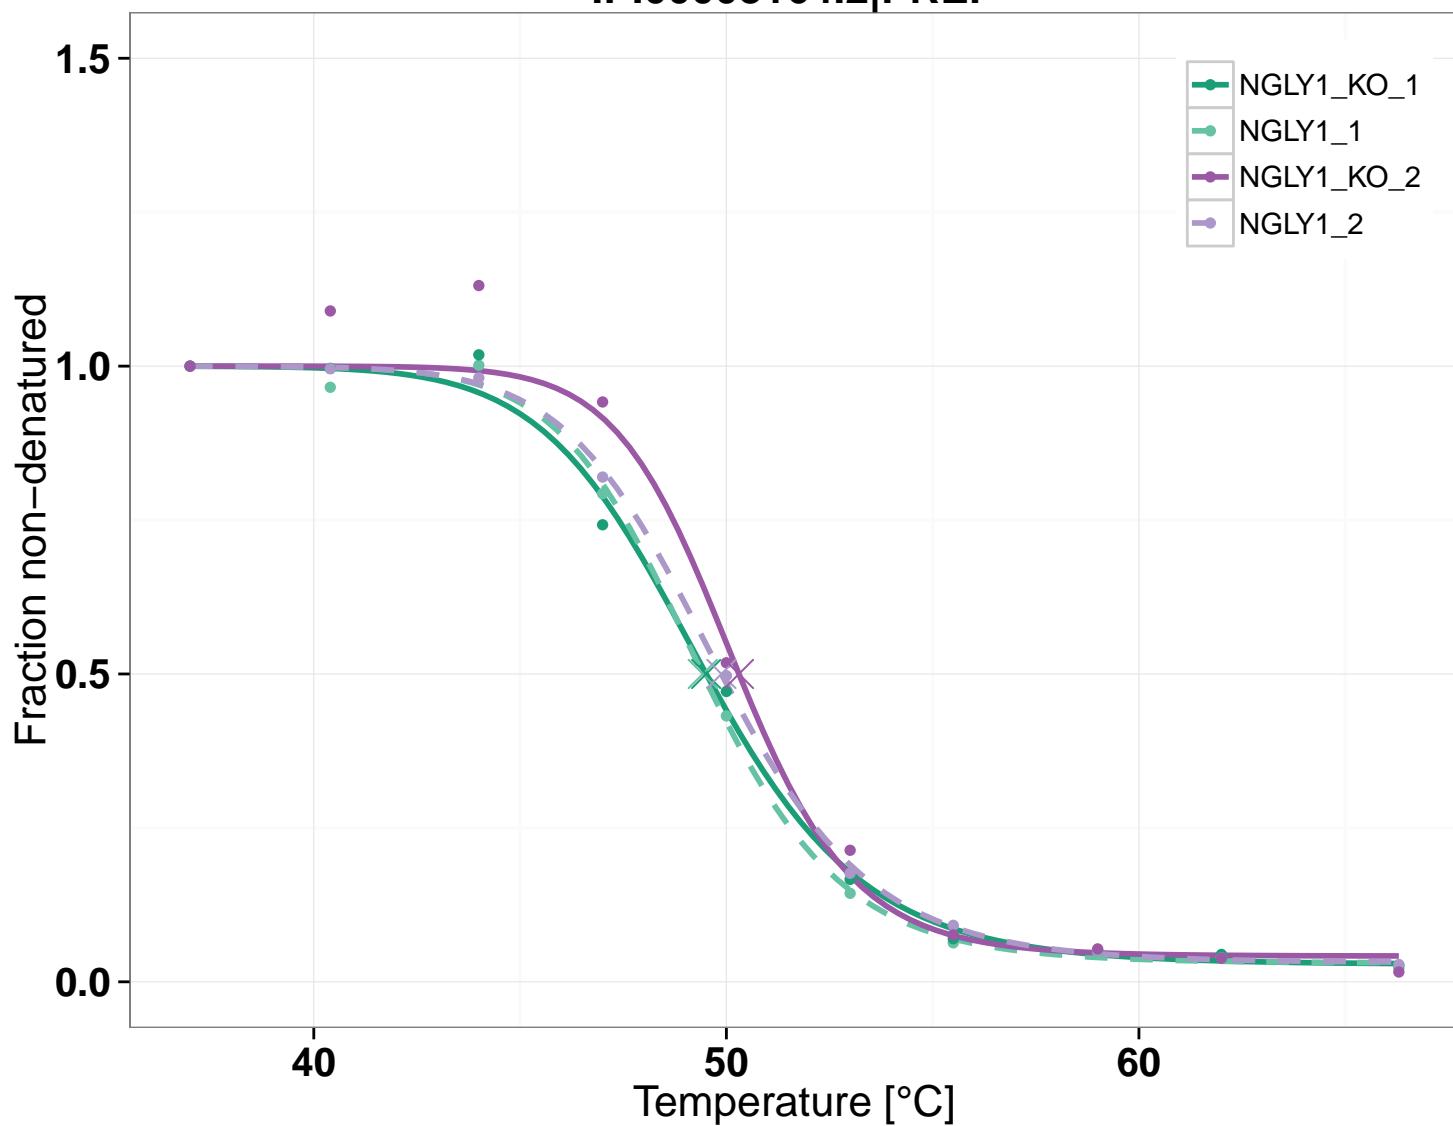

|            | meltPoint | slope | plateau | R2   |
|------------|-----------|-------|---------|------|
| NGLY1_KO_1 | 49.51     | -0.12 | 0.03    | 1    |
| NGLY1_1    | 49.43     | -0.14 | 0.03    | 1    |
| NGLY1_KO_2 | 50.3      | -0.17 | 0.04    | 0.99 |
| NGLY1_2    | 49.88     | -0.13 | 0.03    | 1    |

Supplement: Supplementary file 2278 [file 1]

# IPI00017746.2|BARD1

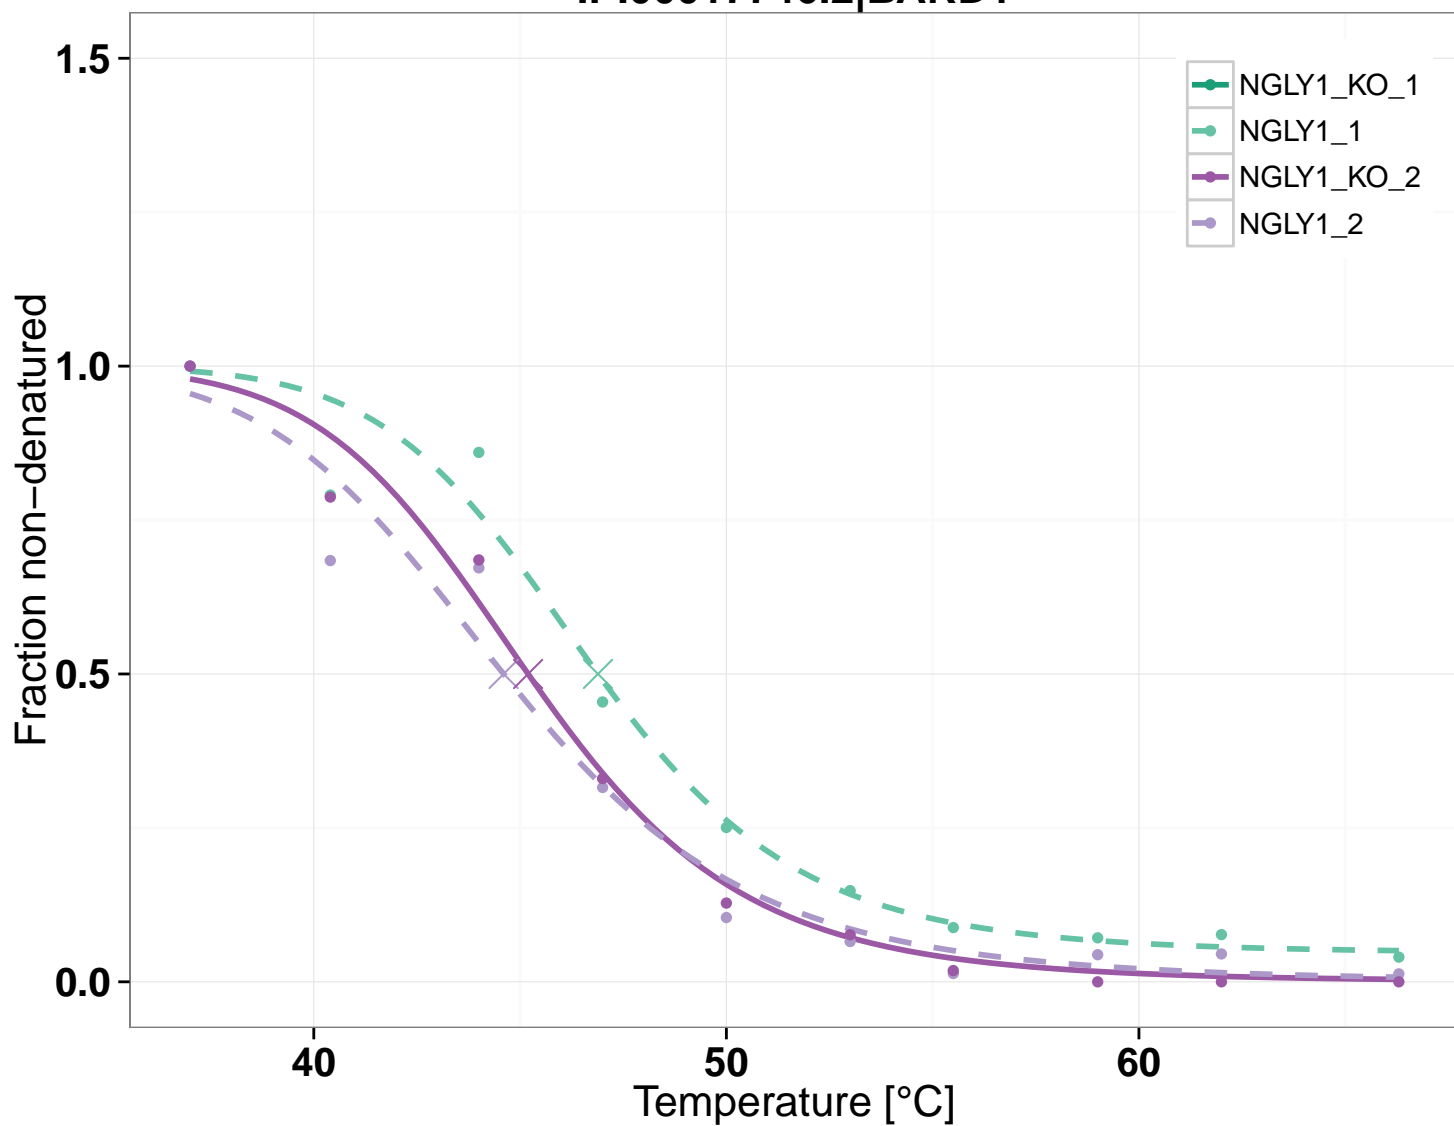

|            | meltPoint | slope  | plateau | R2   |
|------------|-----------|--------|---------|------|
| NGLY1_KO_1 | —         | —      | —       | —    |
| NGLY1_1    | 46.89     | -0.094 | 0.05    | 0.97 |
| NGLY1_KO_2 | 45.19     | -0.097 | 0       | 0.99 |
| NGLY1_2    | 44.6      | -0.085 | 0       | 0.96 |

Supplement: Supplementary file 2279 [file 1]

IPI00749429.1|TTYH3

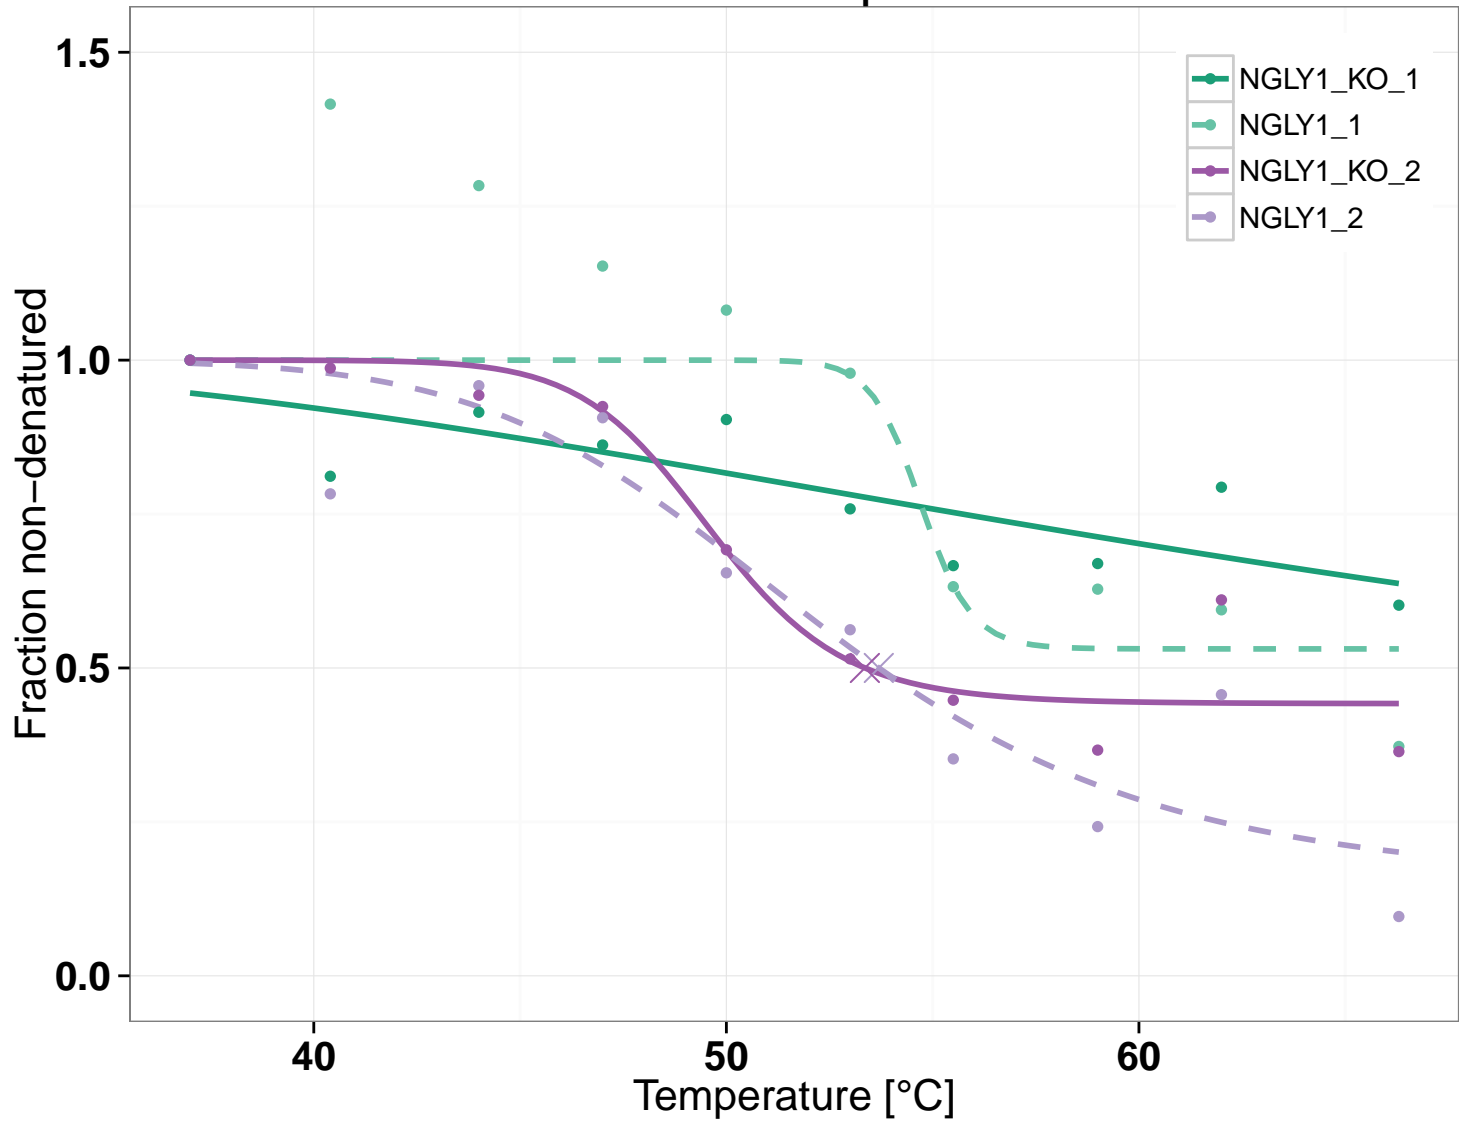

|            | meltPoint | slope  | plateau | R2   |
|------------|-----------|--------|---------|------|
| NGLY1_KO_1 | -         | -0.012 | 0.13    | 0.67 |
| NGLY1_1    | -         | -0.19  | 0.53    | 0.69 |
| NGLY1_KO_2 | 53.36     | -0.087 | 0.44    | 0.93 |
| NGLY1_2    | 53.7      | -0.052 | 0.14    | 0.87 |

Supplement: Supplementary file 2280 [file 1]

# IPI00873829.1|ACAA2

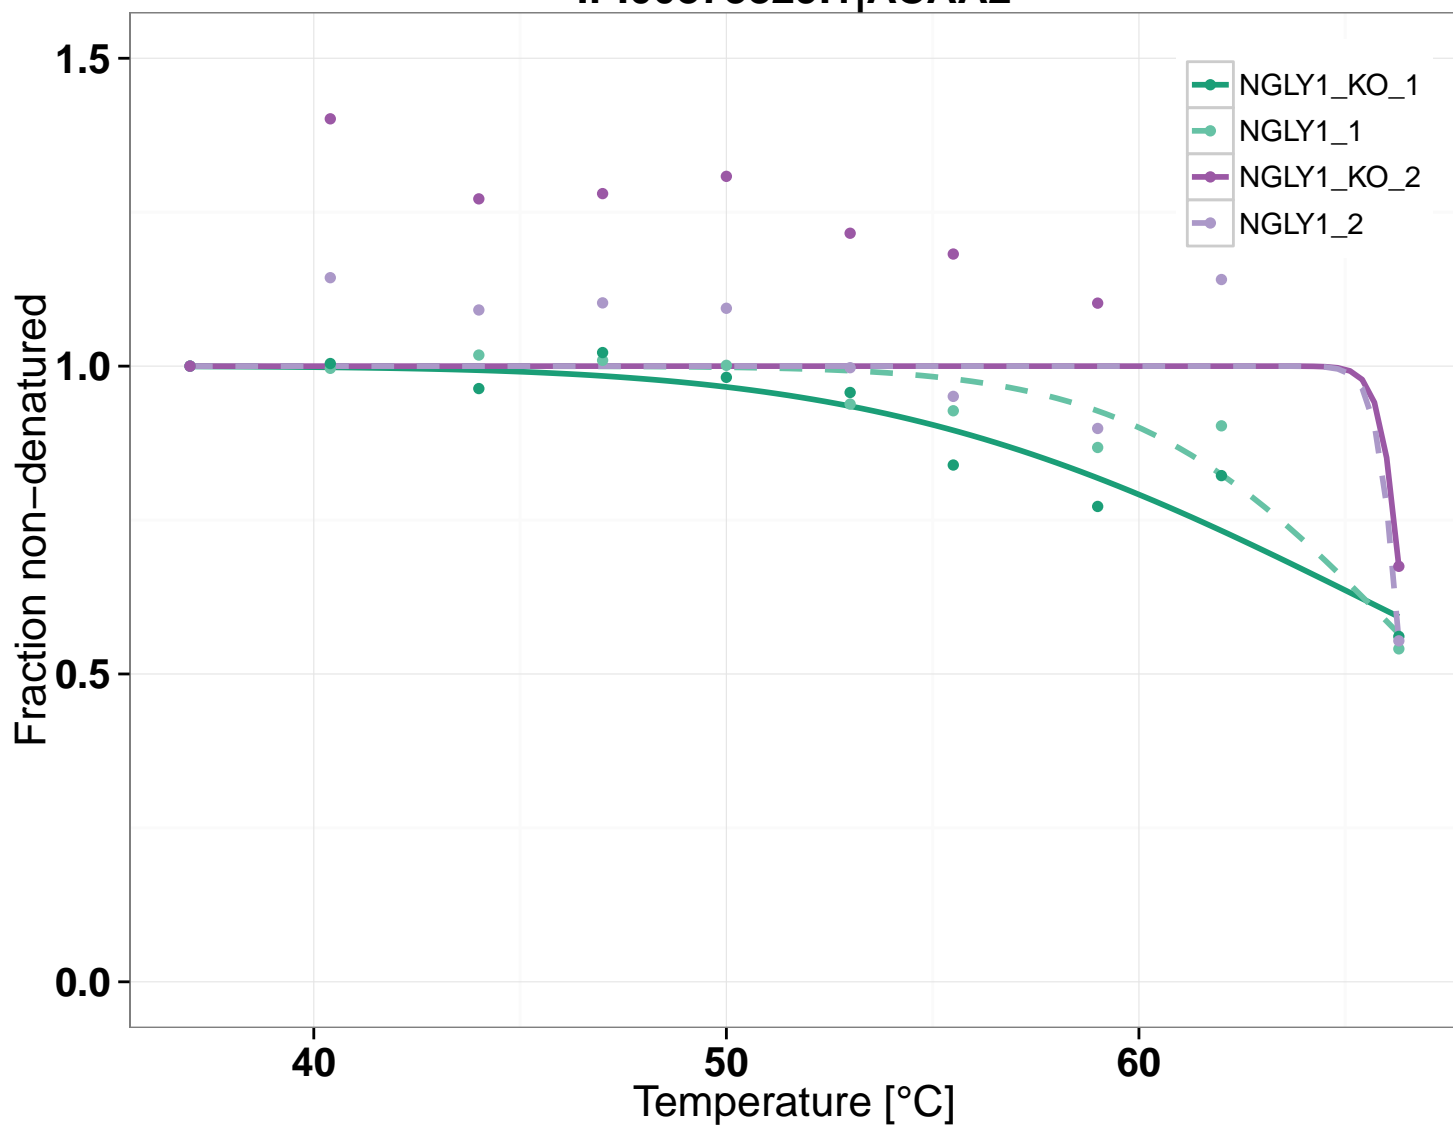

|            | meltPoint | slope  | plateau | R2    |
|------------|-----------|--------|---------|-------|
| NGLY1_KO_1 | —         | -0.033 | 0       | 0.91  |
| NGLY1_1    | —         | —      | 0       | 0.91  |
| NGLY1_KO_2 | —         | —      | 0       | -0.56 |
| NGLY1_2    | —         | —      | 0       | 0.71  |

Supplement: Supplementary file 2281 [file 1]

IPI00056499.1|ZNF622

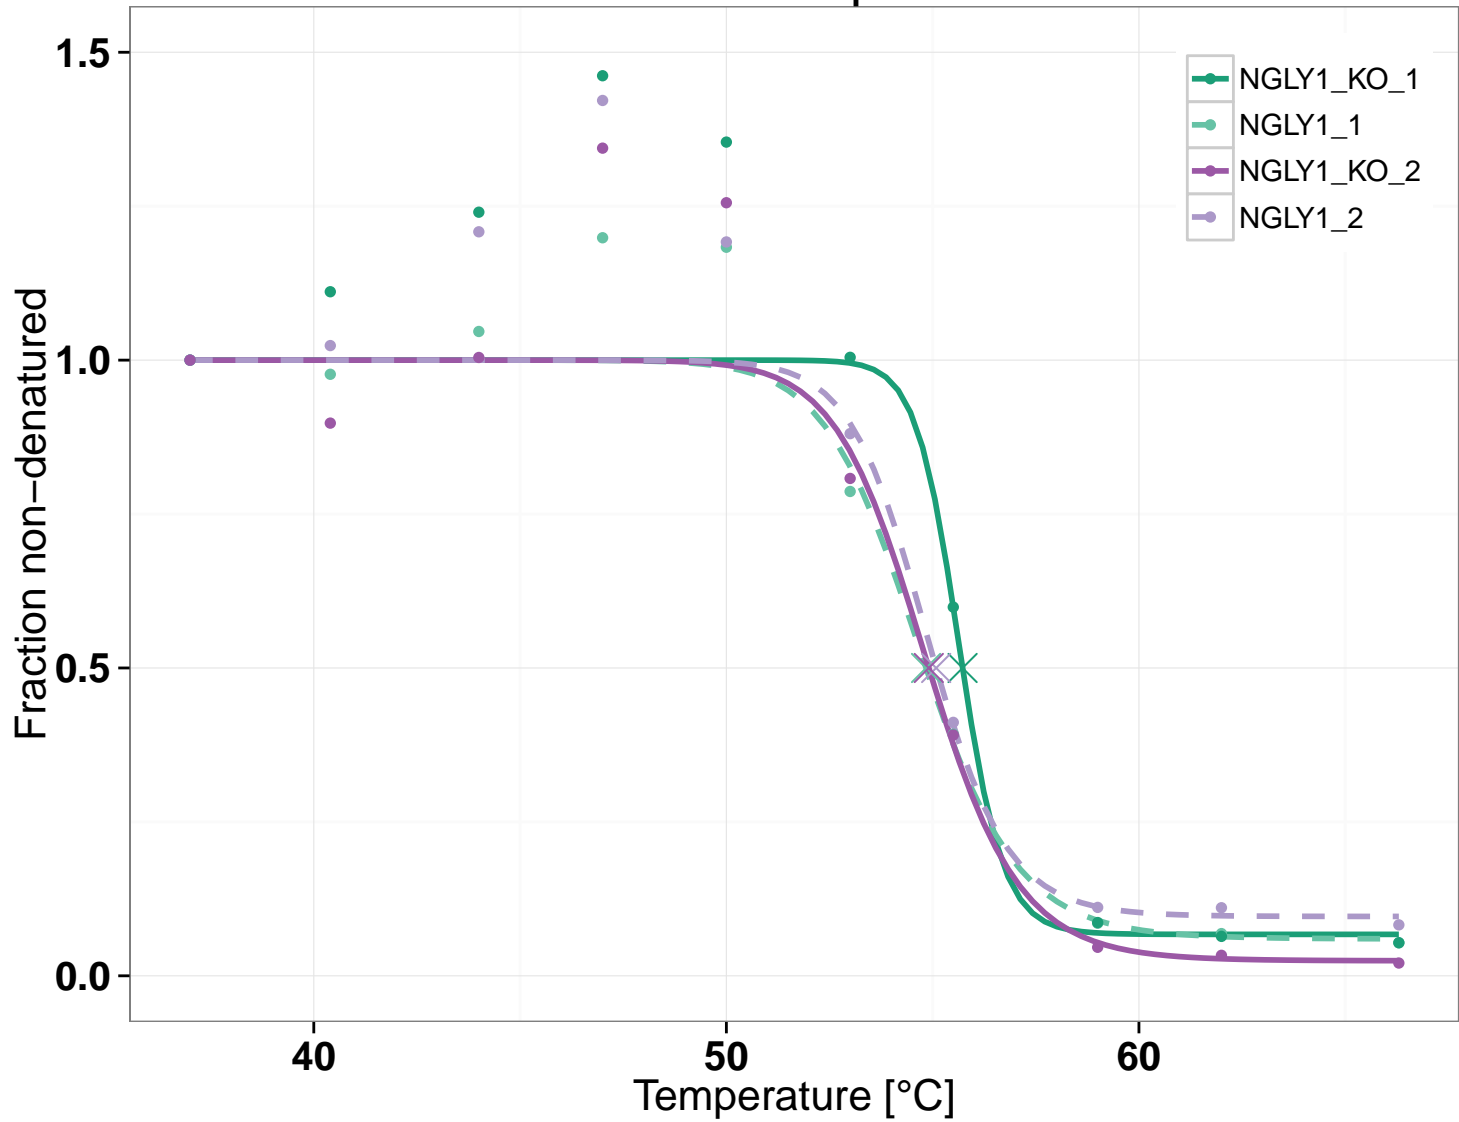

|            | meltPoint | slope | plateau | R2   |
|------------|-----------|-------|---------|------|
| NGLY1_KO_1 | 55.73     | -0.44 | 0.07    | 0.85 |
| NGLY1_1    | 54.84     | -0.2  | 0.06    | 0.96 |
| NGLY1_KO_2 | 54.91     | -0.22 | 0.02    | 0.92 |
| NGLY1_2    | 55.09     | -0.24 | 0.1     | 0.89 |

Supplement: Supplementary file 2282 [file 1]

IPI00470883.2|STAG2

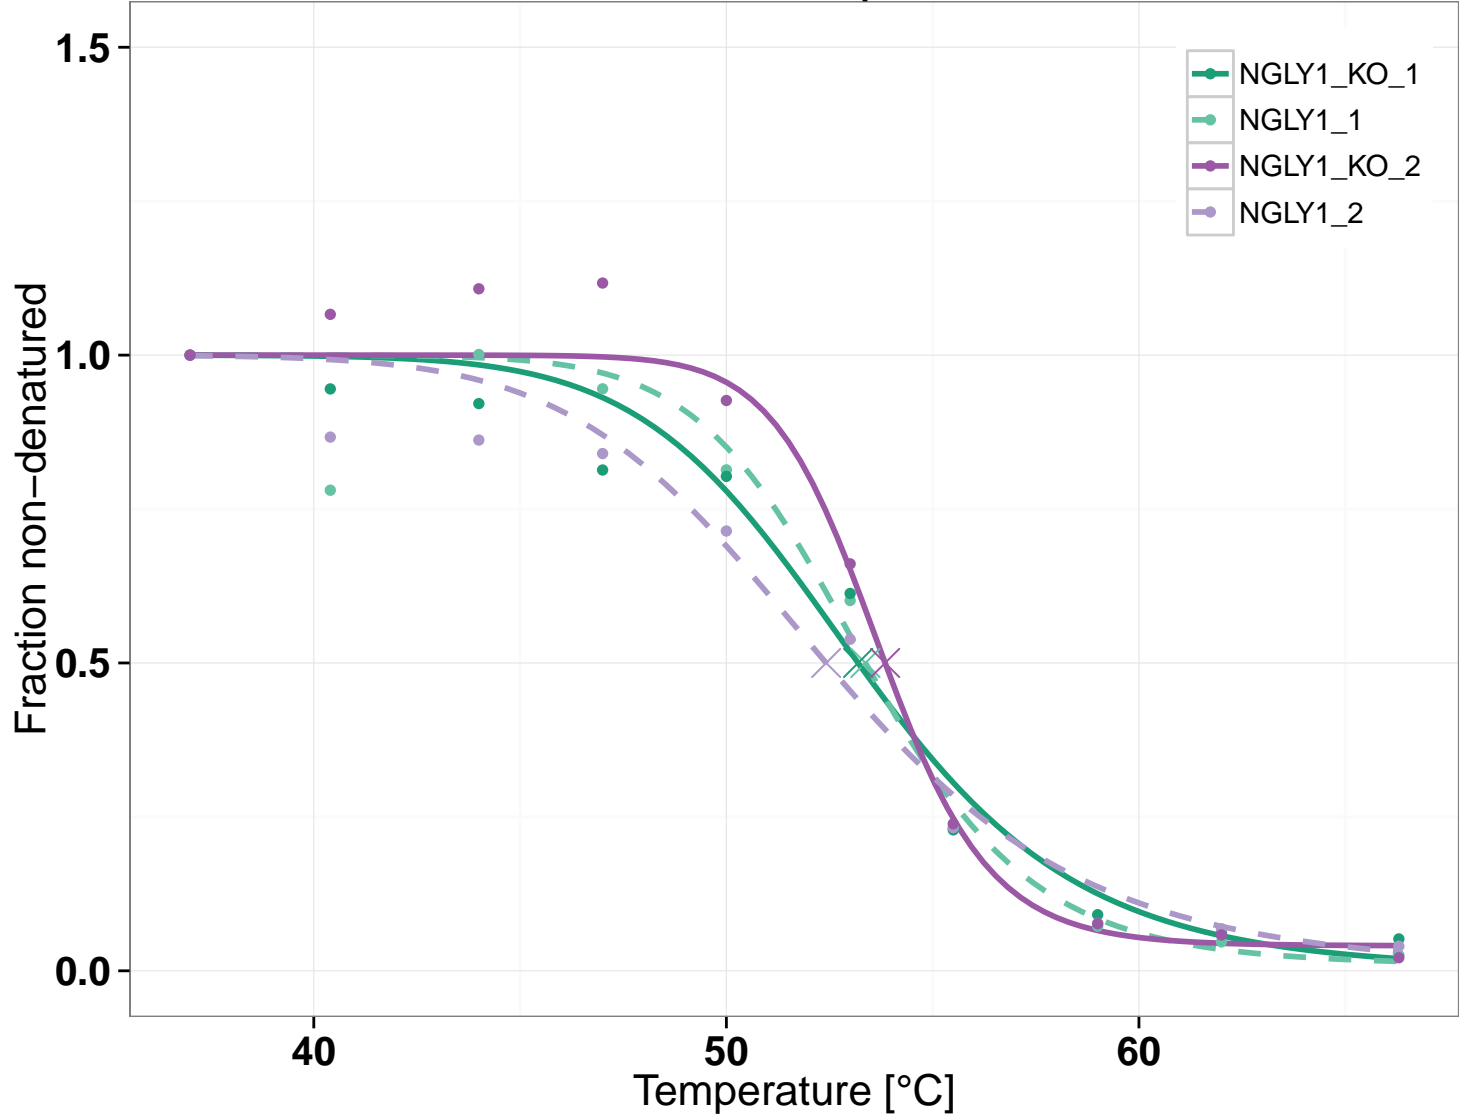

|            | meltPoint | slope  | plateau | R2   |
|------------|-----------|--------|---------|------|
| NGLY1_KO_1 | 53.19     | -0.094 | 0       | 0.97 |
| NGLY1_1    | 53.37     | -0.12  | 0.01    | 0.96 |
| NGLY1_KO_2 | 53.85     | -0.18  | 0.04    | 0.98 |
| NGLY1_2    | 52.42     | -0.08  | 0       | 0.97 |

Supplement: Supplementary file 2283 [file 1]

# IPI00304442.4|PAPOLG

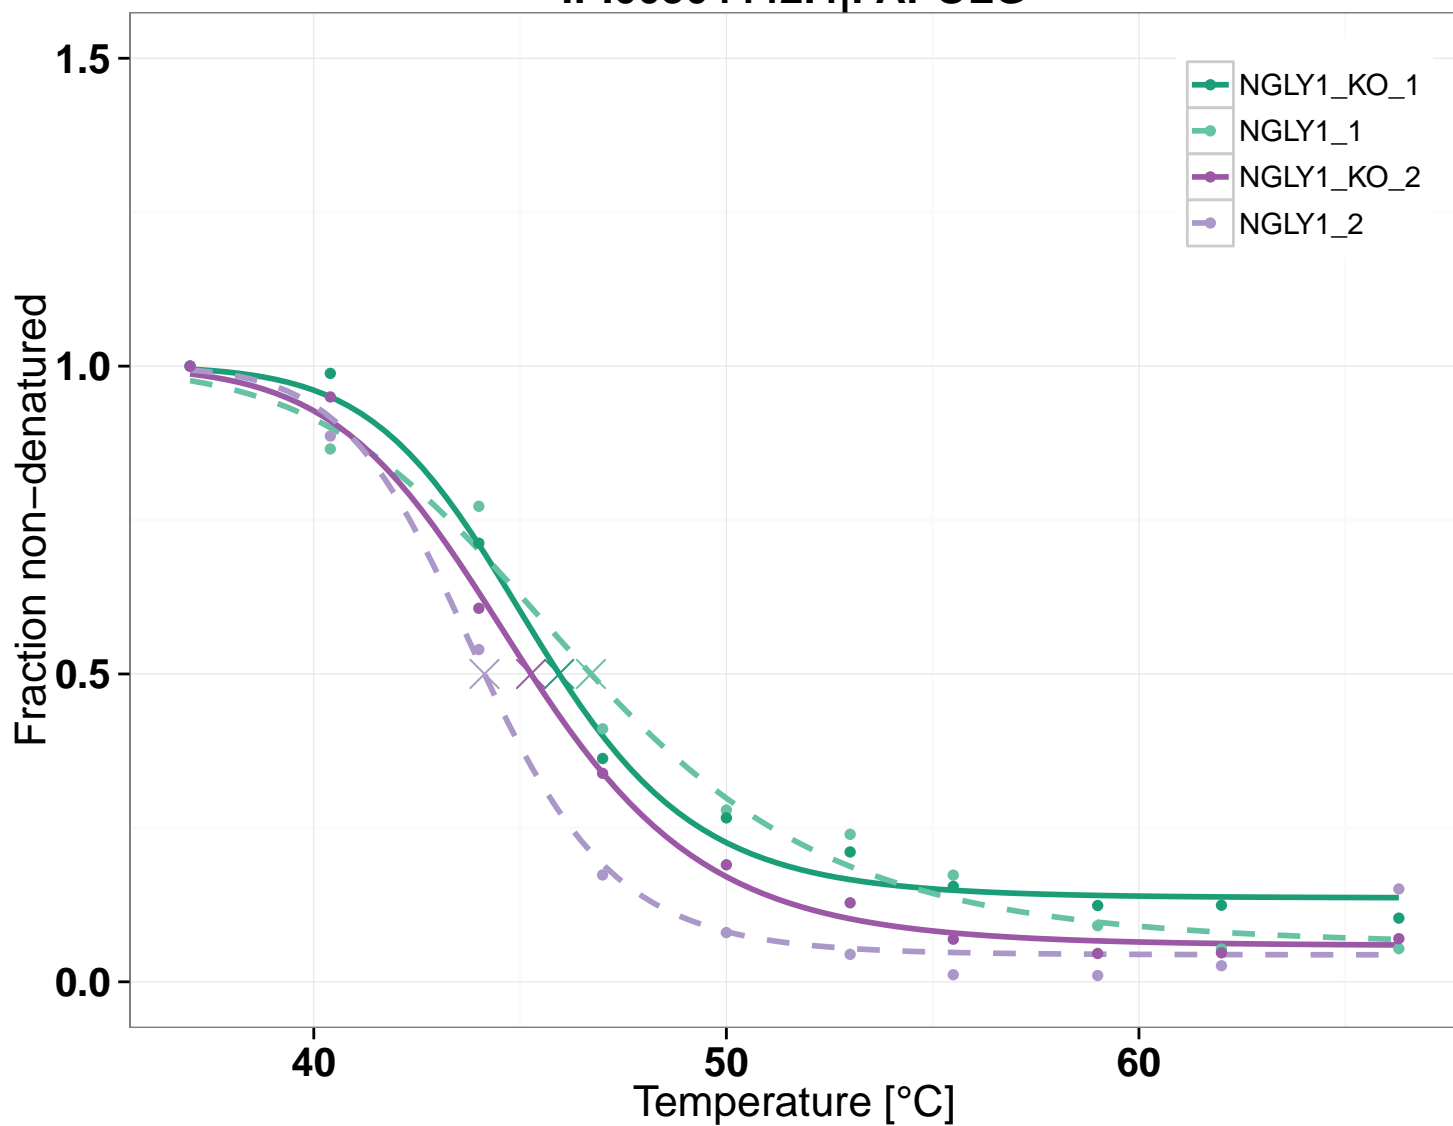

|            | meltPoint | slope  | plateau | R2   |
|------------|-----------|--------|---------|------|
| NGLY1_KO_1 | 45.95     | -0.11  | 0.14    | 0.99 |
| NGLY1_1    | 46.72     | -0.075 | 0.06    | 0.99 |
| NGLY1_KO_2 | 45.27     | -0.11  | 0.06    | 1    |
| NGLY1_2    | 44.14     | -0.15  | 0.04    | 0.99 |

Supplement: Supplementary file 2284 [file 1]

IPI00394788.4|AARS2

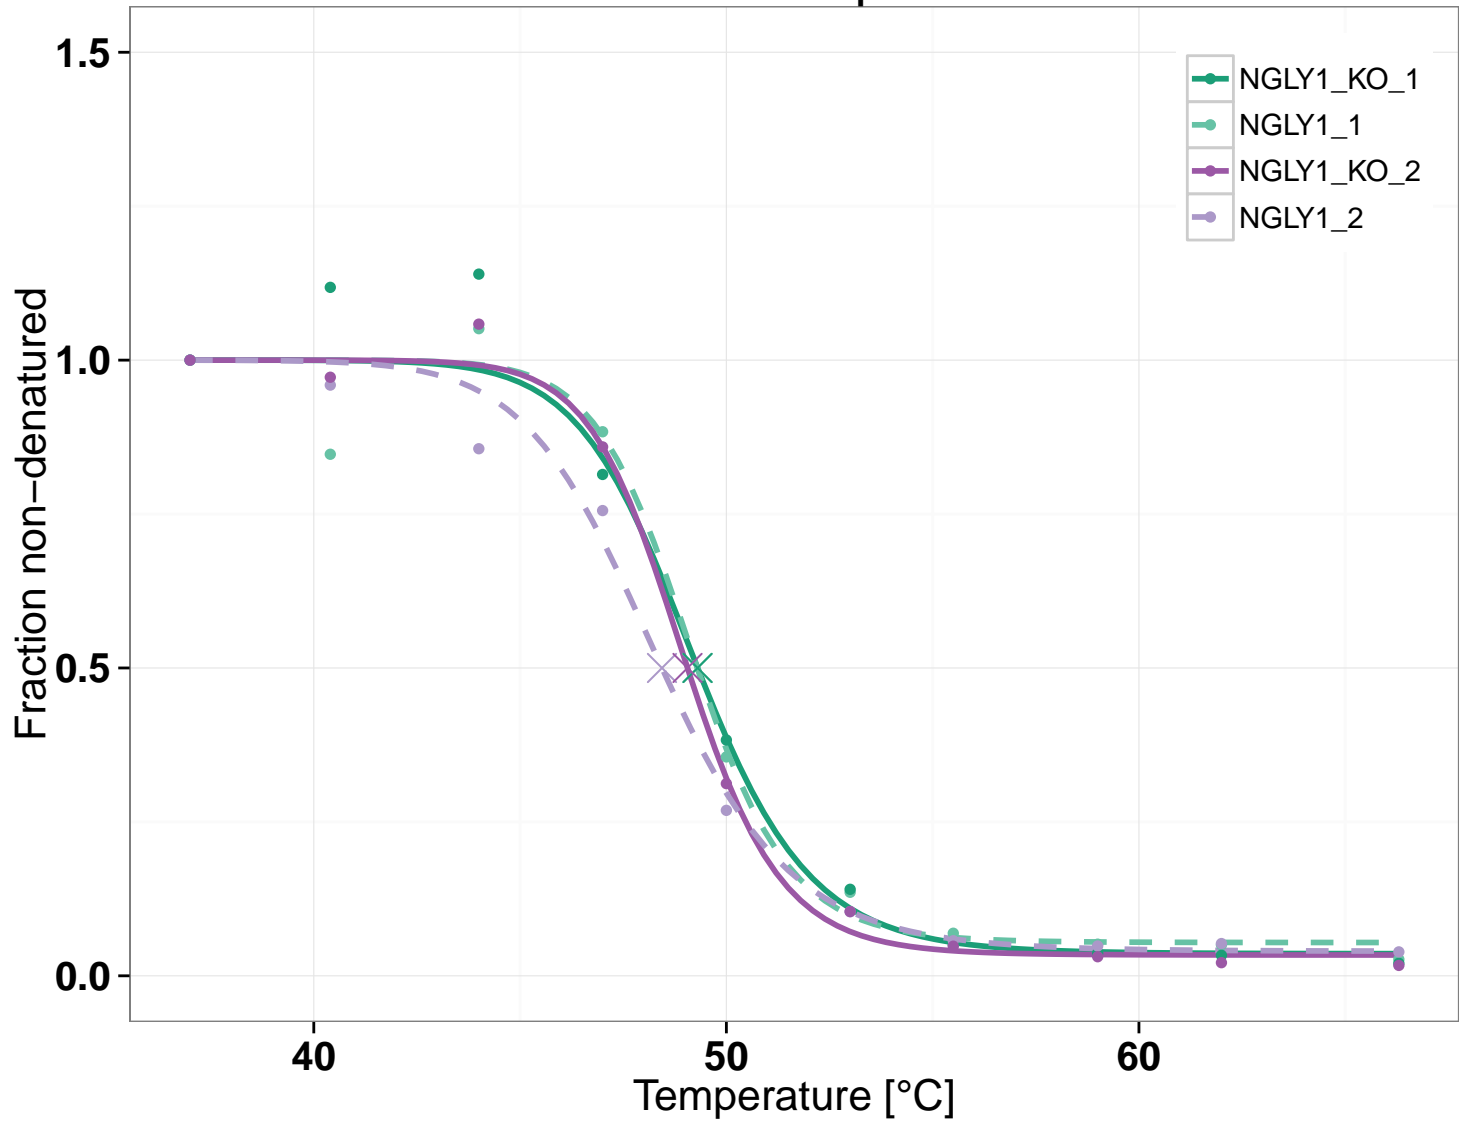

|            | meltPoint | slope | plateau | R2   |
|------------|-----------|-------|---------|------|
| NGLY1_KO_1 | 49.3      | -0.17 | 0.04    | 0.98 |
| NGLY1_1    | 49.29     | -0.2  | 0.05    | 0.98 |
| NGLY1_KO_2 | 49.06     | -0.21 | 0.03    | 1    |
| NGLY1_2    | 48.44     | -0.15 | 0.04    | 0.99 |

Supplement: Supplementary file 2285 [file 1]

IPI00647188.3|HYDIN

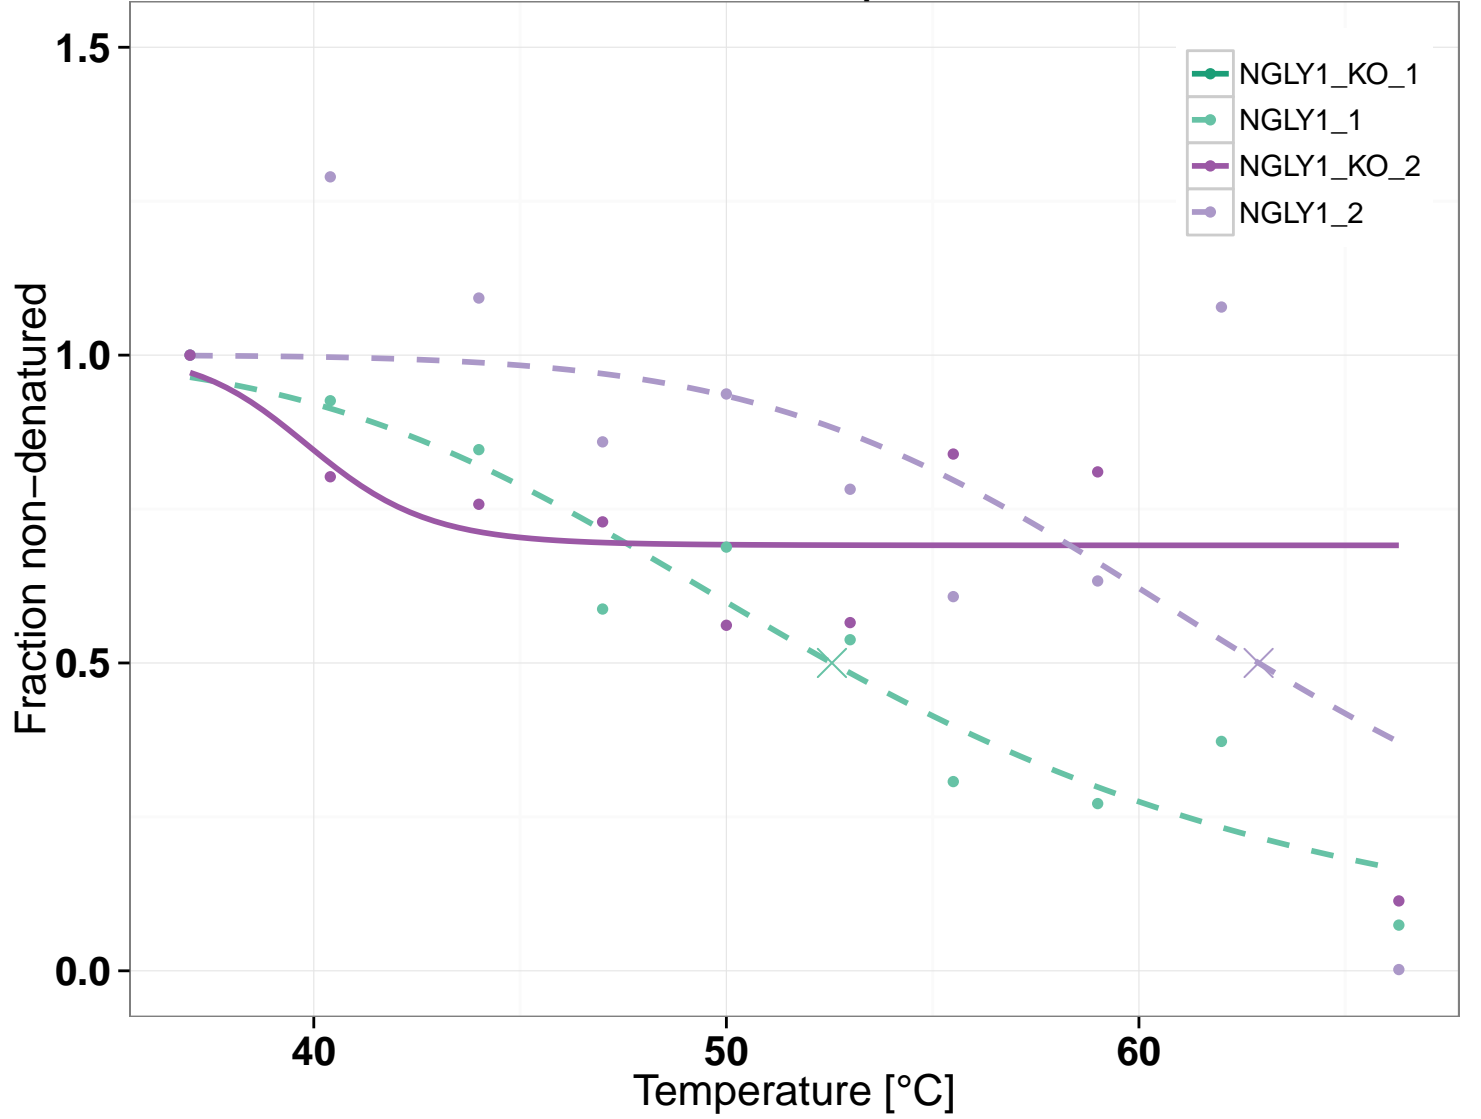

|            | meltPoint | slope  | plateau | R2   |
|------------|-----------|--------|---------|------|
| NGLY1_KO_1 | -         | -      | -       | -    |
| NGLY1_1    | 52.56     | -0.04  | 0       | 0.92 |
| NGLY1_KO_2 | -         | -0.055 | 0.69    | 0.12 |
| NGLY1_2    | 62.9      | -0.042 | 0       | 0.5  |

Supplement: Supplementary file 2286 [file 1]

IPI00011132.2|JMJD4

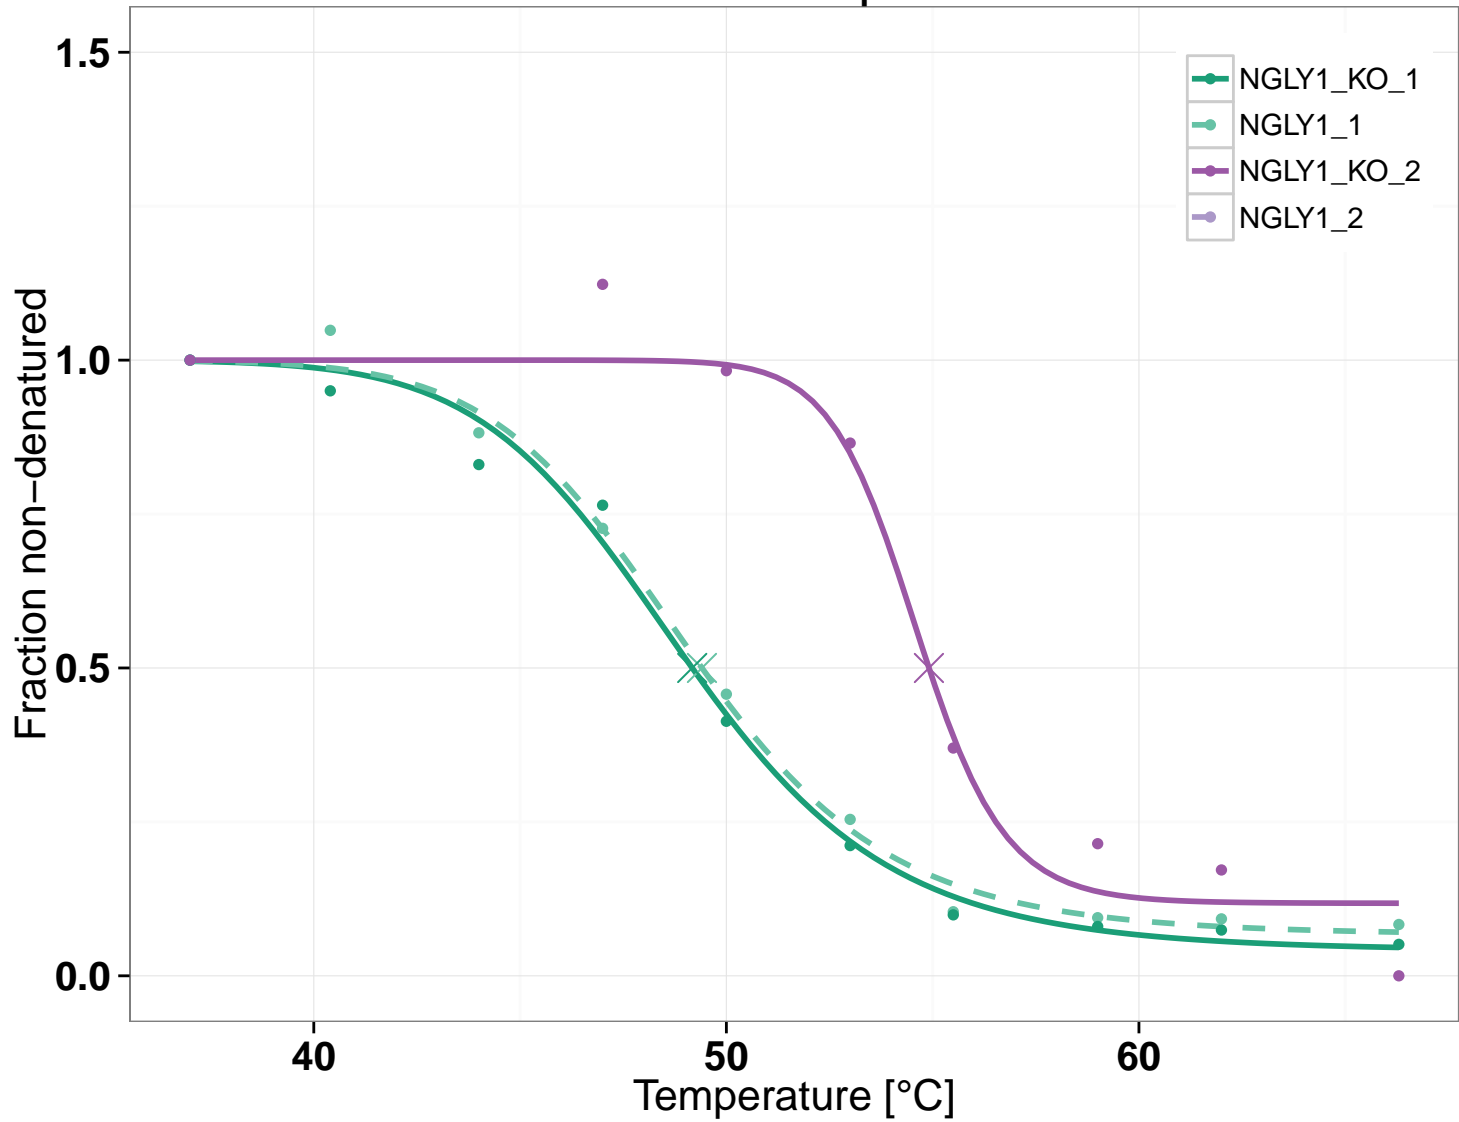

|            | meltPoint | slope  | plateau | R2   |
|------------|-----------|--------|---------|------|
| NGLY1_KO_1 | 49.17     | -0.096 | 0.04    | 0.99 |
| NGLY1_1    | 49.41     | -0.096 | 0.07    | 0.99 |
| NGLY1_KO_2 | 54.91     | -0.21  | 0.12    | 0.51 |
| NGLY1_2    | -         | -      | -       | -    |

Supplement: Supplementary file 2287 [file 1]

# IPI00220409.3|PRKAB1

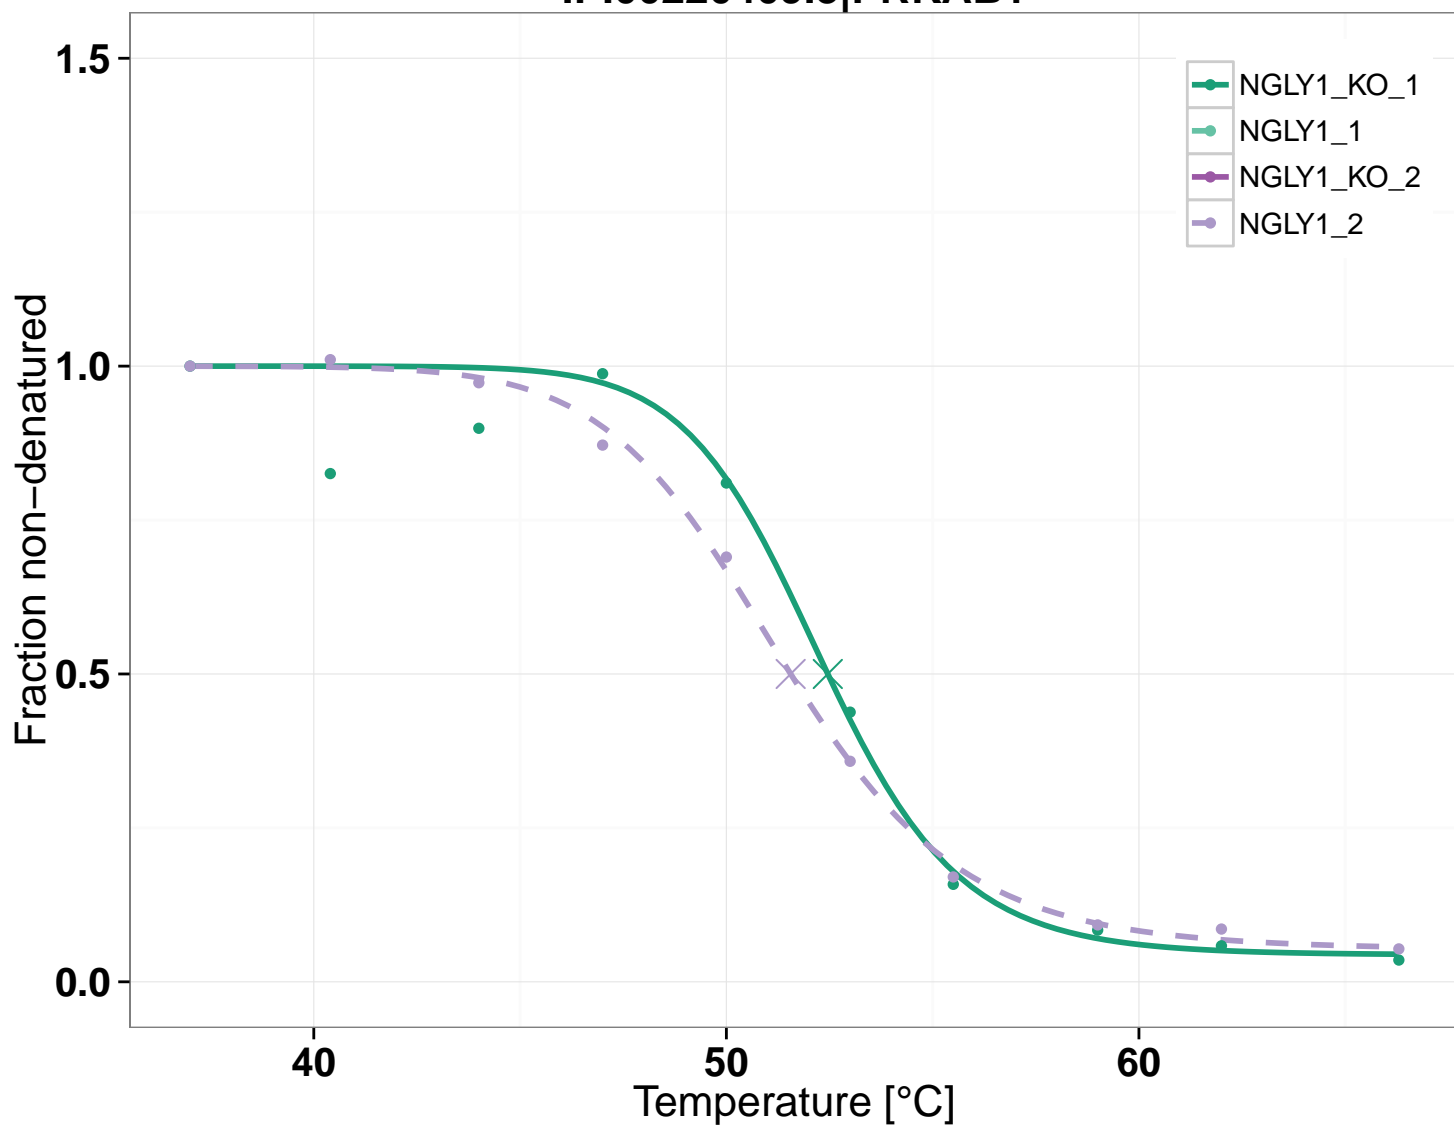

|            | meltPoint | slope | plateau | R2   |
|------------|-----------|-------|---------|------|
| NGLY1_KO_1 | 52.46     | -0.14 | 0.04    | 0.97 |
| NGLY1_1    | -         | -     | -       | -    |
| NGLY1_KO_2 | -         | -     | -       | -    |
| NGLY1_2    | 51.56     | -0.11 | 0.05    | 1    |

Supplement: Supplementary file 2288 [file 1]

IPI00479683.1|FGGY

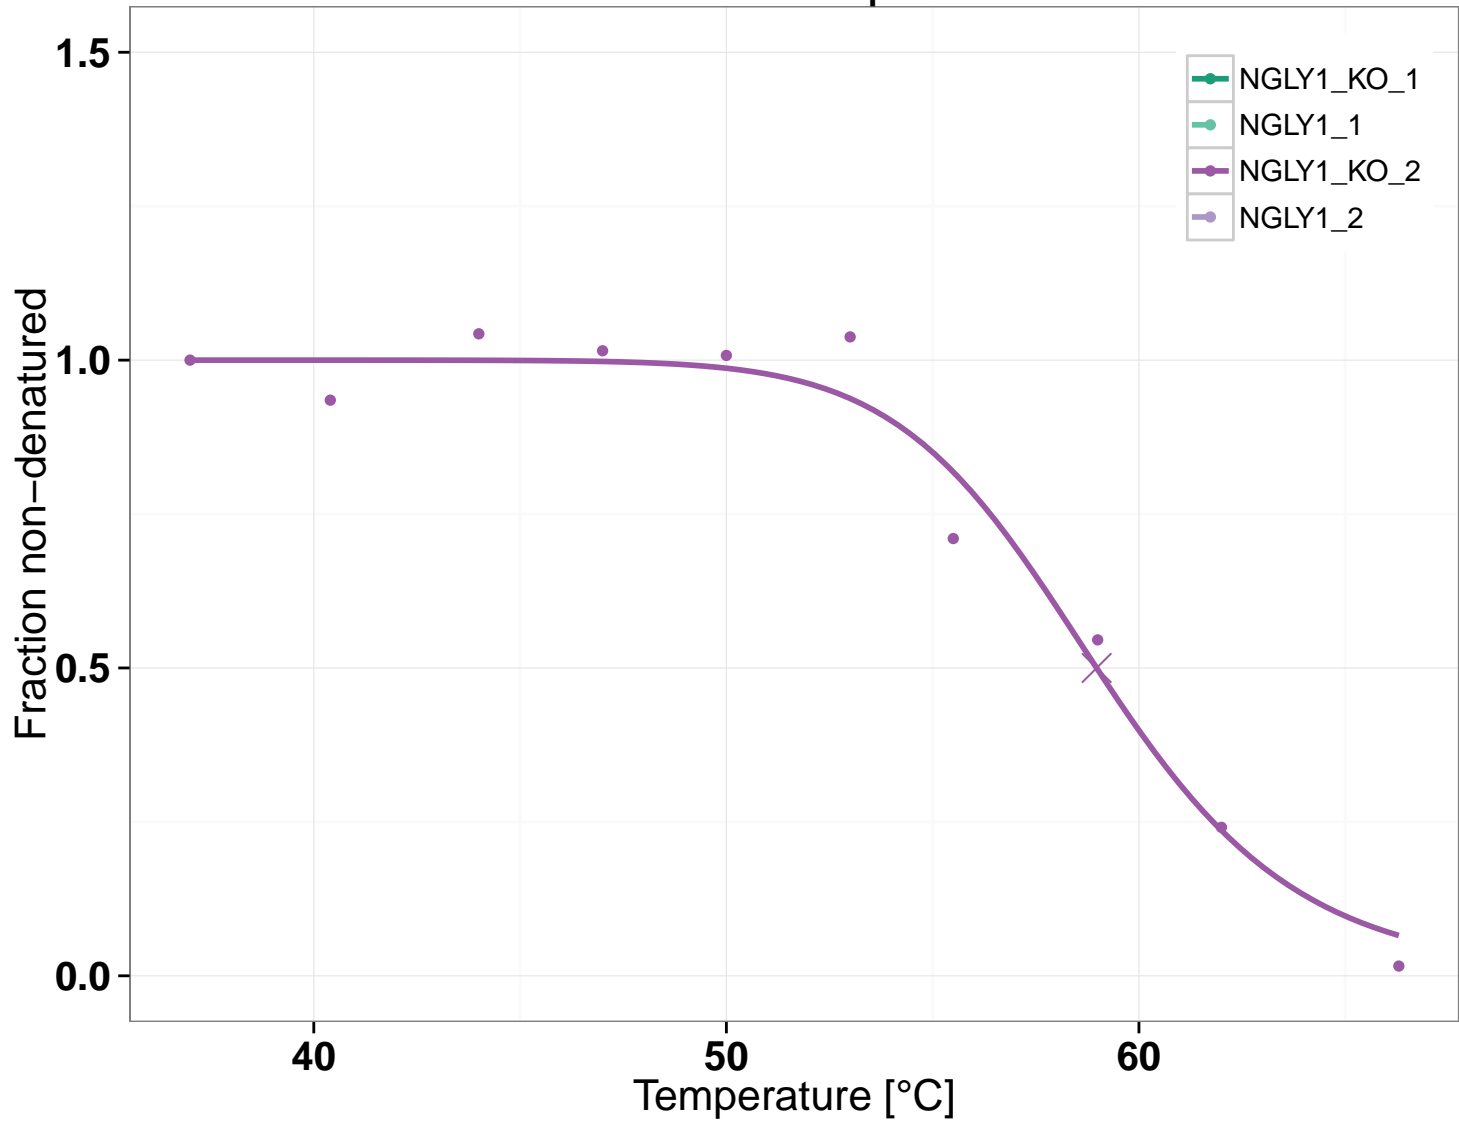

|            | meltPoint | slope | plateau | R2   |
|------------|-----------|-------|---------|------|
| NGLY1_KO_1 | -         | -     | -       | -    |
| NGLY1_1    | -         | -     | -       | -    |
| NGLY1_KO_2 | 58.97     | -0.1  | 0       | 0.97 |
| NGLY1_2    | -         | -     | -       | -    |

Supplement: Supplementary file 2289 [file 1]

IPI00433834.2|RPL26

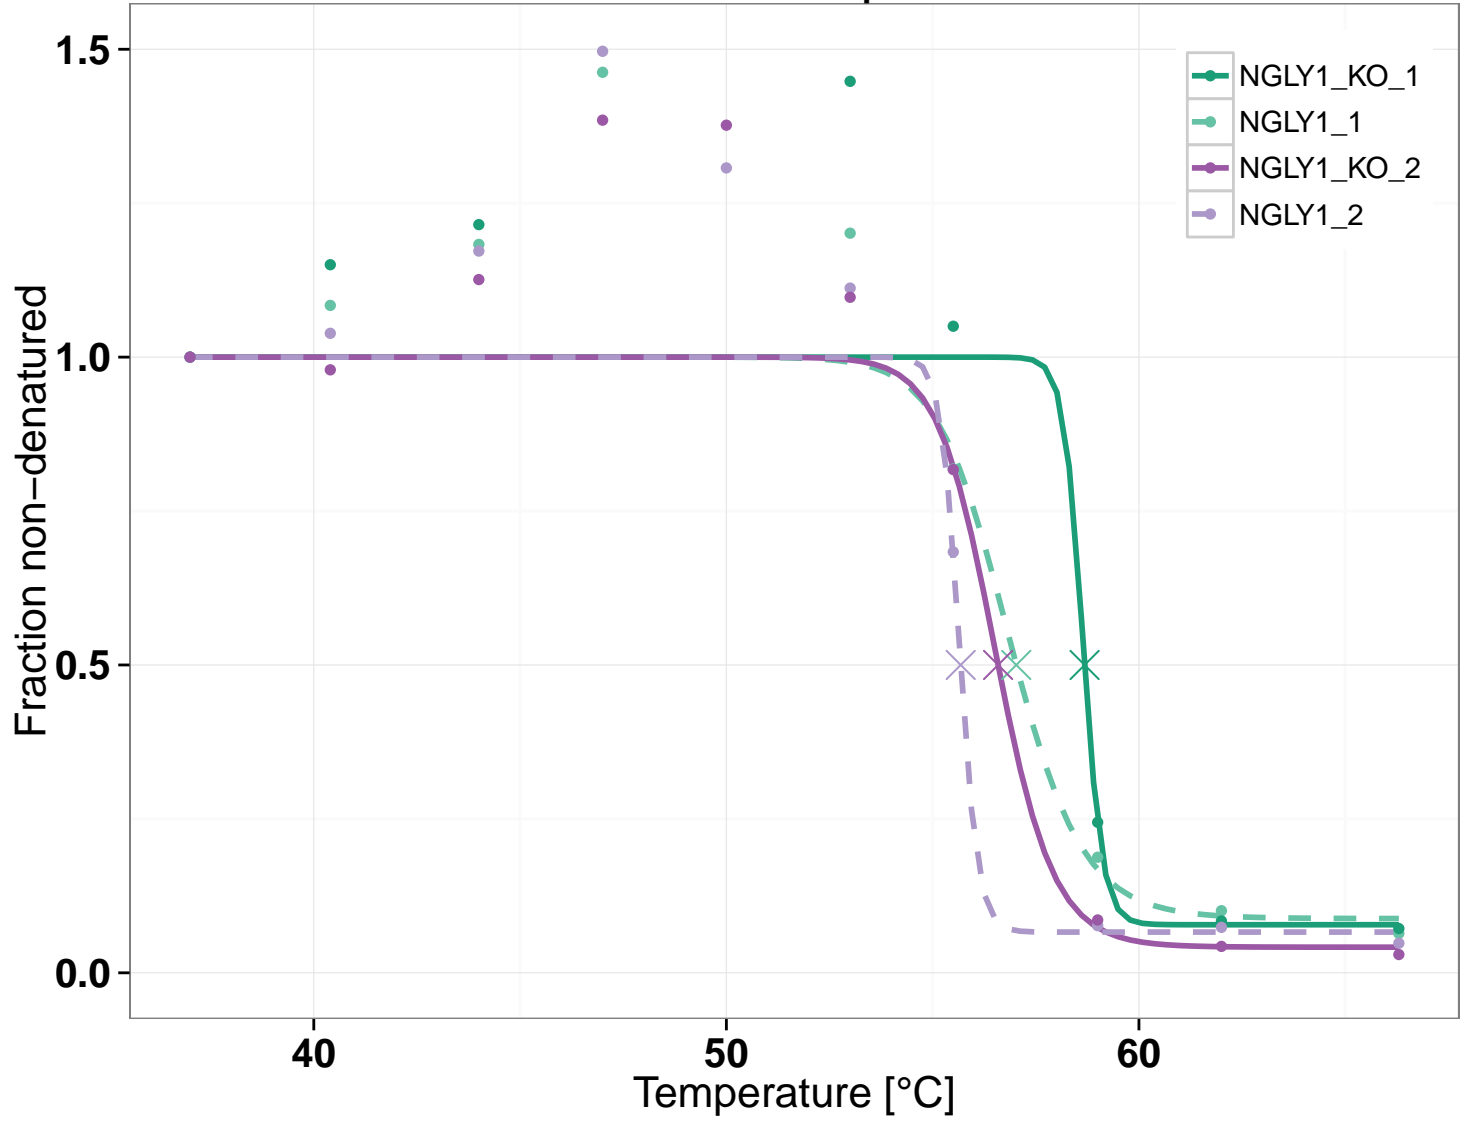

|            | meltPoint | slope | plateau | R2   |
|------------|-----------|-------|---------|------|
| NGLY1_KO_1 | 58.68     | -0.98 | 0.08    | 0.67 |
| NGLY1_1    | 57.03     | -0.26 | 0.09    | 0.79 |
| NGLY1_KO_2 | 56.59     | -0.34 | 0.04    | 0.88 |
| NGLY1_2    | 55.68     | -1    | 0.07    | 0.86 |

Supplement: Supplementary file 2290 [file 1]

IPI00152311.4|C3ORF38

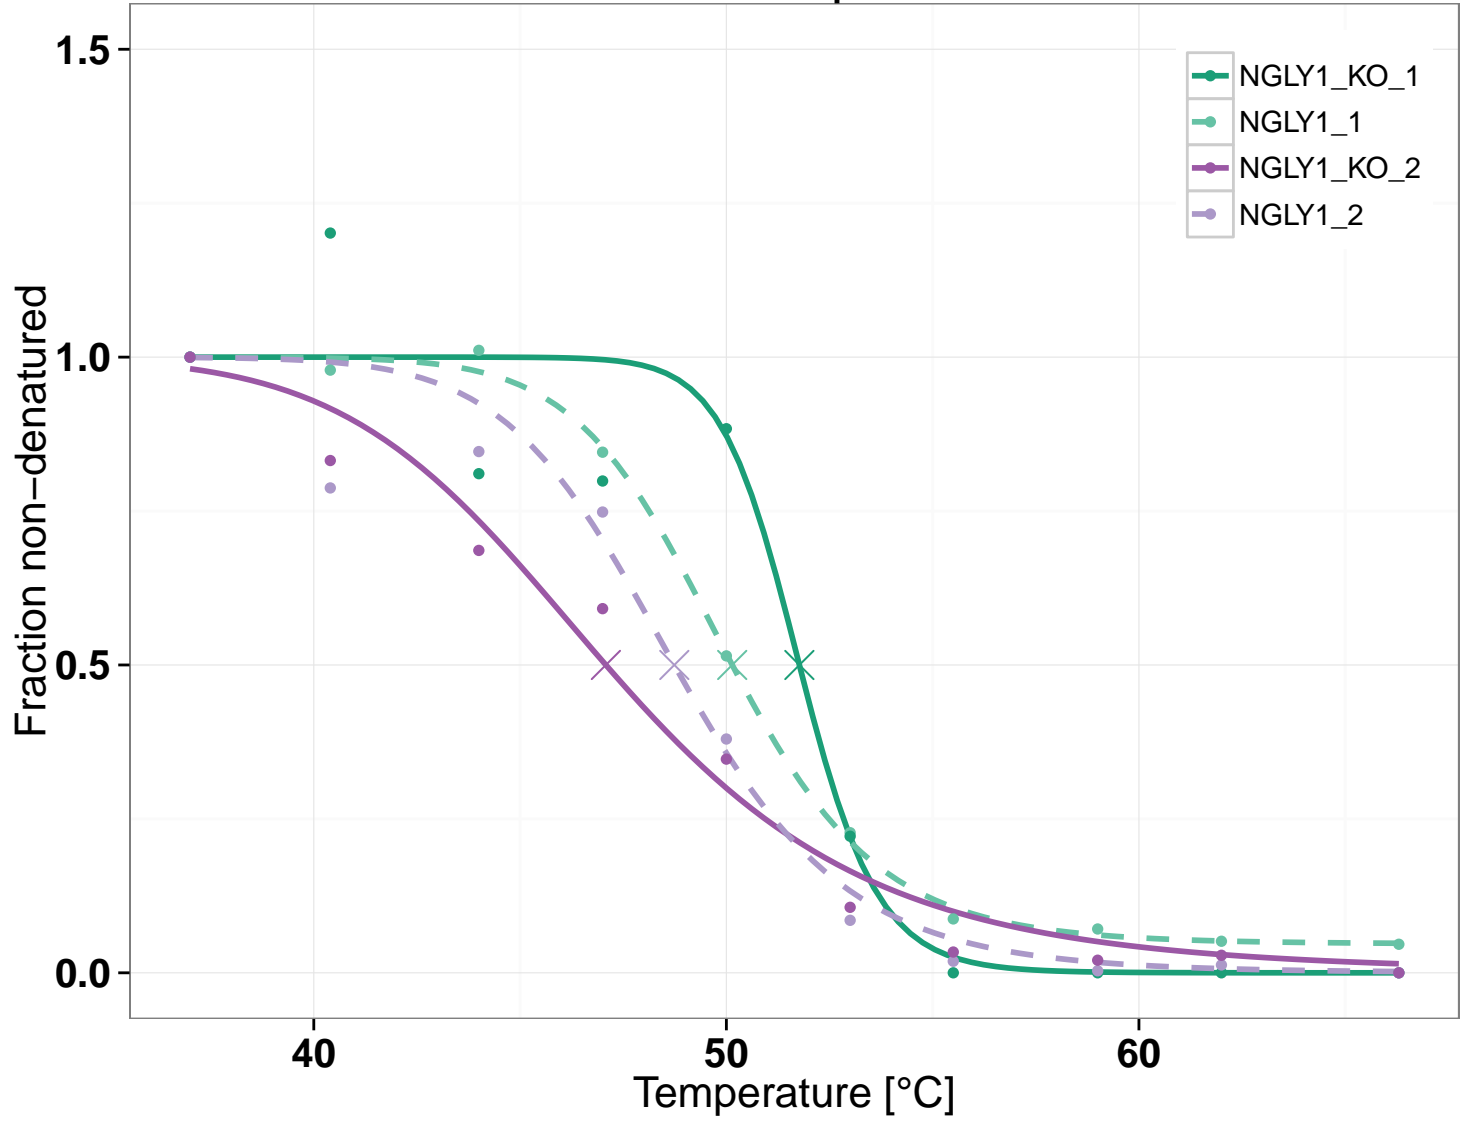

|            | meltPoint | slope  | plateau | R2   |
|------------|-----------|--------|---------|------|
| NGLY1_KO_1 | 51.77     | -0.26  | 0       | 0.95 |
| NGLY1_1    | 50.14     | -0.13  | 0.05    | 1    |
| NGLY1_KO_2 | 47.08     | -0.078 | 0       | 0.98 |
| NGLY1_2    | 48.74     | -0.12  | 0       | 0.96 |

Supplement: Supplementary file 2291 [file 1]

IPI00168284.2|UBAC2

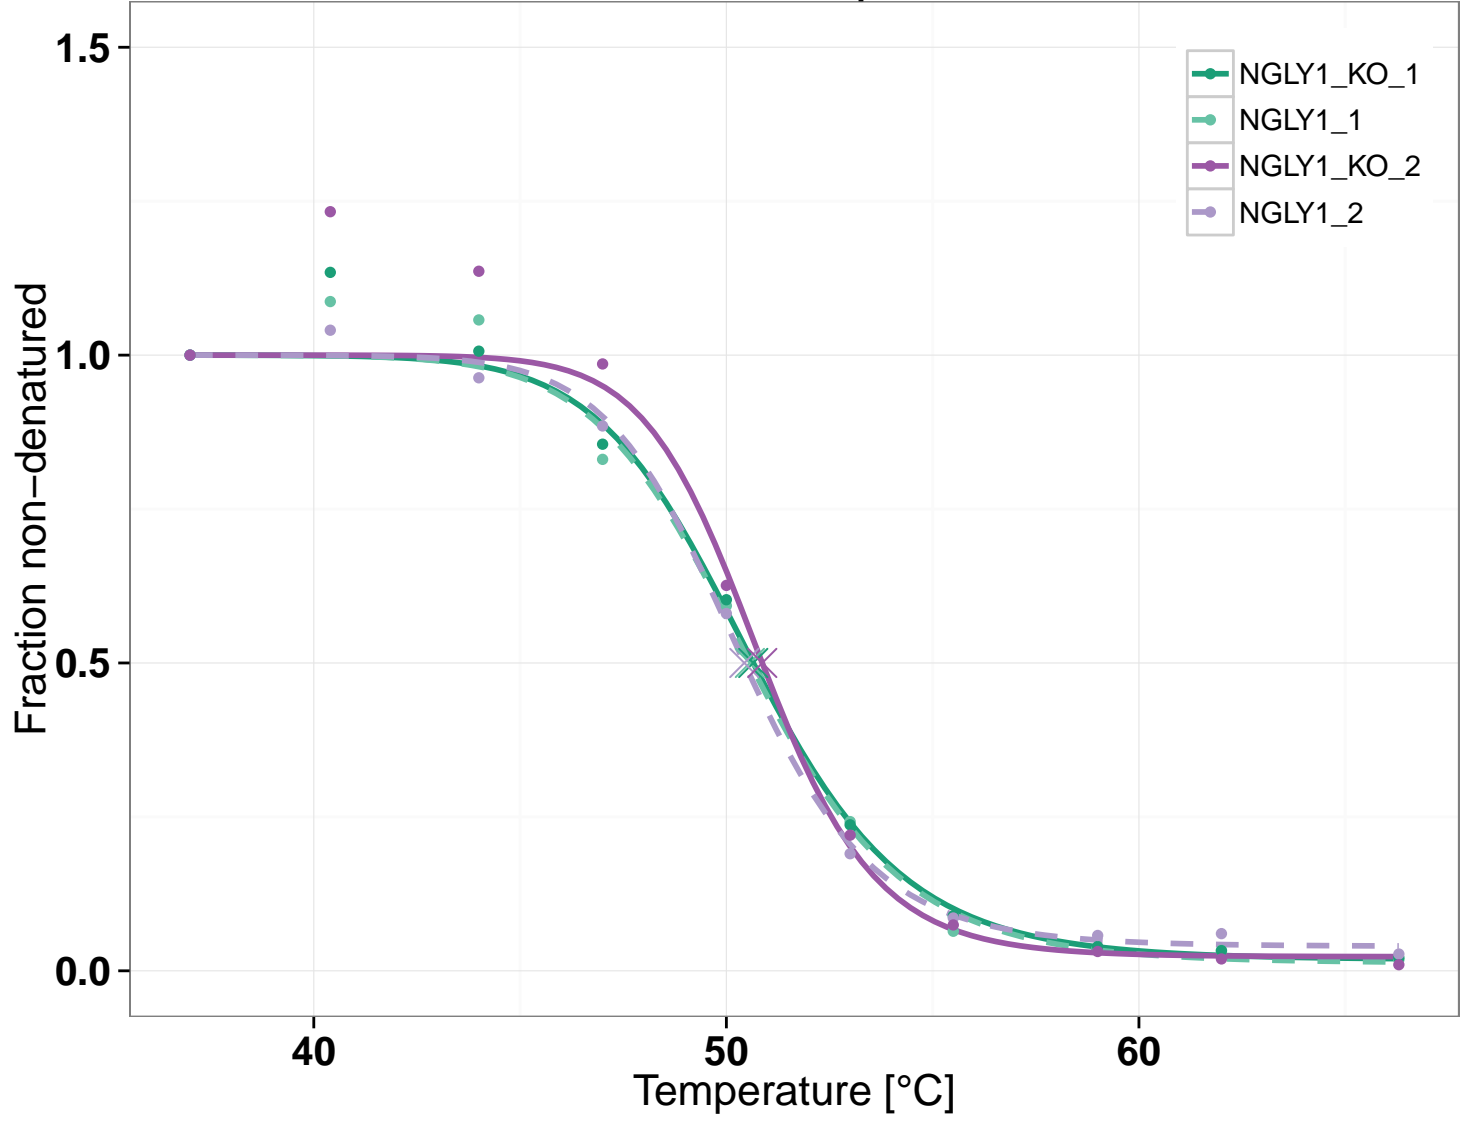

|            | meltPoint | slope | plateau | R2   |
|------------|-----------|-------|---------|------|
| NGLY1_KO_1 | 50.65     | -0.13 | 0.02    | 0.99 |
| NGLY1_1    | 50.57     | -0.13 | 0.01    | 0.99 |
| NGLY1_KO_2 | 50.87     | -0.17 | 0.02    | 0.97 |
| NGLY1_2    | 50.44     | -0.15 | 0.04    | 1    |

Supplement: Supplementary file 2292 [file 1]

IPI00399265.2|TPD52L2

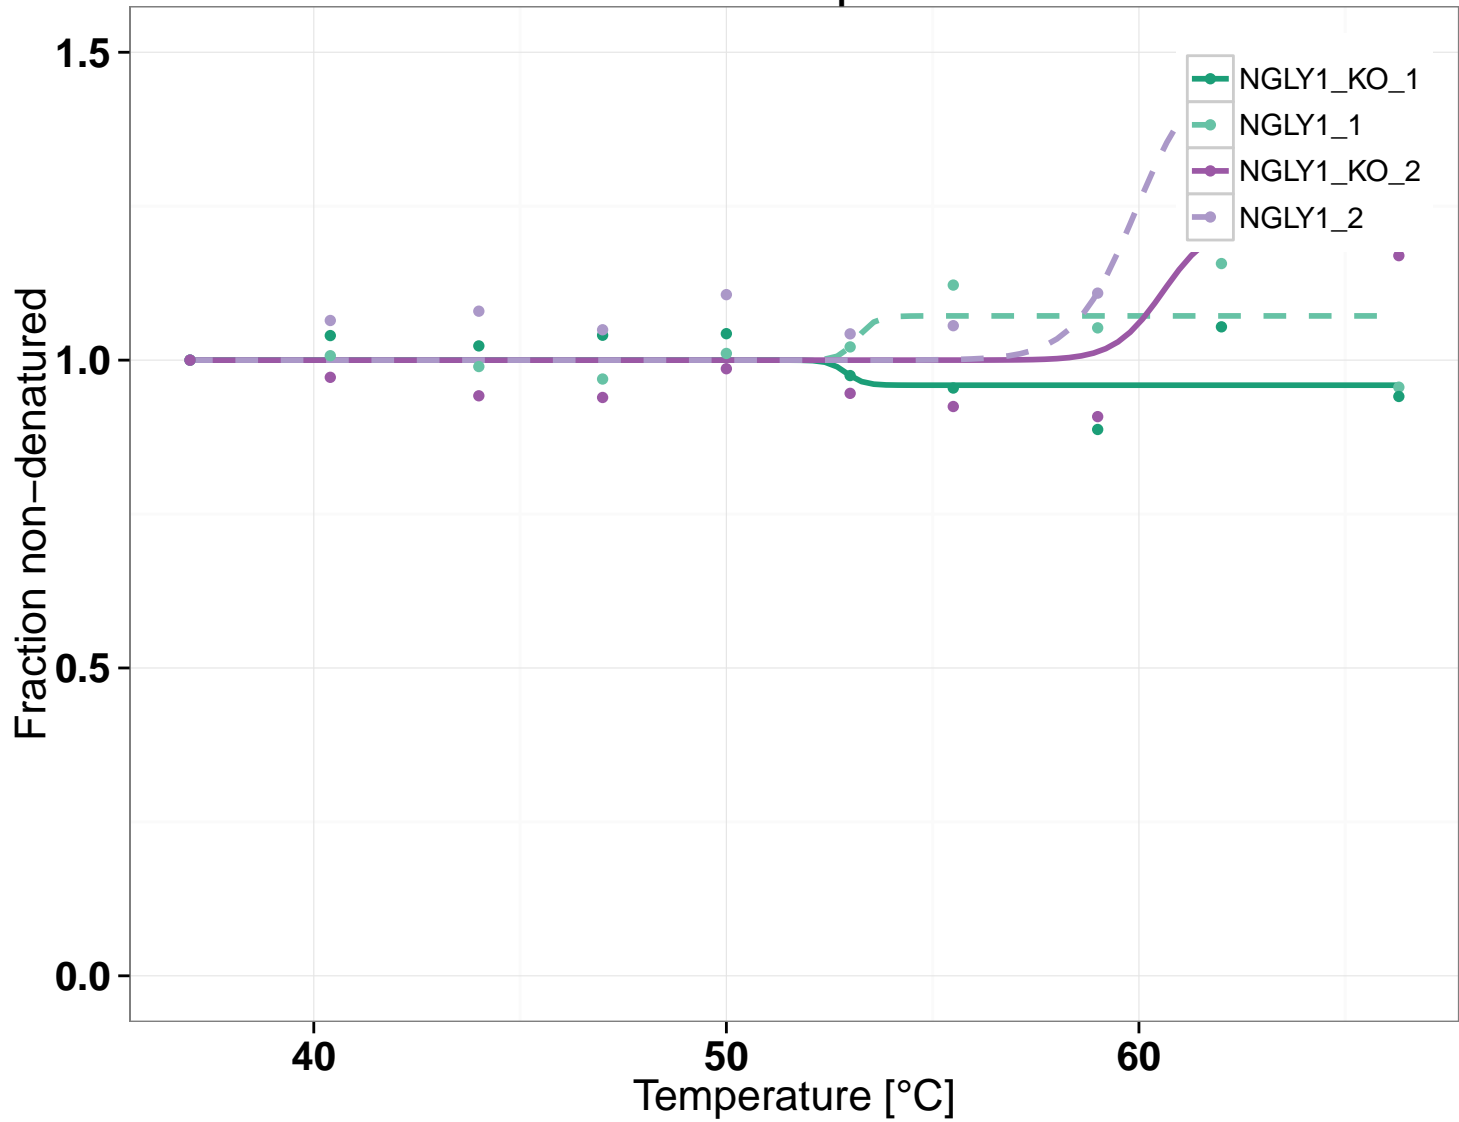

|            | meltPoint | slope  | plateau | R2   |
|------------|-----------|--------|---------|------|
| NGLY1_KO_1 | -         | -0.048 | 0.96    | 0.26 |
| NGLY1_1    | -         | 0.084  | 1.07    | 0.34 |
| NGLY1_KO_2 | -         | 0.095  | 1.23    | 0.72 |
| NGLY1_2    | -         | 0.16   | 1.49    | 0.9  |

Supplement: Supplementary file 2293 [file 1]

IPI00479069.1|HEATR5B

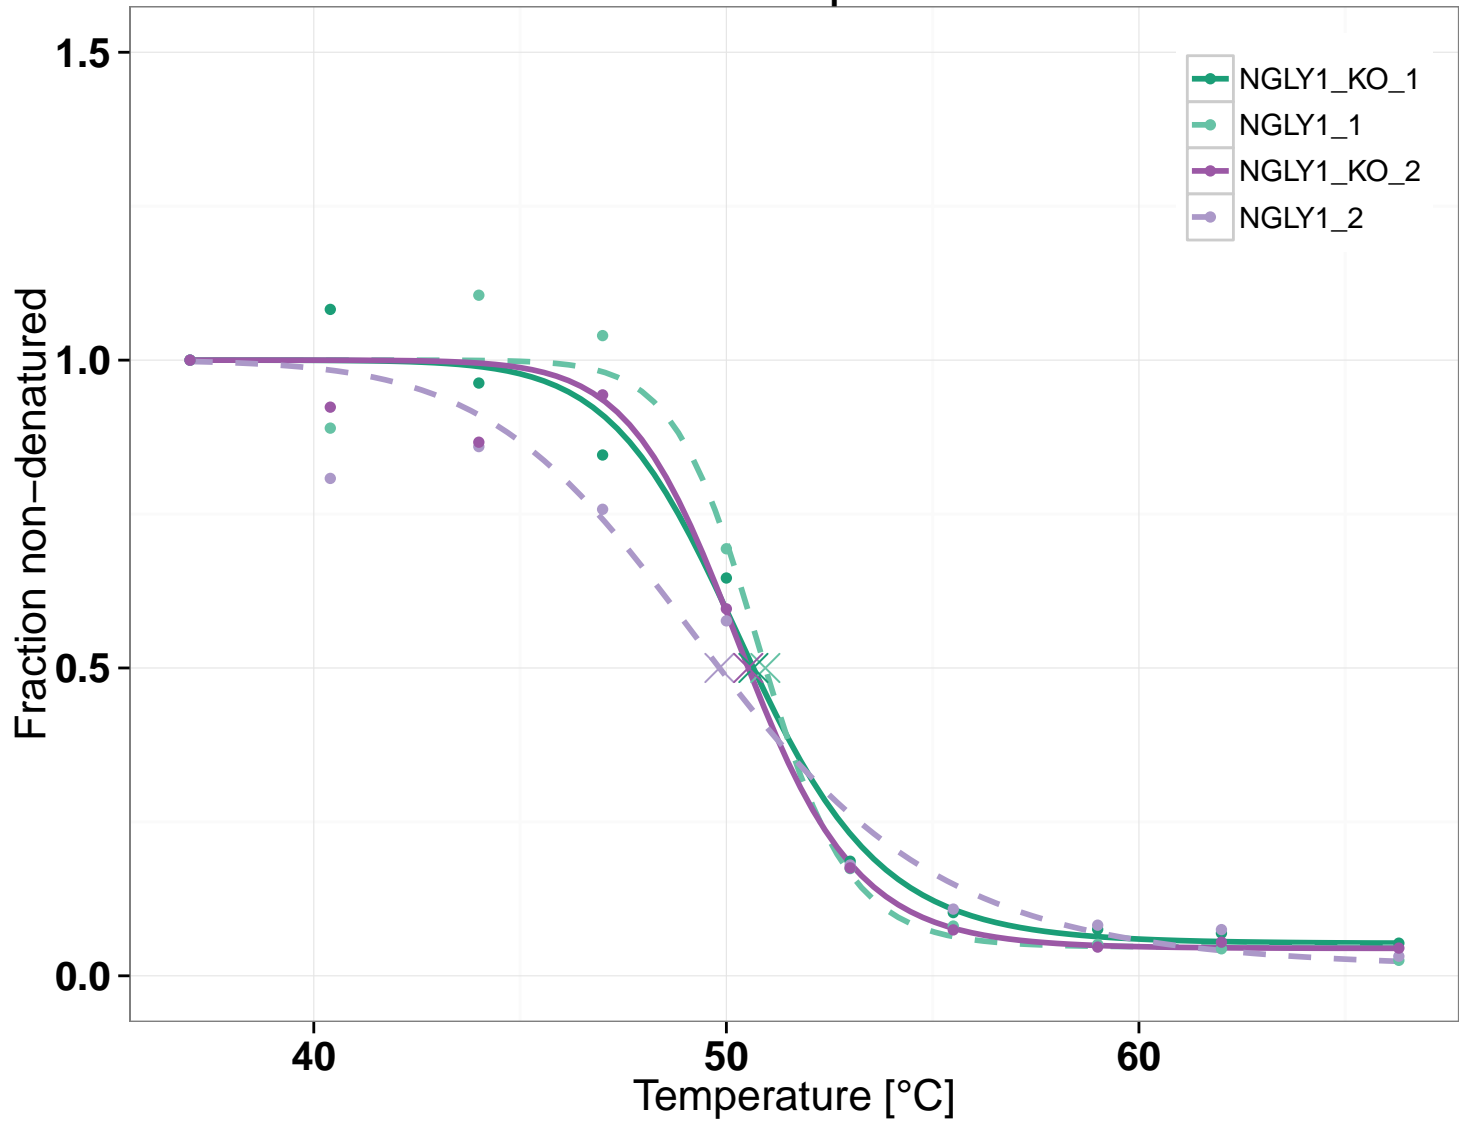

|            | meltPoint | slope  | plateau | R2   |
|------------|-----------|--------|---------|------|
| NGLY1_KO_1 | 50.65     | -0.14  | 0.05    | 0.99 |
| NGLY1_1    | 50.94     | -0.22  | 0.05    | 0.99 |
| NGLY1_KO_2 | 50.53     | -0.17  | 0.04    | 0.99 |
| NGLY1_2    | 49.83     | -0.089 | 0.01    | 0.96 |

Supplement: Supplementary file 2294 [file 1]

IPI00023467.1|ELL

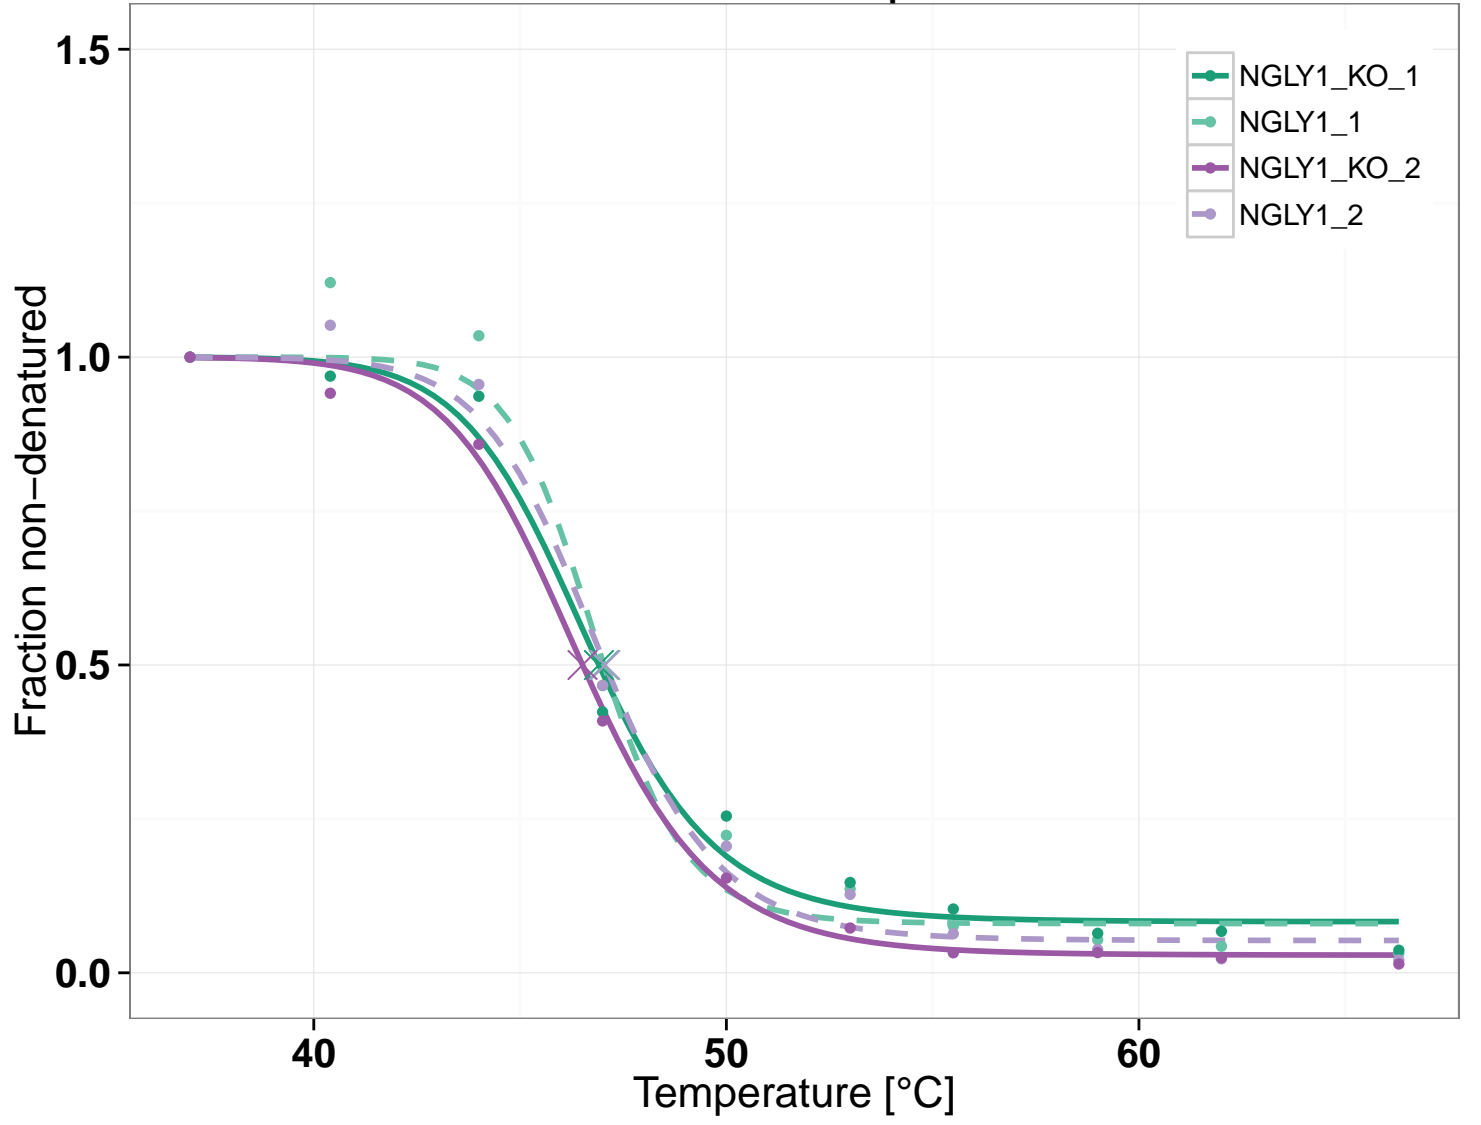

|            | meltPoint | slope | plateau | R2   |
|------------|-----------|-------|---------|------|
| NGLY1_KO_1 | 46.91     | -0.15 | 0.08    | 0.99 |
| NGLY1_1    | 47.03     | -0.21 | 0.08    | 0.98 |
| NGLY1_KO_2 | 46.51     | -0.15 | 0.03    | 1    |
| NGLY1_2    | 47.06     | -0.17 | 0.05    | 0.99 |

Supplement: Supplementary file 2295 [file 1]

IPI00456969.1|DYNC1H1

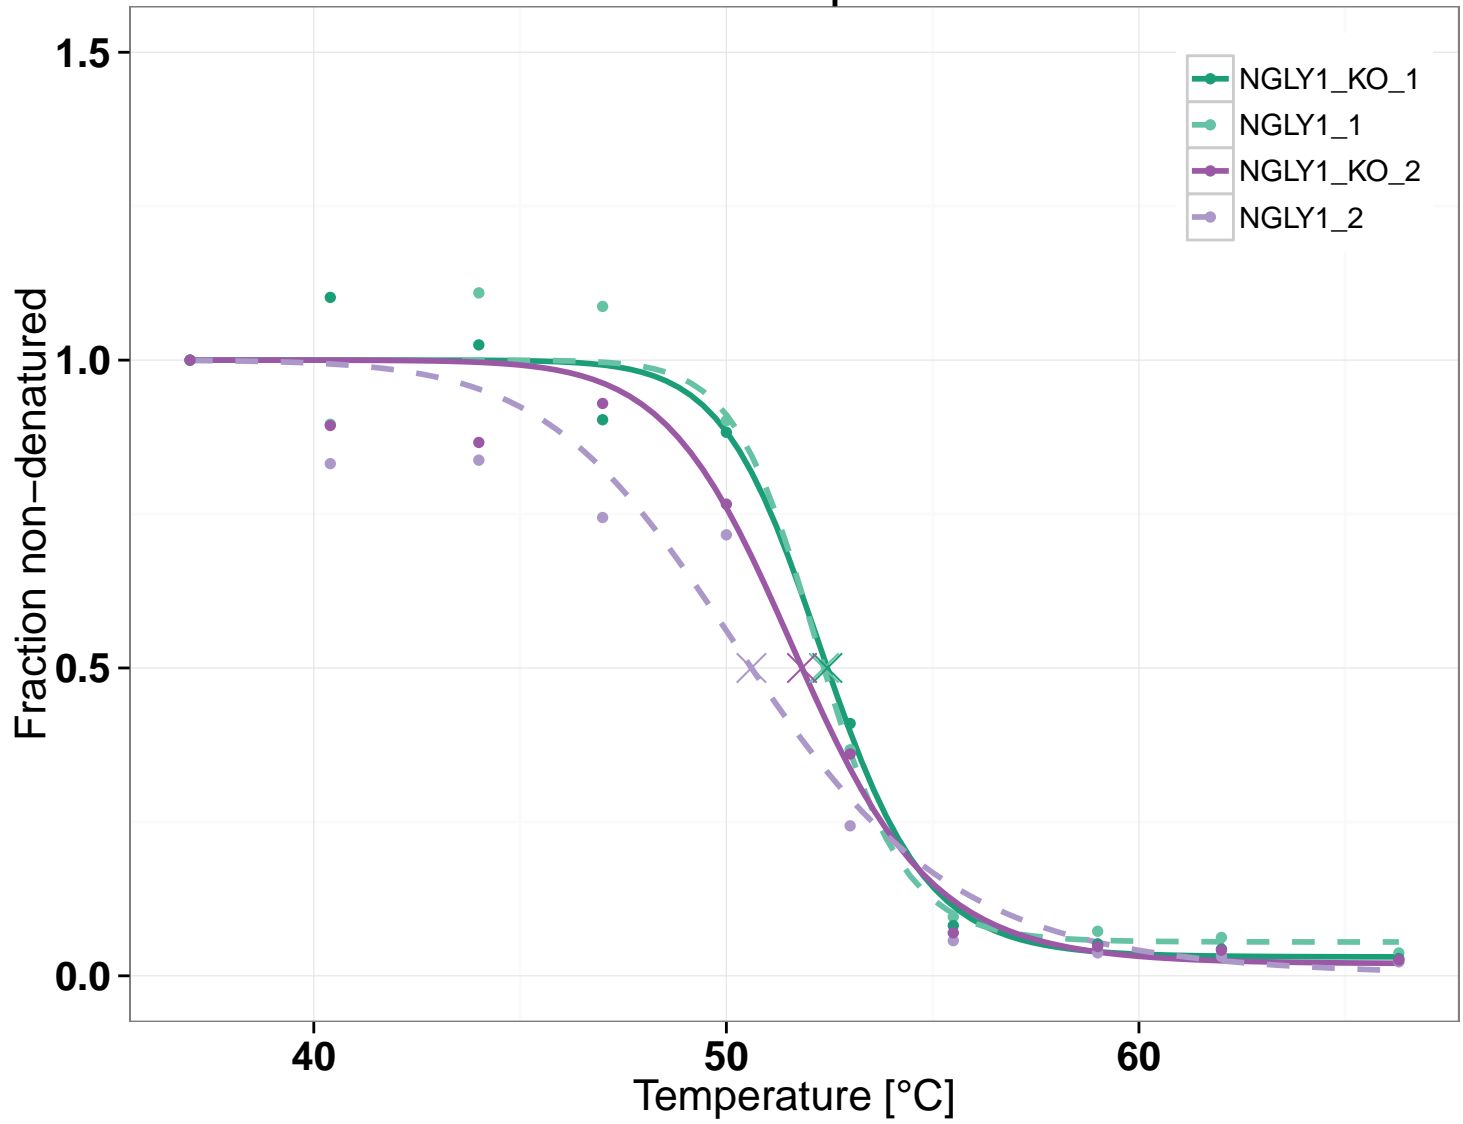

|            | meltPoint | slope | plateau | R2   |
|------------|-----------|-------|---------|------|
| NGLY1_KO_1 | 52.45     | -0.2  | 0.03    | 0.99 |
| NGLY1_1    | 52.36     | -0.23 | 0.05    | 0.98 |
| NGLY1_KO_2 | 51.83     | -0.15 | 0.02    | 0.98 |
| NGLY1_2    | 50.61     | -0.1  | 0       | 0.95 |

Supplement: Supplementary file 2296 [file 1]

# IPI00026448.2|MFF

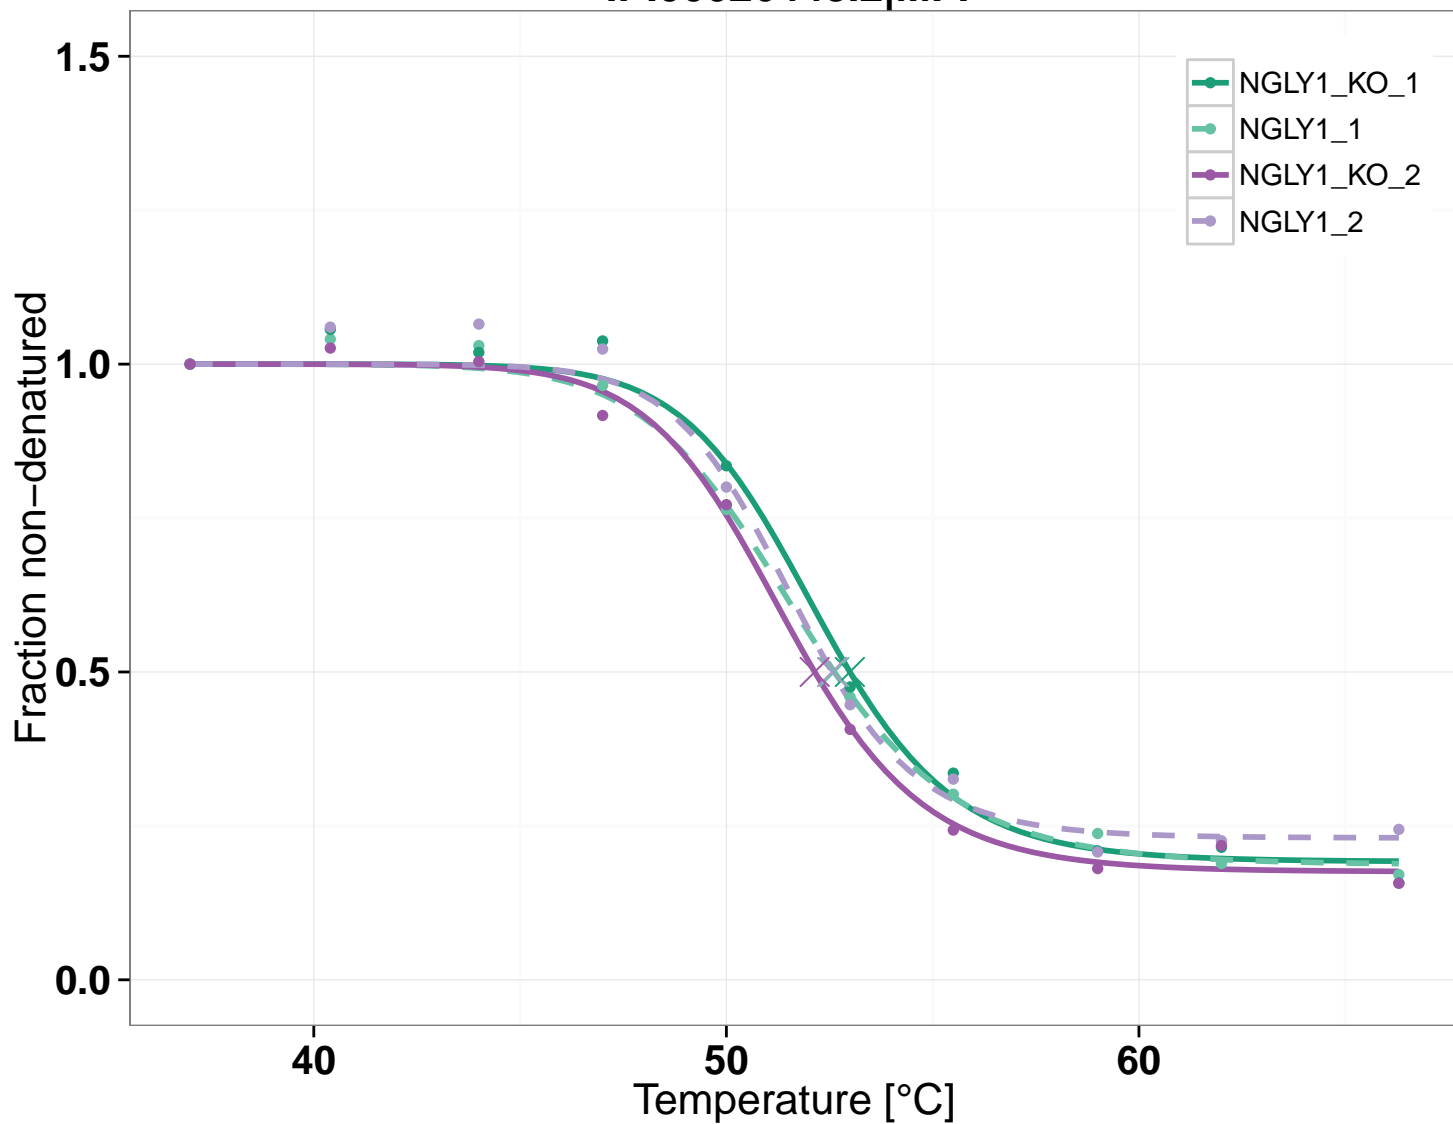

|            | meltPoint | slope | plateau | R2   |
|------------|-----------|-------|---------|------|
| NGLY1_KO_1 | 52.99     | -0.12 | 0.19    | 0.99 |
| NGLY1_1    | 52.62     | -0.11 | 0.19    | 1    |
| NGLY1_KO_2 | 52.14     | -0.12 | 0.18    | 1    |
| NGLY1_2    | 52.56     | -0.13 | 0.23    | 0.99 |

Supplement: Supplementary file 2297 [file 1]

IPI00003566.3|HOMER1

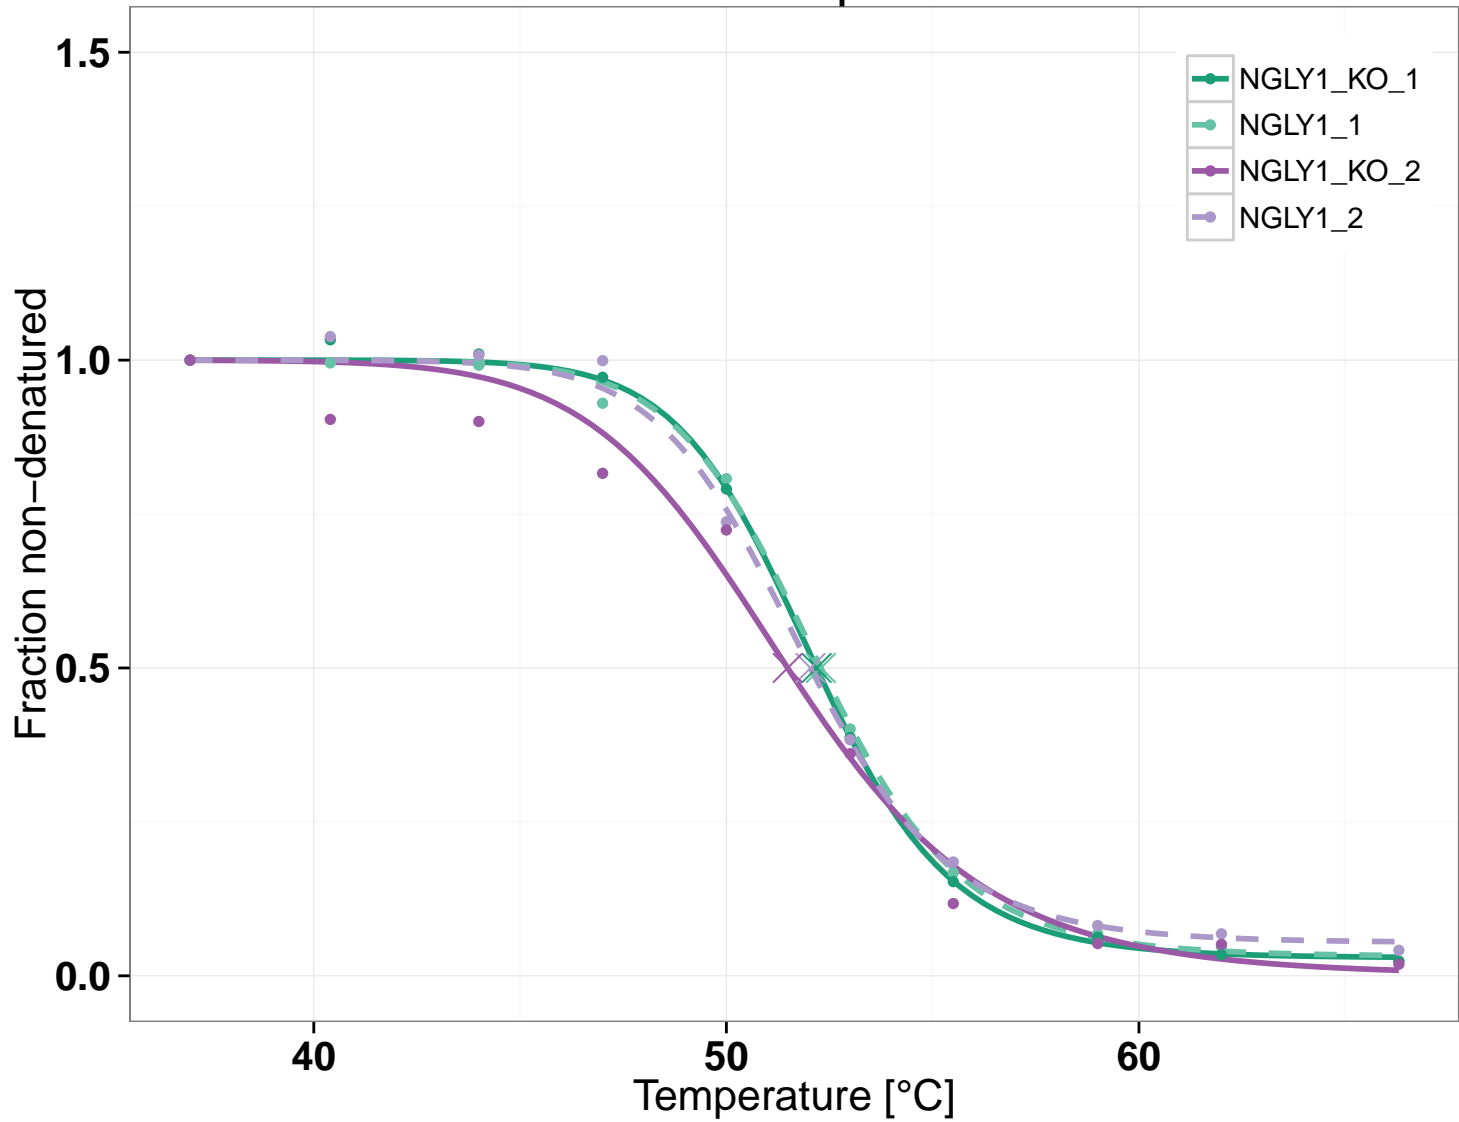

|            | meltPoint | slope | plateau | R2   |
|------------|-----------|-------|---------|------|
| NGLY1_KO_1 | 52.19     | -0.15 | 0.03    | 1    |
| NGLY1_1    | 52.29     | -0.14 | 0.03    | 1    |
| NGLY1_KO_2 | 51.49     | -0.1  | 0       | 0.98 |
| NGLY1_2    | 52.04     | -0.13 | 0.05    | 1    |

Supplement: Supplementary file 2298 [file 1]

IPI00419266.1|NDUFA6

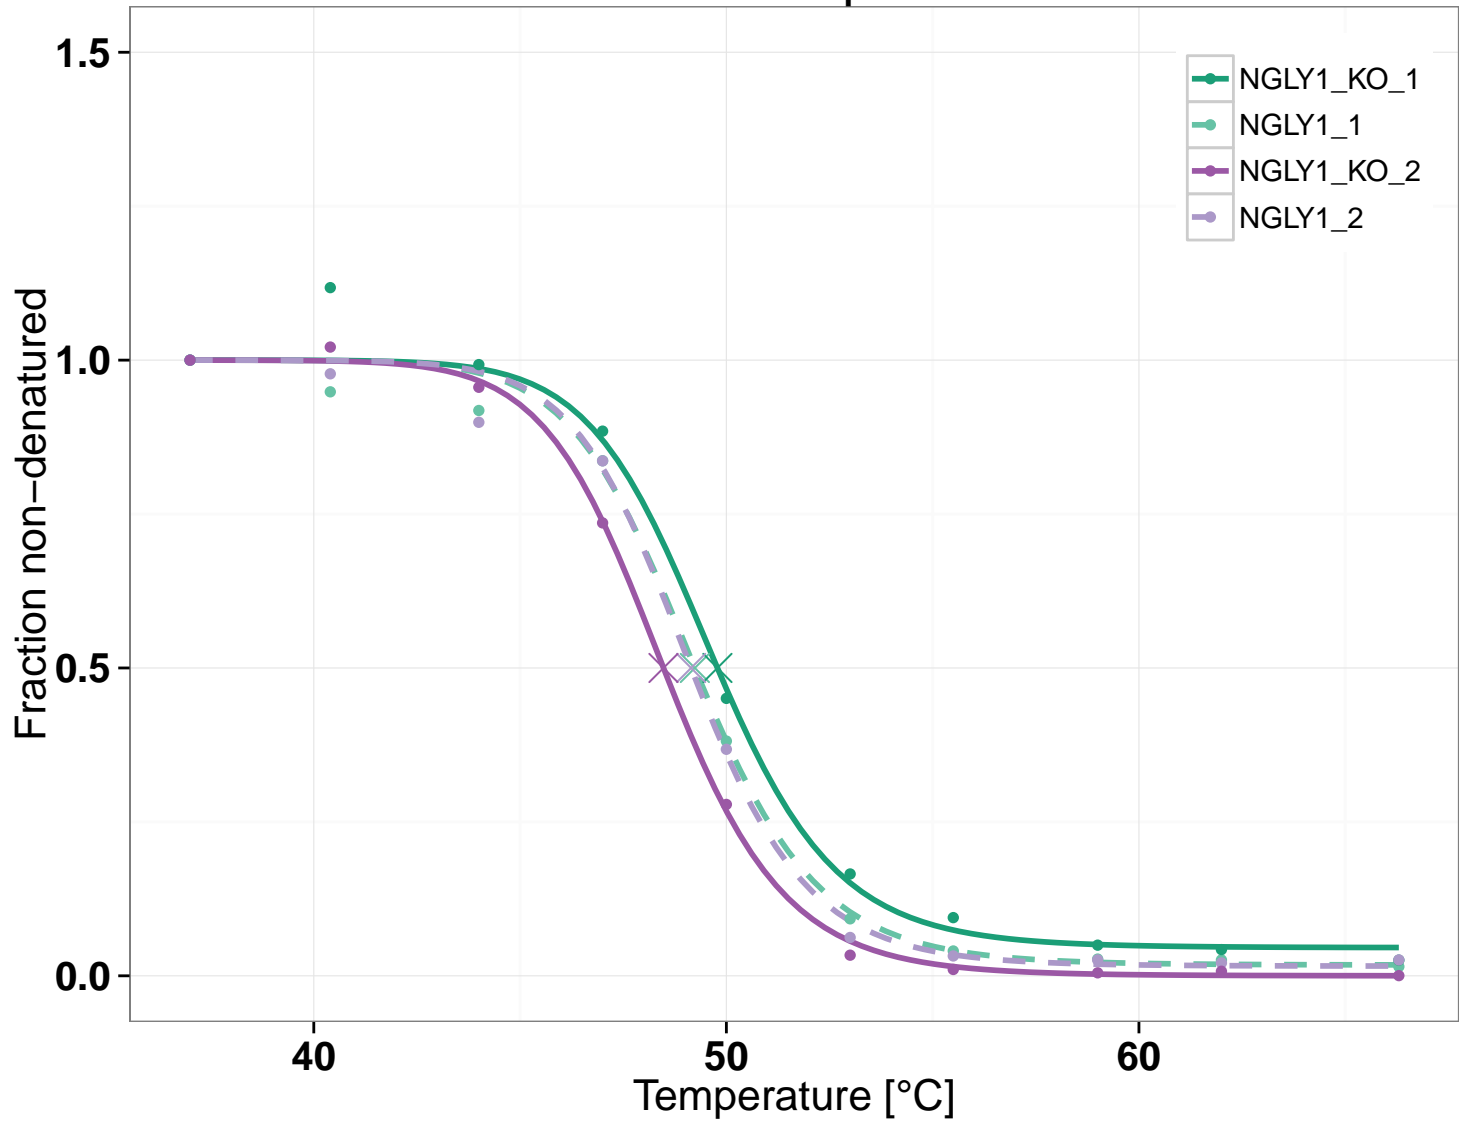

|            | meltPoint | slope | plateau | R2   |
|------------|-----------|-------|---------|------|
| NGLY1_KO_1 | 49.78     | -0.16 | 0.05    | 0.99 |
| NGLY1_1    | 49.24     | -0.16 | 0.02    | 1    |
| NGLY1_KO_2 | 48.48     | -0.17 | 0       | 1    |
| NGLY1_2    | 49.14     | -0.17 | 0.02    | 1    |

Supplement: Supplementary file 2299 [file 1]

IPI00795488.1|LOC285286

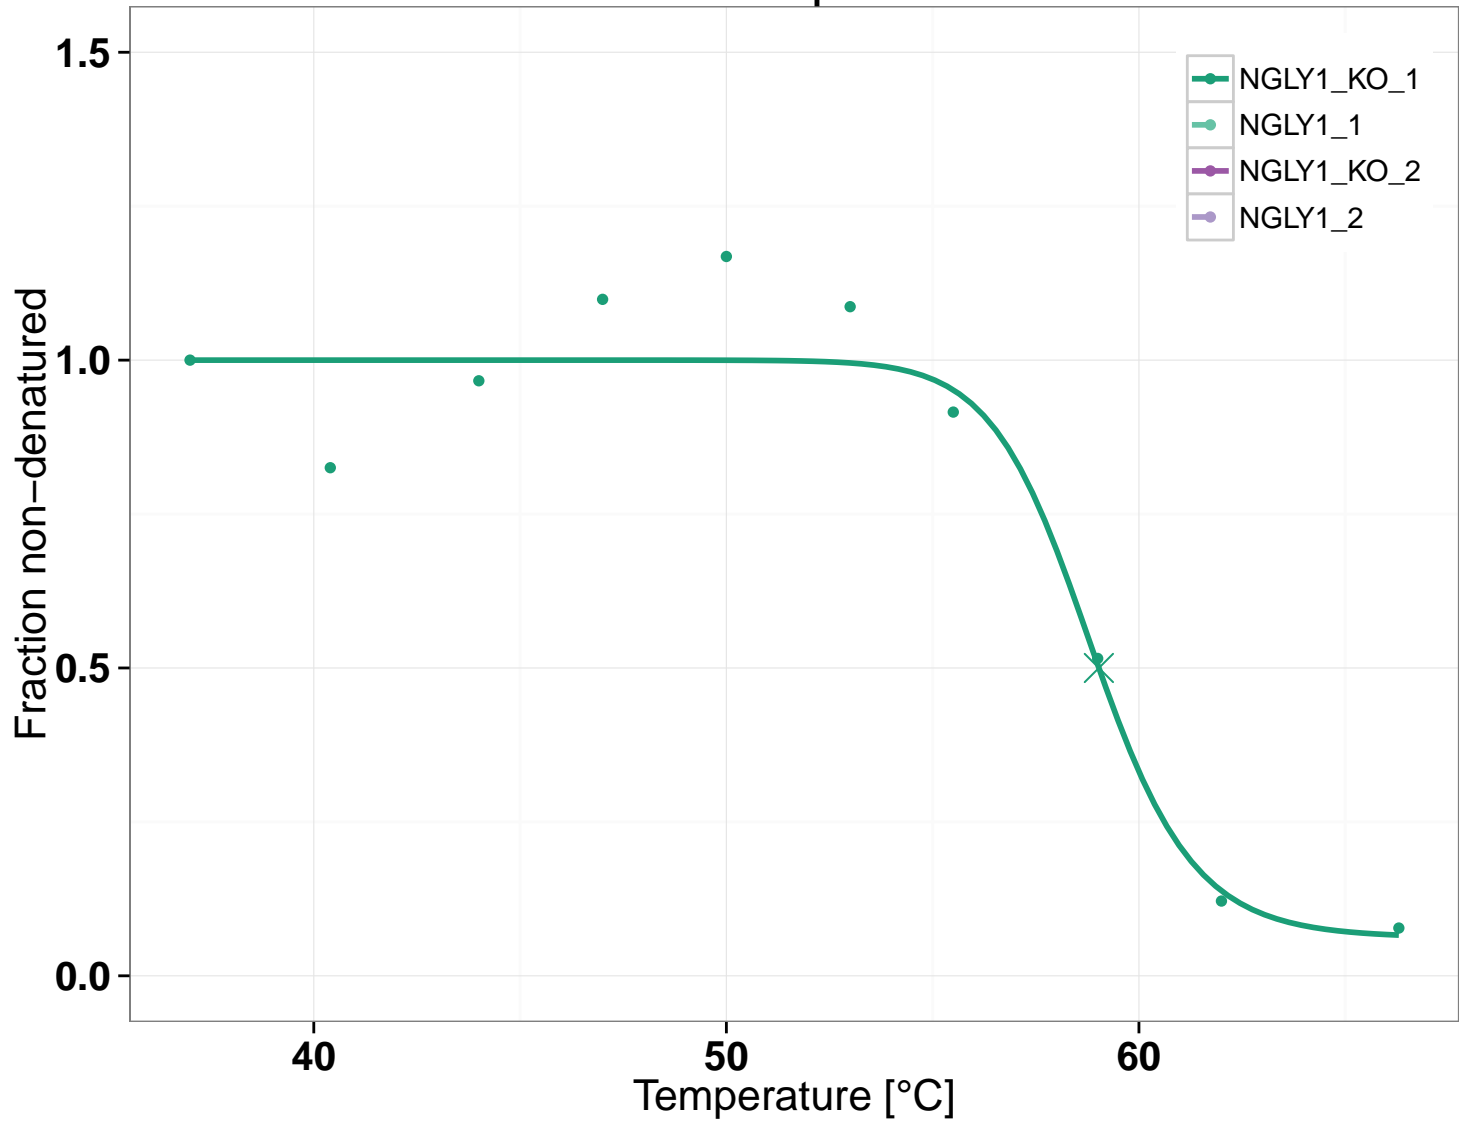

|            | meltPoint | slope | plateau | R2   |
|------------|-----------|-------|---------|------|
| NGLY1_KO_1 | 59.03     | -0.19 | 0.06    | 0.94 |
| NGLY1_1    | -         | -     | -       | -    |
| NGLY1_KO_2 | -         | -     | -       | -    |
| NGLY1_2    | -         | -     | -       | -    |

Supplement: Supplementary file 2300 [file 1]

# IPI00021700.3|PCNA

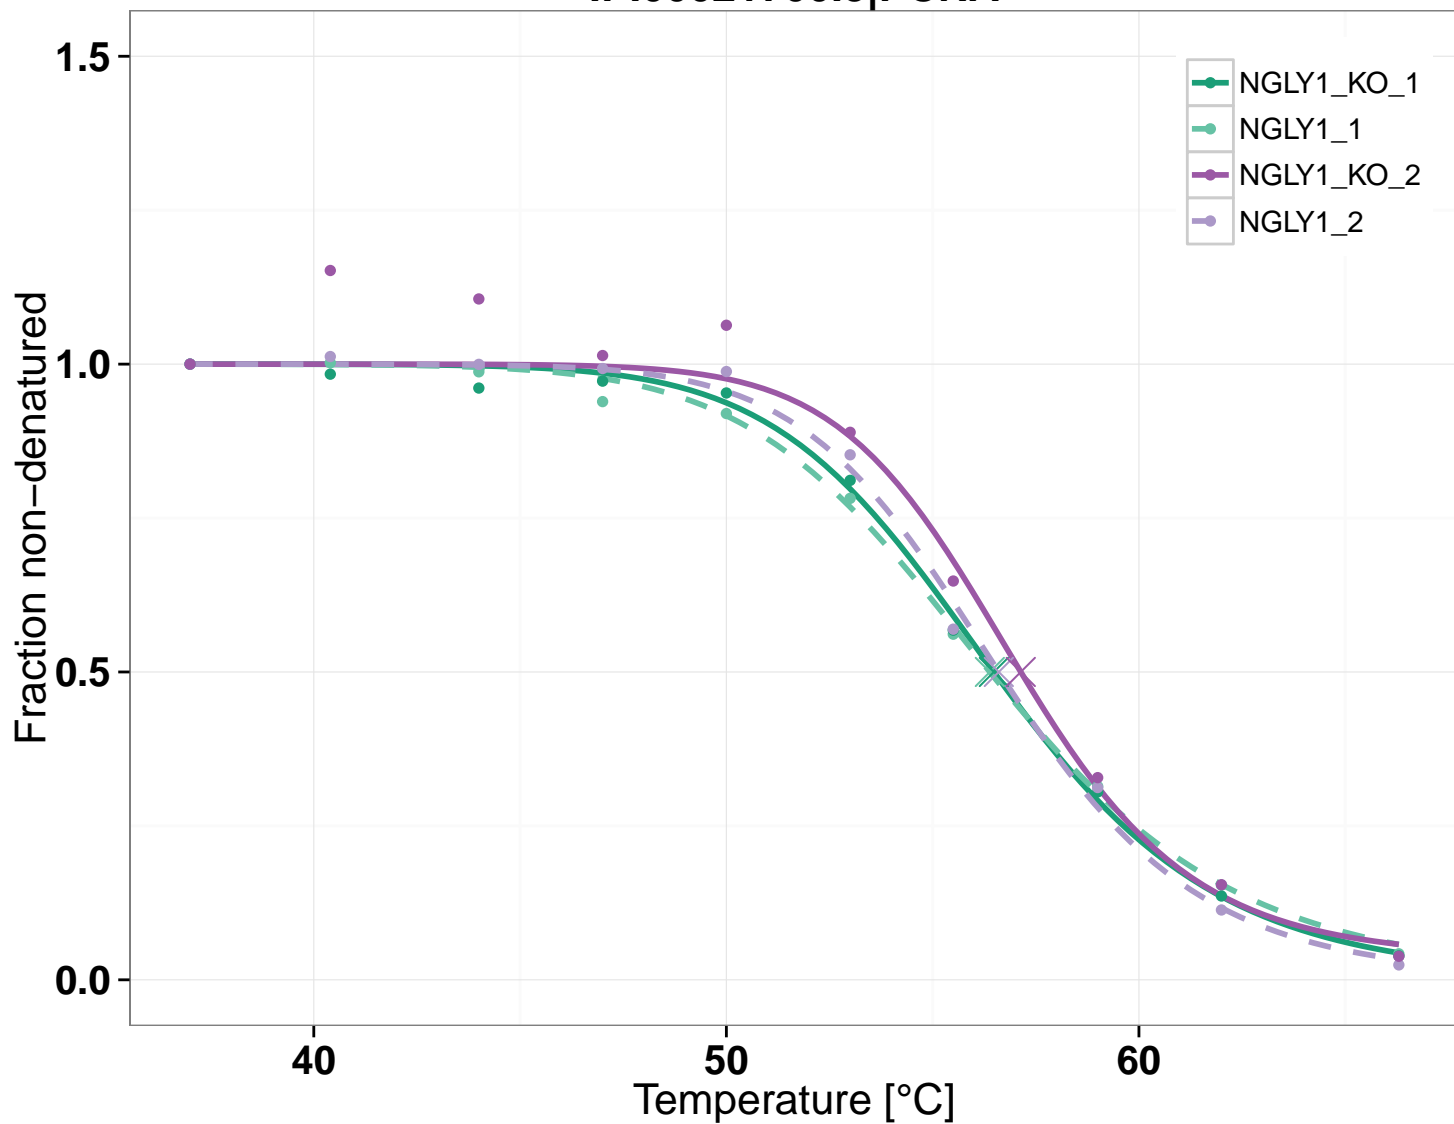

|            | meltPoint | slope  | plateau | R2   |
|------------|-----------|--------|---------|------|
| NGLY1_KO_1 | 56.48     | -0.093 | 0       | 1    |
| NGLY1_1    | 56.39     | -0.084 | 0       | 1    |
| NGLY1_KO_2 | 57.14     | -0.11  | 0.03    | 0.97 |
| NGLY1_2    | 56.6      | -0.1   | 0       | 1    |

Supplement: Supplementary file 2301 [file 1]

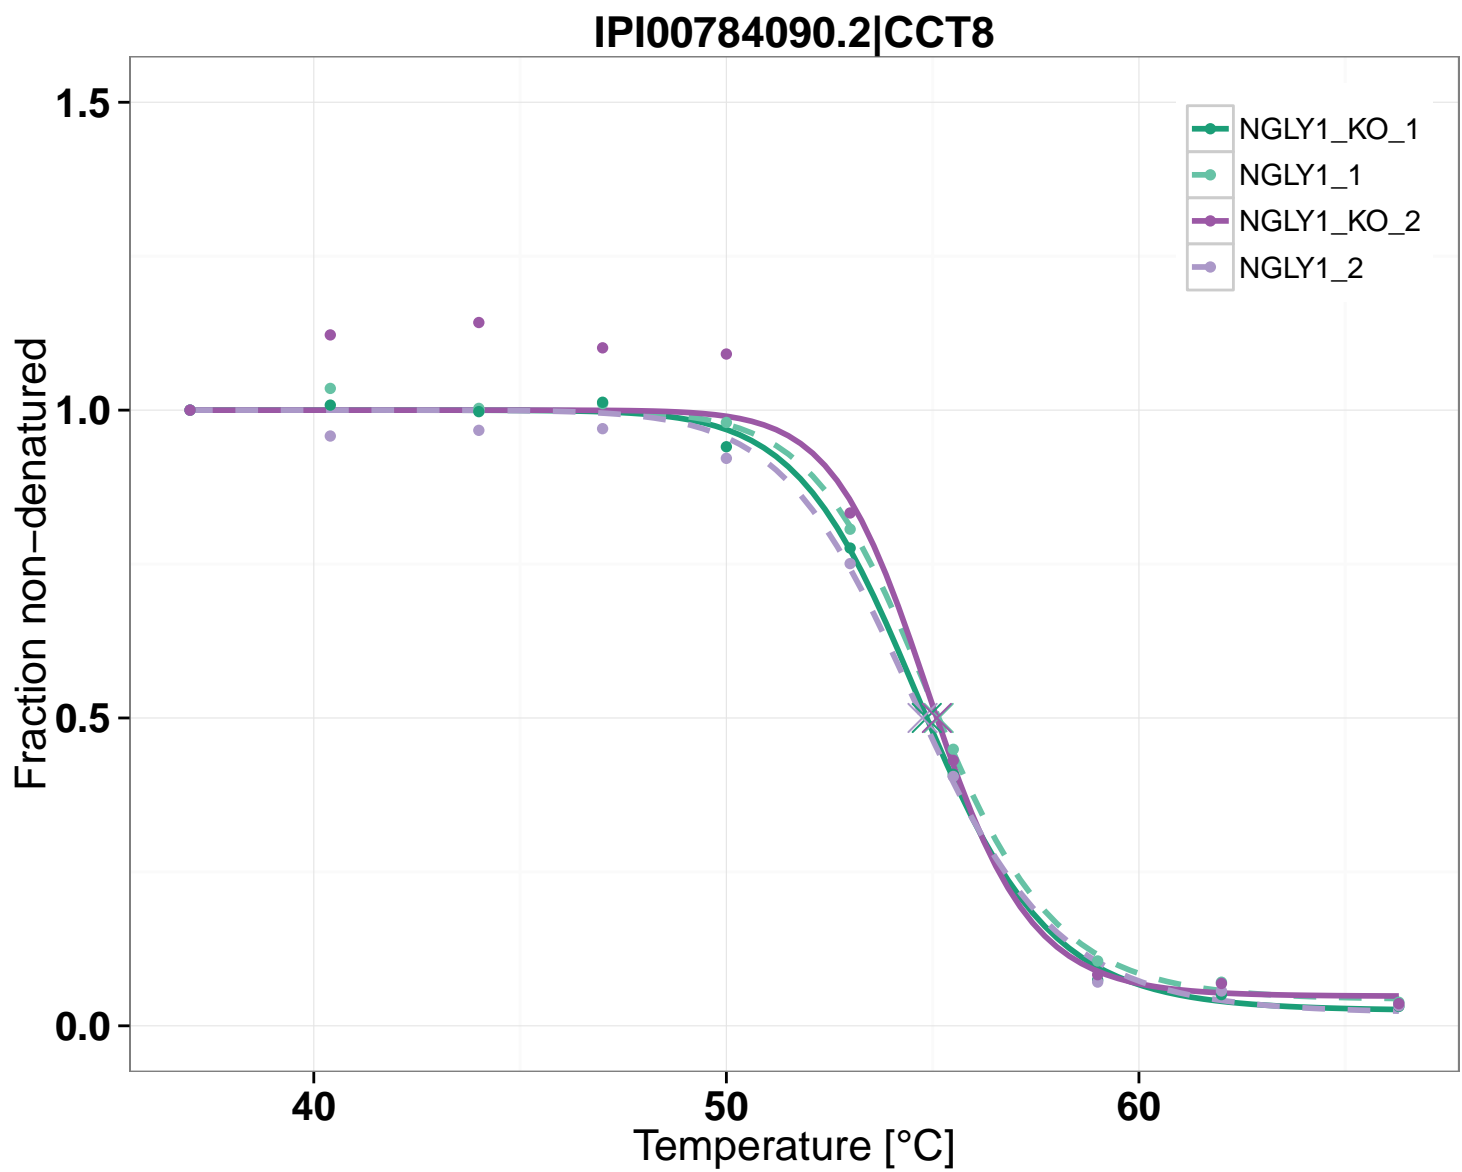

|            | meltPoint | slope | plateau | R2   |
|------------|-----------|-------|---------|------|
| NGLY1_KO_1 | 54.86     | -0.16 | 0.02    | 1    |
| NGLY1_1    | 55.15     | -0.16 | 0.04    | 1    |
| NGLY1_KO_2 | 55.1      | -0.2  | 0.05    | 0.97 |
| NGLY1_2    | 54.75     | -0.15 | 0.02    | 1    |

Supplement: Supplementary file 2302 [file 1]

# IPI00009644.1|RHOU

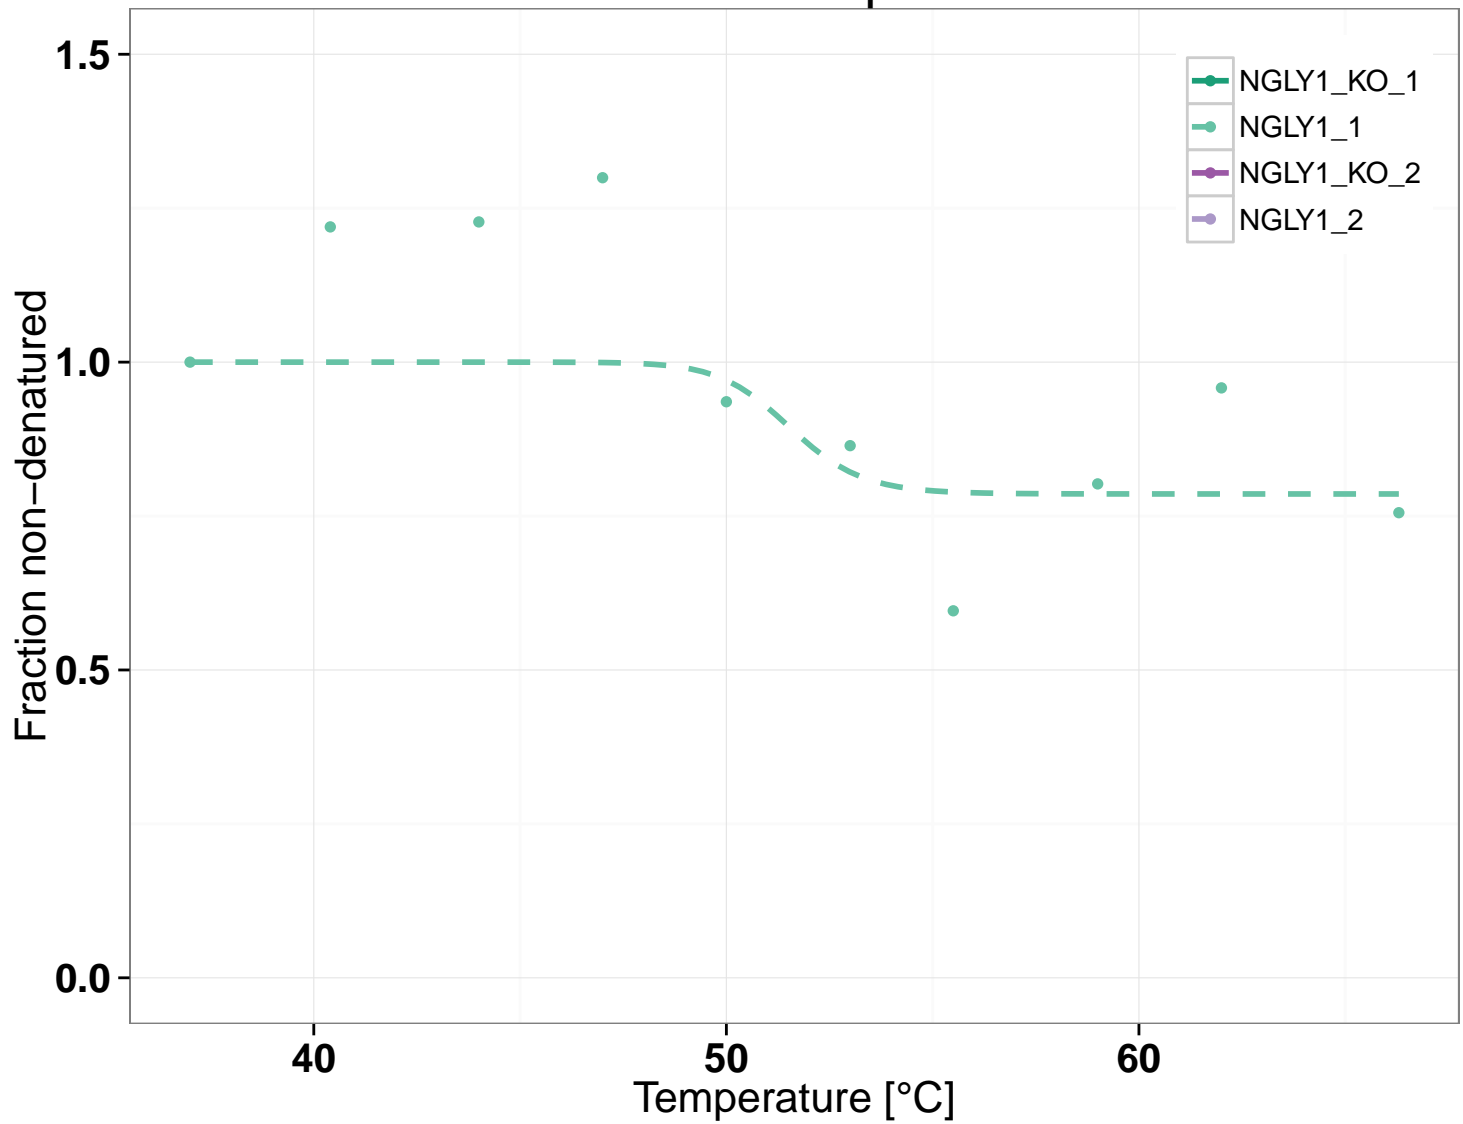

|            | meltPoint | slope  | plateau | R2   |
|------------|-----------|--------|---------|------|
| NGLY1_KO_1 | —         | —      | —       | —    |
| NGLY1_1    | —         | −0.062 | 0.79    | 0.44 |
| NGLY1_KO_2 | —         | —      | —       | —    |
| NGLY1_2    | —         | —      | —       | —    |

Supplement: Supplementary file 2303 [file 1]

# IPI00032939.13|WIPF3

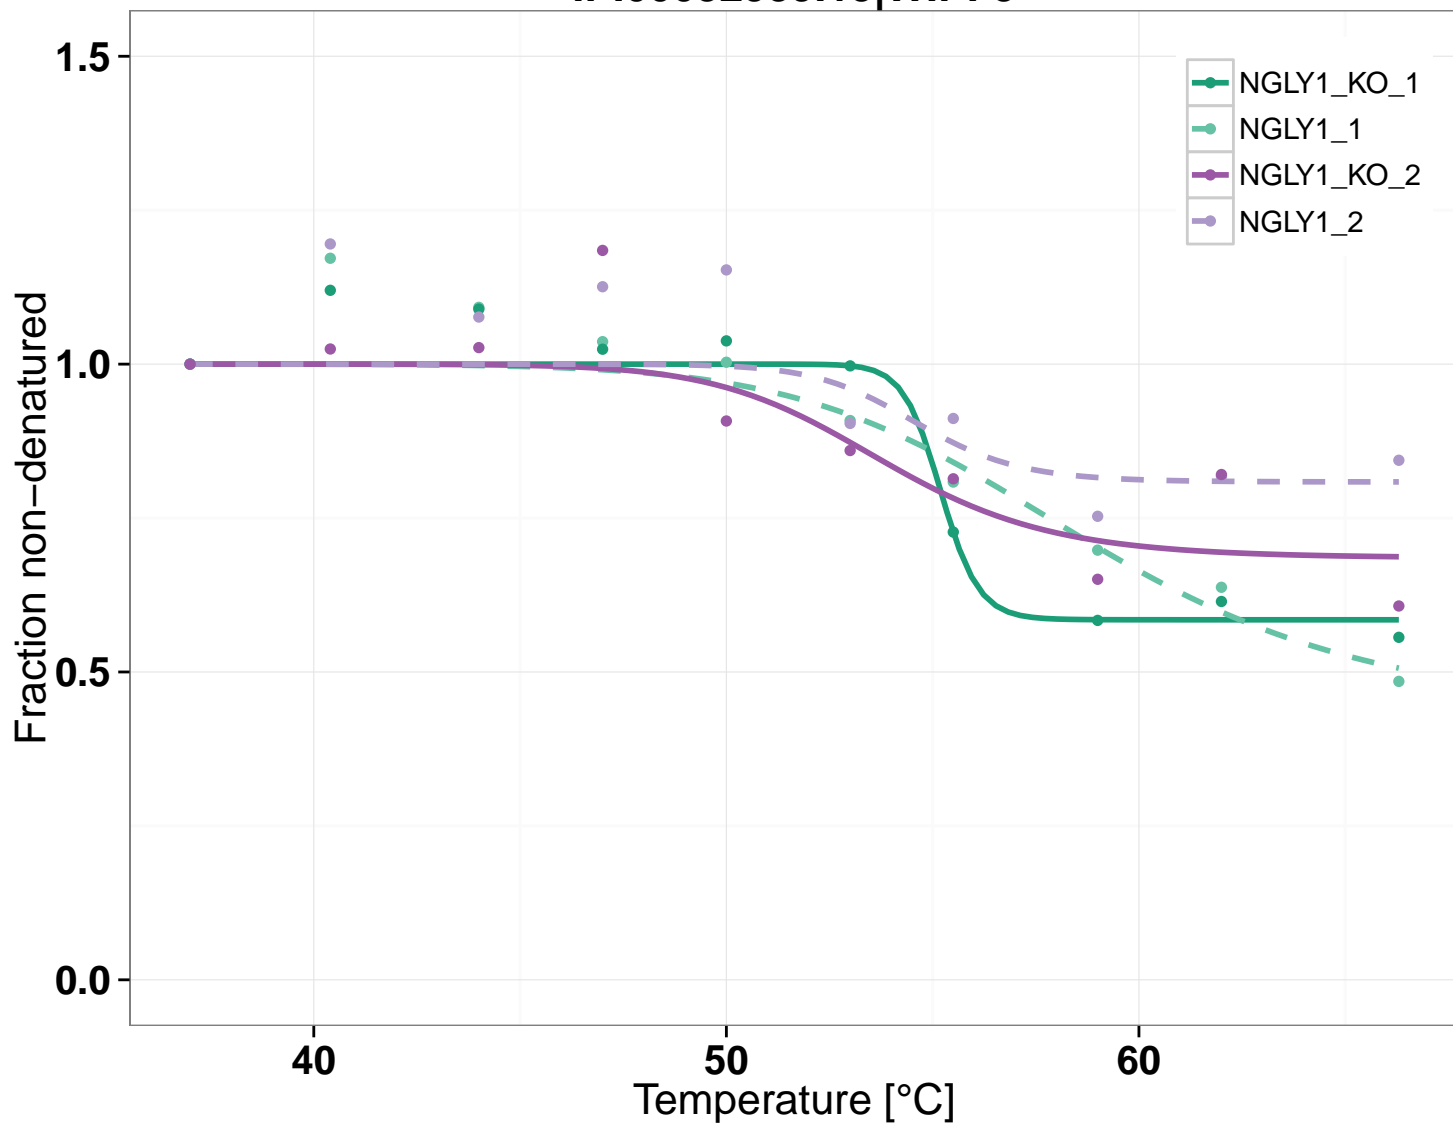

|            | meltPoint | slope  | plateau | R2   |
|------------|-----------|--------|---------|------|
| NGLY1_KO_1 | —         | −0.23  | 0.58    | 0.94 |
| NGLY1_1    | —         | −0.041 | 0.43    | 0.9  |
| NGLY1_KO_2 | —         | −0.039 | 0.68    | 0.76 |
| NGLY1_2    | —         | −0.038 | 0.81    | 0.56 |

Supplement: Supplementary file 2304 [file 1]

IPI00465290.3|DNAJC11

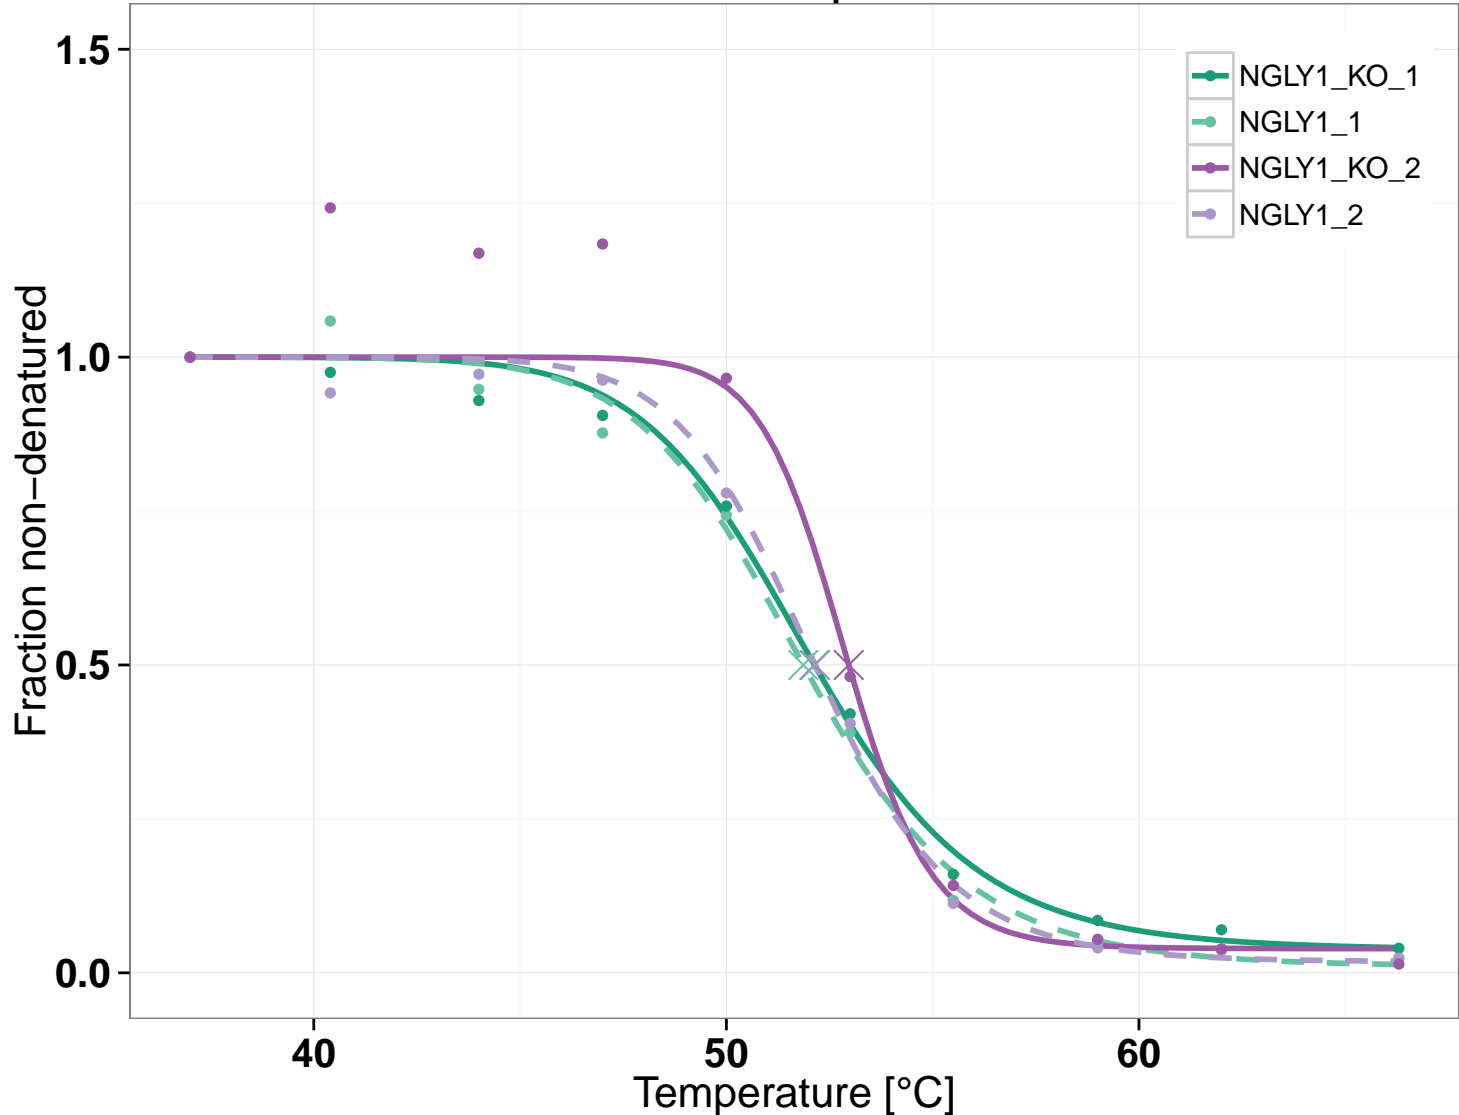

|            | meltPoint | slope | plateau | R2   |
|------------|-----------|-------|---------|------|
| NGLY1_KO_1 | 52.14     | -0.12 | 0.04    | 1    |
| NGLY1_1    | 51.87     | -0.12 | 0.01    | 0.99 |
| NGLY1_KO_2 | 52.97     | -0.23 | 0.04    | 0.95 |
| NGLY1_2    | 52.15     | -0.15 | 0.02    | 1    |

Supplement: Supplementary file 2305 [file 1]

IPI00328798.1|BCL9L

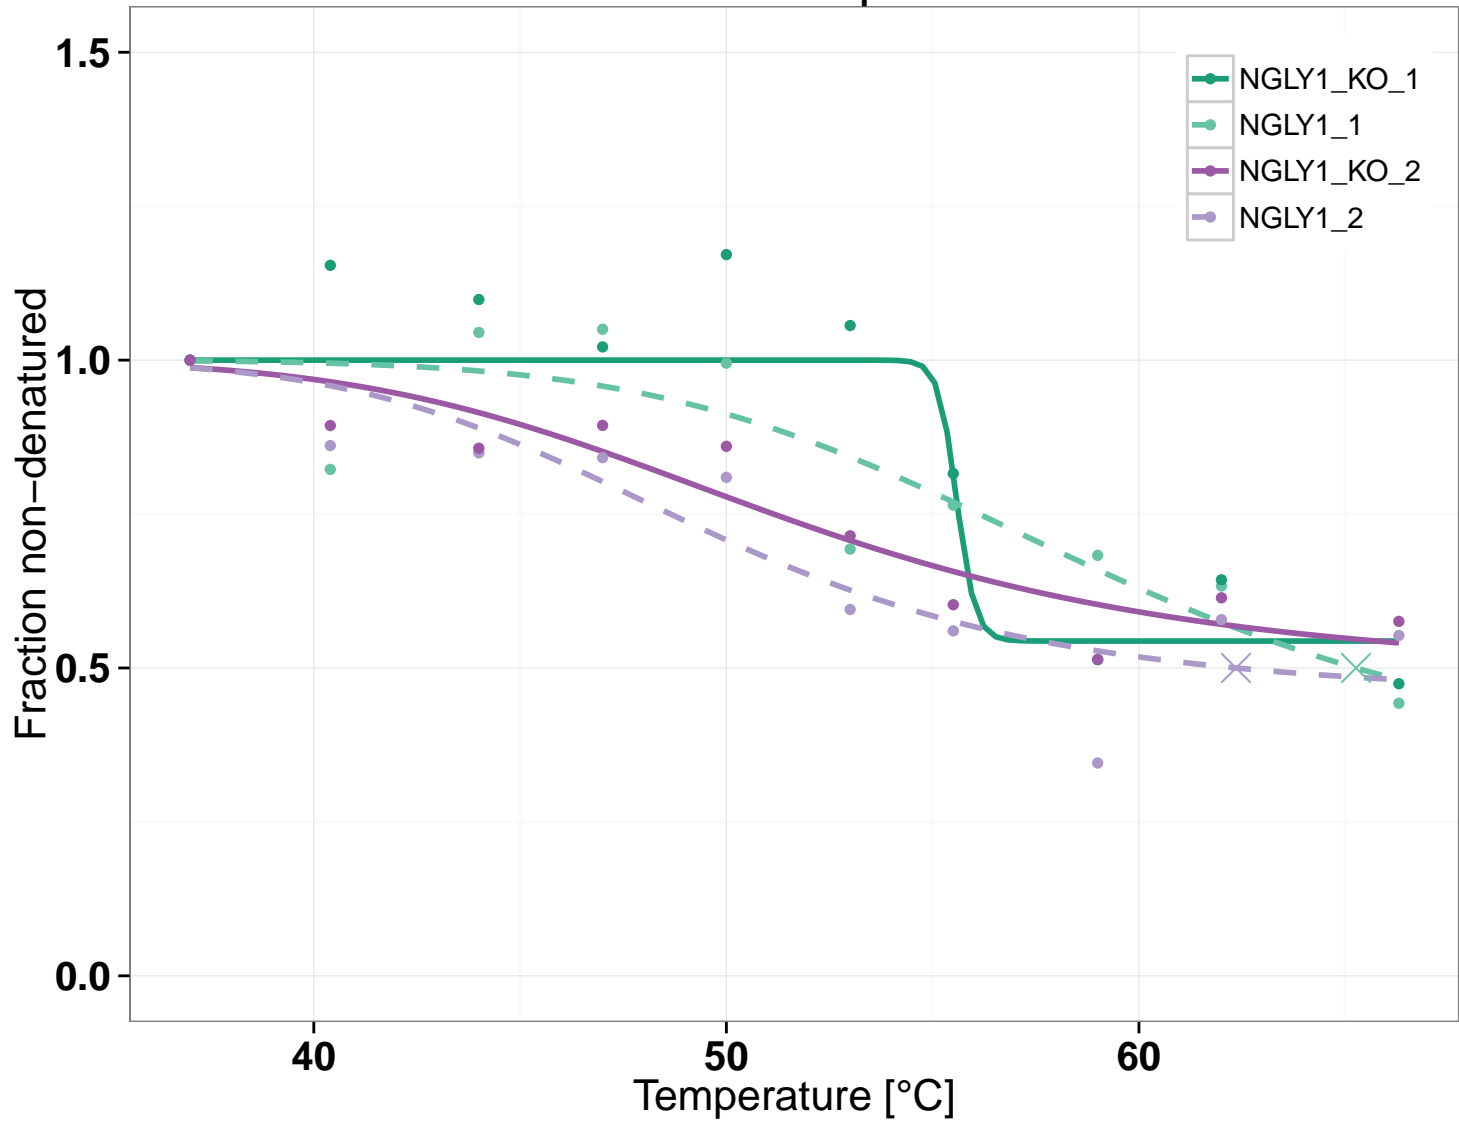

|            | meltPoint | slope  | plateau | R2   |
|------------|-----------|--------|---------|------|
| NGLY1_KO_1 | -         | -0.51  | 0.54    | 0.87 |
| NGLY1_1    | 65.26     | -0.032 | 0.32    | 0.8  |
| NGLY1_KO_2 | -         | -0.025 | 0.49    | 0.88 |
| NGLY1_2    | 62.35     | -0.032 | 0.45    | 0.81 |

Supplement: Supplementary file 2306 [file 1]

# IPI00827535.1|PTMA

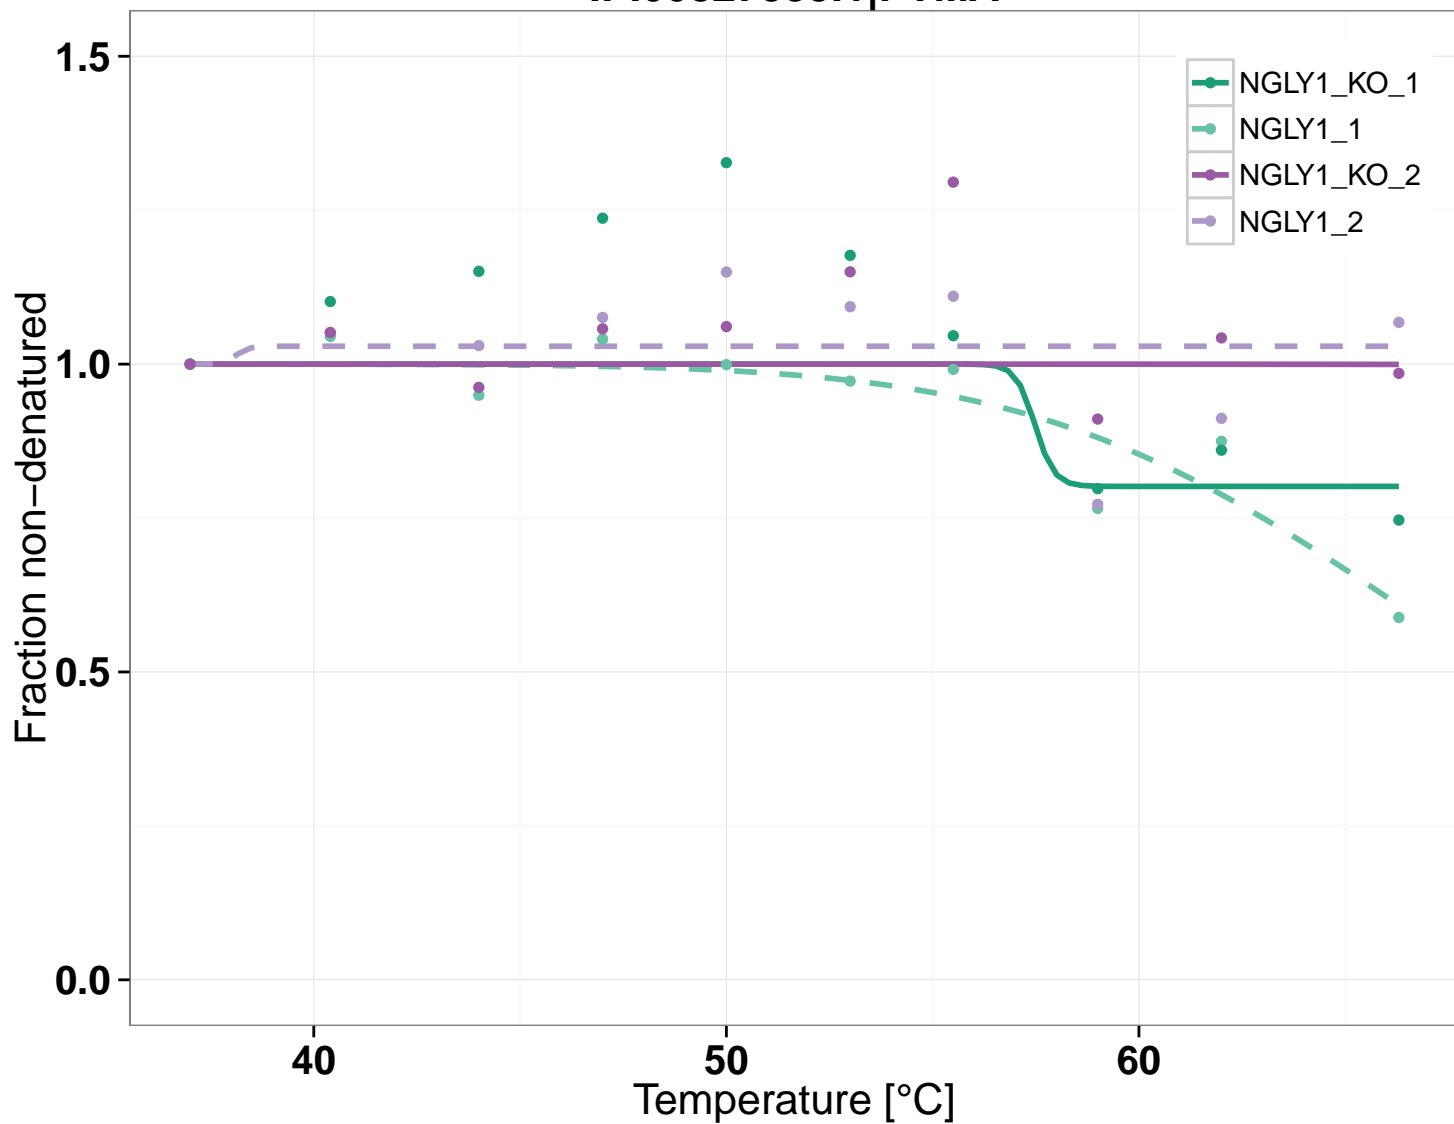

|            | meltPoint | slope | plateau | R2    |
|------------|-----------|-------|---------|-------|
| NGLY1_KO_1 | -         | -0.22 | 0.8     | 0.29  |
| NGLY1_1    | -         | -     | 0       | 0.84  |
| NGLY1_KO_2 | -         | -     | 0       | -0.26 |
| NGLY1_2    | -         | 0.048 | 1.03    | 0.01  |

Supplement: Supplementary file 2307 [file 1]

# IPI00017895.2|GPD2

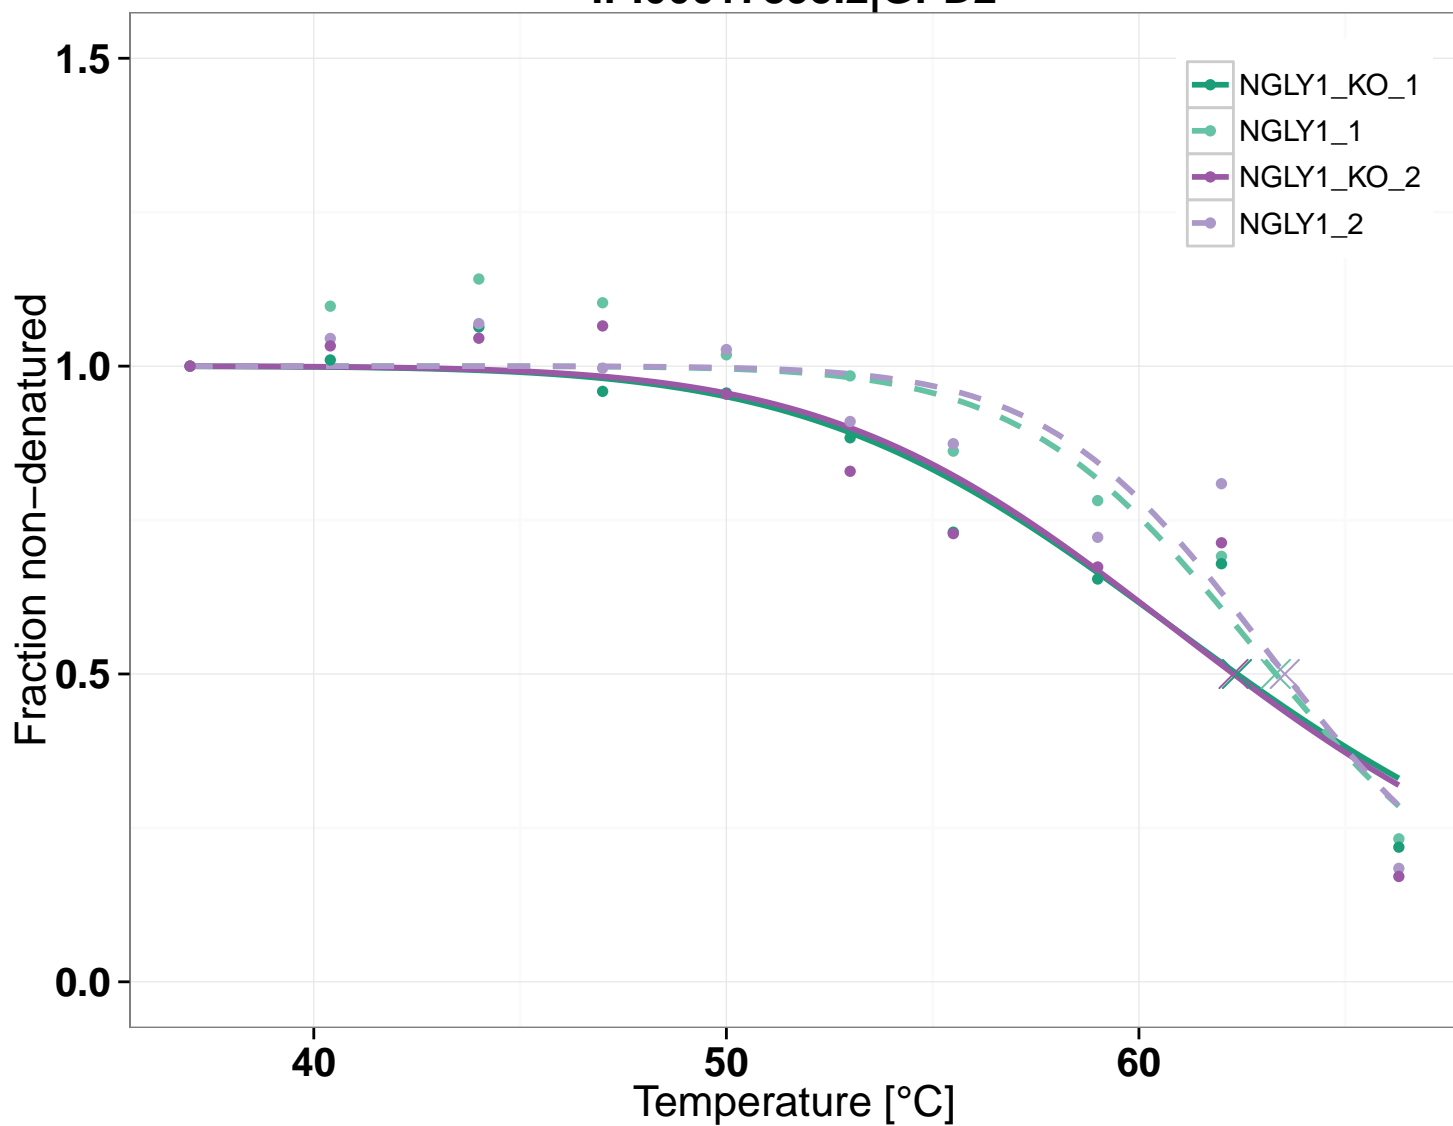

|            | meltPoint | slope  | plateau | R2   |
|------------|-----------|--------|---------|------|
| NGLY1_KO_1 | 62.38     | -0.049 | 0       | 0.91 |
| NGLY1_1    | 63.32     | -0.081 | 0       | 0.91 |
| NGLY1_KO_2 | 62.29     | -0.052 | 0       | 0.87 |
| NGLY1_2    | 63.54     | -0.087 | 0       | 0.88 |

Supplement: Supplementary file 2308 [file 1]

# IPI00217918.1|ELMOD2

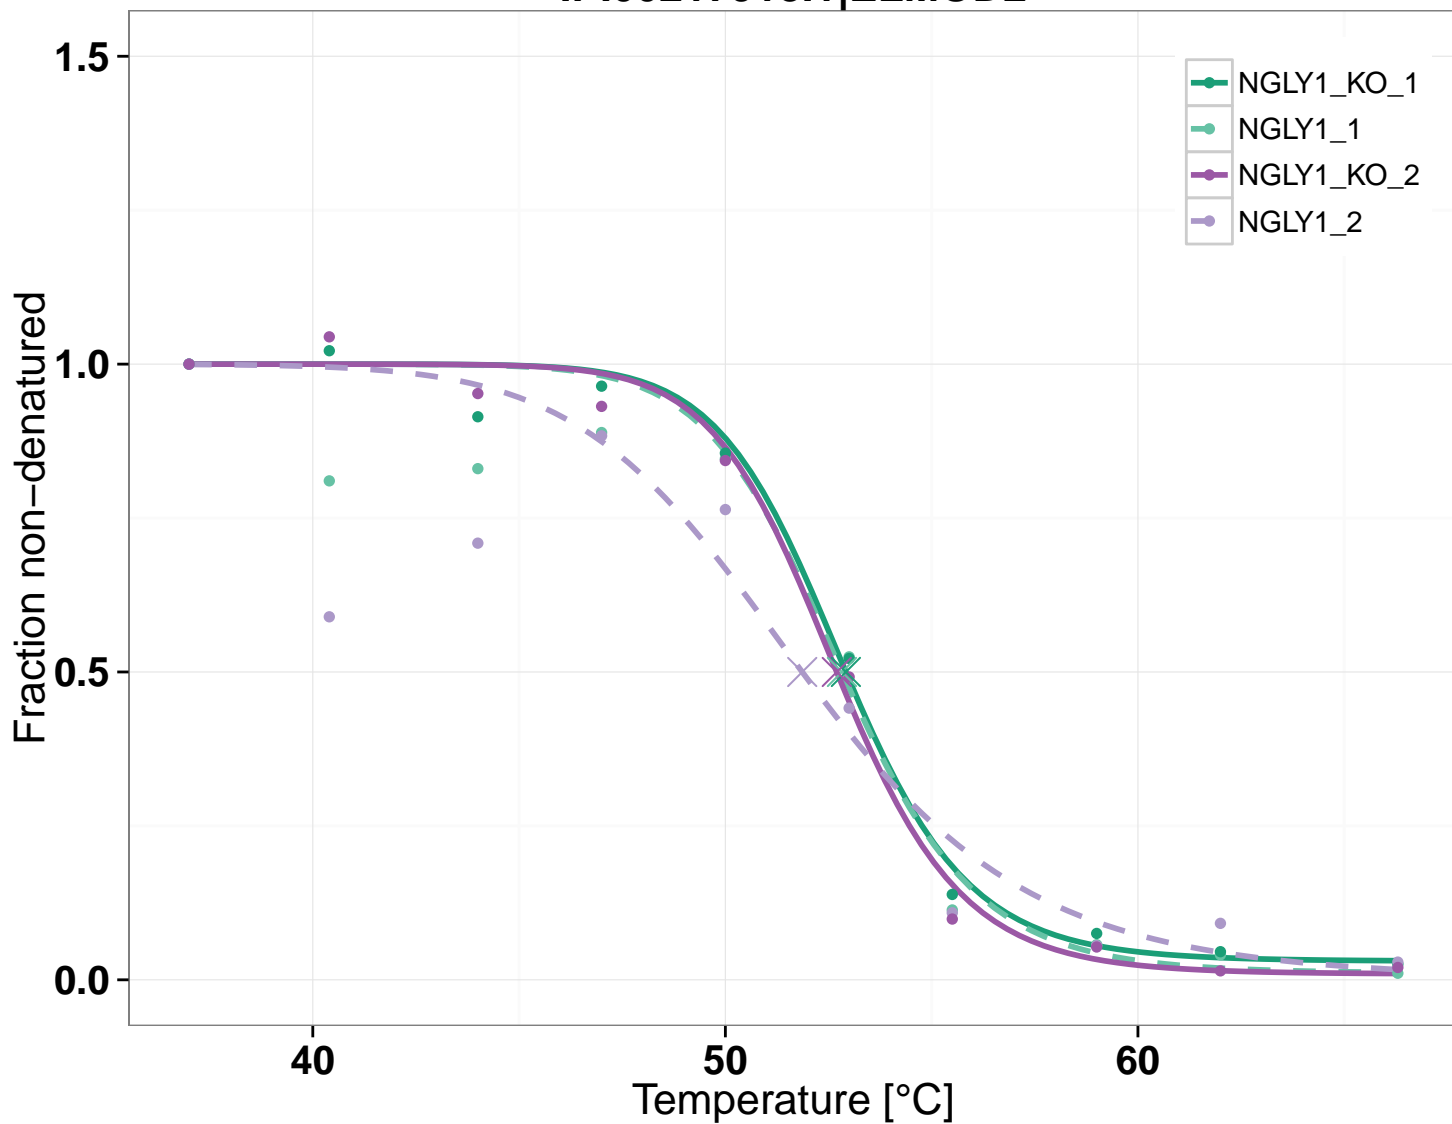

|            | meltPoint | slope  | plateau | R2   |
|------------|-----------|--------|---------|------|
| NGLY1_KO_1 | 52.92     | -0.16  | 0.03    | 0.99 |
| NGLY1_1    | 52.83     | -0.15  | 0.01    | 0.95 |
| NGLY1_KO_2 | 52.7      | -0.16  | 0.01    | 0.99 |
| NGLY1_2    | 51.86     | -0.091 | 0       | 0.79 |

Supplement: Supplementary file 2309 [file 1]

IPI00009334.5|PRKD2

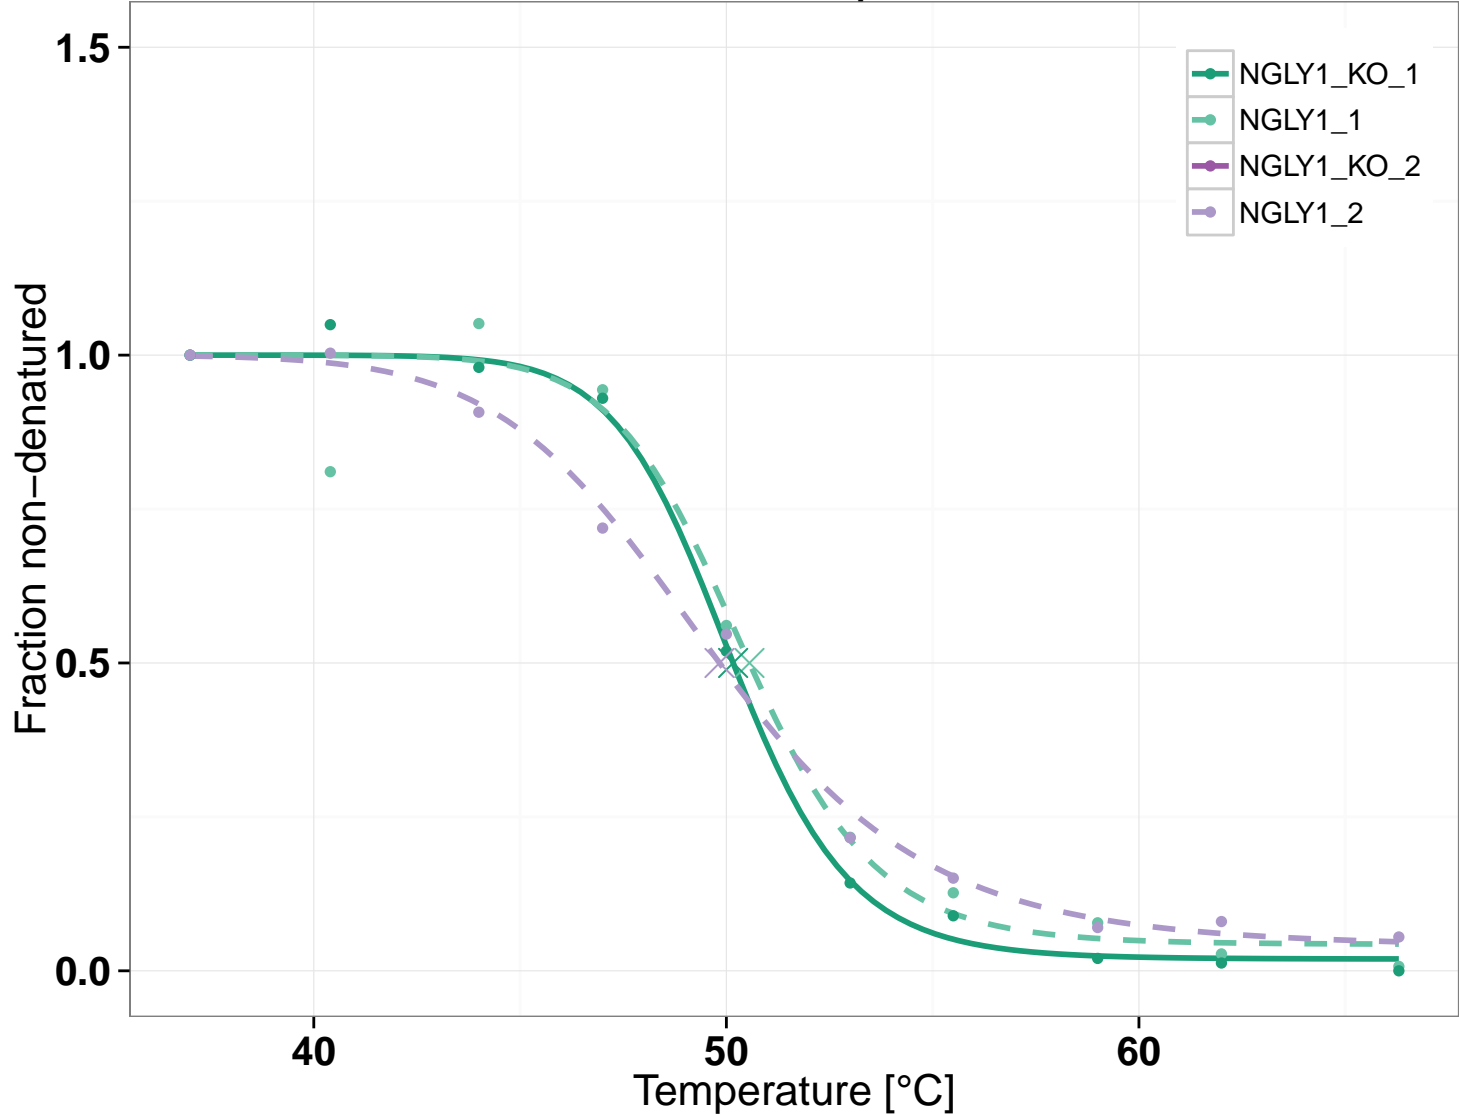

|            | meltPoint | slope  | plateau | R2   |
|------------|-----------|--------|---------|------|
| NGLY1_KO_1 | 50.16     | -0.17  | 0.02    | 1    |
| NGLY1_1    | 50.56     | -0.15  | 0.04    | 0.97 |
| NGLY1_KO_2 | -         | -      | -       | -    |
| NGLY1_2    | 49.83     | -0.092 | 0.04    | 0.99 |

Supplement: Supplementary file 2310 [file 1]
