# Supplementary material (part 24 of 85)
Source: publisher figshare collection journal article supplement (https://gsajournals.figshare.com/articles/dataset/_/12014913)

IPI00103864.3|TMEM158

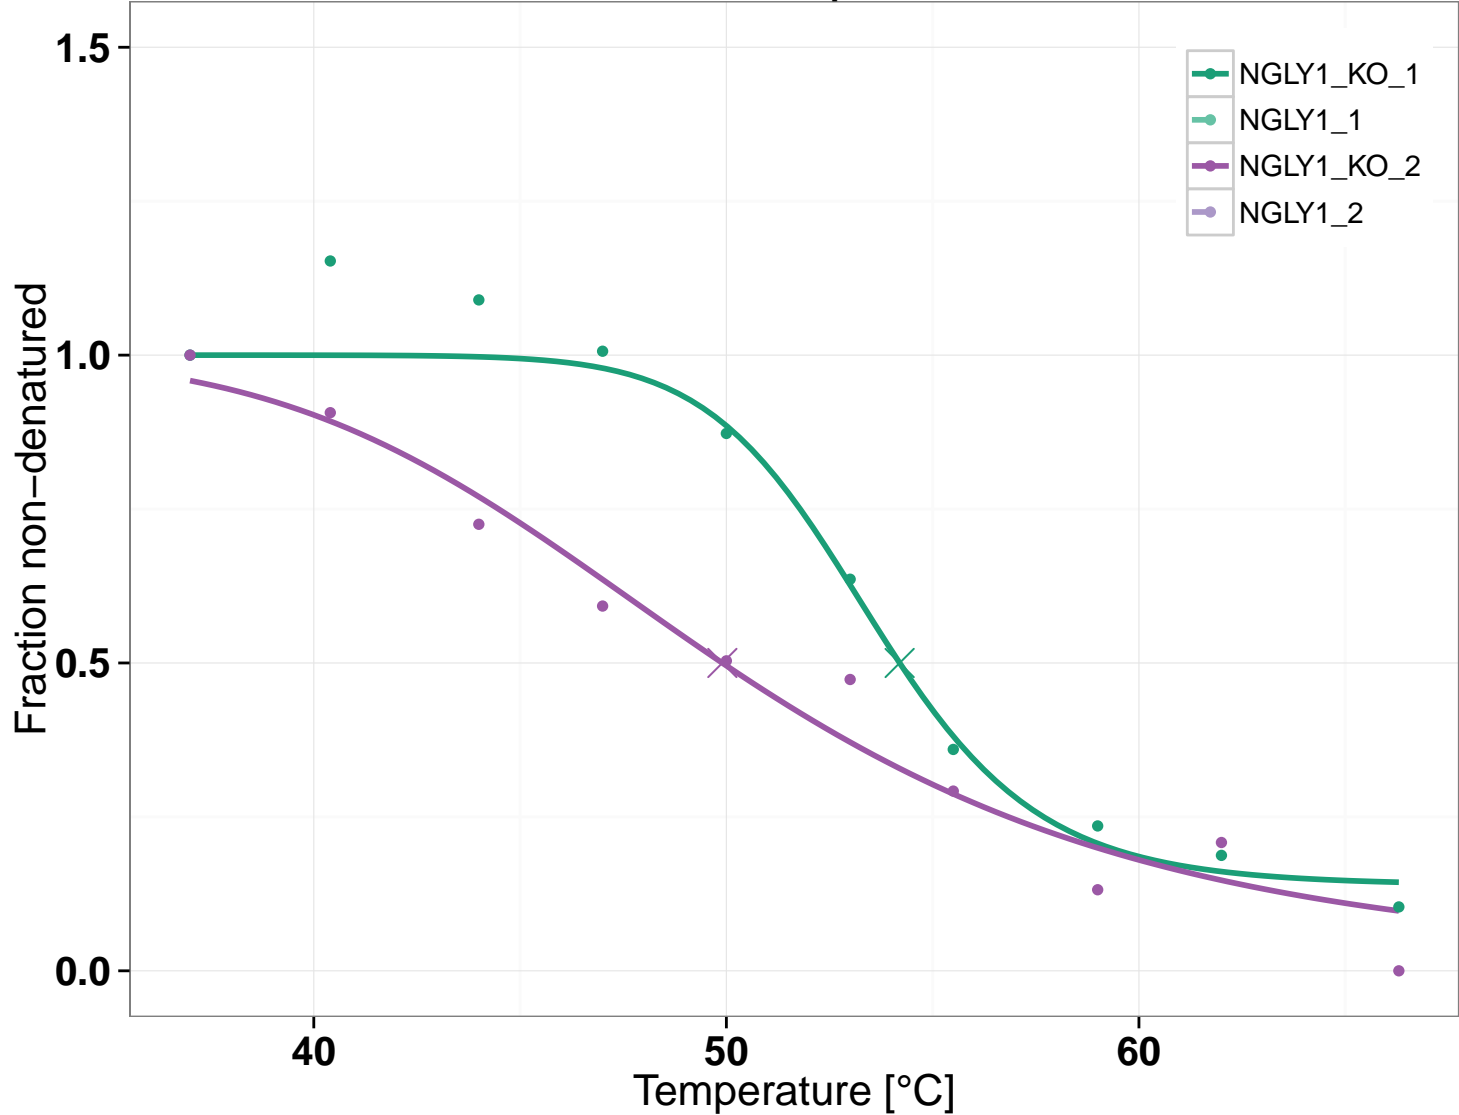

|            | meltPoint | slope  | plateau | R2   |
|------------|-----------|--------|---------|------|
| NGLY1_KO_1 | 54.2      | -0.11  | 0.14    | 0.98 |
| NGLY1_1    | -         | -      | -       | -    |
| NGLY1_KO_2 | 49.9      | -0.047 | 0       | 0.97 |
| NGLY1_2    | -         | -      | -       | -    |

Supplement: Supplementary file 2311 [file 1]

IPI00029744.1|SSBP1

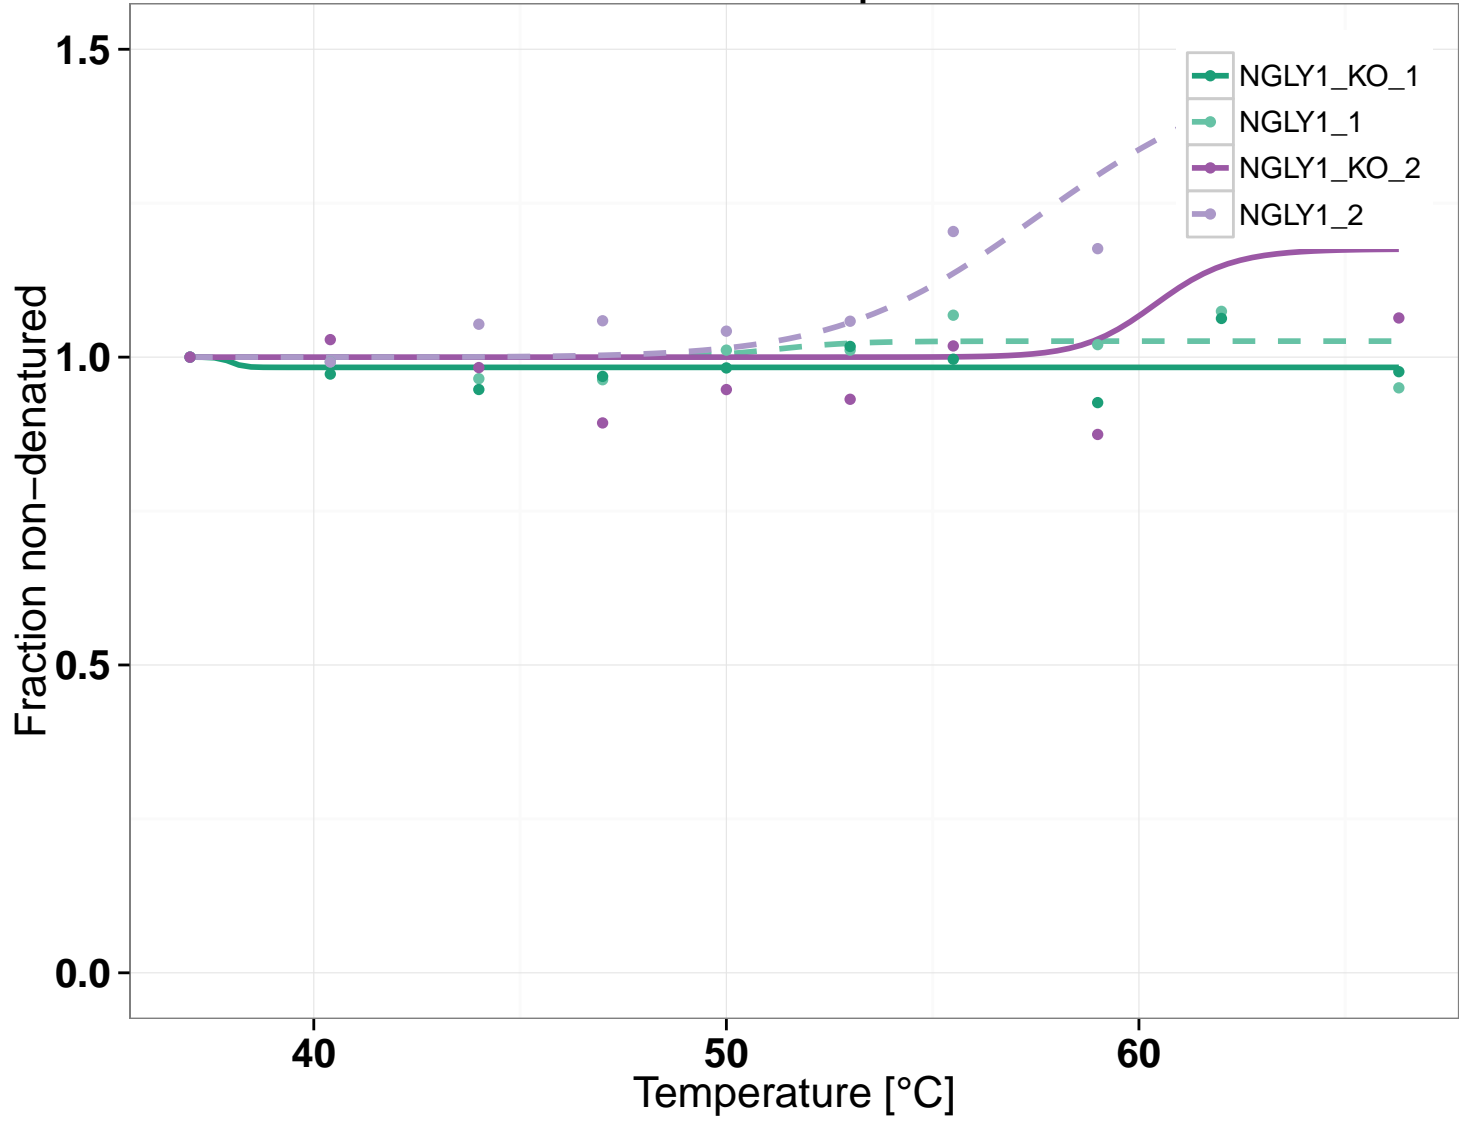

|            | meltPoint | slope  | plateau | R2   |
|------------|-----------|--------|---------|------|
| NGLY1_KO_1 | -         | -0.027 | 0.98    | 0.02 |
| NGLY1_1    | -         | 0.007  | 1.03    | 0.19 |
| NGLY1_KO_2 | -         | 0.048  | 1.18    | 0.39 |
| NGLY1_2    | -         | 0.047  | 1.5     | 0.88 |

Supplement: Supplementary file 2312 [file 1]

IPI00297845.4|NFATC2

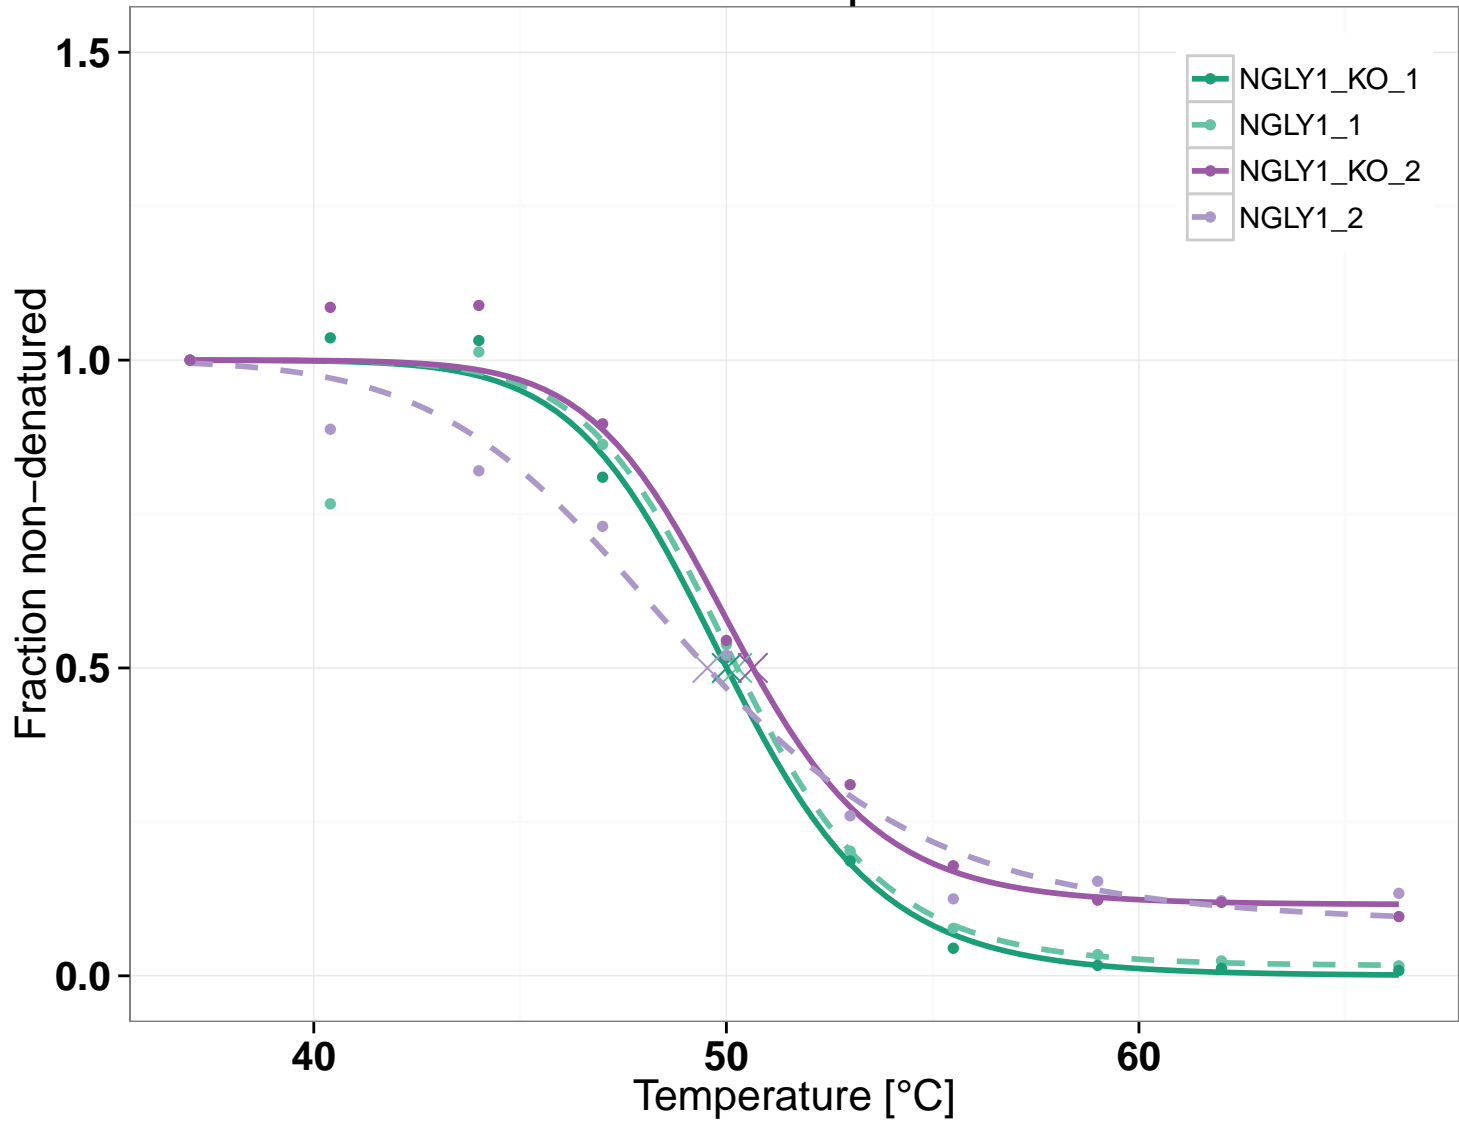

|            | meltPoint | slope  | plateau | R2   |
|------------|-----------|--------|---------|------|
| NGLY1_KO_1 | 50.01     | -0.13  | 0       | 1    |
| NGLY1_1    | 50.26     | -0.14  | 0.02    | 0.97 |
| NGLY1_KO_2 | 50.64     | -0.13  | 0.12    | 0.99 |
| NGLY1_2    | 49.54     | -0.076 | 0.08    | 0.98 |

Supplement: Supplementary file 2313 [file 1]

IPI00873326.1|UFD1L

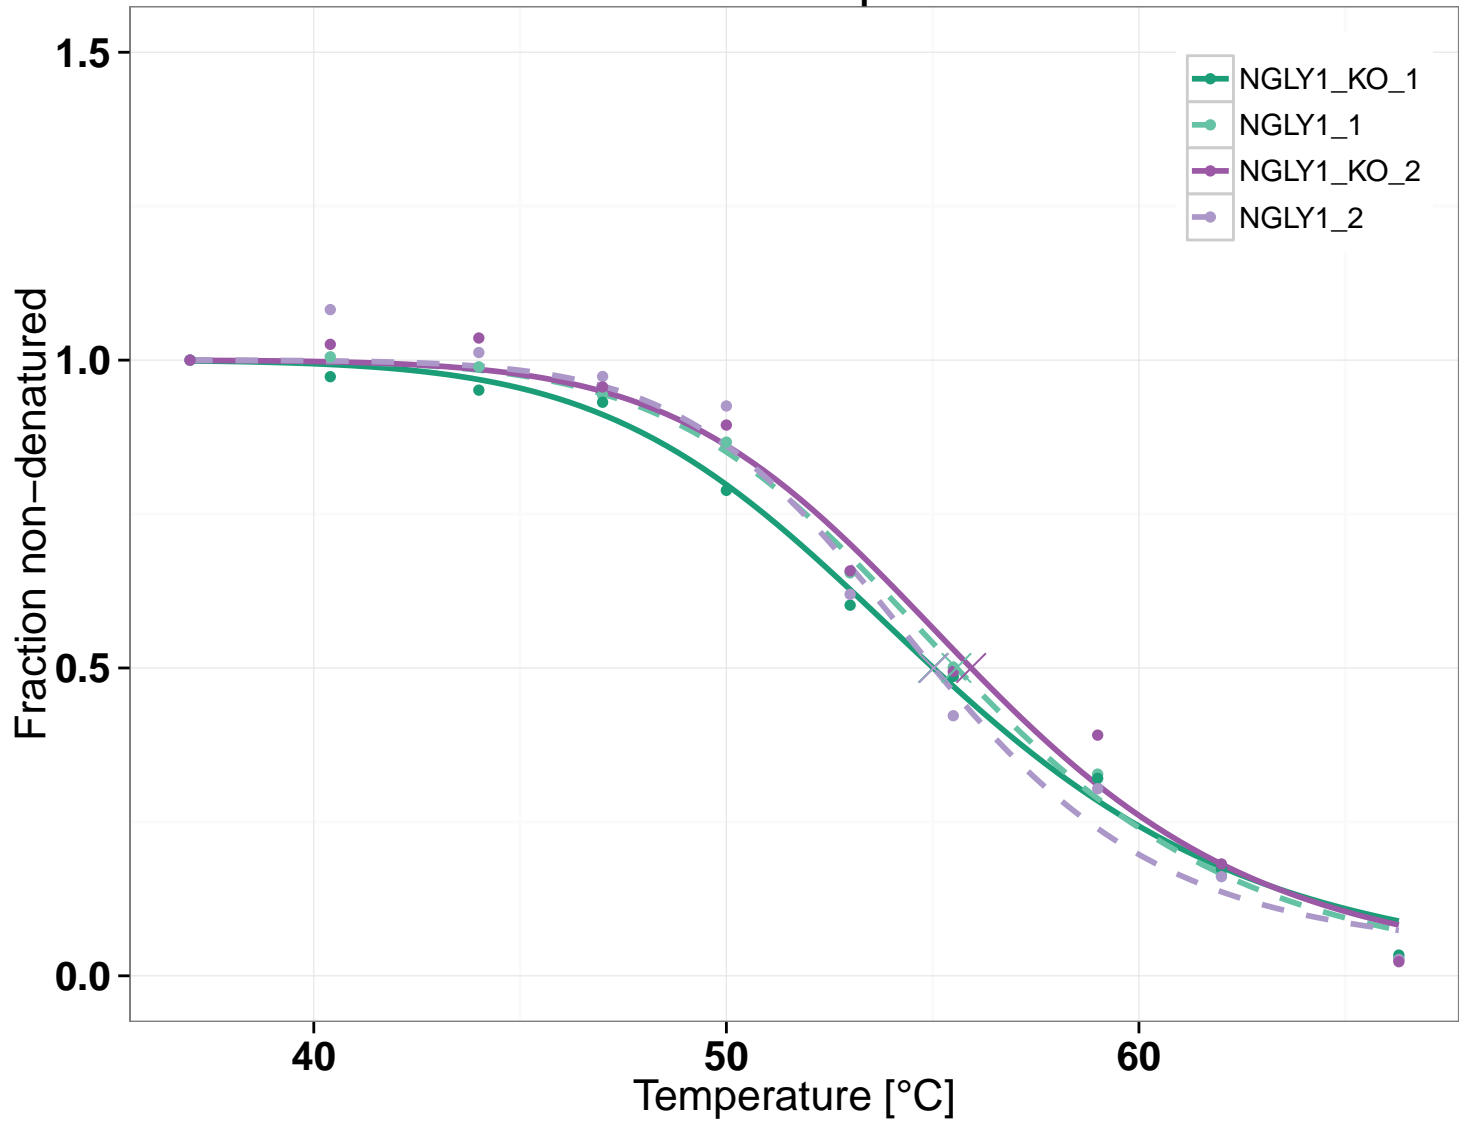

|            | meltPoint | slope  | plateau | R2   |
|------------|-----------|--------|---------|------|
| NGLY1_KO_1 | 55.02     | -0.063 | 0       | 0.99 |
| NGLY1_1    | 55.58     | -0.071 | 0       | 1    |
| NGLY1_KO_2 | 55.93     | -0.07  | 0       | 0.99 |
| NGLY1_2    | 55.02     | -0.083 | 0.04    | 0.98 |

Supplement: Supplementary file 2314 [file 1]

# IPI00873862.1|LIN28B

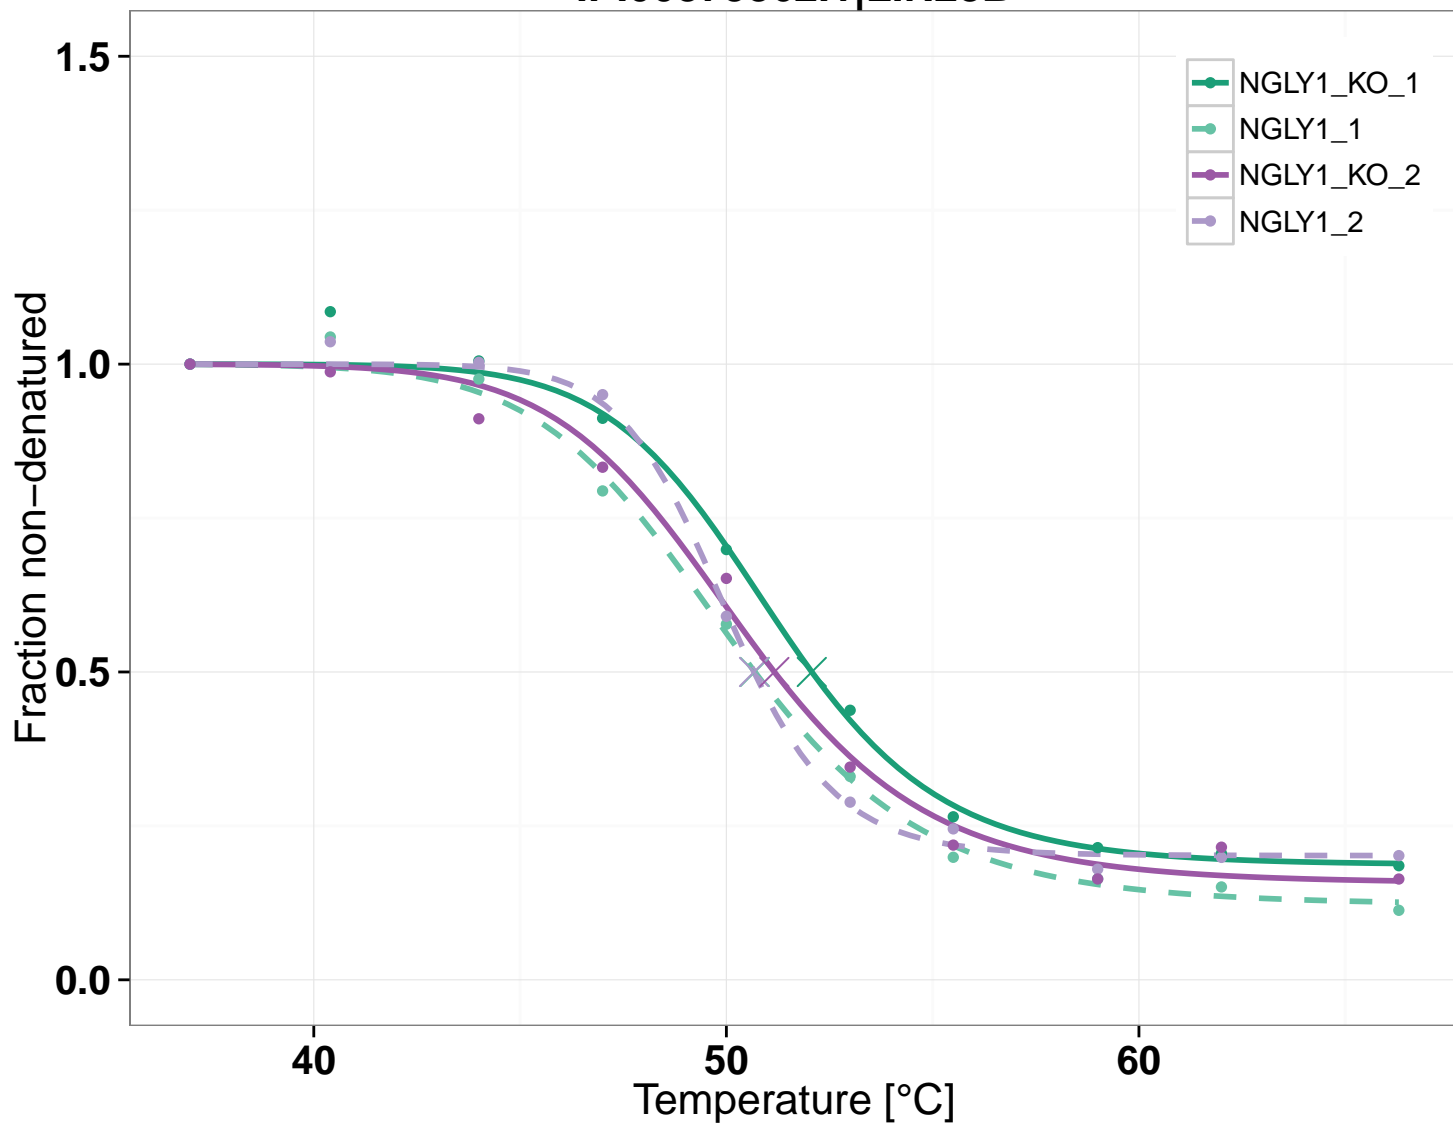

|            | meltPoint | slope  | plateau | R2   |
|------------|-----------|--------|---------|------|
| NGLY1_KO_1 | 52.07     | -0.1   | 0.19    | 0.99 |
| NGLY1_1    | 50.69     | -0.094 | 0.12    | 1    |
| NGLY1_KO_2 | 51.16     | -0.094 | 0.16    | 0.99 |
| NGLY1_2    | 50.67     | -0.15  | 0.2     | 1    |

Supplement: Supplementary file 2315 [file 1]

# IPI00024095.3|ANXA3

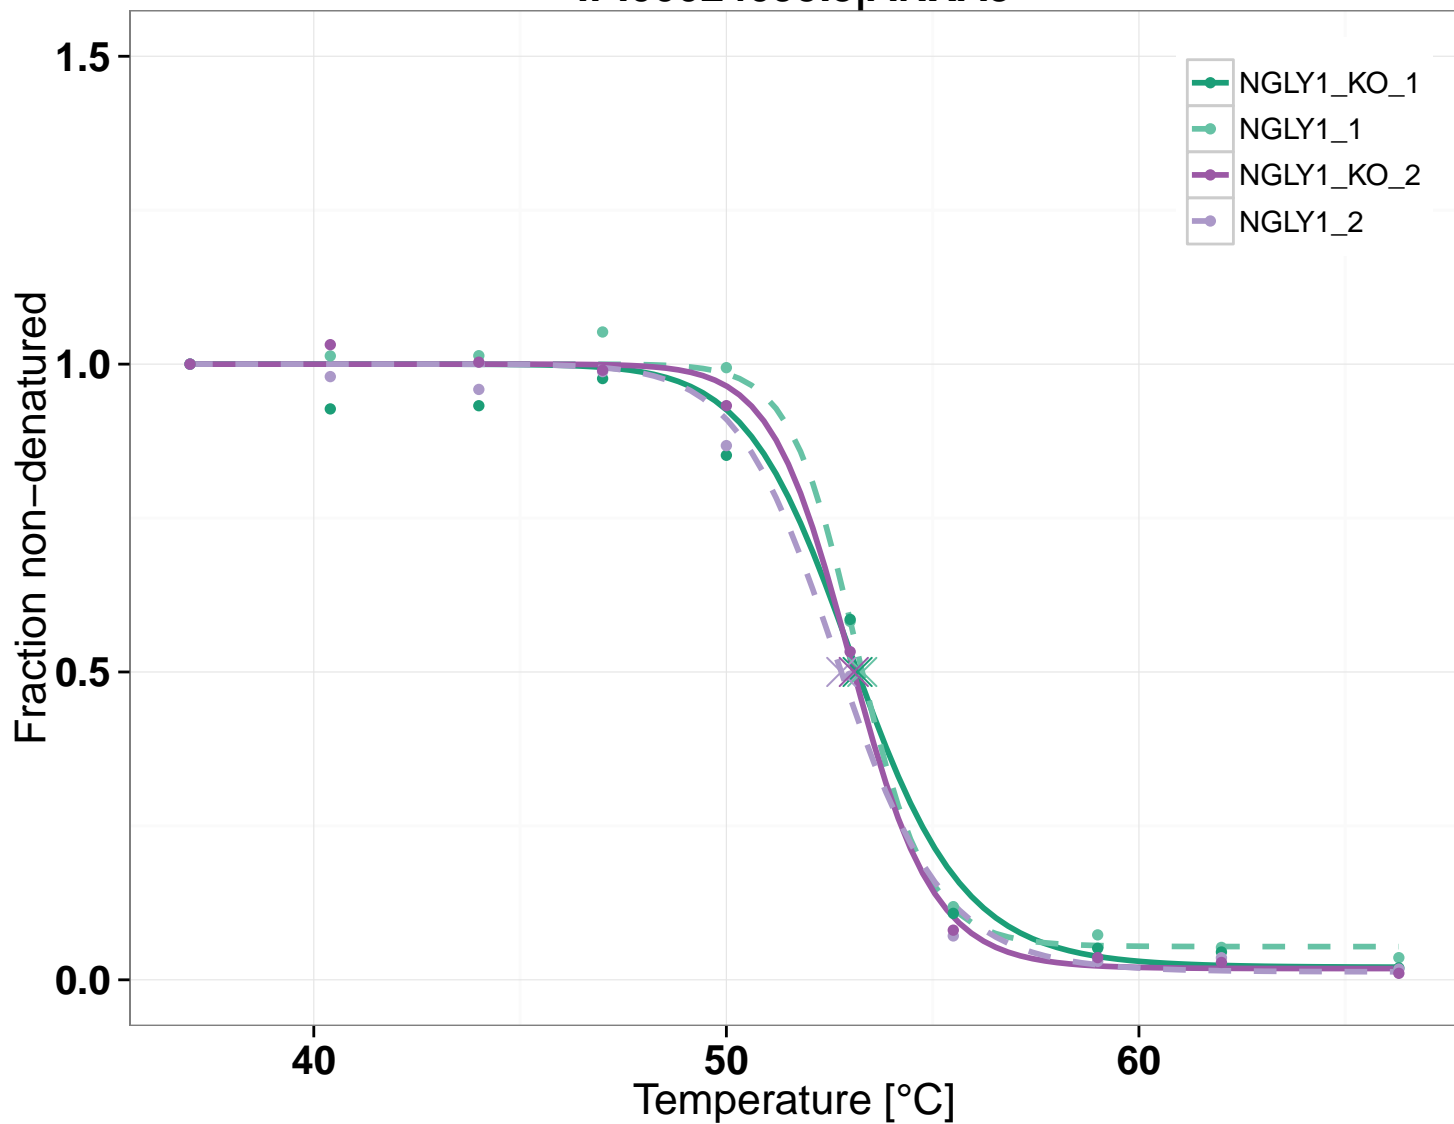

|            | meltPoint | slope | plateau | R2   |
|------------|-----------|-------|---------|------|
| NGLY1_KO_1 | 53.18     | -0.19 | 0.02    | 0.99 |
| NGLY1_1    | 53.29     | -0.29 | 0.05    | 1    |
| NGLY1_KO_2 | 53.09     | -0.25 | 0.02    | 1    |
| NGLY1_2    | 52.79     | -0.2  | 0.01    | 1    |

Supplement: Supplementary file 2316 [file 1]

IPI00872548.1|ZNF320

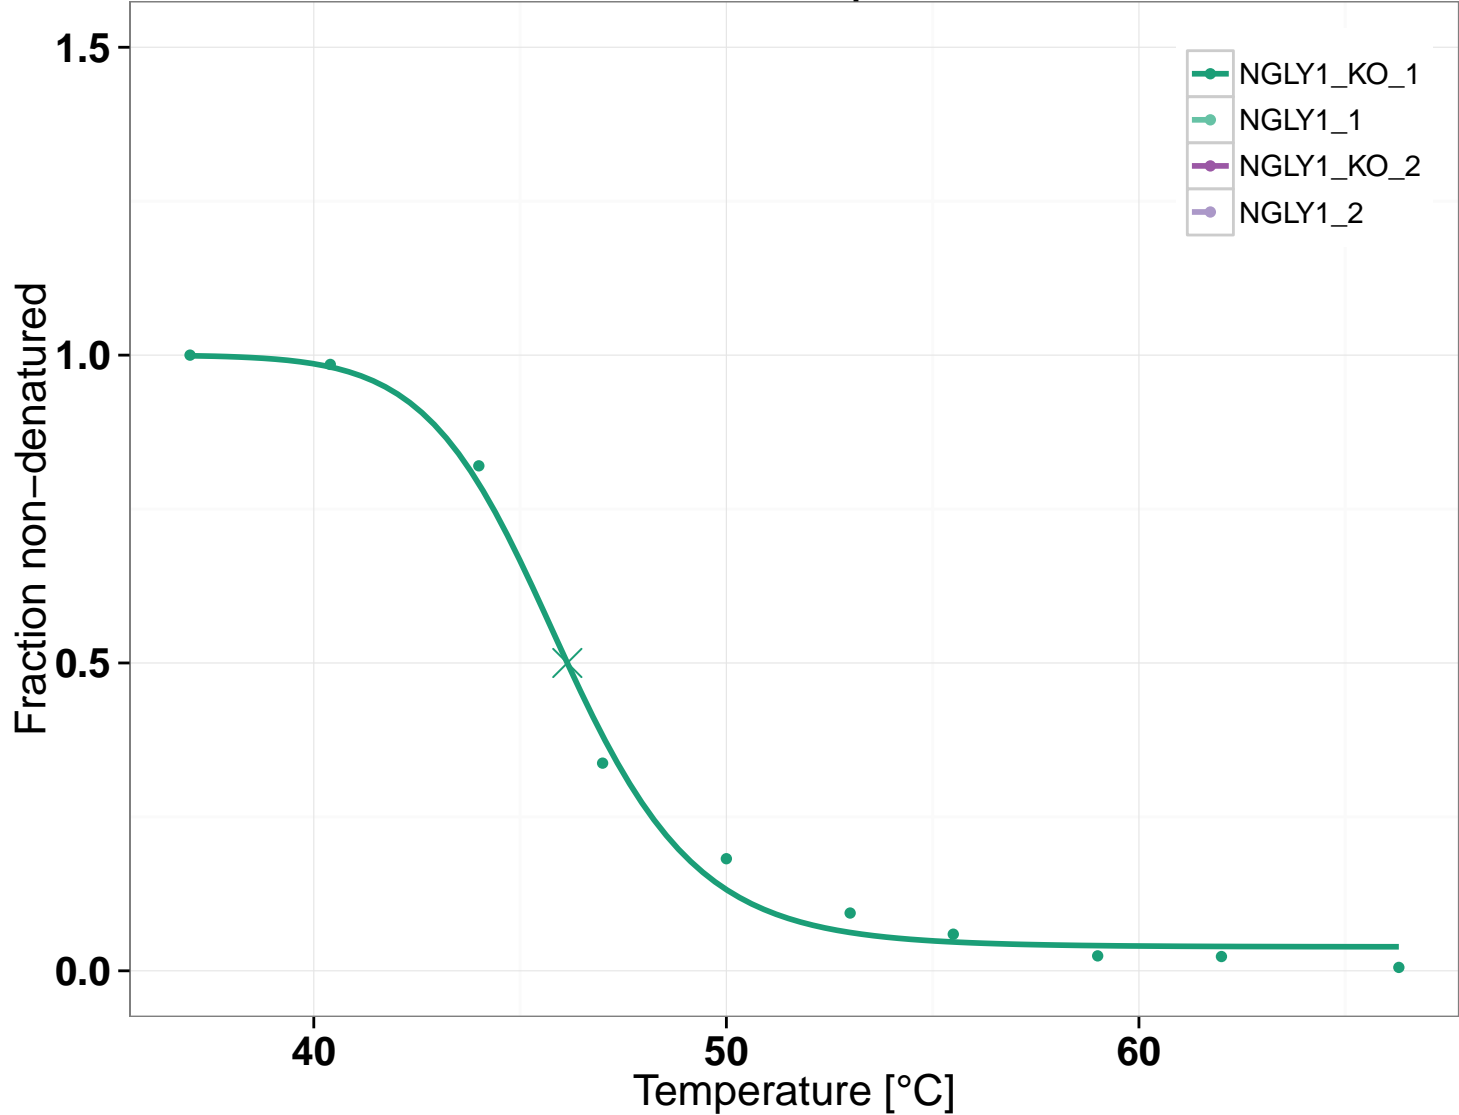

|            | meltPoint | slope | plateau | R2   |
|------------|-----------|-------|---------|------|
| NGLY1_KO_1 | 46.15     | -0.15 | 0.04    | 0.99 |
| NGLY1_1    | -         | -     | -       | -    |
| NGLY1_KO_2 | -         | -     | -       | -    |
| NGLY1_2    | -         | -     | -       | -    |

Supplement: Supplementary file 2317 [file 1]

# IPI00007343.1|RNF113A

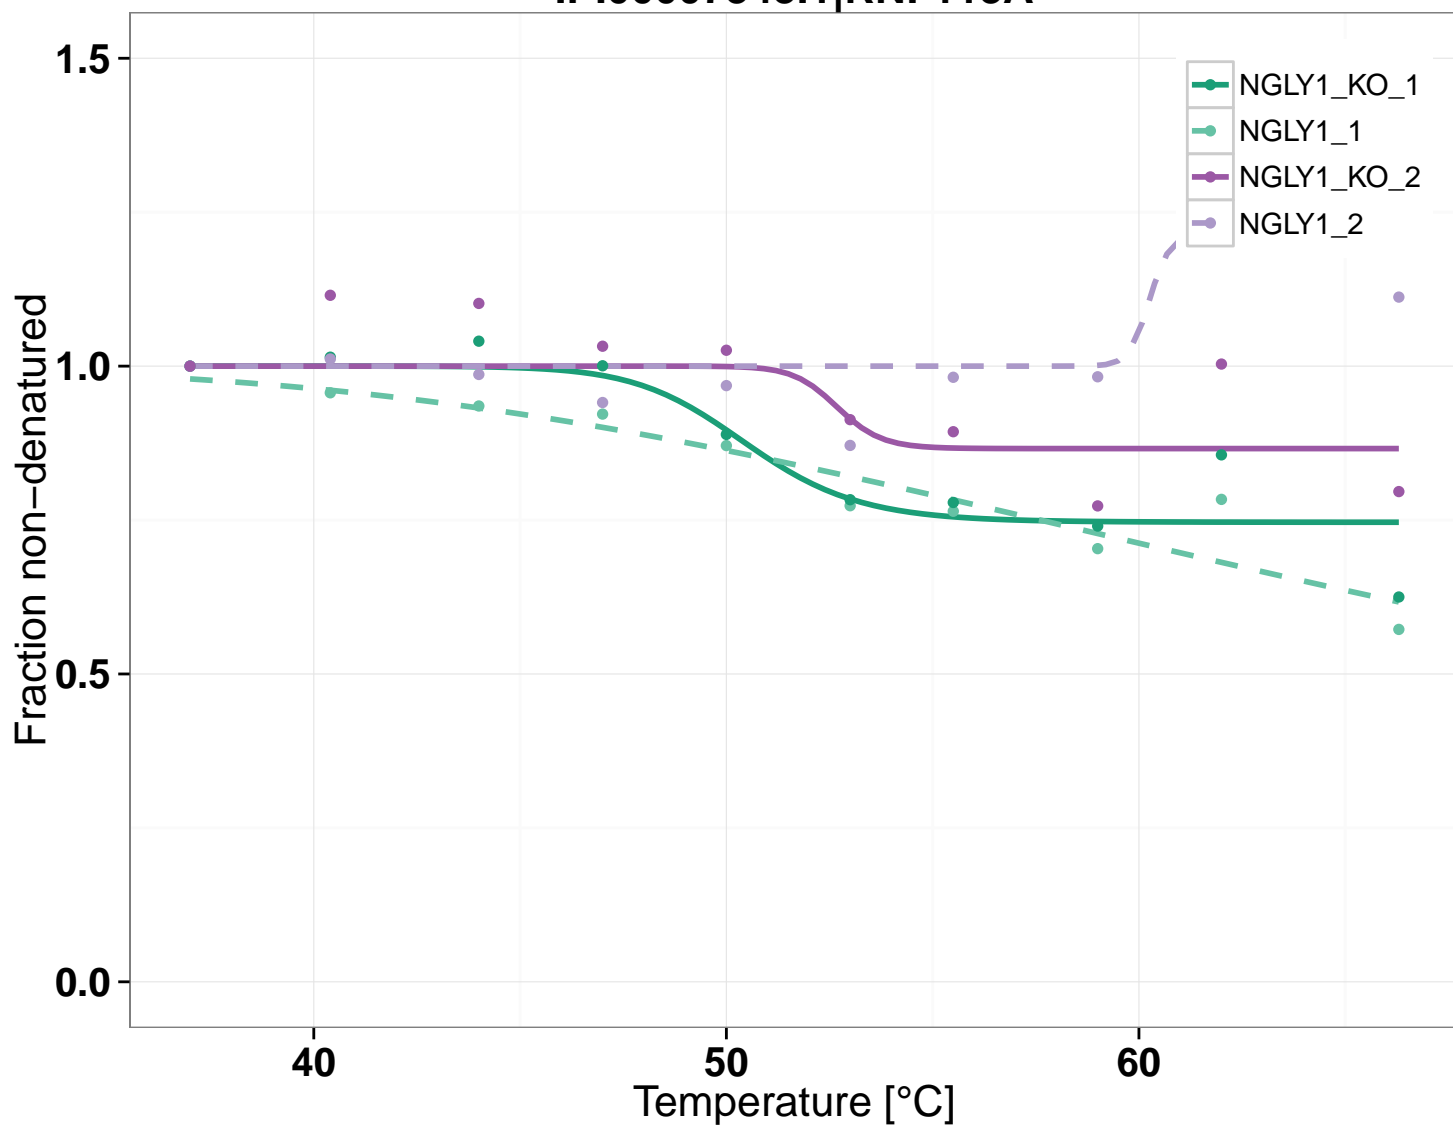

|            | meltPoint | slope  | plateau | R2   |
|------------|-----------|--------|---------|------|
| NGLY1_KO_1 | –         | –0.046 | 0.75    | 0.83 |
| NGLY1_1    | –         | –0.016 | 0.11    | 0.89 |
| NGLY1_KO_2 | –         | –0.063 | 0.87    | 0.53 |
| NGLY1_2    | –         | 0.22   | 1.21    | 0.67 |

Supplement: Supplementary file 2318 [file 1]

IPI00028275.2|ch-TOG

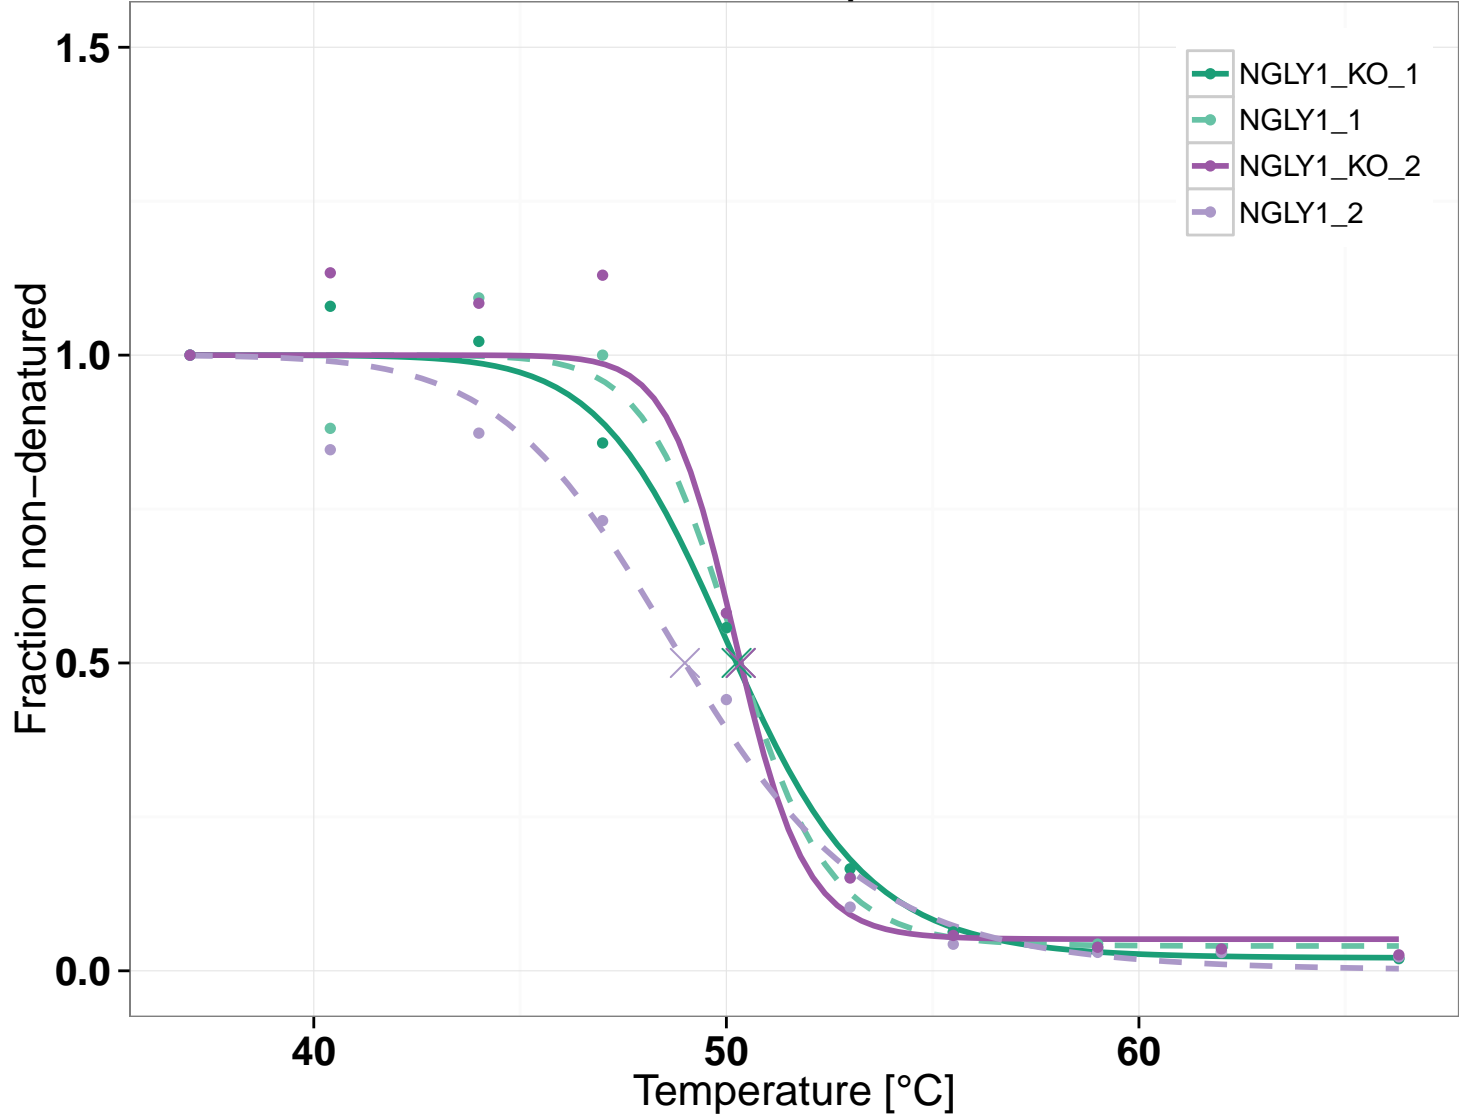

|            | meltPoint | slope | plateau | R2   |
|------------|-----------|-------|---------|------|
| NGLY1_KO_1 | 50.25     | -0.15 | 0.02    | 1    |
| NGLY1_1    | 50.34     | -0.21 | 0.04    | 0.99 |
| NGLY1_KO_2 | 50.35     | -0.29 | 0.05    | 0.98 |
| NGLY1_2    | 48.99     | -0.11 | 0       | 0.98 |

Supplement: Supplementary file 2319 [file 1]

IPI00002579.4|JARID1B

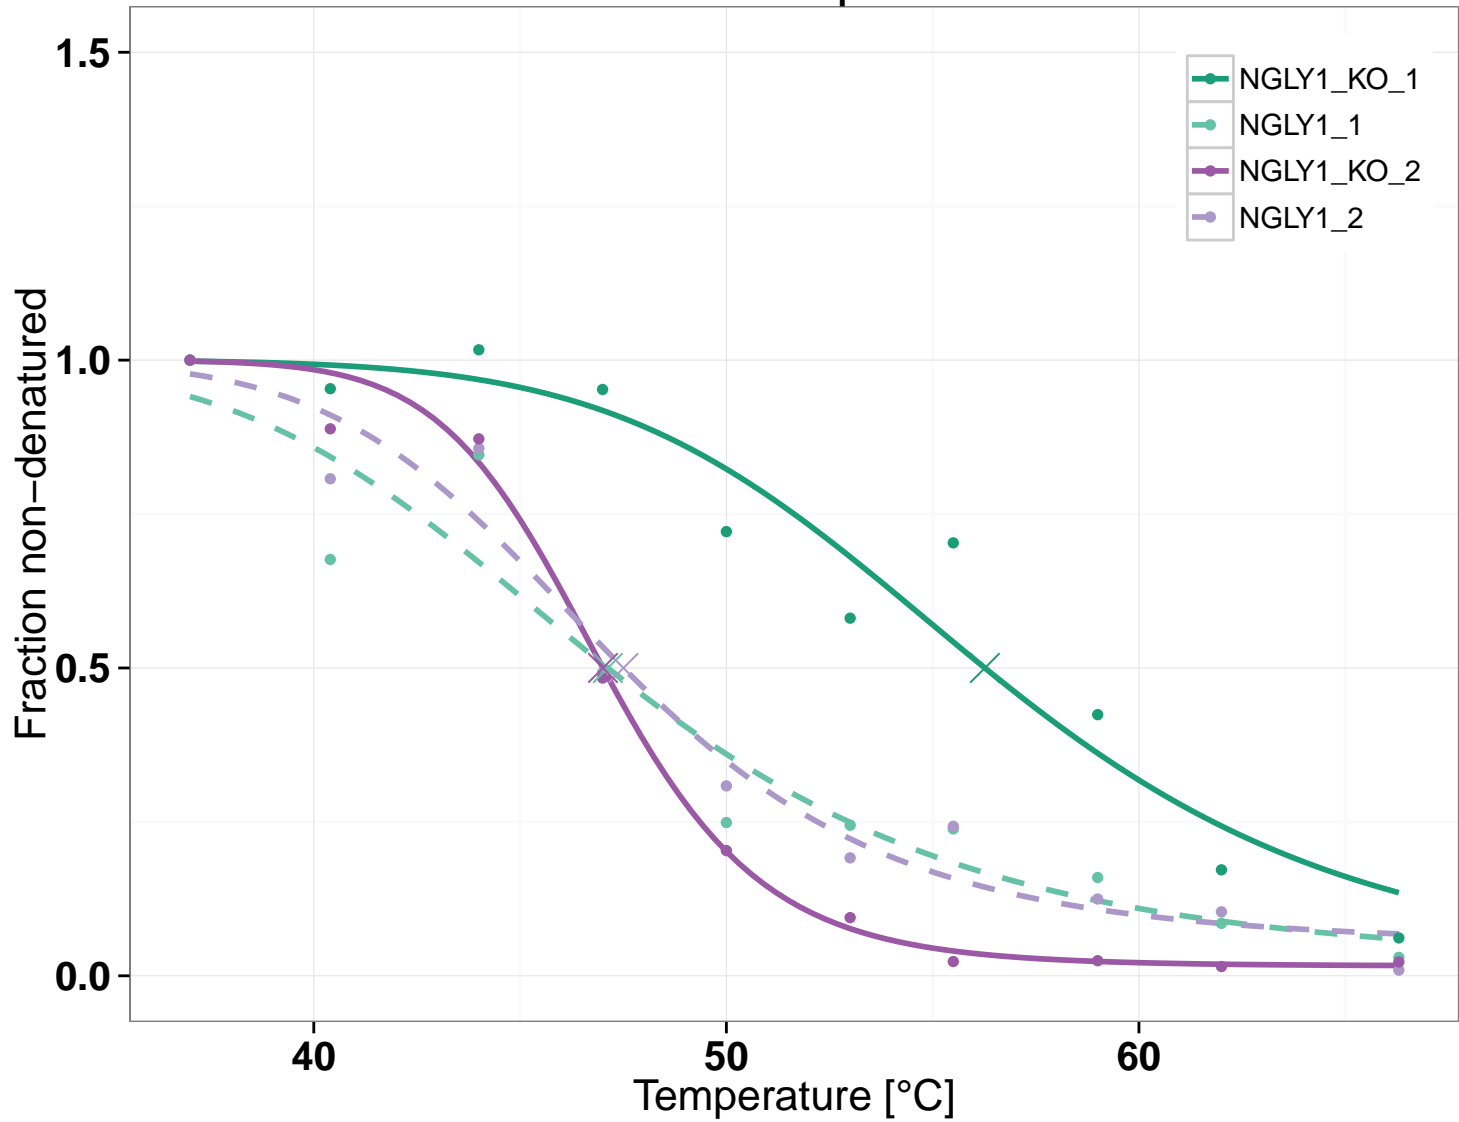

|            | meltPoint | slope  | plateau | R2   |
|------------|-----------|--------|---------|------|
| NGLY1_KO_1 | 56.27     | -0.056 | 0       | 0.94 |
| NGLY1_1    | 47.13     | -0.056 | 0.01    | 0.92 |
| NGLY1_KO_2 | 47.01     | -0.13  | 0.02    | 0.99 |
| NGLY1_2    | 47.51     | -0.07  | 0.05    | 0.96 |

Supplement: Supplementary file 2320 [file 1]

IPI00398828.1|SH3GLB2

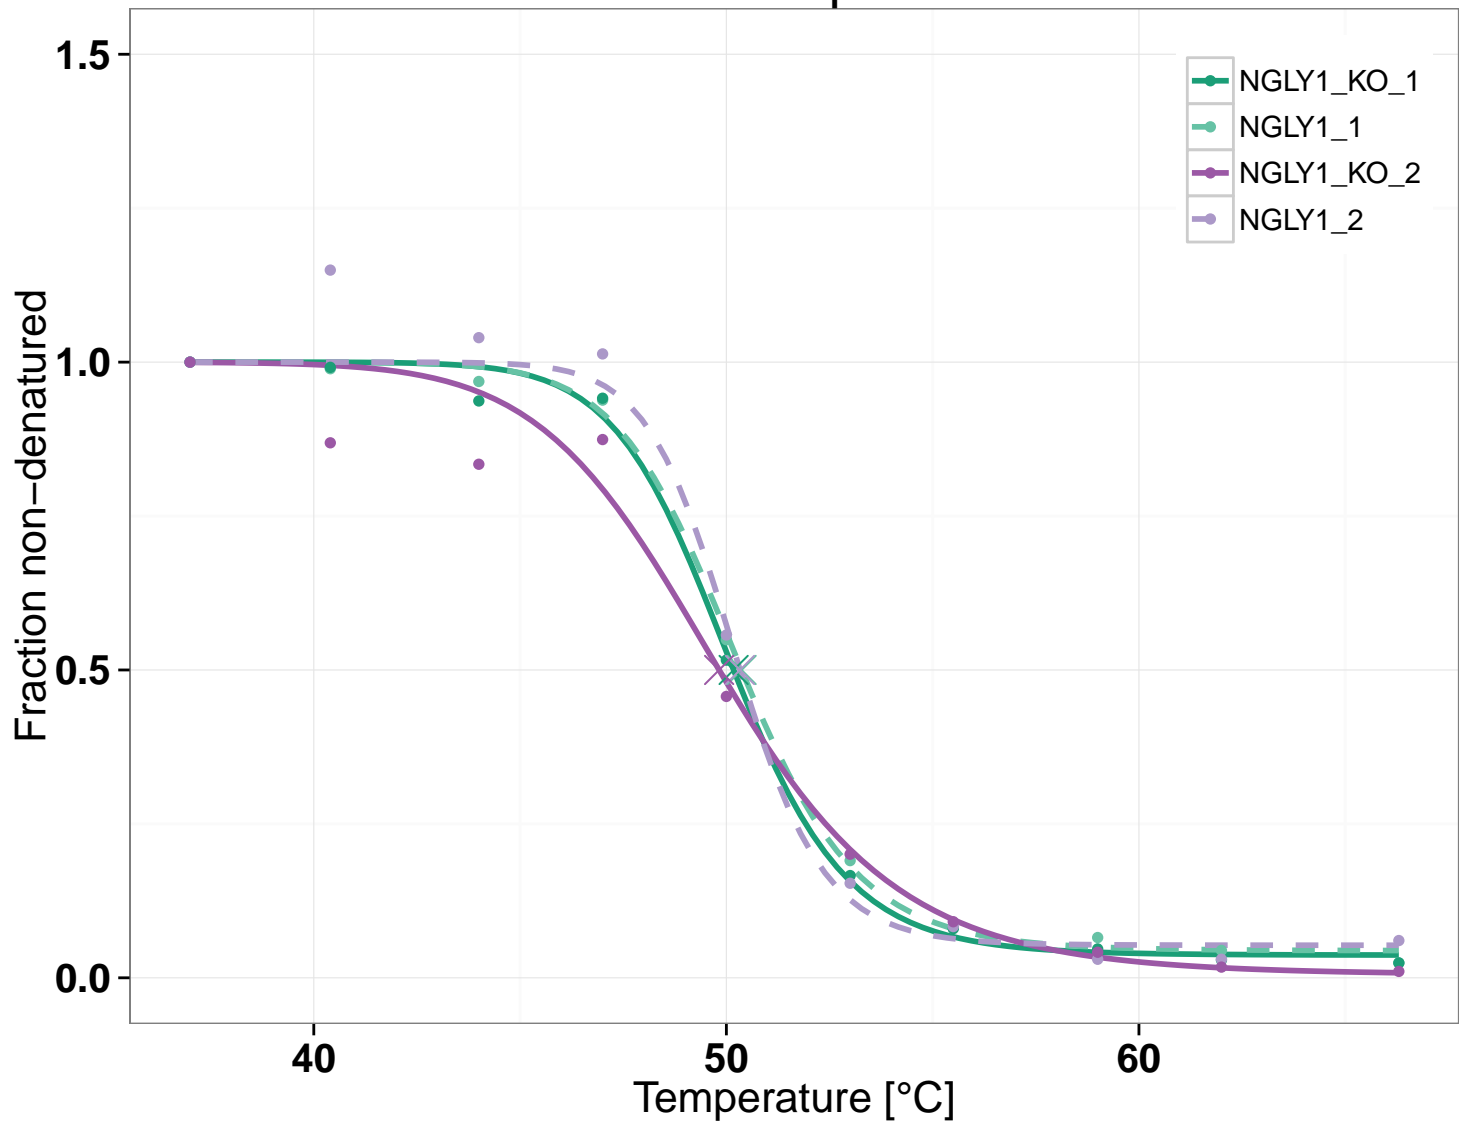

|            | meltPoint | slope | plateau | R2   |
|------------|-----------|-------|---------|------|
| NGLY1_KO_1 | 50.18     | -0.17 | 0.04    | 1    |
| NGLY1_1    | 50.37     | -0.16 | 0.04    | 1    |
| NGLY1_KO_2 | 49.82     | -0.11 | 0       | 0.98 |
| NGLY1_2    | 50.33     | -0.22 | 0.05    | 0.99 |

Supplement: Supplementary file 2321 [file 1]

# IPI00914887.1|RCOR3

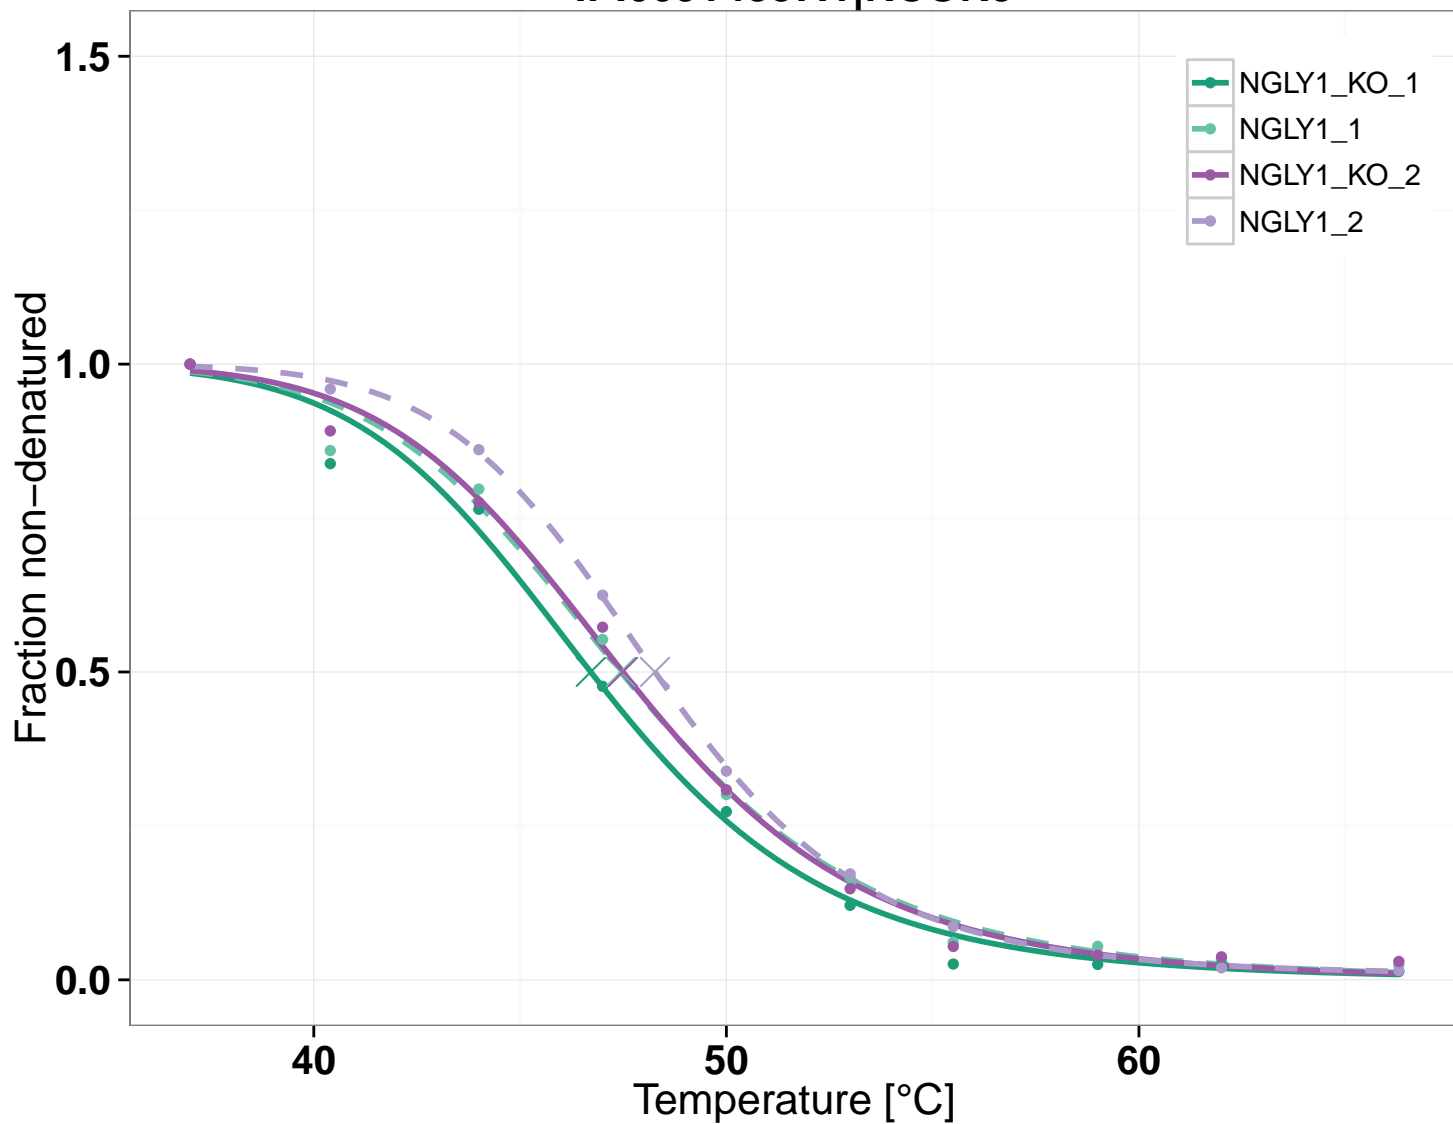

|            | meltPoint | slope  | plateau | R2   |
|------------|-----------|--------|---------|------|
| NGLY1_KO_1 | 46.71     | -0.087 | 0       | 0.99 |
| NGLY1_1    | 47.44     | -0.083 | 0       | 0.99 |
| NGLY1_KO_2 | 47.49     | -0.086 | 0       | 1    |
| NGLY1_2    | 48.27     | -0.096 | 0.01    | 1    |

Supplement: Supplementary file 2322 [file 1]

# IPI00179071.2|NCOA6

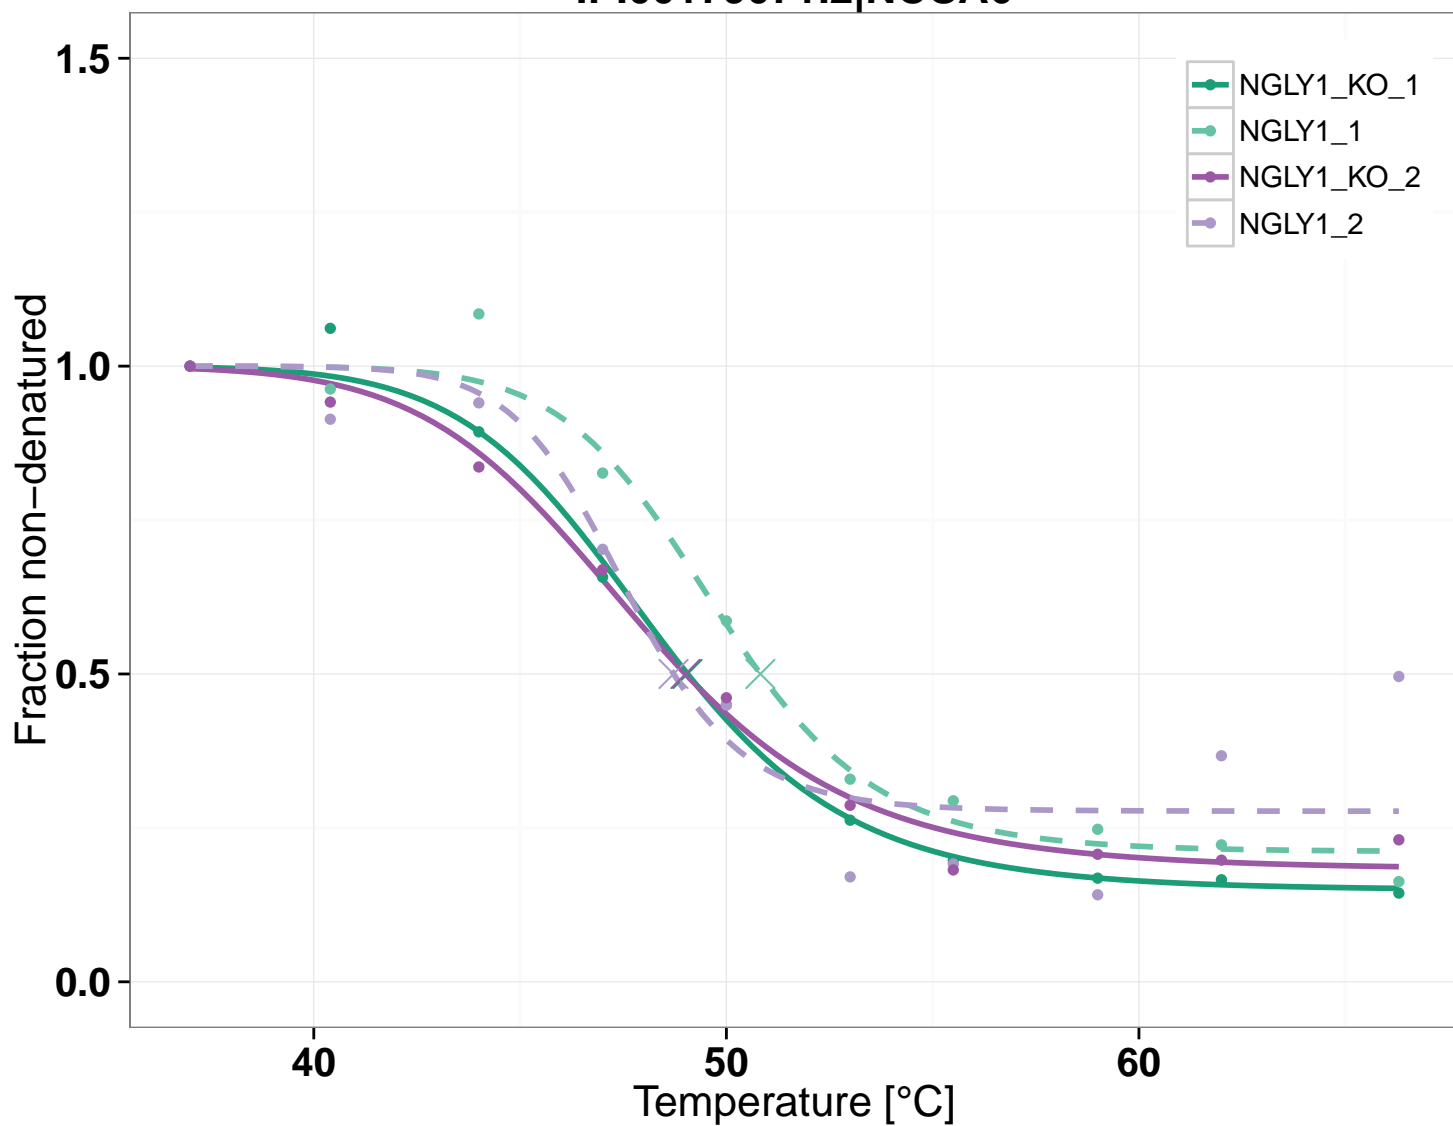

|            | meltPoint | slope  | plateau | R2   |
|------------|-----------|--------|---------|------|
| NGLY1_KO_1 | 49.06     | -0.091 | 0.15    | 0.99 |
| NGLY1_1    | 50.83     | -0.1   | 0.21    | 0.98 |
| NGLY1_KO_2 | 49.01     | -0.079 | 0.18    | 0.99 |
| NGLY1_2    | 48.72     | -0.13  | 0.28    | 0.89 |

Supplement: Supplementary file 2323 [file 1]

# IPI00056357.3|C19ORF10

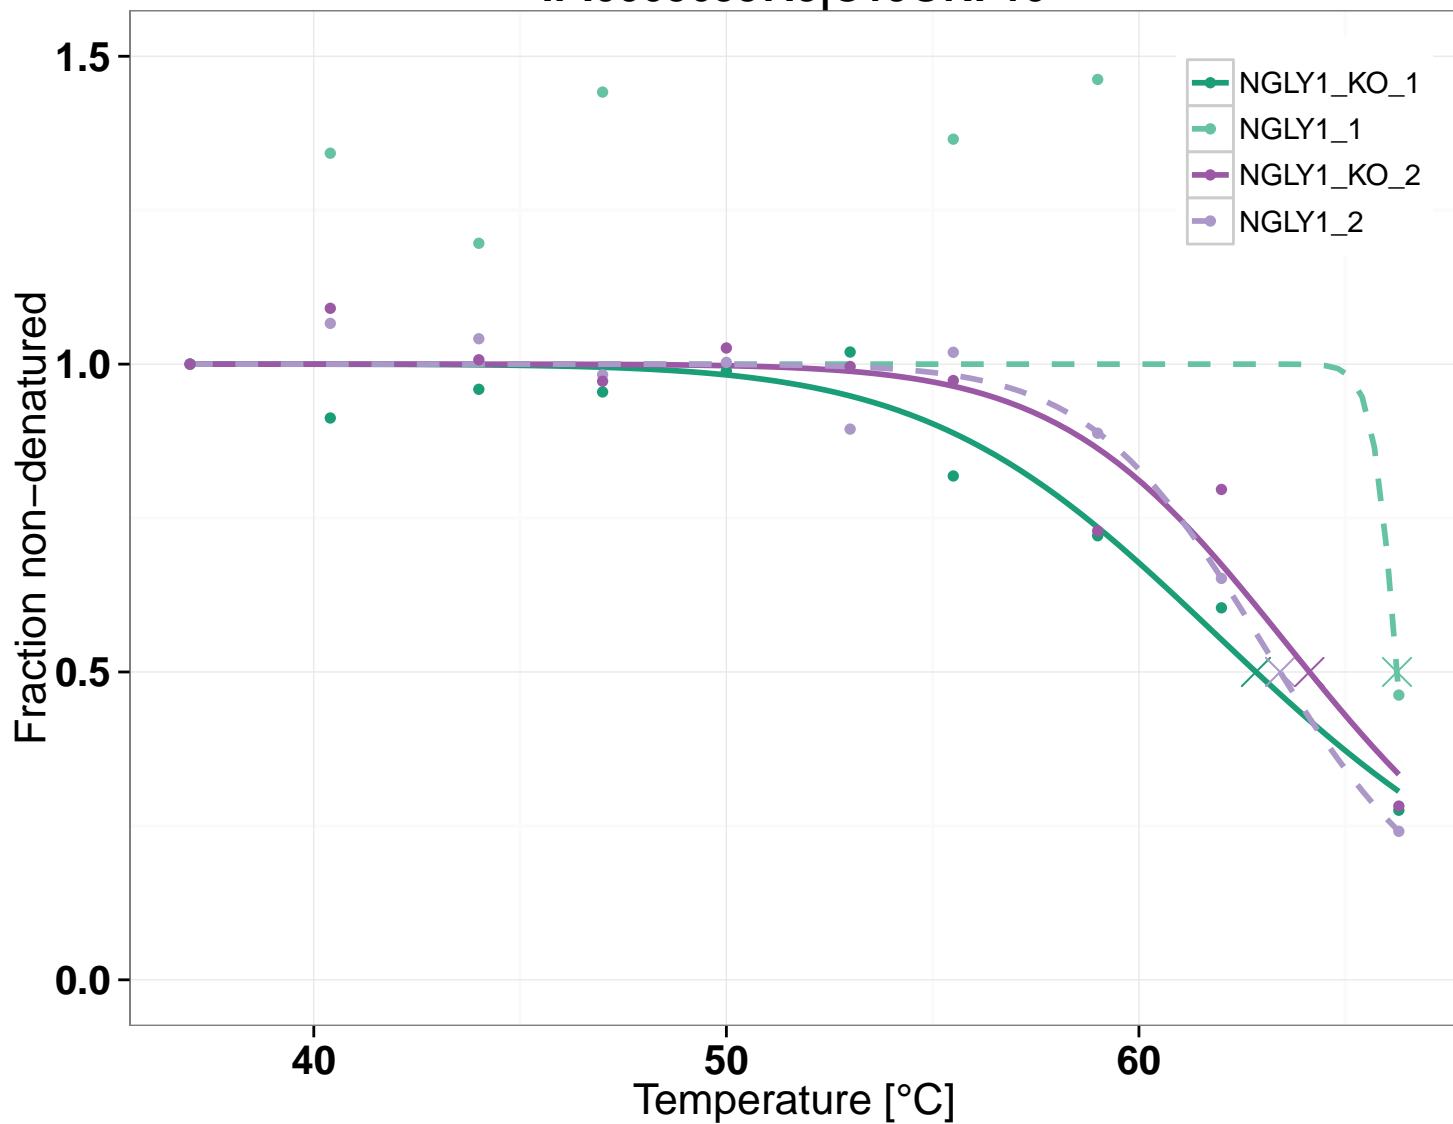

|            | meltPoint | slope  | plateau | R2    |
|------------|-----------|--------|---------|-------|
| NGLY1_KO_1 | 62.84     | -0.063 | 0       | 0.95  |
| NGLY1_1    | 66.26     | -0.84  | 0       | -0.49 |
| NGLY1_KO_2 | 64.13     | -0.083 | 0       | 0.91  |
| NGLY1_2    | 63.42     | -0.11  | 0.03    | 0.97  |

Supplement: Supplementary file 2324 [file 1]

IPI00395539.1|ZNRD1

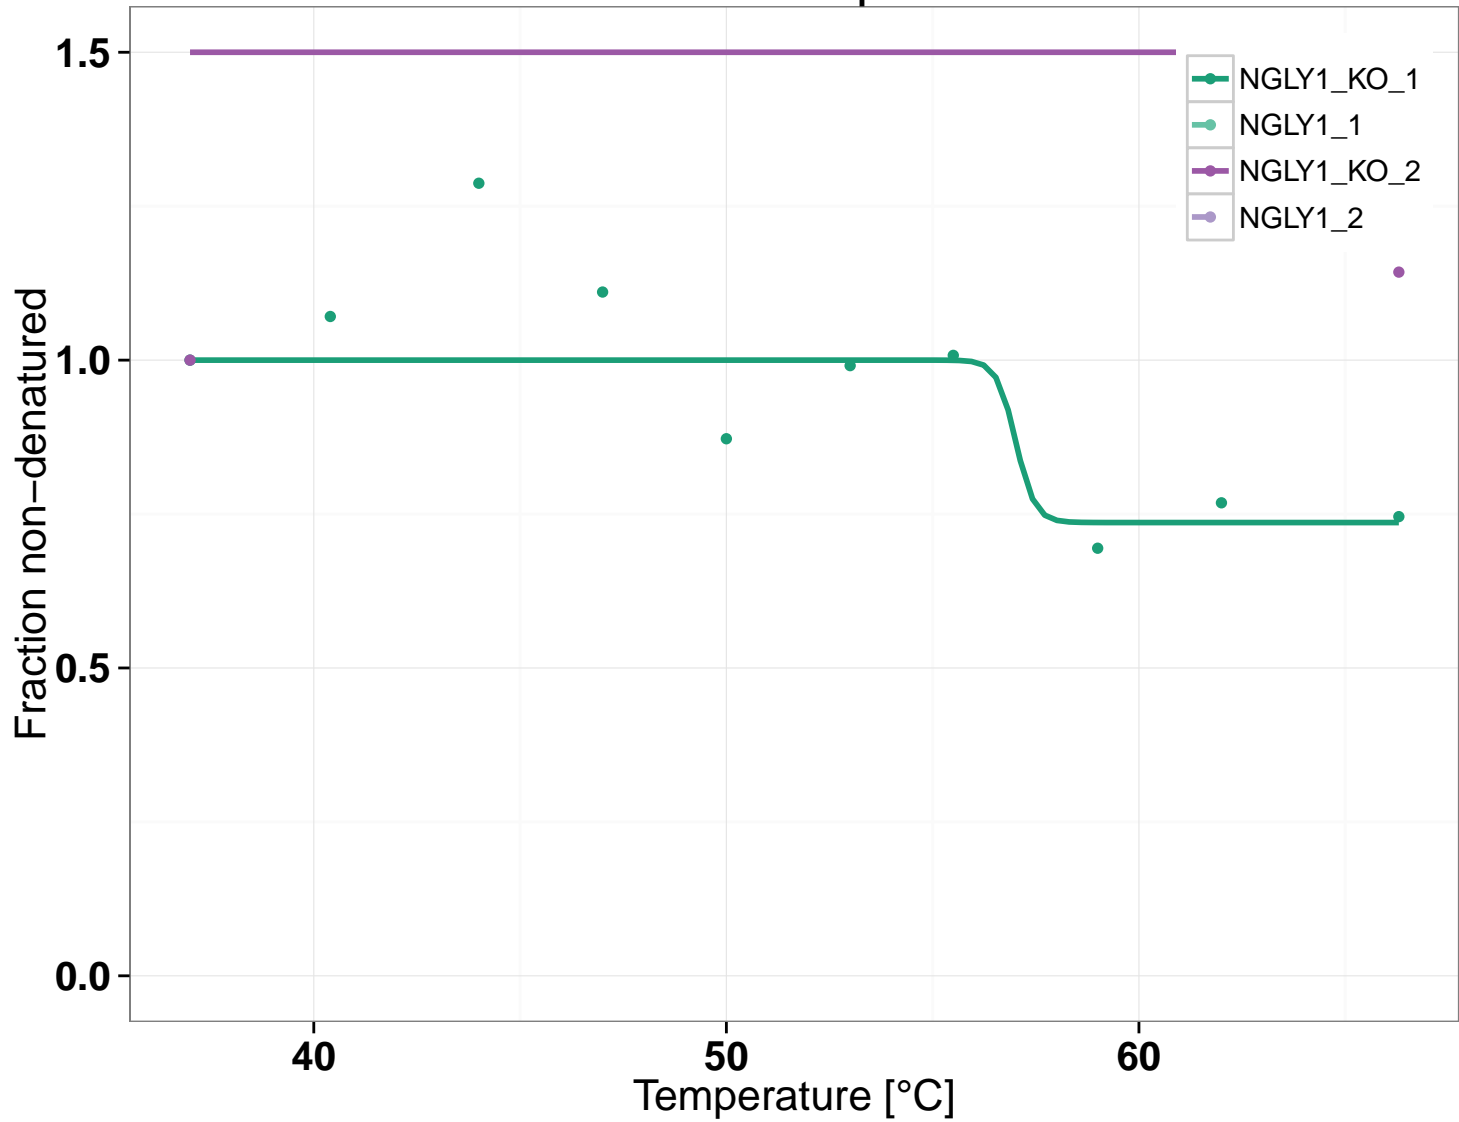

|            | meltPoint | slope | plateau | R2    |
|------------|-----------|-------|---------|-------|
| NGLY1_KO_1 | –         | –0.29 | 0.74    | 0.61  |
| NGLY1_1    | –         | –     | –       | –     |
| NGLY1_KO_2 | –         | –     | 1.5     | –0.42 |
| NGLY1_2    | –         | –     | –       | –     |

Supplement: Supplementary file 2325 [file 1]

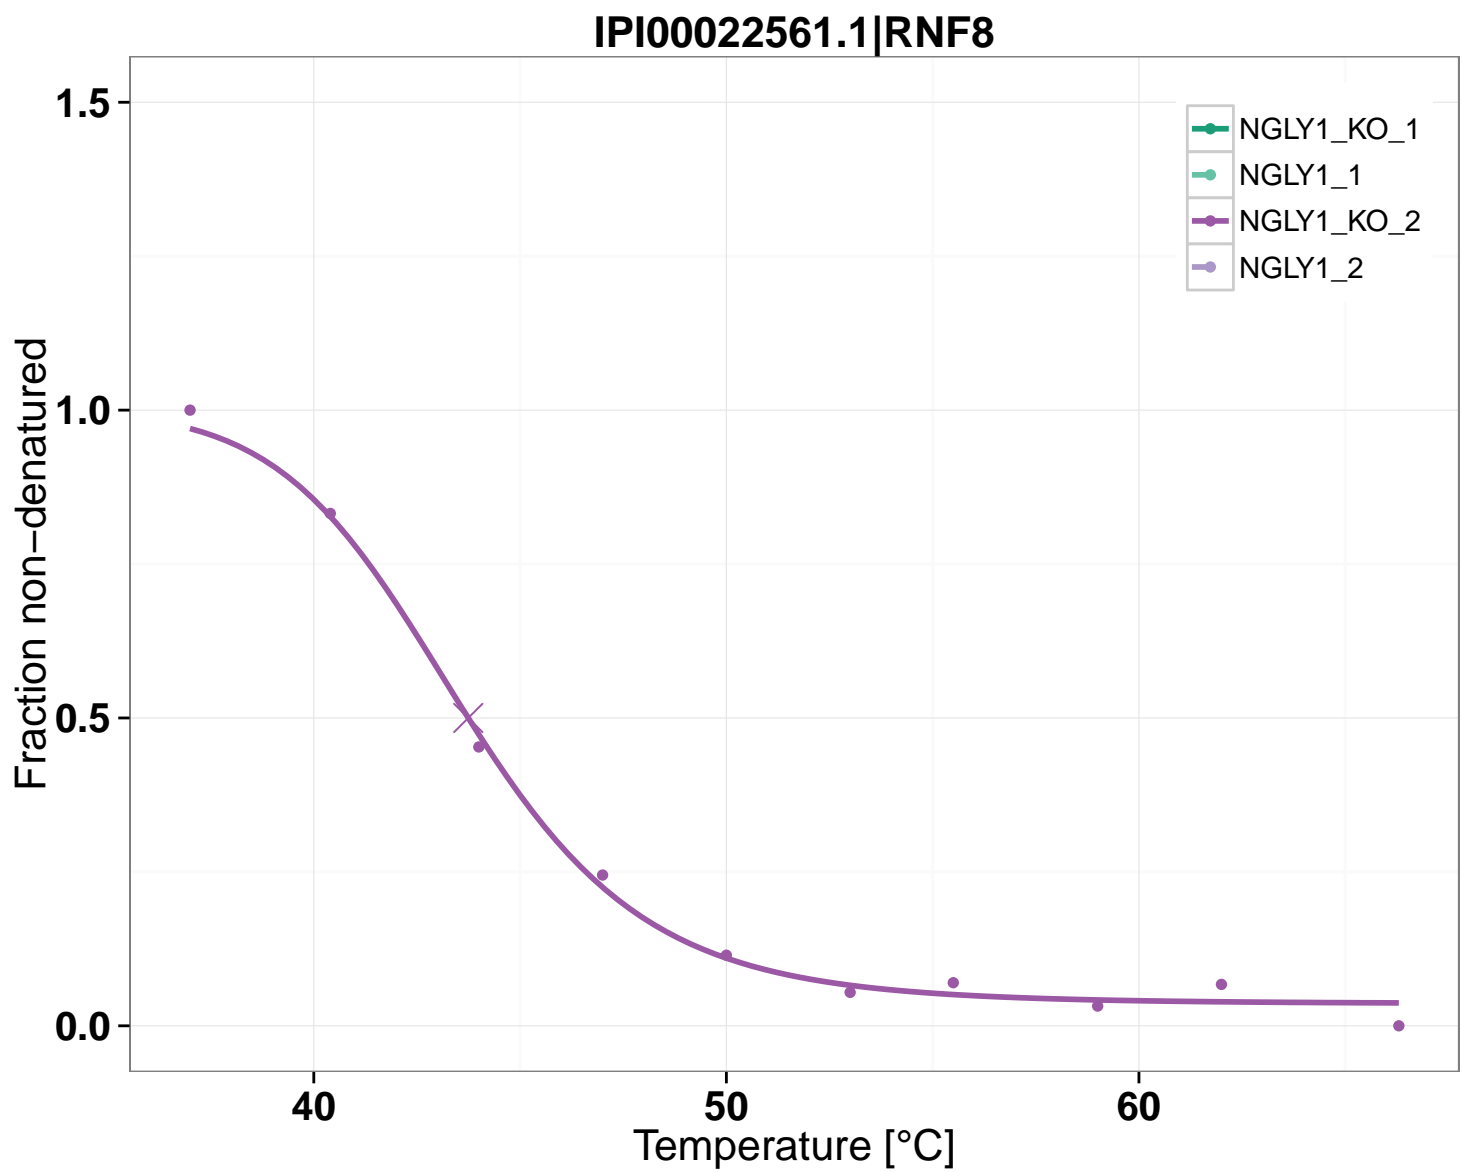

|            | meltPoint | slope | plateau | R2 |
|------------|-----------|-------|---------|----|
| NGLY1_KO_1 | —         | —     | —       | —  |
| NGLY1_1    | —         | —     | —       | —  |
| NGLY1_KO_2 | 43.74     | -0.11 | 0.04    | 1  |
| NGLY1_2    | —         | —     | —       | —  |

Supplement: Supplementary file 2326 [file 1]

IPI00220566.2|TXNRD2

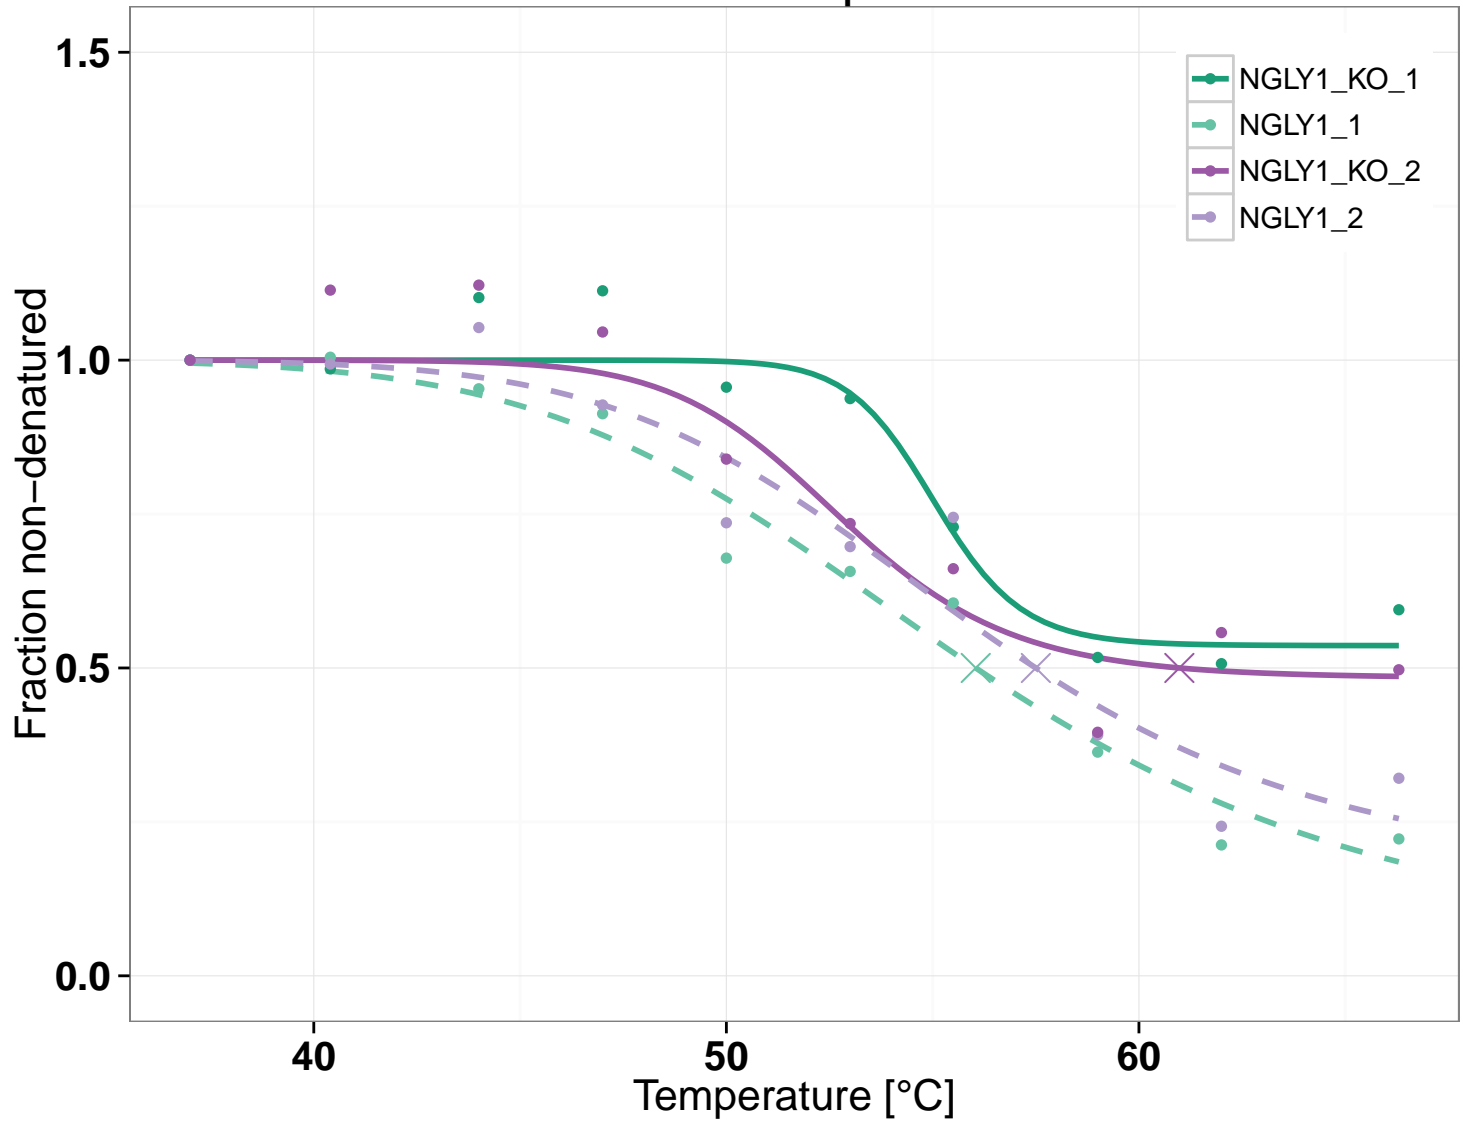

|            | meltPoint | slope  | plateau | R2   |
|------------|-----------|--------|---------|------|
| NGLY1_KO_1 | –         | –0.11  | 0.54    | 0.94 |
| NGLY1_1    | 56.04     | –0.047 | 0.03    | 0.97 |
| NGLY1_KO_2 | 60.98     | –0.063 | 0.48    | 0.91 |
| NGLY1_2    | 57.5      | –0.049 | 0.15    | 0.93 |

Supplement: Supplementary file 2327 [file 1]

# IPI00016702.4|RABGAP1

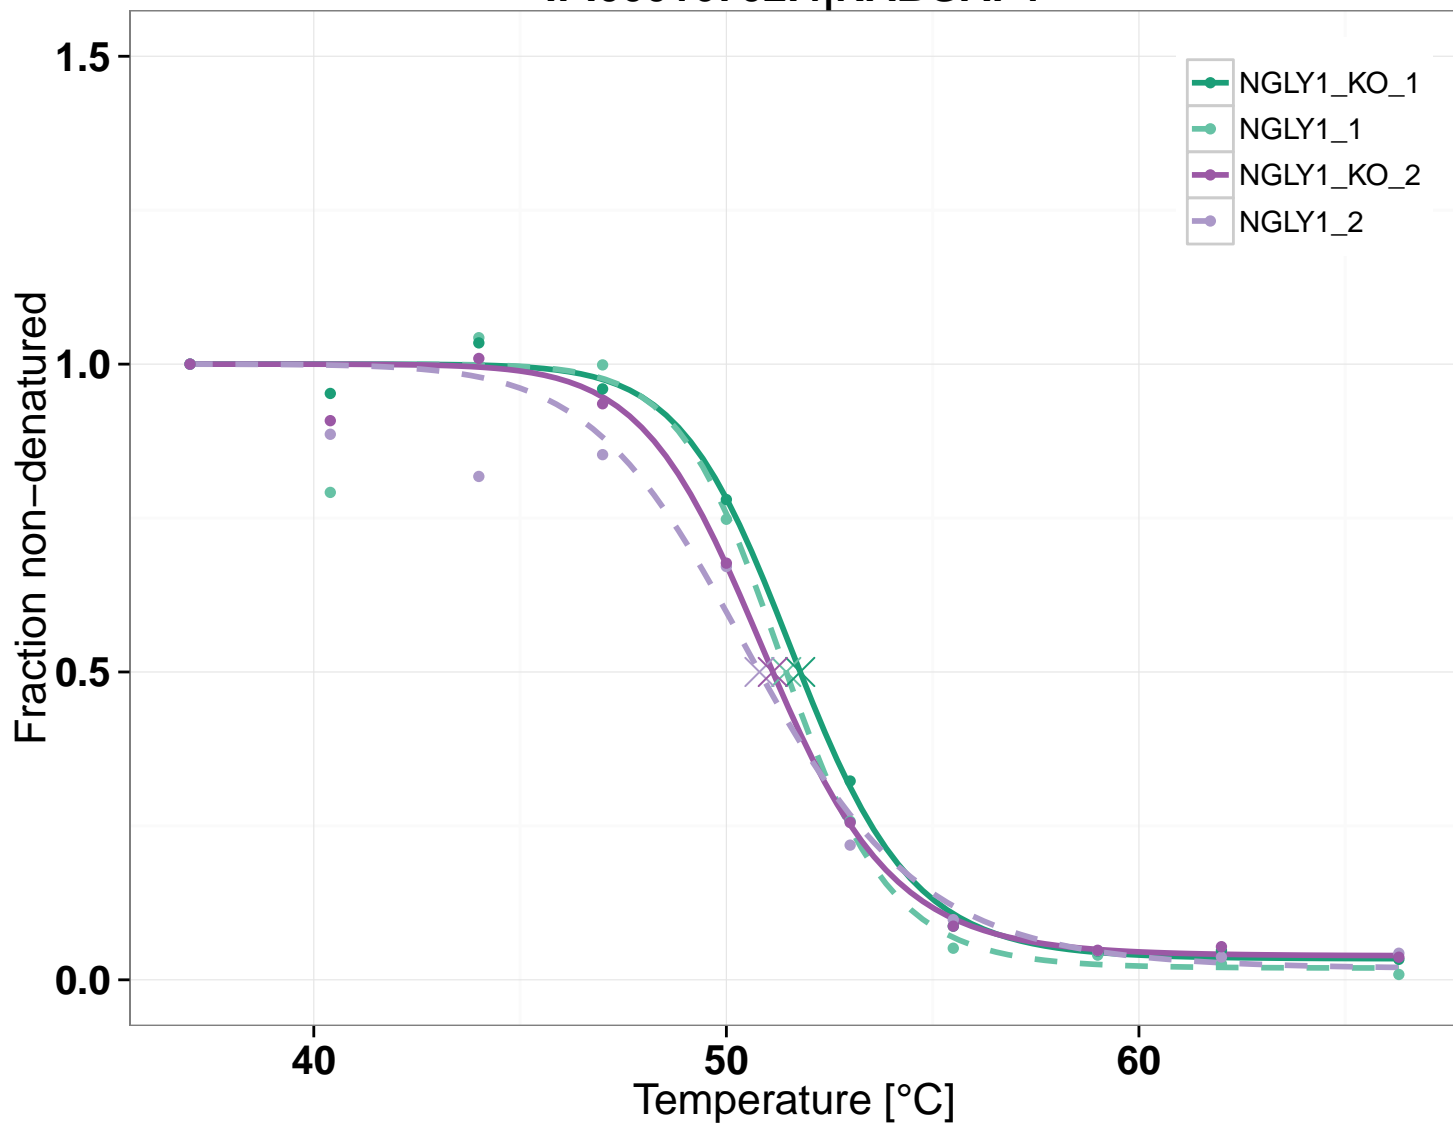

|            | meltPoint | slope | plateau | R2   |
|------------|-----------|-------|---------|------|
| NGLY1_KO_1 | 51.79     | -0.17 | 0.03    | 1    |
| NGLY1_1    | 51.45     | -0.19 | 0.02    | 0.98 |
| NGLY1_KO_2 | 51.13     | -0.16 | 0.04    | 0.99 |
| NGLY1_2    | 50.8      | -0.12 | 0.02    | 0.97 |

Supplement: Supplementary file 2328 [file 1]

IPI00305733.5|SLC41A3

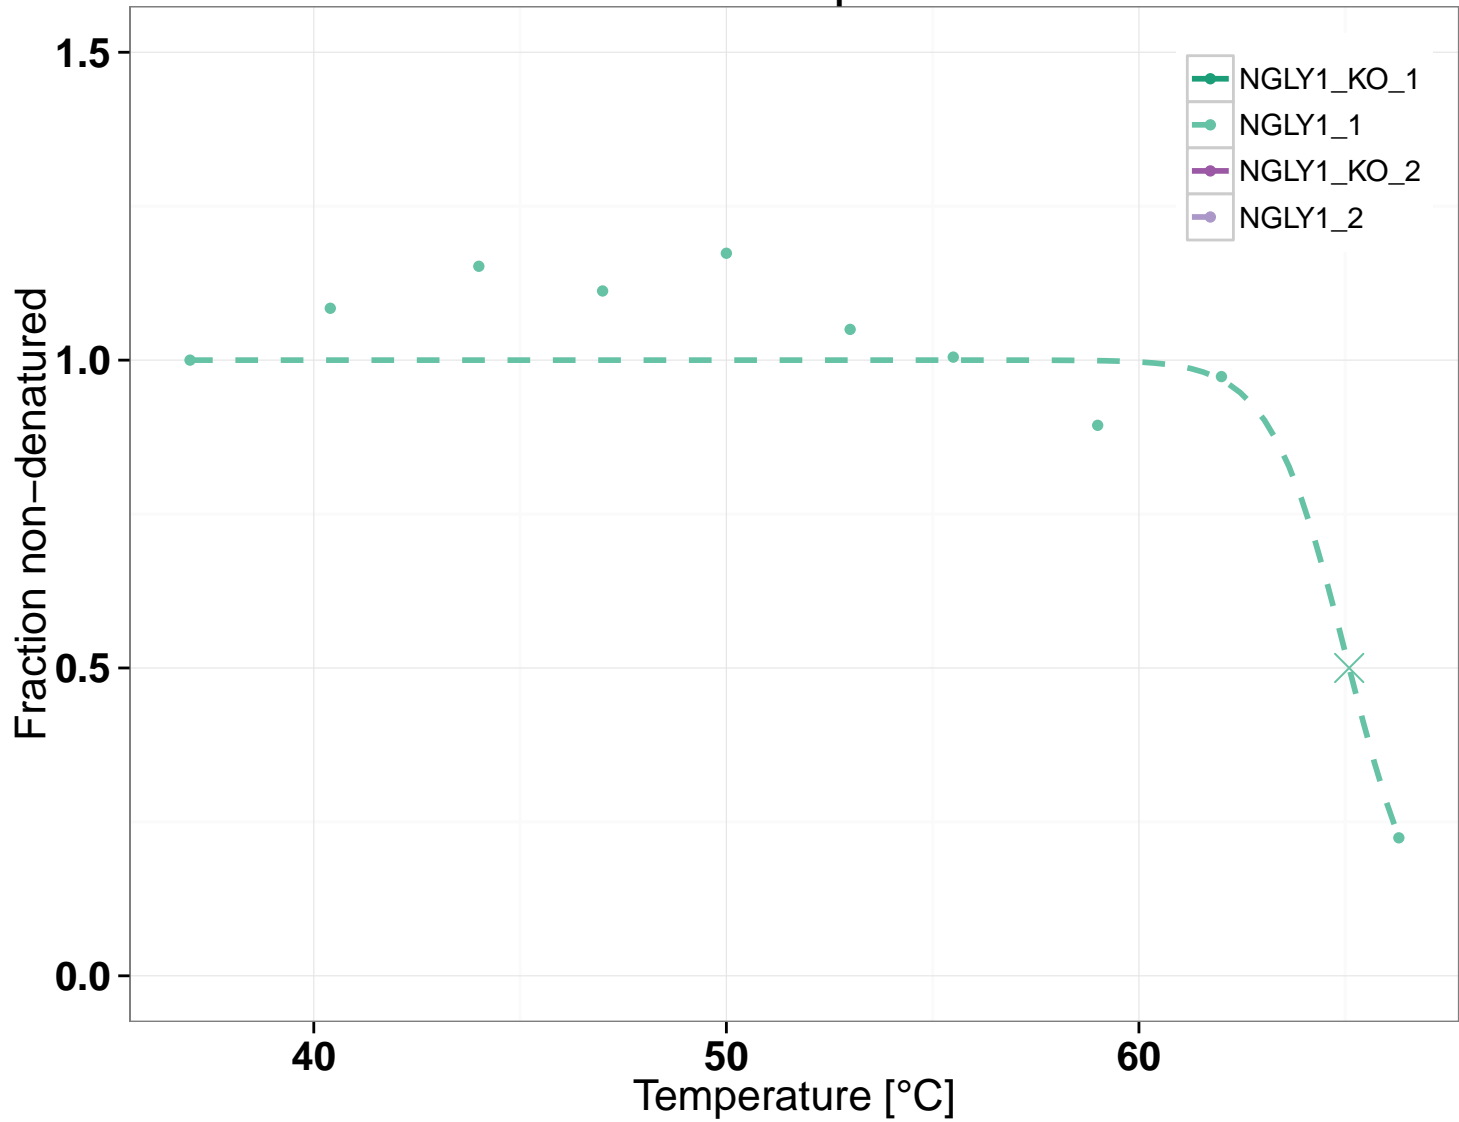

|            | meltPoint | slope | plateau | R2   |
|------------|-----------|-------|---------|------|
| NGLY1_KO_1 | -         | -     | -       | -    |
| NGLY1_1    | 65.1      | -0.26 | 0       | 0.87 |
| NGLY1_KO_2 | -         | -     | -       | -    |
| NGLY1_2    | -         | -     | -       | -    |

Supplement: Supplementary file 2329 [file 1]

# IPI00880028.1|POR

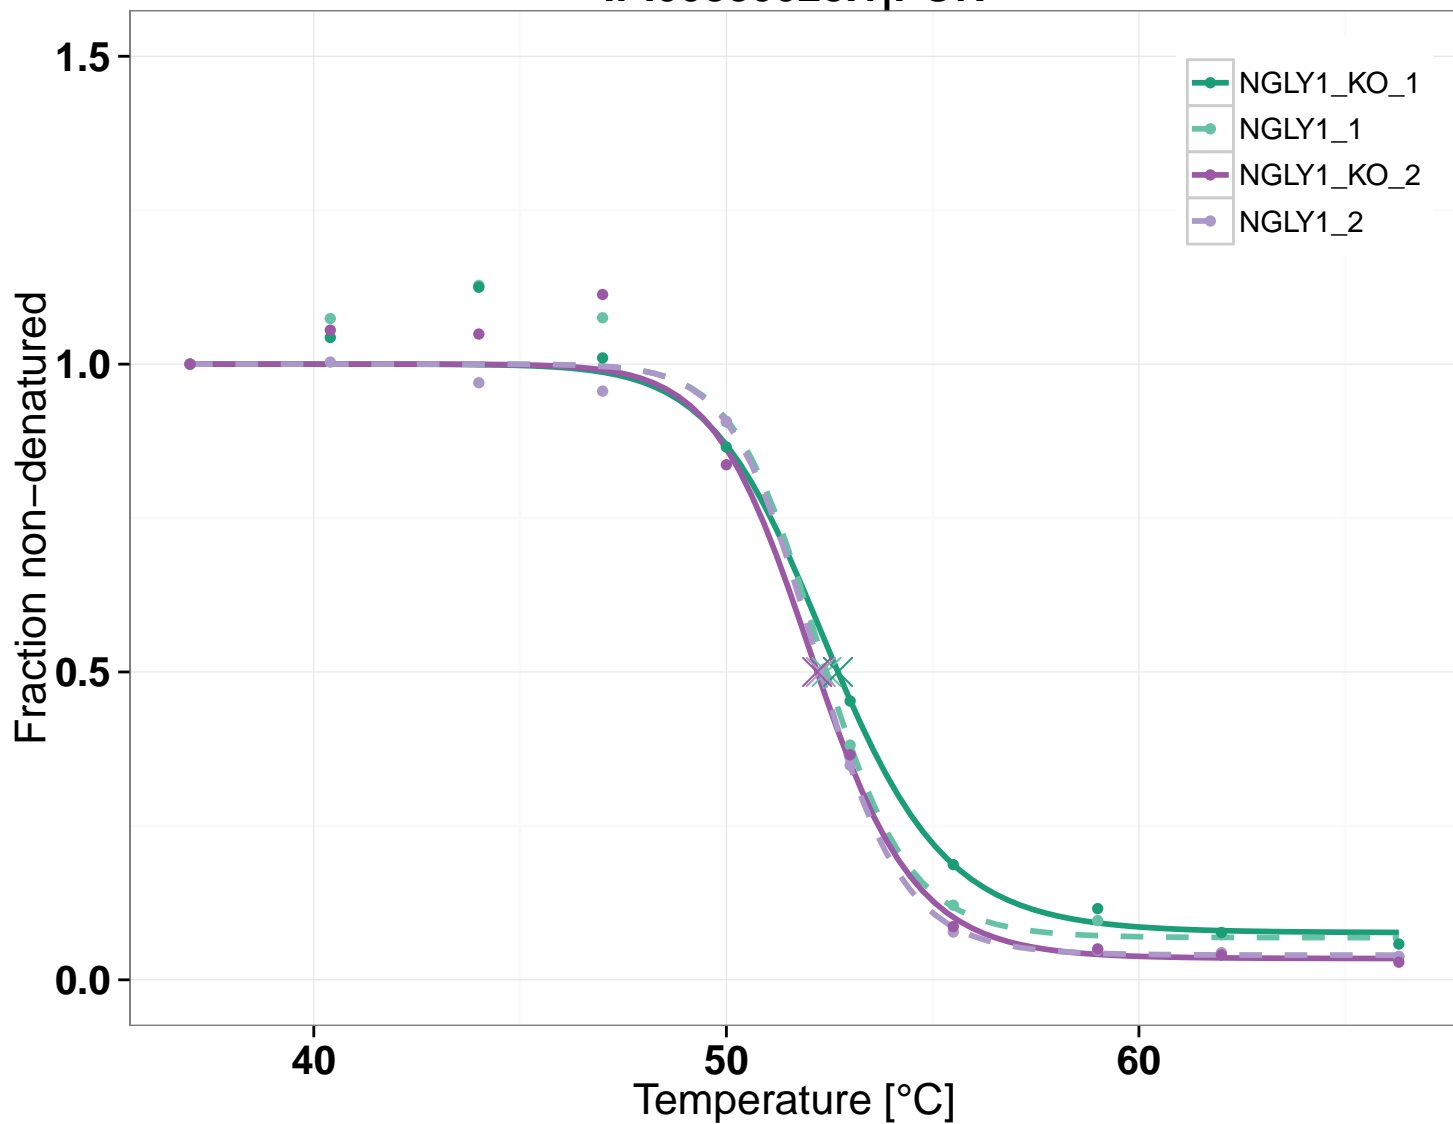

|            | meltPoint | slope | plateau | R2   |
|------------|-----------|-------|---------|------|
| NGLY1_KO_1 | 52.71     | -0.16 | 0.08    | 0.99 |
| NGLY1_1    | 52.43     | -0.22 | 0.07    | 0.99 |
| NGLY1_KO_2 | 52.2      | -0.2  | 0.03    | 0.99 |
| NGLY1_2    | 52.29     | -0.23 | 0.04    | 1    |

Supplement: Supplementary file 2330 [file 1]

IPI00414320.1|ANXA11

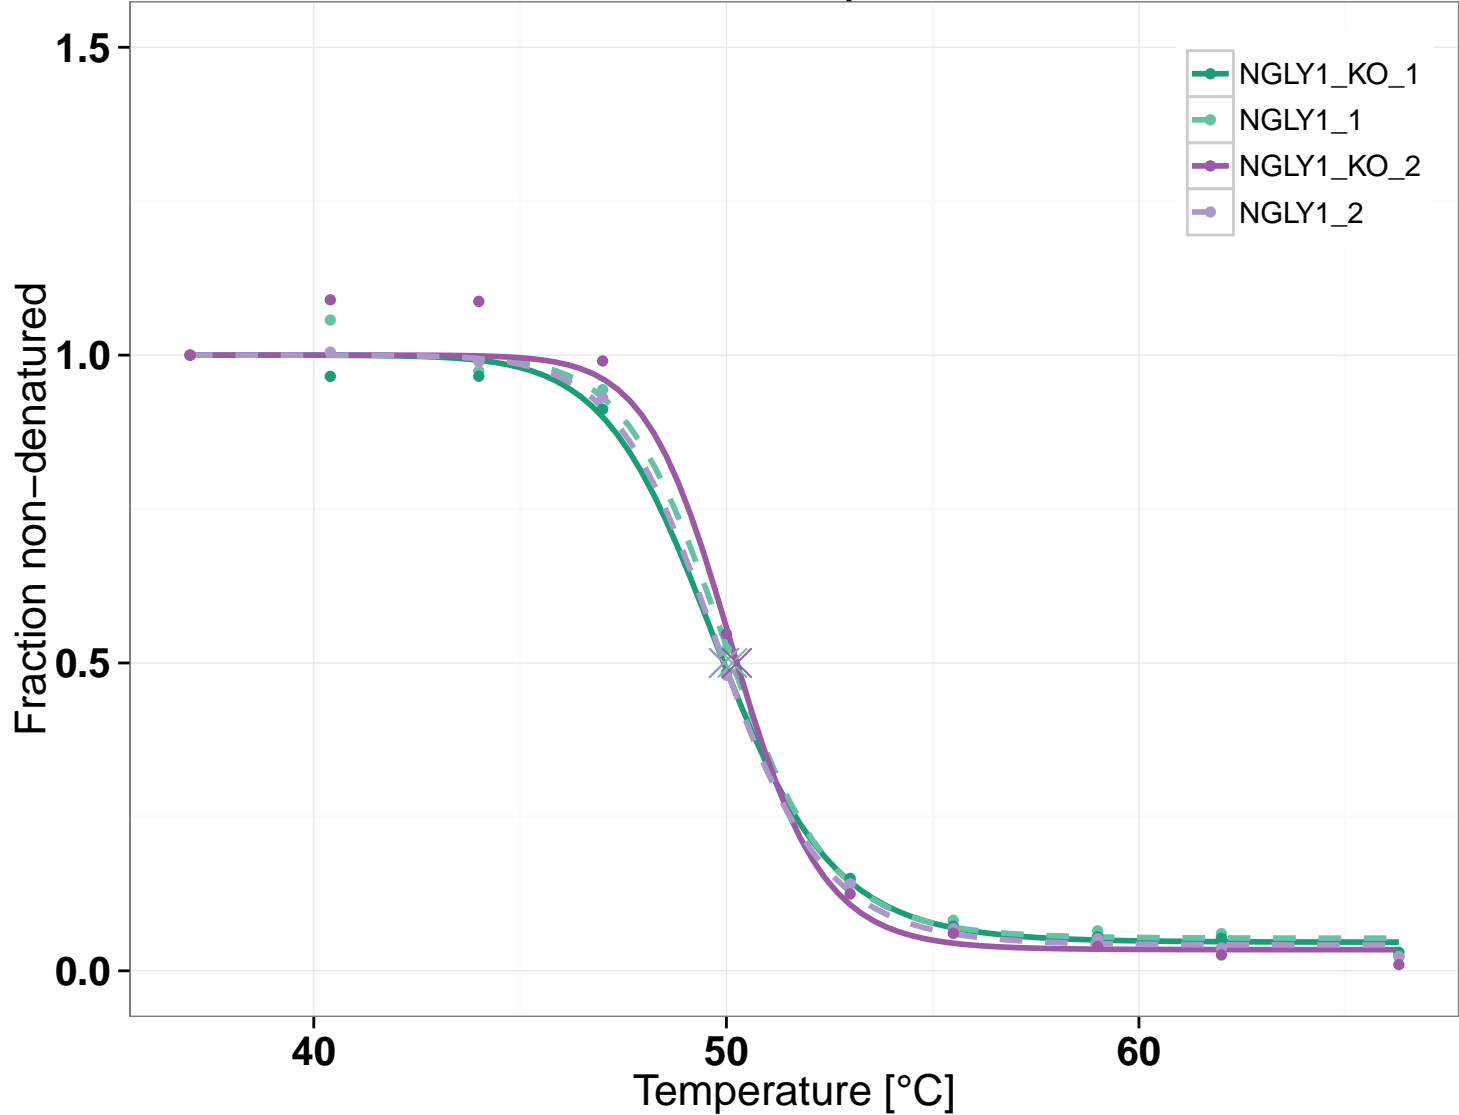

|            | meltPoint | slope | plateau | R2   |
|------------|-----------|-------|---------|------|
| NGLY1_KO_1 | 49.94     | -0.17 | 0.05    | 1    |
| NGLY1_1    | 50.15     | -0.19 | 0.05    | 1    |
| NGLY1_KO_2 | 50.26     | -0.23 | 0.03    | 0.99 |
| NGLY1_2    | 49.95     | -0.19 | 0.04    | 1    |

Supplement: Supplementary file 2331 [file 1]

# IPI00396969.1|C20ORF24

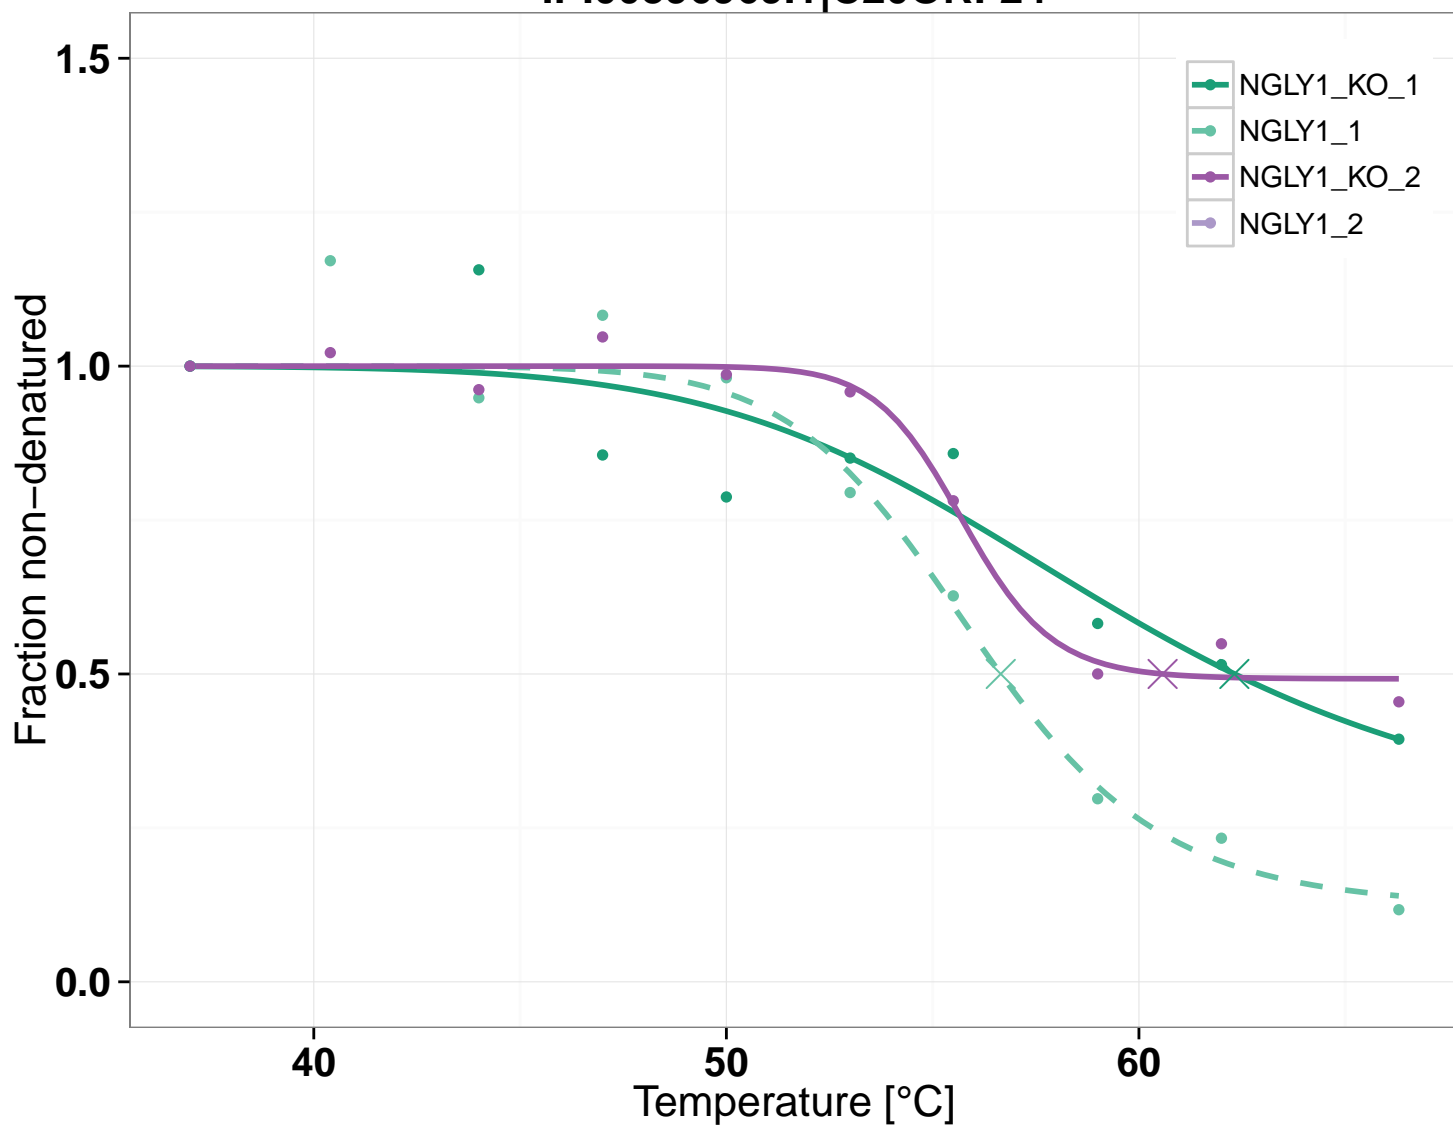

|            | meltPoint | slope  | plateau | R2   |
|------------|-----------|--------|---------|------|
| NGLY1_KO_1 | 62.31     | -0.041 | 0.23    | 0.47 |
| NGLY1_1    | 56.65     | -0.097 | 0.12    | 0.97 |
| NGLY1_KO_2 | 60.57     | -0.12  | 0.49    | 0.98 |
| NGLY1_2    | -         | -      | -       | -    |

Supplement: Supplementary file 2332 [file 1]

IPI00045466.1|NARFL

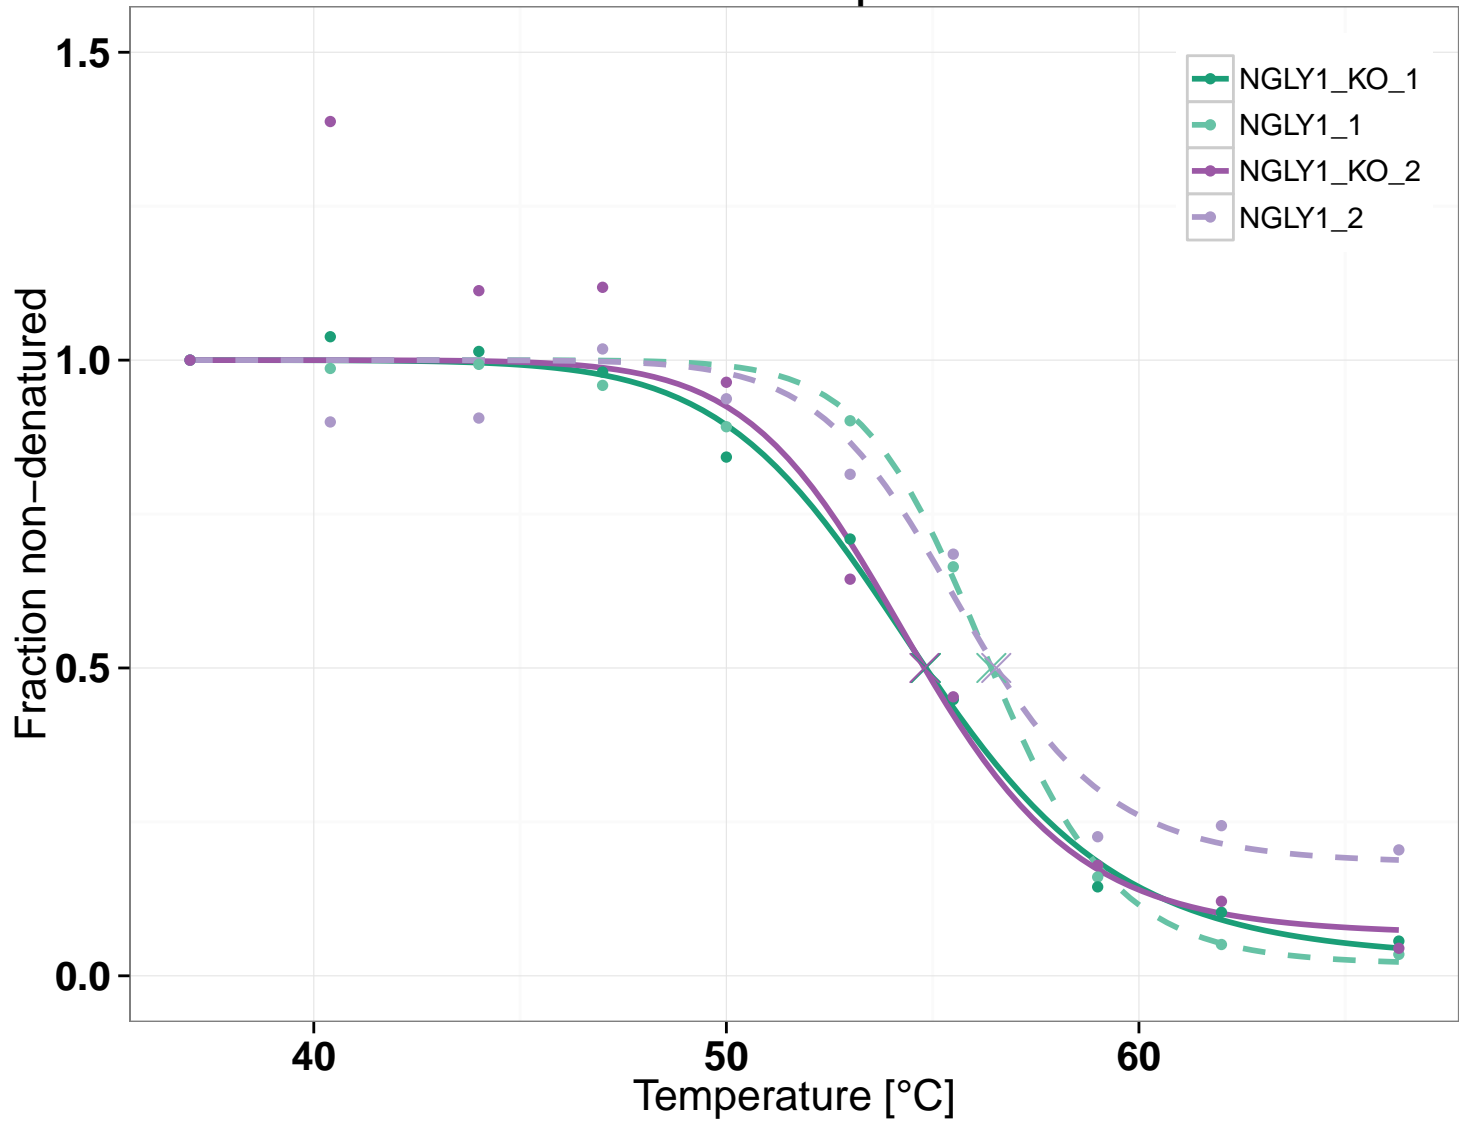

|            | meltPoint | slope | plateau | R2   |
|------------|-----------|-------|---------|------|
| NGLY1_KO_1 | 54.84     | -0.1  | 0.03    | 1    |
| NGLY1_1    | 56.42     | -0.16 | 0.02    | 0.99 |
| NGLY1_KO_2 | 54.8      | -0.12 | 0.07    | 0.91 |
| NGLY1_2    | 56.54     | -0.12 | 0.18    | 0.97 |

Supplement: Supplementary file 2333 [file 1]

IPI00183500.2|NCBP2

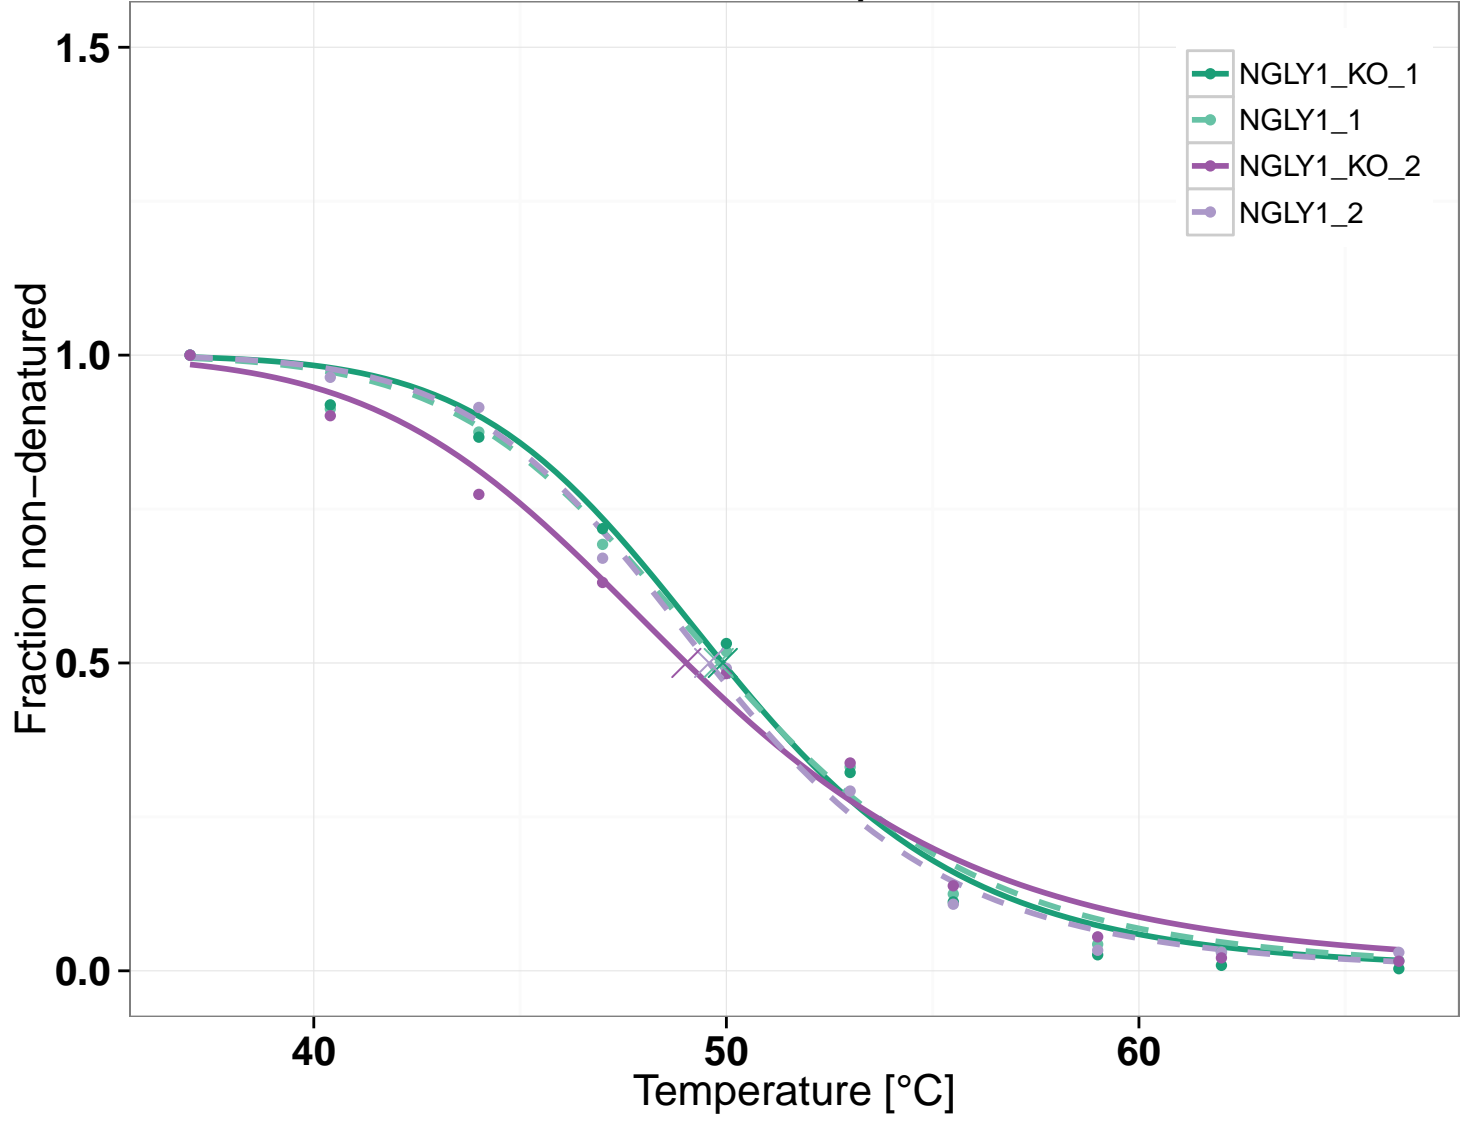

|            | meltPoint | slope  | plateau | R2   |
|------------|-----------|--------|---------|------|
| NGLY1_KO_1 | 49.91     | -0.084 | 0       | 0.99 |
| NGLY1_1    | 49.82     | -0.078 | 0       | 0.99 |
| NGLY1_KO_2 | 49.03     | -0.067 | 0       | 0.99 |
| NGLY1_2    | 49.58     | -0.085 | 0       | 1    |

Supplement: Supplementary file 2334 [file 1]

IPI00023001.2|FAM162A

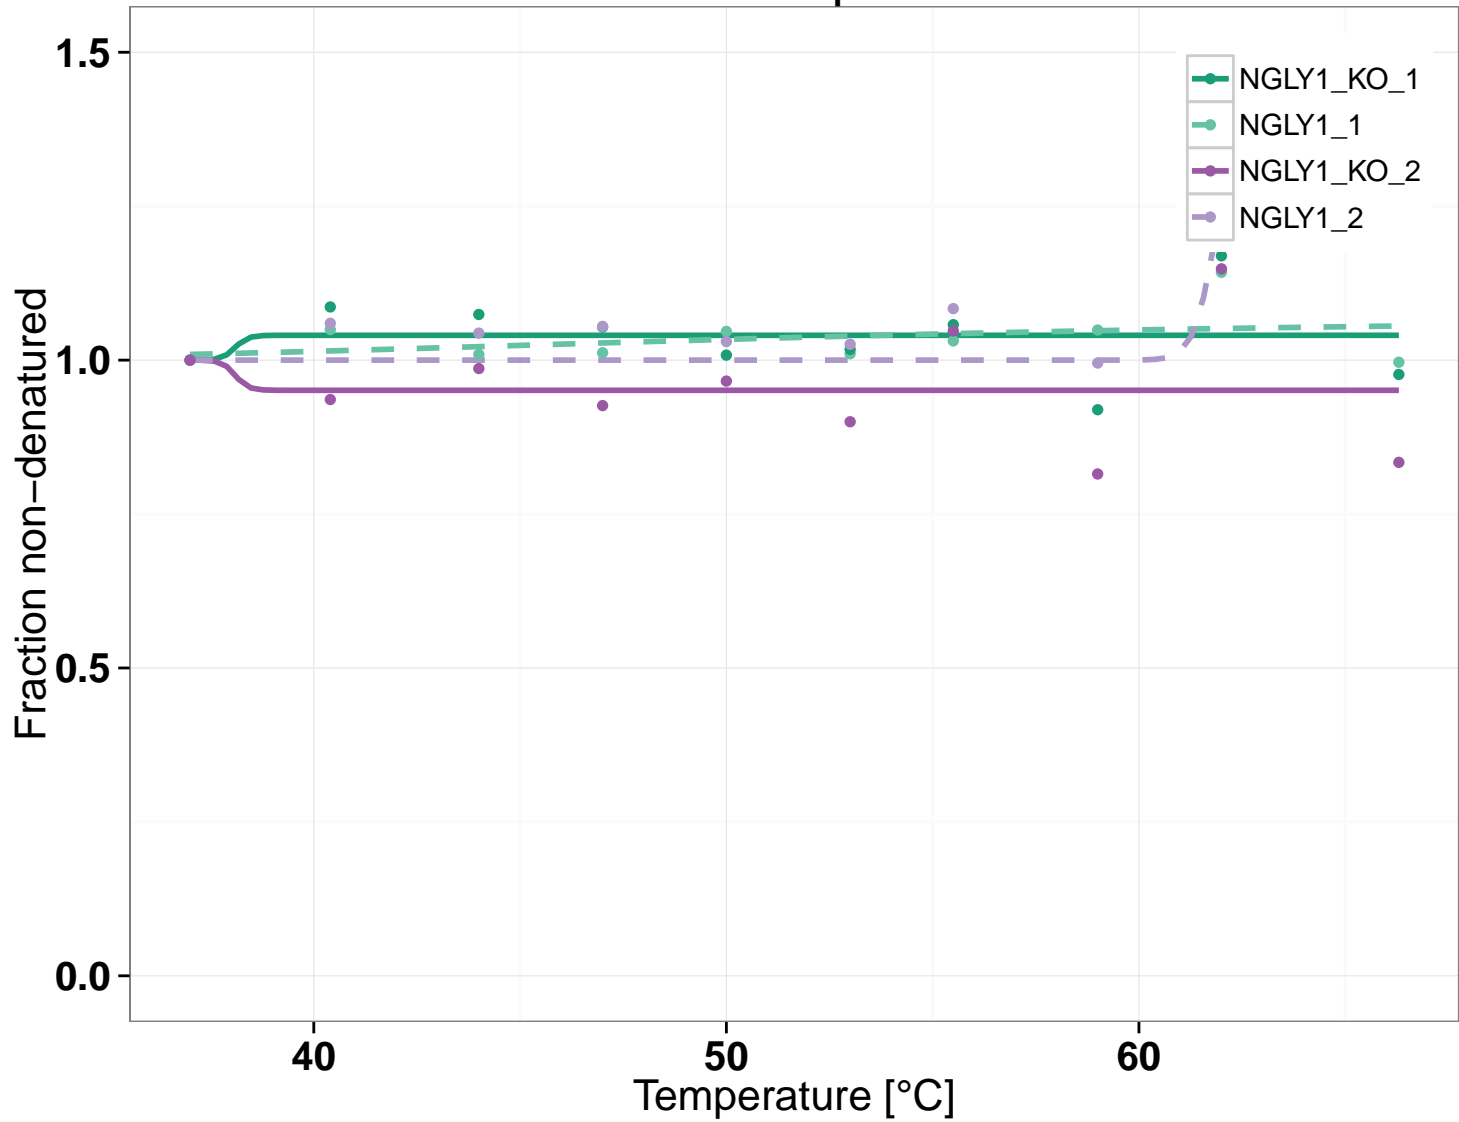

|            | meltPoint | slope | plateau | R2   |
|------------|-----------|-------|---------|------|
| NGLY1_KO_1 | –         | 0.066 | 1.04    | 0.03 |
| NGLY1_1    | –         | 0.002 | 1.08    | 0.12 |
| NGLY1_KO_2 | –         | –0.08 | 0.95    | 0.02 |
| NGLY1_2    | –         | 0.36  | 1.37    | 0.87 |

Supplement: Supplementary file 2335 [file 1]

# IPI00909273.1|B4DWS0\_HUMAN

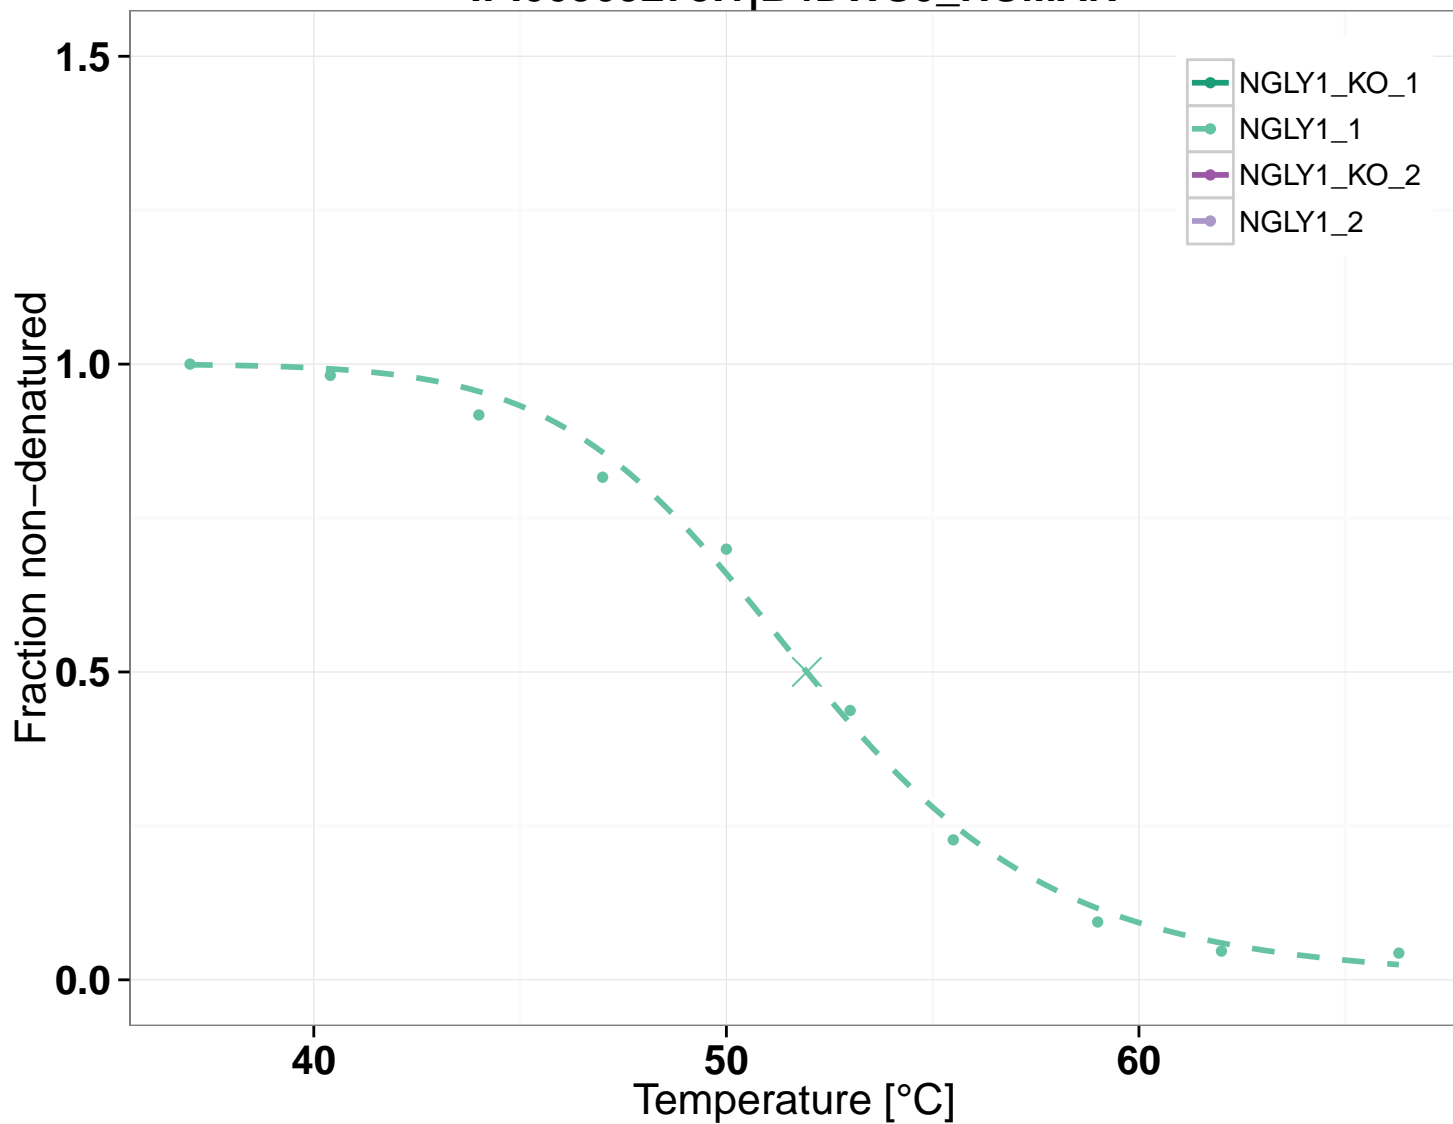

|            | meltPoint | slope  | plateau | R2 |
|------------|-----------|--------|---------|----|
| NGLY1_KO_1 | –         | –      | –       | –  |
| NGLY1_1    | 51.95     | –0.083 | 0       | 1  |
| NGLY1_KO_2 | –         | –      | –       | –  |
| NGLY1_2    | –         | –      | –       | –  |

Supplement: Supplementary file 2336 [file 1]

IPI00218288.6|SEC24D

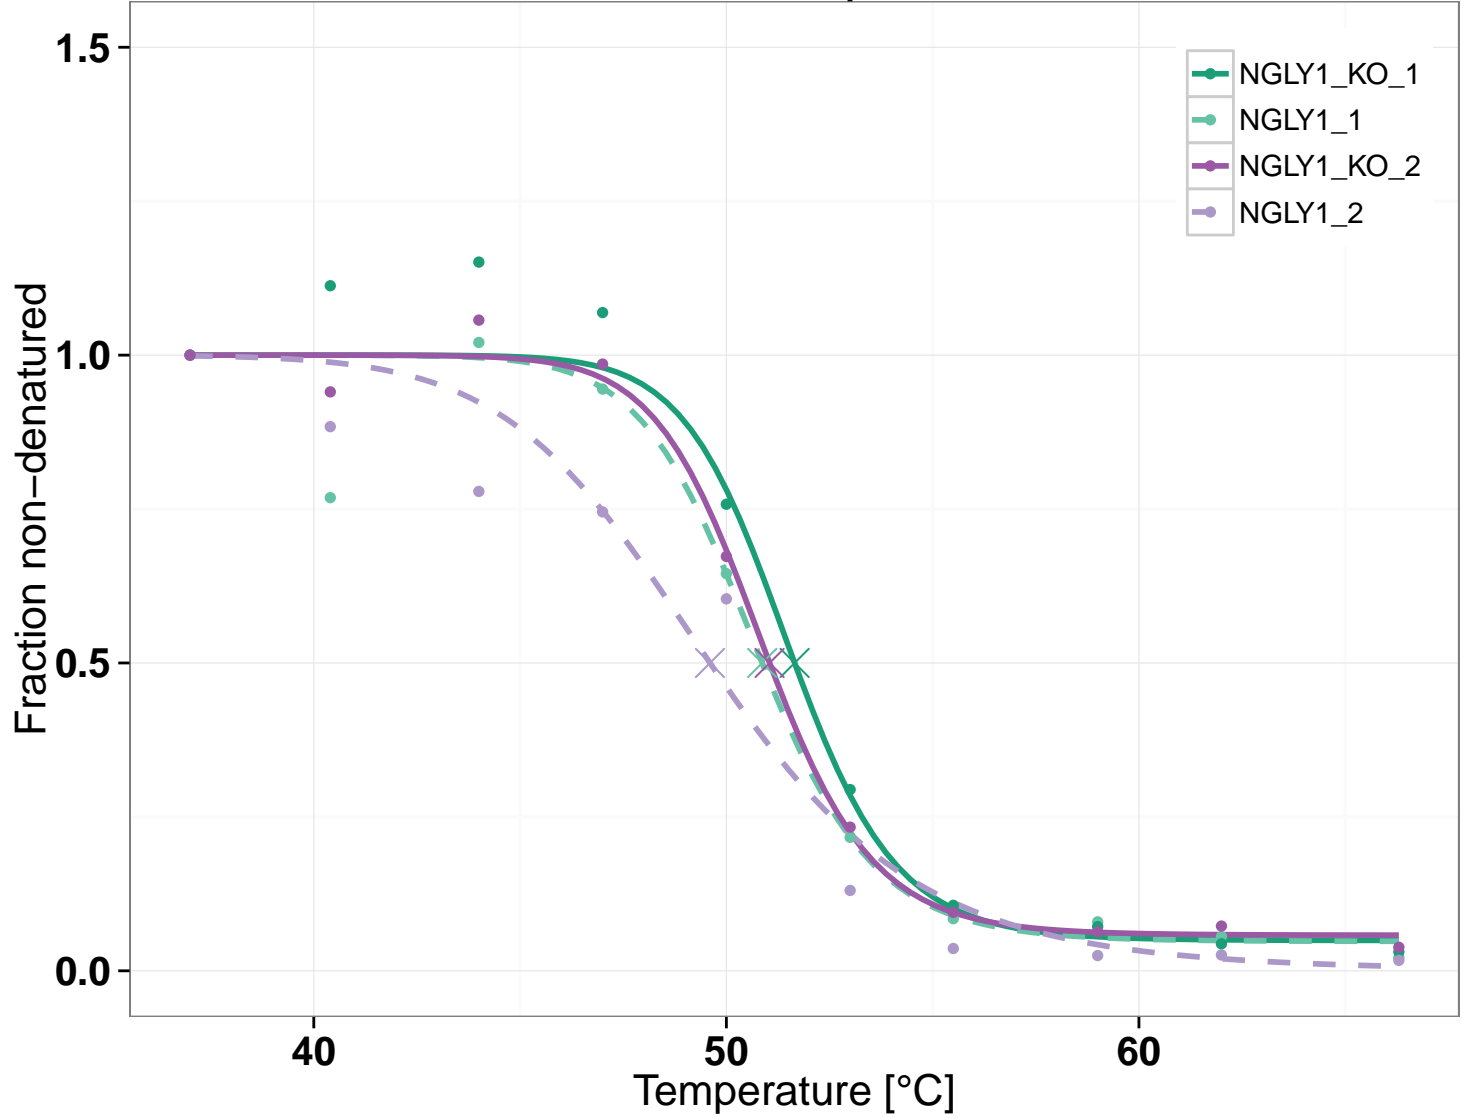

|            | meltPoint | slope | plateau | R2   |
|------------|-----------|-------|---------|------|
| NGLY1_KO_1 | 51.65     | -0.18 | 0.05    | 0.98 |
| NGLY1_1    | 50.87     | -0.17 | 0.05    | 0.97 |
| NGLY1_KO_2 | 51.05     | -0.18 | 0.06    | 1    |
| NGLY1_2    | 49.6      | -0.1  | 0       | 0.96 |

Supplement: Supplementary file 2337 [file 1]

IPI00171437.6|KCTD6

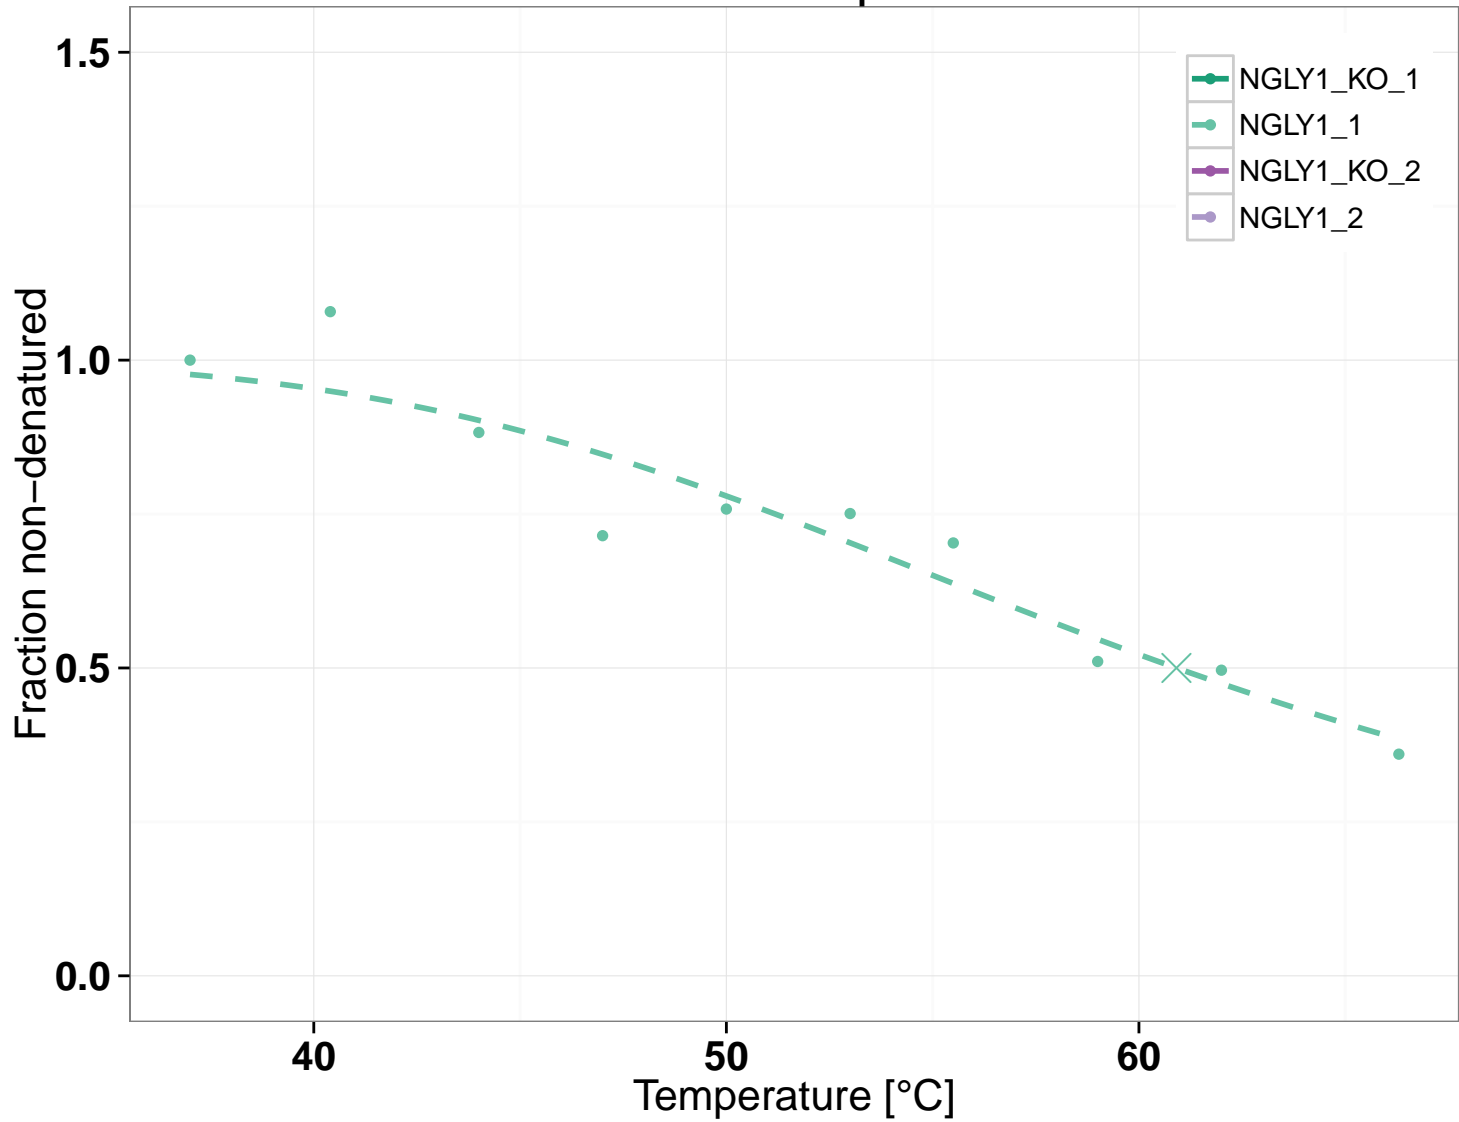

|            | meltPoint | slope  | plateau | R2  |
|------------|-----------|--------|---------|-----|
| NGLY1_KO_1 | -         | -      | -       | -   |
| NGLY1_1    | 60.91     | -0.026 | 0       | 0.9 |
| NGLY1_KO_2 | -         | -      | -       | -   |
| NGLY1_2    | -         | -      | -       | -   |

Supplement: Supplementary file 2338 [file 1]

# IPI00100106.1|RIC8A

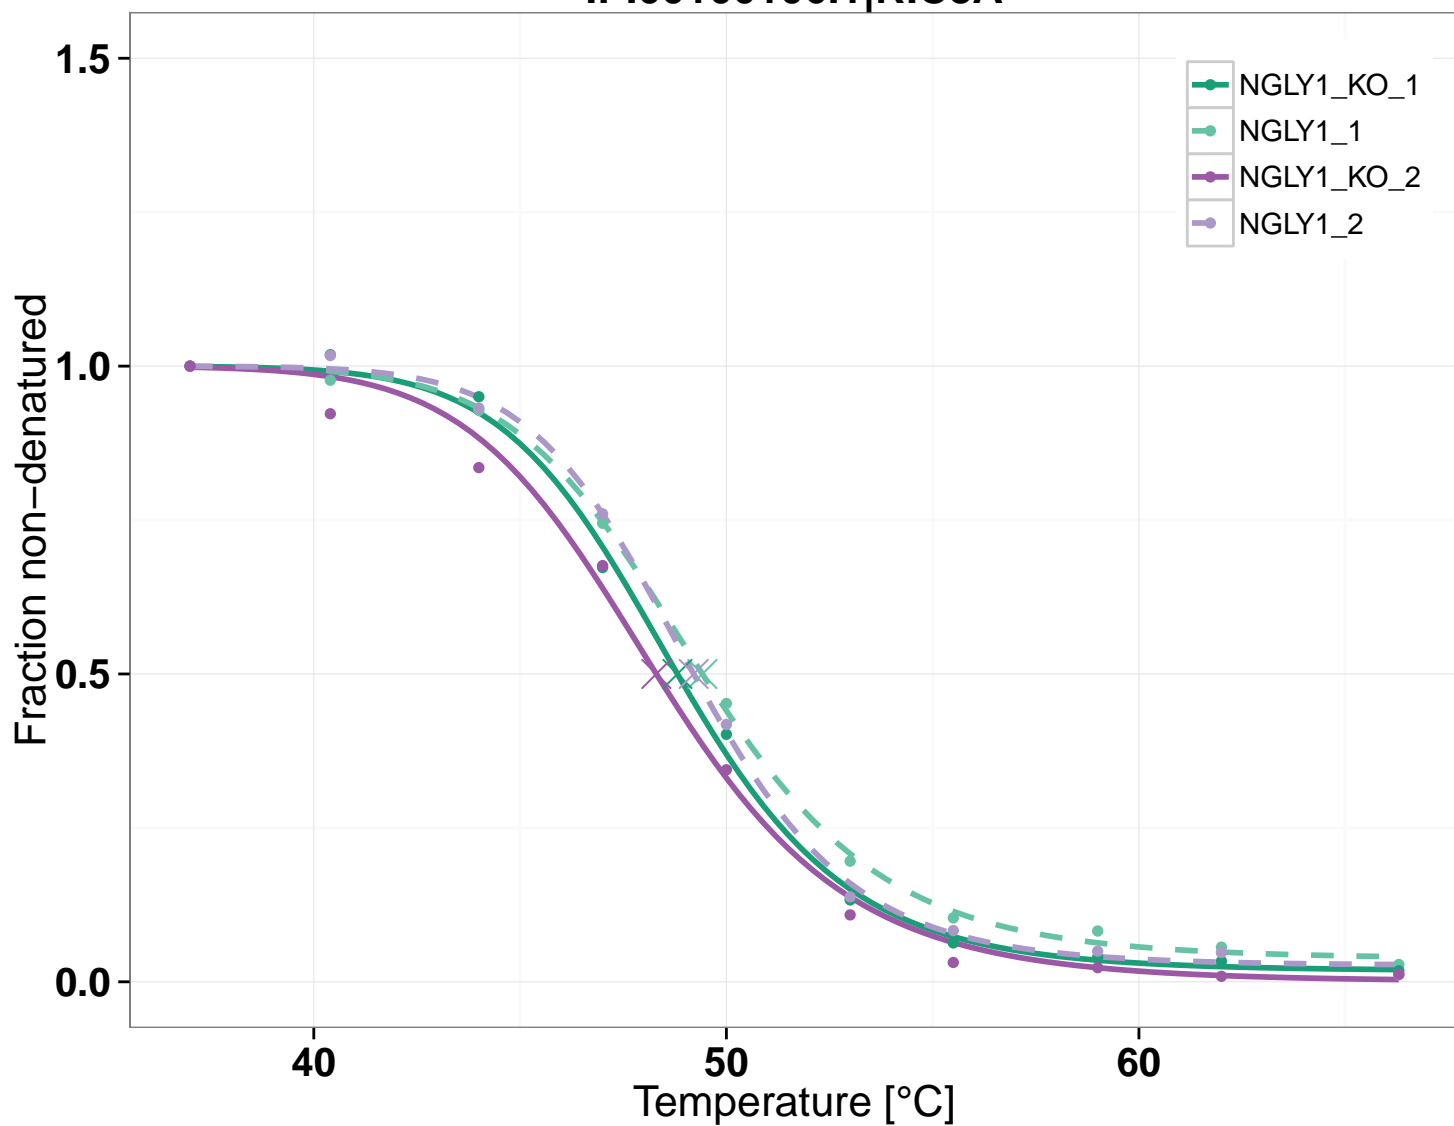

|            | meltPoint | slope | plateau | R2   |
|------------|-----------|-------|---------|------|
| NGLY1_KO_1 | 48.81     | -0.12 | 0.02    | 1    |
| NGLY1_1    | 49.42     | -0.11 | 0.04    | 1    |
| NGLY1_KO_2 | 48.3      | -0.11 | 0       | 0.99 |
| NGLY1_2    | 49.21     | -0.12 | 0.03    | 1    |

Supplement: Supplementary file 2339 [file 1]

IPI00061680.1|CCDC101

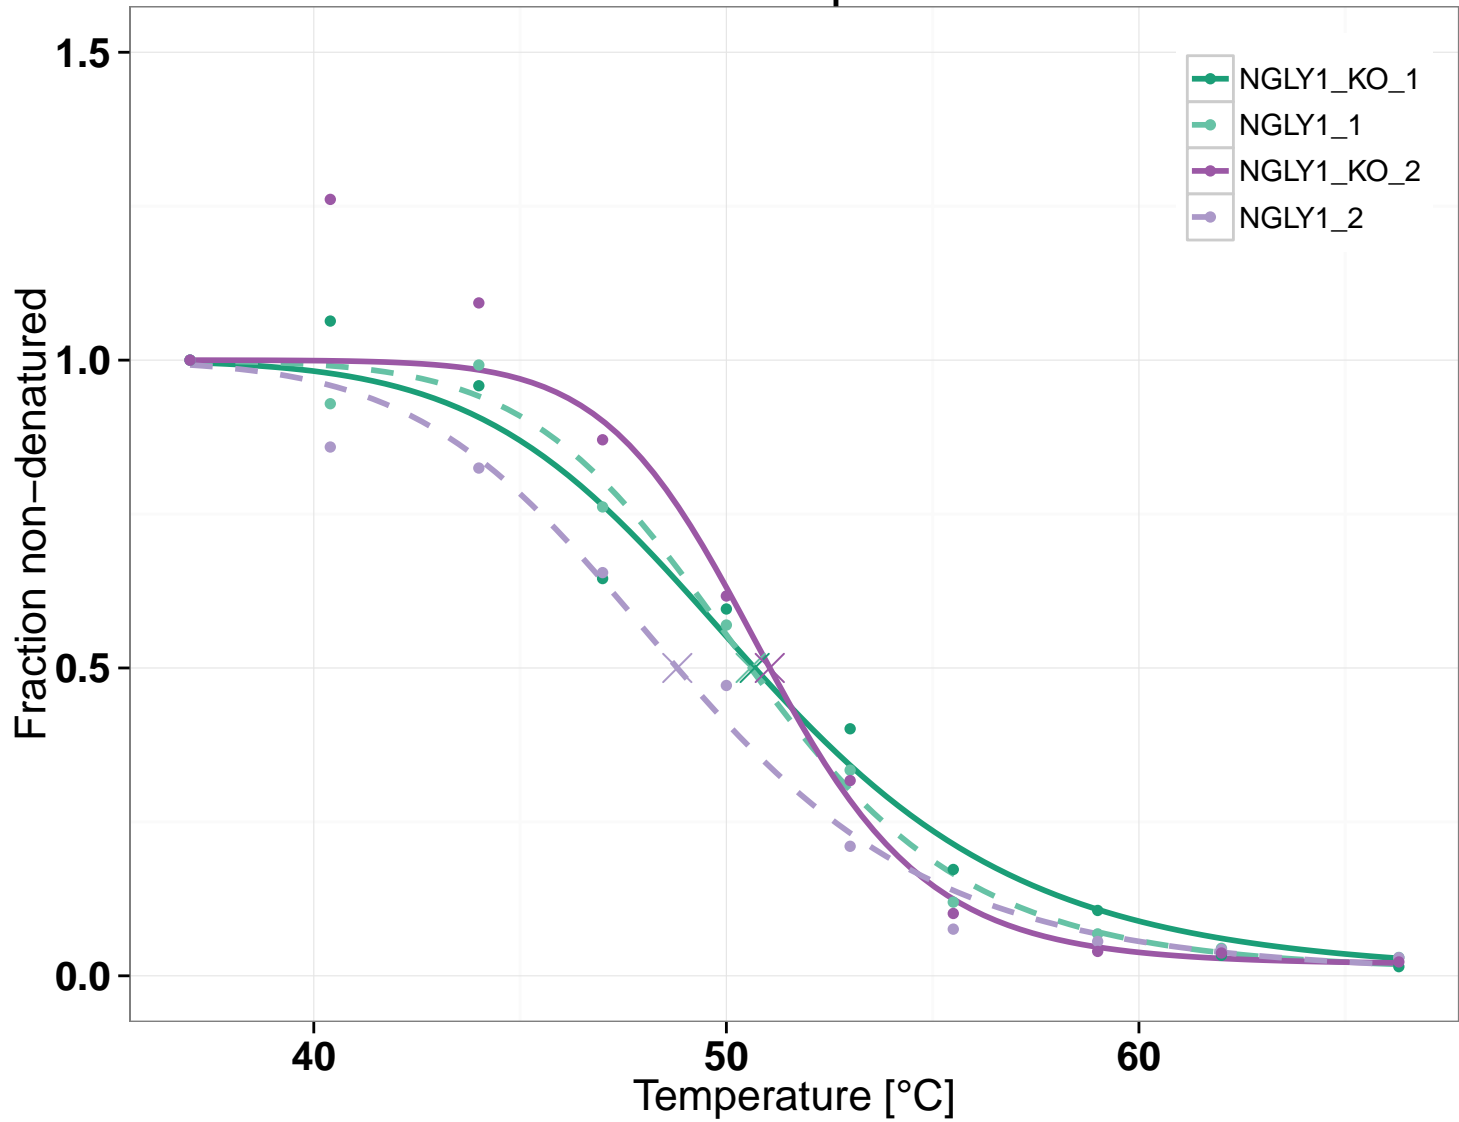

|            | meltPoint | slope  | plateau | R2   |
|------------|-----------|--------|---------|------|
| NGLY1_KO_1 | 50.69     | -0.075 | 0       | 0.98 |
| NGLY1_1    | 50.59     | -0.093 | 0.01    | 0.99 |
| NGLY1_KO_2 | 51.05     | -0.13  | 0.02    | 0.96 |
| NGLY1_2    | 48.81     | -0.079 | 0       | 0.99 |

Supplement: Supplementary file 2340 [file 1]

IPI00299085.3|MAGEC1

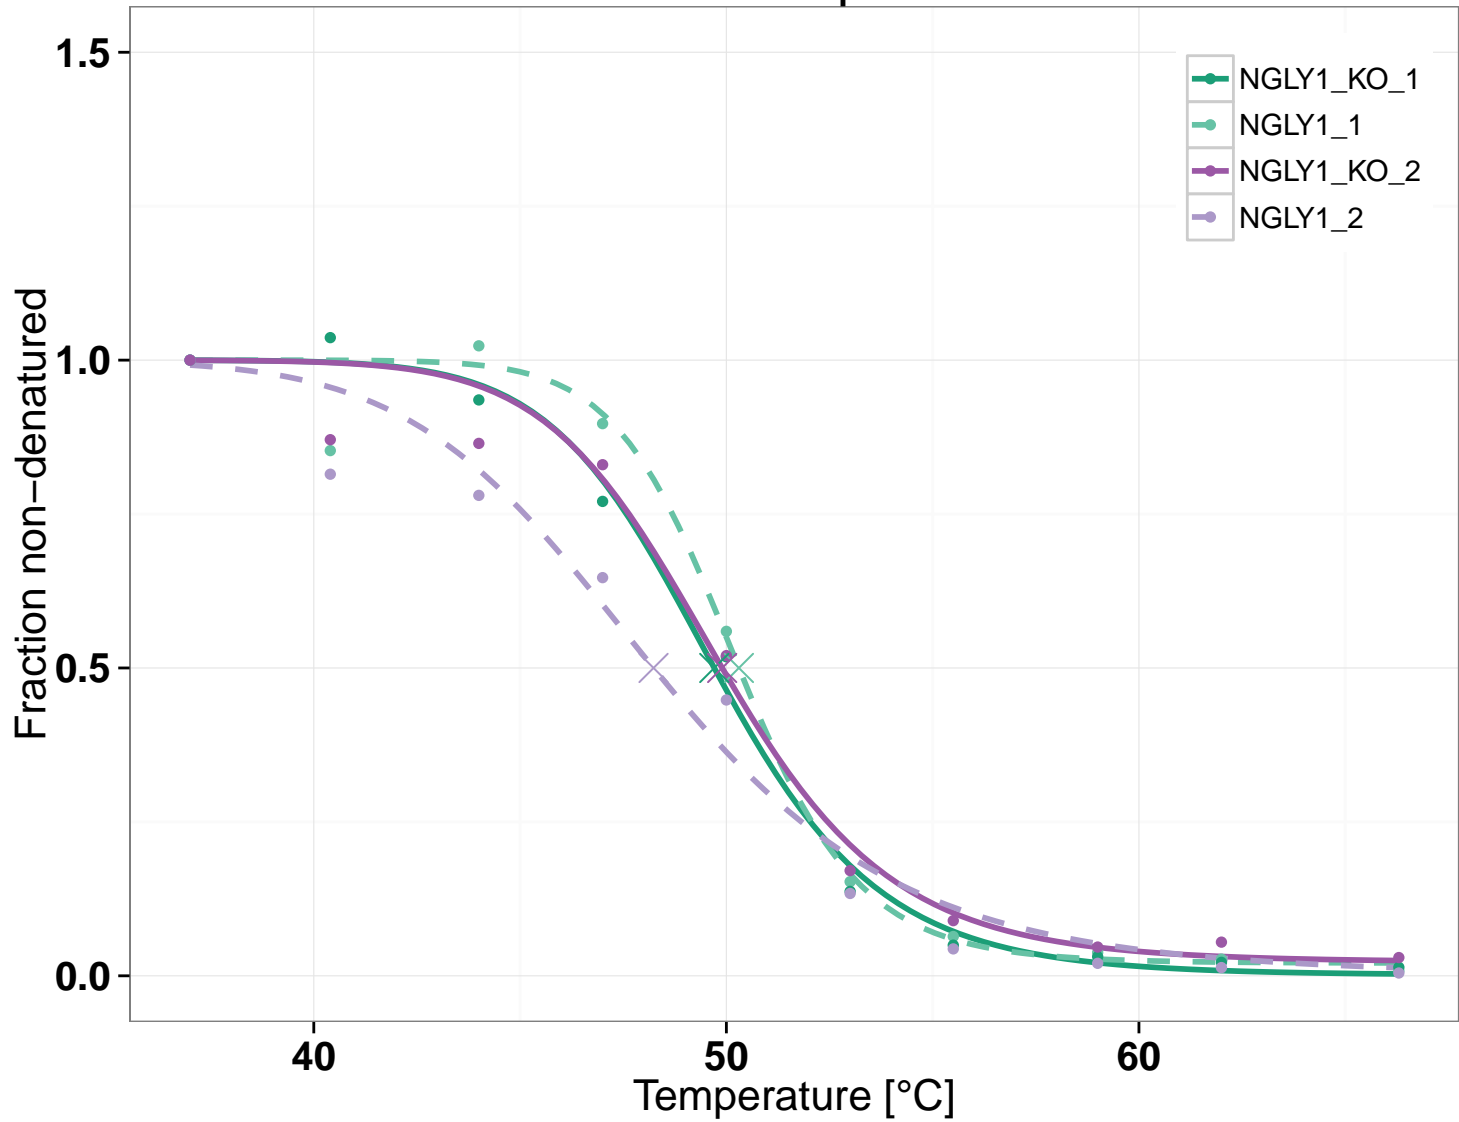

|            | meltPoint | slope  | plateau | R2   |
|------------|-----------|--------|---------|------|
| NGLY1_KO_1 | 49.71     | -0.12  | 0       | 1    |
| NGLY1_1    | 50.3      | -0.16  | 0.02    | 0.99 |
| NGLY1_KO_2 | 49.9      | -0.12  | 0.02    | 0.98 |
| NGLY1_2    | 48.23     | -0.084 | 0       | 0.97 |

Supplement: Supplementary file 2341 [file 1]

# IPI00001654.5|PCM1

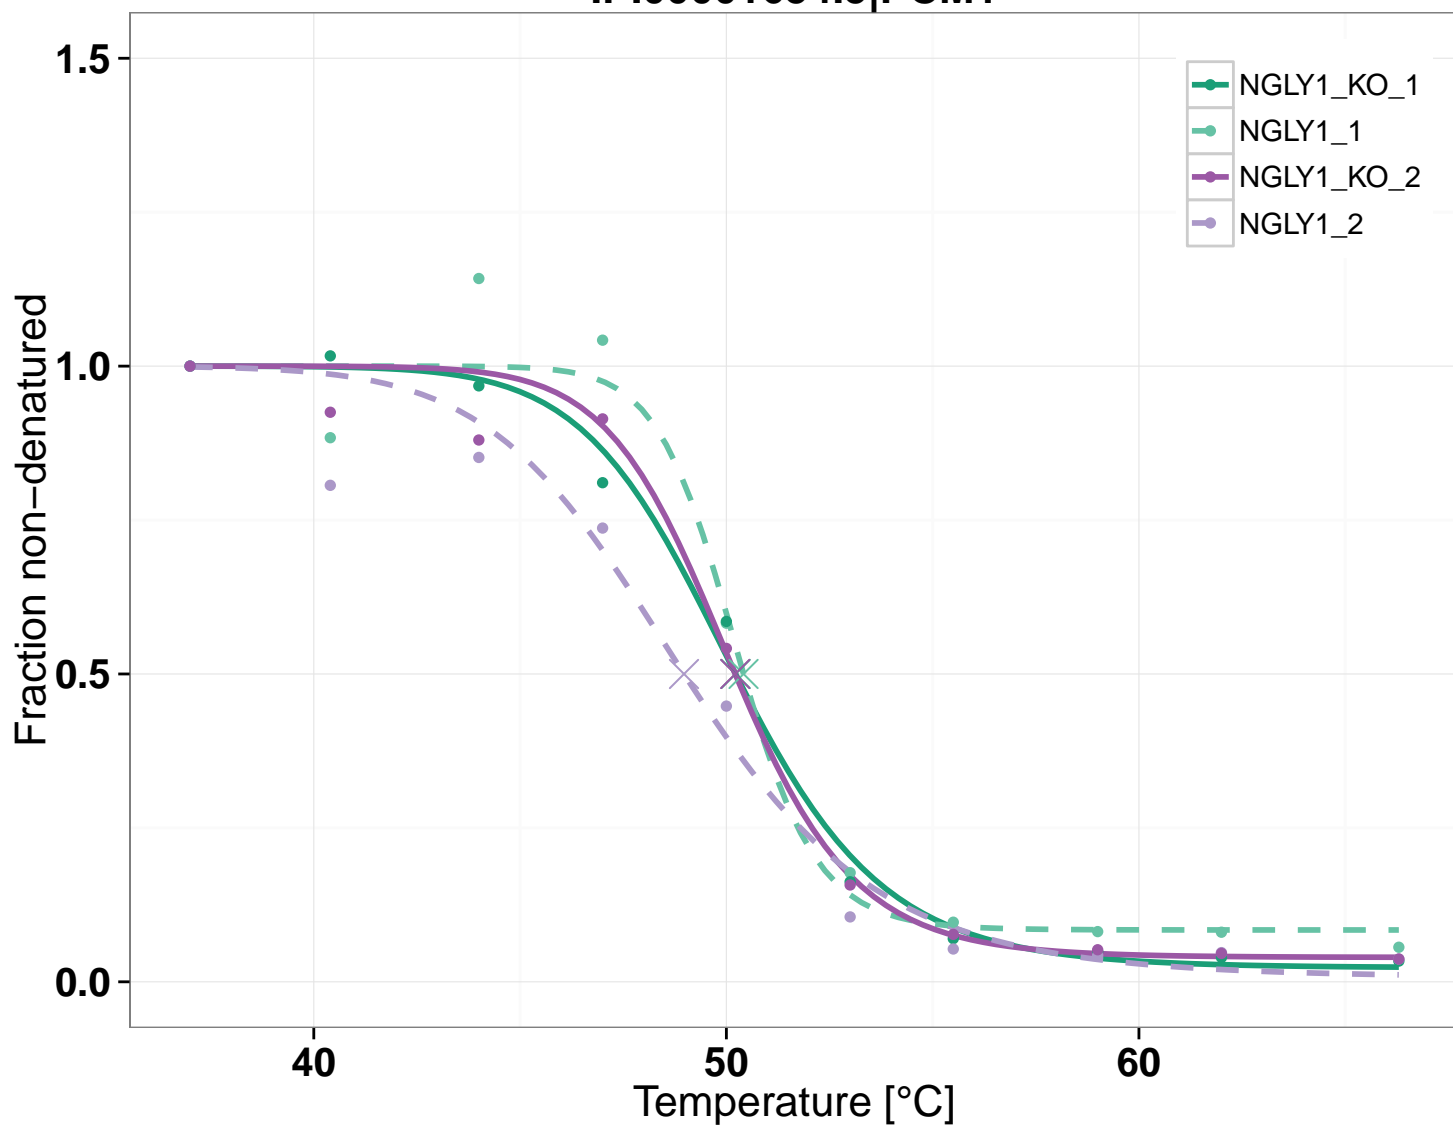

|            | meltPoint | slope | plateau | R2   |
|------------|-----------|-------|---------|------|
| NGLY1_KO_1 | 50.22     | -0.13 | 0.02    | 0.99 |
| NGLY1_1    | 50.42     | -0.24 | 0.08    | 0.98 |
| NGLY1_KO_2 | 50.21     | -0.16 | 0.04    | 0.99 |
| NGLY1_2    | 48.97     | -0.1  | 0.01    | 0.97 |

Supplement: Supplementary file 2342 [file 1]

# IPI00019926.4|ADRBK2

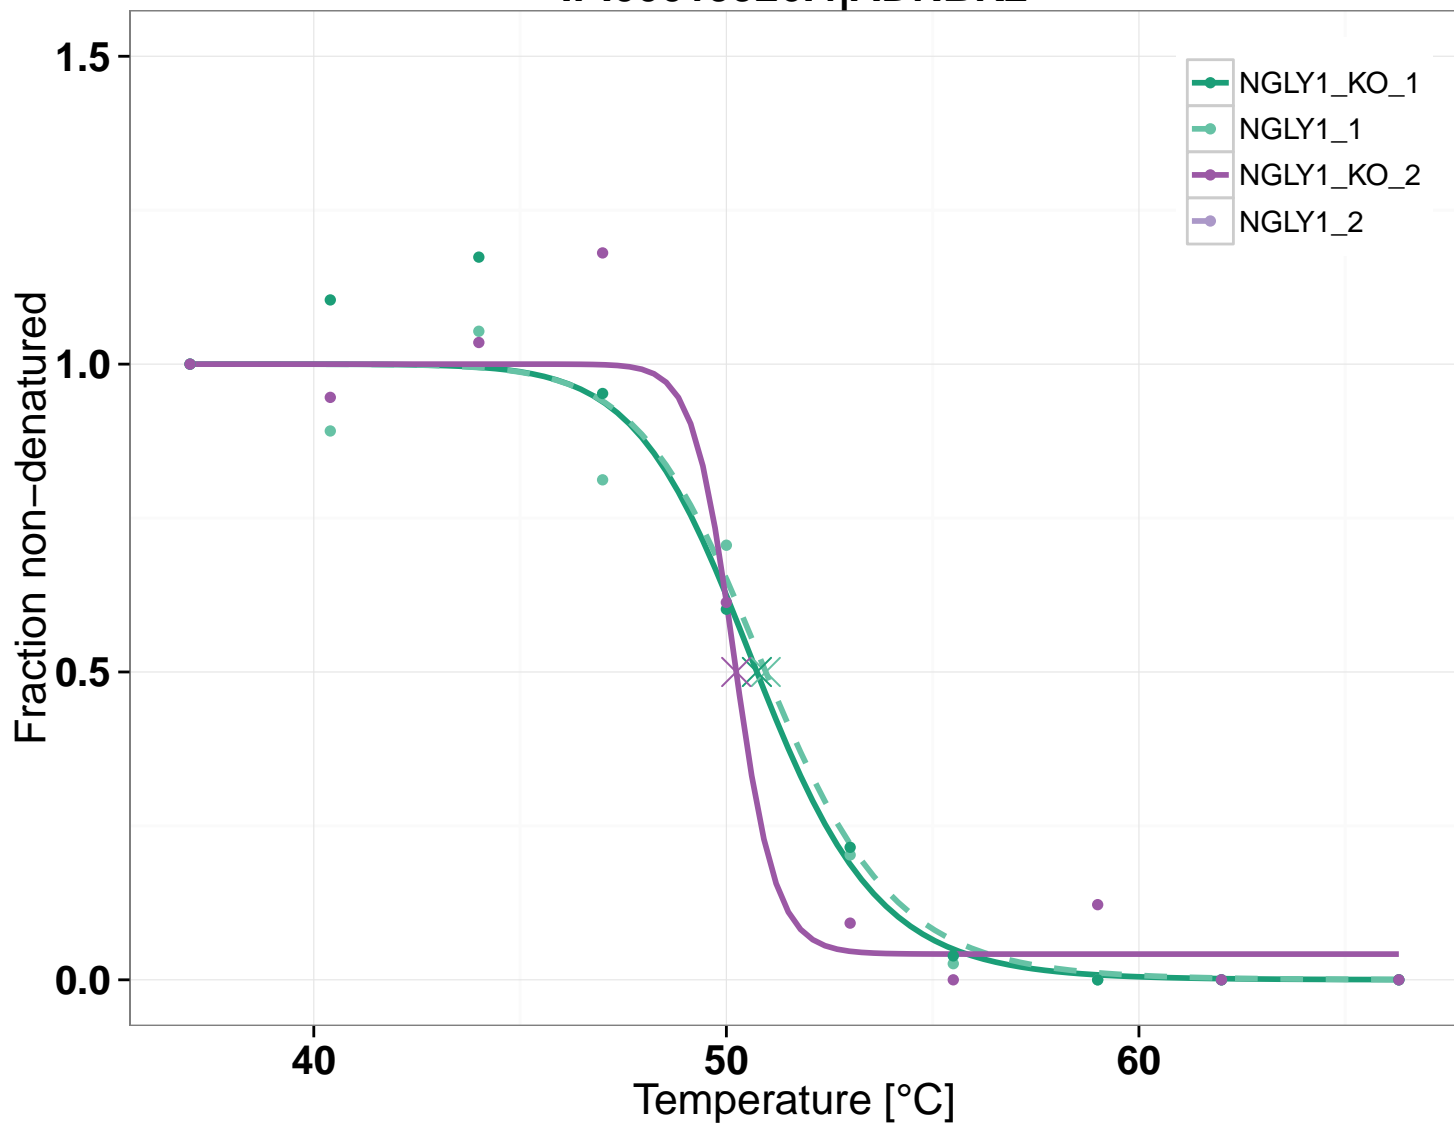

|            | meltPoint | slope | plateau | R2   |
|------------|-----------|-------|---------|------|
| NGLY1_KO_1 | 50.74     | -0.17 | 0       | 0.98 |
| NGLY1_1    | 50.96     | -0.16 | 0       | 0.98 |
| NGLY1_KO_2 | 50.24     | -0.48 | 0.04    | 0.98 |
| NGLY1_2    | -         | -     | -       | -    |

Supplement: Supplementary file 2343 [file 1]

IPI00016377.2|RAB28

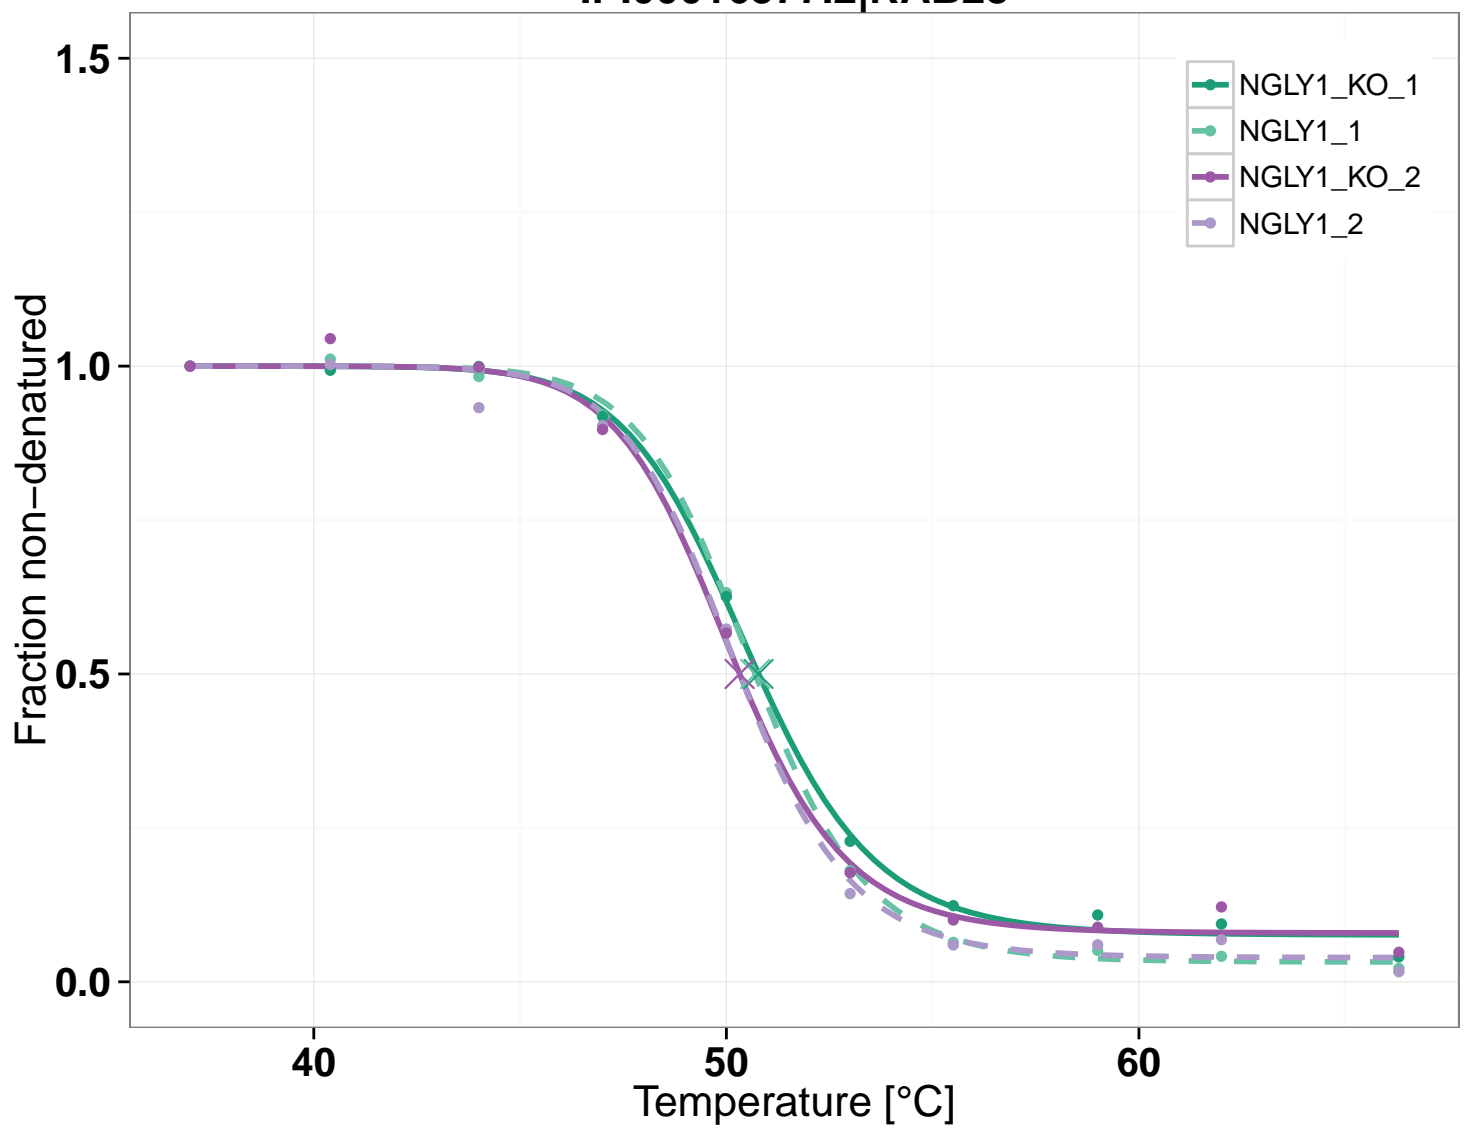

|            | meltPoint | slope | plateau | R2 |
|------------|-----------|-------|---------|----|
| NGLY1_KO_1 | 50.78     | -0.15 | 0.08    | 1  |
| NGLY1_1    | 50.7      | -0.17 | 0.03    | 1  |
| NGLY1_KO_2 | 50.32     | -0.16 | 0.08    | 1  |
| NGLY1_2    | 50.32     | -0.17 | 0.04    | 1  |

Supplement: Supplementary file 2344 [file 1]

# IPI00794880.1|CHD7

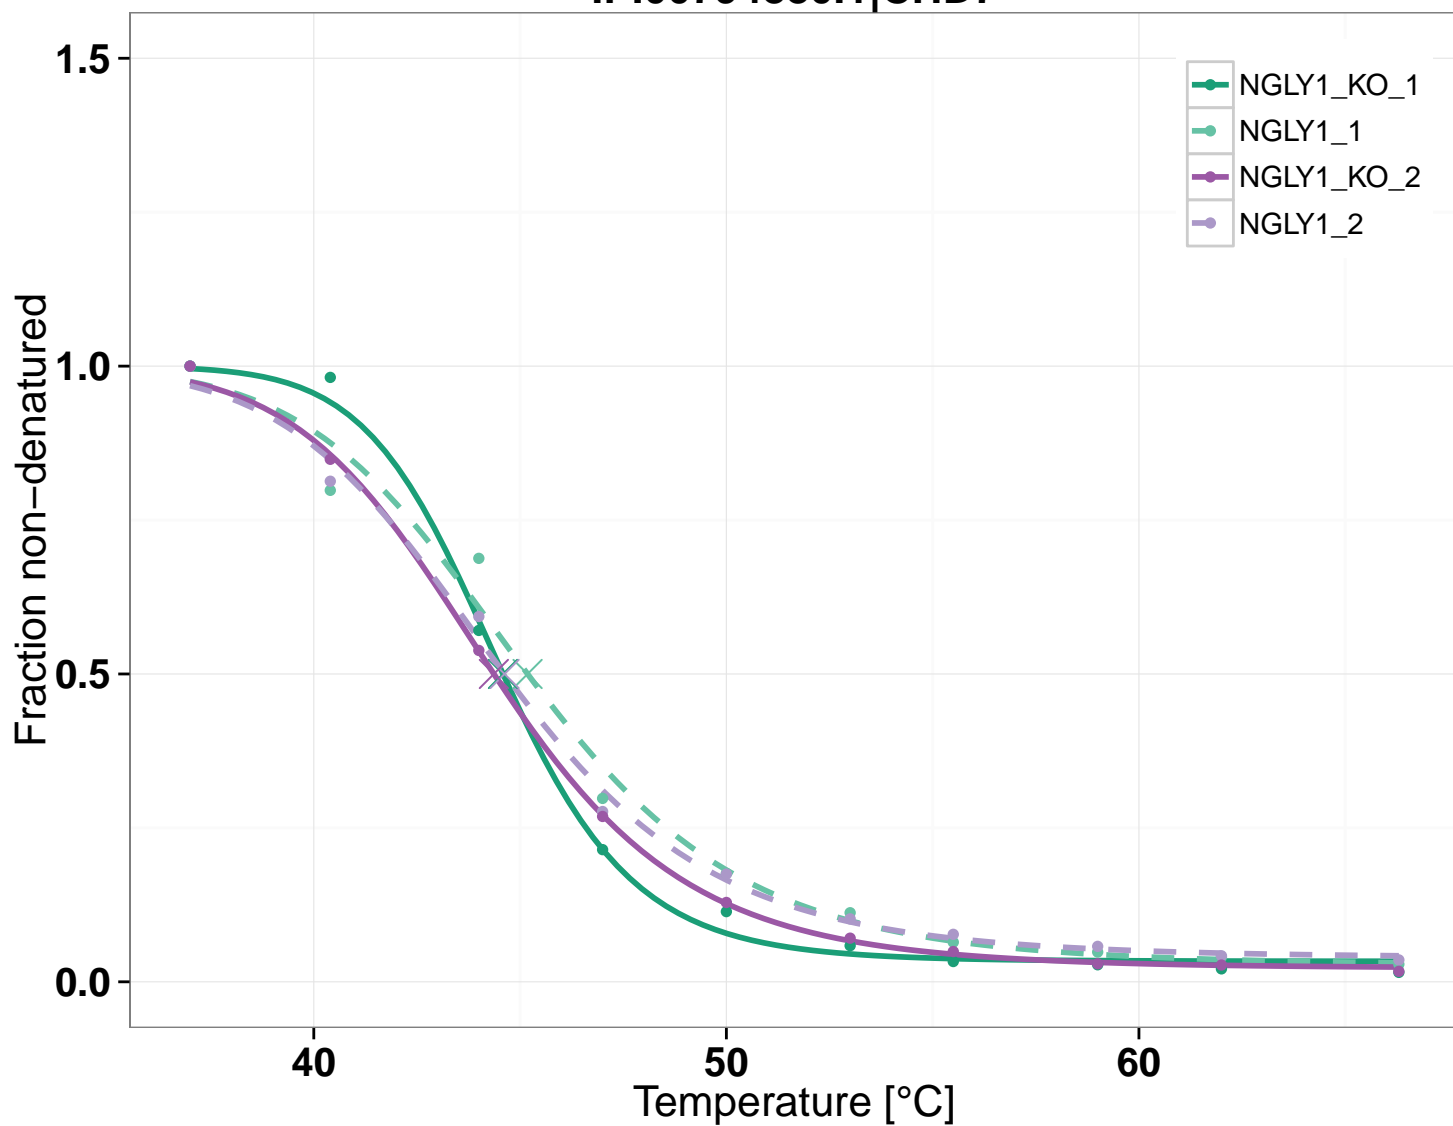

|            | meltPoint | slope  | plateau | R2   |
|------------|-----------|--------|---------|------|
| NGLY1_KO_1 | 44.59     | -0.15  | 0.03    | 1    |
| NGLY1_1    | 45.18     | -0.092 | 0.03    | 0.99 |
| NGLY1_KO_2 | 44.36     | -0.1   | 0.02    | 1    |
| NGLY1_2    | 44.62     | -0.093 | 0.04    | 1    |

Supplement: Supplementary file 2345 [file 1]

# IPI00028065.1|NCK1

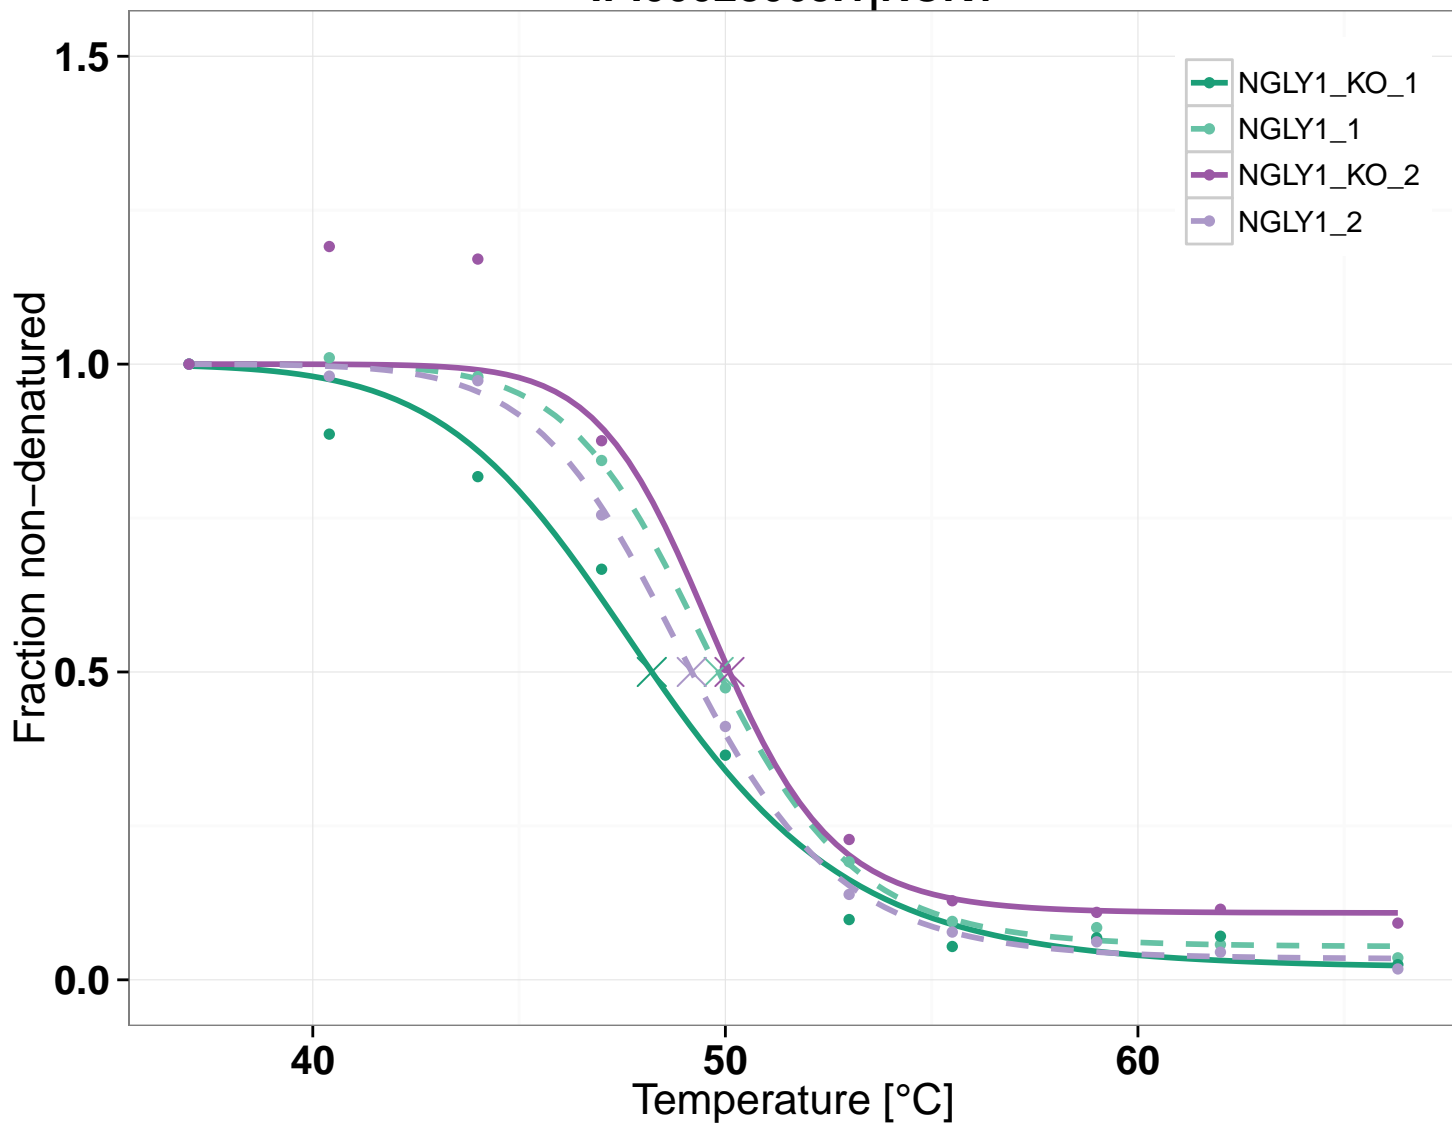

|            | meltPoint | slope  | plateau | R2   |
|------------|-----------|--------|---------|------|
| NGLY1_KO_1 | 48.22     | -0.098 | 0.02    | 0.99 |
| NGLY1_1    | 49.84     | -0.14  | 0.05    | 1    |
| NGLY1_KO_2 | 50.1      | -0.16  | 0.11    | 0.96 |
| NGLY1_2    | 49.18     | -0.13  | 0.03    | 1    |

Supplement: Supplementary file 2346 [file 1]

IPI00402375.4|FAM86A

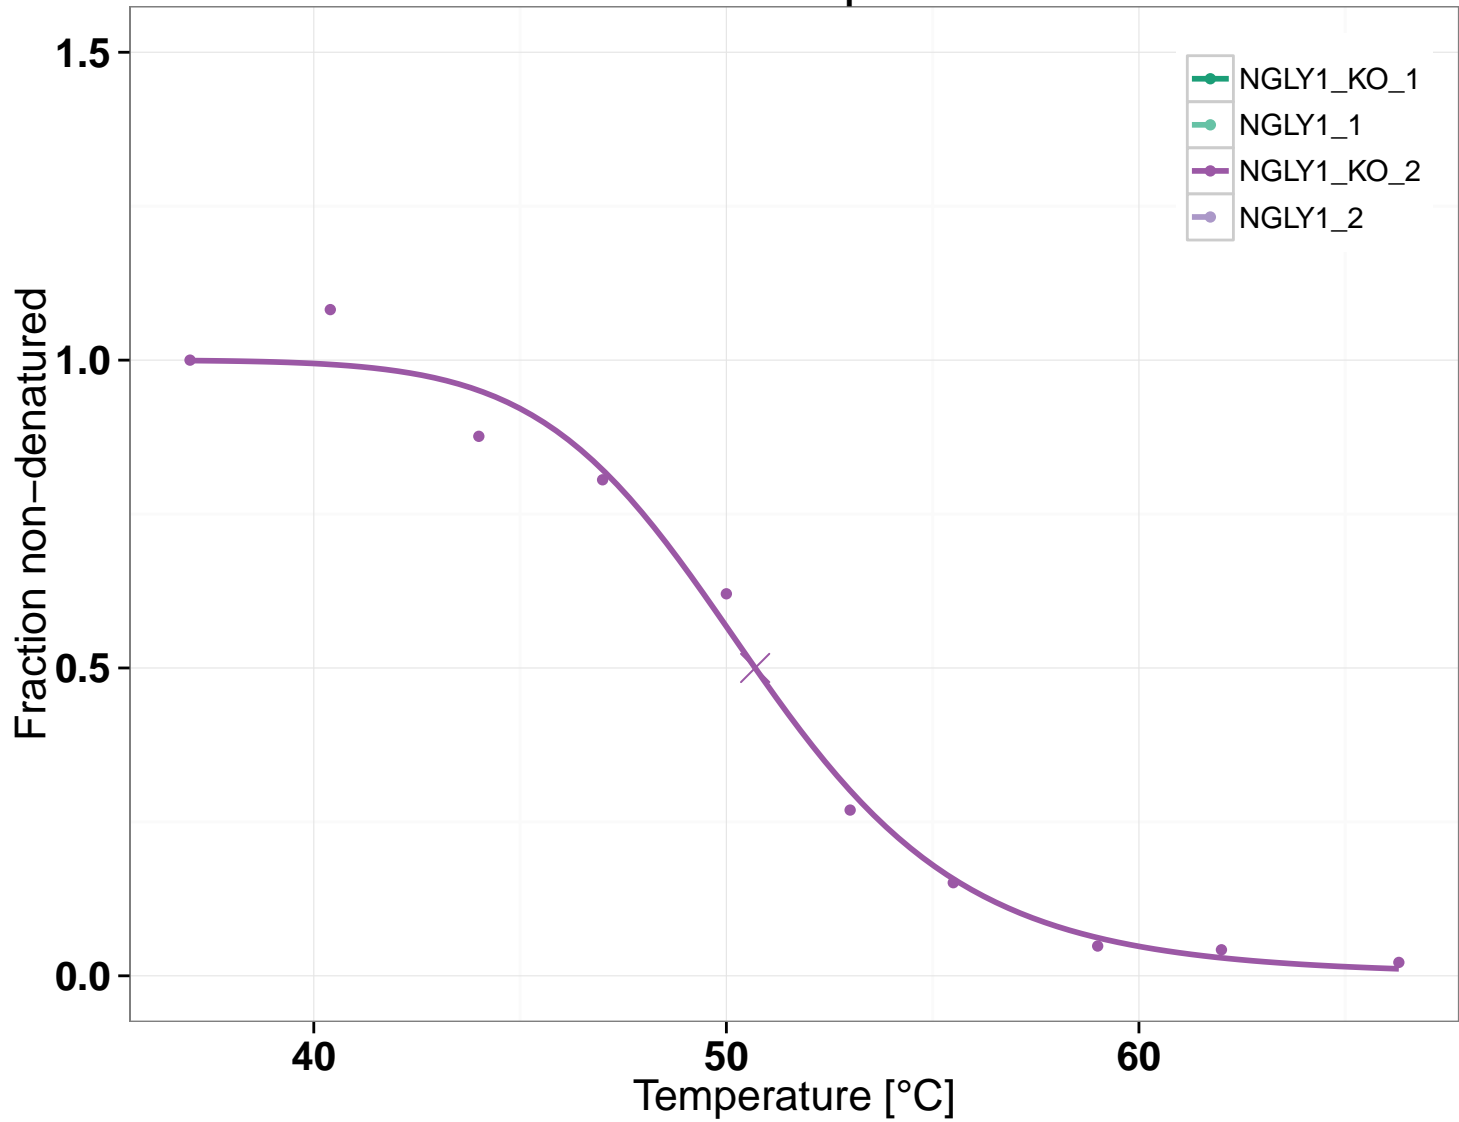

|            | meltPoint | slope  | plateau | R2   |
|------------|-----------|--------|---------|------|
| NGLY1_KO_1 | -         | -      | -       | -    |
| NGLY1_1    | -         | -      | -       | -    |
| NGLY1_KO_2 | 50.7      | -0.097 | 0       | 0.99 |
| NGLY1_2    | -         | -      | -       | -    |

Supplement: Supplementary file 2347 [file 1]

IPI00168462.1|NCRNA00116

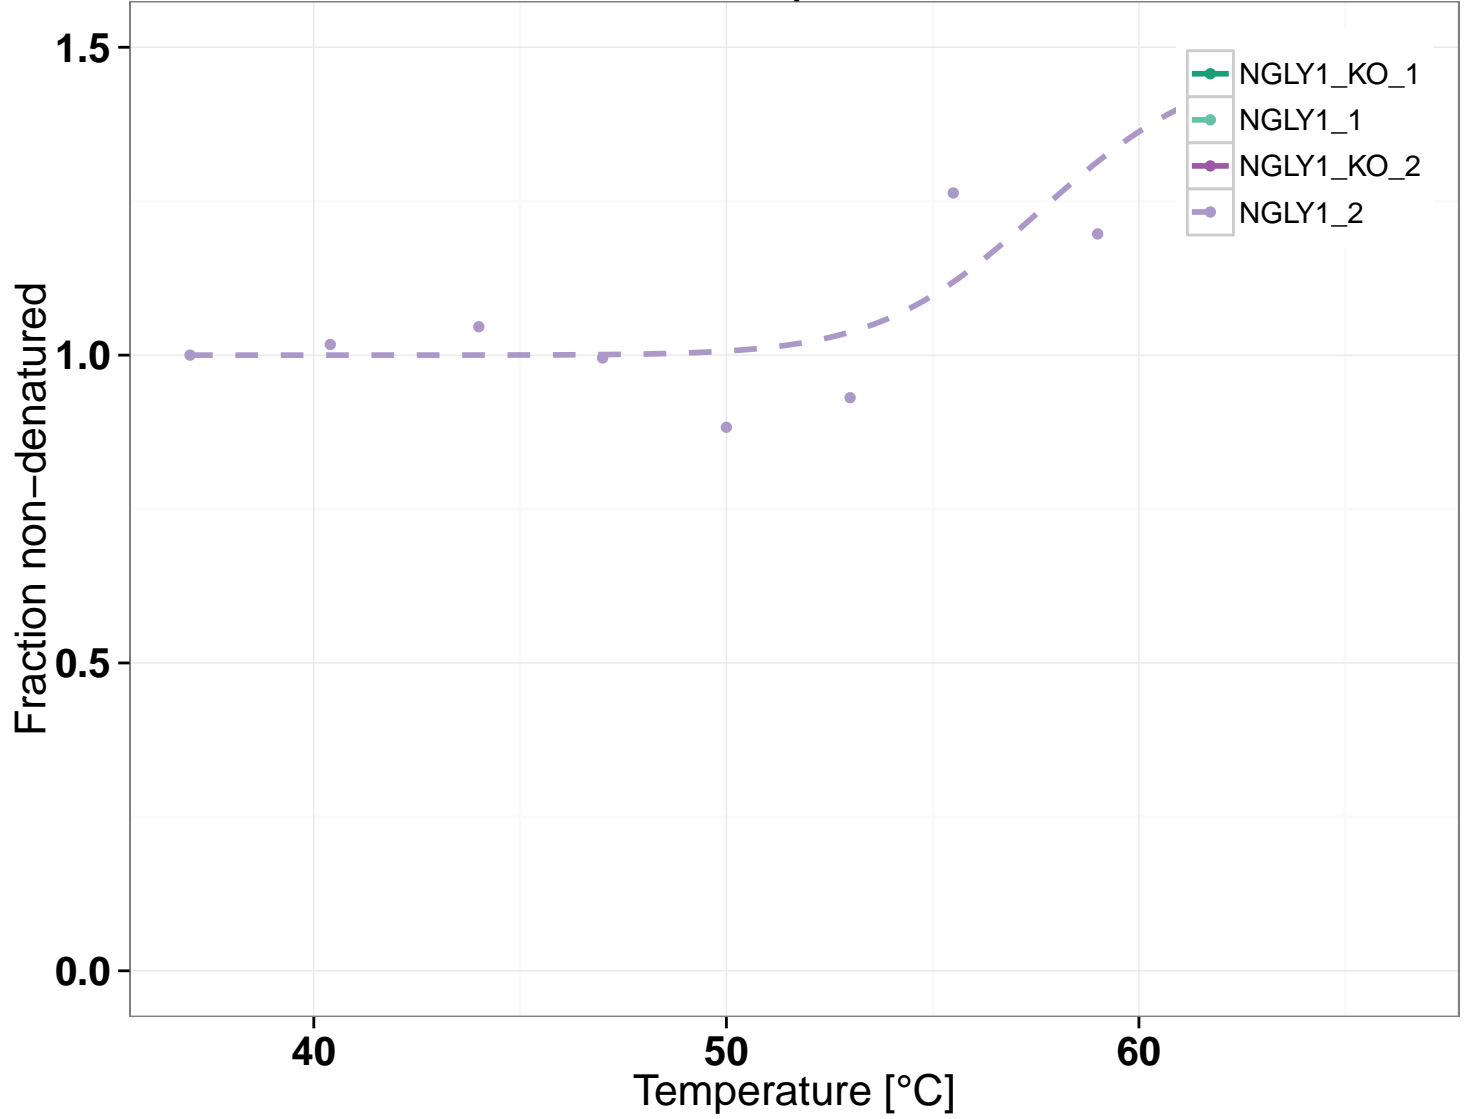

|            | meltPoint | slope | plateau | R2   |
|------------|-----------|-------|---------|------|
| NGLY1_KO_1 | -         | -     | -       | -    |
| NGLY1_1    | -         | -     | -       | -    |
| NGLY1_KO_2 | -         | -     | -       | -    |
| NGLY1_2    | -         | 0.059 | 1.5     | 0.85 |

Supplement: Supplementary file 2348 [file 1]

# IPI00006800.3|ATG5

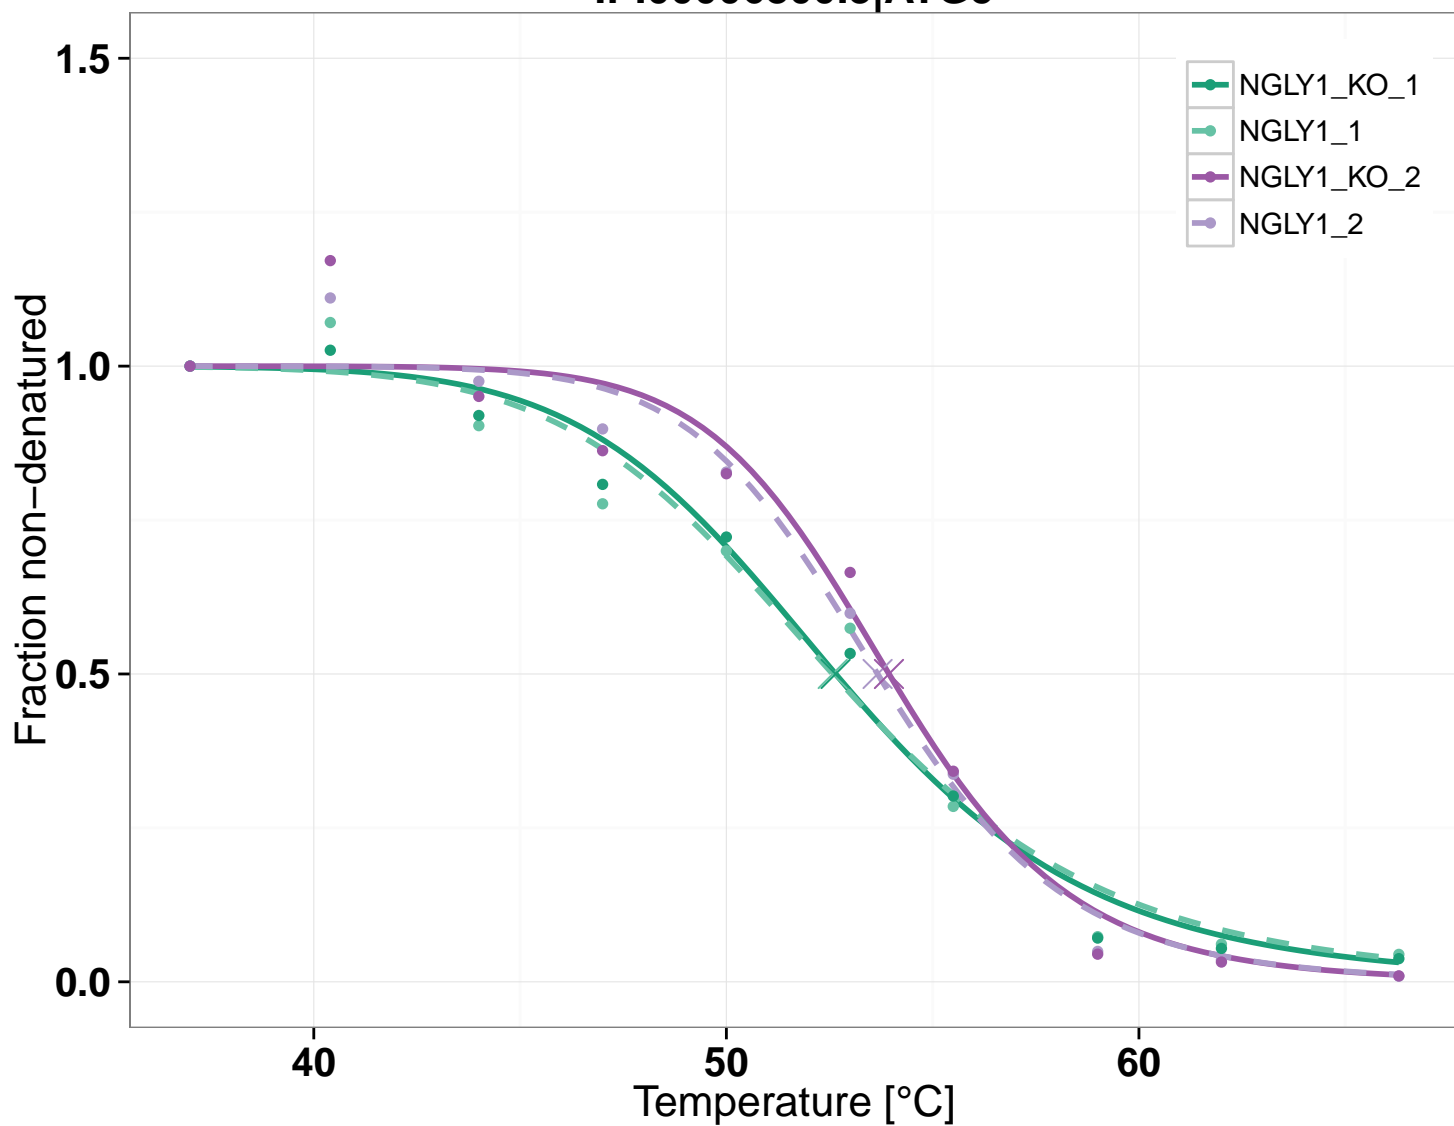

|            | meltPoint | slope  | plateau | R2   |
|------------|-----------|--------|---------|------|
| NGLY1_KO_1 | 52.65     | -0.08  | 0       | 0.99 |
| NGLY1_1    | 52.58     | -0.076 | 0       | 0.98 |
| NGLY1_KO_2 | 53.94     | -0.11  | 0       | 0.97 |
| NGLY1_2    | 53.67     | -0.11  | 0       | 0.99 |

Supplement: Supplementary file 2349 [file 1]

IPI00292433.2|ZNF362

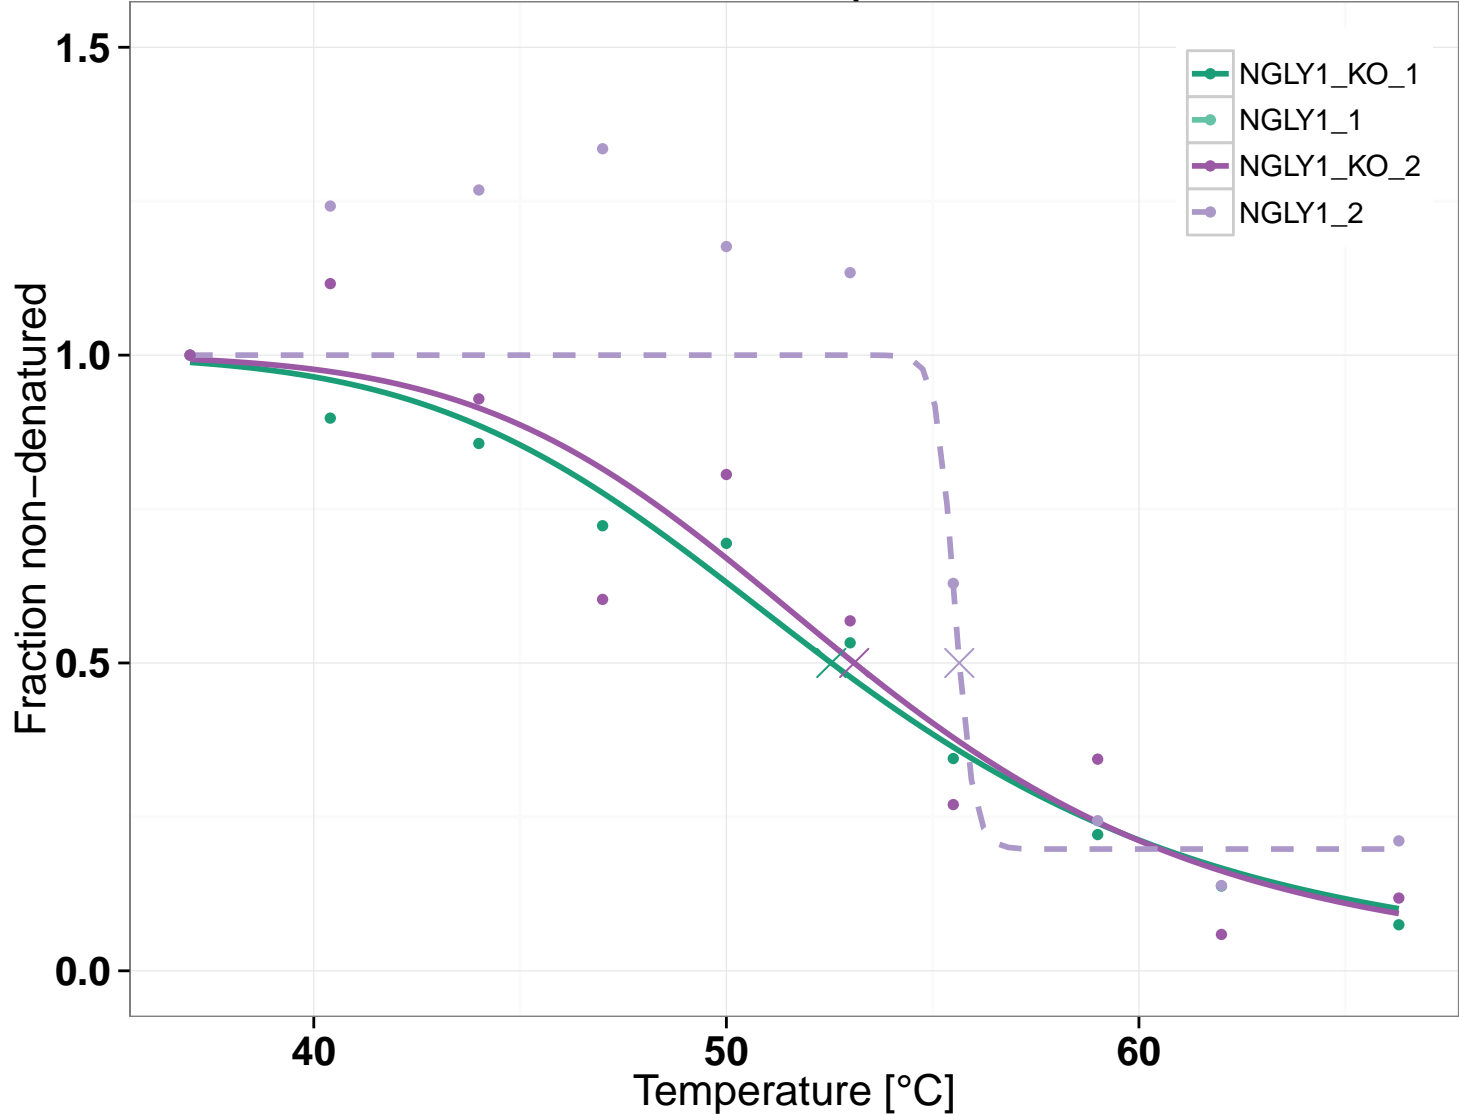

|            | meltPoint | slope  | plateau | R2   |
|------------|-----------|--------|---------|------|
| NGLY1_KO_1 | 52.54     | -0.052 | 0       | 0.98 |
| NGLY1_1    | -         | -      | -       | -    |
| NGLY1_KO_2 | 53.1      | -0.055 | 0       | 0.9  |
| NGLY1_2    | 55.65     | -0.9   | 0.2     | 0.86 |

Supplement: Supplementary file 2350 [file 1]

IPI00384047.1|TRAPPC6B

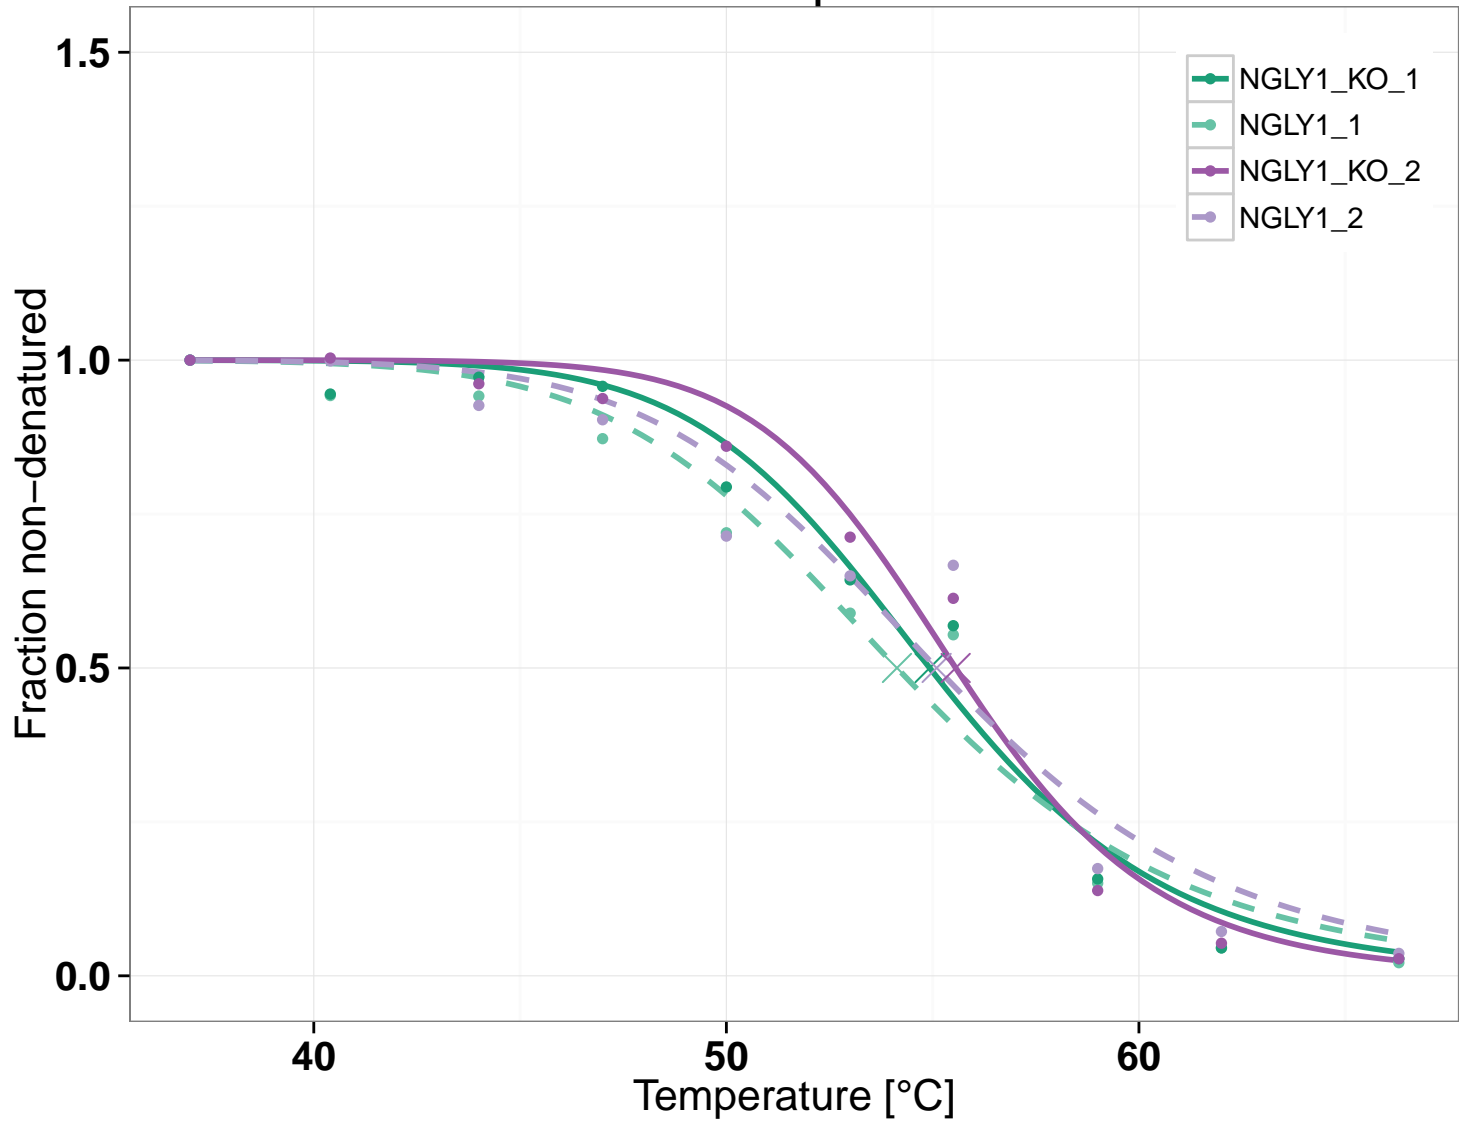

|            | meltPoint | slope  | plateau | R2   |
|------------|-----------|--------|---------|------|
| NGLY1_KO_1 | 54.93     | -0.087 | 0       | 0.98 |
| NGLY1_1    | 54.14     | -0.072 | 0       | 0.97 |
| NGLY1_KO_2 | 55.56     | -0.1   | 0       | 0.98 |
| NGLY1_2    | 55.1      | -0.072 | 0       | 0.95 |

Supplement: Supplementary file 2351 [file 1]

IPI00024050.1|LOC643319

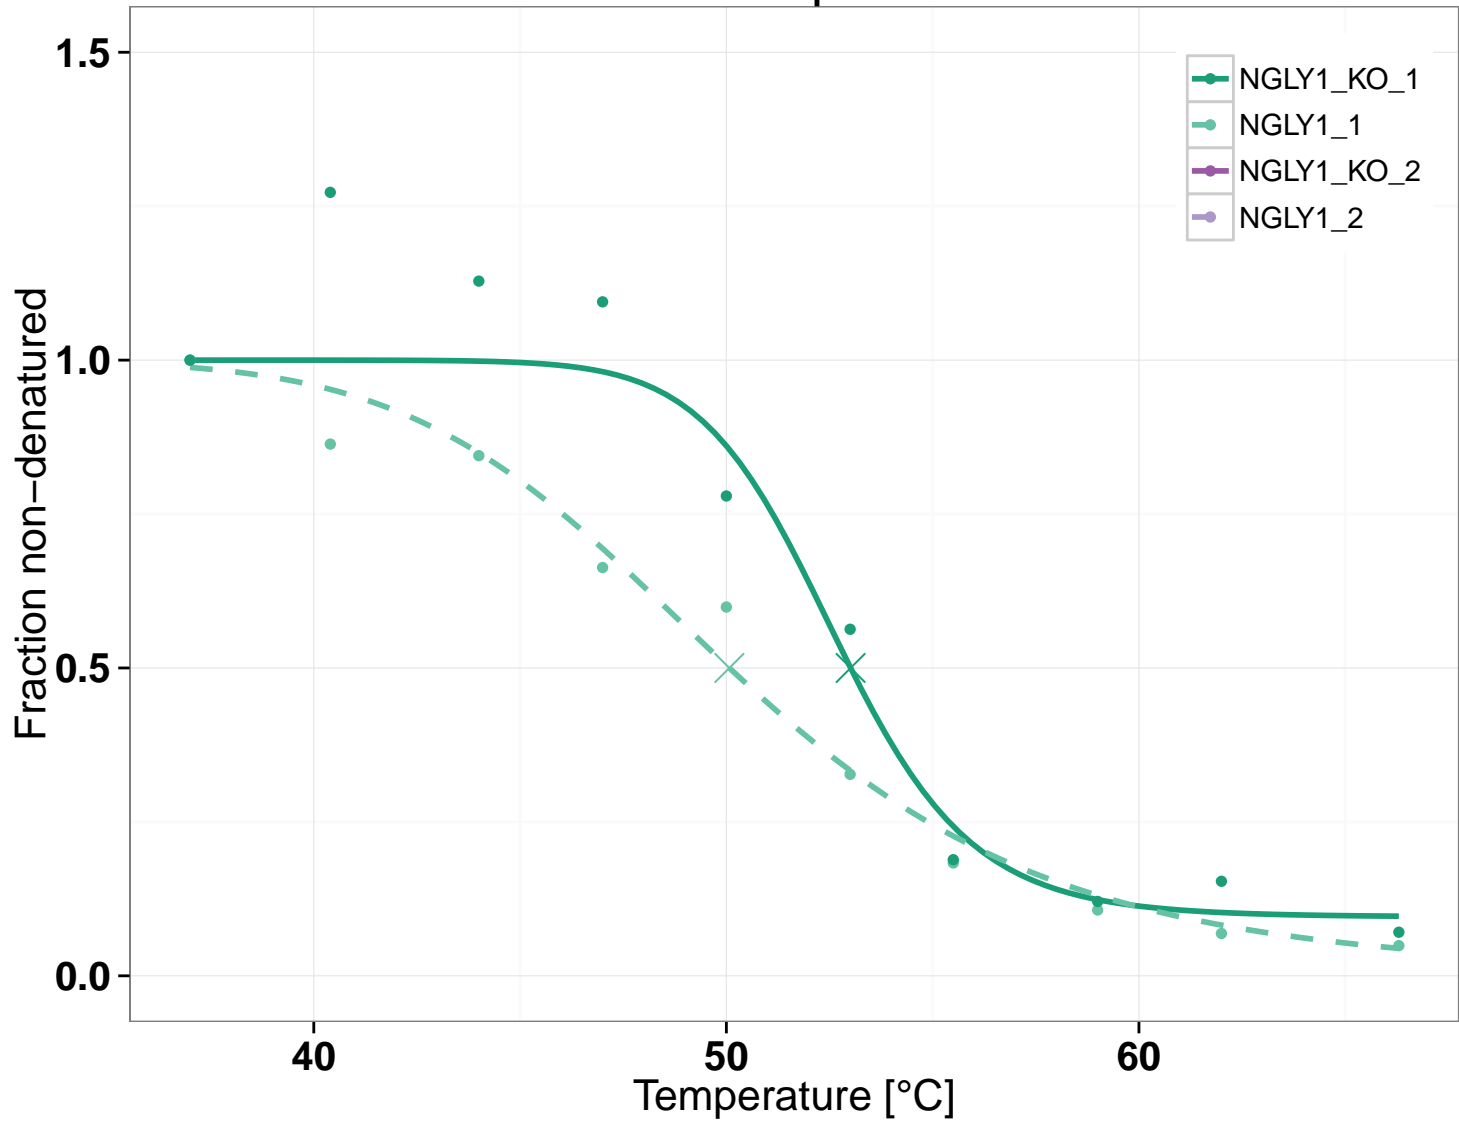

|            | meltPoint | slope  | plateau | R2   |
|------------|-----------|--------|---------|------|
| NGLY1_KO_1 | 53.01     | -0.14  | 0.1     | 0.94 |
| NGLY1_1    | 50.07     | -0.064 | 0       | 0.98 |
| NGLY1_KO_2 | -         | -      | -       | -    |
| NGLY1_2    | -         | -      | -       | -    |

Supplement: Supplementary file 2352 [file 1]

# IPI00027851.2|HEXA

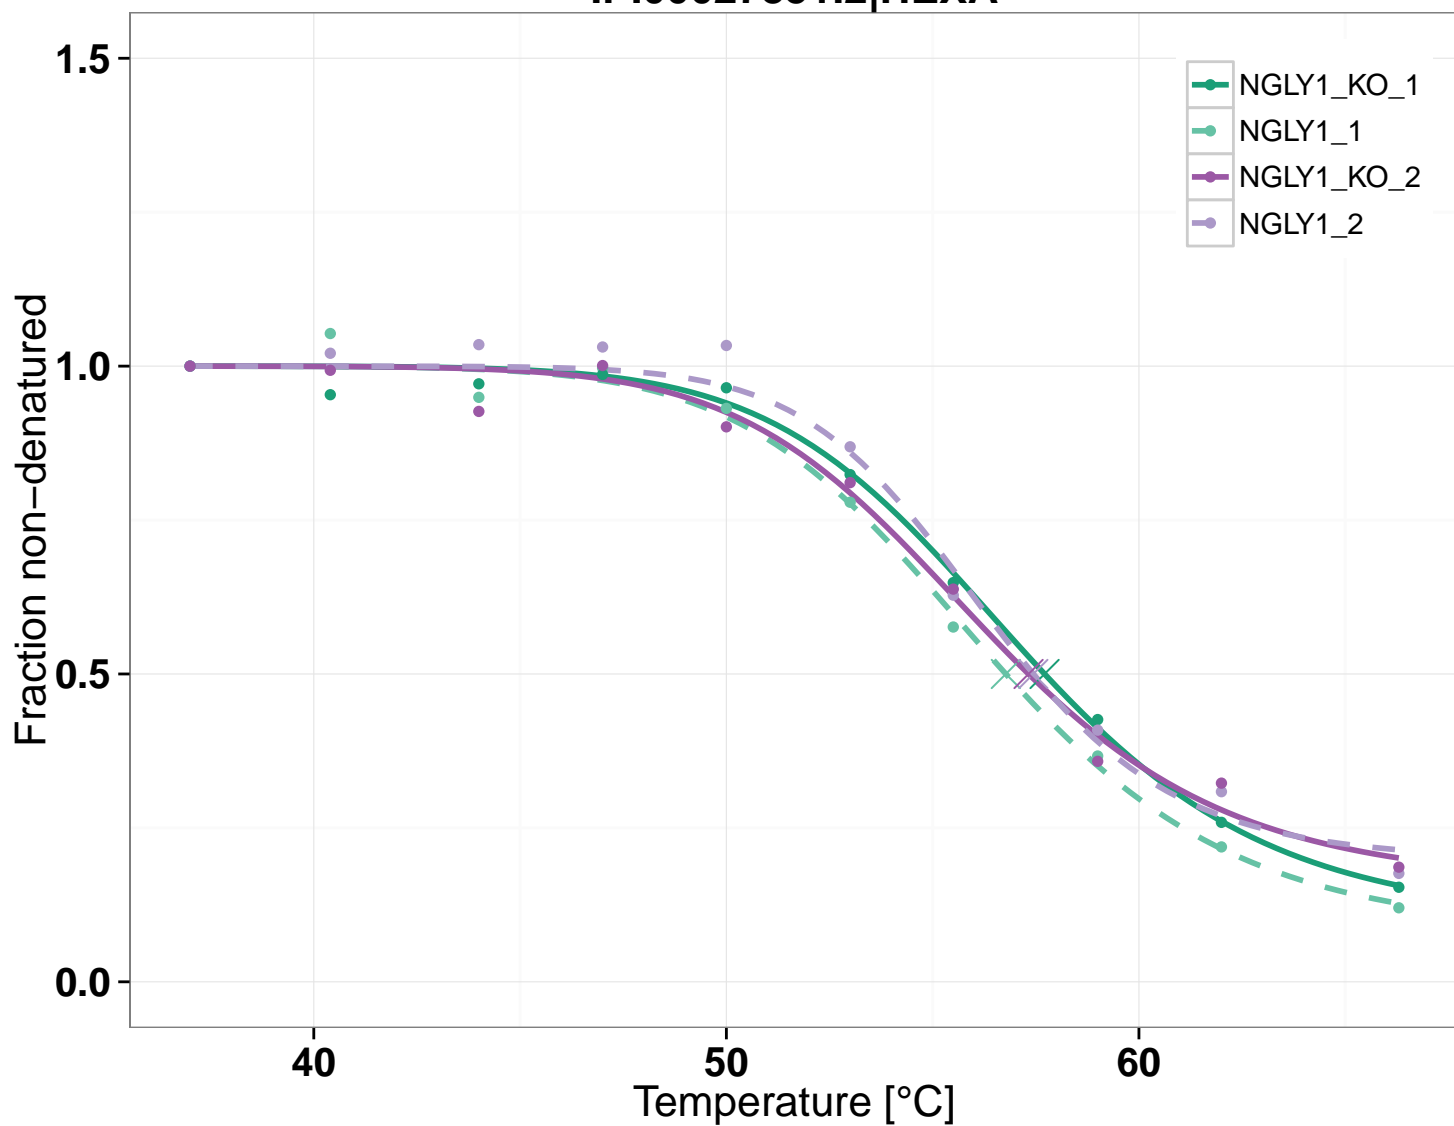

|            | meltPoint | slope  | plateau | R2   |
|------------|-----------|--------|---------|------|
| NGLY1_KO_1 | 57.71     | -0.075 | 0.09    | 1    |
| NGLY1_1    | 56.77     | -0.077 | 0.07    | 0.99 |
| NGLY1_KO_2 | 57.32     | -0.071 | 0.16    | 0.99 |
| NGLY1_2    | 57.44     | -0.09  | 0.2     | 0.99 |

Supplement: Supplementary file 2353 [file 1]

# IPI00305296.2|C12ORF44

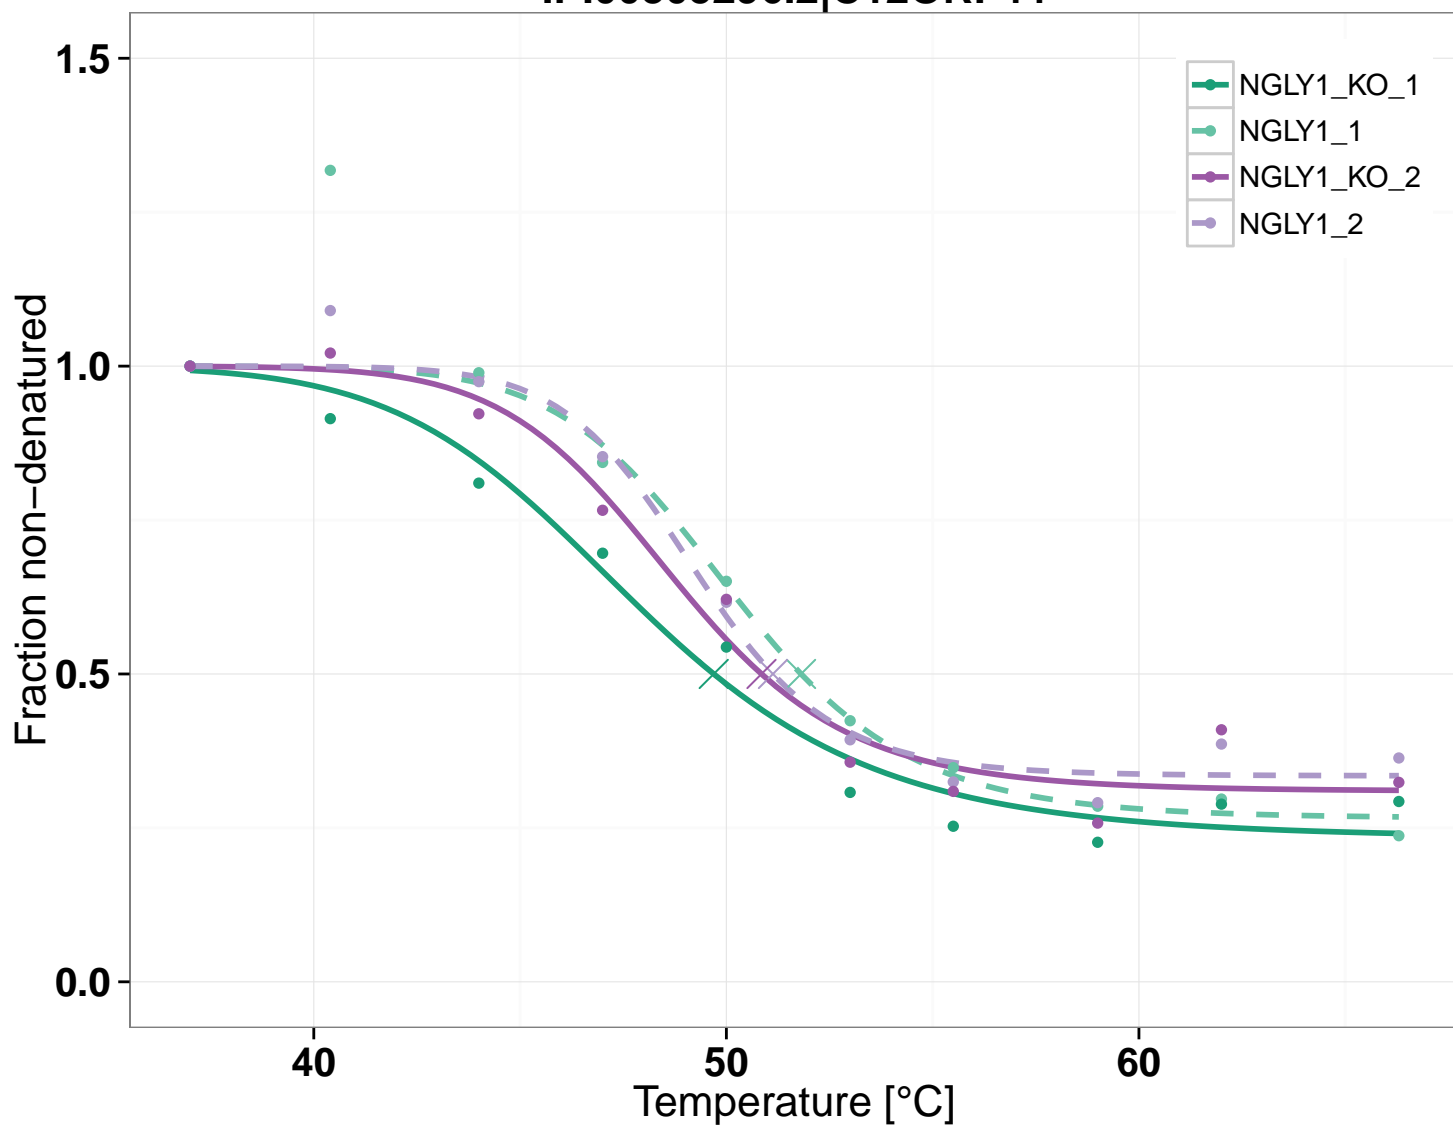

|            | meltPoint | slope  | plateau | R2   |
|------------|-----------|--------|---------|------|
| NGLY1_KO_1 | 49.69     | -0.066 | 0.23    | 0.98 |
| NGLY1_1    | 51.81     | -0.086 | 0.27    | 0.92 |
| NGLY1_KO_2 | 50.85     | -0.082 | 0.31    | 0.97 |
| NGLY1_2    | 51.13     | -0.1   | 0.33    | 0.98 |

Supplement: Supplementary file 2354 [file 1]

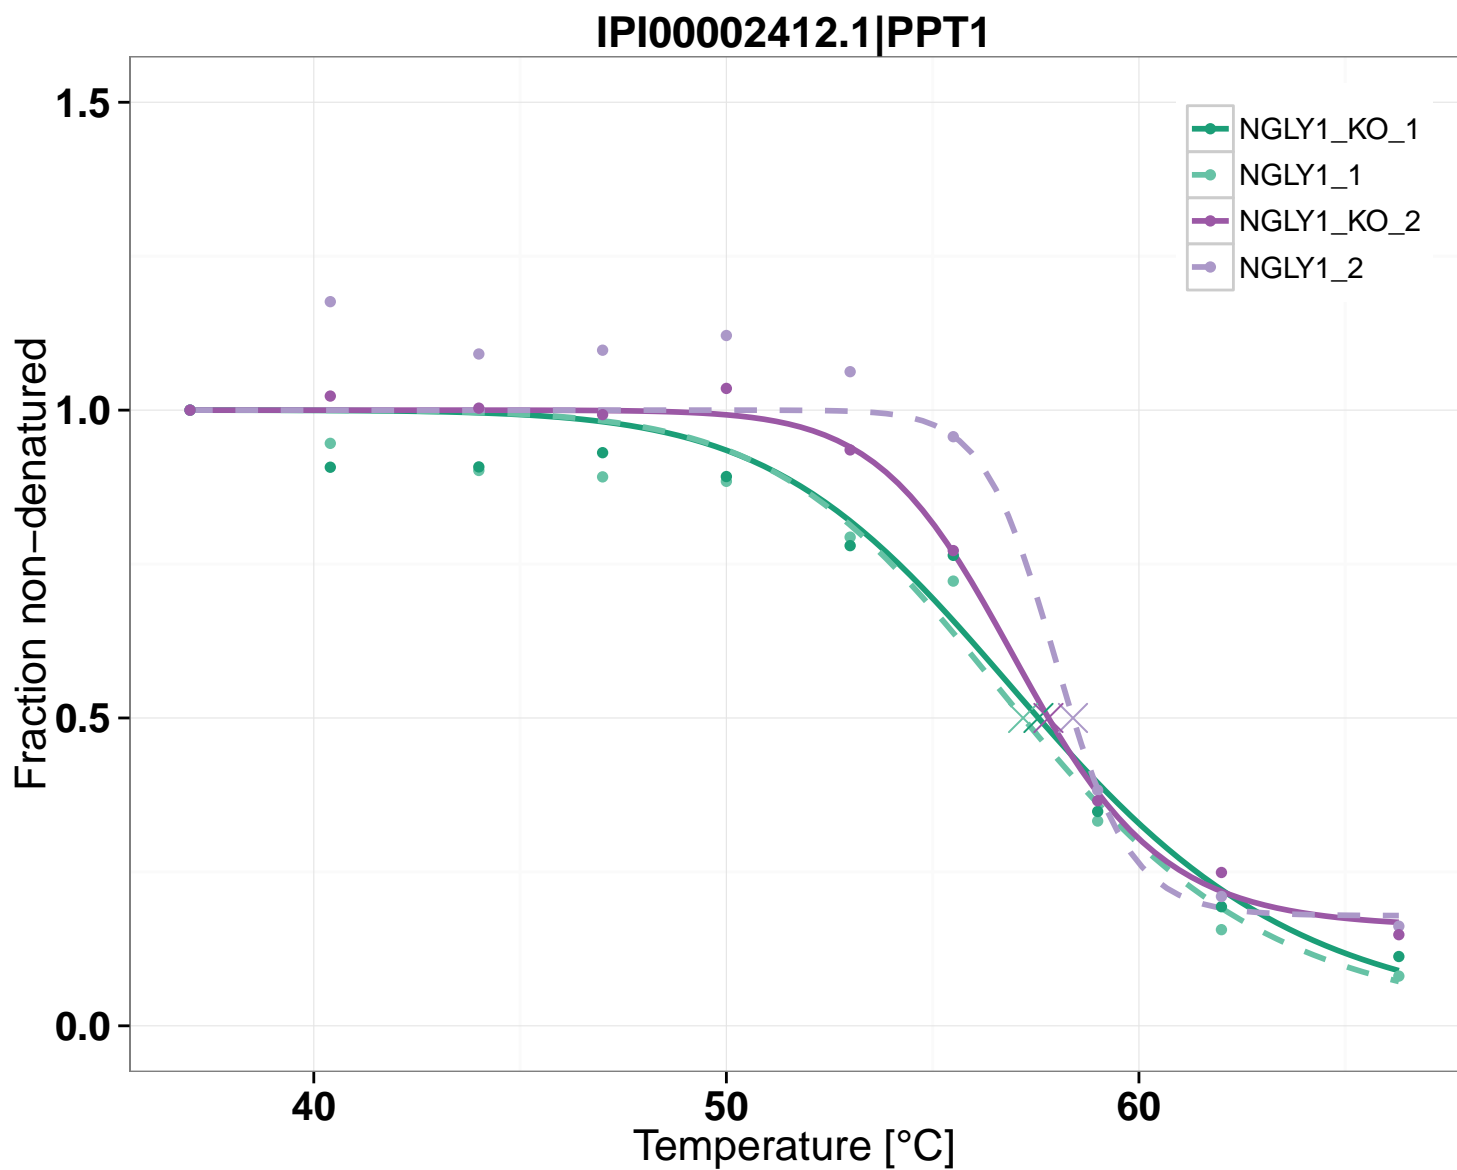

|            | meltPoint | slope  | plateau | R2   |
|------------|-----------|--------|---------|------|
| NGLY1_KO_1 | 57.56     | -0.077 | 0       | 0.96 |
| NGLY1_1    | 57.19     | -0.082 | 0       | 0.97 |
| NGLY1_KO_2 | 57.81     | -0.12  | 0.16    | 1    |
| NGLY1_2    | 58.4      | -0.23  | 0.18    | 0.95 |

Supplement: Supplementary file 2355 [file 1]

# IPI00294619.1|TFG

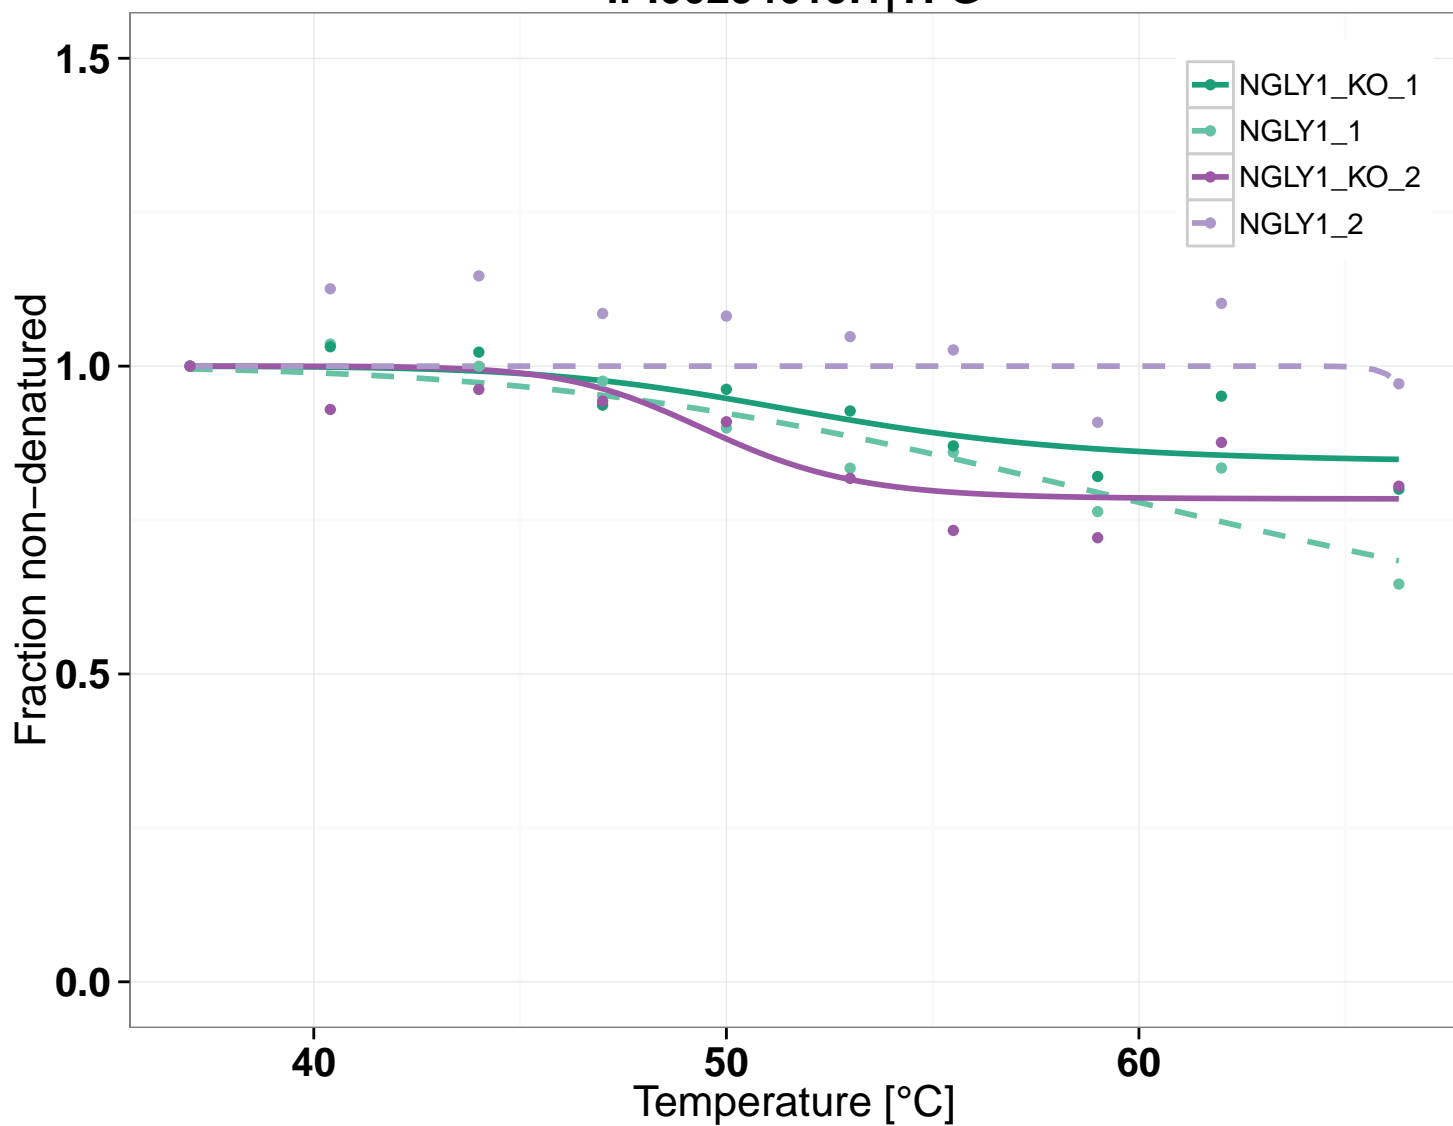

|            | meltPoint | slope  | plateau | R2    |
|------------|-----------|--------|---------|-------|
| NGLY1_KO_1 | —         | −0.012 | 0.84    | 0.69  |
| NGLY1_1    | —         | −0.016 | 0.42    | 0.87  |
| NGLY1_KO_2 | —         | −0.031 | 0.78    | 0.71  |
| NGLY1_2    | —         | —      | 0       | −0.48 |

Supplement: Supplementary file 2356 [file 1]

IPI00171701.4|ORMDL2

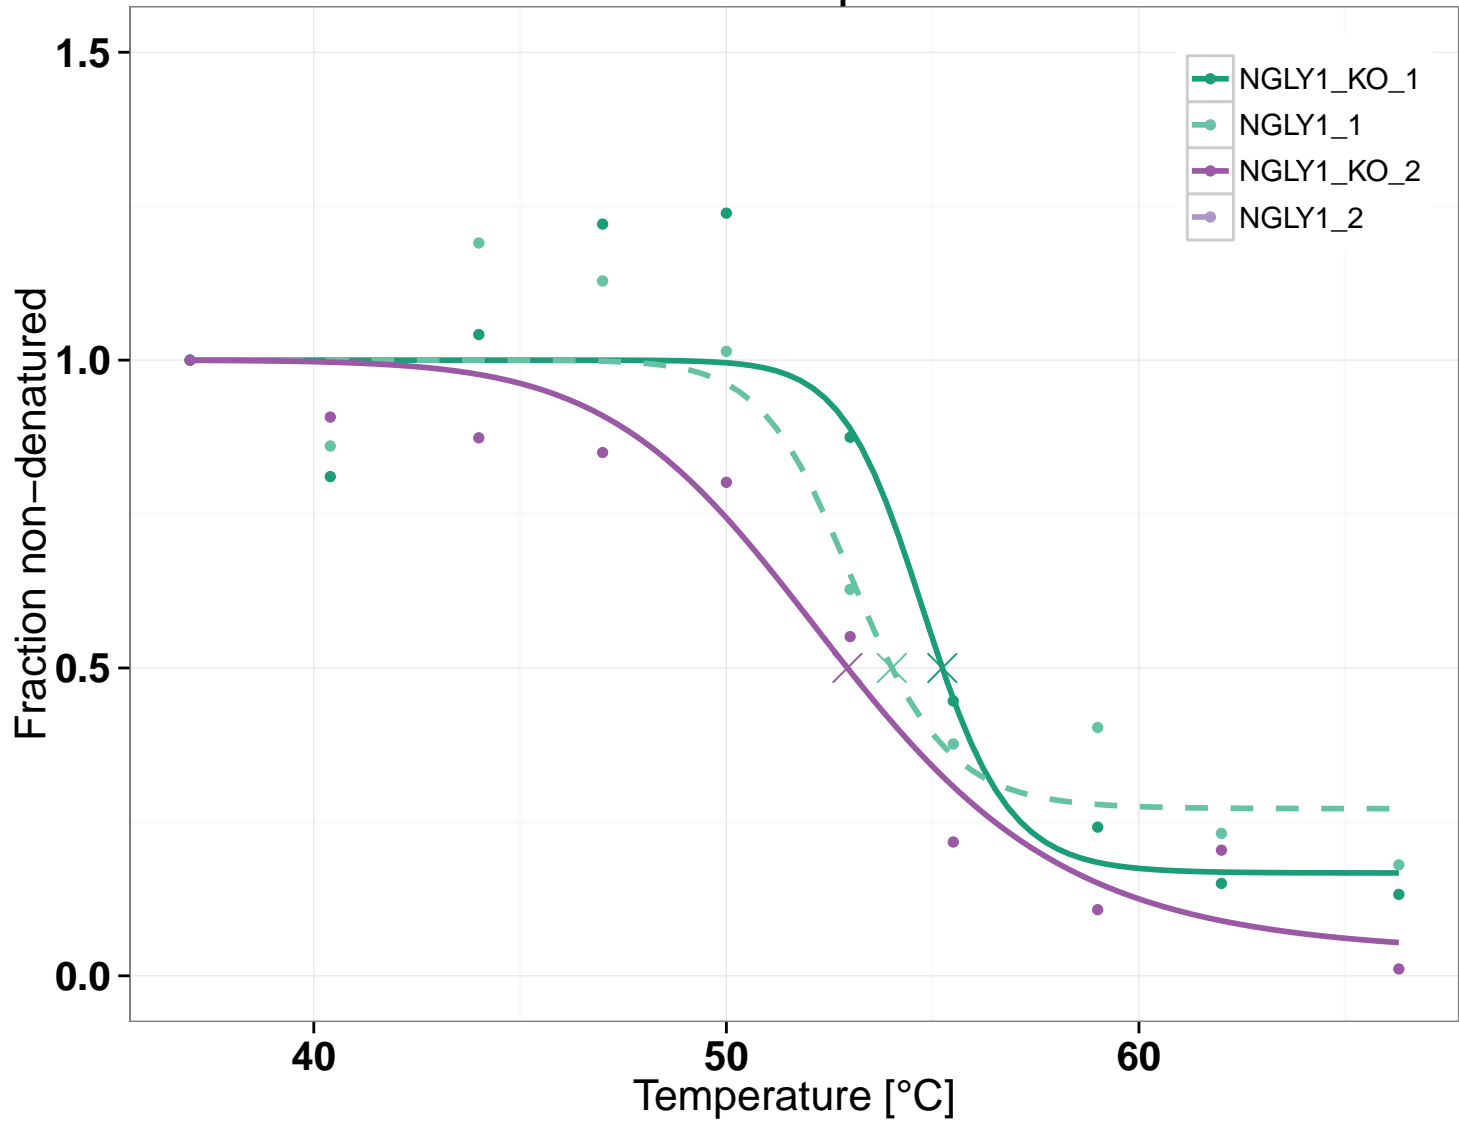

|            | meltPoint | slope  | plateau | R2   |
|------------|-----------|--------|---------|------|
| NGLY1_KO_1 | 55.23     | -0.21  | 0.17    | 0.91 |
| NGLY1_1    | 54.01     | -0.16  | 0.27    | 0.92 |
| NGLY1_KO_2 | 52.93     | -0.086 | 0.03    | 0.96 |
| NGLY1_2    | -         | -      | -       | -    |

Supplement: Supplementary file 2357 [file 1]

IPI00013010.6|WWP2

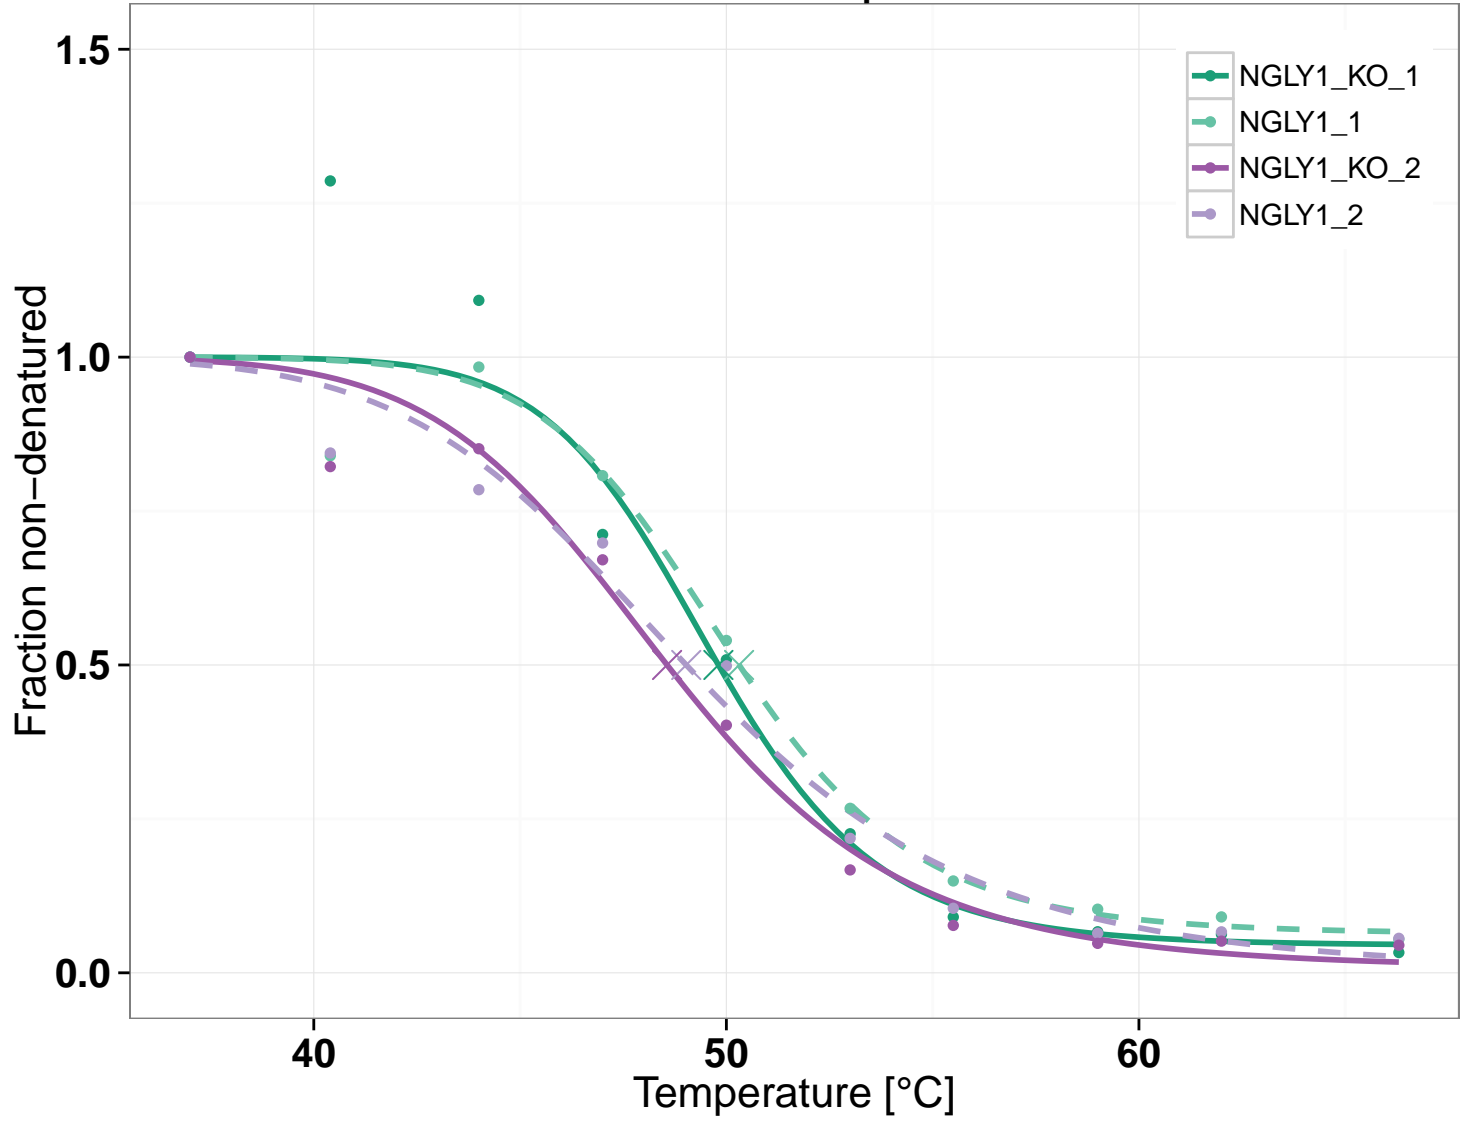

|            | meltPoint | slope  | plateau | R2   |
|------------|-----------|--------|---------|------|
| NGLY1_KO_1 | 49.81     | -0.12  | 0.04    | 0.95 |
| NGLY1_1    | 50.31     | -0.1   | 0.06    | 0.98 |
| NGLY1_KO_2 | 48.56     | -0.087 | 0.01    | 0.98 |
| NGLY1_2    | 49.03     | -0.072 | 0       | 0.98 |

Supplement: Supplementary file 2358 [file 1]

# IPI00009922.3|C14ORF156

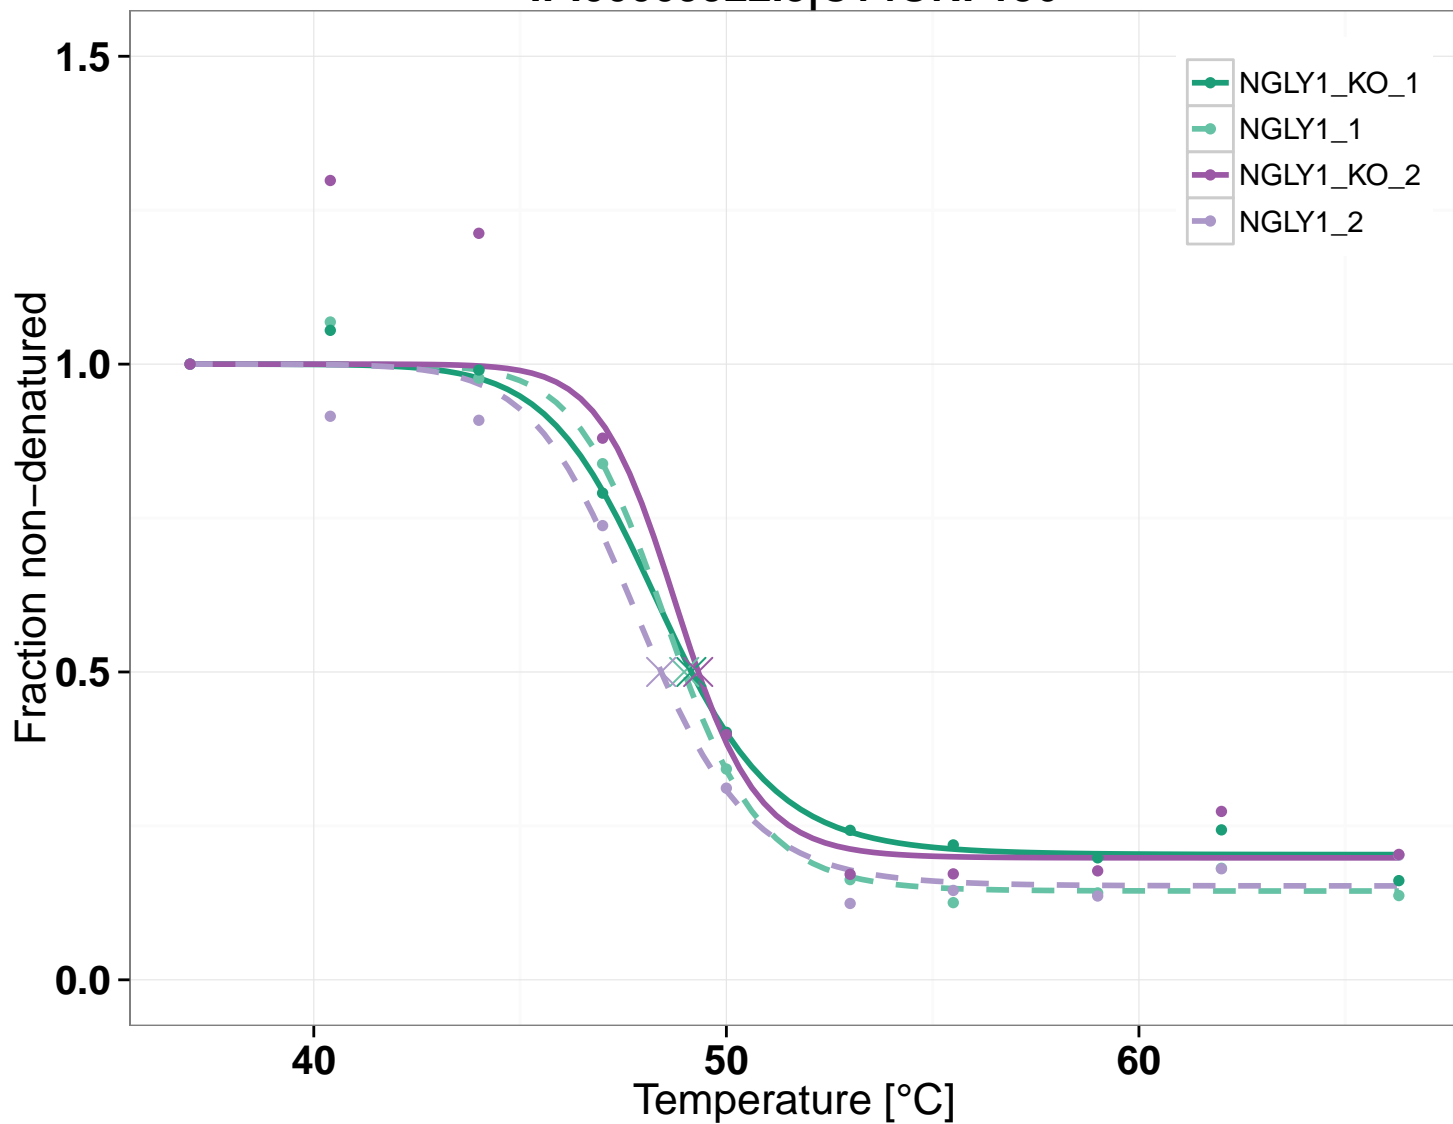

|            | meltPoint | slope | plateau | R2   |
|------------|-----------|-------|---------|------|
| NGLY1_KO_1 | 49.15     | -0.14 | 0.2     | 0.99 |
| NGLY1_1    | 48.98     | -0.19 | 0.14    | 1    |
| NGLY1_KO_2 | 49.32     | -0.21 | 0.2     | 0.93 |
| NGLY1_2    | 48.42     | -0.16 | 0.15    | 0.99 |

Supplement: Supplementary file 2359 [file 1]

IPI00479905.5|NDUFB10

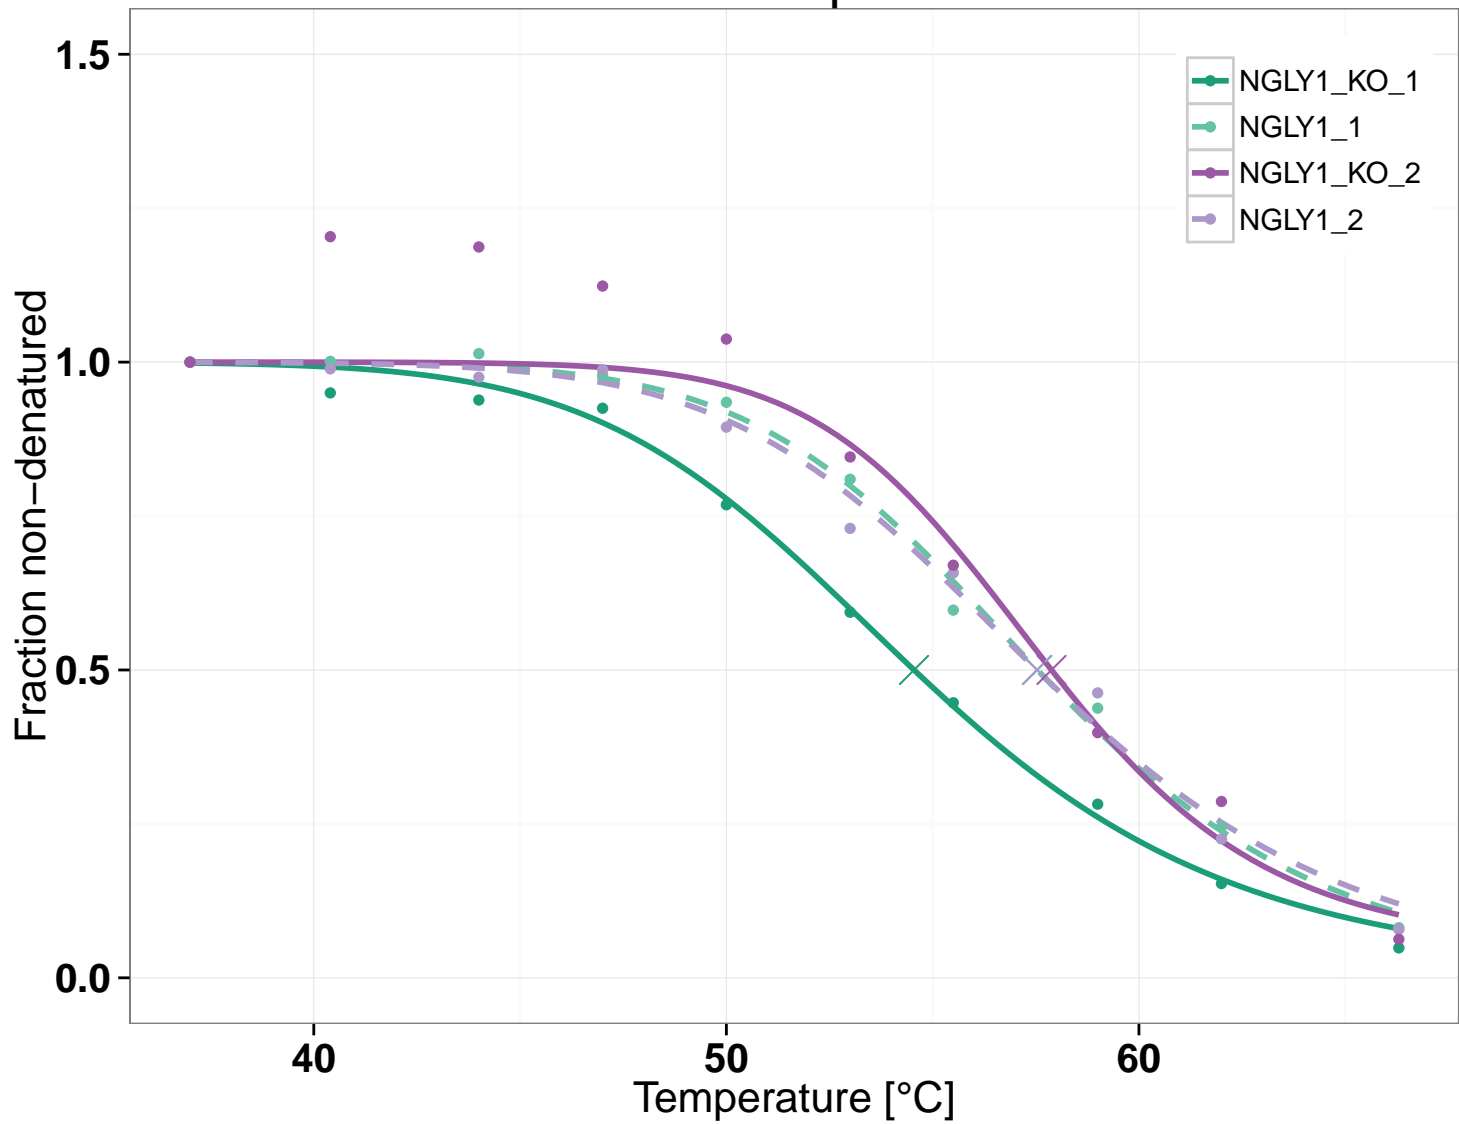

|            | meltPoint | slope  | plateau | R2   |
|------------|-----------|--------|---------|------|
| NGLY1_KO_1 | 54.55     | -0.065 | 0       | 1    |
| NGLY1_1    | 57.54     | -0.071 | 0       | 1    |
| NGLY1_KO_2 | 57.88     | -0.087 | 0.04    | 0.93 |
| NGLY1_2    | 57.53     | -0.067 | 0       | 0.99 |

Supplement: Supplementary file 2360 [file 1]

IPI00007088.6|ANAPC10

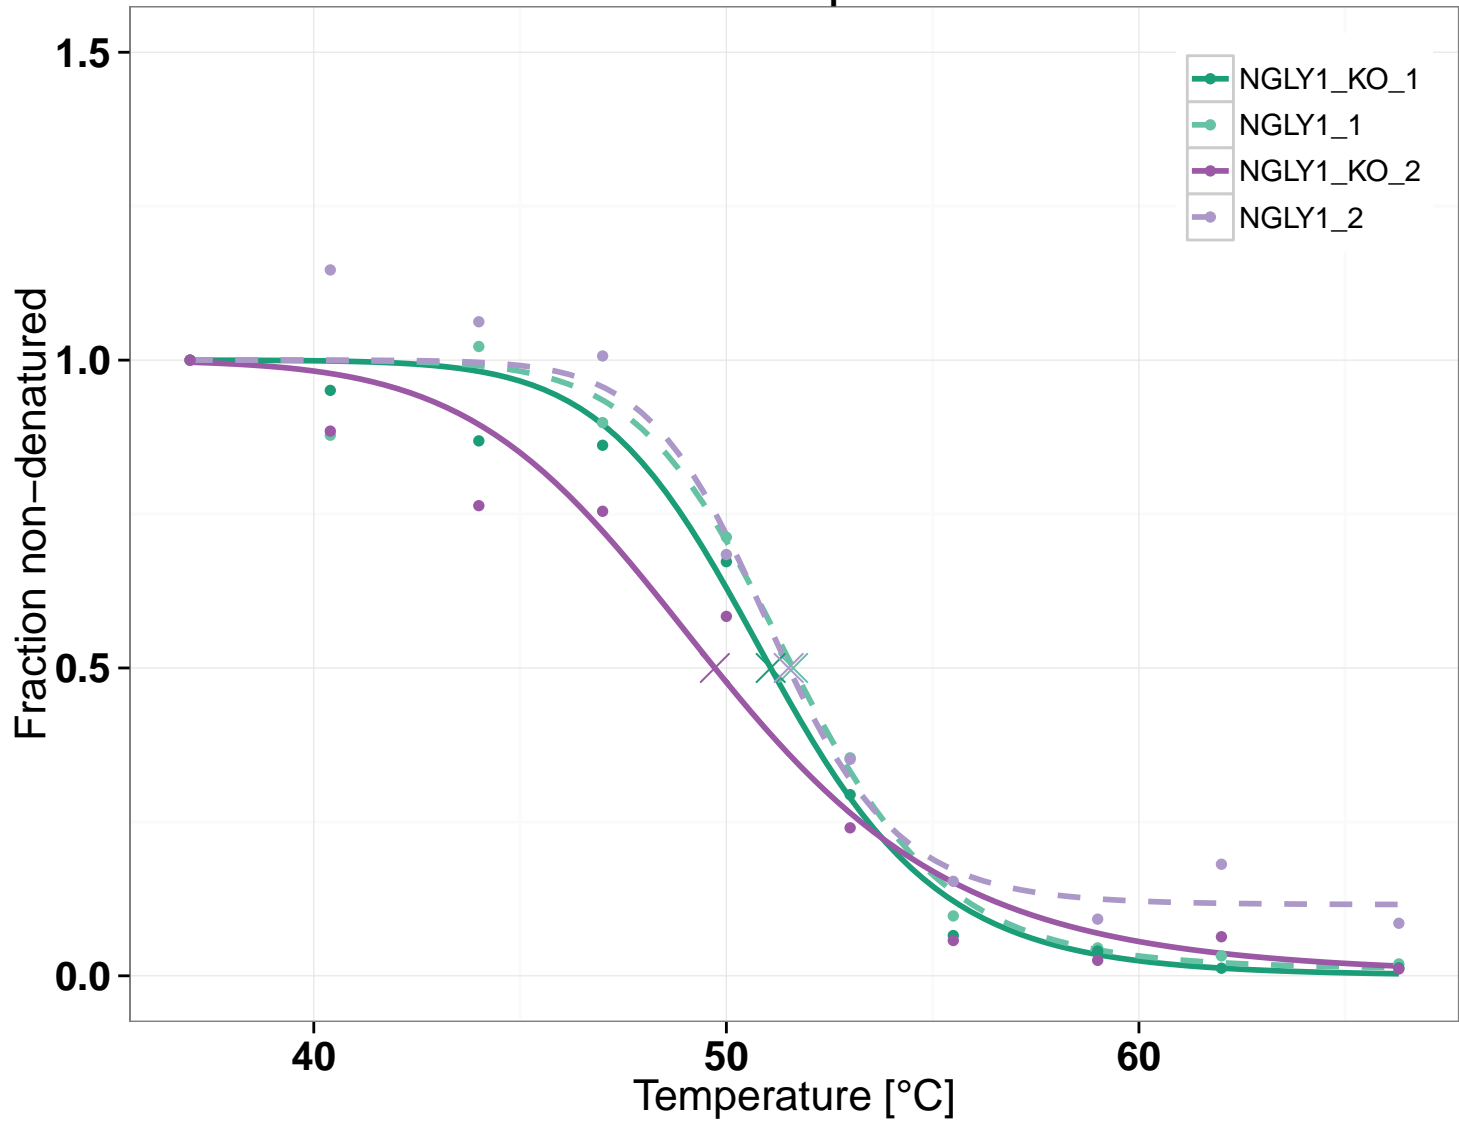

|            | meltPoint | slope  | plateau | R2   |
|------------|-----------|--------|---------|------|
| NGLY1_KO_1 | 51.07     | -0.12  | 0       | 0.99 |
| NGLY1_1    | 51.62     | -0.13  | 0.01    | 0.99 |
| NGLY1_KO_2 | 49.72     | -0.084 | 0       | 0.96 |
| NGLY1_2    | 51.51     | -0.15  | 0.12    | 0.98 |

Supplement: Supplementary file 2361 [file 1]

# IPI00848276.1|C10ORF18

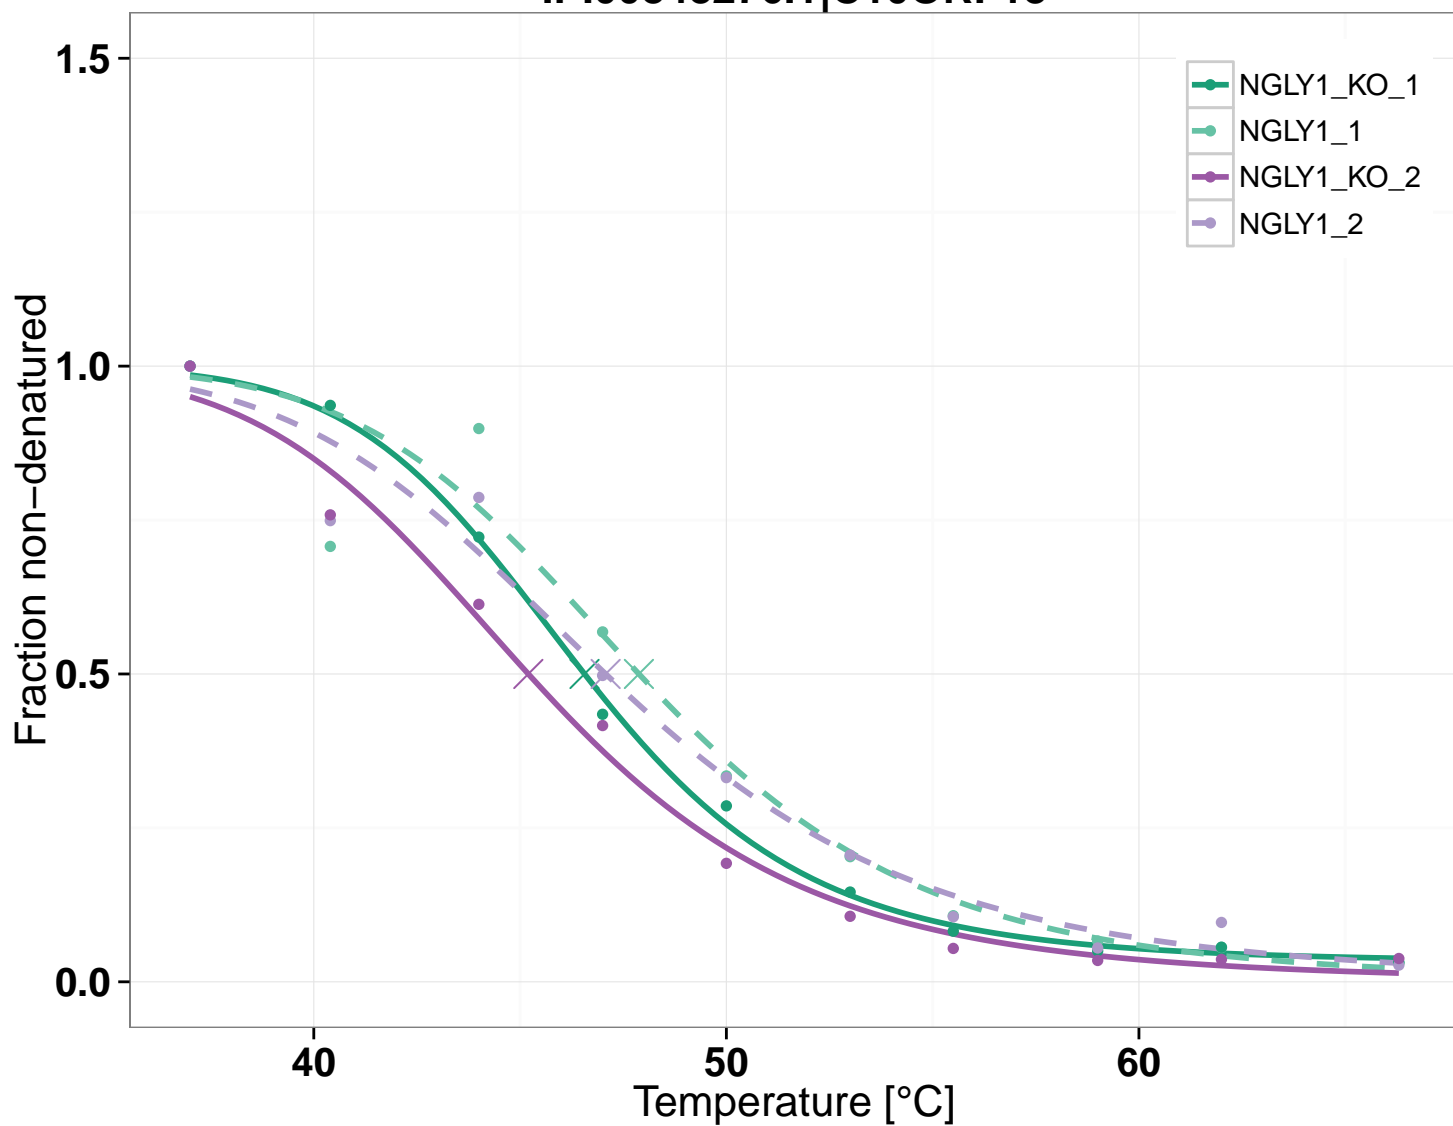

|            | meltPoint | slope  | plateau | R2   |
|------------|-----------|--------|---------|------|
| NGLY1_KO_1 | 46.56     | -0.088 | 0.03    | 1    |
| NGLY1_1    | 47.88     | -0.073 | 0       | 0.95 |
| NGLY1_KO_2 | 45.2      | -0.075 | 0       | 0.99 |
| NGLY1_2    | 47.07     | -0.065 | 0       | 0.97 |

Supplement: Supplementary file 2362 [file 1]

# IPI00385532.1|CAPZB

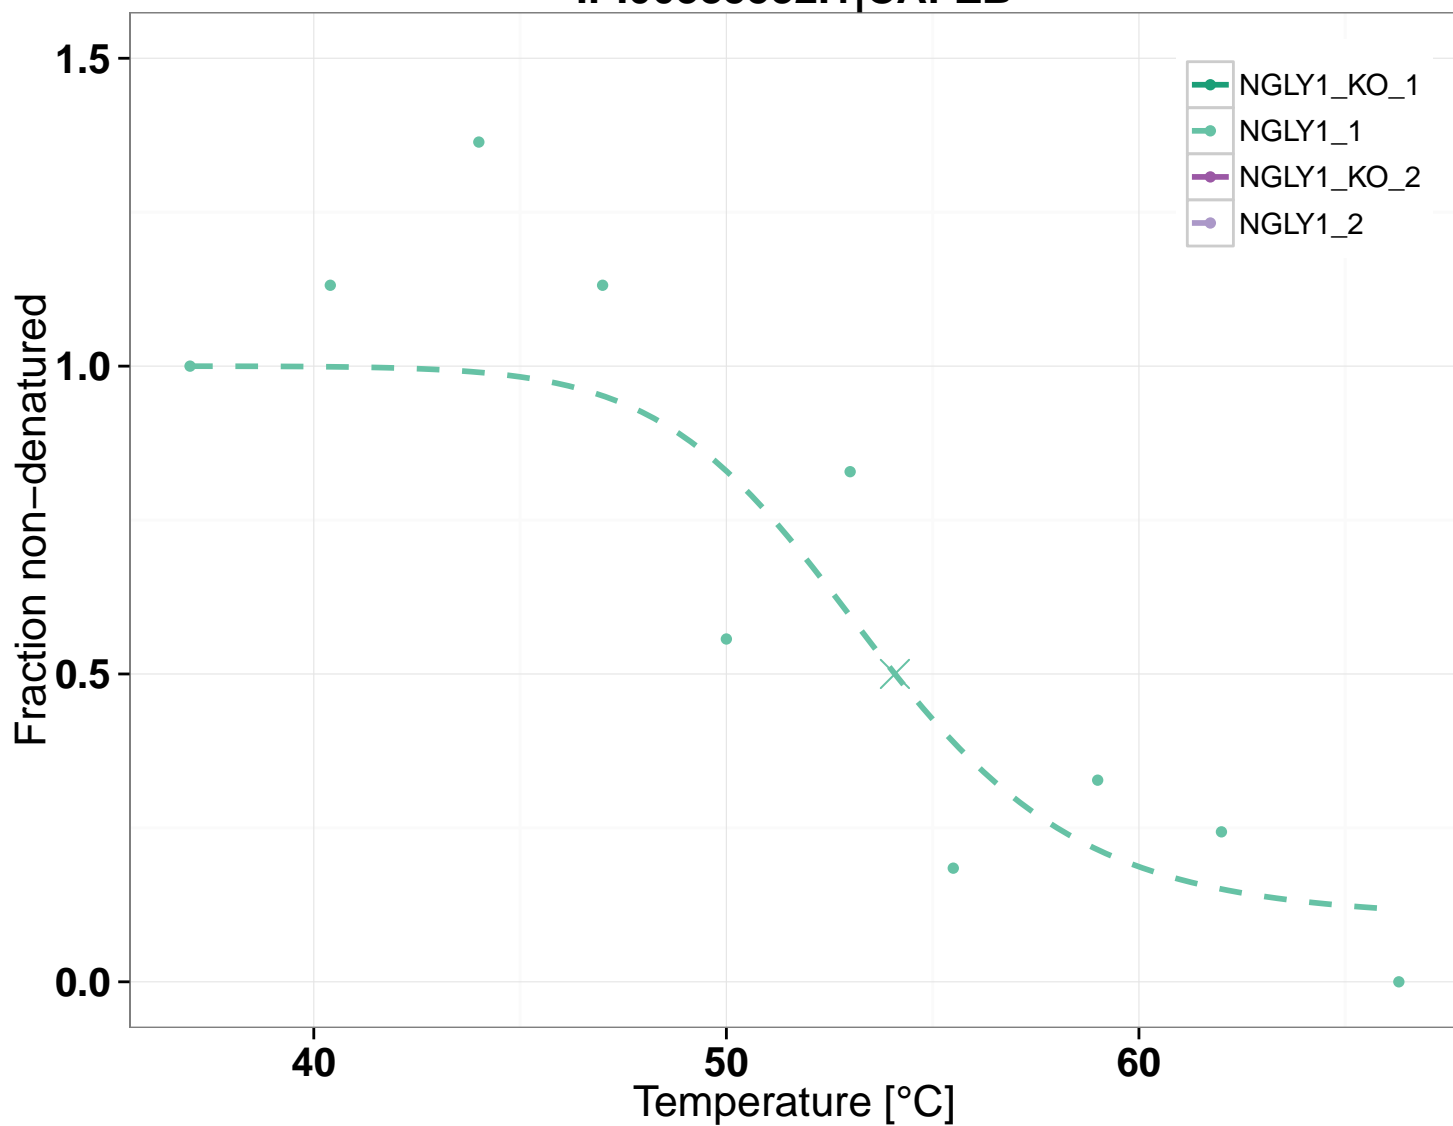

|            | meltPoint | slope  | plateau | R2   |
|------------|-----------|--------|---------|------|
| NGLY1_KO_1 | —         | —      | —       | —    |
| NGLY1_1    | 54.09     | -0.088 | 0.1     | 0.81 |
| NGLY1_KO_2 | —         | —      | —       | —    |
| NGLY1_2    | —         | —      | —       | —    |

Supplement: Supplementary file 2363 [file 1]

# IPI00301364.3|SKP1

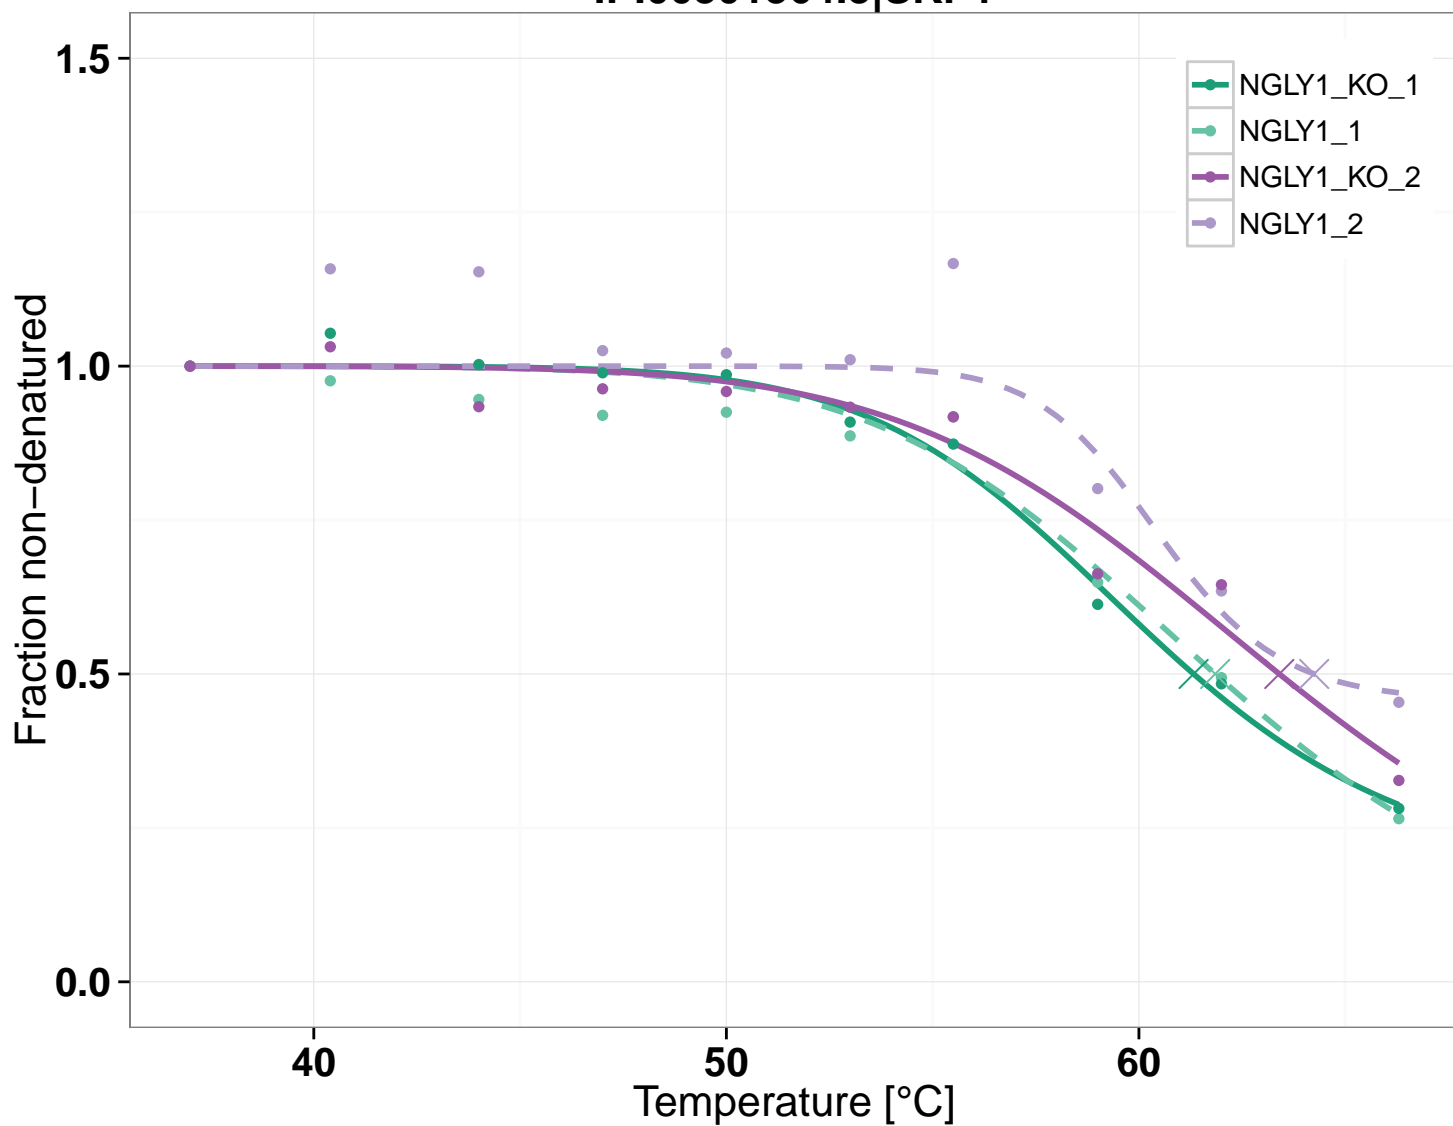

|            | meltPoint | slope  | plateau | R2   |
|------------|-----------|--------|---------|------|
| NGLY1_KO_1 | 61.33     | -0.064 | 0.16    | 0.99 |
| NGLY1_1    | 61.85     | -0.06  | 0       | 0.97 |
| NGLY1_KO_2 | 63.4      | -0.055 | 0       | 0.96 |
| NGLY1_2    | 64.25     | -0.093 | 0.45    | 0.83 |

Supplement: Supplementary file 2364 [file 1]

# IPI00216057.5|SORD

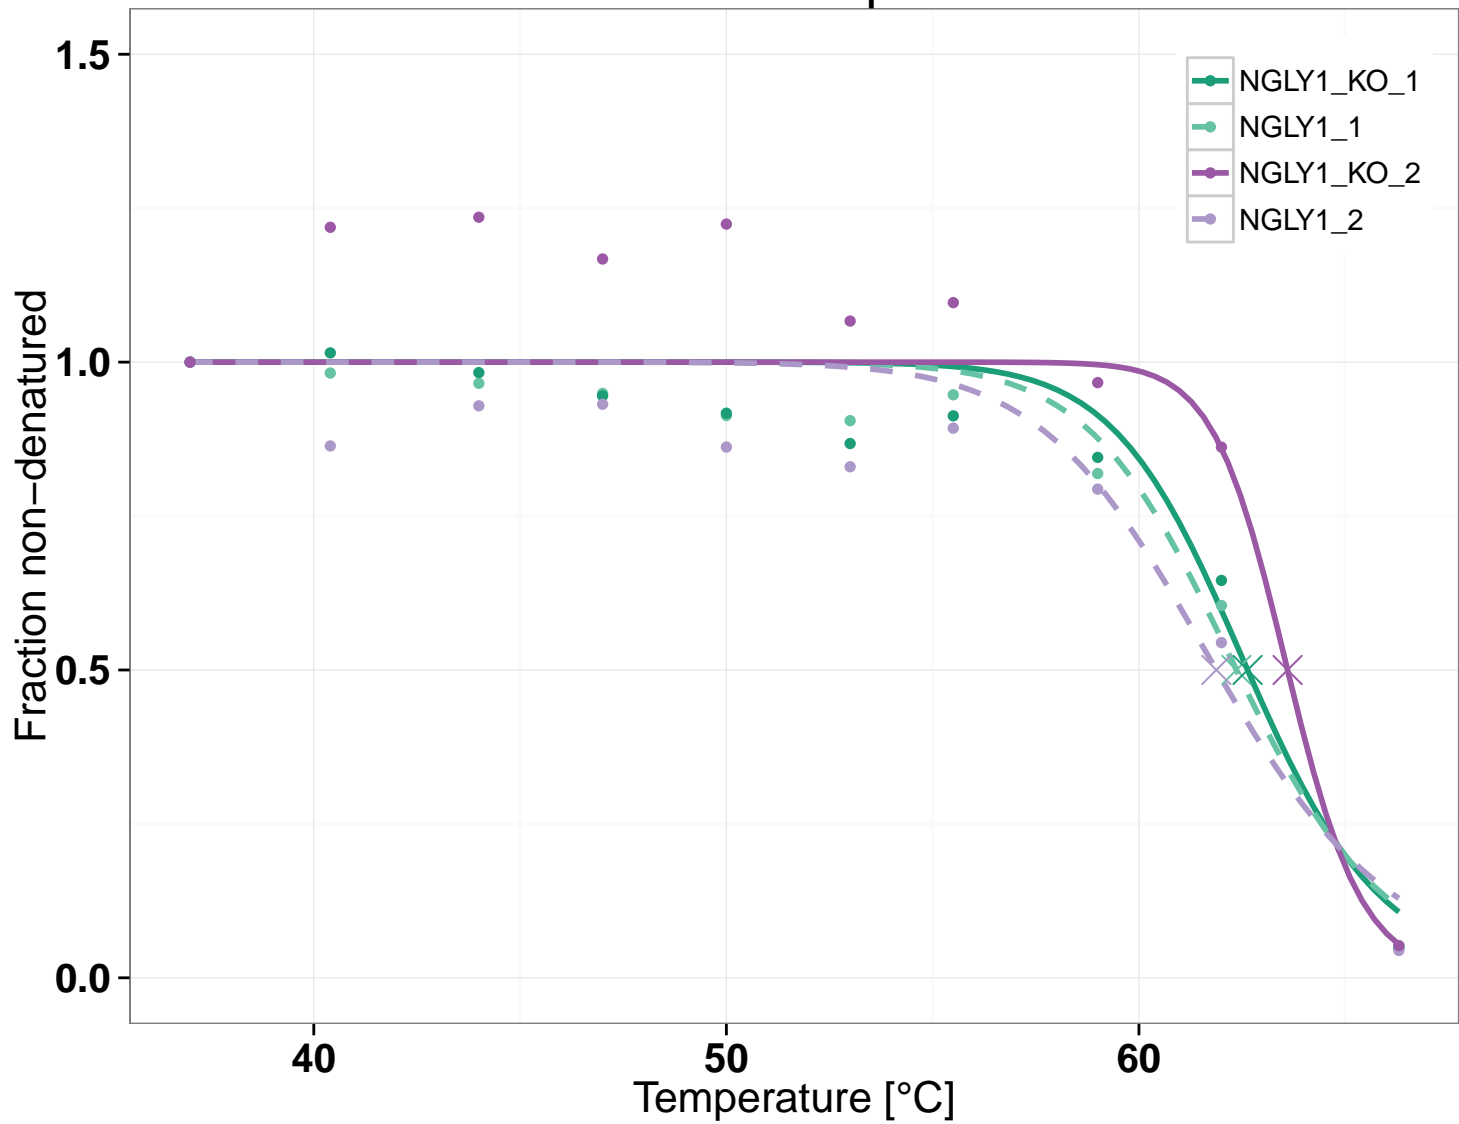

|            | meltPoint | slope | plateau | R2   |
|------------|-----------|-------|---------|------|
| NGLY1_KO_1 | 62.63     | -0.15 | 0       | 0.94 |
| NGLY1_1    | 62.36     | -0.14 | 0       | 0.96 |
| NGLY1_KO_2 | 63.6      | -0.28 | 0       | 0.82 |
| NGLY1_2    | 61.88     | -0.12 | 0       | 0.88 |

Supplement: Supplementary file 2365 [file 1]

# IPI00220219.6|COPB2

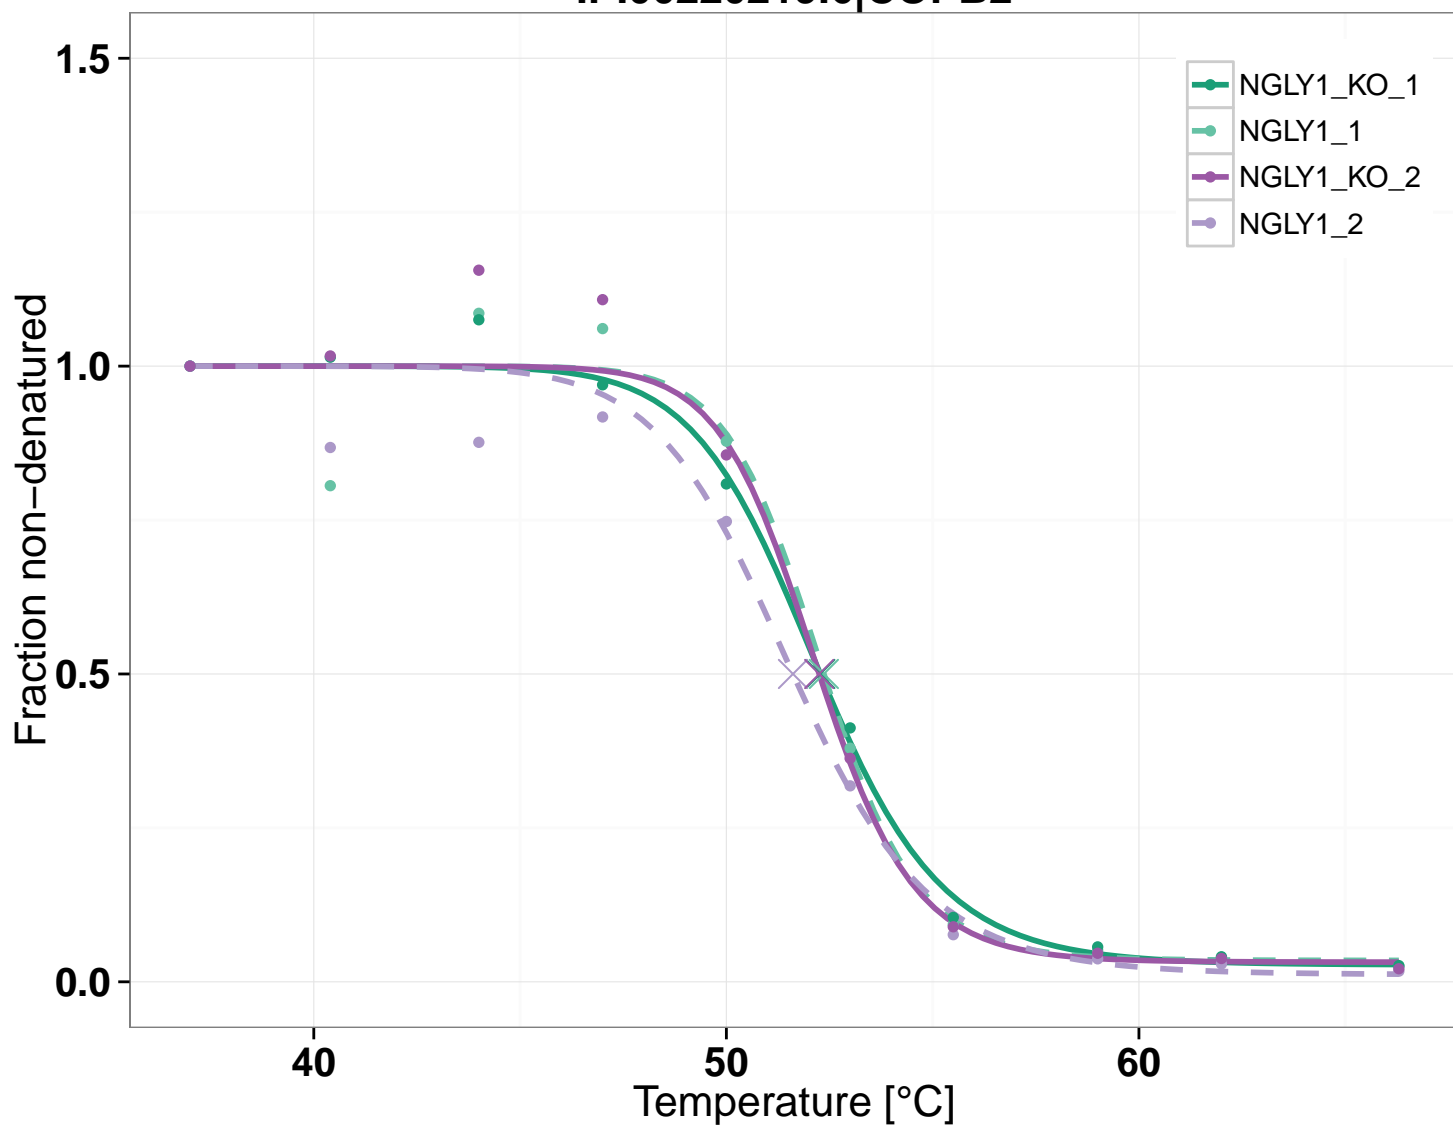

|            | meltPoint | slope | plateau | R2   |
|------------|-----------|-------|---------|------|
| NGLY1_KO_1 | 52.28     | -0.16 | 0.03    | 1    |
| NGLY1_1    | 52.36     | -0.21 | 0.03    | 0.97 |
| NGLY1_KO_2 | 52.25     | -0.21 | 0.03    | 0.98 |
| NGLY1_2    | 51.61     | -0.15 | 0.01    | 0.98 |

Supplement: Supplementary file 2366 [file 1]

IPI00299517.3|FAM175B

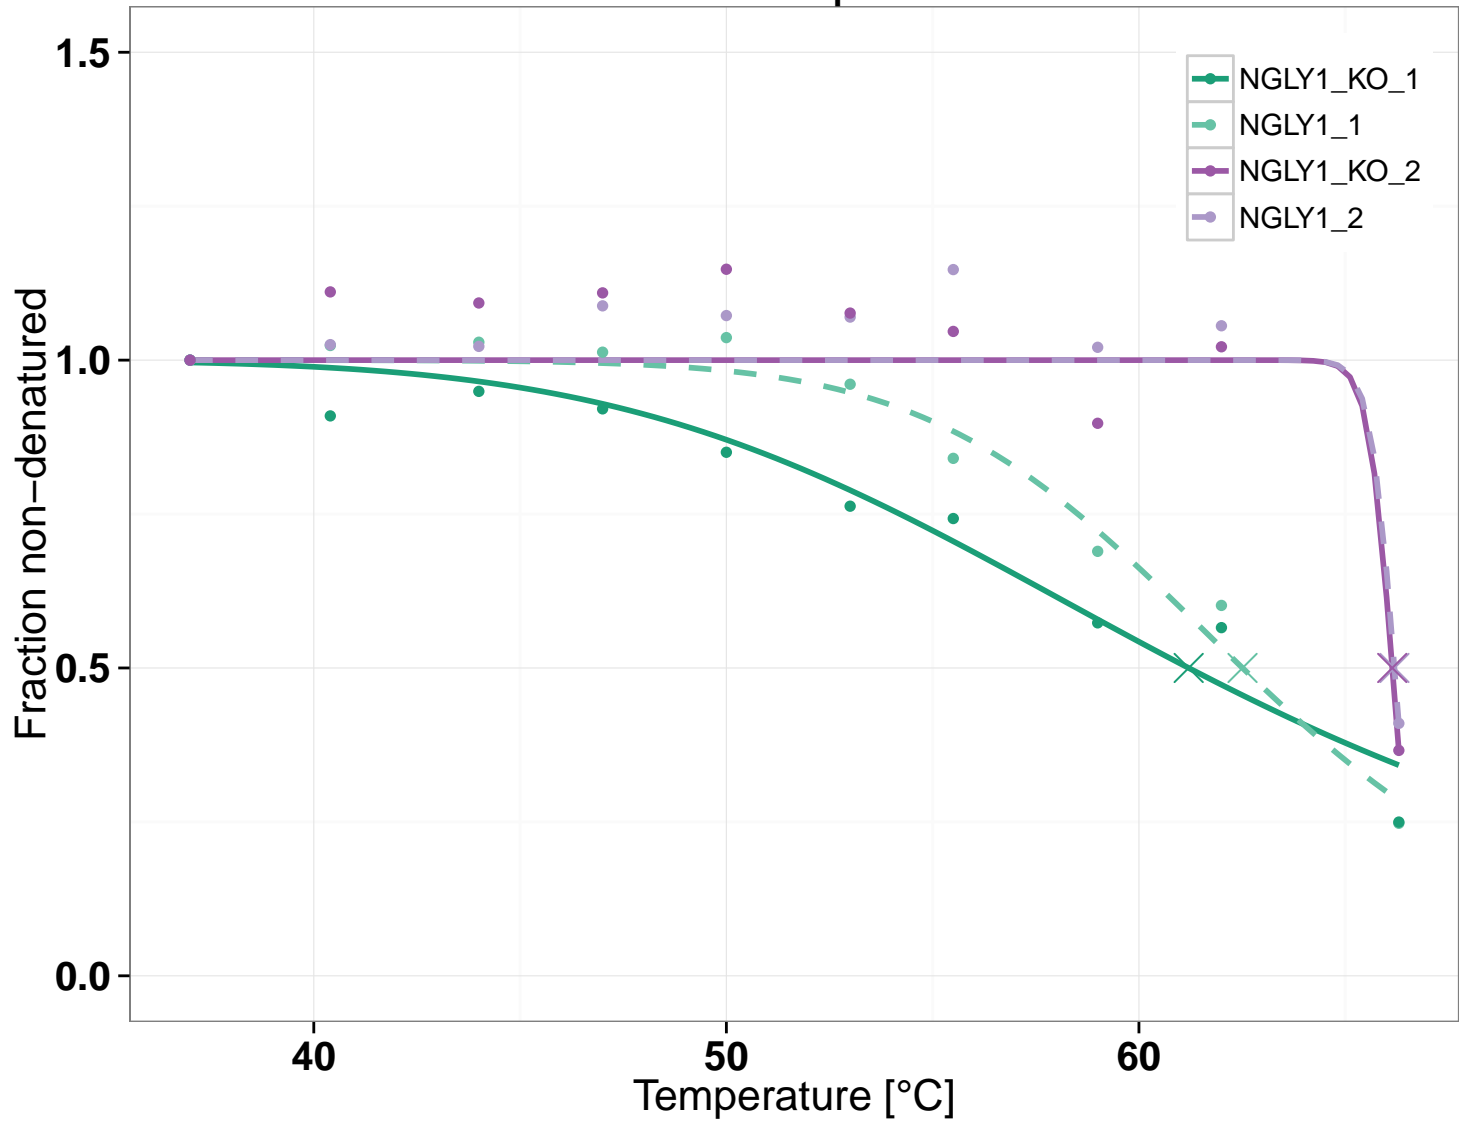

|            | meltPoint | slope  | plateau | R2   |
|------------|-----------|--------|---------|------|
| NGLY1_KO_1 | 61.21     | -0.037 | 0       | 0.95 |
| NGLY1_1    | 62.51     | -0.065 | 0       | 0.98 |
| NGLY1_KO_2 | 66.14     | -0.86  | 0       | 0.84 |
| NGLY1_2    | 66.19     | -0.86  | 0       | 0.89 |

Supplement: Supplementary file 2367 [file 1]

# IPI00032830.2|REXO2

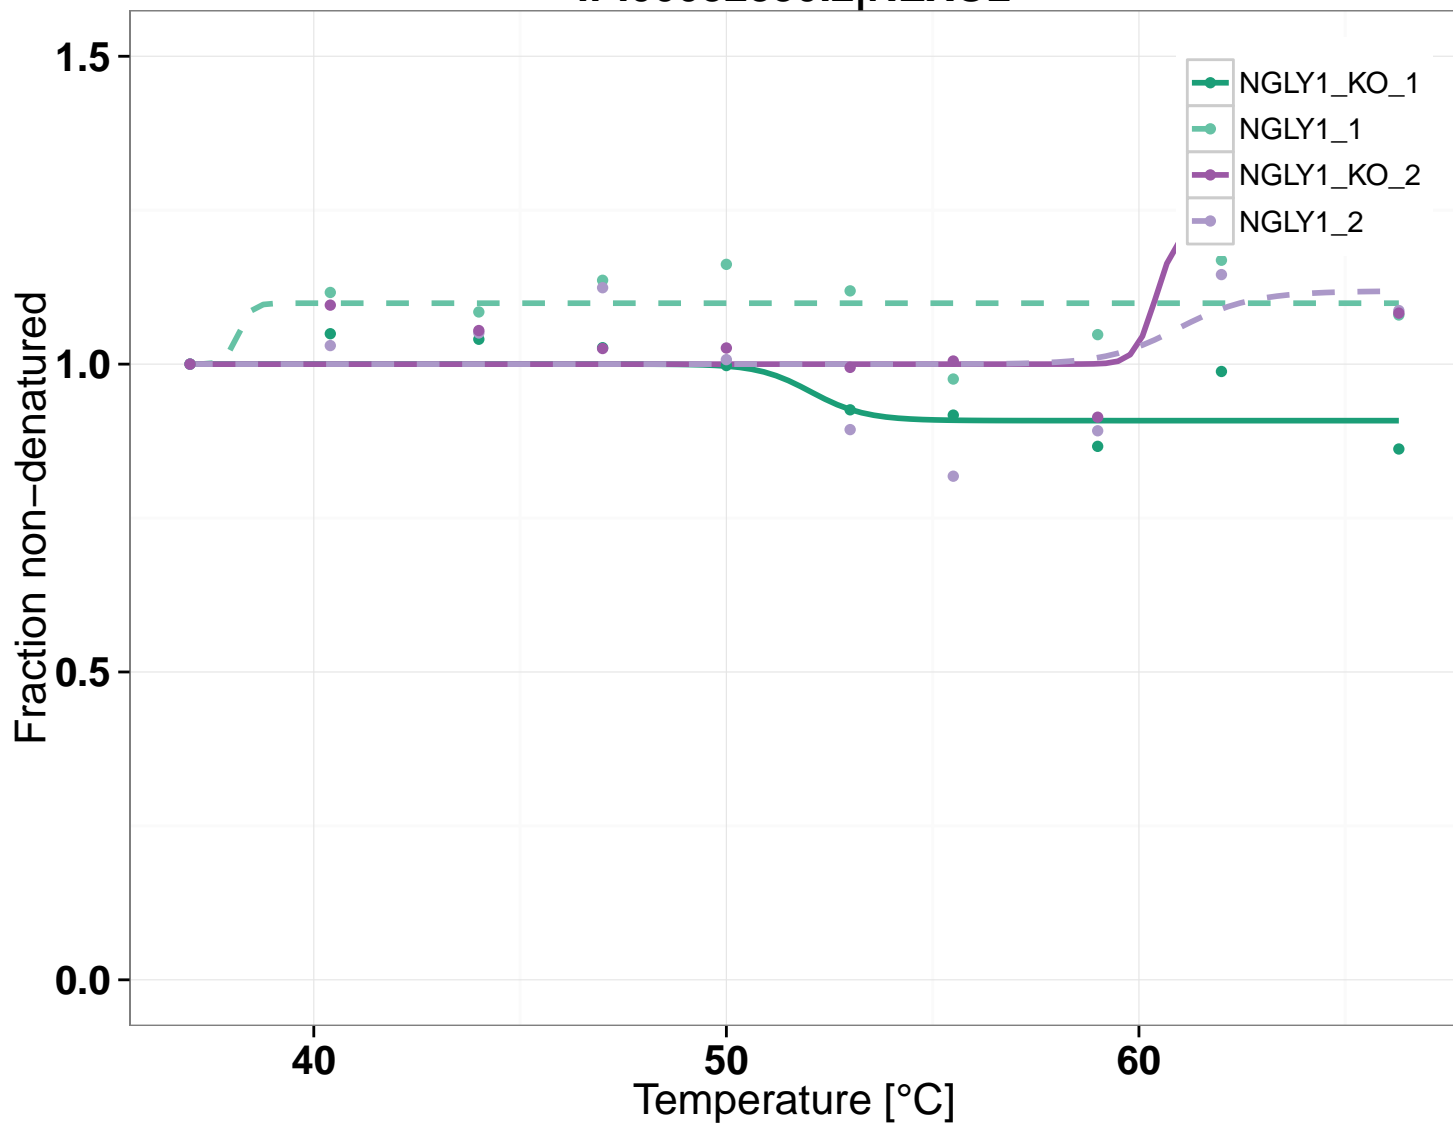

|            | meltPoint | slope  | plateau | R2   |
|------------|-----------|--------|---------|------|
| NGLY1_KO_1 | –         | –0.035 | 0.91    | 0.65 |
| NGLY1_1    | –         | 0.16   | 1.1     | 0.23 |
| NGLY1_KO_2 | –         | 0.22   | 1.22    | 0.53 |
| NGLY1_2    | –         | 0.034  | 1.12    | 0.21 |

Supplement: Supplementary file 2368 [file 1]

IPI00150881.3|C6ORF204

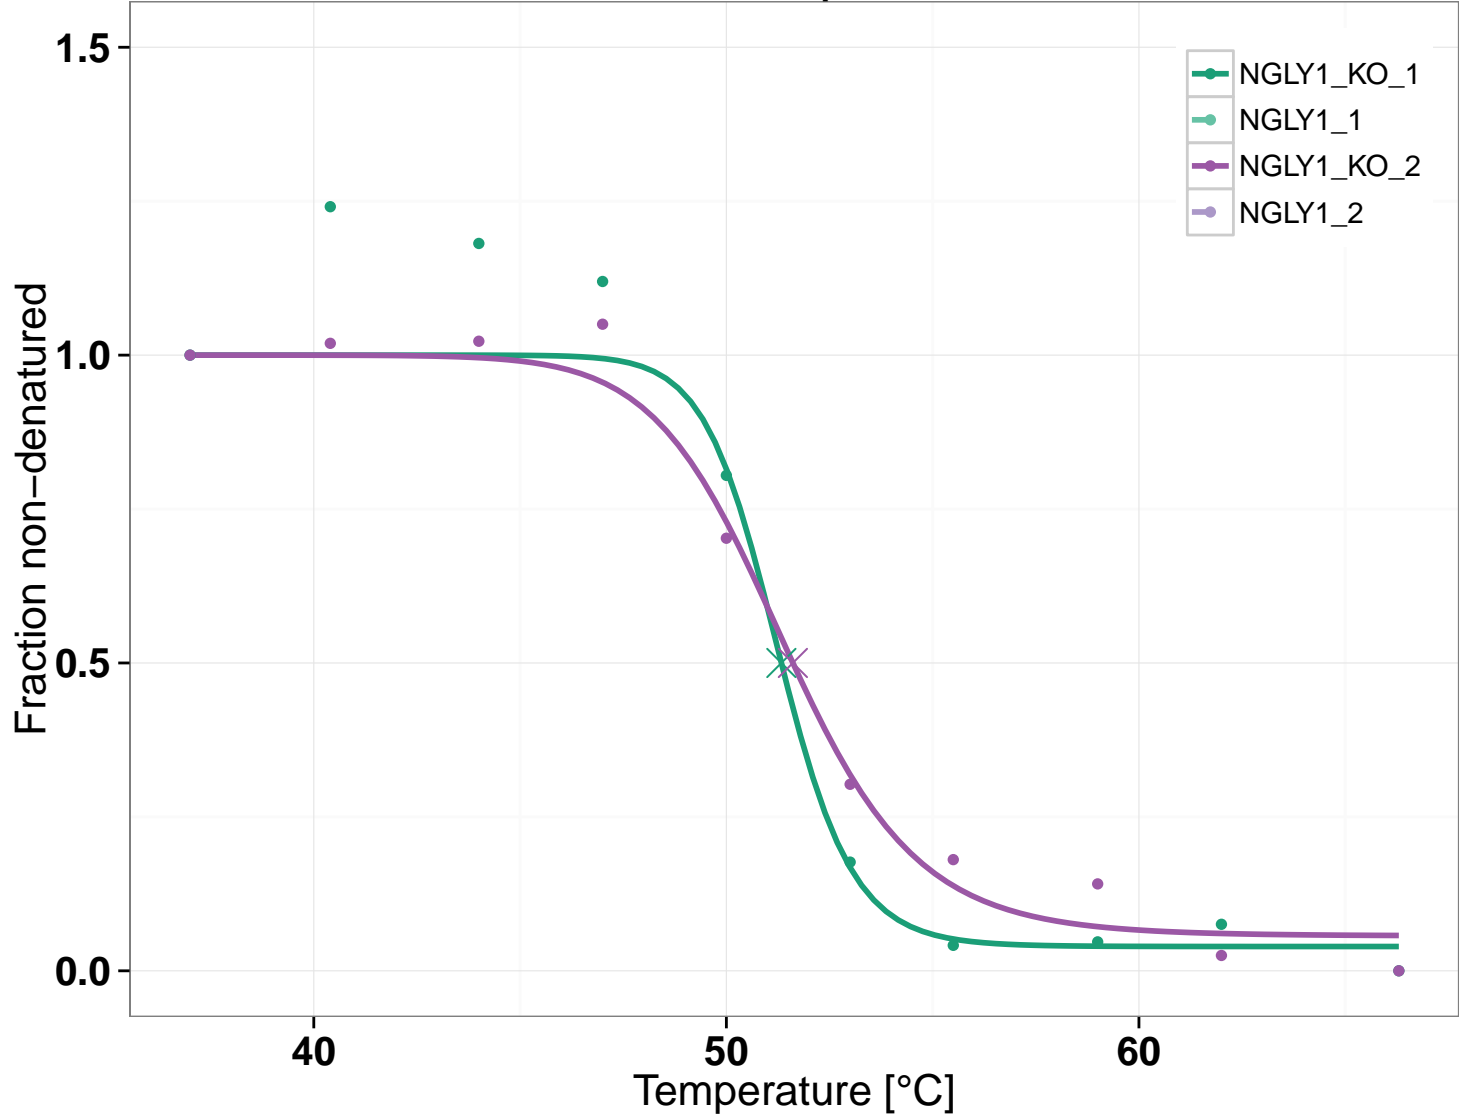

|            | meltPoint | slope | plateau | R2   |
|------------|-----------|-------|---------|------|
| NGLY1_KO_1 | 51.33     | -0.27 | 0.04    | 0.96 |
| NGLY1_1    | -         | -     | -       | -    |
| NGLY1_KO_2 | 51.61     | -0.15 | 0.06    | 0.99 |
| NGLY1_2    | -         | -     | -       | -    |

Supplement: Supplementary file 2369 [file 1]

IPI00027996.1|CORO7

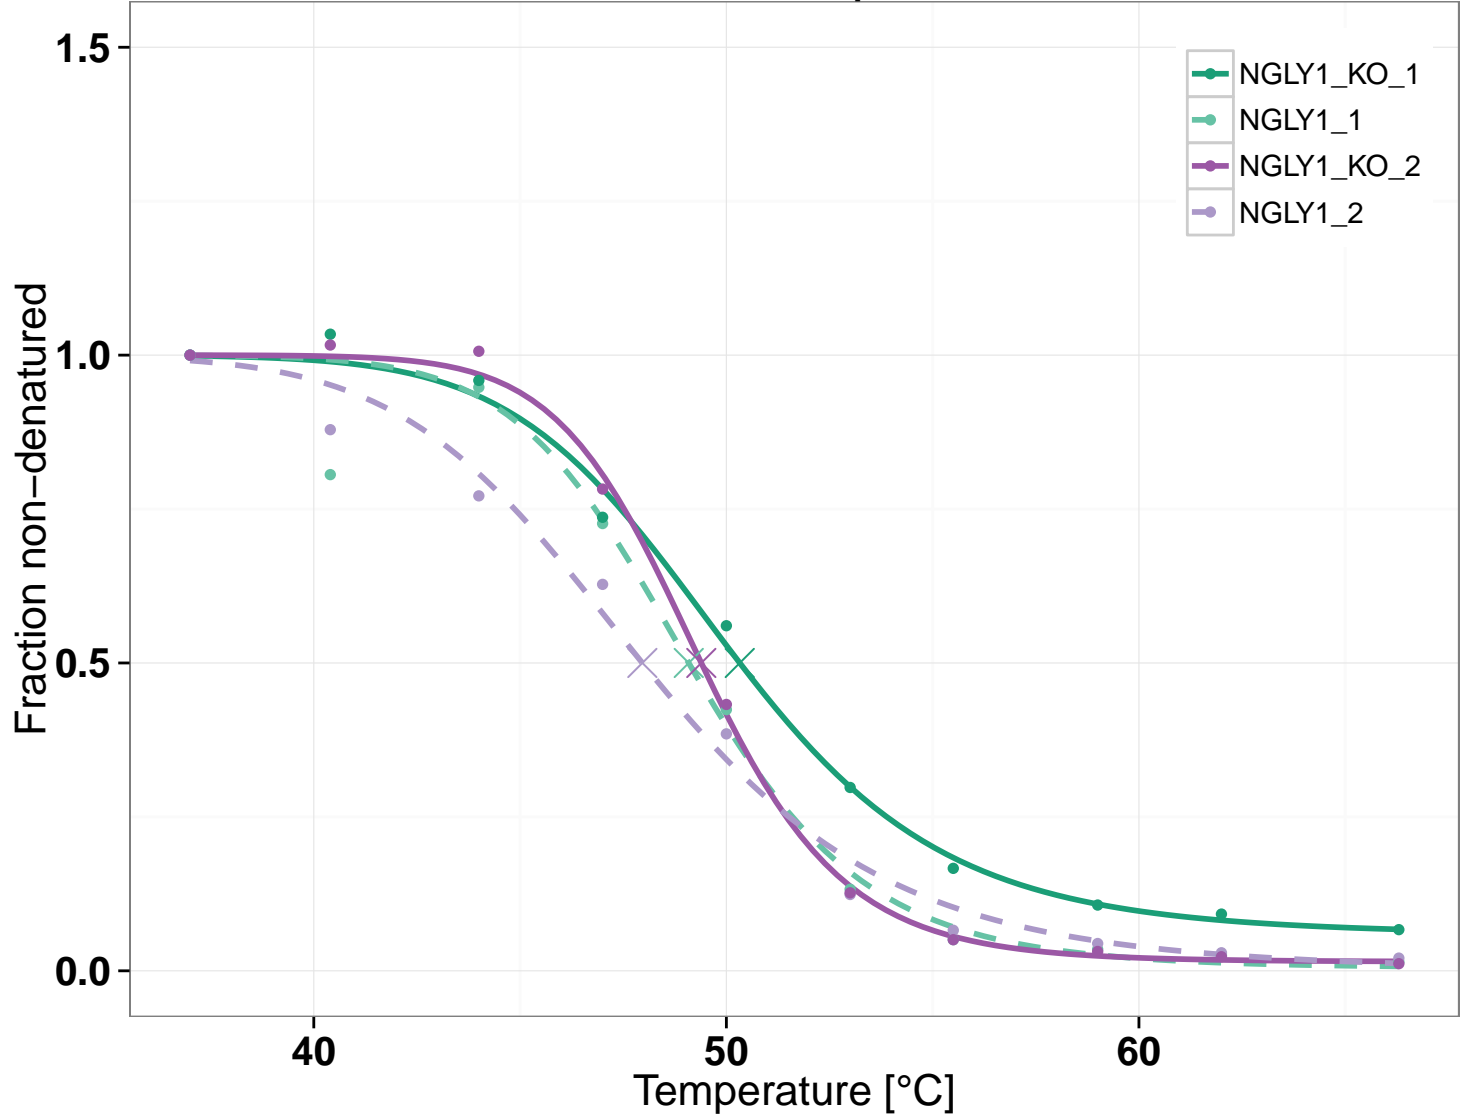

|            | meltPoint | slope  | plateau | R2   |
|------------|-----------|--------|---------|------|
| NGLY1_KO_1 | 50.32     | -0.09  | 0.06    | 1    |
| NGLY1_1    | 49.09     | -0.12  | 0       | 0.98 |
| NGLY1_KO_2 | 49.39     | -0.14  | 0.01    | 1    |
| NGLY1_2    | 47.96     | -0.084 | 0       | 0.99 |

Supplement: Supplementary file 2370 [file 1]

IPI00396048.4|C4ORF41

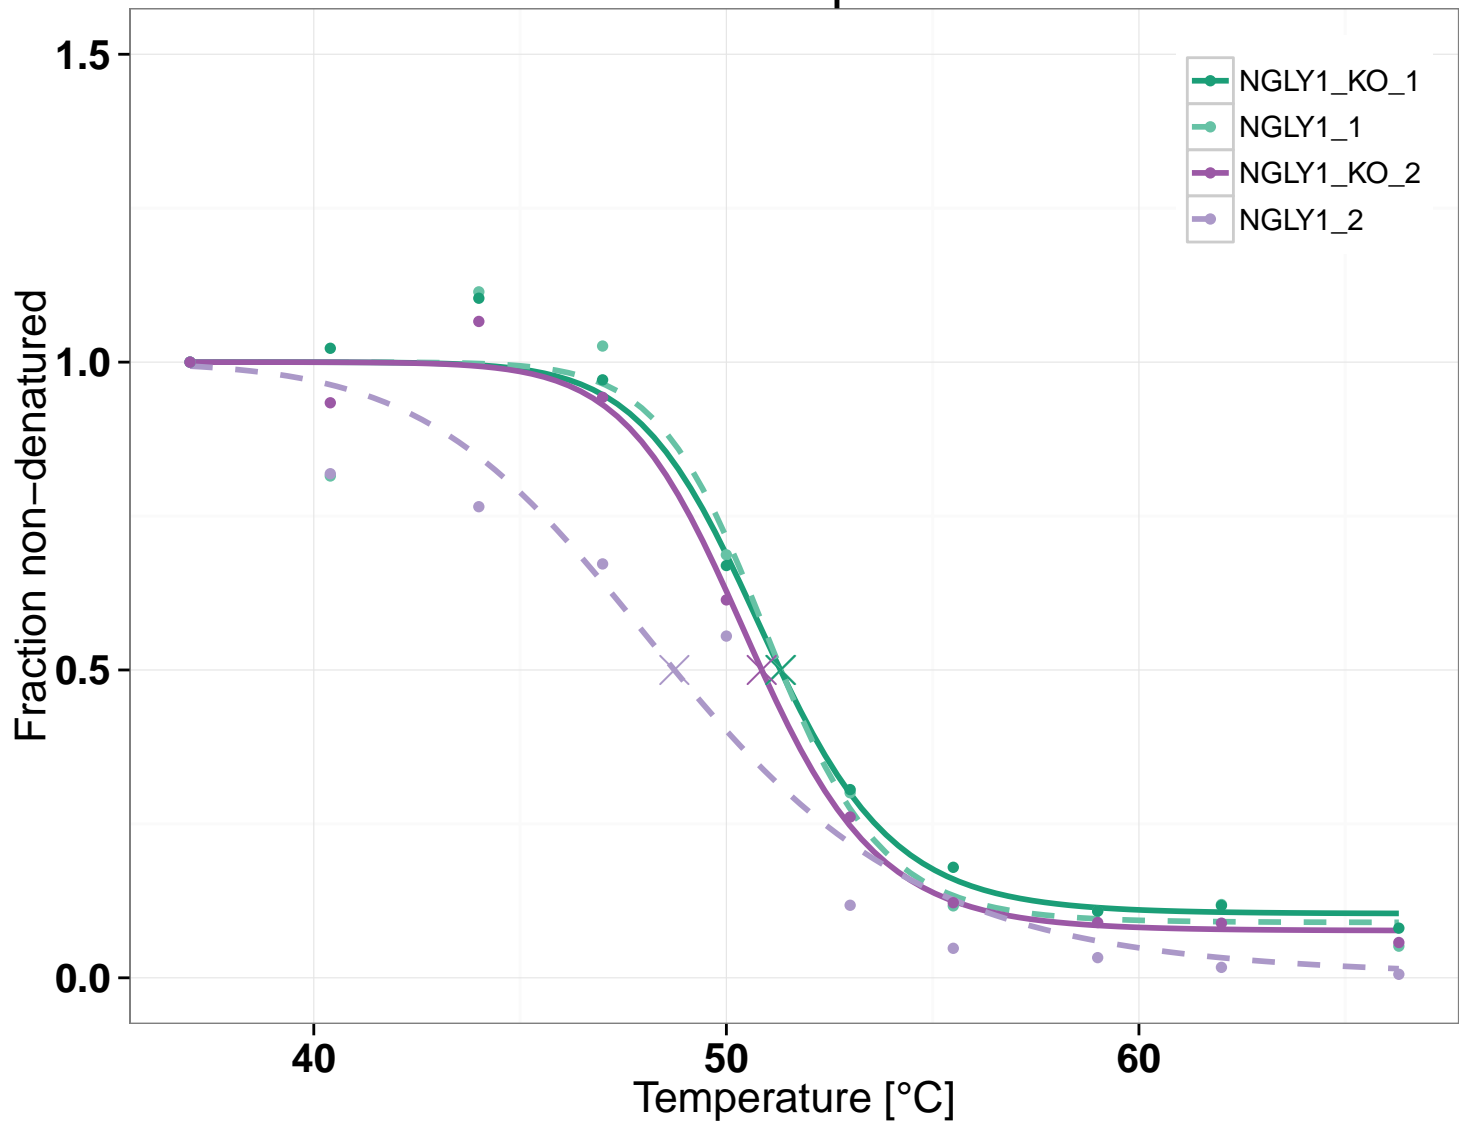

|            | meltPoint | slope  | plateau | R2   |
|------------|-----------|--------|---------|------|
| NGLY1_KO_1 | 51.31     | -0.15  | 0.1     | 0.99 |
| NGLY1_1    | 51.33     | -0.17  | 0.09    | 0.97 |
| NGLY1_KO_2 | 50.86     | -0.15  | 0.08    | 0.99 |
| NGLY1_2    | 48.74     | -0.083 | 0       | 0.95 |

Supplement: Supplementary file 2371 [file 1]

# IPI00031521.1|RFC3

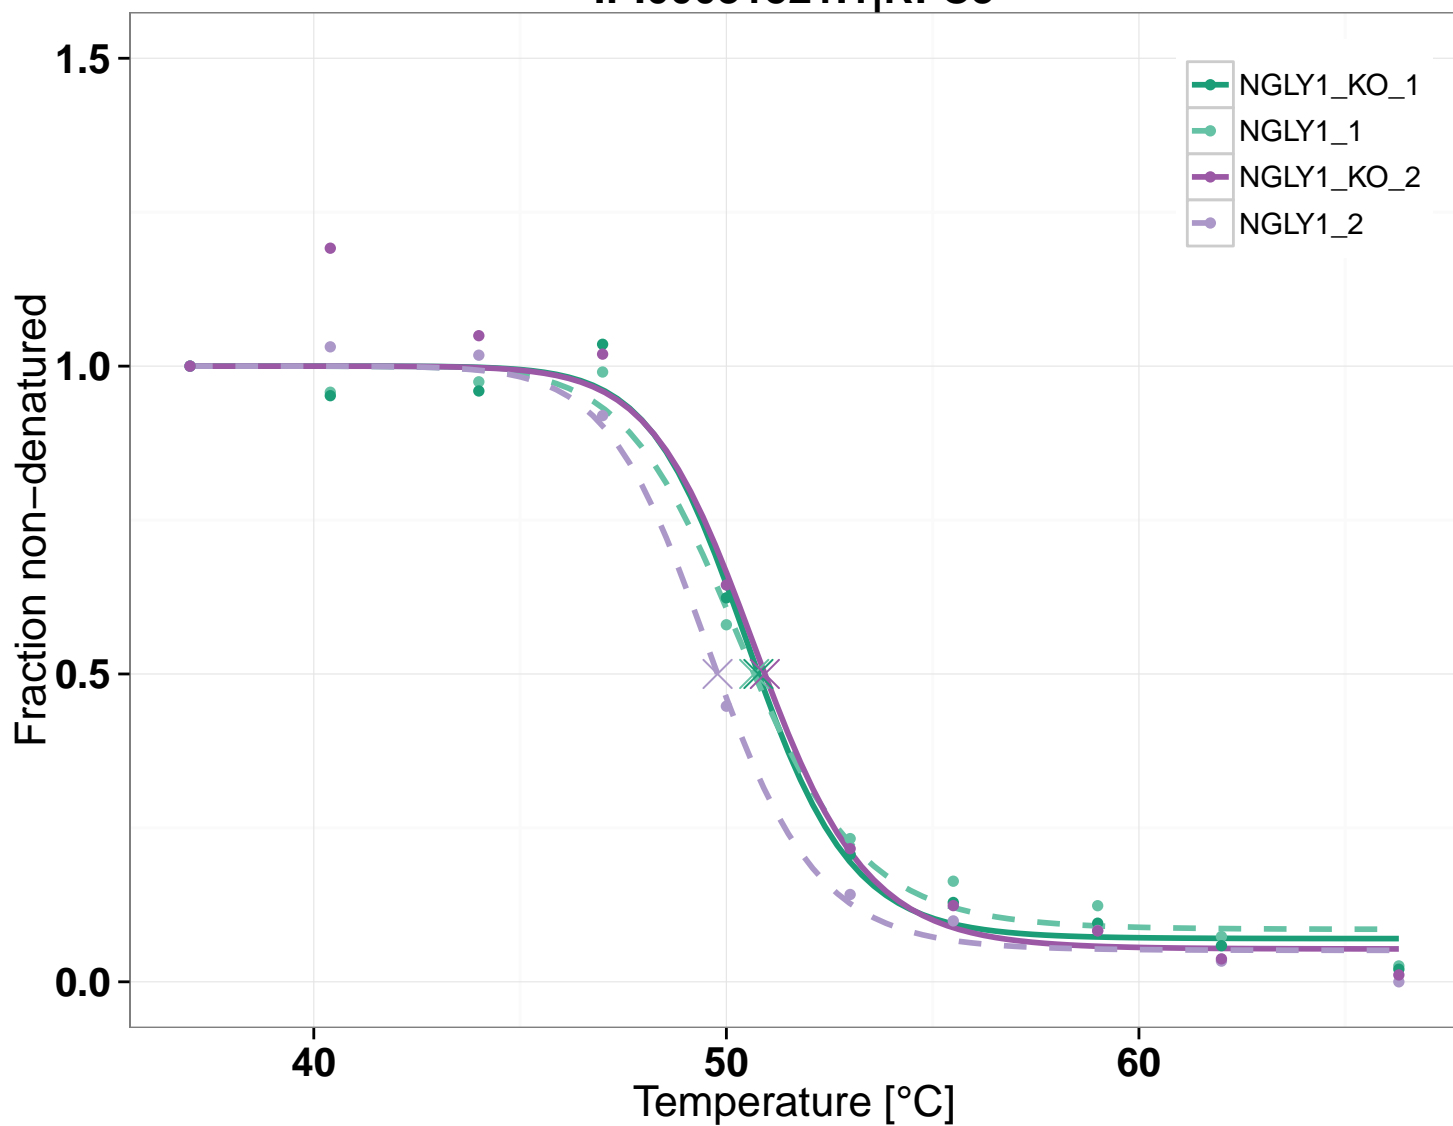

|            | meltPoint | slope | plateau | R2   |
|------------|-----------|-------|---------|------|
| NGLY1_KO_1 | 50.78     | -0.19 | 0.07    | 0.99 |
| NGLY1_1    | 50.68     | -0.16 | 0.09    | 0.99 |
| NGLY1_KO_2 | 50.93     | -0.18 | 0.05    | 0.98 |
| NGLY1_2    | 49.79     | -0.18 | 0.05    | 1    |

Supplement: Supplementary file 2372 [file 1]

IPI00152325.2|RG9MTD2

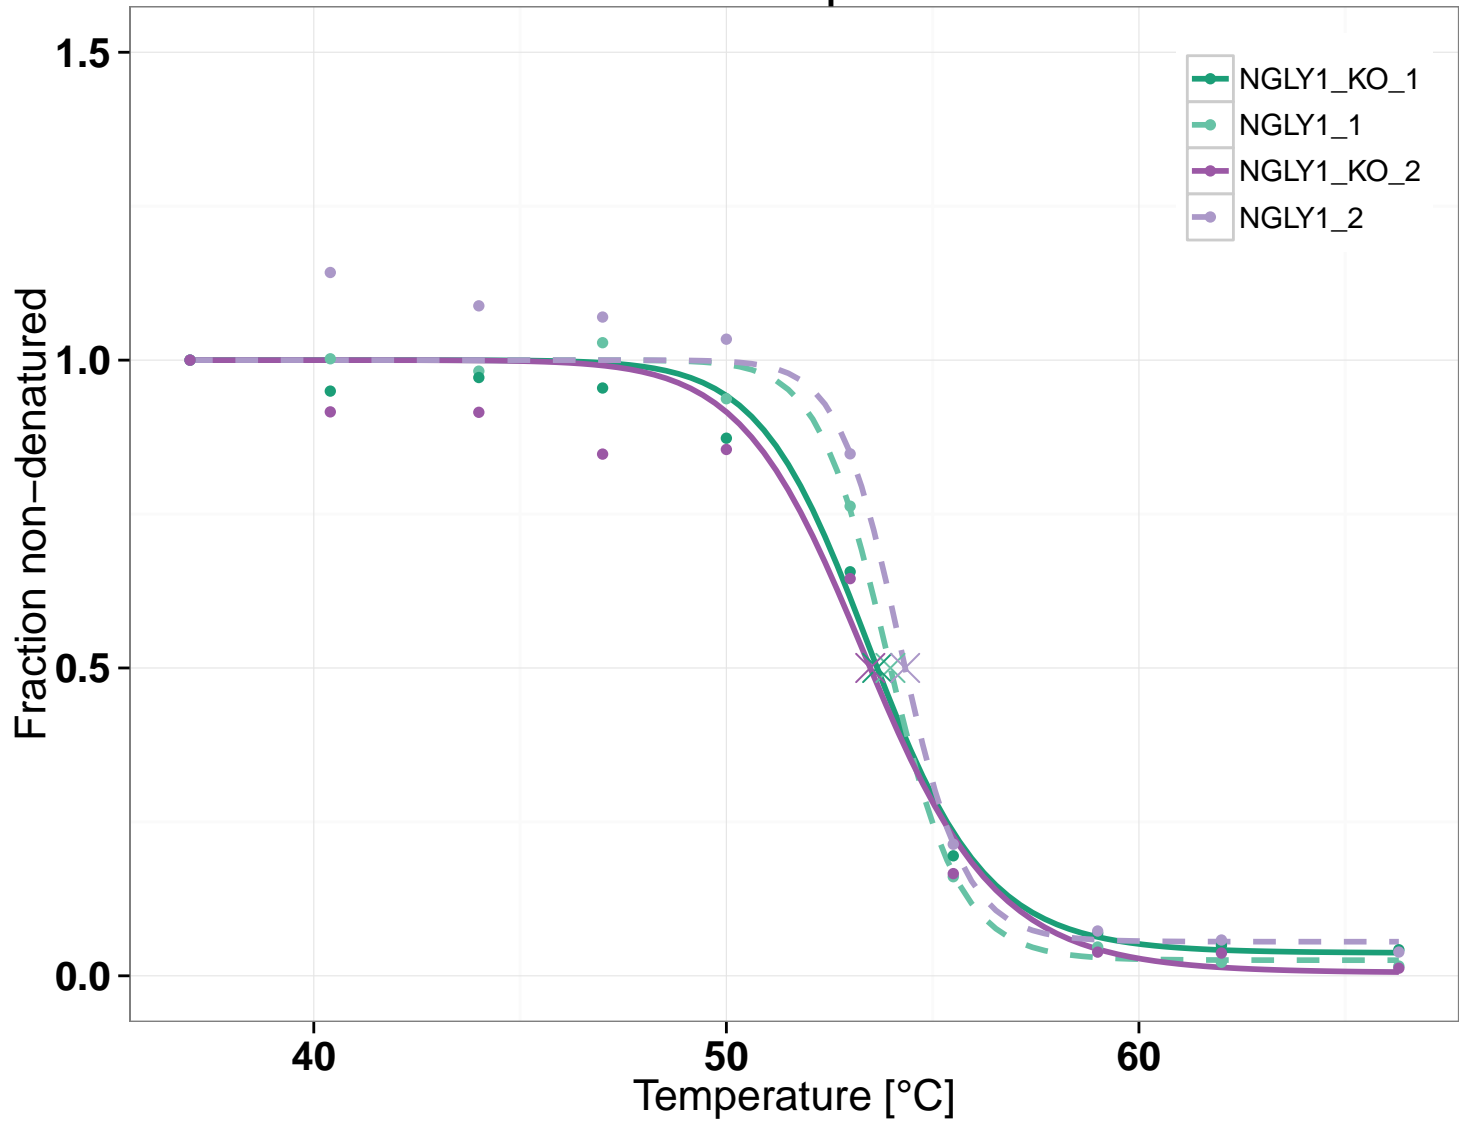

|            | meltPoint | slope | plateau | R2   |
|------------|-----------|-------|---------|------|
| NGLY1_KO_1 | 53.66     | -0.17 | 0.04    | 0.99 |
| NGLY1_1    | 53.98     | -0.28 | 0.03    | 1    |
| NGLY1_KO_2 | 53.49     | -0.16 | 0       | 0.97 |
| NGLY1_2    | 54.33     | -0.31 | 0.06    | 0.98 |

Supplement: Supplementary file 2373 [file 1]

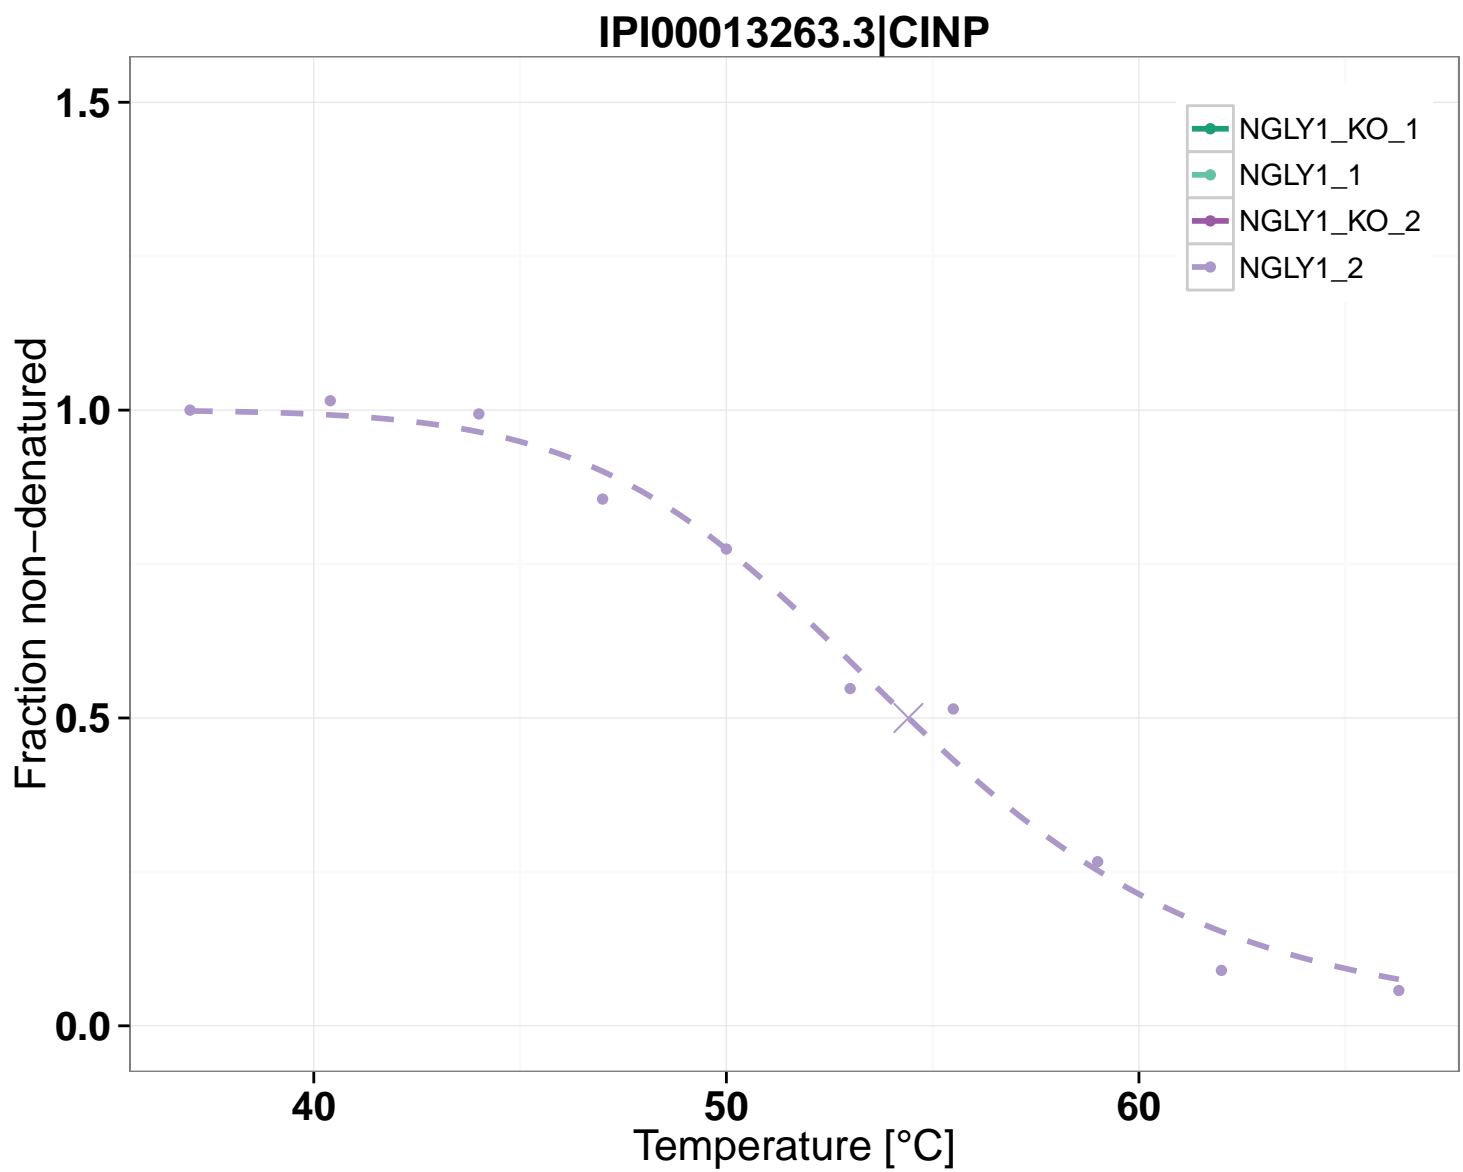

|            | meltPoint | slope  | plateau | R2   |
|------------|-----------|--------|---------|------|
| NGLY1_KO_1 | —         | —      | —       | —    |
| NGLY1_1    | —         | —      | —       | —    |
| NGLY1_KO_2 | —         | —      | —       | —    |
| NGLY1_2    | 54.41     | -0.066 | 0       | 0.99 |

Supplement: Supplementary file 2374 [file 1]

# IPI00024502.2|UBQLN4

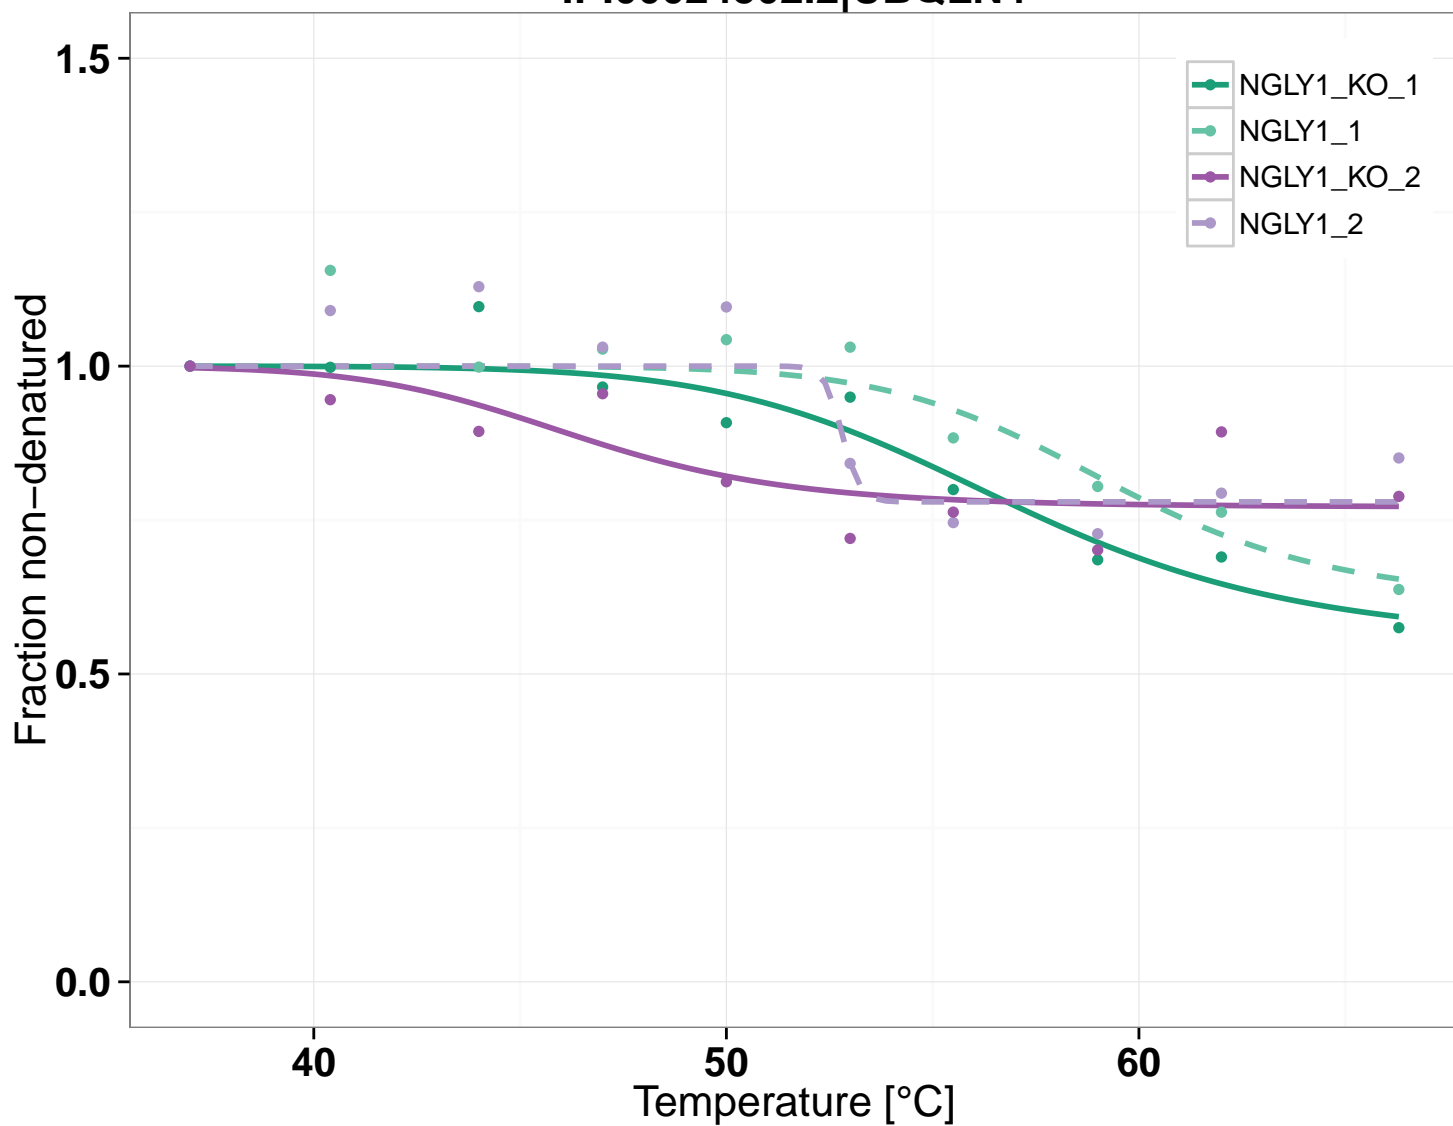

|            | meltPoint | slope  | plateau | R2   |
|------------|-----------|--------|---------|------|
| NGLY1_KO_1 | –         | –0.032 | 0.55    | 0.93 |
| NGLY1_1    | –         | –0.035 | 0.62    | 0.84 |
| NGLY1_KO_2 | –         | –0.022 | 0.77    | 0.63 |
| NGLY1_2    | –         | –0.26  | 0.78    | 0.8  |

Supplement: Supplementary file 2375 [file 1]

IPI00328285.5|USP20

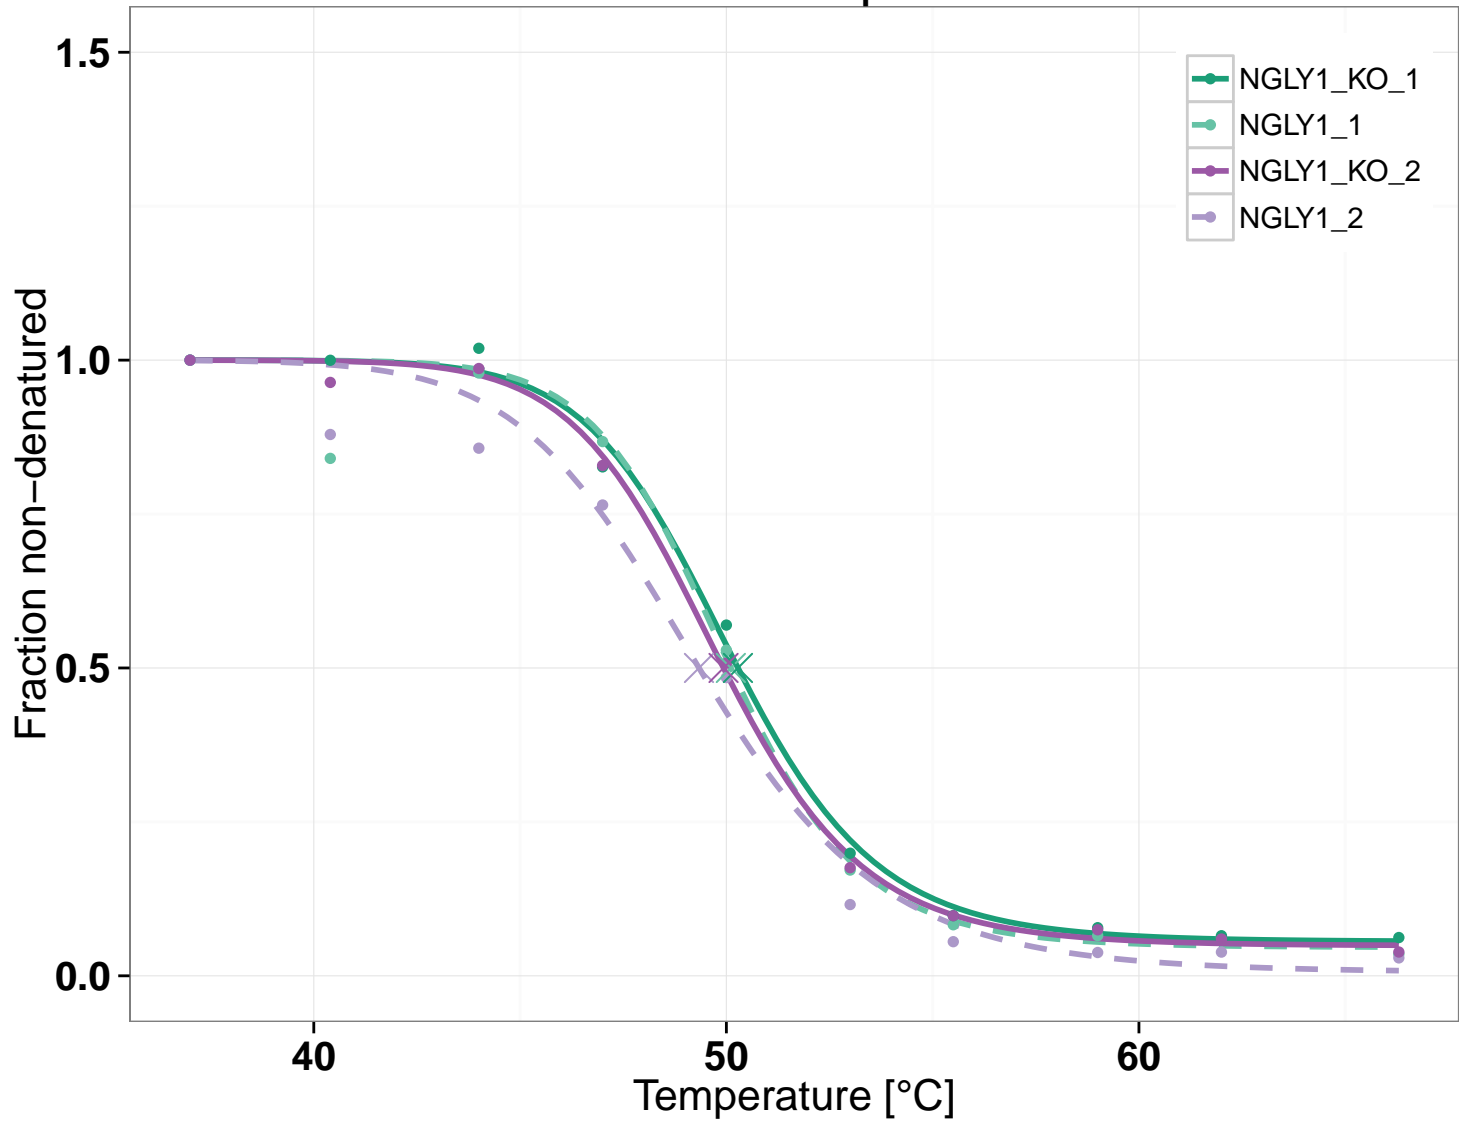

|            | meltPoint | slope | plateau | R2   |
|------------|-----------|-------|---------|------|
| NGLY1_KO_1 | 50.28     | -0.13 | 0.06    | 1    |
| NGLY1_1    | 50.11     | -0.15 | 0.05    | 0.98 |
| NGLY1_KO_2 | 49.93     | -0.13 | 0.05    | 1    |
| NGLY1_2    | 49.34     | -0.11 | 0       | 0.98 |

Supplement: Supplementary file 2376 [file 1]

# IPI00022697.3|DRG2

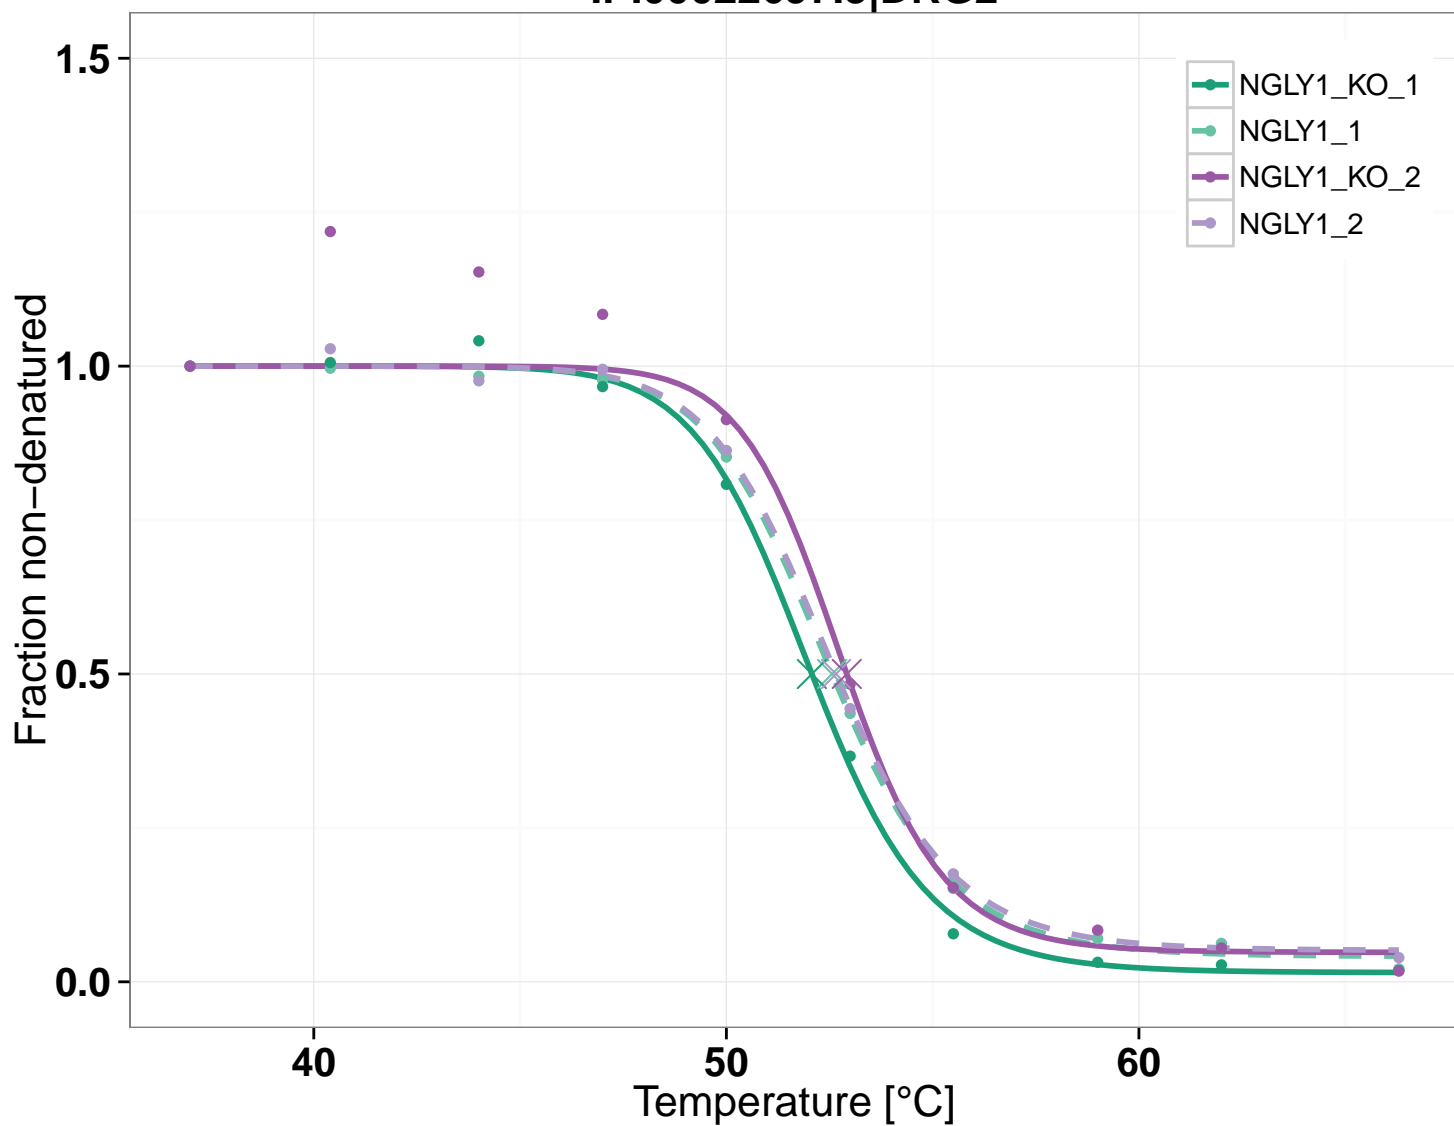

|            | meltPoint | slope | plateau | R2   |
|------------|-----------|-------|---------|------|
| NGLY1_KO_1 | 52.07     | -0.17 | 0.01    | 1    |
| NGLY1_1    | 52.56     | -0.16 | 0.04    | 1    |
| NGLY1_KO_2 | 52.92     | -0.19 | 0.05    | 0.96 |
| NGLY1_2    | 52.66     | -0.16 | 0.05    | 1    |

Supplement: Supplementary file 2377 [file 1]

# IPI00299465.8|LZTFL1

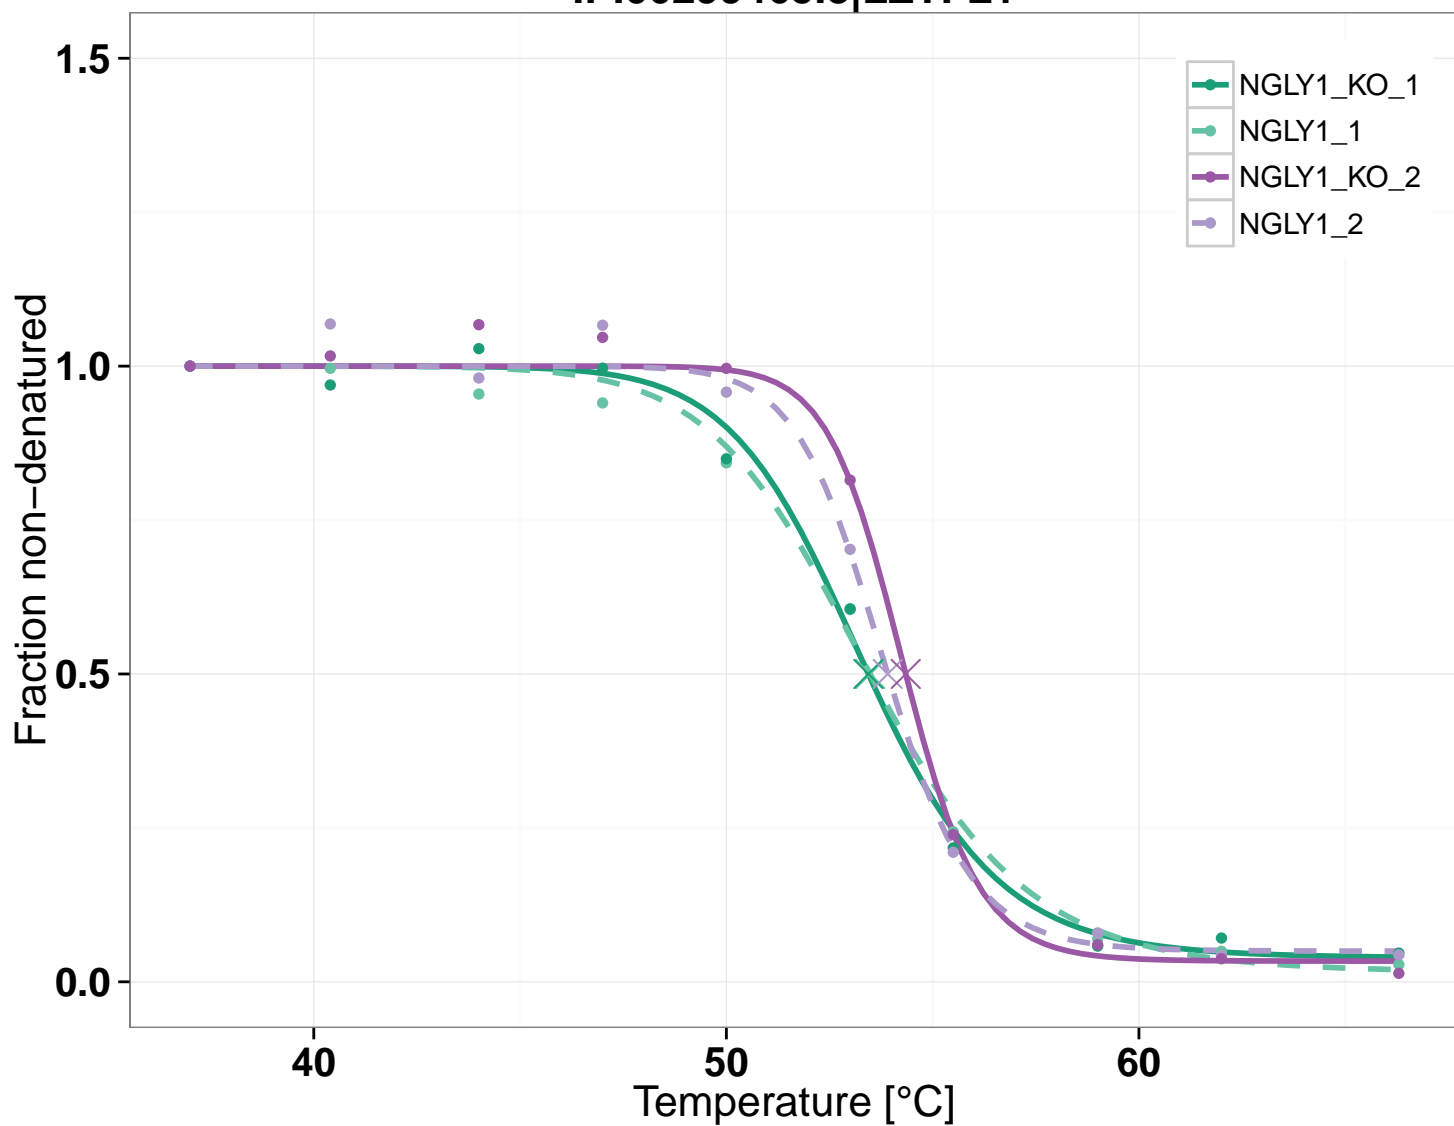

|            | meltPoint | slope | plateau | R2   |
|------------|-----------|-------|---------|------|
| NGLY1_KO_1 | 53.44     | -0.15 | 0.04    | 1    |
| NGLY1_1    | 53.48     | -0.13 | 0.01    | 1    |
| NGLY1_KO_2 | 54.35     | -0.26 | 0.03    | 1    |
| NGLY1_2    | 53.91     | -0.22 | 0.05    | 0.99 |

Supplement: Supplementary file 2378 [file 1]

IPI00027439.1|CDK2AP1

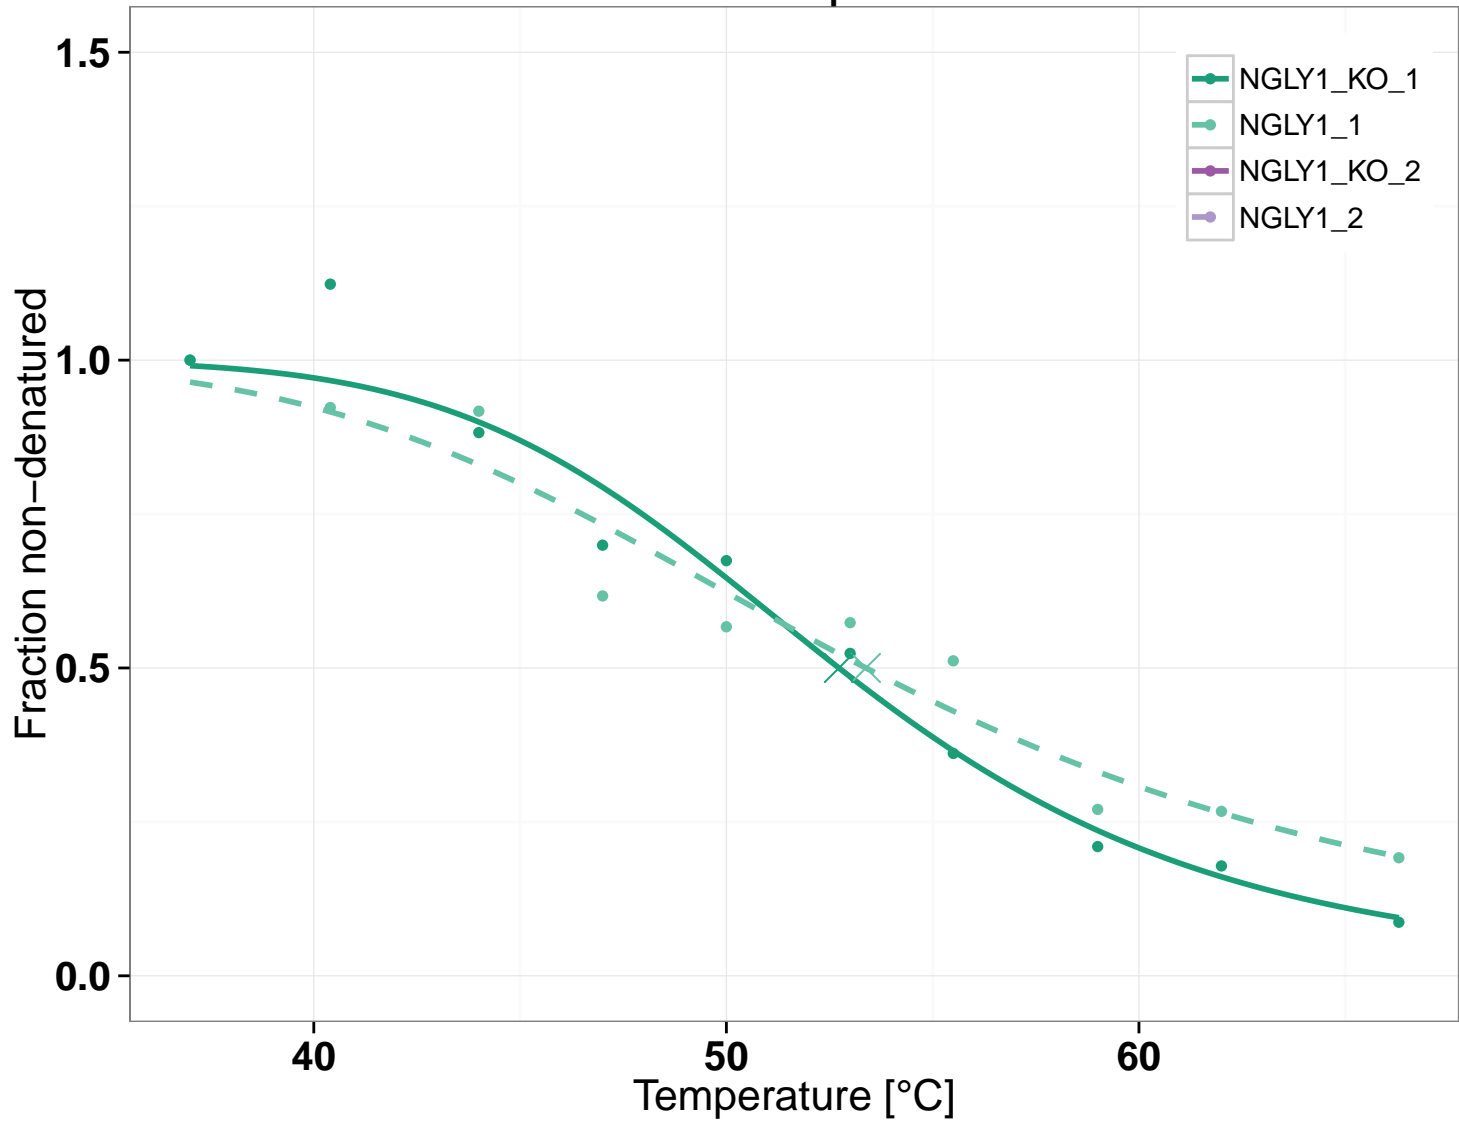

|            | meltPoint | slope  | plateau | R2   |
|------------|-----------|--------|---------|------|
| NGLY1_KO_1 | 52.73     | -0.054 | 0       | 0.97 |
| NGLY1_1    | 53.38     | -0.037 | 0.01    | 0.95 |
| NGLY1_KO_2 | -         | -      | -       | -    |
| NGLY1_2    | -         | -      | -       | -    |

Supplement: Supplementary file 2379 [file 1]

# IPI00464985.5|VPS8

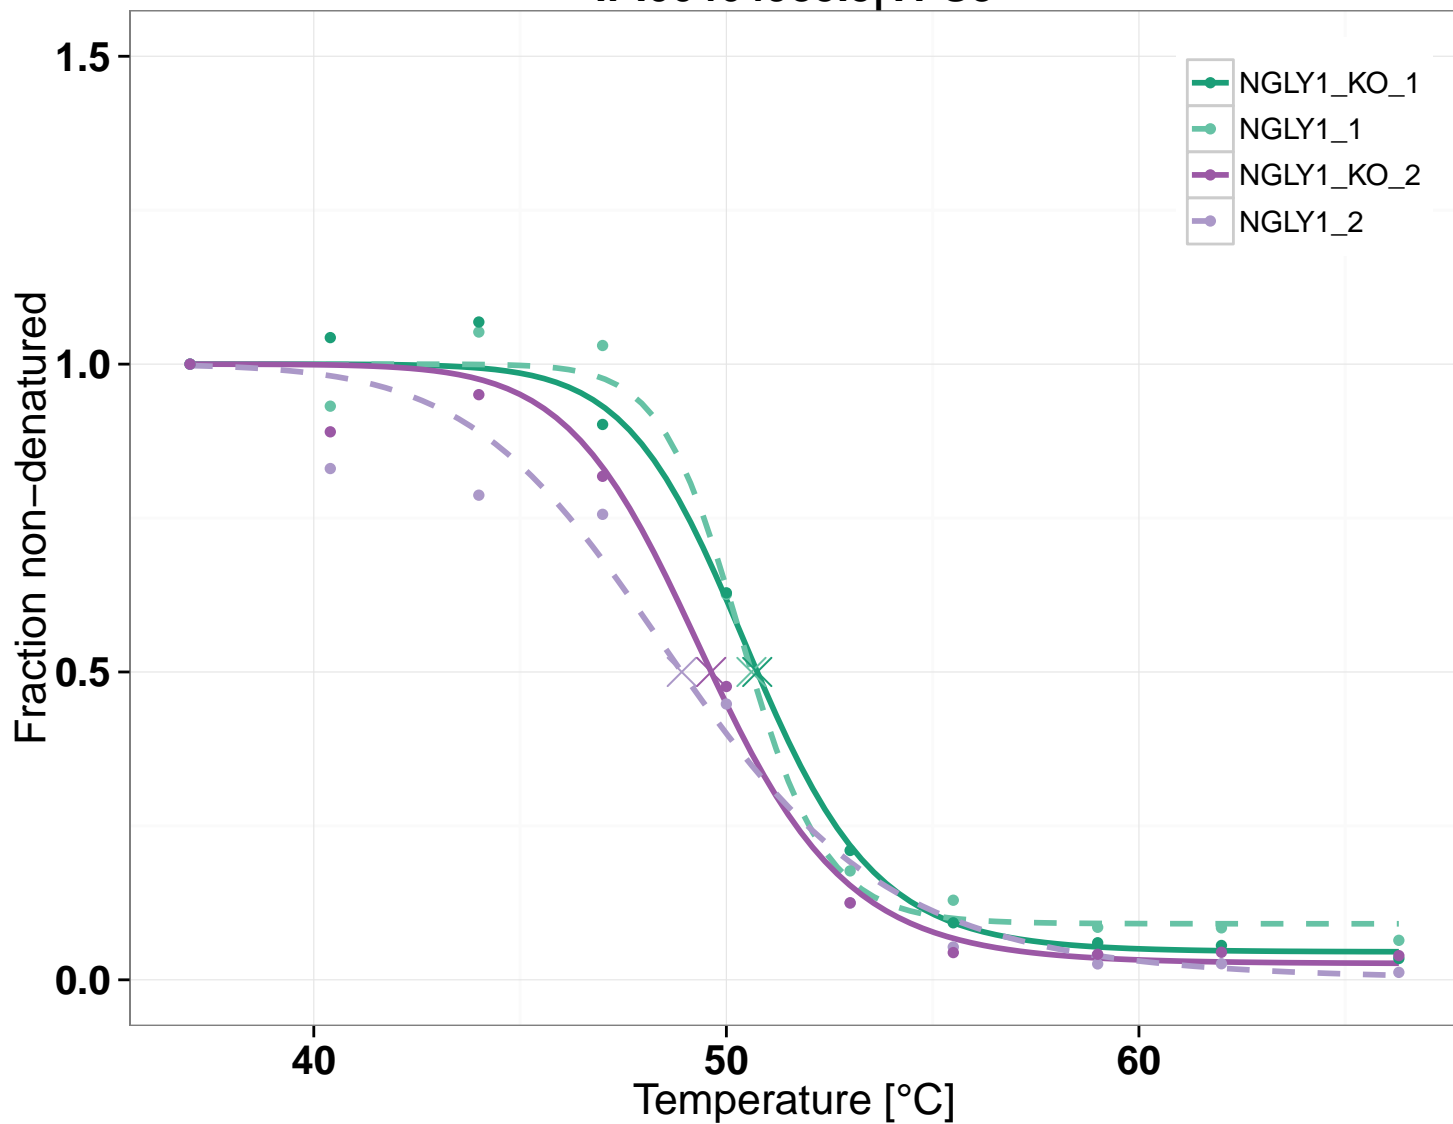

|            | meltPoint | slope  | plateau | R2   |
|------------|-----------|--------|---------|------|
| NGLY1_KO_1 | 50.75     | -0.16  | 0.05    | 1    |
| NGLY1_1    | 50.61     | -0.23  | 0.09    | 0.99 |
| NGLY1_KO_2 | 49.63     | -0.14  | 0.03    | 0.99 |
| NGLY1_2    | 48.92     | -0.097 | 0       | 0.97 |

Supplement: Supplementary file 2380 [file 1]

# IPI00057097.3|DNTTIP1

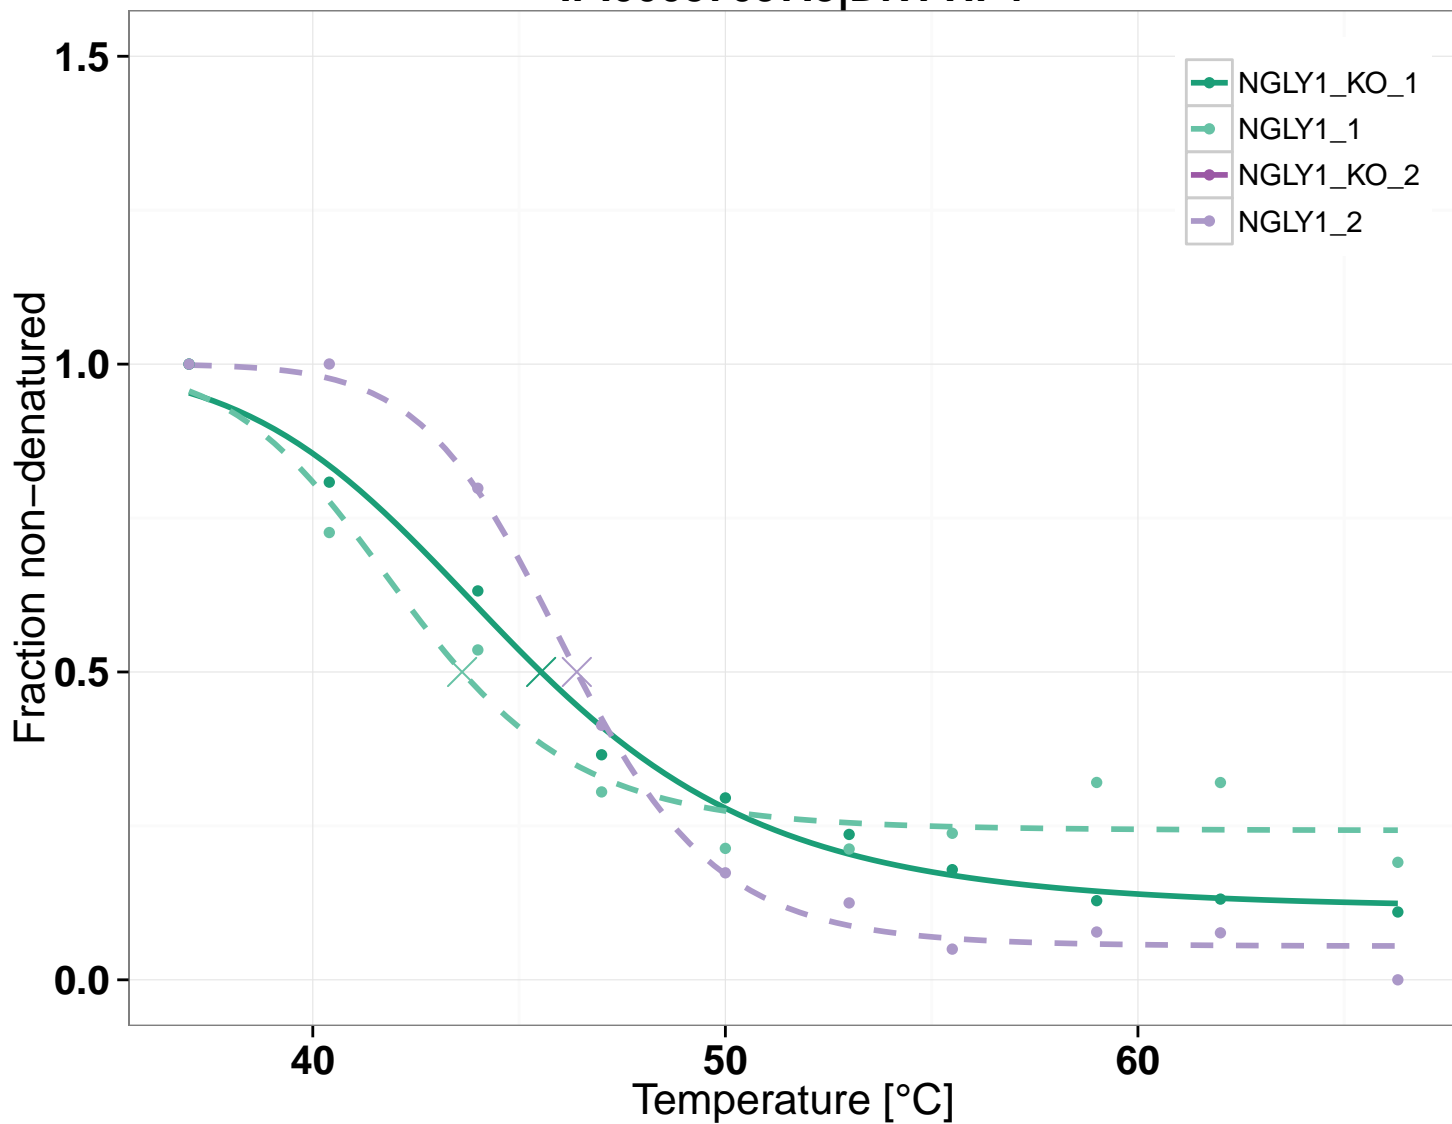

|            | meltPoint | slope  | plateau | R2   |
|------------|-----------|--------|---------|------|
| NGLY1_KO_1 | 45.53     | -0.07  | 0.11    | 0.99 |
| NGLY1_1    | 43.62     | -0.091 | 0.24    | 0.96 |
| NGLY1_KO_2 | -         | -      | -       | -    |
| NGLY1_2    | 46.4      | -0.13  | 0.05    | 1    |

Supplement: Supplementary file 2381 [file 1]

# IPI00017597.3|MAPRE3

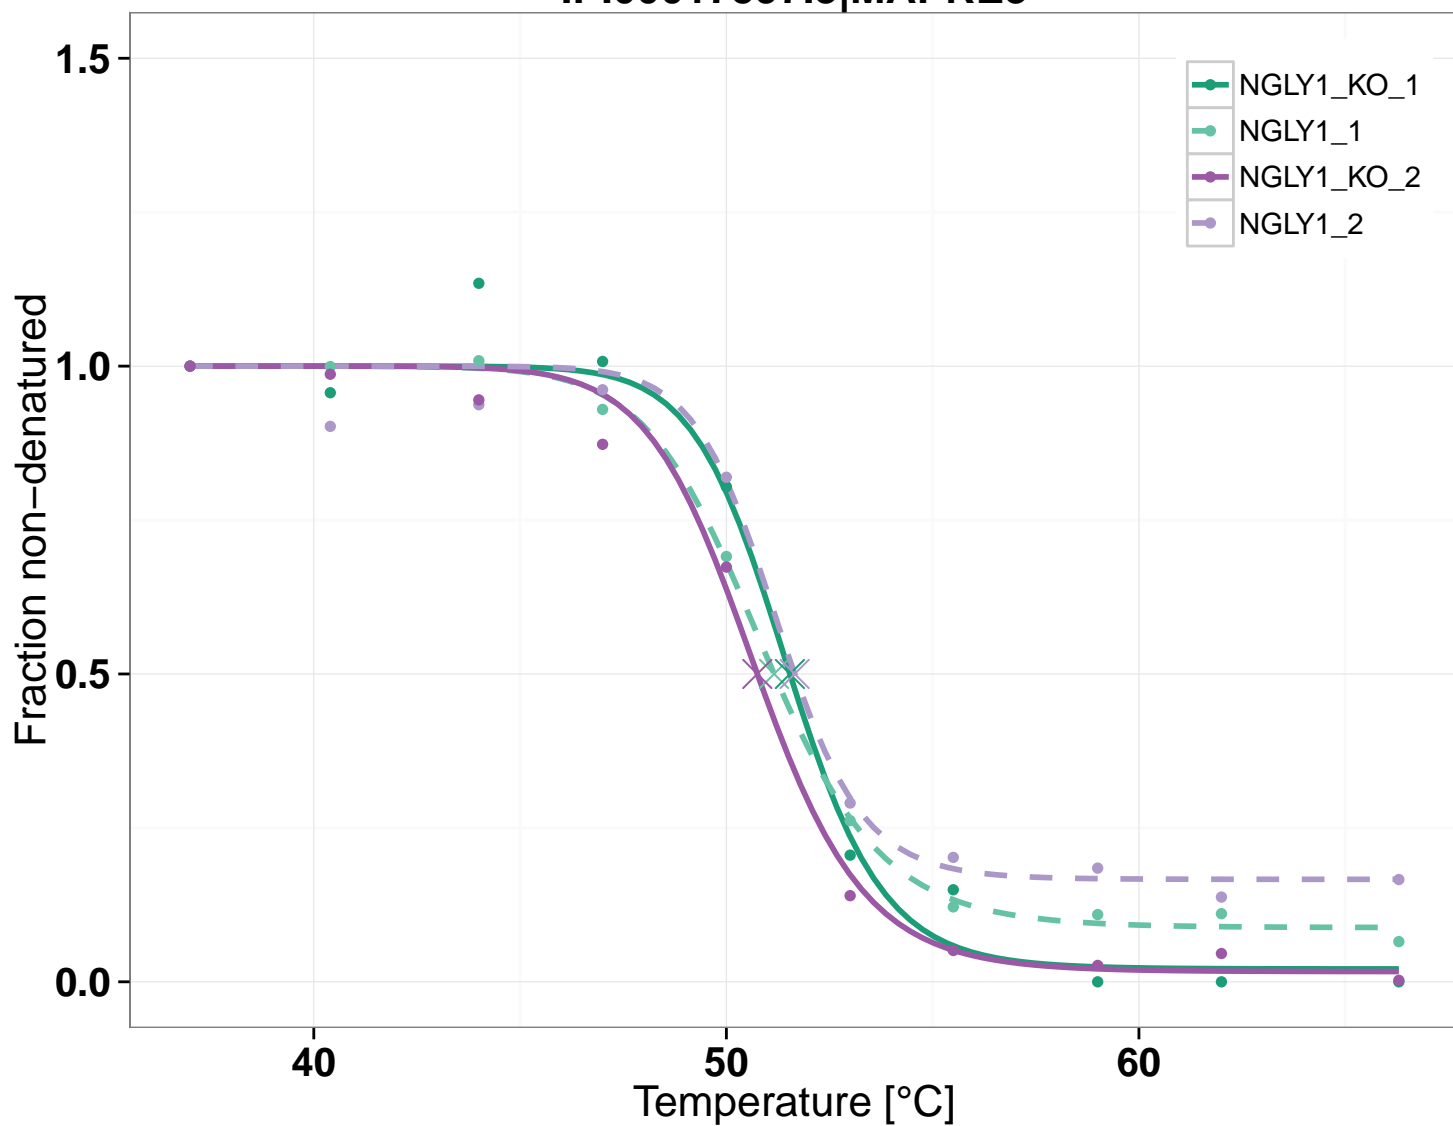

|            | meltPoint | slope | plateau | R2   |
|------------|-----------|-------|---------|------|
| NGLY1_KO_1 | 51.54     | -0.21 | 0.02    | 0.99 |
| NGLY1_1    | 51.16     | -0.16 | 0.09    | 1    |
| NGLY1_KO_2 | 50.75     | -0.19 | 0.02    | 0.99 |
| NGLY1_2    | 51.65     | -0.2  | 0.17    | 0.99 |

Supplement: Supplementary file 2382 [file 1]

# IPI00020128.2|UTP6

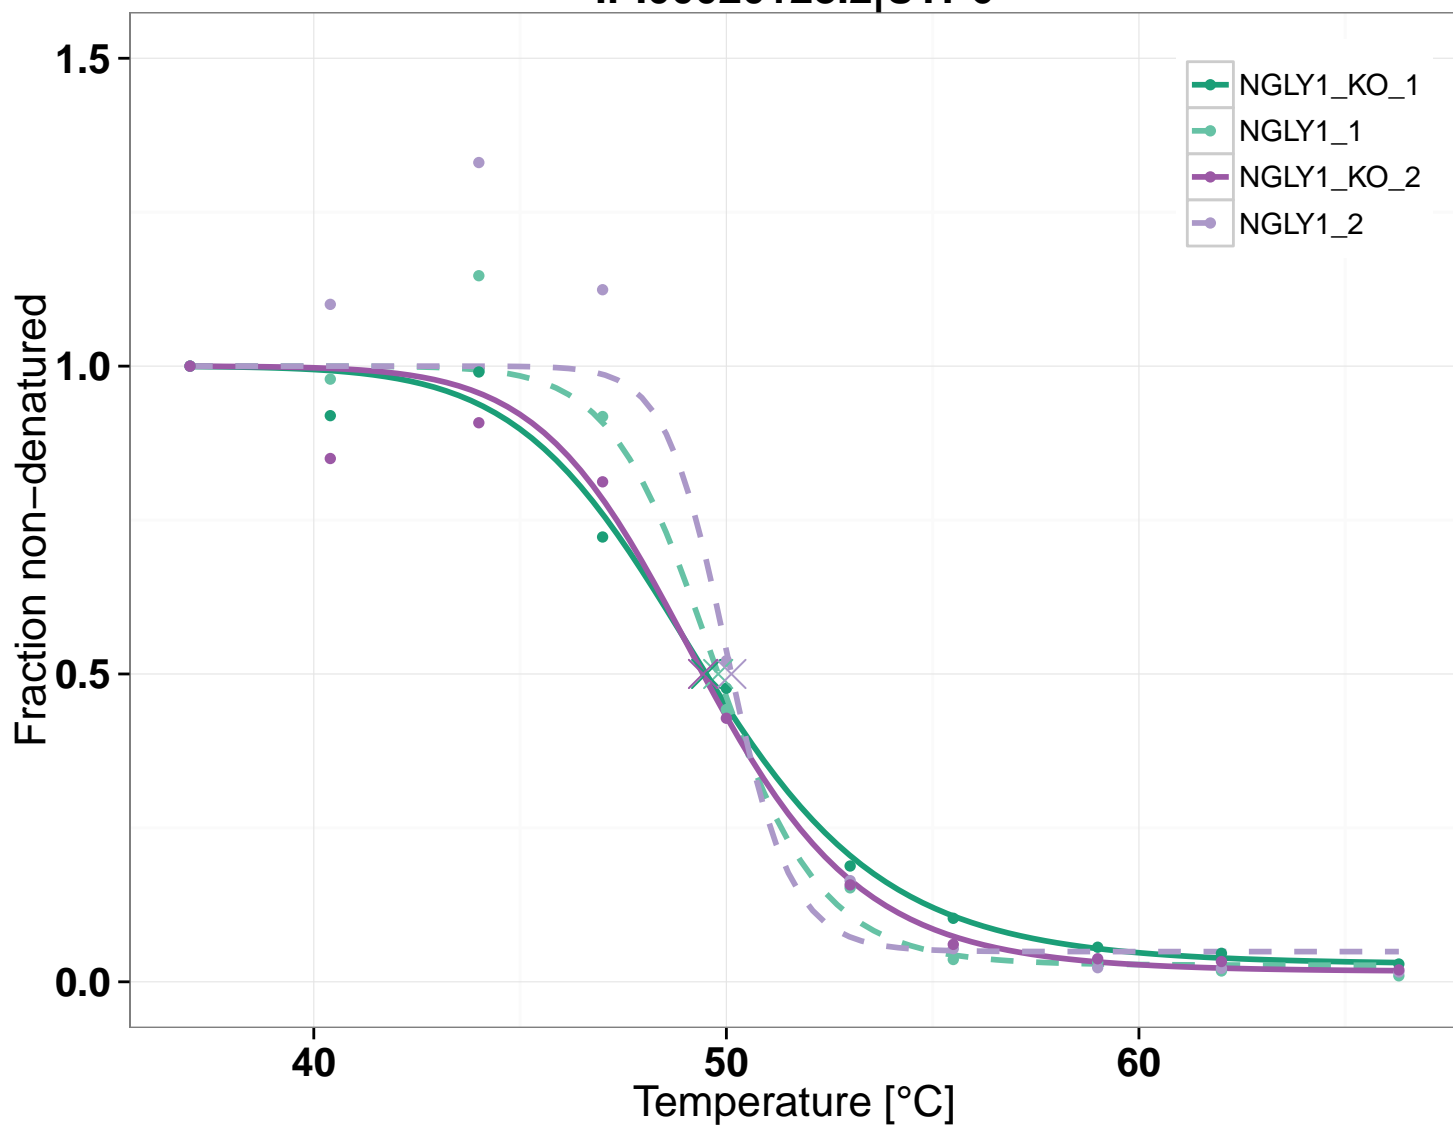

|            | meltPoint | slope | plateau | R2   |
|------------|-----------|-------|---------|------|
| NGLY1_KO_1 | 49.51     | -0.11 | 0.03    | 0.99 |
| NGLY1_1    | 49.8      | -0.19 | 0.03    | 0.99 |
| NGLY1_KO_2 | 49.43     | -0.13 | 0.02    | 0.98 |
| NGLY1_2    | 50.12     | -0.31 | 0.05    | 0.94 |

Supplement: Supplementary file 2383 [file 1]

IPI00909376.1|B4DEM4\_HUMAN

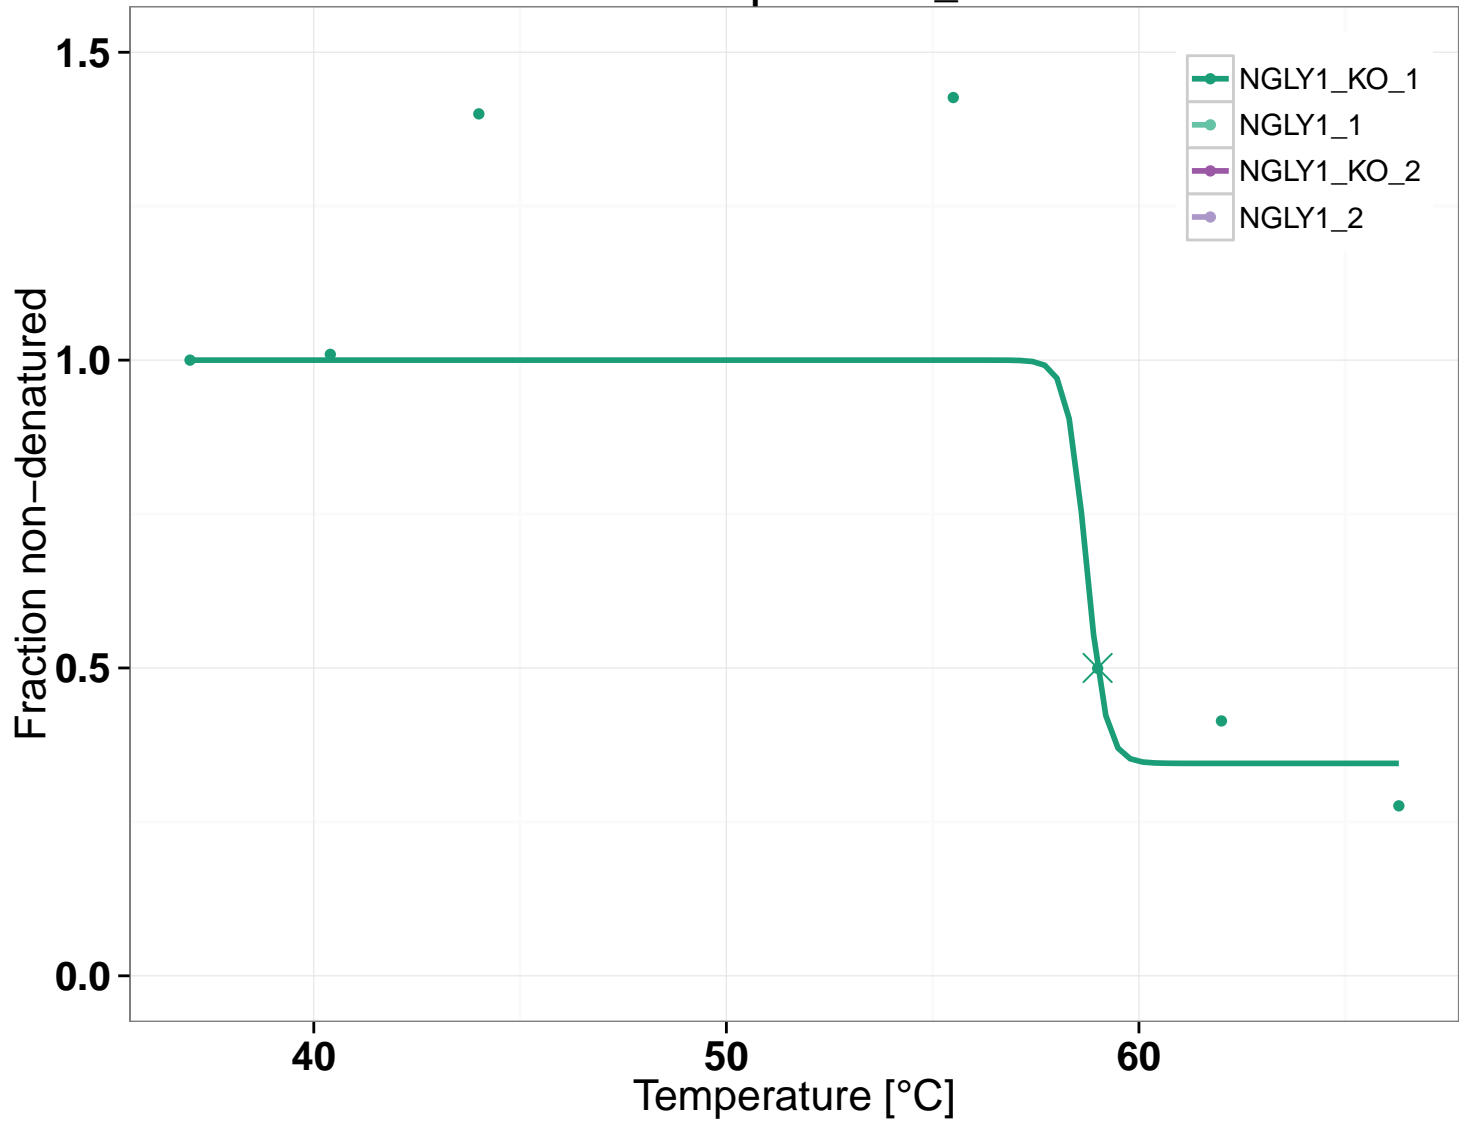

|            | meltPoint | slope | plateau | R2   |
|------------|-----------|-------|---------|------|
| NGLY1_KO_1 | 59        | -0.7  | 0.35    | 0.29 |
| NGLY1_1    | -         | -     | -       | -    |
| NGLY1_KO_2 | -         | -     | -       | -    |
| NGLY1_2    | -         | -     | -       | -    |

Supplement: Supplementary file 2384 [file 1]

IPI00249304.3|PRIC285

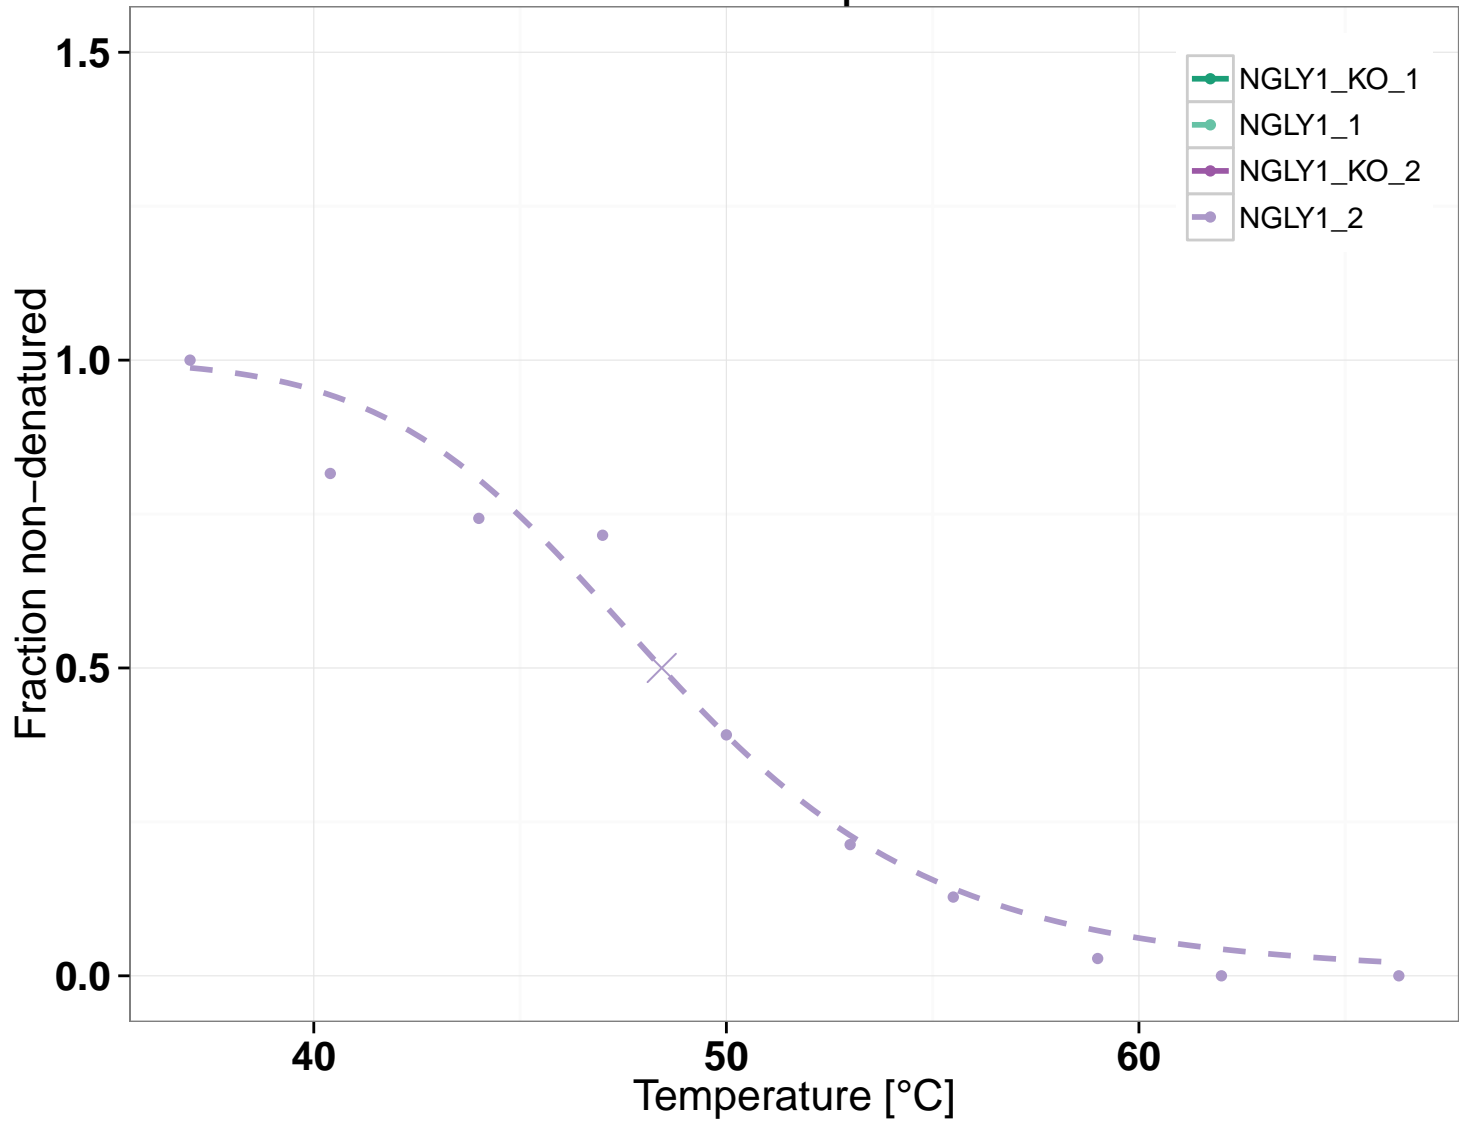

|            | meltPoint | slope  | plateau | R2   |
|------------|-----------|--------|---------|------|
| NGLY1_KO_1 | -         | -      | -       | -    |
| NGLY1_1    | -         | -      | -       | -    |
| NGLY1_KO_2 | -         | -      | -       | -    |
| NGLY1_2    | 48.43     | -0.074 | 0       | 0.97 |

Supplement: Supplementary file 2385 [file 1]

IPI00807722.1|CCDC81

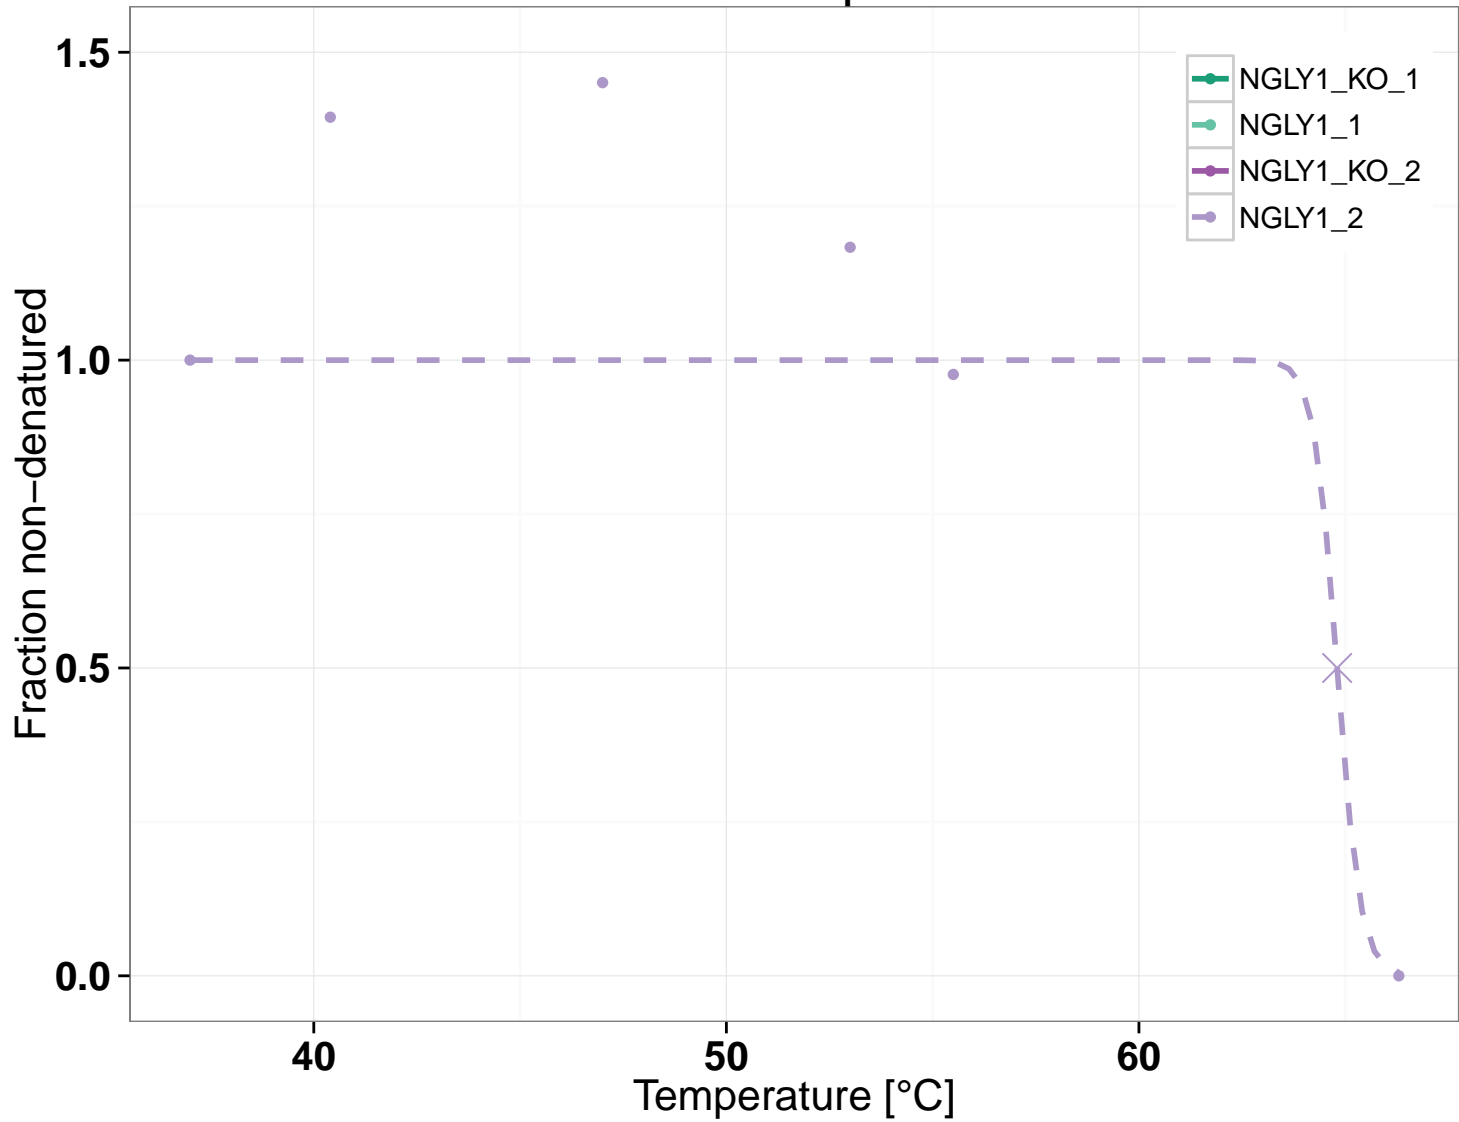

|            | meltPoint | slope | plateau | R2   |
|------------|-----------|-------|---------|------|
| NGLY1_KO_1 | -         | -     | -       | -    |
| NGLY1_1    | -         | -     | -       | -    |
| NGLY1_KO_2 | -         | -     | -       | -    |
| NGLY1_2    | 64.8      | -0.89 | 0       | 0.04 |

Supplement: Supplementary file 2386 [file 1]

IPI00030418.1|TSPAN31

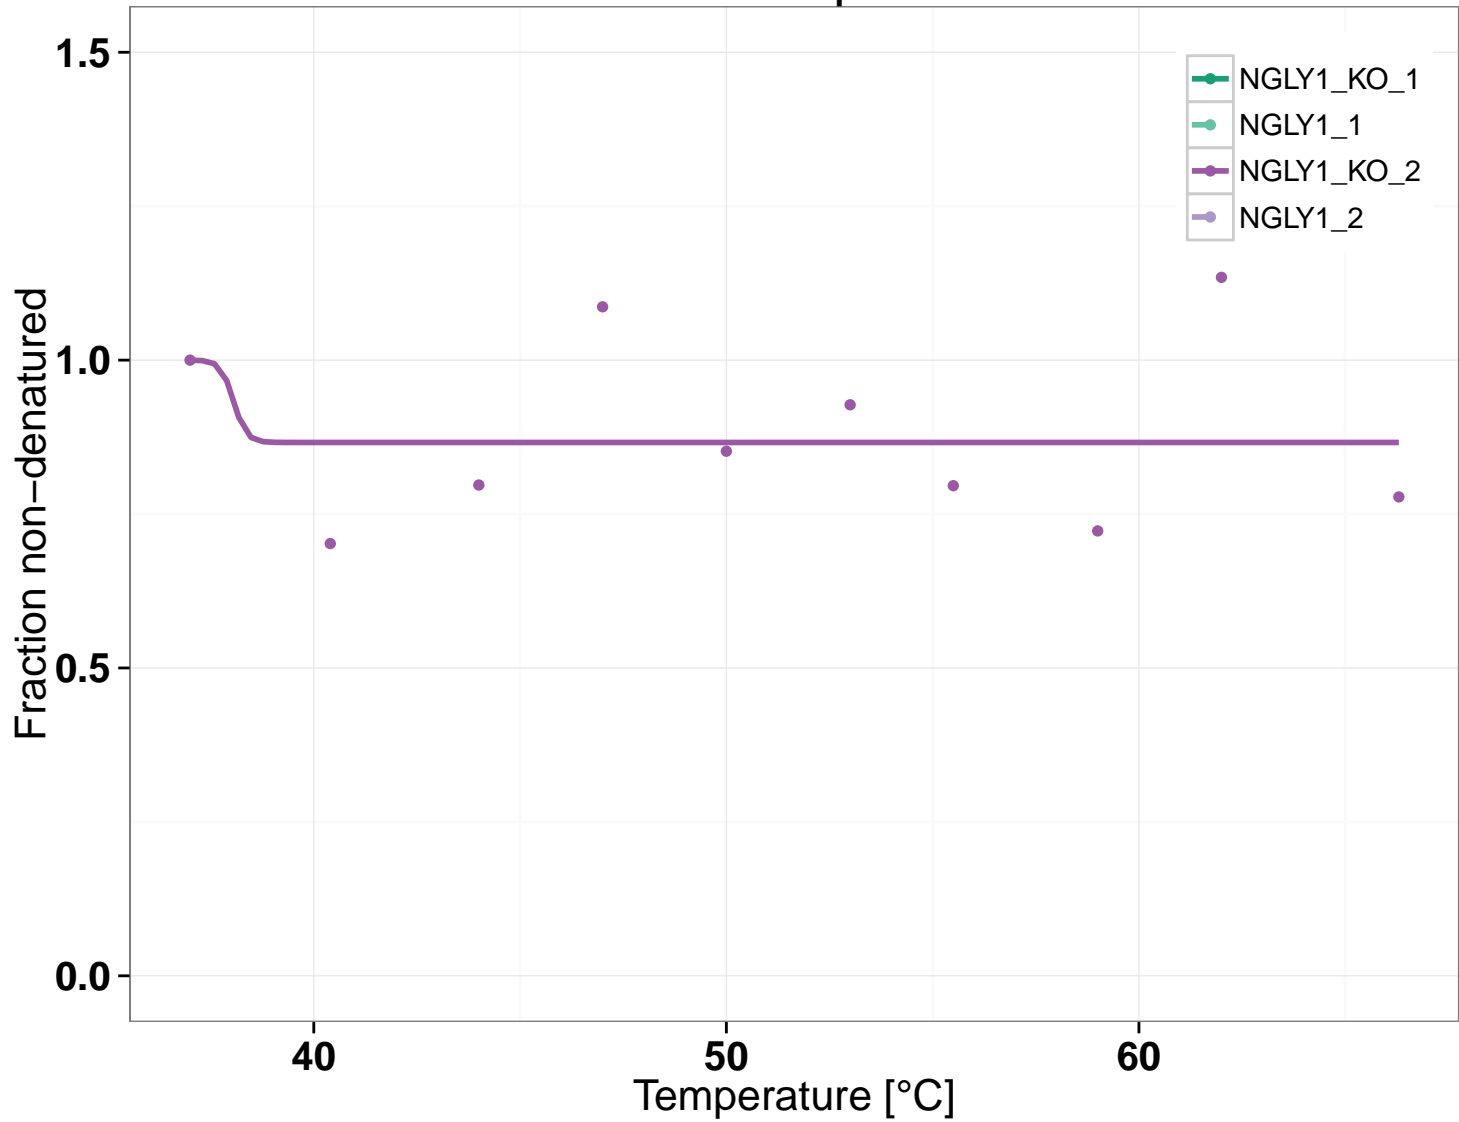

|            | meltPoint | slope | plateau | R2   |
|------------|-----------|-------|---------|------|
| NGLY1_KO_1 | —         | —     | —       | —    |
| NGLY1_1    | —         | —     | —       | —    |
| NGLY1_KO_2 | —         | -0.22 | 0.87    | 0.08 |
| NGLY1_2    | —         | —     | —       | —    |

Supplement: Supplementary file 2387 [file 1]

# IPI00334587.1|HNRNPAB

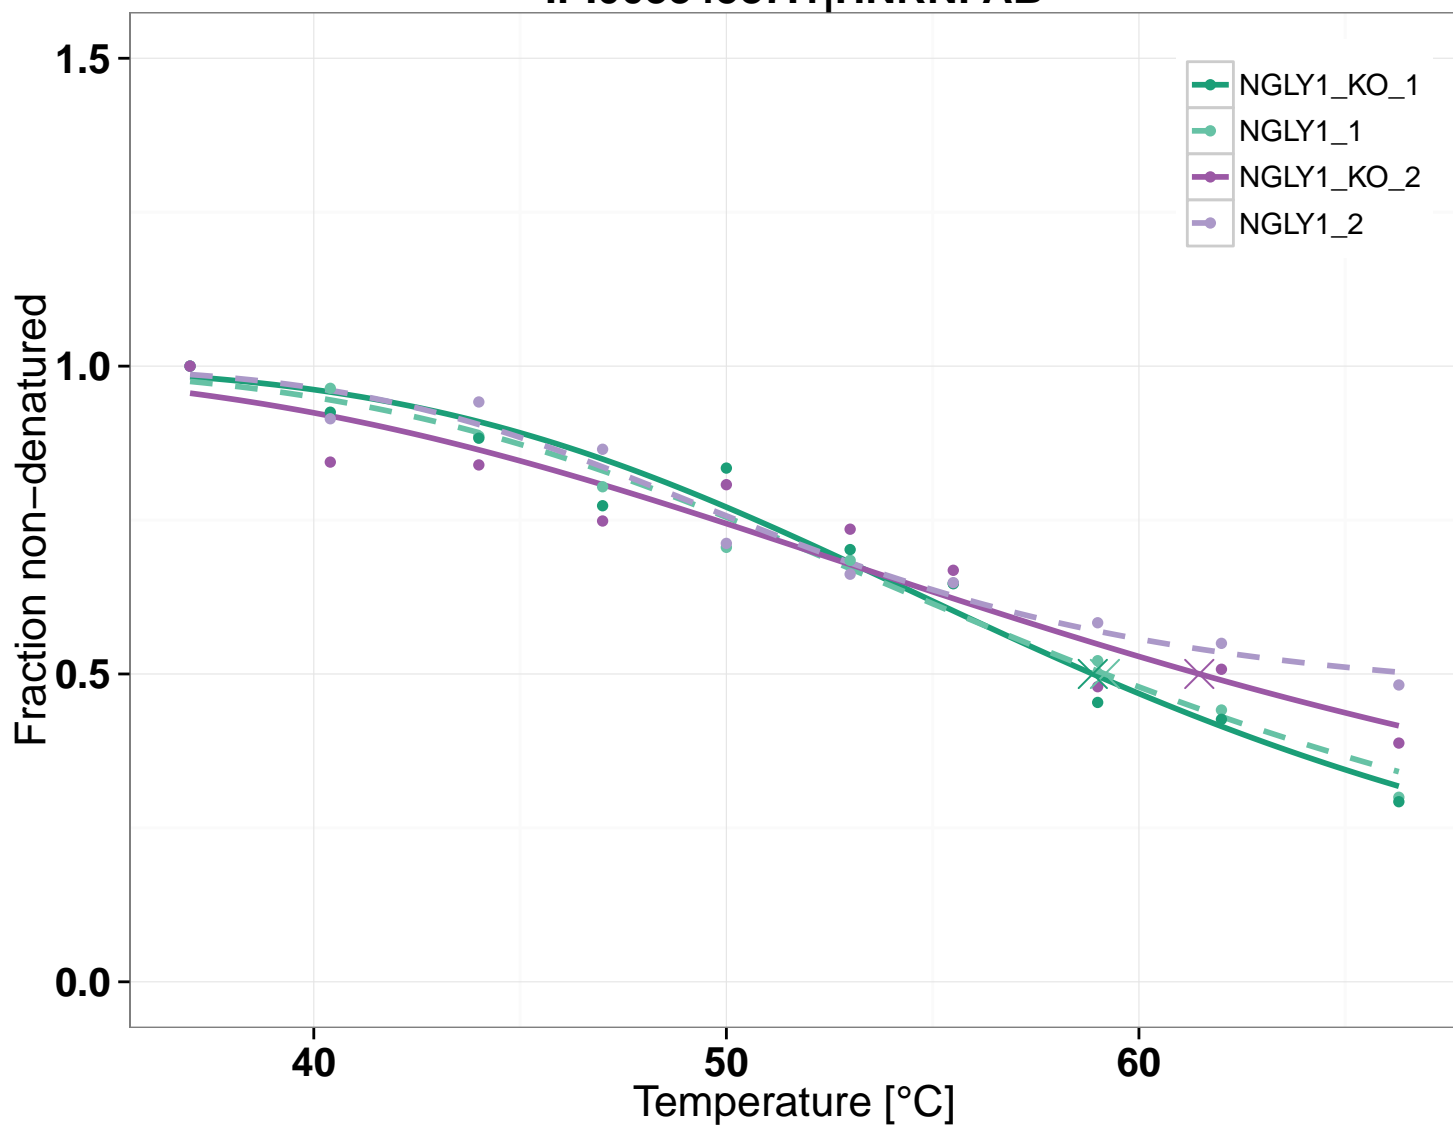

|            | meltPoint | slope  | plateau | R2   |
|------------|-----------|--------|---------|------|
| NGLY1_KO_1 | 58.88     | -0.031 | 0       | 0.97 |
| NGLY1_1    | 59.18     | -0.029 | 0       | 0.98 |
| NGLY1_KO_2 | 61.46     | -0.022 | 0       | 0.92 |
| NGLY1_2    | –         | -0.027 | 0.45    | 0.97 |

Supplement: Supplementary file 2388 [file 1]

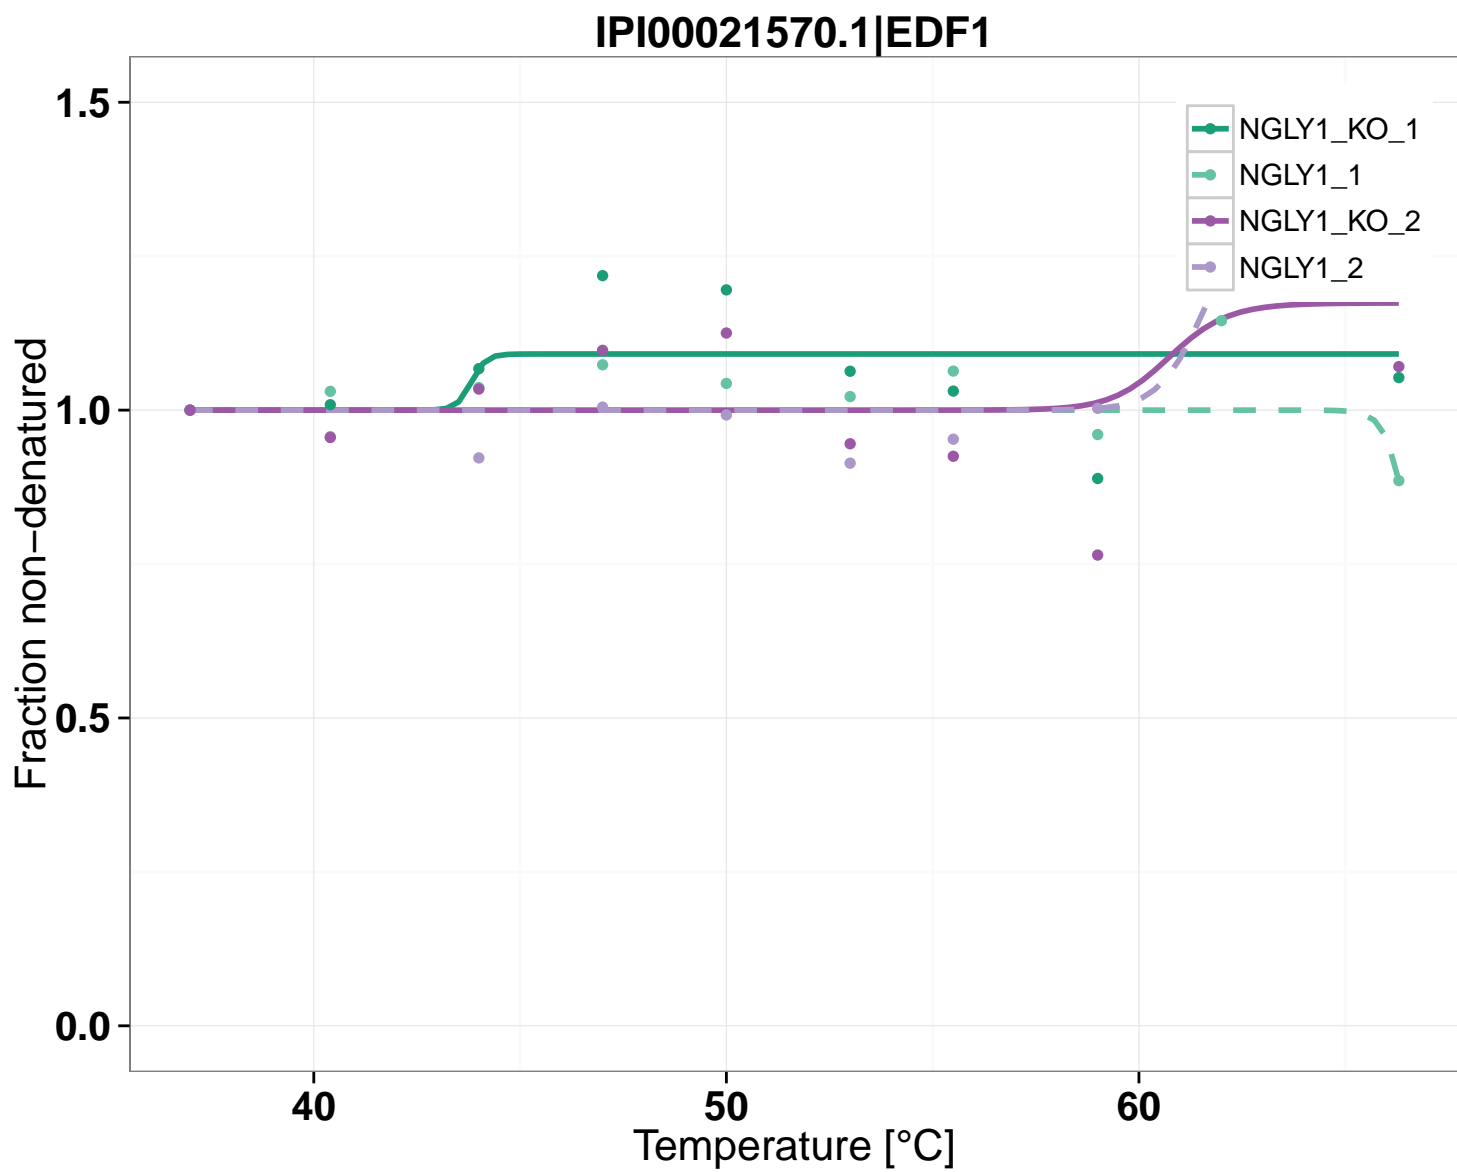

|            | meltPoint | slope | plateau | R2   |
|------------|-----------|-------|---------|------|
| NGLY1_KO_1 | –         | 0.13  | 1.09    | 0.12 |
| NGLY1_1    | –         | –     | 0       | 0.15 |
| NGLY1_KO_2 | –         | 0.062 | 1.17    | 0.27 |
| NGLY1_2    | –         | 0.15  | 1.35    | 0.9  |

Supplement: Supplementary file 2389 [file 1]

# IPI00878611.1|RANBP1

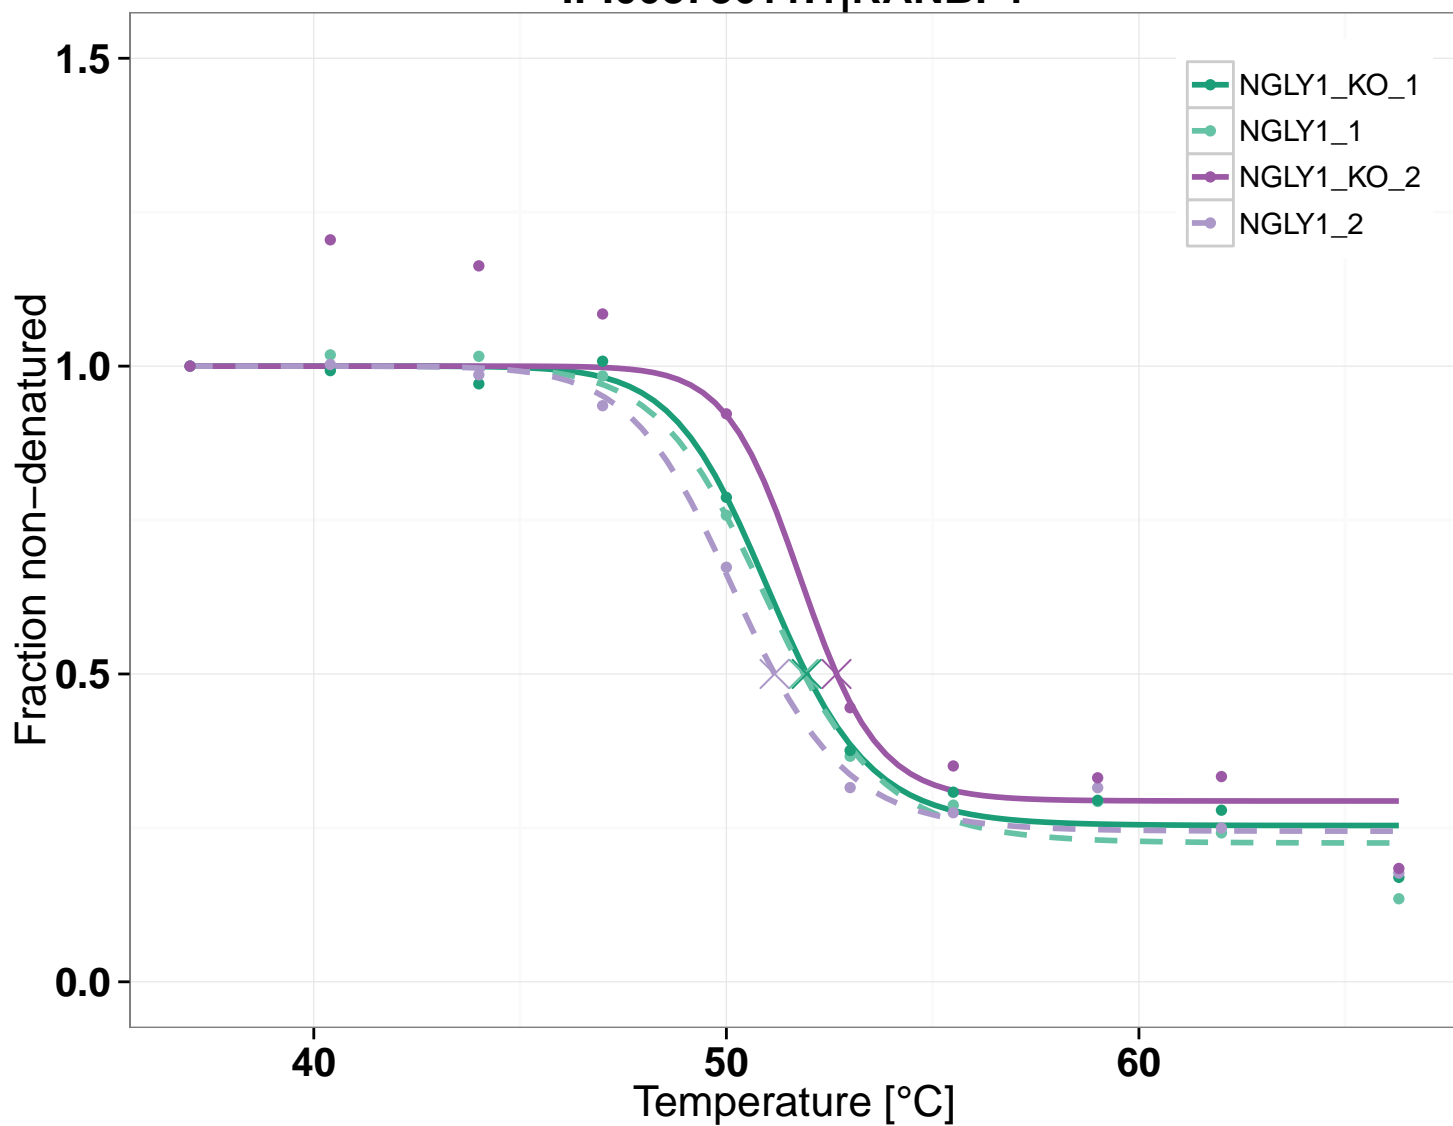

|            | meltPoint | slope | plateau | R2   |
|------------|-----------|-------|---------|------|
| NGLY1_KO_1 | 51.95     | -0.16 | 0.25    | 0.99 |
| NGLY1_1    | 51.87     | -0.14 | 0.23    | 0.99 |
| NGLY1_KO_2 | 52.67     | -0.19 | 0.29    | 0.94 |
| NGLY1_2    | 51.17     | -0.14 | 0.24    | 0.99 |

Supplement: Supplementary file 2390 [file 1]

IPI00217200.5|STXBP4

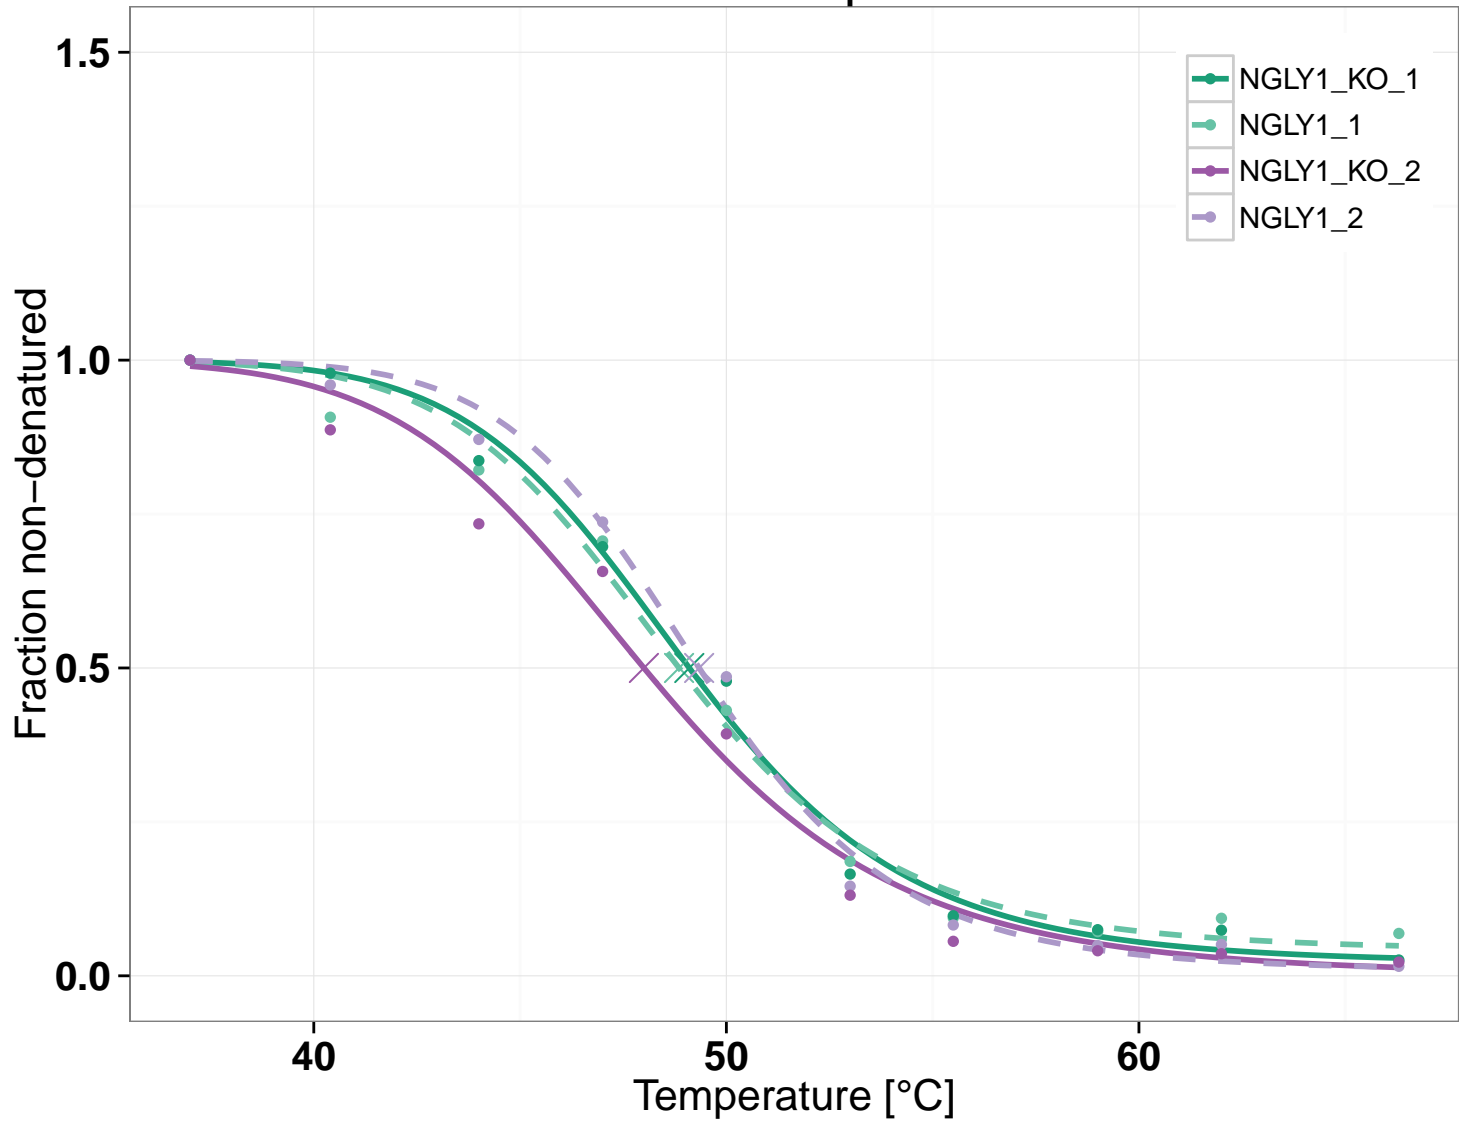

|            | meltPoint | slope  | plateau | R2   |
|------------|-----------|--------|---------|------|
| NGLY1_KO_1 | 49.1      | -0.091 | 0.02    | 0.99 |
| NGLY1_1    | 48.85     | -0.089 | 0.04    | 0.99 |
| NGLY1_KO_2 | 48        | -0.082 | 0       | 0.98 |
| NGLY1_2    | 49.34     | -0.1   | 0.01    | 0.99 |

Supplement: Supplementary file 2391 [file 1]

IPI00549236.2|CCDC90B

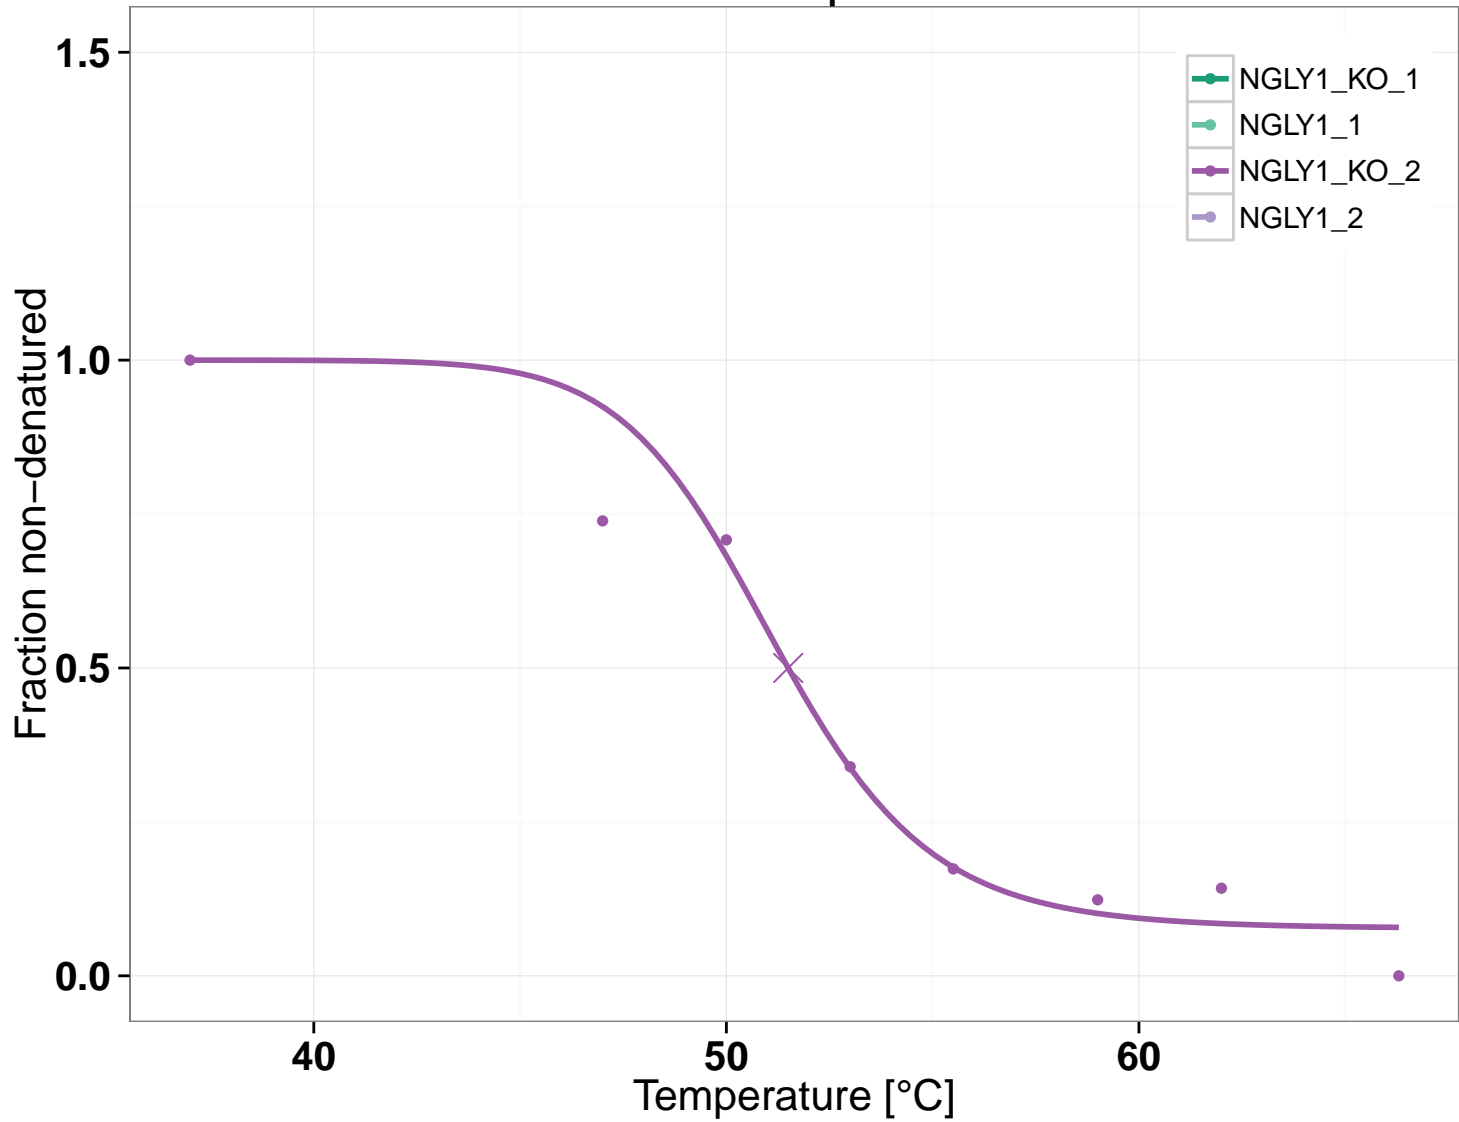

|            | meltPoint | slope | plateau | R2   |
|------------|-----------|-------|---------|------|
| NGLY1_KO_1 | —         | —     | —       | —    |
| NGLY1_1    | —         | —     | —       | —    |
| NGLY1_KO_2 | 51.5      | -0.12 | 0.08    | 0.63 |
| NGLY1_2    | —         | —     | —       | —    |

Supplement: Supplementary file 2392 [file 1]

# IPI00013184.1|ARD1A

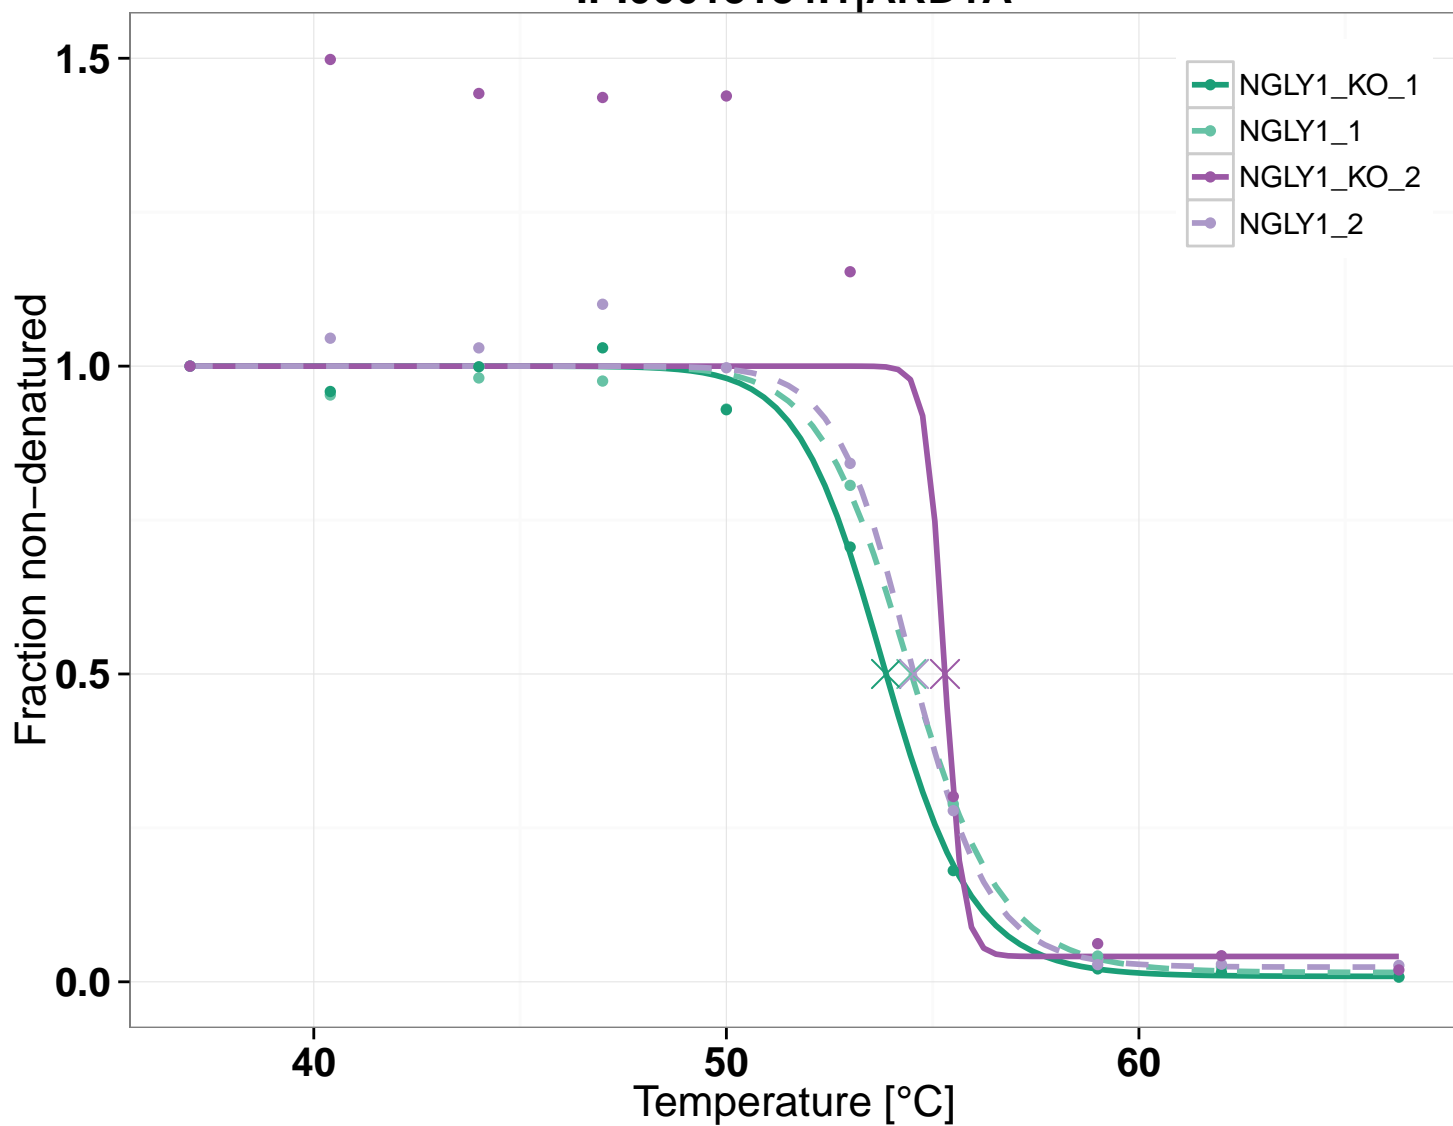

|            | meltPoint | slope | plateau | R2   |
|------------|-----------|-------|---------|------|
| NGLY1_KO_1 | 53.87     | -0.23 | 0.01    | 1    |
| NGLY1_1    | 54.48     | -0.22 | 0.02    | 1    |
| NGLY1_KO_2 | 55.3      | -1.1  | 0.04    | 0.78 |
| NGLY1_2    | 54.55     | -0.26 | 0.02    | 0.99 |

Supplement: Supplementary file 2393 [file 1]

IPI00514501.1|C1ORF57

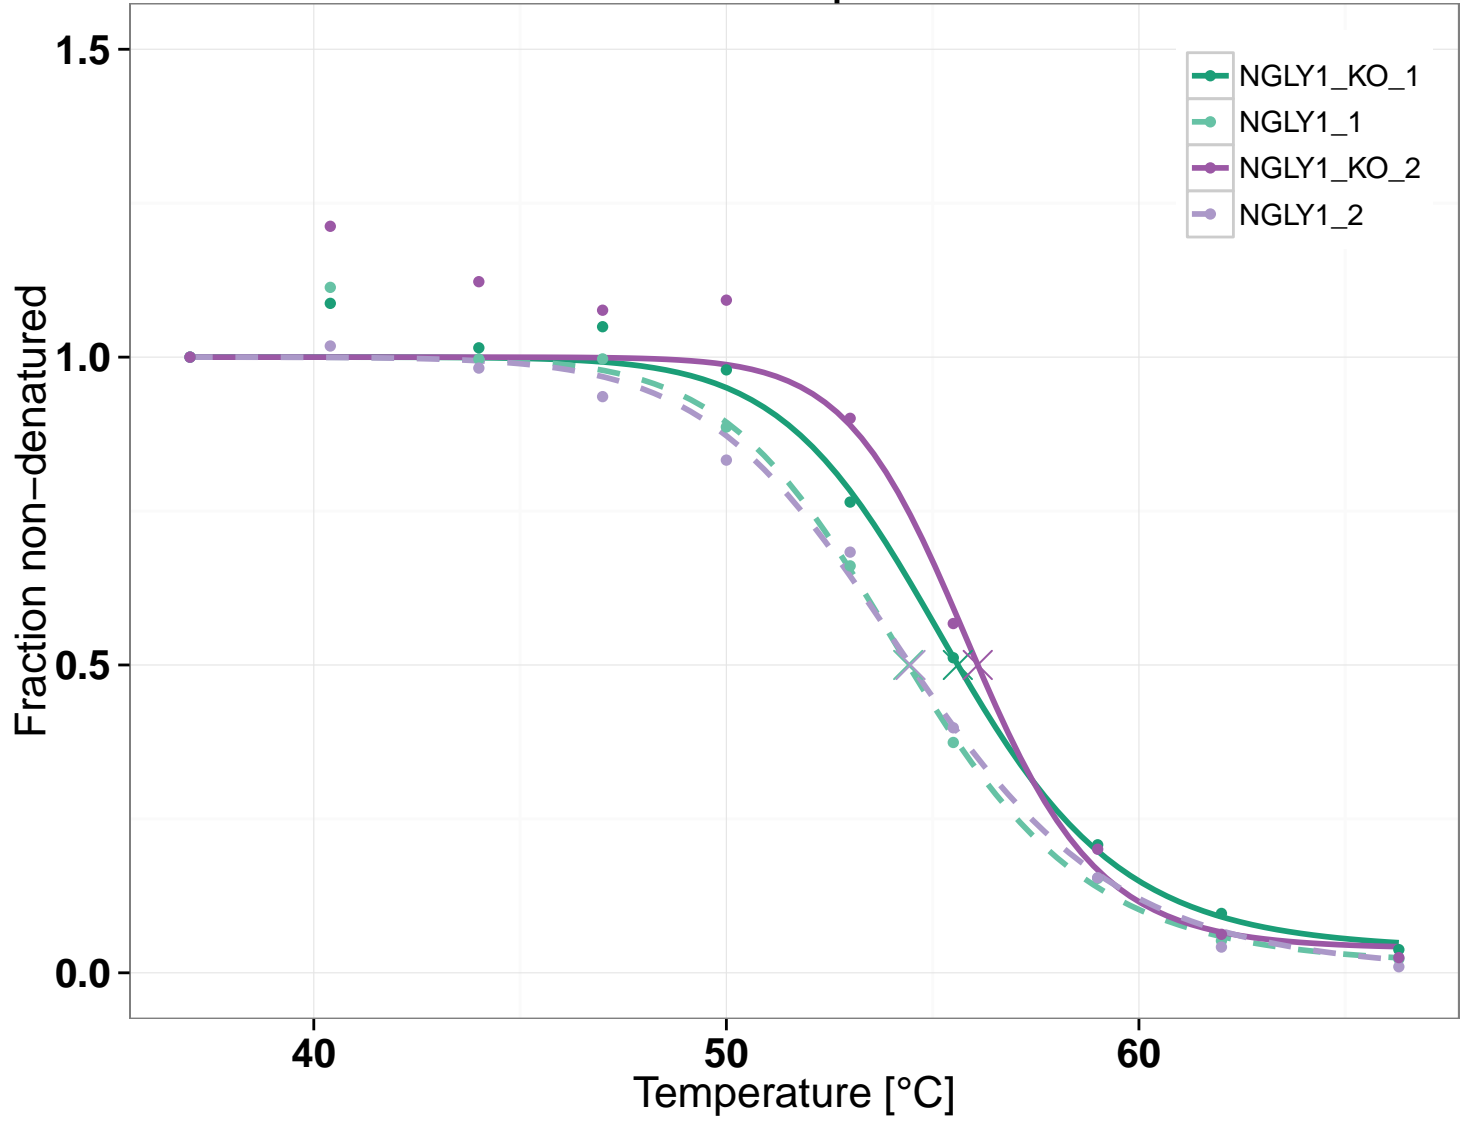

|            | meltPoint | slope | plateau | R2   |
|------------|-----------|-------|---------|------|
| NGLY1_KO_1 | 55.61     | -0.12 | 0.04    | 0.99 |
| NGLY1_1    | 54.41     | -0.11 | 0.01    | 0.99 |
| NGLY1_KO_2 | 56.09     | -0.16 | 0.04    | 0.96 |
| NGLY1_2    | 54.46     | -0.1  | 0       | 1    |

Supplement: Supplementary file 2394 [file 1]

IPI00555734.3|ASRGL1

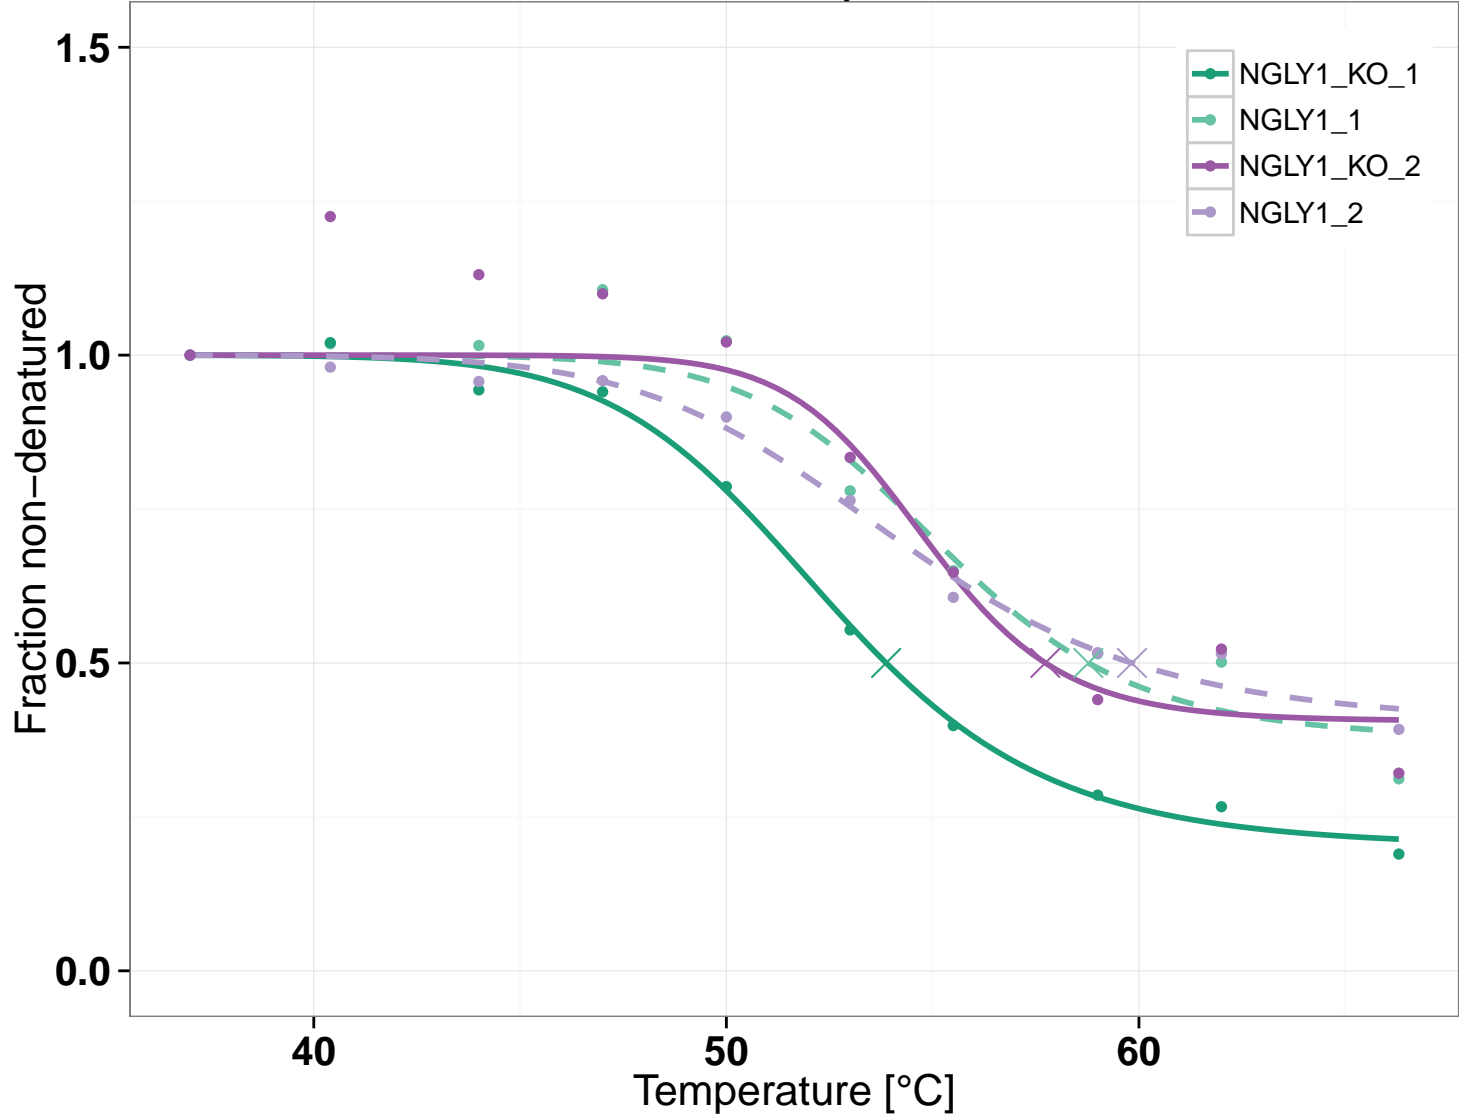

|            | meltPoint | slope  | plateau | R2   |
|------------|-----------|--------|---------|------|
| NGLY1_KO_1 | 53.87     | -0.076 | 0.2     | 1    |
| NGLY1_1    | 58.77     | -0.066 | 0.38    | 0.95 |
| NGLY1_KO_2 | 57.73     | -0.09  | 0.41    | 0.89 |
| NGLY1_2    | 59.83     | -0.048 | 0.4     | 0.99 |

Supplement: Supplementary file 2395 [file 1]

IPI00168340.4|SLC38A9

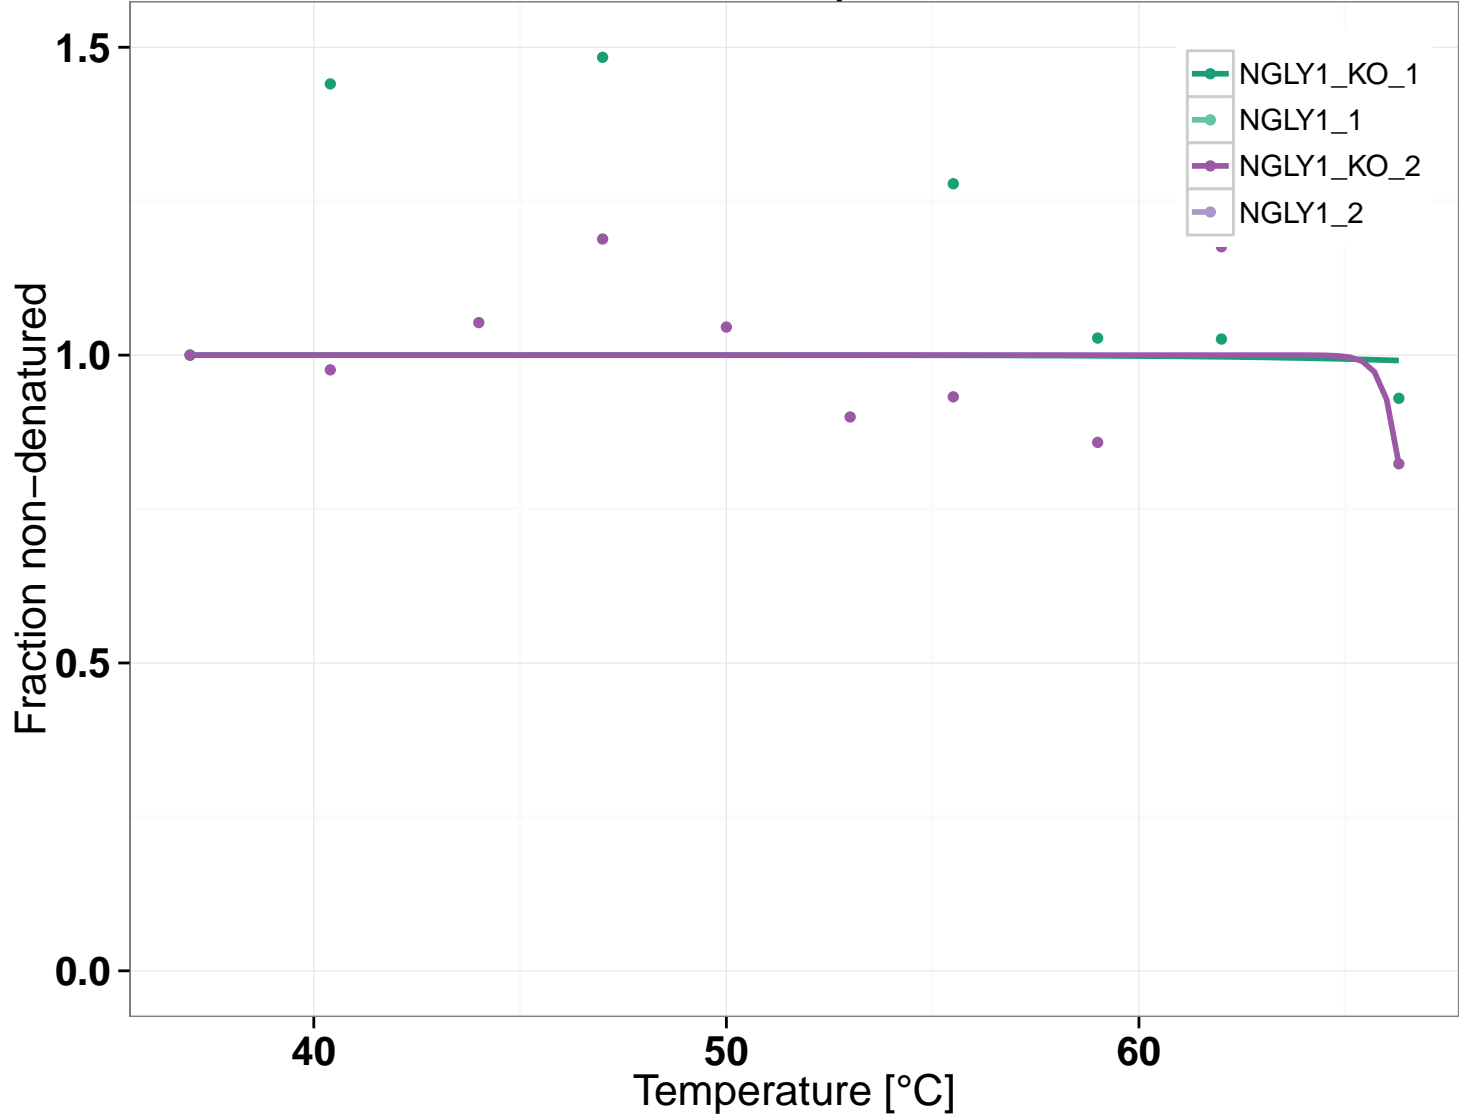

|            | meltPoint | slope | plateau | R2    |
|------------|-----------|-------|---------|-------|
| NGLY1_KO_1 | -         | -     | 0       | -1.09 |
| NGLY1_1    | -         | -     | -       | -     |
| NGLY1_KO_2 | -         | -     | 0       | 0.22  |
| NGLY1_2    | -         | -     | -       | -     |

Supplement: Supplementary file 2396 [file 1]

IPI00152688.1|NSUN6

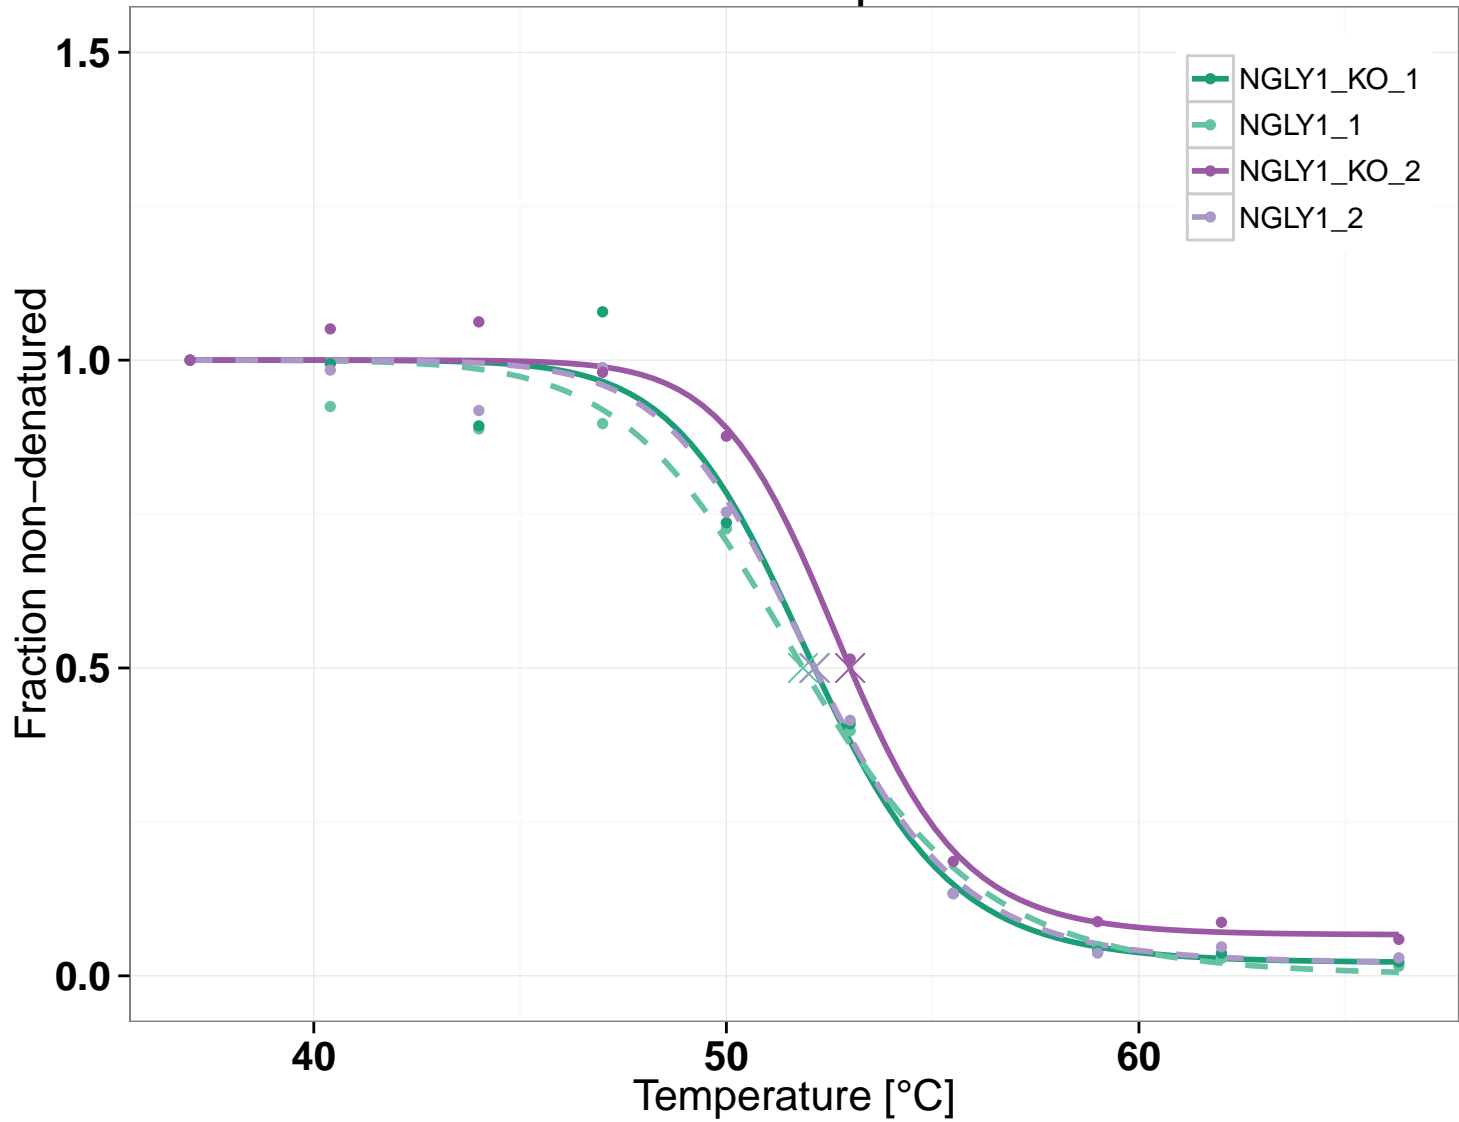

|            | meltPoint | slope | plateau | R2   |
|------------|-----------|-------|---------|------|
| NGLY1_KO_1 | 52.14     | -0.14 | 0.02    | 0.99 |
| NGLY1_1    | 51.86     | -0.11 | 0       | 0.99 |
| NGLY1_KO_2 | 53        | -0.16 | 0.07    | 1    |
| NGLY1_2    | 52.14     | -0.14 | 0.02    | 0.99 |

Supplement: Supplementary file 2397 [file 1]

# IPI00027834.3|HNRNPL

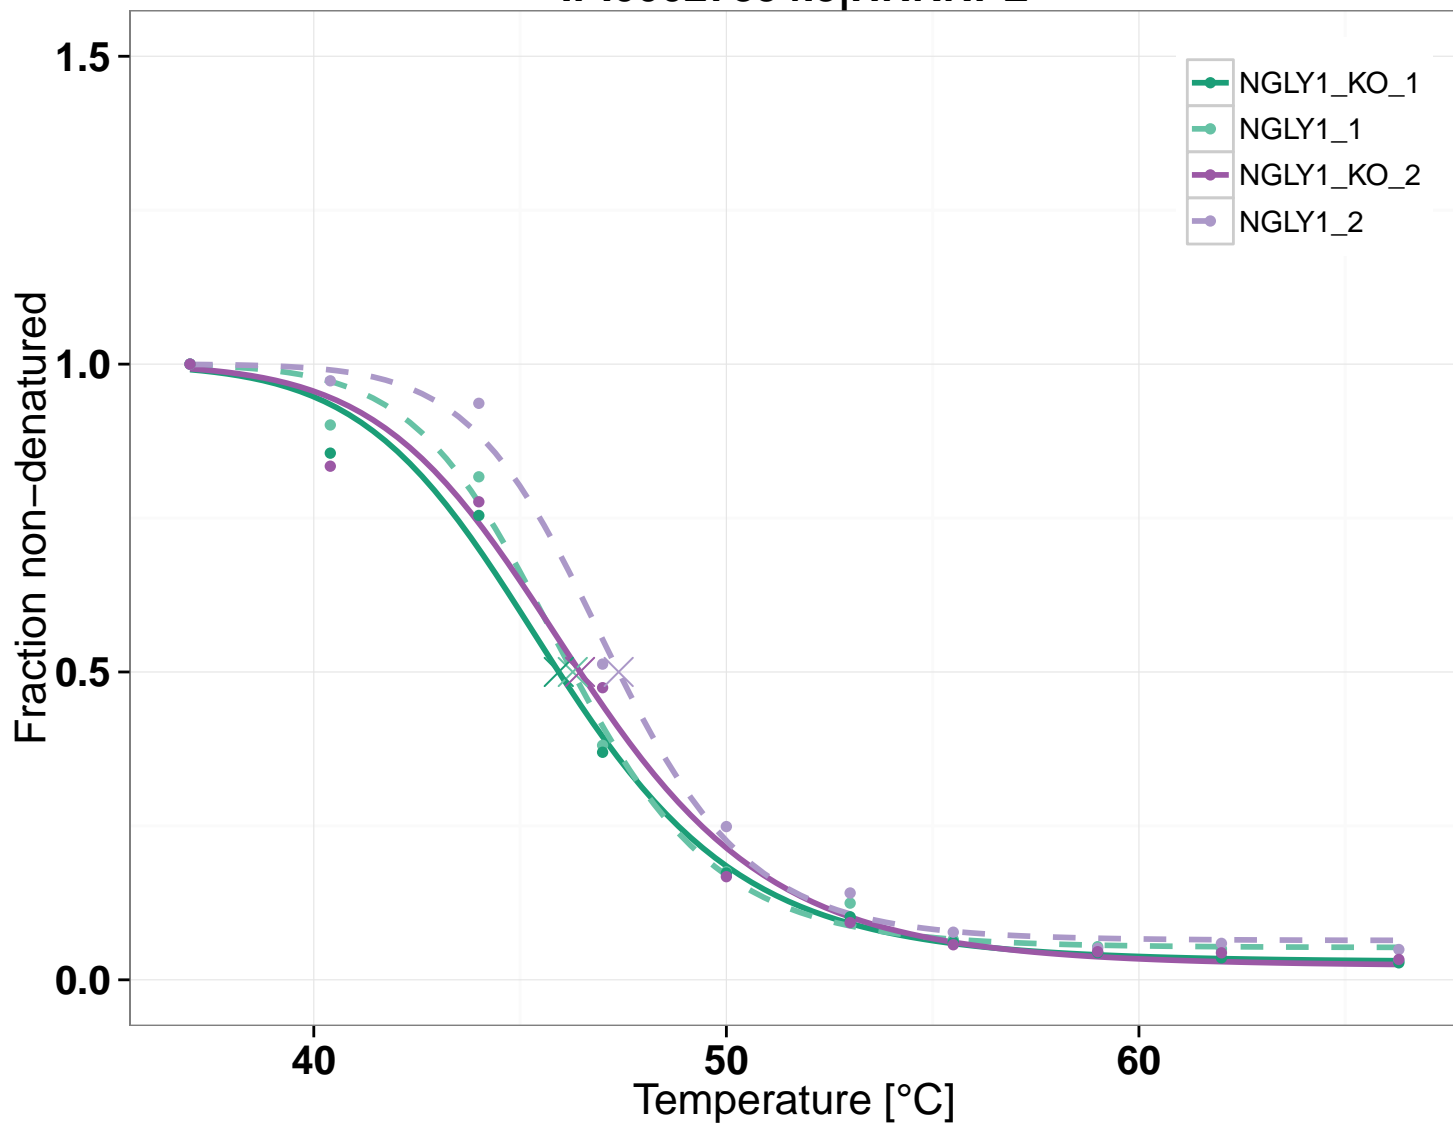

|            | meltPoint | slope | plateau | R2   |
|------------|-----------|-------|---------|------|
| NGLY1_KO_1 | 45.94     | -0.11 | 0.03    | 0.99 |
| NGLY1_1    | 46.28     | -0.13 | 0.05    | 0.99 |
| NGLY1_KO_2 | 46.45     | -0.1  | 0.02    | 0.99 |
| NGLY1_2    | 47.39     | -0.14 | 0.06    | 1    |

Supplement: Supplementary file 2398 [file 1]

IPI00514213.2|ZFAND5

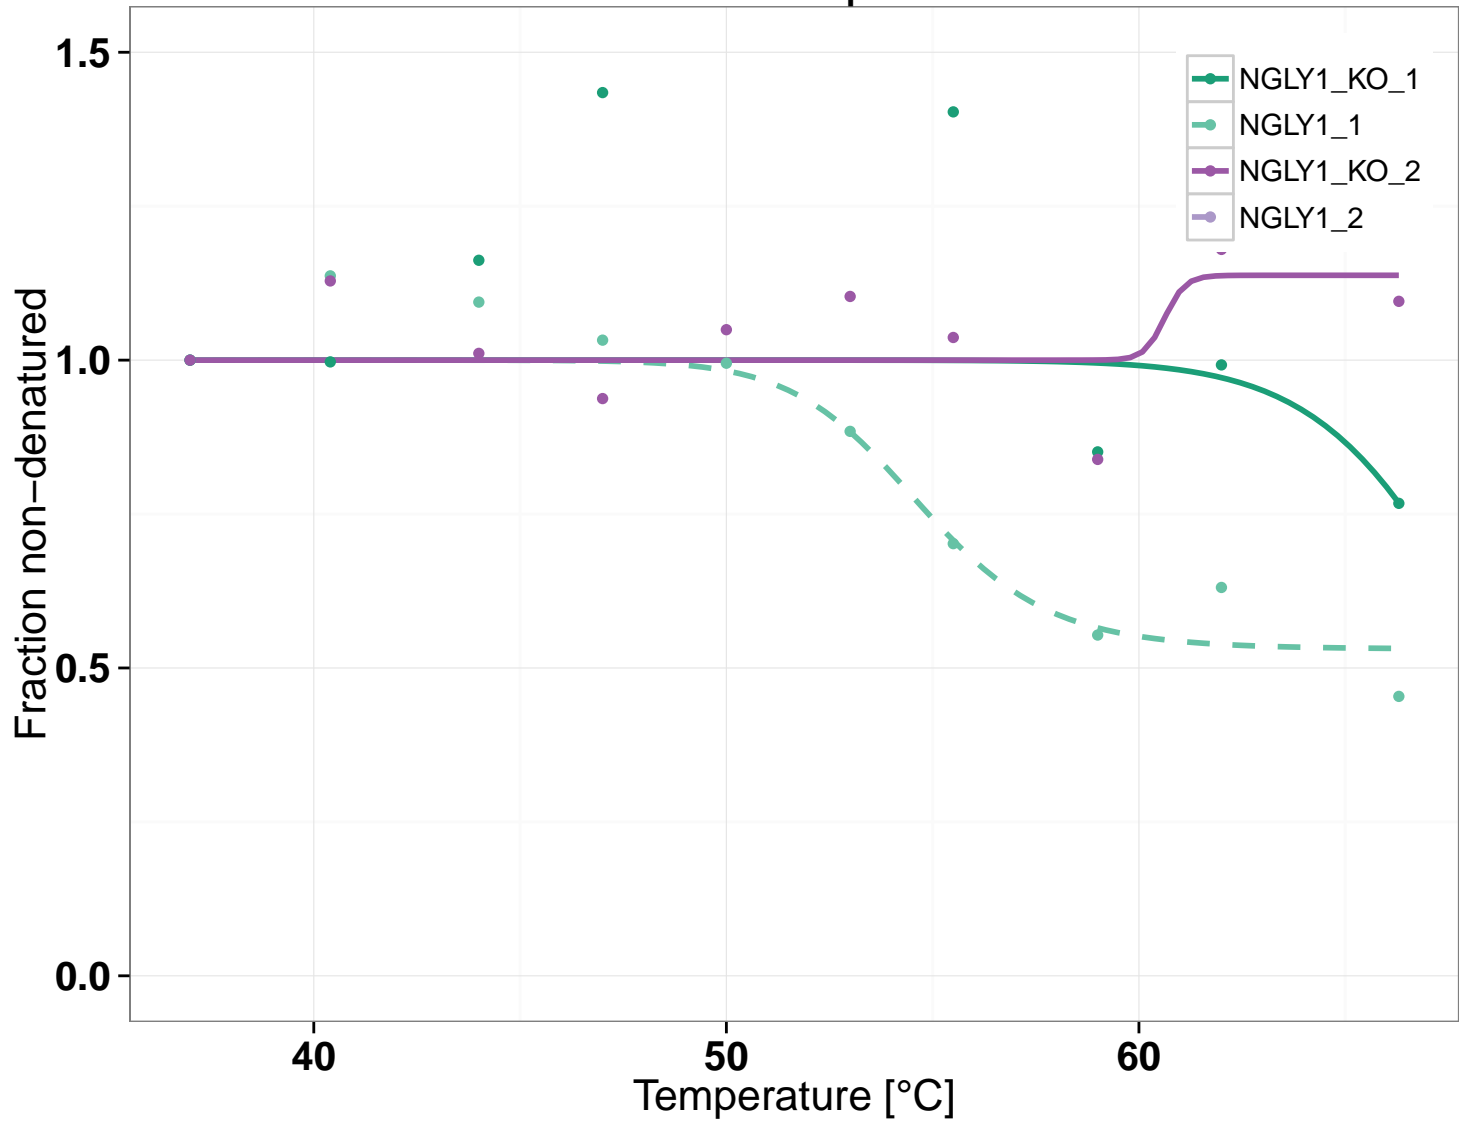

|            | meltPoint | slope  | plateau | R2    |
|------------|-----------|--------|---------|-------|
| NGLY1_KO_1 | -         | -      | 0       | -0.31 |
| NGLY1_1    | -         | -0.075 | 0.53    | 0.92  |
| NGLY1_KO_2 | -         | 0.14   | 1.14    | 0.26  |
| NGLY1_2    | -         | -      | -       | -     |

Supplement: Supplementary file 2399 [file 1]

# IPI00019178.2|PSPH

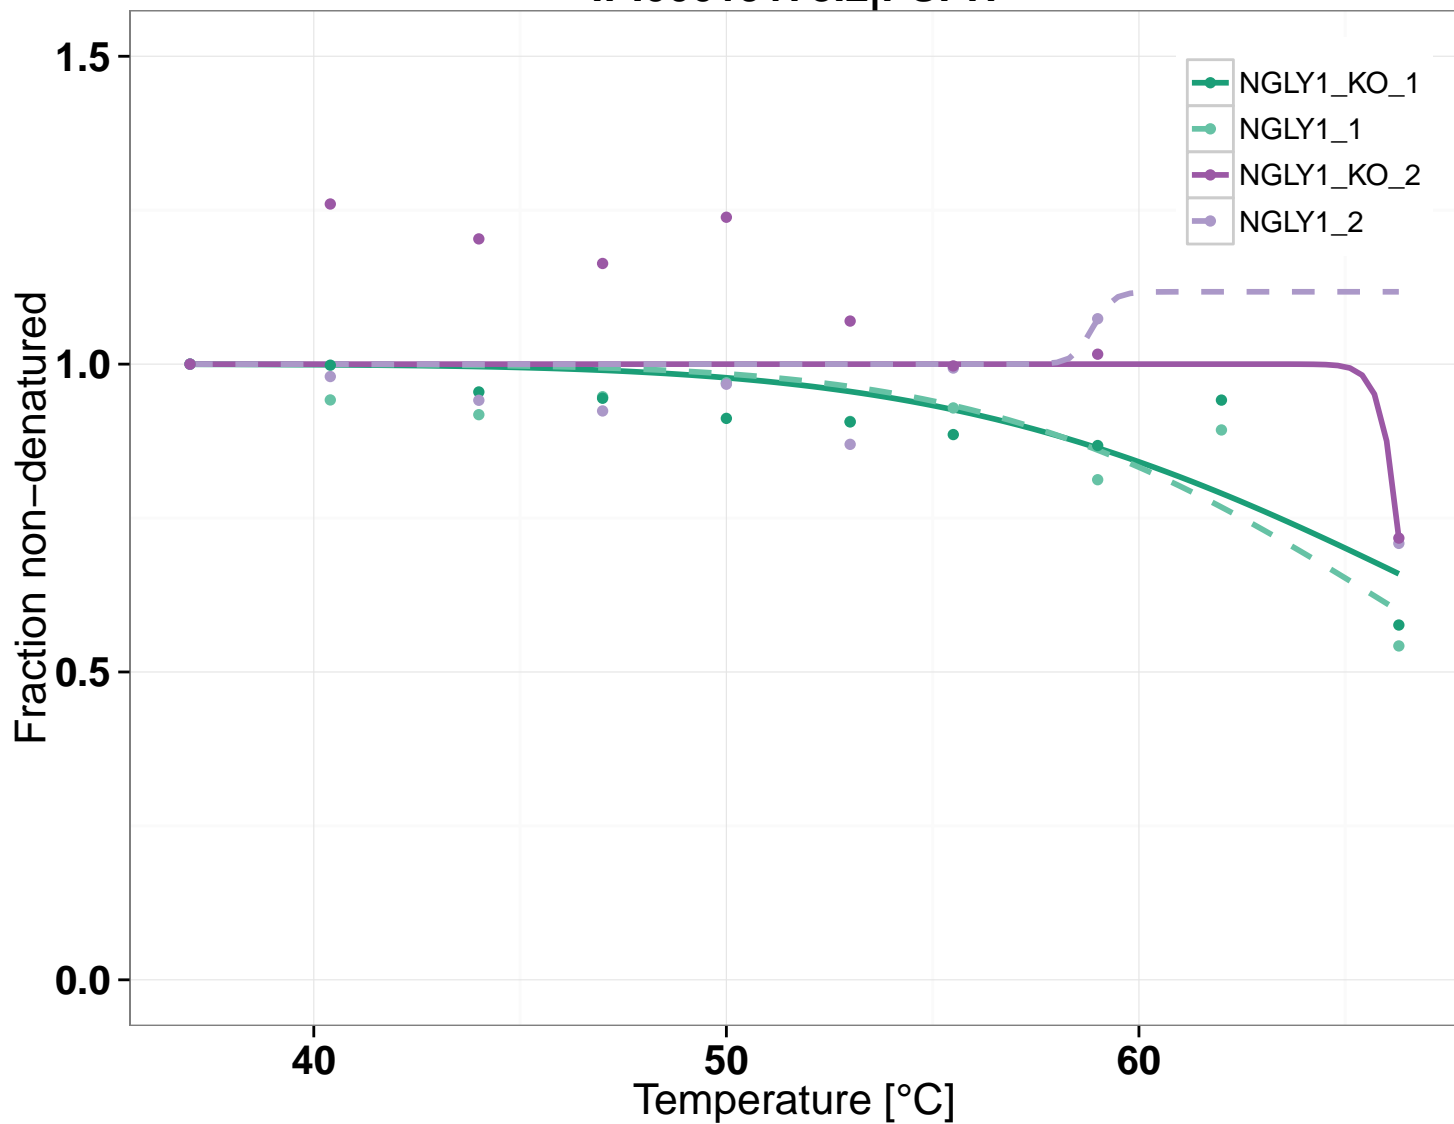

|            | meltPoint | slope | plateau | R2    |
|------------|-----------|-------|---------|-------|
| NGLY1_KO_1 | -         | -     | 0       | 0.68  |
| NGLY1_1    | -         | -     | 0       | 0.76  |
| NGLY1_KO_2 | -         | -     | 0       | -0.05 |
| NGLY1_2    | -         | 0.12  | 1.12    | 0.08  |

Supplement: Supplementary file 2400 [file 1]

IPI00006906.3|C12ORF4

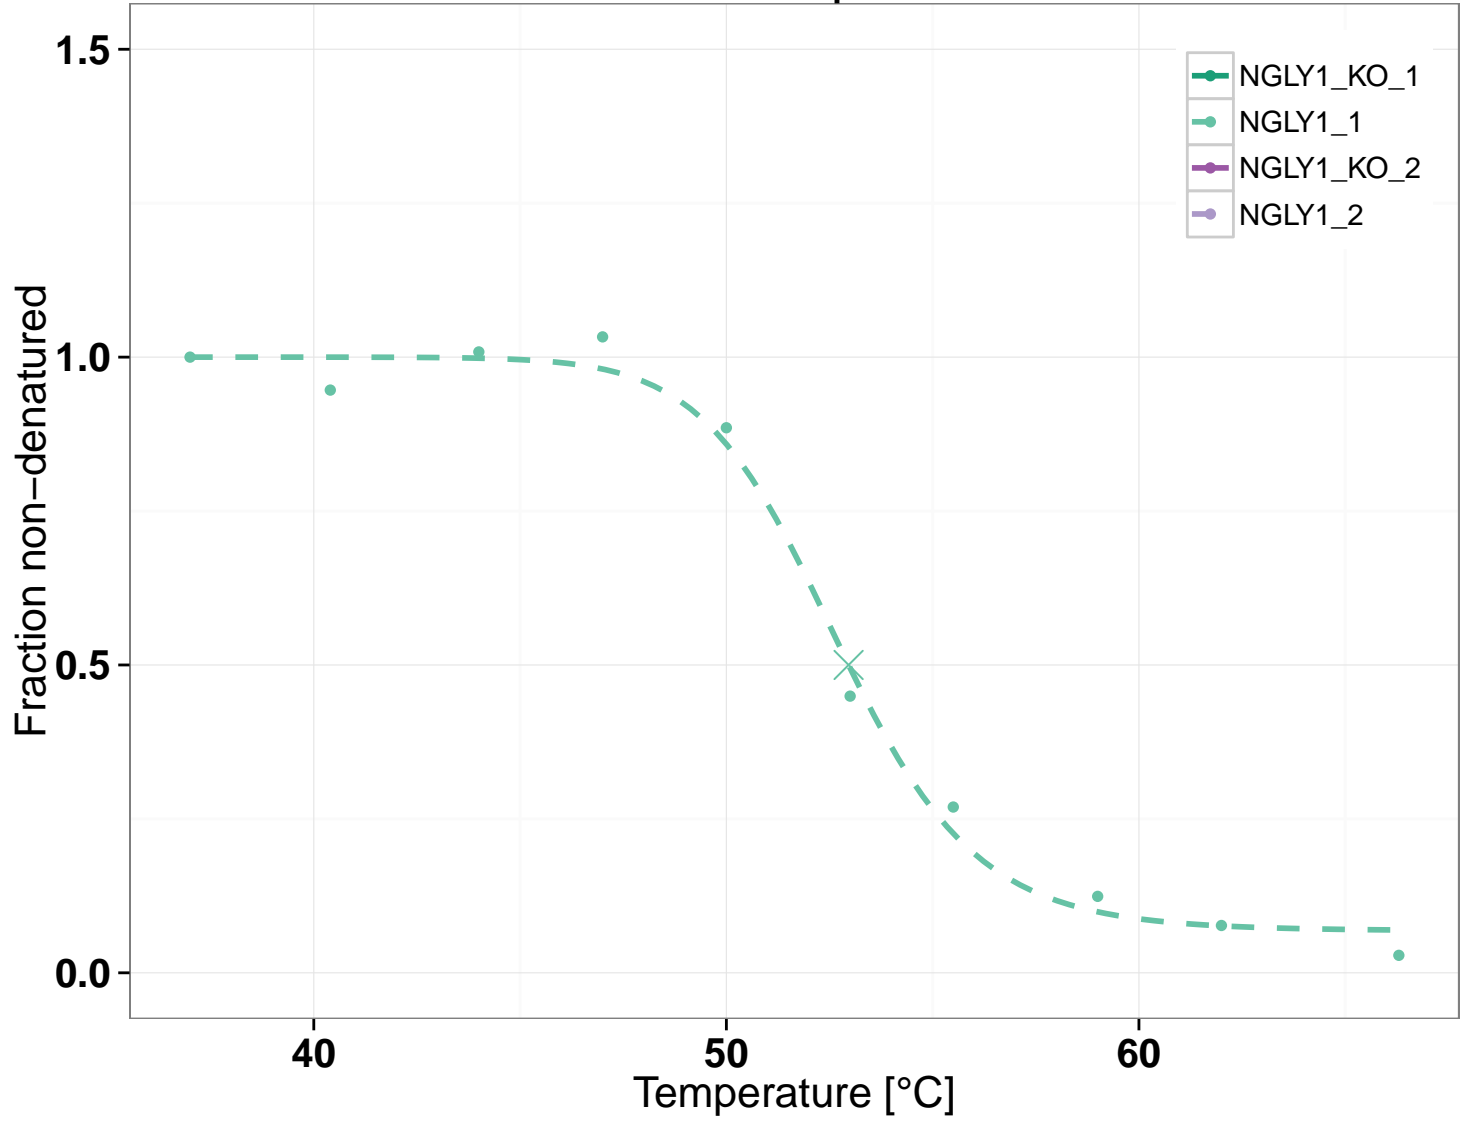

|            | meltPoint | slope | plateau | R2   |
|------------|-----------|-------|---------|------|
| NGLY1_KO_1 | -         | -     | -       | -    |
| NGLY1_1    | 52.96     | -0.14 | 0.07    | 0.99 |
| NGLY1_KO_2 | -         | -     | -       | -    |
| NGLY1_2    | -         | -     | -       | -    |

Supplement: Supplementary file 2401 [file 1]

# IPI00299904.3|MCM7

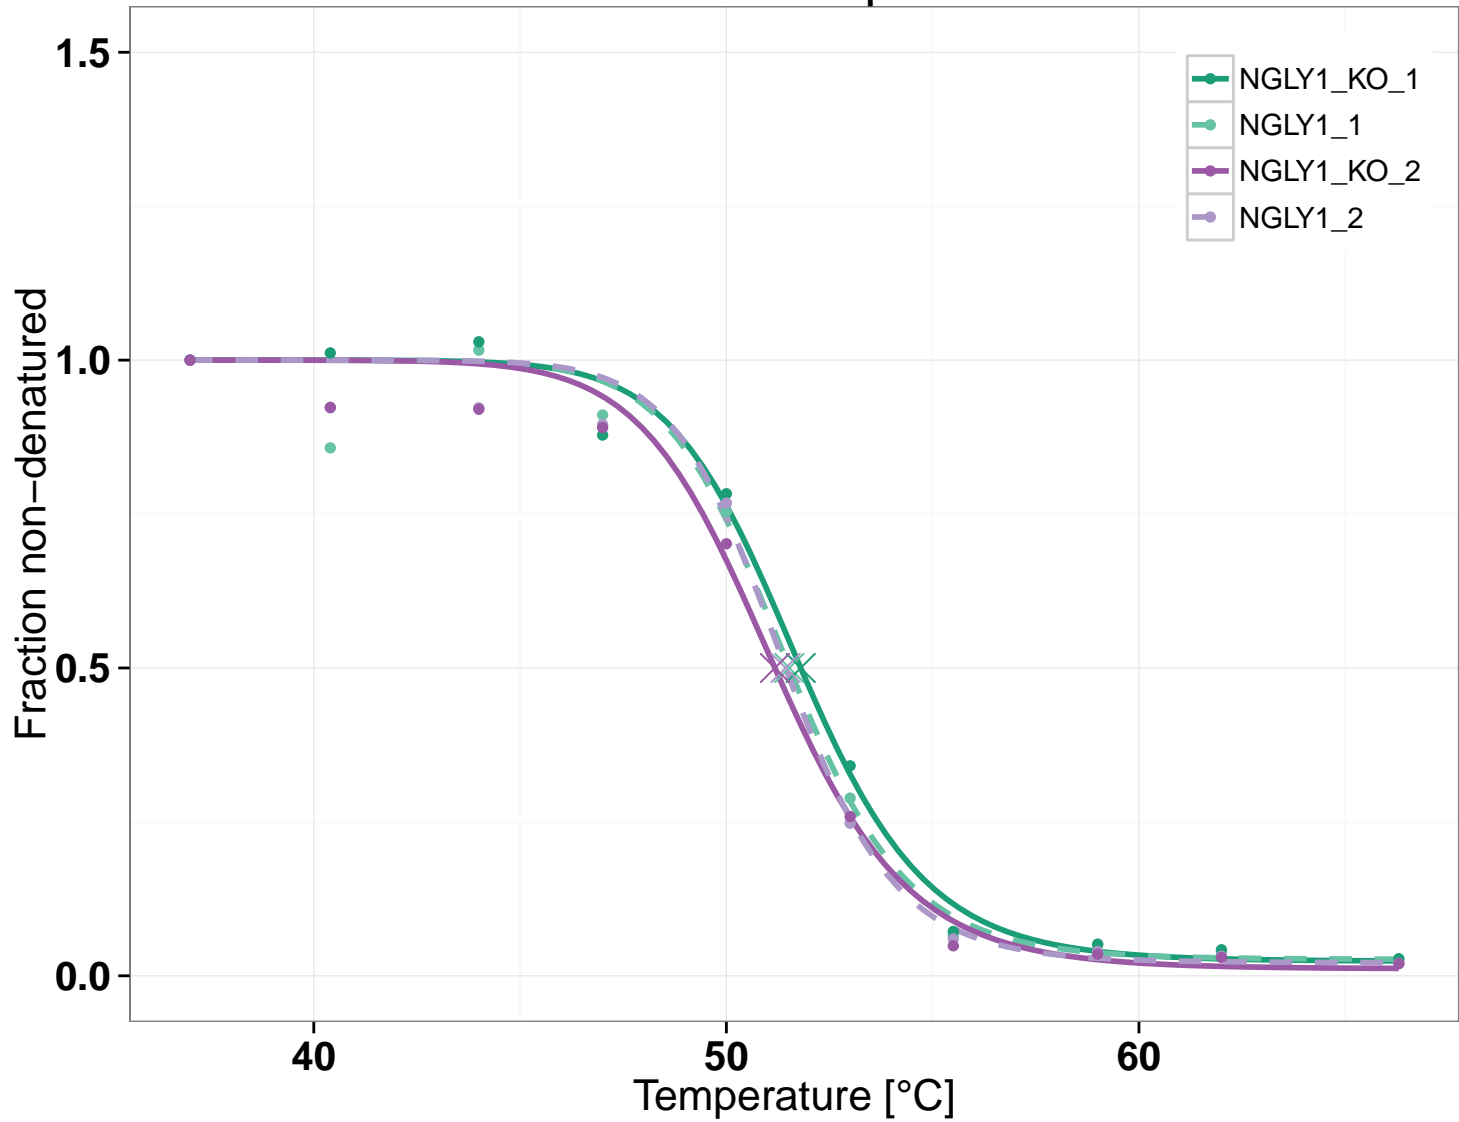

|            | meltPoint | slope | plateau | R2   |
|------------|-----------|-------|---------|------|
| NGLY1_KO_1 | 51.8      | -0.16 | 0.02    | 0.99 |
| NGLY1_1    | 51.53     | -0.17 | 0.03    | 0.99 |
| NGLY1_KO_2 | 51.18     | -0.15 | 0.01    | 0.99 |
| NGLY1_2    | 51.44     | -0.18 | 0.02    | 0.99 |

Supplement: Supplementary file 2402 [file 1]

# IPI00013215.2|ORC1L

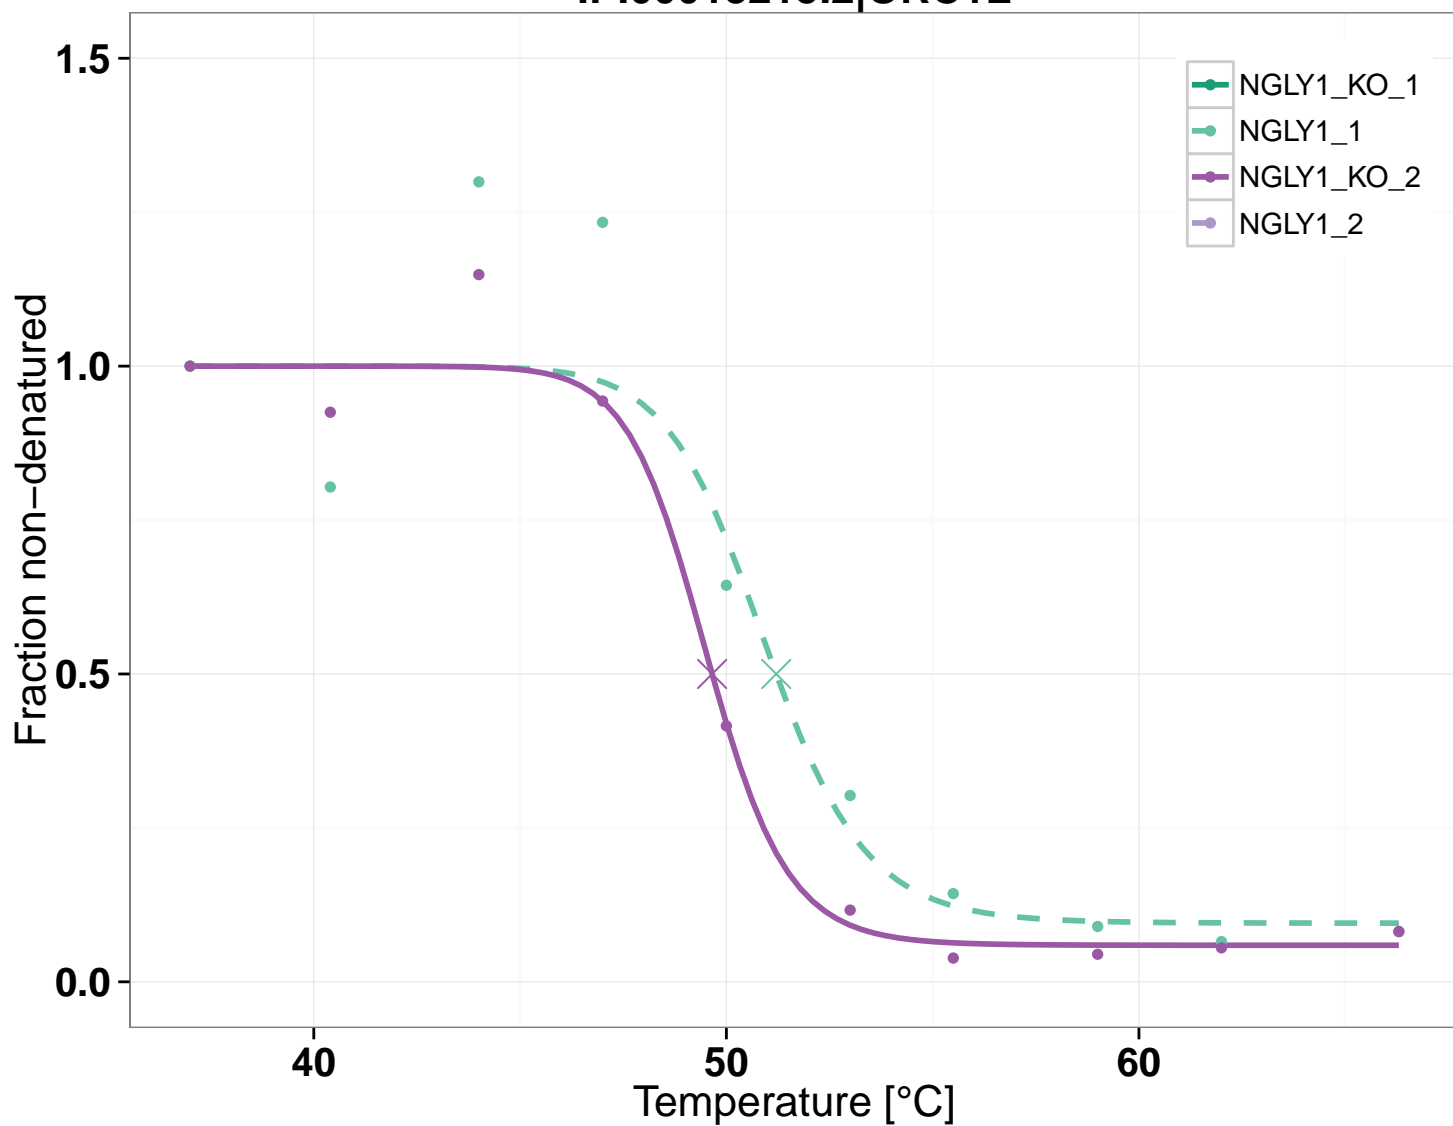

|            | meltPoint | slope | plateau | R2   |
|------------|-----------|-------|---------|------|
| NGLY1_KO_1 | –         | –     | –       | –    |
| NGLY1_1    | 51.21     | –0.19 | 0.1     | 0.91 |
| NGLY1_KO_2 | 49.66     | –0.24 | 0.06    | 0.98 |
| NGLY1_2    | –         | –     | –       | –    |

Supplement: Supplementary file 2403 [file 1]

IPI00456635.2|UNC13D

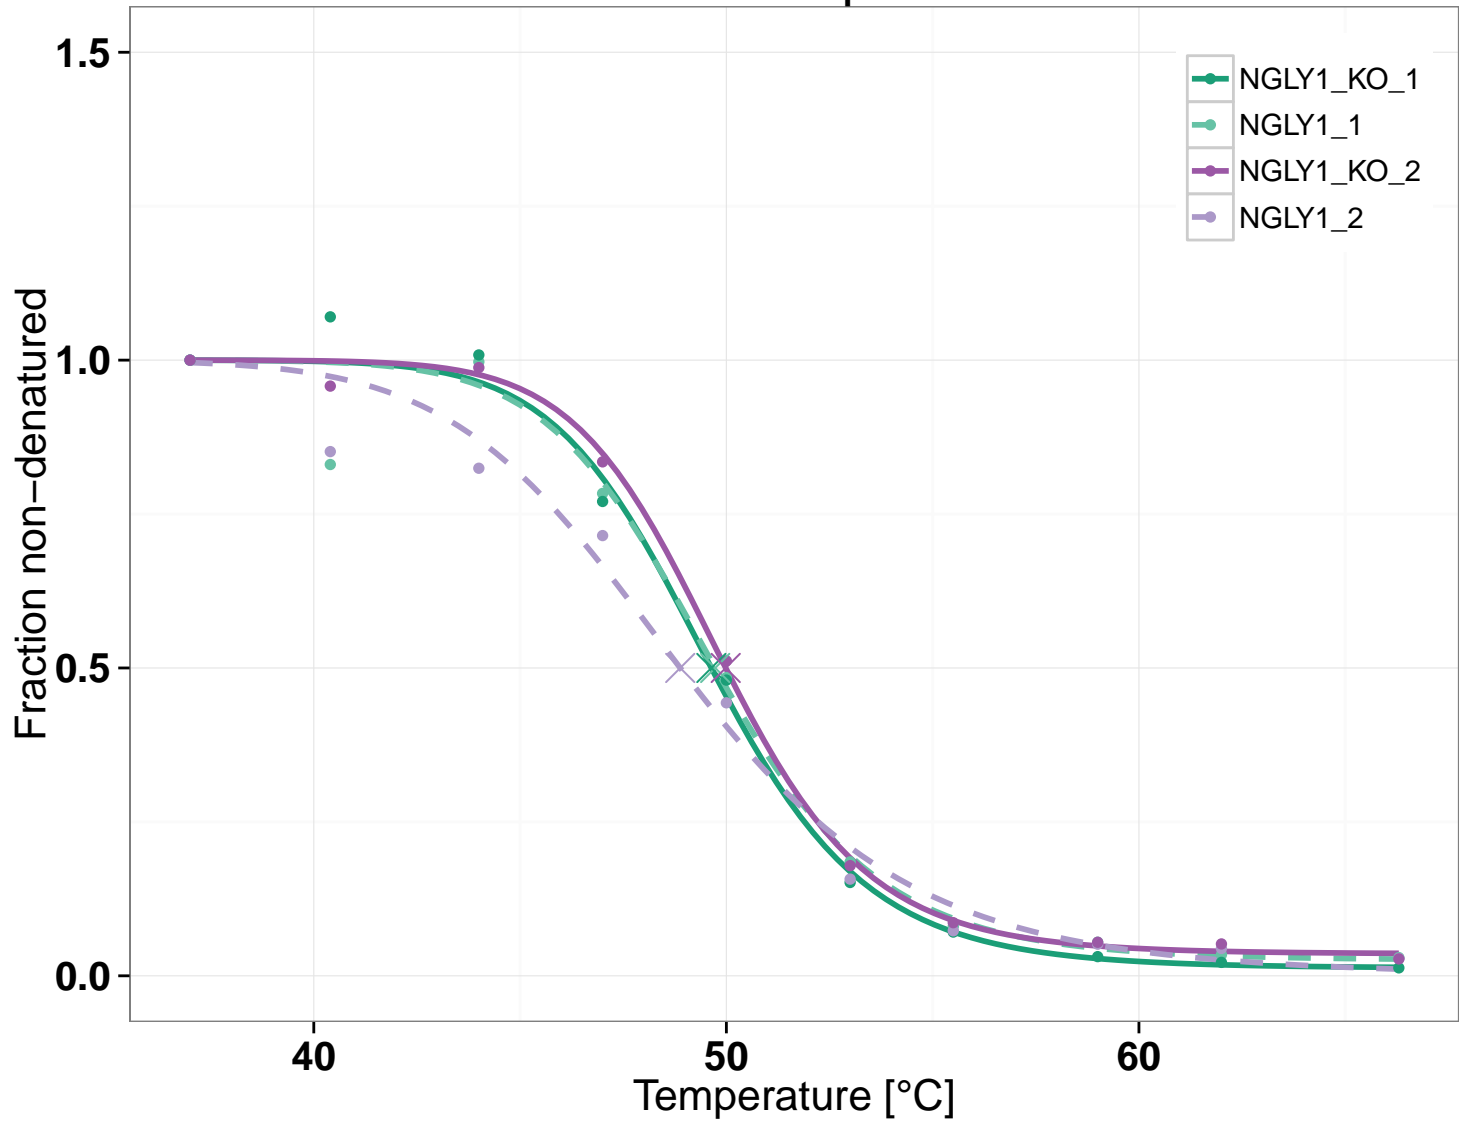

|            | meltPoint | slope  | plateau | R2   |
|------------|-----------|--------|---------|------|
| NGLY1_KO_1 | 49.64     | -0.13  | 0.01    | 0.99 |
| NGLY1_1    | 49.73     | -0.12  | 0.03    | 0.98 |
| NGLY1_KO_2 | 49.98     | -0.13  | 0.04    | 1    |
| NGLY1_2    | 48.88     | -0.089 | 0       | 0.98 |

Supplement: Supplementary file 2404 [file 1]

# IPI00307325.2|ZFP161

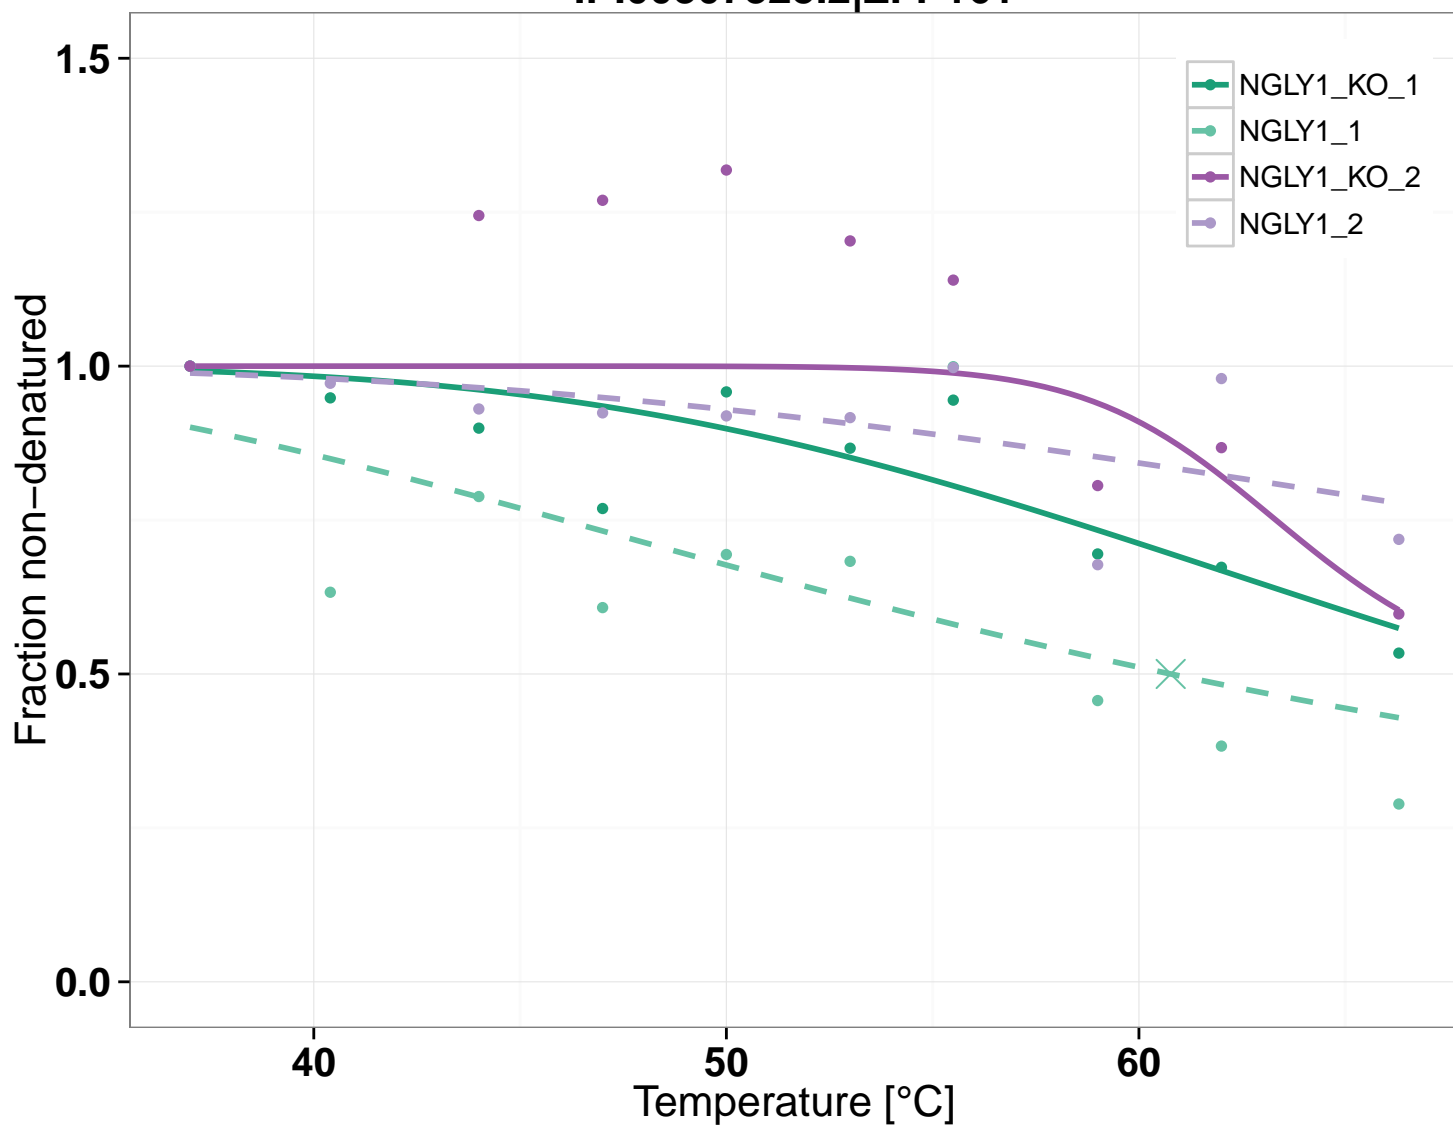

|            | meltPoint | slope  | plateau | R2   |
|------------|-----------|--------|---------|------|
| NGLY1_KO_1 | –         | –0.022 | 0       | 0.72 |
| NGLY1_1    | 60.77     | –0.019 | 0       | 0.44 |
| NGLY1_KO_2 | –         | –0.055 | 0.47    | 0.14 |
| NGLY1_2    | –         | –      | 0       | 0.36 |

Supplement: Supplementary file 2405 [file 1]

IPI00103028.2|AMDHD2

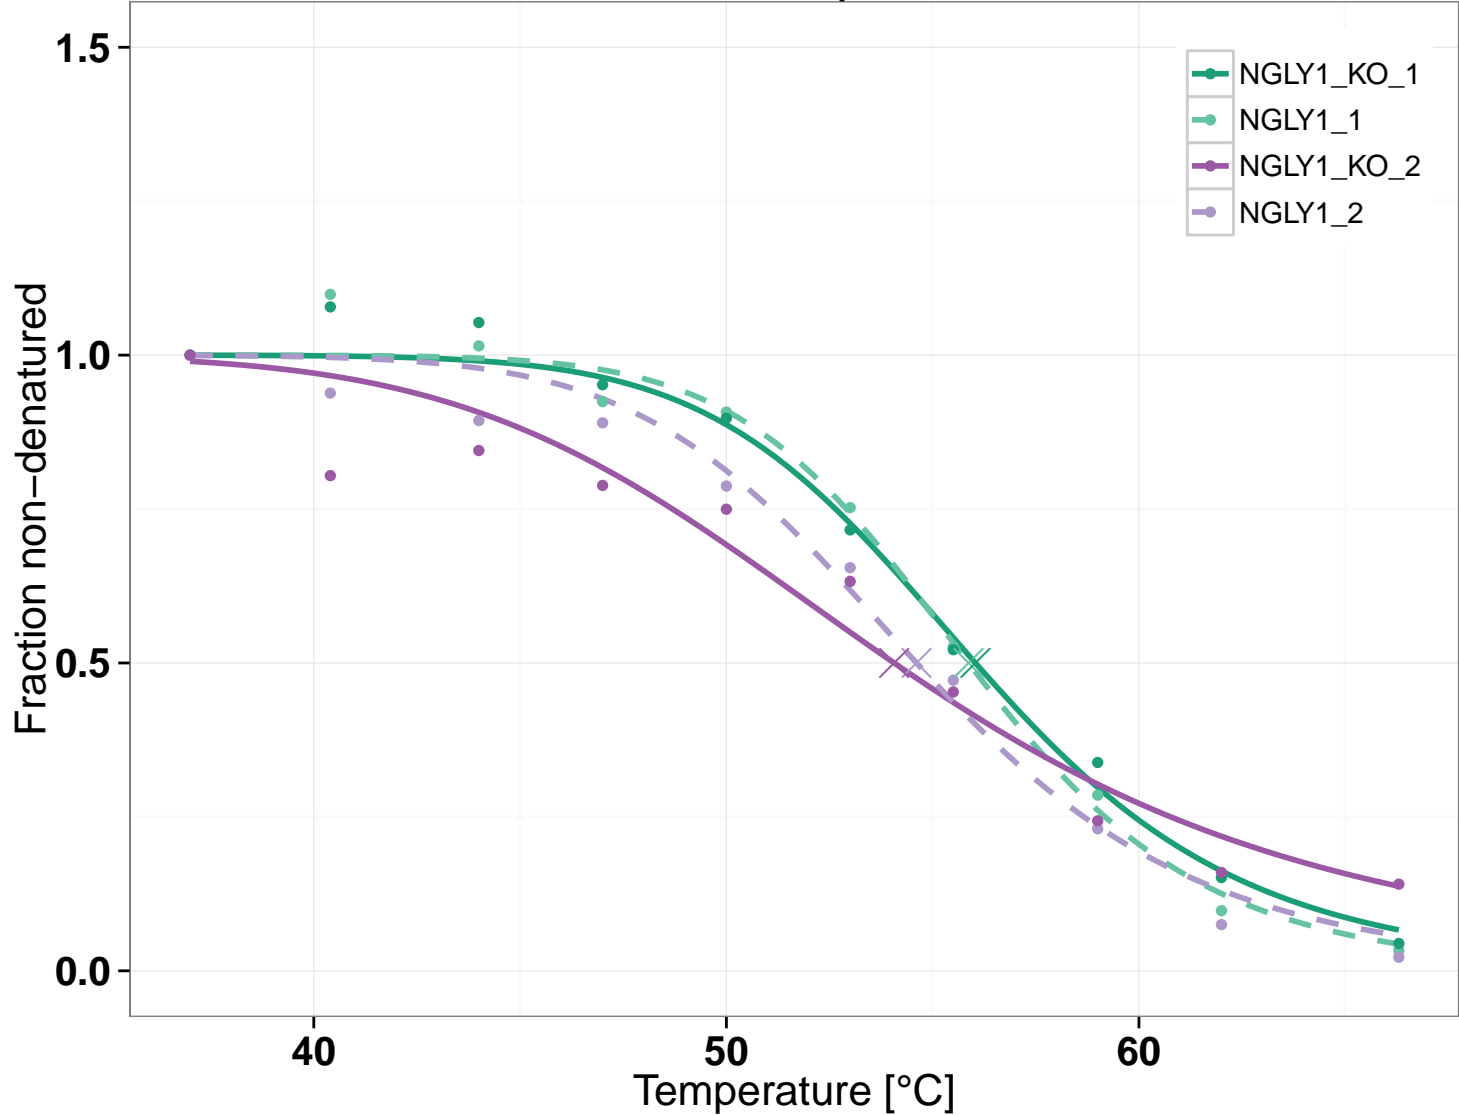

|            | meltPoint | slope  | plateau | R2   |
|------------|-----------|--------|---------|------|
| NGLY1_KO_1 | 56.04     | -0.077 | 0       | 0.99 |
| NGLY1_1    | 55.87     | -0.089 | 0       | 0.99 |
| NGLY1_KO_2 | 54.07     | -0.048 | 0       | 0.94 |
| NGLY1_2    | 54.61     | -0.074 | 0       | 0.98 |

Supplement: Supplementary file 2406 [file 1]

IPI00847793.1|DCD

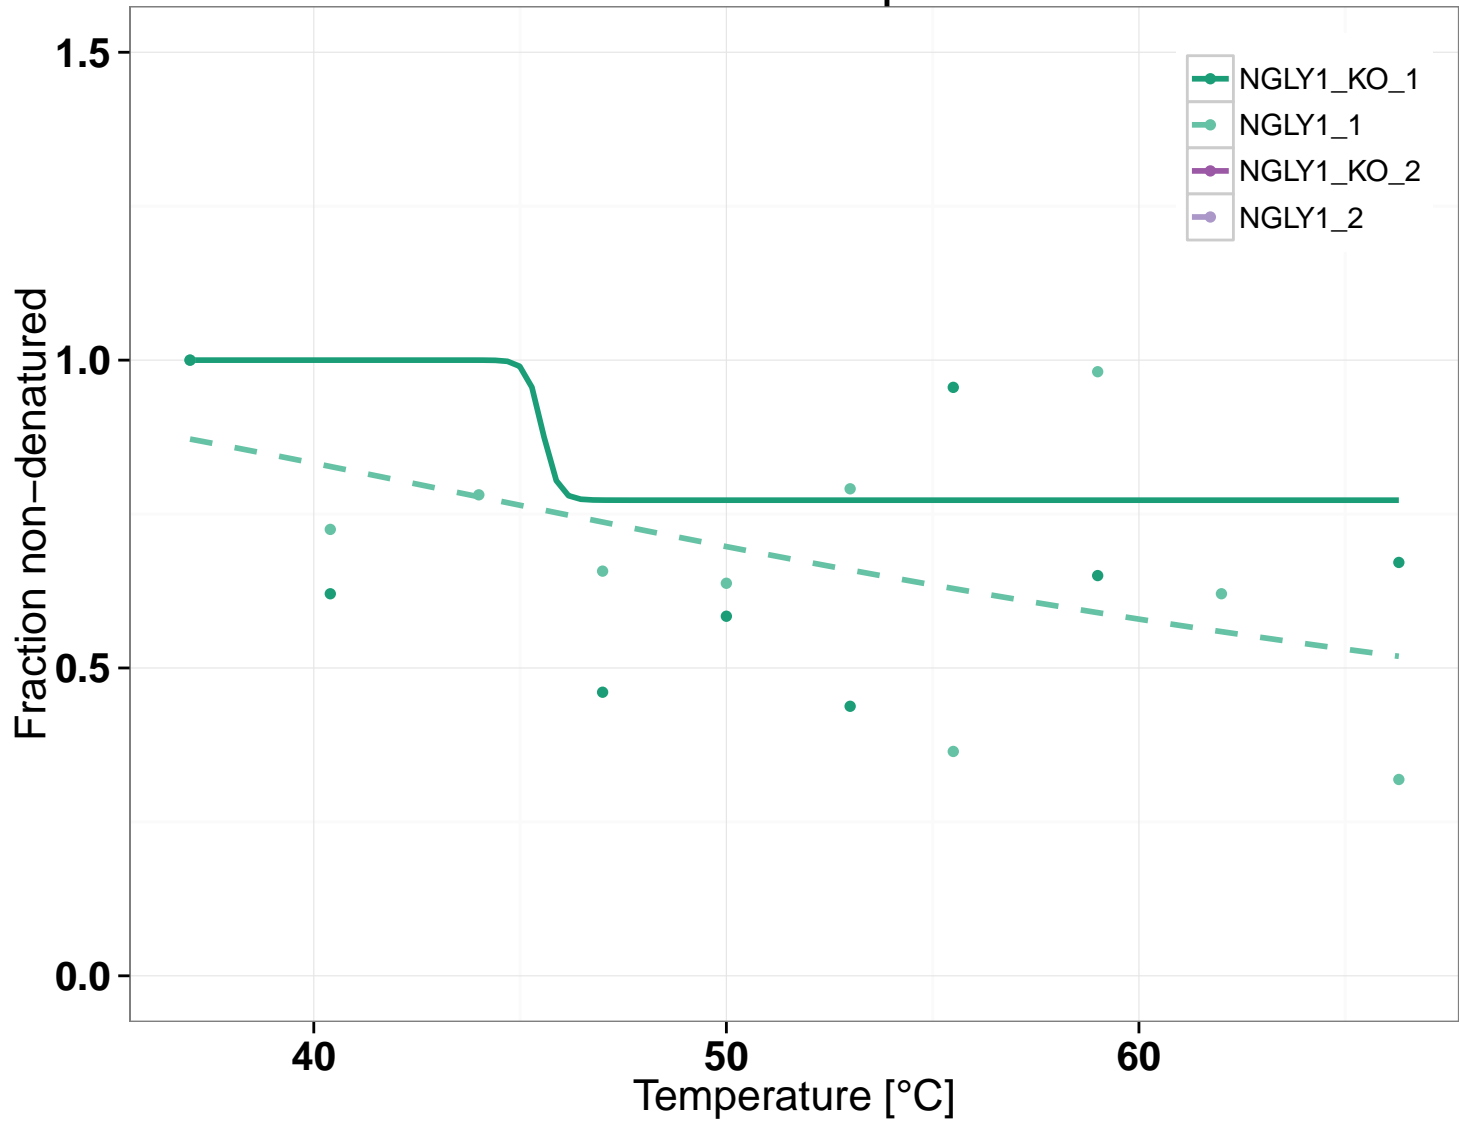

|            | meltPoint | slope  | plateau | R2   |
|------------|-----------|--------|---------|------|
| NGLY1_KO_1 | —         | -0.31  | 0.77    | 0.11 |
| NGLY1_1    | —         | -0.014 | 0       | 0.29 |
| NGLY1_KO_2 | —         | —      | —       | —    |
| NGLY1_2    | —         | —      | —       | —    |

Supplement: Supplementary file 2407 [file 1]

IPI00216338.4|TXNL4A

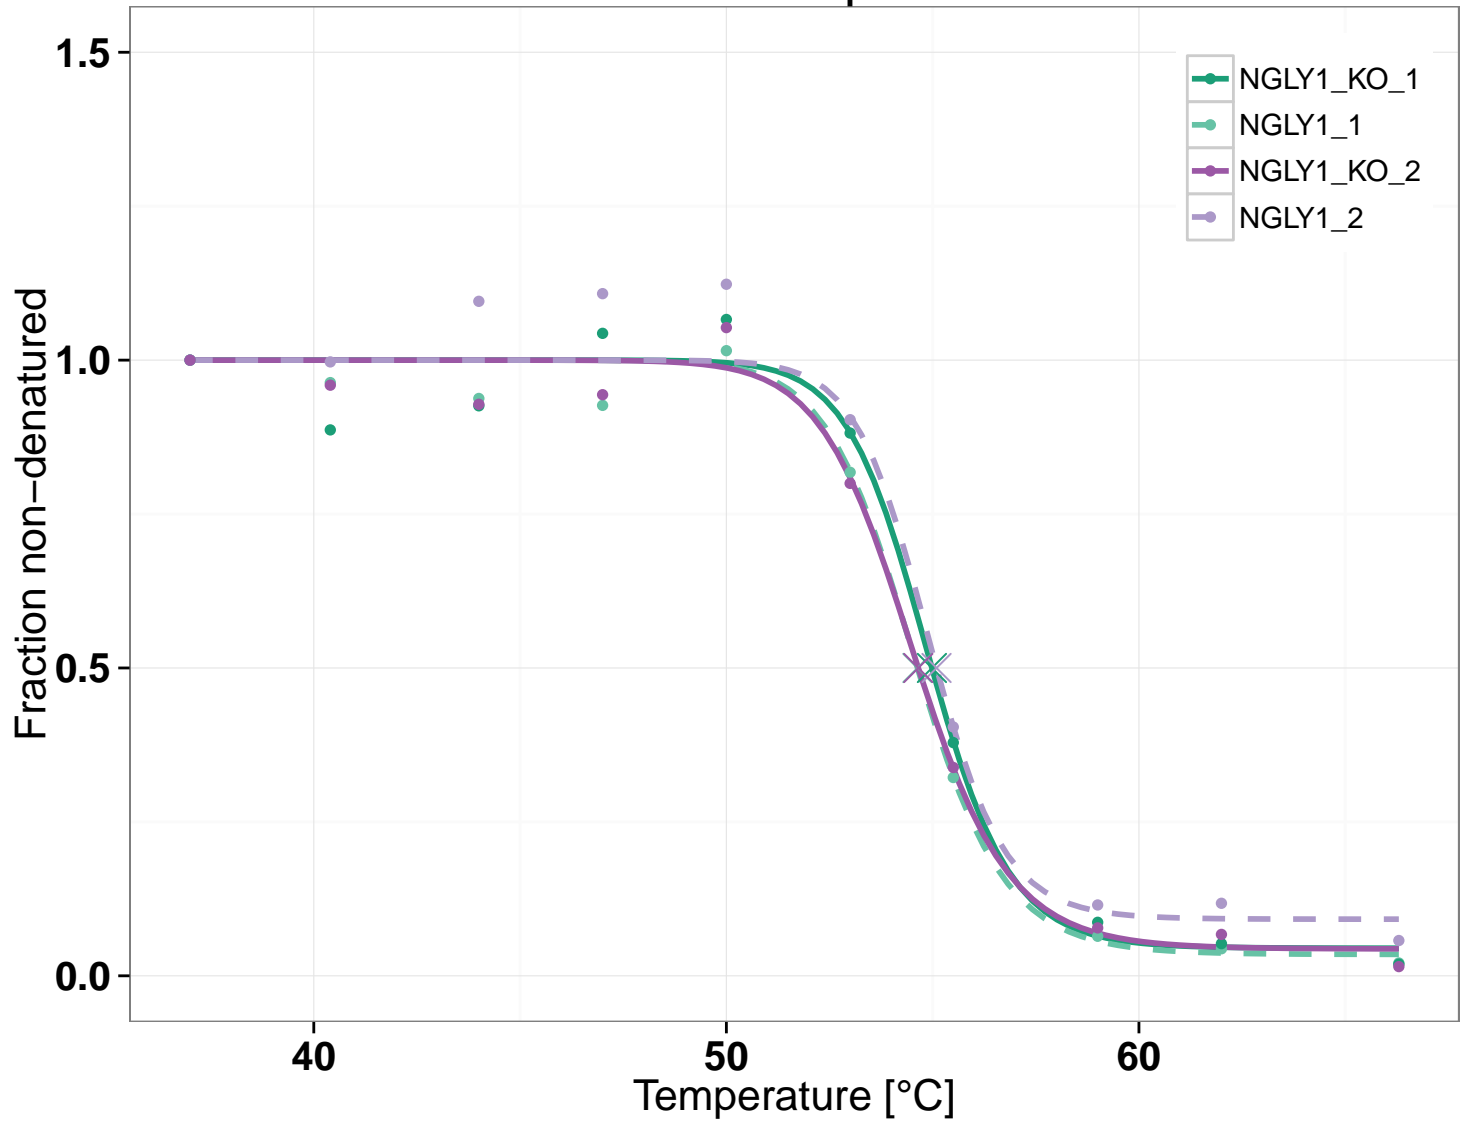

|            | meltPoint | slope | plateau | R2   |
|------------|-----------|-------|---------|------|
| NGLY1_KO_1 | 54.98     | -0.24 | 0.04    | 0.99 |
| NGLY1_1    | 54.63     | -0.22 | 0.03    | 0.99 |
| NGLY1_KO_2 | 54.65     | -0.21 | 0.04    | 0.99 |
| NGLY1_2    | 55.09     | -0.25 | 0.09    | 0.98 |

Supplement: Supplementary file 2408 [file 1]

# IPI00018350.3|MCM5

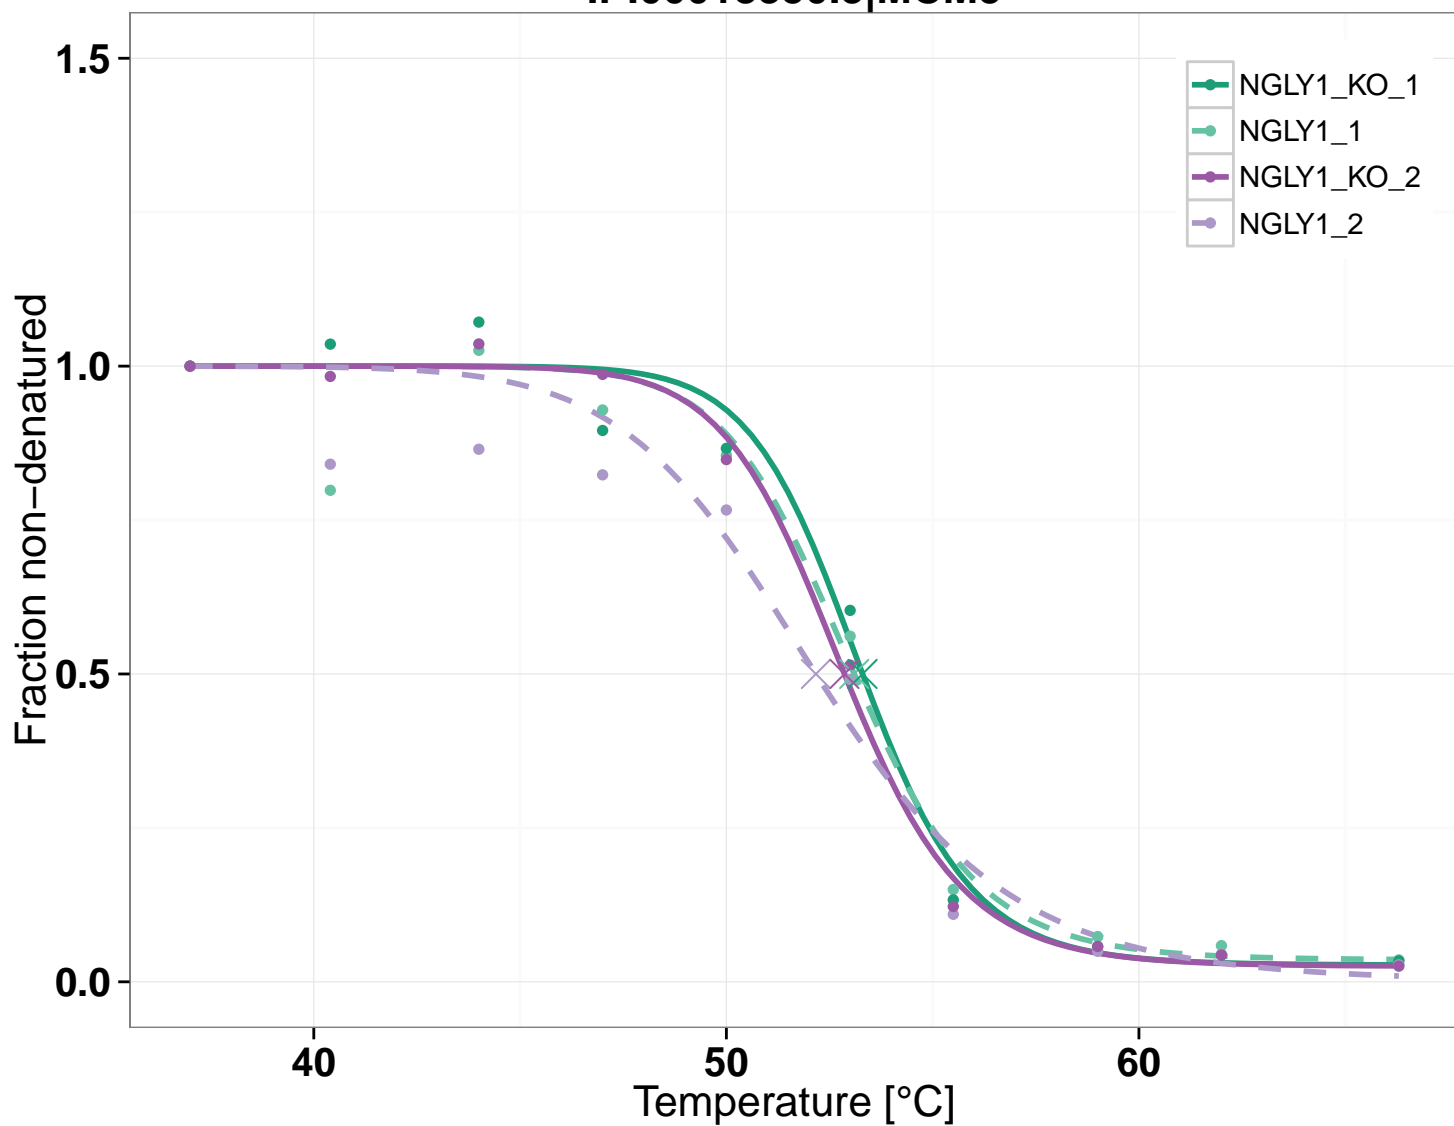

|            | meltPoint | slope | plateau | R2   |
|------------|-----------|-------|---------|------|
| NGLY1_KO_1 | 53.3      | -0.18 | 0.03    | 0.99 |
| NGLY1_1    | 53.1      | -0.16 | 0.04    | 0.97 |
| NGLY1_KO_2 | 52.86     | -0.17 | 0.03    | 1    |
| NGLY1_2    | 52.17     | -0.11 | 0       | 0.95 |

Supplement: Supplementary file 2409 [file 1]

# IPI00023756.2|JARID2

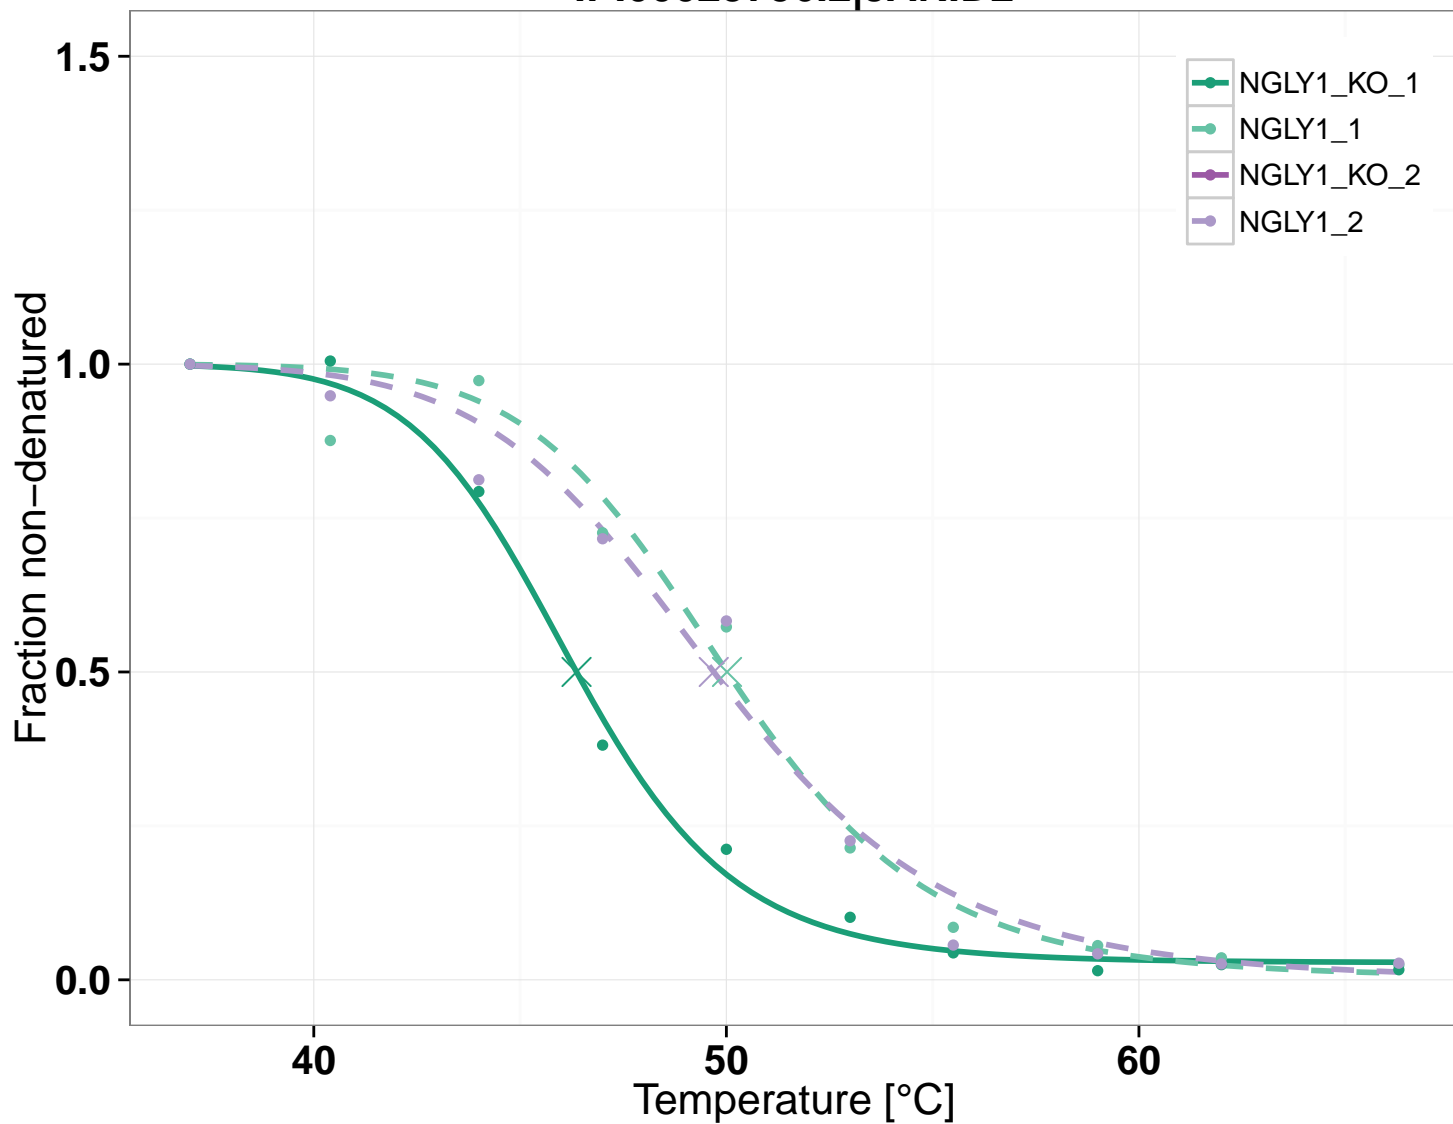

|            | meltPoint | slope  | plateau | R2   |
|------------|-----------|--------|---------|------|
| NGLY1_KO_1 | 46.37     | -0.12  | 0.03    | 1    |
| NGLY1_1    | 50.02     | -0.1   | 0       | 0.98 |
| NGLY1_KO_2 | -         | -      | -       | -    |
| NGLY1_2    | 49.69     | -0.089 | 0       | 0.98 |

Supplement: Supplementary file 2410 [file 1]
