# Supplementary material (part 25 of 85)
Source: publisher figshare collection journal article supplement (https://gsajournals.figshare.com/articles/dataset/_/12014913)

# IPI00747159.1|ACAD8

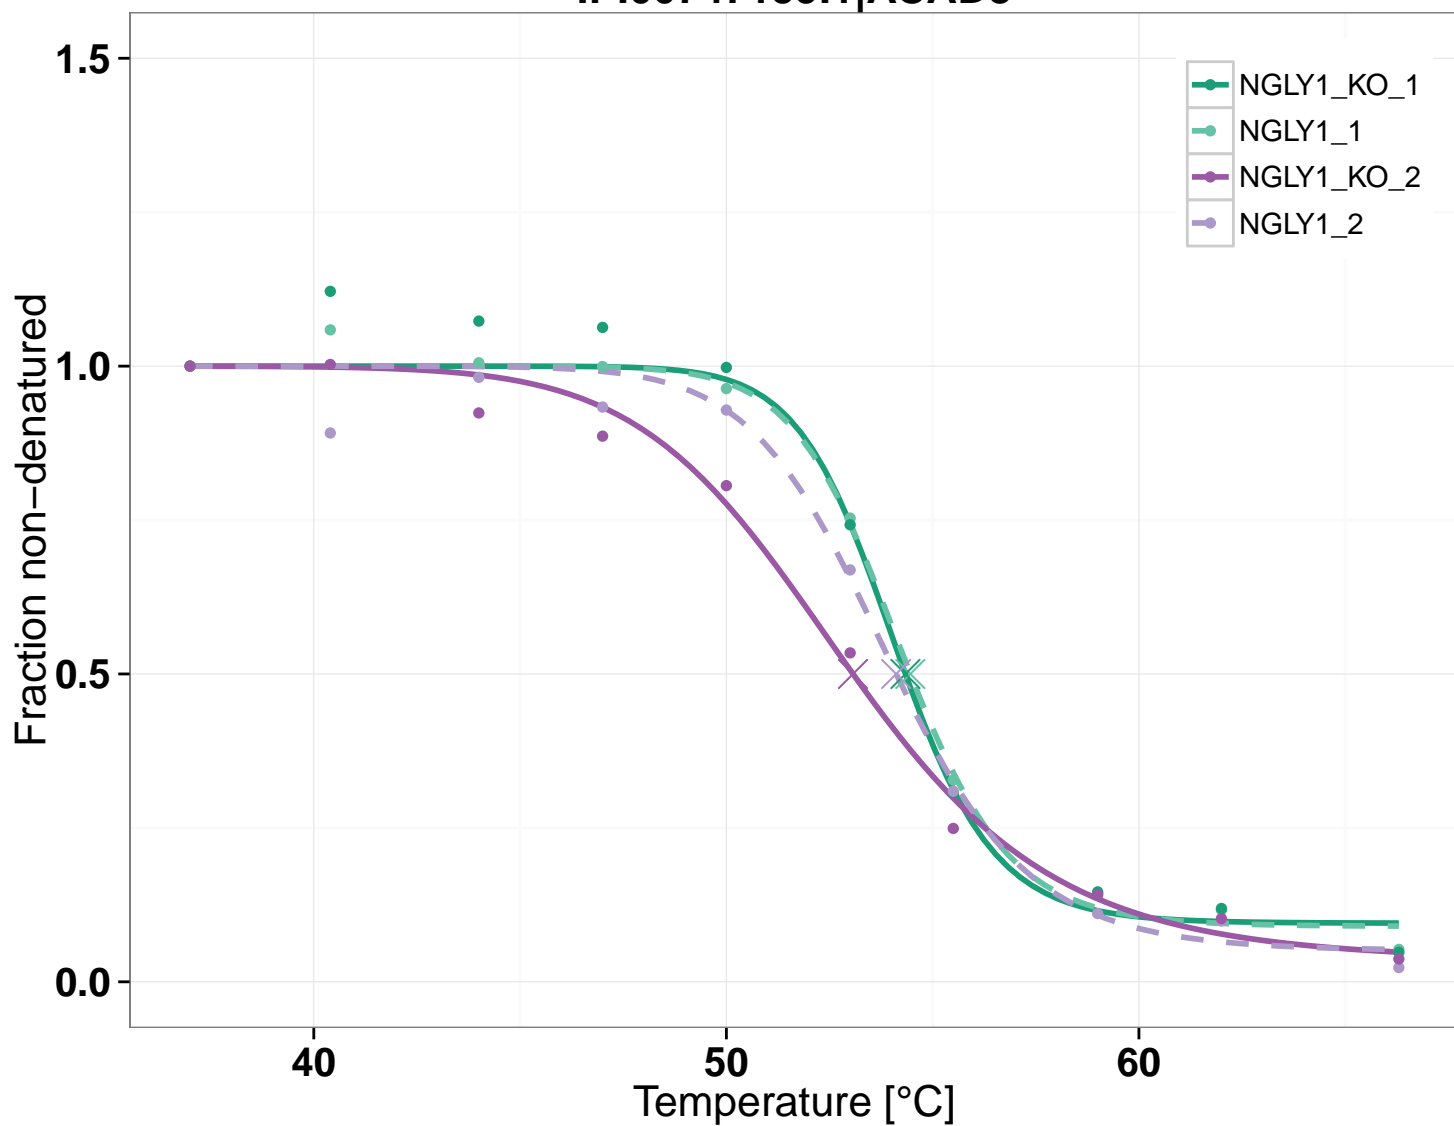

|            | meltPoint | slope  | plateau | R2   |
|------------|-----------|--------|---------|------|
| NGLY1_KO_1 | 54.34     | -0.19  | 0.1     | 0.98 |
| NGLY1_1    | 54.46     | -0.17  | 0.09    | 1    |
| NGLY1_KO_2 | 53.07     | -0.096 | 0.03    | 0.99 |
| NGLY1_2    | 54.12     | -0.14  | 0.05    | 0.99 |

Supplement: Supplementary file 2411 [file 1]

IPI00026625.1|NUP155

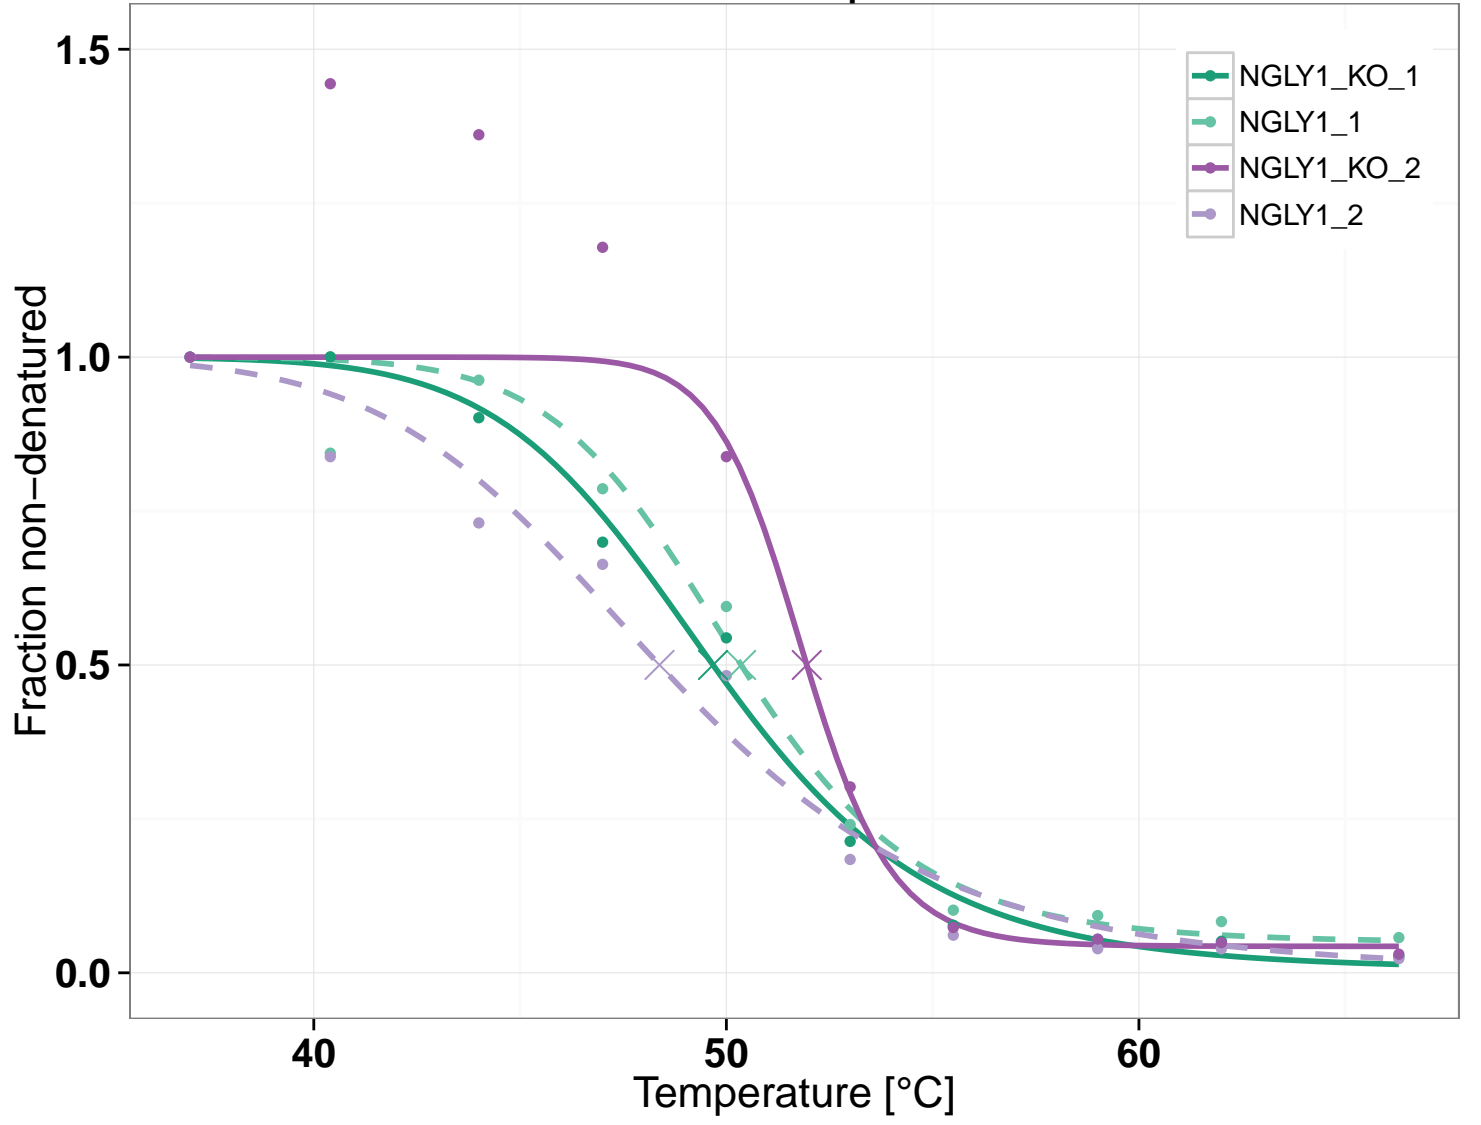

|            | meltPoint | slope  | plateau | R2   |
|------------|-----------|--------|---------|------|
| NGLY1_KO_1 | 49.68     | -0.095 | 0       | 0.99 |
| NGLY1_1    | 50.36     | -0.11  | 0.05    | 0.98 |
| NGLY1_KO_2 | 51.95     | -0.22  | 0.04    | 0.88 |
| NGLY1_2    | 48.38     | -0.074 | 0       | 0.97 |

Supplement: Supplementary file 2412 [file 1]

# IPI00302605.3|SLC30A7

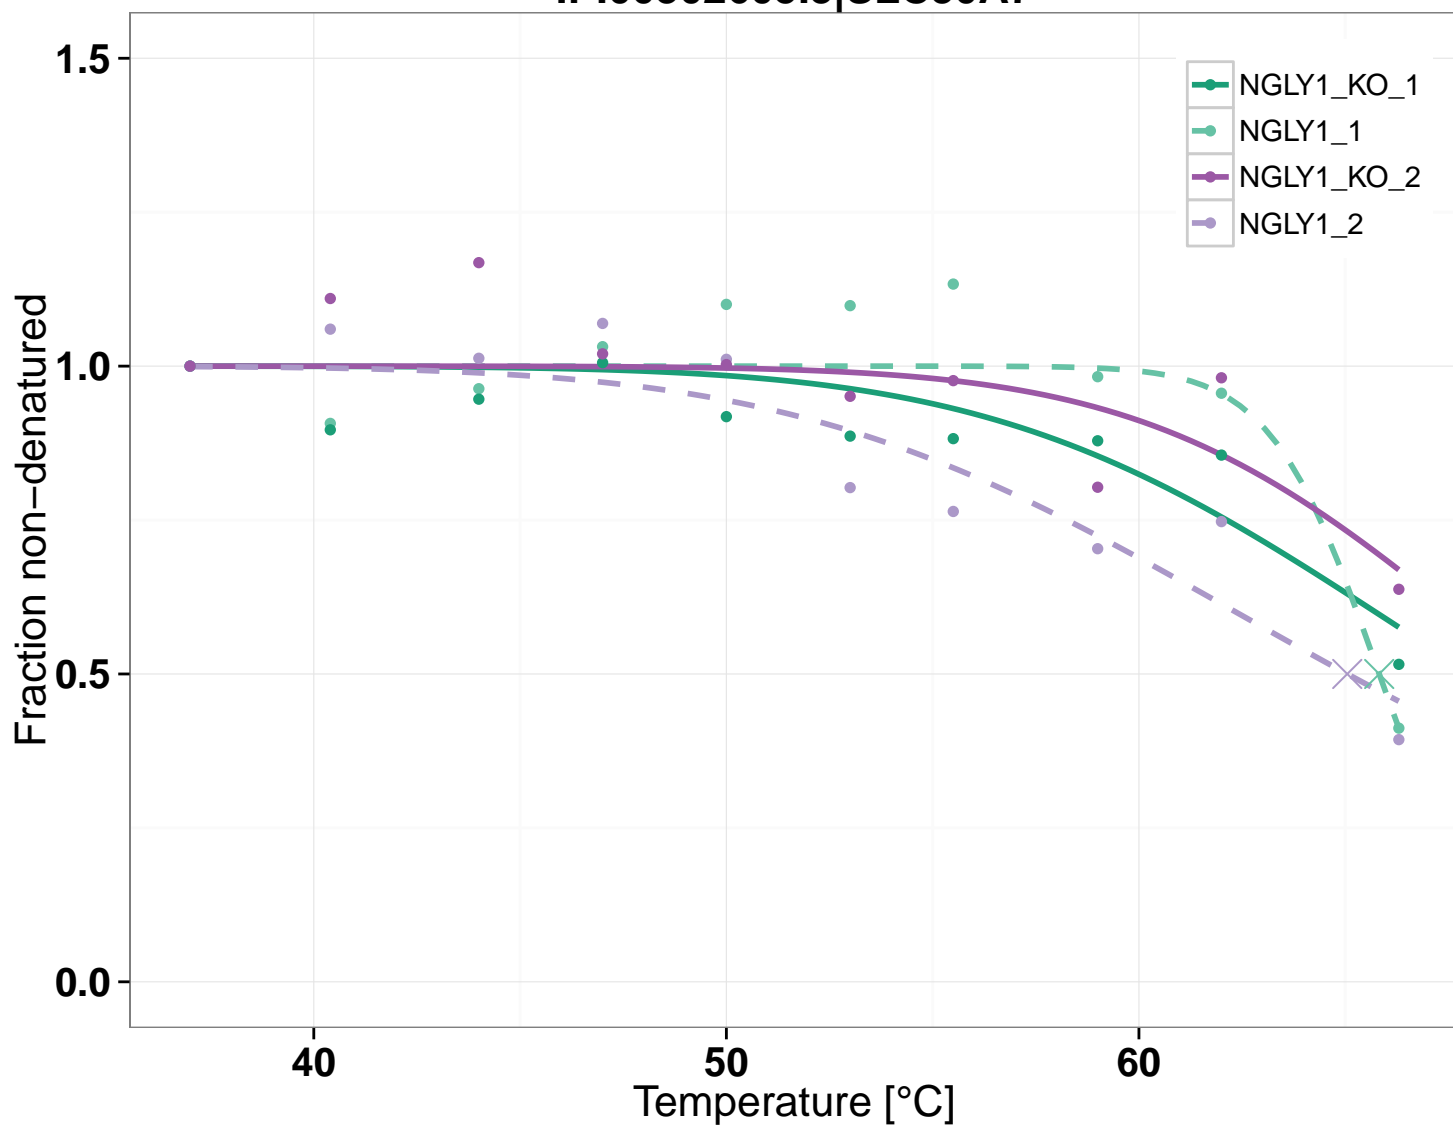

|            | meltPoint | slope  | plateau | R2   |
|------------|-----------|--------|---------|------|
| NGLY1_KO_1 | -         | -0.044 | 0       | 0.76 |
| NGLY1_1    | 65.82     | -0.19  | 0       | 0.87 |
| NGLY1_KO_2 | -         | -      | 0       | 0.62 |
| NGLY1_2    | 65.05     | -0.038 | 0       | 0.87 |

Supplement: Supplementary file 2413 [file 1]

IPI00300241.2|LRRC4B

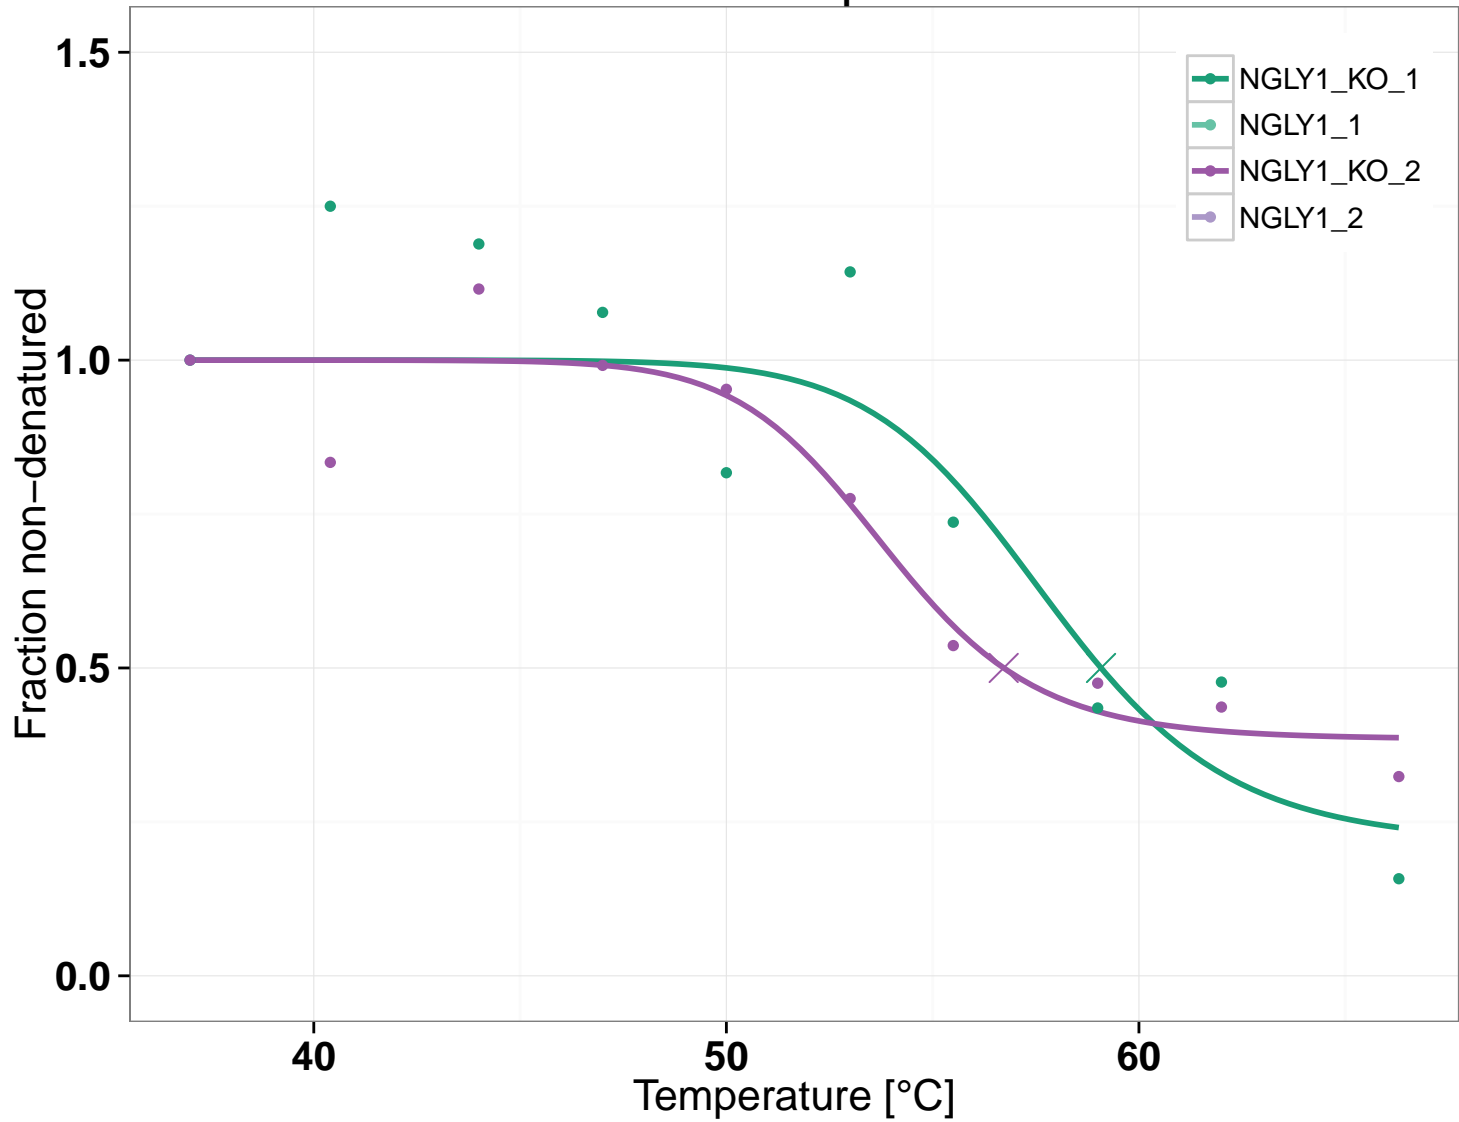

|            | meltPoint | slope  | plateau | R2   |
|------------|-----------|--------|---------|------|
| NGLY1_KO_1 | 59.08     | -0.09  | 0.21    | 0.83 |
| NGLY1_1    | -         | -      | -       | -    |
| NGLY1_KO_2 | 56.72     | -0.084 | 0.38    | 0.93 |
| NGLY1_2    | -         | -      | -       | -    |

Supplement: Supplementary file 2414 [file 1]

IPI00550781.3|PRKRIP1

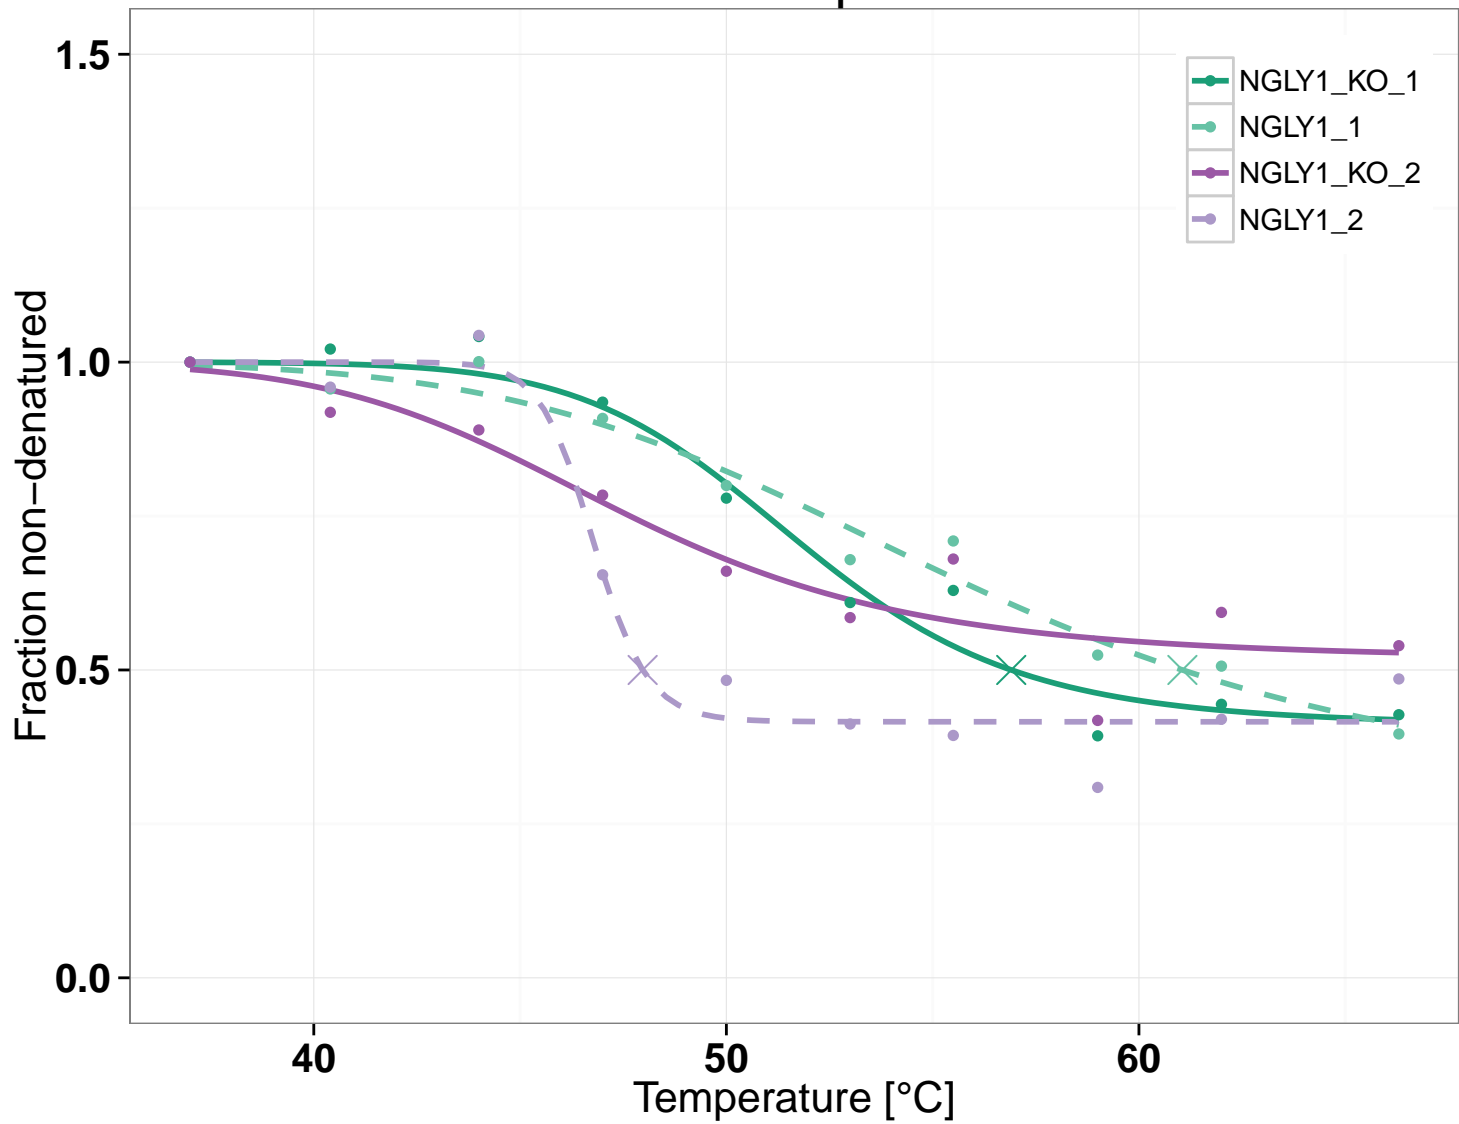

|            | meltPoint | slope  | plateau | R2   |
|------------|-----------|--------|---------|------|
| NGLY1_KO_1 | 56.9      | -0.055 | 0.41    | 0.97 |
| NGLY1_1    | 61.05     | -0.032 | 0.28    | 0.97 |
| NGLY1_KO_2 | -         | -0.034 | 0.52    | 0.89 |
| NGLY1_2    | 47.97     | -0.22  | 0.42    | 0.97 |

Supplement: Supplementary file 2415 [file 1]

IPI00641076.4|FAM65A

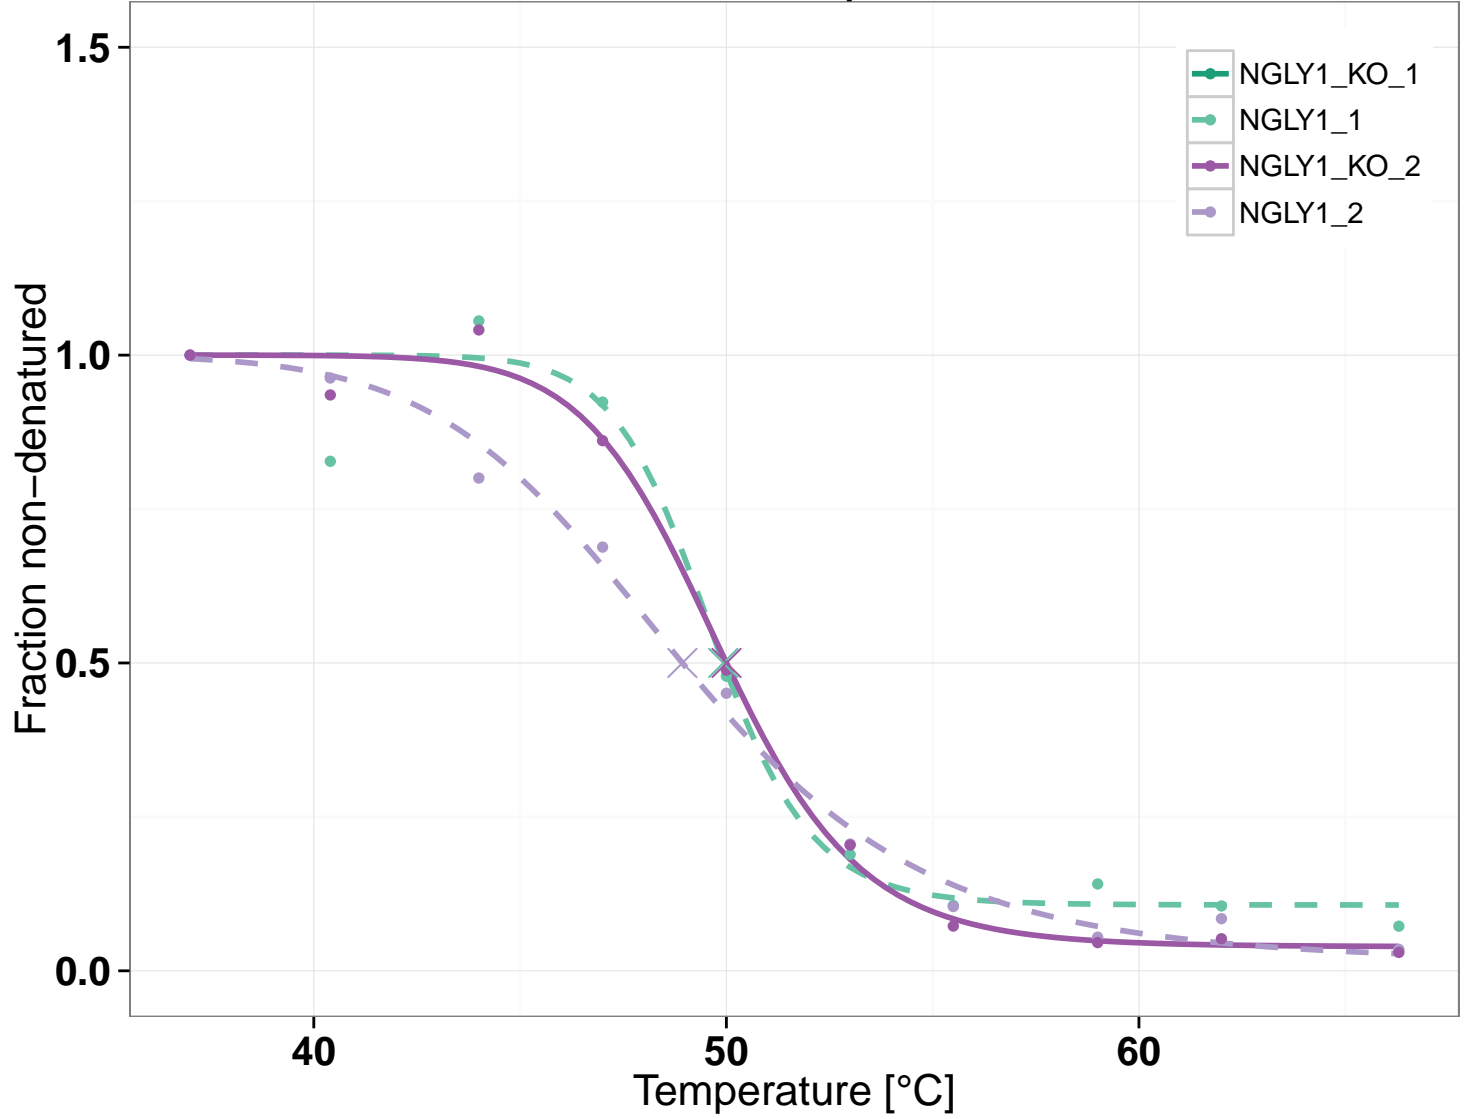

|            | meltPoint | slope  | plateau | R2   |
|------------|-----------|--------|---------|------|
| NGLY1_KO_1 | 50.92     | -0.19  | 0.11    | 0.98 |
| NGLY1_1    | 49.92     | -0.14  | 0.04    | 1    |
| NGLY1_KO_2 | 50        | -0.14  | 0.04    | 1    |
| NGLY1_2    | 48.93     | -0.082 | 0.01    | 0.99 |

Supplement: Supplementary file 2416 [file 1]

# IPI00470781.4|LOC90379

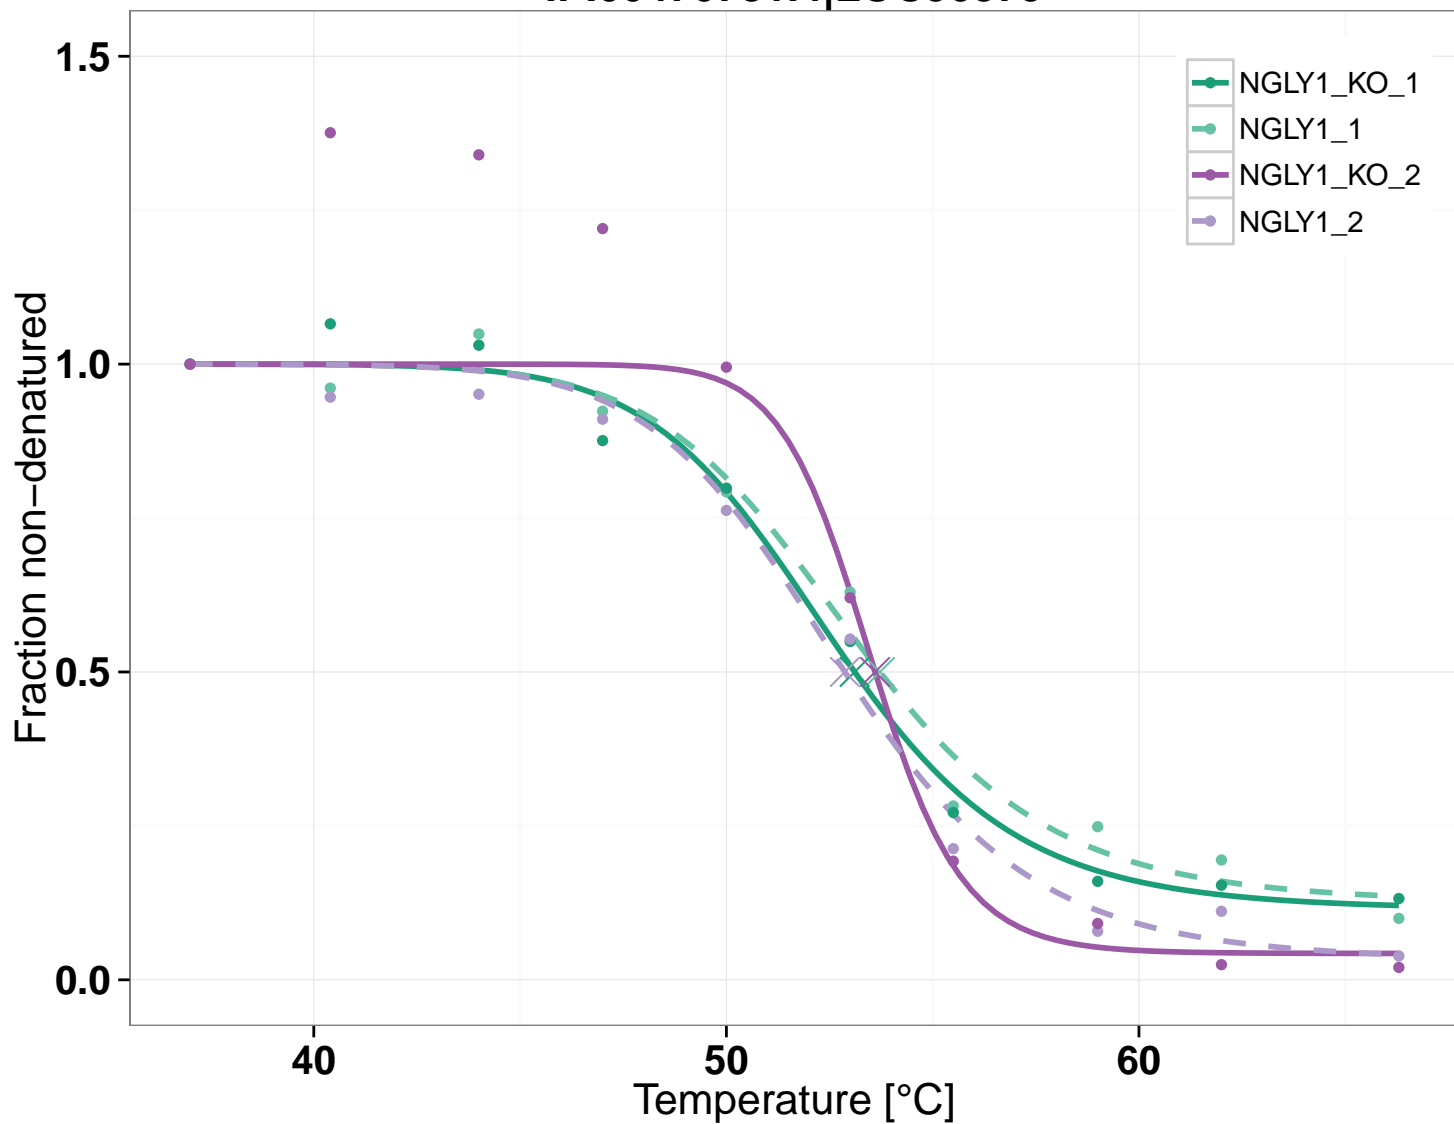

|            | meltPoint | slope  | plateau | R2   |
|------------|-----------|--------|---------|------|
| NGLY1_KO_1 | 53.11     | -0.099 | 0.11    | 0.99 |
| NGLY1_1    | 53.72     | -0.091 | 0.12    | 0.98 |
| NGLY1_KO_2 | 53.61     | -0.22  | 0.04    | 0.89 |
| NGLY1_2    | 52.87     | -0.1   | 0.03    | 0.99 |

Supplement: Supplementary file 2417 [file 1]

IPI00178504.5|DNAJB14

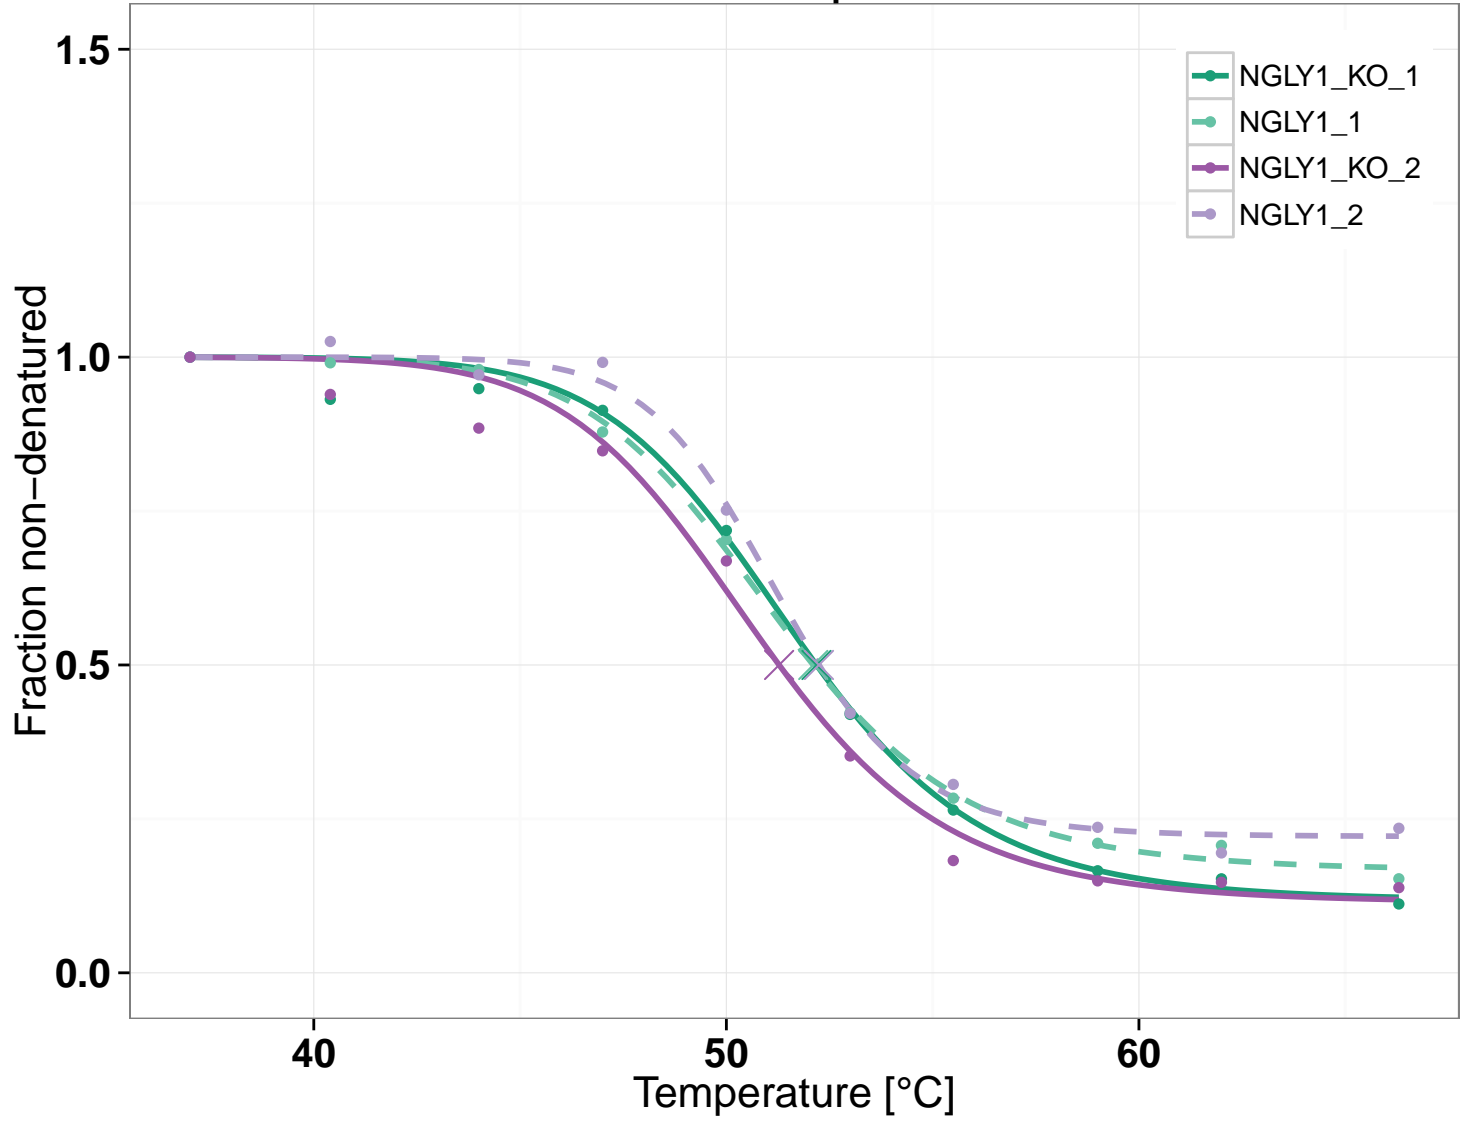

|            | meltPoint | slope  | plateau | R2   |
|------------|-----------|--------|---------|------|
| NGLY1_KO_1 | 52.18     | -0.097 | 0.12    | 1    |
| NGLY1_1    | 52.11     | -0.09  | 0.17    | 1    |
| NGLY1_KO_2 | 51.28     | -0.096 | 0.11    | 0.99 |
| NGLY1_2    | 52.24     | -0.12  | 0.22    | 1    |

Supplement: Supplementary file 2418 [file 1]

IPI00012752.1|GRB10

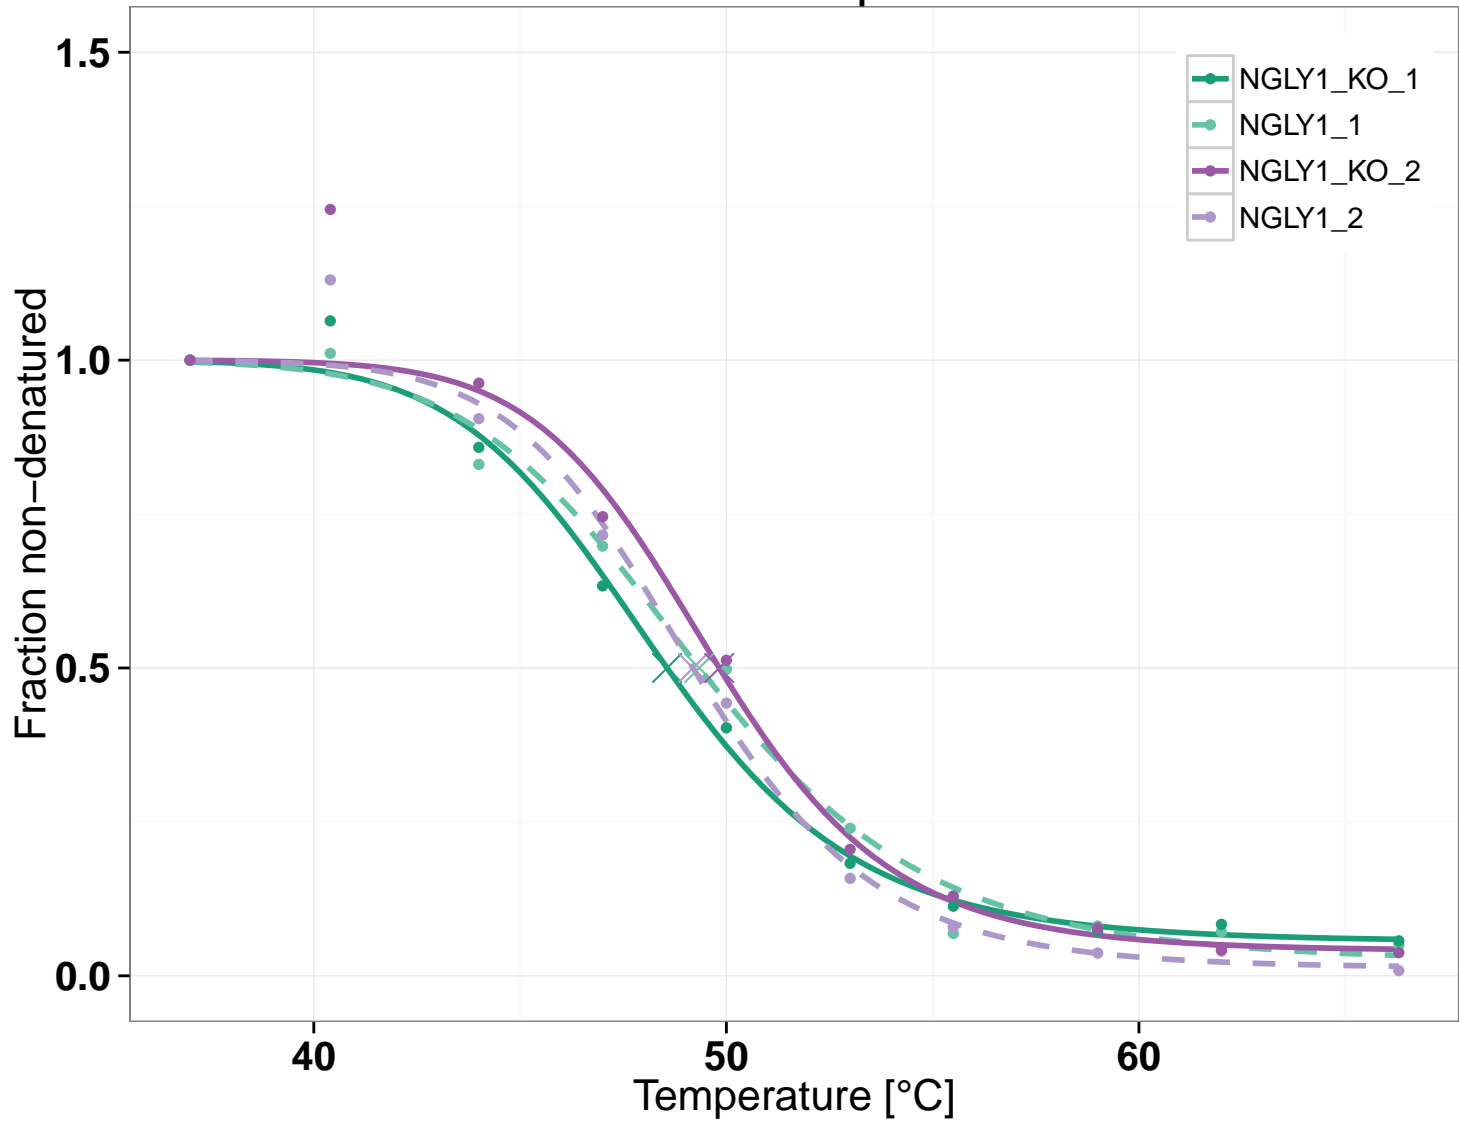

|            | meltPoint | slope  | plateau | R2   |
|------------|-----------|--------|---------|------|
| NGLY1_KO_1 | 48.56     | -0.097 | 0.05    | 0.99 |
| NGLY1_1    | 49.34     | -0.087 | 0.02    | 0.99 |
| NGLY1_KO_2 | 49.83     | -0.11  | 0.04    | 0.97 |
| NGLY1_2    | 49.19     | -0.11  | 0.01    | 0.99 |

Supplement: Supplementary file 2419 [file 1]

# IPI00009235.2|SSR3

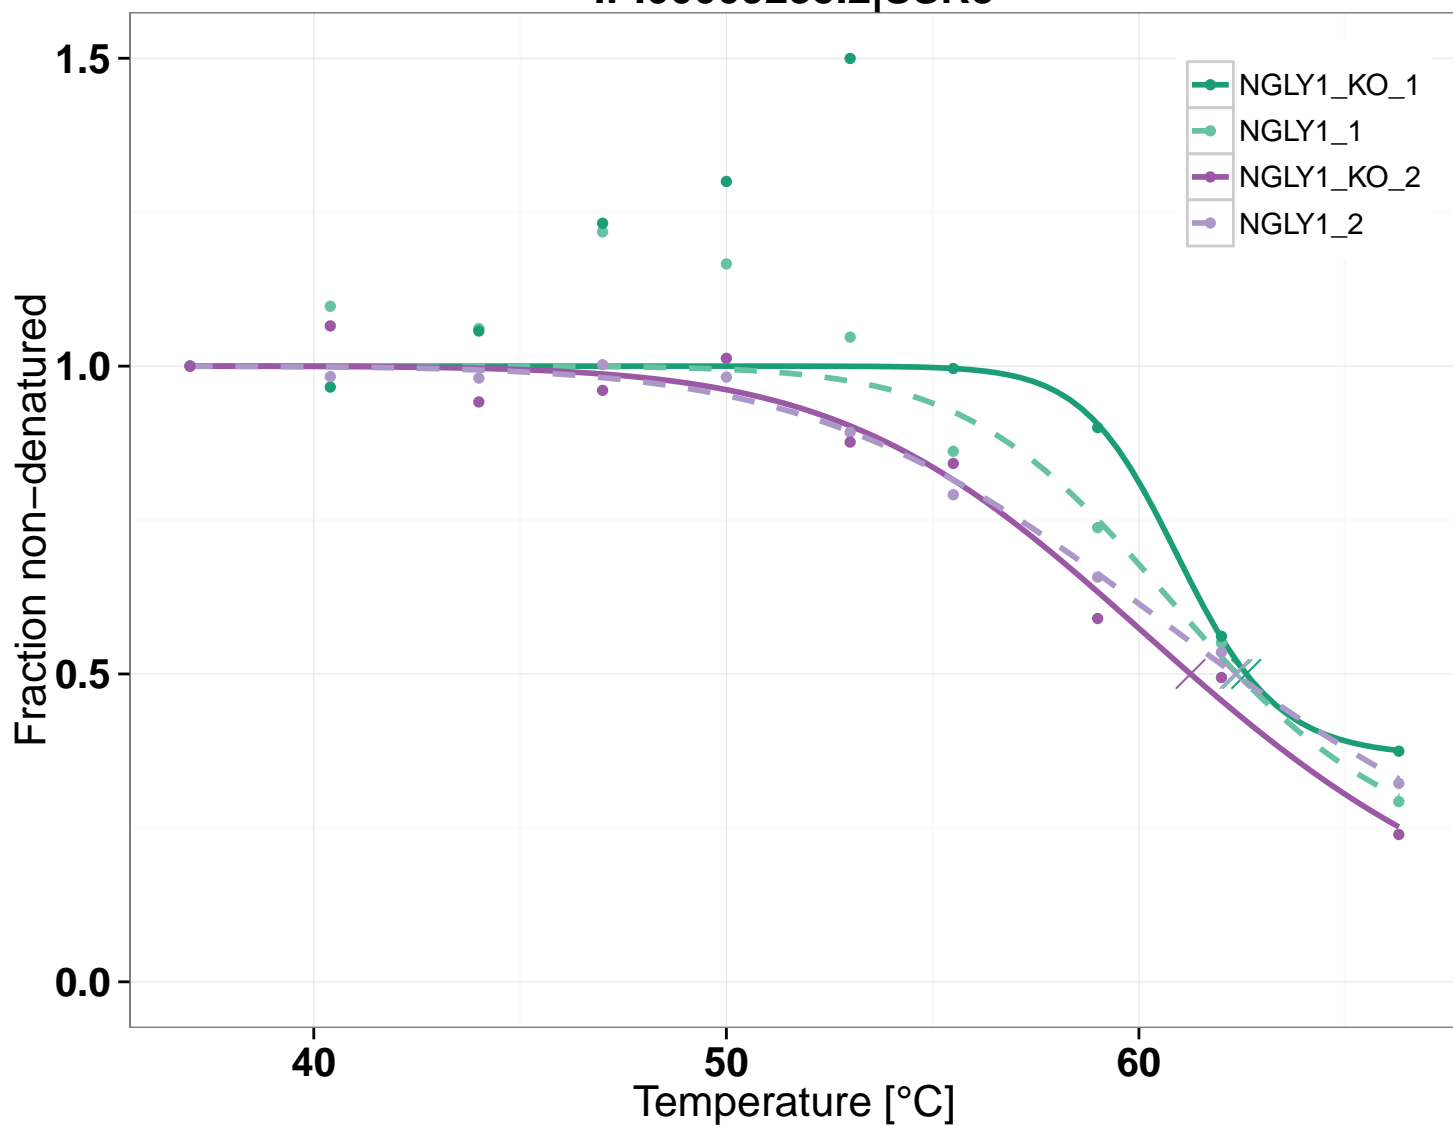

|            | meltPoint | slope  | plateau | R2   |
|------------|-----------|--------|---------|------|
| NGLY1_KO_1 | 62.6      | -0.13  | 0.37    | 0.6  |
| NGLY1_1    | 62.39     | -0.076 | 0.18    | 0.87 |
| NGLY1_KO_2 | 61.25     | -0.06  | 0       | 0.98 |
| NGLY1_2    | 62.32     | -0.05  | 0.02    | 0.99 |

Supplement: Supplementary file 2420 [file 1]

IPI00909125.1|B4DSR2\_HUMAN

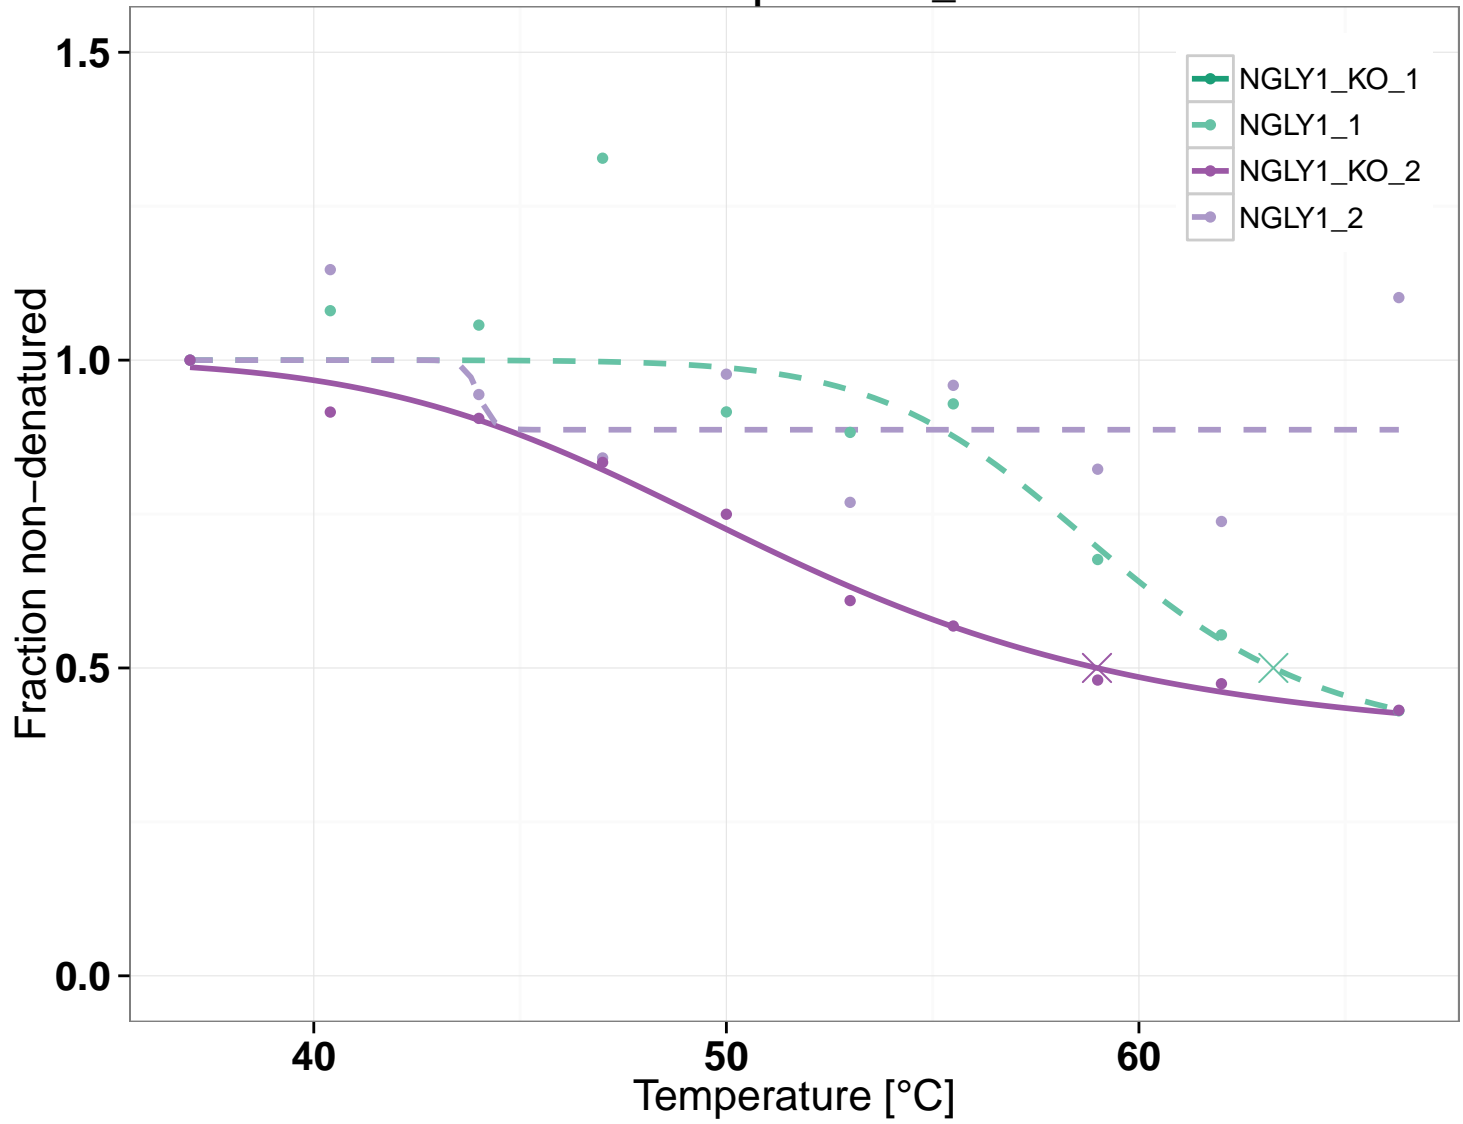

|            | meltPoint | slope  | plateau | R2   |
|------------|-----------|--------|---------|------|
| NGLY1_KO_1 | –         | –      | –       | –    |
| NGLY1_1    | 63.26     | –0.057 | 0.38    | 0.79 |
| NGLY1_KO_2 | 58.98     | –0.033 | 0.37    | 0.99 |
| NGLY1_2    | –         | –0.16  | 0.89    | 0.26 |

Supplement: Supplementary file 2421 [file 1]

IPI00016334.2|MCAM

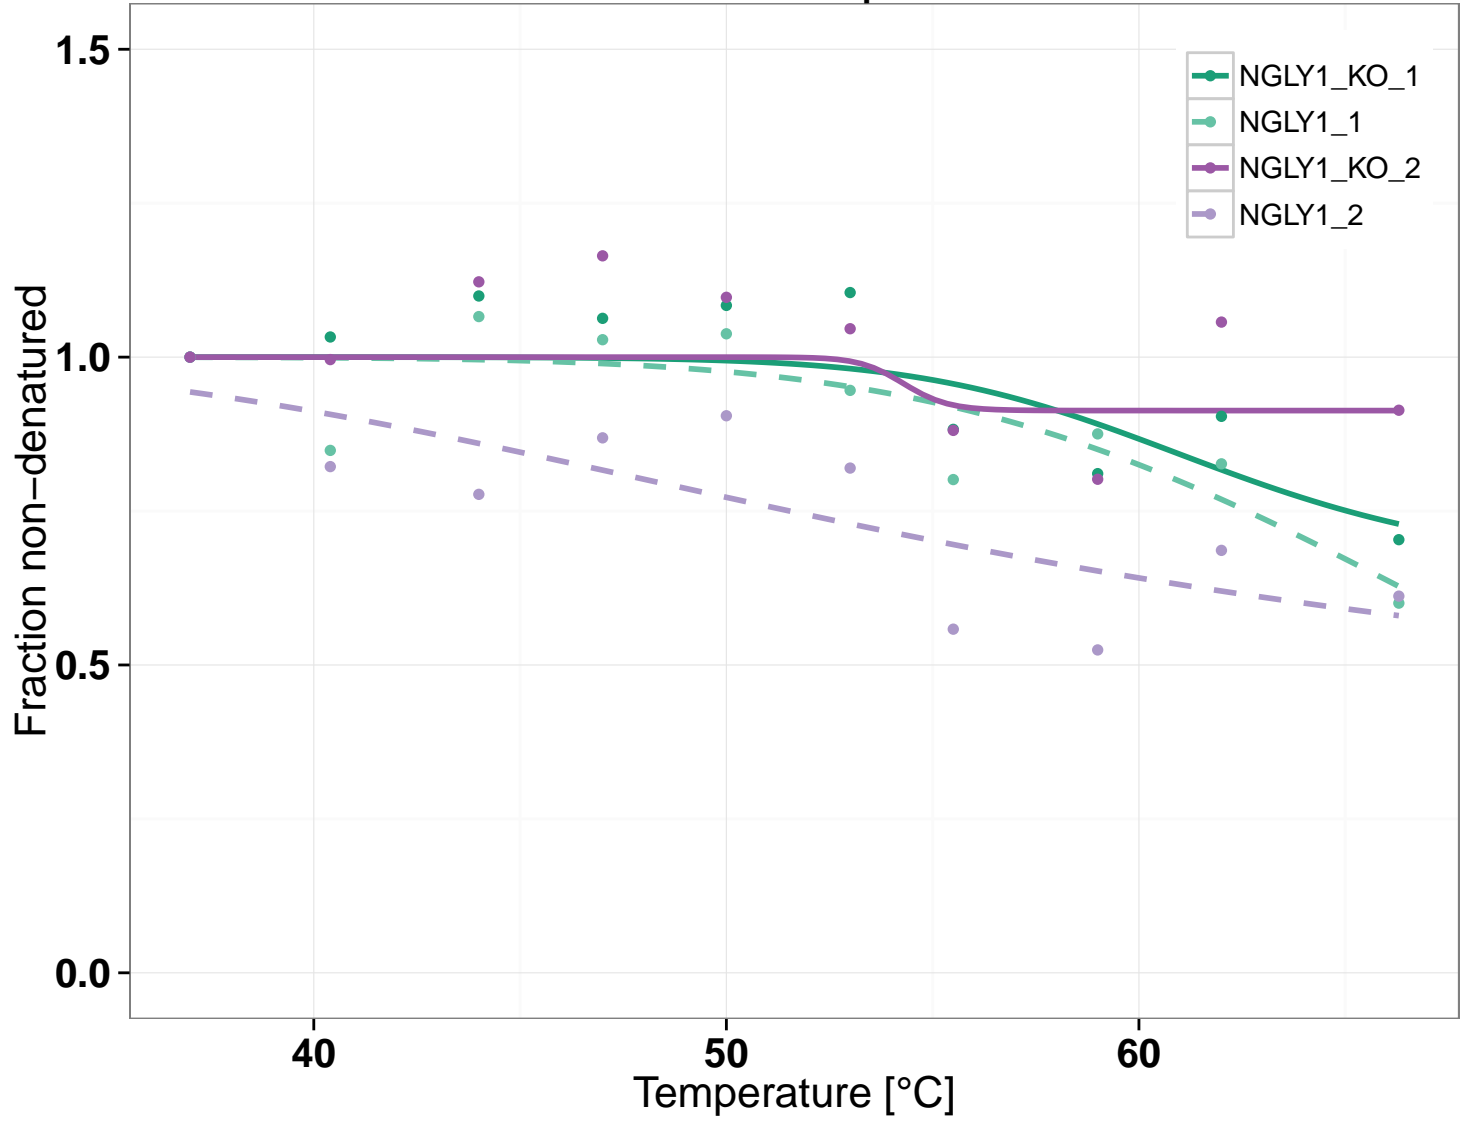

|            | meltPoint | slope  | plateau | R2   |
|------------|-----------|--------|---------|------|
| NGLY1_KO_1 | -         | -0.025 | 0.65    | 0.65 |
| NGLY1_1    | -         | -      | 0       | 0.72 |
| NGLY1_KO_2 | -         | -0.04  | 0.91    | 0.24 |
| NGLY1_2    | -         | -0.015 | 0.35    | 0.61 |

Supplement: Supplementary file 2422 [file 1]

IPI00020472.1|TMEM111

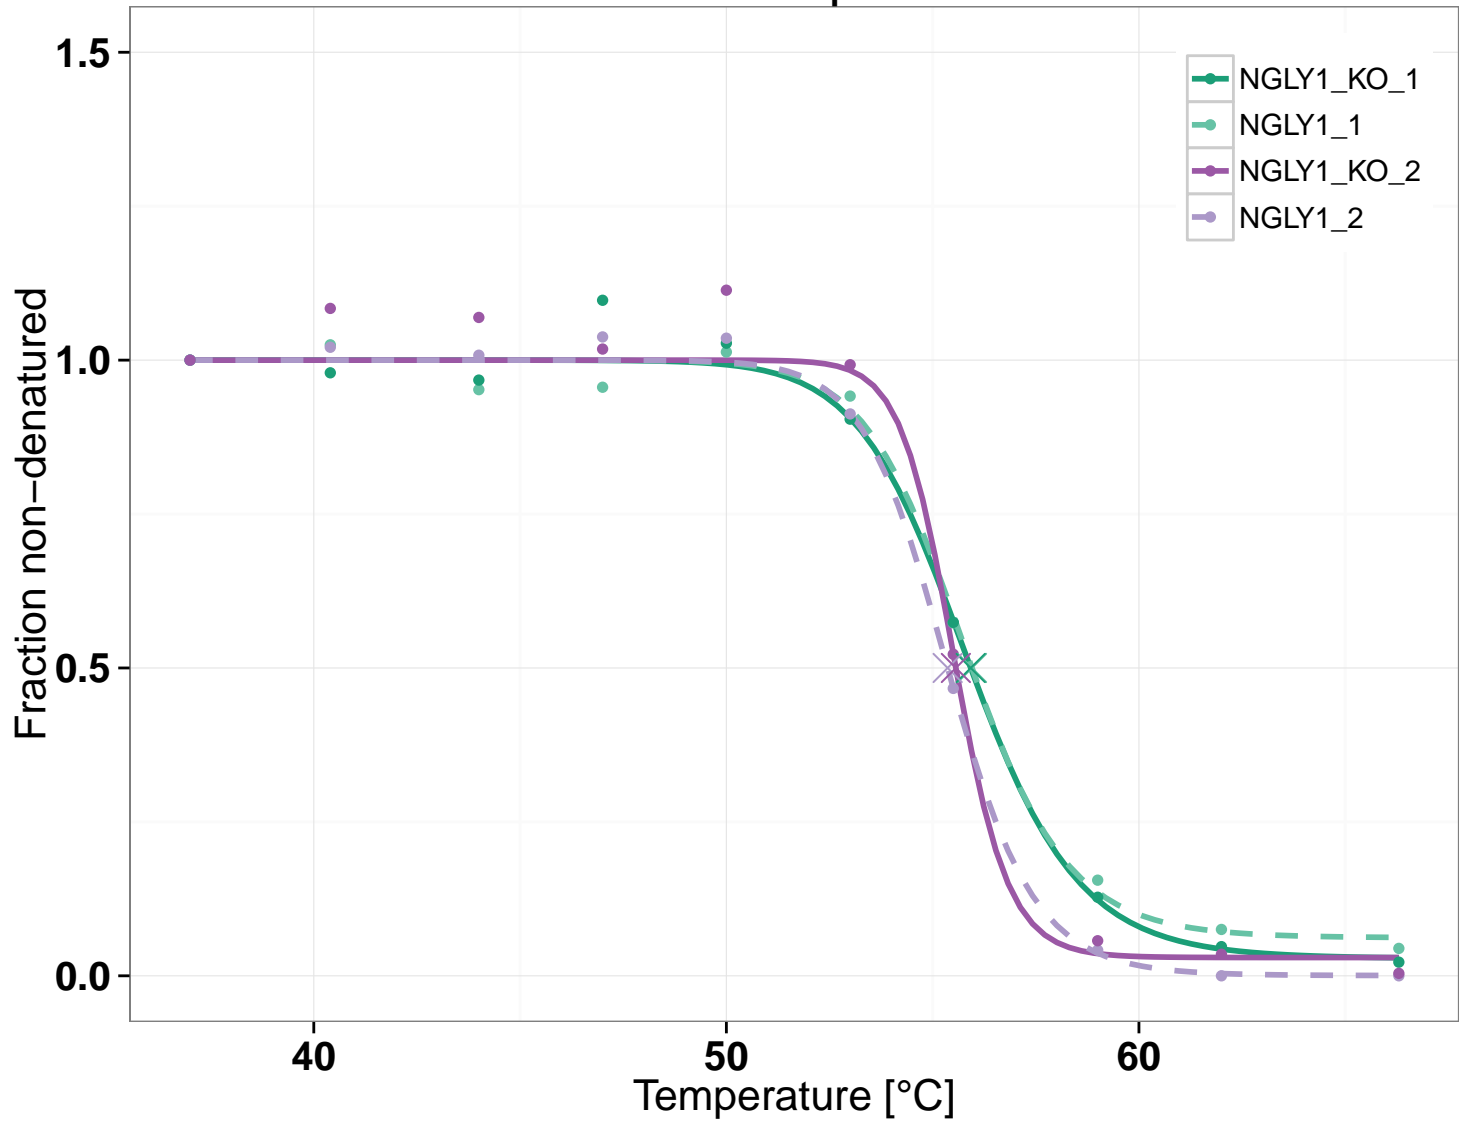

|            | meltPoint | slope | plateau | R2   |
|------------|-----------|-------|---------|------|
| NGLY1_KO_1 | 55.92     | -0.18 | 0.03    | 0.99 |
| NGLY1_1    | 55.95     | -0.19 | 0.06    | 1    |
| NGLY1_KO_2 | 55.56     | -0.37 | 0.03    | 0.99 |
| NGLY1_2    | 55.36     | -0.24 | 0       | 1    |

Supplement: Supplementary file 2423 [file 1]

IPI00647915.1|TAGLN2

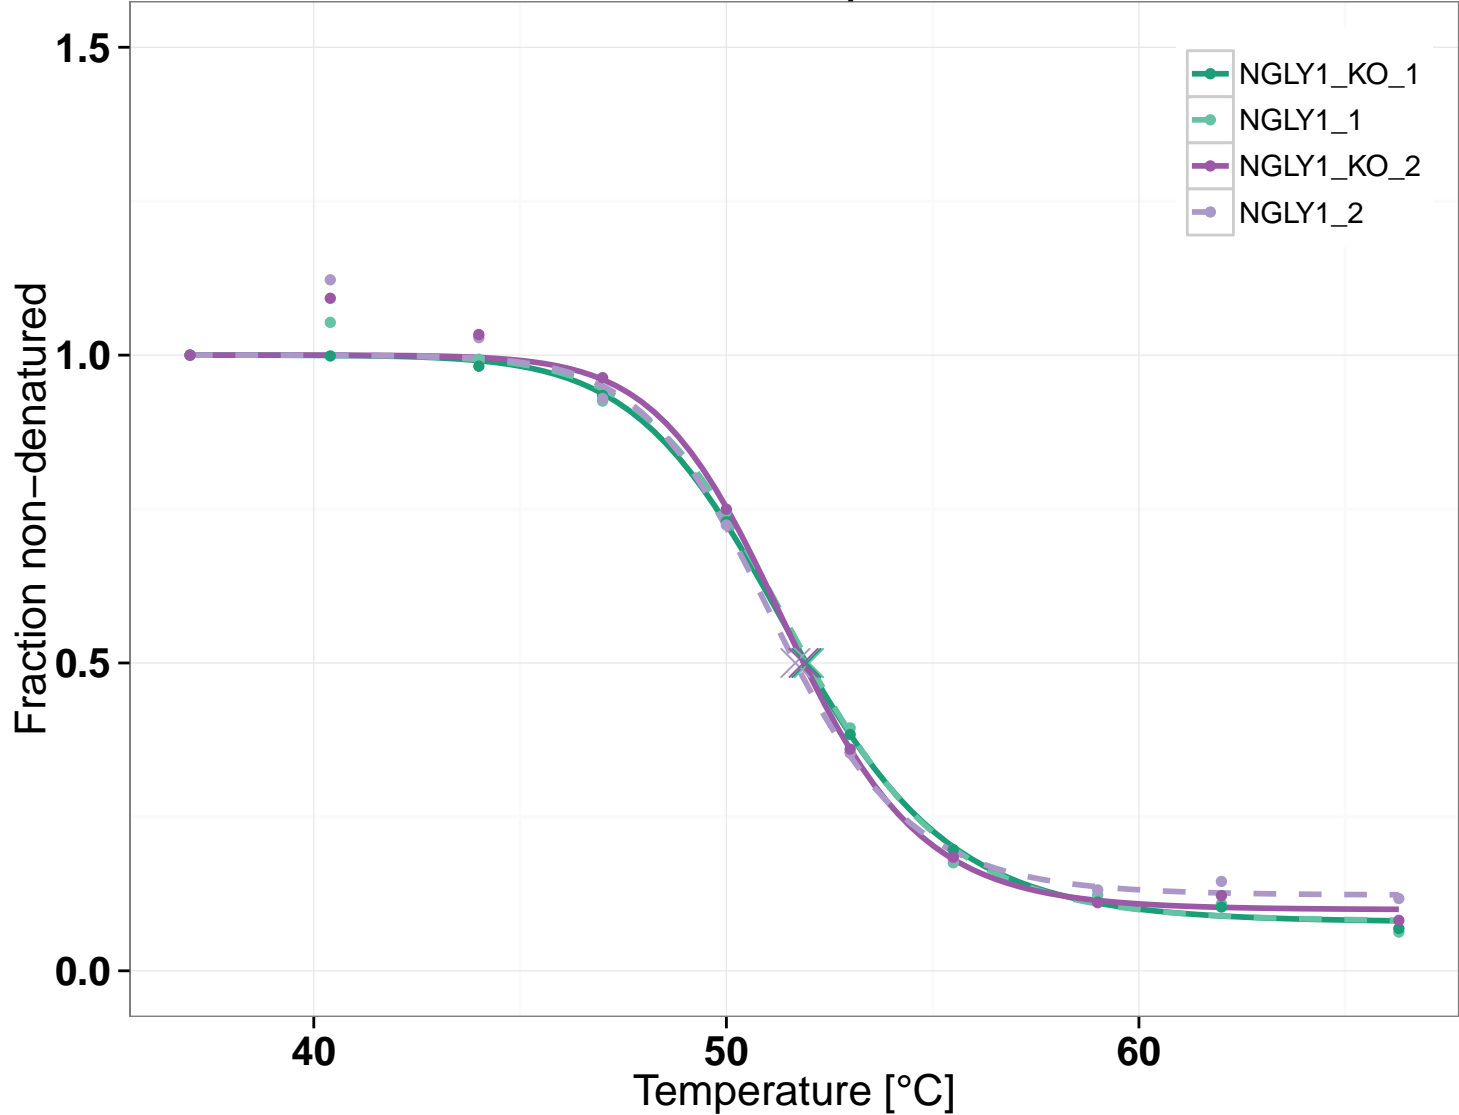

|            | meltPoint | slope | plateau | R2   |
|------------|-----------|-------|---------|------|
| NGLY1_KO_1 | 51.94     | -0.12 | 0.08    | 1    |
| NGLY1_1    | 52        | -0.12 | 0.08    | 1    |
| NGLY1_KO_2 | 51.87     | -0.14 | 0.1     | 0.99 |
| NGLY1_2    | 51.67     | -0.13 | 0.12    | 0.99 |

Supplement: Supplementary file 2424 [file 1]

# IPI00024664.1|USP5

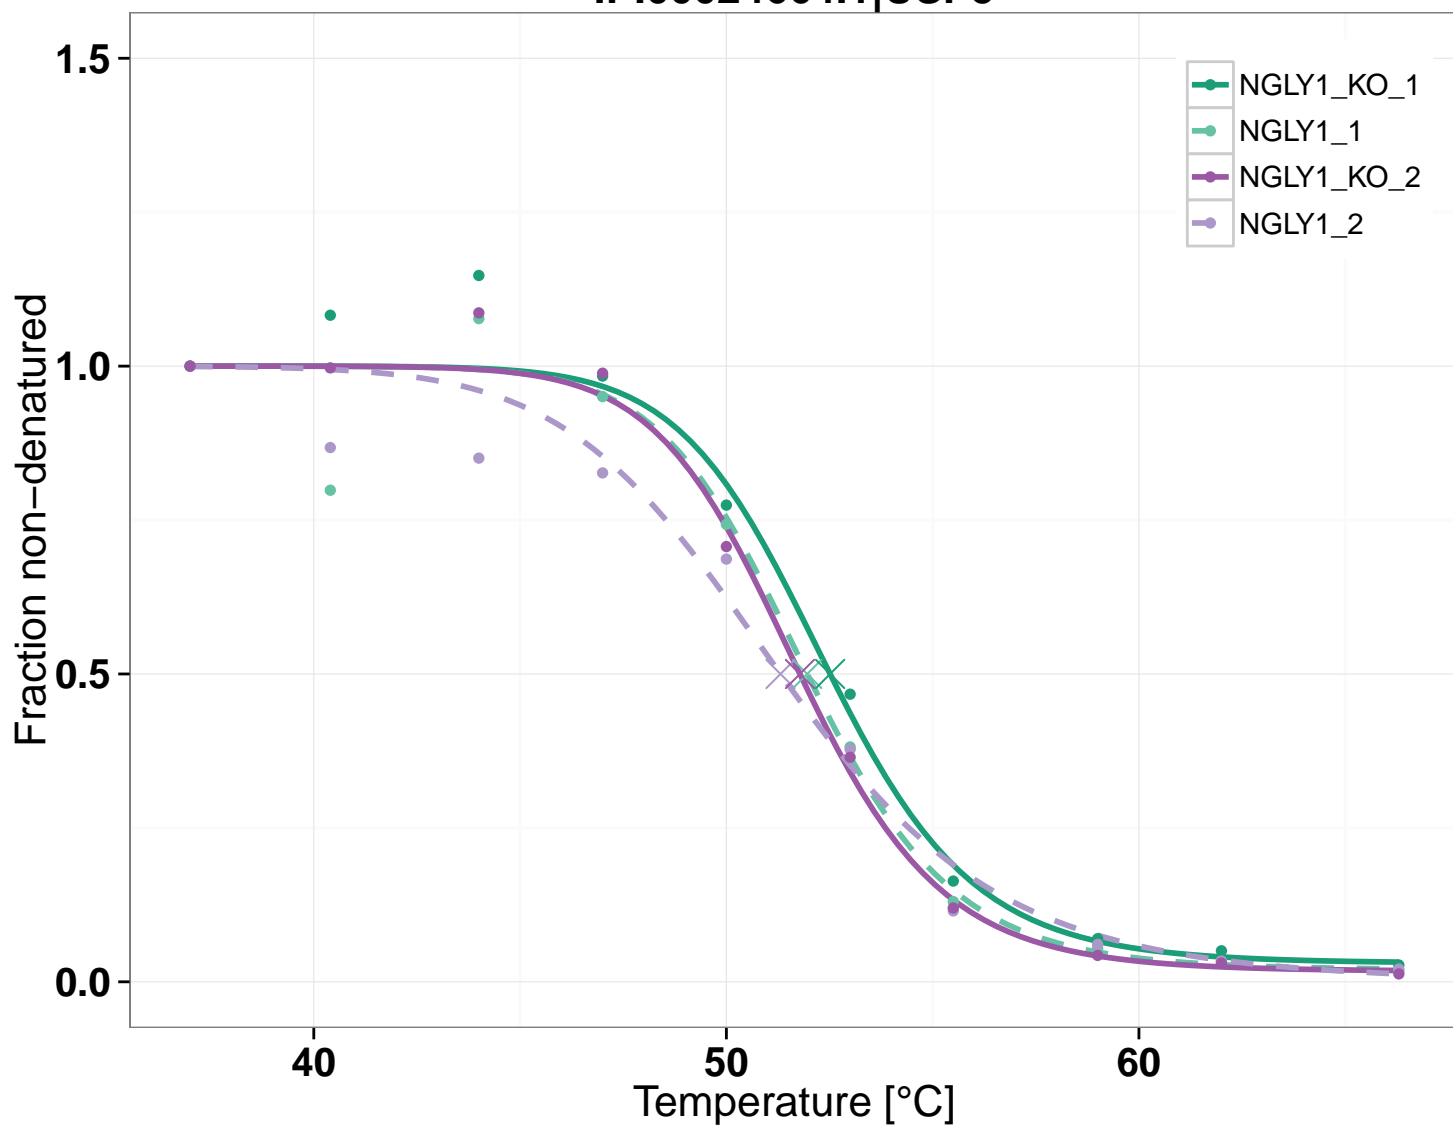

|            | meltPoint | slope  | plateau | R2   |
|------------|-----------|--------|---------|------|
| NGLY1_KO_1 | 52.51     | -0.14  | 0.03    | 0.98 |
| NGLY1_1    | 51.96     | -0.14  | 0.02    | 0.97 |
| NGLY1_KO_2 | 51.78     | -0.14  | 0.02    | 0.99 |
| NGLY1_2    | 51.31     | -0.095 | 0       | 0.97 |

Supplement: Supplementary file 2425 [file 1]

# IPI00016859.2|BRF1

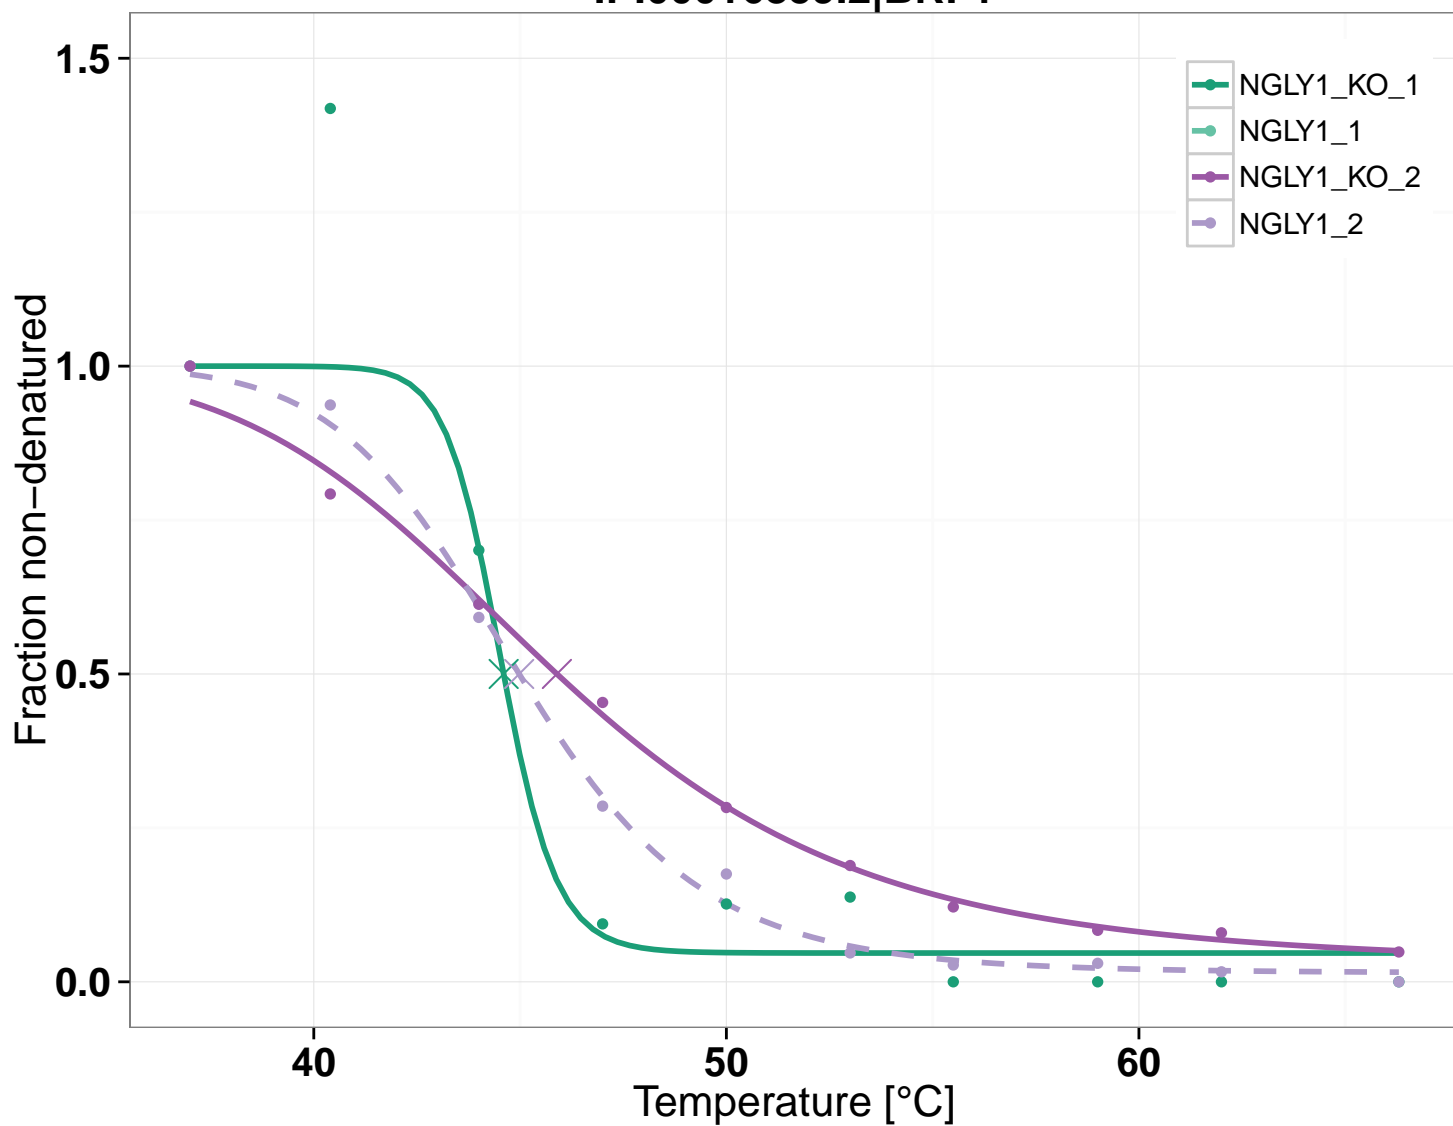

|            | meltPoint | slope  | plateau | R2   |
|------------|-----------|--------|---------|------|
| NGLY1_KO_1 | 44.6      | -0.36  | 0.05    | 0.91 |
| NGLY1_1    | -         | -      | -       | -    |
| NGLY1_KO_2 | 45.89     | -0.065 | 0.03    | 0.99 |
| NGLY1_2    | 44.98     | -0.11  | 0.01    | 1    |

Supplement: Supplementary file 2426 [file 1]

IPI00790757.1|DUSP3

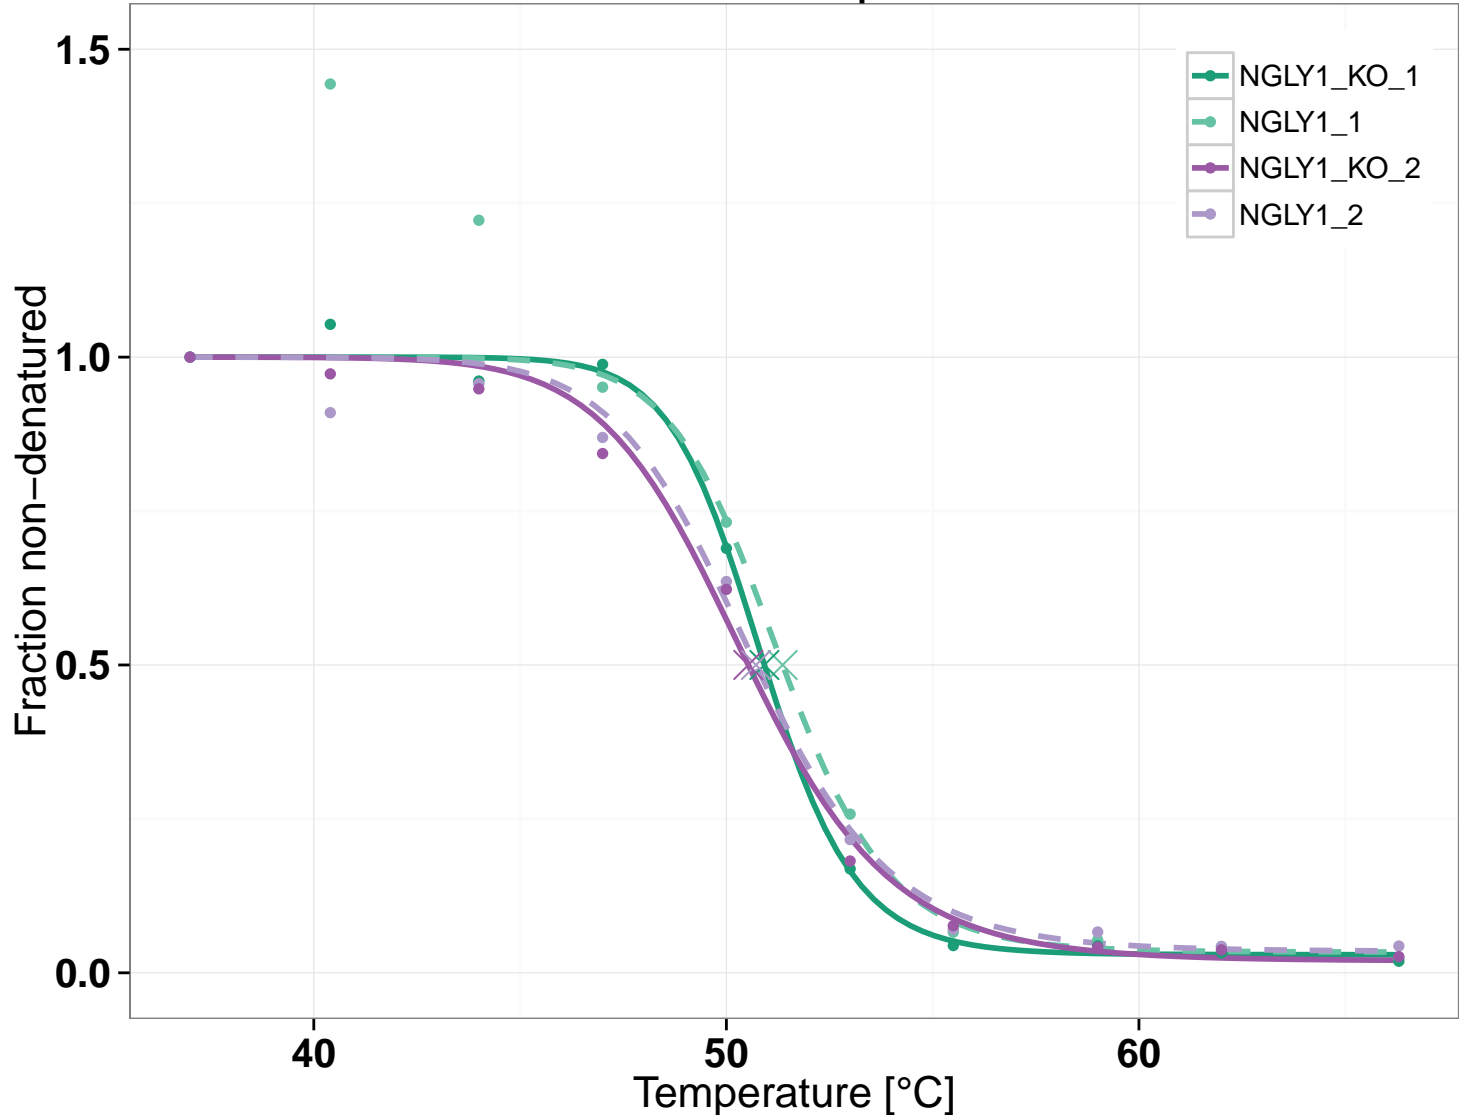

|            | meltPoint | slope | plateau | R2   |
|------------|-----------|-------|---------|------|
| NGLY1_KO_1 | 50.92     | -0.21 | 0.03    | 1    |
| NGLY1_1    | 51.36     | -0.18 | 0.03    | 0.91 |
| NGLY1_KO_2 | 50.53     | -0.14 | 0.02    | 0.99 |
| NGLY1_2    | 50.72     | -0.14 | 0.03    | 0.99 |

Supplement: Supplementary file 2427 [file 1]

IPI00074876.1|PHF20

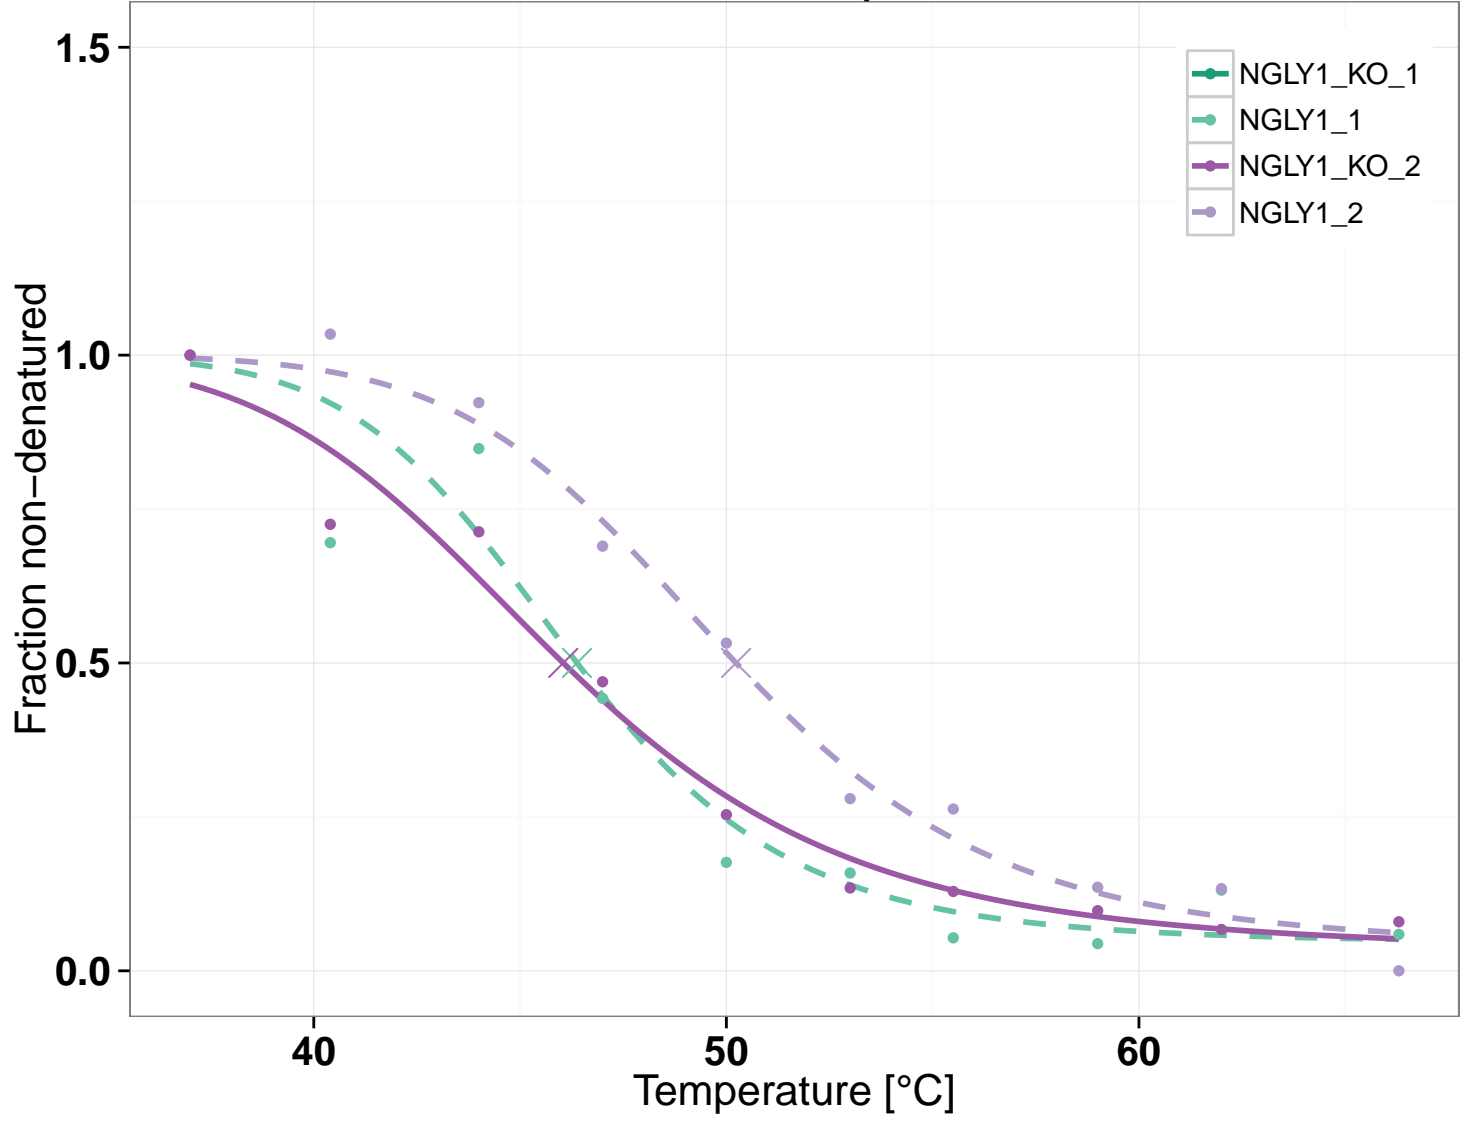

|            | meltPoint | slope  | plateau | R2   |
|------------|-----------|--------|---------|------|
| NGLY1_KO_1 | -         | -      | -       | -    |
| NGLY1_1    | 46.38     | -0.09  | 0.05    | 0.93 |
| NGLY1_KO_2 | 46.05     | -0.067 | 0.03    | 0.97 |
| NGLY1_2    | 50.24     | -0.073 | 0.04    | 0.99 |

Supplement: Supplementary file 2428 [file 1]

# IPI00023529.1|CDK6

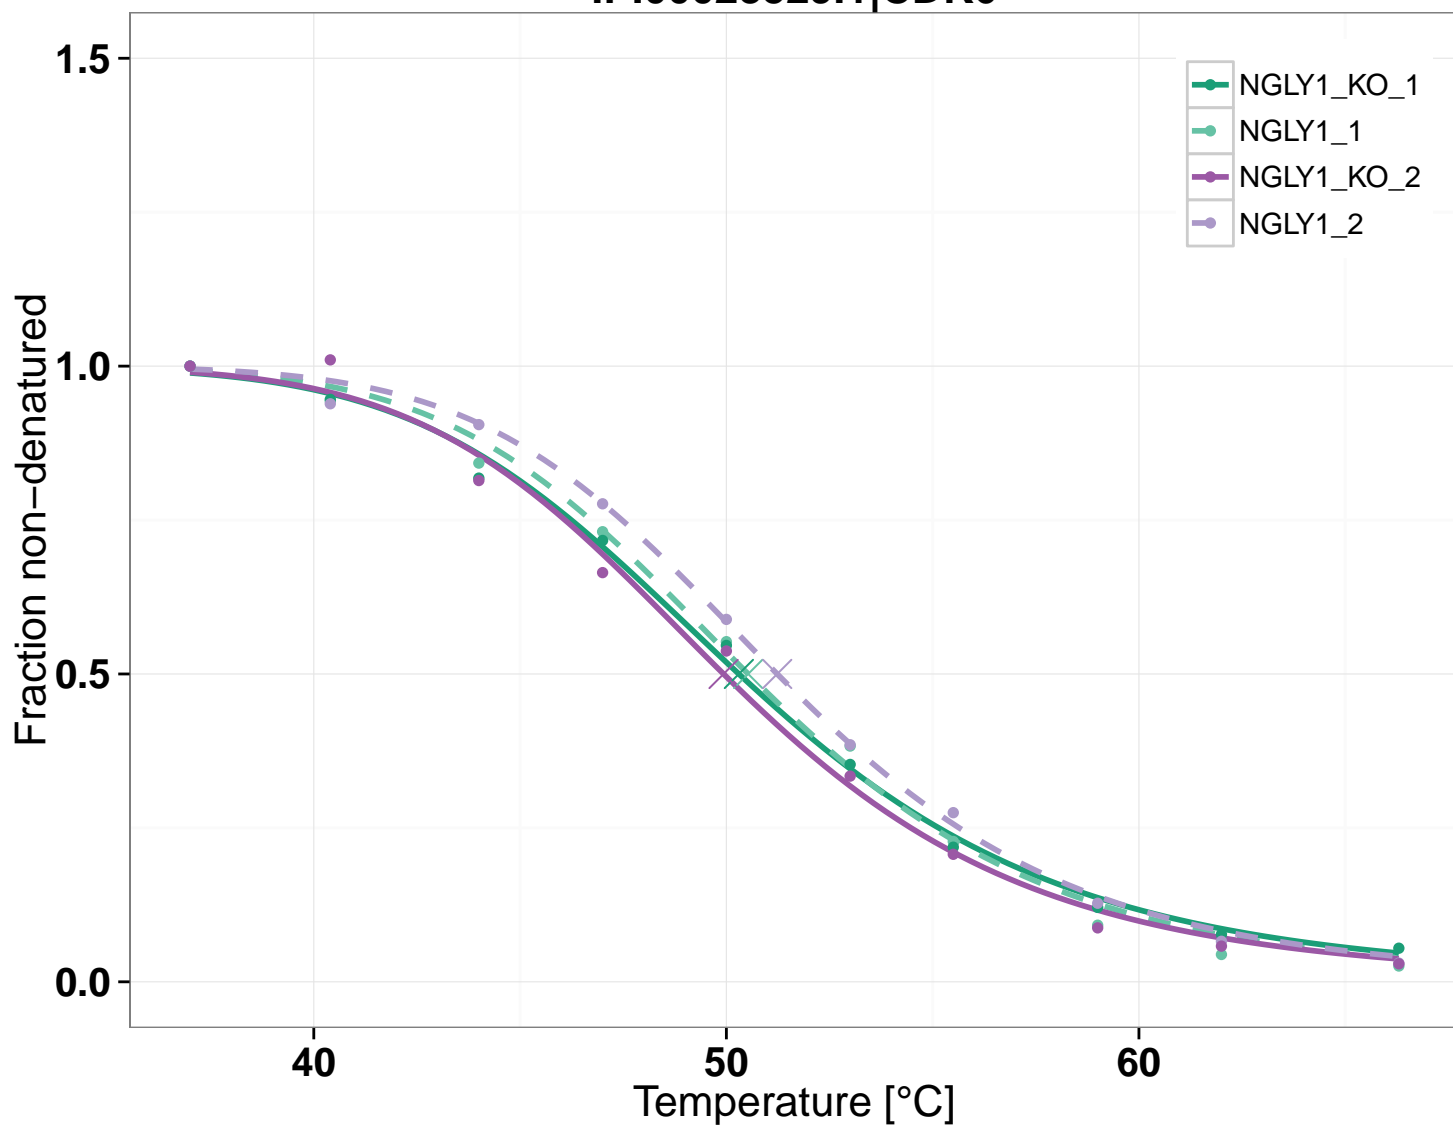

|            | meltPoint | slope  | plateau | R2   |
|------------|-----------|--------|---------|------|
| NGLY1_KO_1 | 50.3      | -0.064 | 0       | 1    |
| NGLY1_1    | 50.53     | -0.068 | 0       | 1    |
| NGLY1_KO_2 | 49.93     | -0.067 | 0       | 0.99 |
| NGLY1_2    | 51.23     | -0.069 | 0       | 1    |

Supplement: Supplementary file 2429 [file 1]

IPI00807625.1|FNBP1

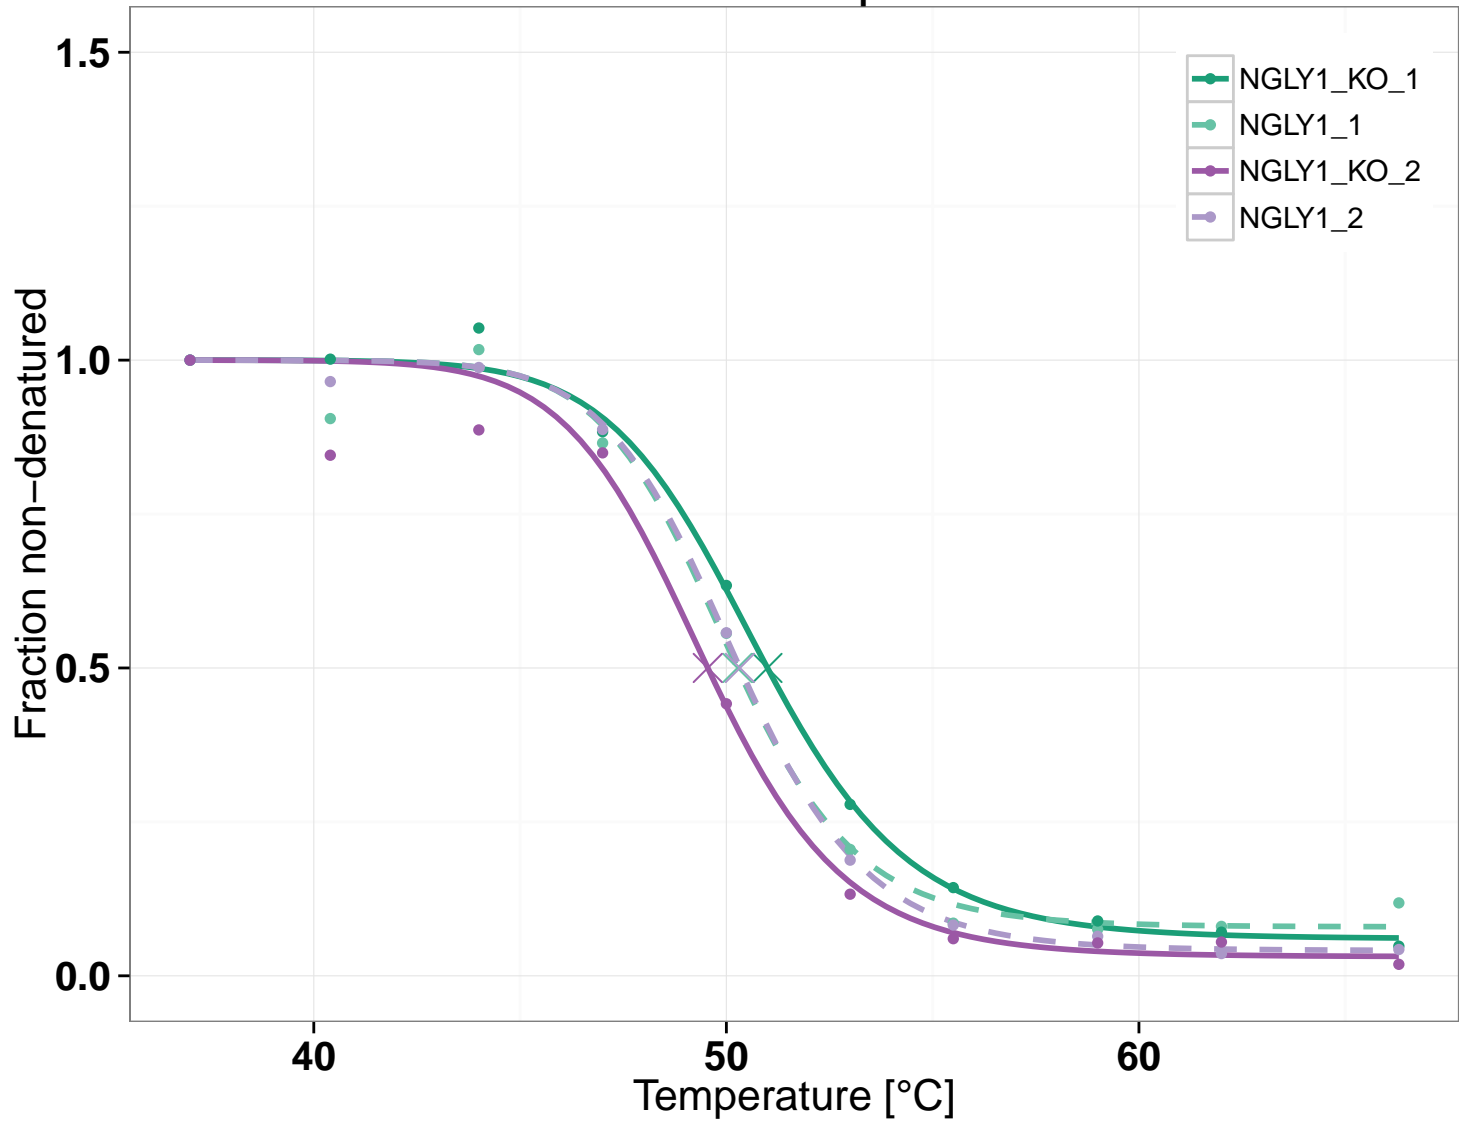

|            | meltPoint | slope | plateau | R2   |
|------------|-----------|-------|---------|------|
| NGLY1_KO_1 | 51        | -0.13 | 0.06    | 1    |
| NGLY1_1    | 50.27     | -0.15 | 0.08    | 0.99 |
| NGLY1_KO_2 | 49.55     | -0.14 | 0.03    | 0.98 |
| NGLY1_2    | 50.33     | -0.15 | 0.04    | 1    |

Supplement: Supplementary file 2430 [file 1]

# IPI00651713.2|LOC57228

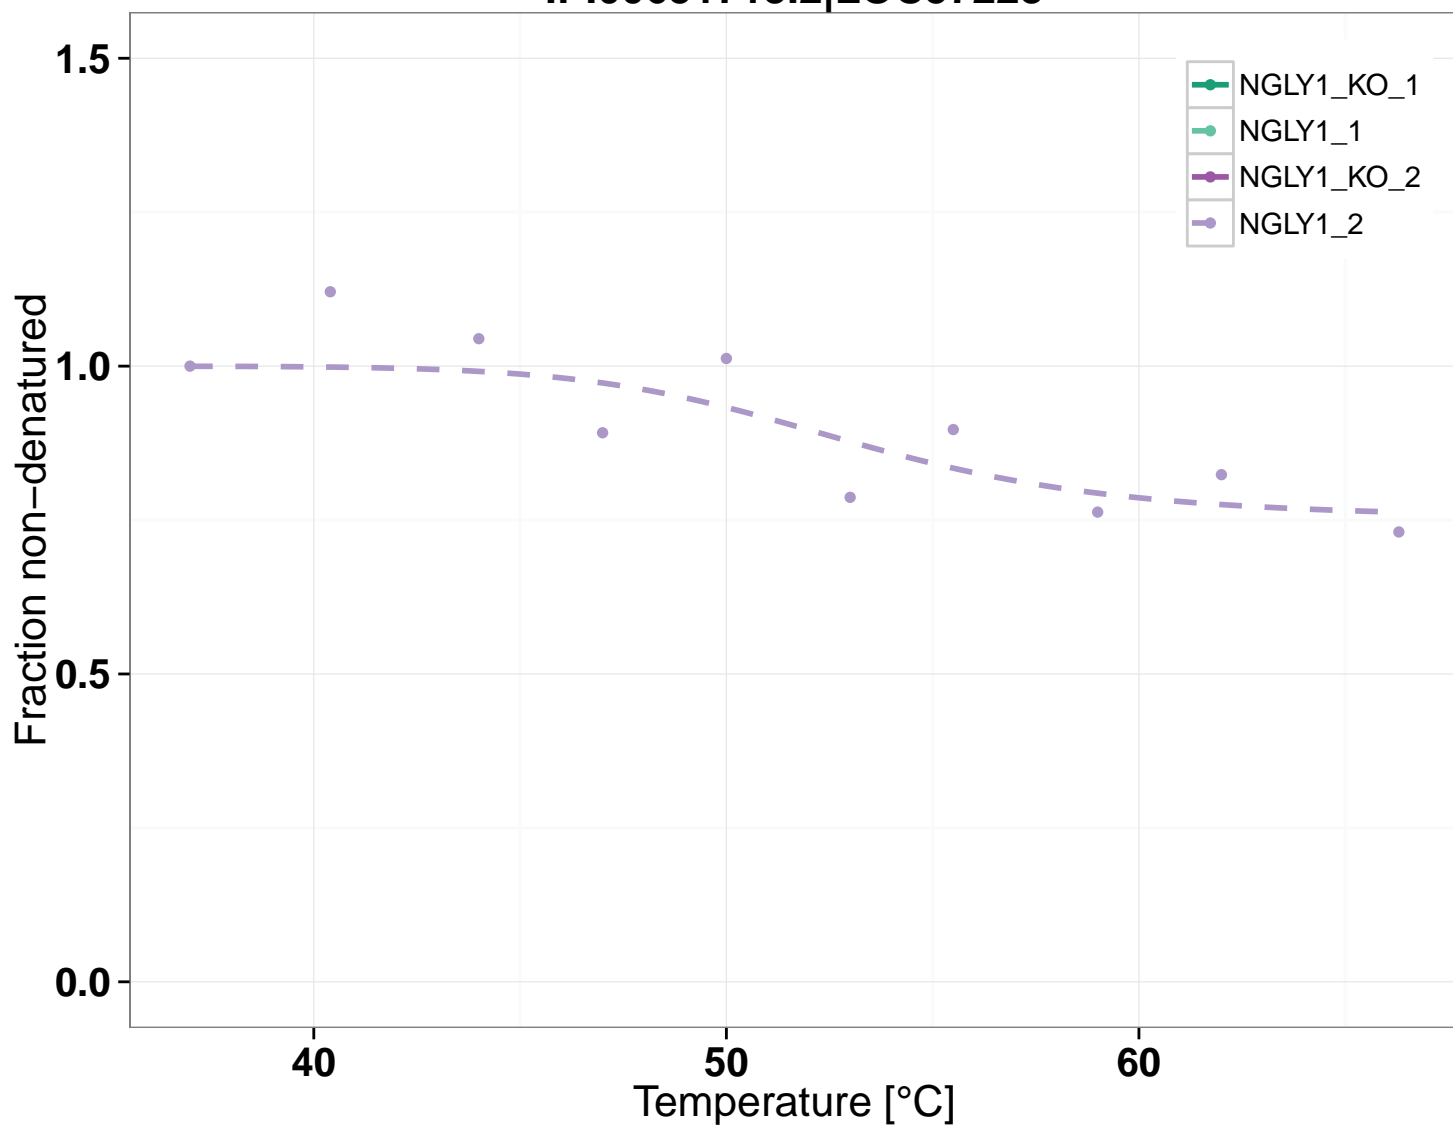

|            | meltPoint | slope  | plateau | R2  |
|------------|-----------|--------|---------|-----|
| NGLY1_KO_1 | —         | —      | —       | —   |
| NGLY1_1    | —         | —      | —       | —   |
| NGLY1_KO_2 | —         | —      | —       | —   |
| NGLY1_2    | —         | −0.019 | 0.75    | 0.7 |

Supplement: Supplementary file 2431 [file 1]

IPI00745125.2|SOAT1

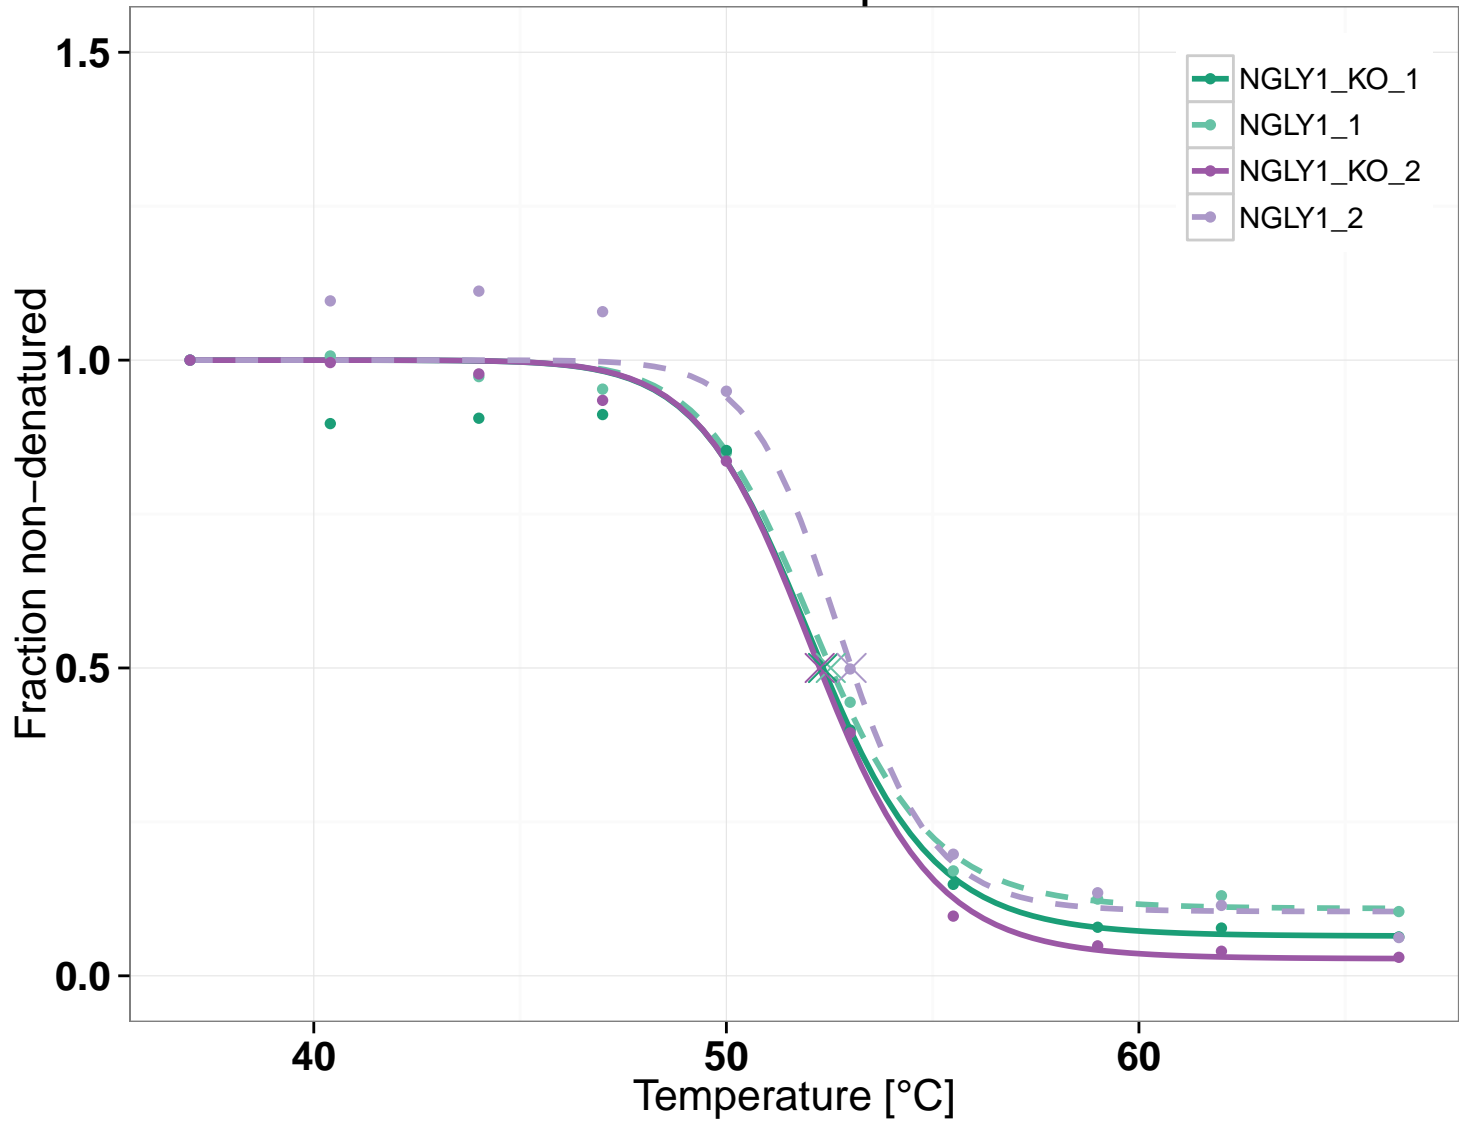

|            | meltPoint | slope | plateau | R2   |
|------------|-----------|-------|---------|------|
| NGLY1_KO_1 | 52.34     | -0.16 | 0.06    | 0.98 |
| NGLY1_1    | 52.53     | -0.16 | 0.11    | 1    |
| NGLY1_KO_2 | 52.26     | -0.17 | 0.03    | 1    |
| NGLY1_2    | 53.04     | -0.2  | 0.1     | 0.98 |

Supplement: Supplementary file 2432 [file 1]

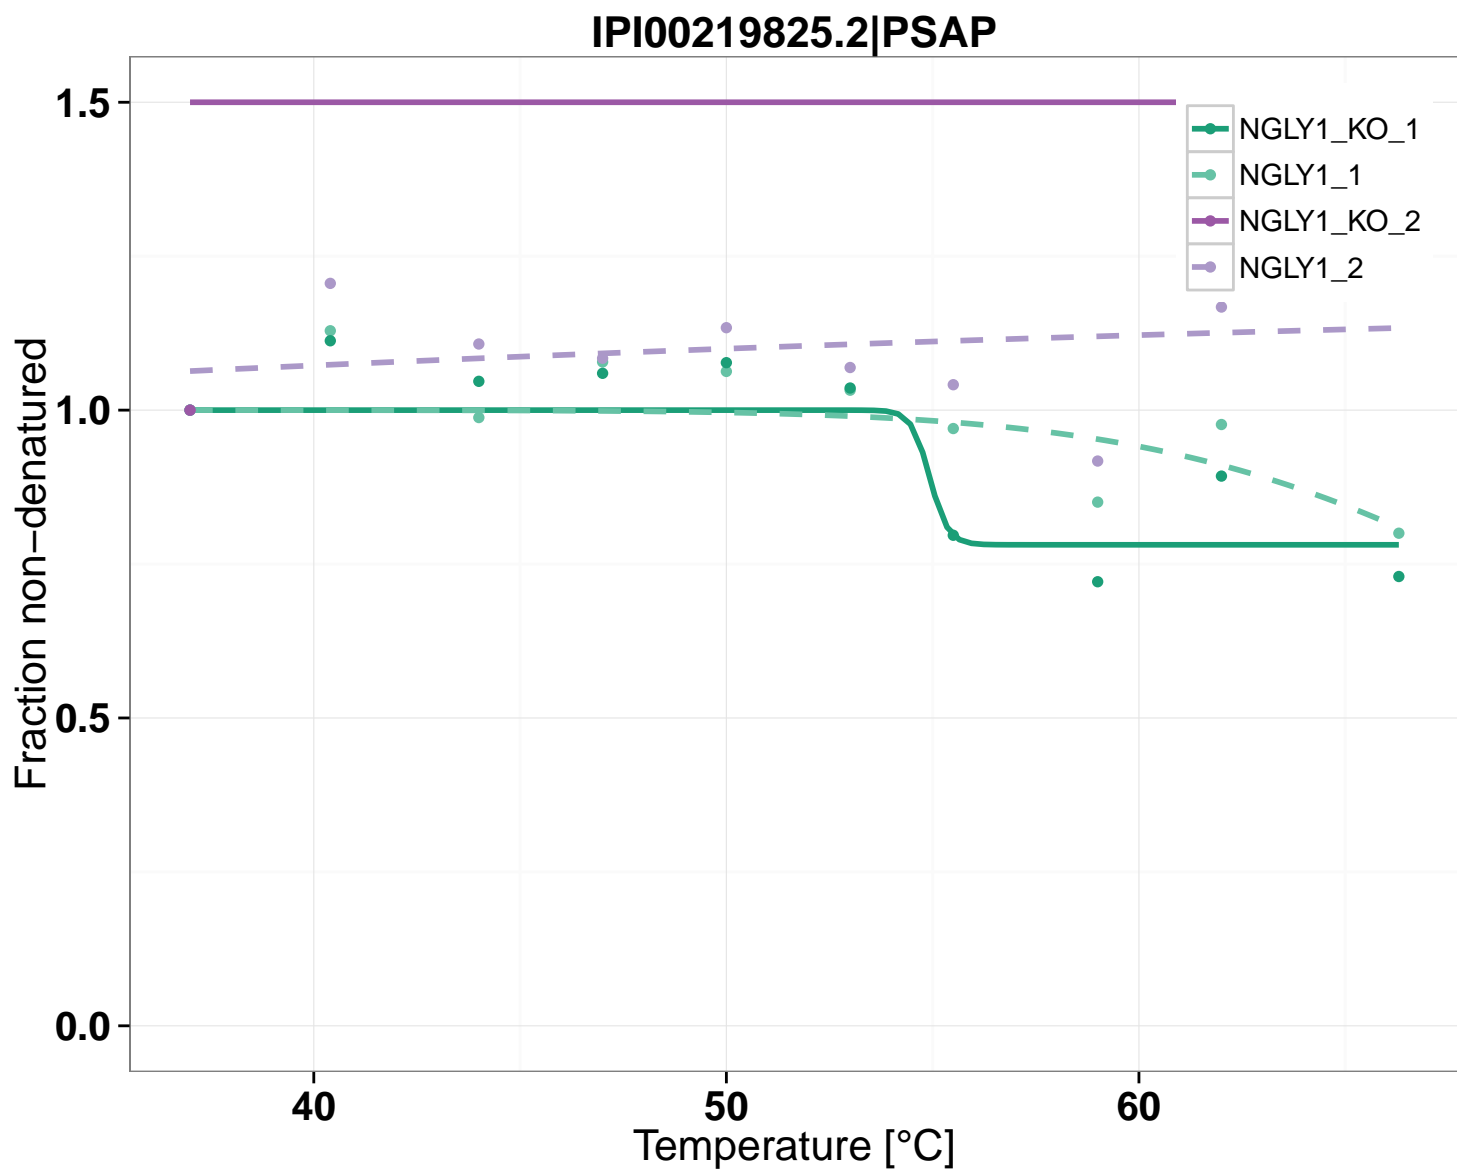

|            | meltPoint | slope | plateau | R2    |
|------------|-----------|-------|---------|-------|
| NGLY1_KO_1 | —         | -0.25 | 0.78    | 0.78  |
| NGLY1_1    | —         | —     | 0       | 0.51  |
| NGLY1_KO_2 | —         | —     | 1.5     | -2.03 |
| NGLY1_2    | —         | —     | 1.5     | 0.04  |

Supplement: Supplementary file 2433 [file 1]

IPI00062343.3|CMTM7

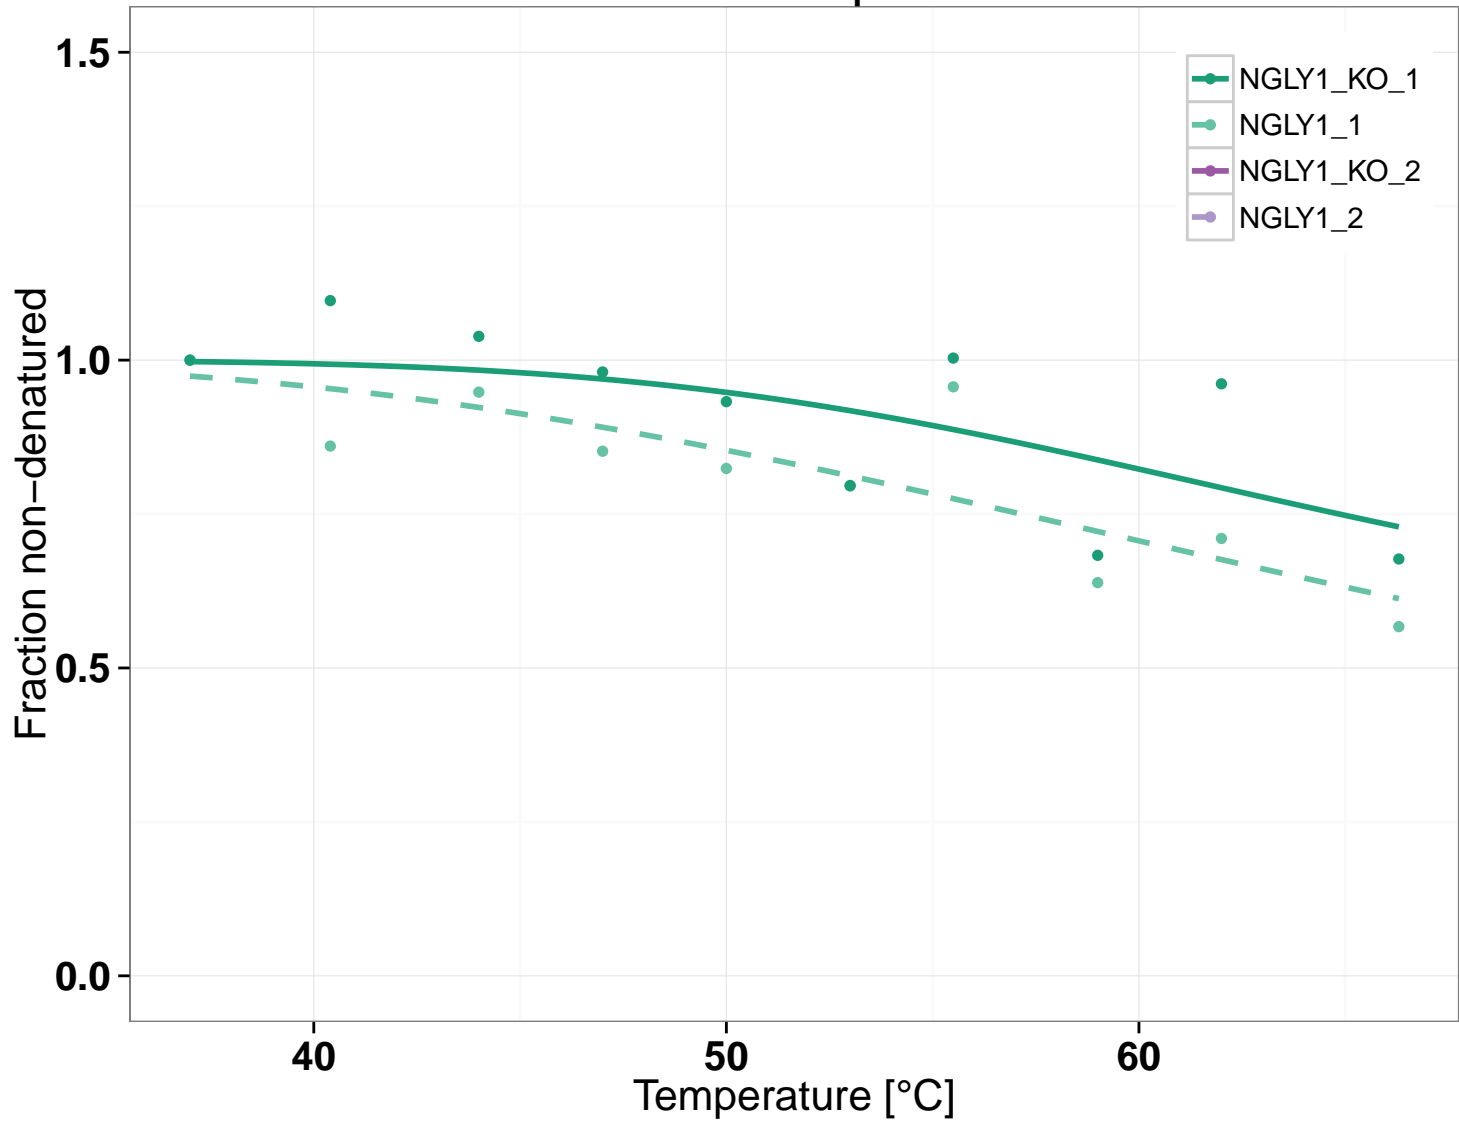

|            | meltPoint | slope  | plateau | R2   |
|------------|-----------|--------|---------|------|
| NGLY1_KO_1 | -         | -0.015 | 0.45    | 0.5  |
| NGLY1_1    | -         | -0.015 | 0       | 0.69 |
| NGLY1_KO_2 | -         | -      | -       | -    |
| NGLY1_2    | -         | -      | -       | -    |

Supplement: Supplementary file 2434 [file 1]

# IPI00337460.3|KLC1

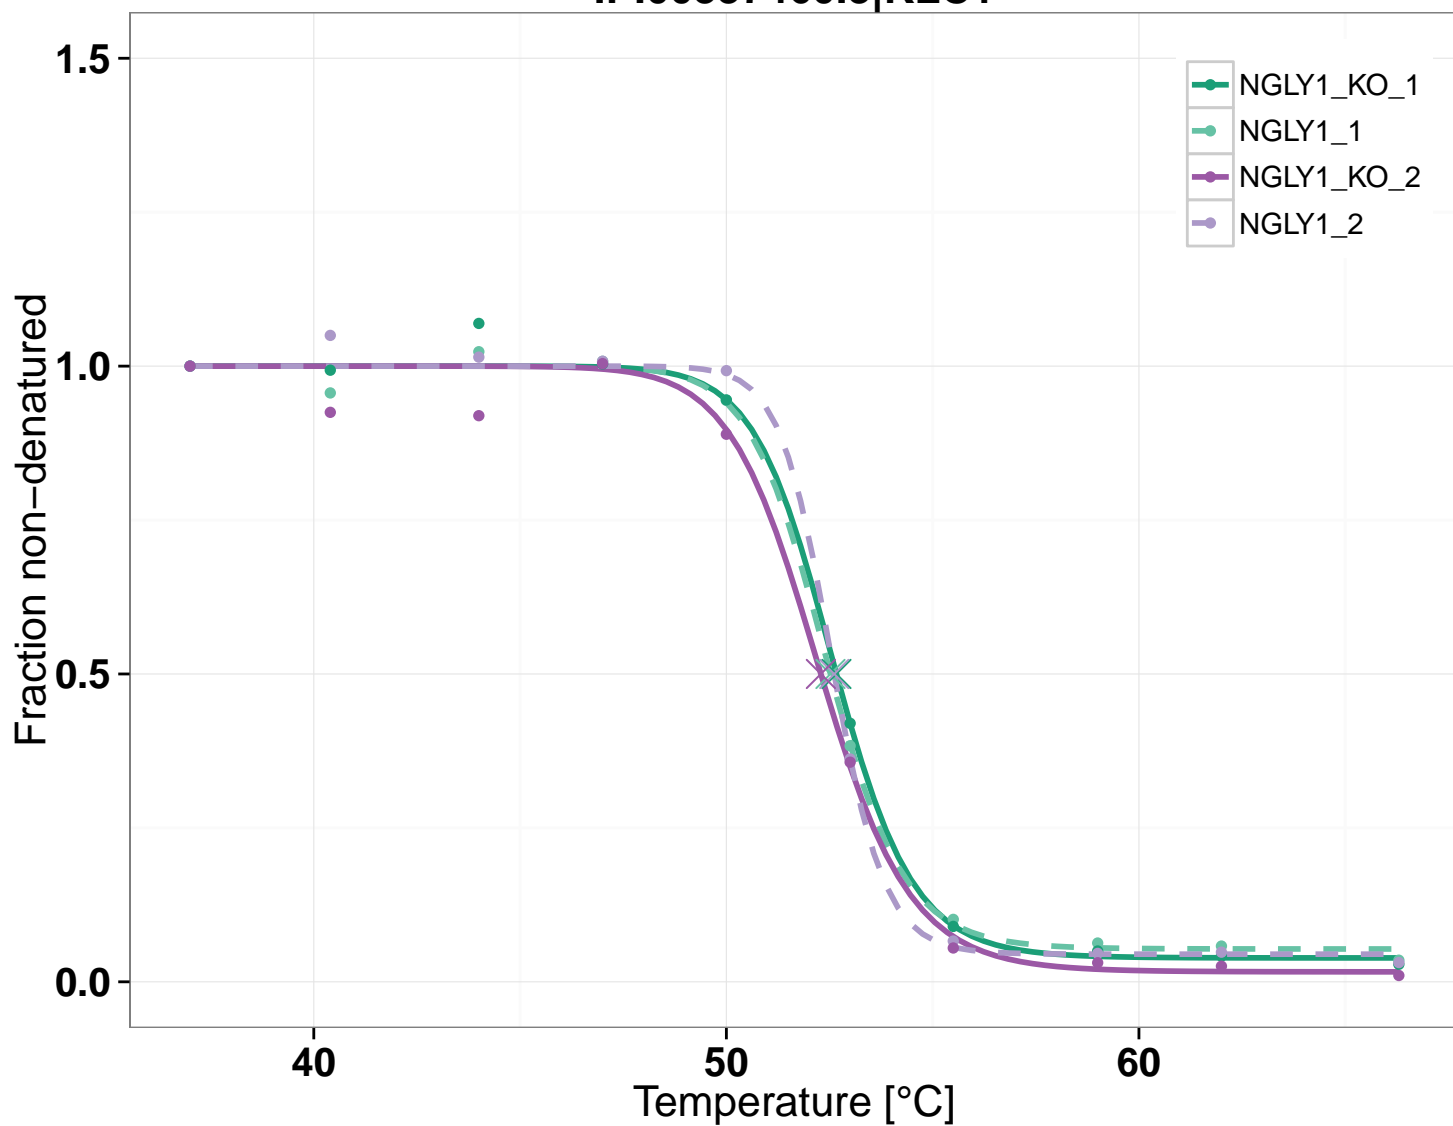

|            | meltPoint | slope | plateau | R2   |
|------------|-----------|-------|---------|------|
| NGLY1_KO_1 | 52.67     | -0.25 | 0.04    | 1    |
| NGLY1_1    | 52.52     | -0.25 | 0.05    | 1    |
| NGLY1_KO_2 | 52.29     | -0.22 | 0.02    | 0.99 |
| NGLY1_2    | 52.62     | -0.38 | 0.04    | 1    |

Supplement: Supplementary file 2435 [file 1]

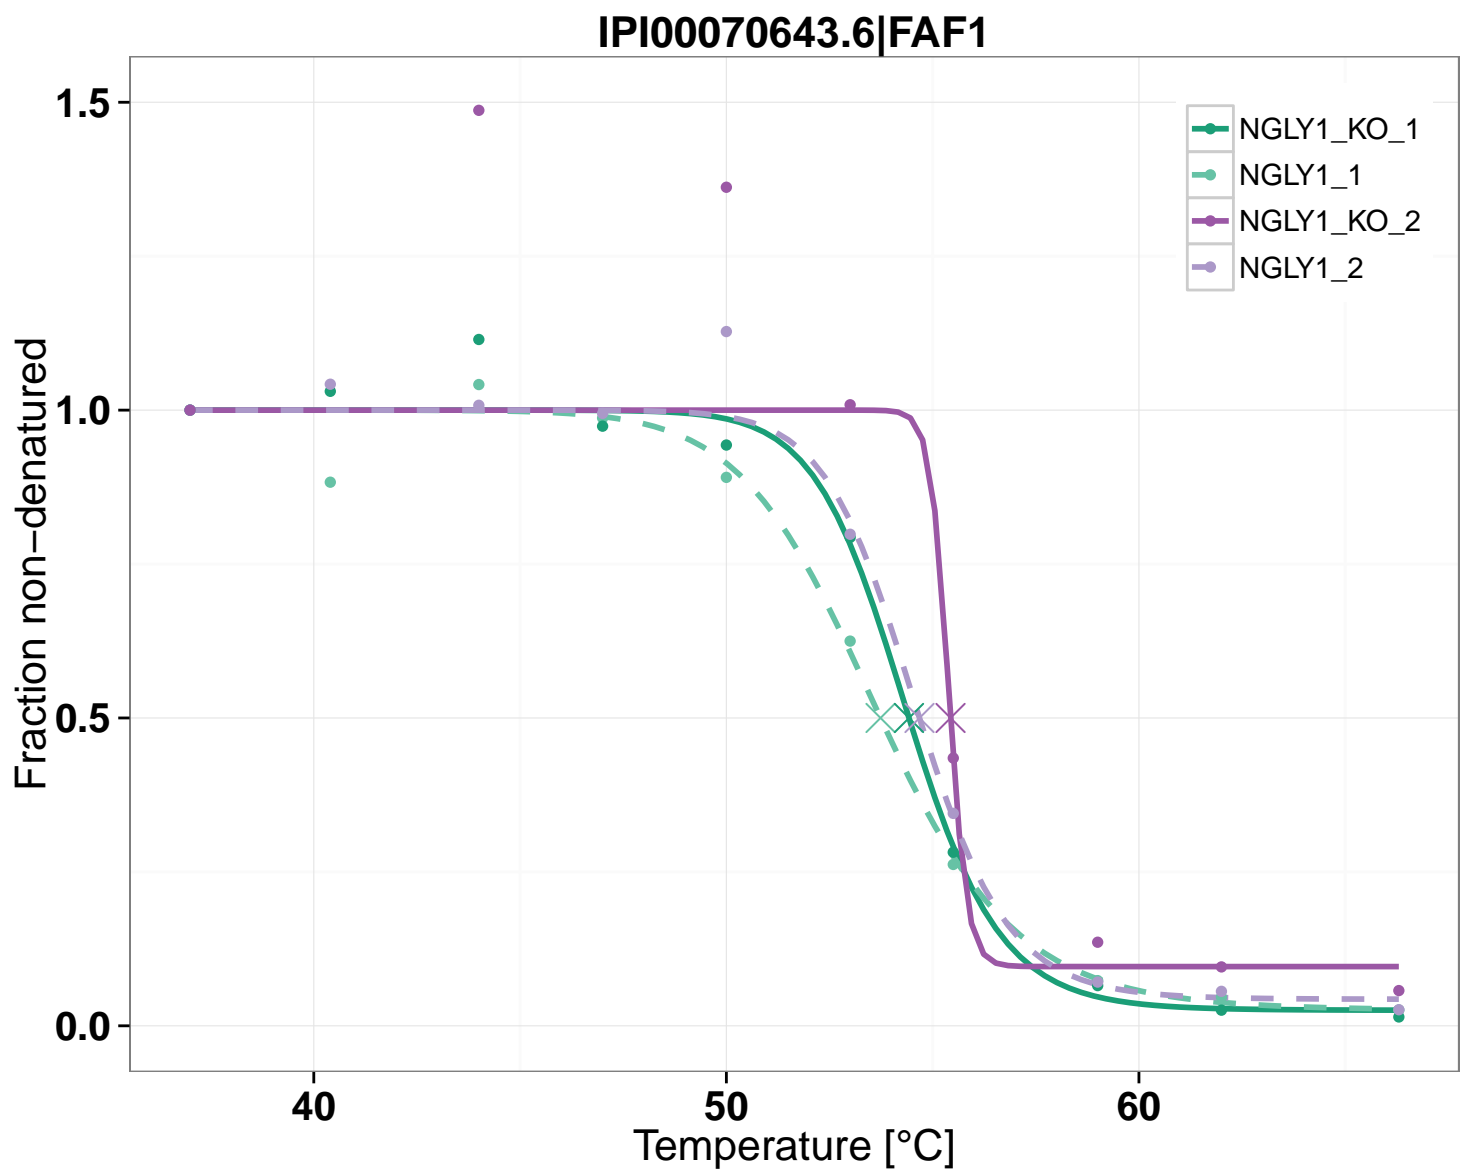

|            | meltPoint | slope | plateau | R2   |
|------------|-----------|-------|---------|------|
| NGLY1_KO_1 | 54.43     | -0.22 | 0.03    | 0.99 |
| NGLY1_1    | 53.74     | -0.15 | 0.03    | 0.99 |
| NGLY1_KO_2 | 55.43     | -1    | 0.1     | 0.72 |
| NGLY1_2    | 54.68     | -0.22 | 0.04    | 0.99 |

Supplement: Supplementary file 2436 [file 1]

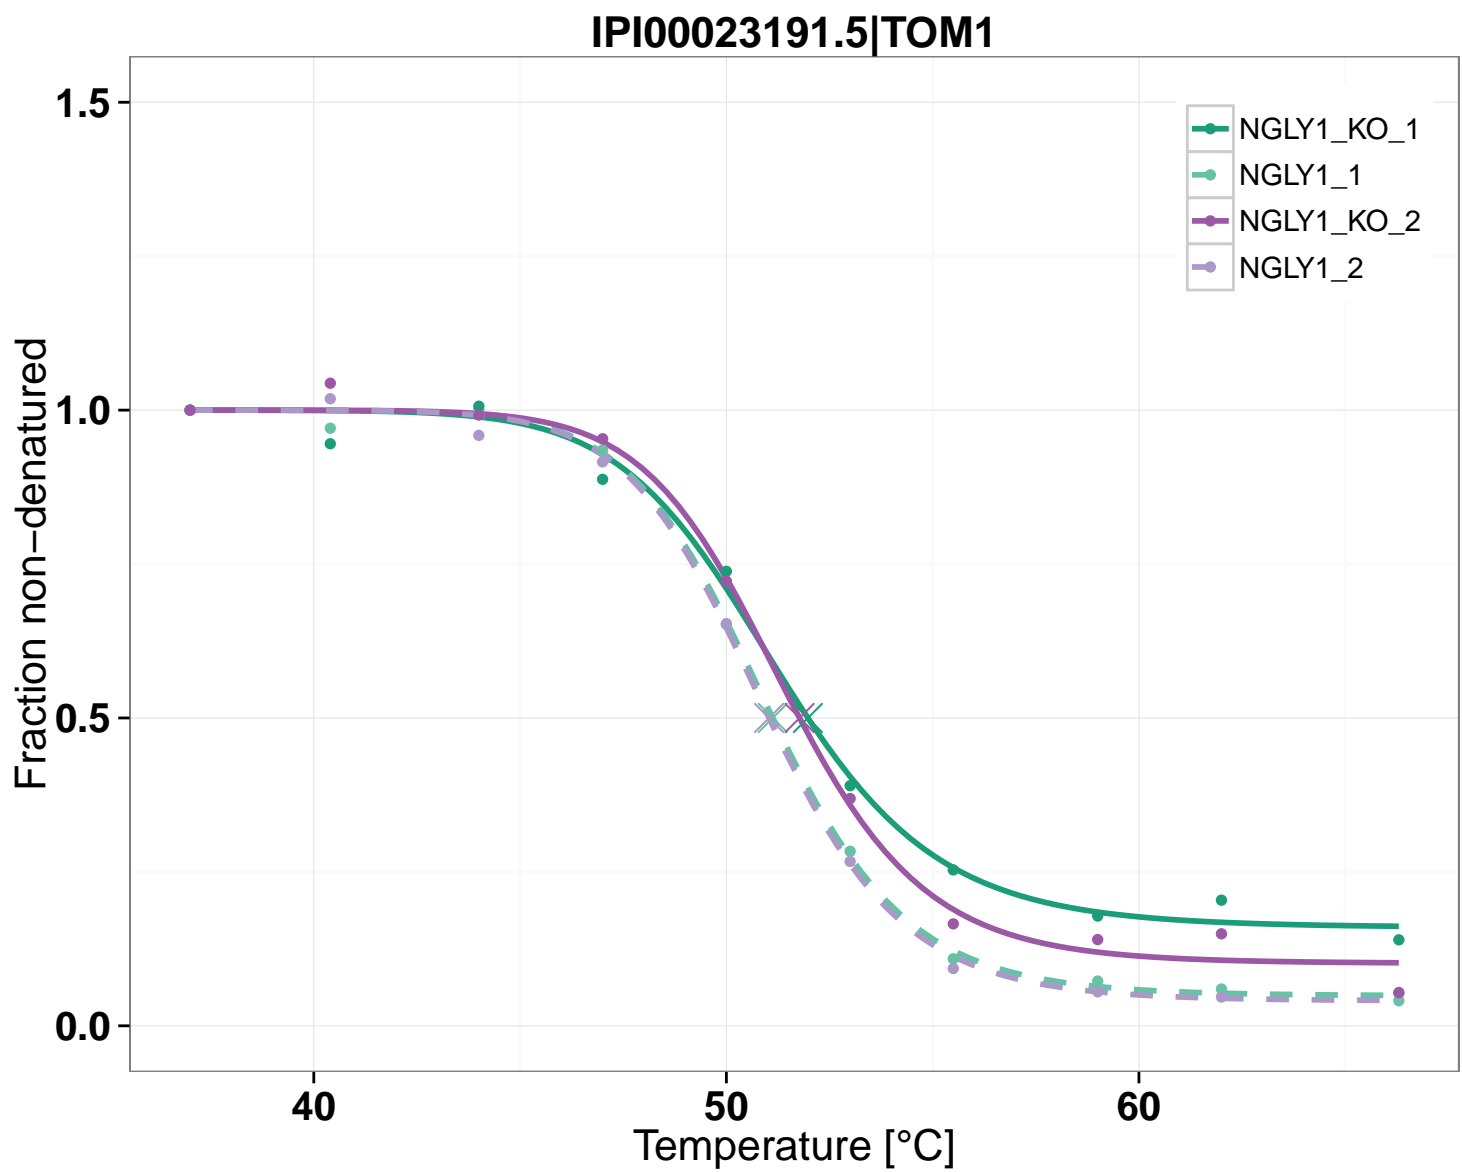

|            | meltPoint | slope | plateau | R2   |
|------------|-----------|-------|---------|------|
| NGLY1_KO_1 | 51.98     | -0.11 | 0.16    | 0.99 |
| NGLY1_1    | 51.12     | -0.14 | 0.05    | 1    |
| NGLY1_KO_2 | 51.77     | -0.13 | 0.1     | 1    |
| NGLY1_2    | 51.03     | -0.14 | 0.04    | 1    |

Supplement: Supplementary file 2437 [file 1]

# IPI00301034.2|NADK

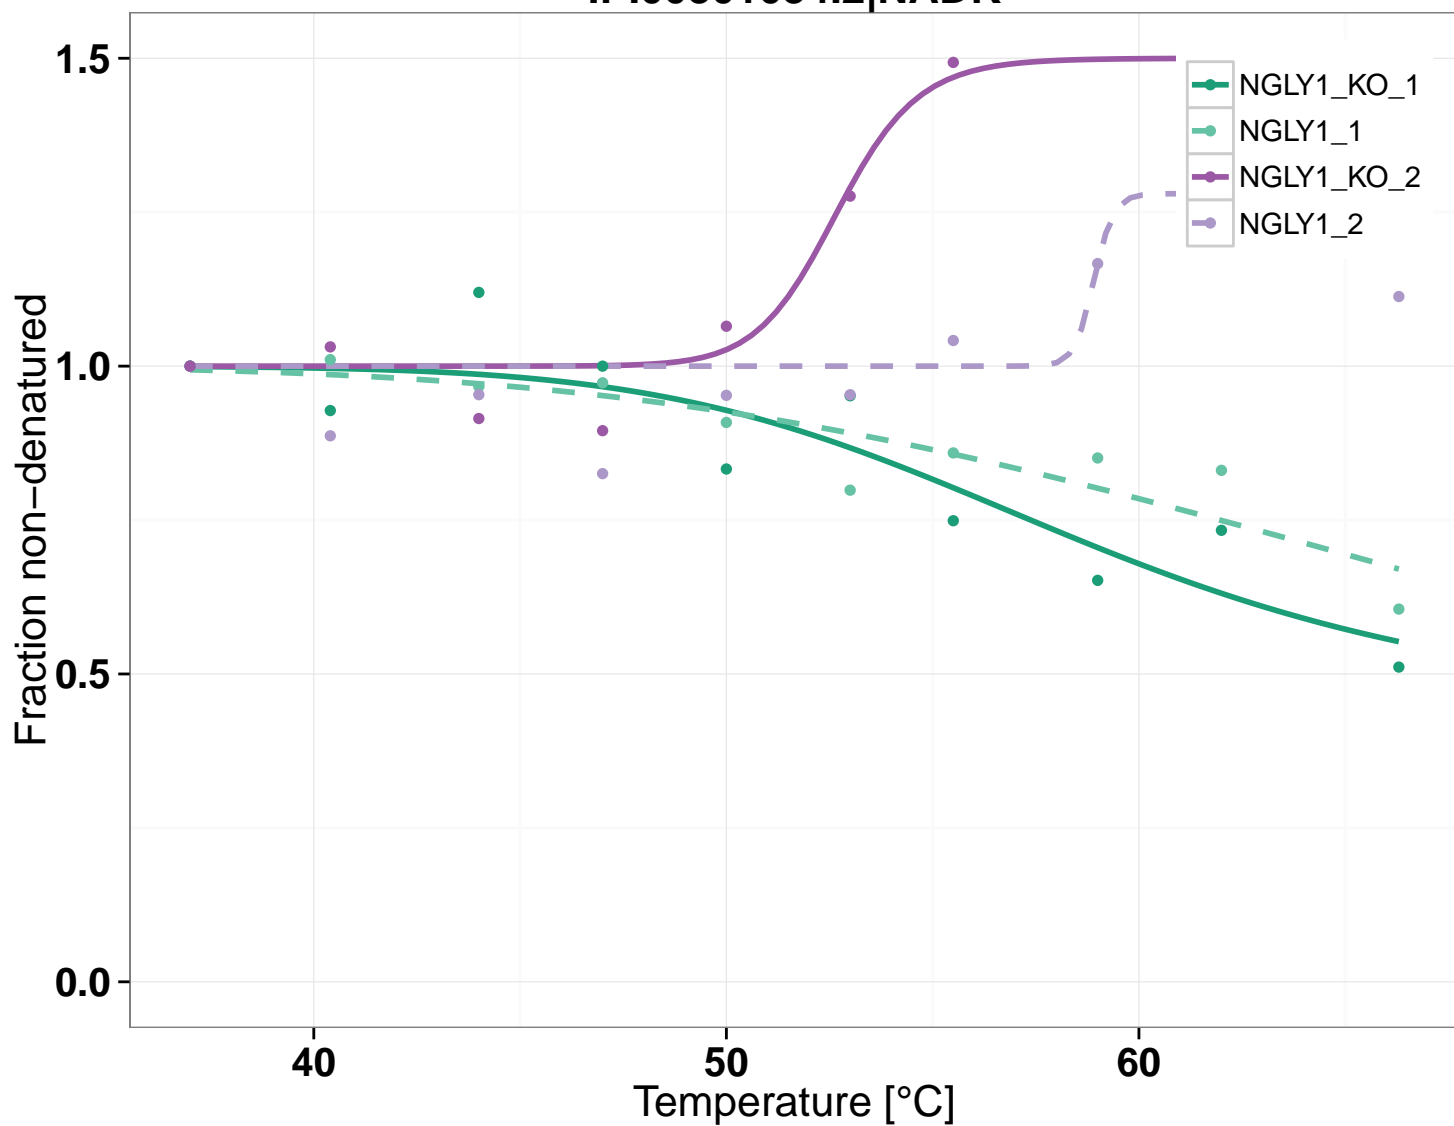

|            | meltPoint | slope  | plateau | R2   |
|------------|-----------|--------|---------|------|
| NGLY1_KO_1 | -         | -0.028 | 0.43    | 0.82 |
| NGLY1_1    | -         | -0.019 | 0       | 0.83 |
| NGLY1_KO_2 | -         | 0.13   | 1.5     | 0.68 |
| NGLY1_2    | -         | 0.3    | 1.28    | 0.62 |

Supplement: Supplementary file 2438 [file 1]

IPI00419844.3|USP39

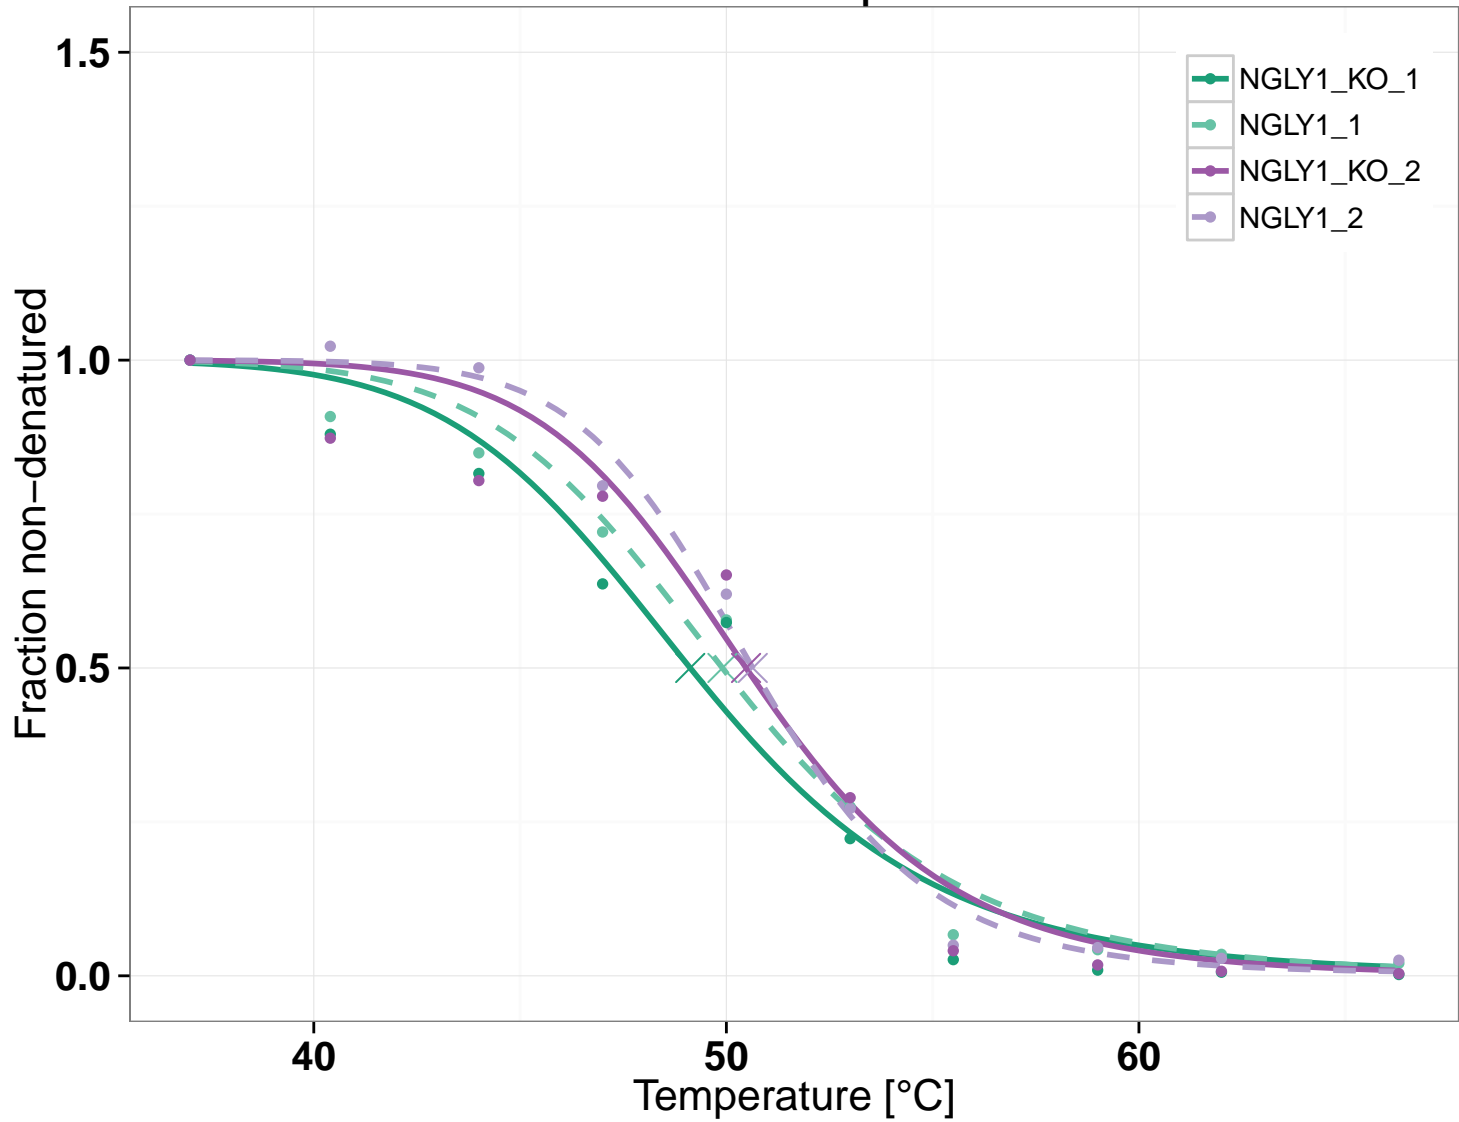

|            | meltPoint | slope  | plateau | R2   |
|------------|-----------|--------|---------|------|
| NGLY1_KO_1 | 49.12     | -0.084 | 0       | 0.97 |
| NGLY1_1    | 49.9      | -0.087 | 0       | 0.98 |
| NGLY1_KO_2 | 50.48     | -0.099 | 0       | 0.96 |
| NGLY1_2    | 50.64     | -0.12  | 0       | 0.99 |

Supplement: Supplementary file 2439 [file 1]

IPI00007691.1|TRAPPC4

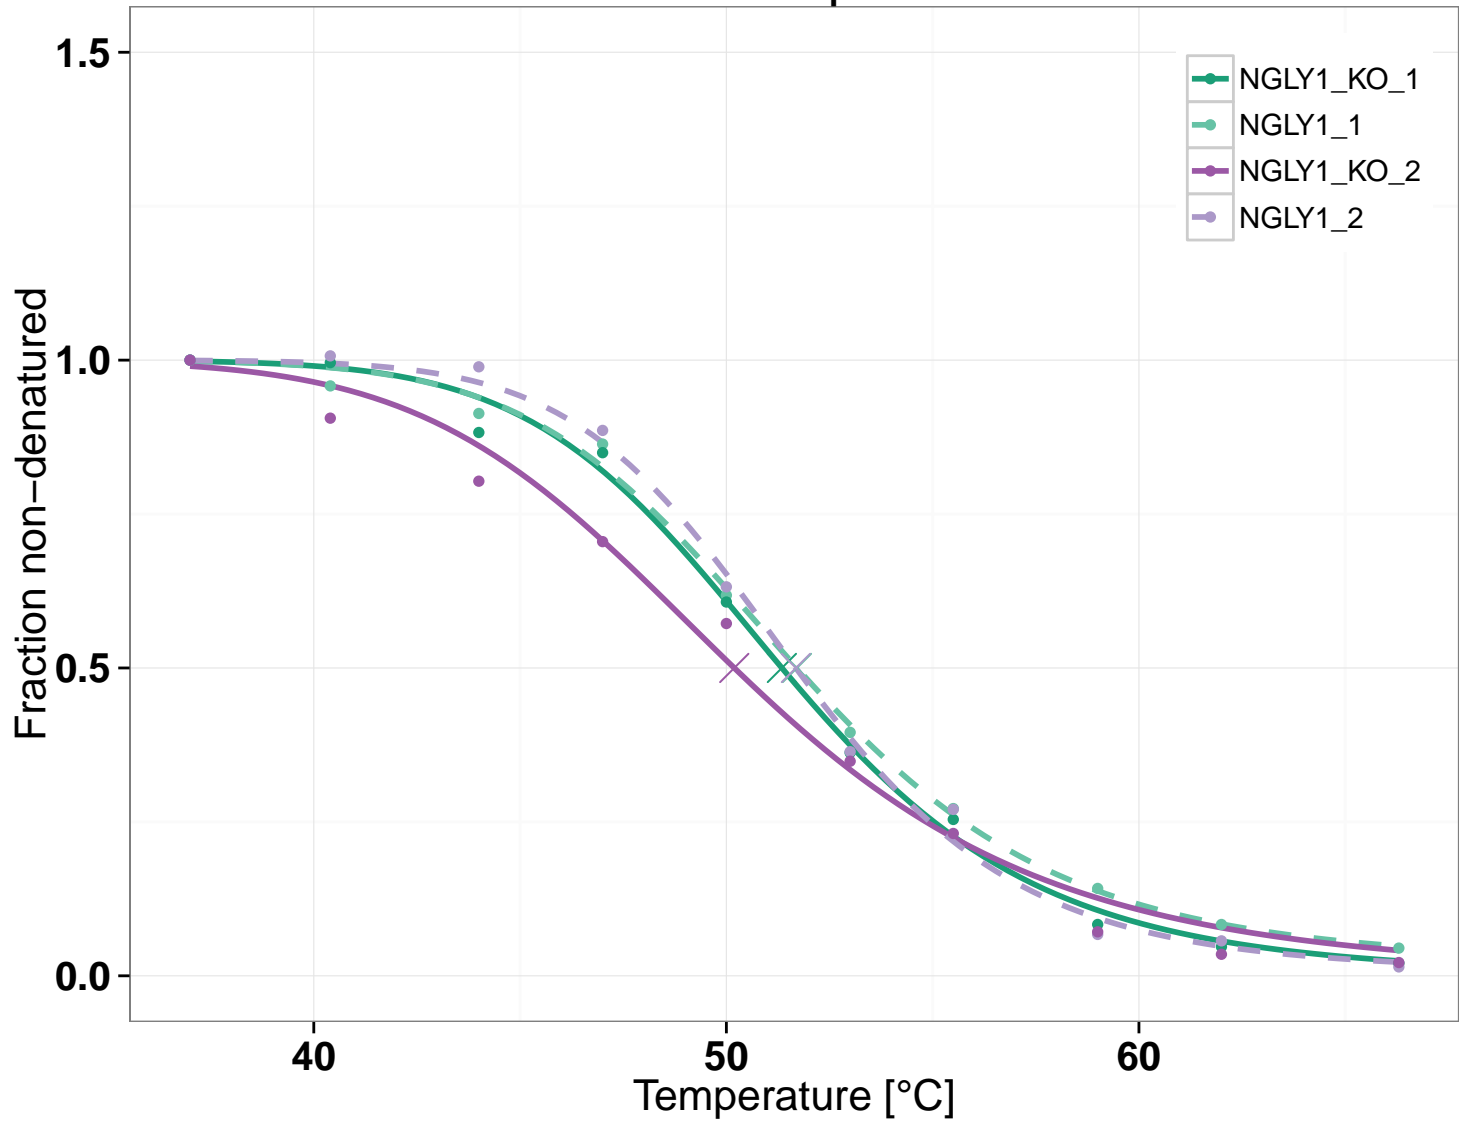

|            | meltPoint | slope  | plateau | R2   |
|------------|-----------|--------|---------|------|
| NGLY1_KO_1 | 51.35     | -0.081 | 0       | 1    |
| NGLY1_1    | 51.71     | -0.076 | 0.02    | 1    |
| NGLY1_KO_2 | 50.19     | -0.066 | 0       | 0.99 |
| NGLY1_2    | 51.69     | -0.092 | 0.01    | 1    |

Supplement: Supplementary file 2440 [file 1]

# IPI00019477.2|SLC25A39

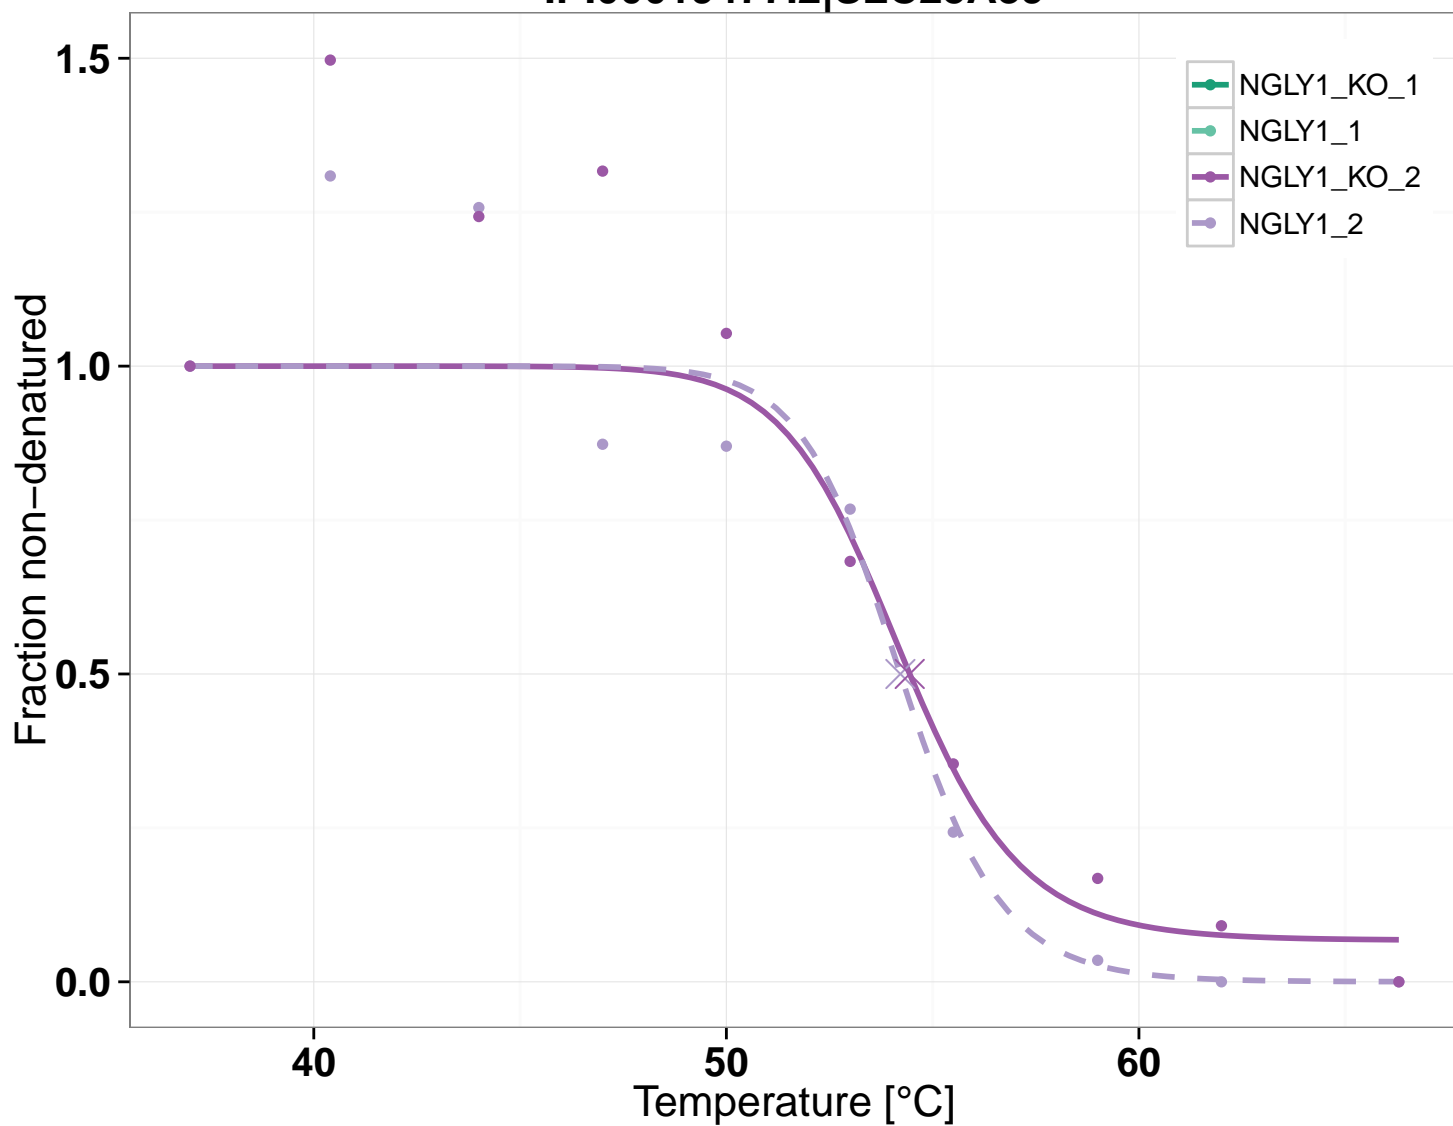

|            | meltPoint | slope | plateau | R2   |
|------------|-----------|-------|---------|------|
| NGLY1_KO_1 | —         | —     | —       | —    |
| NGLY1_1    | —         | —     | —       | —    |
| NGLY1_KO_2 | 54.44     | -0.16 | 0.07    | 0.85 |
| NGLY1_2    | 54.22     | -0.21 | 0       | 0.92 |

Supplement: Supplementary file 2441 [file 1]

IPI00016930.1|ING2

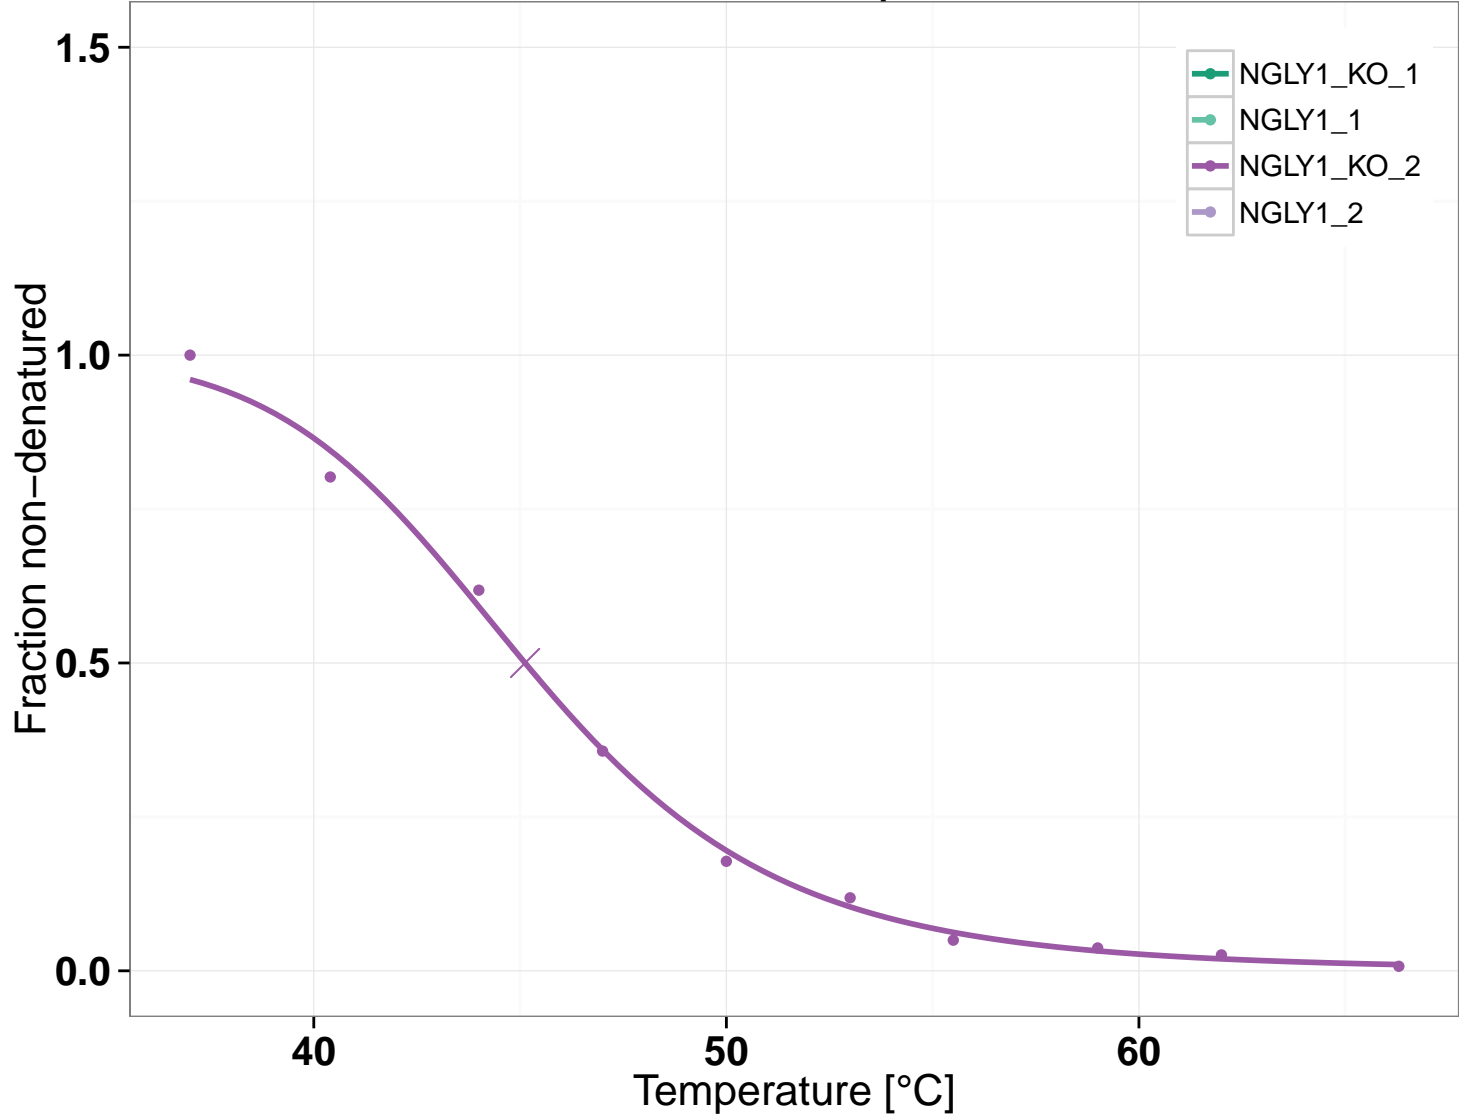

|            | meltPoint | slope  | plateau | R2 |
|------------|-----------|--------|---------|----|
| NGLY1_KO_1 | -         | -      | -       | -  |
| NGLY1_1    | -         | -      | -       | -  |
| NGLY1_KO_2 | 45.12     | -0.082 | 0       | 1  |
| NGLY1_2    | -         | -      | -       | -  |

Supplement: Supplementary file 2442 [file 1]

IPI00005126.1|EFNB2

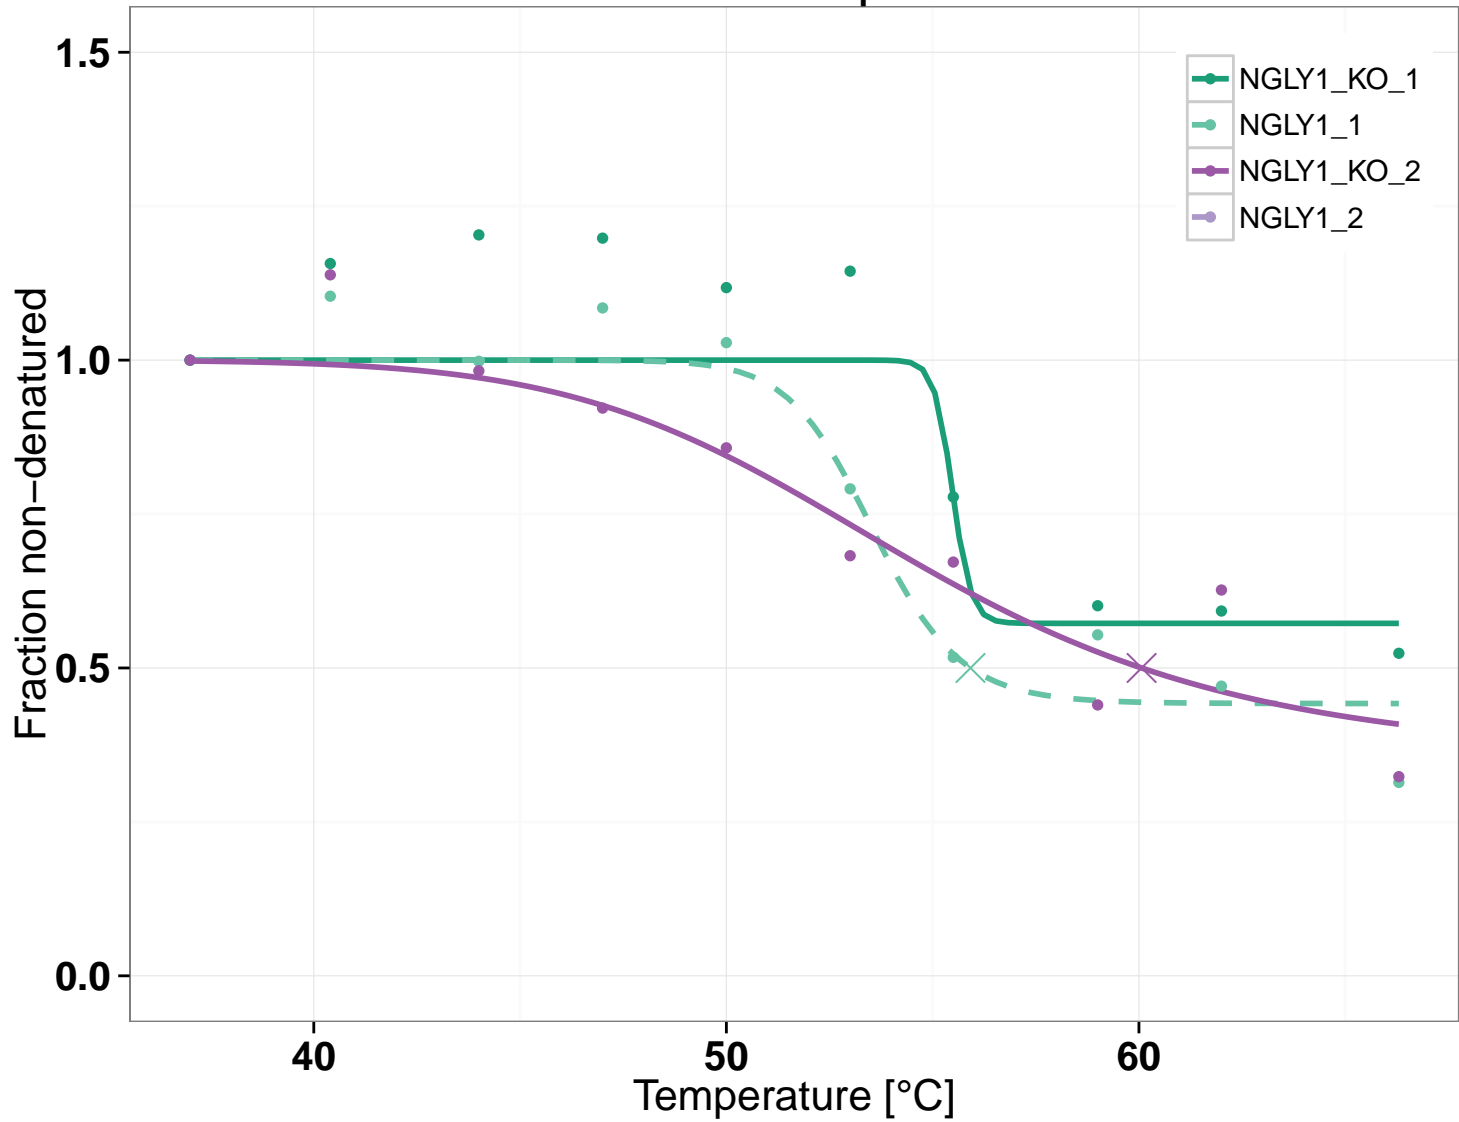

|            | meltPoint | slope  | plateau | R2   |
|------------|-----------|--------|---------|------|
| NGLY1_KO_1 | –         | –0.48  | 0.57    | 0.79 |
| NGLY1_1    | 55.92     | –0.13  | 0.44    | 0.94 |
| NGLY1_KO_2 | 60.06     | –0.039 | 0.35    | 0.89 |
| NGLY1_2    | –         | –      | –       | –    |

Supplement: Supplementary file 2443 [file 1]

# IPI00761051.1|C10ORF137

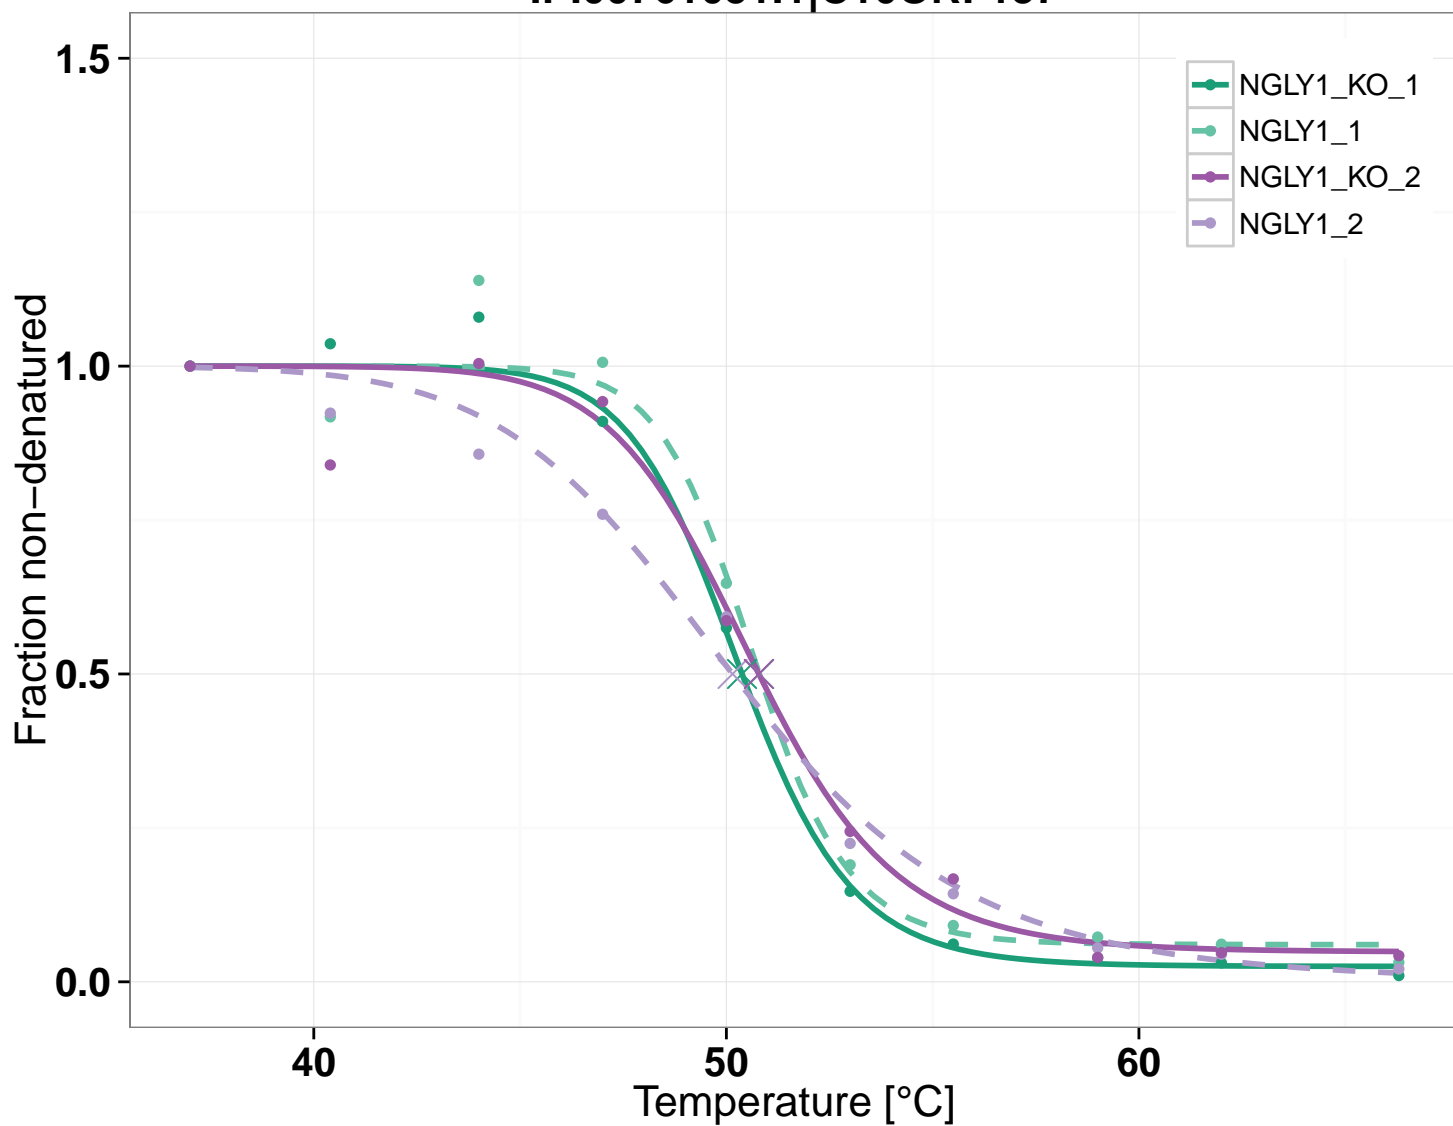

|            | meltPoint | slope  | plateau | R2   |
|------------|-----------|--------|---------|------|
| NGLY1_KO_1 | 50.38     | -0.18  | 0.02    | 1    |
| NGLY1_1    | 50.8      | -0.2   | 0.06    | 0.99 |
| NGLY1_KO_2 | 50.79     | -0.14  | 0.05    | 0.98 |
| NGLY1_2    | 50.15     | -0.088 | 0       | 0.99 |

Supplement: Supplementary file 2444 [file 1]

# IPI00028957.2|UBE4A

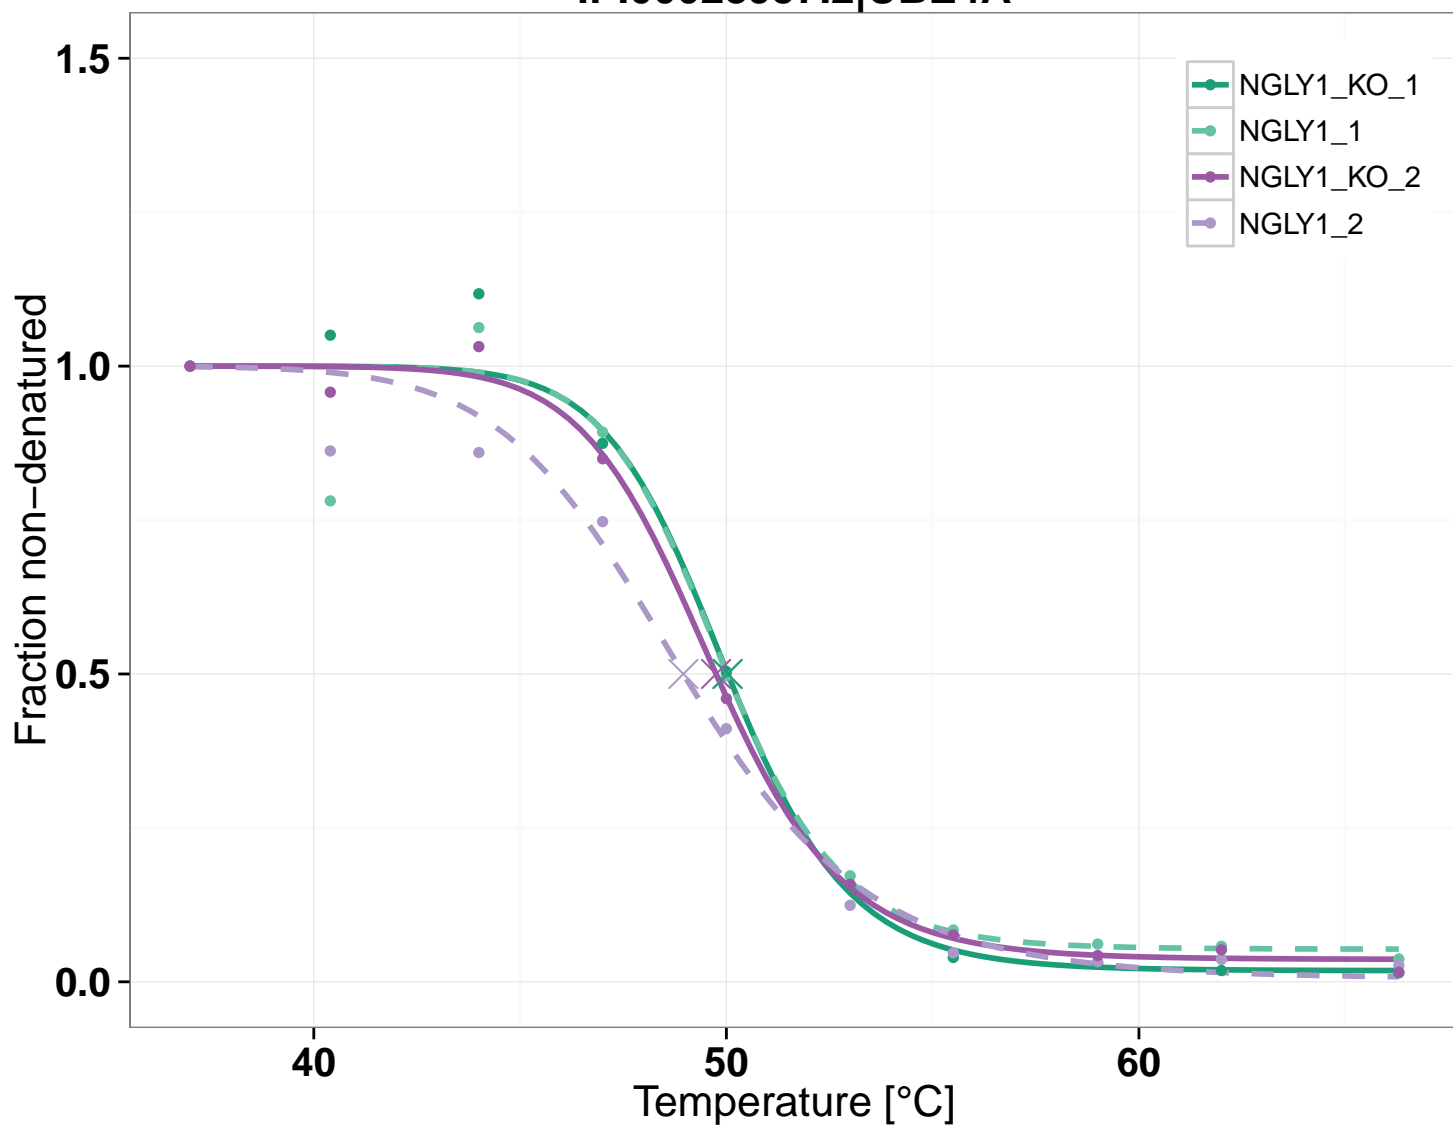

|            | meltPoint | slope | plateau | R2   |
|------------|-----------|-------|---------|------|
| NGLY1_KO_1 | 50.03     | -0.17 | 0.02    | 0.99 |
| NGLY1_1    | 50.02     | -0.16 | 0.05    | 0.97 |
| NGLY1_KO_2 | 49.75     | -0.15 | 0.04    | 1    |
| NGLY1_2    | 48.96     | -0.11 | 0       | 0.98 |

Supplement: Supplementary file 2445 [file 1]

IPI00642984.2|BCAP31

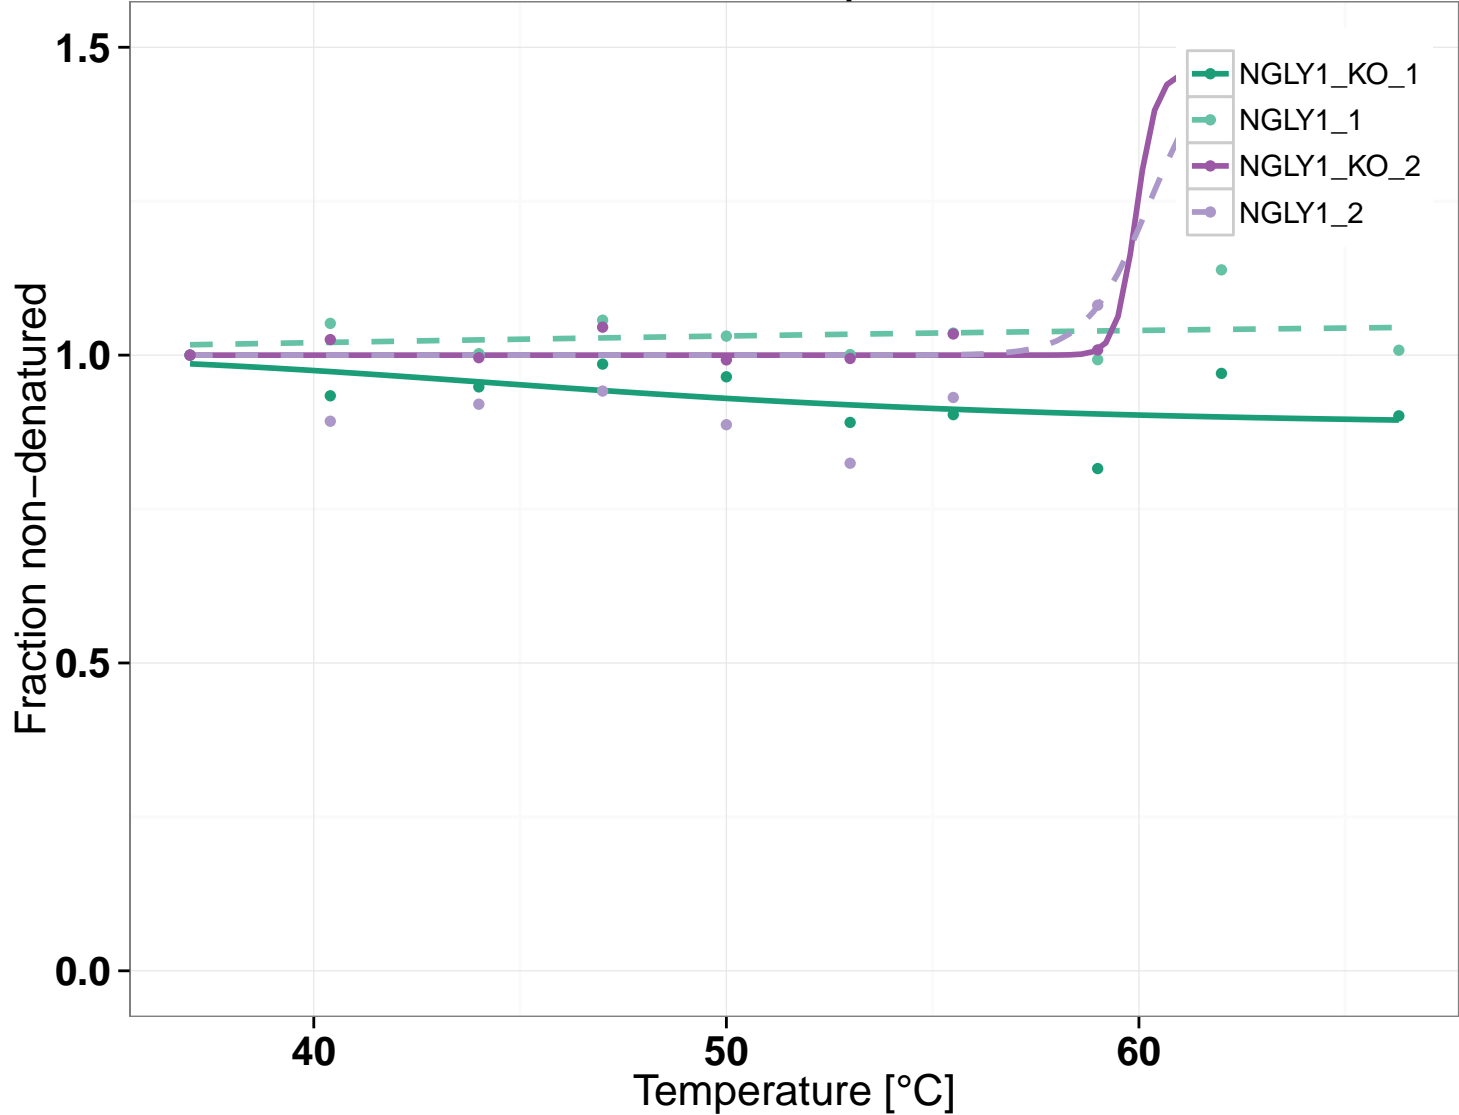

|            | meltPoint | slope   | plateau | R2   |
|------------|-----------|---------|---------|------|
| NGLY1_KO_1 | —         | -0.0048 | 0.88    | 0.31 |
| NGLY1_1    | —         | 0.0011  | 1.13    | 0.04 |
| NGLY1_KO_2 | —         | 0.48    | 1.46    | 0.98 |
| NGLY1_2    | —         | 0.16    | 1.5     | 0.87 |

Supplement: Supplementary file 2446 [file 1]

IPI00383597.2|SLC4A2

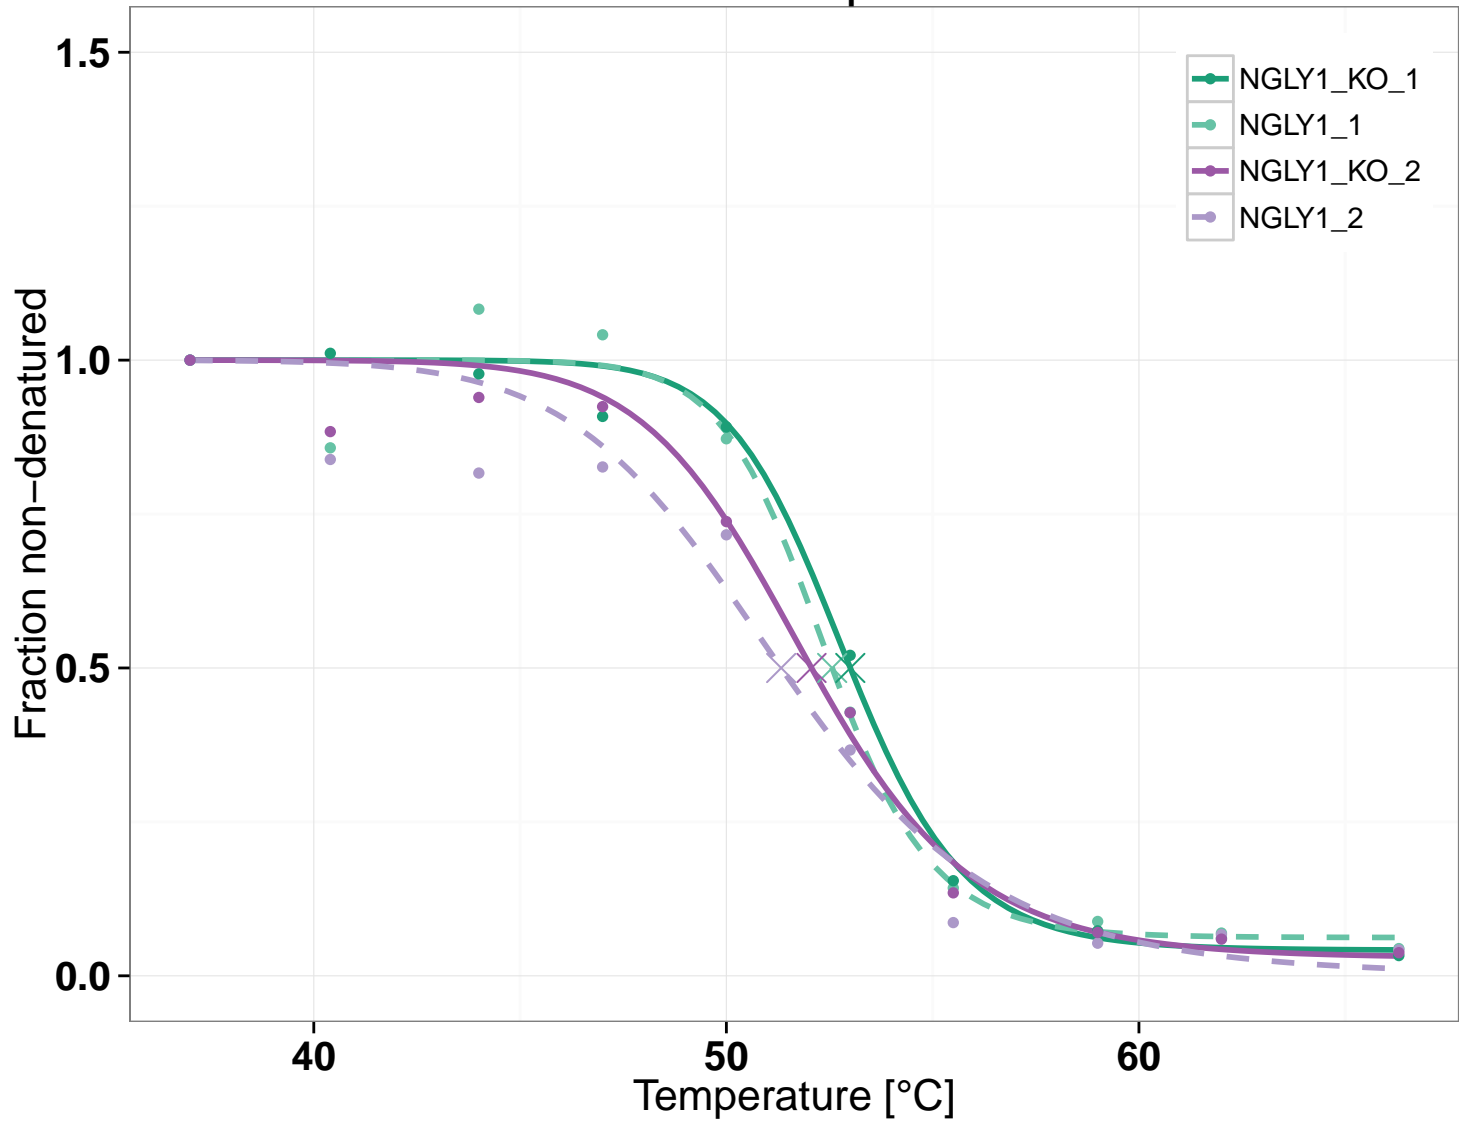

|            | meltPoint | slope  | plateau | R2   |
|------------|-----------|--------|---------|------|
| NGLY1_KO_1 | 53        | -0.17  | 0.04    | 0.99 |
| NGLY1_1    | 52.56     | -0.18  | 0.06    | 0.98 |
| NGLY1_KO_2 | 52.06     | -0.12  | 0.03    | 0.99 |
| NGLY1_2    | 51.33     | -0.097 | 0       | 0.95 |

Supplement: Supplementary file 2447 [file 1]

# IPI00306723.3|CEBPZ

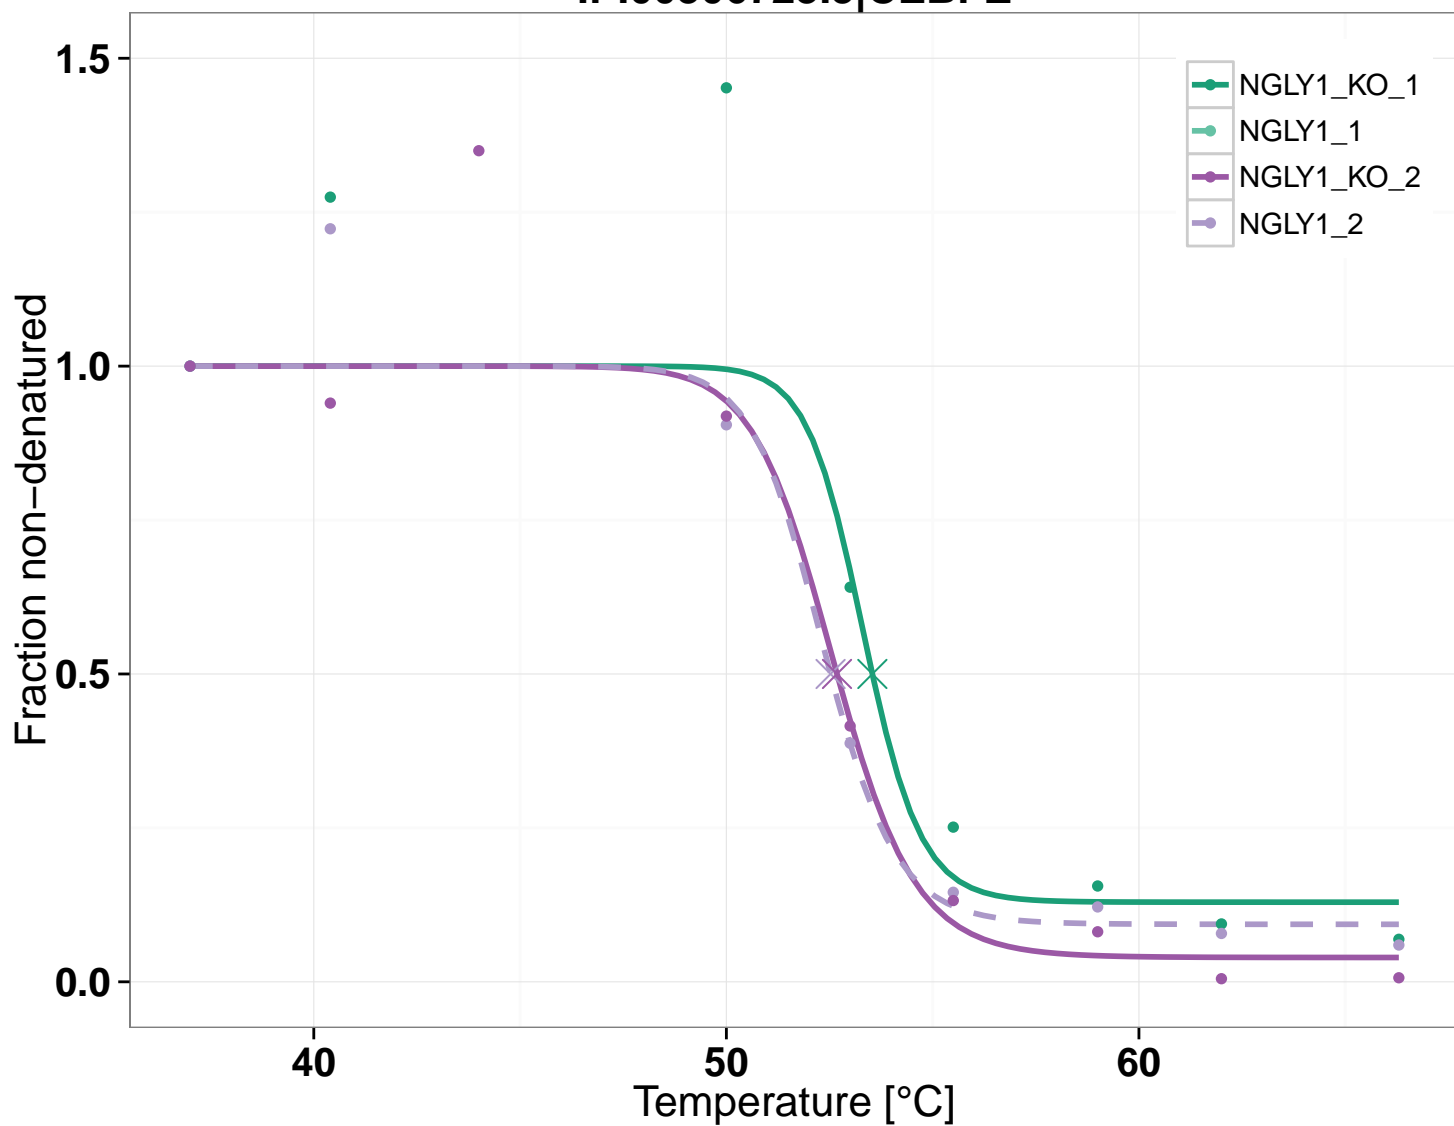

|            | meltPoint | slope | plateau | R2   |
|------------|-----------|-------|---------|------|
| NGLY1_KO_1 | 53.54     | -0.32 | 0.13    | 0.45 |
| NGLY1_1    | -         | -     | -       | -    |
| NGLY1_KO_2 | 52.68     | -0.24 | 0.04    | 0.78 |
| NGLY1_2    | 52.53     | -0.26 | 0.09    | 0.62 |

Supplement: Supplementary file 2448 [file 1]

IPI00872686.1|CAPN2

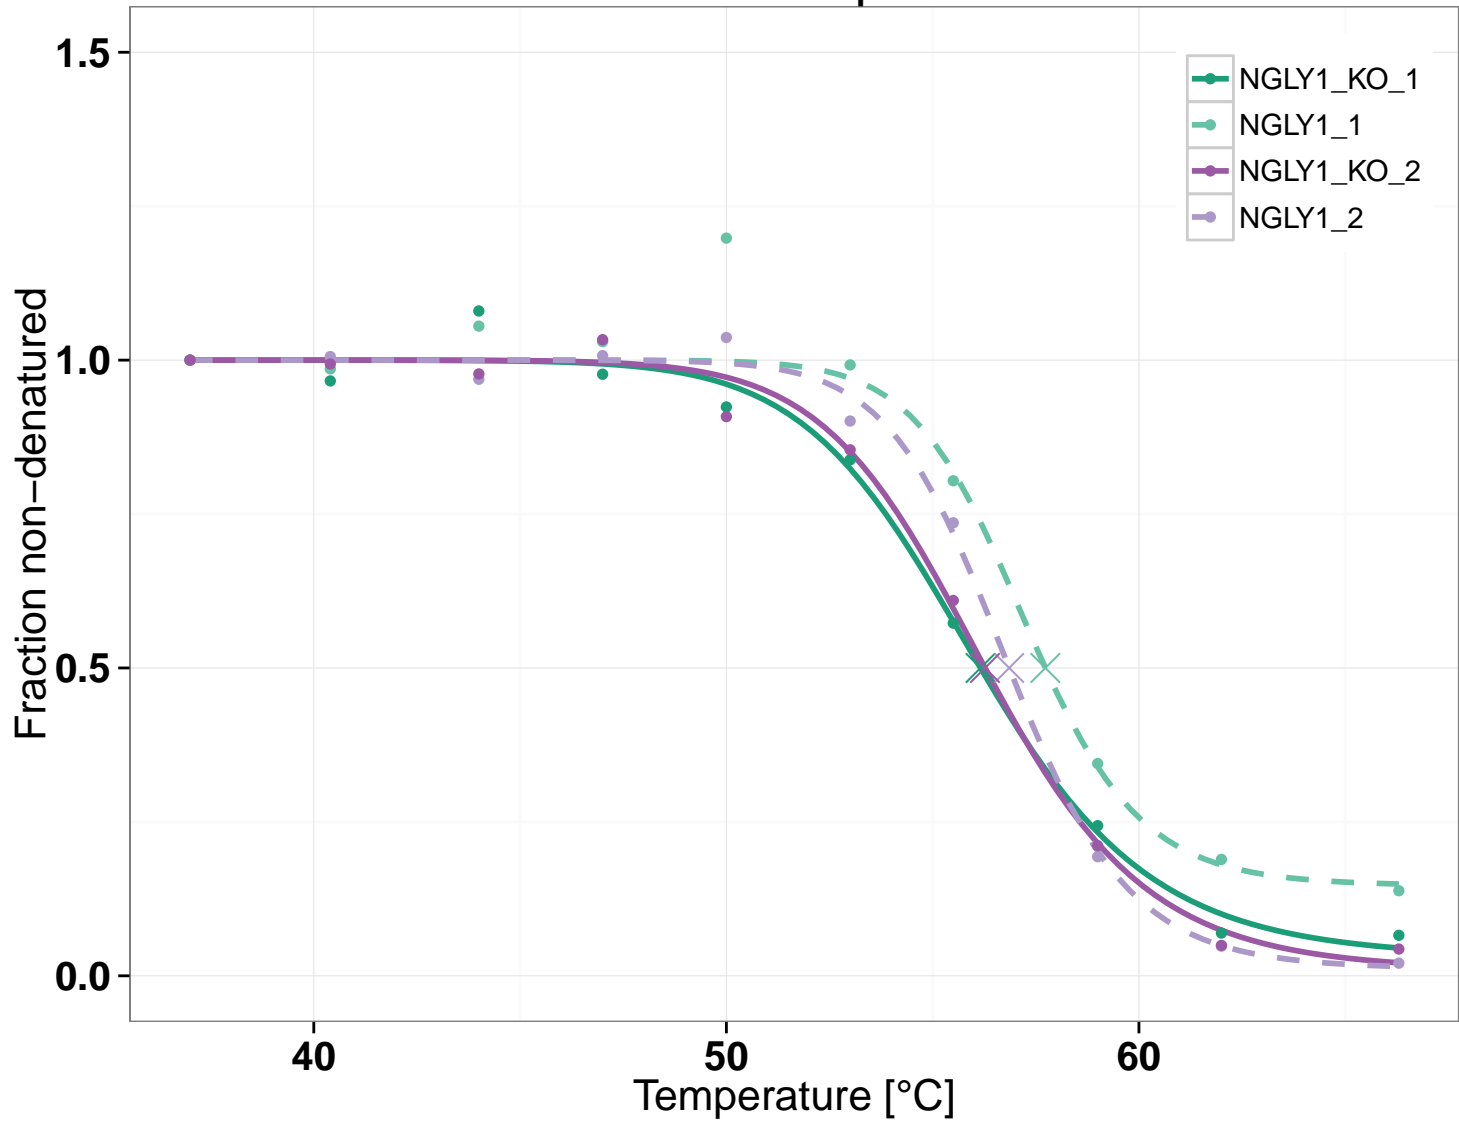

|            | meltPoint | slope | plateau | R2   |
|------------|-----------|-------|---------|------|
| NGLY1_KO_1 | 56.16     | -0.11 | 0.03    | 0.99 |
| NGLY1_1    | 57.73     | -0.16 | 0.15    | 0.97 |
| NGLY1_KO_2 | 56.27     | -0.13 | 0.01    | 1    |
| NGLY1_2    | 56.86     | -0.17 | 0.01    | 1    |

Supplement: Supplementary file 2449 [file 1]

IPI00100193.4|FLJ11506

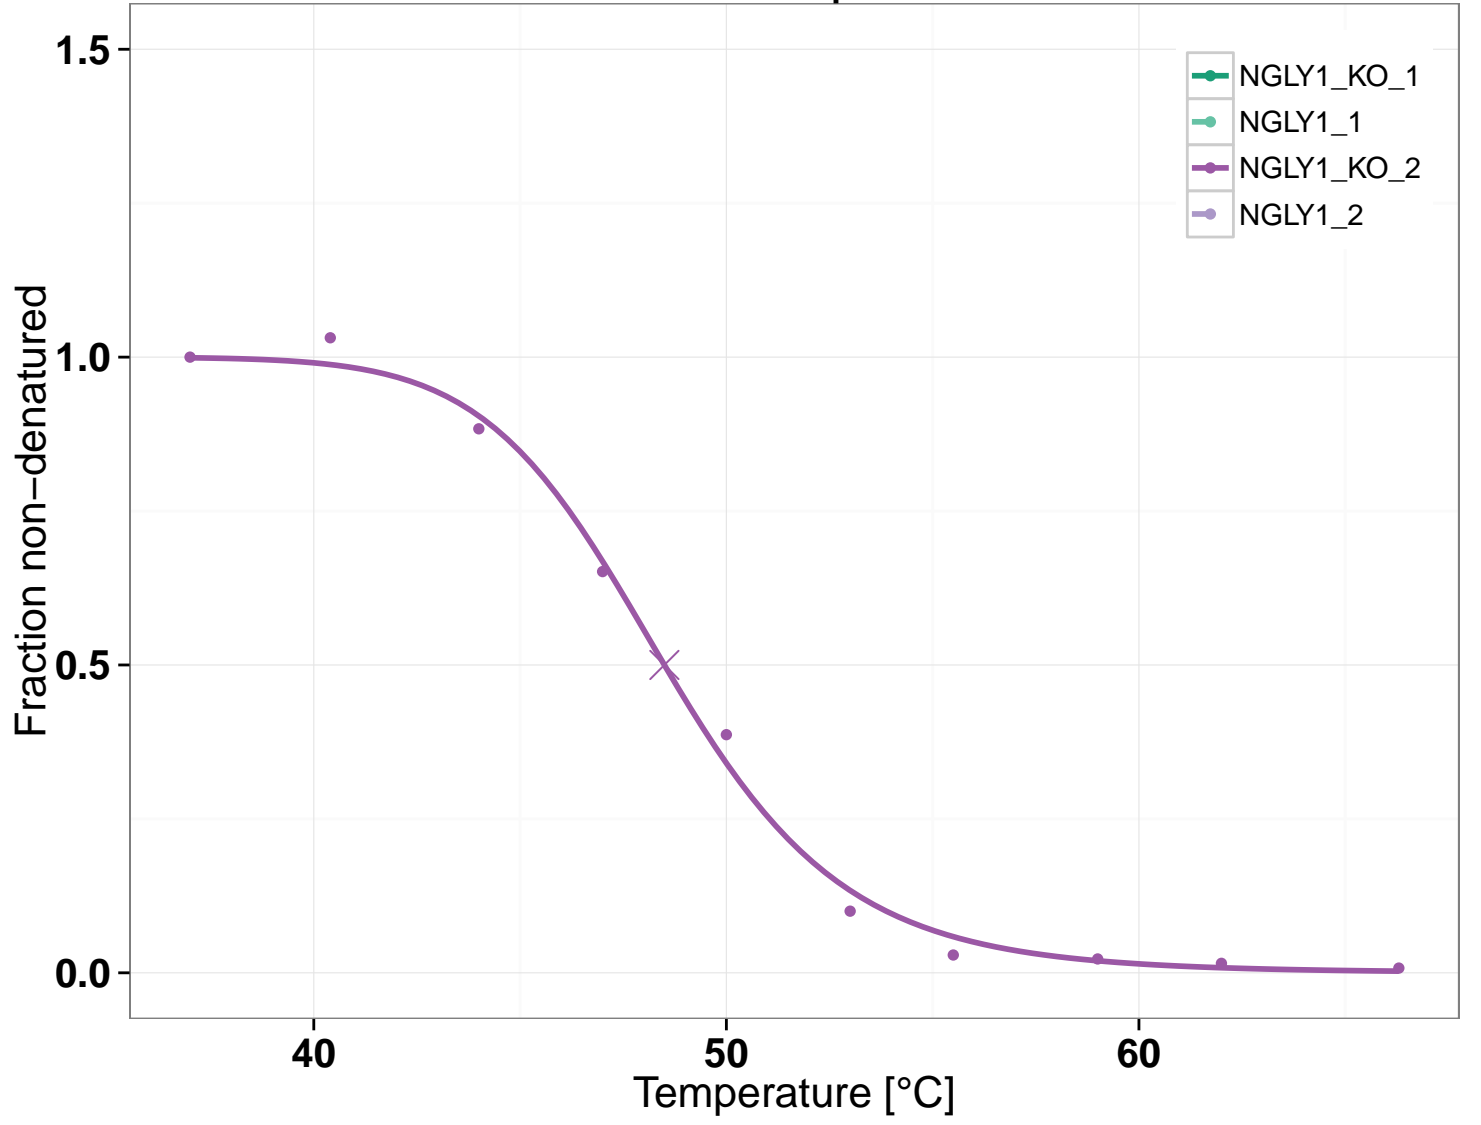

|            | meltPoint | slope | plateau | R2 |
|------------|-----------|-------|---------|----|
| NGLY1_KO_1 | -         | -     | -       | -  |
| NGLY1_1    | -         | -     | -       | -  |
| NGLY1_KO_2 | 48.5      | -0.11 | 0       | 1  |
| NGLY1_2    | -         | -     | -       | -  |

Supplement: Supplementary file 2450 [file 1]

IPI00055405.3|ALKBH2

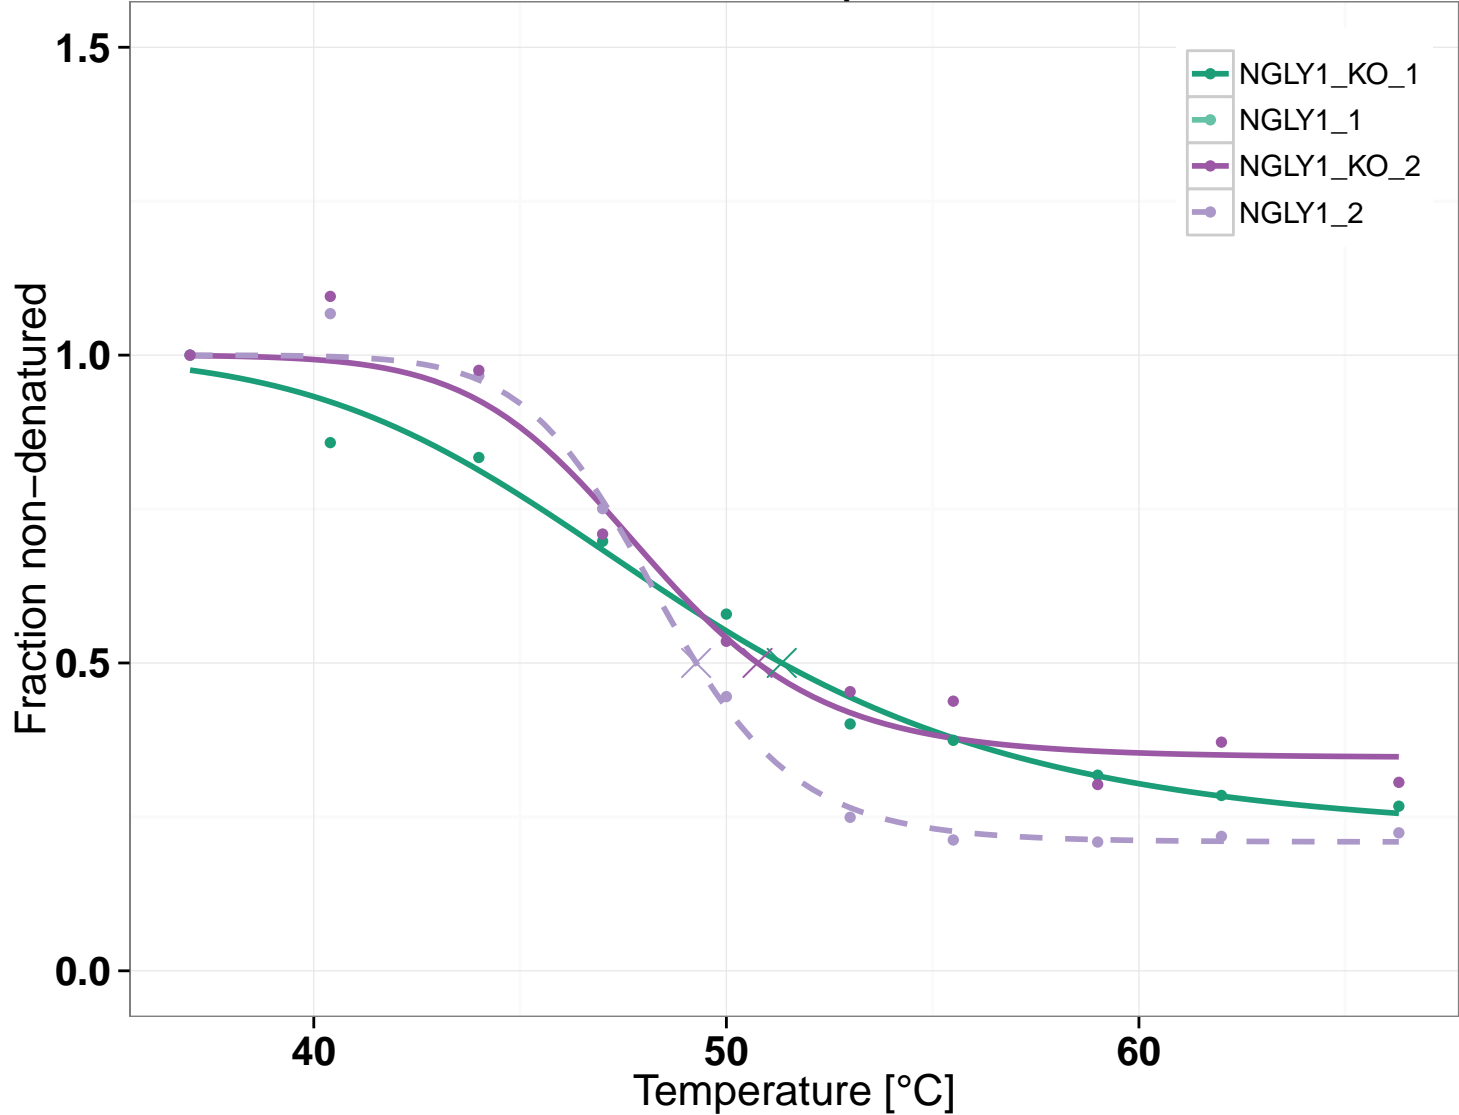

|            | meltPoint | slope  | plateau | R2   |
|------------|-----------|--------|---------|------|
| NGLY1_KO_1 | 51.34     | -0.045 | 0.21    | 0.99 |
| NGLY1_1    | —         | —      | —       | —    |
| NGLY1_KO_2 | 50.76     | -0.076 | 0.35    | 0.97 |
| NGLY1_2    | 49.27     | -0.12  | 0.21    | 0.99 |

Supplement: Supplementary file 2451 [file 1]

IPI00418301.3|C3ORF33

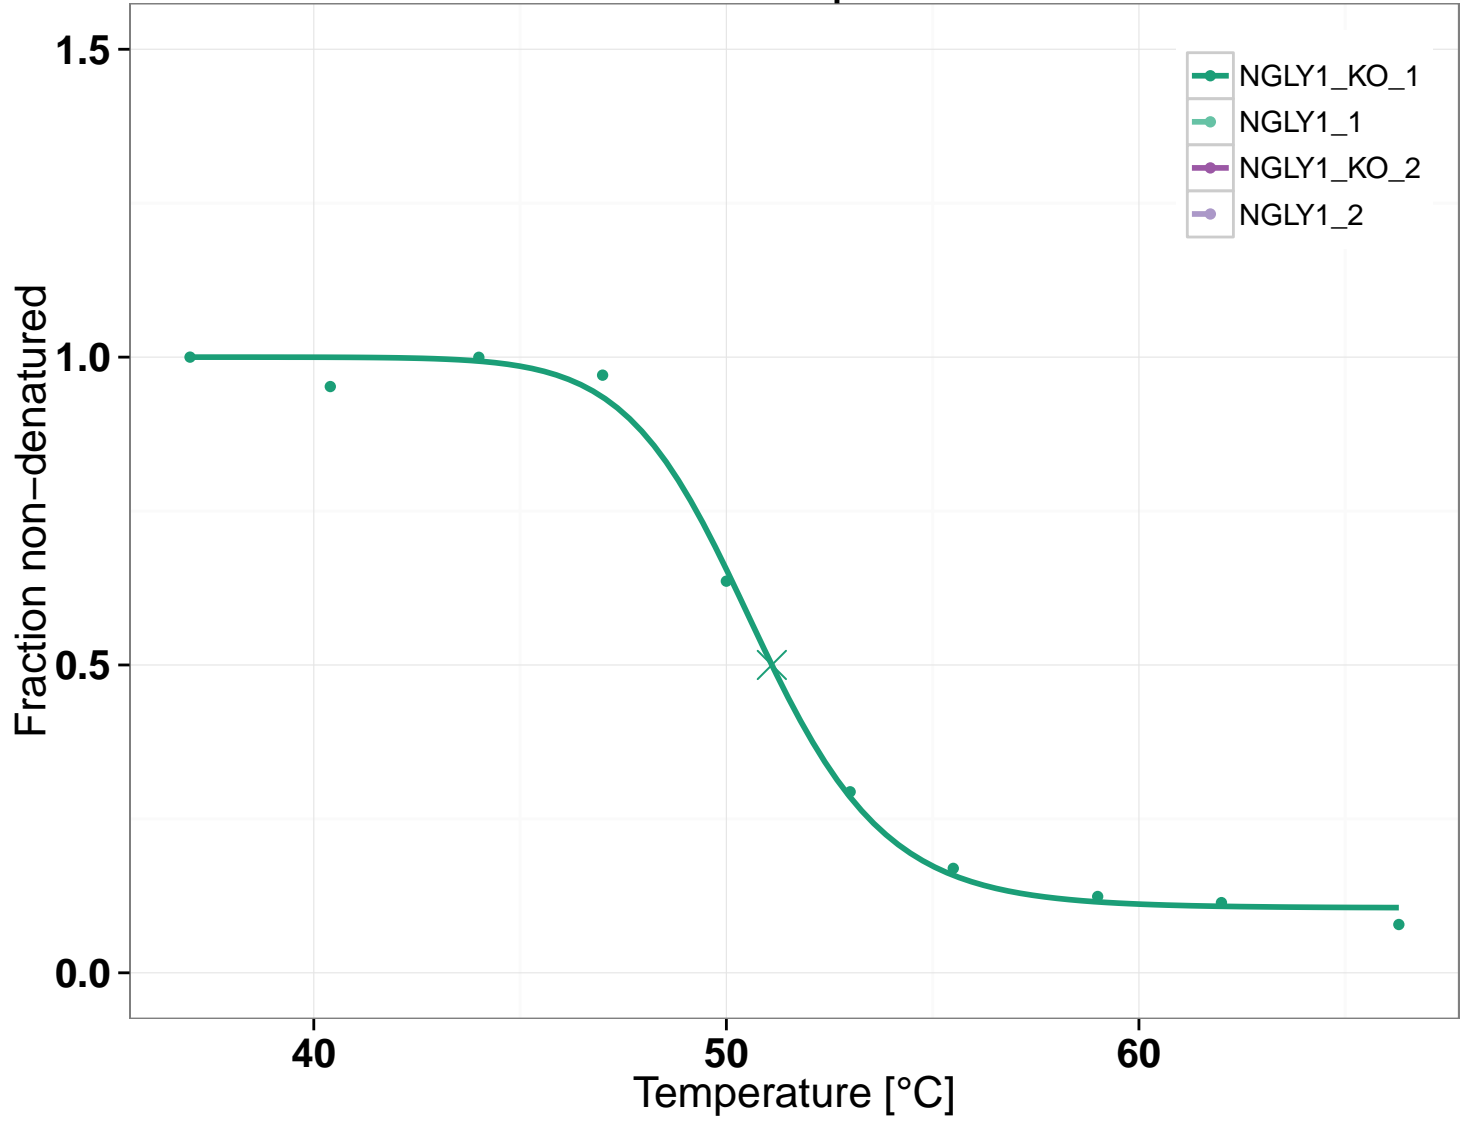

|            | meltPoint | slope | plateau | R2 |
|------------|-----------|-------|---------|----|
| NGLY1_KO_1 | 51.1      | -0.14 | 0.11    | 1  |
| NGLY1_1    | -         | -     | -       | -  |
| NGLY1_KO_2 | -         | -     | -       | -  |
| NGLY1_2    | -         | -     | -       | -  |

Supplement: Supplementary file 2452 [file 1]

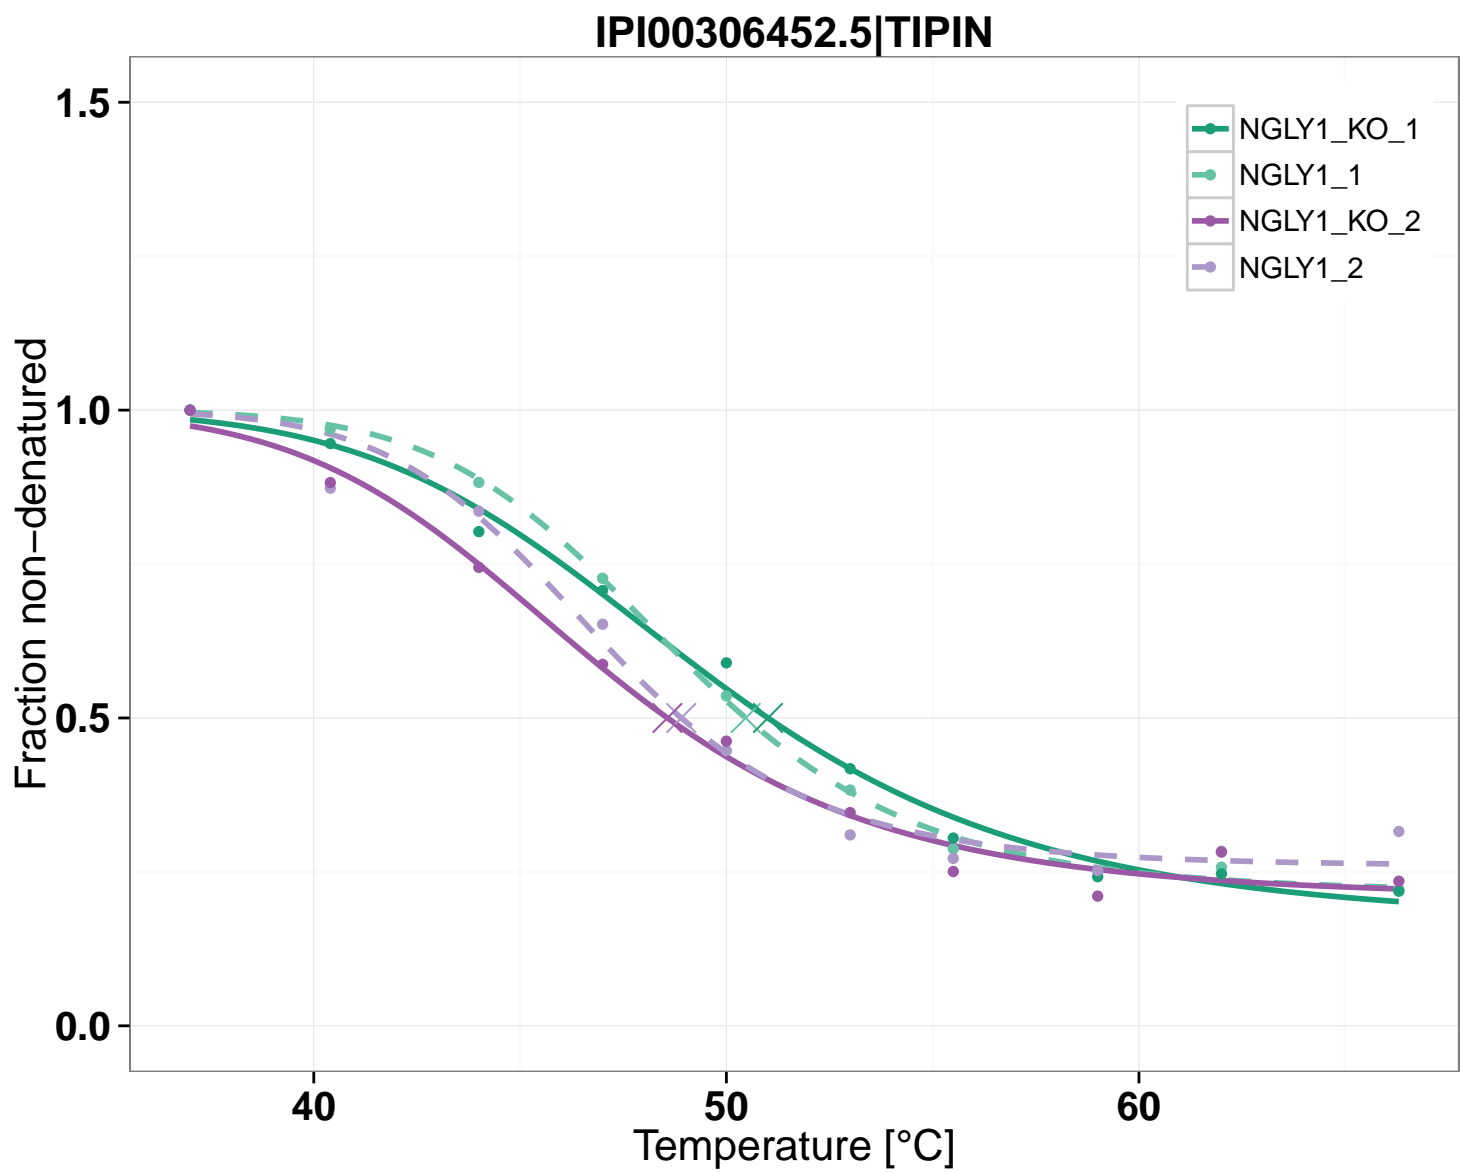

|            | meltPoint | slope  | plateau | R2   |
|------------|-----------|--------|---------|------|
| NGLY1_KO_1 | 51.01     | -0.052 | 0.16    | 0.99 |
| NGLY1_1    | 50.47     | -0.068 | 0.22    | 1    |
| NGLY1_KO_2 | 48.57     | -0.057 | 0.21    | 0.99 |
| NGLY1_2    | 48.91     | -0.072 | 0.26    | 0.98 |

Supplement: Supplementary file 2453 [file 1]

# IPI00413142.1|BTRC

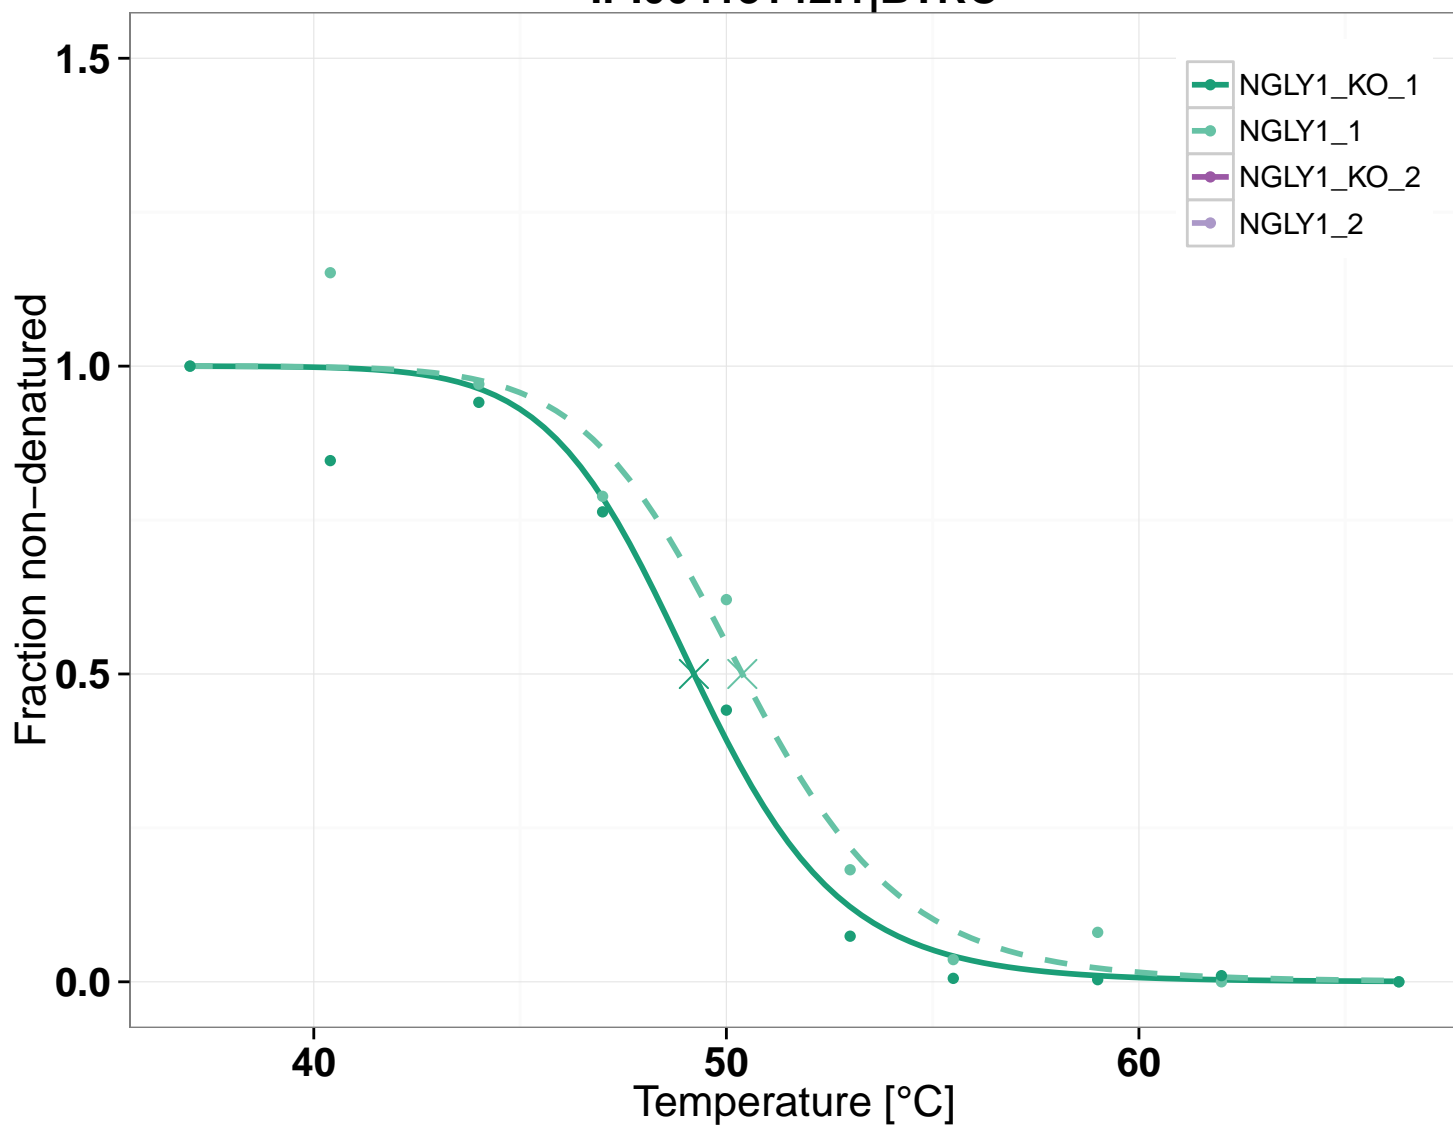

|            | meltPoint | slope | plateau | R2   |
|------------|-----------|-------|---------|------|
| NGLY1_KO_1 | 49.21     | -0.14 | 0       | 0.98 |
| NGLY1_1    | 50.39     | -0.13 | 0       | 0.98 |
| NGLY1_KO_2 | -         | -     | -       | -    |
| NGLY1_2    | -         | -     | -       | -    |

Supplement: Supplementary file 2454 [file 1]

# IPI00453476.2|PGAM1

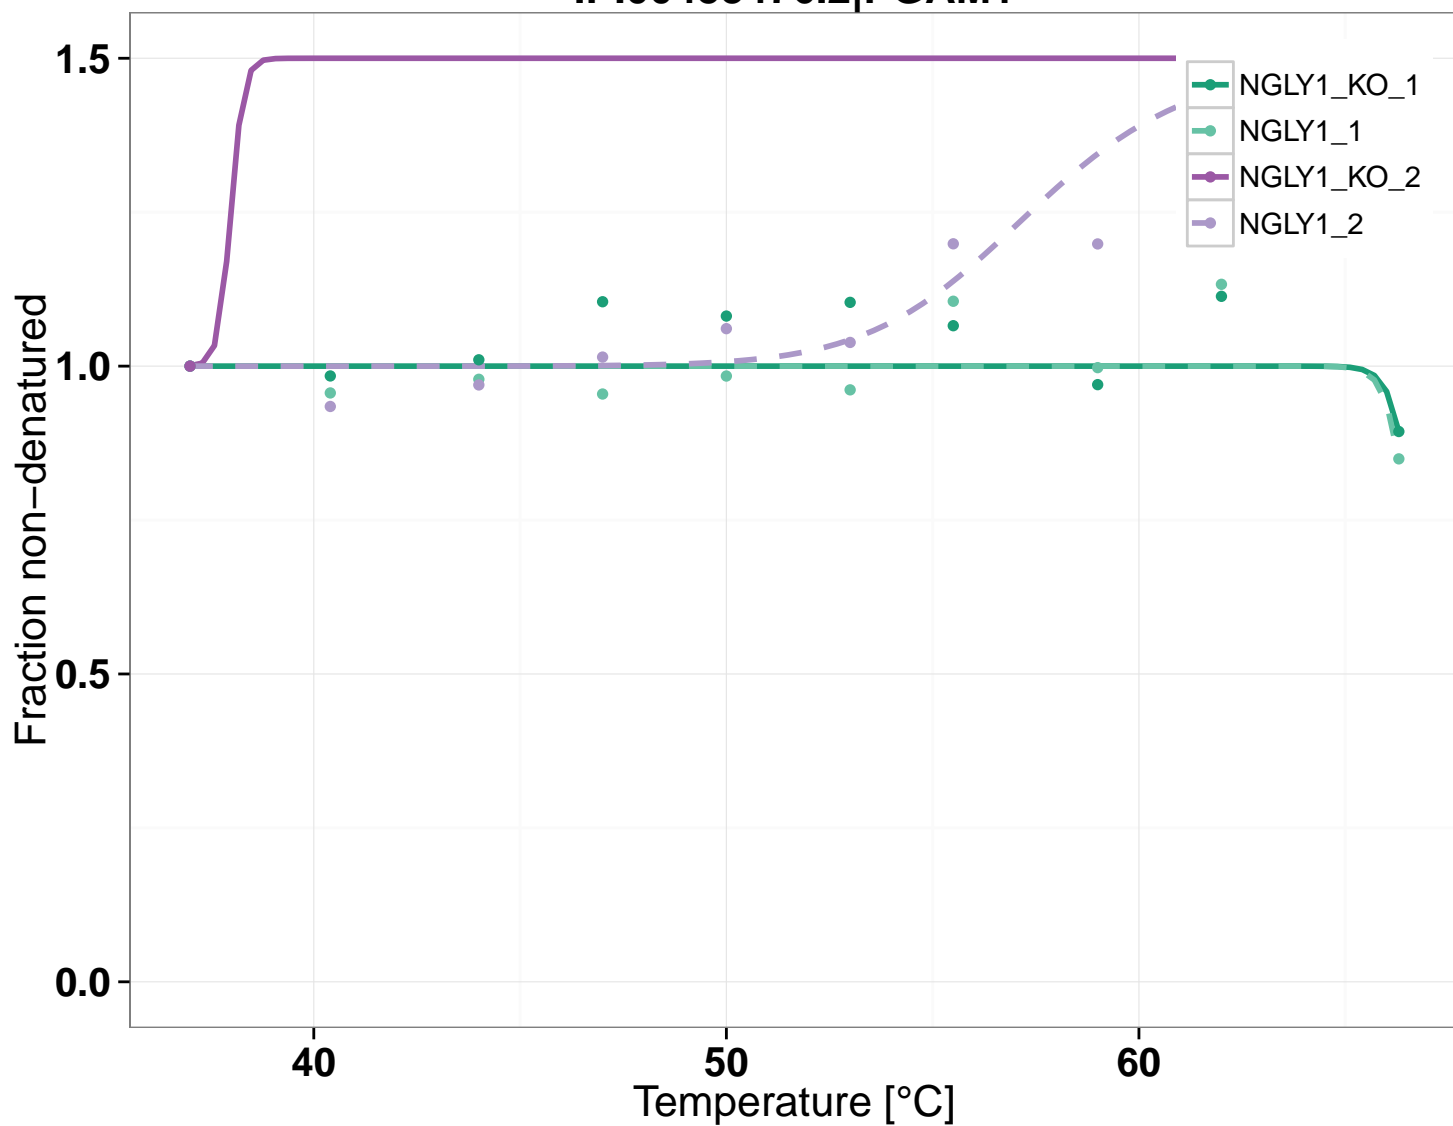

|            | meltPoint | slope | plateau | R2    |
|------------|-----------|-------|---------|-------|
| NGLY1_KO_1 | —         | —     | 0       | 0.01  |
| NGLY1_1    | —         | —     | 0       | 0.39  |
| NGLY1_KO_2 | —         | 0.82  | 1.5     | -3.97 |
| NGLY1_2    | —         | 0.063 | 1.5     | 0.84  |

Supplement: Supplementary file 2455 [file 1]

IPI00412272.2|SH3BGRL2

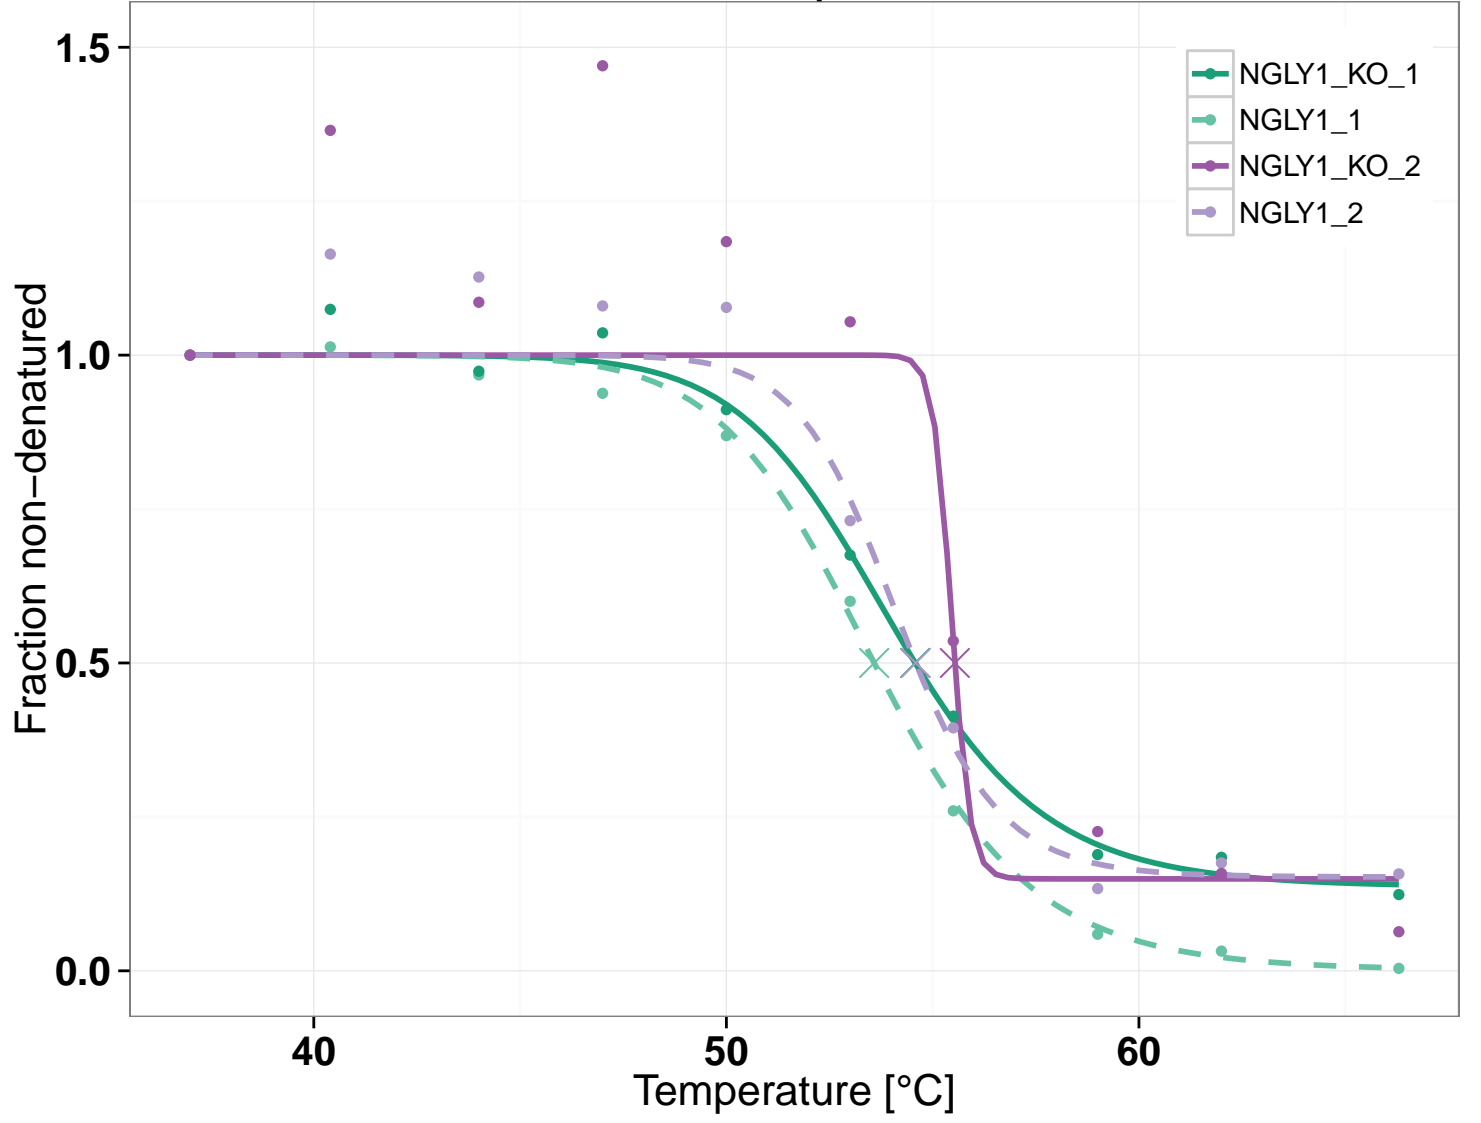

|            | meltPoint | slope | plateau | R2   |
|------------|-----------|-------|---------|------|
| NGLY1_KO_1 | 54.58     | -0.12 | 0.14    | 0.99 |
| NGLY1_1    | 53.58     | -0.13 | 0       | 1    |
| NGLY1_KO_2 | 55.54     | -0.96 | 0.15    | 0.83 |
| NGLY1_2    | 54.59     | -0.17 | 0.15    | 0.96 |

Supplement: Supplementary file 2456 [file 1]

# IPI00018192.2|WDR74

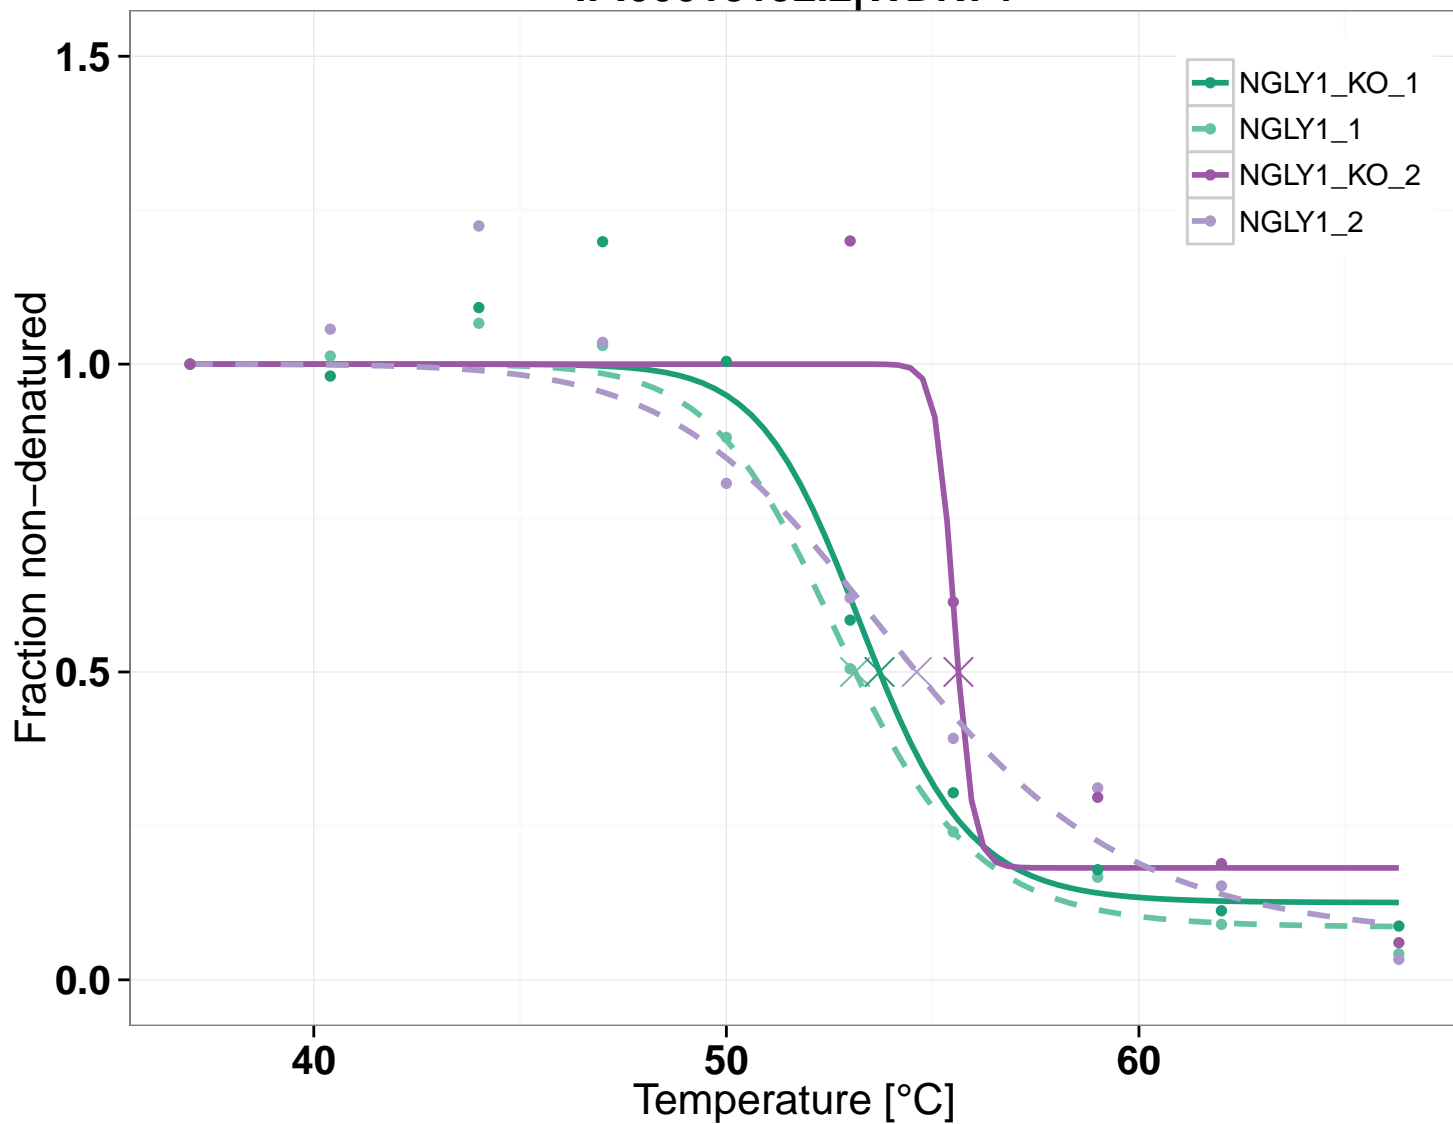

|            | meltPoint | slope  | plateau | R2   |
|------------|-----------|--------|---------|------|
| NGLY1_KO_1 | 53.71     | -0.17  | 0.13    | 0.97 |
| NGLY1_1    | 53.12     | -0.14  | 0.09    | 0.99 |
| NGLY1_KO_2 | 55.63     | -0.92  | 0.18    | 0.43 |
| NGLY1_2    | 54.61     | -0.084 | 0.06    | 0.95 |

Supplement: Supplementary file 2457 [file 1]

IPI00872769.1|LEPROT

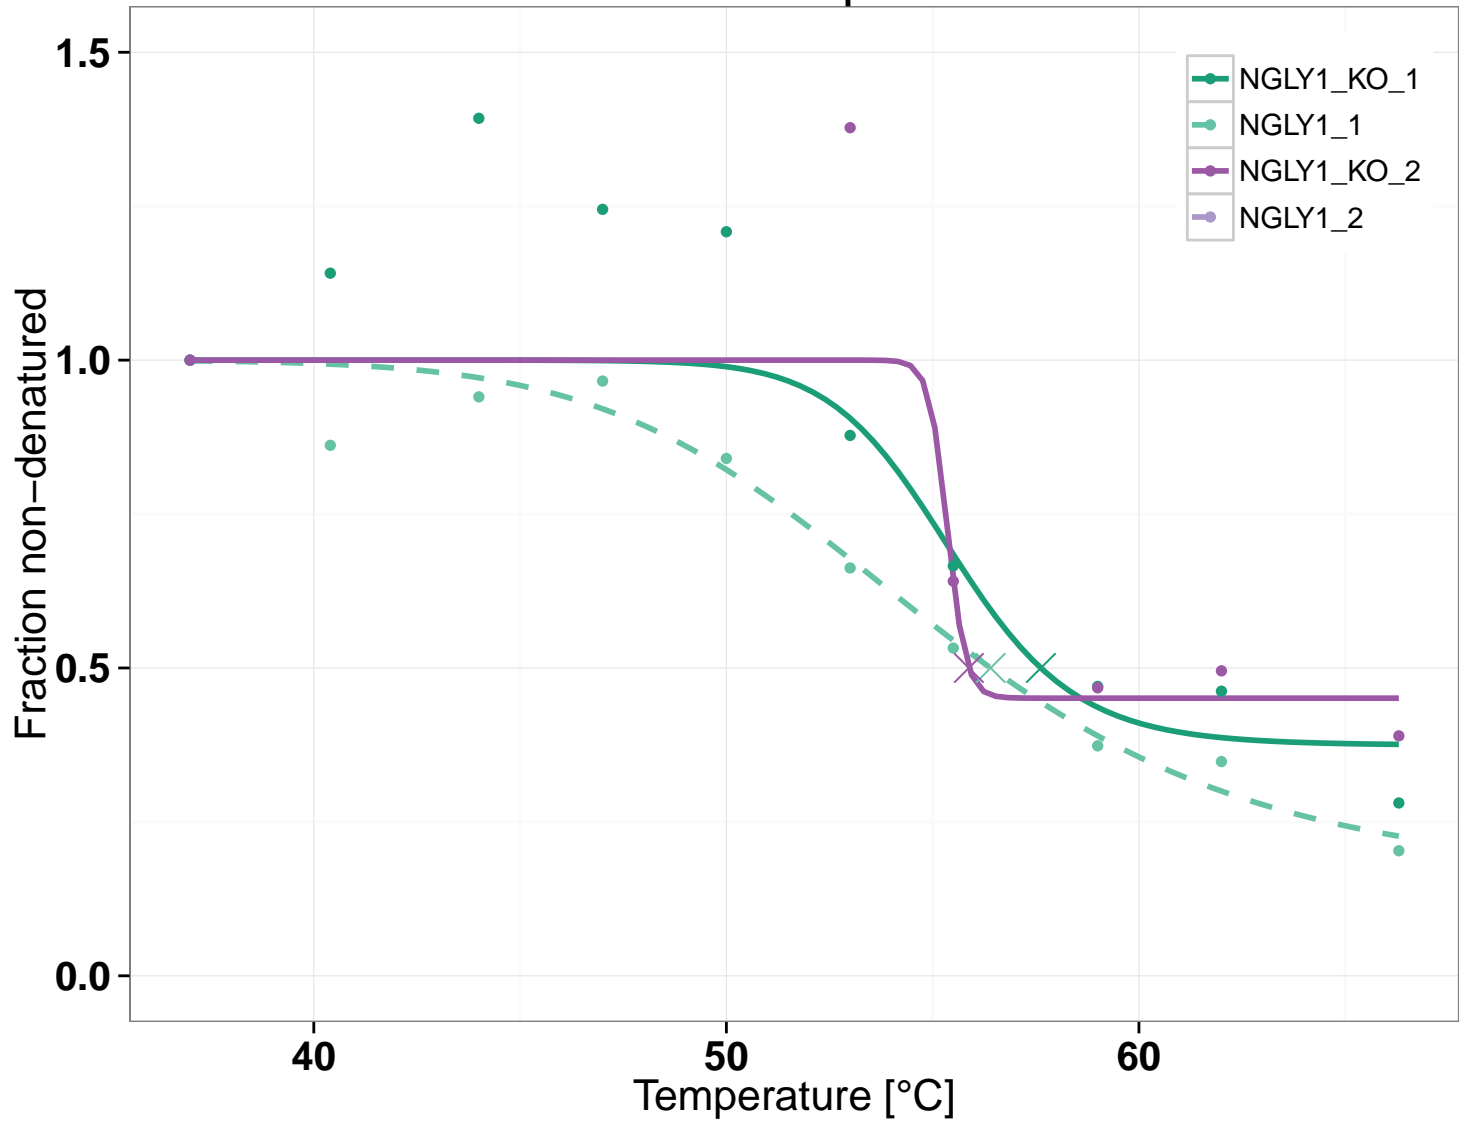

|            | meltPoint | slope  | plateau | R2   |
|------------|-----------|--------|---------|------|
| NGLY1_KO_1 | 57.62     | -0.1   | 0.37    | 0.78 |
| NGLY1_1    | 56.41     | -0.053 | 0.15    | 0.97 |
| NGLY1_KO_2 | 55.88     | -0.62  | 0.45    | 0.35 |
| NGLY1_2    | -         | -      | -       | -    |

Supplement: Supplementary file 2458 [file 1]

IPI00011635.3|BCL2L13

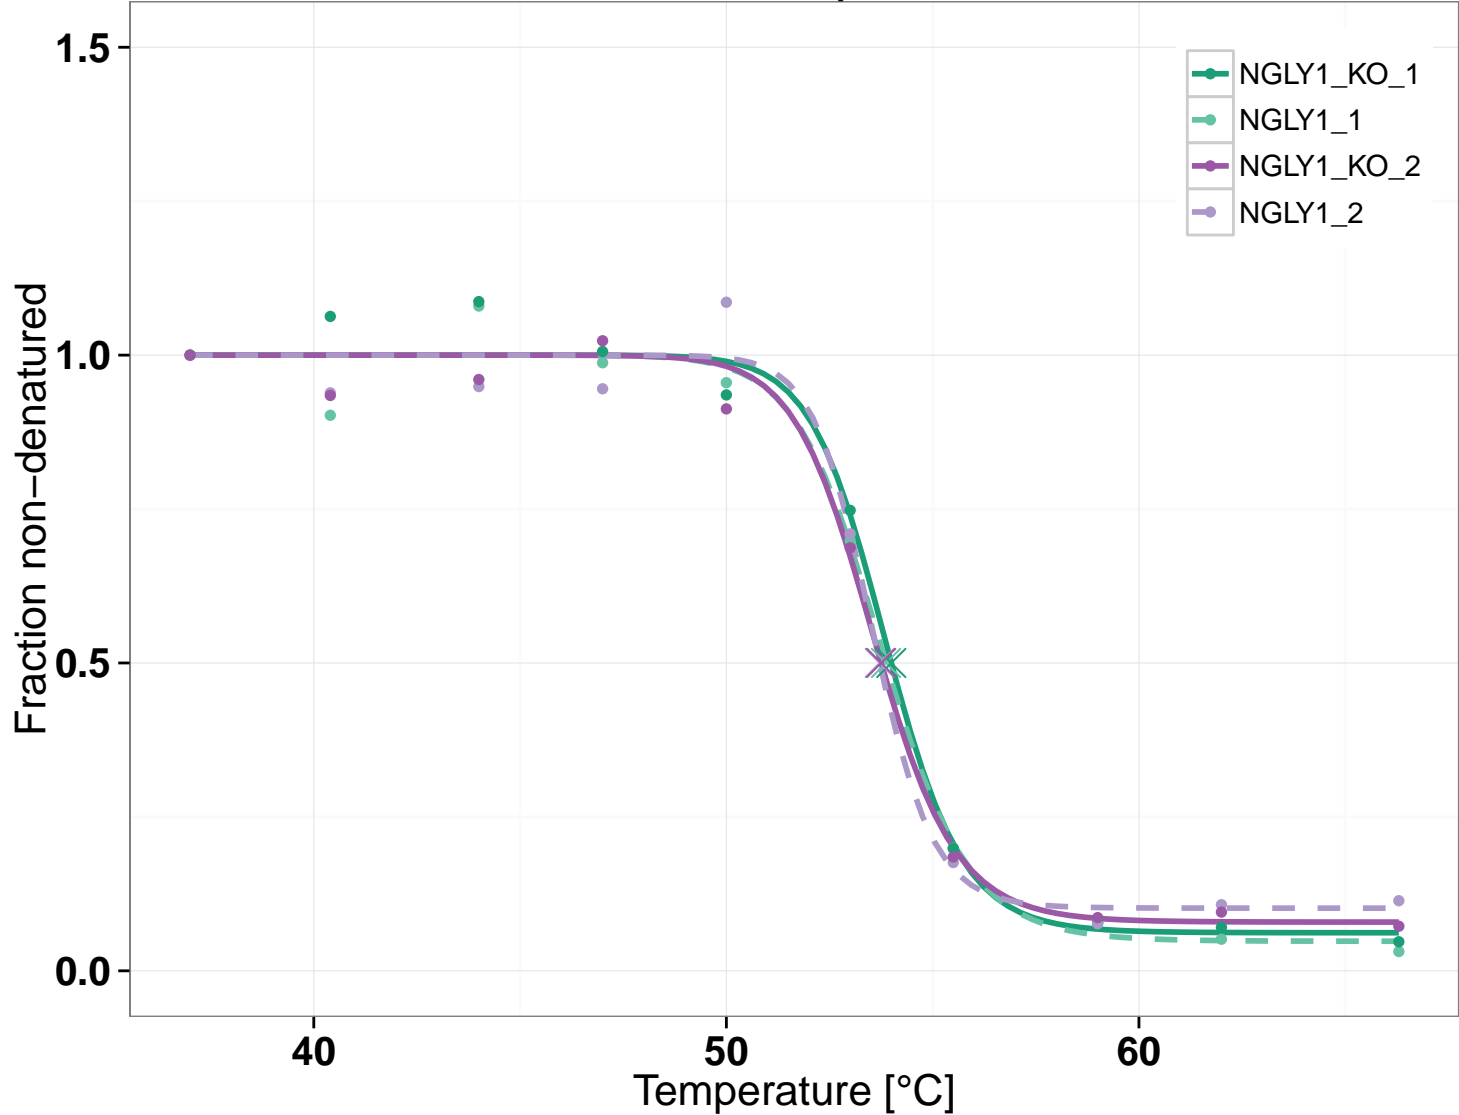

|            | meltPoint | slope | plateau | R2   |
|------------|-----------|-------|---------|------|
| NGLY1_KO_1 | 54        | -0.25 | 0.06    | 0.99 |
| NGLY1_1    | 53.87     | -0.23 | 0.05    | 0.99 |
| NGLY1_KO_2 | 53.75     | -0.23 | 0.08    | 0.99 |
| NGLY1_2    | 53.72     | -0.31 | 0.1     | 0.99 |

Supplement: Supplementary file 2459 [file 1]

# IPI00013871.1|RRM1

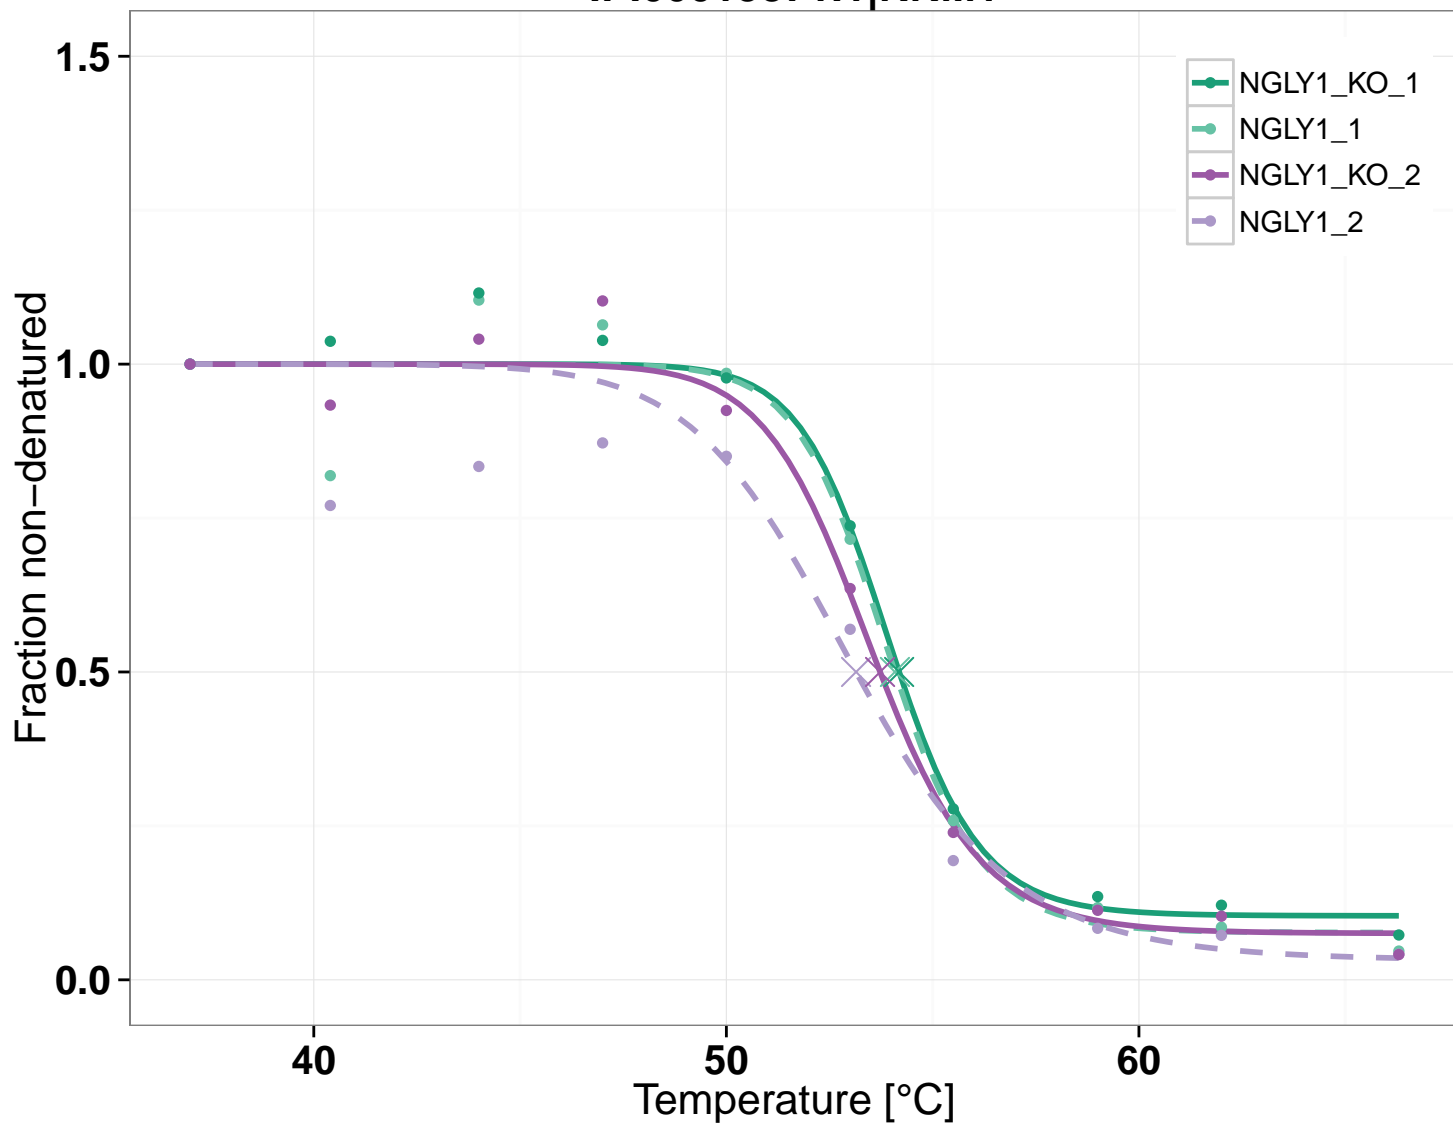

|            | meltPoint | slope | plateau | R2   |
|------------|-----------|-------|---------|------|
| NGLY1_KO_1 | 54.19     | -0.21 | 0.1     | 0.99 |
| NGLY1_1    | 54.09     | -0.21 | 0.08    | 0.97 |
| NGLY1_KO_2 | 53.73     | -0.18 | 0.08    | 0.99 |
| NGLY1_2    | 53.14     | -0.12 | 0.03    | 0.93 |

Supplement: Supplementary file 2460 [file 1]

IPI00103419.4|SF4

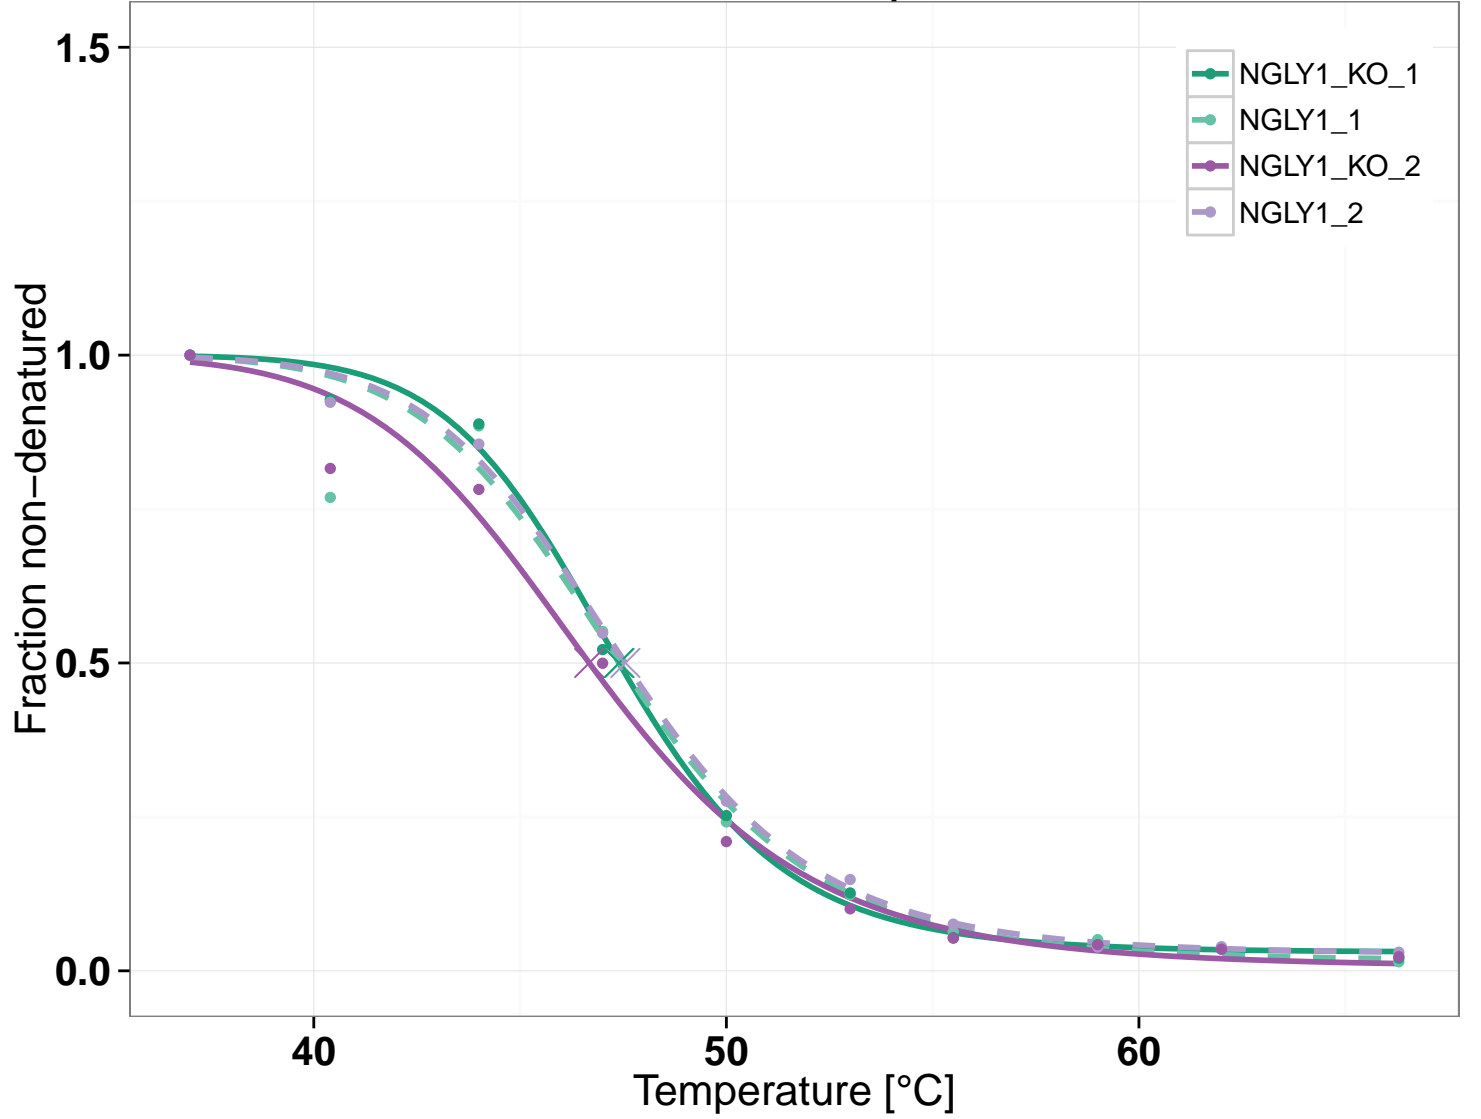

|            | meltPoint | slope  | plateau | R2   |
|------------|-----------|--------|---------|------|
| NGLY1_KO_1 | 47.4      | -0.12  | 0.03    | 1    |
| NGLY1_1    | 47.41     | -0.1   | 0.02    | 0.97 |
| NGLY1_KO_2 | 46.68     | -0.092 | 0.01    | 0.99 |
| NGLY1_2    | 47.55     | -0.1   | 0.03    | 1    |

Supplement: Supplementary file 2461 [file 1]

IPI00329070.1|BTBD10

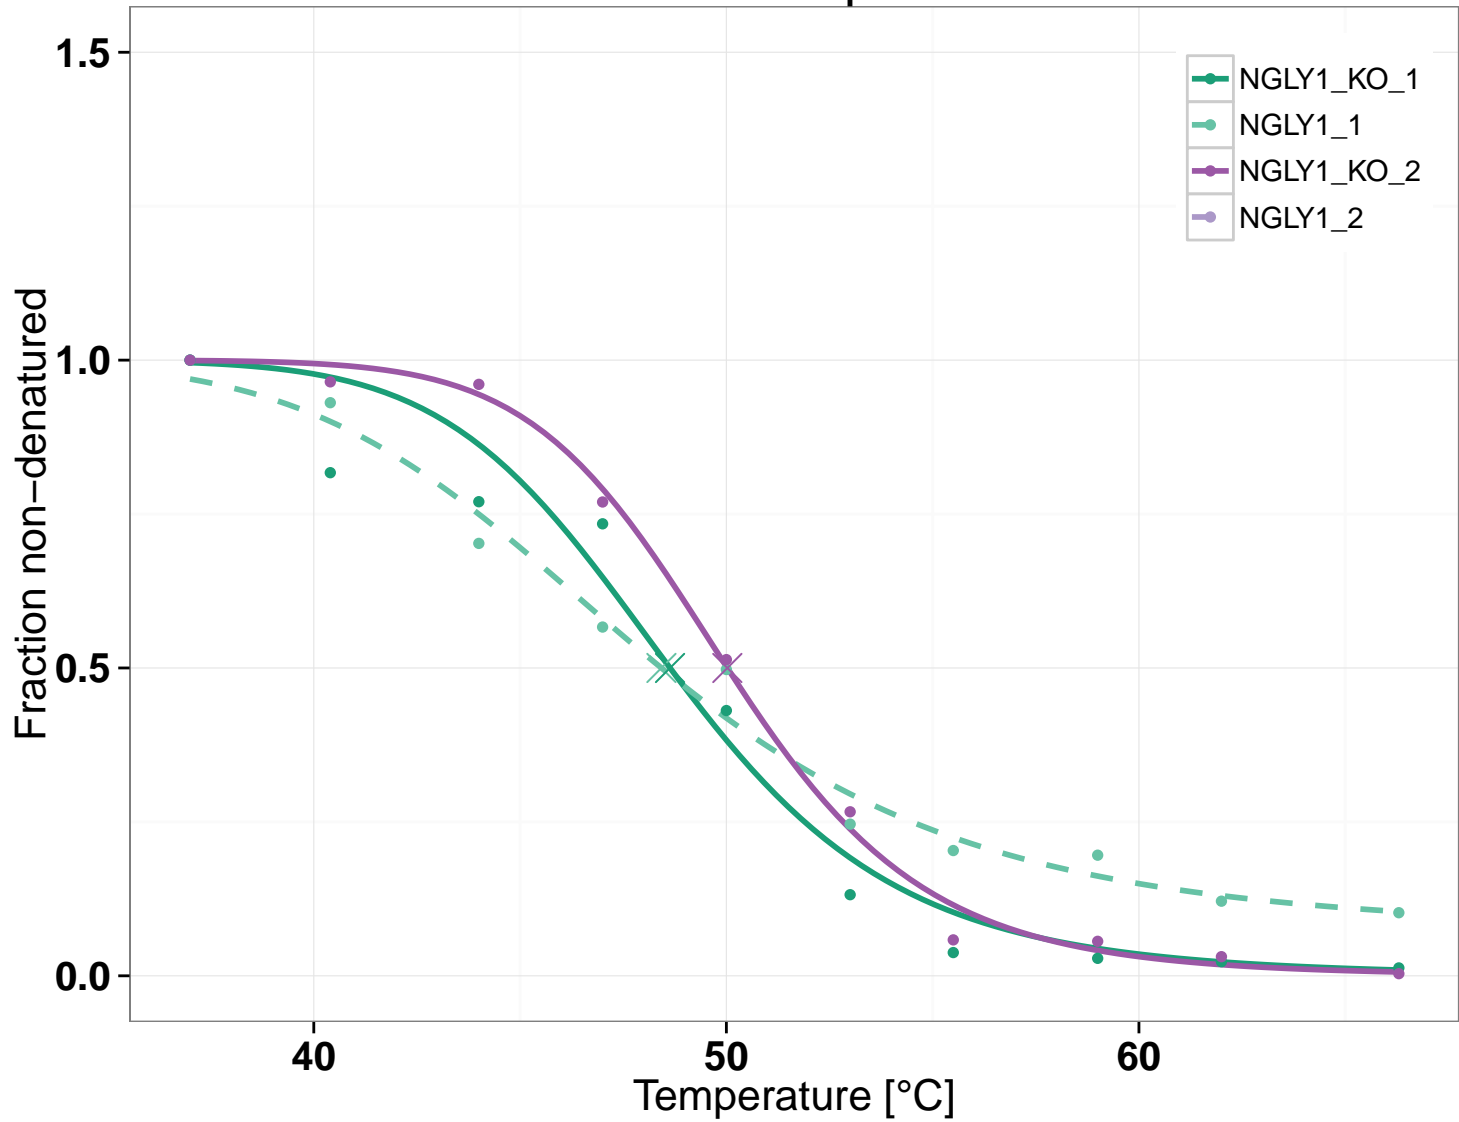

|            | meltPoint | slope  | plateau | R2   |
|------------|-----------|--------|---------|------|
| NGLY1_KO_1 | 48.63     | -0.091 | 0       | 0.96 |
| NGLY1_1    | 48.43     | -0.058 | 0.07    | 0.99 |
| NGLY1_KO_2 | 50.02     | -0.1   | 0       | 1    |
| NGLY1_2    | -         | -      | -       | -    |

Supplement: Supplementary file 2462 [file 1]

IPI00888974.1|LOC643177

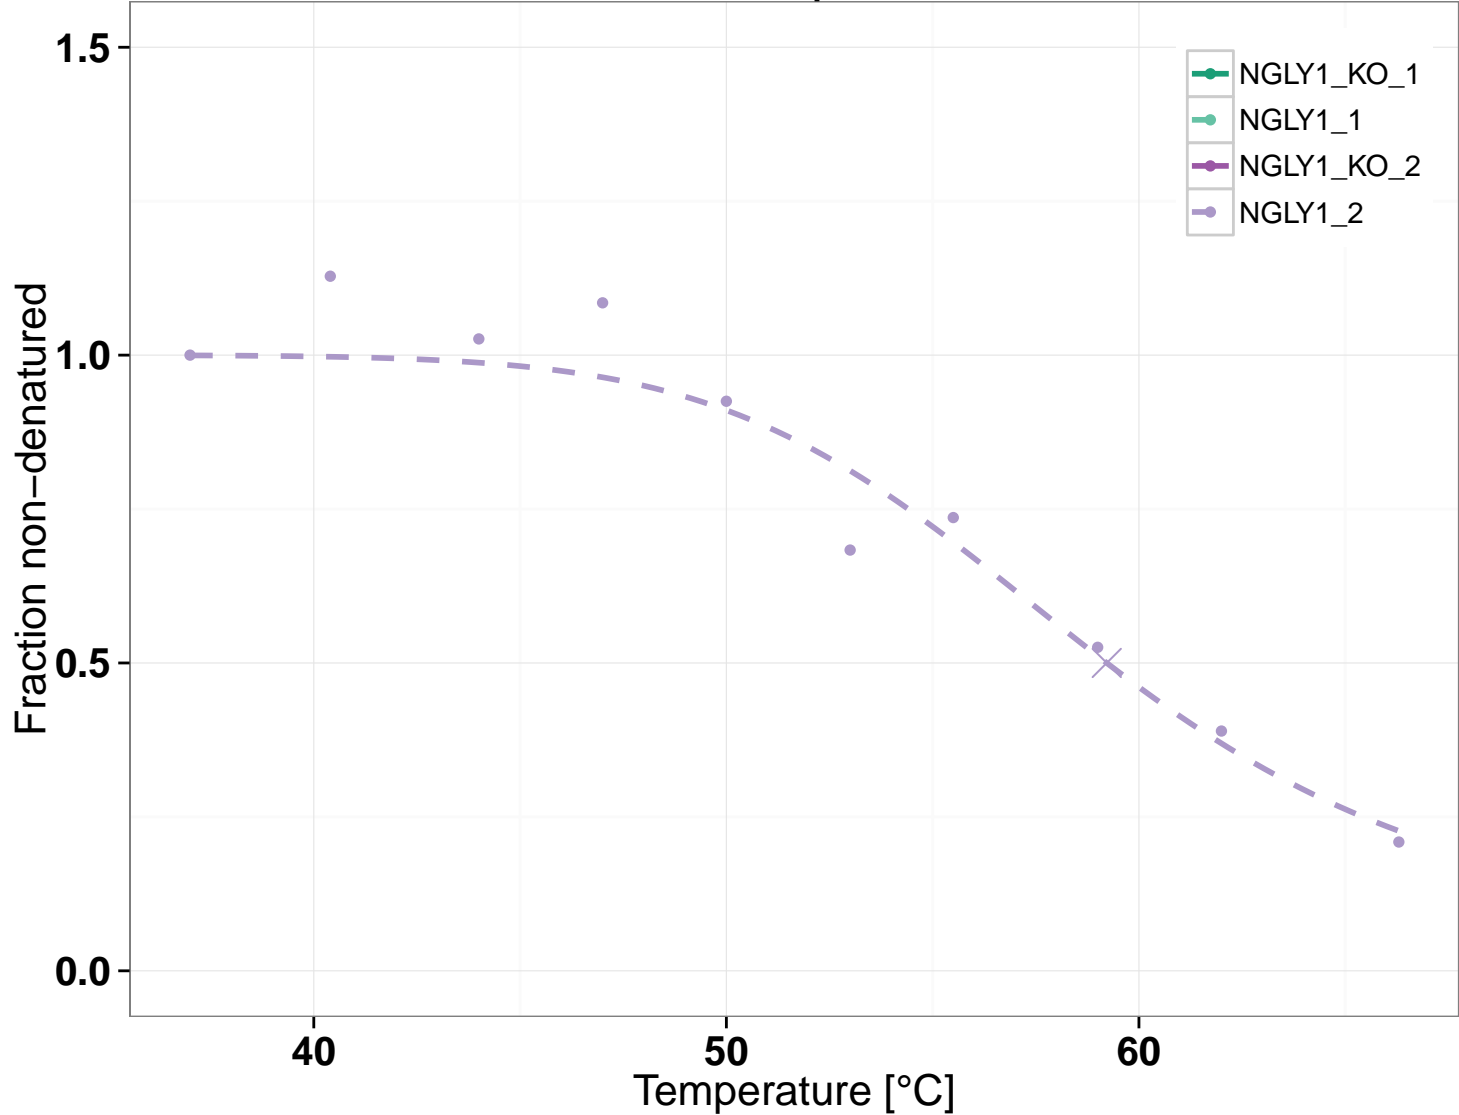

|            | meltPoint | slope  | plateau | R2   |
|------------|-----------|--------|---------|------|
| NGLY1_KO_1 | -         | -      | -       | -    |
| NGLY1_1    | -         | -      | -       | -    |
| NGLY1_KO_2 | -         | -      | -       | -    |
| NGLY1_2    | 59.22     | -0.054 | 0.05    | 0.94 |

Supplement: Supplementary file 2463 [file 1]

# IPI00029009.3|PIP5K1C

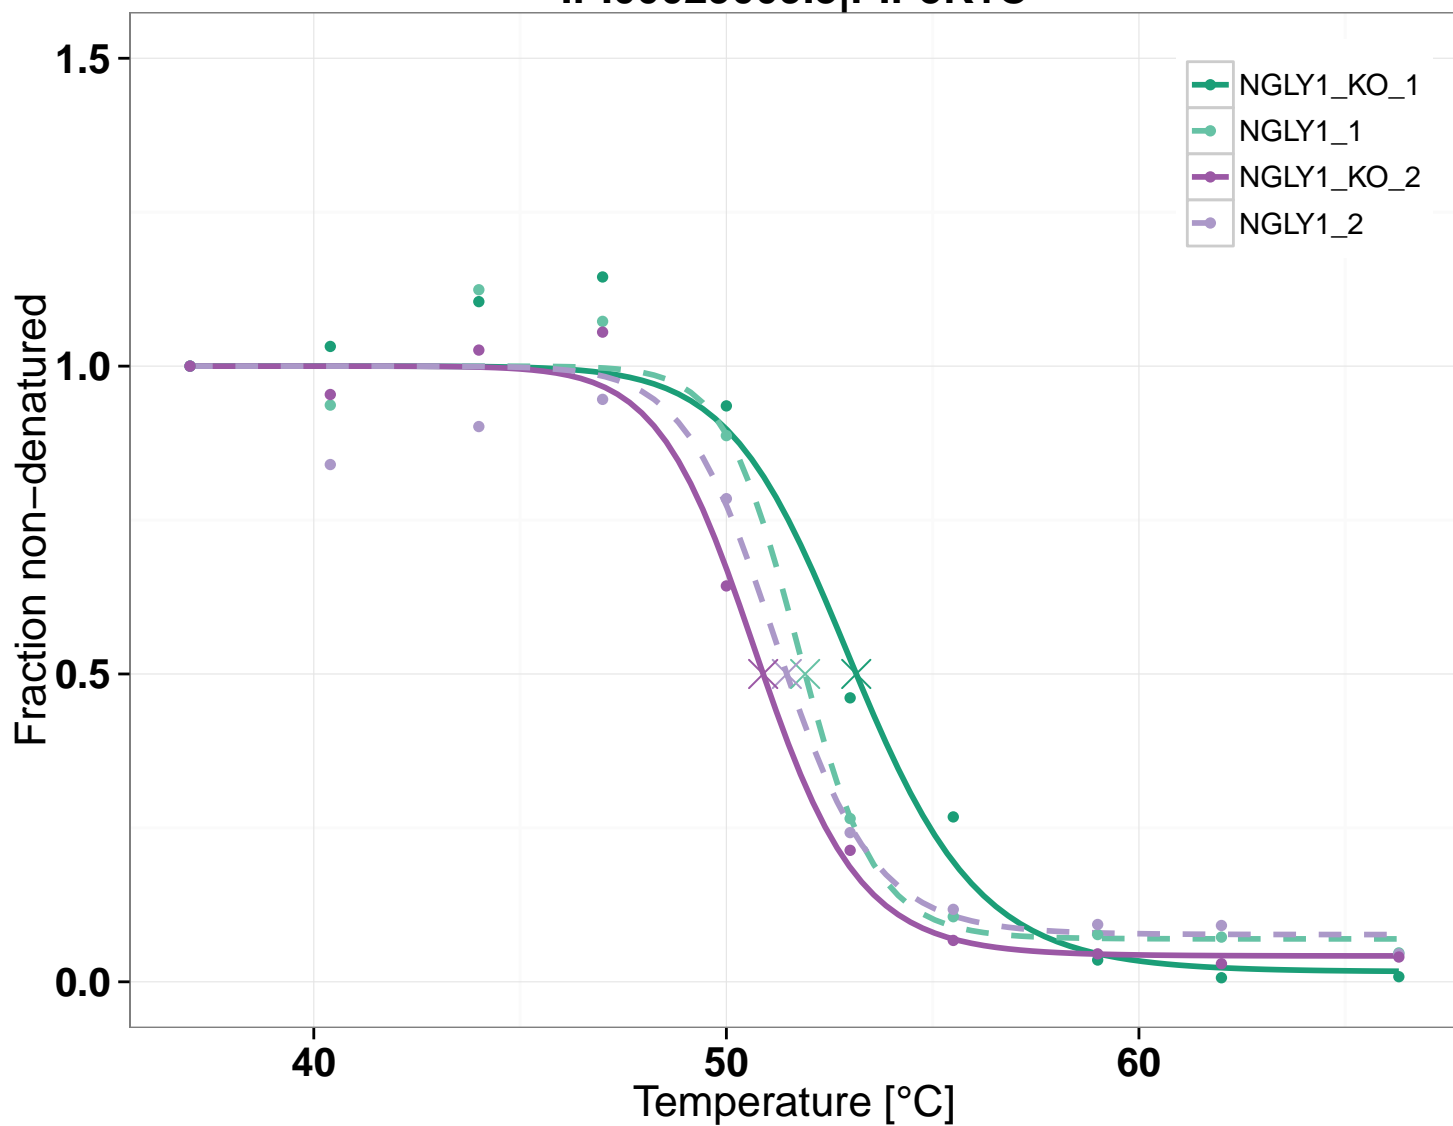

|            | meltPoint | slope | plateau | R2   |
|------------|-----------|-------|---------|------|
| NGLY1_KO_1 | 53.15     | -0.16 | 0.02    | 0.98 |
| NGLY1_1    | 51.91     | -0.25 | 0.07    | 0.99 |
| NGLY1_KO_2 | 50.89     | -0.2  | 0.04    | 0.99 |
| NGLY1_2    | 51.47     | -0.2  | 0.08    | 0.98 |

Supplement: Supplementary file 2464 [file 1]

IPI00004290.3|C1ORF107

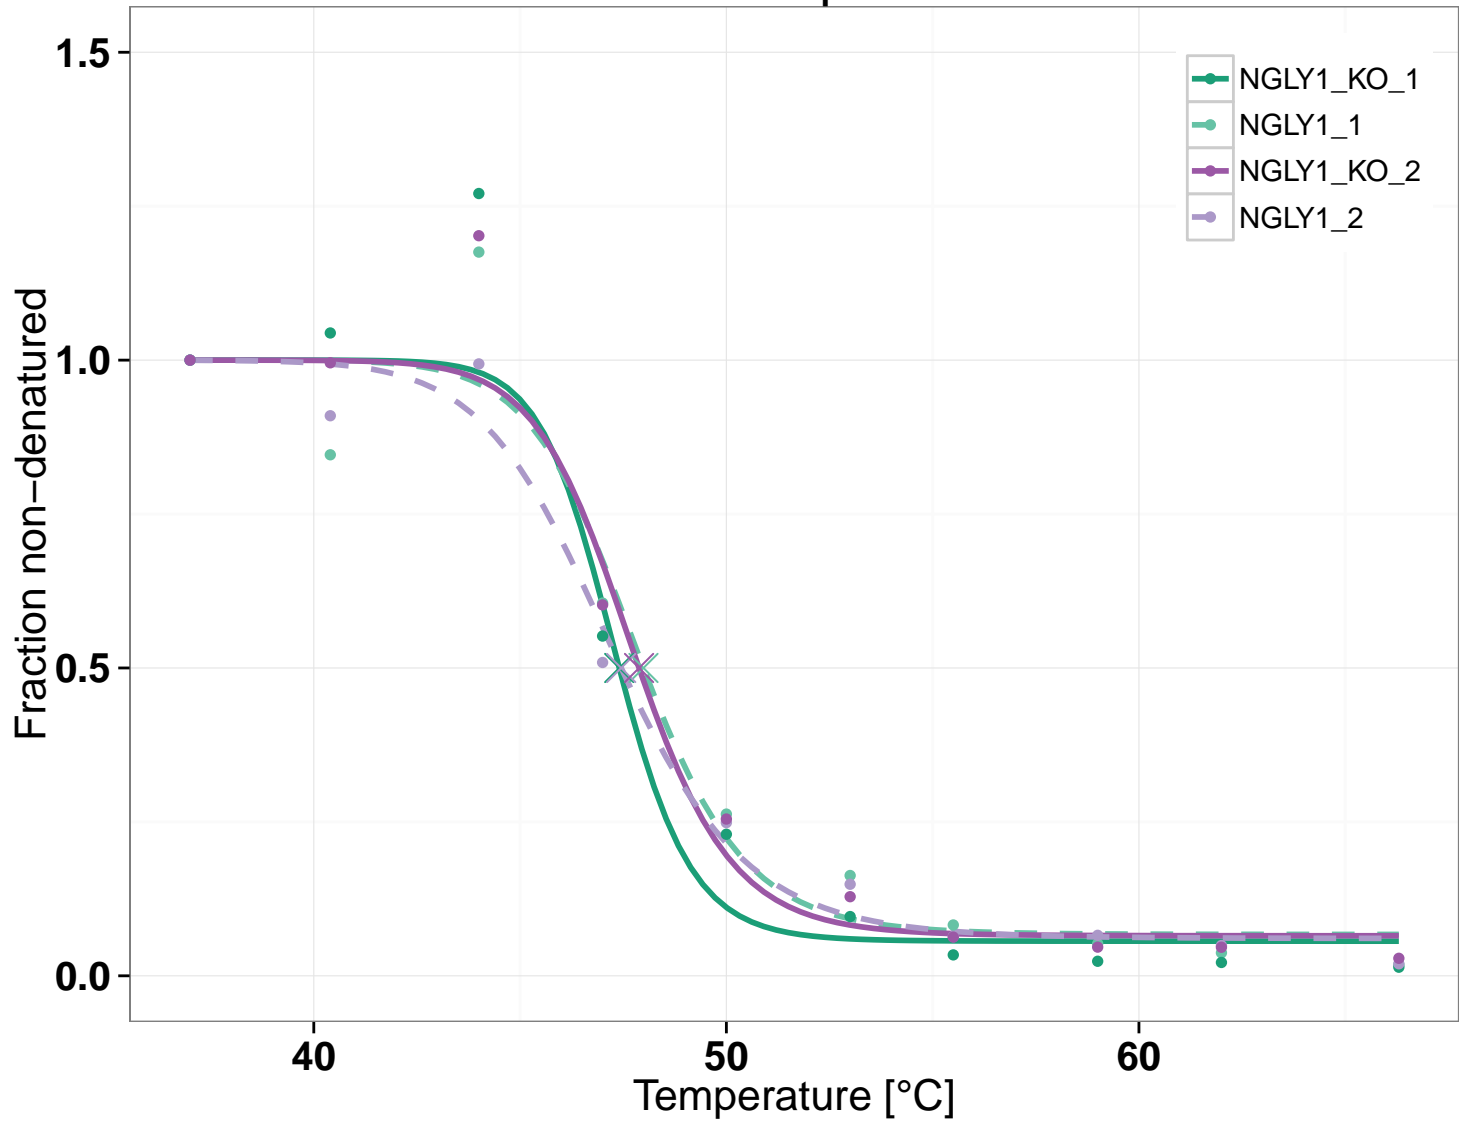

|            | meltPoint | slope | plateau | R2   |
|------------|-----------|-------|---------|------|
| NGLY1_KO_1 | 47.4      | -0.26 | 0.06    | 0.95 |
| NGLY1_1    | 47.99     | -0.18 | 0.07    | 0.95 |
| NGLY1_KO_2 | 47.88     | -0.2  | 0.07    | 0.97 |
| NGLY1_2    | 47.45     | -0.15 | 0.06    | 0.98 |

Supplement: Supplementary file 2465 [file 1]

IPI00074230.5|HMBOX1

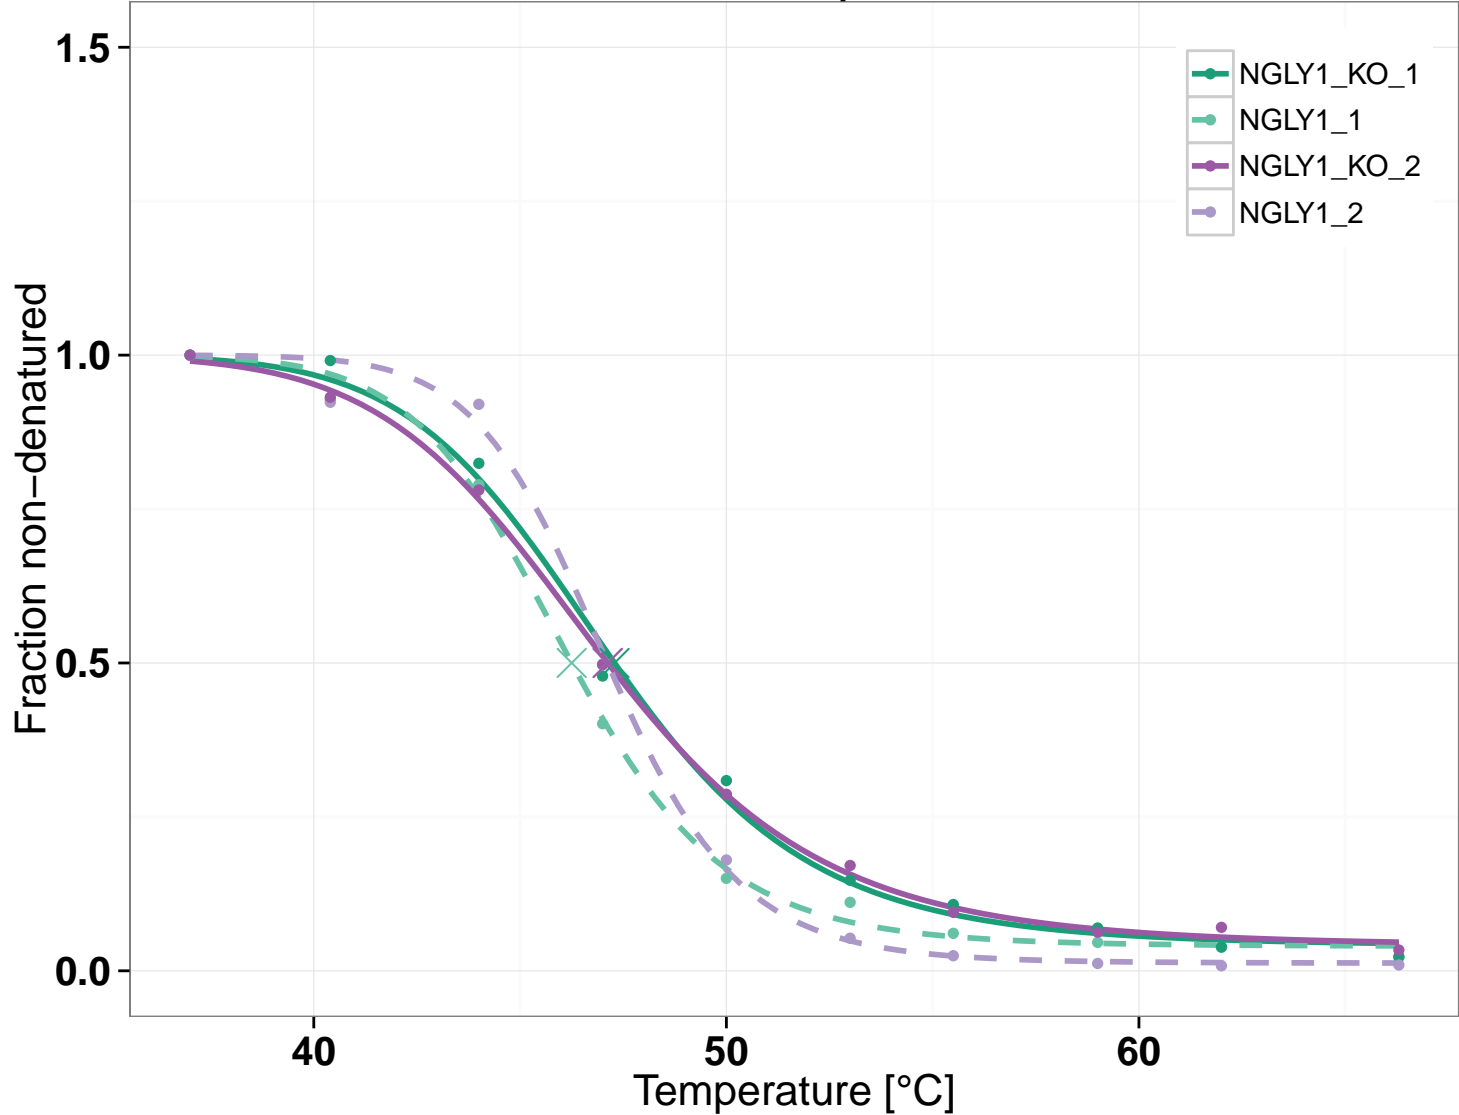

|            | meltPoint | slope  | plateau | R2 |
|------------|-----------|--------|---------|----|
| NGLY1_KO_1 | 47.29     | -0.098 | 0.04    | 1  |
| NGLY1_1    | 46.25     | -0.13  | 0.04    | 1  |
| NGLY1_KO_2 | 47.13     | -0.089 | 0.04    | 1  |
| NGLY1_2    | 47.12     | -0.15  | 0.01    | 1  |

Supplement: Supplementary file 2466 [file 1]

IPI00008454.1|DNAJB11

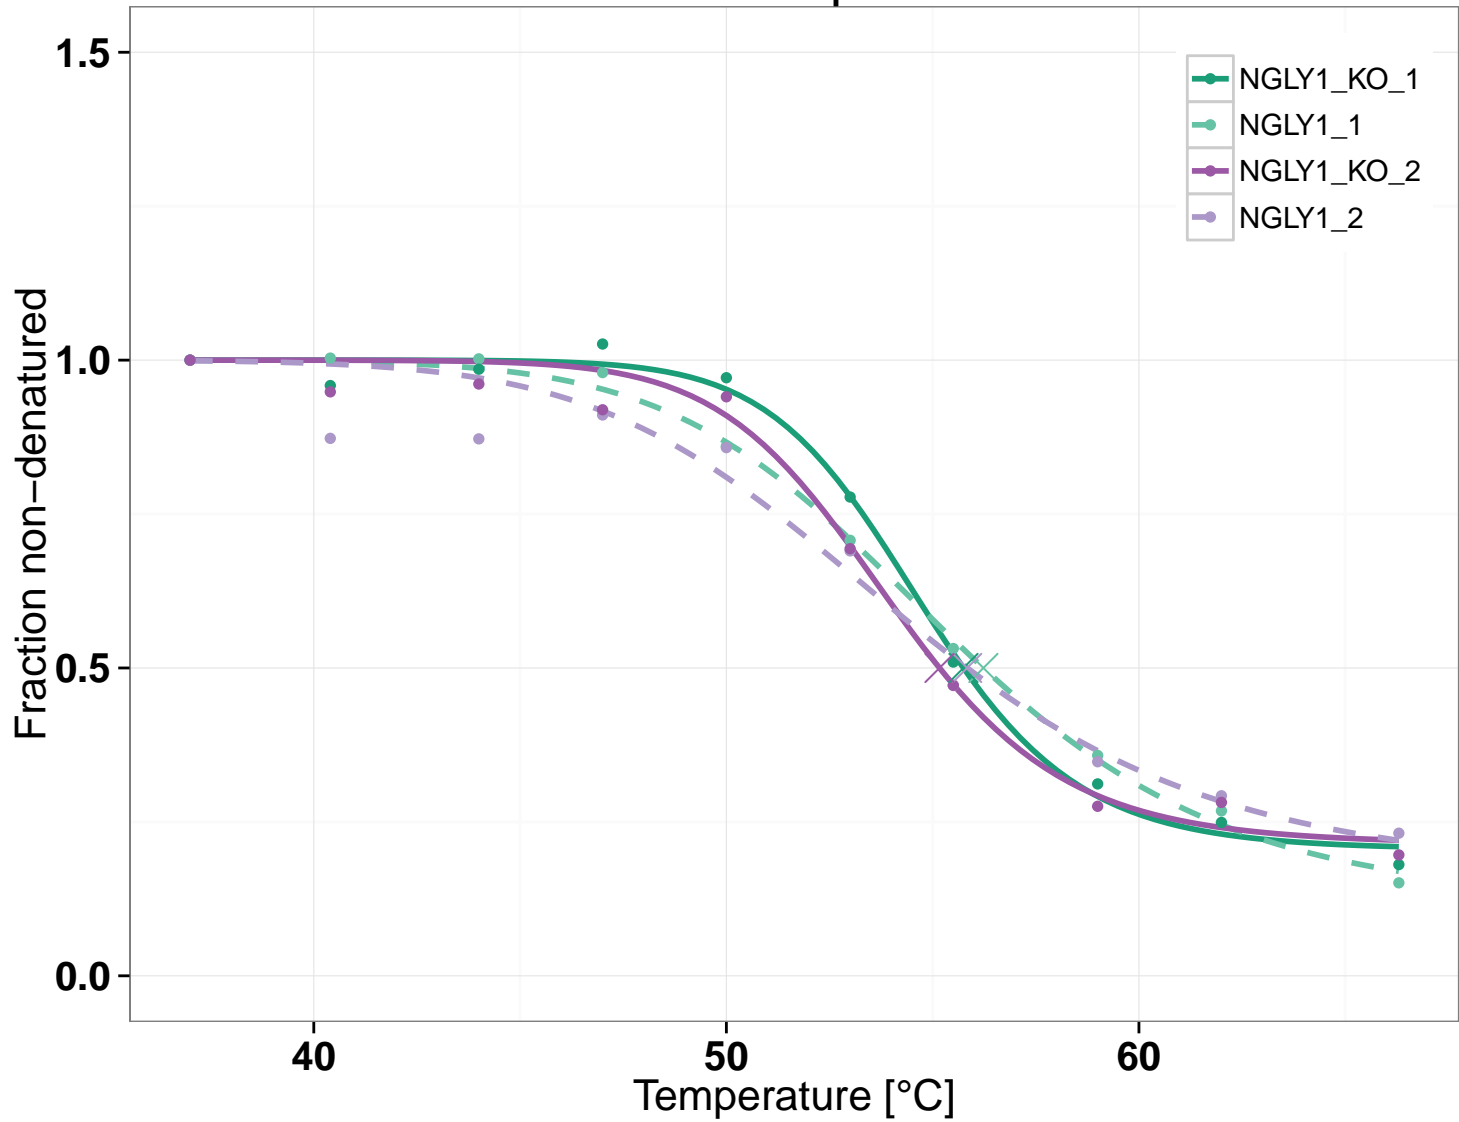

|            | meltPoint | slope  | plateau | R2   |
|------------|-----------|--------|---------|------|
| NGLY1_KO_1 | 55.75     | -0.11  | 0.2     | 1    |
| NGLY1_1    | 56.23     | -0.066 | 0.11    | 1    |
| NGLY1_KO_2 | 55.17     | -0.094 | 0.21    | 0.99 |
| NGLY1_2    | 55.84     | -0.056 | 0.16    | 0.96 |

Supplement: Supplementary file 2467 [file 1]

# IPI00413108.4|RPSA

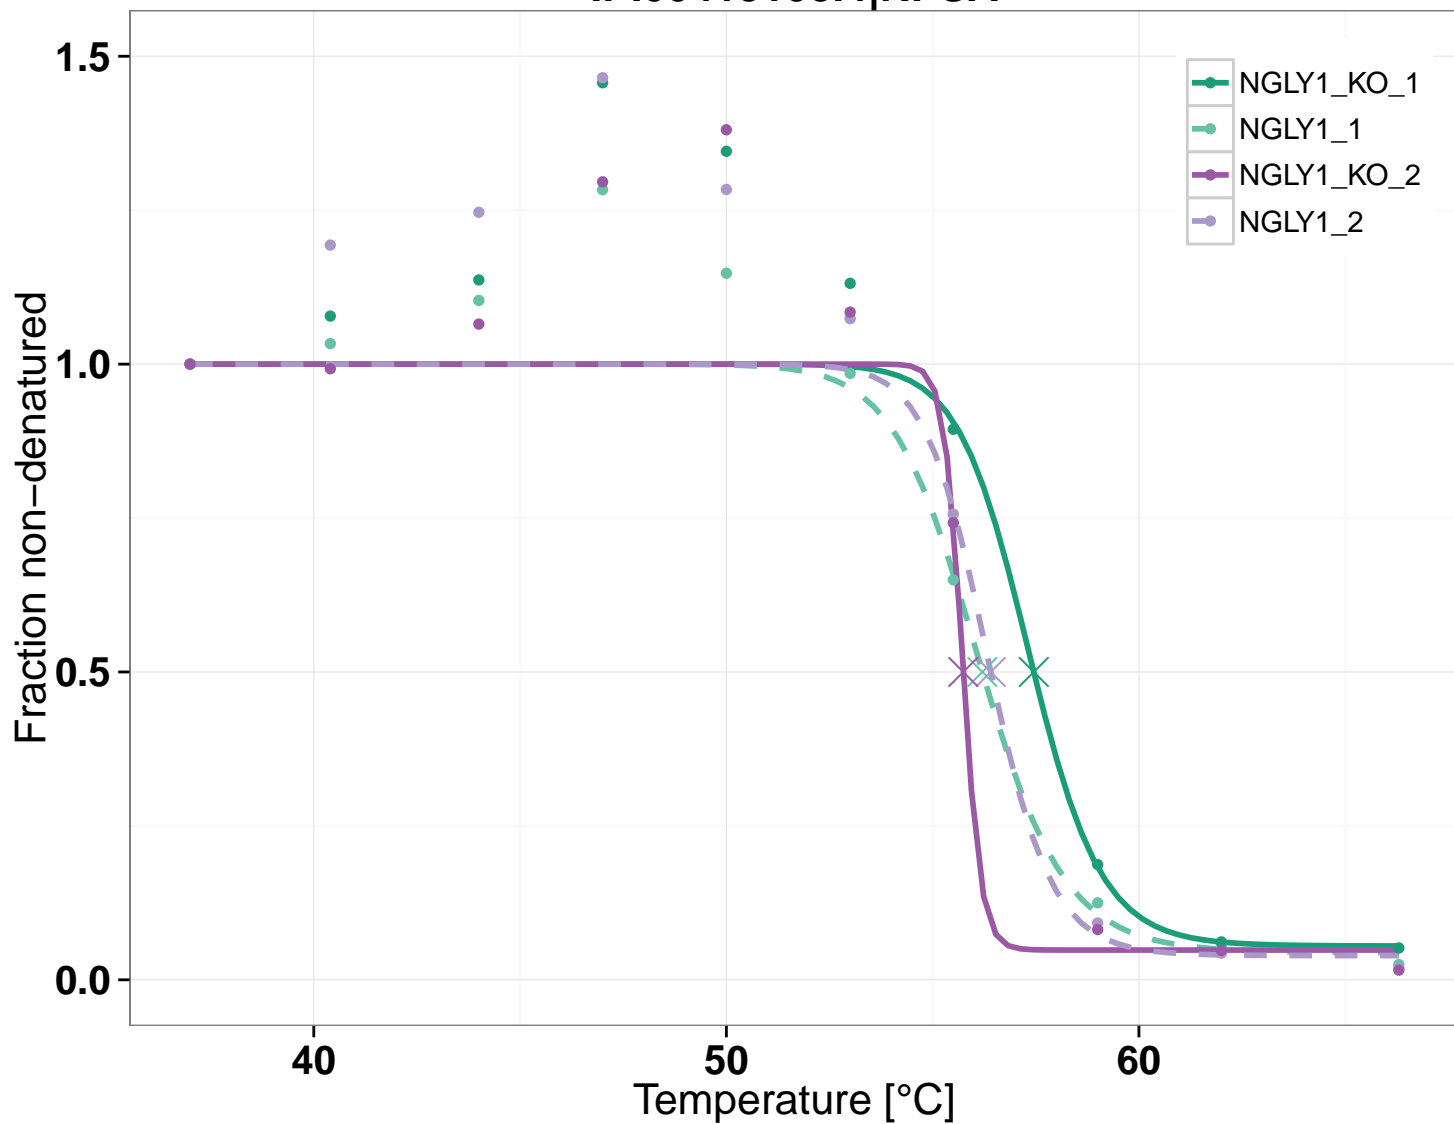

|            | meltPoint | slope | plateau | R2   |
|------------|-----------|-------|---------|------|
| NGLY1_KO_1 | 57.45     | -0.27 | 0.05    | 0.85 |
| NGLY1_1    | 56.21     | -0.23 | 0.04    | 0.95 |
| NGLY1_KO_2 | 55.74     | -1.1  | 0.05    | 0.9  |
| NGLY1_2    | 56.41     | -0.31 | 0.04    | 0.86 |

Supplement: Supplementary file 2468 [file 1]

IPI00915356.1|FLJ12529

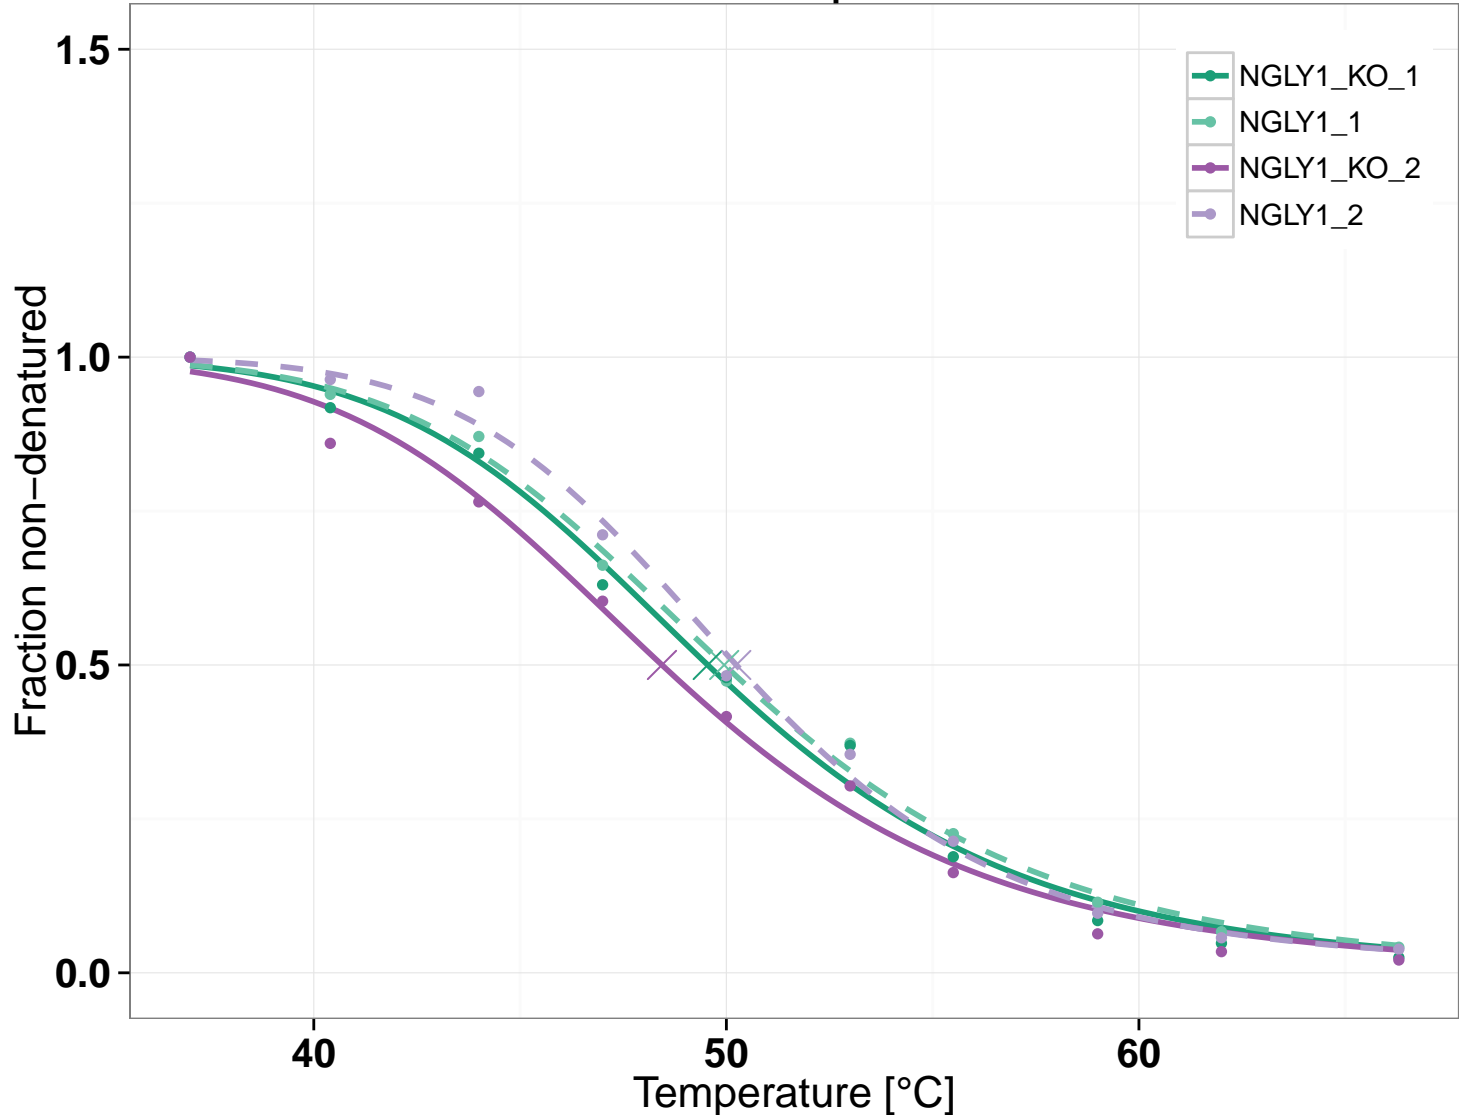

|            | meltPoint | slope  | plateau | R2   |
|------------|-----------|--------|---------|------|
| NGLY1_KO_1 | 49.55     | -0.065 | 0       | 0.99 |
| NGLY1_1    | 49.95     | -0.064 | 0       | 1    |
| NGLY1_KO_2 | 48.44     | -0.064 | 0       | 0.99 |
| NGLY1_2    | 50.24     | -0.075 | 0.01    | 1    |

Supplement: Supplementary file 2469 [file 1]

IPI00009453.2|TFAP2A

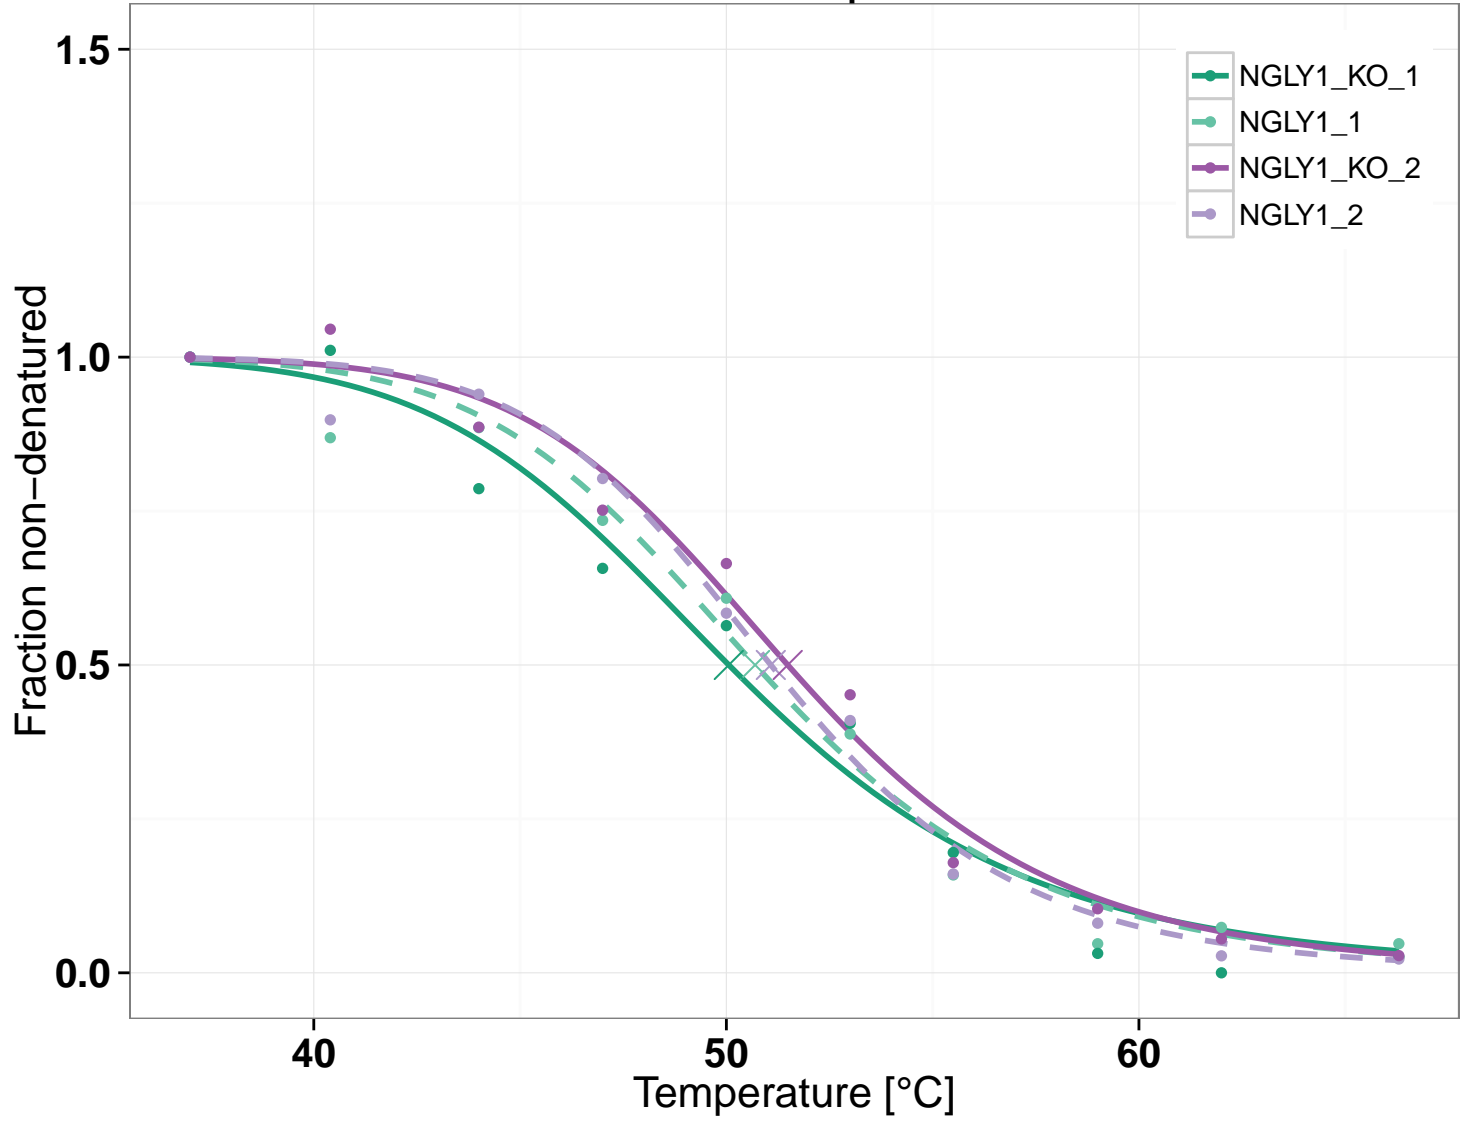

|            | meltPoint | slope  | plateau | R2   |
|------------|-----------|--------|---------|------|
| NGLY1_KO_1 | 50.06     | -0.069 | 0       | 0.98 |
| NGLY1_1    | 50.7      | -0.074 | 0       | 0.98 |
| NGLY1_KO_2 | 51.49     | -0.077 | 0       | 0.99 |
| NGLY1_2    | 51.08     | -0.084 | 0       | 0.99 |

Supplement: Supplementary file 2470 [file 1]

# IPI00789360.1|PLDN

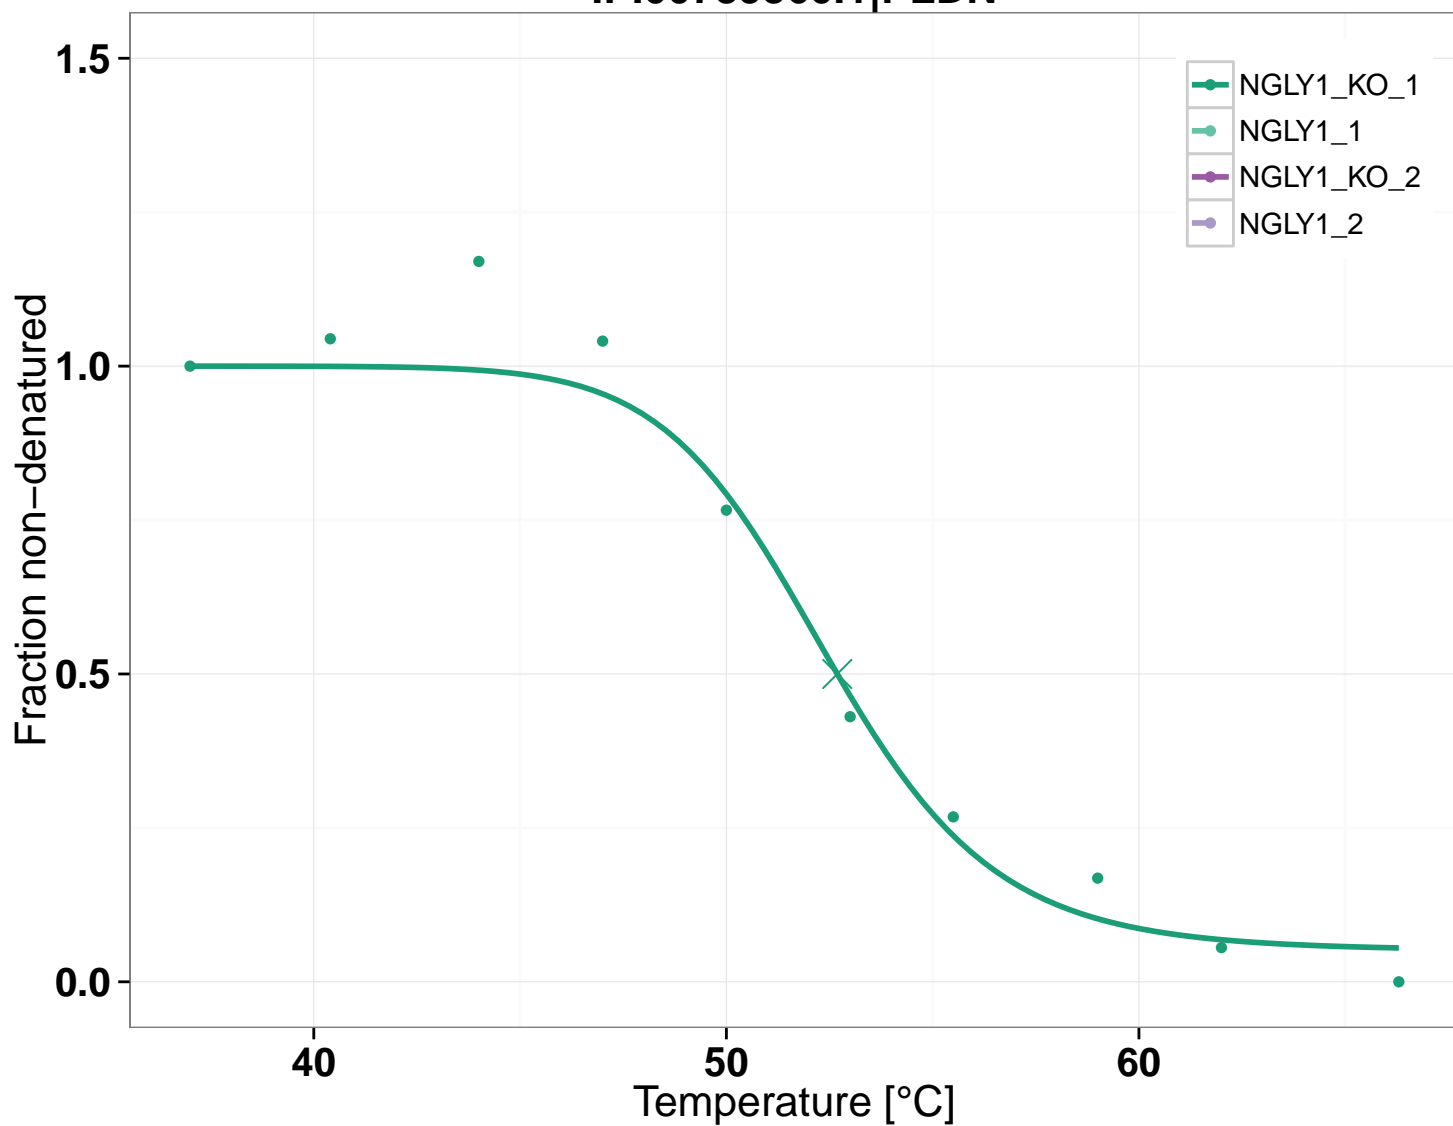

|            | meltPoint | slope | plateau | R2   |
|------------|-----------|-------|---------|------|
| NGLY1_KO_1 | 52.69     | -0.12 | 0.05    | 0.97 |
| NGLY1_1    | —         | —     | —       | —    |
| NGLY1_KO_2 | —         | —     | —       | —    |
| NGLY1_2    | —         | —     | —       | —    |

Supplement: Supplementary file 2471 [file 1]

IPI00182757.10|KIAA1967

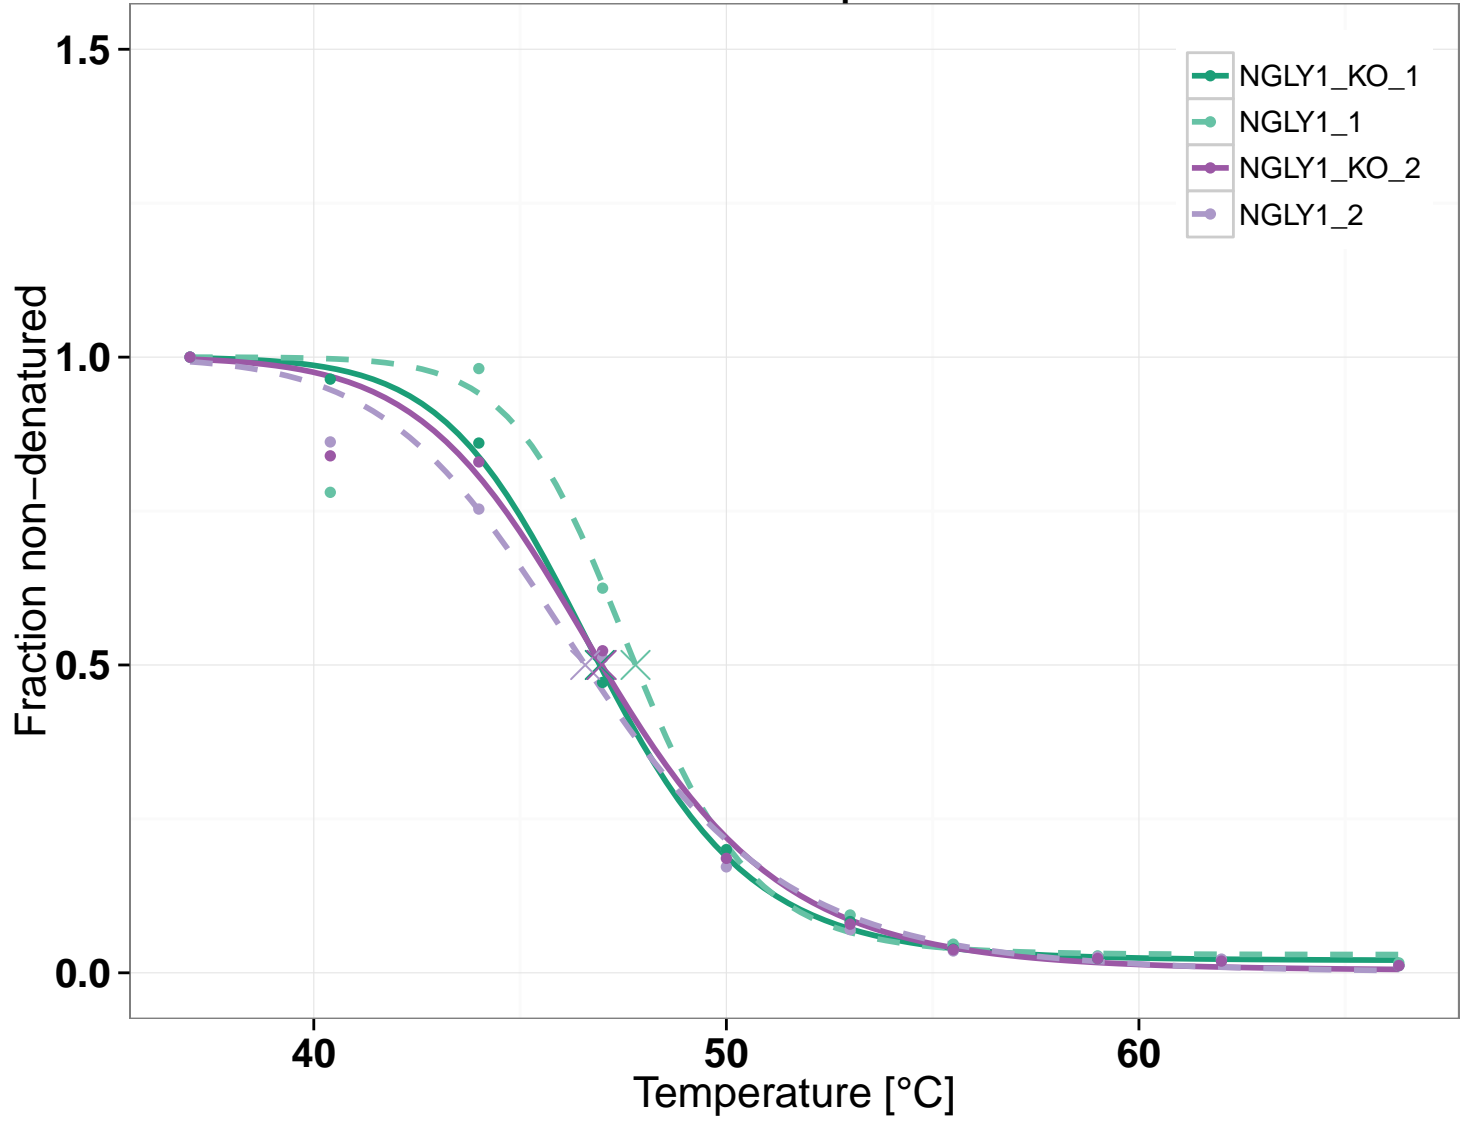

|            | meltPoint | slope | plateau | R2   |
|------------|-----------|-------|---------|------|
| NGLY1_KO_1 | 46.93     | -0.13 | 0.02    | 1    |
| NGLY1_1    | 47.8      | -0.17 | 0.03    | 0.97 |
| NGLY1_KO_2 | 46.98     | -0.11 | 0       | 0.99 |
| NGLY1_2    | 46.58     | -0.1  | 0       | 0.99 |

Supplement: Supplementary file 2472 [file 1]

IPI00009319.1|NCKIPSD

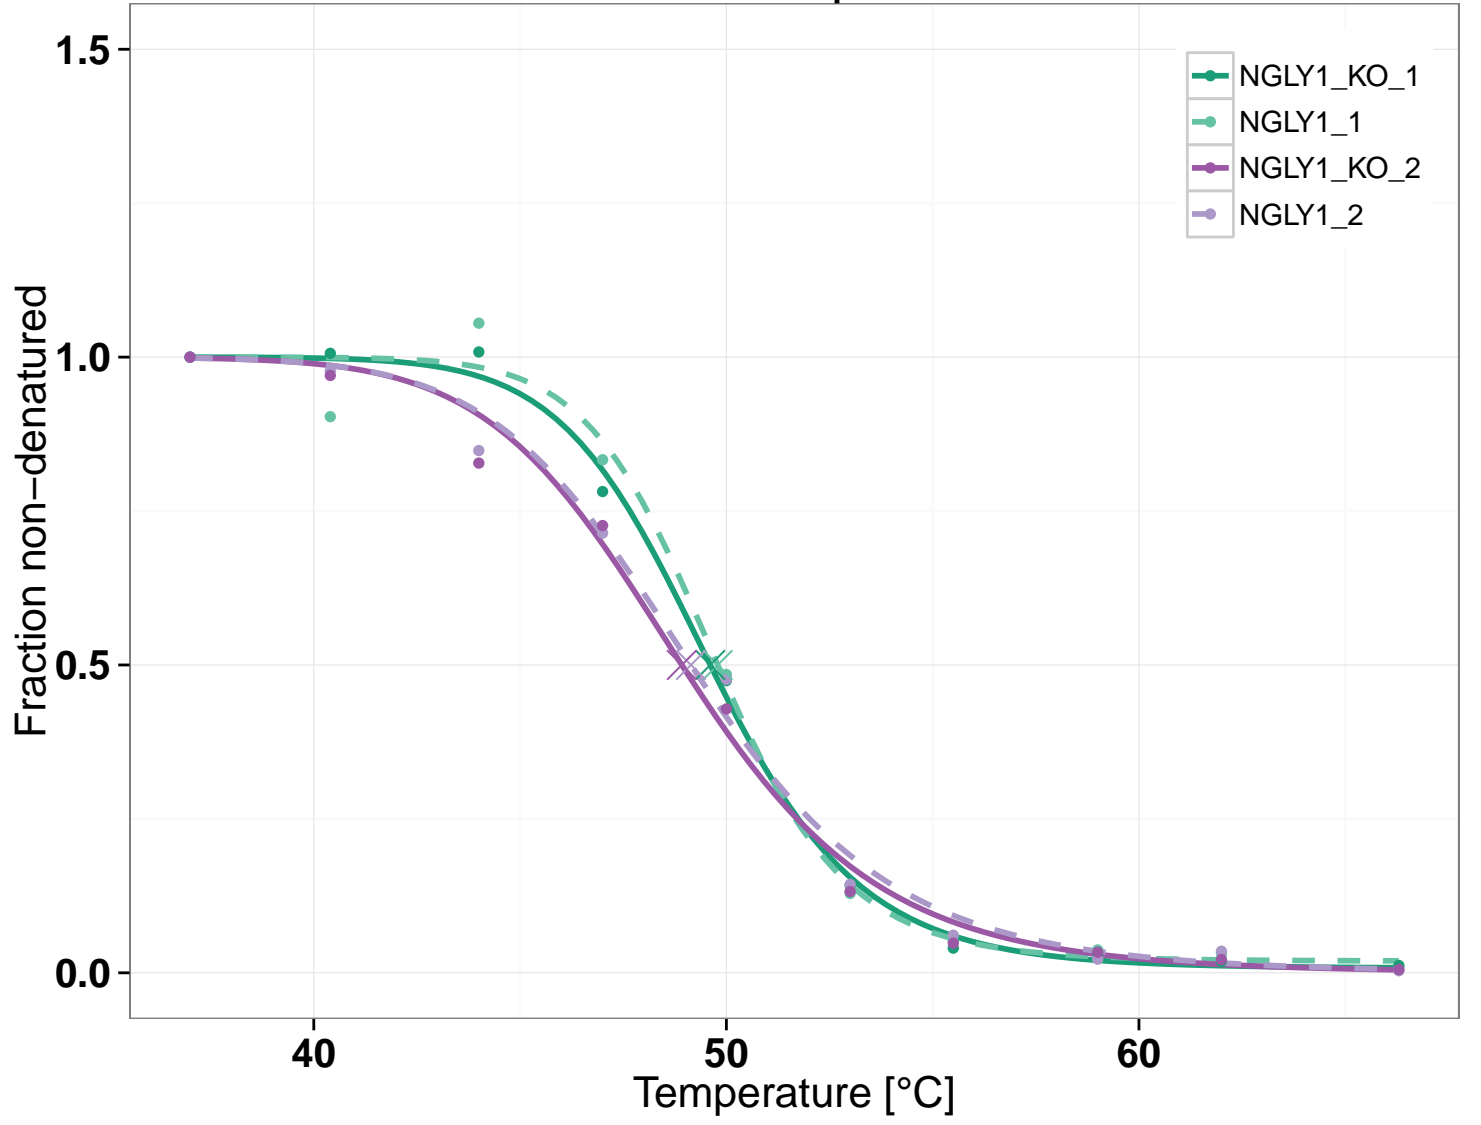

|            | meltPoint | slope | plateau | R2   |
|------------|-----------|-------|---------|------|
| NGLY1_KO_1 | 49.61     | -0.14 | 0.01    | 1    |
| NGLY1_1    | 49.79     | -0.16 | 0.02    | 0.99 |
| NGLY1_KO_2 | 48.92     | -0.1  | 0       | 0.99 |
| NGLY1_2    | 49.14     | -0.1  | 0       | 0.99 |

Supplement: Supplementary file 2473 [file 1]

# IPI00847543.2|LBA1

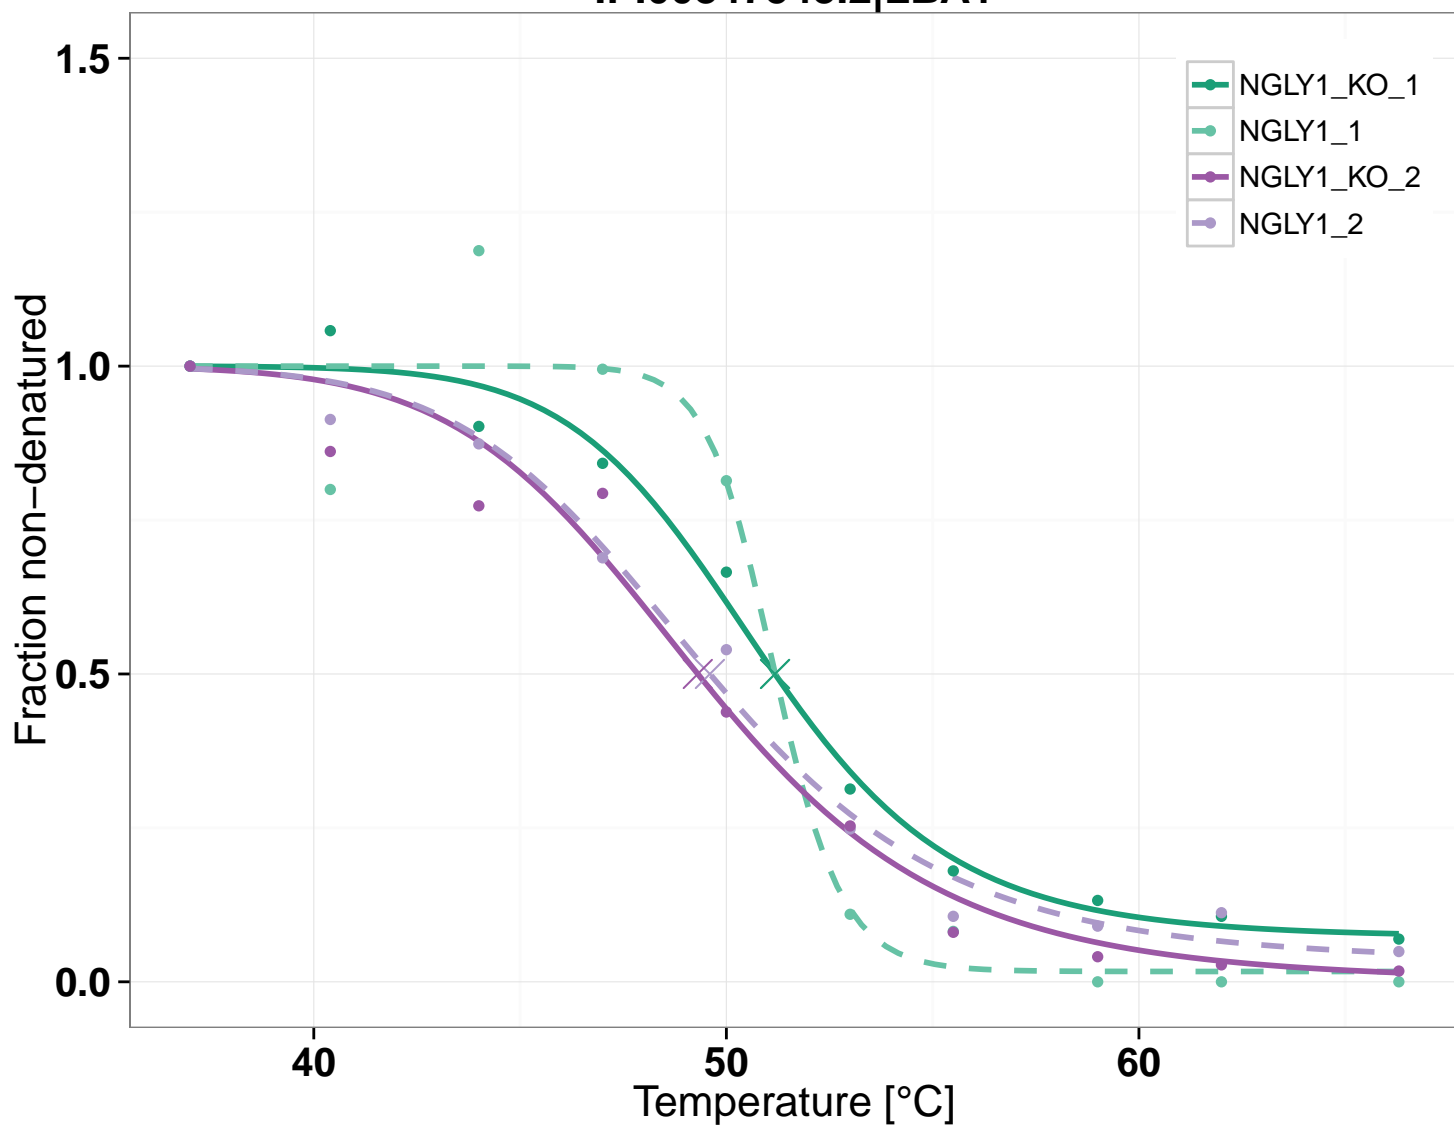

|            | meltPoint | slope  | plateau | R2   |
|------------|-----------|--------|---------|------|
| NGLY1_KO_1 | 51.18     | -0.1   | 0.07    | 0.99 |
| NGLY1_1    | 51.18     | -0.3   | 0.02    | 0.96 |
| NGLY1_KO_2 | 49.31     | -0.084 | 0       | 0.97 |
| NGLY1_2    | 49.6      | -0.081 | 0.03    | 0.99 |

Supplement: Supplementary file 2474 [file 1]

# IPI00007321.2|LYPLA1

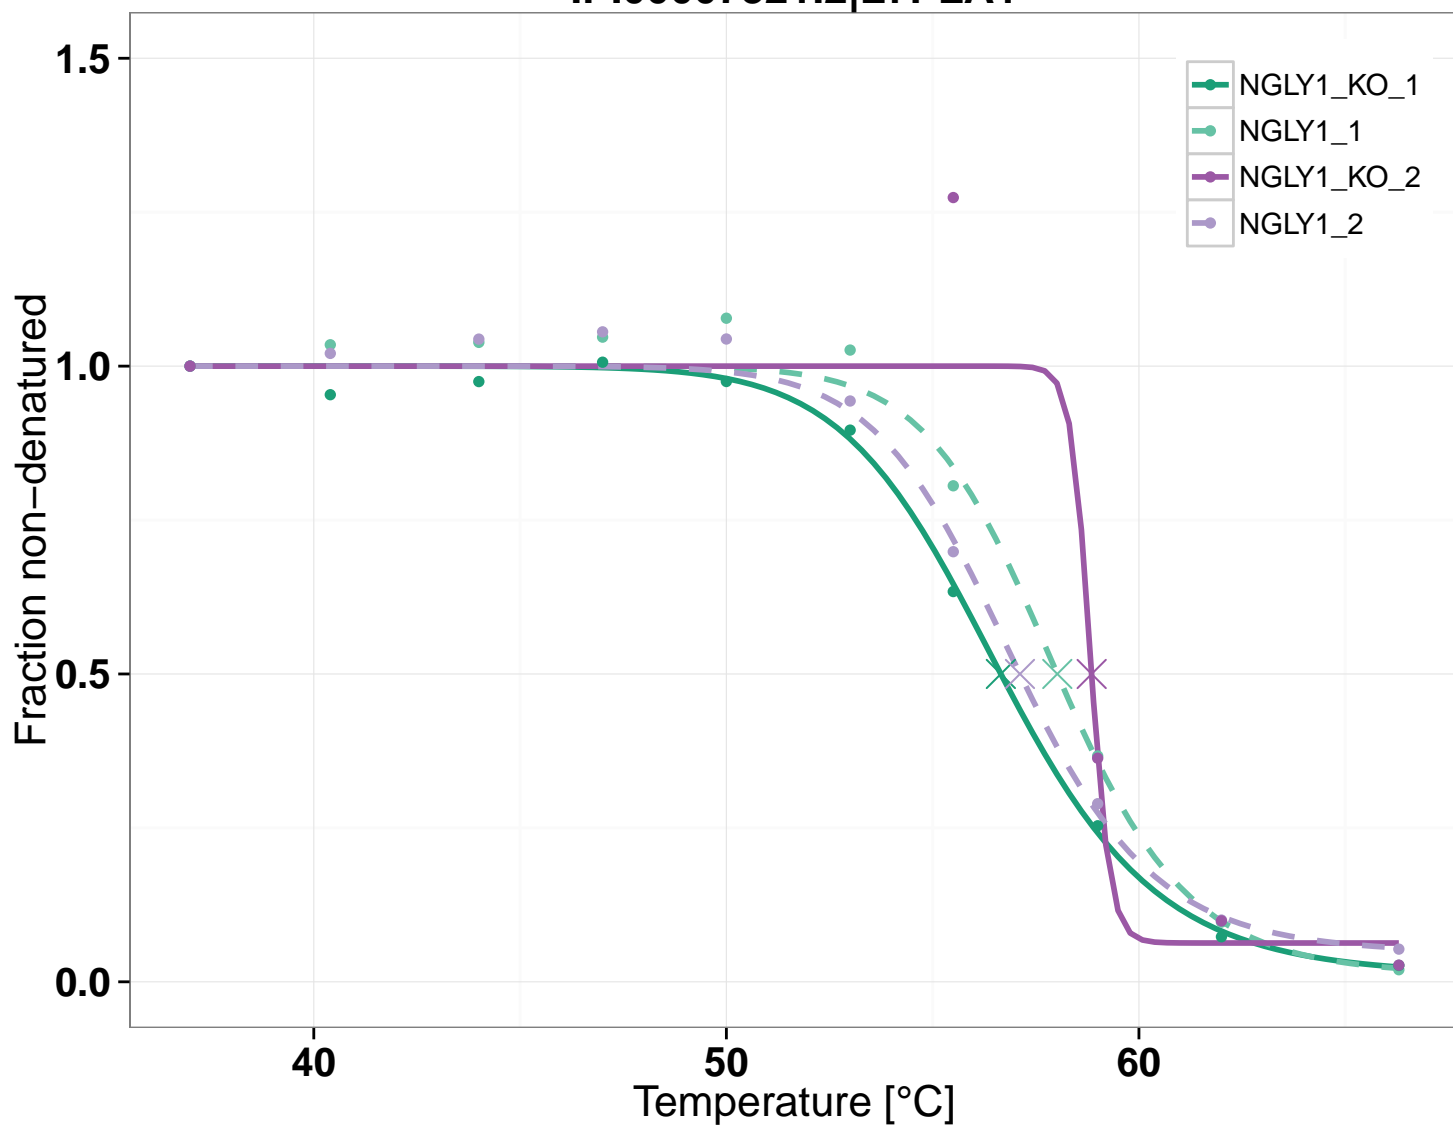

|            | meltPoint | slope | plateau | R2   |
|------------|-----------|-------|---------|------|
| NGLY1_KO_1 | 56.65     | -0.13 | 0.01    | 1    |
| NGLY1_1    | 58.02     | -0.15 | 0.01    | 0.99 |
| NGLY1_KO_2 | 58.85     | -1    | 0.06    | 0.29 |
| NGLY1_2    | 57.12     | -0.14 | 0.05    | 0.99 |

Supplement: Supplementary file 2475 [file 1]

IPI00021265.4|NUDT6

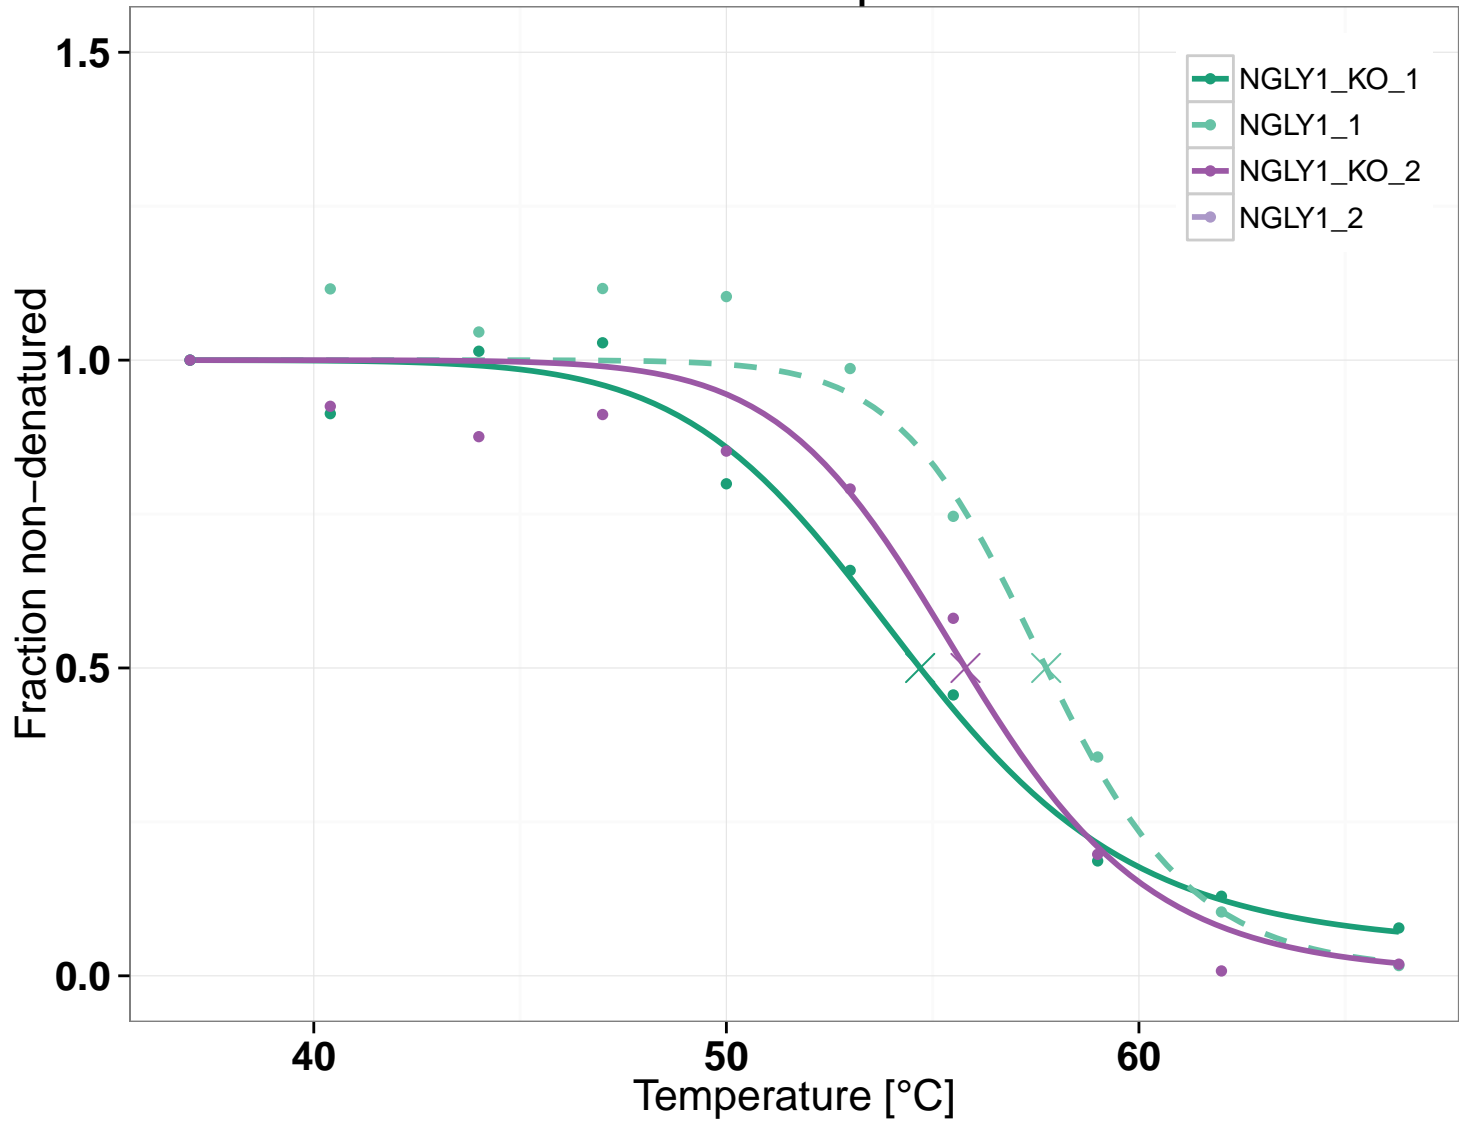

|            | meltPoint | slope  | plateau | R2   |
|------------|-----------|--------|---------|------|
| NGLY1_KO_1 | 54.7      | -0.087 | 0.04    | 0.99 |
| NGLY1_1    | 57.75     | -0.14  | 0.01    | 0.97 |
| NGLY1_KO_2 | 55.8      | -0.11  | 0       | 0.97 |
| NGLY1_2    | -         | -      | -       | -    |

Supplement: Supplementary file 2476 [file 1]

# IPI00019770.3|FAU

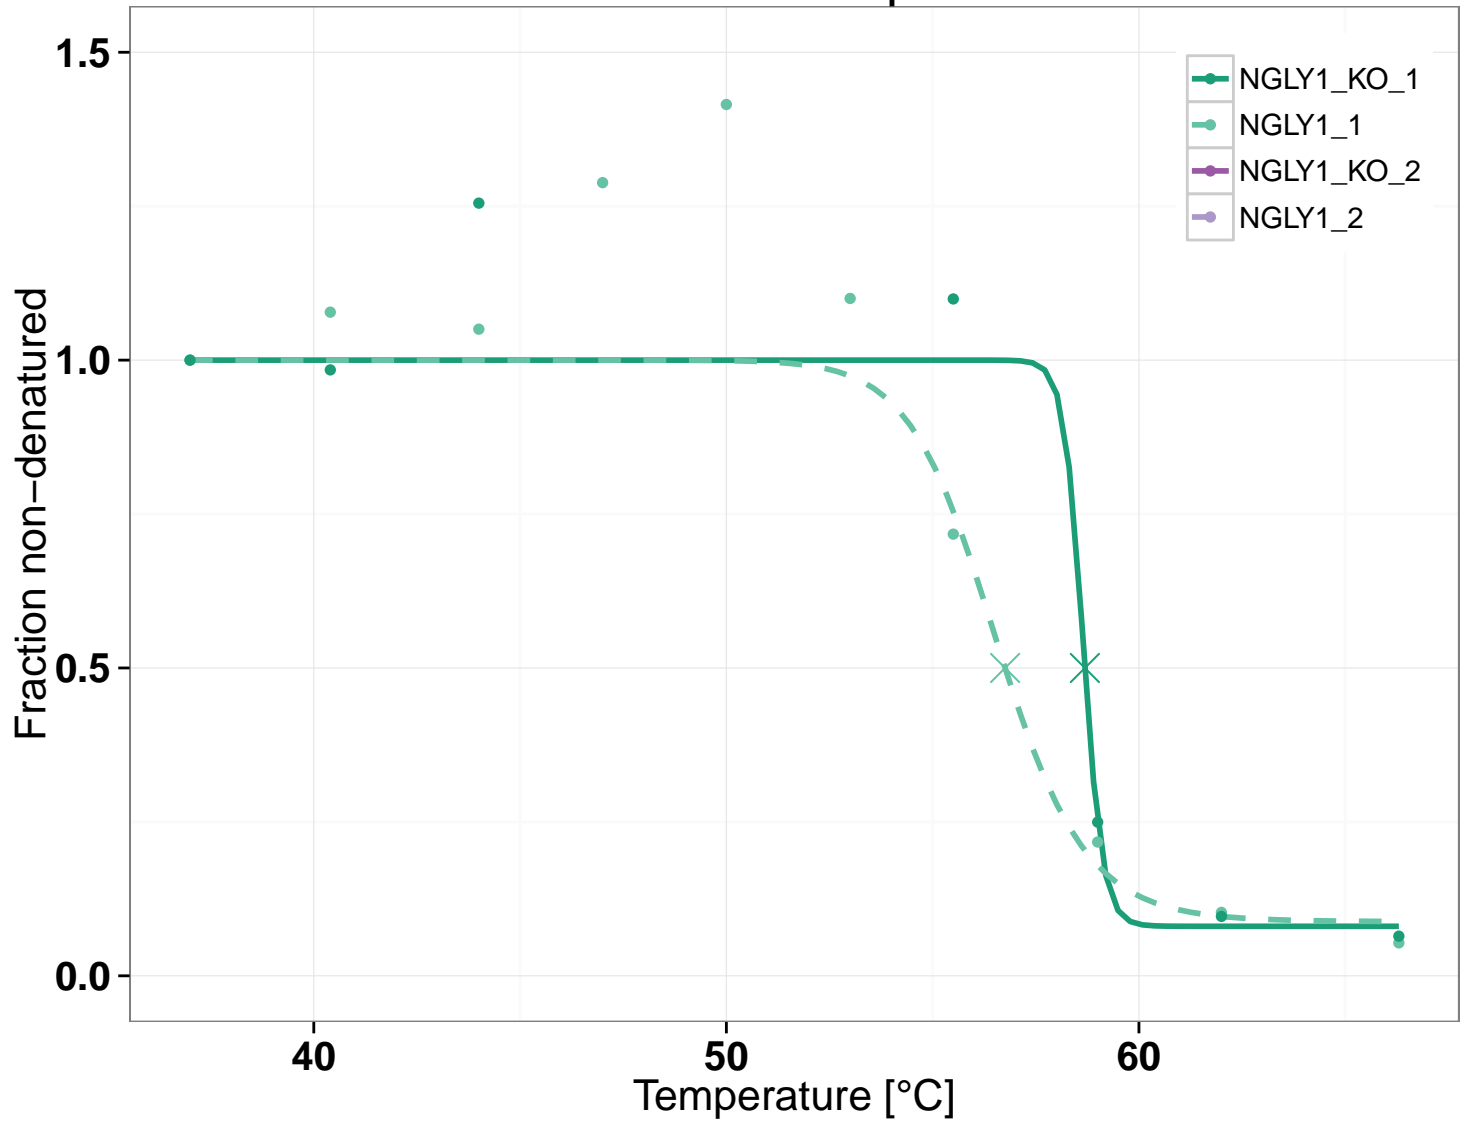

|            | meltPoint | slope | plateau | R2   |
|------------|-----------|-------|---------|------|
| NGLY1_KO_1 | 58.69     | -0.98 | 0.08    | 0.58 |
| NGLY1_1    | 56.76     | -0.21 | 0.09    | 0.87 |
| NGLY1_KO_2 | -         | -     | -       | -    |
| NGLY1_2    | -         | -     | -       | -    |

Supplement: Supplementary file 2477 [file 1]

IPI00414168.1|MARCH5

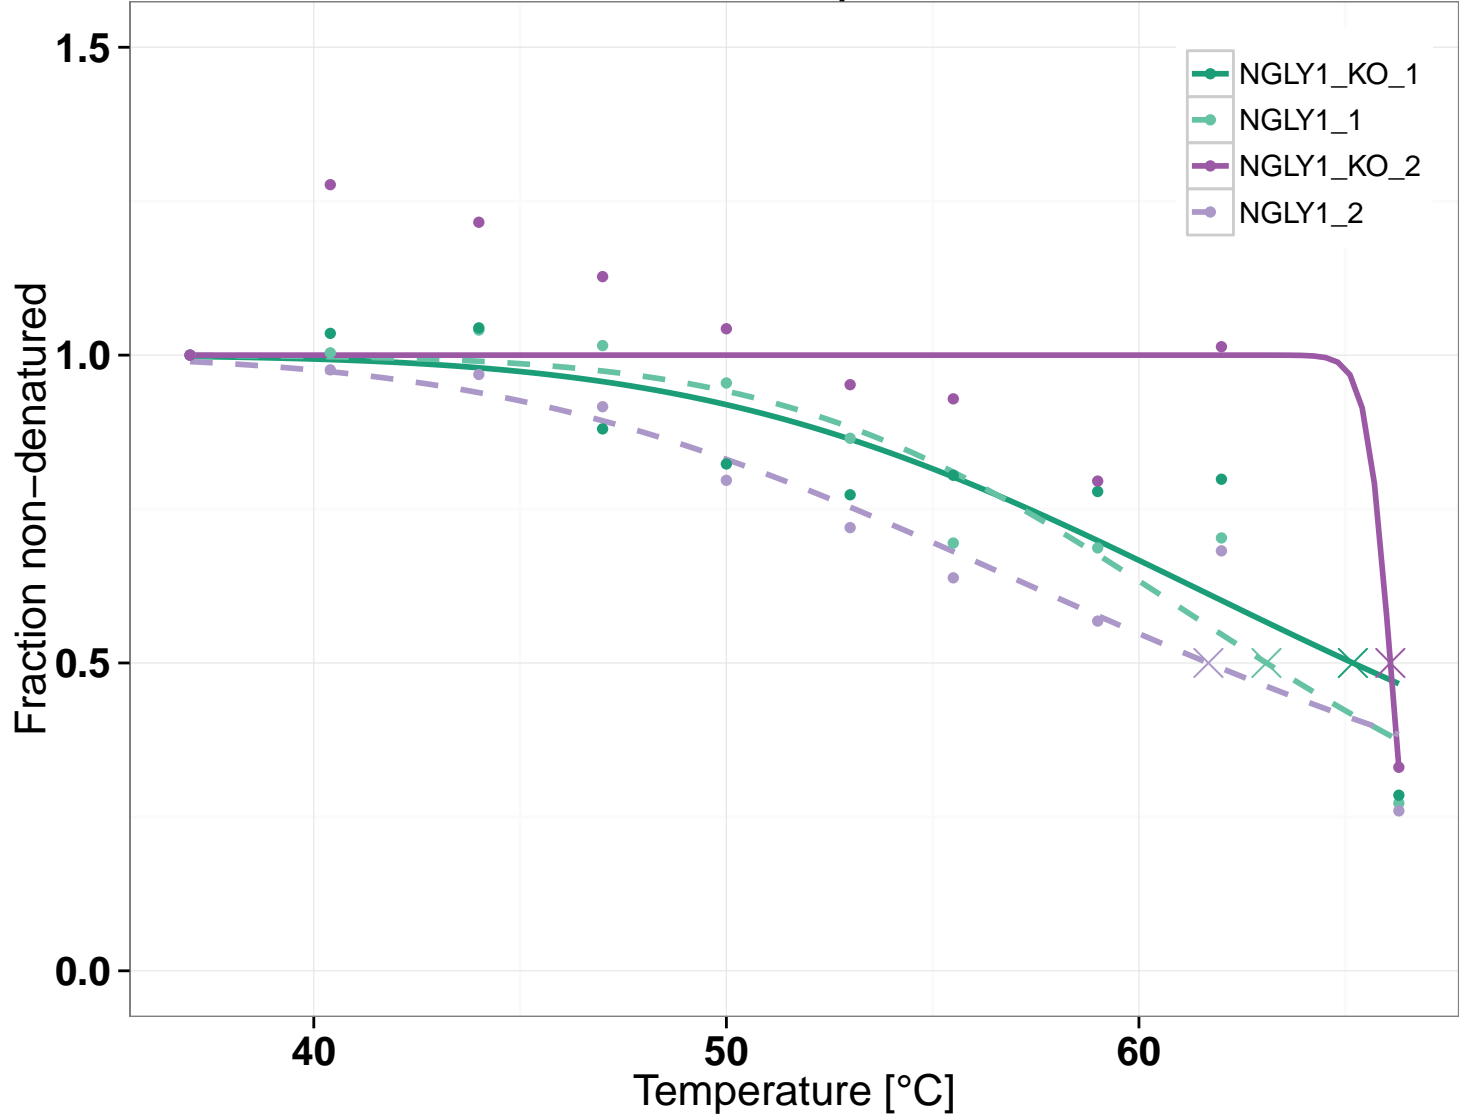

|            | meltPoint | slope  | plateau | R2   |
|------------|-----------|--------|---------|------|
| NGLY1_KO_1 | 65.19     | -0.033 | 0       | 0.75 |
| NGLY1_1    | 63.09     | -0.044 | 0       | 0.9  |
| NGLY1_KO_2 | 66.09     | -0.86  | 0       | 0.7  |
| NGLY1_2    | 61.68     | -0.03  | 0       | 0.88 |

Supplement: Supplementary file 2478 [file 1]

IPI00658023.1|PTPN11

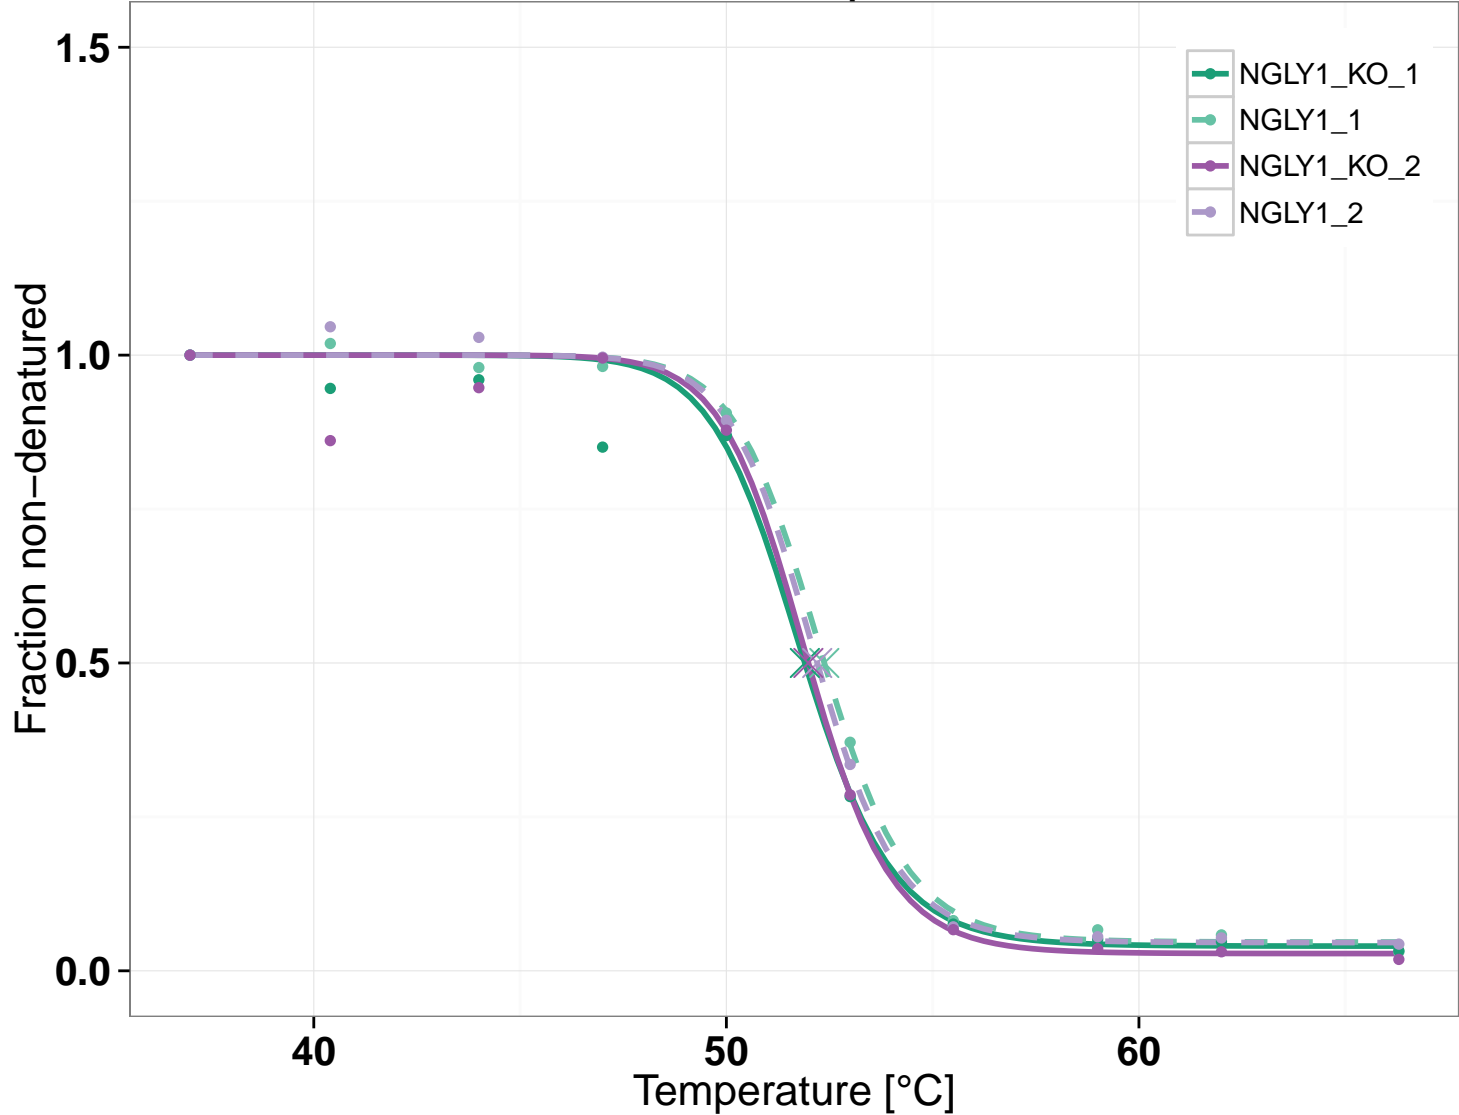

|            | meltPoint | slope | plateau | R2   |
|------------|-----------|-------|---------|------|
| NGLY1_KO_1 | 51.9      | -0.22 | 0.04    | 0.99 |
| NGLY1_1    | 52.37     | -0.23 | 0.05    | 1    |
| NGLY1_KO_2 | 51.99     | -0.24 | 0.03    | 0.99 |
| NGLY1_2    | 52.2      | -0.23 | 0.05    | 1    |

Supplement: Supplementary file 2479 [file 1]

# IPI00640519.2|MTHFSD

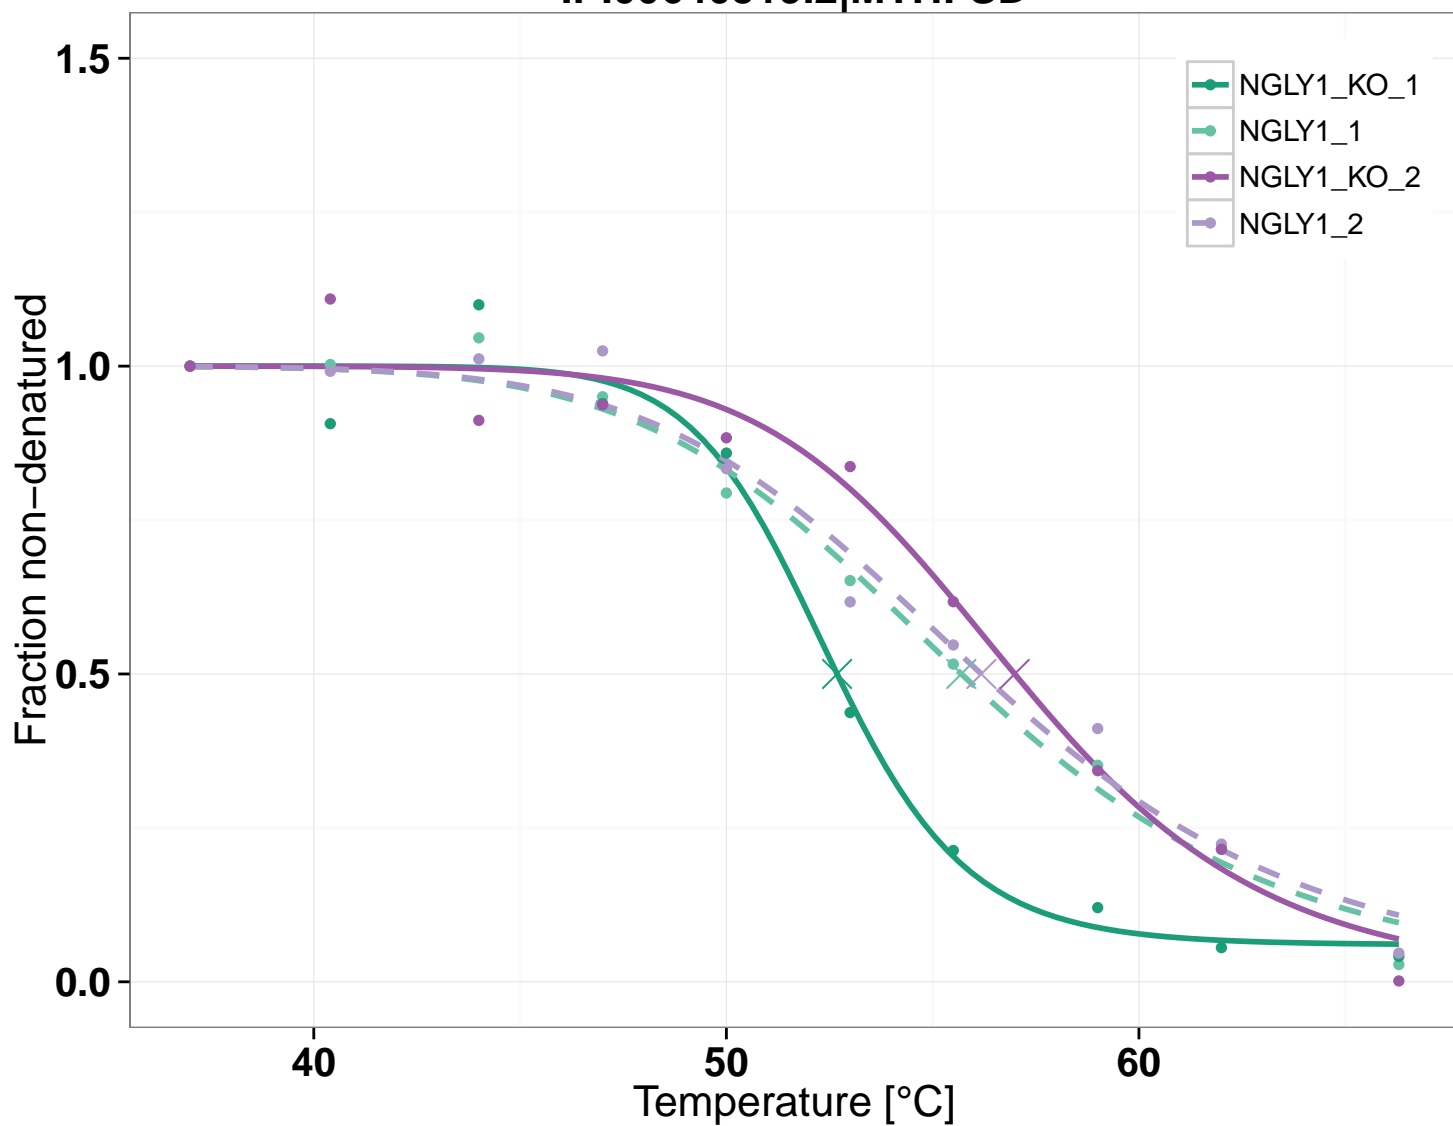

|            | meltPoint | slope  | plateau | R2   |
|------------|-----------|--------|---------|------|
| NGLY1_KO_1 | 52.68     | -0.14  | 0.06    | 0.99 |
| NGLY1_1    | 55.7      | -0.064 | 0       | 0.99 |
| NGLY1_KO_2 | 56.99     | -0.082 | 0       | 0.98 |
| NGLY1_2    | 56.18     | -0.063 | 0       | 0.98 |

Supplement: Supplementary file 2480 [file 1]

# IPI00027969.1|VHL

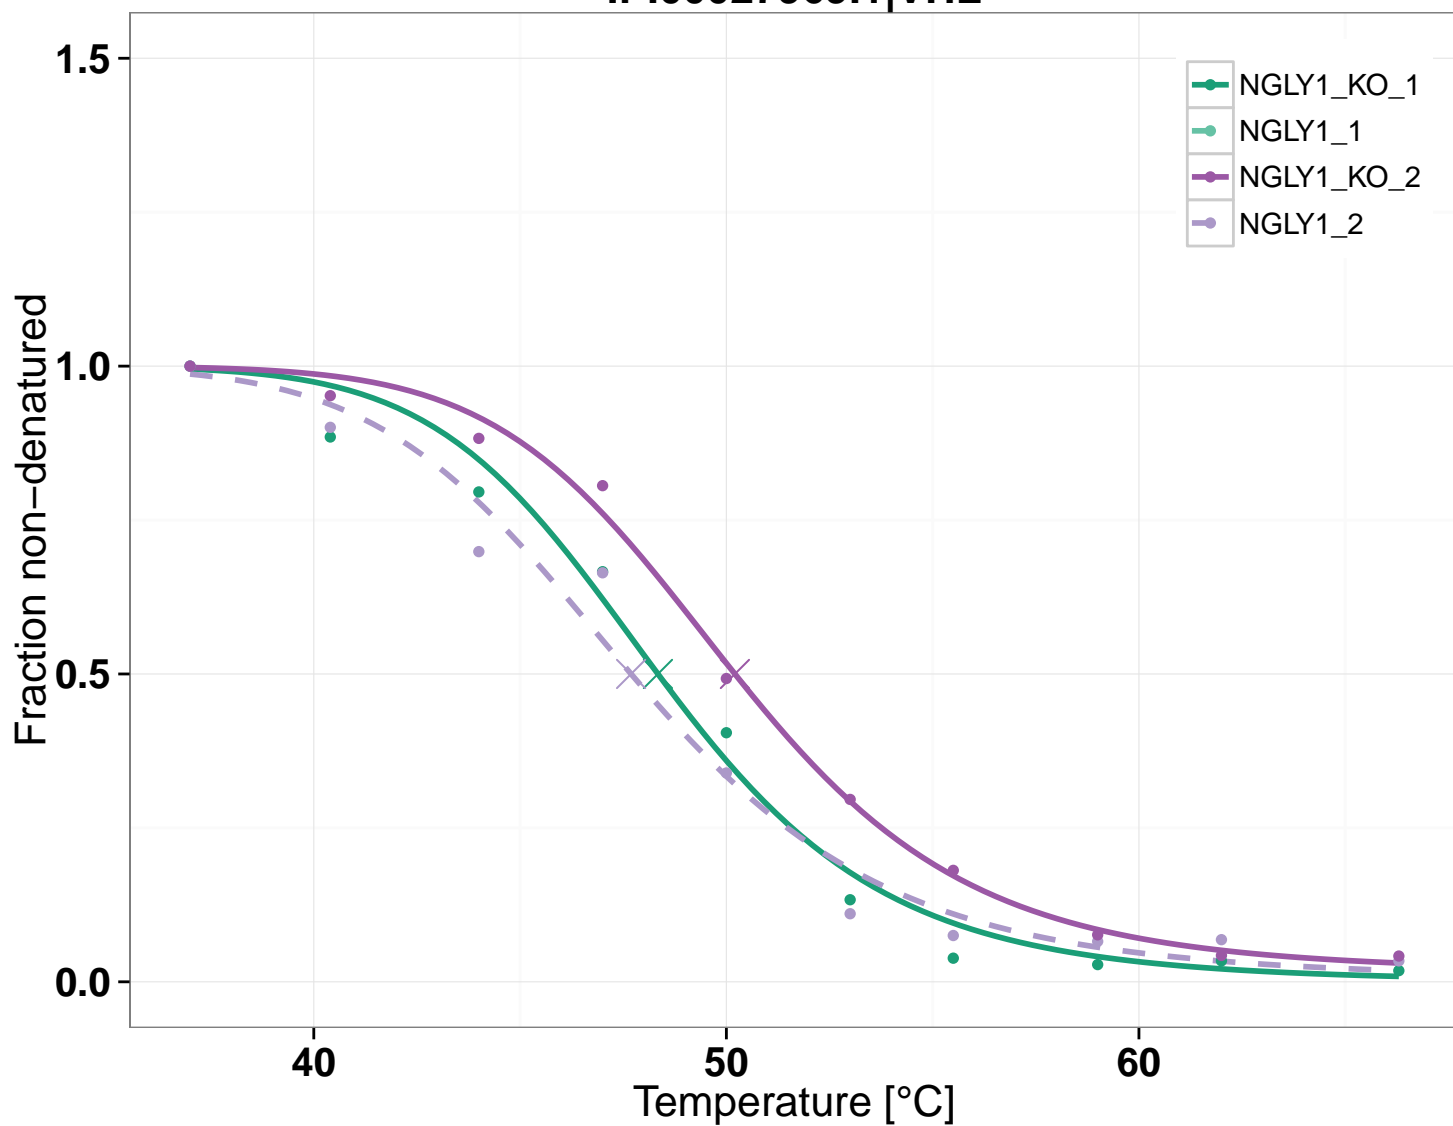

|            | meltPoint | slope  | plateau | R2   |
|------------|-----------|--------|---------|------|
| NGLY1_KO_1 | 48.34     | -0.091 | 0       | 0.99 |
| NGLY1_1    | -         | -      | -       | -    |
| NGLY1_KO_2 | 50.21     | -0.085 | 0.02    | 1    |
| NGLY1_2    | 47.69     | -0.08  | 0       | 0.98 |

Supplement: Supplementary file 2481 [file 1]

IPI00168698.1|PDZD8

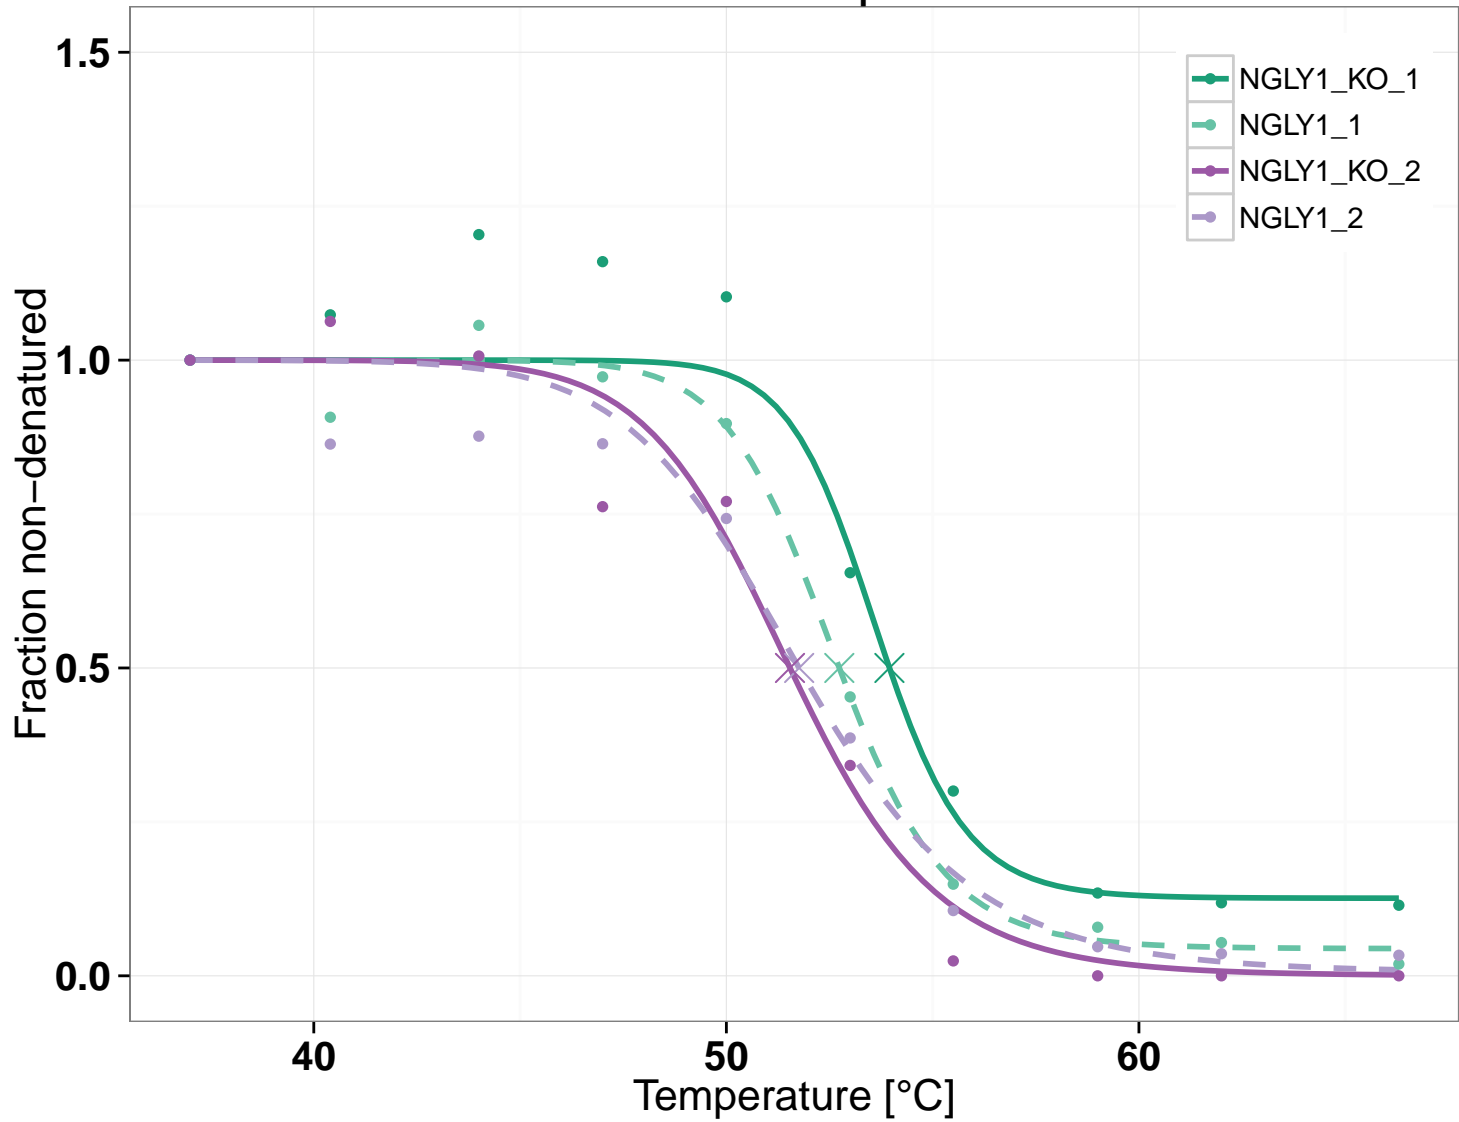

|            | meltPoint | slope | plateau | R2   |
|------------|-----------|-------|---------|------|
| NGLY1_KO_1 | 53.95     | -0.2  | 0.13    | 0.95 |
| NGLY1_1    | 52.74     | -0.18 | 0.04    | 0.99 |
| NGLY1_KO_2 | 51.54     | -0.14 | 0       | 0.97 |
| NGLY1_2    | 51.76     | -0.12 | 0       | 0.97 |

Supplement: Supplementary file 2482 [file 1]

IPI00647286.1|FAM129B

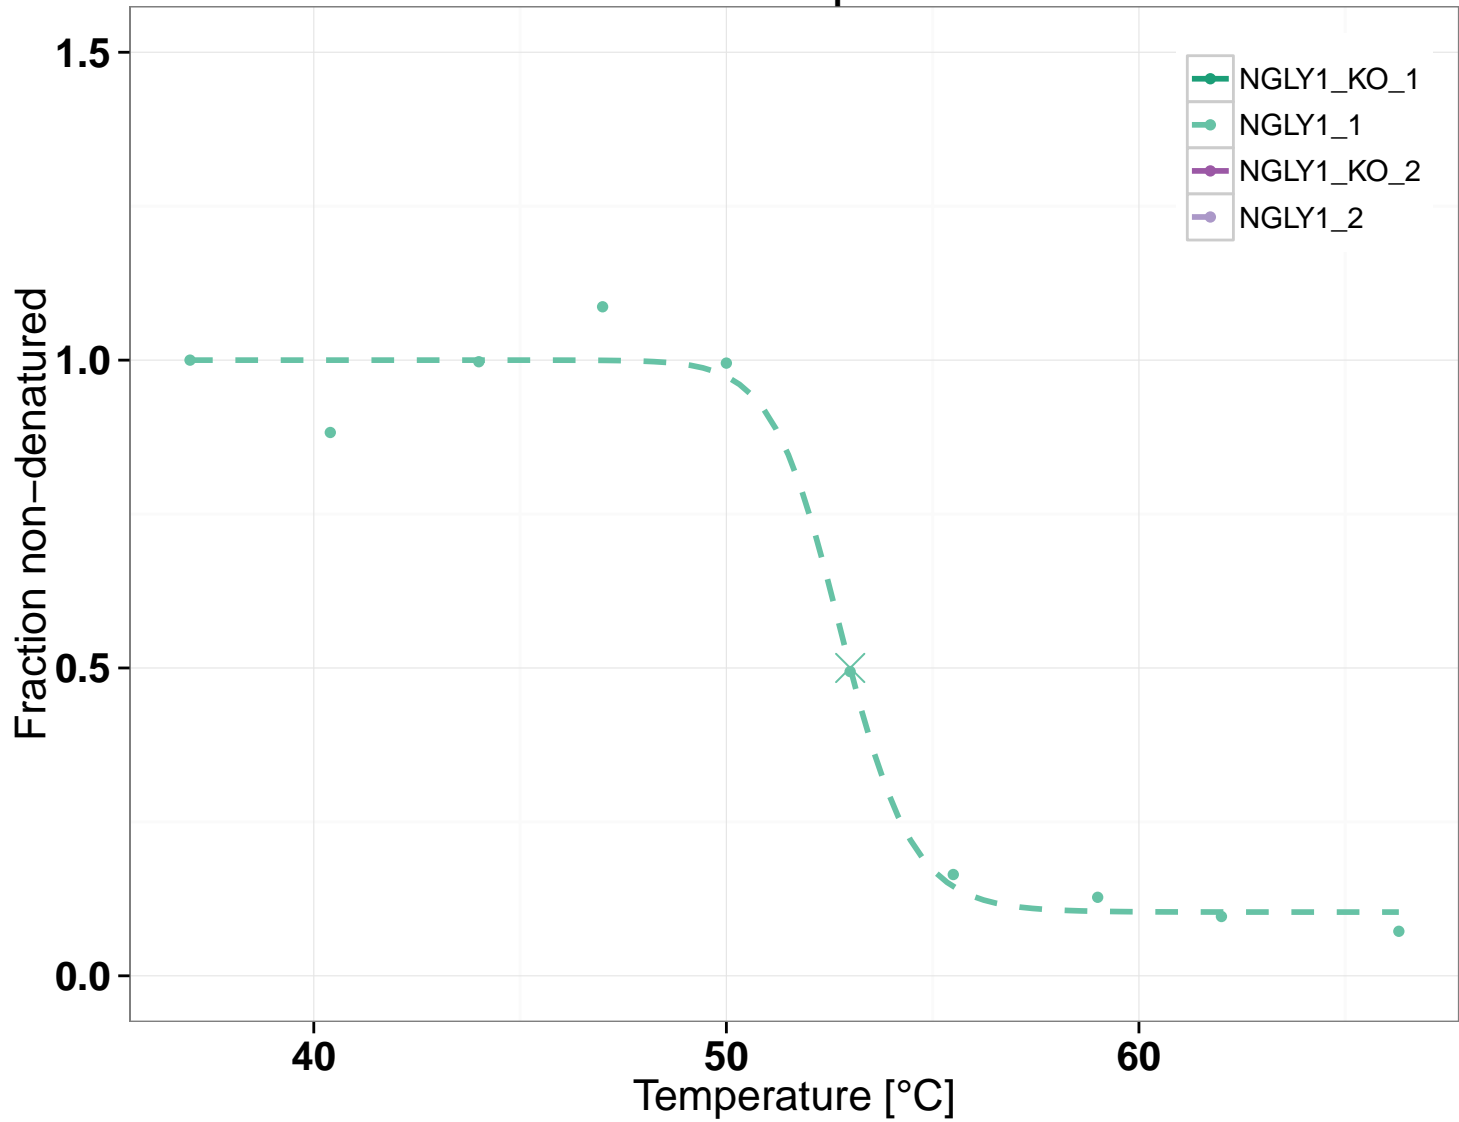

|            | meltPoint | slope | plateau | R2   |
|------------|-----------|-------|---------|------|
| NGLY1_KO_1 | -         | -     | -       | -    |
| NGLY1_1    | 53        | -0.26 | 0.1     | 0.99 |
| NGLY1_KO_2 | -         | -     | -       | -    |
| NGLY1_2    | -         | -     | -       | -    |

Supplement: Supplementary file 2483 [file 1]

# IPI00016443.1|C11ORF79

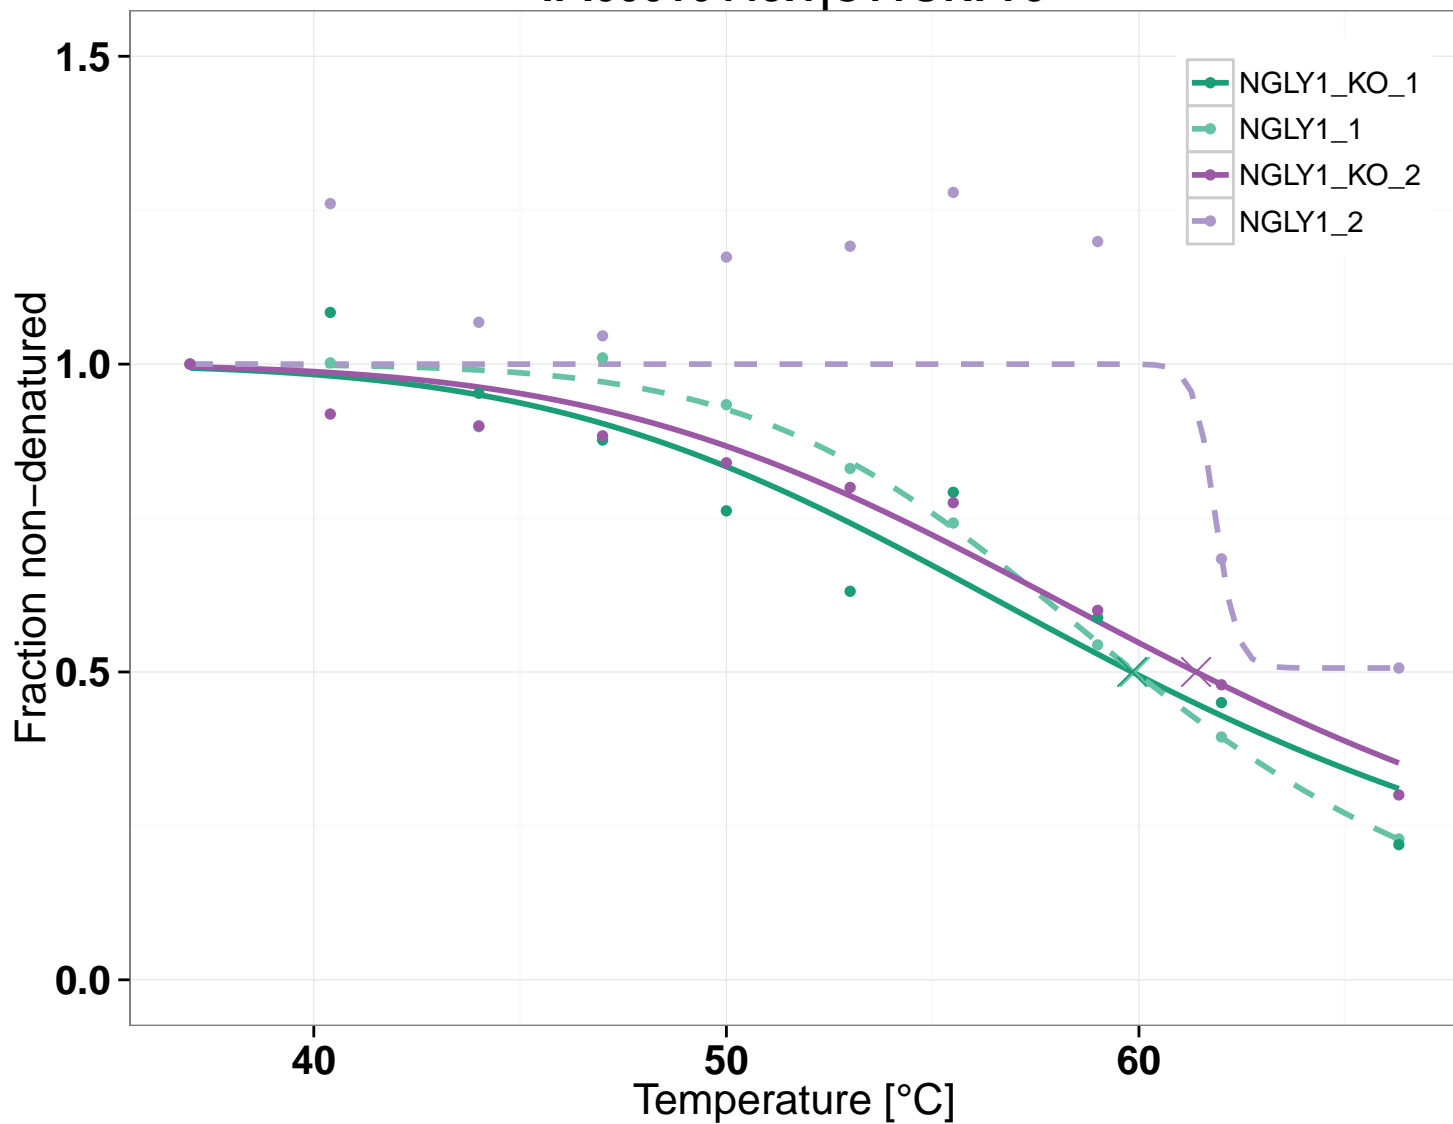

|            | meltPoint | slope  | plateau | R2   |
|------------|-----------|--------|---------|------|
| NGLY1_KO_1 | 59.84     | -0.036 | 0       | 0.91 |
| NGLY1_1    | 59.9      | -0.055 | 0.01    | 0.99 |
| NGLY1_KO_2 | 61.39     | -0.035 | 0       | 0.96 |
| NGLY1_2    | -         | -0.48  | 0.51    | 0.56 |

Supplement: Supplementary file 2484 [file 1]

IPI00337642.3|C9ORF91

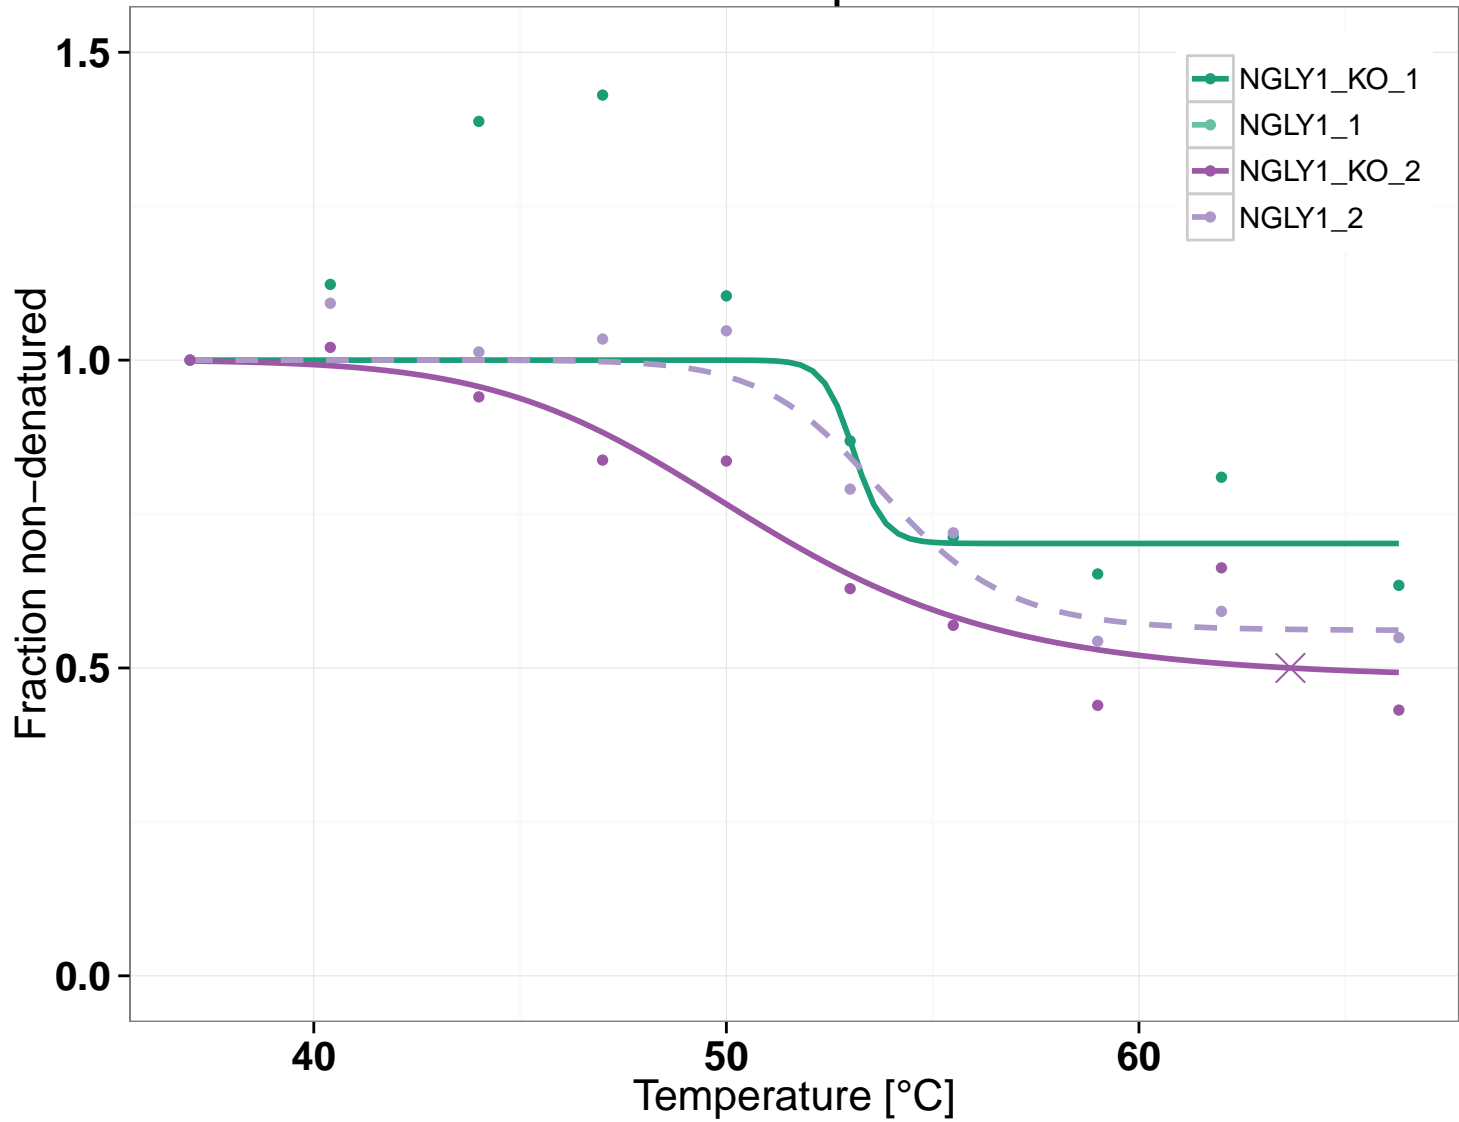

|            | meltPoint | slope  | plateau | R2   |
|------------|-----------|--------|---------|------|
| NGLY1_KO_1 | -         | -0.2   | 0.7     | 0.49 |
| NGLY1_1    | -         | -      | -       | -    |
| NGLY1_KO_2 | 63.67     | -0.042 | 0.48    | 0.9  |
| NGLY1_2    | -         | -0.073 | 0.56    | 0.95 |

Supplement: Supplementary file 2485 [file 1]

IPI00793199.1|ANXA4

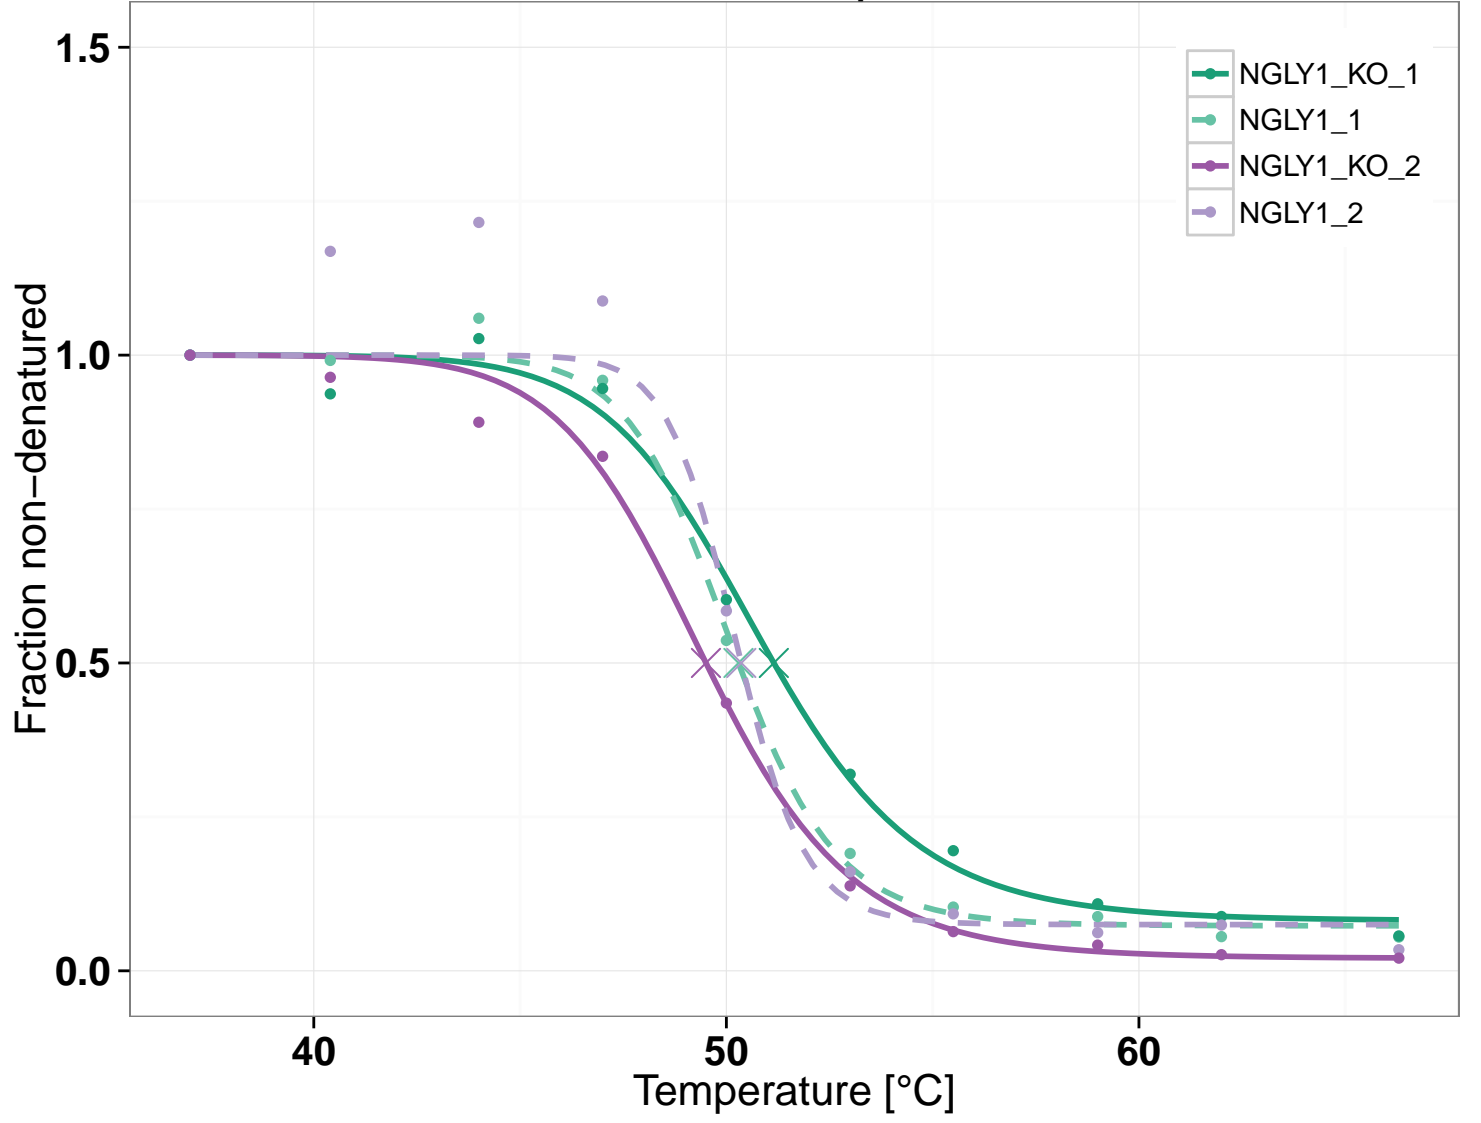

|            | meltPoint | slope | plateau | R2   |
|------------|-----------|-------|---------|------|
| NGLY1_KO_1 | 51.15     | -0.12 | 0.08    | 0.99 |
| NGLY1_1    | 50.29     | -0.18 | 0.07    | 1    |
| NGLY1_KO_2 | 49.51     | -0.14 | 0.02    | 1    |
| NGLY1_2    | 50.36     | -0.28 | 0.08    | 0.96 |

Supplement: Supplementary file 2486 [file 1]

# IPI00216053.1|MEF2D

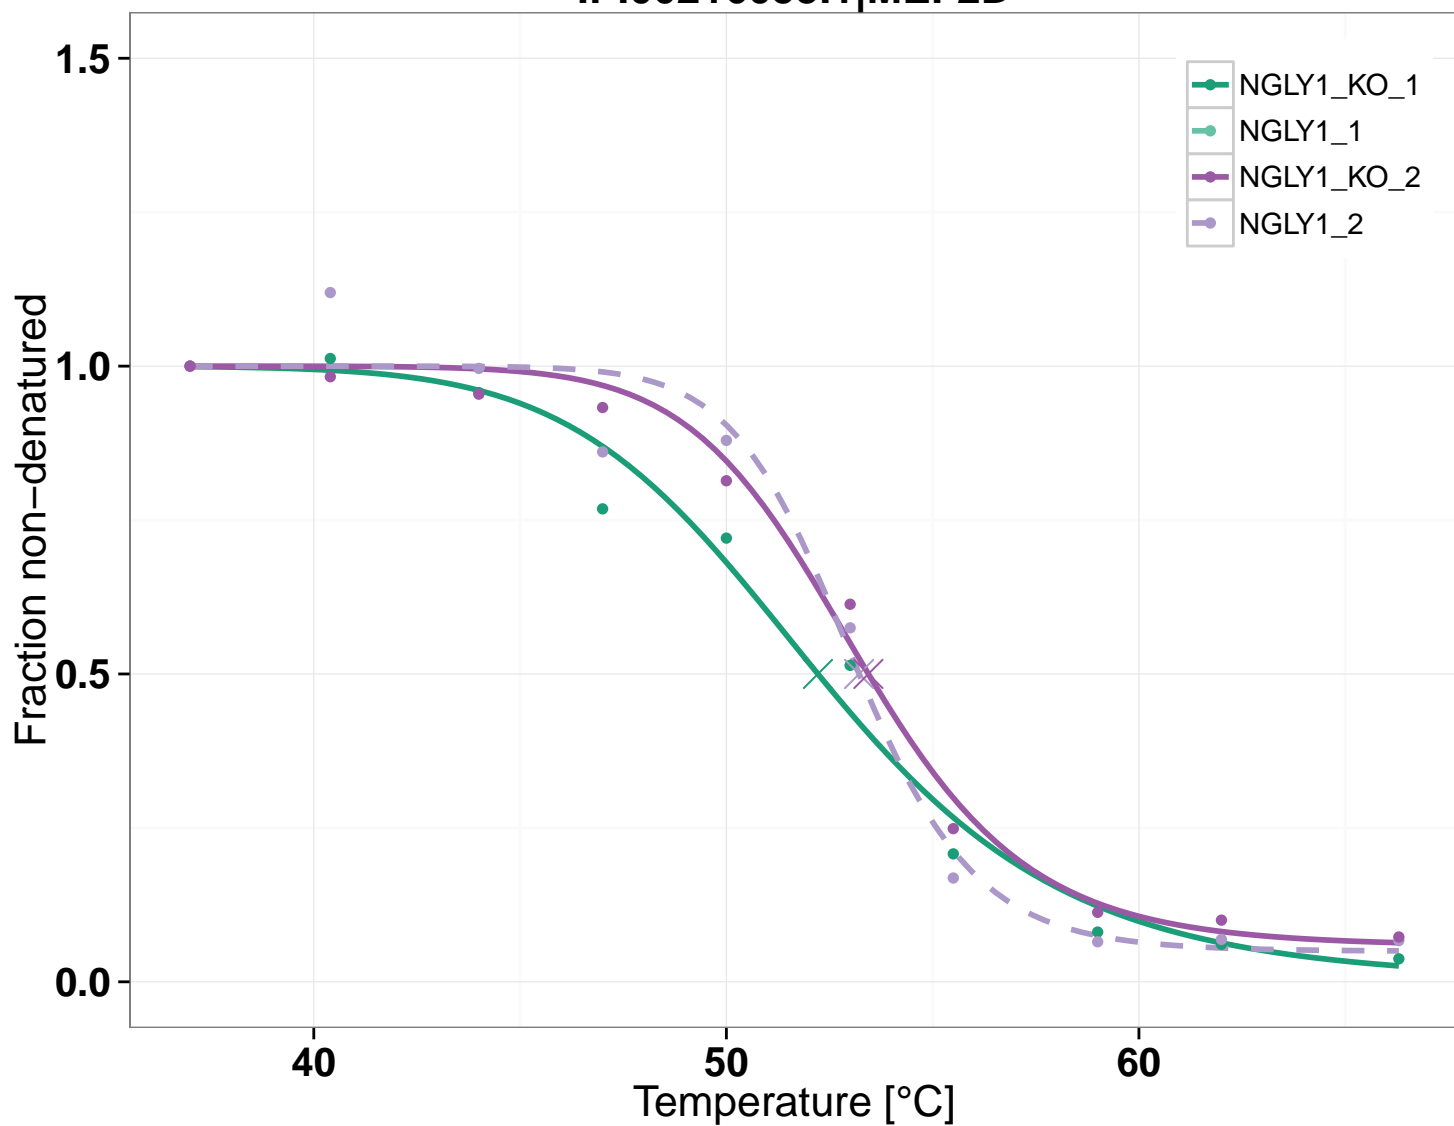

|            | meltPoint | slope  | plateau | R2   |
|------------|-----------|--------|---------|------|
| NGLY1_KO_1 | 52.22     | -0.083 | 0       | 0.98 |
| NGLY1_1    | -         | -      | -       | -    |
| NGLY1_KO_2 | 53.44     | -0.11  | 0.06    | 0.99 |
| NGLY1_2    | 53.22     | -0.16  | 0.05    | 0.98 |

Supplement: Supplementary file 2487 [file 1]

# IPI00216136.1|KHK

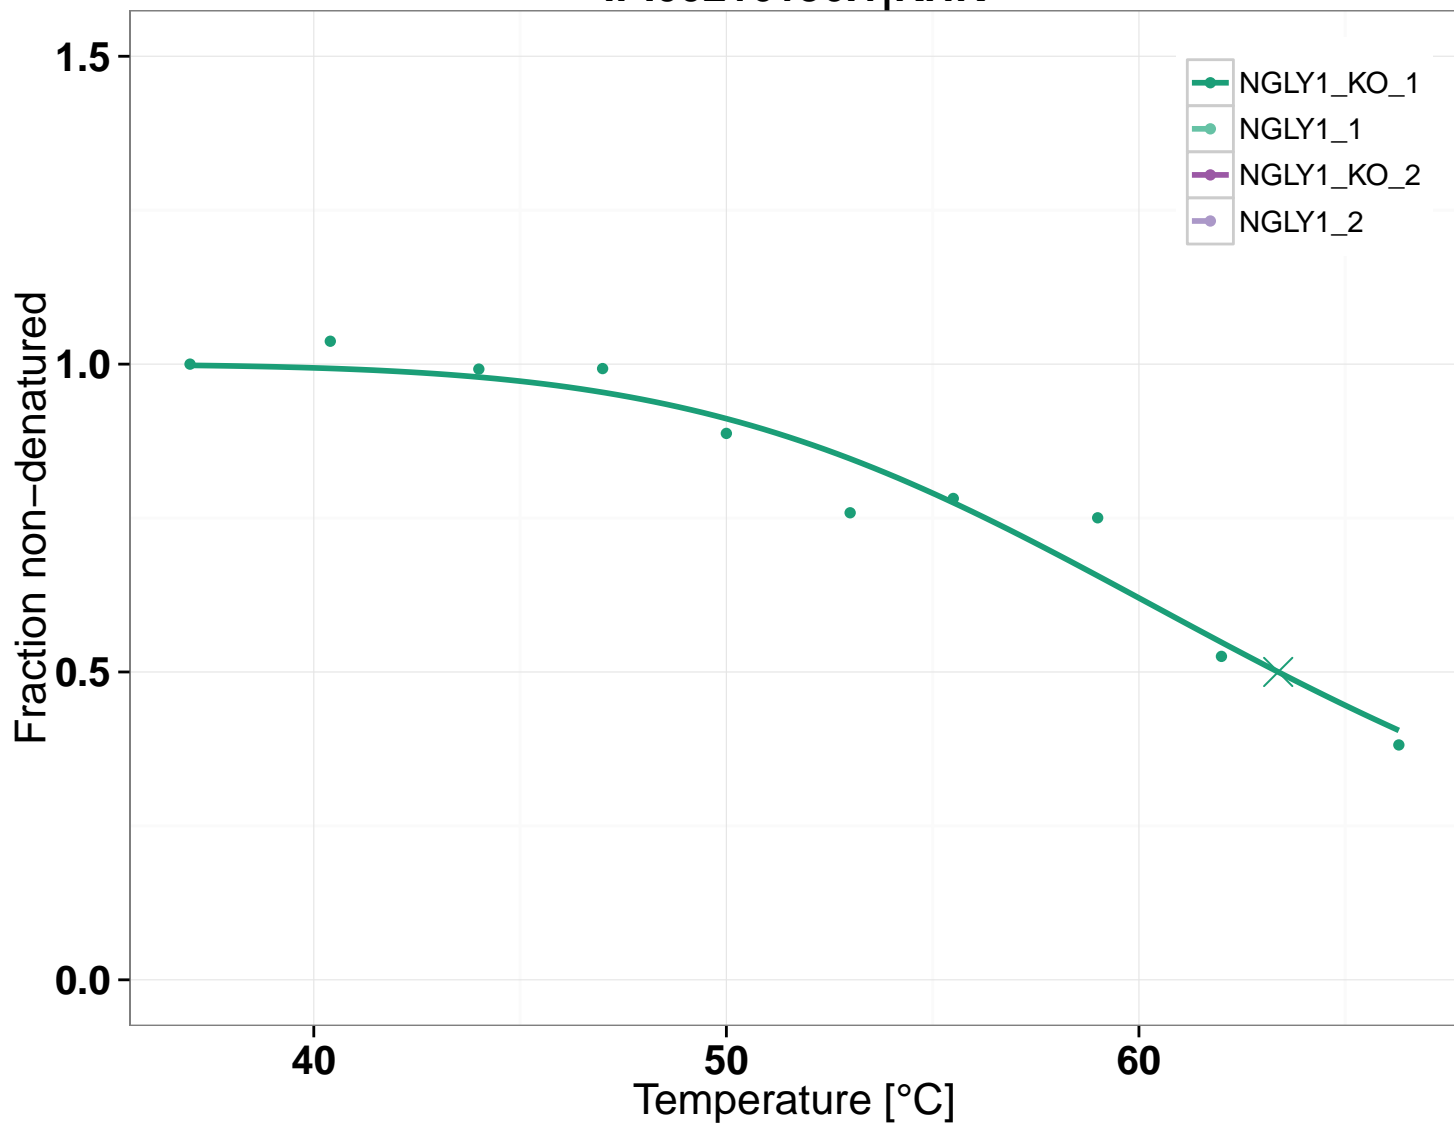

|            | meltPoint | slope  | plateau | R2   |
|------------|-----------|--------|---------|------|
| NGLY1_KO_1 | 63.38     | -0.036 | 0       | 0.95 |
| NGLY1_1    | -         | -      | -       | -    |
| NGLY1_KO_2 | -         | -      | -       | -    |
| NGLY1_2    | -         | -      | -       | -    |

Supplement: Supplementary file 2488 [file 1]

# IPI00022334.1|OAT

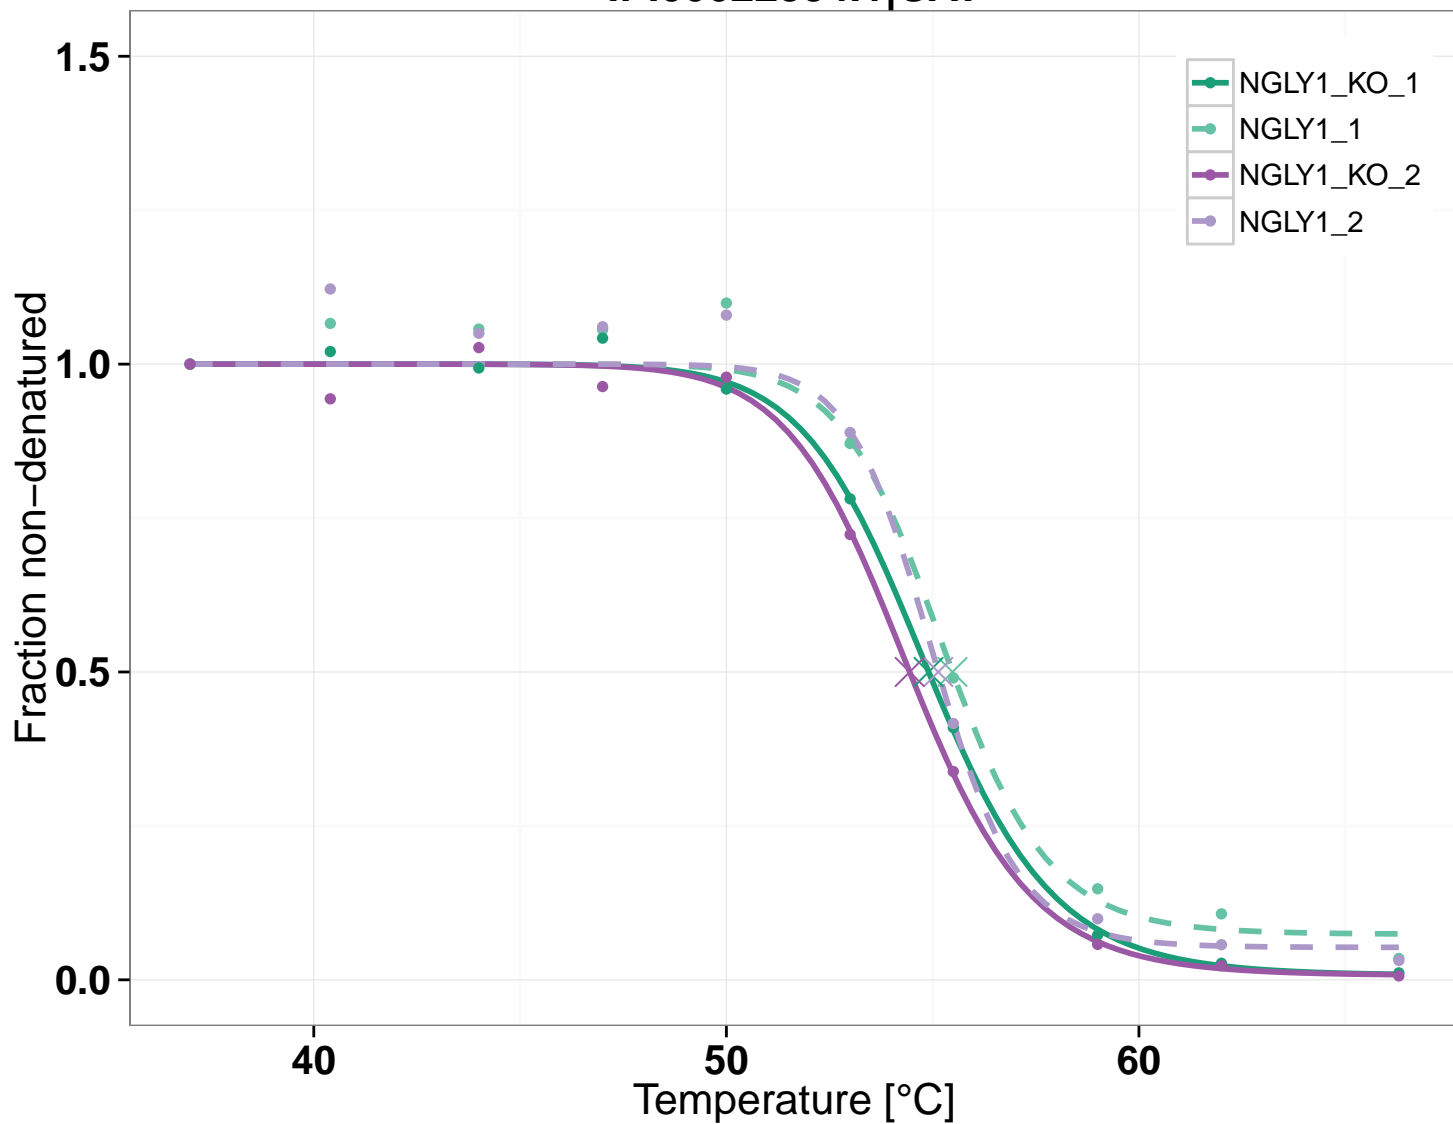

|            | meltPoint | slope | plateau | R2   |
|------------|-----------|-------|---------|------|
| NGLY1_KO_1 | 54.9      | -0.16 | 0.01    | 1    |
| NGLY1_1    | 55.48     | -0.18 | 0.07    | 0.99 |
| NGLY1_KO_2 | 54.44     | -0.17 | 0.01    | 1    |
| NGLY1_2    | 55.14     | -0.23 | 0.05    | 0.99 |

Supplement: Supplementary file 2489 [file 1]

IPI00479789.2|C1ORF103

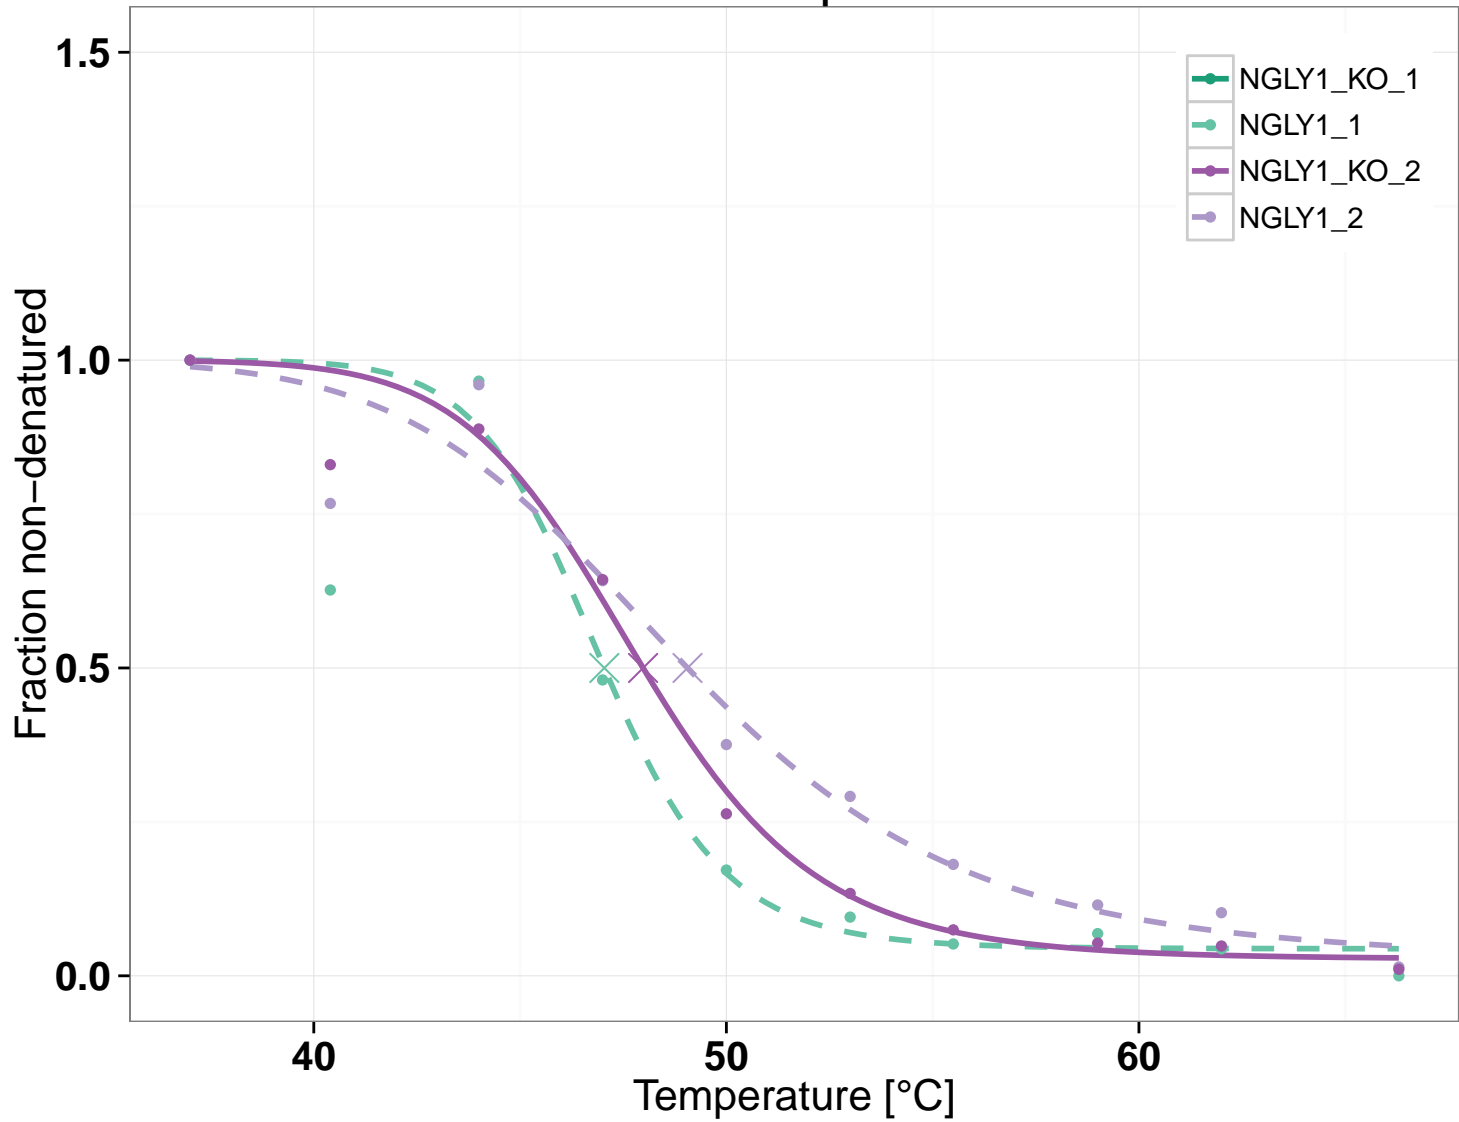

|            | meltPoint | slope  | plateau | R2   |
|------------|-----------|--------|---------|------|
| NGLY1_KO_1 | —         | —      | —       | —    |
| NGLY1_1    | 47.04     | -0.16  | 0.04    | 0.9  |
| NGLY1_KO_2 | 47.98     | -0.11  | 0.03    | 0.98 |
| NGLY1_2    | 49.06     | -0.071 | 0.02    | 0.95 |

Supplement: Supplementary file 2490 [file 1]

IPI00477611.1|COL5A1

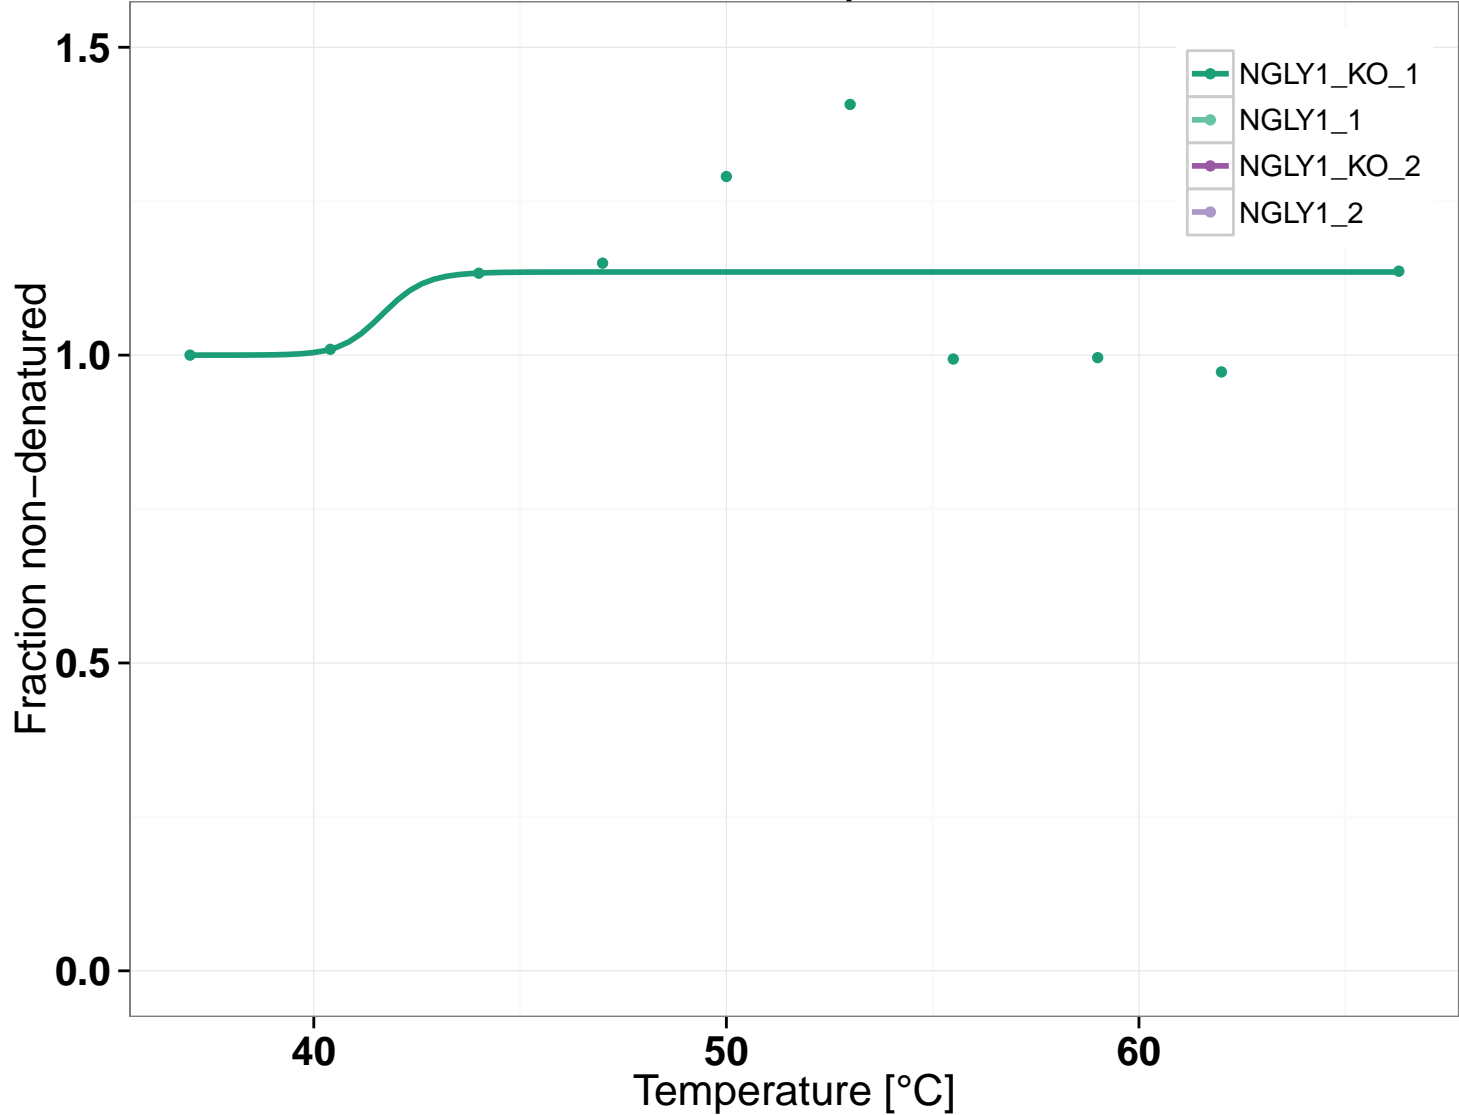

|            | meltPoint | slope | plateau | R2   |
|------------|-----------|-------|---------|------|
| NGLY1_KO_1 | —         | 0.066 | 1.13    | 0.14 |
| NGLY1_1    | —         | —     | —       | —    |
| NGLY1_KO_2 | —         | —     | —       | —    |
| NGLY1_2    | —         | —     | —       | —    |

Supplement: Supplementary file 2491 [file 1]

IPI00556144.3|C19ORF54

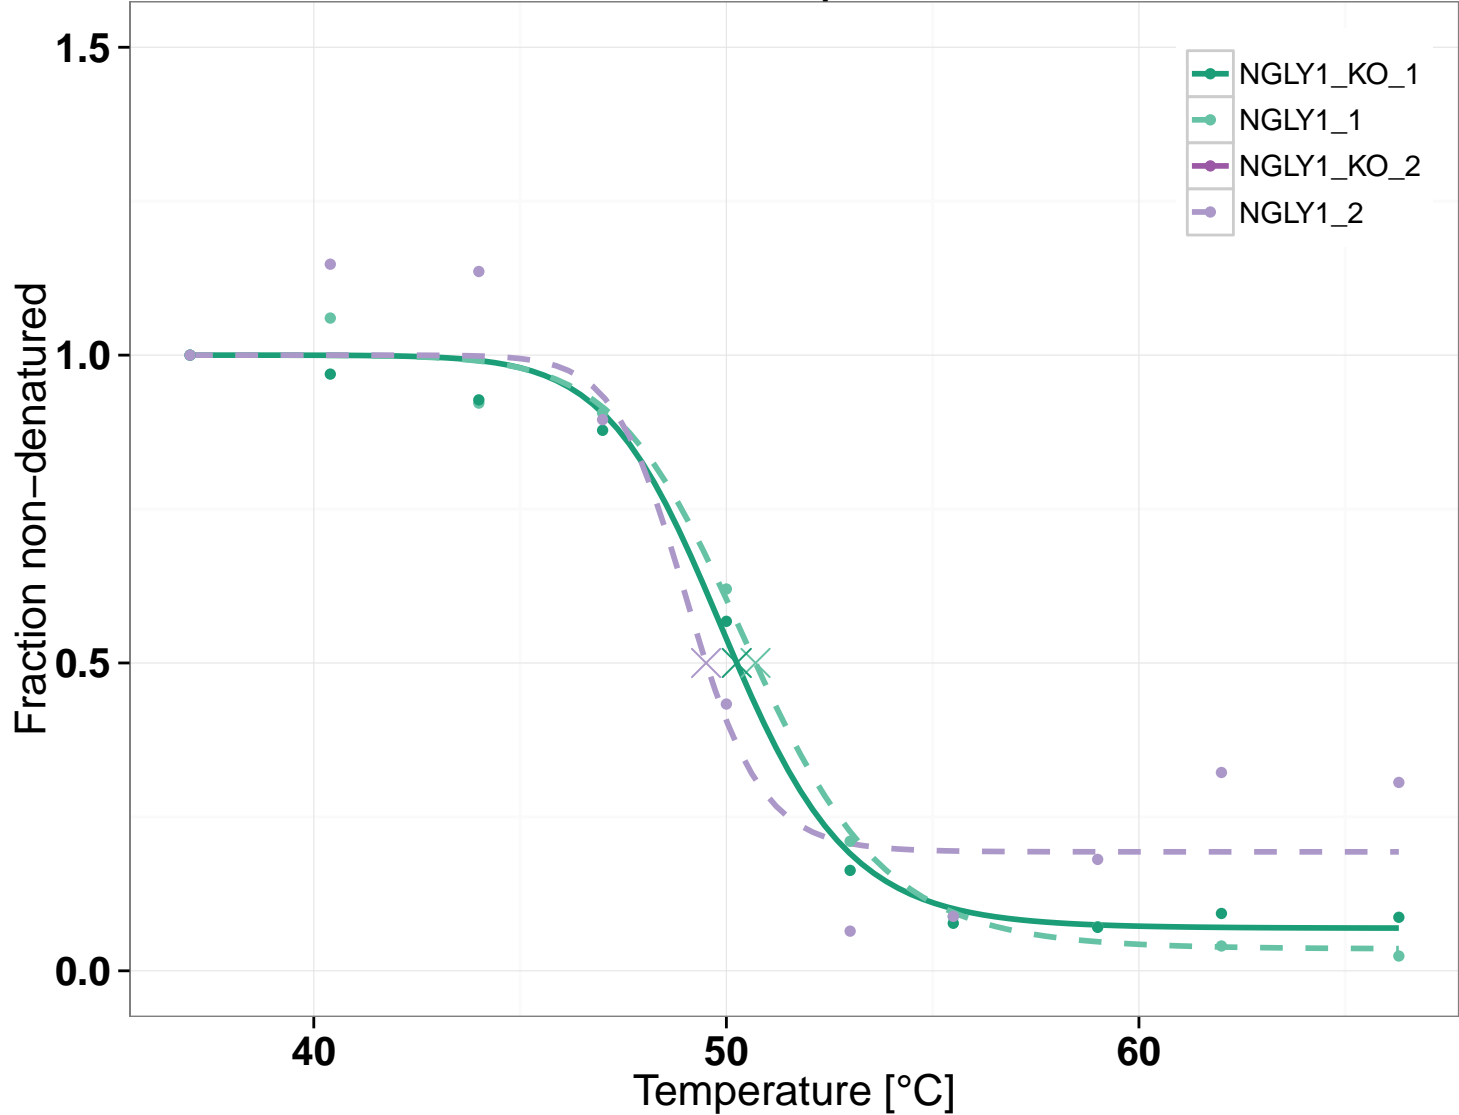

|            | meltPoint | slope | plateau | R2   |
|------------|-----------|-------|---------|------|
| NGLY1_KO_1 | 50.25     | -0.16 | 0.07    | 0.99 |
| NGLY1_1    | 50.71     | -0.15 | 0.04    | 0.99 |
| NGLY1_KO_2 | -         | -     | -       | -    |
| NGLY1_2    | 49.51     | -0.23 | 0.19    | 0.94 |

Supplement: Supplementary file 2492 [file 1]

IPI00296157.6|RETSAT

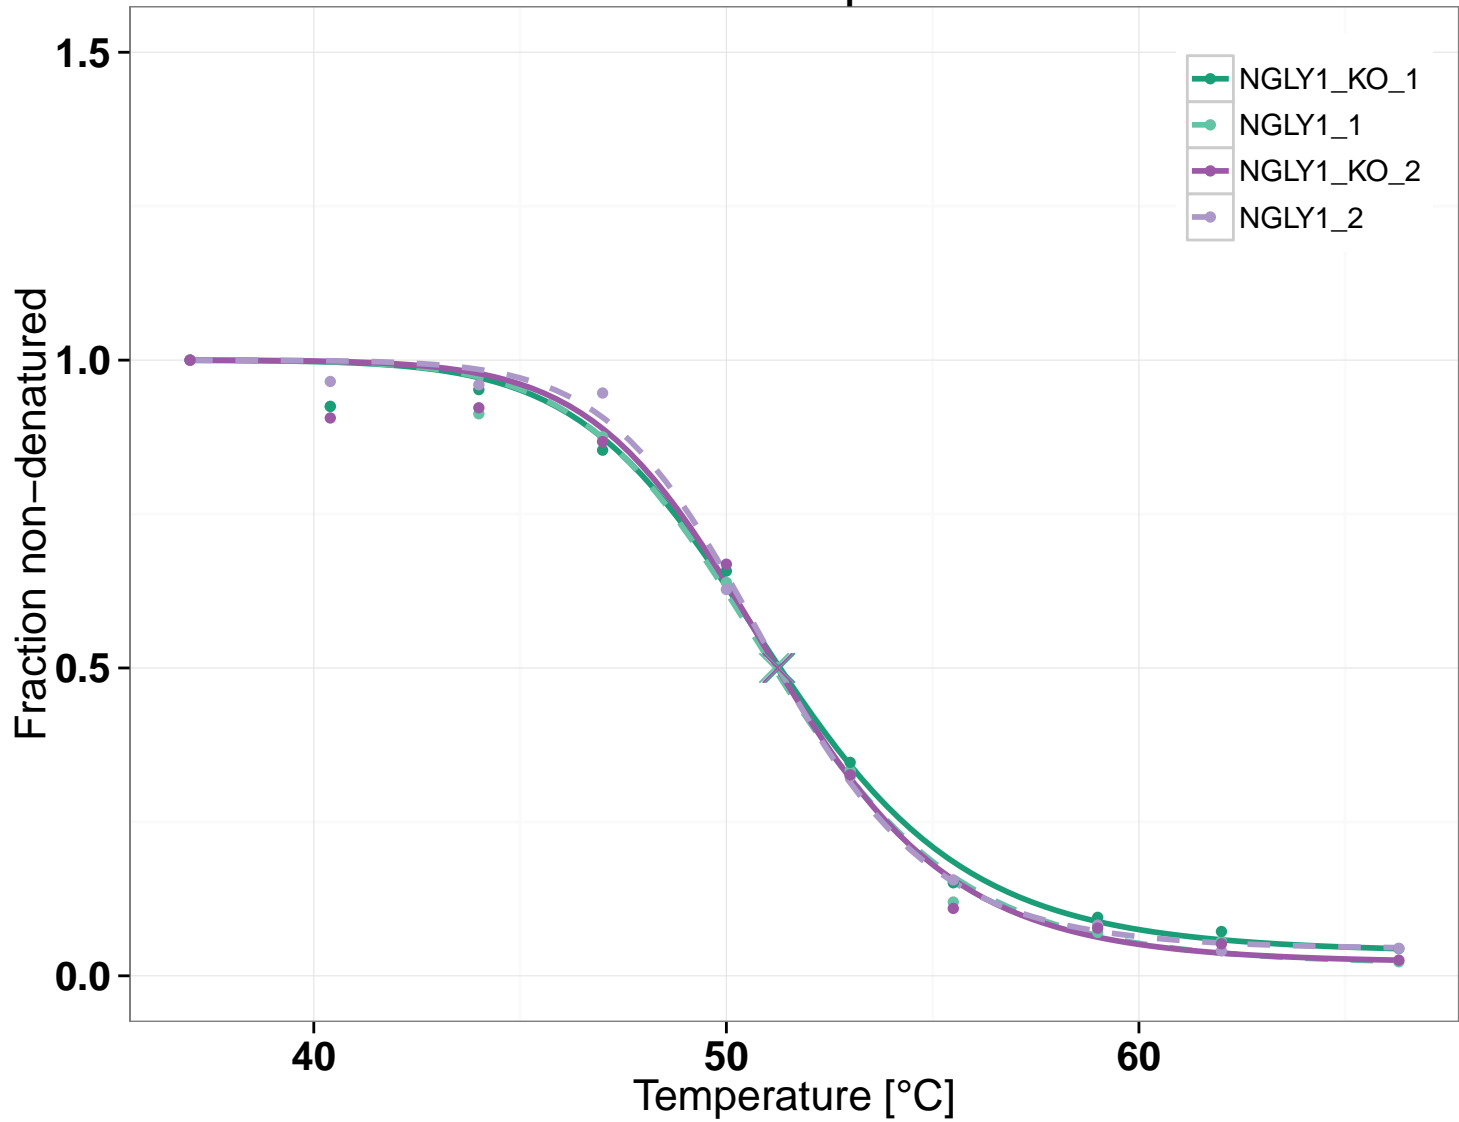

|            | meltPoint | slope | plateau | R2   |
|------------|-----------|-------|---------|------|
| NGLY1_KO_1 | 51.3      | -0.1  | 0.04    | 0.99 |
| NGLY1_1    | 51.16     | -0.11 | 0.02    | 0.99 |
| NGLY1_KO_2 | 51.24     | -0.11 | 0.02    | 0.99 |
| NGLY1_2    | 51.26     | -0.12 | 0.04    | 1    |

Supplement: Supplementary file 2493 [file 1]

IPI00215928.4|CETN2

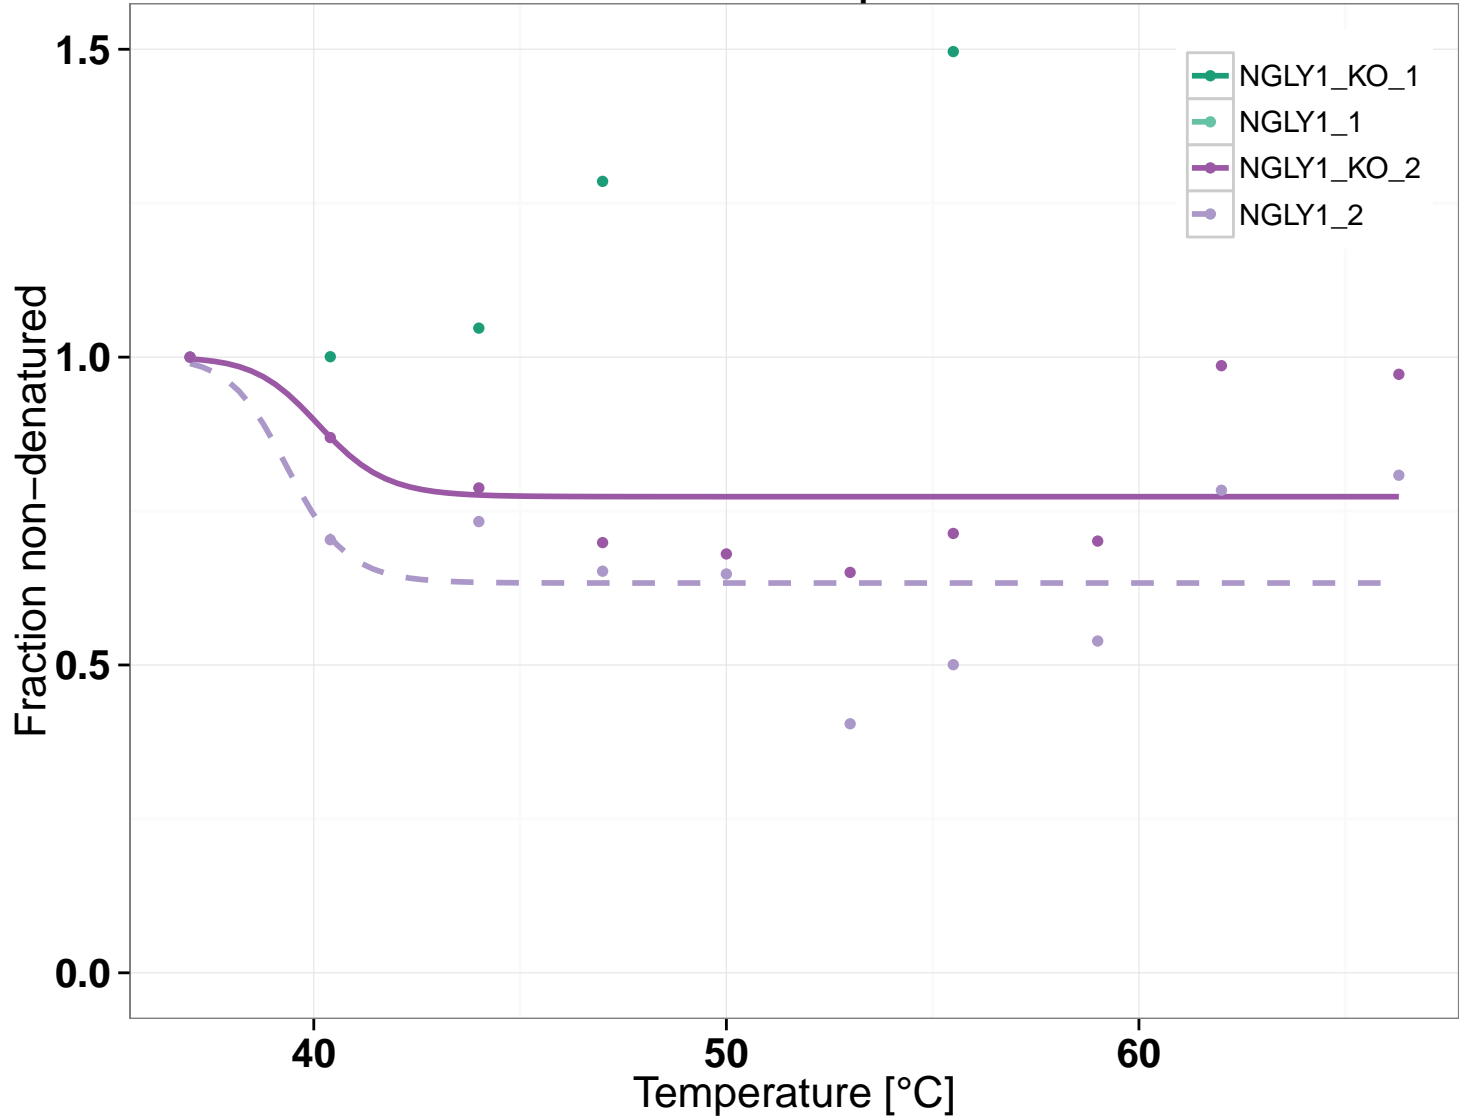

|            | meltPoint | slope  | plateau | R2   |
|------------|-----------|--------|---------|------|
| NGLY1_KO_1 | -         | -      | -       | -    |
| NGLY1_1    | -         | -      | -       | -    |
| NGLY1_KO_2 | -         | -0.072 | 0.77    | 0.29 |
| NGLY1_2    | -         | -0.13  | 0.63    | 0.46 |

Supplement: Supplementary file 2494 [file 1]

IPI00853278.1|SLAIN2

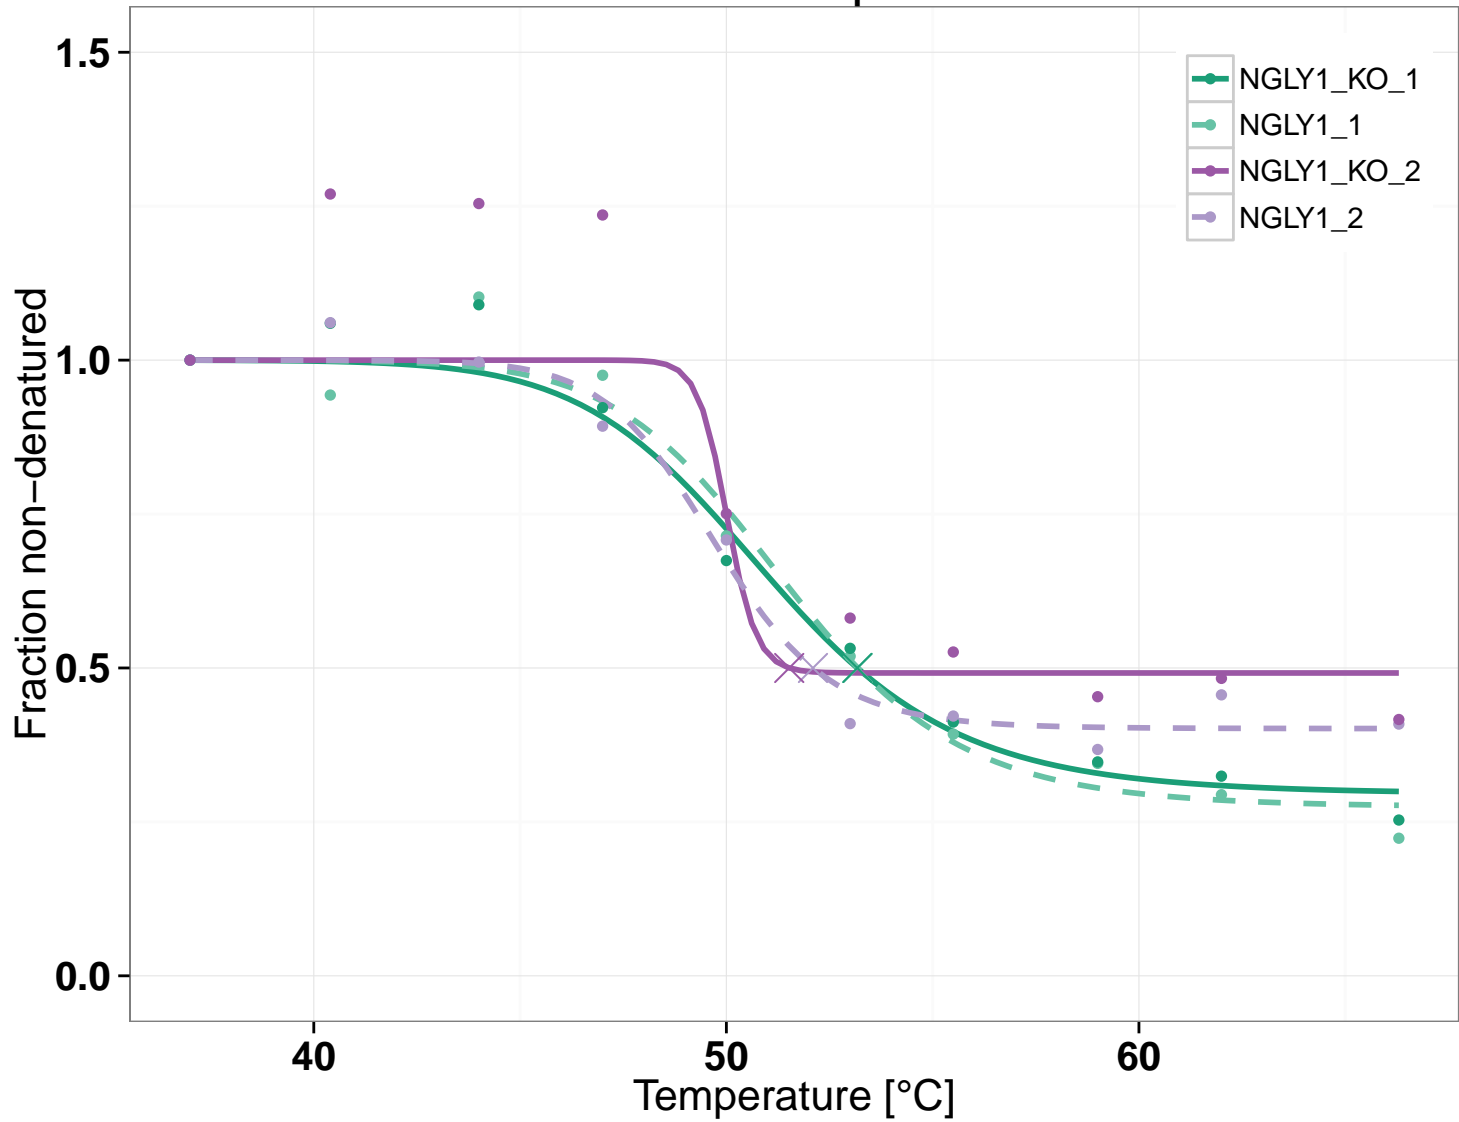

|            | meltPoint | slope  | plateau | R2   |
|------------|-----------|--------|---------|------|
| NGLY1_KO_1 | 53.17     | -0.077 | 0.3     | 0.98 |
| NGLY1_1    | 53.19     | -0.086 | 0.27    | 0.98 |
| NGLY1_KO_2 | 51.52     | -0.36  | 0.49    | 0.82 |
| NGLY1_2    | 52.1      | -0.11  | 0.4     | 0.98 |

Supplement: Supplementary file 2495 [file 1]

IPI00293074.5|SLC44A2

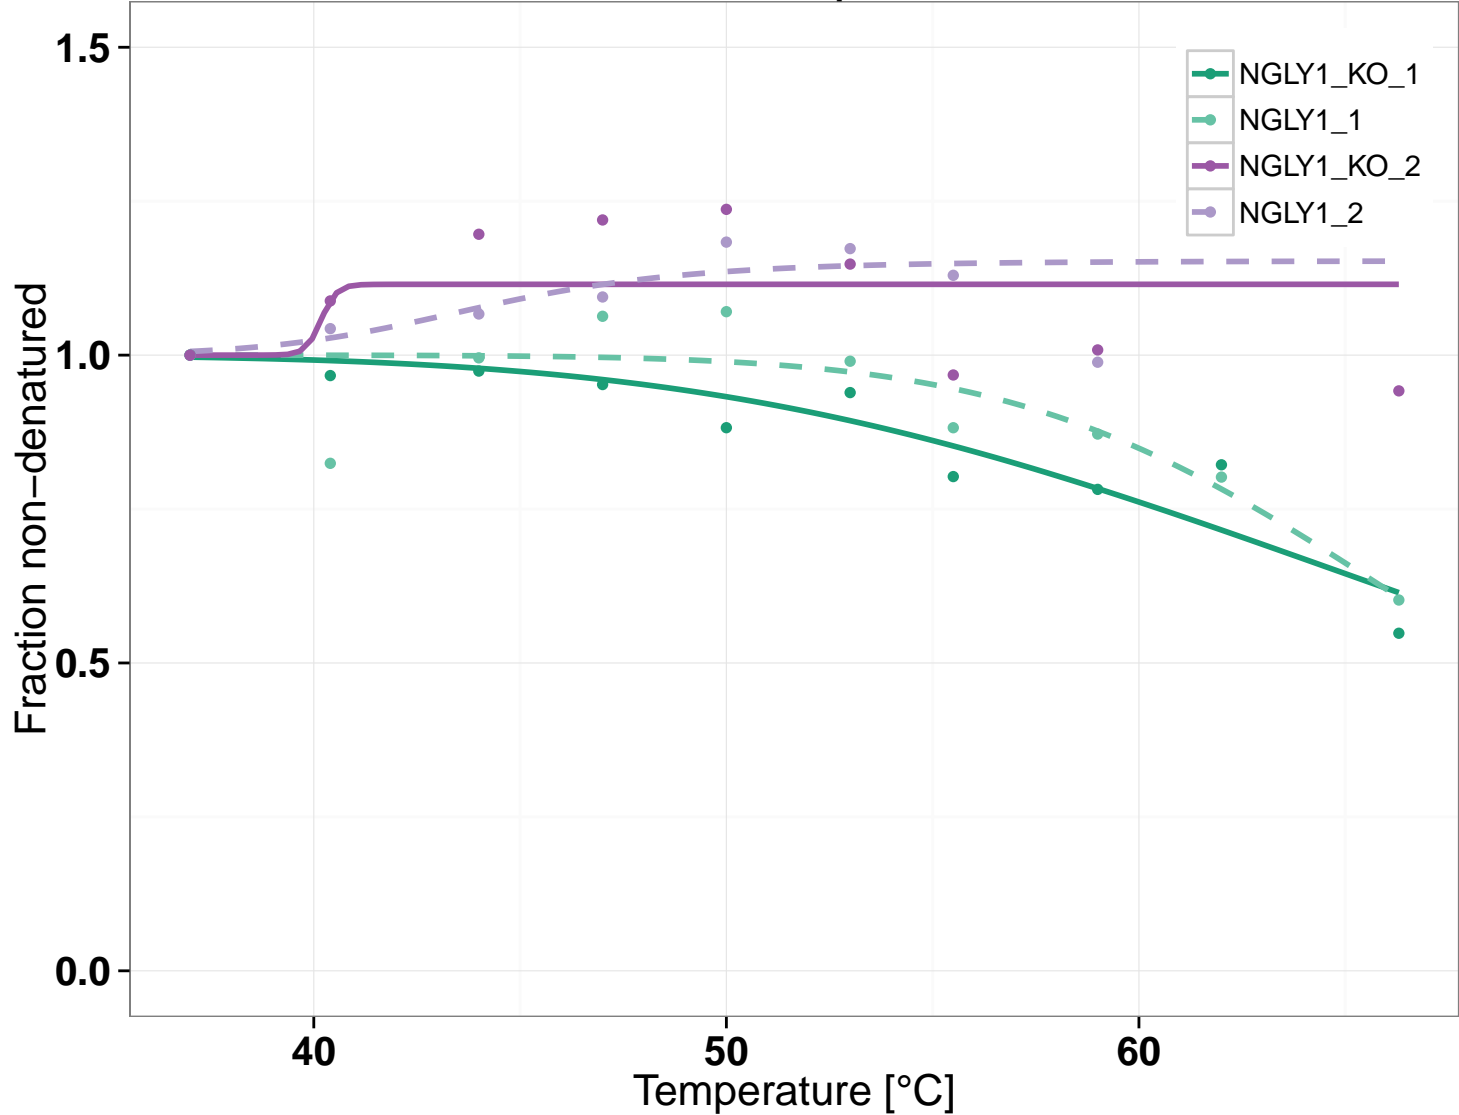

|            | meltPoint | slope  | plateau | R2   |
|------------|-----------|--------|---------|------|
| NGLY1_KO_1 | -         | -0.024 | 0       | 0.86 |
| NGLY1_1    | -         | -0.043 | 0.09    | 0.75 |
| NGLY1_KO_2 | -         | 0.16   | 1.11    | 0.1  |
| NGLY1_2    | -         | 0.015  | 1.15    | 0.4  |

Supplement: Supplementary file 2496 [file 1]

# IPI00911050.1|FDXR

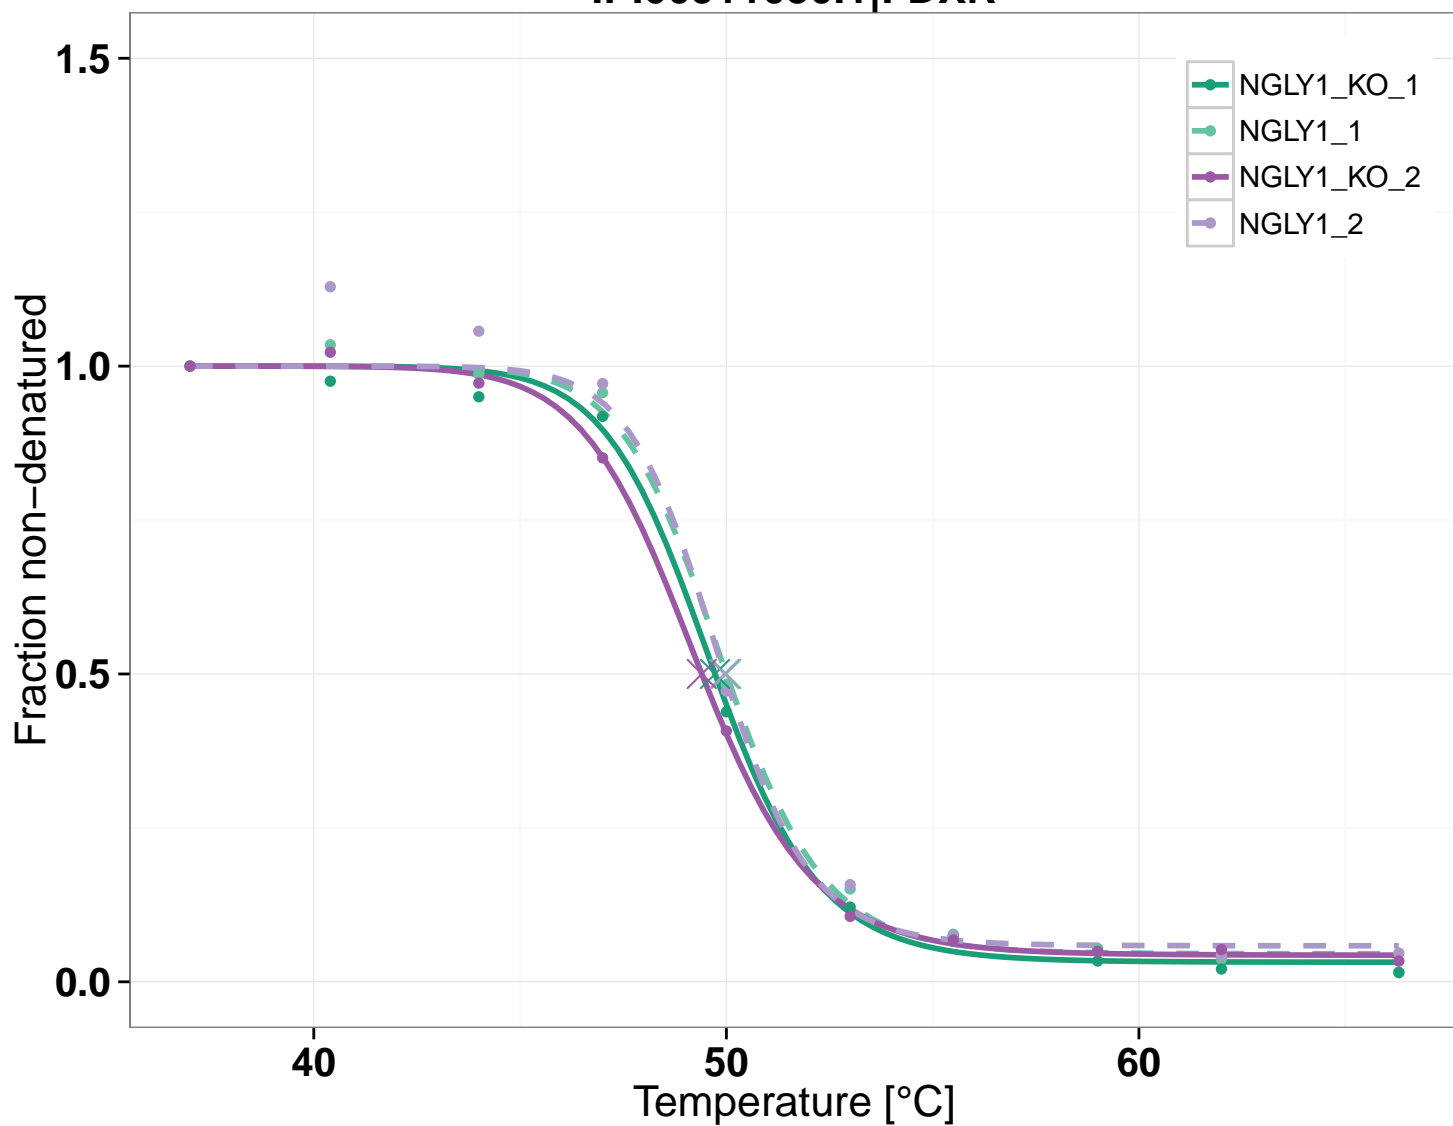

|            | meltPoint | slope | plateau | R2   |
|------------|-----------|-------|---------|------|
| NGLY1_KO_1 | 49.73     | -0.19 | 0.03    | 1    |
| NGLY1_1    | 50        | -0.19 | 0.05    | 1    |
| NGLY1_KO_2 | 49.4      | -0.17 | 0.04    | 1    |
| NGLY1_2    | 49.95     | -0.21 | 0.06    | 0.99 |

Supplement: Supplementary file 2497 [file 1]

IPI00101532.5|CEP55

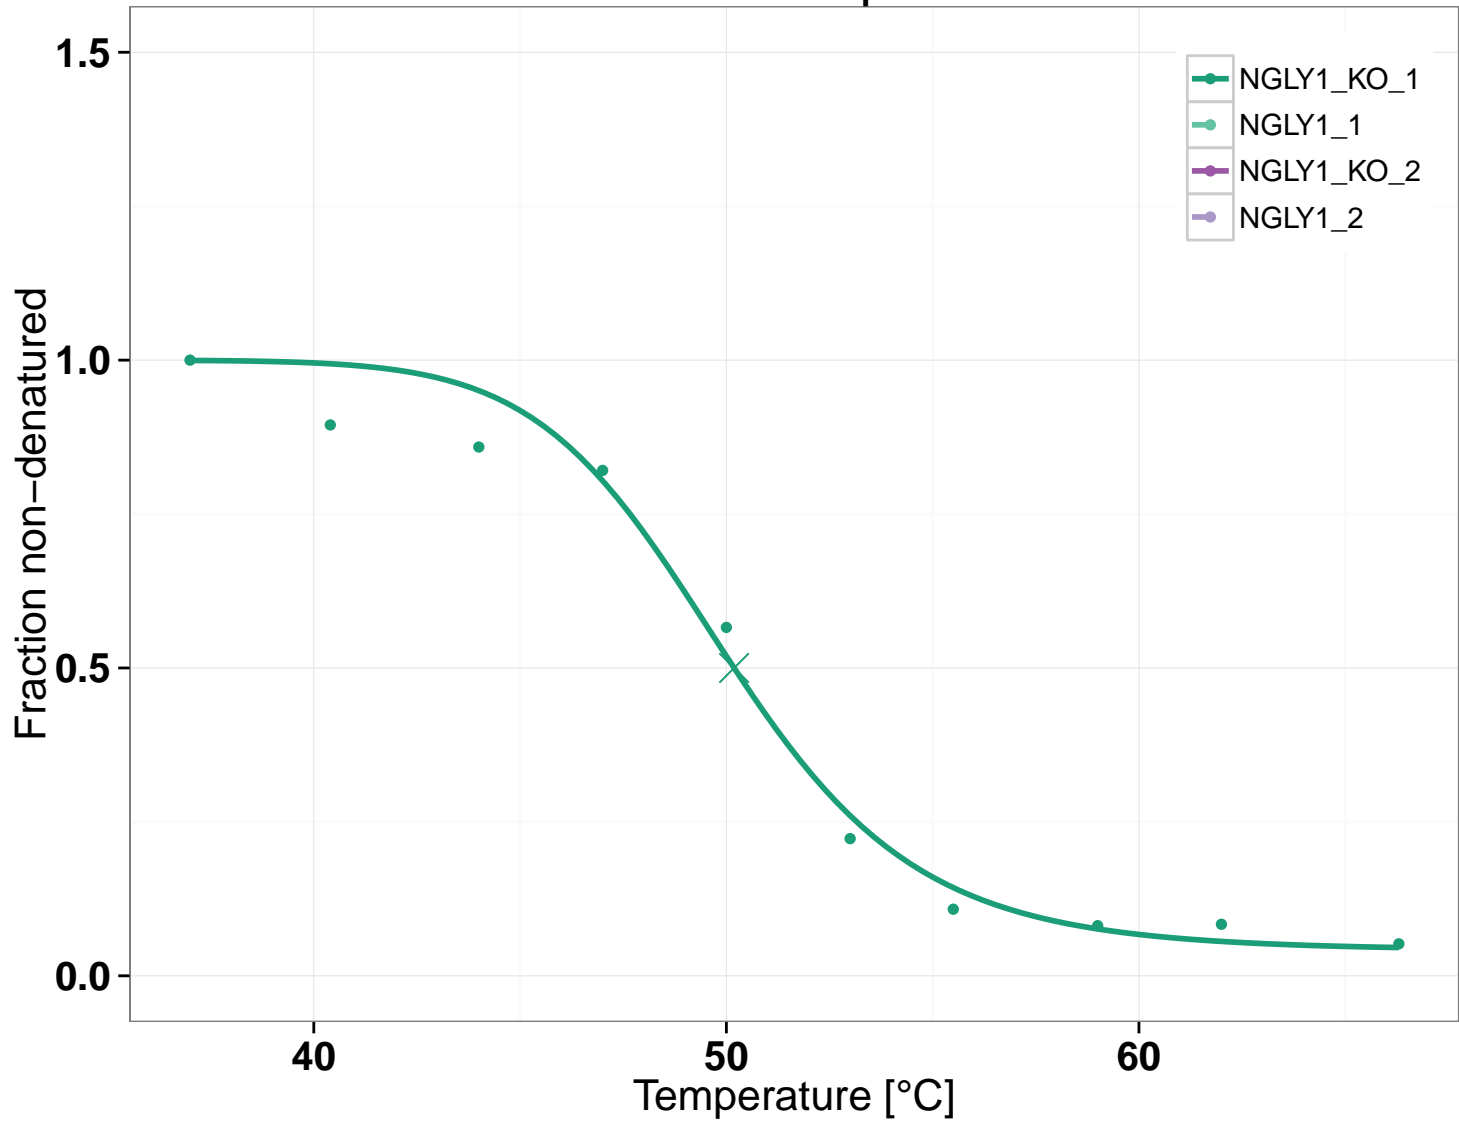

|            | meltPoint | slope | plateau | R2   |
|------------|-----------|-------|---------|------|
| NGLY1_KO_1 | 50.19     | -0.1  | 0.04    | 0.98 |
| NGLY1_1    | -         | -     | -       | -    |
| NGLY1_KO_2 | -         | -     | -       | -    |
| NGLY1_2    | -         | -     | -       | -    |

Supplement: Supplementary file 2498 [file 1]

IPI00300744.3|TMEM14B

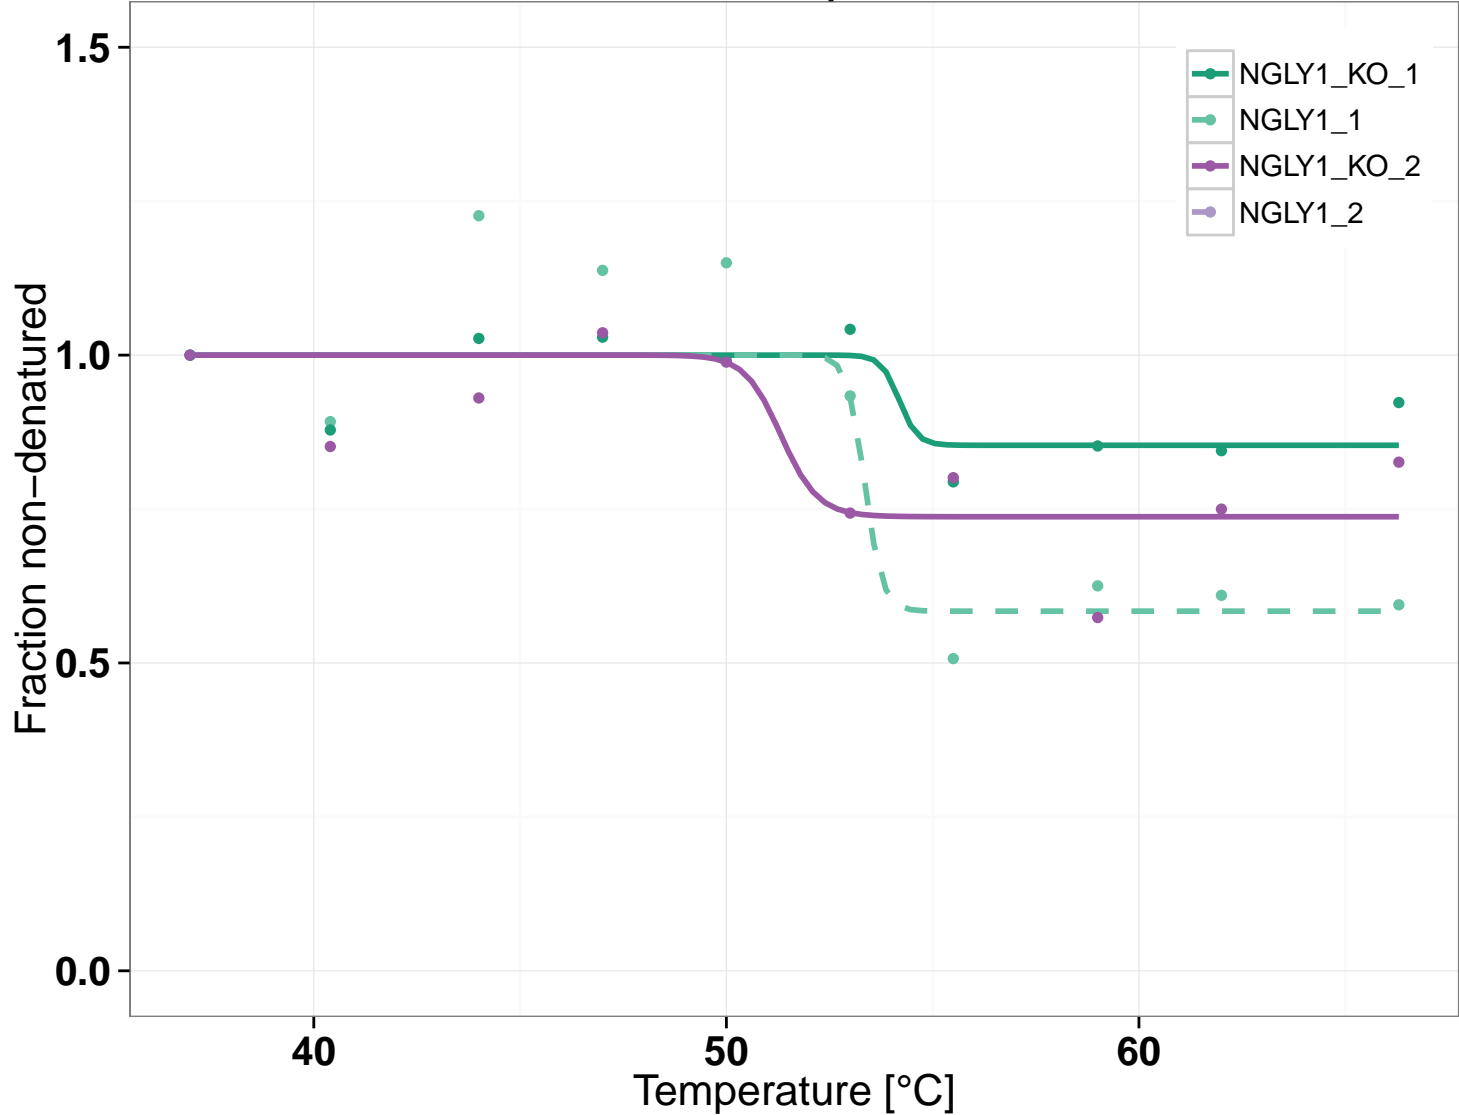

|            | meltPoint | slope | plateau | R2   |
|------------|-----------|-------|---------|------|
| NGLY1_KO_1 | —         | −0.17 | 0.85    | 0.64 |
| NGLY1_1    | —         | −0.49 | 0.58    | 0.82 |
| NGLY1_KO_2 | —         | −0.15 | 0.74    | 0.63 |
| NGLY1_2    | —         | —     | —       | —    |

Supplement: Supplementary file 2499 [file 1]

IPI00018288.1|POLR2C

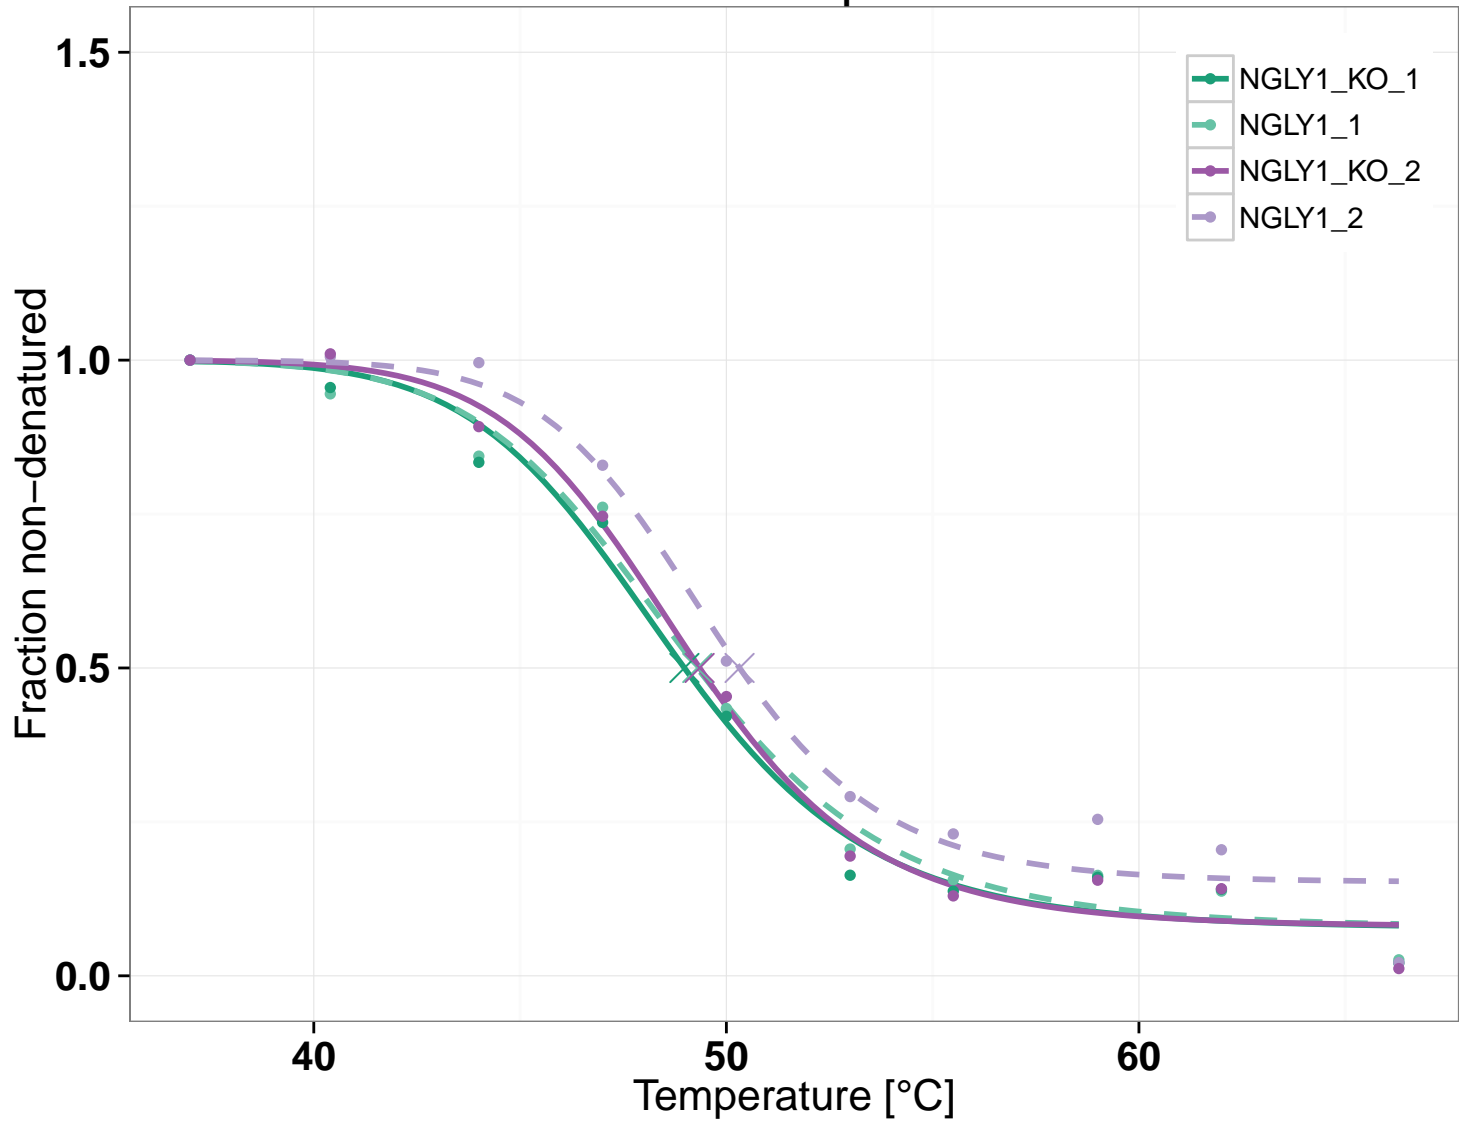

|            | meltPoint | slope  | plateau | R2   |
|------------|-----------|--------|---------|------|
| NGLY1_KO_1 | 48.98     | -0.095 | 0.08    | 0.98 |
| NGLY1_1    | 49.3      | -0.091 | 0.08    | 0.99 |
| NGLY1_KO_2 | 49.35     | -0.1   | 0.08    | 0.99 |
| NGLY1_2    | 50.32     | -0.1   | 0.15    | 0.98 |

Supplement: Supplementary file 2500 [file 1]

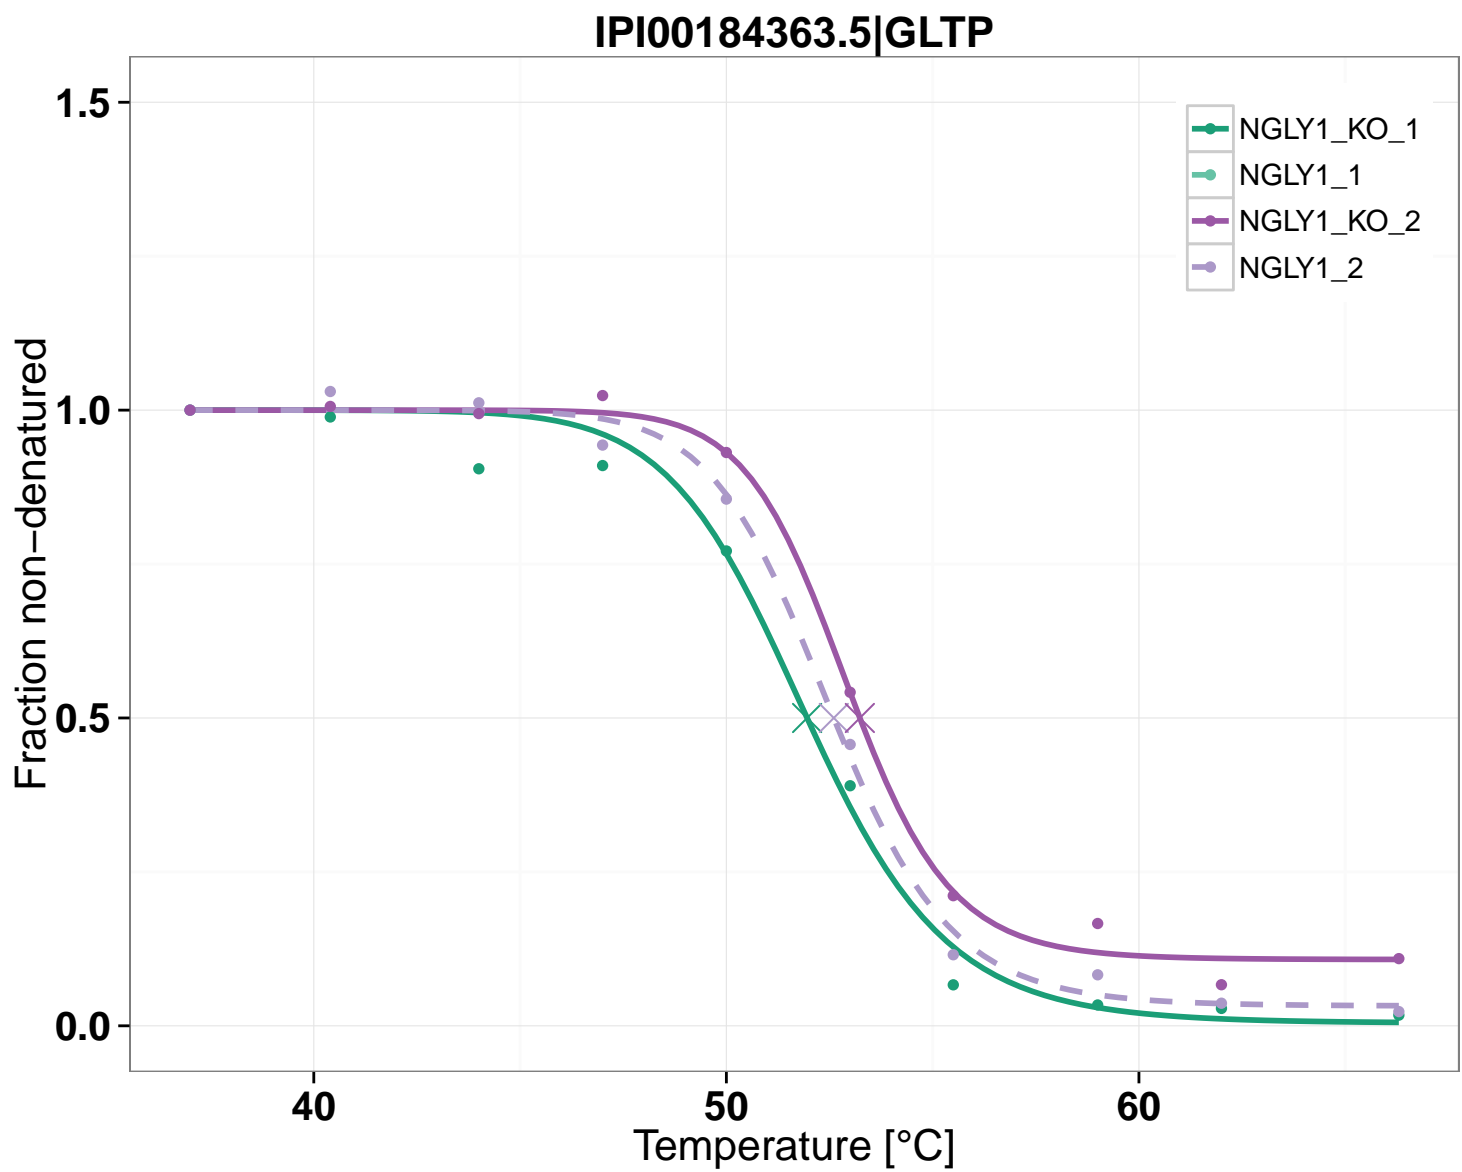

|            | meltPoint | slope | plateau | R2   |
|------------|-----------|-------|---------|------|
| NGLY1_KO_1 | 51.96     | -0.15 | 0       | 0.99 |
| NGLY1_1    | –         | –     | –       | –    |
| NGLY1_KO_2 | 53.24     | -0.18 | 0.11    | 1    |
| NGLY1_2    | 52.6      | -0.17 | 0.03    | 1    |

Supplement: Supplementary file 2501 [file 1]

IPI00020030.3|SLC39A9

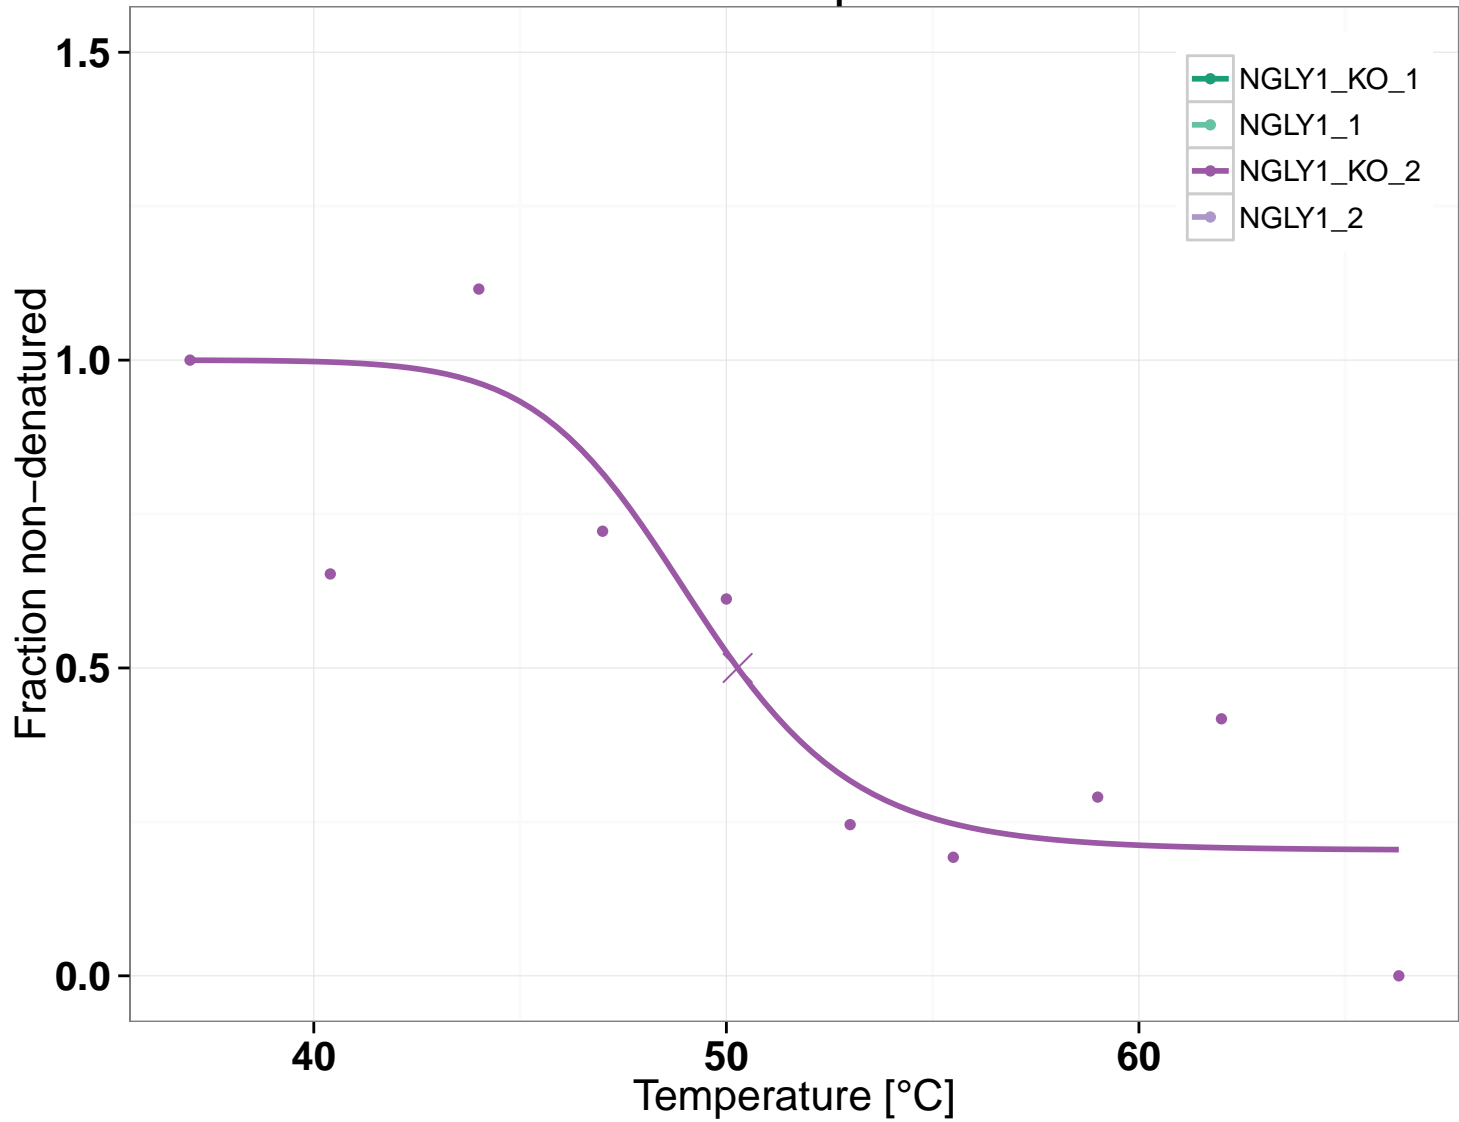

|            | meltPoint | slope | plateau | R2   |
|------------|-----------|-------|---------|------|
| NGLY1_KO_1 | —         | —     | —       | —    |
| NGLY1_1    | —         | —     | —       | —    |
| NGLY1_KO_2 | 50.27     | -0.1  | 0.2     | 0.78 |
| NGLY1_2    | —         | —     | —       | —    |

Supplement: Supplementary file 2502 [file 1]

# IPI00396630.3|PRKACA

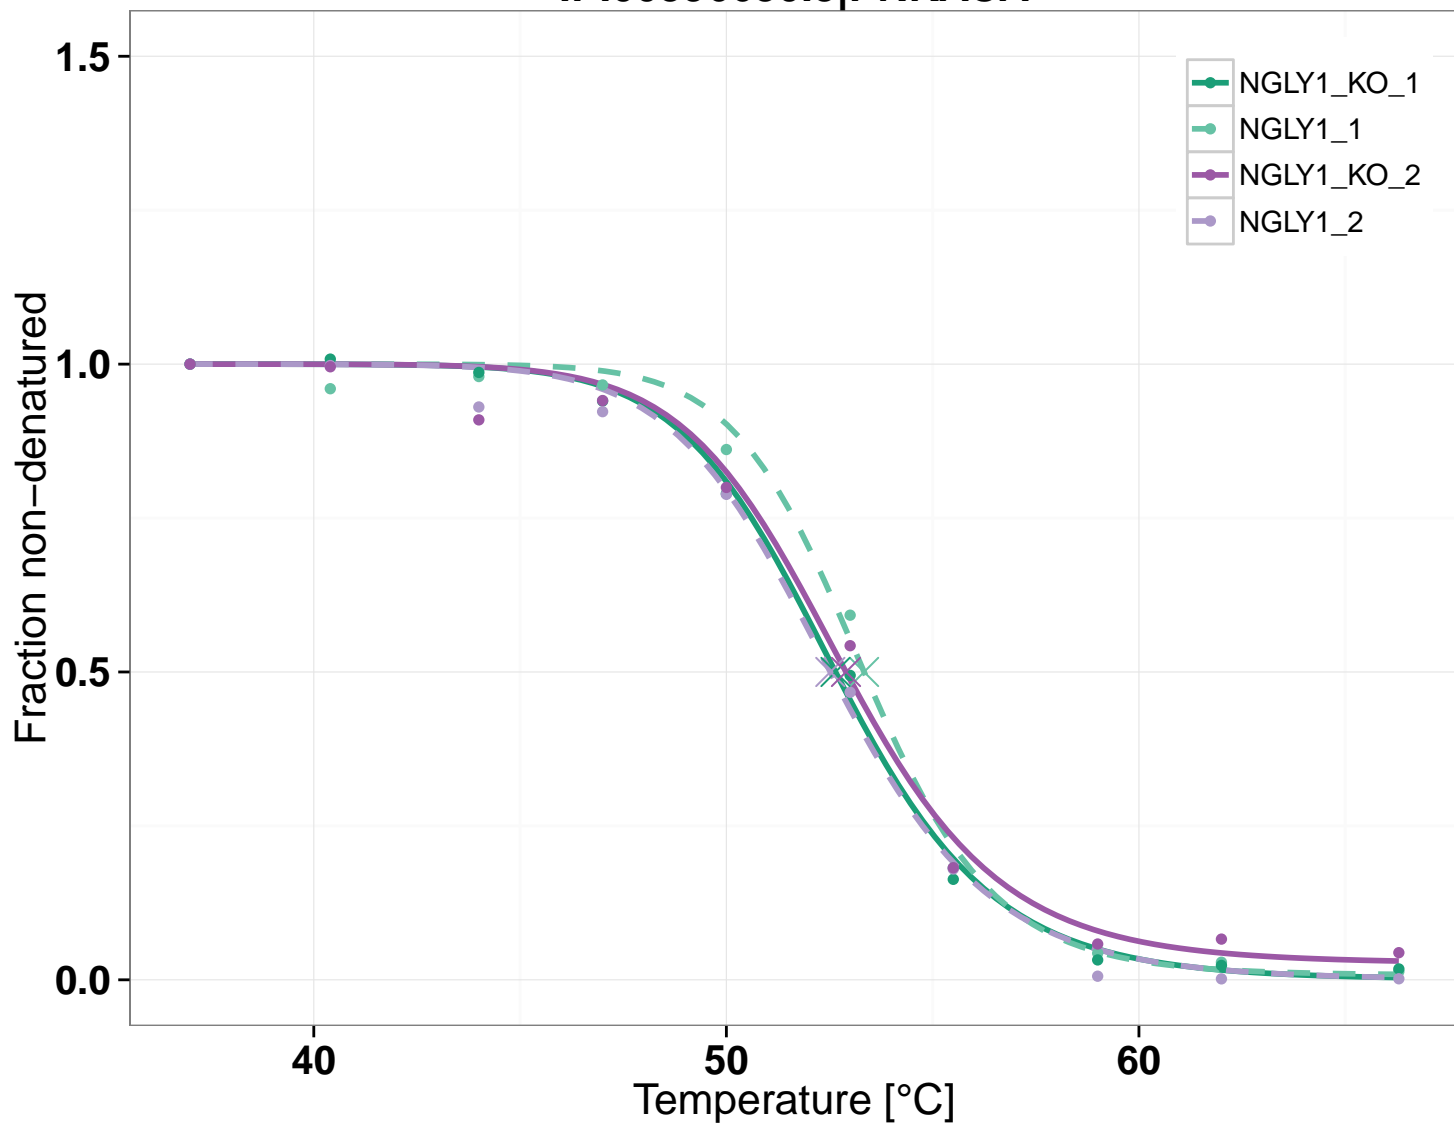

|            | meltPoint | slope | plateau | R2   |
|------------|-----------|-------|---------|------|
| NGLY1_KO_1 | 52.65     | -0.13 | 0       | 1    |
| NGLY1_1    | 53.34     | -0.16 | 0.01    | 1    |
| NGLY1_KO_2 | 52.9      | -0.13 | 0.03    | 0.99 |
| NGLY1_2    | 52.52     | -0.13 | 0       | 1    |

Supplement: Supplementary file 2503 [file 1]

# IPI00013452.9|EPRS

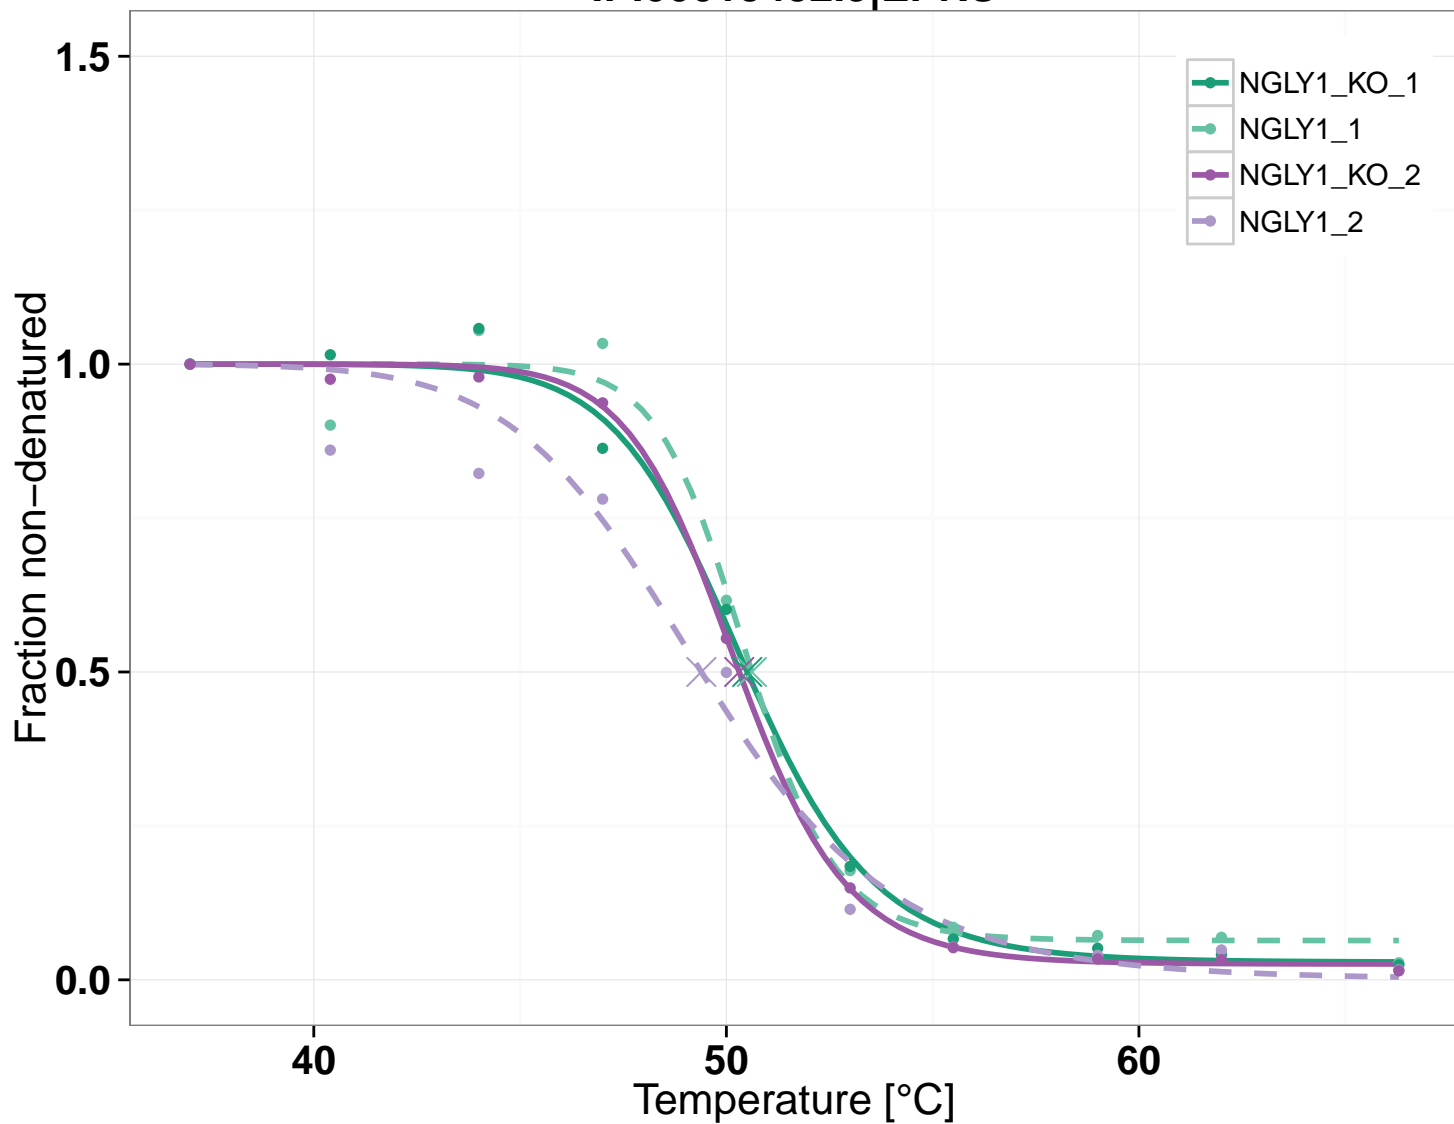

|            | meltPoint | slope | plateau | R2   |
|------------|-----------|-------|---------|------|
| NGLY1_KO_1 | 50.51     | -0.15 | 0.03    | 1    |
| NGLY1_1    | 50.62     | -0.22 | 0.06    | 0.99 |
| NGLY1_KO_2 | 50.31     | -0.18 | 0.03    | 1    |
| NGLY1_2    | 49.39     | -0.11 | 0       | 0.97 |

Supplement: Supplementary file 2504 [file 1]

IPI00743813.3|ASPM

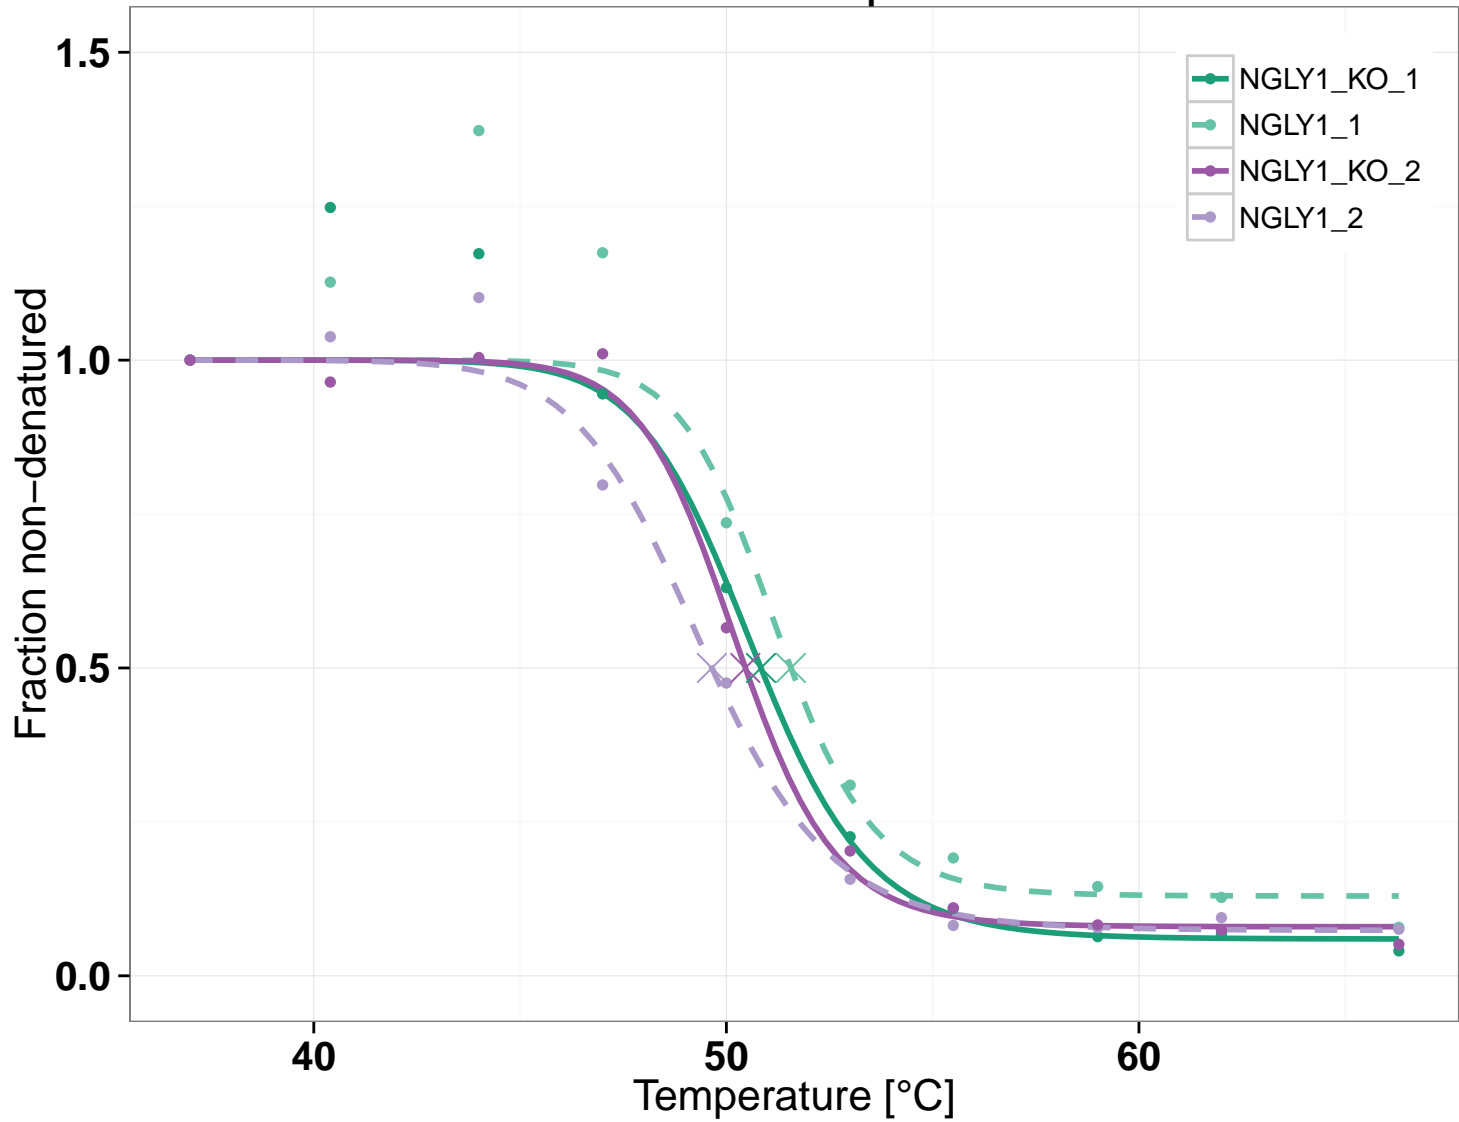

|            | meltPoint | slope | plateau | R2   |
|------------|-----------|-------|---------|------|
| NGLY1_KO_1 | 50.84     | -0.17 | 0.06    | 0.96 |
| NGLY1_1    | 51.57     | -0.19 | 0.13    | 0.92 |
| NGLY1_KO_2 | 50.46     | -0.19 | 0.08    | 1    |
| NGLY1_2    | 49.65     | -0.15 | 0.07    | 0.99 |

Supplement: Supplementary file 2505 [file 1]

IPI00019517.2|WT1

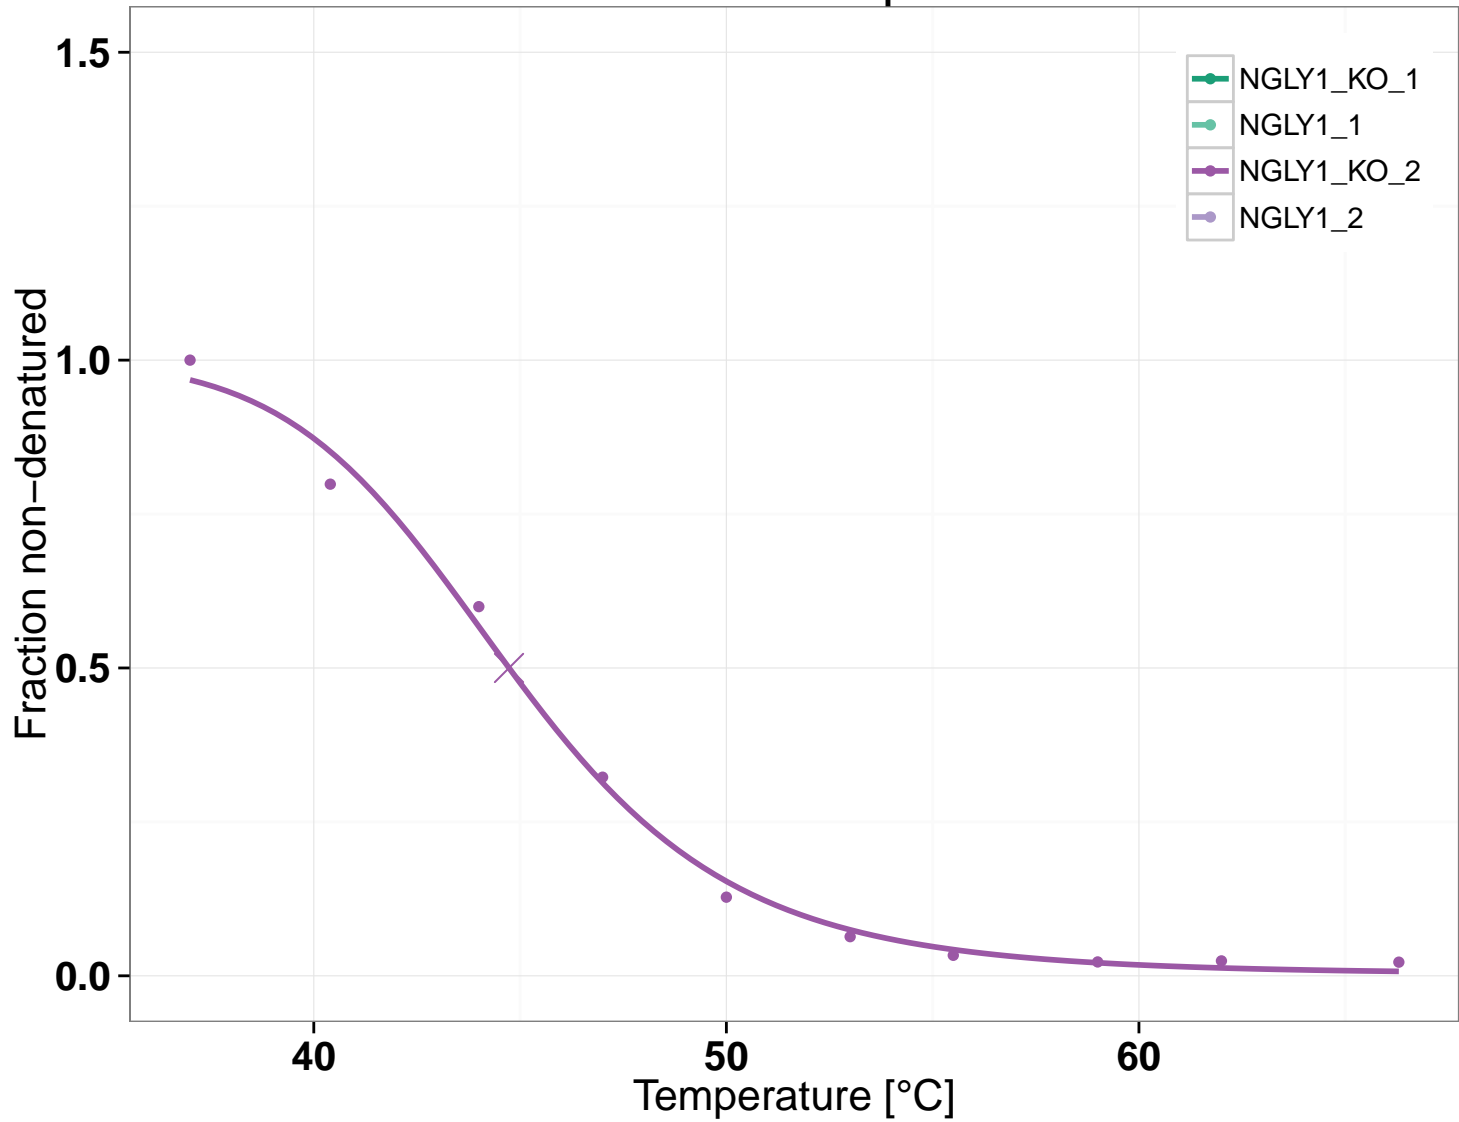

|            | meltPoint | slope  | plateau | R2   |
|------------|-----------|--------|---------|------|
| NGLY1_KO_1 | —         | —      | —       | —    |
| NGLY1_1    | —         | —      | —       | —    |
| NGLY1_KO_2 | 44.73     | -0.092 | 0       | 0.99 |
| NGLY1_2    | —         | —      | —       | —    |

Supplement: Supplementary file 2506 [file 1]

# IPI00007188.5|SLC25A5

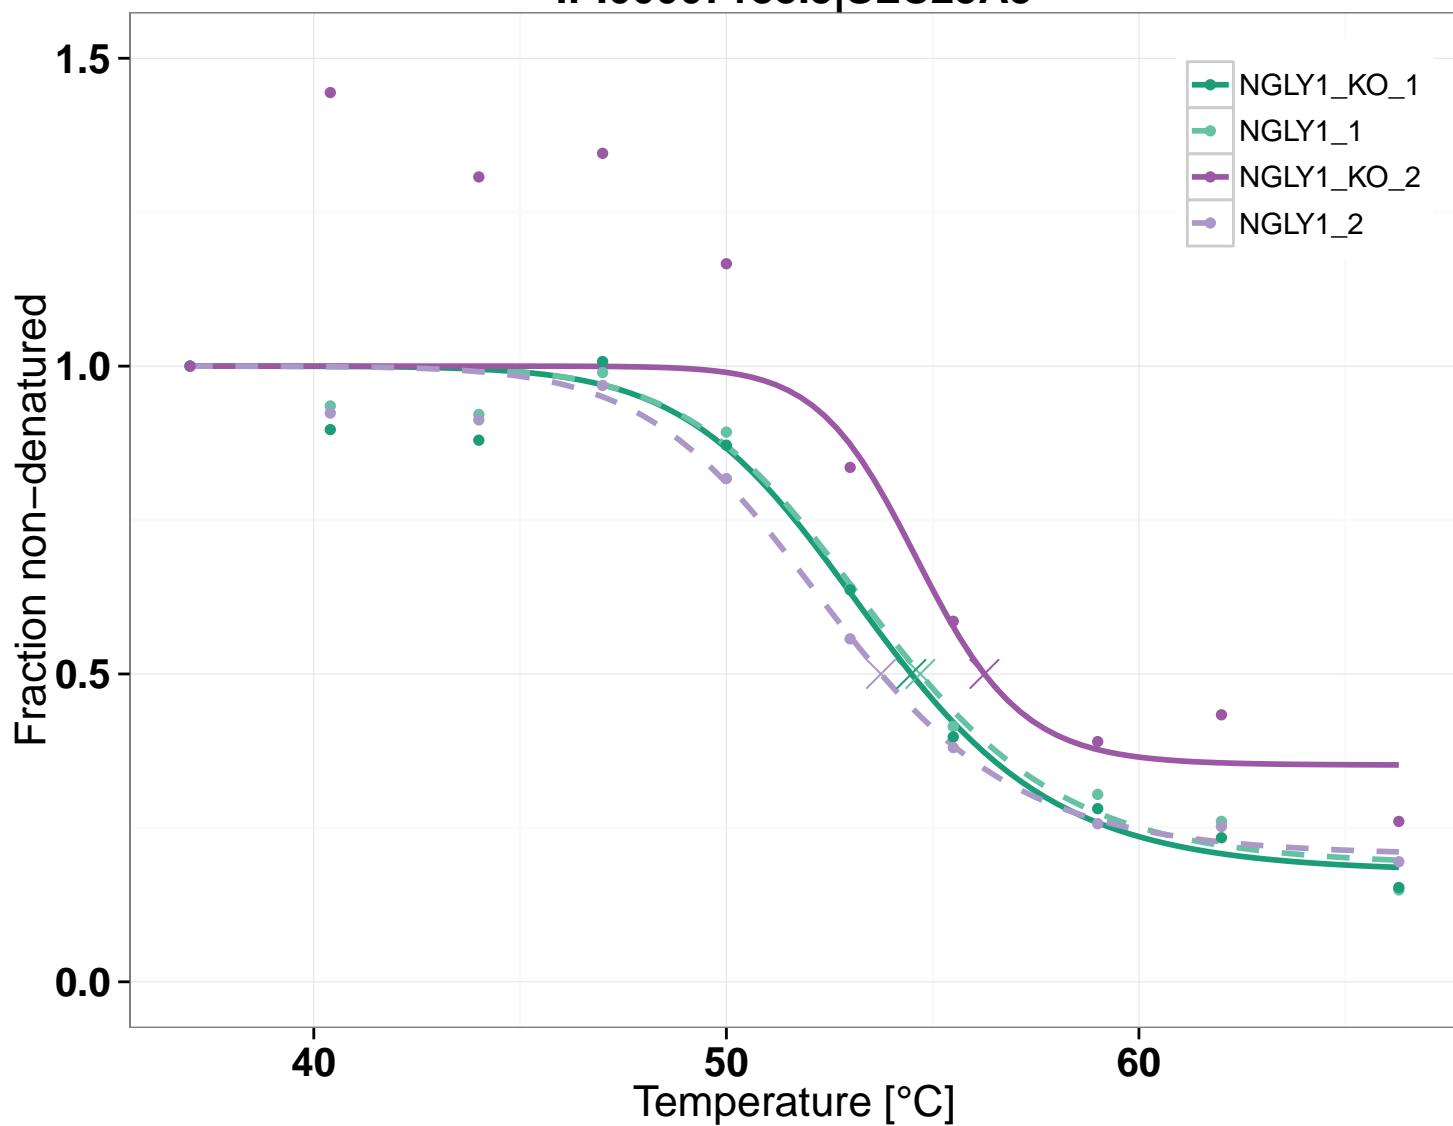

|            | meltPoint | slope  | plateau | R2   |
|------------|-----------|--------|---------|------|
| NGLY1_KO_1 | 54.48     | -0.092 | 0.18    | 0.97 |
| NGLY1_1    | 54.7      | -0.089 | 0.19    | 0.98 |
| NGLY1_KO_2 | 56.25     | -0.13  | 0.35    | 0.73 |
| NGLY1_2    | 53.75     | -0.088 | 0.2     | 0.99 |

Supplement: Supplementary file 2507 [file 1]

IPI00015956.3|EXOSC3

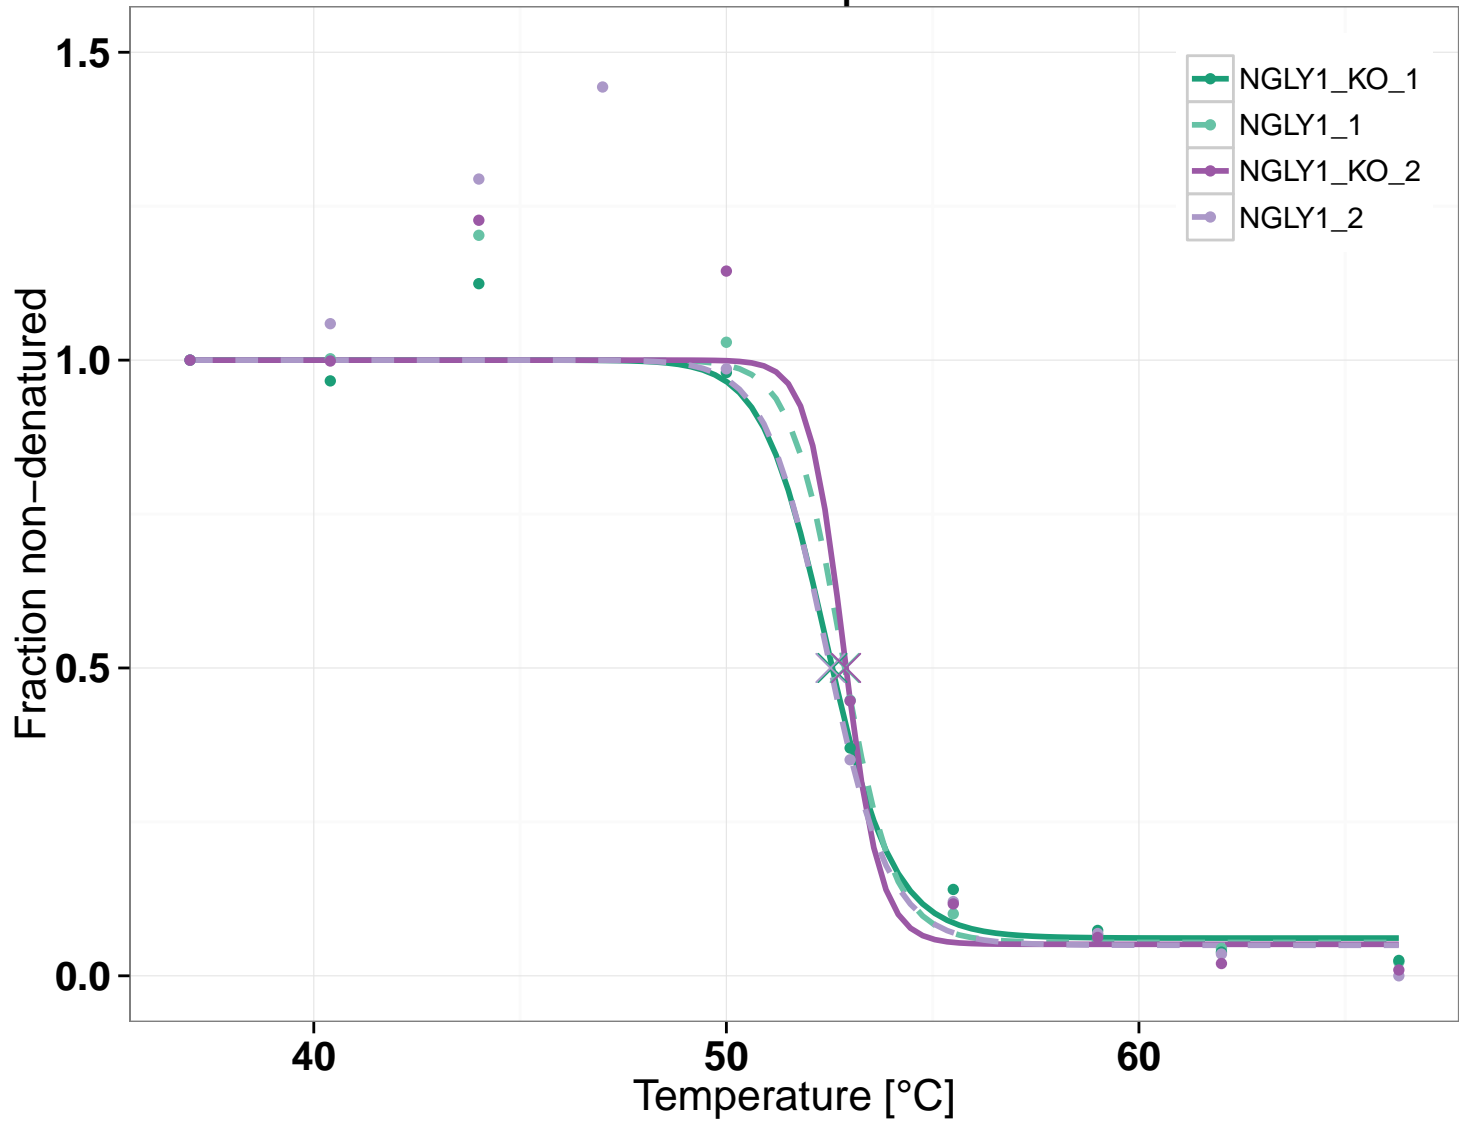

|            | meltPoint | slope | plateau | R2   |
|------------|-----------|-------|---------|------|
| NGLY1_KO_1 | 52.57     | -0.3  | 0.06    | 0.88 |
| NGLY1_1    | 52.87     | -0.38 | 0.05    | 0.75 |
| NGLY1_KO_2 | 52.9      | -0.54 | 0.05    | 0.85 |
| NGLY1_2    | 52.52     | -0.32 | 0.05    | 0.9  |

Supplement: Supplementary file 2508 [file 1]

IPI00307749.2|NDUFS7

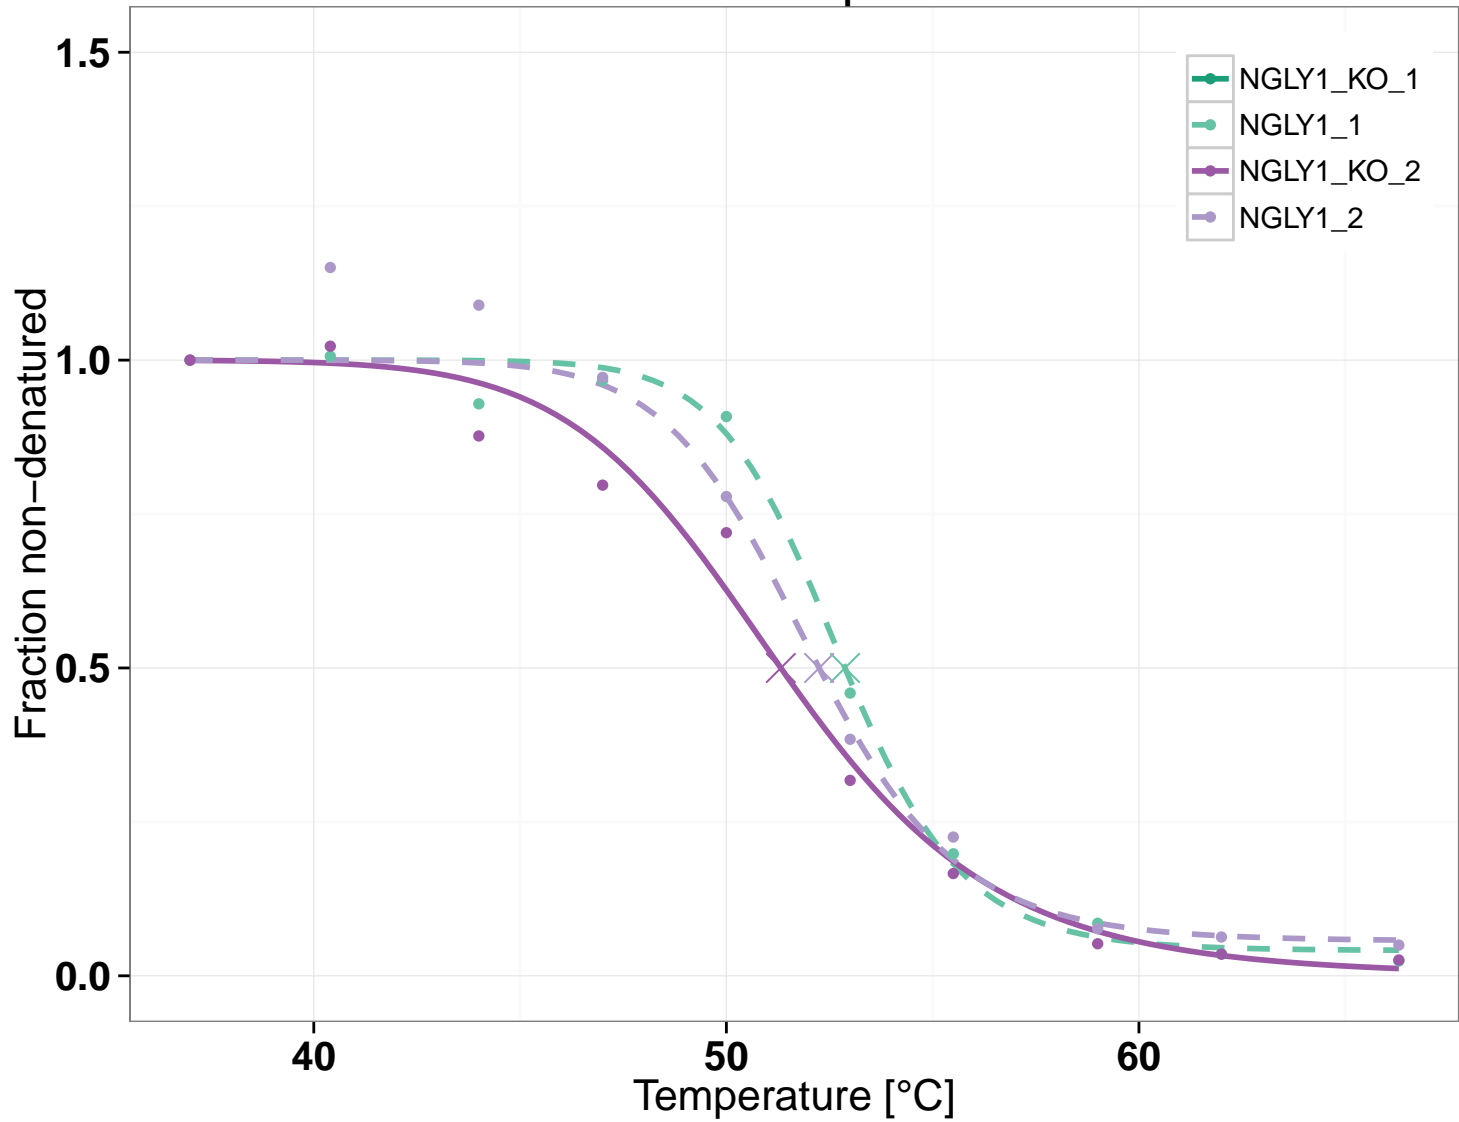

|            | meltPoint | slope  | plateau | R2   |
|------------|-----------|--------|---------|------|
| NGLY1_KO_1 | —         | —      | —       | —    |
| NGLY1_1    | 52.88     | -0.16  | 0.04    | 1    |
| NGLY1_KO_2 | 51.32     | -0.097 | 0       | 0.99 |
| NGLY1_2    | 52.25     | -0.13  | 0.06    | 0.98 |

Supplement: Supplementary file 2509 [file 1]

IPI00019471.1|IRS1

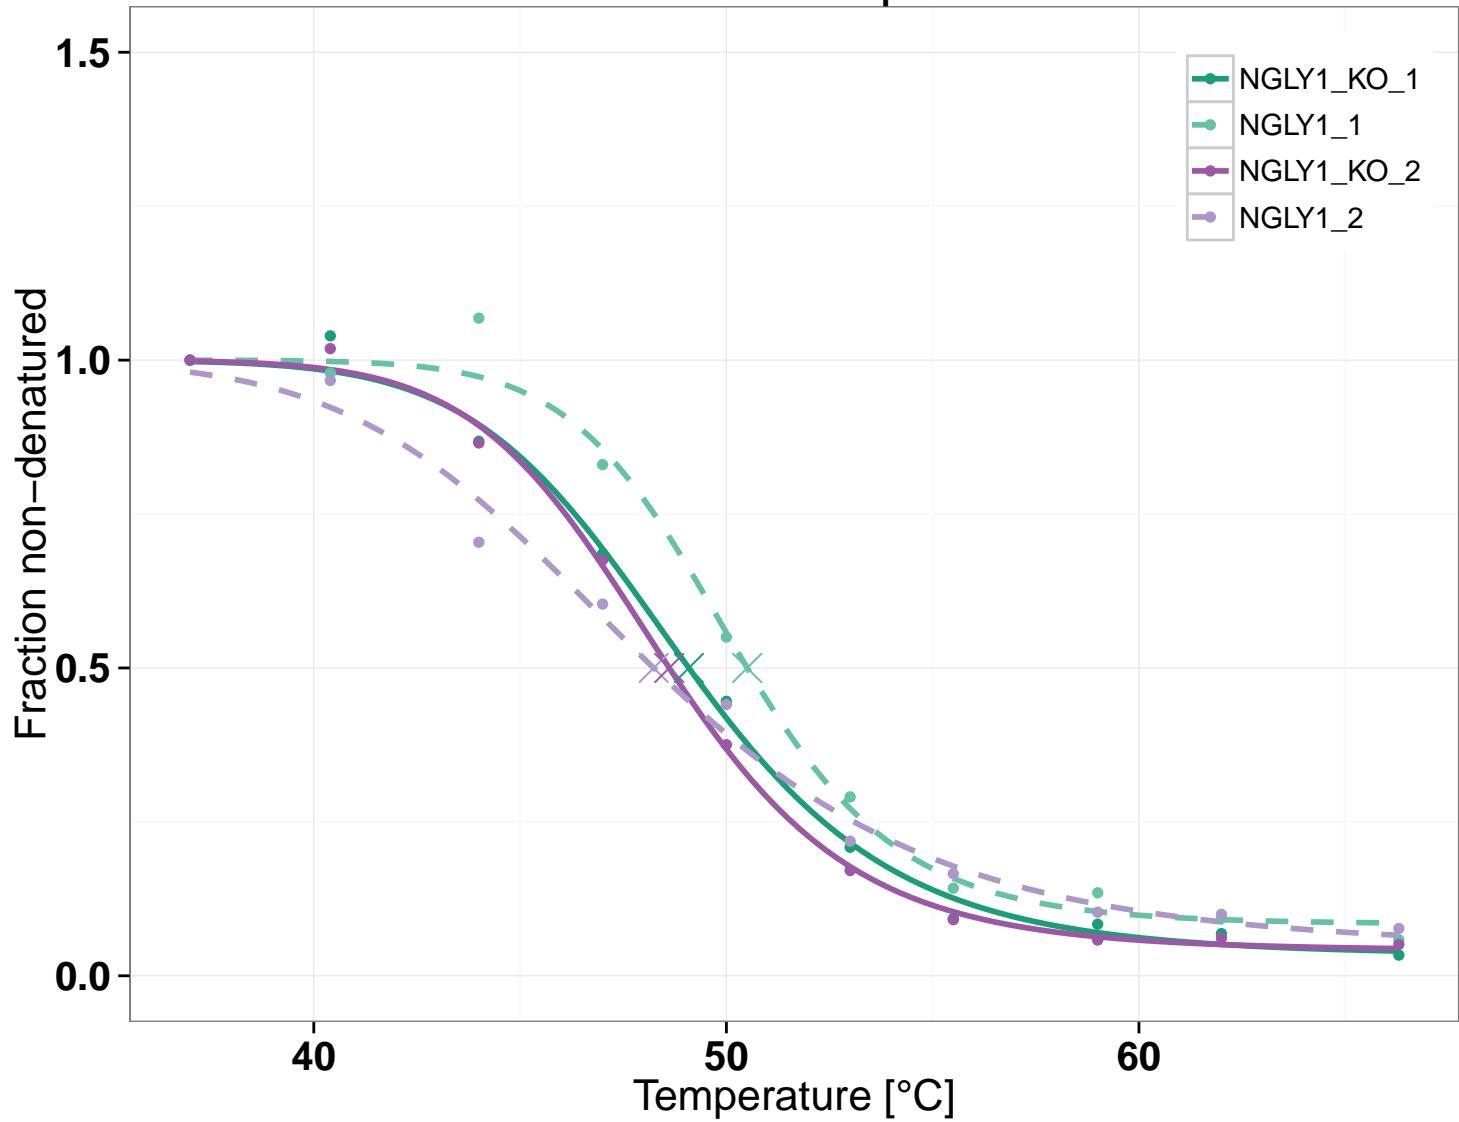

|            | meltPoint | slope  | plateau | R2   |
|------------|-----------|--------|---------|------|
| NGLY1_KO_1 | 49.09     | -0.094 | 0.03    | 1    |
| NGLY1_1    | 50.51     | -0.12  | 0.08    | 0.99 |
| NGLY1_KO_2 | 48.62     | -0.1   | 0.04    | 1    |
| NGLY1_2    | 48.24     | -0.067 | 0.04    | 0.99 |

Supplement: Supplementary file 2510 [file 1]
