# Supplementary material (part 26 of 85)
Source: publisher figshare collection journal article supplement (https://gsajournals.figshare.com/articles/dataset/_/12014913)

# IPI00004534.3|PFAS

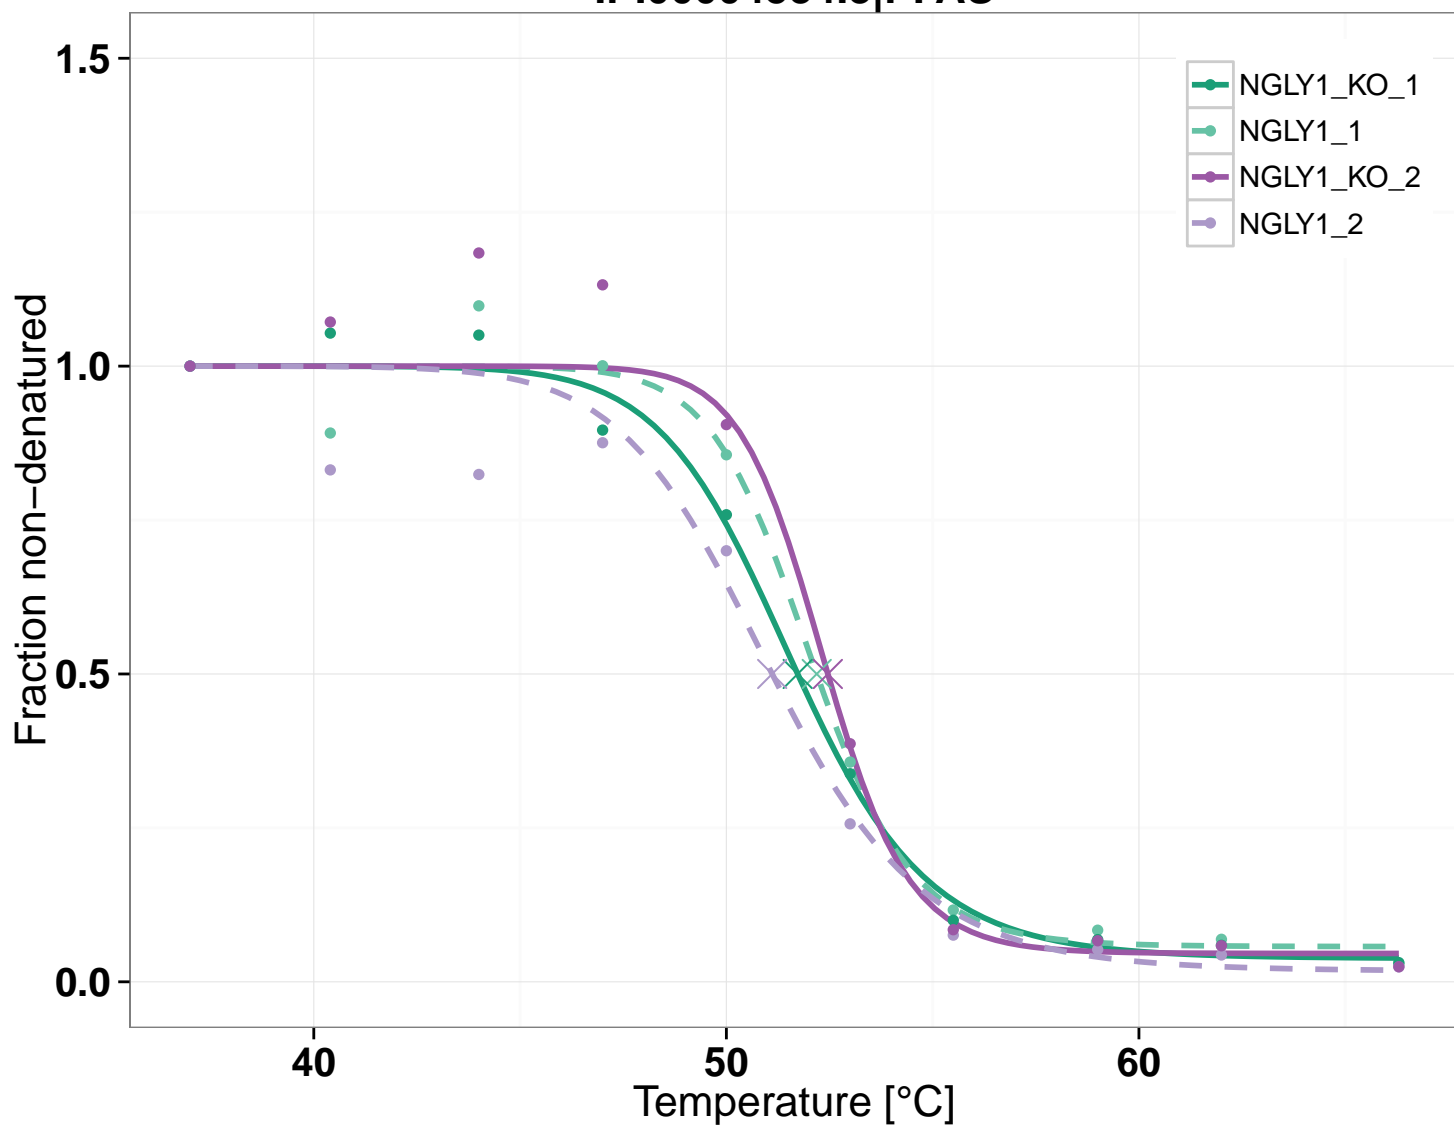

|            | meltPoint | slope | plateau | R2   |
|------------|-----------|-------|---------|------|
| NGLY1_KO_1 | 51.73     | -0.15 | 0.04    | 0.99 |
| NGLY1_1    | 52.19     | -0.19 | 0.06    | 0.99 |
| NGLY1_KO_2 | 52.46     | -0.23 | 0.05    | 0.97 |
| NGLY1_2    | 51.11     | -0.13 | 0.02    | 0.96 |

Supplement: Supplementary file 2511 [file 1]

IPI00024642.2|CCDC47

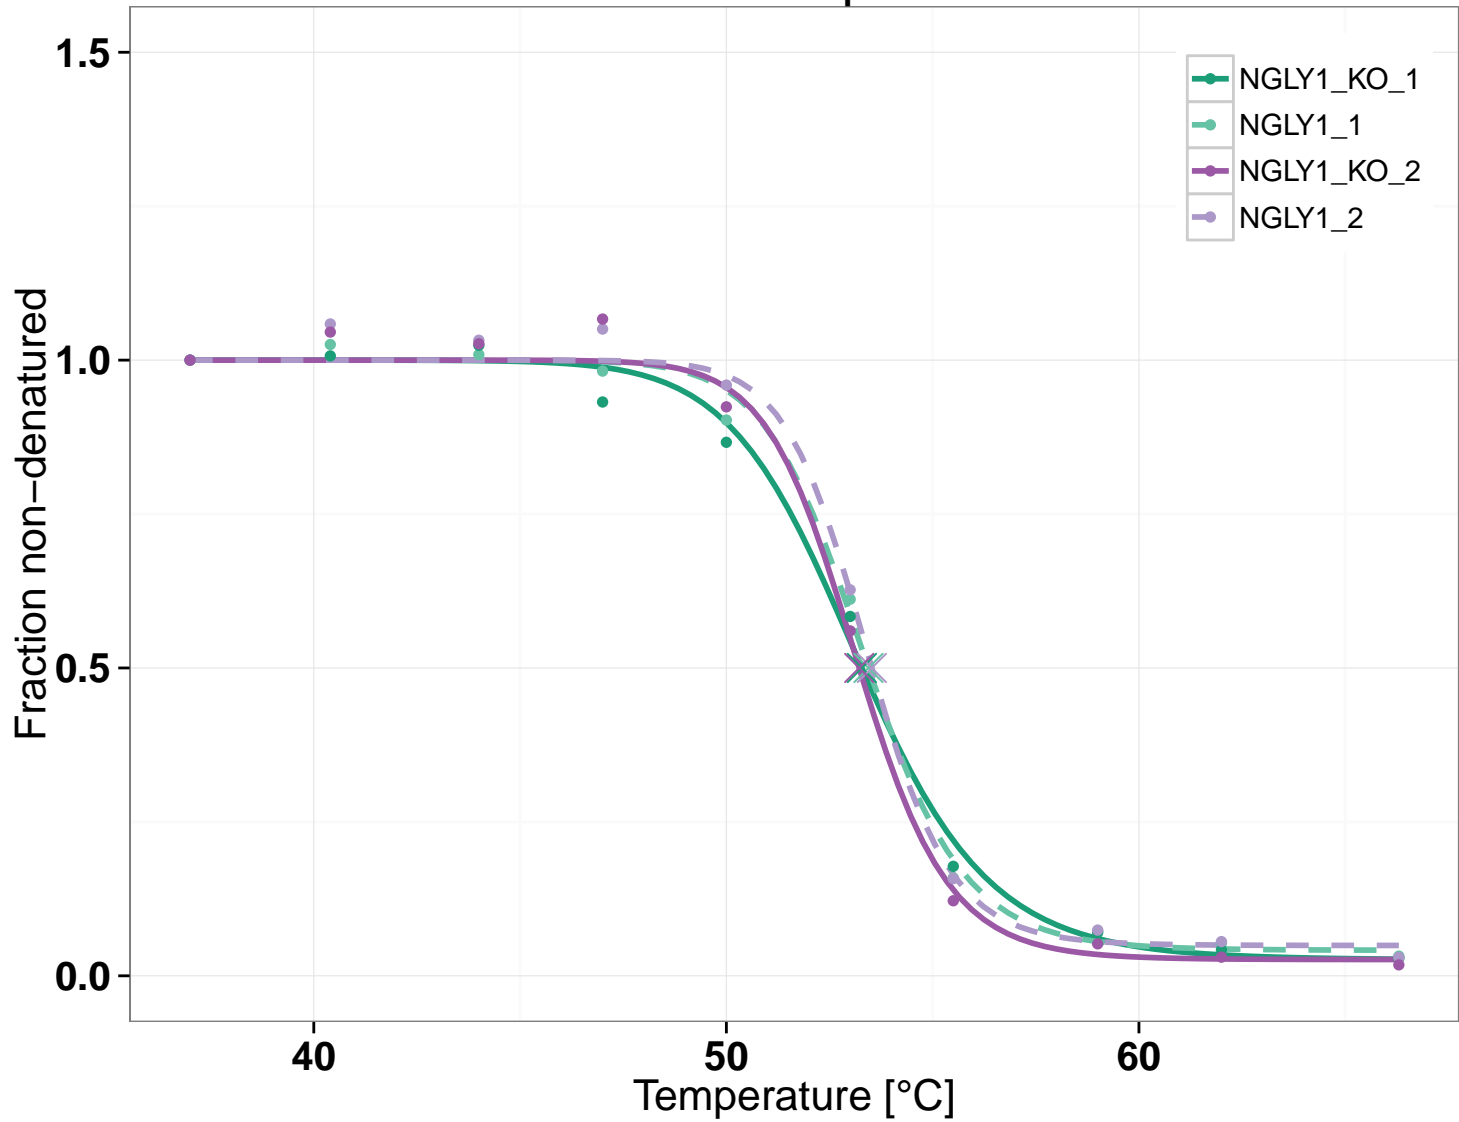

|            | meltPoint | slope | plateau | R2 |
|------------|-----------|-------|---------|----|
| NGLY1_KO_1 | 53.28     | -0.15 | 0.03    | 1  |
| NGLY1_1    | 53.44     | -0.2  | 0.04    | 1  |
| NGLY1_KO_2 | 53.22     | -0.22 | 0.03    | 1  |
| NGLY1_2    | 53.53     | -0.24 | 0.05    | 1  |

Supplement: Supplementary file 2512 [file 1]

IPI00000118.1|ICAM4

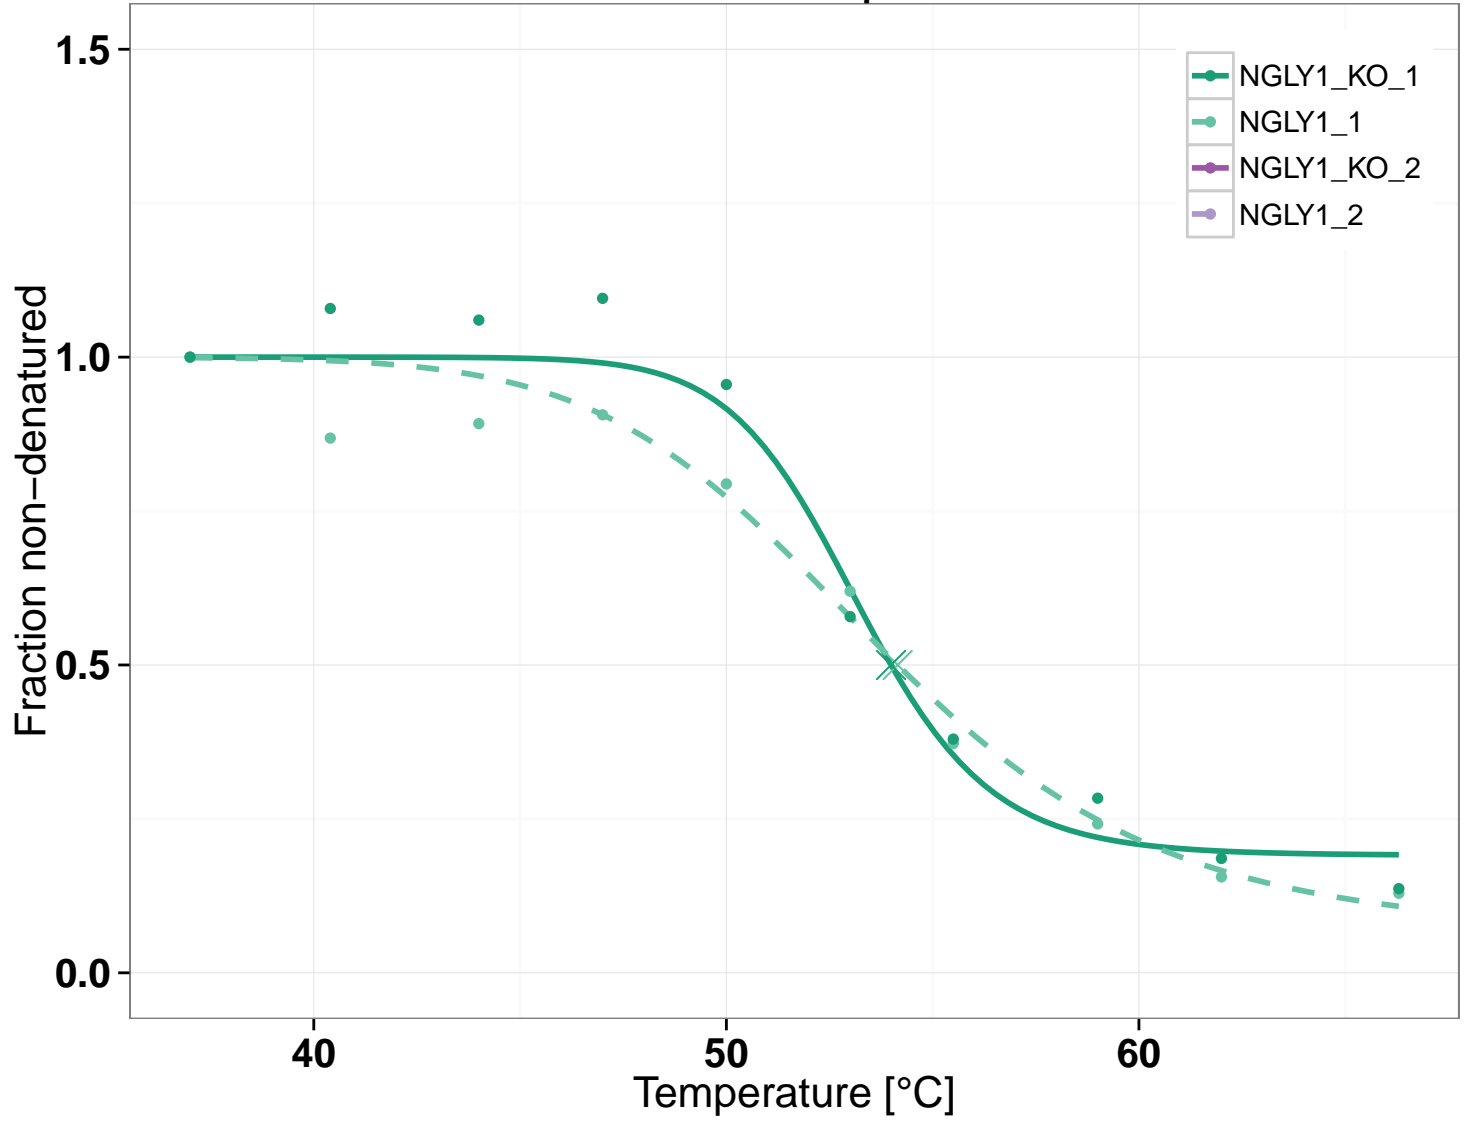

|            | meltPoint | slope  | plateau | R2   |
|------------|-----------|--------|---------|------|
| NGLY1_KO_1 | 53.99     | -0.13  | 0.19    | 0.98 |
| NGLY1_1    | 54.15     | -0.069 | 0.06    | 0.97 |
| NGLY1_KO_2 | -         | -      | -       | -    |
| NGLY1_2    | -         | -      | -       | -    |

Supplement: Supplementary file 2513 [file 1]

IPI00877956.1|ANKRD54

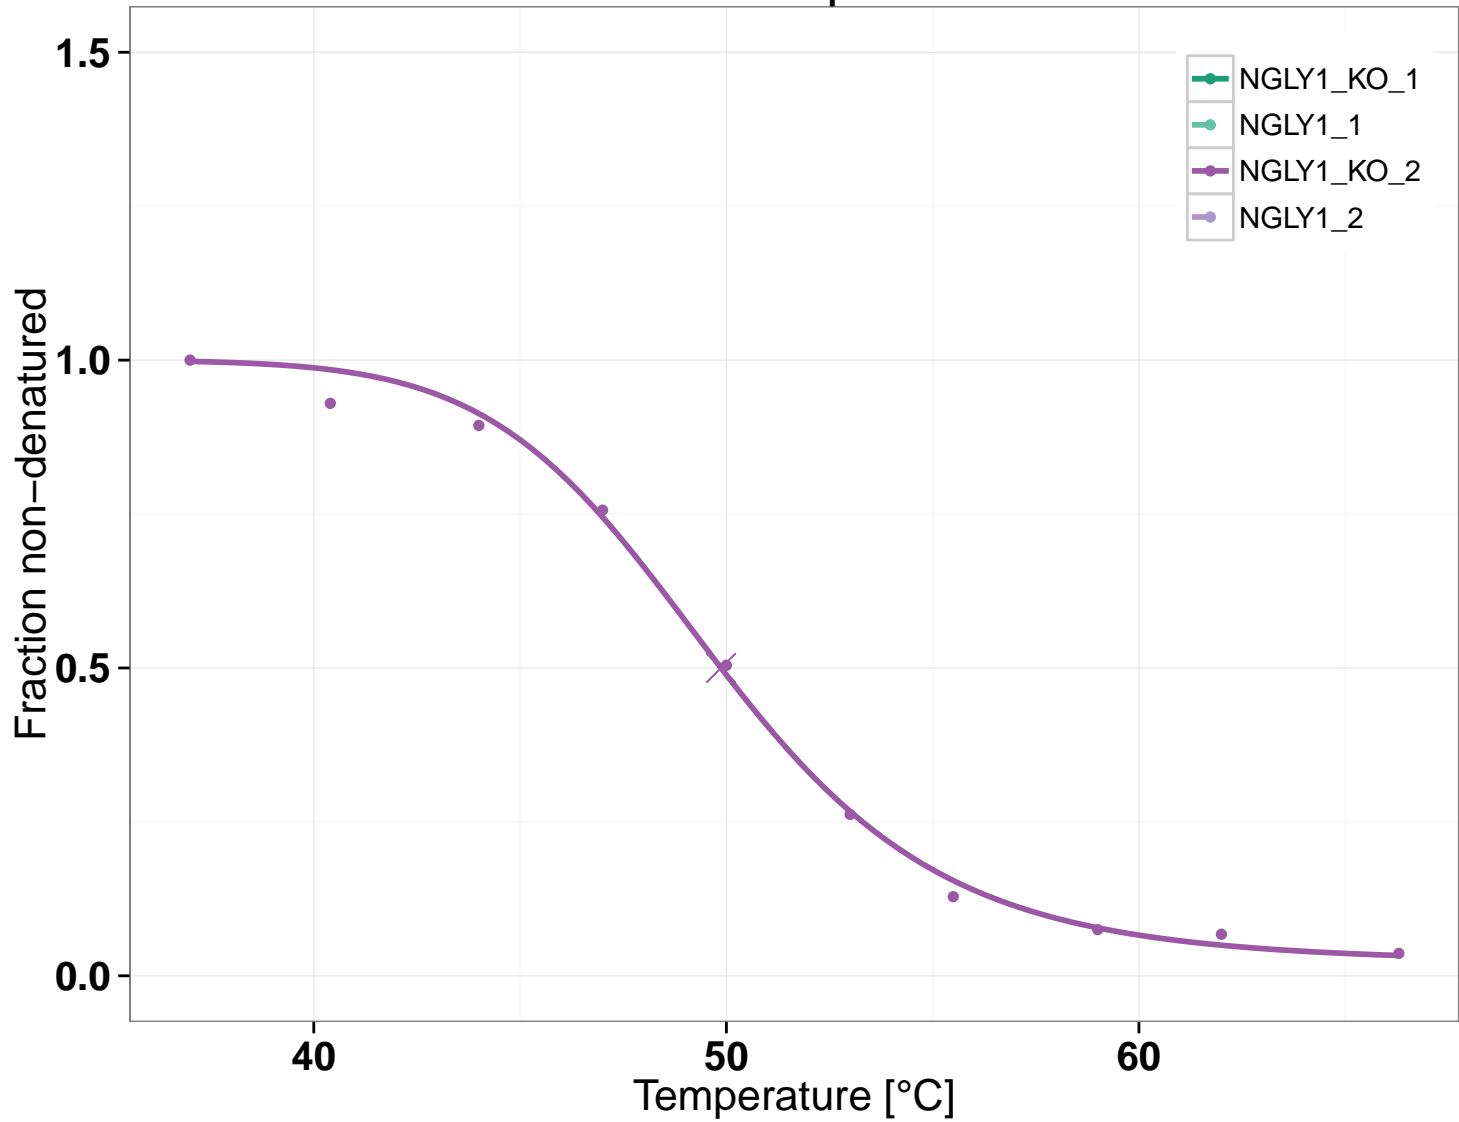

|            | meltPoint | slope  | plateau | R2 |
|------------|-----------|--------|---------|----|
| NGLY1_KO_1 | —         | —      | —       | —  |
| NGLY1_1    | —         | —      | —       | —  |
| NGLY1_KO_2 | 49.87     | -0.089 | 0.02    | 1  |
| NGLY1_2    | —         | —      | —       | —  |

Supplement: Supplementary file 2514 [file 1]

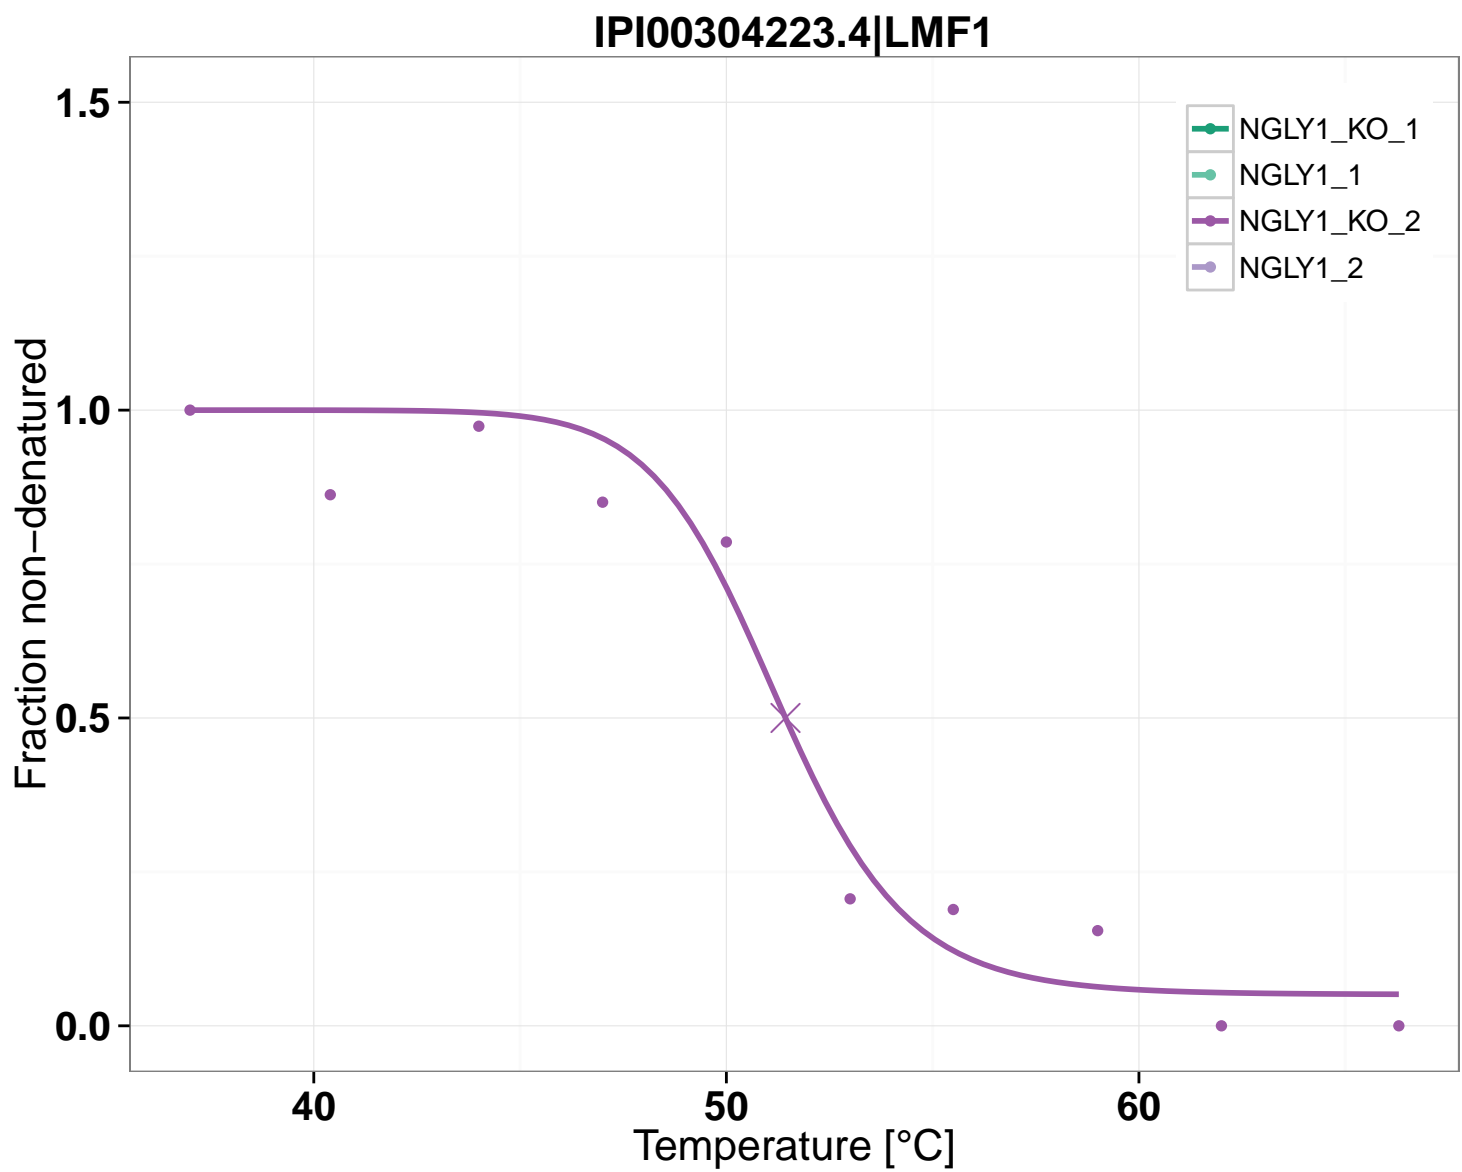

|            | meltPoint | slope | plateau | R2   |
|------------|-----------|-------|---------|------|
| NGLY1_KO_1 | —         | —     | —       | —    |
| NGLY1_1    | —         | —     | —       | —    |
| NGLY1_KO_2 | 51.43     | -0.15 | 0.05    | 0.96 |
| NGLY1_2    | —         | —     | —       | —    |

Supplement: Supplementary file 2515 [file 1]

IPI00879258.1|31 KDA PROTEIN.

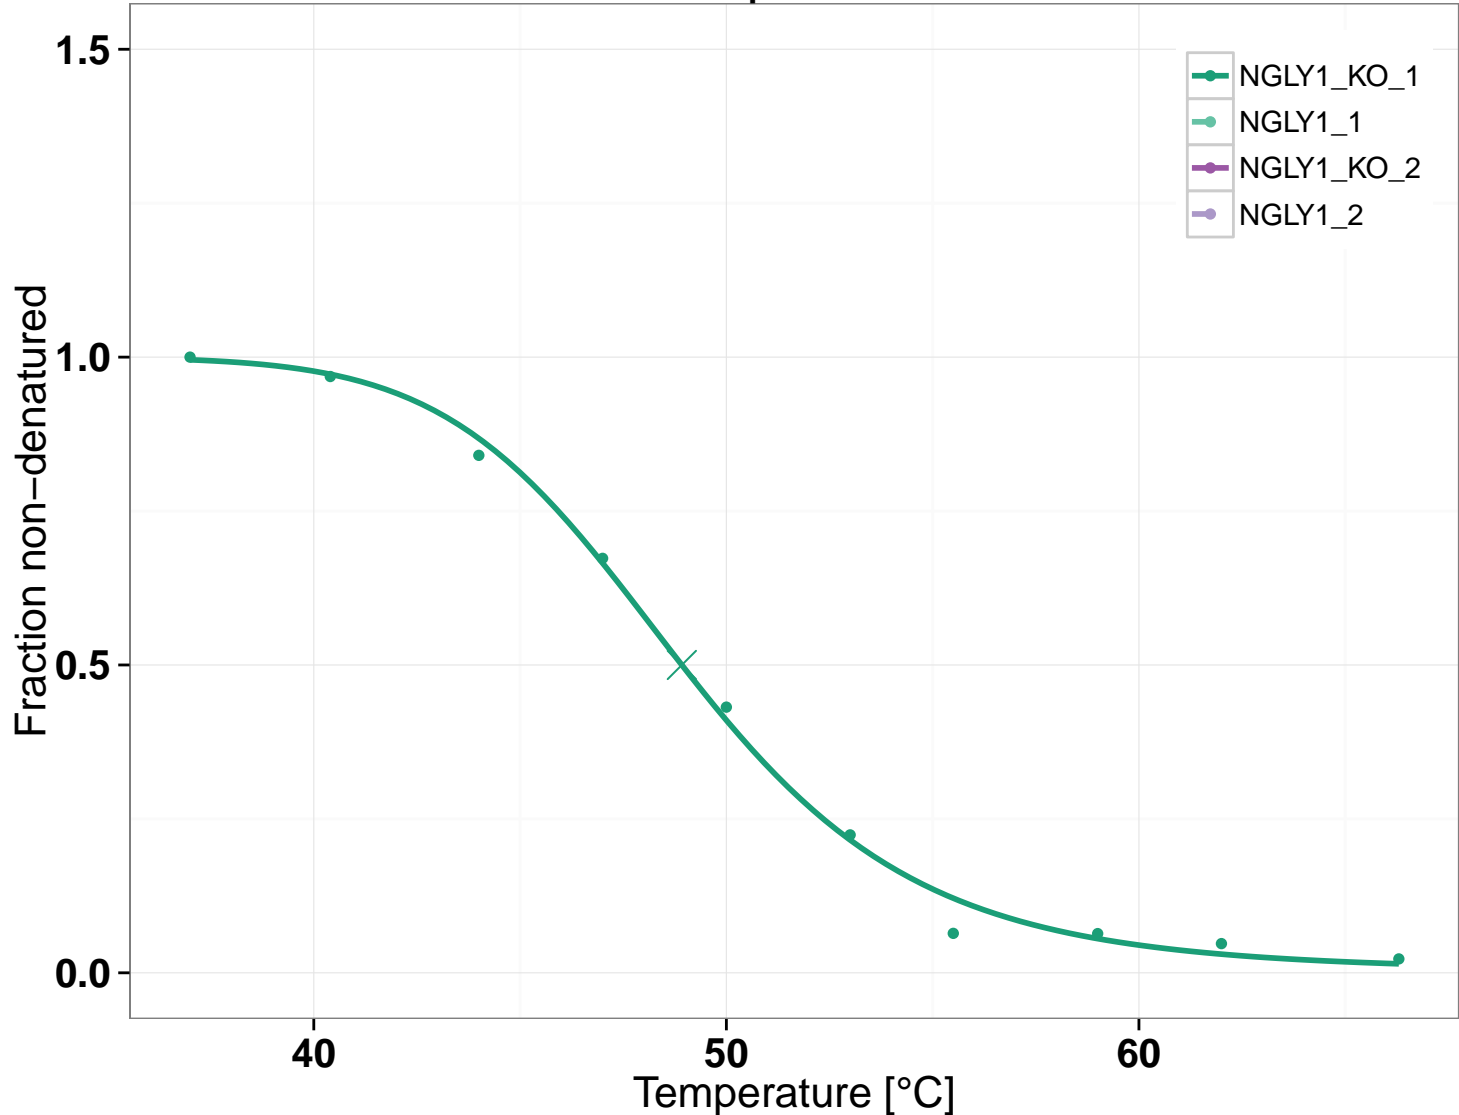

|            | meltPoint | slope  | plateau | R2 |
|------------|-----------|--------|---------|----|
| NGLY1_KO_1 | 48.92     | -0.087 | 0       | 1  |
| NGLY1_1    | -         | -      | -       | -  |
| NGLY1_KO_2 | -         | -      | -       | -  |
| NGLY1_2    | -         | -      | -       | -  |

Supplement: Supplementary file 2516 [file 1]

IPI00103059.4|NAT14

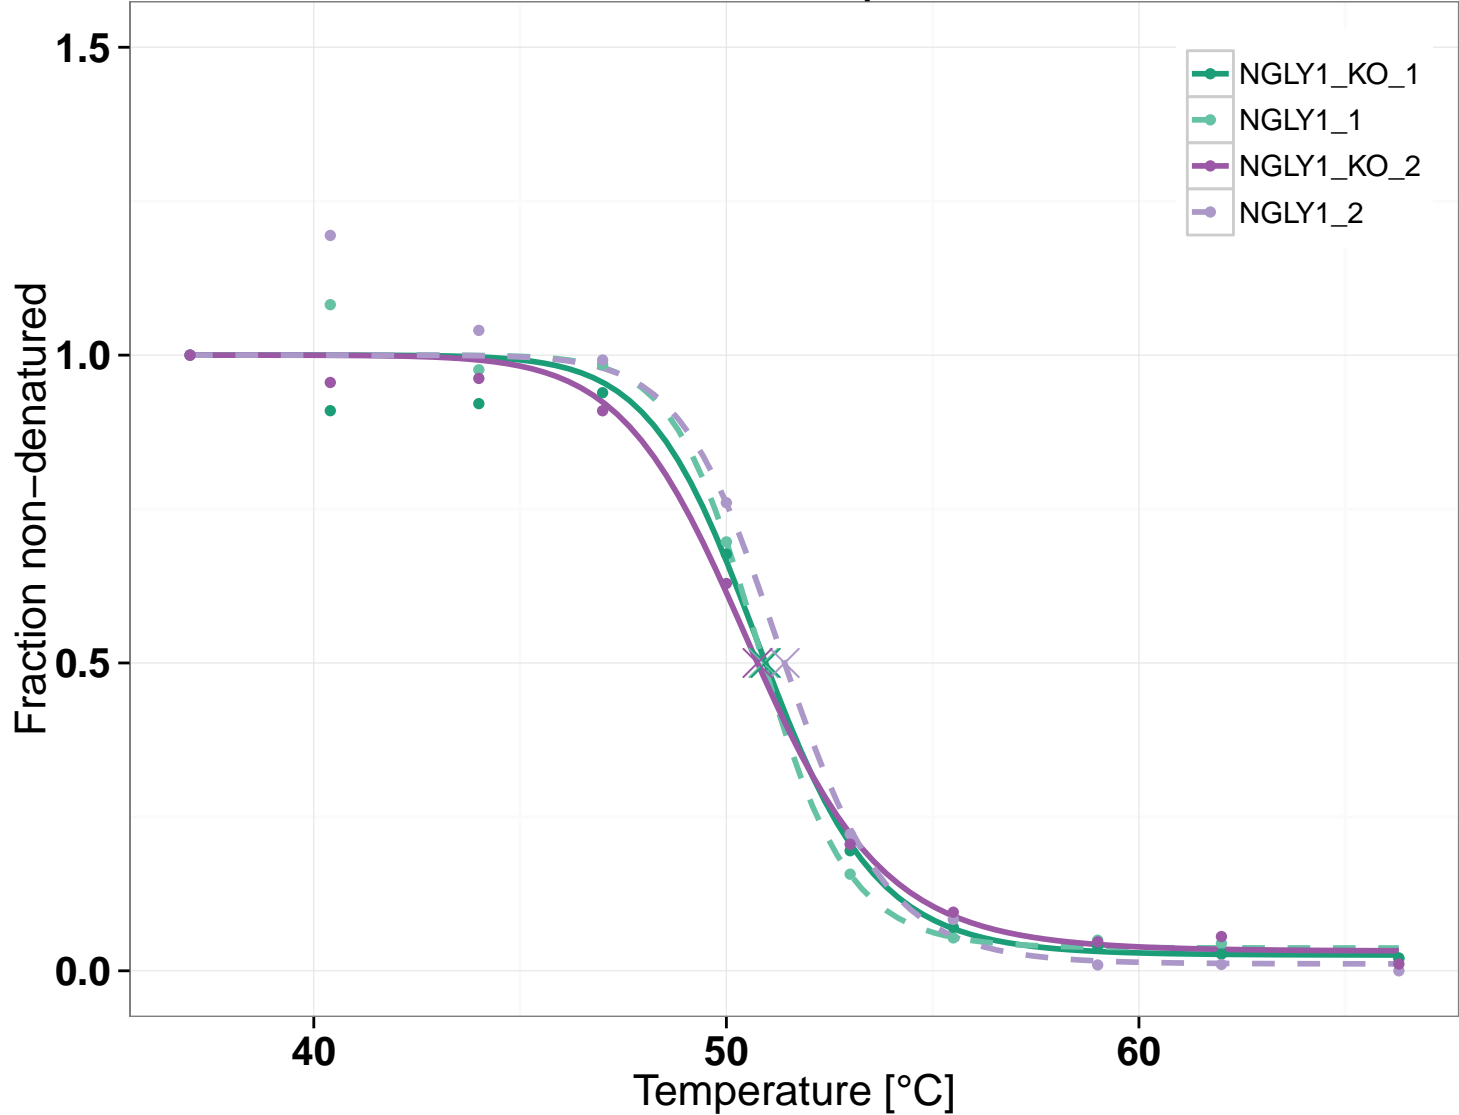

|            | meltPoint | slope | plateau | R2   |
|------------|-----------|-------|---------|------|
| NGLY1_KO_1 | 50.95     | -0.18 | 0.03    | 0.99 |
| NGLY1_1    | 50.9      | -0.23 | 0.04    | 1    |
| NGLY1_KO_2 | 50.76     | -0.15 | 0.03    | 1    |
| NGLY1_2    | 51.41     | -0.2  | 0.01    | 0.98 |

Supplement: Supplementary file 2517 [file 1]

IPI00174442.2|FAM98A

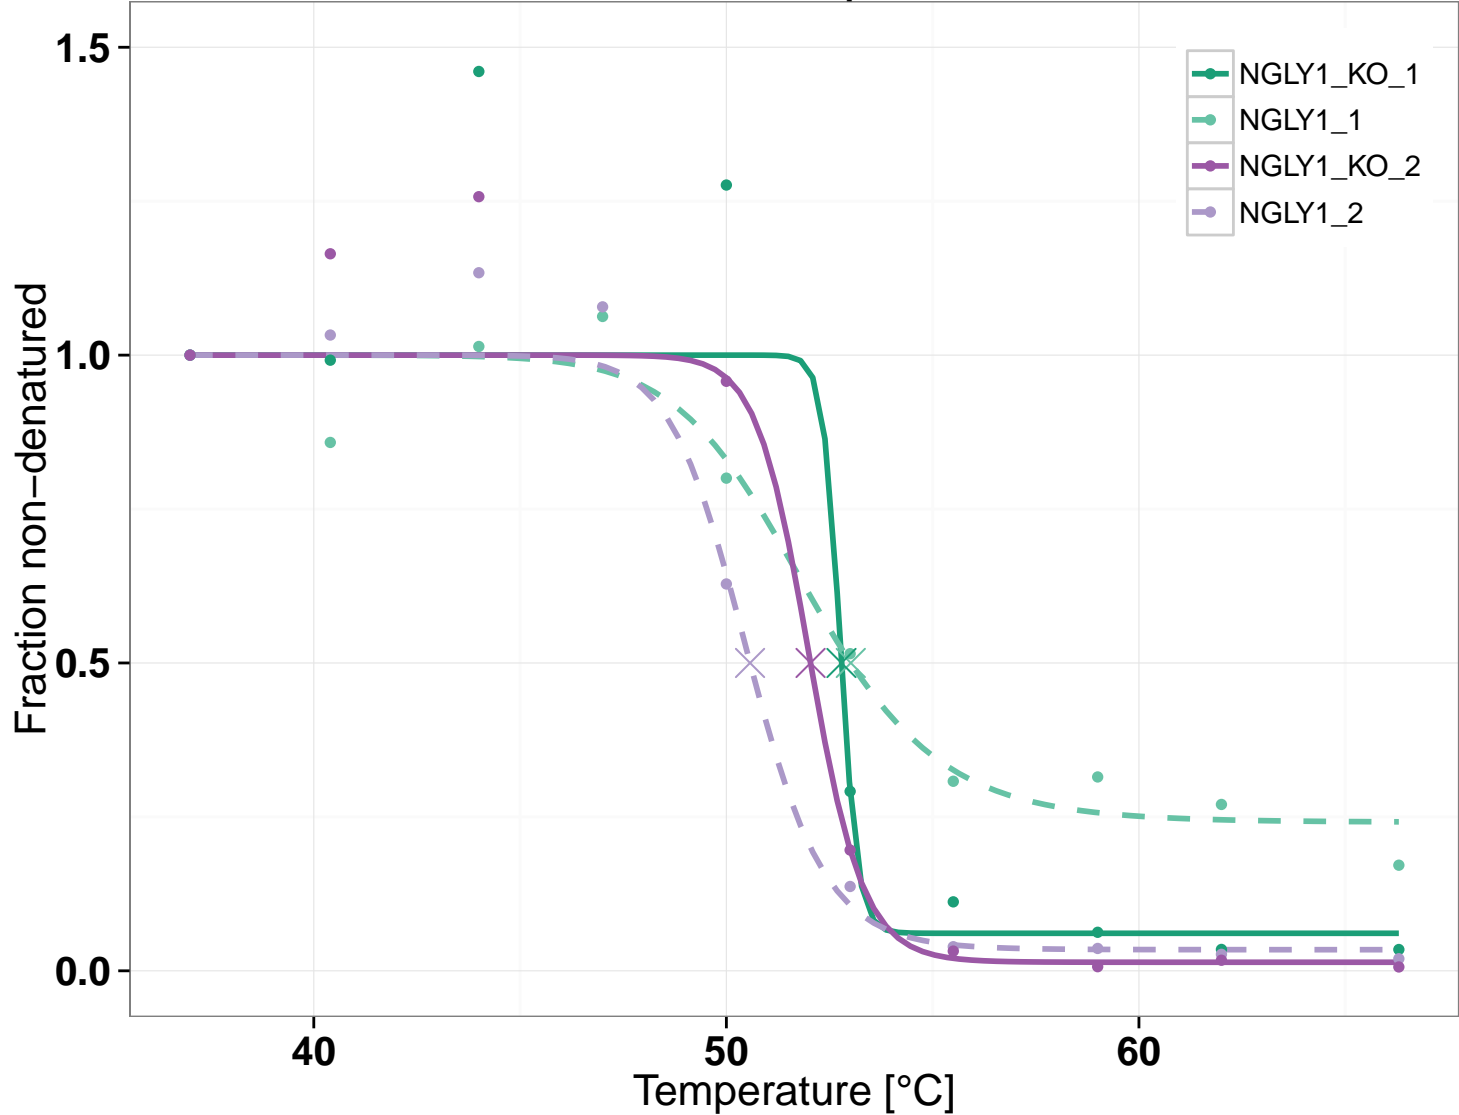

|            | meltPoint | slope | plateau | R2   |
|------------|-----------|-------|---------|------|
| NGLY1_KO_1 | 52.79     | -1.1  | 0.06    | 0.77 |
| NGLY1_1    | 53.02     | -0.12 | 0.24    | 0.97 |
| NGLY1_KO_2 | 52.04     | -0.38 | 0.01    | 0.85 |
| NGLY1_2    | 50.57     | -0.26 | 0.03    | 0.99 |

Supplement: Supplementary file 2518 [file 1]

IPI00657782.1|SSBP2

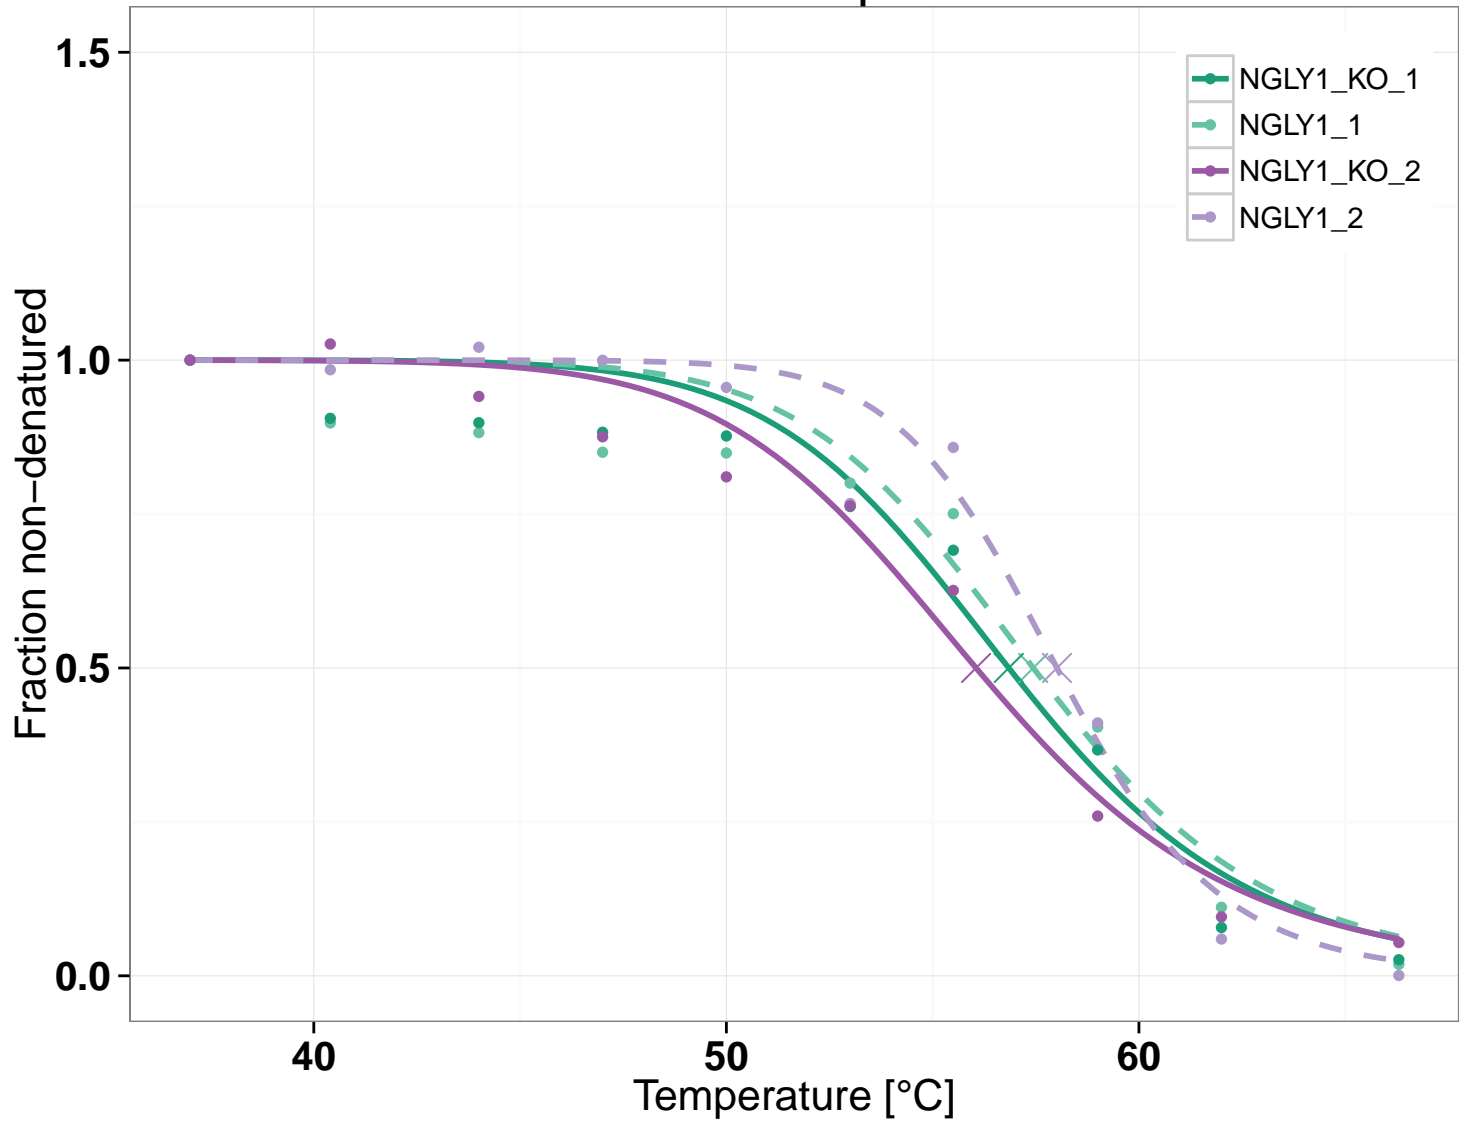

|            | meltPoint | slope  | plateau | R2   |
|------------|-----------|--------|---------|------|
| NGLY1_KO_1 | 56.84     | -0.086 | 0       | 0.96 |
| NGLY1_1    | 57.44     | -0.088 | 0       | 0.94 |
| NGLY1_KO_2 | 56.05     | -0.08  | 0       | 0.98 |
| NGLY1_2    | 58.01     | -0.13  | 0       | 0.97 |

Supplement: Supplementary file 2519 [file 1]

# IPI00328488.6|MAN2B2

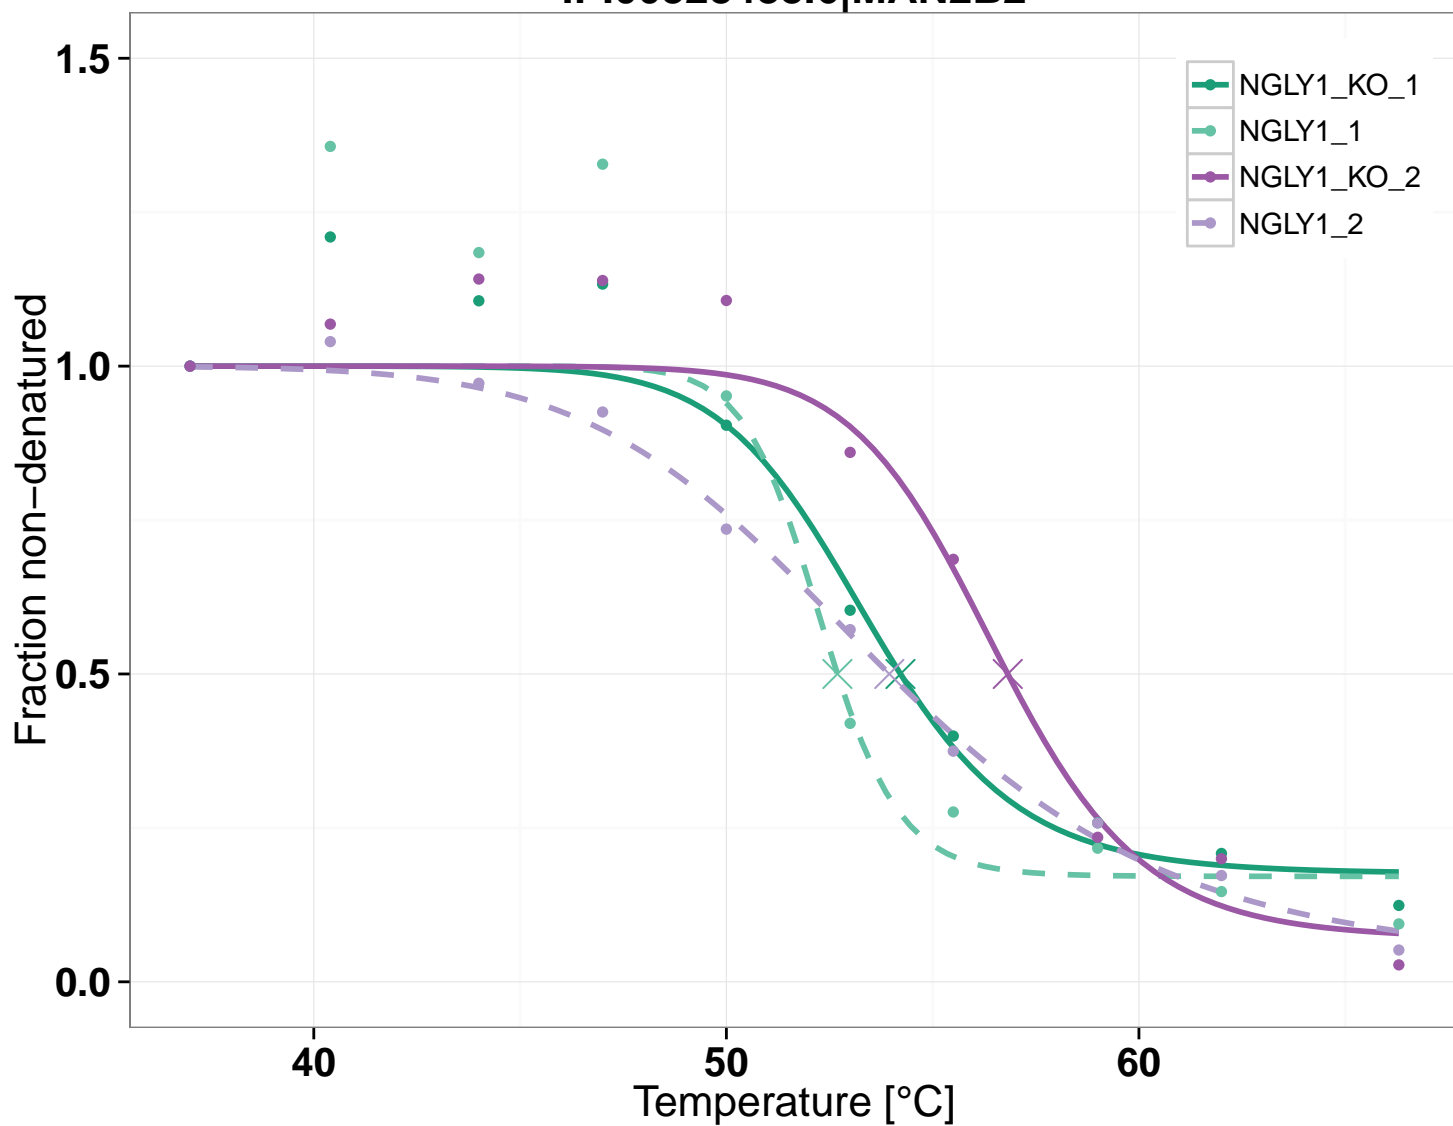

|            | meltPoint | slope  | plateau | R2   |
|------------|-----------|--------|---------|------|
| NGLY1_KO_1 | 54.22     | -0.11  | 0.18    | 0.95 |
| NGLY1_1    | 52.69     | -0.22  | 0.17    | 0.88 |
| NGLY1_KO_2 | 56.82     | -0.13  | 0.07    | 0.96 |
| NGLY1_2    | 53.95     | -0.068 | 0.03    | 0.99 |

Supplement: Supplementary file 2520 [file 1]

IPI00219806.7|S100A7

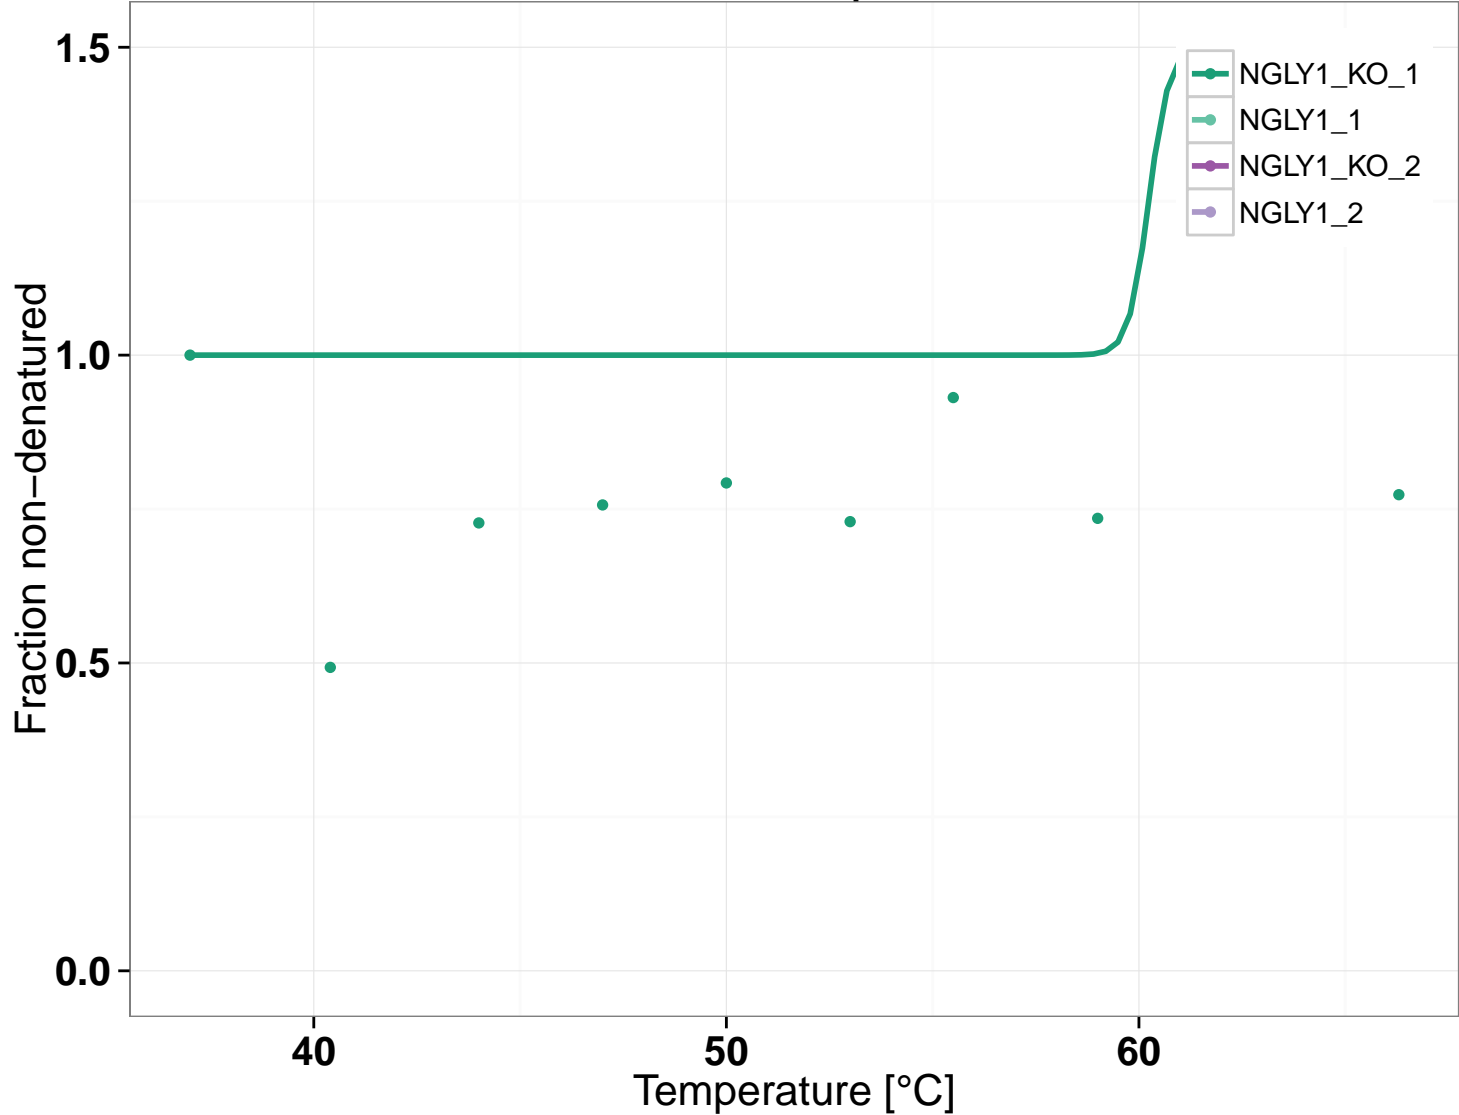

|            | meltPoint | slope | plateau | R2   |
|------------|-----------|-------|---------|------|
| NGLY1_KO_1 | —         | 0.52  | 1.5     | 0.27 |
| NGLY1_1    | —         | —     | —       | —    |
| NGLY1_KO_2 | —         | —     | —       | —    |
| NGLY1_2    | —         | —     | —       | —    |

Supplement: Supplementary file 2521 [file 1]

IPI00844249.1|GPAM

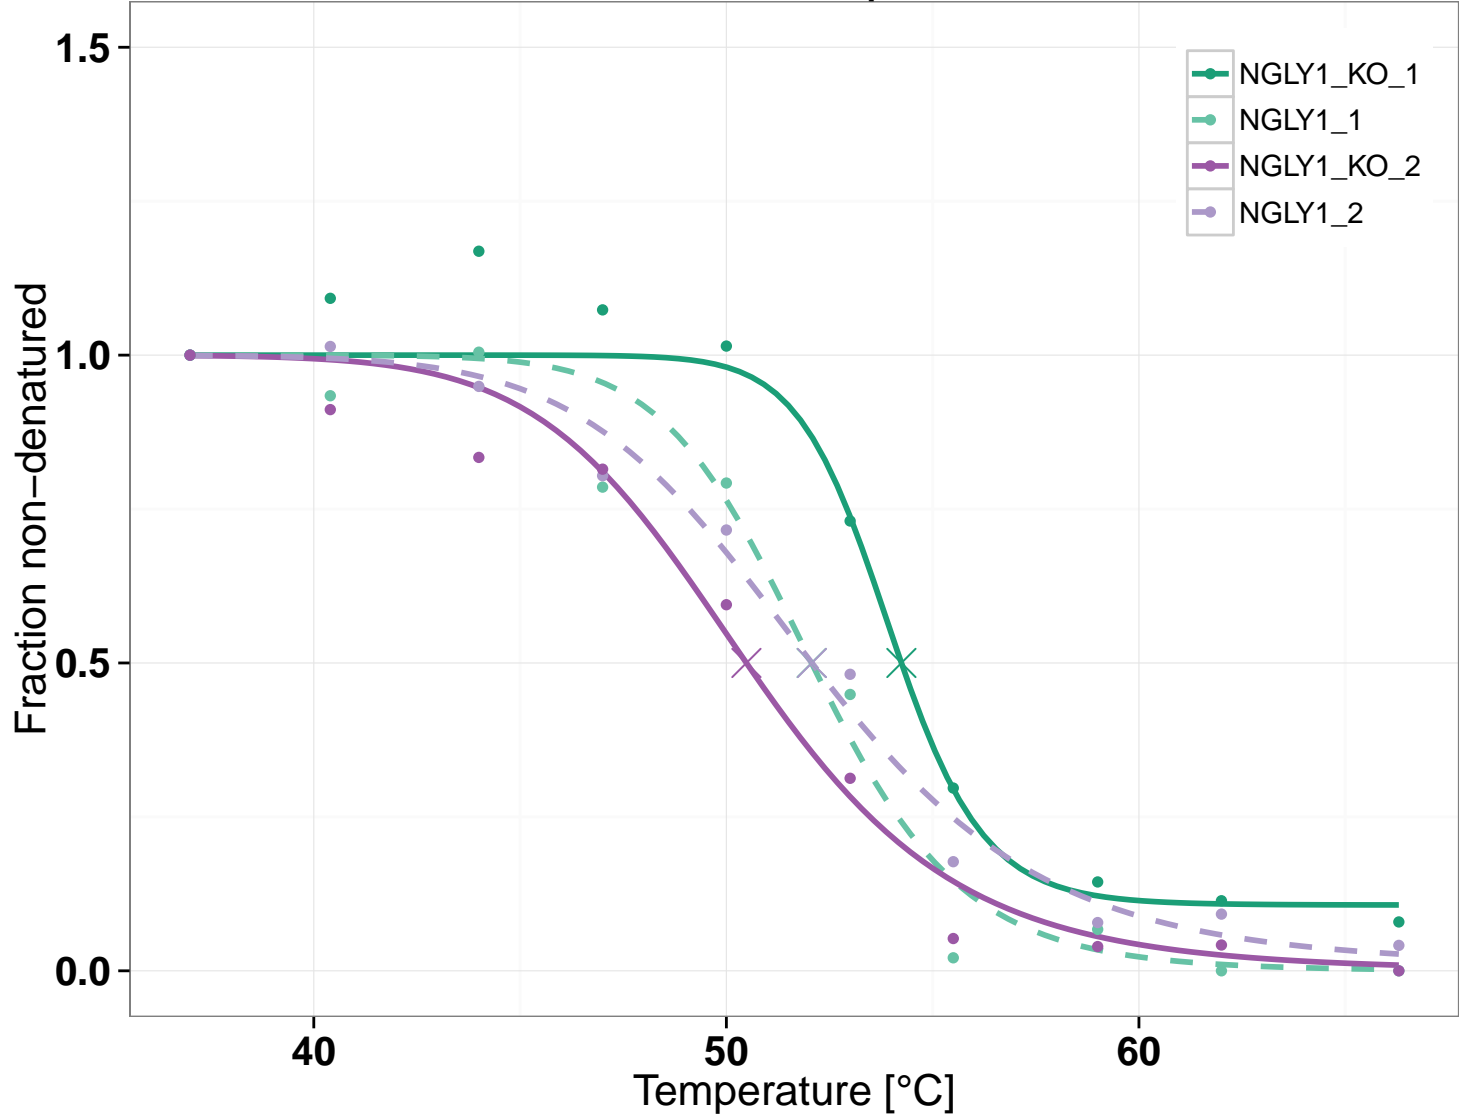

|            | meltPoint | slope  | plateau | R2   |
|------------|-----------|--------|---------|------|
| NGLY1_KO_1 | 54.24     | -0.2   | 0.11    | 0.98 |
| NGLY1_1    | 52.07     | -0.14  | 0       | 0.97 |
| NGLY1_KO_2 | 50.49     | -0.098 | 0       | 0.98 |
| NGLY1_2    | 52.07     | -0.088 | 0.01    | 0.99 |

Supplement: Supplementary file 2522 [file 1]

# IPI00384180.4|YRDC

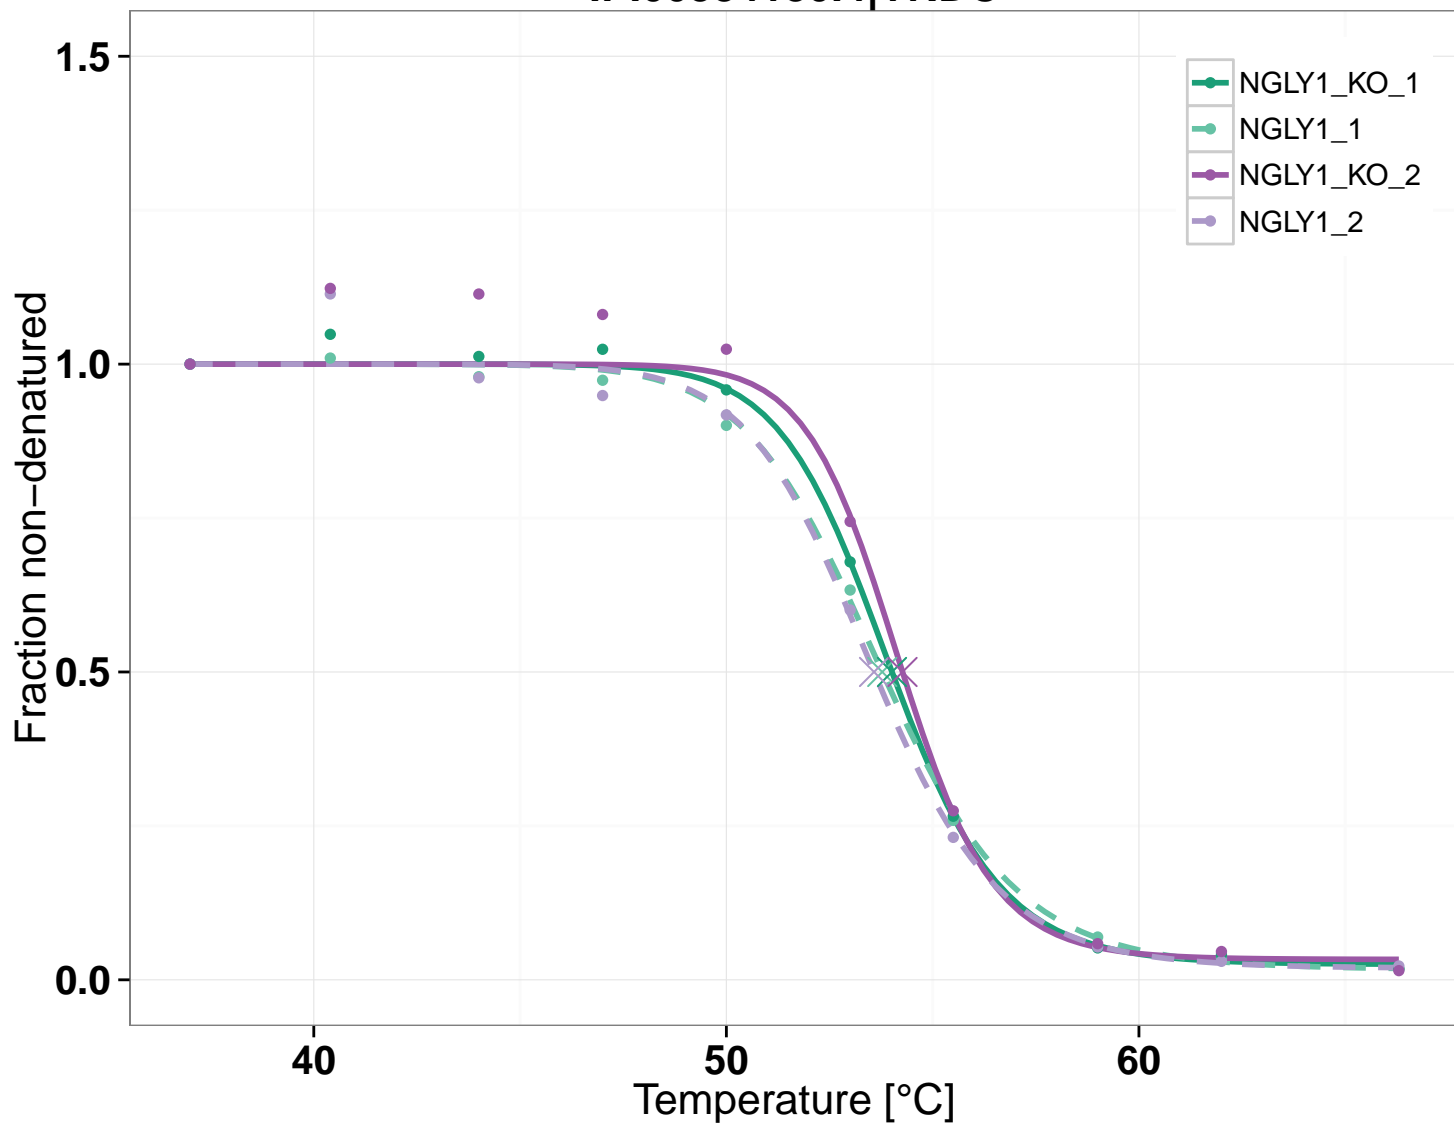

|            | meltPoint | slope | plateau | R2   |
|------------|-----------|-------|---------|------|
| NGLY1_KO_1 | 54.01     | -0.18 | 0.02    | 1    |
| NGLY1_1    | 53.78     | -0.15 | 0.02    | 1    |
| NGLY1_KO_2 | 54.27     | -0.21 | 0.03    | 0.98 |
| NGLY1_2    | 53.58     | -0.16 | 0.02    | 0.99 |

Supplement: Supplementary file 2523 [file 1]

# IPI00478758.2|C10ORF119

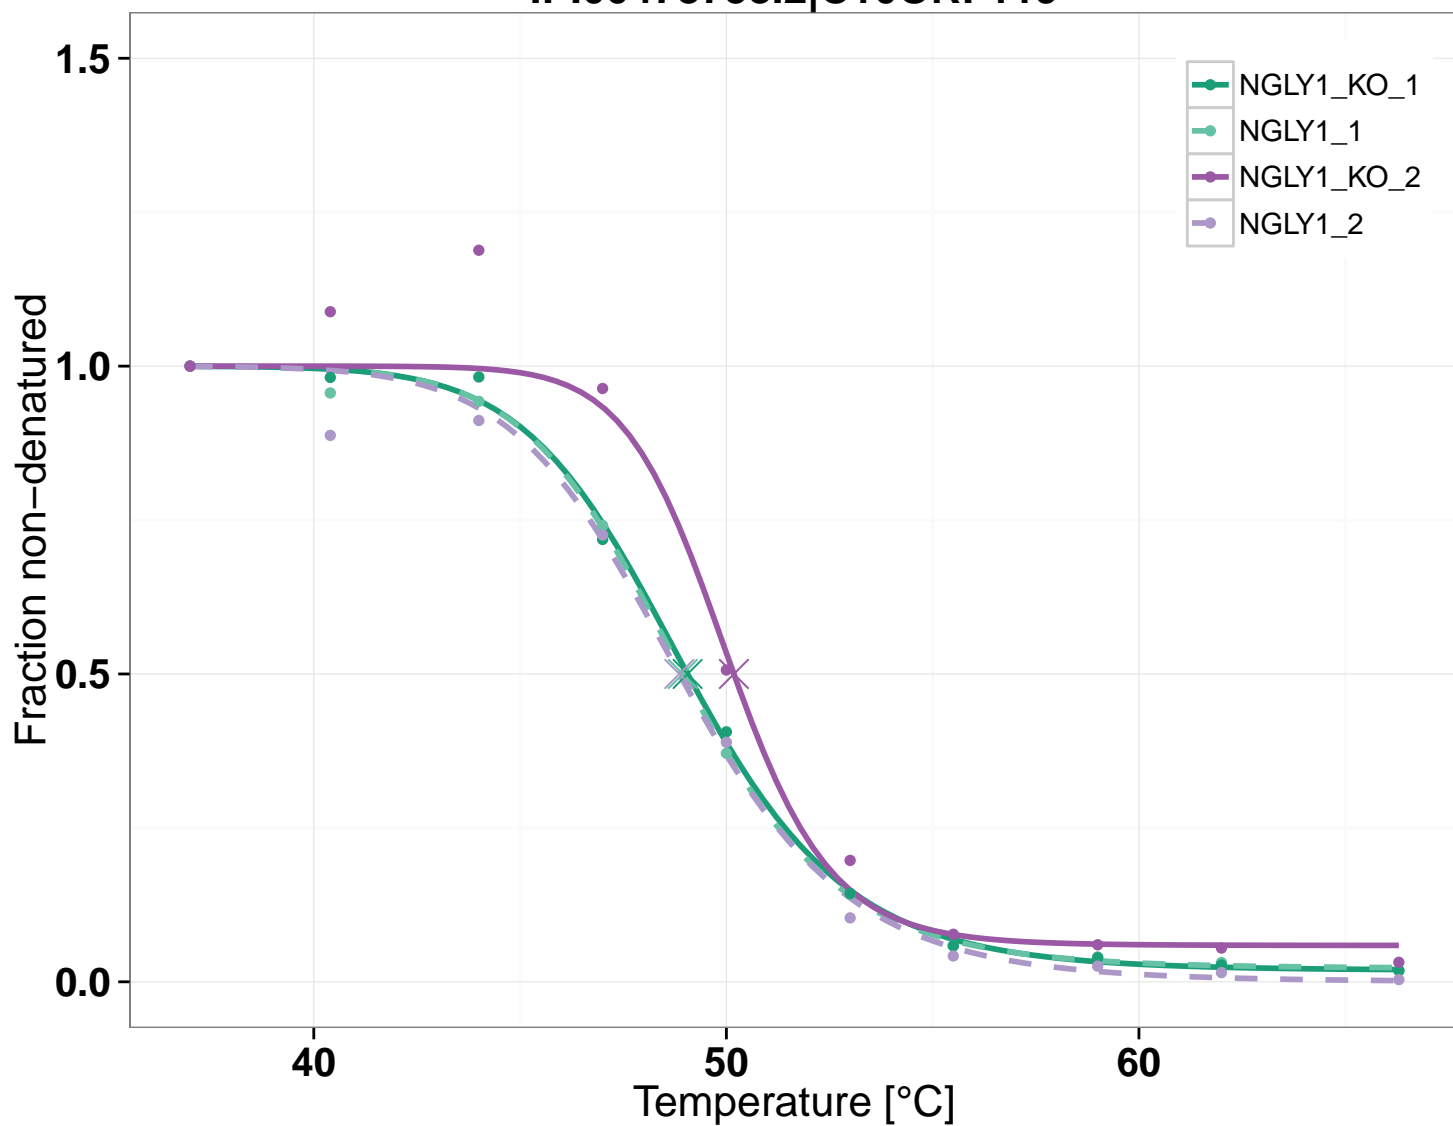

|            | meltPoint | slope | plateau | R2   |
|------------|-----------|-------|---------|------|
| NGLY1_KO_1 | 49.06     | -0.13 | 0.02    | 1    |
| NGLY1_1    | 48.94     | -0.13 | 0.02    | 1    |
| NGLY1_KO_2 | 50.18     | -0.19 | 0.06    | 0.98 |
| NGLY1_2    | 48.86     | -0.12 | 0       | 0.99 |

Supplement: Supplementary file 2524 [file 1]

IPI00420014.2|SNRNP200

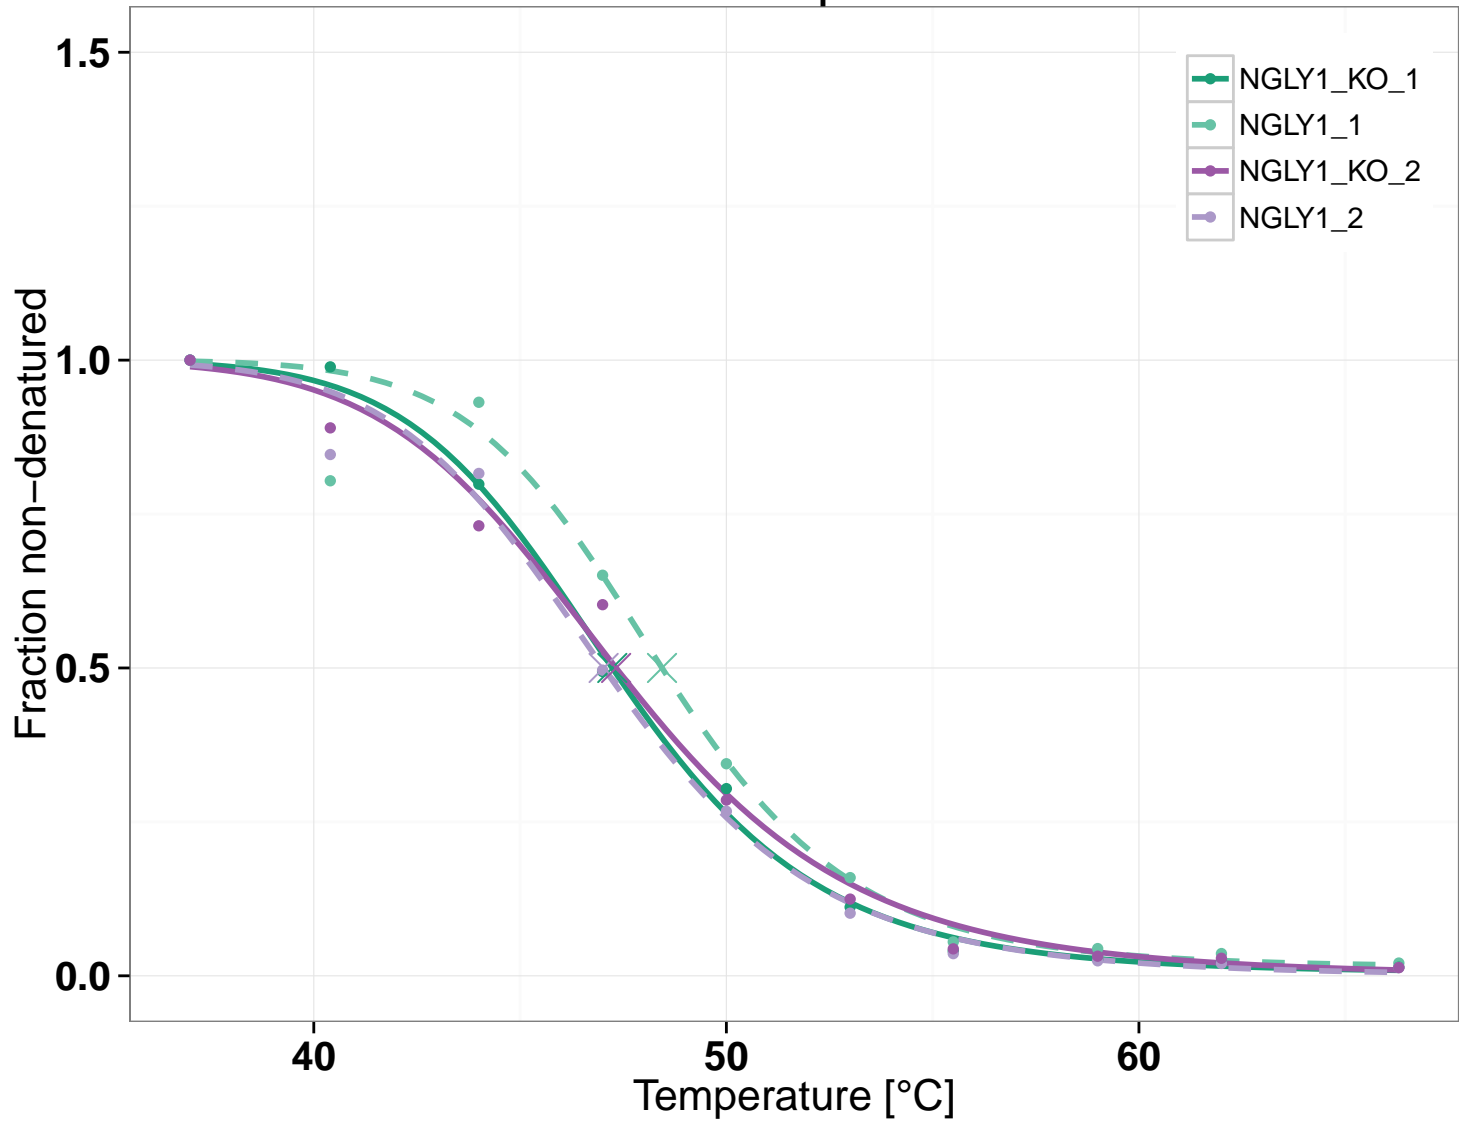

|            | meltPoint | slope  | plateau | R2   |
|------------|-----------|--------|---------|------|
| NGLY1_KO_1 | 47.23     | -0.1   | 0       | 1    |
| NGLY1_1    | 48.44     | -0.11  | 0.01    | 0.98 |
| NGLY1_KO_2 | 47.33     | -0.087 | 0       | 0.99 |
| NGLY1_2    | 47.02     | -0.096 | 0       | 0.99 |

Supplement: Supplementary file 2525 [file 1]

IPI00797056.1|ZBTB10

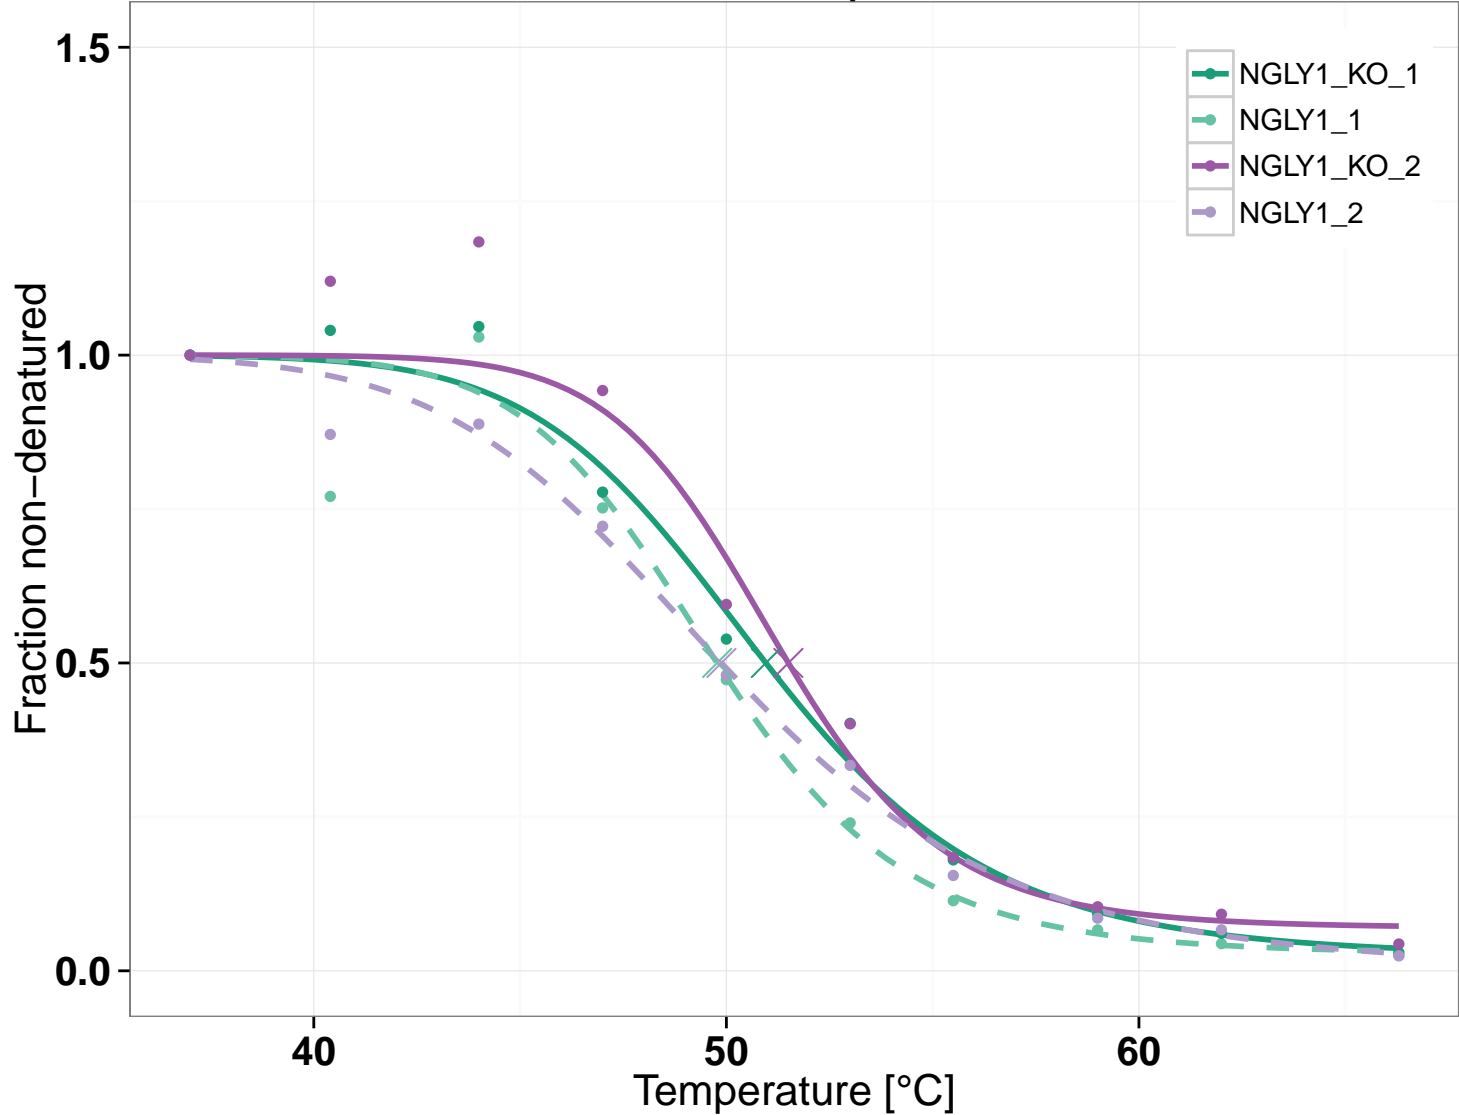

|            | meltPoint | slope  | plateau | R2   |
|------------|-----------|--------|---------|------|
| NGLY1_KO_1 | 50.96     | -0.088 | 0.02    | 0.99 |
| NGLY1_1    | 49.78     | -0.1   | 0.03    | 0.96 |
| NGLY1_KO_2 | 51.5      | -0.11  | 0.07    | 0.97 |
| NGLY1_2    | 49.88     | -0.073 | 0       | 0.99 |

Supplement: Supplementary file 2526 [file 1]

# IPI00256376.6|ECHDC3

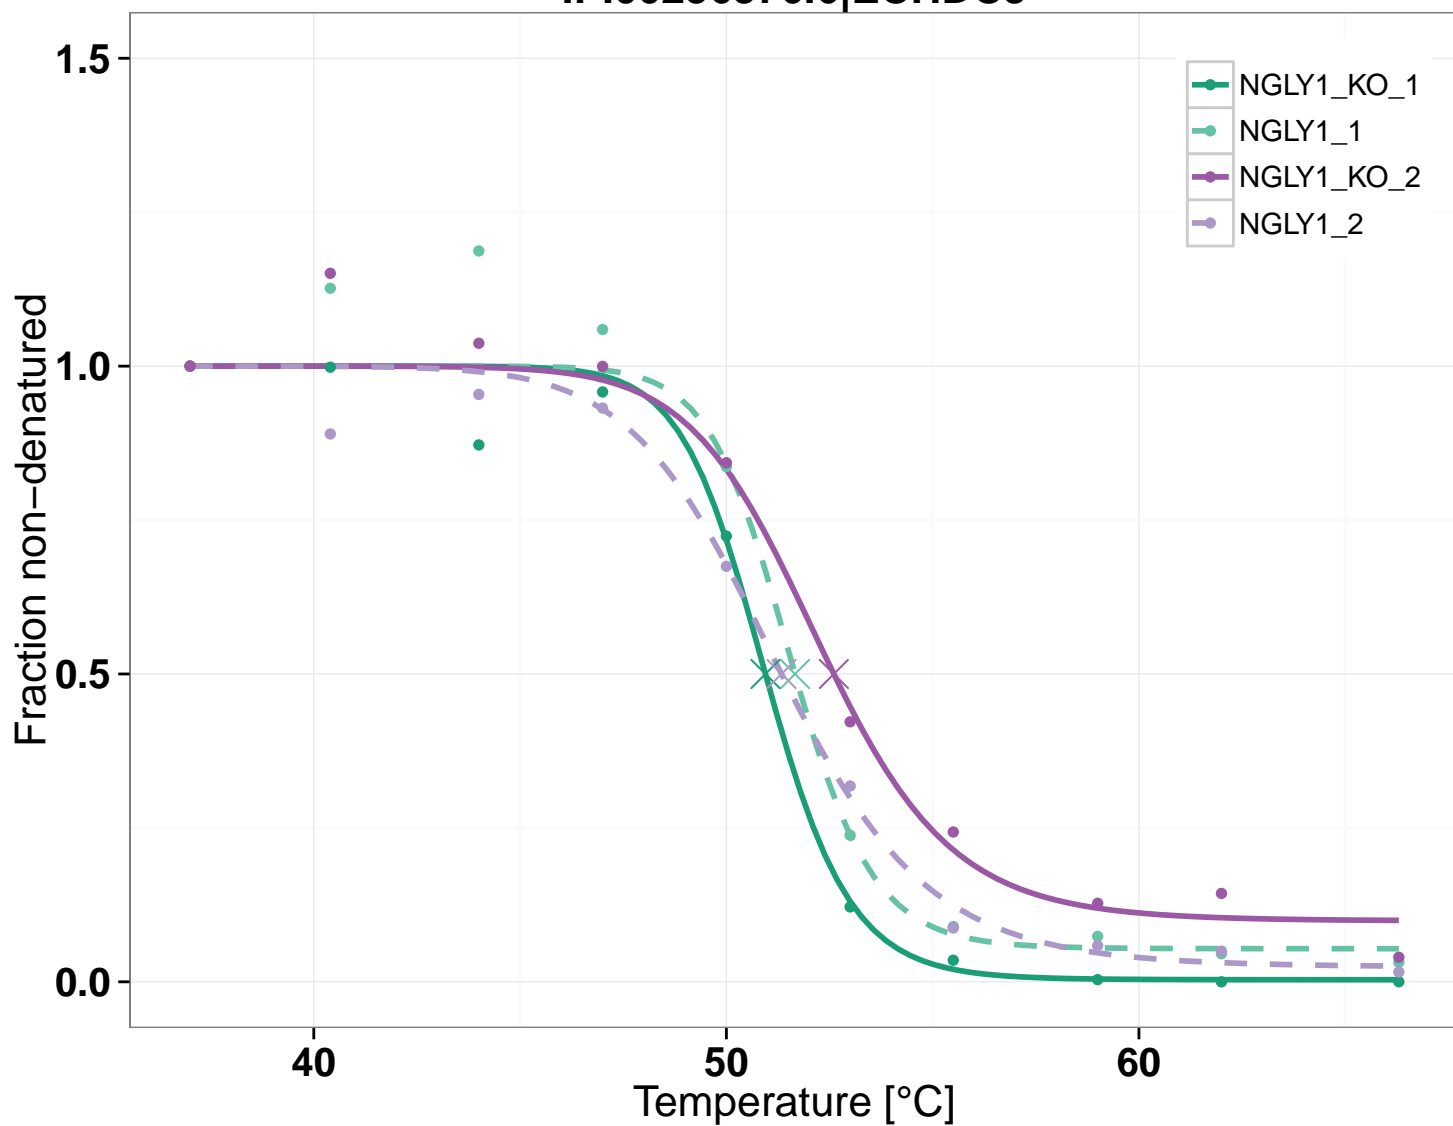

|            | meltPoint | slope | plateau | R2   |
|------------|-----------|-------|---------|------|
| NGLY1_KO_1 | 50.95     | -0.24 | 0       | 0.99 |
| NGLY1_1    | 51.66     | -0.24 | 0.05    | 0.98 |
| NGLY1_KO_2 | 52.6      | -0.14 | 0.1     | 0.98 |
| NGLY1_2    | 51.34     | -0.14 | 0.02    | 0.99 |

Supplement: Supplementary file 2527 [file 1]

IPI00743509.2|E2F3

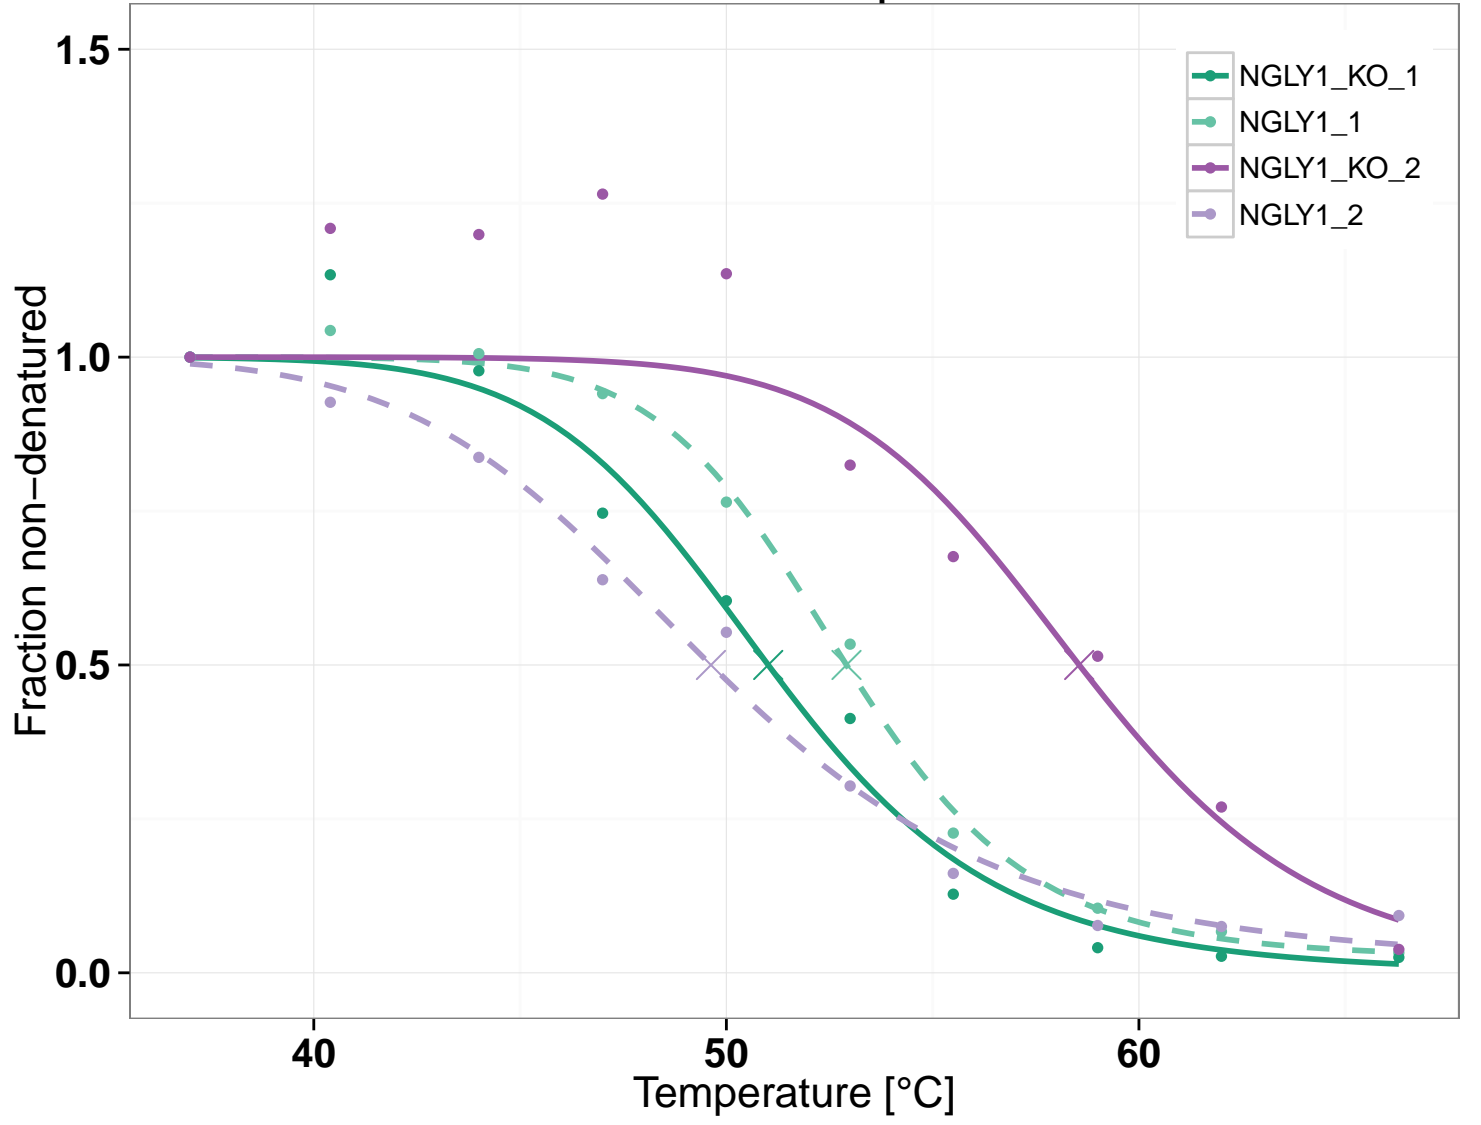

|            | meltPoint | slope  | plateau | R2   |
|------------|-----------|--------|---------|------|
| NGLY1_KO_1 | 51.01     | -0.091 | 0       | 0.98 |
| NGLY1_1    | 52.91     | -0.11  | 0.02    | 1    |
| NGLY1_KO_2 | 58.55     | -0.087 | 0       | 0.88 |
| NGLY1_2    | 49.63     | -0.068 | 0.01    | 0.99 |

Supplement: Supplementary file 2528 [file 1]

# IPI00030116.2|PGM3

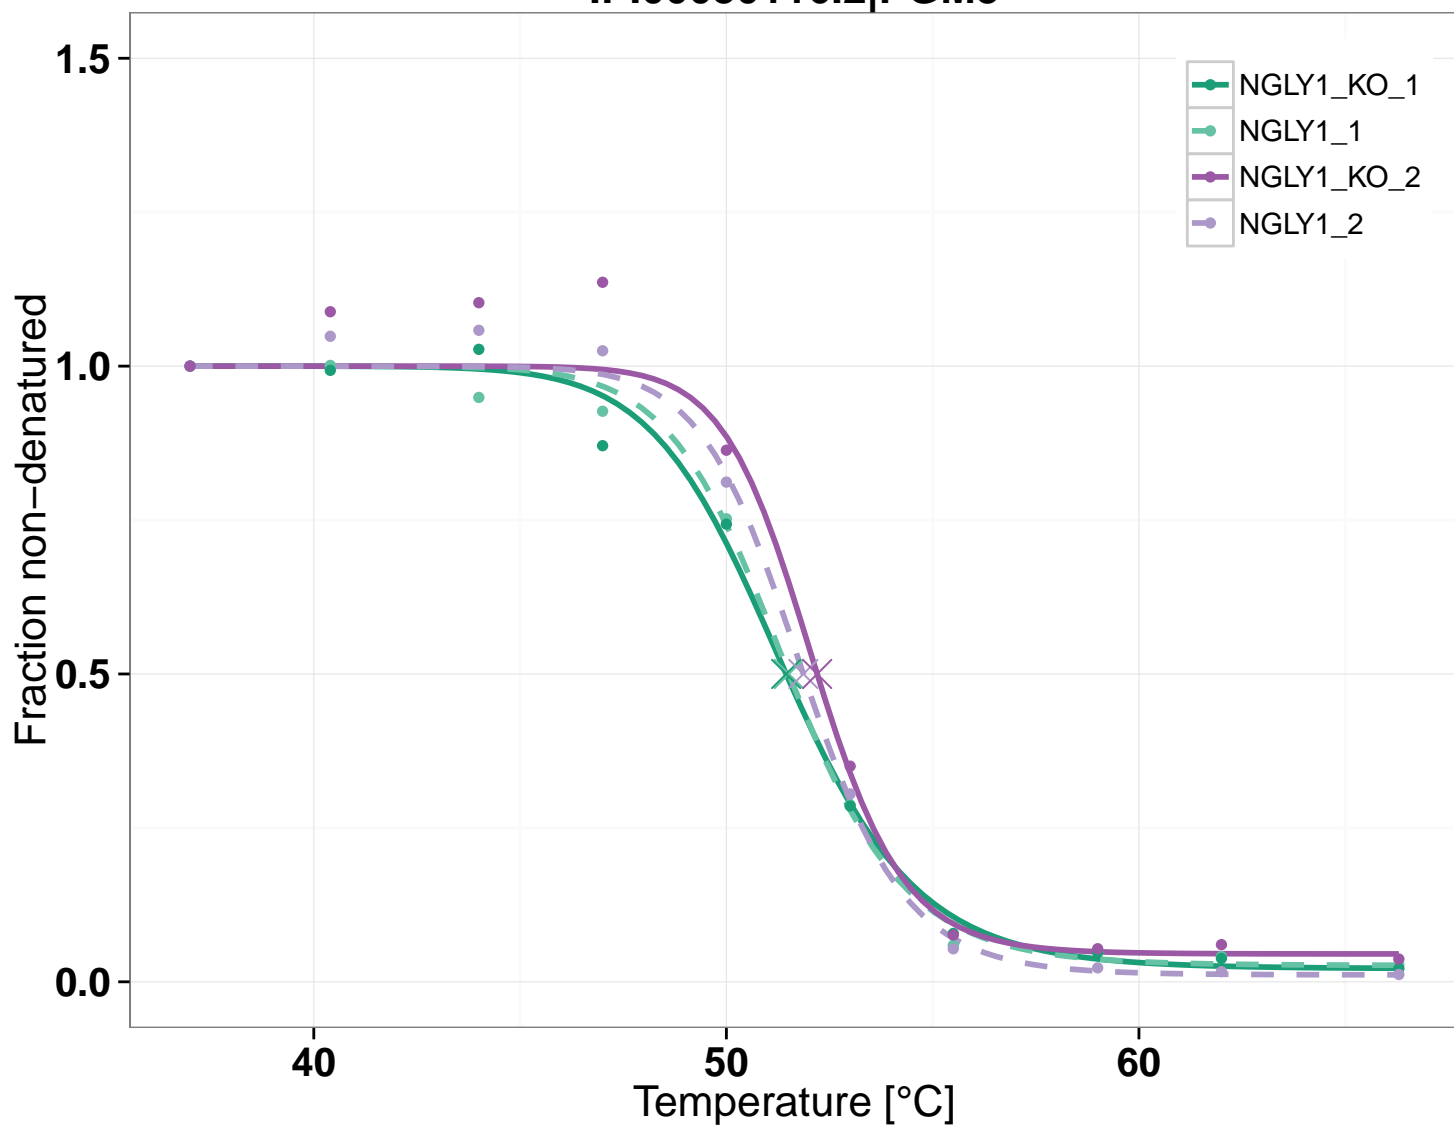

|            | meltPoint | slope | plateau | R2   |
|------------|-----------|-------|---------|------|
| NGLY1_KO_1 | 51.45     | -0.15 | 0.02    | 0.99 |
| NGLY1_1    | 51.52     | -0.17 | 0.03    | 1    |
| NGLY1_KO_2 | 52.2      | -0.22 | 0.05    | 0.98 |
| NGLY1_2    | 51.87     | -0.2  | 0.01    | 1    |

Supplement: Supplementary file 2529 [file 1]

# IPI00026268.3|GNB1

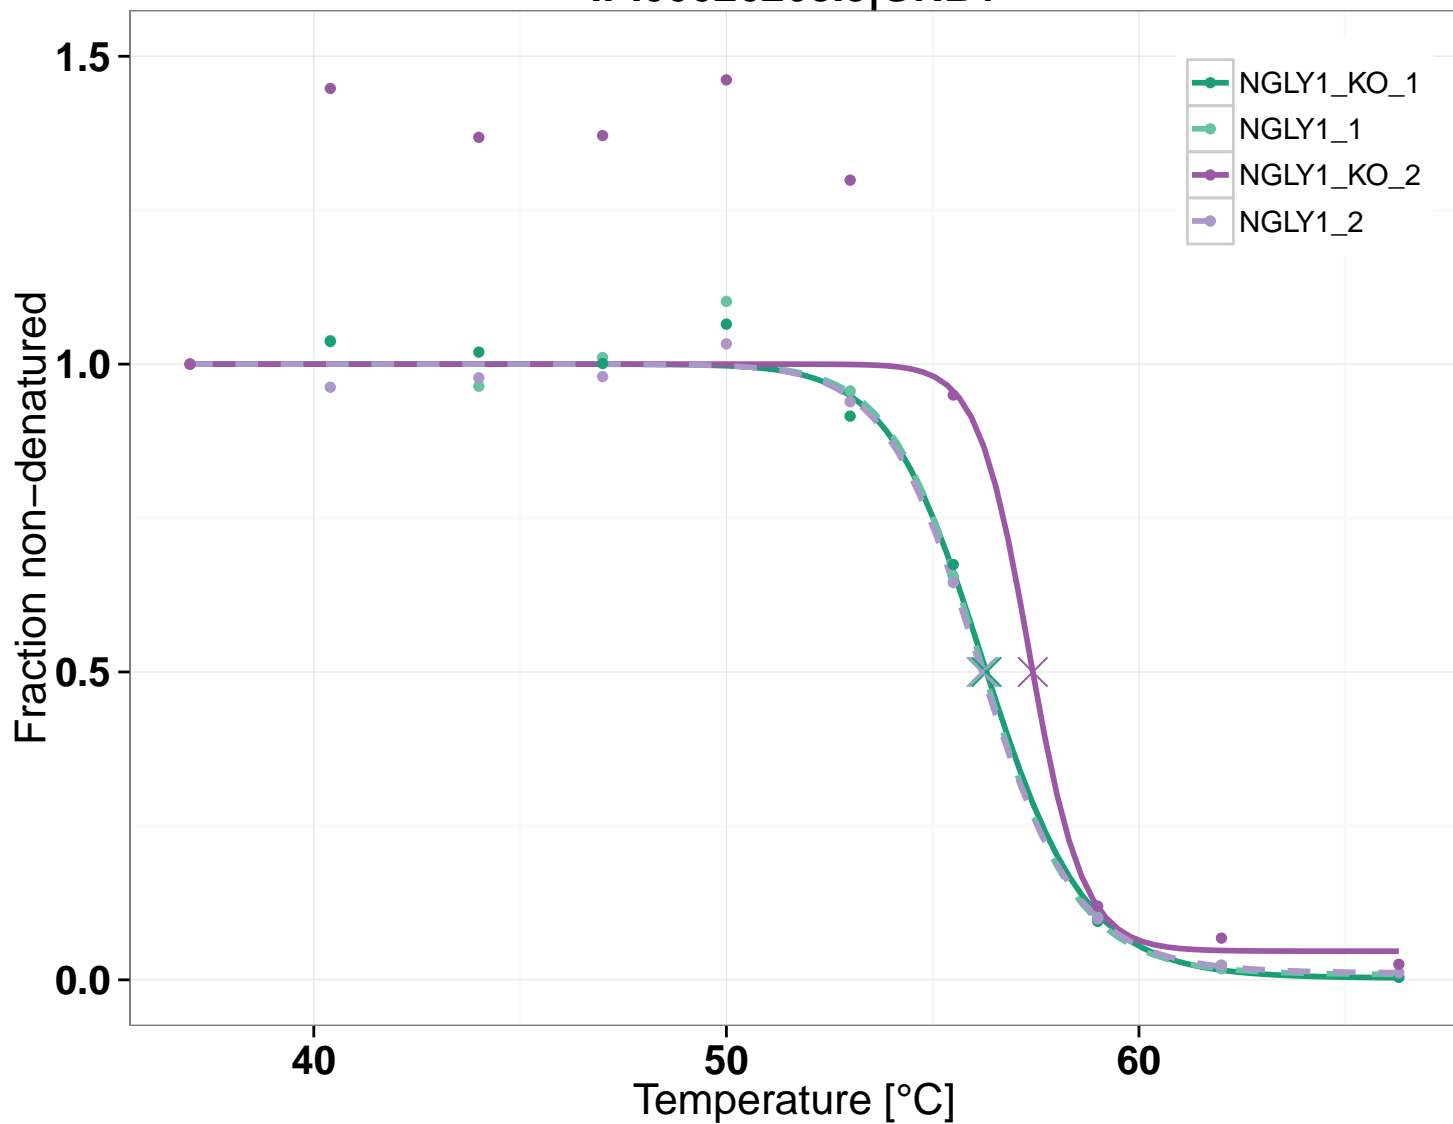

|            | meltPoint | slope | plateau | R2   |
|------------|-----------|-------|---------|------|
| NGLY1_KO_1 | 56.31     | -0.21 | 0       | 1    |
| NGLY1_1    | 56.24     | -0.22 | 0.01    | 0.99 |
| NGLY1_KO_2 | 57.43     | -0.38 | 0.05    | 0.76 |
| NGLY1_2    | 56.19     | -0.21 | 0.01    | 1    |

Supplement: Supplementary file 2530 [file 1]

IPI00027232.3|IGF1R

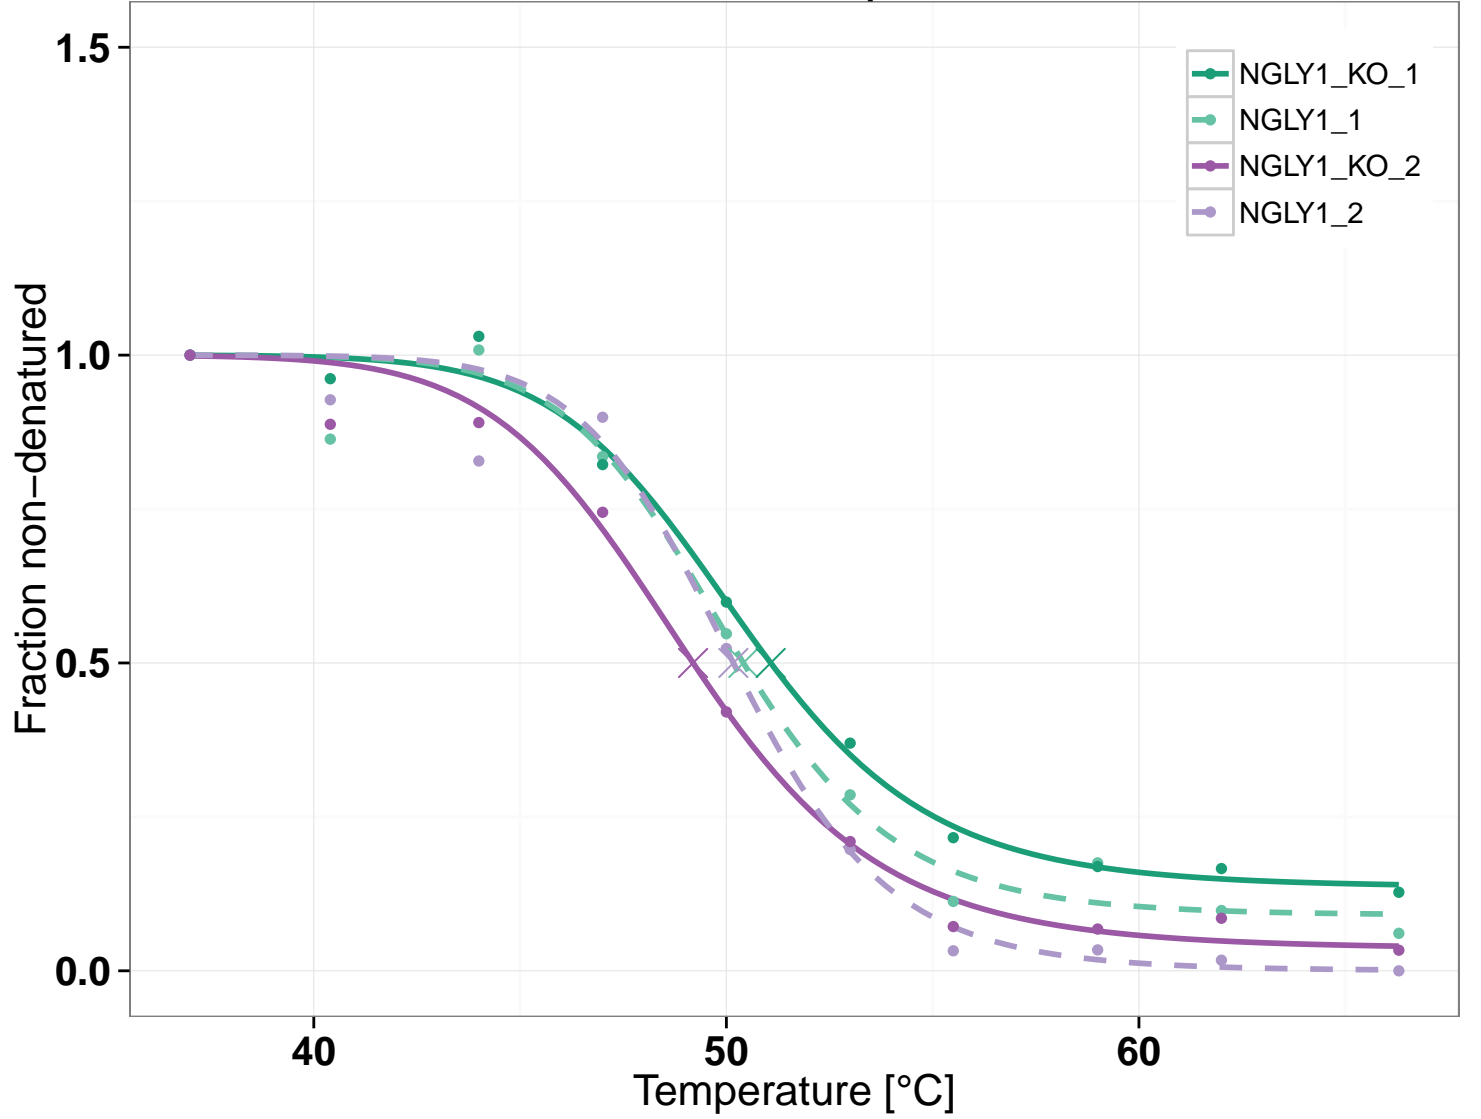

|            | meltPoint | slope  | plateau | R2   |
|------------|-----------|--------|---------|------|
| NGLY1_KO_1 | 51.07     | -0.095 | 0.14    | 0.99 |
| NGLY1_1    | 50.41     | -0.11  | 0.09    | 0.98 |
| NGLY1_KO_2 | 49.19     | -0.1   | 0.04    | 0.99 |
| NGLY1_2    | 50.17     | -0.13  | 0       | 0.98 |

Supplement: Supplementary file 2531 [file 1]

IPI00254338.2|FAM134C

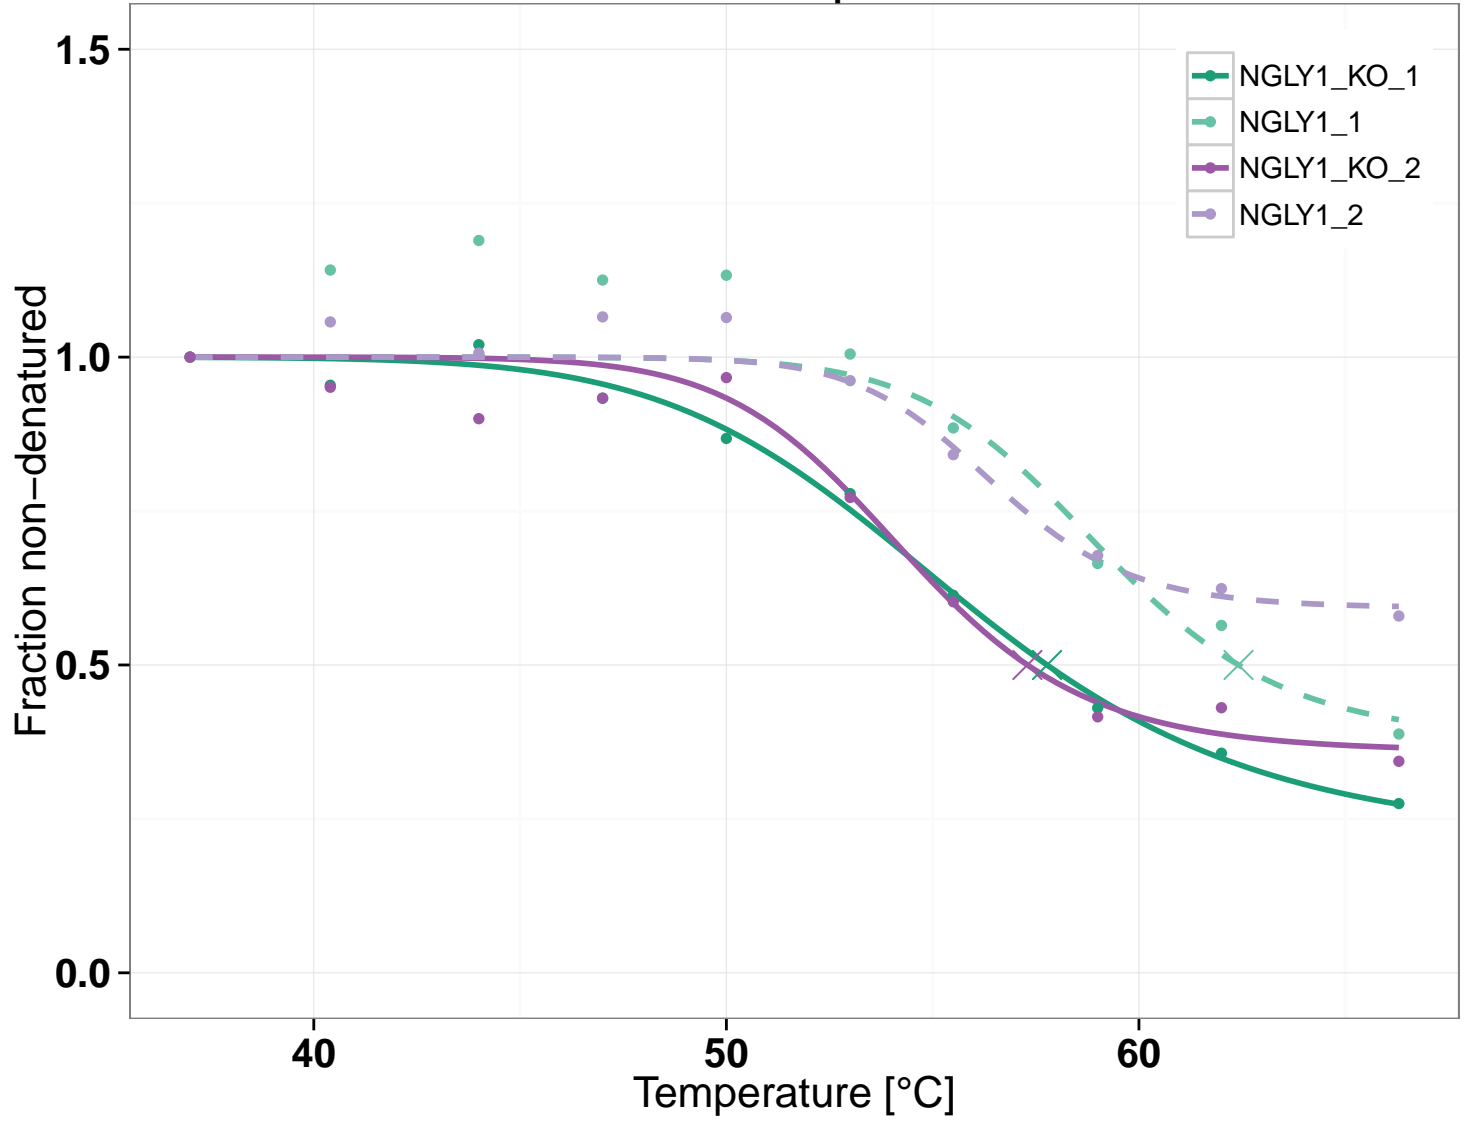

|            | meltPoint | slope  | plateau | R2   |
|------------|-----------|--------|---------|------|
| NGLY1_KO_1 | 57.77     | -0.055 | 0.21    | 0.99 |
| NGLY1_1    | 62.41     | -0.07  | 0.38    | 0.86 |
| NGLY1_KO_2 | 57.3      | -0.073 | 0.36    | 0.97 |
| NGLY1_2    | -         | -0.061 | 0.59    | 0.96 |

Supplement: Supplementary file 2532 [file 1]

IPI00291010.2|C17ORF63

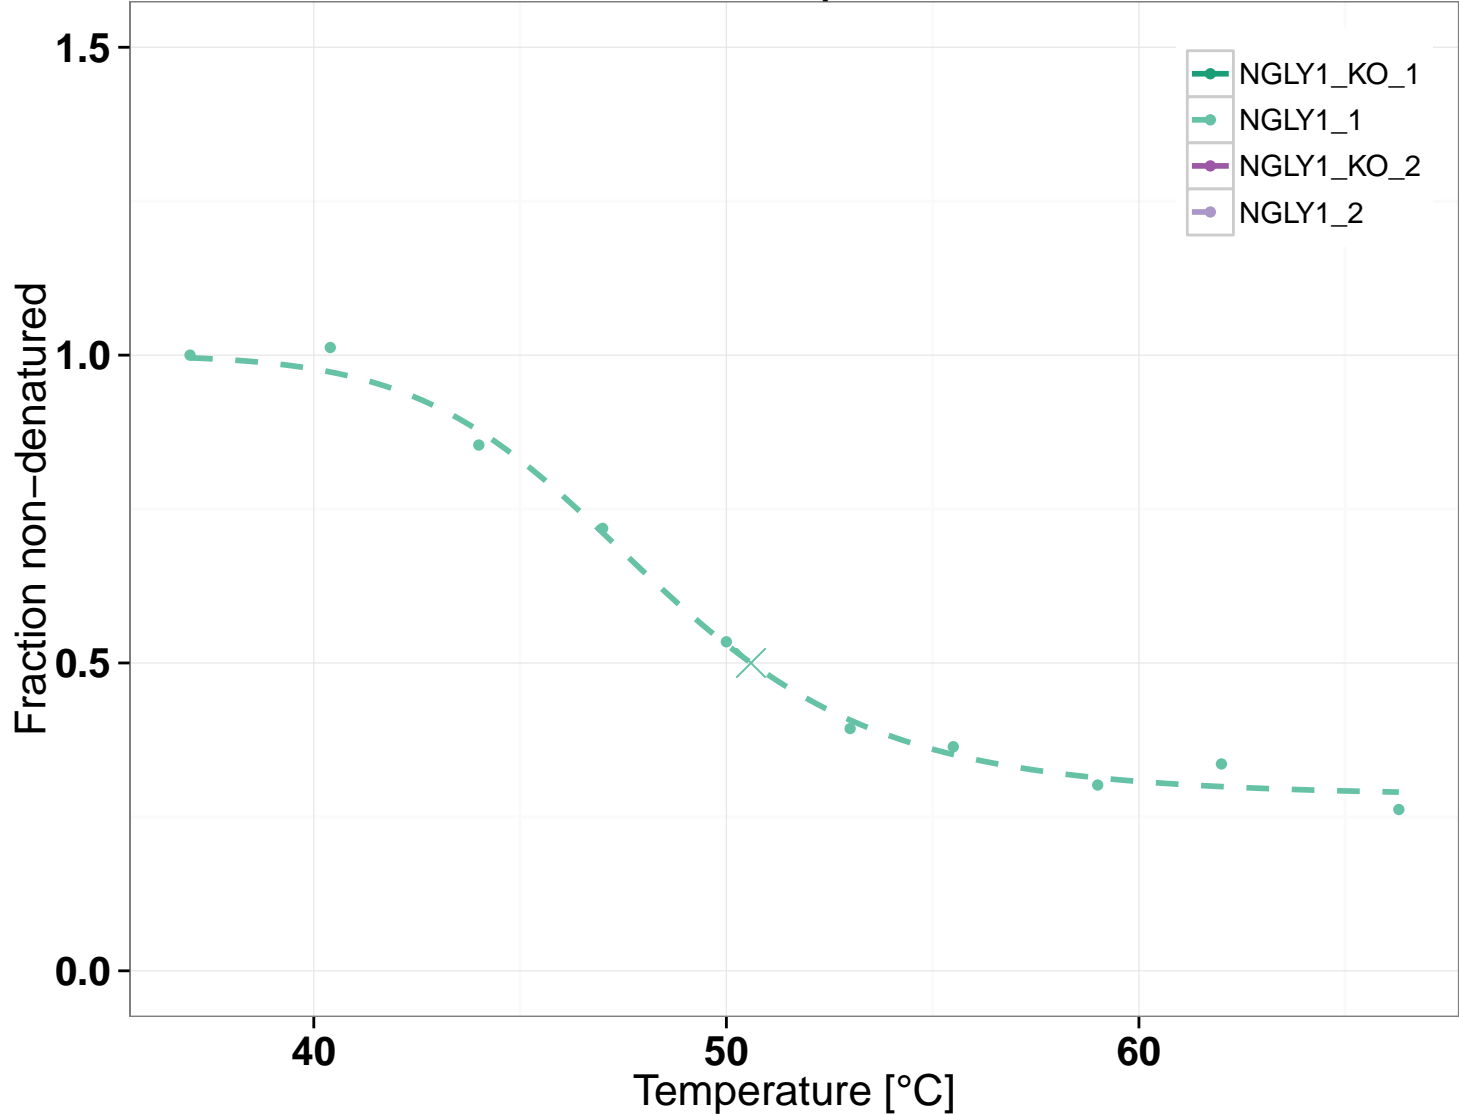

|            | meltPoint | slope  | plateau | R2   |
|------------|-----------|--------|---------|------|
| NGLY1_KO_1 | -         | -      | -       | -    |
| NGLY1_1    | 50.6      | -0.064 | 0.28    | 0.99 |
| NGLY1_KO_2 | -         | -      | -       | -    |
| NGLY1_2    | -         | -      | -       | -    |

Supplement: Supplementary file 2533 [file 1]

IPI00480142.2|CUL4B

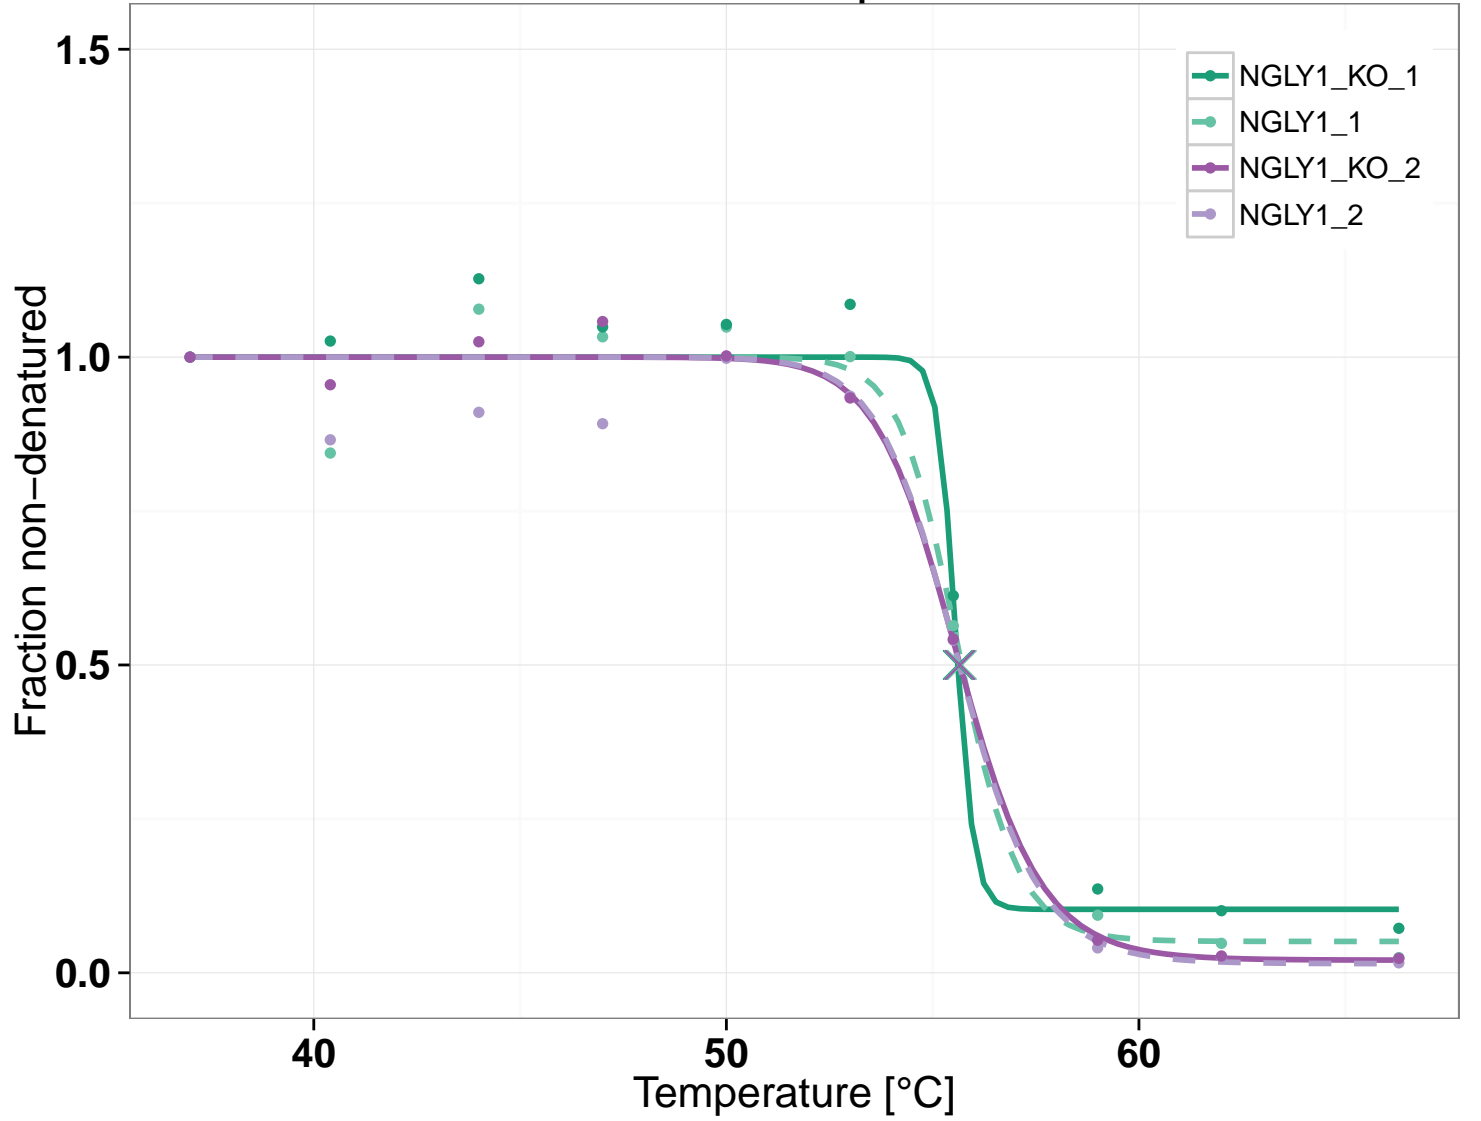

|            | meltPoint | slope | plateau | R2   |
|------------|-----------|-------|---------|------|
| NGLY1_KO_1 | 55.61     | -1    | 0.1     | 0.98 |
| NGLY1_1    | 55.7      | -0.33 | 0.05    | 0.98 |
| NGLY1_KO_2 | 55.66     | -0.24 | 0.02    | 1    |
| NGLY1_2    | 55.65     | -0.25 | 0.01    | 0.98 |

Supplement: Supplementary file 2534 [file 1]

# IPI00396145.1|PIP5K3

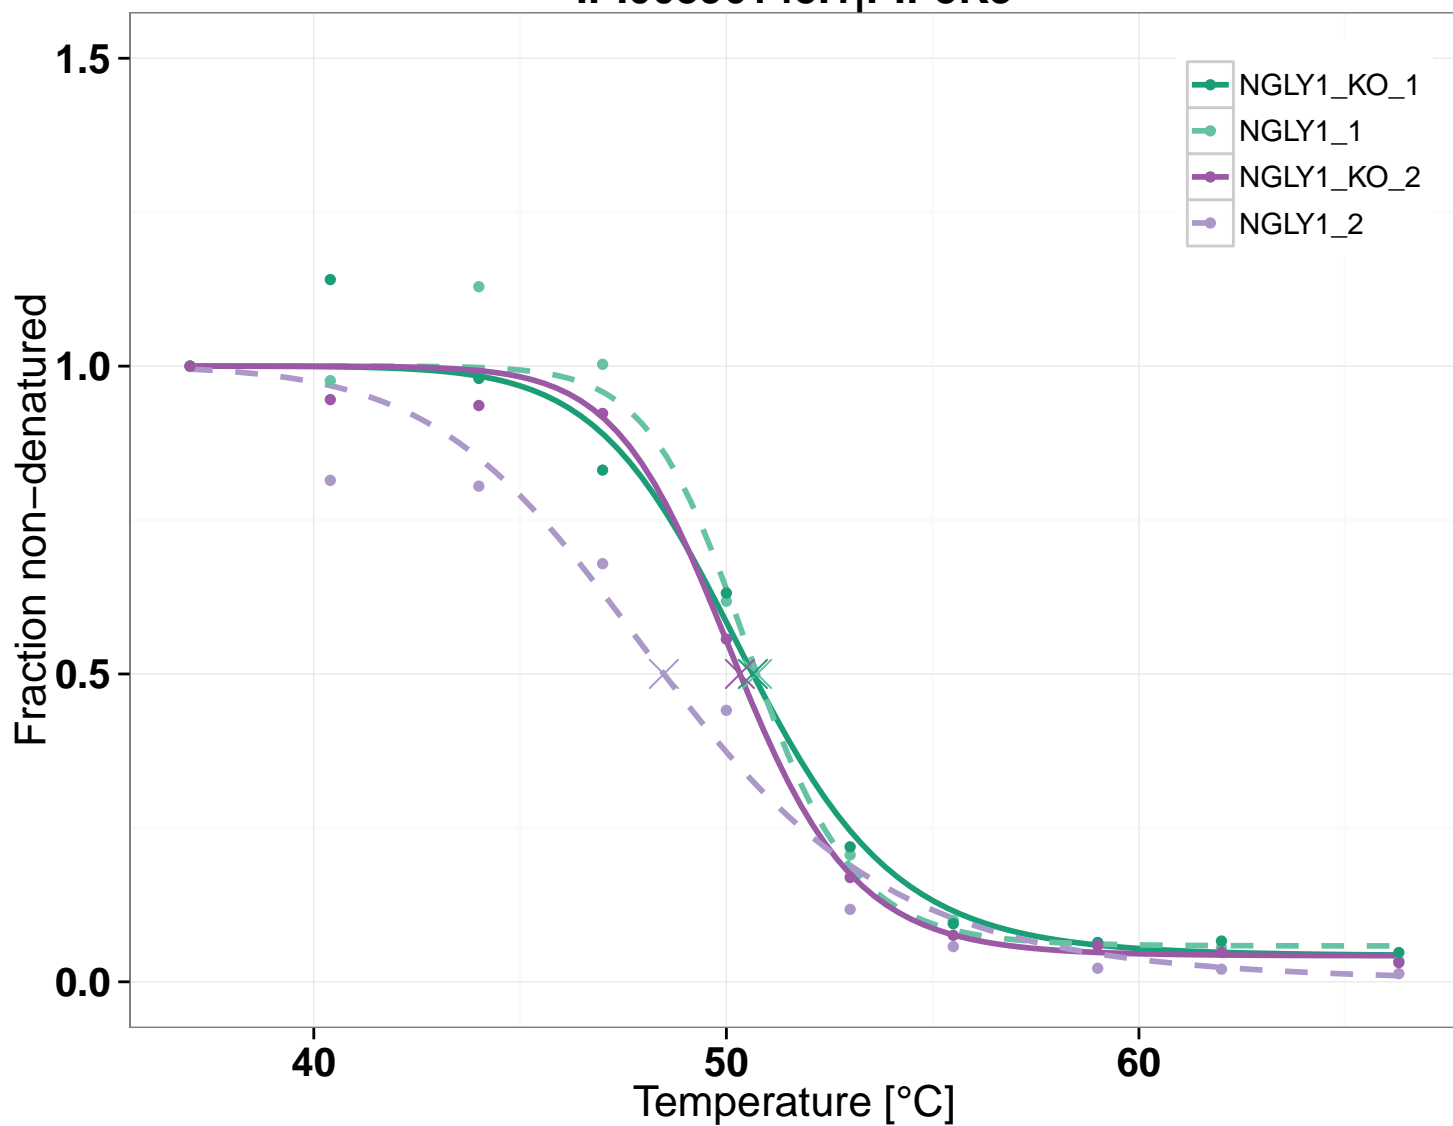

|            | meltPoint | slope  | plateau | R2   |
|------------|-----------|--------|---------|------|
| NGLY1_KO_1 | 50.64     | -0.13  | 0.04    | 0.99 |
| NGLY1_1    | 50.74     | -0.19  | 0.06    | 0.99 |
| NGLY1_KO_2 | 50.33     | -0.17  | 0.04    | 1    |
| NGLY1_2    | 48.49     | -0.089 | 0       | 0.97 |

Supplement: Supplementary file 2535 [file 1]

# IPI00012578.1|KPNA4

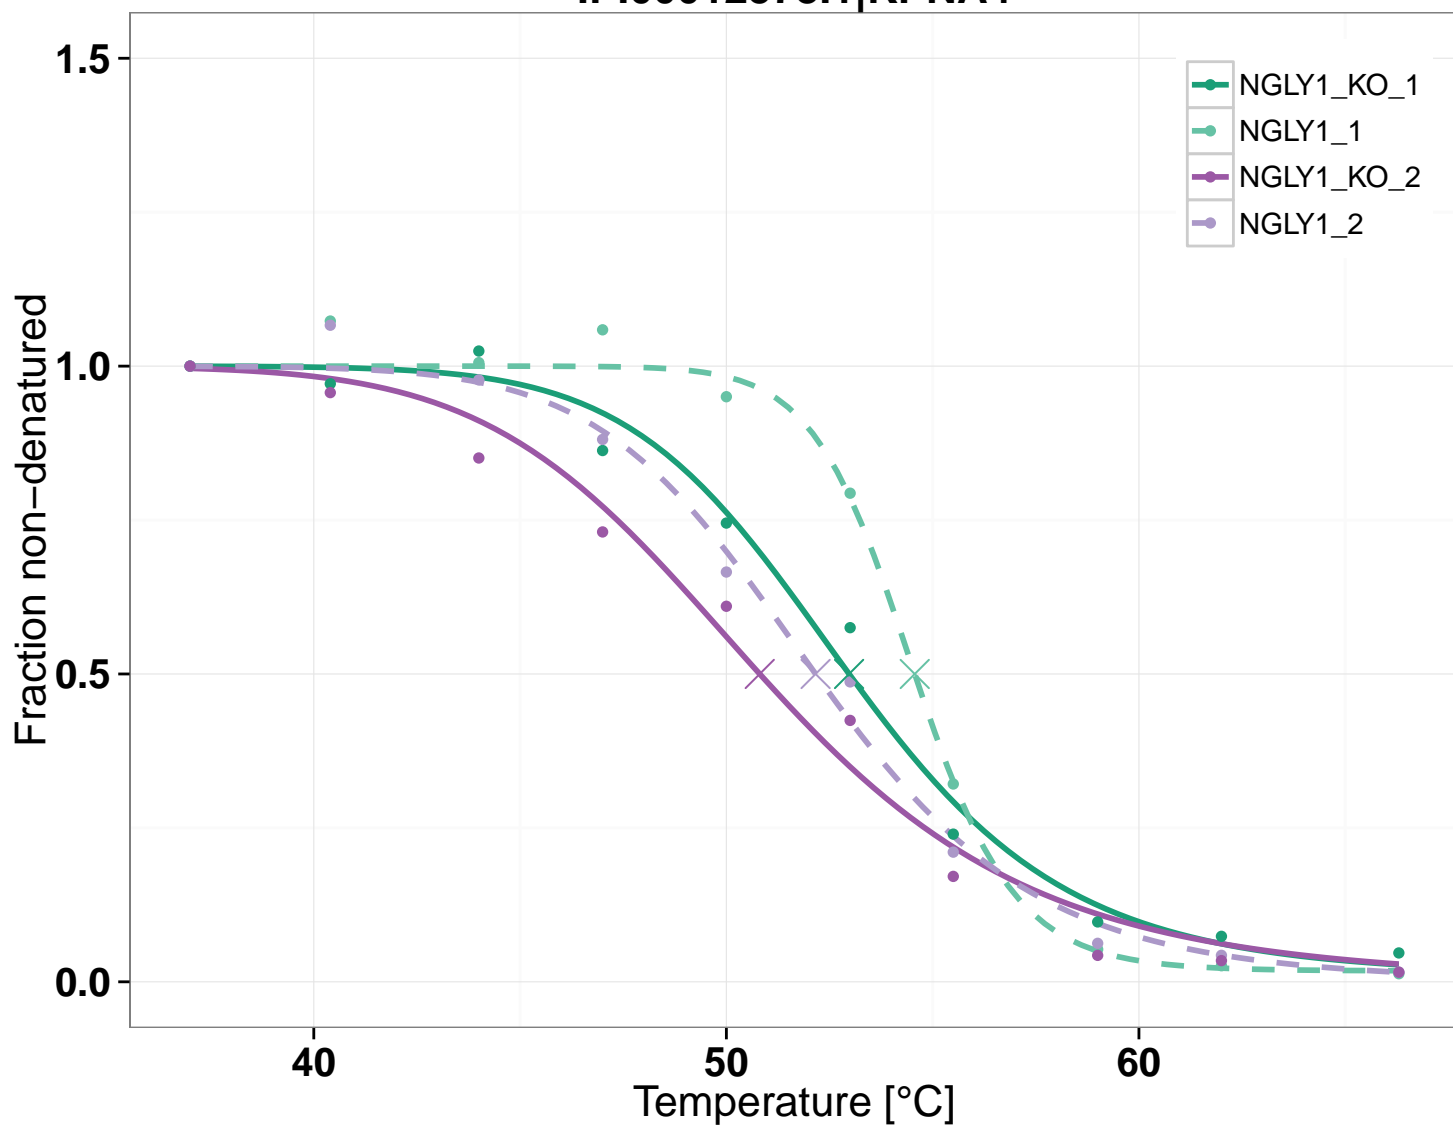

|            | meltPoint | slope  | plateau | R2   |
|------------|-----------|--------|---------|------|
| NGLY1_KO_1 | 52.97     | -0.093 | 0.01    | 0.99 |
| NGLY1_1    | 54.57     | -0.2   | 0.02    | 0.99 |
| NGLY1_KO_2 | 50.81     | -0.075 | 0       | 0.98 |
| NGLY1_2    | 52.16     | -0.094 | 0       | 0.99 |

Supplement: Supplementary file 2536 [file 1]

IPI00305010.3|FLJ11151

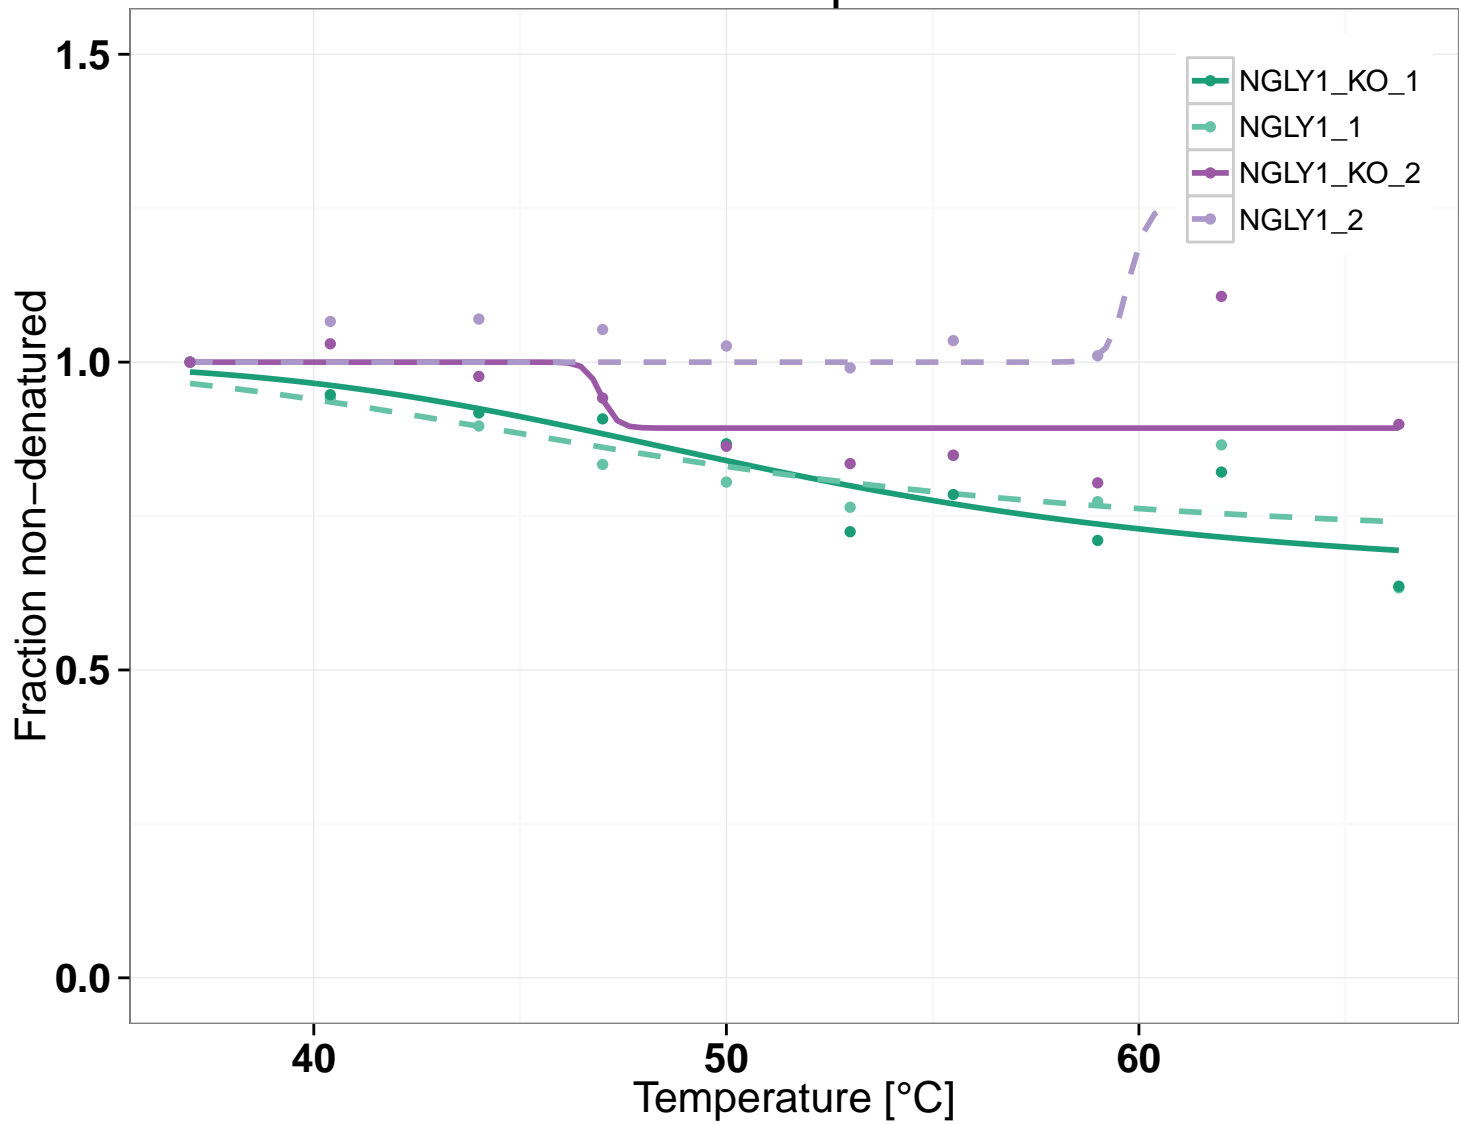

|            | meltPoint | slope  | plateau | R2   |
|------------|-----------|--------|---------|------|
| NGLY1_KO_1 | —         | −0.015 | 0.64    | 0.81 |
| NGLY1_1    | —         | −0.011 | 0.7     | 0.66 |
| NGLY1_KO_2 | —         | −0.14  | 0.89    | 0.28 |
| NGLY1_2    | —         | 0.27   | 1.26    | 0.83 |

Supplement: Supplementary file 2537 [file 1]

IPI00166873.3|C9ORF23

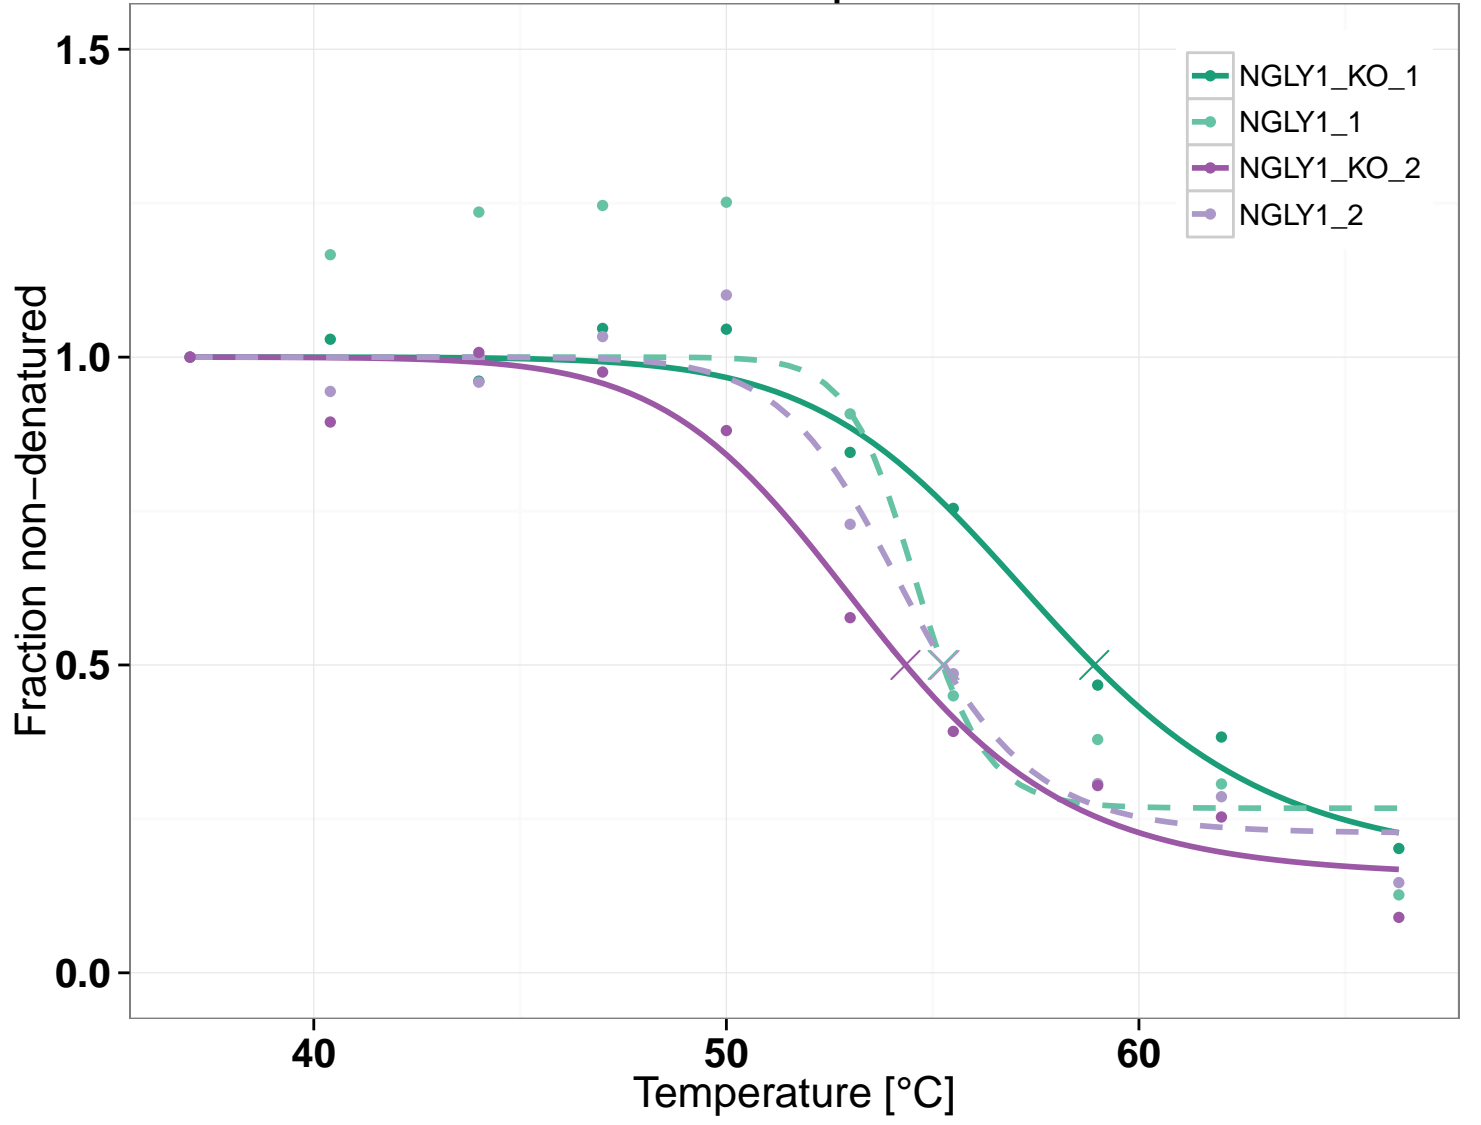

|            | meltPoint | slope  | plateau | R2   |
|------------|-----------|--------|---------|------|
| NGLY1_KO_1 | 58.92     | -0.075 | 0.17    | 0.98 |
| NGLY1_1    | 55.24     | -0.22  | 0.27    | 0.86 |
| NGLY1_KO_2 | 54.34     | -0.086 | 0.16    | 0.98 |
| NGLY1_2    | 55.29     | -0.13  | 0.23    | 0.97 |

Supplement: Supplementary file 2538 [file 1]

# IPI00436705.7|MORC3

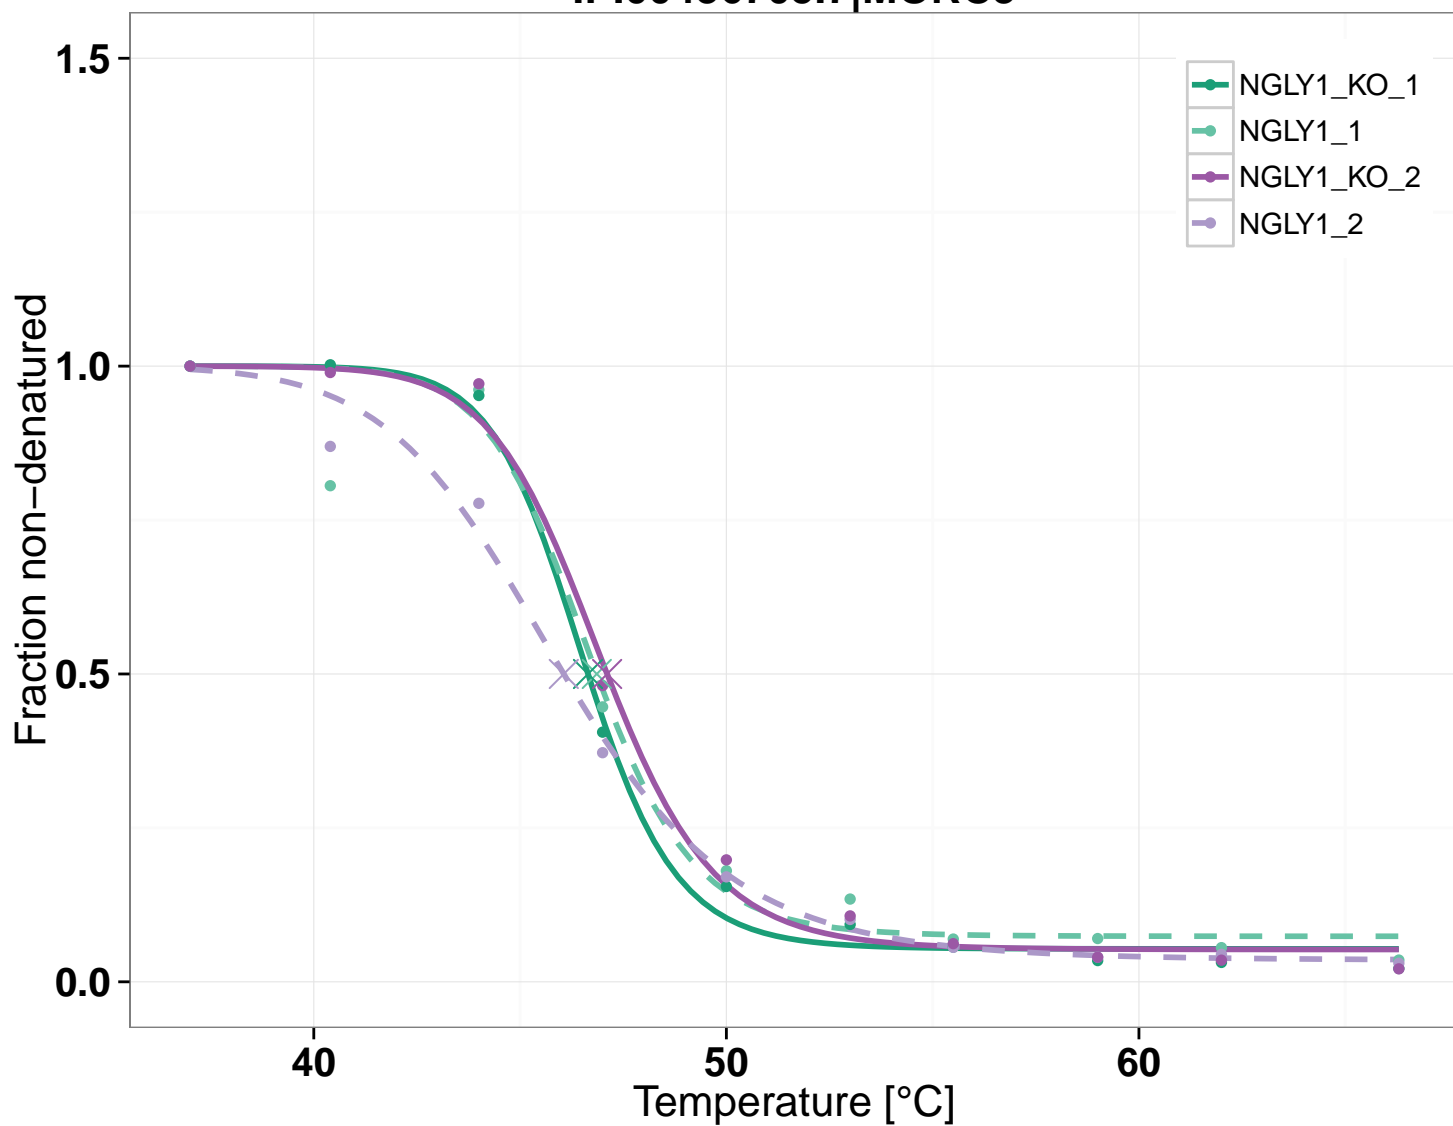

|            | meltPoint | slope | plateau | R2   |
|------------|-----------|-------|---------|------|
| NGLY1_KO_1 | 46.65     | -0.21 | 0.05    | 1    |
| NGLY1_1    | 46.86     | -0.18 | 0.07    | 0.97 |
| NGLY1_KO_2 | 47.11     | -0.17 | 0.05    | 0.99 |
| NGLY1_2    | 46.06     | -0.11 | 0.03    | 0.99 |

Supplement: Supplementary file 2539 [file 1]

# IPI00061203.1|ITPKC

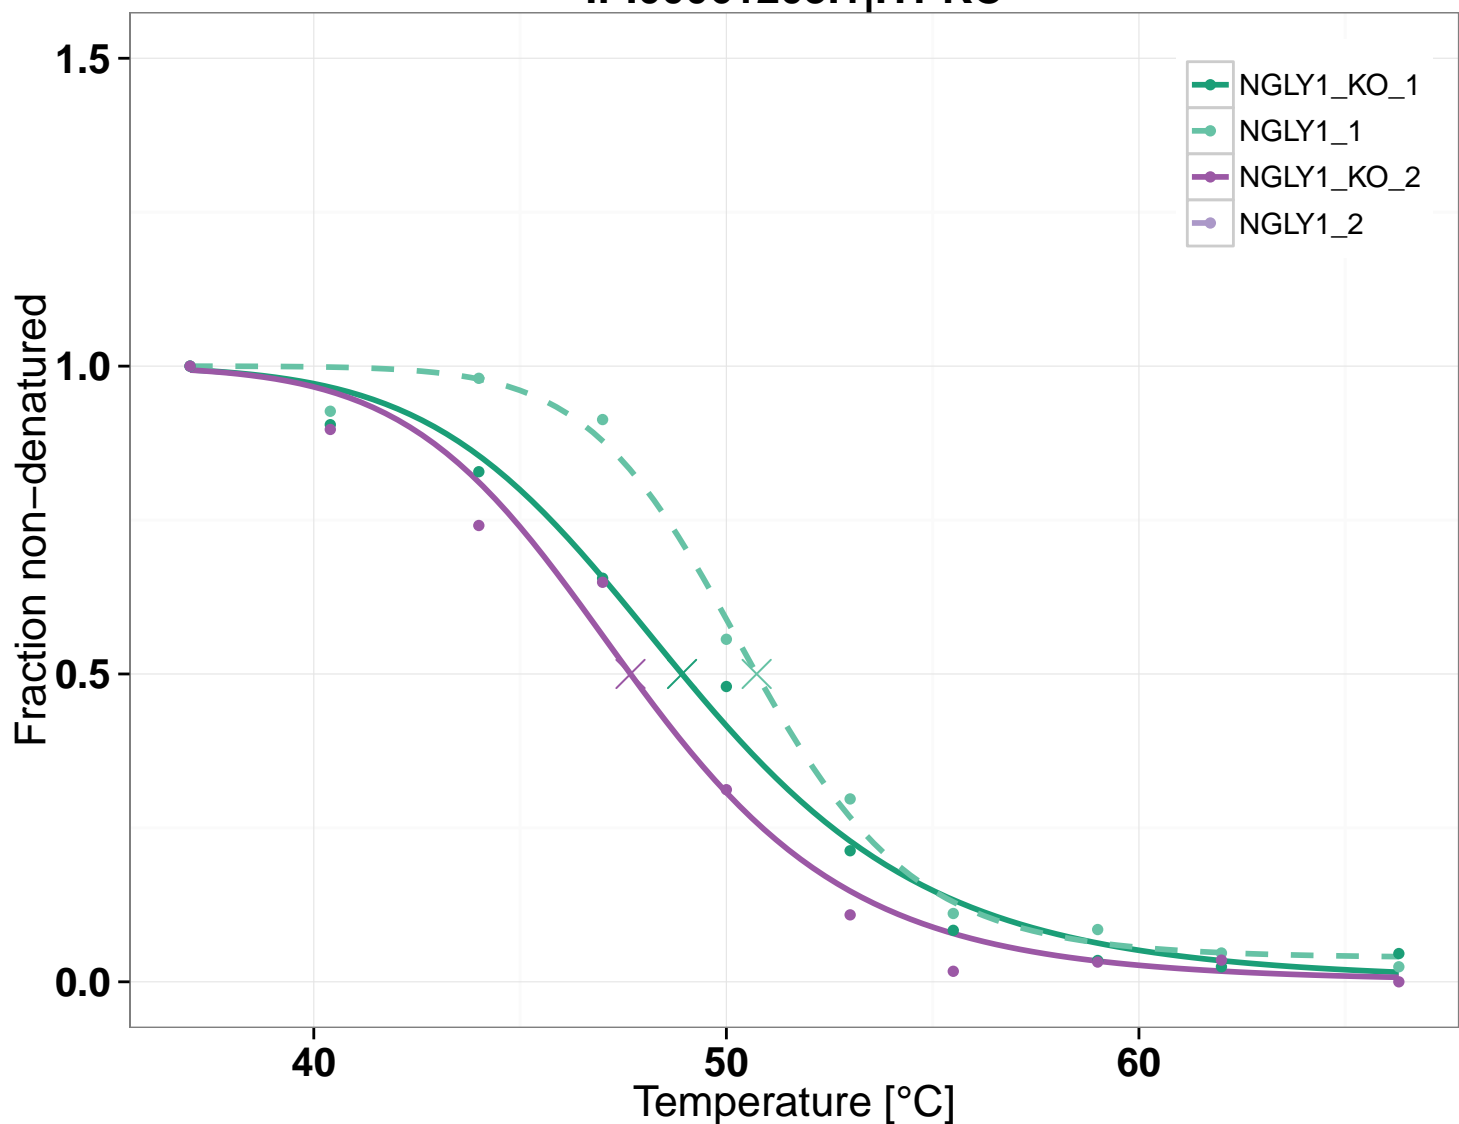

|            | meltPoint | slope  | plateau | R2   |
|------------|-----------|--------|---------|------|
| NGLY1_KO_1 | 48.93     | -0.082 | 0       | 0.99 |
| NGLY1_1    | 50.73     | -0.12  | 0.04    | 0.99 |
| NGLY1_KO_2 | 47.68     | -0.093 | 0       | 0.98 |
| NGLY1_2    | -         | -      | -       | -    |

Supplement: Supplementary file 2540 [file 1]

IPI00178440.3|EEF1B2

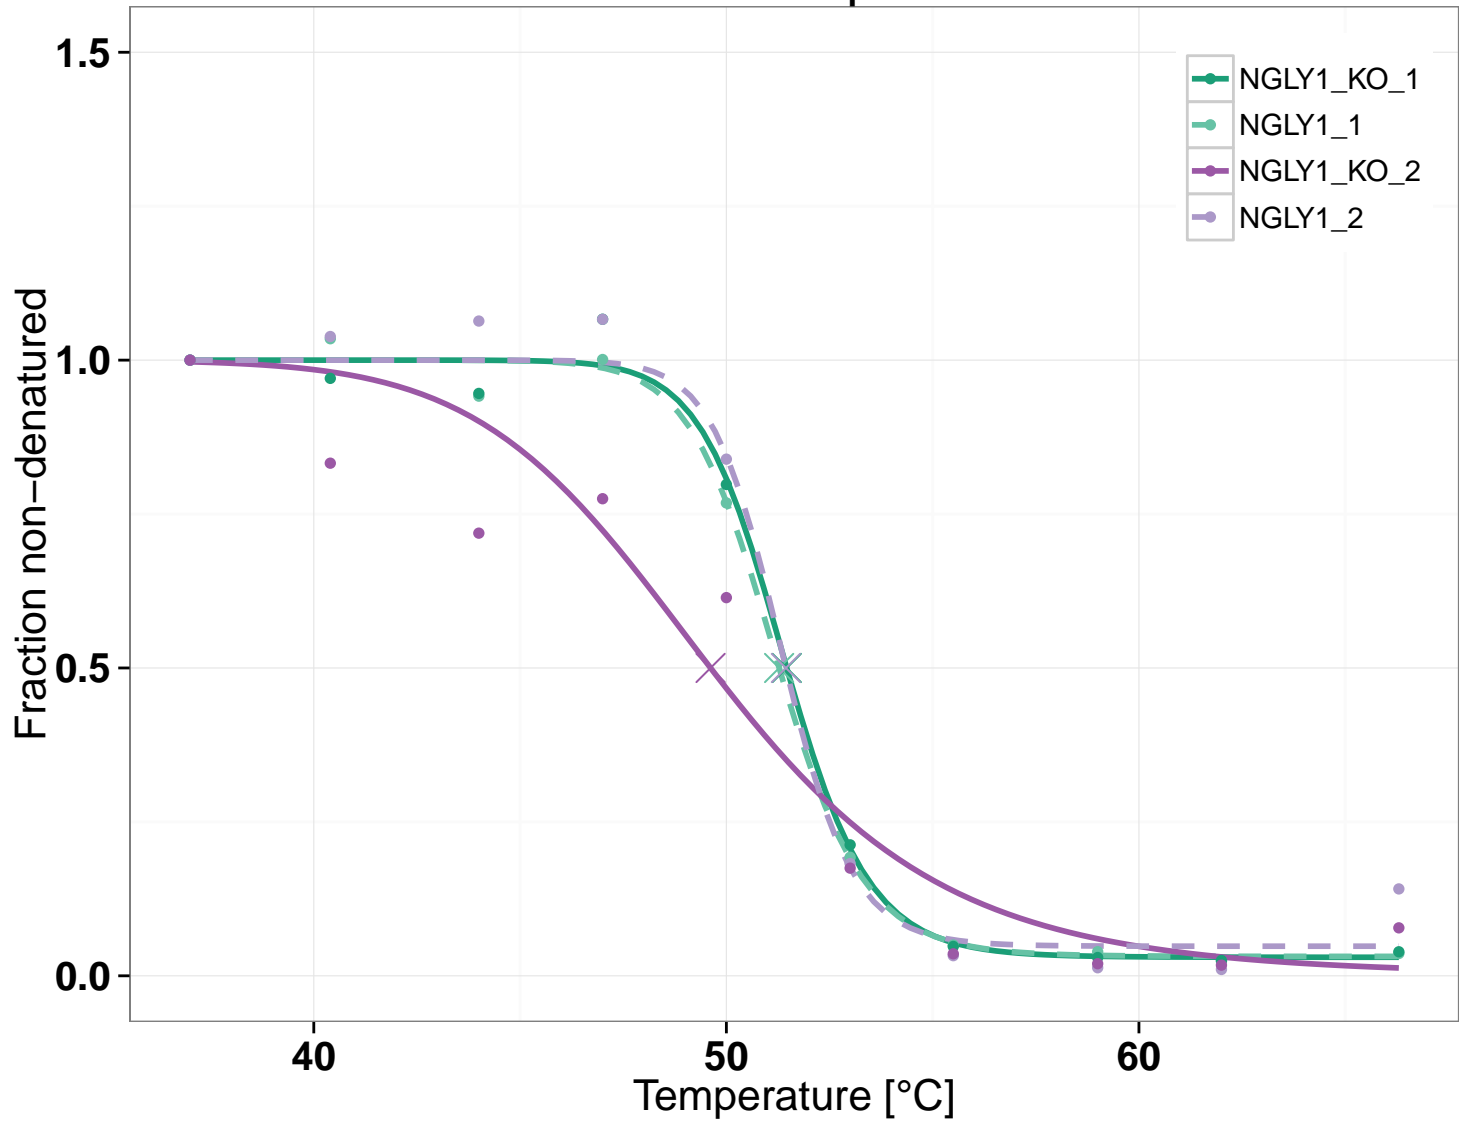

|            | meltPoint | slope  | plateau | R2   |
|------------|-----------|--------|---------|------|
| NGLY1_KO_1 | 51.46     | -0.24  | 0.03    | 1    |
| NGLY1_1    | 51.28     | -0.23  | 0.03    | 1    |
| NGLY1_KO_2 | 49.62     | -0.088 | 0       | 0.93 |
| NGLY1_2    | 51.44     | -0.28  | 0.05    | 0.99 |

Supplement: Supplementary file 2541 [file 1]

IPI00221277.3|KCNQ5

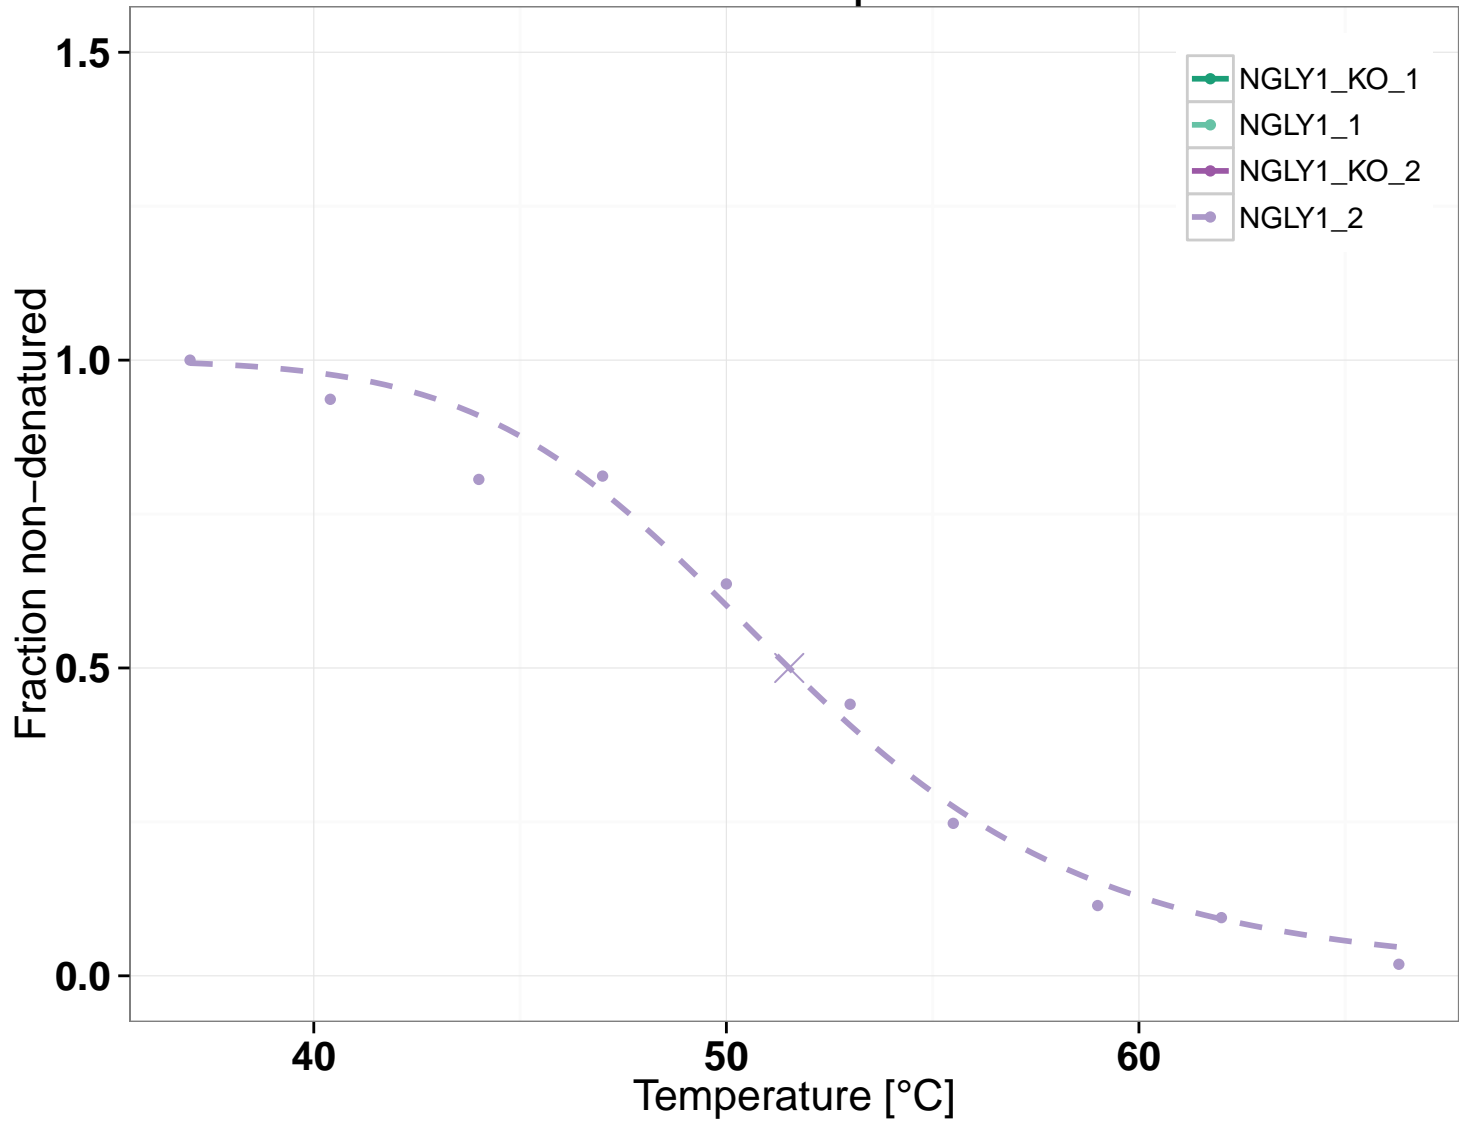

|            | meltPoint | slope  | plateau | R2   |
|------------|-----------|--------|---------|------|
| NGLY1_KO_1 | —         | —      | —       | —    |
| NGLY1_1    | —         | —      | —       | —    |
| NGLY1_KO_2 | —         | —      | —       | —    |
| NGLY1_2    | 51.52     | -0.067 | 0       | 0.99 |

Supplement: Supplementary file 2542 [file 1]

# IPI00514893.3|DAAM2

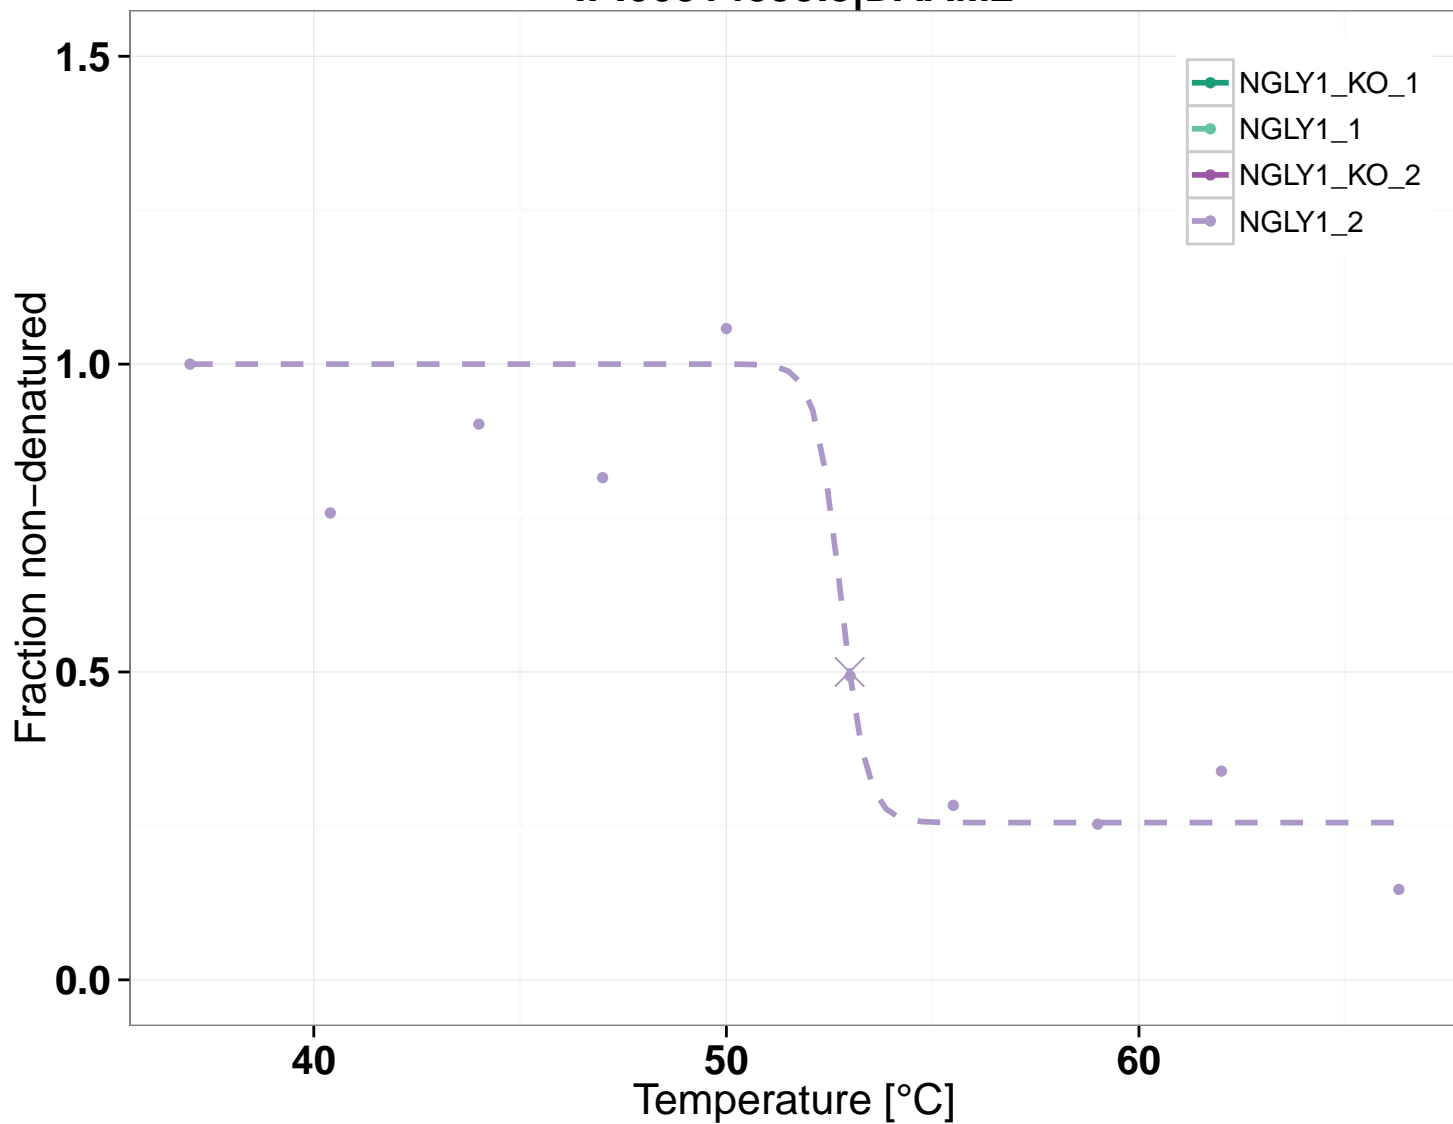

|            | meltPoint | slope | plateau | R2   |
|------------|-----------|-------|---------|------|
| NGLY1_KO_1 | —         | —     | —       | —    |
| NGLY1_1    | —         | —     | —       | —    |
| NGLY1_KO_2 | —         | —     | —       | —    |
| NGLY1_2    | 52.99     | -0.6  | 0.26    | 0.88 |

Supplement: Supplementary file 2543 [file 1]

IPI00019345.1|RAP1A

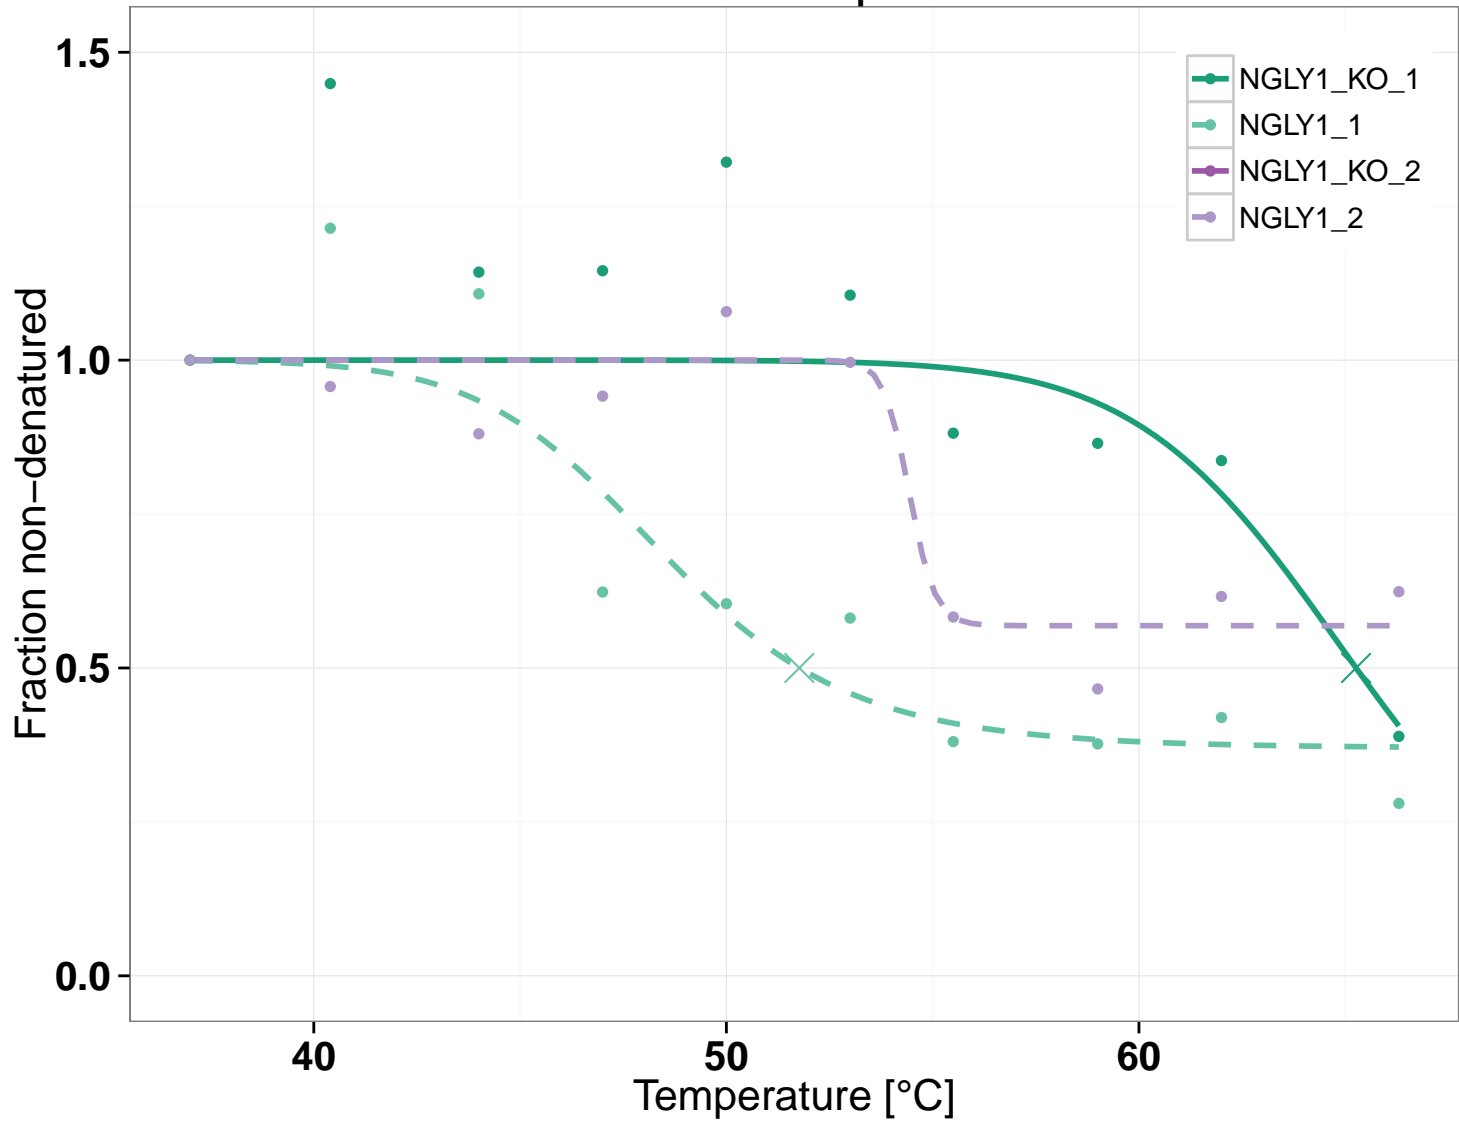

|            | meltPoint | slope  | plateau | R2   |
|------------|-----------|--------|---------|------|
| NGLY1_KO_1 | 65.26     | -0.094 | 0       | 0.52 |
| NGLY1_1    | 51.77     | -0.069 | 0.37    | 0.87 |
| NGLY1_KO_2 | -         | -      | -       | -    |
| NGLY1_2    | -         | -0.35  | 0.57    | 0.9  |

Supplement: Supplementary file 2544 [file 1]

IPI00304865.3|TGFB<sub>R3</sub>

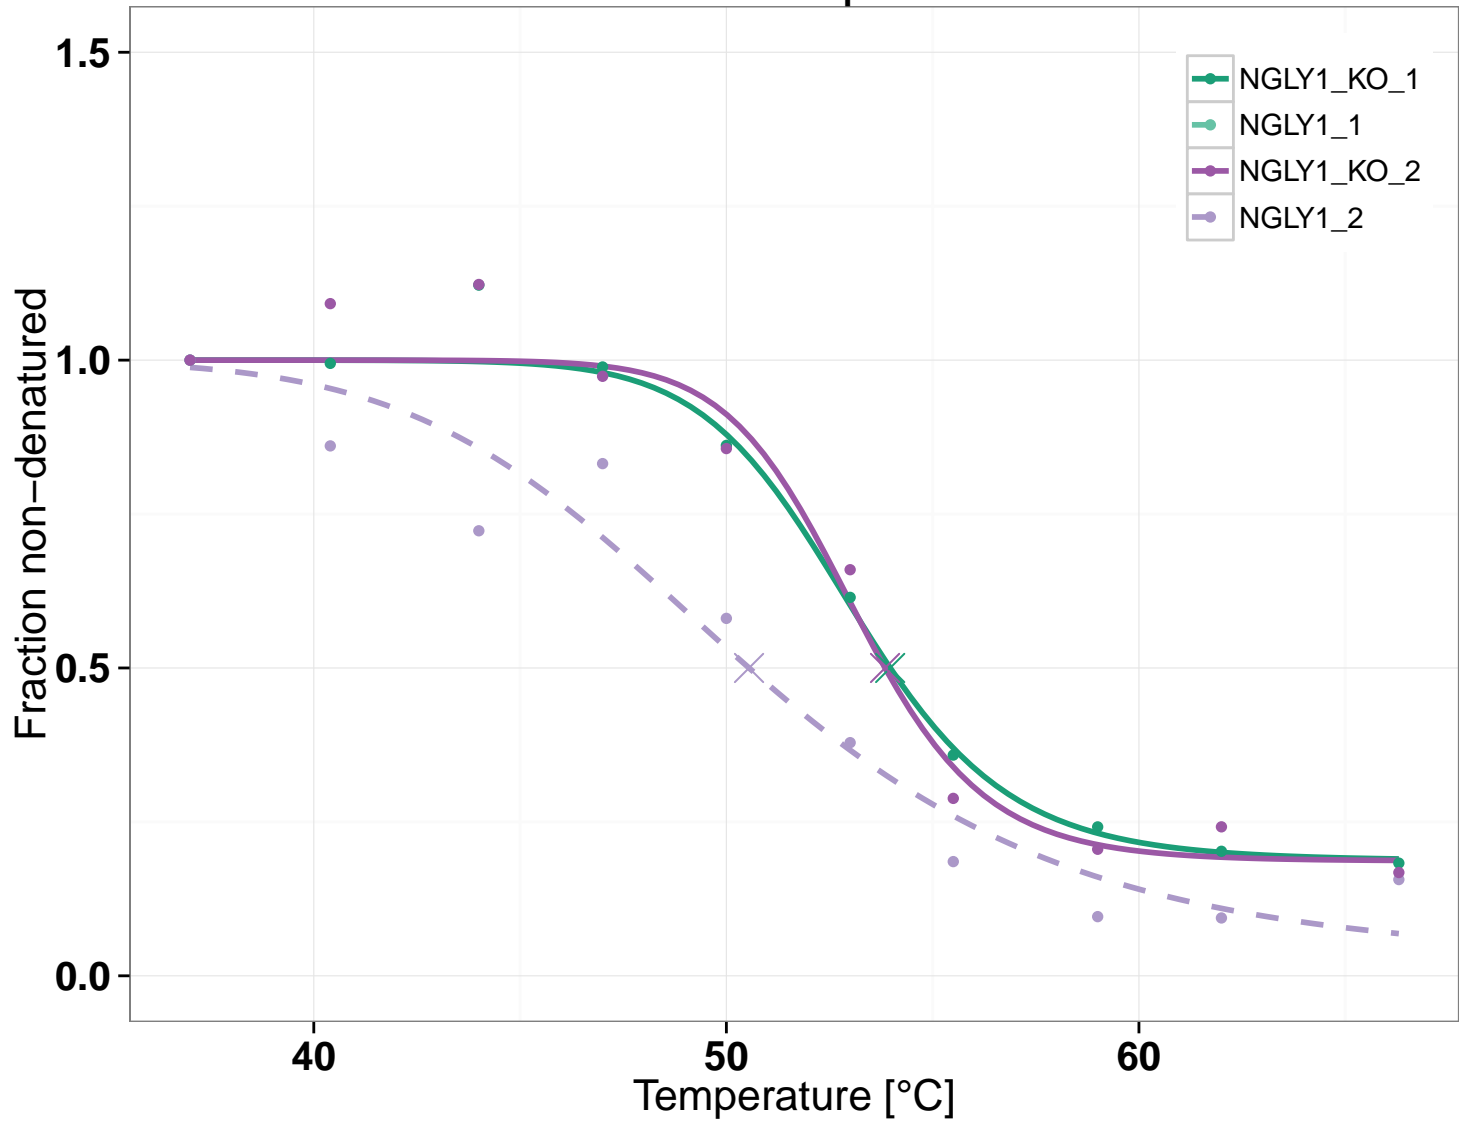

|            | meltPoint | slope  | plateau | R2   |
|------------|-----------|--------|---------|------|
| NGLY1_KO_1 | 53.97     | -0.11  | 0.19    | 0.99 |
| NGLY1_1    | -         | -      | -       | -    |
| NGLY1_KO_2 | 53.85     | -0.13  | 0.19    | 0.98 |
| NGLY1_2    | 50.55     | -0.061 | 0.02    | 0.94 |

Supplement: Supplementary file 2545 [file 1]

IPI00298202.1|ACOT8

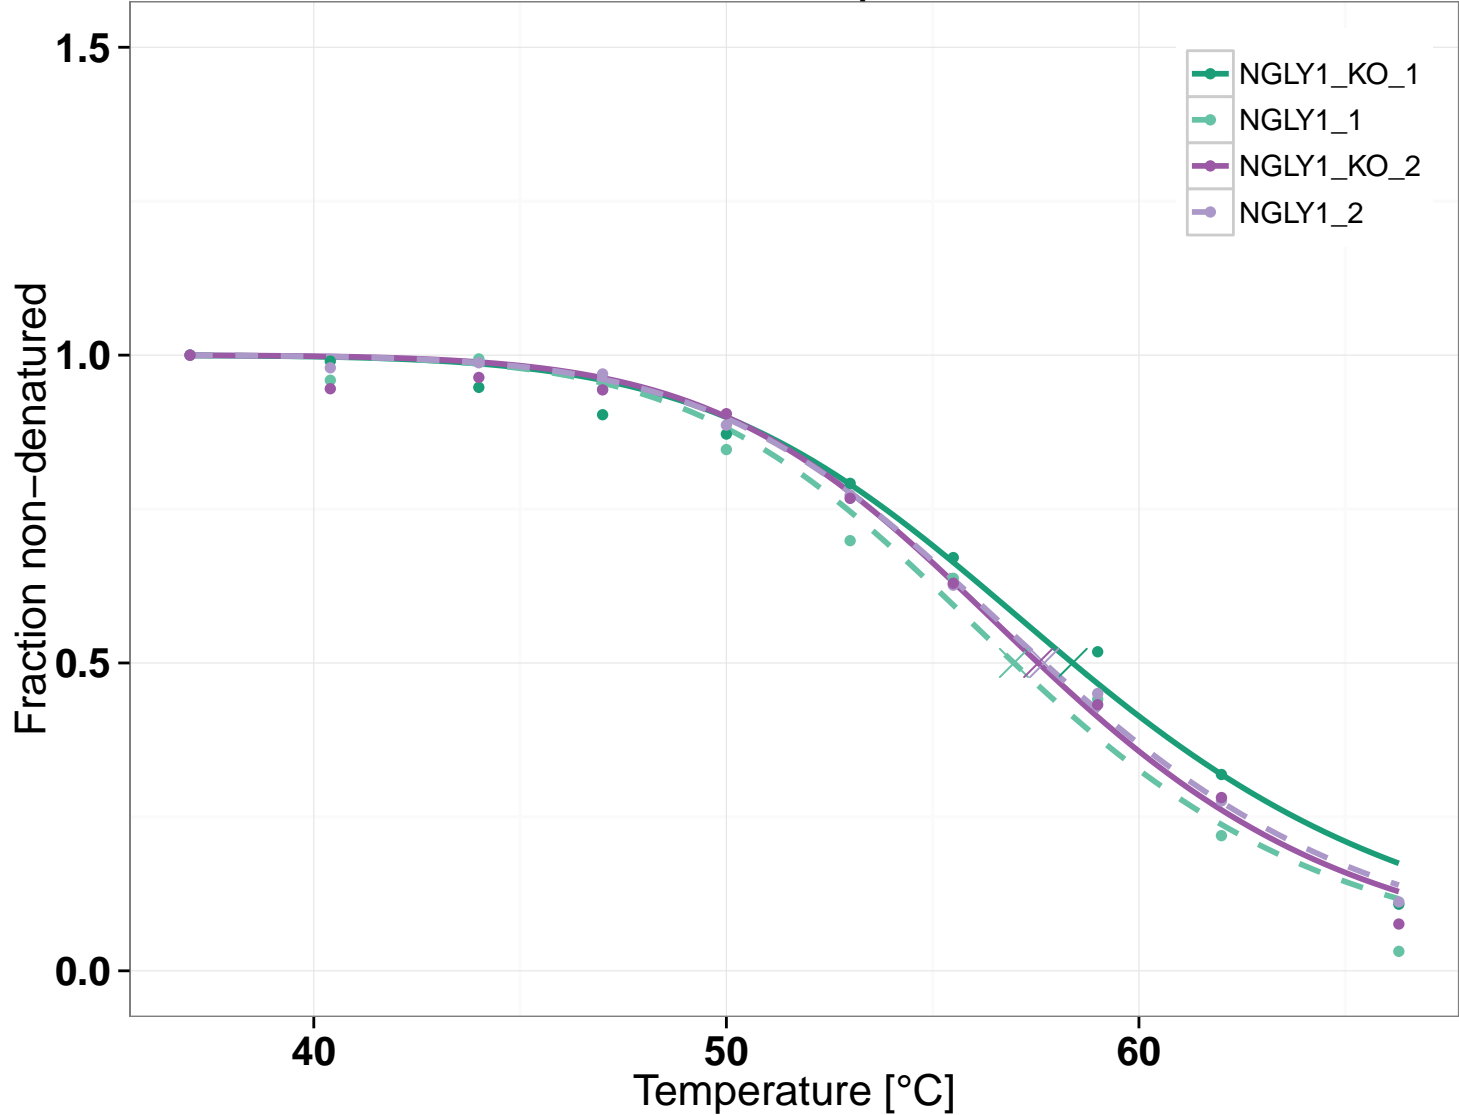

|            | meltPoint | slope  | plateau | R2   |
|------------|-----------|--------|---------|------|
| NGLY1_KO_1 | 58.39     | -0.057 | 0       | 0.99 |
| NGLY1_1    | 56.97     | -0.064 | 0       | 0.98 |
| NGLY1_KO_2 | 57.56     | -0.064 | 0       | 0.99 |
| NGLY1_2    | 57.7      | -0.062 | 0       | 1    |

Supplement: Supplementary file 2546 [file 1]

IPI00001655.1|C16ORF80

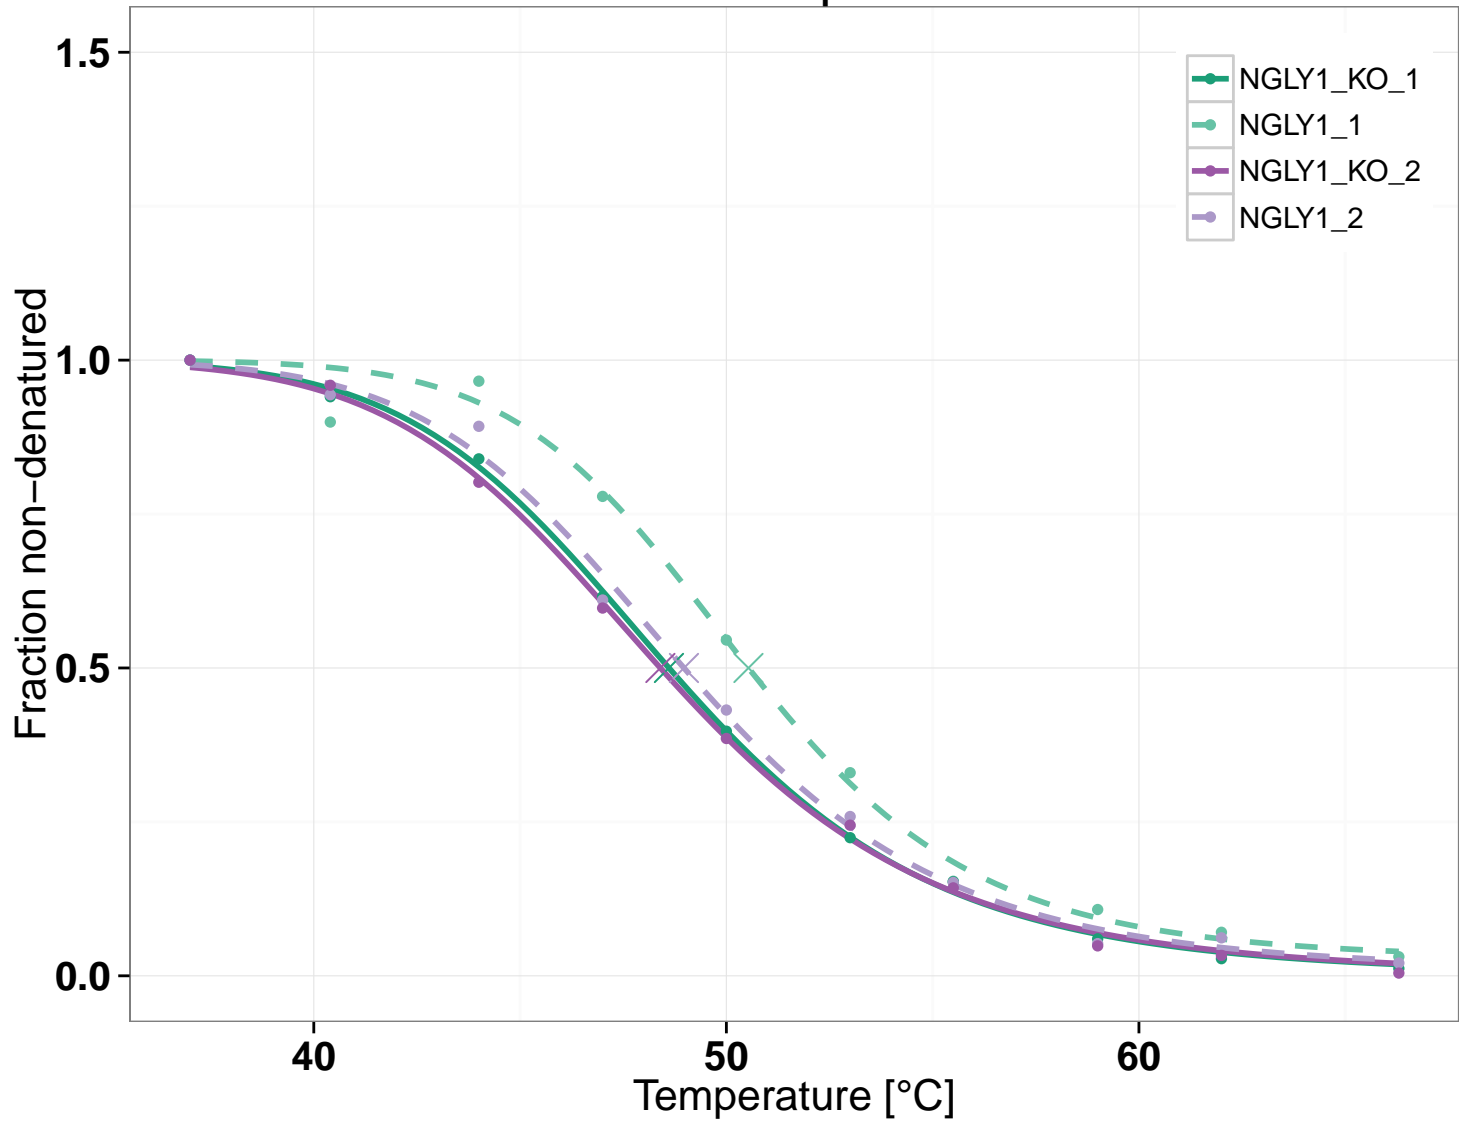

|            | meltPoint | slope  | plateau | R2   |
|------------|-----------|--------|---------|------|
| NGLY1_KO_1 | 48.61     | -0.078 | 0       | 1    |
| NGLY1_1    | 50.54     | -0.087 | 0.03    | 0.99 |
| NGLY1_KO_2 | 48.4      | -0.076 | 0       | 1    |
| NGLY1_2    | 48.97     | -0.078 | 0.01    | 1    |

Supplement: Supplementary file 2547 [file 1]

# IPI00295098.3|SRPRB

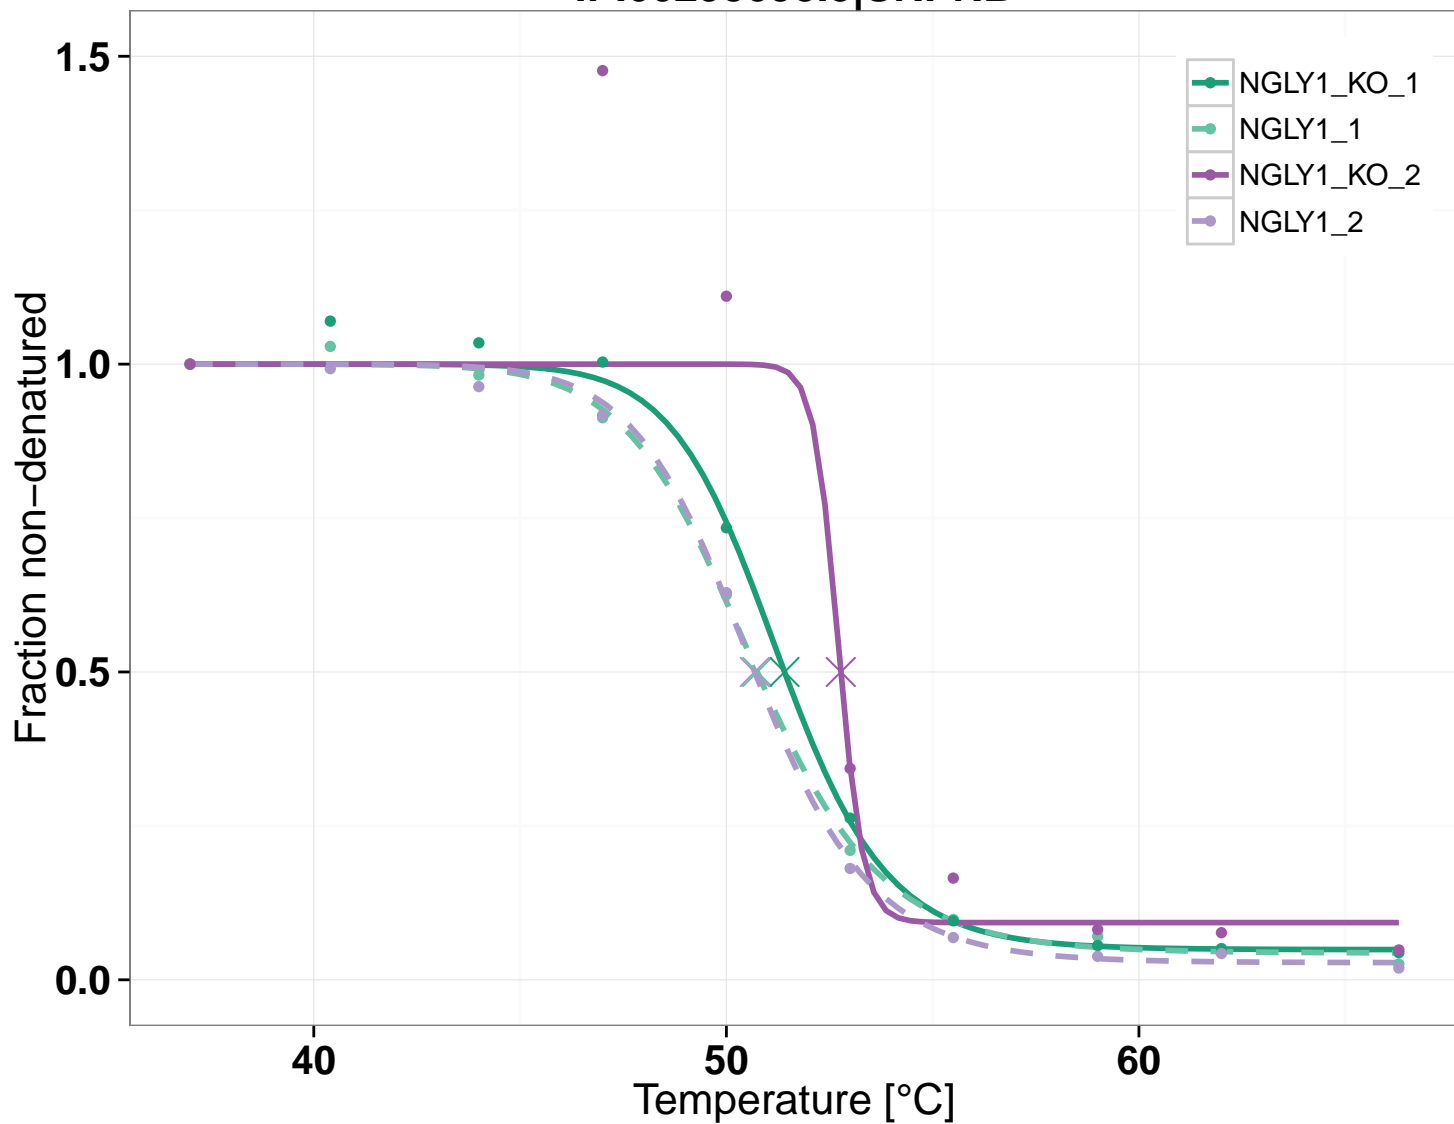

|            | meltPoint | slope | plateau | R2   |
|------------|-----------|-------|---------|------|
| NGLY1_KO_1 | 51.41     | -0.18 | 0.05    | 1    |
| NGLY1_1    | 50.75     | -0.15 | 0.04    | 1    |
| NGLY1_KO_2 | 52.77     | -0.76 | 0.09    | 0.77 |
| NGLY1_2    | 50.69     | -0.17 | 0.03    | 1    |

Supplement: Supplementary file 2548 [file 1]

IPI00029469.1|ACTR1B

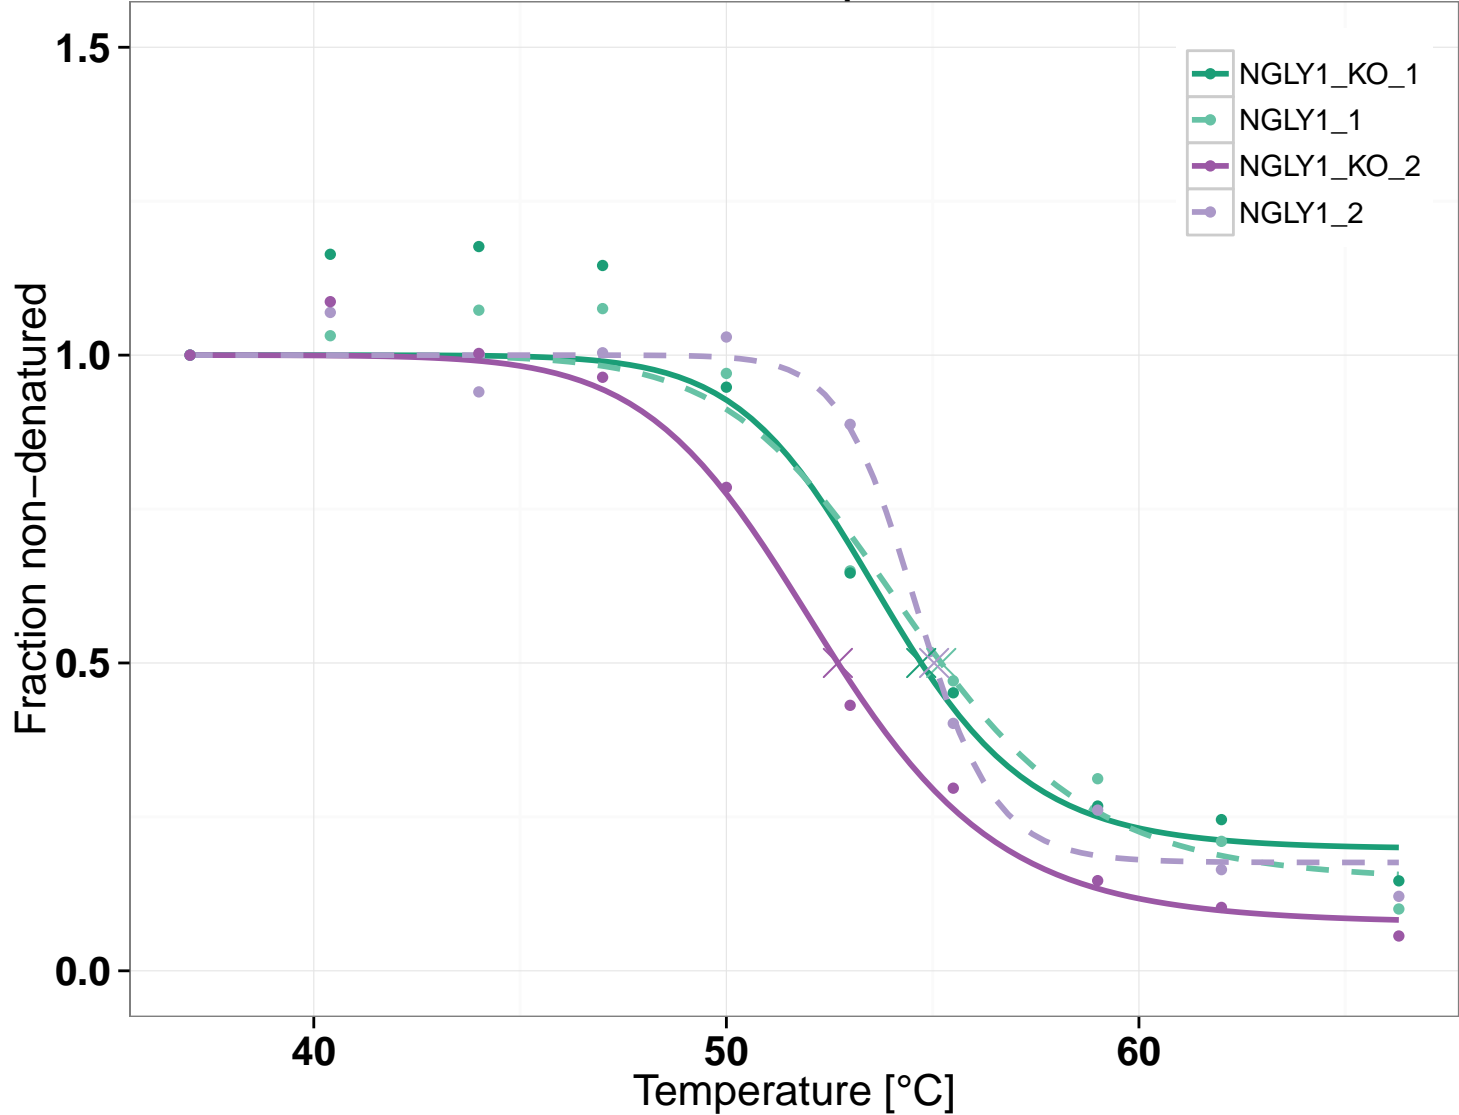

|            | meltPoint | slope  | plateau | R2   |
|------------|-----------|--------|---------|------|
| NGLY1_KO_1 | 54.72     | -0.11  | 0.2     | 0.94 |
| NGLY1_1    | 55.21     | -0.097 | 0.15    | 0.98 |
| NGLY1_KO_2 | 52.7      | -0.11  | 0.08    | 0.99 |
| NGLY1_2    | 55.03     | -0.22  | 0.18    | 0.99 |

Supplement: Supplementary file 2549 [file 1]

IPI00374272.3|C5ORF51

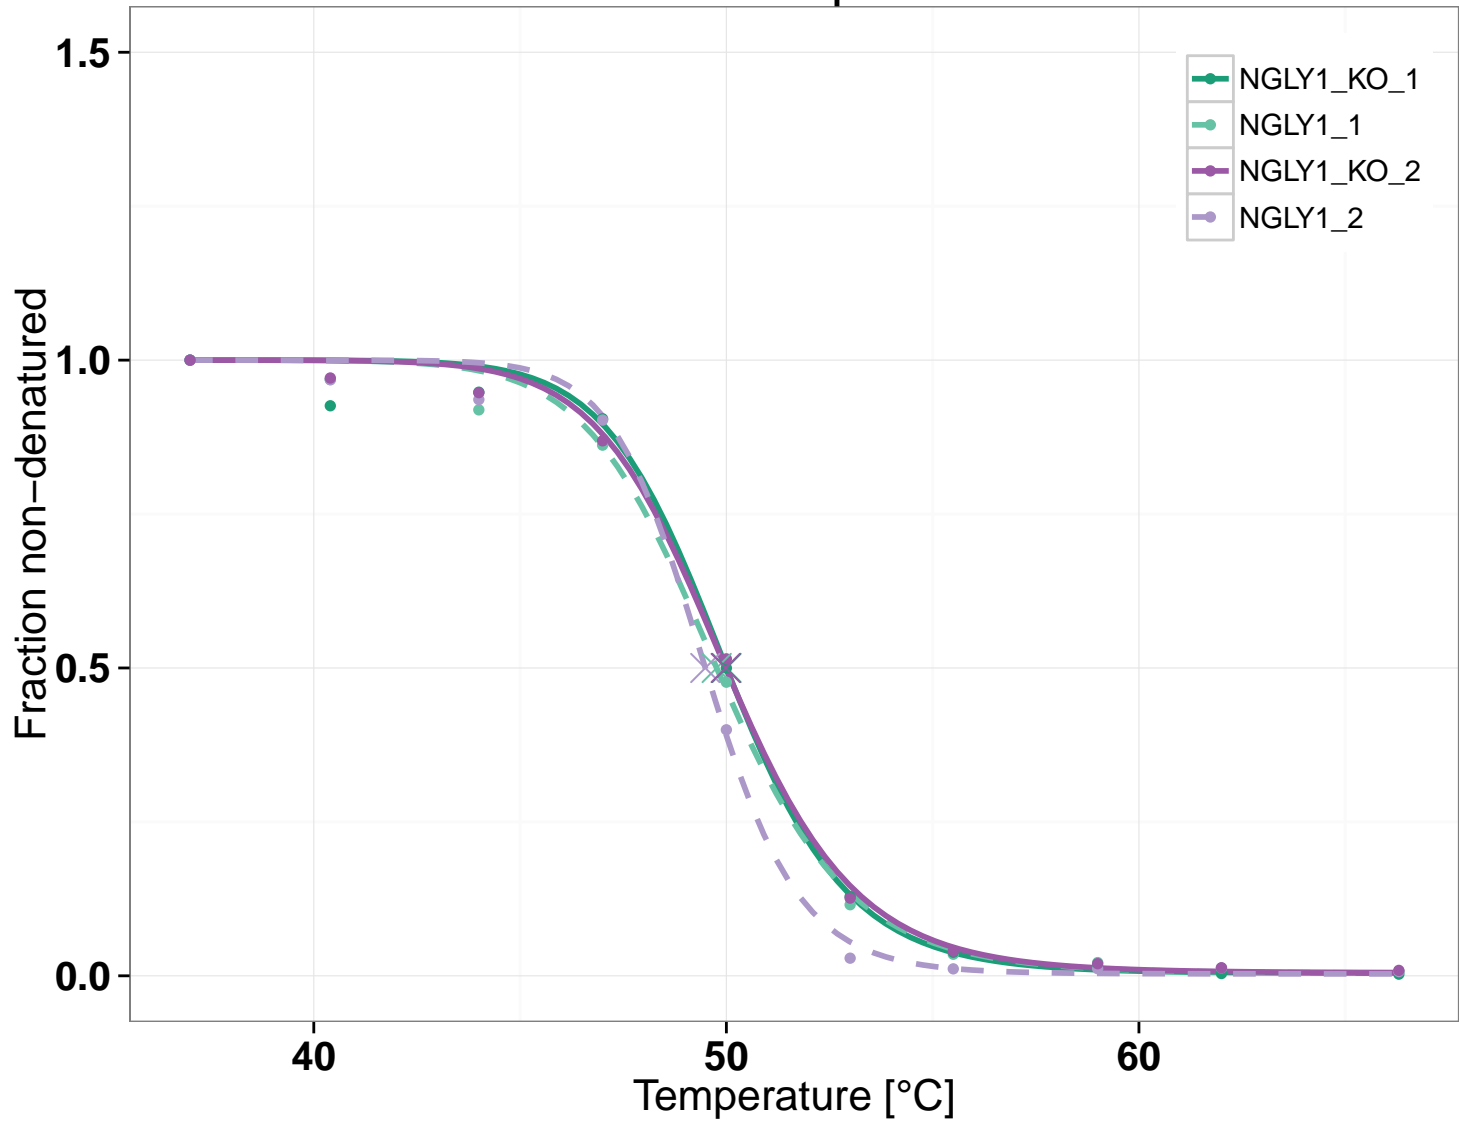

|            | meltPoint | slope | plateau | R2 |
|------------|-----------|-------|---------|----|
| NGLY1_KO_1 | 50        | -0.17 | 0       | 1  |
| NGLY1_1    | 49.77     | -0.16 | 0       | 1  |
| NGLY1_KO_2 | 49.98     | -0.16 | 0       | 1  |
| NGLY1_2    | 49.49     | -0.22 | 0       | 1  |

Supplement: Supplementary file 2550 [file 1]

# IPI00640027.2|ODF2

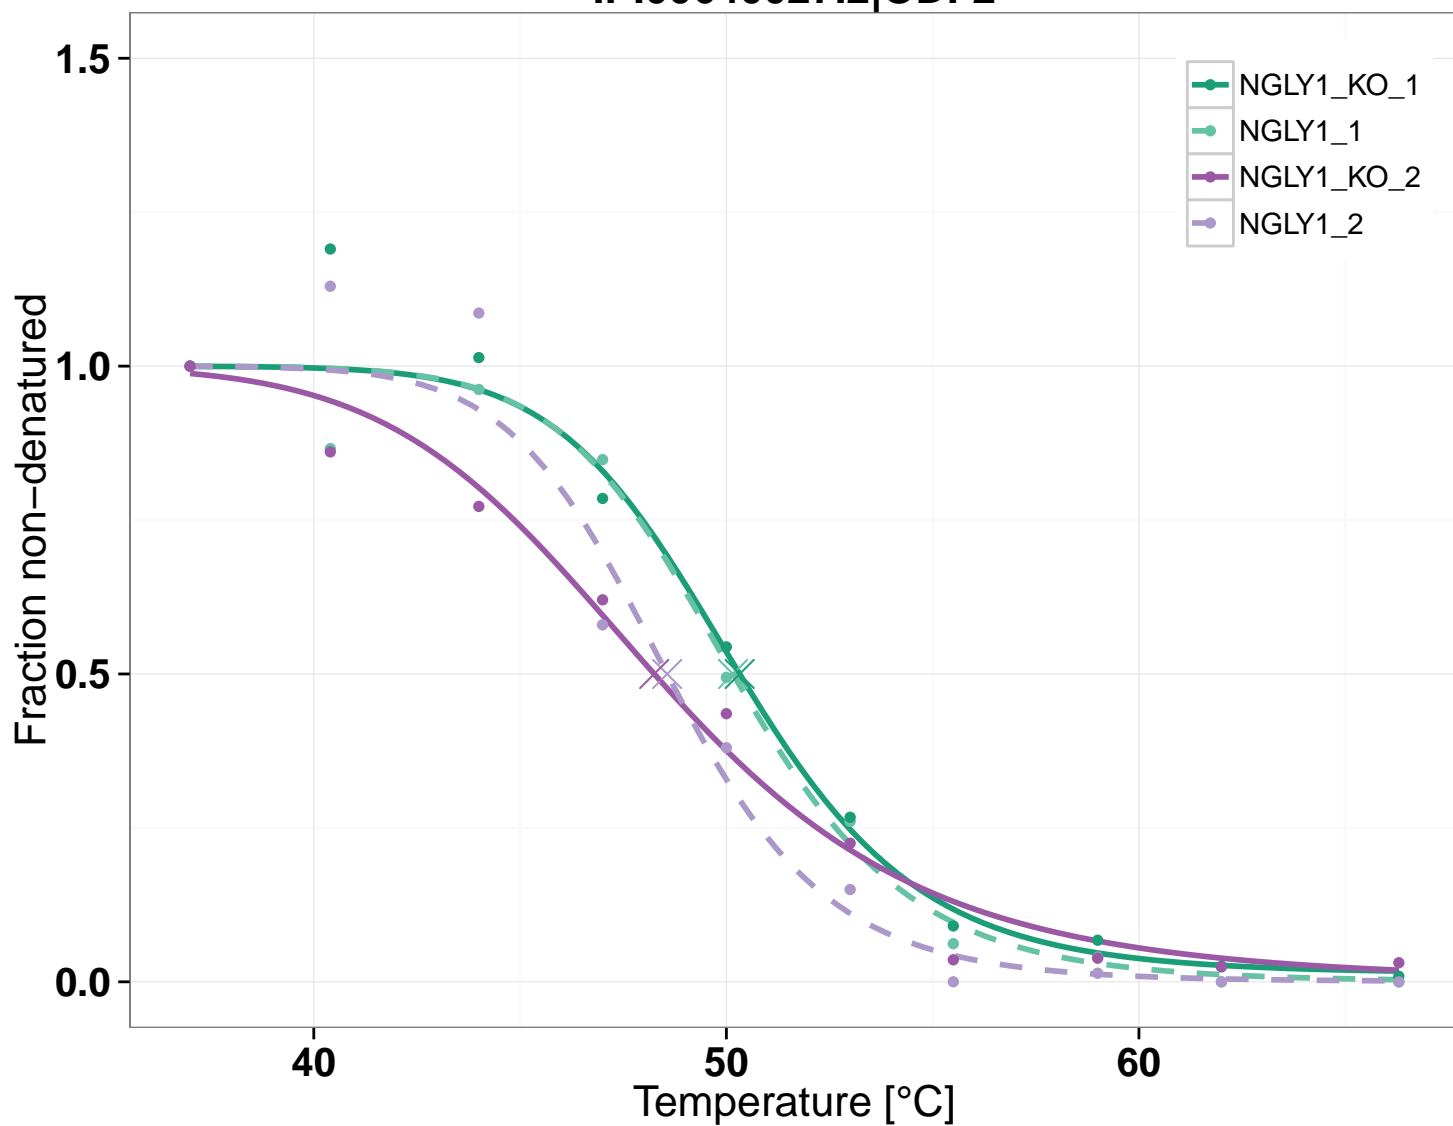

|            | meltPoint | slope  | plateau | R2   |
|------------|-----------|--------|---------|------|
| NGLY1_KO_1 | 50.32     | -0.11  | 0.01    | 0.98 |
| NGLY1_1    | 50.16     | -0.12  | 0       | 0.99 |
| NGLY1_KO_2 | 48.25     | -0.077 | 0       | 0.98 |
| NGLY1_2    | 48.56     | -0.13  | 0       | 0.97 |

Supplement: Supplementary file 2551 [file 1]

IPI00300585.4|RRAGC

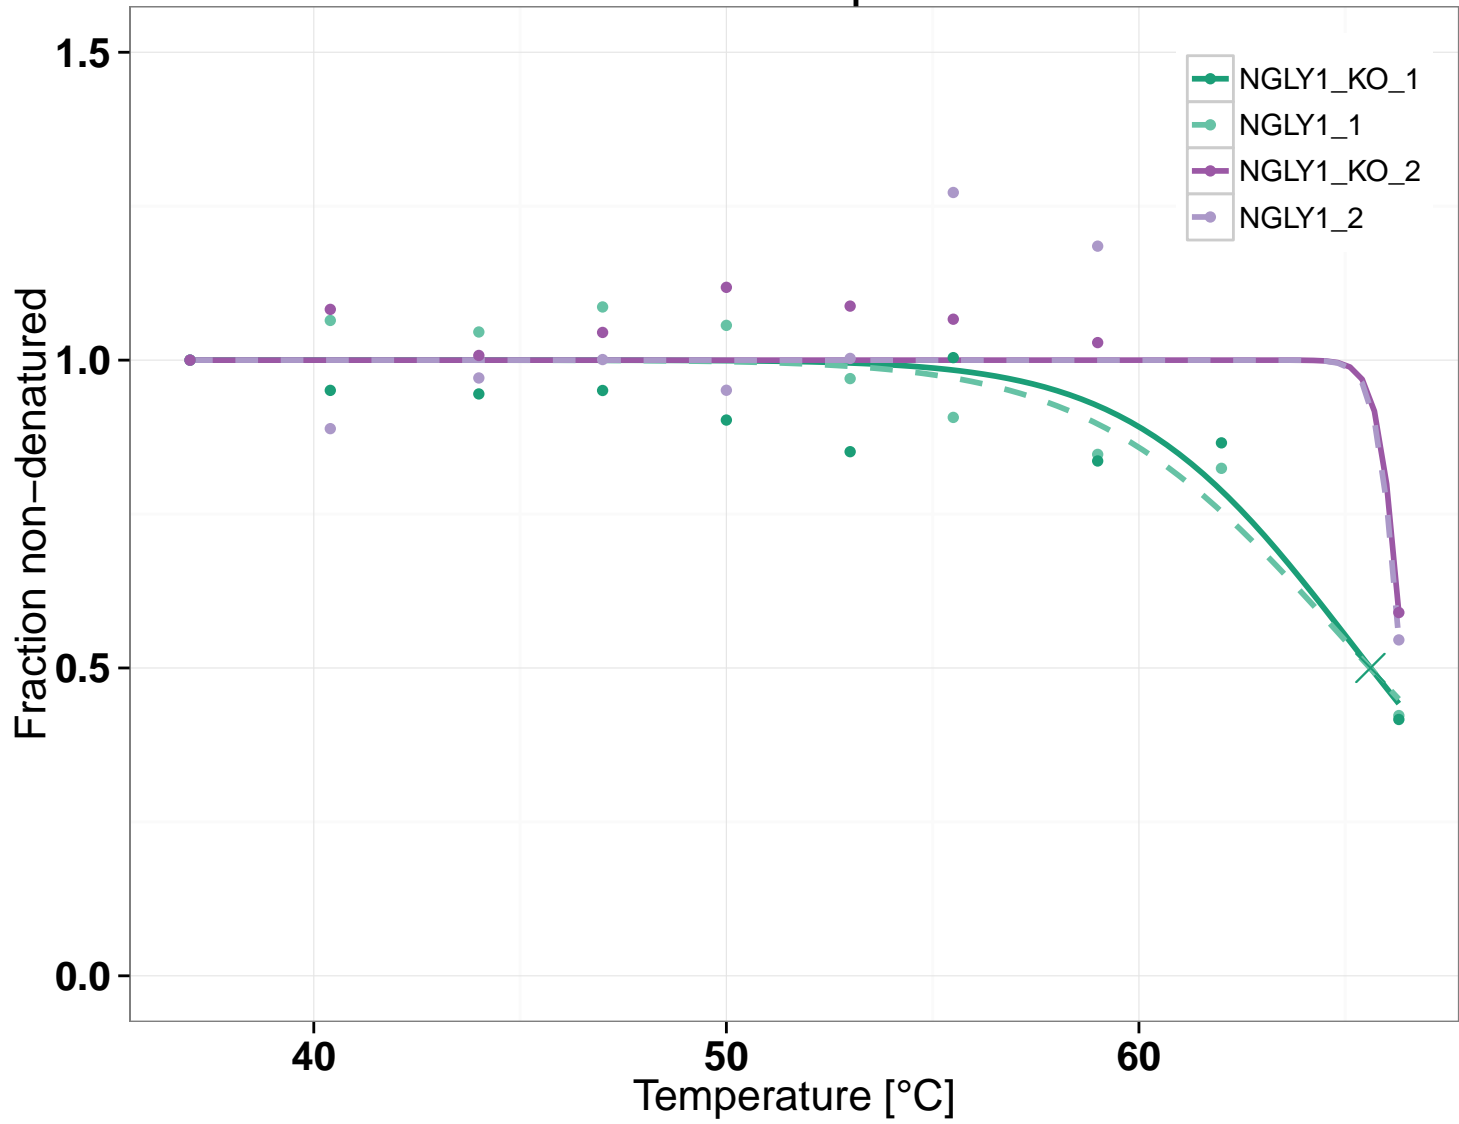

|            | meltPoint | slope  | plateau | R2   |
|------------|-----------|--------|---------|------|
| NGLY1_KO_1 | 65.62     | -0.087 | 0       | 0.8  |
| NGLY1_1    | 65.6      | -0.074 | 0       | 0.92 |
| NGLY1_KO_2 | -         | -      | 0       | 0.59 |
| NGLY1_2    | -         | -      | 0       | 0.37 |

Supplement: Supplementary file 2552 [file 1]

IPI00783277.1|WDR22

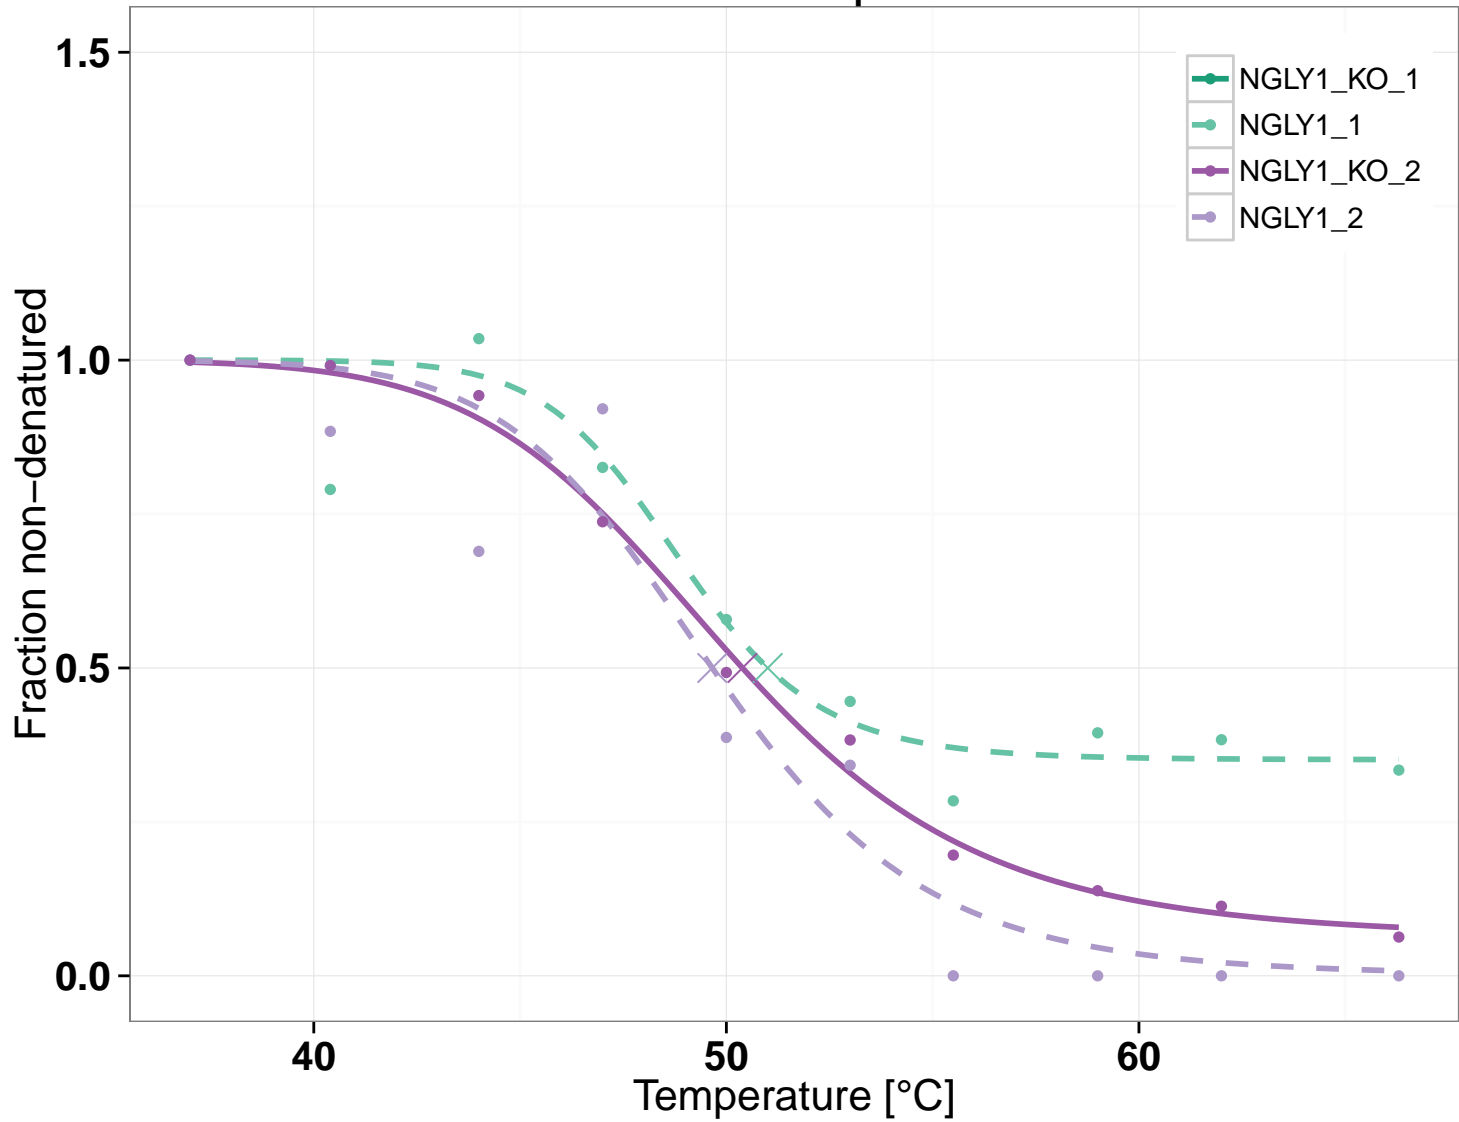

|            | meltPoint | slope  | plateau | R2   |
|------------|-----------|--------|---------|------|
| NGLY1_KO_1 | -         | -      | -       | -    |
| NGLY1_1    | 51        | -0.097 | 0.35    | 0.92 |
| NGLY1_KO_2 | 50.39     | -0.077 | 0.06    | 0.99 |
| NGLY1_2    | 49.66     | -0.098 | 0       | 0.92 |

Supplement: Supplementary file 2553 [file 1]

IPI00074020.3|CENPK

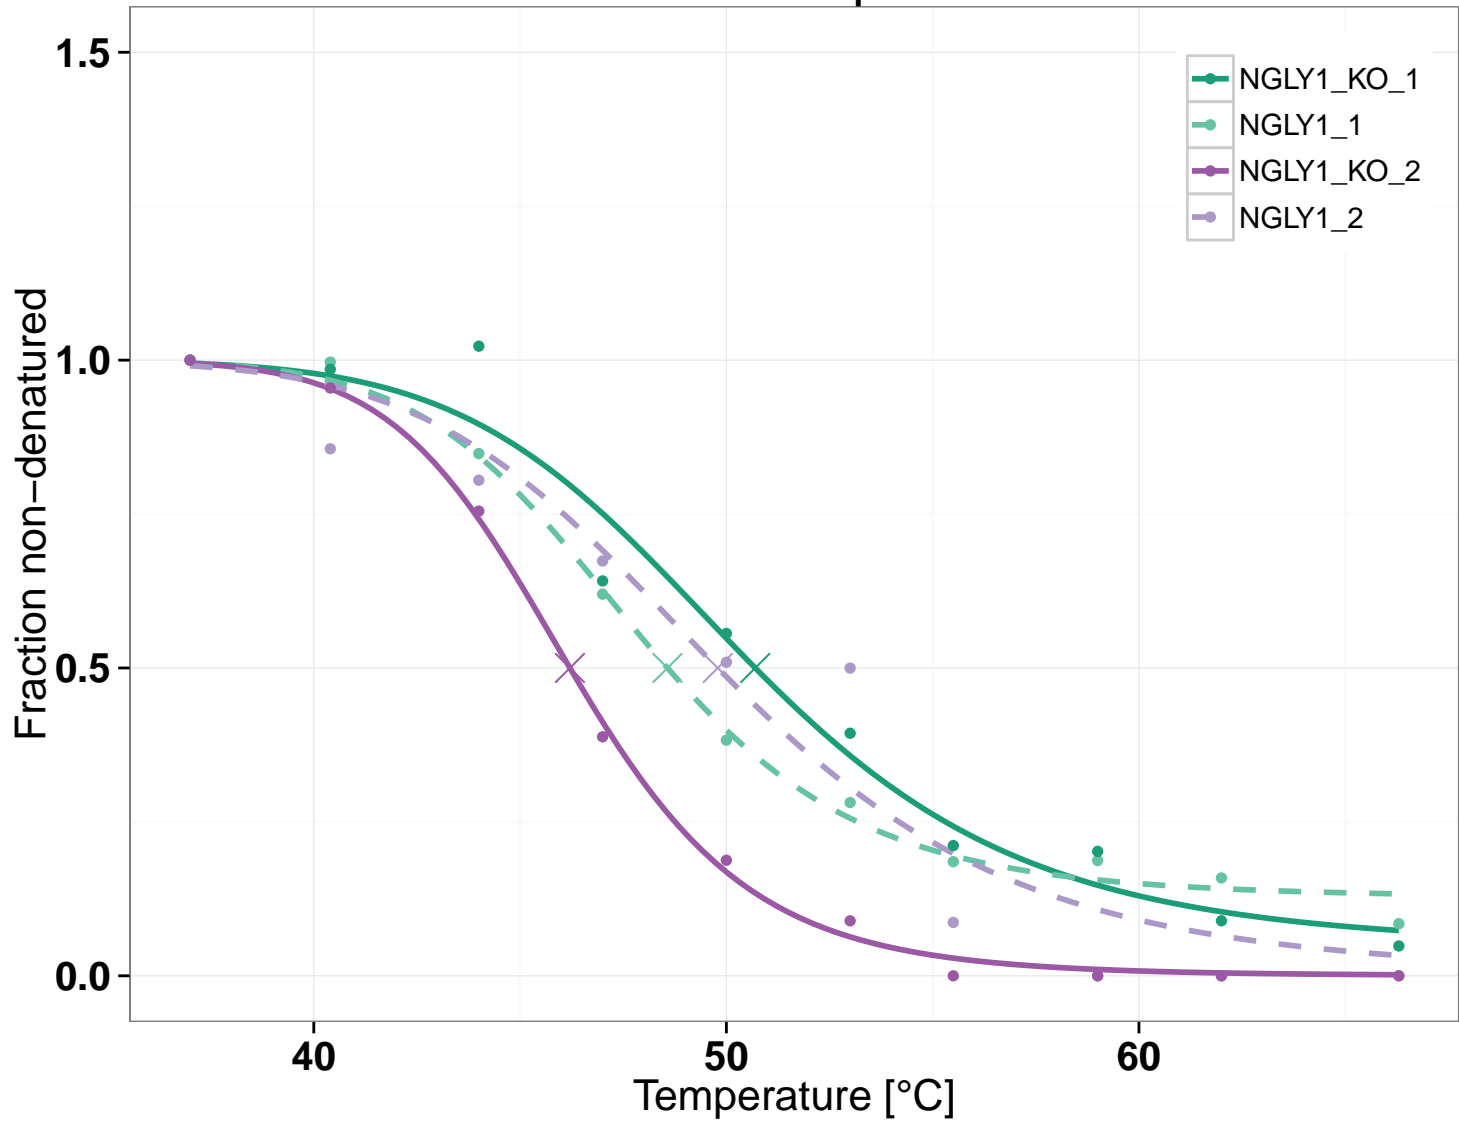

|            | meltPoint | slope  | plateau | R2   |
|------------|-----------|--------|---------|------|
| NGLY1_KO_1 | 50.7      | -0.07  | 0.05    | 0.97 |
| NGLY1_1    | 48.57     | -0.082 | 0.13    | 1    |
| NGLY1_KO_2 | 46.21     | -0.11  | 0       | 1    |
| NGLY1_2    | 49.79     | -0.07  | 0       | 0.94 |

Supplement: Supplementary file 2554 [file 1]

IPI00016077.1|GBAS

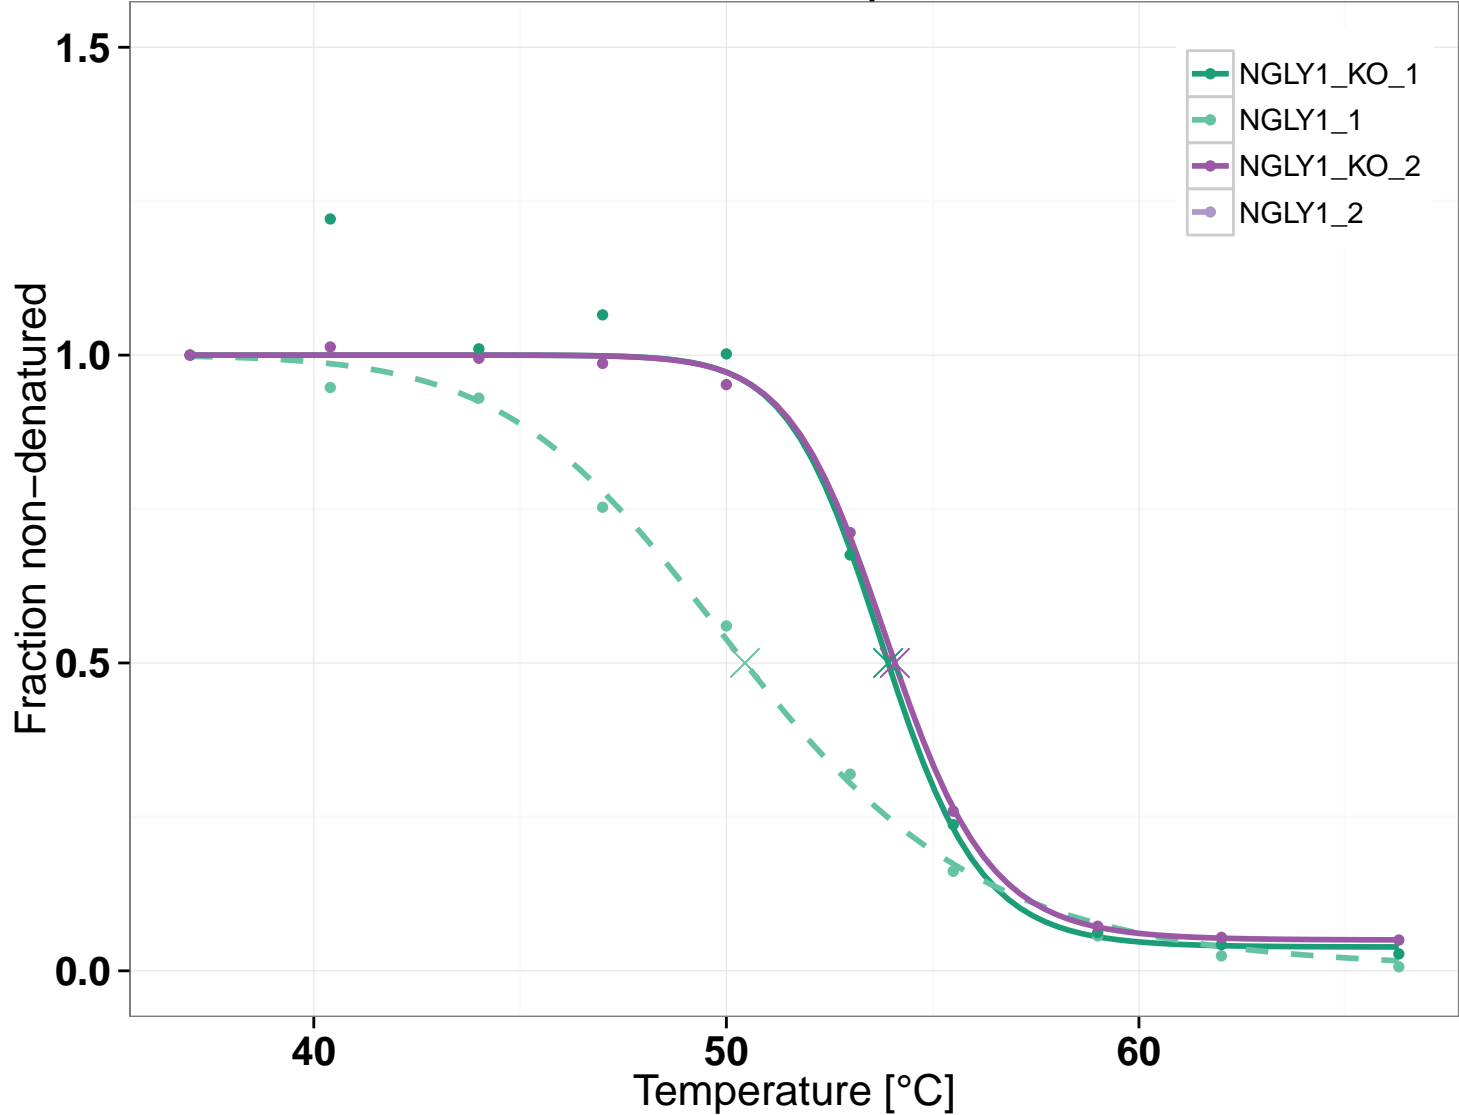

|            | meltPoint | slope  | plateau | R2   |
|------------|-----------|--------|---------|------|
| NGLY1_KO_1 | 53.92     | -0.21  | 0.04    | 0.97 |
| NGLY1_1    | 50.45     | -0.086 | 0       | 1    |
| NGLY1_KO_2 | 54.08     | -0.2   | 0.05    | 1    |
| NGLY1_2    | -         | -      | -       | -    |

Supplement: Supplementary file 2555 [file 1]

IPI00011084.2|CLDN6

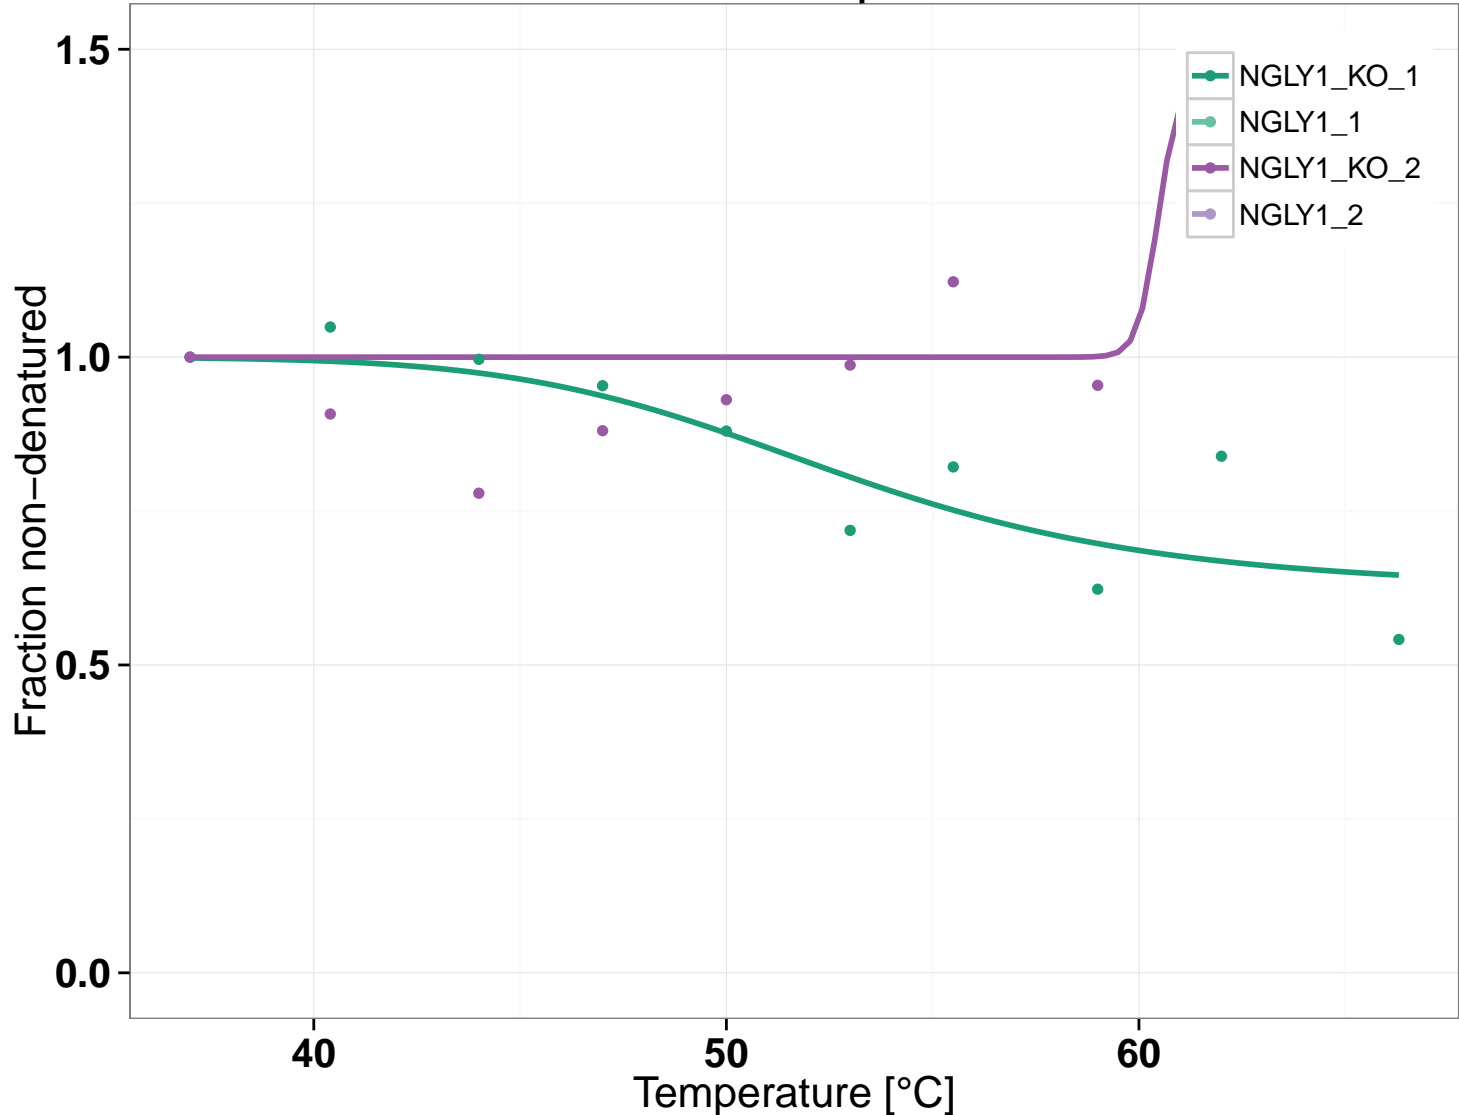

|            | meltPoint | slope  | plateau | R2   |
|------------|-----------|--------|---------|------|
| NGLY1_KO_1 | —         | -0.024 | 0.62    | 0.76 |
| NGLY1_1    | —         | —      | —       | —    |
| NGLY1_KO_2 | —         | 0.46   | 1.45    | 0.8  |
| NGLY1_2    | —         | —      | —       | —    |

Supplement: Supplementary file 2556 [file 1]

IPI00018451.6|CIB1

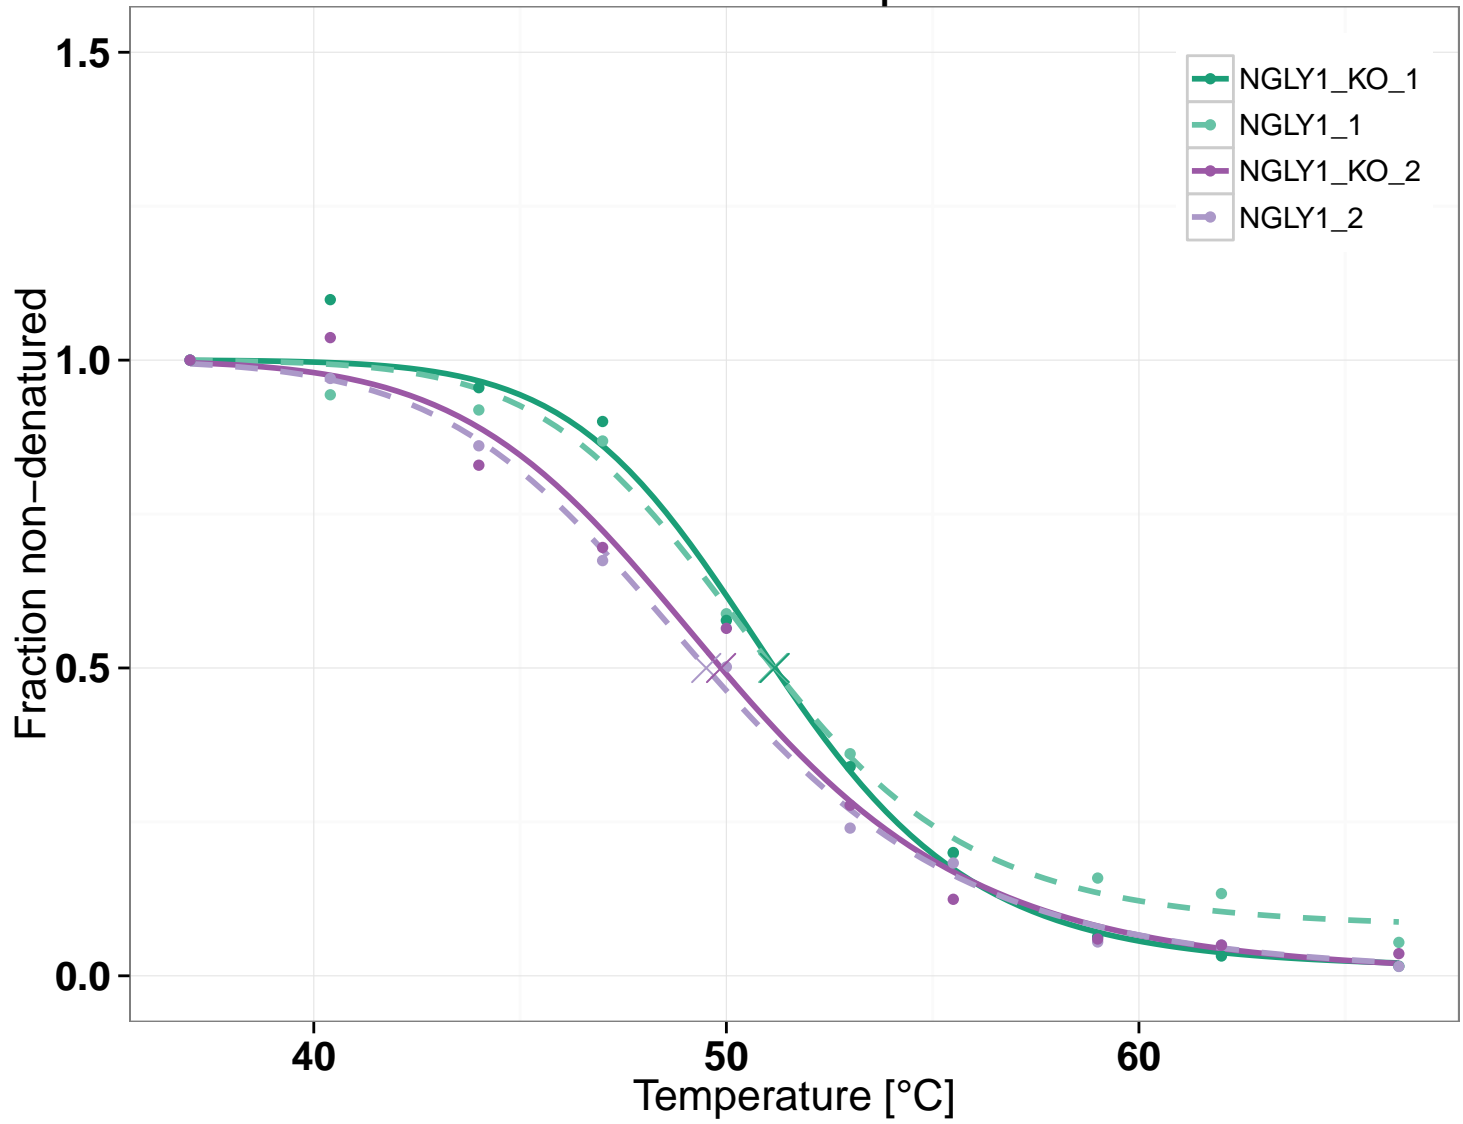

|            | meltPoint | slope  | plateau | R2   |
|------------|-----------|--------|---------|------|
| NGLY1_KO_1 | 51.17     | -0.1   | 0.01    | 0.99 |
| NGLY1_1    | 51.14     | -0.089 | 0.08    | 0.99 |
| NGLY1_KO_2 | 49.87     | -0.08  | 0       | 0.99 |
| NGLY1_2    | 49.51     | -0.078 | 0       | 1    |

Supplement: Supplementary file 2557 [file 1]

IPI00396022.2|ATP9B

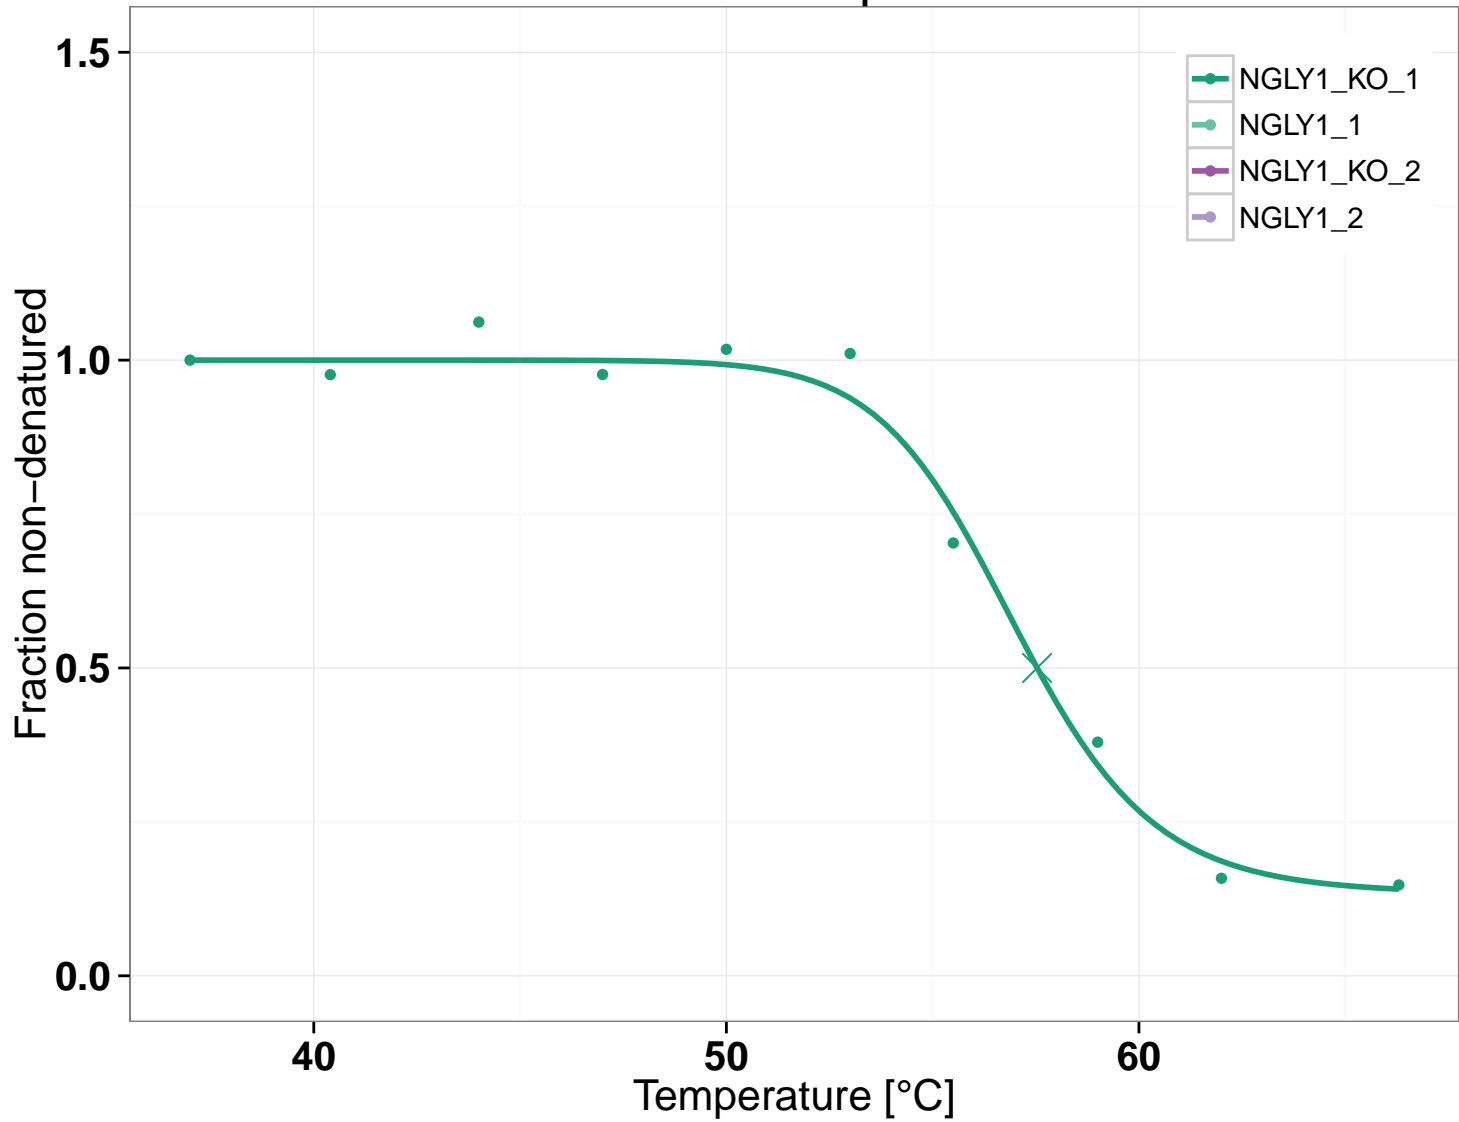

|            | meltPoint | slope | plateau | R2   |
|------------|-----------|-------|---------|------|
| NGLY1_KO_1 | 57.53     | -0.13 | 0.13    | 0.99 |
| NGLY1_1    | -         | -     | -       | -    |
| NGLY1_KO_2 | -         | -     | -       | -    |
| NGLY1_2    | -         | -     | -       | -    |

Supplement: Supplementary file 2558 [file 1]

IPI00019835.1|BCL2L12

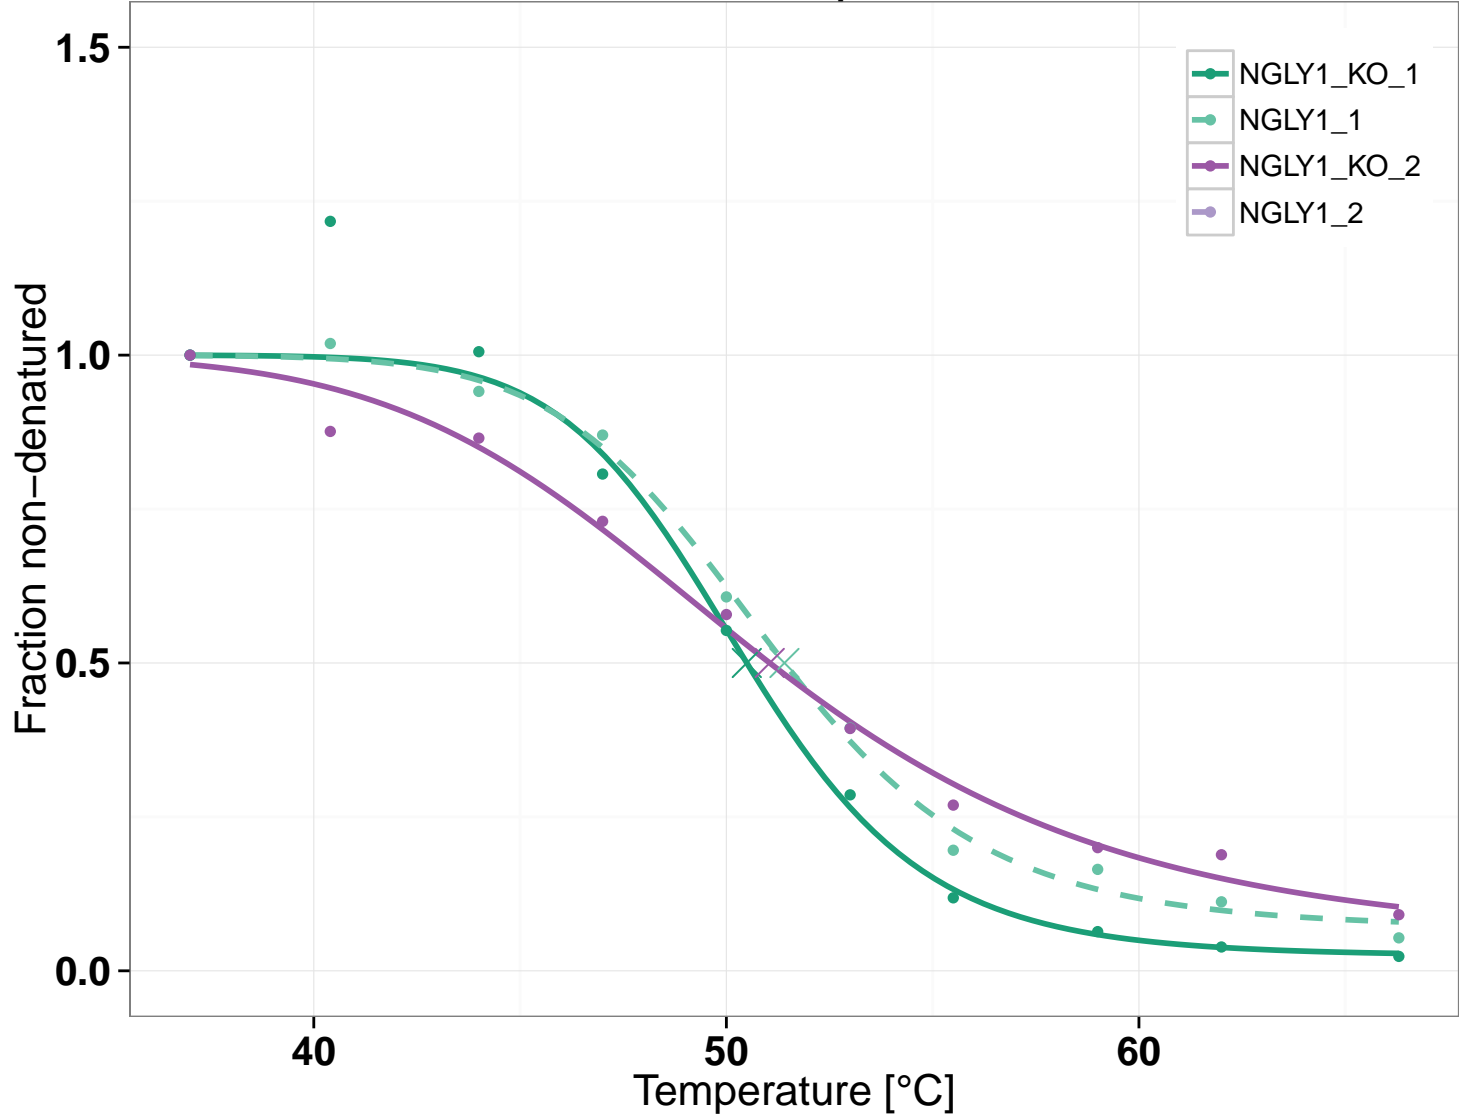

|            | meltPoint | slope  | plateau | R2   |
|------------|-----------|--------|---------|------|
| NGLY1_KO_1 | 50.5      | -0.11  | 0.02    | 0.97 |
| NGLY1_1    | 51.41     | -0.089 | 0.07    | 1    |
| NGLY1_KO_2 | 51.05     | -0.055 | 0.04    | 0.99 |
| NGLY1_2    | -         | -      | -       | -    |

Supplement: Supplementary file 2559 [file 1]

IPI00456899.2|RNF169

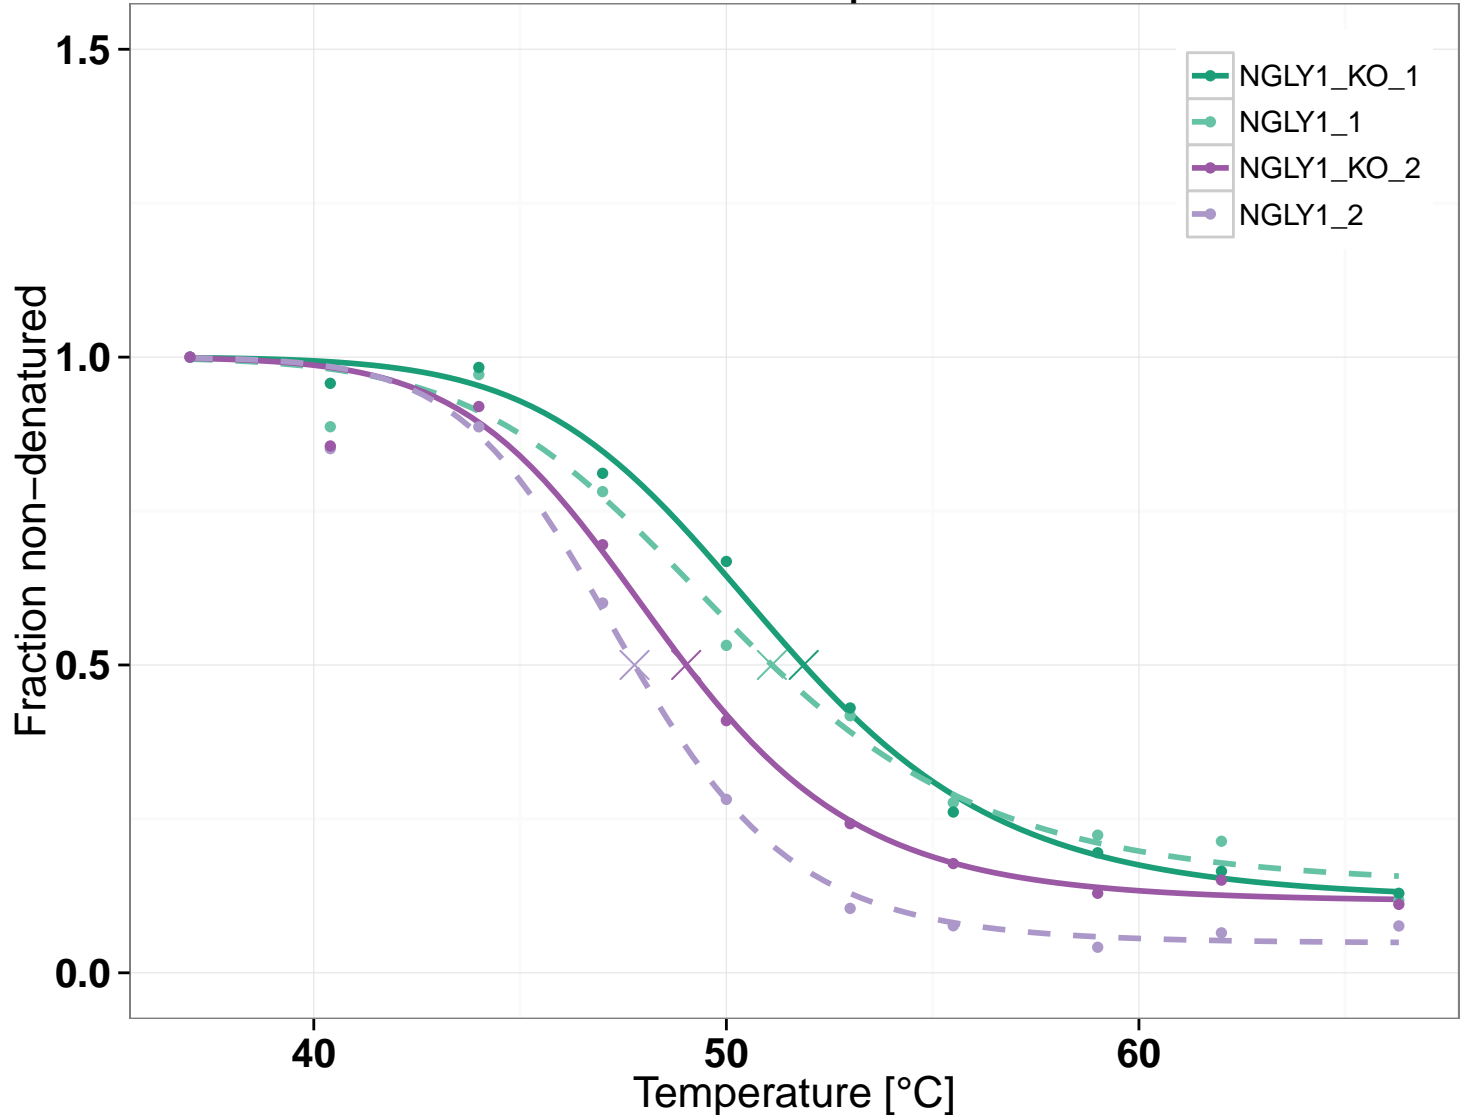

|            | meltPoint | slope  | plateau | R2   |
|------------|-----------|--------|---------|------|
| NGLY1_KO_1 | 51.87     | -0.078 | 0.12    | 1    |
| NGLY1_1    | 51.1      | -0.069 | 0.14    | 0.98 |
| NGLY1_KO_2 | 49.03     | -0.092 | 0.12    | 0.98 |
| NGLY1_2    | 47.77     | -0.12  | 0.05    | 0.99 |

Supplement: Supplementary file 2560 [file 1]

IPI00411730.5|PPP4R1

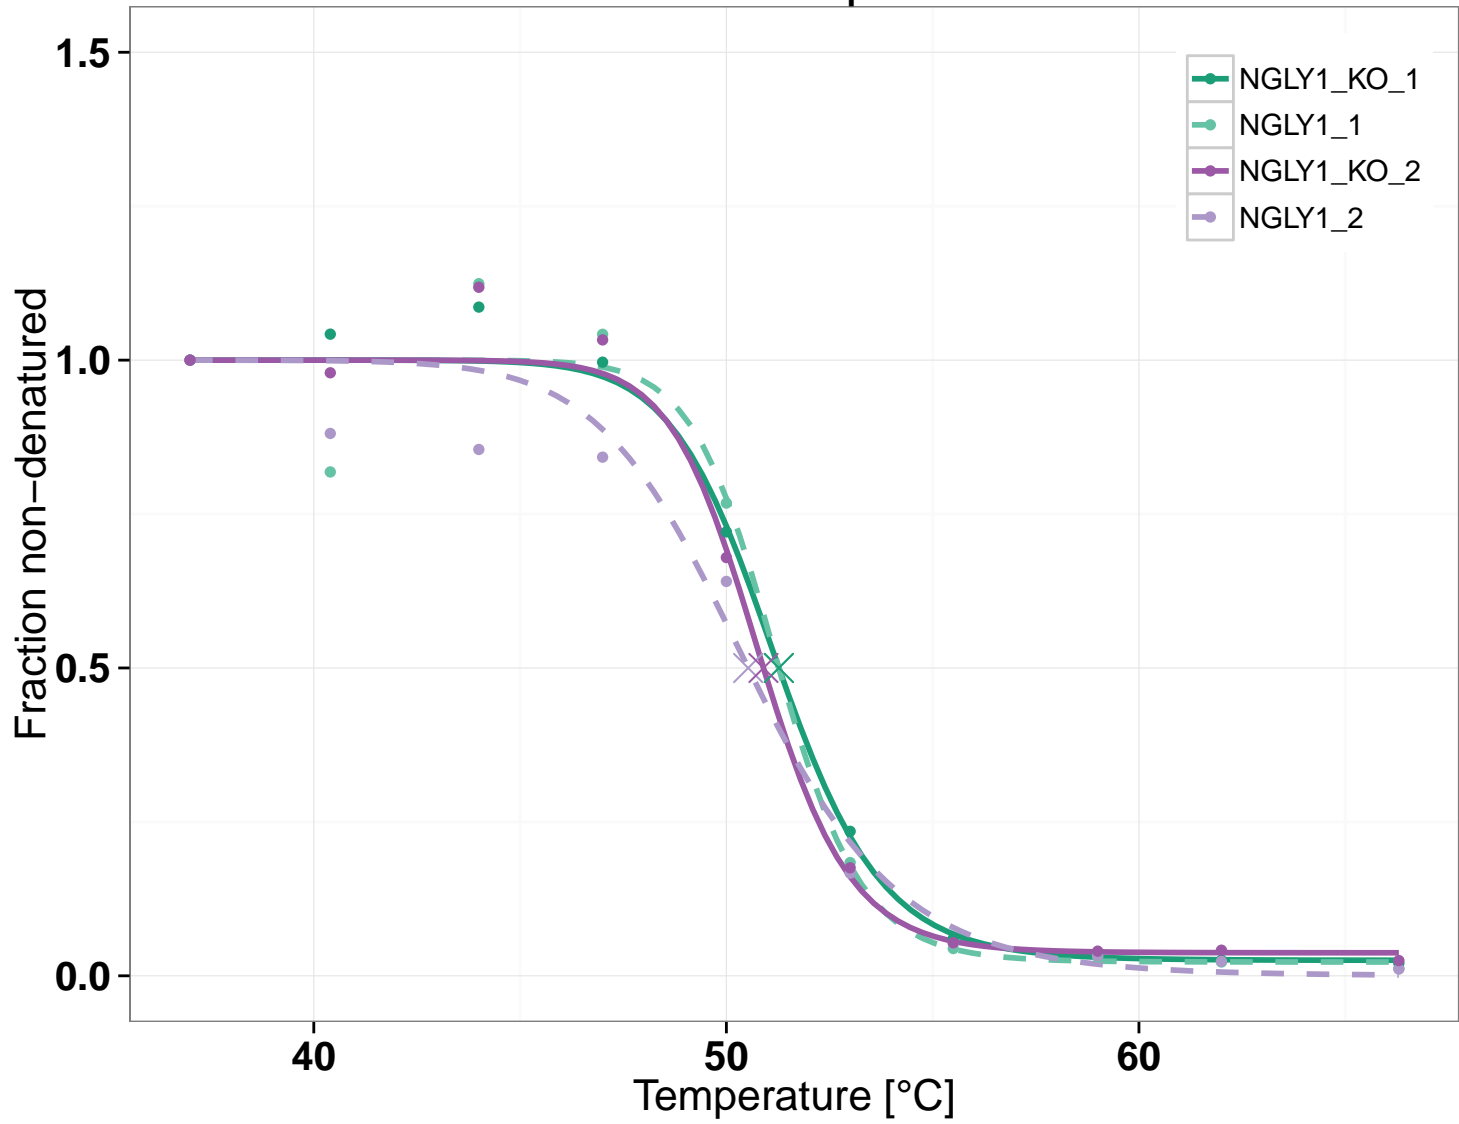

|            | meltPoint | slope | plateau | R2   |
|------------|-----------|-------|---------|------|
| NGLY1_KO_1 | 51.27     | -0.19 | 0.03    | 1    |
| NGLY1_1    | 51.27     | -0.24 | 0.02    | 0.98 |
| NGLY1_KO_2 | 50.9      | -0.22 | 0.04    | 0.99 |
| NGLY1_2    | 50.53     | -0.14 | 0       | 0.97 |

Supplement: Supplementary file 2561 [file 1]

# IPI00743931.3|GORASP2

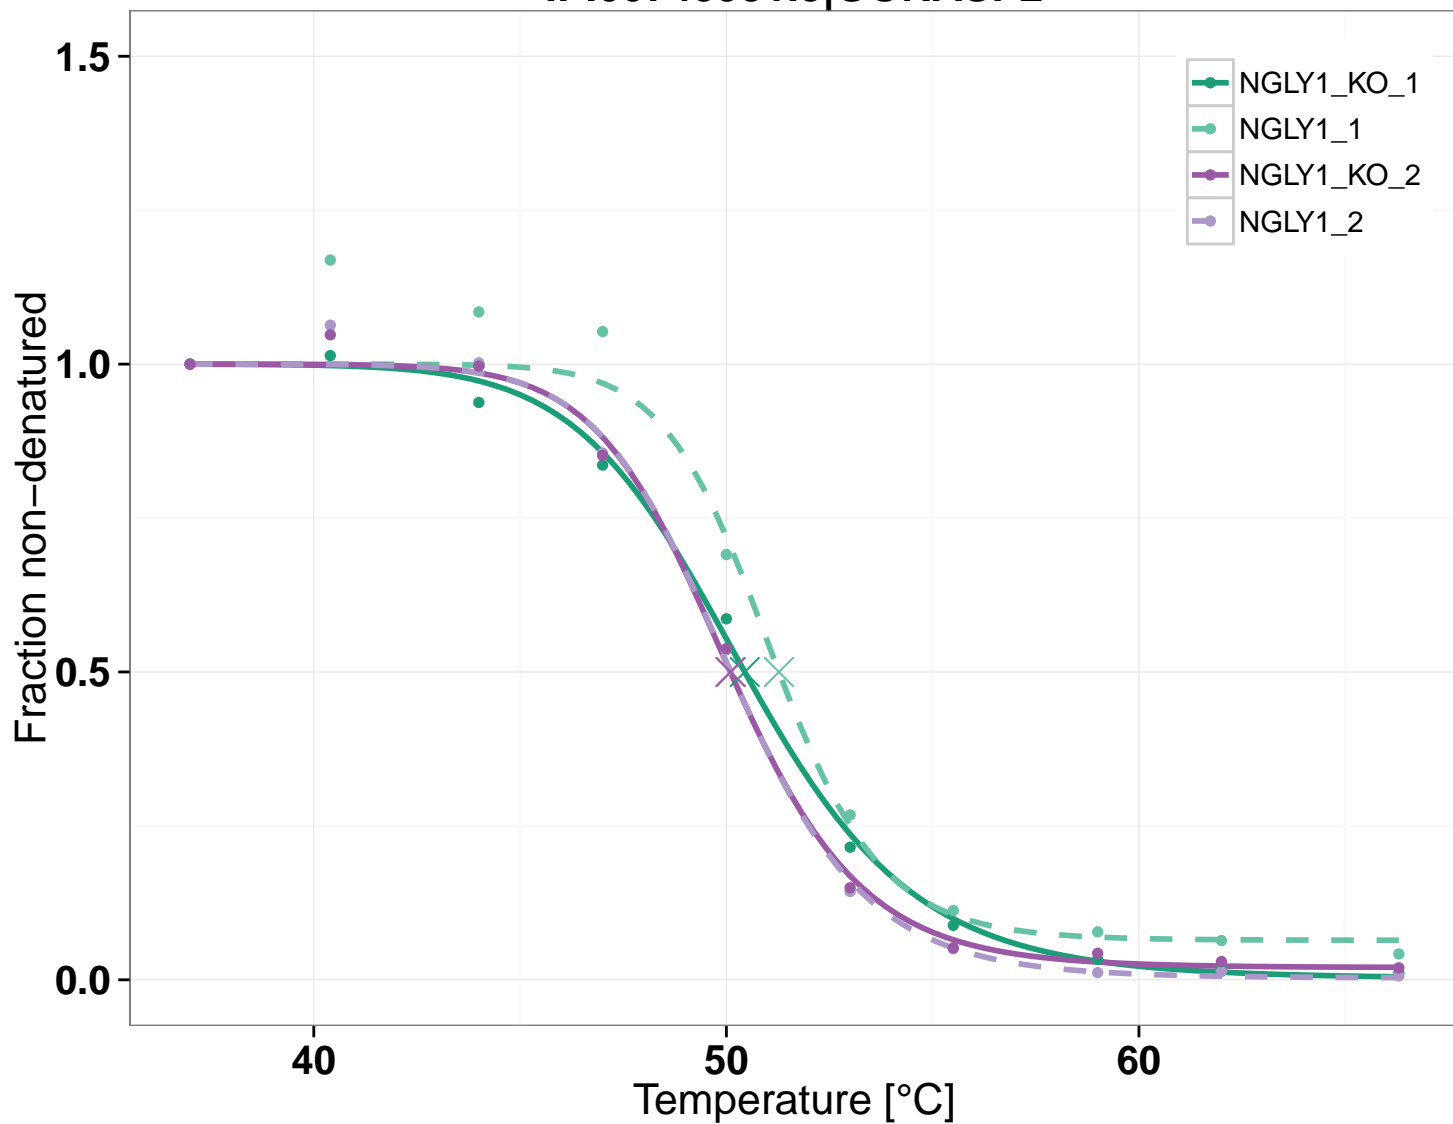

|            | meltPoint | slope | plateau | R2   |
|------------|-----------|-------|---------|------|
| NGLY1_KO_1 | 50.44     | -0.12 | 0       | 1    |
| NGLY1_1    | 51.27     | -0.18 | 0.06    | 0.98 |
| NGLY1_KO_2 | 50.1      | -0.15 | 0.02    | 1    |
| NGLY1_2    | 50.11     | -0.15 | 0       | 1    |

Supplement: Supplementary file 2562 [file 1]

# IPI00294501.1|DHCR7

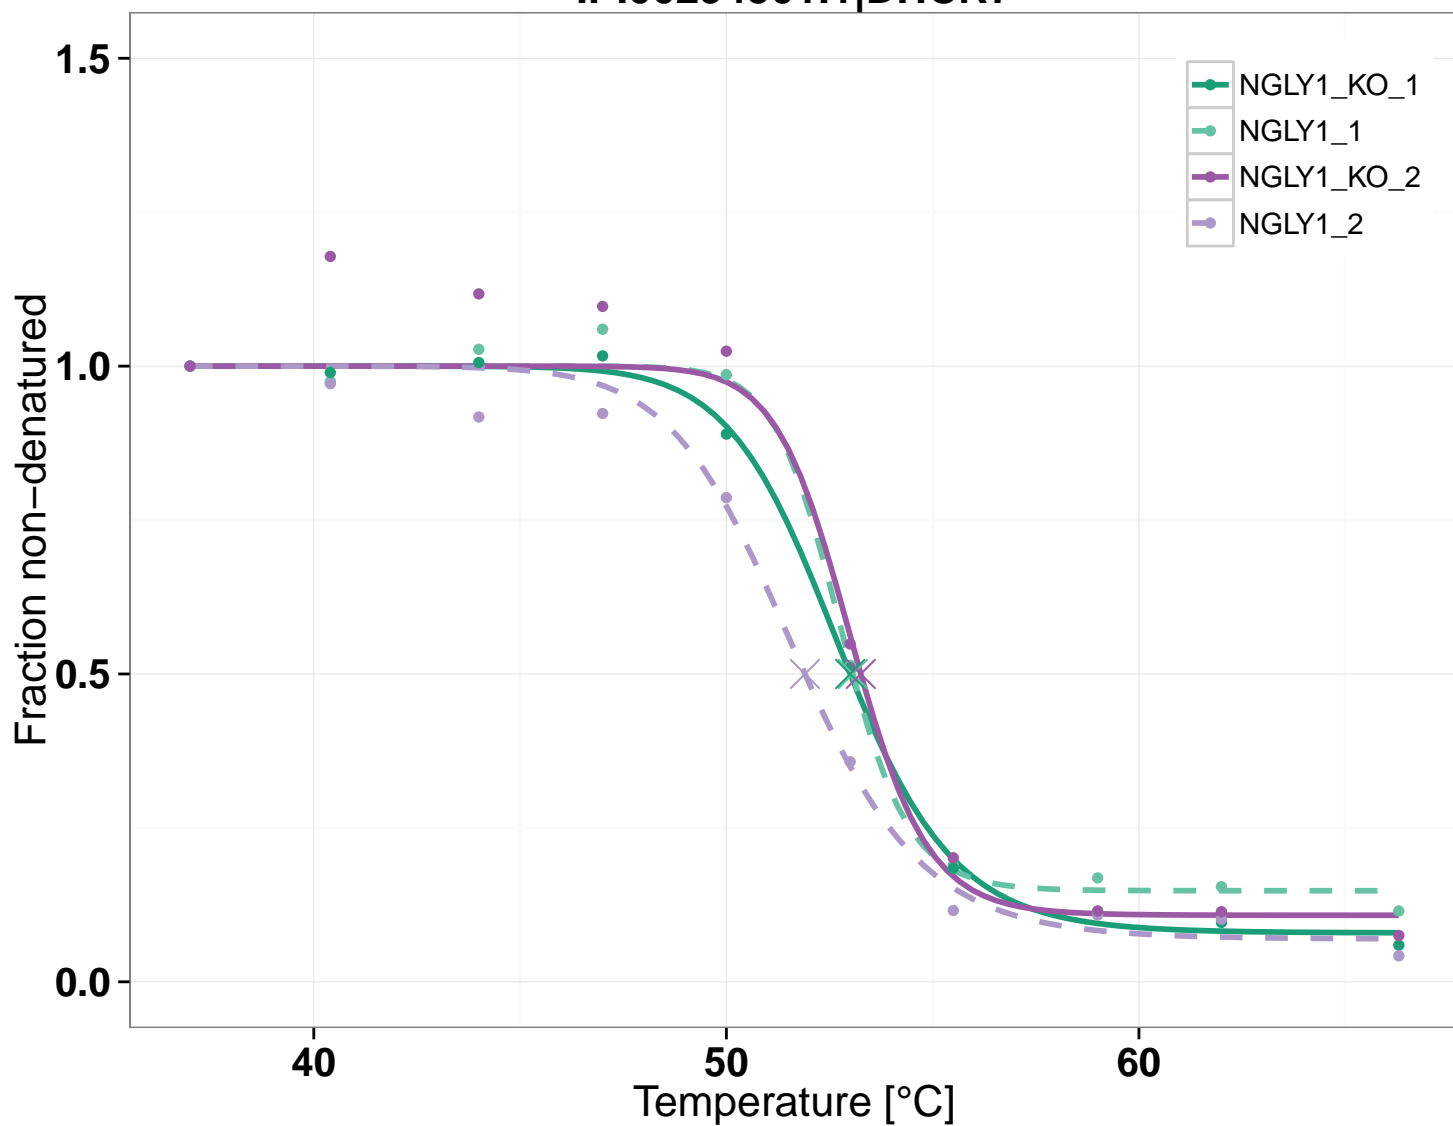

|            | meltPoint | slope | plateau | R2   |
|------------|-----------|-------|---------|------|
| NGLY1_KO_1 | 53        | -0.17 | 0.08    | 1    |
| NGLY1_1    | 53.06     | -0.26 | 0.15    | 1    |
| NGLY1_KO_2 | 53.26     | -0.24 | 0.11    | 0.97 |
| NGLY1_2    | 51.91     | -0.15 | 0.07    | 0.99 |

Supplement: Supplementary file 2563 [file 1]

IPI00019353.4|AGK

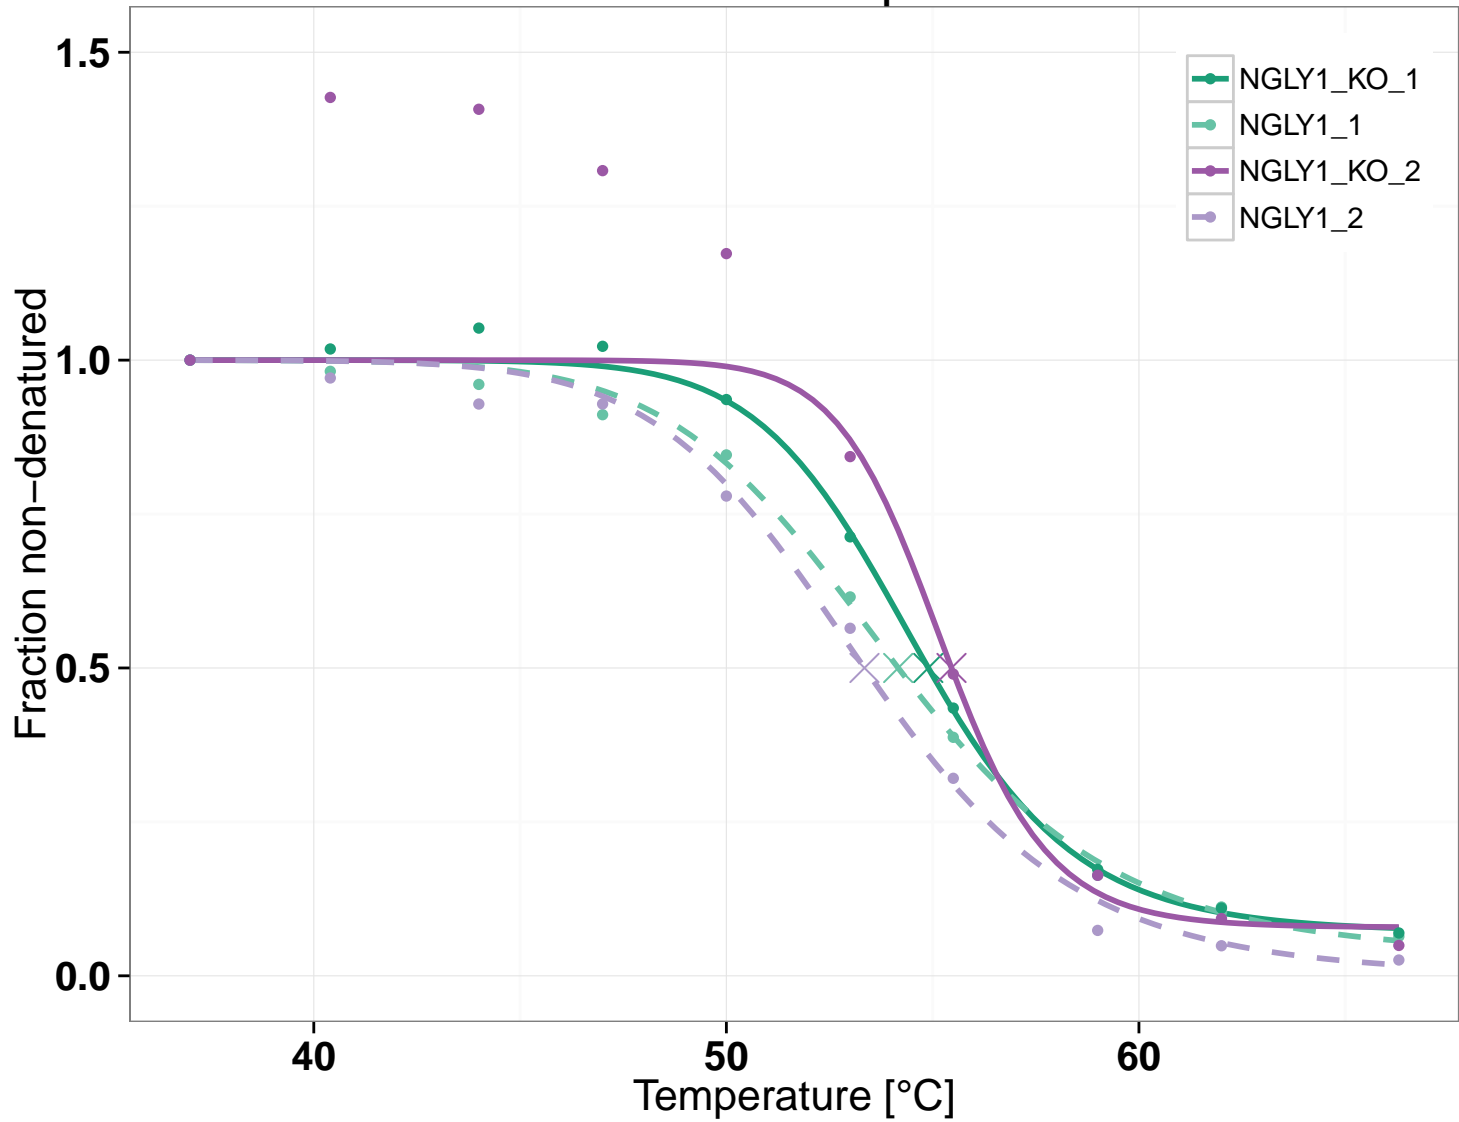

|            | meltPoint | slope  | plateau | R2   |
|------------|-----------|--------|---------|------|
| NGLY1_KO_1 | 54.89     | -0.12  | 0.07    | 1    |
| NGLY1_1    | 54.17     | -0.089 | 0.03    | 1    |
| NGLY1_KO_2 | 55.46     | -0.18  | 0.08    | 0.83 |
| NGLY1_2    | 53.35     | -0.097 | 0       | 0.99 |

Supplement: Supplementary file 2564 [file 1]

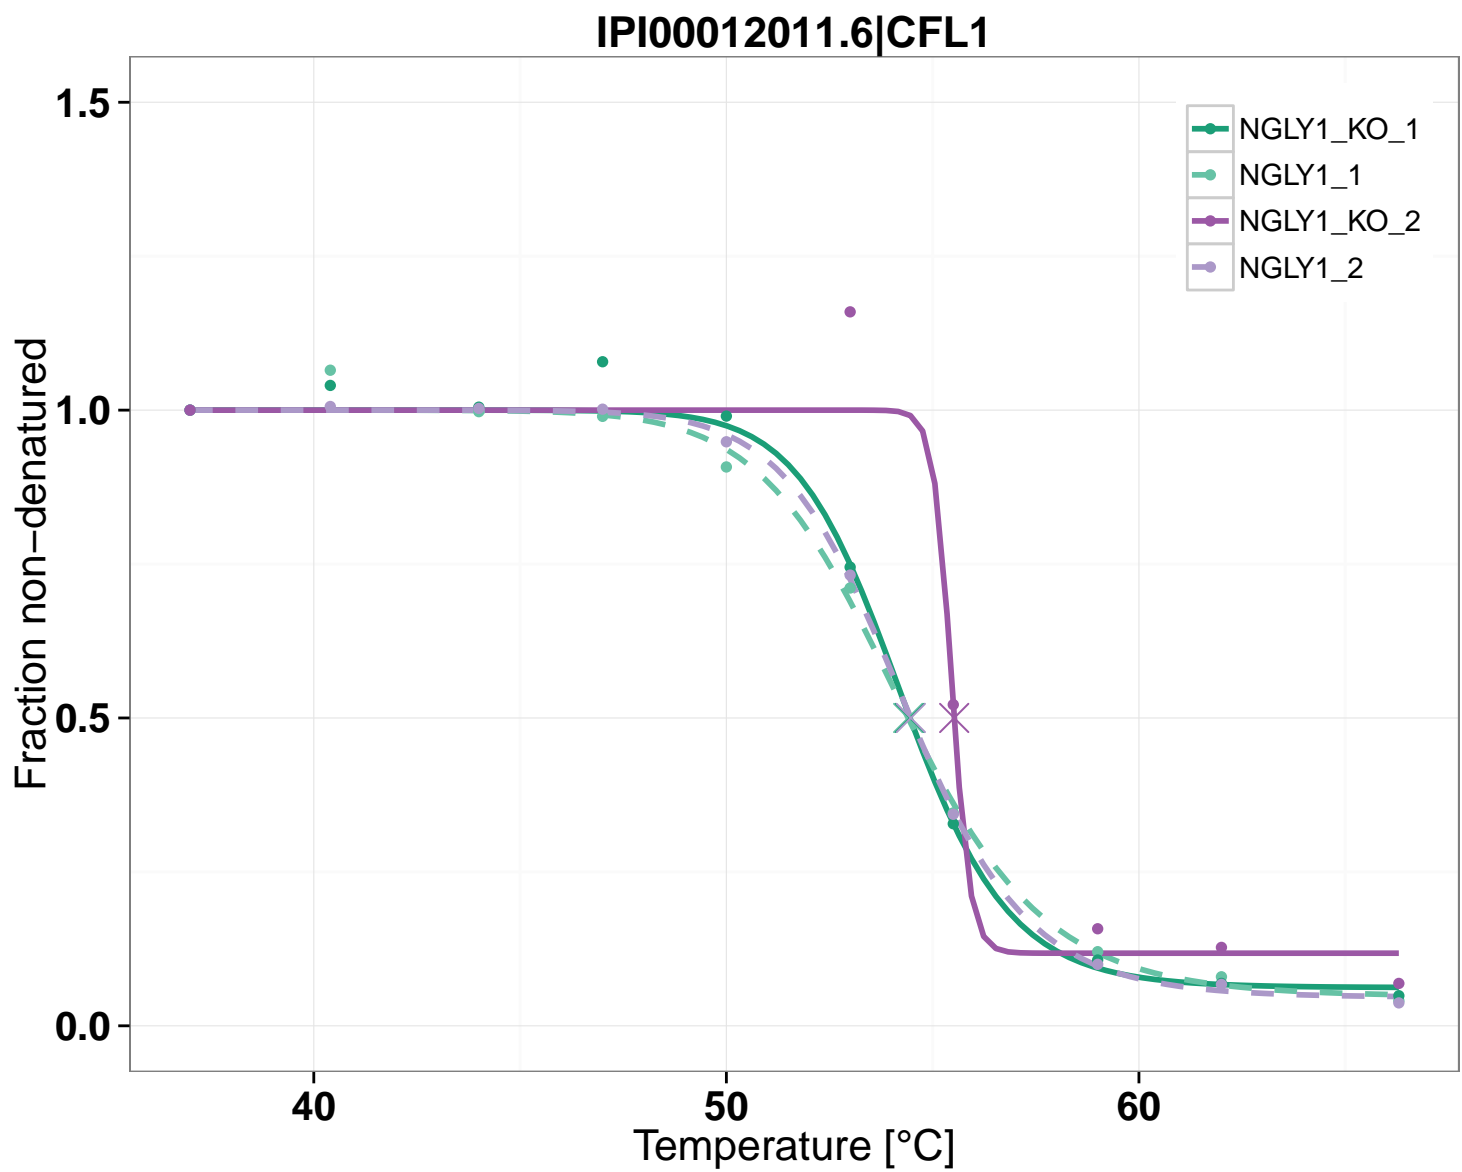

|            | meltPoint | slope | plateau | R2   |
|------------|-----------|-------|---------|------|
| NGLY1_KO_1 | 54.45     | -0.18 | 0.06    | 1    |
| NGLY1_1    | 54.41     | -0.14 | 0.05    | 1    |
| NGLY1_KO_2 | 55.52     | -0.99 | 0.12    | 0.51 |
| NGLY1_2    | 54.47     | -0.16 | 0.05    | 1    |

Supplement: Supplementary file 2565 [file 1]

# IPI00480187.2|PHF8

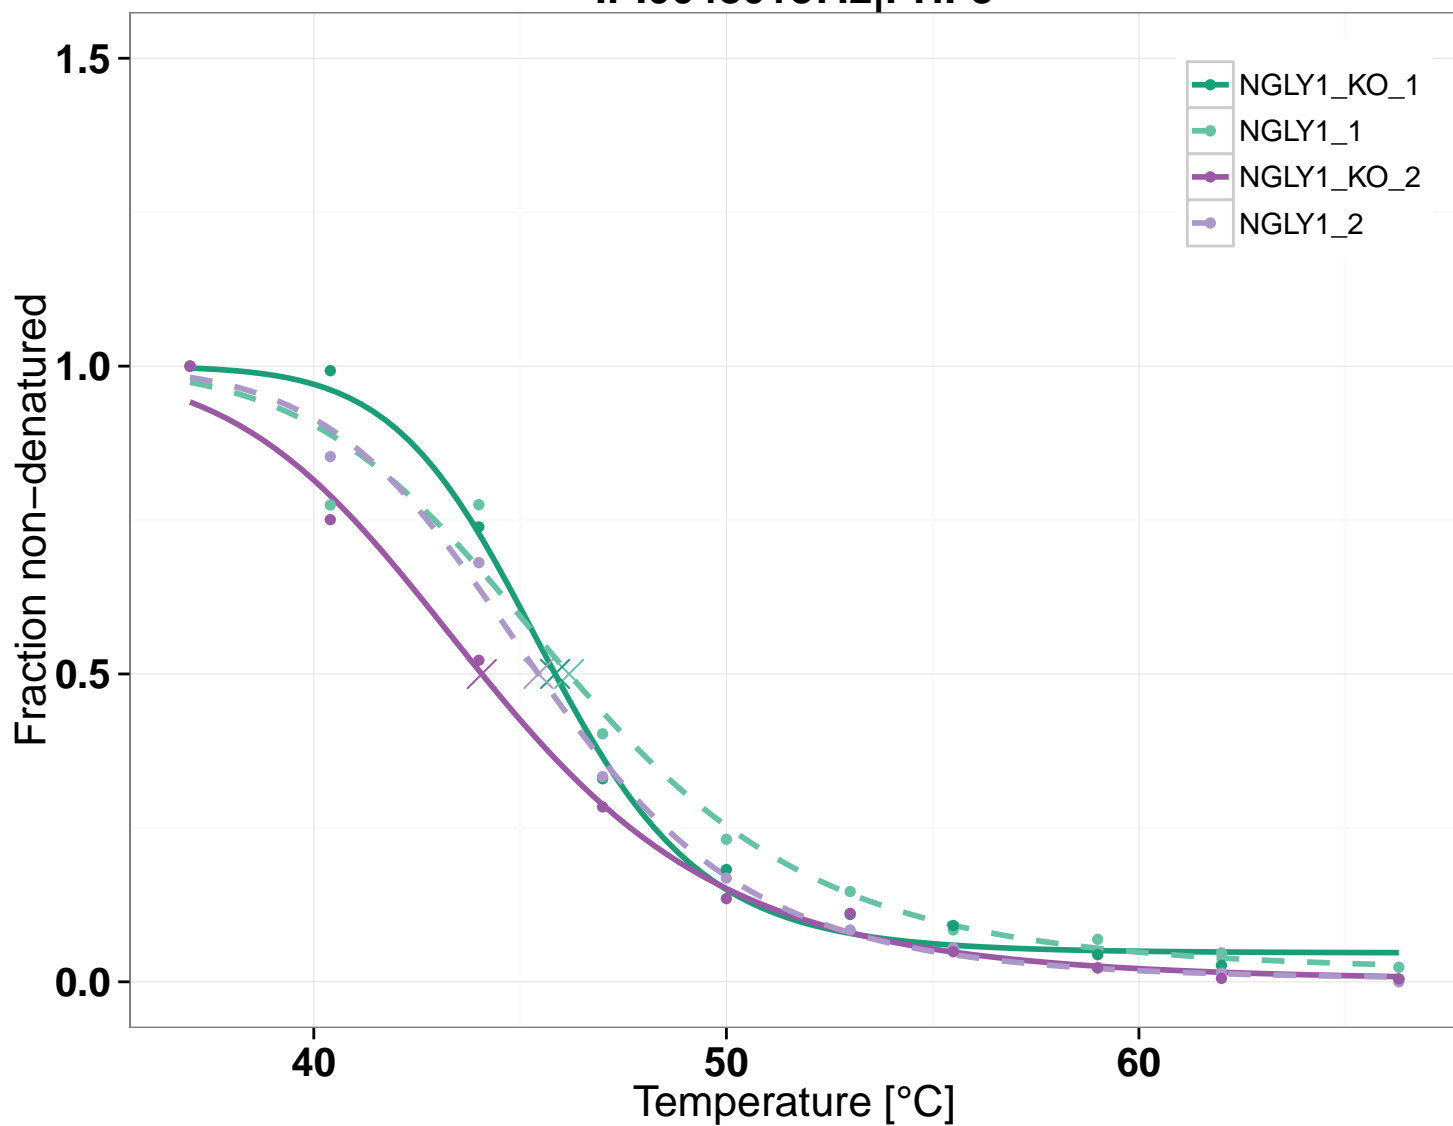

|            | meltPoint | slope  | plateau | R2   |
|------------|-----------|--------|---------|------|
| NGLY1_KO_1 | 45.85     | -0.13  | 0.05    | 0.99 |
| NGLY1_1    | 46.19     | -0.08  | 0.02    | 0.98 |
| NGLY1_KO_2 | 44.07     | -0.084 | 0       | 0.99 |
| NGLY1_2    | 45.44     | -0.097 | 0       | 1    |

Supplement: Supplementary file 2566 [file 1]

# IPI00002496.2|GMPPB

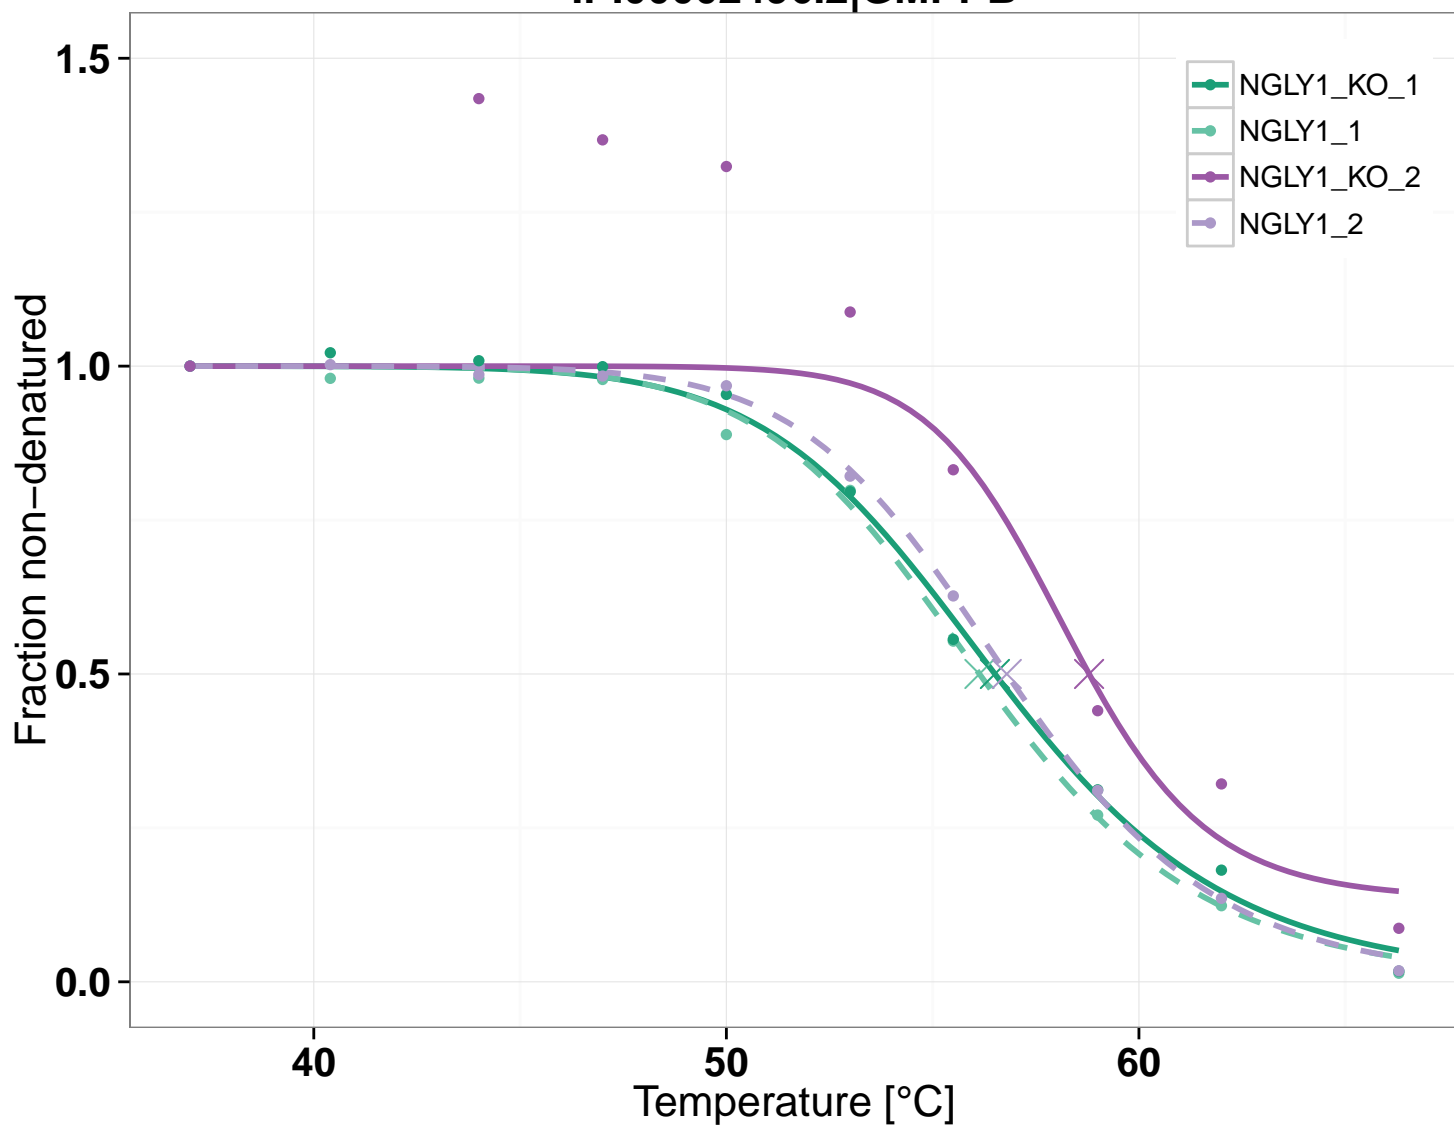

|            | meltPoint | slope  | plateau | R2   |
|------------|-----------|--------|---------|------|
| NGLY1_KO_1 | 56.51     | -0.089 | 0       | 1    |
| NGLY1_1    | 56.13     | -0.093 | 0       | 1    |
| NGLY1_KO_2 | 58.79     | -0.13  | 0.13    | 0.66 |
| NGLY1_2    | 56.8      | -0.099 | 0       | 1    |

Supplement: Supplementary file 2567 [file 1]

IPI00008528.4|ATP8

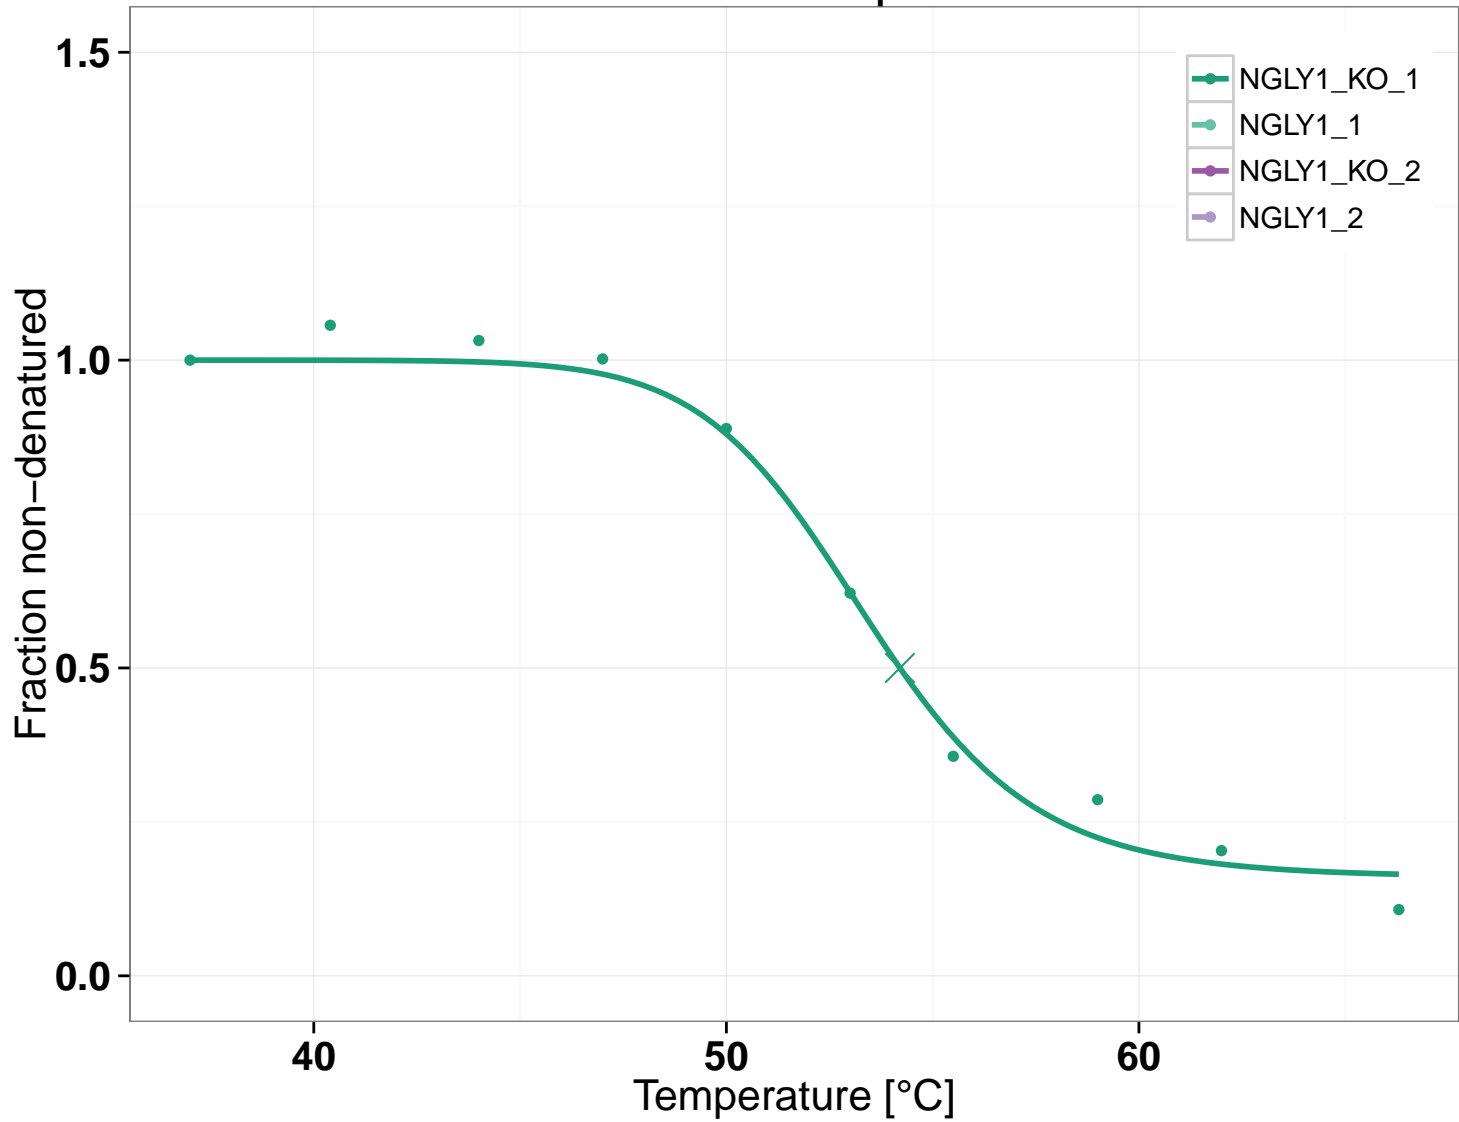

|            | meltPoint | slope | plateau | R2   |
|------------|-----------|-------|---------|------|
| NGLY1_KO_1 | 54.21     | -0.1  | 0.16    | 0.99 |
| NGLY1_1    | -         | -     | -       | -    |
| NGLY1_KO_2 | -         | -     | -       | -    |
| NGLY1_2    | -         | -     | -       | -    |

Supplement: Supplementary file 2568 [file 1]

IPI00007024.1|FAM96B

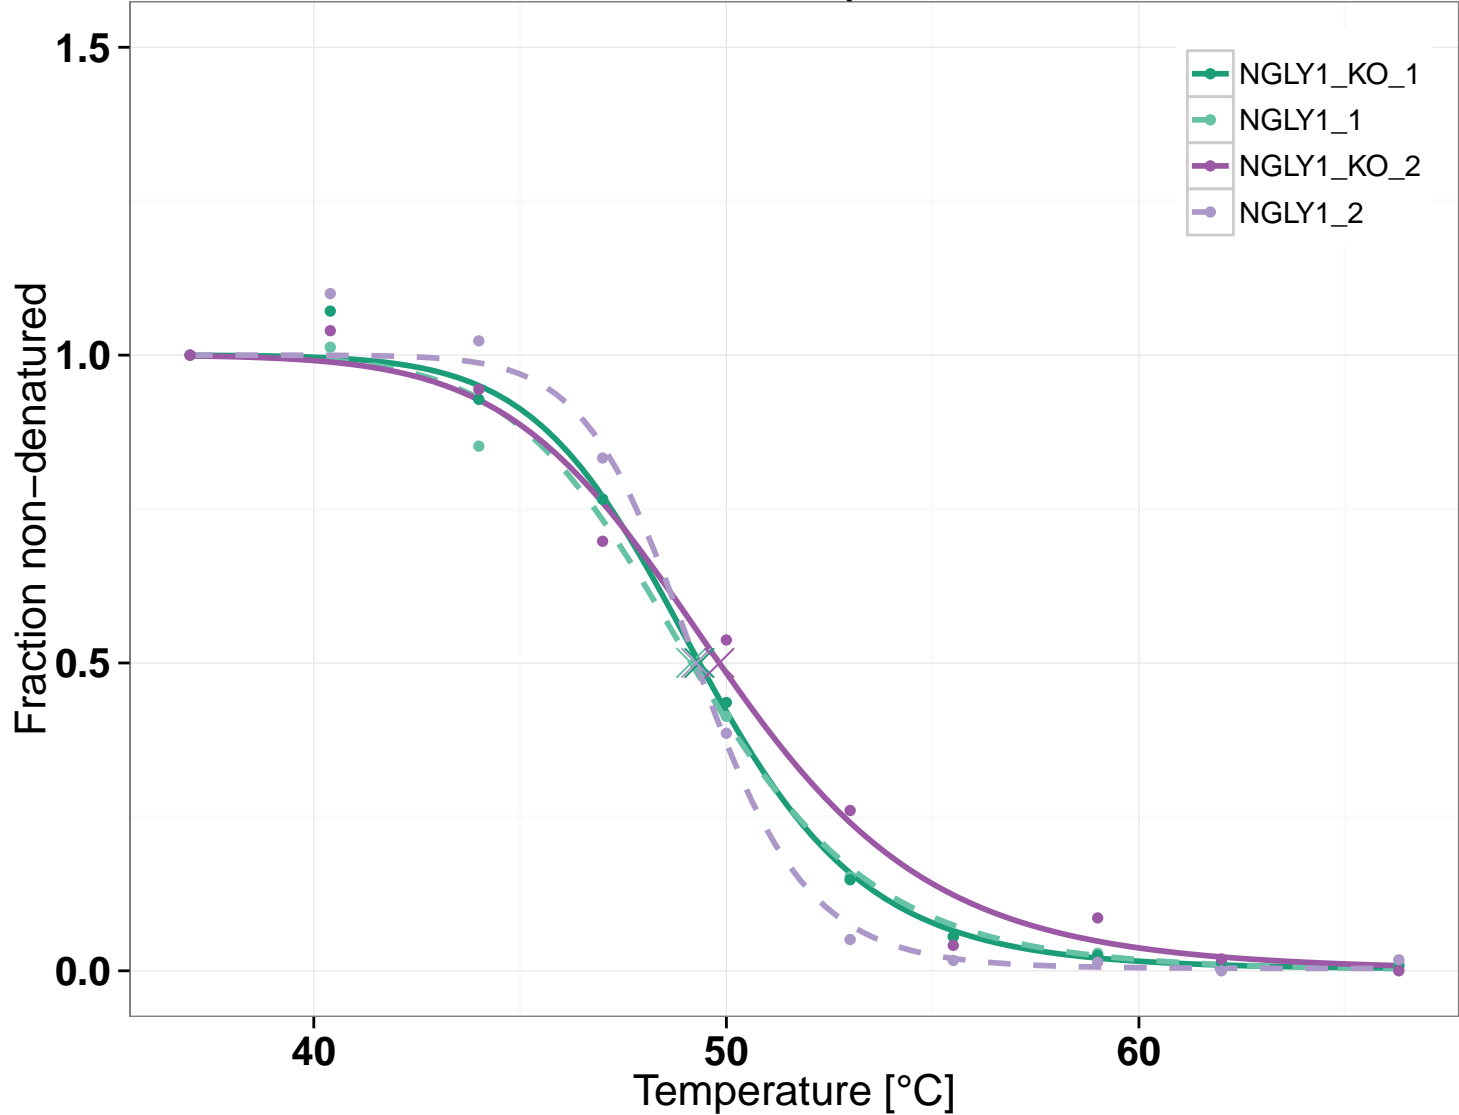

|            | meltPoint | slope  | plateau | R2   |
|------------|-----------|--------|---------|------|
| NGLY1_KO_1 | 49.35     | -0.12  | 0       | 1    |
| NGLY1_1    | 49.15     | -0.11  | 0       | 1    |
| NGLY1_KO_2 | 49.83     | -0.097 | 0       | 0.99 |
| NGLY1_2    | 49.27     | -0.18  | 0       | 0.99 |

Supplement: Supplementary file 2569 [file 1]

IPI00027554.2|SLC35D1

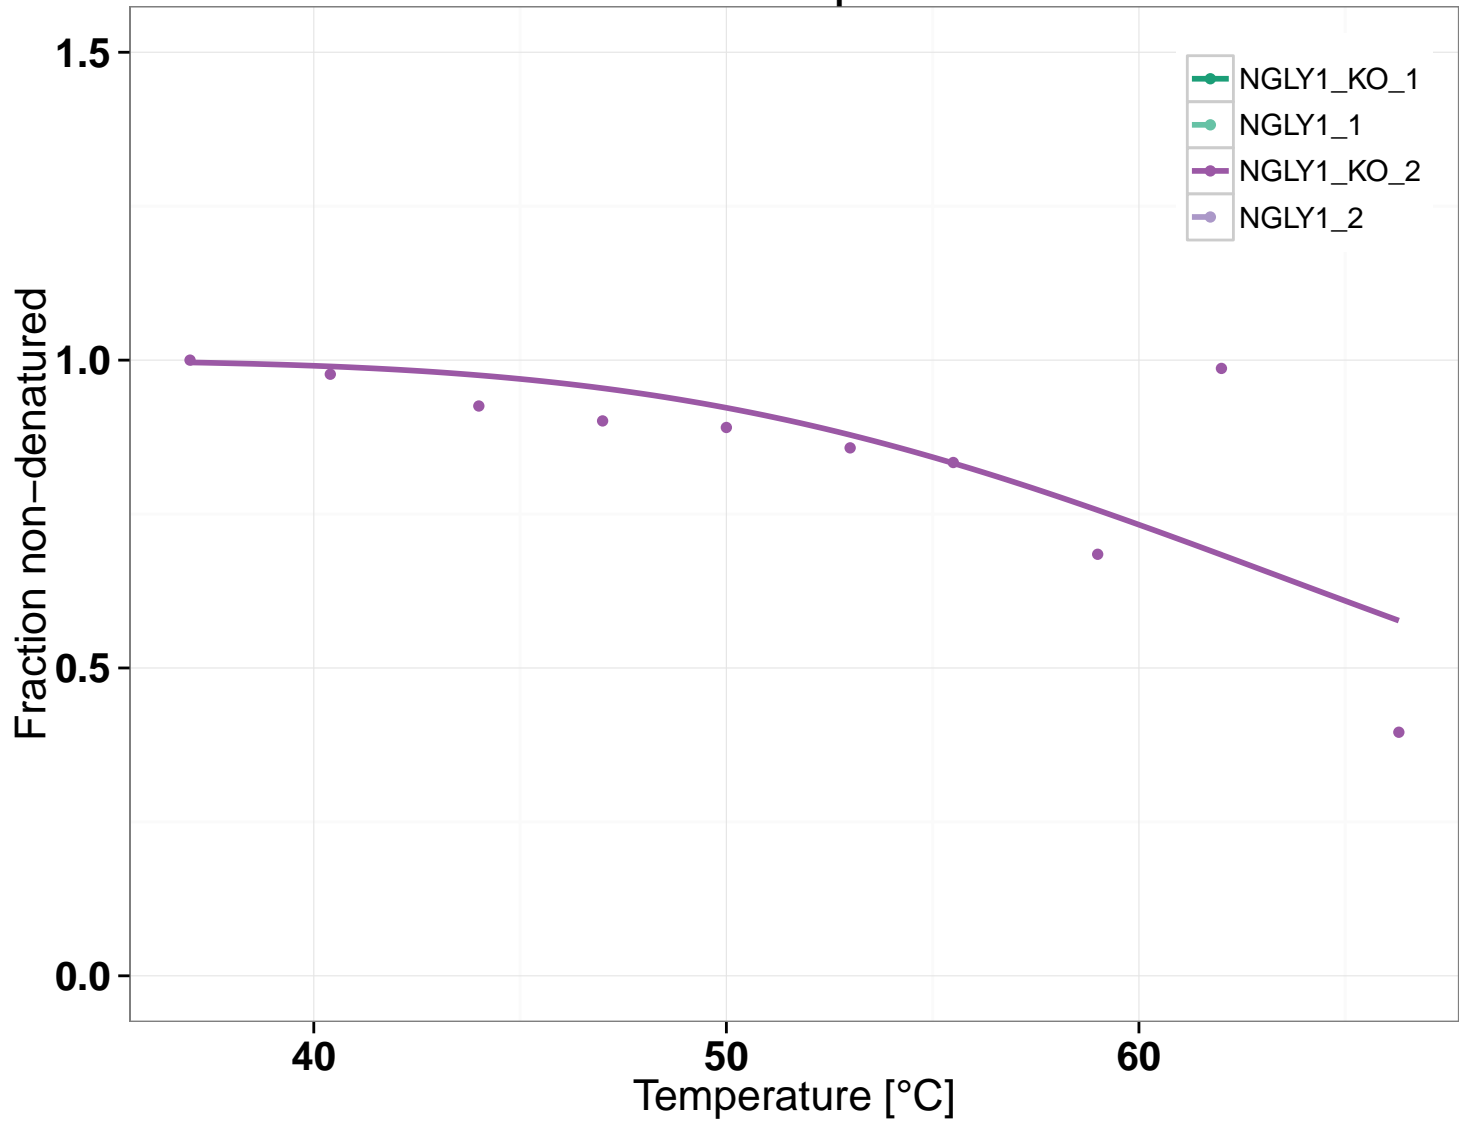

|            | meltPoint | slope  | plateau | R2   |
|------------|-----------|--------|---------|------|
| NGLY1_KO_1 | —         | —      | —       | —    |
| NGLY1_1    | —         | —      | —       | —    |
| NGLY1_KO_2 | —         | -0.025 | 0       | 0.55 |
| NGLY1_2    | —         | —      | —       | —    |

Supplement: Supplementary file 2570 [file 1]

IPI00641570.2|CCDC117

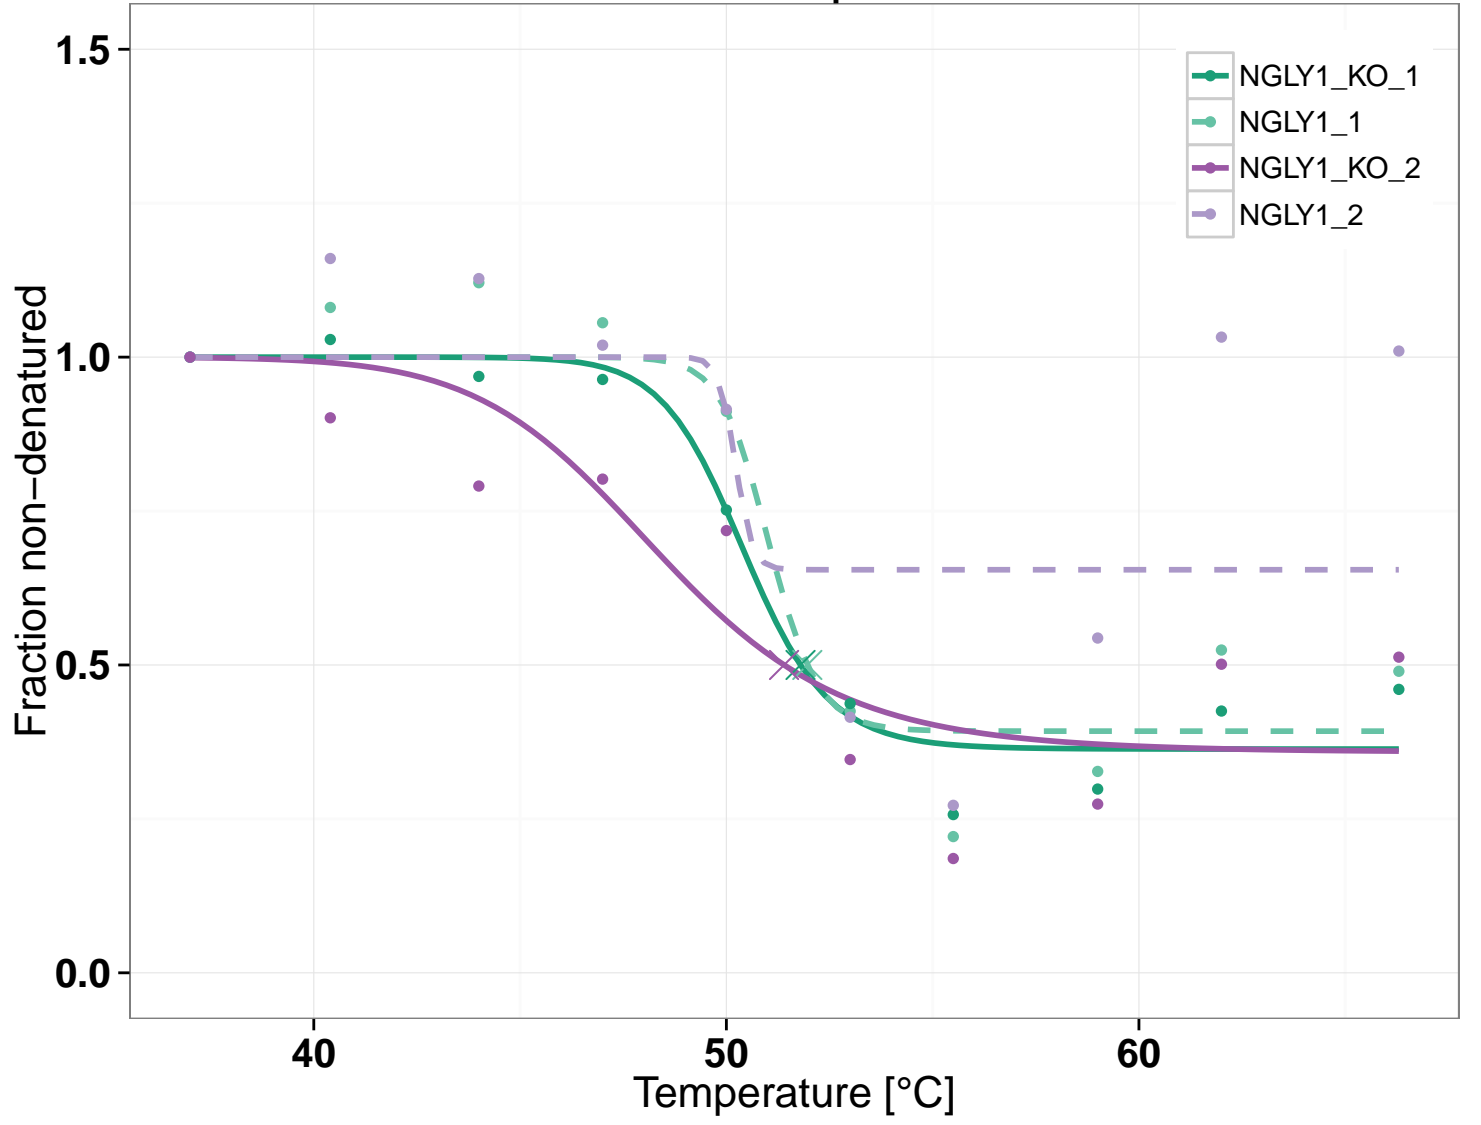

|            | meltPoint | slope  | plateau | R2   |
|------------|-----------|--------|---------|------|
| NGLY1_KO_1 | 51.8      | -0.16  | 0.36    | 0.96 |
| NGLY1_1    | 51.96     | -0.26  | 0.39    | 0.92 |
| NGLY1_KO_2 | 51.4      | -0.072 | 0.36    | 0.78 |
| NGLY1_2    | -         | -0.43  | 0.65    | 0.42 |

Supplement: Supplementary file 2571 [file 1]

IPI00470600.1|OR6C74

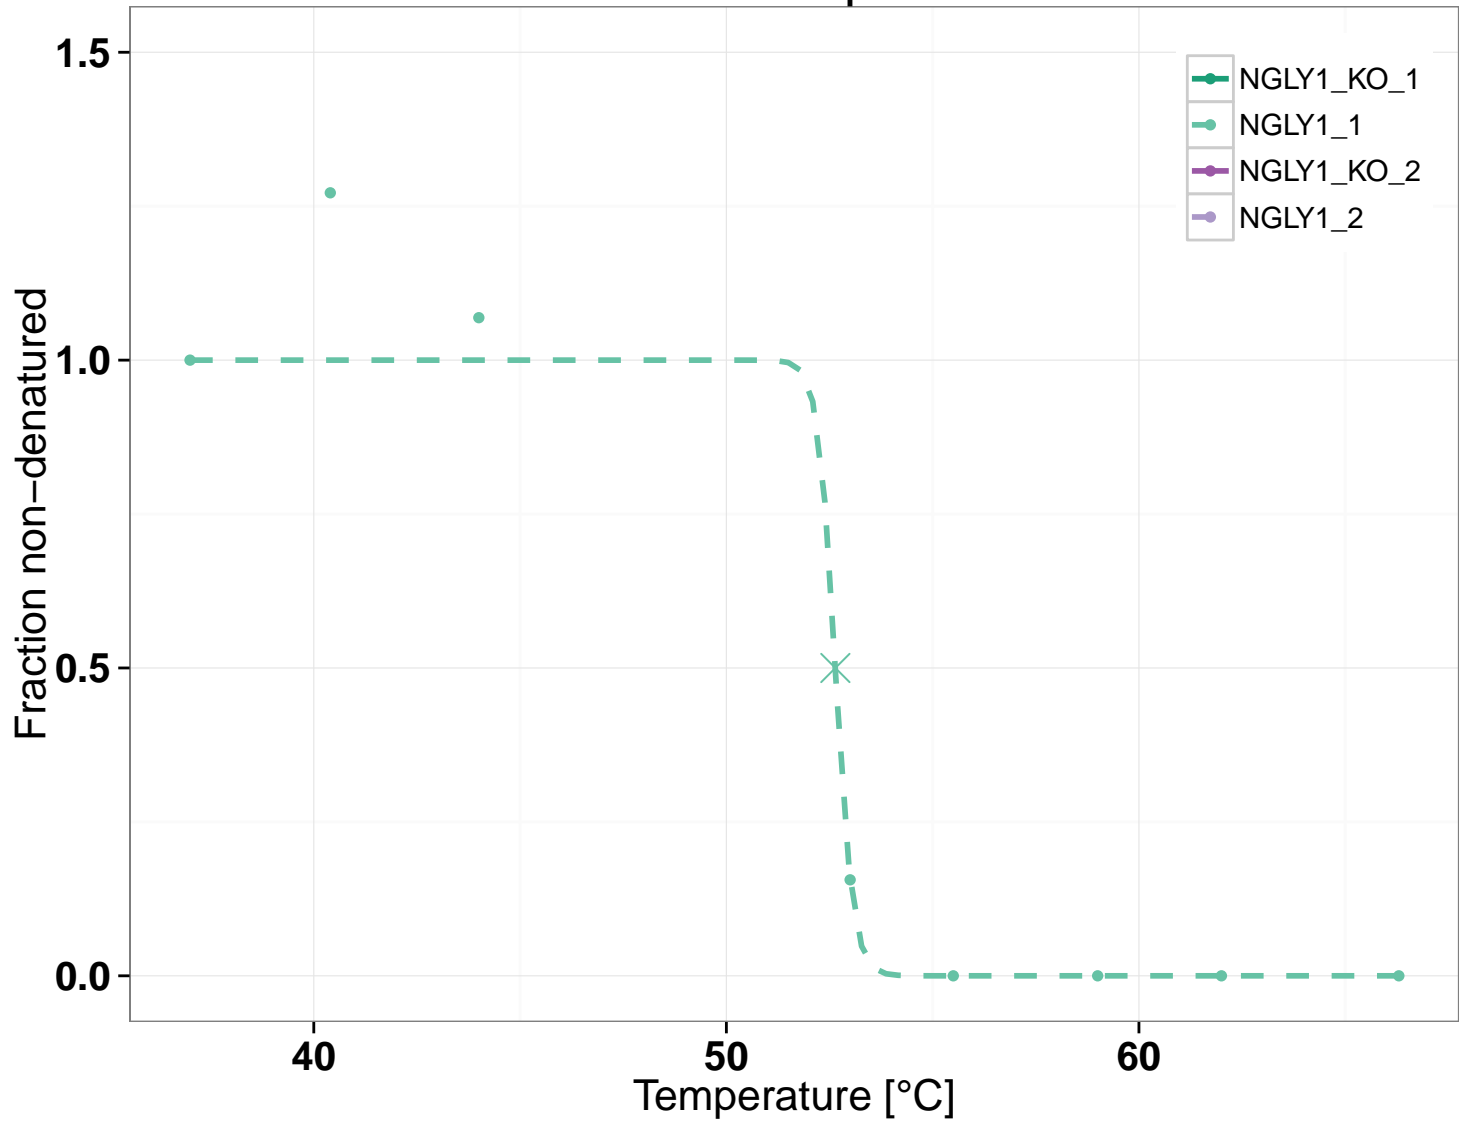

|            | meltPoint | slope | plateau | R2   |
|------------|-----------|-------|---------|------|
| NGLY1_KO_1 | -         | -     | -       | -    |
| NGLY1_1    | 52.64     | -1.2  | 0       | 0.77 |
| NGLY1_KO_2 | -         | -     | -       | -    |
| NGLY1_2    | -         | -     | -       | -    |

Supplement: Supplementary file 2572 [file 1]

IPI00297191.2|MED14

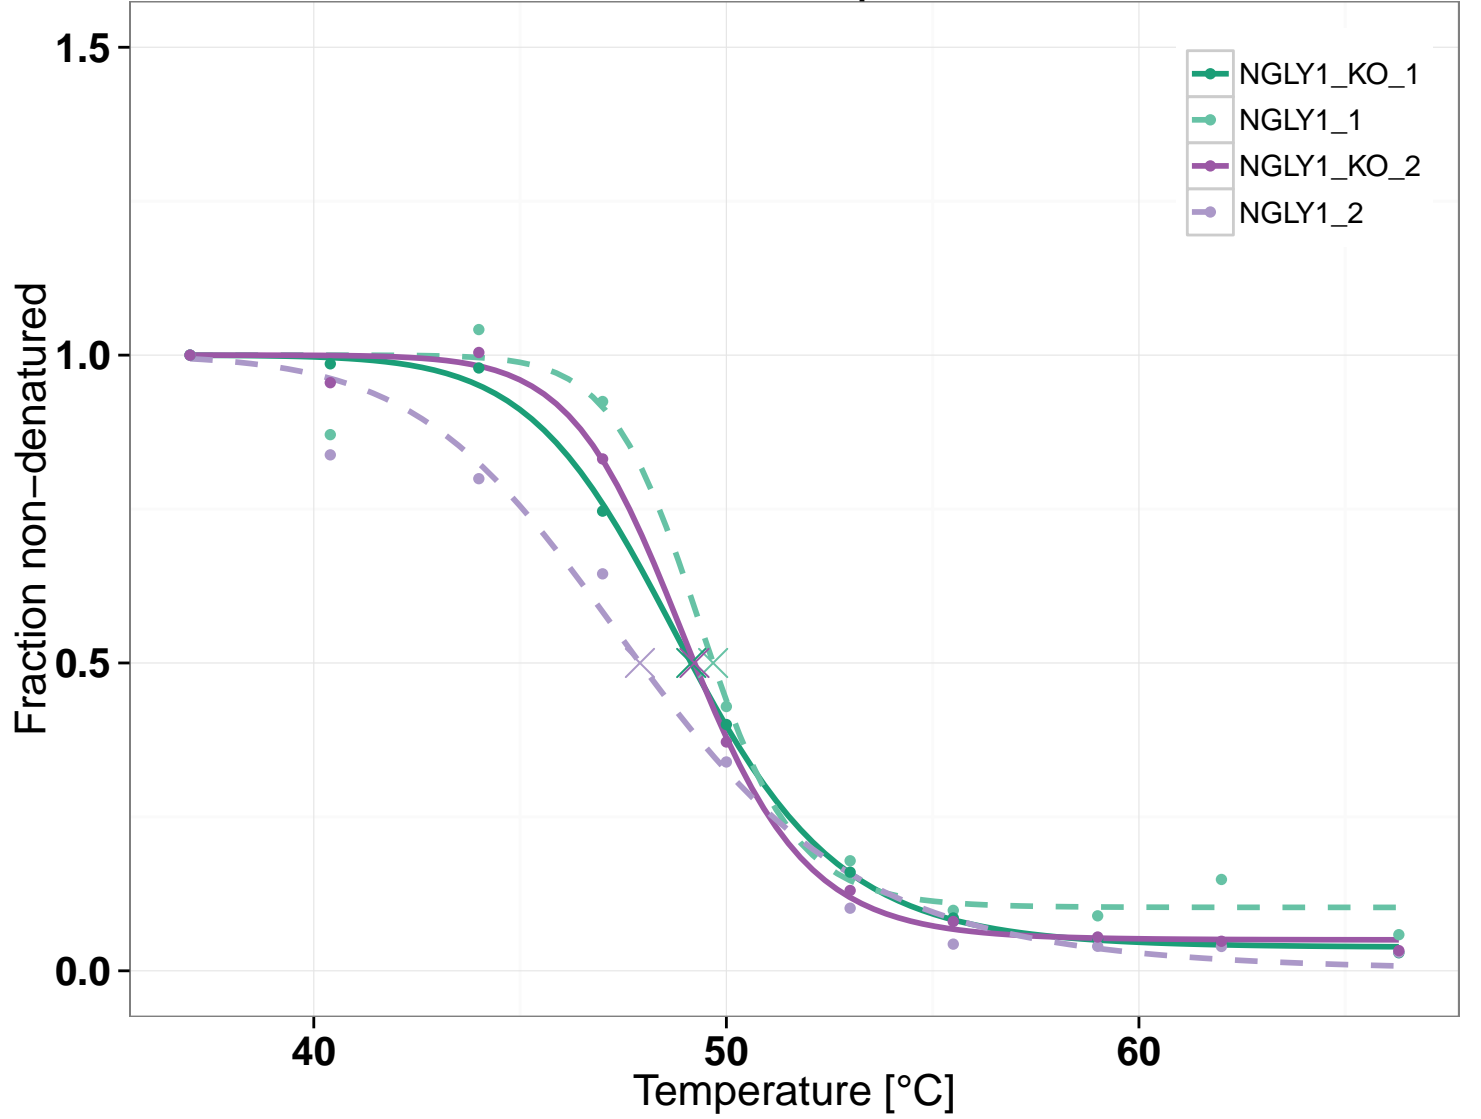

|            | meltPoint | slope  | plateau | R2   |
|------------|-----------|--------|---------|------|
| NGLY1_KO_1 | 49.15     | -0.13  | 0.04    | 1    |
| NGLY1_1    | 49.68     | -0.2   | 0.1     | 0.98 |
| NGLY1_KO_2 | 49.23     | -0.17  | 0.05    | 1    |
| NGLY1_2    | 47.91     | -0.092 | 0       | 0.98 |

Supplement: Supplementary file 2573 [file 1]

# IPI00016814.3|ZNF670

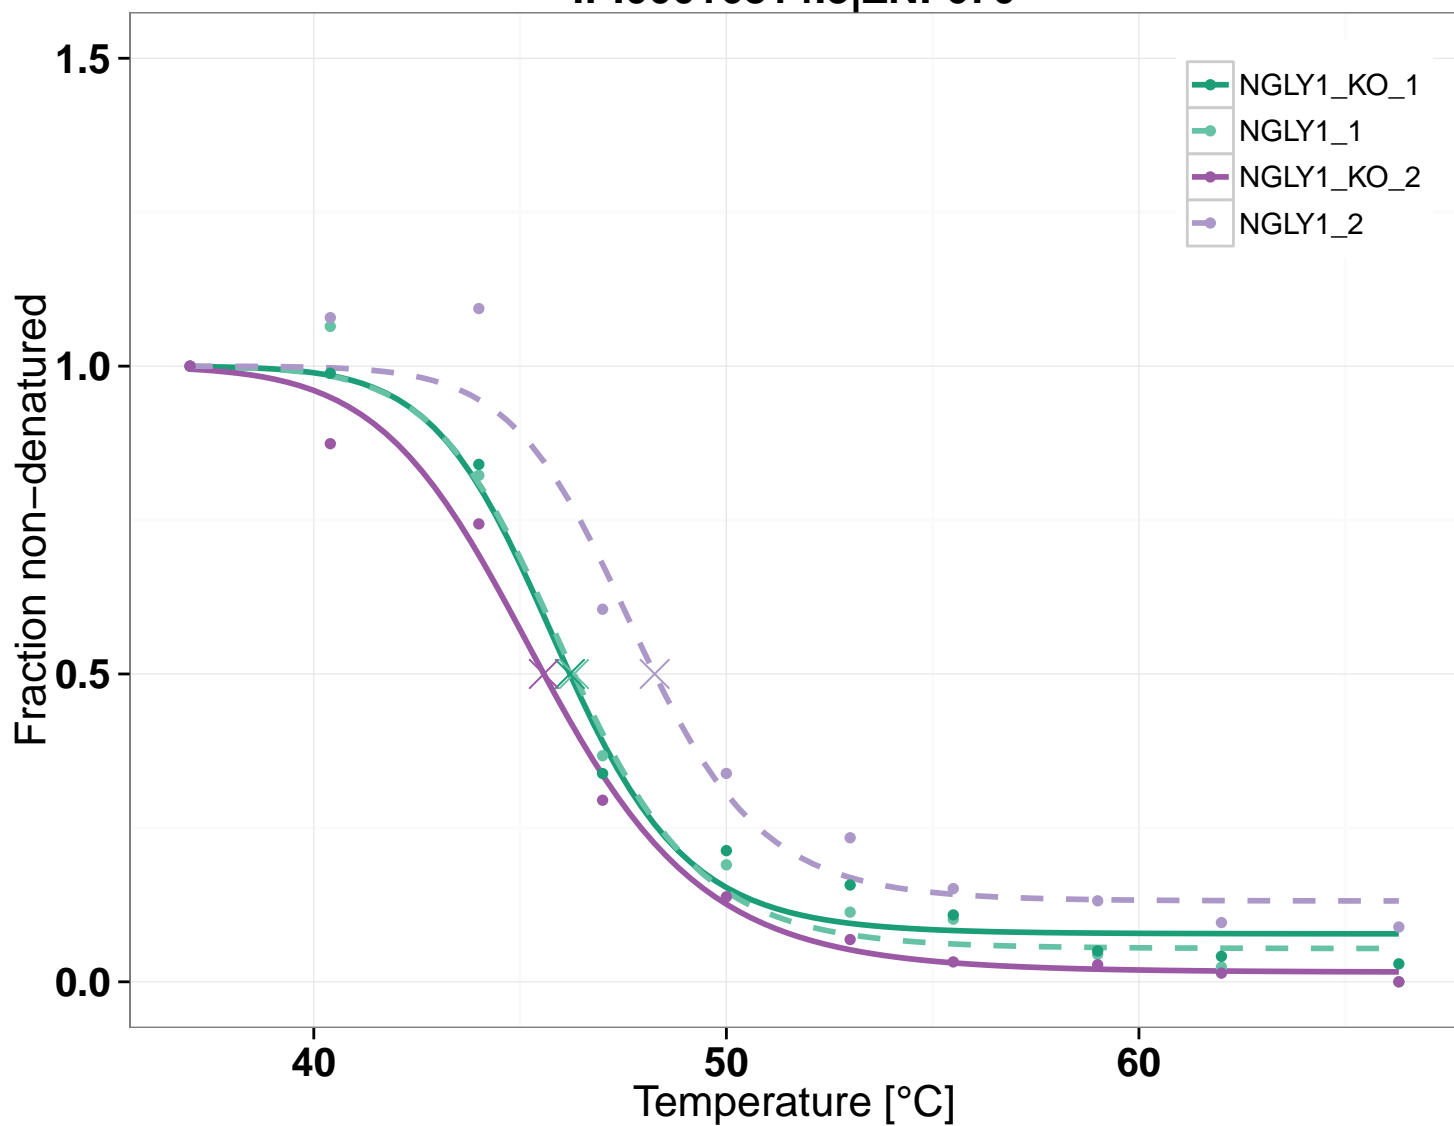

|            | meltPoint | slope | plateau | R2   |
|------------|-----------|-------|---------|------|
| NGLY1_KO_1 | 46.21     | -0.15 | 0.08    | 0.99 |
| NGLY1_1    | 46.3      | -0.15 | 0.05    | 0.99 |
| NGLY1_KO_2 | 45.58     | -0.13 | 0.02    | 0.99 |
| NGLY1_2    | 48.26     | -0.14 | 0.13    | 0.97 |

Supplement: Supplementary file 2574 [file 1]

IPI00329791.9|DDX46

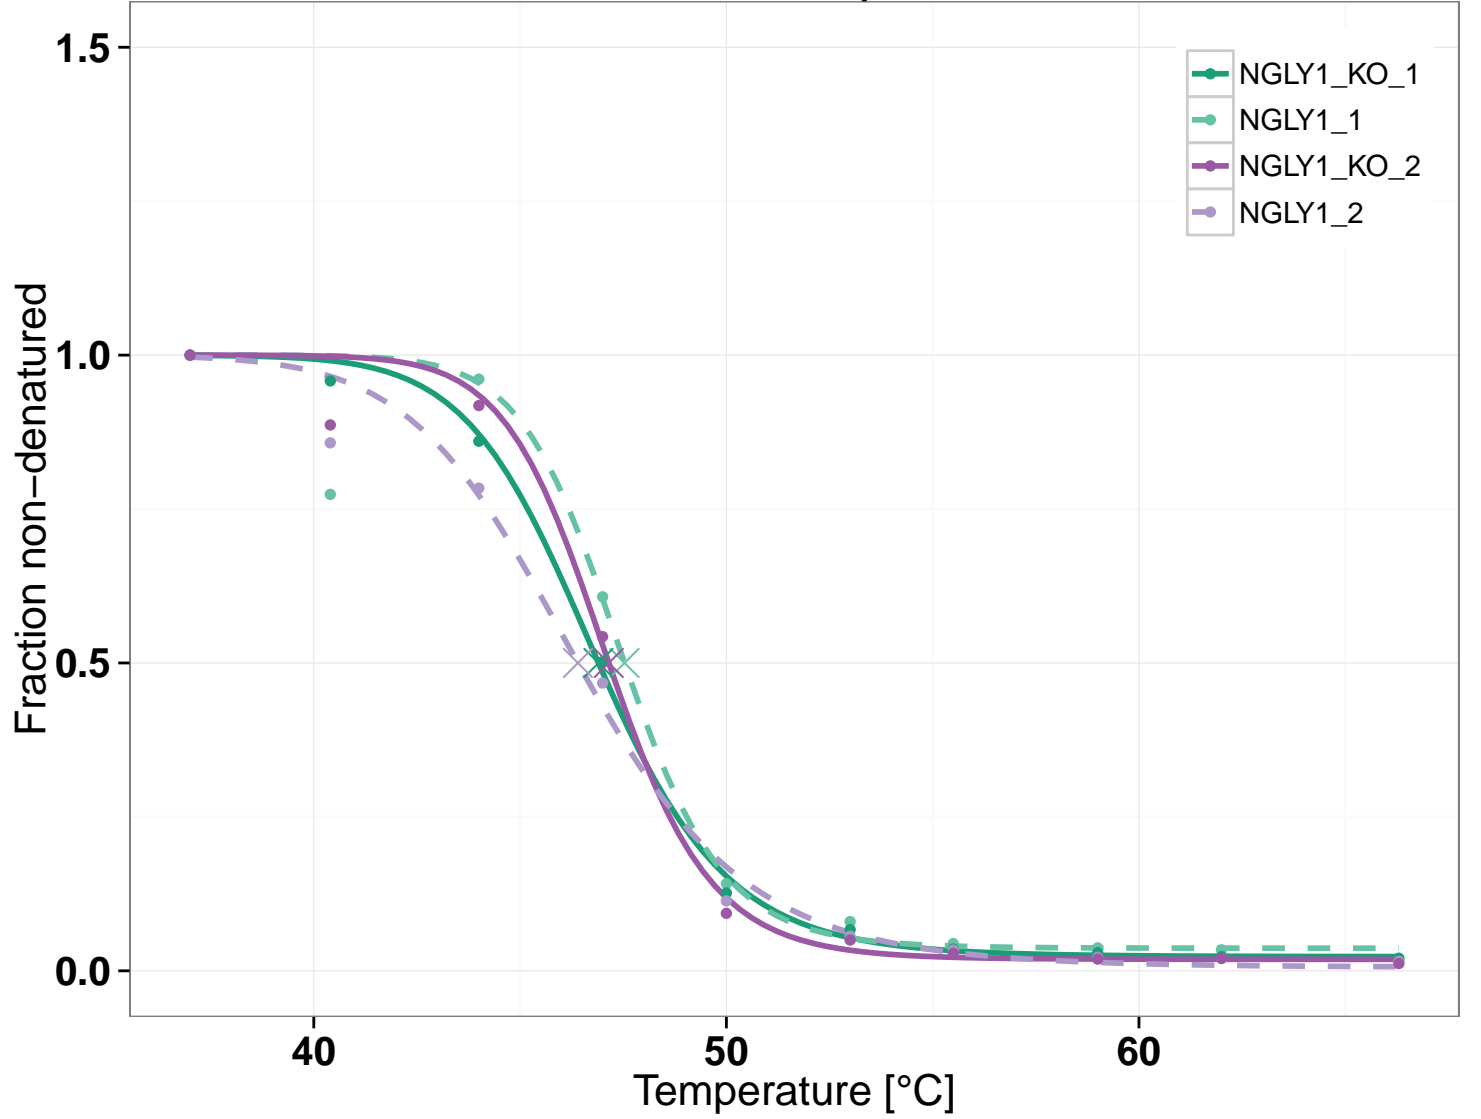

|            | meltPoint | slope | plateau | R2   |
|------------|-----------|-------|---------|------|
| NGLY1_KO_1 | 46.9      | -0.15 | 0.02    | 1    |
| NGLY1_1    | 47.53     | -0.2  | 0.04    | 0.97 |
| NGLY1_KO_2 | 47.15     | -0.2  | 0.02    | 0.99 |
| NGLY1_2    | 46.4      | -0.12 | 0.01    | 0.99 |

Supplement: Supplementary file 2575 [file 1]

IPI00871695.1|DEK

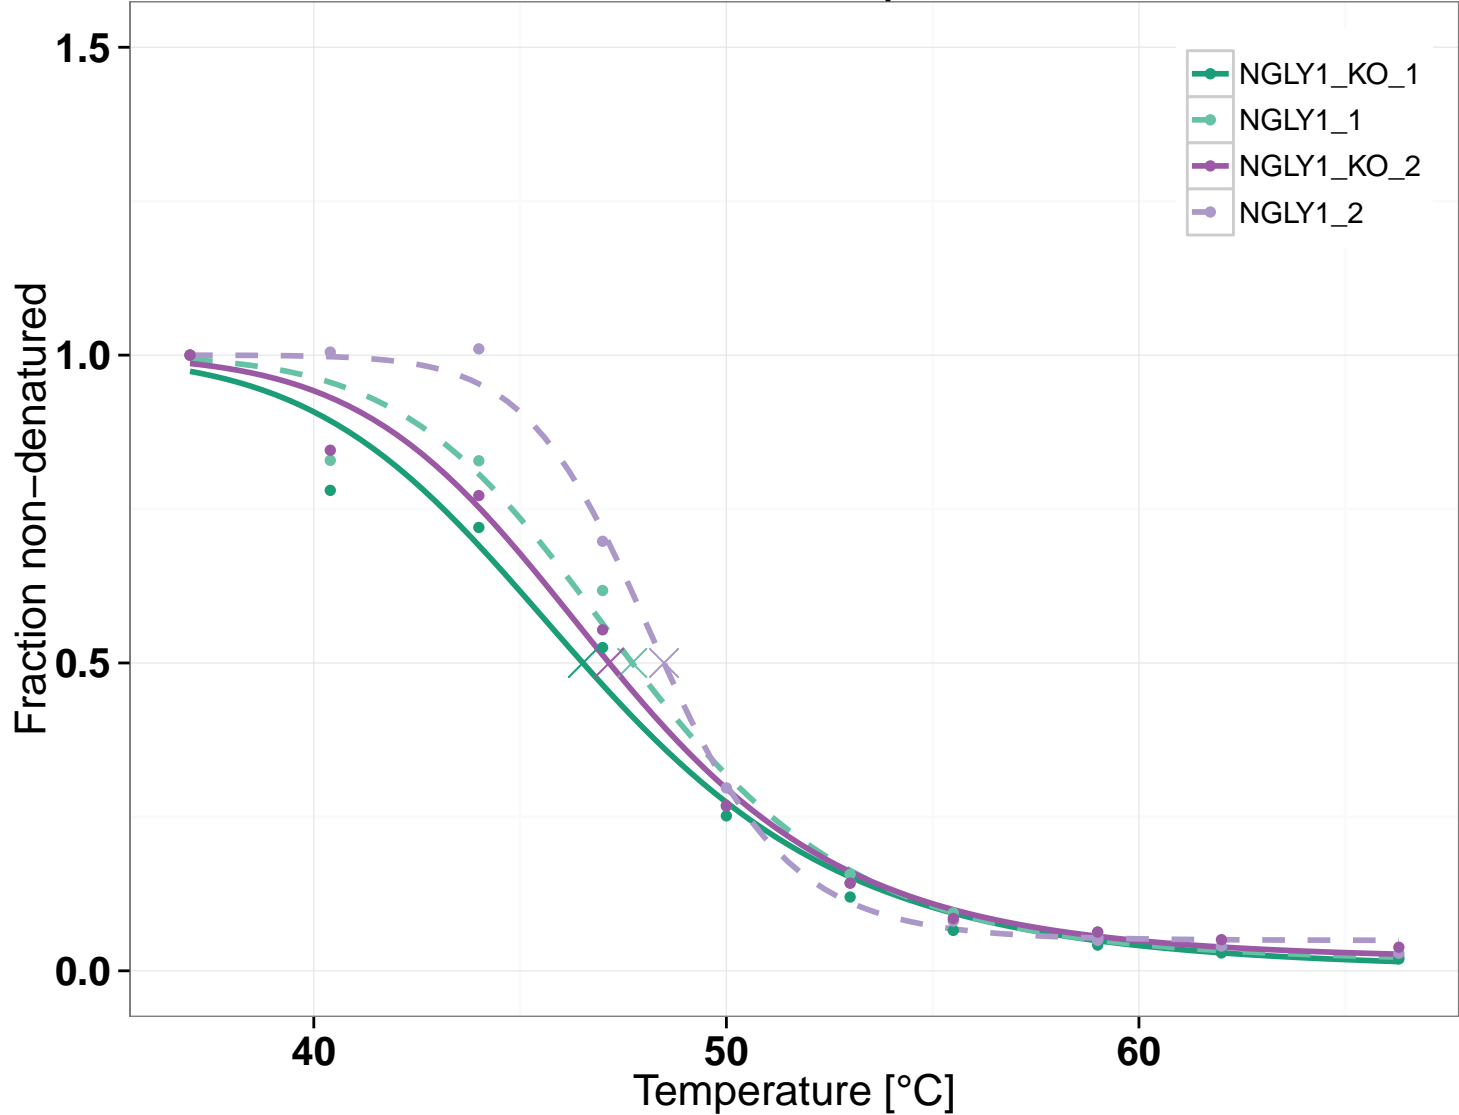

|            | meltPoint | slope  | plateau | R2   |
|------------|-----------|--------|---------|------|
| NGLY1_KO_1 | 46.52     | -0.077 | 0       | 0.98 |
| NGLY1_1    | 47.72     | -0.09  | 0.01    | 0.98 |
| NGLY1_KO_2 | 47.16     | -0.083 | 0.02    | 0.99 |
| NGLY1_2    | 48.49     | -0.15  | 0.05    | 1    |

Supplement: Supplementary file 2576 [file 1]

IPI00001735.5|NCOR2

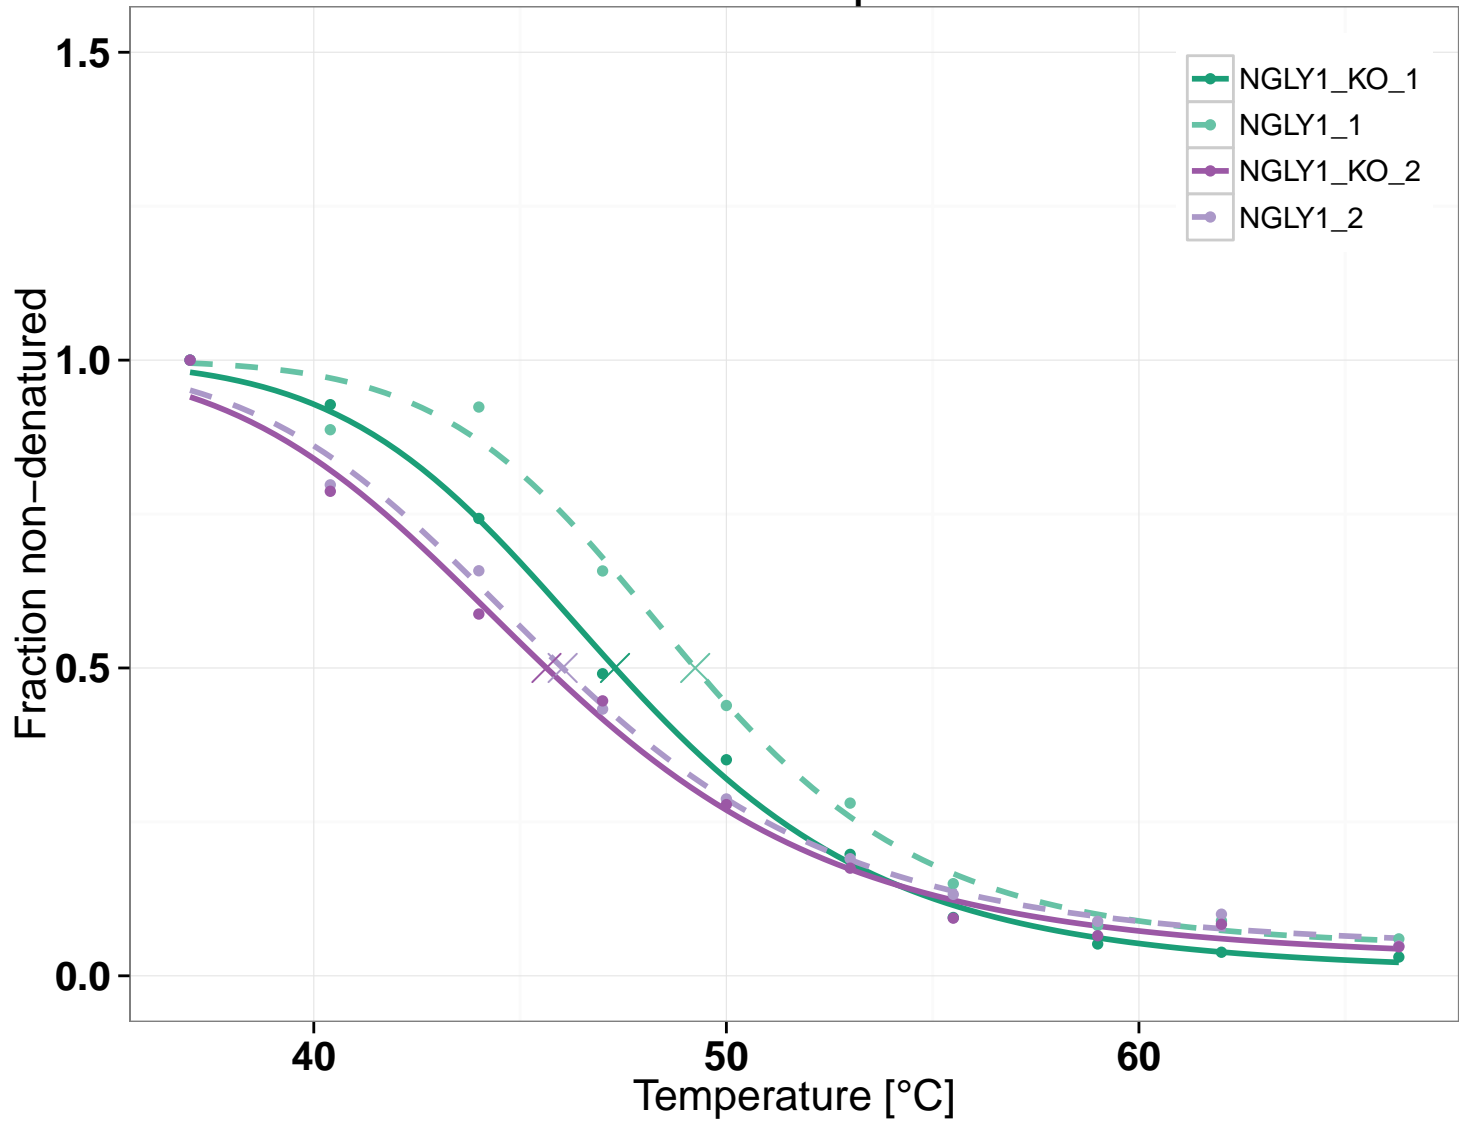

|            | meltPoint | slope  | plateau | R2   |
|------------|-----------|--------|---------|------|
| NGLY1_KO_1 | 47.3      | -0.076 | 0       | 1    |
| NGLY1_1    | 49.24     | -0.081 | 0.04    | 0.99 |
| NGLY1_KO_2 | 45.64     | -0.066 | 0.02    | 0.99 |
| NGLY1_2    | 46.03     | -0.067 | 0.04    | 0.99 |

Supplement: Supplementary file 2577 [file 1]

# IPI00024143.4|AAAS

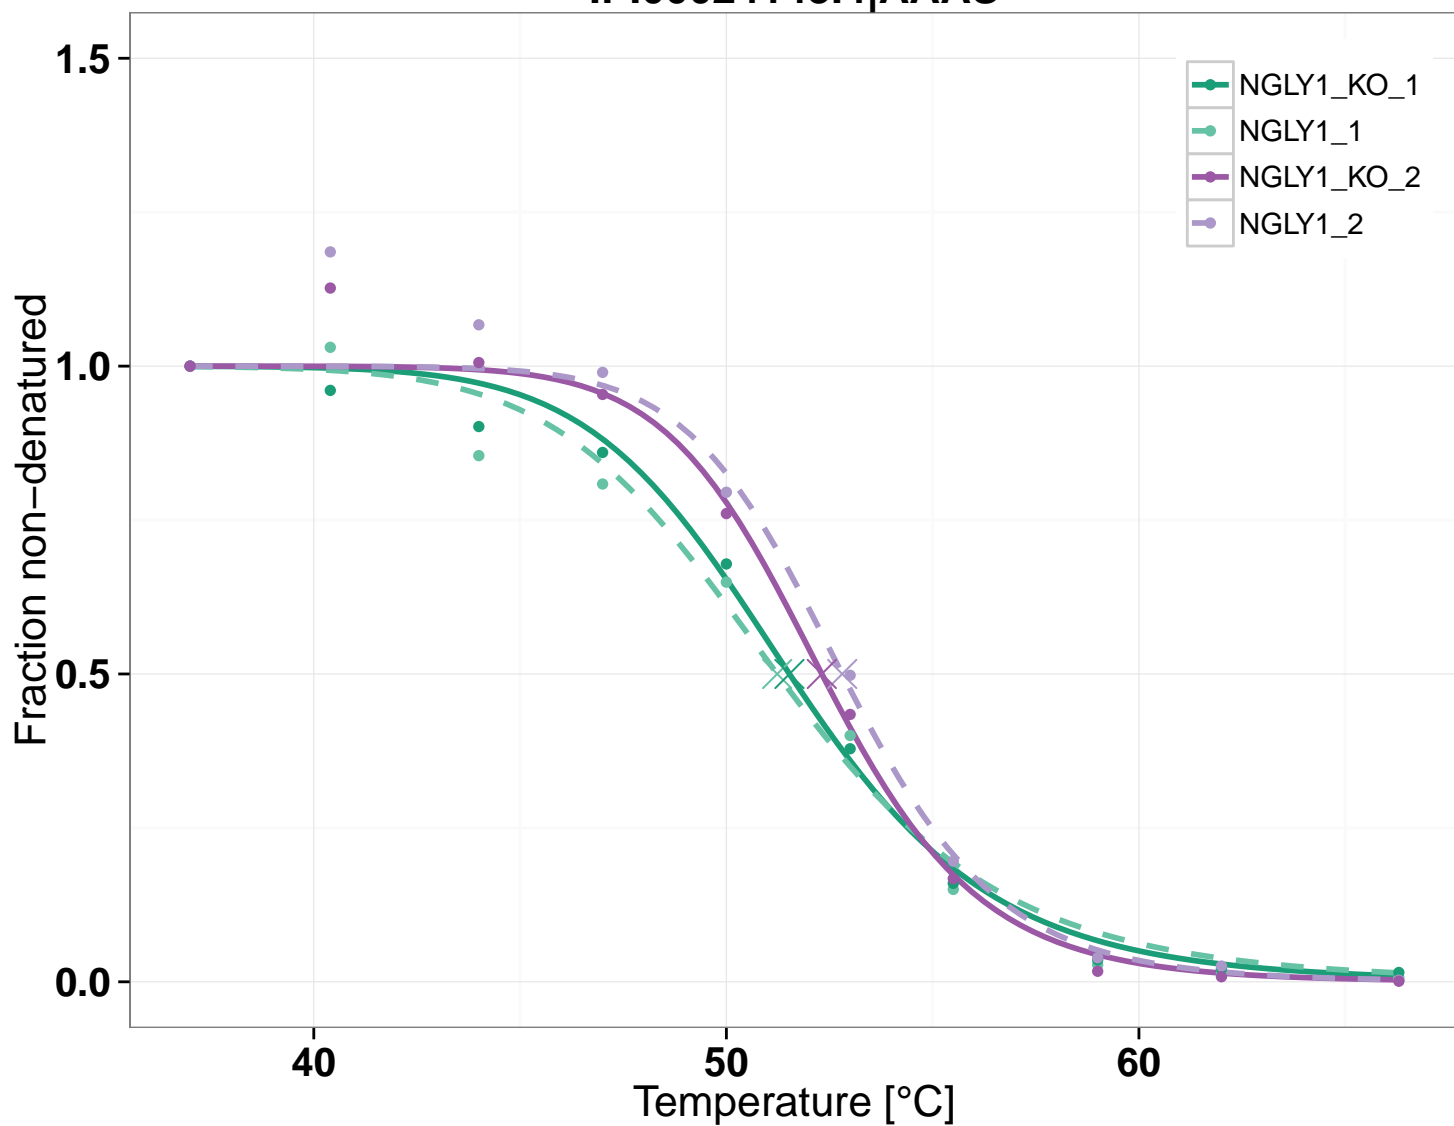

|            | meltPoint | slope  | plateau | R2   |
|------------|-----------|--------|---------|------|
| NGLY1_KO_1 | 51.53     | -0.1   | 0       | 0.99 |
| NGLY1_1    | 51.23     | -0.092 | 0       | 0.99 |
| NGLY1_KO_2 | 52.31     | -0.13  | 0       | 0.99 |
| NGLY1_2    | 52.81     | -0.13  | 0       | 0.98 |

Supplement: Supplementary file 2578 [file 1]

IPI00217413.3|DHX29

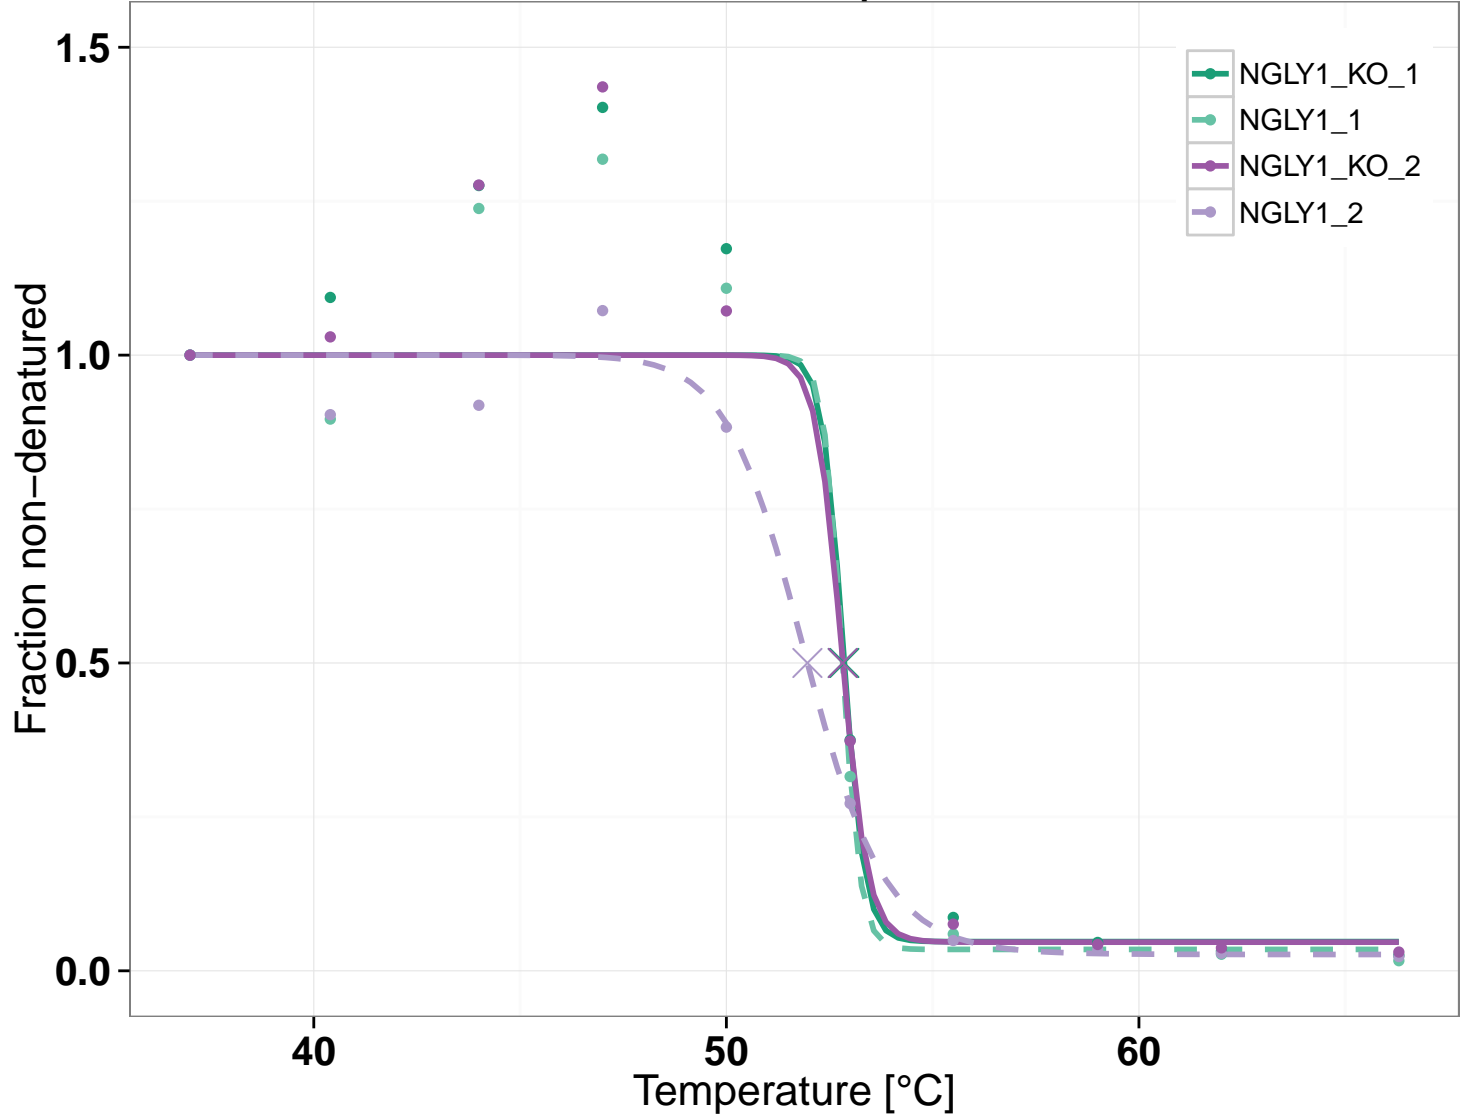

|            | meltPoint | slope | plateau | R2   |
|------------|-----------|-------|---------|------|
| NGLY1_KO_1 | 52.86     | -0.93 | 0.05    | 0.91 |
| NGLY1_1    | 52.82     | -1.1  | 0.03    | 0.93 |
| NGLY1_KO_2 | 52.82     | -0.76 | 0.05    | 0.91 |
| NGLY1_2    | 51.96     | -0.25 | 0.03    | 0.99 |

Supplement: Supplementary file 2579 [file 1]

IPI00022790.2|MFAP1

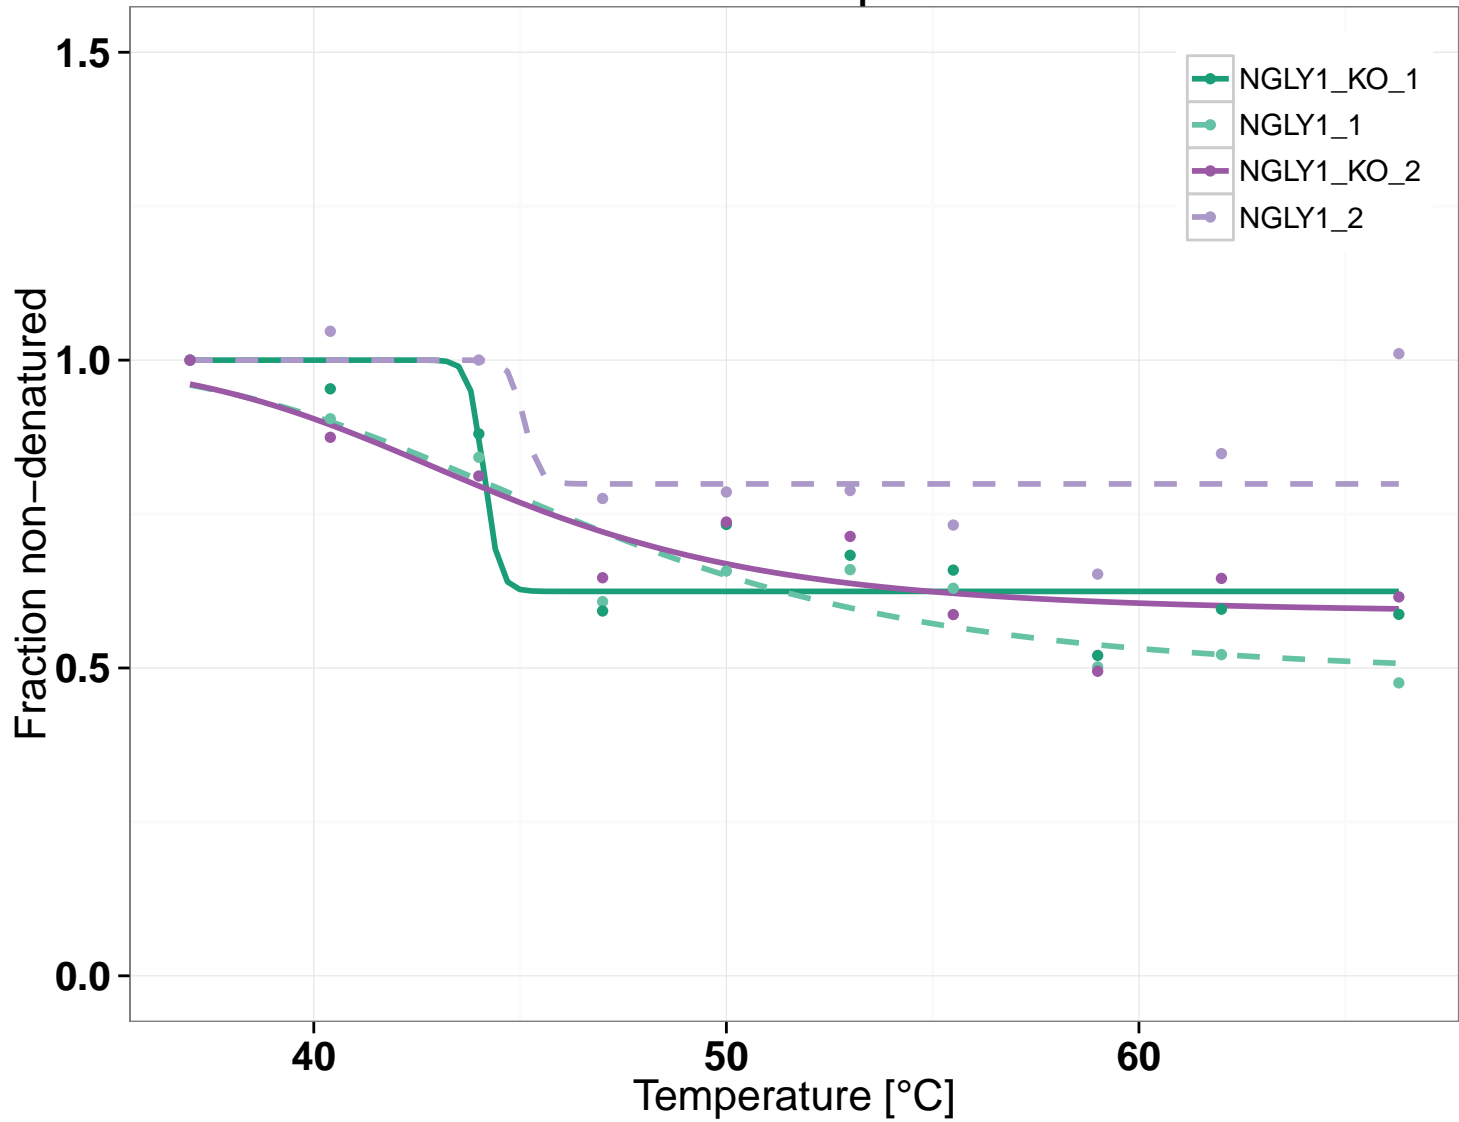

|            | meltPoint | slope  | plateau | R2   |
|------------|-----------|--------|---------|------|
| NGLY1_KO_1 | -         | -0.53  | 0.62    | 0.87 |
| NGLY1_1    | -         | -0.029 | 0.48    | 0.91 |
| NGLY1_KO_2 | -         | -0.028 | 0.59    | 0.83 |
| NGLY1_2    | -         | -0.28  | 0.8     | 0.56 |

Supplement: Supplementary file 2580 [file 1]

IPI00032314.2|LAGE3

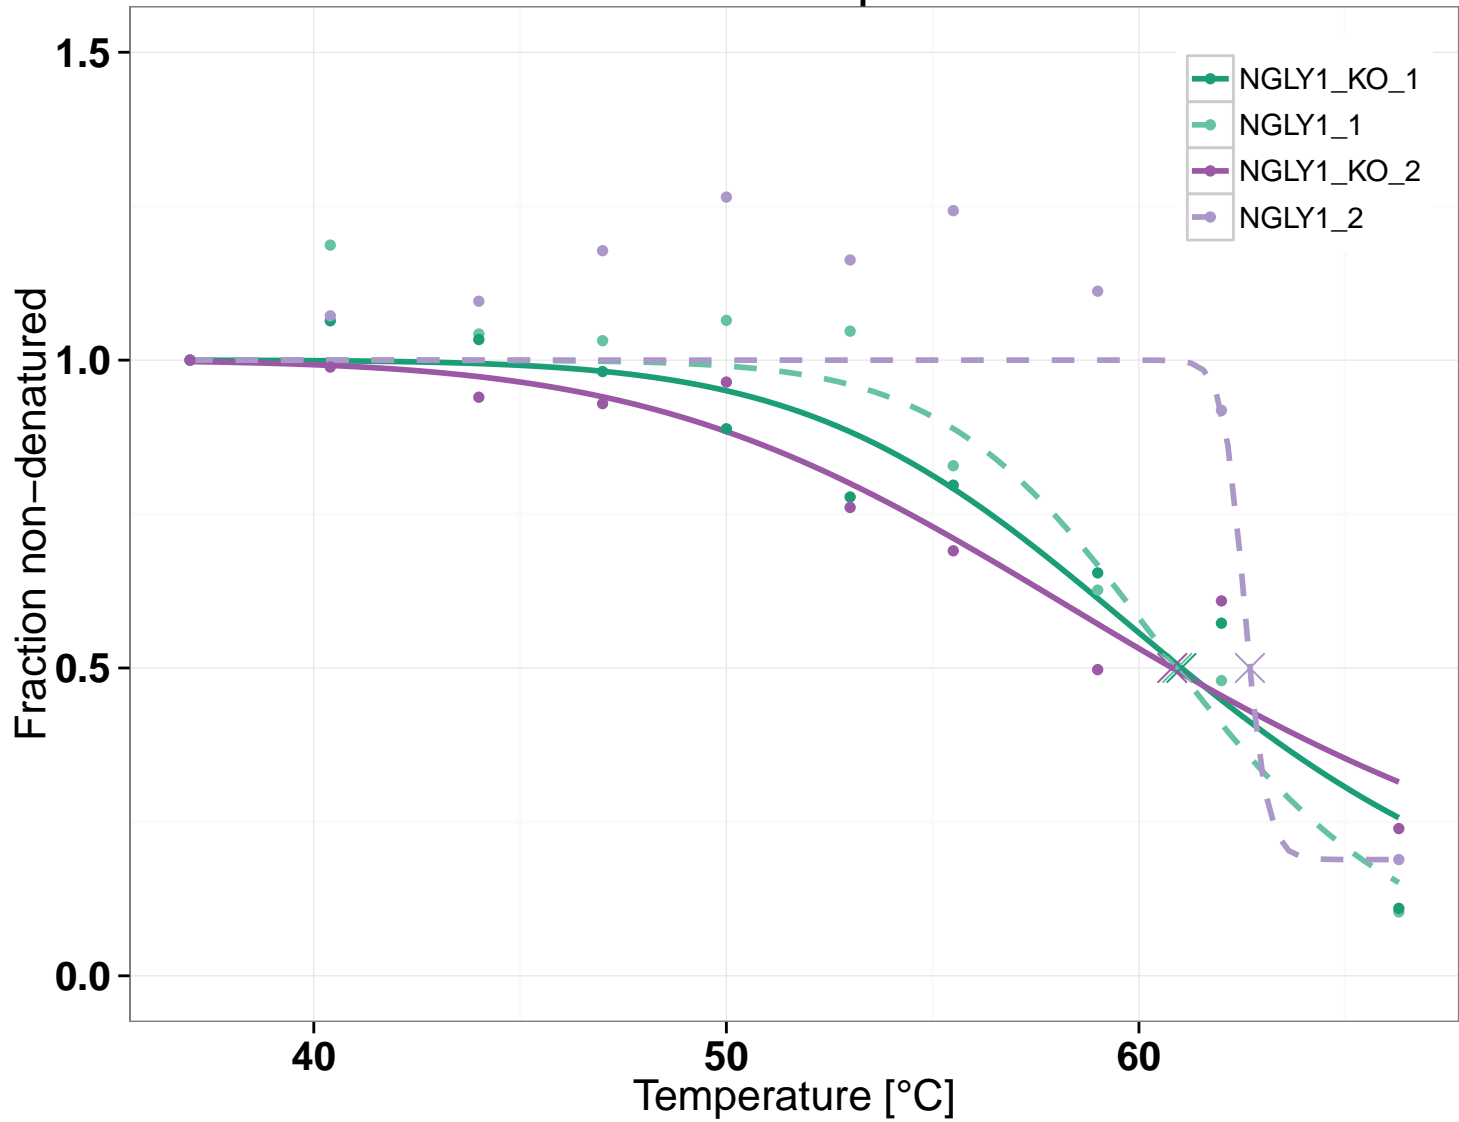

|            | meltPoint | slope  | plateau | R2   |
|------------|-----------|--------|---------|------|
| NGLY1_KO_1 | 61.03     | -0.056 | 0       | 0.92 |
| NGLY1_1    | 60.93     | -0.088 | 0       | 0.94 |
| NGLY1_KO_2 | 60.81     | -0.04  | 0       | 0.92 |
| NGLY1_2    | 62.69     | -0.78  | 0.19    | 0.76 |

Supplement: Supplementary file 2581 [file 1]

# IPI00414717.1|GLG1

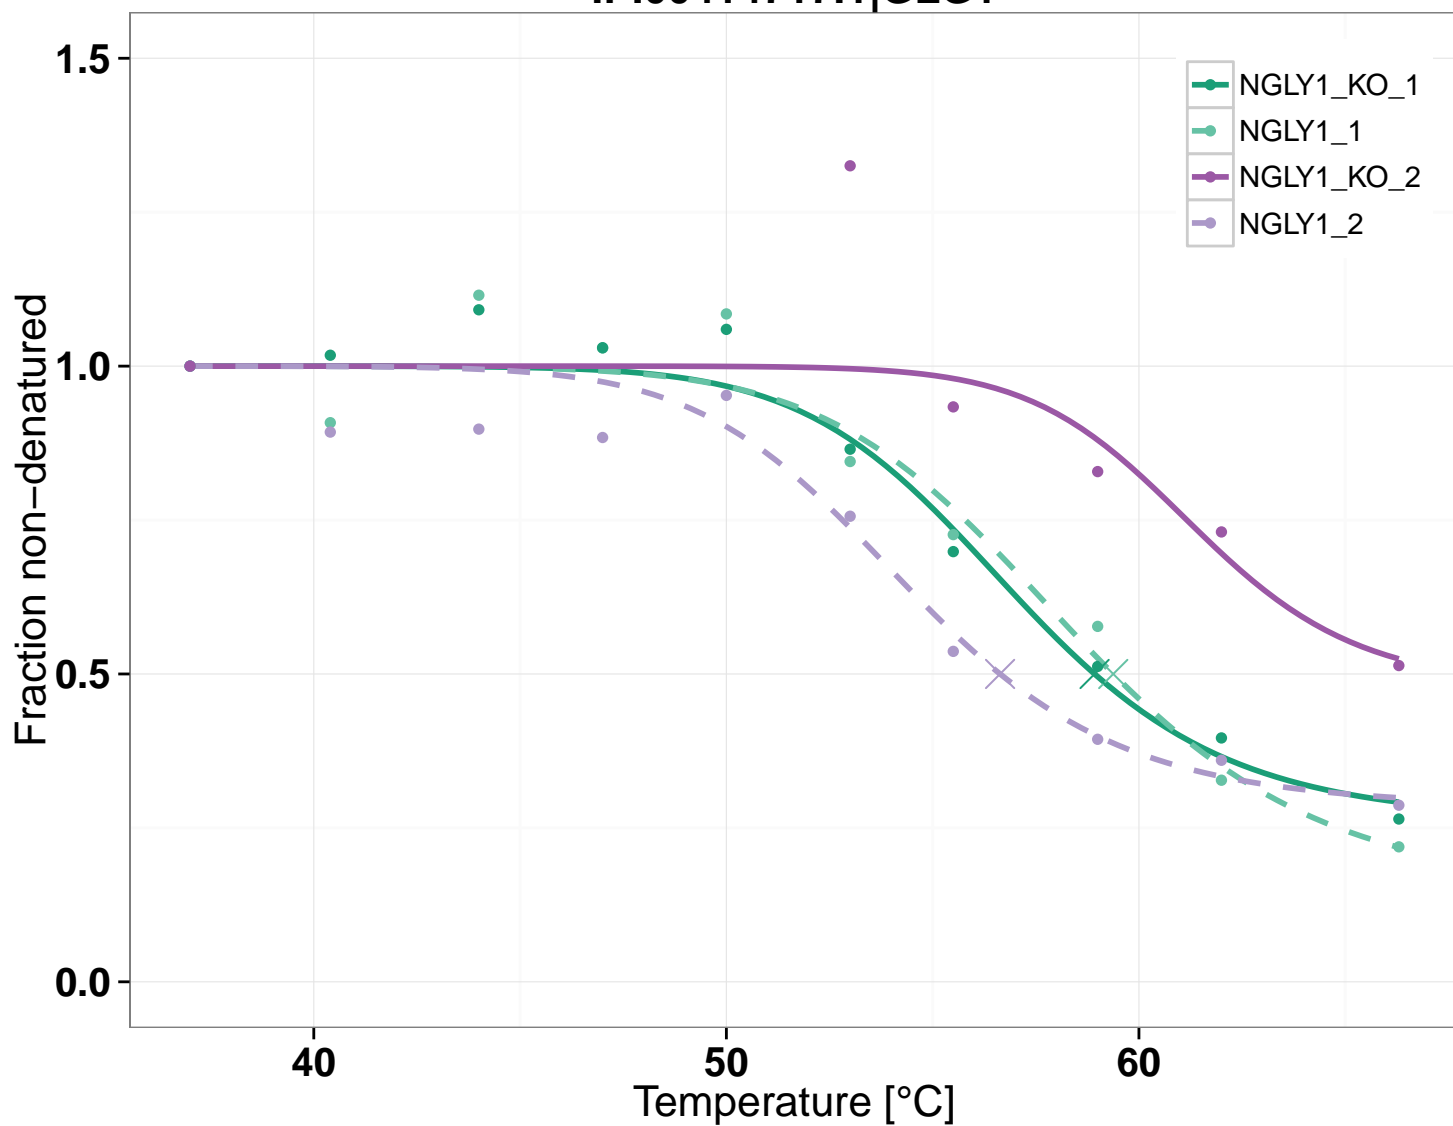

|            | meltPoint | slope  | plateau | R2    |
|------------|-----------|--------|---------|-------|
| NGLY1_KO_1 | 58.92     | -0.072 | 0.26    | 0.97  |
| NGLY1_1    | 59.38     | -0.072 | 0.14    | 0.95  |
| NGLY1_KO_2 | -         | -0.066 | 0.48    | -0.01 |
| NGLY1_2    | 56.63     | -0.07  | 0.28    | 0.95  |

Supplement: Supplementary file 2582 [file 1]

IPI00909496.1|B4DLE8\_HUMAN

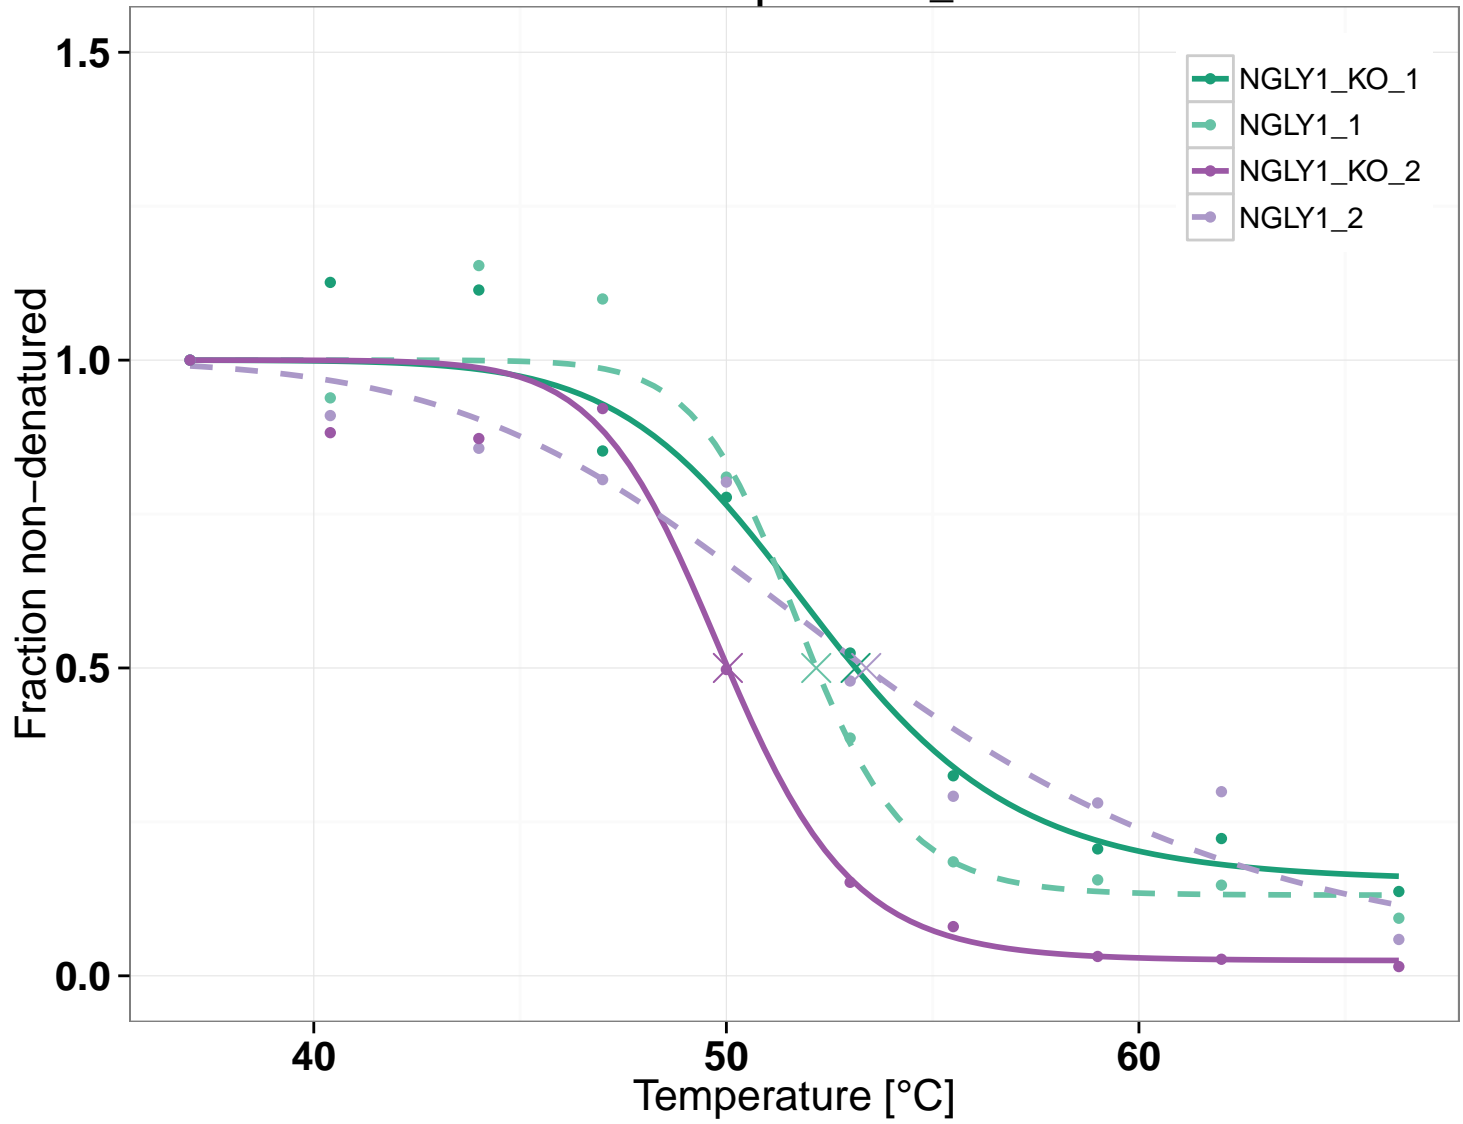

|            | meltPoint | slope  | plateau | R2   |
|------------|-----------|--------|---------|------|
| NGLY1_KO_1 | 53.13     | -0.088 | 0.15    | 0.97 |
| NGLY1_1    | 52.18     | -0.17  | 0.13    | 0.98 |
| NGLY1_KO_2 | 50.04     | -0.16  | 0.02    | 0.98 |
| NGLY1_2    | 53.39     | -0.051 | 0       | 0.95 |

Supplement: Supplementary file 2583 [file 1]

IPI00004337.2|ZBTB11

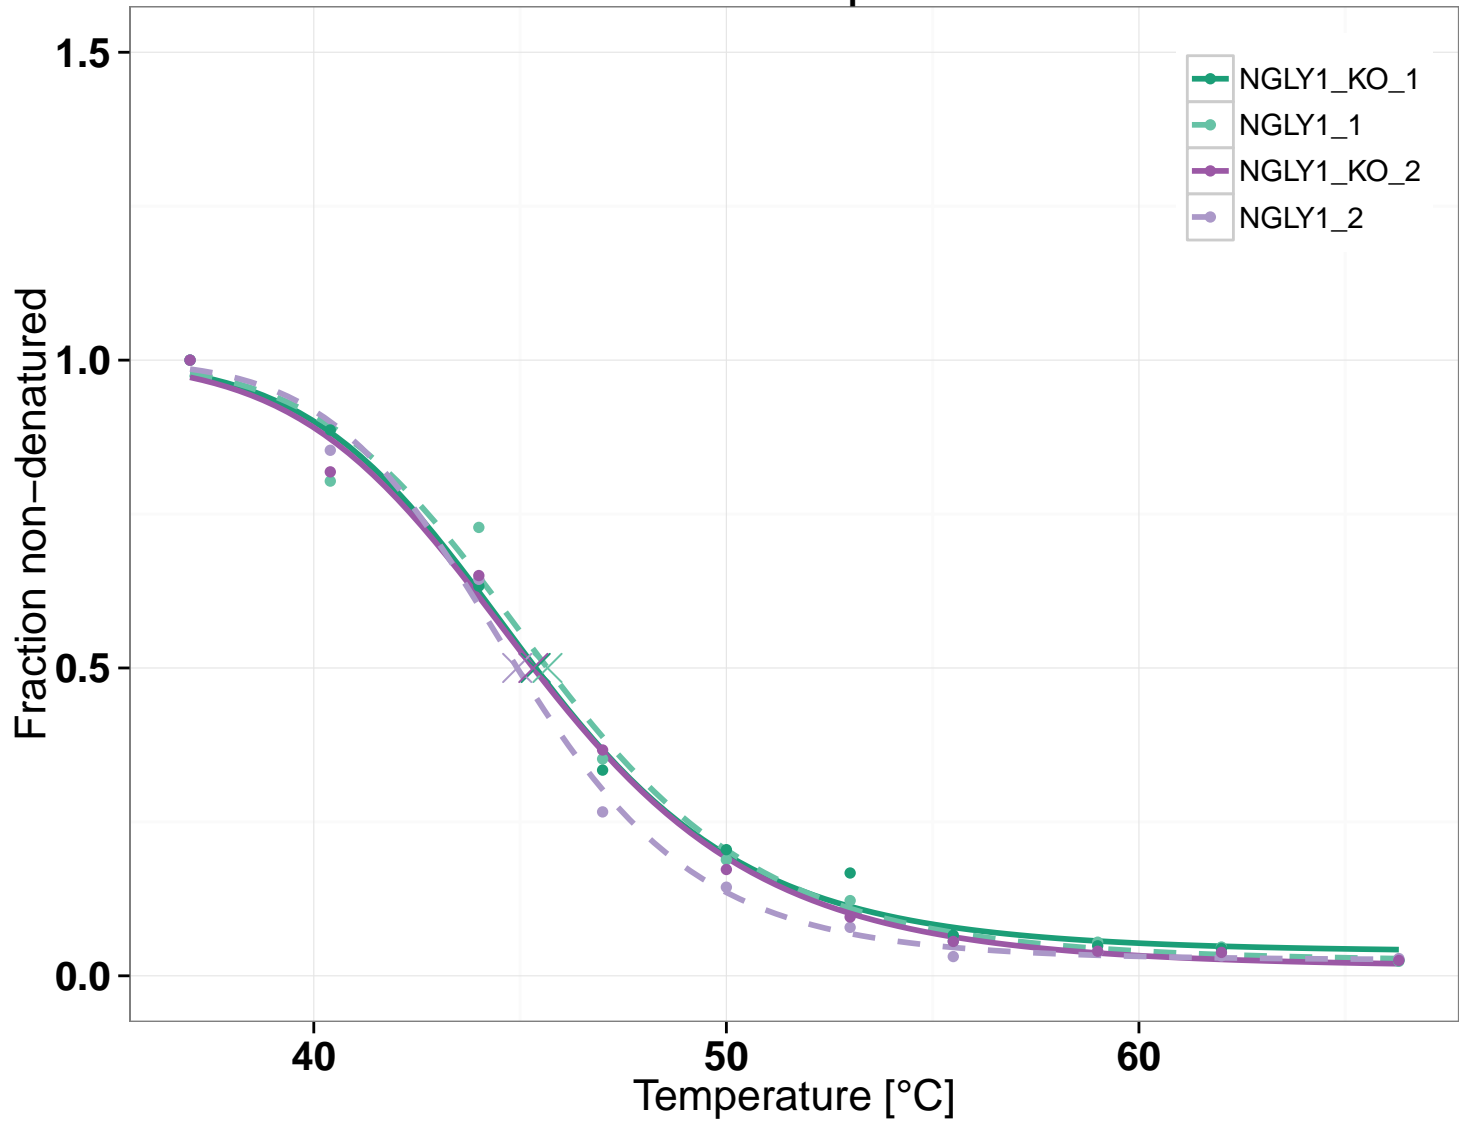

|            | meltPoint | slope  | plateau | R2   |
|------------|-----------|--------|---------|------|
| NGLY1_KO_1 | 45.38     | -0.09  | 0.04    | 1    |
| NGLY1_1    | 45.66     | -0.09  | 0.02    | 0.99 |
| NGLY1_KO_2 | 45.32     | -0.088 | 0.01    | 1    |
| NGLY1_2    | 44.93     | -0.11  | 0.03    | 1    |

Supplement: Supplementary file 2584 [file 1]

IPI00061108.3|MRRF

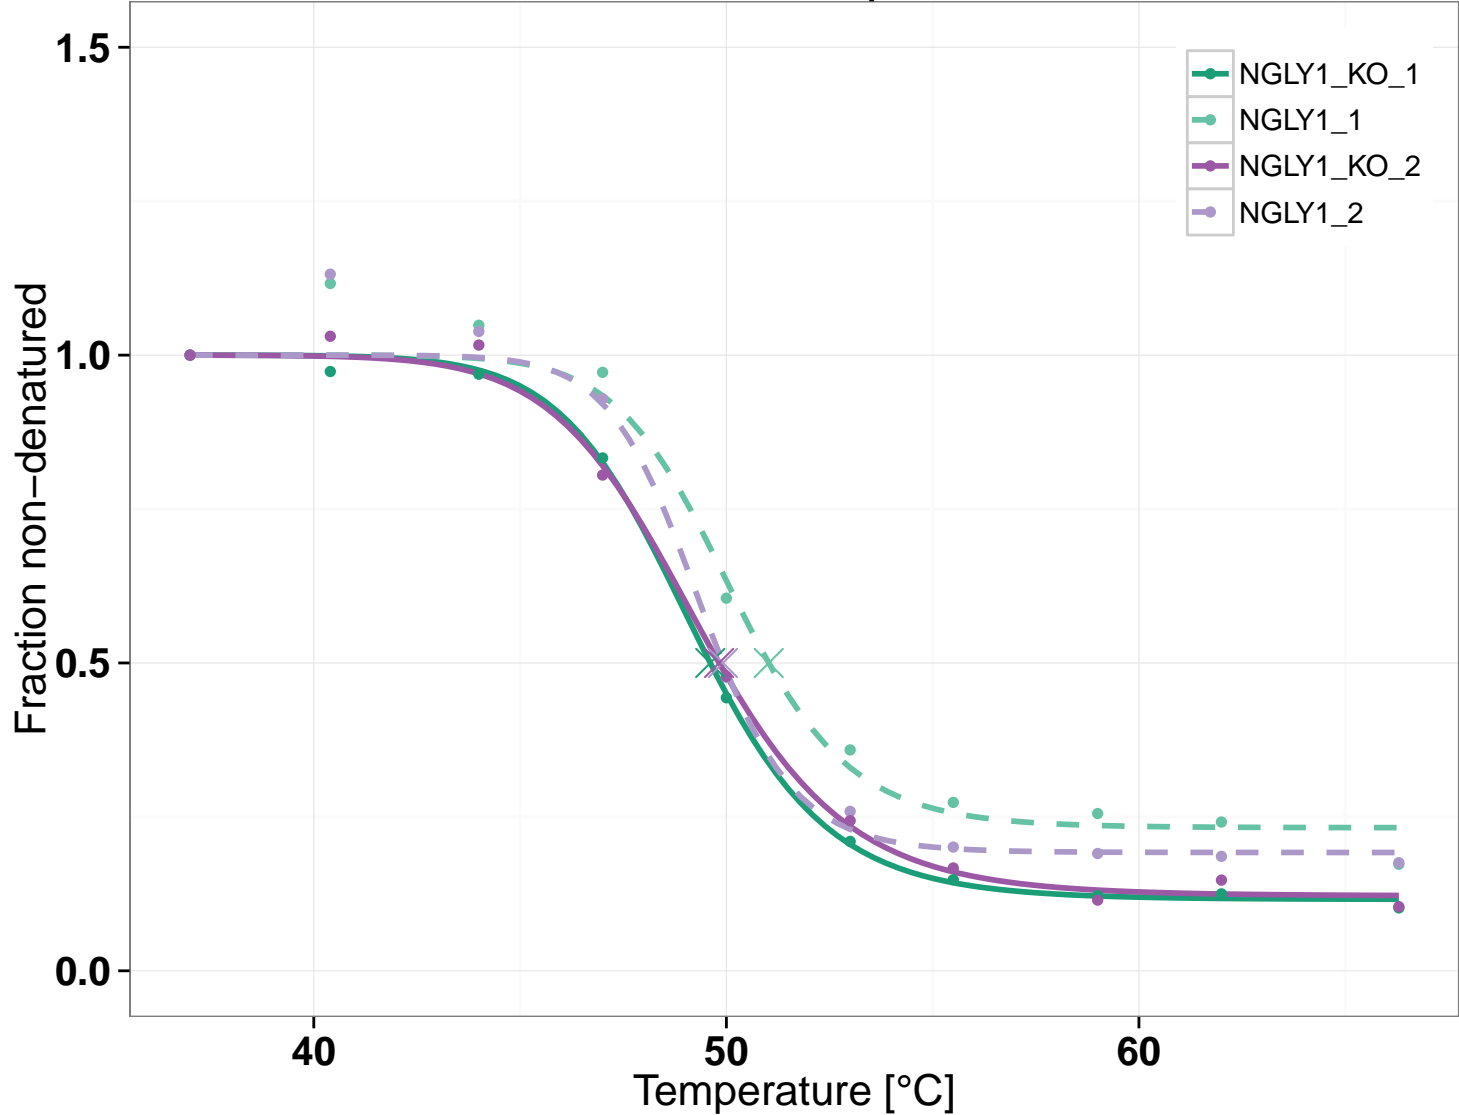

|            | meltPoint | slope | plateau | R2   |
|------------|-----------|-------|---------|------|
| NGLY1_KO_1 | 49.61     | -0.14 | 0.12    | 1    |
| NGLY1_1    | 51.03     | -0.14 | 0.23    | 0.98 |
| NGLY1_KO_2 | 49.82     | -0.12 | 0.12    | 1    |
| NGLY1_2    | 49.92     | -0.18 | 0.19    | 0.99 |

Supplement: Supplementary file 2585 [file 1]

IPI00179851.3|C11ORF9

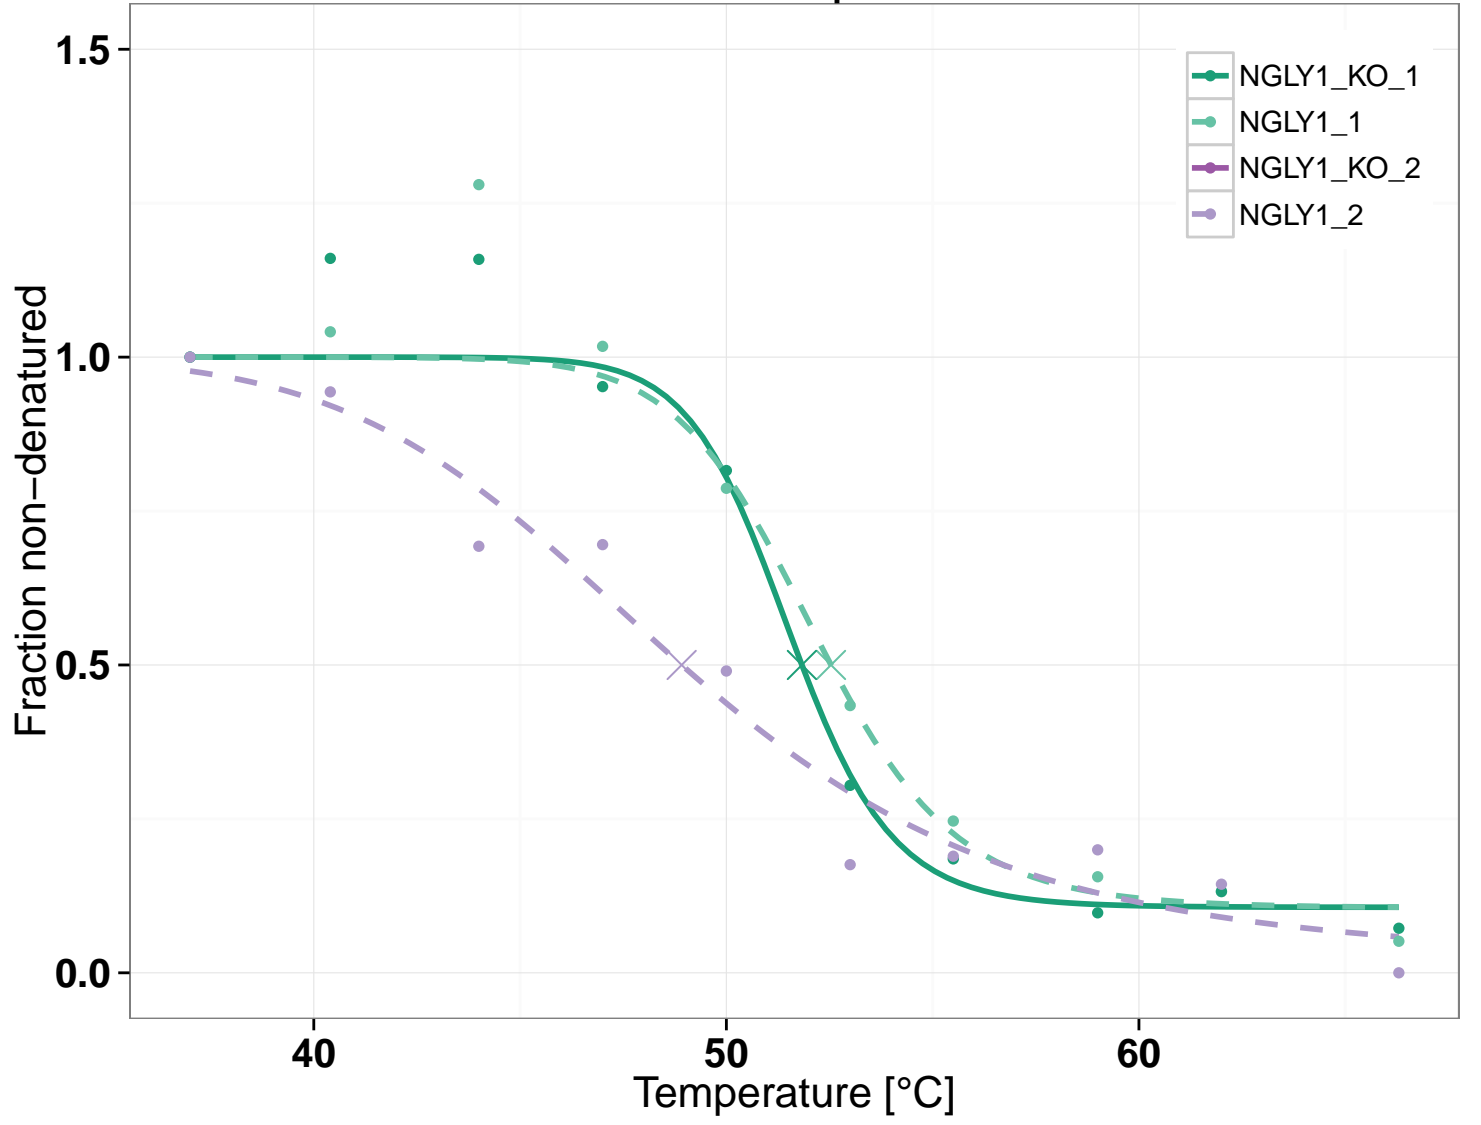

|            | meltPoint | slope  | plateau | R2   |
|------------|-----------|--------|---------|------|
| NGLY1_KO_1 | 51.83     | -0.18  | 0.11    | 0.97 |
| NGLY1_1    | 52.54     | -0.13  | 0.11    | 0.95 |
| NGLY1_KO_2 | -         | -      | -       | -    |
| NGLY1_2    | 48.92     | -0.061 | 0.02    | 0.96 |

Supplement: Supplementary file 2586 [file 1]

# IPI00016620.5|PSTPIP2

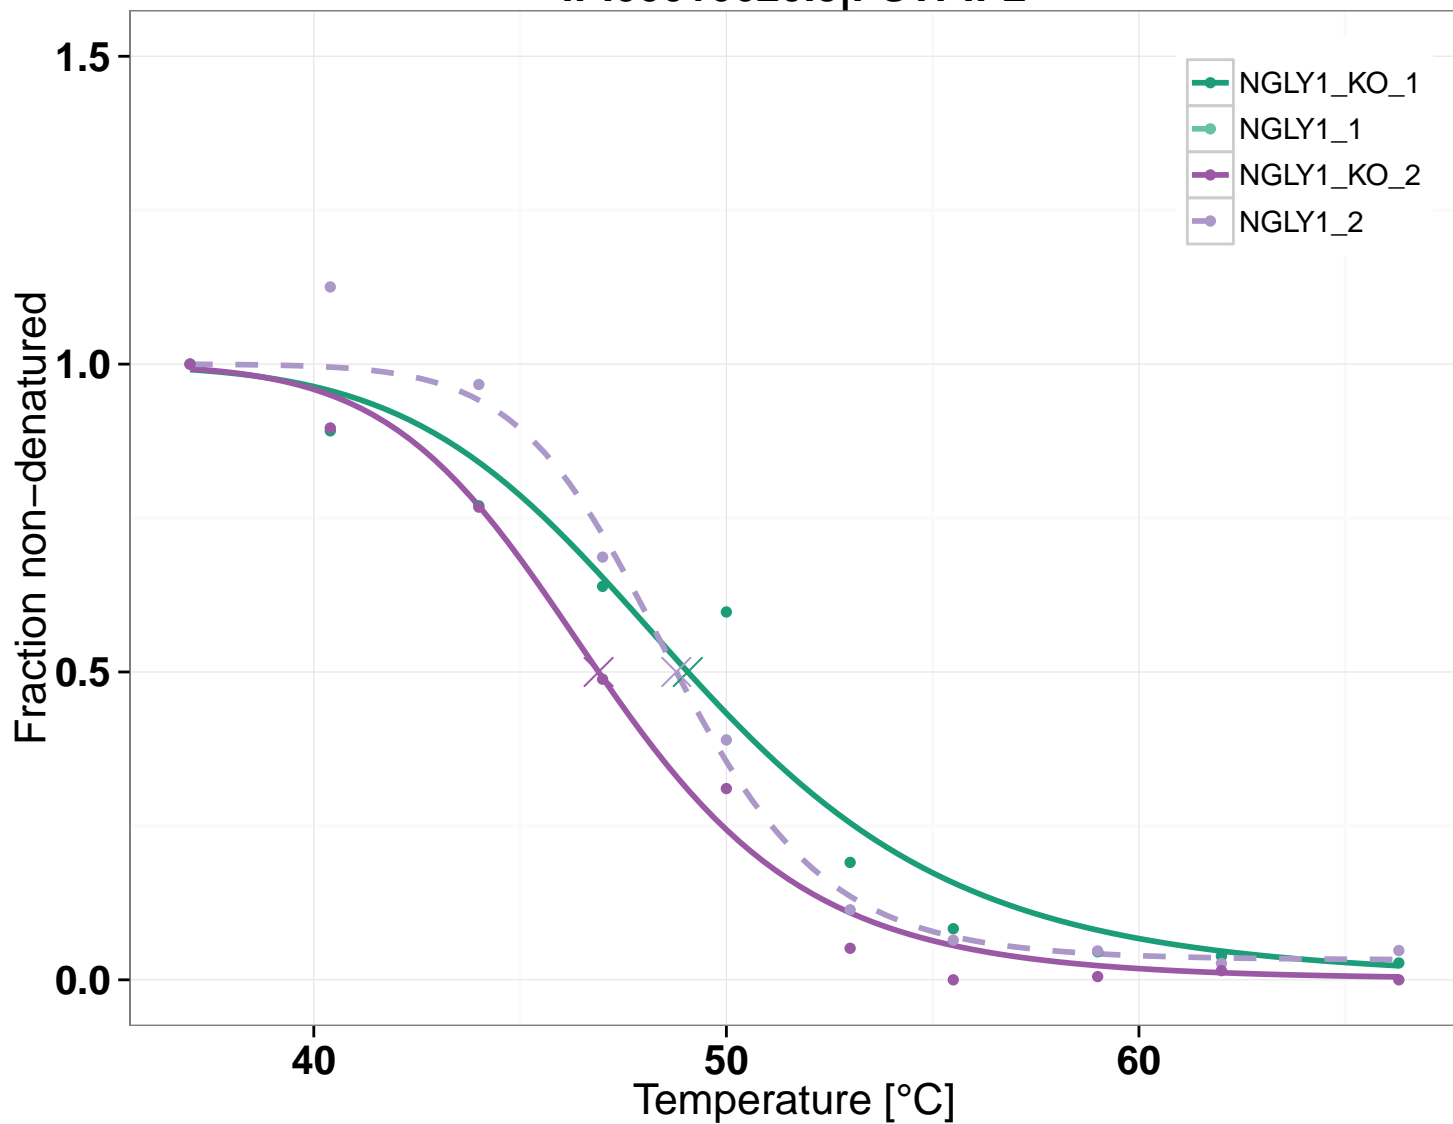

|            | meltPoint | slope  | plateau | R2   |
|------------|-----------|--------|---------|------|
| NGLY1_KO_1 | 49.07     | -0.075 | 0       | 0.97 |
| NGLY1_1    | -         | -      | -       | -    |
| NGLY1_KO_2 | 46.9      | -0.099 | 0       | 0.99 |
| NGLY1_2    | 48.79     | -0.13  | 0.03    | 0.99 |

Supplement: Supplementary file 2587 [file 1]

IPI00384971.1|C5ORF43

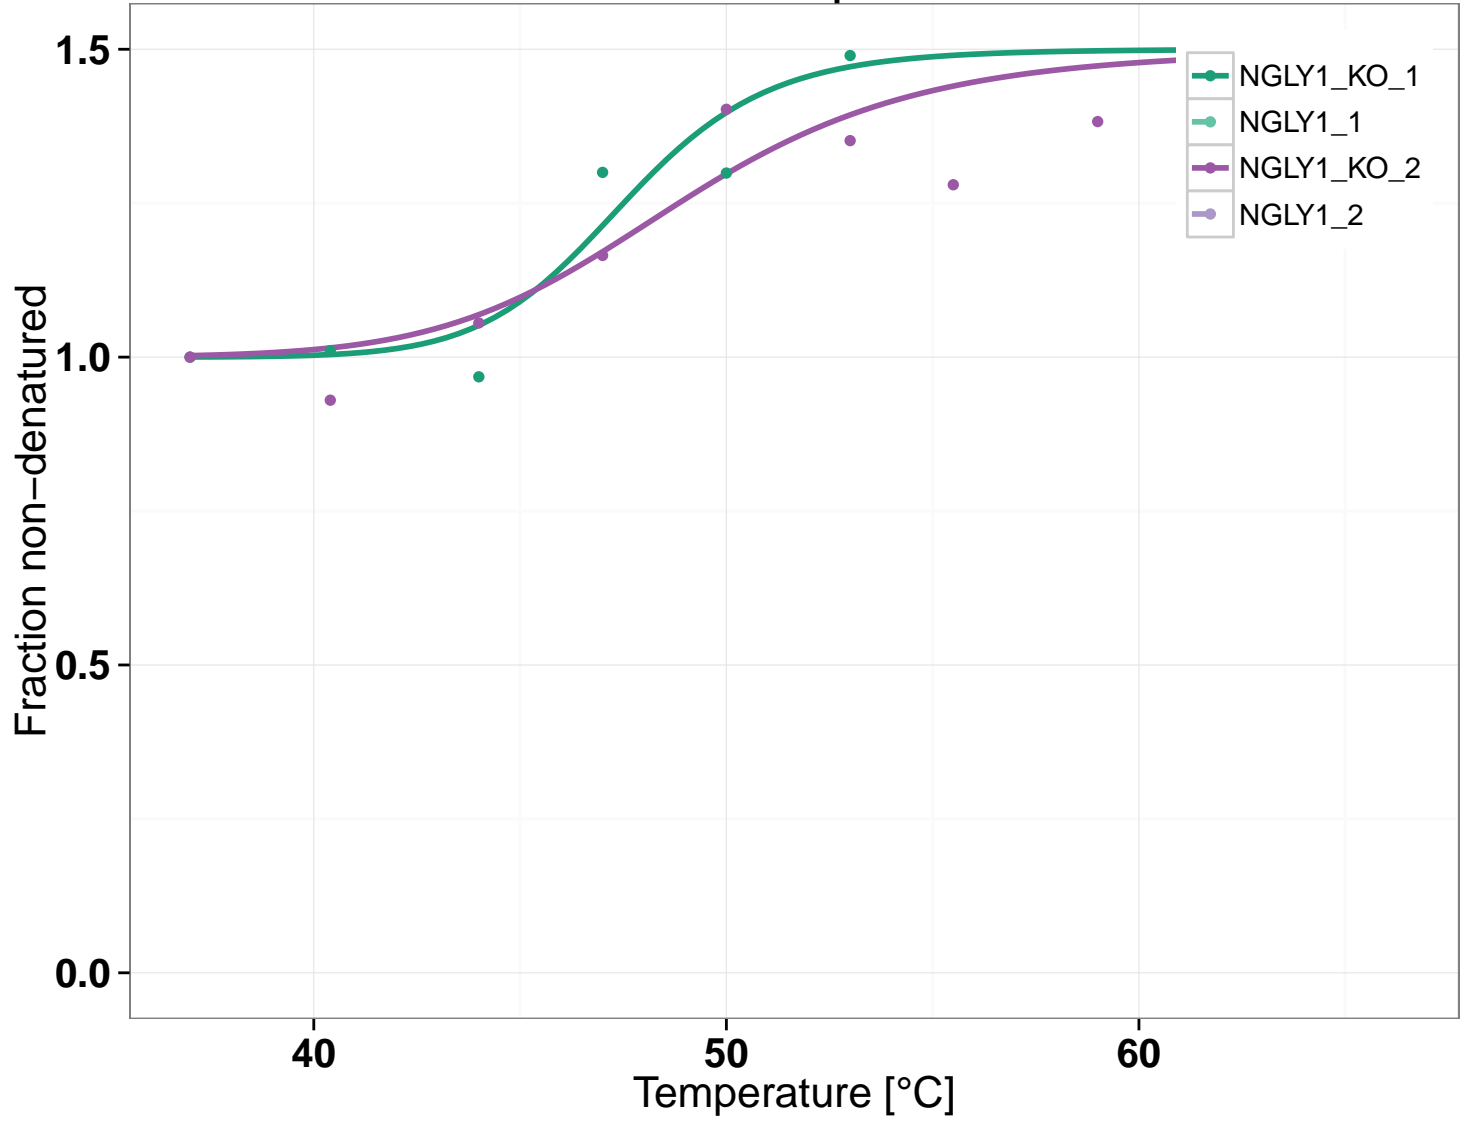

|            | meltPoint | slope | plateau | R2   |
|------------|-----------|-------|---------|------|
| NGLY1_KO_1 | —         | 0.072 | 1.5     | 0.81 |
| NGLY1_1    | —         | —     | —       | —    |
| NGLY1_KO_2 | —         | 0.043 | 1.5     | 0.74 |
| NGLY1_2    | —         | —     | —       | —    |

Supplement: Supplementary file 2588 [file 1]

# IPI00217324.1|PPIL2

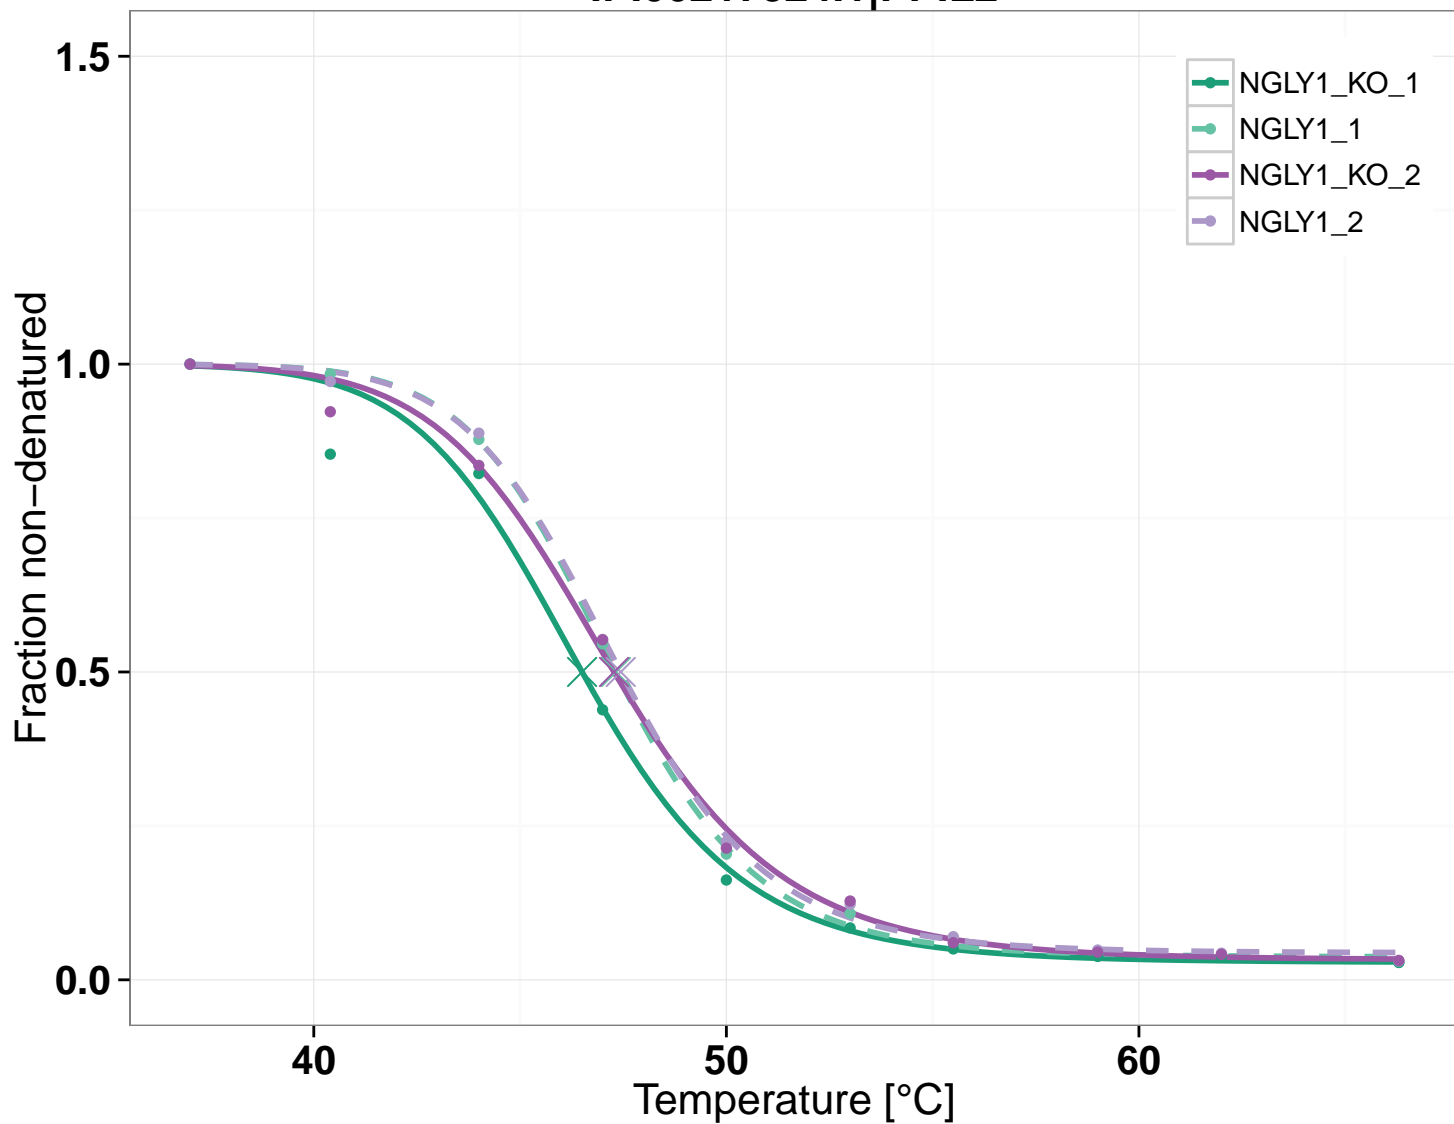

|            | meltPoint | slope | plateau | R2   |
|------------|-----------|-------|---------|------|
| NGLY1_KO_1 | 46.5      | -0.12 | 0.03    | 0.99 |
| NGLY1_1    | 47.32     | -0.14 | 0.04    | 1    |
| NGLY1_KO_2 | 47.28     | -0.11 | 0.03    | 1    |
| NGLY1_2    | 47.44     | -0.13 | 0.04    | 1    |

Supplement: Supplementary file 2589 [file 1]

IPI00168944.4|KBTBD8

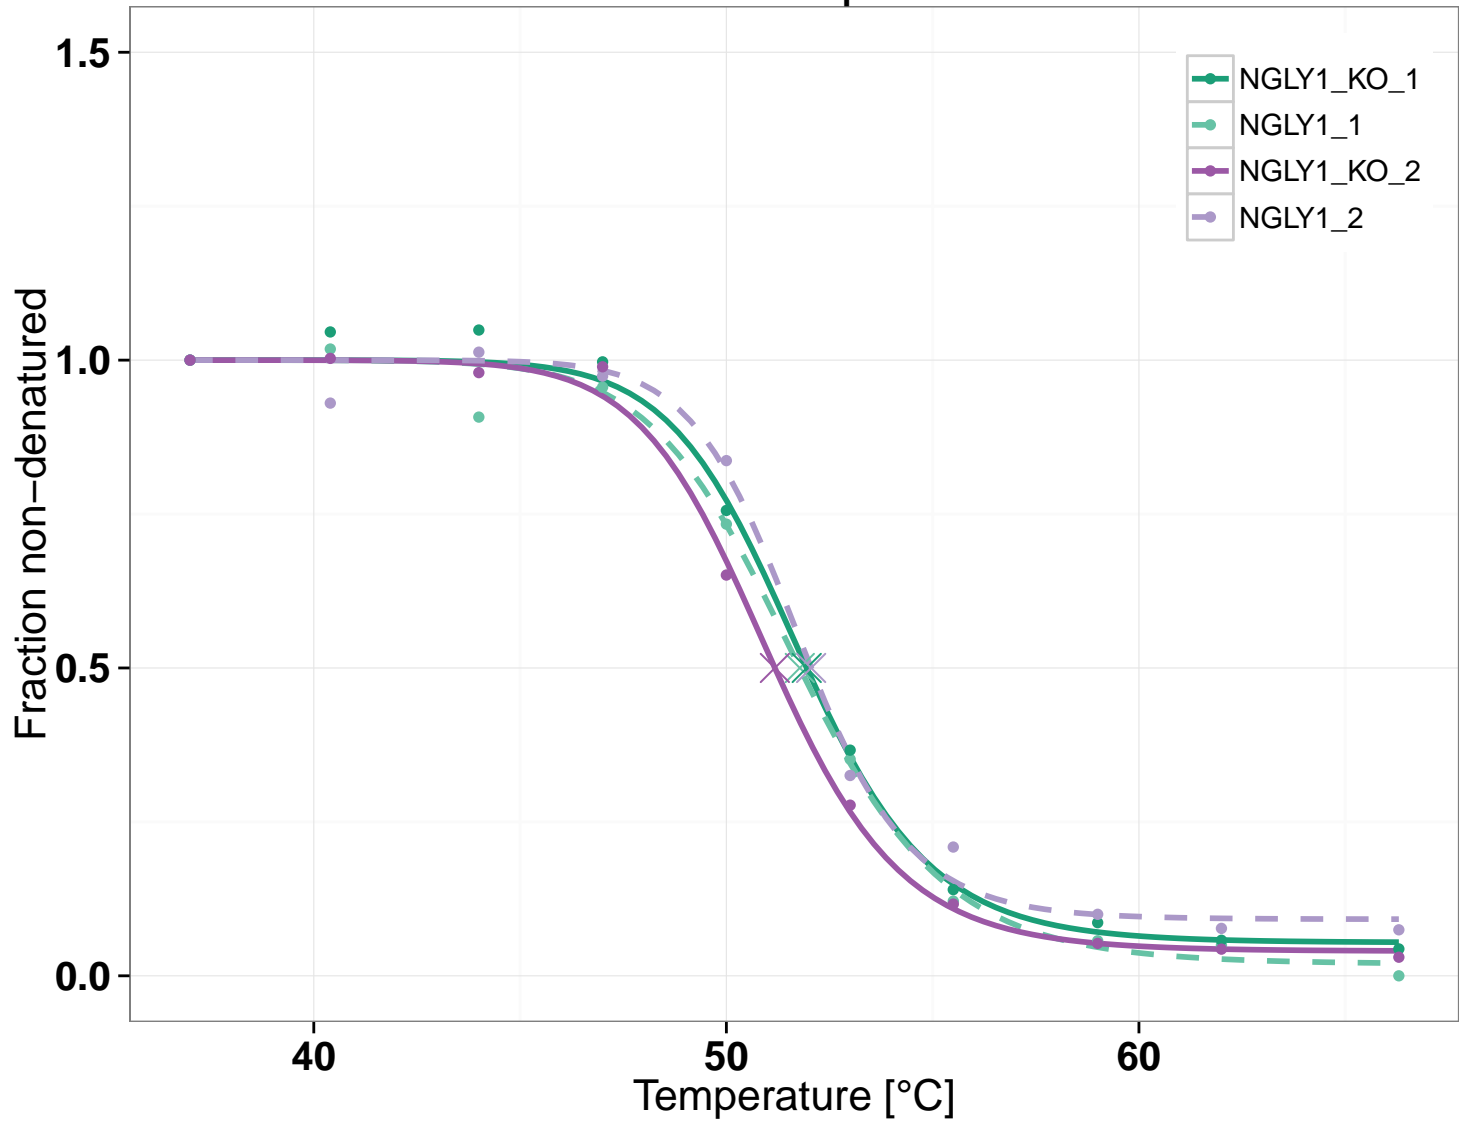

|            | meltPoint | slope | plateau | R2   |
|------------|-----------|-------|---------|------|
| NGLY1_KO_1 | 51.95     | -0.15 | 0.05    | 1    |
| NGLY1_1    | 51.78     | -0.14 | 0.02    | 0.99 |
| NGLY1_KO_2 | 51.18     | -0.15 | 0.04    | 1    |
| NGLY1_2    | 52.05     | -0.17 | 0.09    | 0.99 |

Supplement: Supplementary file 2590 [file 1]

IPI00007306.1|CFDP1

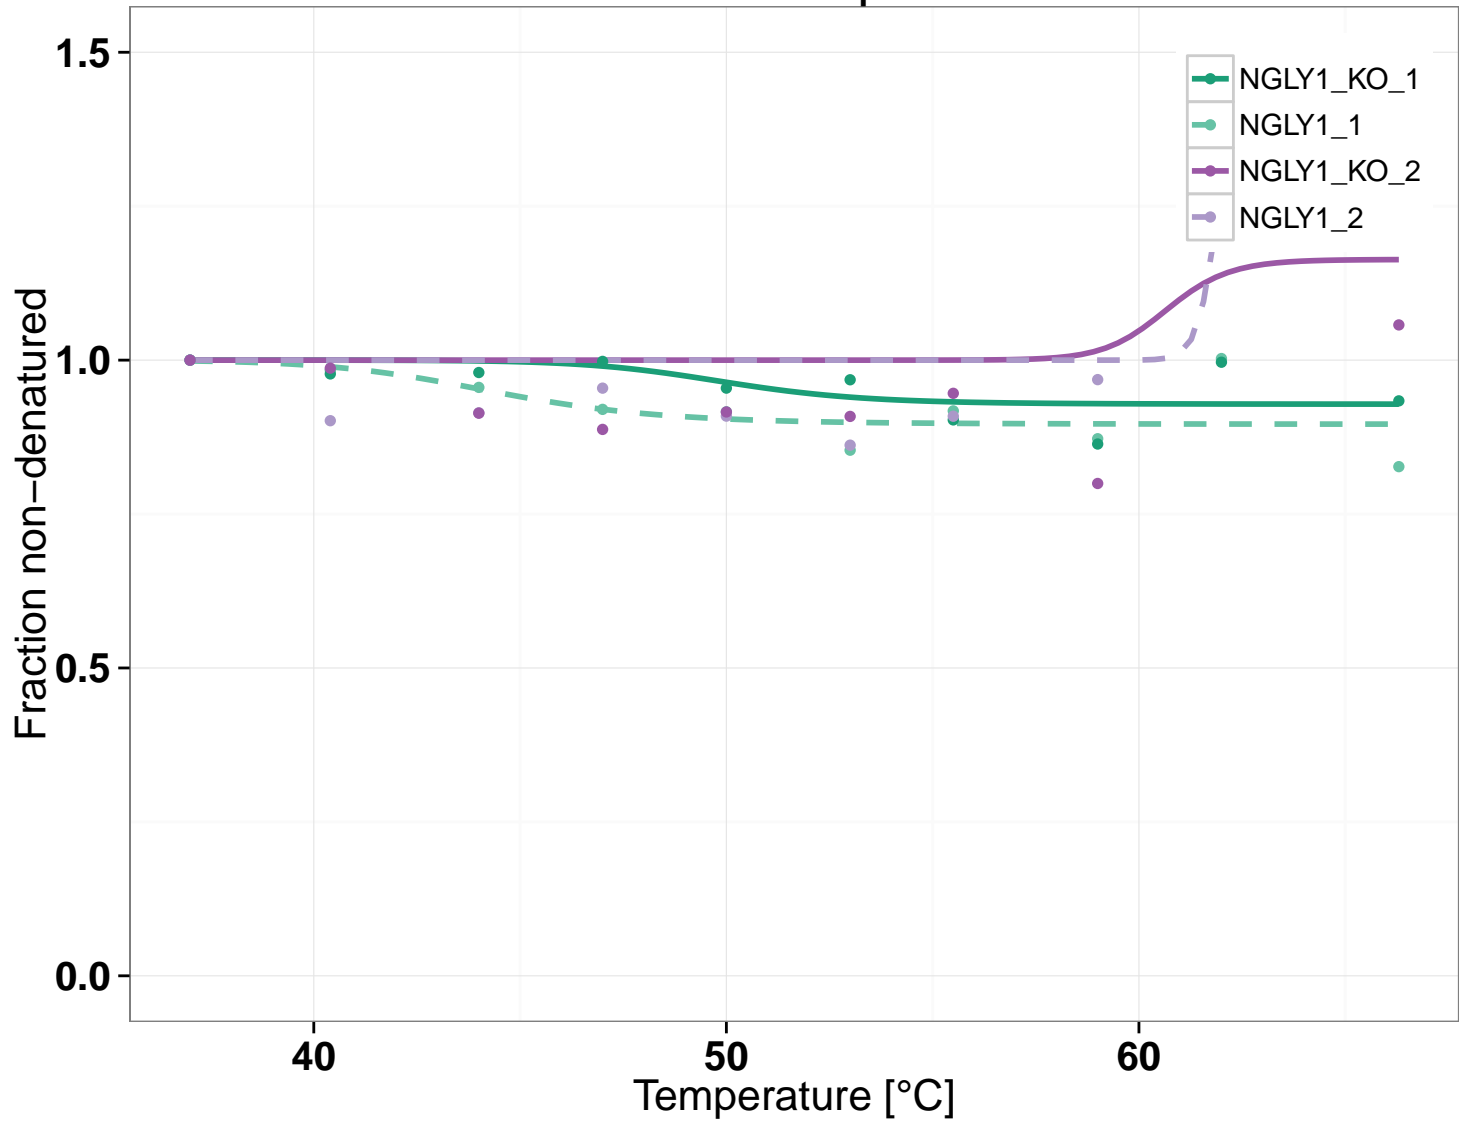

|            | meltPoint | slope  | plateau | R2   |
|------------|-----------|--------|---------|------|
| NGLY1_KO_1 | -         | -0.011 | 0.93    | 0.37 |
| NGLY1_1    | -         | -0.013 | 0.9     | 0.43 |
| NGLY1_KO_2 | -         | 0.054  | 1.16    | 0.24 |
| NGLY1_2    | -         | 0.49   | 1.5     | 0.86 |

Supplement: Supplementary file 2591 [file 1]

# IPI00478068.2|GSTCD

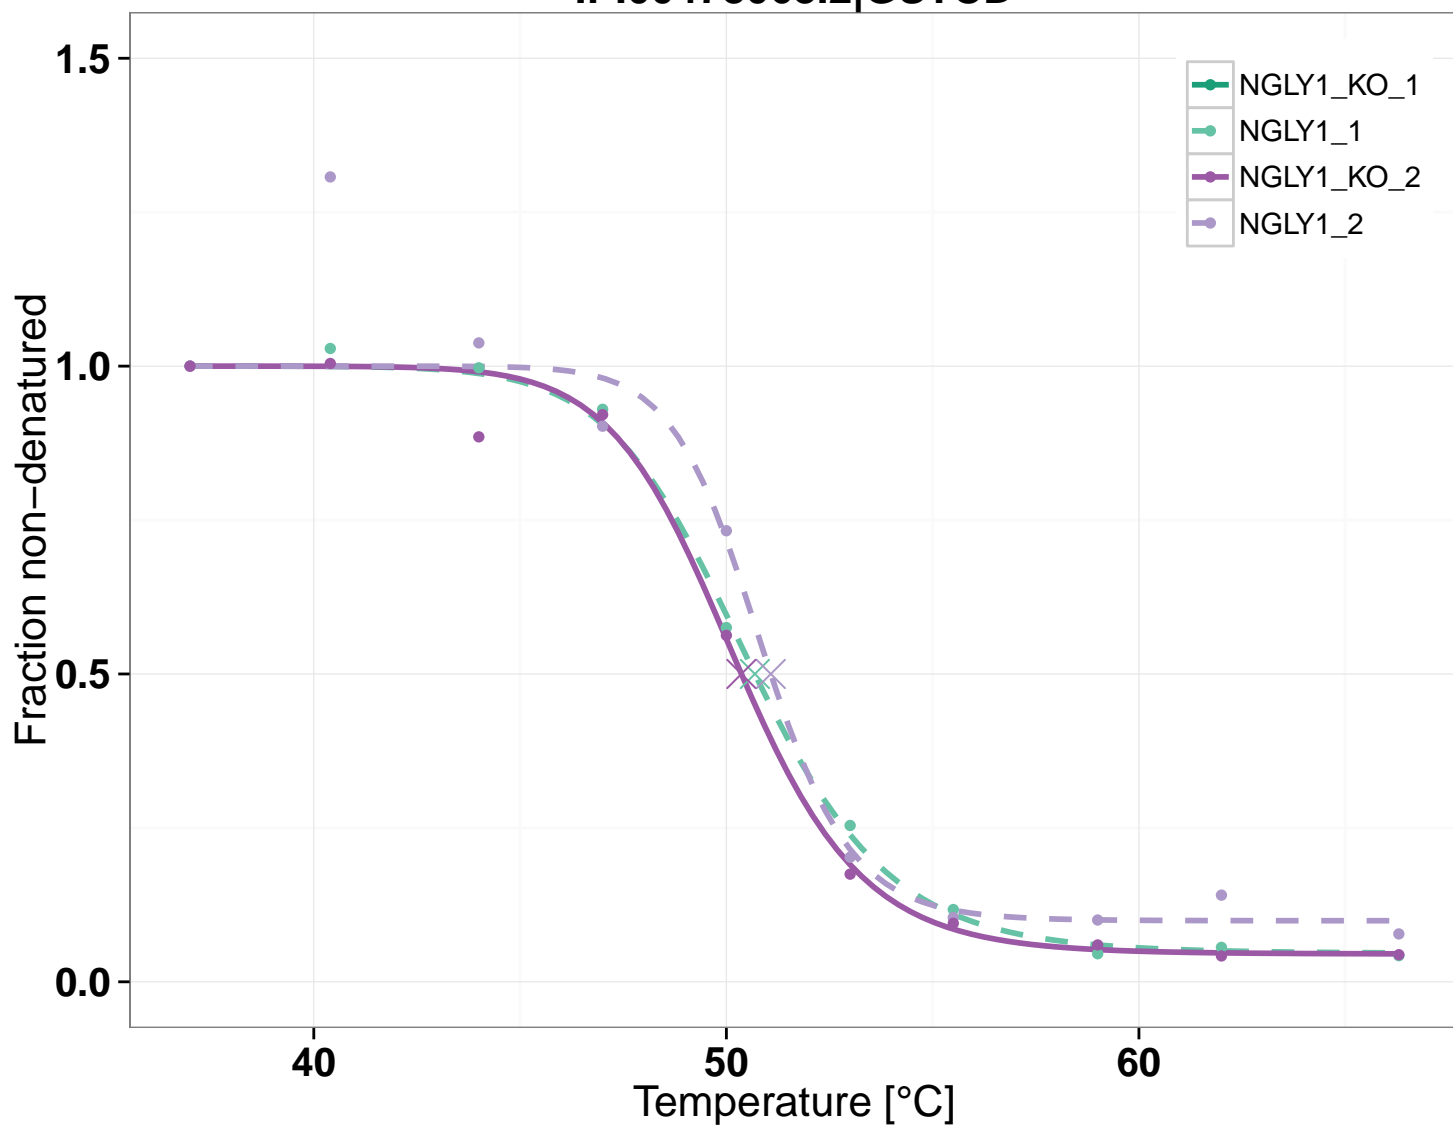

|            | meltPoint | slope | plateau | R2   |
|------------|-----------|-------|---------|------|
| NGLY1_KO_1 | –         | –     | –       | –    |
| NGLY1_1    | 50.69     | –0.14 | 0.05    | 1    |
| NGLY1_KO_2 | 50.36     | –0.16 | 0.05    | 0.99 |
| NGLY1_2    | 51.08     | –0.21 | 0.1     | 0.95 |

Supplement: Supplementary file 2592 [file 1]

# IPI00015990.1|EYA3

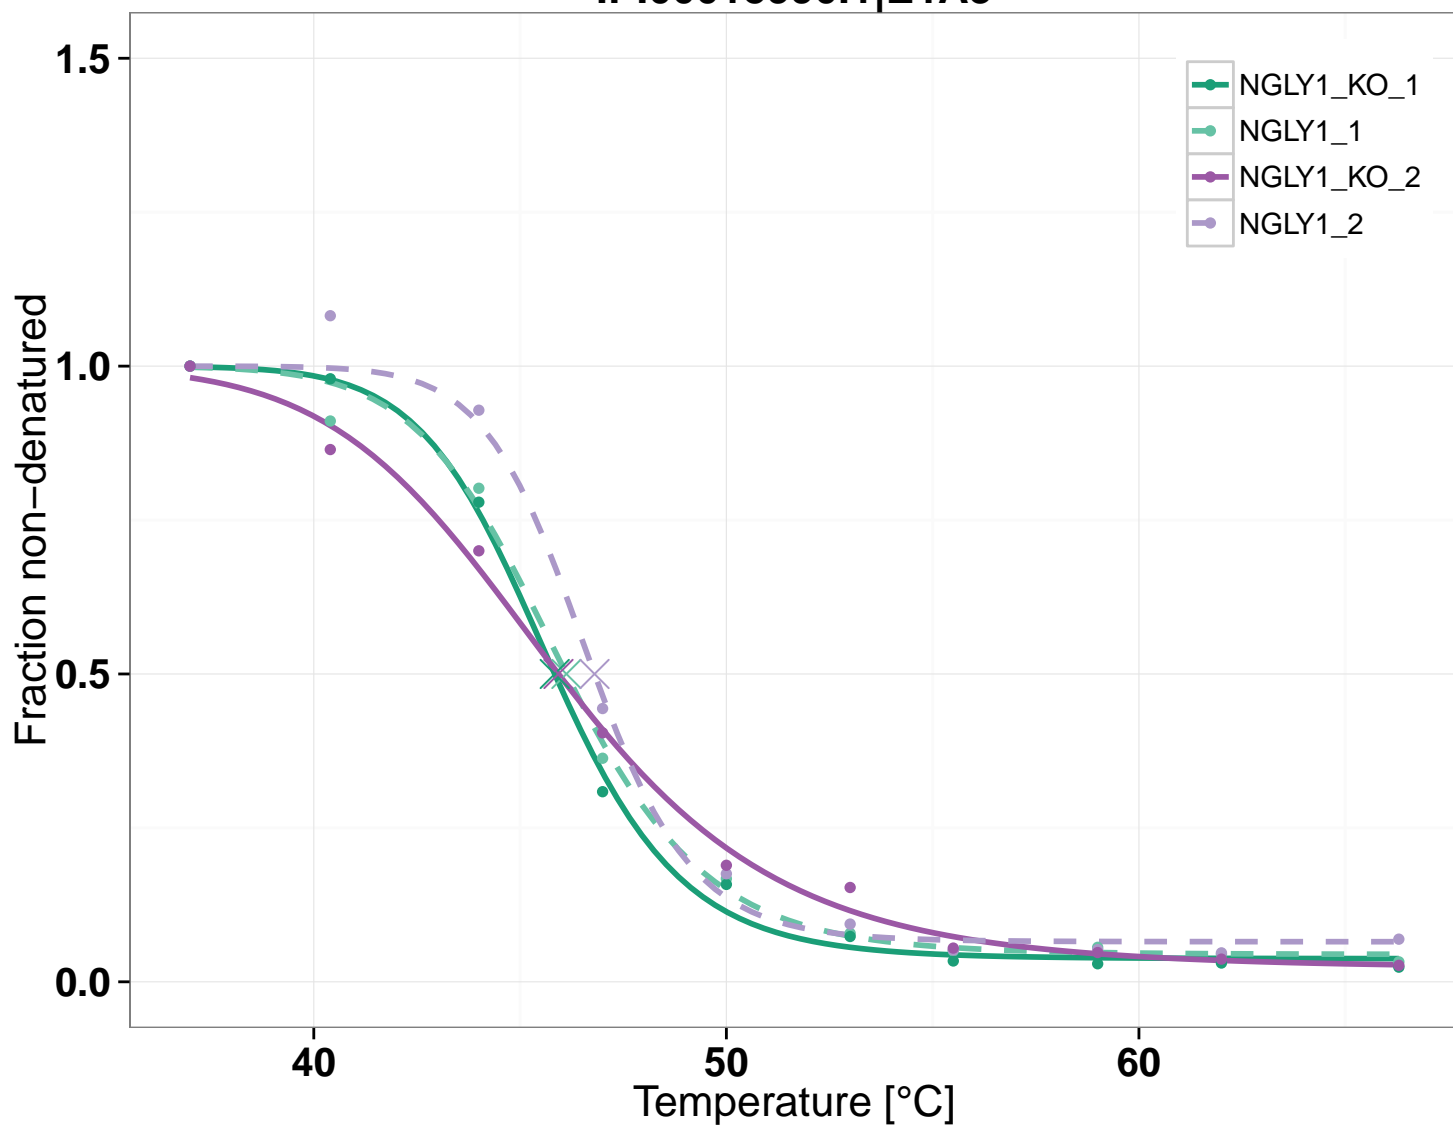

|            | meltPoint | slope | plateau | R2   |
|------------|-----------|-------|---------|------|
| NGLY1_KO_1 | 45.84     | -0.15 | 0.04    | 1    |
| NGLY1_1    | 46.12     | -0.14 | 0.04    | 1    |
| NGLY1_KO_2 | 45.93     | -0.09 | 0.02    | 1    |
| NGLY1_2    | 46.8      | -0.19 | 0.07    | 0.99 |

Supplement: Supplementary file 2593 [file 1]

# IPI00015736.3|UBA5

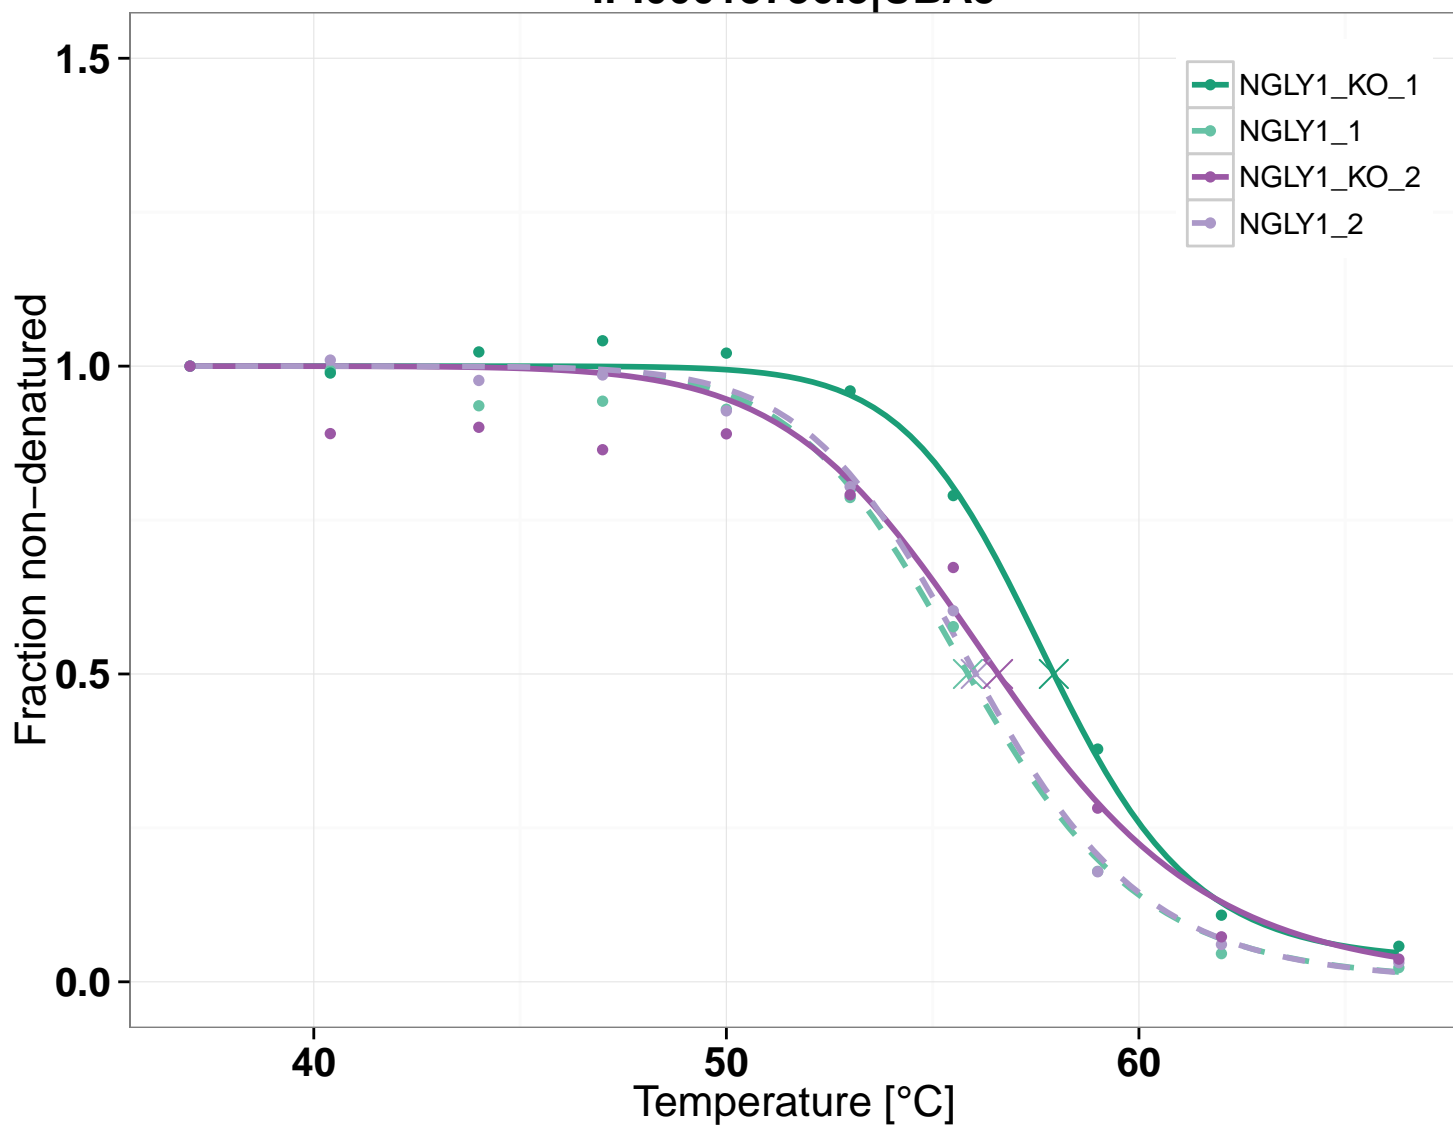

|            | meltPoint | slope  | plateau | R2   |
|------------|-----------|--------|---------|------|
| NGLY1_KO_1 | 57.94     | -0.14  | 0.03    | 1    |
| NGLY1_1    | 55.86     | -0.12  | 0       | 0.99 |
| NGLY1_KO_2 | 56.59     | -0.097 | 0       | 0.96 |
| NGLY1_2    | 56.04     | -0.12  | 0       | 1    |

Supplement: Supplementary file 2594 [file 1]

IPI00400812.5|SSFA2

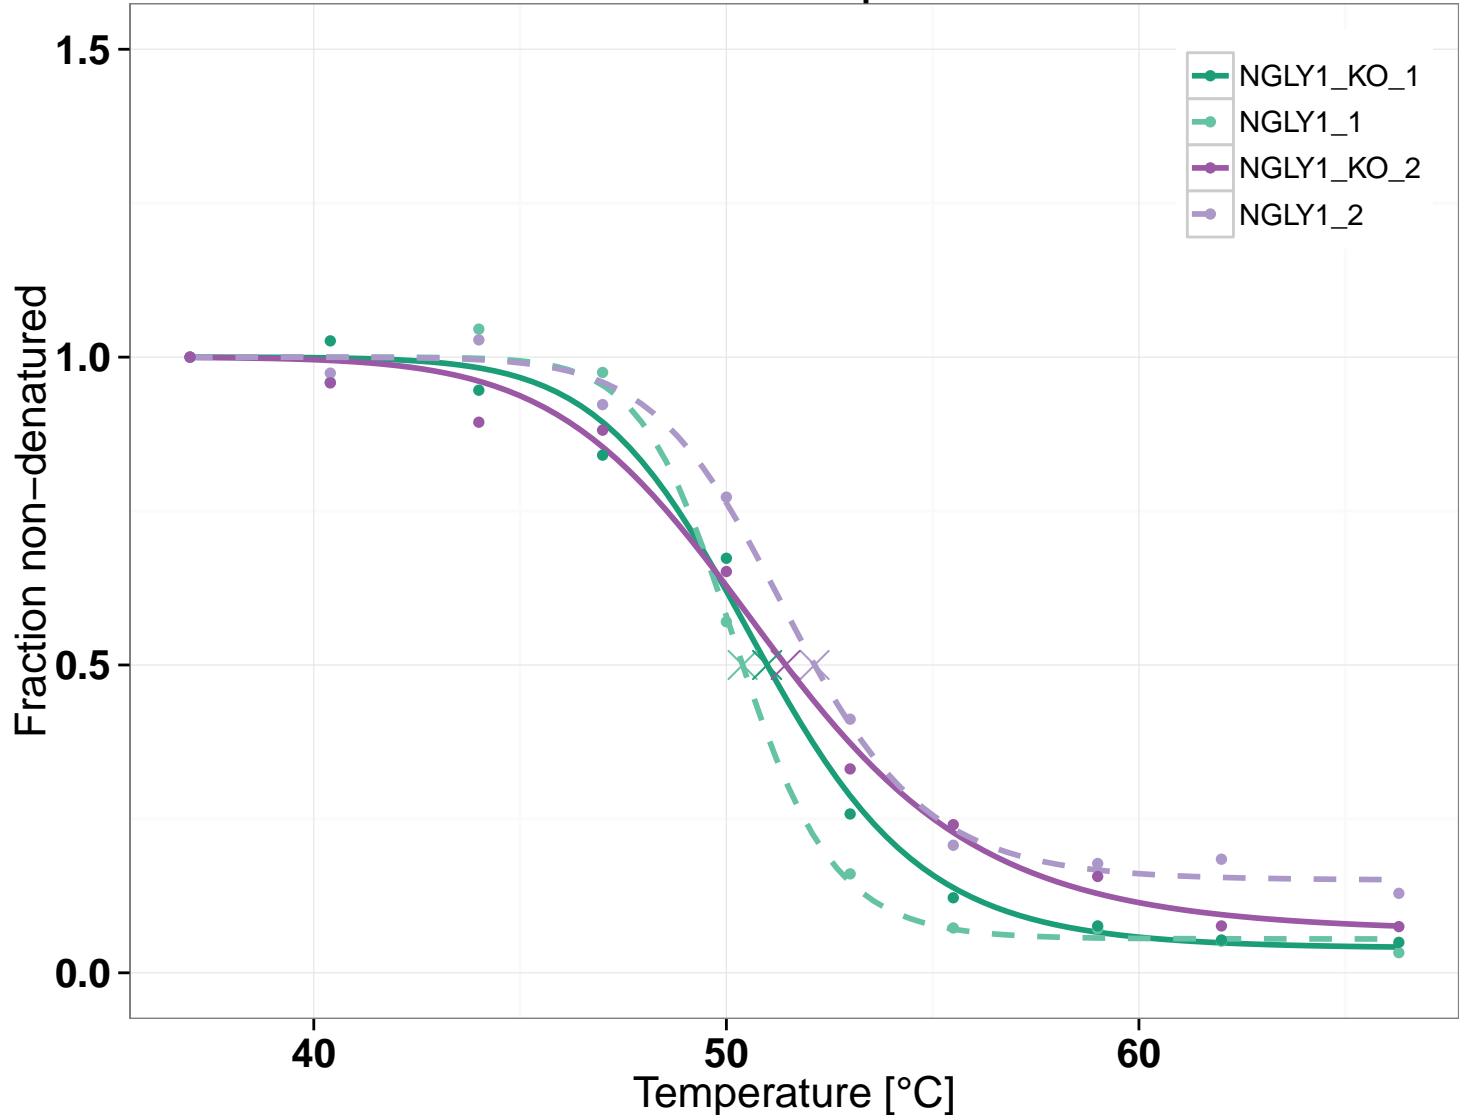

|            | meltPoint | slope | plateau | R2   |
|------------|-----------|-------|---------|------|
| NGLY1_KO_1 | 50.99     | -0.12 | 0.04    | 0.99 |
| NGLY1_1    | 50.39     | -0.2  | 0.05    | 1    |
| NGLY1_KO_2 | 51.44     | -0.09 | 0.07    | 0.99 |
| NGLY1_2    | 52.14     | -0.13 | 0.15    | 1    |

Supplement: Supplementary file 2595 [file 1]

IPI00032901.2|SAGE1

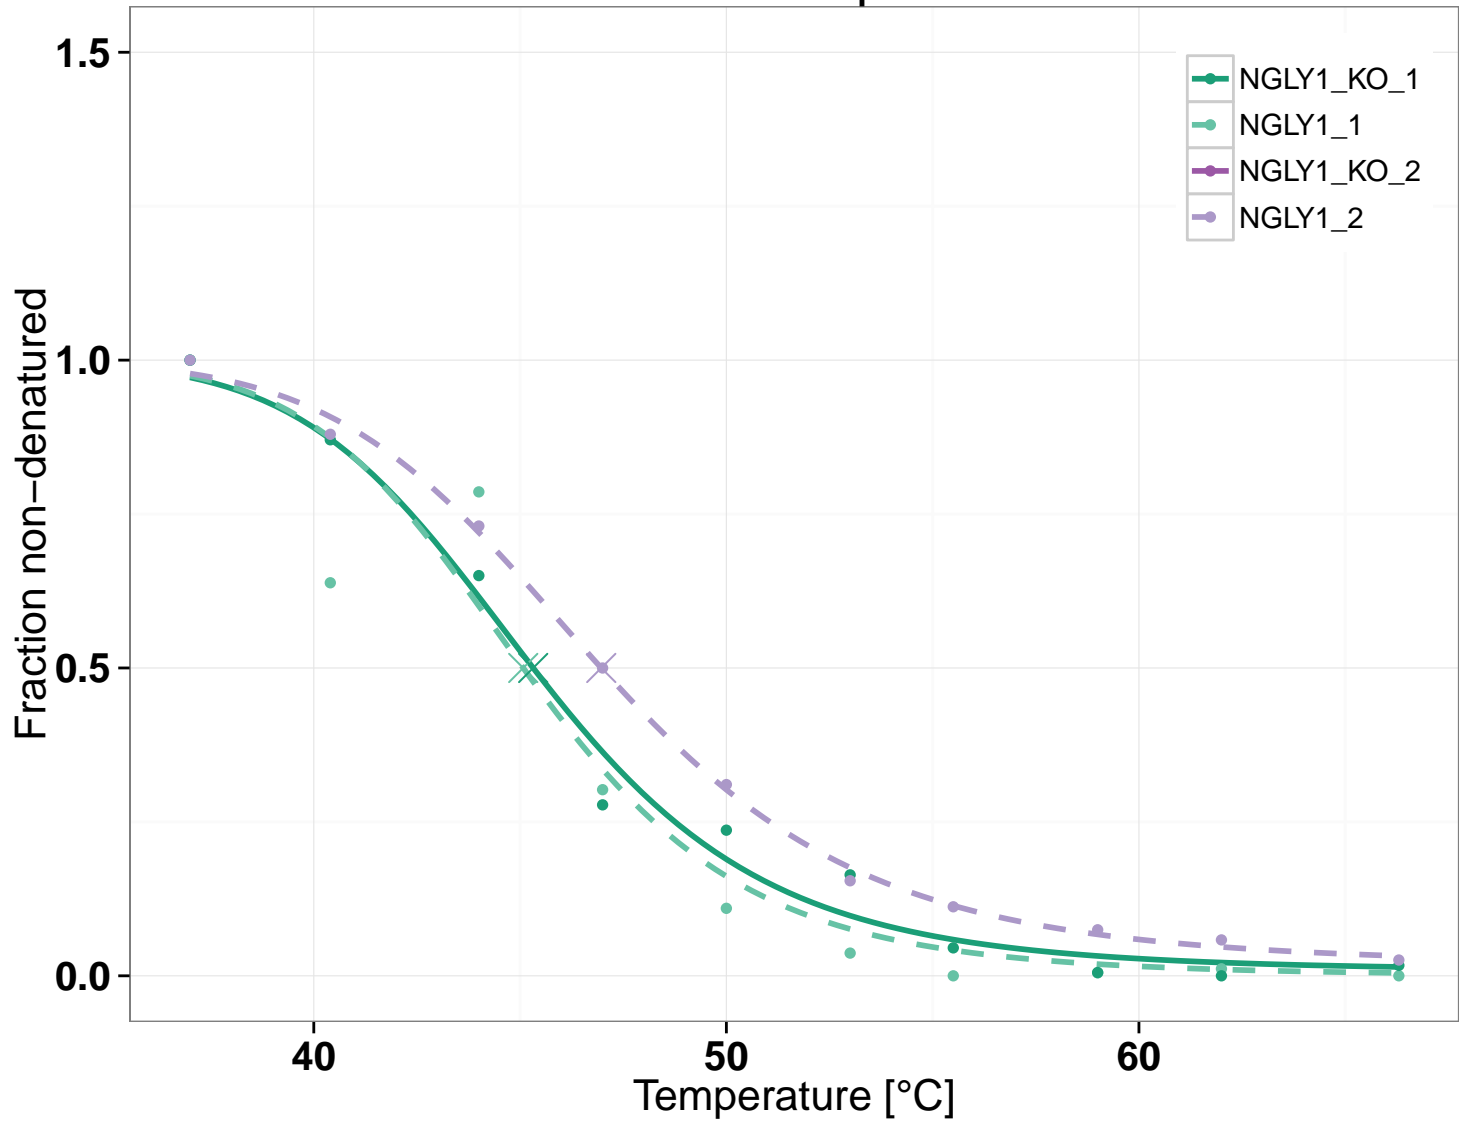

|            | meltPoint | slope  | plateau | R2   |
|------------|-----------|--------|---------|------|
| NGLY1_KO_1 | 45.32     | -0.088 | 0.01    | 0.99 |
| NGLY1_1    | 45.08     | -0.094 | 0       | 0.92 |
| NGLY1_KO_2 | -         | -      | -       | -    |
| NGLY1_2    | 46.97     | -0.076 | 0.02    | 1    |

Supplement: Supplementary file 2596 [file 1]

IPI00289831.4|PTPRS

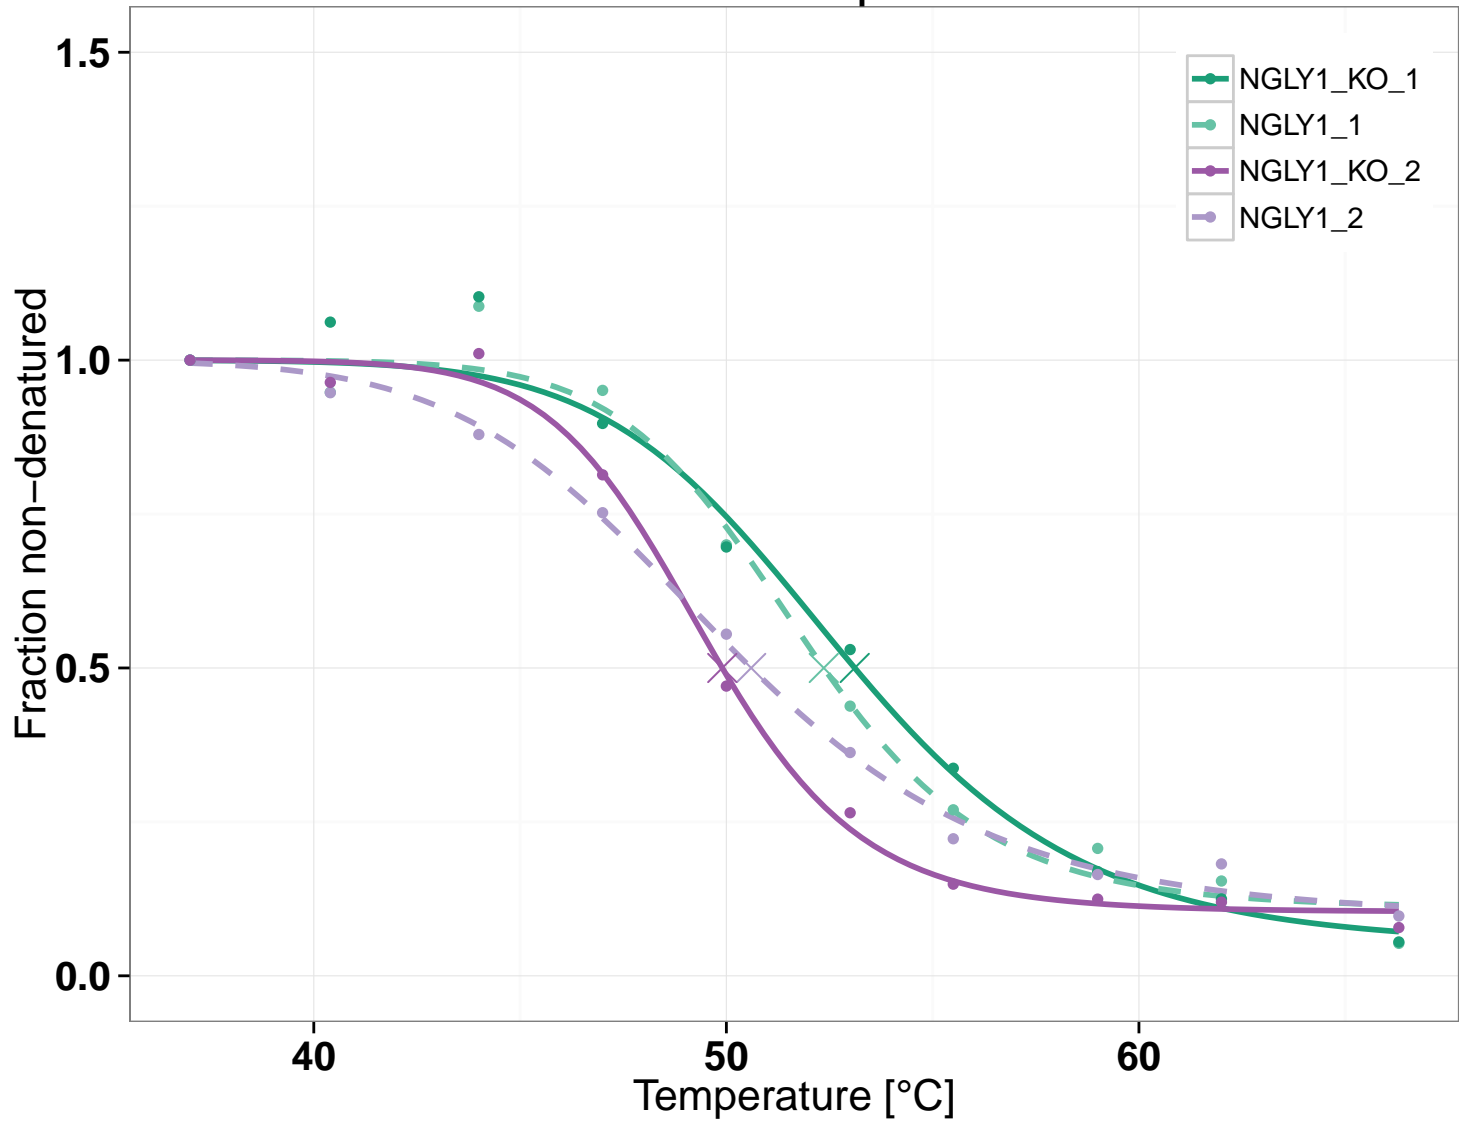

|            | meltPoint | slope  | plateau | R2   |
|------------|-----------|--------|---------|------|
| NGLY1_KO_1 | 53.11     | -0.082 | 0.05    | 0.98 |
| NGLY1_1    | 52.36     | -0.099 | 0.11    | 0.99 |
| NGLY1_KO_2 | 49.9      | -0.12  | 0.1     | 1    |
| NGLY1_2    | 50.6      | -0.069 | 0.09    | 1    |

Supplement: Supplementary file 2597 [file 1]

IPI00019329.1|DYNLL1

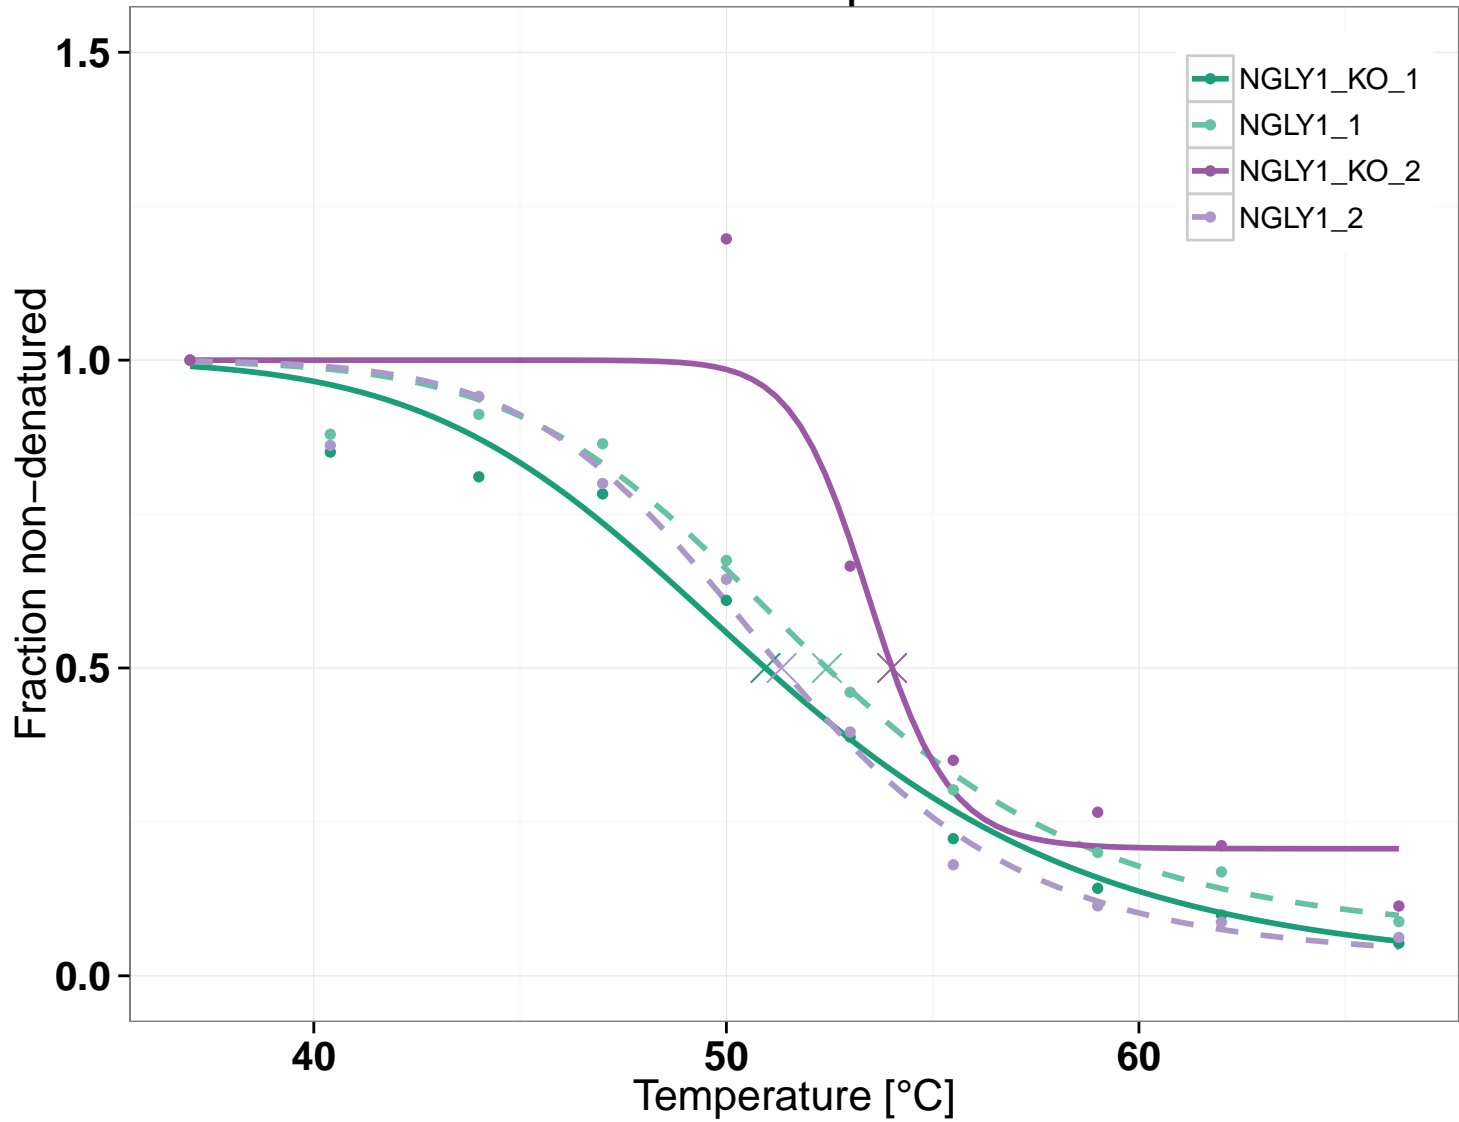

|            | meltPoint | slope  | plateau | R2   |
|------------|-----------|--------|---------|------|
| NGLY1_KO_1 | 50.95     | -0.061 | 0       | 0.98 |
| NGLY1_1    | 52.44     | -0.067 | 0.06    | 0.99 |
| NGLY1_KO_2 | 54.02     | -0.21  | 0.21    | 0.6  |
| NGLY1_2    | 51.34     | -0.081 | 0.03    | 0.98 |

Supplement: Supplementary file 2598 [file 1]

IPI00872754.1|STK24

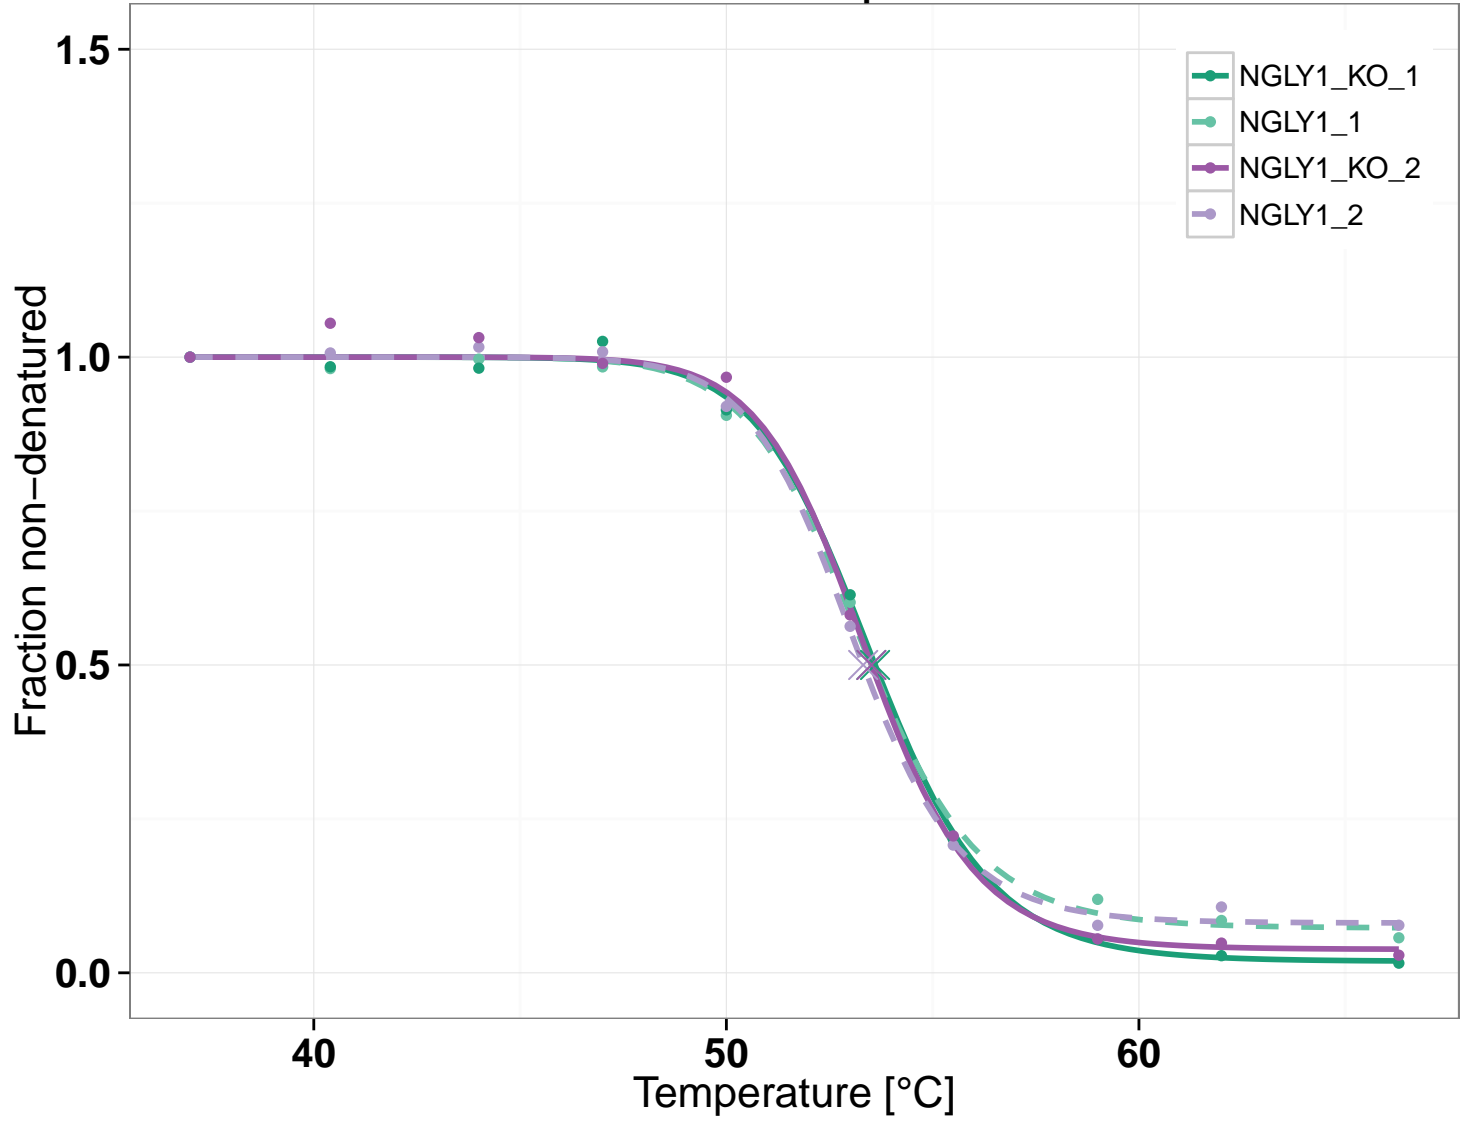

|            | meltPoint | slope | plateau | R2 |
|------------|-----------|-------|---------|----|
| NGLY1_KO_1 | 53.61     | -0.17 | 0.02    | 1  |
| NGLY1_1    | 53.51     | -0.16 | 0.07    | 1  |
| NGLY1_KO_2 | 53.52     | -0.18 | 0.04    | 1  |
| NGLY1_2    | 53.32     | -0.18 | 0.08    | 1  |

Supplement: Supplementary file 2599 [file 1]

IPI00903111.1|B3KXV1\_HUMAN

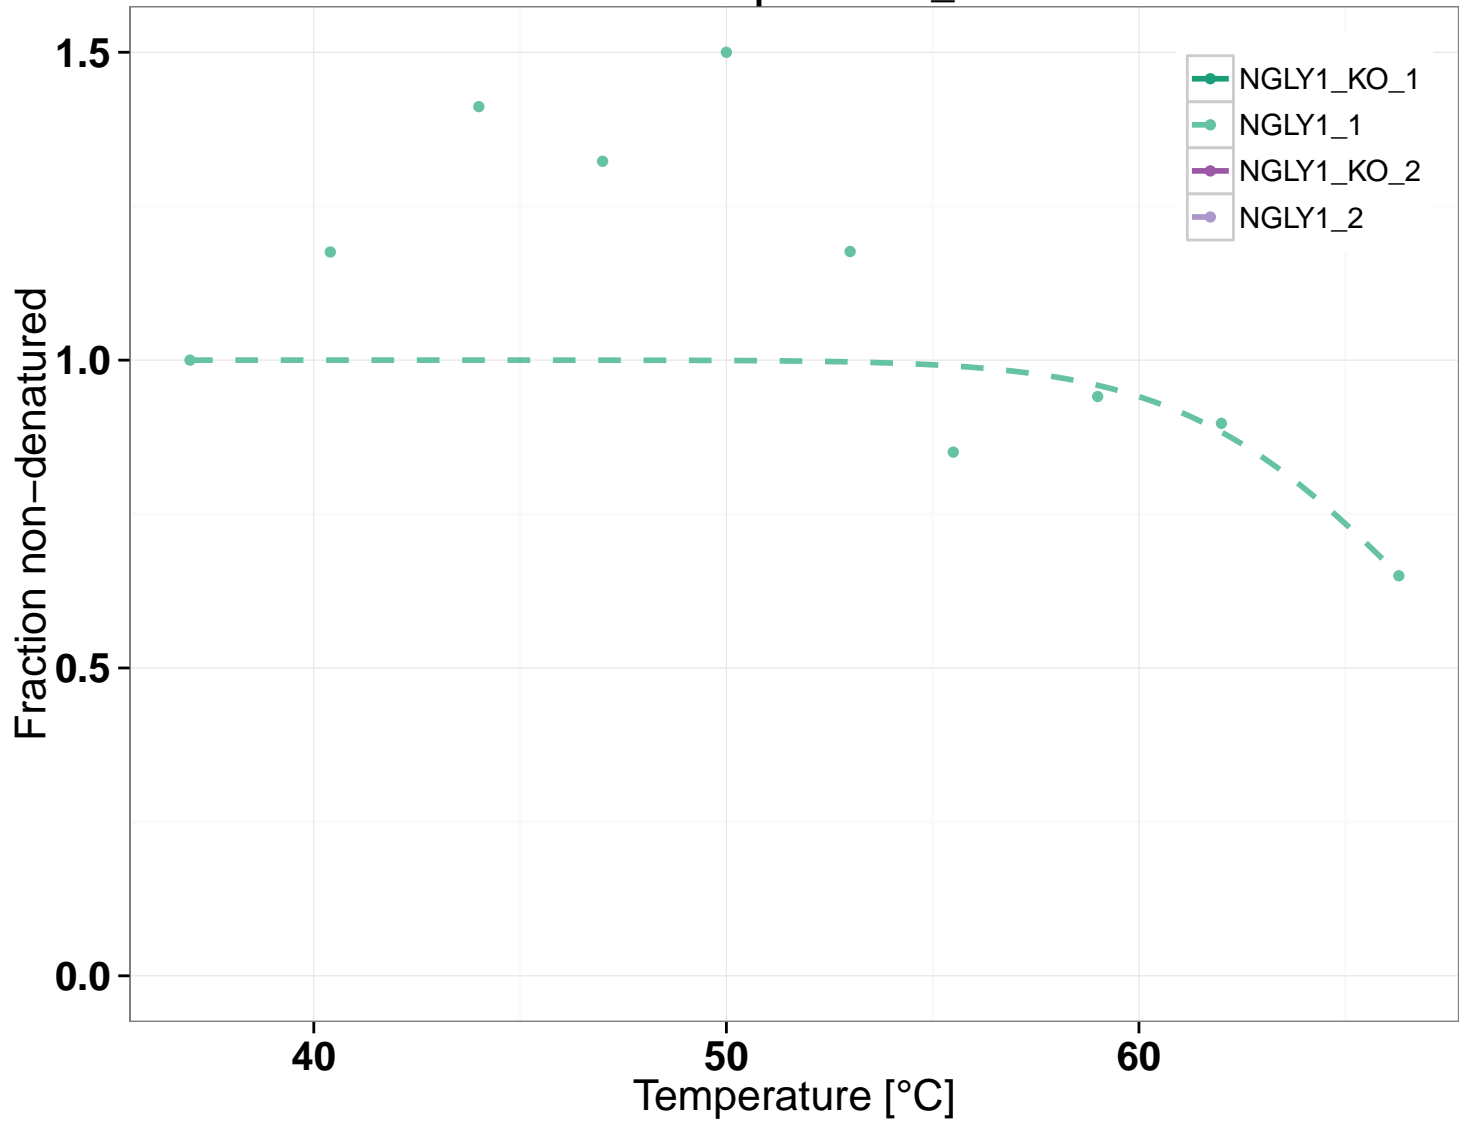

|            | meltPoint | slope | plateau | R2   |
|------------|-----------|-------|---------|------|
| NGLY1_KO_1 | —         | —     | —       | —    |
| NGLY1_1    | —         | —     | 0.13    | 0.08 |
| NGLY1_KO_2 | —         | —     | —       | —    |
| NGLY1_2    | —         | —     | —       | —    |

Supplement: Supplementary file 2600 [file 1]

IPI00013877.2|HNRNPH3

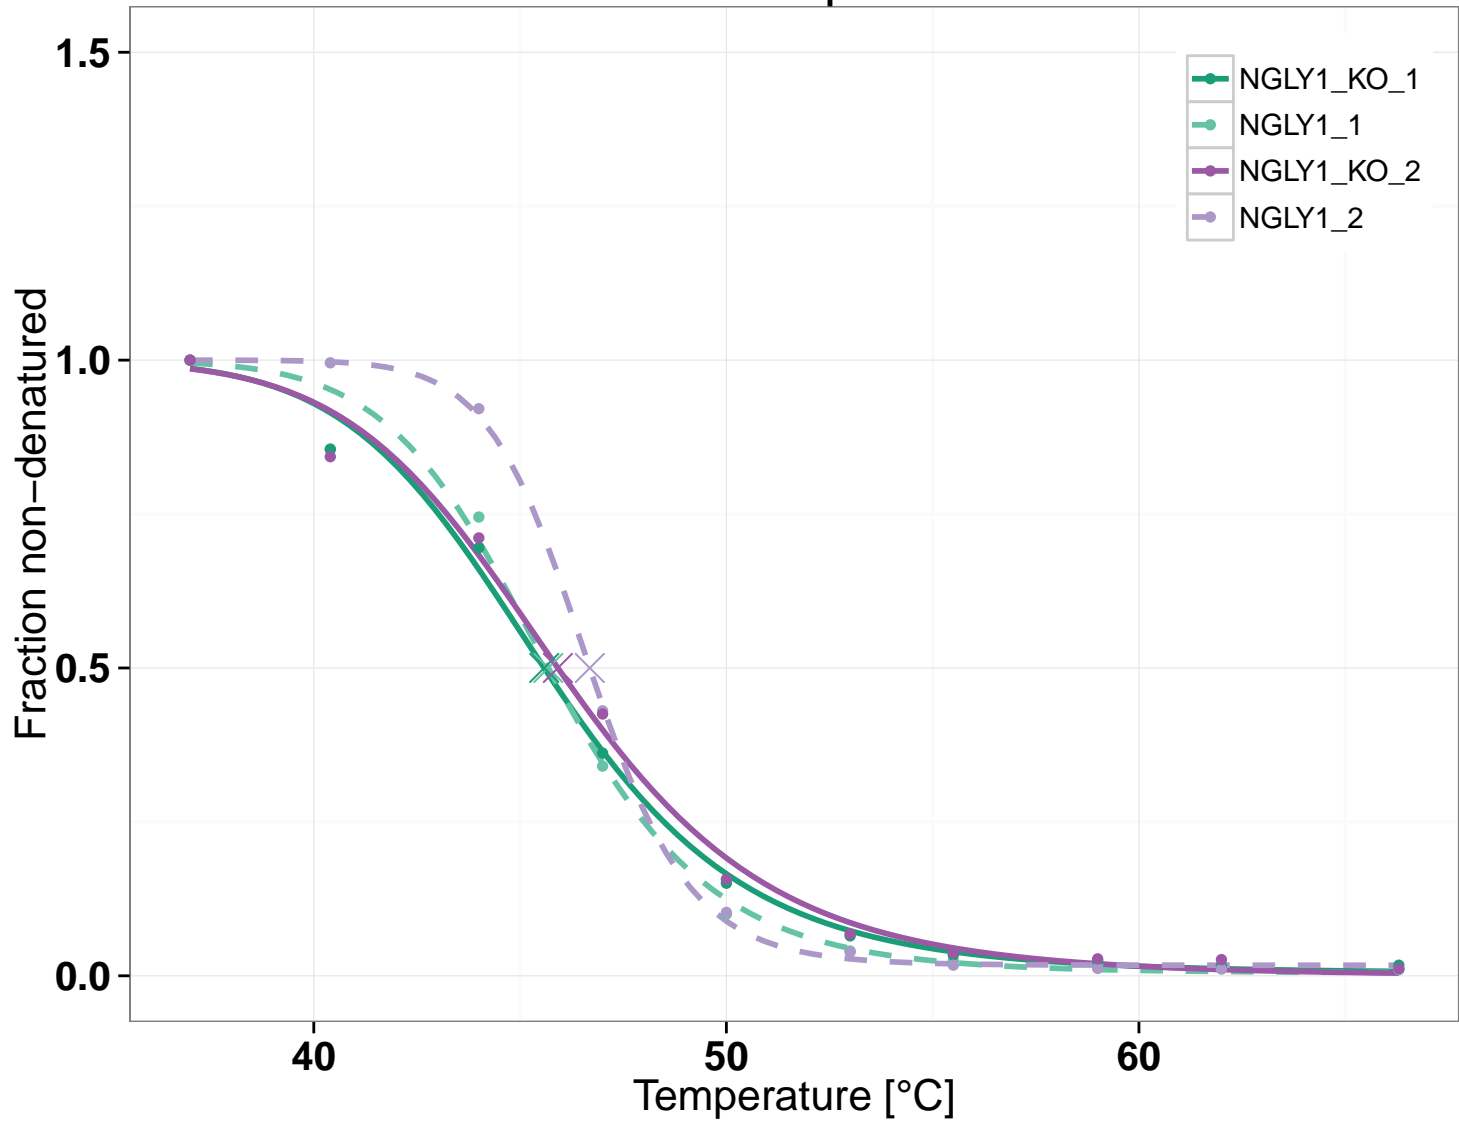

|            | meltPoint | slope  | plateau | R2   |
|------------|-----------|--------|---------|------|
| NGLY1_KO_1 | 45.58     | -0.1   | 0       | 1    |
| NGLY1_1    | 45.68     | -0.13  | 0       | 0.99 |
| NGLY1_KO_2 | 45.92     | -0.097 | 0       | 0.99 |
| NGLY1_2    | 46.69     | -0.2   | 0.02    | 1    |

Supplement: Supplementary file 2601 [file 1]

# IPI00032791.4|POP4

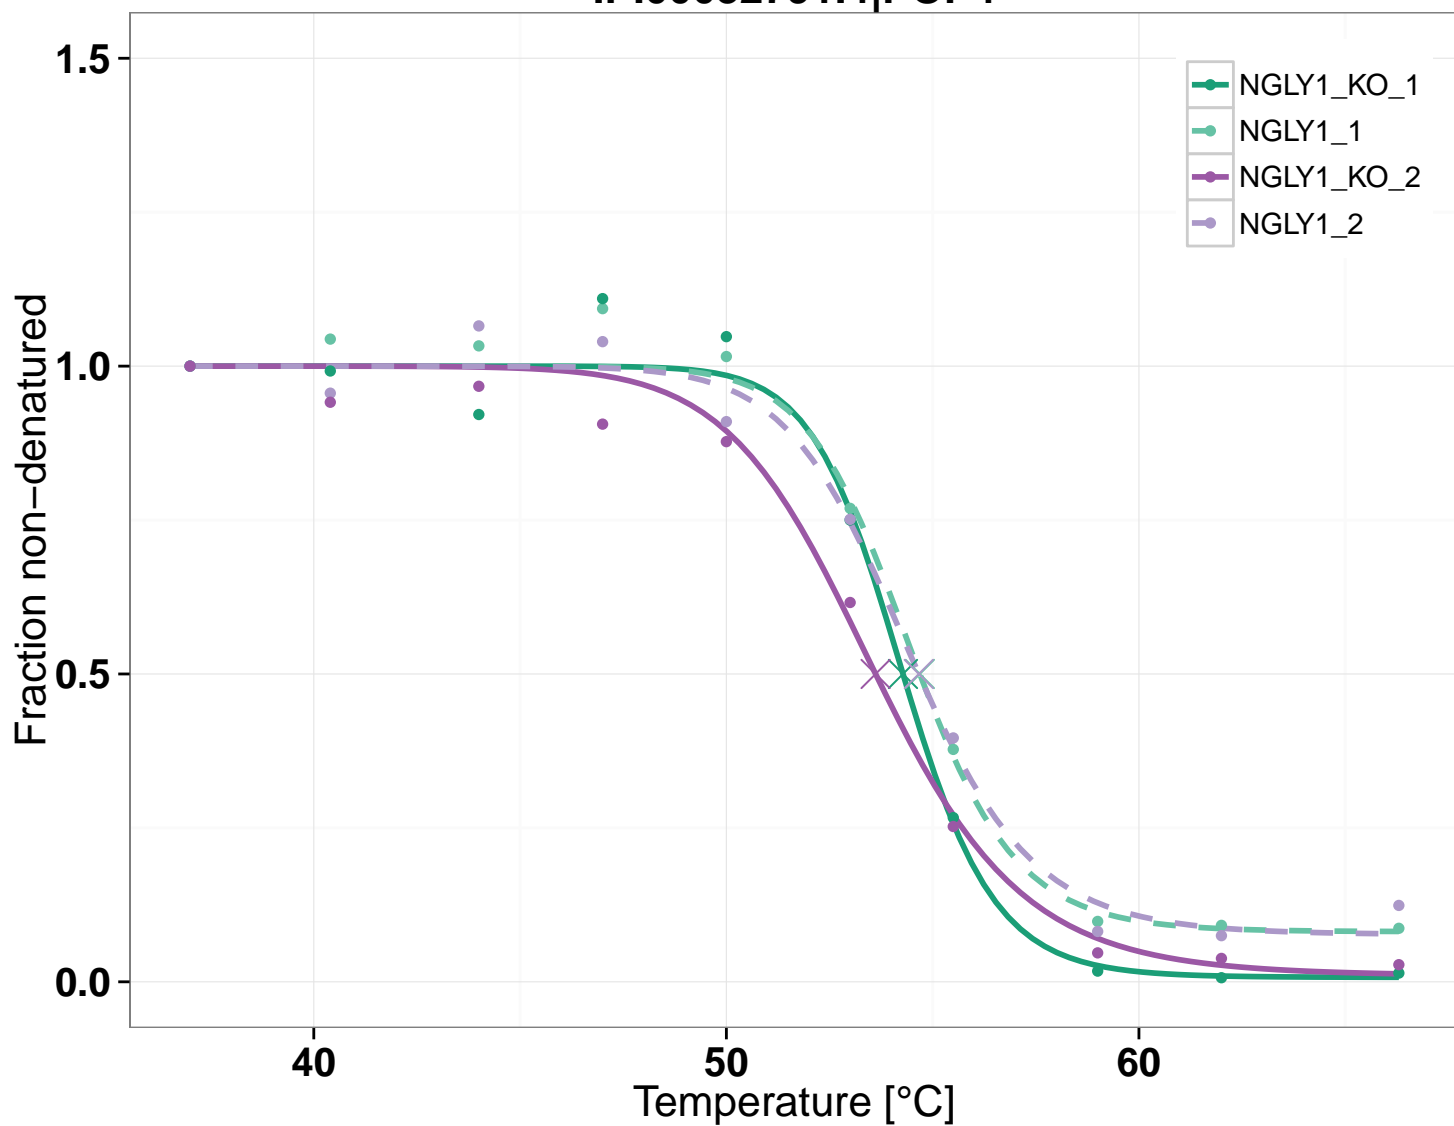

|            | meltPoint | slope | plateau | R2   |
|------------|-----------|-------|---------|------|
| NGLY1_KO_1 | 54.28     | -0.22 | 0.01    | 0.99 |
| NGLY1_1    | 54.69     | -0.18 | 0.08    | 0.99 |
| NGLY1_KO_2 | 53.62     | -0.14 | 0.01    | 0.99 |
| NGLY1_2    | 54.66     | -0.15 | 0.08    | 0.99 |

Supplement: Supplementary file 2602 [file 1]

IPI00869000.1|C12ORF51

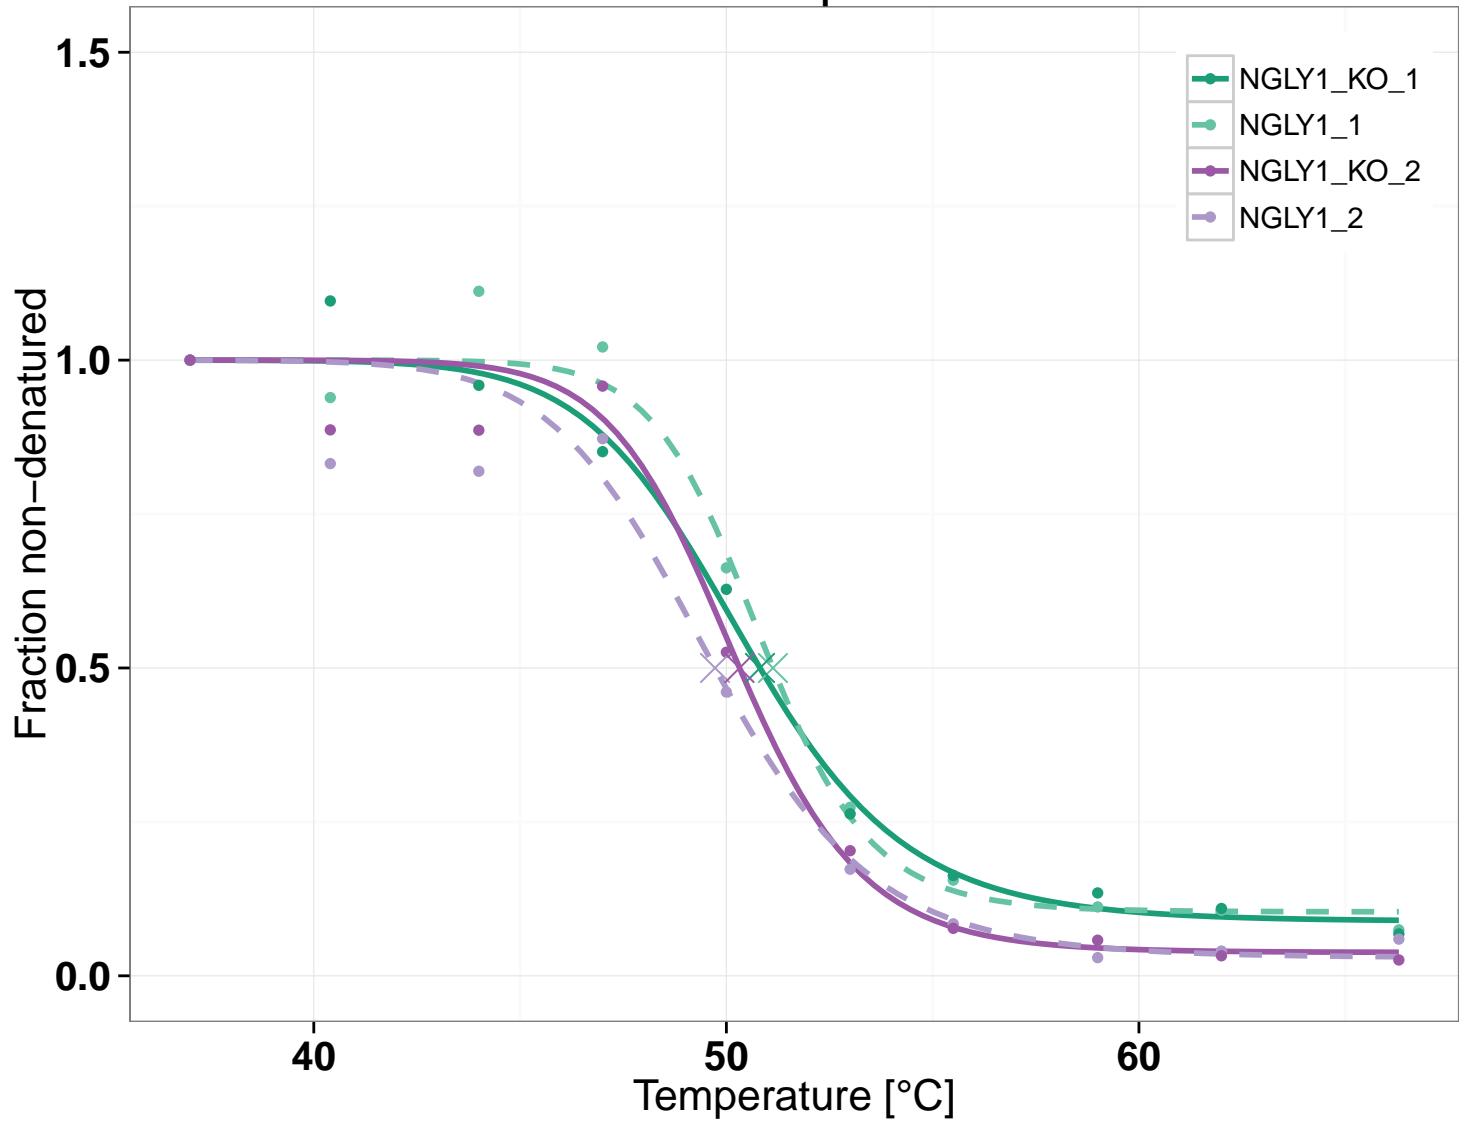

|            | meltPoint | slope | plateau | R2   |
|------------|-----------|-------|---------|------|
| NGLY1_KO_1 | 50.82     | -0.12 | 0.09    | 0.99 |
| NGLY1_1    | 51.13     | -0.17 | 0.1     | 0.99 |
| NGLY1_KO_2 | 50.32     | -0.16 | 0.04    | 0.98 |
| NGLY1_2    | 49.73     | -0.12 | 0.03    | 0.96 |

Supplement: Supplementary file 2603 [file 1]

IPI00000398.2|NUSAP1

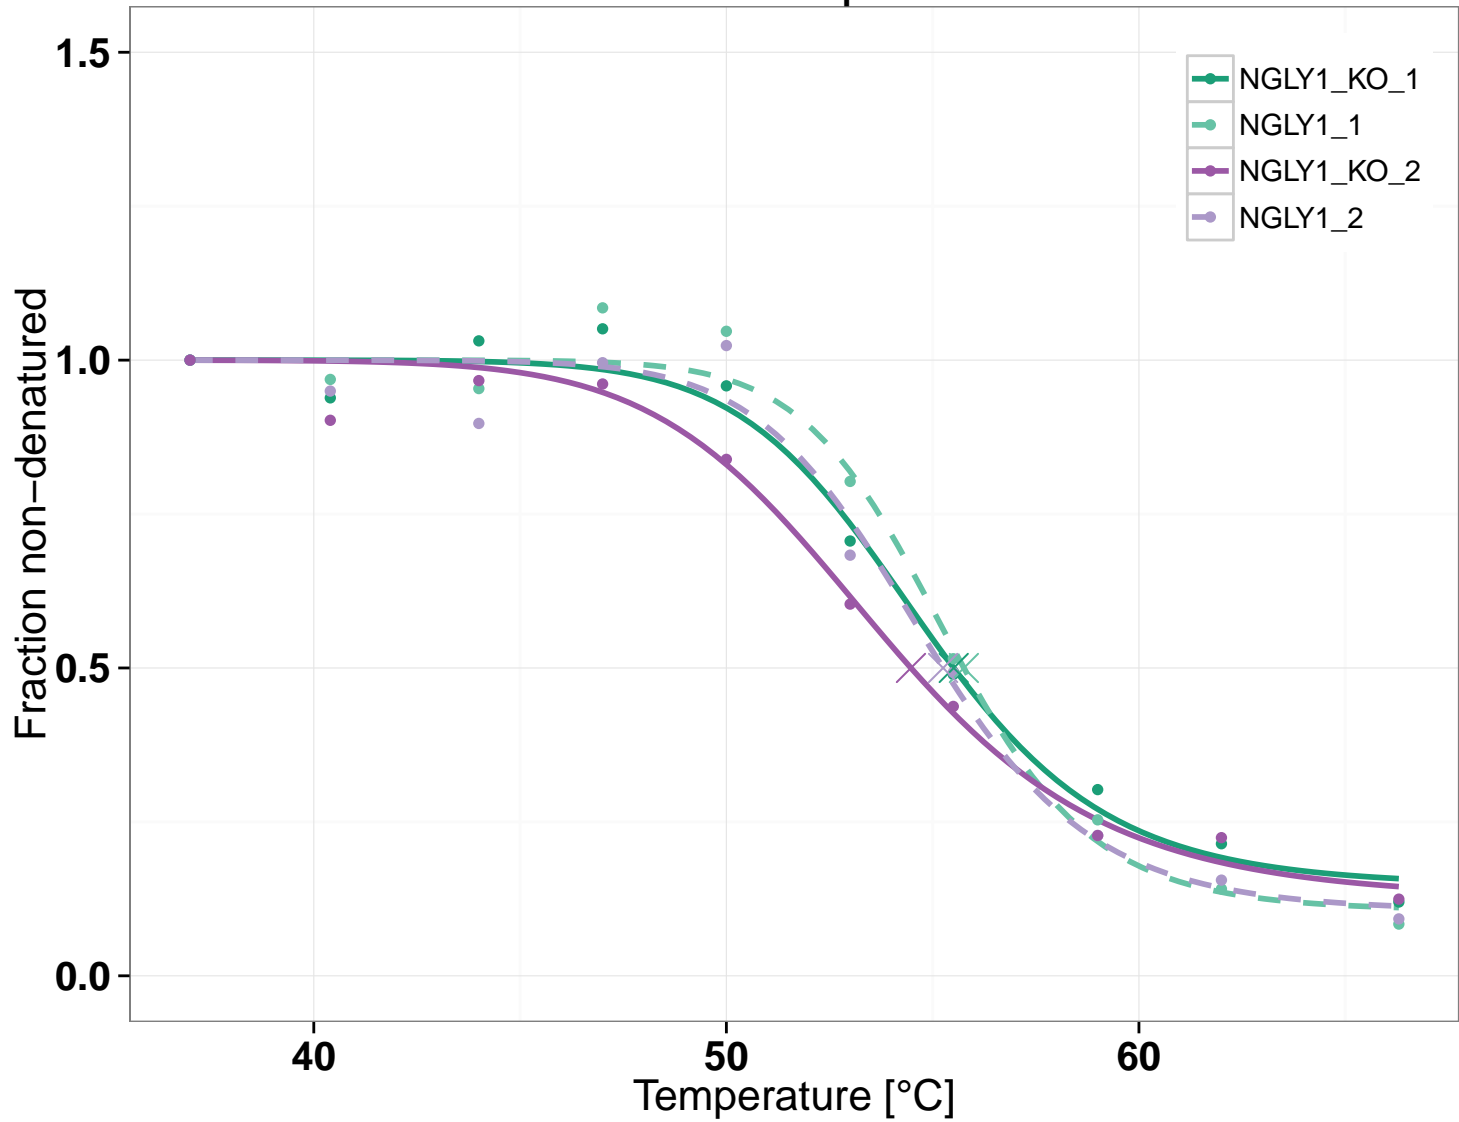

|            | meltPoint | slope  | plateau | R2   |
|------------|-----------|--------|---------|------|
| NGLY1_KO_1 | 55.51     | -0.096 | 0.15    | 0.99 |
| NGLY1_1    | 55.76     | -0.13  | 0.11    | 0.99 |
| NGLY1_KO_2 | 54.47     | -0.08  | 0.12    | 0.99 |
| NGLY1_2    | 55.25     | -0.11  | 0.1     | 0.98 |

Supplement: Supplementary file 2604 [file 1]

IPI00171599.7|EFHC2

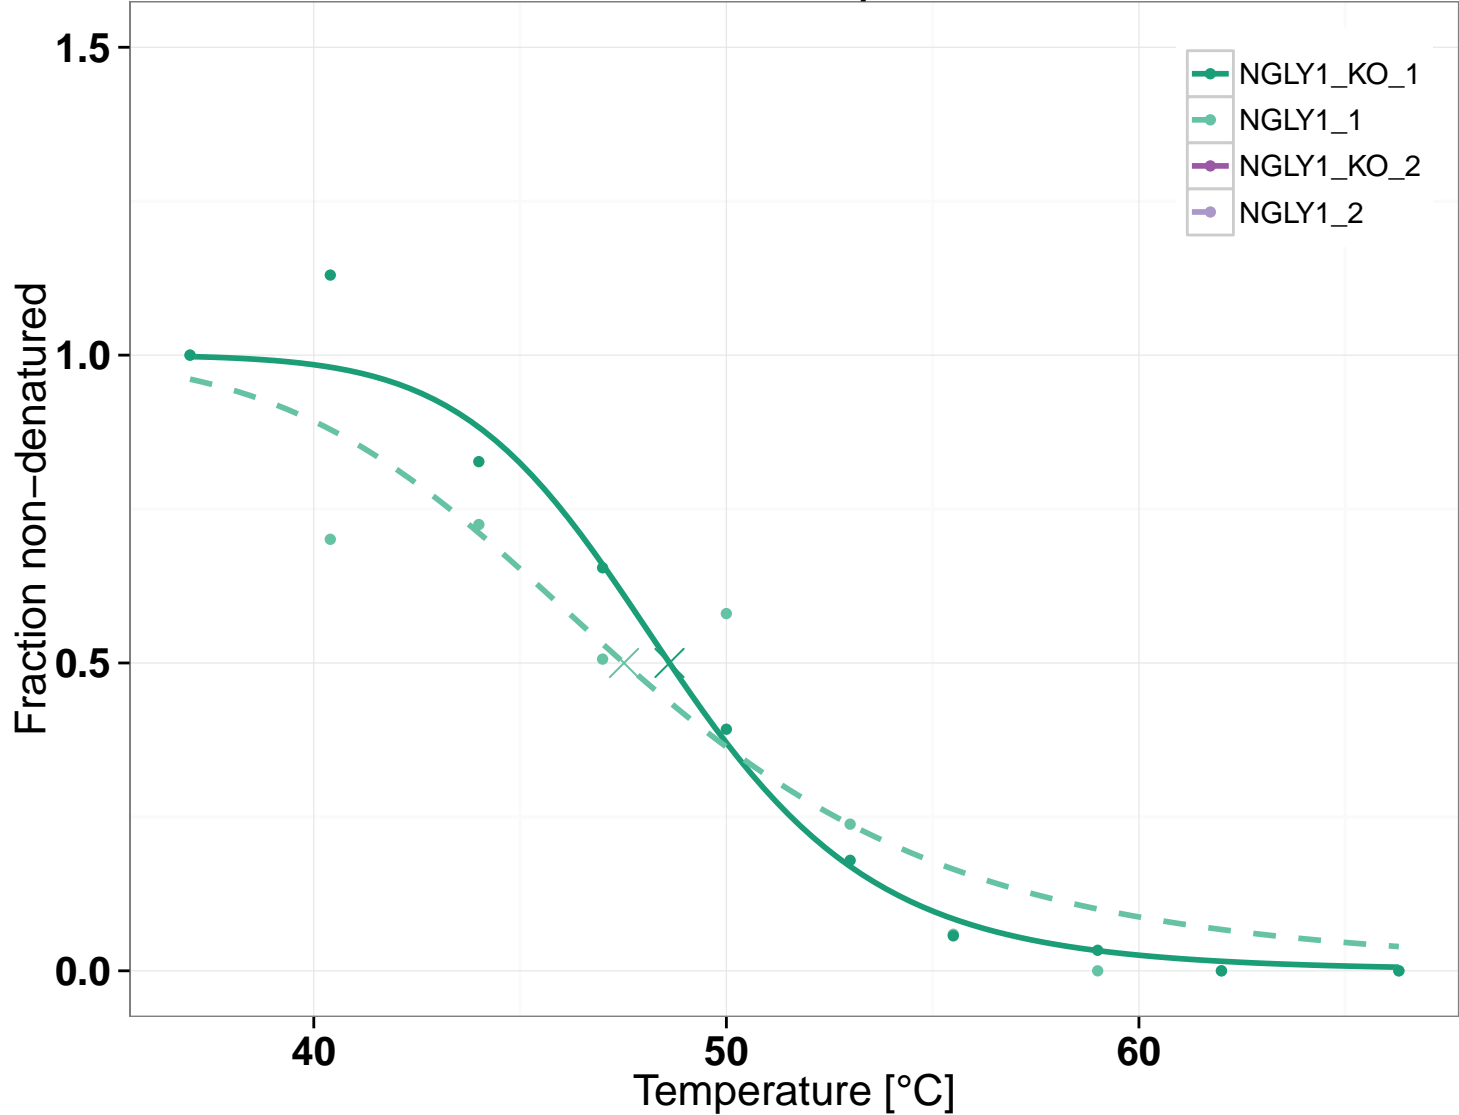

|            | meltPoint | slope  | plateau | R2   |
|------------|-----------|--------|---------|------|
| NGLY1_KO_1 | 48.62     | -0.1   | 0       | 0.98 |
| NGLY1_1    | 47.52     | -0.061 | 0       | 0.91 |
| NGLY1_KO_2 | -         | -      | -       | -    |
| NGLY1_2    | -         | -      | -       | -    |

Supplement: Supplementary file 2605 [file 1]

IPI00014073.1|APBA3

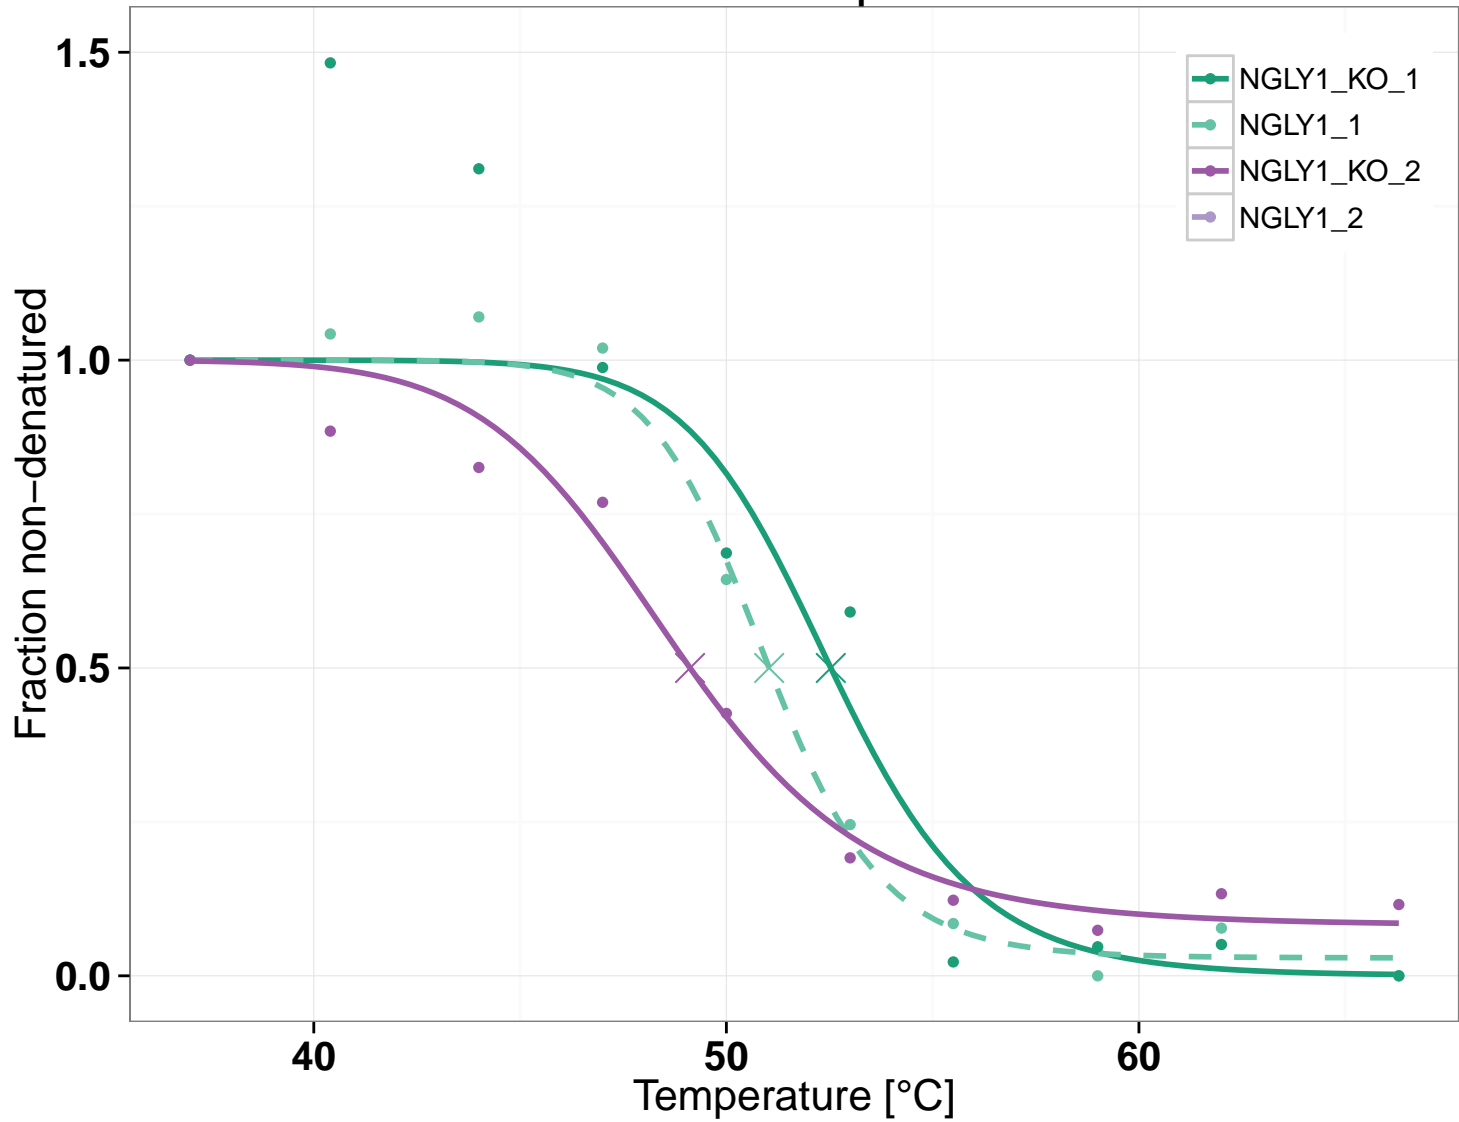

|            | meltPoint | slope  | plateau | R2   |
|------------|-----------|--------|---------|------|
| NGLY1_KO_1 | 52.53     | -0.14  | 0       | 0.86 |
| NGLY1_1    | 51.04     | -0.17  | 0.03    | 0.99 |
| NGLY1_KO_2 | 49.12     | -0.098 | 0.08    | 0.98 |
| NGLY1_2    | -         | -      | -       | -    |

Supplement: Supplementary file 2606 [file 1]

IPI00030090.1|ETNK1

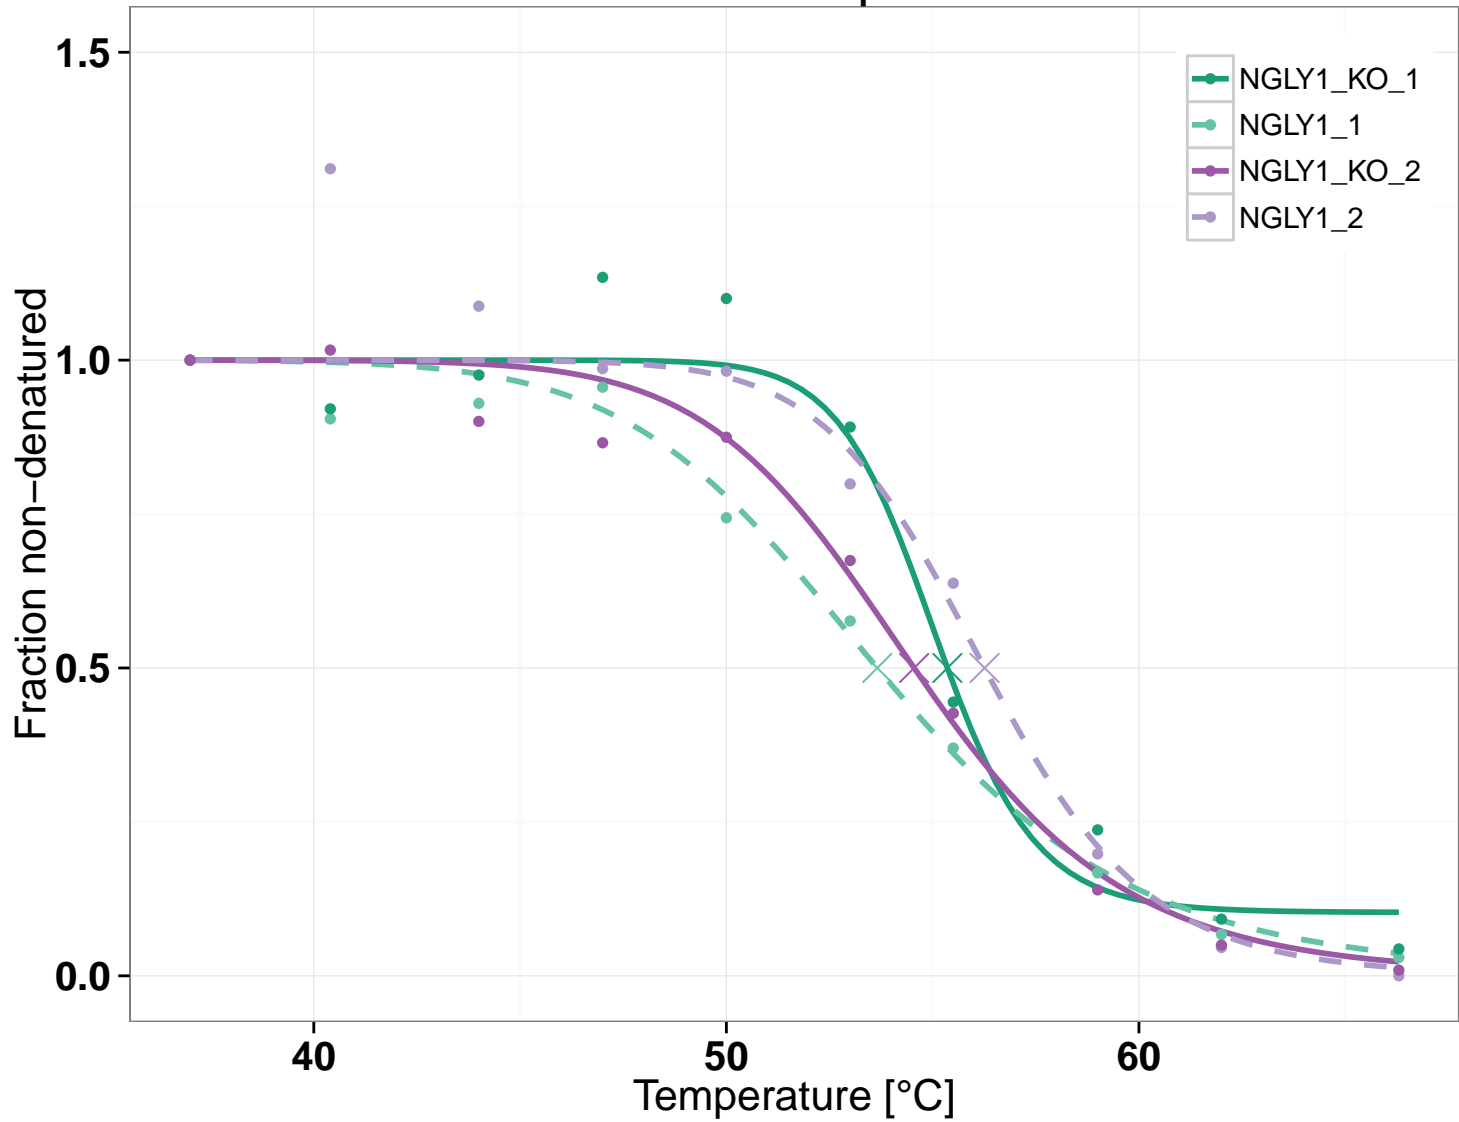

|            | meltPoint | slope  | plateau | R2   |
|------------|-----------|--------|---------|------|
| NGLY1_KO_1 | 55.36     | -0.19  | 0.1     | 0.97 |
| NGLY1_1    | 53.66     | -0.081 | 0       | 0.99 |
| NGLY1_KO_2 | 54.55     | -0.098 | 0       | 0.99 |
| NGLY1_2    | 56.26     | -0.13  | 0       | 0.94 |

Supplement: Supplementary file 2607 [file 1]

# IPI00103064.4|EXOC7

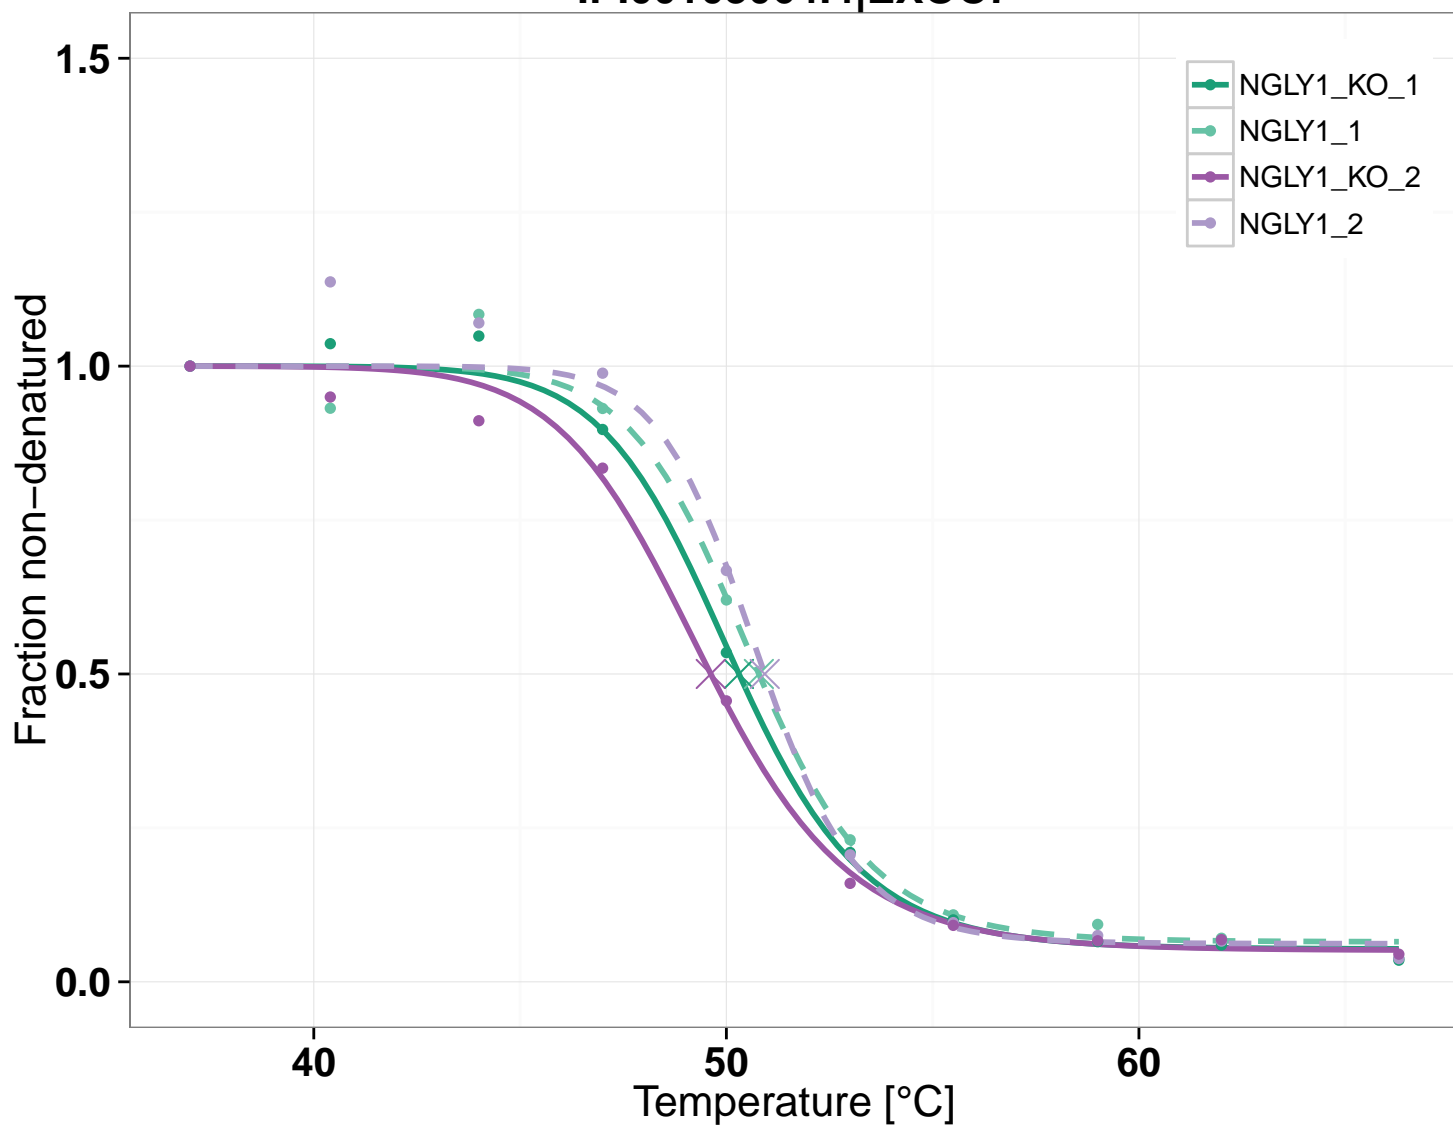

|            | meltPoint | slope | plateau | R2   |
|------------|-----------|-------|---------|------|
| NGLY1_KO_1 | 50.3      | -0.15 | 0.05    | 1    |
| NGLY1_1    | 50.79     | -0.16 | 0.06    | 0.99 |
| NGLY1_KO_2 | 49.62     | -0.13 | 0.05    | 1    |
| NGLY1_2    | 50.93     | -0.19 | 0.06    | 0.99 |

Supplement: Supplementary file 2608 [file 1]

# IPI00099834.4|UBN1

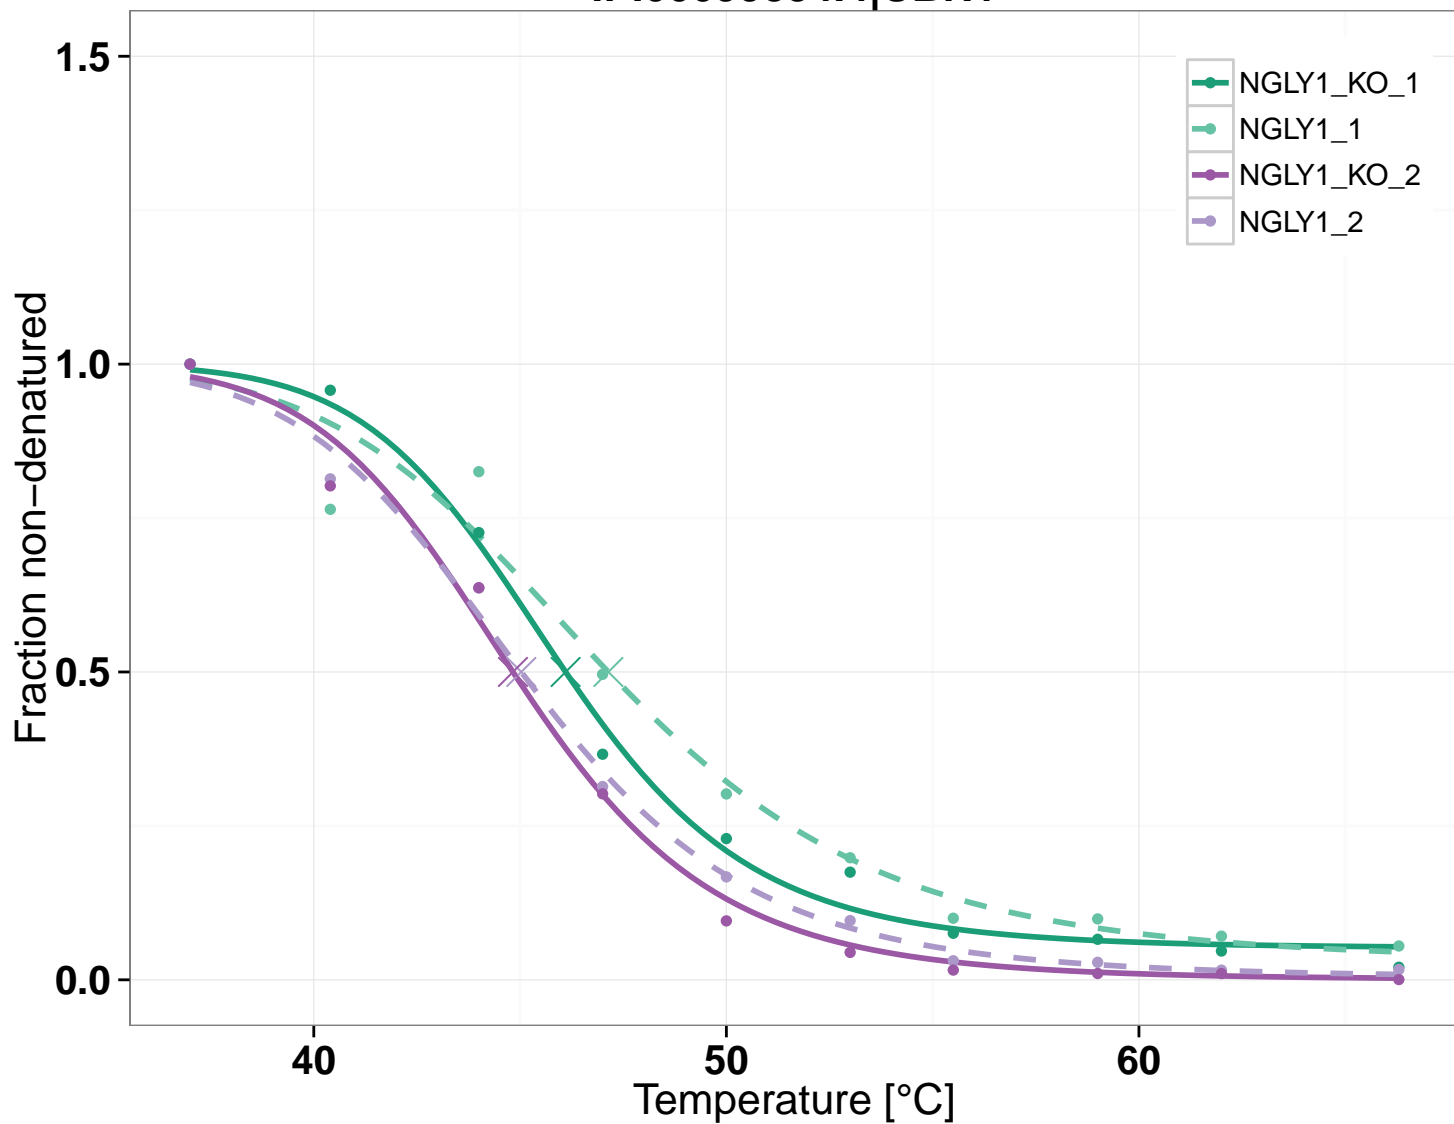

|            | meltPoint | slope  | plateau | R2   |
|------------|-----------|--------|---------|------|
| NGLY1_KO_1 | 46.1      | -0.1   | 0.05    | 0.99 |
| NGLY1_1    | 47.14     | -0.072 | 0.03    | 0.97 |
| NGLY1_KO_2 | 44.83     | -0.1   | 0       | 0.99 |
| NGLY1_2    | 45.03     | -0.09  | 0       | 0.99 |

Supplement: Supplementary file 2609 [file 1]

IPI00015826.2|ABCB10

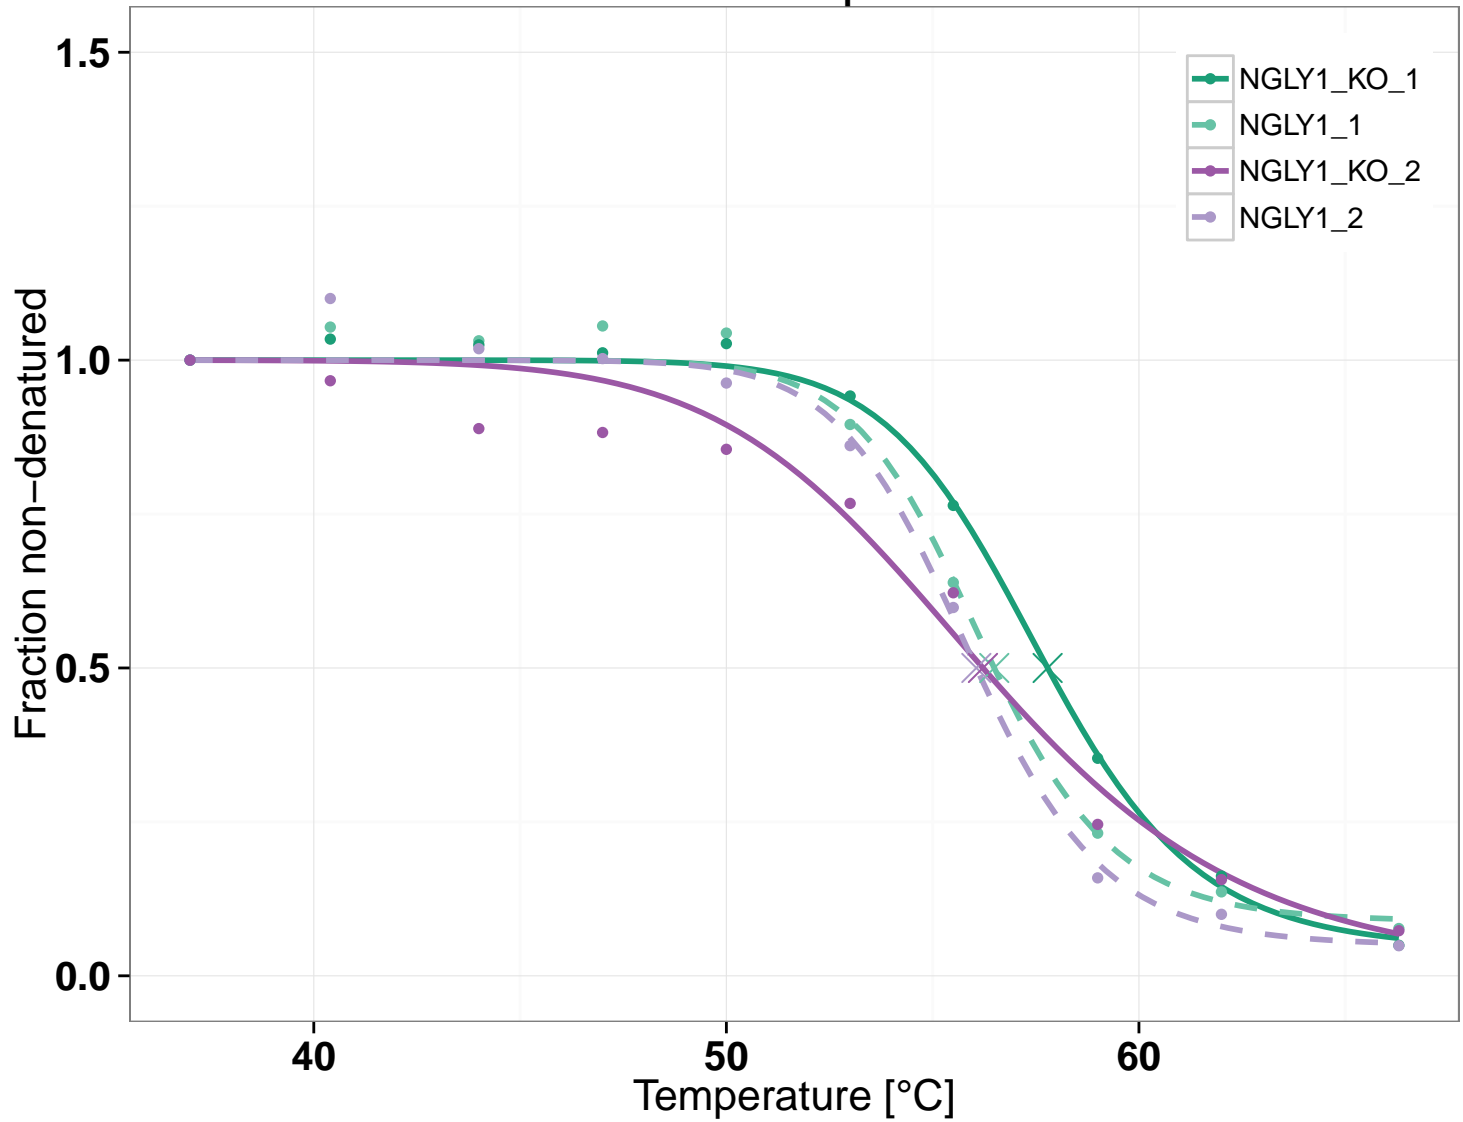

|            | meltPoint | slope  | plateau | R2   |
|------------|-----------|--------|---------|------|
| NGLY1_KO_1 | 57.79     | -0.13  | 0.04    | 1    |
| NGLY1_1    | 56.49     | -0.14  | 0.09    | 0.99 |
| NGLY1_KO_2 | 56.22     | -0.078 | 0       | 0.97 |
| NGLY1_2    | 56.06     | -0.15  | 0.05    | 0.99 |

Supplement: Supplementary file 2610 [file 1]
