# Supplementary material (part 27 of 85)
Source: publisher figshare collection journal article supplement (https://gsajournals.figshare.com/articles/dataset/_/12014913)

IPI00101734.5|FAM105B

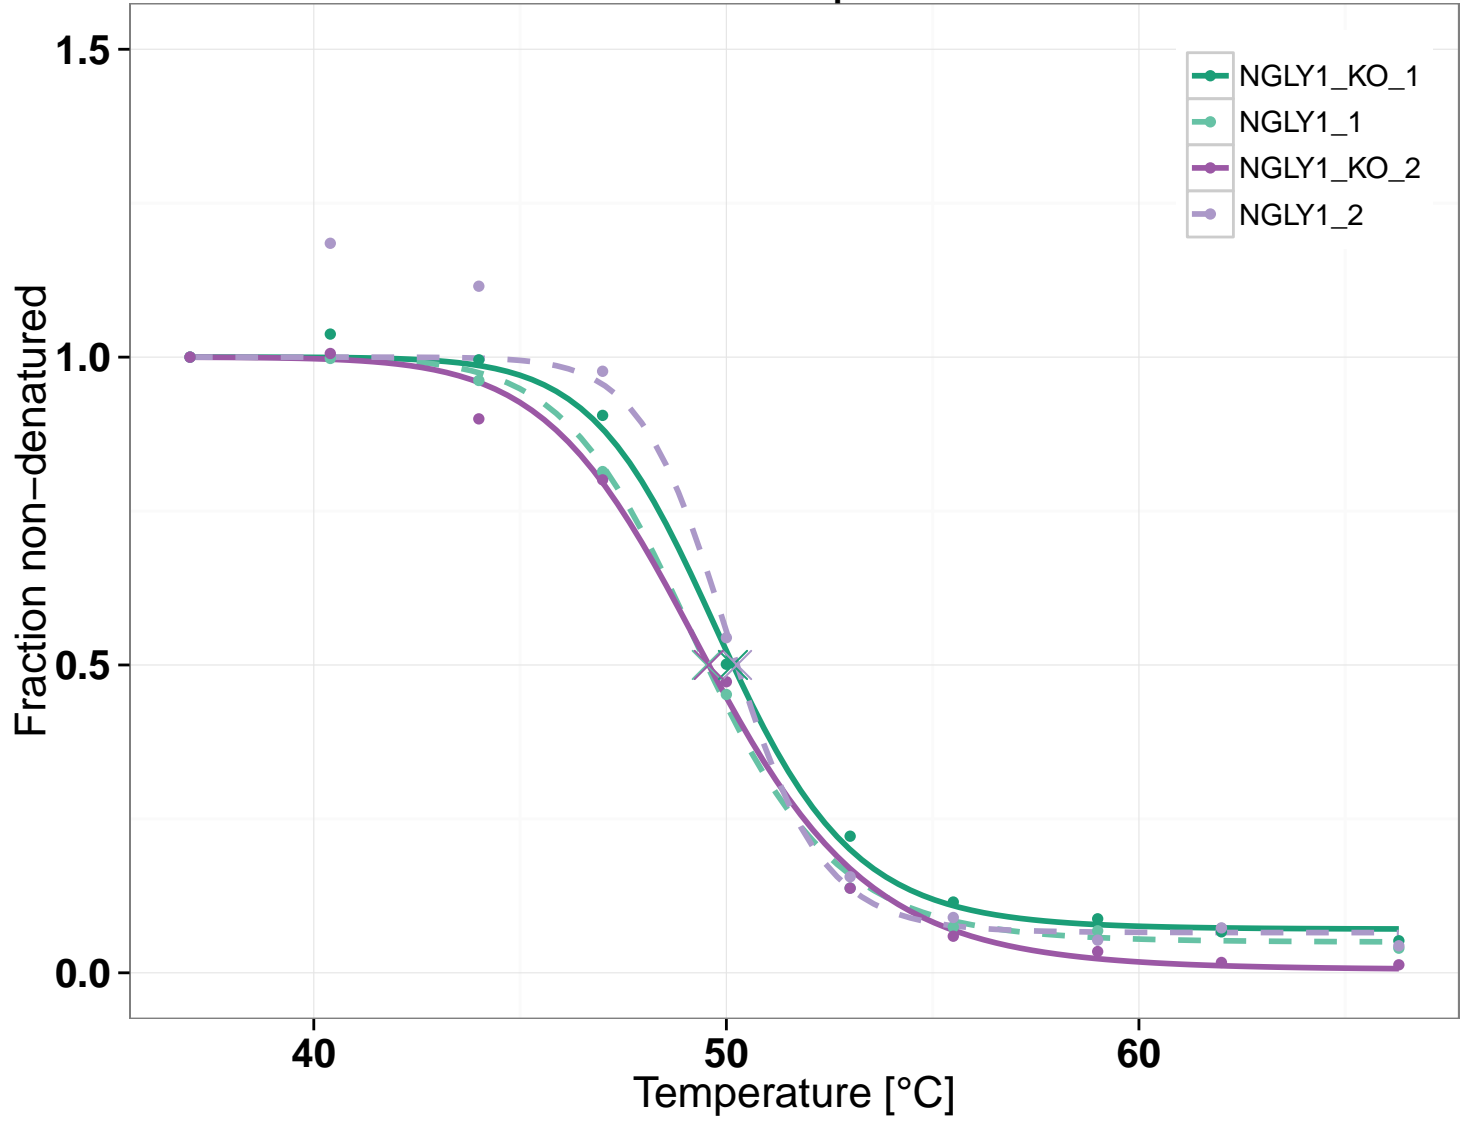

|            | meltPoint | slope | plateau | R2   |
|------------|-----------|-------|---------|------|
| NGLY1_KO_1 | 50.16     | -0.15 | 0.07    | 1    |
| NGLY1_1    | 49.53     | -0.14 | 0.05    | 1    |
| NGLY1_KO_2 | 49.57     | -0.13 | 0       | 1    |
| NGLY1_2    | 50.26     | -0.21 | 0.07    | 0.98 |

Supplement: Supplementary file 2611 [file 1]

# IPI00254484.3|ACD

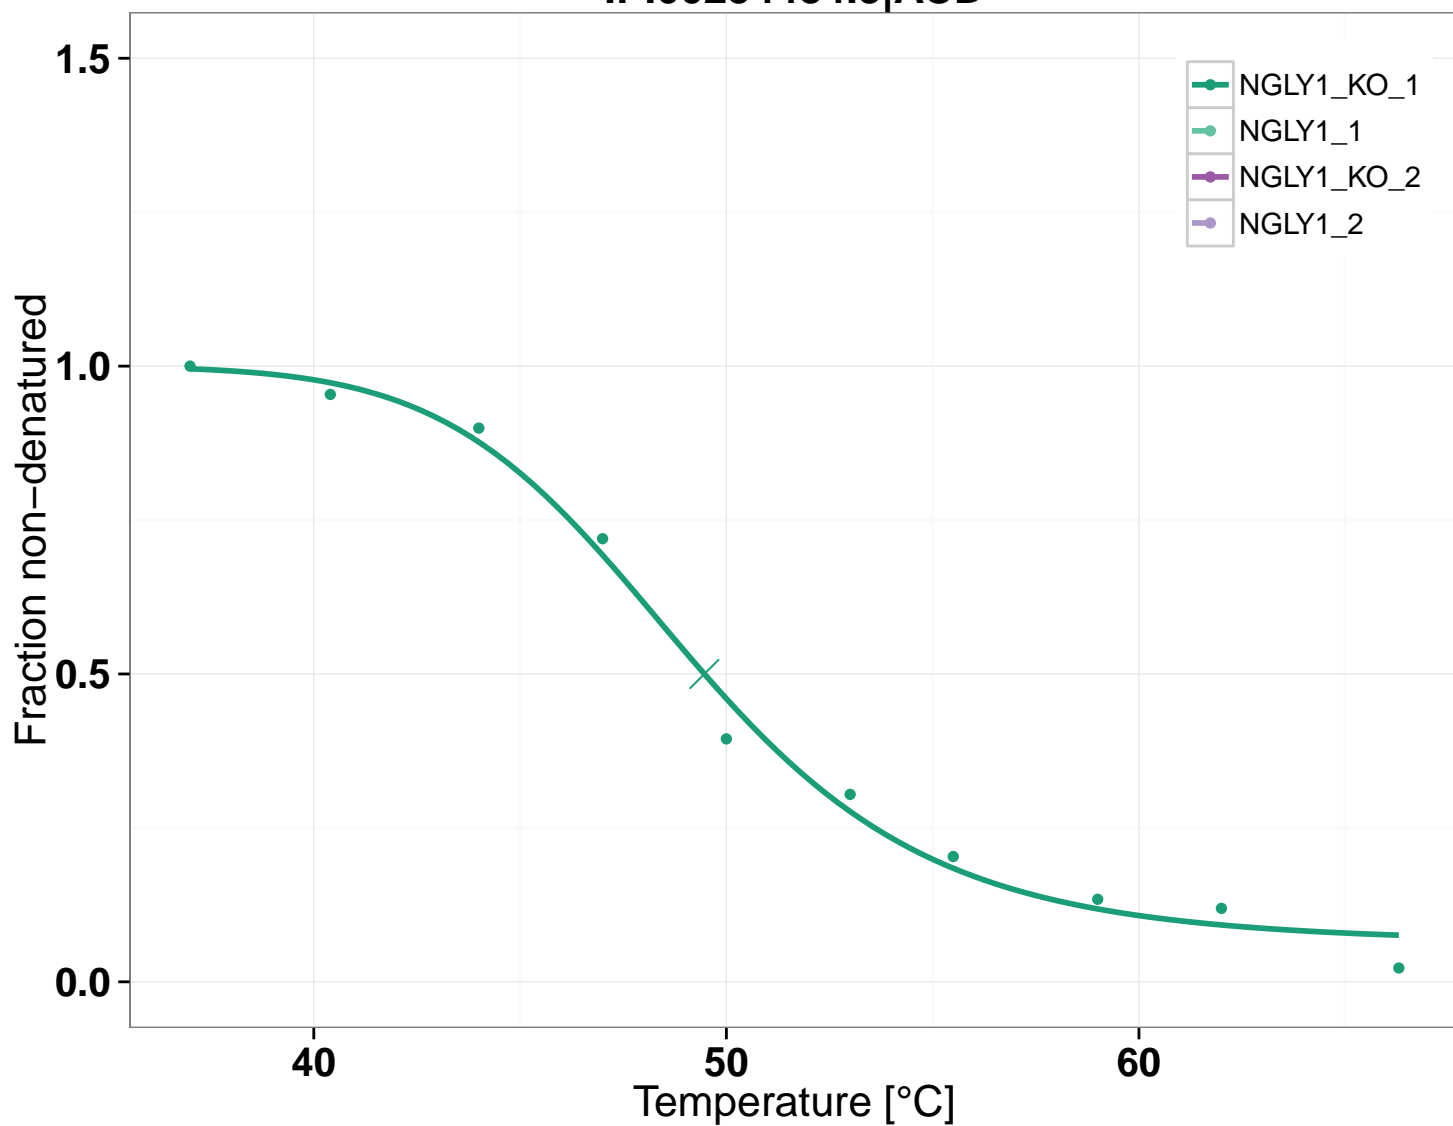

|            | meltPoint | slope | plateau | R2   |
|------------|-----------|-------|---------|------|
| NGLY1_KO_1 | 49.47     | -0.08 | 0.06    | 0.99 |
| NGLY1_1    | -         | -     | -       | -    |
| NGLY1_KO_2 | -         | -     | -       | -    |
| NGLY1_2    | -         | -     | -       | -    |

Supplement: Supplementary file 2612 [file 1]

# IPI00103994.4|LARS

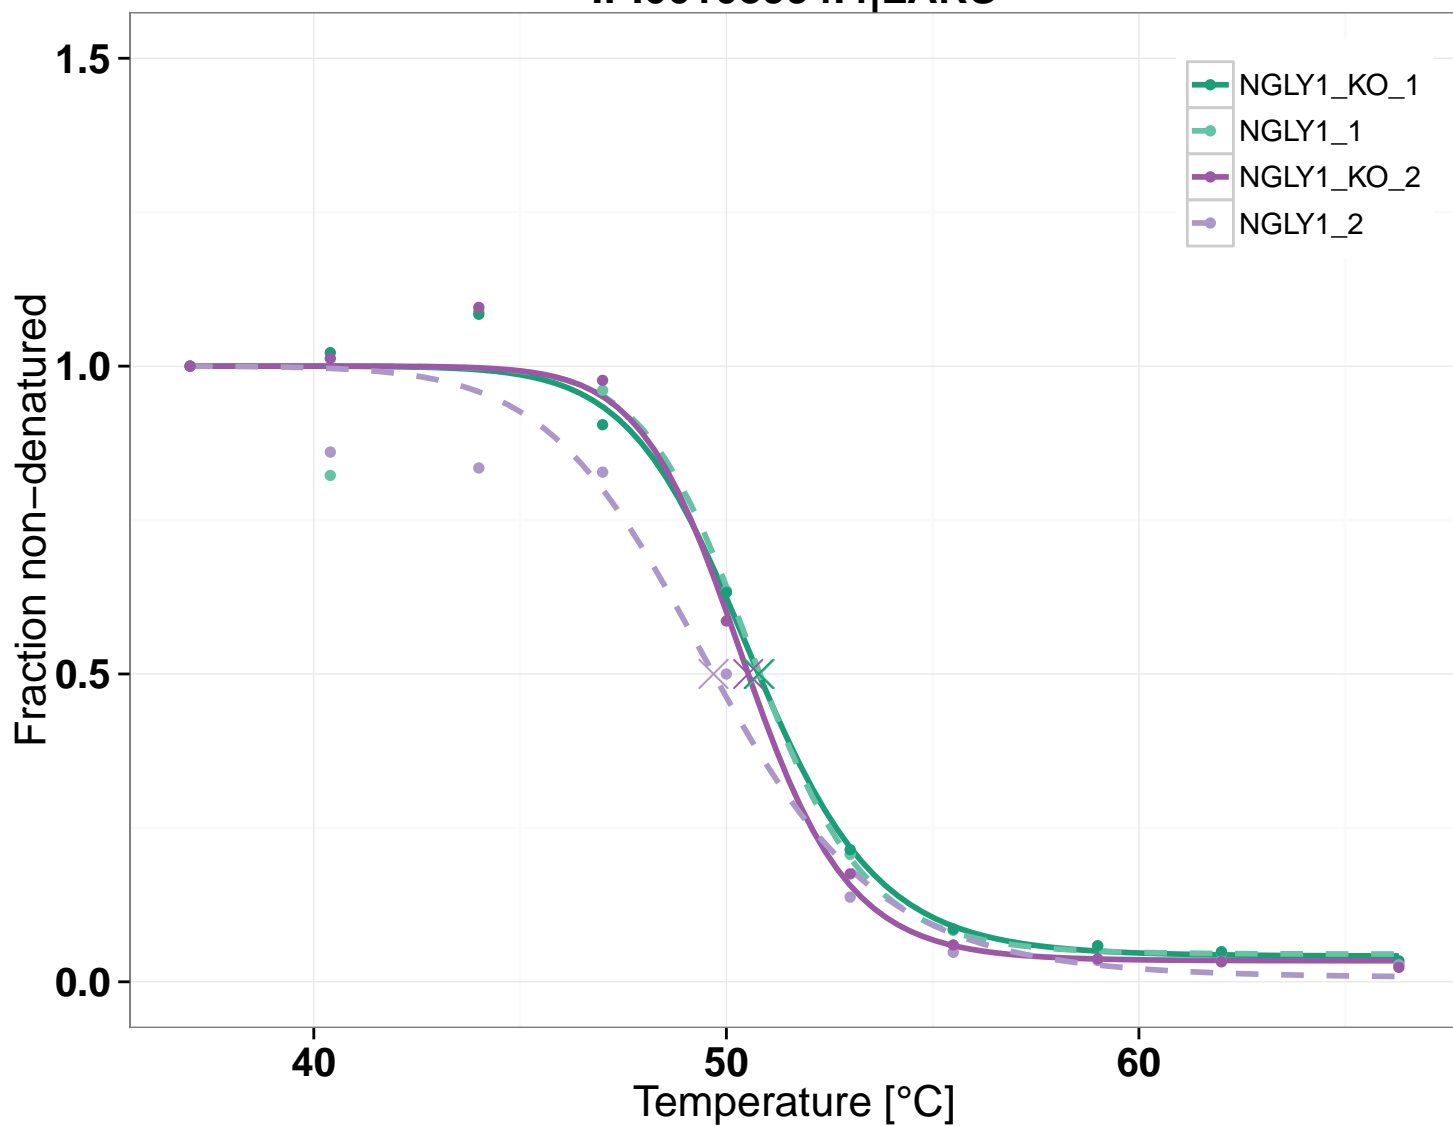

|            | meltPoint | slope | plateau | R2   |
|------------|-----------|-------|---------|------|
| NGLY1_KO_1 | 50.78     | -0.16 | 0.04    | 0.99 |
| NGLY1_1    | 50.81     | -0.18 | 0.04    | 0.98 |
| NGLY1_KO_2 | 50.53     | -0.19 | 0.03    | 0.99 |
| NGLY1_2    | 49.69     | -0.12 | 0.01    | 0.97 |

Supplement: Supplementary file 2613 [file 1]

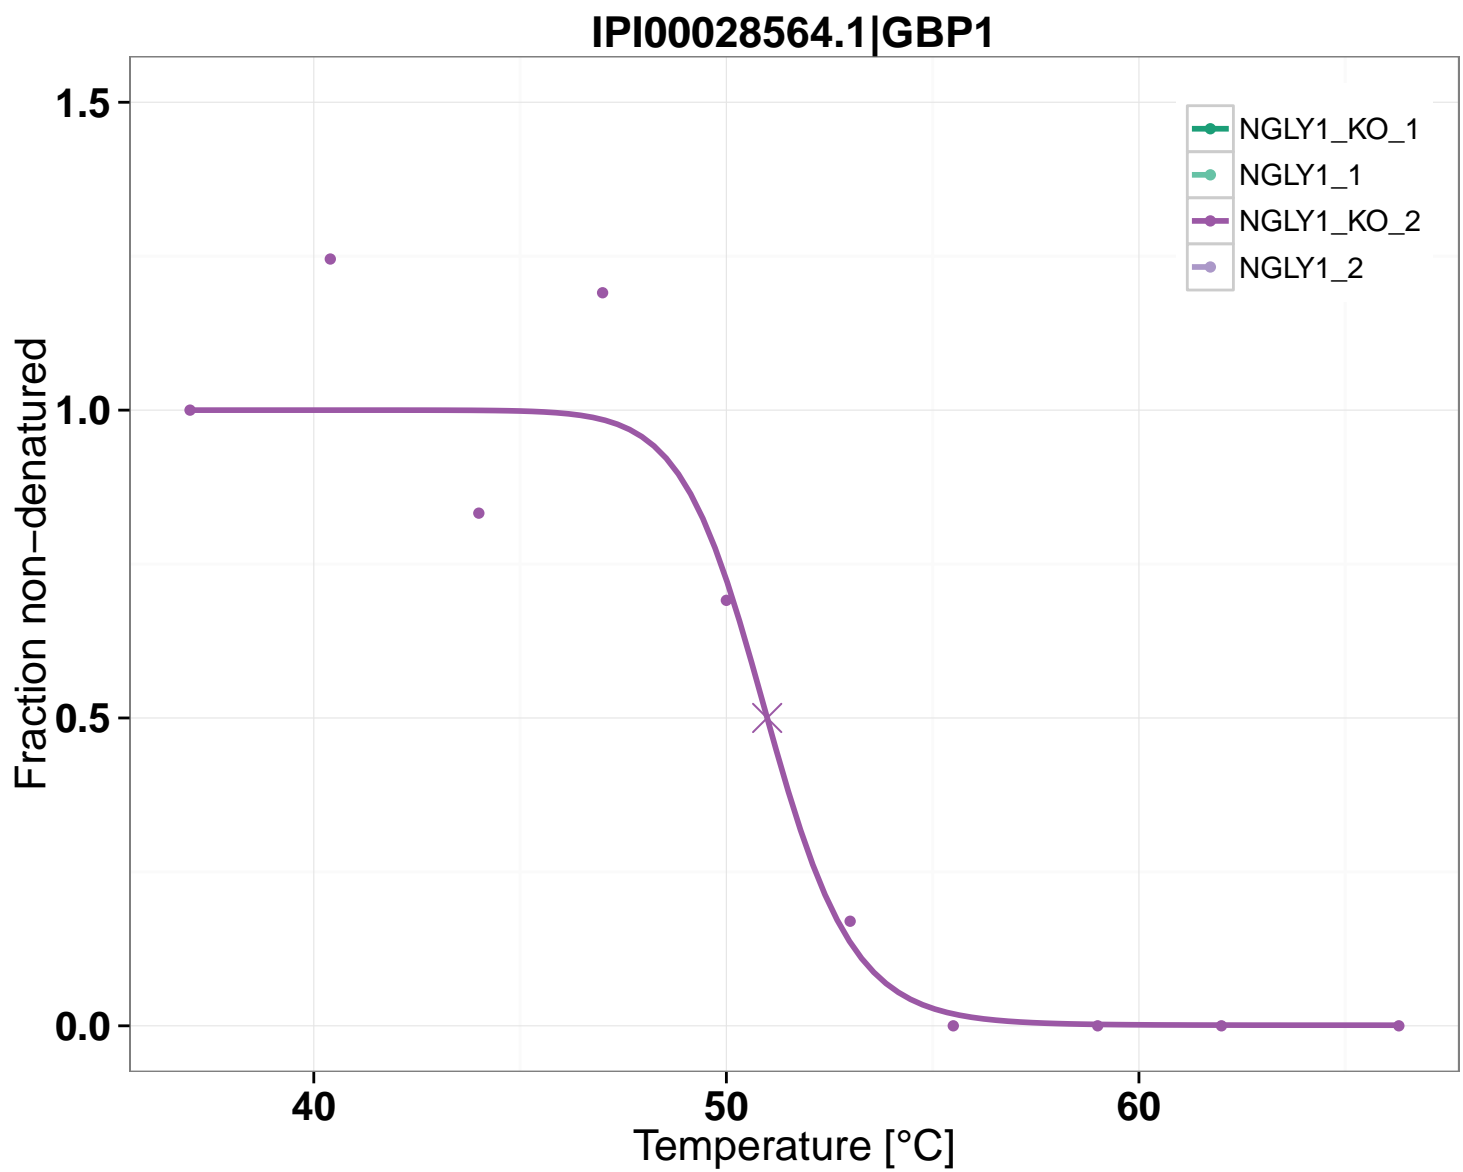

|            | meltPoint | slope | plateau | R2   |
|------------|-----------|-------|---------|------|
| NGLY1_KO_1 | —         | —     | —       | —    |
| NGLY1_1    | —         | —     | —       | —    |
| NGLY1_KO_2 | 50.99     | -0.24 | 0       | 0.95 |
| NGLY1_2    | —         | —     | —       | —    |

Supplement: Supplementary file 2614 [file 1]

IPI00647930.1|PPAPDC2

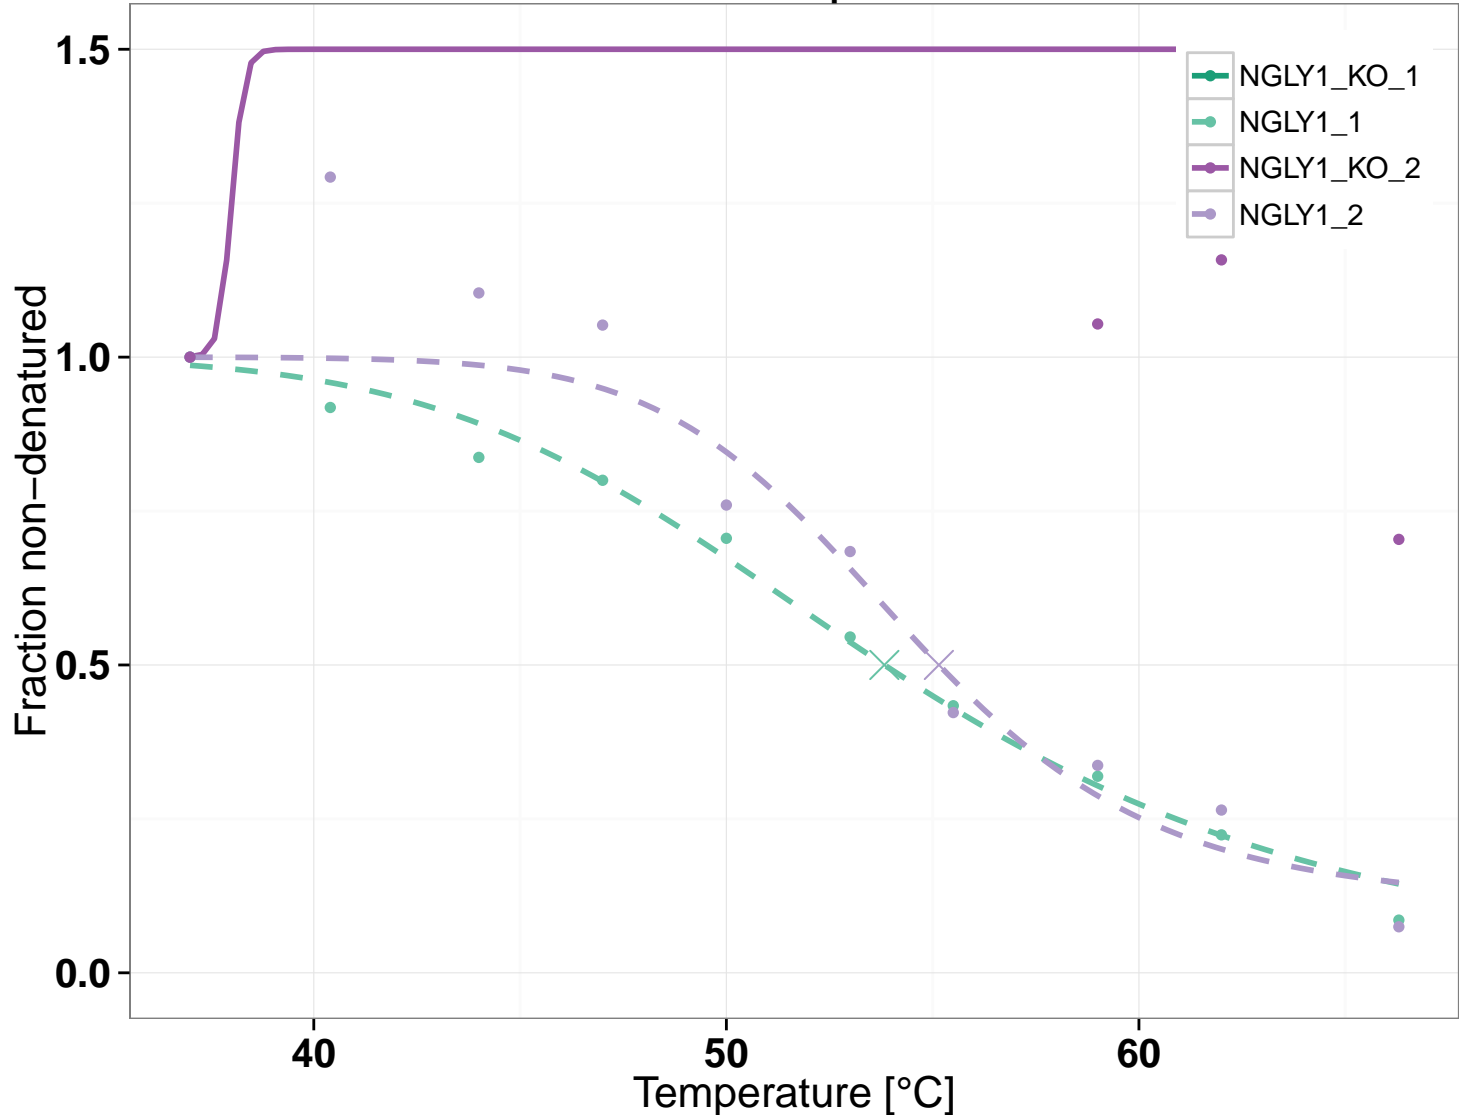

|            | meltPoint | slope  | plateau | R2   |
|------------|-----------|--------|---------|------|
| NGLY1_KO_1 | -         | -      | -       | -    |
| NGLY1_1    | 53.83     | -0.046 | 0       | 0.99 |
| NGLY1_KO_2 | -         | 0.82   | 1.5     | -0.3 |
| NGLY1_2    | 55.15     | -0.074 | 0.11    | 0.91 |

Supplement: Supplementary file 2615 [file 1]

# IPI00797038.1|PCK2

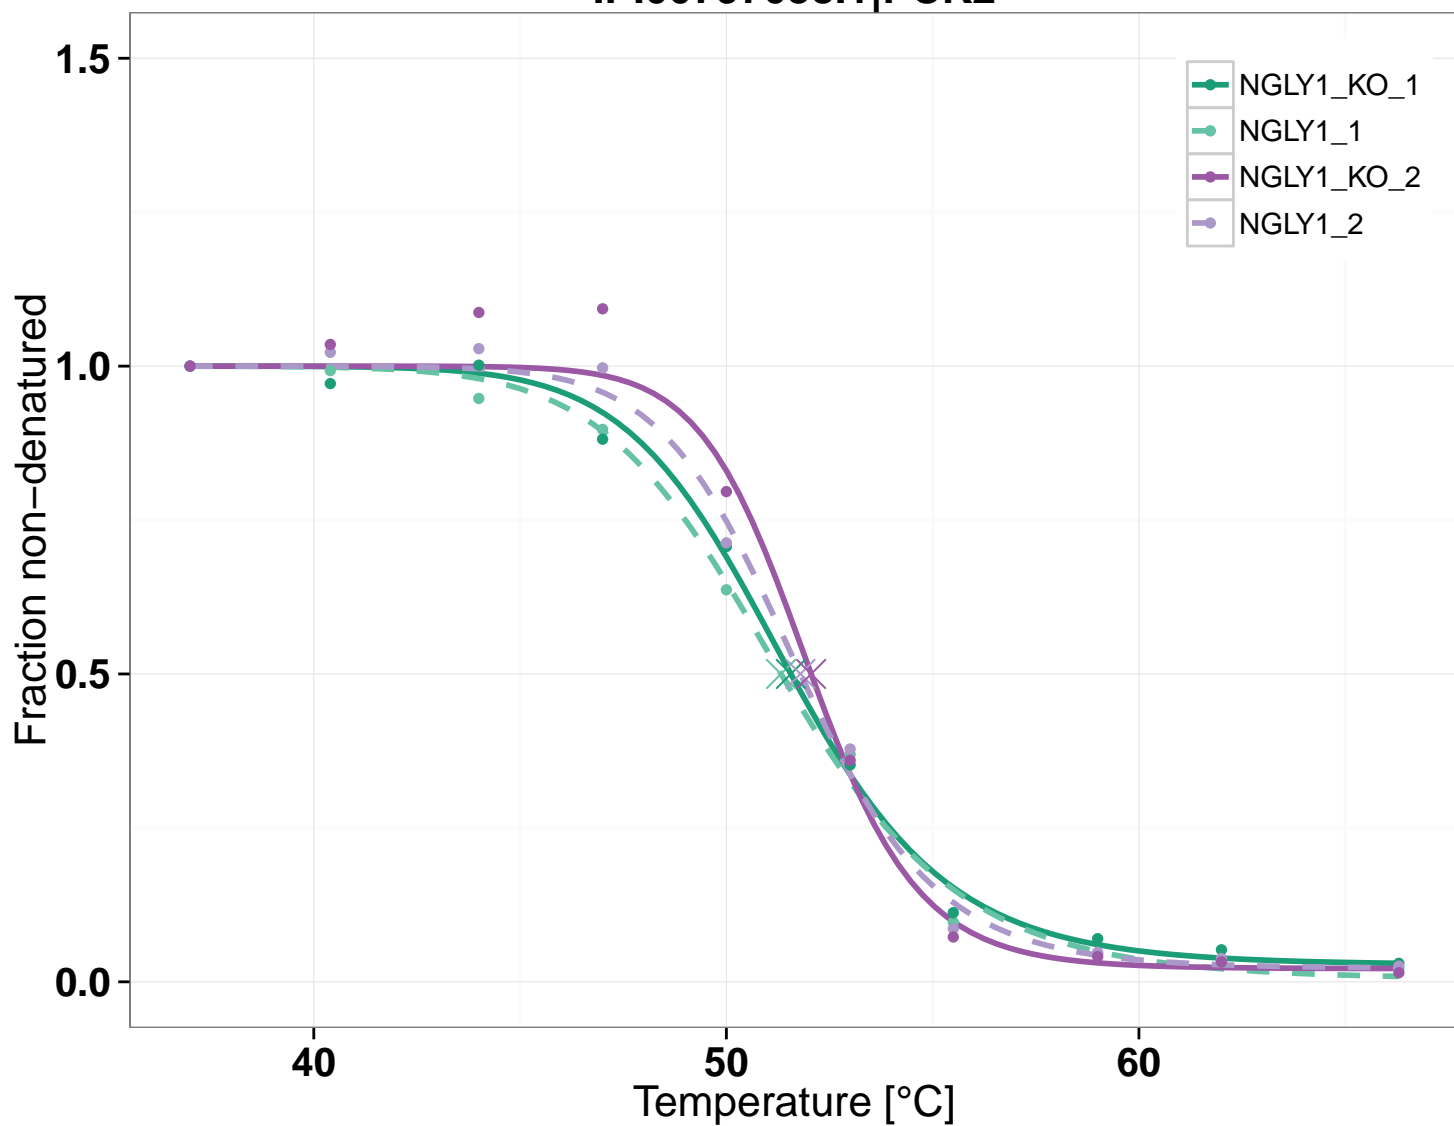

|            | meltPoint | slope | plateau | R2   |
|------------|-----------|-------|---------|------|
| NGLY1_KO_1 | 51.56     | -0.12 | 0.03    | 1    |
| NGLY1_1    | 51.32     | -0.11 | 0       | 1    |
| NGLY1_KO_2 | 52.06     | -0.18 | 0.02    | 0.99 |
| NGLY1_2    | 51.8      | -0.15 | 0.02    | 1    |

Supplement: Supplementary file 2616 [file 1]

# IPI00005160.3|ARPC1B

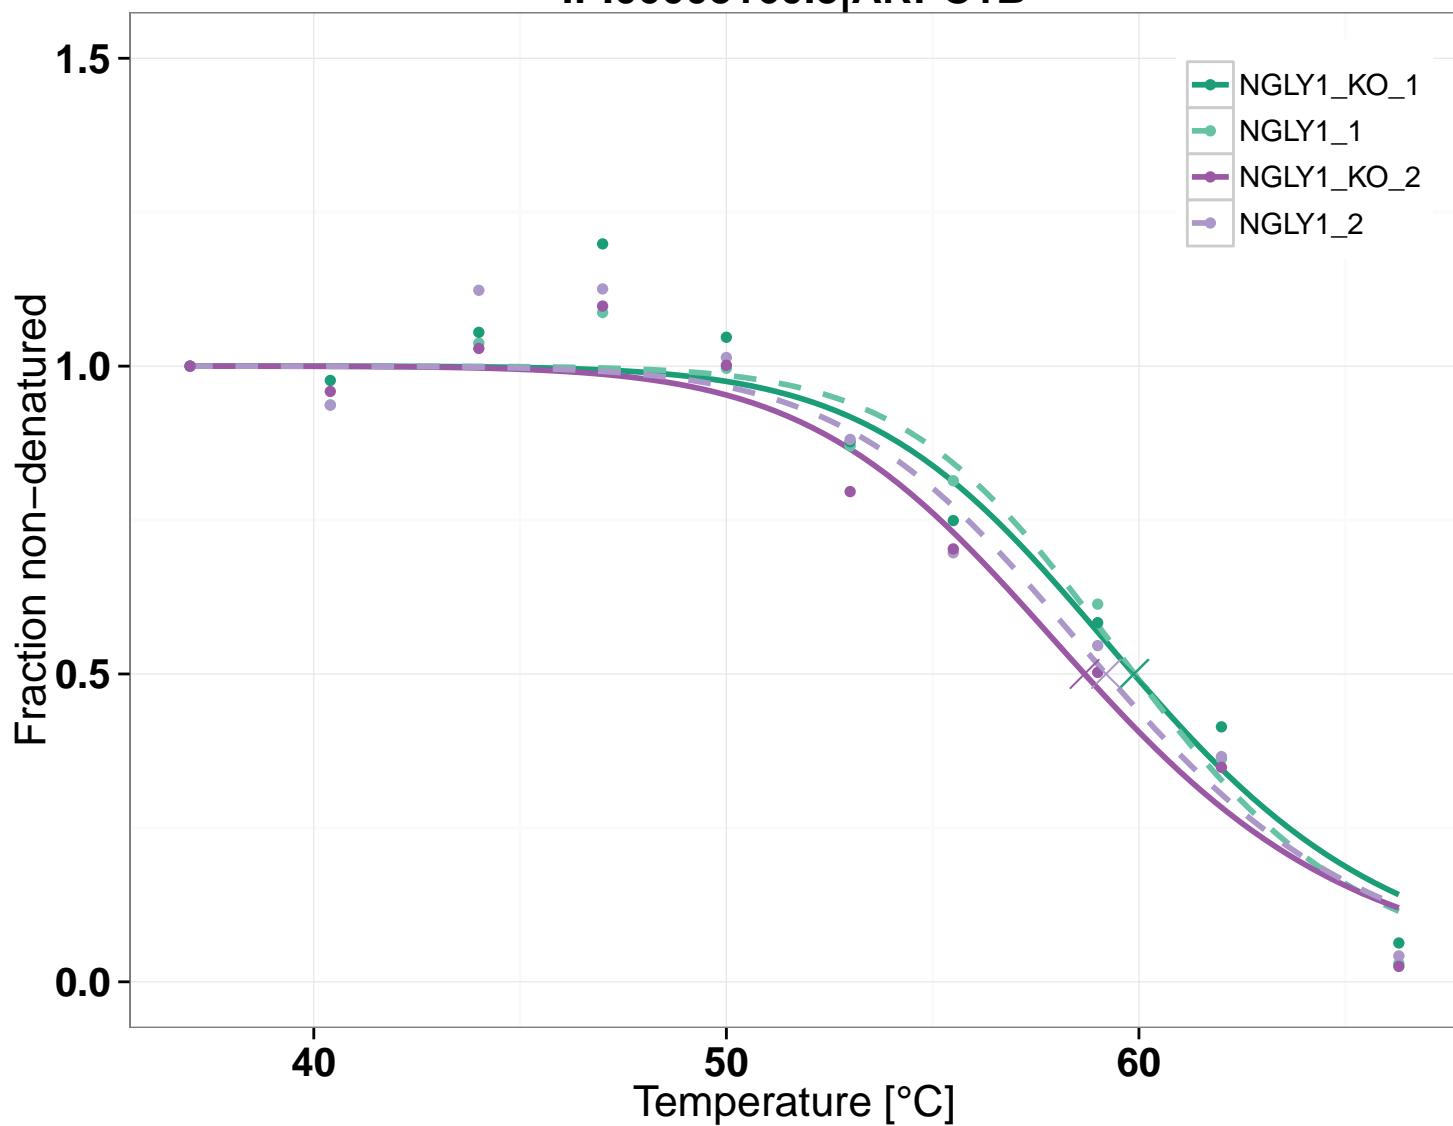

|            | meltPoint | slope  | plateau | R2   |
|------------|-----------|--------|---------|------|
| NGLY1_KO_1 | 59.87     | -0.079 | 0       | 0.94 |
| NGLY1_1    | 59.89     | -0.089 | 0       | 0.97 |
| NGLY1_KO_2 | 58.68     | -0.075 | 0       | 0.97 |
| NGLY1_2    | 59.2      | -0.078 | 0       | 0.95 |

Supplement: Supplementary file 2617 [file 1]

IPI00644775.1|EXOSC5

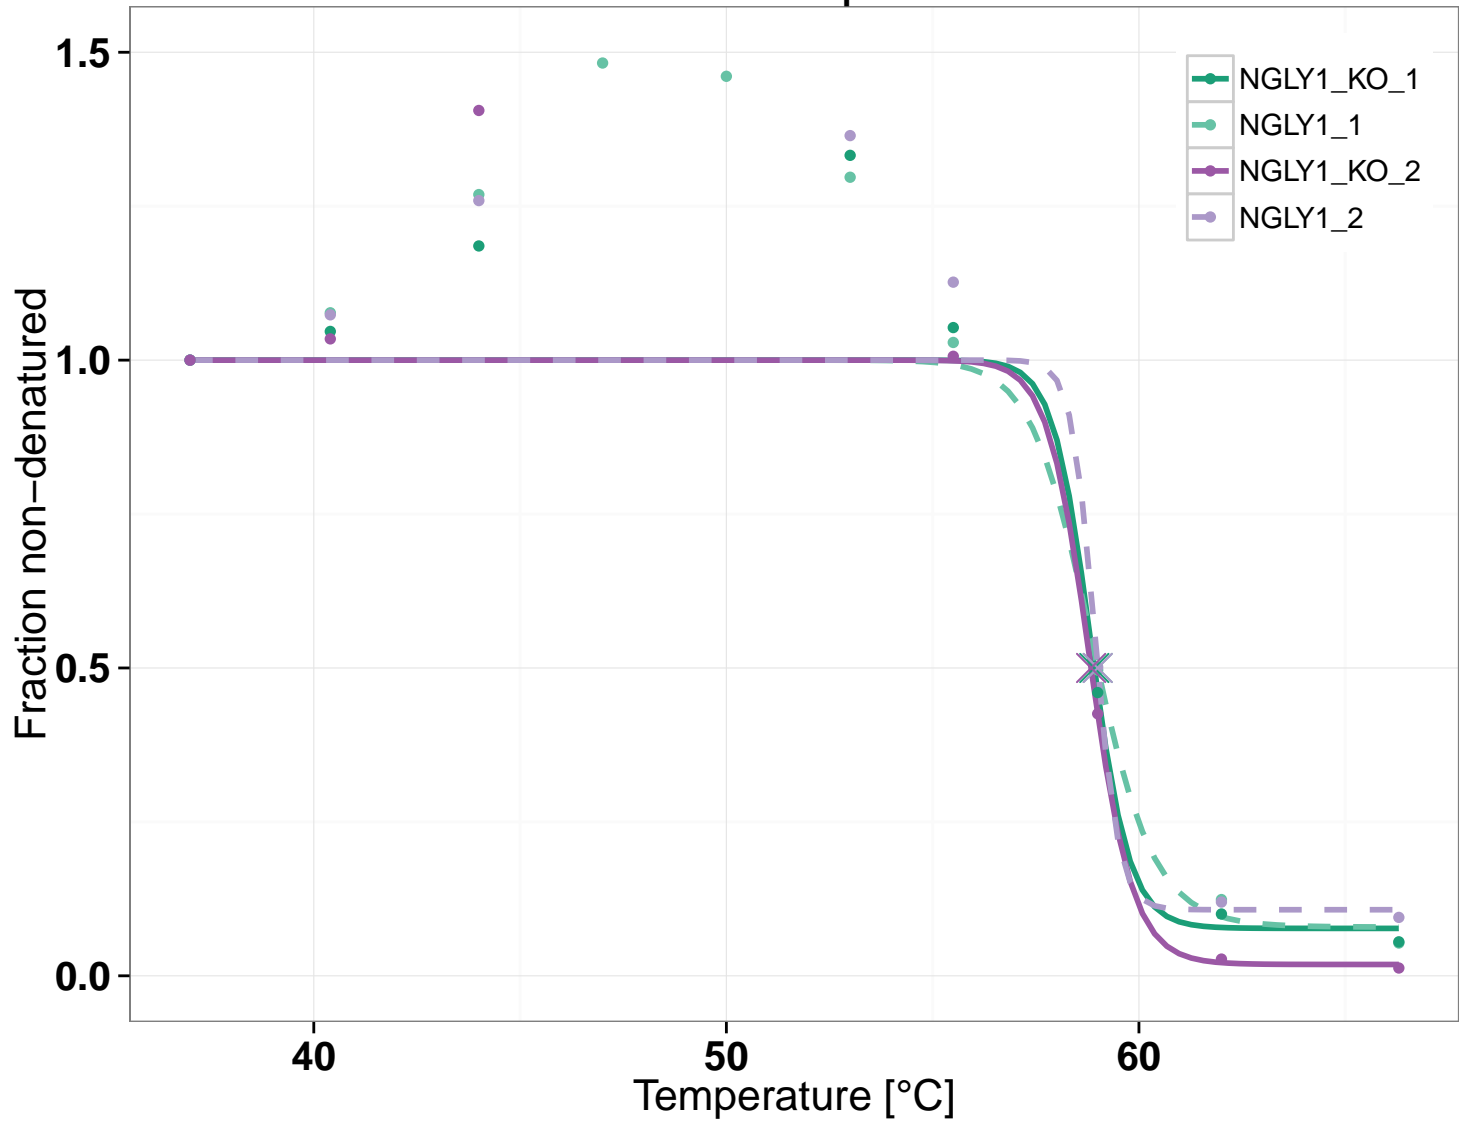

|            | meltPoint | slope | plateau | R2   |
|------------|-----------|-------|---------|------|
| NGLY1_KO_1 | 58.92     | -0.5  | 0.08    | 0.73 |
| NGLY1_1    | 59        | -0.31 | 0.08    | 0.75 |
| NGLY1_KO_2 | 58.84     | -0.47 | 0.02    | 0.5  |
| NGLY1_2    | 59        | -0.78 | 0.11    | 0.67 |

Supplement: Supplementary file 2618 [file 1]

# IPI00007132.7|RHOBTB3

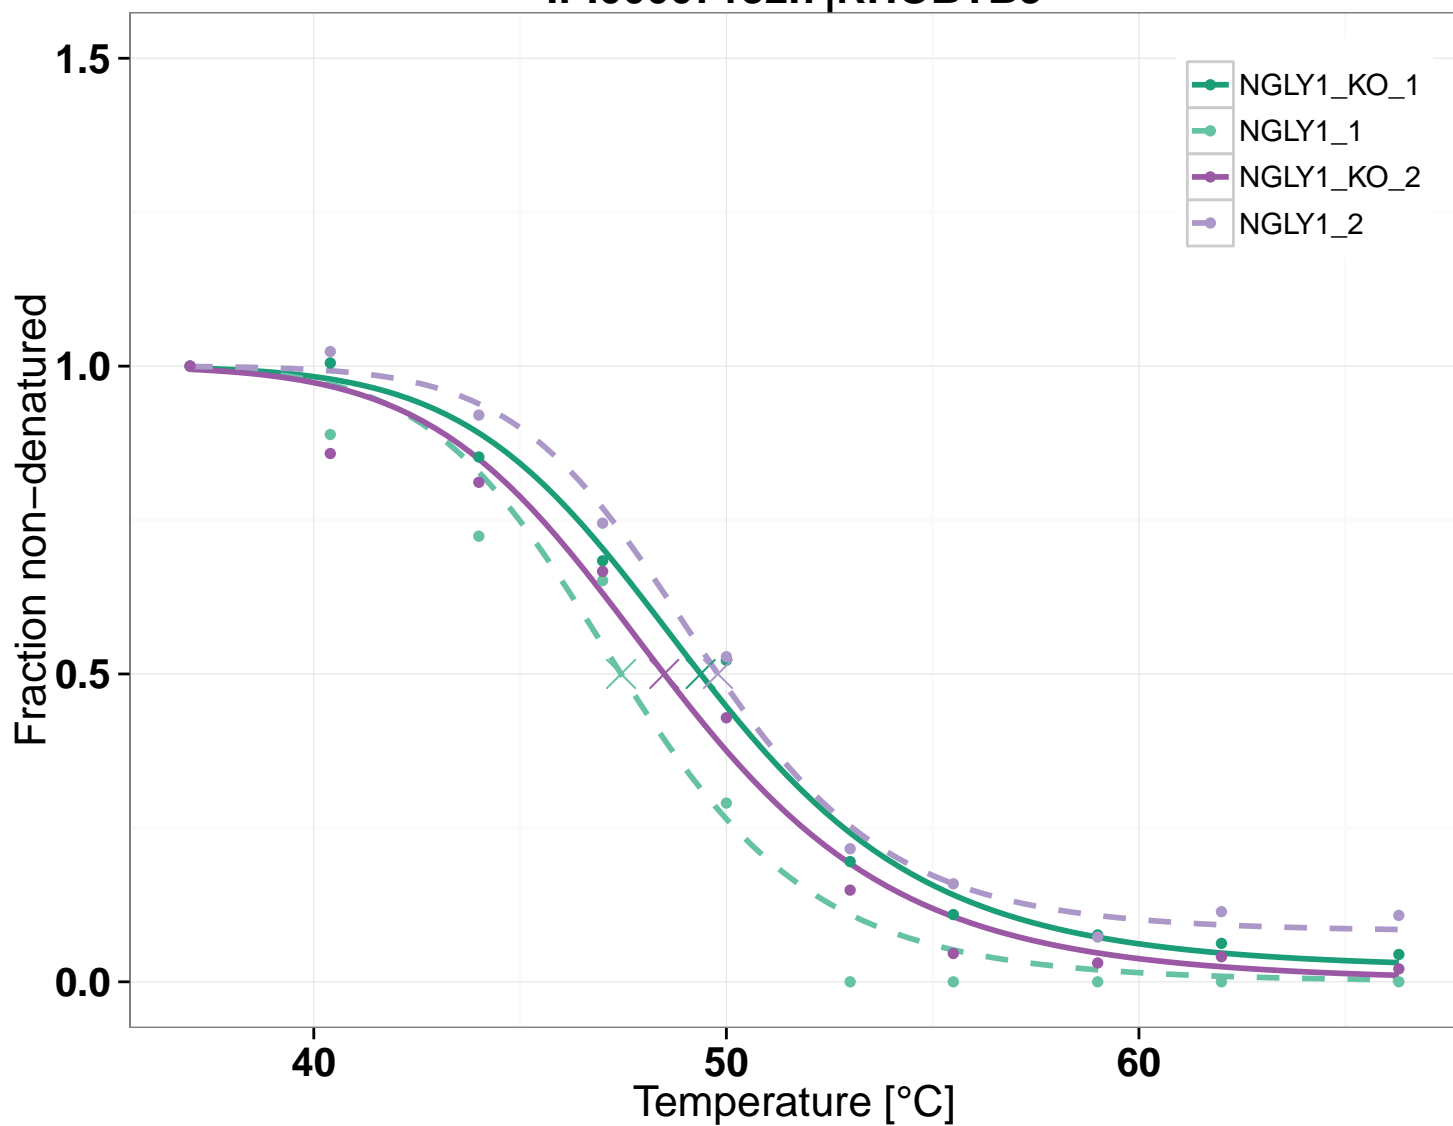

|            | meltPoint | slope  | plateau | R2   |
|------------|-----------|--------|---------|------|
| NGLY1_KO_1 | 49.38     | -0.088 | 0.02    | 0.99 |
| NGLY1_1    | 47.45     | -0.11  | 0       | 0.97 |
| NGLY1_KO_2 | 48.49     | -0.088 | 0       | 0.98 |
| NGLY1_2    | 49.8      | -0.1   | 0.08    | 0.99 |

Supplement: Supplementary file 2619 [file 1]

# IPI00216003.4|CUL5

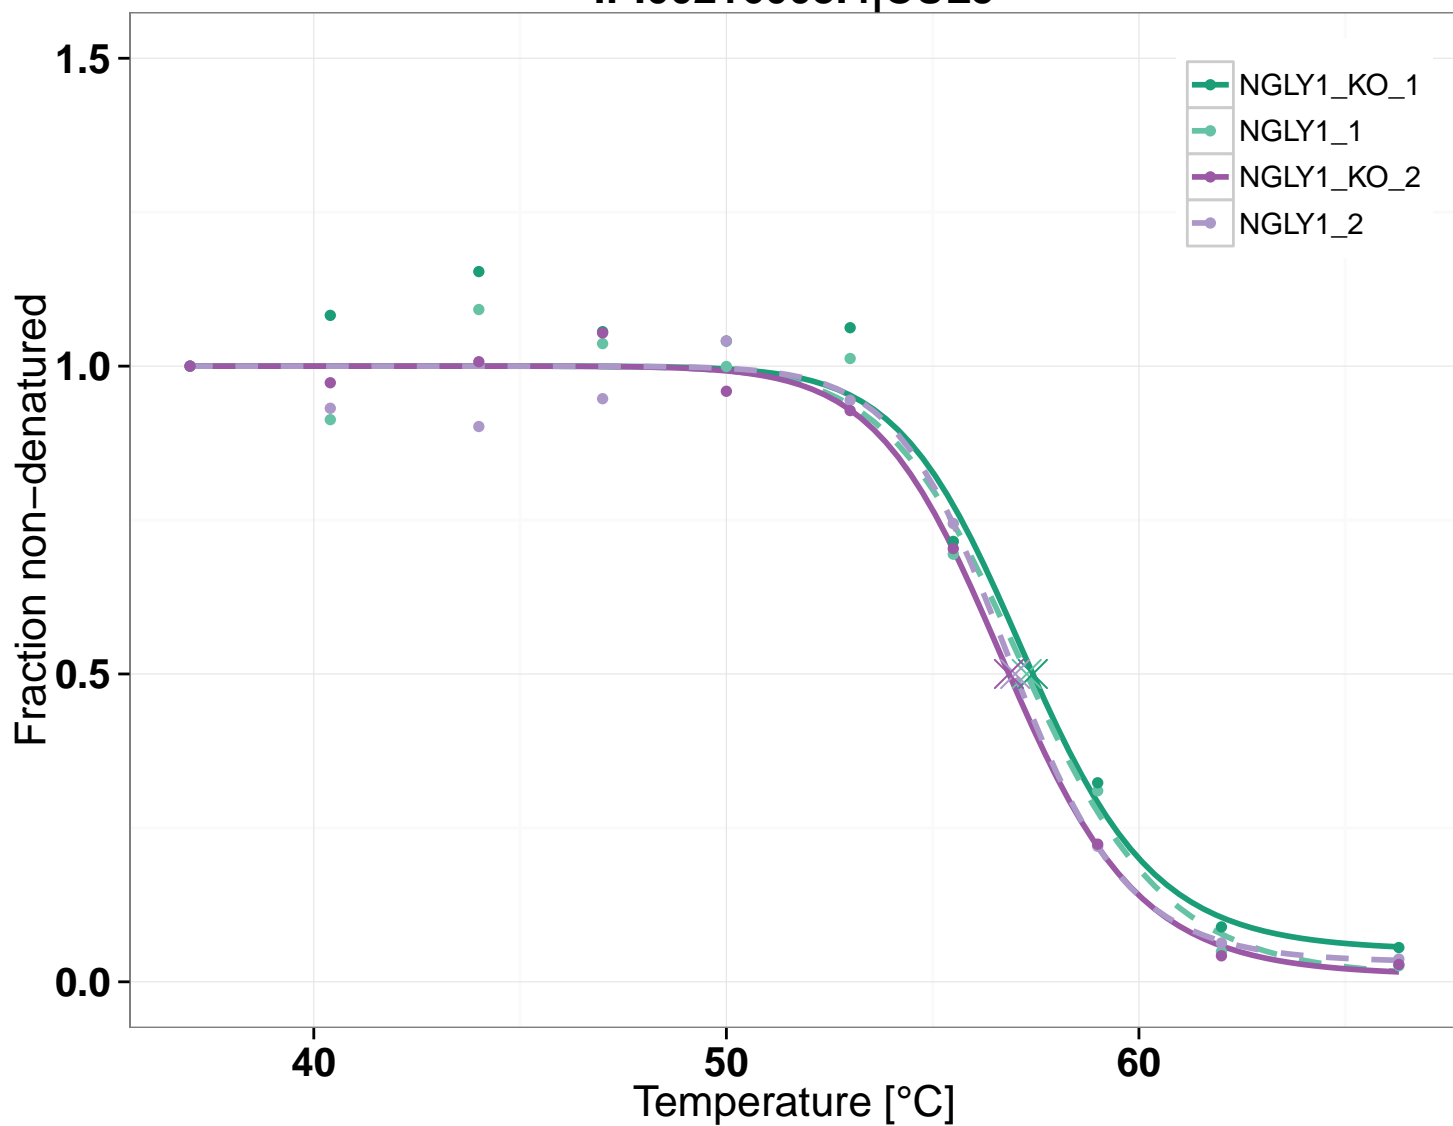

|            | meltPoint | slope | plateau | R2   |
|------------|-----------|-------|---------|------|
| NGLY1_KO_1 | 57.43     | -0.15 | 0.05    | 0.97 |
| NGLY1_1    | 57.28     | -0.15 | 0.01    | 0.98 |
| NGLY1_KO_2 | 56.85     | -0.16 | 0.01    | 1    |
| NGLY1_2    | 57        | -0.17 | 0.03    | 0.99 |

Supplement: Supplementary file 2620 [file 1]

# IPI00008433.4|RPS5

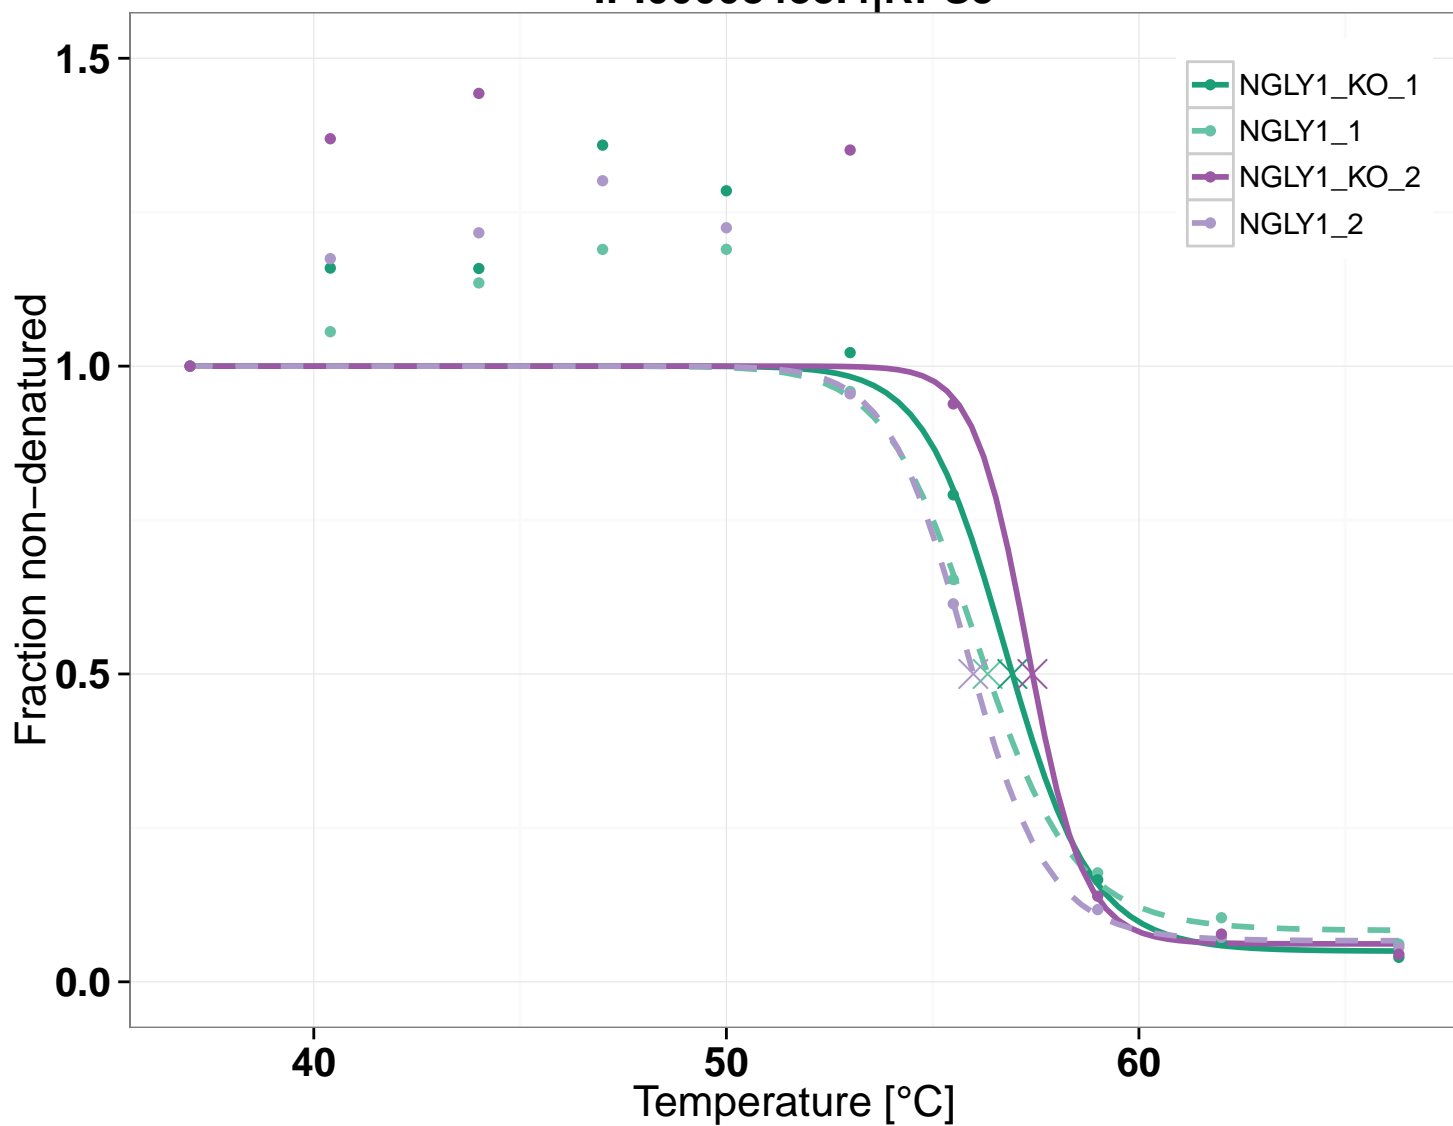

|            | meltPoint | slope | plateau | R2   |
|------------|-----------|-------|---------|------|
| NGLY1_KO_1 | 56.93     | -0.23 | 0.05    | 0.89 |
| NGLY1_1    | 56.33     | -0.2  | 0.08    | 0.95 |
| NGLY1_KO_2 | 57.42     | -0.35 | 0.06    | 0.6  |
| NGLY1_2    | 55.99     | -0.24 | 0.07    | 0.91 |

Supplement: Supplementary file 2621 [file 1]

IPI00029244.1|ANAPC13

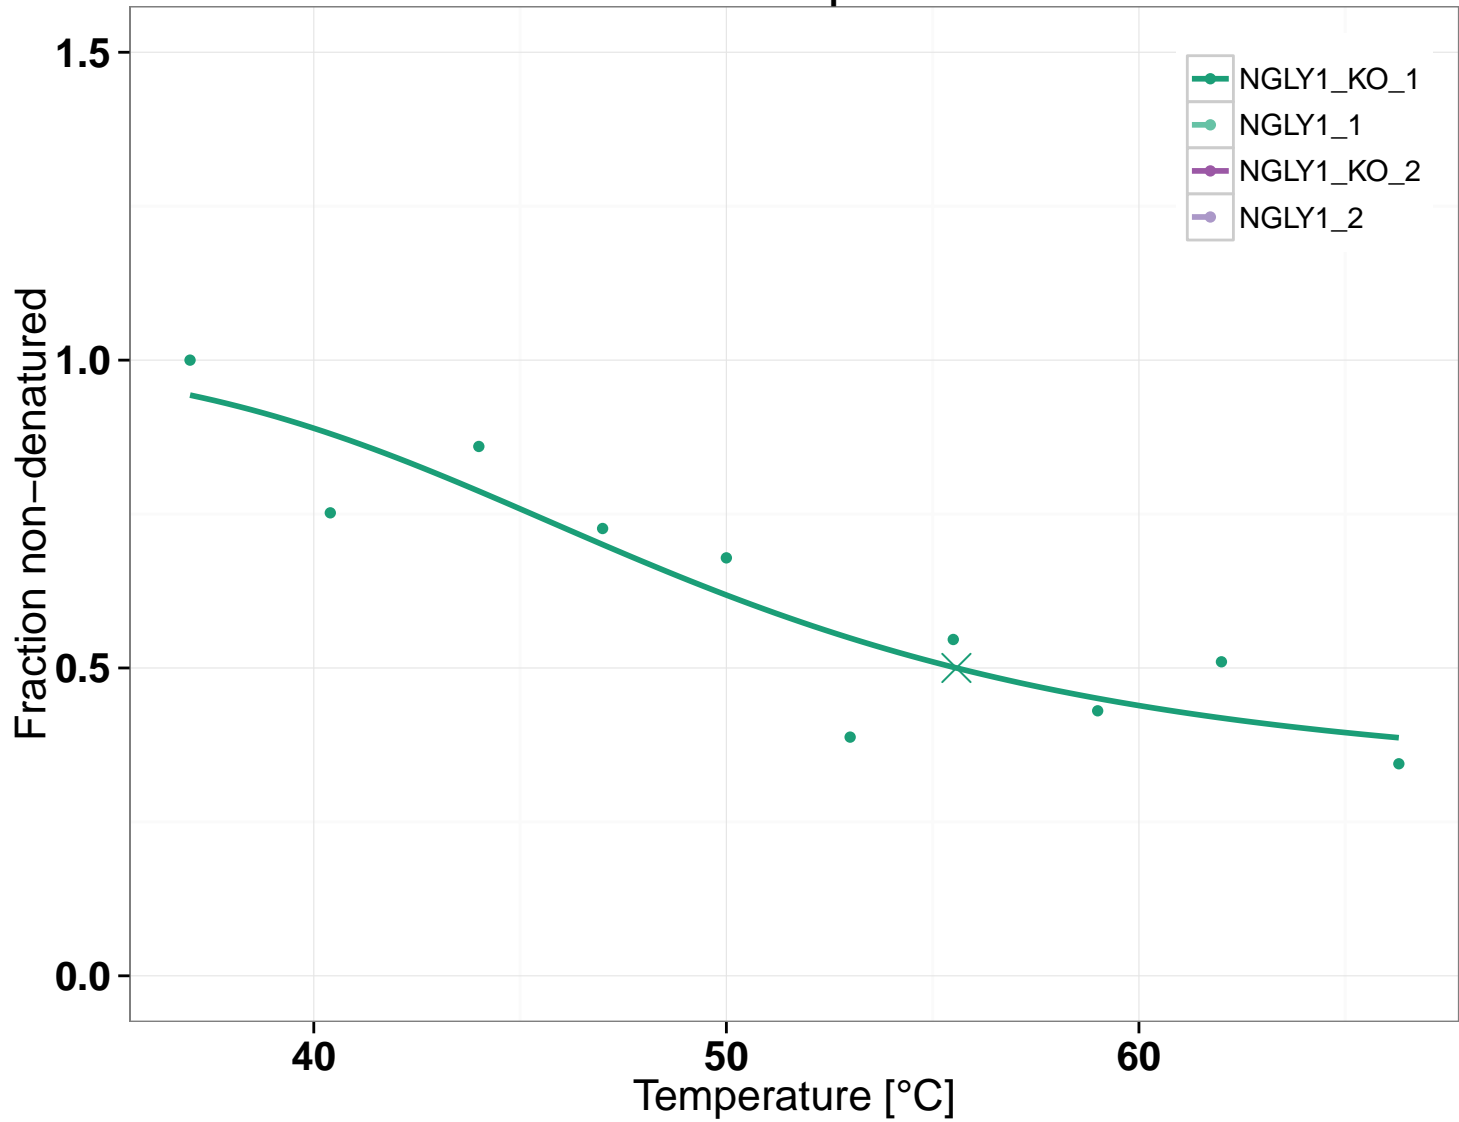

|            | meltPoint | slope  | plateau | R2   |
|------------|-----------|--------|---------|------|
| NGLY1_KO_1 | 55.58     | -0.029 | 0.31    | 0.84 |
| NGLY1_1    | -         | -      | -       | -    |
| NGLY1_KO_2 | -         | -      | -       | -    |
| NGLY1_2    | -         | -      | -       | -    |

Supplement: Supplementary file 2622 [file 1]

IPI00784461.1|FLJ14213

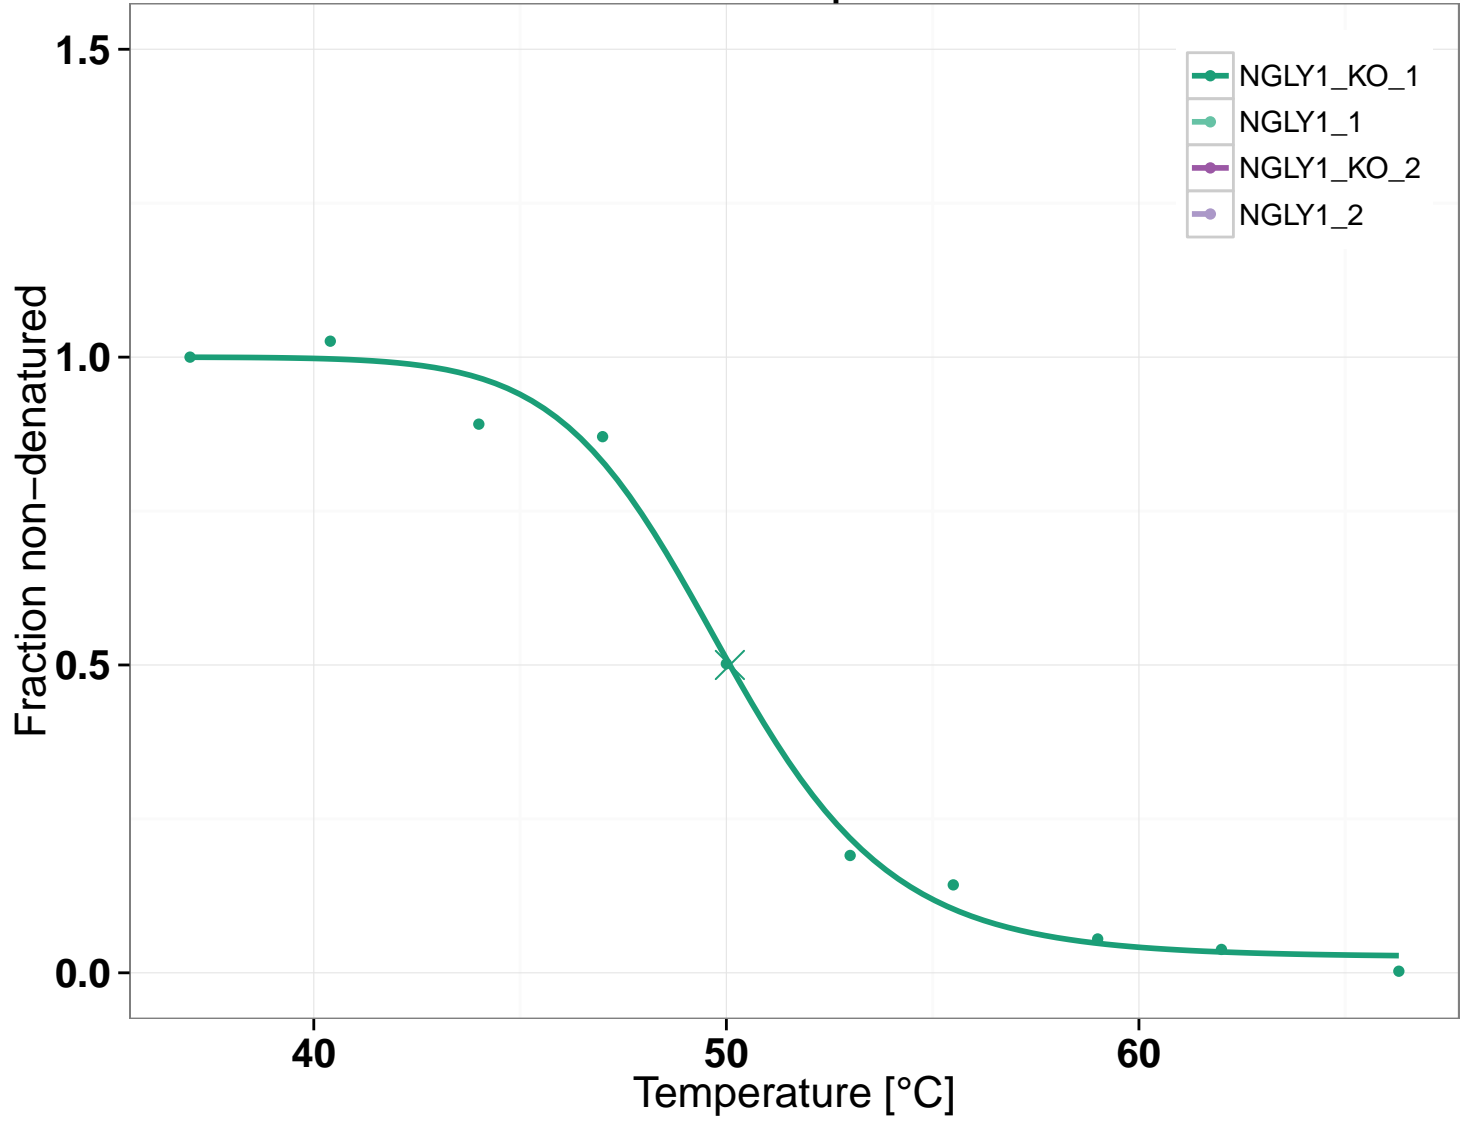

|            | meltPoint | slope | plateau | R2   |
|------------|-----------|-------|---------|------|
| NGLY1_KO_1 | 50.09     | -0.12 | 0.03    | 0.99 |
| NGLY1_1    | -         | -     | -       | -    |
| NGLY1_KO_2 | -         | -     | -       | -    |
| NGLY1_2    | -         | -     | -       | -    |

Supplement: Supplementary file 2623 [file 1]

IPI00019195.2|RPP38

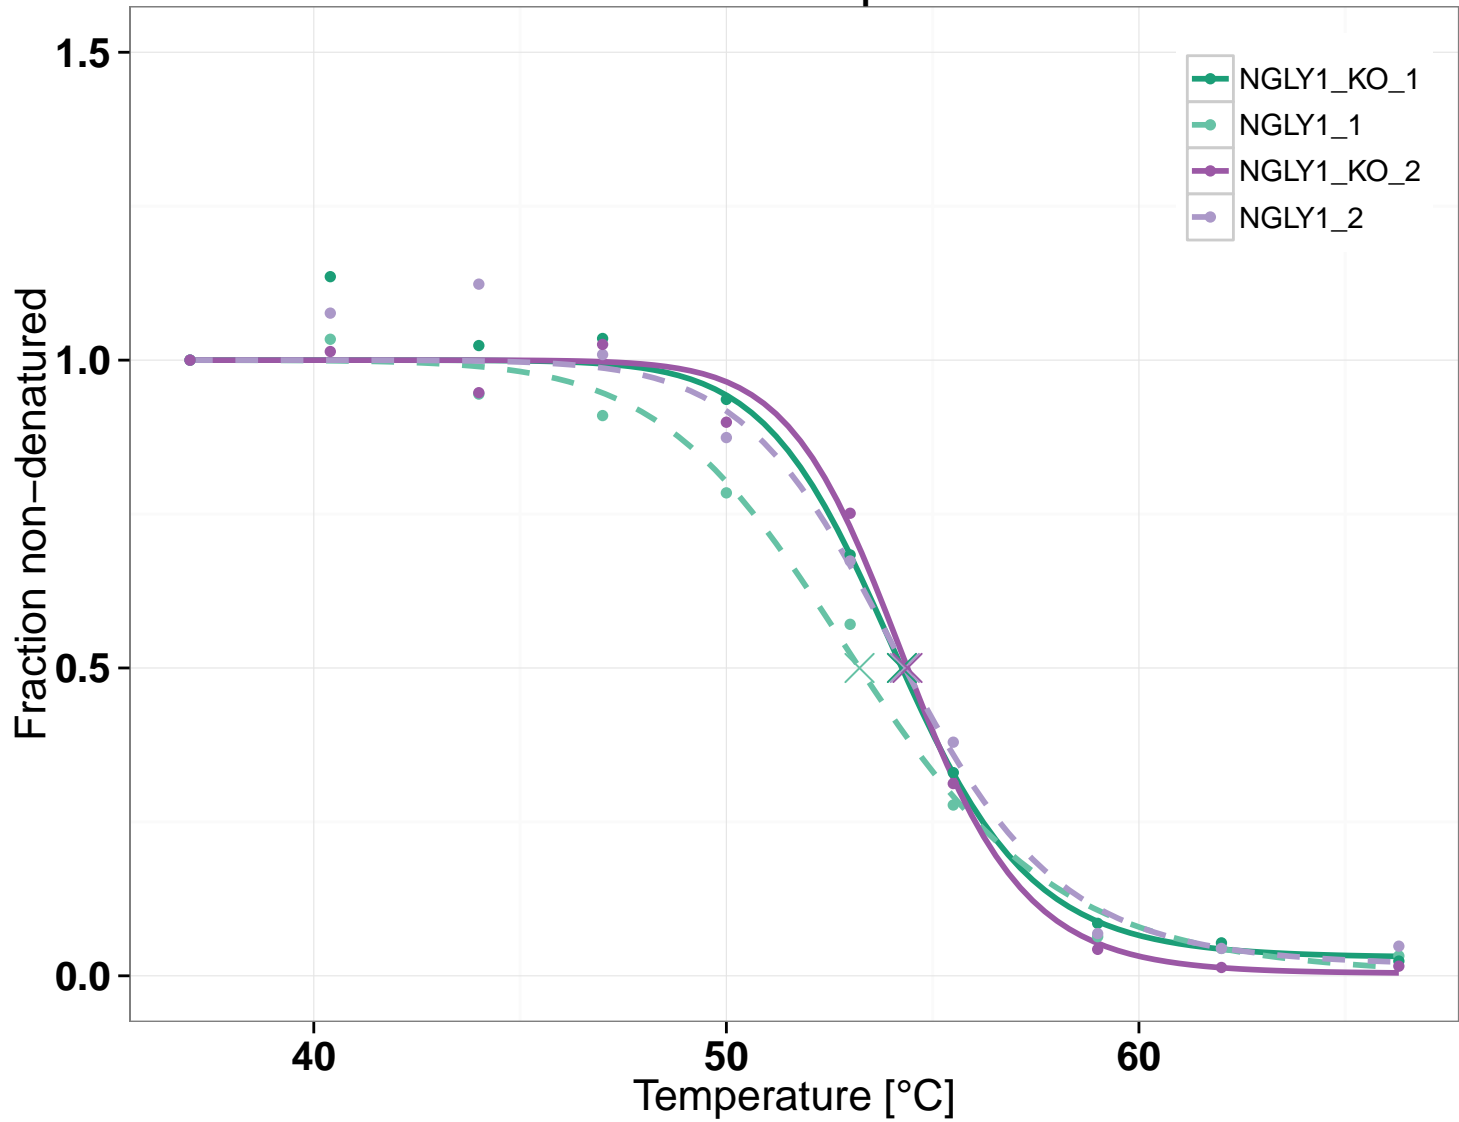

|            | meltPoint | slope | plateau | R2   |
|------------|-----------|-------|---------|------|
| NGLY1_KO_1 | 54.26     | -0.15 | 0.03    | 0.99 |
| NGLY1_1    | 53.23     | -0.1  | 0       | 0.99 |
| NGLY1_KO_2 | 54.39     | -0.17 | 0       | 1    |
| NGLY1_2    | 54.33     | -0.13 | 0.02    | 0.99 |

Supplement: Supplementary file 2624 [file 1]

IPI00013885.1|CASP14

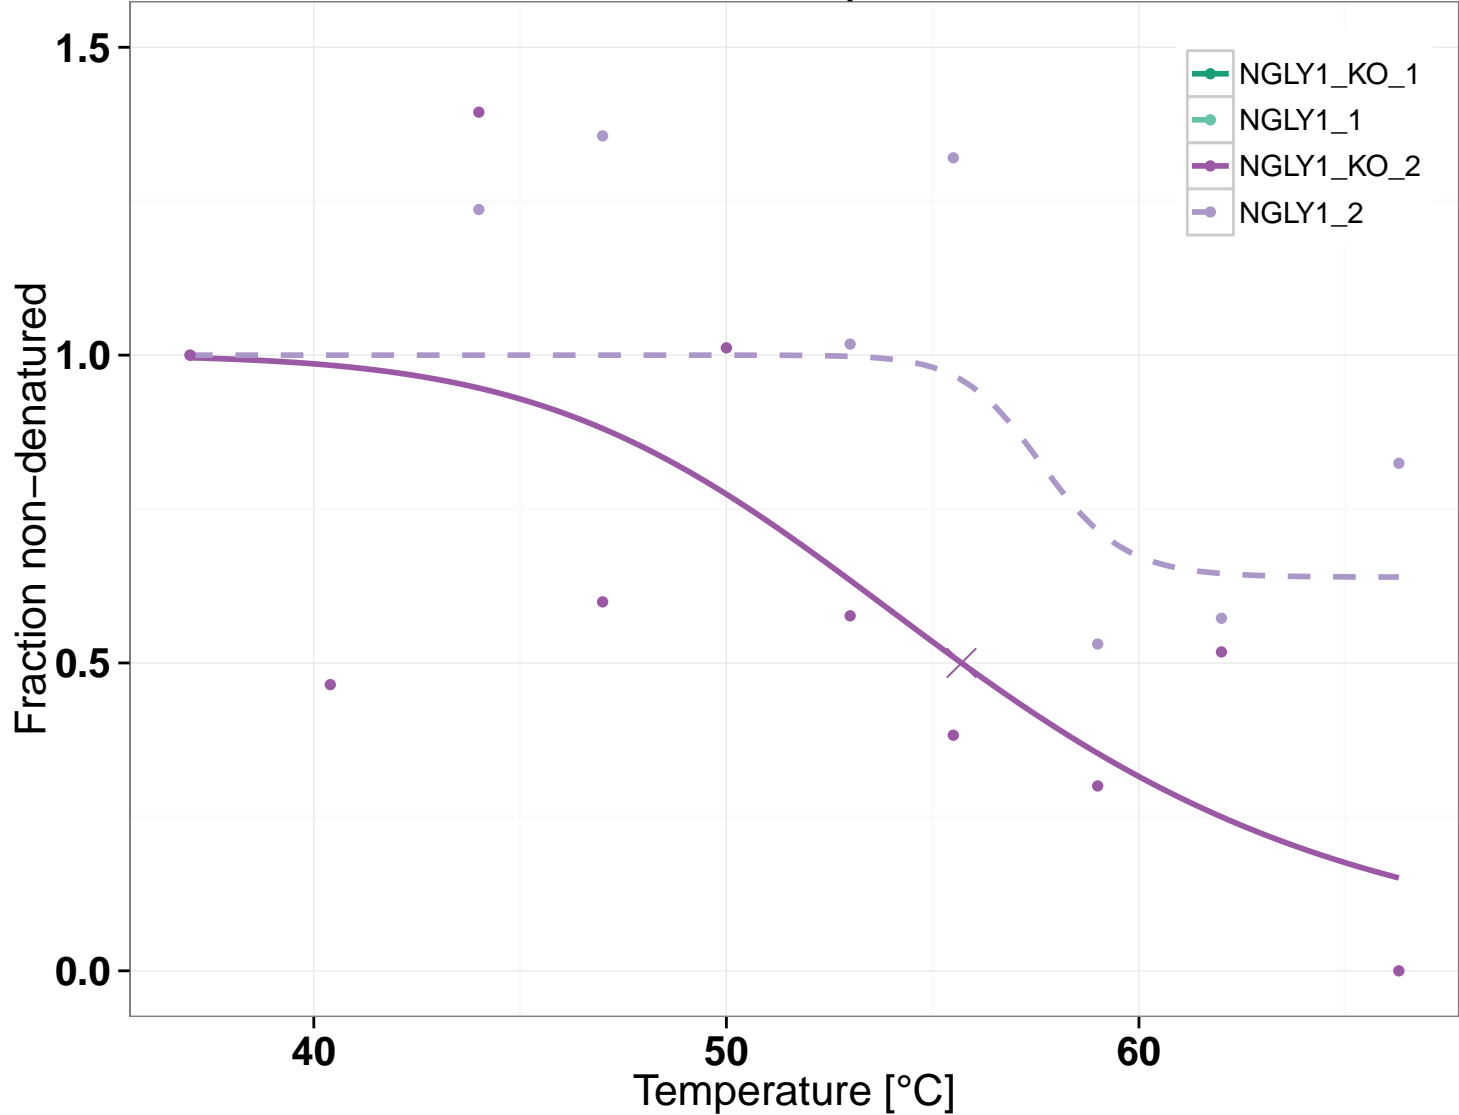

|            | meltPoint | slope  | plateau | R2   |
|------------|-----------|--------|---------|------|
| NGLY1_KO_1 | -         | -      | -       | -    |
| NGLY1_1    | -         | -      | -       | -    |
| NGLY1_KO_2 | 55.7      | -0.05  | 0       | 0.51 |
| NGLY1_2    | -         | -0.092 | 0.64    | 0.13 |

Supplement: Supplementary file 2625 [file 1]

IPI00006014.1|KIAA0562

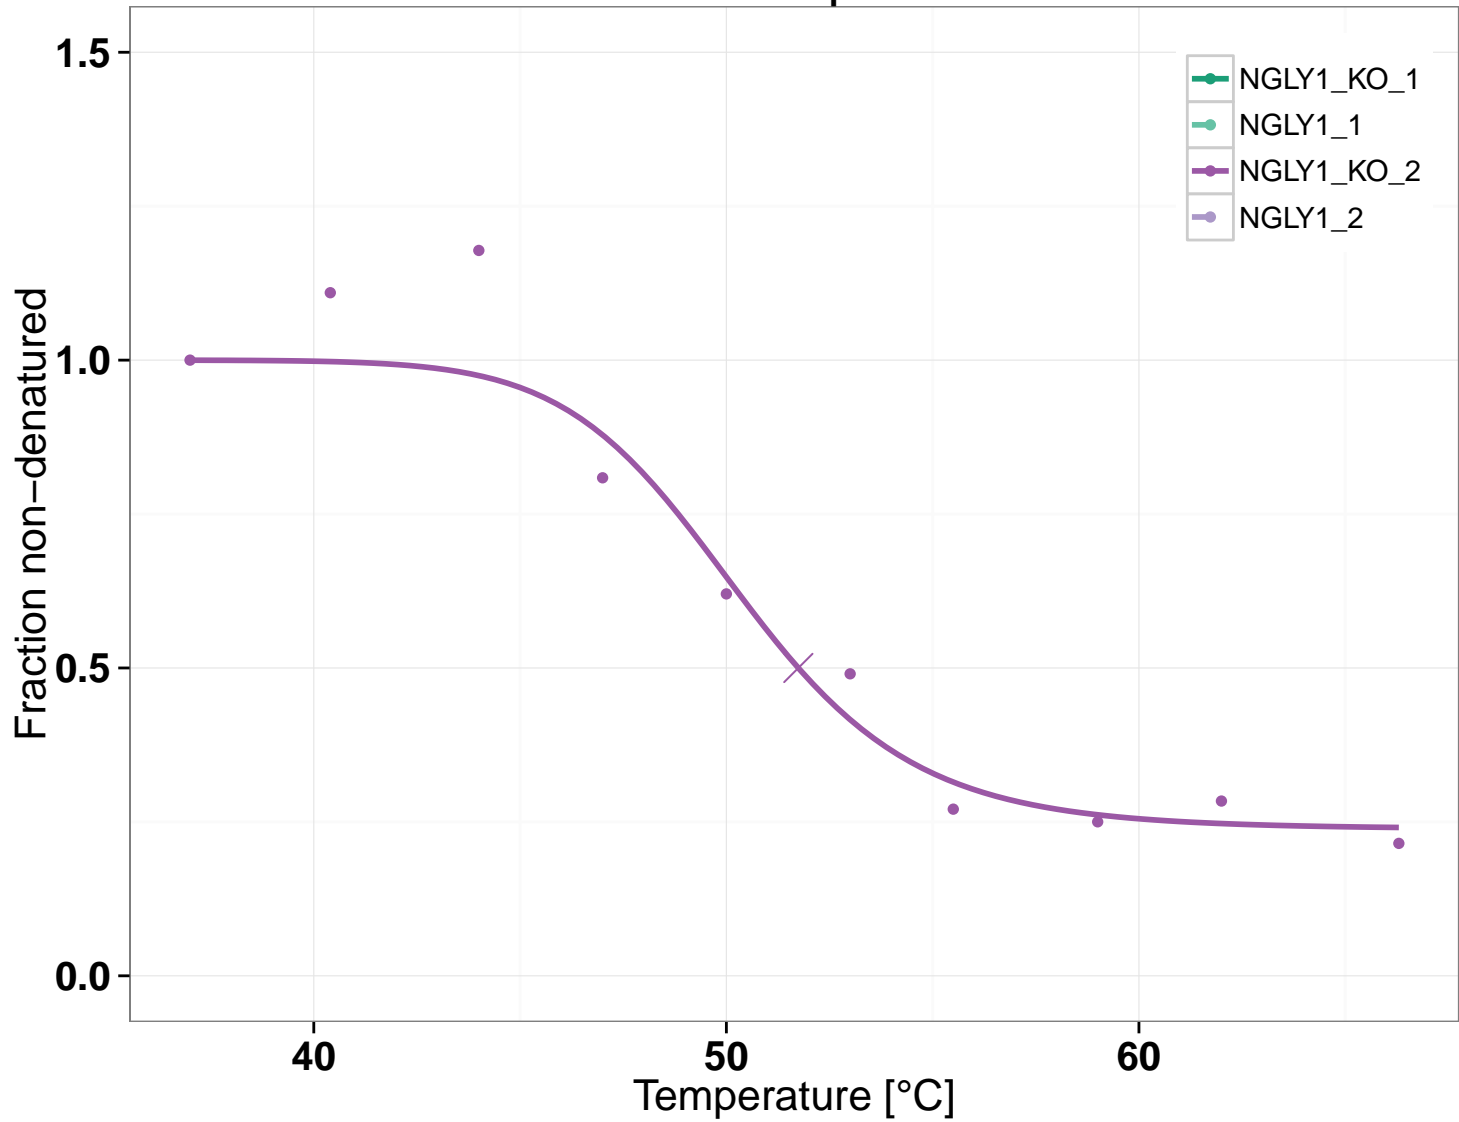

|            | meltPoint | slope | plateau | R2   |
|------------|-----------|-------|---------|------|
| NGLY1_KO_1 | —         | —     | —       | —    |
| NGLY1_1    | —         | —     | —       | —    |
| NGLY1_KO_2 | 51.74     | -0.09 | 0.24    | 0.95 |
| NGLY1_2    | —         | —     | —       | —    |

Supplement: Supplementary file 2626 [file 1]

# IPI00073193.2|EME1

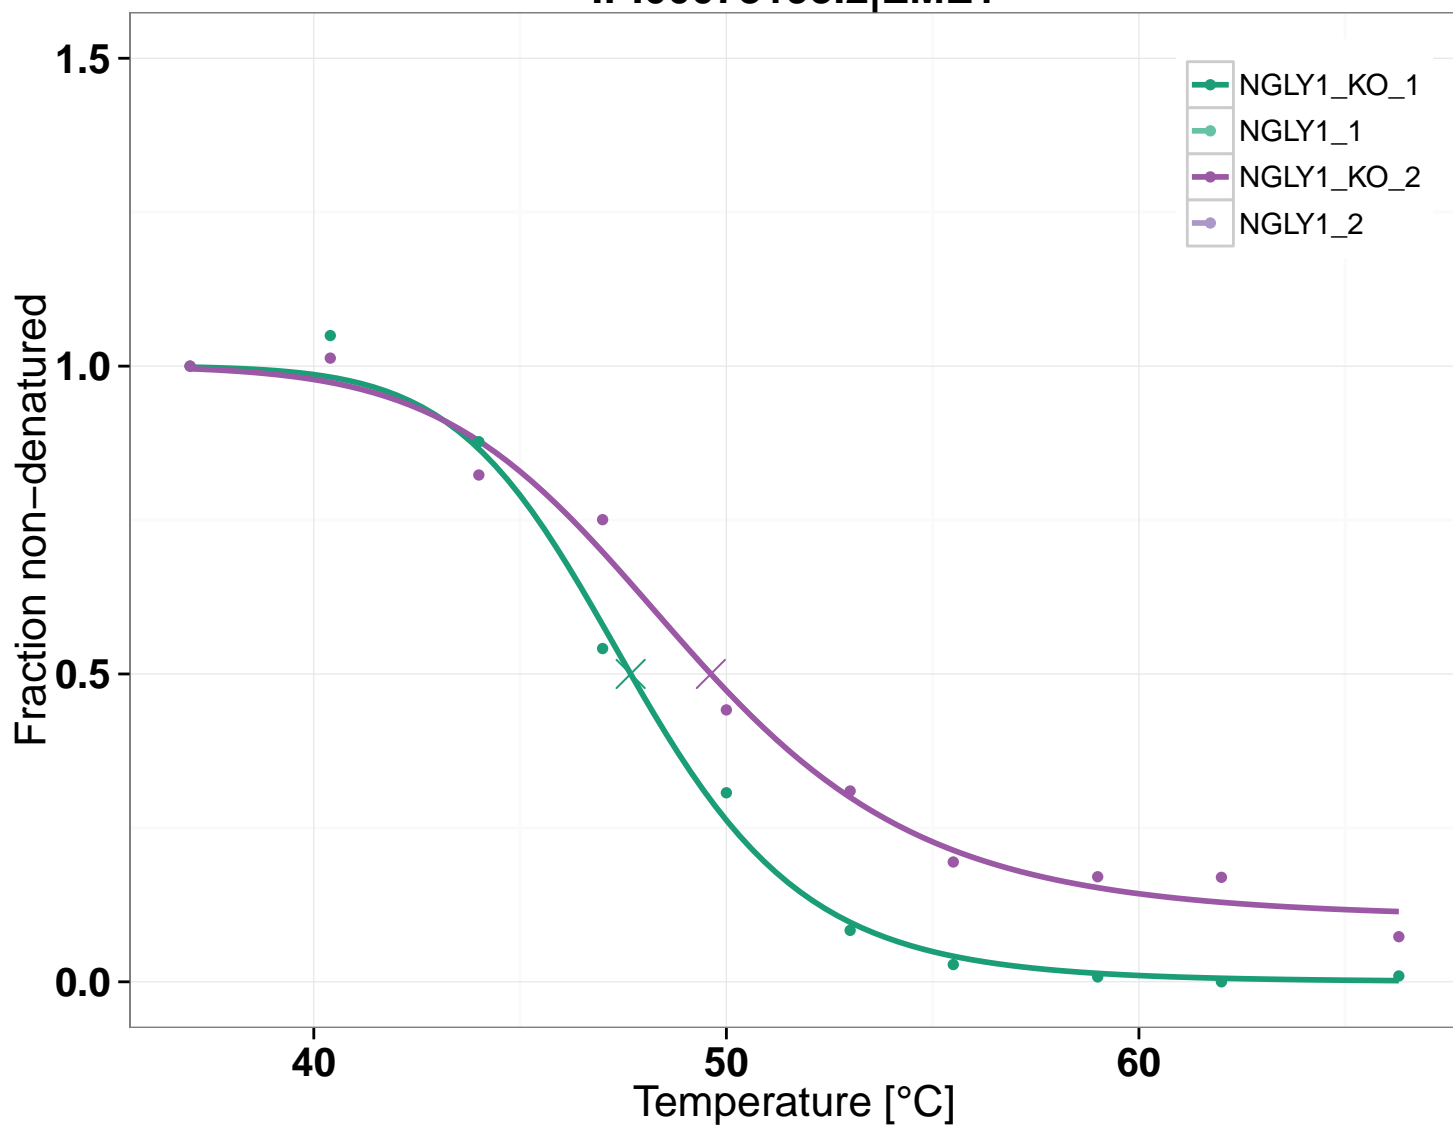

|            | meltPoint | slope  | plateau | R2   |
|------------|-----------|--------|---------|------|
| NGLY1_KO_1 | 47.68     | -0.12  | 0       | 1    |
| NGLY1_1    | -         | -      | -       | -    |
| NGLY1_KO_2 | 49.62     | -0.077 | 0.1     | 0.99 |
| NGLY1_2    | -         | -      | -       | -    |

Supplement: Supplementary file 2627 [file 1]

# IPI00382452.1|CHMP1A

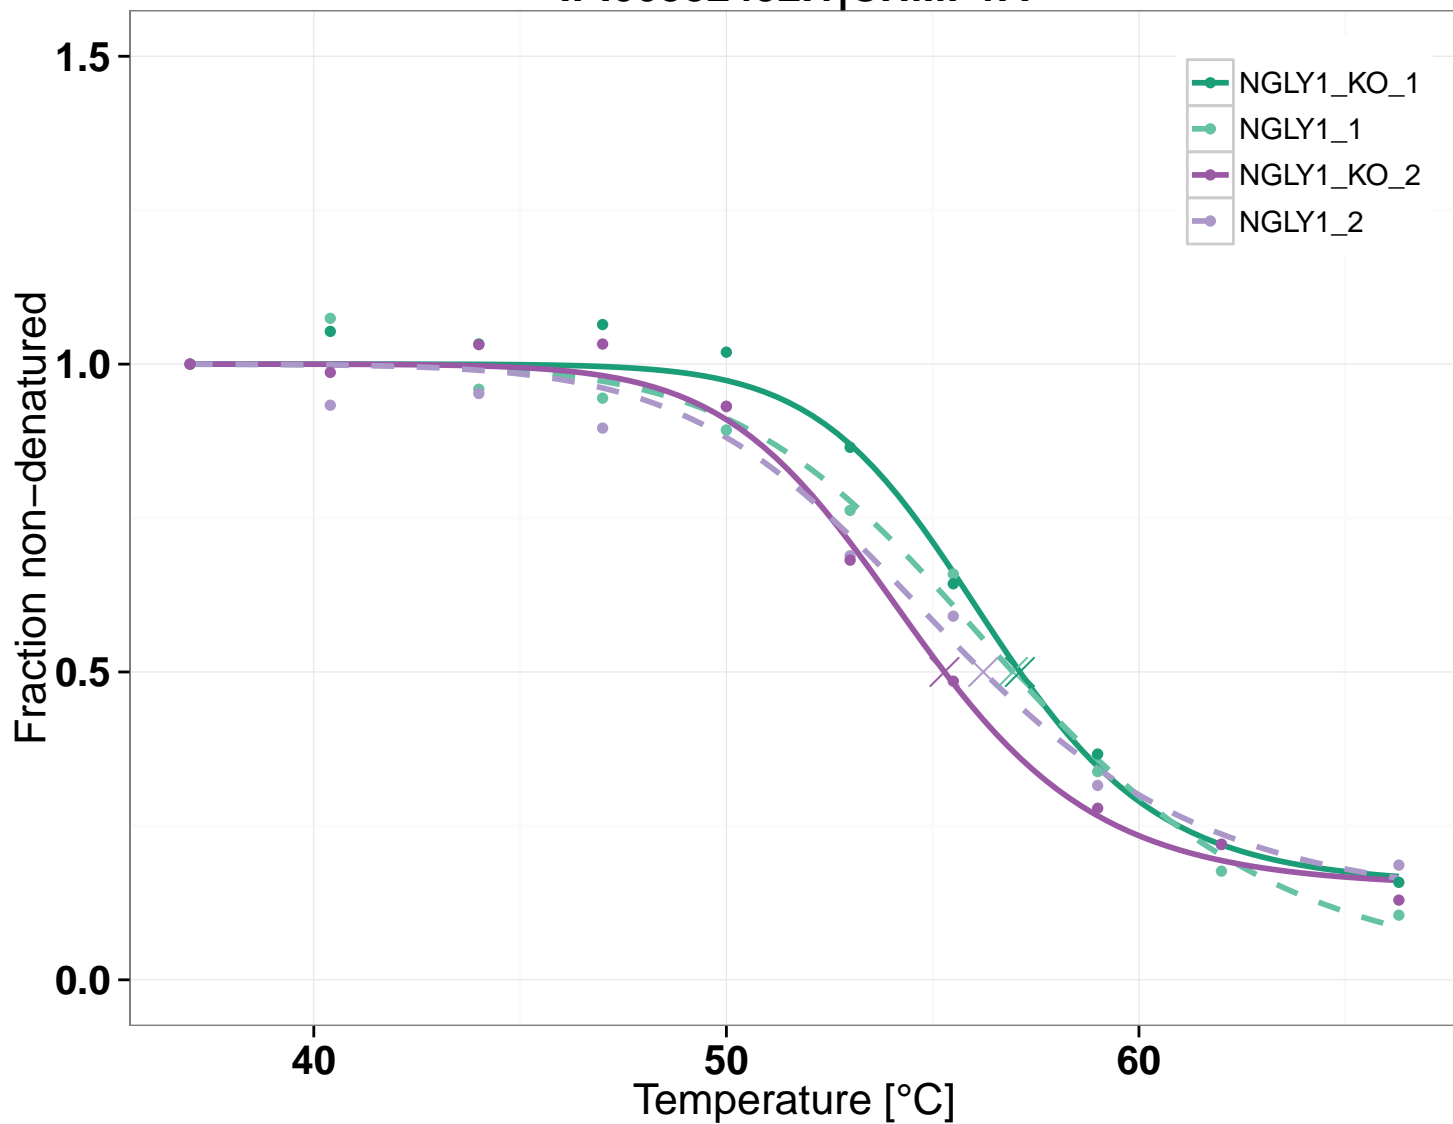

|            | meltPoint | slope  | plateau | R2   |
|------------|-----------|--------|---------|------|
| NGLY1_KO_1 | 57.11     | -0.1   | 0.15    | 0.99 |
| NGLY1_1    | 56.95     | -0.075 | 0       | 0.99 |
| NGLY1_KO_2 | 55.29     | -0.094 | 0.15    | 0.99 |
| NGLY1_2    | 56.23     | -0.07  | 0.12    | 0.98 |

Supplement: Supplementary file 2628 [file 1]

# IPI00412157.4|PPME1

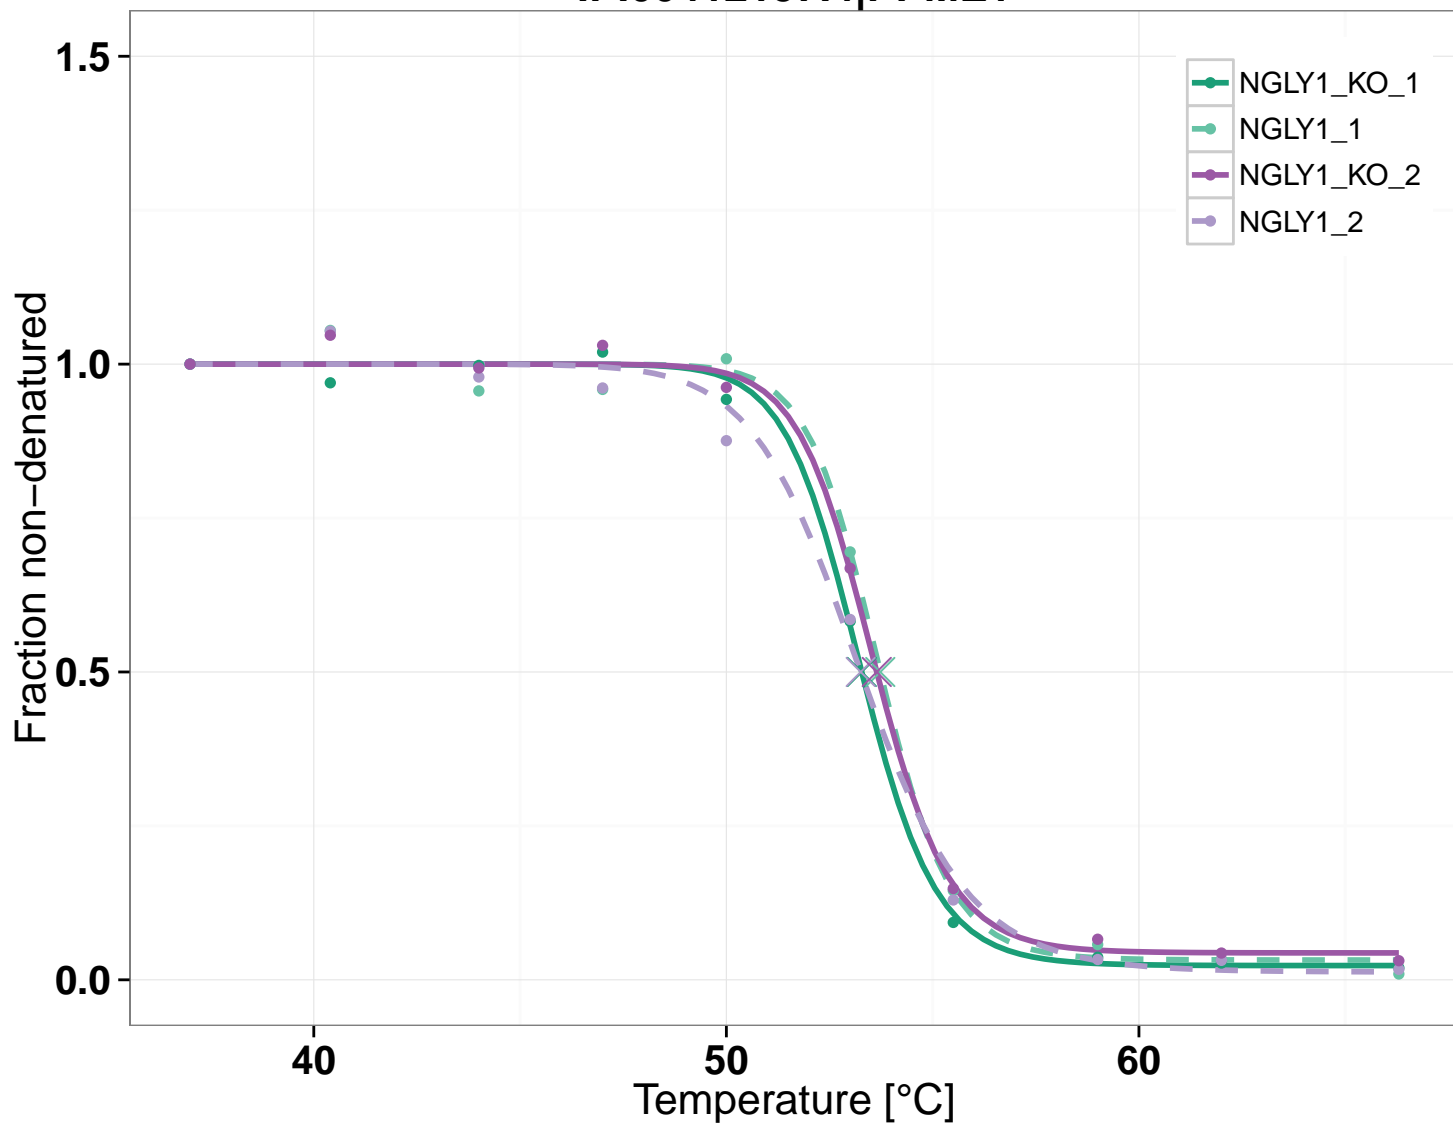

|            | meltPoint | slope | plateau | R2   |
|------------|-----------|-------|---------|------|
| NGLY1_KO_1 | 53.28     | -0.27 | 0.02    | 1    |
| NGLY1_1    | 53.73     | -0.28 | 0.03    | 1    |
| NGLY1_KO_2 | 53.64     | -0.26 | 0.04    | 1    |
| NGLY1_2    | 53.26     | -0.19 | 0.01    | 0.99 |

Supplement: Supplementary file 2629 [file 1]

# IPI00019318.1|PRR3

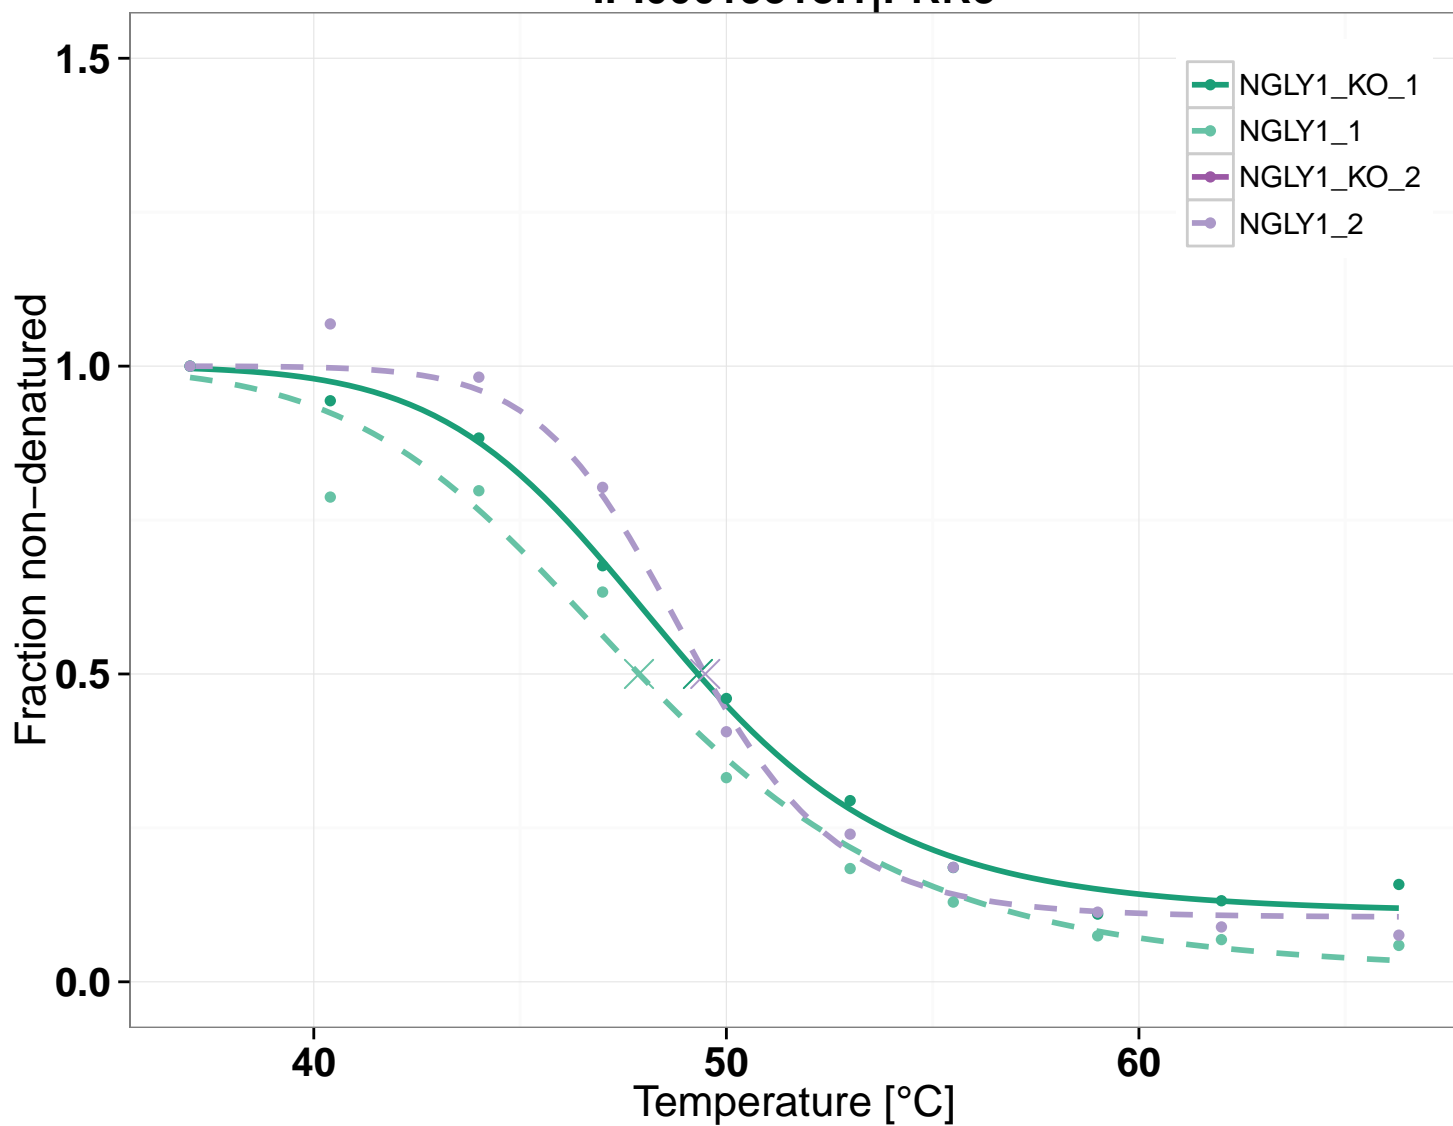

|            | meltPoint | slope  | plateau | R2   |
|------------|-----------|--------|---------|------|
| NGLY1_KO_1 | 49.31     | -0.081 | 0.11    | 1    |
| NGLY1_1    | 47.88     | -0.072 | 0.01    | 0.98 |
| NGLY1_KO_2 | -         | -      | -       | -    |
| NGLY1_2    | 49.49     | -0.12  | 0.1     | 0.99 |

Supplement: Supplementary file 2630 [file 1]

IPI00893565.1|DMRTA2

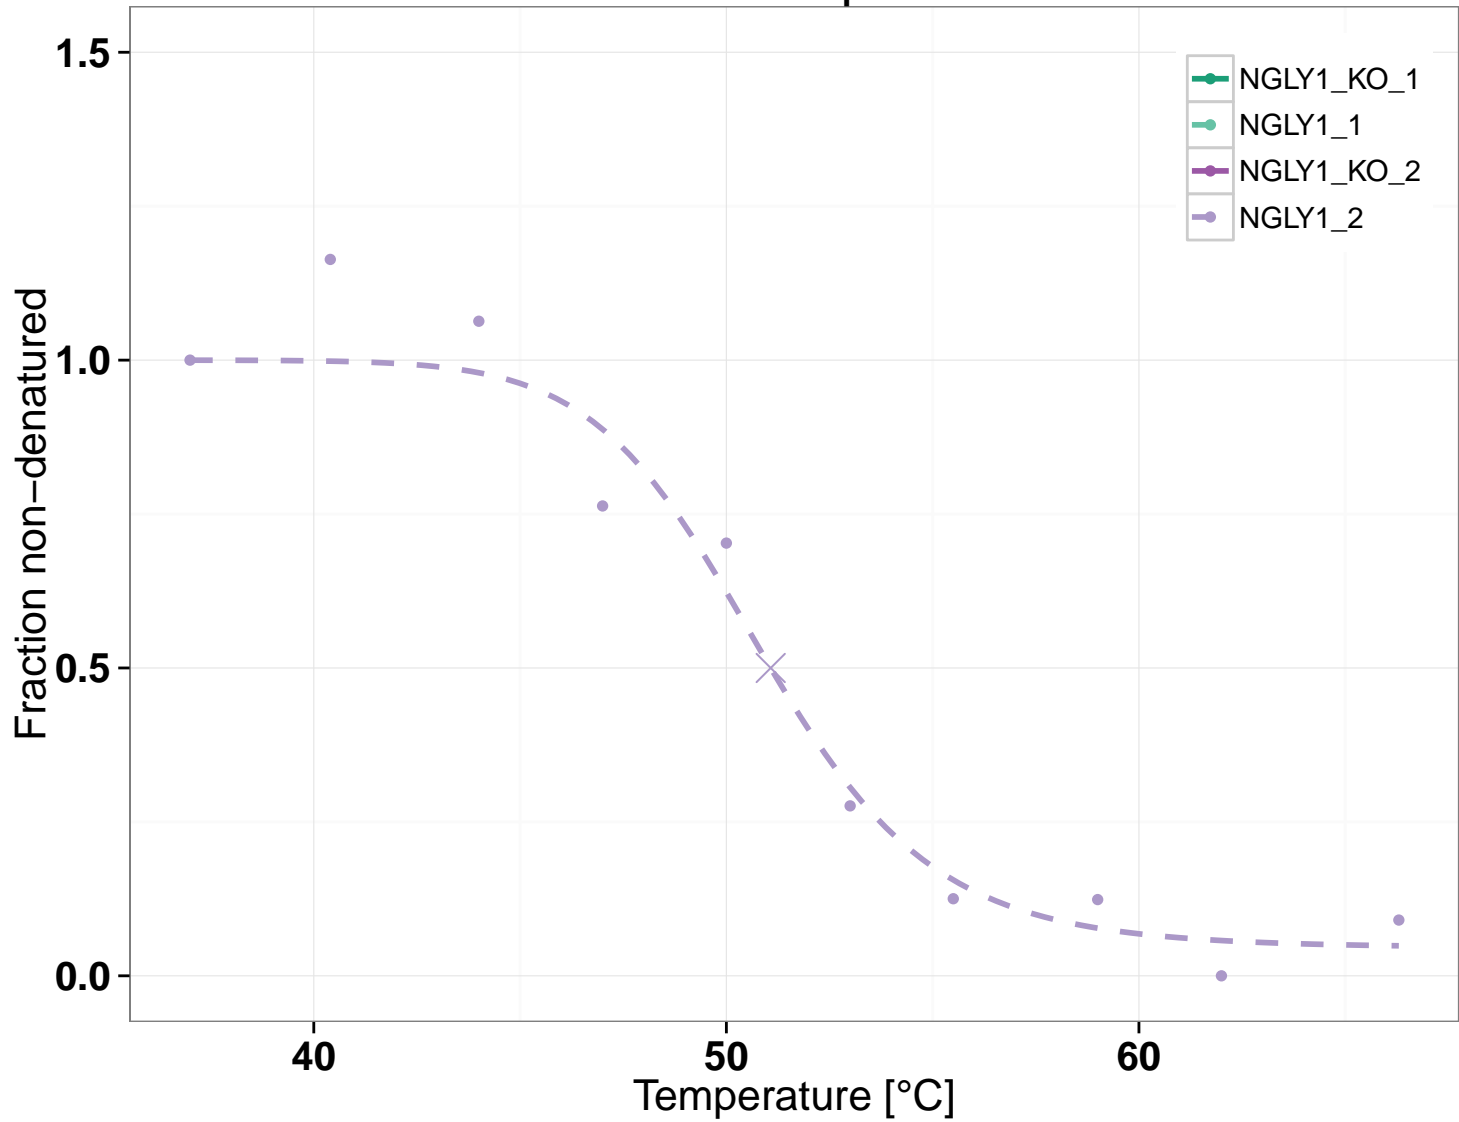

|            | meltPoint | slope | plateau | R2   |
|------------|-----------|-------|---------|------|
| NGLY1_KO_1 | —         | —     | —       | —    |
| NGLY1_1    | —         | —     | —       | —    |
| NGLY1_KO_2 | —         | —     | —       | —    |
| NGLY1_2    | 51.07     | -0.12 | 0.05    | 0.96 |

Supplement: Supplementary file 2631 [file 1]

# IPI00004273.6|RBM25

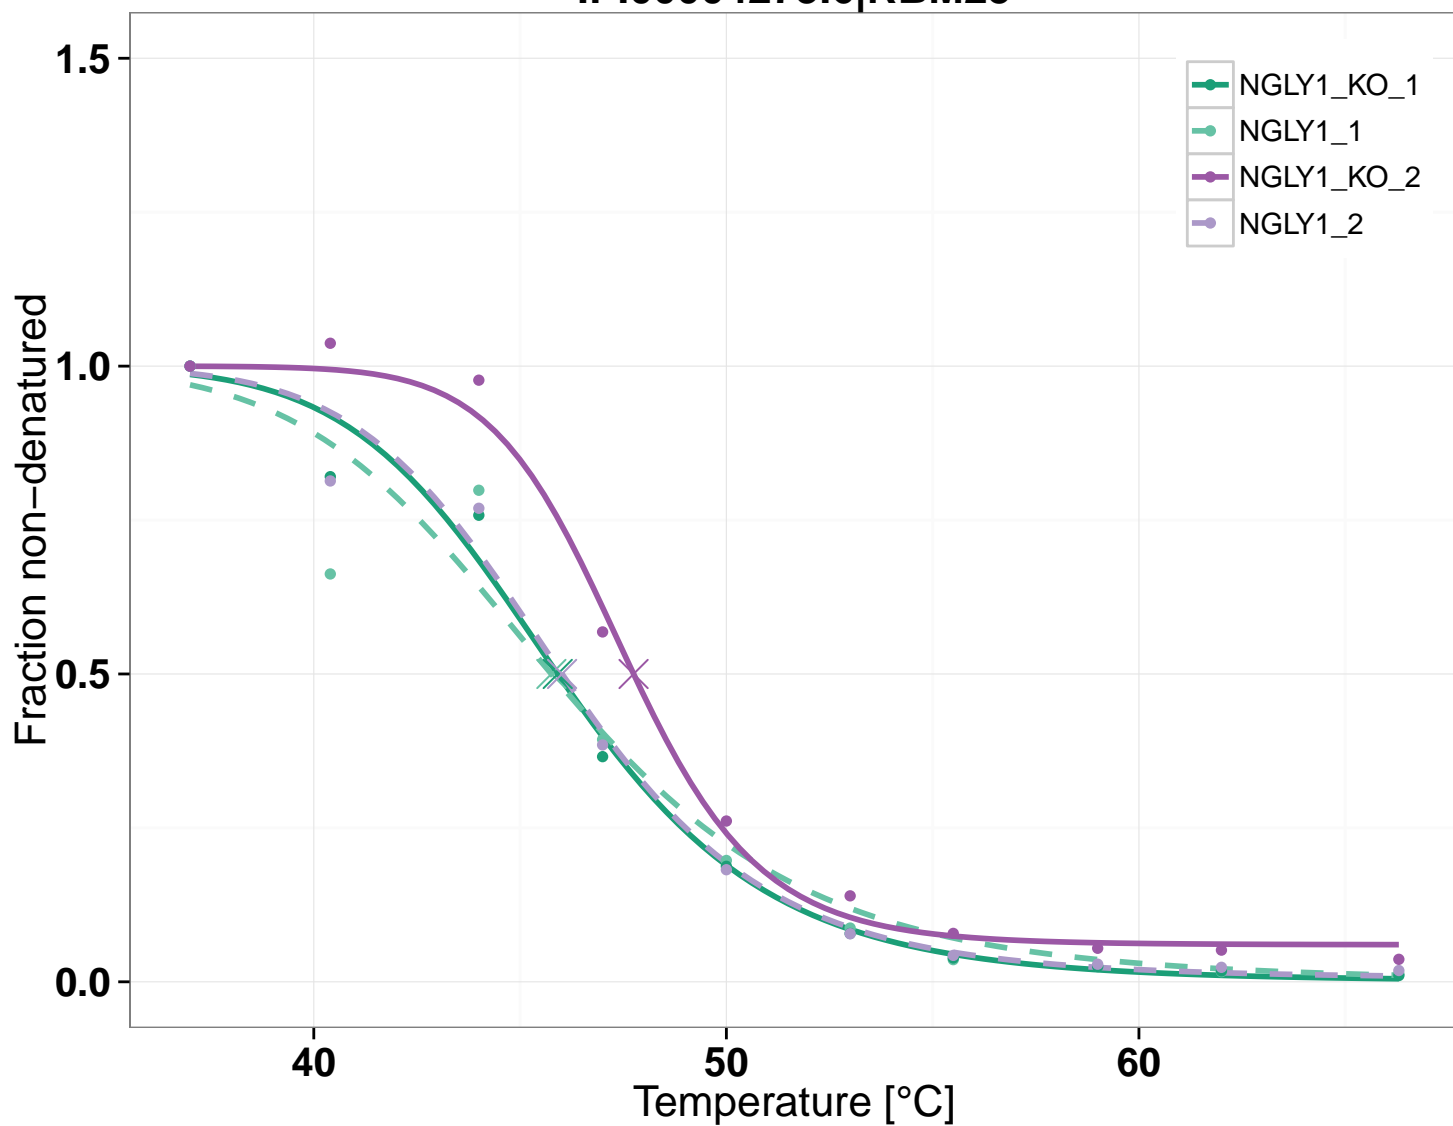

|            | meltPoint | slope  | plateau | R2   |
|------------|-----------|--------|---------|------|
| NGLY1_KO_1 | 45.91     | -0.098 | 0       | 0.99 |
| NGLY1_1    | 45.76     | -0.081 | 0       | 0.94 |
| NGLY1_KO_2 | 47.75     | -0.14  | 0.06    | 0.99 |
| NGLY1_2    | 46.02     | -0.099 | 0.01    | 0.99 |

Supplement: Supplementary file 2632 [file 1]

# IPI00219518.7|ARL1

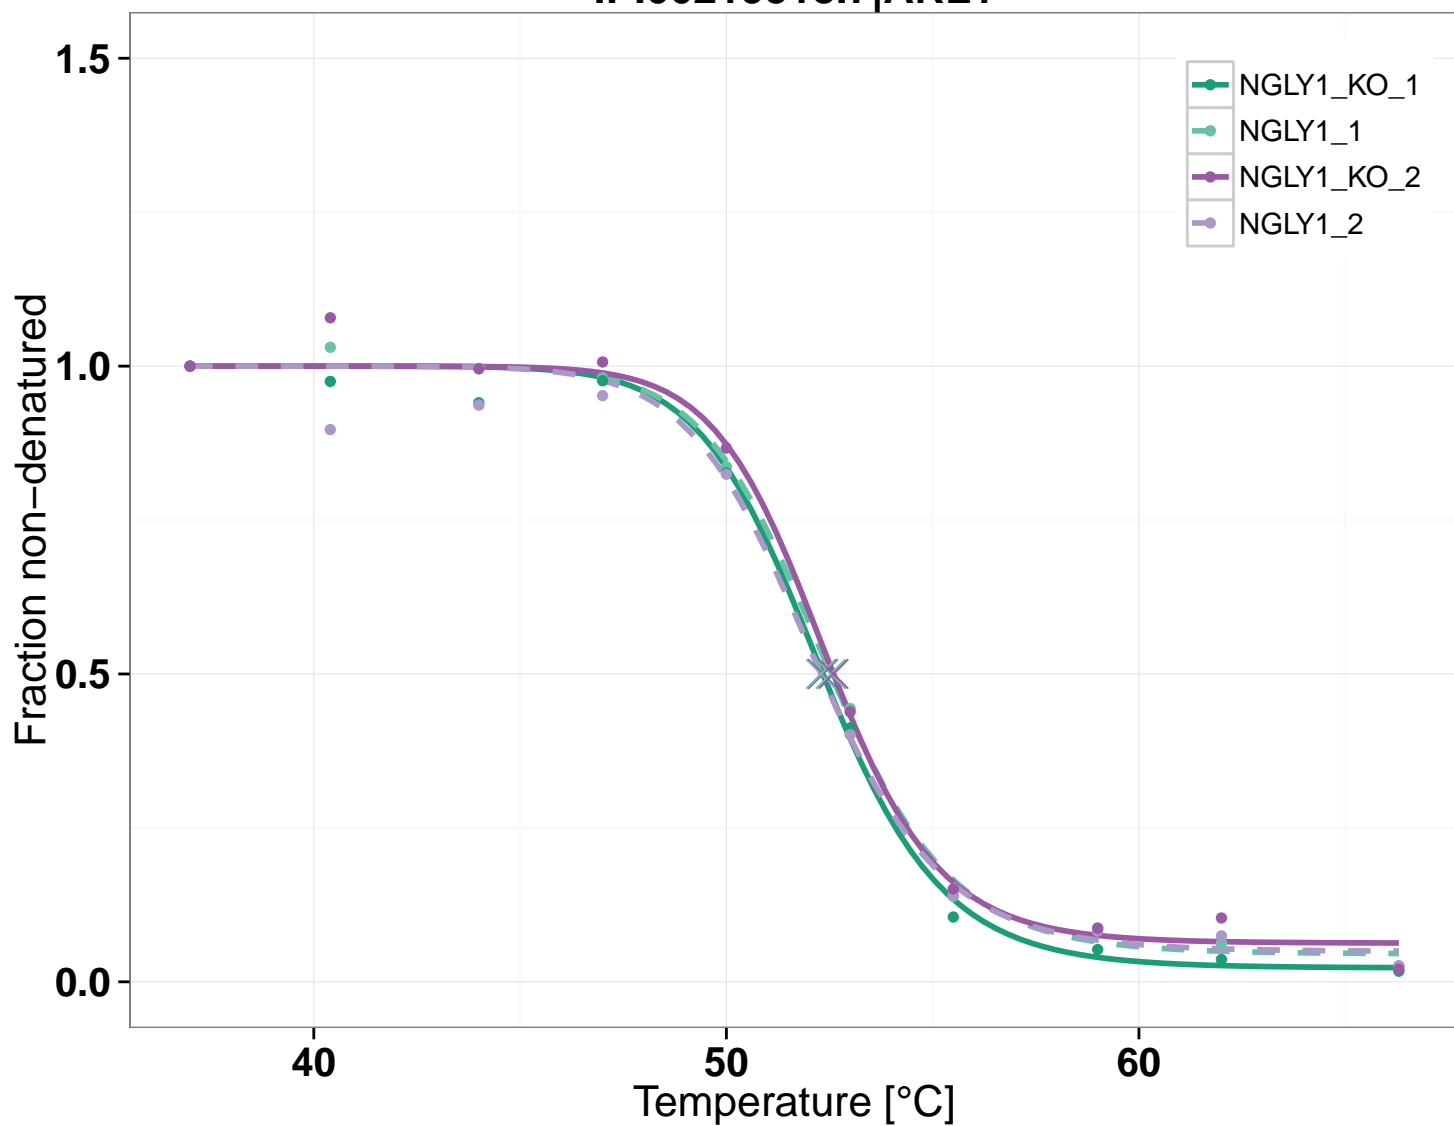

|            | meltPoint | slope | plateau | R2   |
|------------|-----------|-------|---------|------|
| NGLY1_KO_1 | 52.34     | -0.17 | 0.02    | 1    |
| NGLY1_1    | 52.53     | -0.16 | 0.05    | 1    |
| NGLY1_KO_2 | 52.6      | -0.17 | 0.06    | 0.99 |
| NGLY1_2    | 52.29     | -0.15 | 0.05    | 0.99 |

Supplement: Supplementary file 2633 [file 1]

IPI00216746.1|HNRNPK

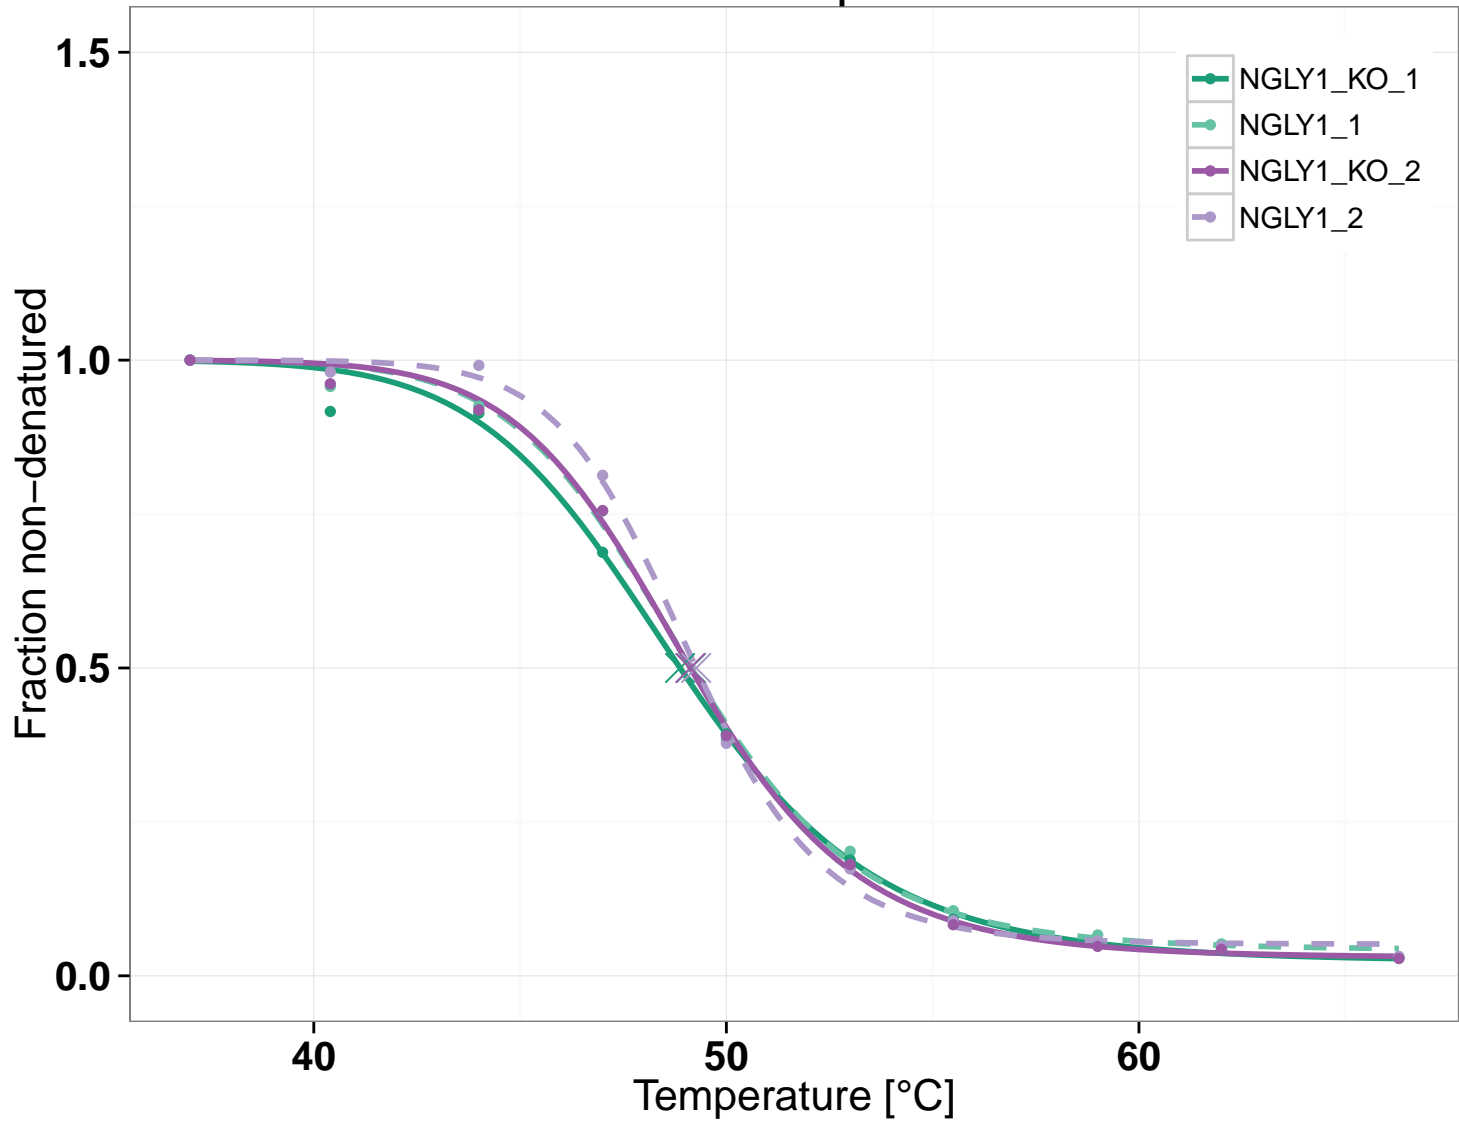

|            | meltPoint | slope | plateau | R2 |
|------------|-----------|-------|---------|----|
| NGLY1_KO_1 | 48.88     | -0.1  | 0.02    | 1  |
| NGLY1_1    | 49.15     | -0.11 | 0.04    | 1  |
| NGLY1_KO_2 | 49.13     | -0.12 | 0.03    | 1  |
| NGLY1_2    | 49.27     | -0.15 | 0.05    | 1  |

Supplement: Supplementary file 2634 [file 1]

IPI00043741.4|C8ORF37

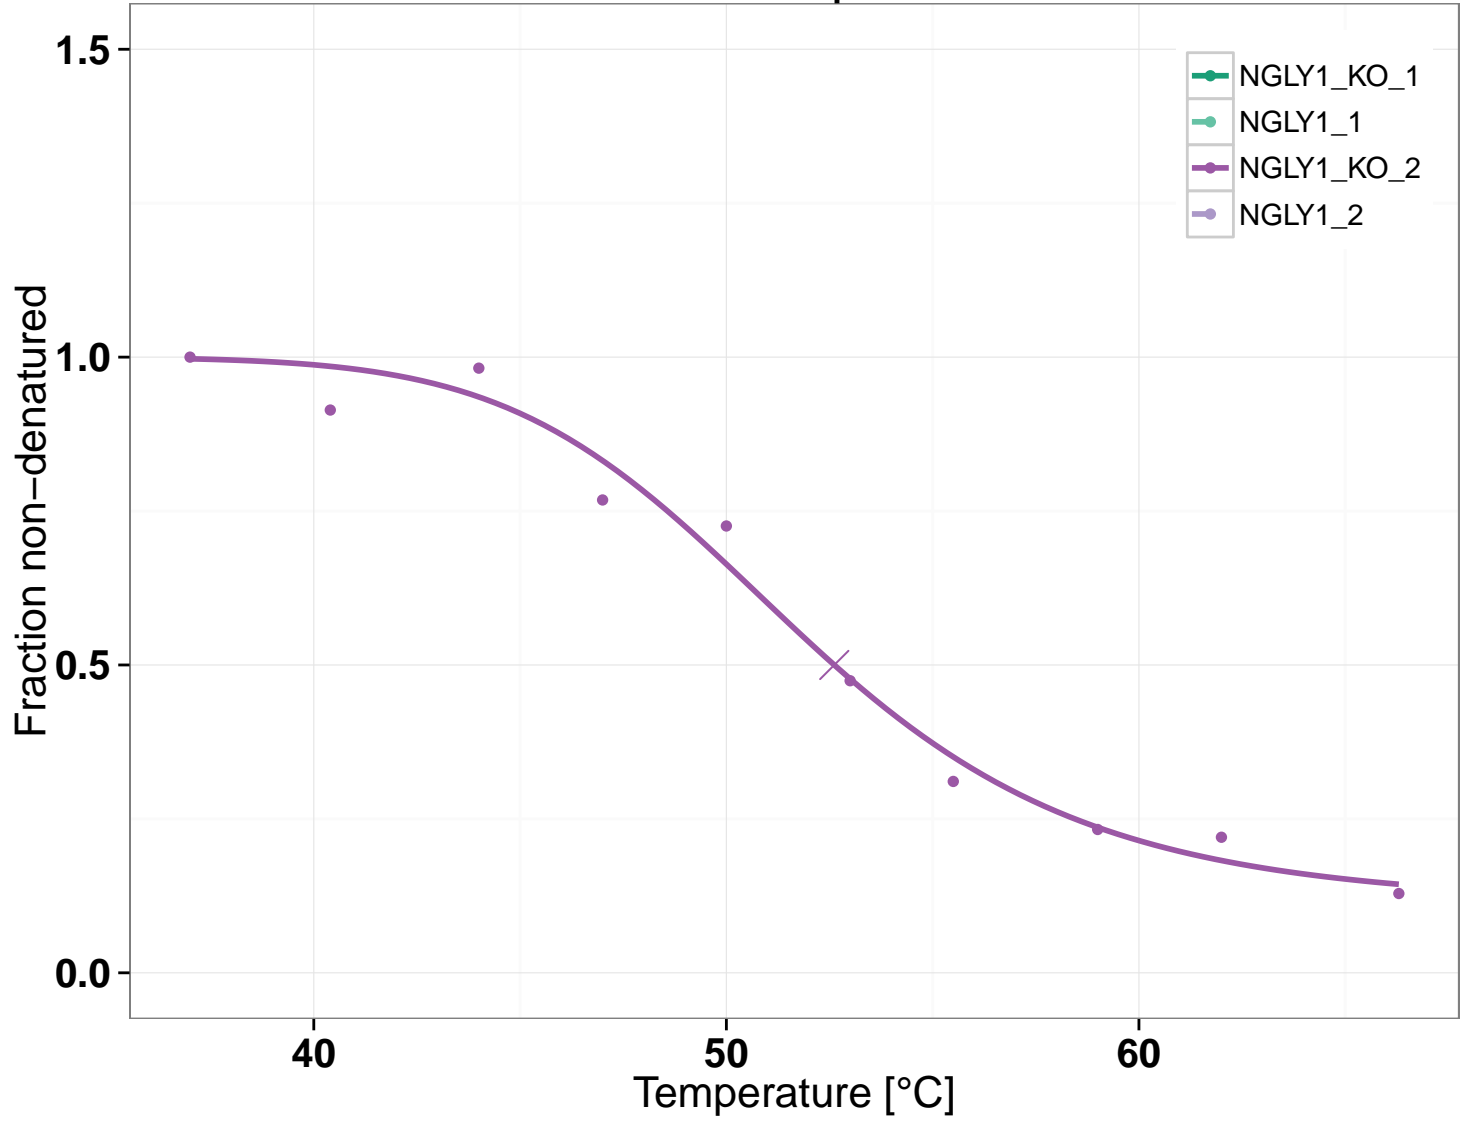

|            | meltPoint | slope  | plateau | R2   |
|------------|-----------|--------|---------|------|
| NGLY1_KO_1 | —         | —      | —       | —    |
| NGLY1_1    | —         | —      | —       | —    |
| NGLY1_KO_2 | 52.62     | -0.064 | 0.11    | 0.98 |
| NGLY1_2    | —         | —      | —       | —    |

Supplement: Supplementary file 2635 [file 1]

IPI00186681.12|ACBD5

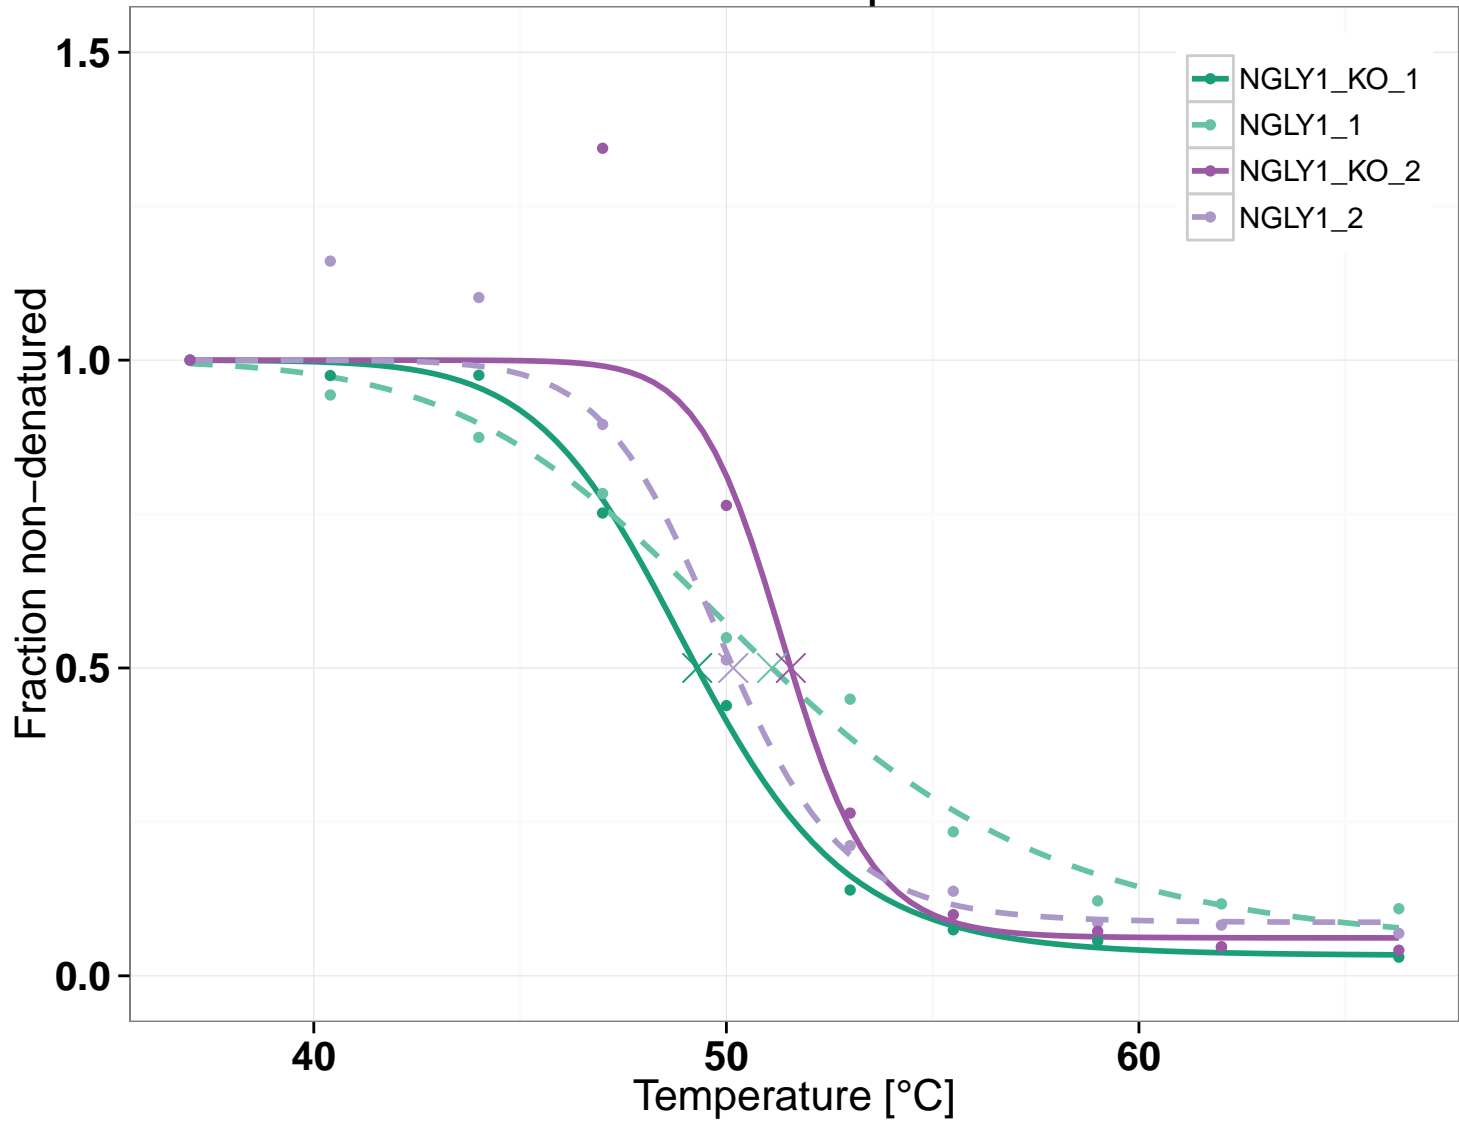

|            | meltPoint | slope  | plateau | R2   |
|------------|-----------|--------|---------|------|
| NGLY1_KO_1 | 49.29     | -0.13  | 0.03    | 1    |
| NGLY1_1    | 51.11     | -0.066 | 0.04    | 0.99 |
| NGLY1_KO_2 | 51.56     | -0.22  | 0.06    | 0.81 |
| NGLY1_2    | 50.17     | -0.16  | 0.09    | 0.98 |

Supplement: Supplementary file 2636 [file 1]

IPI00032139.1|SERPINB9

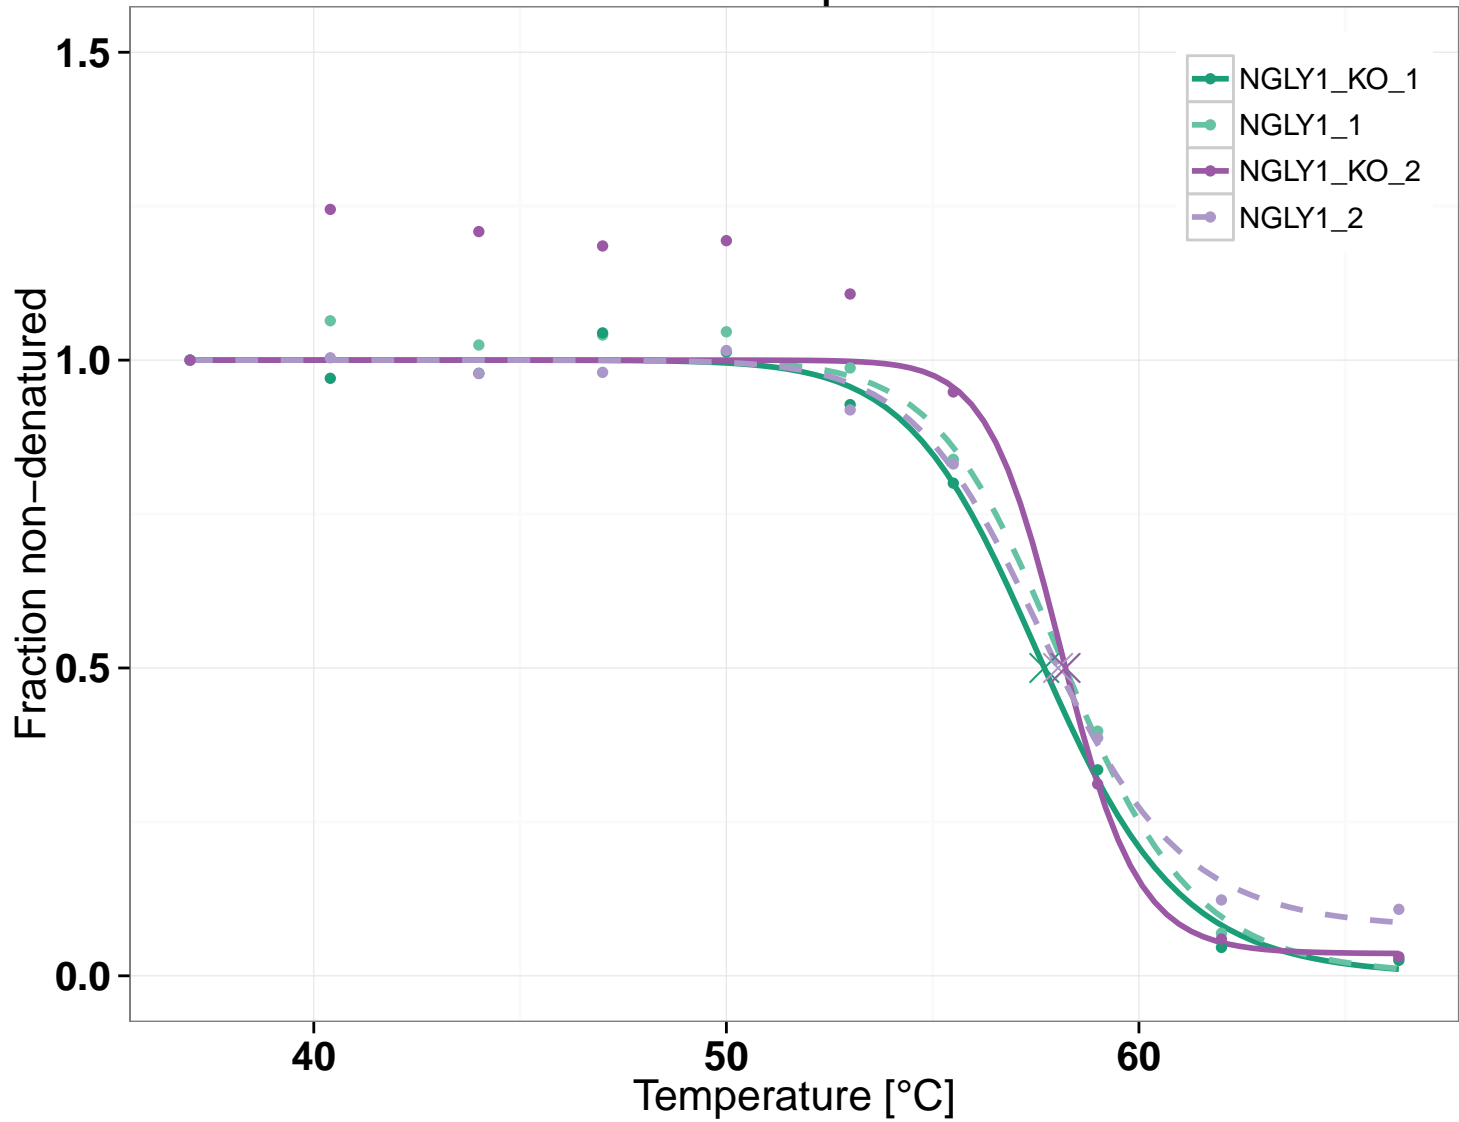

|            | meltPoint | slope | plateau | R2   |
|------------|-----------|-------|---------|------|
| NGLY1_KO_1 | 57.71     | -0.15 | 0       | 1    |
| NGLY1_1    | 58.22     | -0.16 | 0       | 0.99 |
| NGLY1_KO_2 | 58.22     | -0.26 | 0.04    | 0.91 |
| NGLY1_2    | 58.04     | -0.14 | 0.08    | 1    |

Supplement: Supplementary file 2637 [file 1]

IPI00031534.3|ST6GALNAC1

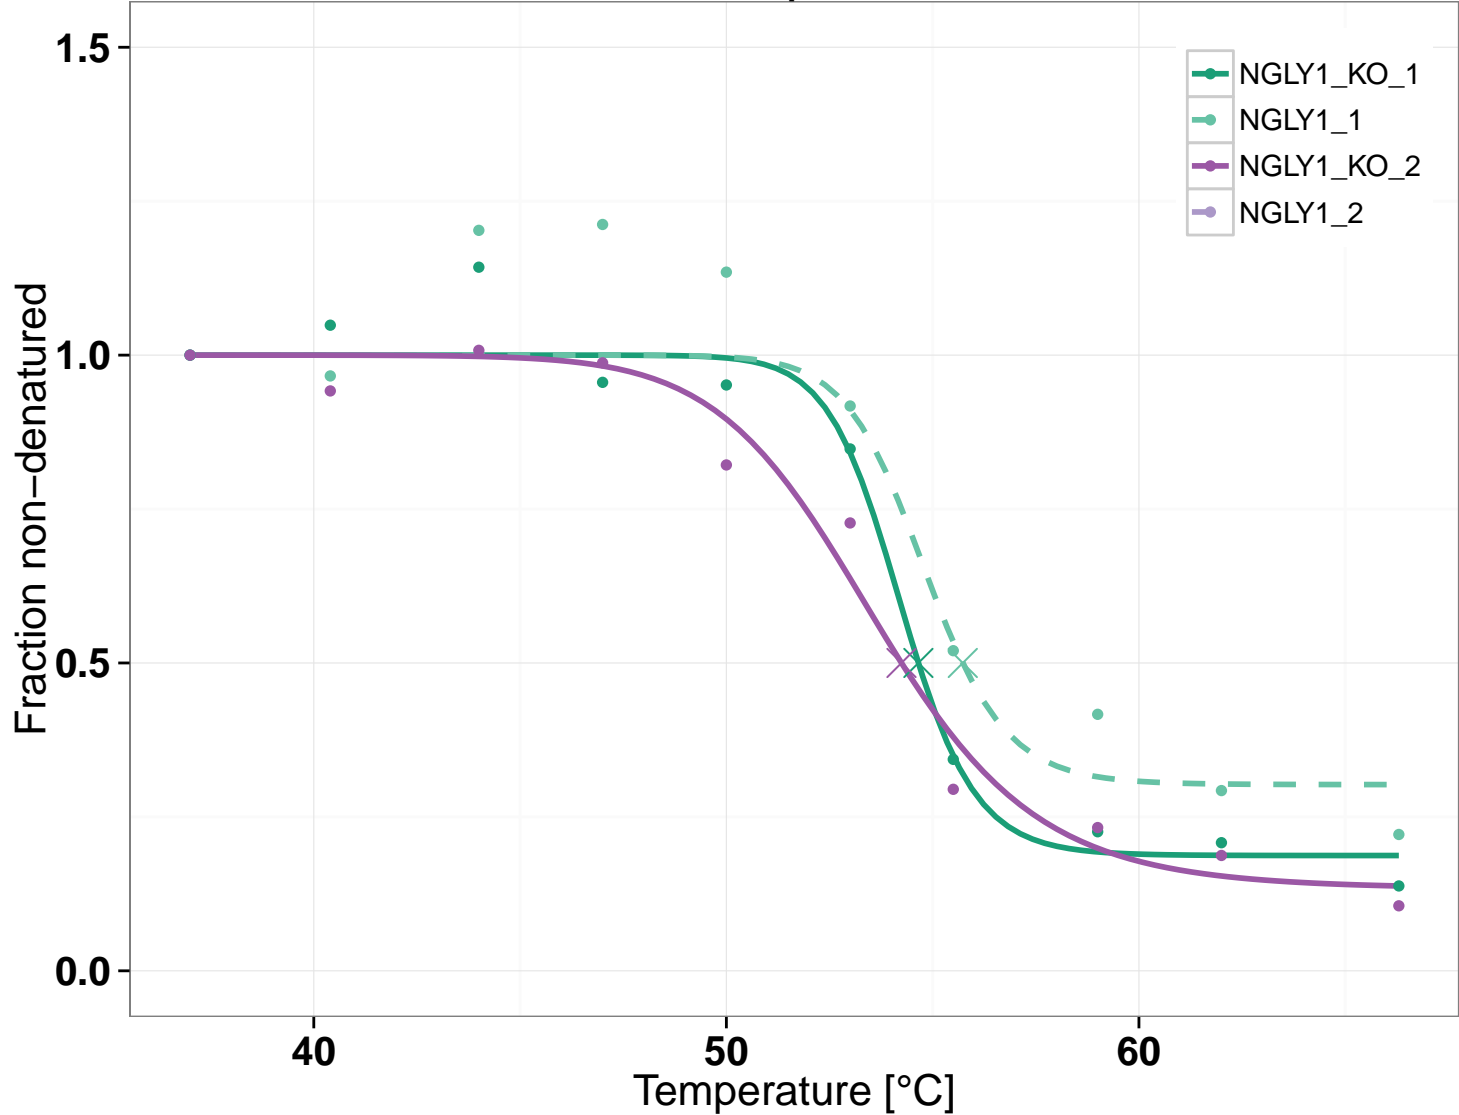

|            | meltPoint | slope | plateau | R2   |
|------------|-----------|-------|---------|------|
| NGLY1_KO_1 | 54.65     | -0.23 | 0.19    | 0.98 |
| NGLY1_1    | 55.73     | -0.18 | 0.3     | 0.91 |
| NGLY1_KO_2 | 54.24     | -0.11 | 0.13    | 0.98 |
| NGLY1_2    | -         | -     | -       | -    |

Supplement: Supplementary file 2638 [file 1]

IPI00550440.3|C2ORF18

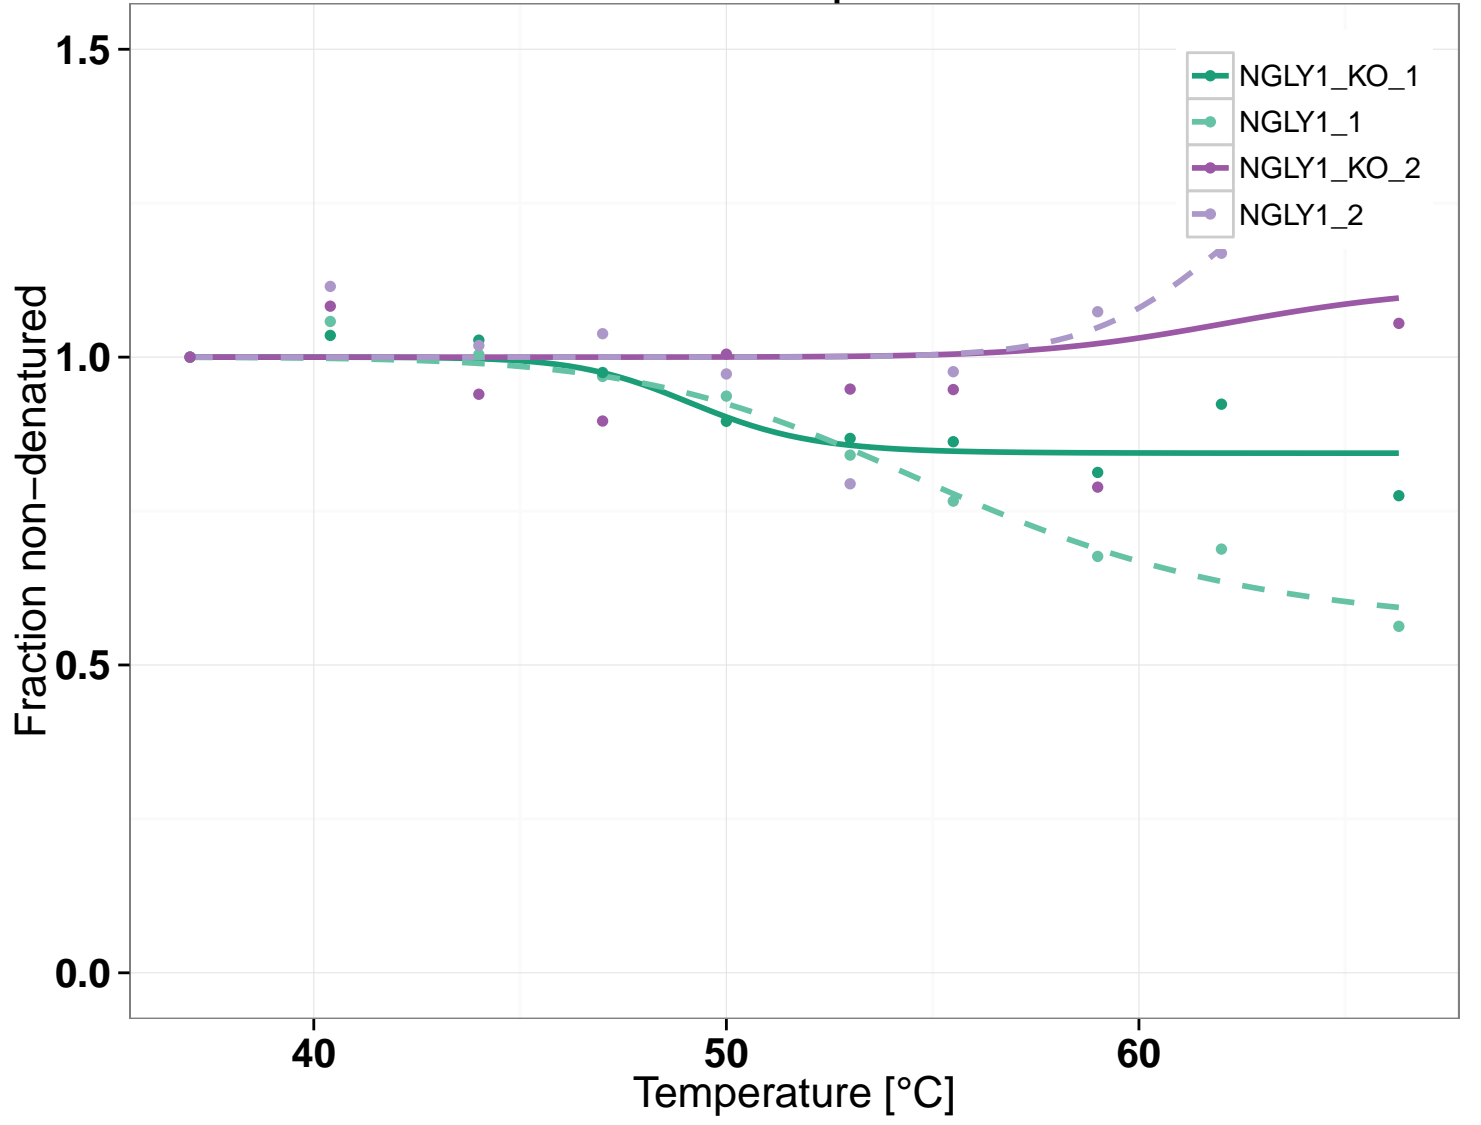

|            | meltPoint | slope  | plateau | R2   |
|------------|-----------|--------|---------|------|
| NGLY1_KO_1 | -         | -0.027 | 0.84    | 0.8  |
| NGLY1_1    | -         | -0.029 | 0.55    | 0.97 |
| NGLY1_KO_2 | -         | 0.012  | 1.12    | 0.09 |
| NGLY1_2    | -         | 0.056  | 1.41    | 0.69 |

Supplement: Supplementary file 2639 [file 1]

IPI00065285.1|IMMP1L

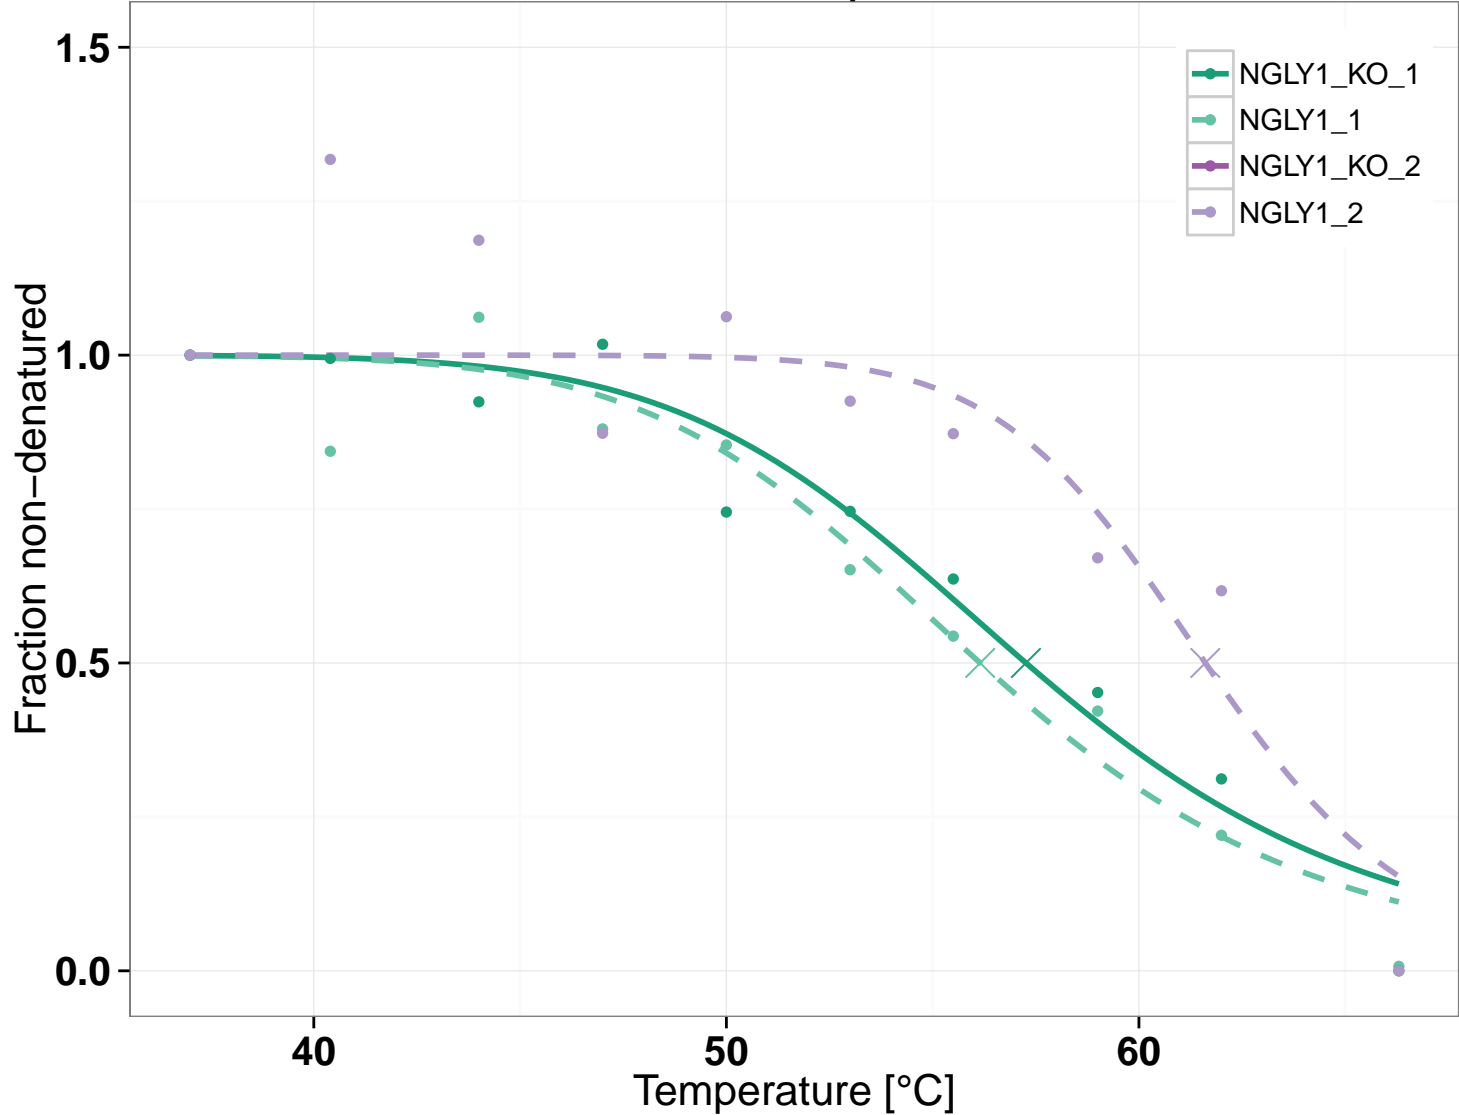

|            | meltPoint | slope  | plateau | R2   |
|------------|-----------|--------|---------|------|
| NGLY1_KO_1 | 57.26     | -0.059 | 0       | 0.95 |
| NGLY1_1    | 56.15     | -0.062 | 0       | 0.95 |
| NGLY1_KO_2 | -         | -      | -       | -    |
| NGLY1_2    | 61.61     | -0.099 | 0       | 0.82 |

Supplement: Supplementary file 2640 [file 1]

IPI00550431.1|ZCCHC11

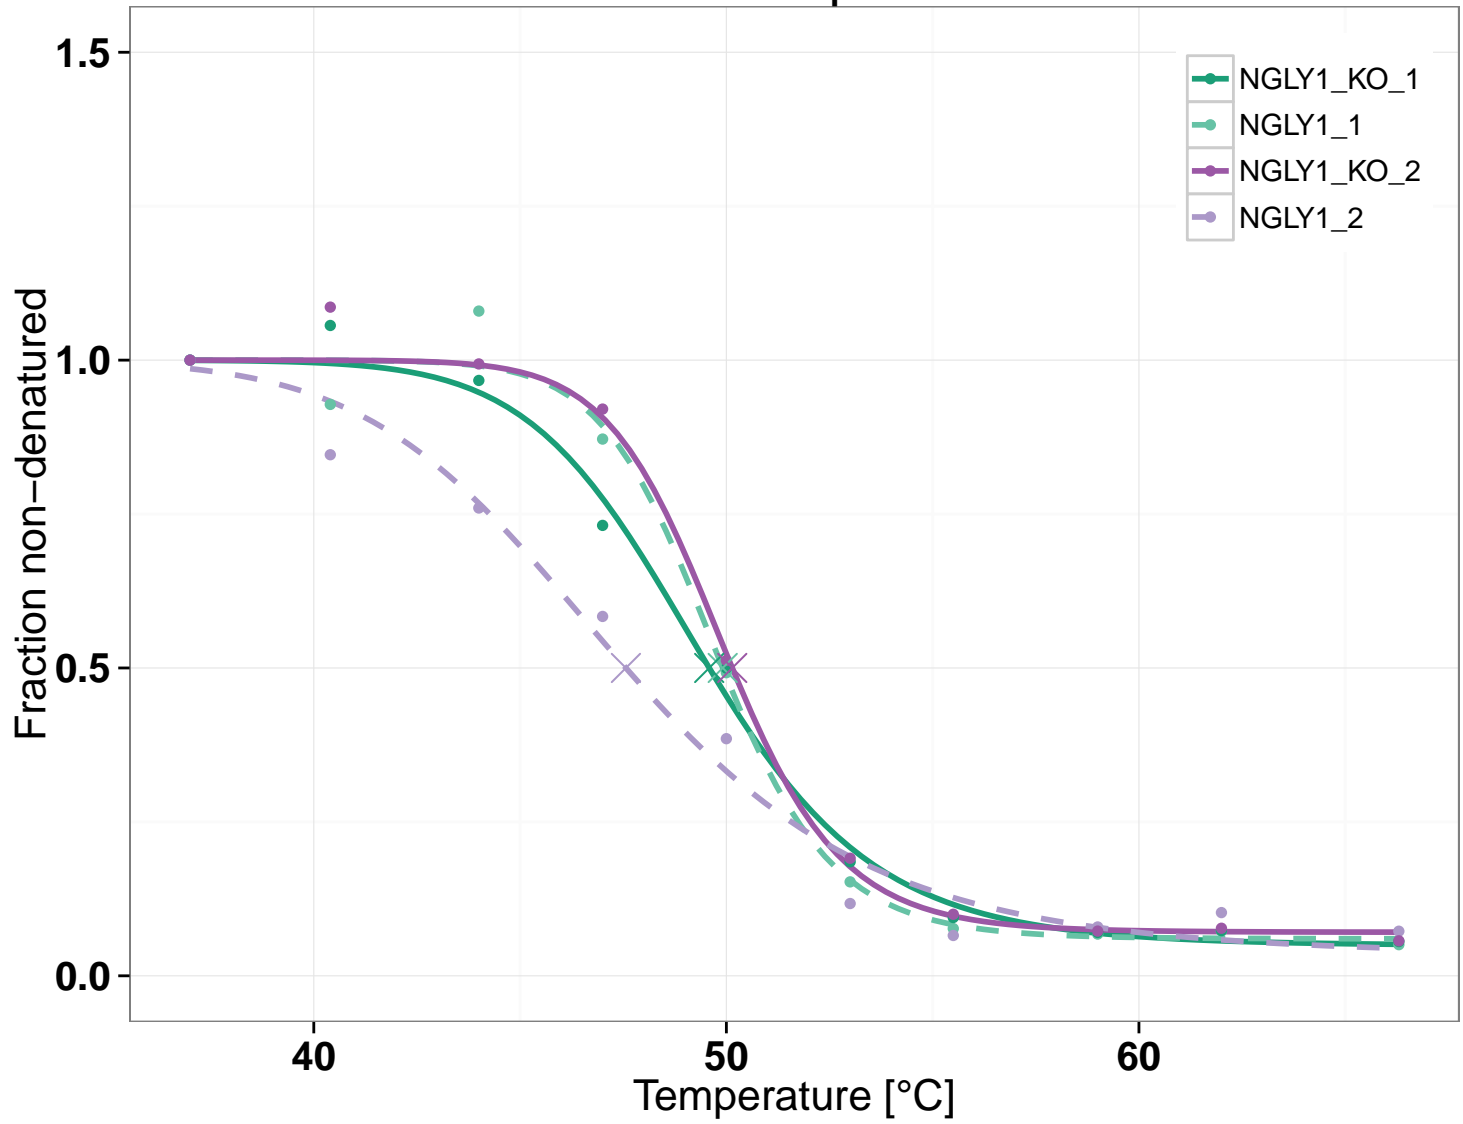

|            | meltPoint | slope  | plateau | R2   |
|------------|-----------|--------|---------|------|
| NGLY1_KO_1 | 49.58     | -0.11  | 0.05    | 0.99 |
| NGLY1_1    | 49.91     | -0.17  | 0.06    | 0.99 |
| NGLY1_KO_2 | 50.14     | -0.16  | 0.07    | 1    |
| NGLY1_2    | 47.57     | -0.079 | 0.03    | 0.98 |

Supplement: Supplementary file 2641 [file 1]

# IPI00013888.1|ITM2A

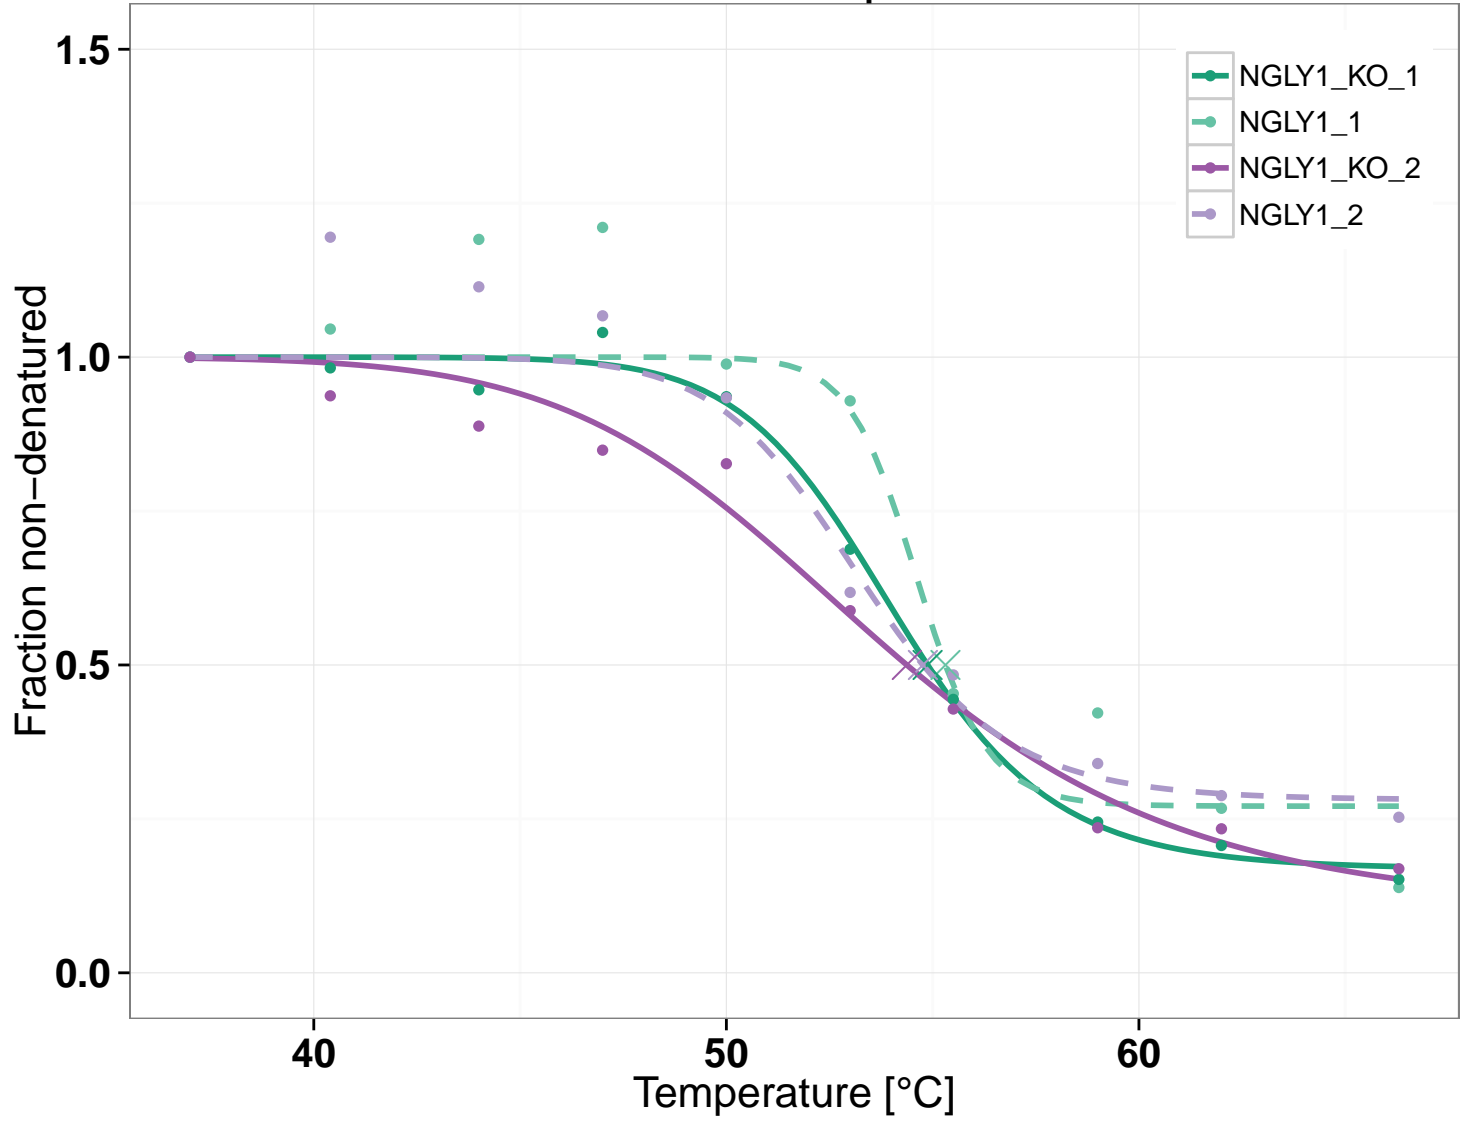

|            | meltPoint | slope | plateau | R2   |
|------------|-----------|-------|---------|------|
| NGLY1_KO_1 | 54.88     | -0.11 | 0.17    | 0.99 |
| NGLY1_1    | 55.31     | -0.22 | 0.27    | 0.92 |
| NGLY1_KO_2 | 54.37     | -0.06 | 0.09    | 0.98 |
| NGLY1_2    | 54.76     | -0.1  | 0.28    | 0.95 |

Supplement: Supplementary file 2642 [file 1]

IPI00014980.1|PPP2R5B

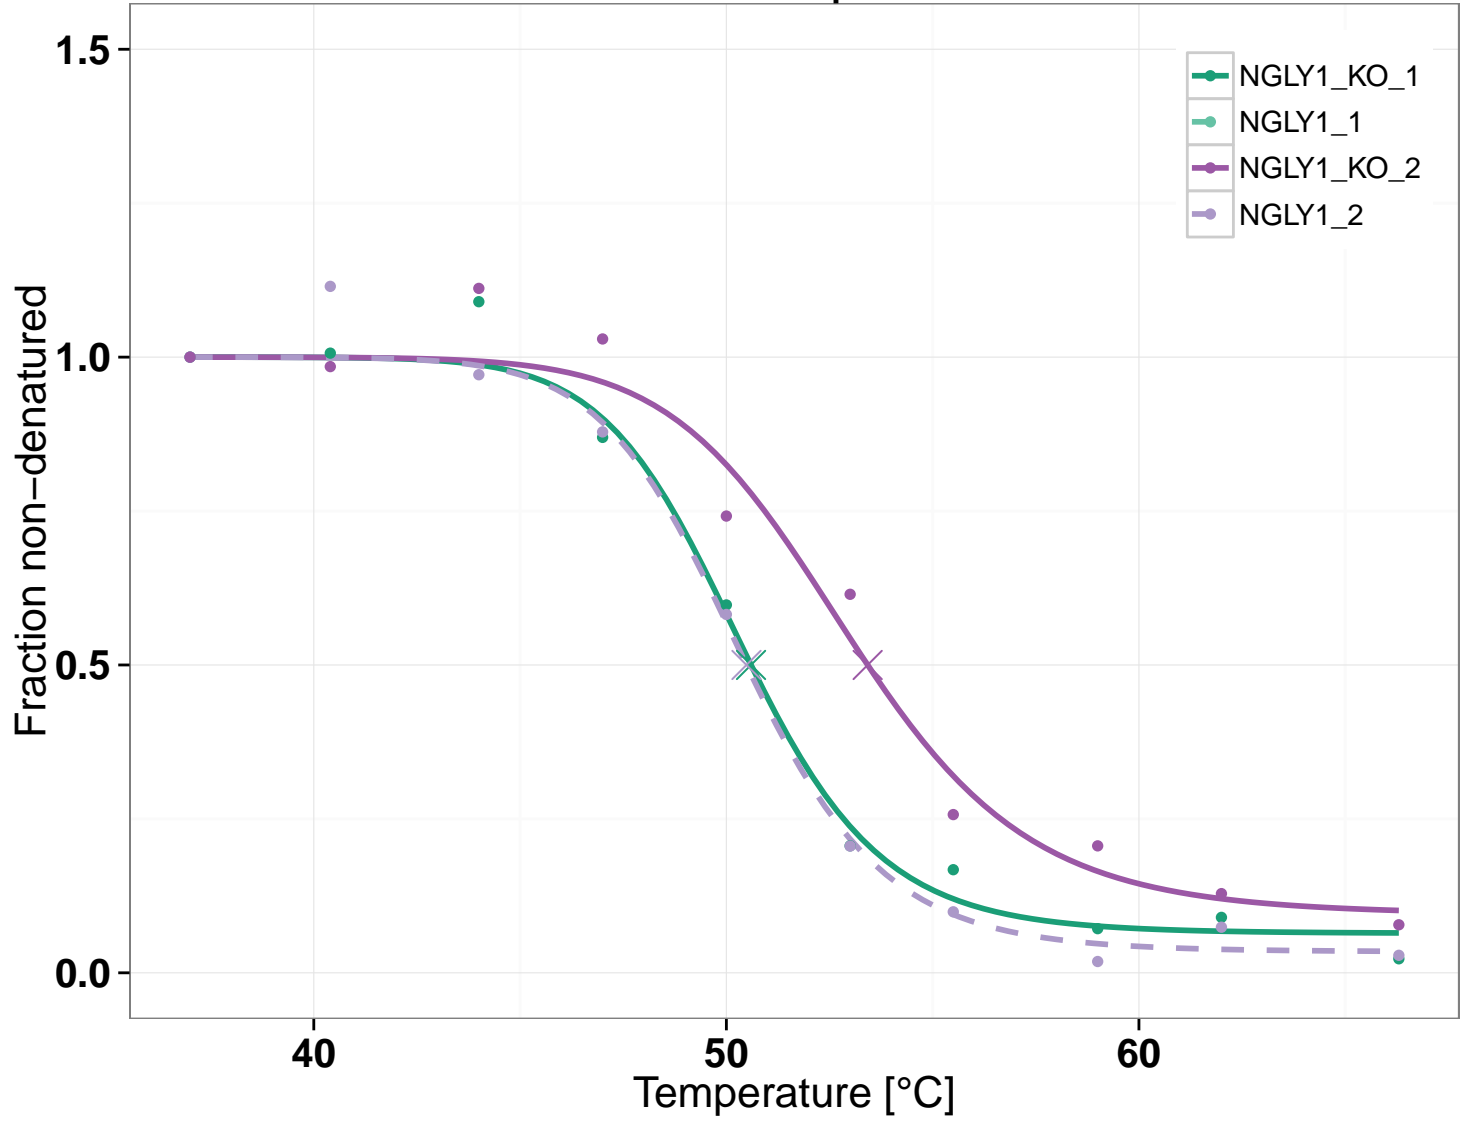

|            | meltPoint | slope | plateau | R2   |
|------------|-----------|-------|---------|------|
| NGLY1_KO_1 | 50.6      | -0.14 | 0.06    | 0.99 |
| NGLY1_1    | -         | -     | -       | -    |
| NGLY1_KO_2 | 53.42     | -0.1  | 0.09    | 0.98 |
| NGLY1_2    | 50.49     | -0.14 | 0.03    | 0.99 |

Supplement: Supplementary file 2643 [file 1]

IPI00165230.1|DAZAP1

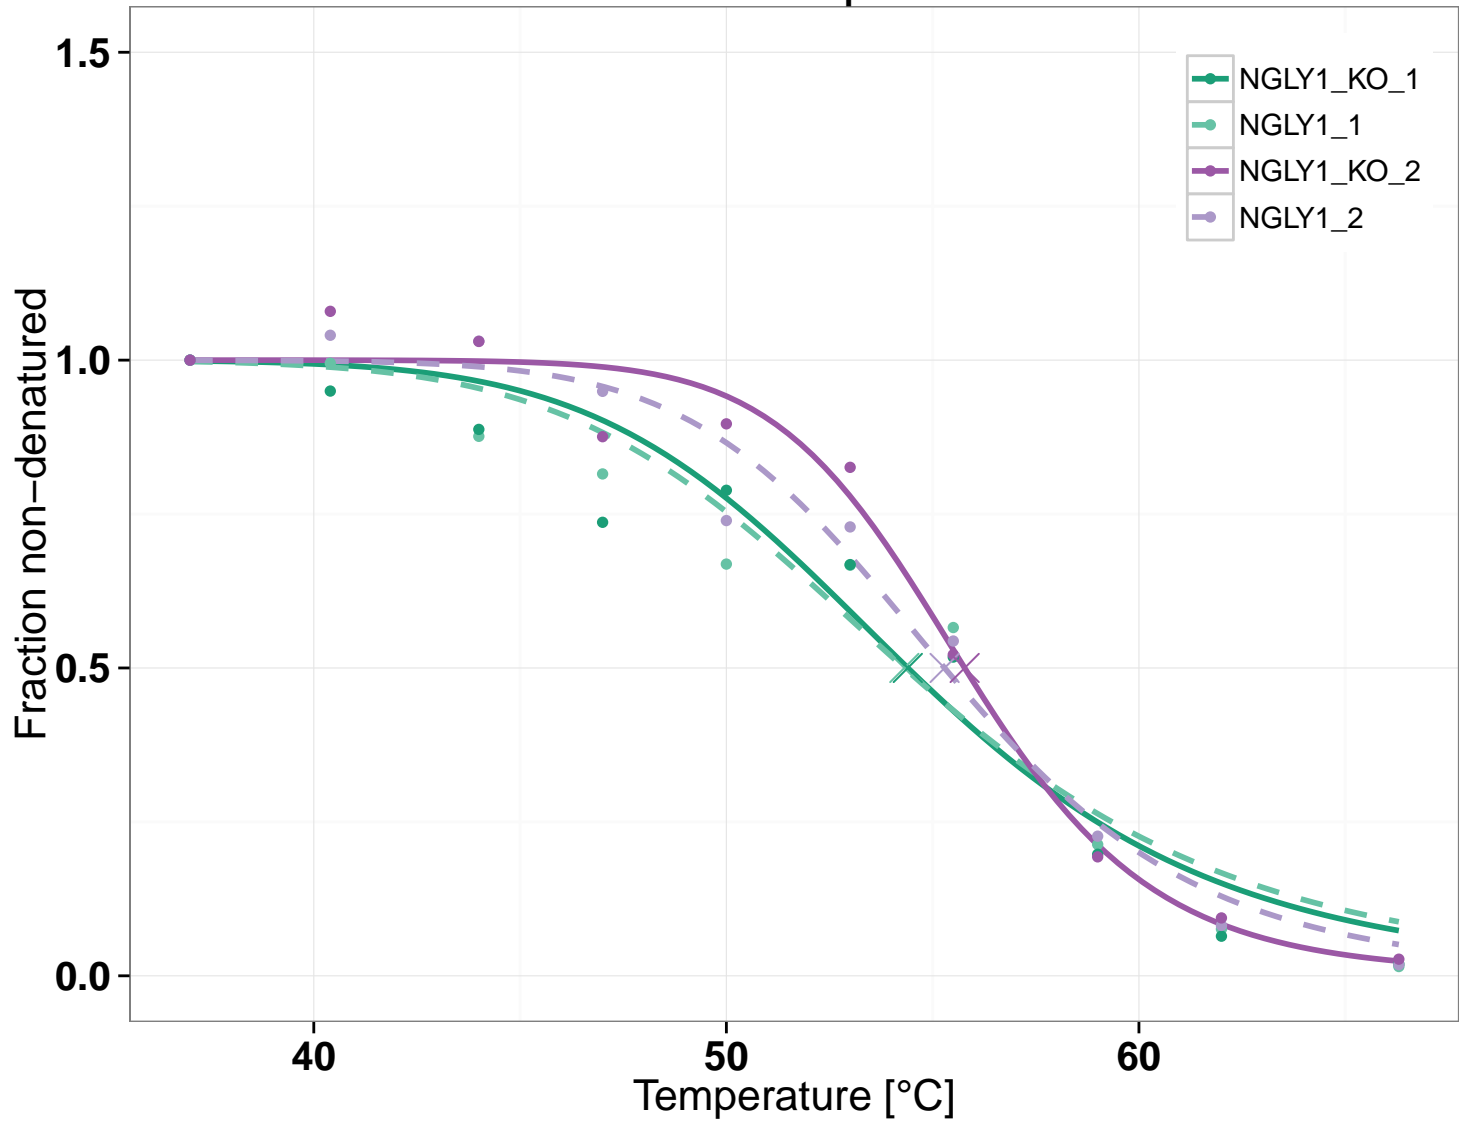

|            | meltPoint | slope  | plateau | R2   |
|------------|-----------|--------|---------|------|
| NGLY1_KO_1 | 54.4      | -0.066 | 0       | 0.95 |
| NGLY1_1    | 54.31     | -0.061 | 0       | 0.95 |
| NGLY1_KO_2 | 55.78     | -0.11  | 0       | 0.98 |
| NGLY1_2    | 55.29     | -0.081 | 0       | 0.98 |

Supplement: Supplementary file 2644 [file 1]

# IPI00397383.2|KIF1B

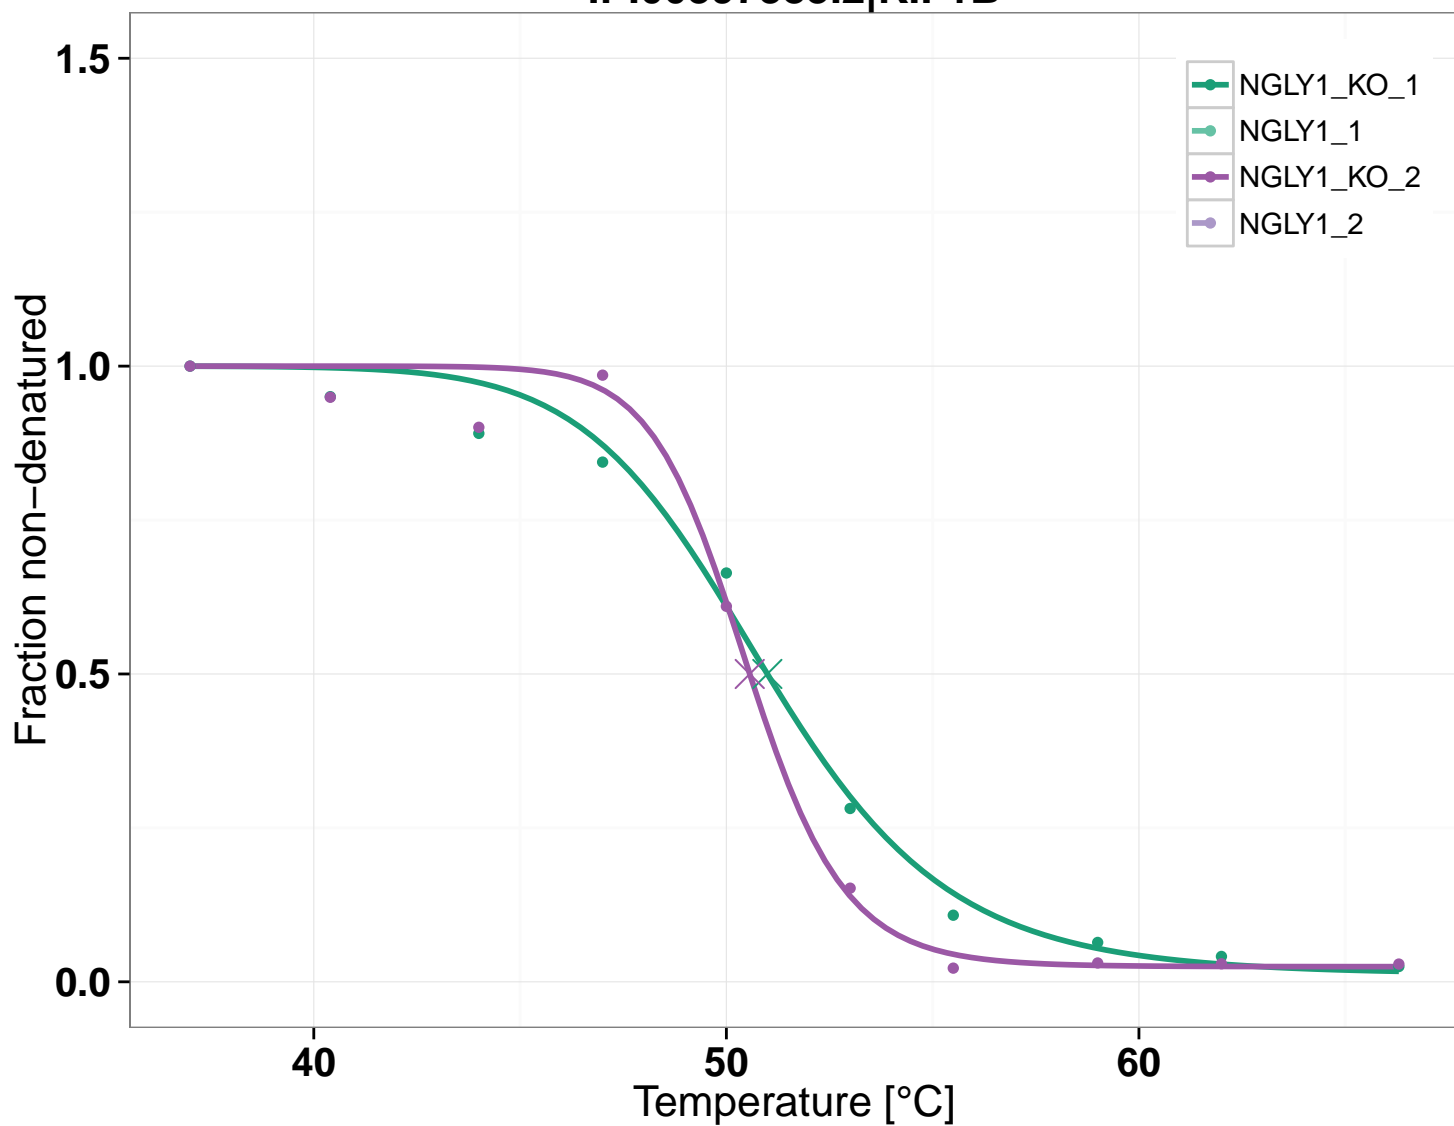

|            | meltPoint | slope | plateau | R2   |
|------------|-----------|-------|---------|------|
| NGLY1_KO_1 | 50.99     | -0.11 | 0.01    | 0.99 |
| NGLY1_1    | -         | -     | -       | -    |
| NGLY1_KO_2 | 50.57     | -0.21 | 0.02    | 0.99 |
| NGLY1_2    | -         | -     | -       | -    |

Supplement: Supplementary file 2645 [file 1]

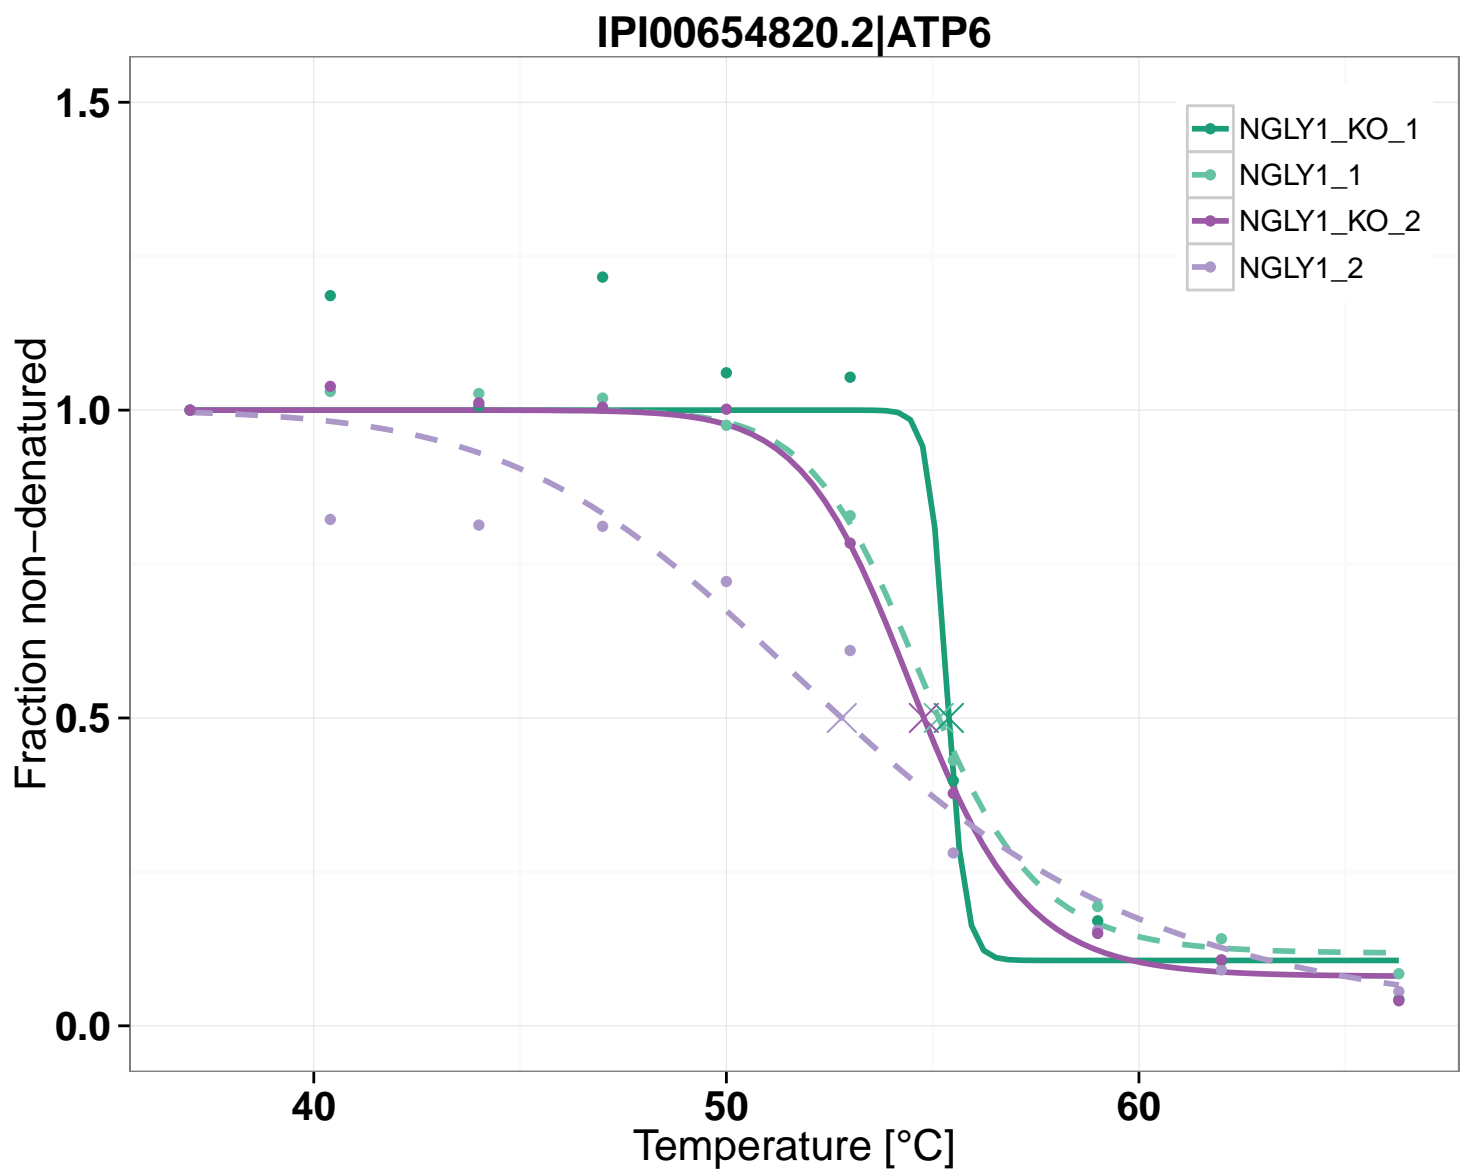

|            | meltPoint | slope  | plateau | R2   |
|------------|-----------|--------|---------|------|
| NGLY1_KO_1 | 55.39     | -1     | 0.11    | 0.95 |
| NGLY1_1    | 55.15     | -0.16  | 0.12    | 1    |
| NGLY1_KO_2 | 54.79     | -0.17  | 0.08    | 1    |
| NGLY1_2    | 52.8      | -0.063 | 0       | 0.94 |

Supplement: Supplementary file 2646 [file 1]

IPI00004459.1|DIMIT1L

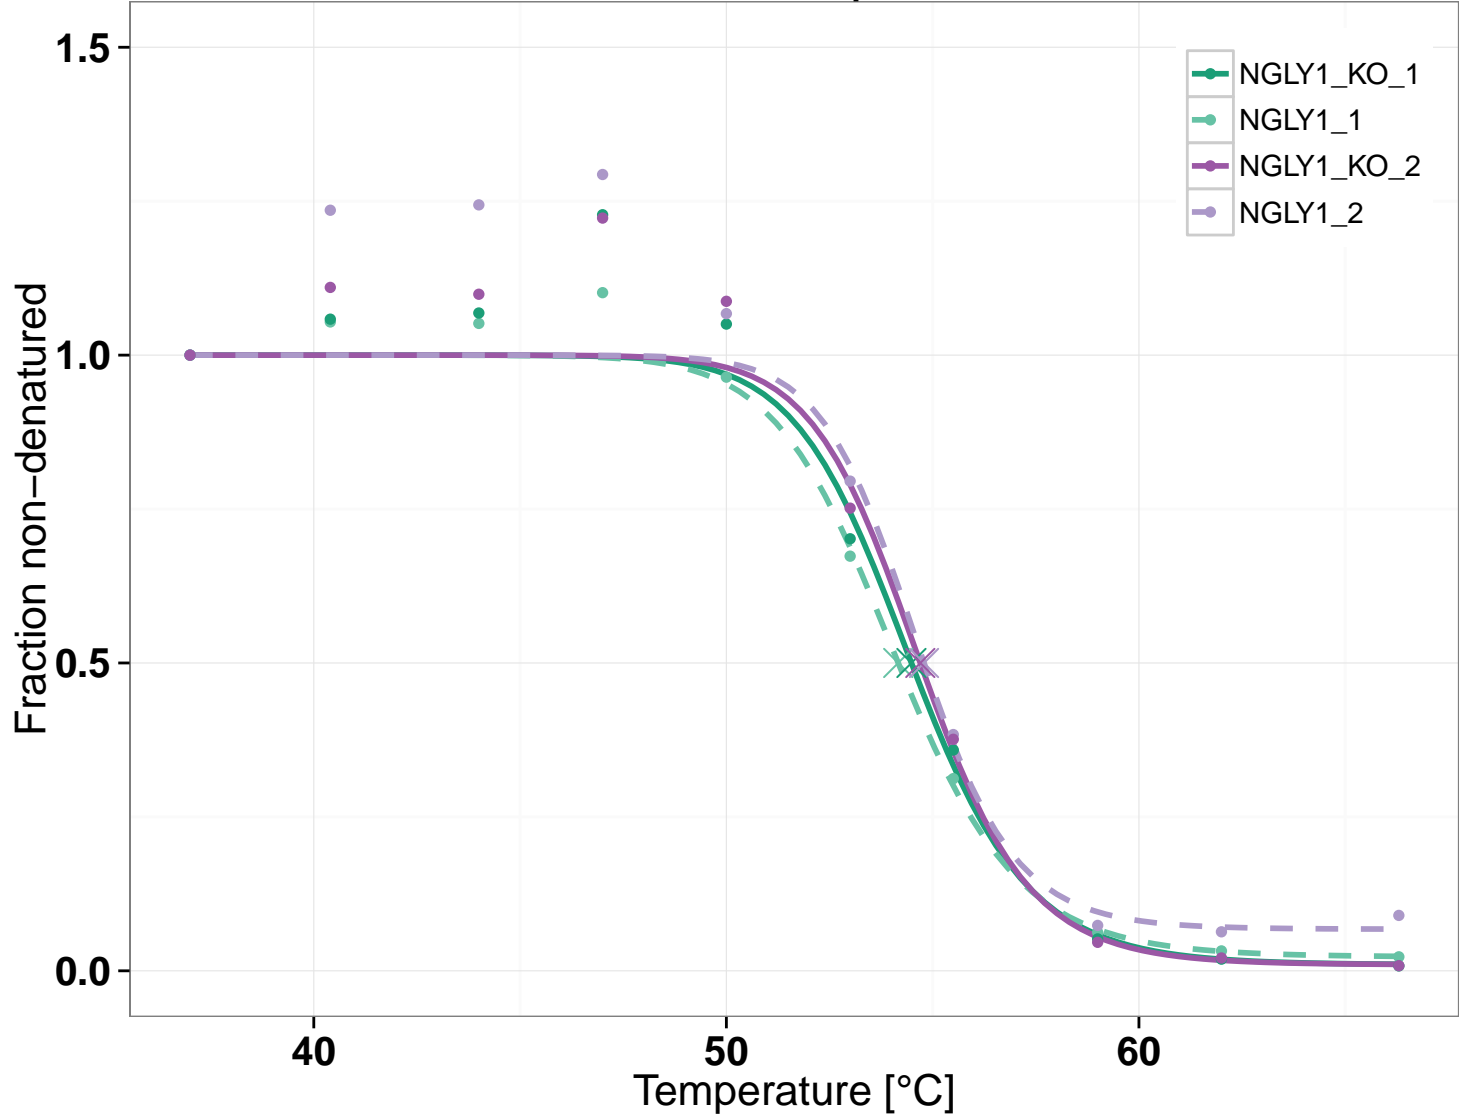

|            | meltPoint | slope | plateau | R2   |
|------------|-----------|-------|---------|------|
| NGLY1_KO_1 | 54.49     | -0.18 | 0.01    | 0.97 |
| NGLY1_1    | 54.17     | -0.17 | 0.02    | 0.99 |
| NGLY1_KO_2 | 54.7      | -0.19 | 0.01    | 0.96 |
| NGLY1_2    | 54.79     | -0.2  | 0.07    | 0.91 |

Supplement: Supplementary file 2647 [file 1]

IPI00014540.1|HOXB4

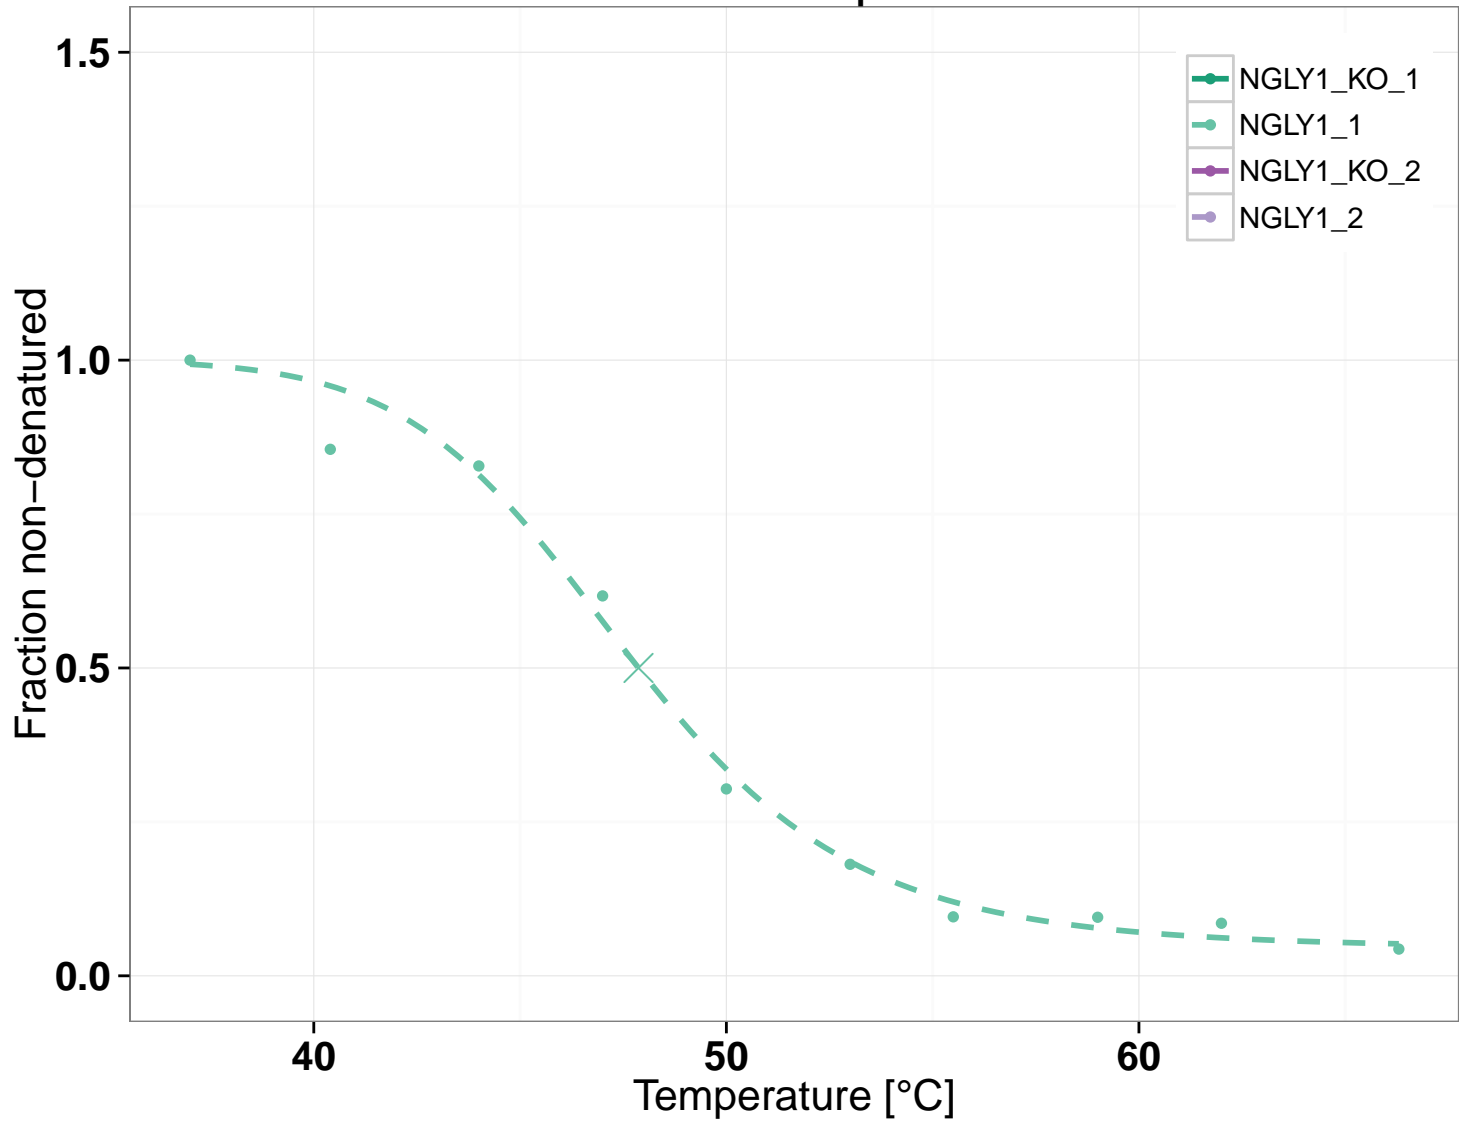

|            | meltPoint | slope  | plateau | R2   |
|------------|-----------|--------|---------|------|
| NGLY1_KO_1 | -         | -      | -       | -    |
| NGLY1_1    | 47.87     | -0.088 | 0.04    | 0.99 |
| NGLY1_KO_2 | -         | -      | -       | -    |
| NGLY1_2    | -         | -      | -       | -    |

Supplement: Supplementary file 2648 [file 1]

IPI00024821.1|PSMD14

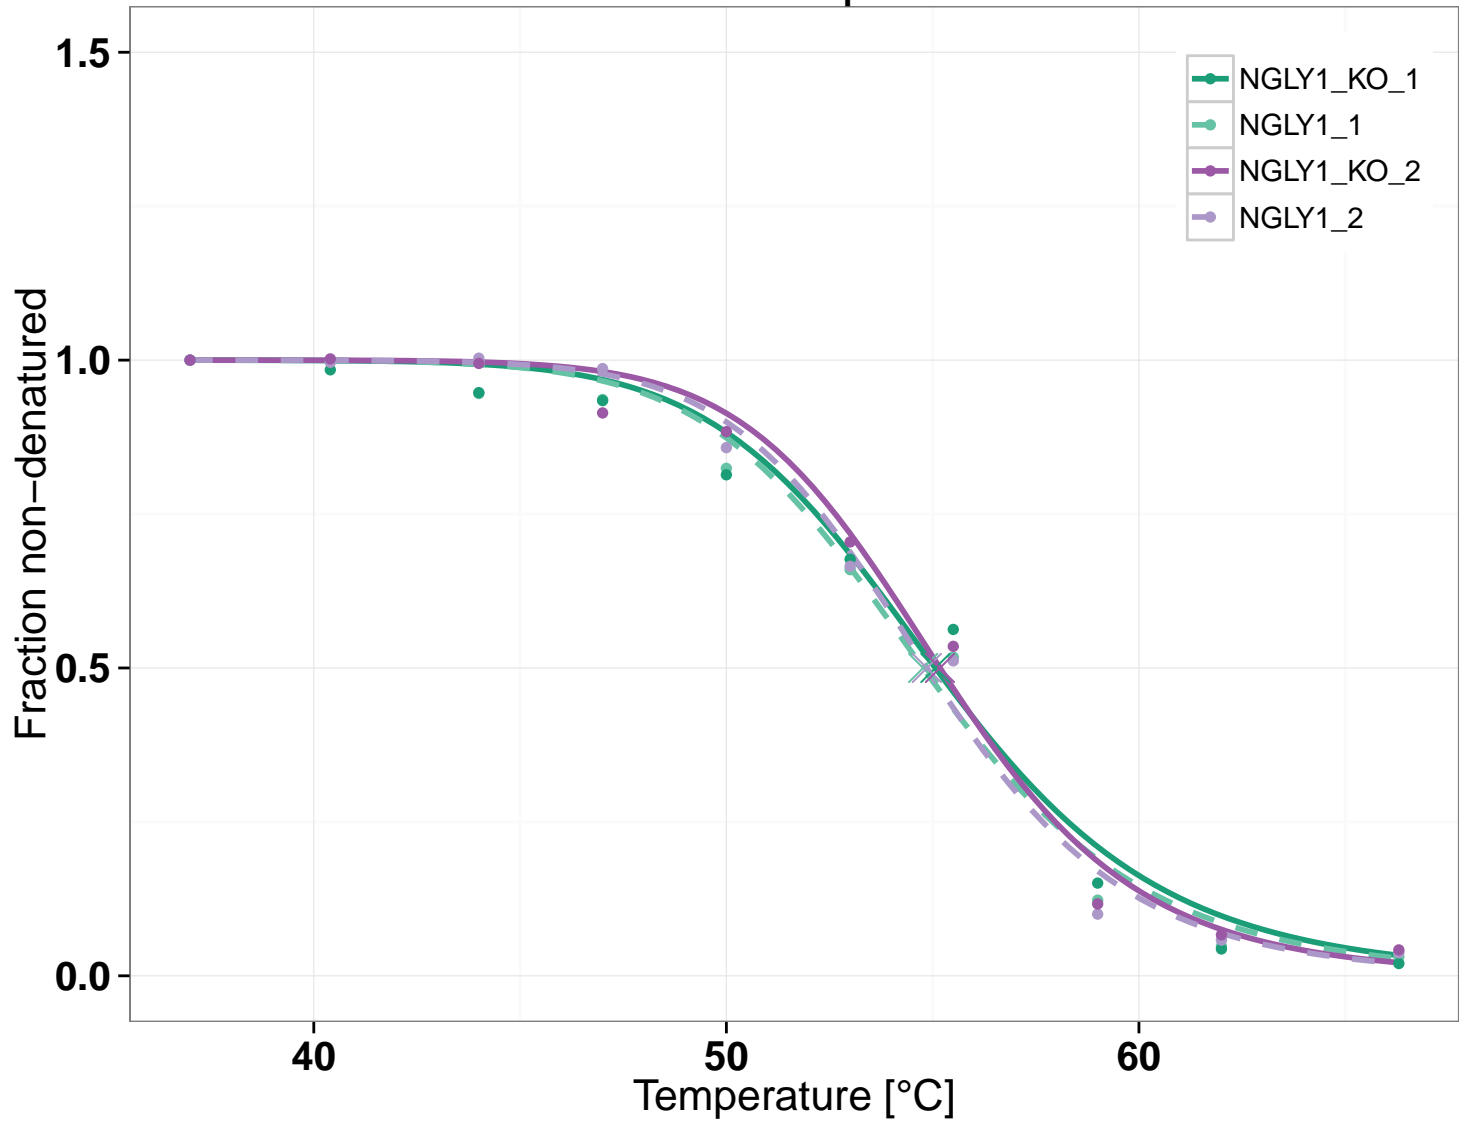

|            | meltPoint | slope  | plateau | R2   |
|------------|-----------|--------|---------|------|
| NGLY1_KO_1 | 55.07     | -0.091 | 0       | 0.98 |
| NGLY1_1    | 54.77     | -0.093 | 0       | 0.99 |
| NGLY1_KO_2 | 55.18     | -0.1   | 0       | 0.99 |
| NGLY1_2    | 54.86     | -0.1   | 0       | 0.99 |

Supplement: Supplementary file 2649 [file 1]

# IPI00299635.6|BIRC6

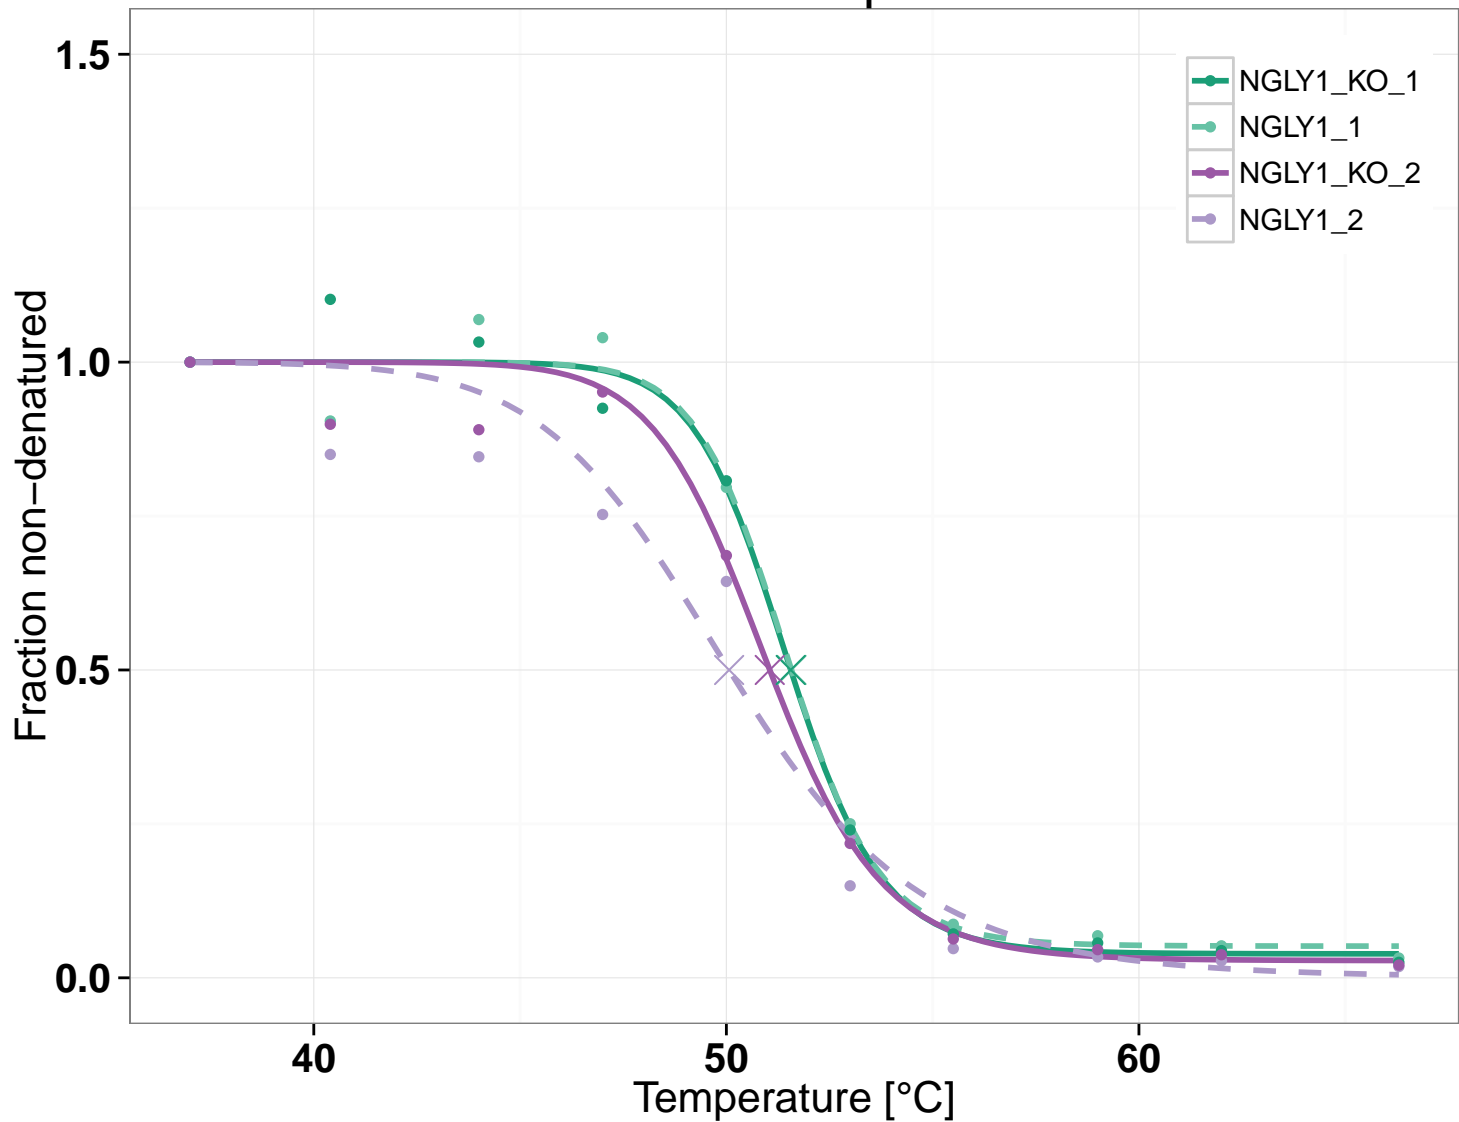

|            | meltPoint | slope | plateau | R2   |
|------------|-----------|-------|---------|------|
| NGLY1_KO_1 | 51.56     | -0.21 | 0.04    | 0.99 |
| NGLY1_1    | 51.58     | -0.21 | 0.05    | 0.99 |
| NGLY1_KO_2 | 51.05     | -0.17 | 0.03    | 0.99 |
| NGLY1_2    | 50.07     | -0.11 | 0       | 0.96 |

Supplement: Supplementary file 2650 [file 1]

# IPI00412672.1|PKN1

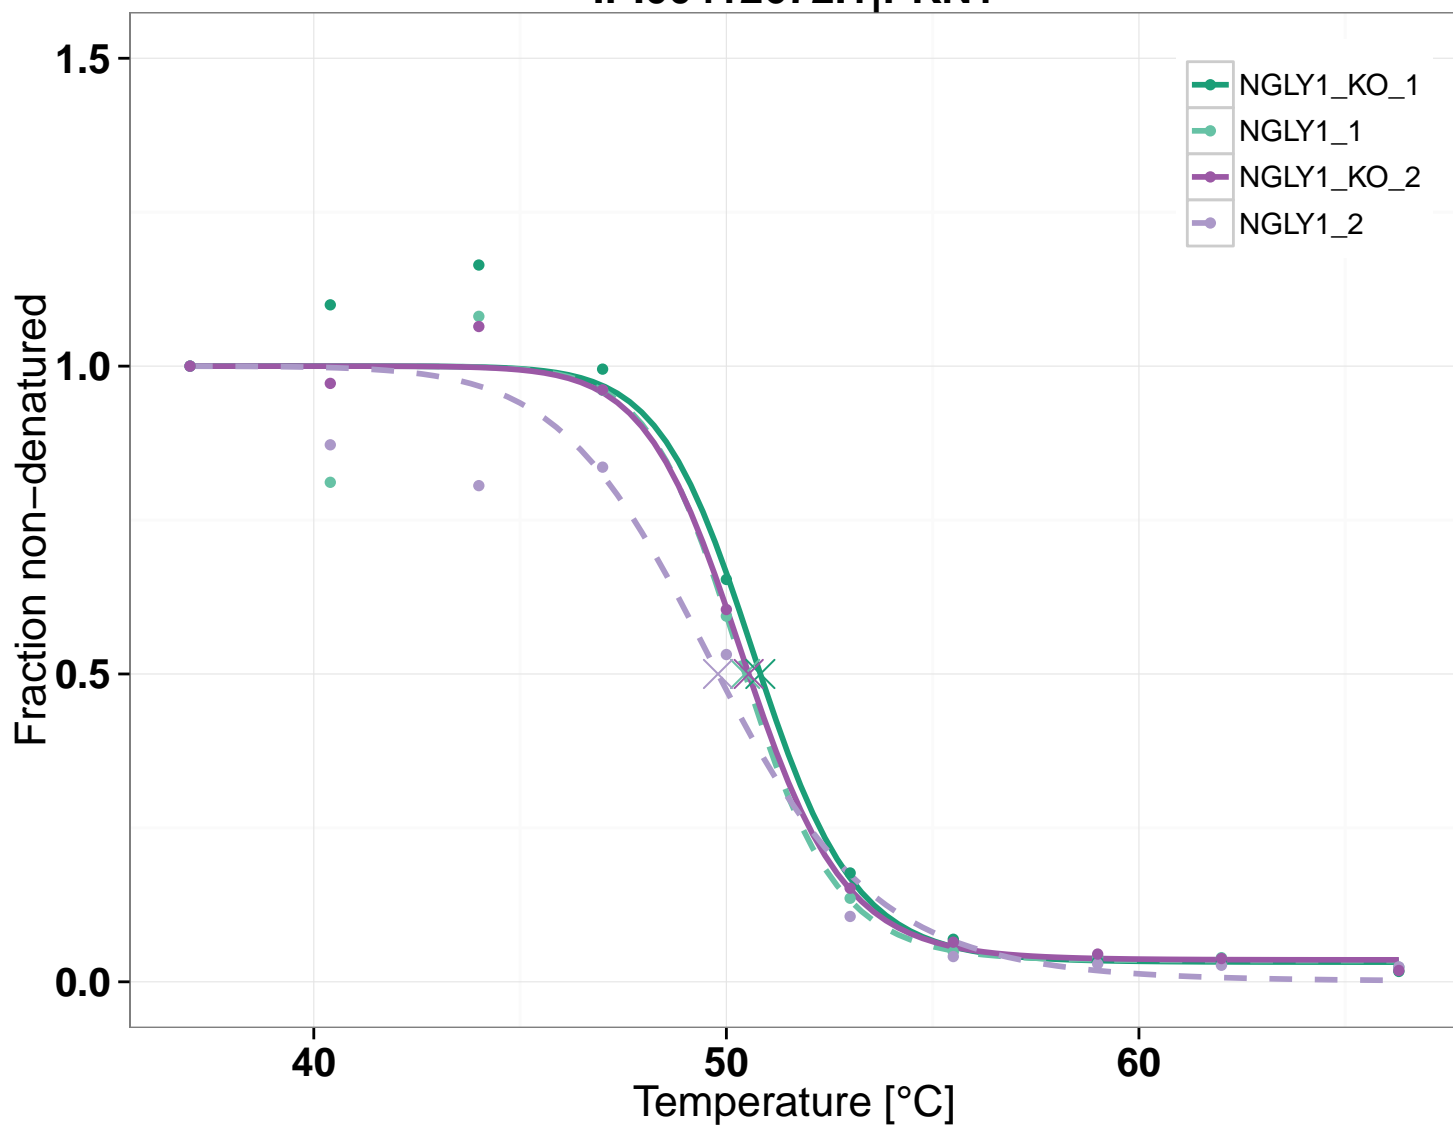

|            | meltPoint | slope | plateau | R2   |
|------------|-----------|-------|---------|------|
| NGLY1_KO_1 | 50.82     | -0.2  | 0.03    | 0.98 |
| NGLY1_1    | 50.45     | -0.21 | 0.03    | 0.98 |
| NGLY1_KO_2 | 50.54     | -0.2  | 0.04    | 1    |
| NGLY1_2    | 49.8      | -0.13 | 0       | 0.97 |

Supplement: Supplementary file 2651 [file 1]

IPI00021362.3|ZNF335

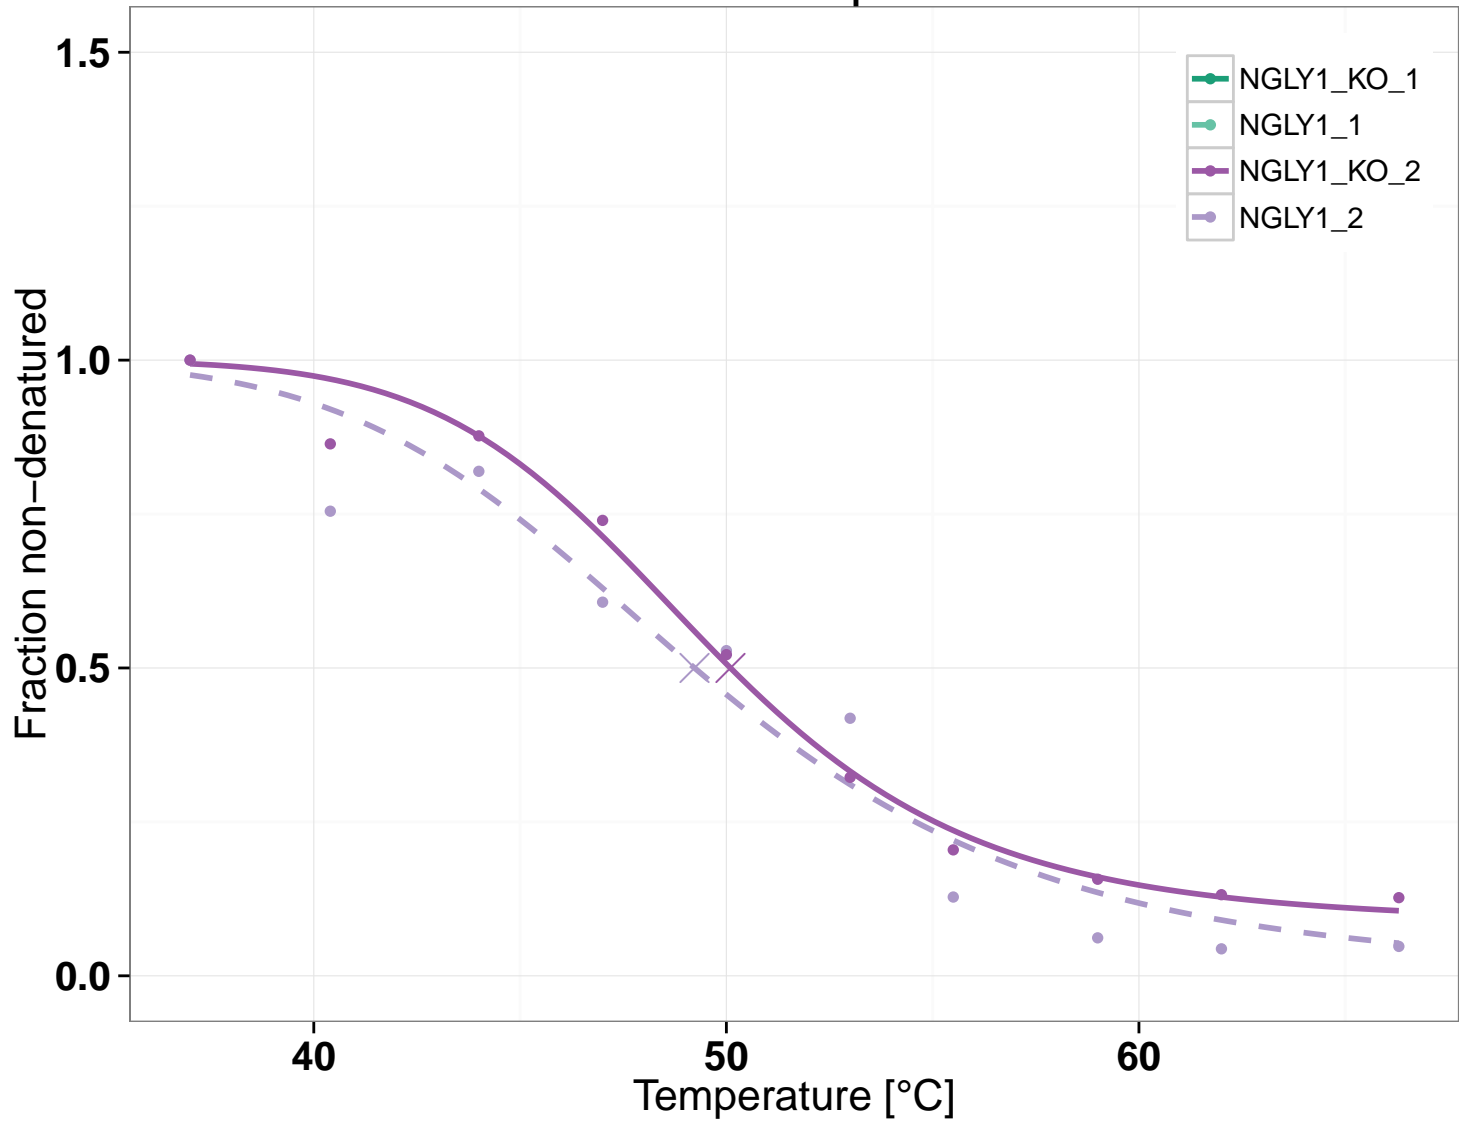

|            | meltPoint | slope  | plateau | R2   |
|------------|-----------|--------|---------|------|
| NGLY1_KO_1 | —         | —      | —       | —    |
| NGLY1_1    | —         | —      | —       | —    |
| NGLY1_KO_2 | 50.1      | -0.07  | 0.09    | 0.99 |
| NGLY1_2    | 49.23     | -0.059 | 0       | 0.95 |

Supplement: Supplementary file 2652 [file 1]

IPI00472782.1|PHF14

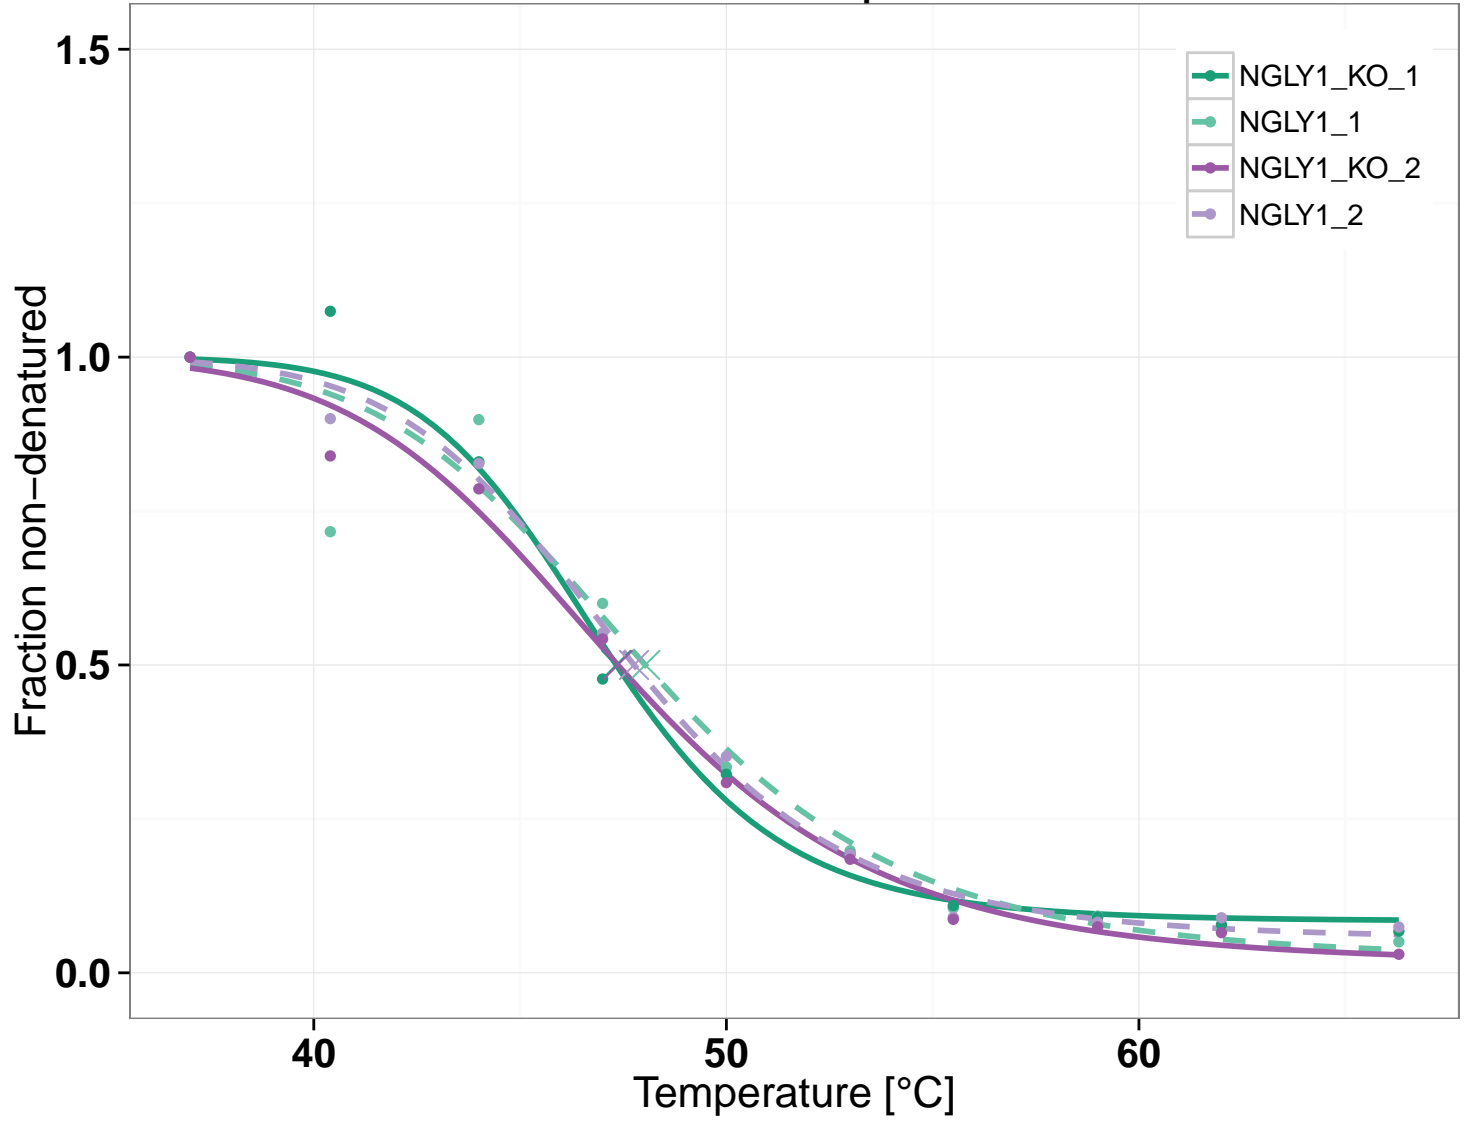

|            | meltPoint | slope  | plateau | R2   |
|------------|-----------|--------|---------|------|
| NGLY1_KO_1 | 47.33     | -0.1   | 0.08    | 0.99 |
| NGLY1_1    | 48.03     | -0.076 | 0.02    | 0.95 |
| NGLY1_KO_2 | 47.37     | -0.077 | 0.01    | 0.99 |
| NGLY1_2    | 47.76     | -0.086 | 0.05    | 1    |

Supplement: Supplementary file 2653 [file 1]

IPI00855873.1|TMEM192

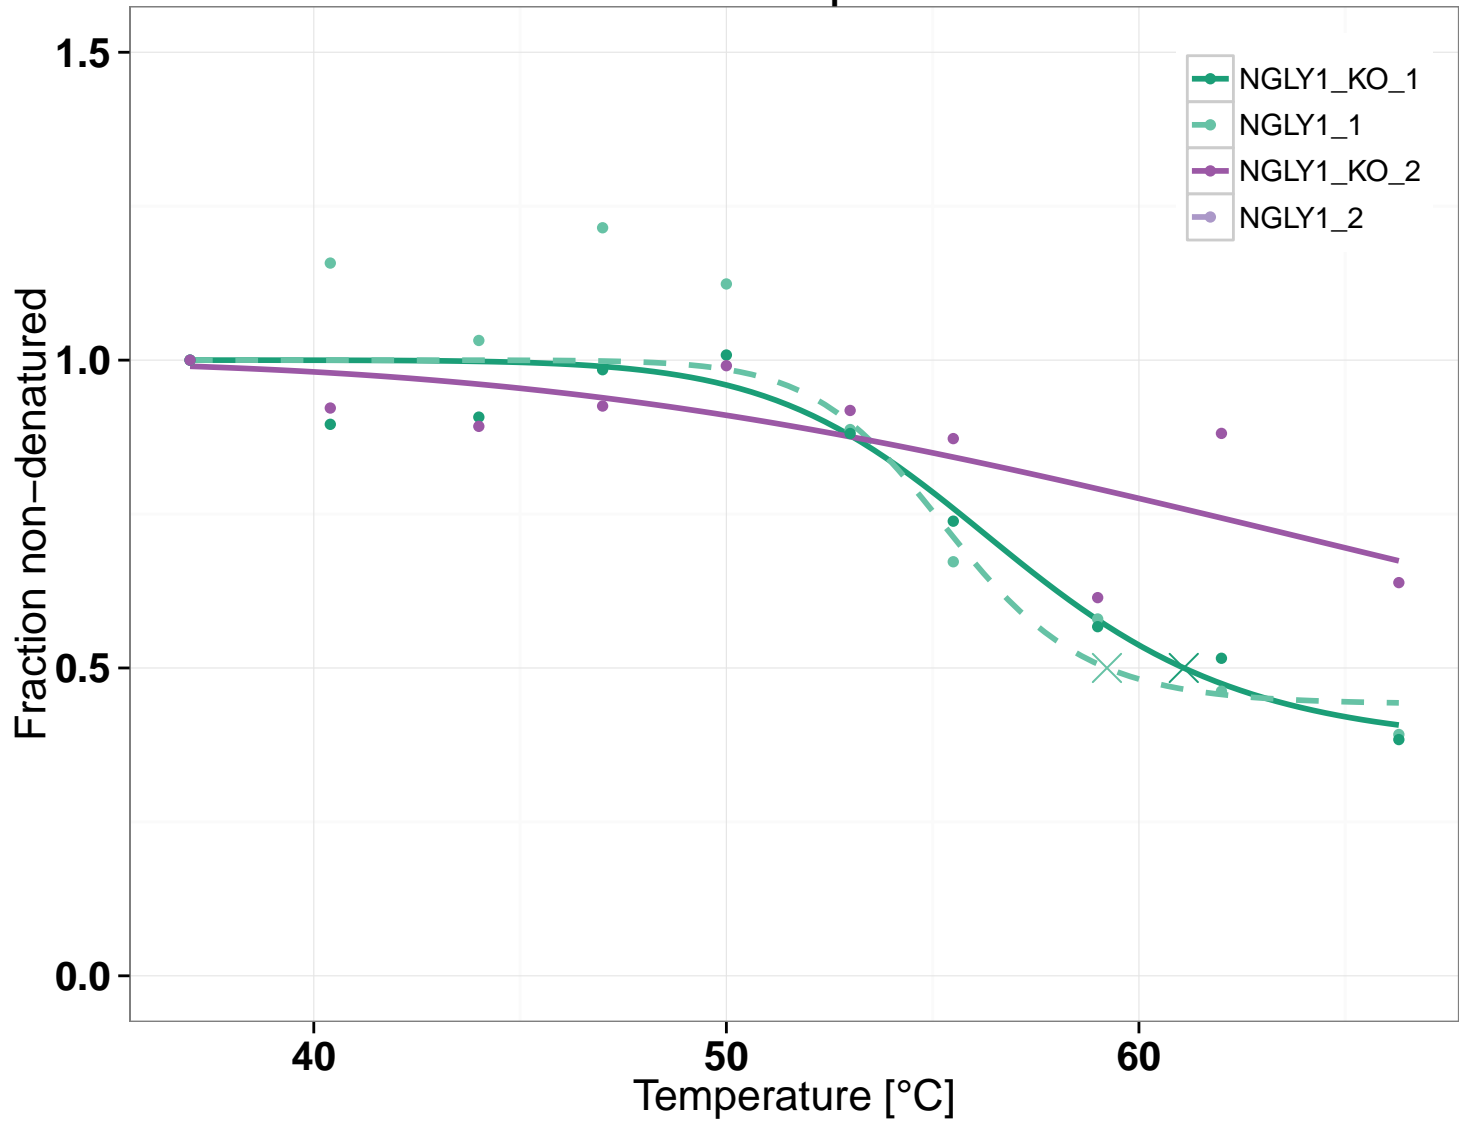

|            | meltPoint | slope  | plateau | R2   |
|------------|-----------|--------|---------|------|
| NGLY1_KO_1 | 61.09     | -0.055 | 0.37    | 0.95 |
| NGLY1_1    | 59.22     | -0.084 | 0.44    | 0.88 |
| NGLY1_KO_2 | -         | -0.016 | 0       | 0.57 |
| NGLY1_2    | -         | -      | -       | -    |

Supplement: Supplementary file 2654 [file 1]

IPI00911046.1|RP6-213H19 1

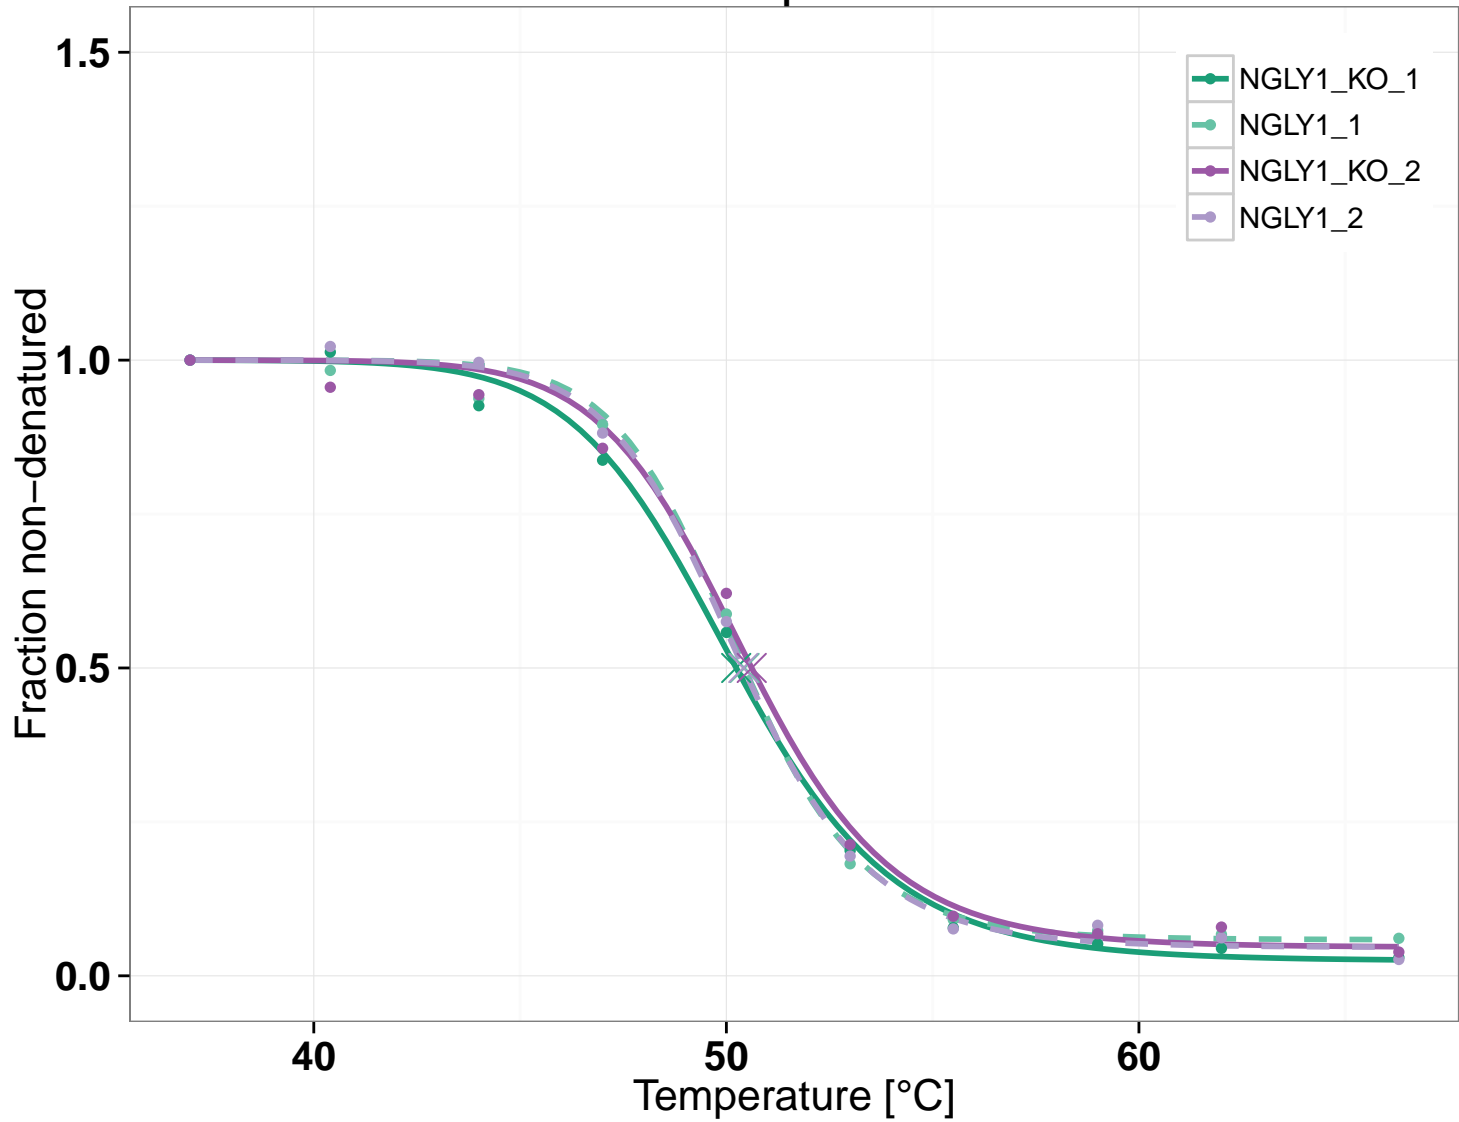

|            | meltPoint | slope | plateau | R2   |
|------------|-----------|-------|---------|------|
| NGLY1_KO_1 | 50.24     | -0.13 | 0.02    | 1    |
| NGLY1_1    | 50.44     | -0.16 | 0.06    | 1    |
| NGLY1_KO_2 | 50.61     | -0.13 | 0.05    | 0.99 |
| NGLY1_2    | 50.41     | -0.15 | 0.05    | 1    |

Supplement: Supplementary file 2655 [file 1]

# IPI00465275.2|RANBP9

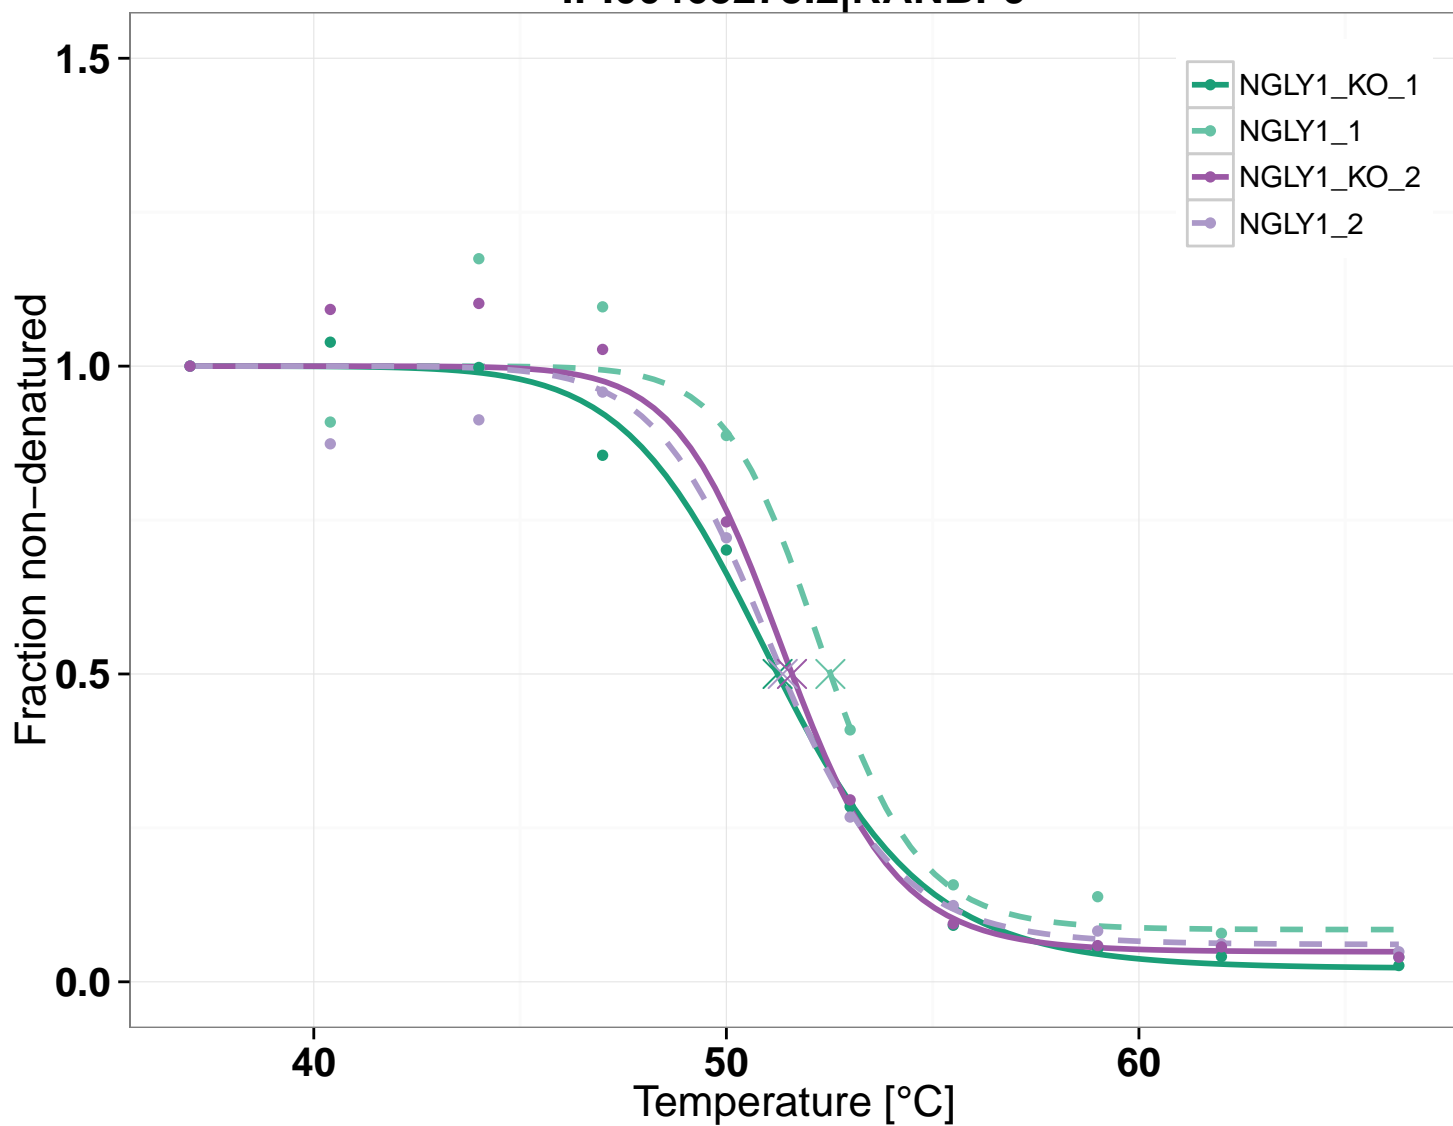

|            | meltPoint | slope | plateau | R2   |
|------------|-----------|-------|---------|------|
| NGLY1_KO_1 | 51.24     | -0.13 | 0.02    | 1    |
| NGLY1_1    | 52.52     | -0.19 | 0.08    | 0.97 |
| NGLY1_KO_2 | 51.59     | -0.18 | 0.05    | 0.99 |
| NGLY1_2    | 51.37     | -0.16 | 0.06    | 0.99 |

Supplement: Supplementary file 2656 [file 1]

# IPI00915400.1|ROD1

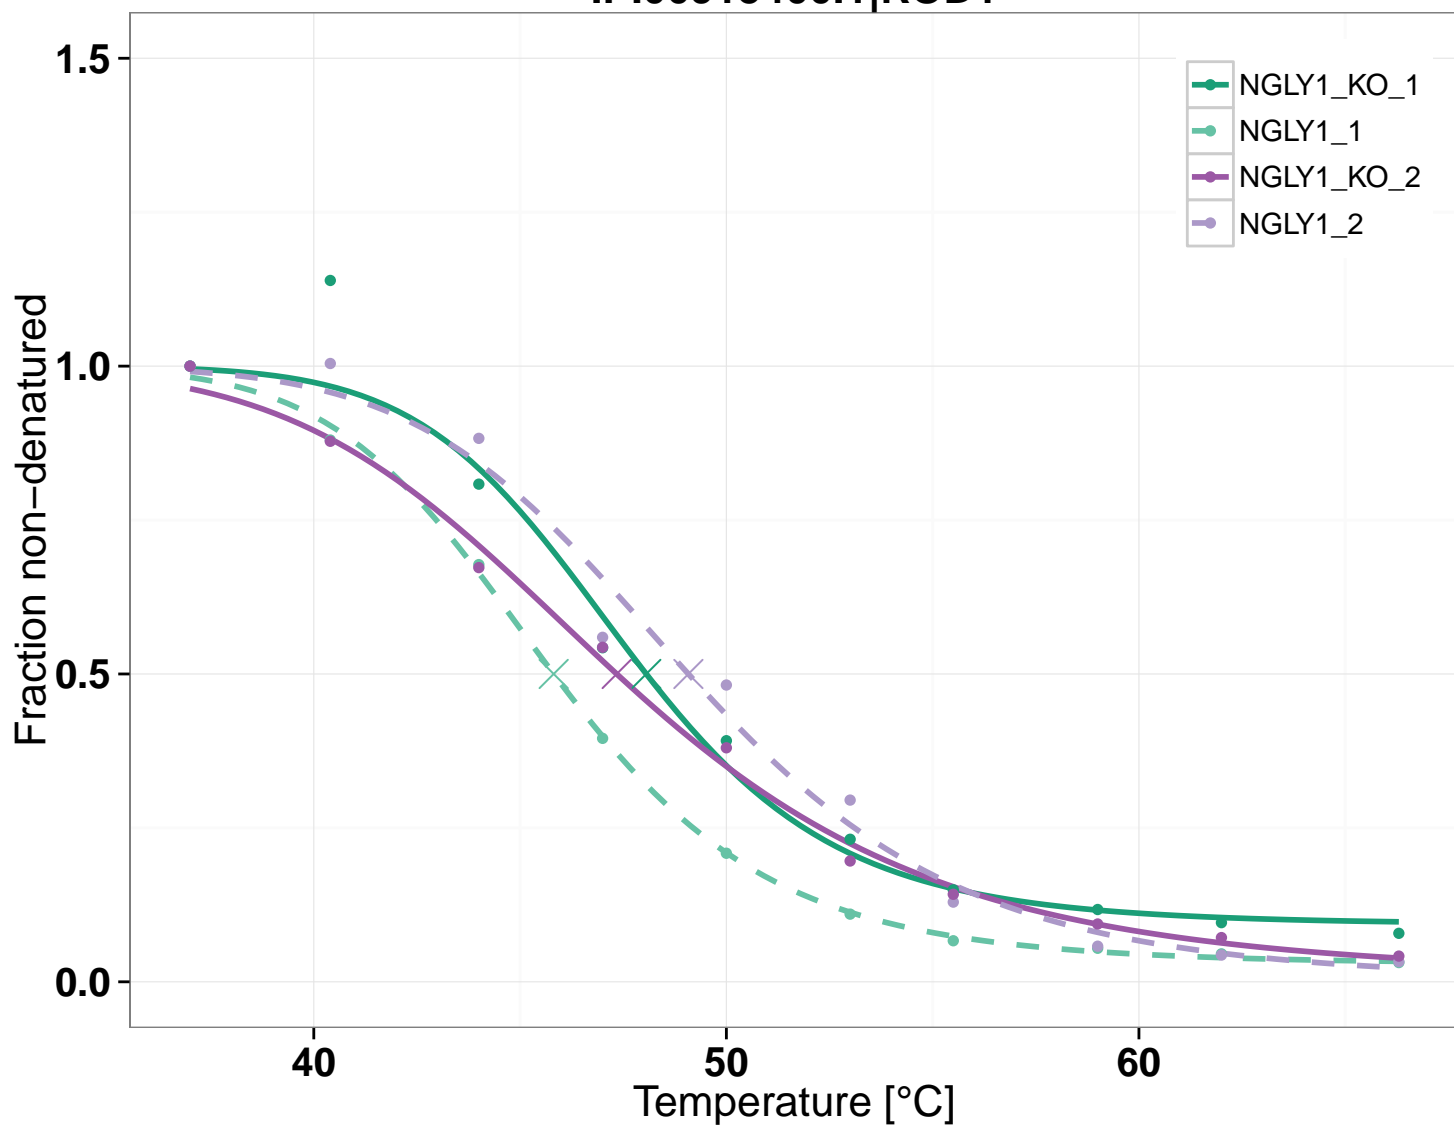

|            | meltPoint | slope  | plateau | R2   |
|------------|-----------|--------|---------|------|
| NGLY1_KO_1 | 48.06     | -0.09  | 0.09    | 0.98 |
| NGLY1_1    | 45.81     | -0.091 | 0.03    | 1    |
| NGLY1_KO_2 | 47.34     | -0.064 | 0.01    | 1    |
| NGLY1_2    | 49.08     | -0.075 | 0       | 0.99 |

Supplement: Supplementary file 2657 [file 1]

# IPI00153031.3|C17ORF80

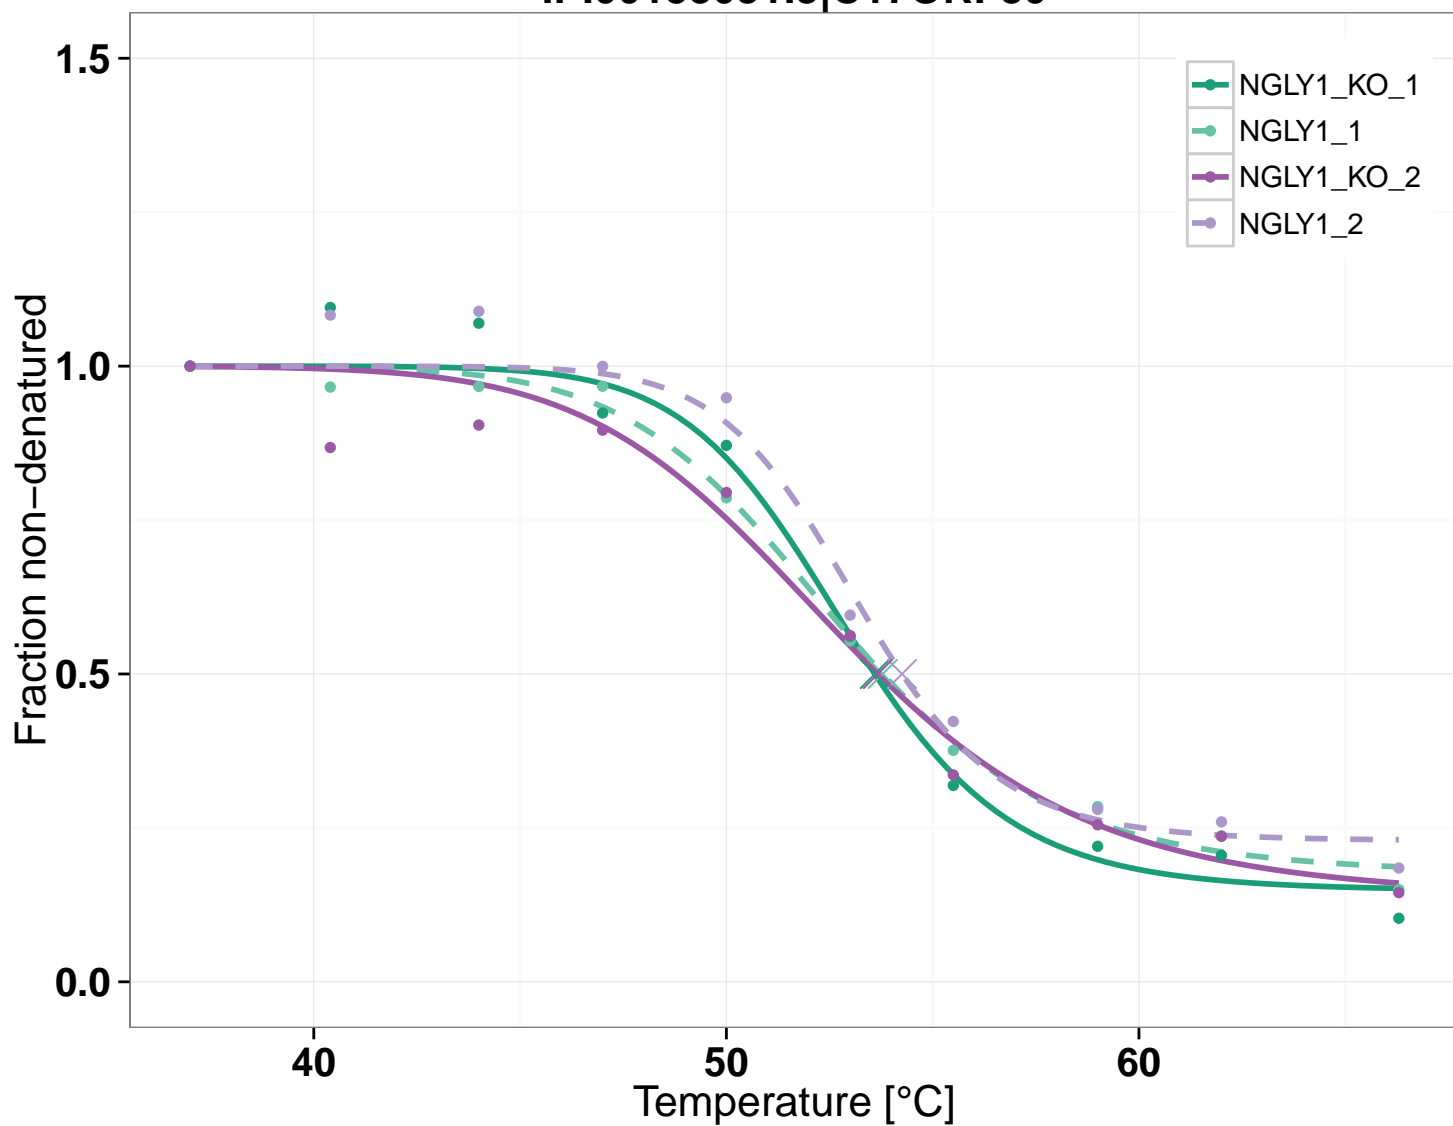

|            | meltPoint | slope  | plateau | R2   |
|------------|-----------|--------|---------|------|
| NGLY1_KO_1 | 53.6      | -0.11  | 0.15    | 0.98 |
| NGLY1_1    | 53.79     | -0.08  | 0.17    | 0.99 |
| NGLY1_KO_2 | 53.67     | -0.071 | 0.14    | 0.97 |
| NGLY1_2    | 54.26     | -0.11  | 0.23    | 0.98 |

Supplement: Supplementary file 2658 [file 1]

# IPI00478002.1|A6NGR5\_HUMAN

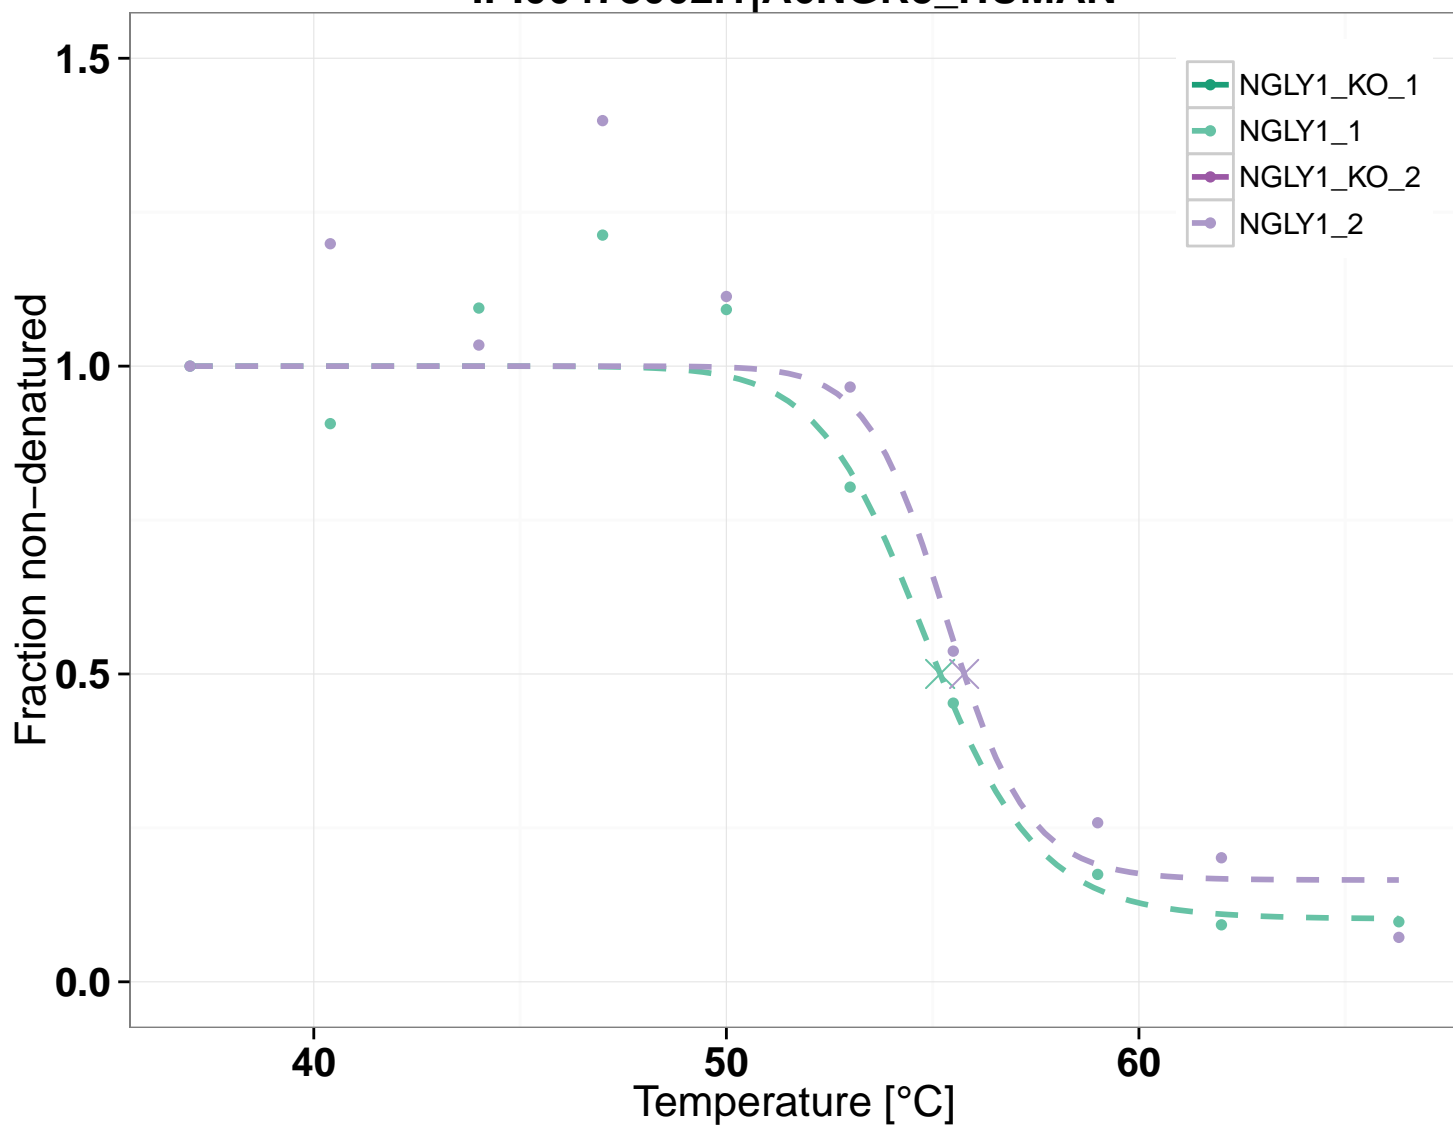

|            | meltPoint | slope | plateau | R2   |
|------------|-----------|-------|---------|------|
| NGLY1_KO_1 | —         | —     | —       | —    |
| NGLY1_1    | 55.18     | -0.17 | 0.1     | 0.96 |
| NGLY1_KO_2 | —         | —     | —       | —    |
| NGLY1_2    | 55.76     | -0.21 | 0.17    | 0.88 |

Supplement: Supplementary file 2659 [file 1]

IPI00145260.3|C1ORF69

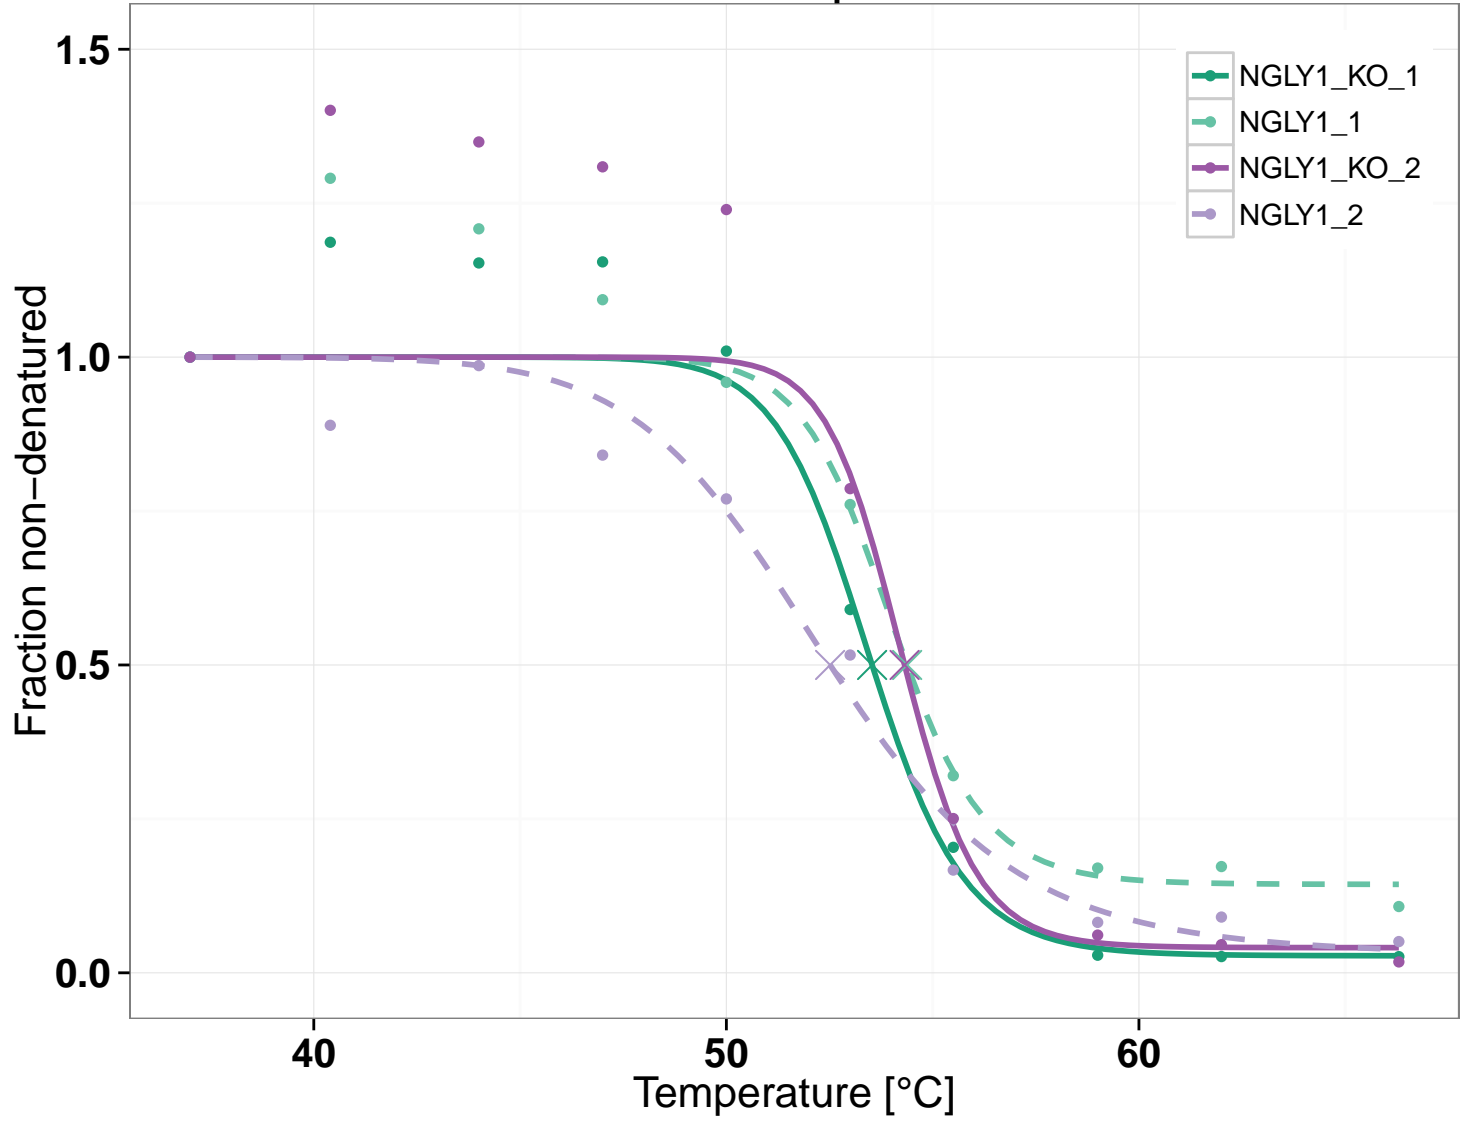

|            | meltPoint | slope | plateau | R2   |
|------------|-----------|-------|---------|------|
| NGLY1_KO_1 | 53.53     | -0.21 | 0.03    | 0.96 |
| NGLY1_1    | 54.38     | -0.19 | 0.14    | 0.93 |
| NGLY1_KO_2 | 54.32     | -0.26 | 0.04    | 0.86 |
| NGLY1_2    | 52.51     | -0.1  | 0.03    | 0.98 |

Supplement: Supplementary file 2660 [file 1]

IPI00328161.7|FKBP8

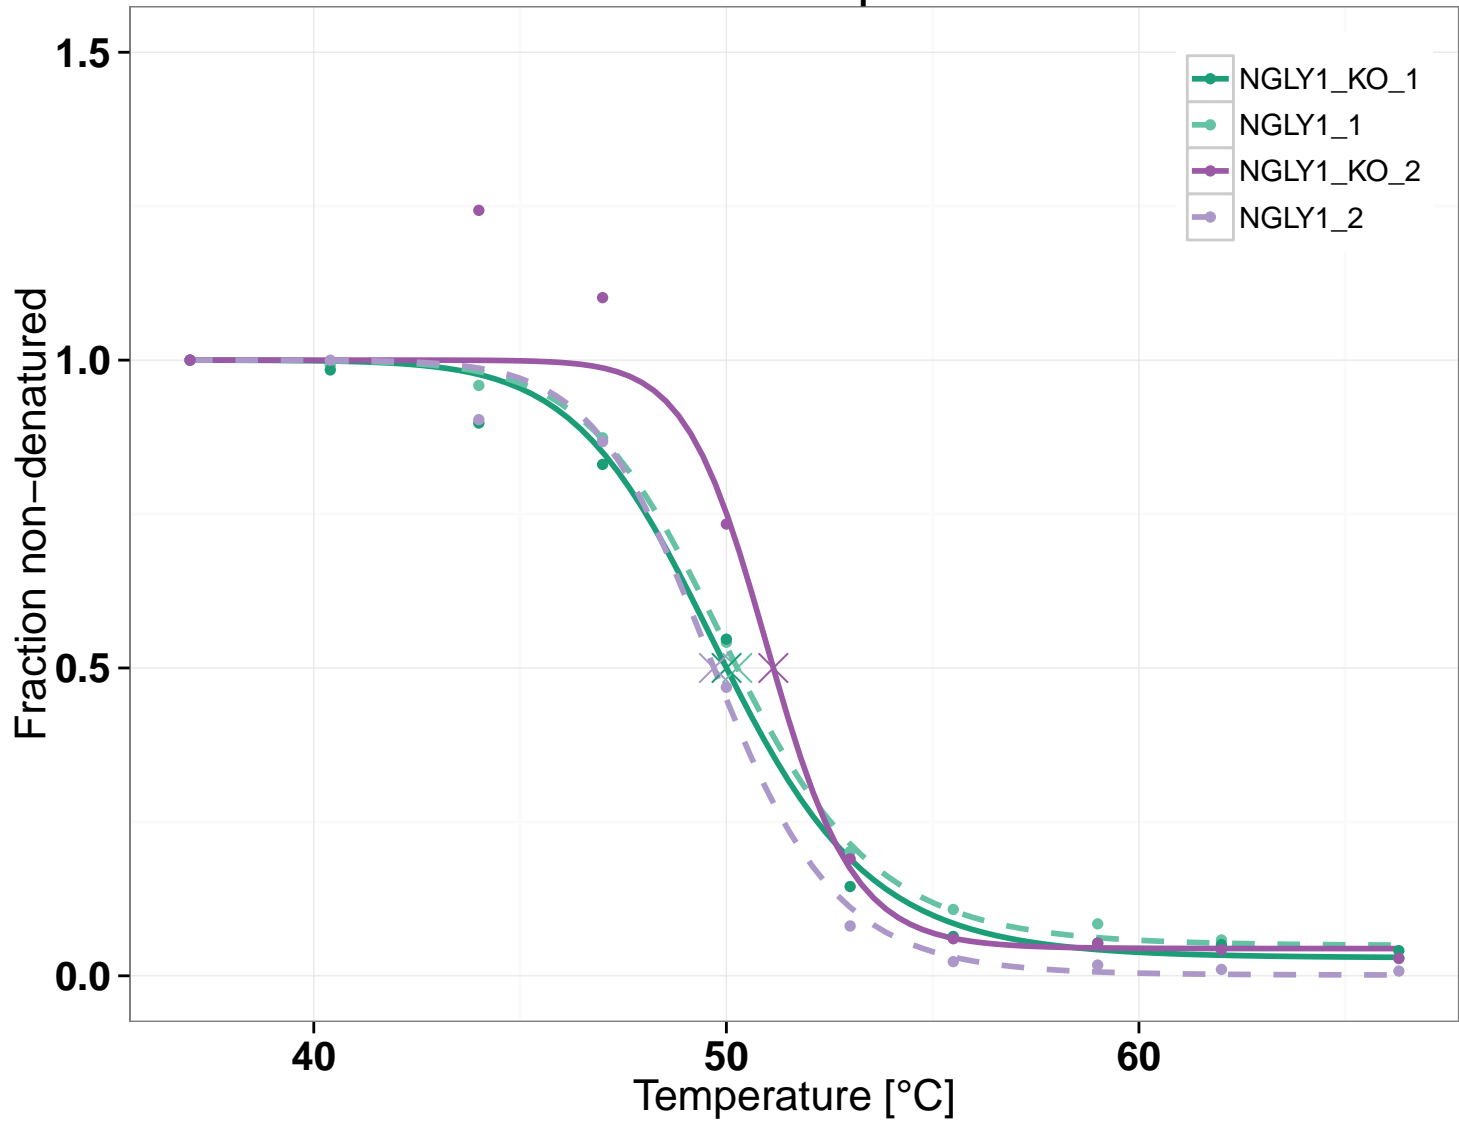

|            | meltPoint | slope | plateau | R2   |
|------------|-----------|-------|---------|------|
| NGLY1_KO_1 | 50        | -0.14 | 0.03    | 0.99 |
| NGLY1_1    | 50.26     | -0.14 | 0.05    | 1    |
| NGLY1_KO_2 | 51.14     | -0.24 | 0.04    | 0.89 |
| NGLY1_2    | 49.7      | -0.17 | 0       | 1    |

Supplement: Supplementary file 2661 [file 1]

IPI00514759.3|GPATCH3

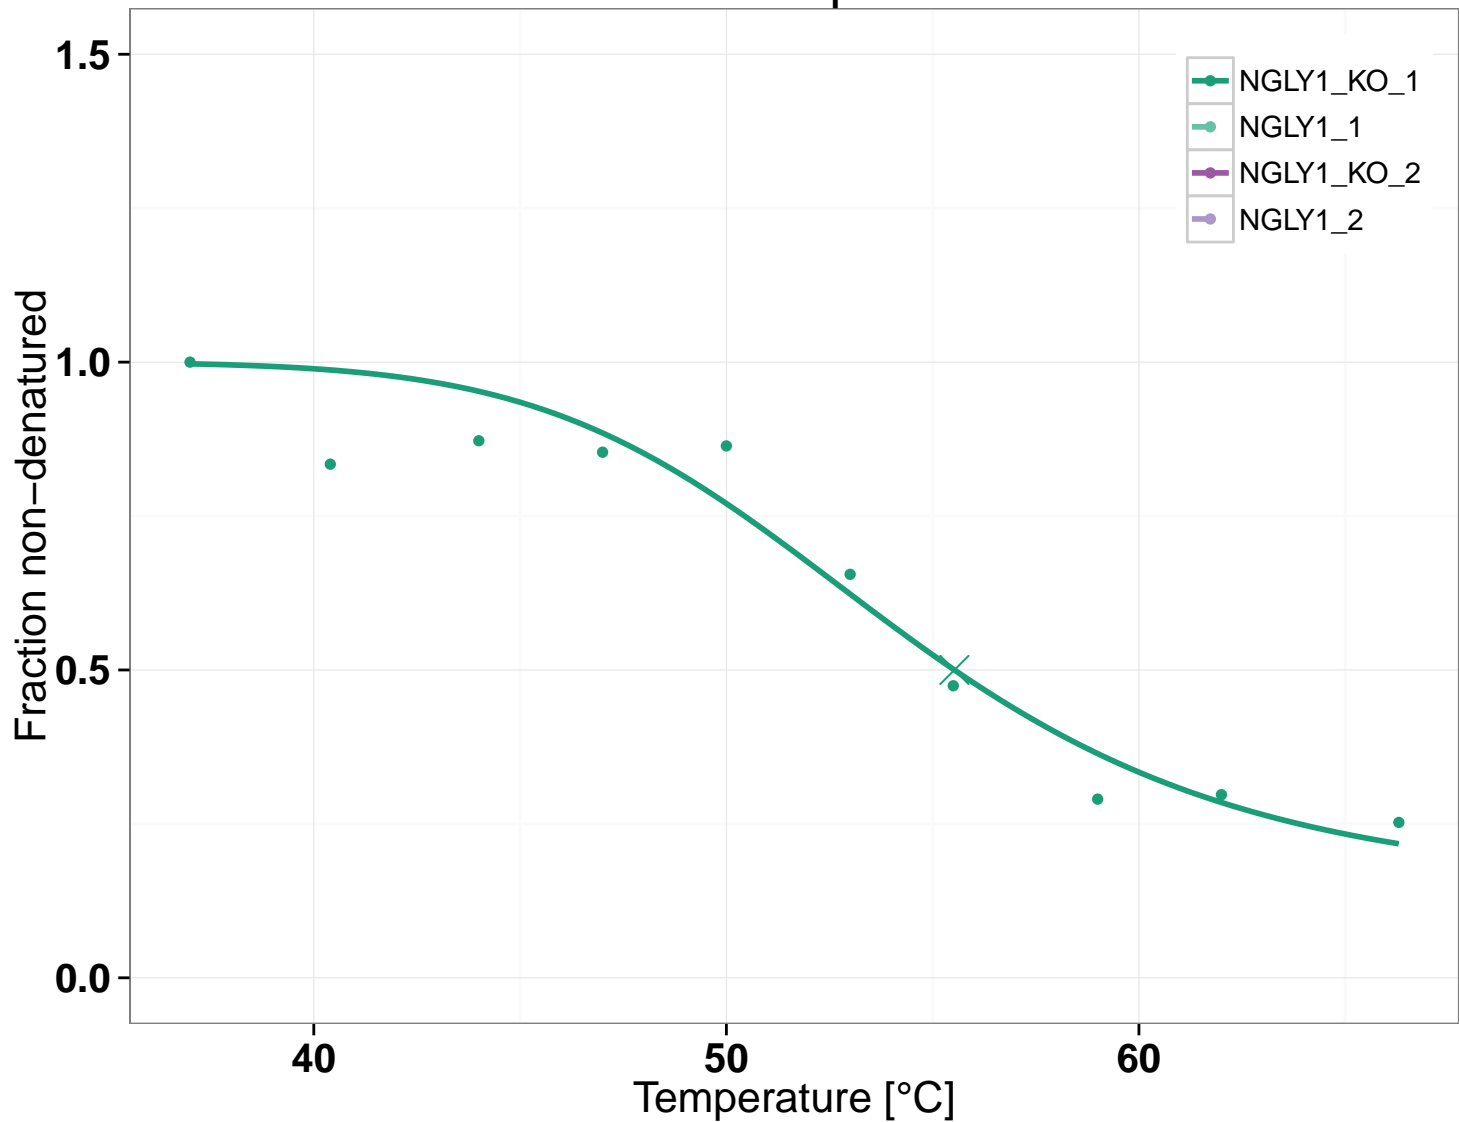

|            | meltPoint | slope  | plateau | R2   |
|------------|-----------|--------|---------|------|
| NGLY1_KO_1 | 55.53     | -0.051 | 0.14    | 0.93 |
| NGLY1_1    | -         | -      | -       | -    |
| NGLY1_KO_2 | -         | -      | -       | -    |
| NGLY1_2    | -         | -      | -       | -    |

Supplement: Supplementary file 2662 [file 1]

IPI00062511.5|C19ORF20

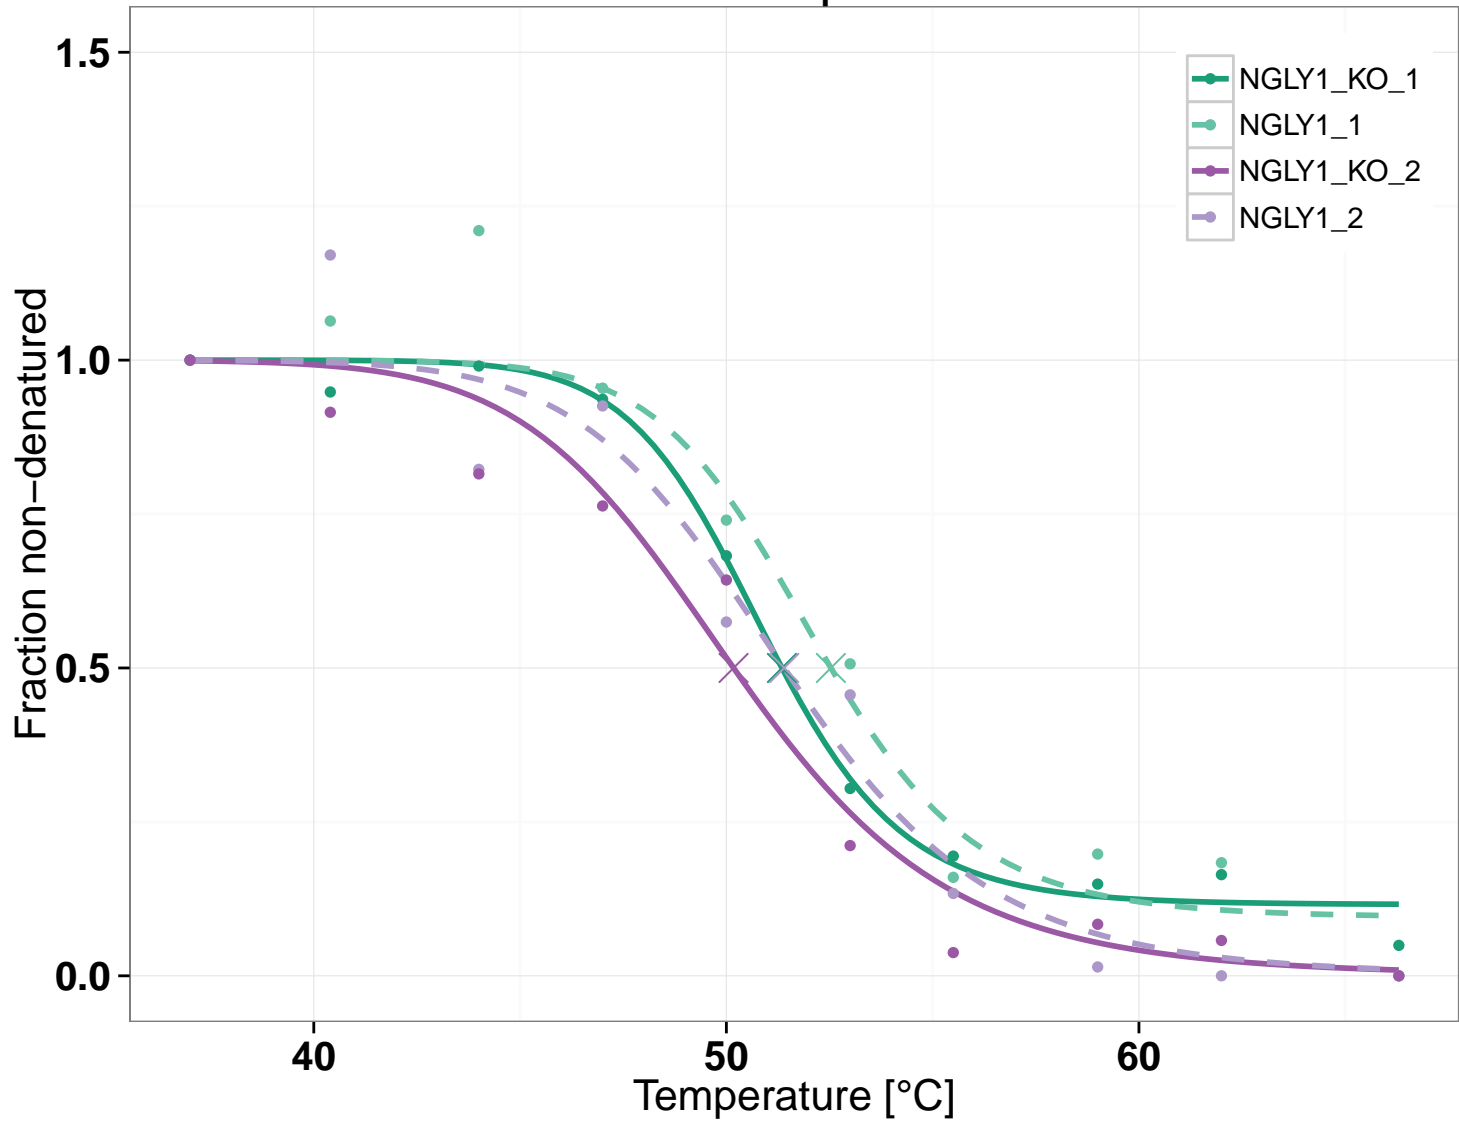

|            | meltPoint | slope  | plateau | R2   |
|------------|-----------|--------|---------|------|
| NGLY1_KO_1 | 51.35     | -0.13  | 0.12    | 0.99 |
| NGLY1_1    | 52.53     | -0.12  | 0.09    | 0.95 |
| NGLY1_KO_2 | 50.17     | -0.097 | 0       | 0.97 |
| NGLY1_2    | 51.4      | -0.1   | 0       | 0.96 |

Supplement: Supplementary file 2663 [file 1]

# IPI00647650.3|EIF3H

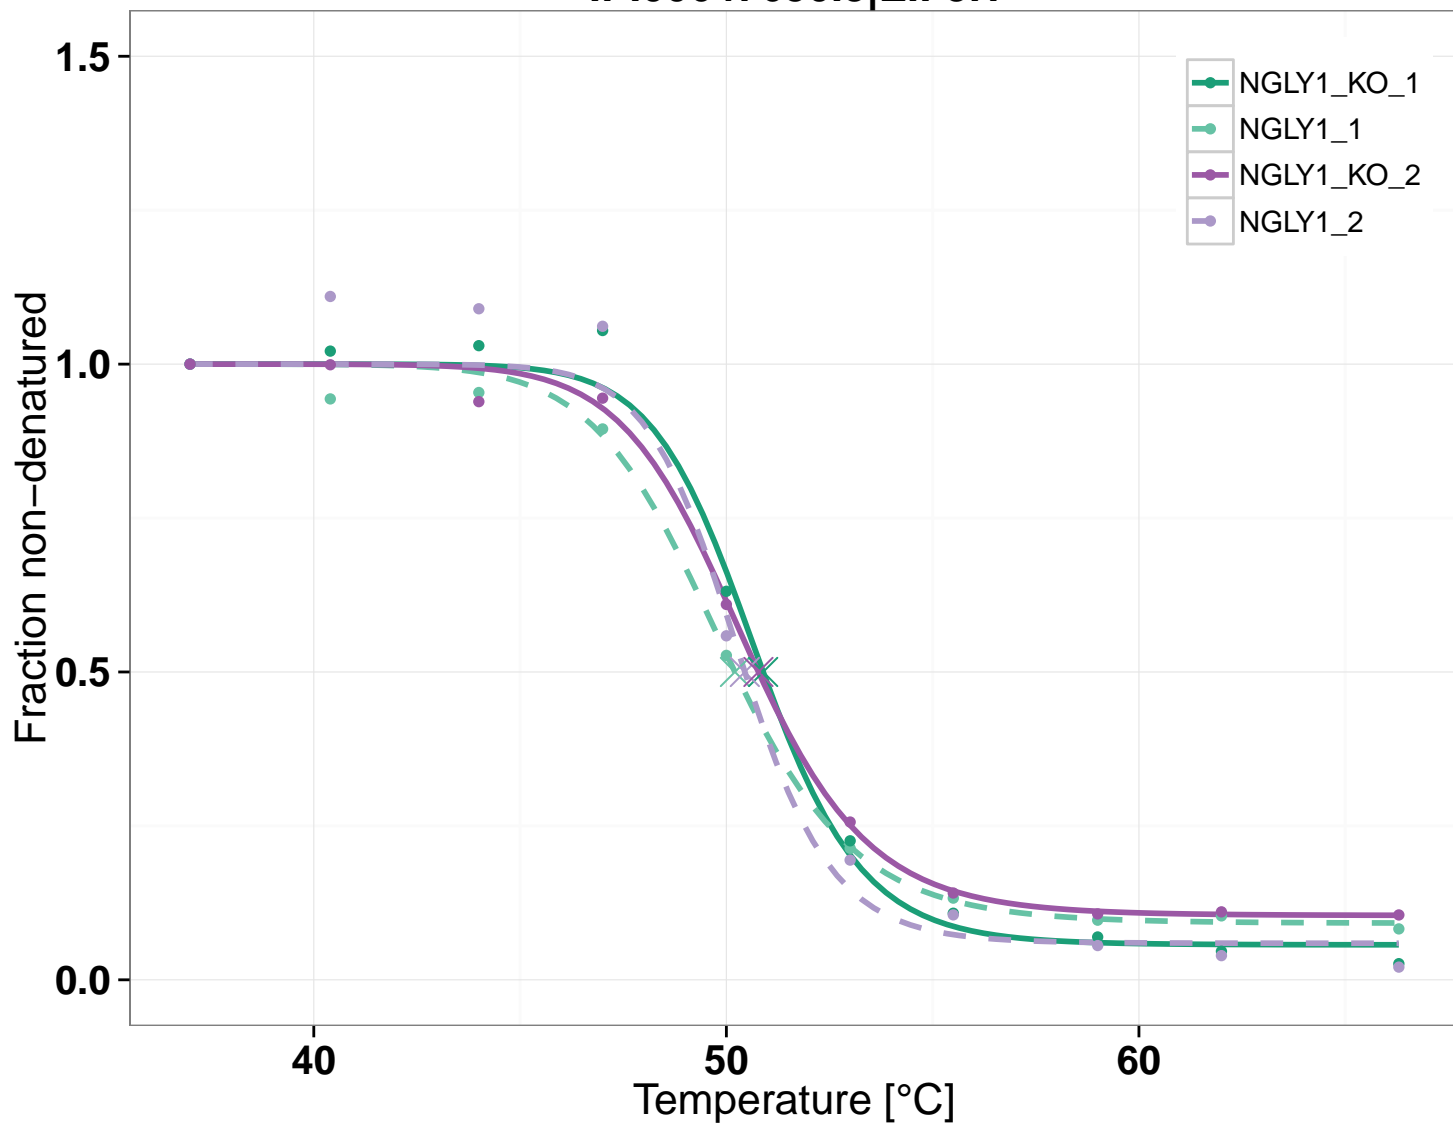

|            | meltPoint | slope | plateau | R2   |
|------------|-----------|-------|---------|------|
| NGLY1_KO_1 | 50.89     | -0.19 | 0.06    | 0.99 |
| NGLY1_1    | 50.21     | -0.14 | 0.09    | 1    |
| NGLY1_KO_2 | 50.78     | -0.15 | 0.1     | 1    |
| NGLY1_2    | 50.45     | -0.21 | 0.06    | 0.98 |

Supplement: Supplementary file 2664 [file 1]

IPI00872640.1|GLT25D2

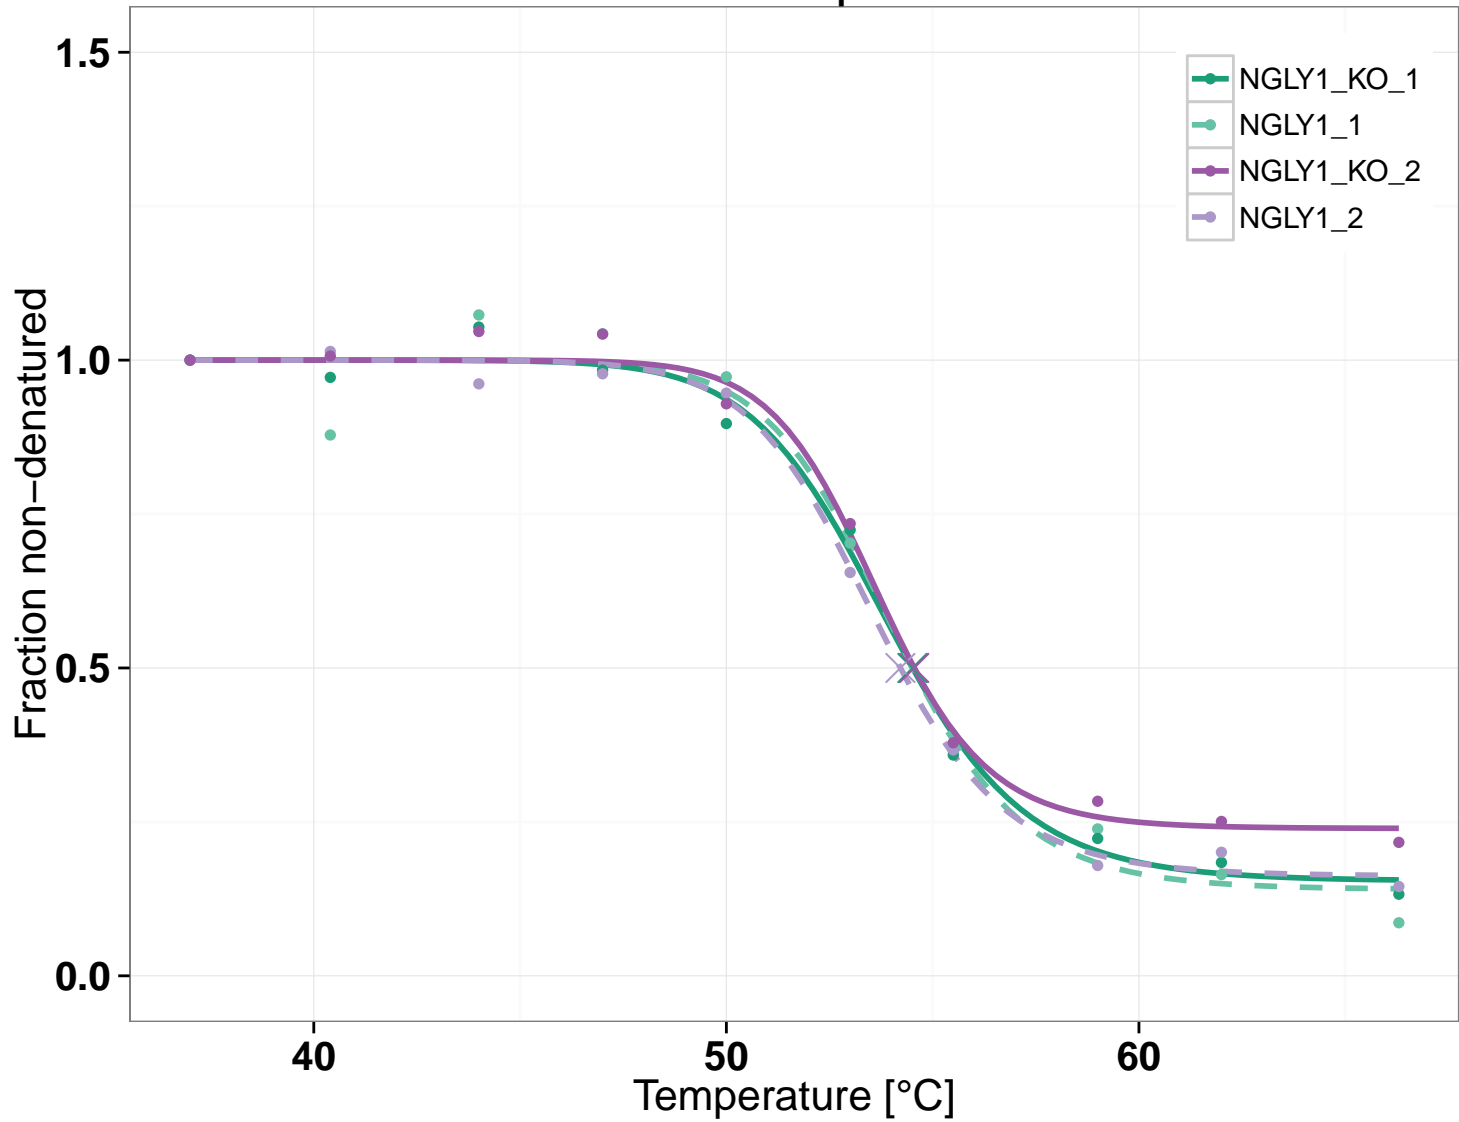

|            | meltPoint | slope | plateau | R2   |
|------------|-----------|-------|---------|------|
| NGLY1_KO_1 | 54.51     | -0.13 | 0.15    | 0.99 |
| NGLY1_1    | 54.52     | -0.14 | 0.14    | 0.98 |
| NGLY1_KO_2 | 54.55     | -0.14 | 0.24    | 0.99 |
| NGLY1_2    | 54.22     | -0.13 | 0.16    | 1    |

Supplement: Supplementary file 2665 [file 1]

# IPI00029730.1|STX4

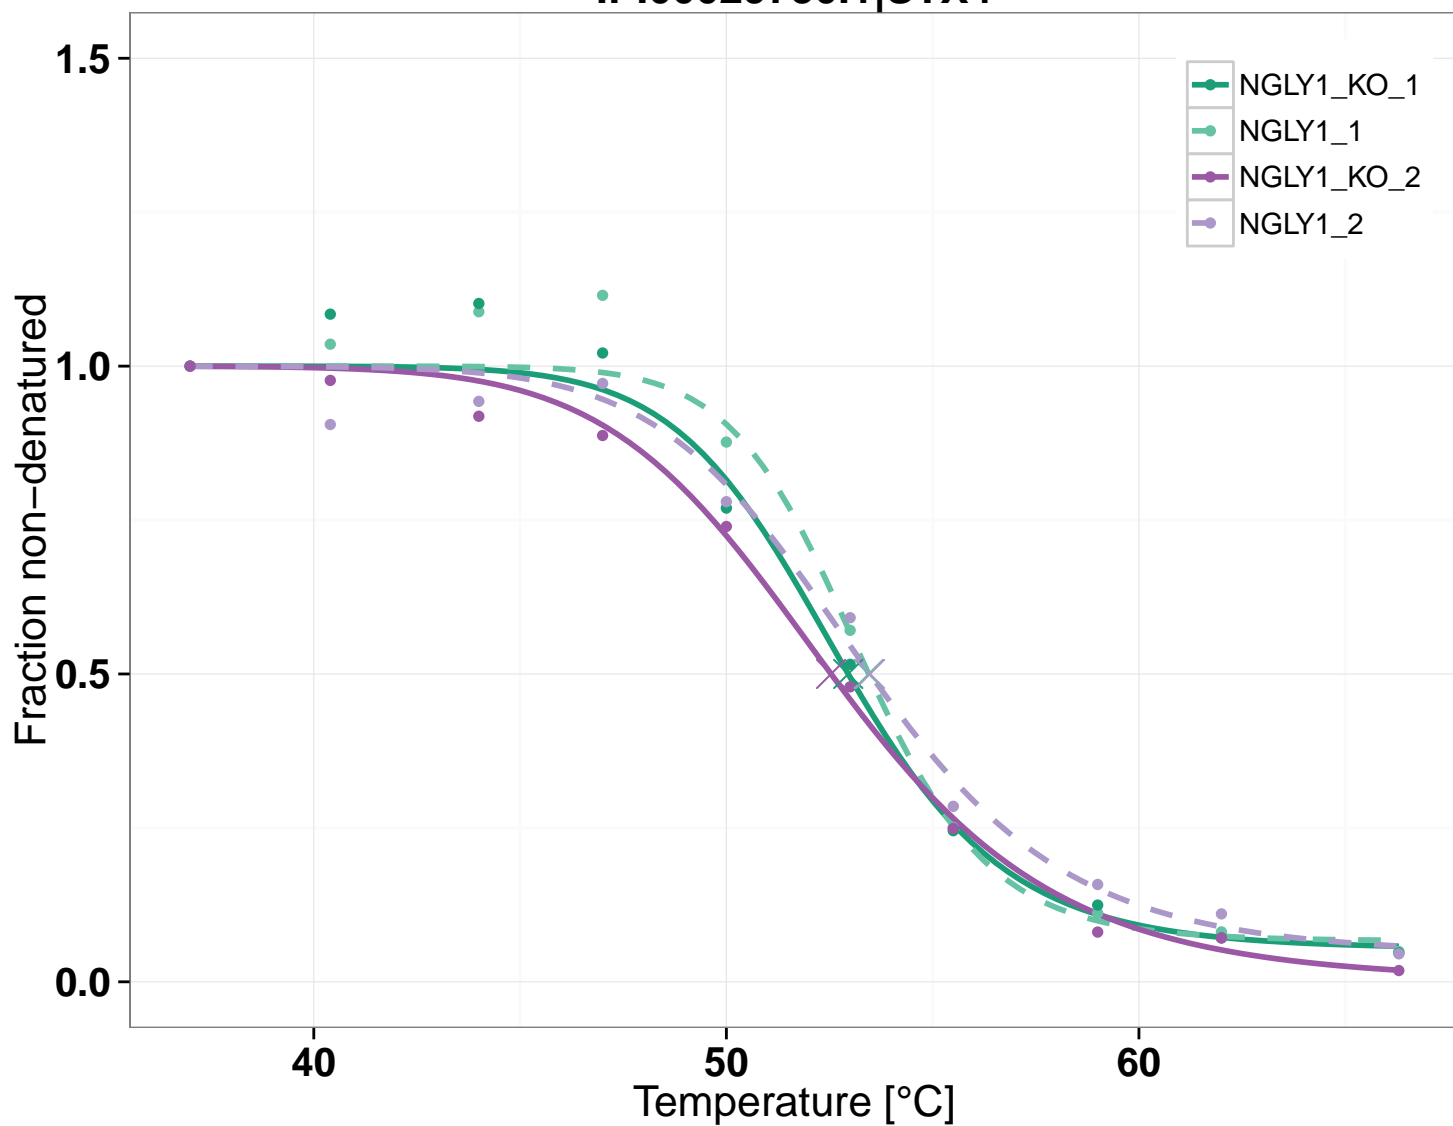

|            | meltPoint | slope  | plateau | R2   |
|------------|-----------|--------|---------|------|
| NGLY1_KO_1 | 52.95     | -0.12  | 0.05    | 0.99 |
| NGLY1_1    | 53.45     | -0.15  | 0.07    | 0.99 |
| NGLY1_KO_2 | 52.54     | -0.092 | 0       | 1    |
| NGLY1_2    | 53.48     | -0.096 | 0.04    | 0.99 |

Supplement: Supplementary file 2666 [file 1]

IPI00030035.3|TMBIM4

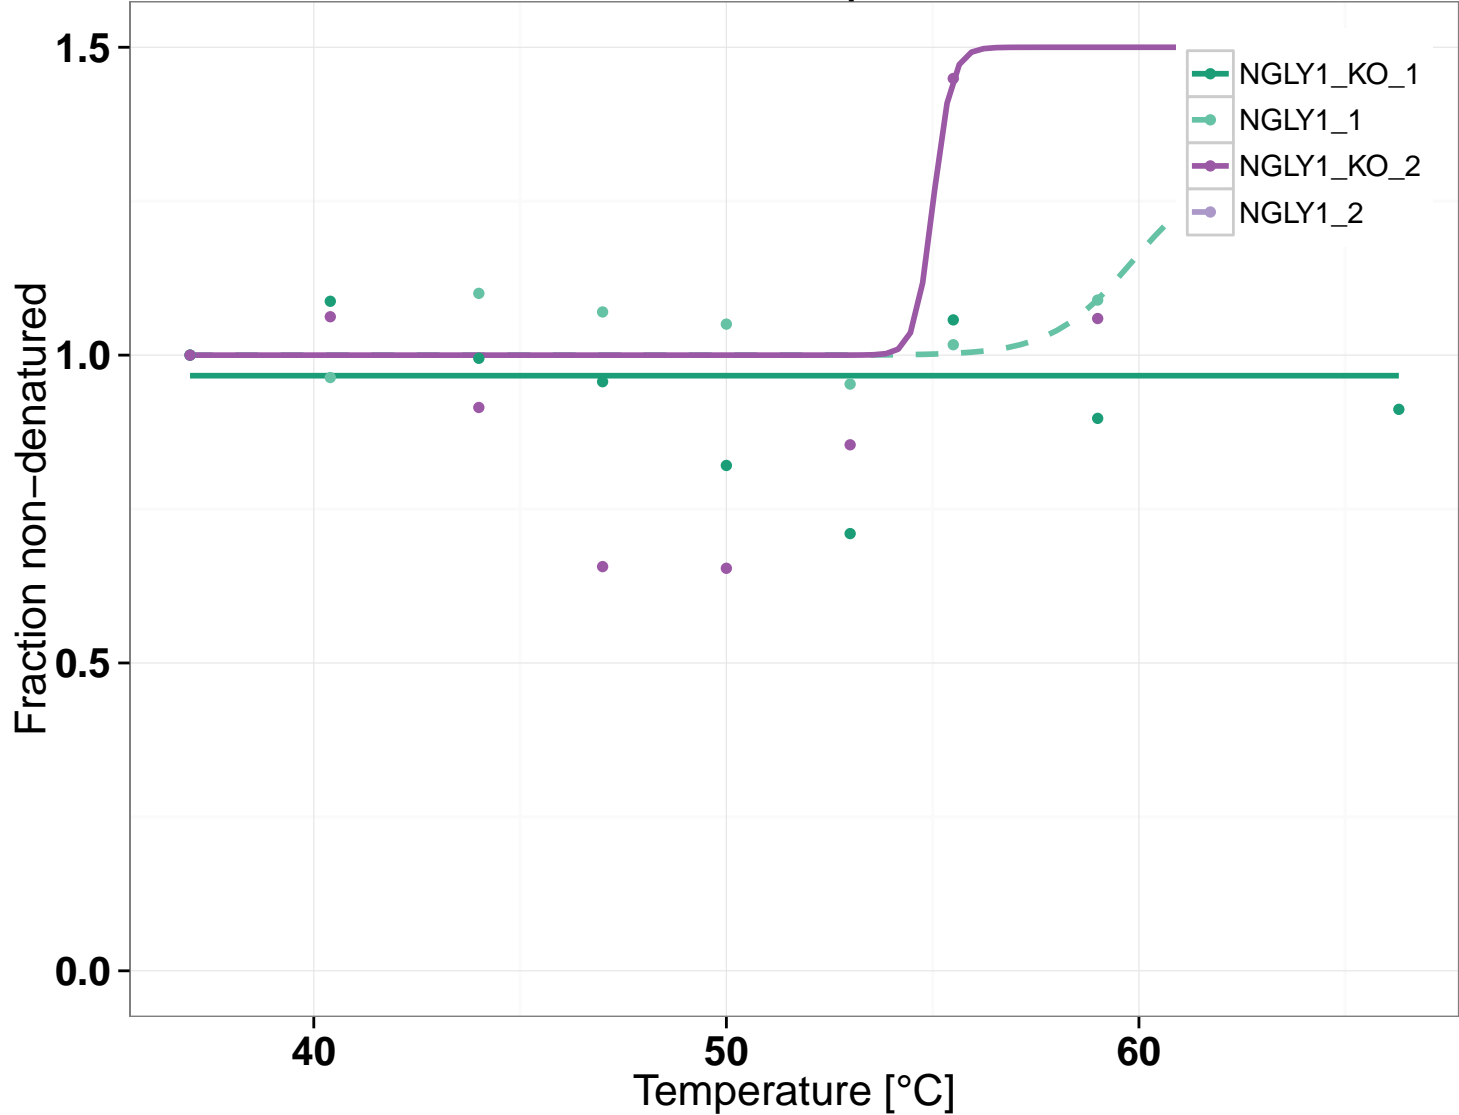

|            | meltPoint | slope | plateau | R2   |
|------------|-----------|-------|---------|------|
| NGLY1_KO_1 | -         | -     | 0.93    | 0    |
| NGLY1_1    | -         | 0.078 | 1.32    | 0.84 |
| NGLY1_KO_2 | -         | 0.57  | 1.5     | 0.5  |
| NGLY1_2    | -         | -     | -       | -    |

Supplement: Supplementary file 2667 [file 1]

IPI00414442.2|CDK5RAP3

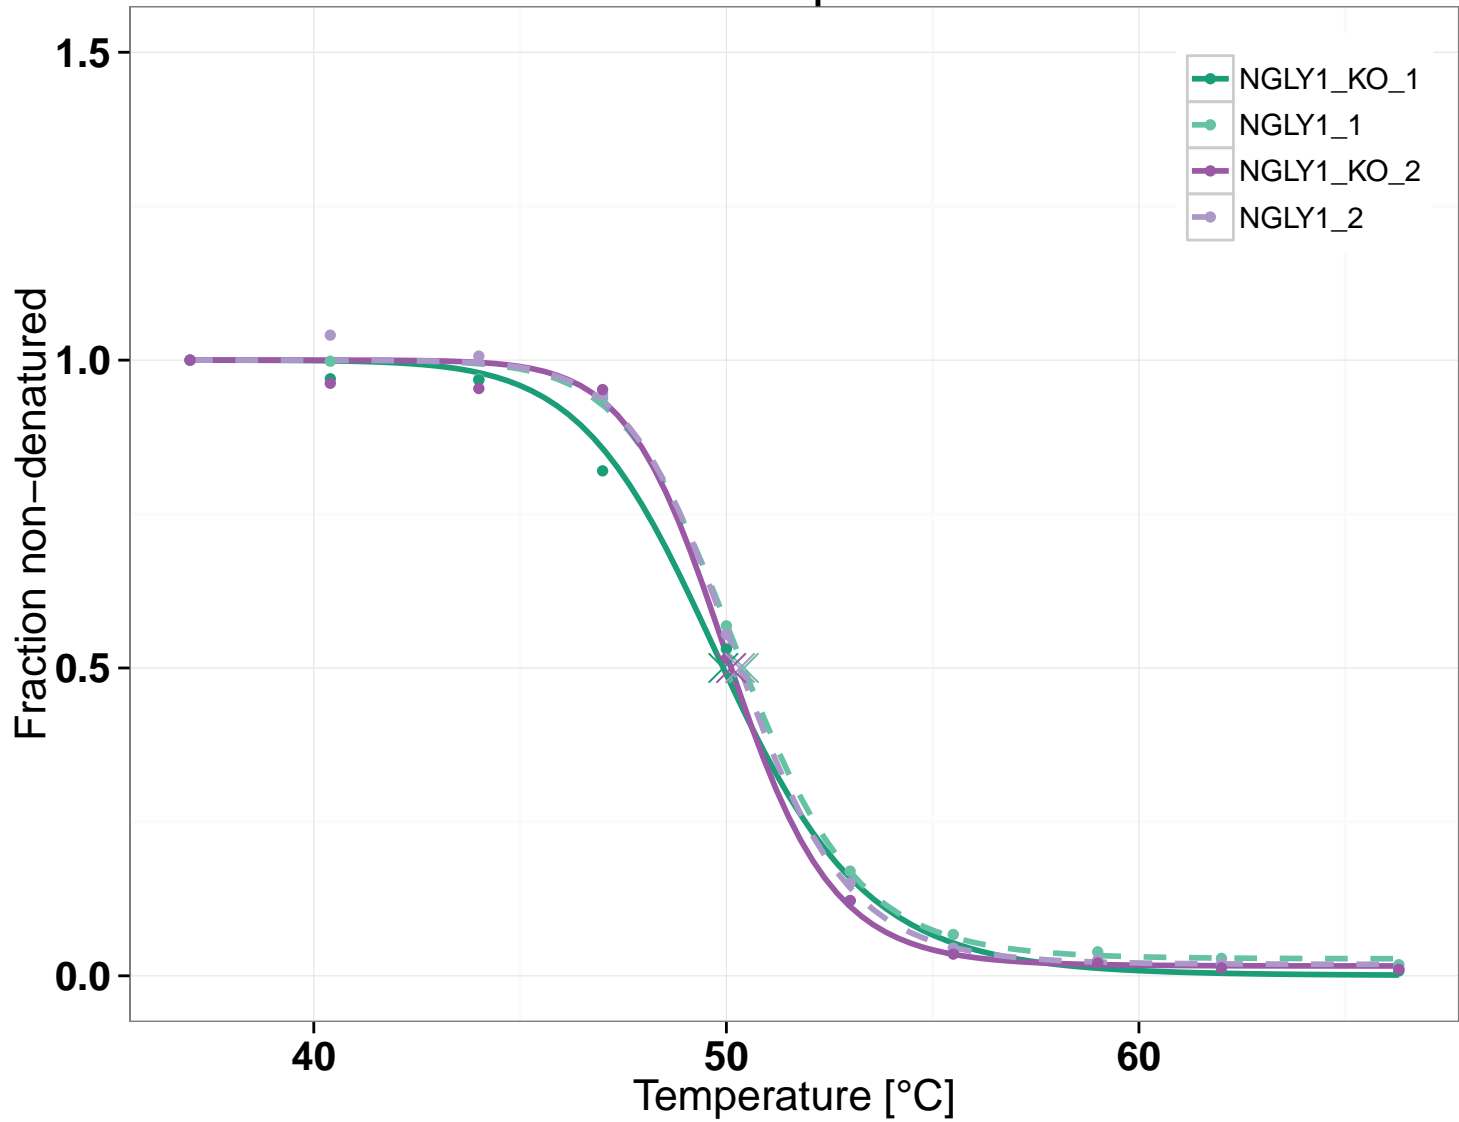

|            | meltPoint | slope | plateau | R2 |
|------------|-----------|-------|---------|----|
| NGLY1_KO_1 | 49.93     | -0.14 | 0       | 1  |
| NGLY1_1    | 50.42     | -0.17 | 0.03    | 1  |
| NGLY1_KO_2 | 50.12     | -0.2  | 0.02    | 1  |
| NGLY1_2    | 50.33     | -0.18 | 0.02    | 1  |

Supplement: Supplementary file 2668 [file 1]

# IPI00337315.1|RBBP6

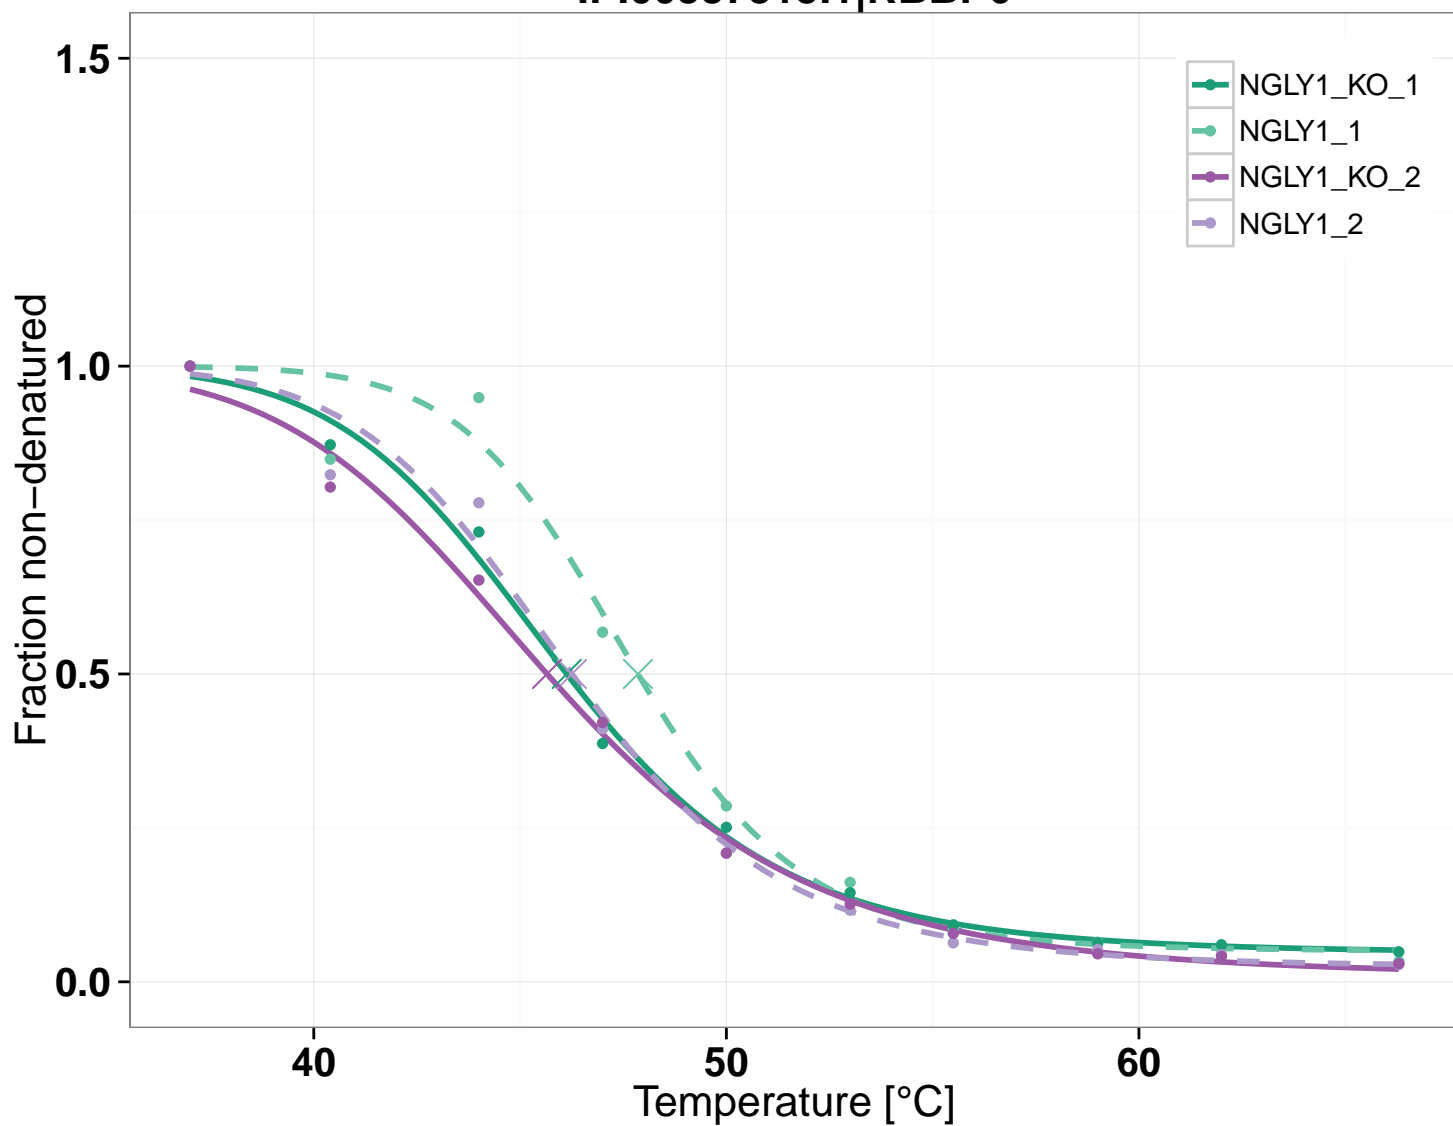

|            | meltPoint | slope  | plateau | R2   |
|------------|-----------|--------|---------|------|
| NGLY1_KO_1 | 46.13     | -0.089 | 0.05    | 1    |
| NGLY1_1    | 47.86     | -0.12  | 0.05    | 0.98 |
| NGLY1_KO_2 | 45.65     | -0.077 | 0.01    | 0.99 |
| NGLY1_2    | 46.26     | -0.094 | 0.02    | 0.99 |

Supplement: Supplementary file 2669 [file 1]

IPI00759493.3|SUCLG1

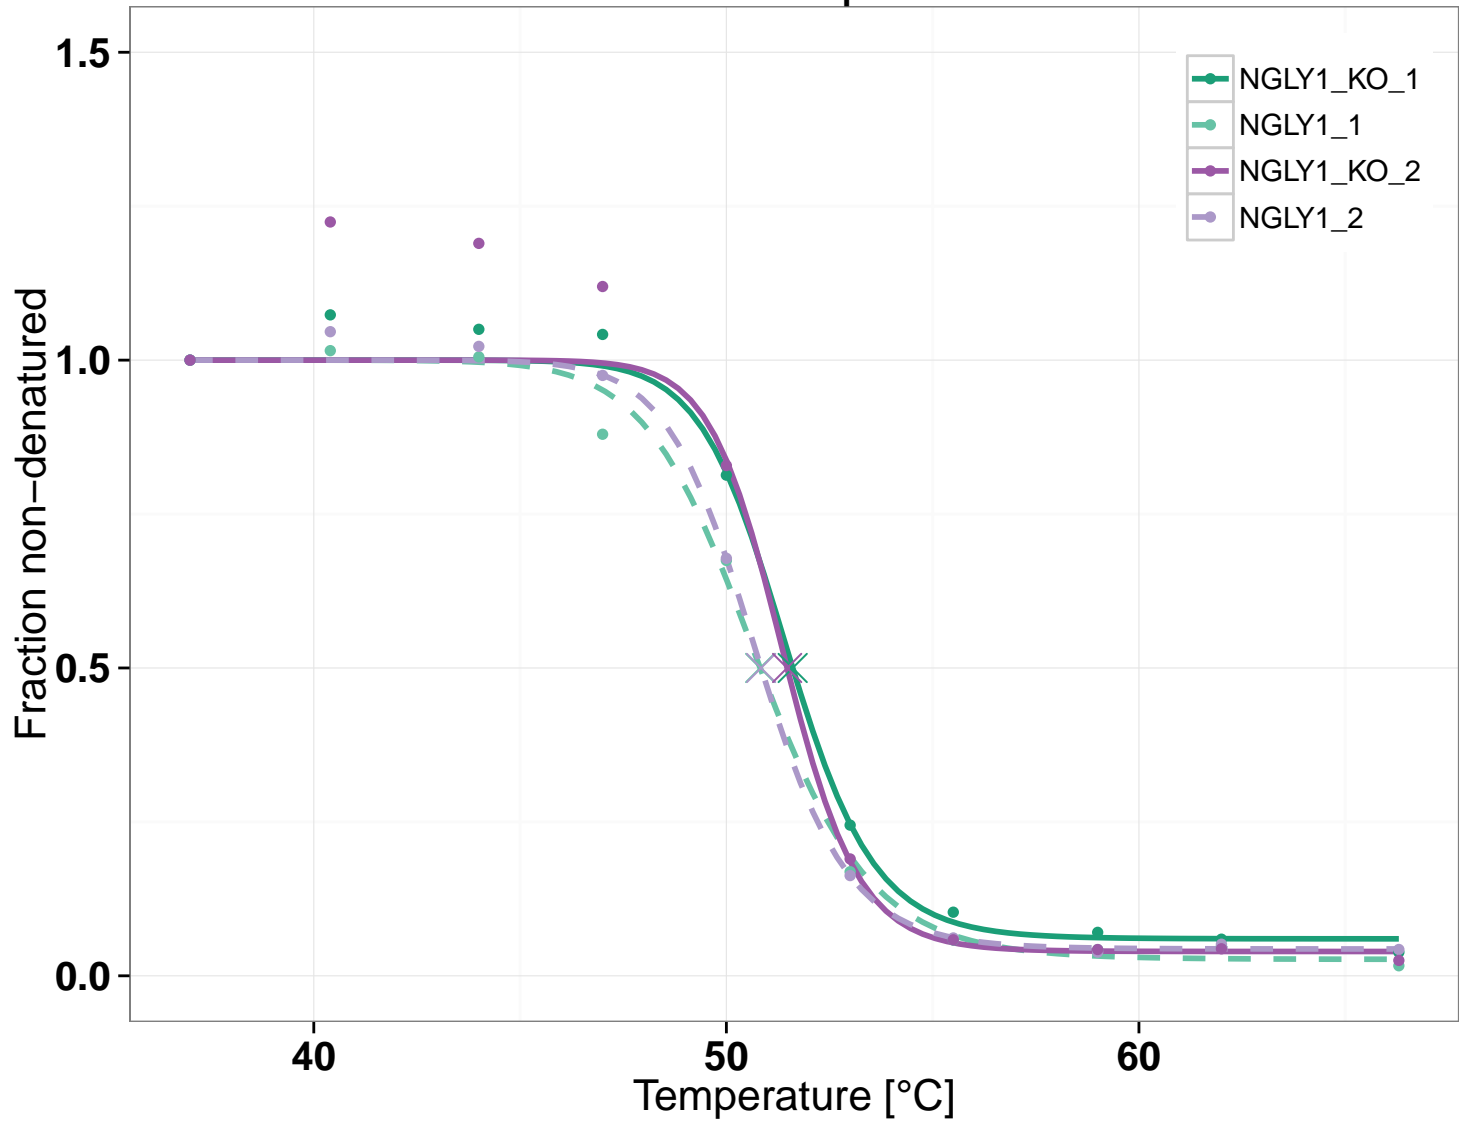

|            | meltPoint | slope | plateau | R2   |
|------------|-----------|-------|---------|------|
| NGLY1_KO_1 | 51.61     | -0.22 | 0.06    | 0.99 |
| NGLY1_1    | 50.82     | -0.18 | 0.03    | 1    |
| NGLY1_KO_2 | 51.47     | -0.27 | 0.04    | 0.96 |
| NGLY1_2    | 50.84     | -0.22 | 0.04    | 1    |

Supplement: Supplementary file 2670 [file 1]

# IPI00306049.6|MSTO1

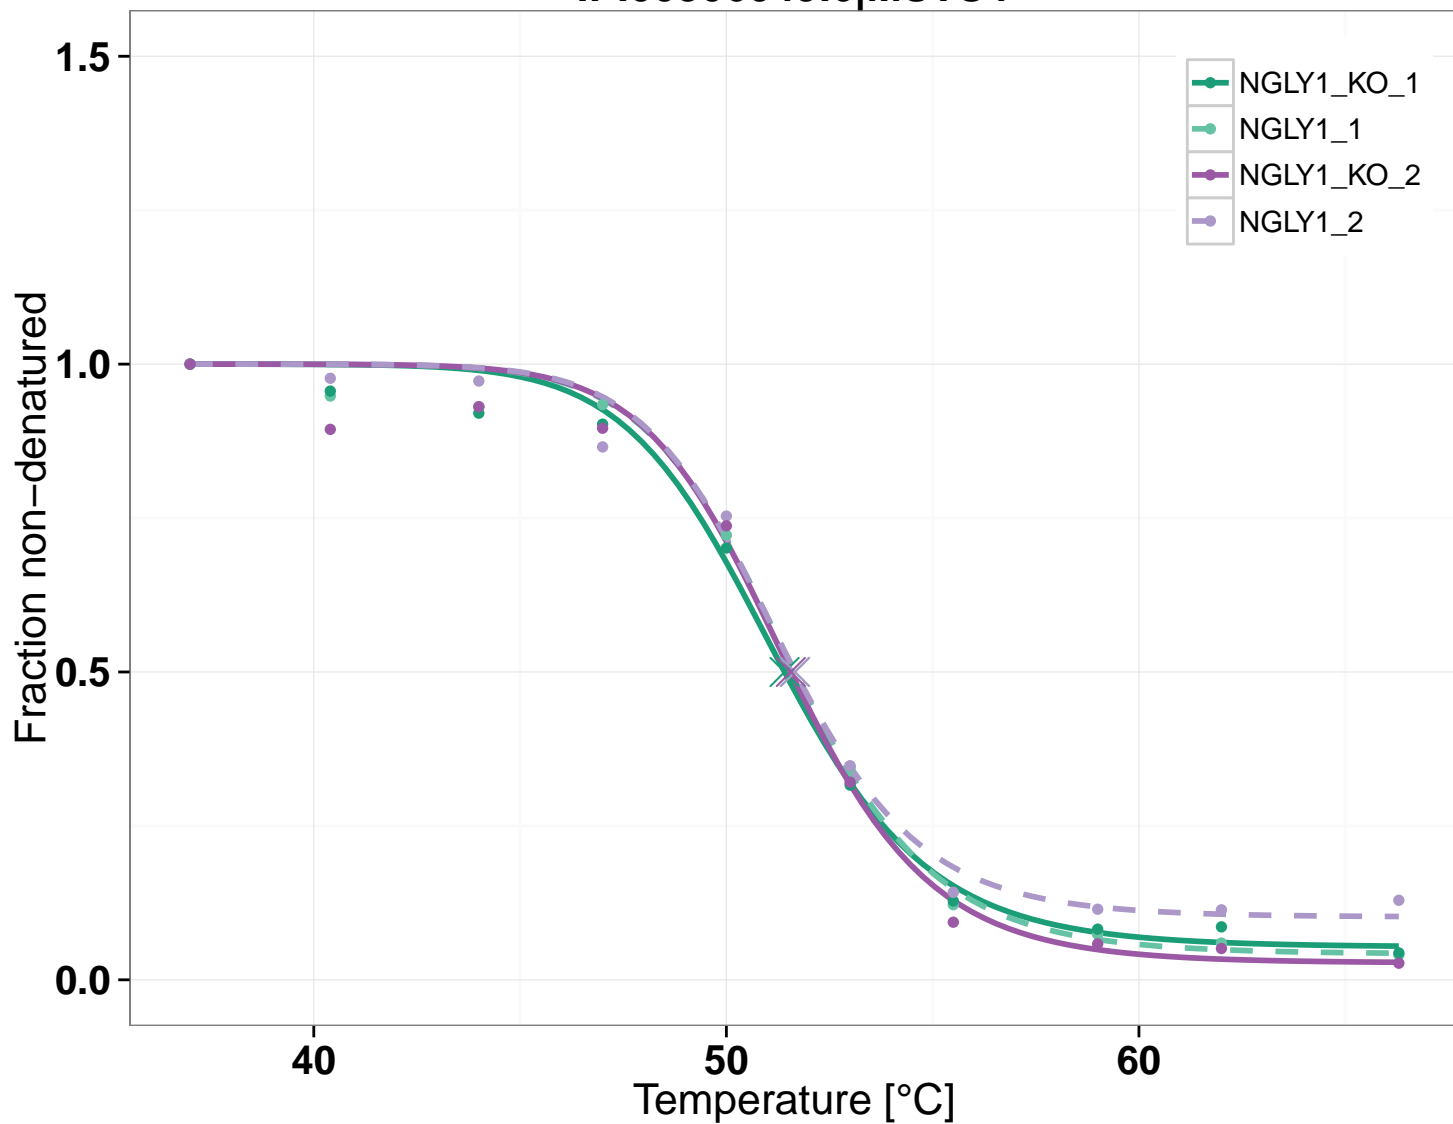

|            | meltPoint | slope | plateau | R2   |
|------------|-----------|-------|---------|------|
| NGLY1_KO_1 | 51.41     | -0.13 | 0.05    | 0.99 |
| NGLY1_1    | 51.65     | -0.13 | 0.04    | 1    |
| NGLY1_KO_2 | 51.56     | -0.14 | 0.03    | 0.99 |
| NGLY1_2    | 51.67     | -0.13 | 0.1     | 0.99 |

Supplement: Supplementary file 2671 [file 1]

# IPI00743454.2|ACN9

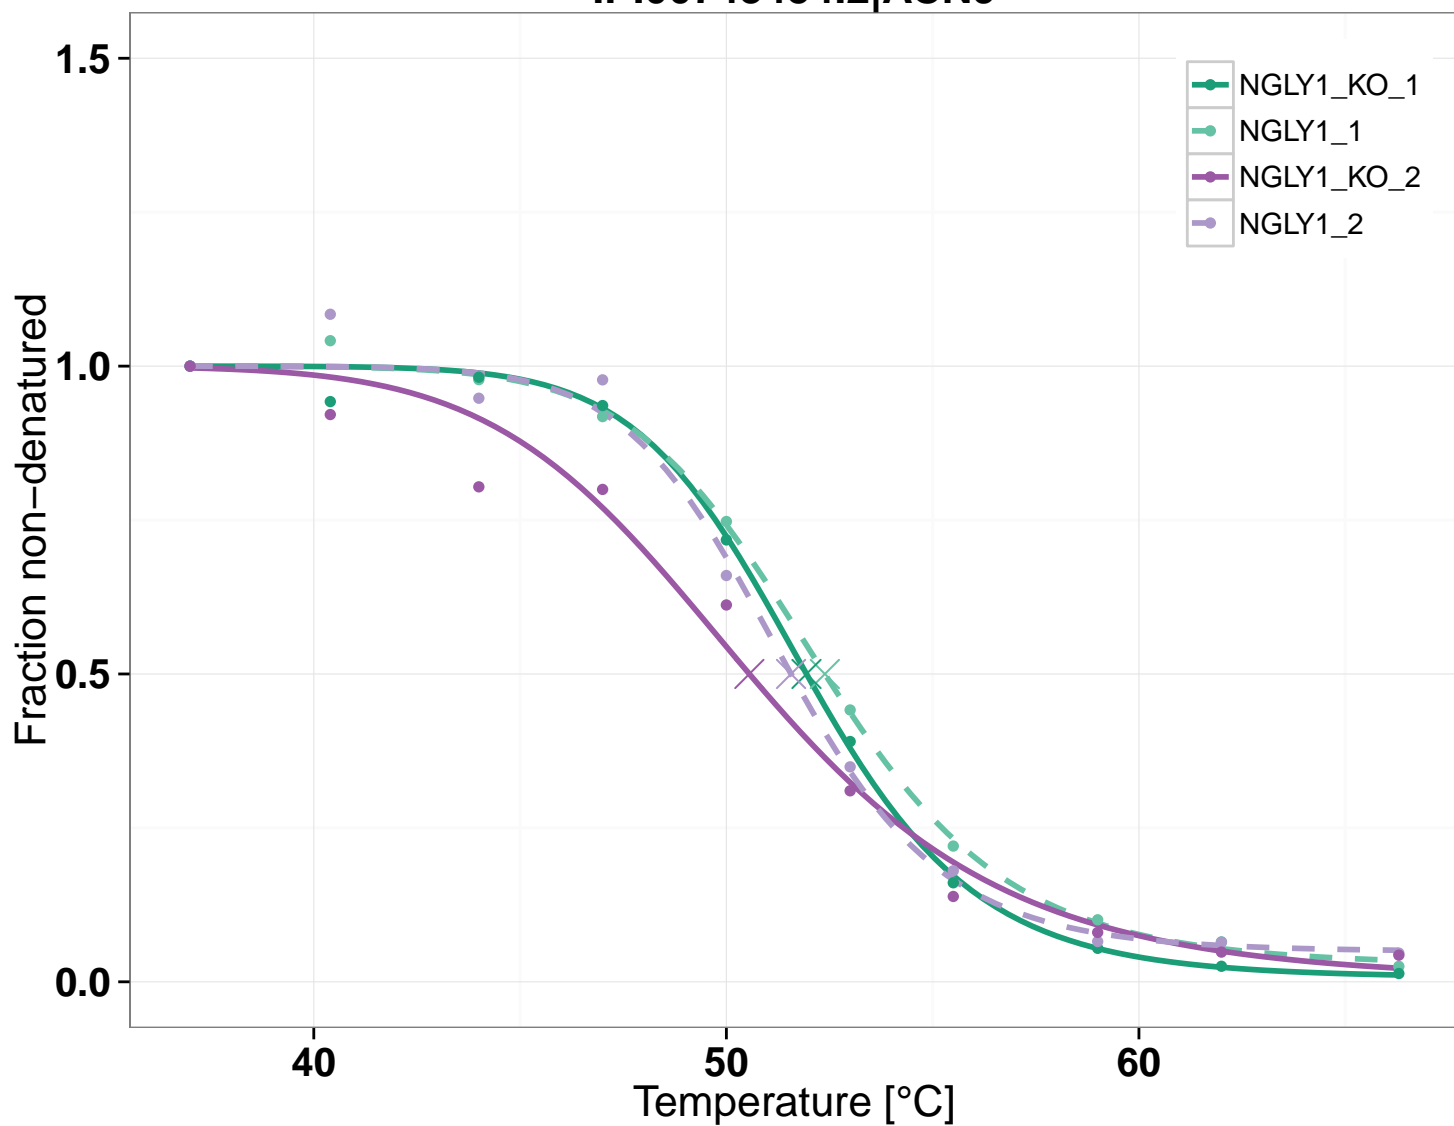

|            | meltPoint | slope | plateau | R2   |
|------------|-----------|-------|---------|------|
| NGLY1_KO_1 | 51.94     | -0.12 | 0.01    | 1    |
| NGLY1_1    | 52.39     | -0.11 | 0.03    | 1    |
| NGLY1_KO_2 | 50.56     | -0.08 | 0       | 0.98 |
| NGLY1_2    | 51.57     | -0.12 | 0.05    | 0.99 |

Supplement: Supplementary file 2672 [file 1]

IPI00167764.2|TMEM102

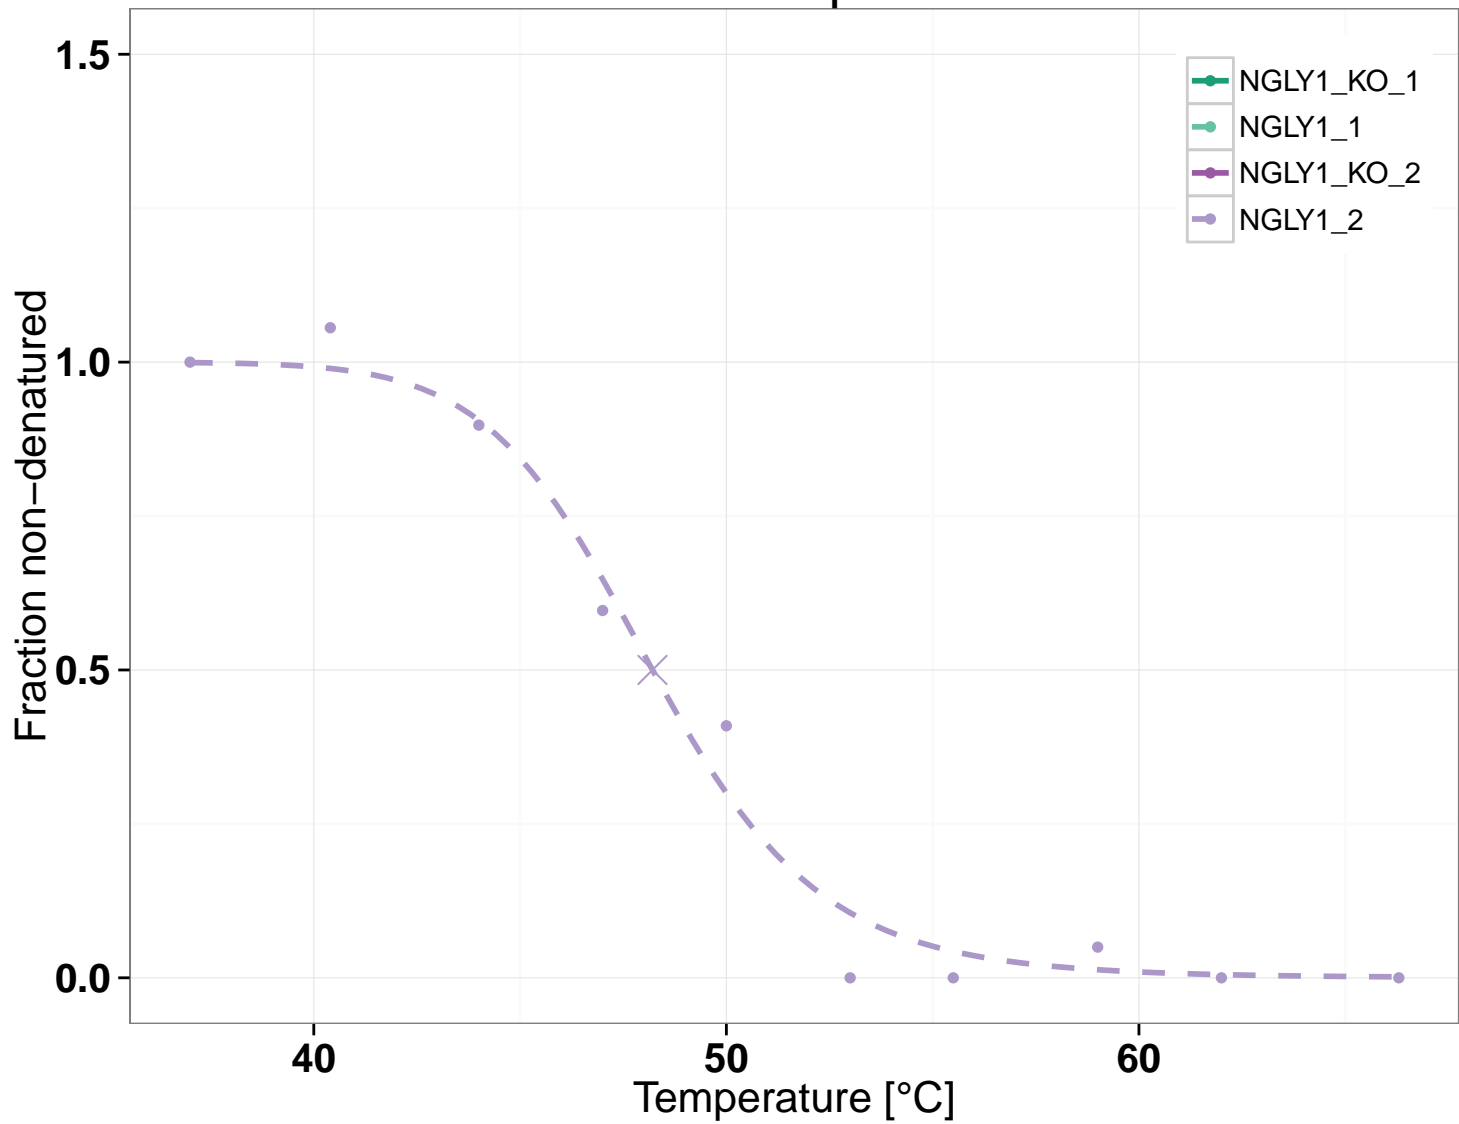

|            | meltPoint | slope | plateau | R2   |
|------------|-----------|-------|---------|------|
| NGLY1_KO_1 | -         | -     | -       | -    |
| NGLY1_1    | -         | -     | -       | -    |
| NGLY1_KO_2 | -         | -     | -       | -    |
| NGLY1_2    | 48.21     | -0.12 | 0       | 0.98 |

Supplement: Supplementary file 2673 [file 1]

IPI00247674.6|PALM3

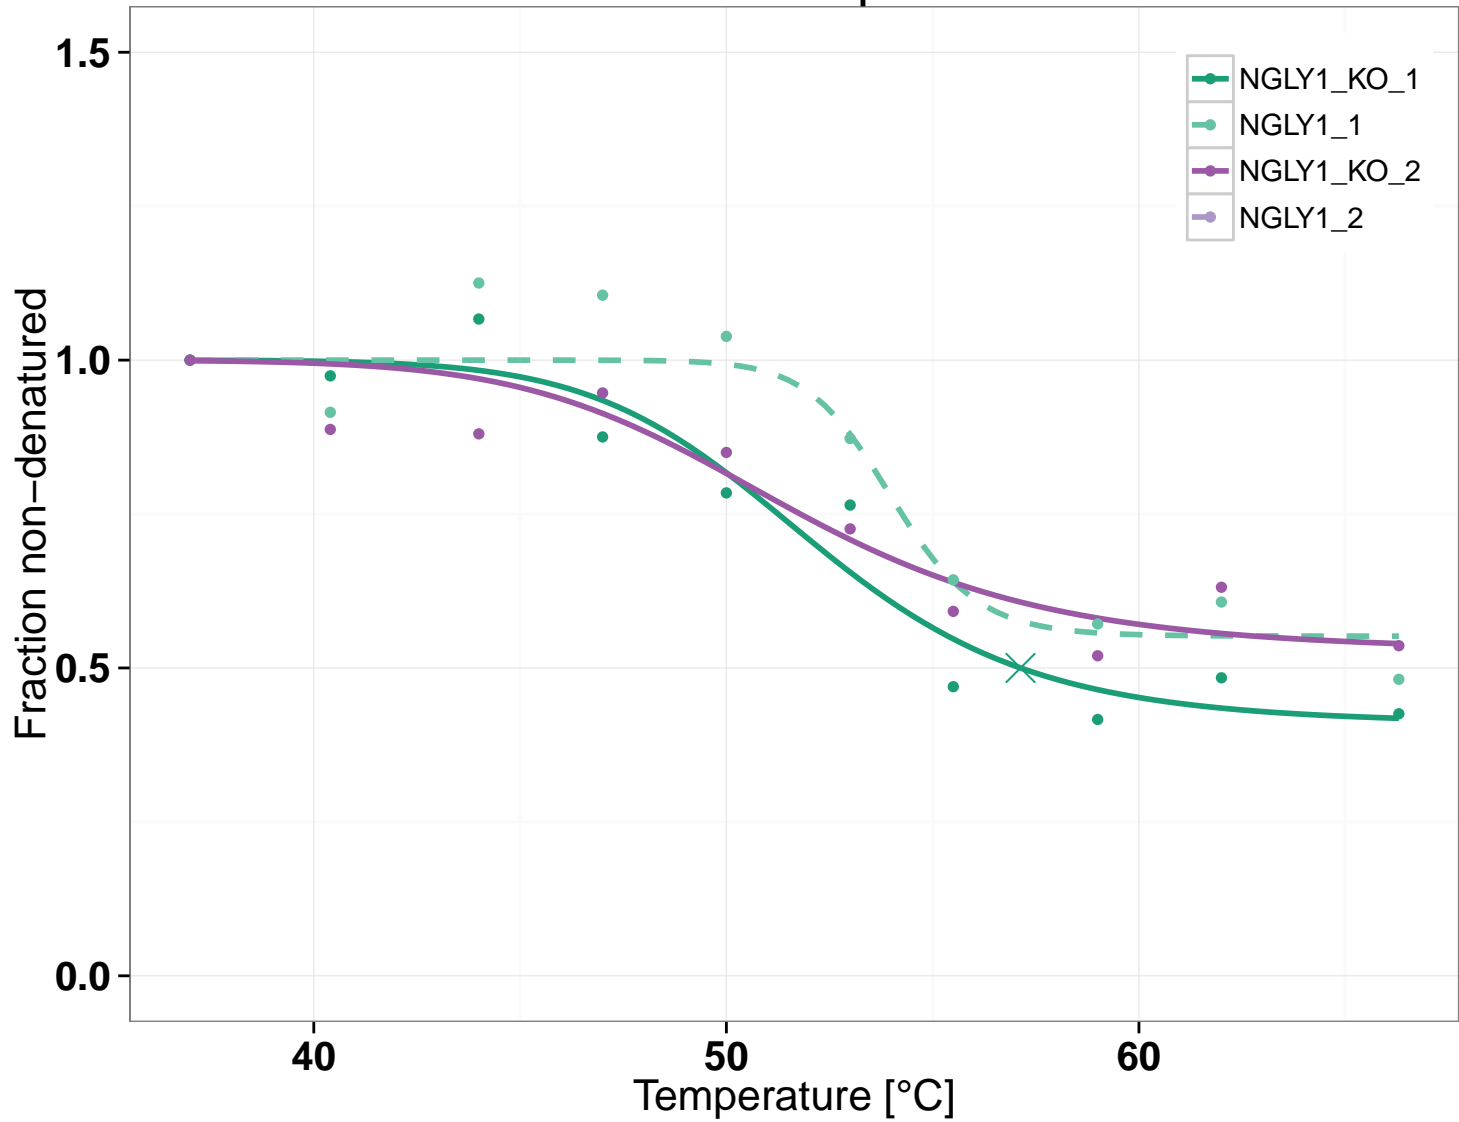

|            | meltPoint | slope  | plateau | R2   |
|------------|-----------|--------|---------|------|
| NGLY1_KO_1 | 57.13     | -0.055 | 0.41    | 0.94 |
| NGLY1_1    | -         | -0.11  | 0.55    | 0.91 |
| NGLY1_KO_2 | -         | -0.037 | 0.53    | 0.88 |
| NGLY1_2    | -         | -      | -       | -    |

Supplement: Supplementary file 2674 [file 1]

# IPI00027508.1|IL1R1

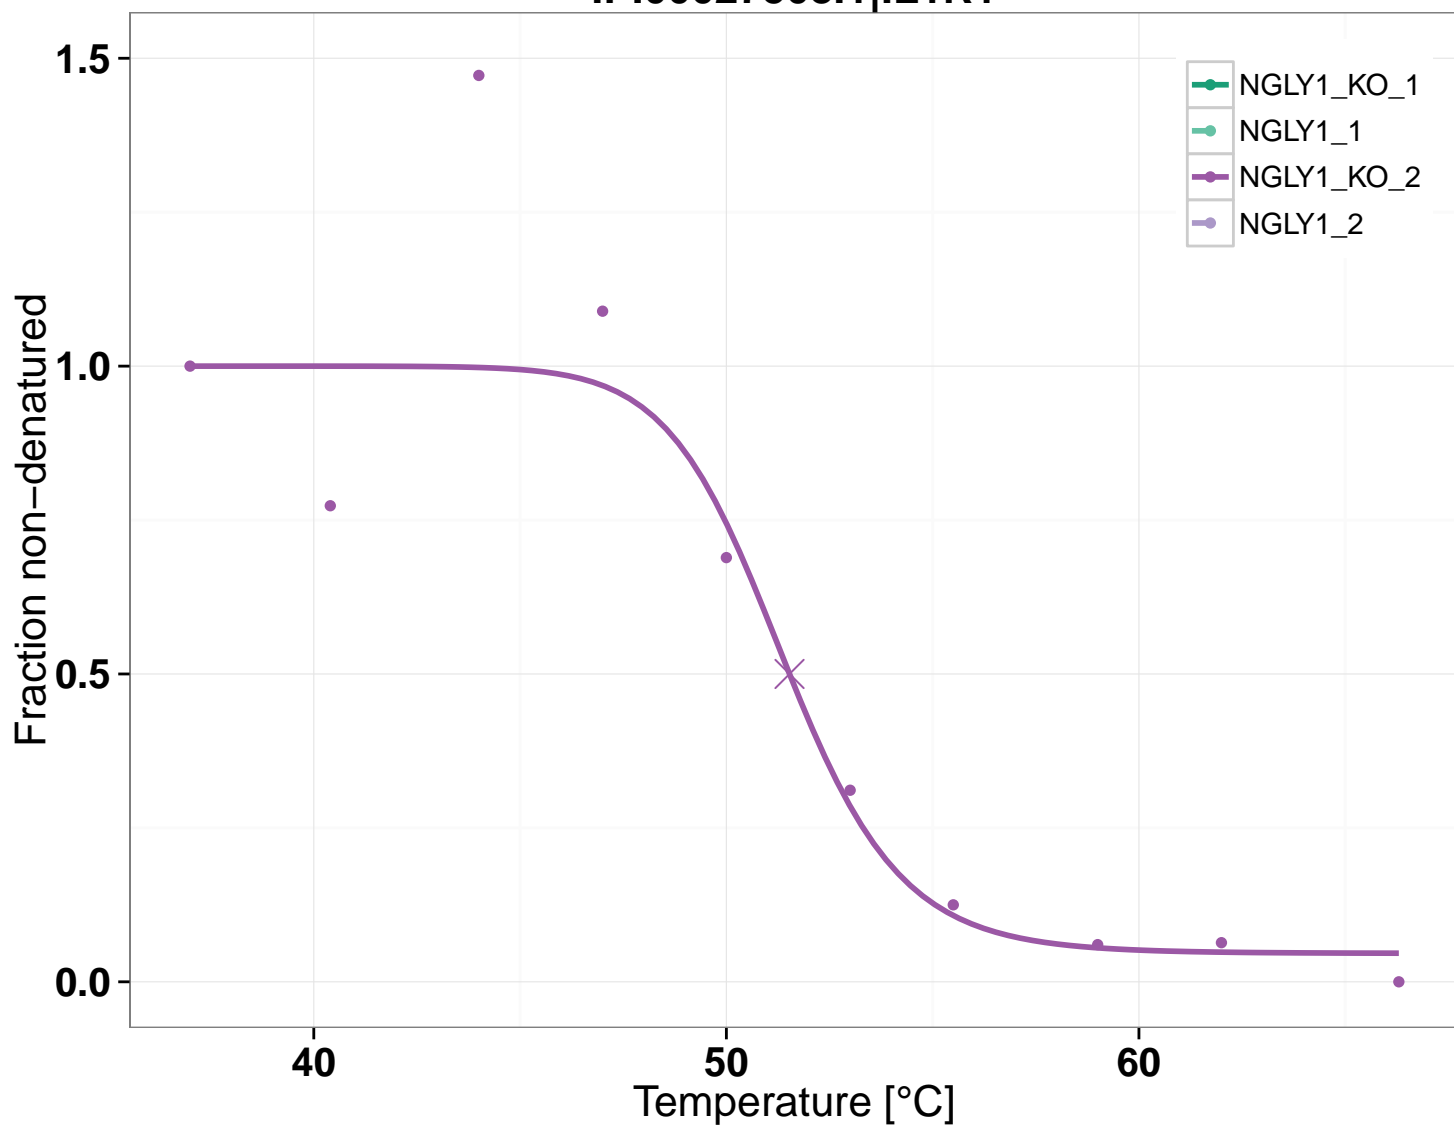

|            | meltPoint | slope | plateau | R2   |
|------------|-----------|-------|---------|------|
| NGLY1_KO_1 | —         | —     | —       | —    |
| NGLY1_1    | —         | —     | —       | —    |
| NGLY1_KO_2 | 51.53     | -0.17 | 0.05    | 0.88 |
| NGLY1_2    | —         | —     | —       | —    |

Supplement: Supplementary file 2675 [file 1]

# IPI00307155.7|ROCK2

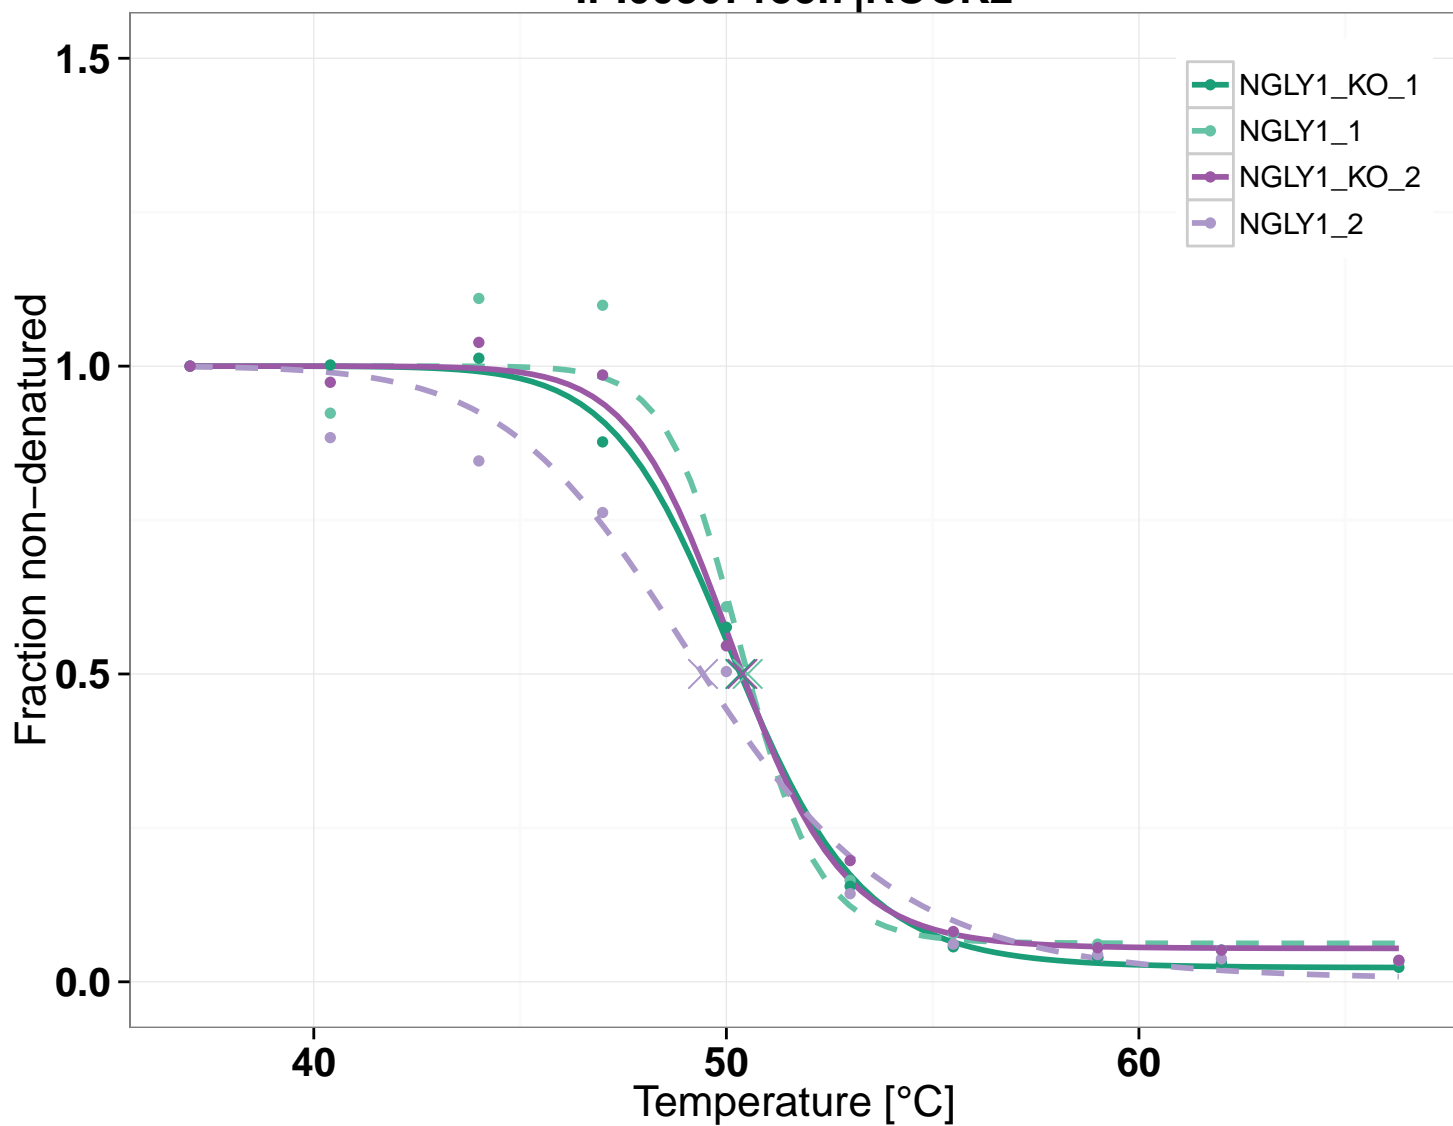

|            | meltPoint | slope | plateau | R2   |
|------------|-----------|-------|---------|------|
| NGLY1_KO_1 | 50.34     | -0.16 | 0.02    | 1    |
| NGLY1_1    | 50.52     | -0.25 | 0.06    | 0.98 |
| NGLY1_KO_2 | 50.39     | -0.18 | 0.05    | 1    |
| NGLY1_2    | 49.43     | -0.1  | 0       | 0.98 |

Supplement: Supplementary file 2676 [file 1]

# IPI00033350.3|MKRN1

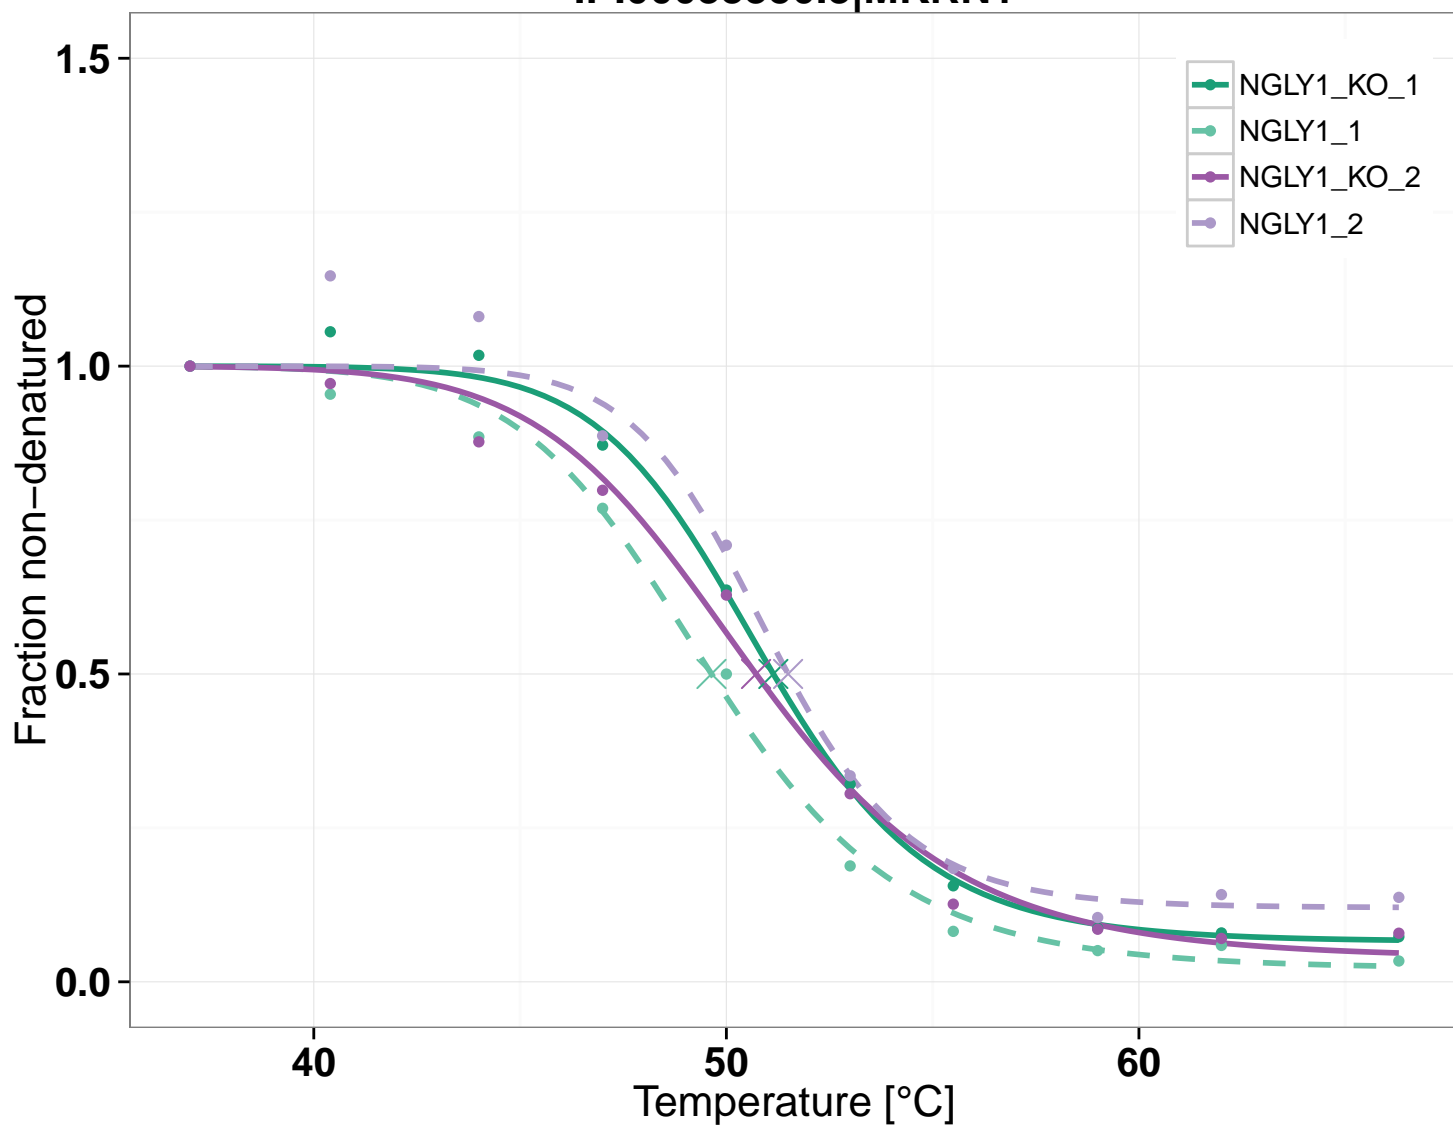

|            | meltPoint | slope  | plateau | R2   |
|------------|-----------|--------|---------|------|
| NGLY1_KO_1 | 51.14     | -0.12  | 0.07    | 1    |
| NGLY1_1    | 49.64     | -0.11  | 0.02    | 0.99 |
| NGLY1_KO_2 | 50.72     | -0.094 | 0.04    | 0.99 |
| NGLY1_2    | 51.5      | -0.13  | 0.12    | 0.98 |

Supplement: Supplementary file 2677 [file 1]

# IPI00219852.2|CD46

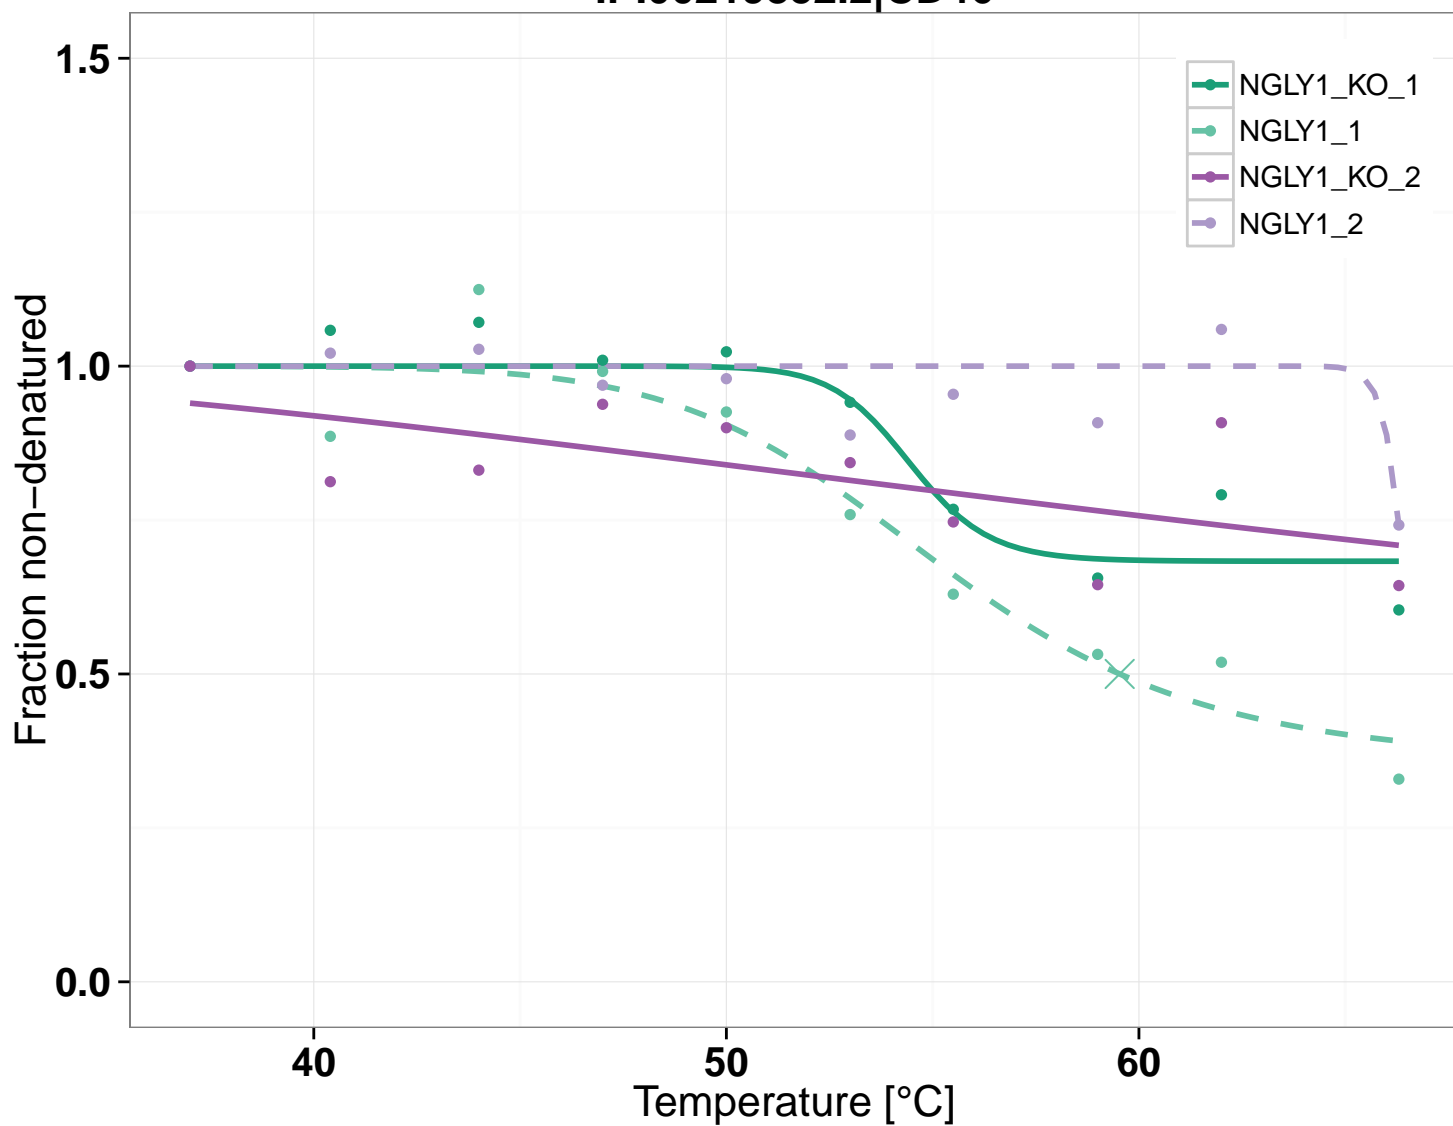

|            | meltPoint | slope   | plateau | R2   |
|------------|-----------|---------|---------|------|
| NGLY1_KO_1 | -         | -0.083  | 0.68    | 0.9  |
| NGLY1_1    | 59.53     | -0.05   | 0.36    | 0.93 |
| NGLY1_KO_2 | -         | -0.0084 | 0       | 0.4  |
| NGLY1_2    | -         | -       | 0       | 0.61 |

Supplement: Supplementary file 2678 [file 1]

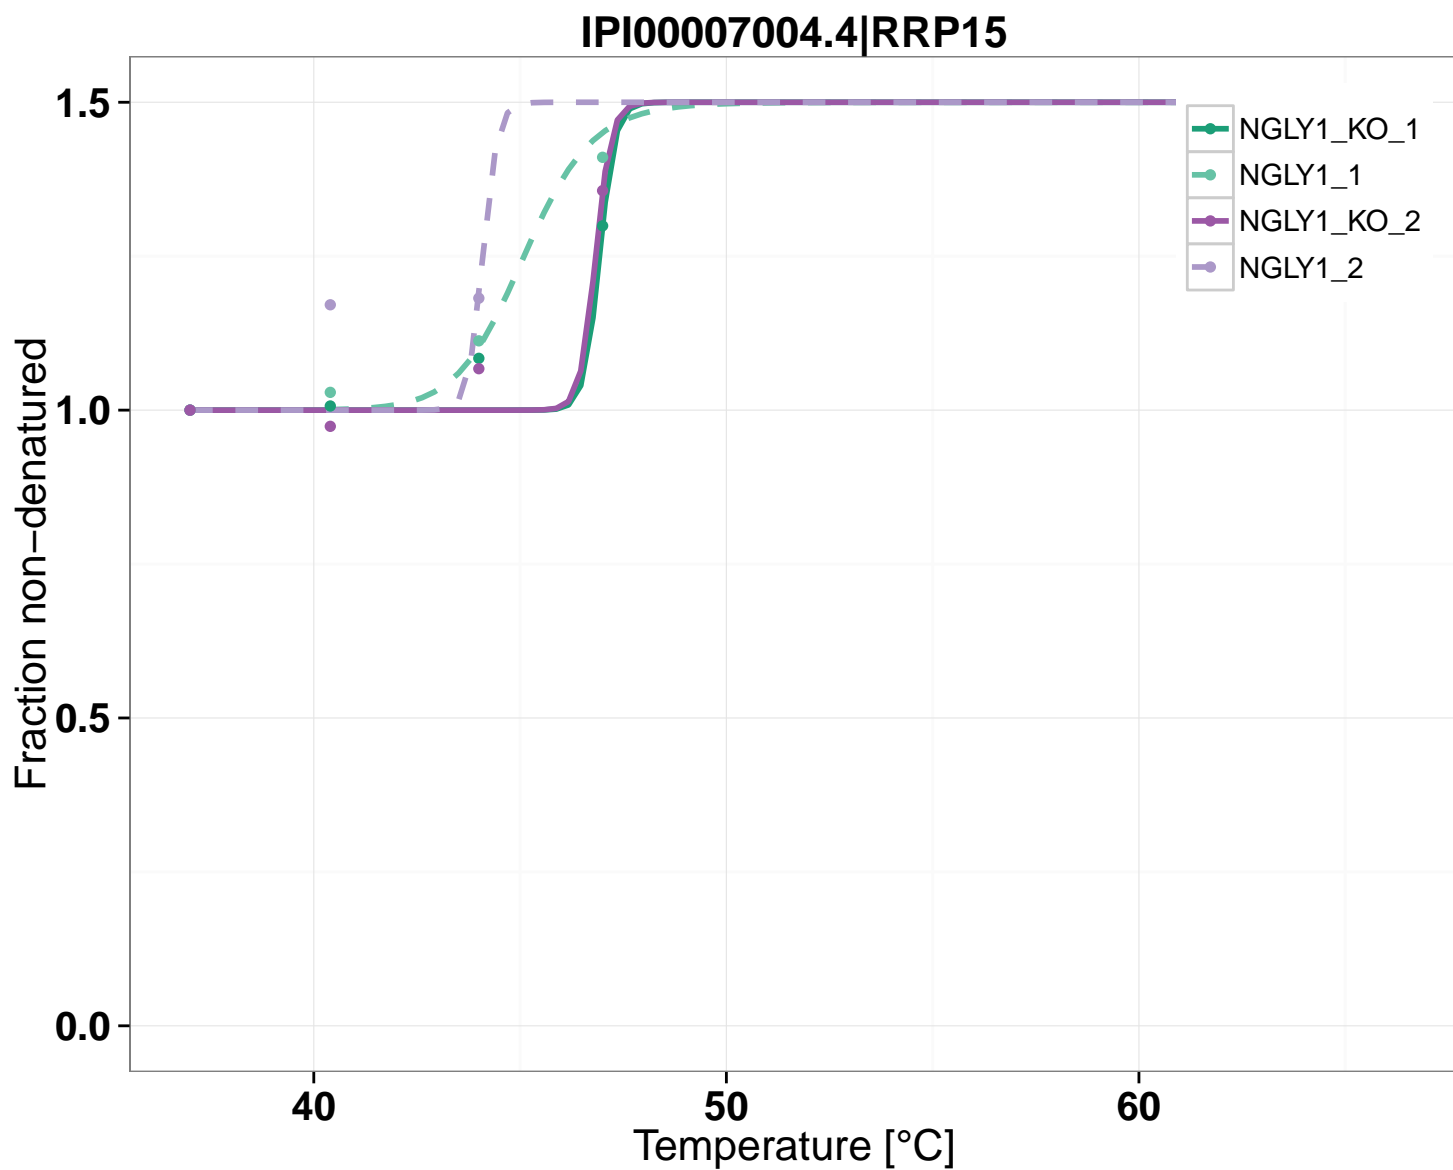

|            | meltPoint | slope | plateau | R2    |
|------------|-----------|-------|---------|-------|
| NGLY1_KO_1 | —         | 0.67  | 1.5     | 0.41  |
| NGLY1_1    | —         | 0.15  | 1.5     | 0.12  |
| NGLY1_KO_2 | —         | 0.67  | 1.5     | -0.01 |
| NGLY1_2    | —         | 0.71  | 1.5     | -0.62 |

Supplement: Supplementary file 2679 [file 1]

# IPI00003856.1|ATP6V1E1

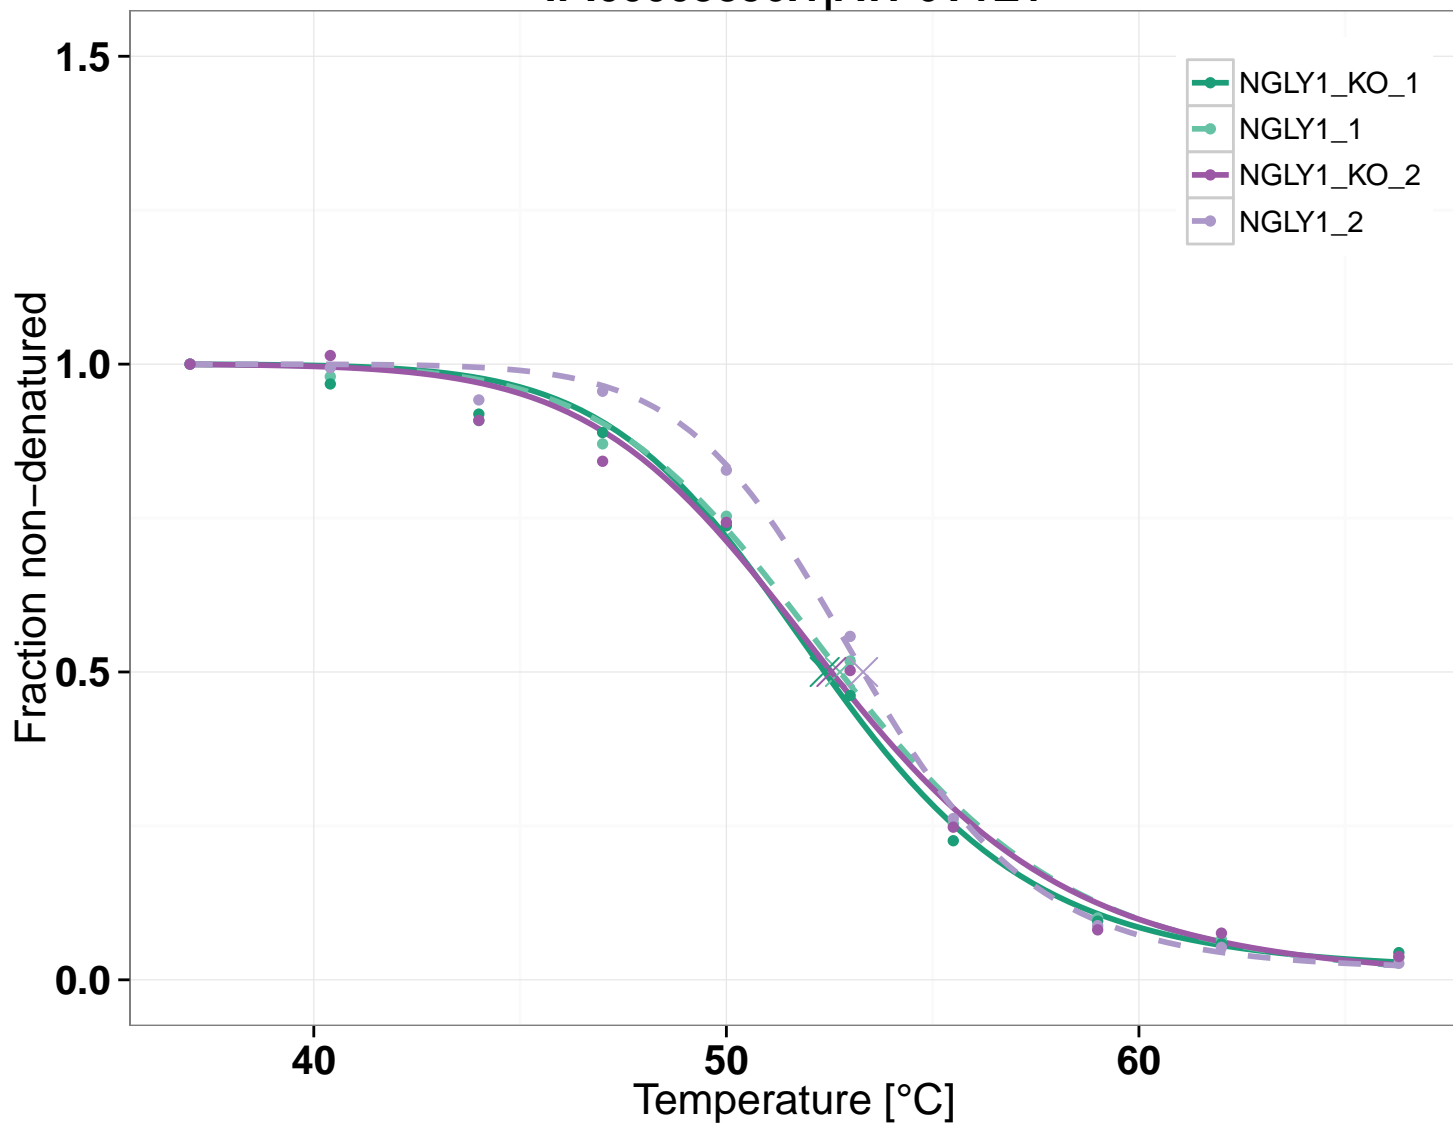

|            | meltPoint | slope  | plateau | R2   |
|------------|-----------|--------|---------|------|
| NGLY1_KO_1 | 52.38     | -0.095 | 0.01    | 1    |
| NGLY1_1    | 52.75     | -0.088 | 0       | 0.99 |
| NGLY1_KO_2 | 52.55     | -0.086 | 0       | 0.99 |
| NGLY1_2    | 53.31     | -0.12  | 0.02    | 1    |

Supplement: Supplementary file 2680 [file 1]

IPI00019812.1|PPP5C

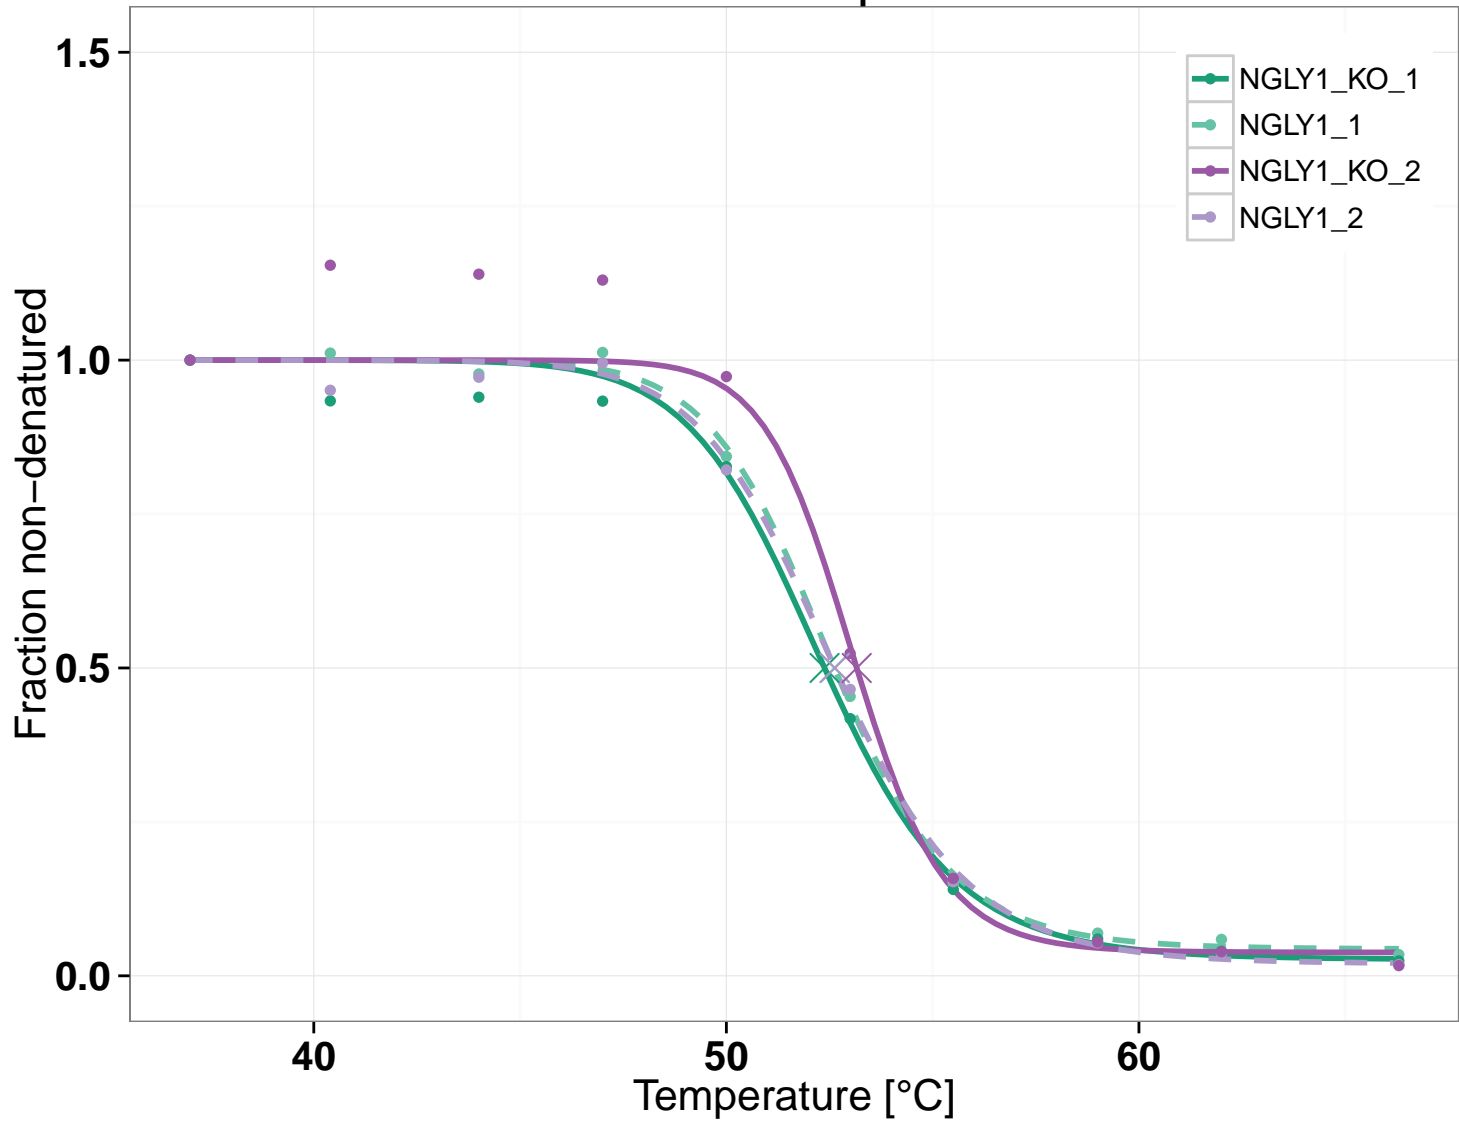

|            | meltPoint | slope | plateau | R2   |
|------------|-----------|-------|---------|------|
| NGLY1_KO_1 | 52.38     | -0.15 | 0.03    | 0.99 |
| NGLY1_1    | 52.62     | -0.16 | 0.04    | 1    |
| NGLY1_KO_2 | 53.16     | -0.22 | 0.04    | 0.97 |
| NGLY1_2    | 52.63     | -0.15 | 0.02    | 1    |

Supplement: Supplementary file 2681 [file 1]

# IPI00903119.1|SMS

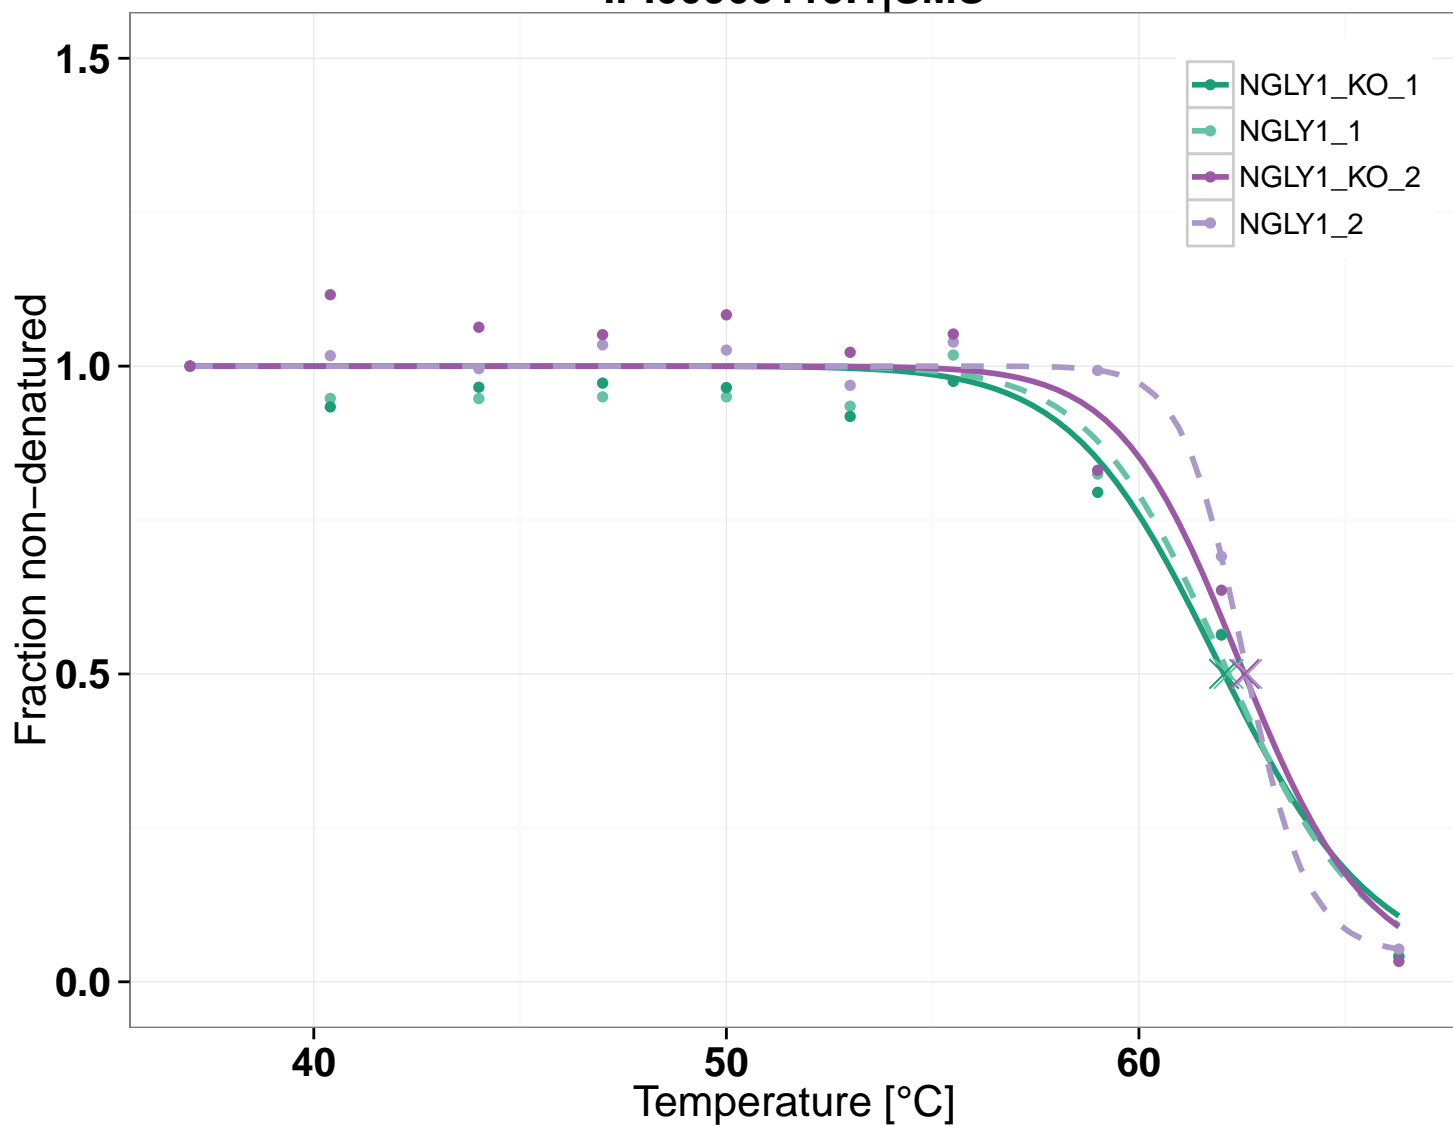

|            | meltPoint | slope | plateau | R2   |
|------------|-----------|-------|---------|------|
| NGLY1_KO_1 | 62.06     | -0.13 | 0       | 0.97 |
| NGLY1_1    | 62.17     | -0.15 | 0       | 0.97 |
| NGLY1_KO_2 | 62.56     | -0.16 | 0       | 0.96 |
| NGLY1_2    | 62.63     | -0.31 | 0.04    | 0.99 |

Supplement: Supplementary file 2682 [file 1]

IPI00247490.5|SLC35D3

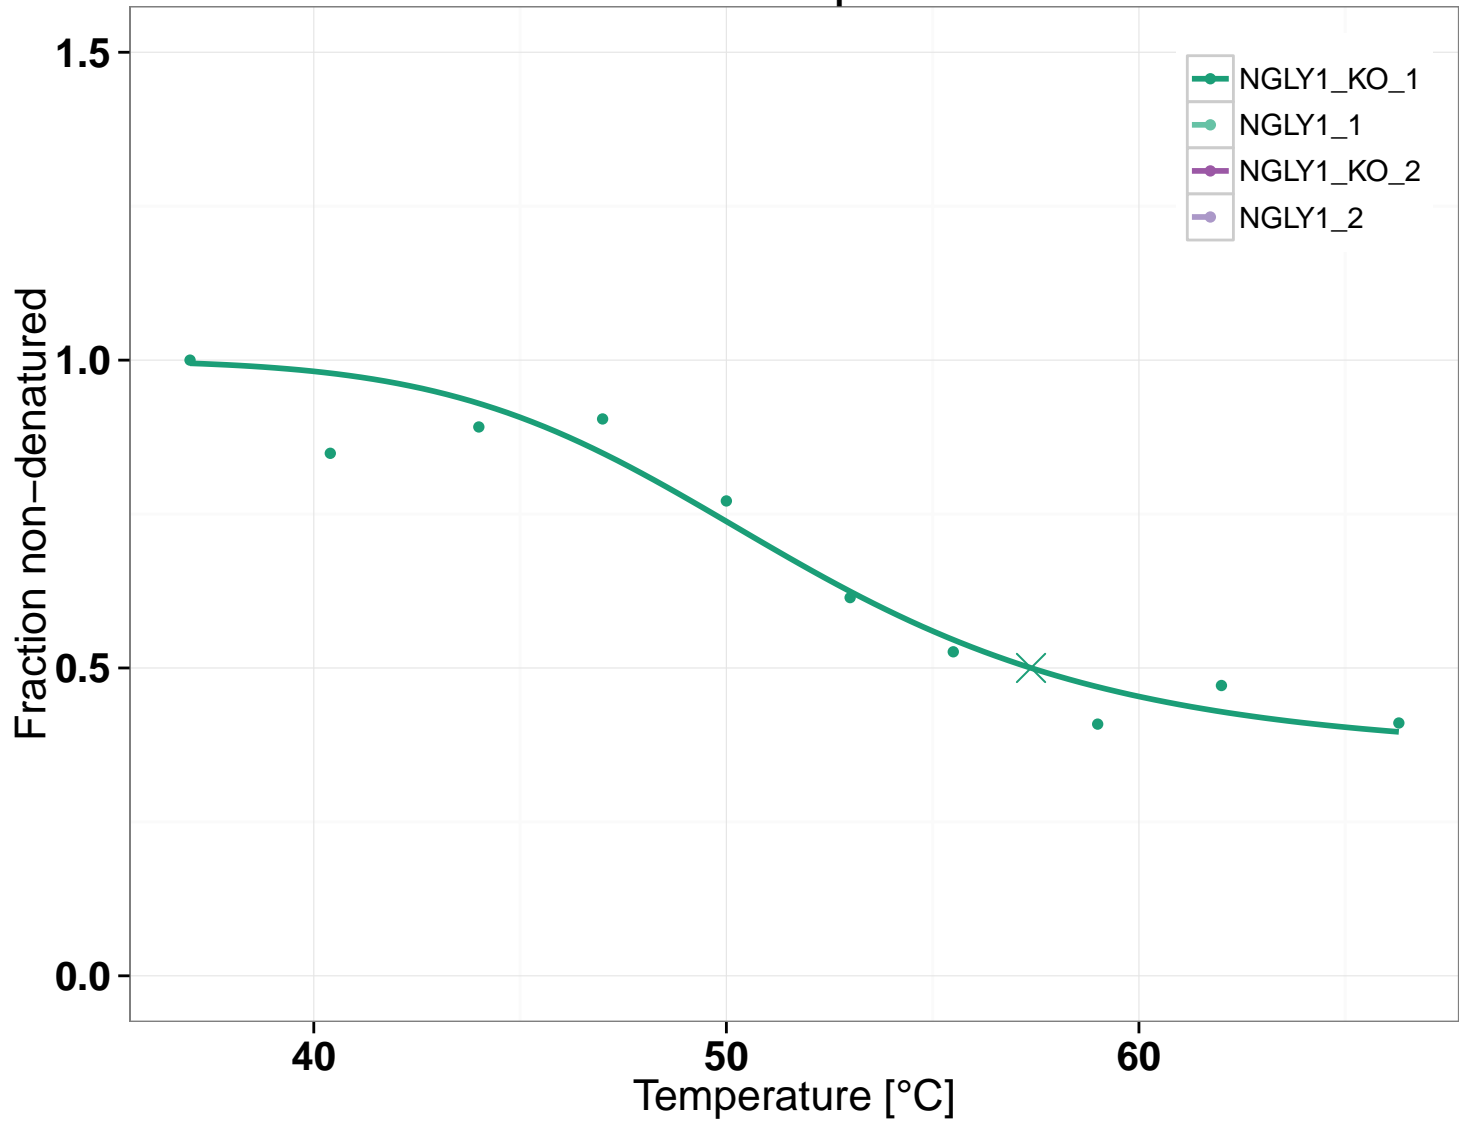

|            | meltPoint | slope  | plateau | R2   |
|------------|-----------|--------|---------|------|
| NGLY1_KO_1 | 57.38     | -0.039 | 0.36    | 0.94 |
| NGLY1_1    | -         | -      | -       | -    |
| NGLY1_KO_2 | -         | -      | -       | -    |
| NGLY1_2    | -         | -      | -       | -    |

Supplement: Supplementary file 2683 [file 1]

# IPI00328765.3|PIBF1

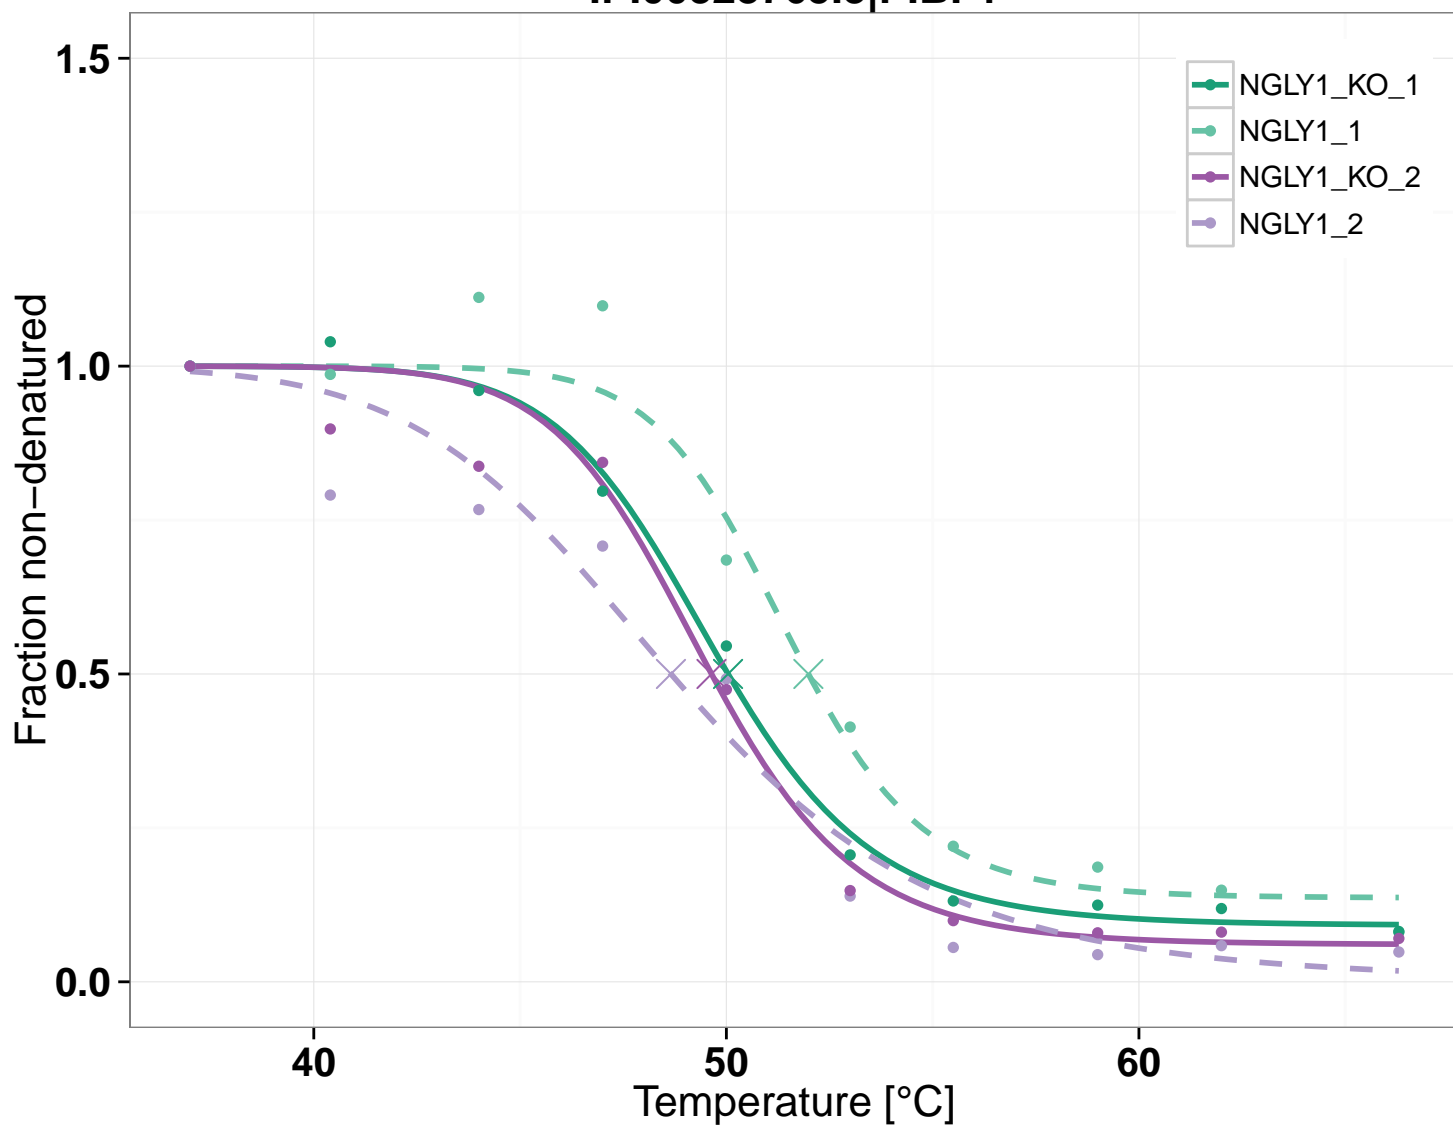

|            | meltPoint | slope  | plateau | R2   |
|------------|-----------|--------|---------|------|
| NGLY1_KO_1 | 50.04     | -0.12  | 0.09    | 1    |
| NGLY1_1    | 51.99     | -0.13  | 0.14    | 0.97 |
| NGLY1_KO_2 | 49.64     | -0.13  | 0.06    | 0.98 |
| NGLY1_2    | 48.66     | -0.079 | 0       | 0.95 |

Supplement: Supplementary file 2684 [file 1]

IPI00071826.3|FAM54B

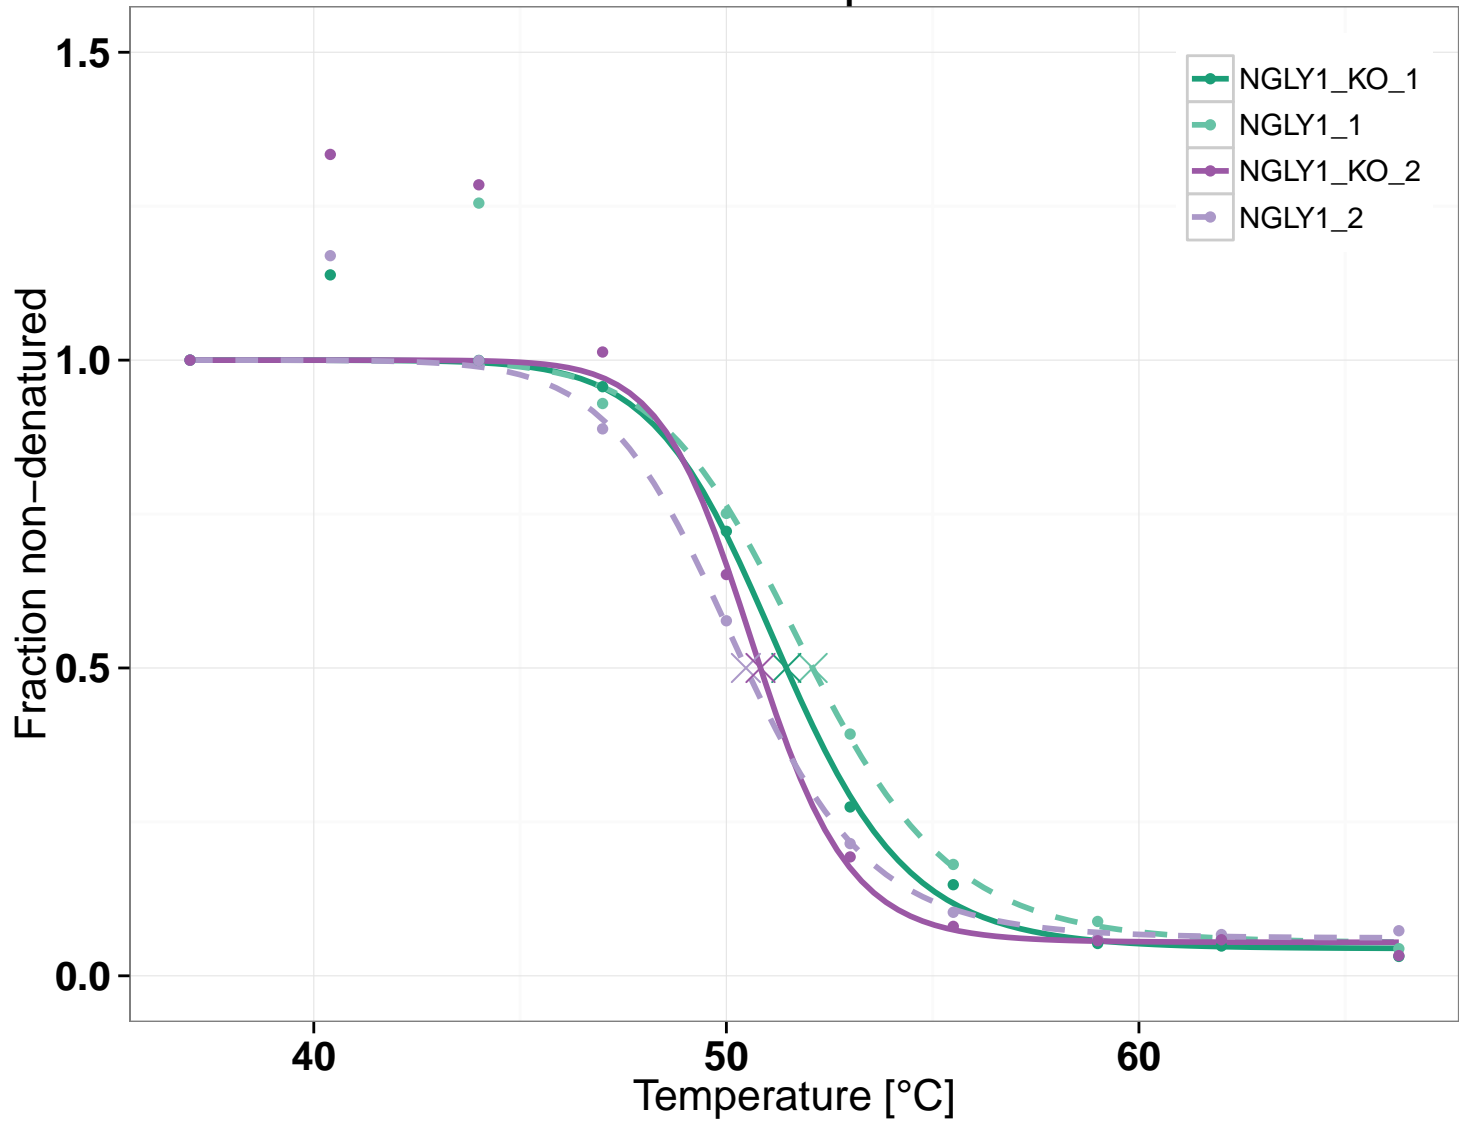

|            | meltPoint | slope | plateau | R2   |
|------------|-----------|-------|---------|------|
| NGLY1_KO_1 | 51.45     | -0.15 | 0.04    | 0.99 |
| NGLY1_1    | 52.09     | -0.13 | 0.05    | 0.85 |
| NGLY1_KO_2 | 50.83     | -0.21 | 0.05    | 0.93 |
| NGLY1_2    | 50.47     | -0.15 | 0.06    | 0.98 |

Supplement: Supplementary file 2685 [file 1]

IPI00071703.2|GFM2

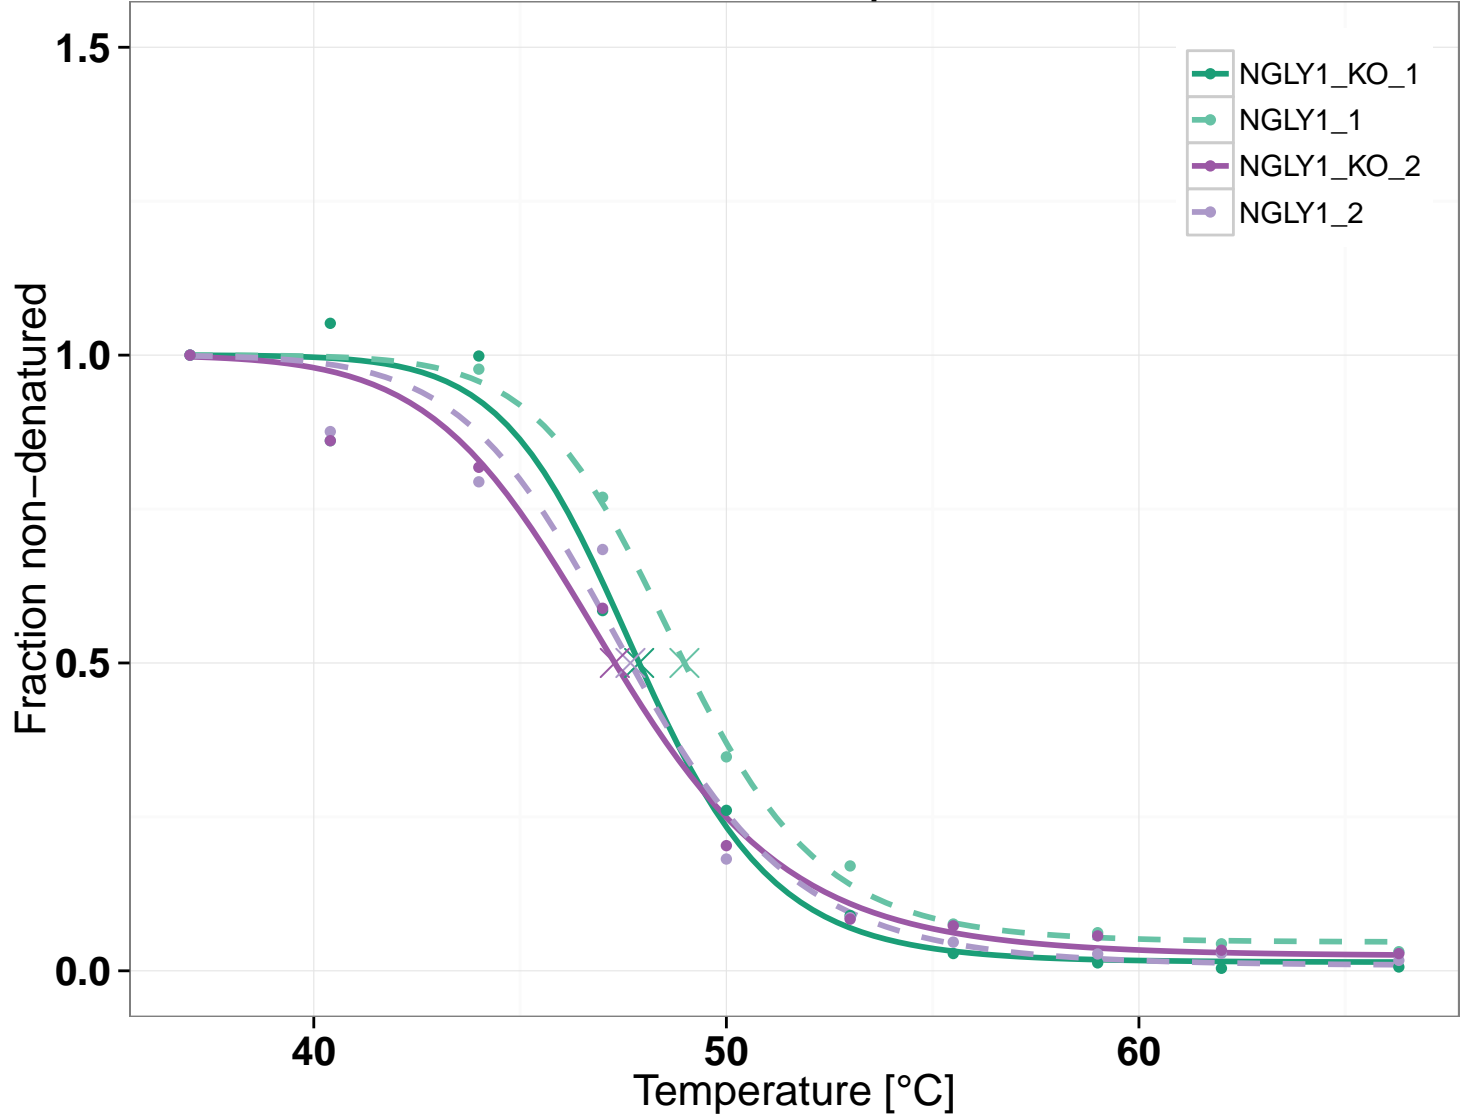

|            | meltPoint | slope | plateau | R2   |
|------------|-----------|-------|---------|------|
| NGLY1_KO_1 | 47.89     | -0.15 | 0.01    | 0.99 |
| NGLY1_1    | 48.98     | -0.14 | 0.05    | 0.99 |
| NGLY1_KO_2 | 47.3      | -0.11 | 0.02    | 0.99 |
| NGLY1_2    | 47.67     | -0.12 | 0.01    | 0.98 |

Supplement: Supplementary file 2686 [file 1]

IPI00022479.6|HERC1

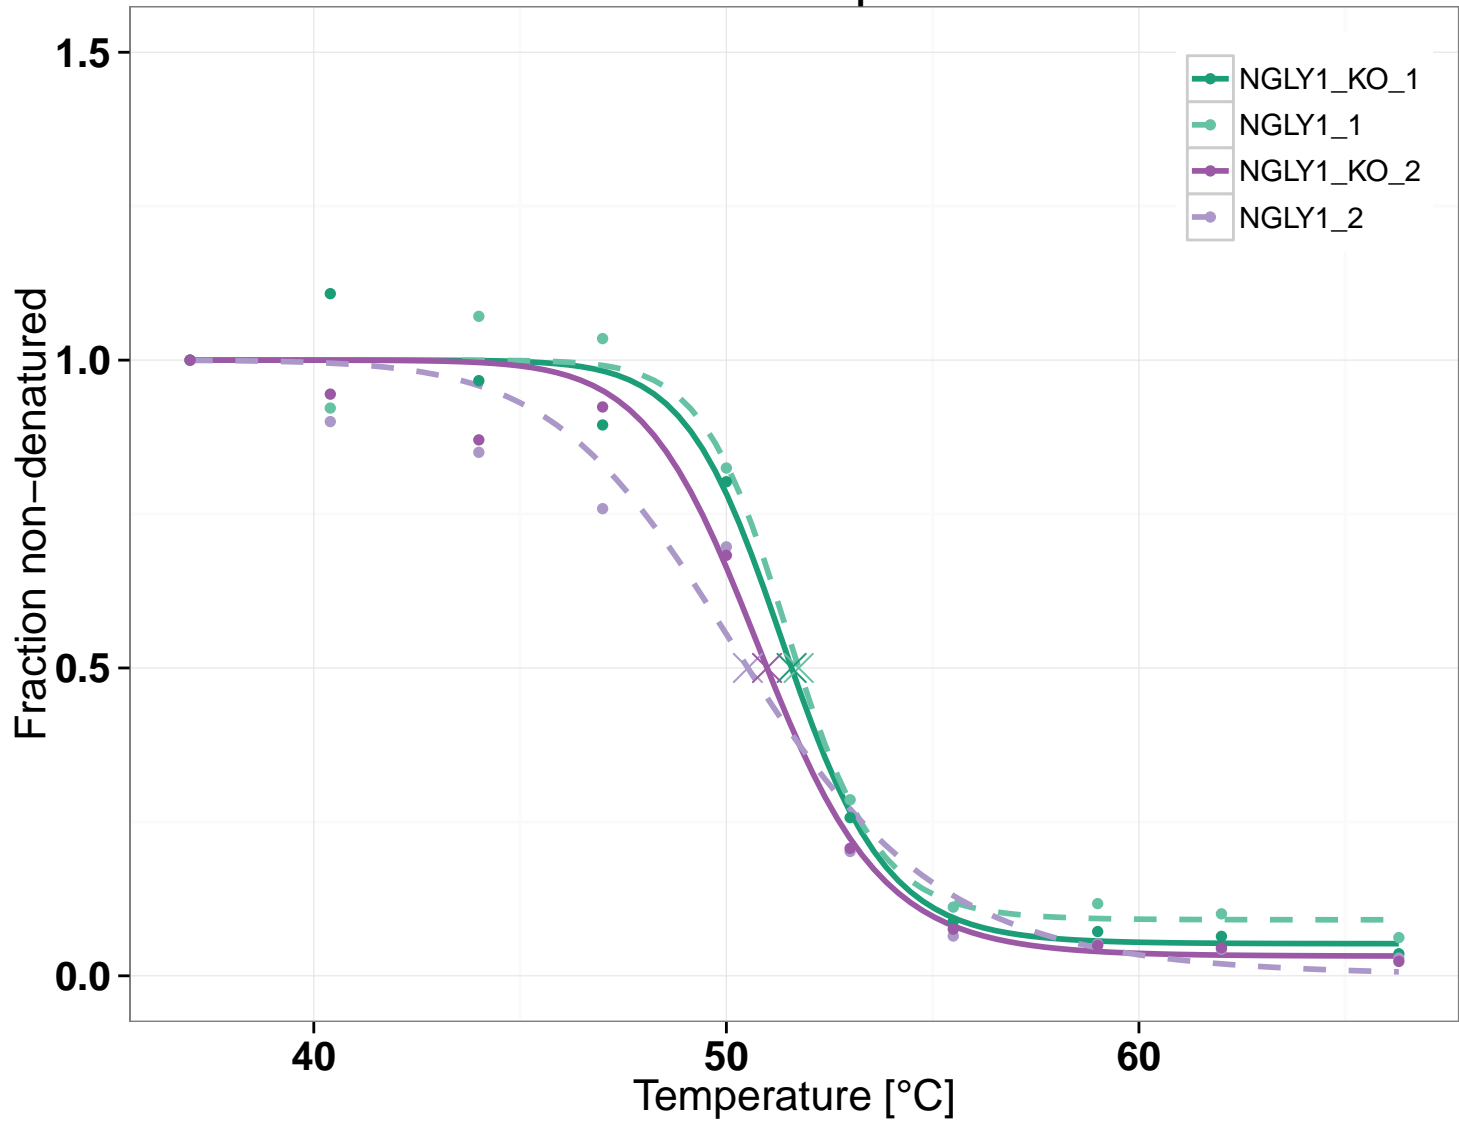

|            | meltPoint | slope | plateau | R2   |
|------------|-----------|-------|---------|------|
| NGLY1_KO_1 | 51.58     | -0.19 | 0.05    | 0.99 |
| NGLY1_1    | 51.75     | -0.21 | 0.09    | 0.99 |
| NGLY1_KO_2 | 50.99     | -0.17 | 0.03    | 0.99 |
| NGLY1_2    | 50.52     | -0.11 | 0       | 0.96 |

Supplement: Supplementary file 2687 [file 1]

IPI00298870.1|TRAPPC10

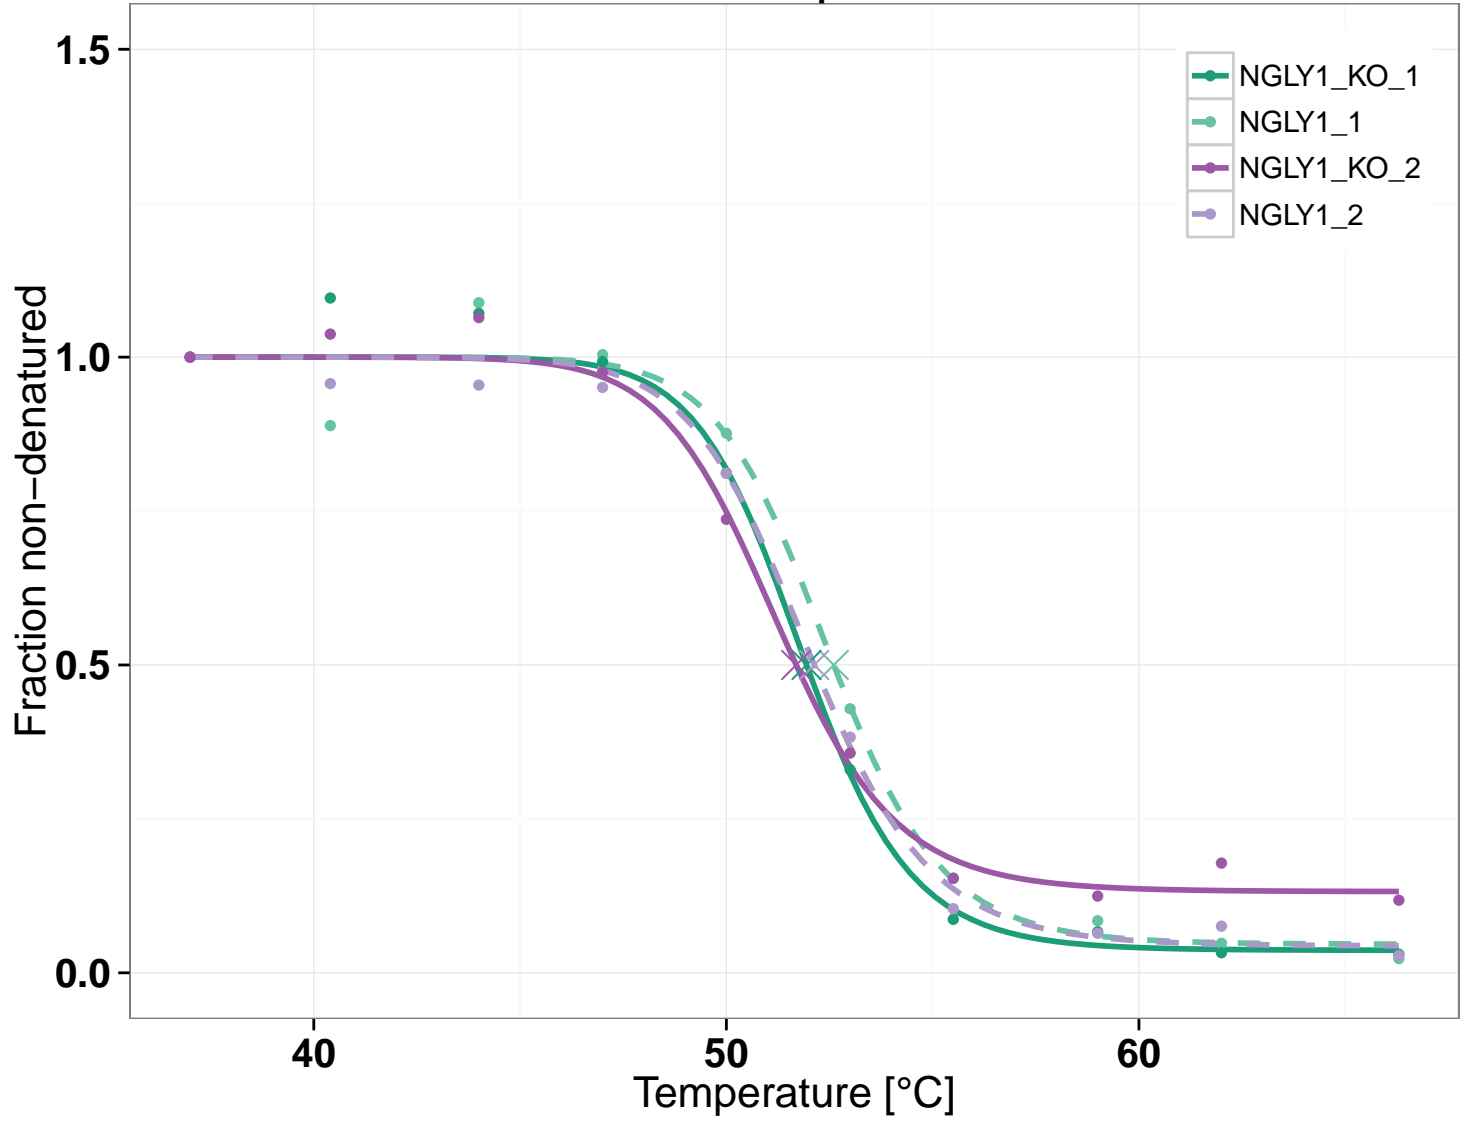

|            | meltPoint | slope | plateau | R2   |
|------------|-----------|-------|---------|------|
| NGLY1_KO_1 | 51.94     | -0.18 | 0.04    | 0.99 |
| NGLY1_1    | 52.6      | -0.17 | 0.05    | 0.99 |
| NGLY1_KO_2 | 51.69     | -0.15 | 0.13    | 0.99 |
| NGLY1_2    | 52.13     | -0.16 | 0.04    | 1    |

Supplement: Supplementary file 2688 [file 1]

IPI00048500.14|UBXN2B

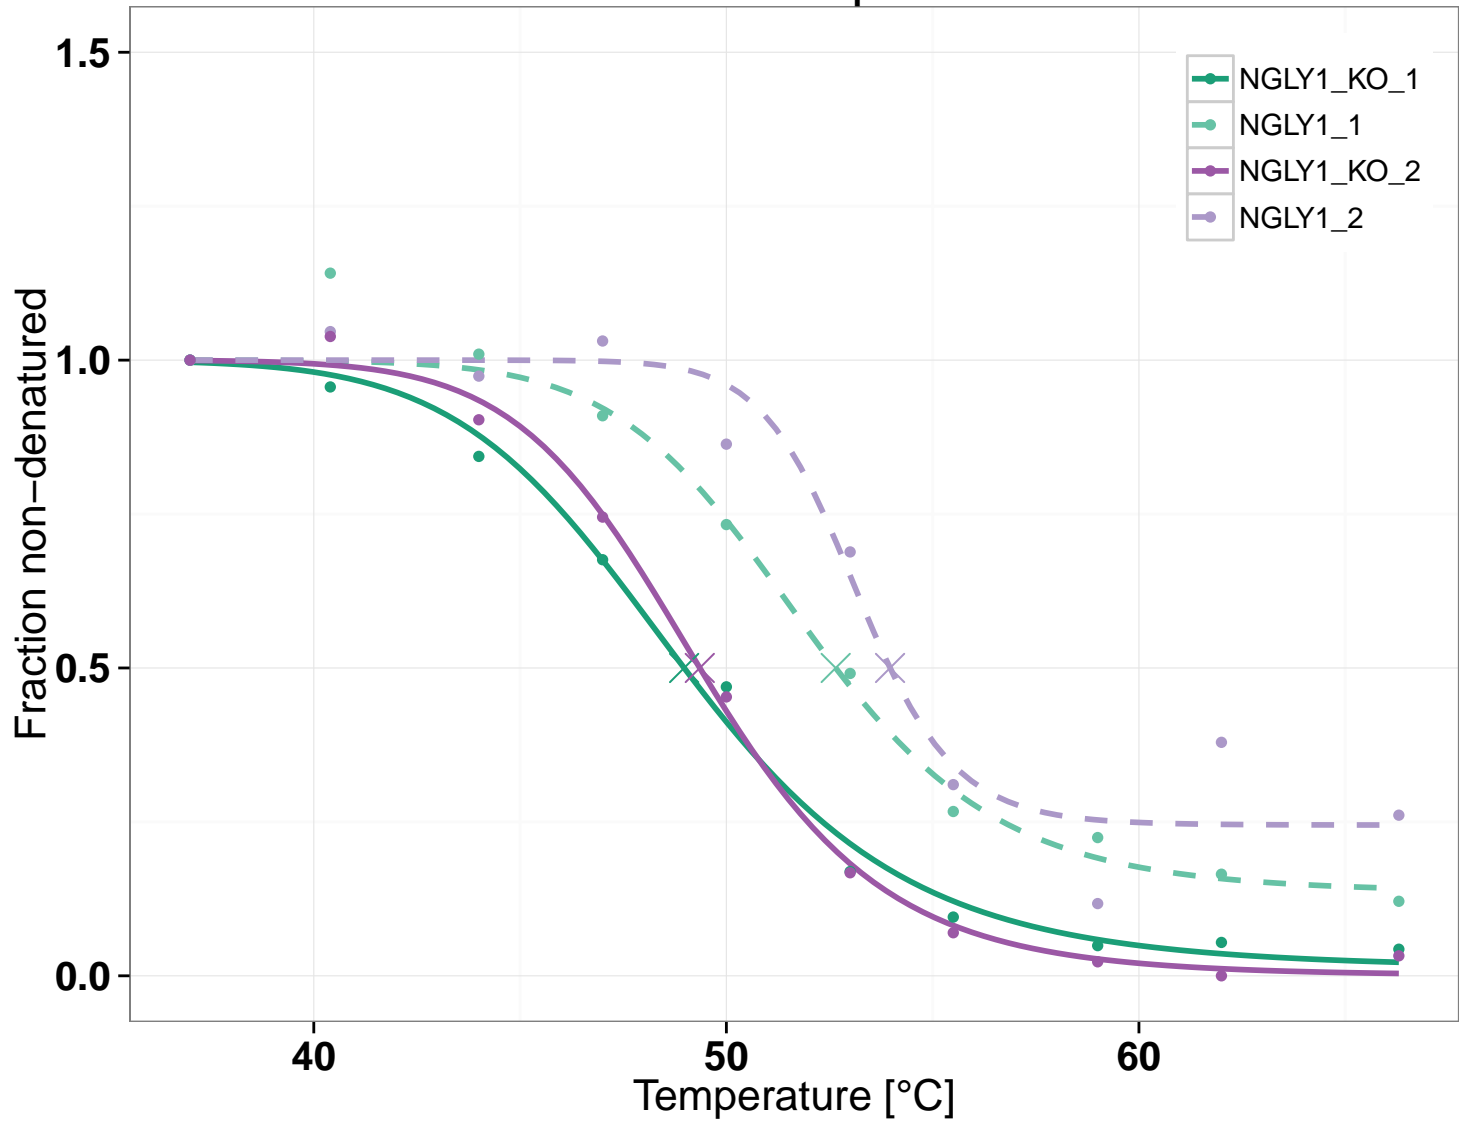

|            | meltPoint | slope  | plateau | R2   |
|------------|-----------|--------|---------|------|
| NGLY1_KO_1 | 48.98     | -0.09  | 0.01    | 0.99 |
| NGLY1_1    | 52.65     | -0.093 | 0.14    | 0.98 |
| NGLY1_KO_2 | 49.36     | -0.11  | 0       | 1    |
| NGLY1_2    | 53.97     | -0.16  | 0.24    | 0.96 |

Supplement: Supplementary file 2689 [file 1]

# IPI00023205.2|TCF25

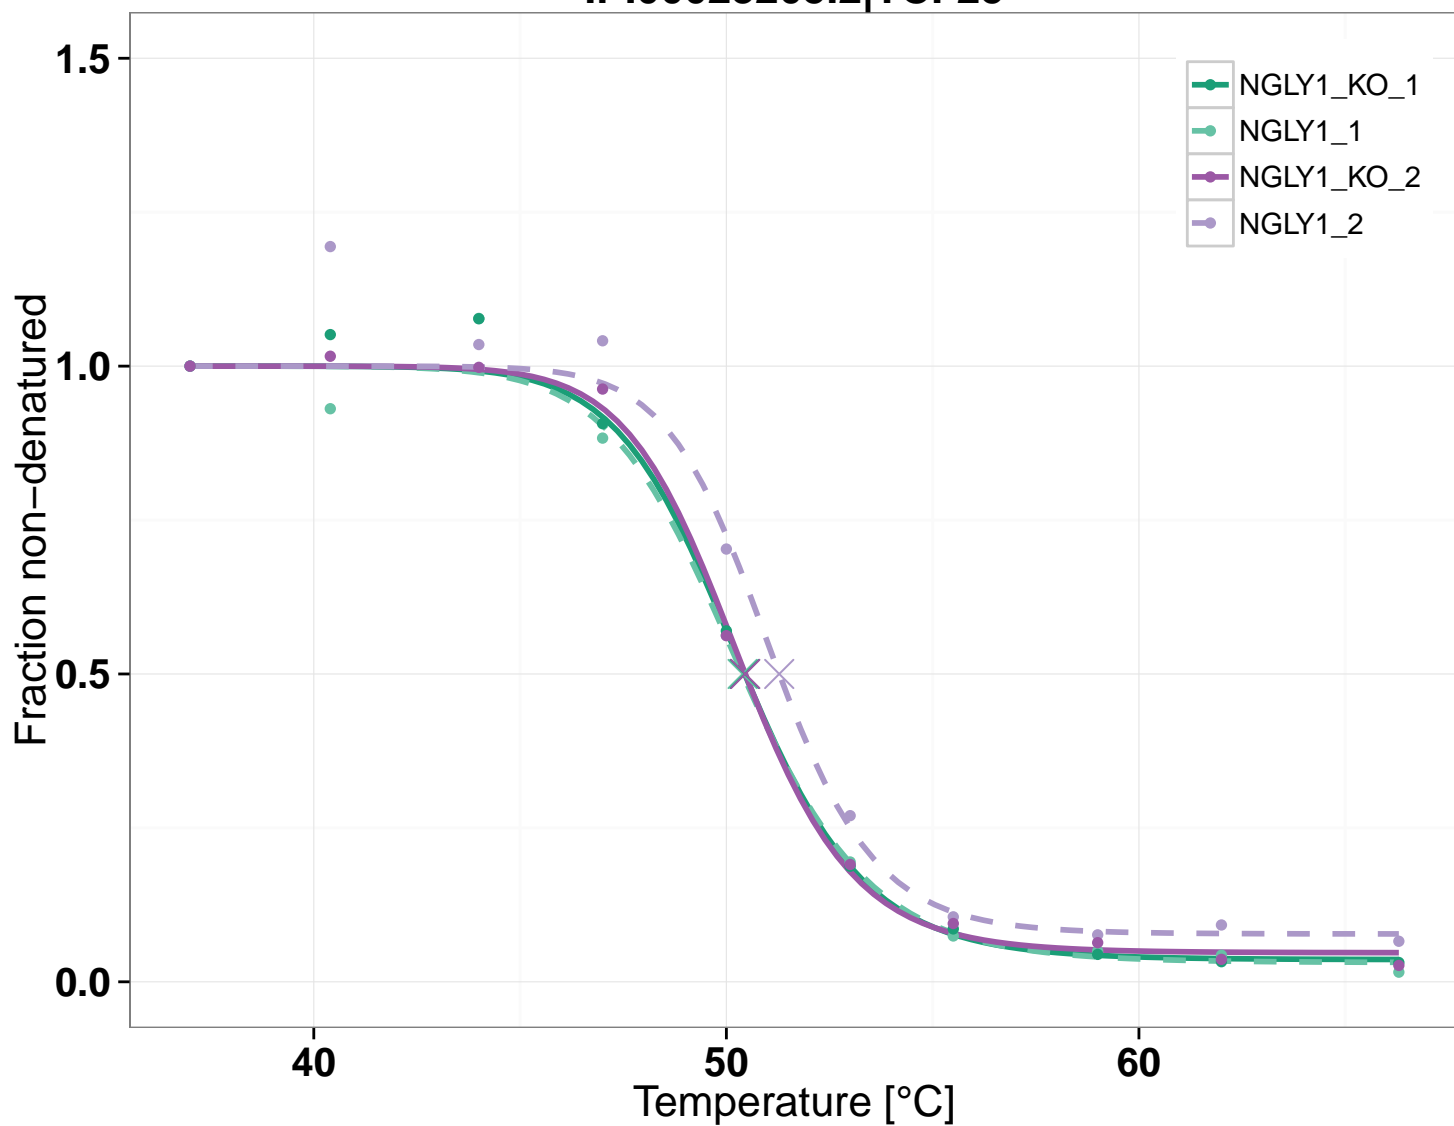

|            | meltPoint | slope | plateau | R2   |
|------------|-----------|-------|---------|------|
| NGLY1_KO_1 | 50.44     | -0.16 | 0.04    | 0.99 |
| NGLY1_1    | 50.39     | -0.15 | 0.03    | 0.99 |
| NGLY1_KO_2 | 50.46     | -0.17 | 0.05    | 1    |
| NGLY1_2    | 51.28     | -0.18 | 0.08    | 0.98 |

Supplement: Supplementary file 2690 [file 1]

IPI00847670.1|LOC440043

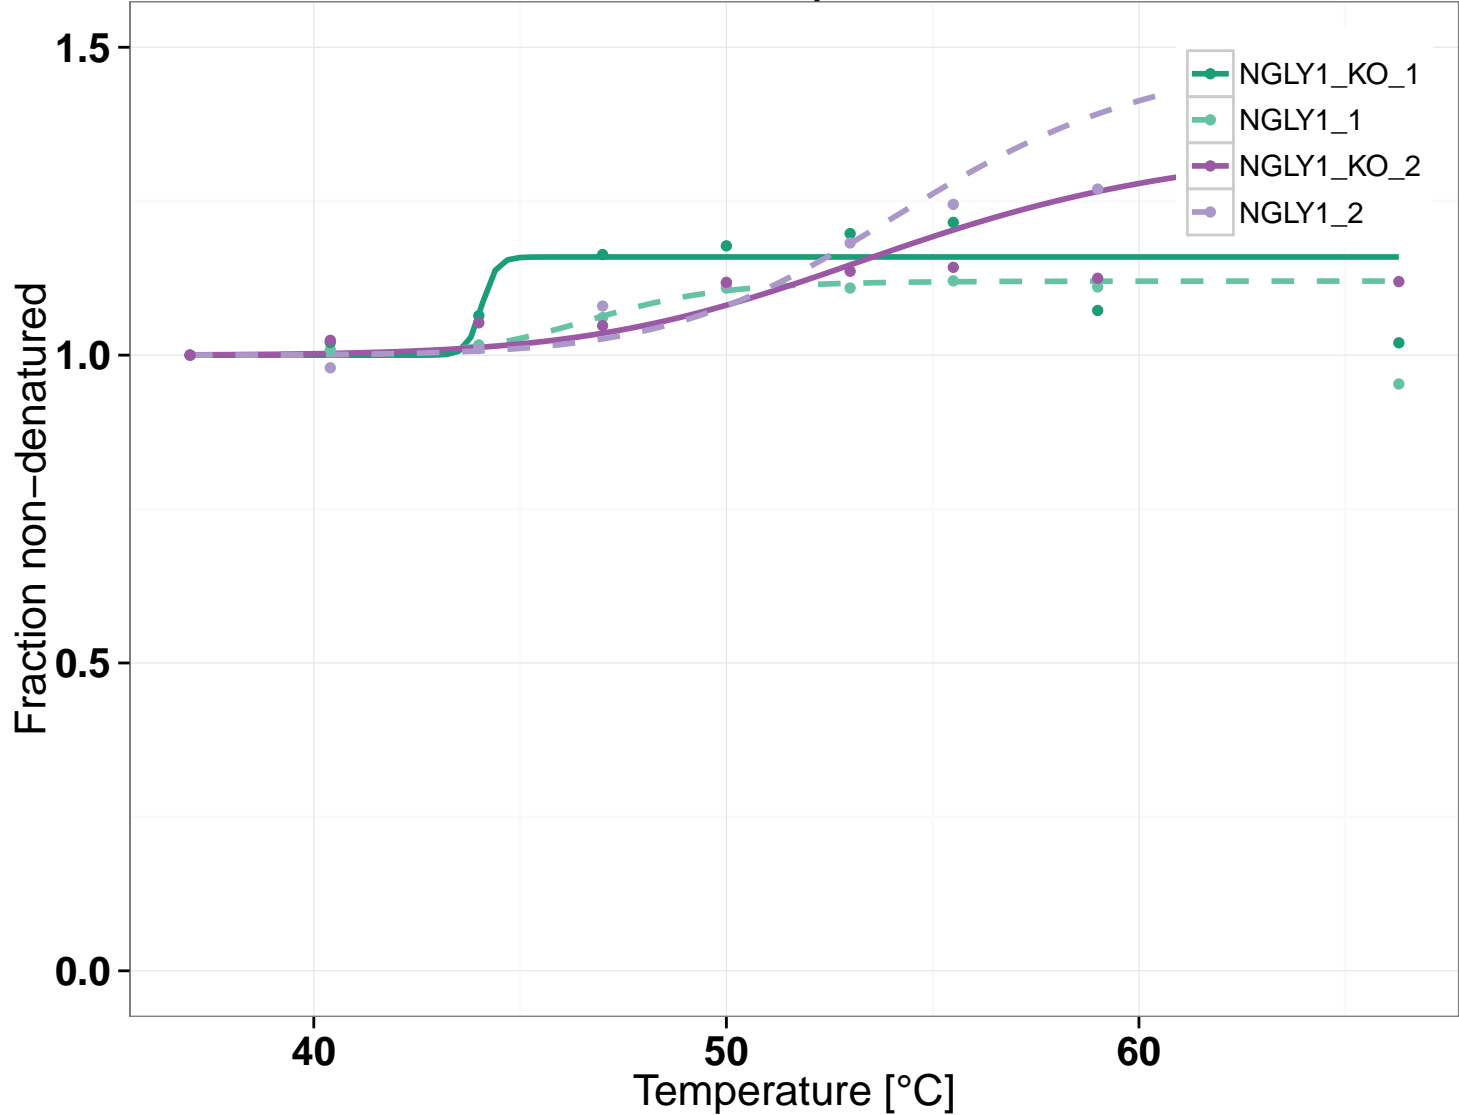

|            | meltPoint | slope | plateau | R2   |
|------------|-----------|-------|---------|------|
| NGLY1_KO_1 | —         | 0.23  | 1.16    | 0.46 |
| NGLY1_1    | —         | 0.019 | 1.12    | 0.29 |
| NGLY1_KO_2 | —         | 0.023 | 1.35    | 0.37 |
| NGLY1_2    | —         | 0.041 | 1.5     | 0.83 |

Supplement: Supplementary file 2691 [file 1]

IPI00639957.2|CARM1

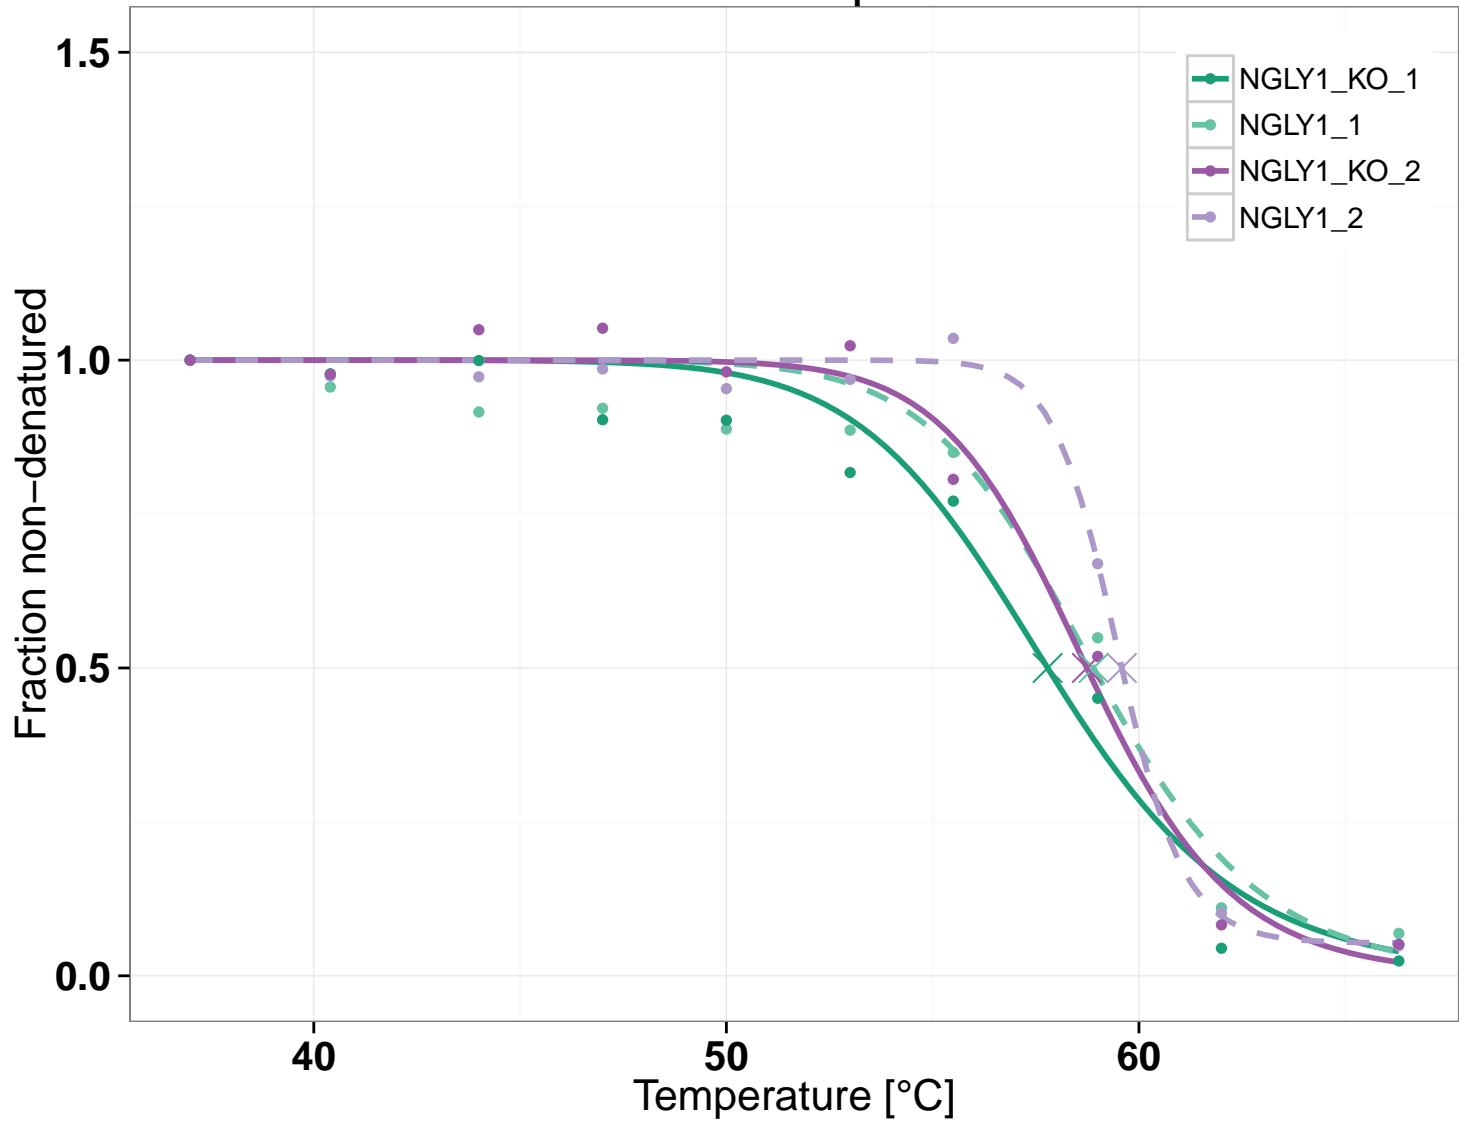

|            | meltPoint | slope | plateau | R2   |
|------------|-----------|-------|---------|------|
| NGLY1_KO_1 | 57.79     | -0.11 | 0       | 0.97 |
| NGLY1_1    | 58.9      | -0.12 | 0       | 0.96 |
| NGLY1_KO_2 | 58.74     | -0.14 | 0       | 0.98 |
| NGLY1_2    | 59.59     | -0.3  | 0.05    | 1    |

Supplement: Supplementary file 2692 [file 1]

IPI00642032.1|TXNL1

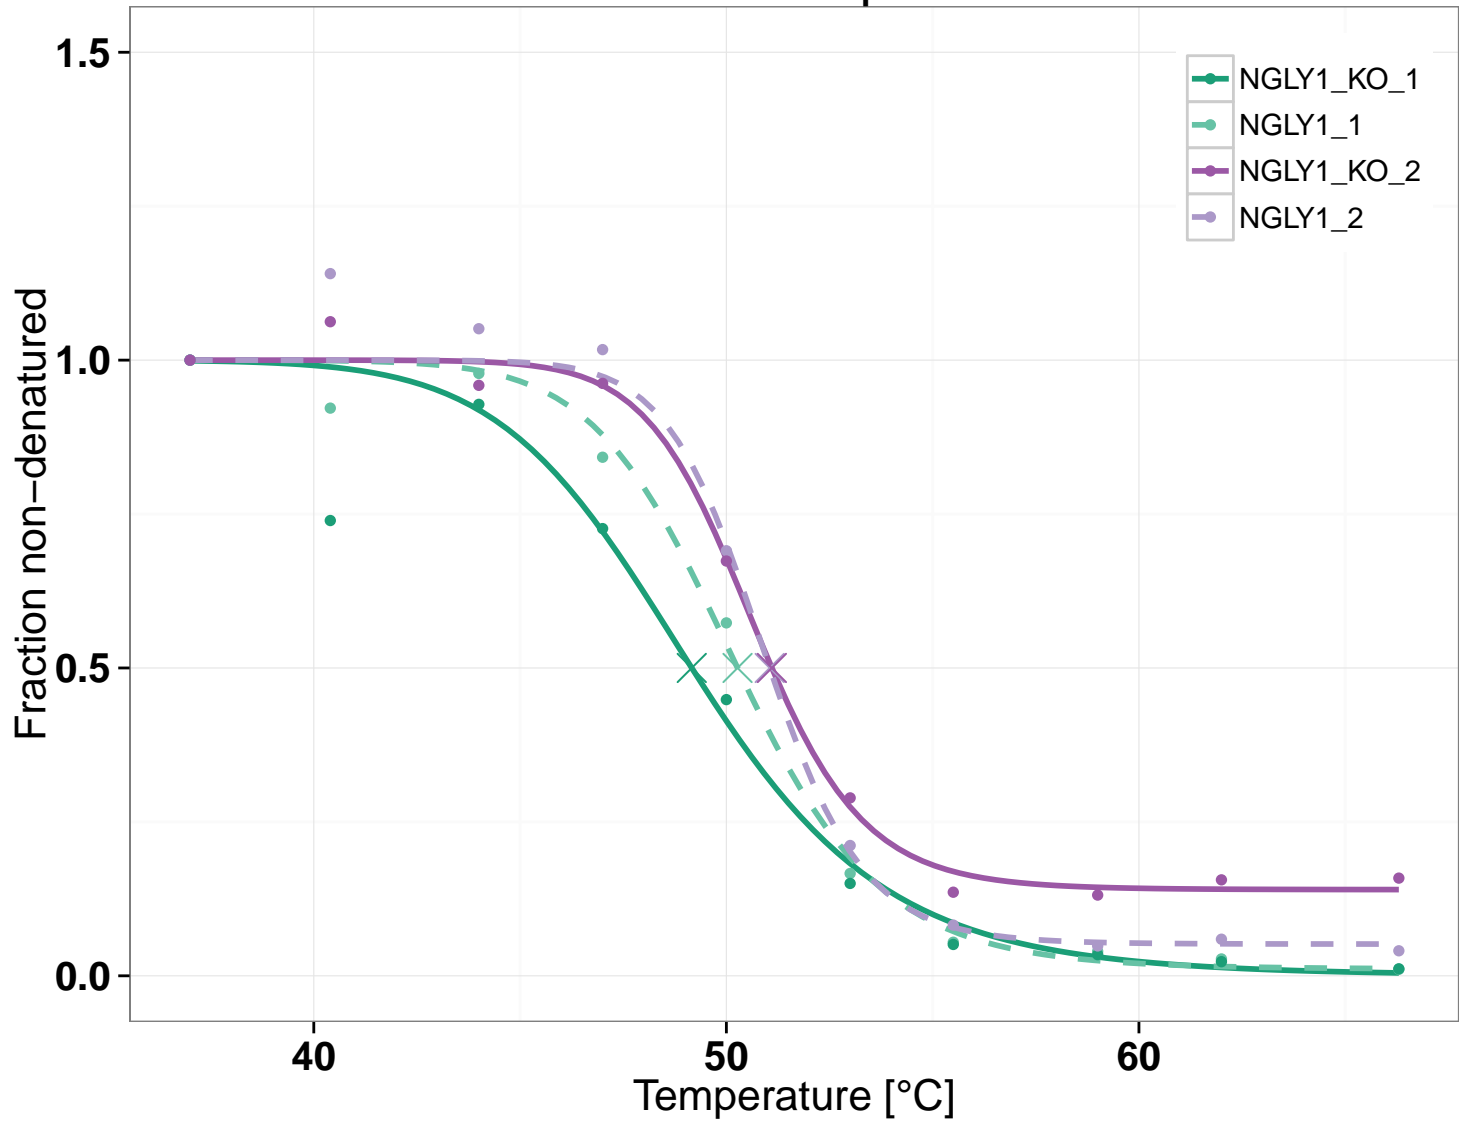

|            | meltPoint | slope | plateau | R2   |
|------------|-----------|-------|---------|------|
| NGLY1_KO_1 | 49.16     | -0.11 | 0       | 0.96 |
| NGLY1_1    | 50.27     | -0.14 | 0.01    | 0.99 |
| NGLY1_KO_2 | 51.1      | -0.16 | 0.14    | 1    |
| NGLY1_2    | 51.05     | -0.2  | 0.05    | 0.99 |

Supplement: Supplementary file 2693 [file 1]

# IPI00001690.2|CUL7

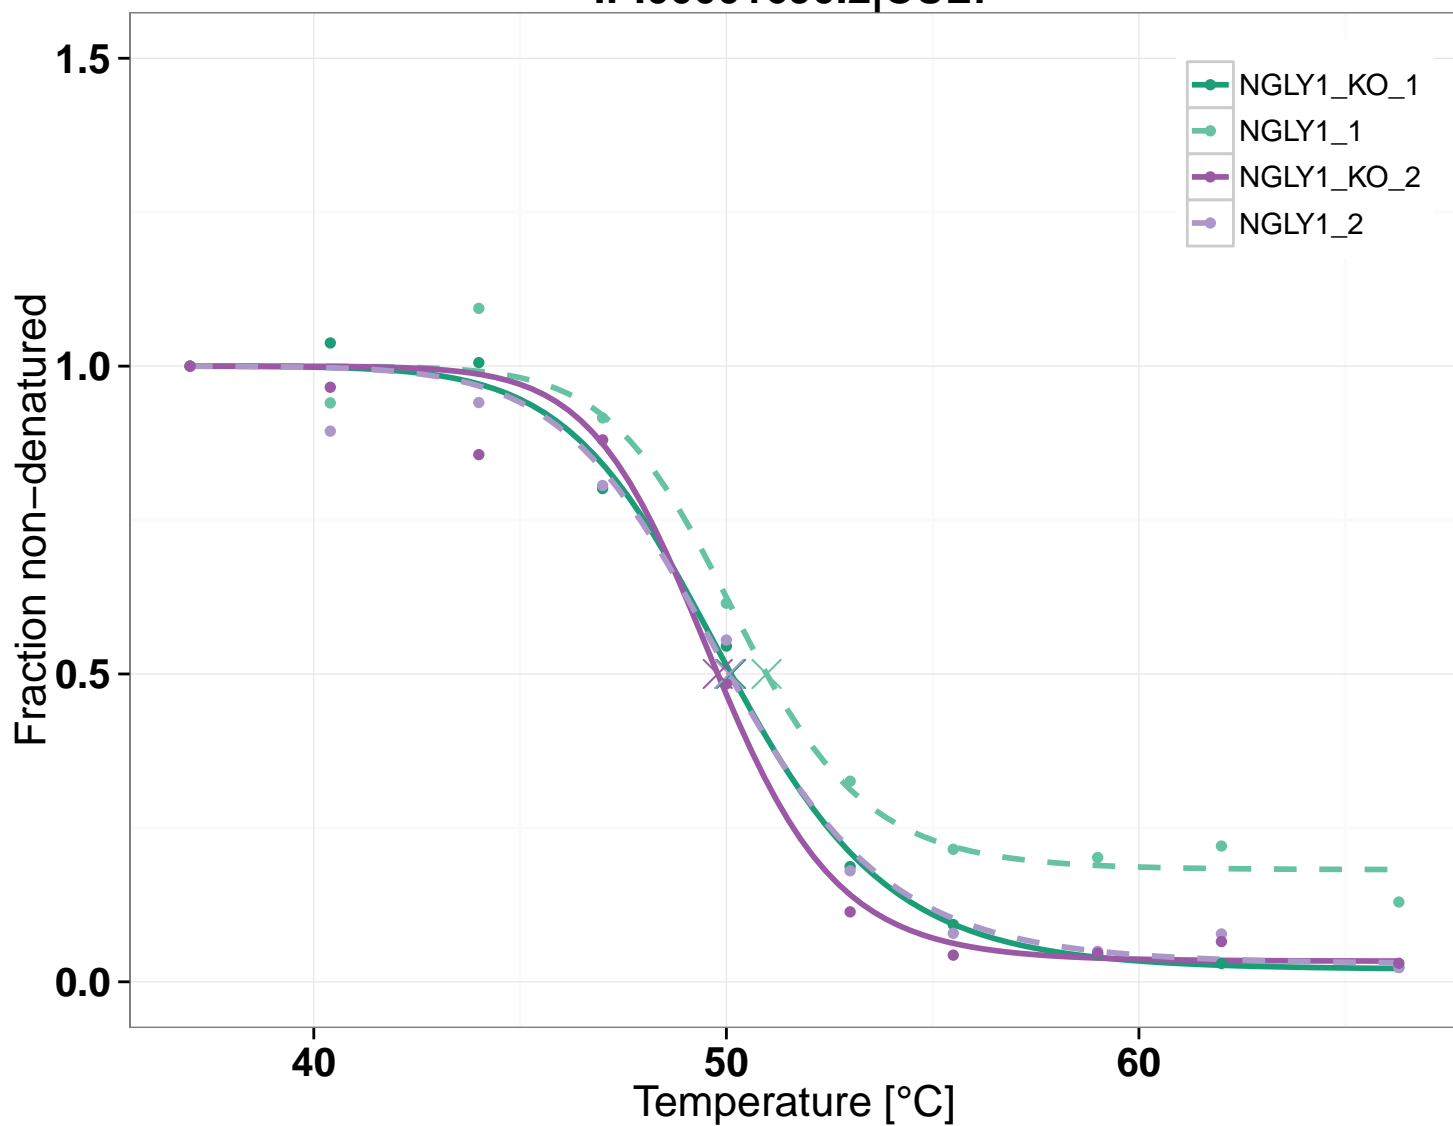

|            | meltPoint | slope | plateau | R2   |
|------------|-----------|-------|---------|------|
| NGLY1_KO_1 | 50.11     | -0.13 | 0.02    | 1    |
| NGLY1_1    | 50.97     | -0.13 | 0.18    | 0.99 |
| NGLY1_KO_2 | 49.79     | -0.16 | 0.03    | 0.99 |
| NGLY1_2    | 50.07     | -0.12 | 0.03    | 0.99 |

Supplement: Supplementary file 2694 [file 1]

IPI00012718.2|ID1

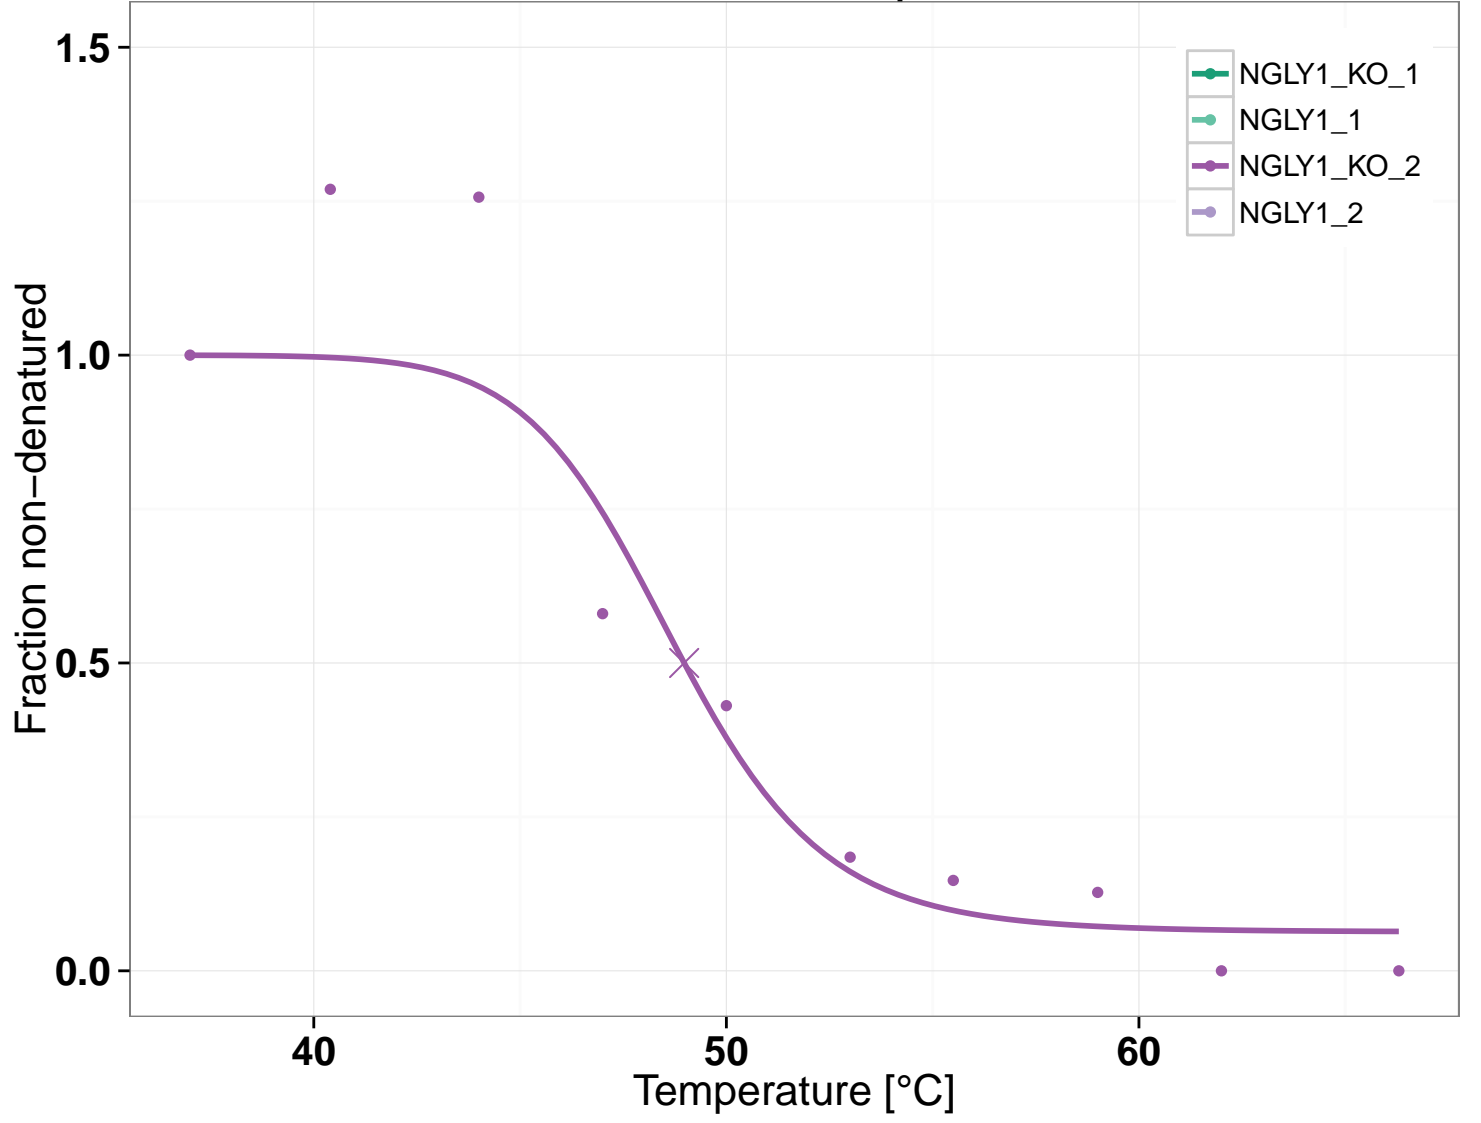

|            | meltPoint | slope | plateau | R2   |
|------------|-----------|-------|---------|------|
| NGLY1_KO_1 | —         | —     | —       | —    |
| NGLY1_1    | —         | —     | —       | —    |
| NGLY1_KO_2 | 48.98     | -0.13 | 0.06    | 0.91 |
| NGLY1_2    | —         | —     | —       | —    |

Supplement: Supplementary file 2695 [file 1]

IPI00852806.1|EXOC6B

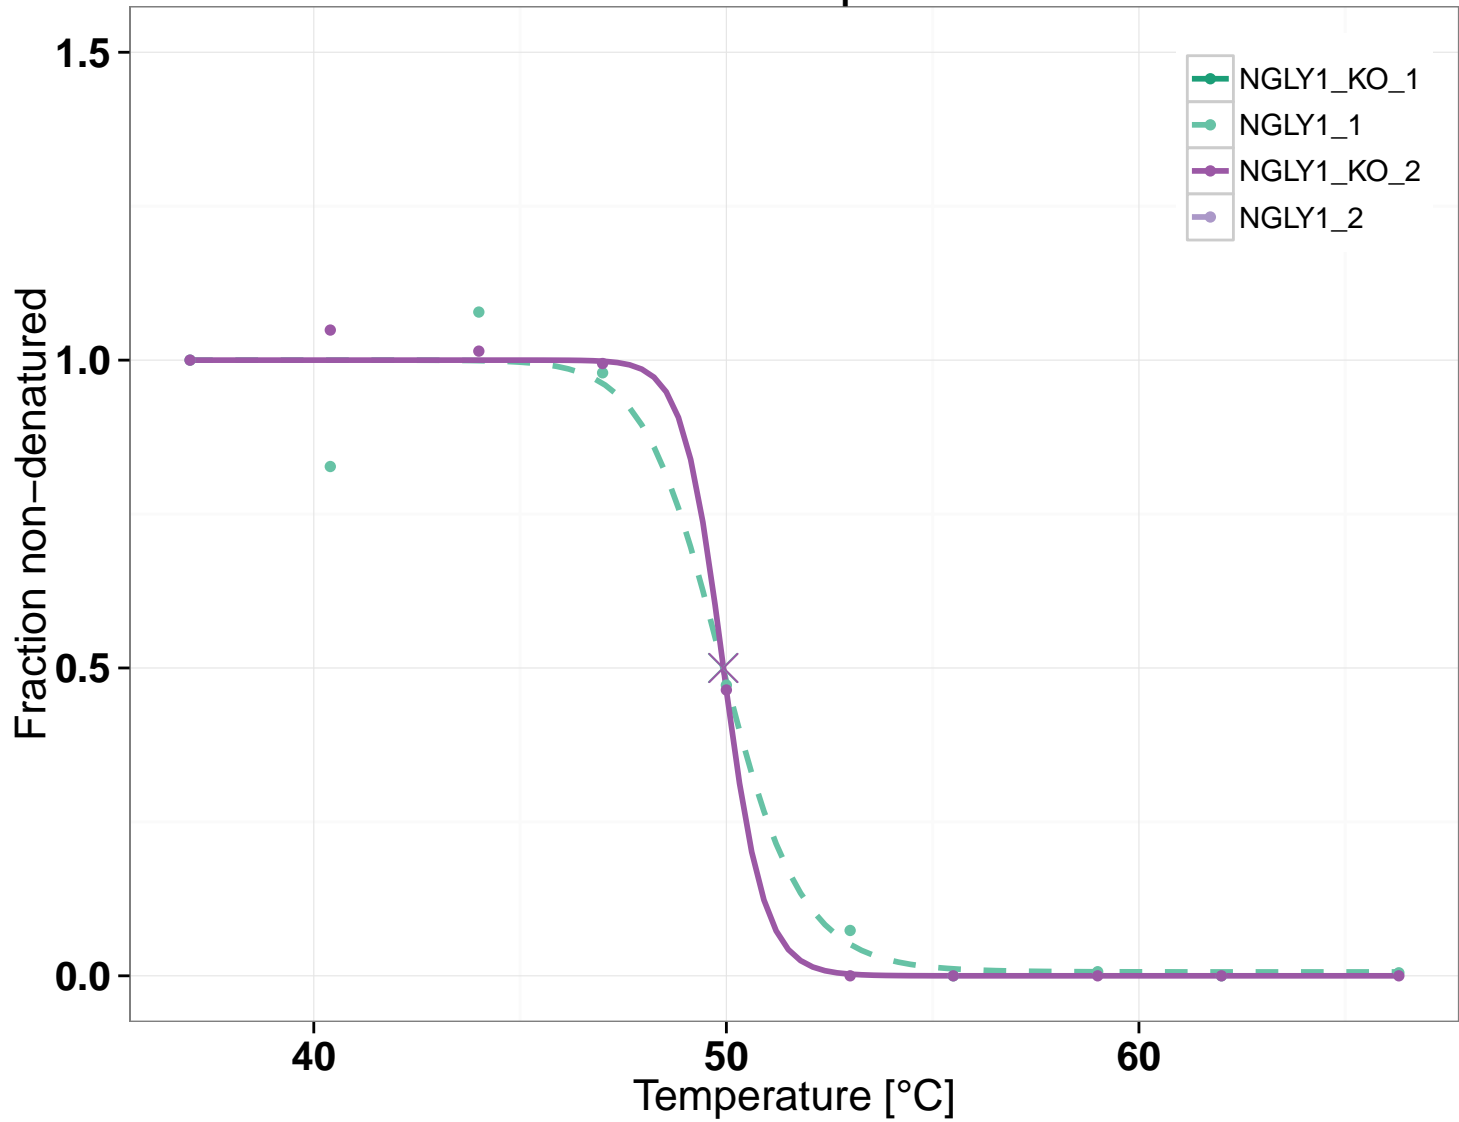

|            | meltPoint | slope | plateau | R2   |
|------------|-----------|-------|---------|------|
| NGLY1_KO_1 | -         | -     | -       | -    |
| NGLY1_1    | 49.92     | -0.26 | 0.01    | 0.98 |
| NGLY1_KO_2 | 49.93     | -0.51 | 0       | 1    |
| NGLY1_2    | -         | -     | -       | -    |

Supplement: Supplementary file 2696 [file 1]

IPI00514847.1|BCAP29

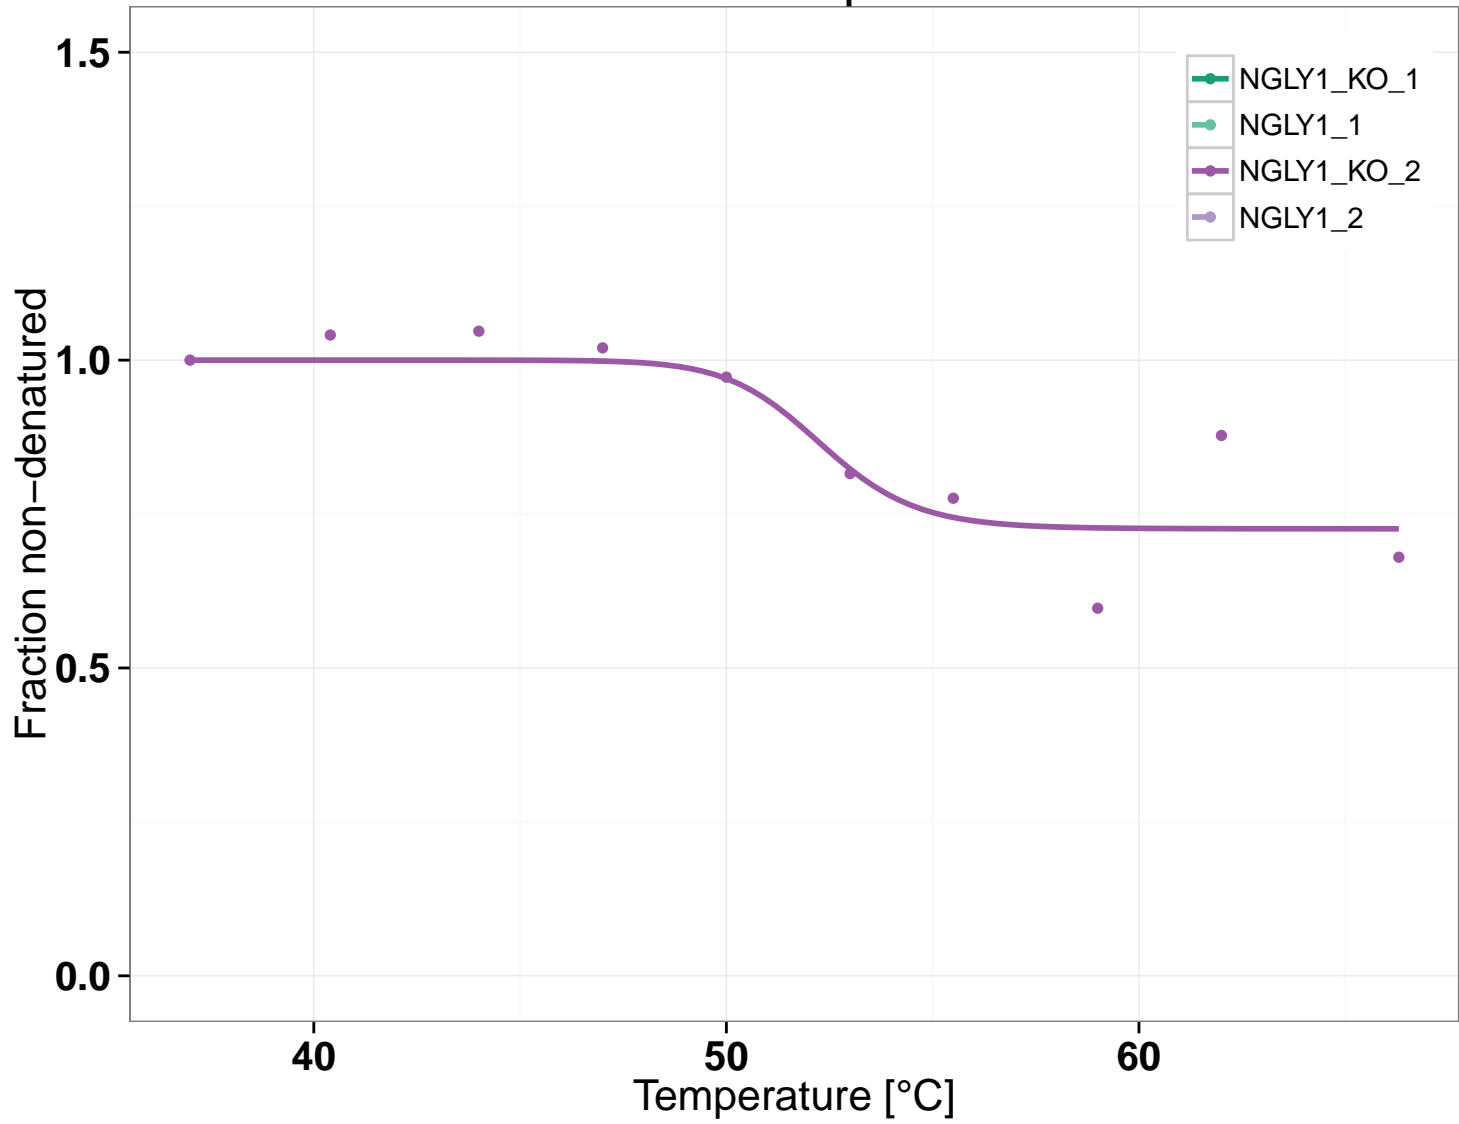

|            | meltPoint | slope | plateau | R2   |
|------------|-----------|-------|---------|------|
| NGLY1_KO_1 | —         | —     | —       | —    |
| NGLY1_1    | —         | —     | —       | —    |
| NGLY1_KO_2 | —         | -0.06 | 0.73    | 0.79 |
| NGLY1_2    | —         | —     | —       | —    |

Supplement: Supplementary file 2697 [file 1]

# IPI00216999.2|C14ORF21

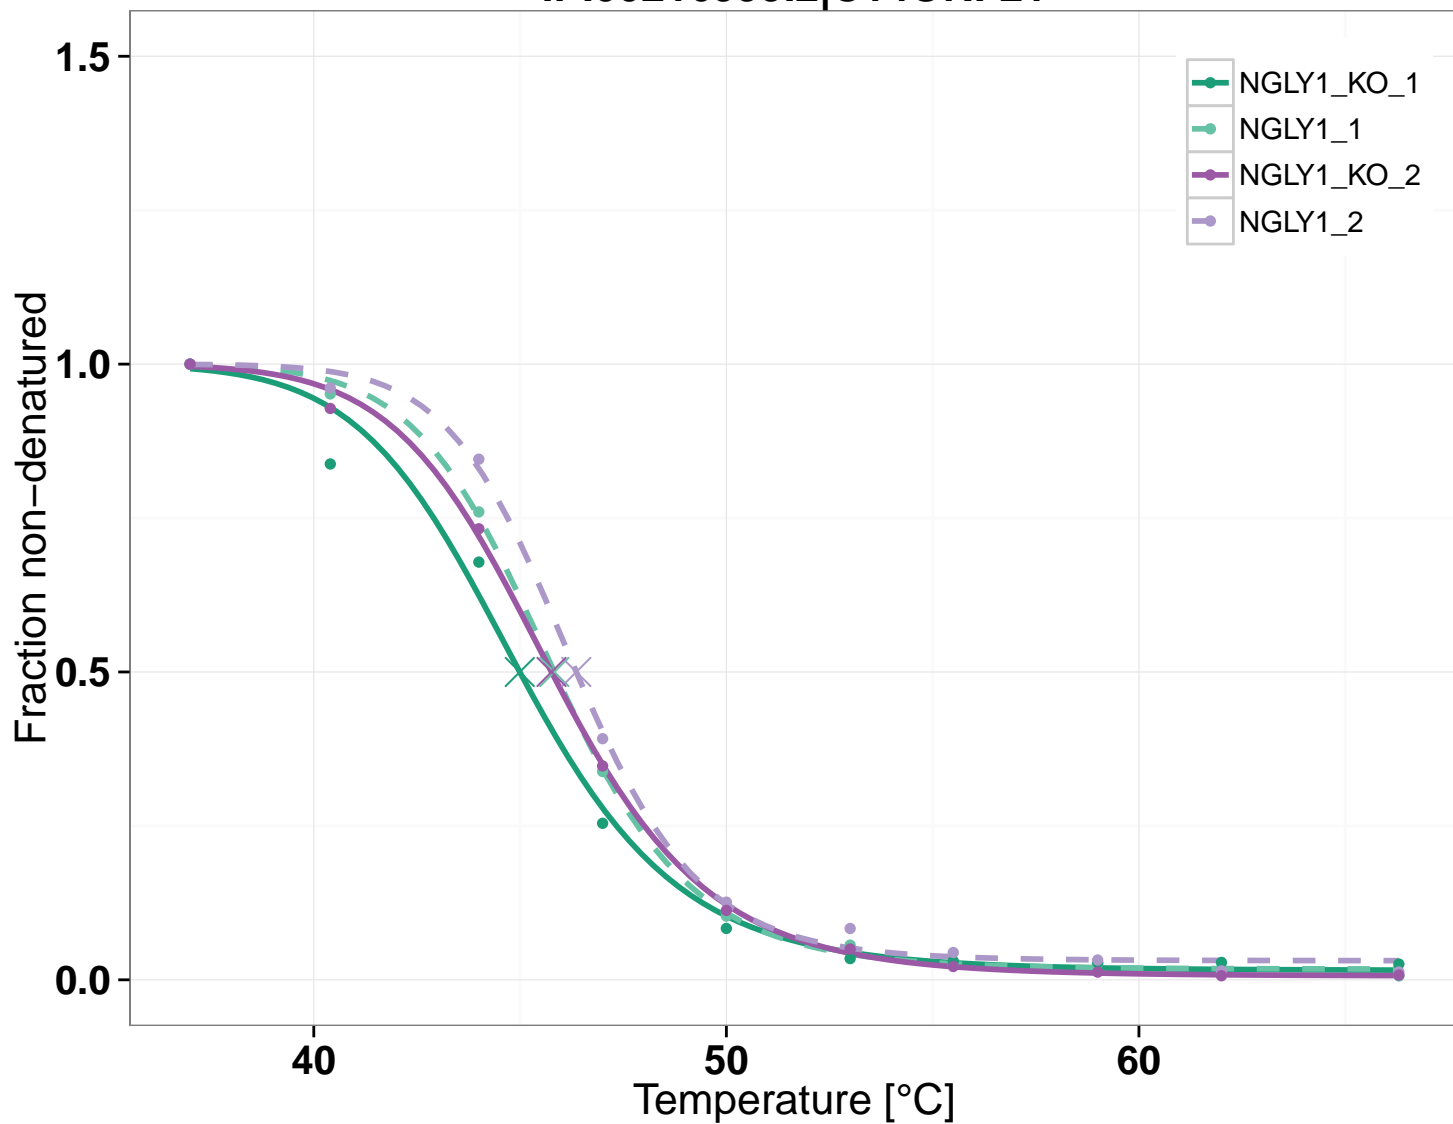

|            | meltPoint | slope | plateau | R2   |
|------------|-----------|-------|---------|------|
| NGLY1_KO_1 | 44.99     | -0.13 | 0.02    | 0.99 |
| NGLY1_1    | 45.83     | -0.15 | 0.02    | 1    |
| NGLY1_KO_2 | 45.76     | -0.13 | 0.01    | 1    |
| NGLY1_2    | 46.36     | -0.16 | 0.03    | 1    |

Supplement: Supplementary file 2698 [file 1]

IPI00299425.3|GPR108

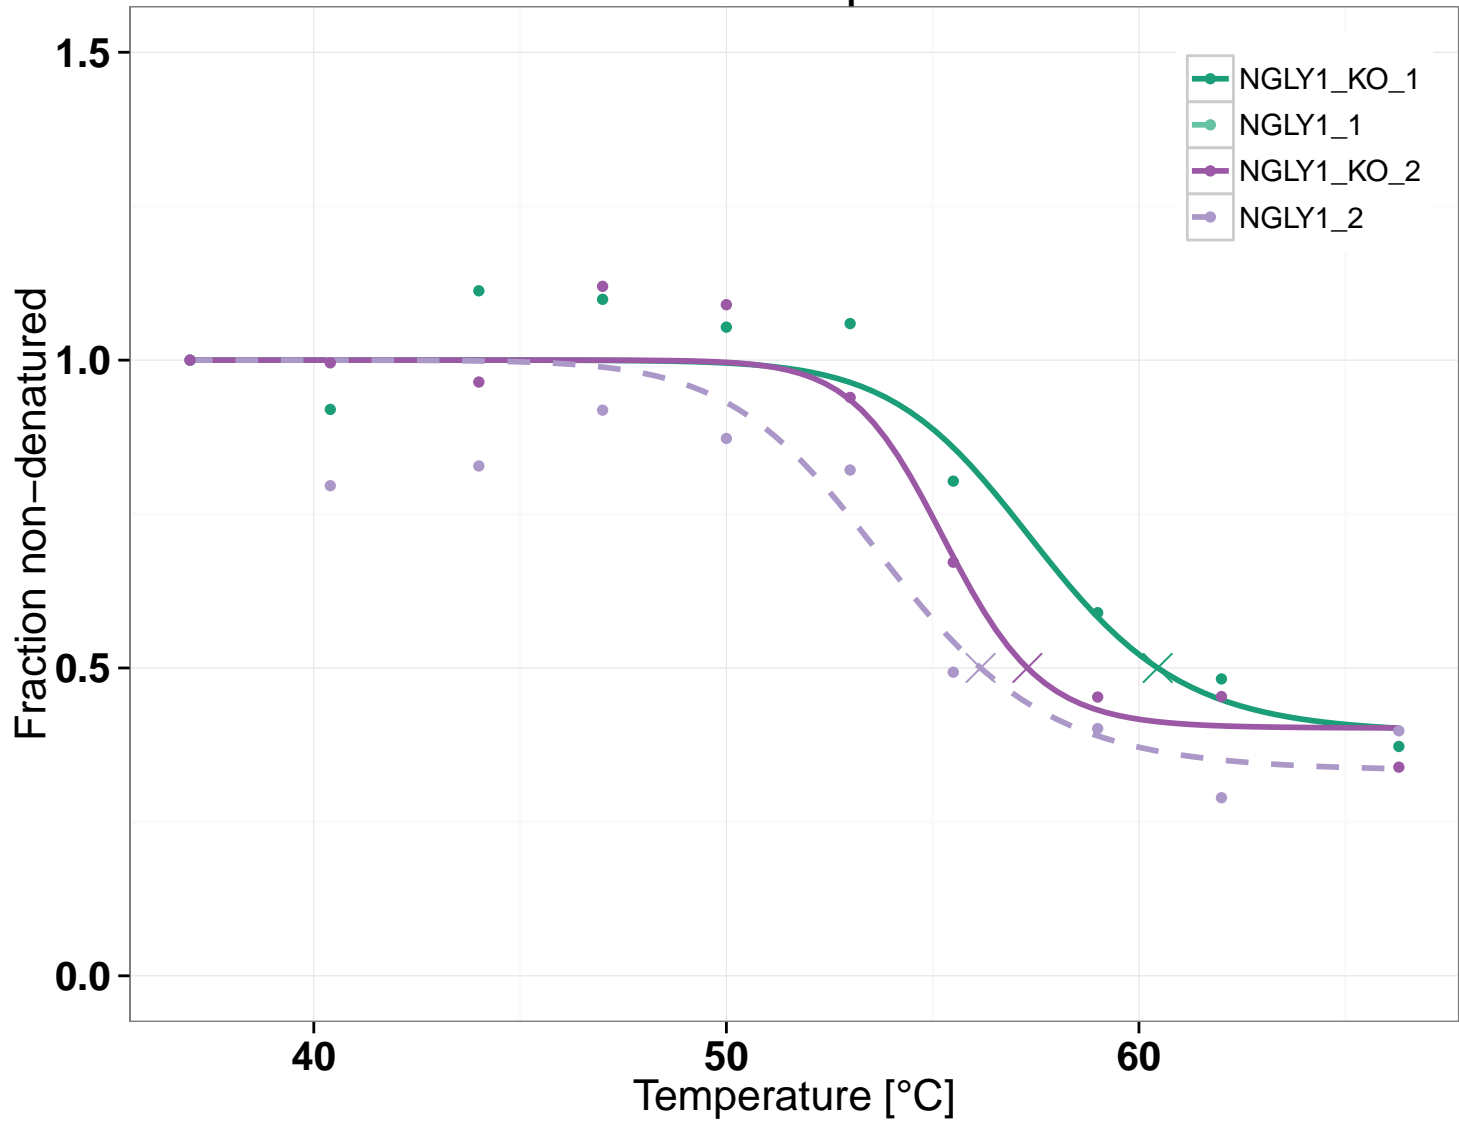

|            | meltPoint | slope  | plateau | R2   |
|------------|-----------|--------|---------|------|
| NGLY1_KO_1 | 60.45     | -0.085 | 0.39    | 0.93 |
| NGLY1_1    | -         | -      | -       | -    |
| NGLY1_KO_2 | 57.3      | -0.13  | 0.4     | 0.96 |
| NGLY1_2    | 56.16     | -0.086 | 0.33    | 0.84 |

Supplement: Supplementary file 2699 [file 1]

# IPI00217985.1|DOCK3

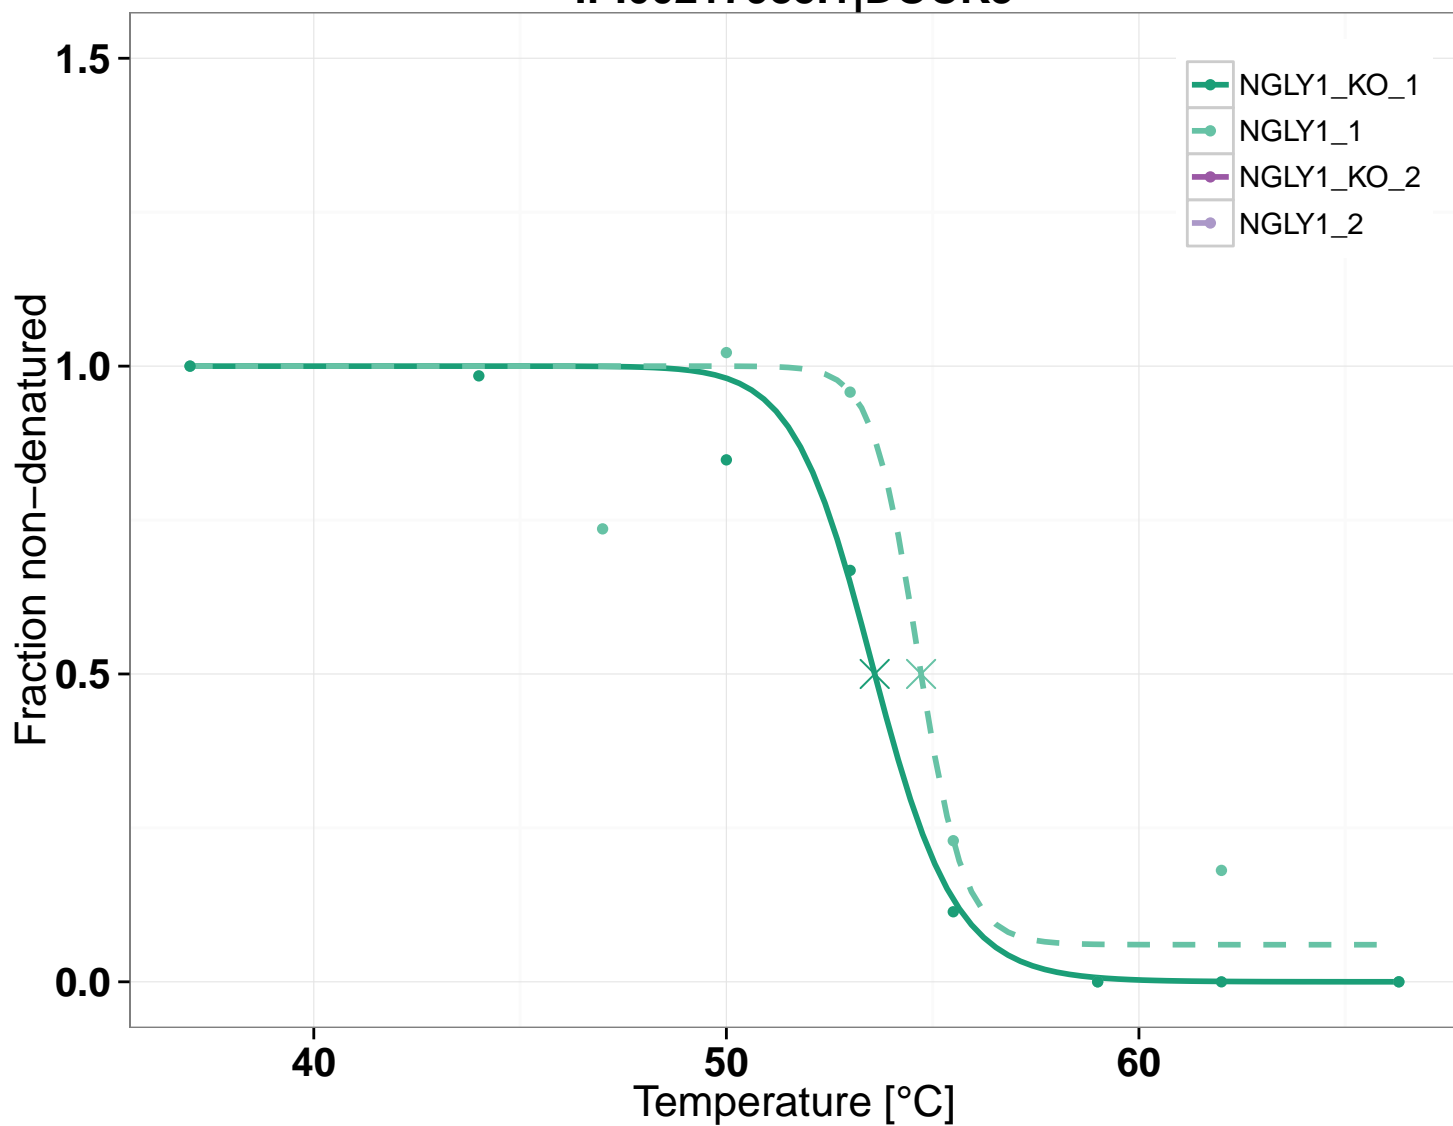

|            | meltPoint | slope | plateau | R2   |
|------------|-----------|-------|---------|------|
| NGLY1_KO_1 | 53.6      | -0.25 | 0       | 0.48 |
| NGLY1_1    | 54.72     | -0.43 | 0.06    | 0.31 |
| NGLY1_KO_2 | -         | -     | -       | -    |
| NGLY1_2    | -         | -     | -       | -    |

Supplement: Supplementary file 2700 [file 1]

# IPI00016478.5|C1ORF109

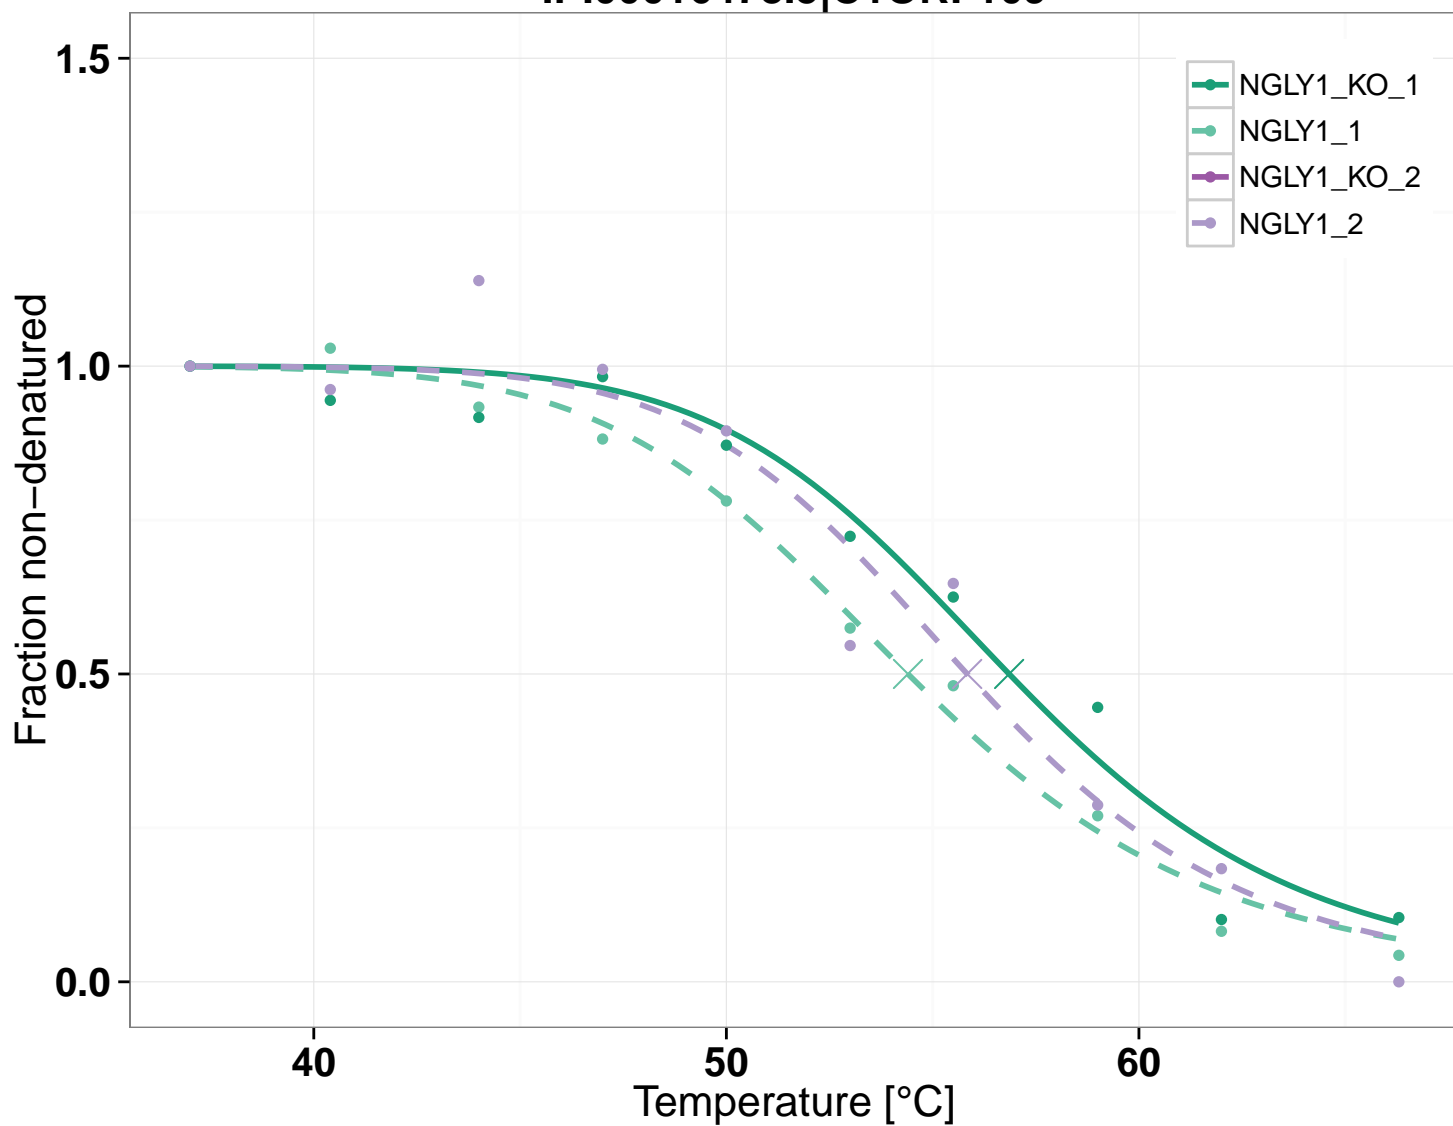

|            | meltPoint | slope  | plateau | R2   |
|------------|-----------|--------|---------|------|
| NGLY1_KO_1 | 56.85     | -0.07  | 0       | 0.97 |
| NGLY1_1    | 54.4      | -0.068 | 0       | 0.99 |
| NGLY1_KO_2 | -         | -      | -       | -    |
| NGLY1_2    | 55.84     | -0.074 | 0       | 0.95 |

Supplement: Supplementary file 2701 [file 1]

IPI00026358.3|GABARAPL2

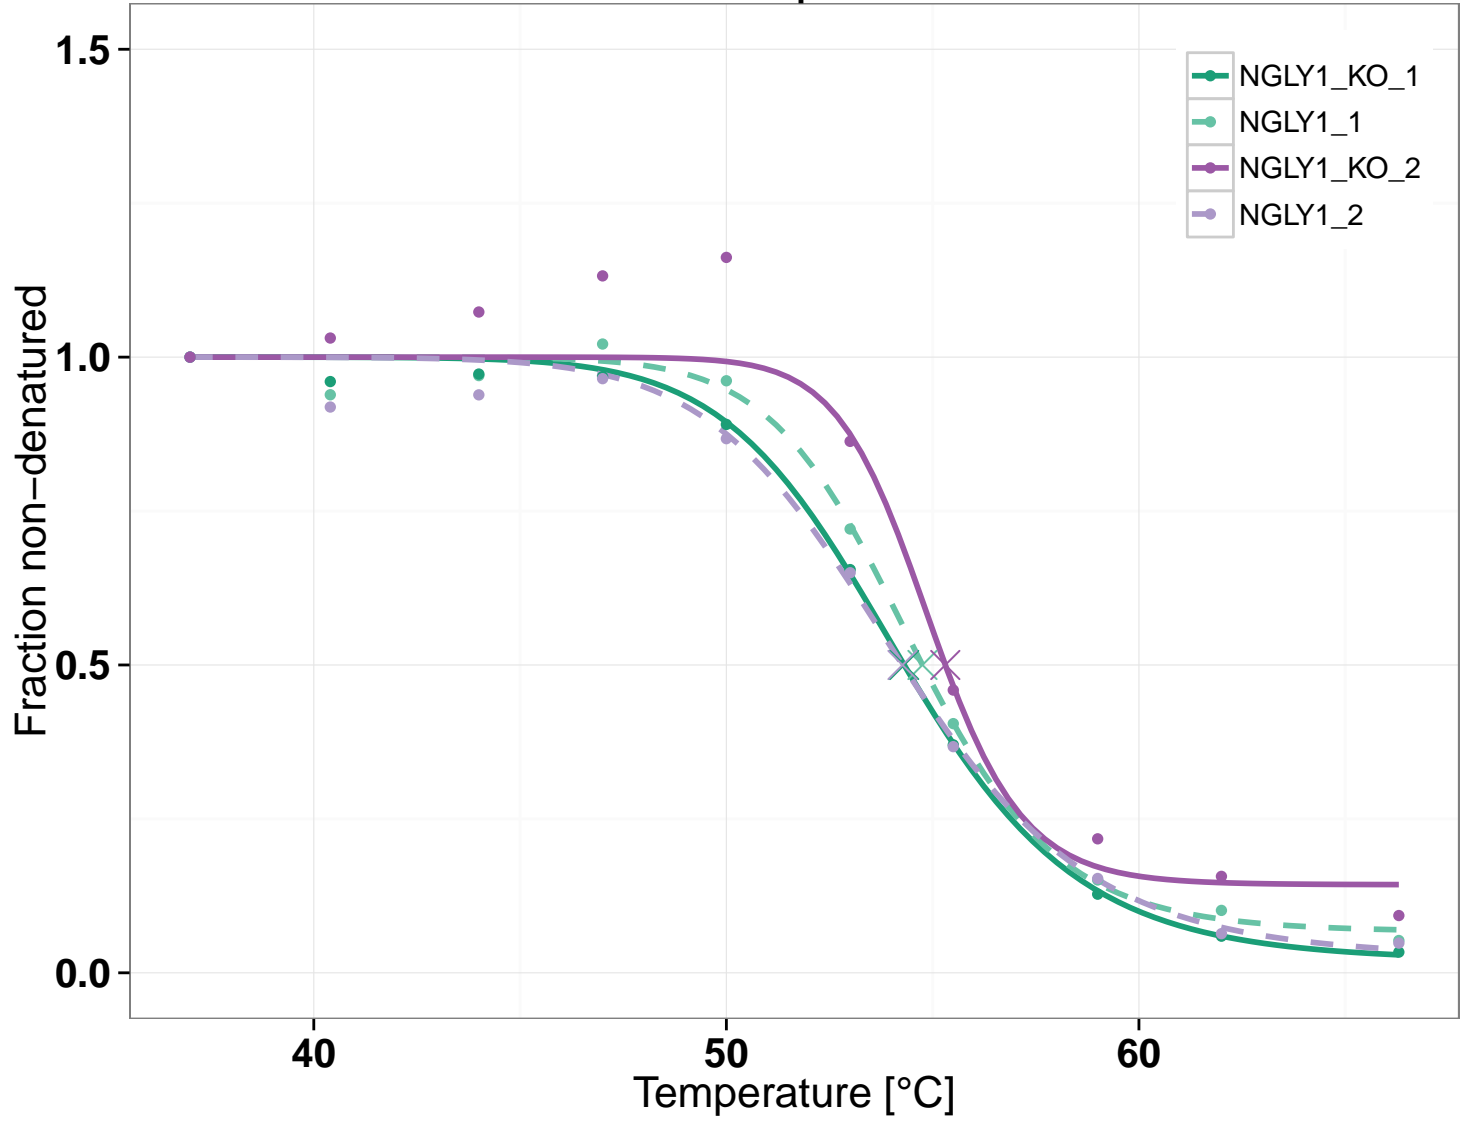

|            | meltPoint | slope | plateau | R2   |
|------------|-----------|-------|---------|------|
| NGLY1_KO_1 | 54.31     | -0.11 | 0.02    | 1    |
| NGLY1_1    | 54.75     | -0.13 | 0.07    | 1    |
| NGLY1_KO_2 | 55.31     | -0.19 | 0.14    | 0.97 |
| NGLY1_2    | 54.27     | -0.1  | 0.02    | 0.99 |

Supplement: Supplementary file 2702 [file 1]

IPI00217354.3|ARFGAP1

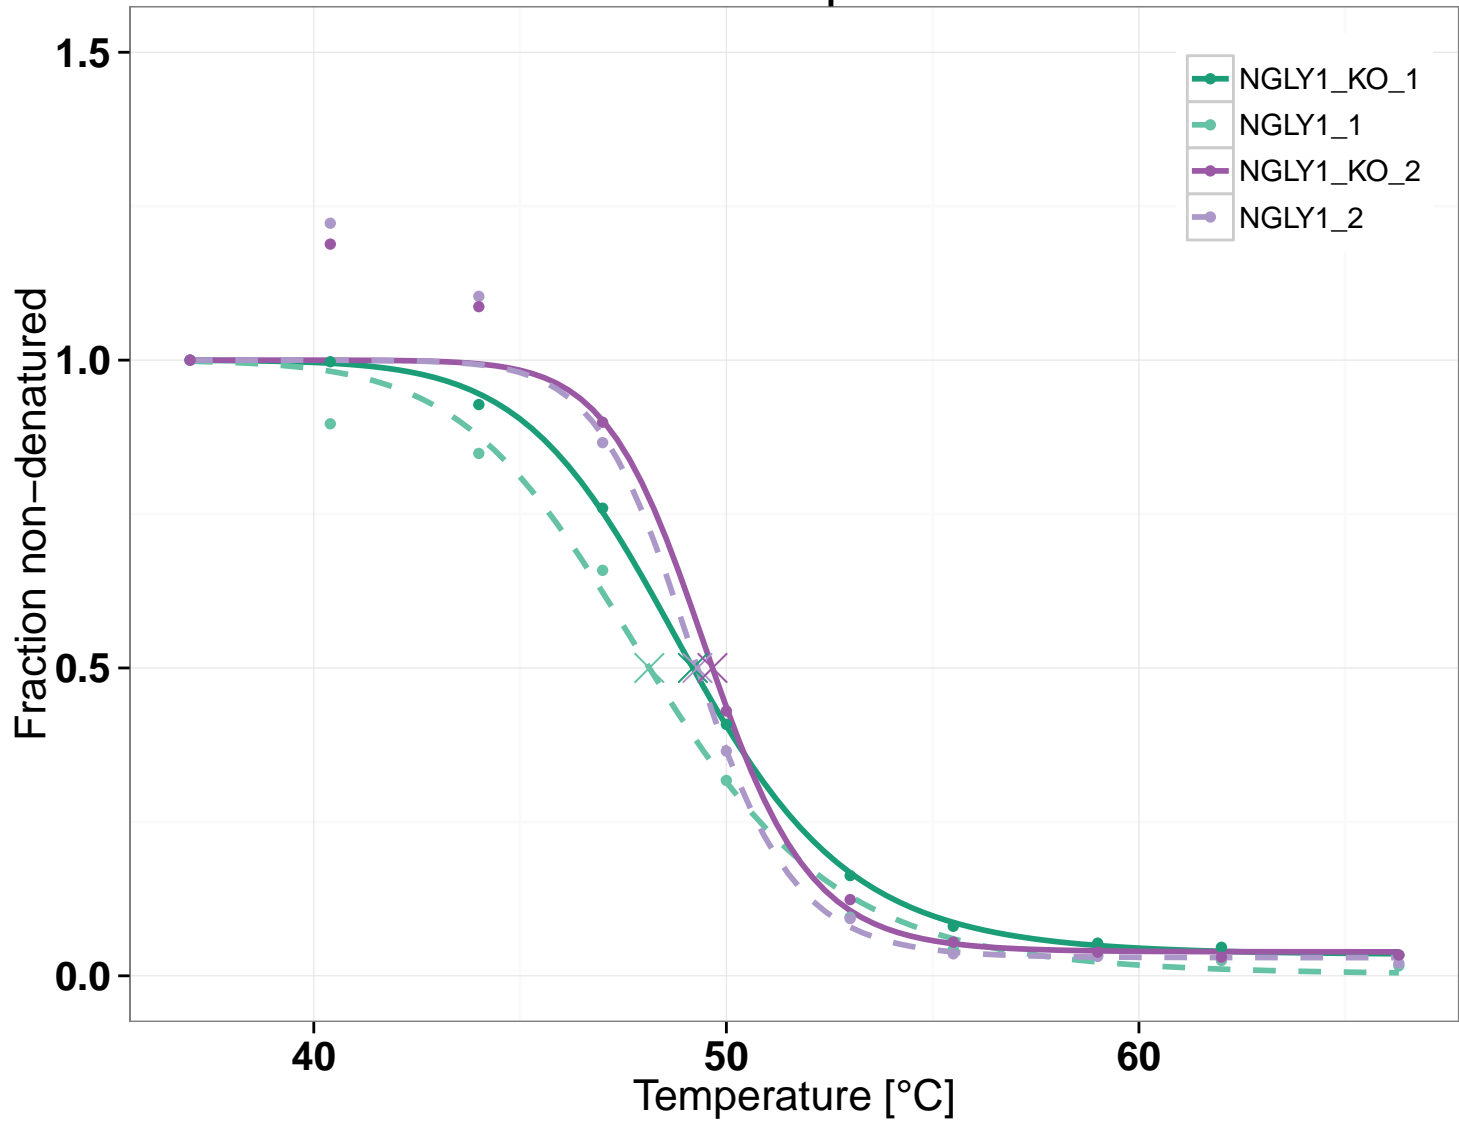

|            | meltPoint | slope | plateau | R2   |
|------------|-----------|-------|---------|------|
| NGLY1_KO_1 | 49.19     | -0.12 | 0.03    | 1    |
| NGLY1_1    | 48.13     | -0.11 | 0       | 0.99 |
| NGLY1_KO_2 | 49.66     | -0.19 | 0.04    | 0.98 |
| NGLY1_2    | 49.3      | -0.2  | 0.03    | 0.97 |

Supplement: Supplementary file 2703 [file 1]

# IPI00009145.1|MAN1A2

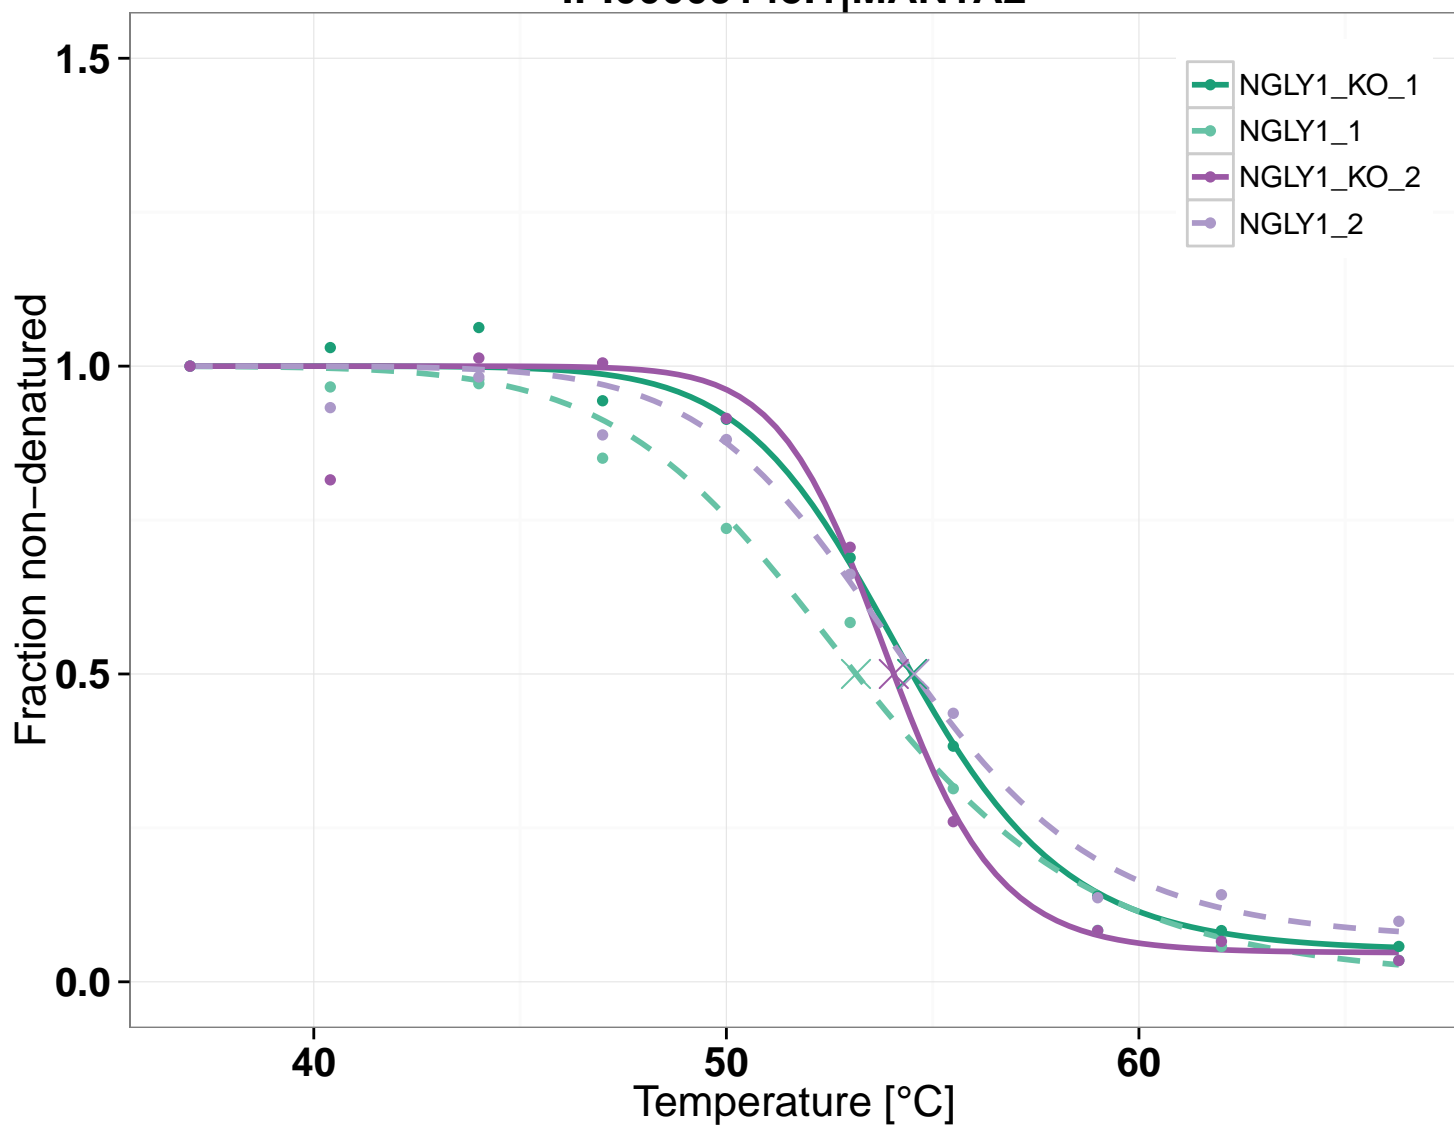

|            | meltPoint | slope  | plateau | R2   |
|------------|-----------|--------|---------|------|
| NGLY1_KO_1 | 54.5      | -0.12  | 0.05    | 1    |
| NGLY1_1    | 53.14     | -0.085 | 0       | 0.99 |
| NGLY1_KO_2 | 54.06     | -0.18  | 0.05    | 0.98 |
| NGLY1_2    | 54.56     | -0.096 | 0.07    | 0.99 |

Supplement: Supplementary file 2704 [file 1]

IPI00293652.1|IRAK1

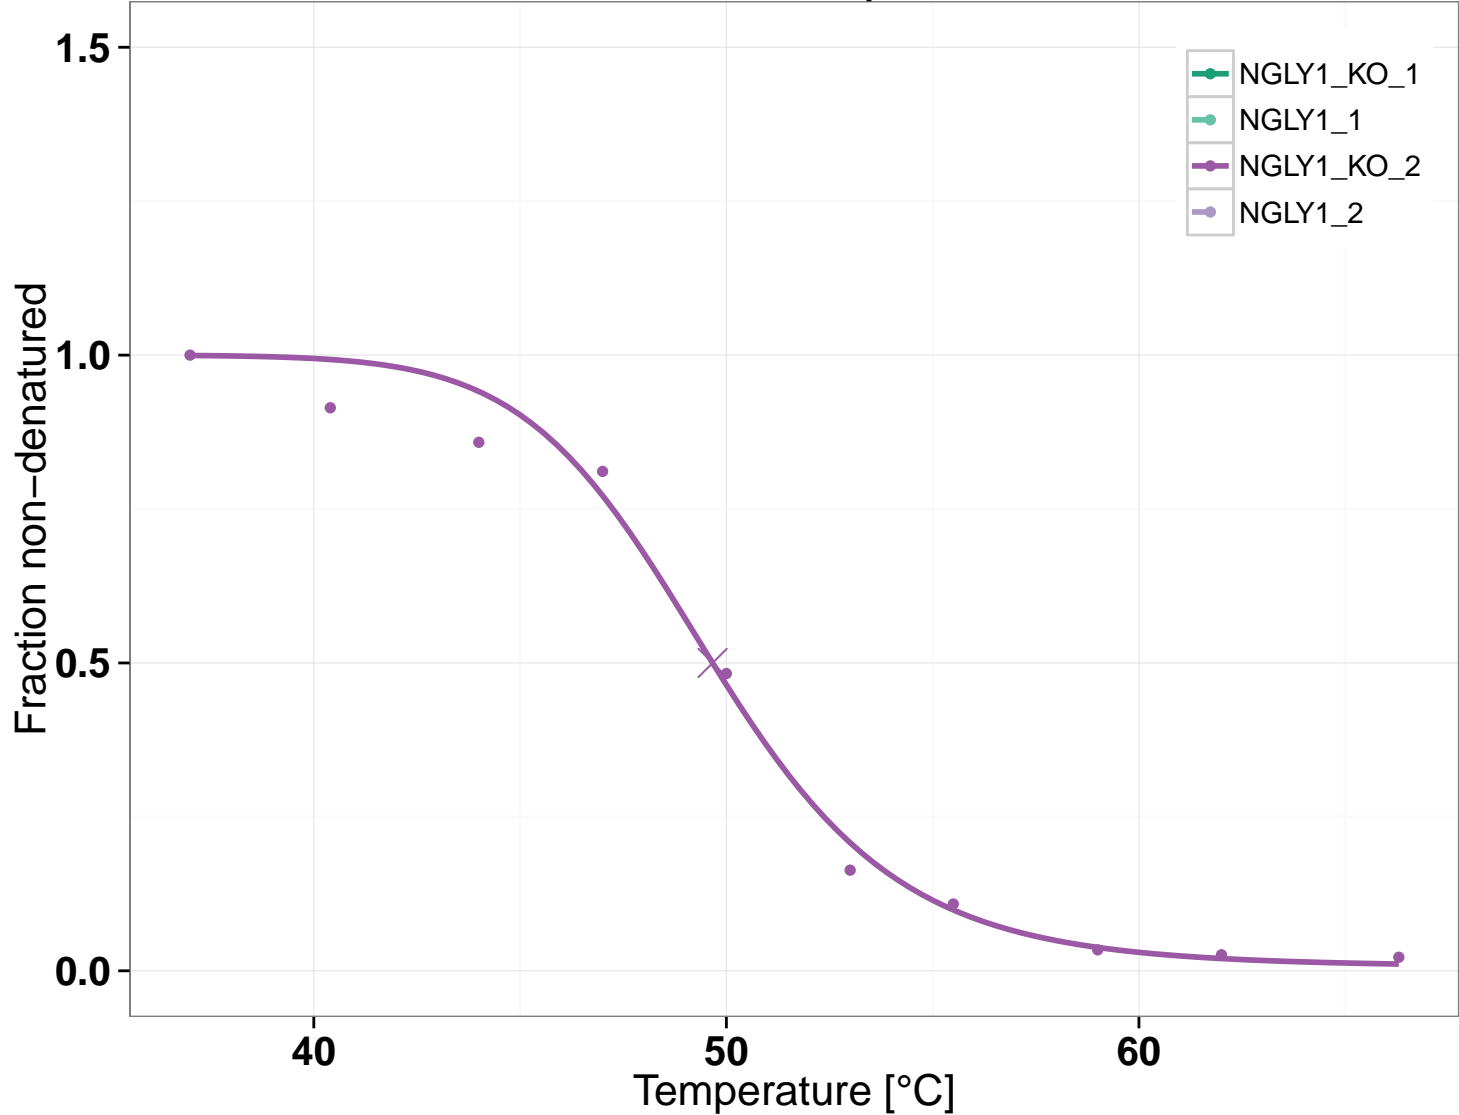

|            | meltPoint | slope | plateau | R2   |
|------------|-----------|-------|---------|------|
| NGLY1_KO_1 | -         | -     | -       | -    |
| NGLY1_1    | -         | -     | -       | -    |
| NGLY1_KO_2 | 49.67     | -0.11 | 0.01    | 0.99 |
| NGLY1_2    | -         | -     | -       | -    |

Supplement: Supplementary file 2705 [file 1]

# IPI00456722.3|GARNL1

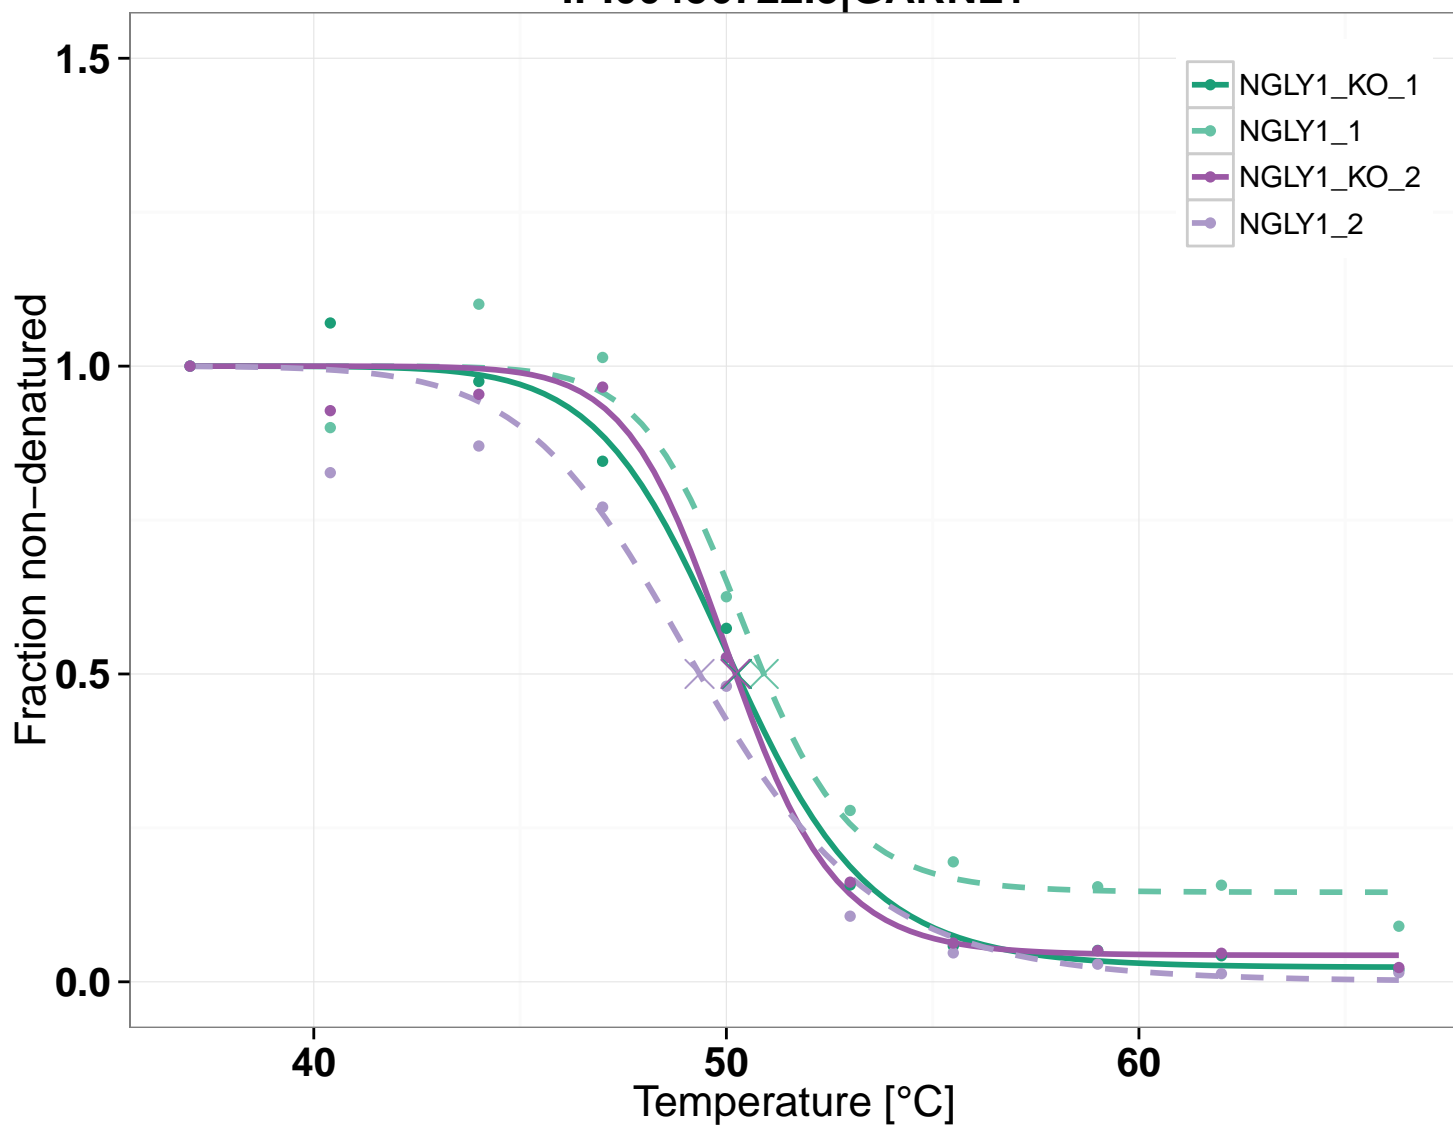

|            | meltPoint | slope | plateau | R2   |
|------------|-----------|-------|---------|------|
| NGLY1_KO_1 | 50.26     | -0.15 | 0.02    | 0.99 |
| NGLY1_1    | 50.91     | -0.17 | 0.15    | 0.98 |
| NGLY1_KO_2 | 50.22     | -0.19 | 0.04    | 0.99 |
| NGLY1_2    | 49.35     | -0.12 | 0       | 0.97 |

Supplement: Supplementary file 2706 [file 1]

# IPI00102927.1|STYX

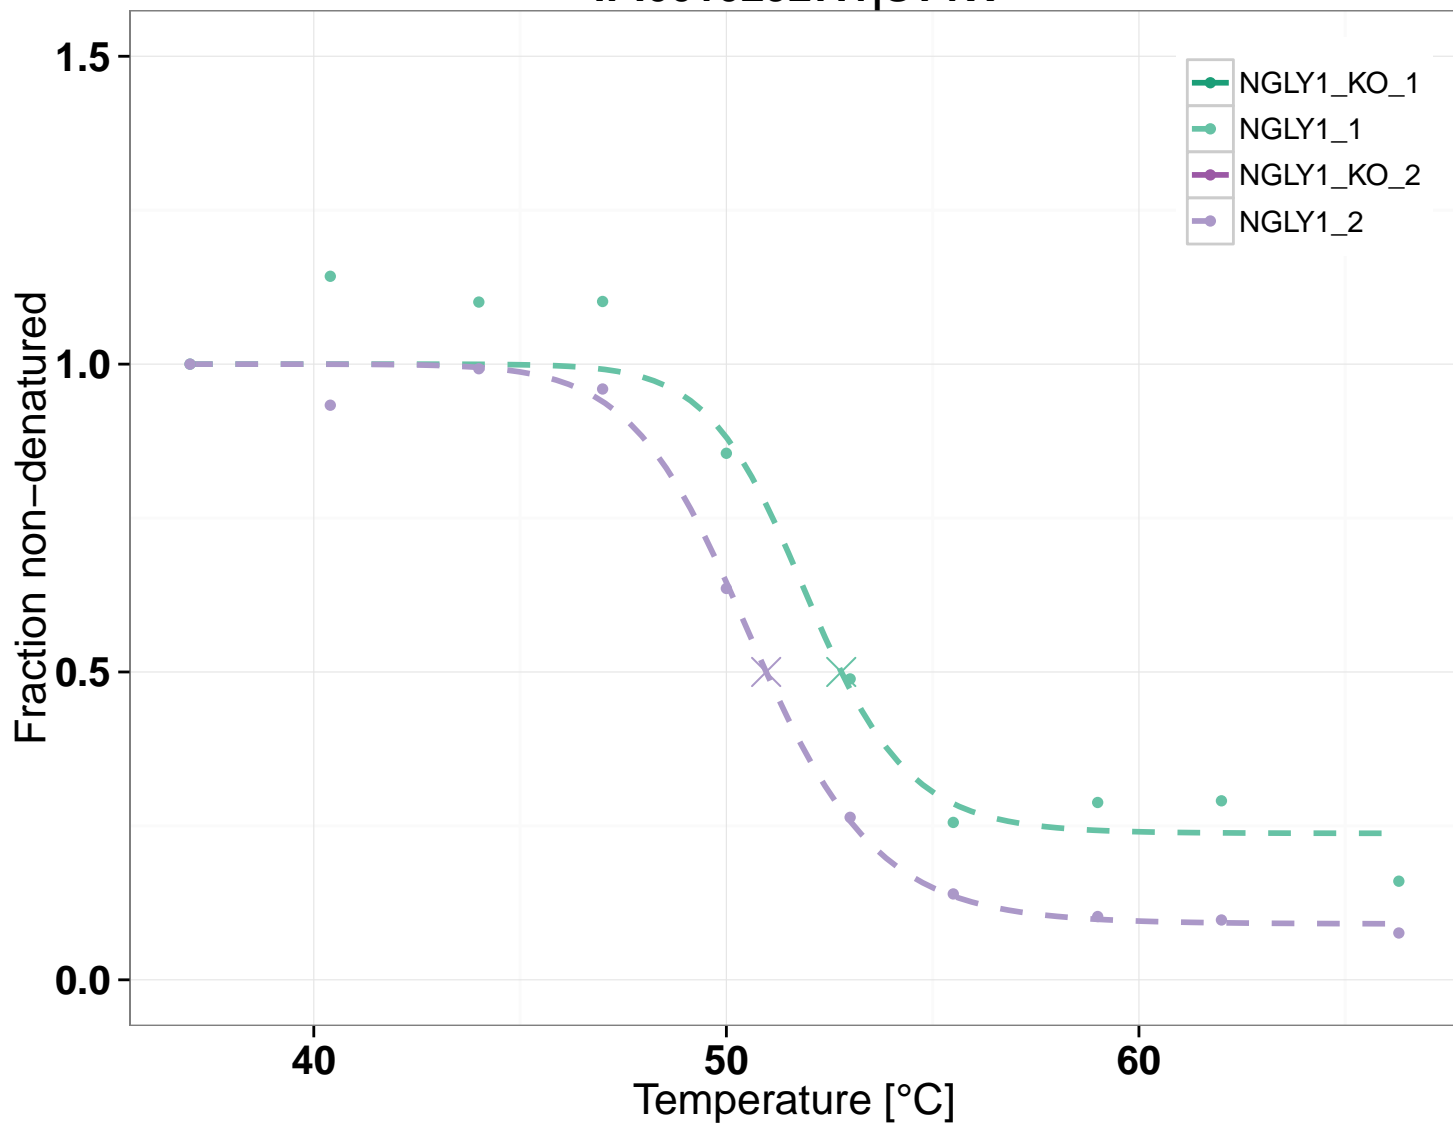

|            | meltPoint | slope | plateau | R2   |
|------------|-----------|-------|---------|------|
| NGLY1_KO_1 | —         | —     | —       | —    |
| NGLY1_1    | 52.78     | -0.16 | 0.24    | 0.96 |
| NGLY1_KO_2 | —         | —     | —       | —    |
| NGLY1_2    | 50.96     | -0.15 | 0.09    | 1    |

Supplement: Supplementary file 2707 [file 1]

# IPI00736251.2|PPM1H

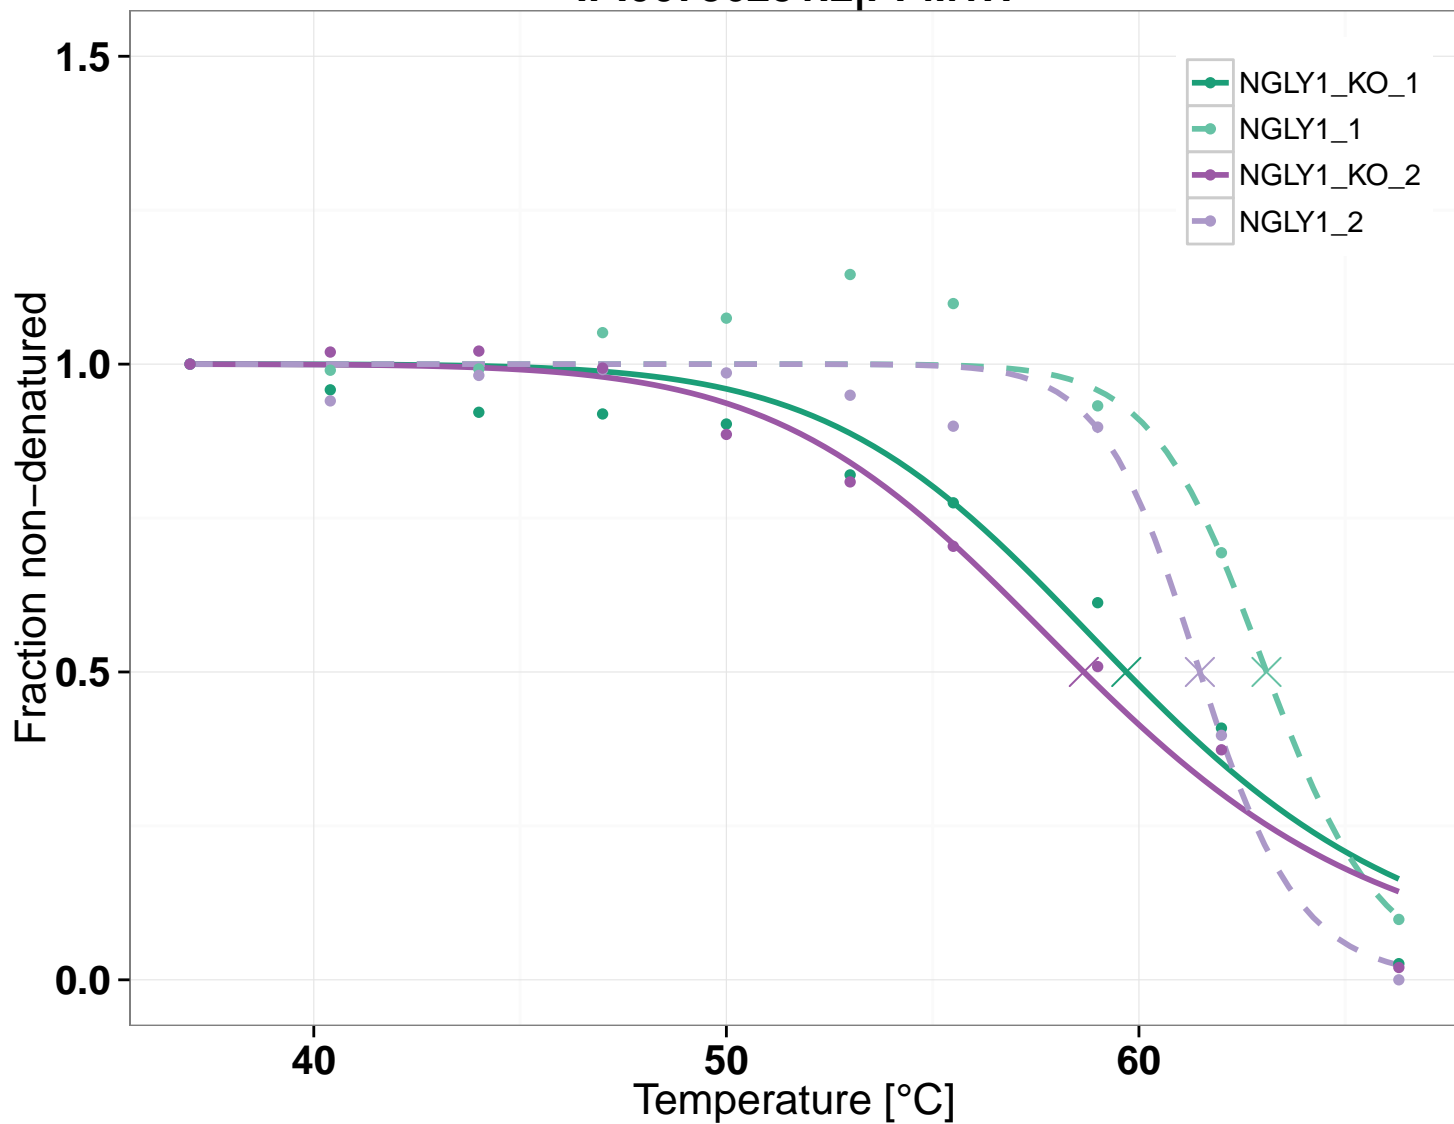

|            | meltPoint | slope  | plateau | R2   |
|------------|-----------|--------|---------|------|
| NGLY1_KO_1 | 59.69     | -0.07  | 0       | 0.95 |
| NGLY1_1    | 63.09     | -0.18  | 0       | 0.95 |
| NGLY1_KO_2 | 58.66     | -0.067 | 0       | 0.97 |
| NGLY1_2    | 61.48     | -0.21  | 0       | 0.98 |

Supplement: Supplementary file 2708 [file 1]

IPI00246842.4|TAF1C

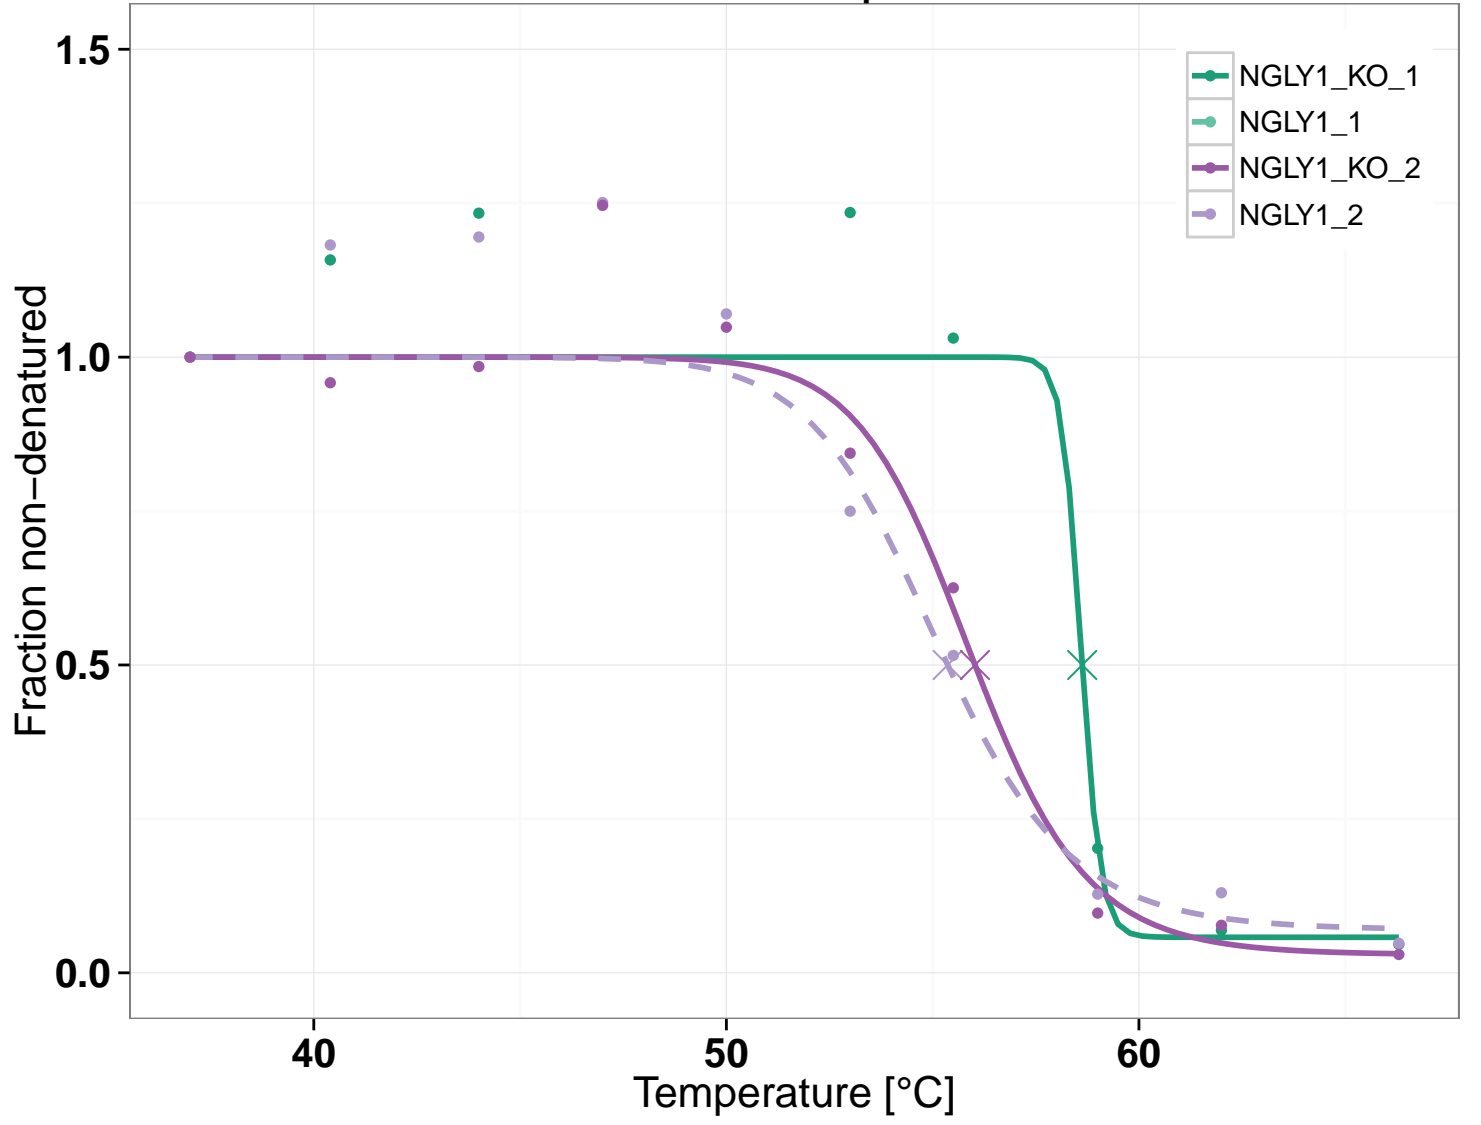

|            | meltPoint | slope | plateau | R2   |
|------------|-----------|-------|---------|------|
| NGLY1_KO_1 | 58.63     | -1    | 0.06    | 0.73 |
| NGLY1_1    | -         | -     | -       | -    |
| NGLY1_KO_2 | 56.03     | -0.17 | 0.03    | 0.96 |
| NGLY1_2    | 55.36     | -0.15 | 0.07    | 0.93 |

Supplement: Supplementary file 2709 [file 1]

IPI00178611.5|CCDC109B

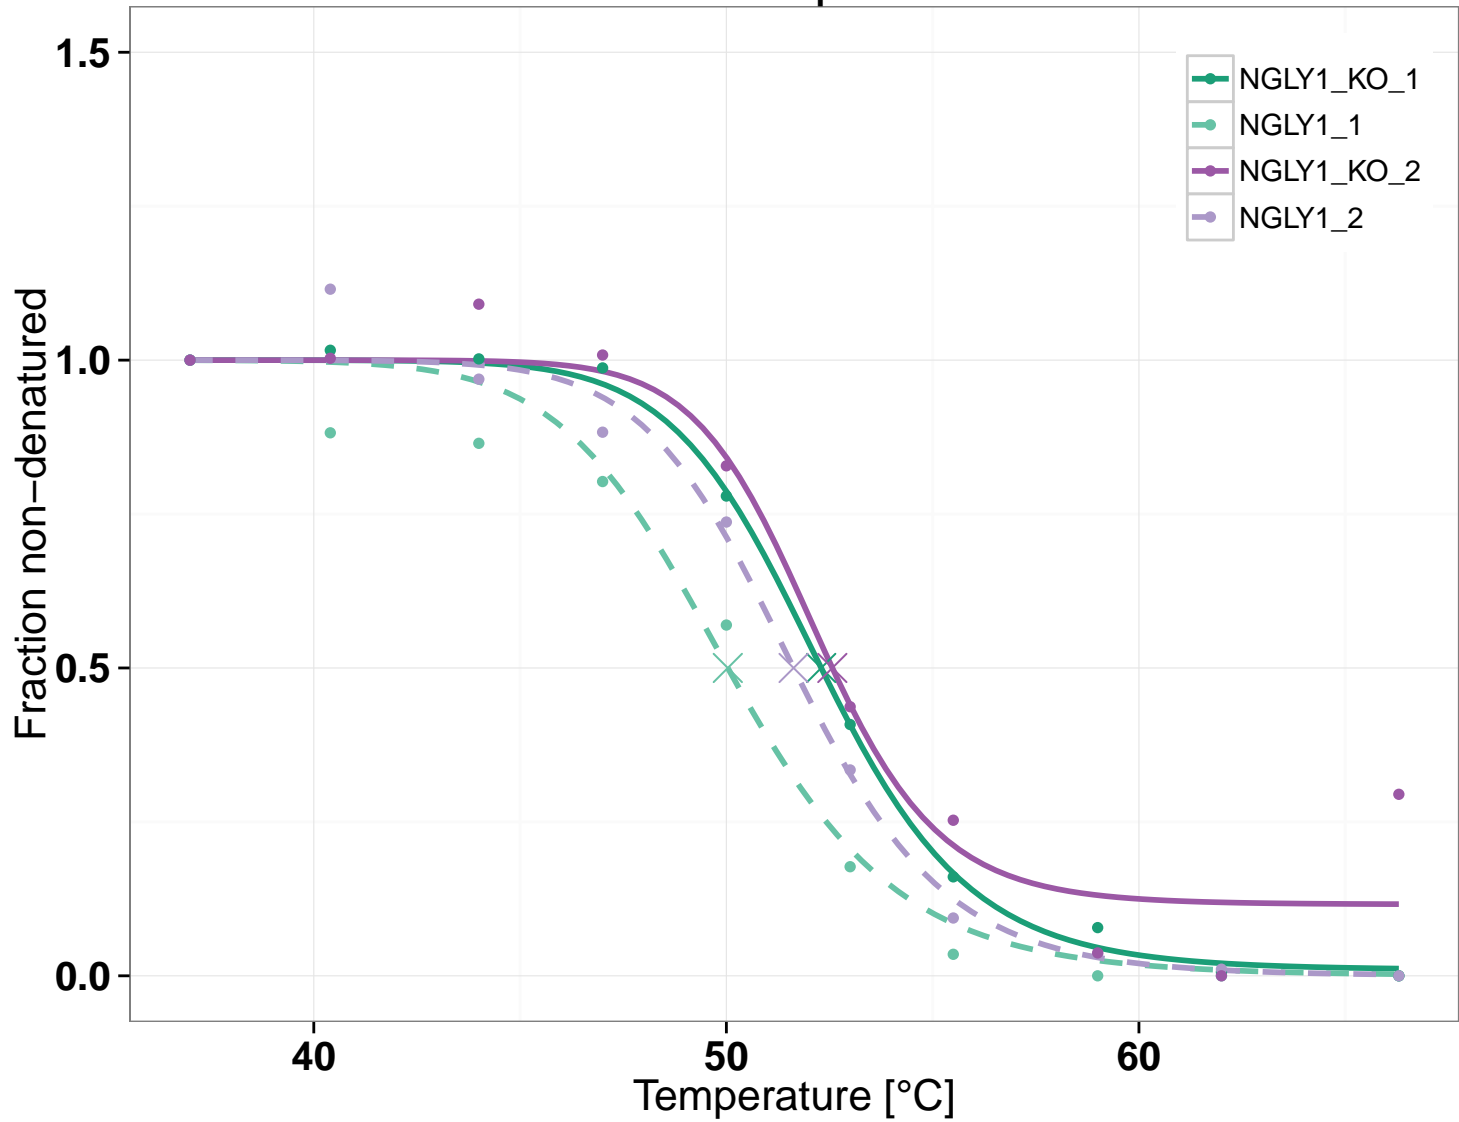

|            | meltPoint | slope | plateau | R2   |
|------------|-----------|-------|---------|------|
| NGLY1_KO_1 | 52.3      | -0.14 | 0.01    | 1    |
| NGLY1_1    | 50.03     | -0.12 | 0       | 0.98 |
| NGLY1_KO_2 | 52.57     | -0.15 | 0.12    | 0.96 |
| NGLY1_2    | 51.63     | -0.14 | 0       | 0.99 |

Supplement: Supplementary file 2710 [file 1]
