# Supplementary material (part 28 of 85)
Source: publisher figshare collection journal article supplement (https://gsajournals.figshare.com/articles/dataset/_/12014913)

# IPI00655704.2|PDK1

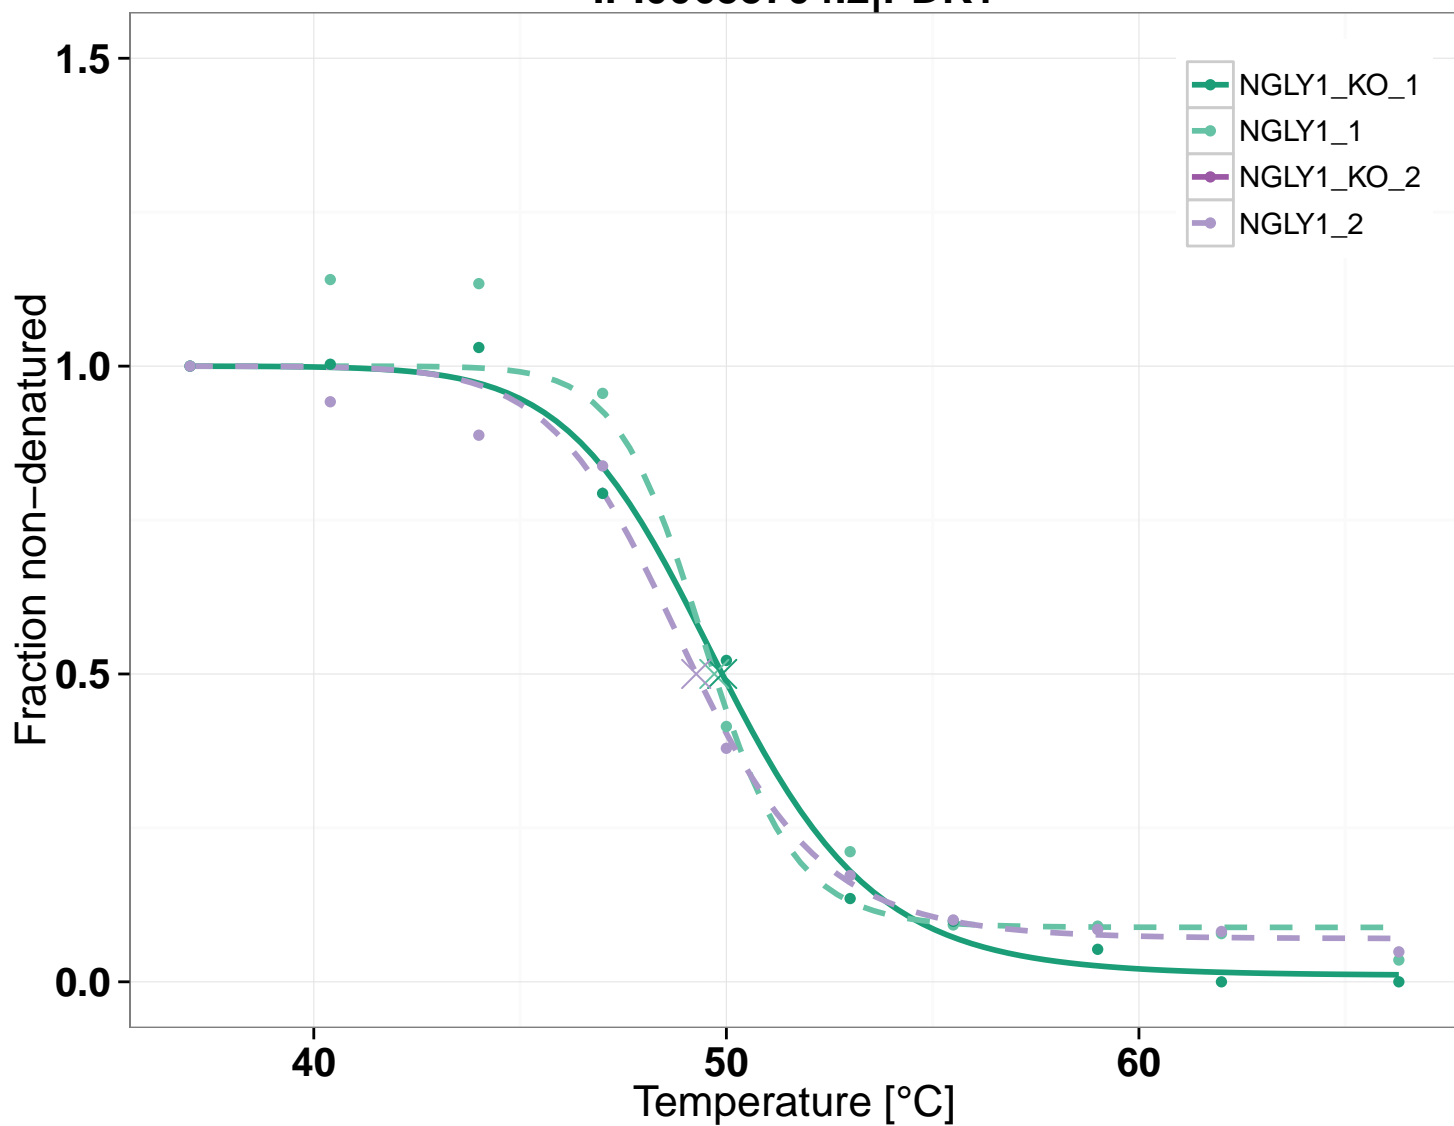

|            | meltPoint | slope | plateau | R2   |
|------------|-----------|-------|---------|------|
| NGLY1_KO_1 | 49.9      | -0.13 | 0.01    | 0.99 |
| NGLY1_1    | 49.71     | -0.21 | 0.09    | 0.98 |
| NGLY1_KO_2 | -         | -     | -       | -    |
| NGLY1_2    | 49.27     | -0.14 | 0.07    | 0.99 |

Supplement: Supplementary file 2711 [file 1]

IPI00000725.4|ZNF451

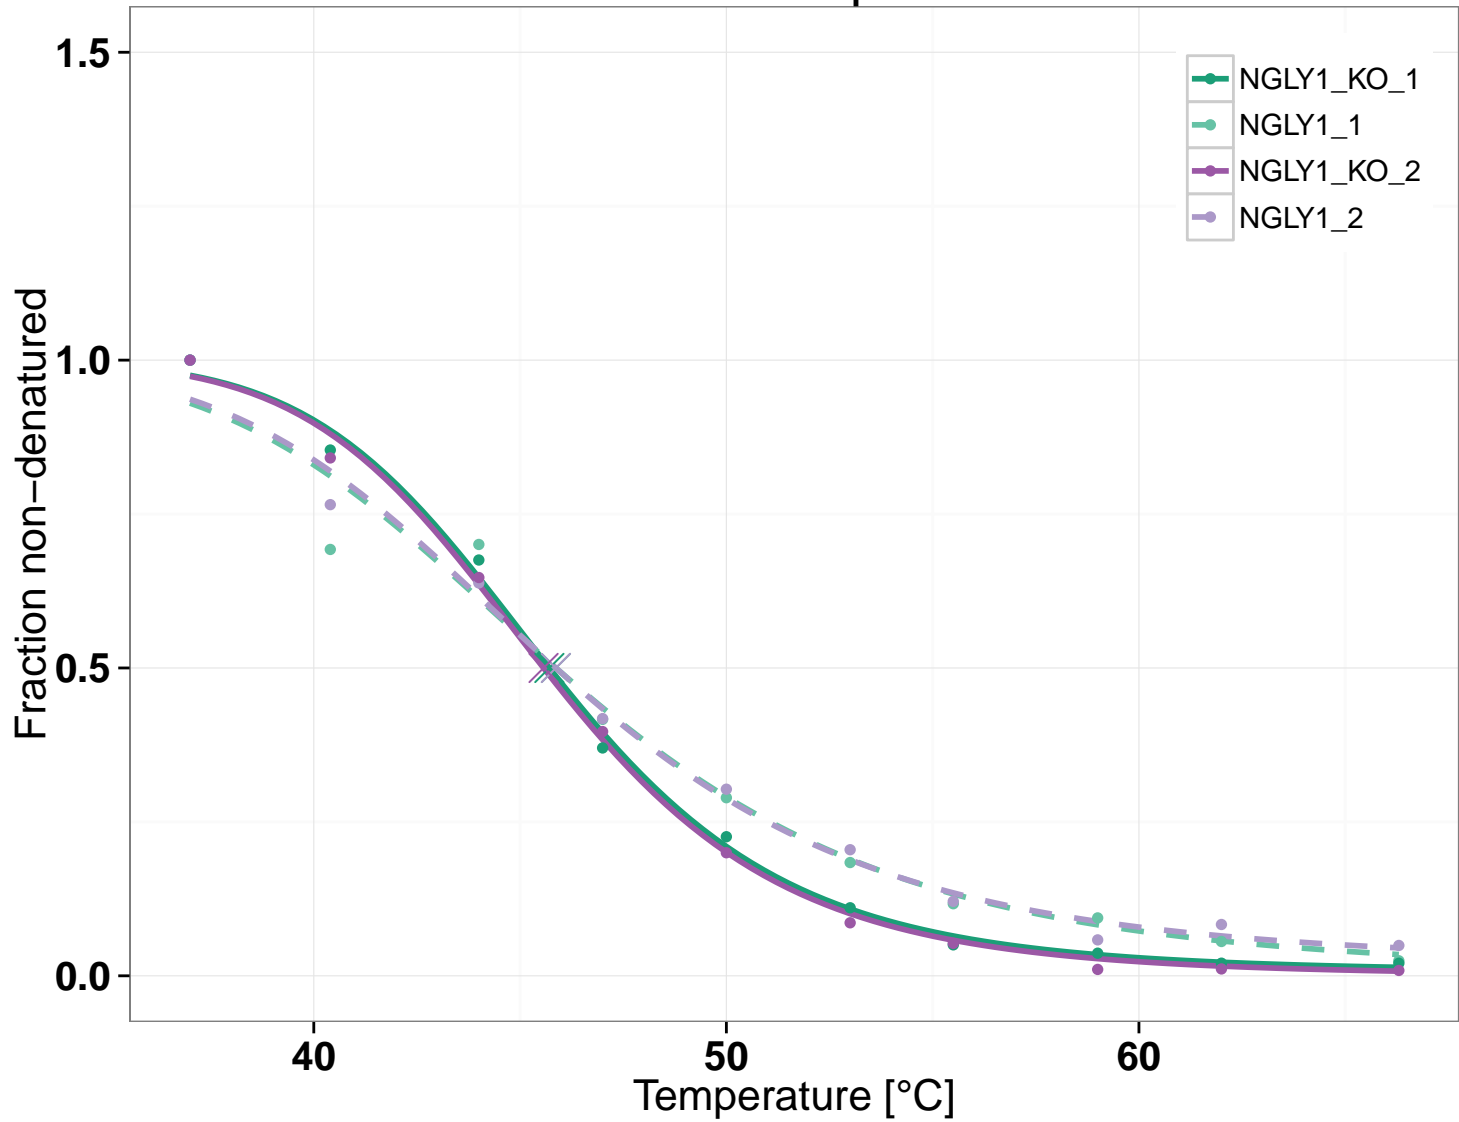

|            | meltPoint | slope  | plateau | R2   |
|------------|-----------|--------|---------|------|
| NGLY1_KO_1 | 45.71     | -0.087 | 0.01    | 1    |
| NGLY1_1    | 45.87     | -0.061 | 0       | 0.97 |
| NGLY1_KO_2 | 45.57     | -0.087 | 0       | 1    |
| NGLY1_2    | 45.87     | -0.063 | 0.02    | 0.99 |

Supplement: Supplementary file 2712 [file 1]

IPI00002966.2|HSPA4

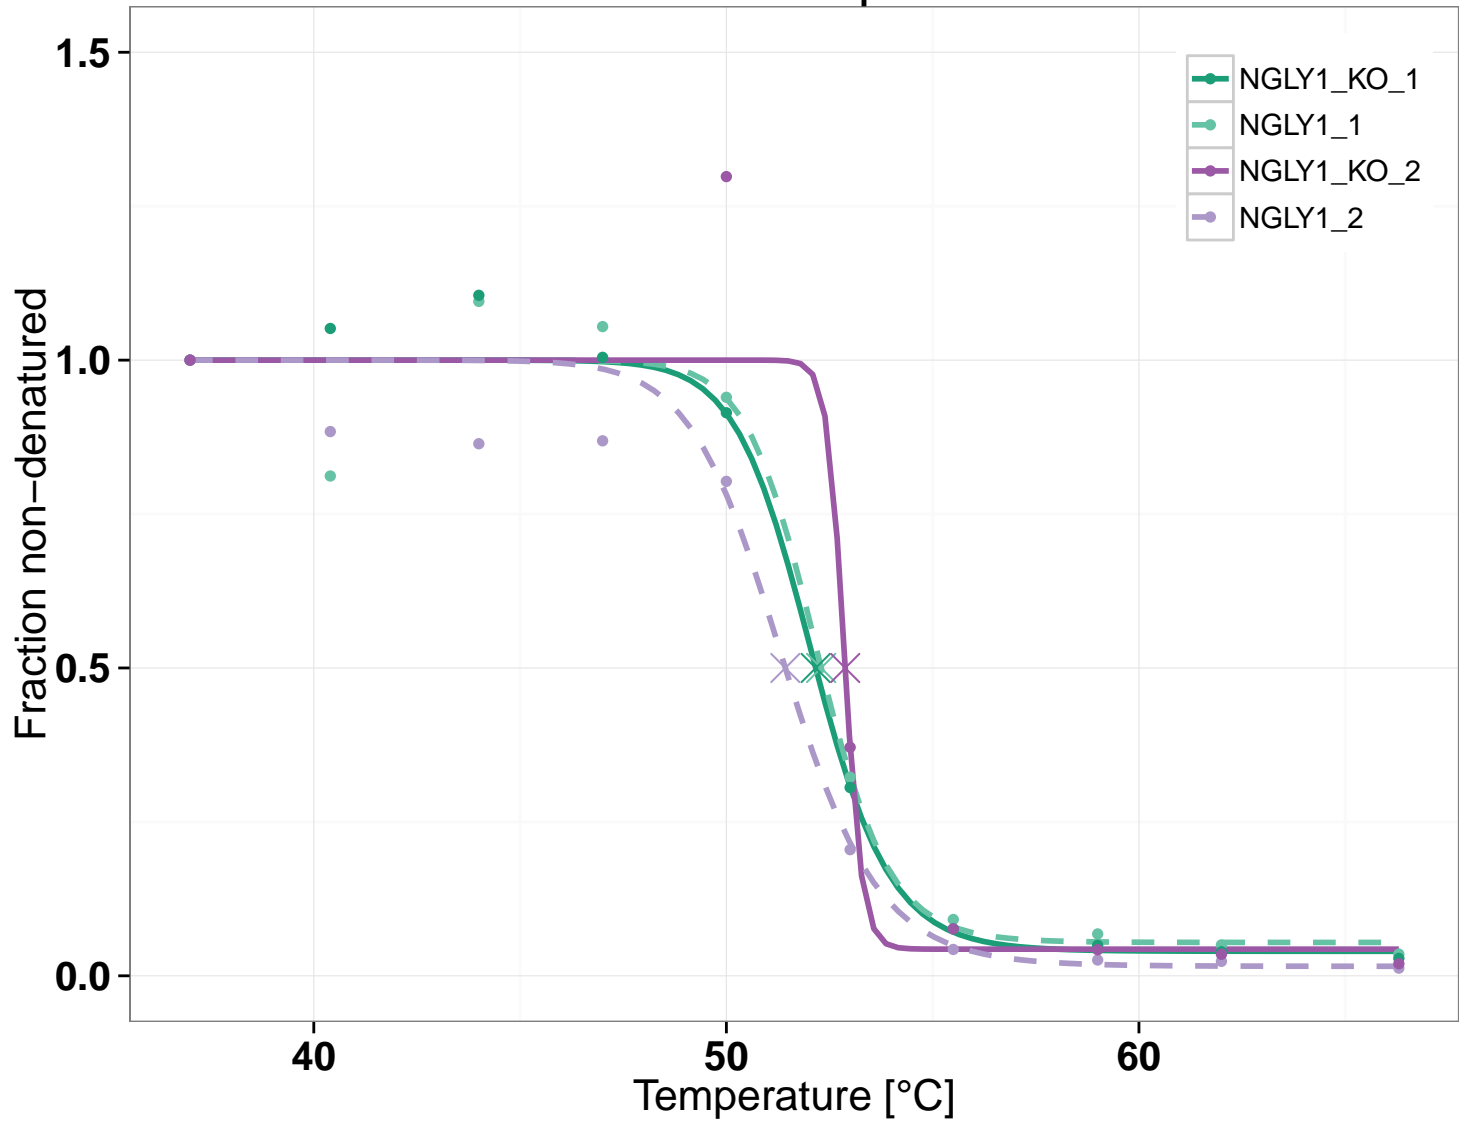

|            | meltPoint | slope | plateau | R2   |
|------------|-----------|-------|---------|------|
| NGLY1_KO_1 | 52.17     | -0.26 | 0.04    | 0.99 |
| NGLY1_1    | 52.3      | -0.27 | 0.05    | 0.98 |
| NGLY1_KO_2 | 52.88     | -1.1  | 0.04    | 0.76 |
| NGLY1_2    | 51.43     | -0.22 | 0.02    | 0.97 |

Supplement: Supplementary file 2713 [file 1]

IPI00332841.3|RAPGEF1

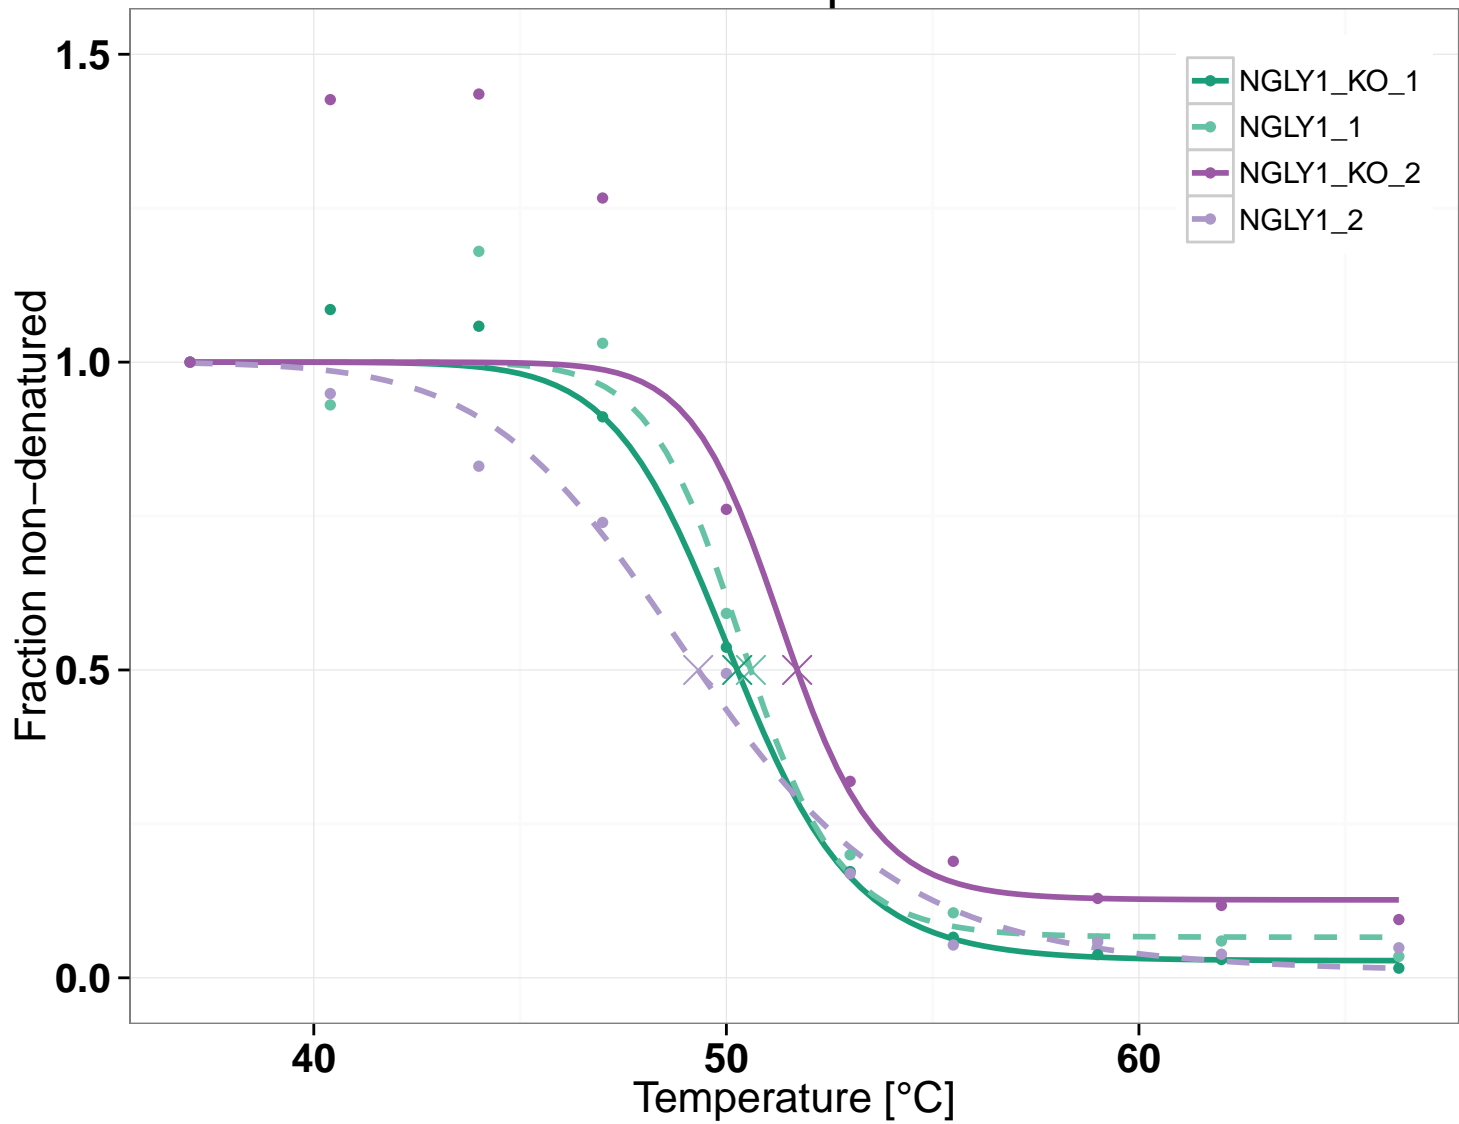

|            | meltPoint | slope  | plateau | R2   |
|------------|-----------|--------|---------|------|
| NGLY1_KO_1 | 50.26     | -0.17  | 0.03    | 0.99 |
| NGLY1_1    | 50.59     | -0.2   | 0.07    | 0.98 |
| NGLY1_KO_2 | 51.72     | -0.19  | 0.13    | 0.84 |
| NGLY1_2    | 49.32     | -0.098 | 0.01    | 0.99 |

Supplement: Supplementary file 2714 [file 1]

IPI00021417.3|SART1

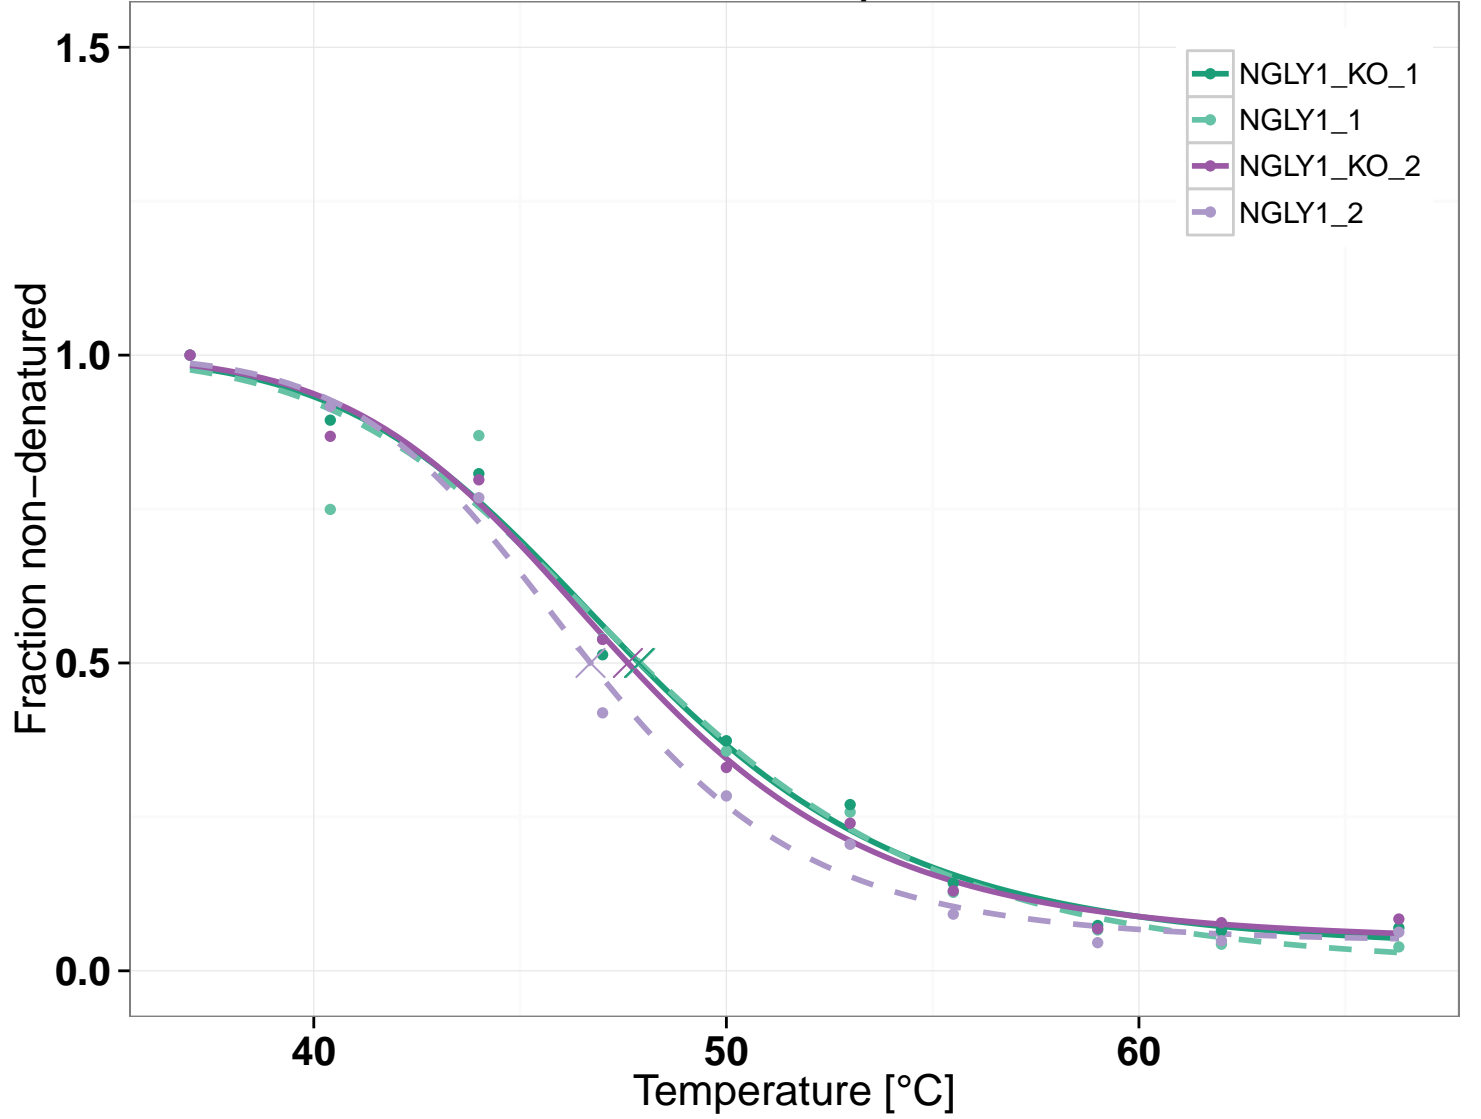

|            | meltPoint | slope  | plateau | R2   |
|------------|-----------|--------|---------|------|
| NGLY1_KO_1 | 47.88     | -0.07  | 0.03    | 0.99 |
| NGLY1_1    | 47.91     | -0.067 | 0       | 0.96 |
| NGLY1_KO_2 | 47.61     | -0.075 | 0.05    | 0.99 |
| NGLY1_2    | 46.71     | -0.087 | 0.05    | 0.99 |

Supplement: Supplementary file 2715 [file 1]

IPI00848035.1|C5ORF44

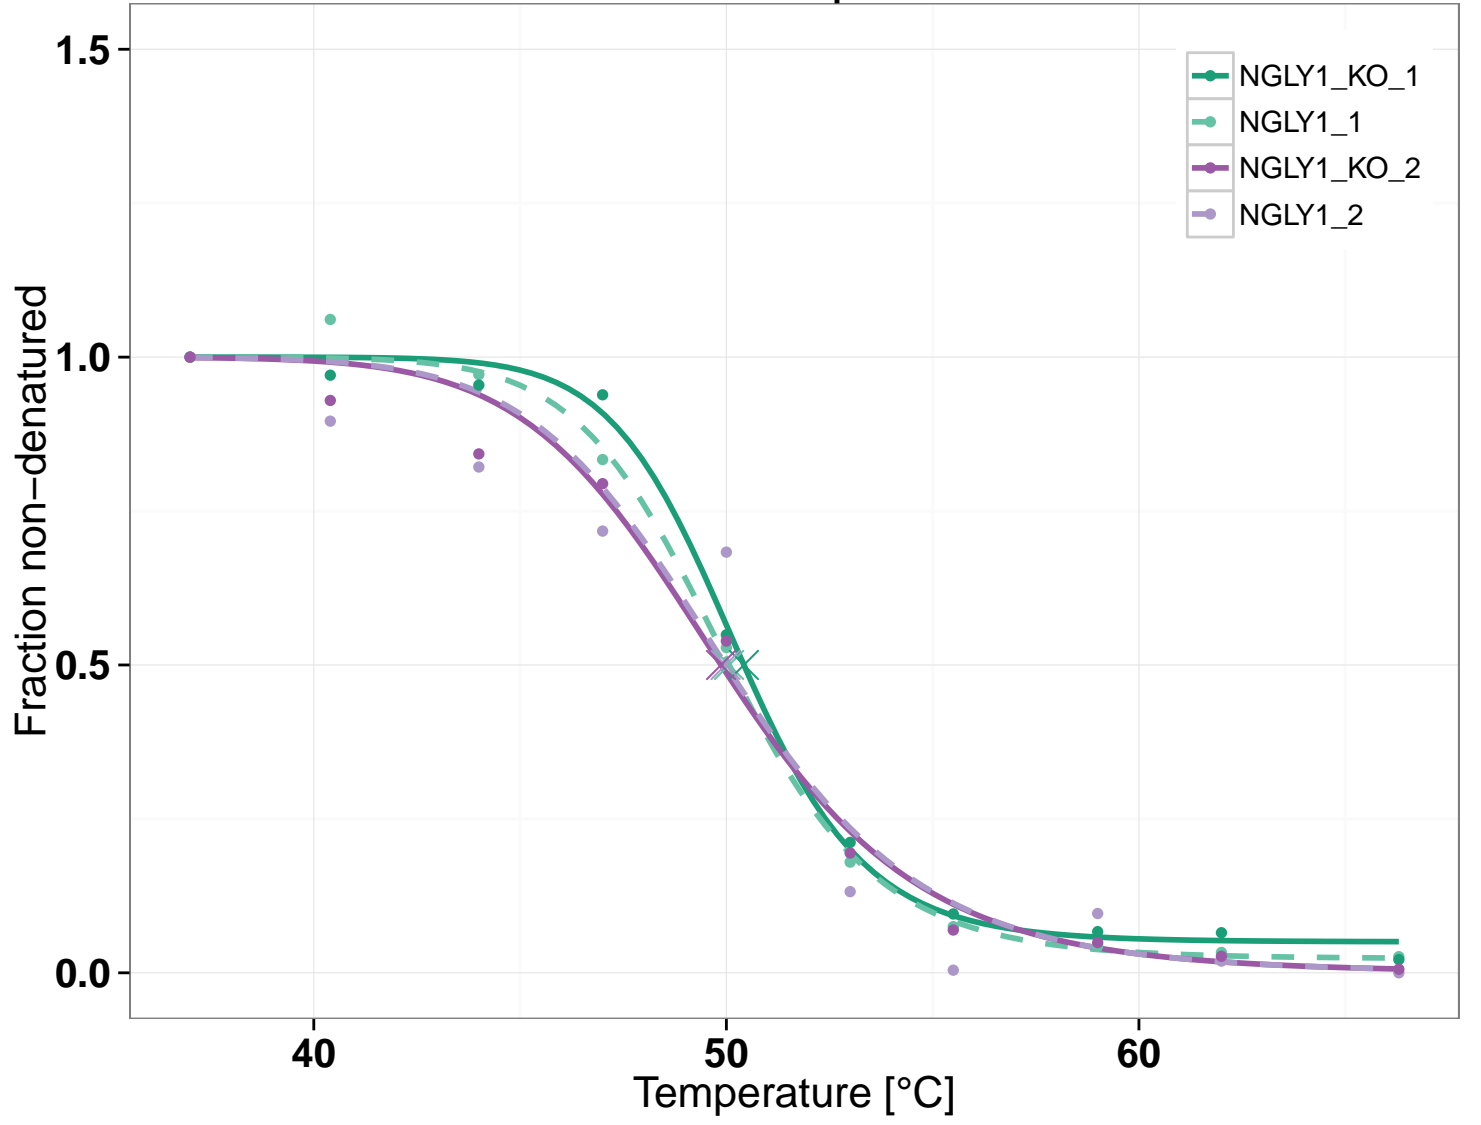

|            | meltPoint | slope | plateau | R2   |
|------------|-----------|-------|---------|------|
| NGLY1_KO_1 | 50.42     | -0.15 | 0.05    | 1    |
| NGLY1_1    | 50.07     | -0.13 | 0.02    | 1    |
| NGLY1_KO_2 | 49.87     | -0.1  | 0       | 0.99 |
| NGLY1_2    | 49.98     | -0.1  | 0       | 0.94 |

Supplement: Supplementary file 2716 [file 1]

IPI00749237.1|C14ORF2

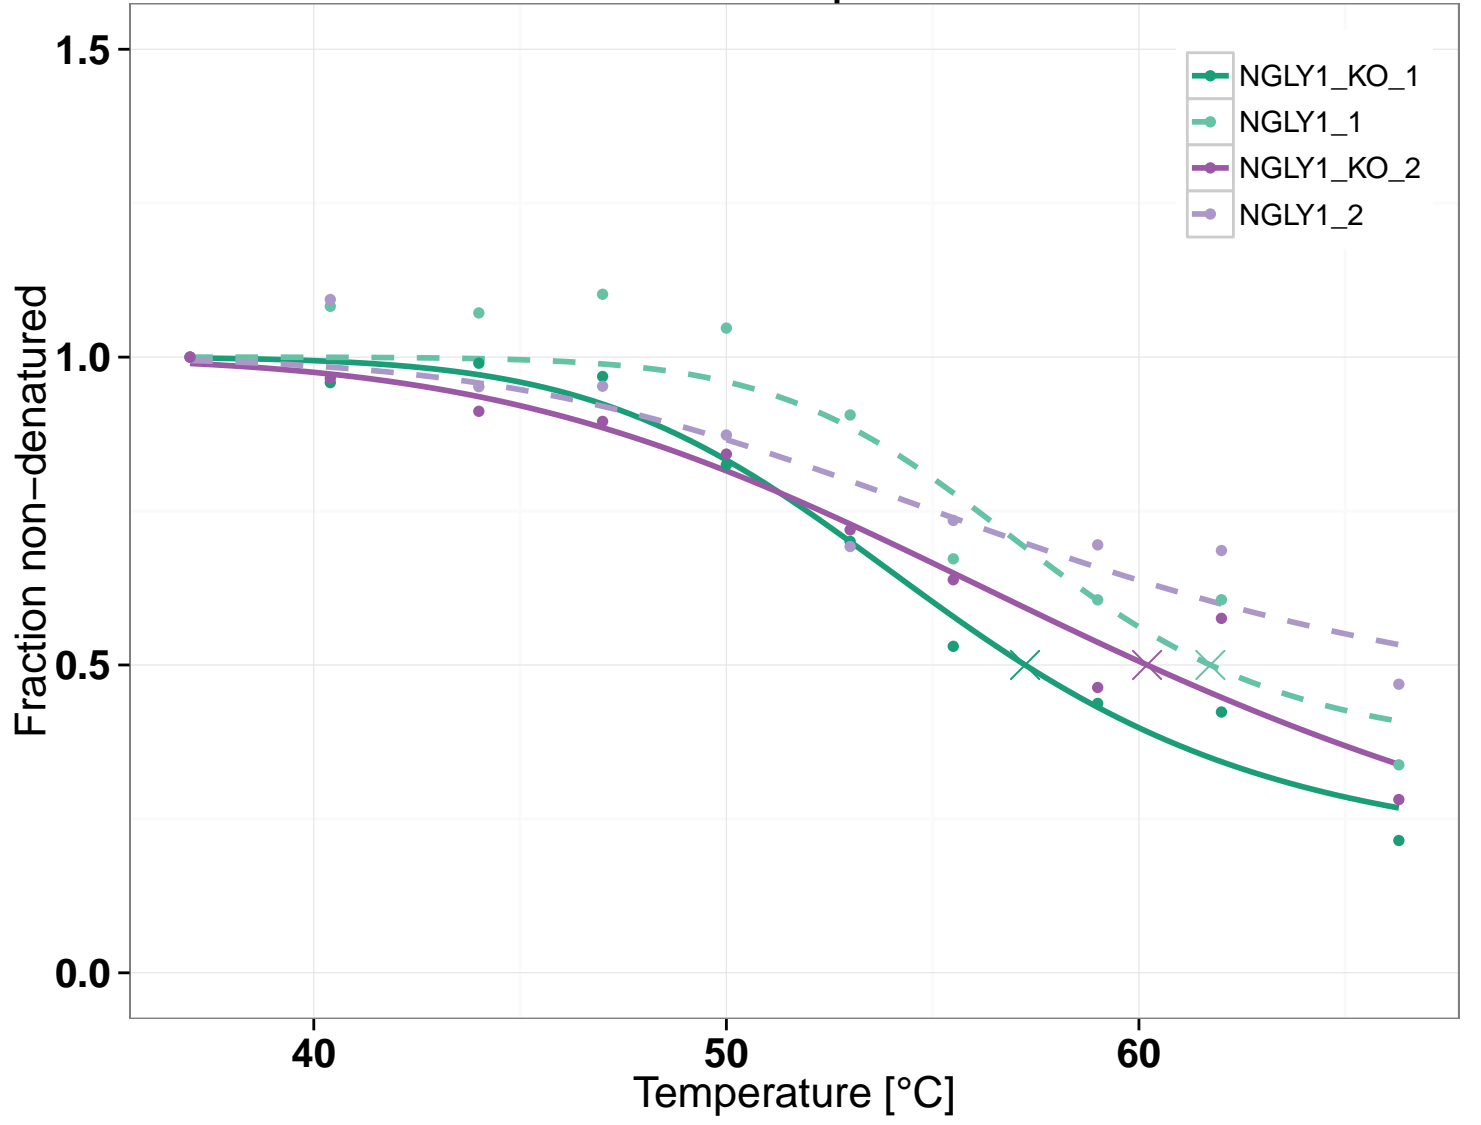

|            | meltPoint | slope  | plateau | R2   |
|------------|-----------|--------|---------|------|
| NGLY1_KO_1 | 57.24     | -0.049 | 0.18    | 0.98 |
| NGLY1_1    | 61.73     | -0.051 | 0.35    | 0.9  |
| NGLY1_KO_2 | 60.2      | -0.032 | 0       | 0.95 |
| NGLY1_2    | -         | -0.024 | 0.38    | 0.88 |

Supplement: Supplementary file 2717 [file 1]

IPI00305833.3|SMU1

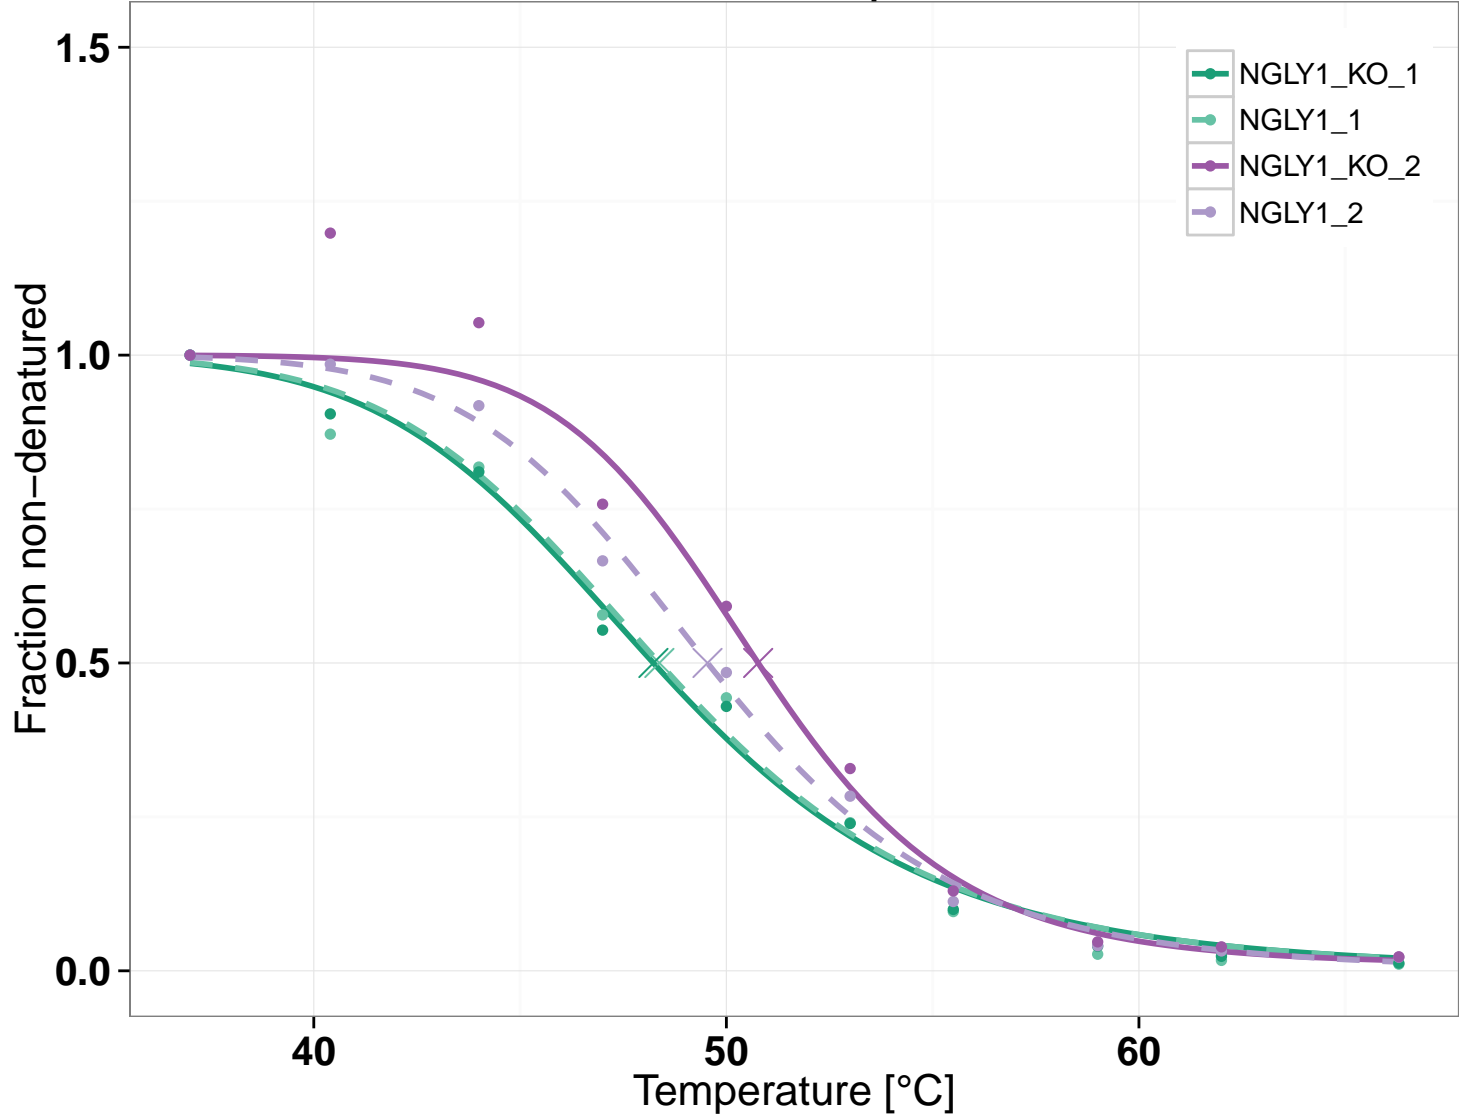

|            | meltPoint | slope  | plateau | R2   |
|------------|-----------|--------|---------|------|
| NGLY1_KO_1 | 48.23     | -0.075 | 0       | 0.99 |
| NGLY1_1    | 48.38     | -0.075 | 0       | 0.99 |
| NGLY1_KO_2 | 50.77     | -0.1   | 0.01    | 0.97 |
| NGLY1_2    | 49.54     | -0.086 | 0       | 1    |

Supplement: Supplementary file 2718 [file 1]

# IPI00301021.3|SSR1

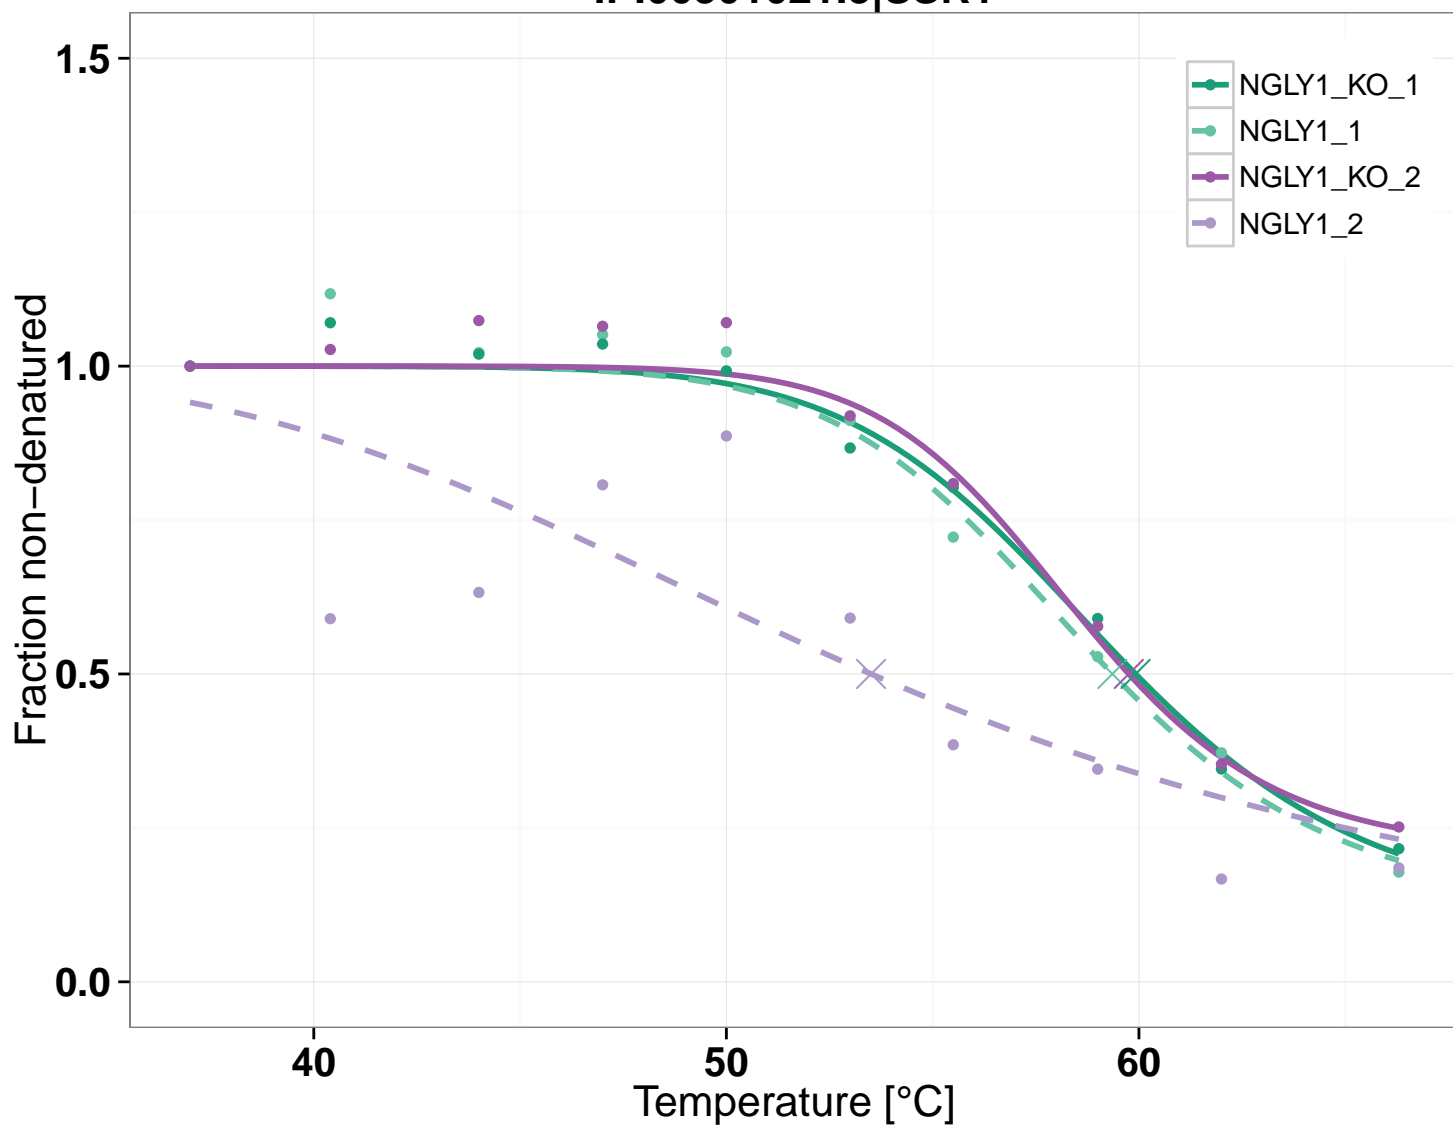

|            | meltPoint | slope  | plateau | R2   |
|------------|-----------|--------|---------|------|
| NGLY1_KO_1 | 59.92     | -0.072 | 0.1     | 0.99 |
| NGLY1_1    | 59.36     | -0.073 | 0.11    | 0.97 |
| NGLY1_KO_2 | 59.75     | -0.083 | 0.21    | 0.98 |
| NGLY1_2    | 53.51     | -0.032 | 0       | 0.69 |

Supplement: Supplementary file 2719 [file 1]

IPI00646689.1|TXNDC17

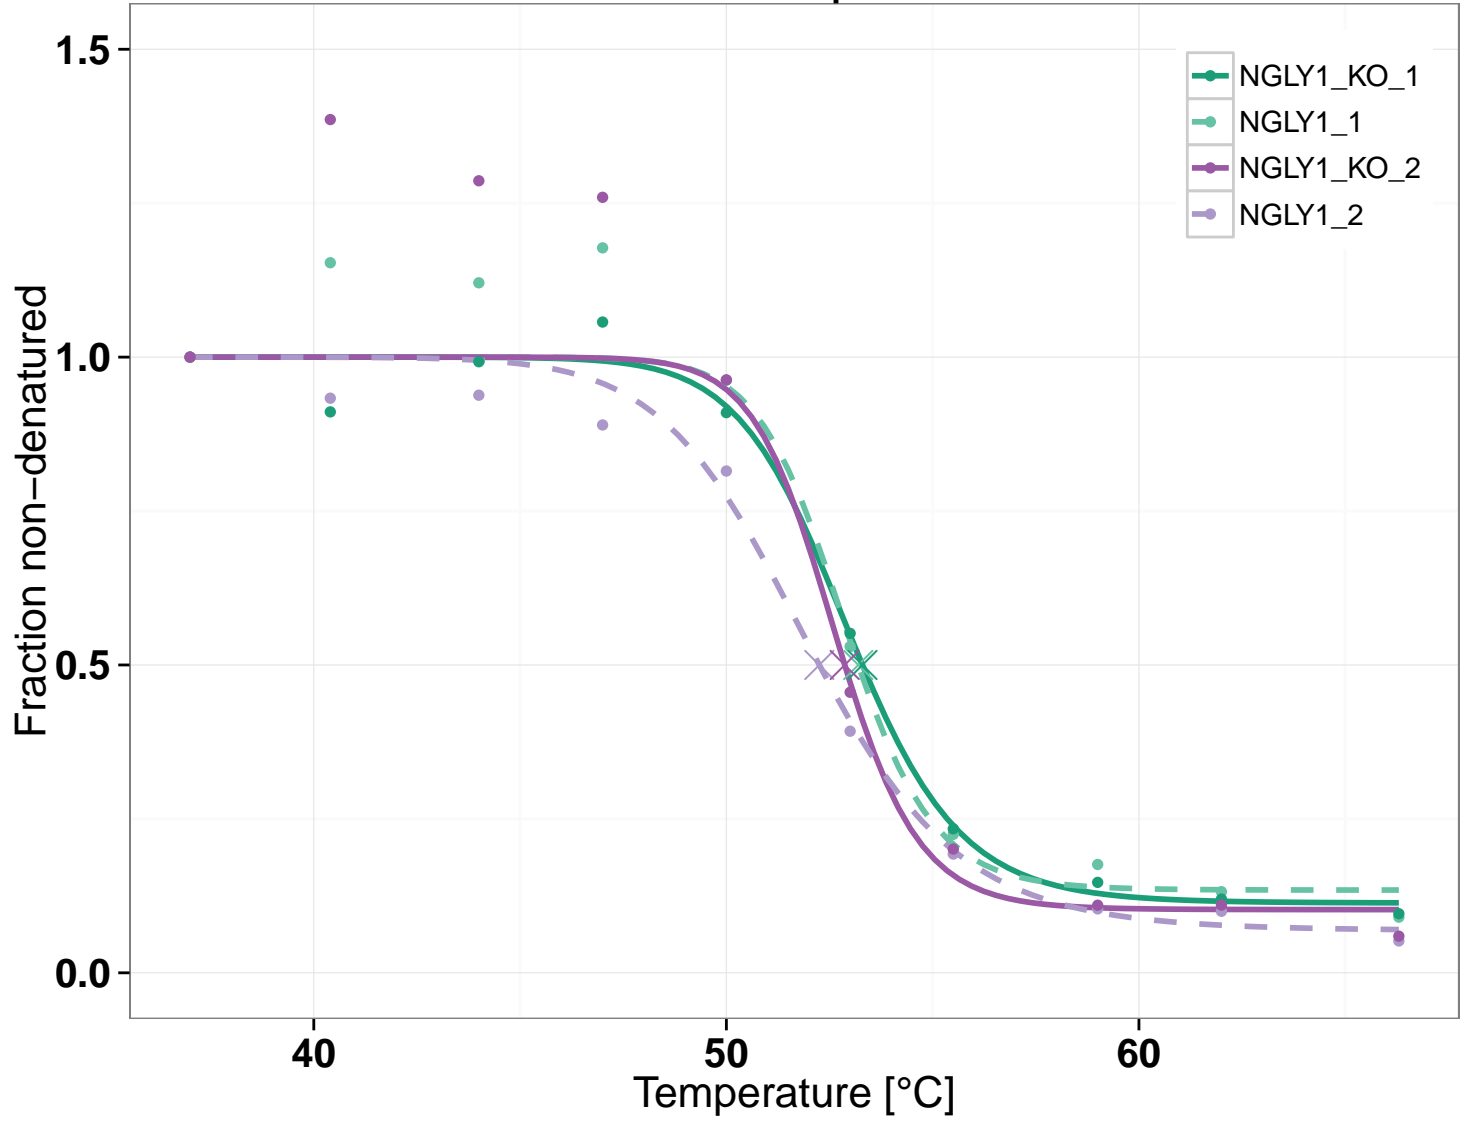

|            | meltPoint | slope | plateau | R2   |
|------------|-----------|-------|---------|------|
| NGLY1_KO_1 | 53.3      | -0.16 | 0.11    | 0.99 |
| NGLY1_1    | 53.2      | -0.2  | 0.13    | 0.96 |
| NGLY1_KO_2 | 52.87     | -0.22 | 0.1     | 0.89 |
| NGLY1_2    | 52.25     | -0.13 | 0.07    | 0.99 |

Supplement: Supplementary file 2720 [file 1]

IPI00642204.3|TXNDC16

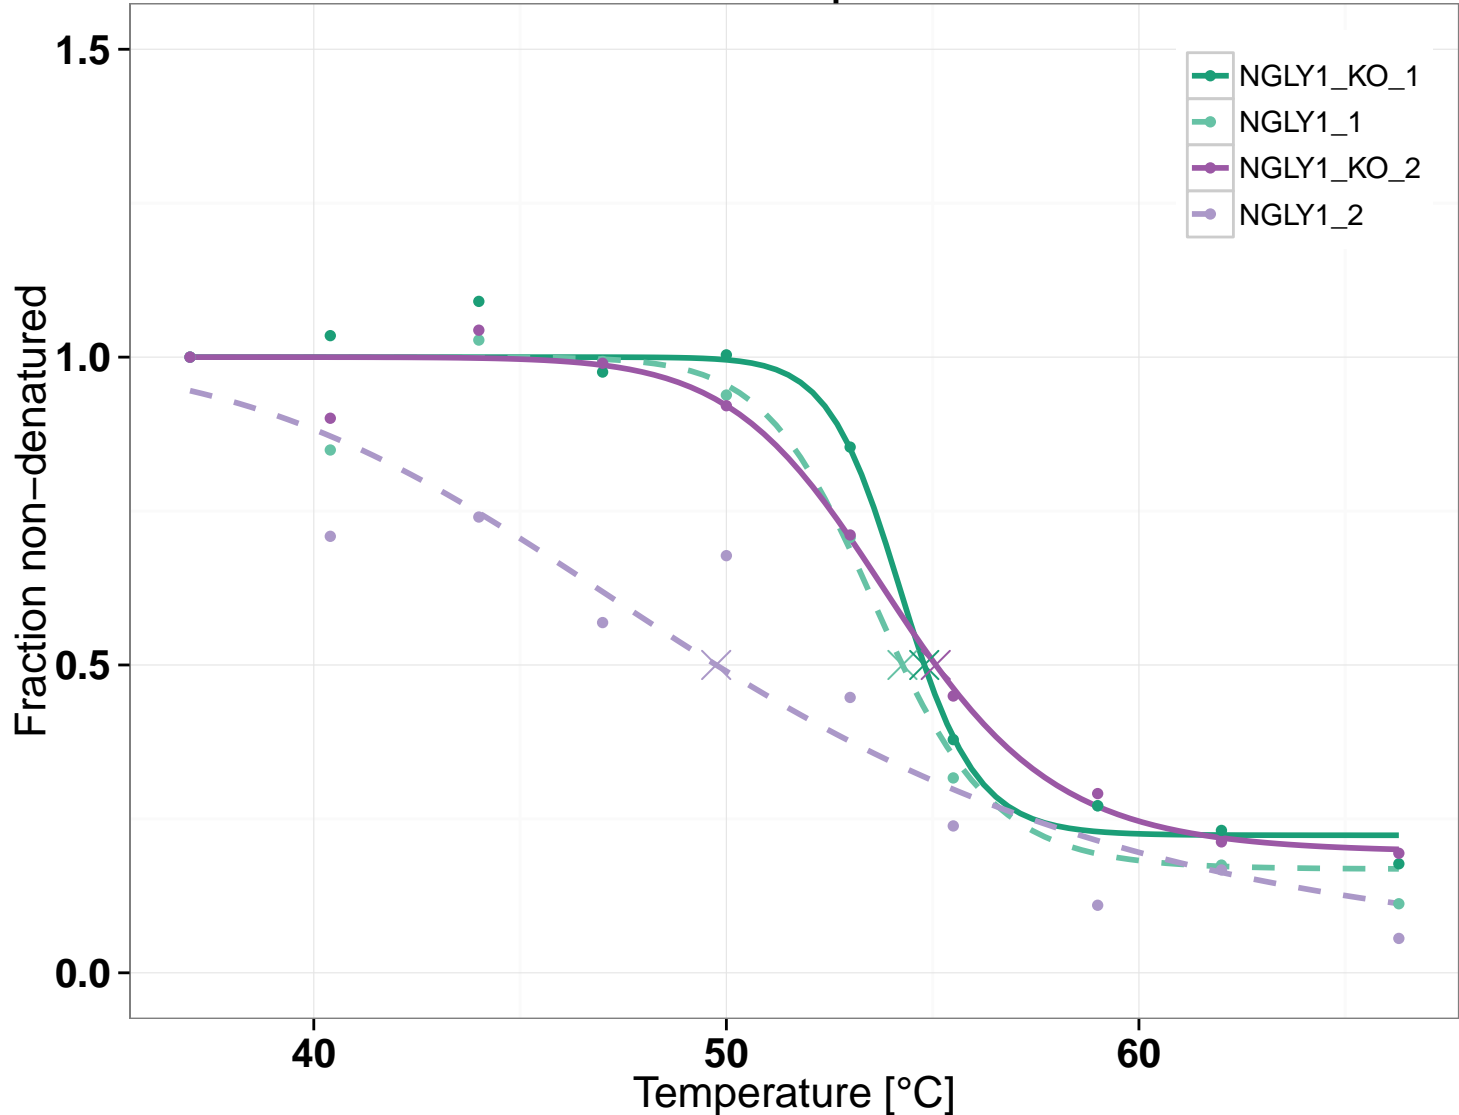

|            | meltPoint | slope  | plateau | R2   |
|------------|-----------|--------|---------|------|
| NGLY1_KO_1 | 54.8      | -0.22  | 0.22    | 0.99 |
| NGLY1_1    | 54.27     | -0.15  | 0.17    | 0.97 |
| NGLY1_KO_2 | 55.07     | -0.1   | 0.2     | 0.99 |
| NGLY1_2    | 49.75     | -0.044 | 0       | 0.9  |

Supplement: Supplementary file 2721 [file 1]

# IPI00026154.3|PRKCSH

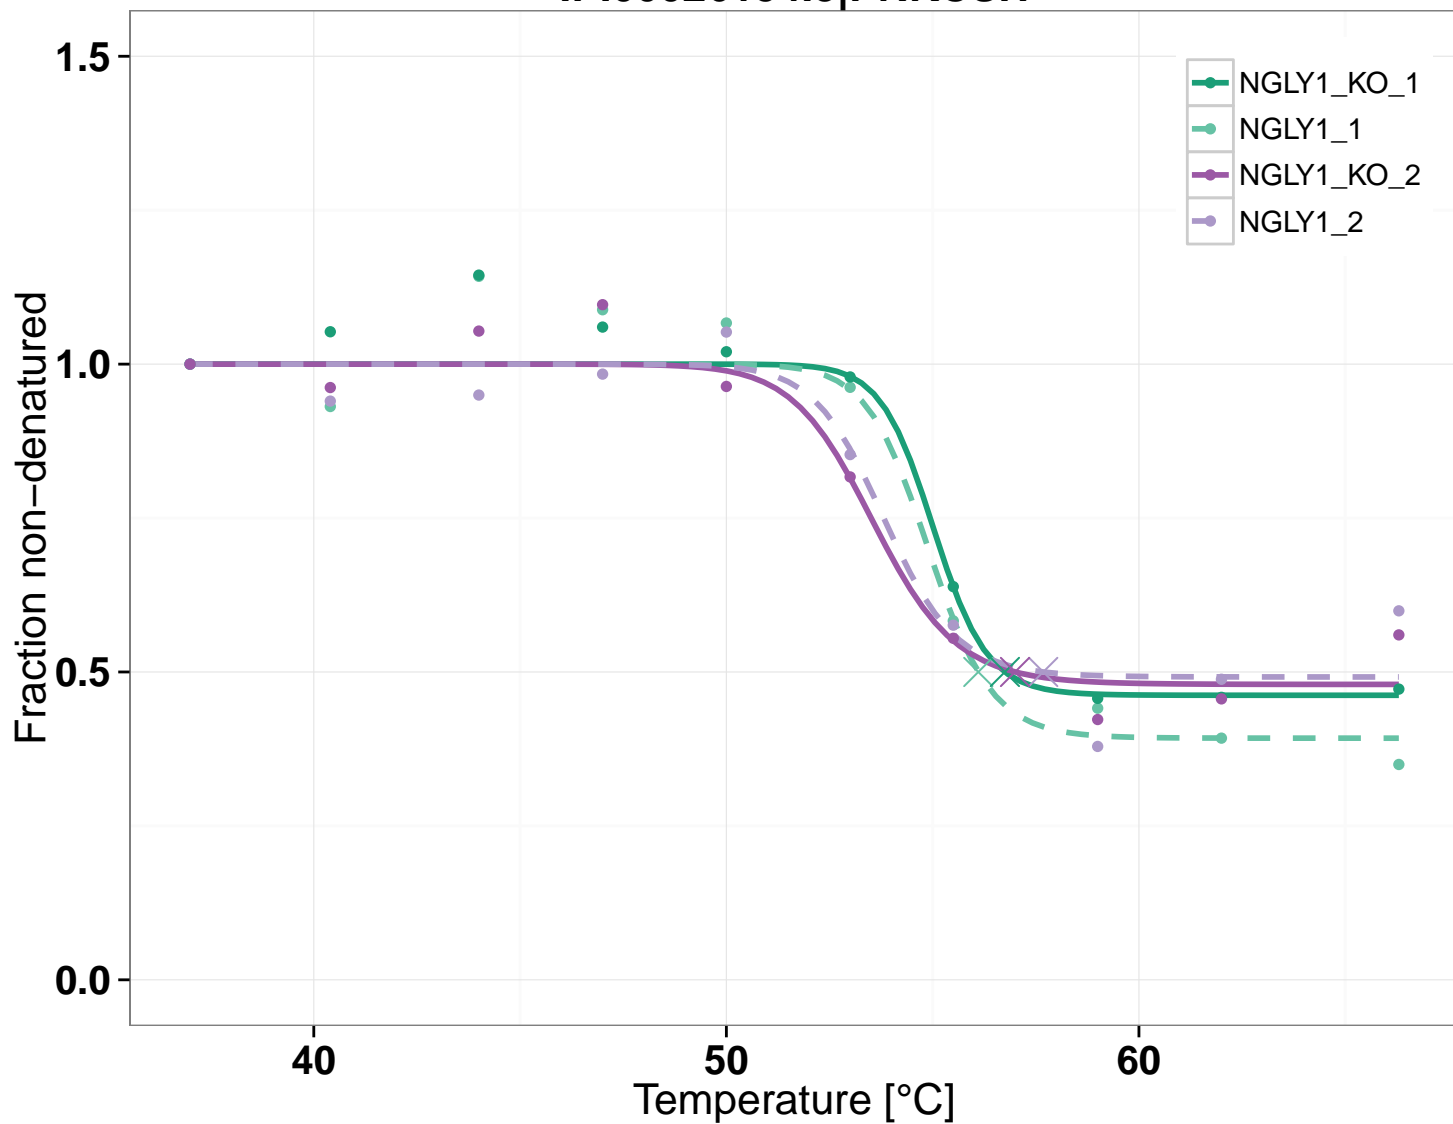

|            | meltPoint | slope | plateau | R2   |
|------------|-----------|-------|---------|------|
| NGLY1_KO_1 | 56.75     | -0.21 | 0.46    | 0.96 |
| NGLY1_1    | 56.11     | -0.2  | 0.39    | 0.95 |
| NGLY1_KO_2 | 57        | -0.13 | 0.48    | 0.96 |
| NGLY1_2    | 57.68     | -0.15 | 0.49    | 0.94 |

Supplement: Supplementary file 2722 [file 1]

# IPI00031675.7|MON1A

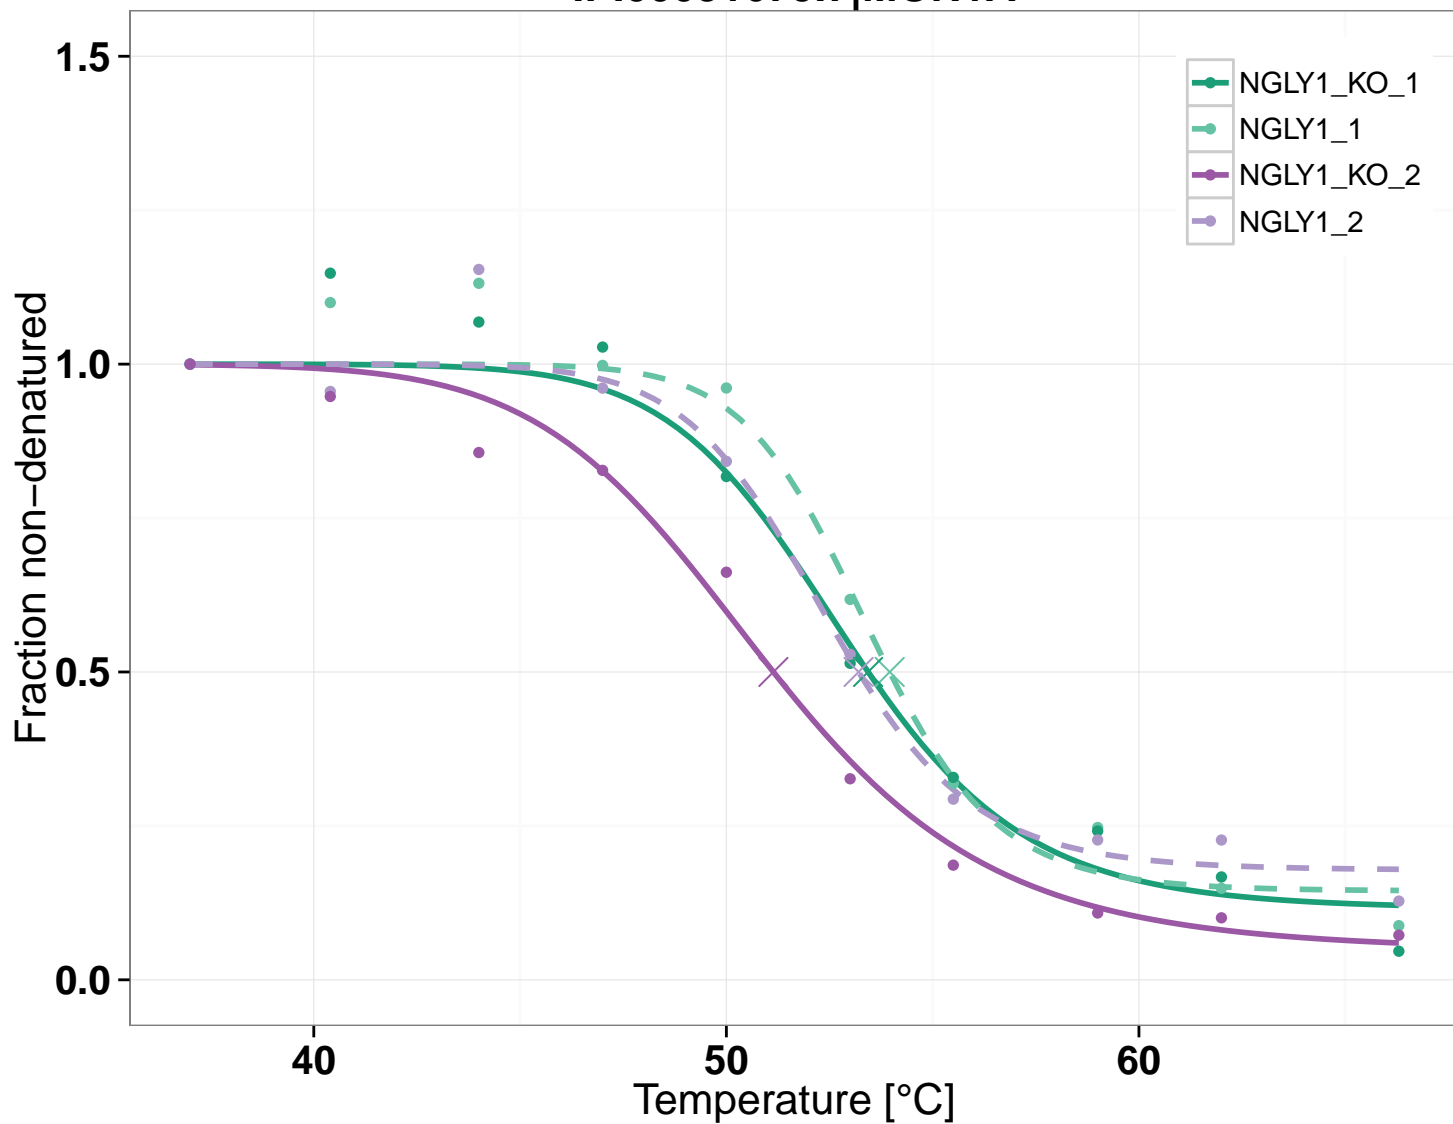

|            | meltPoint | slope  | plateau | R2   |
|------------|-----------|--------|---------|------|
| NGLY1_KO_1 | 53.44     | -0.1   | 0.11    | 0.97 |
| NGLY1_1    | 53.96     | -0.14  | 0.14    | 0.98 |
| NGLY1_KO_2 | 51.14     | -0.087 | 0.05    | 0.99 |
| NGLY1_2    | 53.21     | -0.12  | 0.18    | 0.98 |

Supplement: Supplementary file 2723 [file 1]

# IPI00791060.2|C19ORF62

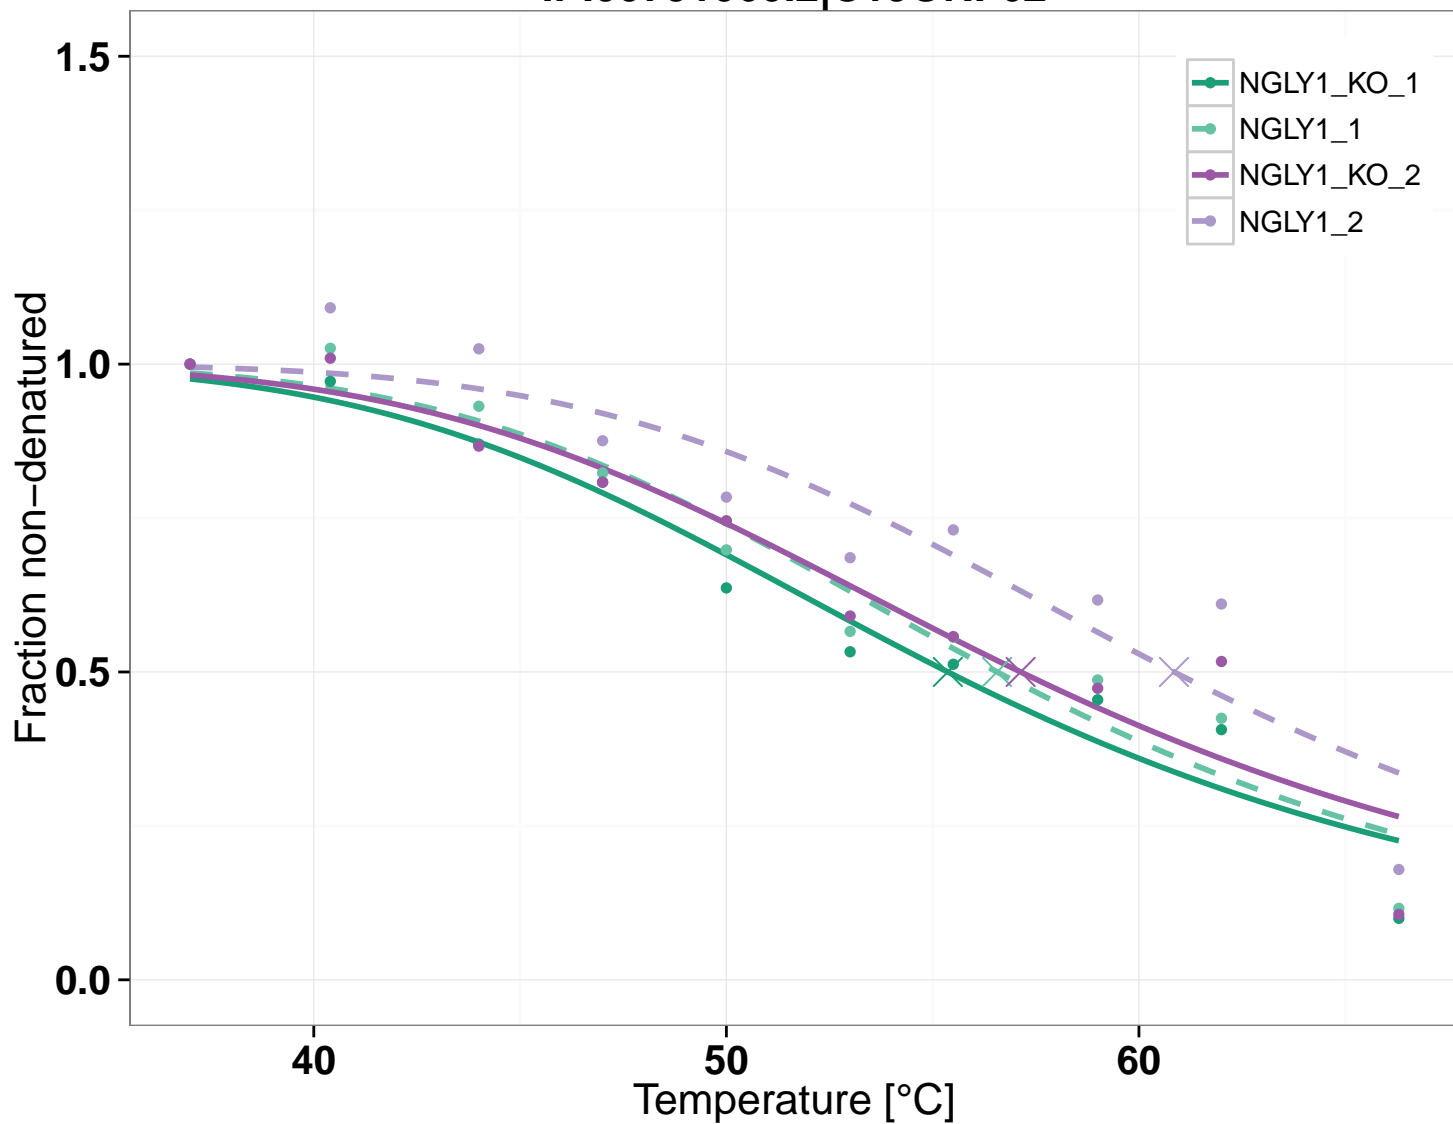

|            | meltPoint | slope  | plateau | R2   |
|------------|-----------|--------|---------|------|
| NGLY1_KO_1 | 55.37     | -0.036 | 0       | 0.95 |
| NGLY1_1    | 56.56     | -0.037 | 0       | 0.95 |
| NGLY1_KO_2 | 57.13     | -0.035 | 0       | 0.91 |
| NGLY1_2    | 60.85     | -0.036 | 0       | 0.87 |

Supplement: Supplementary file 2724 [file 1]

IPI00305490.4|HICE1

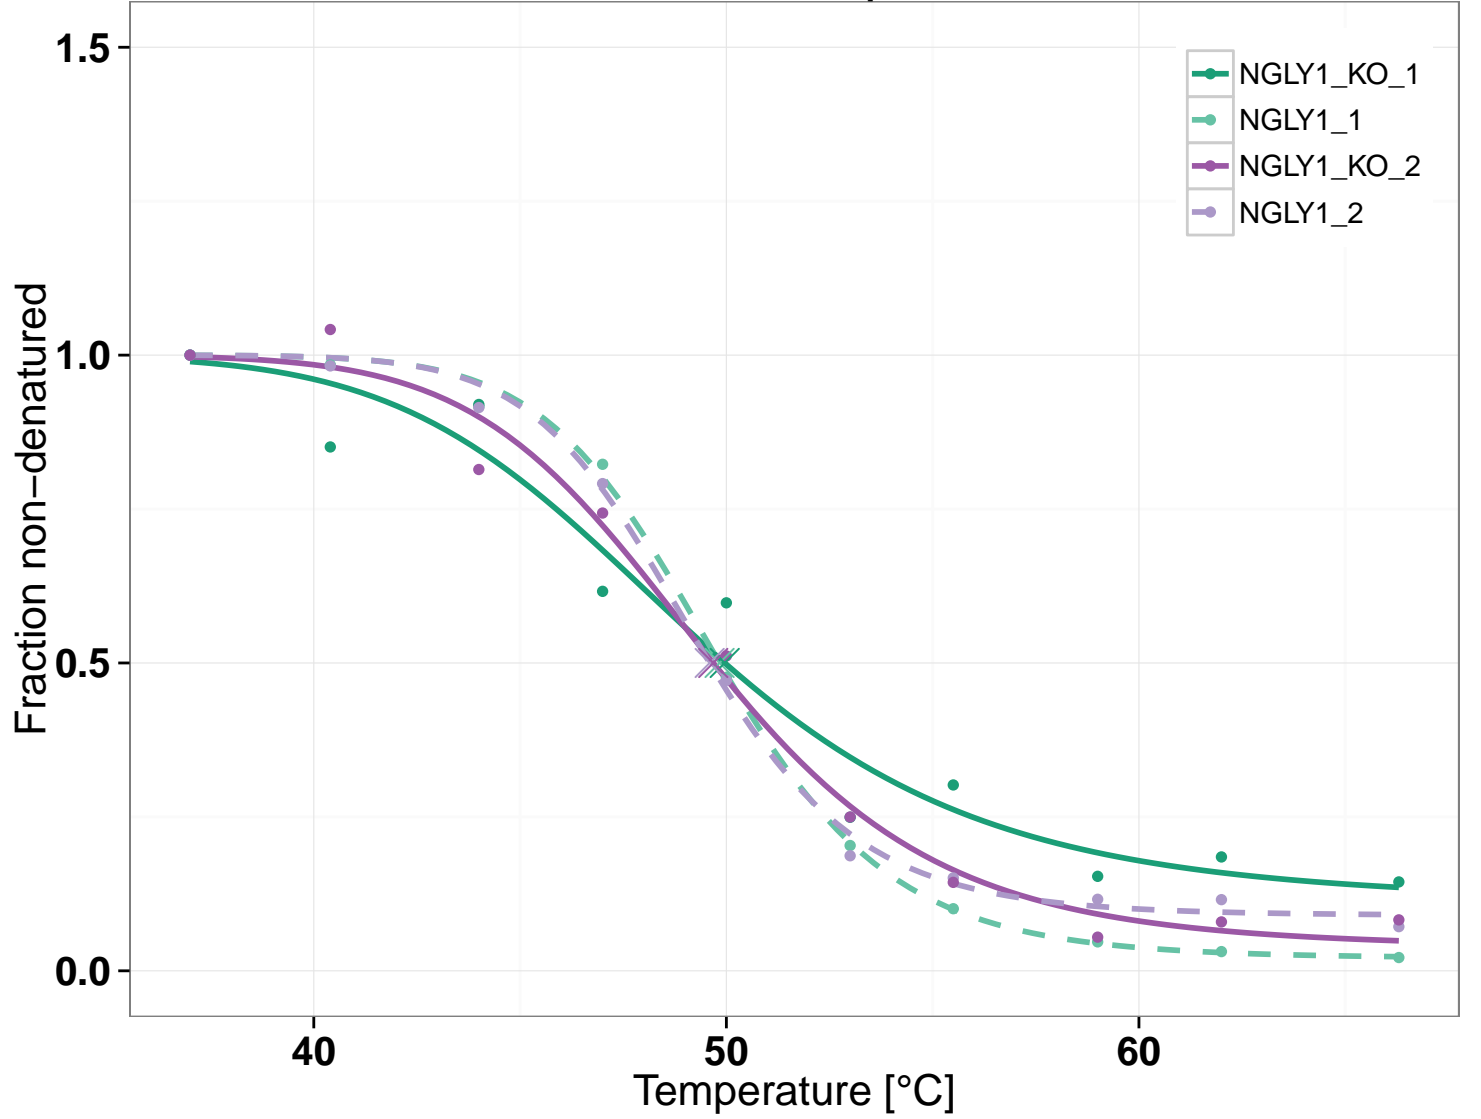

|            | meltPoint | slope  | plateau | R2   |
|------------|-----------|--------|---------|------|
| NGLY1_KO_1 | 49.96     | -0.063 | 0.11    | 0.96 |
| NGLY1_1    | 49.84     | -0.12  | 0.02    | 1    |
| NGLY1_KO_2 | 49.68     | -0.086 | 0.04    | 0.99 |
| NGLY1_2    | 49.6      | -0.11  | 0.09    | 1    |

Supplement: Supplementary file 2725 [file 1]

IPI00385128.3|LPCAT4

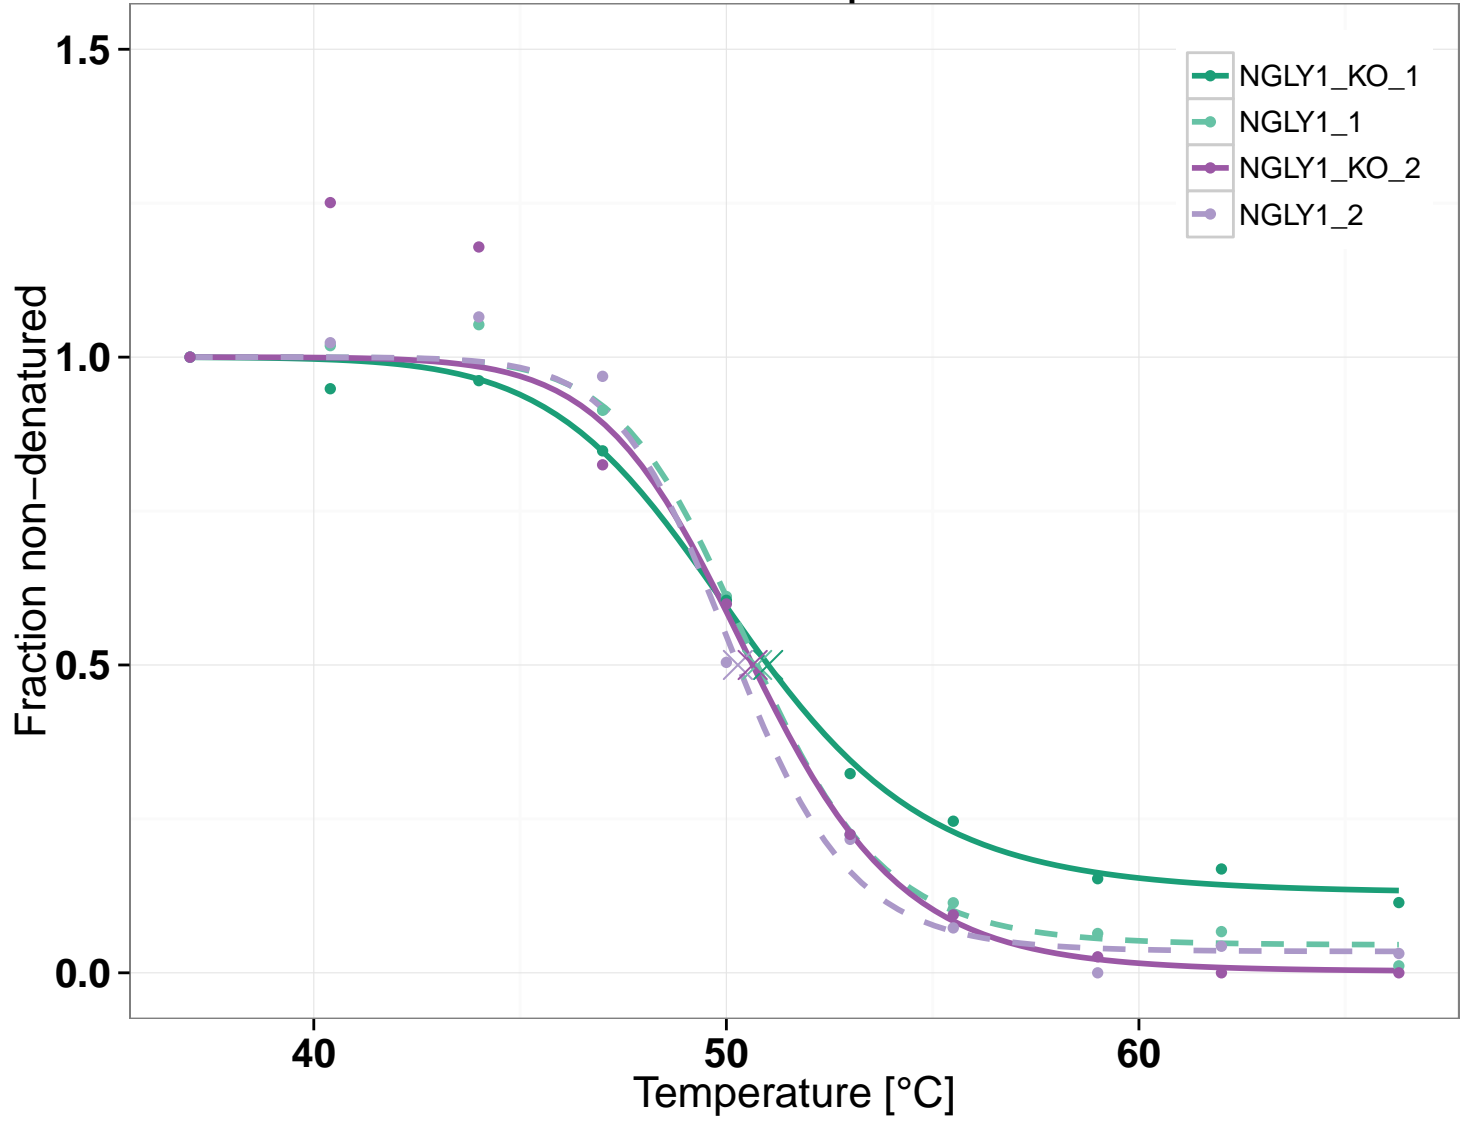

|            | meltPoint | slope  | plateau | R2   |
|------------|-----------|--------|---------|------|
| NGLY1_KO_1 | 51.01     | -0.096 | 0.13    | 1    |
| NGLY1_1    | 50.75     | -0.15  | 0.05    | 1    |
| NGLY1_KO_2 | 50.64     | -0.14  | 0       | 0.95 |
| NGLY1_2    | 50.28     | -0.17  | 0.03    | 0.99 |

Supplement: Supplementary file 2726 [file 1]

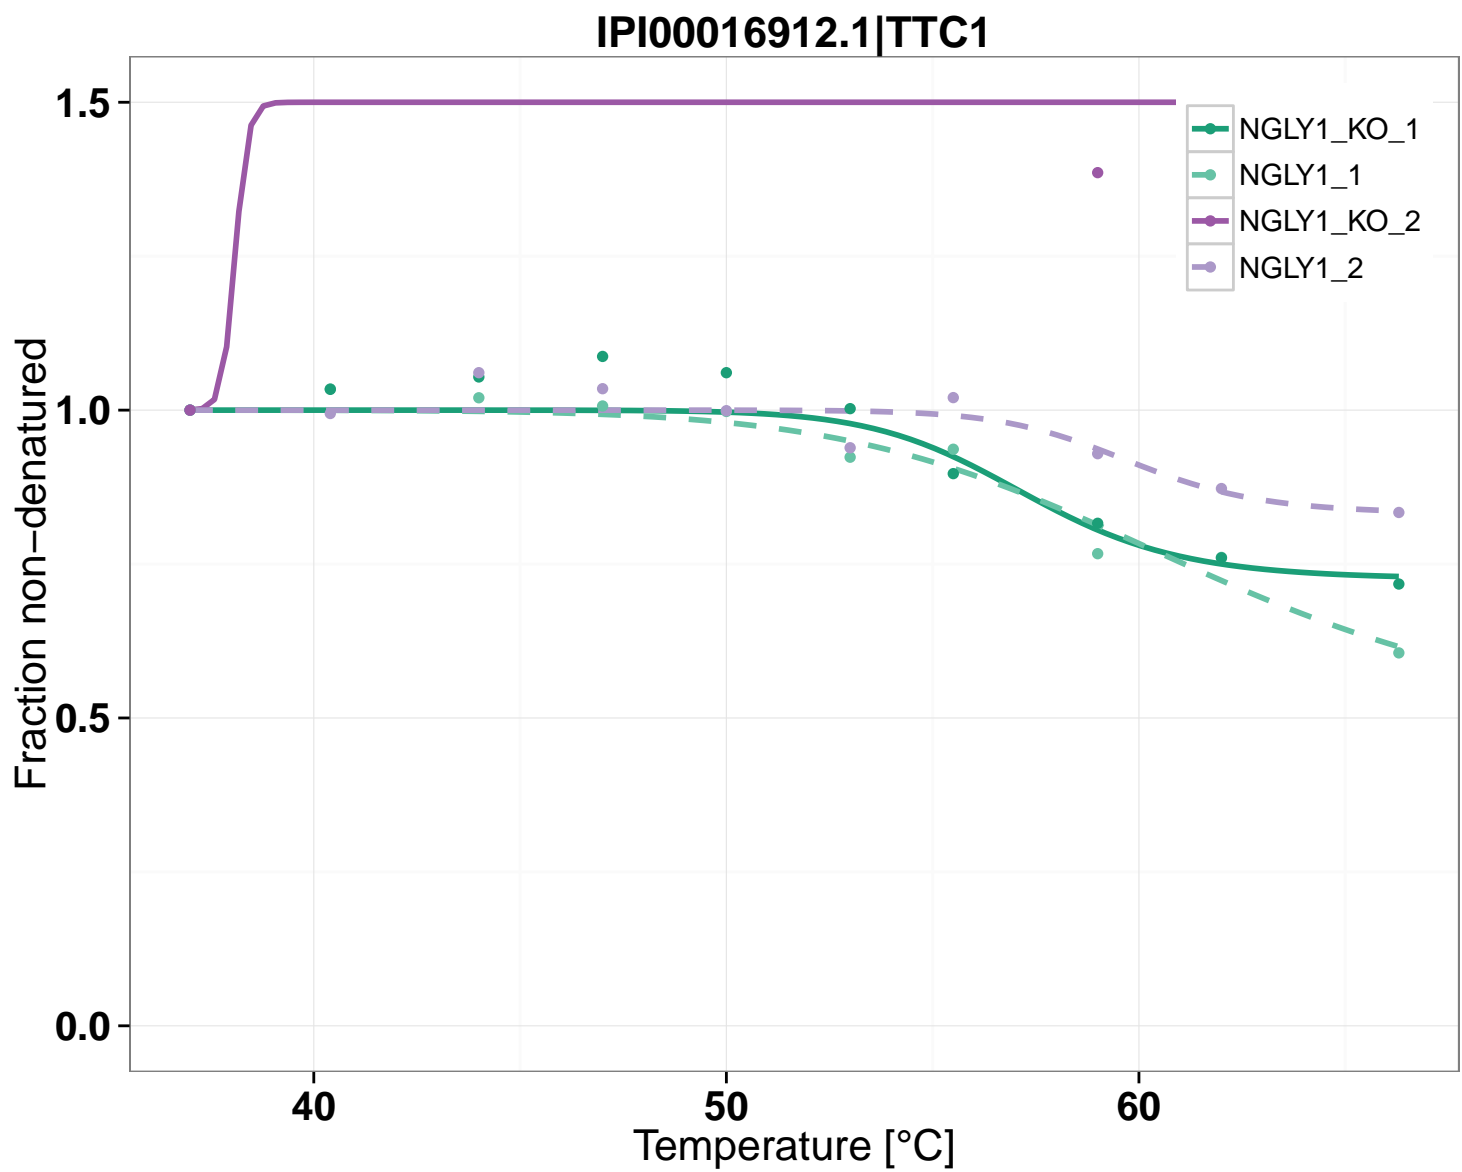

|            | meltPoint | slope  | plateau | R2   |
|------------|-----------|--------|---------|------|
| NGLY1_KO_1 | —         | −0.037 | 0.73    | 0.89 |
| NGLY1_1    | —         | −0.03  | 0.48    | 0.96 |
| NGLY1_KO_2 | —         | 0.82   | 1.5     | 0.24 |
| NGLY1_2    | —         | −0.026 | 0.83    | 0.8  |

Supplement: Supplementary file 2727 [file 1]

IPI00395663.5|ANKS1A

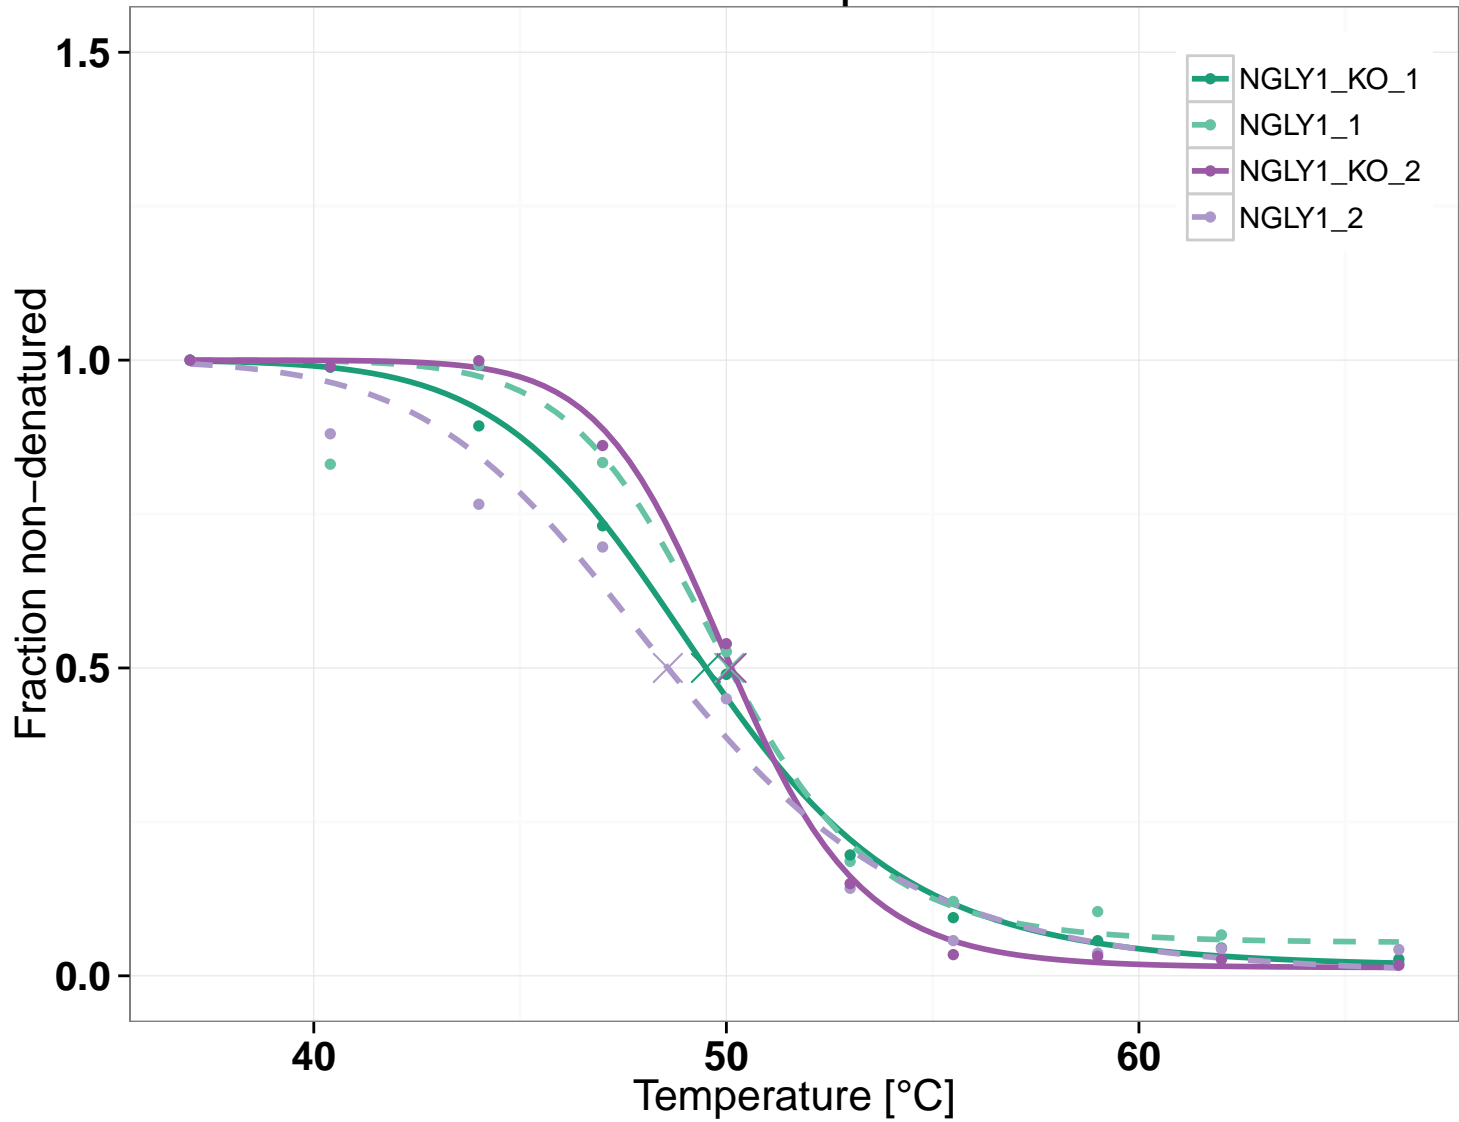

|            | meltPoint | slope  | plateau | R2   |
|------------|-----------|--------|---------|------|
| NGLY1_KO_1 | 49.5      | -0.099 | 0.01    | 1    |
| NGLY1_1    | 50.07     | -0.13  | 0.05    | 0.98 |
| NGLY1_KO_2 | 50.13     | -0.16  | 0.01    | 1    |
| NGLY1_2    | 48.58     | -0.085 | 0       | 0.98 |

Supplement: Supplementary file 2728 [file 1]

IPI00413674.1|PHYHD1

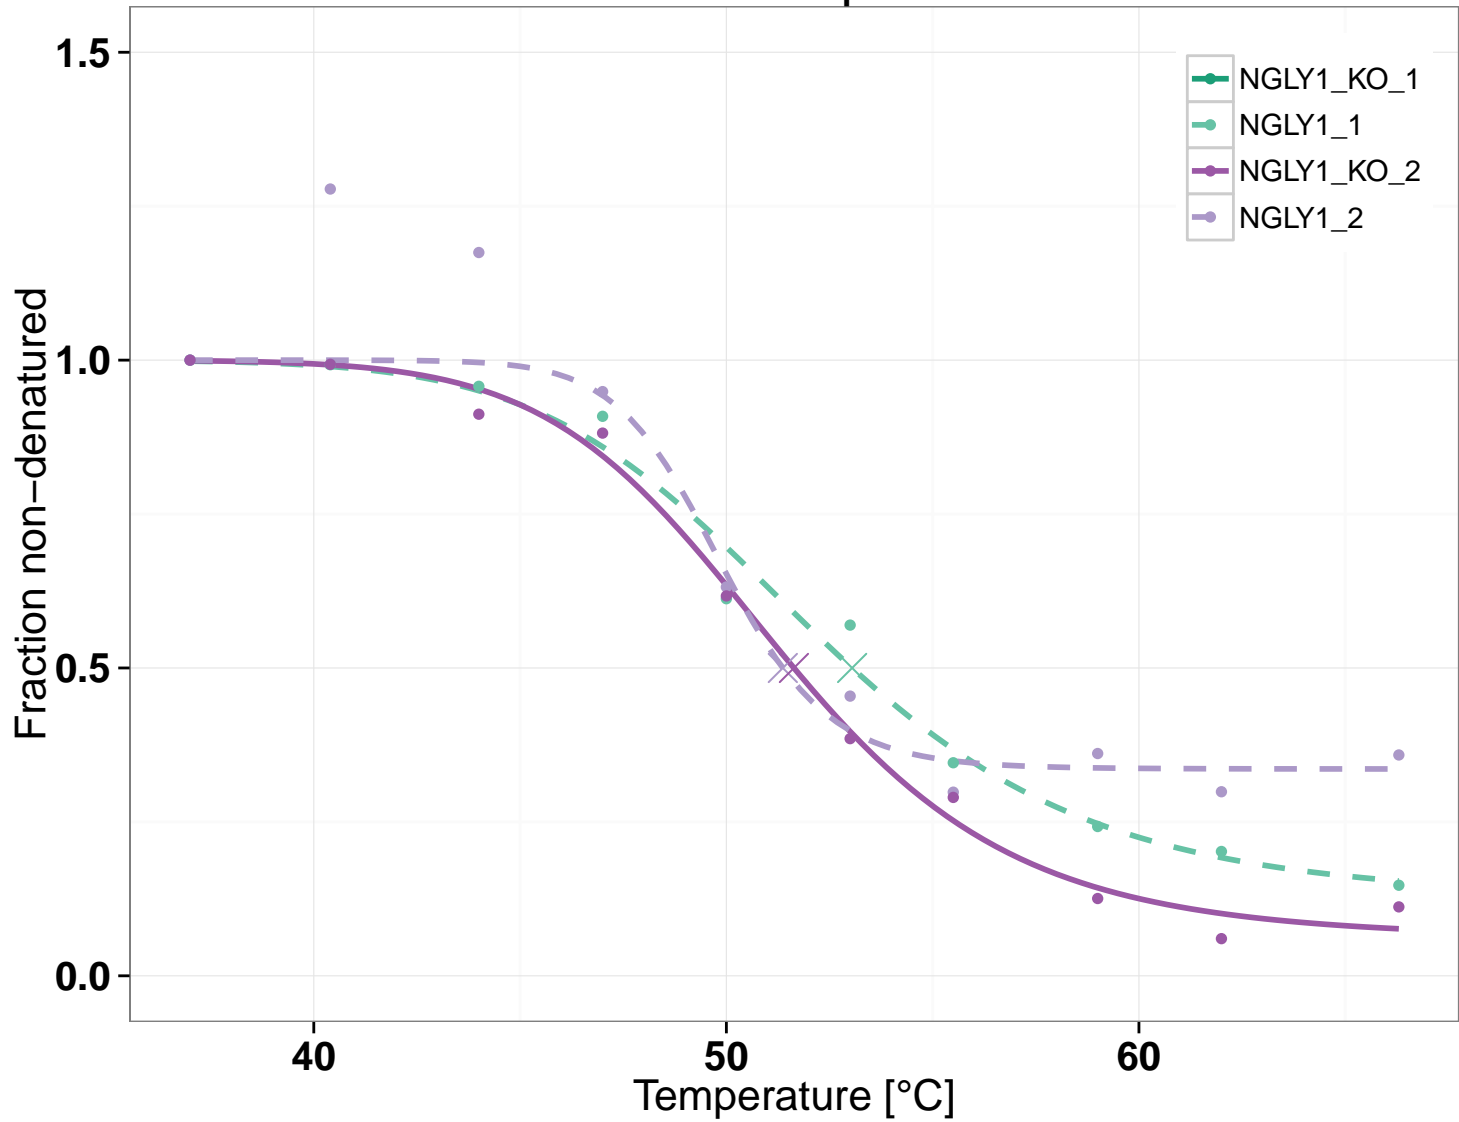

|            | meltPoint | slope  | plateau | R2   |
|------------|-----------|--------|---------|------|
| NGLY1_KO_1 | -         | -      | -       | -    |
| NGLY1_1    | 53.05     | -0.066 | 0.12    | 0.99 |
| NGLY1_KO_2 | 51.64     | -0.083 | 0.06    | 0.99 |
| NGLY1_2    | 51.37     | -0.13  | 0.34    | 0.91 |

Supplement: Supplementary file 2729 [file 1]

# IPI00291840.5|ZFP90

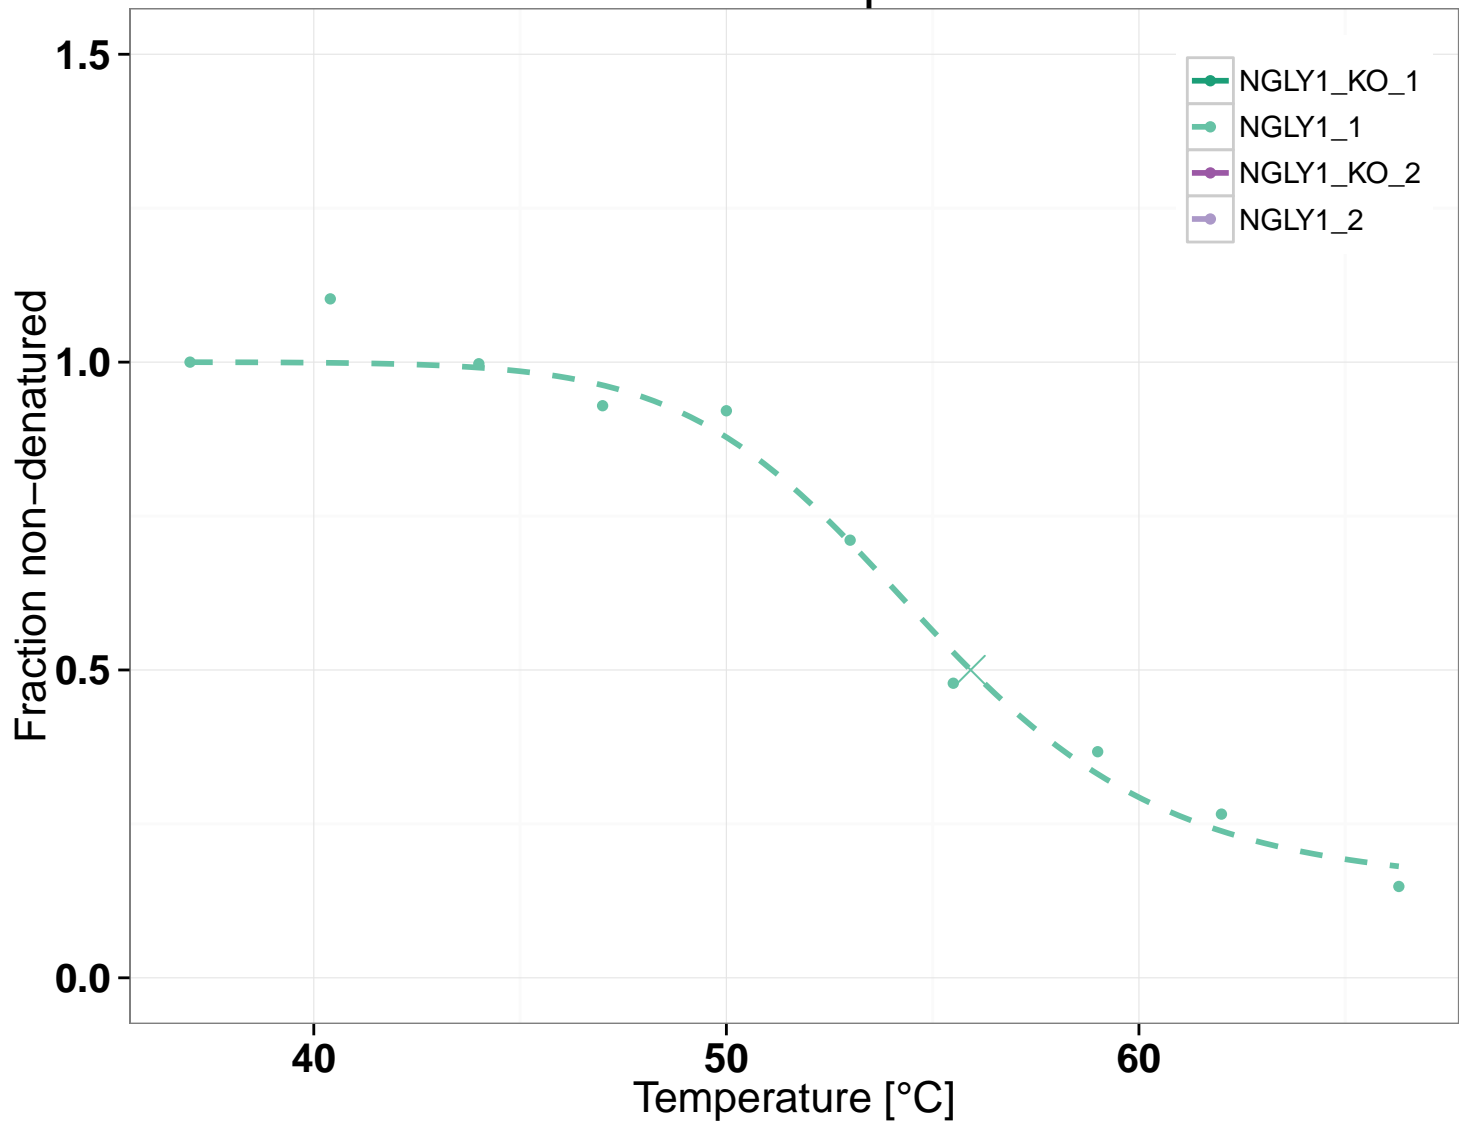

|            | meltPoint | slope  | plateau | R2   |
|------------|-----------|--------|---------|------|
| NGLY1_KO_1 | –         | –      | –       | –    |
| NGLY1_1    | 55.92     | –0.072 | 0.15    | 0.98 |
| NGLY1_KO_2 | –         | –      | –       | –    |
| NGLY1_2    | –         | –      | –       | –    |

Supplement: Supplementary file 2730 [file 1]

IPI00873993.1|UBE2D2

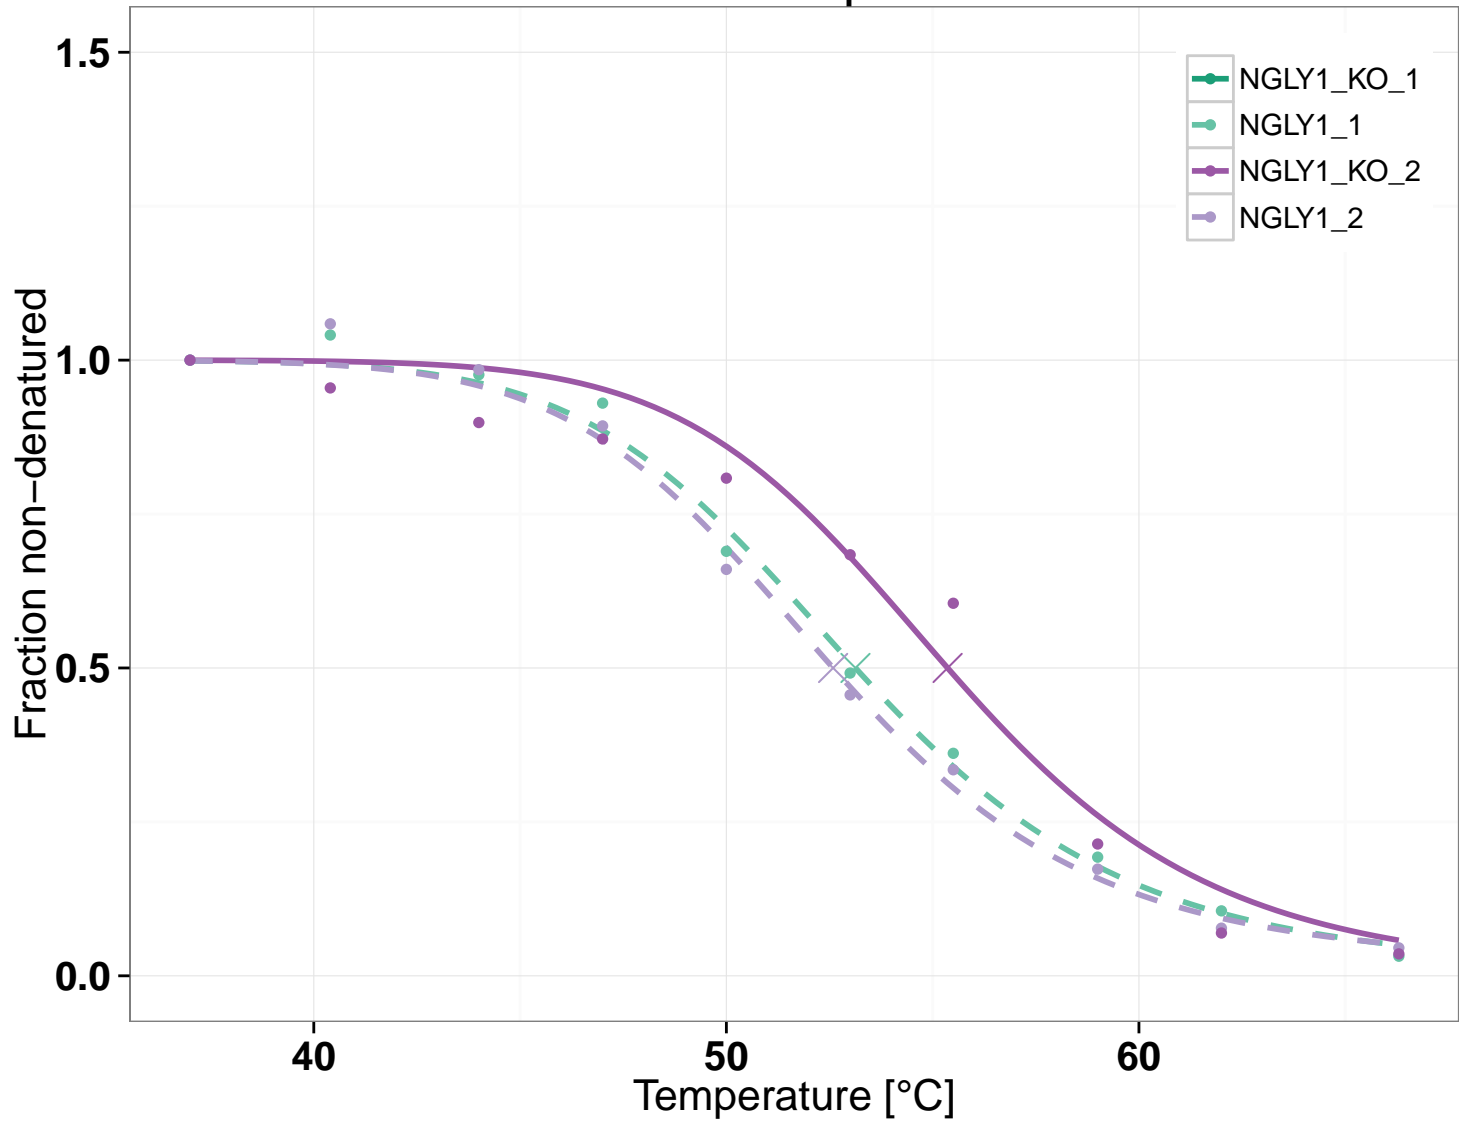

|            | meltPoint | slope  | plateau | R2   |
|------------|-----------|--------|---------|------|
| NGLY1_KO_1 | —         | —      | —       | —    |
| NGLY1_1    | 53.13     | -0.075 | 0.01    | 0.99 |
| NGLY1_KO_2 | 55.36     | -0.078 | 0       | 0.97 |
| NGLY1_2    | 52.59     | -0.077 | 0.02    | 0.99 |

Supplement: Supplementary file 2731 [file 1]

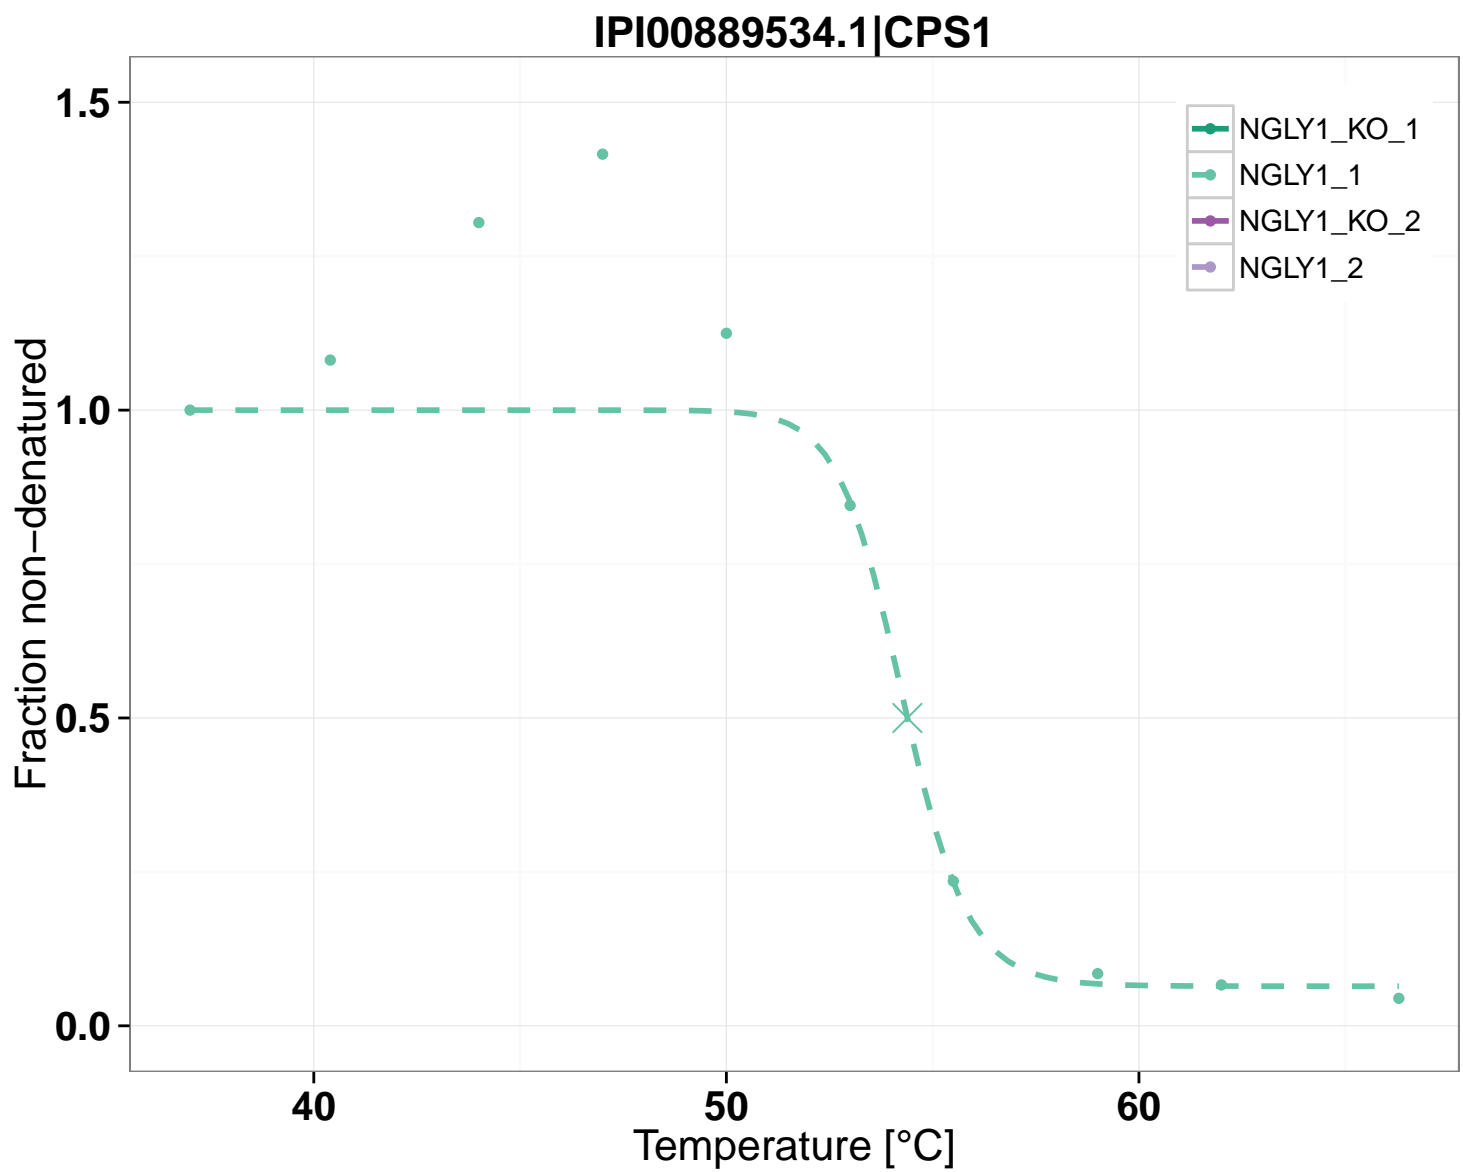

|            | meltPoint | slope | plateau | R2   |
|------------|-----------|-------|---------|------|
| NGLY1_KO_1 | —         | —     | —       | —    |
| NGLY1_1    | 54.39     | -0.3  | 0.06    | 0.89 |
| NGLY1_KO_2 | —         | —     | —       | —    |
| NGLY1_2    | —         | —     | —       | —    |

Supplement: Supplementary file 2732 [file 1]

# IPI00107722.6|MCEE

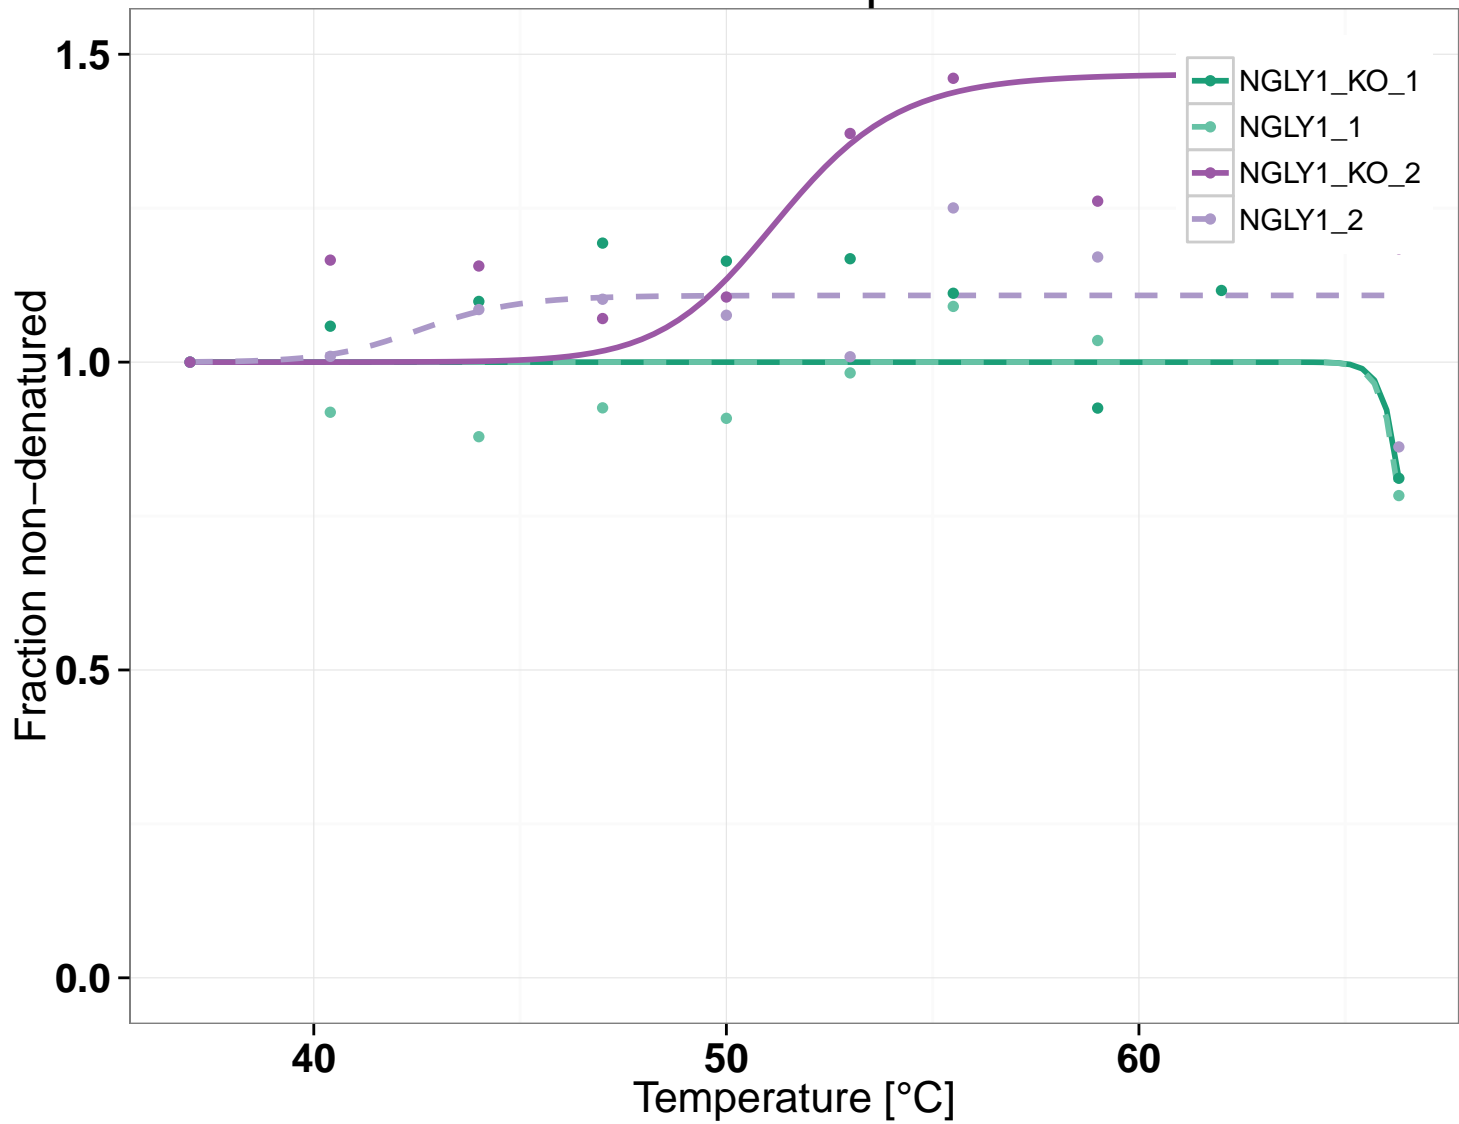

|            | meltPoint | slope | plateau | R2    |
|------------|-----------|-------|---------|-------|
| NGLY1_KO_1 | -         | -     | 0       | -0.05 |
| NGLY1_1    | -         | -     | 0       | 0.29  |
| NGLY1_KO_2 | -         | 0.081 | 1.47    | 0.4   |
| NGLY1_2    | -         | 0.024 | 1.11    | 0.12  |

Supplement: Supplementary file 2733 [file 1]

# IPI00028059.1|NUMB

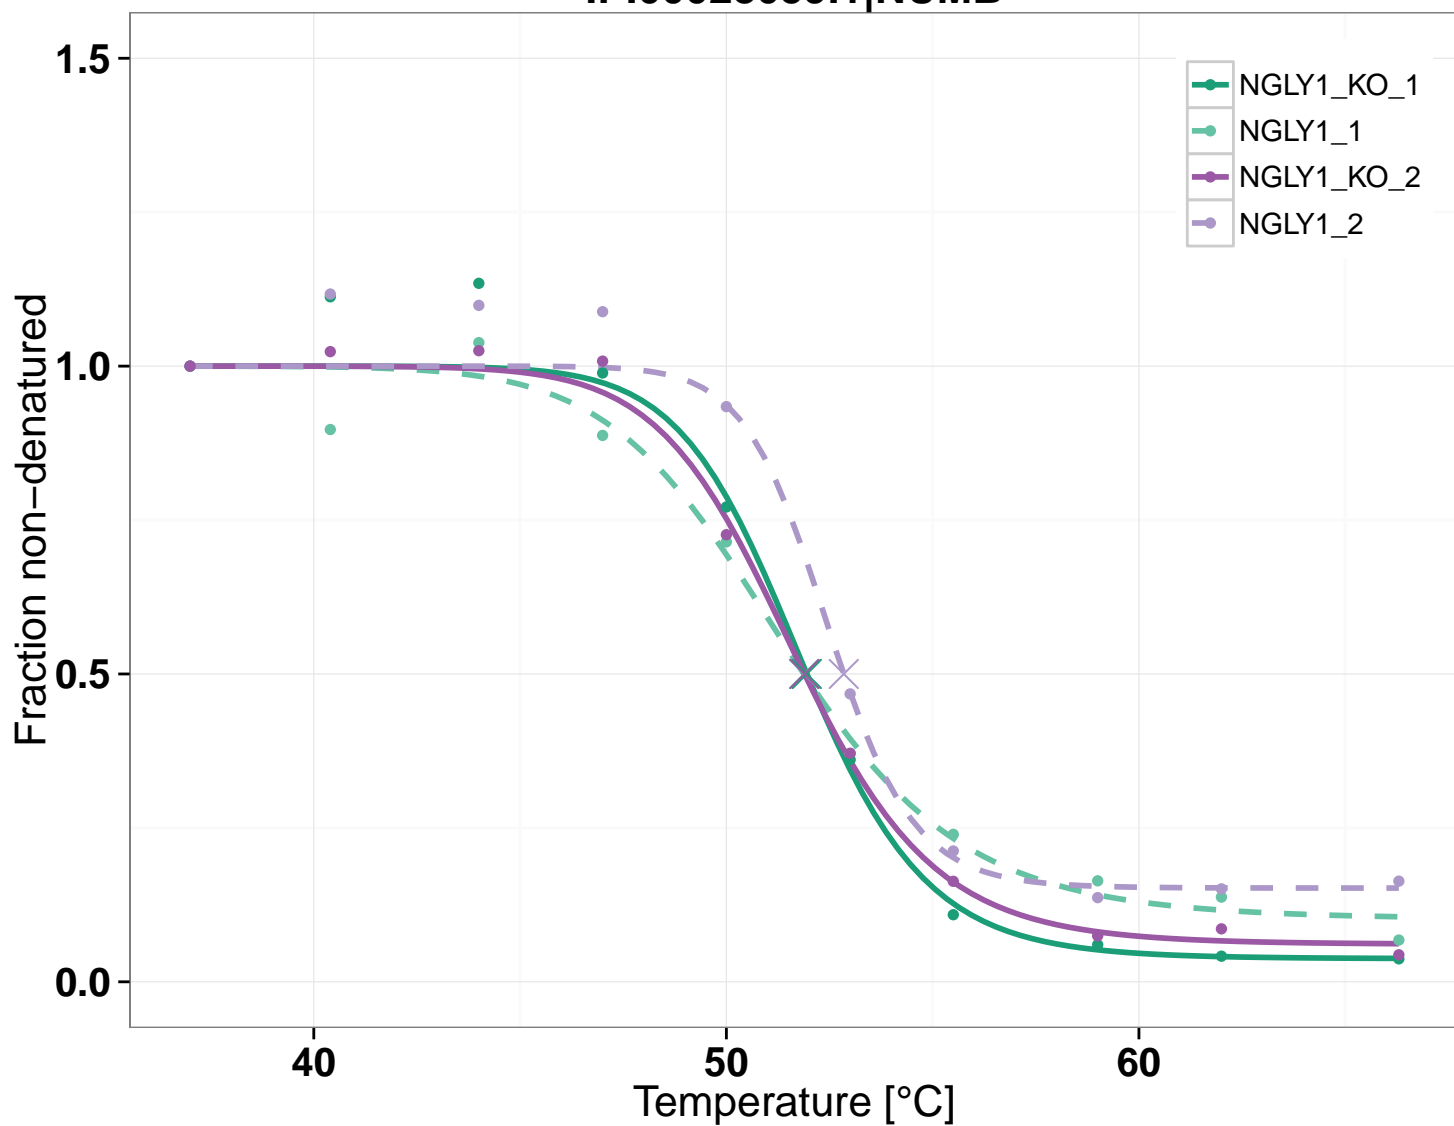

|            | meltPoint | slope | plateau | R2   |
|------------|-----------|-------|---------|------|
| NGLY1_KO_1 | 51.95     | -0.16 | 0.04    | 0.98 |
| NGLY1_1    | 51.88     | -0.1  | 0.1     | 0.99 |
| NGLY1_KO_2 | 51.89     | -0.14 | 0.06    | 1    |
| NGLY1_2    | 52.85     | -0.21 | 0.15    | 0.98 |

Supplement: Supplementary file 2734 [file 1]

IPI00414410.2|MRPL22

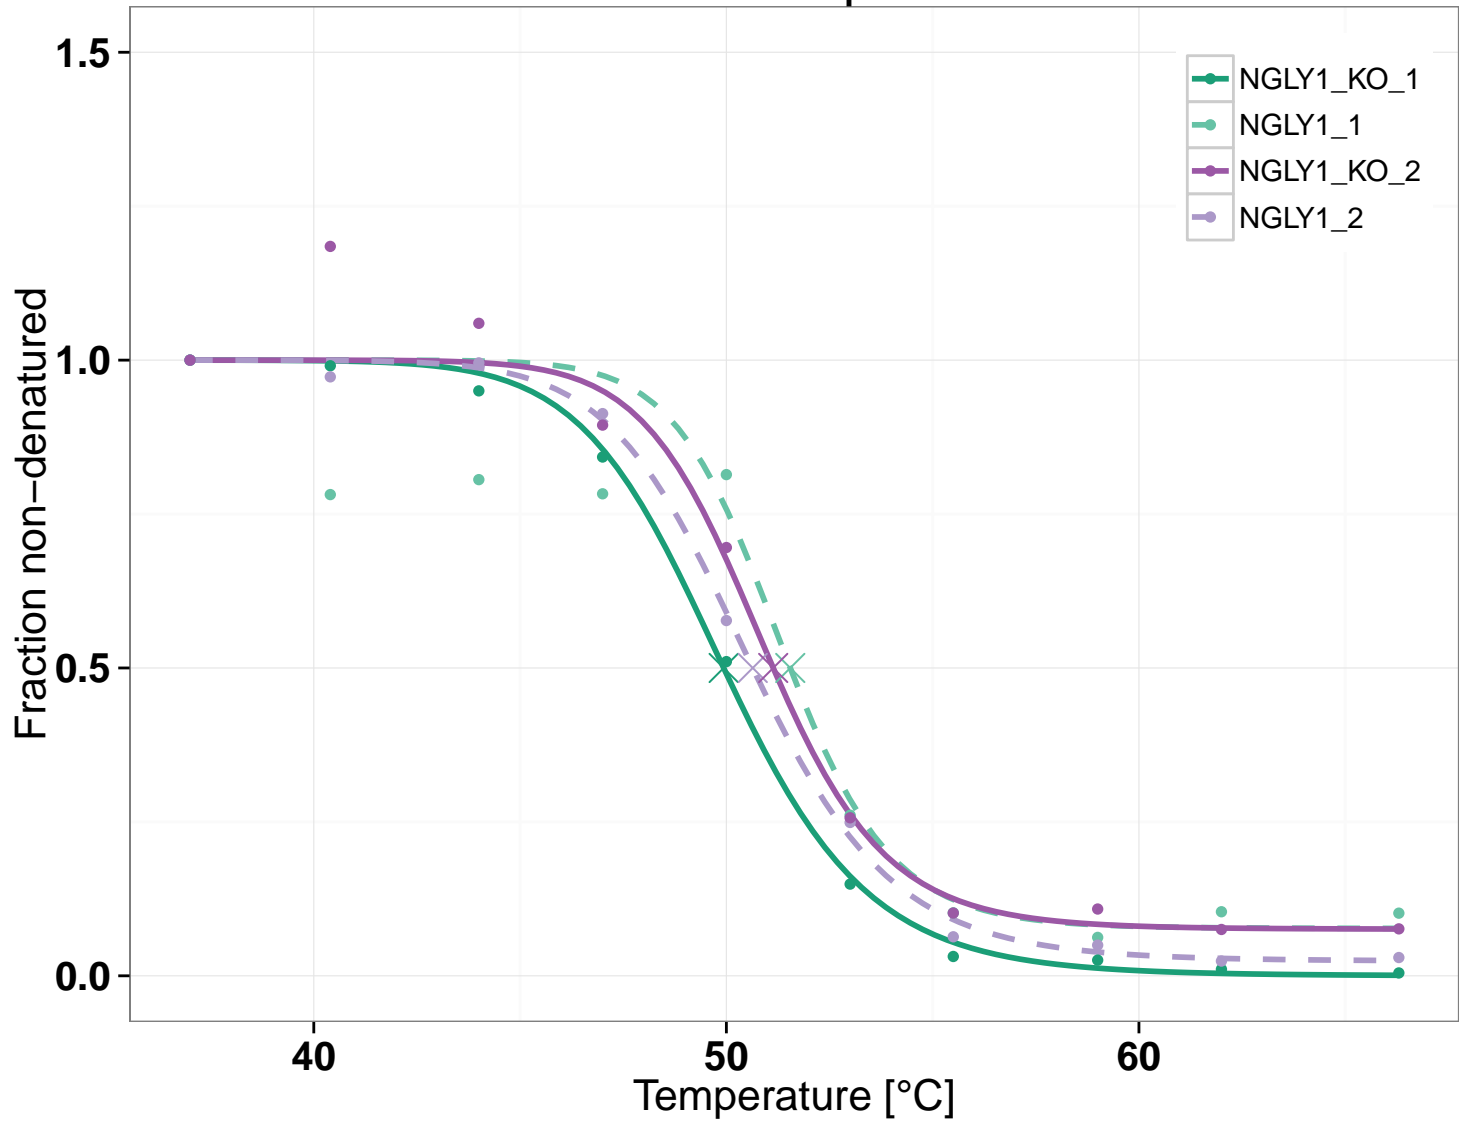

|            | meltPoint | slope | plateau | R2   |
|------------|-----------|-------|---------|------|
| NGLY1_KO_1 | 49.93     | -0.14 | 0       | 1    |
| NGLY1_1    | 51.55     | -0.18 | 0.08    | 0.9  |
| NGLY1_KO_2 | 51.14     | -0.16 | 0.08    | 0.98 |
| NGLY1_2    | 50.64     | -0.14 | 0.02    | 1    |

Supplement: Supplementary file 2735 [file 1]

IPI00871180.1|CCNYL1

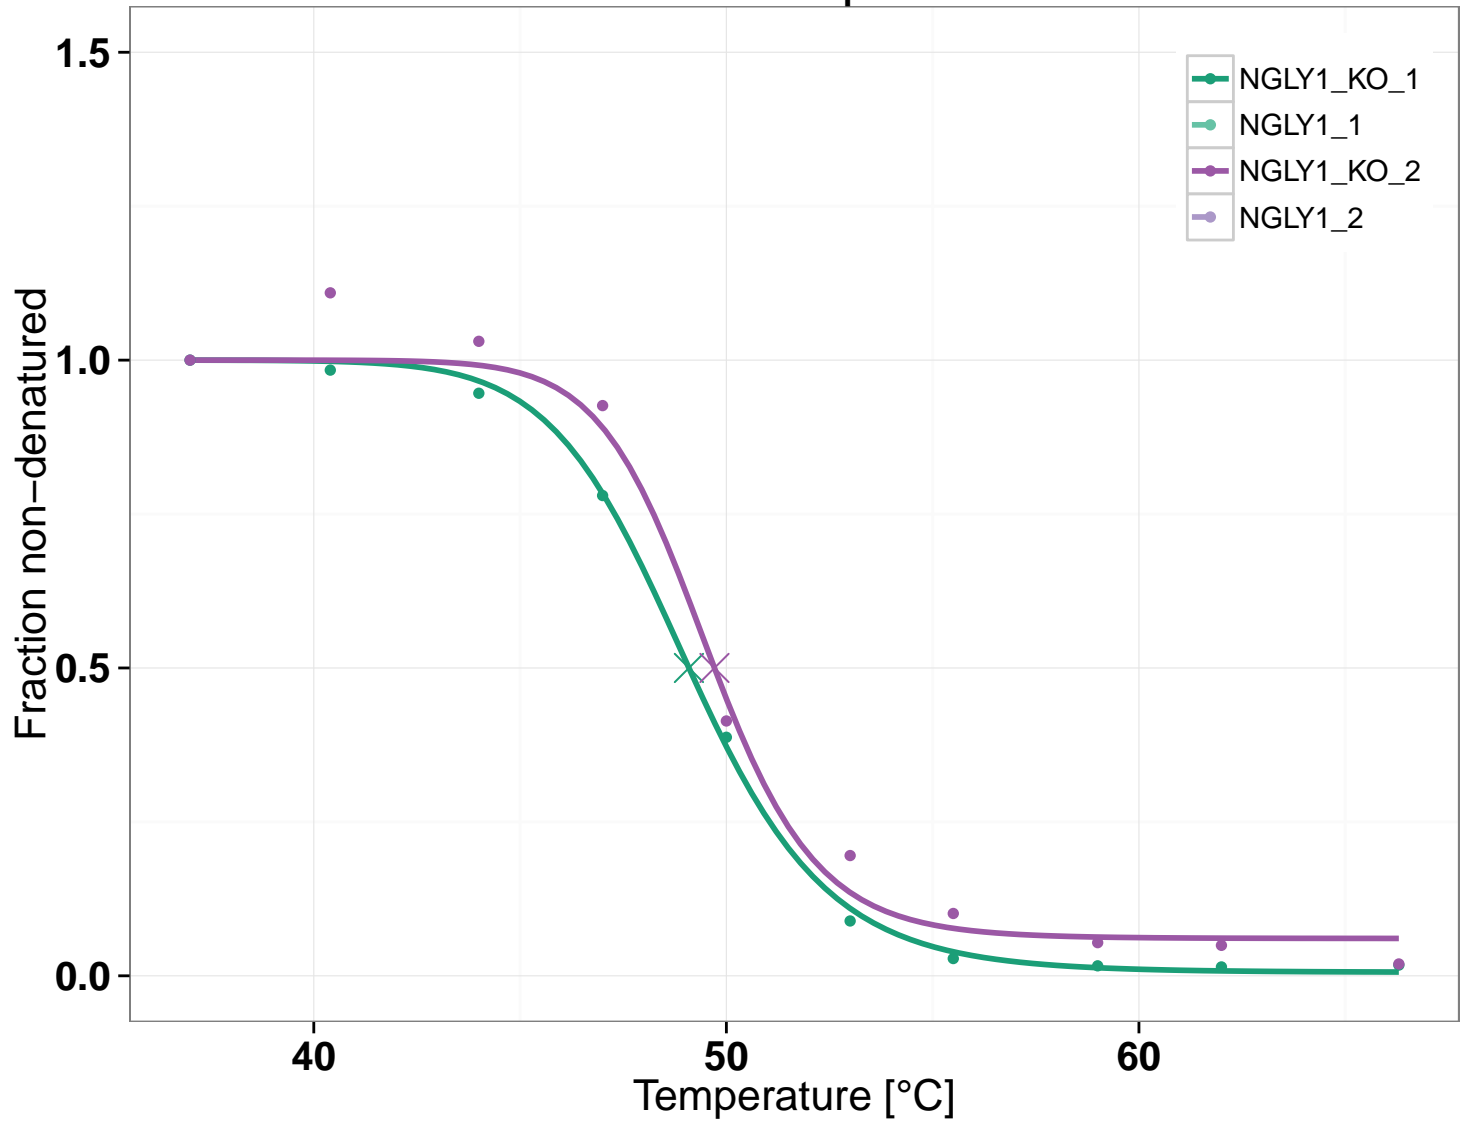

|            | meltPoint | slope | plateau | R2   |
|------------|-----------|-------|---------|------|
| NGLY1_KO_1 | 49.09     | -0.15 | 0.01    | 1    |
| NGLY1_1    | -         | -     | -       | -    |
| NGLY1_KO_2 | 49.71     | -0.18 | 0.06    | 0.99 |
| NGLY1_2    | -         | -     | -       | -    |

Supplement: Supplementary file 2736 [file 1]

IPI00873338.1|SDCCAG8

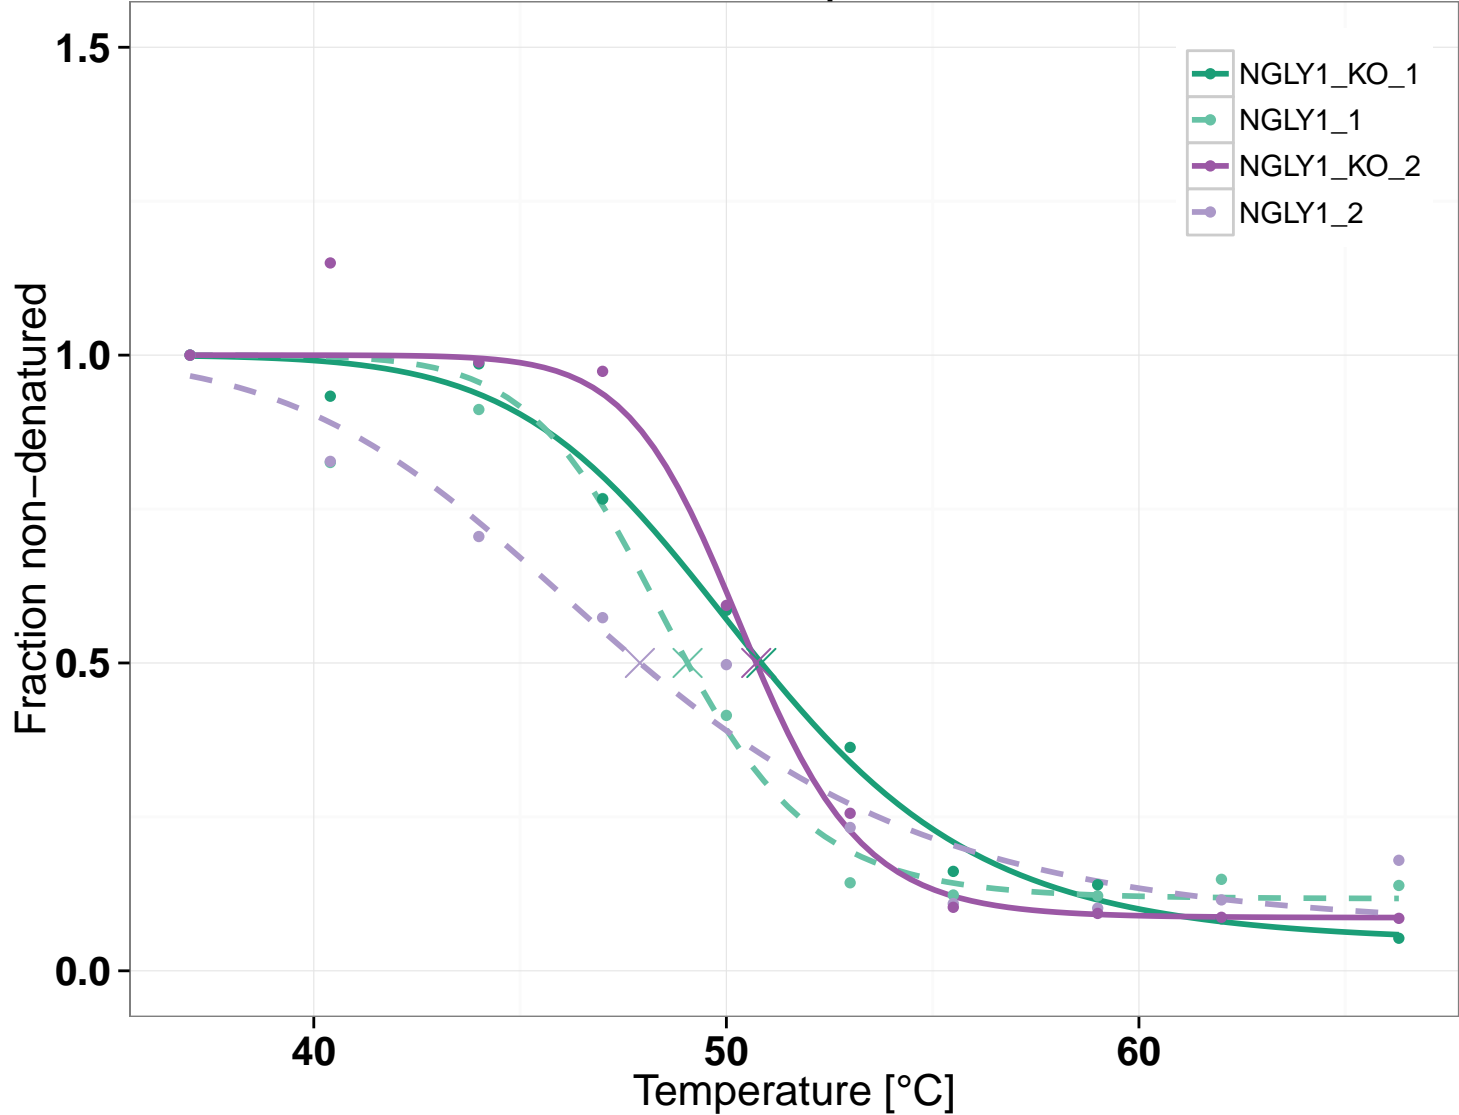

|            | meltPoint | slope  | plateau | R2   |
|------------|-----------|--------|---------|------|
| NGLY1_KO_1 | 50.85     | -0.085 | 0.04    | 0.99 |
| NGLY1_1    | 49.06     | -0.13  | 0.12    | 0.97 |
| NGLY1_KO_2 | 50.72     | -0.16  | 0.09    | 0.99 |
| NGLY1_2    | 47.9      | -0.06  | 0.06    | 0.96 |

Supplement: Supplementary file 2737 [file 1]

# IPI00216654.2|NOLC1

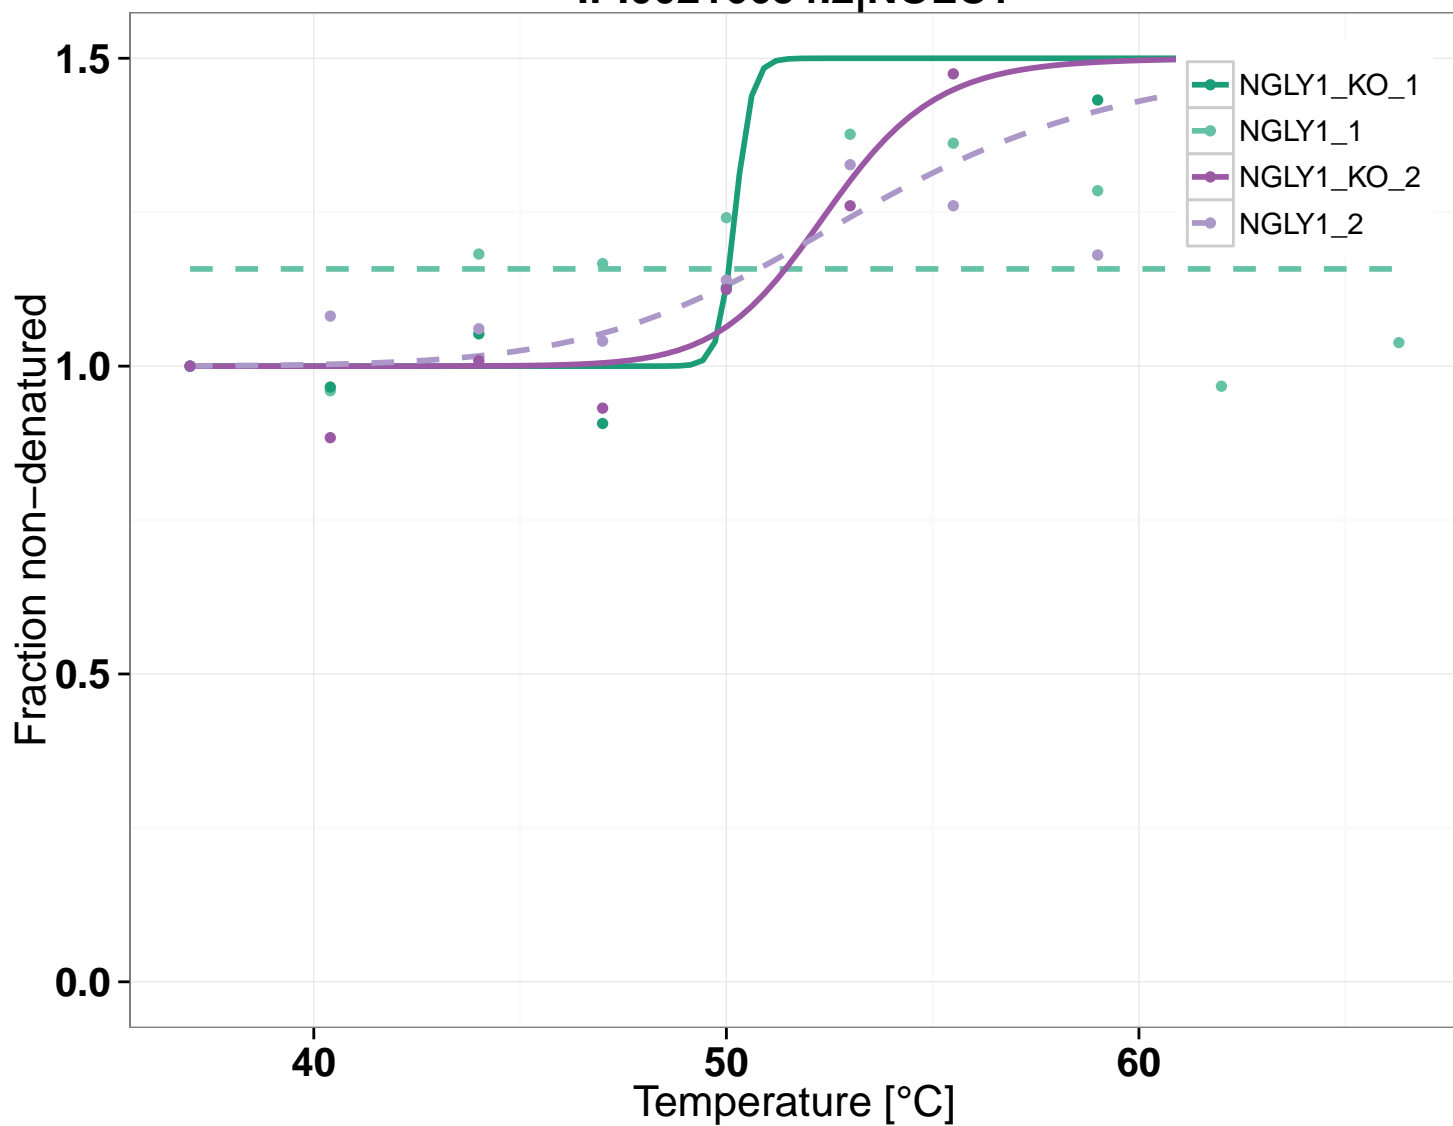

|            | meltPoint | slope | plateau | R2   |
|------------|-----------|-------|---------|------|
| NGLY1_KO_1 | –         | 0.62  | 1.5     | 0.92 |
| NGLY1_1    | –         | –     | 1.32    | 0    |
| NGLY1_KO_2 | –         | 0.094 | 1.5     | 0.66 |
| NGLY1_2    | –         | 0.038 | 1.5     | 0.65 |

Supplement: Supplementary file 2738 [file 1]

IPI00014577.1|RAB18

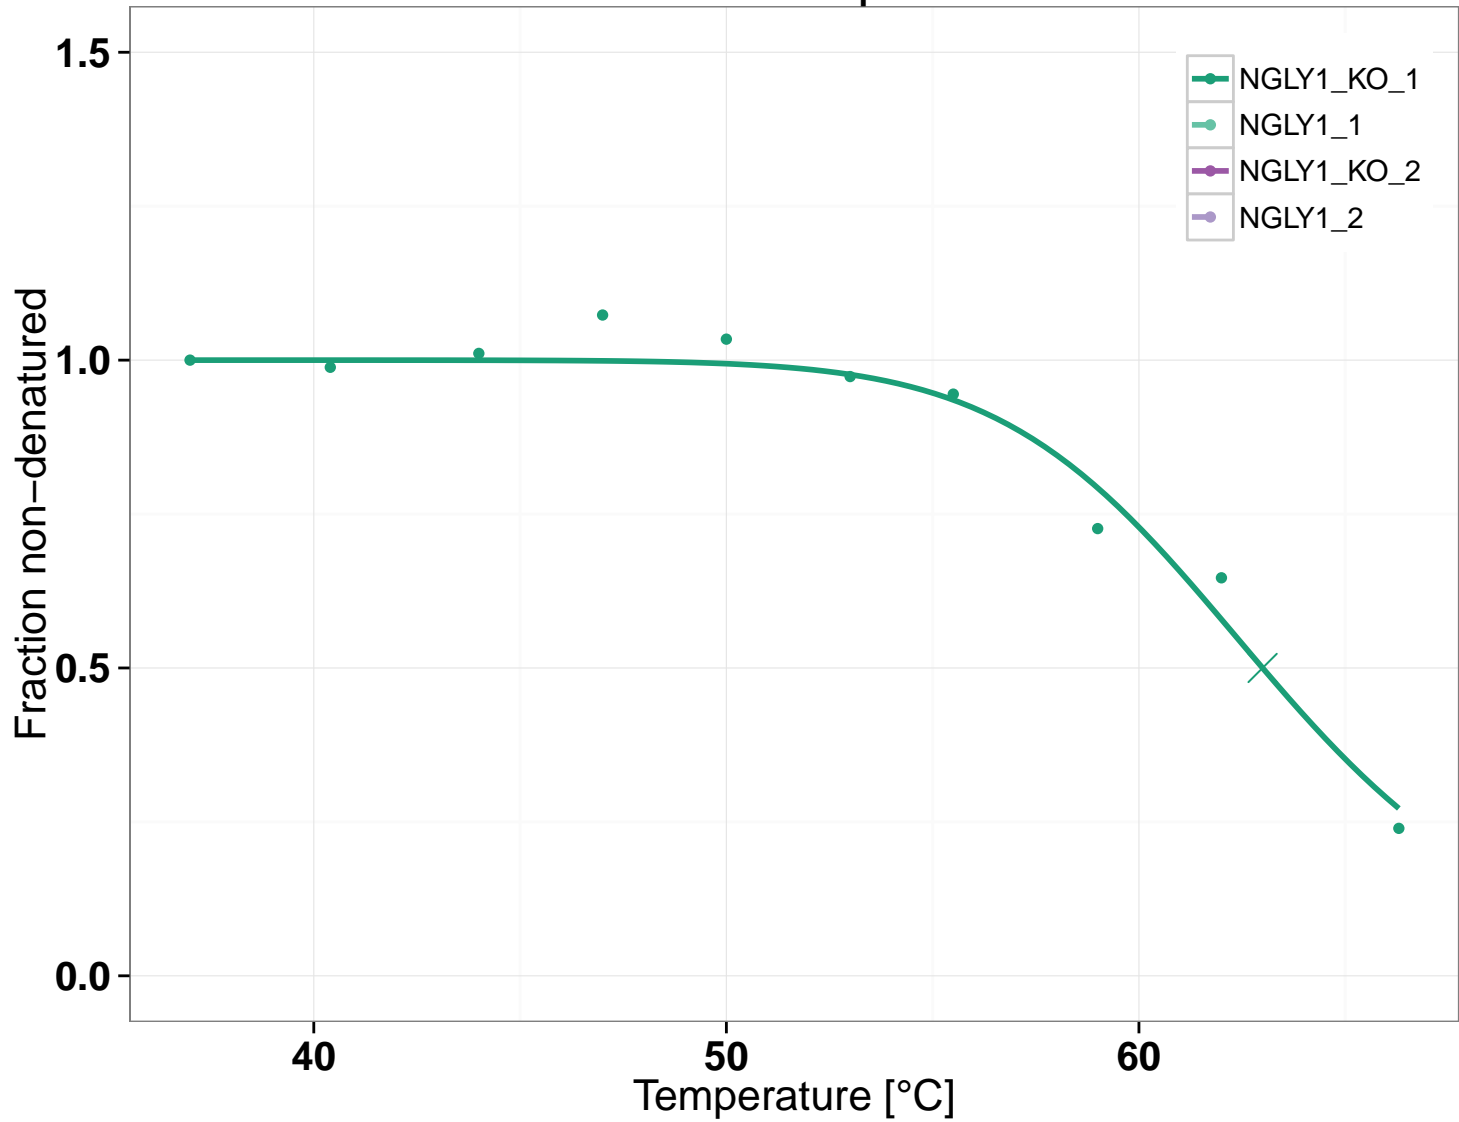

|            | meltPoint | slope  | plateau | R2   |
|------------|-----------|--------|---------|------|
| NGLY1_KO_1 | 63        | -0.079 | 0       | 0.97 |
| NGLY1_1    | -         | -      | -       | -    |
| NGLY1_KO_2 | -         | -      | -       | -    |
| NGLY1_2    | -         | -      | -       | -    |

Supplement: Supplementary file 2740 [file 1]

IPI00888777.1|ZNF853

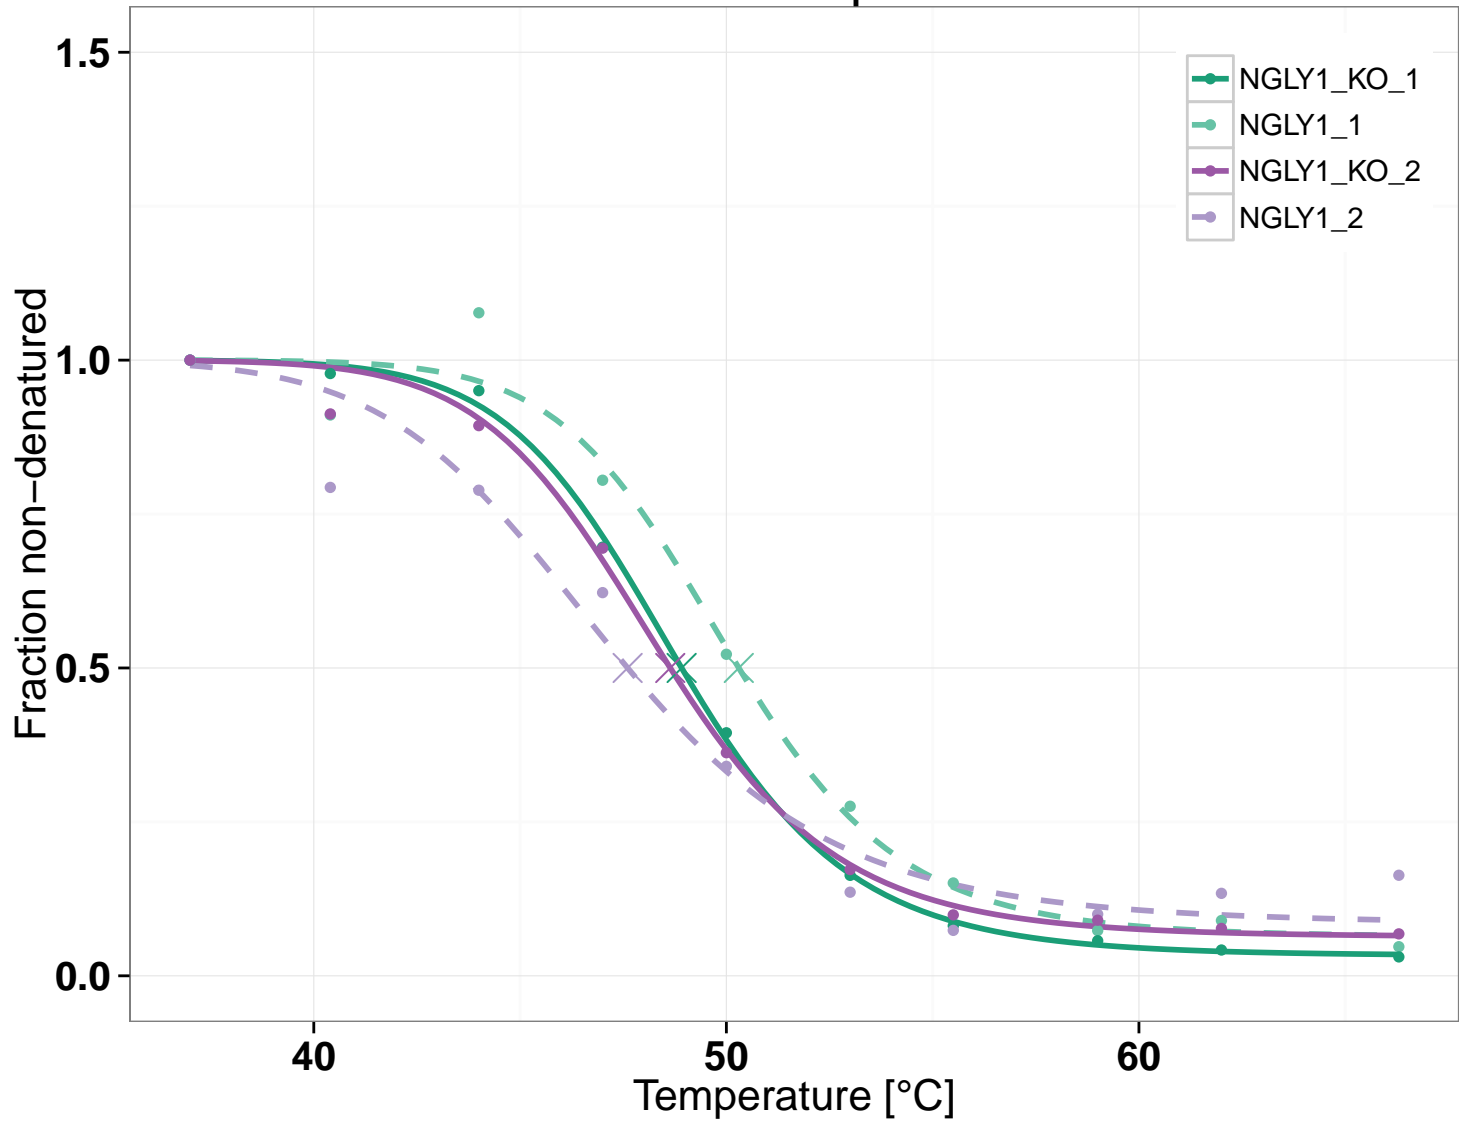

|            | meltPoint | slope  | plateau | R2   |
|------------|-----------|--------|---------|------|
| NGLY1_KO_1 | 48.92     | -0.12  | 0.03    | 1    |
| NGLY1_1    | 50.3      | -0.11  | 0.06    | 0.99 |
| NGLY1_KO_2 | 48.64     | -0.11  | 0.06    | 1    |
| NGLY1_2    | 47.61     | -0.084 | 0.08    | 0.96 |

Supplement: Supplementary file 2741 [file 1]

# IPI00401283.4|MEGF9

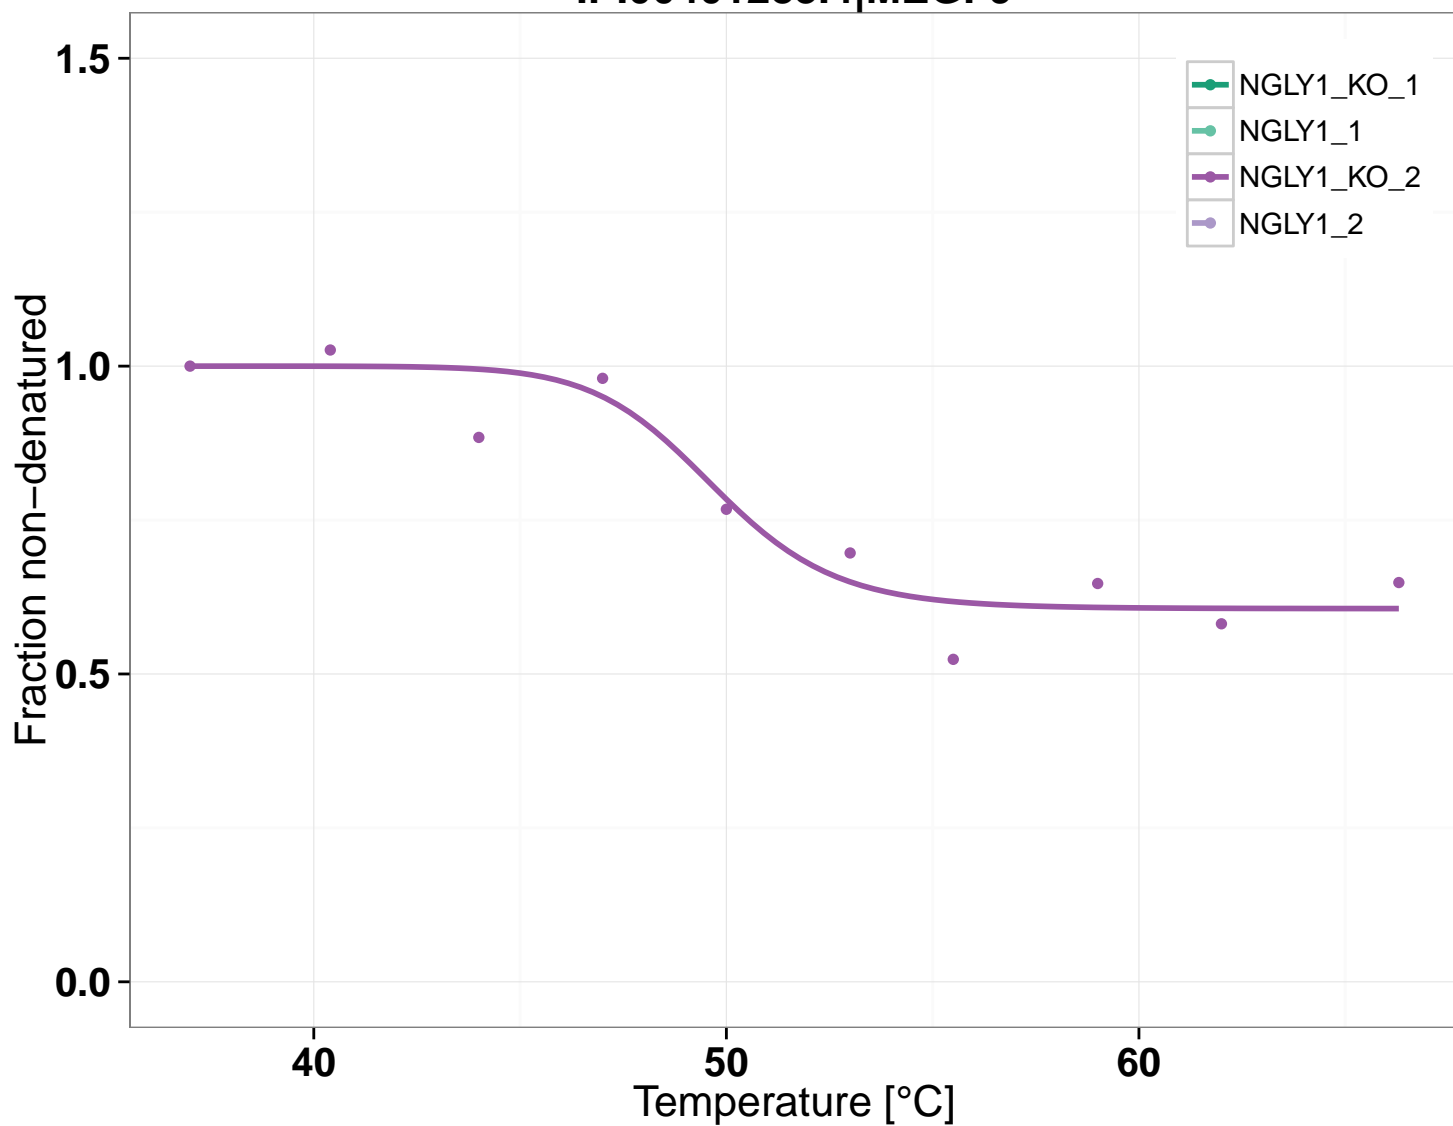

|            | meltPoint | slope  | plateau | R2   |
|------------|-----------|--------|---------|------|
| NGLY1_KO_1 | —         | —      | —       | —    |
| NGLY1_1    | —         | —      | —       | —    |
| NGLY1_KO_2 | —         | -0.067 | 0.61    | 0.91 |
| NGLY1_2    | —         | —      | —       | —    |

Supplement: Supplementary file 2742 [file 1]

IPI00795469.1|FLJ11506

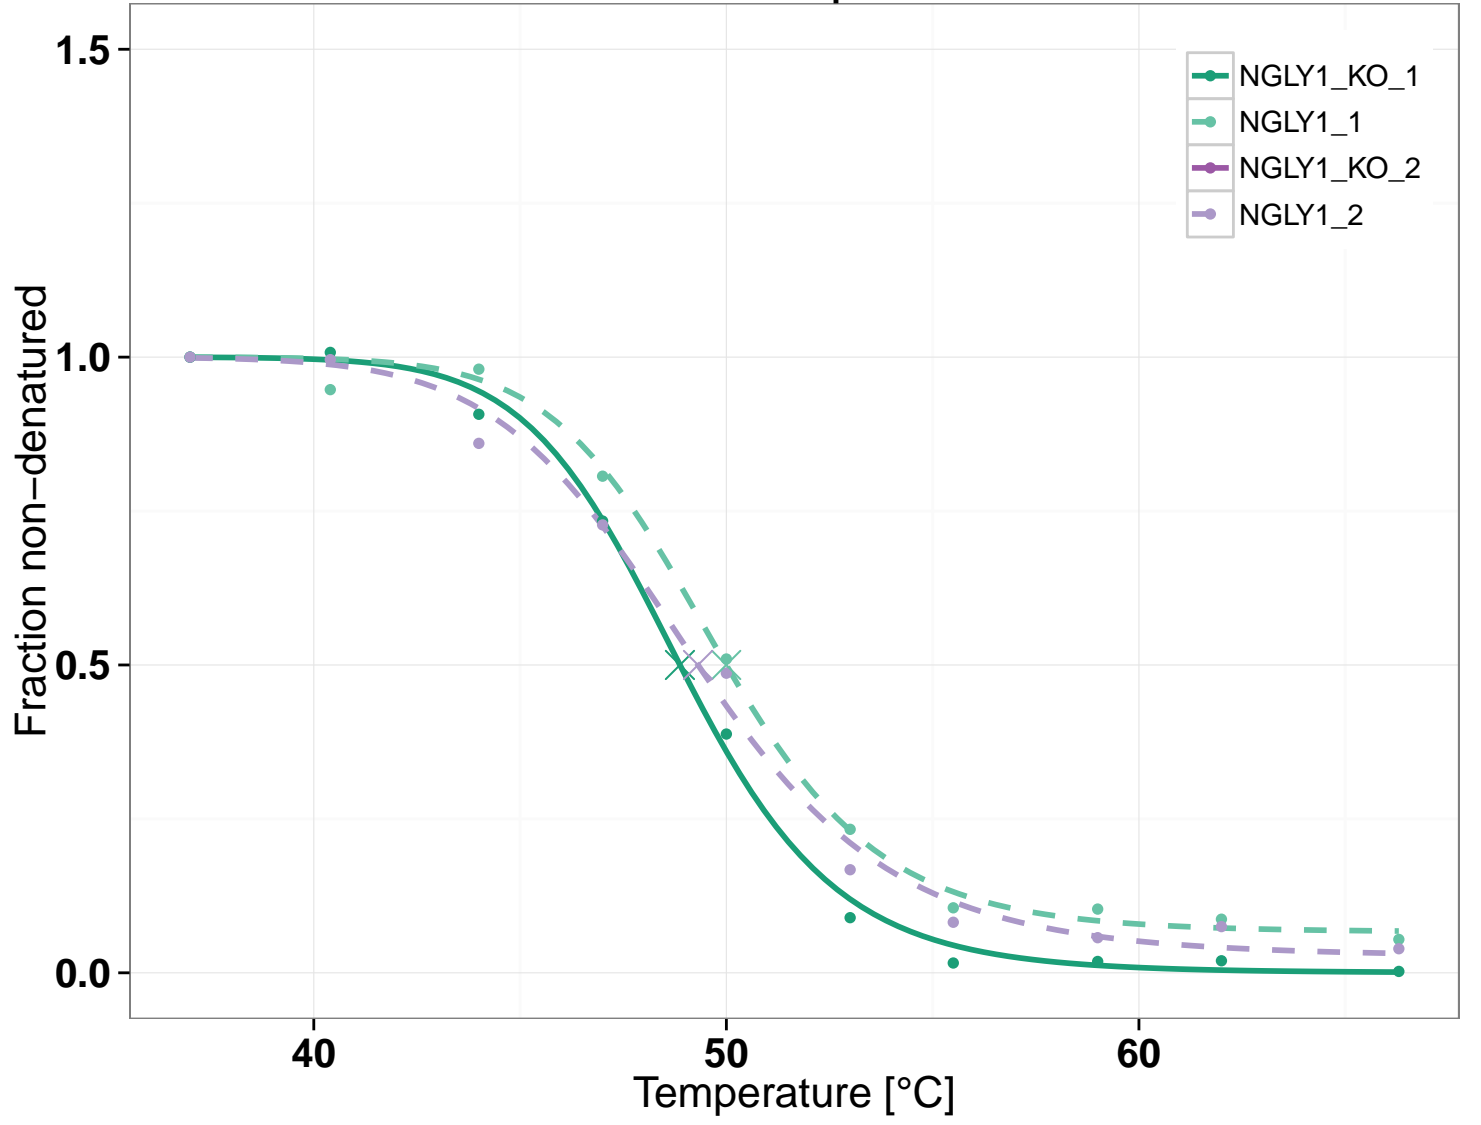

|            | meltPoint | slope | plateau | R2   |
|------------|-----------|-------|---------|------|
| NGLY1_KO_1 | 48.87     | -0.13 | 0       | 1    |
| NGLY1_1    | 50        | -0.12 | 0.07    | 1    |
| NGLY1_KO_2 | -         | -     | -       | -    |
| NGLY1_2    | 49.31     | -0.1  | 0.03    | 0.99 |

Supplement: Supplementary file 2743 [file 1]

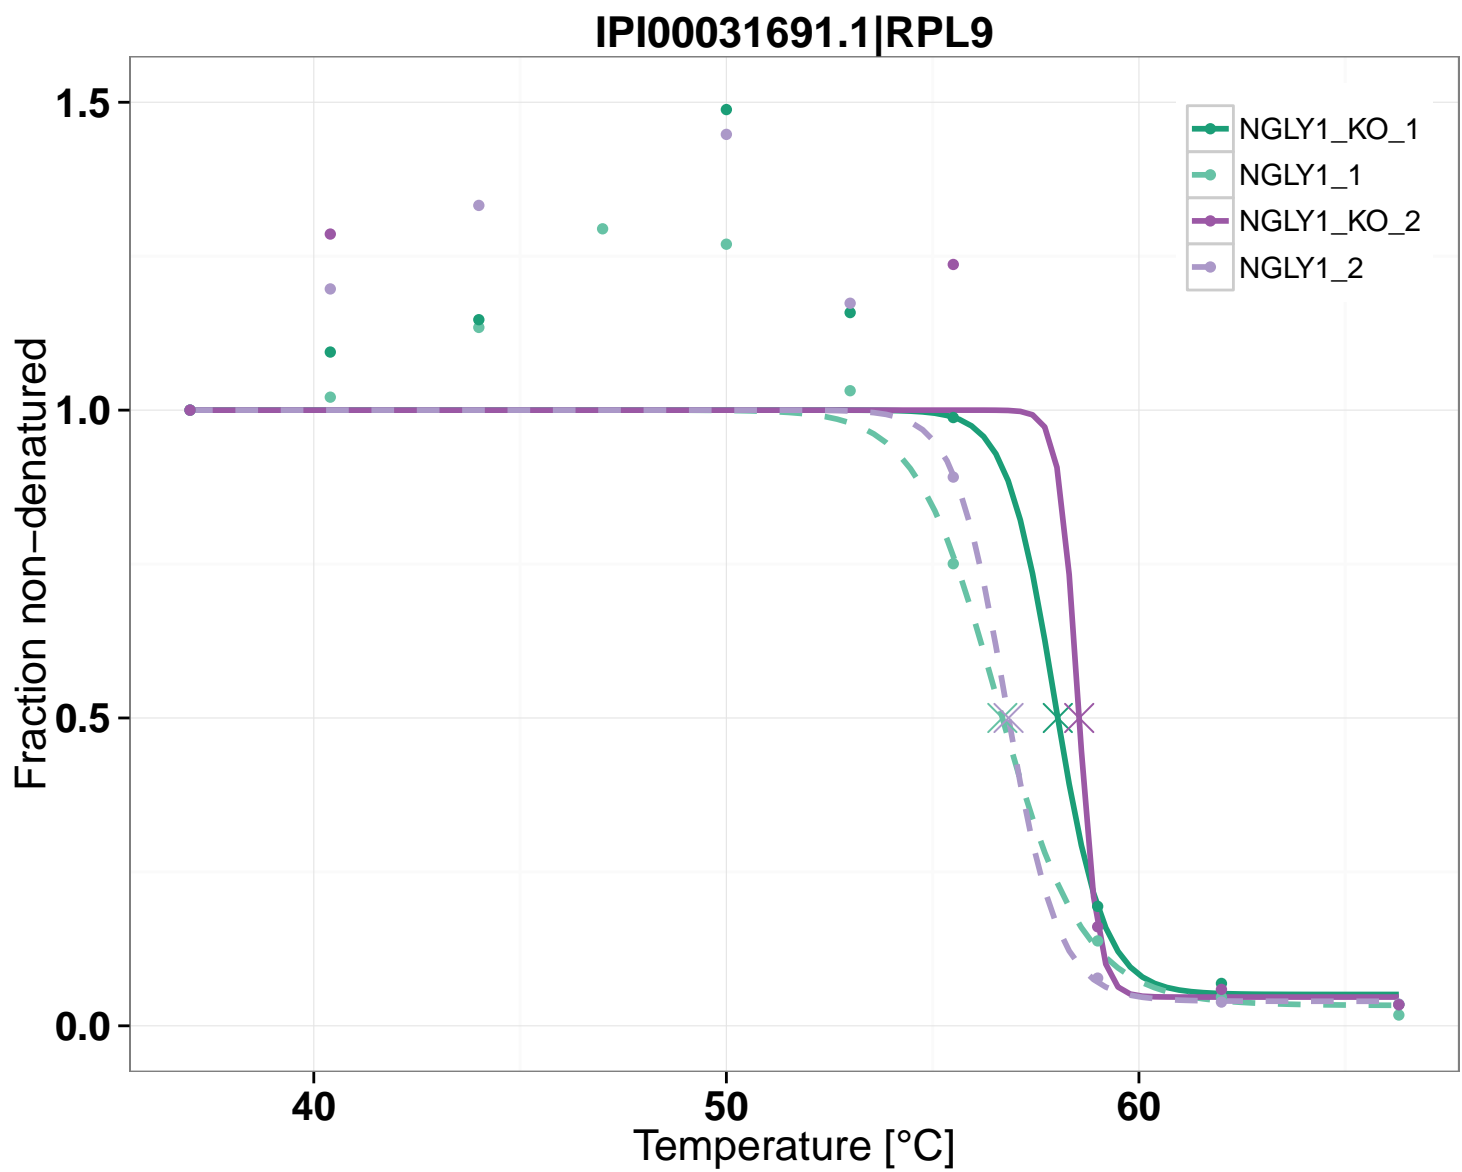

|            | meltPoint | slope | plateau | R2   |
|------------|-----------|-------|---------|------|
| NGLY1_KO_1 | 58.03     | -0.4  | 0.05    | 0.79 |
| NGLY1_1    | 56.69     | -0.24 | 0.03    | 0.92 |
| NGLY1_KO_2 | 58.55     | -1    | 0.05    | 0.39 |
| NGLY1_2    | 56.84     | -0.38 | 0.04    | 0.78 |

Supplement: Supplementary file 2744 [file 1]

IPI00306960.3|NARS

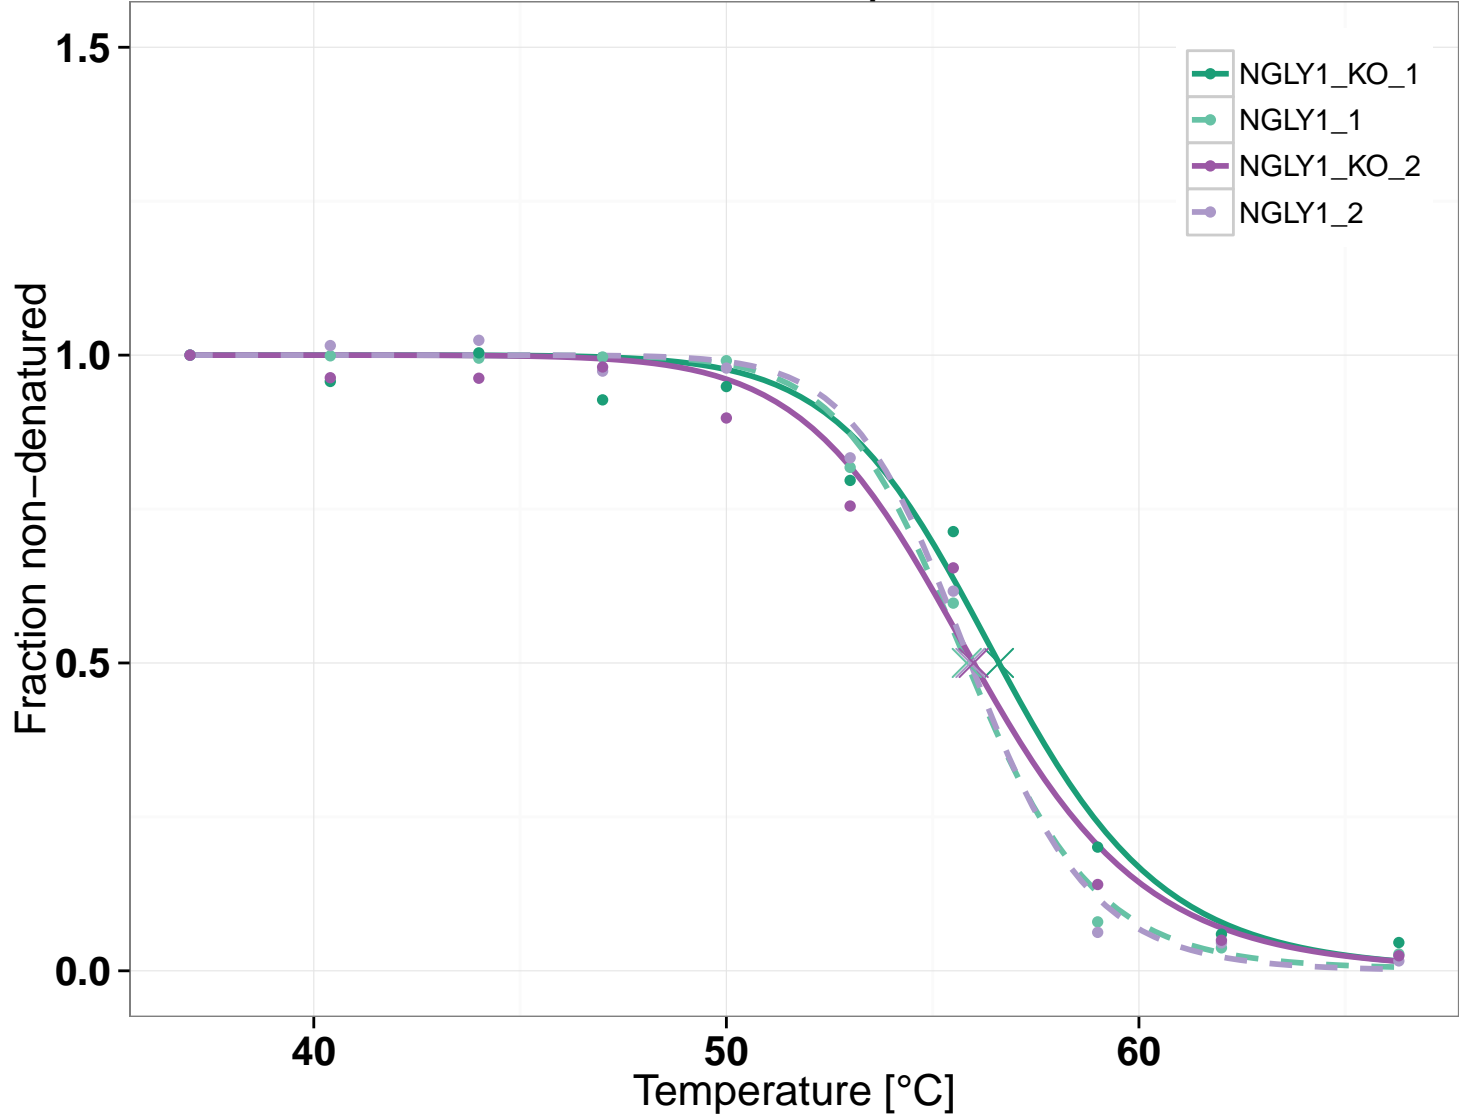

|            | meltPoint | slope | plateau | R2   |
|------------|-----------|-------|---------|------|
| NGLY1_KO_1 | 56.61     | -0.13 | 0       | 0.98 |
| NGLY1_1    | 55.83     | -0.16 | 0       | 1    |
| NGLY1_KO_2 | 55.99     | -0.12 | 0       | 0.98 |
| NGLY1_2    | 55.92     | -0.17 | 0       | 0.99 |

Supplement: Supplementary file 2745 [file 1]

# IPI00554701.2|UCRC

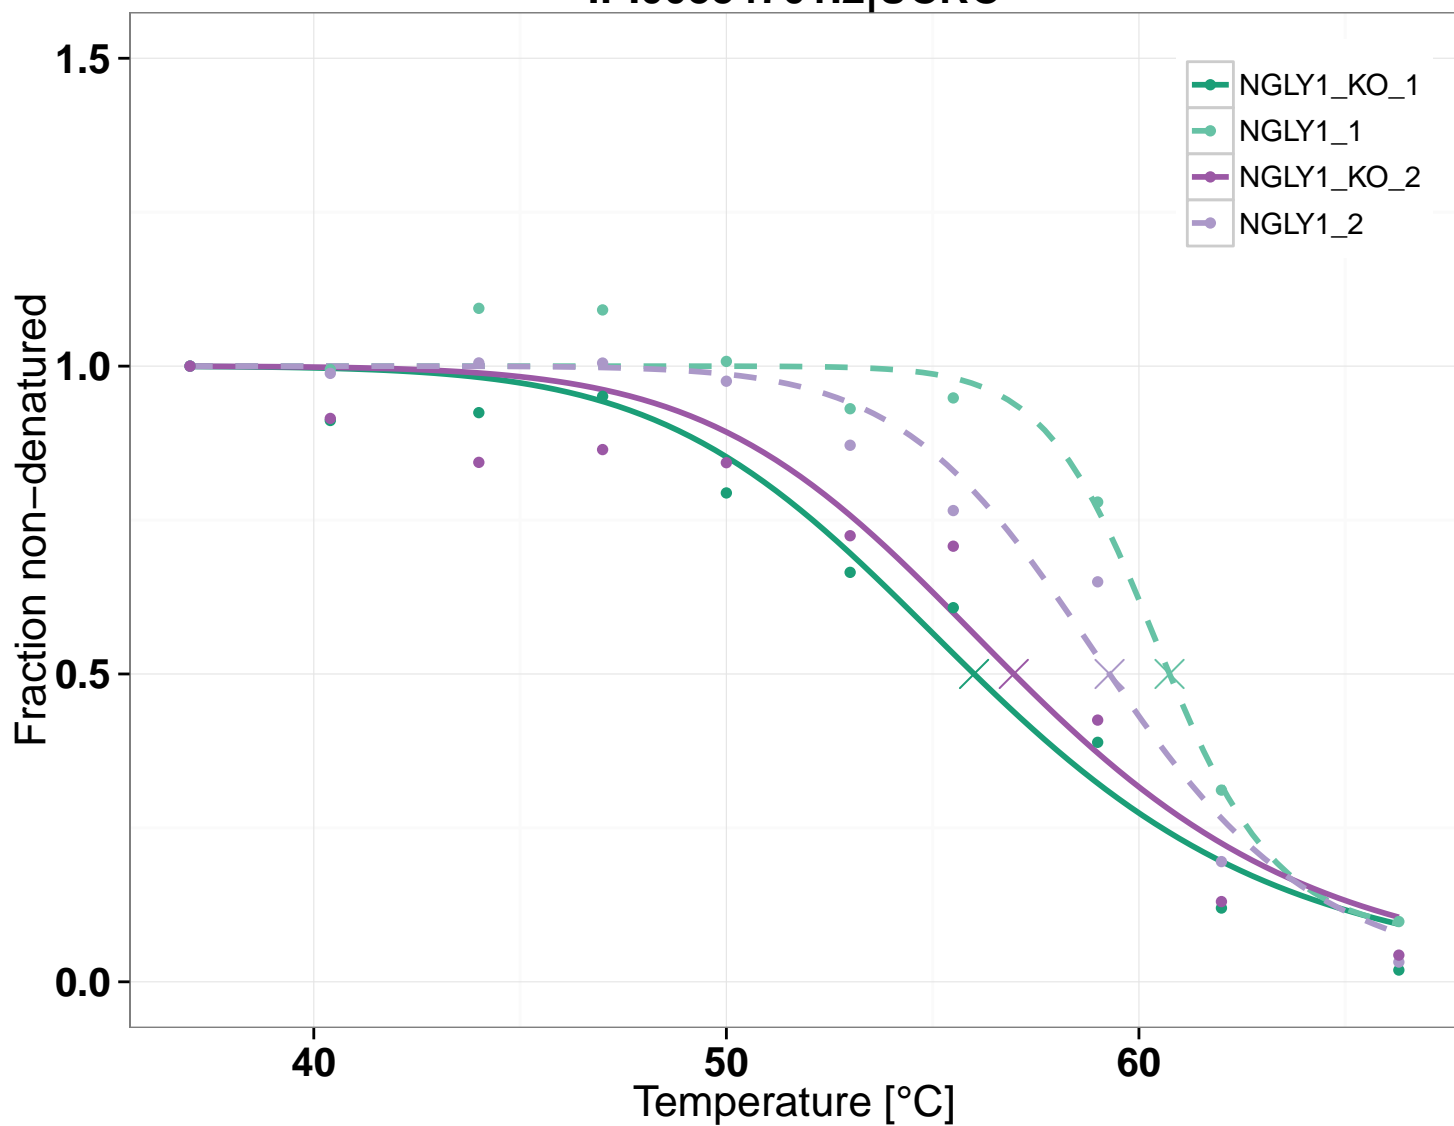

|            | meltPoint | slope  | plateau | R2   |
|------------|-----------|--------|---------|------|
| NGLY1_KO_1 | 56        | -0.066 | 0       | 0.97 |
| NGLY1_1    | 60.74     | -0.16  | 0.07    | 0.98 |
| NGLY1_KO_2 | 56.97     | -0.068 | 0       | 0.93 |
| NGLY1_2    | 59.29     | -0.099 | 0       | 0.97 |

Supplement: Supplementary file 2746 [file 1]

# IPI00024551.1|C15ORF24

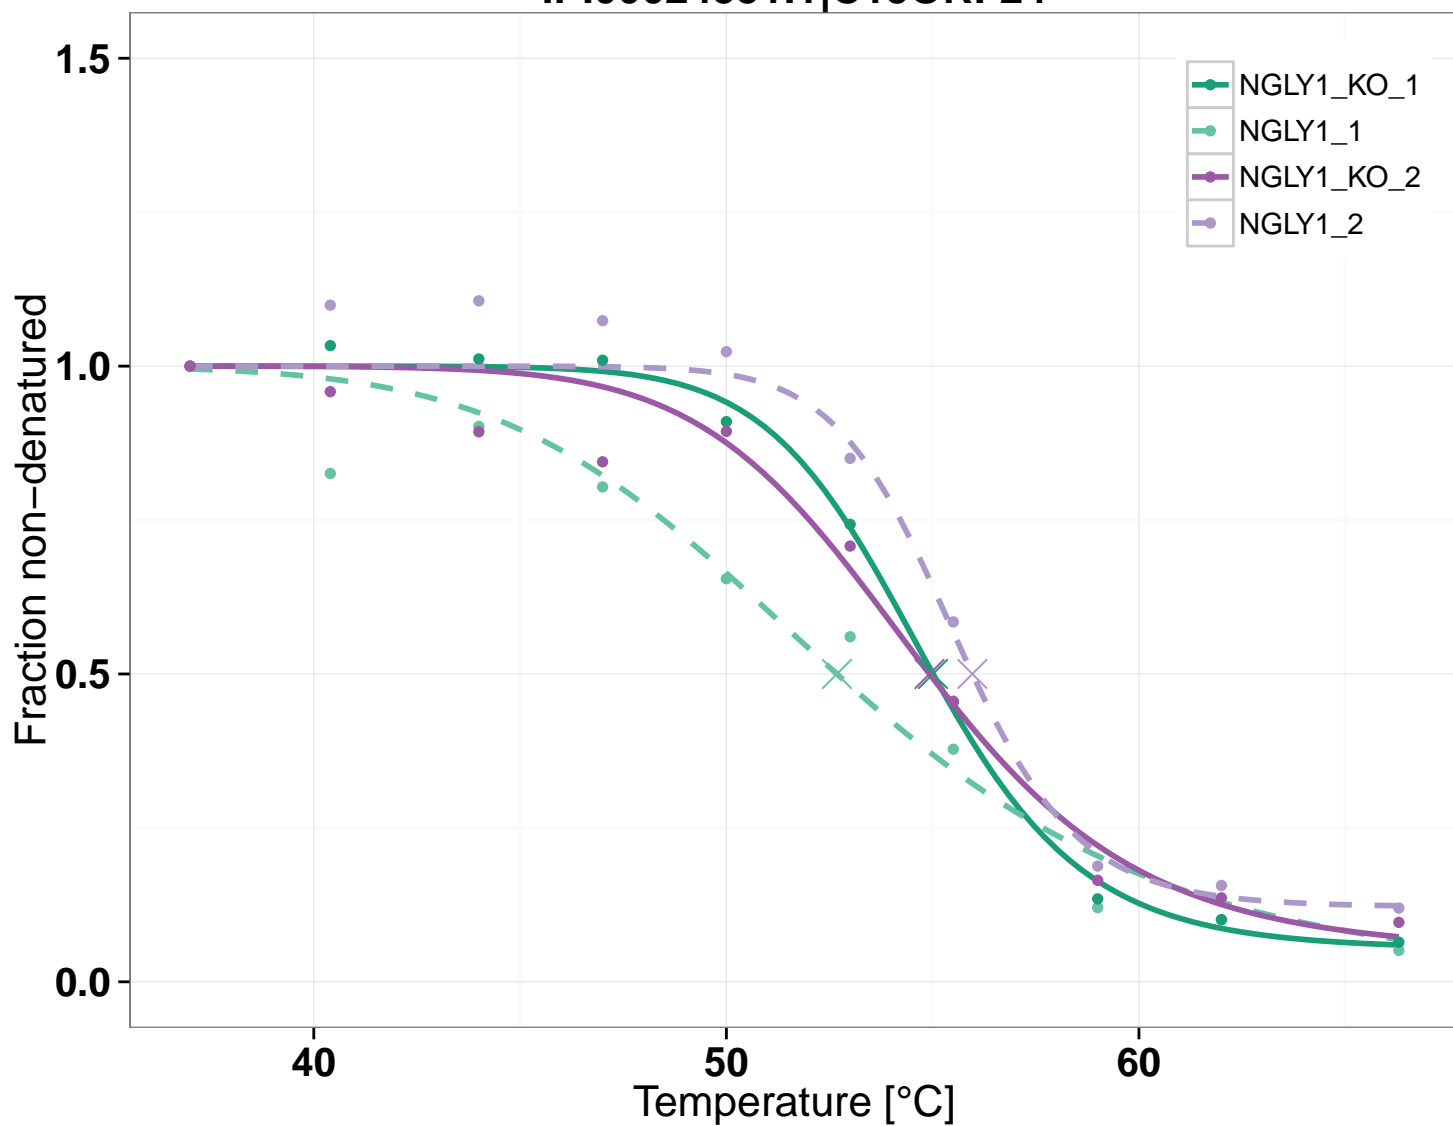

|            | meltPoint | slope  | plateau | R2   |
|------------|-----------|--------|---------|------|
| NGLY1_KO_1 | 55.01     | -0.12  | 0.05    | 1    |
| NGLY1_1    | 52.68     | -0.062 | 0       | 0.96 |
| NGLY1_KO_2 | 54.92     | -0.09  | 0.05    | 0.97 |
| NGLY1_2    | 55.96     | -0.15  | 0.12    | 0.98 |

Supplement: Supplementary file 2747 [file 1]

IPI00871535.1|SPTAN1

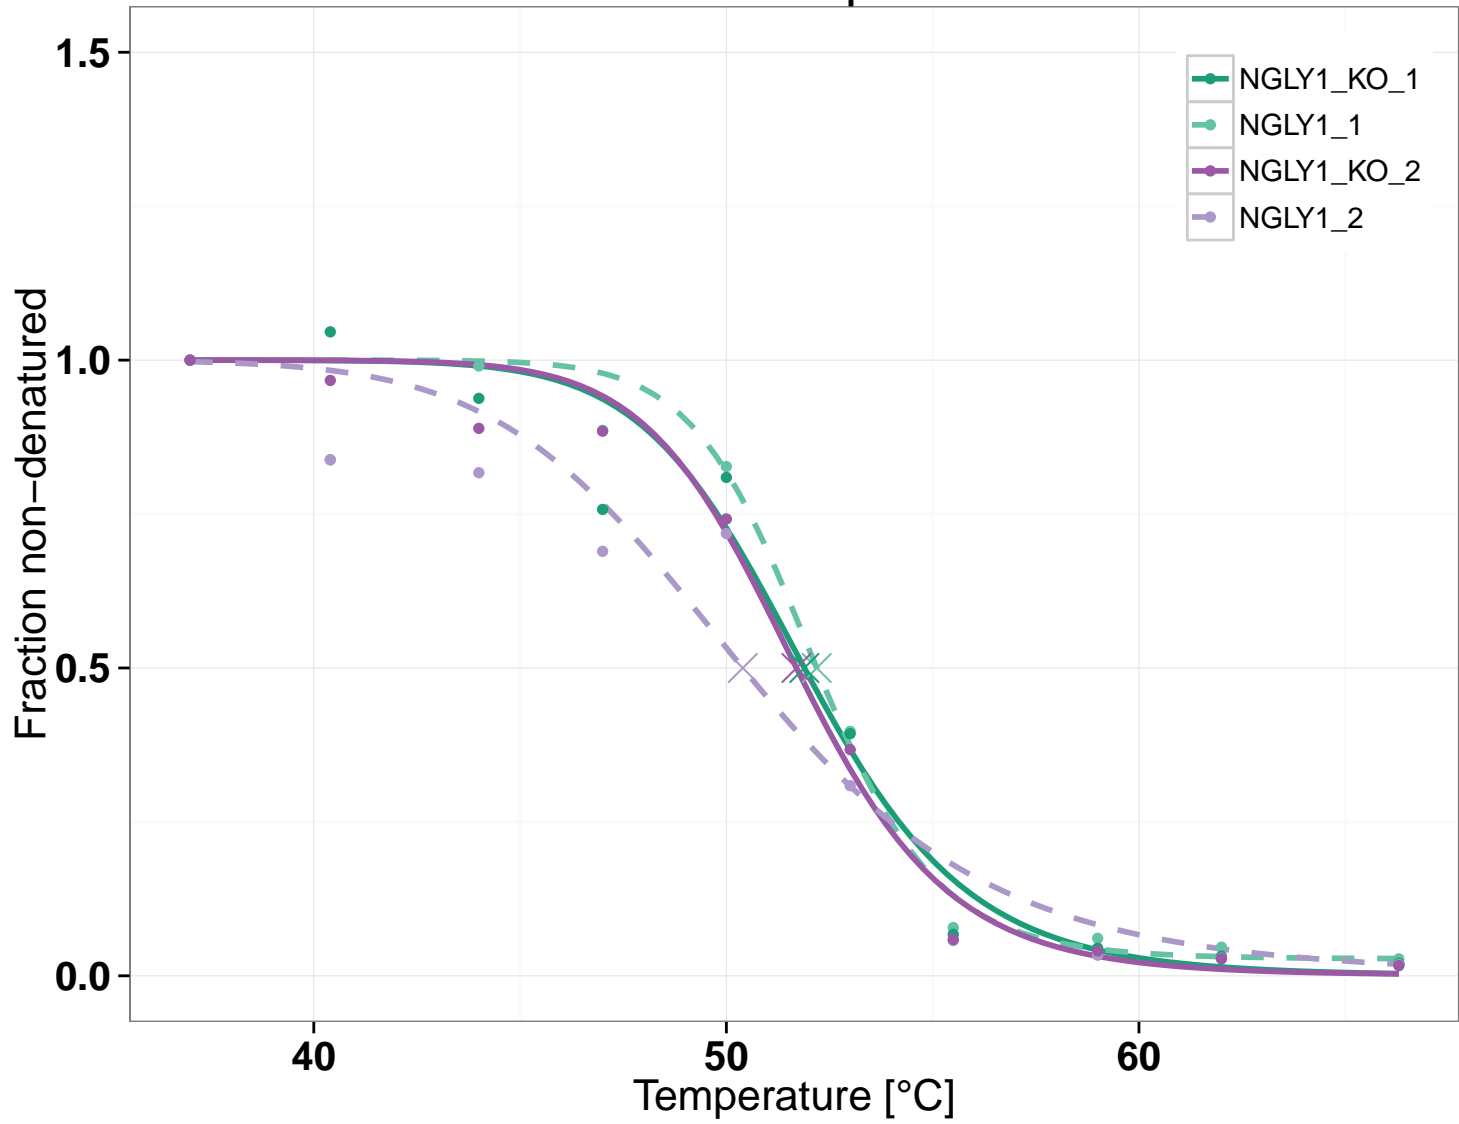

|            | meltPoint | slope  | plateau | R2   |
|------------|-----------|--------|---------|------|
| NGLY1_KO_1 | 51.89     | -0.13  | 0       | 0.97 |
| NGLY1_1    | 52.19     | -0.16  | 0.03    | 0.98 |
| NGLY1_KO_2 | 51.7      | -0.14  | 0       | 0.99 |
| NGLY1_2    | 50.4      | -0.083 | 0       | 0.94 |

Supplement: Supplementary file 2748 [file 1]

# IPI00710783.2|HBA1

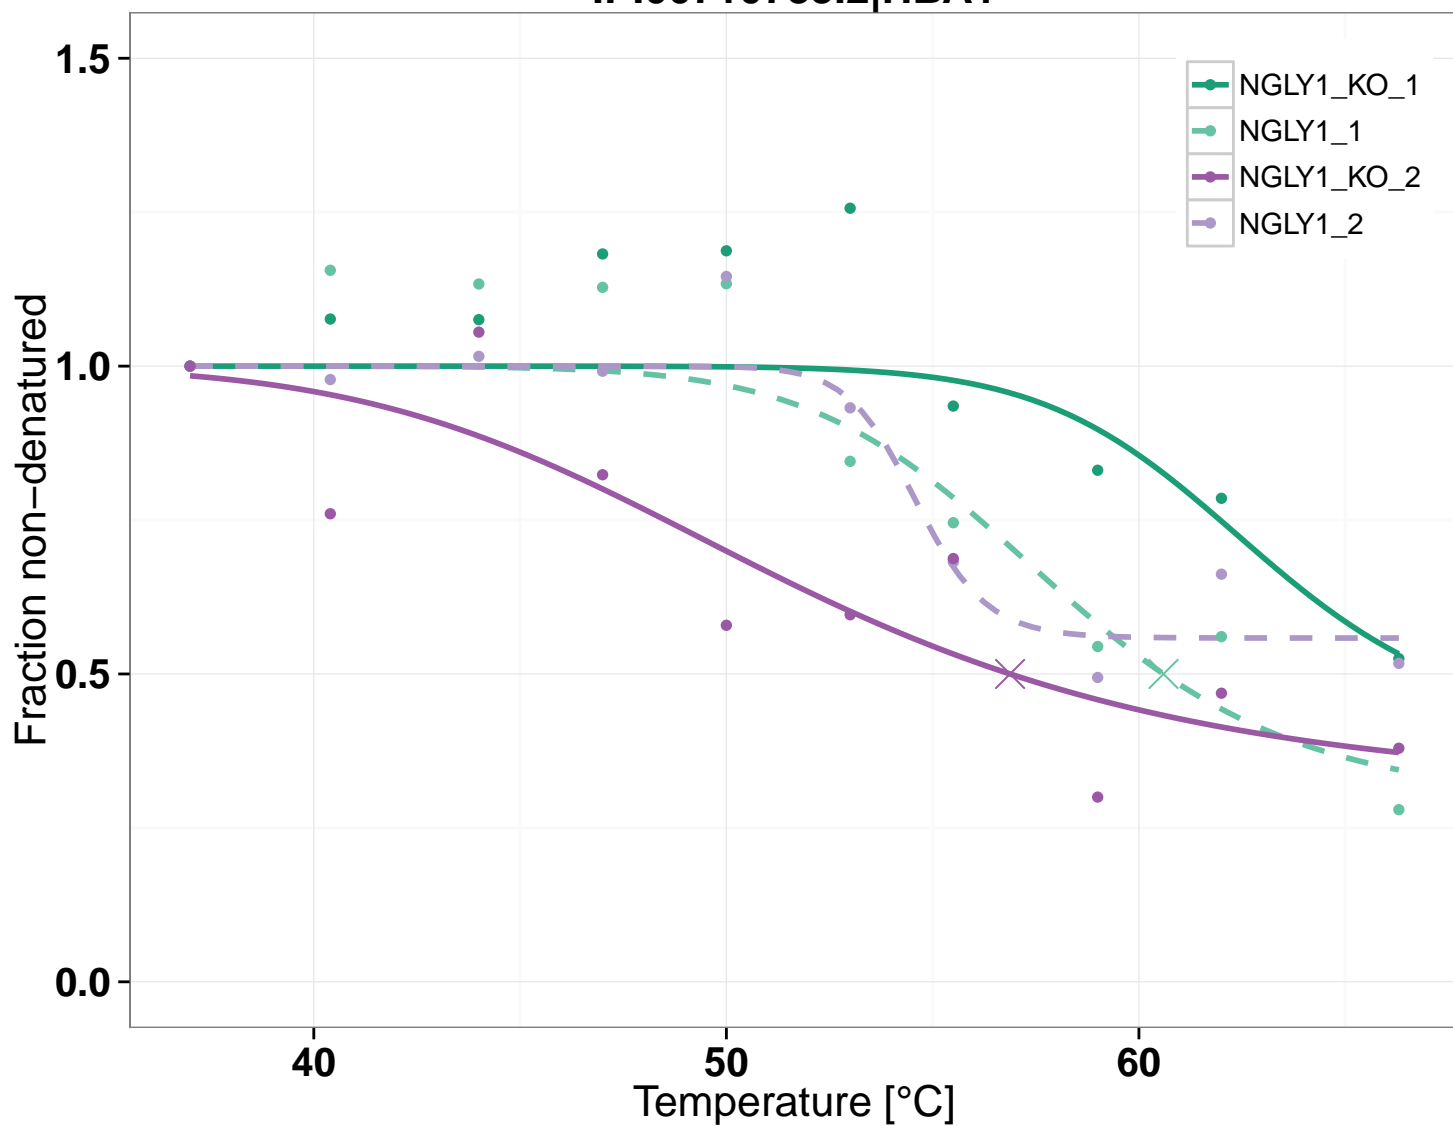

|            | meltPoint | slope  | plateau | R2   |
|------------|-----------|--------|---------|------|
| NGLY1_KO_1 | –         | –0.058 | 0.4     | 0.65 |
| NGLY1_1    | 60.6      | –0.06  | 0.29    | 0.87 |
| NGLY1_KO_2 | 56.88     | –0.034 | 0.3     | 0.76 |
| NGLY1_2    | –         | –0.13  | 0.56    | 0.92 |

Supplement: Supplementary file 2749 [file 1]

IPI00910962.1|ELOVL5

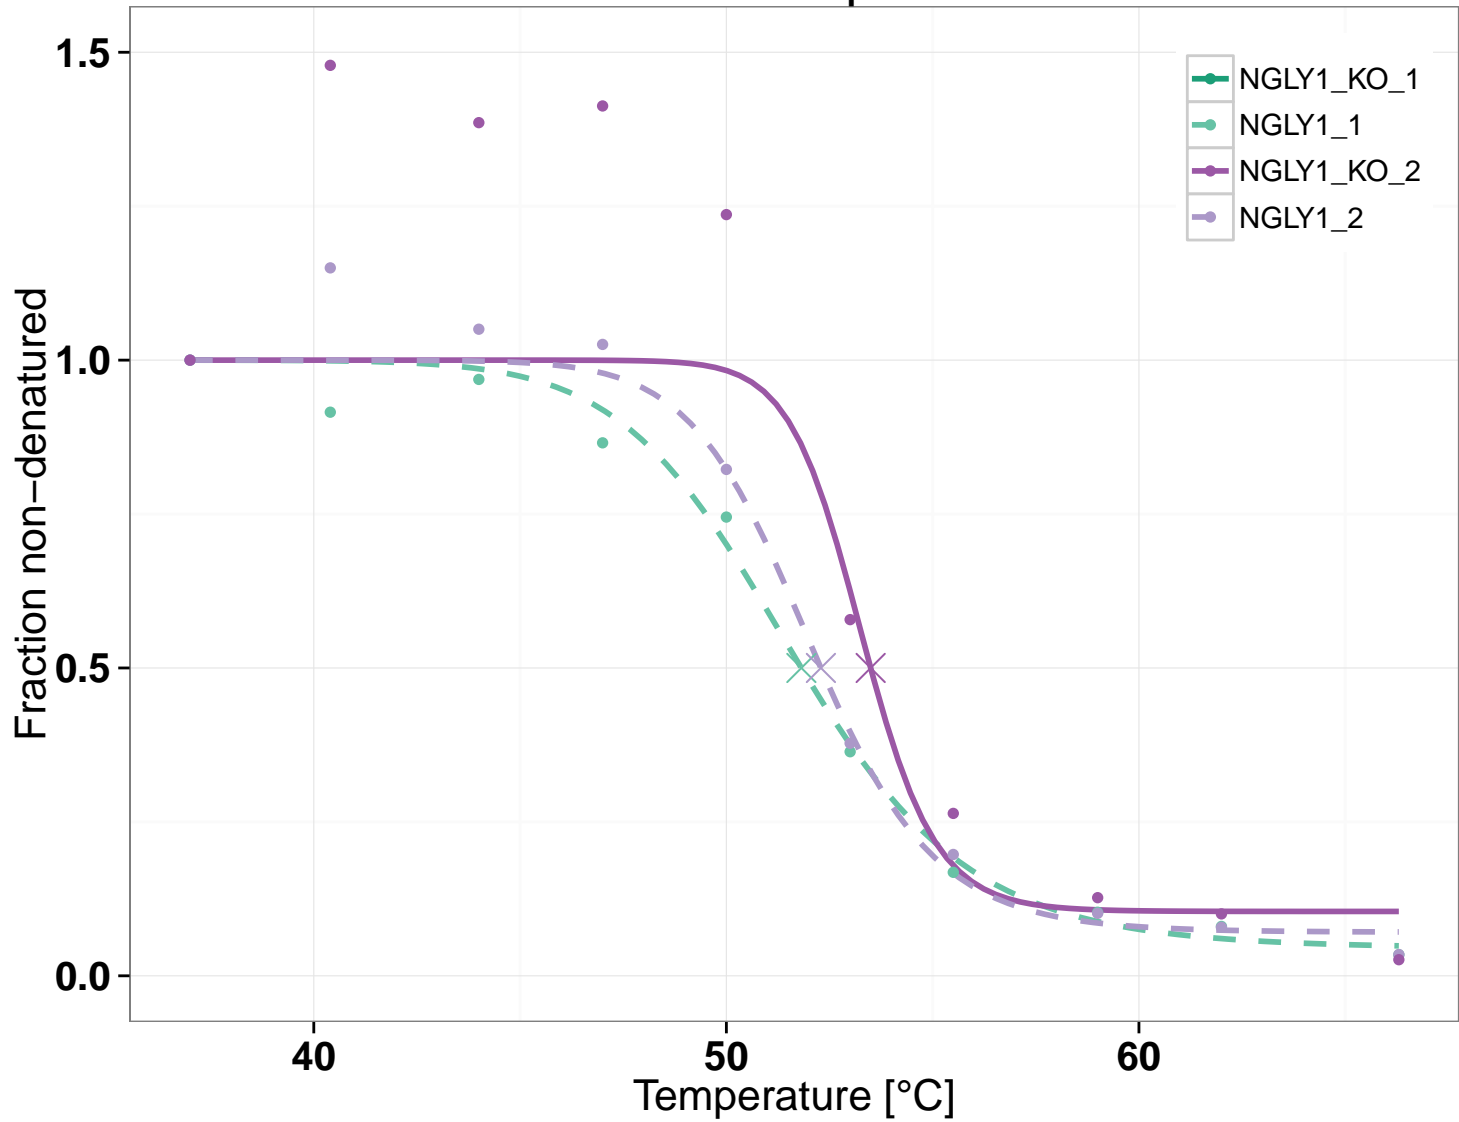

|            | meltPoint | slope | plateau | R2   |
|------------|-----------|-------|---------|------|
| NGLY1_KO_1 | -         | -     | -       | -    |
| NGLY1_1    | 51.82     | -0.11 | 0.04    | 0.99 |
| NGLY1_KO_2 | 53.5      | -0.25 | 0.1     | 0.81 |
| NGLY1_2    | 52.29     | -0.16 | 0.07    | 0.98 |

Supplement: Supplementary file 2750 [file 1]

IPI00384176.1|PBRM1

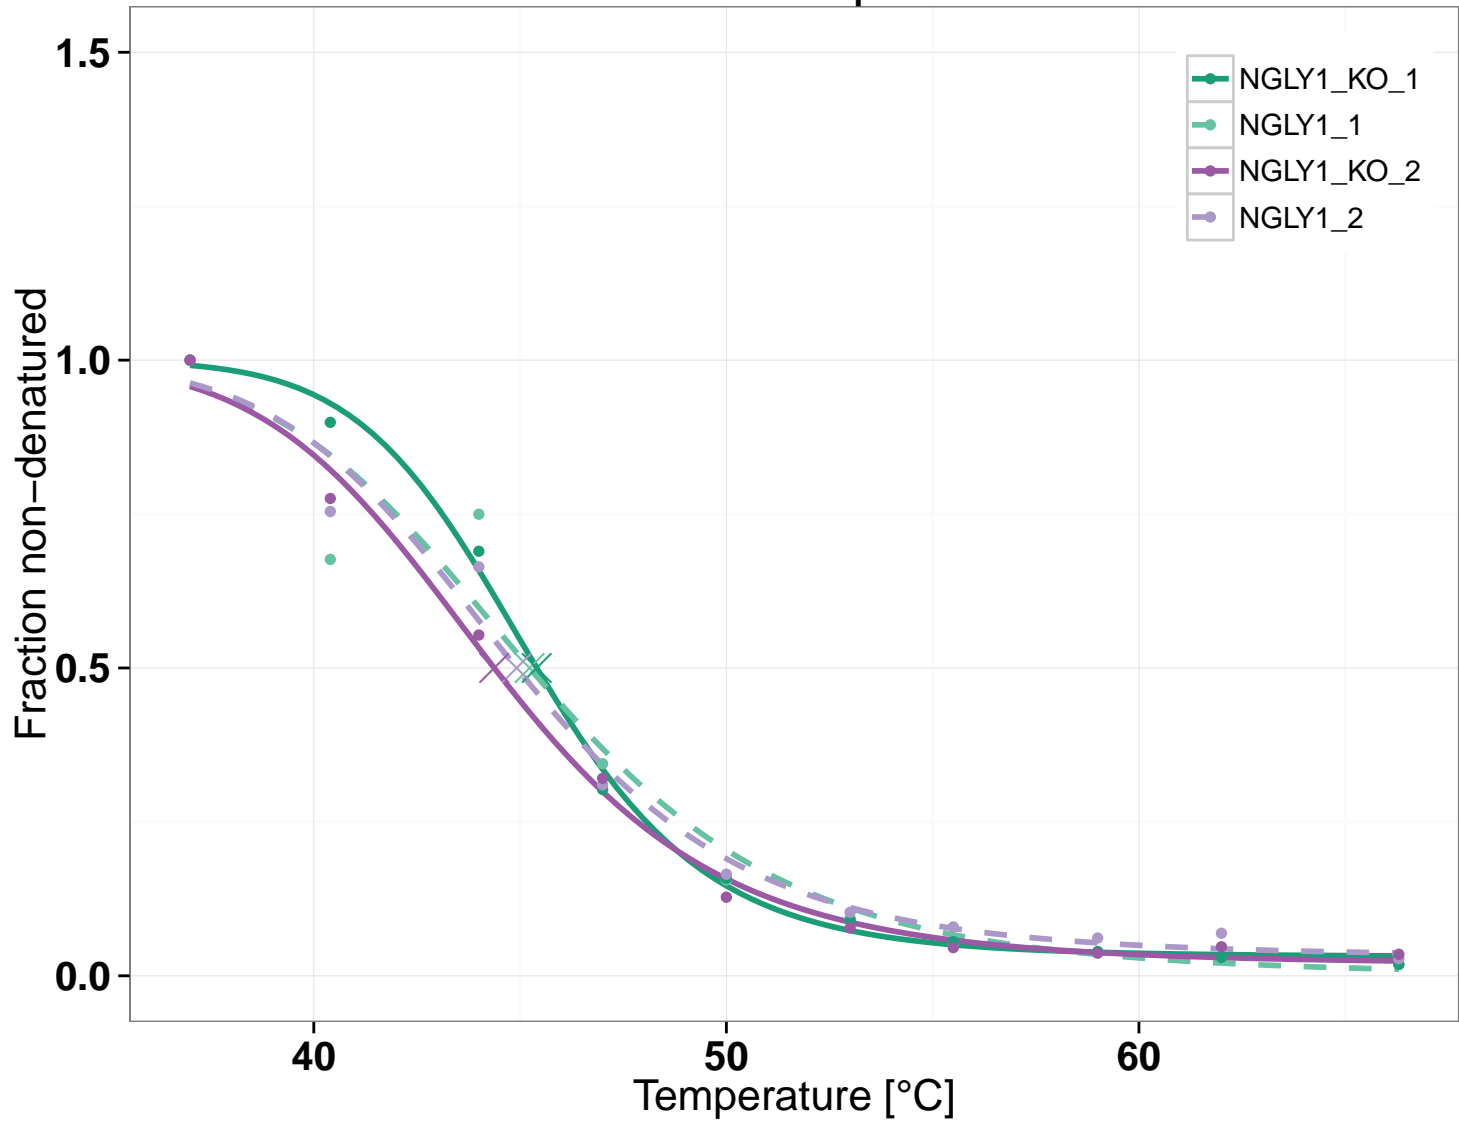

|            | meltPoint | slope  | plateau | R2   |
|------------|-----------|--------|---------|------|
| NGLY1_KO_1 | 45.4      | -0.11  | 0.03    | 1    |
| NGLY1_1    | 45.23     | -0.08  | 0       | 0.95 |
| NGLY1_KO_2 | 44.37     | -0.089 | 0.02    | 0.99 |
| NGLY1_2    | 44.92     | -0.085 | 0.03    | 0.98 |

Supplement: Supplementary file 2751 [file 1]

# IPI00006547.4|ITFG1

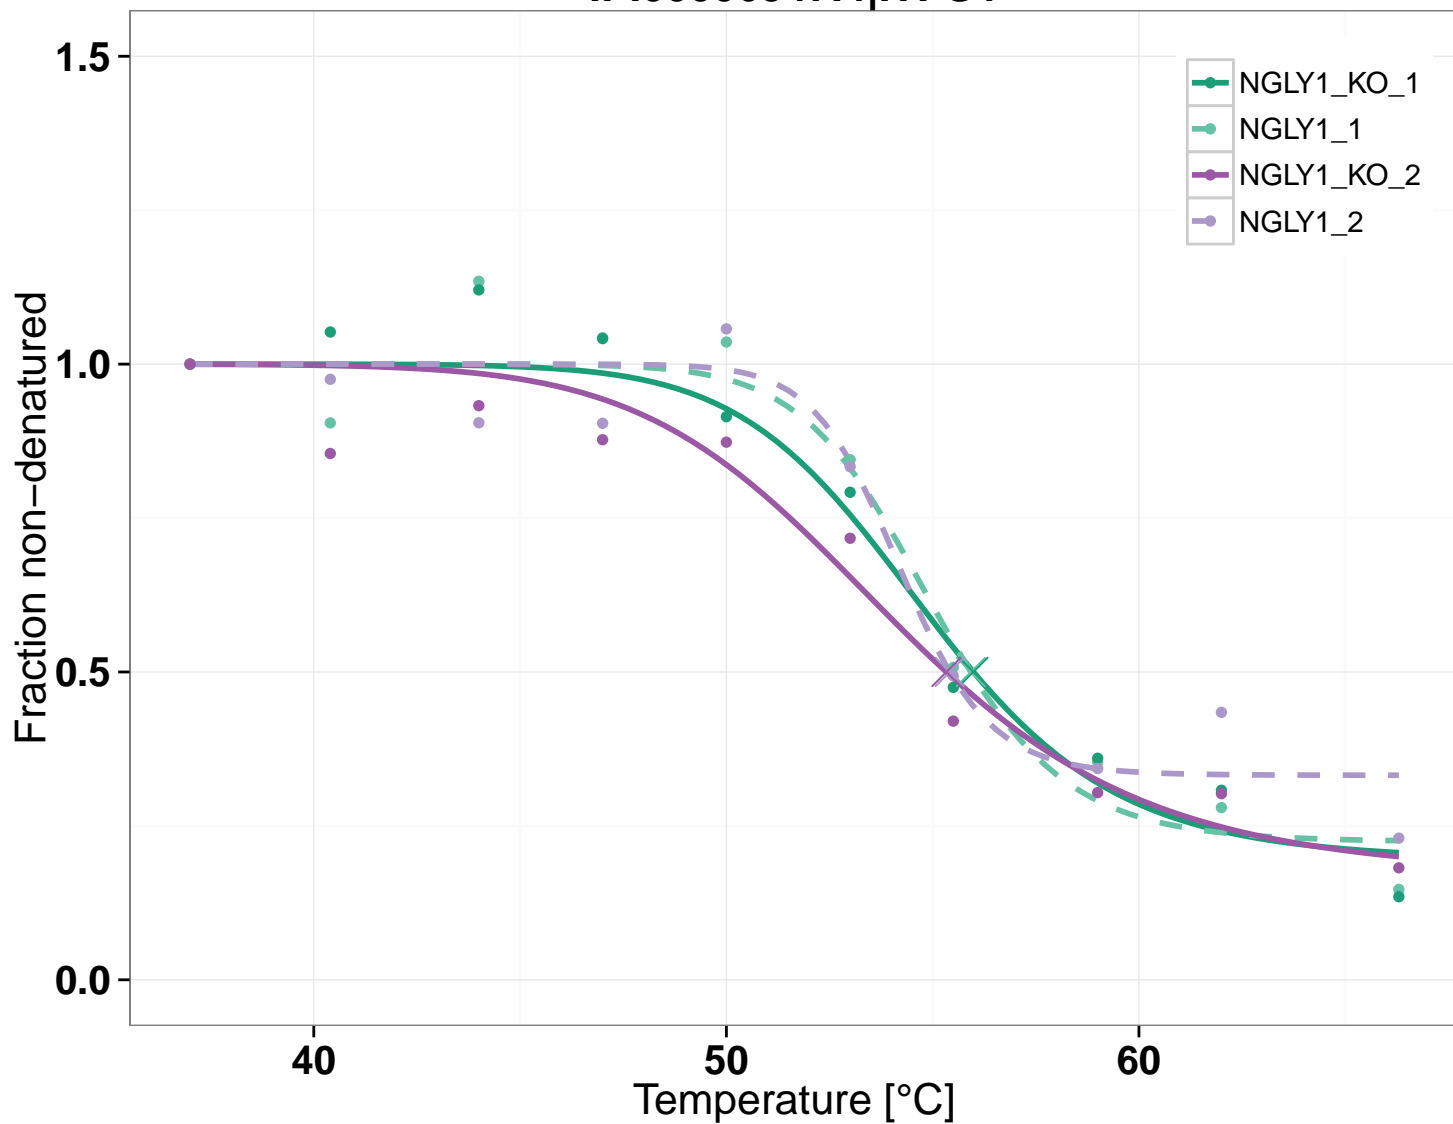

|            | meltPoint | slope  | plateau | R2   |
|------------|-----------|--------|---------|------|
| NGLY1_KO_1 | 55.99     | -0.089 | 0.19    | 0.97 |
| NGLY1_1    | 55.93     | -0.12  | 0.22    | 0.96 |
| NGLY1_KO_2 | 55.33     | -0.068 | 0.17    | 0.95 |
| NGLY1_2    | 55.41     | -0.16  | 0.33    | 0.95 |

Supplement: Supplementary file 2752 [file 1]

# IPI00444371.3|WDR44

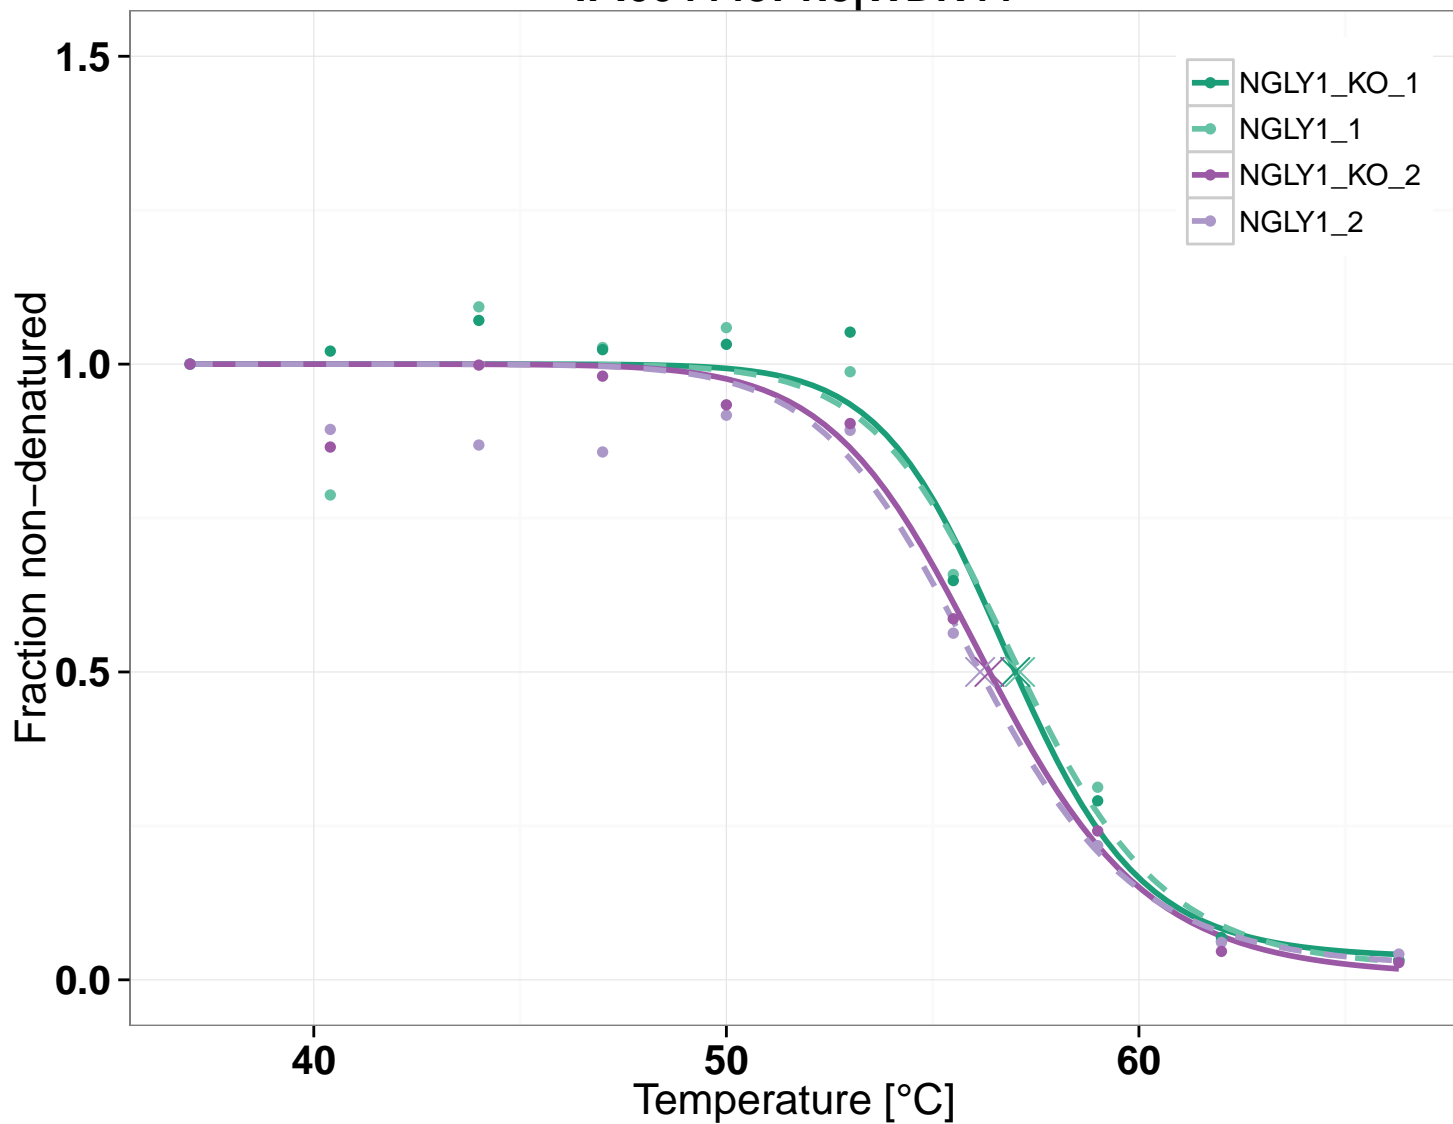

|            | meltPoint | slope | plateau | R2   |
|------------|-----------|-------|---------|------|
| NGLY1_KO_1 | 57        | -0.15 | 0.04    | 0.98 |
| NGLY1_1    | 57.12     | -0.14 | 0.02    | 0.96 |
| NGLY1_KO_2 | 56.38     | -0.13 | 0.01    | 0.98 |
| NGLY1_2    | 56.15     | -0.13 | 0.02    | 0.96 |

Supplement: Supplementary file 2753 [file 1]

# IPI00414236.7|MUTYH

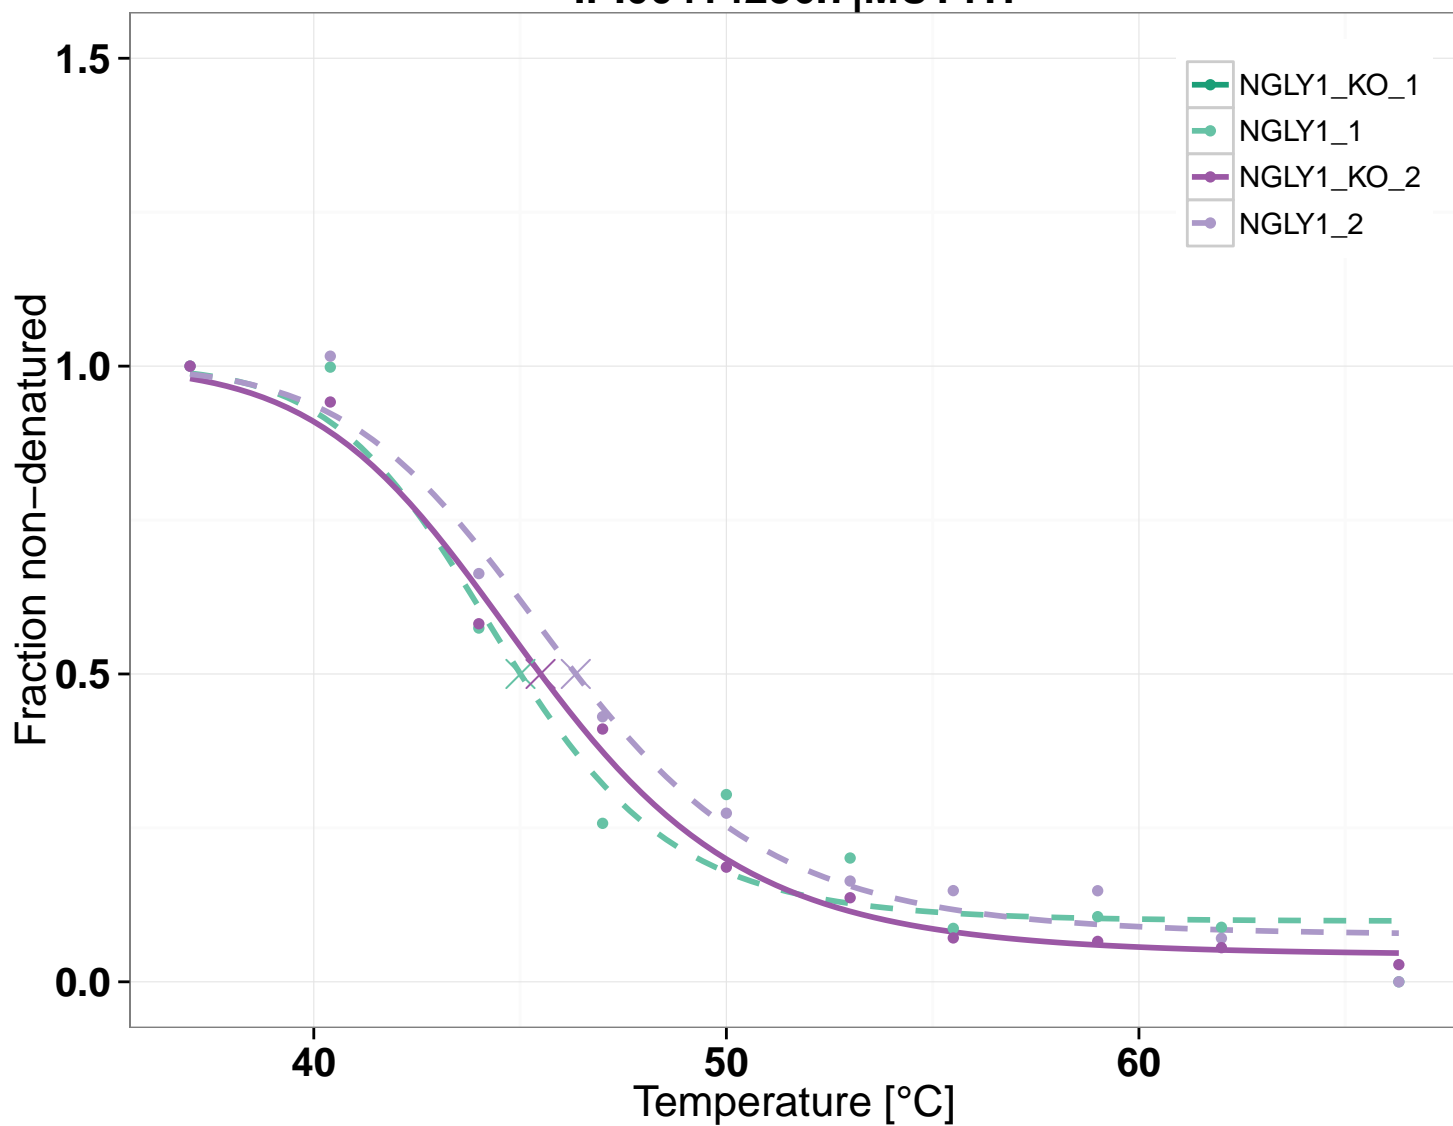

|            | meltPoint | slope  | plateau | R2   |
|------------|-----------|--------|---------|------|
| NGLY1_KO_1 | –         | –      | –       | –    |
| NGLY1_1    | 45.01     | –0.11  | 0.1     | 0.96 |
| NGLY1_KO_2 | 45.5      | –0.092 | 0.04    | 0.99 |
| NGLY1_2    | 46.35     | –0.09  | 0.07    | 0.98 |

Supplement: Supplementary file 2754 [file 1]

IPI00002535.2|FKBP2

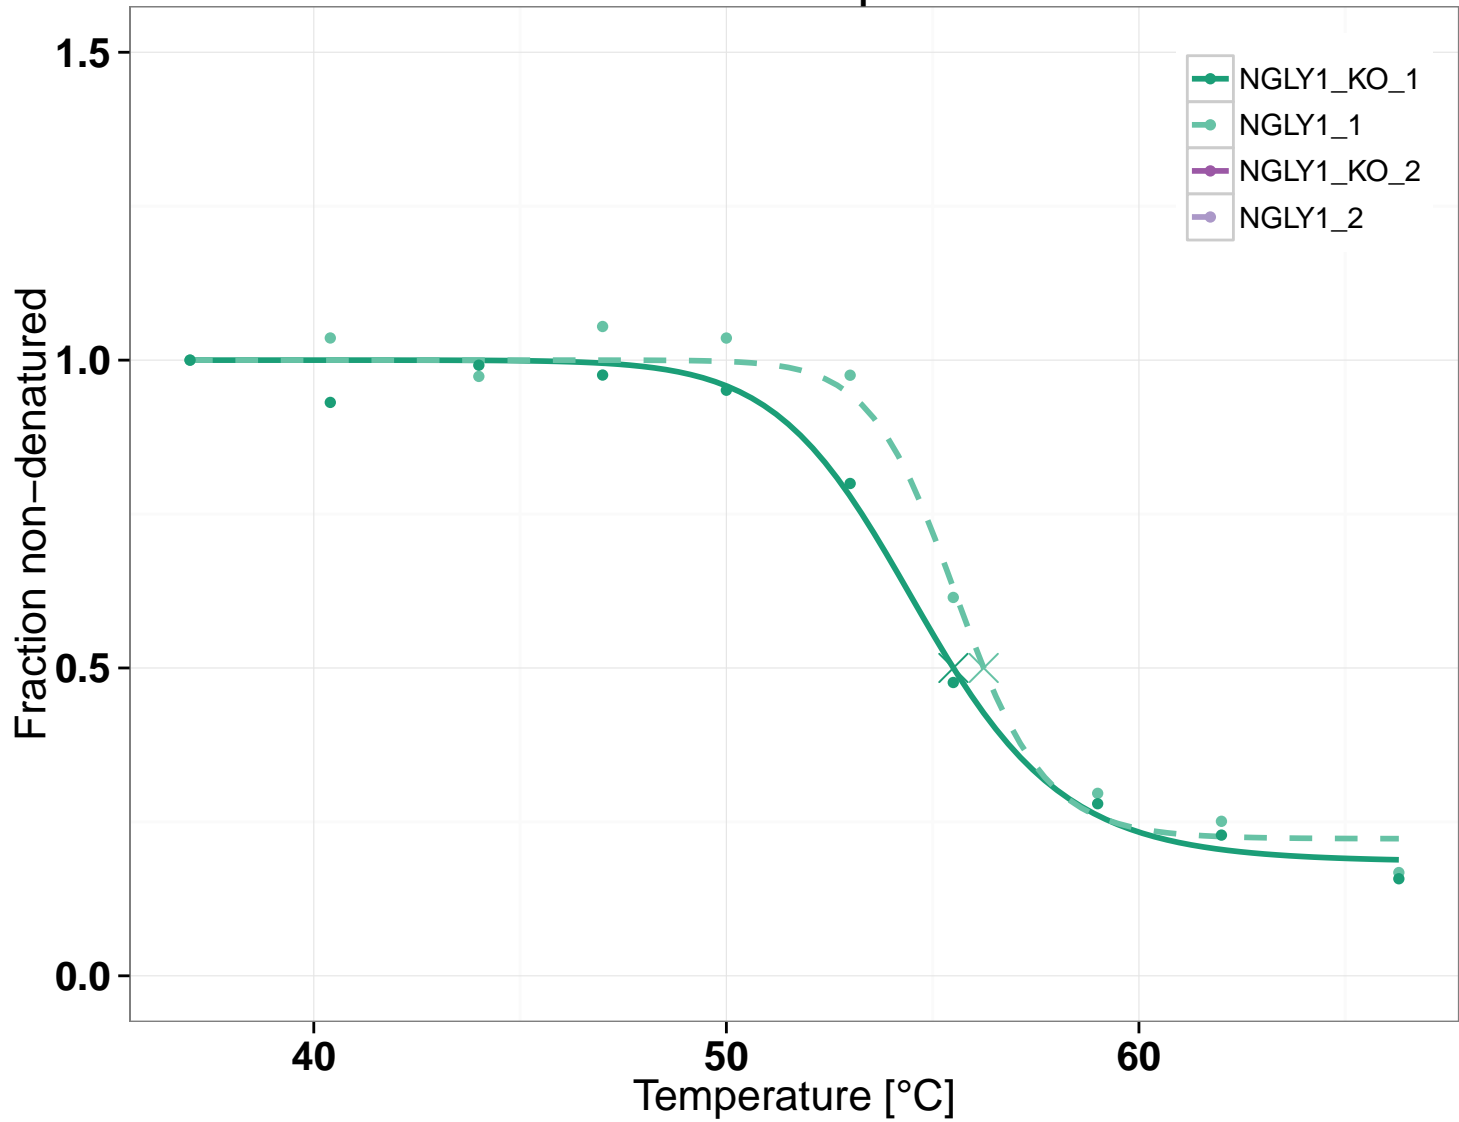

|            | meltPoint | slope | plateau | R2   |
|------------|-----------|-------|---------|------|
| NGLY1_KO_1 | 55.5      | -0.12 | 0.19    | 0.99 |
| NGLY1_1    | 56.24     | -0.18 | 0.22    | 0.99 |
| NGLY1_KO_2 | -         | -     | -       | -    |
| NGLY1_2    | -         | -     | -       | -    |

Supplement: Supplementary file 2755 [file 1]

IPI00329820.2|ACTL8

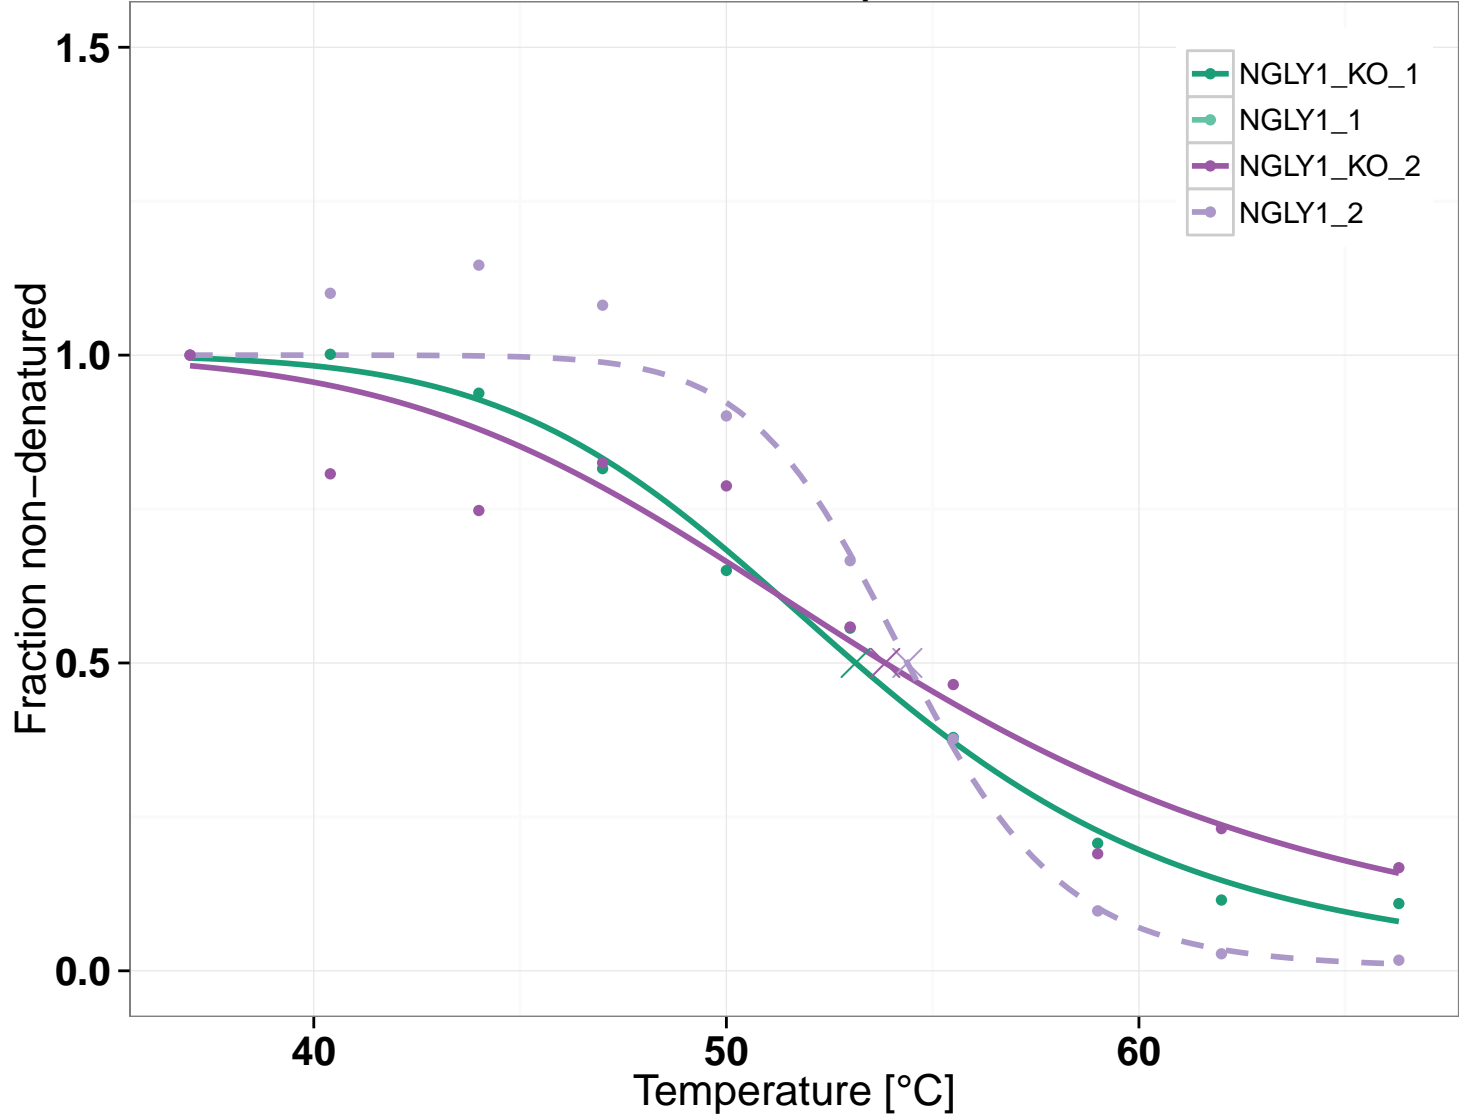

|            | meltPoint | slope  | plateau | R2   |
|------------|-----------|--------|---------|------|
| NGLY1_KO_1 | 53.13     | -0.059 | 0       | 0.99 |
| NGLY1_1    | -         | -      | -       | -    |
| NGLY1_KO_2 | 53.85     | -0.043 | 0       | 0.91 |
| NGLY1_2    | 54.39     | -0.13  | 0.01    | 0.98 |

Supplement: Supplementary file 2756 [file 1]

# IPI00873935.1|DKC1

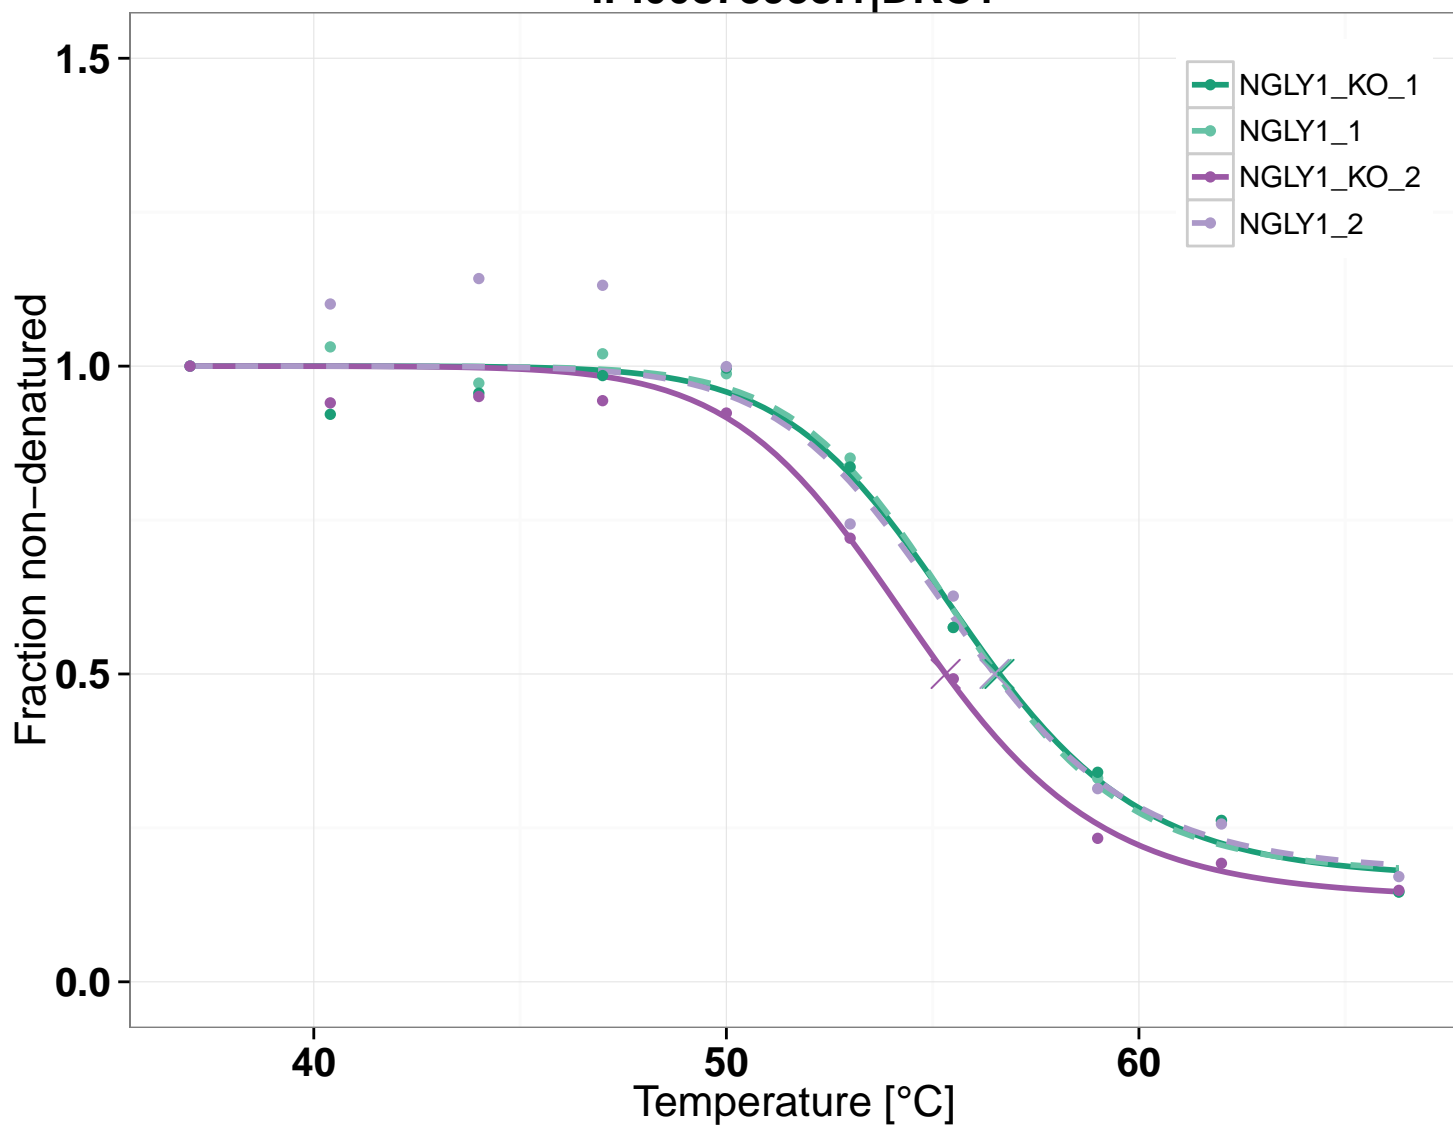

|            | meltPoint | slope  | plateau | R2   |
|------------|-----------|--------|---------|------|
| NGLY1_KO_1 | 56.62     | -0.097 | 0.17    | 0.99 |
| NGLY1_1    | 56.55     | -0.1   | 0.18    | 0.99 |
| NGLY1_KO_2 | 55.31     | -0.097 | 0.13    | 0.99 |
| NGLY1_2    | 56.5      | -0.095 | 0.18    | 0.96 |

Supplement: Supplementary file 2757 [file 1]

IPI00020915.1|MRFAP1

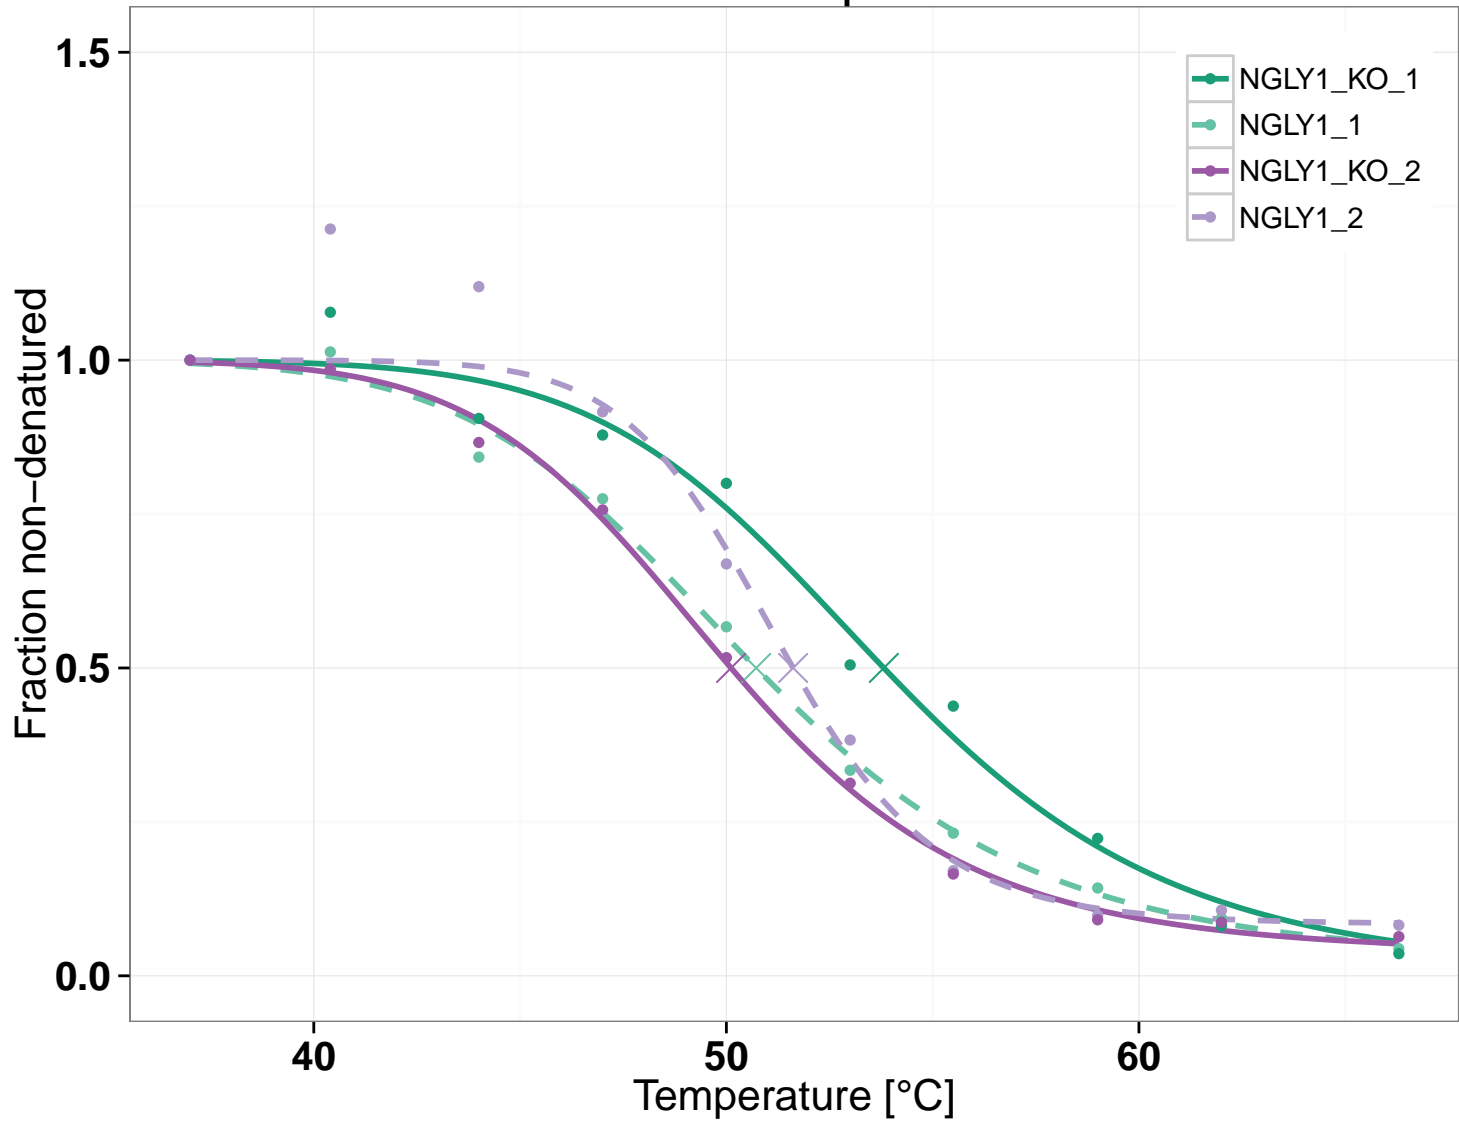

|            | meltPoint | slope  | plateau | R2   |
|------------|-----------|--------|---------|------|
| NGLY1_KO_1 | 53.82     | -0.071 | 0       | 0.99 |
| NGLY1_1    | 50.72     | -0.07  | 0.02    | 1    |
| NGLY1_KO_2 | 50.11     | -0.08  | 0.04    | 1    |
| NGLY1_2    | 51.62     | -0.12  | 0.08    | 0.97 |

Supplement: Supplementary file 2758 [file 1]

IPI00150515.4|TMEM218

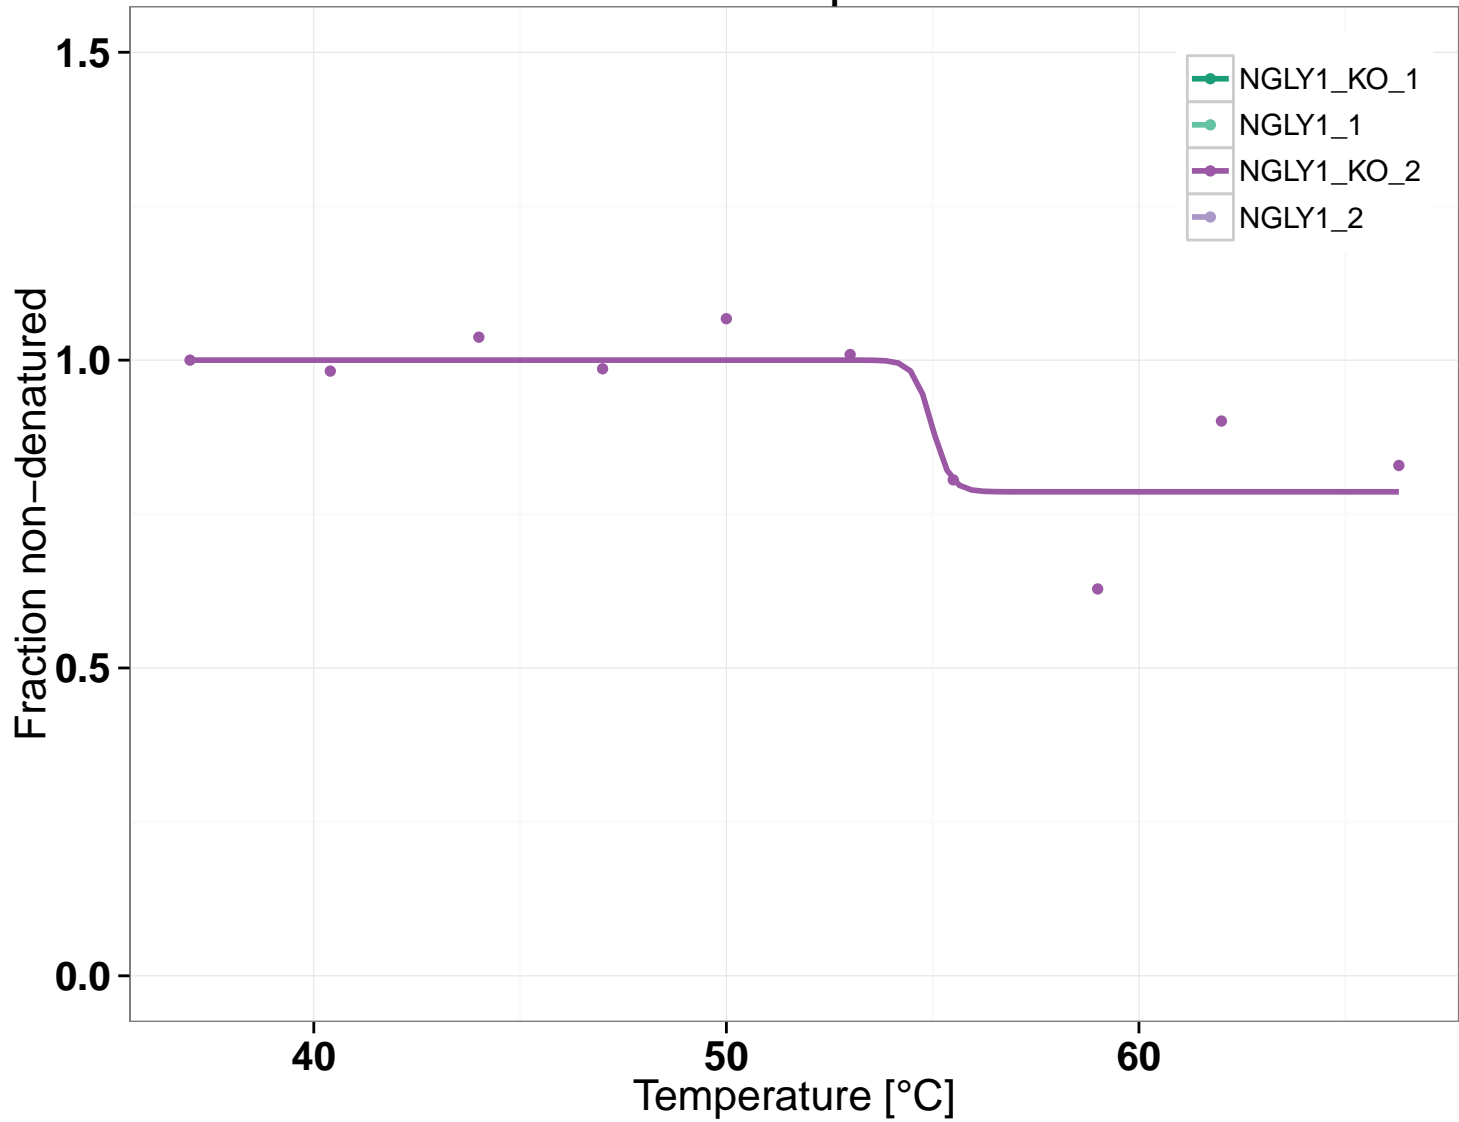

|            | meltPoint | slope | plateau | R2   |
|------------|-----------|-------|---------|------|
| NGLY1_KO_1 | -         | -     | -       | -    |
| NGLY1_1    | -         | -     | -       | -    |
| NGLY1_KO_2 | -         | -0.24 | 0.79    | 0.72 |
| NGLY1_2    | -         | -     | -       | -    |

Supplement: Supplementary file 2759 [file 1]

# IPI00807573.1|PIK3R1

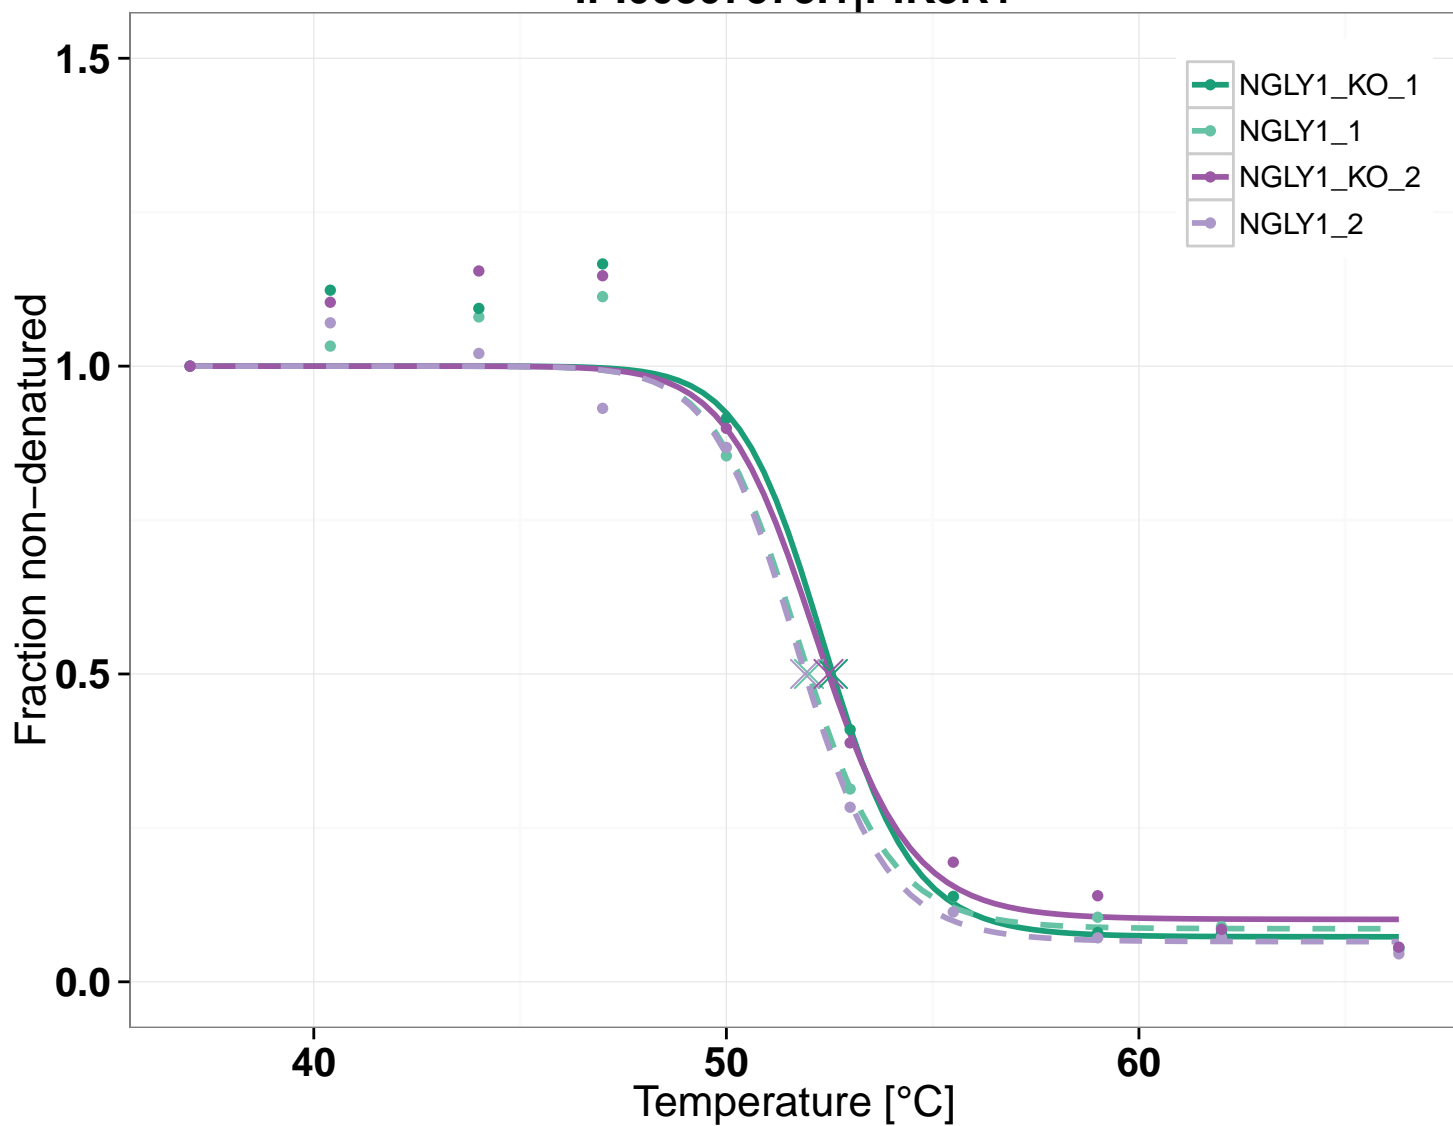

|            | meltPoint | slope | plateau | R2   |
|------------|-----------|-------|---------|------|
| NGLY1_KO_1 | 52.58     | -0.22 | 0.07    | 0.98 |
| NGLY1_1    | 52        | -0.21 | 0.09    | 0.99 |
| NGLY1_KO_2 | 52.48     | -0.2  | 0.1     | 0.97 |
| NGLY1_2    | 51.91     | -0.22 | 0.07    | 0.99 |

Supplement: Supplementary file 2760 [file 1]

# IPI00306382.2|SCAMP3

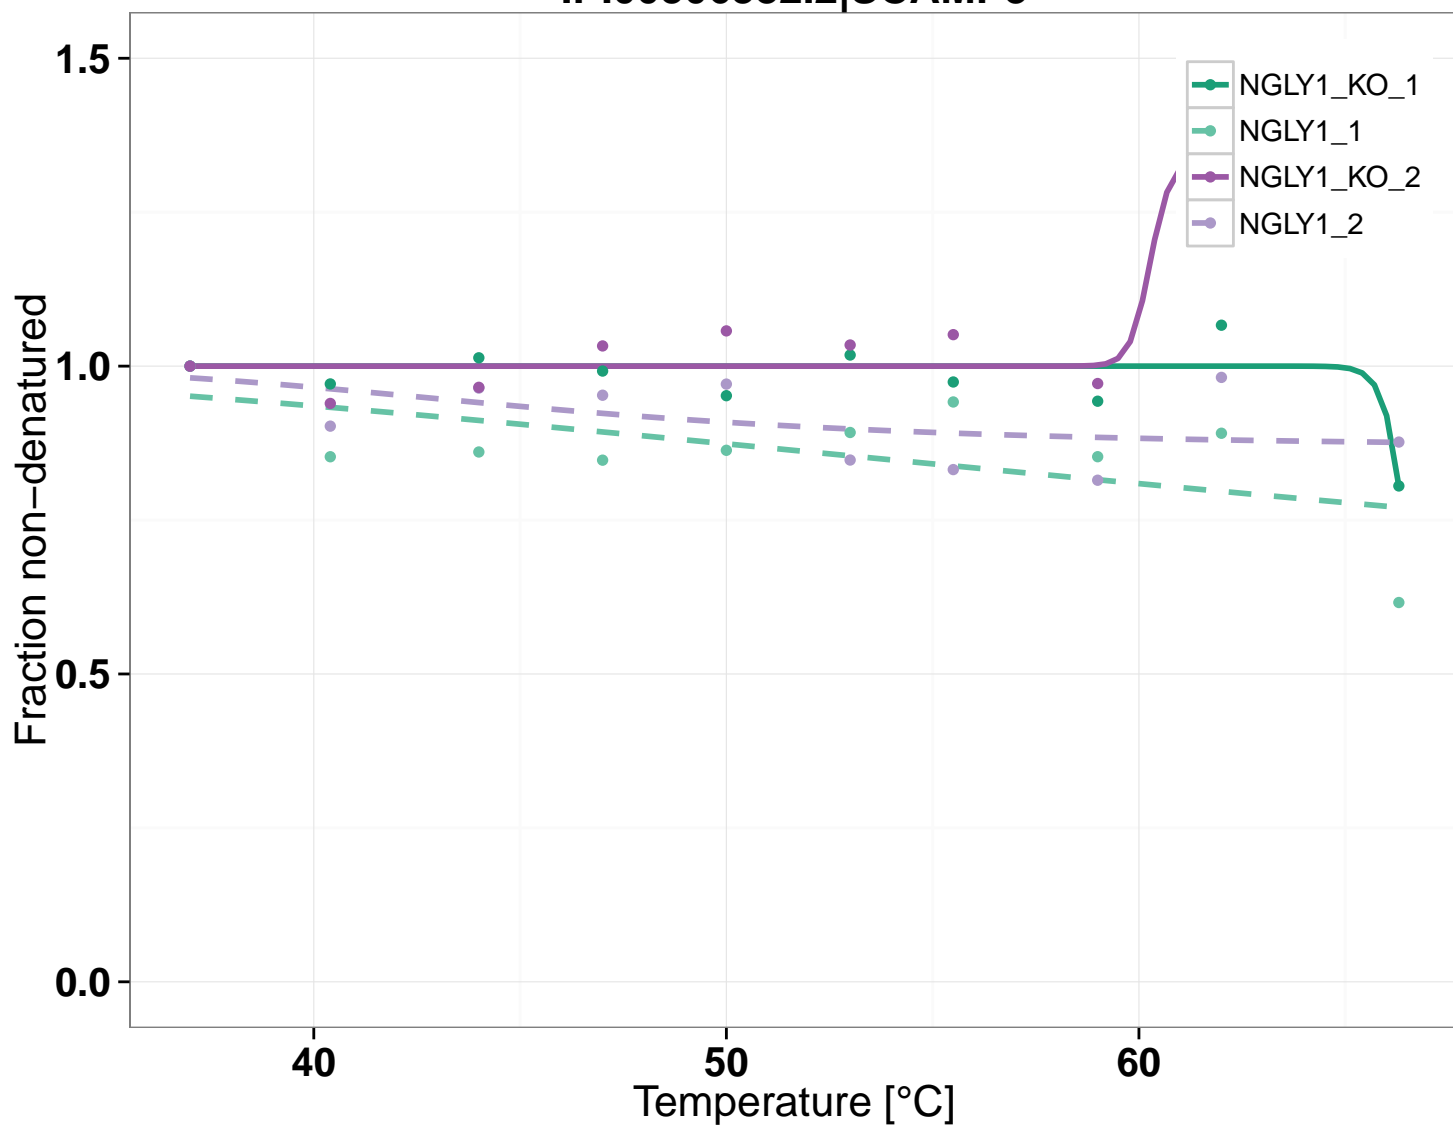

|            | meltPoint | slope   | plateau | R2   |
|------------|-----------|---------|---------|------|
| NGLY1_KO_1 | –         | –       | 0       | 0.72 |
| NGLY1_1    | –         | –0.0065 | 0       | 0.32 |
| NGLY1_KO_2 | –         | 0.35    | 1.34    | 0.76 |
| NGLY1_2    | –         | –0.0063 | 0.87    | 0.27 |

Supplement: Supplementary file 2761 [file 1]

# IPI00412224.2|WDR11

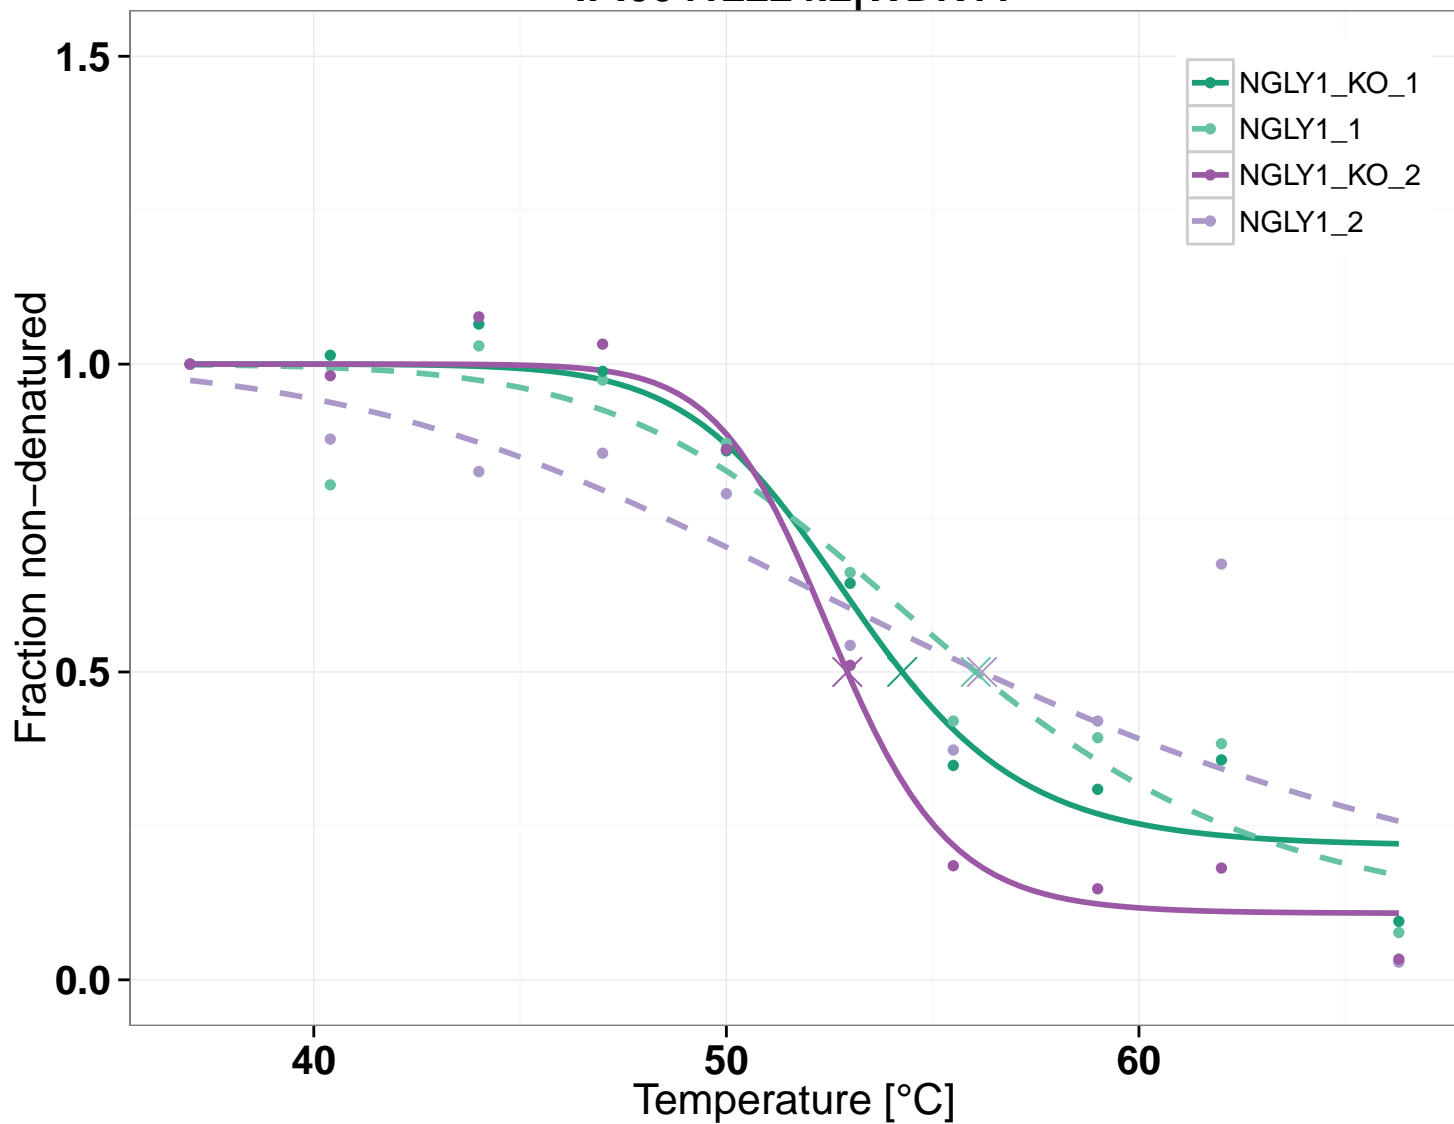

|            | meltPoint | slope  | plateau | R2   |
|------------|-----------|--------|---------|------|
| NGLY1_KO_1 | 54.26     | -0.097 | 0.22    | 0.96 |
| NGLY1_1    | 56.05     | -0.058 | 0.08    | 0.91 |
| NGLY1_KO_2 | 52.93     | -0.16  | 0.11    | 0.99 |
| NGLY1_2    | 56.2      | -0.033 | 0       | 0.74 |

Supplement: Supplementary file 2762 [file 1]

# IPI00023073.1|XRCC3

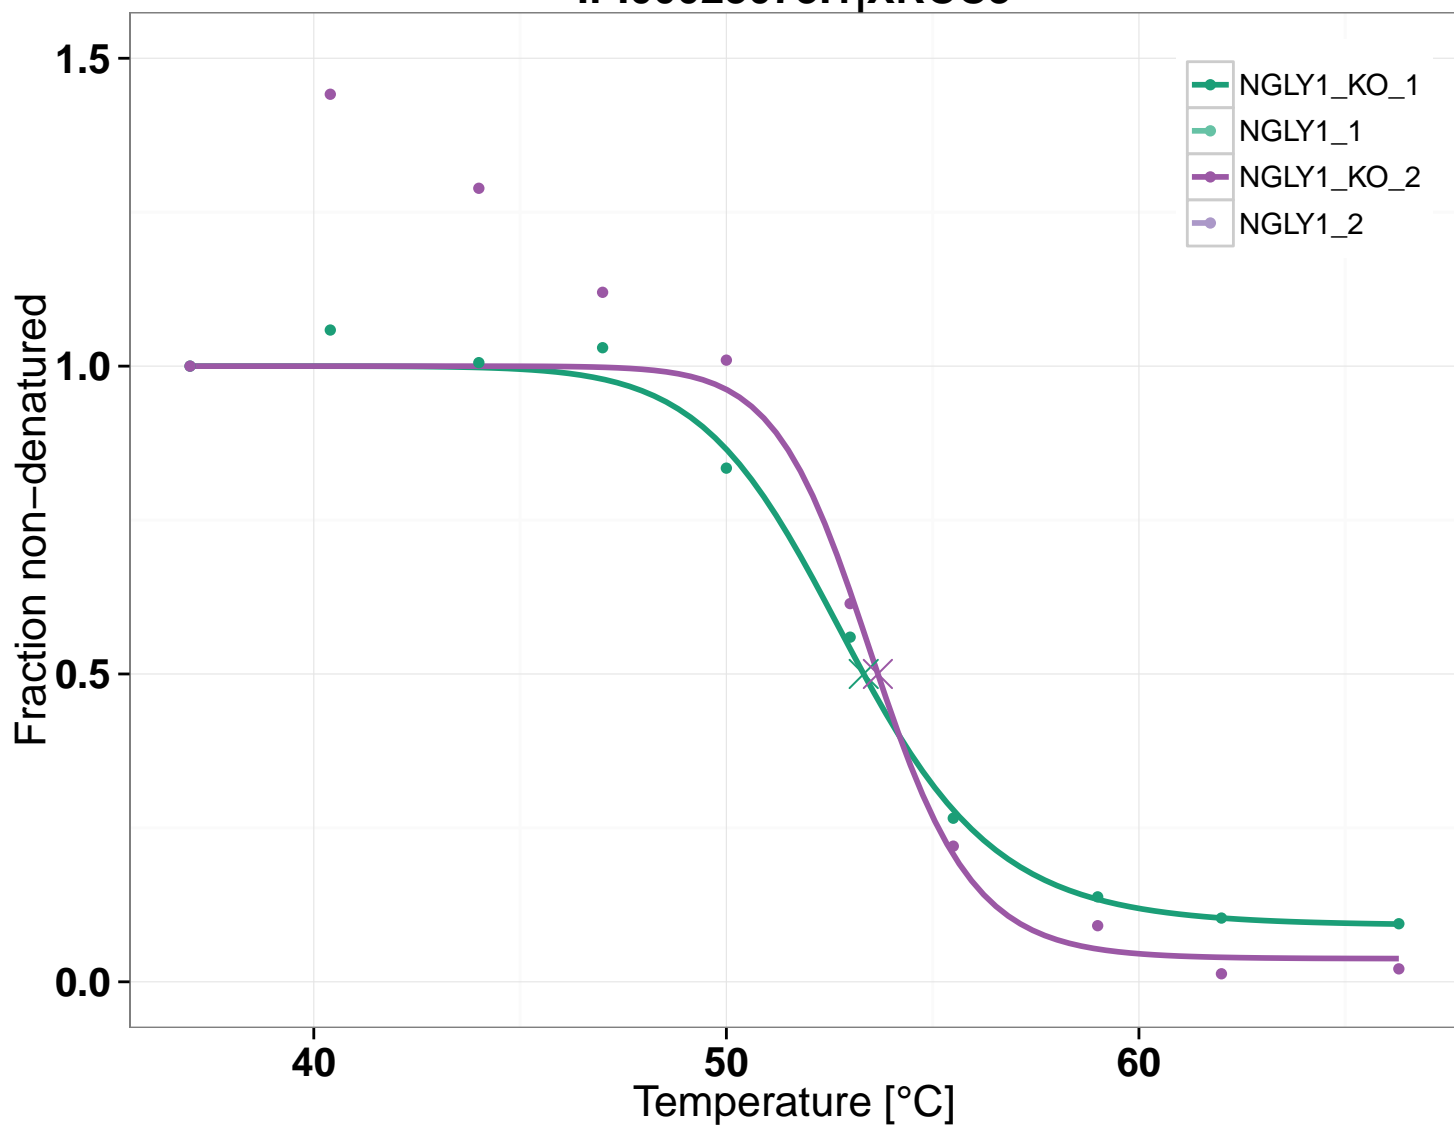

|            | meltPoint | slope | plateau | R2   |
|------------|-----------|-------|---------|------|
| NGLY1_KO_1 | 53.33     | -0.13 | 0.09    | 1    |
| NGLY1_1    | -         | -     | -       | -    |
| NGLY1_KO_2 | 53.67     | -0.2  | 0.04    | 0.89 |
| NGLY1_2    | -         | -     | -       | -    |

Supplement: Supplementary file 2763 [file 1]

# IPI00100160.3|CAND1

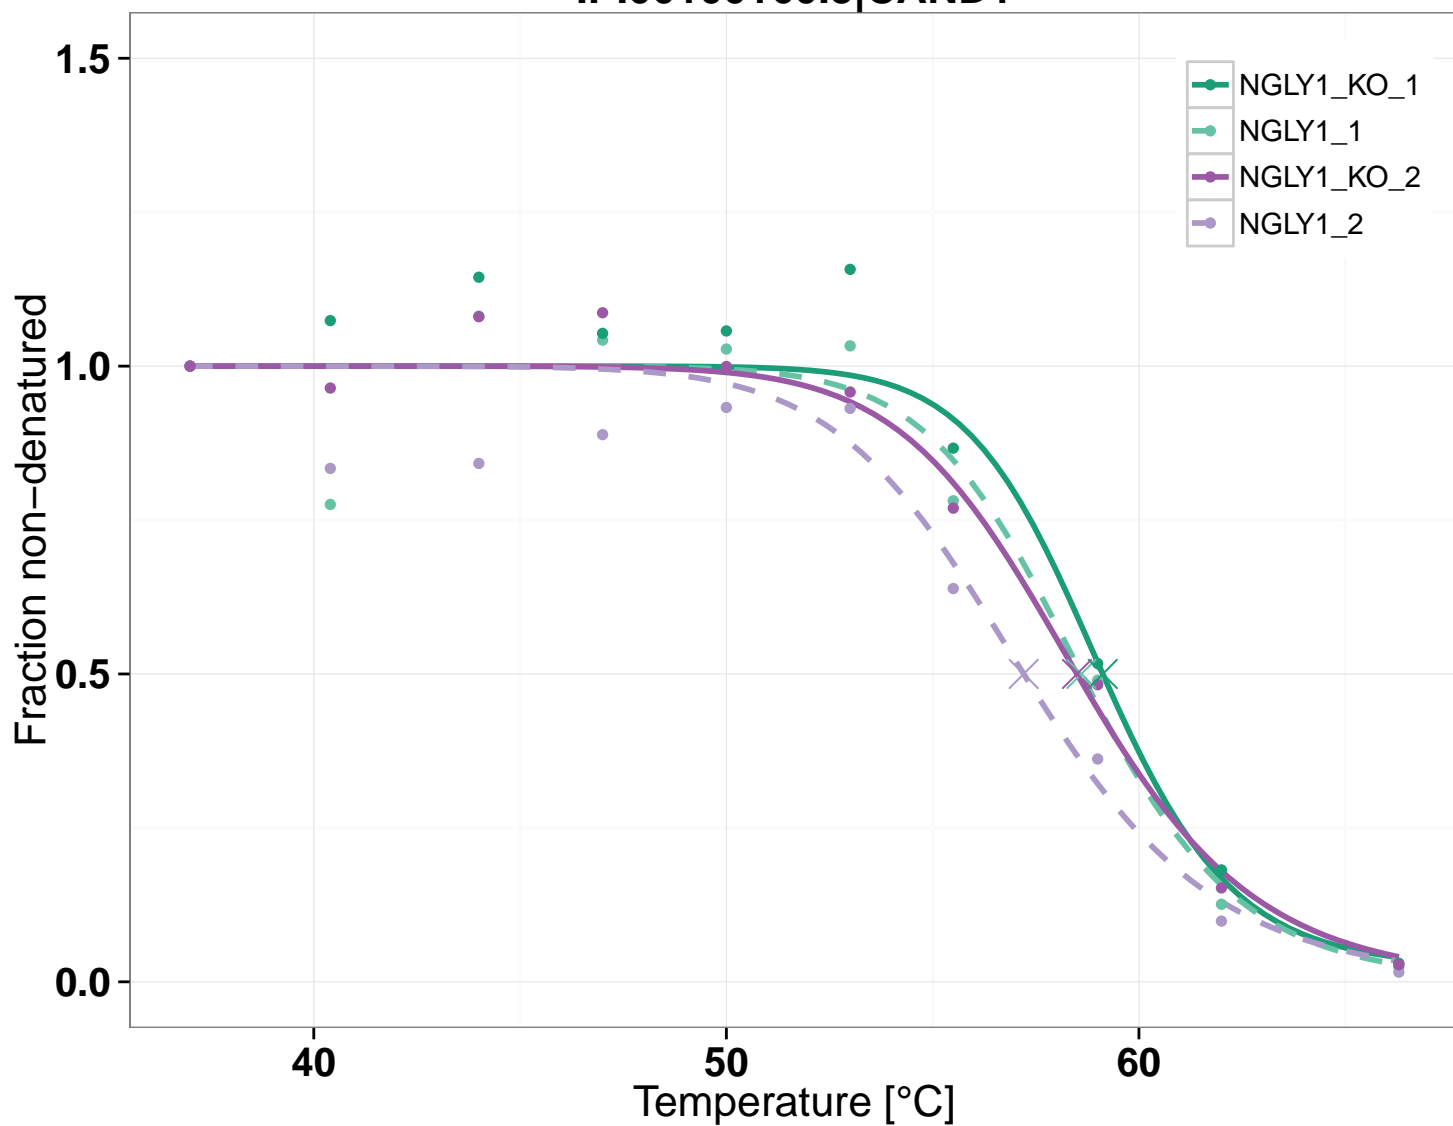

|            | meltPoint | slope | plateau | R2   |
|------------|-----------|-------|---------|------|
| NGLY1_KO_1 | 59.12     | -0.15 | 0.02    | 0.96 |
| NGLY1_1    | 58.61     | -0.13 | 0       | 0.95 |
| NGLY1_KO_2 | 58.5      | -0.12 | 0       | 0.99 |
| NGLY1_2    | 57.21     | -0.11 | 0       | 0.94 |

Supplement: Supplementary file 2764 [file 1]

IPI00216047.3|SMARCC2

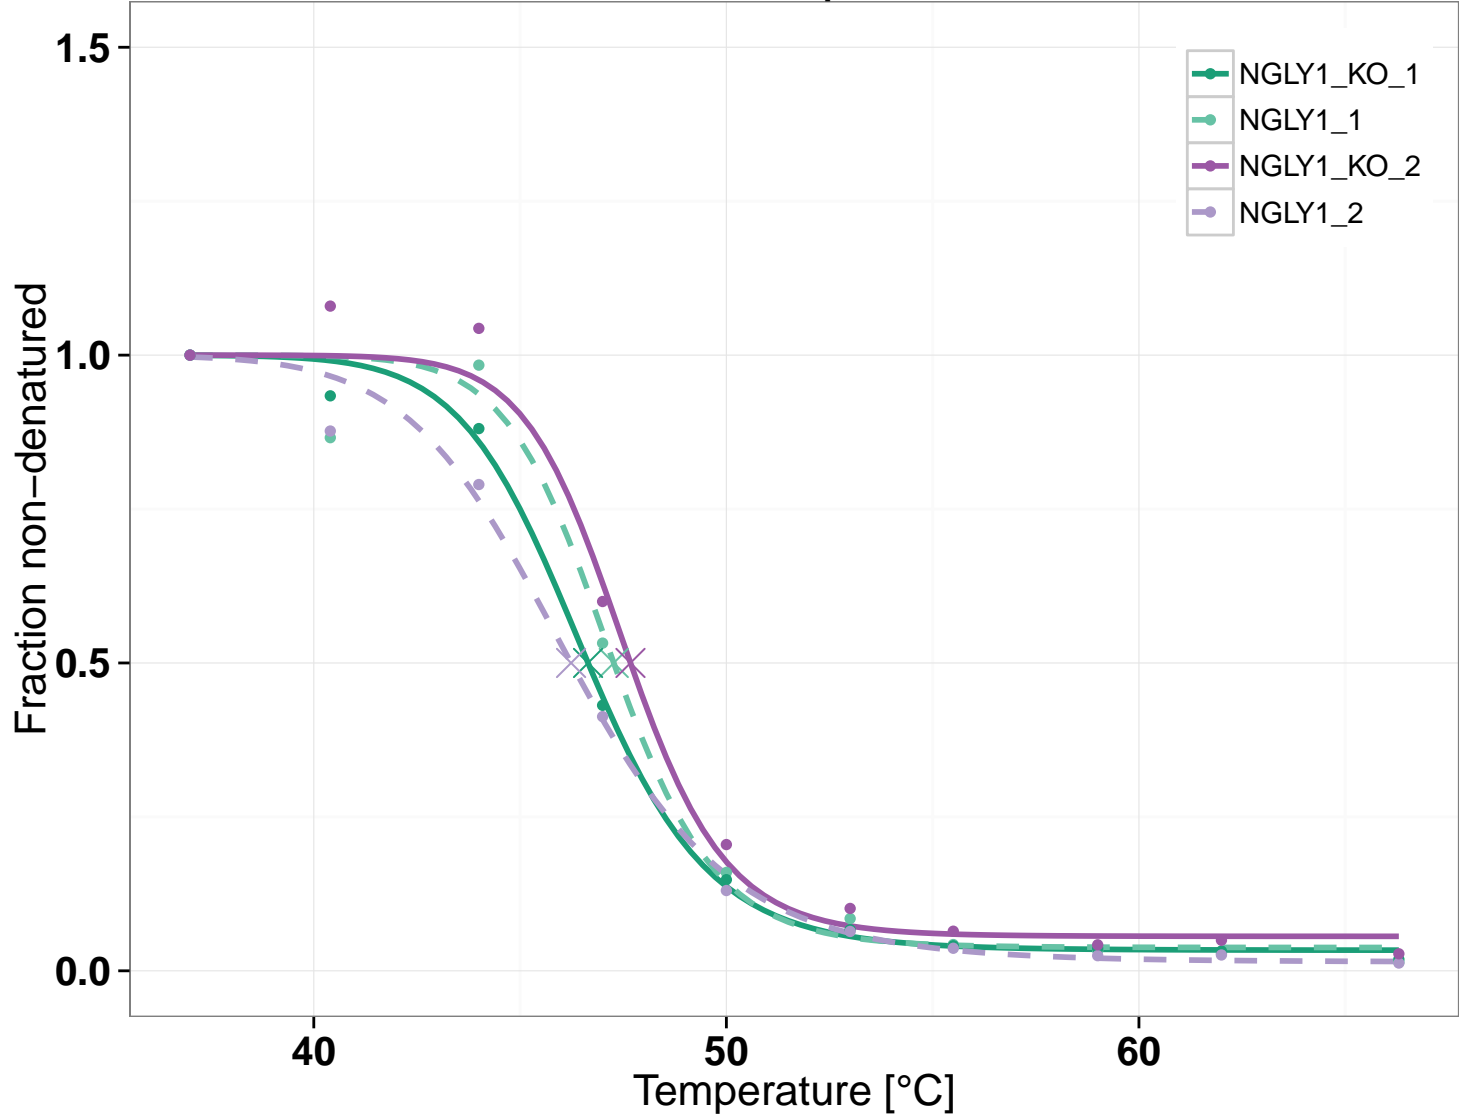

|            | meltPoint | slope | plateau | R2   |
|------------|-----------|-------|---------|------|
| NGLY1_KO_1 | 46.65     | -0.16 | 0.03    | 1    |
| NGLY1_1    | 47.27     | -0.19 | 0.04    | 0.99 |
| NGLY1_KO_2 | 47.68     | -0.19 | 0.06    | 0.99 |
| NGLY1_2    | 46.24     | -0.13 | 0.01    | 0.99 |

Supplement: Supplementary file 2765 [file 1]

# IPI00643071.2|FAM108B1

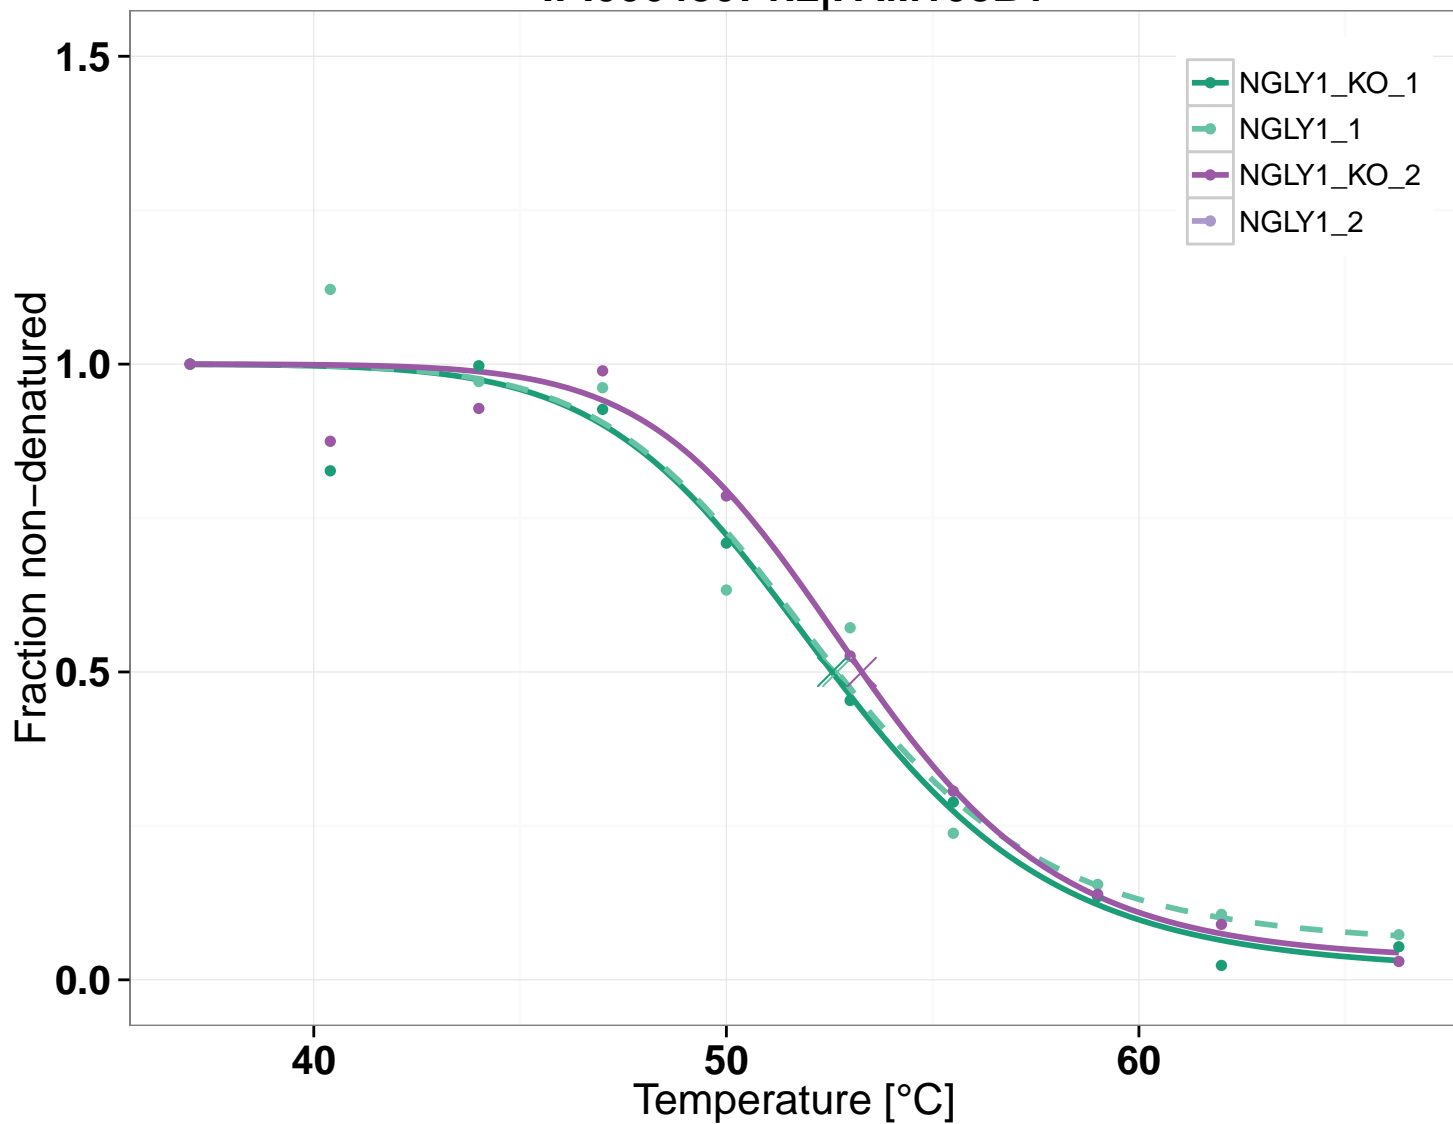

|            | meltPoint | slope  | plateau | R2   |
|------------|-----------|--------|---------|------|
| NGLY1_KO_1 | 52.56     | -0.09  | 0.01    | 0.98 |
| NGLY1_1    | 52.69     | -0.088 | 0.06    | 0.97 |
| NGLY1_KO_2 | 53.28     | -0.097 | 0.03    | 0.98 |
| NGLY1_2    | -         | -      | -       | -    |

Supplement: Supplementary file 2766 [file 1]

IPI00013328.1|TUSC3

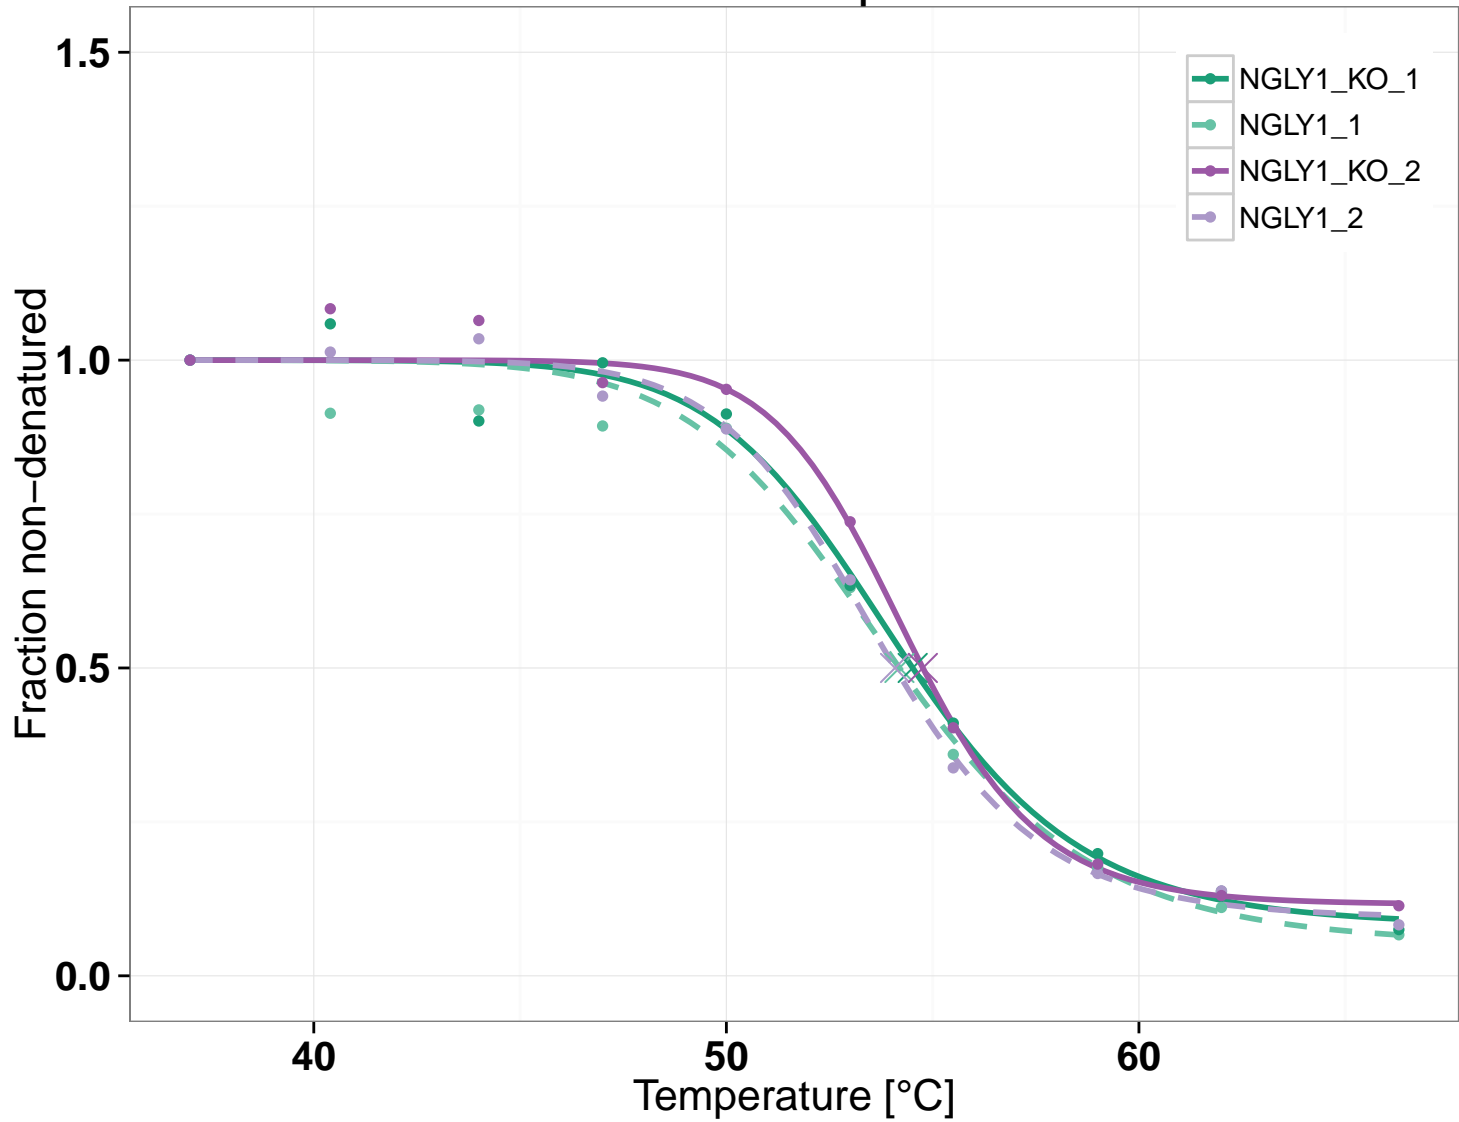

|            | meltPoint | slope  | plateau | R2   |
|------------|-----------|--------|---------|------|
| NGLY1_KO_1 | 54.52     | -0.1   | 0.08    | 0.99 |
| NGLY1_1    | 54.19     | -0.097 | 0.05    | 0.98 |
| NGLY1_KO_2 | 54.76     | -0.14  | 0.12    | 0.99 |
| NGLY1_2    | 54.09     | -0.12  | 0.09    | 1    |

Supplement: Supplementary file 2767 [file 1]

IPI00001159.10|GCN1L1

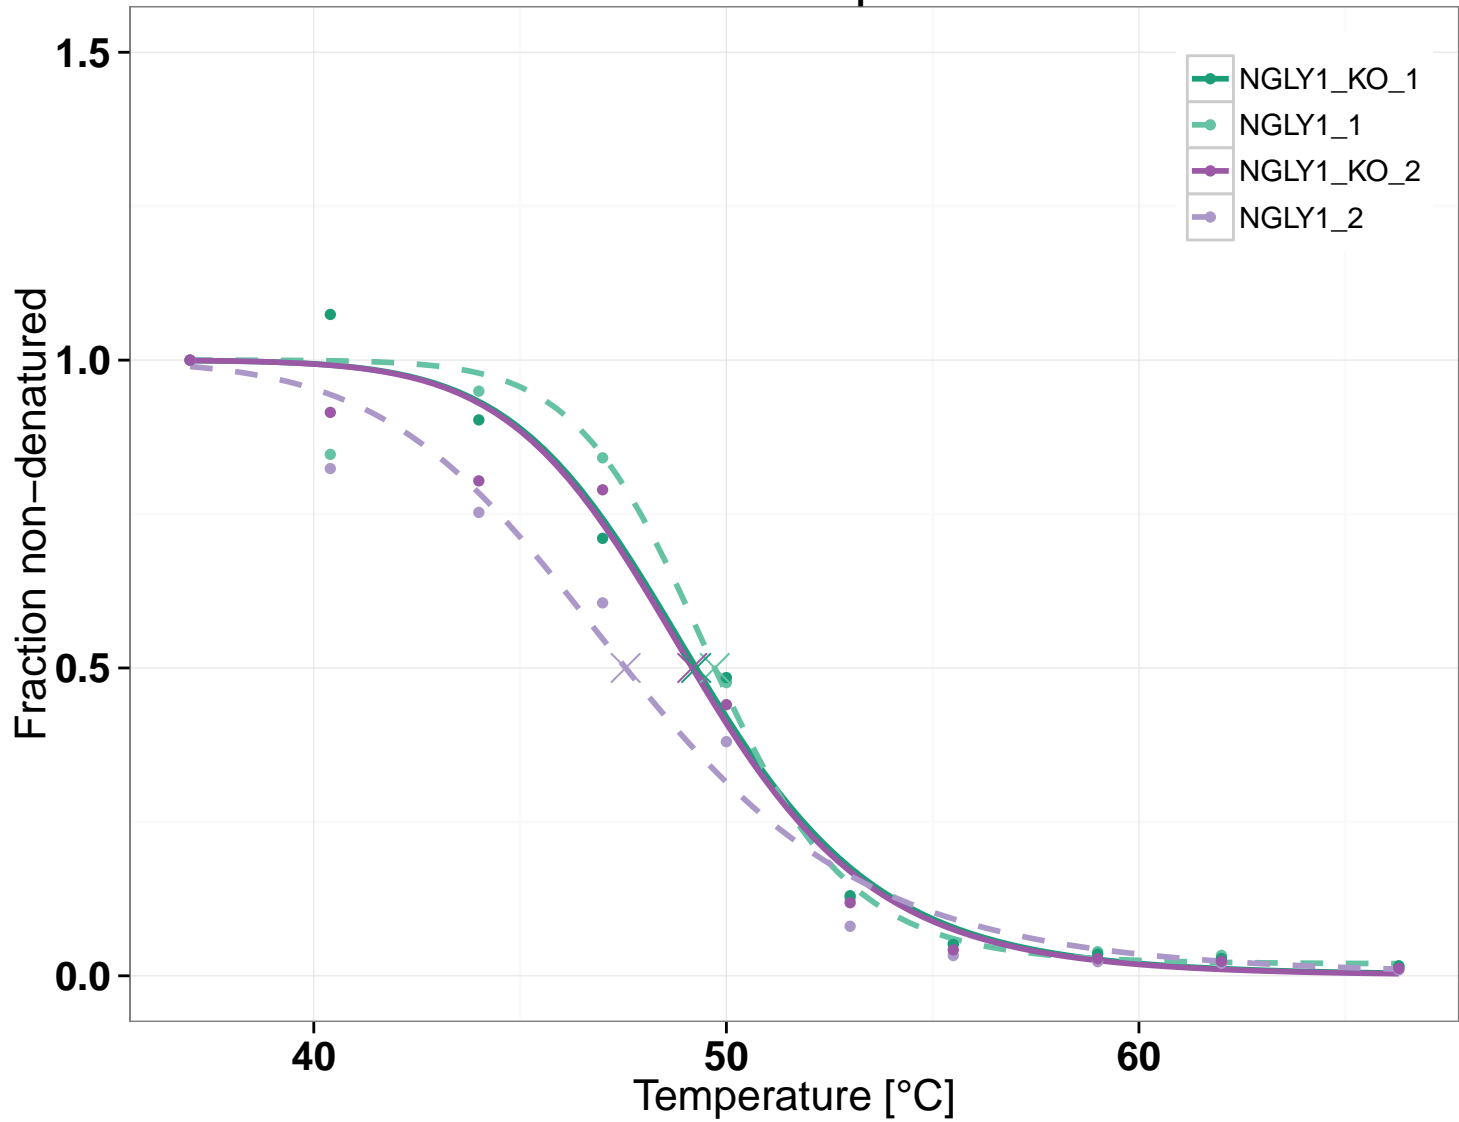

|            | meltPoint | slope  | plateau | R2   |
|------------|-----------|--------|---------|------|
| NGLY1_KO_1 | 49.27     | -0.11  | 0       | 0.99 |
| NGLY1_1    | 49.72     | -0.15  | 0.02    | 0.98 |
| NGLY1_KO_2 | 49.17     | -0.11  | 0       | 0.98 |
| NGLY1_2    | 47.56     | -0.085 | 0       | 0.98 |

Supplement: Supplementary file 2768 [file 1]

IPI00019903.1|CCDC44

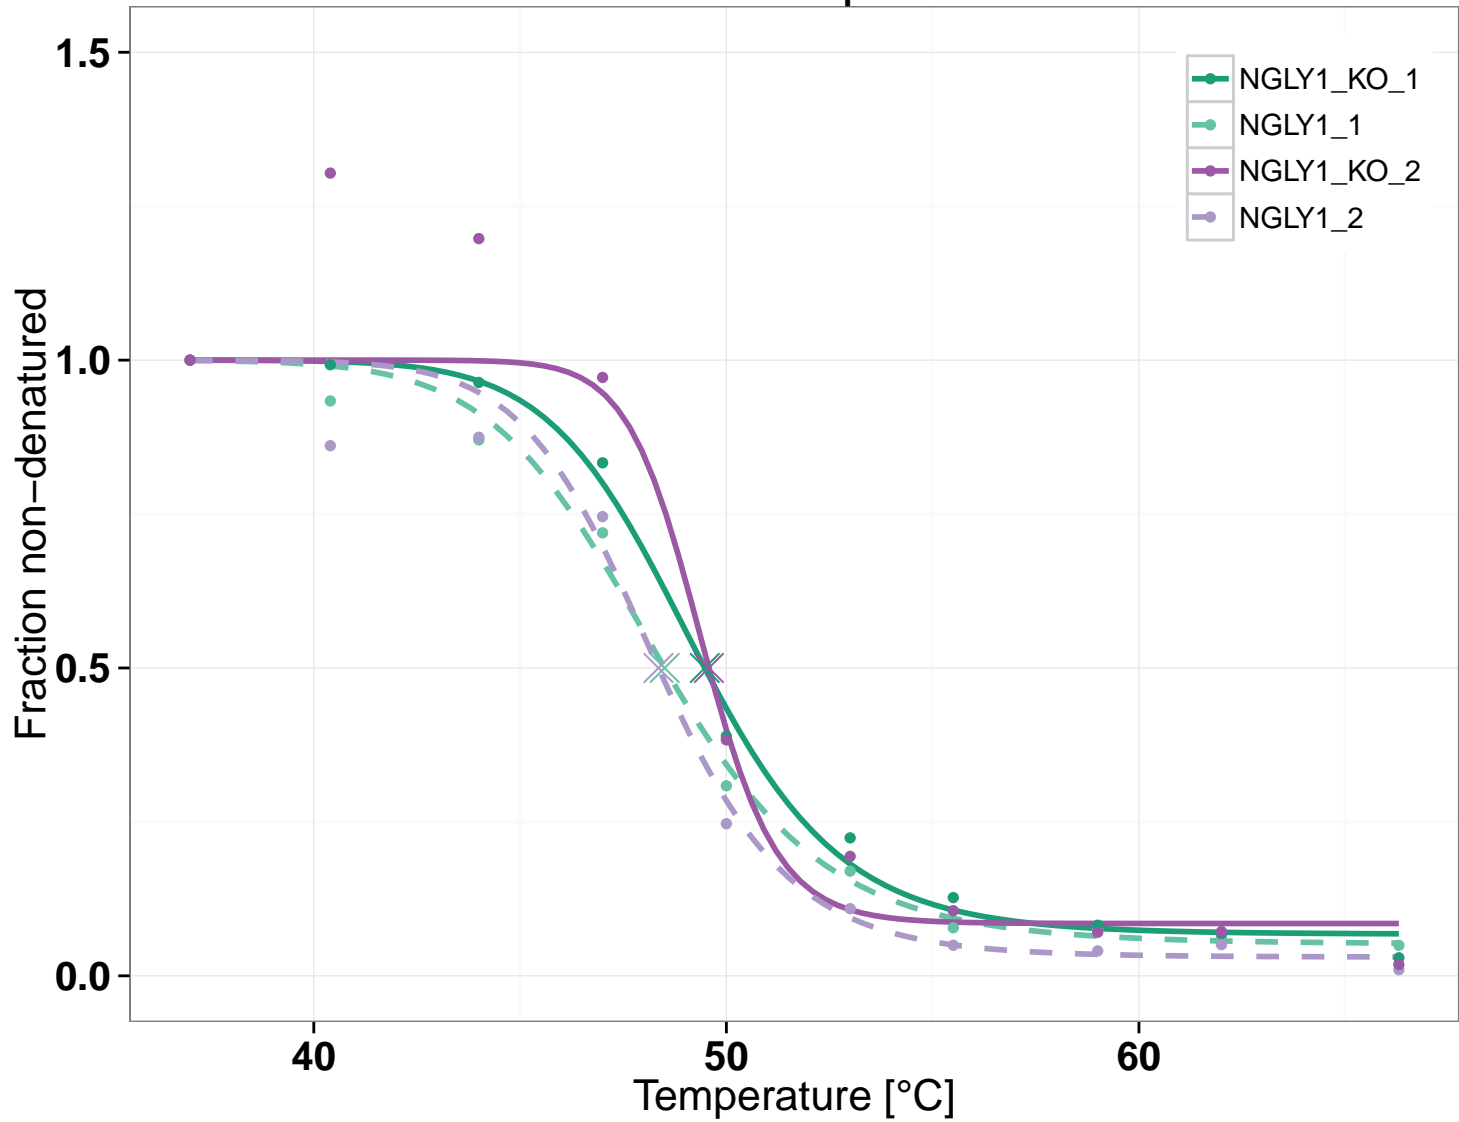

|            | meltPoint | slope | plateau | R2   |
|------------|-----------|-------|---------|------|
| NGLY1_KO_1 | 49.48     | -0.13 | 0.07    | 1    |
| NGLY1_1    | 48.5      | -0.12 | 0.05    | 0.99 |
| NGLY1_KO_2 | 49.58     | -0.25 | 0.08    | 0.94 |
| NGLY1_2    | 48.35     | -0.15 | 0.03    | 0.98 |

Supplement: Supplementary file 2769 [file 1]

# IPI00026496.3|NPM3

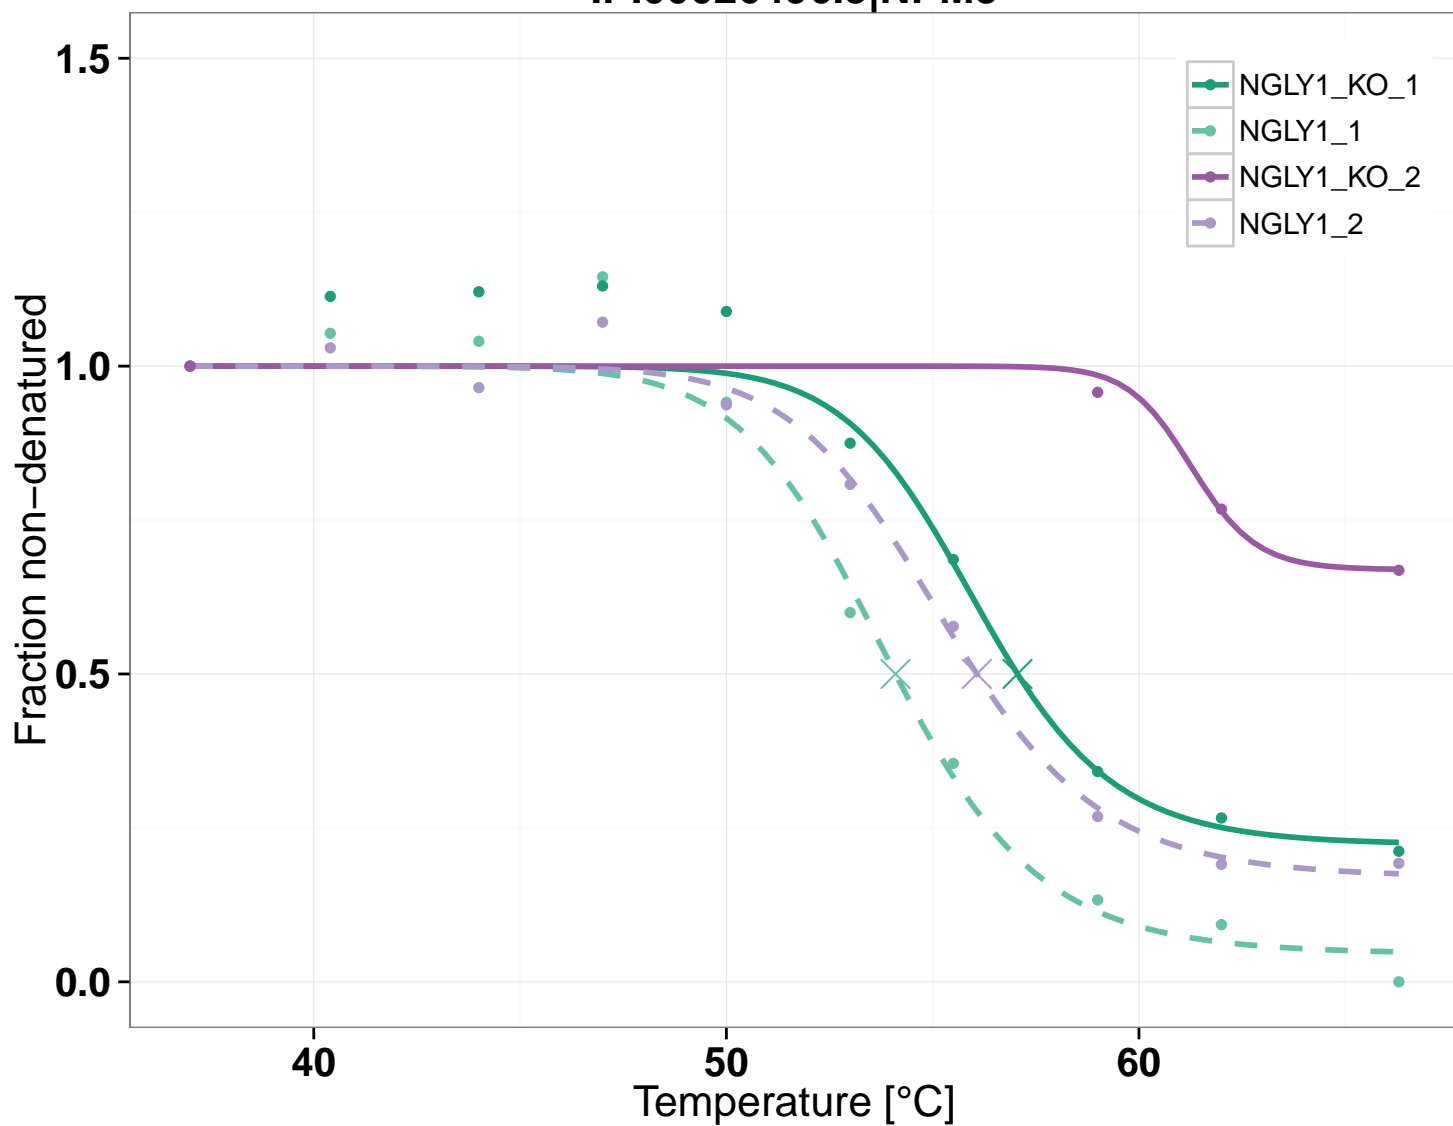

|            | meltPoint | slope | plateau | R2    |
|------------|-----------|-------|---------|-------|
| NGLY1_KO_1 | 57.06     | -0.12 | 0.22    | 0.96  |
| NGLY1_1    | 54.1      | -0.13 | 0.04    | 0.98  |
| NGLY1_KO_2 | -         | -0.11 | 0.67    | -1.16 |
| NGLY1_2    | 56.07     | -0.11 | 0.17    | 0.99  |

Supplement: Supplementary file 2770 [file 1]

IPI00300621.1|SYNJ2

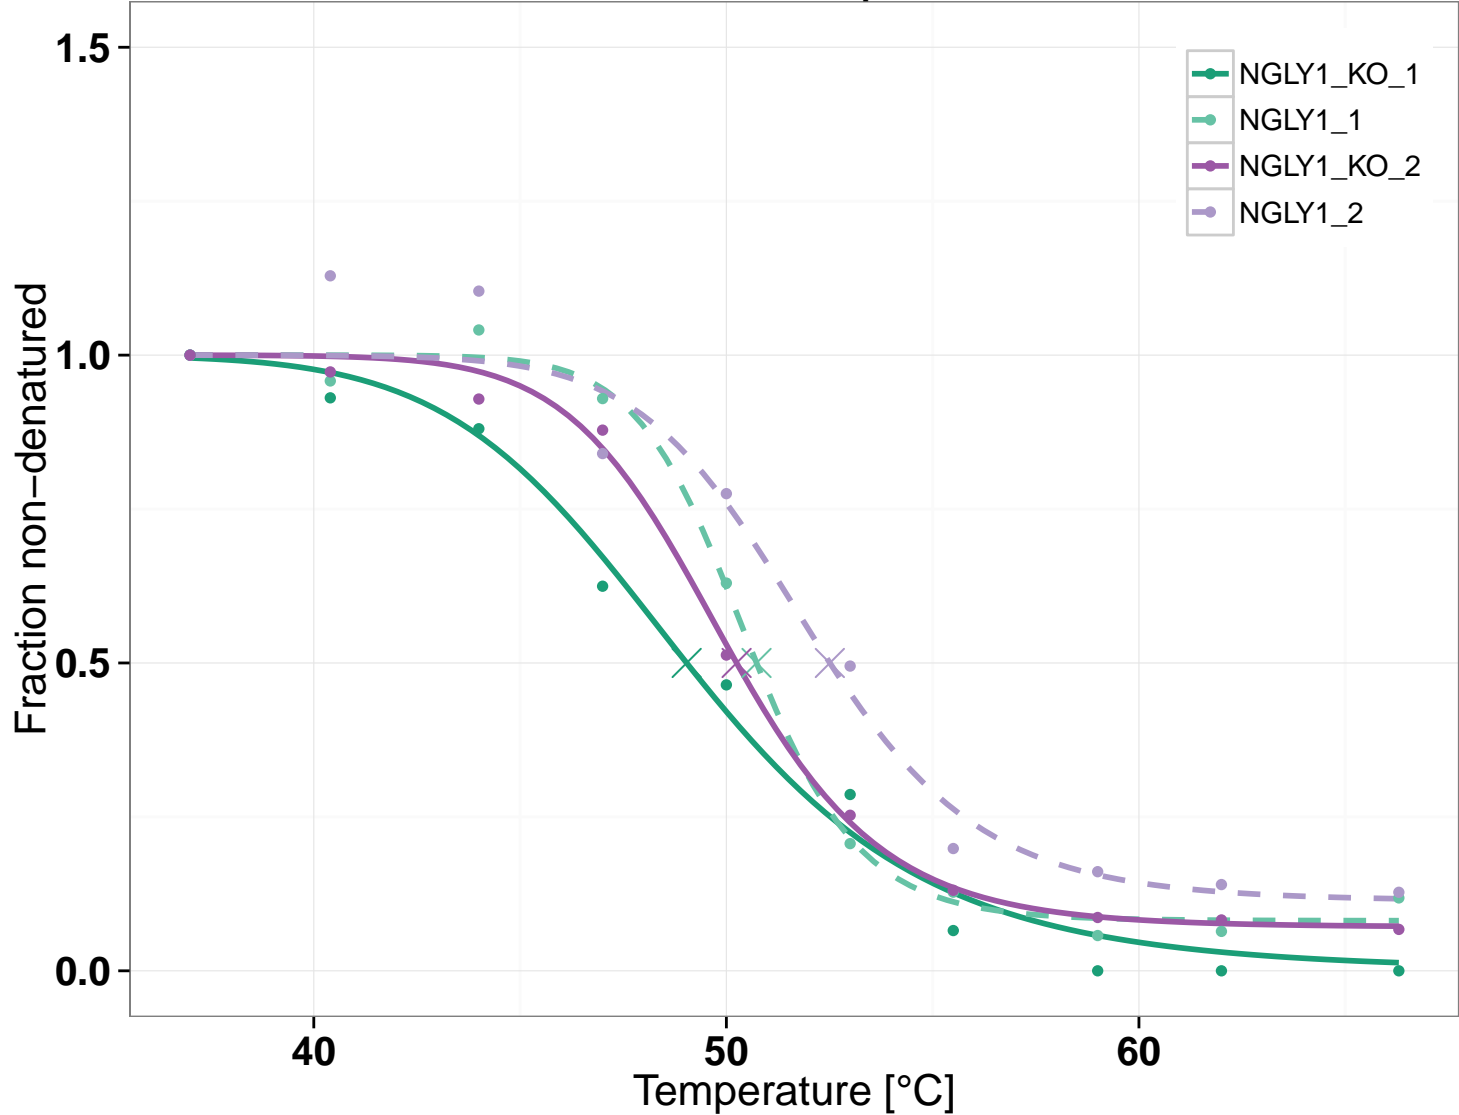

|            | meltPoint | slope  | plateau | R2   |
|------------|-----------|--------|---------|------|
| NGLY1_KO_1 | 49.04     | -0.086 | 0       | 0.99 |
| NGLY1_1    | 50.73     | -0.17  | 0.08    | 1    |
| NGLY1_KO_2 | 50.25     | -0.12  | 0.07    | 1    |
| NGLY1_2    | 52.51     | -0.11  | 0.11    | 0.97 |

Supplement: Supplementary file 2771 [file 1]

IPI00023500.1|DPAGT1

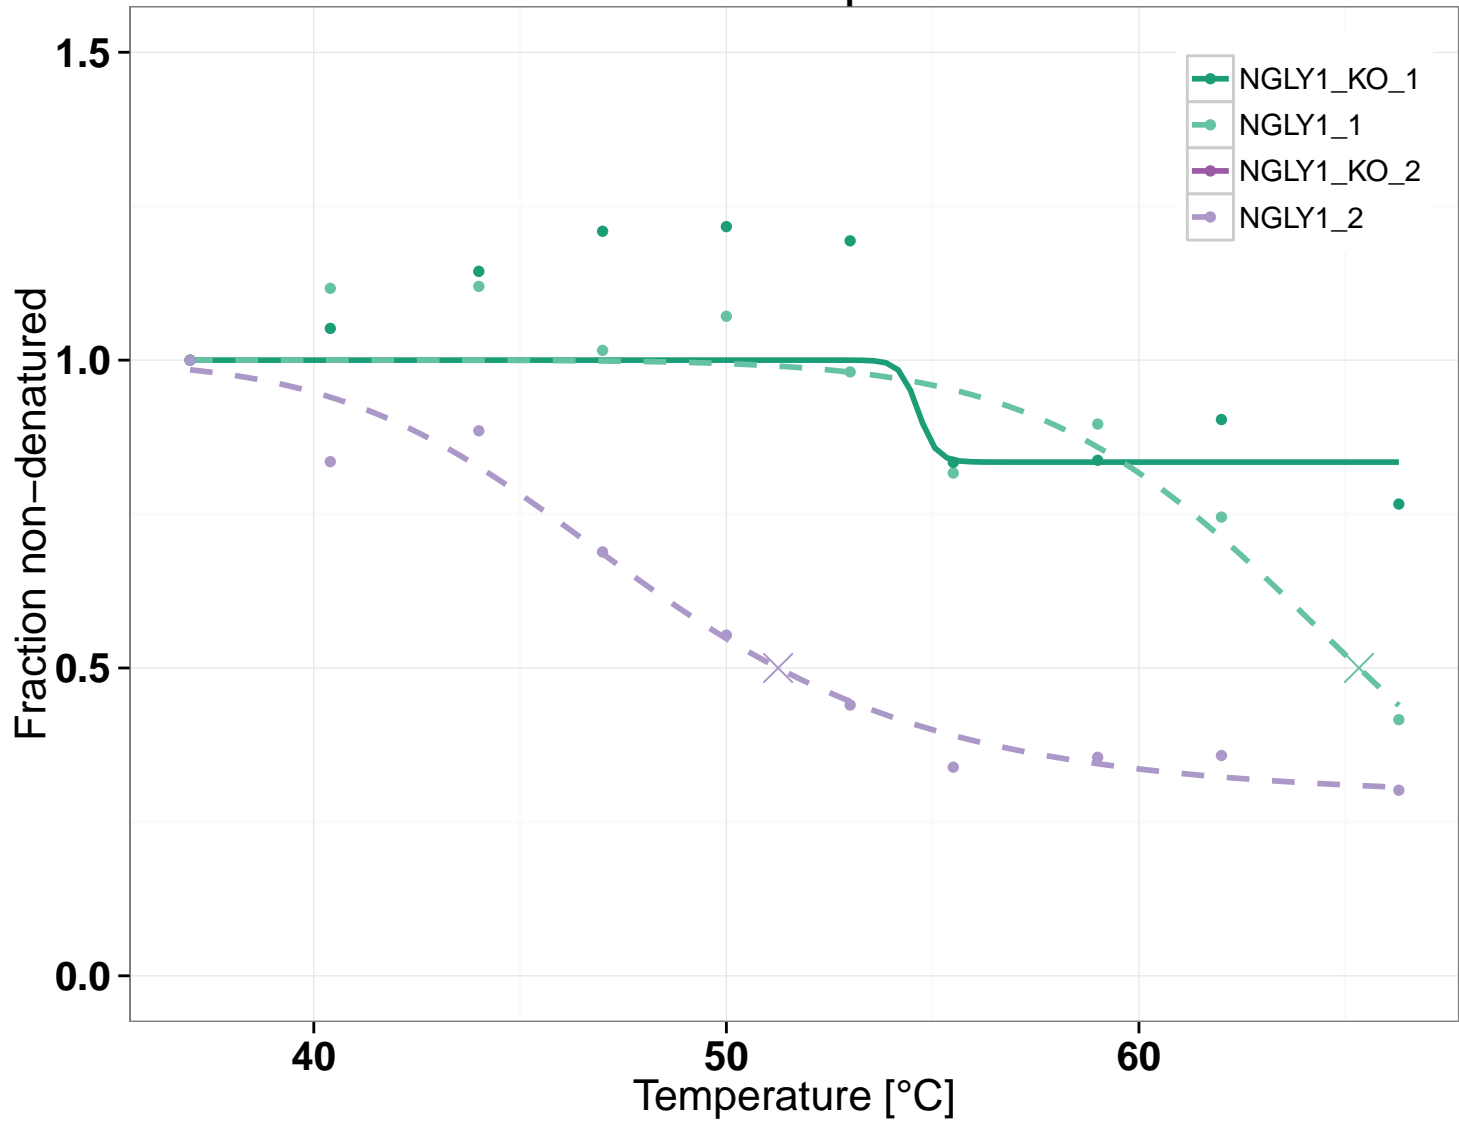

|            | meltPoint | slope  | plateau | R2   |
|------------|-----------|--------|---------|------|
| NGLY1_KO_1 | -         | -0.19  | 0.83    | 0.4  |
| NGLY1_1    | 65.33     | -0.065 | 0       | 0.87 |
| NGLY1_KO_2 | -         | -      | -       | -    |
| NGLY1_2    | 51.25     | -0.049 | 0.29    | 0.97 |

Supplement: Supplementary file 2772 [file 1]

IPI00305518.3|CCDC45

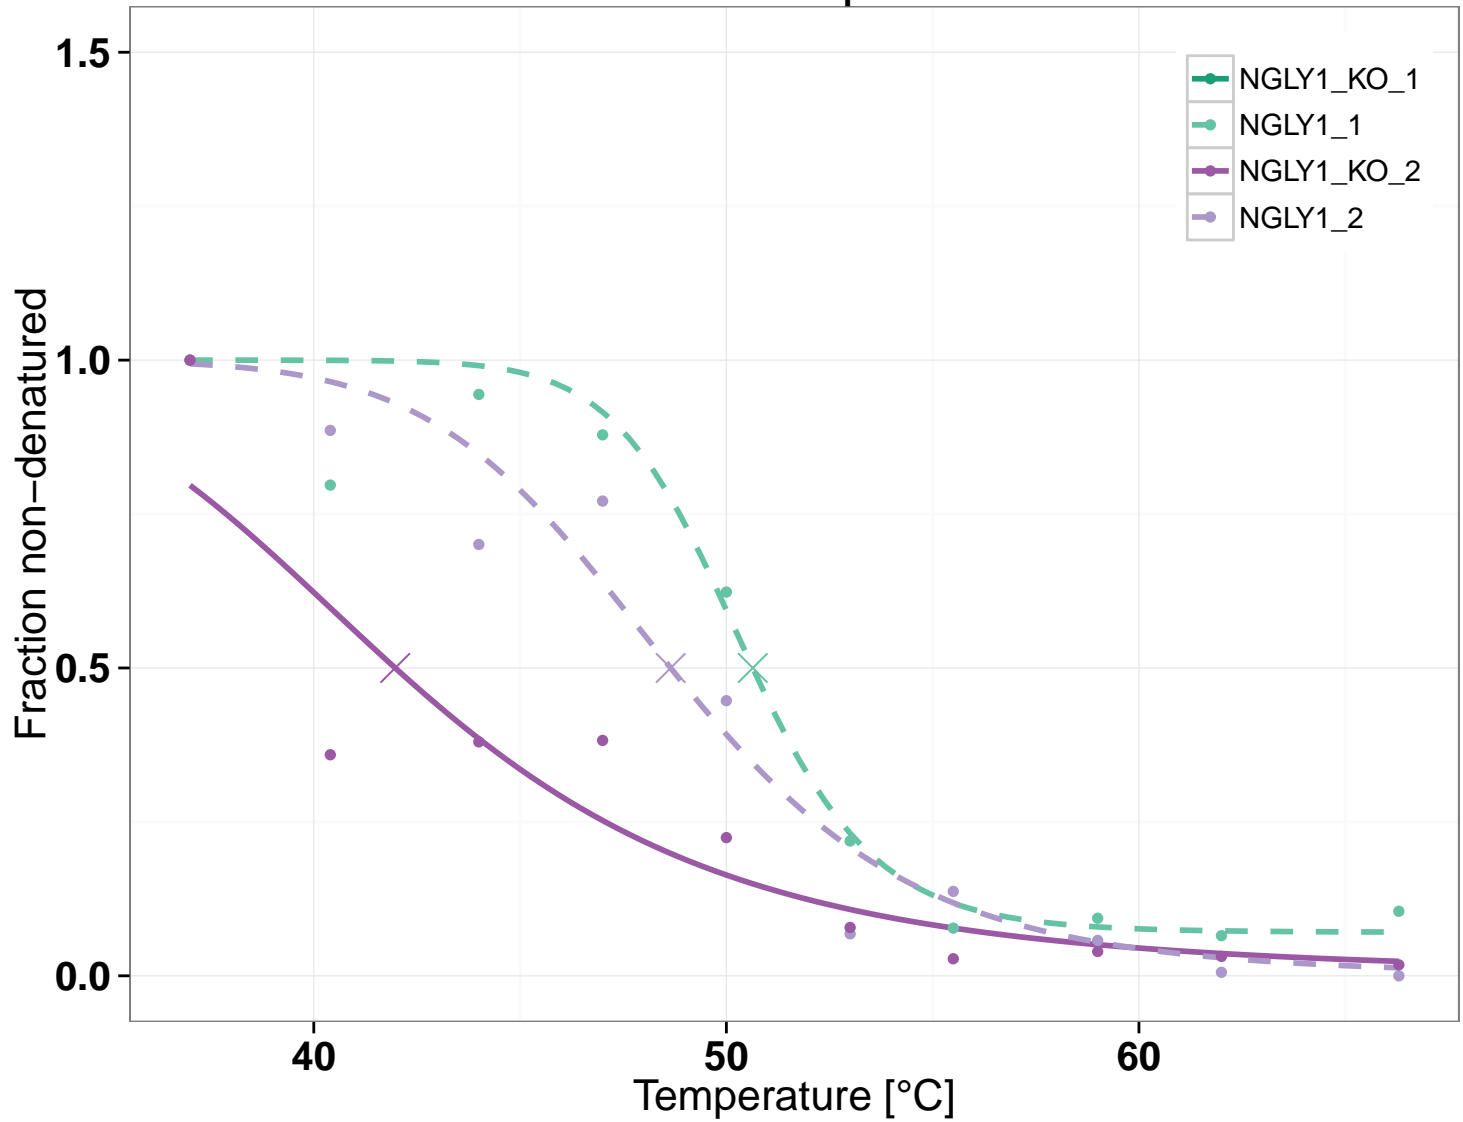

|            | meltPoint | slope  | plateau | R2   |
|------------|-----------|--------|---------|------|
| NGLY1_KO_1 | –         | –      | –       | –    |
| NGLY1_1    | 50.64     | –0.15  | 0.07    | 0.97 |
| NGLY1_KO_2 | 41.97     | –0.063 | 0       | 0.85 |
| NGLY1_2    | 48.65     | –0.085 | 0       | 0.95 |

Supplement: Supplementary file 2773 [file 1]

# IPI00790740.1|PDIA3

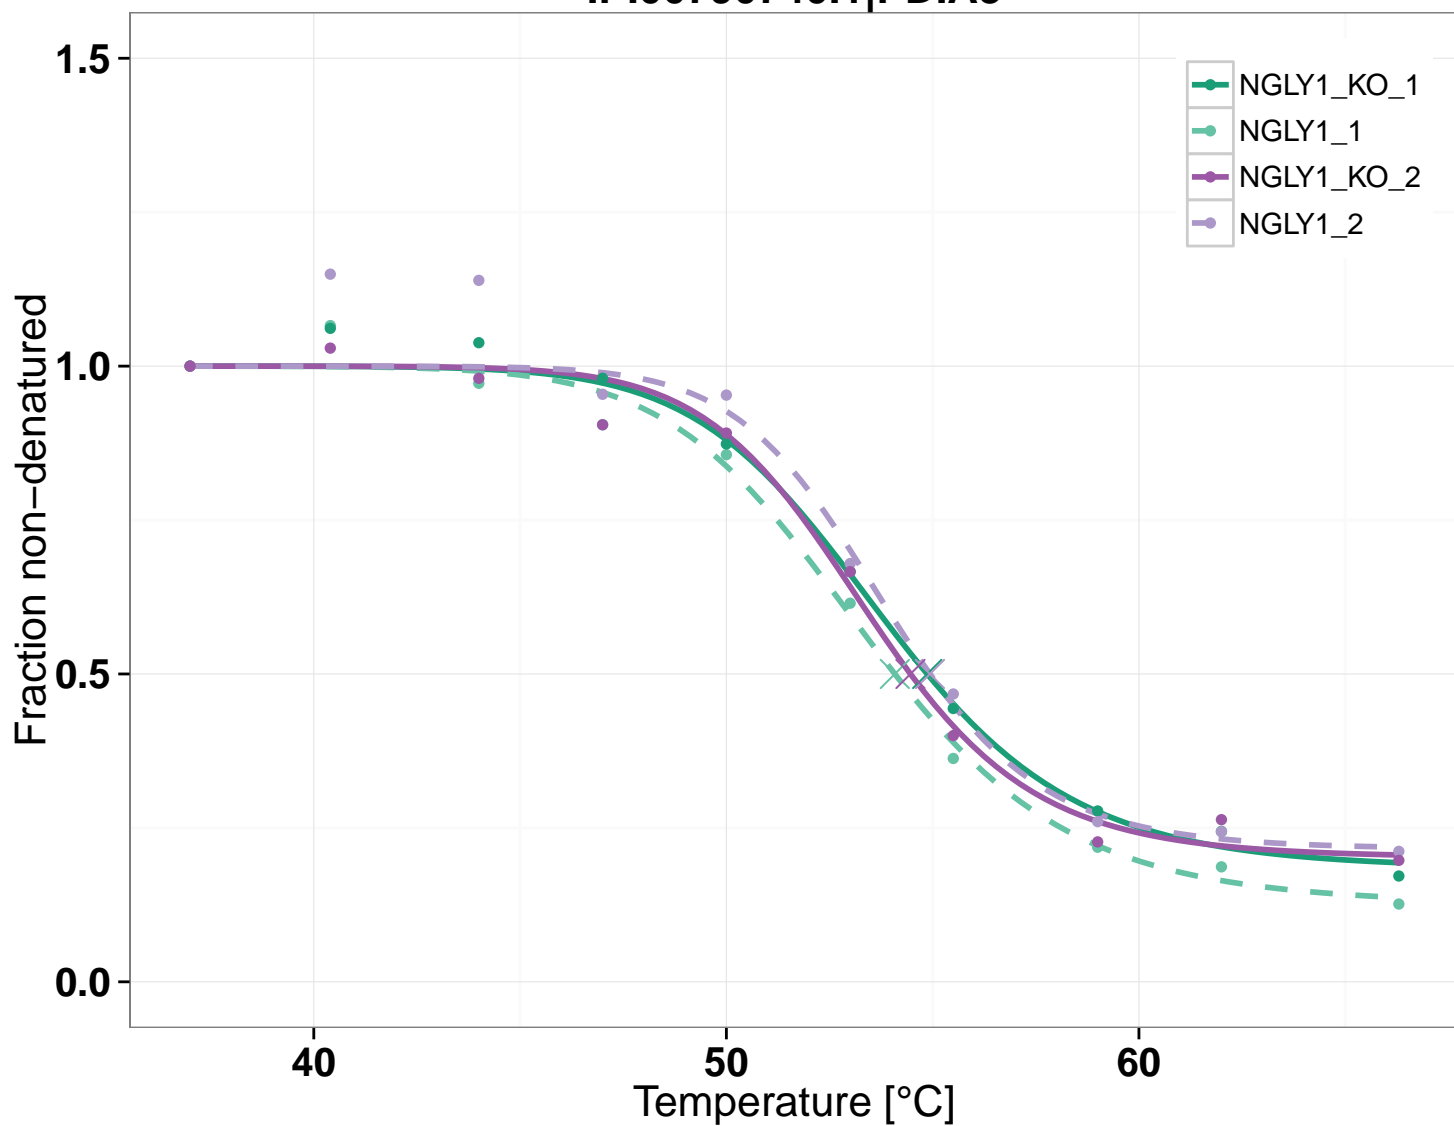

|            | meltPoint | slope  | plateau | R2   |
|------------|-----------|--------|---------|------|
| NGLY1_KO_1 | 54.87     | -0.089 | 0.18    | 0.99 |
| NGLY1_1    | 54.08     | -0.091 | 0.12    | 0.99 |
| NGLY1_KO_2 | 54.46     | -0.1   | 0.2     | 0.99 |
| NGLY1_2    | 54.93     | -0.11  | 0.22    | 0.97 |

Supplement: Supplementary file 2774 [file 1]

IPI00005181.1|PLSCR1

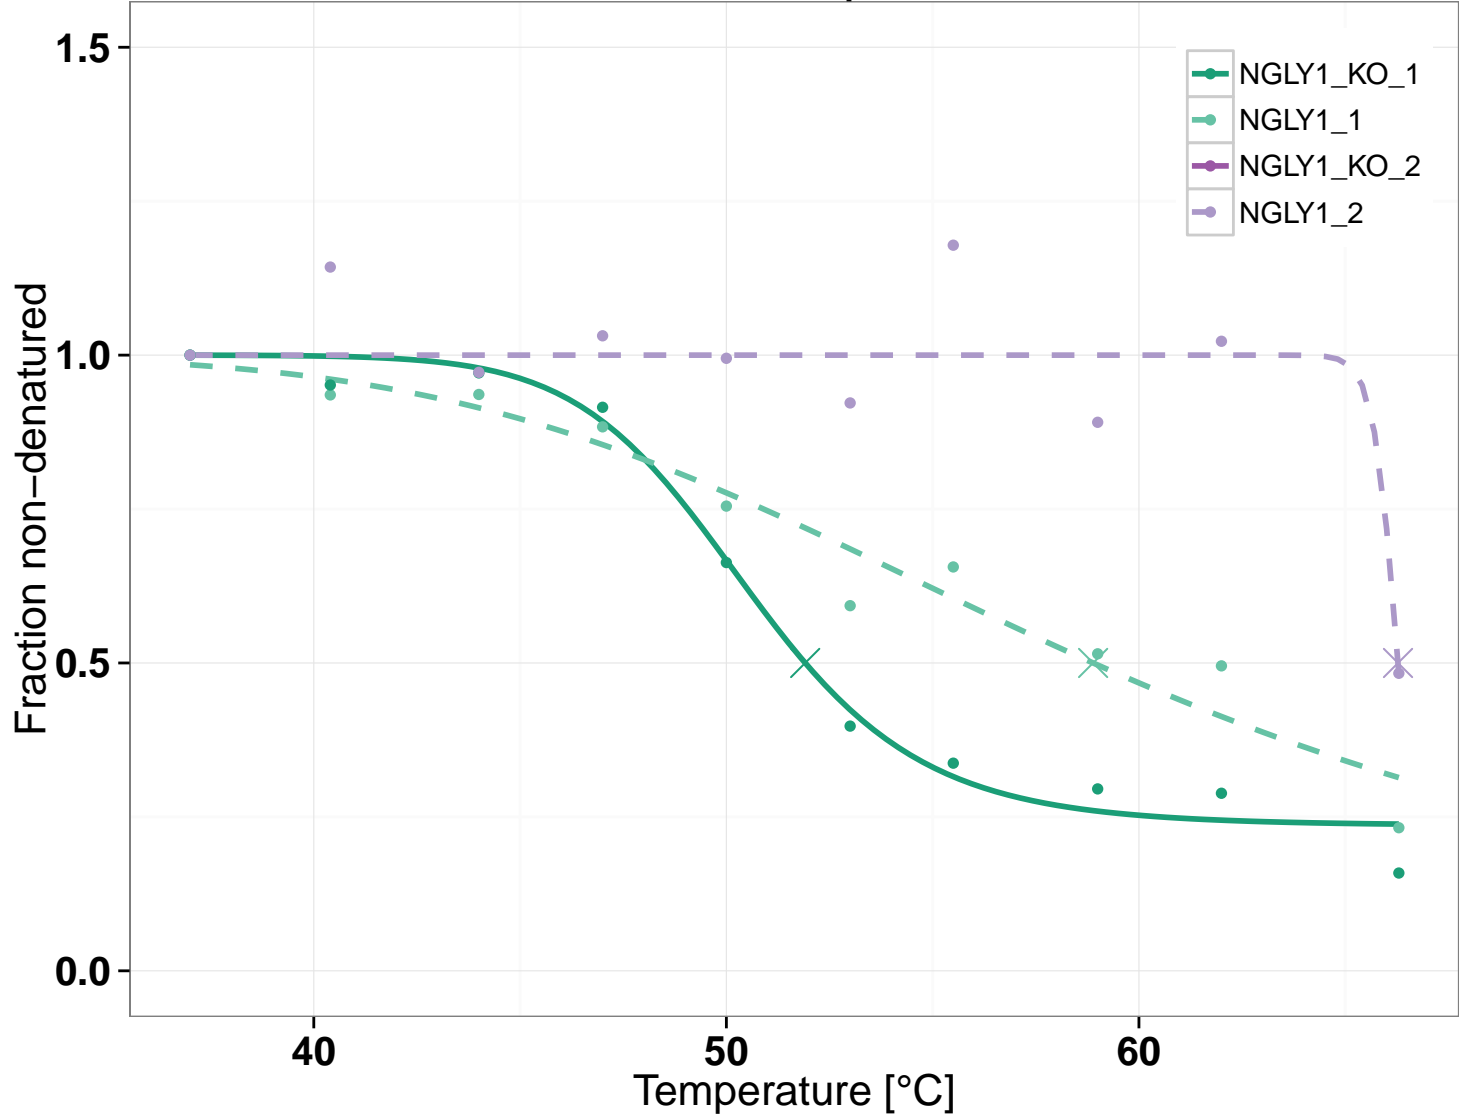

|            | meltPoint | slope  | plateau | R2   |
|------------|-----------|--------|---------|------|
| NGLY1_KO_1 | 51.91     | -0.092 | 0.24    | 0.99 |
| NGLY1_1    | 58.89     | -0.032 | 0       | 0.95 |
| NGLY1_KO_2 | -         | -      | -       | -    |
| NGLY1_2    | 66.28     | -0.84  | 0       | 0.78 |

Supplement: Supplementary file 2775 [file 1]

# IPI00386119.4|SF1

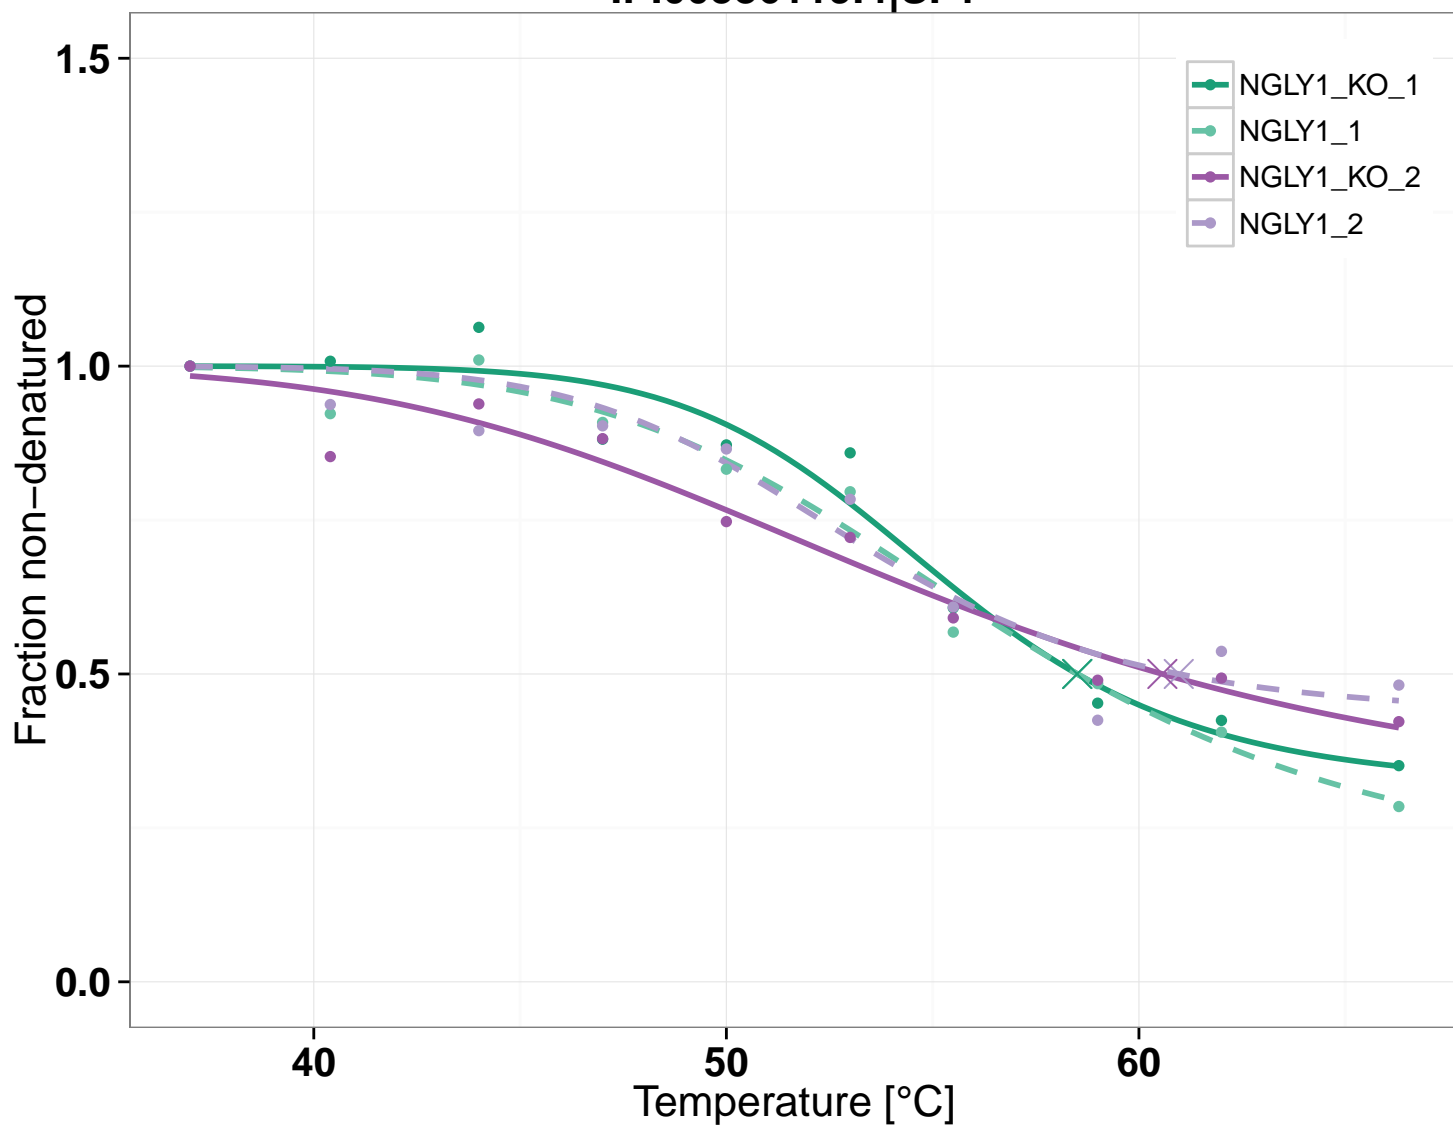

|            | meltPoint | slope  | plateau | R2   |
|------------|-----------|--------|---------|------|
| NGLY1_KO_1 | 58.5      | -0.055 | 0.32    | 0.96 |
| NGLY1_1    | 58.51     | -0.044 | 0.17    | 0.98 |
| NGLY1_KO_2 | 60.57     | -0.028 | 0.26    | 0.95 |
| NGLY1_2    | 60.97     | -0.042 | 0.43    | 0.92 |

Supplement: Supplementary file 2776 [file 1]

IPI00166817.4|ZNF561

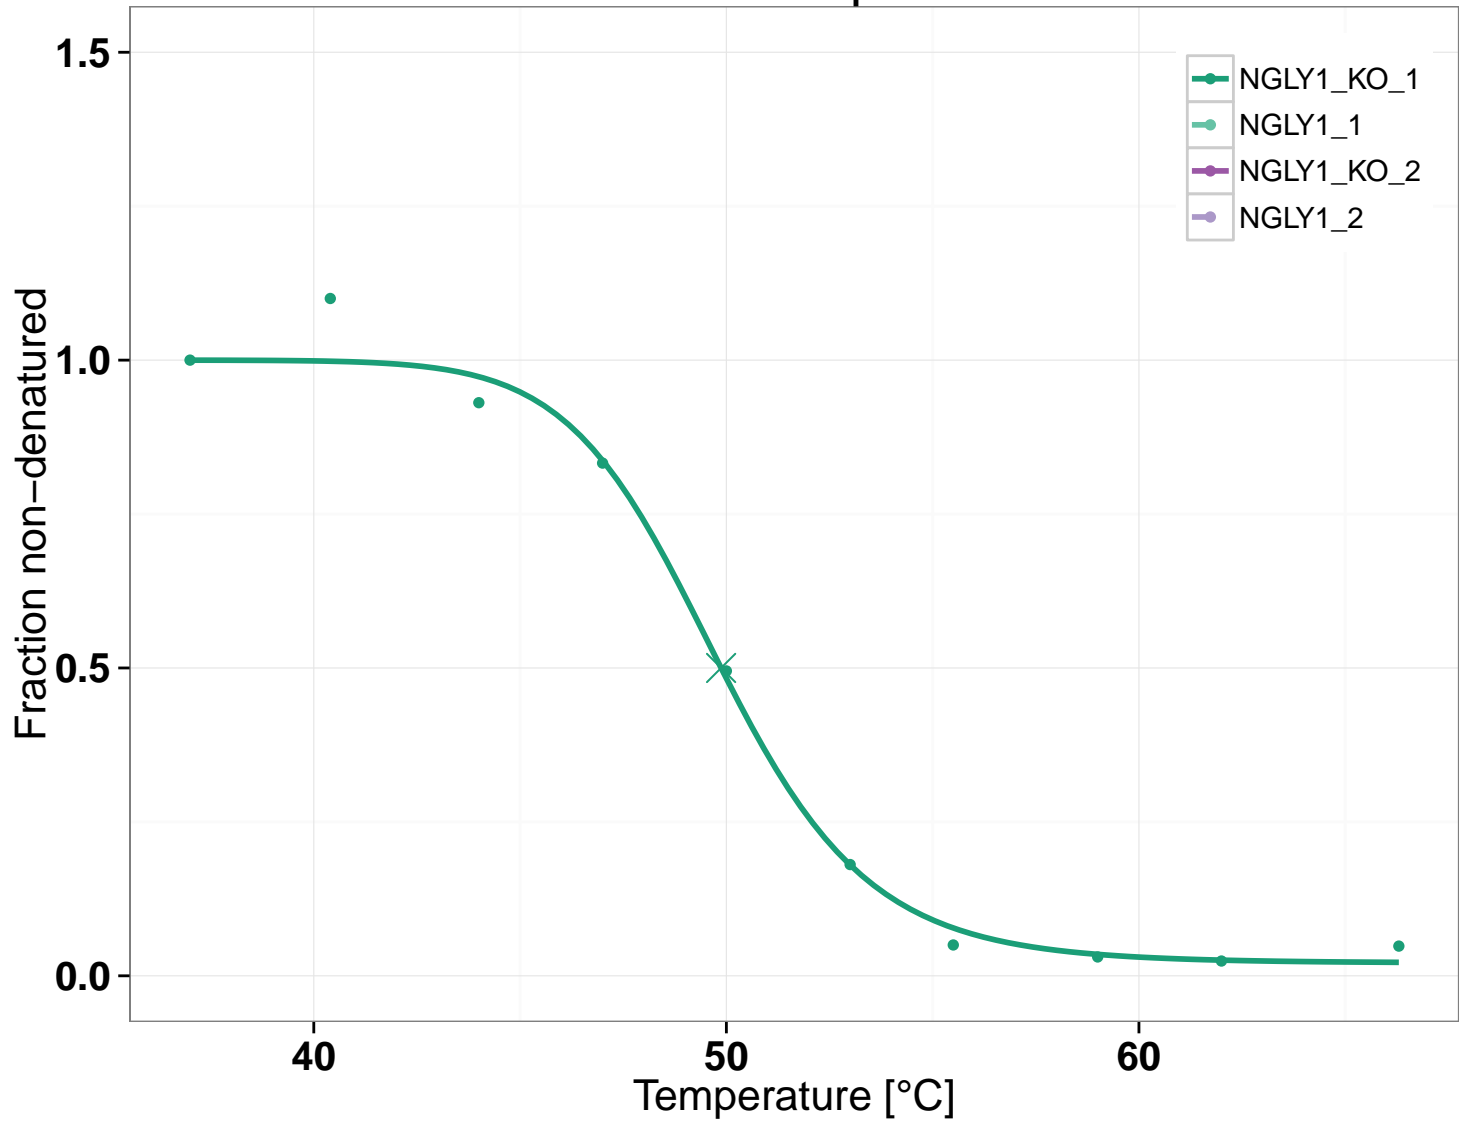

|            | meltPoint | slope | plateau | R2   |
|------------|-----------|-------|---------|------|
| NGLY1_KO_1 | 49.87     | -0.13 | 0.02    | 0.99 |
| NGLY1_1    | -         | -     | -       | -    |
| NGLY1_KO_2 | -         | -     | -       | -    |
| NGLY1_2    | -         | -     | -       | -    |

Supplement: Supplementary file 2777 [file 1]

IPI00023727.1|KIF3C

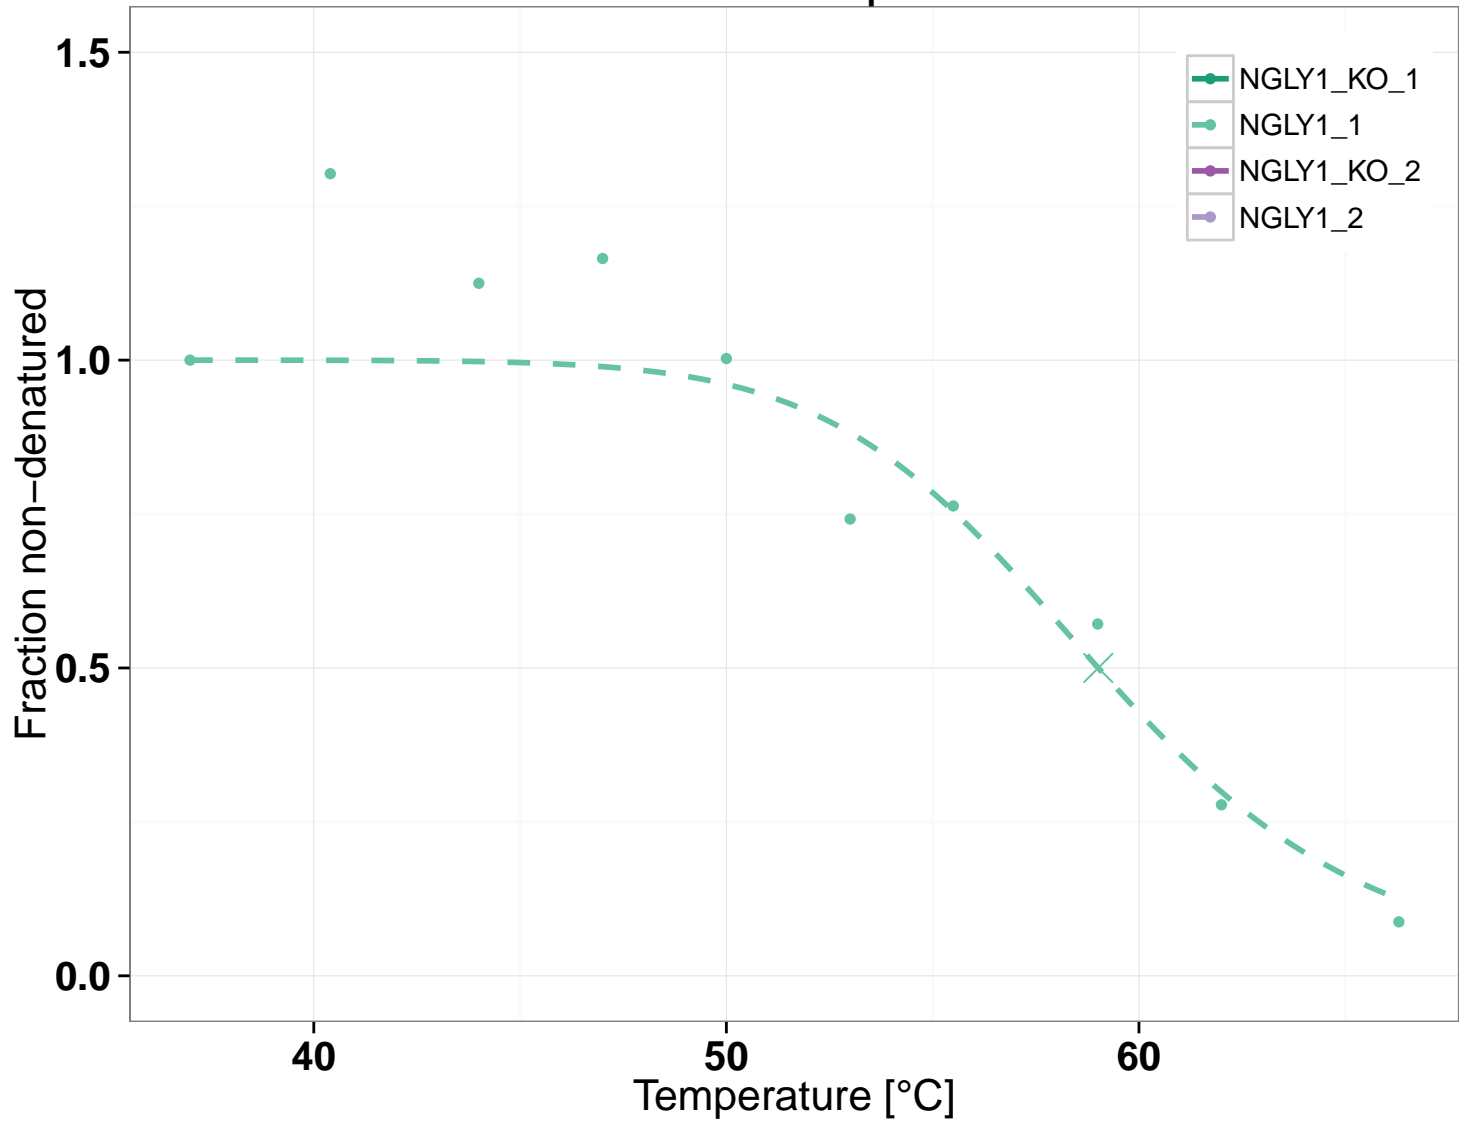

|            | meltPoint | slope  | plateau | R2   |
|------------|-----------|--------|---------|------|
| NGLY1_KO_1 | –         | –      | –       | –    |
| NGLY1_1    | 59.01     | –0.076 | 0       | 0.88 |
| NGLY1_KO_2 | –         | –      | –       | –    |
| NGLY1_2    | –         | –      | –       | –    |

Supplement: Supplementary file 2778 [file 1]

IPI00397575.3|LRRC41

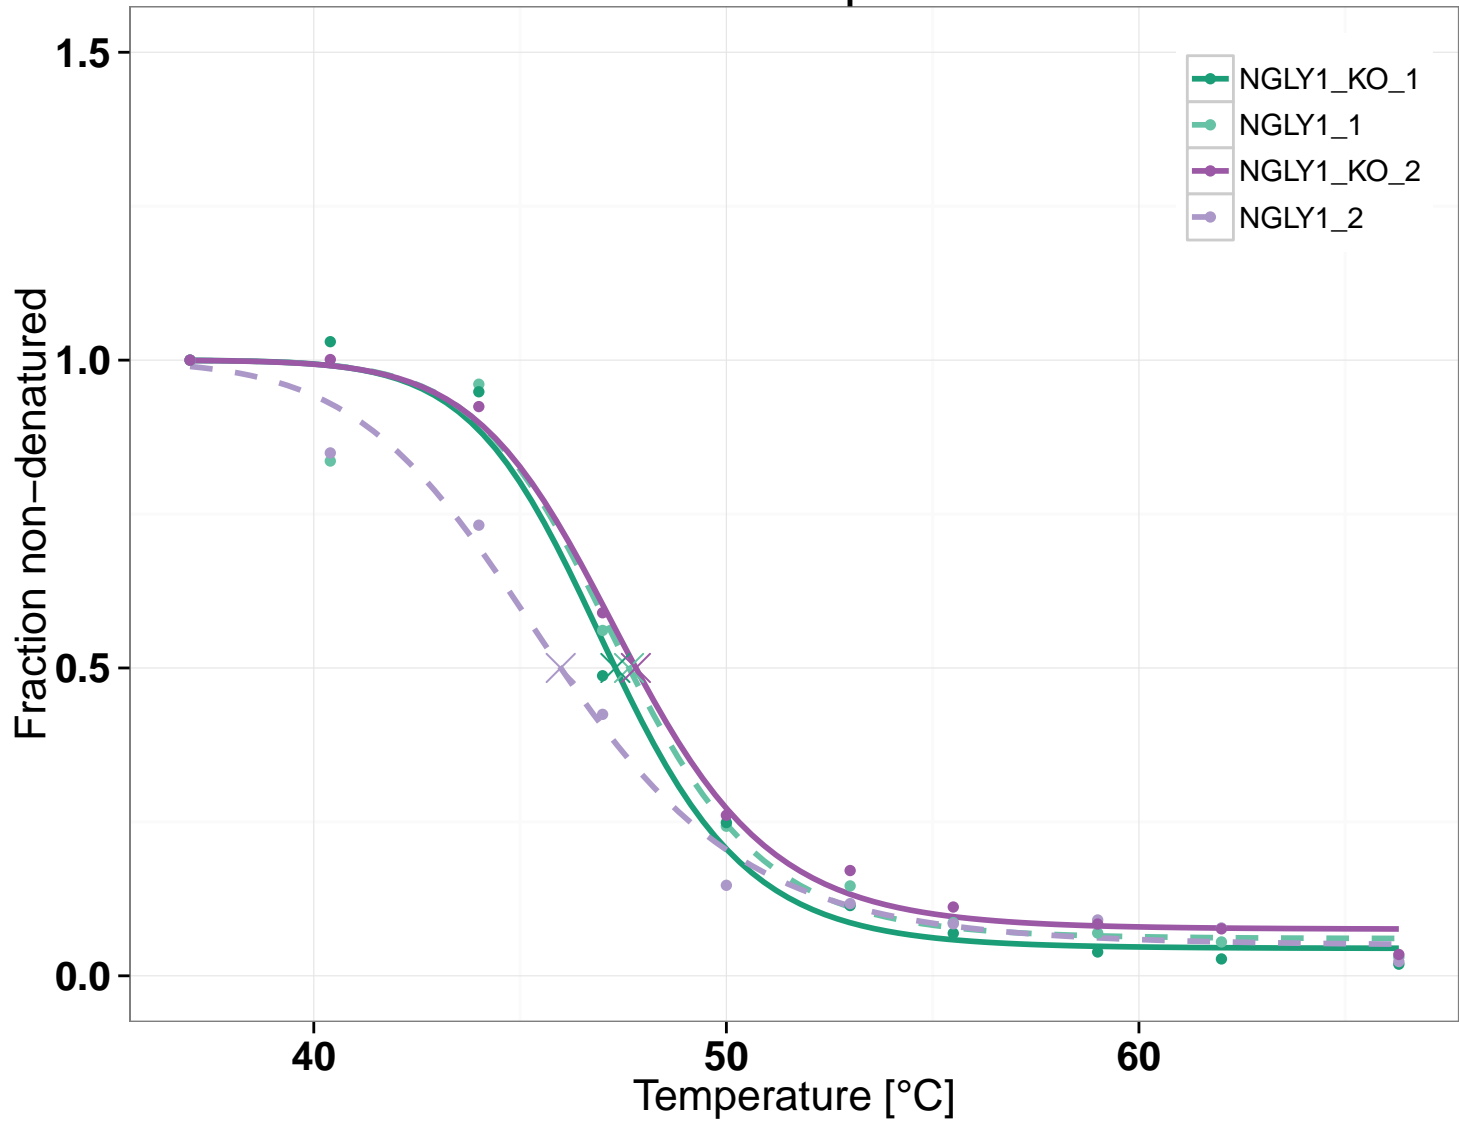

|            | meltPoint | slope | plateau | R2   |
|------------|-----------|-------|---------|------|
| NGLY1_KO_1 | 47.31     | -0.14 | 0.04    | 0.99 |
| NGLY1_1    | 47.64     | -0.13 | 0.06    | 0.98 |
| NGLY1_KO_2 | 47.81     | -0.13 | 0.08    | 1    |
| NGLY1_2    | 45.98     | -0.1  | 0.05    | 0.99 |

Supplement: Supplementary file 2779 [file 1]

IPI00426640.1|GTF2H2

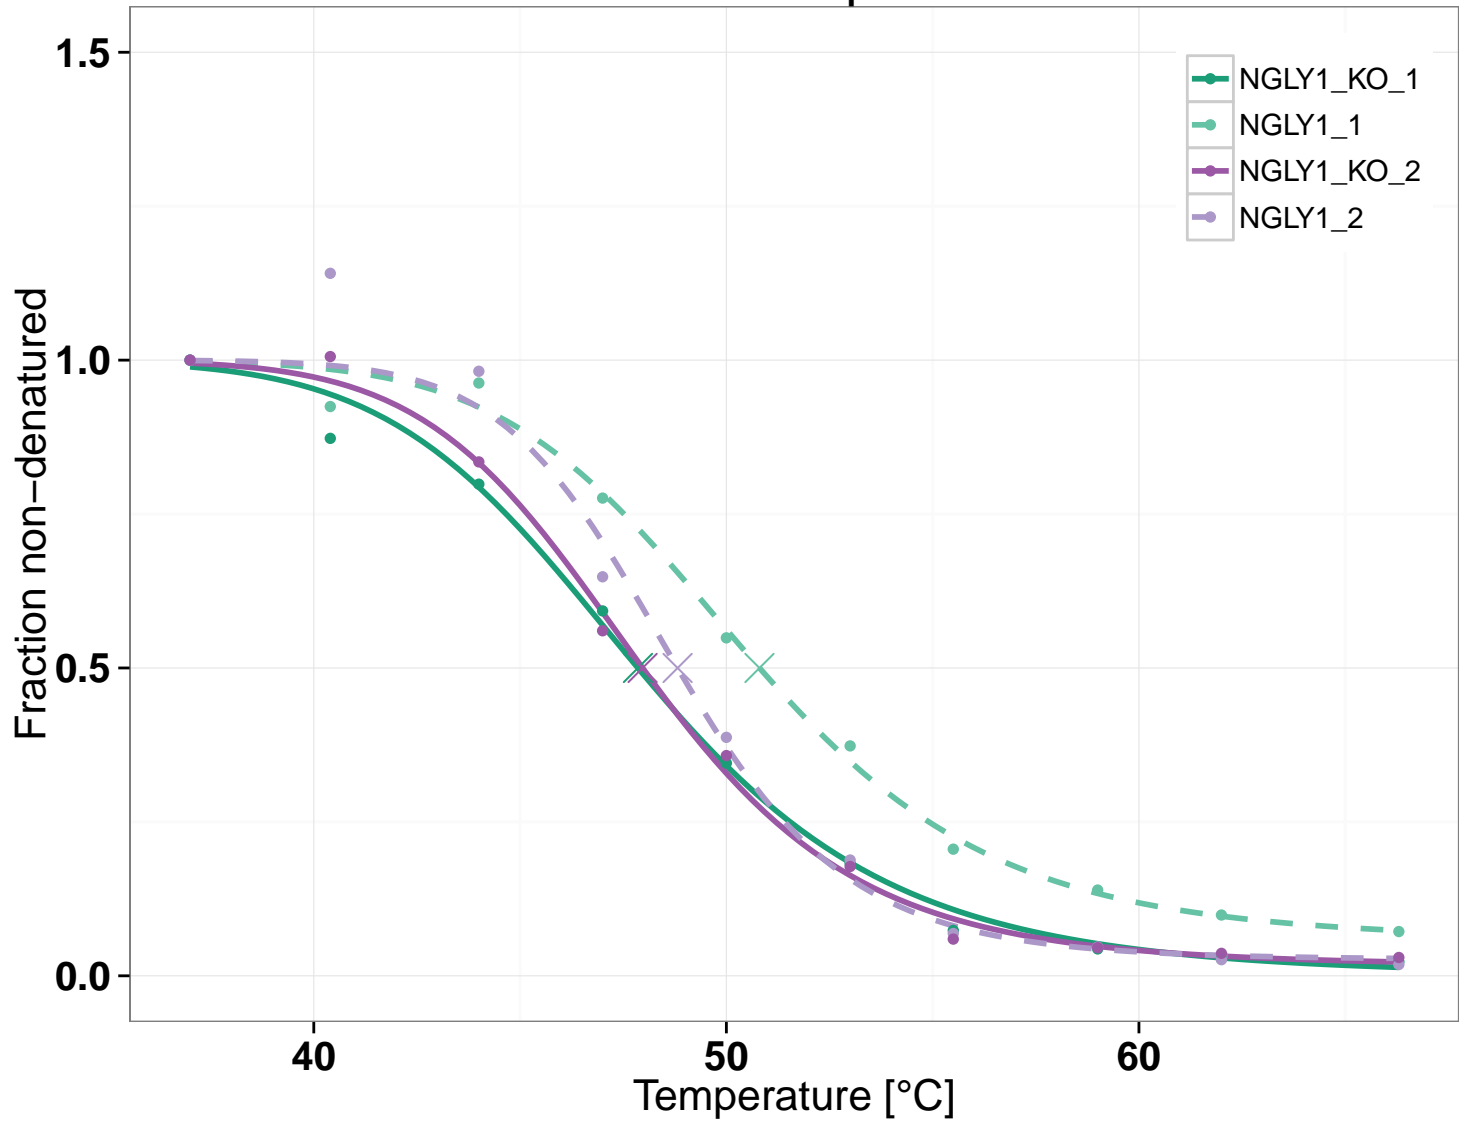

|            | meltPoint | slope  | plateau | R2   |
|------------|-----------|--------|---------|------|
| NGLY1_KO_1 | 47.86     | -0.082 | 0       | 0.99 |
| NGLY1_1    | 50.8      | -0.079 | 0.06    | 0.99 |
| NGLY1_KO_2 | 47.97     | -0.094 | 0.02    | 1    |
| NGLY1_2    | 48.82     | -0.12  | 0.03    | 0.98 |

Supplement: Supplementary file 2780 [file 1]

IPI00164528.1|SNTA1

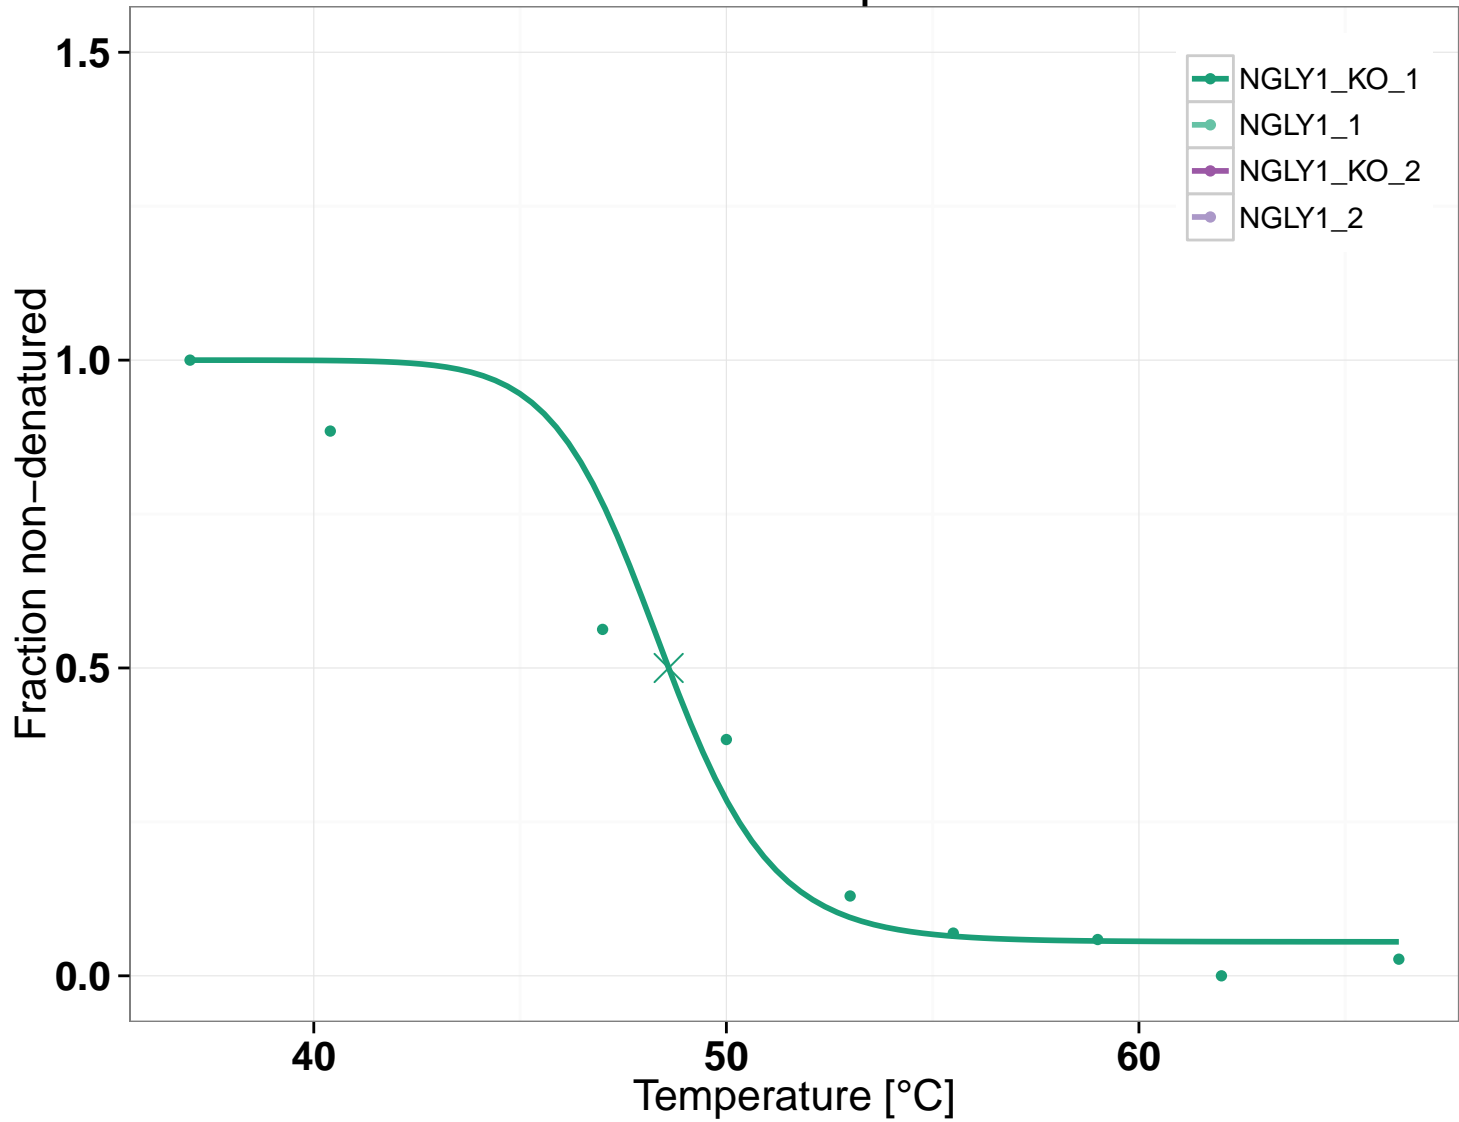

|            | meltPoint | slope | plateau | R2   |
|------------|-----------|-------|---------|------|
| NGLY1_KO_1 | 48.6      | -0.18 | 0.06    | 0.78 |
| NGLY1_1    | —         | —     | —       | —    |
| NGLY1_KO_2 | —         | —     | —       | —    |
| NGLY1_2    | —         | —     | —       | —    |

Supplement: Supplementary file 2781 [file 1]

IPI00059292.3|MAGOH

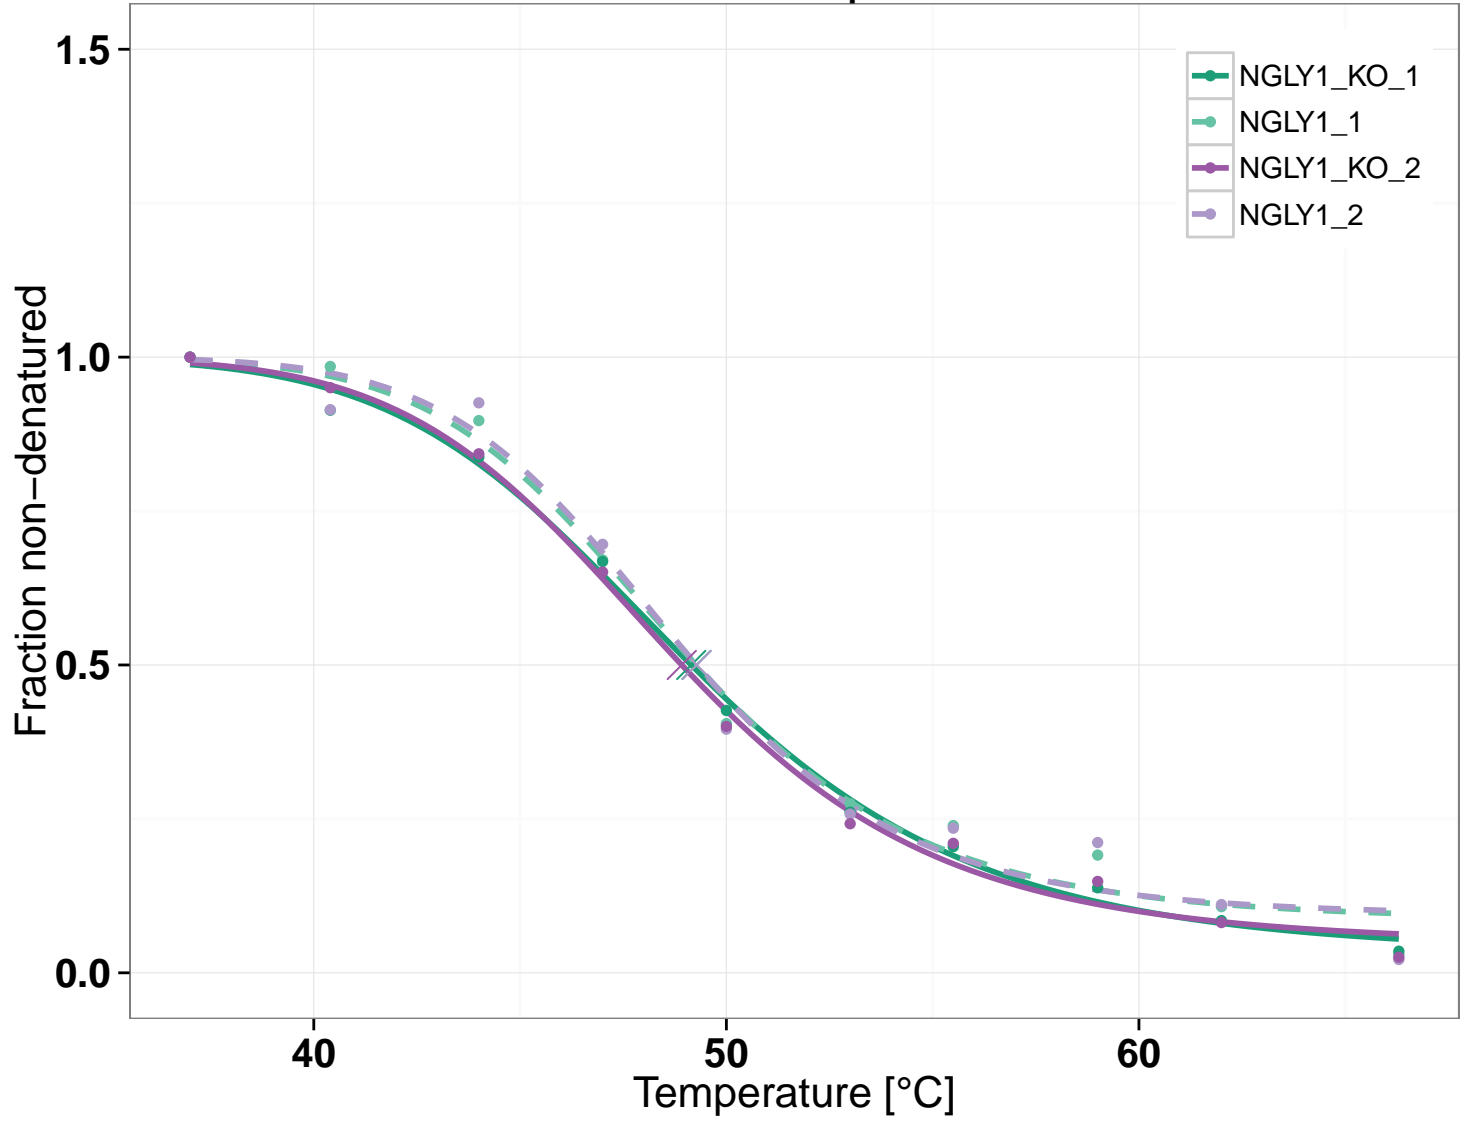

|            | meltPoint | slope  | plateau | R2   |
|------------|-----------|--------|---------|------|
| NGLY1_KO_1 | 49.15     | -0.069 | 0.03    | 1    |
| NGLY1_1    | 49.27     | -0.078 | 0.08    | 0.99 |
| NGLY1_KO_2 | 48.92     | -0.074 | 0.04    | 1    |
| NGLY1_2    | 49.28     | -0.081 | 0.09    | 0.98 |

Supplement: Supplementary file 2782 [file 1]

# IPI00785113.1|LRRFIP1

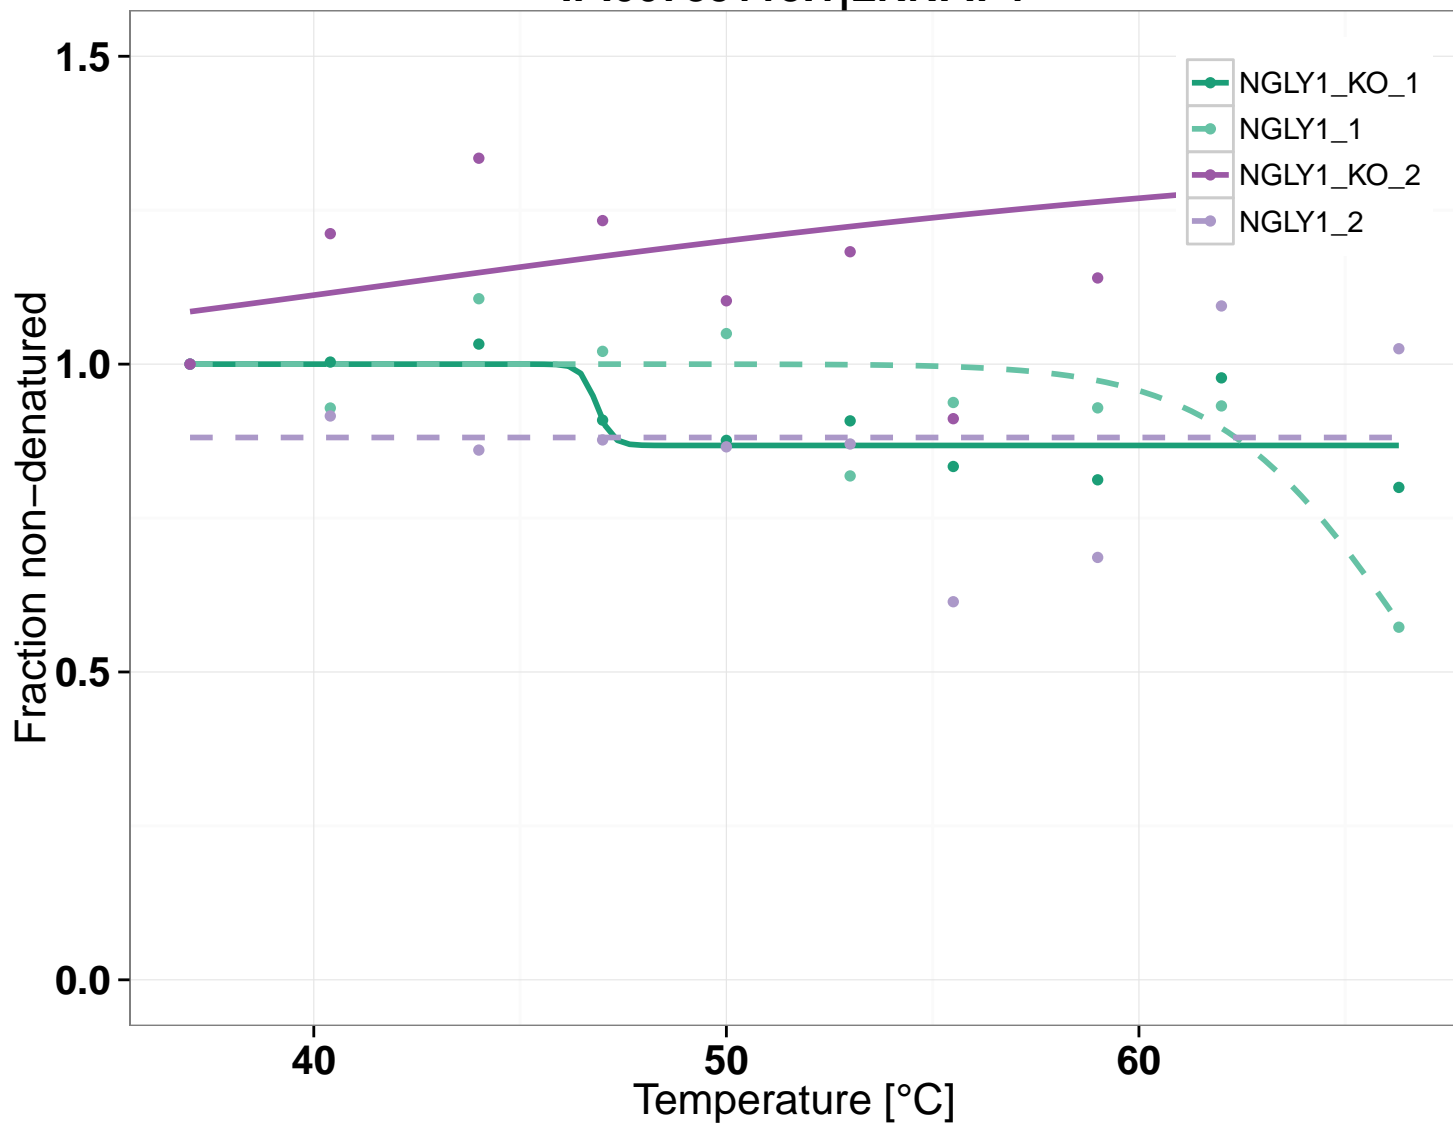

|            | meltPoint | slope  | plateau | R2   |
|------------|-----------|--------|---------|------|
| NGLY1_KO_1 | —         | -0.18  | 0.87    | 0.63 |
| NGLY1_1    | —         | —      | 0       | 0.71 |
| NGLY1_KO_2 | —         | 0.0092 | 1.5     | 0.16 |
| NGLY1_2    | —         | —      | 0.76    | 0    |

Supplement: Supplementary file 2783 [file 1]

IPI00026519.1|PPIF

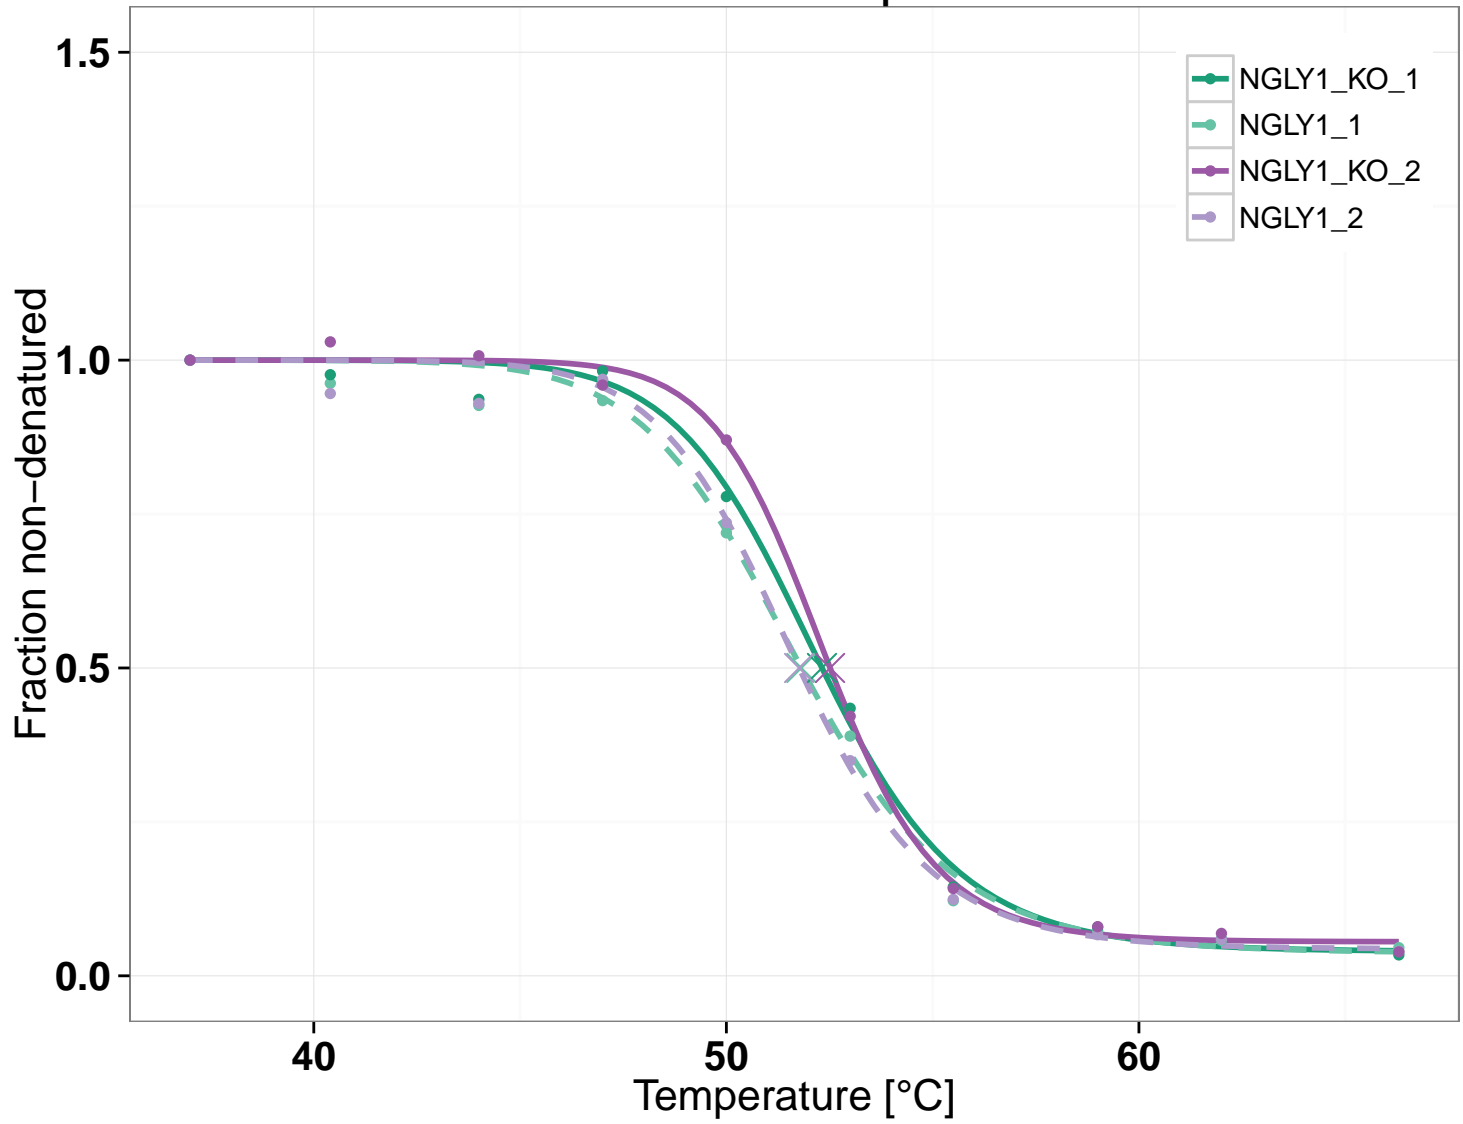

|            | meltPoint | slope | plateau | R2   |
|------------|-----------|-------|---------|------|
| NGLY1_KO_1 | 52.32     | -0.14 | 0.04    | 1    |
| NGLY1_1    | 51.82     | -0.13 | 0.04    | 0.99 |
| NGLY1_KO_2 | 52.51     | -0.17 | 0.06    | 1    |
| NGLY1_2    | 51.76     | -0.14 | 0.04    | 1    |

Supplement: Supplementary file 2784 [file 1]

IPI00009542.1|MAGED2

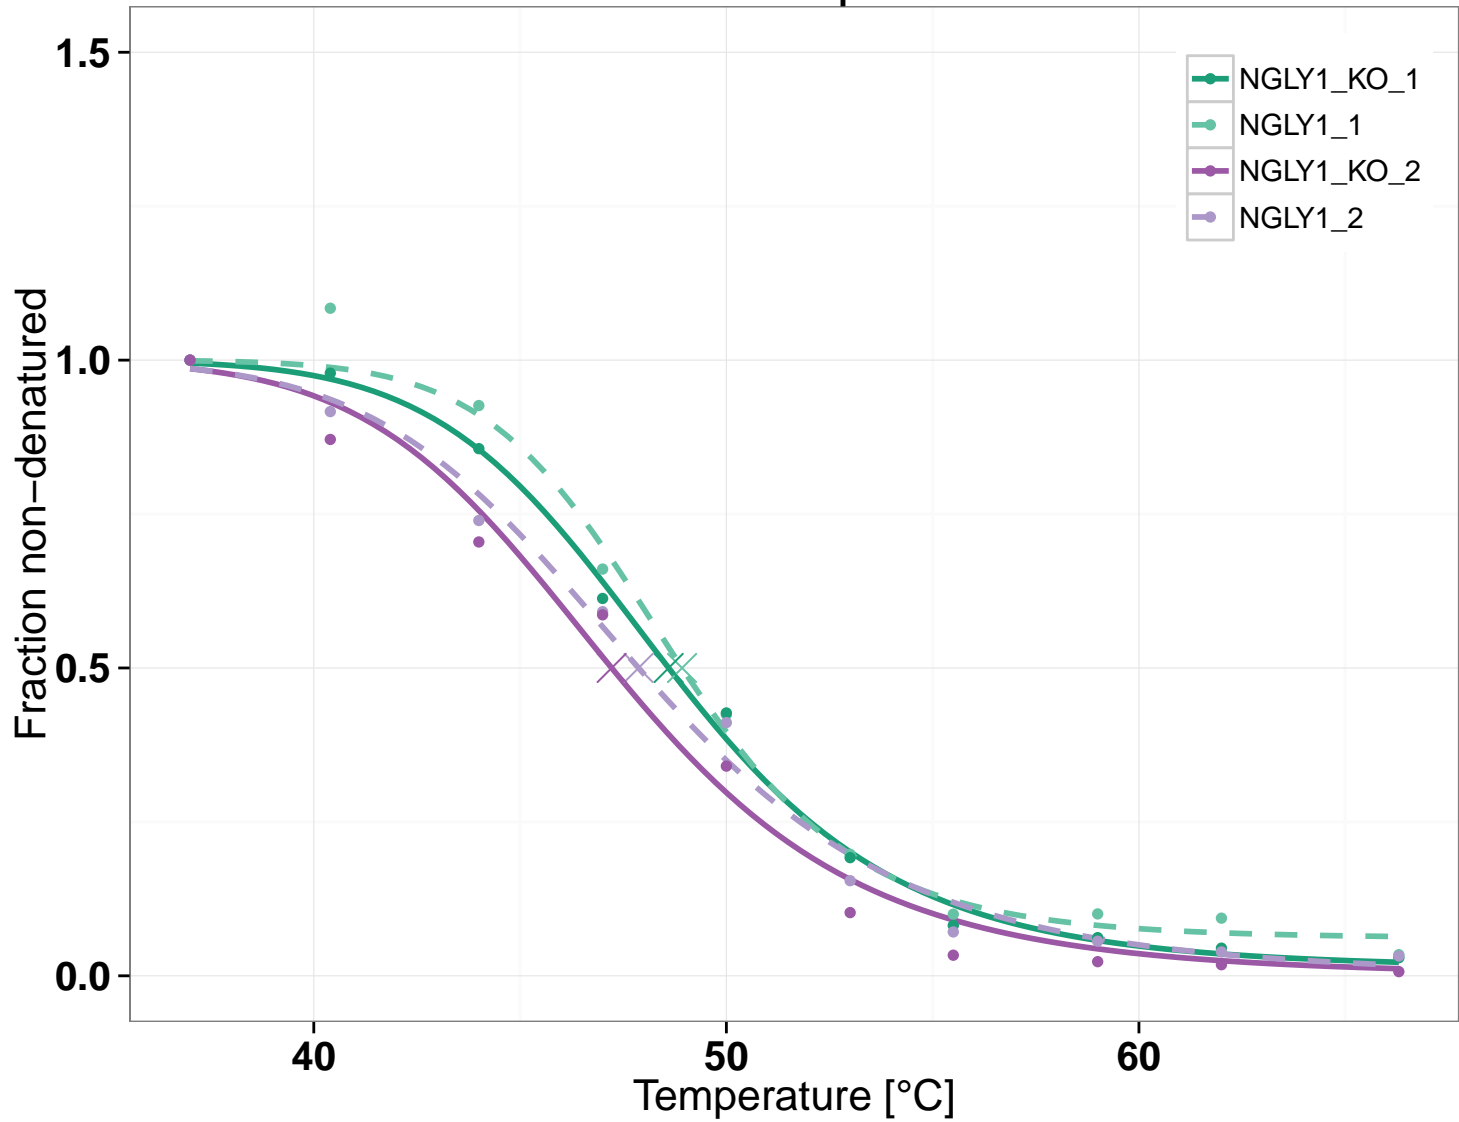

|            | meltPoint | slope  | plateau | R2   |
|------------|-----------|--------|---------|------|
| NGLY1_KO_1 | 48.6      | -0.088 | 0.01    | 1    |
| NGLY1_1    | 48.93     | -0.1   | 0.06    | 0.99 |
| NGLY1_KO_2 | 47.22     | -0.083 | 0       | 0.99 |
| NGLY1_2    | 47.87     | -0.077 | 0       | 0.99 |

Supplement: Supplementary file 2786 [file 1]

IPI00384350.1|CYP4Z1

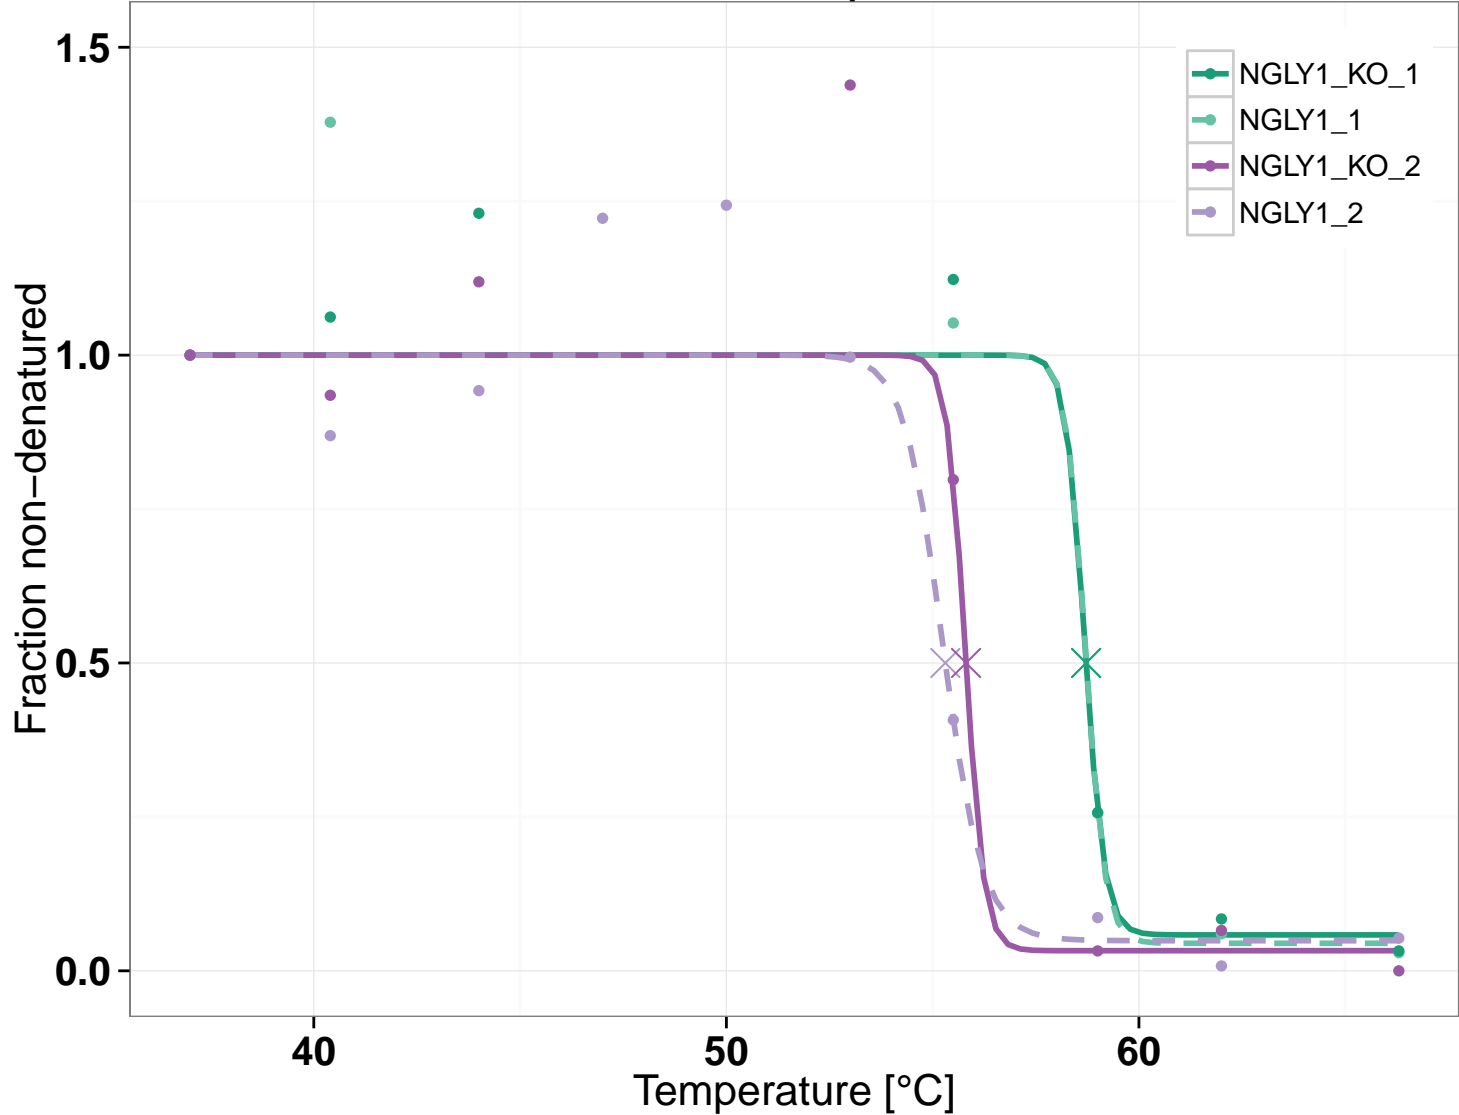

|            | meltPoint | slope | plateau | R2   |
|------------|-----------|-------|---------|------|
| NGLY1_KO_1 | 58.72     | -1    | 0.06    | 0.51 |
| NGLY1_1    | 58.72     | -1    | 0.04    | 0.14 |
| NGLY1_KO_2 | 55.81     | -1.1  | 0.03    | 0.72 |
| NGLY1_2    | 55.31     | -0.49 | 0.05    | 0.94 |

Supplement: Supplementary file 2787 [file 1]

IPI00656021.2|VPS53

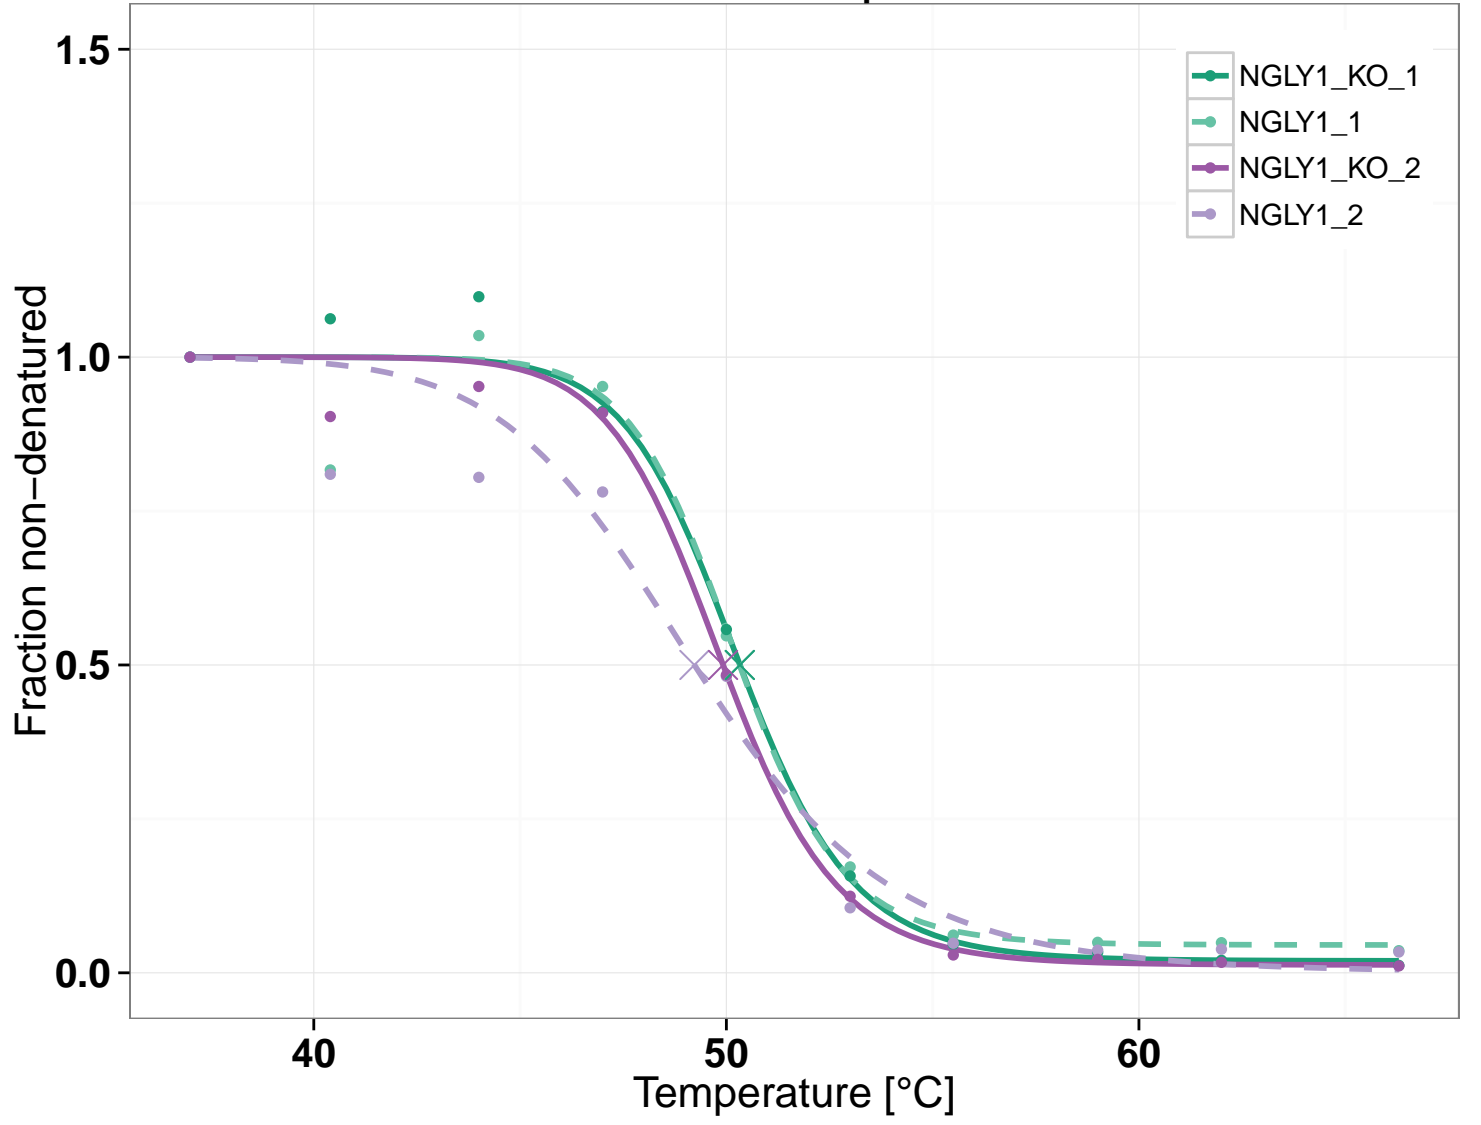

|            | meltPoint | slope | plateau | R2   |
|------------|-----------|-------|---------|------|
| NGLY1_KO_1 | 50.33     | -0.18 | 0.02    | 0.99 |
| NGLY1_1    | 50.32     | -0.18 | 0.05    | 0.98 |
| NGLY1_KO_2 | 49.92     | -0.18 | 0.01    | 0.99 |
| NGLY1_2    | 49.22     | -0.11 | 0       | 0.96 |

Supplement: Supplementary file 2788 [file 1]

IPI00027761.5|DNAL1

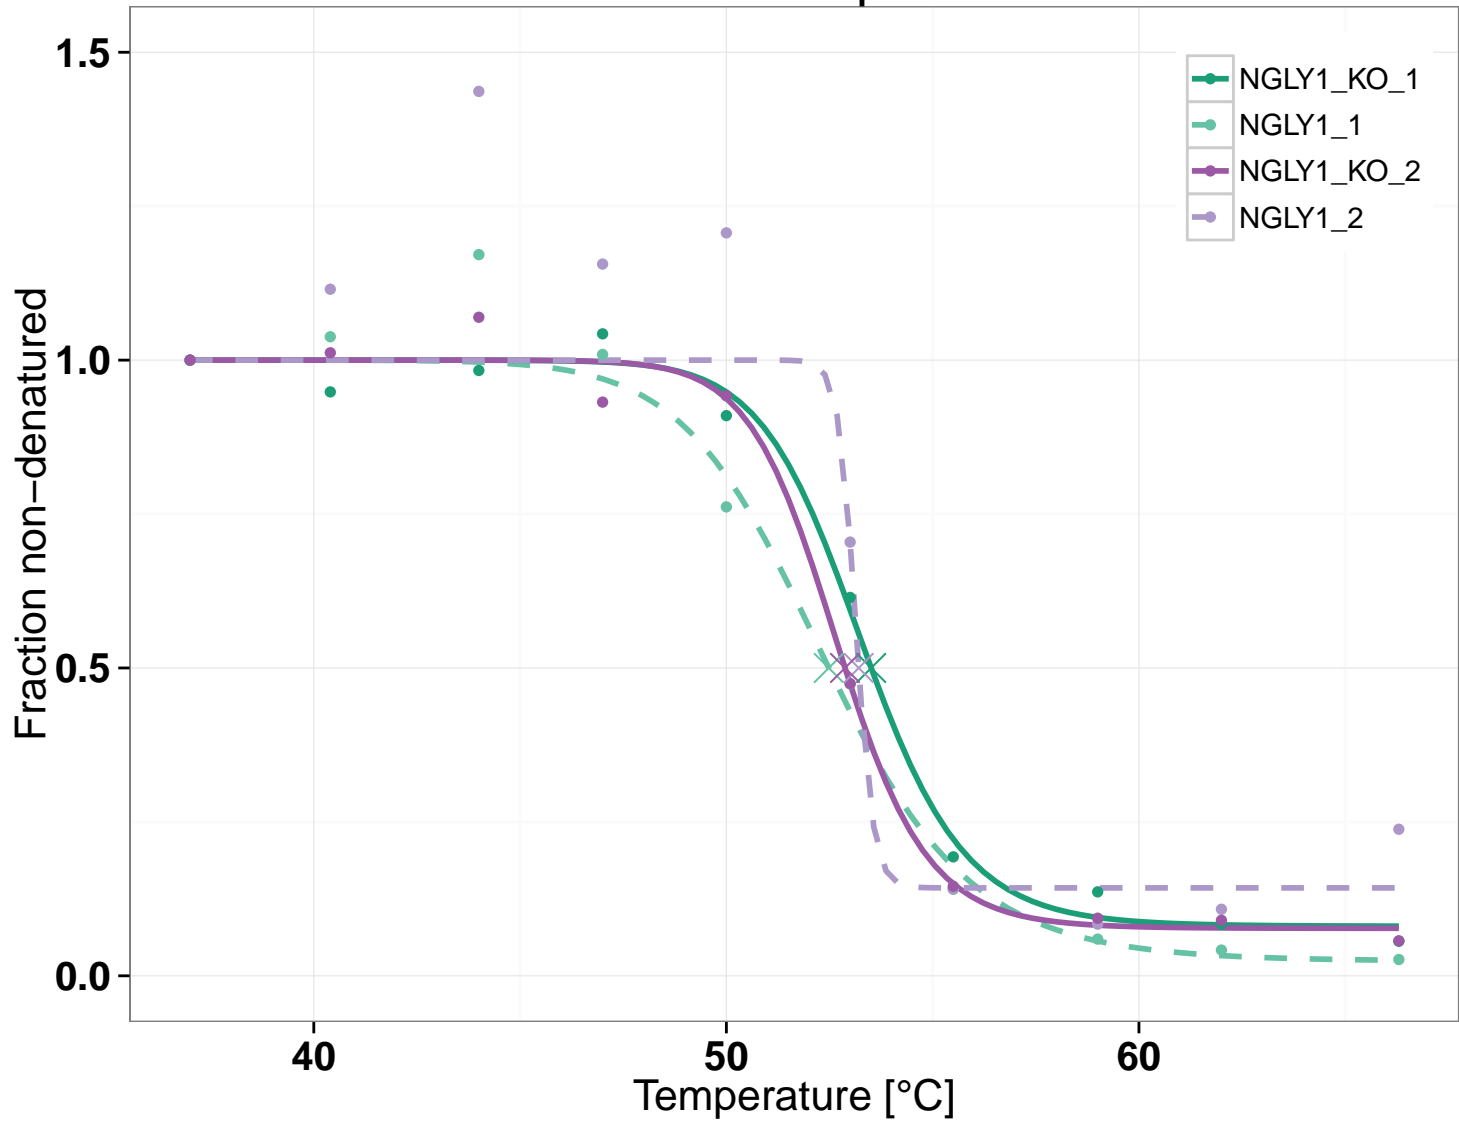

|            | meltPoint | slope | plateau | R2   |
|------------|-----------|-------|---------|------|
| NGLY1_KO_1 | 53.51     | -0.19 | 0.08    | 0.99 |
| NGLY1_1    | 52.48     | -0.14 | 0.02    | 0.98 |
| NGLY1_KO_2 | 52.88     | -0.21 | 0.08    | 0.99 |
| NGLY1_2    | 53.21     | -1    | 0.14    | 0.89 |

Supplement: Supplementary file 2789 [file 1]

IPI00005158.1|LONP1

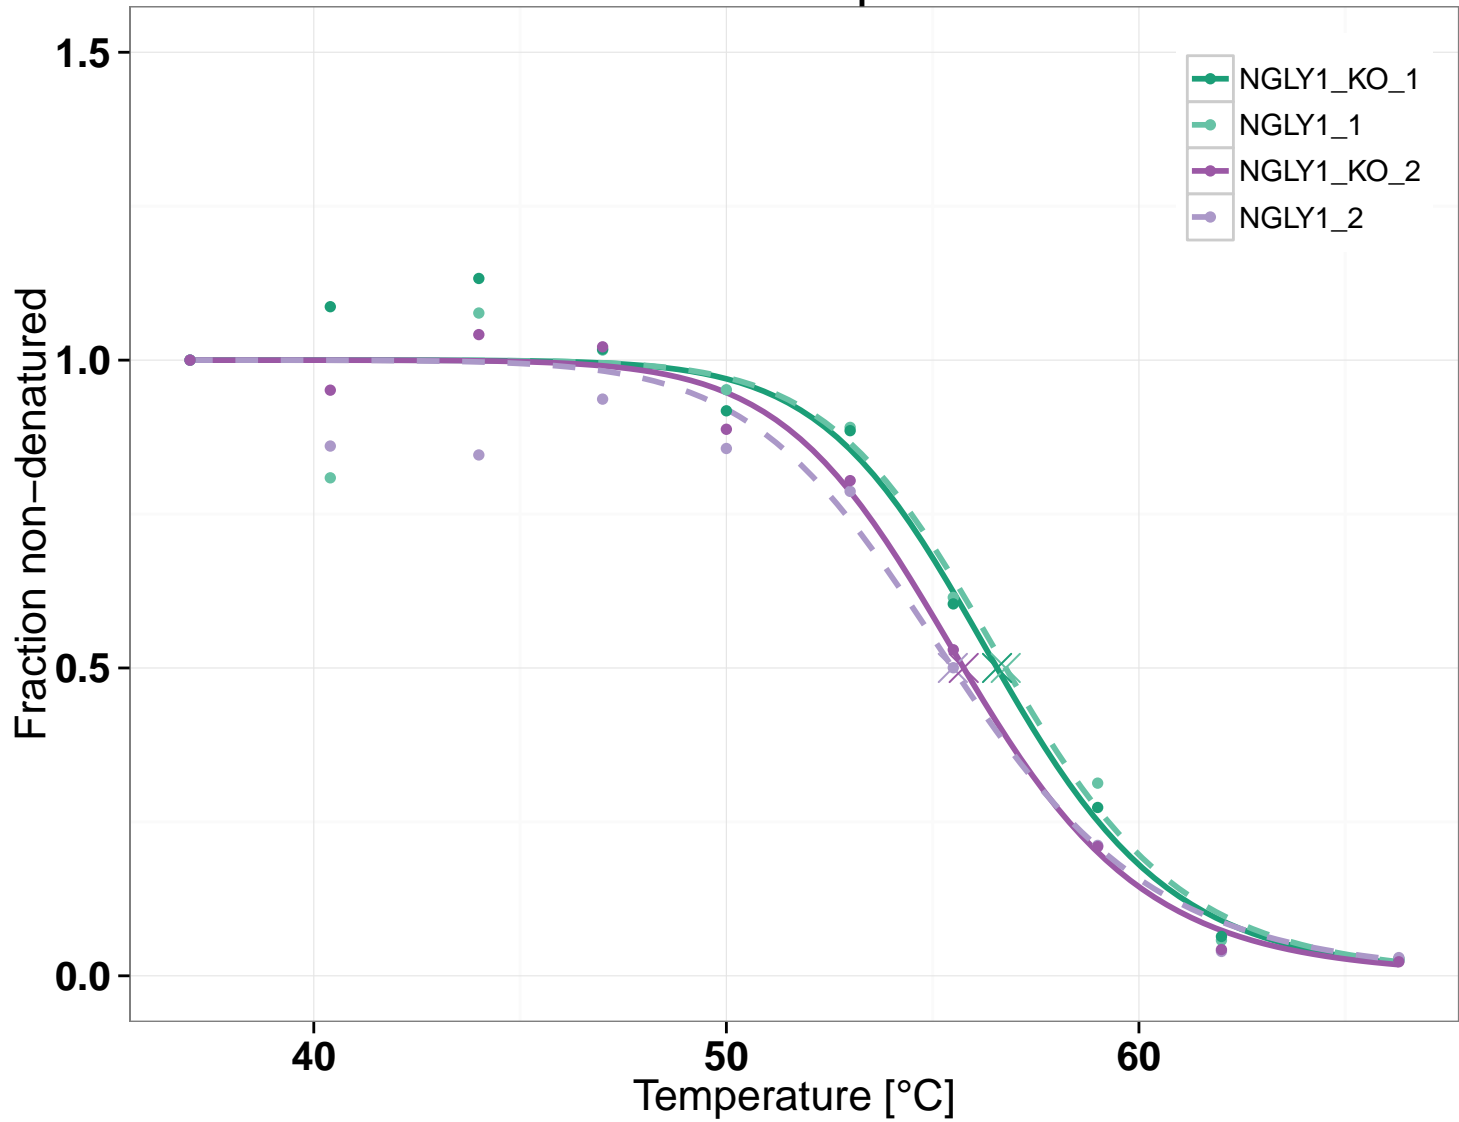

|            | meltPoint | slope | plateau | R2   |
|------------|-----------|-------|---------|------|
| NGLY1_KO_1 | 56.56     | -0.12 | 0       | 0.98 |
| NGLY1_1    | 56.77     | -0.12 | 0       | 0.97 |
| NGLY1_KO_2 | 55.75     | -0.11 | 0       | 0.99 |
| NGLY1_2    | 55.49     | -0.1  | 0       | 0.96 |

Supplement: Supplementary file 2790 [file 1]

# IPI00152951.1|SLC35B3

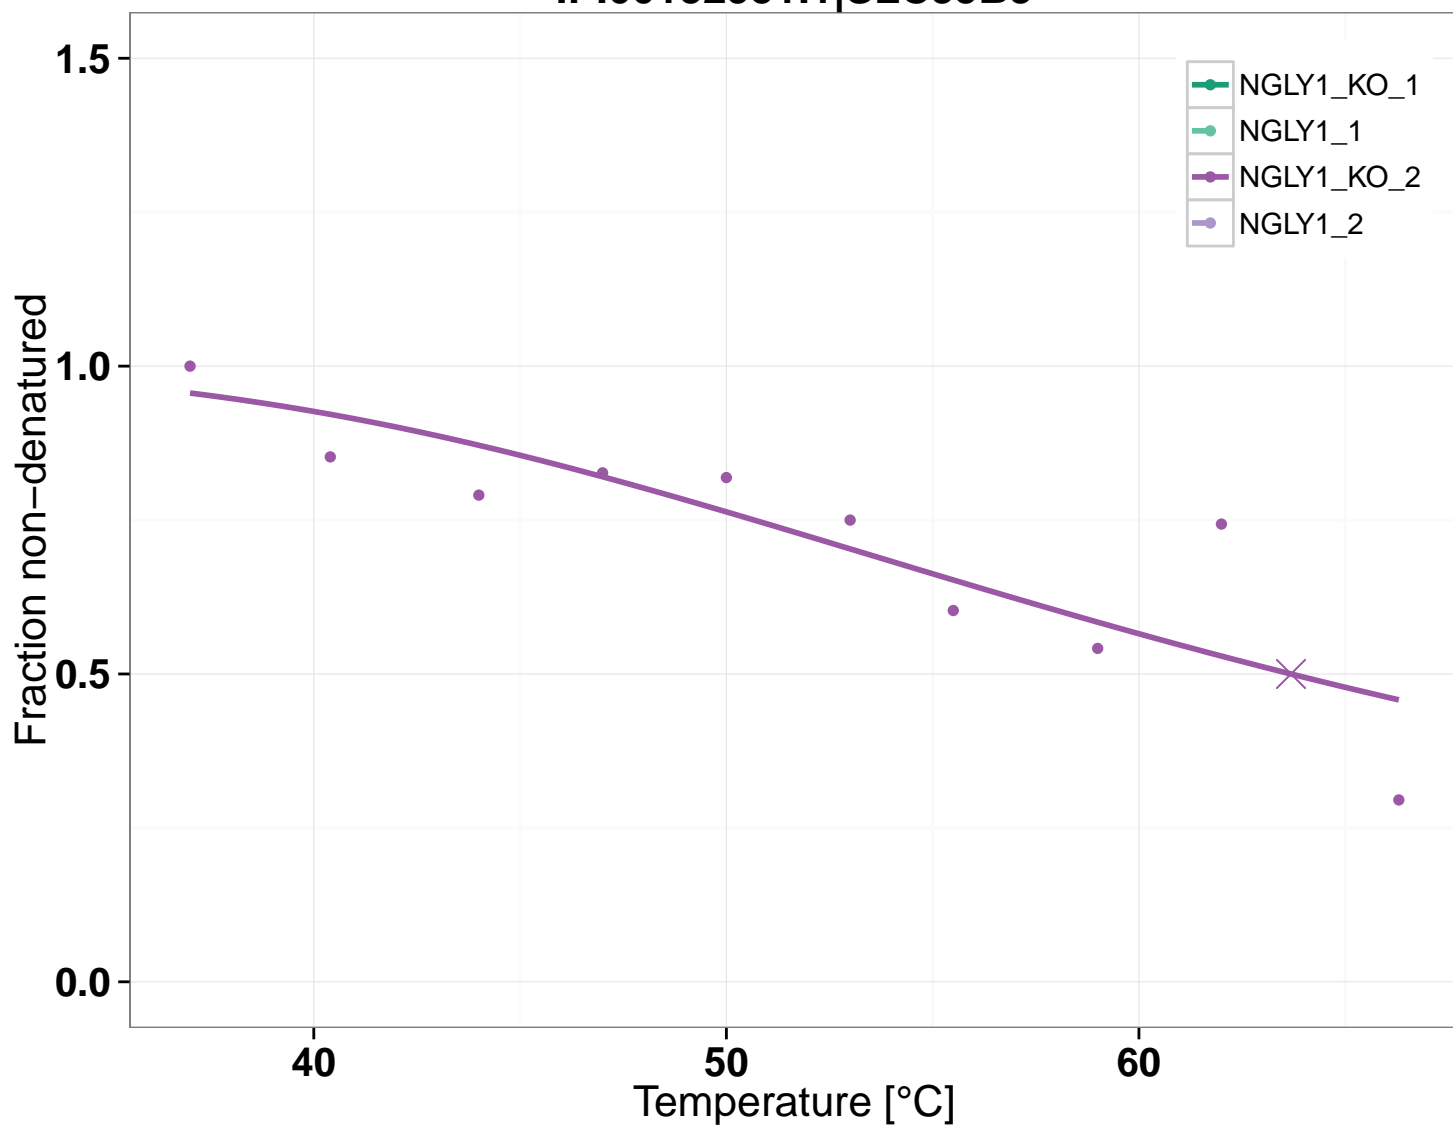

|            | meltPoint | slope | plateau | R2   |
|------------|-----------|-------|---------|------|
| NGLY1_KO_1 | —         | —     | —       | —    |
| NGLY1_1    | —         | —     | —       | —    |
| NGLY1_KO_2 | 63.69     | -0.02 | 0       | 0.73 |
| NGLY1_2    | —         | —     | —       | —    |

Supplement: Supplementary file 2791 [file 1]

IPI00744140.2|FAM63B

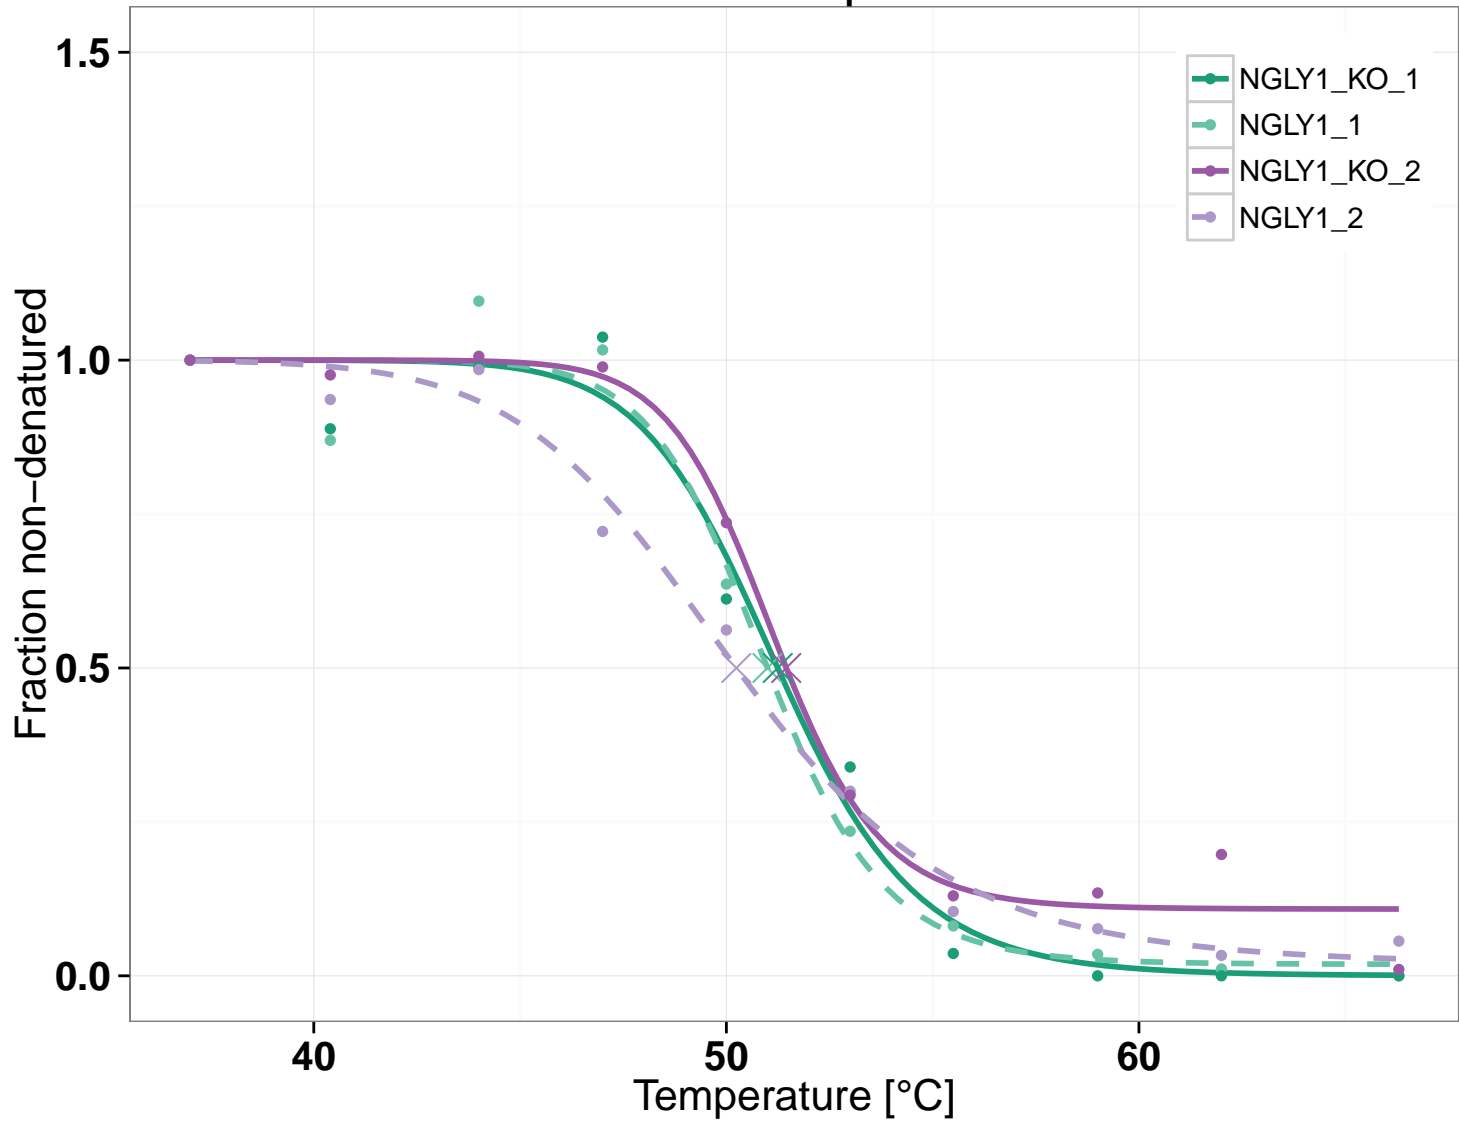

|            | meltPoint | slope  | plateau | R2   |
|------------|-----------|--------|---------|------|
| NGLY1_KO_1 | 51.25     | -0.15  | 0       | 0.98 |
| NGLY1_1    | 50.99     | -0.17  | 0.02    | 0.98 |
| NGLY1_KO_2 | 51.45     | -0.17  | 0.11    | 0.99 |
| NGLY1_2    | 50.24     | -0.093 | 0.02    | 0.99 |

Supplement: Supplementary file 2792 [file 1]

# IPI00396015.5|ACACA

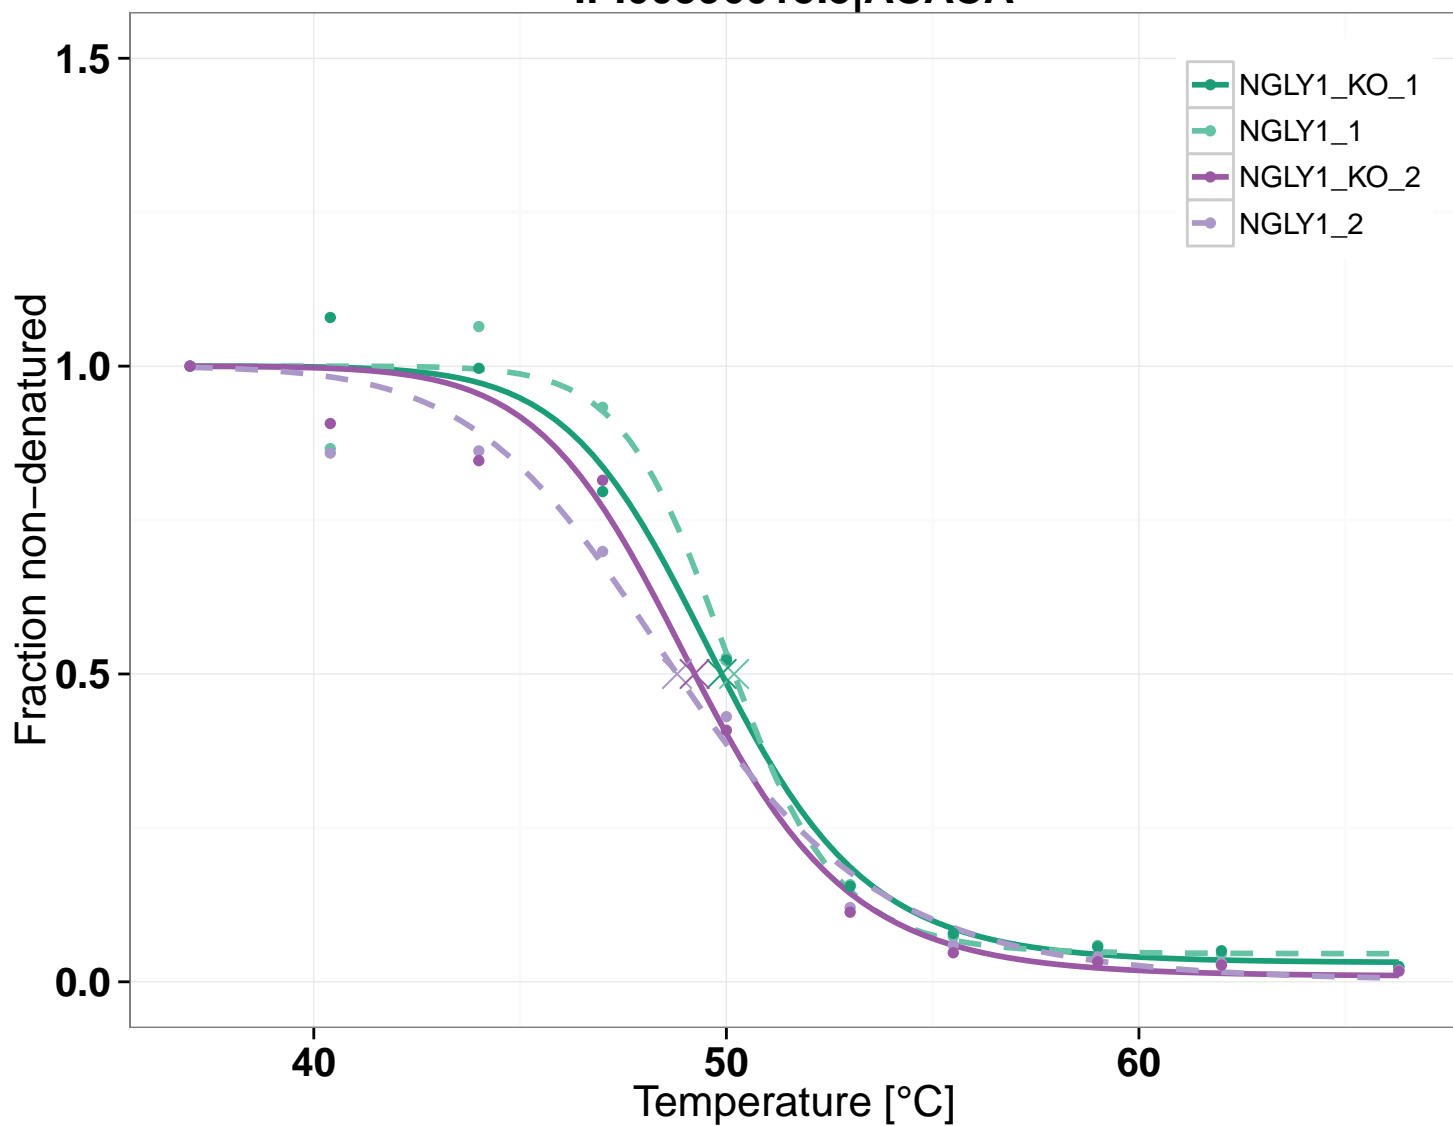

|            | meltPoint | slope | plateau | R2   |
|------------|-----------|-------|---------|------|
| NGLY1_KO_1 | 49.88     | -0.13 | 0.03    | 0.99 |
| NGLY1_1    | 50.19     | -0.18 | 0.05    | 0.99 |
| NGLY1_KO_2 | 49.23     | -0.13 | 0.01    | 0.99 |
| NGLY1_2    | 48.8      | -0.1  | 0       | 0.98 |

Supplement: Supplementary file 2793 [file 1]

# IPI00000162.5|NGDN

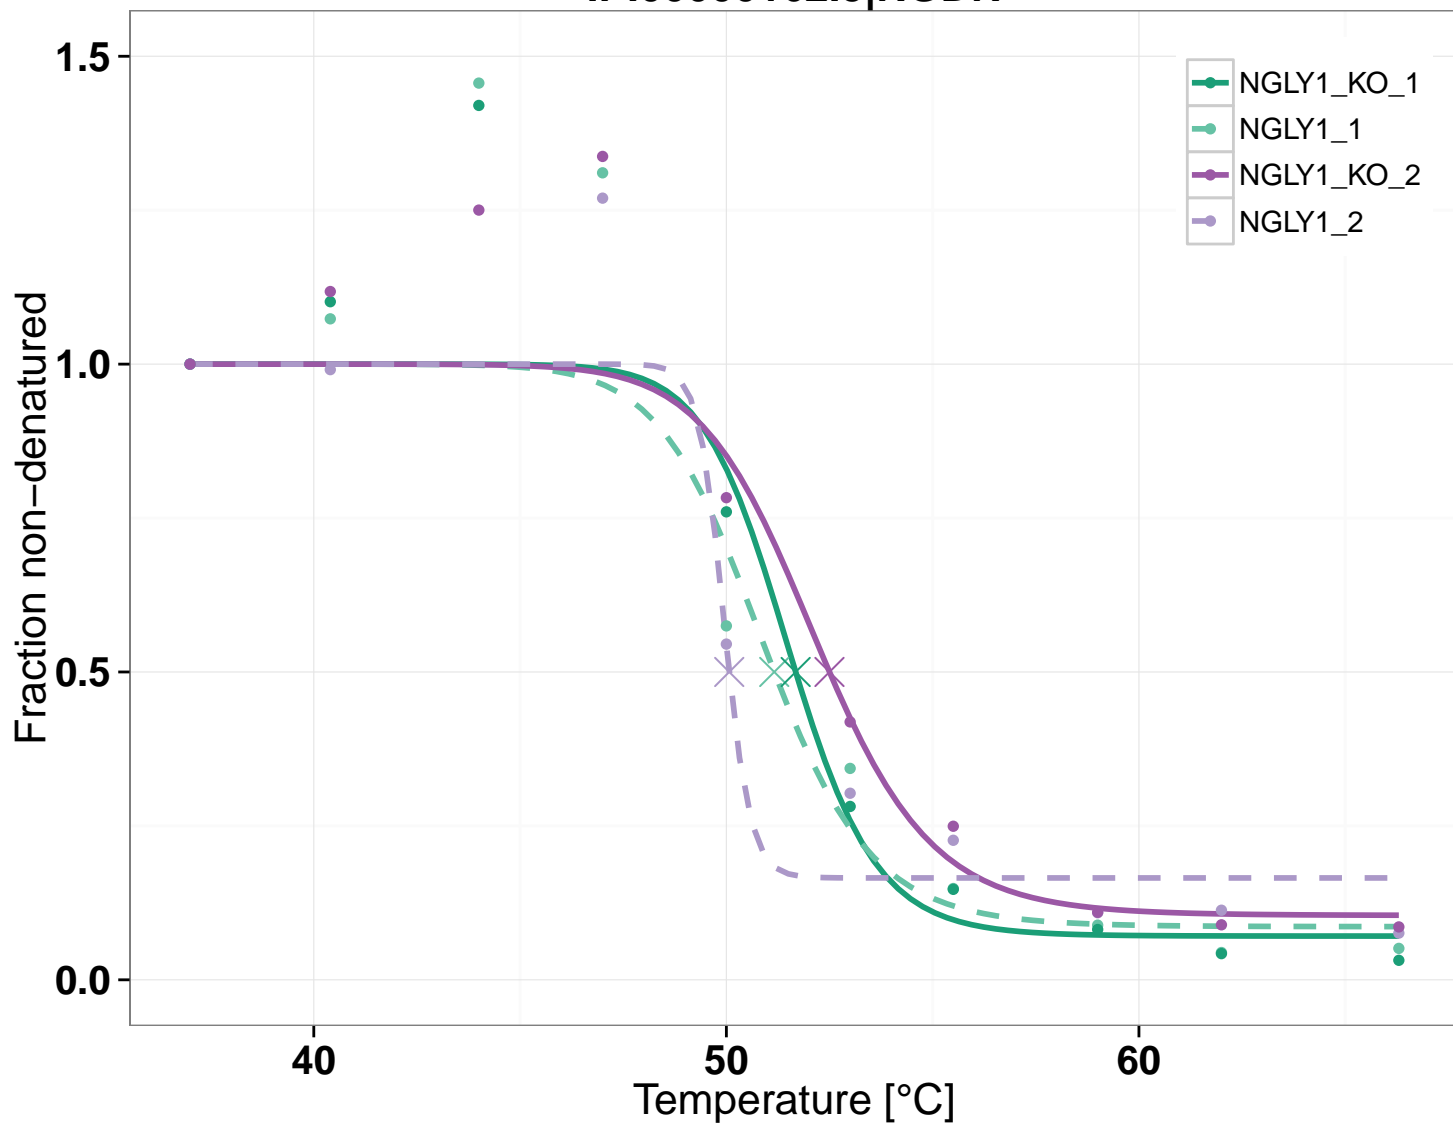

|            | meltPoint | slope | plateau | R2   |
|------------|-----------|-------|---------|------|
| NGLY1_KO_1 | 51.68     | -0.22 | 0.07    | 0.83 |
| NGLY1_1    | 51.16     | -0.18 | 0.09    | 0.87 |
| NGLY1_KO_2 | 52.5      | -0.16 | 0.1     | 0.91 |
| NGLY1_2    | 50.07     | -0.67 | 0.17    | 0.85 |

Supplement: Supplementary file 2794 [file 1]

IPI00329107.4|NR2C2AP

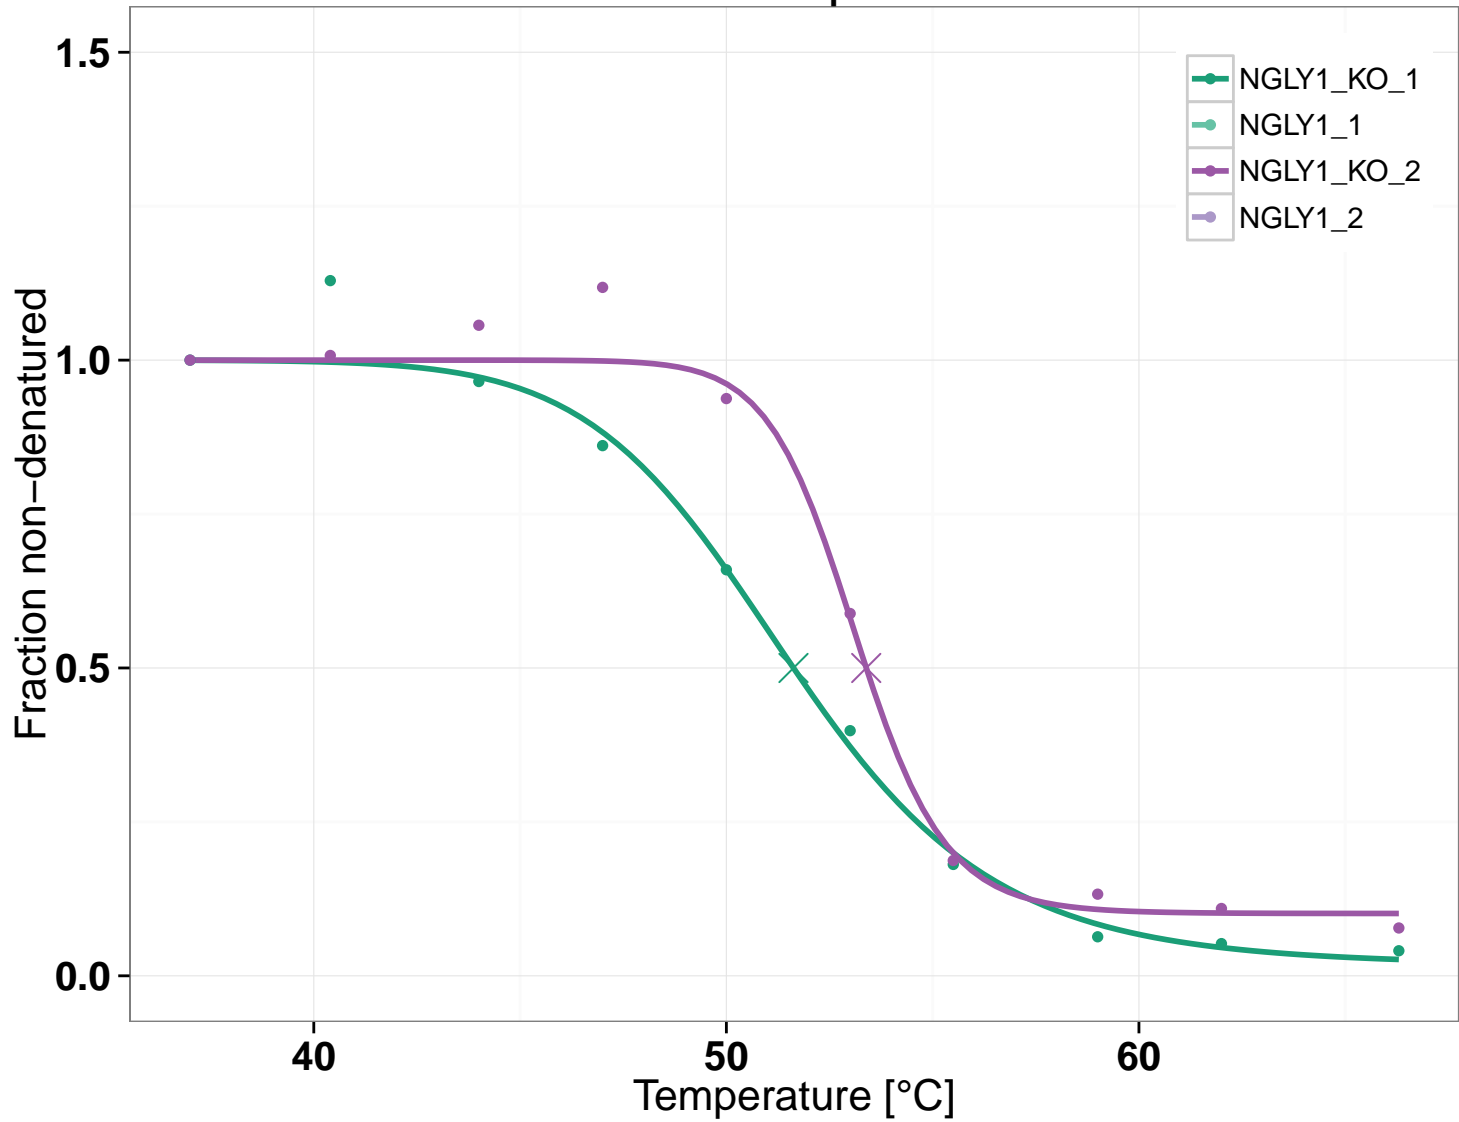

|            | meltPoint | slope | plateau | R2   |
|------------|-----------|-------|---------|------|
| NGLY1_KO_1 | 51.63     | -0.1  | 0.02    | 0.99 |
| NGLY1_1    | -         | -     | -       | -    |
| NGLY1_KO_2 | 53.39     | -0.21 | 0.1     | 0.99 |
| NGLY1_2    | -         | -     | -       | -    |

Supplement: Supplementary file 2795 [file 1]

IPI00871151.1|LLGL2

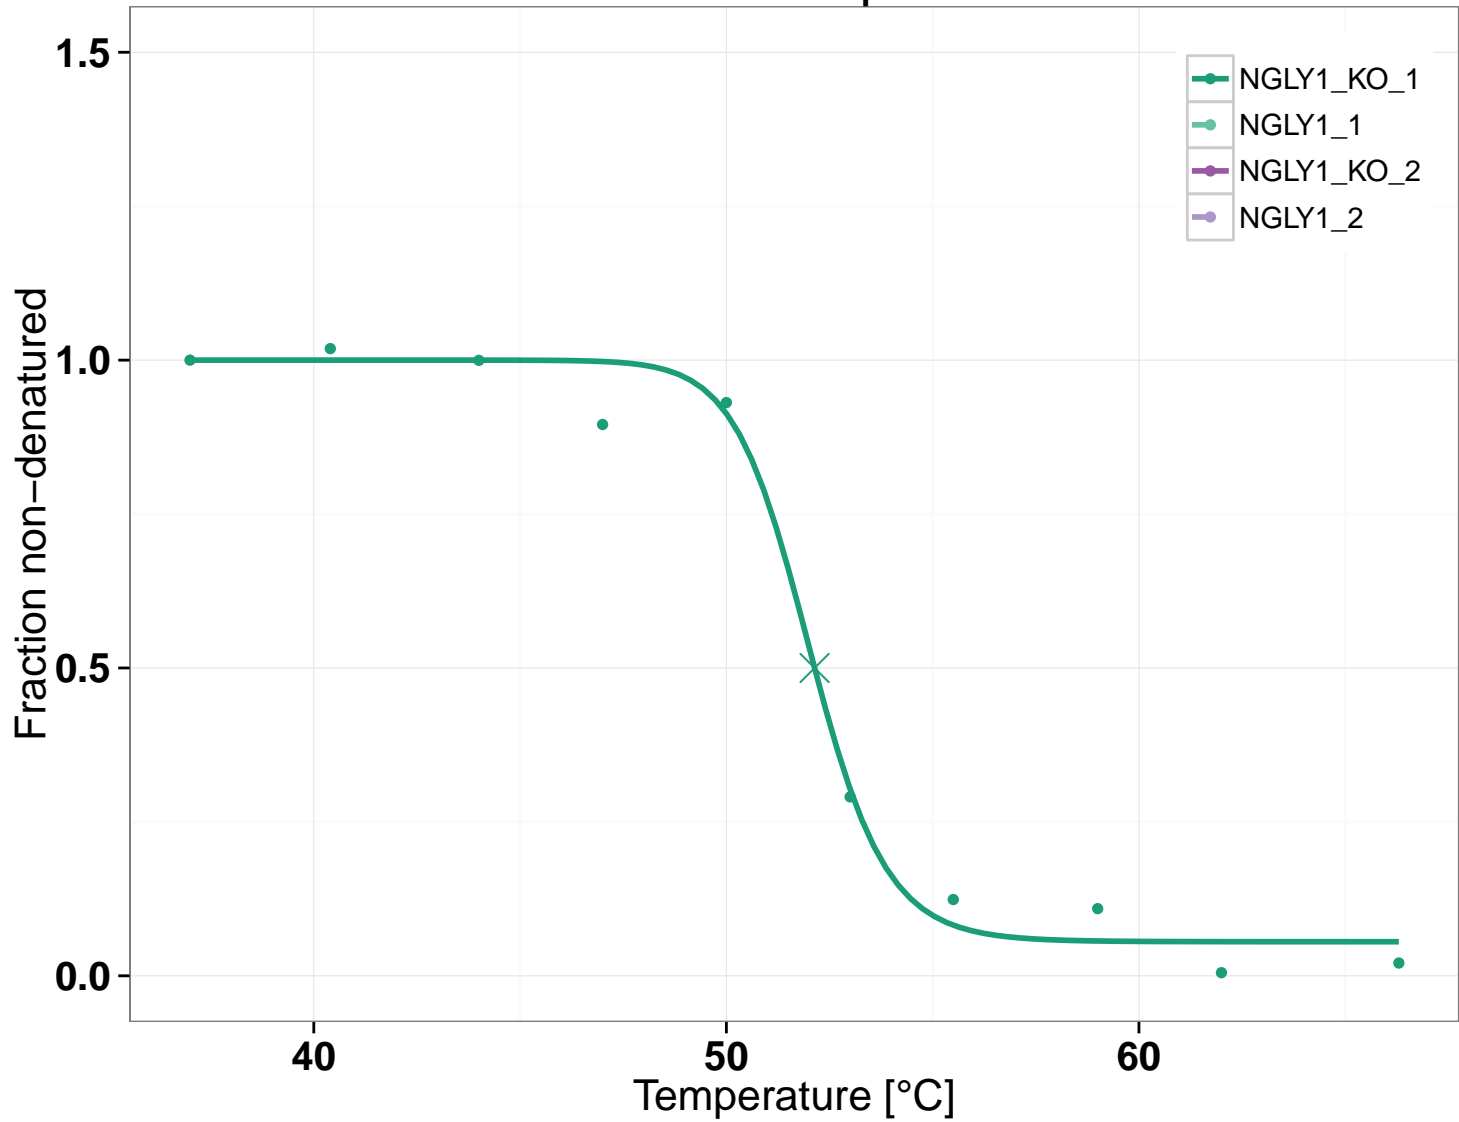

|            | meltPoint | slope | plateau | R2   |
|------------|-----------|-------|---------|------|
| NGLY1_KO_1 | 52.14     | -0.26 | 0.06    | 0.99 |
| NGLY1_1    | -         | -     | -       | -    |
| NGLY1_KO_2 | -         | -     | -       | -    |
| NGLY1_2    | -         | -     | -       | -    |

Supplement: Supplementary file 2796 [file 1]

# IPI00410334.3|SLC26A11

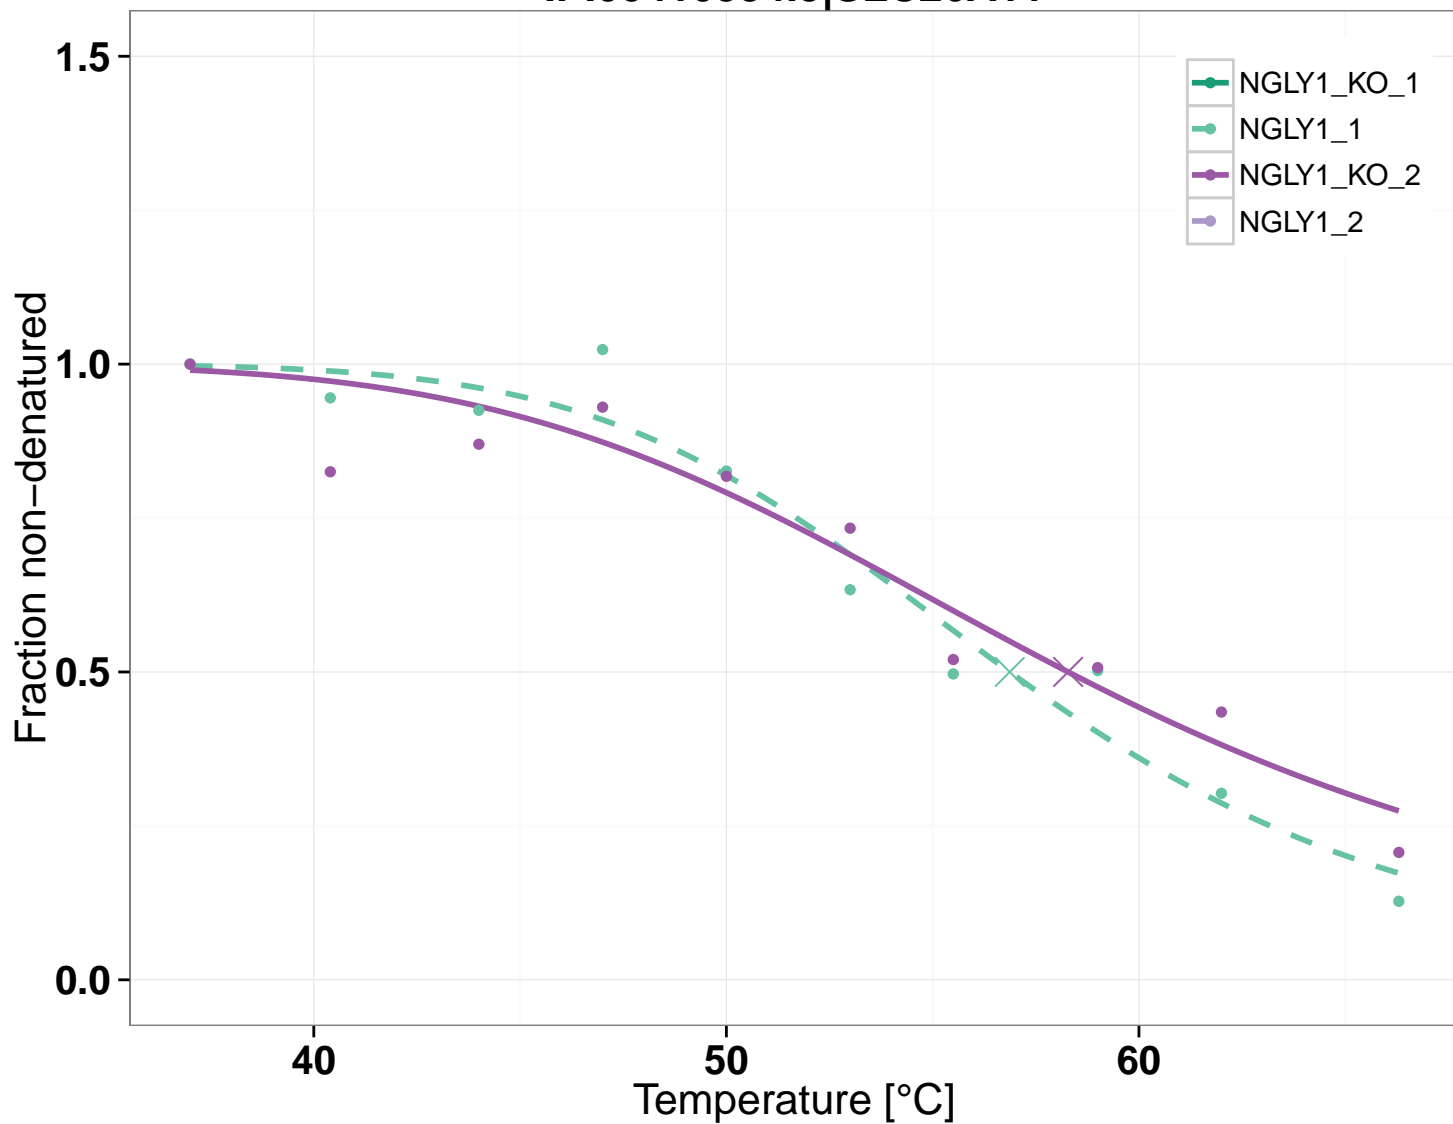

|            | meltPoint | slope  | plateau | R2   |
|------------|-----------|--------|---------|------|
| NGLY1_KO_1 | —         | —      | —       | —    |
| NGLY1_1    | 56.87     | -0.05  | 0       | 0.96 |
| NGLY1_KO_2 | 58.28     | -0.037 | 0       | 0.92 |
| NGLY1_2    | —         | —      | —       | —    |

Supplement: Supplementary file 2797 [file 1]

IPI00909060.1|FDFT1

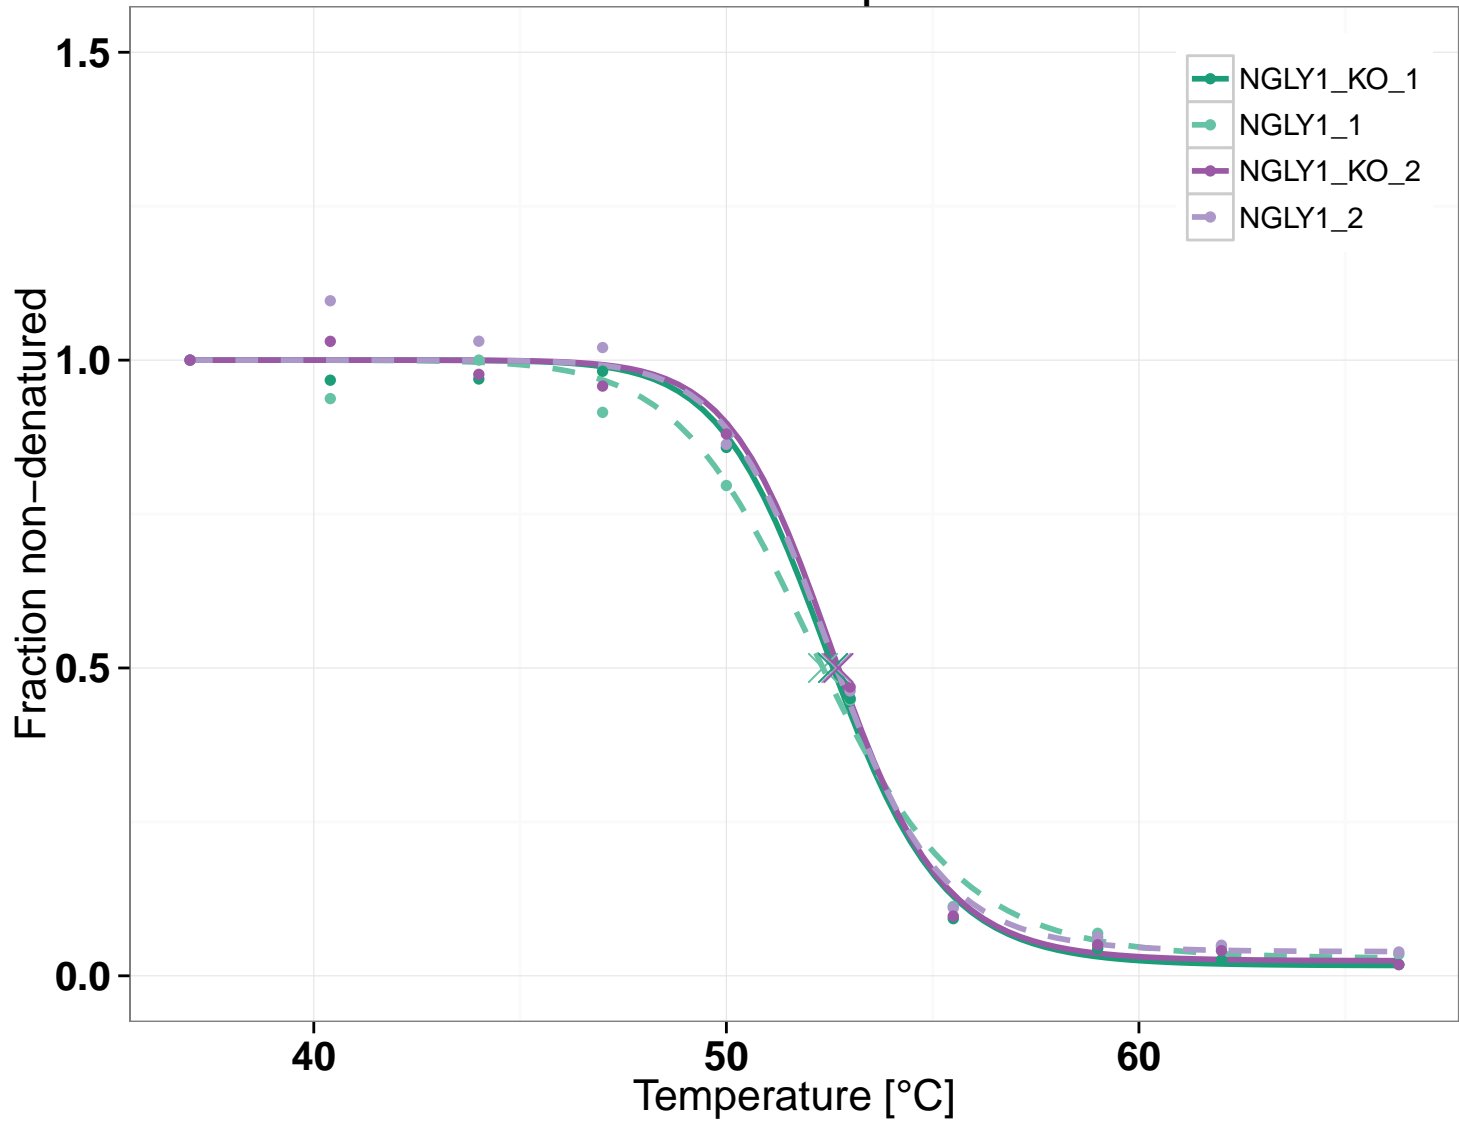

|            | meltPoint | slope | plateau | R2   |
|------------|-----------|-------|---------|------|
| NGLY1_KO_1 | 52.59     | -0.18 | 0.02    | 1    |
| NGLY1_1    | 52.34     | -0.14 | 0.03    | 0.99 |
| NGLY1_KO_2 | 52.72     | -0.19 | 0.02    | 1    |
| NGLY1_2    | 52.67     | -0.18 | 0.04    | 0.99 |

Supplement: Supplementary file 2798 [file 1]

IPI00177940.2|NT5C1B

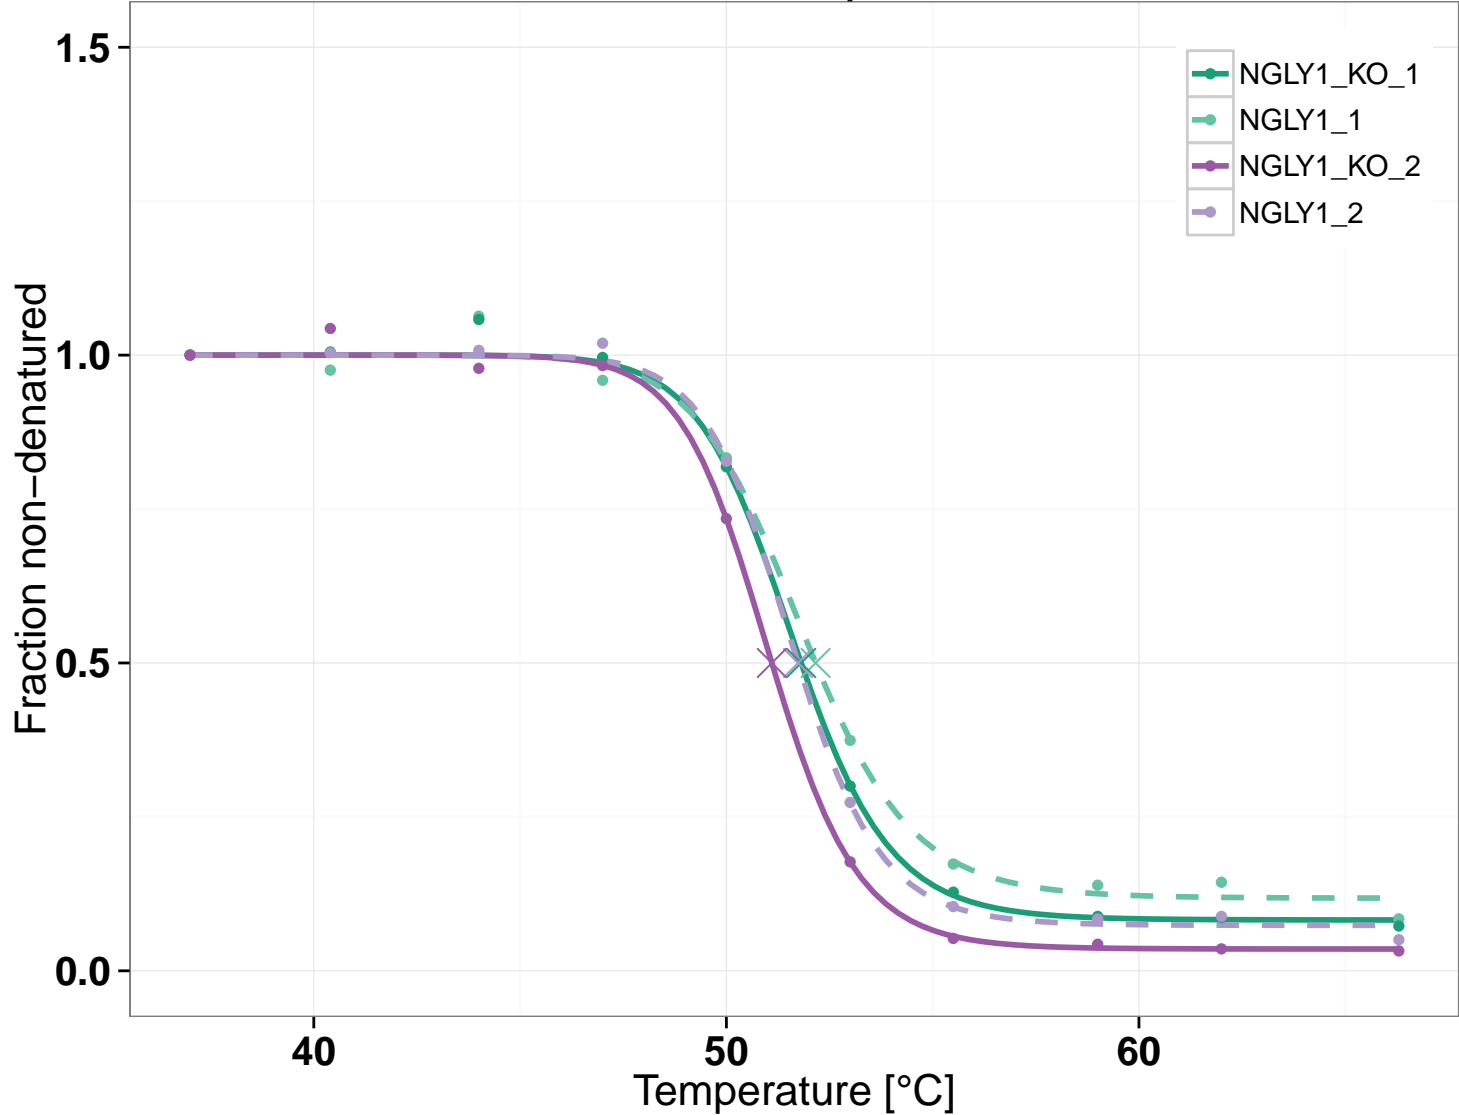

|            | meltPoint | slope | plateau | R2 |
|------------|-----------|-------|---------|----|
| NGLY1_KO_1 | 51.81     | -0.2  | 0.08    | 1  |
| NGLY1_1    | 52.16     | -0.17 | 0.12    | 1  |
| NGLY1_KO_2 | 51.1      | -0.22 | 0.04    | 1  |
| NGLY1_2    | 51.74     | -0.22 | 0.07    | 1  |

Supplement: Supplementary file 2799 [file 1]

# IPI00005634.3|TTC37

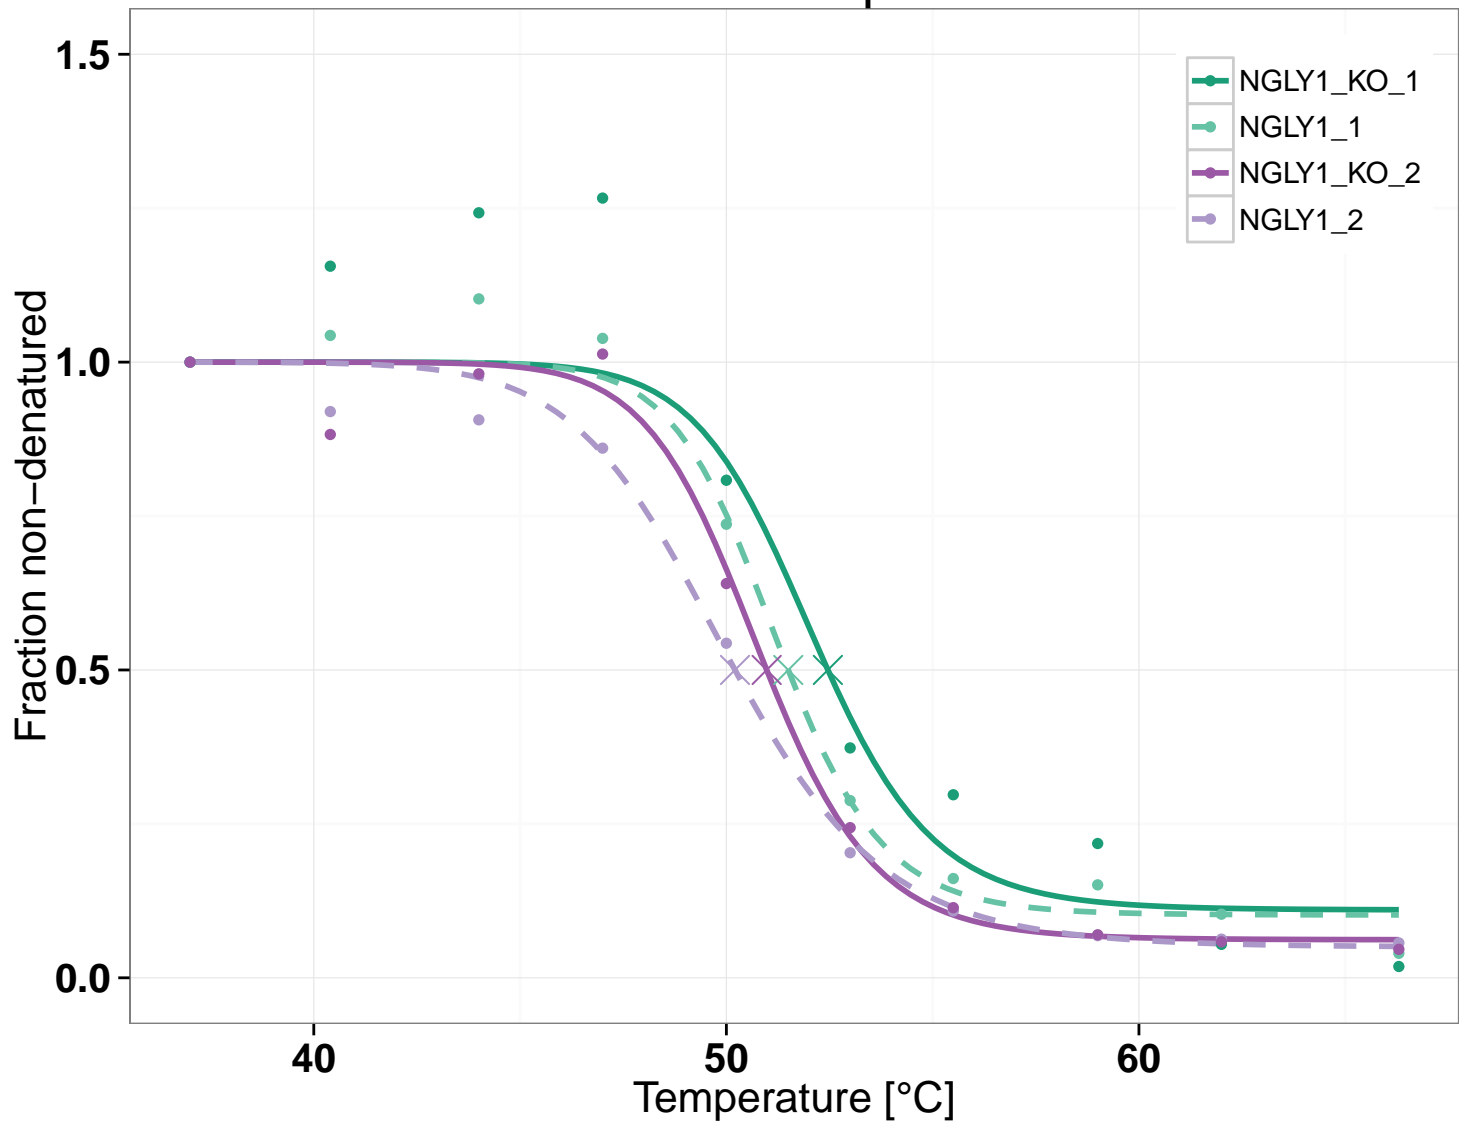

|            | meltPoint | slope | plateau | R2   |
|------------|-----------|-------|---------|------|
| NGLY1_KO_1 | 52.46     | -0.15 | 0.11    | 0.91 |
| NGLY1_1    | 51.5      | -0.18 | 0.1     | 0.99 |
| NGLY1_KO_2 | 50.98     | -0.17 | 0.06    | 0.99 |
| NGLY1_2    | 50.21     | -0.13 | 0.05    | 0.99 |

Supplement: Supplementary file 2800 [file 1]

# IPI00552639.2|EIF4G1

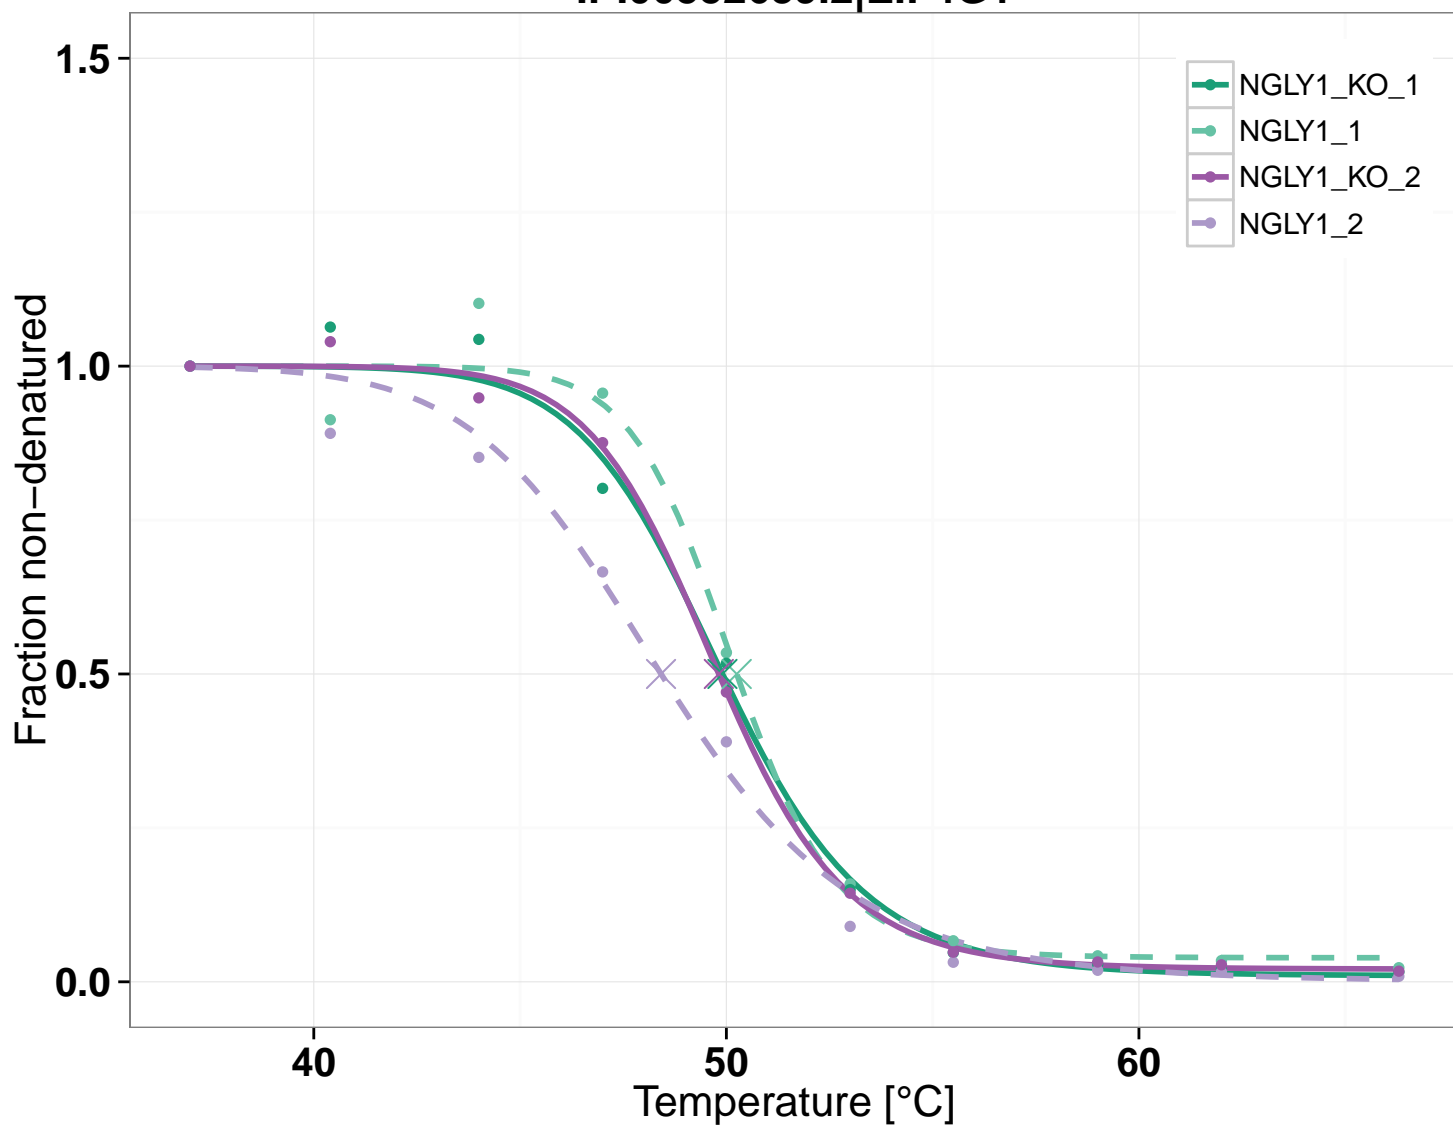

Supplement: Supplementary file 2801 [file 1]

IPI00234793.3|KCTD15

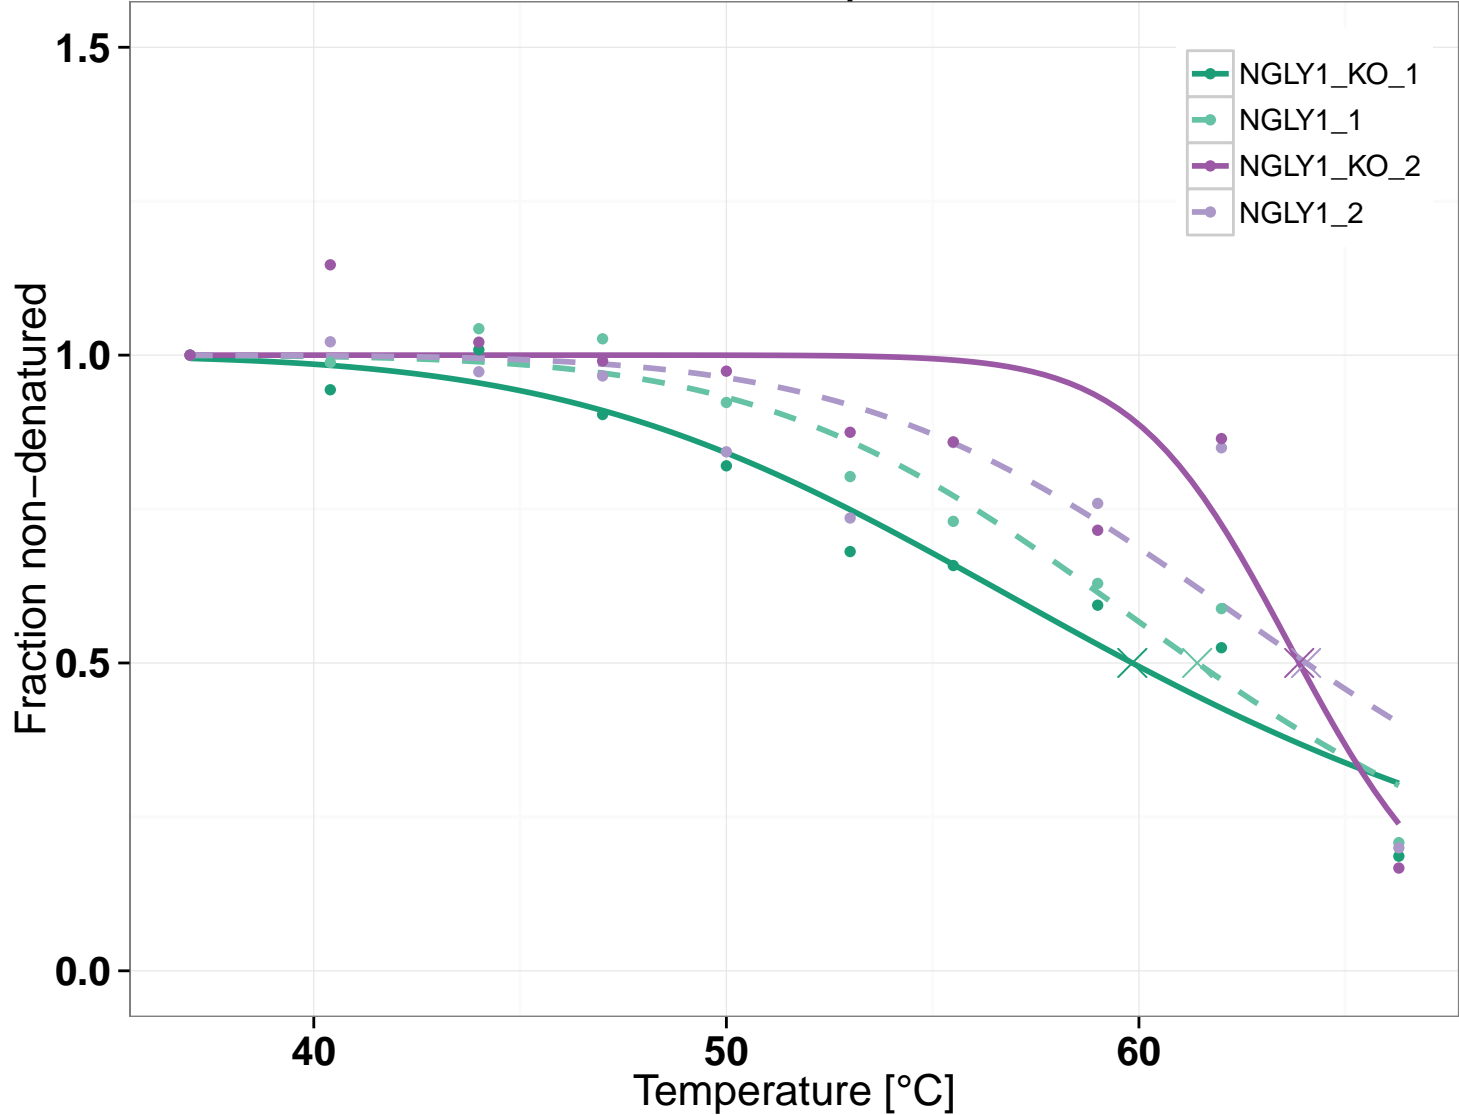

|            | meltPoint | slope  | plateau | R2   |
|------------|-----------|--------|---------|------|
| NGLY1_KO_1 | 59.84     | -0.037 | 0       | 0.94 |
| NGLY1_1    | 61.41     | -0.048 | 0       | 0.95 |
| NGLY1_KO_2 | 63.89     | -0.13  | 0       | 0.81 |
| NGLY1_2    | 64.05     | -0.047 | 0       | 0.7  |

Supplement: Supplementary file 2802 [file 1]

IPI00829927.1|ARMC9

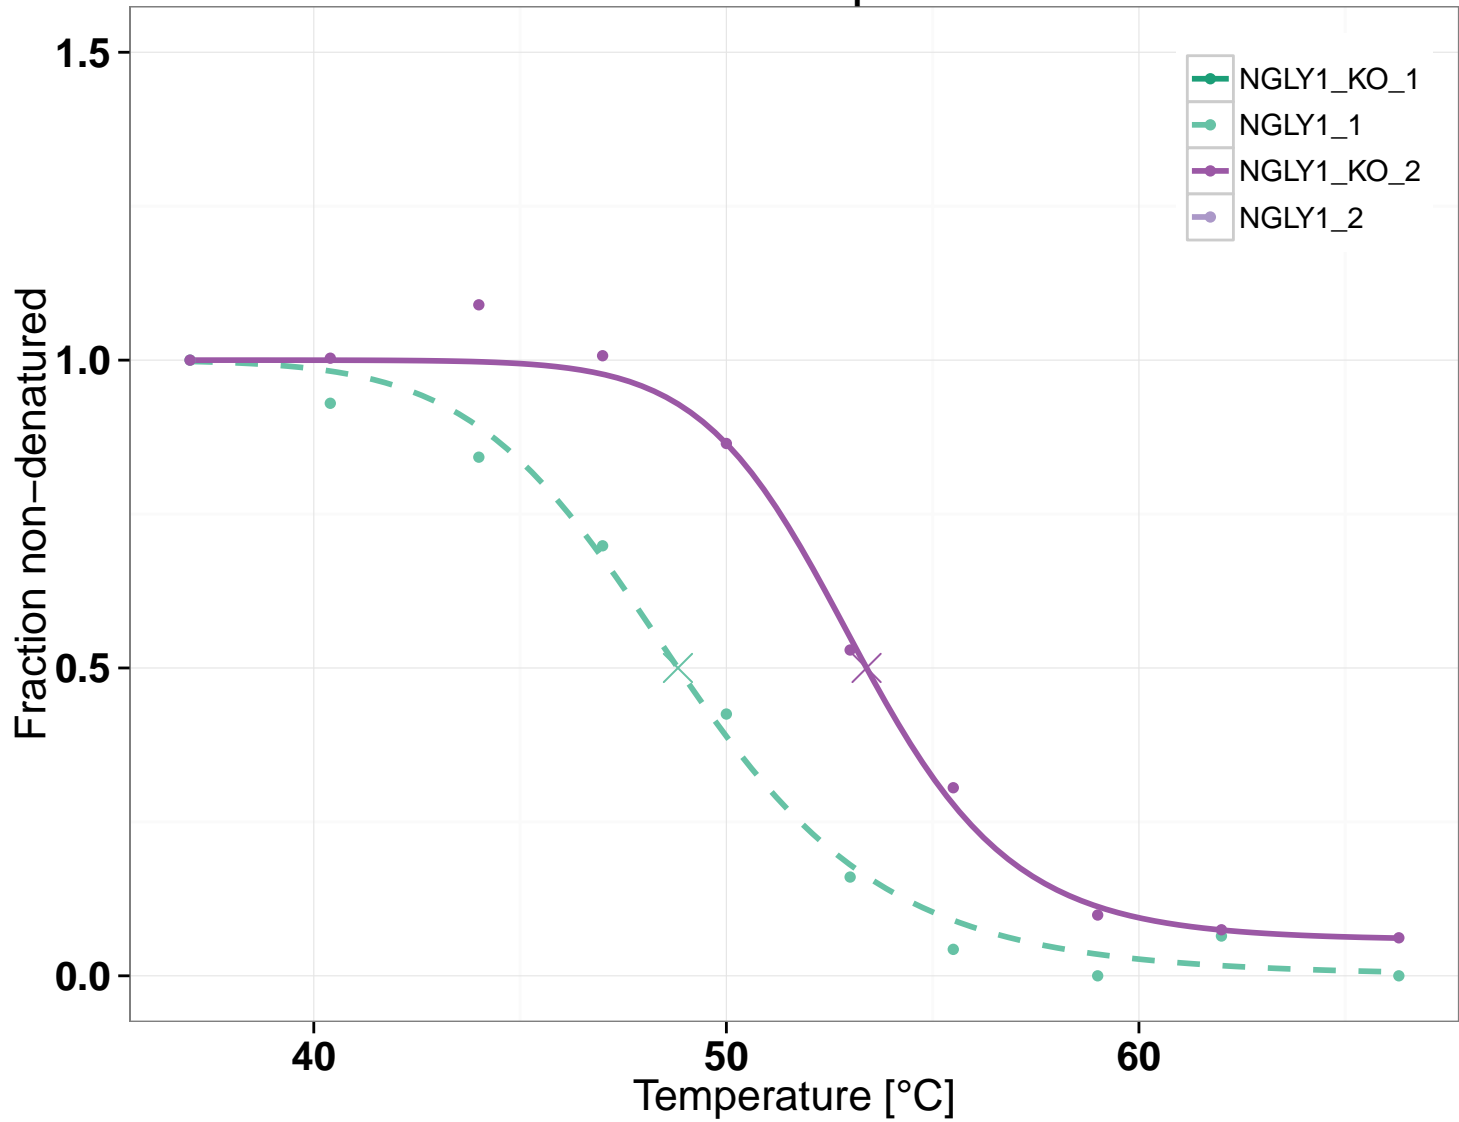

|            | meltPoint | slope | plateau | R2   |
|------------|-----------|-------|---------|------|
| NGLY1_KO_1 | -         | -     | -       | -    |
| NGLY1_1    | 48.83     | -0.1  | 0       | 0.99 |
| NGLY1_KO_2 | 53.4      | -0.13 | 0.06    | 0.99 |
| NGLY1_2    | -         | -     | -       | -    |

Supplement: Supplementary file 2803 [file 1]

# IPI00916440.1|COX2

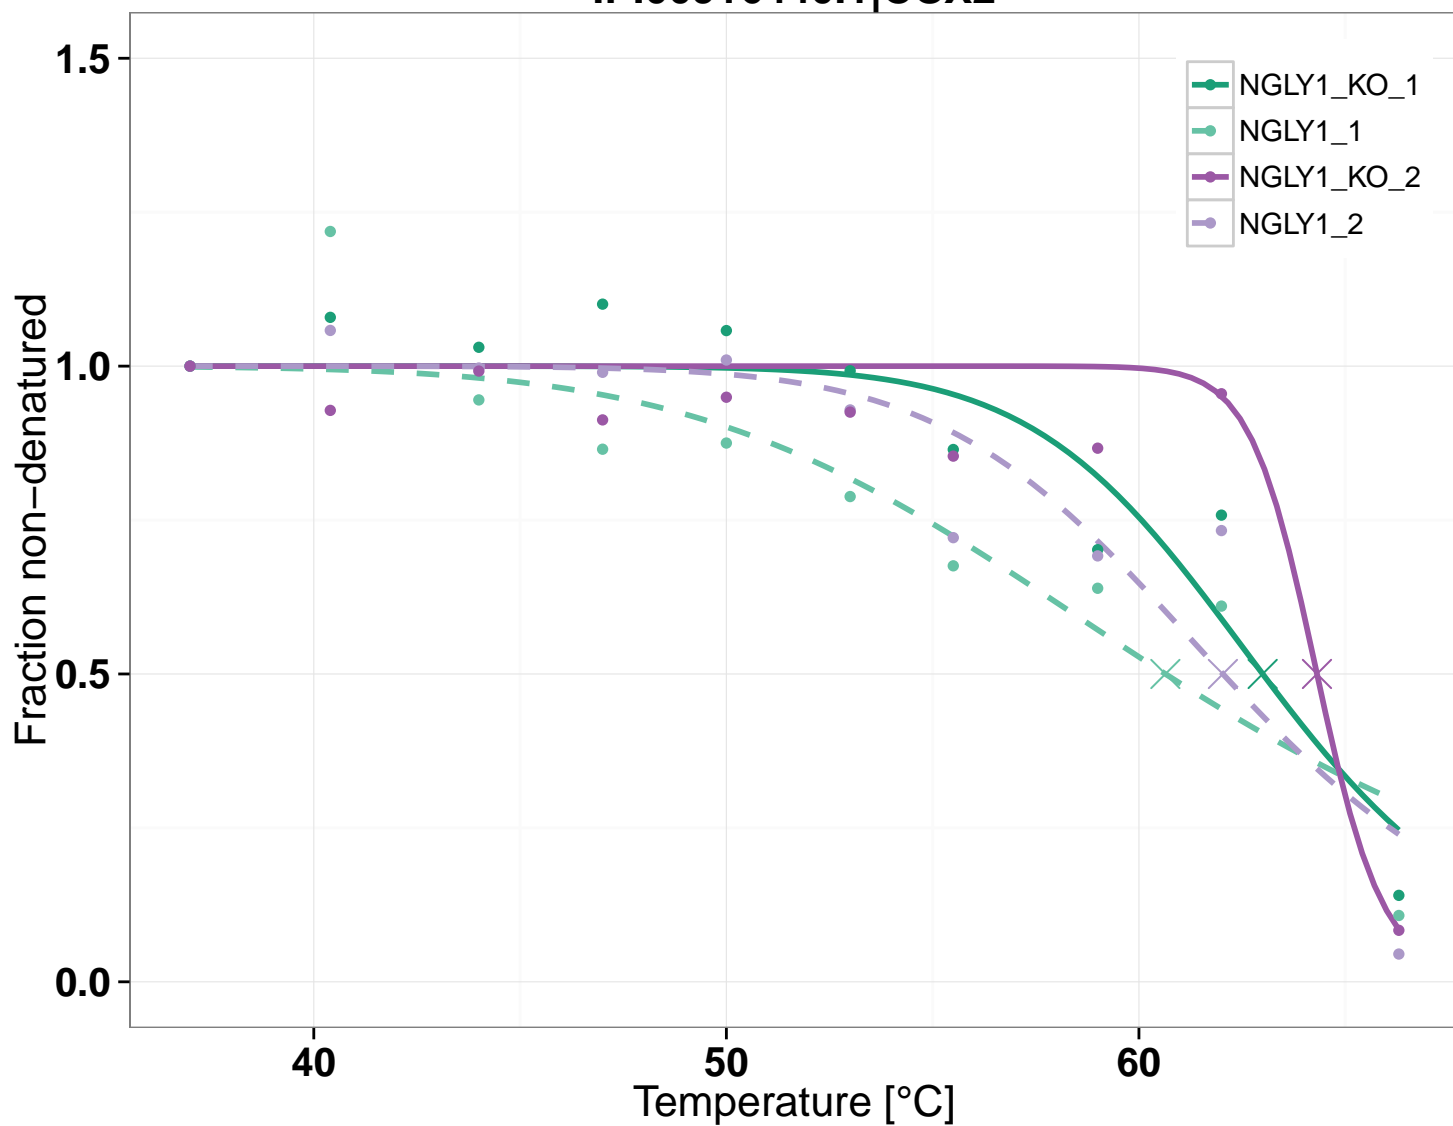

|            | meltPoint | slope  | plateau | R2   |
|------------|-----------|--------|---------|------|
| NGLY1_KO_1 | 63        | -0.09  | 0       | 0.89 |
| NGLY1_1    | 60.64     | -0.044 | 0       | 0.84 |
| NGLY1_KO_2 | 64.32     | -0.31  | 0       | 0.91 |
| NGLY1_2    | 62.04     | -0.073 | 0       | 0.85 |

Supplement: Supplementary file 2804 [file 1]

# CZB00000046.1|HA-UBIQUITIN

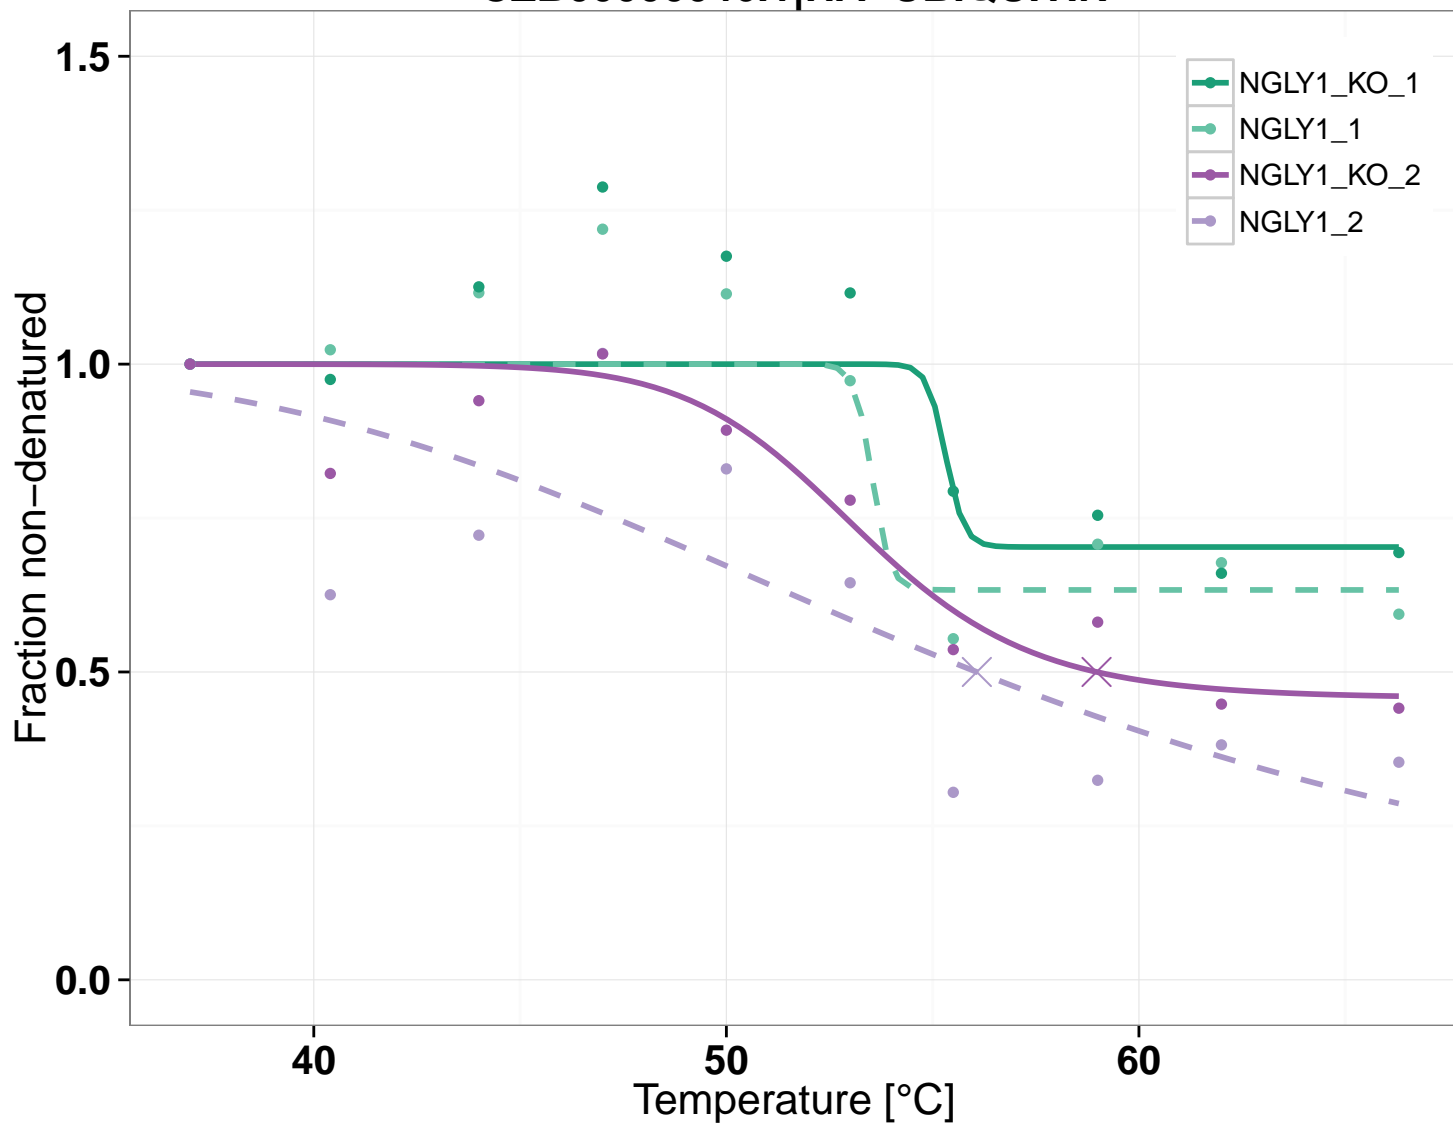

|            | meltPoint | slope  | plateau | R2   |
|------------|-----------|--------|---------|------|
| NGLY1_KO_1 | –         | –0.34  | 0.7     | 0.66 |
| NGLY1_1    | –         | –0.43  | 0.63    | 0.83 |
| NGLY1_KO_2 | 58.97     | –0.065 | 0.46    | 0.89 |
| NGLY1_2    | 56.07     | –0.029 | 0       | 0.63 |

Supplement: Supplementary file 2805 [file 1]

# IPI00016405.1|OCIAD1

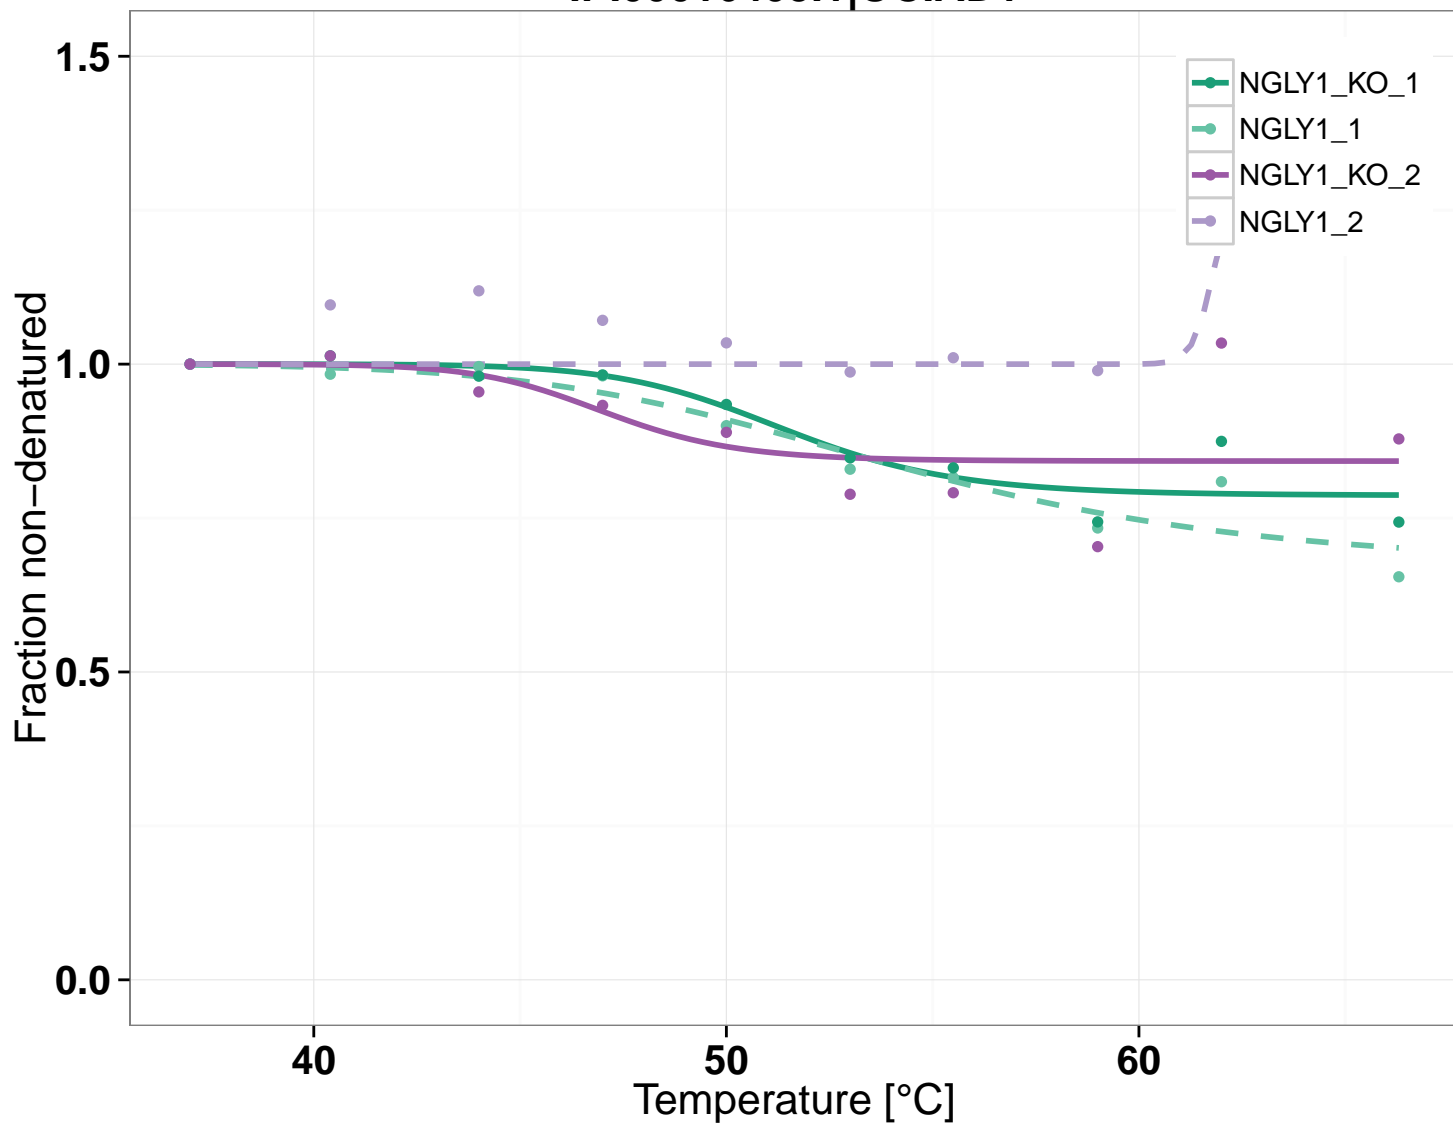

|            | meltPoint | slope  | plateau | R2   |
|------------|-----------|--------|---------|------|
| NGLY1_KO_1 | -         | -0.026 | 0.79    | 0.87 |
| NGLY1_1    | -         | -0.019 | 0.67    | 0.91 |
| NGLY1_KO_2 | -         | -0.025 | 0.84    | 0.4  |
| NGLY1_2    | -         | 0.3    | 1.3     | 0.69 |

Supplement: Supplementary file 2806 [file 1]

# IPI00017596.3|MAPRE1

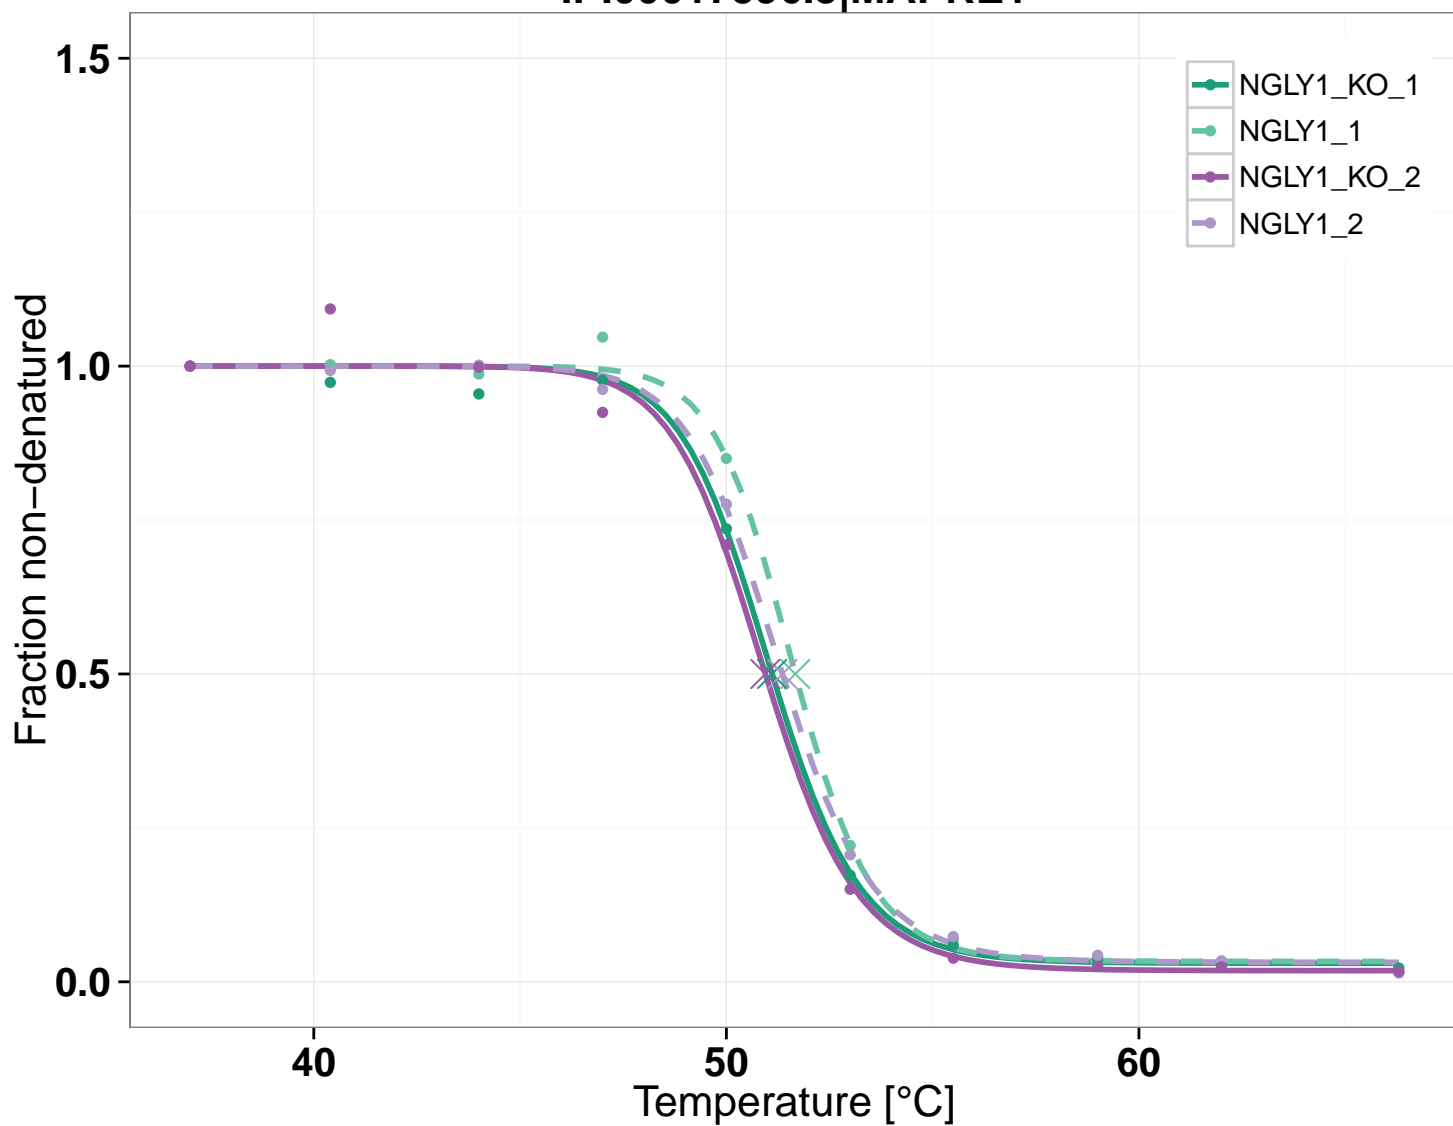

|            | meltPoint | slope | plateau | R2   |
|------------|-----------|-------|---------|------|
| NGLY1_KO_1 | 51.11     | -0.22 | 0.03    | 1    |
| NGLY1_1    | 51.67     | -0.25 | 0.03    | 1    |
| NGLY1_KO_2 | 50.94     | -0.22 | 0.02    | 0.99 |
| NGLY1_2    | 51.36     | -0.21 | 0.03    | 1    |

Supplement: Supplementary file 2807 [file 1]

# IPI00872673.1|NDE1

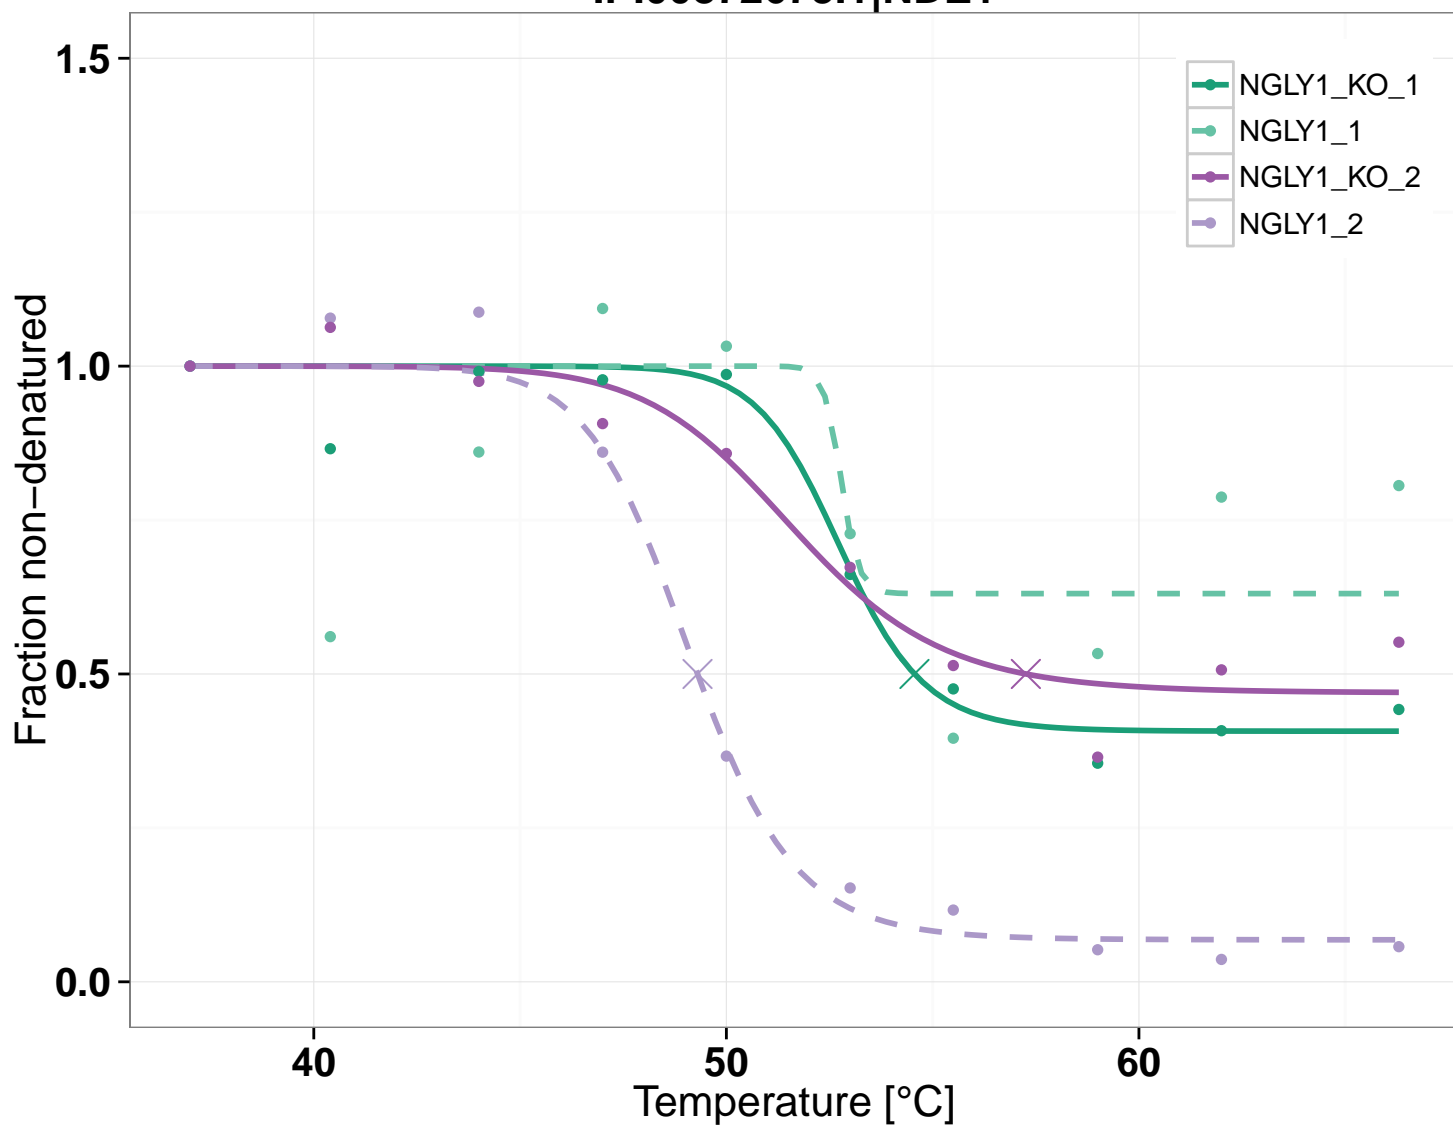

|            | meltPoint | slope  | plateau | R2   |
|------------|-----------|--------|---------|------|
| NGLY1_KO_1 | 54.56     | -0.14  | 0.41    | 0.97 |
| NGLY1_1    | -         | -0.44  | 0.63    | 0.28 |
| NGLY1_KO_2 | 57.26     | -0.073 | 0.47    | 0.94 |
| NGLY1_2    | 49.3      | -0.18  | 0.07    | 0.99 |

Supplement: Supplementary file 2808 [file 1]

IPI00792810.1|ARHGAP27

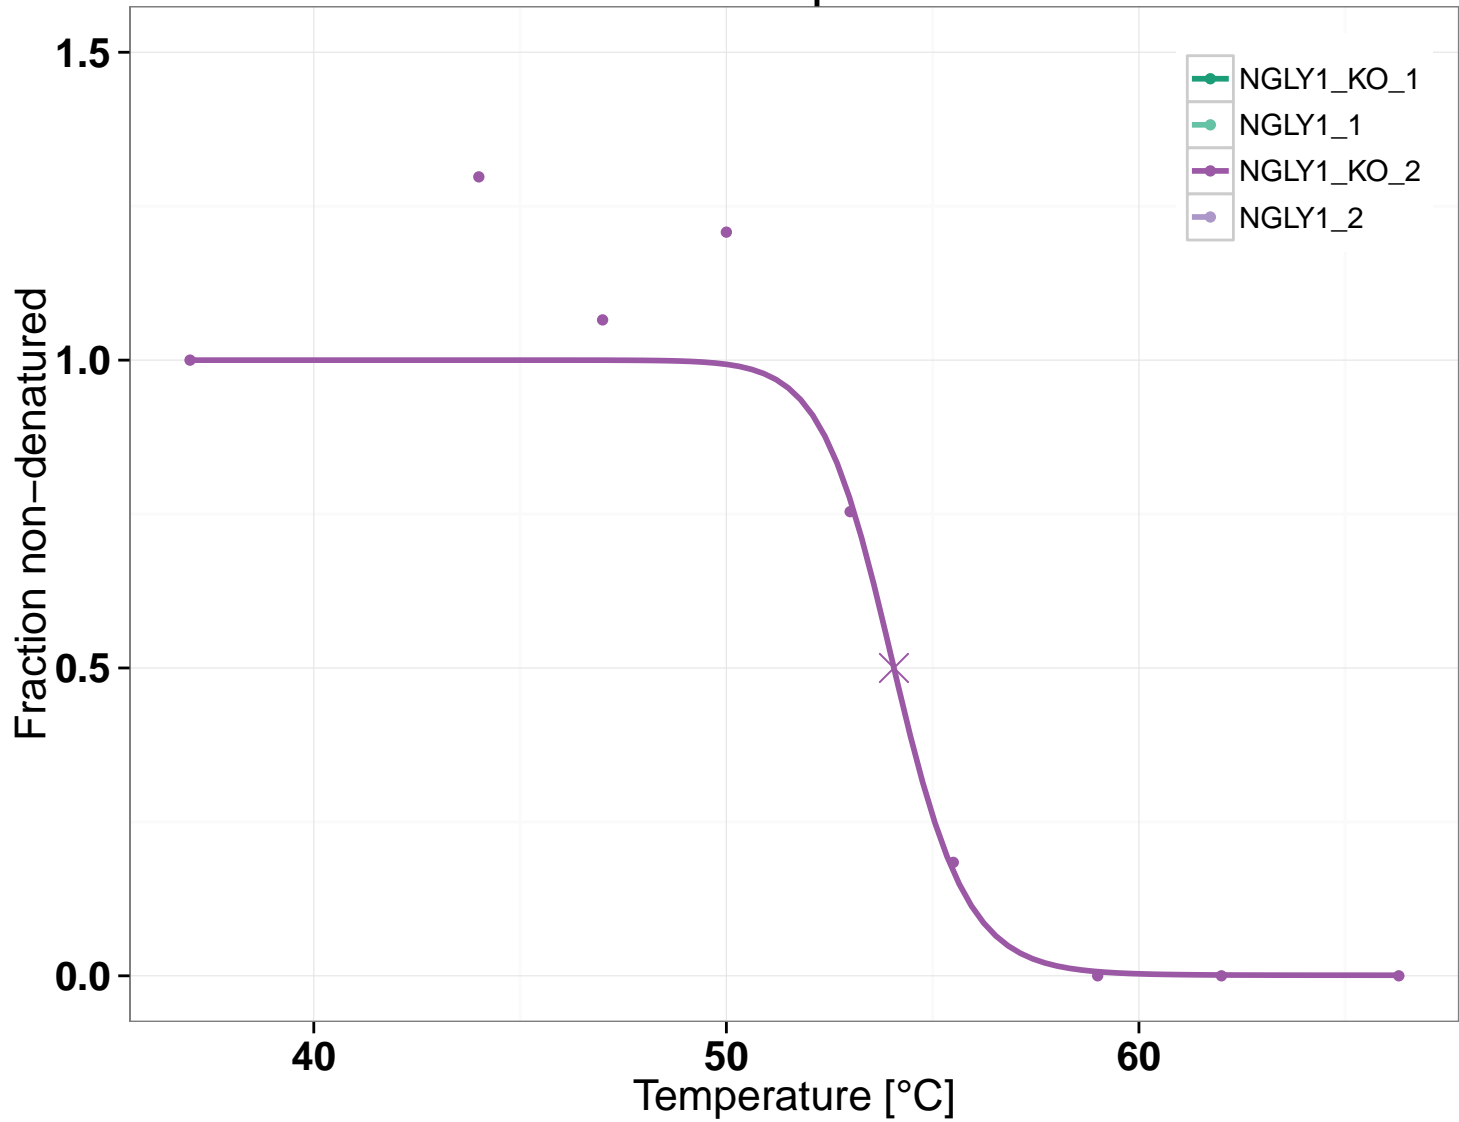

|            | meltPoint | slope | plateau | R2   |
|------------|-----------|-------|---------|------|
| NGLY1_KO_1 | -         | -     | -       | -    |
| NGLY1_1    | -         | -     | -       | -    |
| NGLY1_KO_2 | 54.06     | -0.28 | 0       | 0.87 |
| NGLY1_2    | -         | -     | -       | -    |

Supplement: Supplementary file 2809 [file 1]

# IPI00106913.4|DHRS4

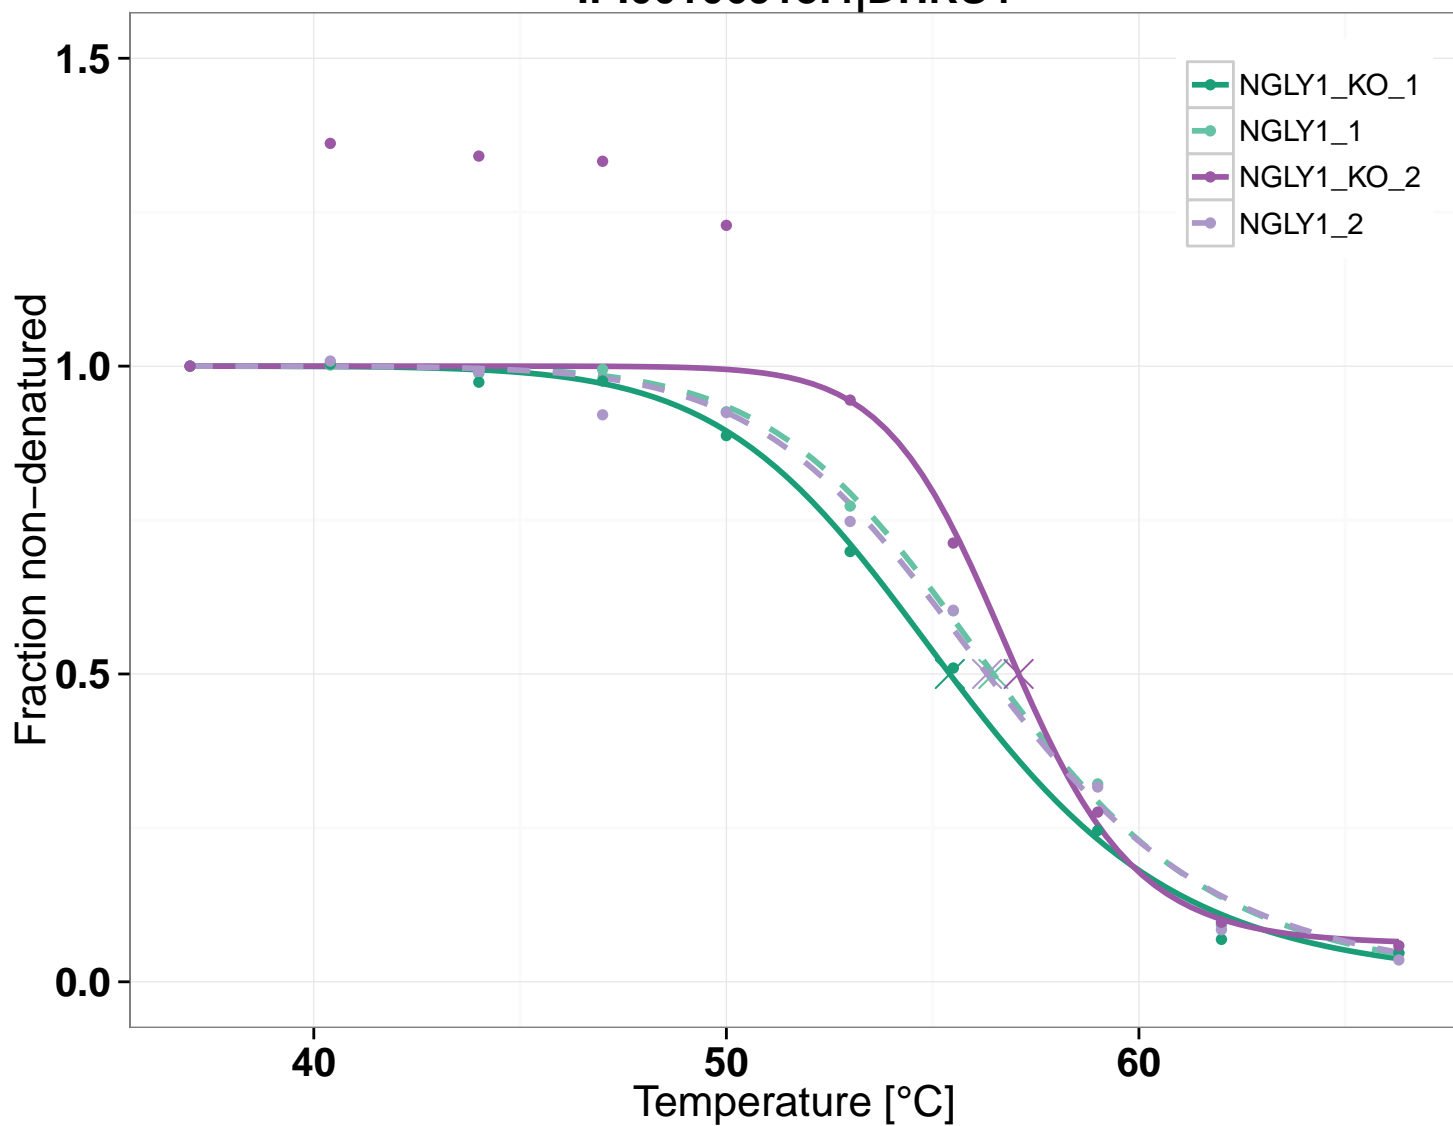

|            | meltPoint | slope  | plateau | R2   |
|------------|-----------|--------|---------|------|
| NGLY1_KO_1 | 55.42     | -0.09  | 0       | 1    |
| NGLY1_1    | 56.47     | -0.092 | 0       | 1    |
| NGLY1_KO_2 | 57.08     | -0.16  | 0.06    | 0.83 |
| NGLY1_2    | 56.32     | -0.089 | 0       | 0.99 |

Supplement: Supplementary file 2810 [file 1]

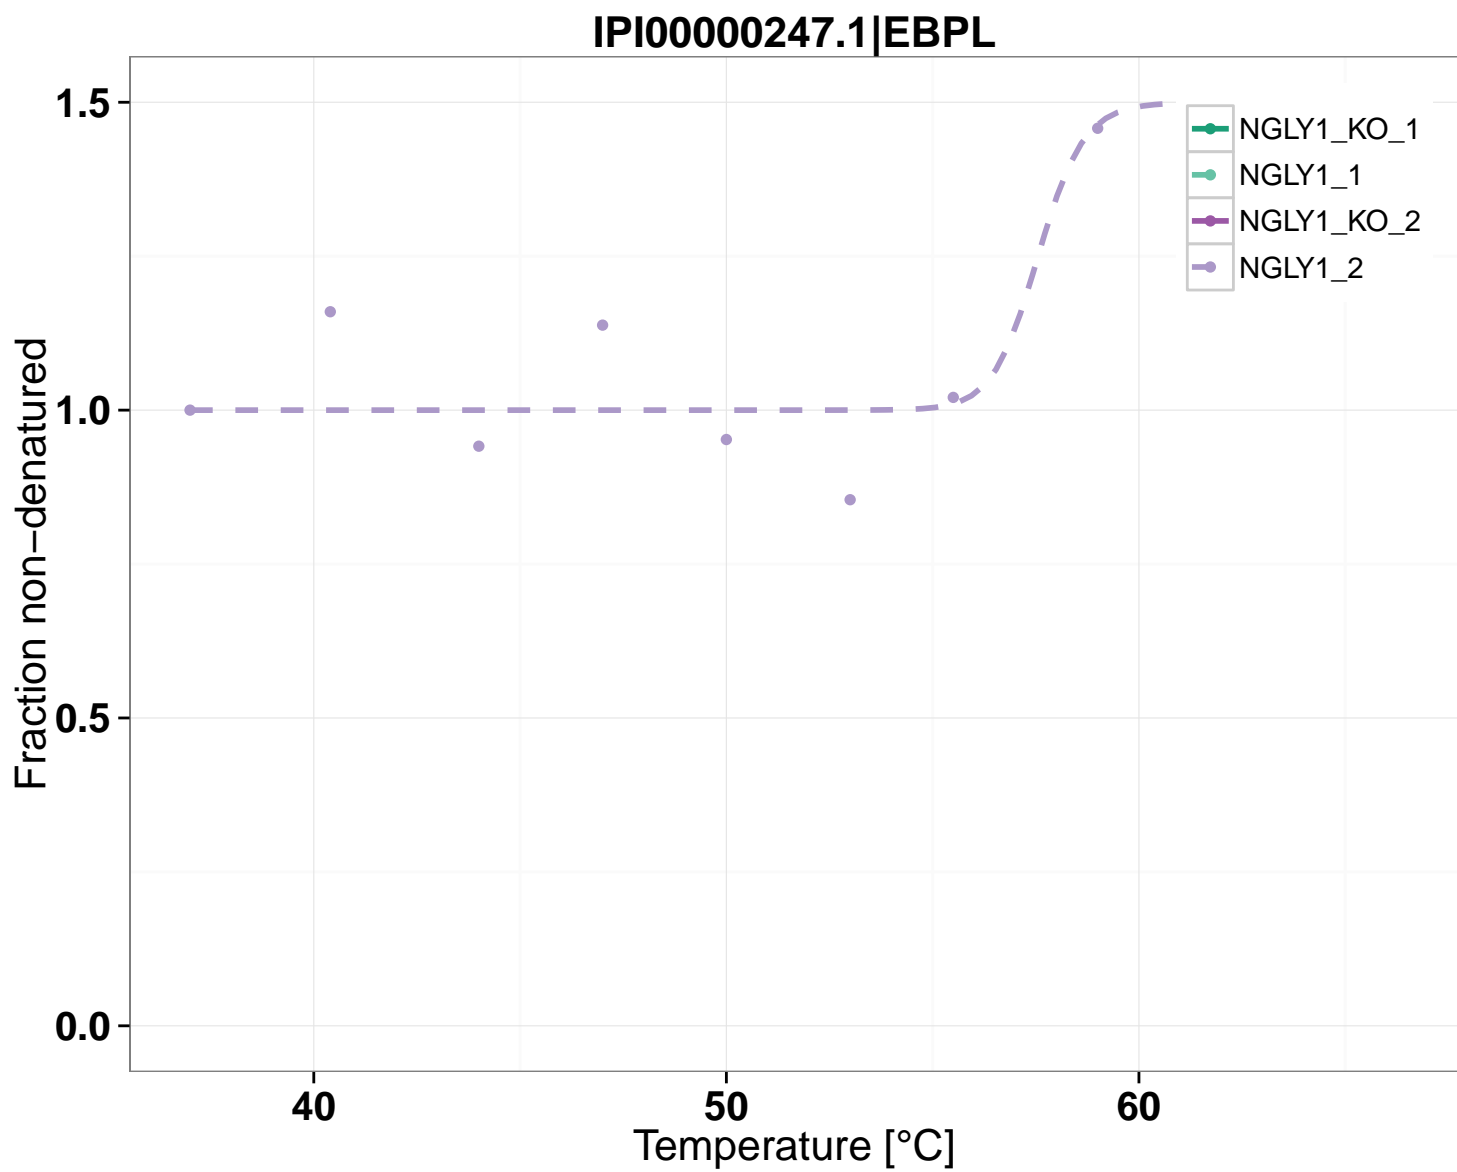

|            | meltPoint | slope | plateau | R2   |
|------------|-----------|-------|---------|------|
| NGLY1_KO_1 | —         | —     | —       | —    |
| NGLY1_1    | —         | —     | —       | —    |
| NGLY1_KO_2 | —         | —     | —       | —    |
| NGLY1_2    | —         | 0.23  | 1.5     | 0.76 |

Supplement: Supplementary file 2811 [file 1]

IPI00290032.1|TRPM7

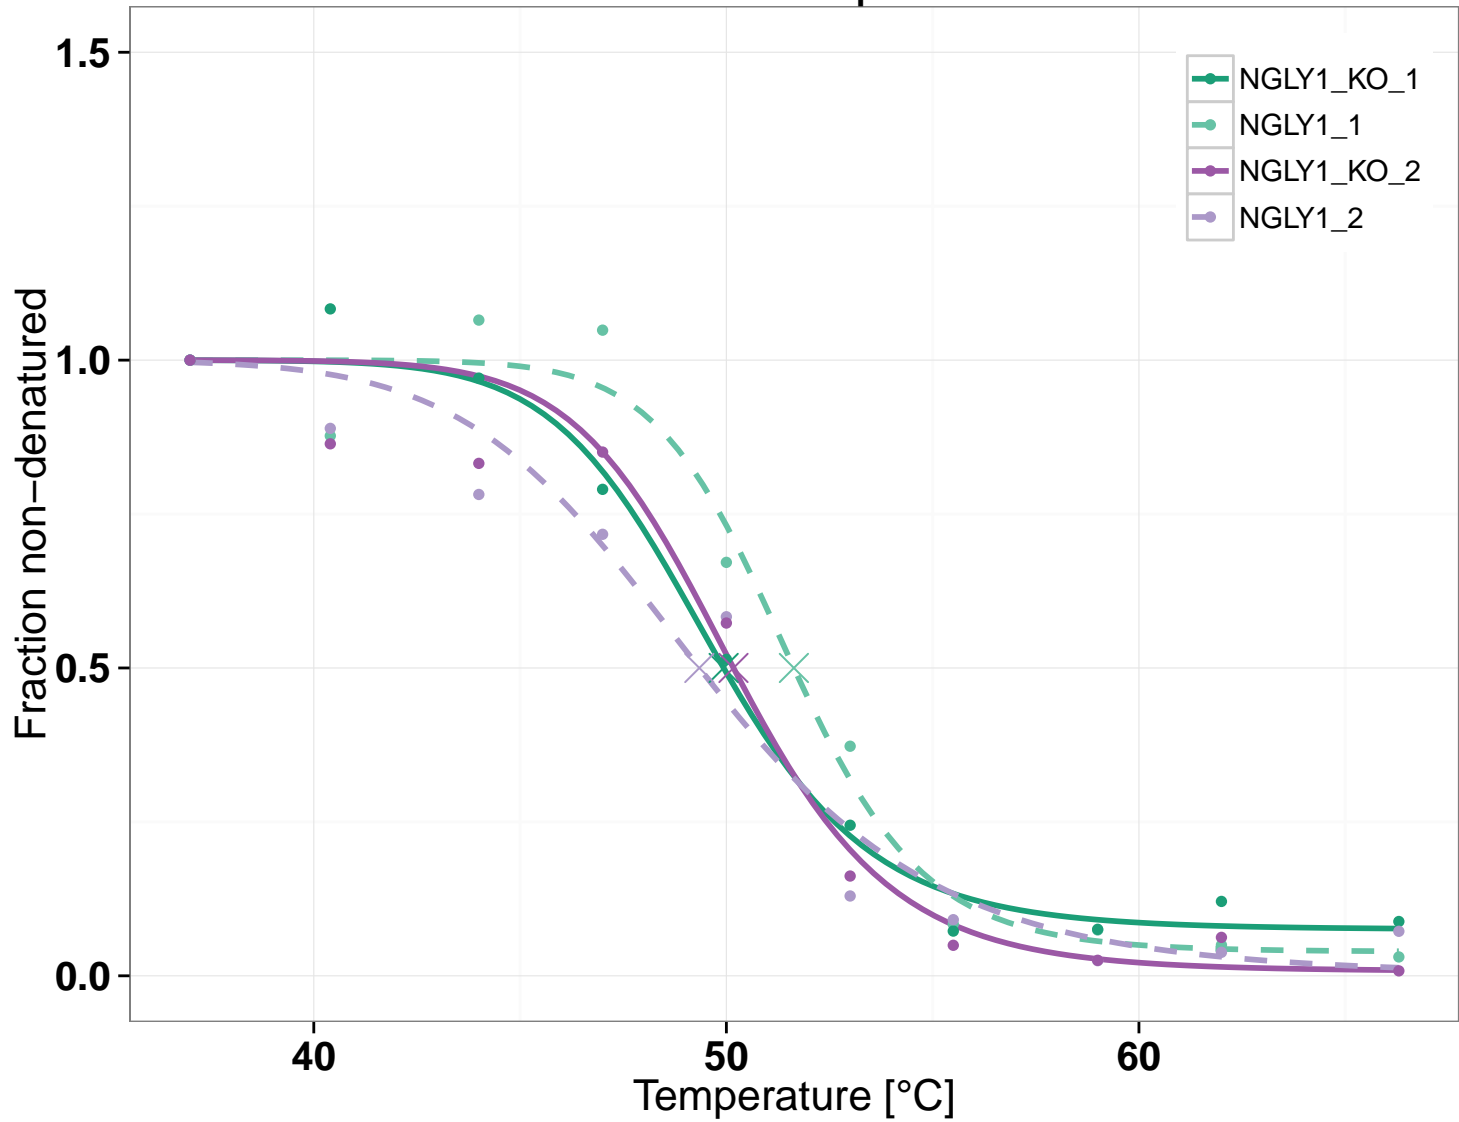

|            | meltPoint | slope  | plateau | R2   |
|------------|-----------|--------|---------|------|
| NGLY1_KO_1 | 49.93     | -0.12  | 0.08    | 0.99 |
| NGLY1_1    | 51.64     | -0.15  | 0.04    | 0.98 |
| NGLY1_KO_2 | 50.17     | -0.13  | 0.01    | 0.97 |
| NGLY1_2    | 49.34     | -0.087 | 0       | 0.96 |

Supplement: Supplementary file 2812 [file 1]
