# Supplementary material (part 29 of 85)
Source: publisher figshare collection journal article supplement (https://gsajournals.figshare.com/articles/dataset/_/12014913)

# IPI00855820.1|MON2

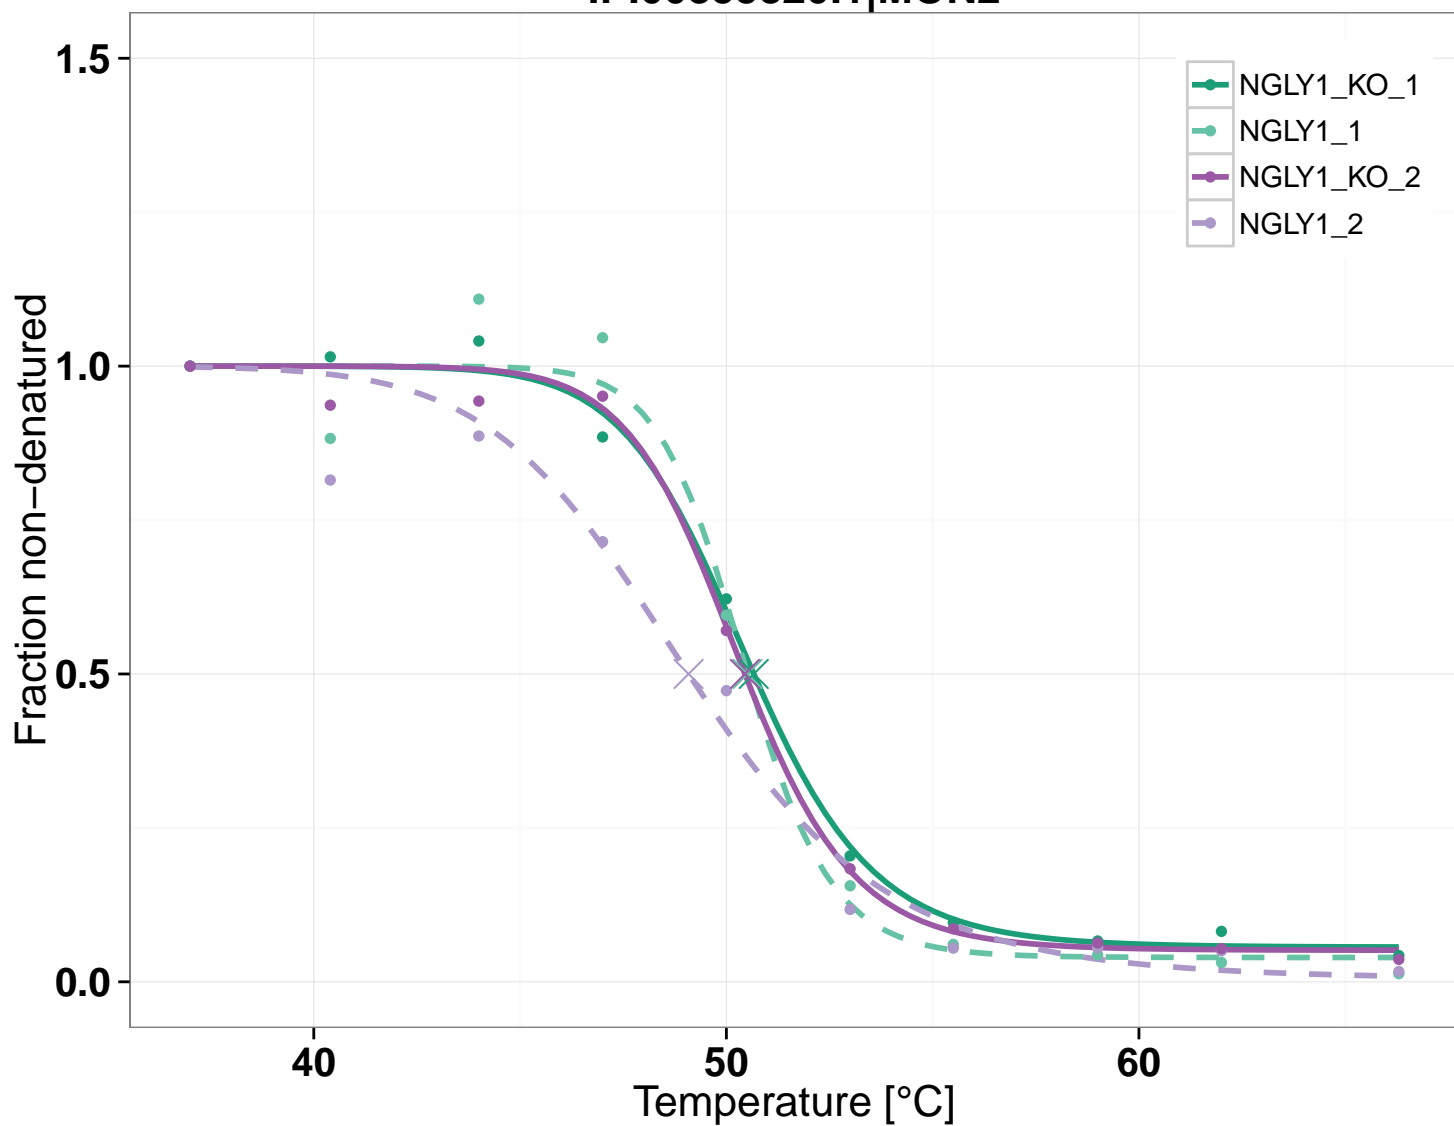

|            | meltPoint | slope | plateau | R2   |
|------------|-----------|-------|---------|------|
| NGLY1_KO_1 | 50.66     | -0.15 | 0.06    | 1    |
| NGLY1_1    | 50.51     | -0.23 | 0.04    | 0.98 |
| NGLY1_KO_2 | 50.45     | -0.17 | 0.05    | 1    |
| NGLY1_2    | 49.08     | -0.1  | 0       | 0.97 |

Supplement: Supplementary file 2813 [file 1]

IPI00167546.3|C2ORF69

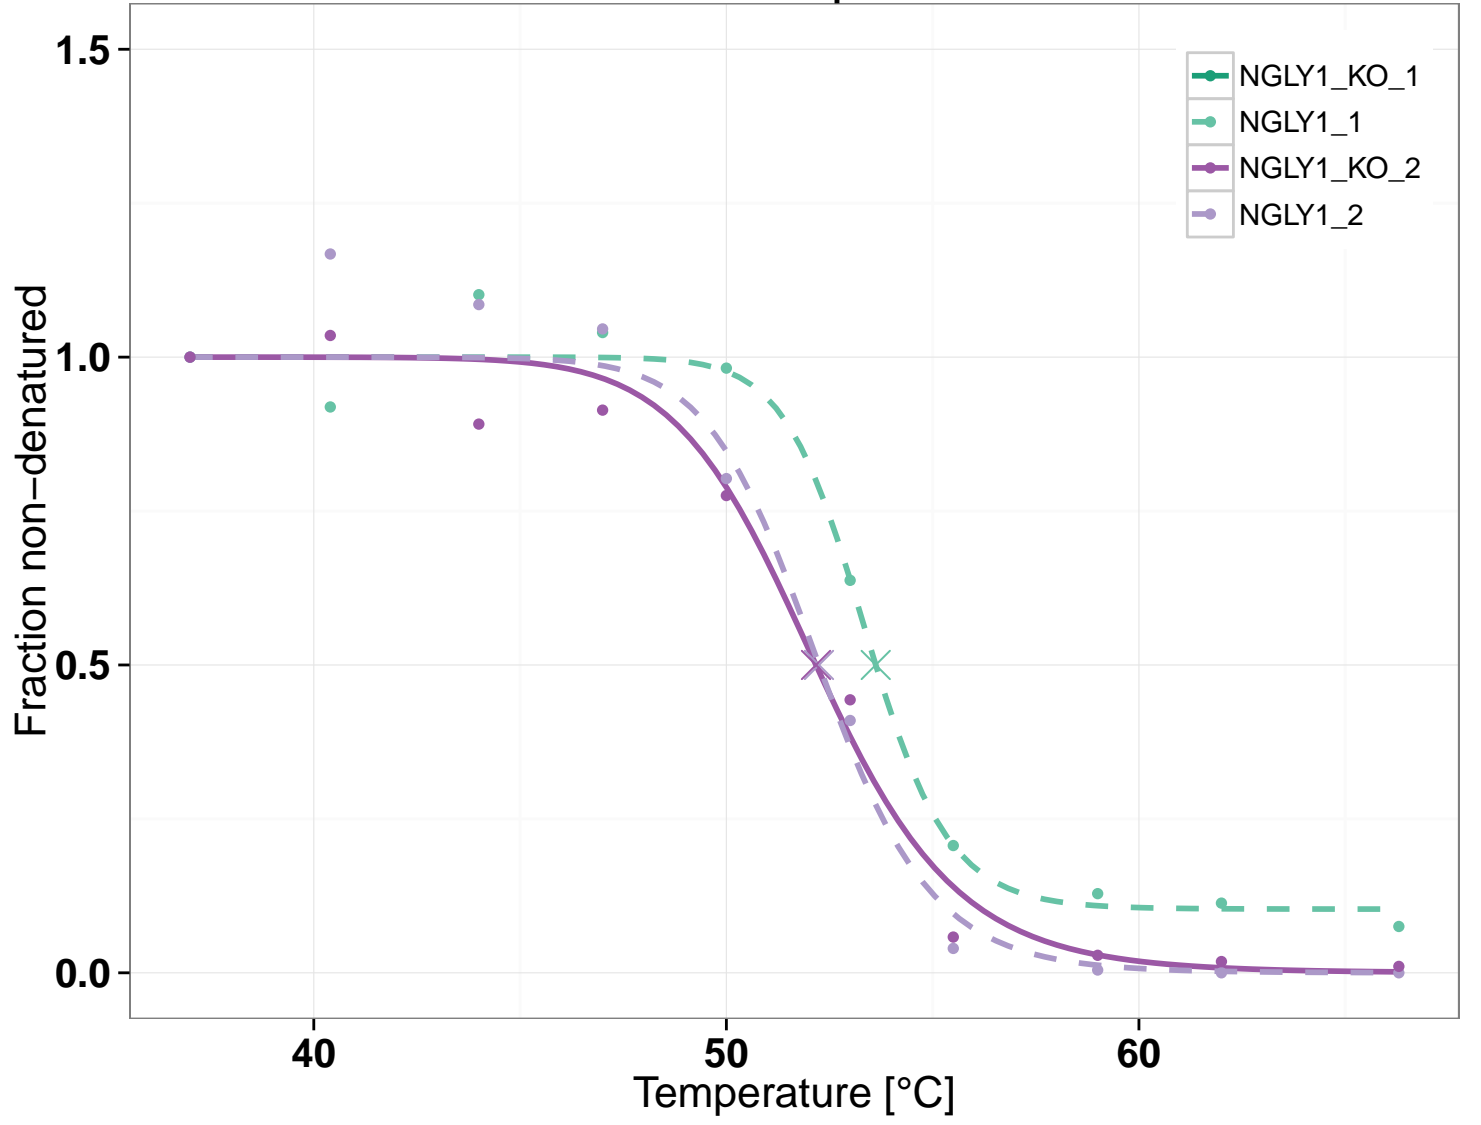

|            | meltPoint | slope | plateau | R2   |
|------------|-----------|-------|---------|------|
| NGLY1_KO_1 | –         | –     | –       | –    |
| NGLY1_1    | 53.62     | –0.23 | 0.1     | 0.99 |
| NGLY1_KO_2 | 52.17     | –0.15 | 0       | 0.99 |
| NGLY1_2    | 52.25     | –0.18 | 0       | 0.98 |

Supplement: Supplementary file 2814 [file 1]

IPI00844214.1|CTNNBL1

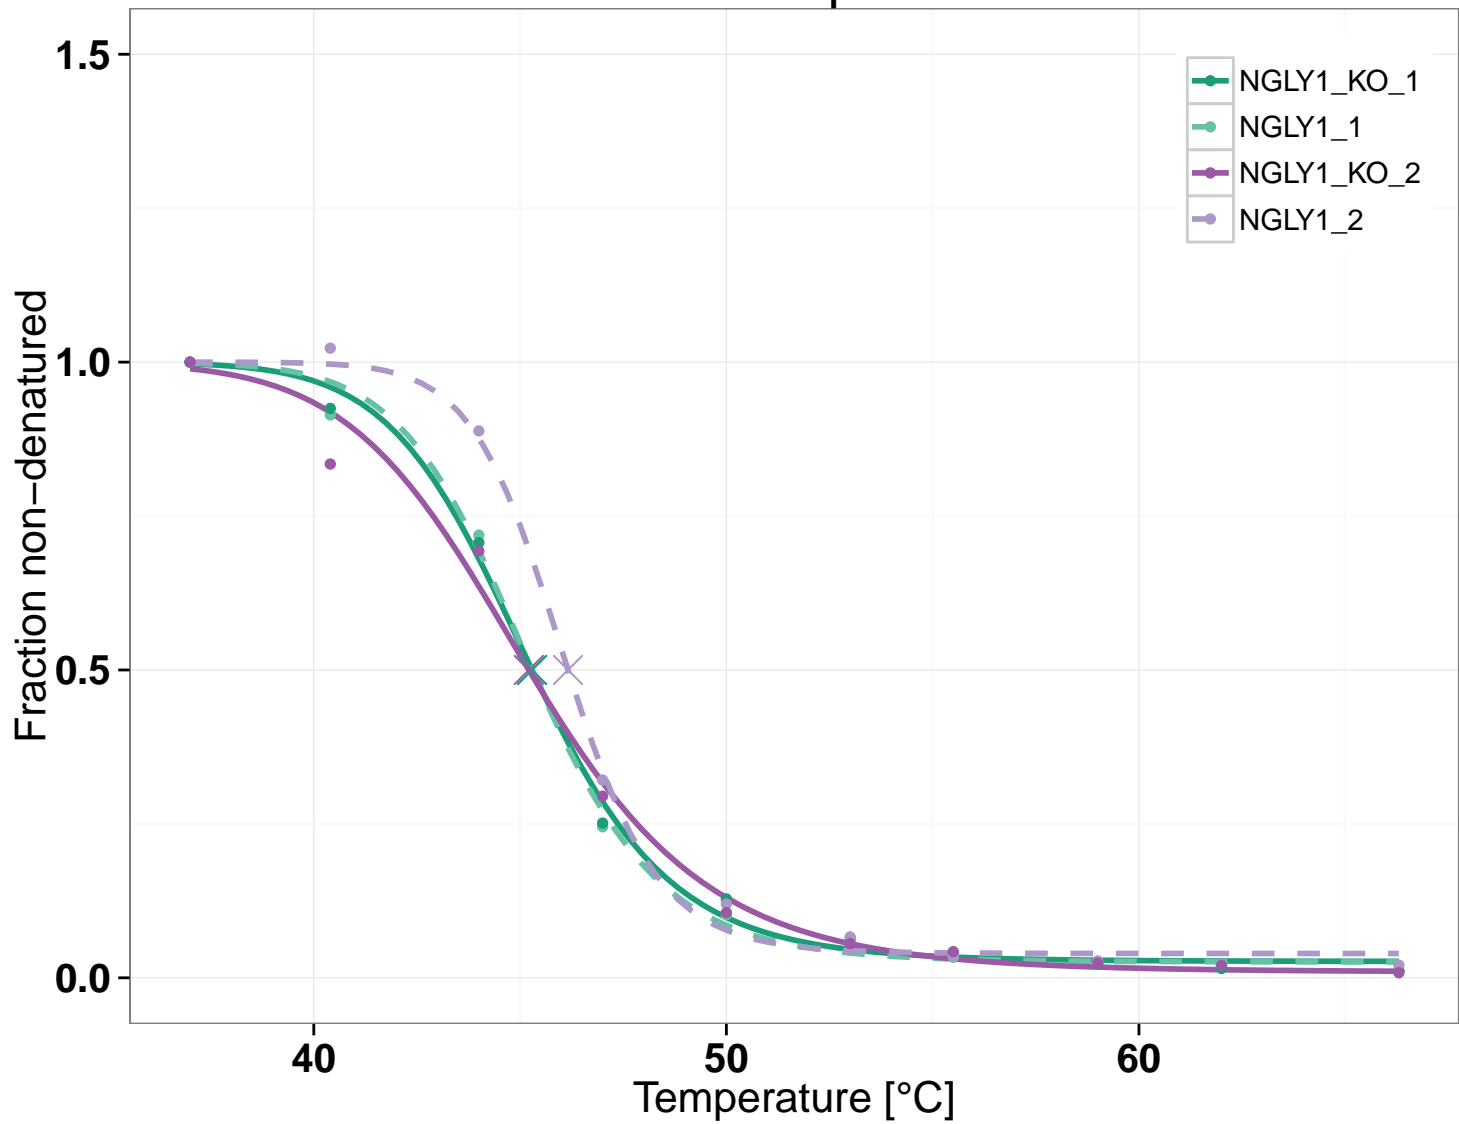

|            | meltPoint | slope | plateau | R2   |
|------------|-----------|-------|---------|------|
| NGLY1_KO_1 | 45.29     | -0.14 | 0.03    | 1    |
| NGLY1_1    | 45.29     | -0.15 | 0.03    | 1    |
| NGLY1_KO_2 | 45.21     | -0.11 | 0.01    | 0.99 |
| NGLY1_2    | 46.16     | -0.21 | 0.04    | 1    |

Supplement: Supplementary file 2815 [file 1]

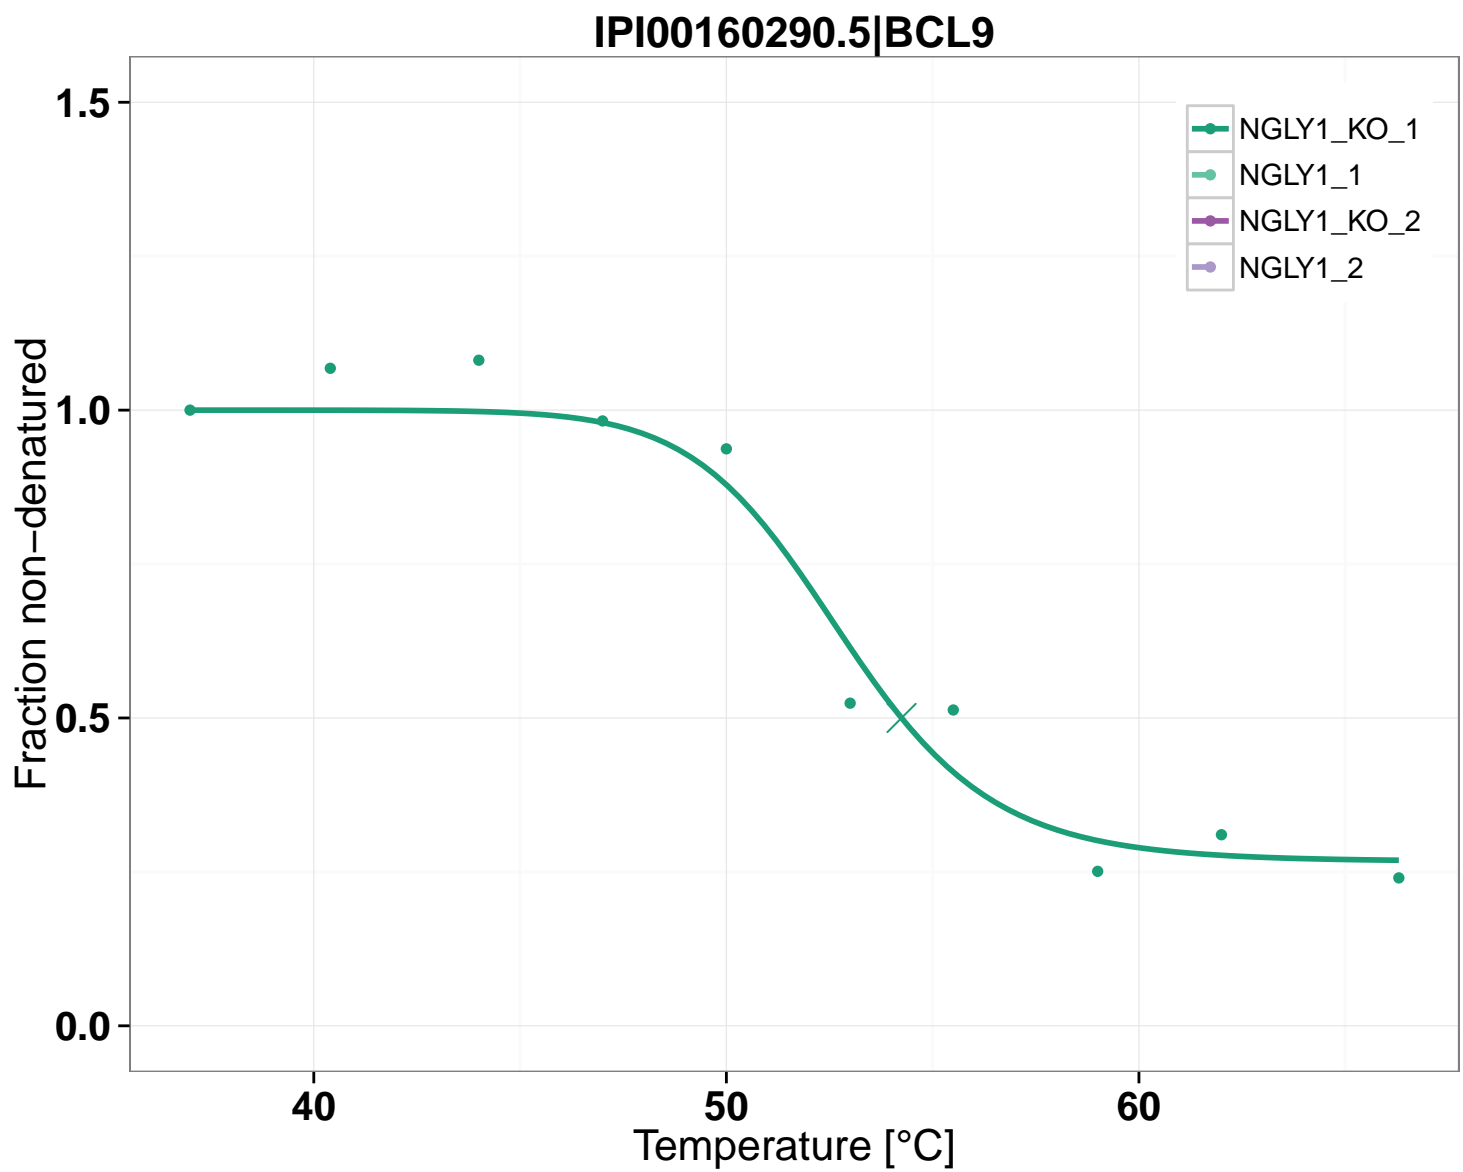

|            | meltPoint | slope | plateau | R2   |
|------------|-----------|-------|---------|------|
| NGLY1_KO_1 | 54.25     | -0.1  | 0.27    | 0.97 |
| NGLY1_1    | -         | -     | -       | -    |
| NGLY1_KO_2 | -         | -     | -       | -    |
| NGLY1_2    | -         | -     | -       | -    |

Supplement: Supplementary file 2816 [file 1]

# IPI00014232.1|ARL6IP1

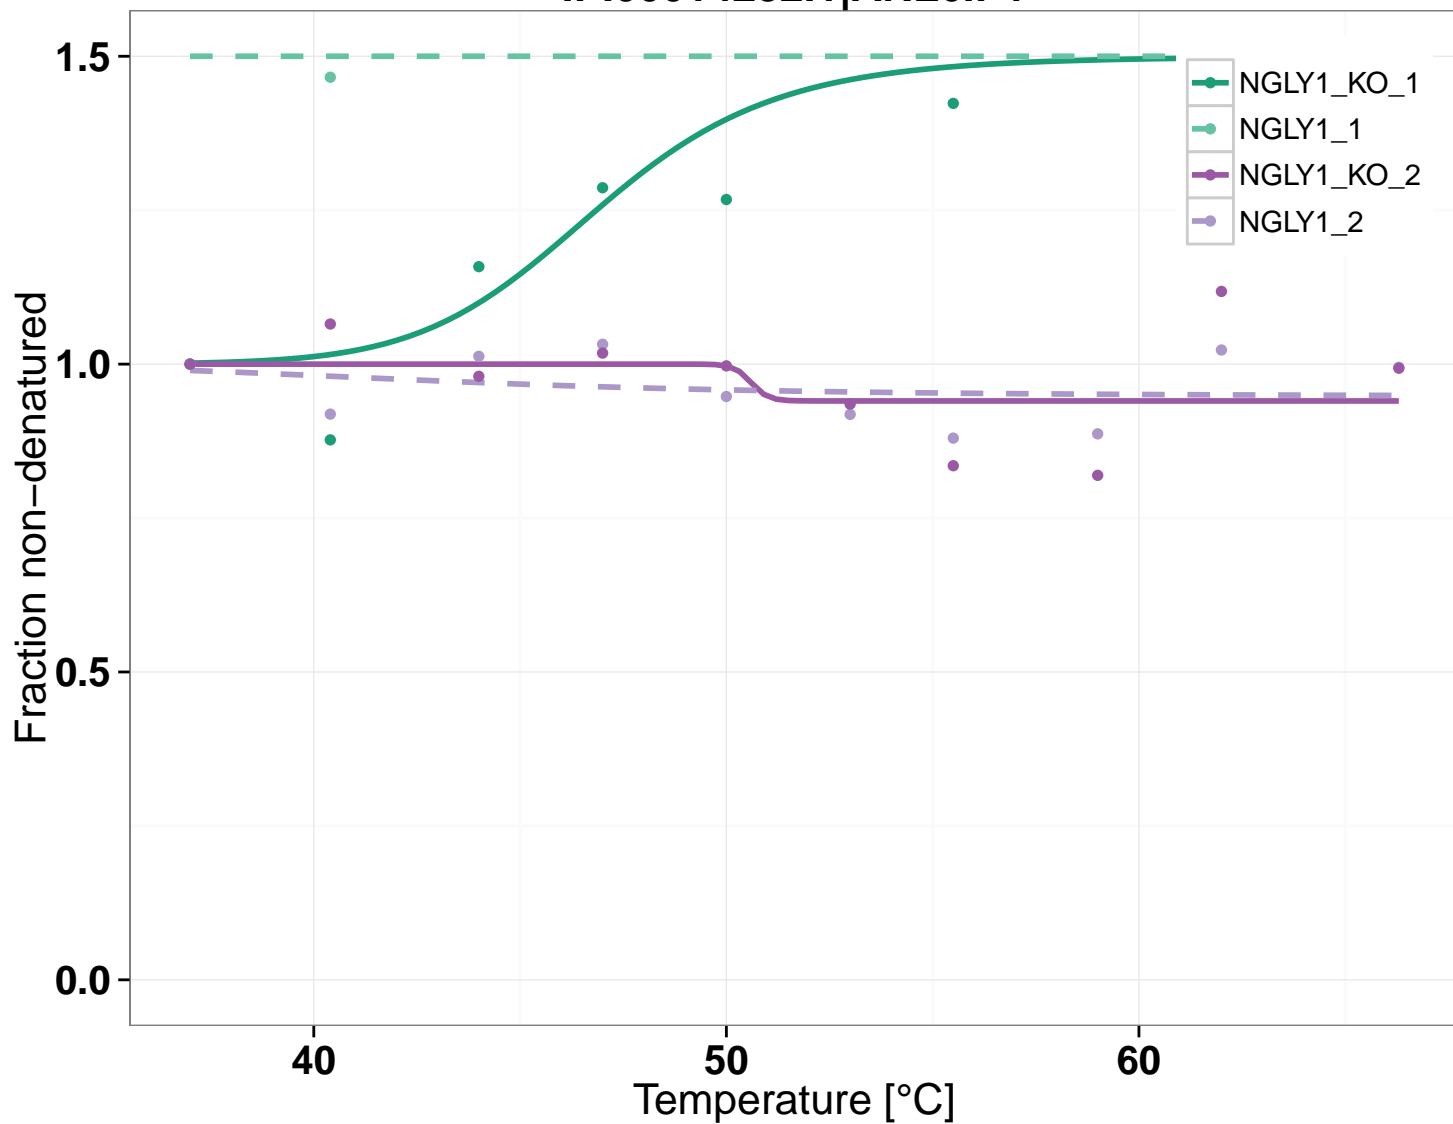

|            | meltPoint | slope  | plateau | R2    |
|------------|-----------|--------|---------|-------|
| NGLY1_KO_1 | –         | 0.058  | 1.5     | 0.8   |
| NGLY1_1    | –         | –      | 1.5     | –0.77 |
| NGLY1_KO_2 | –         | –0.074 | 0.94    | 0.16  |
| NGLY1_2    | –         | –0.003 | 0.95    | 0.04  |

Supplement: Supplementary file 2817 [file 1]

# IPI00328715.4|MTDH

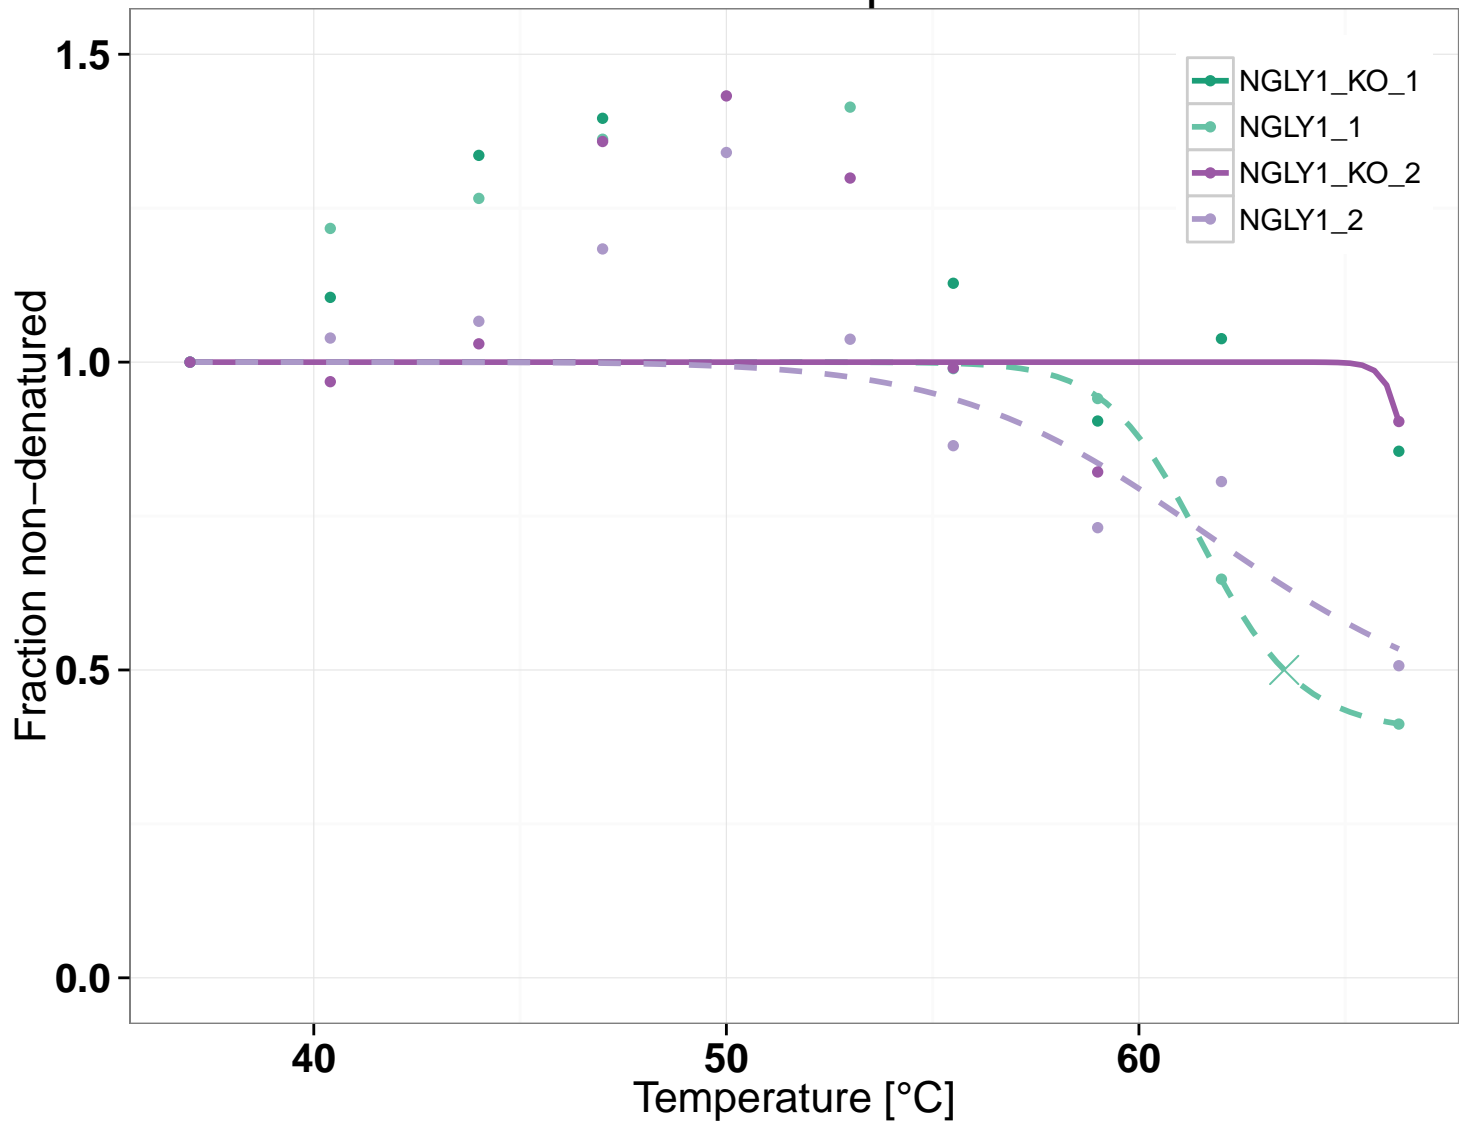

|            | meltPoint | slope  | plateau | R2    |
|------------|-----------|--------|---------|-------|
| NGLY1_KO_1 | -         | -      | -       | -     |
| NGLY1_1    | 63.52     | -0.13  | 0.4     | 0.38  |
| NGLY1_KO_2 | -         | -      | 0.01    | -0.26 |
| NGLY1_2    | -         | -0.046 | 0.38    | 0.62  |

Supplement: Supplementary file 2818 [file 1]

IPI00025318.1|SH3BGRL

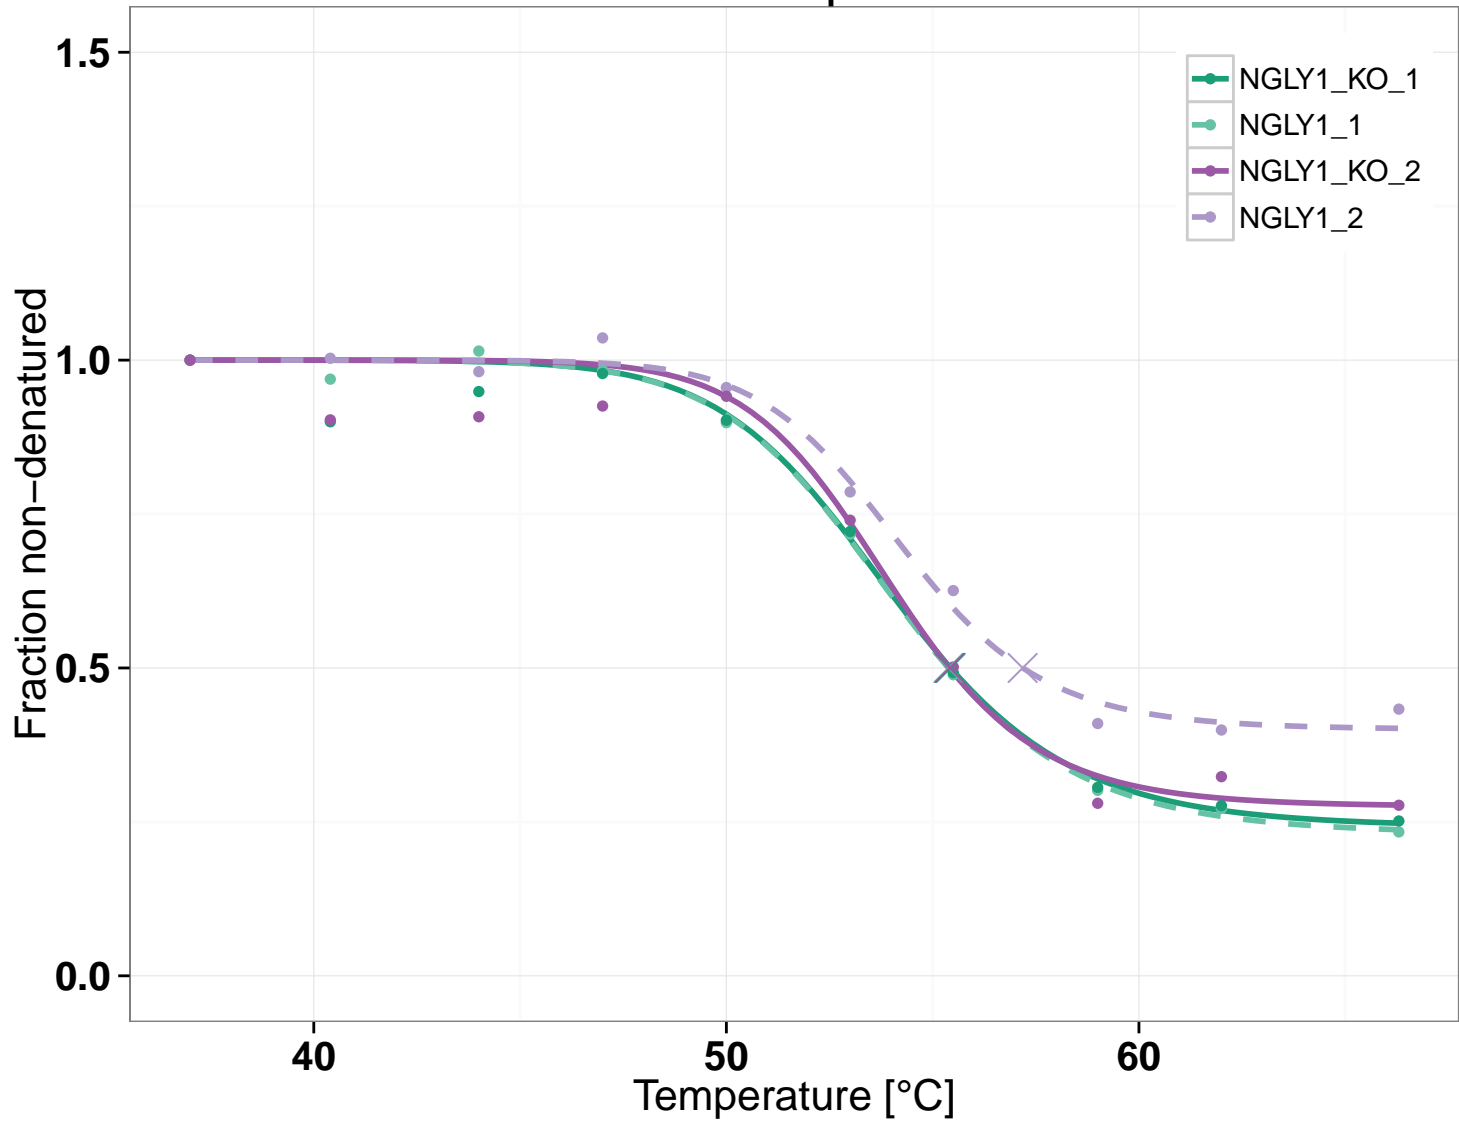

|            | meltPoint | slope  | plateau | R2   |
|------------|-----------|--------|---------|------|
| NGLY1_KO_1 | 55.43     | -0.09  | 0.24    | 0.99 |
| NGLY1_1    | 55.38     | -0.09  | 0.23    | 1    |
| NGLY1_KO_2 | 55.41     | -0.1   | 0.27    | 0.97 |
| NGLY1_2    | 57.18     | -0.086 | 0.4     | 0.99 |

Supplement: Supplementary file 2819 [file 1]

IPI00008285.1|FAM8A1

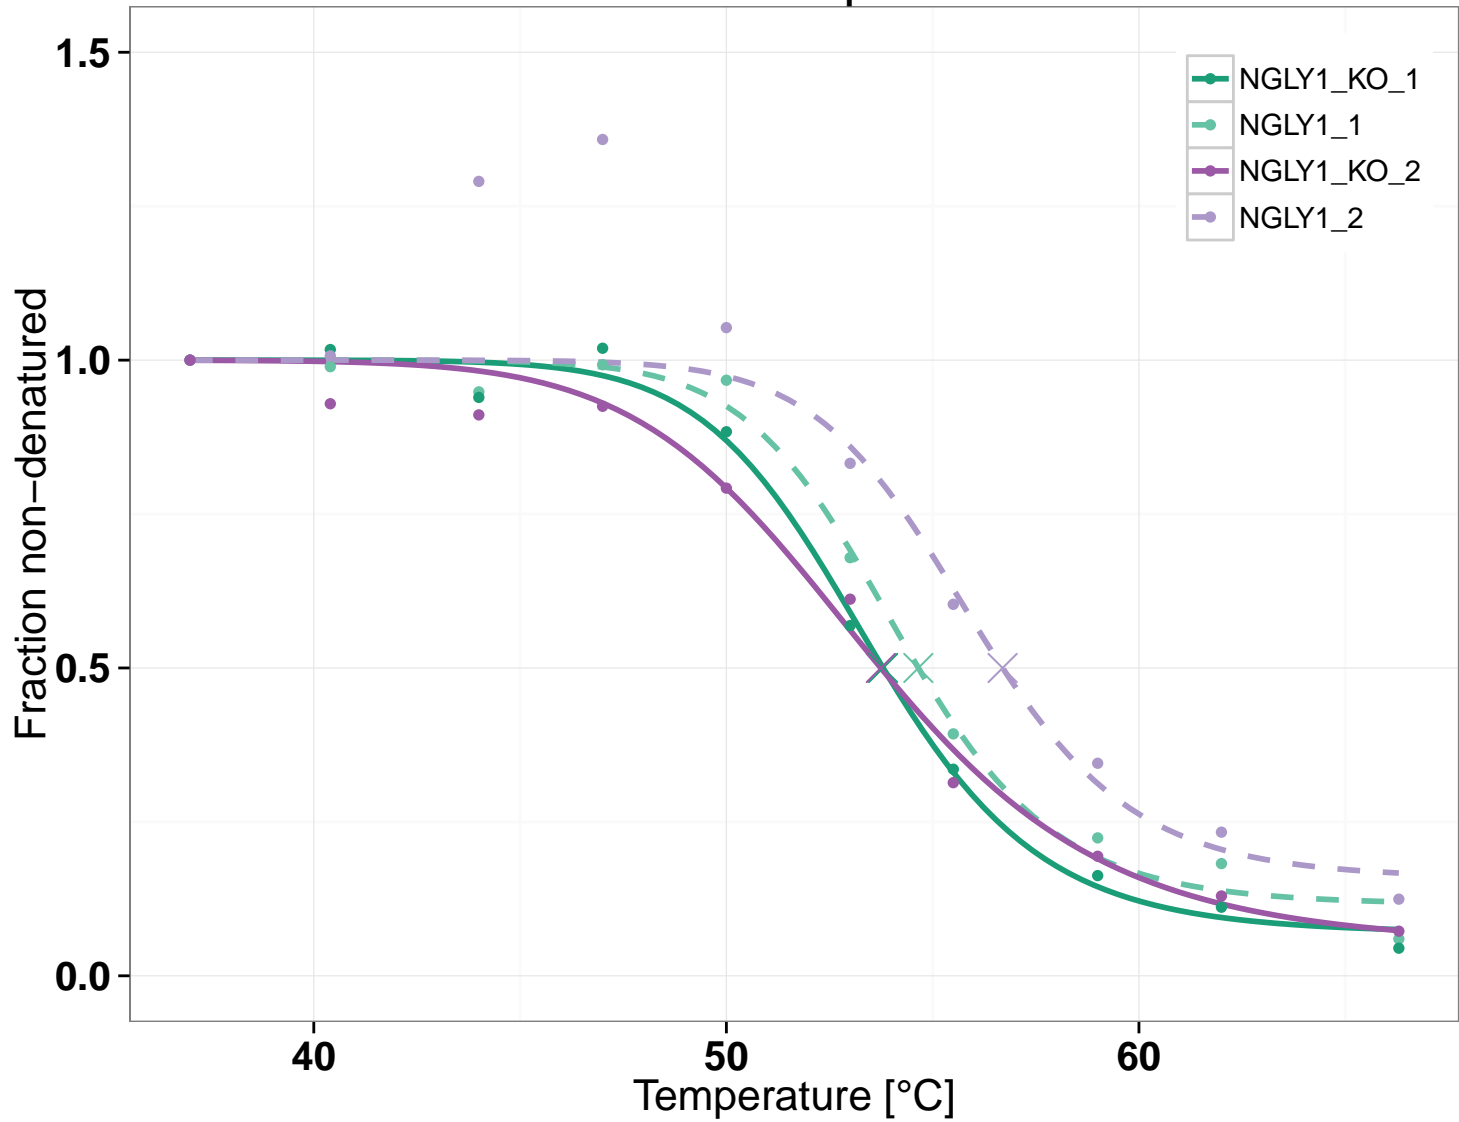

|            | meltPoint | slope  | plateau | R2   |
|------------|-----------|--------|---------|------|
| NGLY1_KO_1 | 53.8      | -0.11  | 0.07    | 0.99 |
| NGLY1_1    | 54.65     | -0.12  | 0.12    | 0.99 |
| NGLY1_KO_2 | 53.74     | -0.083 | 0.05    | 0.99 |
| NGLY1_2    | 56.7      | -0.11  | 0.16    | 0.87 |

Supplement: Supplementary file 2820 [file 1]

# IPI00061623.1|SGTB

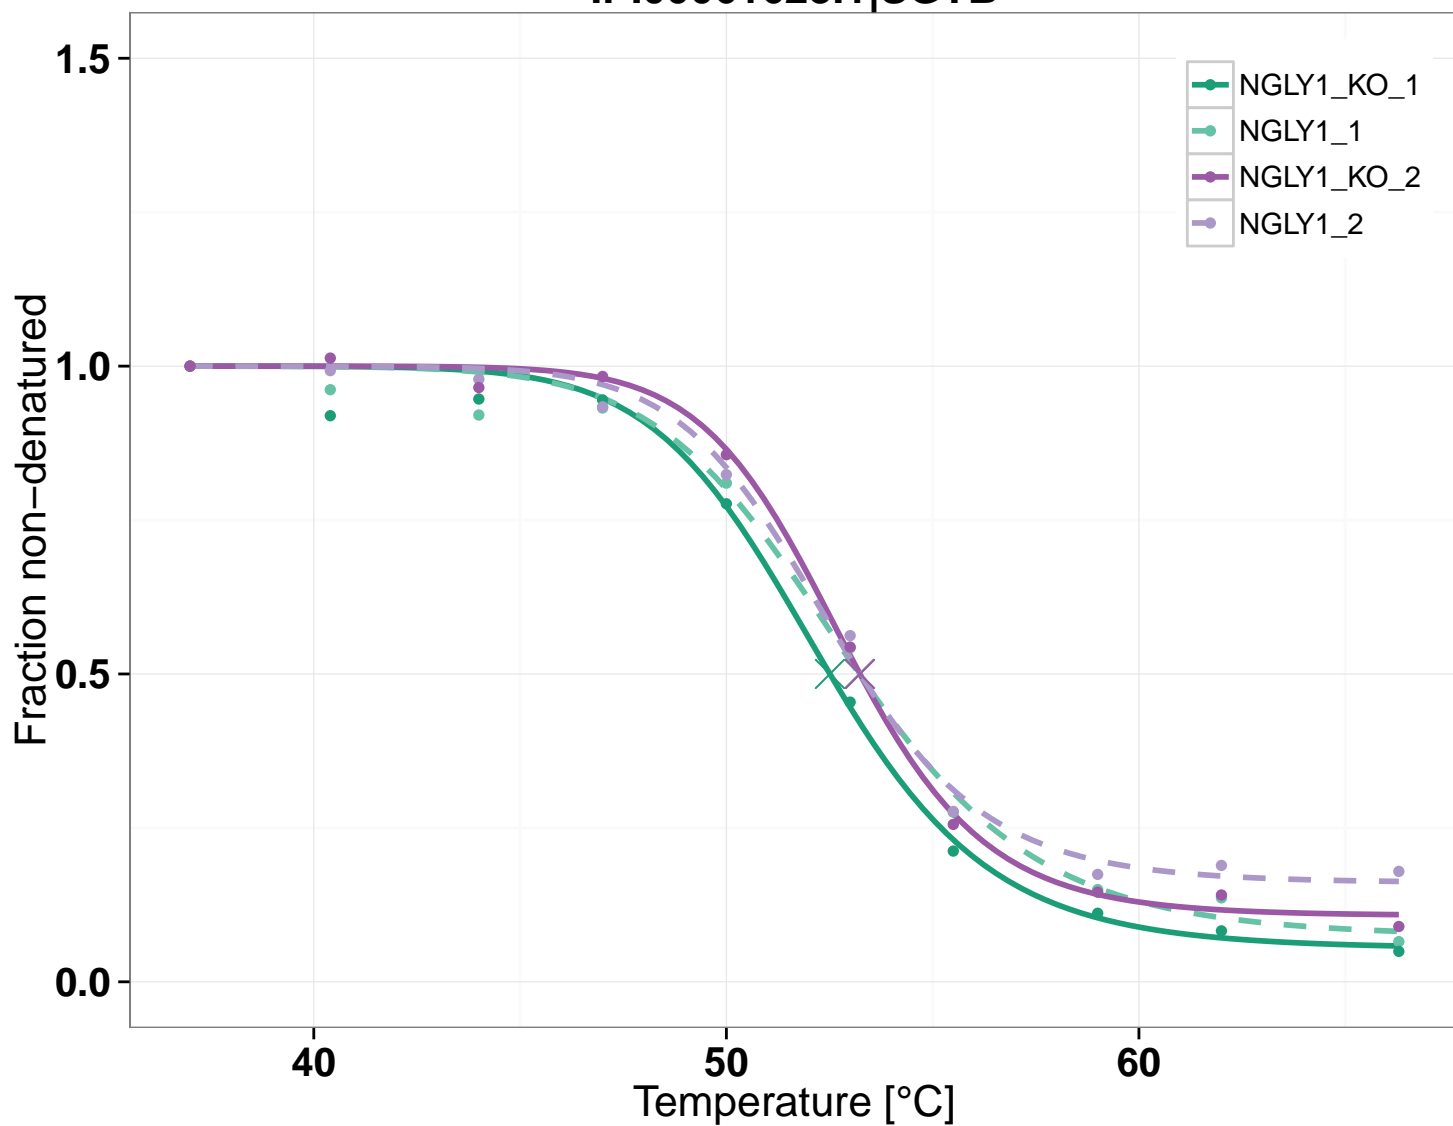

|            | meltPoint | slope | plateau | R2   |
|------------|-----------|-------|---------|------|
| NGLY1_KO_1 | 52.51     | -0.12 | 0.05    | 0.99 |
| NGLY1_1    | 53.22     | -0.1  | 0.07    | 0.99 |
| NGLY1_KO_2 | 53.24     | -0.13 | 0.11    | 1    |
| NGLY1_2    | 53.24     | -0.11 | 0.16    | 1    |

Supplement: Supplementary file 2821 [file 1]

IPI00017580.1|KIN

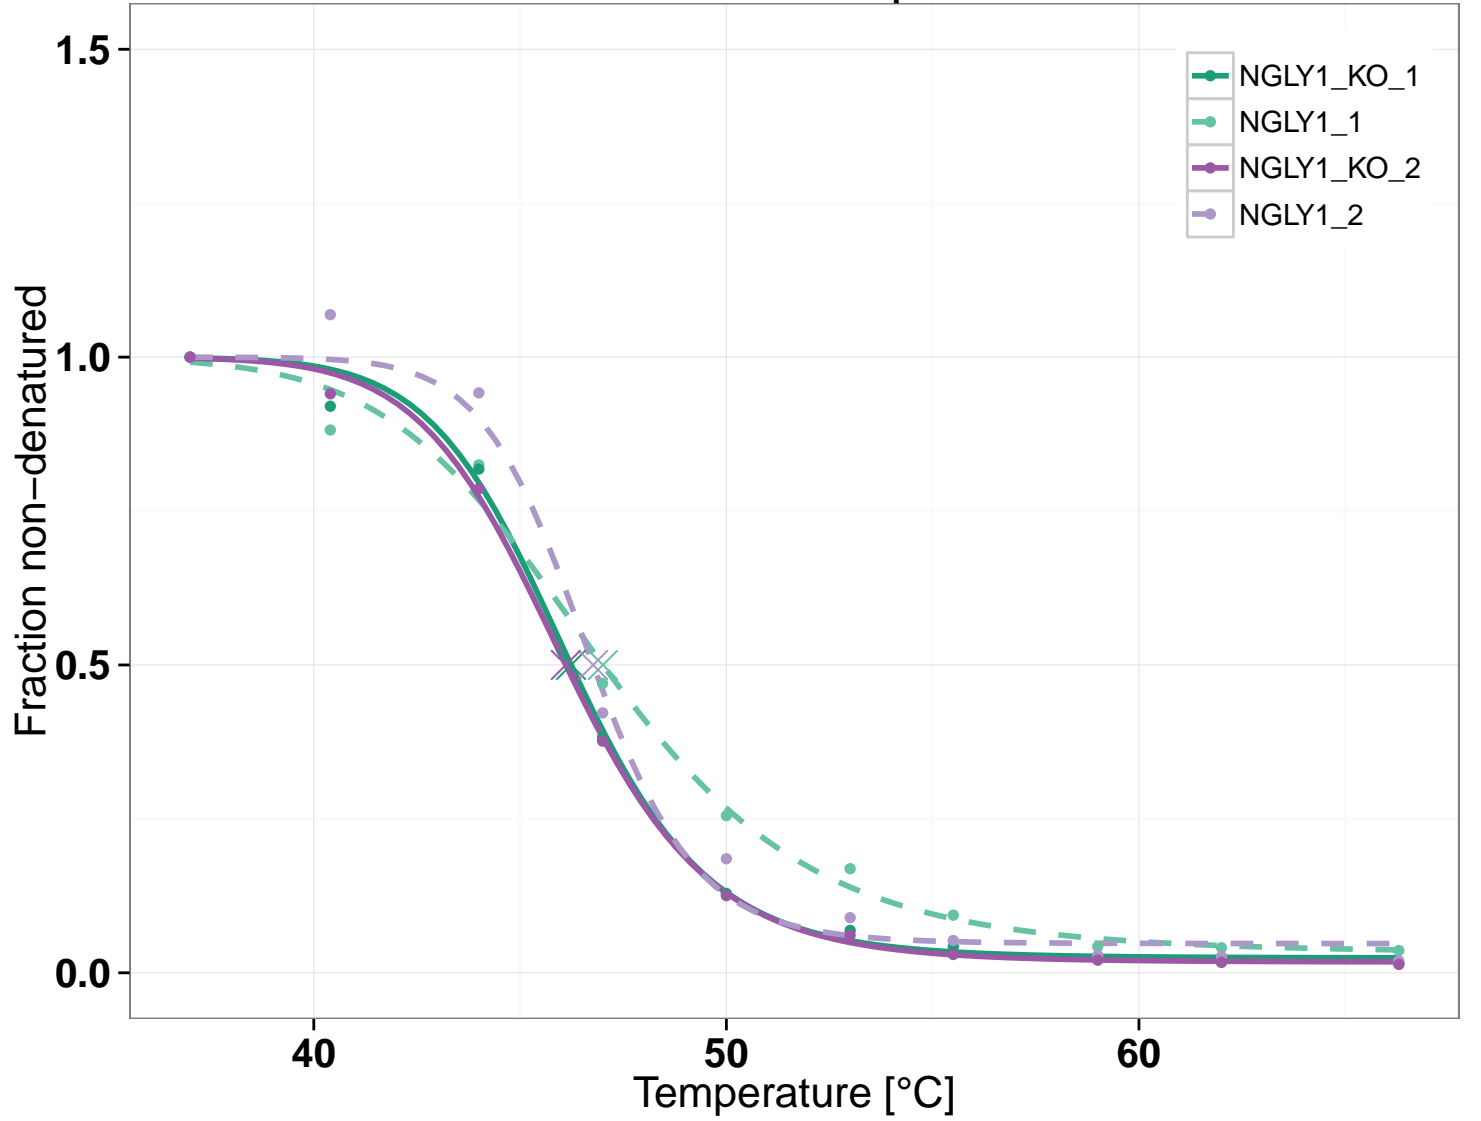

|            | meltPoint | slope  | plateau | R2   |
|------------|-----------|--------|---------|------|
| NGLY1_KO_1 | 46.23     | -0.14  | 0.02    | 1    |
| NGLY1_1    | 47.01     | -0.094 | 0.03    | 0.99 |
| NGLY1_KO_2 | 46.11     | -0.14  | 0.02    | 1    |
| NGLY1_2    | 46.77     | -0.18  | 0.05    | 0.99 |

Supplement: Supplementary file 2822 [file 1]

IPI00464963.4|HEMGN

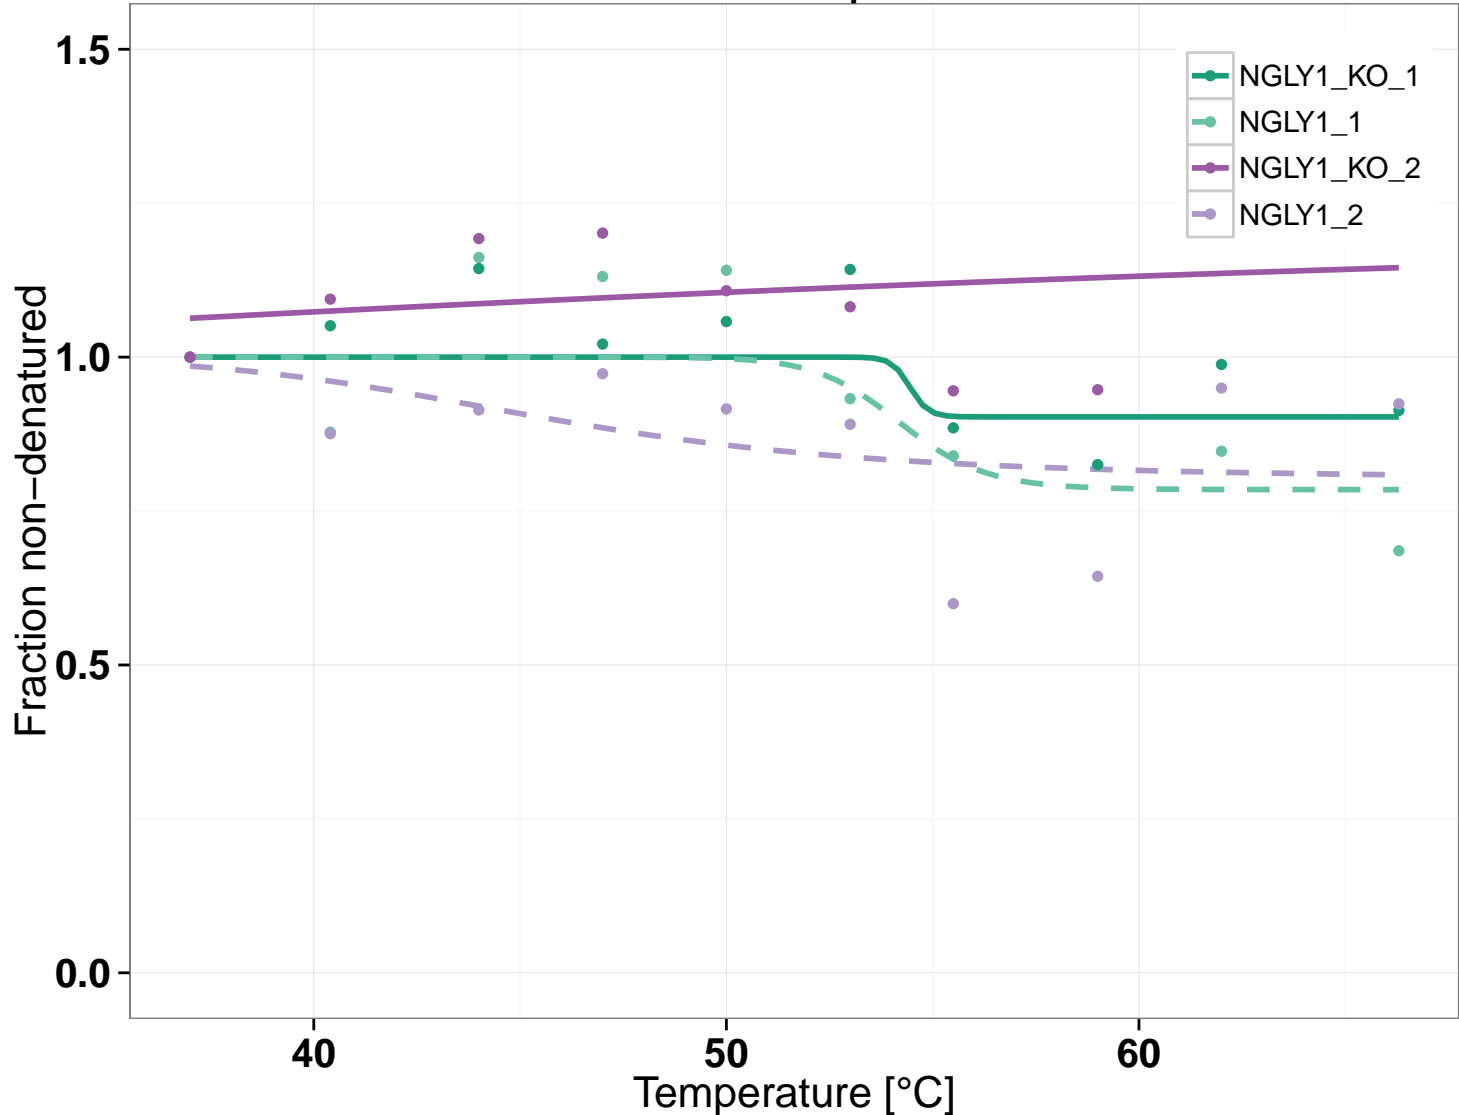

|            | meltPoint | slope  | plateau | R2   |
|------------|-----------|--------|---------|------|
| NGLY1_KO_1 | —         | −0.11  | 0.9     | 0.38 |
| NGLY1_1    | —         | −0.052 | 0.78    | 0.59 |
| NGLY1_KO_2 | —         | —      | 1.5     | 0.05 |
| NGLY1_2    | —         | −0.012 | 0.8     | 0.18 |

Supplement: Supplementary file 2823 [file 1]

IPI00032459.1|AP3M1

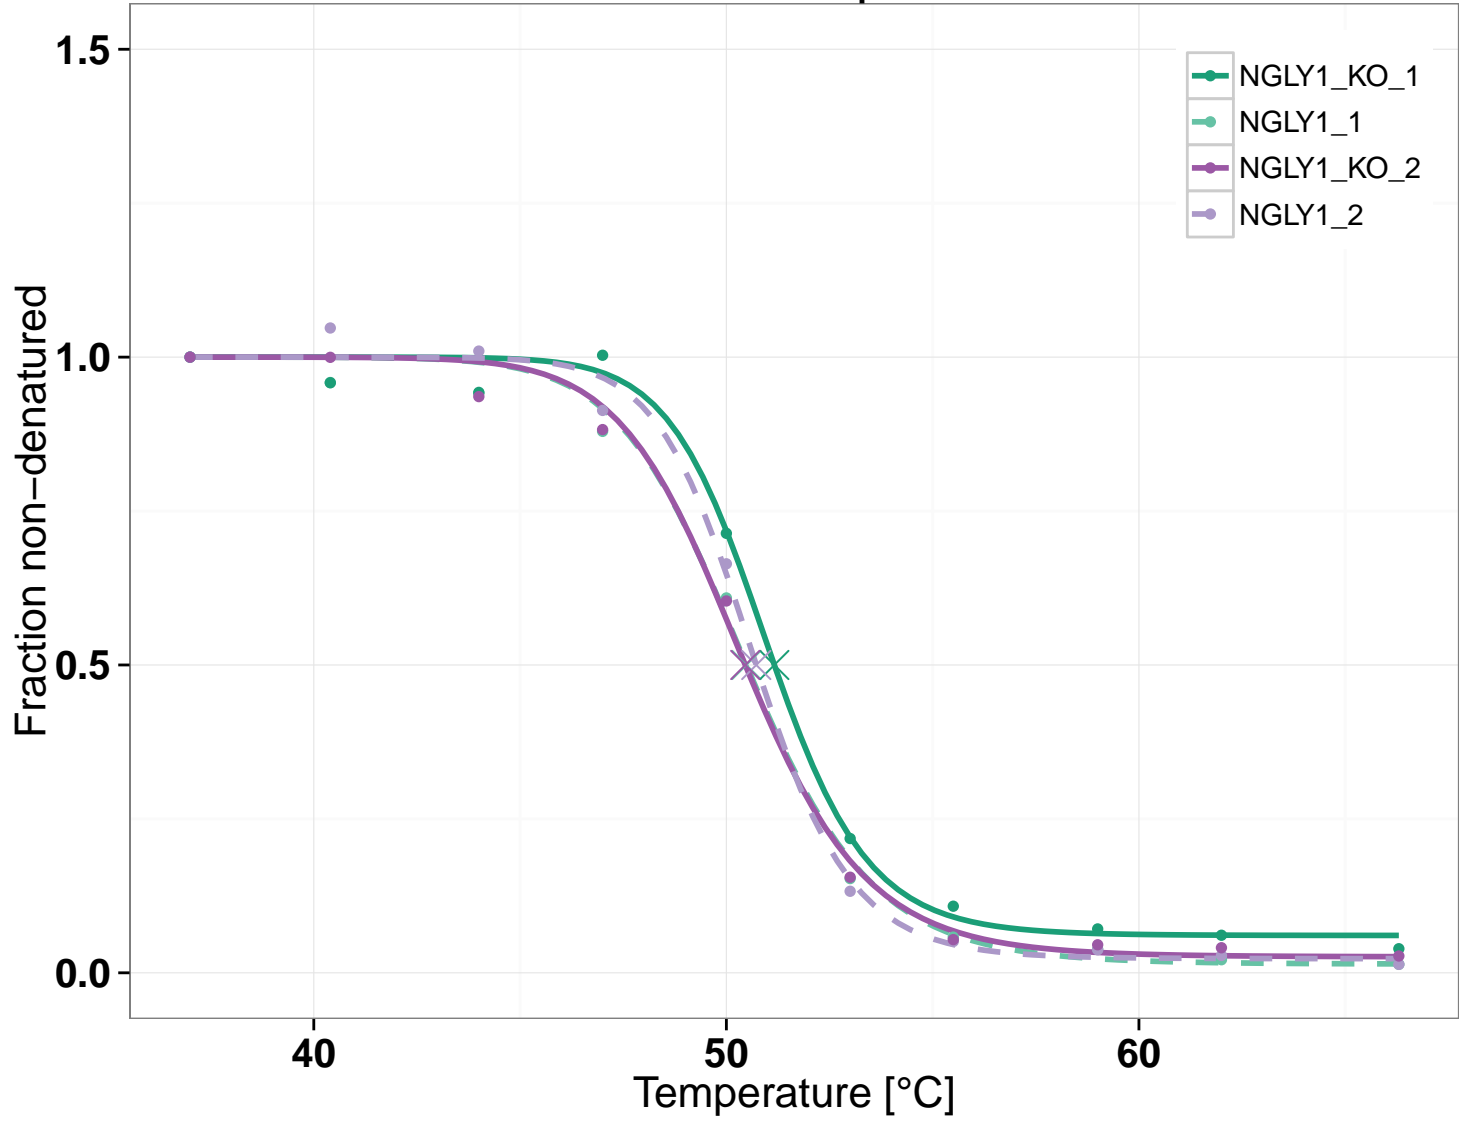

|            | meltPoint | slope | plateau | R2 |
|------------|-----------|-------|---------|----|
| NGLY1_KO_1 | 51.16     | -0.19 | 0.06    | 1  |
| NGLY1_1    | 50.49     | -0.16 | 0.01    | 1  |
| NGLY1_KO_2 | 50.46     | -0.16 | 0.03    | 1  |
| NGLY1_2    | 50.72     | -0.21 | 0.02    | 1  |

Supplement: Supplementary file 2824 [file 1]

IPI00002614.3|UVRAG

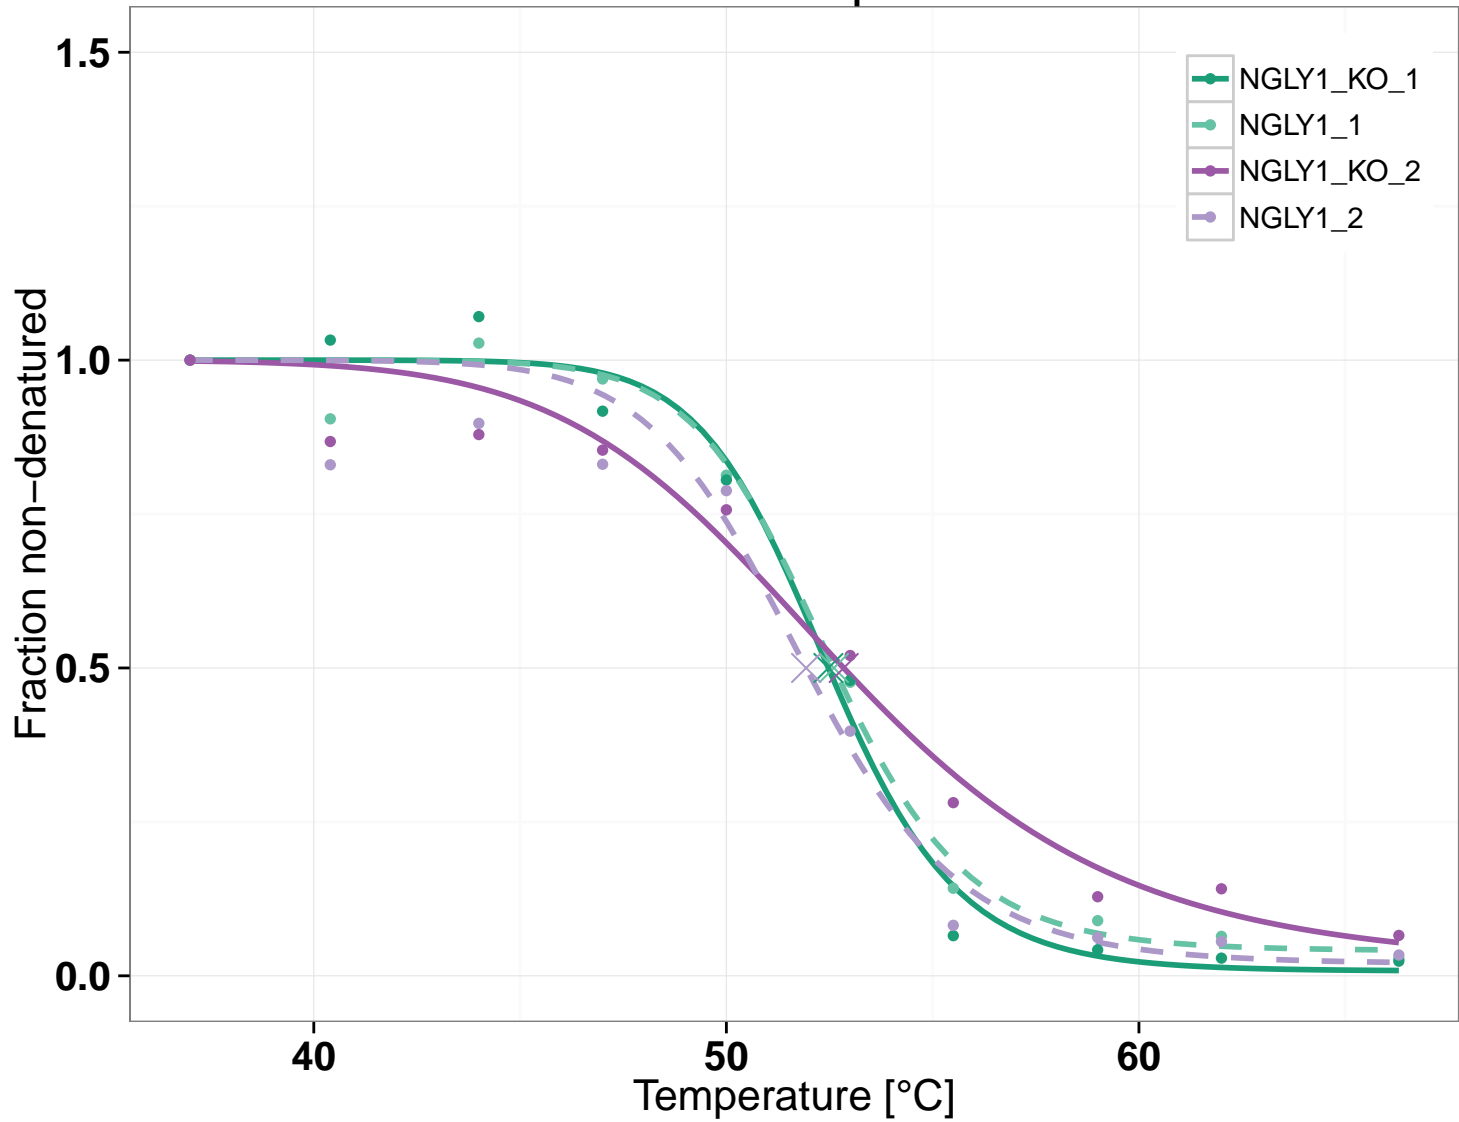

|            | meltPoint | slope  | plateau | R2   |
|------------|-----------|--------|---------|------|
| NGLY1_KO_1 | 52.47     | -0.16  | 0.01    | 0.99 |
| NGLY1_1    | 52.61     | -0.14  | 0.04    | 0.99 |
| NGLY1_KO_2 | 52.84     | -0.073 | 0.01    | 0.97 |
| NGLY1_2    | 51.93     | -0.13  | 0.02    | 0.96 |

Supplement: Supplementary file 2825 [file 1]

# IPI00885074.1|FNIP2

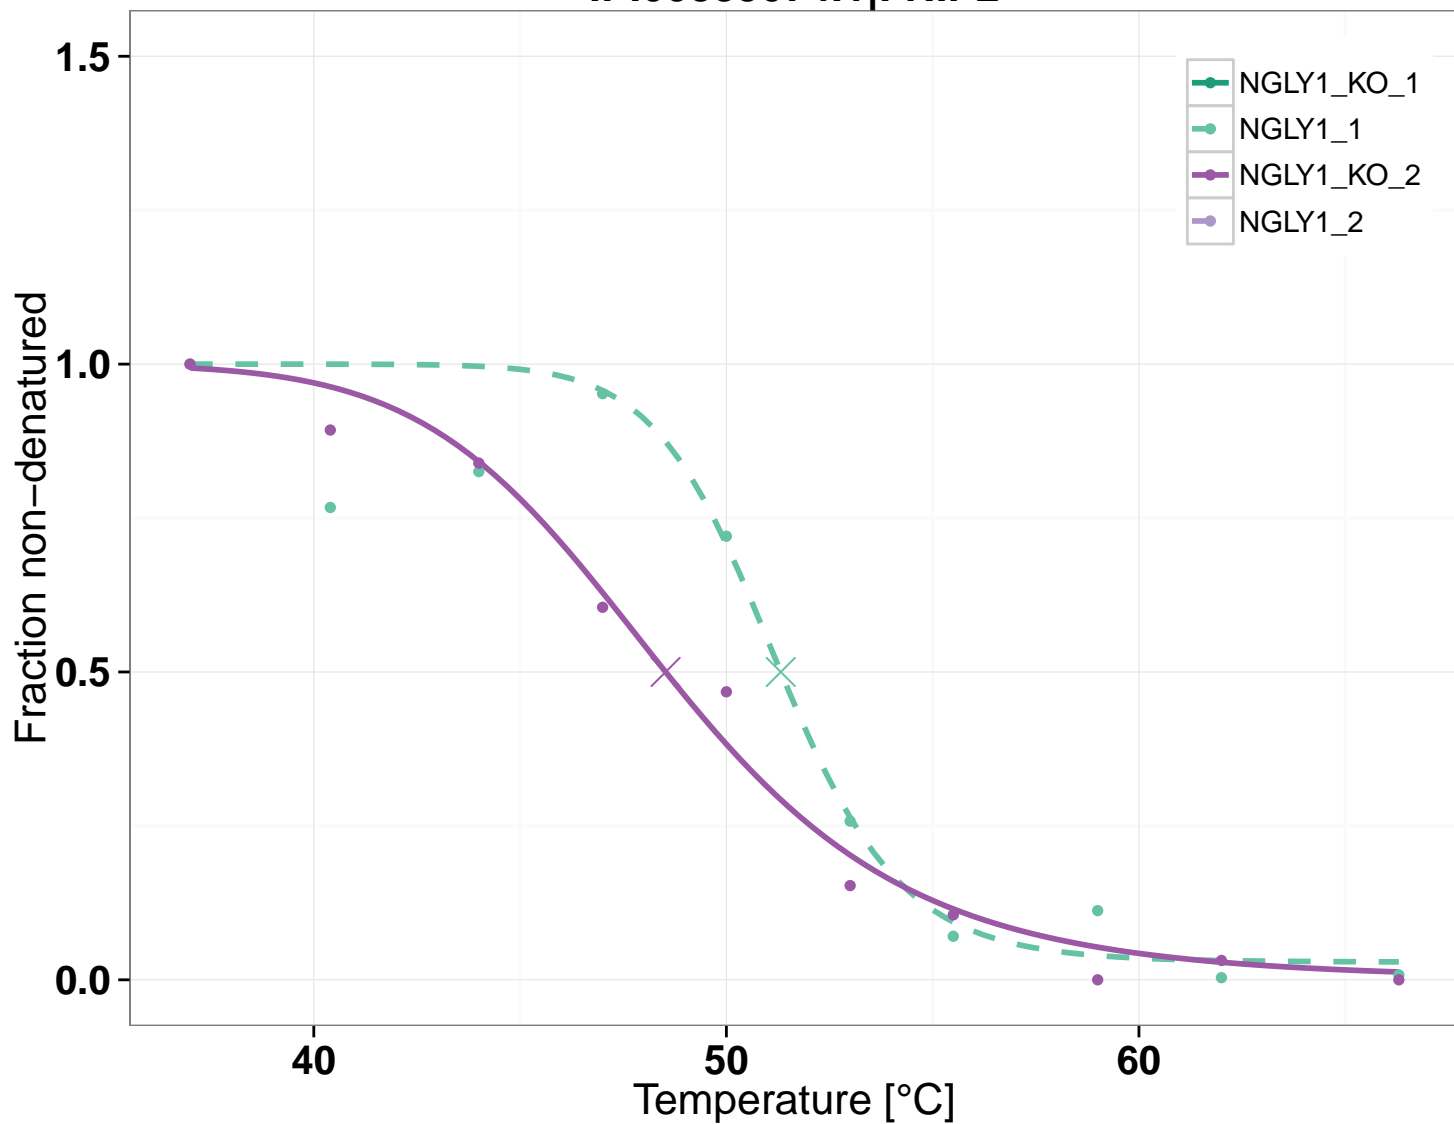

|            | meltPoint | slope  | plateau | R2   |
|------------|-----------|--------|---------|------|
| NGLY1_KO_1 | —         | —      | —       | —    |
| NGLY1_1    | 51.32     | -0.16  | 0.03    | 0.94 |
| NGLY1_KO_2 | 48.53     | -0.085 | 0       | 0.99 |
| NGLY1_2    | —         | —      | —       | —    |

Supplement: Supplementary file 2826 [file 1]

IPI00298258.4|UNC13B

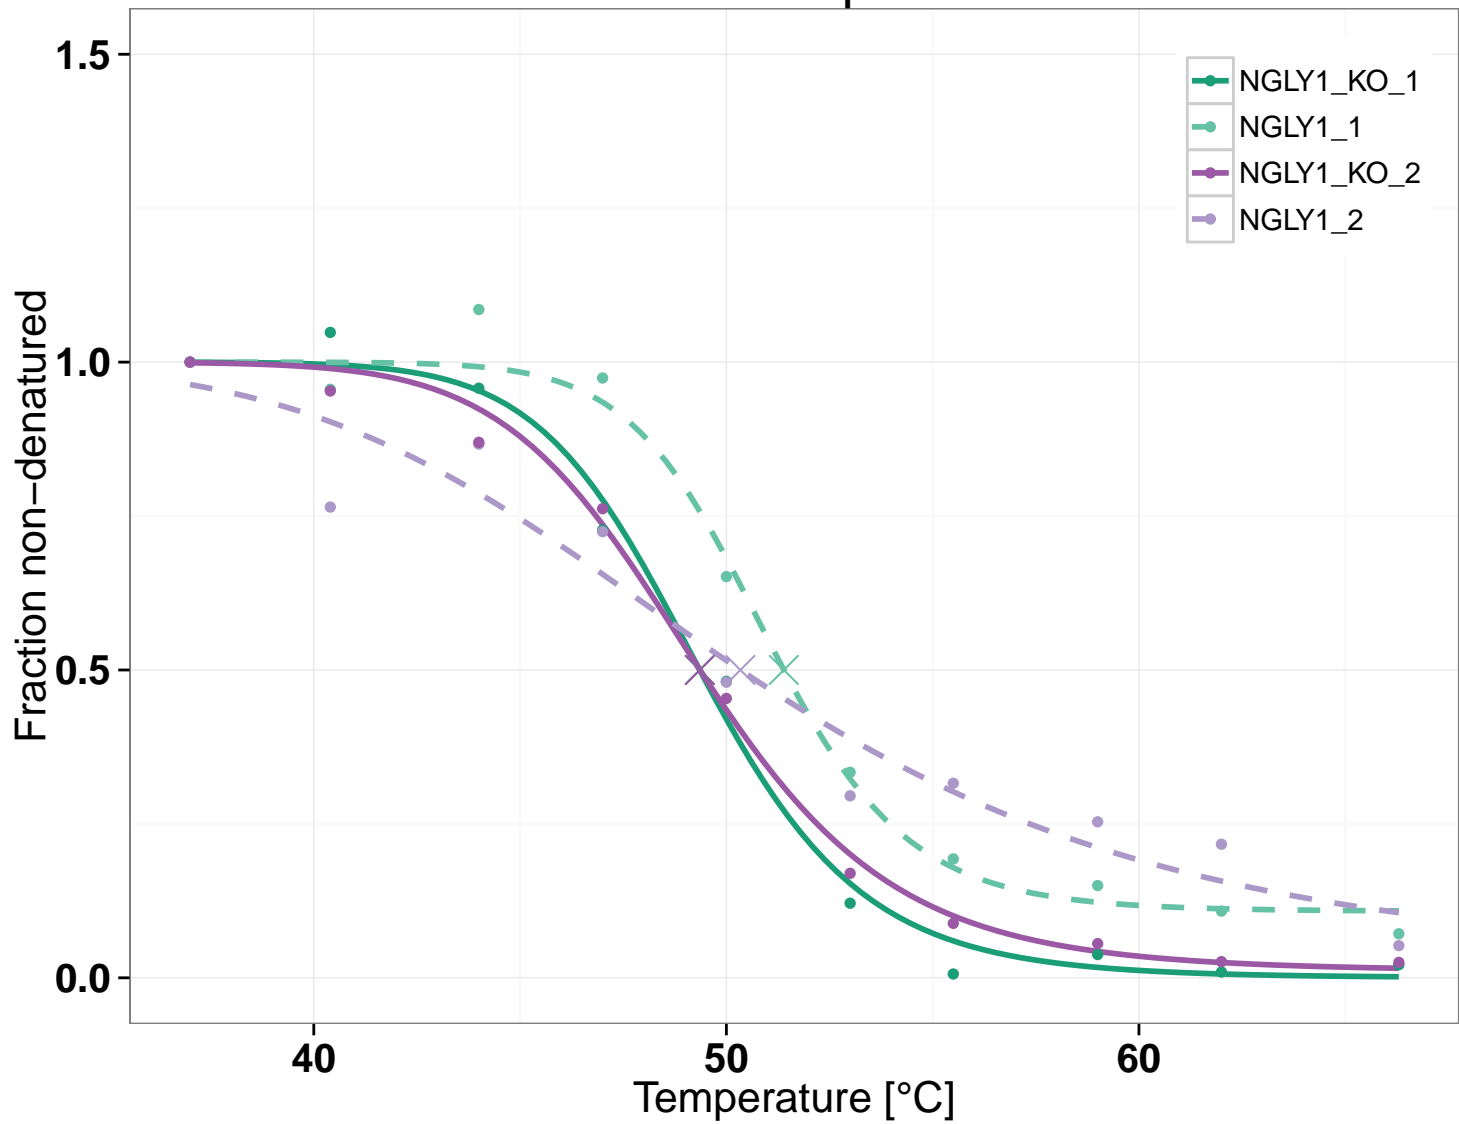

|            | meltPoint | slope  | plateau | R2   |
|------------|-----------|--------|---------|------|
| NGLY1_KO_1 | 49.35     | -0.13  | 0       | 0.99 |
| NGLY1_1    | 51.39     | -0.13  | 0.11    | 0.99 |
| NGLY1_KO_2 | 49.36     | -0.1   | 0.01    | 1    |
| NGLY1_2    | 50.34     | -0.047 | 0.01    | 0.95 |

Supplement: Supplementary file 2827 [file 1]

IPI00456048.4|COMMD2

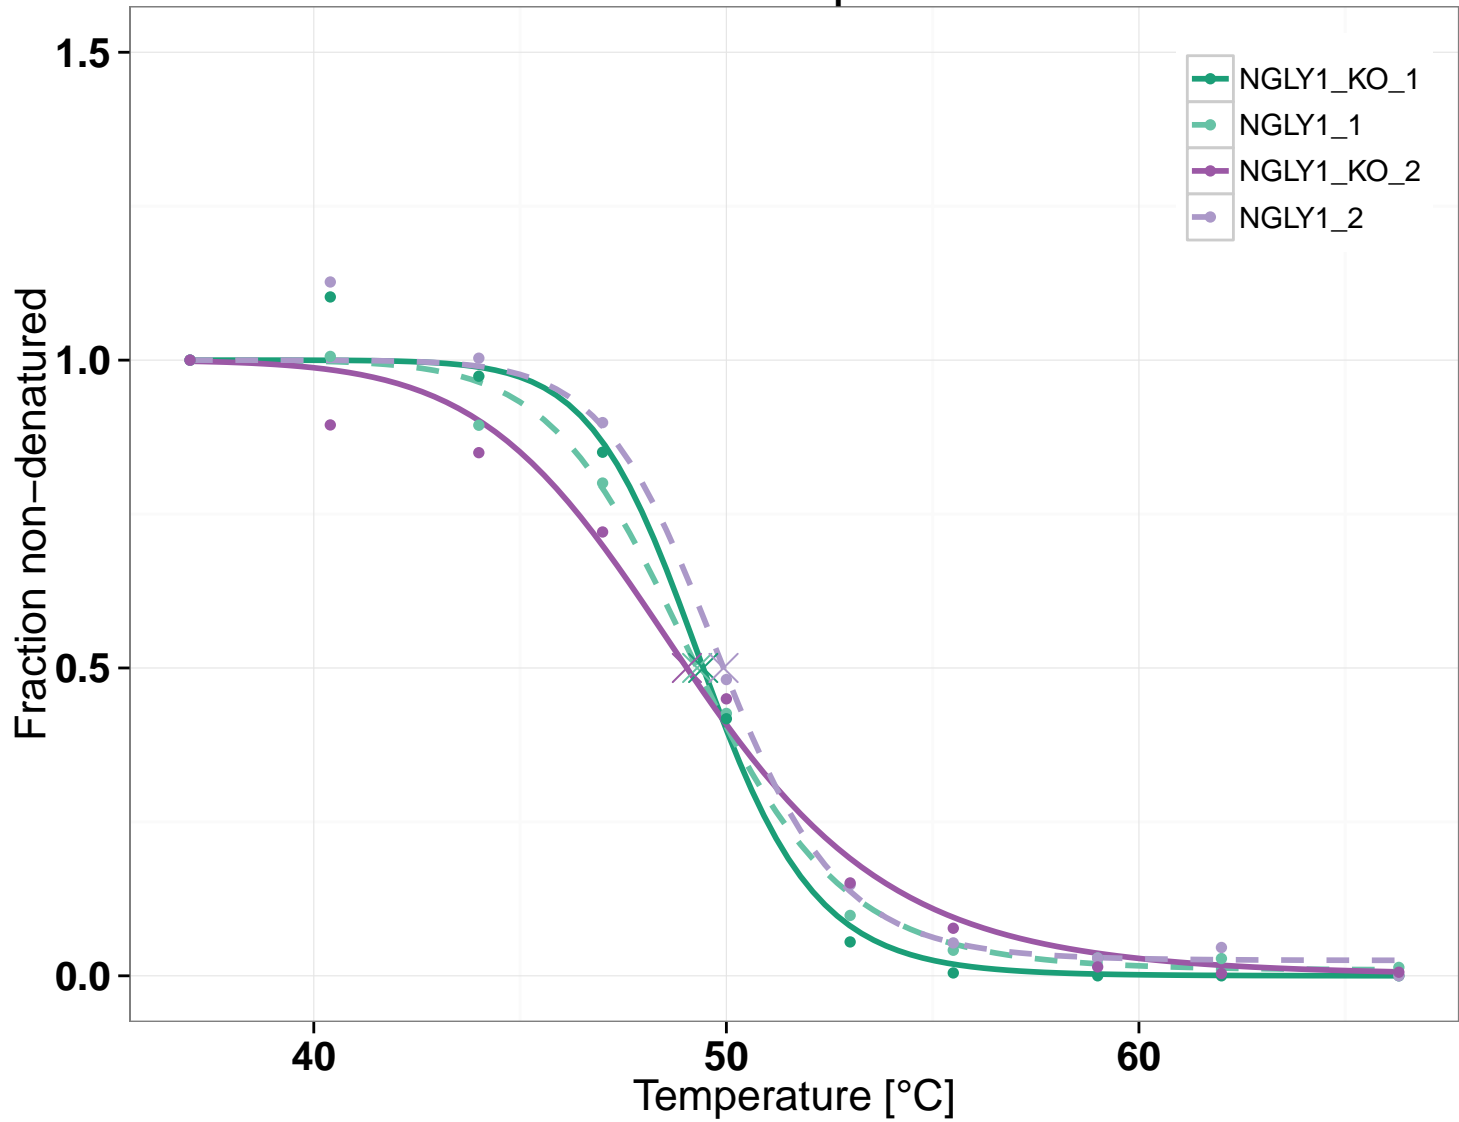

|            | meltPoint | slope | plateau | R2   |
|------------|-----------|-------|---------|------|
| NGLY1_KO_1 | 49.44     | -0.18 | 0       | 0.99 |
| NGLY1_1    | 49.29     | -0.14 | 0.01    | 1    |
| NGLY1_KO_2 | 49.04     | -0.1  | 0       | 0.99 |
| NGLY1_2    | 49.93     | -0.17 | 0.02    | 0.99 |

Supplement: Supplementary file 2828 [file 1]

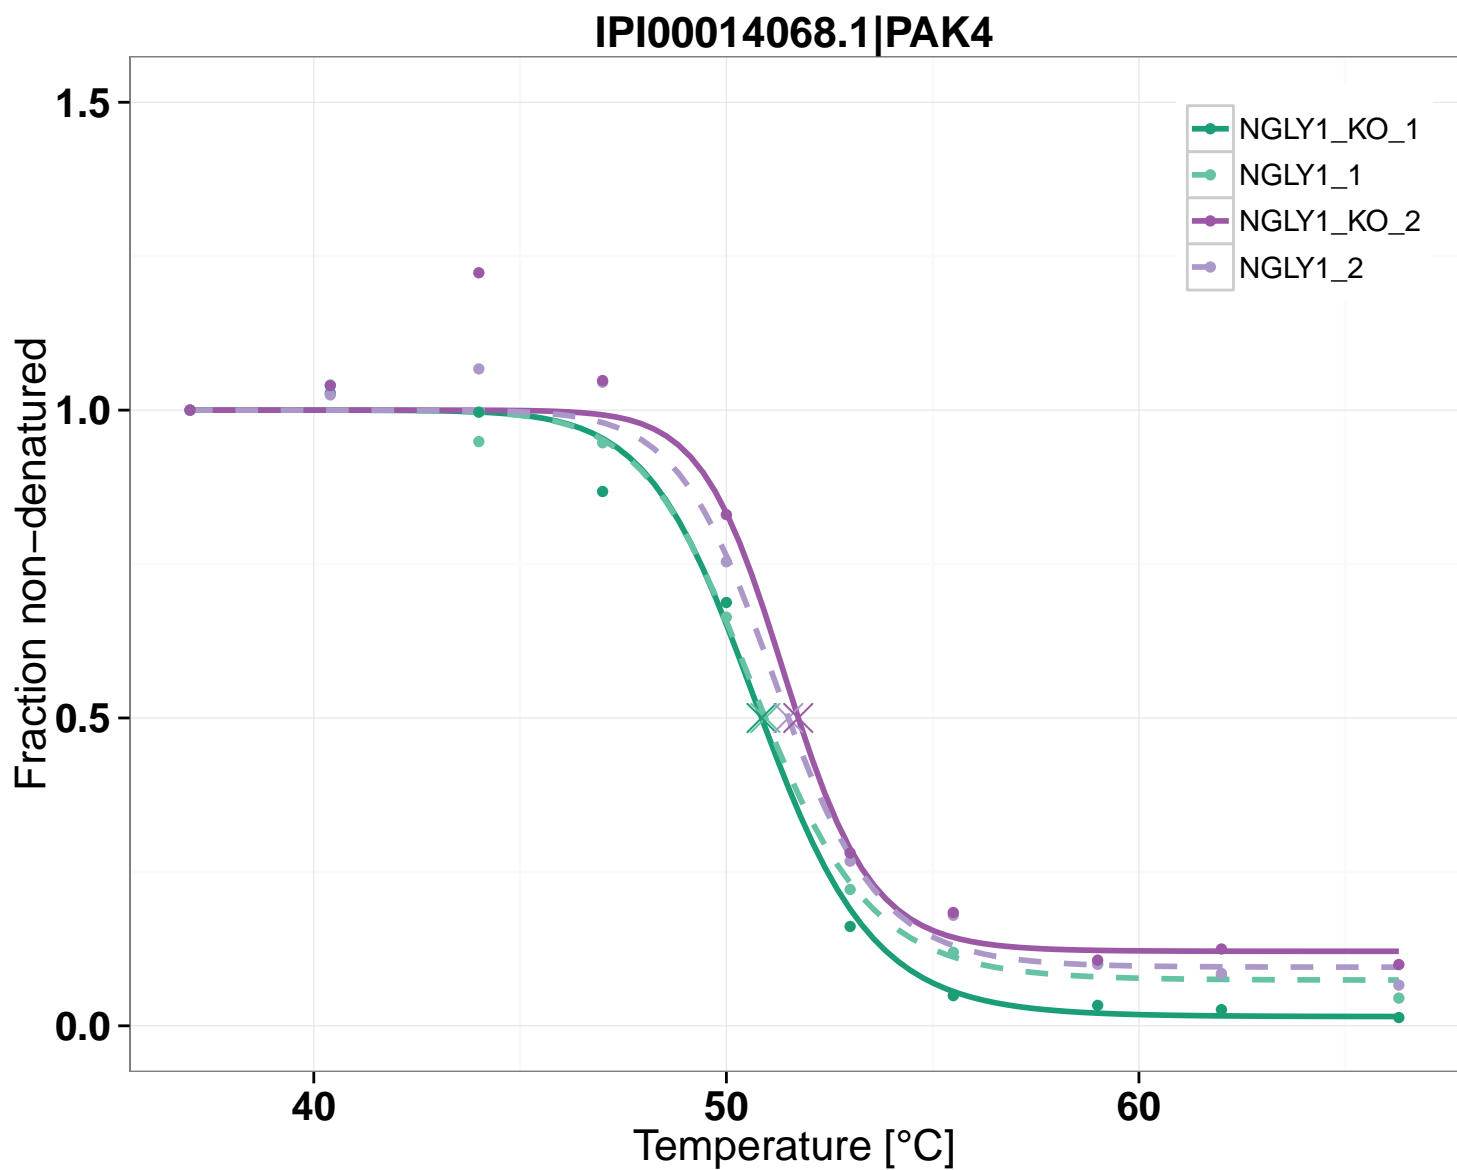

|            | meltPoint | slope | plateau | R2   |
|------------|-----------|-------|---------|------|
| NGLY1_KO_1 | 50.85     | -0.18 | 0.01    | 0.99 |
| NGLY1_1    | 50.94     | -0.17 | 0.07    | 1    |
| NGLY1_KO_2 | 51.74     | -0.21 | 0.12    | 0.97 |
| NGLY1_2    | 51.5      | -0.19 | 0.1     | 0.99 |

Supplement: Supplementary file 2829 [file 1]

# IPI00005661.1|MLX

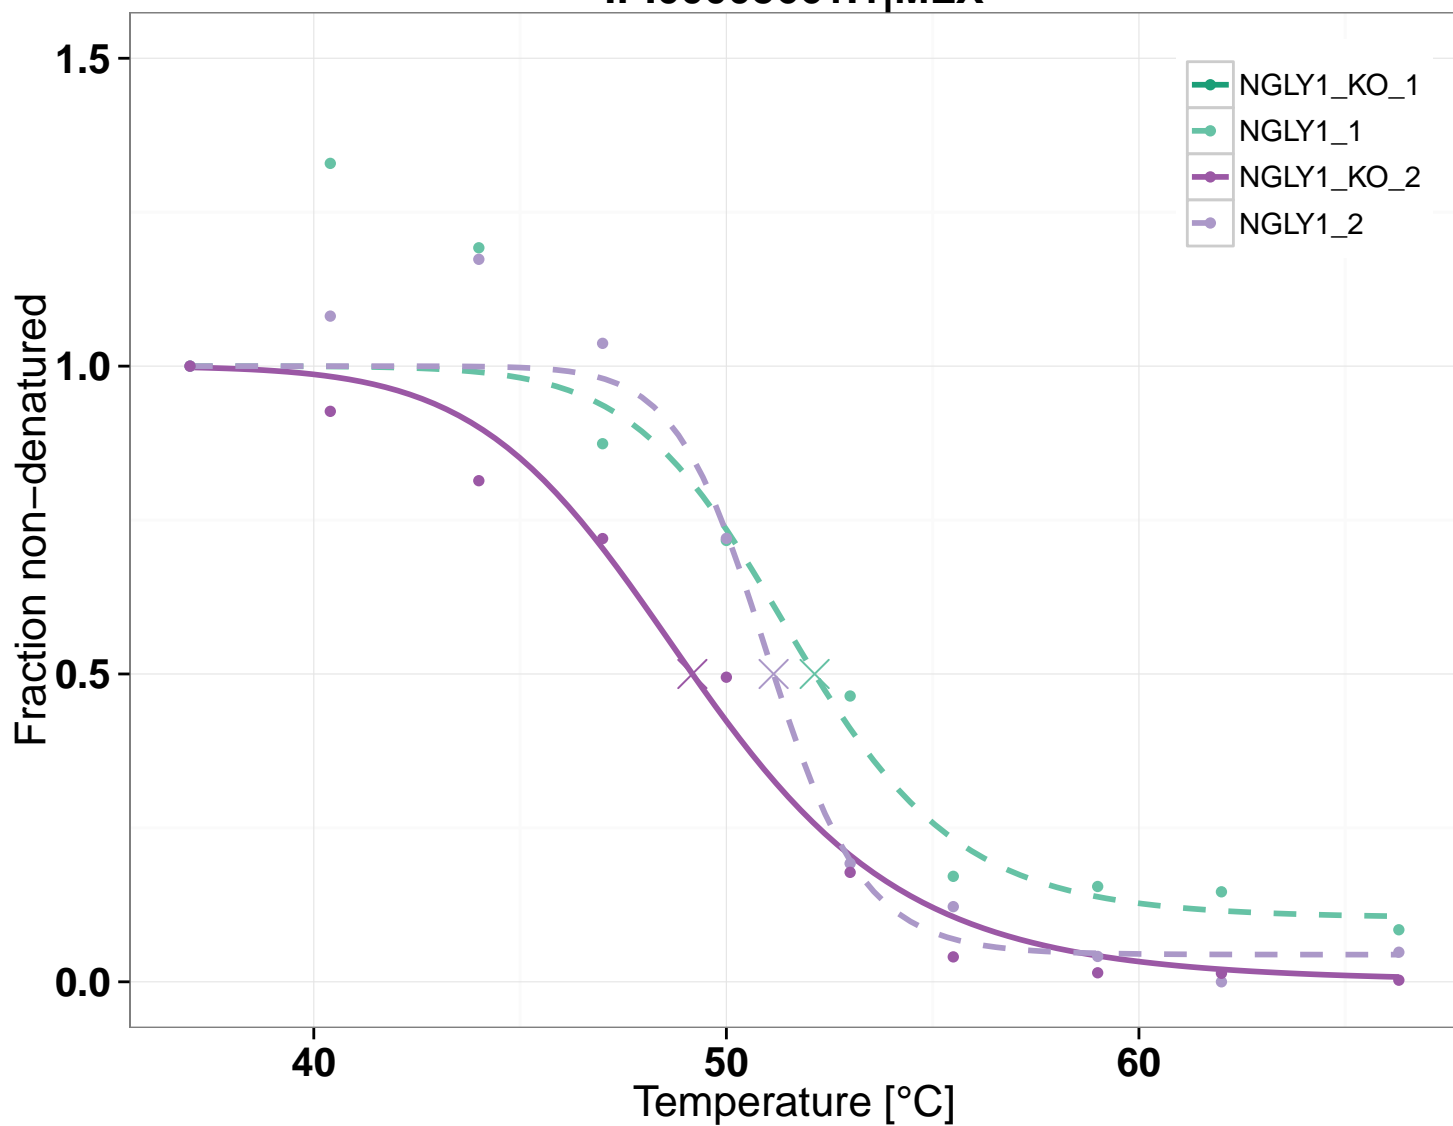

|            | meltPoint | slope  | plateau | R2   |
|------------|-----------|--------|---------|------|
| NGLY1_KO_1 | –         | –      | –       | –    |
| NGLY1_1    | 52.14     | –0.11  | 0.1     | 0.92 |
| NGLY1_KO_2 | 49.18     | –0.096 | 0       | 0.99 |
| NGLY1_2    | 51.14     | –0.21  | 0.04    | 0.98 |

Supplement: Supplementary file 2830 [file 1]

# IPI00018364.2|RAP2B

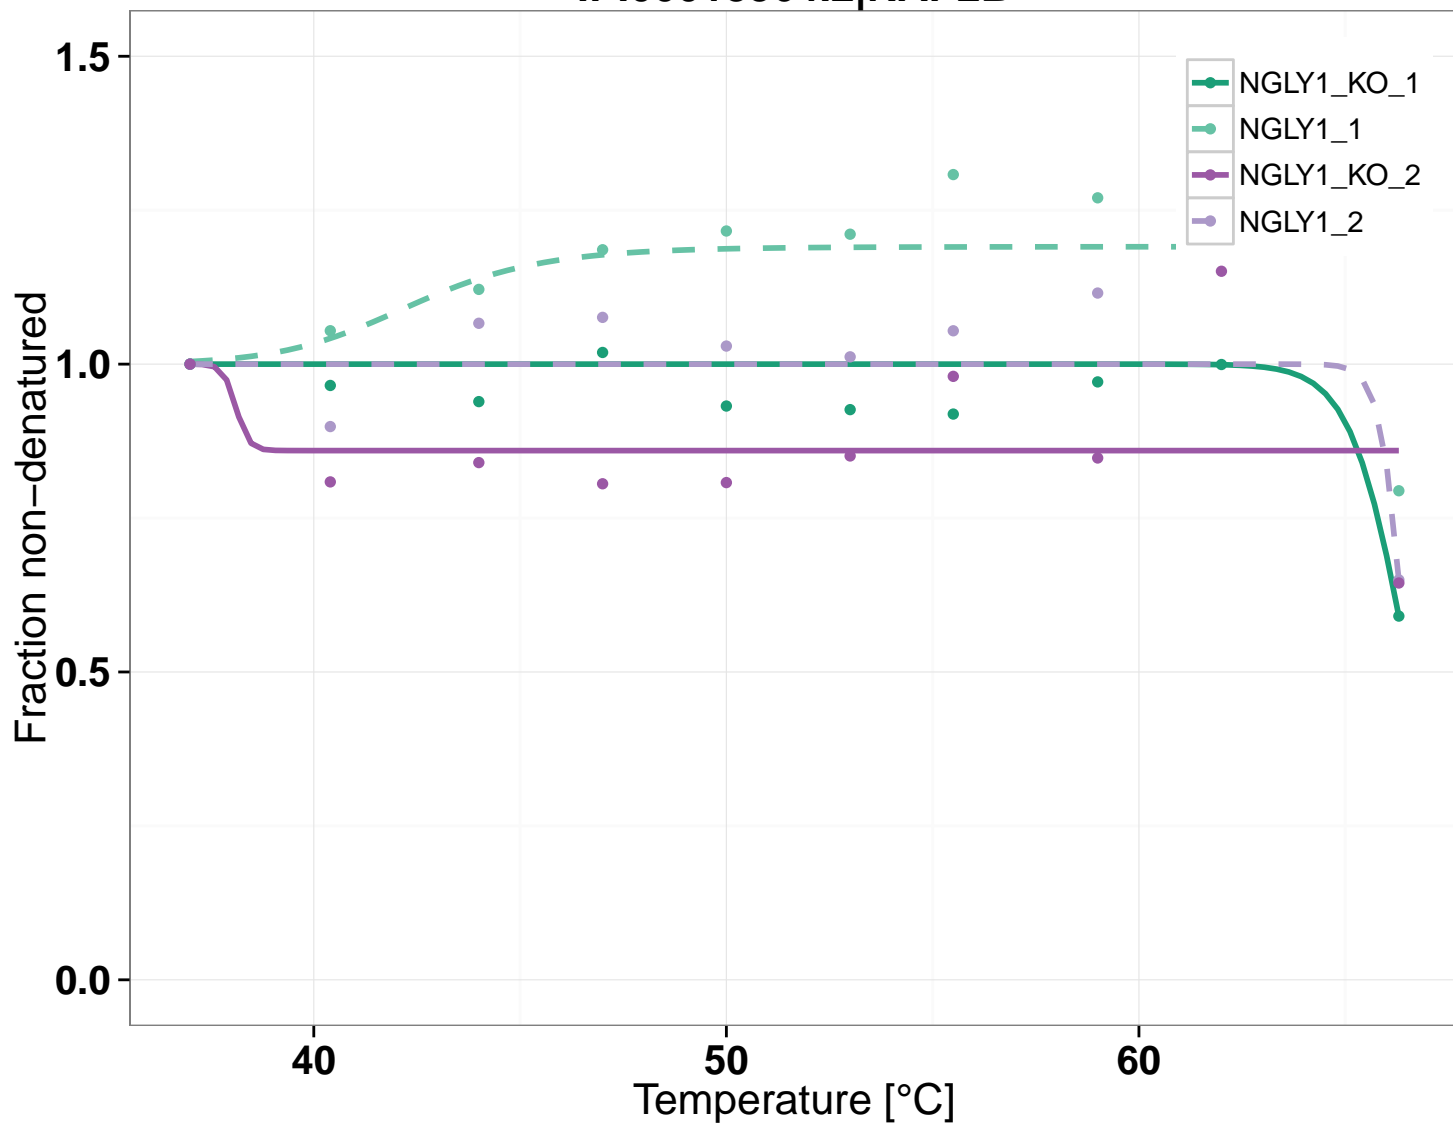

|            | meltPoint | slope | plateau | R2   |
|------------|-----------|-------|---------|------|
| NGLY1_KO_1 | -         | -     | 0       | 0.83 |
| NGLY1_1    | -         | 0.03  | 1.19    | 0.17 |
| NGLY1_KO_2 | -         | -0.23 | 0.86    | 0.1  |
| NGLY1_2    | -         | -     | 0       | 0.41 |

Supplement: Supplementary file 2831 [file 1]

IPI00015388.1|PAFAH2

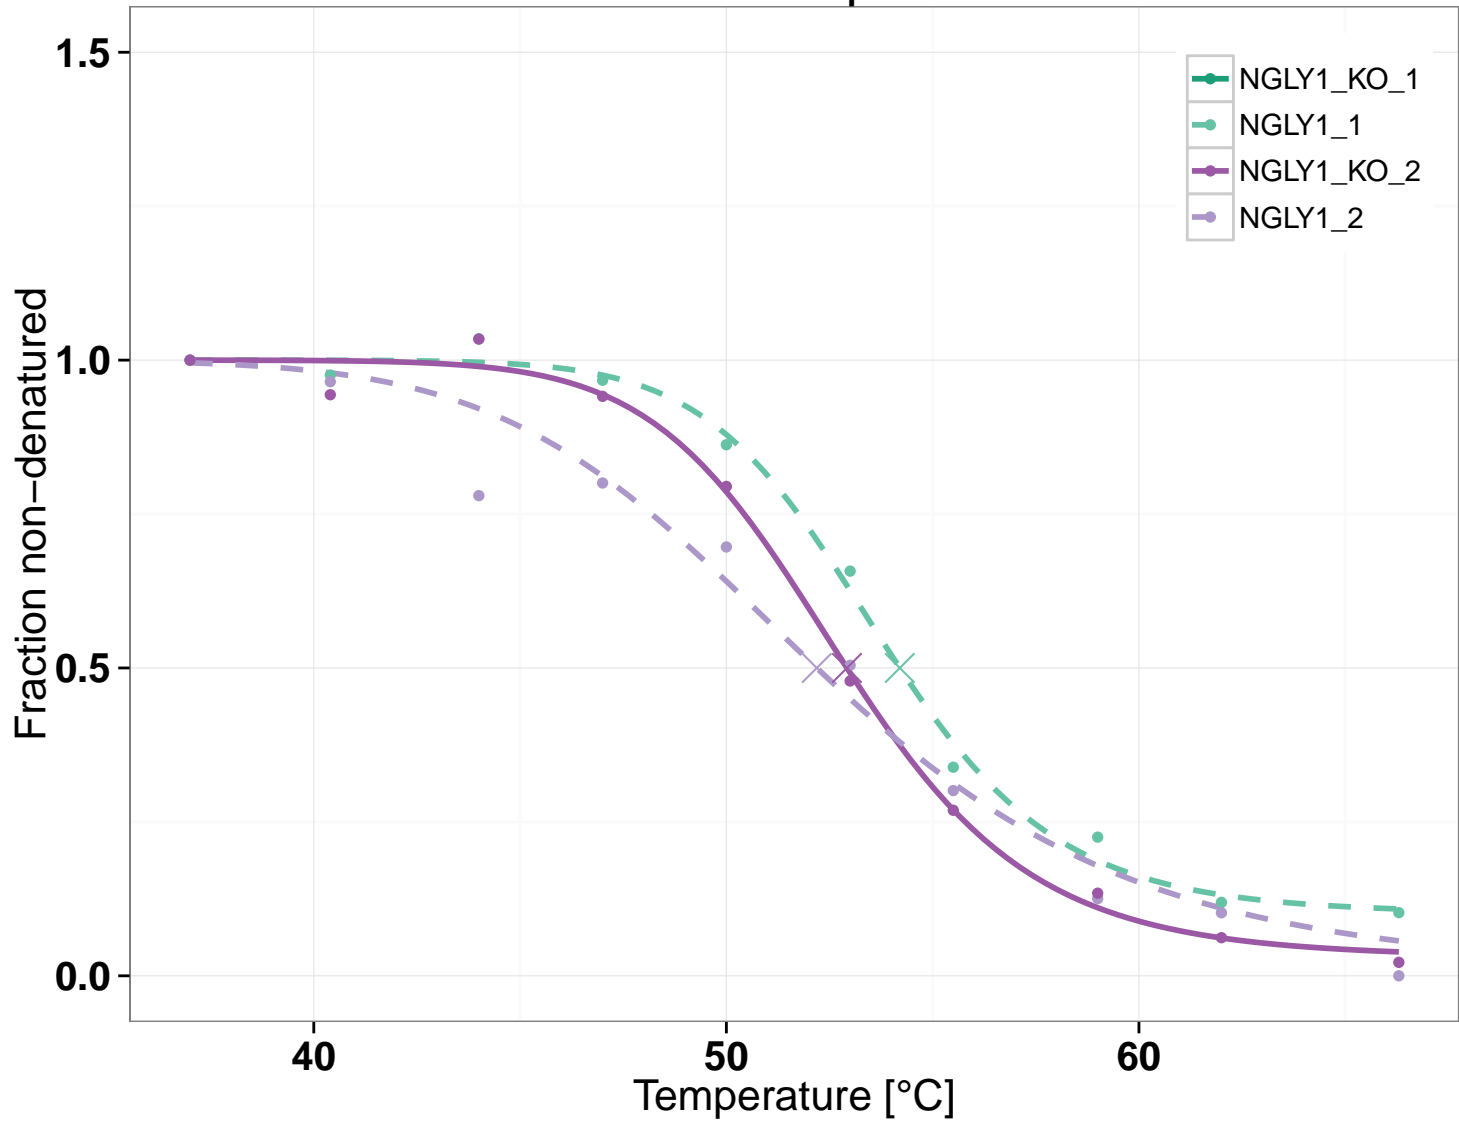

|            | meltPoint | slope  | plateau | R2   |
|------------|-----------|--------|---------|------|
| NGLY1_KO_1 | -         | -      | -       | -    |
| NGLY1_1    | 54.2      | -0.11  | 0.1     | 1    |
| NGLY1_KO_2 | 52.92     | -0.11  | 0.03    | 1    |
| NGLY1_2    | 52.19     | -0.065 | 0       | 0.97 |

Supplement: Supplementary file 2832 [file 1]

IPI00298726.2|MAP3K8

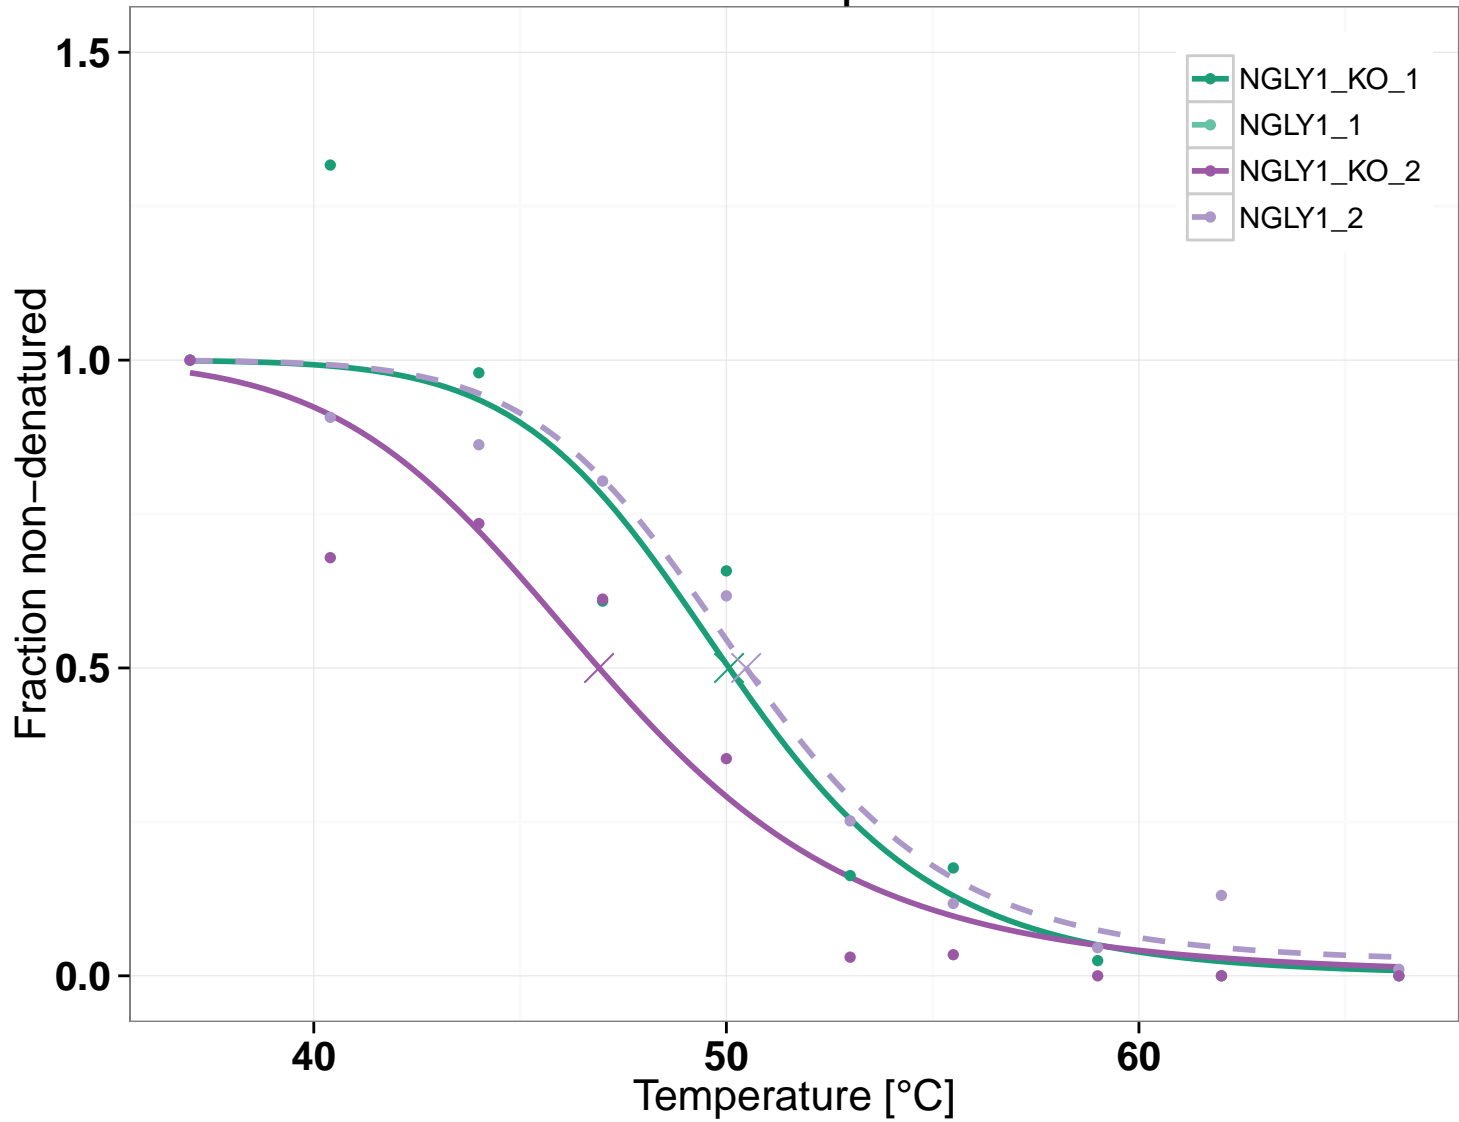

|            | meltPoint | slope  | plateau | R2   |
|------------|-----------|--------|---------|------|
| NGLY1_KO_1 | 50.07     | -0.098 | 0       | 0.92 |
| NGLY1_1    | -         | -      | -       | -    |
| NGLY1_KO_2 | 46.92     | -0.078 | 0       | 0.93 |
| NGLY1_2    | 50.48     | -0.096 | 0.02    | 0.98 |

Supplement: Supplementary file 2833 [file 1]

# IPI00296524.2|ARSK

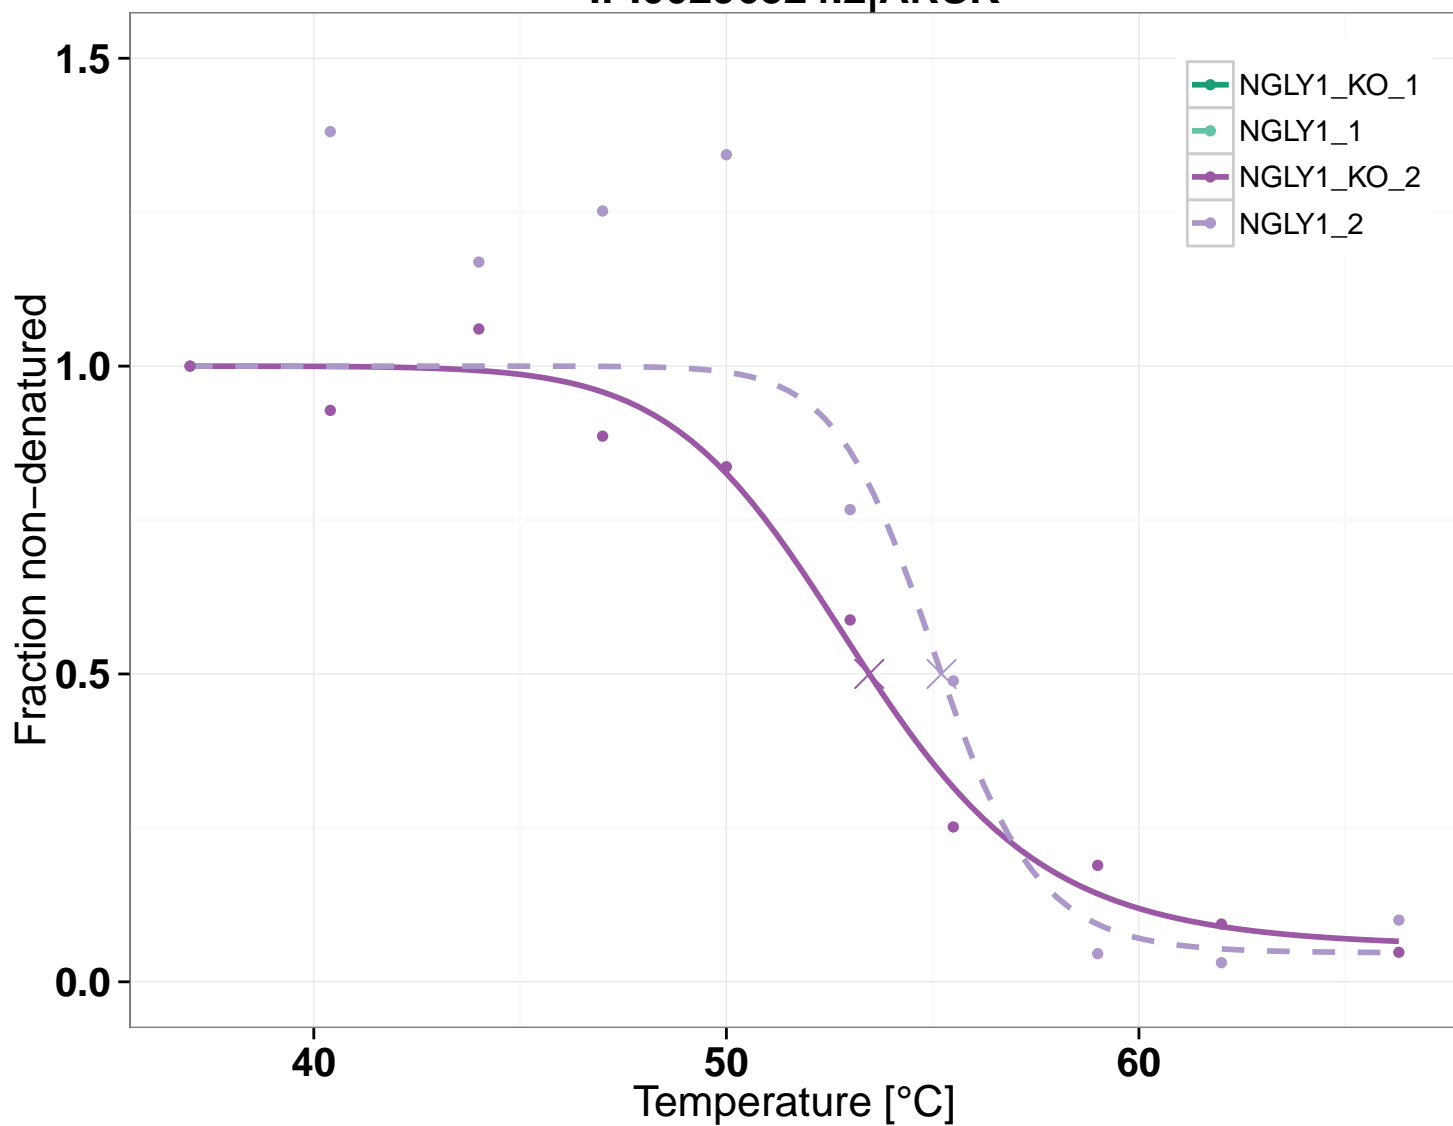

|            | meltPoint | slope | plateau | R2   |
|------------|-----------|-------|---------|------|
| NGLY1_KO_1 | —         | —     | —       | —    |
| NGLY1_1    | —         | —     | —       | —    |
| NGLY1_KO_2 | 53.46     | -0.1  | 0.06    | 0.98 |
| NGLY1_2    | 55.22     | -0.19 | 0.05    | 0.86 |

Supplement: Supplementary file 2834 [file 1]

IPI00031458.1|ICMT

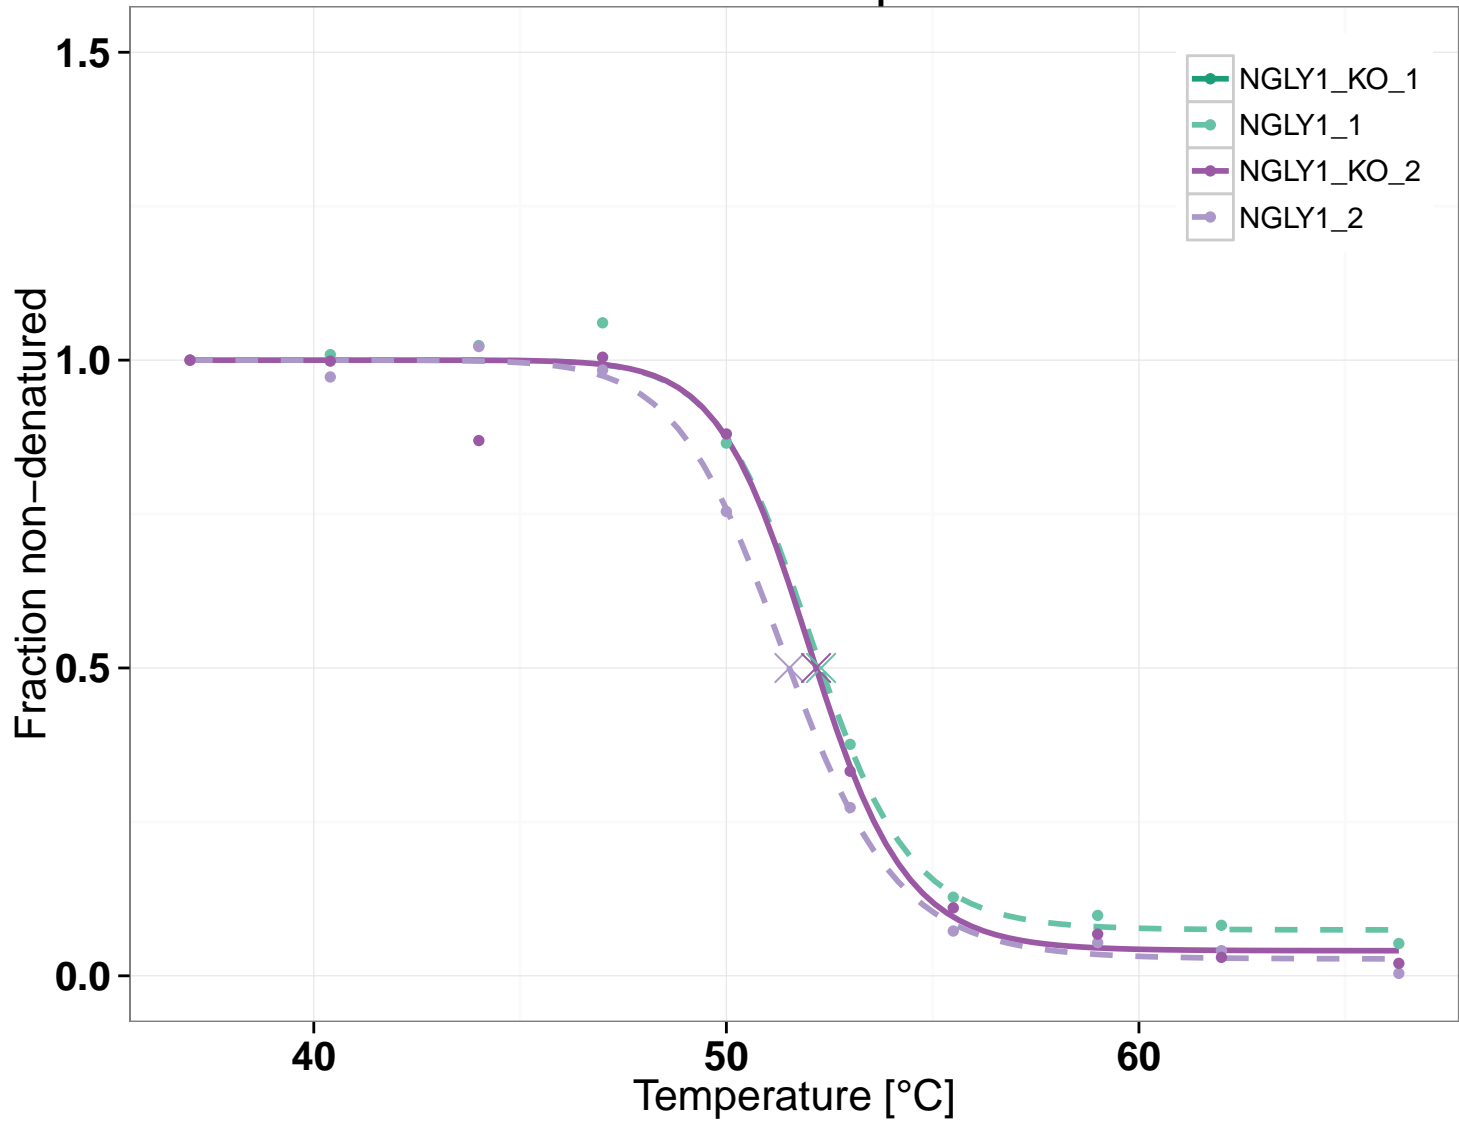

|            | meltPoint | slope | plateau | R2   |
|------------|-----------|-------|---------|------|
| NGLY1_KO_1 | -         | -     | -       | -    |
| NGLY1_1    | 52.3      | -0.2  | 0.07    | 1    |
| NGLY1_KO_2 | 52.18     | -0.21 | 0.04    | 0.99 |
| NGLY1_2    | 51.53     | -0.18 | 0.03    | 1    |

Supplement: Supplementary file 2835 [file 1]

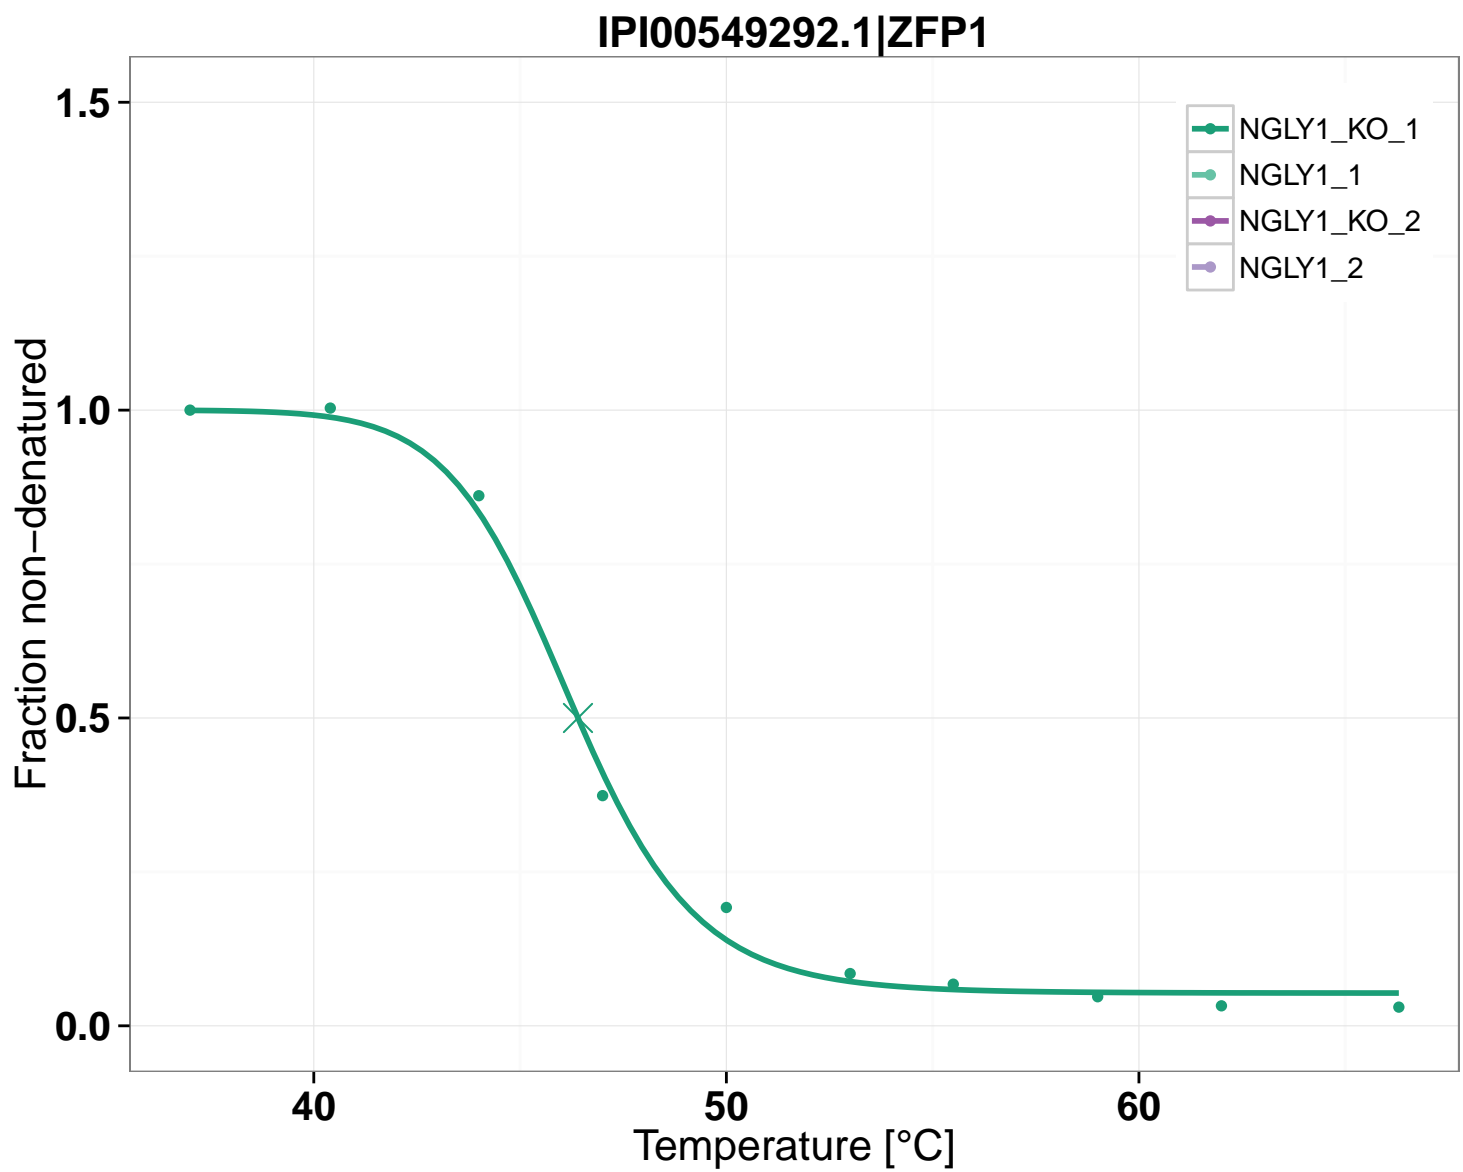

|            | meltPoint | slope | plateau | R2 |
|------------|-----------|-------|---------|----|
| NGLY1_KO_1 | 46.4      | -0.16 | 0.05    | 1  |
| NGLY1_1    | -         | -     | -       | -  |
| NGLY1_KO_2 | -         | -     | -       | -  |
| NGLY1_2    | -         | -     | -       | -  |

Supplement: Supplementary file 2836 [file 1]

# IPI00658210.1|WDR48

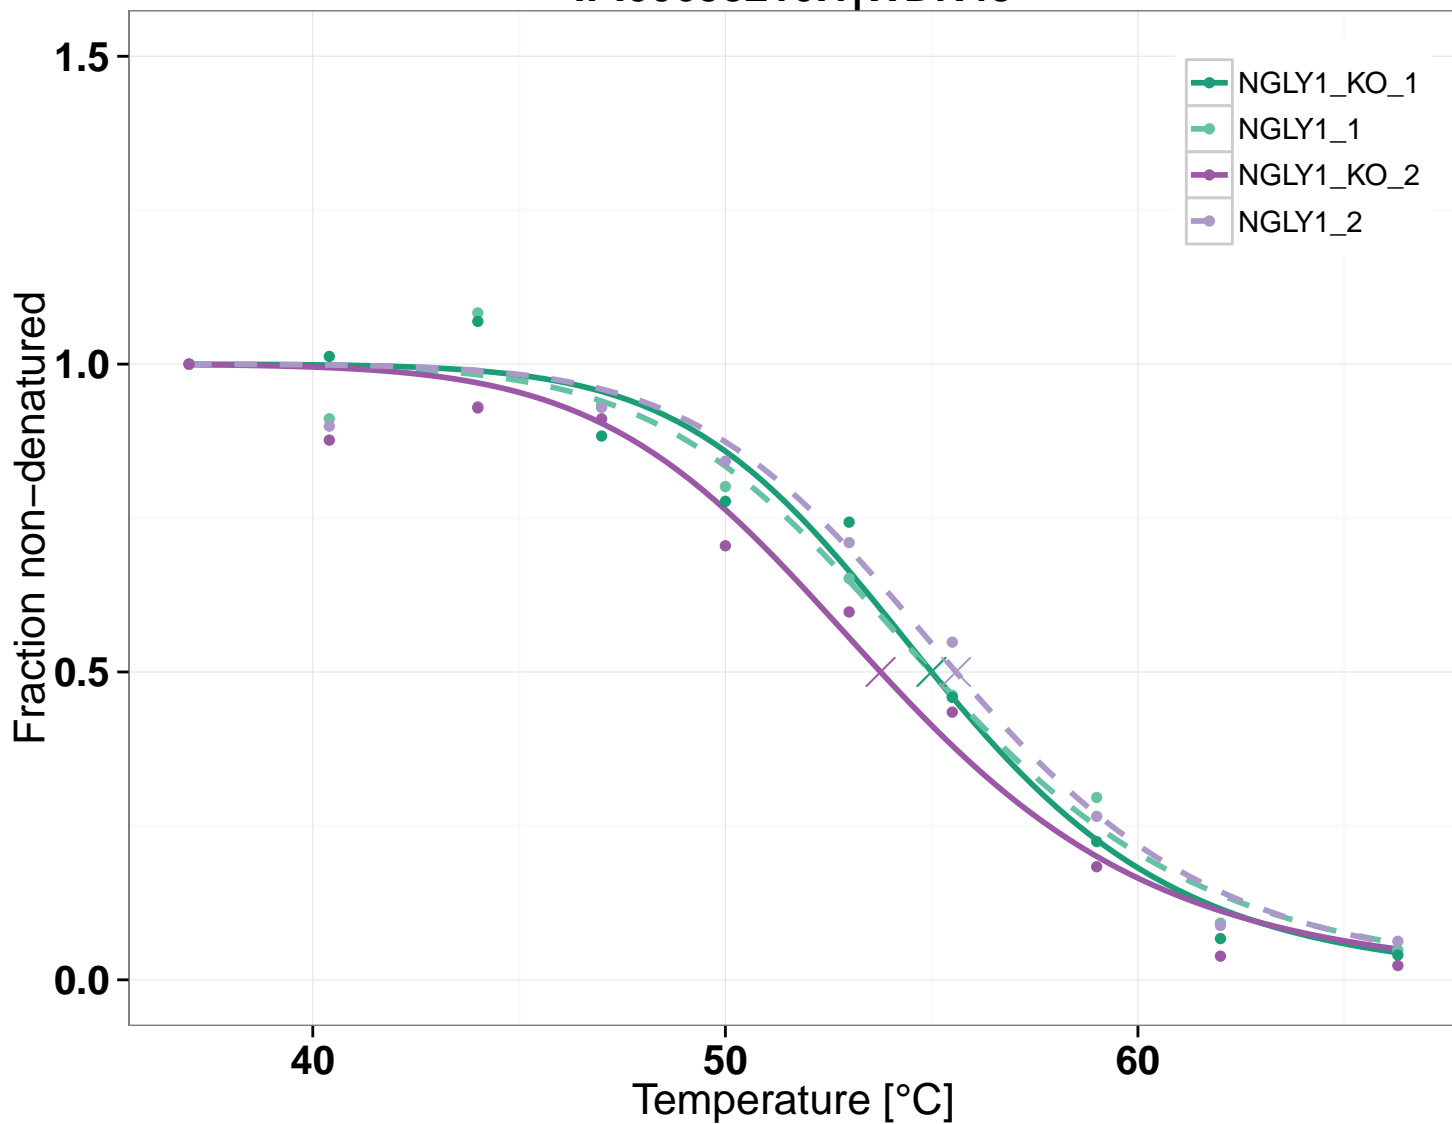

|            | meltPoint | slope  | plateau | R2   |
|------------|-----------|--------|---------|------|
| NGLY1_KO_1 | 55        | -0.083 | 0       | 0.98 |
| NGLY1_1    | 54.99     | -0.075 | 0       | 0.98 |
| NGLY1_KO_2 | 53.76     | -0.074 | 0       | 0.98 |
| NGLY1_2    | 55.59     | -0.079 | 0       | 0.98 |

Supplement: Supplementary file 2837 [file 1]

# IPI00217468.3|HIST1H1B

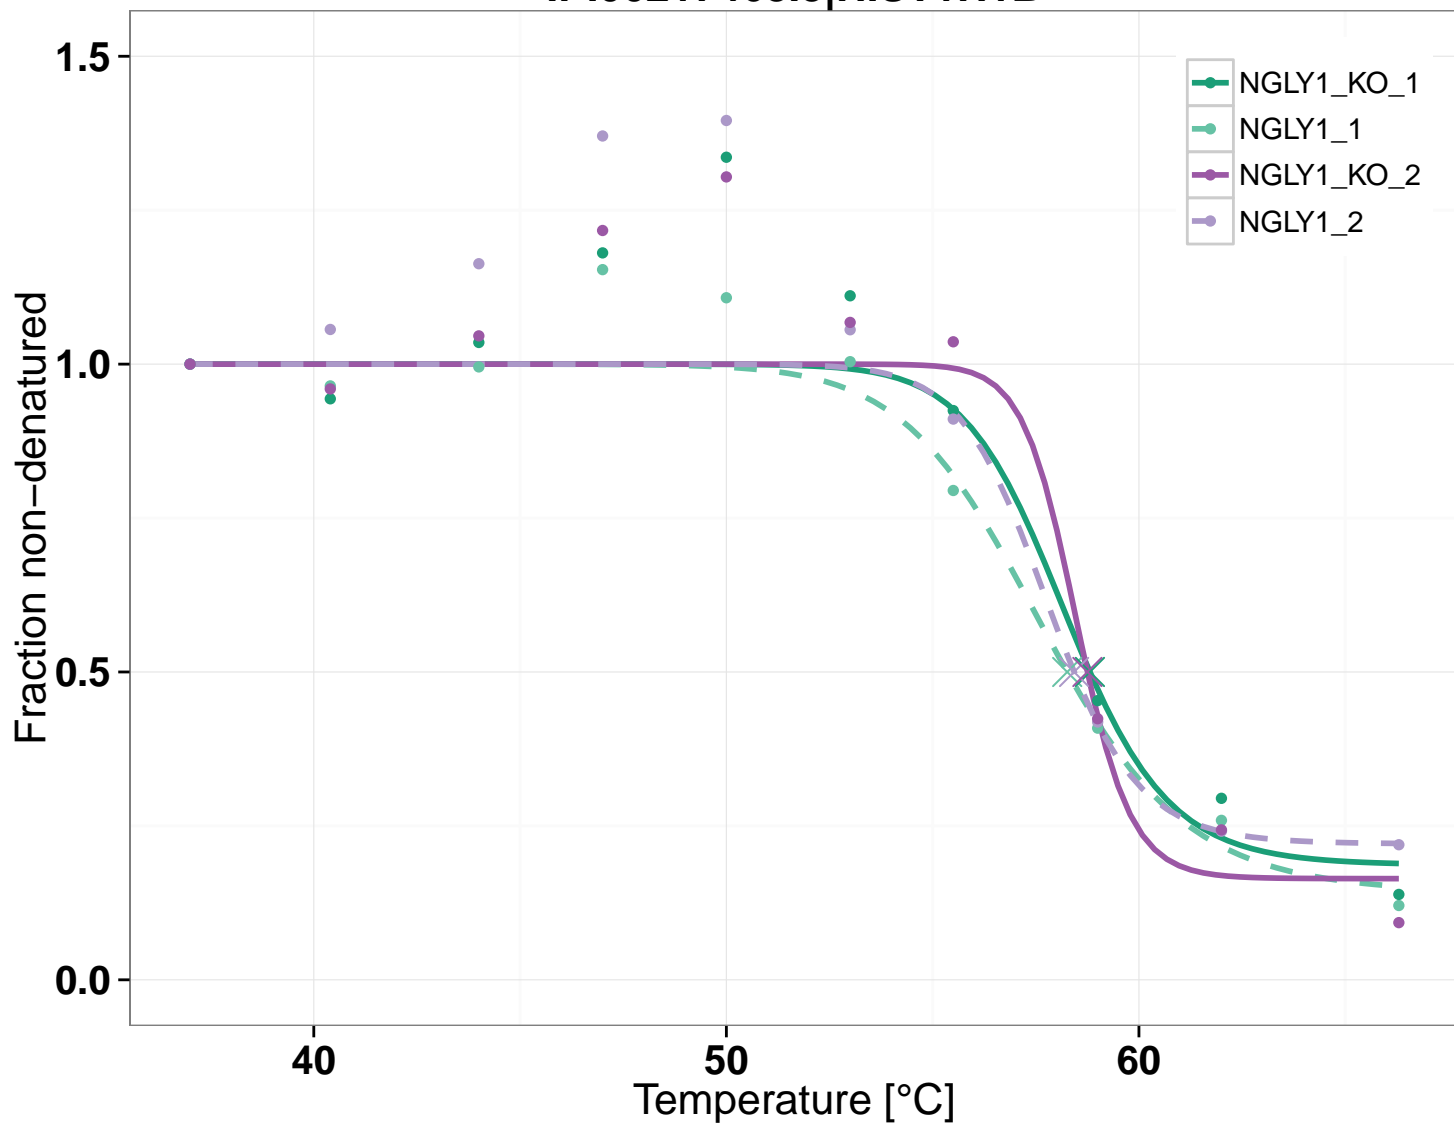

|            | meltPoint | slope | plateau | R2   |
|------------|-----------|-------|---------|------|
| NGLY1_KO_1 | 58.81     | -0.16 | 0.19    | 0.88 |
| NGLY1_1    | 58.26     | -0.13 | 0.14    | 0.97 |
| NGLY1_KO_2 | 58.75     | -0.32 | 0.16    | 0.9  |
| NGLY1_2    | 58.43     | -0.18 | 0.22    | 0.81 |

Supplement: Supplementary file 2838 [file 1]

IPI00027223.2|IDH1

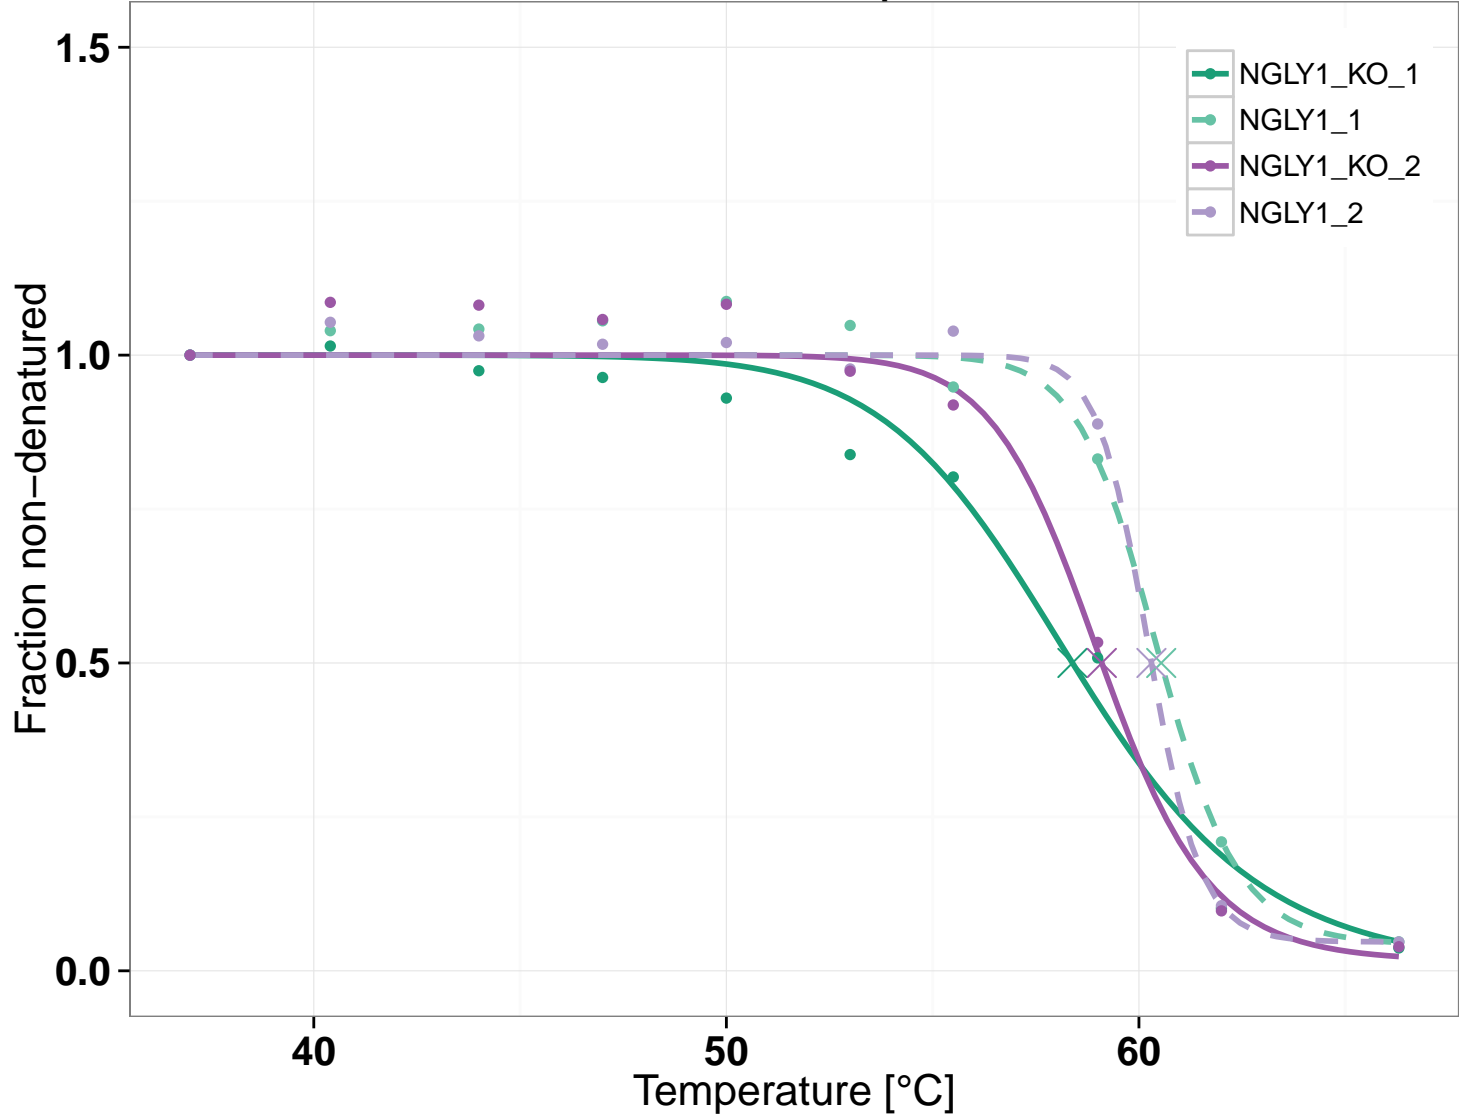

|            | meltPoint | slope | plateau | R2   |
|------------|-----------|-------|---------|------|
| NGLY1_KO_1 | 58.39     | -0.11 | 0       | 0.98 |
| NGLY1_1    | 60.54     | -0.25 | 0.04    | 0.99 |
| NGLY1_KO_2 | 59.1      | -0.19 | 0.02    | 0.98 |
| NGLY1_2    | 60.3      | -0.38 | 0.05    | 1    |

Supplement: Supplementary file 2839 [file 1]

# IPI00028457.2|RGS7

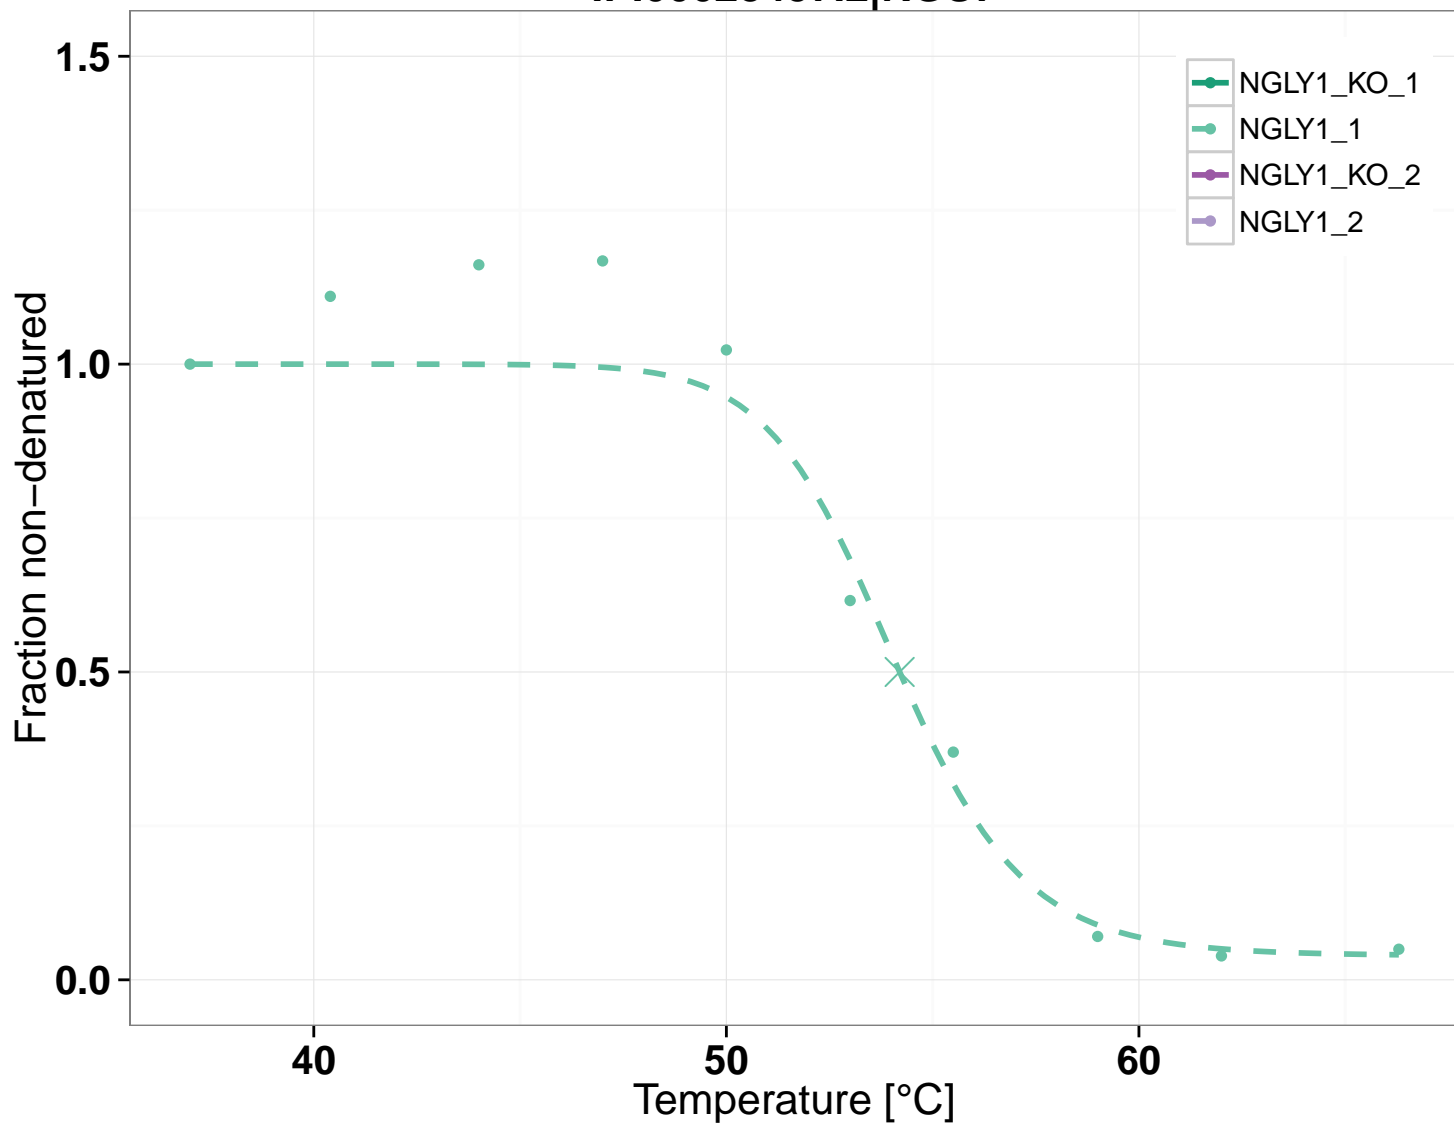

|            | meltPoint | slope | plateau | R2   |
|------------|-----------|-------|---------|------|
| NGLY1_KO_1 | -         | -     | -       | -    |
| NGLY1_1    | 54.2      | -0.15 | 0.04    | 0.96 |
| NGLY1_KO_2 | -         | -     | -       | -    |
| NGLY1_2    | -         | -     | -       | -    |

Supplement: Supplementary file 2840 [file 1]

# IPI00168665.4|WDR88

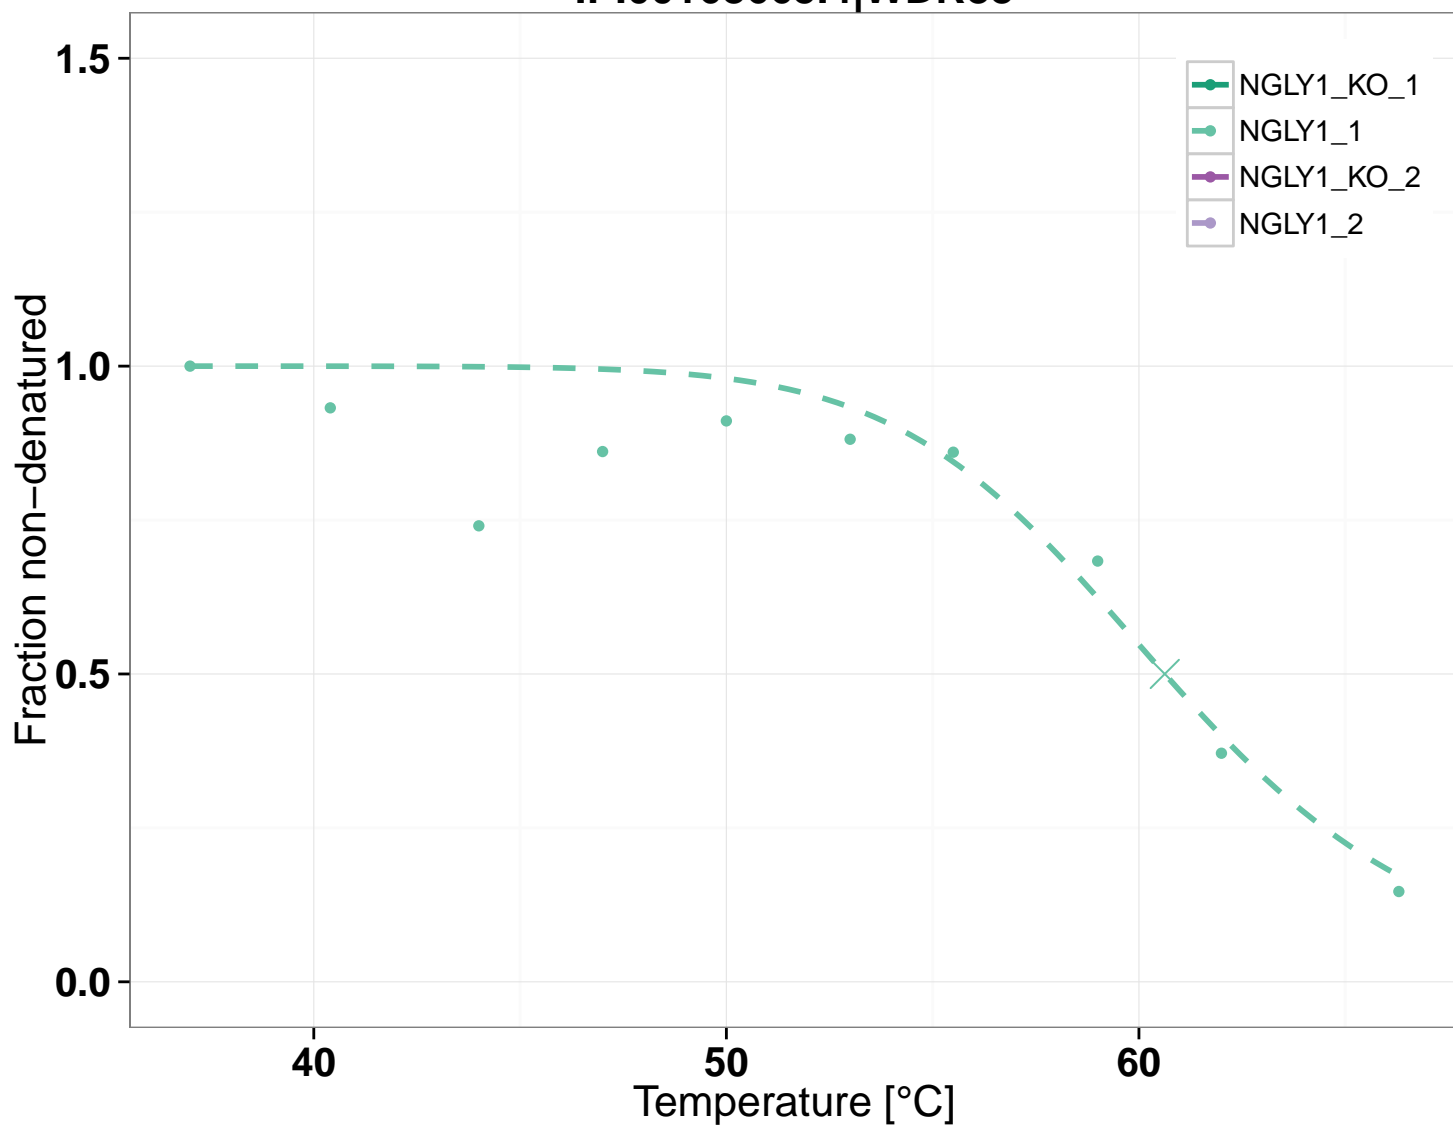

|            | meltPoint | slope  | plateau | R2   |
|------------|-----------|--------|---------|------|
| NGLY1_KO_1 | –         | –      | –       | –    |
| NGLY1_1    | 60.63     | –0.076 | 0       | 0.85 |
| NGLY1_KO_2 | –         | –      | –       | –    |
| NGLY1_2    | –         | –      | –       | –    |

Supplement: Supplementary file 2841 [file 1]

IPI00871970.1|ZNF235

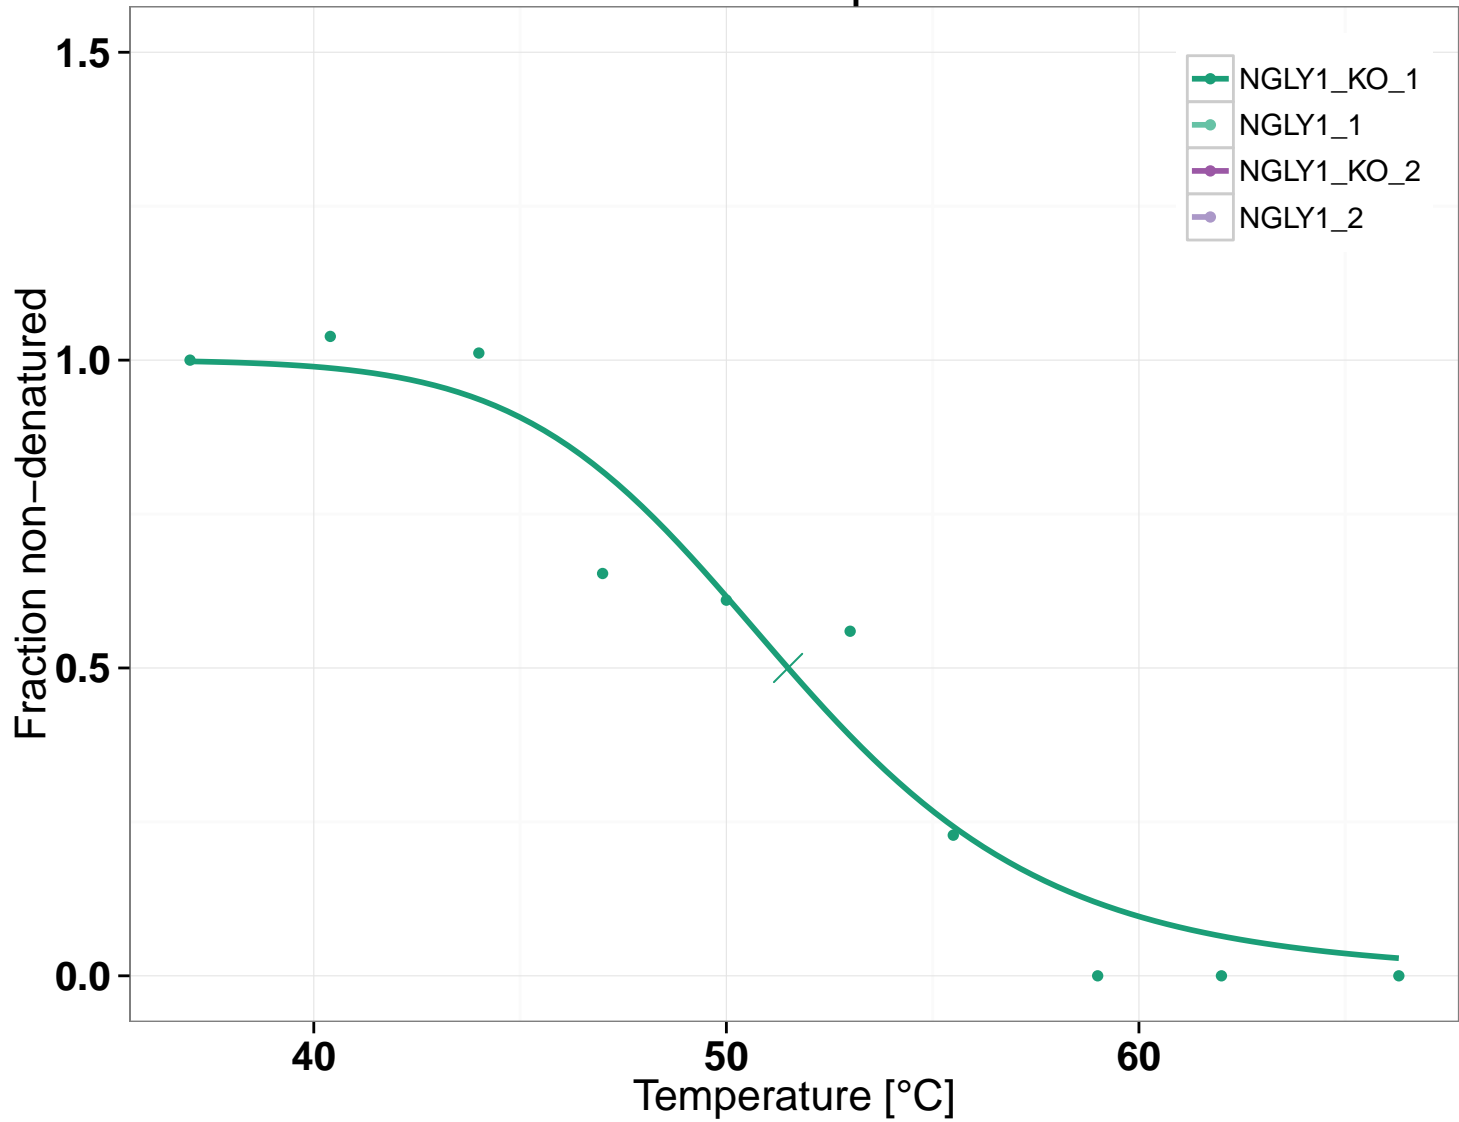

|            | meltPoint | slope  | plateau | R2   |
|------------|-----------|--------|---------|------|
| NGLY1_KO_1 | 51.5      | -0.078 | 0       | 0.95 |
| NGLY1_1    | -         | -      | -       | -    |
| NGLY1_KO_2 | -         | -      | -       | -    |
| NGLY1_2    | -         | -      | -       | -    |

Supplement: Supplementary file 2842 [file 1]

# IPI00296022.1|UQCRH

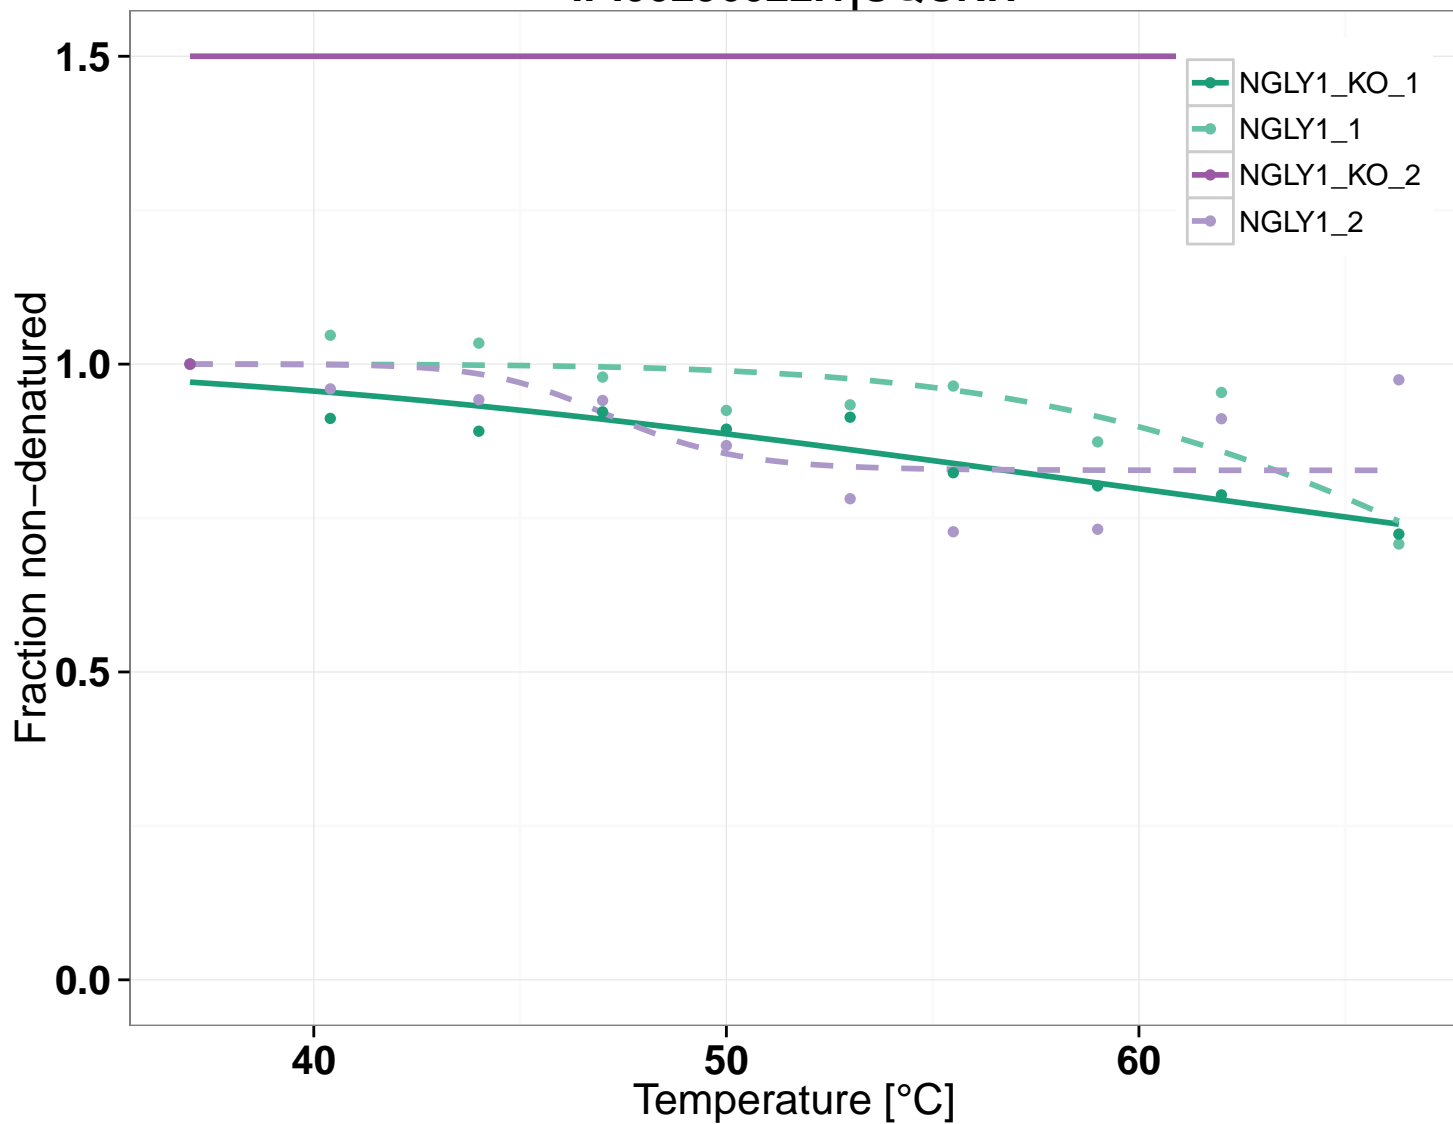

|            | meltPoint | slope   | plateau | R2    |
|------------|-----------|---------|---------|-------|
| NGLY1_KO_1 | —         | −0.0092 | 0       | 0.87  |
| NGLY1_1    | —         | —       | 0       | 0.74  |
| NGLY1_KO_2 | —         | —       | 1.5     | −2.61 |
| NGLY1_2    | —         | −0.028  | 0.83    | 0.41  |

Supplement: Supplementary file 2843 [file 1]

# IPI00746412.2|SFRS2IP

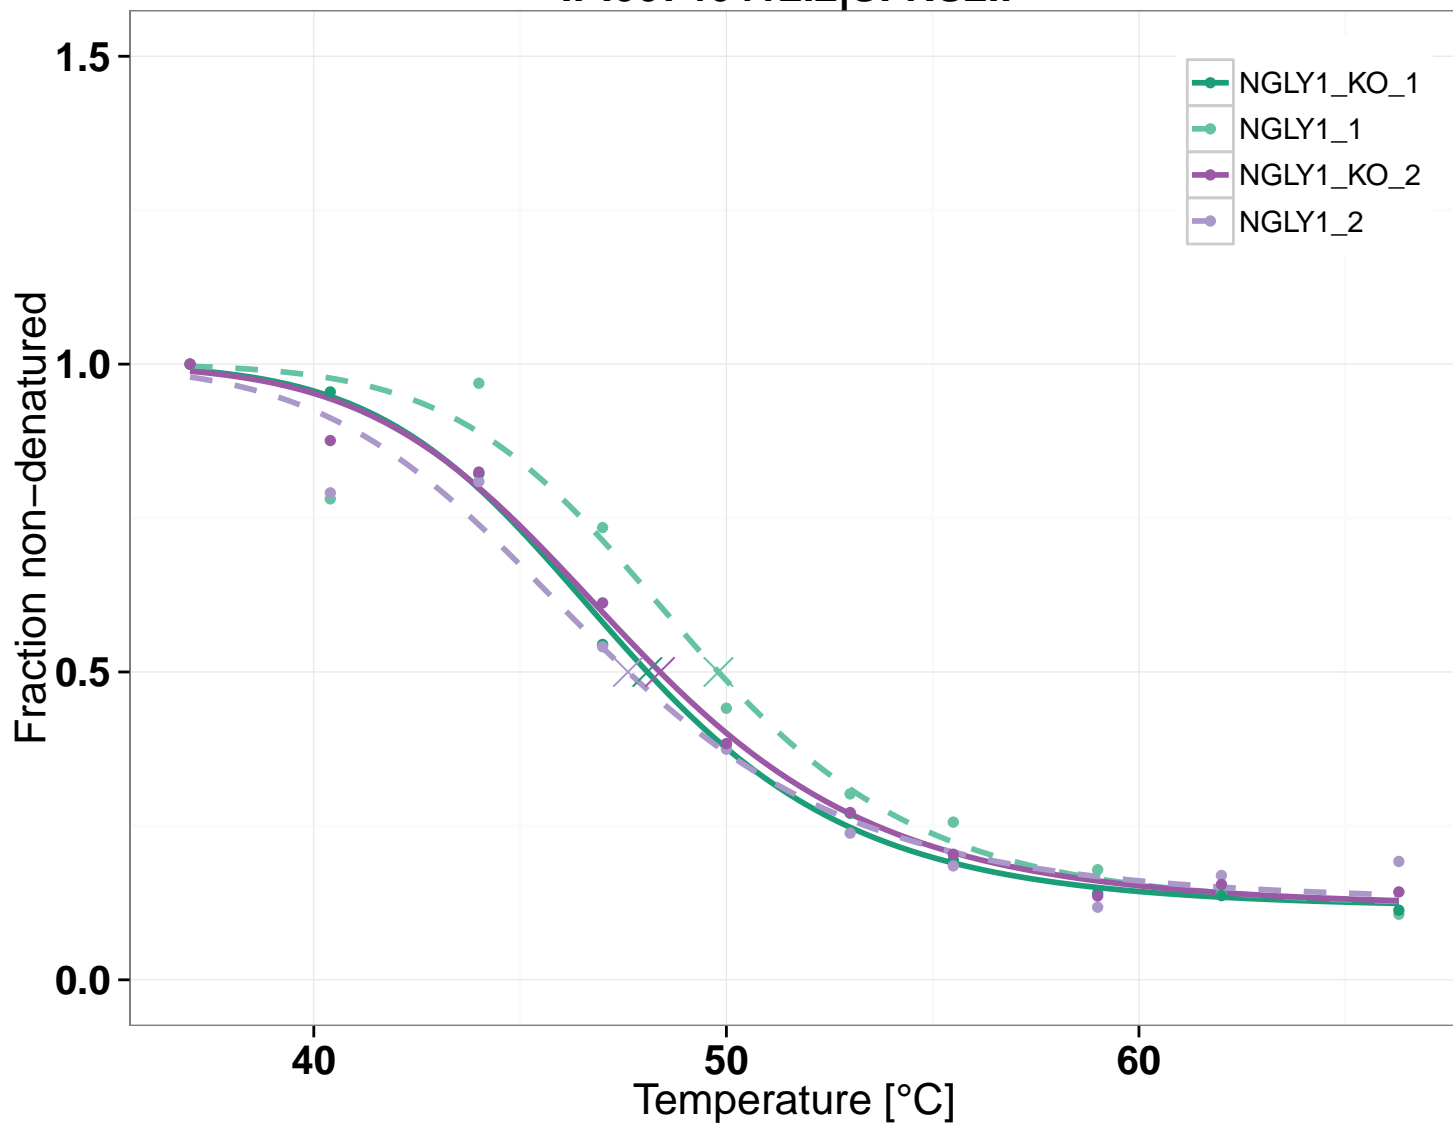

|            | meltPoint | slope  | plateau | R2   |
|------------|-----------|--------|---------|------|
| NGLY1_KO_1 | 48.08     | -0.077 | 0.12    | 1    |
| NGLY1_1    | 49.81     | -0.078 | 0.12    | 0.96 |
| NGLY1_KO_2 | 48.39     | -0.072 | 0.12    | 0.99 |
| NGLY1_2    | 47.62     | -0.068 | 0.13    | 0.97 |

Supplement: Supplementary file 2844 [file 1]

IPI00220656.4|CCT6B

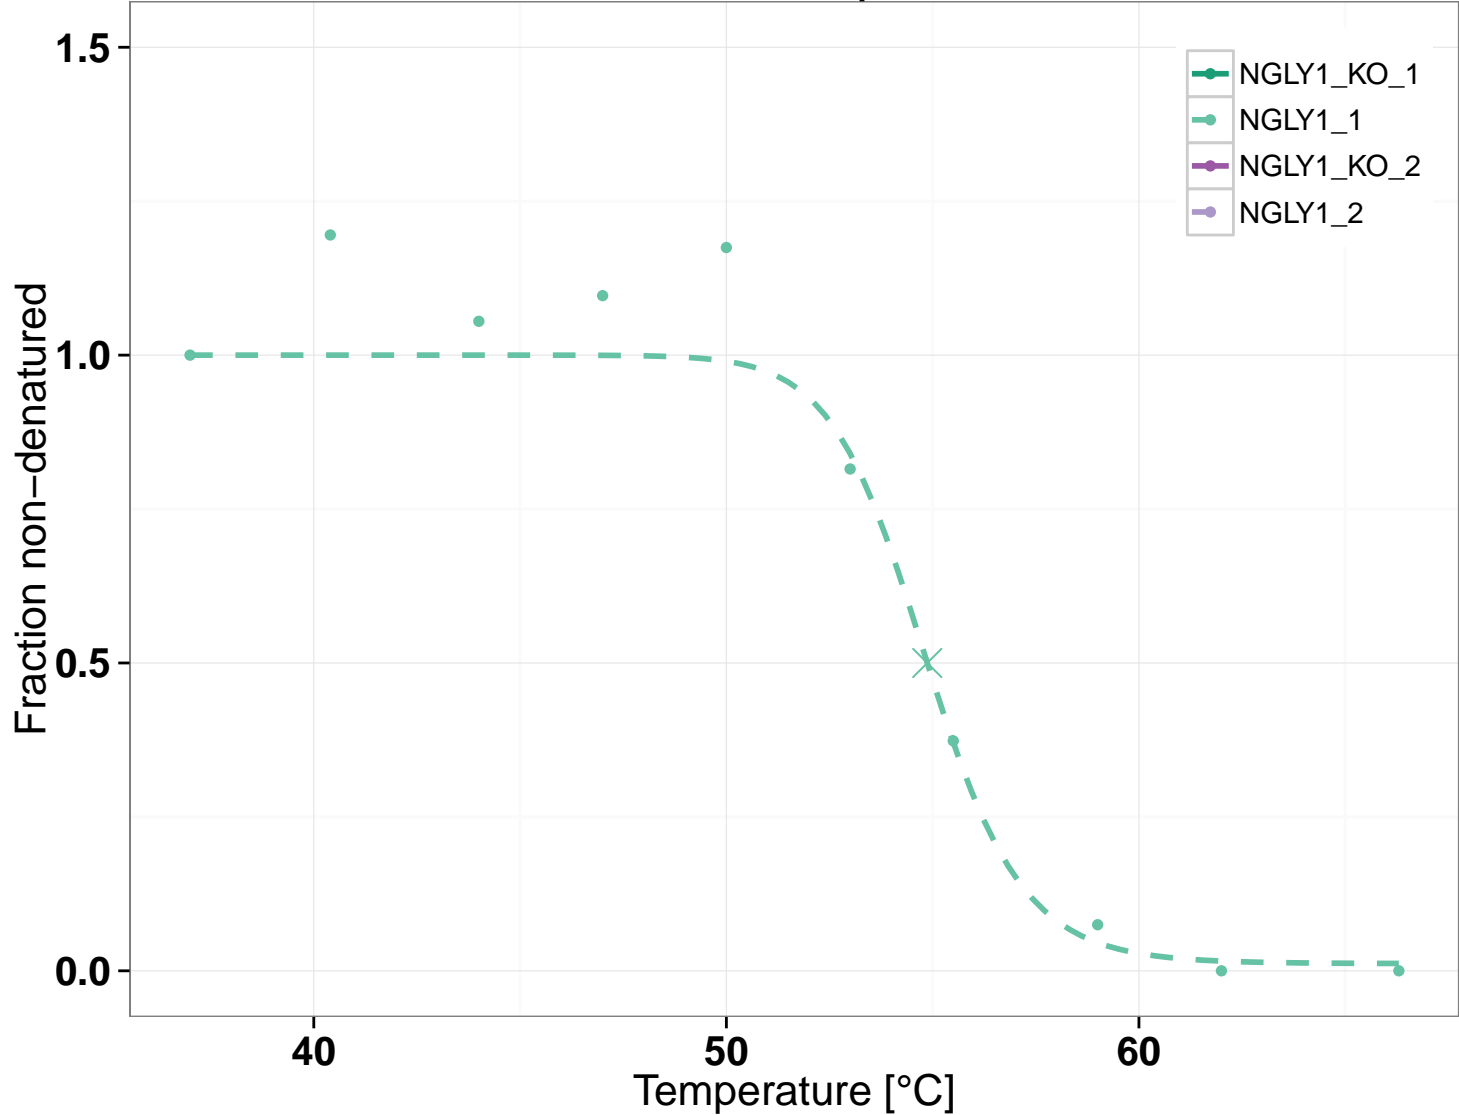

|            | meltPoint | slope | plateau | R2   |
|------------|-----------|-------|---------|------|
| NGLY1_KO_1 | -         | -     | -       | -    |
| NGLY1_1    | 54.87     | -0.21 | 0.01    | 0.96 |
| NGLY1_KO_2 | -         | -     | -       | -    |
| NGLY1_2    | -         | -     | -       | -    |

Supplement: Supplementary file 2845 [file 1]

# IPI00030964.1|HES1

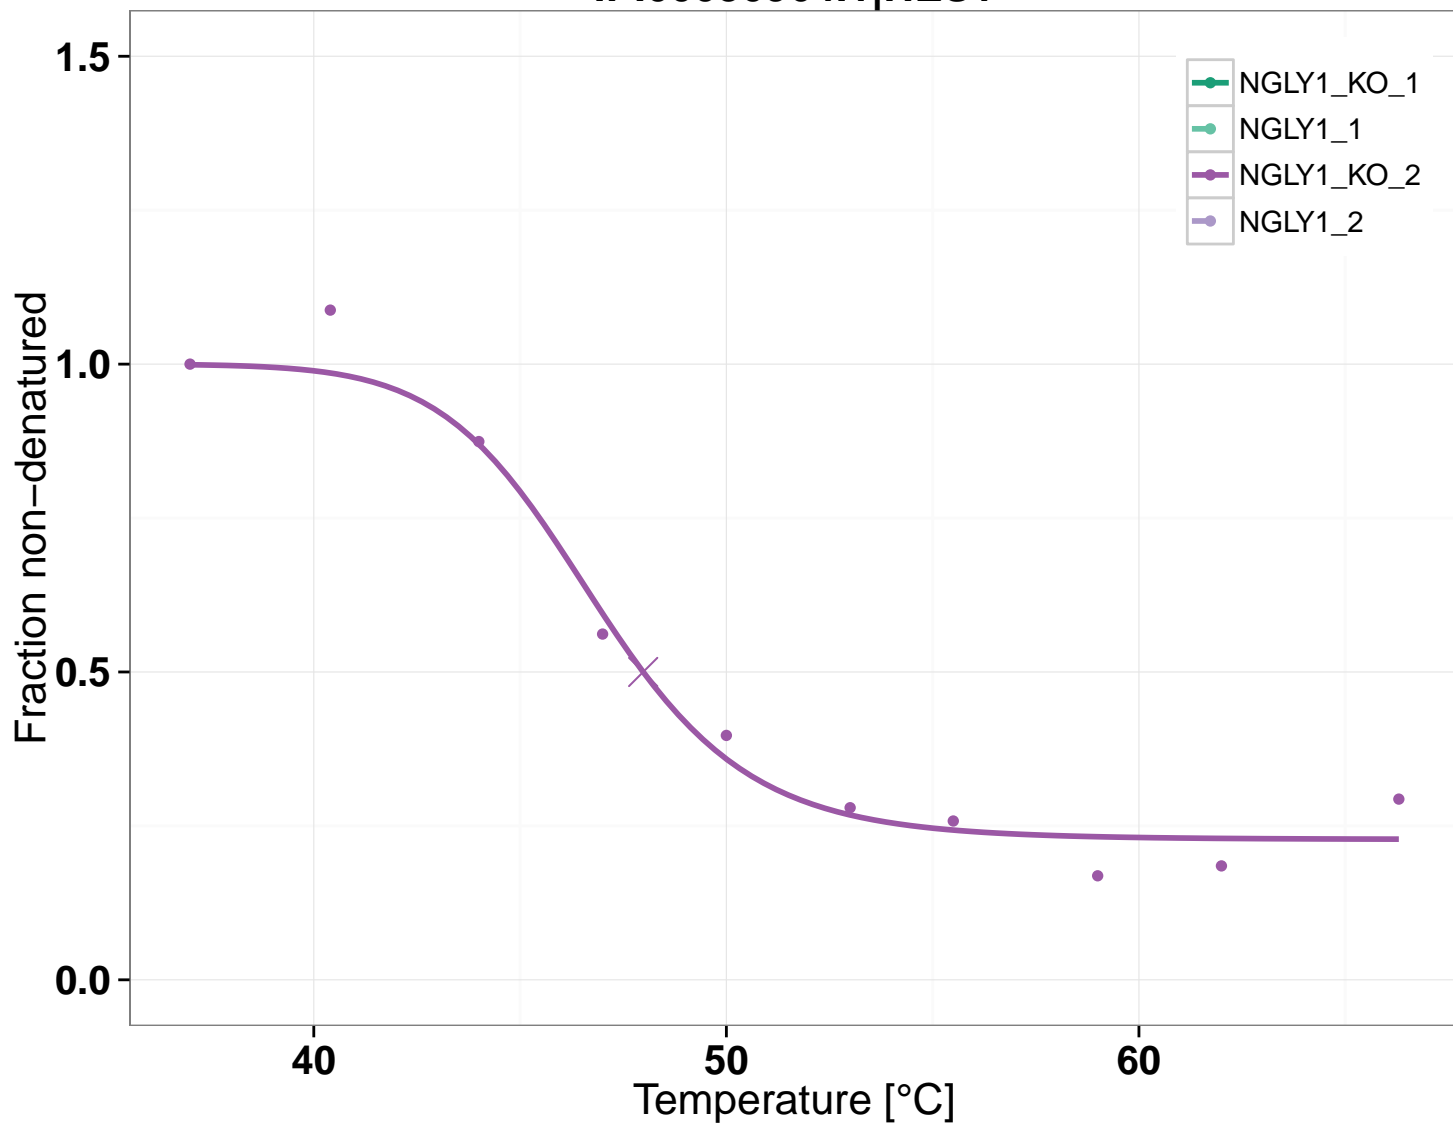

|            | meltPoint | slope | plateau | R2   |
|------------|-----------|-------|---------|------|
| NGLY1_KO_1 | —         | —     | —       | —    |
| NGLY1_1    | —         | —     | —       | —    |
| NGLY1_KO_2 | 47.98     | -0.1  | 0.23    | 0.98 |
| NGLY1_2    | —         | —     | —       | —    |

Supplement: Supplementary file 2846 [file 1]

# IPI00419471.3|TYW1

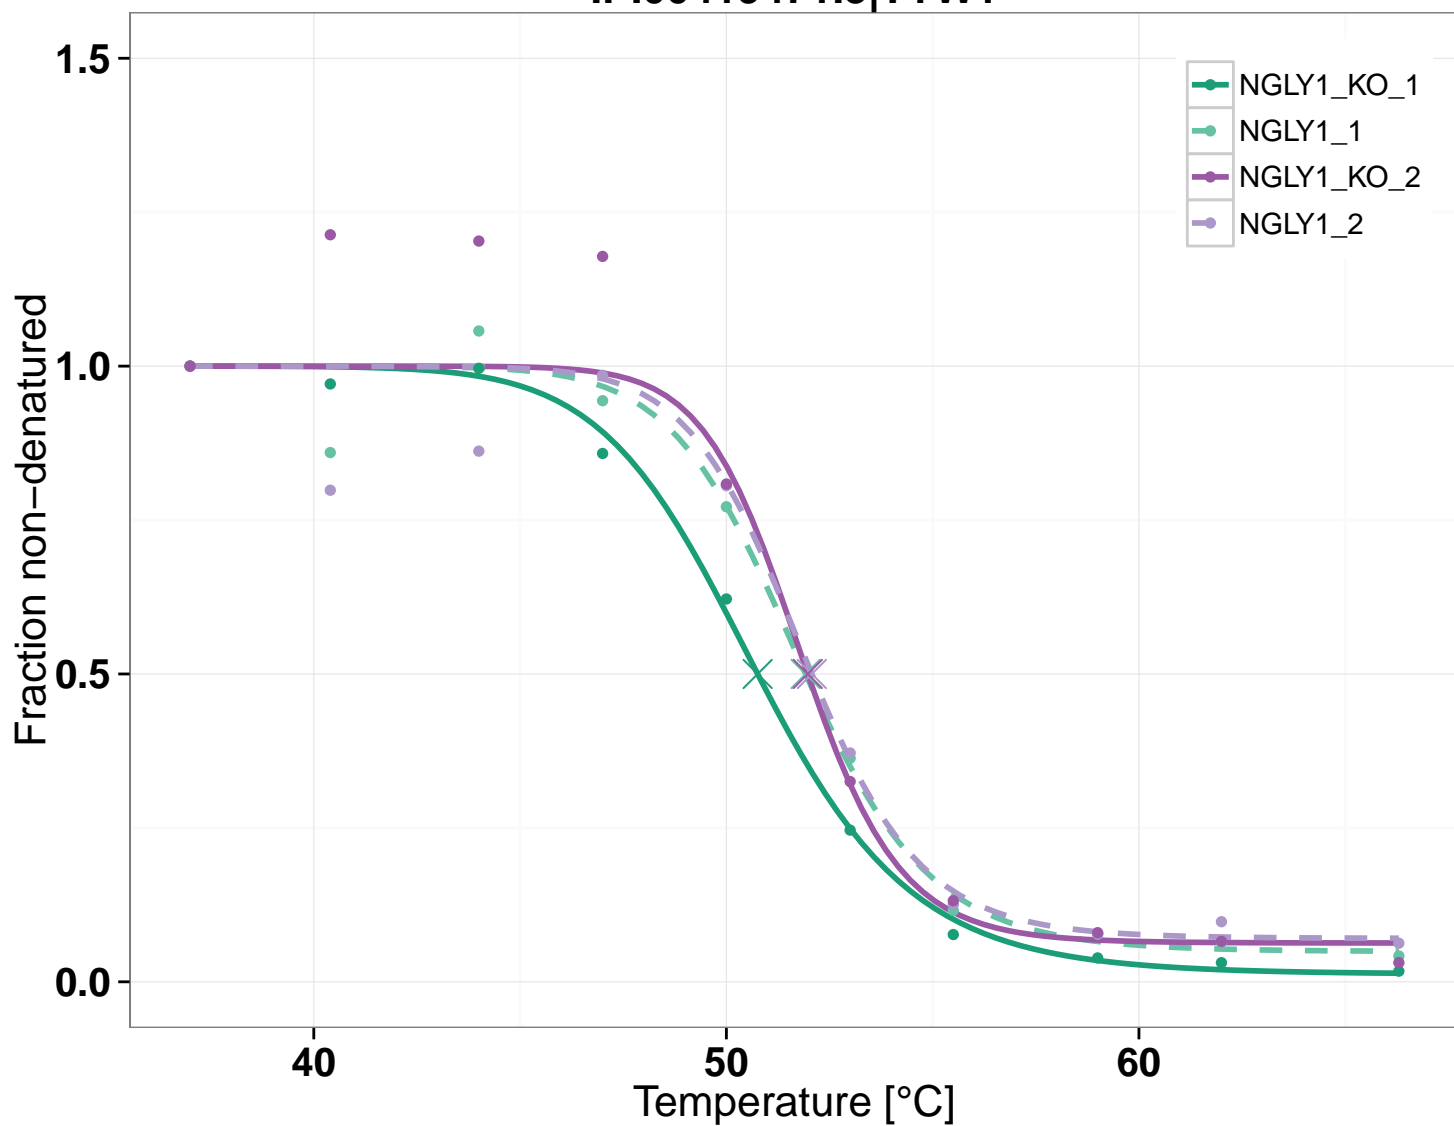

|            | meltPoint | slope | plateau | R2   |
|------------|-----------|-------|---------|------|
| NGLY1_KO_1 | 50.76     | -0.13 | 0.01    | 1    |
| NGLY1_1    | 51.92     | -0.15 | 0.05    | 0.99 |
| NGLY1_KO_2 | 51.97     | -0.2  | 0.06    | 0.95 |
| NGLY1_2    | 52.07     | -0.16 | 0.07    | 0.96 |

Supplement: Supplementary file 2847 [file 1]

# IPI00060893.1|C10ORF104

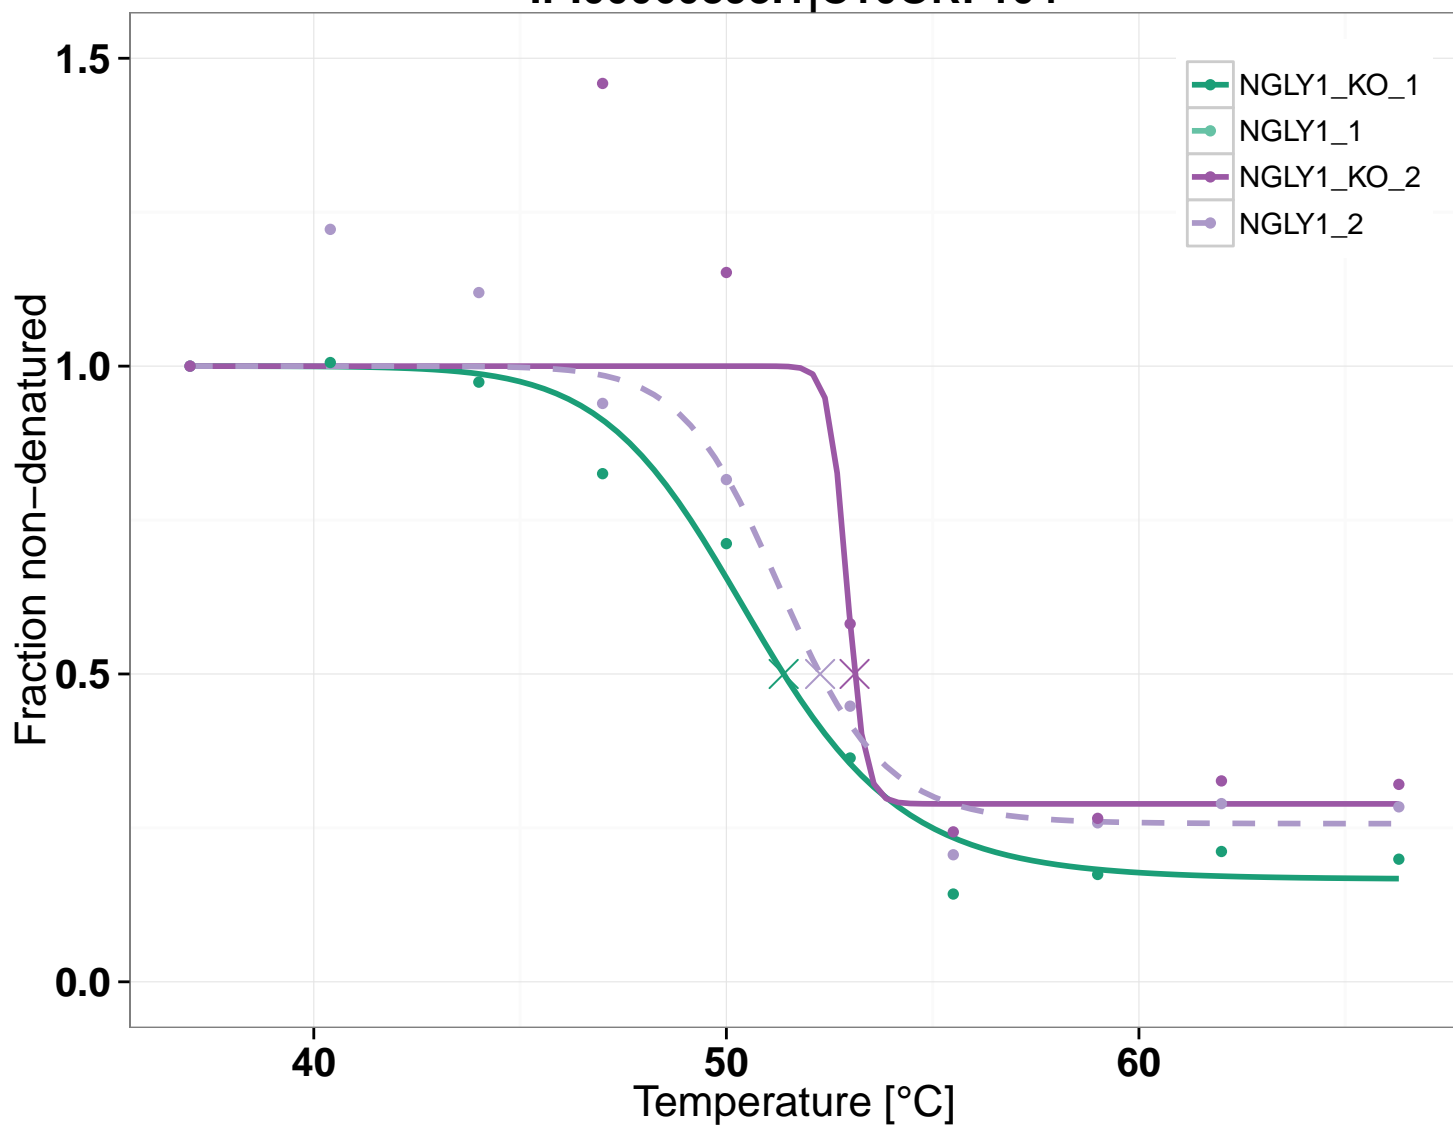

|            | meltPoint | slope | plateau | R2   |
|------------|-----------|-------|---------|------|
| NGLY1_KO_1 | 51.39     | -0.11 | 0.17    | 0.98 |
| NGLY1_1    | -         | -     | -       | -    |
| NGLY1_KO_2 | 53.11     | -0.84 | 0.29    | 0.61 |
| NGLY1_2    | 52.27     | -0.15 | 0.26    | 0.95 |

Supplement: Supplementary file 2848 [file 1]

IPI00018240.8|SDAD1

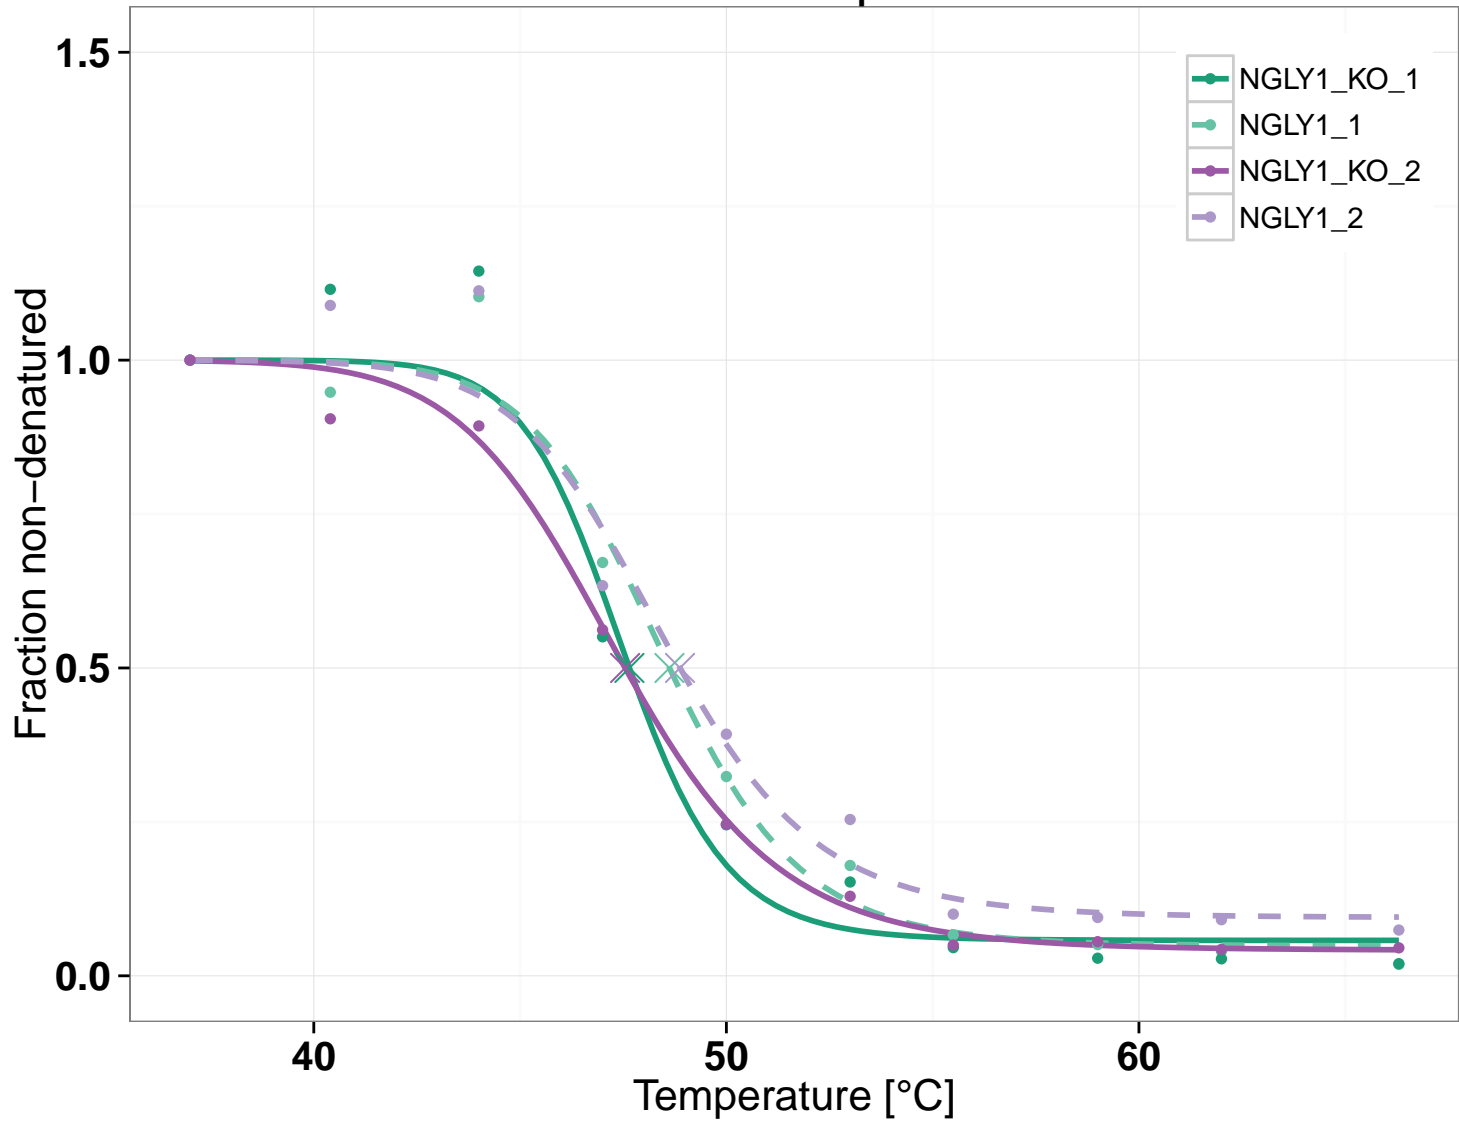

|            | meltPoint | slope | plateau | R2   |
|------------|-----------|-------|---------|------|
| NGLY1_KO_1 | 47.65     | -0.19 | 0.06    | 0.97 |
| NGLY1_1    | 48.62     | -0.14 | 0.05    | 0.98 |
| NGLY1_KO_2 | 47.55     | -0.12 | 0.04    | 0.99 |
| NGLY1_2    | 48.88     | -0.12 | 0.09    | 0.97 |

Supplement: Supplementary file 2849 [file 1]

# IPI00026993.1|RNF2

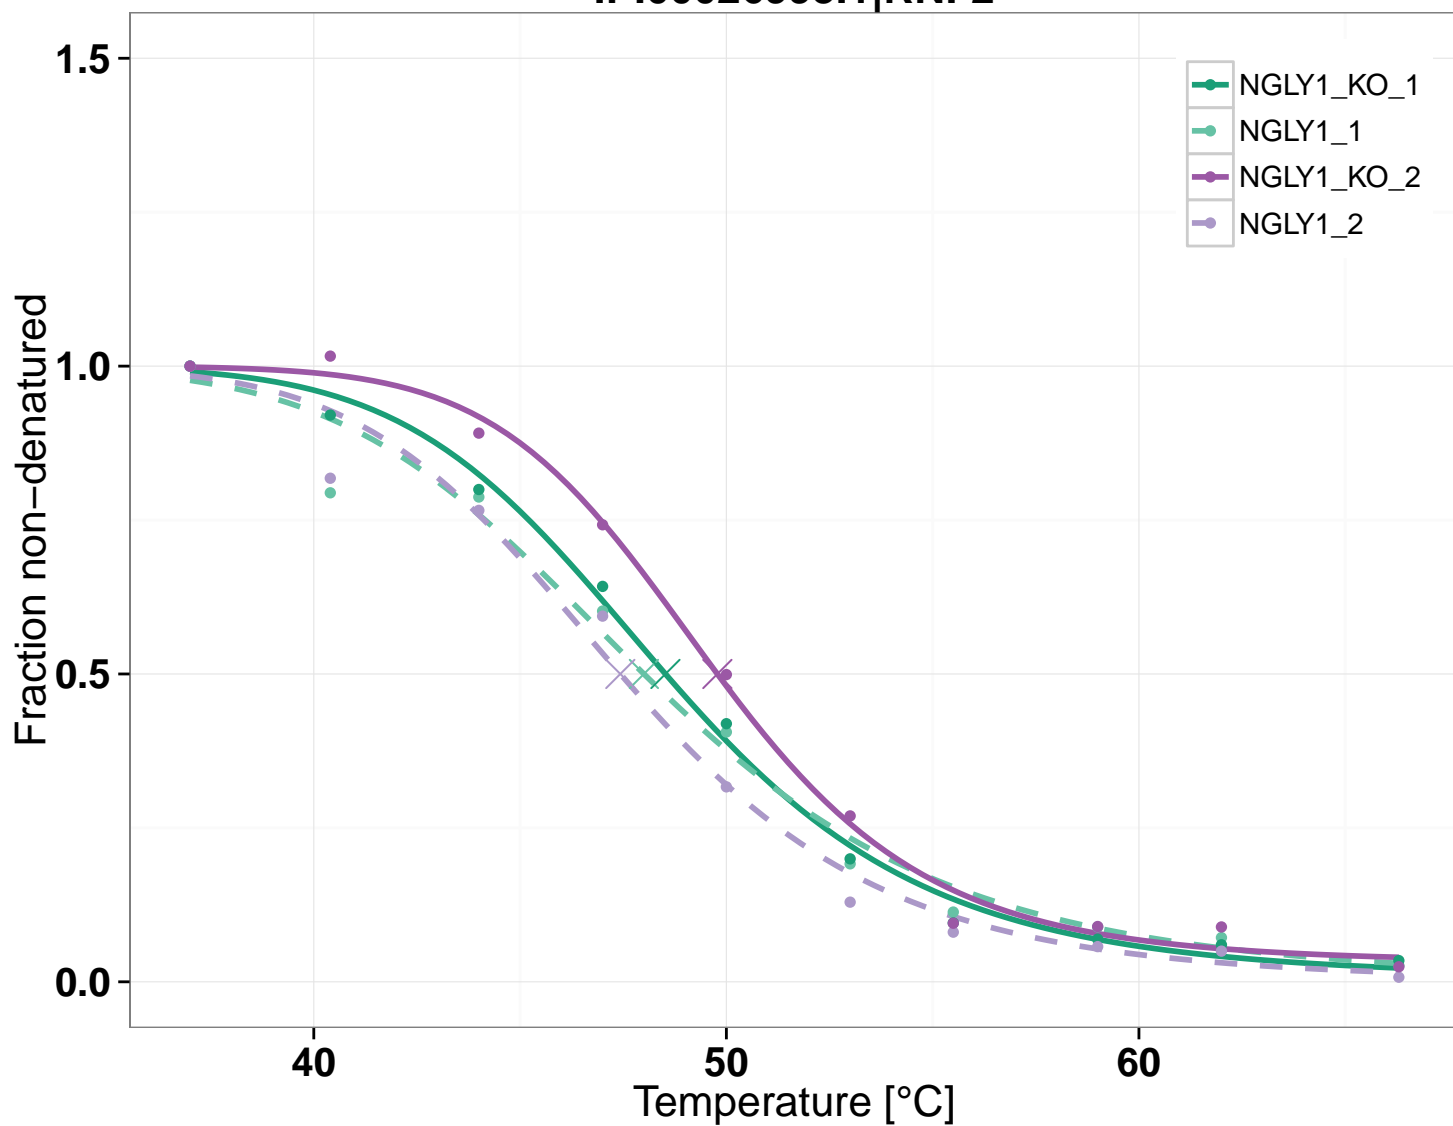

|            | meltPoint | slope  | plateau | R2   |
|------------|-----------|--------|---------|------|
| NGLY1_KO_1 | 48.52     | -0.079 | 0.01    | 1    |
| NGLY1_1    | 48        | -0.067 | 0       | 0.98 |
| NGLY1_KO_2 | 49.78     | -0.092 | 0.03    | 1    |
| NGLY1_2    | 47.43     | -0.079 | 0       | 0.98 |

Supplement: Supplementary file 2850 [file 1]

IPI00328257.4|AP1B1

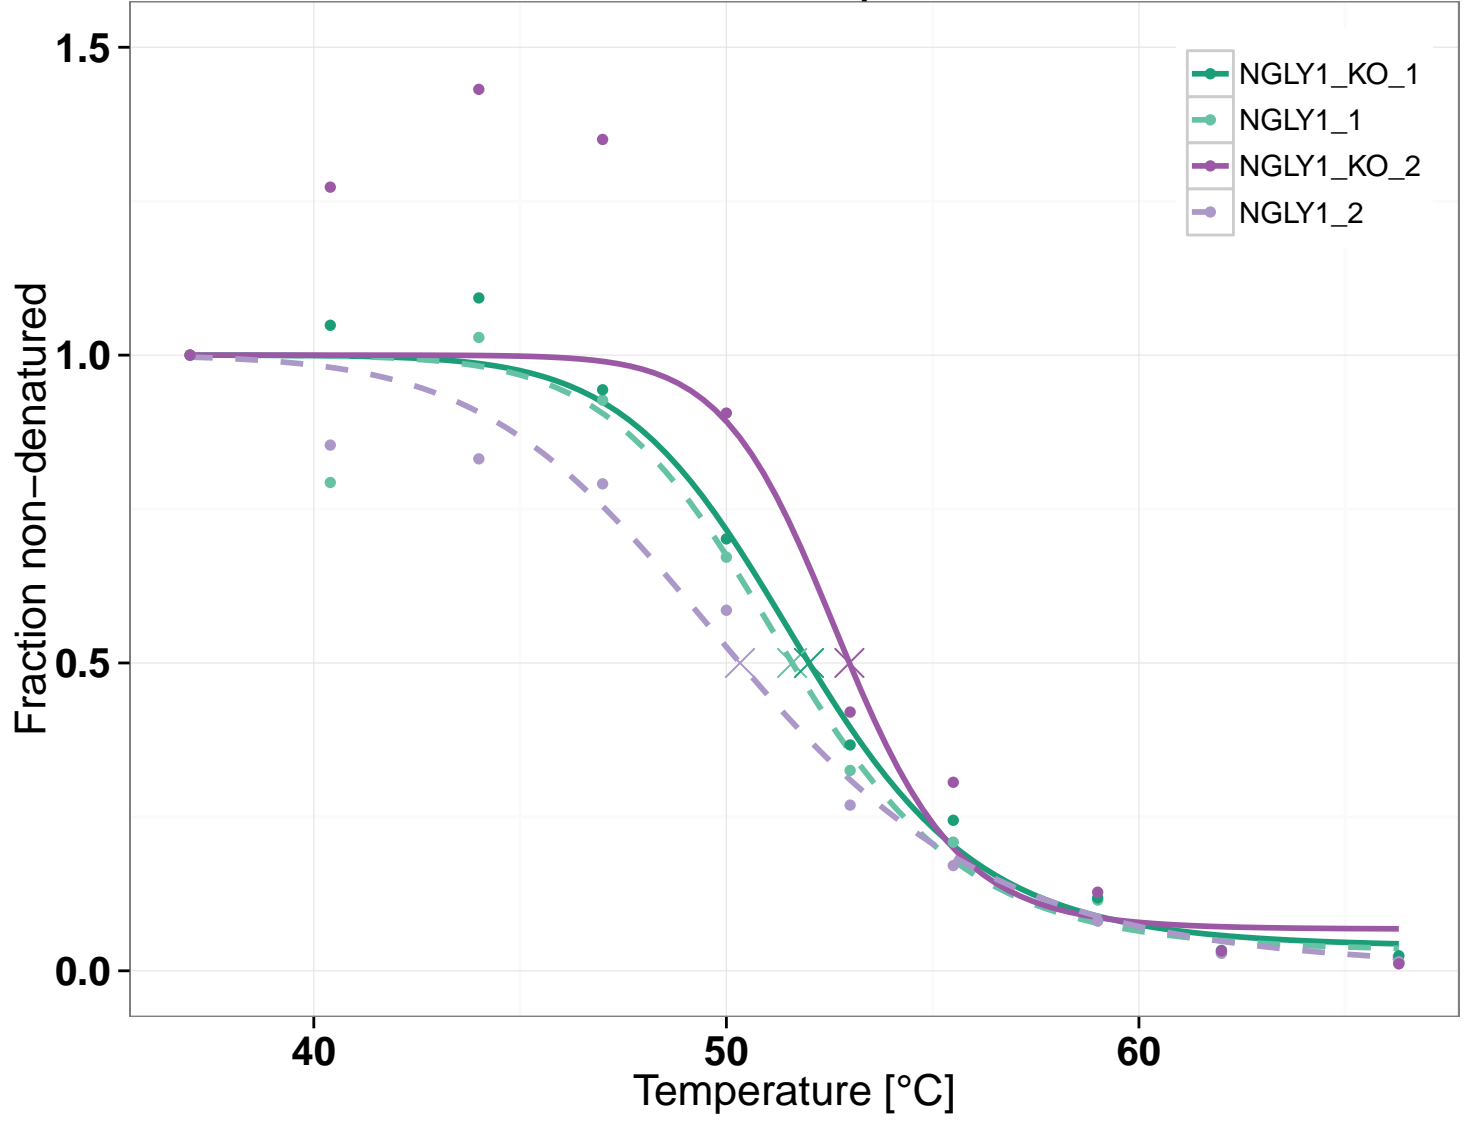

|            | meltPoint | slope | plateau | R2   |
|------------|-----------|-------|---------|------|
| NGLY1_KO_1 | 52        | -0.11 | 0.04    | 0.99 |
| NGLY1_1    | 51.59     | -0.11 | 0.03    | 0.97 |
| NGLY1_KO_2 | 52.98     | -0.16 | 0.07    | 0.86 |
| NGLY1_2    | 50.33     | -0.08 | 0       | 0.98 |

Supplement: Supplementary file 2851 [file 1]

# IPI00829917.3|IQSEC3

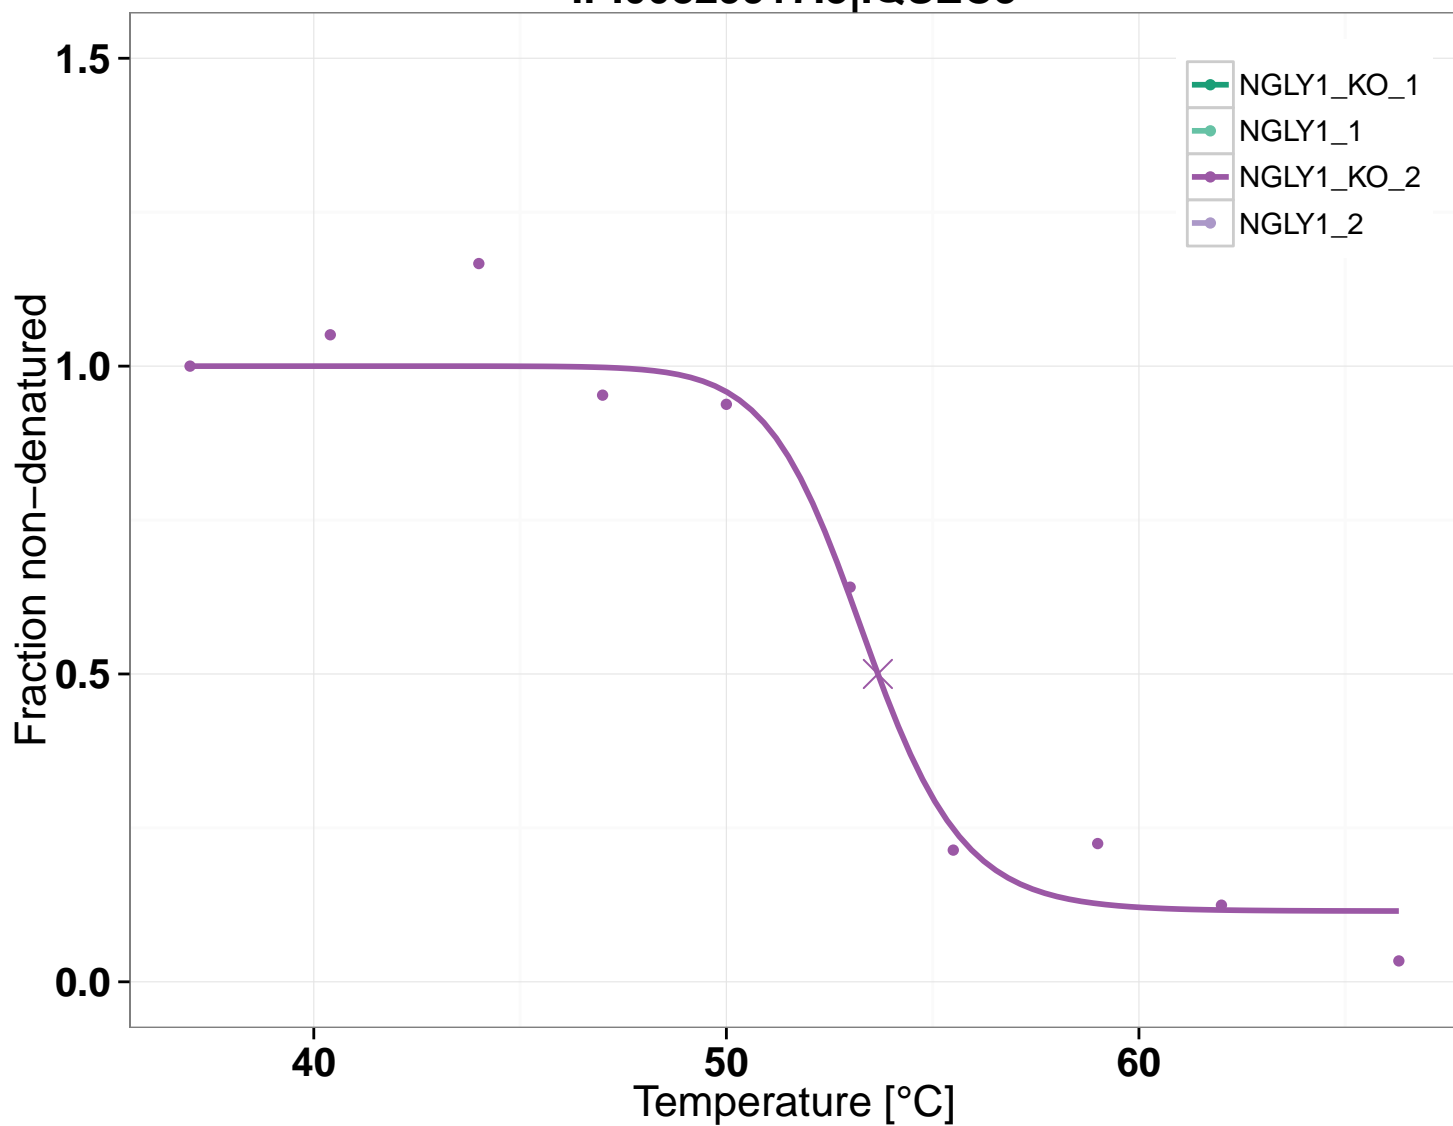

|            | meltPoint | slope | plateau | R2   |
|------------|-----------|-------|---------|------|
| NGLY1_KO_1 | —         | —     | —       | —    |
| NGLY1_1    | —         | —     | —       | —    |
| NGLY1_KO_2 | 53.67     | -0.19 | 0.11    | 0.97 |
| NGLY1_2    | —         | —     | —       | —    |

Supplement: Supplementary file 2852 [file 1]

# IPI00029133.4|ATP5F1

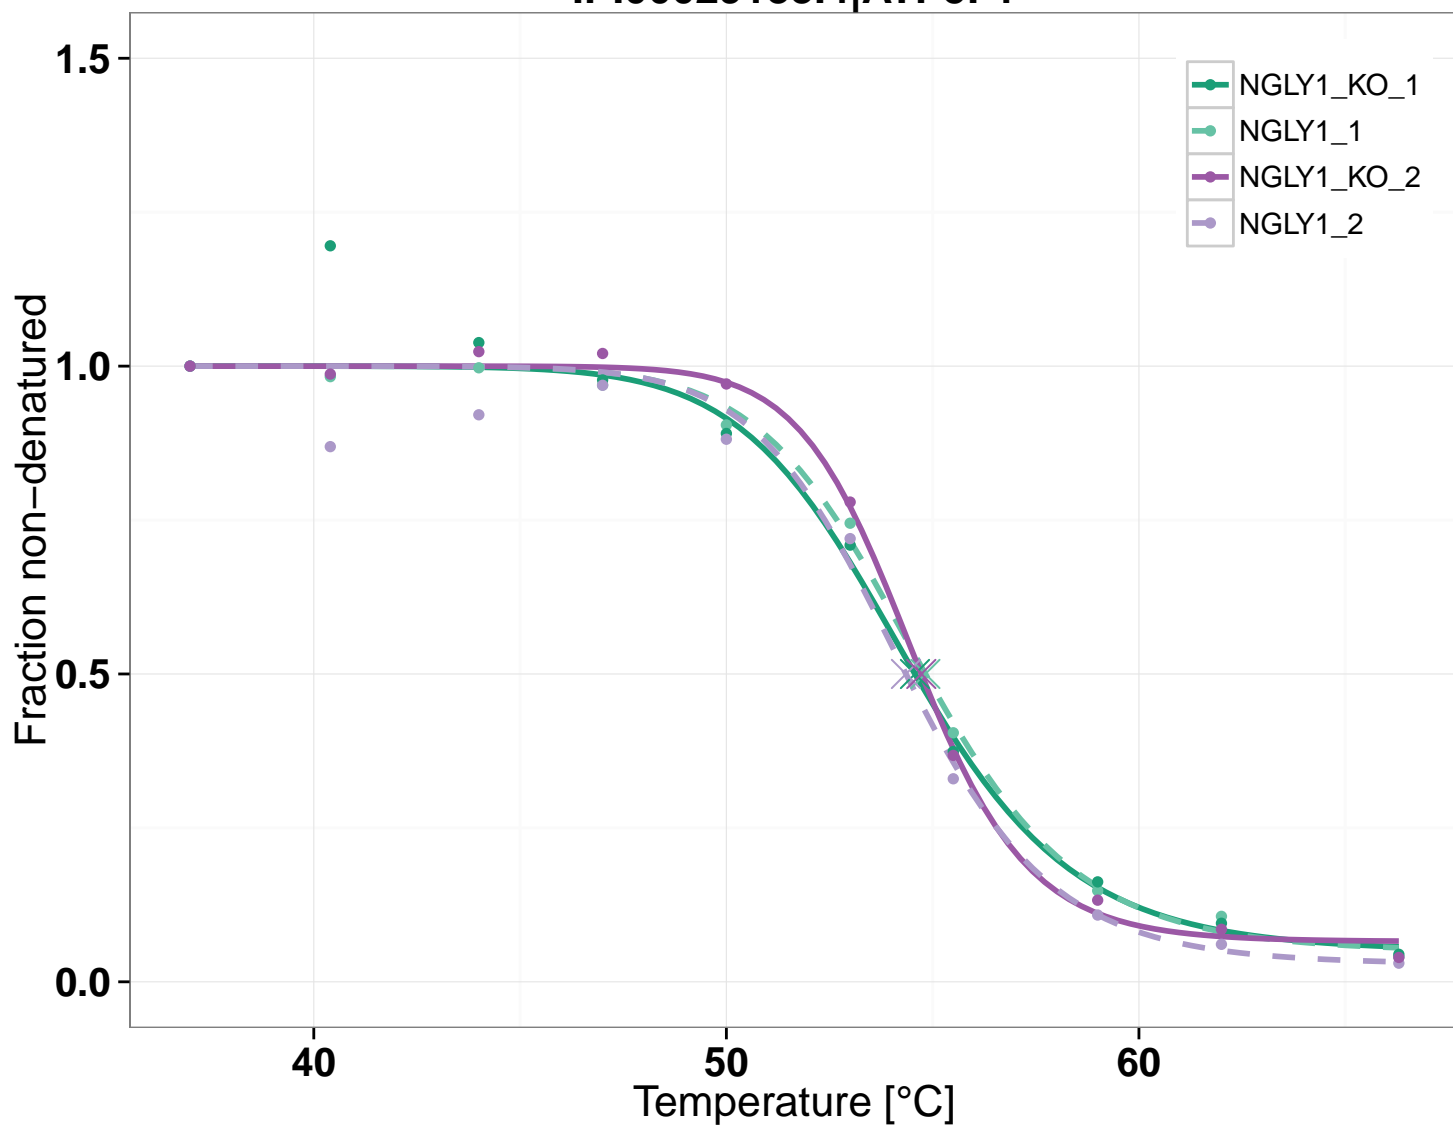

|            | meltPoint | slope | plateau | R2   |
|------------|-----------|-------|---------|------|
| NGLY1_KO_1 | 54.57     | -0.12 | 0.05    | 0.98 |
| NGLY1_1    | 54.82     | -0.12 | 0.05    | 1    |
| NGLY1_KO_2 | 54.73     | -0.17 | 0.07    | 1    |
| NGLY1_2    | 54.35     | -0.13 | 0.03    | 0.98 |

Supplement: Supplementary file 2853 [file 1]

# IPI00219012.4|FYN

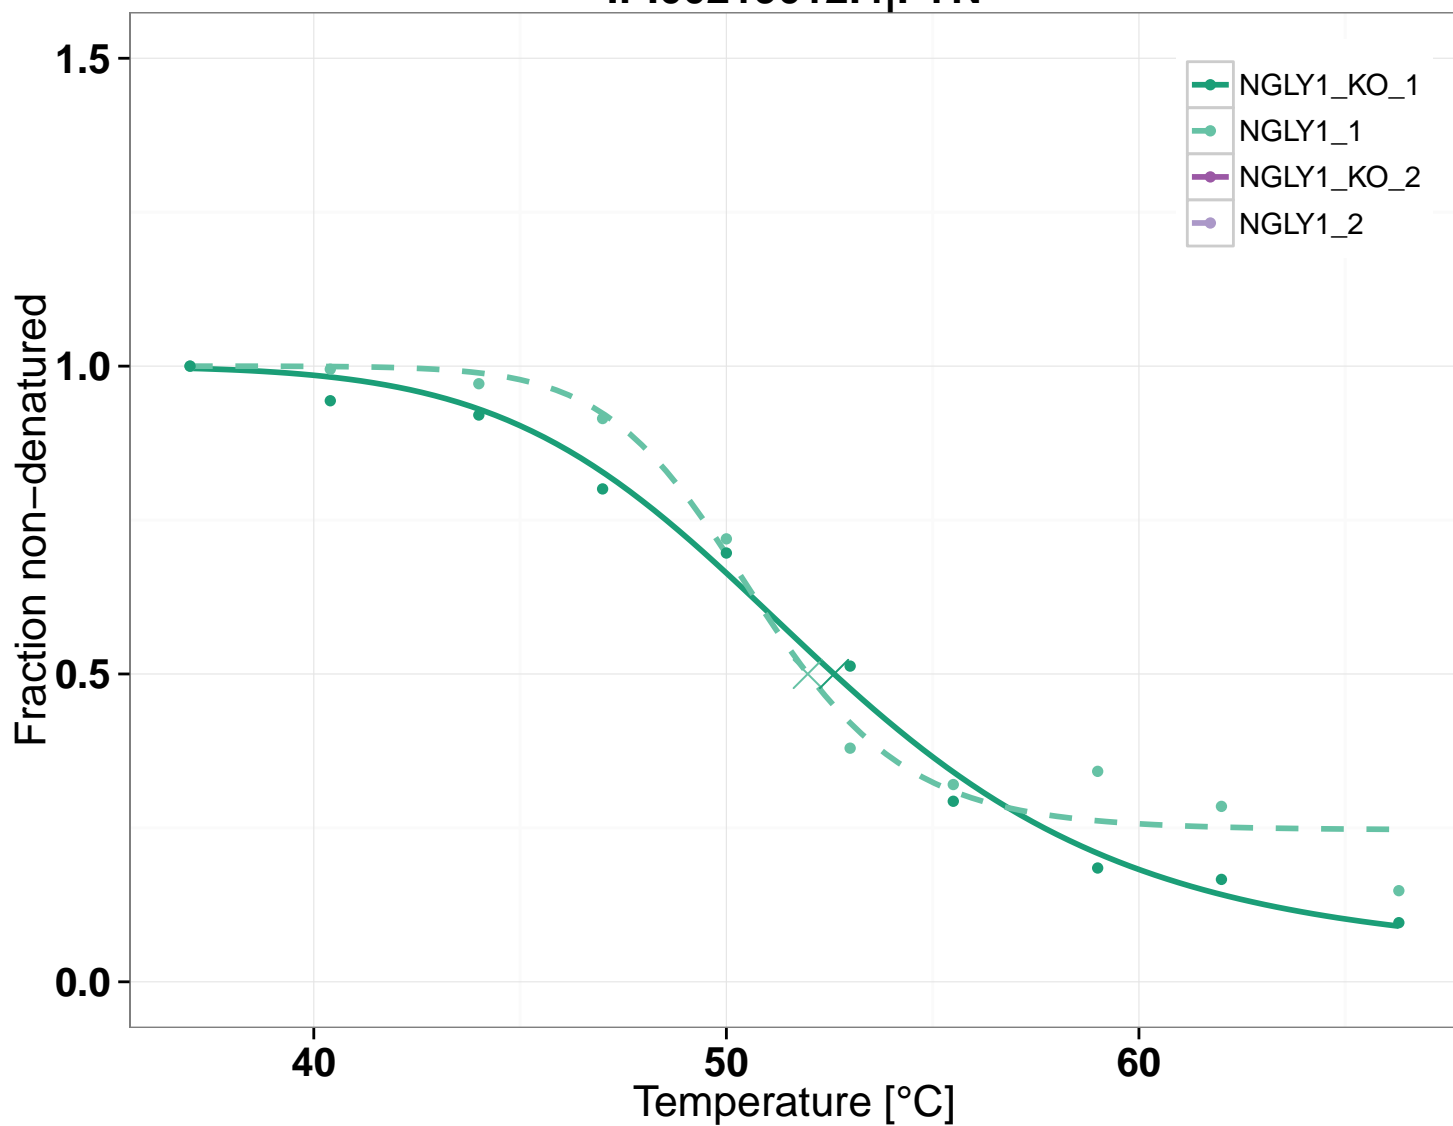

|            | meltPoint | slope  | plateau | R2   |
|------------|-----------|--------|---------|------|
| NGLY1_KO_1 | 52.61     | -0.063 | 0.04    | 0.99 |
| NGLY1_1    | 51.97     | -0.1   | 0.25    | 0.98 |
| NGLY1_KO_2 | -         | -      | -       | -    |
| NGLY1_2    | -         | -      | -       | -    |

Supplement: Supplementary file 2854 [file 1]

# IPI00018813.5|COPS2

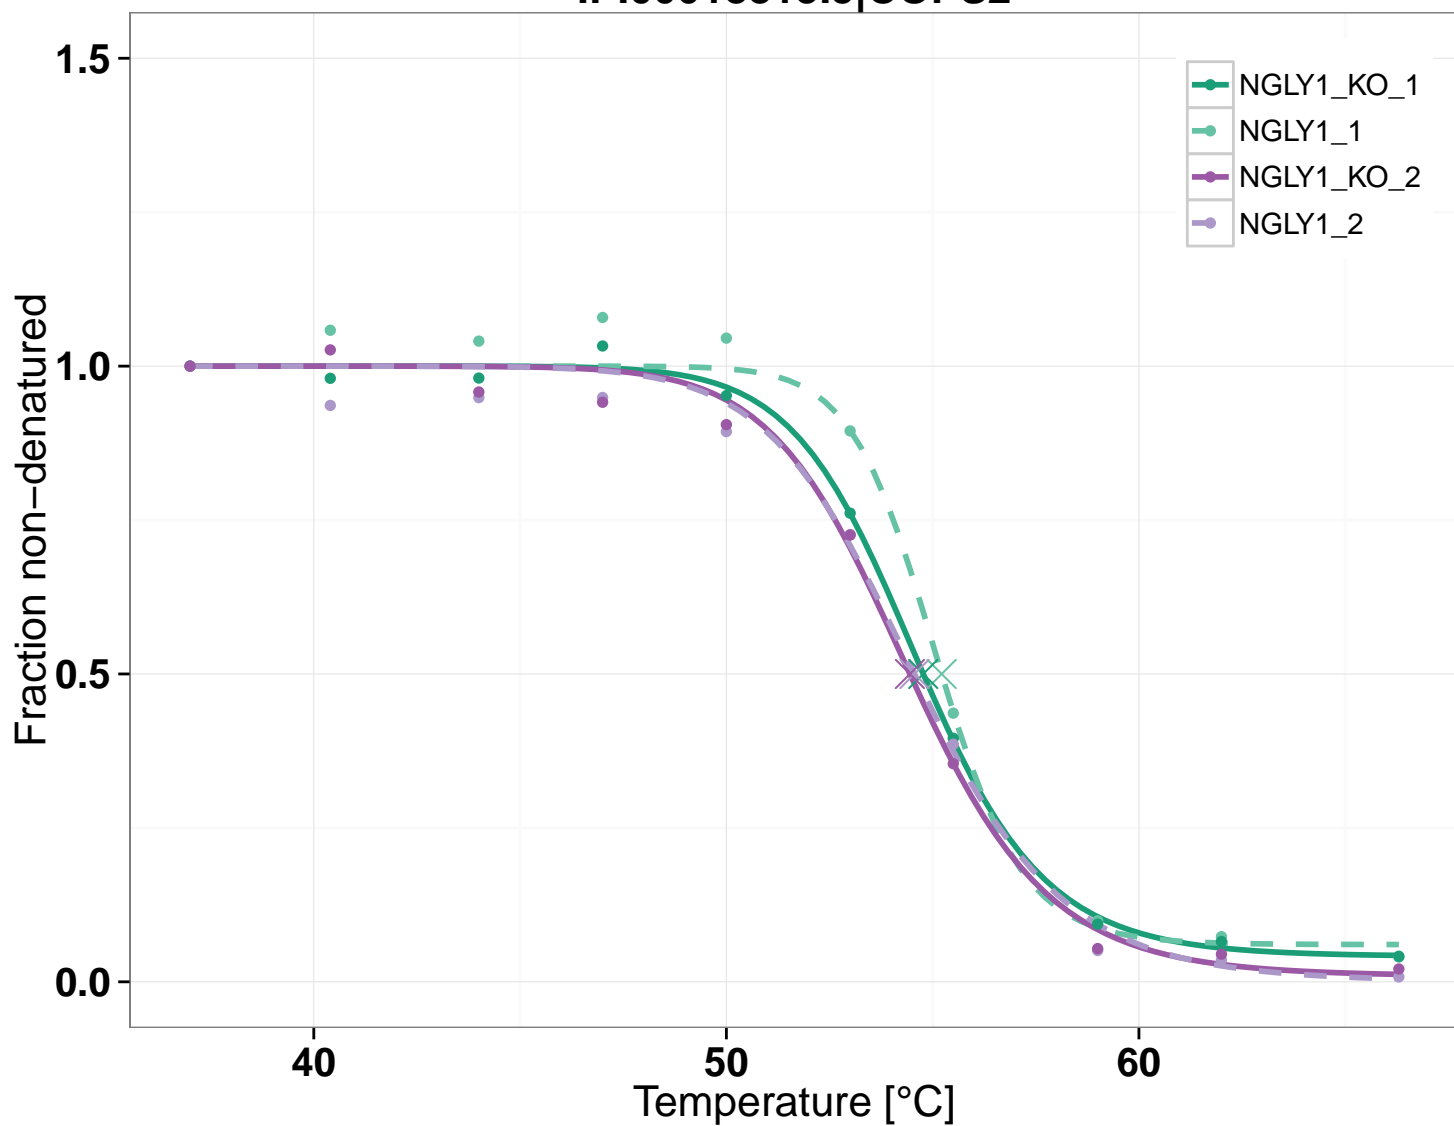

|            | meltPoint | slope | plateau | R2   |
|------------|-----------|-------|---------|------|
| NGLY1_KO_1 | 54.77     | -0.16 | 0.04    | 1    |
| NGLY1_1    | 55.22     | -0.23 | 0.06    | 0.99 |
| NGLY1_KO_2 | 54.45     | -0.15 | 0.01    | 0.99 |
| NGLY1_2    | 54.56     | -0.14 | 0       | 0.99 |

Supplement: Supplementary file 2855 [file 1]

# IPI00218733.6|SOD1

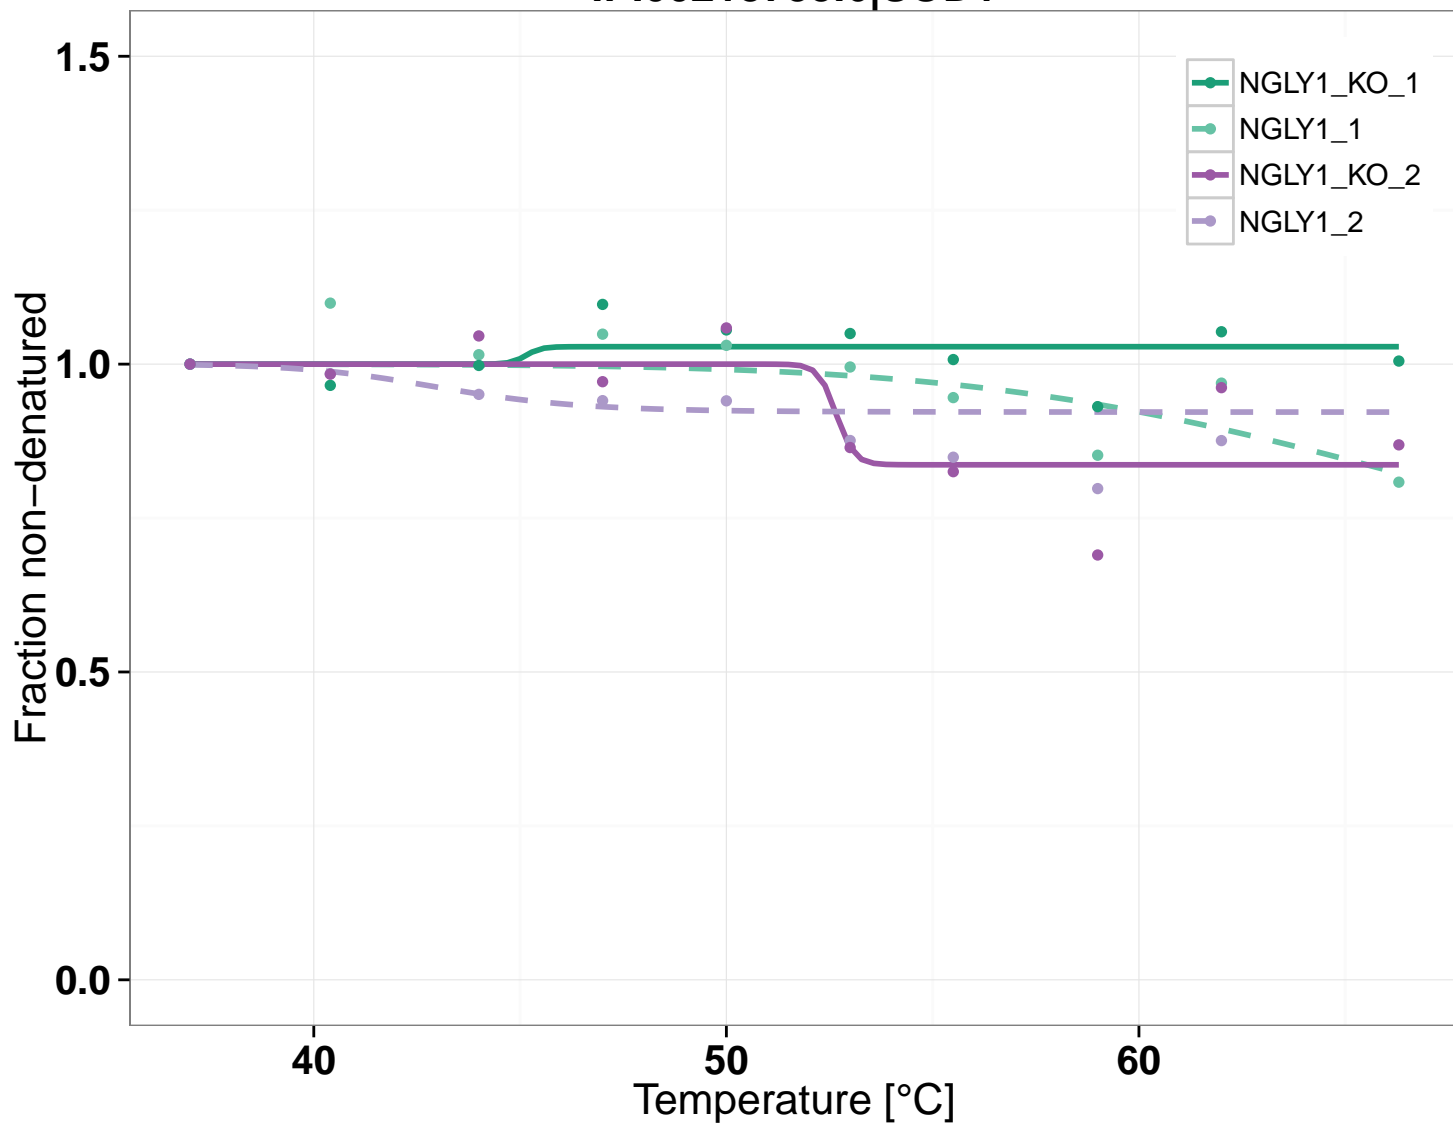

|            | meltPoint | slope  | plateau | R2   |
|------------|-----------|--------|---------|------|
| NGLY1_KO_1 | –         | 0.039  | 1.03    | 0.14 |
| NGLY1_1    | –         | –      | 0.52    | 0.61 |
| NGLY1_KO_2 | –         | –0.19  | 0.84    | 0.62 |
| NGLY1_2    | –         | –0.011 | 0.92    | 0.07 |

Supplement: Supplementary file 2856 [file 1]

# IPI00291068.3|PI4K2B

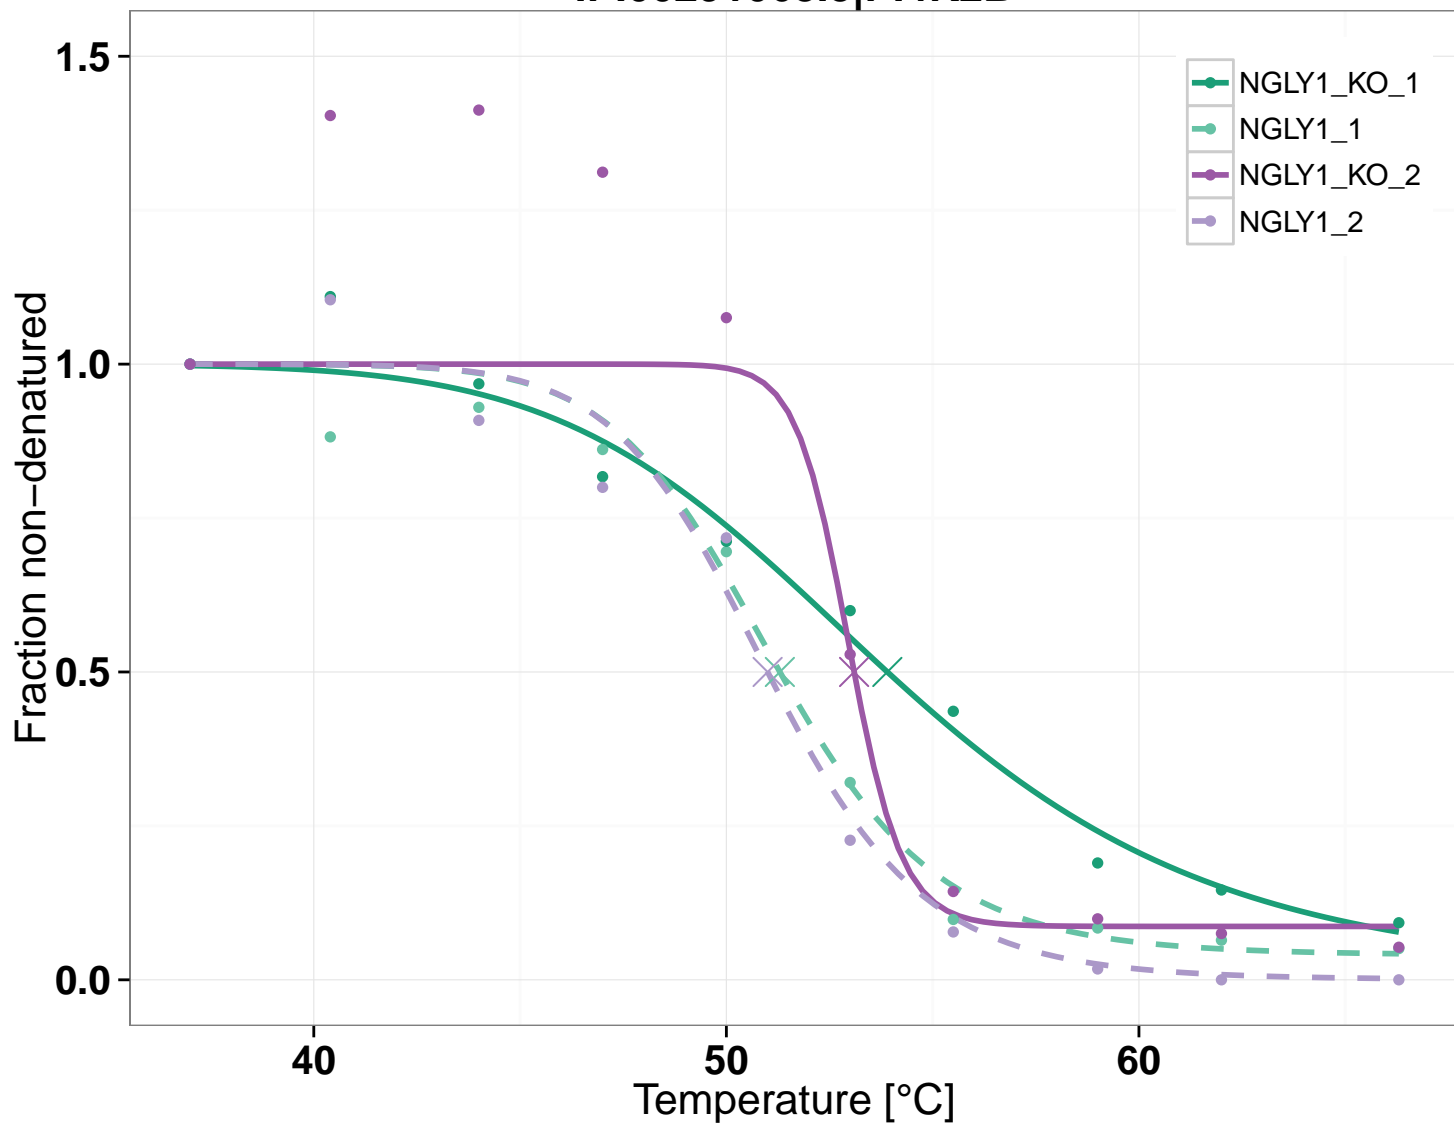

|            | meltPoint | slope  | plateau | R2   |
|------------|-----------|--------|---------|------|
| NGLY1_KO_1 | 53.9      | -0.063 | 0       | 0.98 |
| NGLY1_1    | 51.3      | -0.12  | 0.04    | 0.98 |
| NGLY1_KO_2 | 53.1      | -0.36  | 0.09    | 0.86 |
| NGLY1_2    | 51        | -0.13  | 0       | 0.98 |

Supplement: Supplementary file 2857 [file 1]

IPI00549357.3|FOXRED1

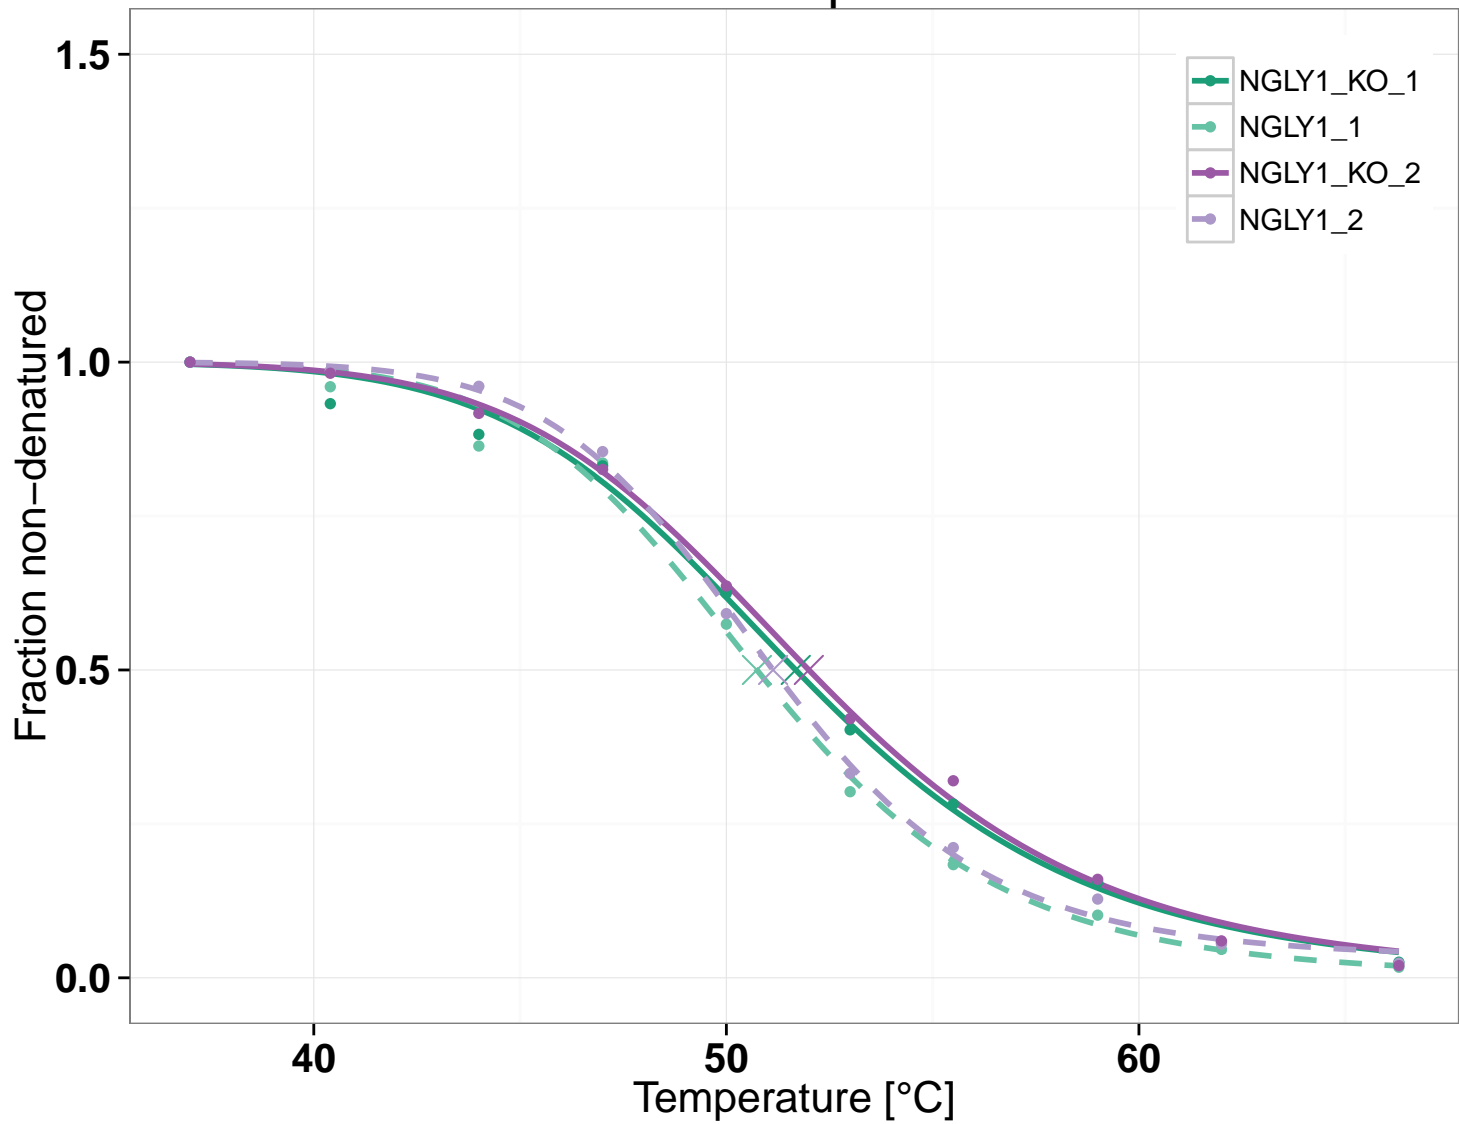

|            | meltPoint | slope  | plateau | R2   |
|------------|-----------|--------|---------|------|
| NGLY1_KO_1 | 51.68     | -0.07  | 0       | 1    |
| NGLY1_1    | 50.74     | -0.085 | 0       | 0.99 |
| NGLY1_KO_2 | 52        | -0.07  | 0       | 1    |
| NGLY1_2    | 51.13     | -0.091 | 0.03    | 1    |

Supplement: Supplementary file 2858 [file 1]

IPI00878288.1|ATG2A

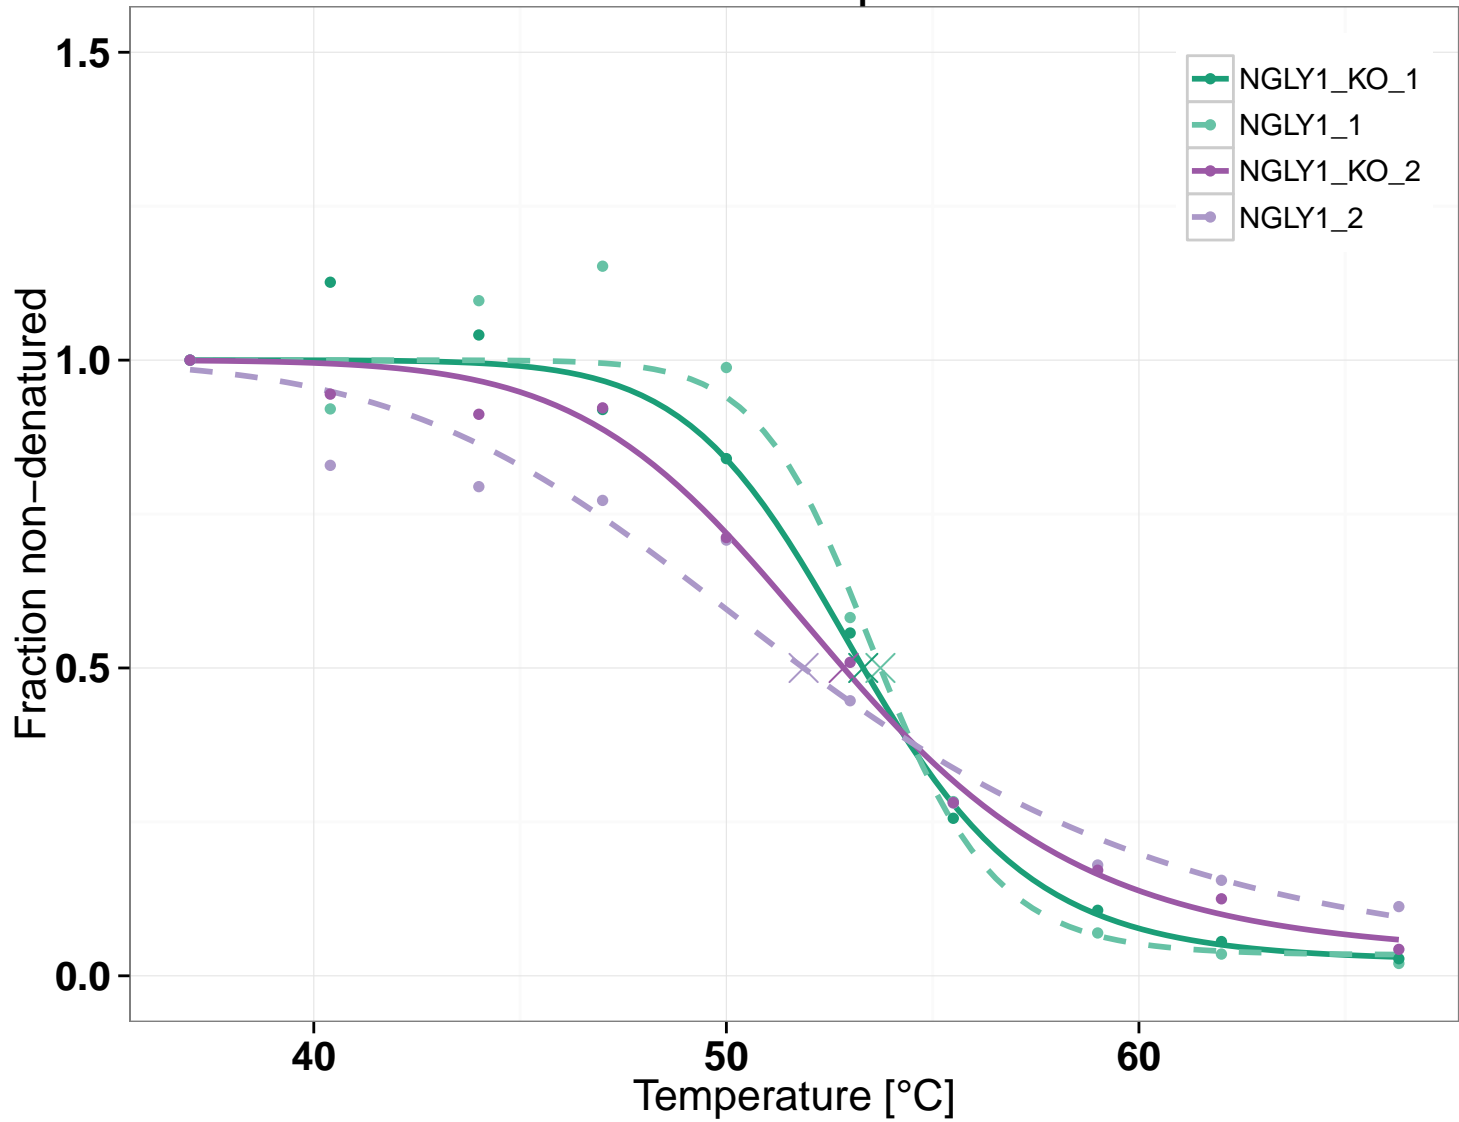

|            | meltPoint | slope  | plateau | R2   |
|------------|-----------|--------|---------|------|
| NGLY1_KO_1 | 53.32     | -0.12  | 0.02    | 0.99 |
| NGLY1_1    | 53.73     | -0.17  | 0.03    | 0.98 |
| NGLY1_KO_2 | 52.84     | -0.079 | 0.03    | 0.99 |
| NGLY1_2    | 51.87     | -0.052 | 0       | 0.96 |

Supplement: Supplementary file 2859 [file 1]

IPI00017730.1|SMAD5

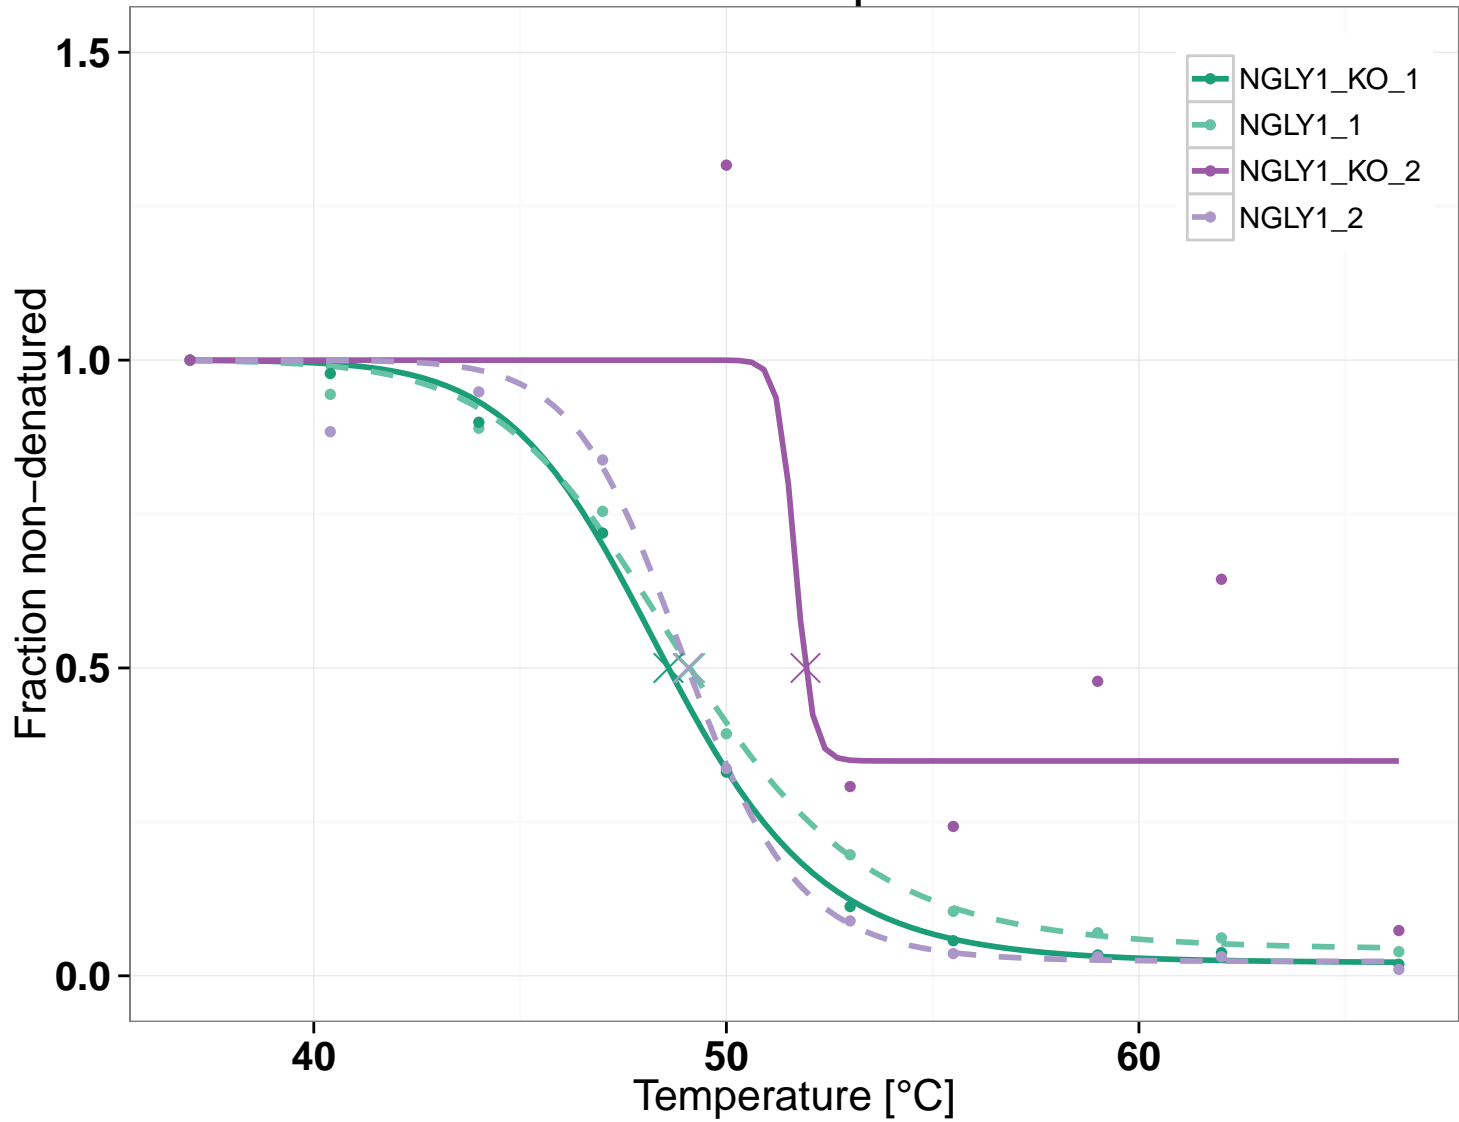

|            | meltPoint | slope | plateau | R2    |
|------------|-----------|-------|---------|-------|
| NGLY1_KO_1 | 48.6      | -0.13 | 0.02    | 1     |
| NGLY1_1    | 49.12     | -0.11 | 0.04    | 1     |
| NGLY1_KO_2 | 51.92     | -0.79 | 0.35    | -0.08 |
| NGLY1_2    | 49.06     | -0.18 | 0.02    | 0.99  |

Supplement: Supplementary file 2860 [file 1]

# IPI00023339.2|CREBBP

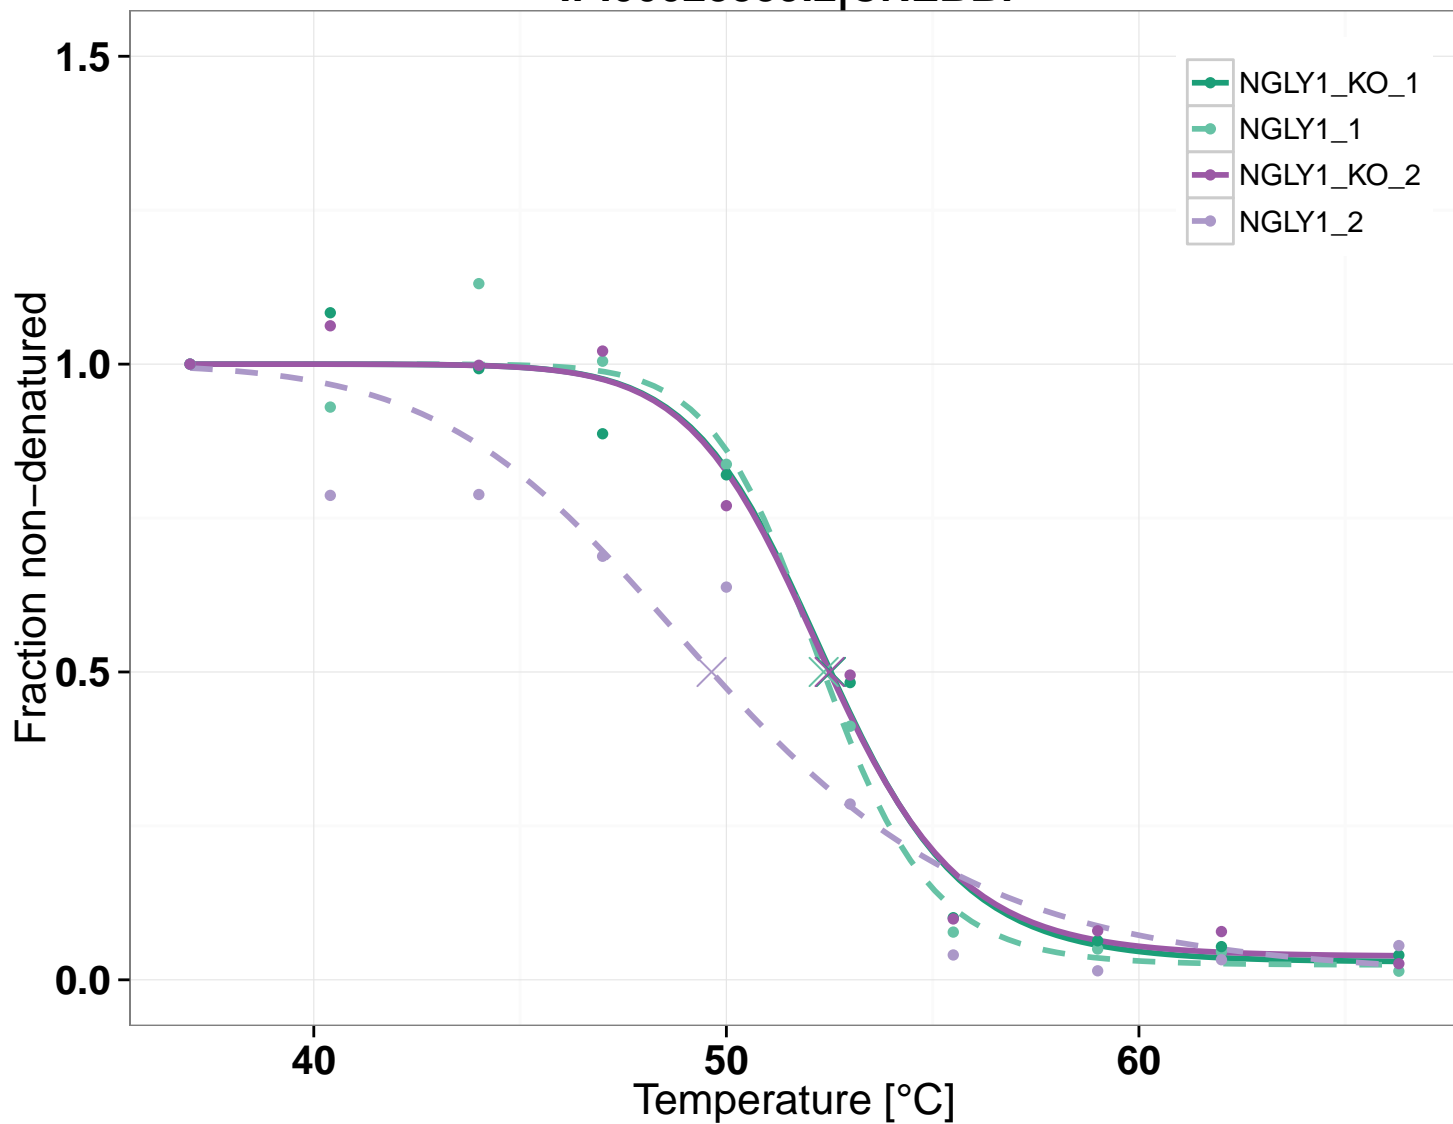

|            | meltPoint | slope  | plateau | R2   |
|------------|-----------|--------|---------|------|
| NGLY1_KO_1 | 52.53     | -0.15  | 0.03    | 0.99 |
| NGLY1_1    | 52.36     | -0.18  | 0.02    | 0.99 |
| NGLY1_KO_2 | 52.5      | -0.15  | 0.04    | 0.99 |
| NGLY1_2    | 49.64     | -0.076 | 0       | 0.93 |

Supplement: Supplementary file 2861 [file 1]

IPI00016284.1|GGNBP2

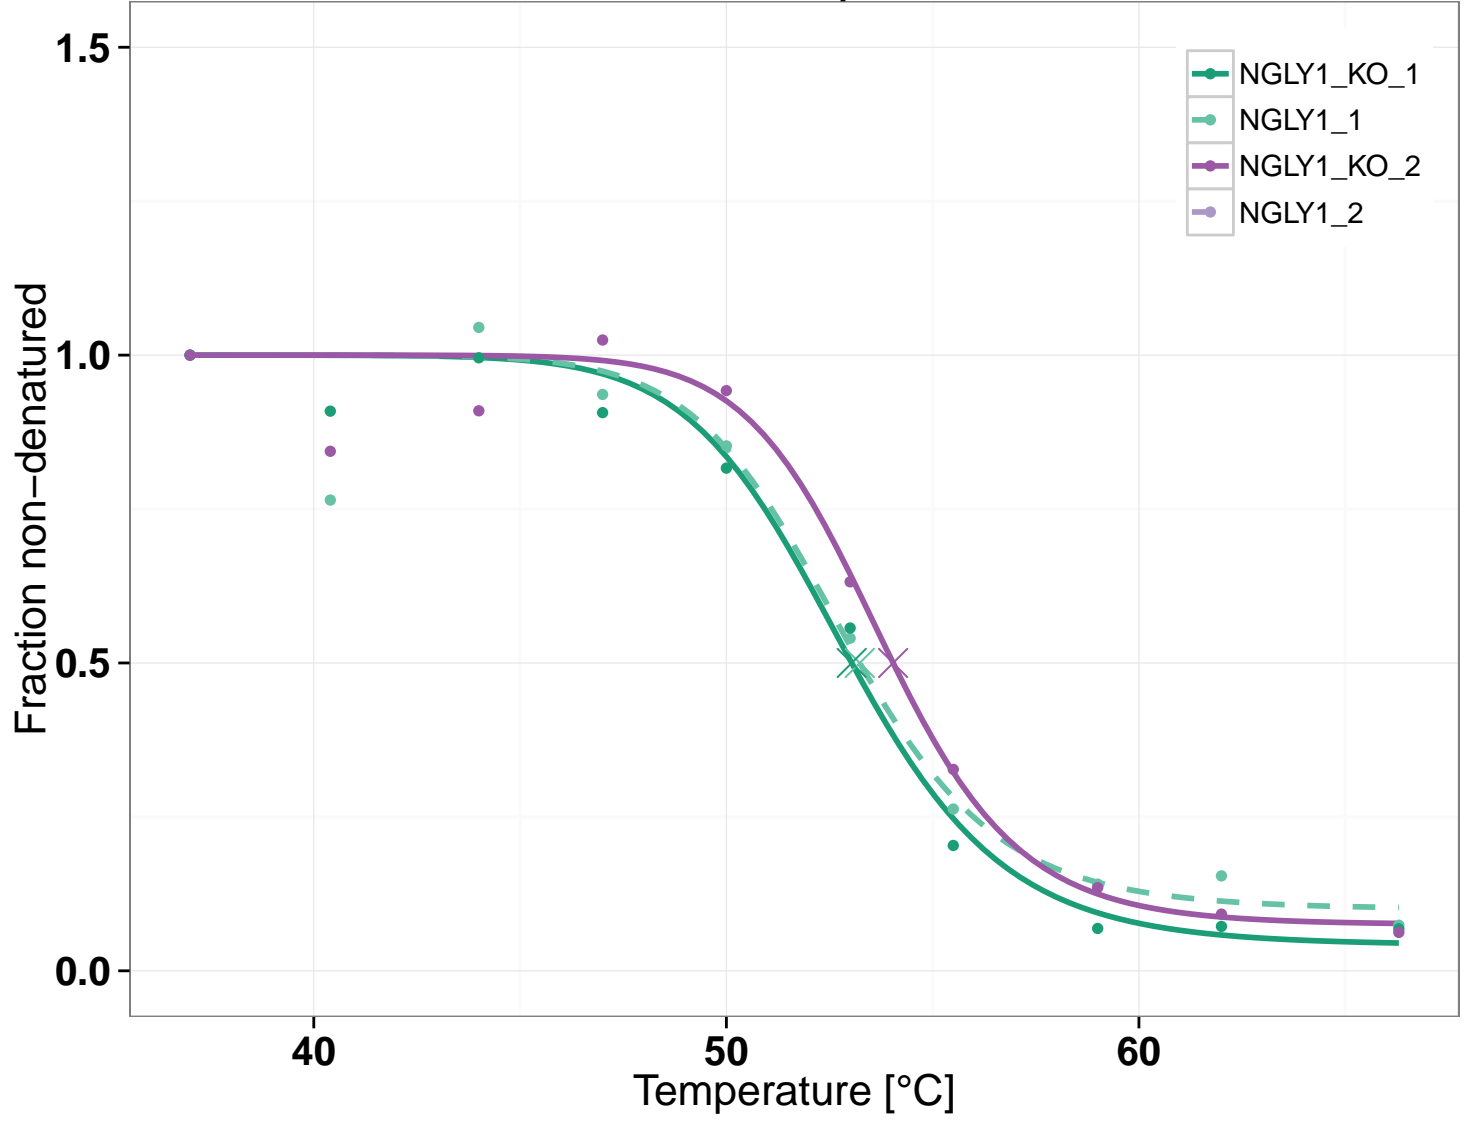

|            | meltPoint | slope | plateau | R2   |
|------------|-----------|-------|---------|------|
| NGLY1_KO_1 | 53.04     | -0.12 | 0.04    | 0.99 |
| NGLY1_1    | 53.23     | -0.12 | 0.1     | 0.95 |
| NGLY1_KO_2 | 54.04     | -0.14 | 0.07    | 0.98 |
| NGLY1_2    | -         | -     | -       | -    |

Supplement: Supplementary file 2862 [file 1]

# IPI00000115.1|CNIH4

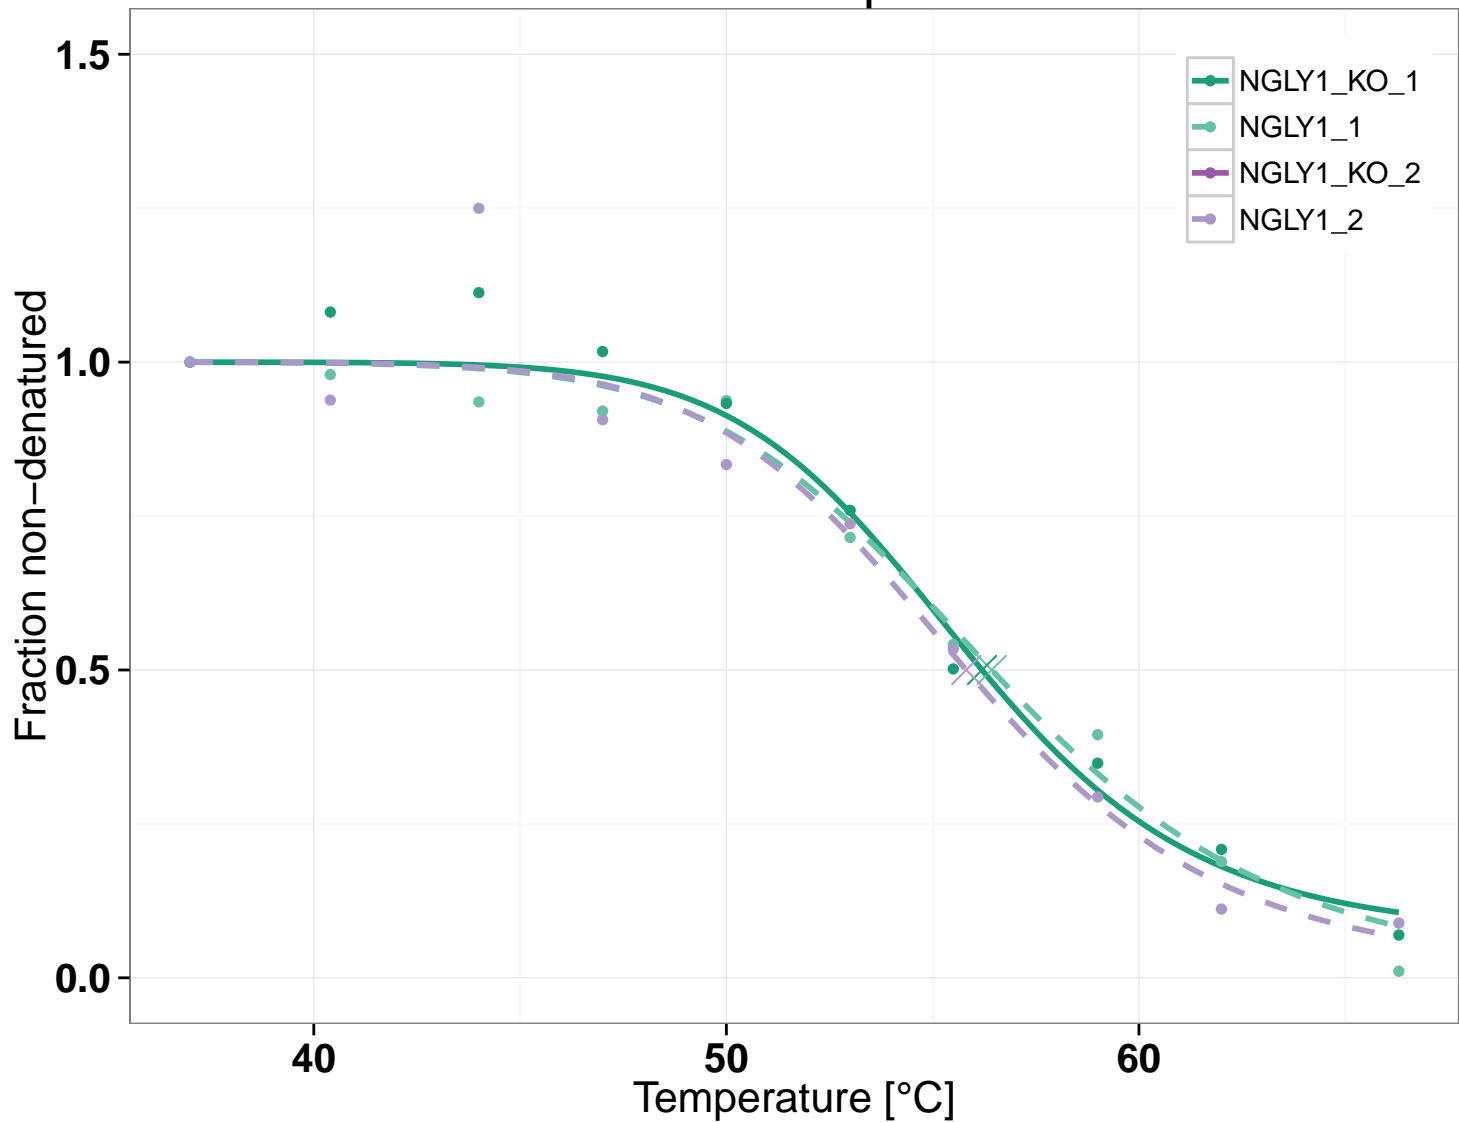

|            | meltPoint | slope  | plateau | R2   |
|------------|-----------|--------|---------|------|
| NGLY1_KO_1 | 56.2      | -0.083 | 0.07    | 0.98 |
| NGLY1_1    | 56.43     | -0.072 | 0       | 0.98 |
| NGLY1_KO_2 | -         | -      | -       | -    |
| NGLY1_2    | 55.81     | -0.079 | 0.01    | 0.94 |

Supplement: Supplementary file 2863 [file 1]

# IPI00016780.3|PRDM2

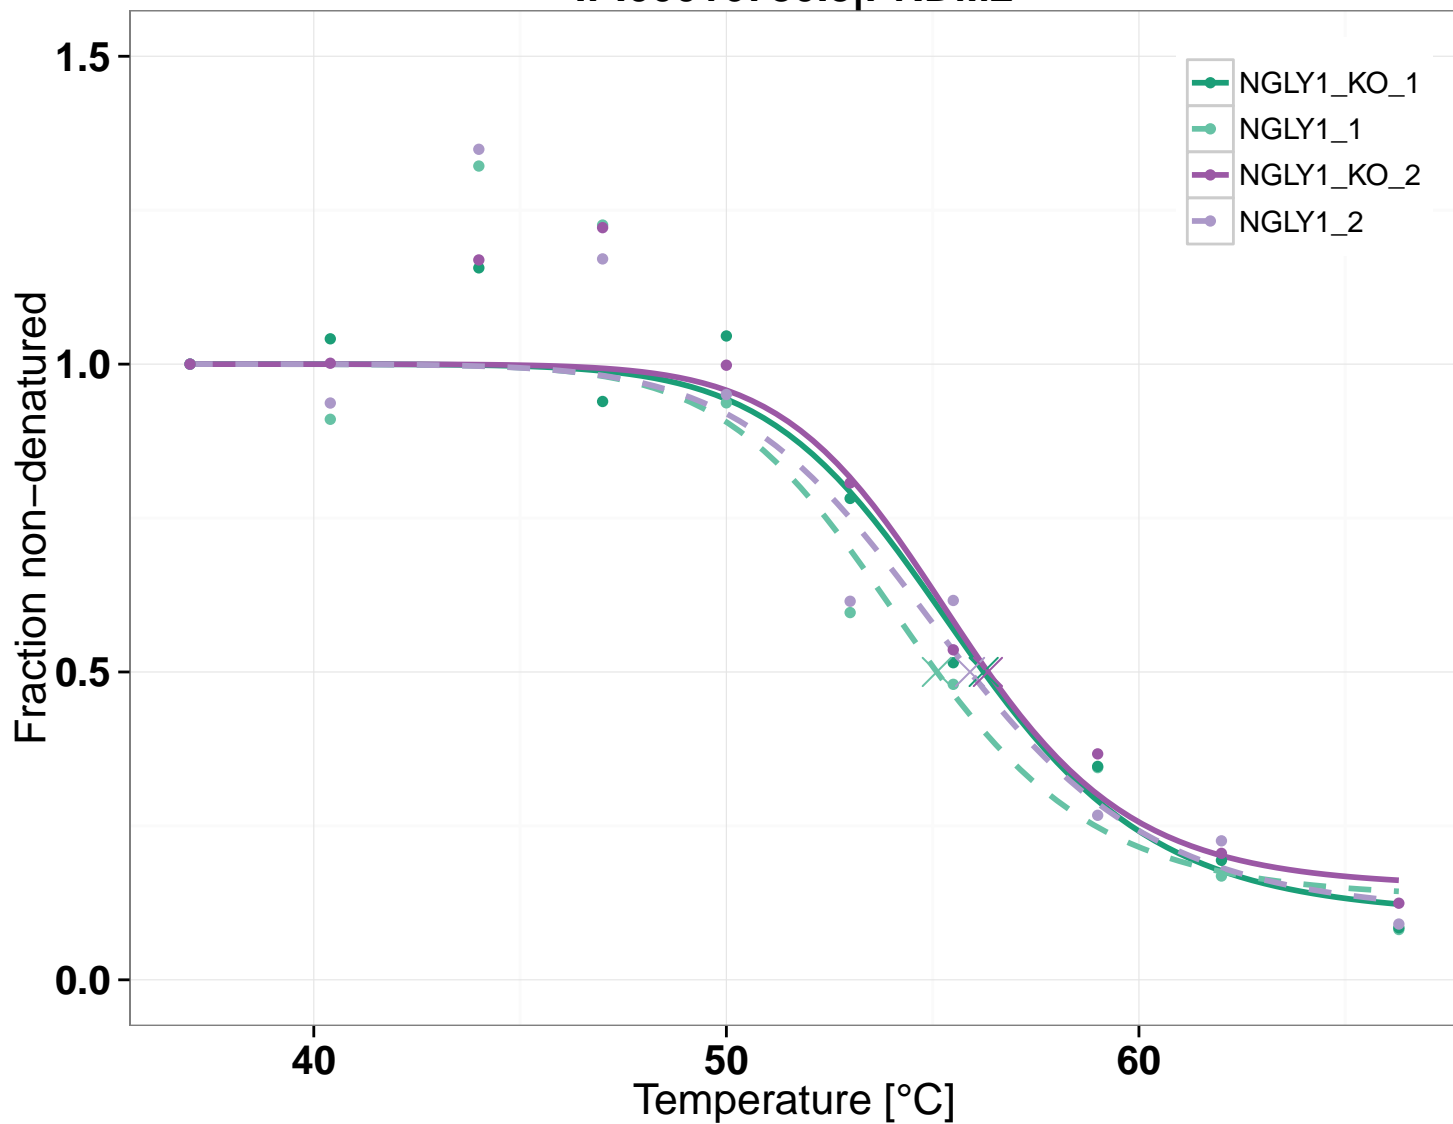

|            | meltPoint | slope  | plateau | R2   |
|------------|-----------|--------|---------|------|
| NGLY1_KO_1 | 56.24     | -0.096 | 0.1     | 0.97 |
| NGLY1_1    | 55.1      | -0.096 | 0.13    | 0.88 |
| NGLY1_KO_2 | 56.34     | -0.1   | 0.15    | 0.94 |
| NGLY1_2    | 55.91     | -0.089 | 0.1     | 0.88 |

Supplement: Supplementary file 2864 [file 1]

IPI00873904.1|GRIPAP1

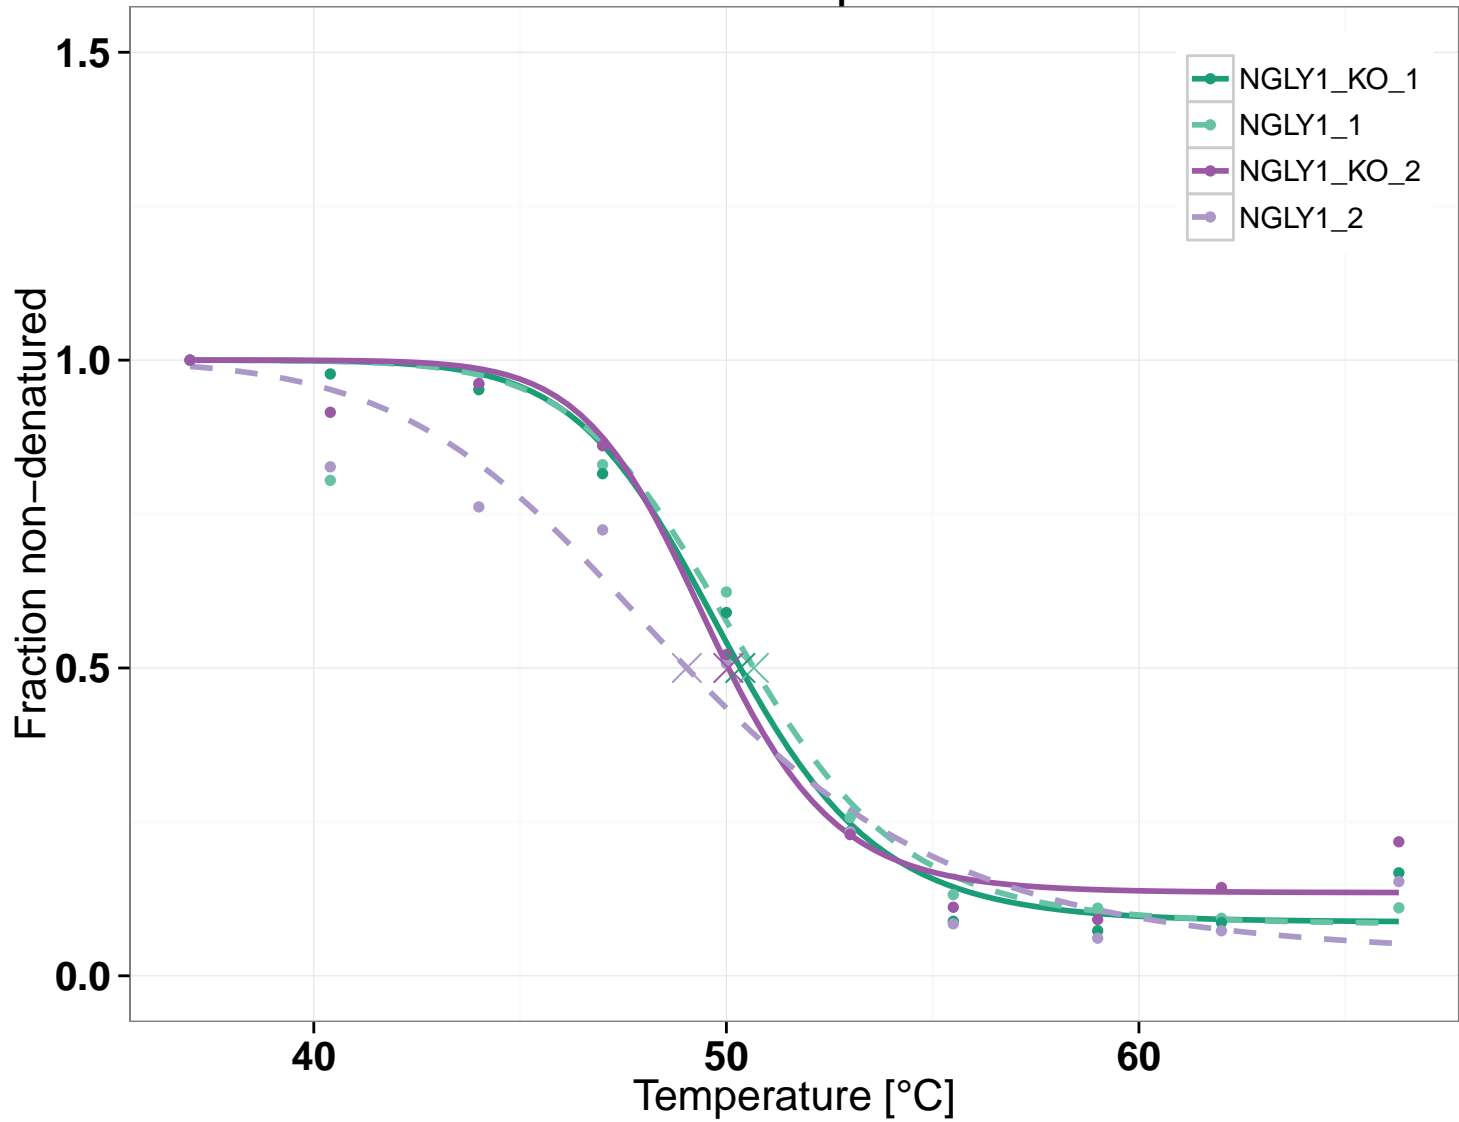

|            | meltPoint | slope  | plateau | R2   |
|------------|-----------|--------|---------|------|
| NGLY1_KO_1 | 50.34     | -0.12  | 0.09    | 0.99 |
| NGLY1_1    | 50.67     | -0.12  | 0.08    | 0.97 |
| NGLY1_KO_2 | 50.05     | -0.14  | 0.14    | 0.99 |
| NGLY1_2    | 49.04     | -0.072 | 0.03    | 0.95 |

Supplement: Supplementary file 2865 [file 1]

IPI00295394.2|COX11

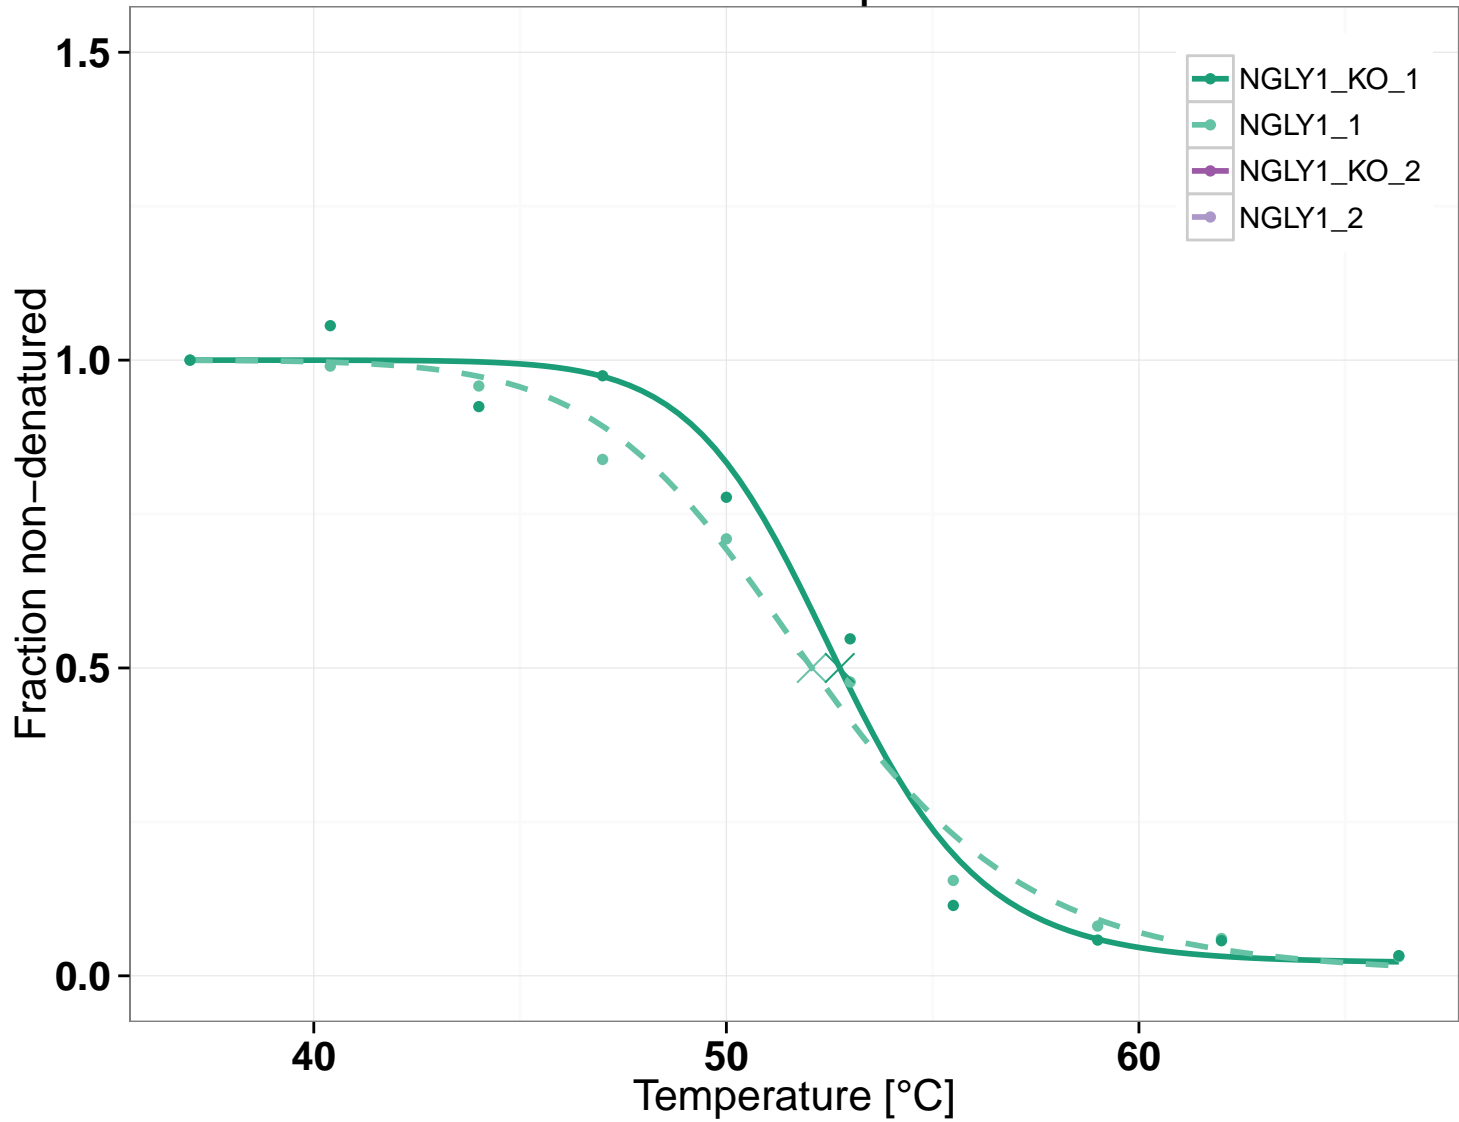

|            | meltPoint | slope  | plateau | R2   |
|------------|-----------|--------|---------|------|
| NGLY1_KO_1 | 52.75     | -0.14  | 0.02    | 0.99 |
| NGLY1_1    | 52.07     | -0.095 | 0       | 0.99 |
| NGLY1_KO_2 | -         | -      | -       | -    |
| NGLY1_2    | -         | -      | -       | -    |

Supplement: Supplementary file 2866 [file 1]

IPI00791325.1|KIAA0020

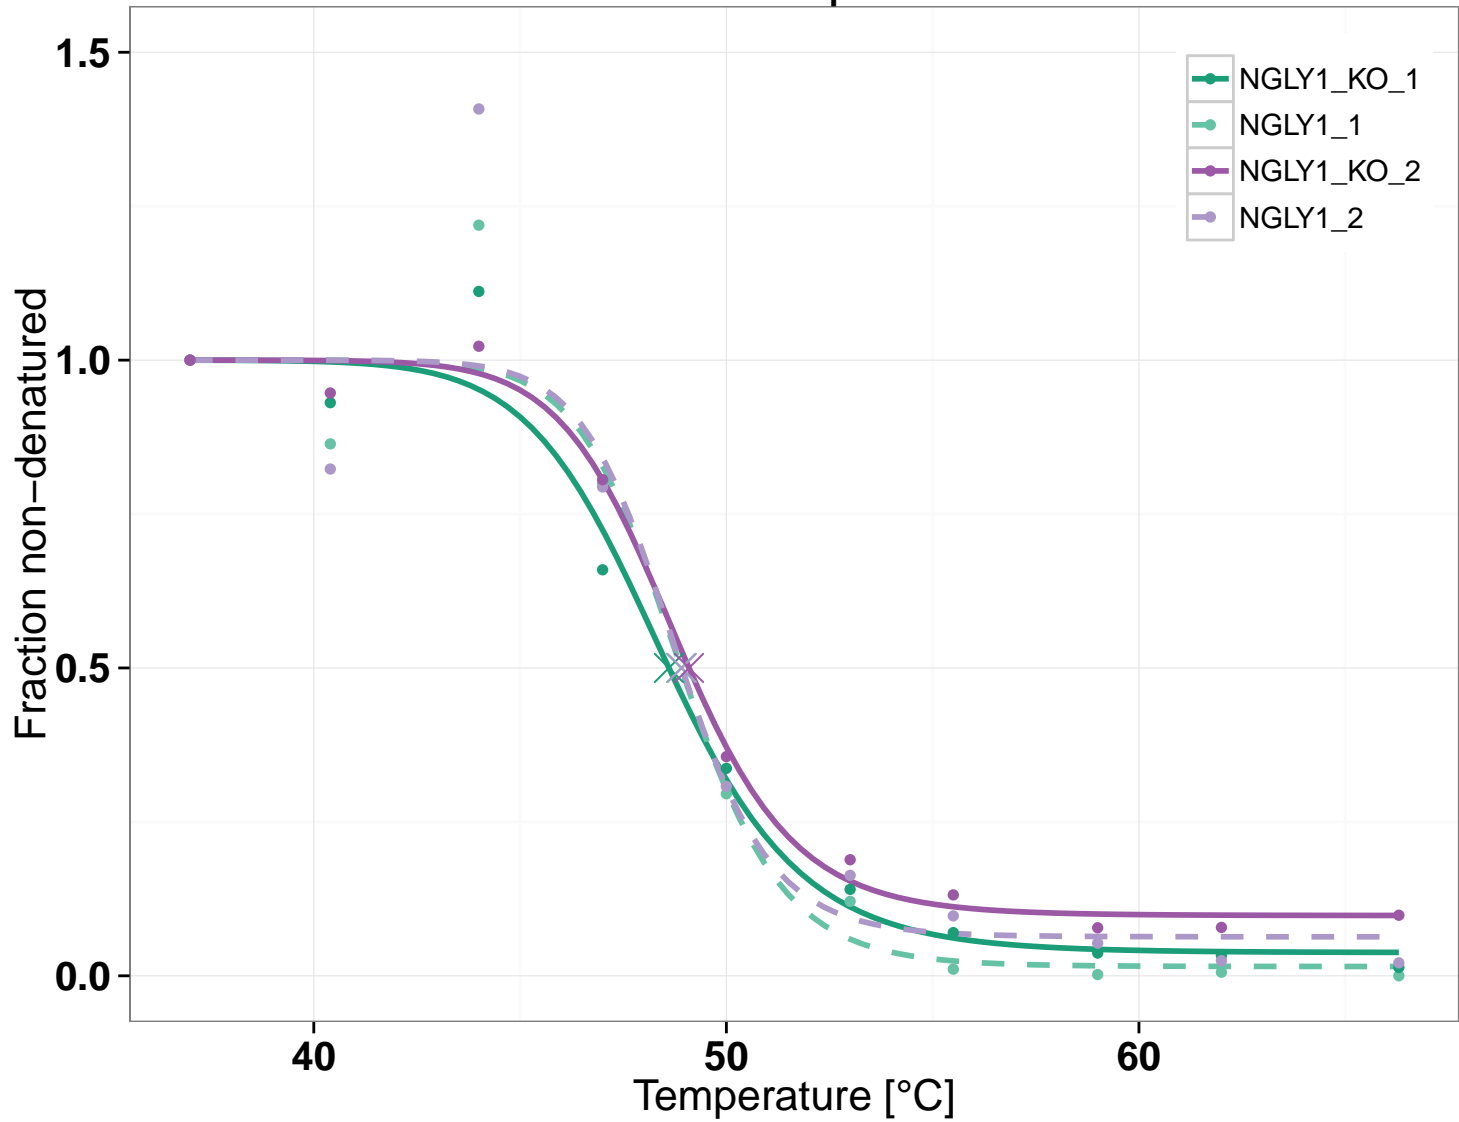

|            | meltPoint | slope | plateau | R2   |
|------------|-----------|-------|---------|------|
| NGLY1_KO_1 | 48.61     | -0.14 | 0.04    | 0.98 |
| NGLY1_1    | 48.9      | -0.2  | 0.02    | 0.96 |
| NGLY1_KO_2 | 49.09     | -0.16 | 0.1     | 1    |
| NGLY1_2    | 48.92     | -0.2  | 0.06    | 0.9  |

Supplement: Supplementary file 2867 [file 1]

IPI00004472.1|WNK1

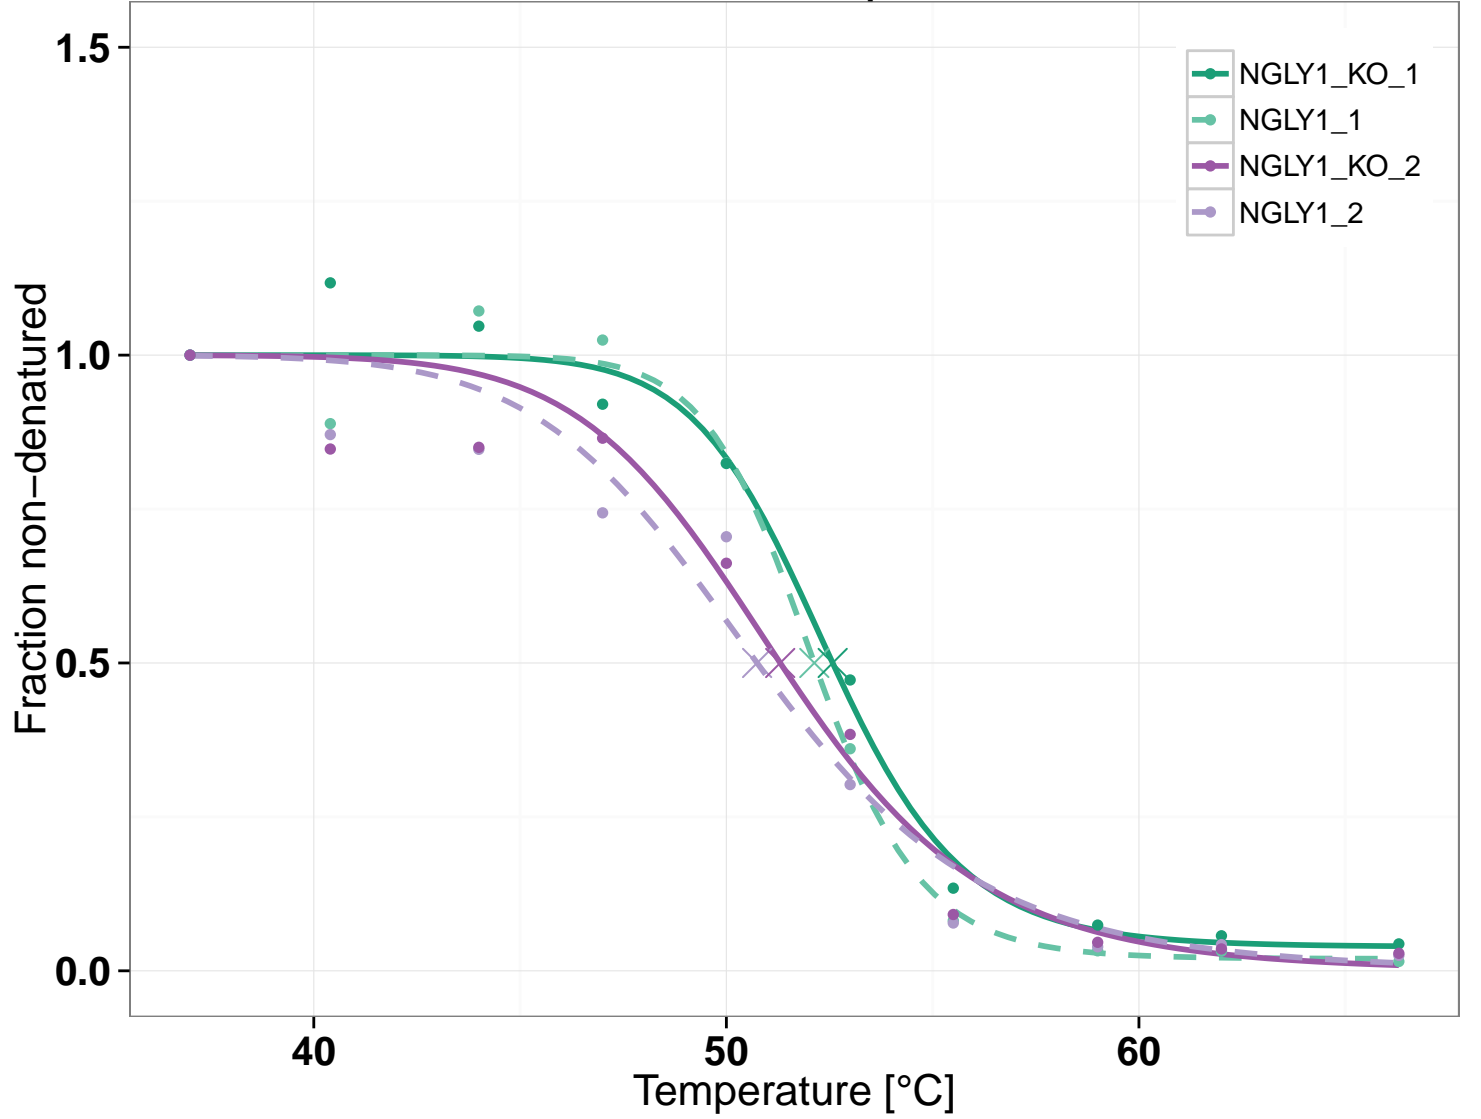

|            | meltPoint | slope  | plateau | R2   |
|------------|-----------|--------|---------|------|
| NGLY1_KO_1 | 52.58     | -0.15  | 0.04    | 0.99 |
| NGLY1_1    | 52.13     | -0.19  | 0.02    | 0.99 |
| NGLY1_KO_2 | 51.31     | -0.1   | 0       | 0.97 |
| NGLY1_2    | 50.75     | -0.092 | 0       | 0.96 |

Supplement: Supplementary file 2868 [file 1]

# IPI00160448.5|MAP1D

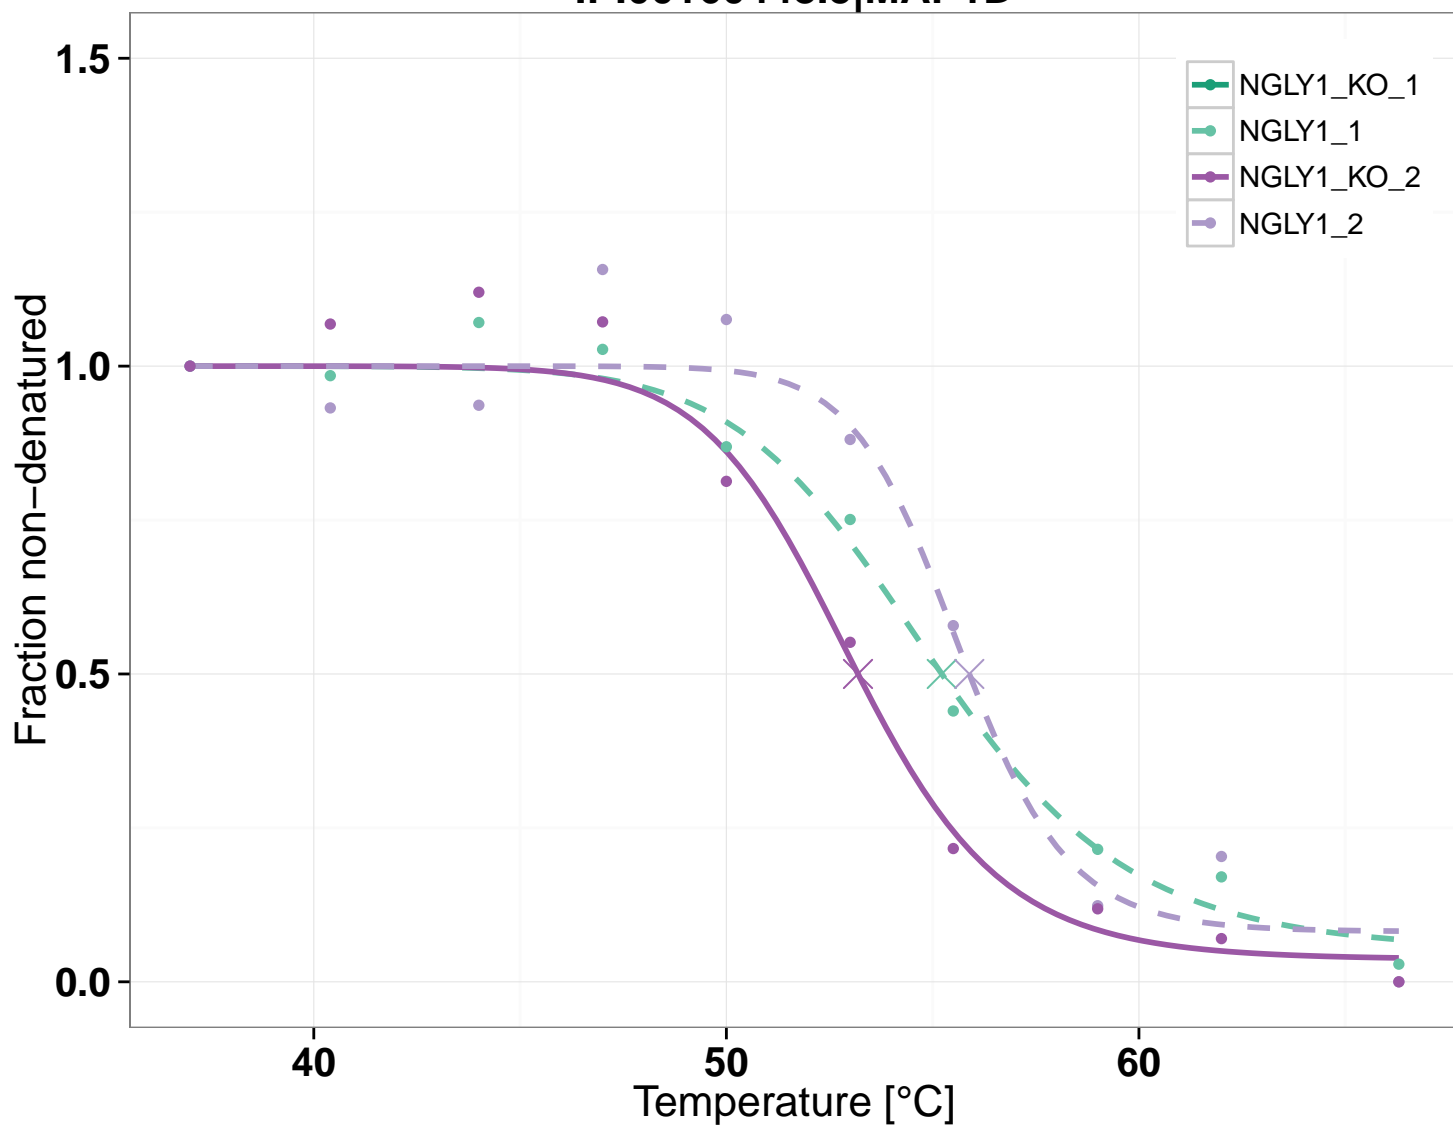

|            | meltPoint | slope  | plateau | R2   |
|------------|-----------|--------|---------|------|
| NGLY1_KO_1 | –         | –      | –       | –    |
| NGLY1_1    | 55.22     | –0.099 | 0.05    | 0.99 |
| NGLY1_KO_2 | 53.19     | –0.13  | 0.04    | 0.98 |
| NGLY1_2    | 55.89     | –0.18  | 0.08    | 0.96 |

Supplement: Supplementary file 2869 [file 1]

IPI00397994.4|LOC389203

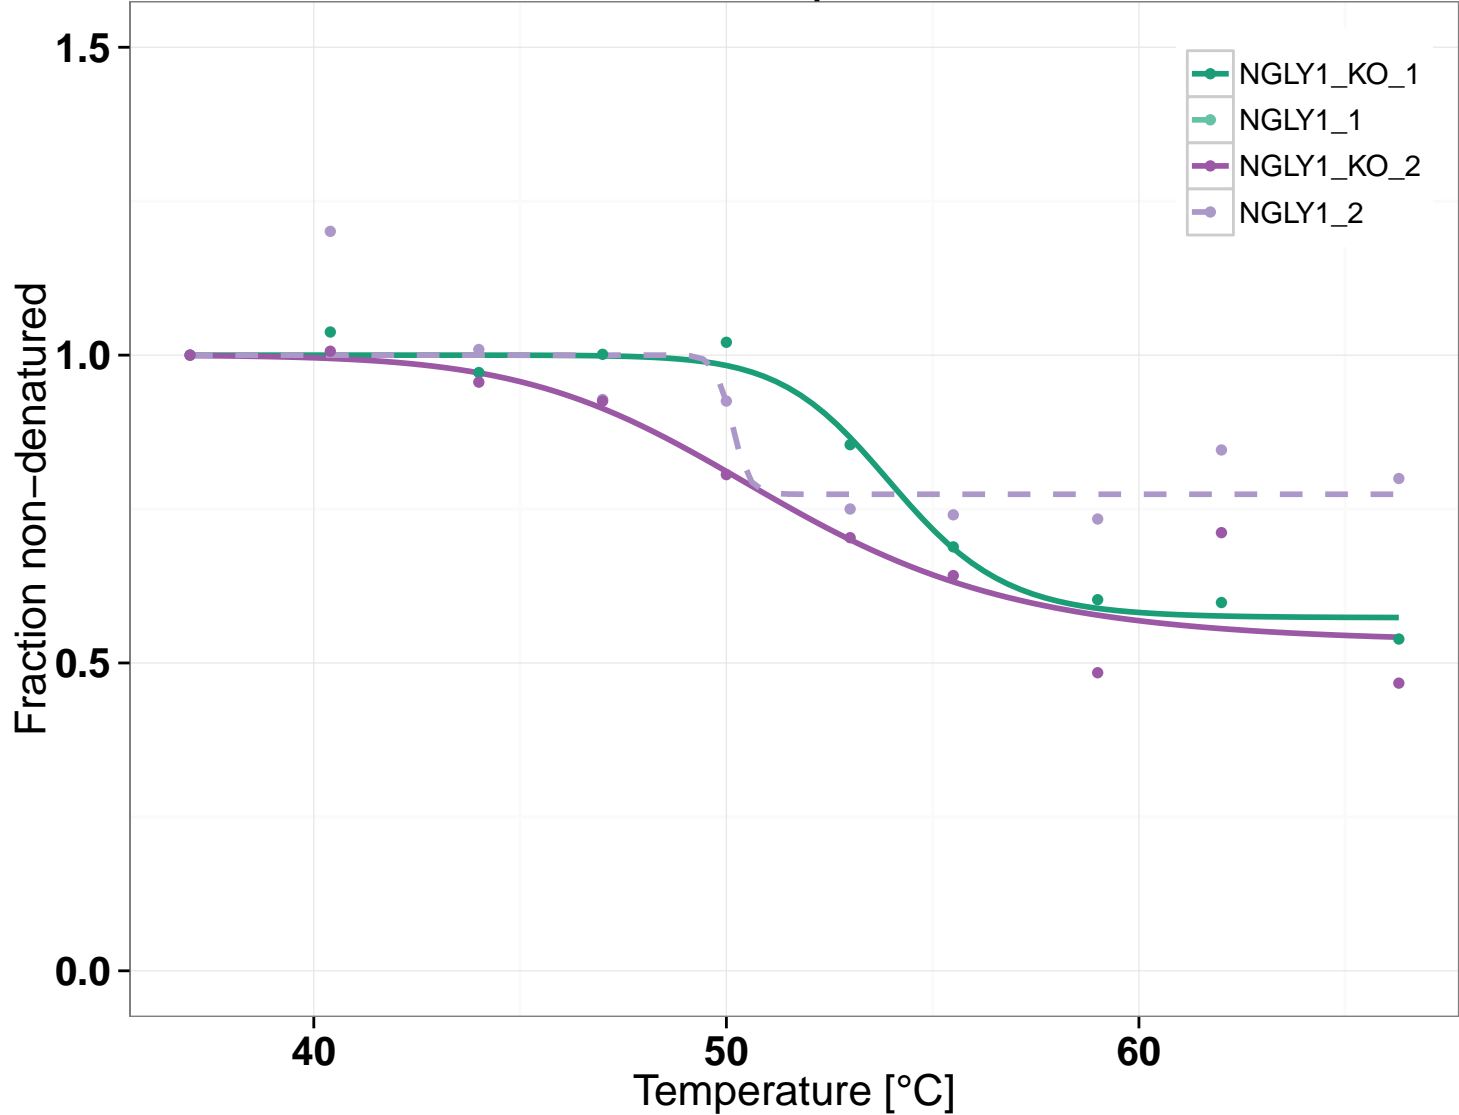

|            | meltPoint | slope  | plateau | R2   |
|------------|-----------|--------|---------|------|
| NGLY1_KO_1 | —         | -0.078 | 0.57    | 0.98 |
| NGLY1_1    | —         | —      | —       | —    |
| NGLY1_KO_2 | —         | -0.039 | 0.53    | 0.89 |
| NGLY1_2    | —         | -0.28  | 0.77    | 0.73 |

Supplement: Supplementary file 2870 [file 1]

# IPI00219919.2|DMAP1

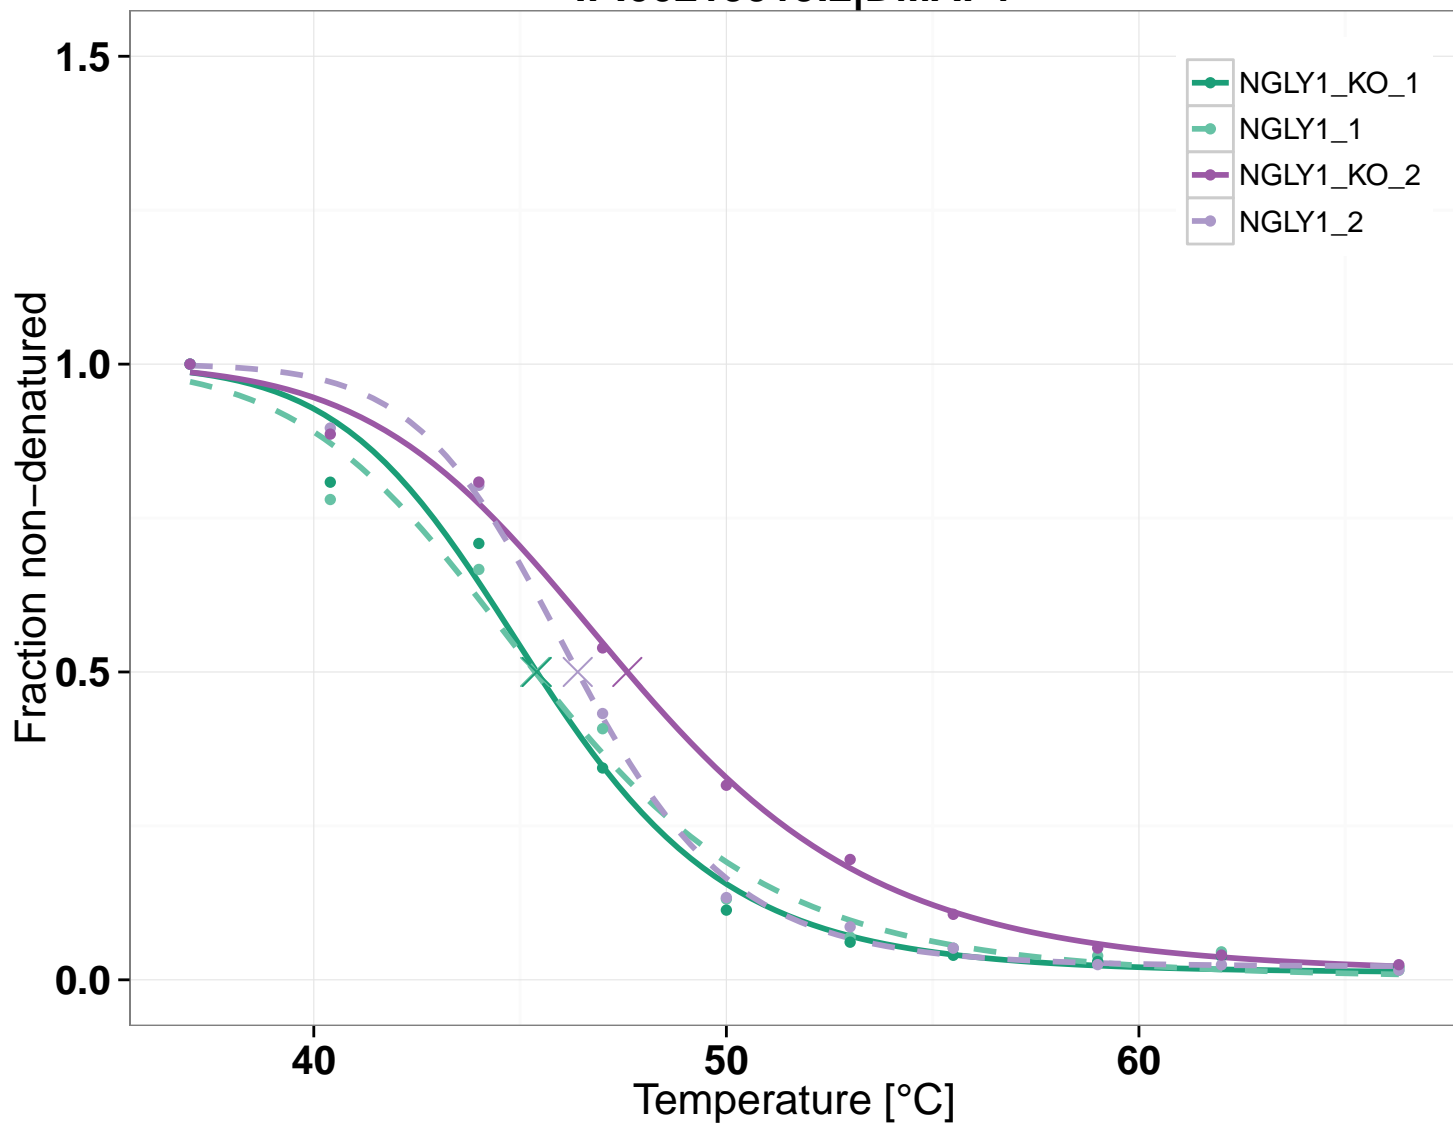

|            | meltPoint | slope  | plateau | R2   |
|------------|-----------|--------|---------|------|
| NGLY1_KO_1 | 45.4      | -0.1   | 0.01    | 0.99 |
| NGLY1_1    | 45.36     | -0.087 | 0       | 0.98 |
| NGLY1_KO_2 | 47.6      | -0.08  | 0.01    | 1    |
| NGLY1_2    | 46.4      | -0.13  | 0.02    | 0.99 |

Supplement: Supplementary file 2871 [file 1]

IPI00219110.7|FREQ

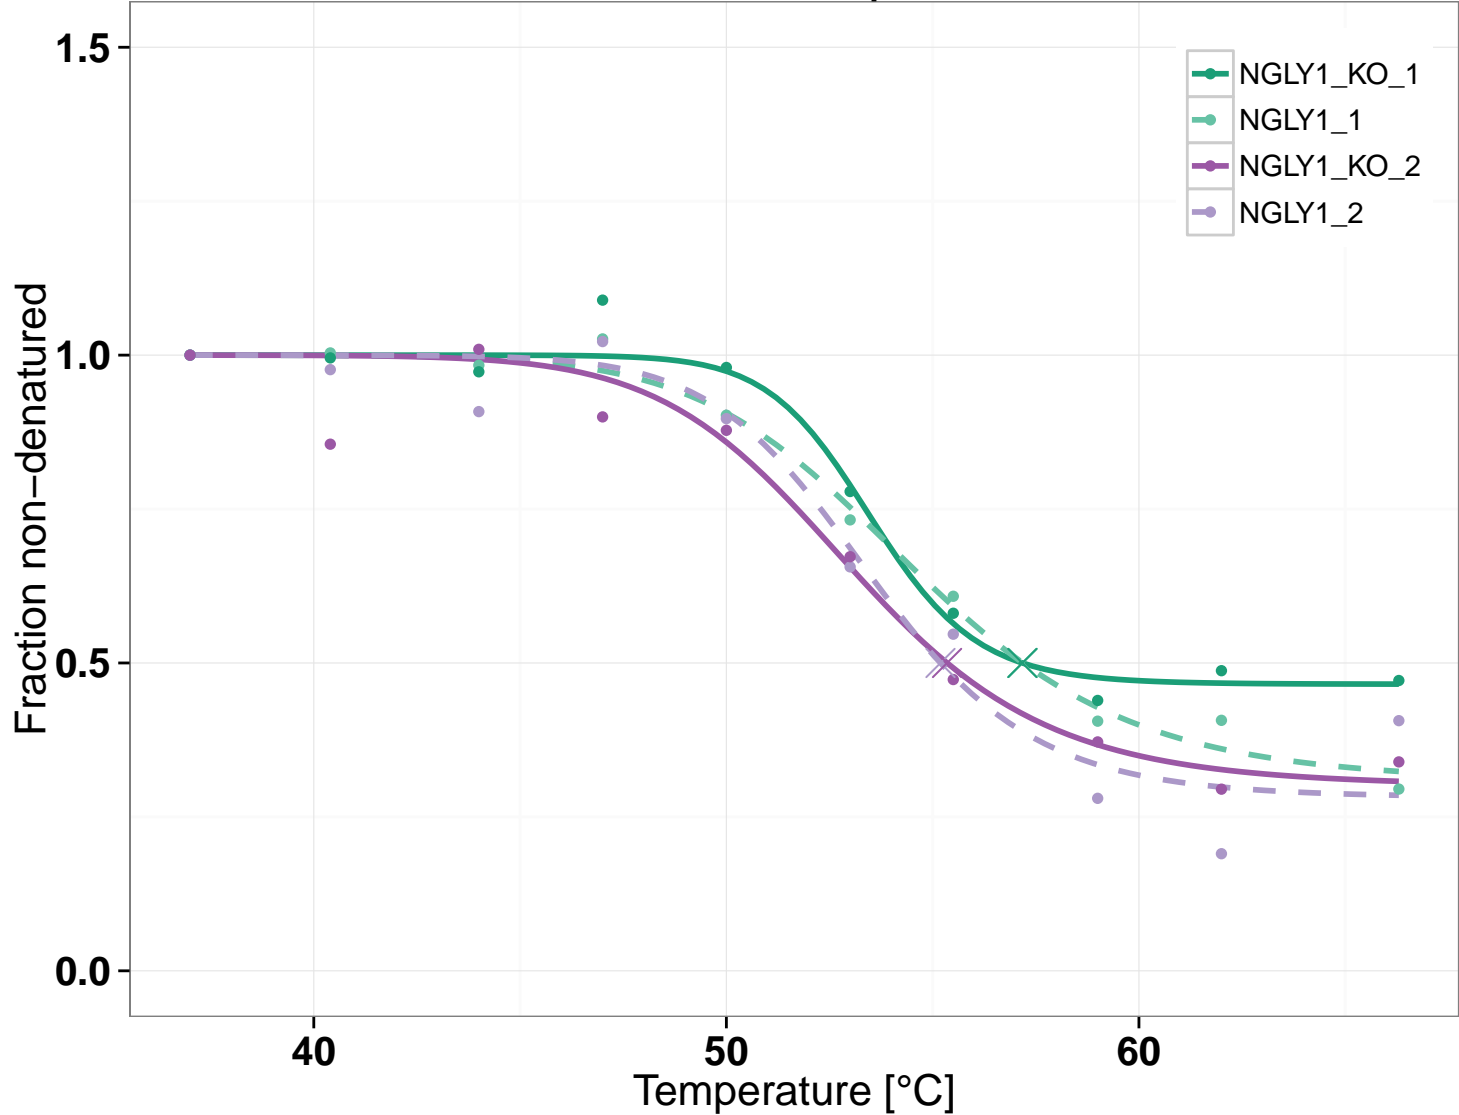

|            | meltPoint | slope  | plateau | R2   |
|------------|-----------|--------|---------|------|
| NGLY1_KO_1 | 57.17     | -0.11  | 0.47    | 0.98 |
| NGLY1_1    | 57.19     | -0.066 | 0.31    | 0.99 |
| NGLY1_KO_2 | 55.35     | -0.074 | 0.3     | 0.96 |
| NGLY1_2    | 55.19     | -0.091 | 0.28    | 0.95 |

Supplement: Supplementary file 2872 [file 1]

IPI00383089.1|Q8WWH6\_HUMAN

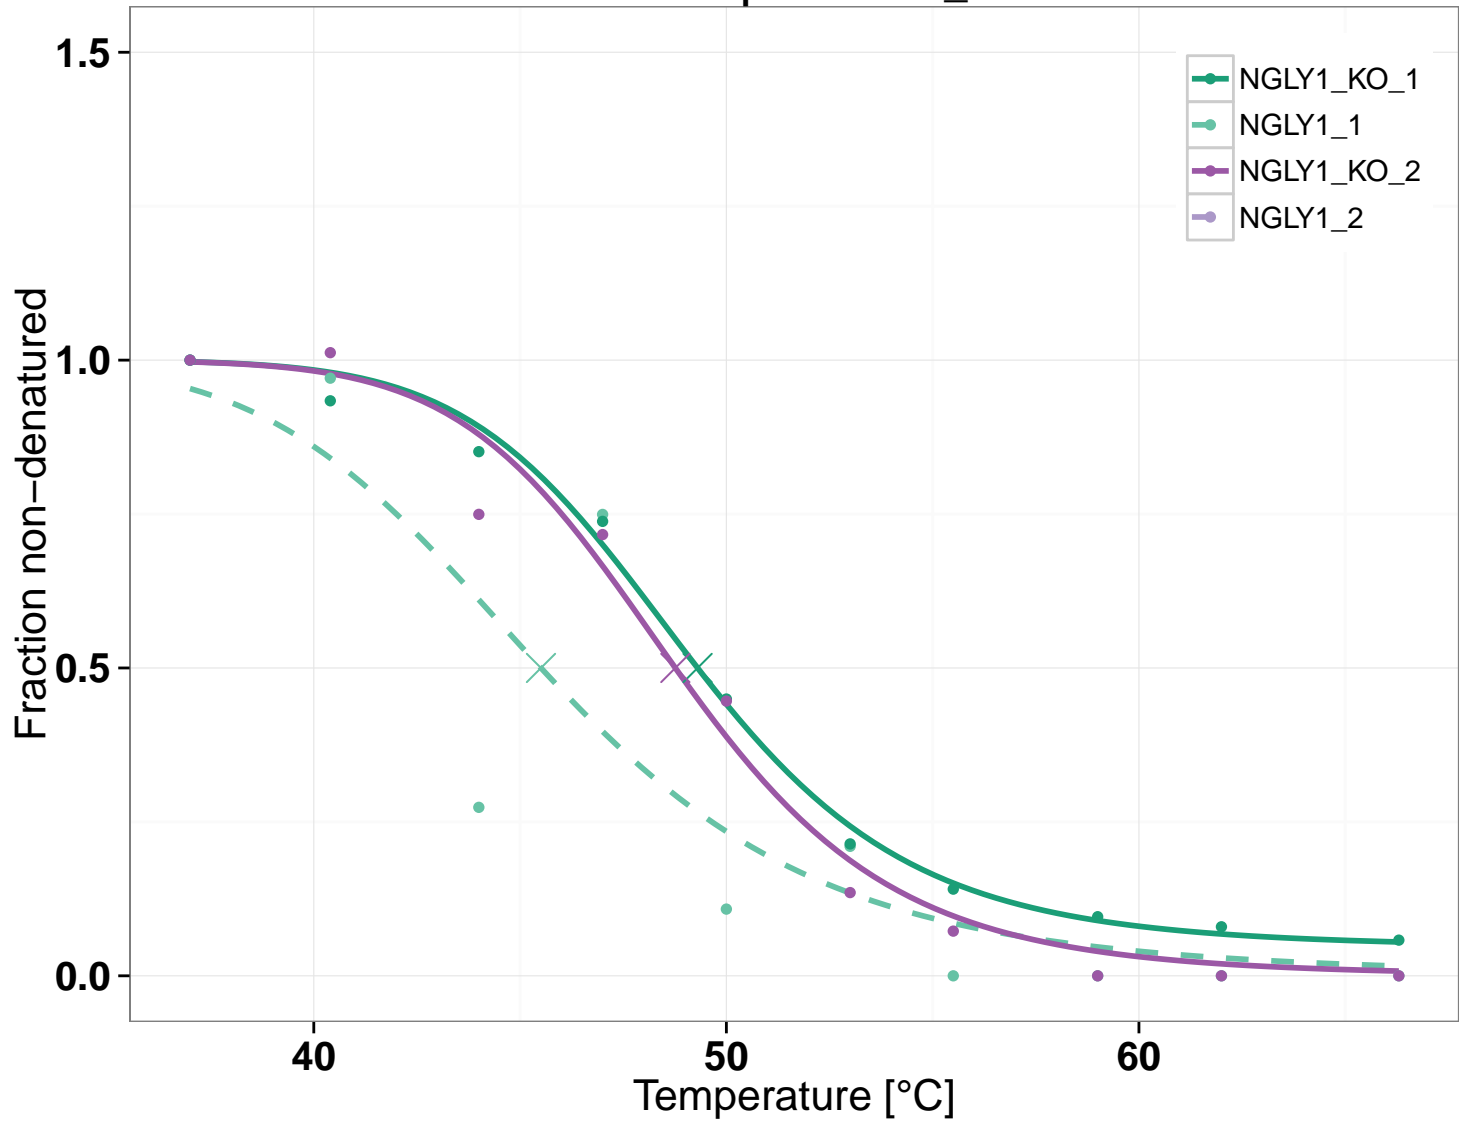

|            | meltPoint | slope  | plateau | R2   |
|------------|-----------|--------|---------|------|
| NGLY1_KO_1 | 49.3      | -0.089 | 0.05    | 1    |
| NGLY1_1    | 45.51     | -0.074 | 0       | 0.81 |
| NGLY1_KO_2 | 48.76     | -0.095 | 0       | 0.98 |
| NGLY1_2    | -         | -      | -       | -    |

Supplement: Supplementary file 2873 [file 1]

IPI00004524.1|GCA

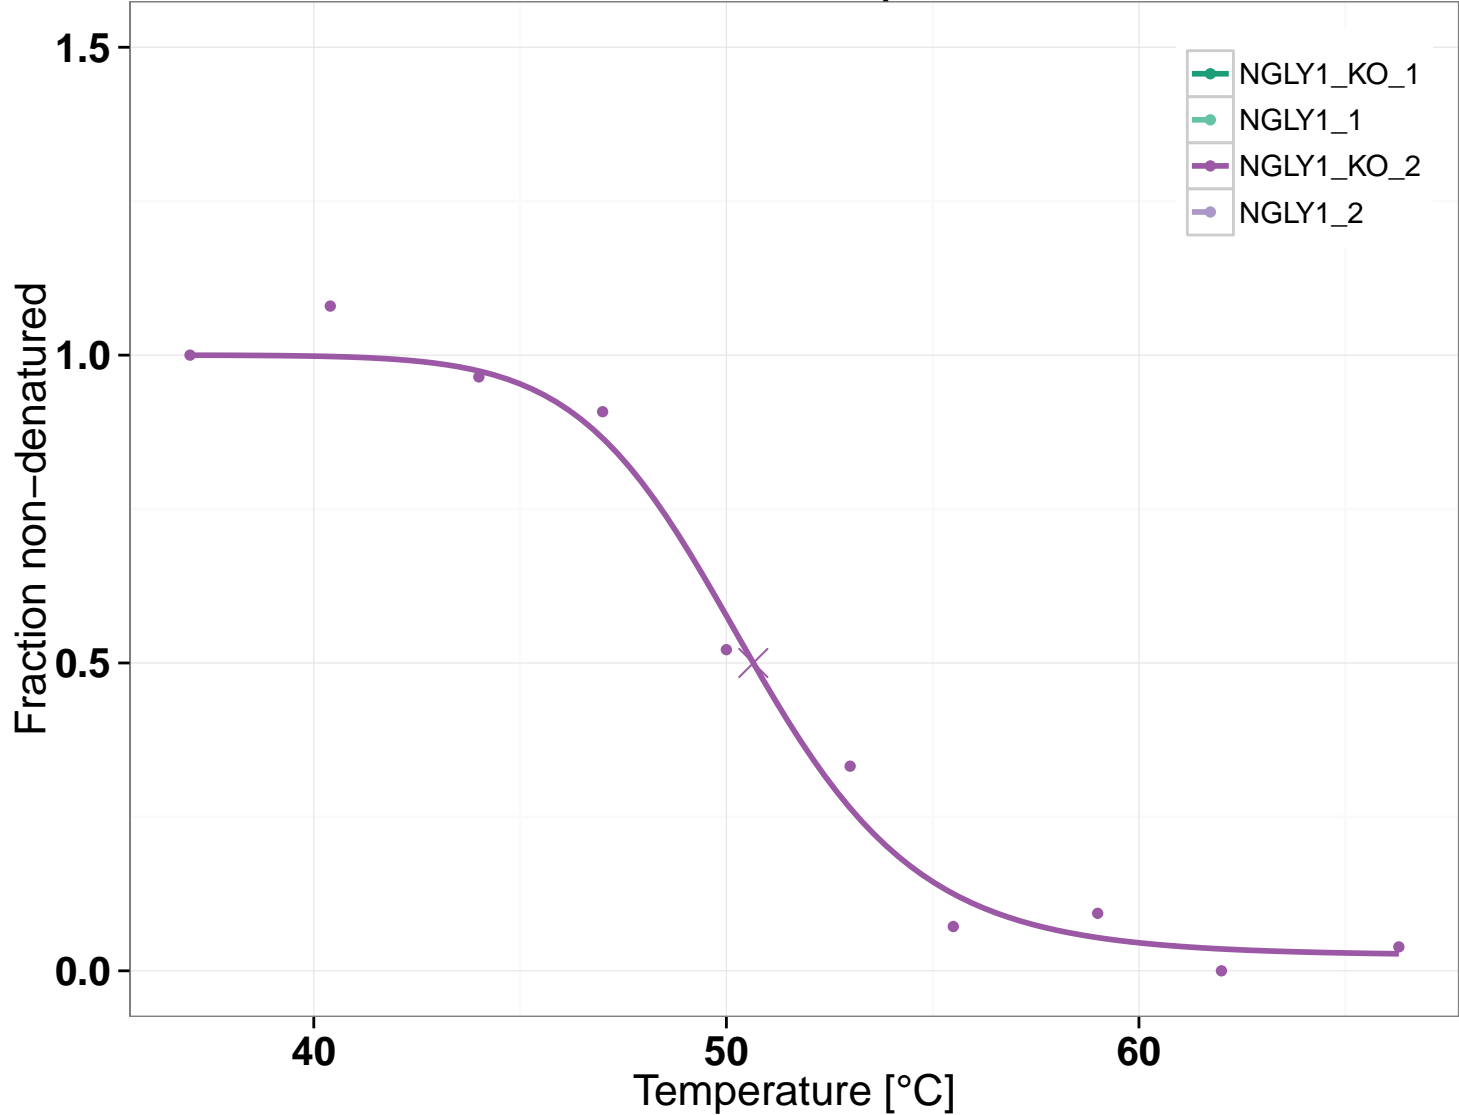

|            | meltPoint | slope | plateau | R2   |
|------------|-----------|-------|---------|------|
| NGLY1_KO_1 | -         | -     | -       | -    |
| NGLY1_1    | -         | -     | -       | -    |
| NGLY1_KO_2 | 50.65     | -0.12 | 0.02    | 0.99 |
| NGLY1_2    | -         | -     | -       | -    |

Supplement: Supplementary file 2874 [file 1]

IPI00642971.3|EEF1D

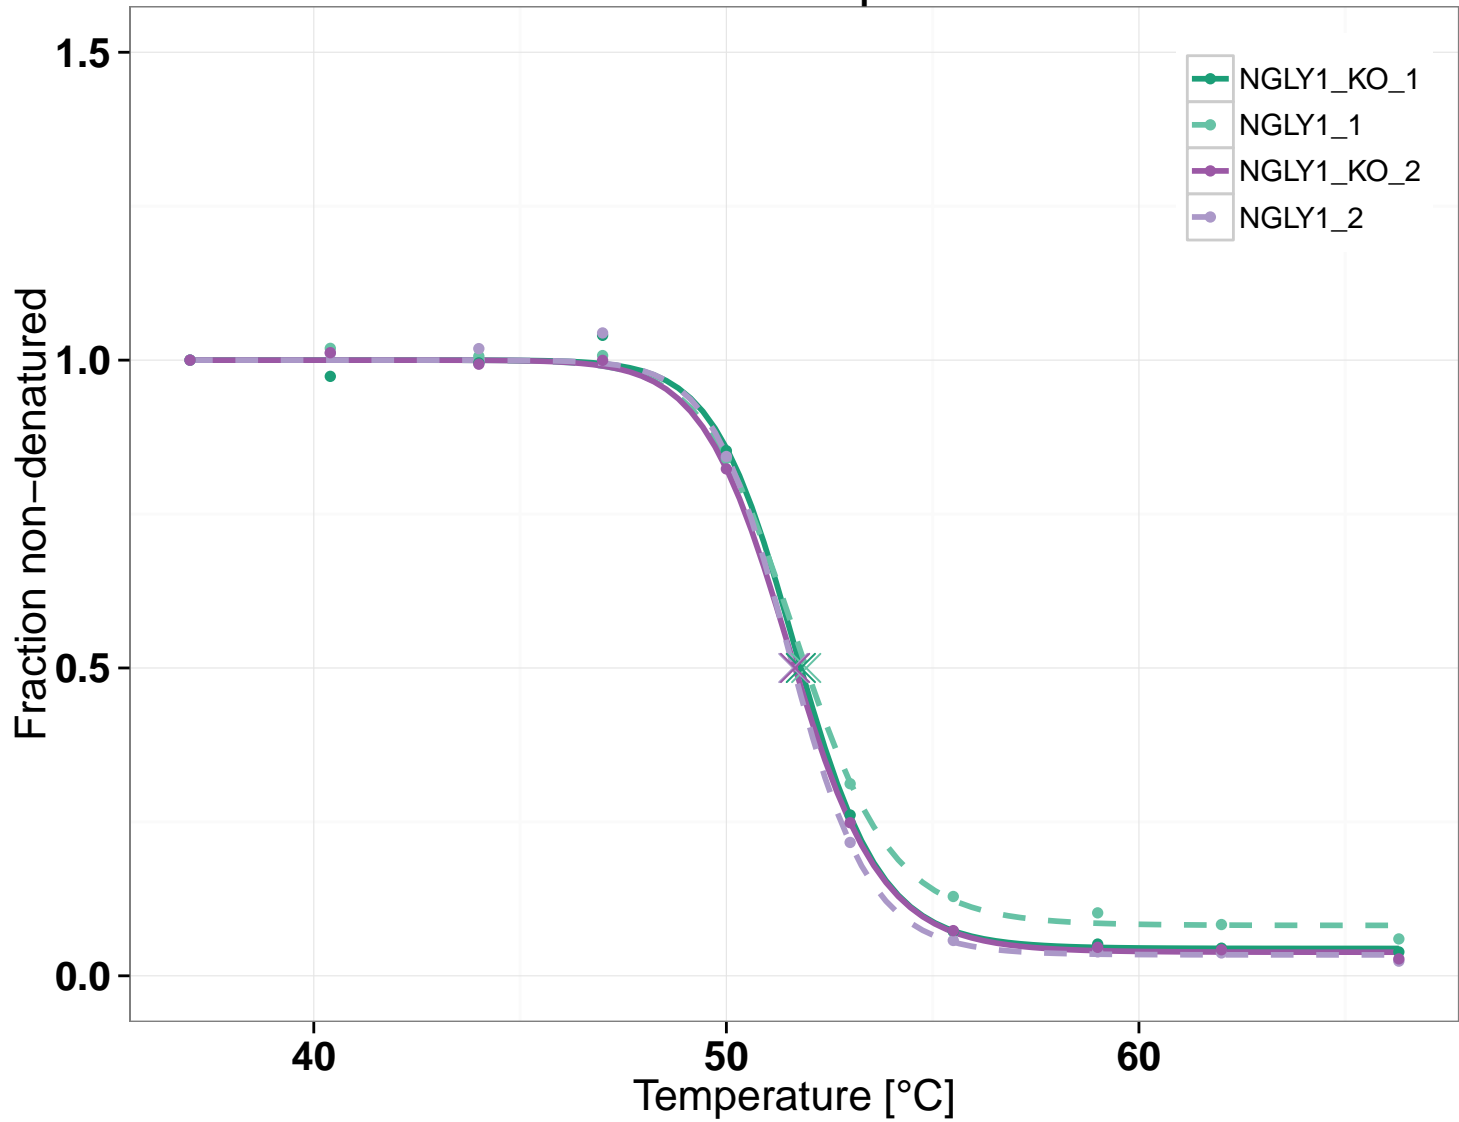

|            | meltPoint | slope | plateau | R2 |
|------------|-----------|-------|---------|----|
| NGLY1_KO_1 | 51.81     | -0.24 | 0.04    | 1  |
| NGLY1_1    | 51.94     | -0.2  | 0.08    | 1  |
| NGLY1_KO_2 | 51.67     | -0.22 | 0.04    | 1  |
| NGLY1_2    | 51.62     | -0.25 | 0.03    | 1  |

Supplement: Supplementary file 2875 [file 1]

IPI00783118.2|NT5DC2

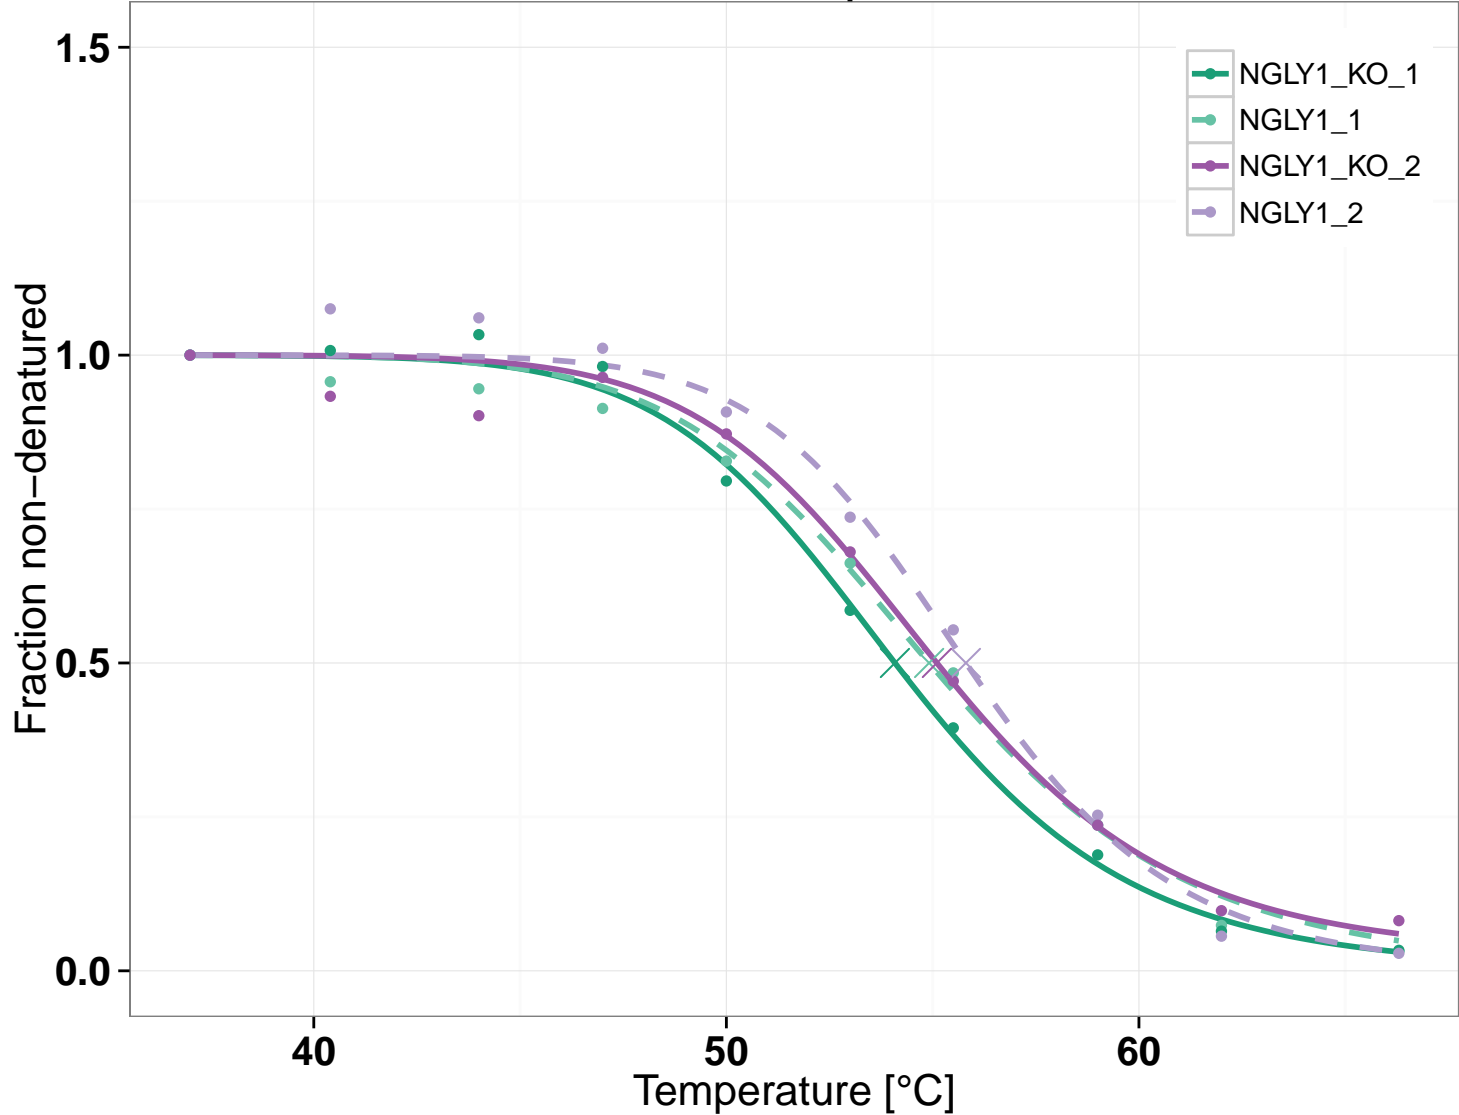

|            | meltPoint | slope  | plateau | R2   |
|------------|-----------|--------|---------|------|
| NGLY1_KO_1 | 54.09     | -0.088 | 0       | 1    |
| NGLY1_1    | 54.91     | -0.08  | 0       | 0.99 |
| NGLY1_KO_2 | 55.1      | -0.085 | 0.02    | 0.99 |
| NGLY1_2    | 55.81     | -0.099 | 0       | 0.99 |

Supplement: Supplementary file 2876 [file 1]

# IPI00332106.2|PBXIP1

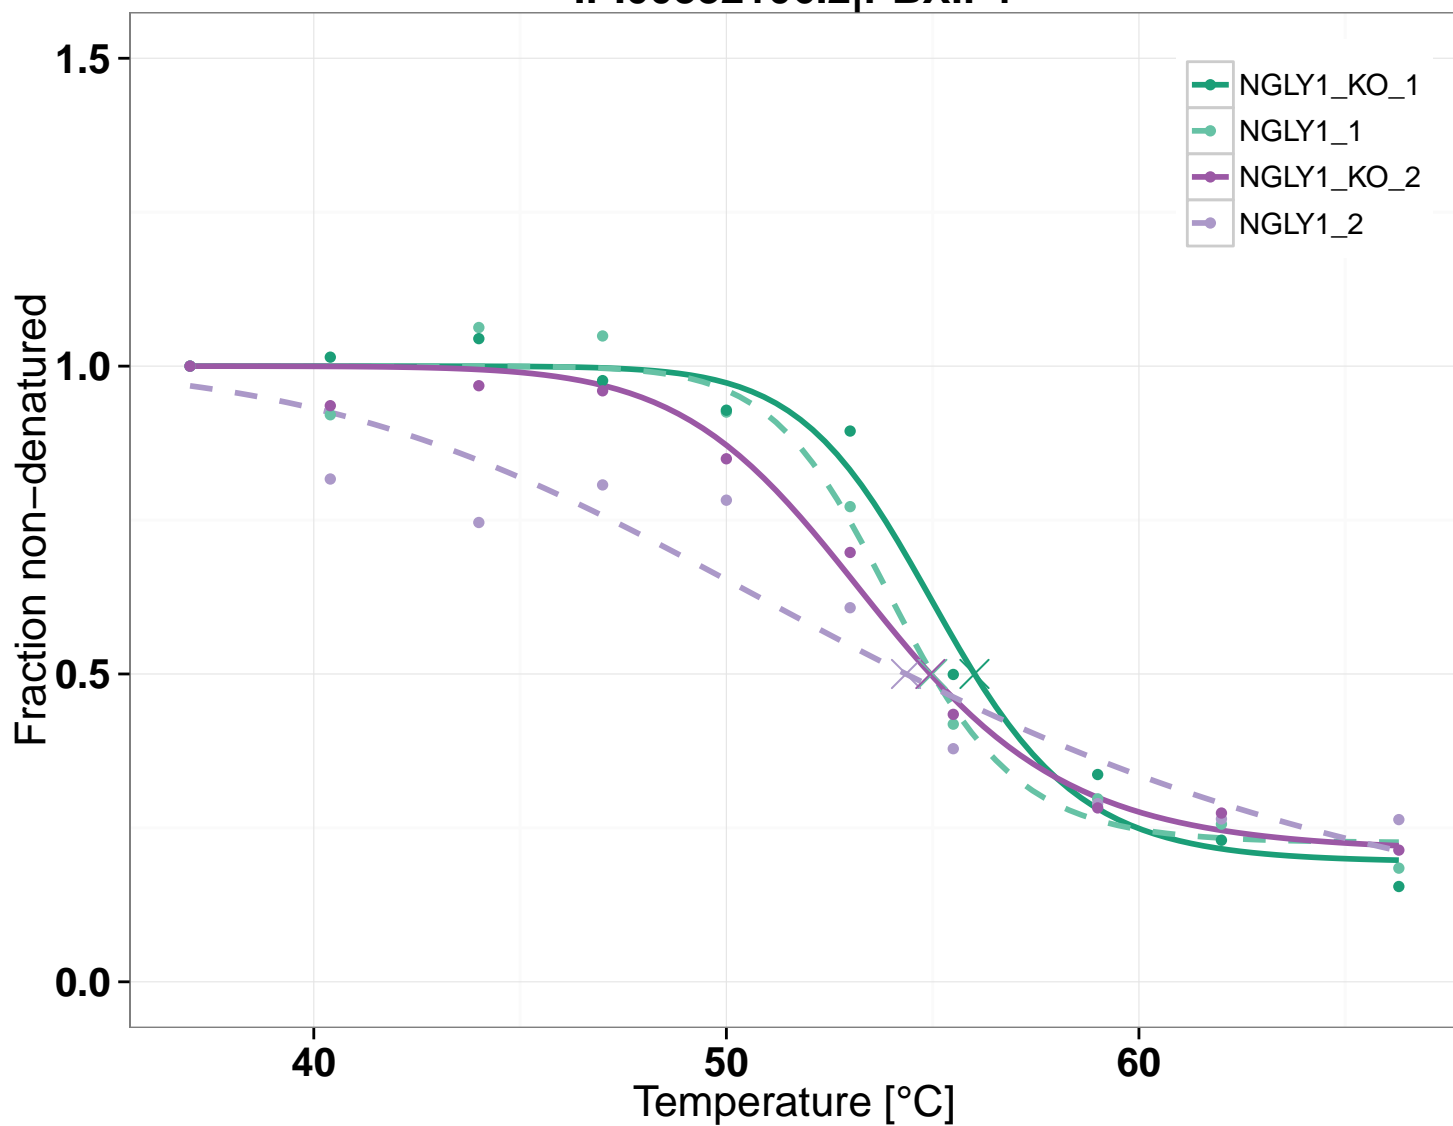

|            | meltPoint | slope  | plateau | R2   |
|------------|-----------|--------|---------|------|
| NGLY1_KO_1 | 56.01     | -0.12  | 0.19    | 0.99 |
| NGLY1_1    | 54.99     | -0.13  | 0.23    | 0.98 |
| NGLY1_KO_2 | 54.94     | -0.084 | 0.21    | 0.99 |
| NGLY1_2    | 54.35     | -0.036 | 0       | 0.91 |

Supplement: Supplementary file 2877 [file 1]

# IPI00074010.4|QTRTD1

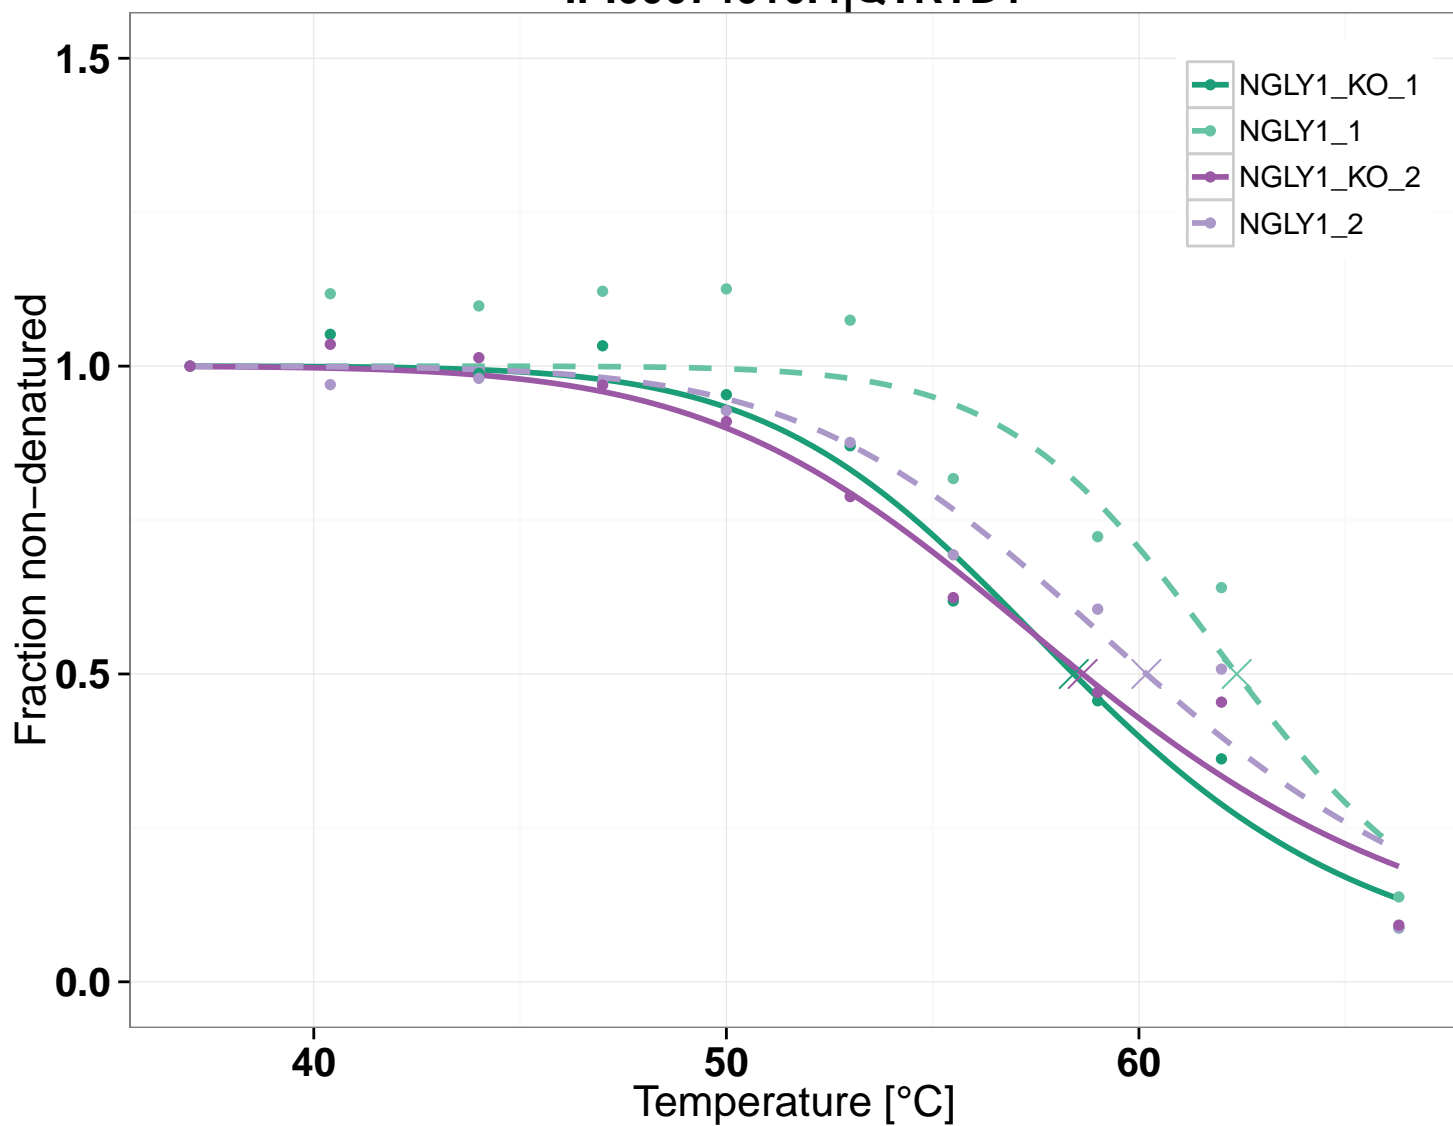

|            | meltPoint | slope  | plateau | R2   |
|------------|-----------|--------|---------|------|
| NGLY1_KO_1 | 58.42     | -0.068 | 0       | 0.98 |
| NGLY1_1    | 62.37     | -0.089 | 0       | 0.89 |
| NGLY1_KO_2 | 58.64     | -0.055 | 0       | 0.97 |
| NGLY1_2    | 60.18     | -0.06  | 0       | 0.95 |

Supplement: Supplementary file 2878 [file 1]

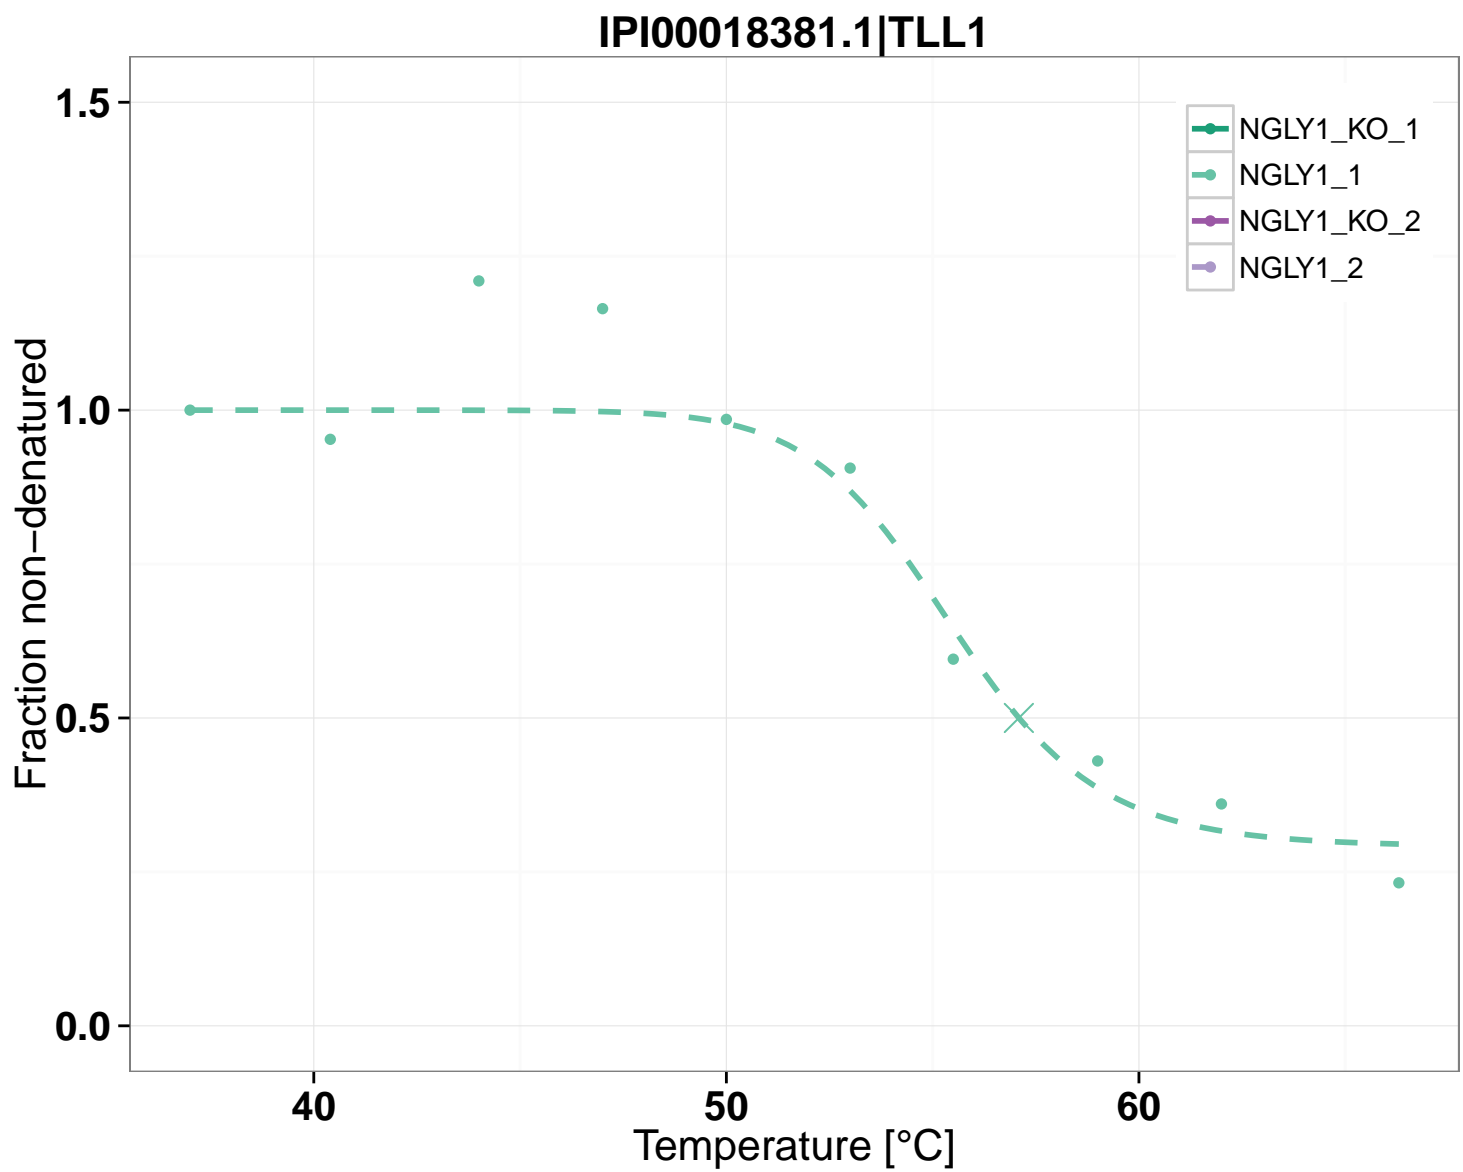

|            | meltPoint | slope | plateau | R2   |
|------------|-----------|-------|---------|------|
| NGLY1_KO_1 | —         | —     | —       | —    |
| NGLY1_1    | 57.09     | -0.1  | 0.29    | 0.92 |
| NGLY1_KO_2 | —         | —     | —       | —    |
| NGLY1_2    | —         | —     | —       | —    |

Supplement: Supplementary file 2879 [file 1]

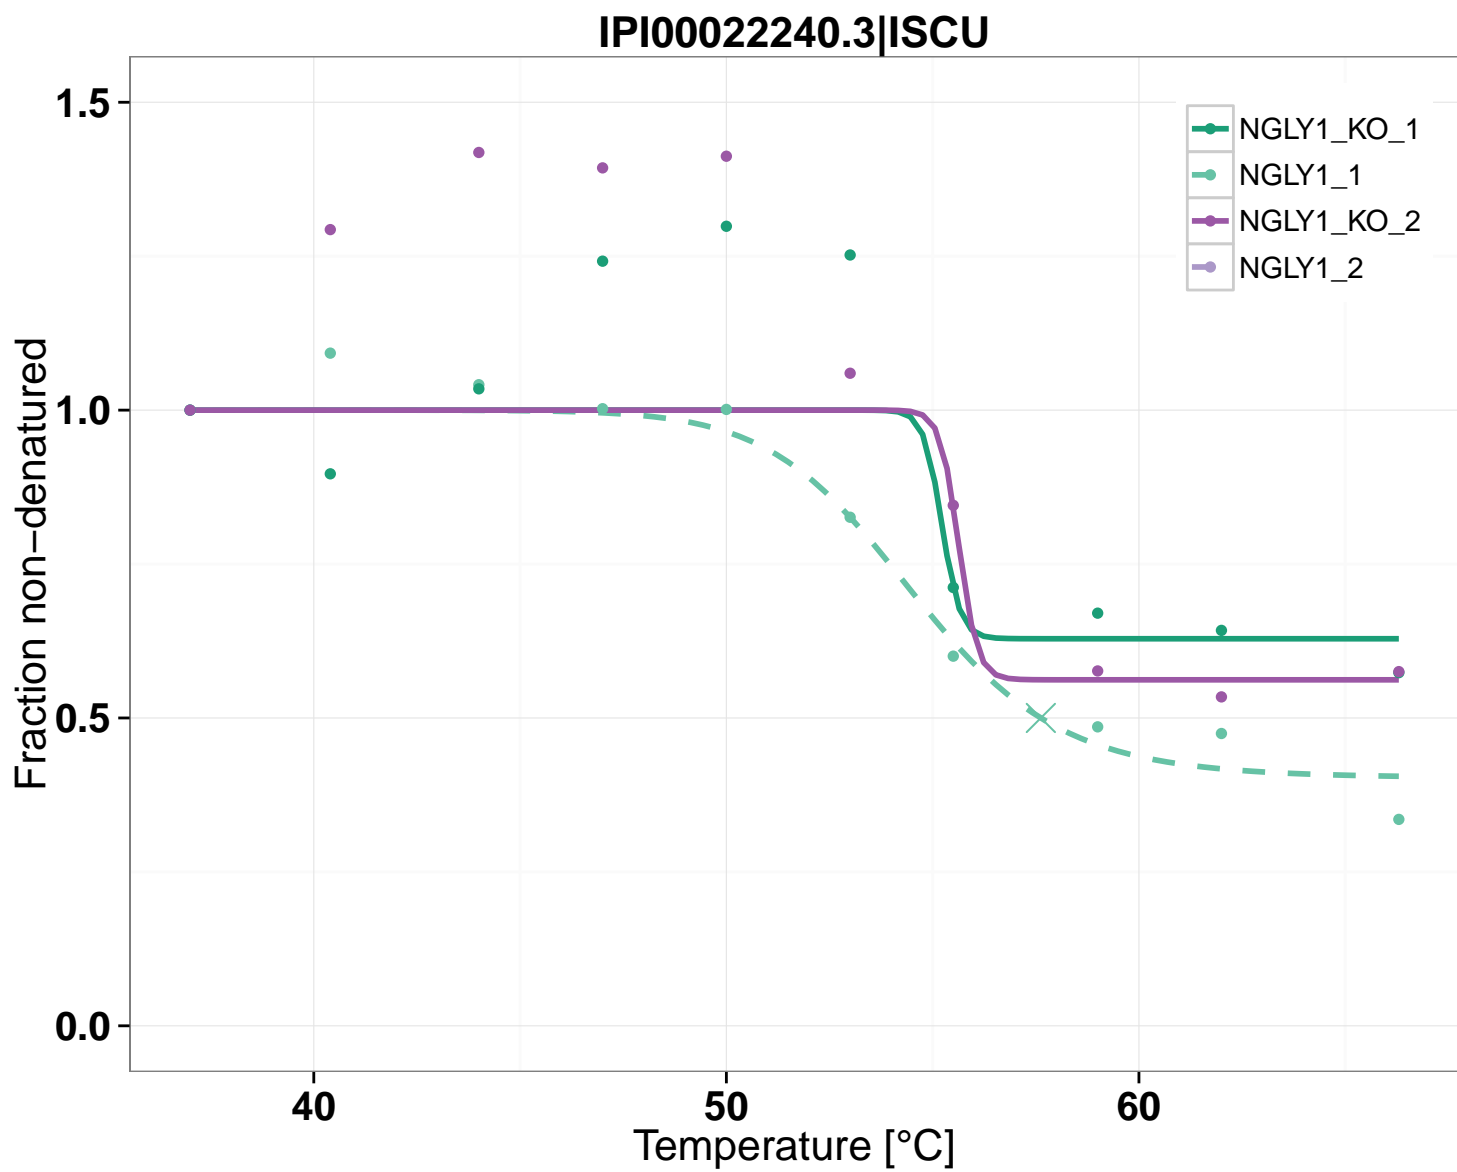

|            | meltPoint | slope  | plateau | R2   |
|------------|-----------|--------|---------|------|
| NGLY1_KO_1 | –         | –0.42  | 0.63    | 0.66 |
| NGLY1_1    | 57.62     | –0.084 | 0.4     | 0.97 |
| NGLY1_KO_2 | –         | –0.49  | 0.56    | 0.5  |
| NGLY1_2    | –         | –      | –       | –    |

Supplement: Supplementary file 2880 [file 1]

# IPI00411710.8|EIF4G3

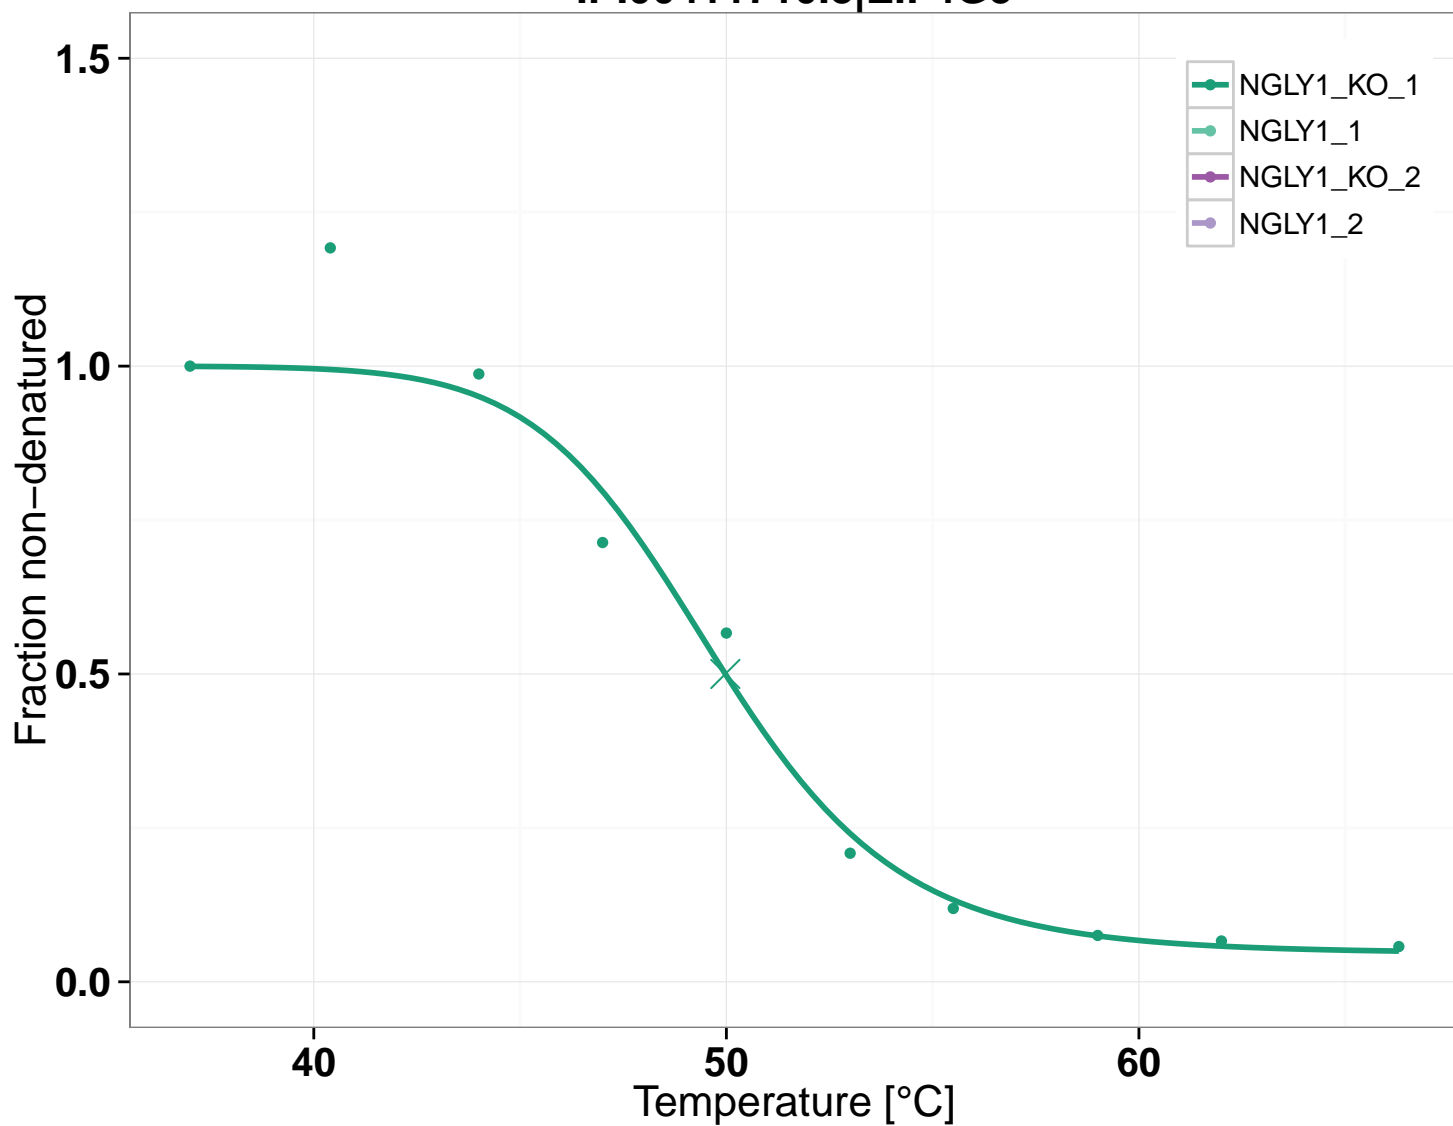

|            | meltPoint | slope | plateau | R2   |
|------------|-----------|-------|---------|------|
| NGLY1_KO_1 | 49.98     | -0.11 | 0.05    | 0.97 |
| NGLY1_1    | -         | -     | -       | -    |
| NGLY1_KO_2 | -         | -     | -       | -    |
| NGLY1_2    | -         | -     | -       | -    |

Supplement: Supplementary file 2881 [file 1]

IPI00164366.4|TPCN1

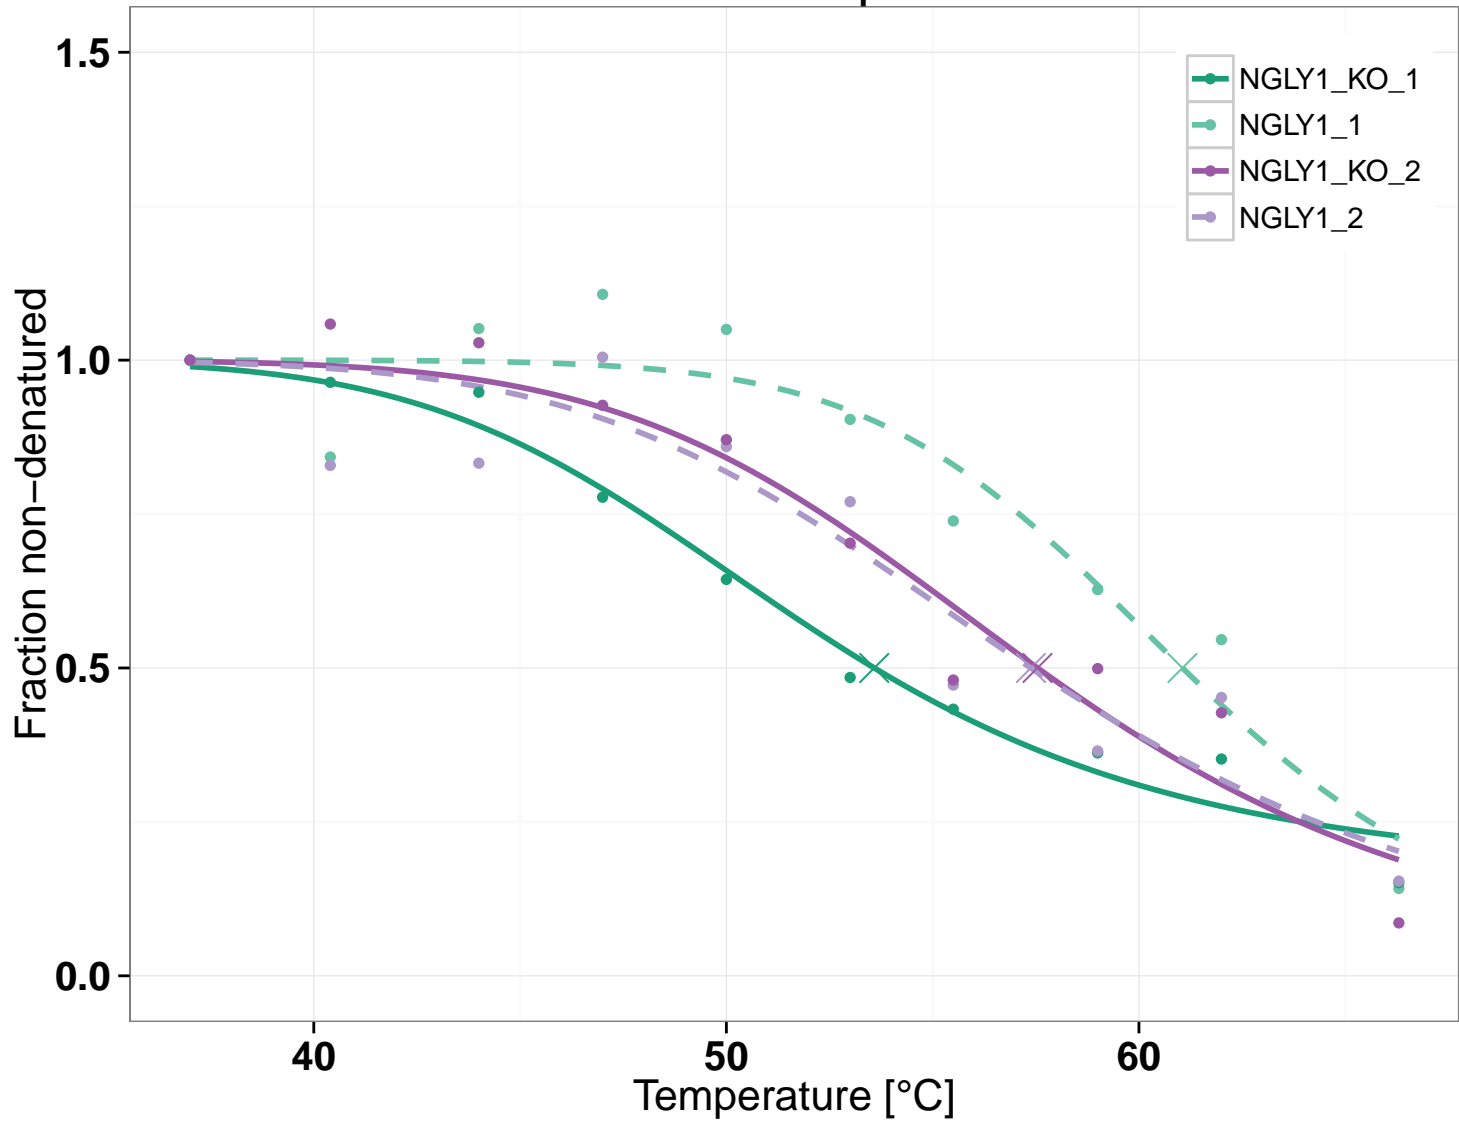

|            | meltPoint | slope  | plateau | R2   |
|------------|-----------|--------|---------|------|
| NGLY1_KO_1 | 53.58     | -0.046 | 0.16    | 0.98 |
| NGLY1_1    | 61.05     | -0.066 | 0       | 0.91 |
| NGLY1_KO_2 | 57.54     | -0.05  | 0       | 0.94 |
| NGLY1_2    | 57.38     | -0.046 | 0       | 0.88 |

Supplement: Supplementary file 2882 [file 1]

IPI00306511.2|L3MBTL3

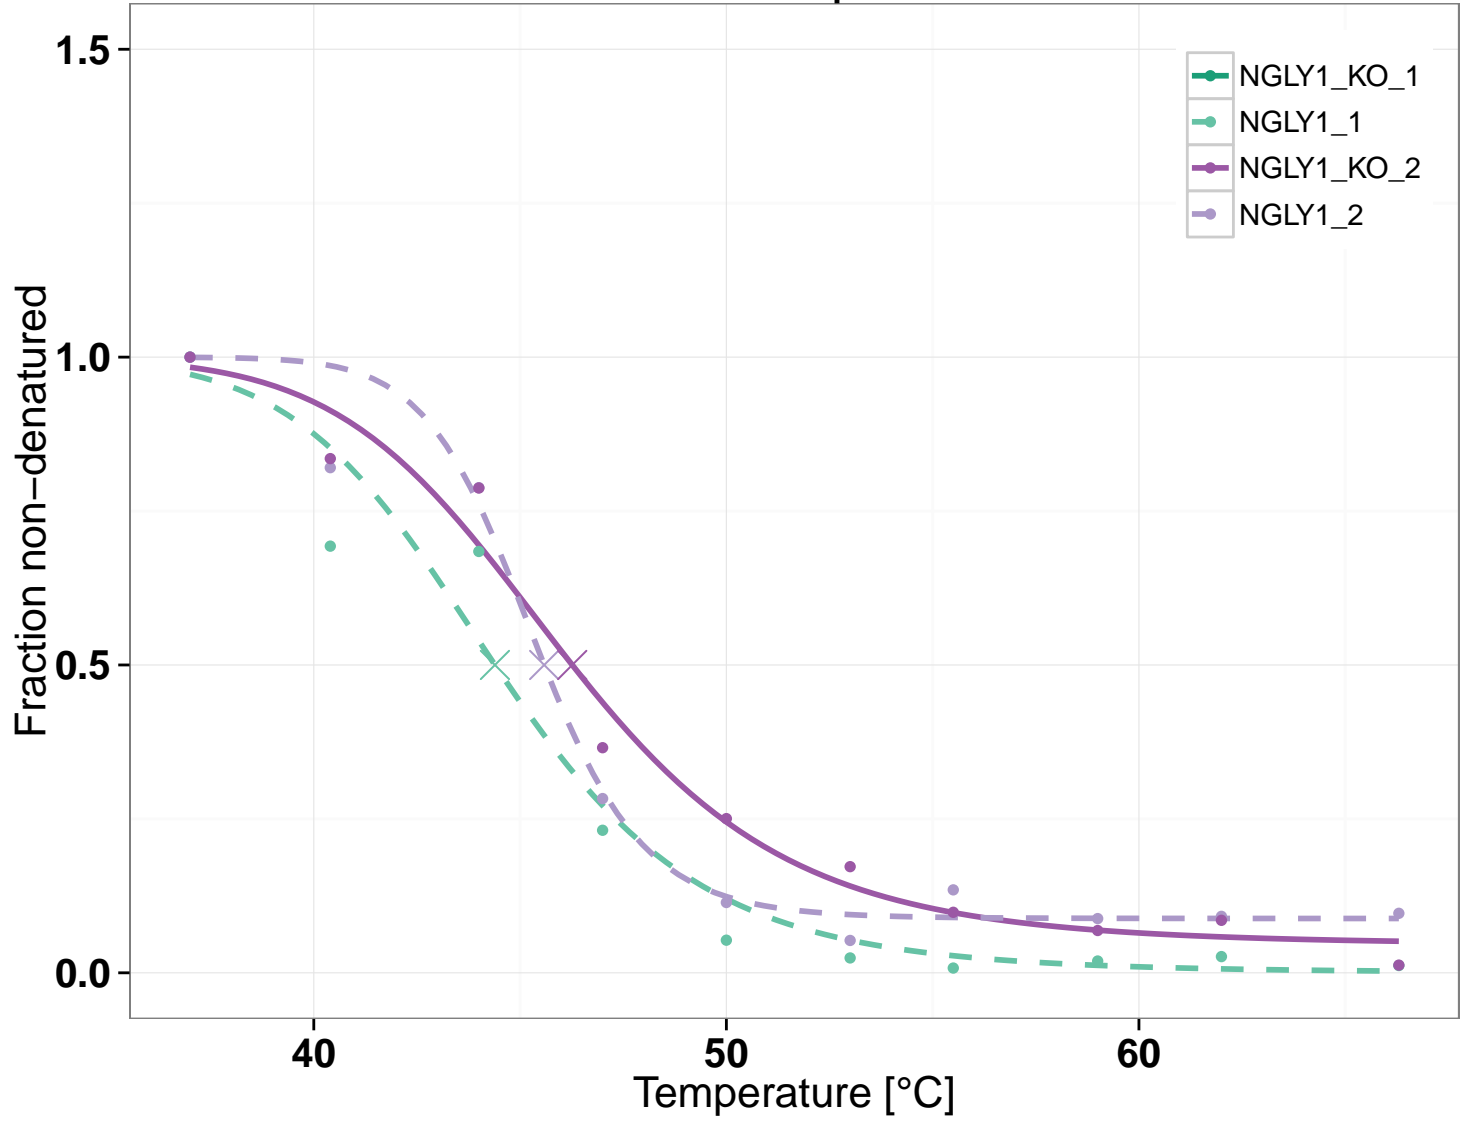

|            | meltPoint | slope  | plateau | R2   |
|------------|-----------|--------|---------|------|
| NGLY1_KO_1 | –         | –      | –       | –    |
| NGLY1_1    | 44.39     | –0.1   | 0       | 0.96 |
| NGLY1_KO_2 | 46.26     | –0.087 | 0.05    | 0.98 |
| NGLY1_2    | 45.58     | –0.17  | 0.09    | 0.97 |

Supplement: Supplementary file 2883 [file 1]

# IPI00006167.1|PPM1G

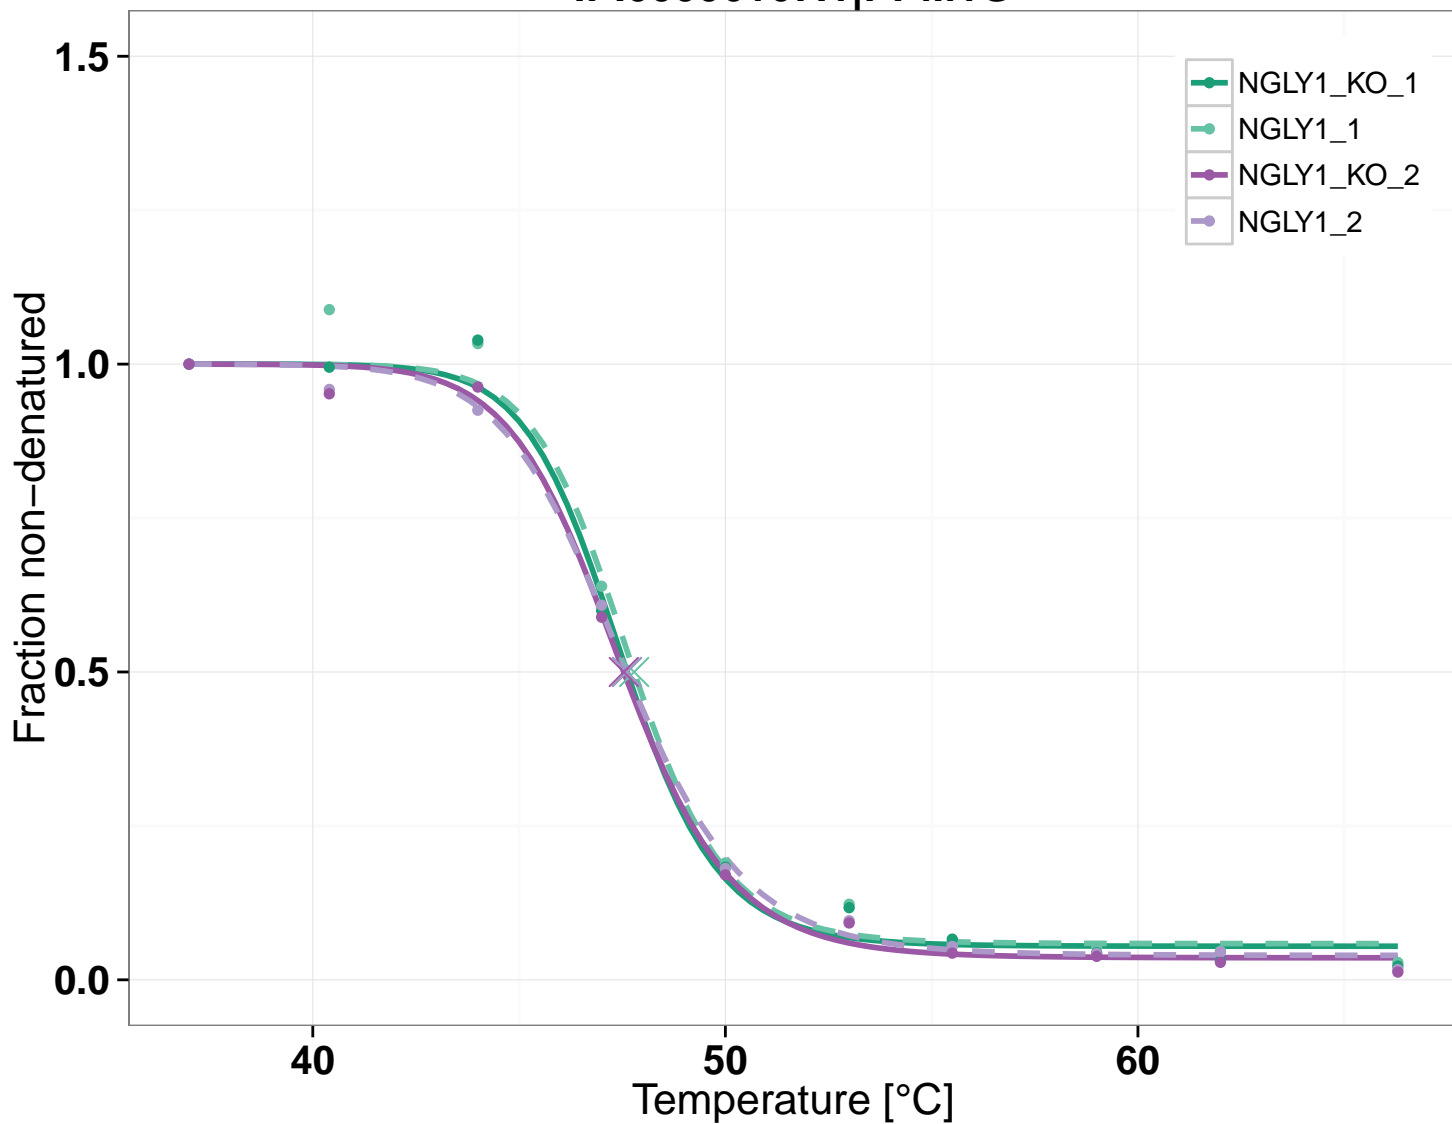

|            | meltPoint | slope | plateau | R2   |
|------------|-----------|-------|---------|------|
| NGLY1_KO_1 | 47.62     | -0.2  | 0.05    | 0.99 |
| NGLY1_1    | 47.79     | -0.2  | 0.06    | 0.99 |
| NGLY1_KO_2 | 47.54     | -0.18 | 0.04    | 1    |
| NGLY1_2    | 47.61     | -0.16 | 0.04    | 1    |

Supplement: Supplementary file 2885 [file 1]

# IPI00219527.4|TRIM11

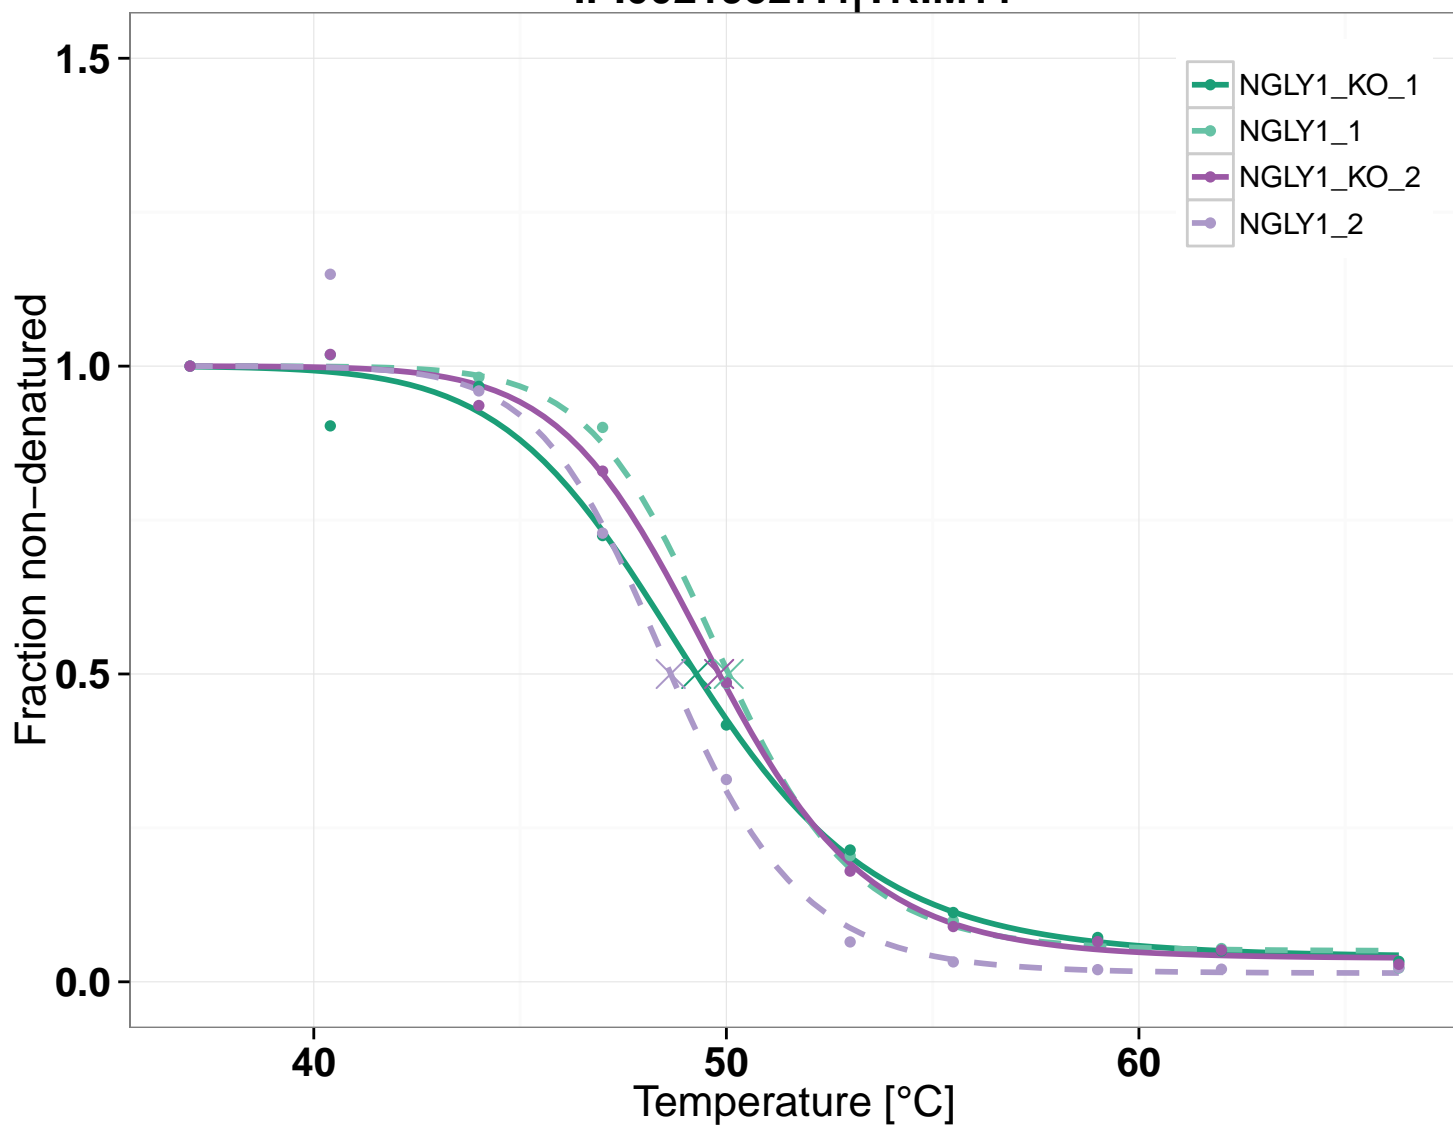

|            | meltPoint | slope | plateau | R2   |
|------------|-----------|-------|---------|------|
| NGLY1_KO_1 | 49.27     | -0.11 | 0.04    | 0.99 |
| NGLY1_1    | 50.06     | -0.15 | 0.05    | 1    |
| NGLY1_KO_2 | 49.82     | -0.13 | 0.04    | 1    |
| NGLY1_2    | 48.65     | -0.15 | 0.01    | 0.99 |

Supplement: Supplementary file 2886 [file 1]

IPI00386494.2|SPPL2B

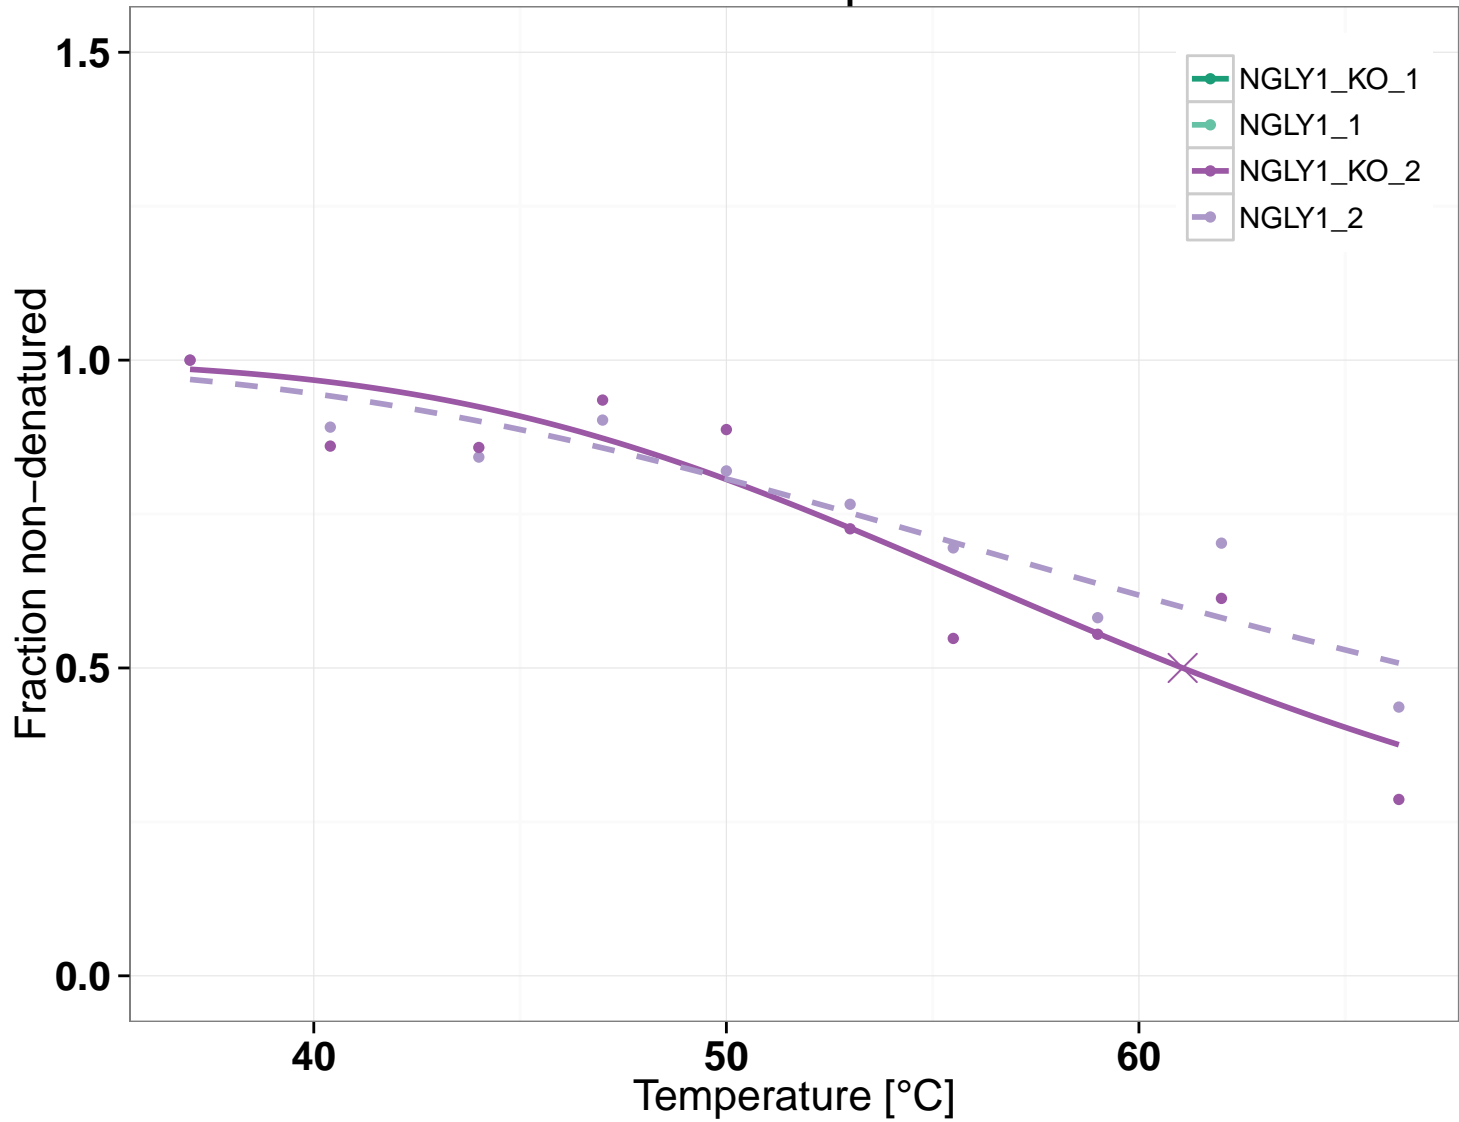

|            | meltPoint | slope  | plateau | R2   |
|------------|-----------|--------|---------|------|
| NGLY1_KO_1 | -         | -      | -       | -    |
| NGLY1_1    | -         | -      | -       | -    |
| NGLY1_KO_2 | 61.06     | -0.029 | 0       | 0.86 |
| NGLY1_2    | -         | -0.019 | 0       | 0.87 |

Supplement: Supplementary file 2887 [file 1]

IPI00383444.2|TCP11L1

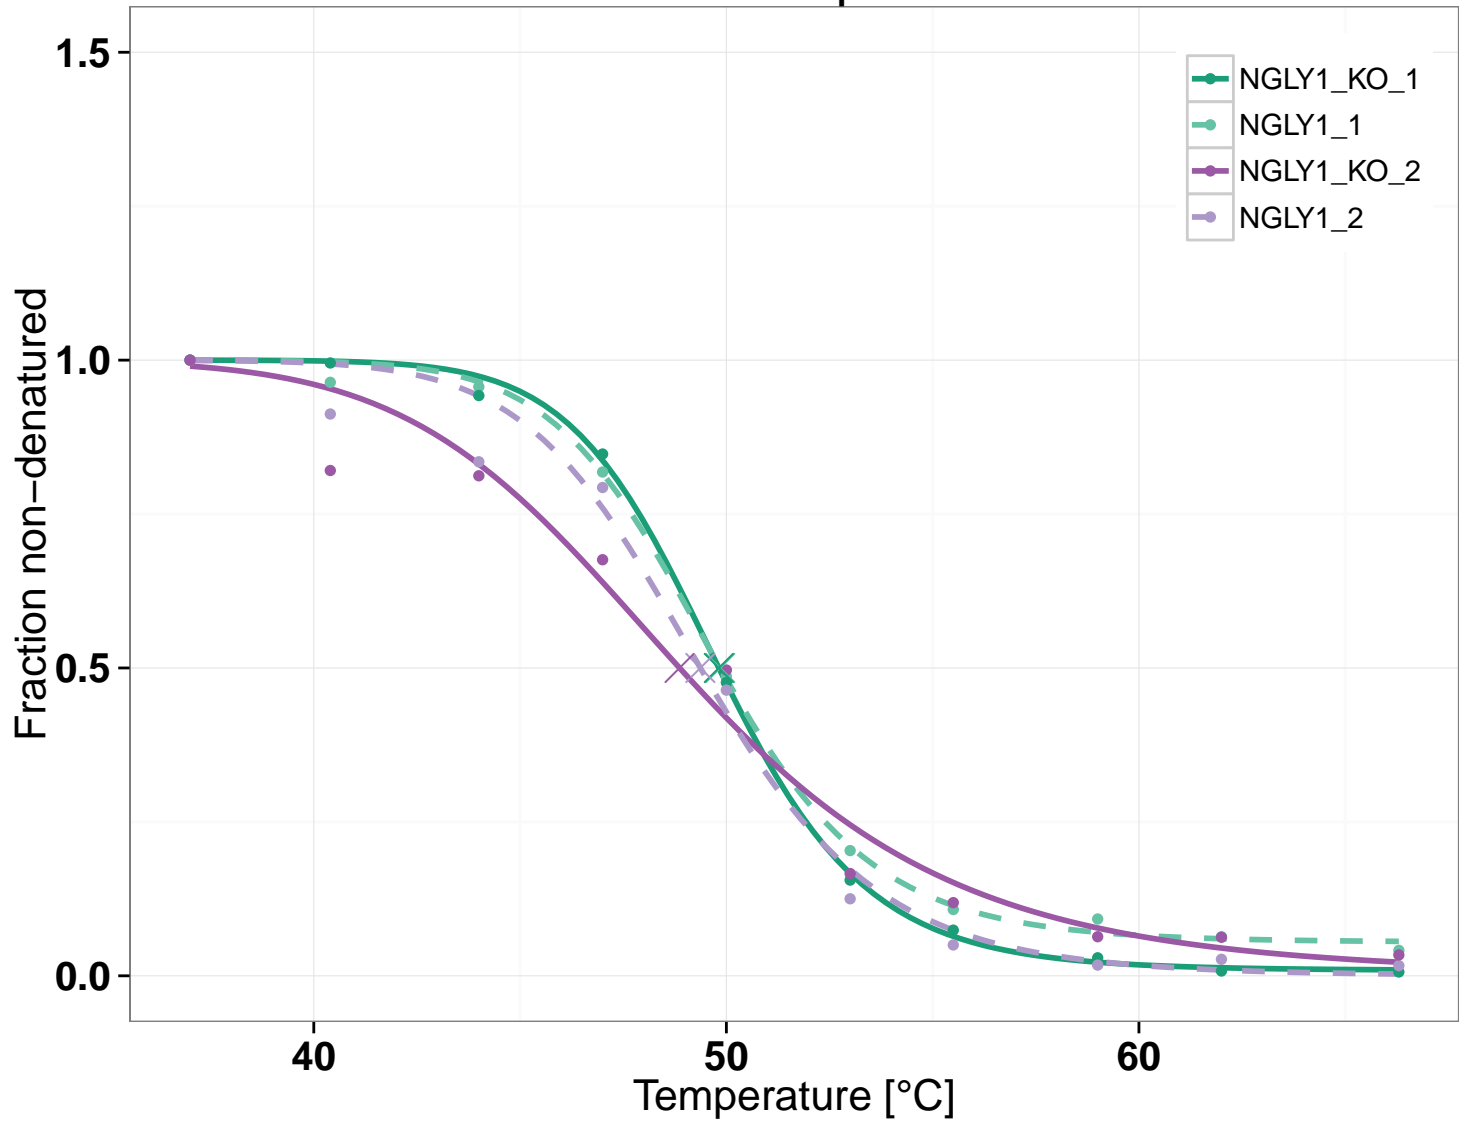

|            | meltPoint | slope  | plateau | R2   |
|------------|-----------|--------|---------|------|
| NGLY1_KO_1 | 49.82     | -0.14  | 0.01    | 1    |
| NGLY1_1    | 49.85     | -0.12  | 0.05    | 1    |
| NGLY1_KO_2 | 48.87     | -0.075 | 0       | 0.97 |
| NGLY1_2    | 49.37     | -0.12  | 0       | 0.99 |

Supplement: Supplementary file 2888 [file 1]

IPI00456749.2|ATP5G2

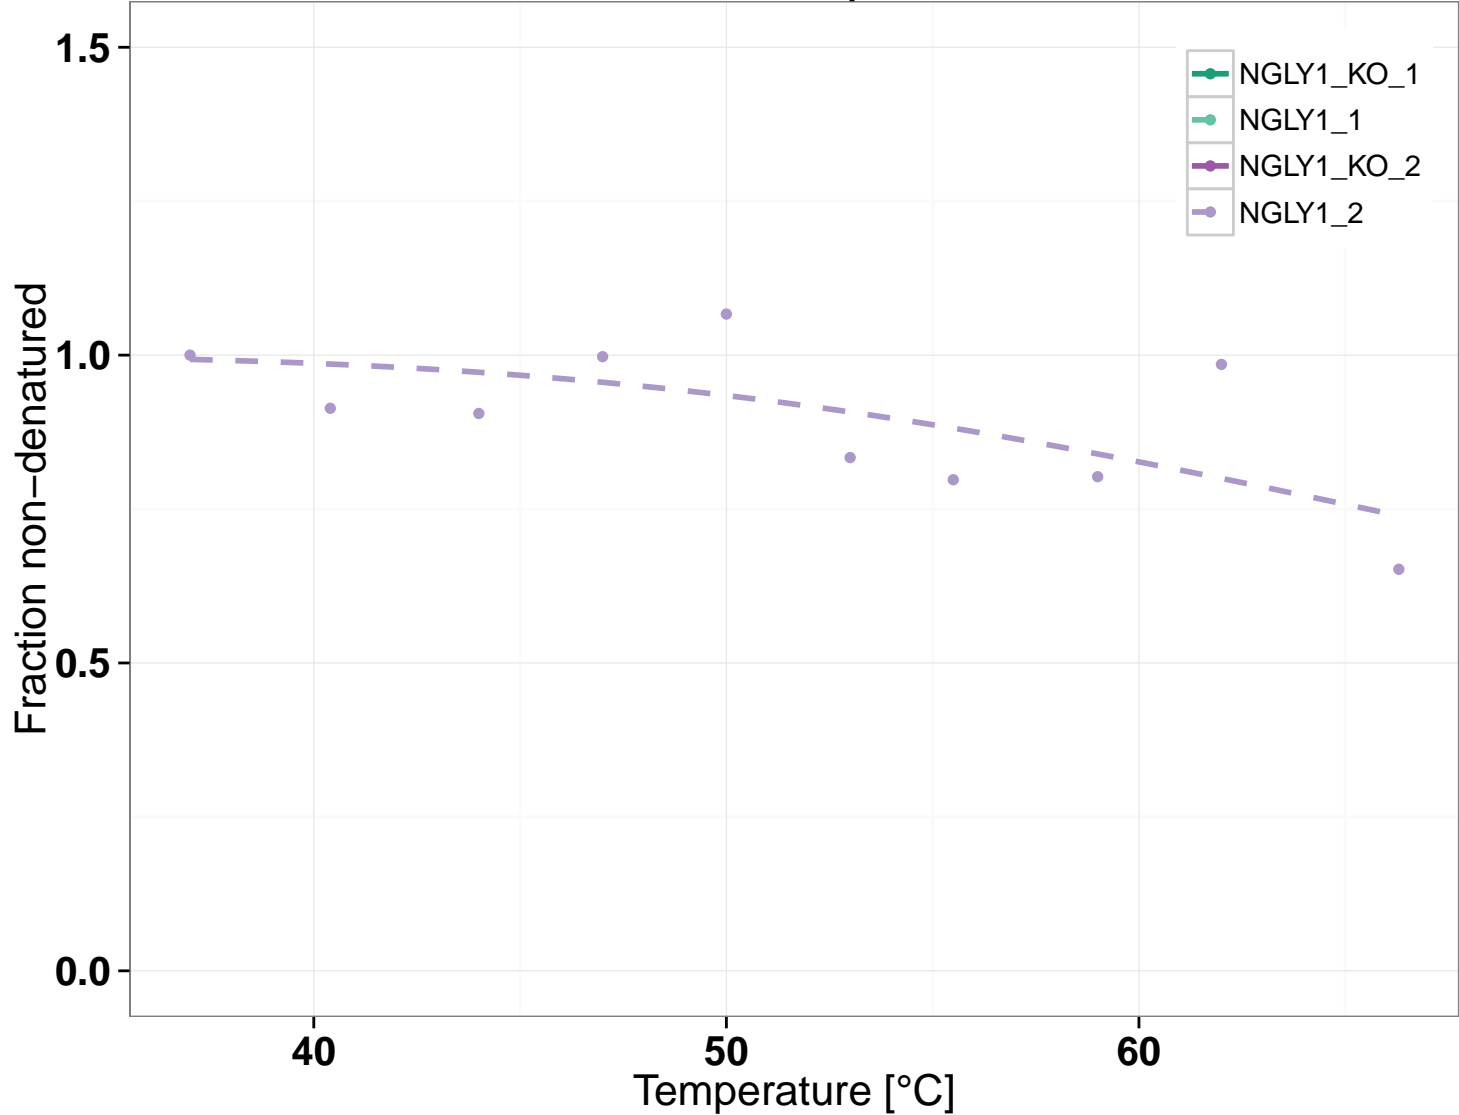

|            | meltPoint | slope | plateau | R2  |
|------------|-----------|-------|---------|-----|
| NGLY1_KO_1 | -         | -     | -       | -   |
| NGLY1_1    | -         | -     | -       | -   |
| NGLY1_KO_2 | -         | -     | -       | -   |
| NGLY1_2    | -         | -     | 0       | 0.4 |

Supplement: Supplementary file 2889 [file 1]

# IPI00411816.3|MRPL2

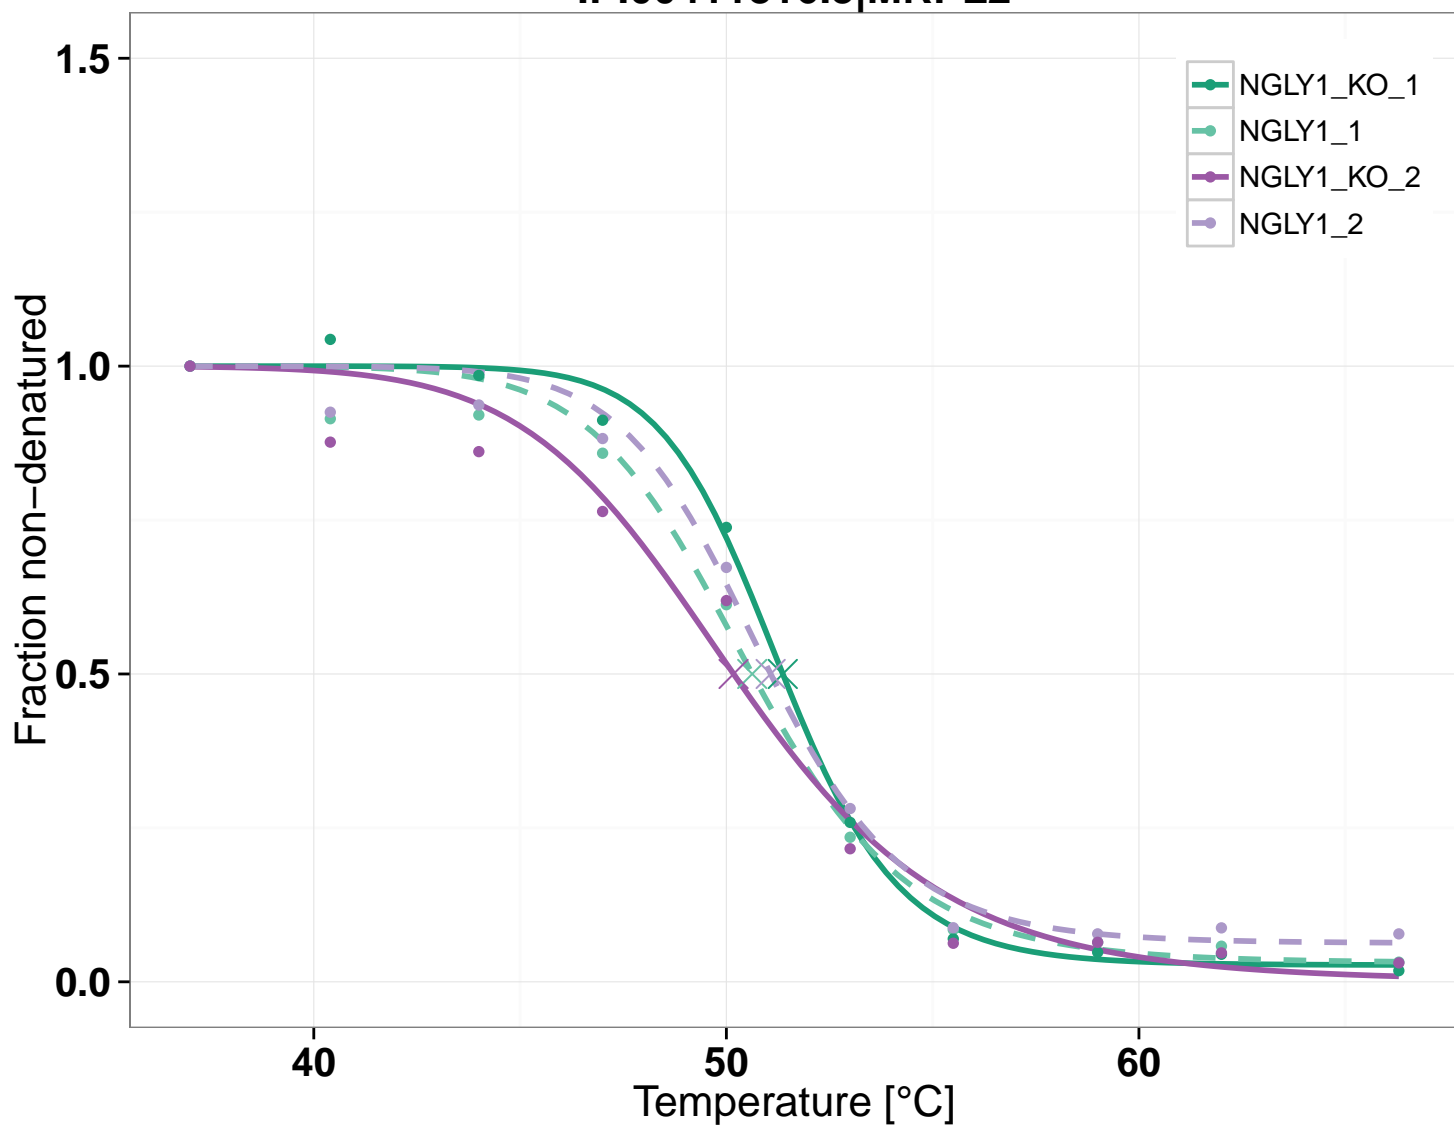

|            | meltPoint | slope  | plateau | R2   |
|------------|-----------|--------|---------|------|
| NGLY1_KO_1 | 51.37     | -0.17  | 0.03    | 1    |
| NGLY1_1    | 50.63     | -0.13  | 0.03    | 0.99 |
| NGLY1_KO_2 | 50.17     | -0.098 | 0       | 0.97 |
| NGLY1_2    | 51.07     | -0.14  | 0.06    | 0.99 |

Supplement: Supplementary file 2890 [file 1]

IPI00795421.2|NR2C1

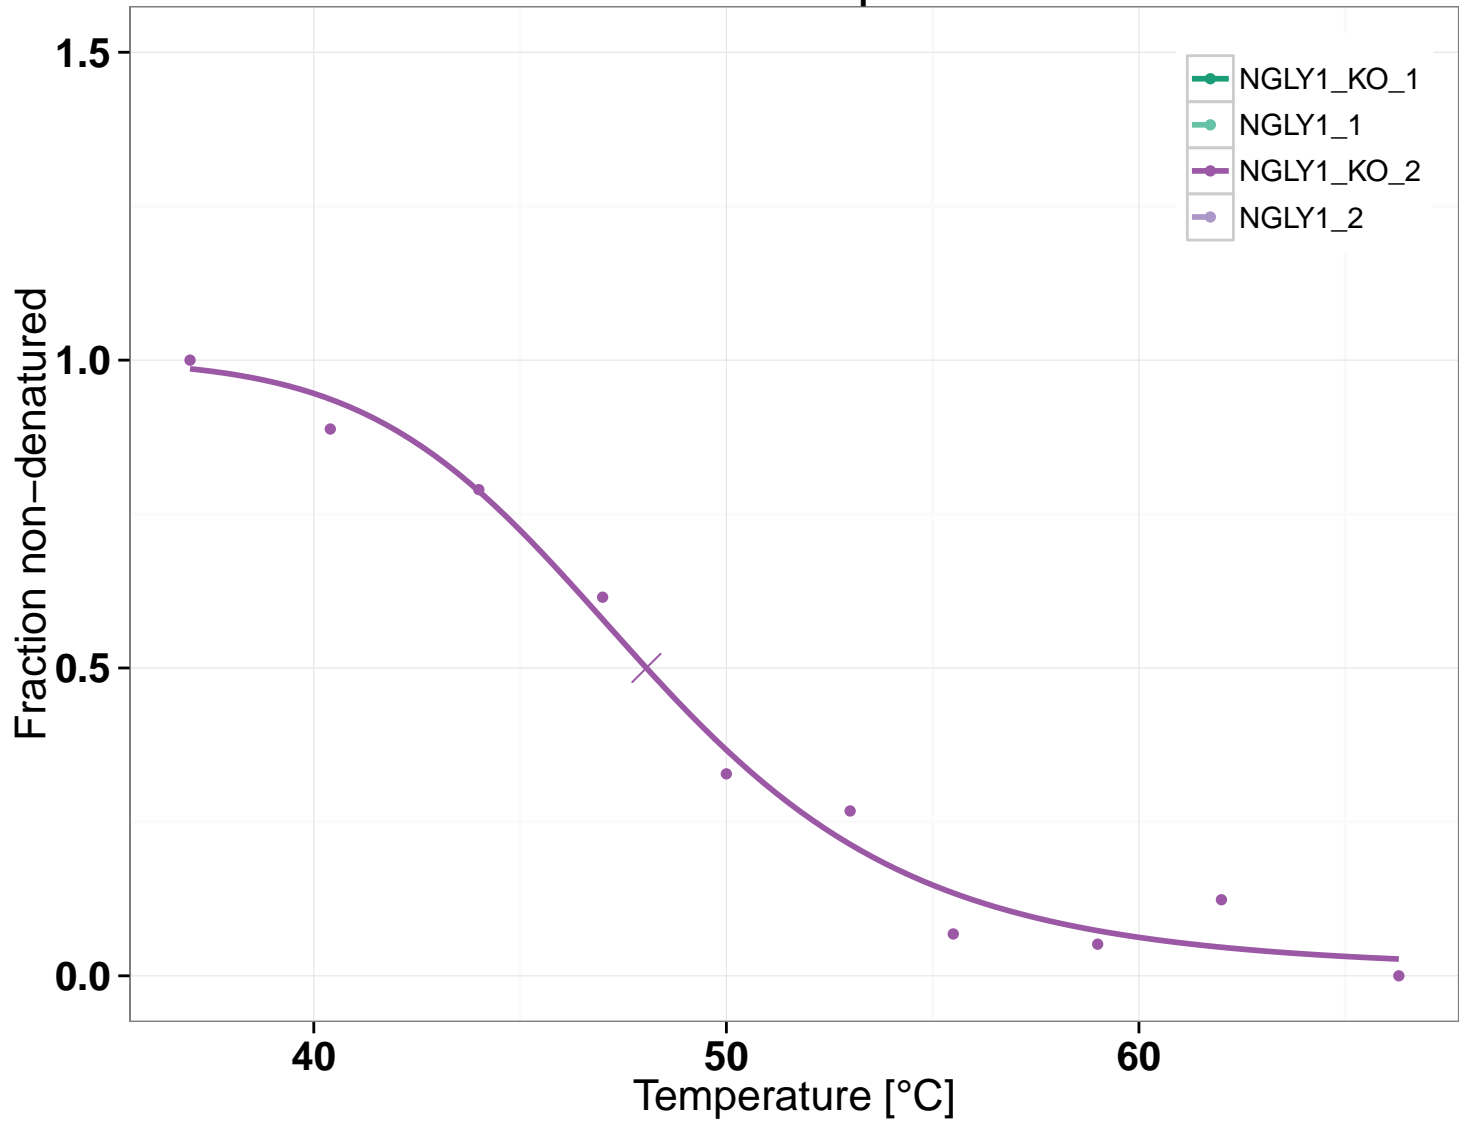

|            | meltPoint | slope  | plateau | R2   |
|------------|-----------|--------|---------|------|
| NGLY1_KO_1 | -         | -      | -       | -    |
| NGLY1_1    | -         | -      | -       | -    |
| NGLY1_KO_2 | 48.06     | -0.075 | 0.01    | 0.98 |
| NGLY1_2    | -         | -      | -       | -    |

Supplement: Supplementary file 2891 [file 1]

# IPI00552460.1|PPT2

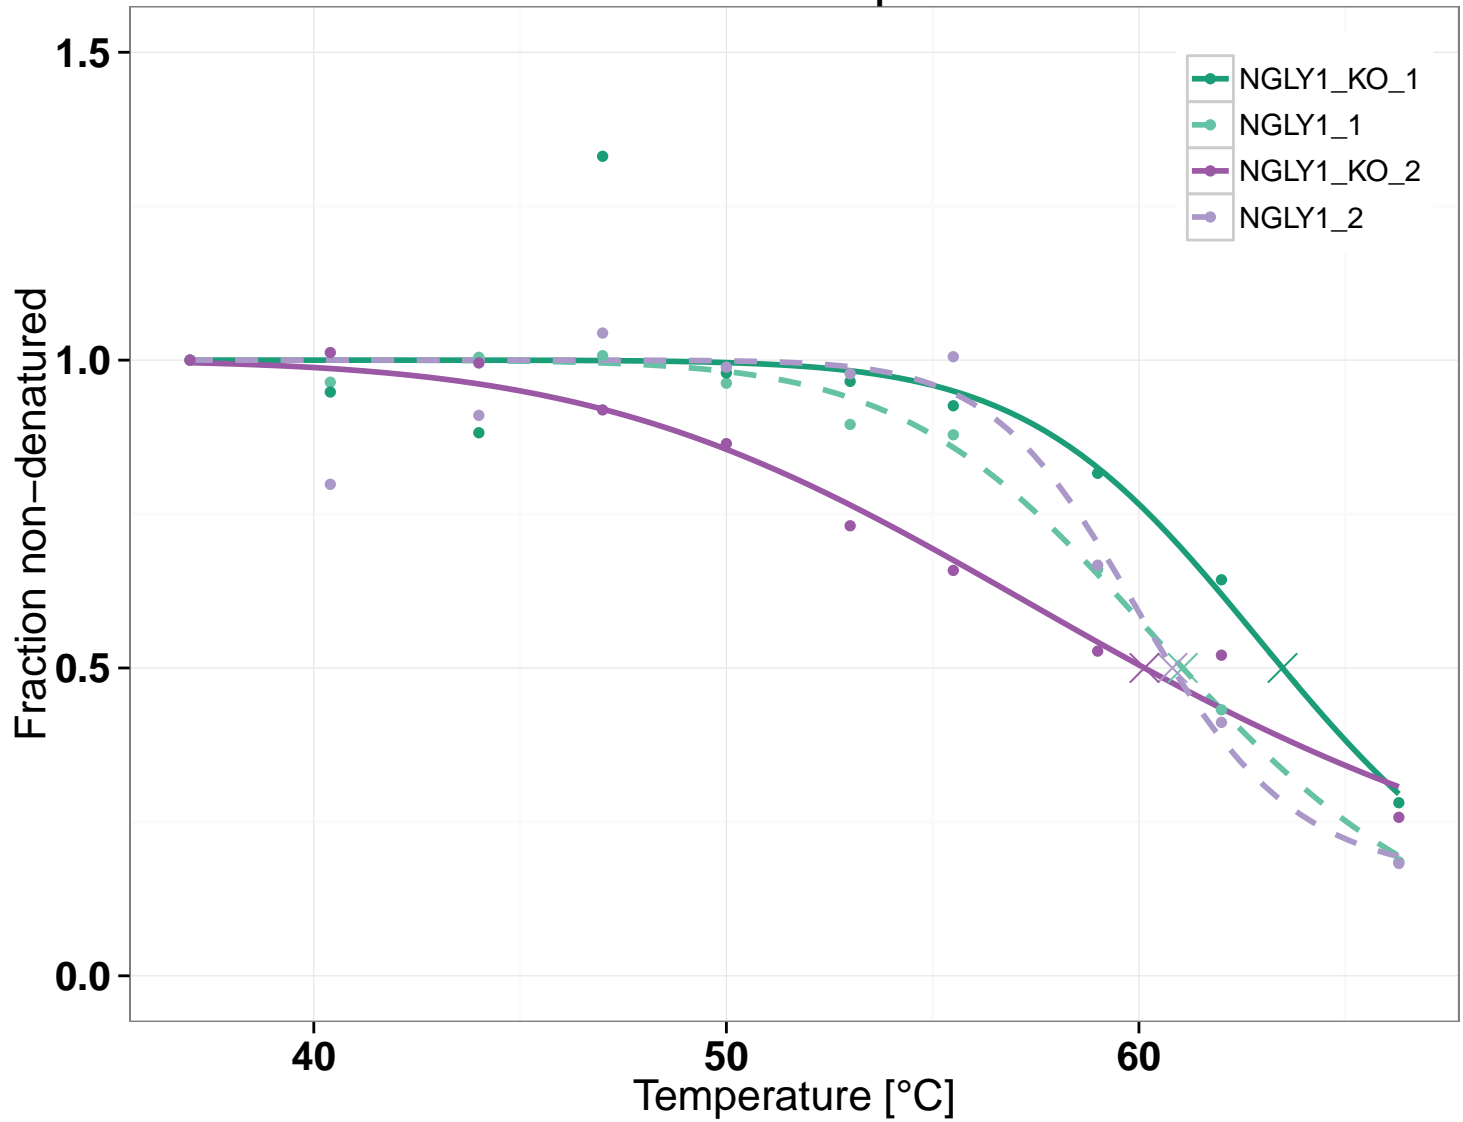

|            | meltPoint | slope  | plateau | R2   |
|------------|-----------|--------|---------|------|
| NGLY1_KO_1 | 63.48     | -0.081 | 0       | 0.81 |
| NGLY1_1    | 61.06     | -0.074 | 0       | 0.99 |
| NGLY1_KO_2 | 60.13     | -0.038 | 0       | 0.98 |
| NGLY1_2    | 60.81     | -0.11  | 0.15    | 0.93 |

Supplement: Supplementary file 2892 [file 1]

IPI00295940.4|UNC84B

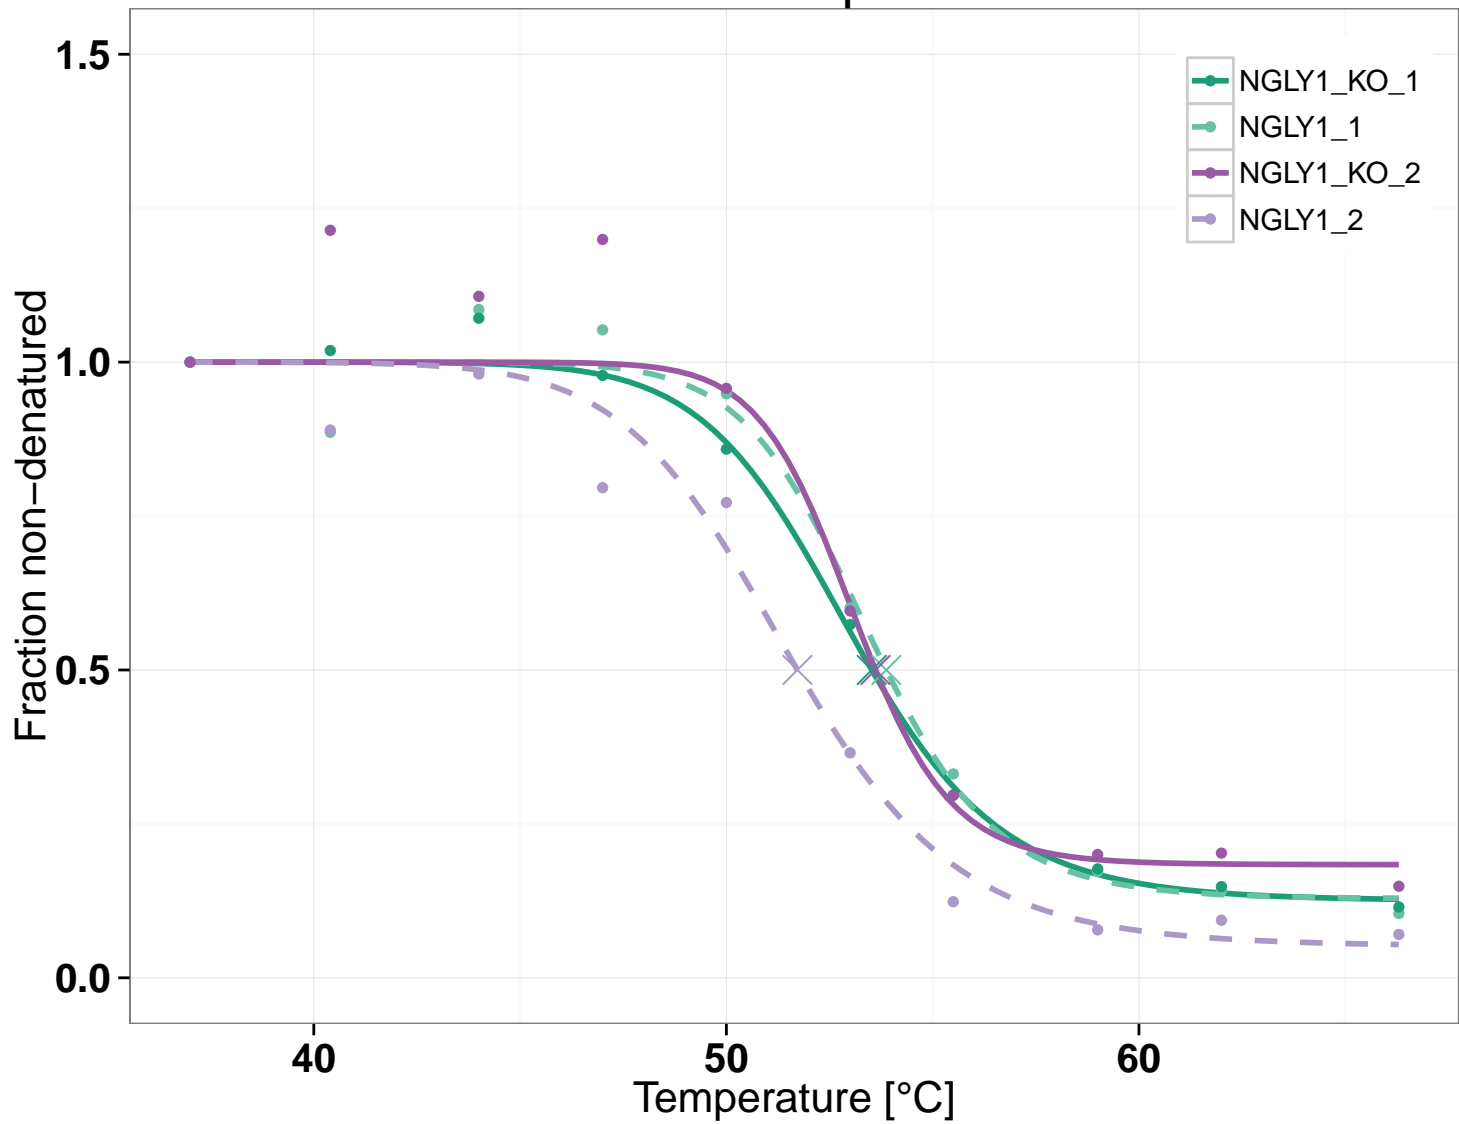

|            | meltPoint | slope | plateau | R2   |
|------------|-----------|-------|---------|------|
| NGLY1_KO_1 | 53.52     | -0.12 | 0.13    | 1    |
| NGLY1_1    | 53.88     | -0.14 | 0.13    | 0.98 |
| NGLY1_KO_2 | 53.61     | -0.18 | 0.18    | 0.94 |
| NGLY1_2    | 51.72     | -0.12 | 0.05    | 0.97 |

Supplement: Supplementary file 2893 [file 1]

# IPI00008961.1|TERF2IP

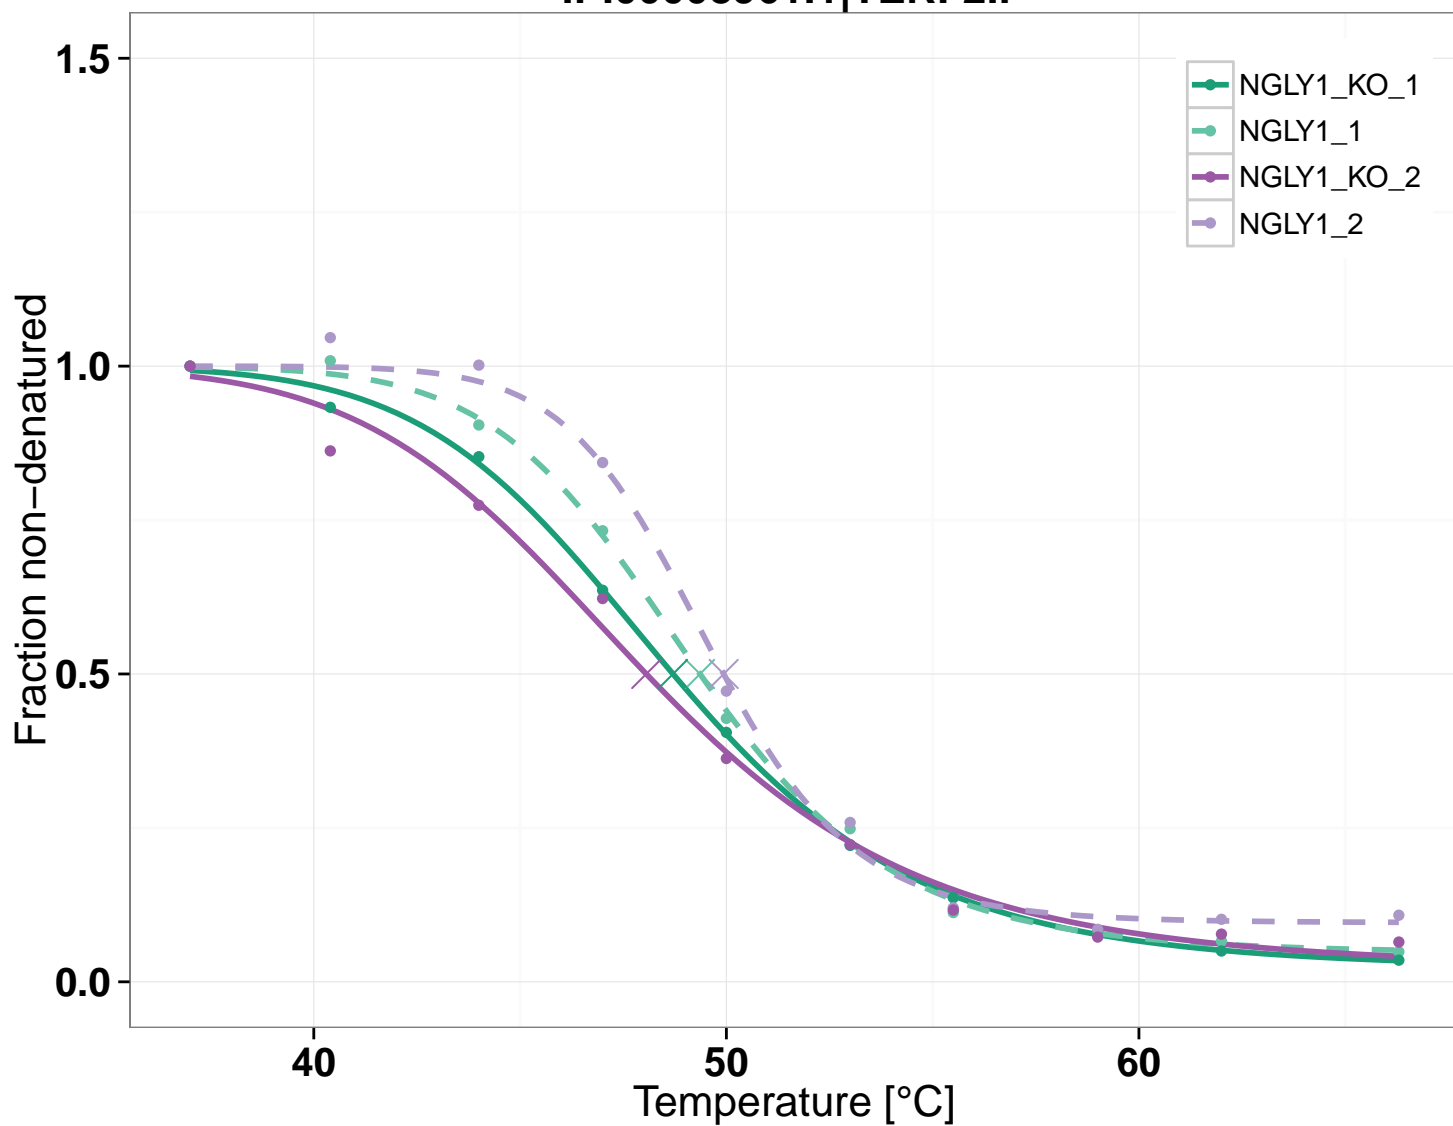

|            | meltPoint | slope  | plateau | R2   |
|------------|-----------|--------|---------|------|
| NGLY1_KO_1 | 48.71     | -0.081 | 0.02    | 1    |
| NGLY1_1    | 49.36     | -0.098 | 0.05    | 1    |
| NGLY1_KO_2 | 48.06     | -0.072 | 0.02    | 0.99 |
| NGLY1_2    | 49.94     | -0.13  | 0.1     | 1    |

Supplement: Supplementary file 2894 [file 1]

# IPI00748532.2|NCOA3

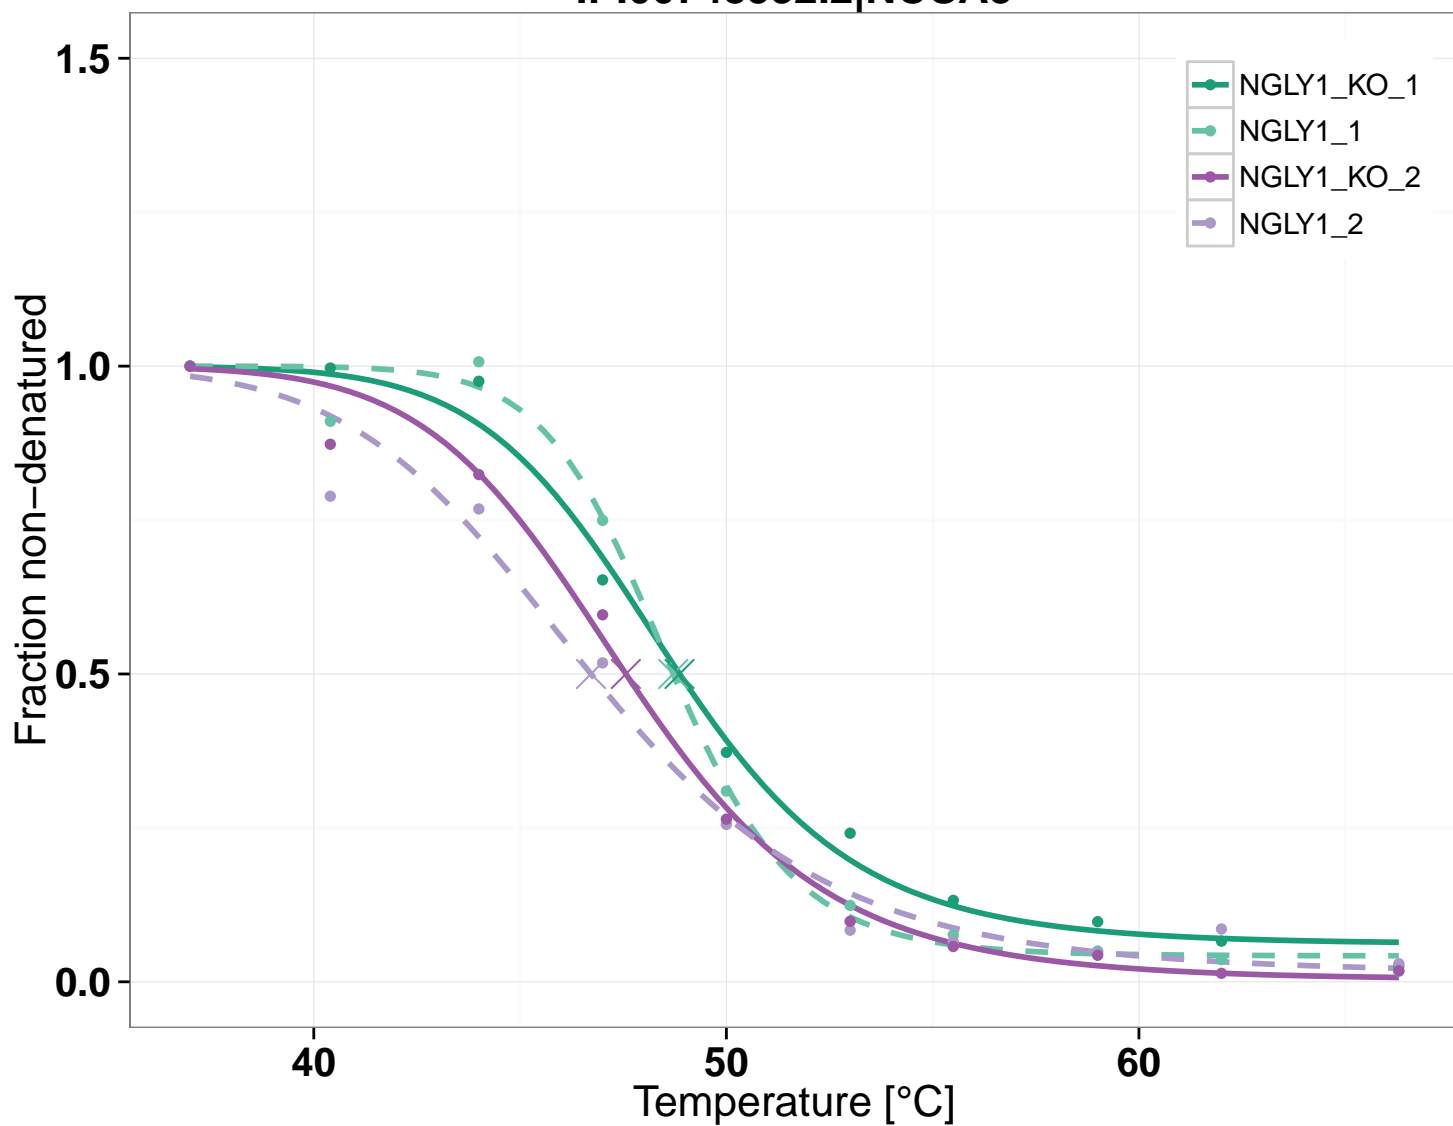

|            | meltPoint | slope  | plateau | R2   |
|------------|-----------|--------|---------|------|
| NGLY1_KO_1 | 48.87     | -0.1   | 0.06    | 0.99 |
| NGLY1_1    | 48.71     | -0.16  | 0.04    | 0.99 |
| NGLY1_KO_2 | 47.56     | -0.1   | 0       | 0.99 |
| NGLY1_2    | 46.72     | -0.084 | 0.01    | 0.98 |

Supplement: Supplementary file 2895 [file 1]

# IPI00169325.1|WDR36

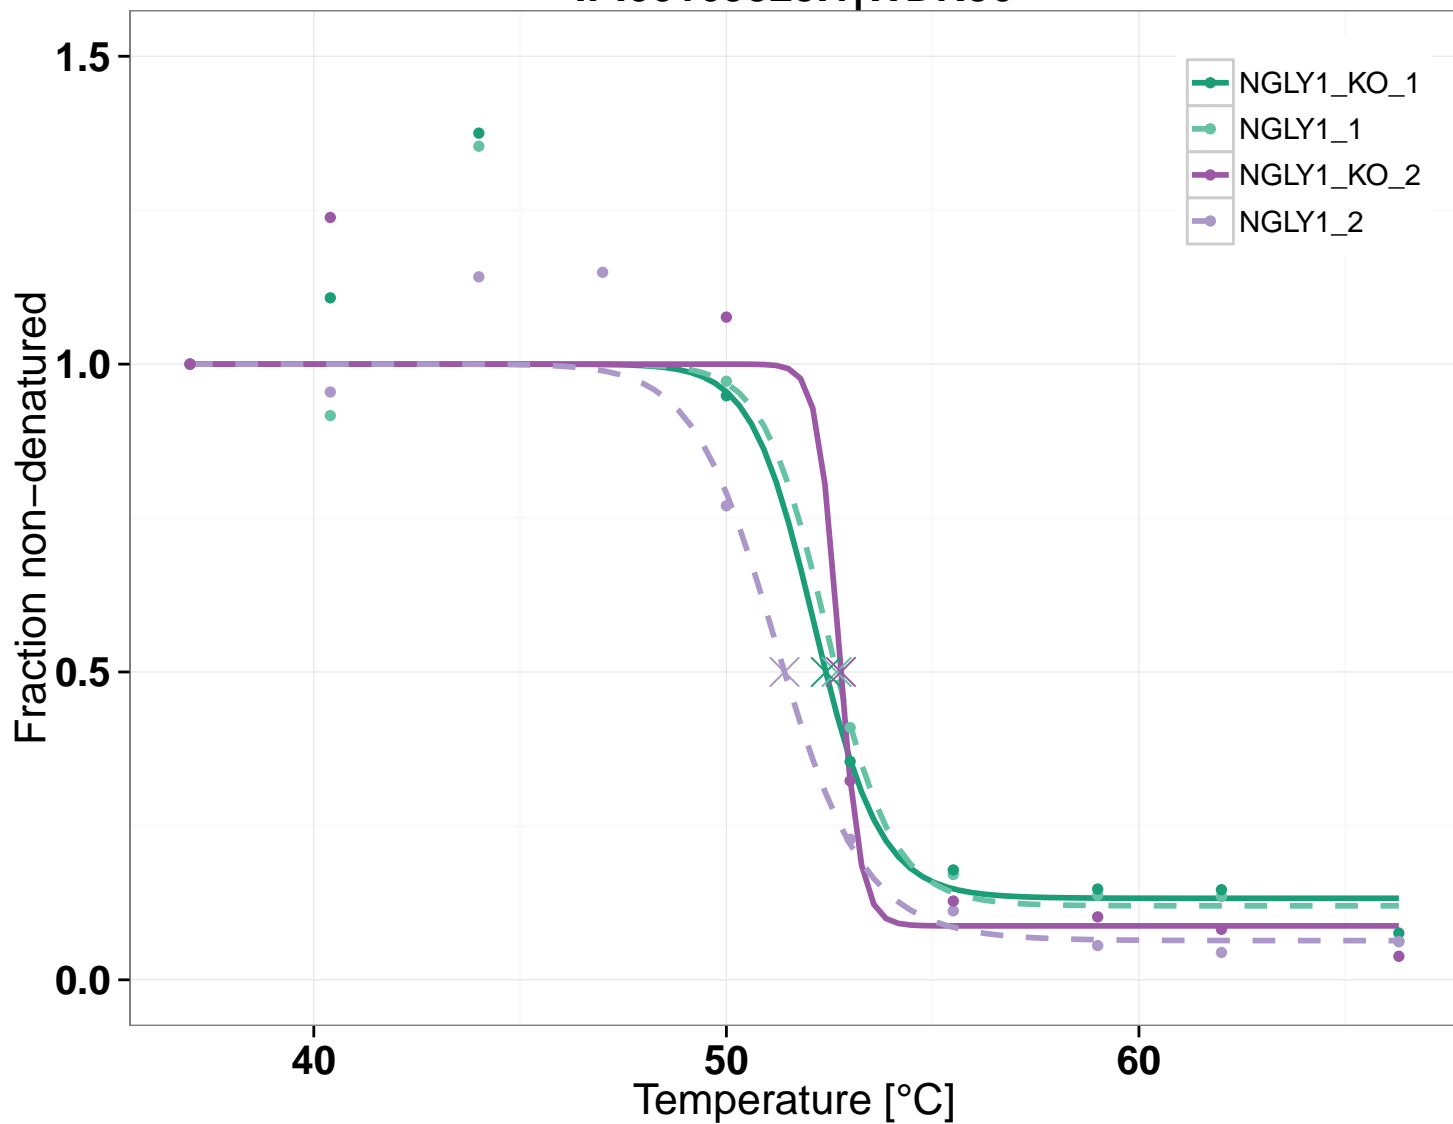

|            | meltPoint | slope | plateau | R2   |
|------------|-----------|-------|---------|------|
| NGLY1_KO_1 | 52.41     | -0.28 | 0.13    | 0.84 |
| NGLY1_1    | 52.67     | -0.28 | 0.12    | 0.85 |
| NGLY1_KO_2 | 52.77     | -0.88 | 0.09    | 0.67 |
| NGLY1_2    | 51.41     | -0.22 | 0.06    | 0.98 |

Supplement: Supplementary file 2896 [file 1]

IPI00023860.1|NAP1L1

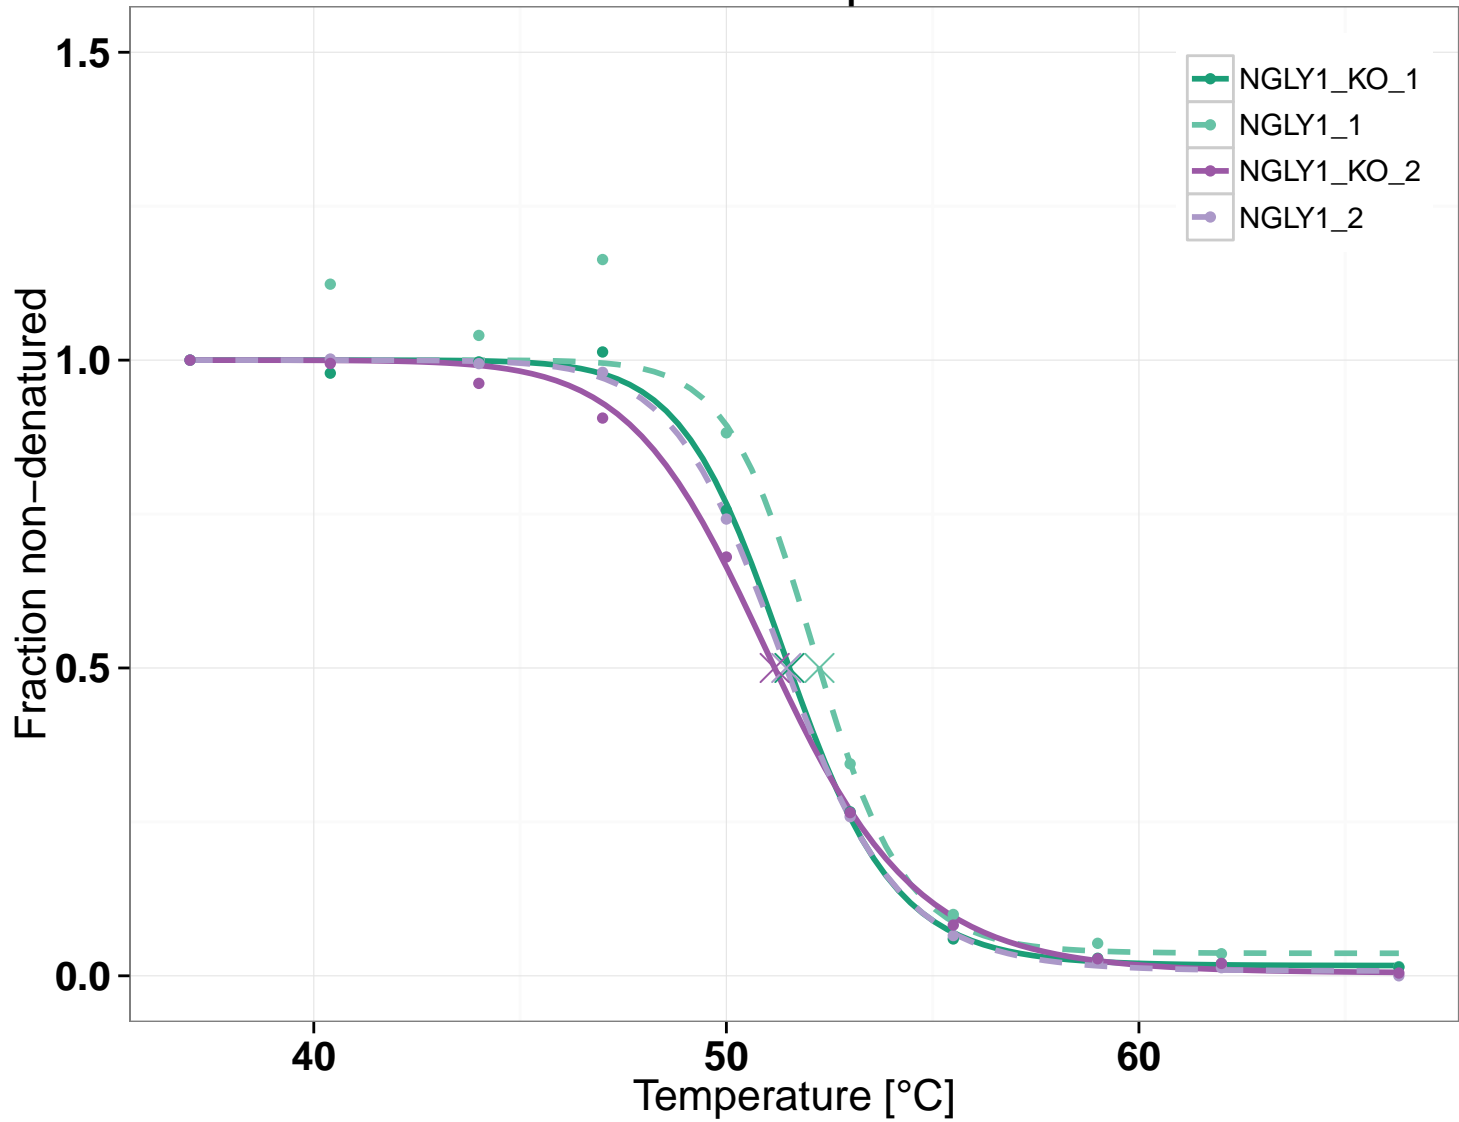

|            | meltPoint | slope | plateau | R2   |
|------------|-----------|-------|---------|------|
| NGLY1_KO_1 | 51.53     | -0.19 | 0.02    | 1    |
| NGLY1_1    | 52.26     | -0.22 | 0.04    | 0.98 |
| NGLY1_KO_2 | 51.17     | -0.14 | 0       | 1    |
| NGLY1_2    | 51.45     | -0.18 | 0.01    | 1    |

Supplement: Supplementary file 2897 [file 1]

IPI00419450.2|FBXO46

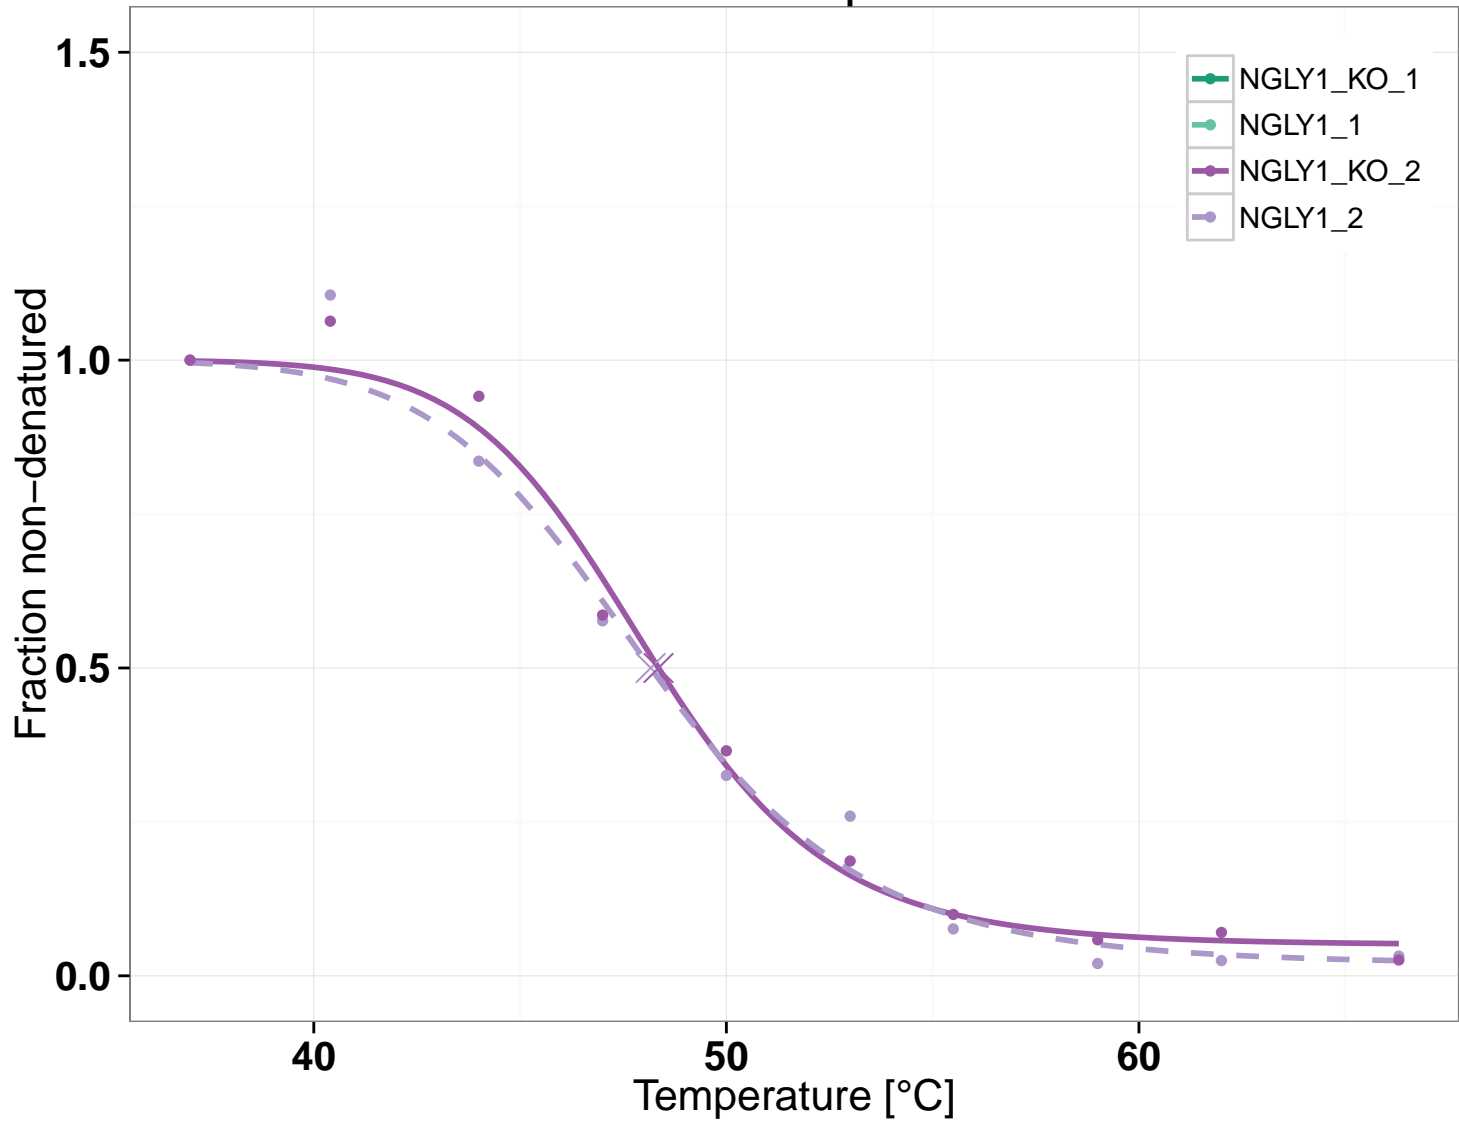

|            | meltPoint | slope  | plateau | R2   |
|------------|-----------|--------|---------|------|
| NGLY1_KO_1 | —         | —      | —       | —    |
| NGLY1_1    | —         | —      | —       | —    |
| NGLY1_KO_2 | 48.36     | -0.11  | 0.05    | 0.99 |
| NGLY1_2    | 48.17     | -0.094 | 0.02    | 0.98 |

Supplement: Supplementary file 2898 [file 1]

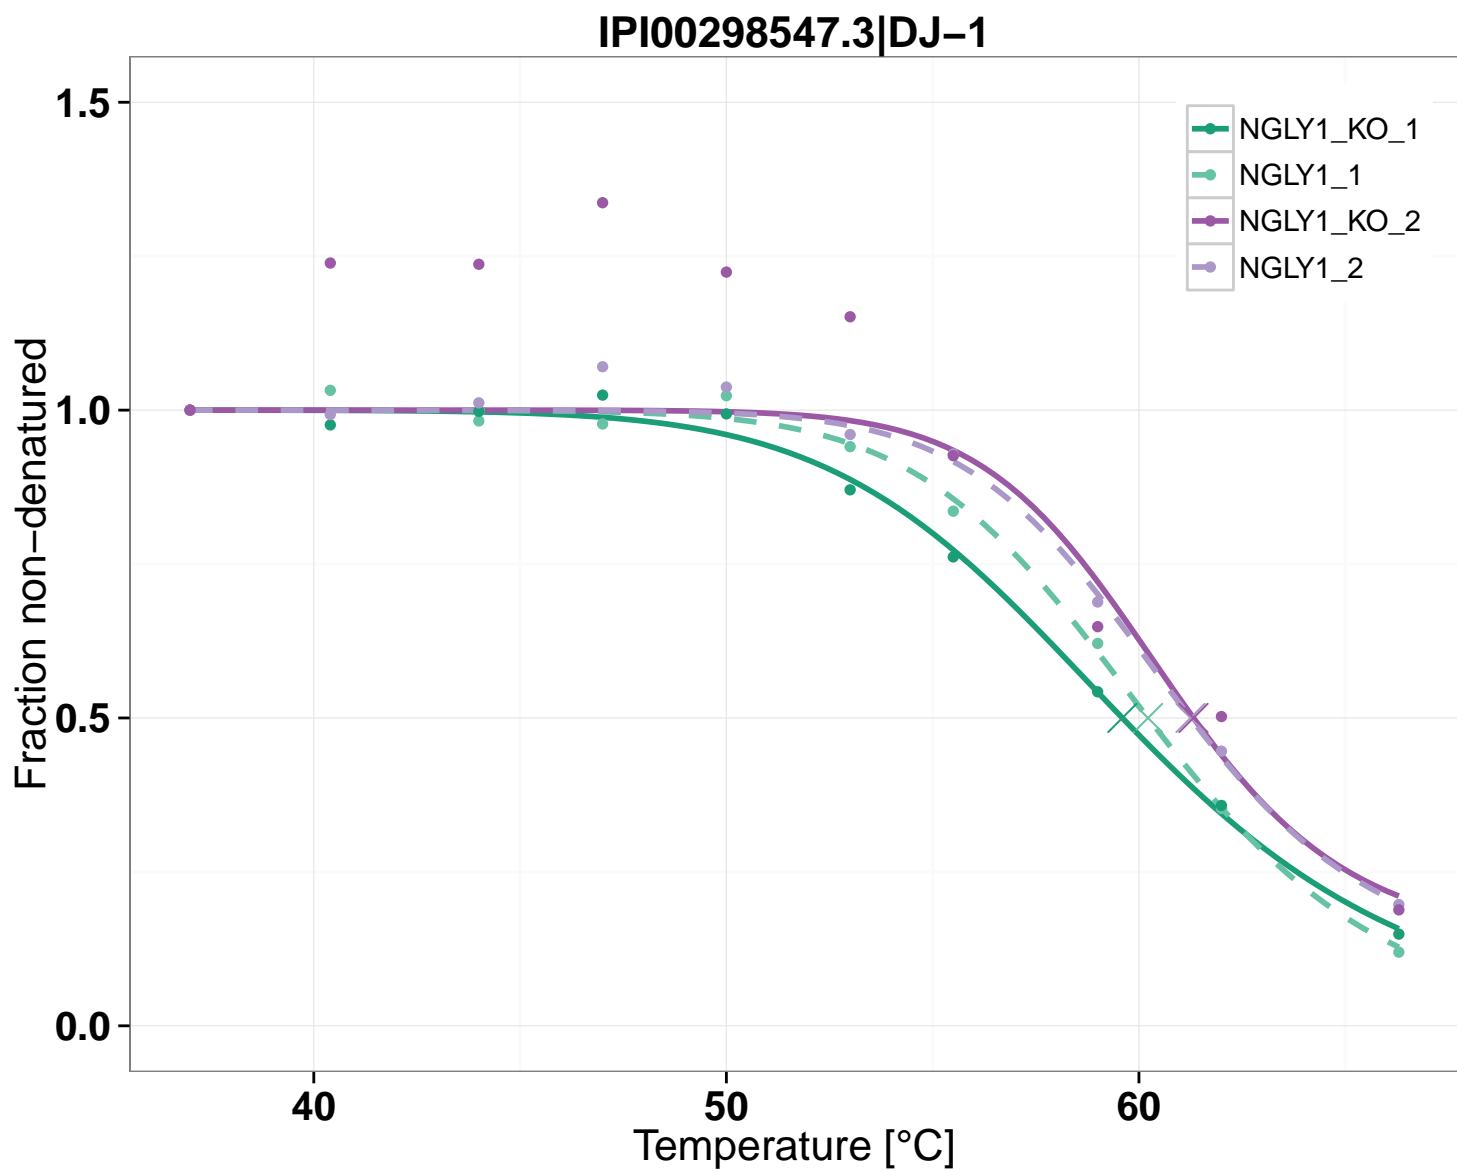

|            | meltPoint | slope  | plateau | R2   |
|------------|-----------|--------|---------|------|
| NGLY1_KO_1 | 59.6      | -0.071 | 0       | 1    |
| NGLY1_1    | 60.22     | -0.088 | 0       | 1    |
| NGLY1_KO_2 | 61.32     | -0.098 | 0.13    | 0.76 |
| NGLY1_2    | 61.25     | -0.091 | 0.1     | 0.99 |

Supplement: Supplementary file 2899 [file 1]

# IPI00556494.3|MED4

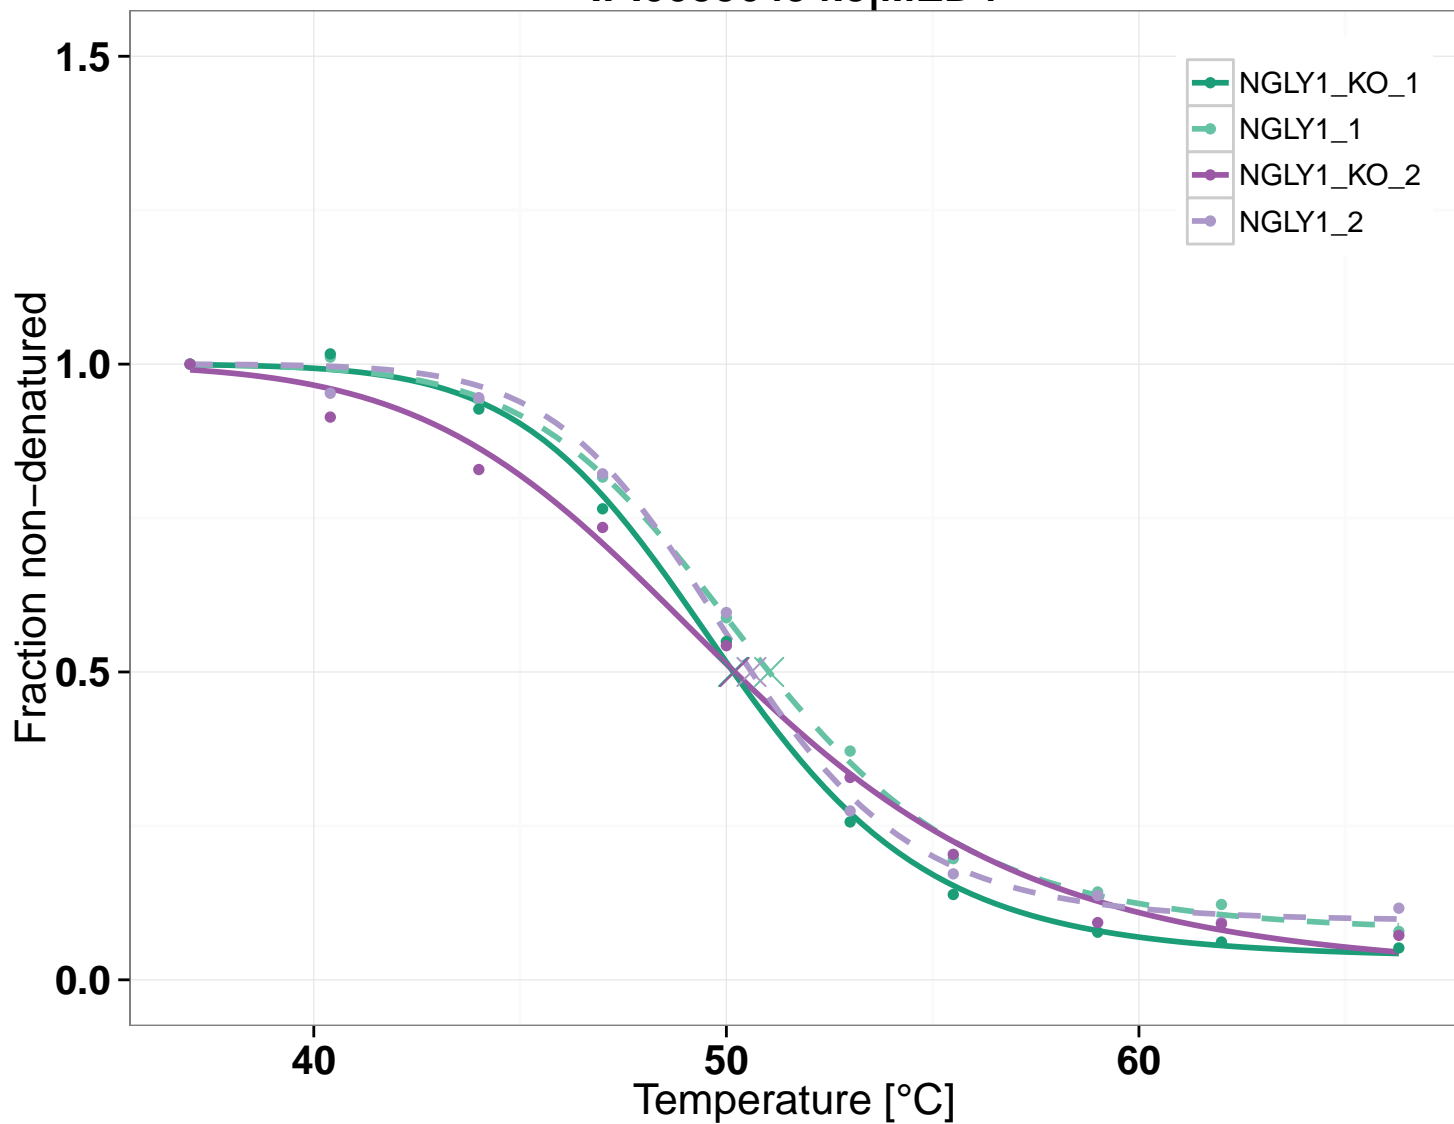

|            | meltPoint | slope  | plateau | R2   |
|------------|-----------|--------|---------|------|
| NGLY1_KO_1 | 50.17     | -0.097 | 0.04    | 1    |
| NGLY1_1    | 51.04     | -0.086 | 0.08    | 1    |
| NGLY1_KO_2 | 50.2      | -0.067 | 0.01    | 0.99 |
| NGLY1_2    | 50.61     | -0.1   | 0.1     | 1    |

Supplement: Supplementary file 2900 [file 1]

# IPI00032959.3|GPD1L

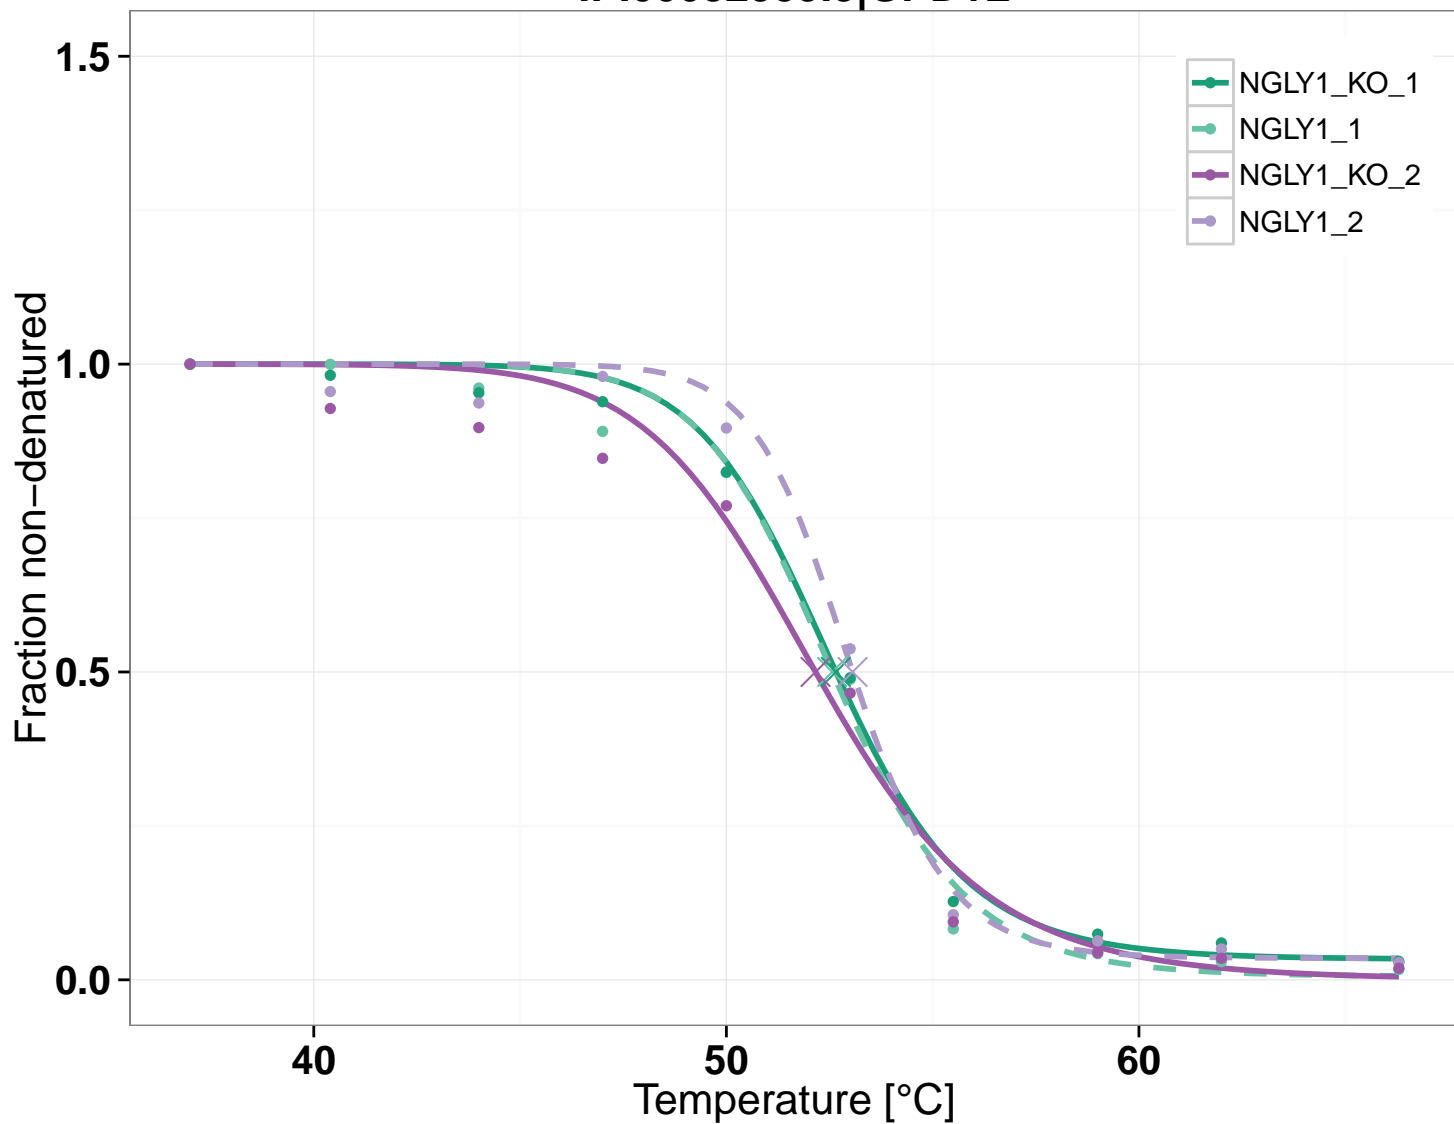

|            | meltPoint | slope | plateau | R2   |
|------------|-----------|-------|---------|------|
| NGLY1_KO_1 | 52.66     | -0.15 | 0.03    | 0.99 |
| NGLY1_1    | 52.57     | -0.15 | 0.01    | 0.99 |
| NGLY1_KO_2 | 52.16     | -0.12 | 0       | 0.98 |
| NGLY1_2    | 53.06     | -0.21 | 0.03    | 0.99 |

Supplement: Supplementary file 2901 [file 1]

IPI00030363.1|ACAT1

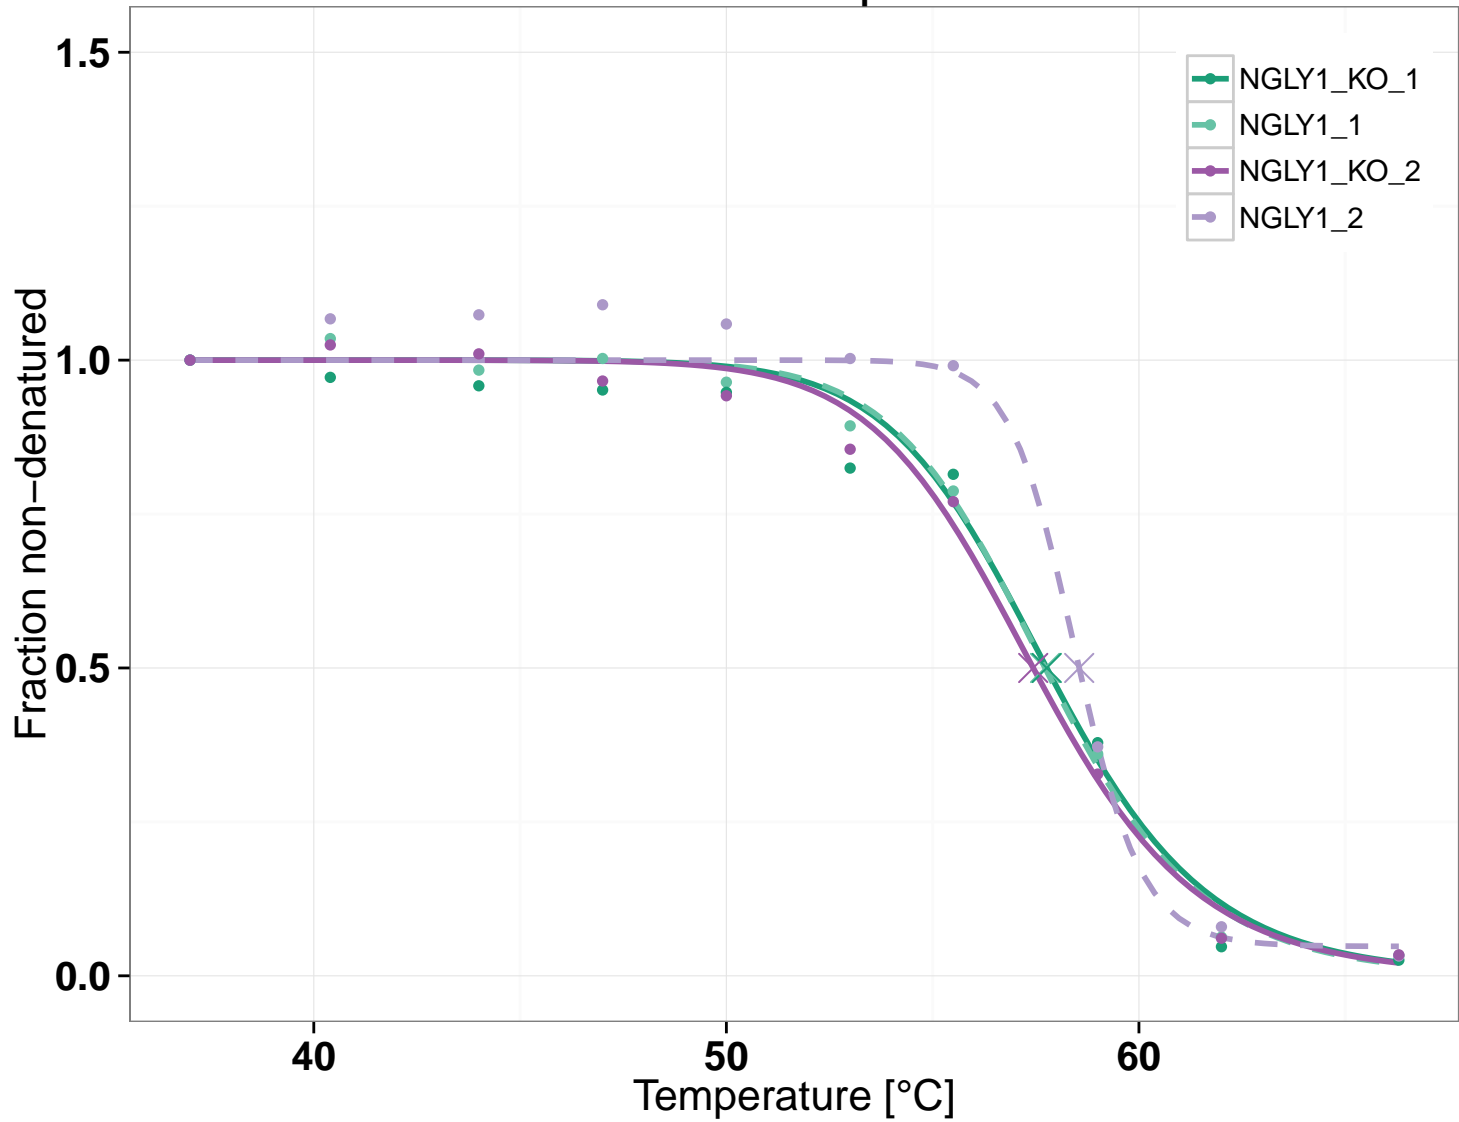

|            | meltPoint | slope | plateau | R2   |
|------------|-----------|-------|---------|------|
| NGLY1_KO_1 | 57.77     | -0.13 | 0       | 0.98 |
| NGLY1_1    | 57.73     | -0.13 | 0       | 1    |
| NGLY1_KO_2 | 57.44     | -0.13 | 0       | 0.99 |
| NGLY1_2    | 58.55     | -0.3  | 0.05    | 0.99 |

Supplement: Supplementary file 2902 [file 1]

# IPI00026969.4|SEC23IP

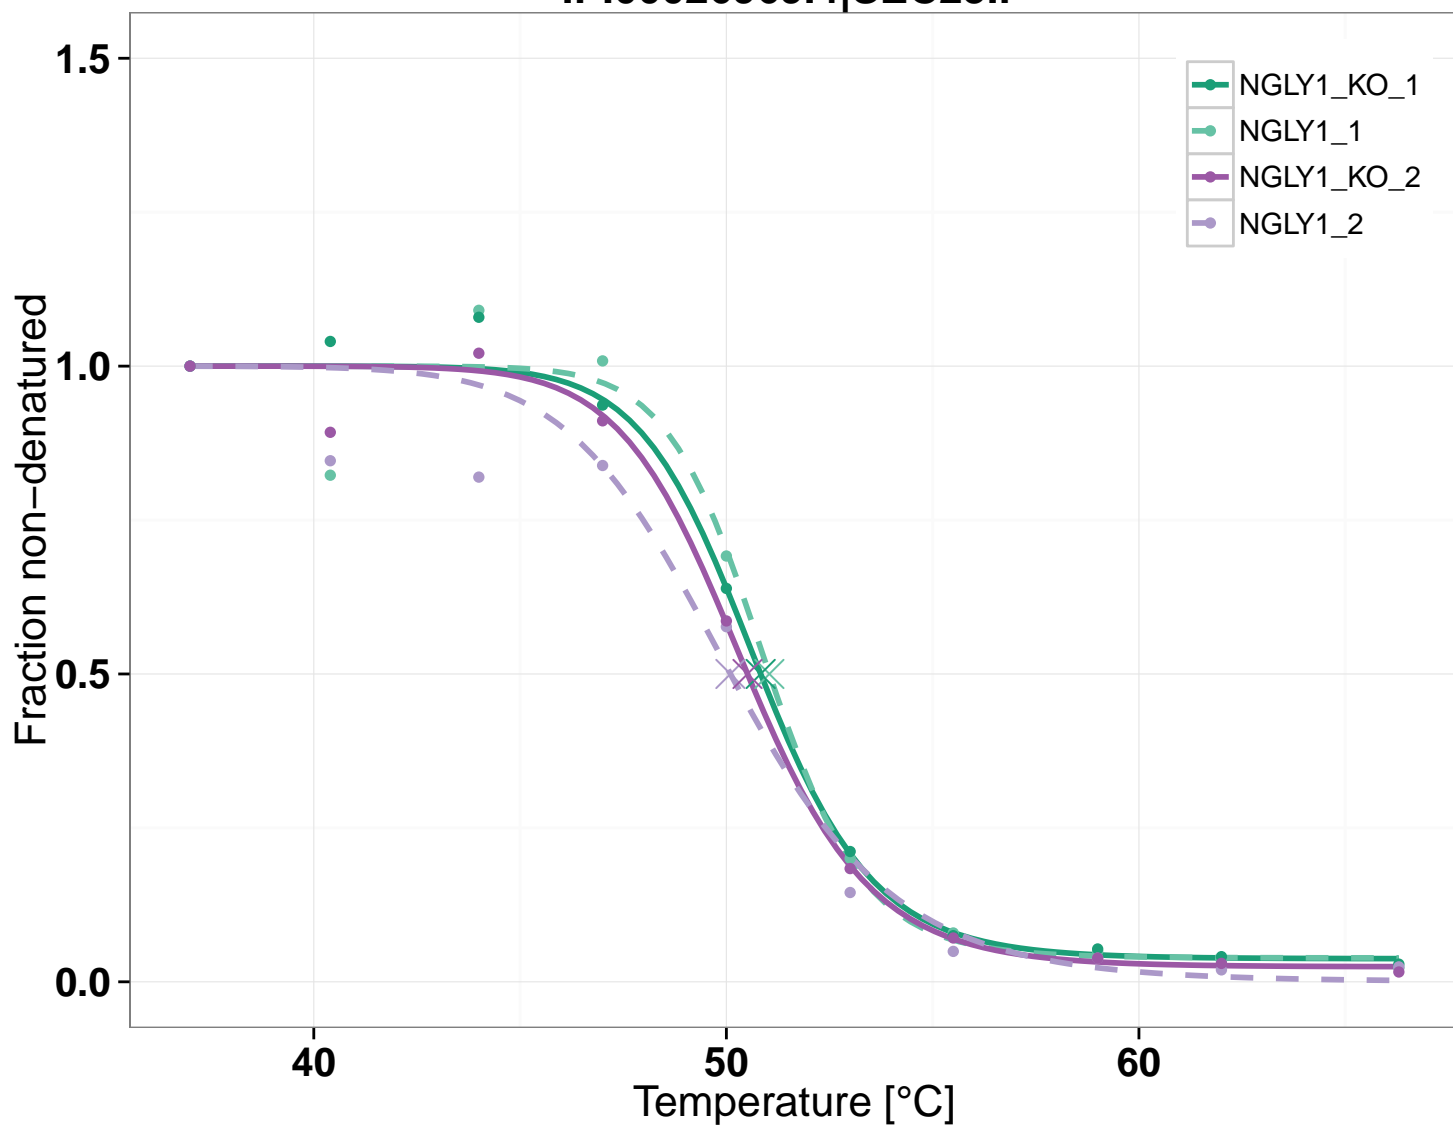

|            | meltPoint | slope | plateau | R2   |
|------------|-----------|-------|---------|------|
| NGLY1_KO_1 | 50.83     | -0.17 | 0.04    | 1    |
| NGLY1_1    | 51.04     | -0.2  | 0.04    | 0.98 |
| NGLY1_KO_2 | 50.51     | -0.16 | 0.02    | 0.99 |
| NGLY1_2    | 50.1      | -0.13 | 0       | 0.96 |

Supplement: Supplementary file 2903 [file 1]

# IPI00015011.1|FBXL12

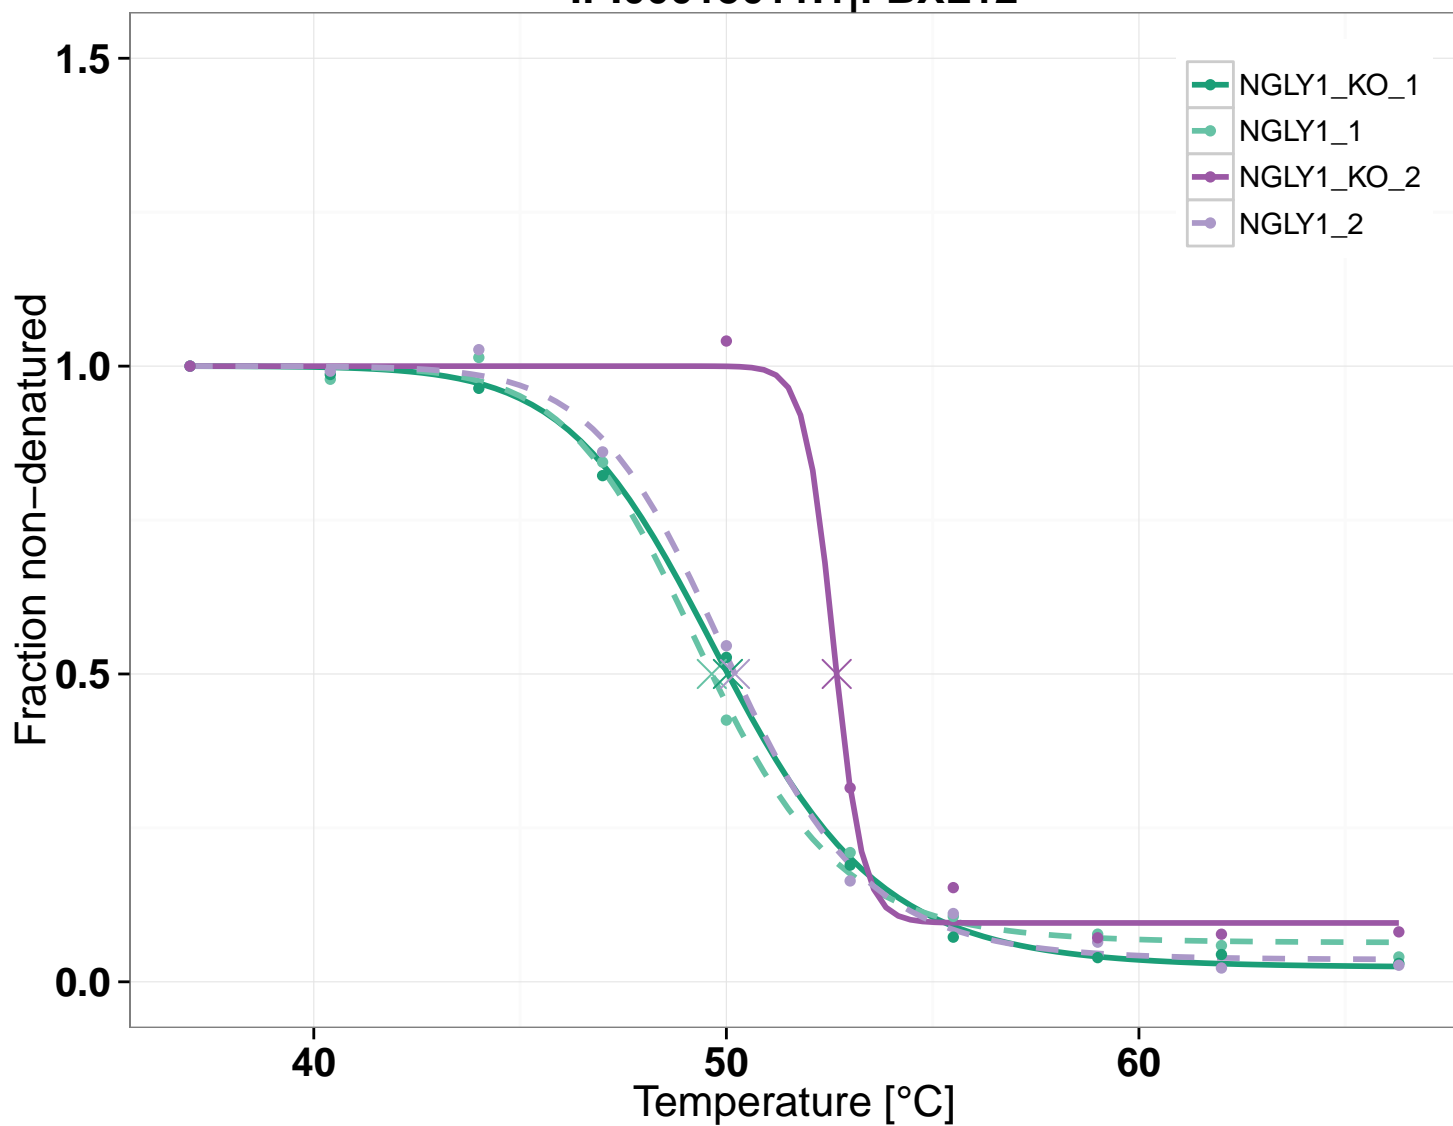

|            | meltPoint | slope | plateau | R2   |
|------------|-----------|-------|---------|------|
| NGLY1_KO_1 | 50.04     | -0.13 | 0.02    | 1    |
| NGLY1_1    | 49.65     | -0.14 | 0.06    | 1    |
| NGLY1_KO_2 | 52.67     | -0.65 | 0.1     | 0.52 |
| NGLY1_2    | 50.21     | -0.15 | 0.04    | 1    |

Supplement: Supplementary file 2904 [file 1]

# IPI00306516.1|TIMM44

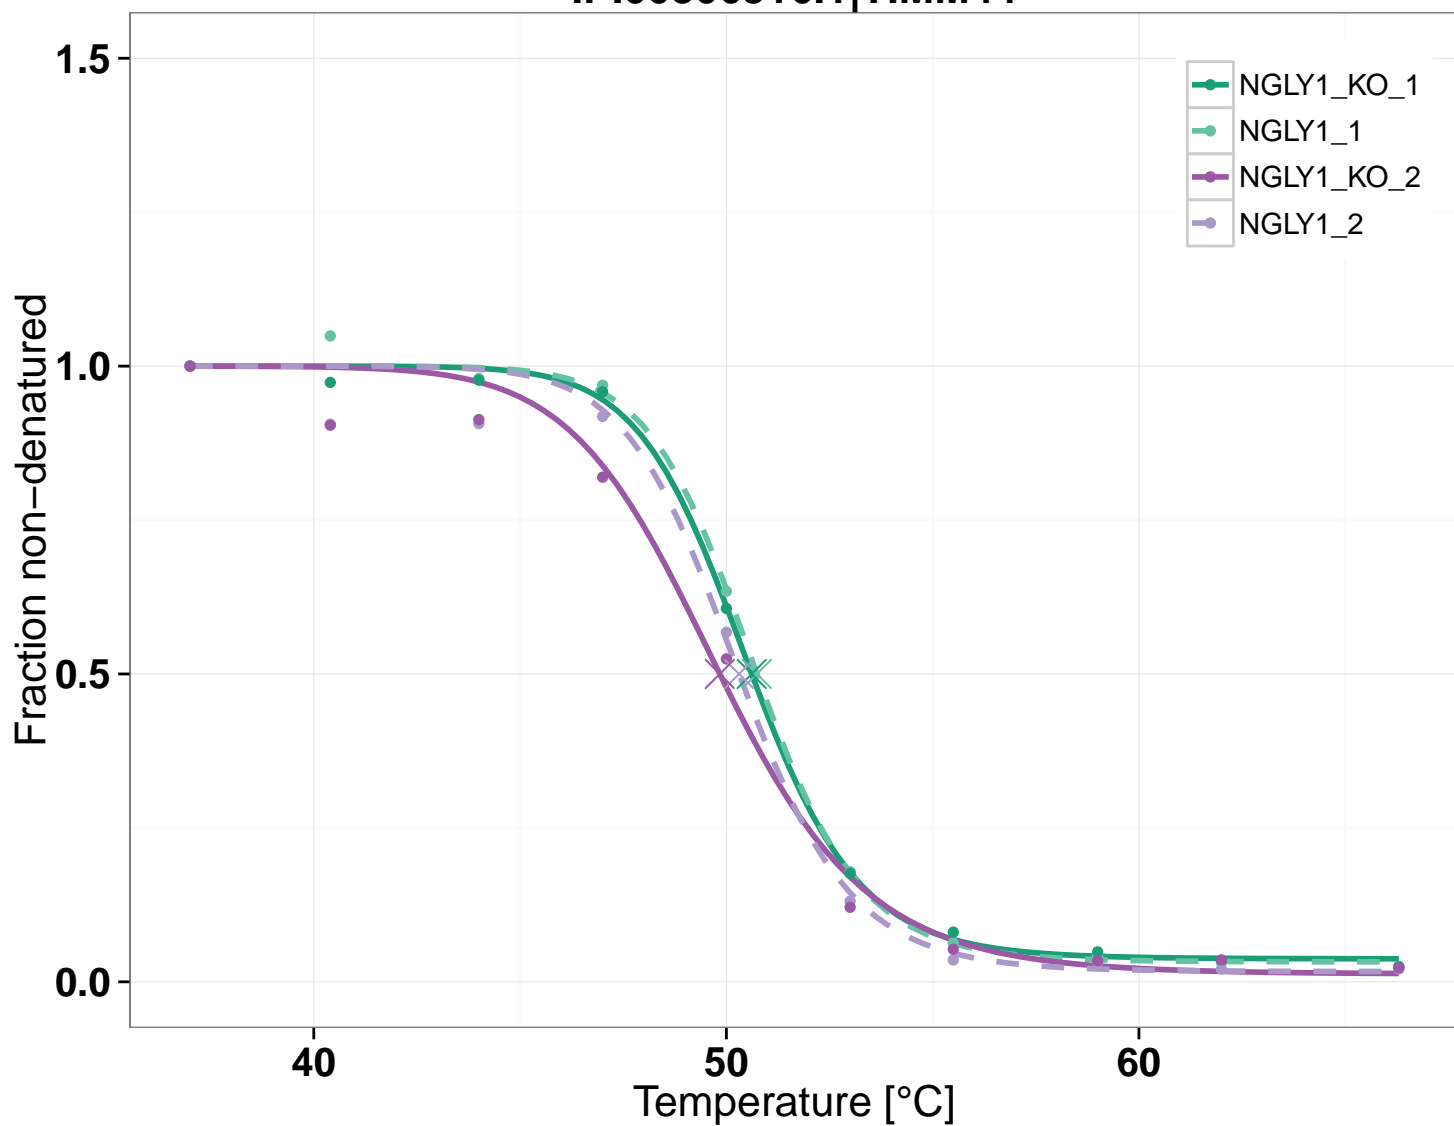

|            | meltPoint | slope | plateau | R2   |
|------------|-----------|-------|---------|------|
| NGLY1_KO_1 | 50.61     | -0.18 | 0.04    | 1    |
| NGLY1_1    | 50.74     | -0.19 | 0.03    | 1    |
| NGLY1_KO_2 | 49.84     | -0.14 | 0.01    | 0.99 |
| NGLY1_2    | 50.31     | -0.18 | 0.02    | 0.99 |

Supplement: Supplementary file 2905 [file 1]

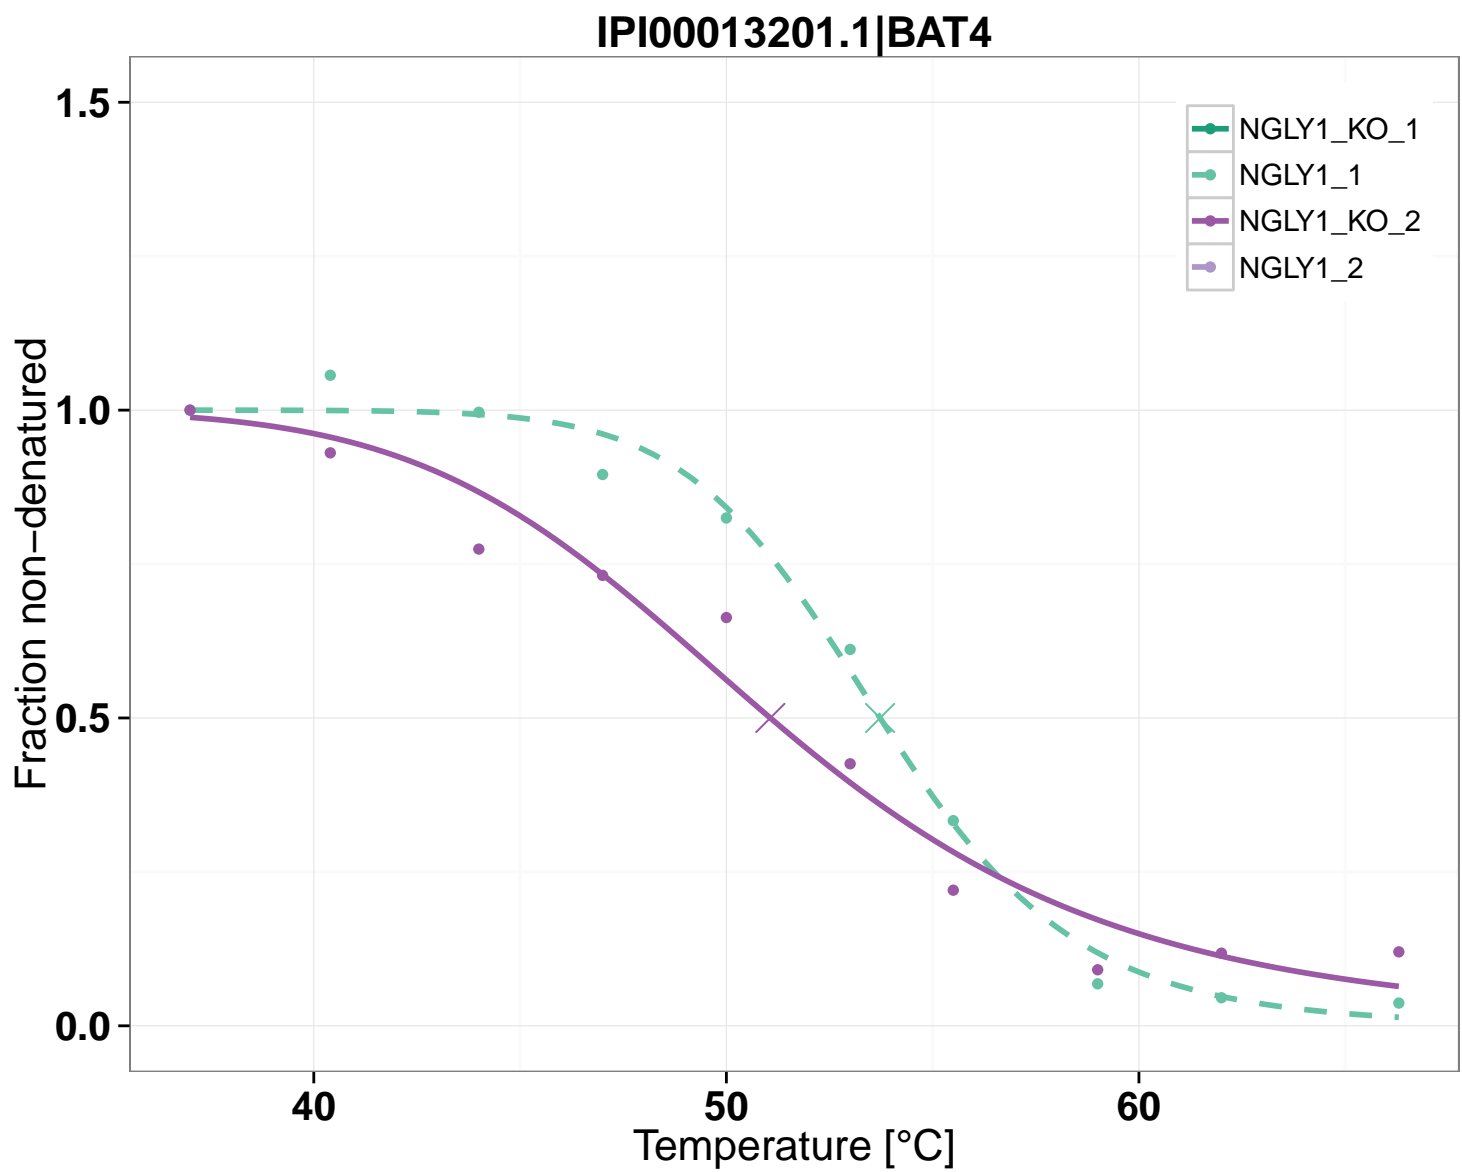

|            | meltPoint | slope  | plateau | R2   |
|------------|-----------|--------|---------|------|
| NGLY1_KO_1 | —         | —      | —       | —    |
| NGLY1_1    | 53.73     | -0.11  | 0       | 0.99 |
| NGLY1_KO_2 | 51.07     | -0.059 | 0       | 0.97 |
| NGLY1_2    | —         | —      | —       | —    |

Supplement: Supplementary file 2906 [file 1]

IPI00449132.1|AP3S2

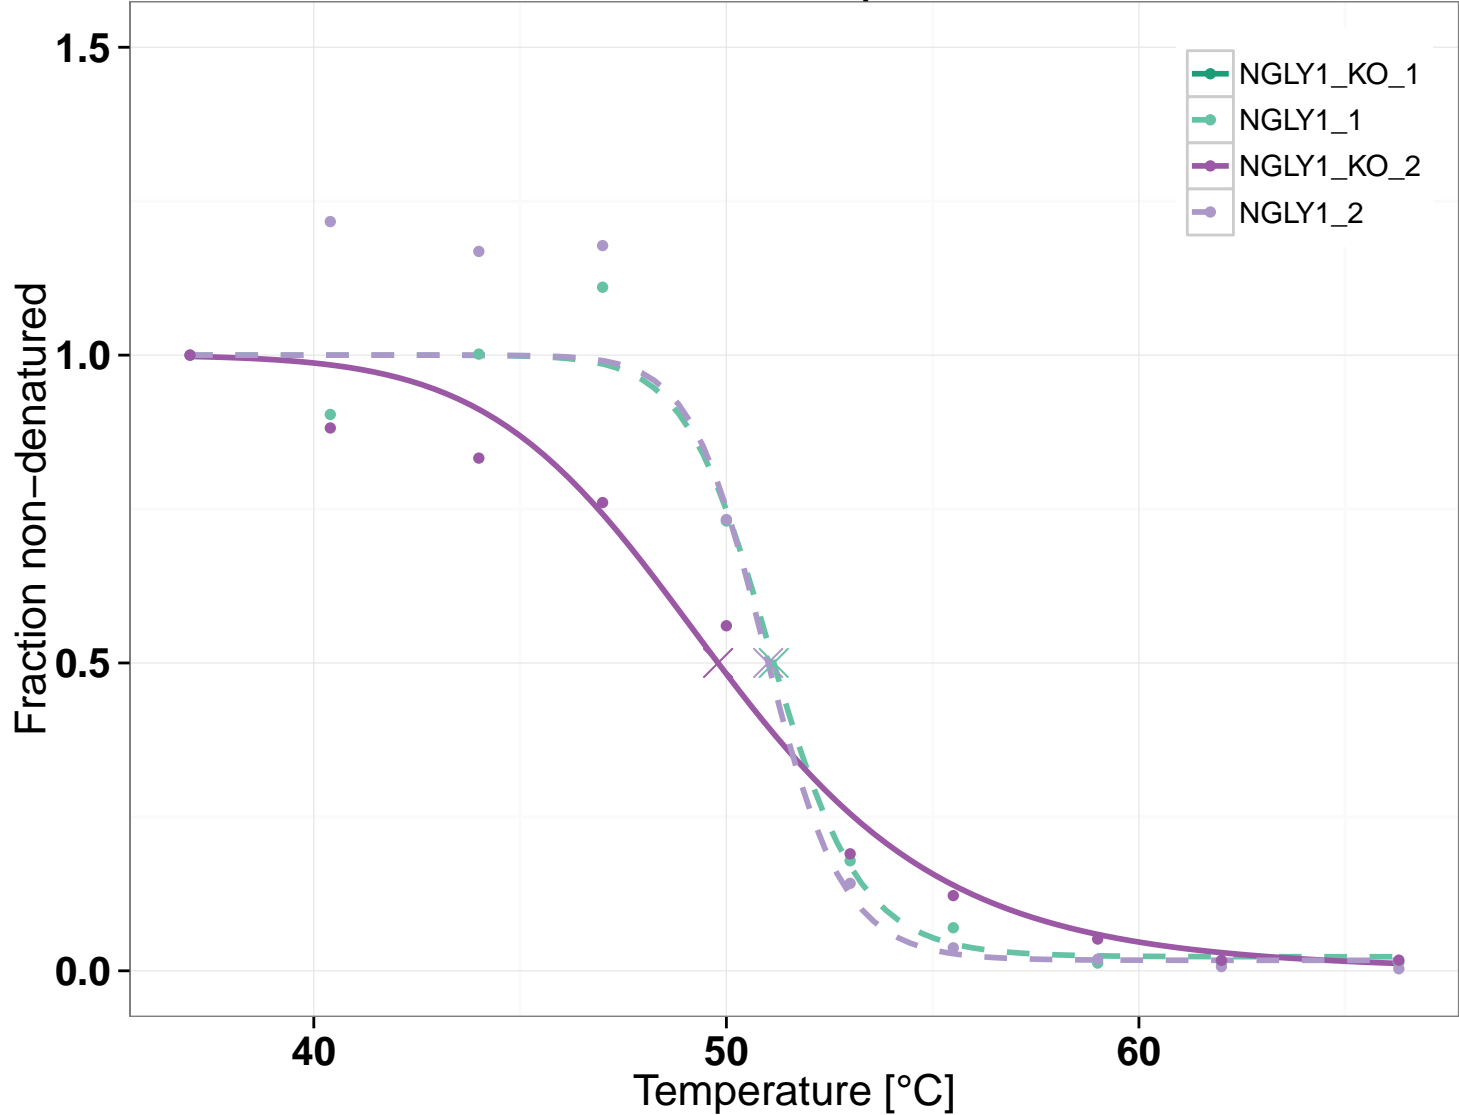

|            | meltPoint | slope | plateau | R2   |
|------------|-----------|-------|---------|------|
| NGLY1_KO_1 | –         | –     | –       | –    |
| NGLY1_1    | 51.15     | –0.23 | 0.02    | 0.99 |
| NGLY1_KO_2 | 49.8      | –0.09 | 0       | 0.98 |
| NGLY1_2    | 51.01     | –0.27 | 0.02    | 0.96 |

Supplement: Supplementary file 2907 [file 1]

IPI00030383.1|PPP1R8

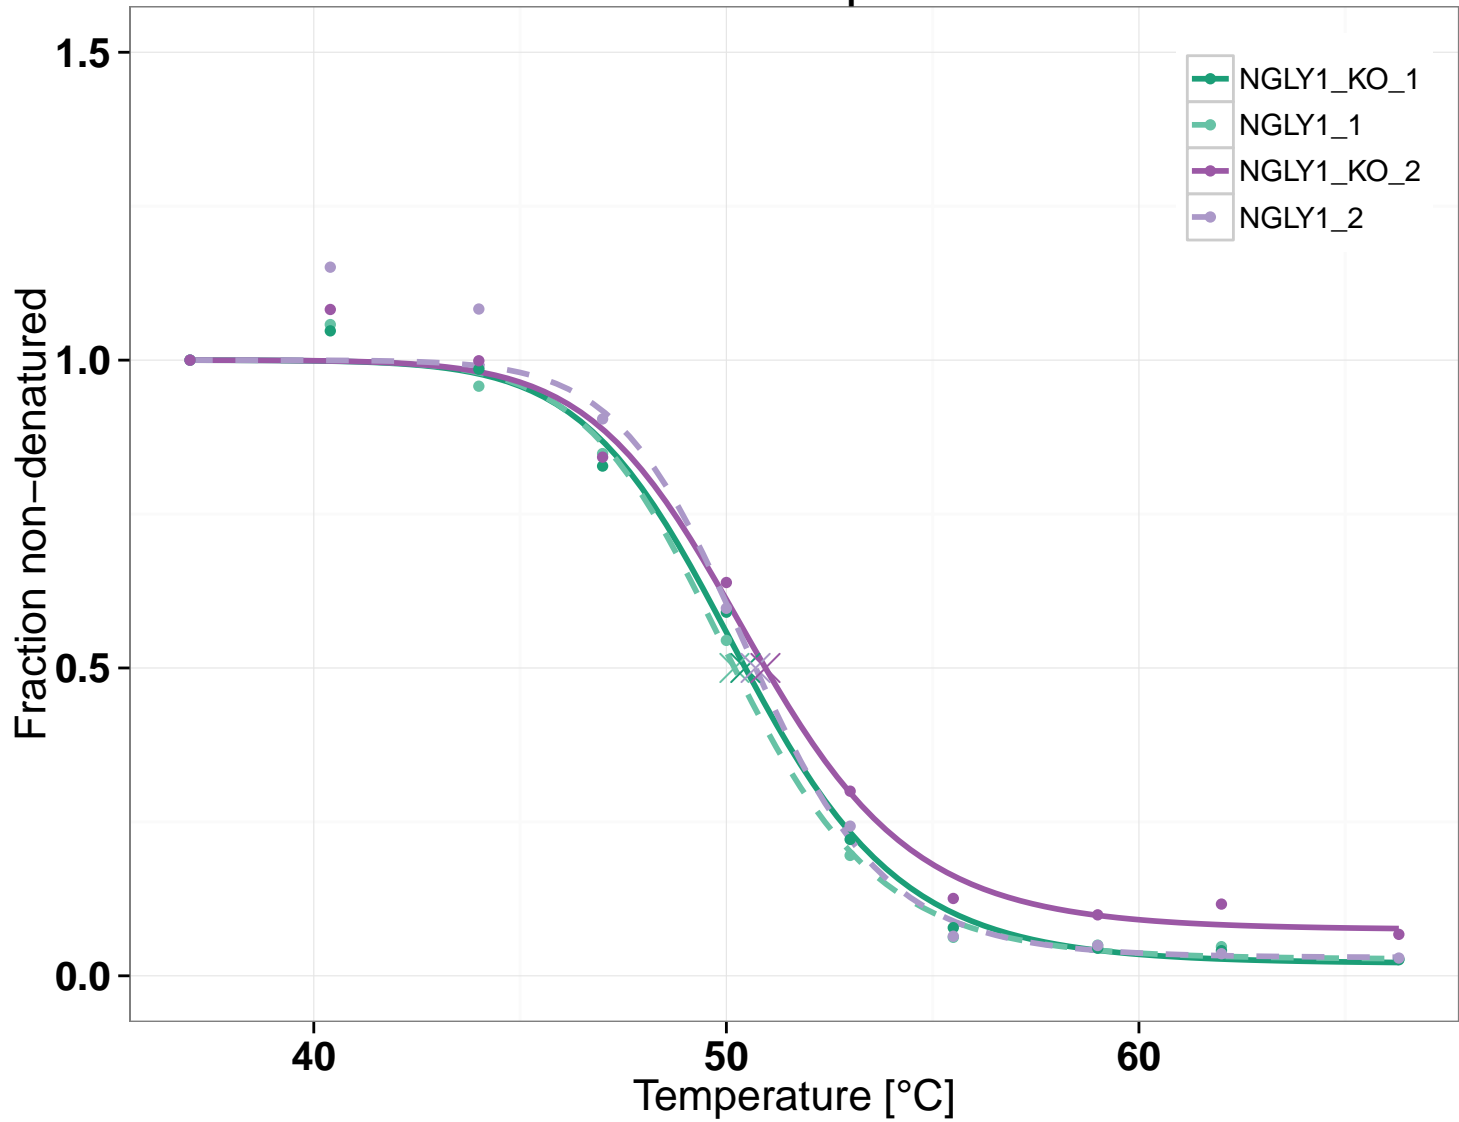

|            | meltPoint | slope | plateau | R2   |
|------------|-----------|-------|---------|------|
| NGLY1_KO_1 | 50.46     | -0.13 | 0.02    | 1    |
| NGLY1_1    | 50.2      | -0.14 | 0.03    | 1    |
| NGLY1_KO_2 | 50.95     | -0.12 | 0.07    | 0.99 |
| NGLY1_2    | 50.71     | -0.15 | 0.03    | 0.98 |

Supplement: Supplementary file 2908 [file 1]

IPI00217616.2|FAM126B

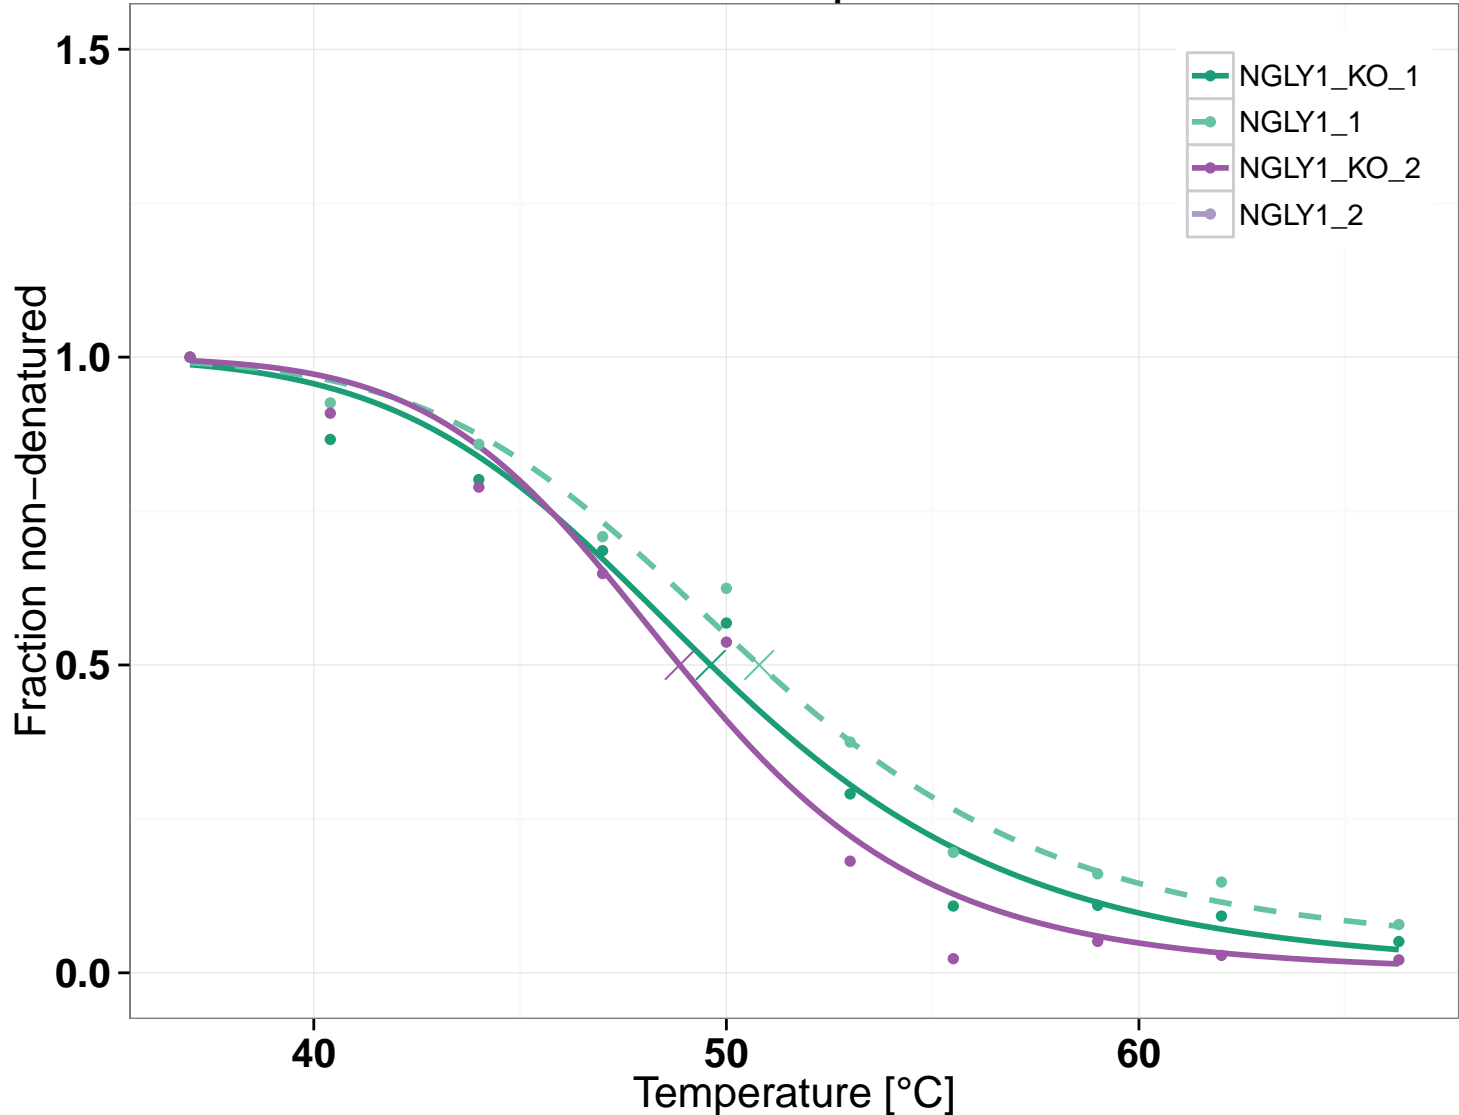

|            | meltPoint | slope  | plateau | R2   |
|------------|-----------|--------|---------|------|
| NGLY1_KO_1 | 49.62     | -0.066 | 0       | 0.98 |
| NGLY1_1    | 50.8      | -0.063 | 0.03    | 0.99 |
| NGLY1_KO_2 | 48.87     | -0.083 | 0       | 0.97 |
| NGLY1_2    | -         | -      | -       | -    |

Supplement: Supplementary file 2909 [file 1]

IPI00295501.1|CNOT8

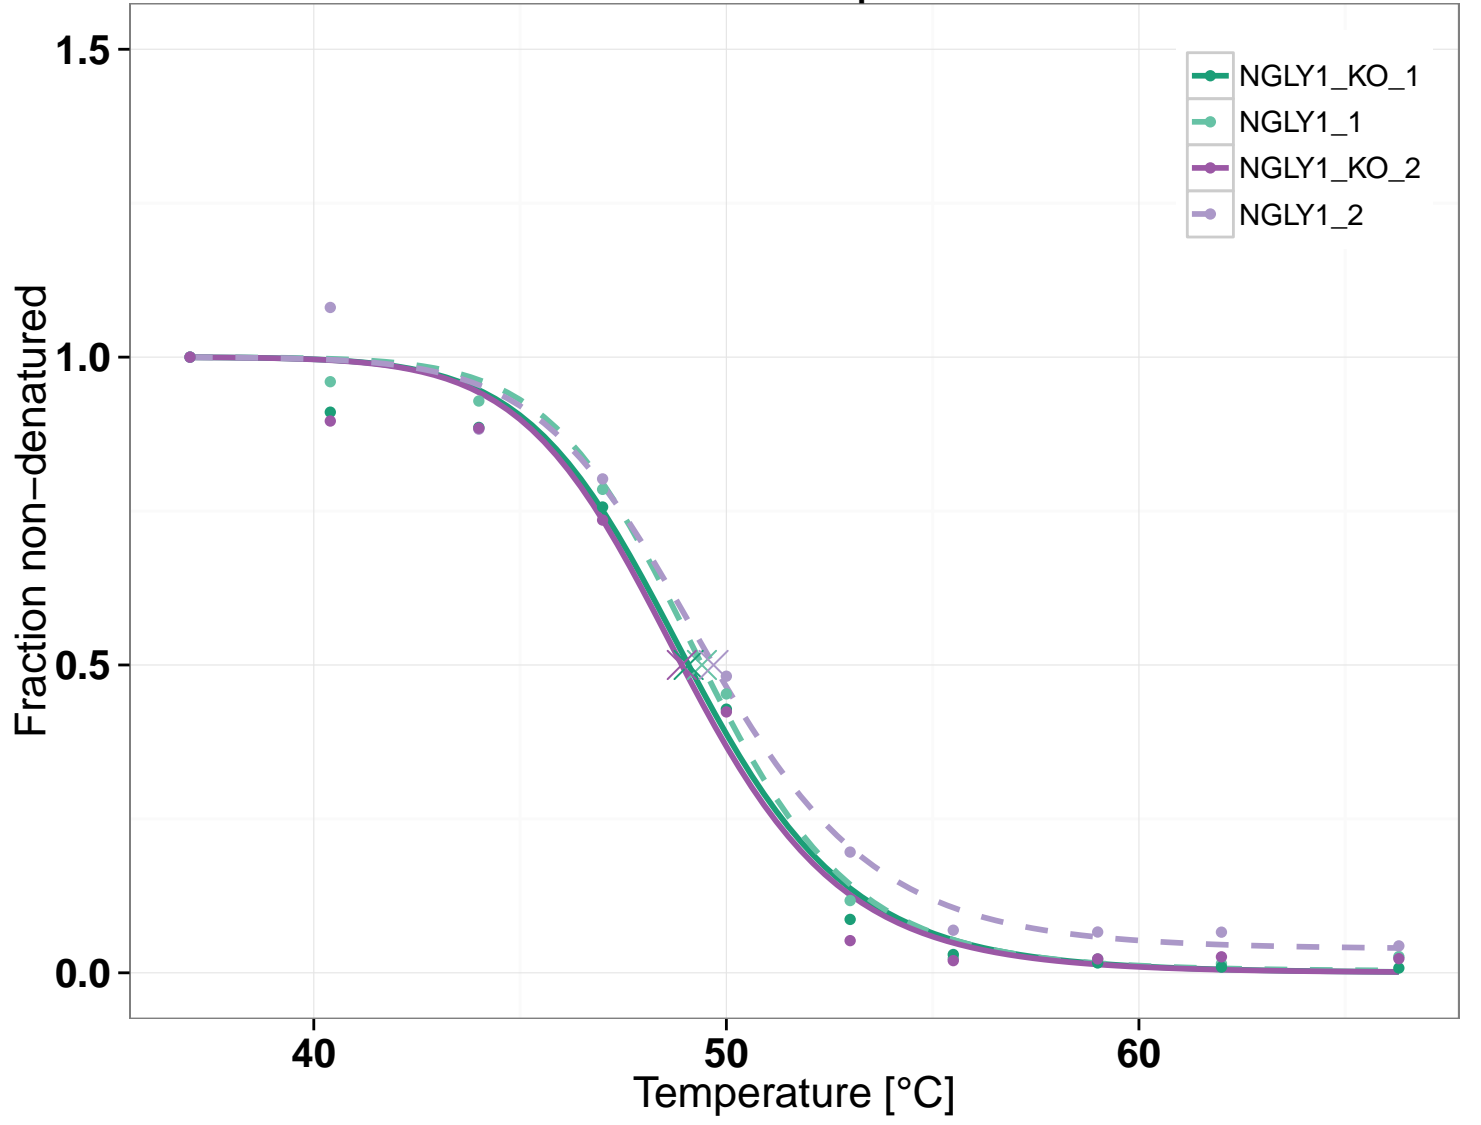

|            | meltPoint | slope | plateau | R2   |
|------------|-----------|-------|---------|------|
| NGLY1_KO_1 | 49.08     | -0.13 | 0       | 0.99 |
| NGLY1_1    | 49.41     | -0.13 | 0       | 1    |
| NGLY1_KO_2 | 48.92     | -0.13 | 0       | 0.99 |
| NGLY1_2    | 49.69     | -0.12 | 0.04    | 0.99 |

Supplement: Supplementary file 2910 [file 1]

IPI00908444.1|CAMK2G

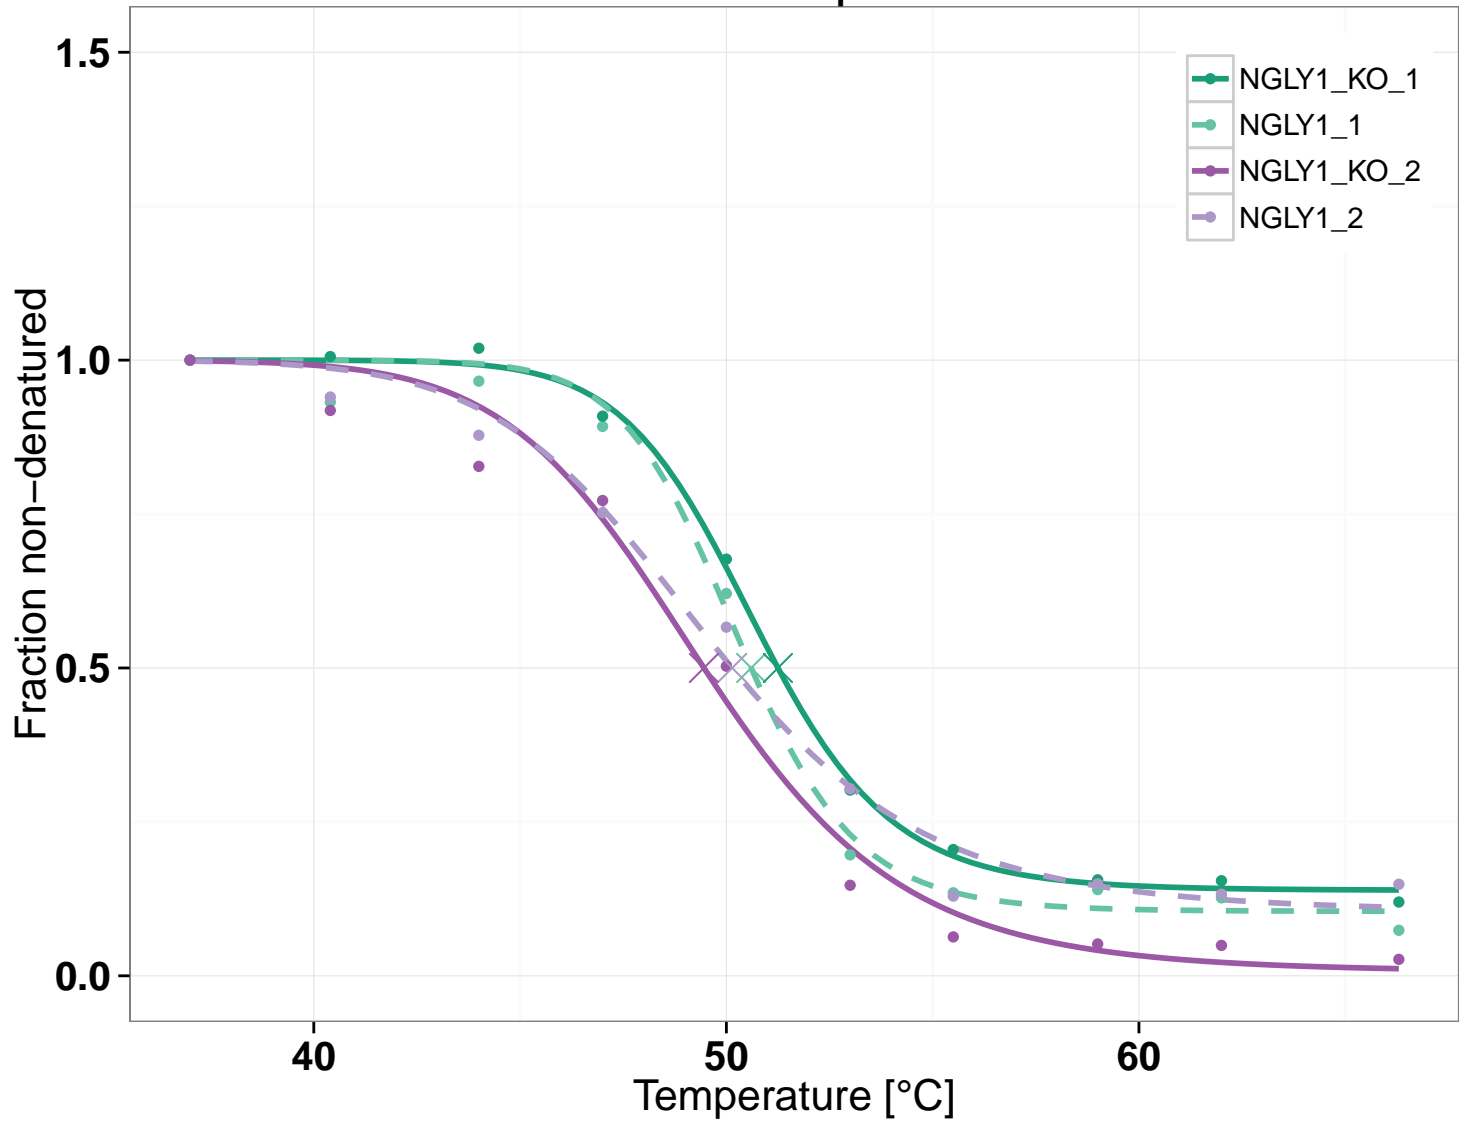

|            | meltPoint | slope  | plateau | R2   |
|------------|-----------|--------|---------|------|
| NGLY1_KO_1 | 51.25     | -0.13  | 0.14    | 1    |
| NGLY1_1    | 50.6      | -0.16  | 0.1     | 0.99 |
| NGLY1_KO_2 | 49.46     | -0.1   | 0.01    | 0.98 |
| NGLY1_2    | 50.14     | -0.085 | 0.1     | 0.99 |

Supplement: Supplementary file 2911 [file 1]

# IPI00062298.3|C1ORF151

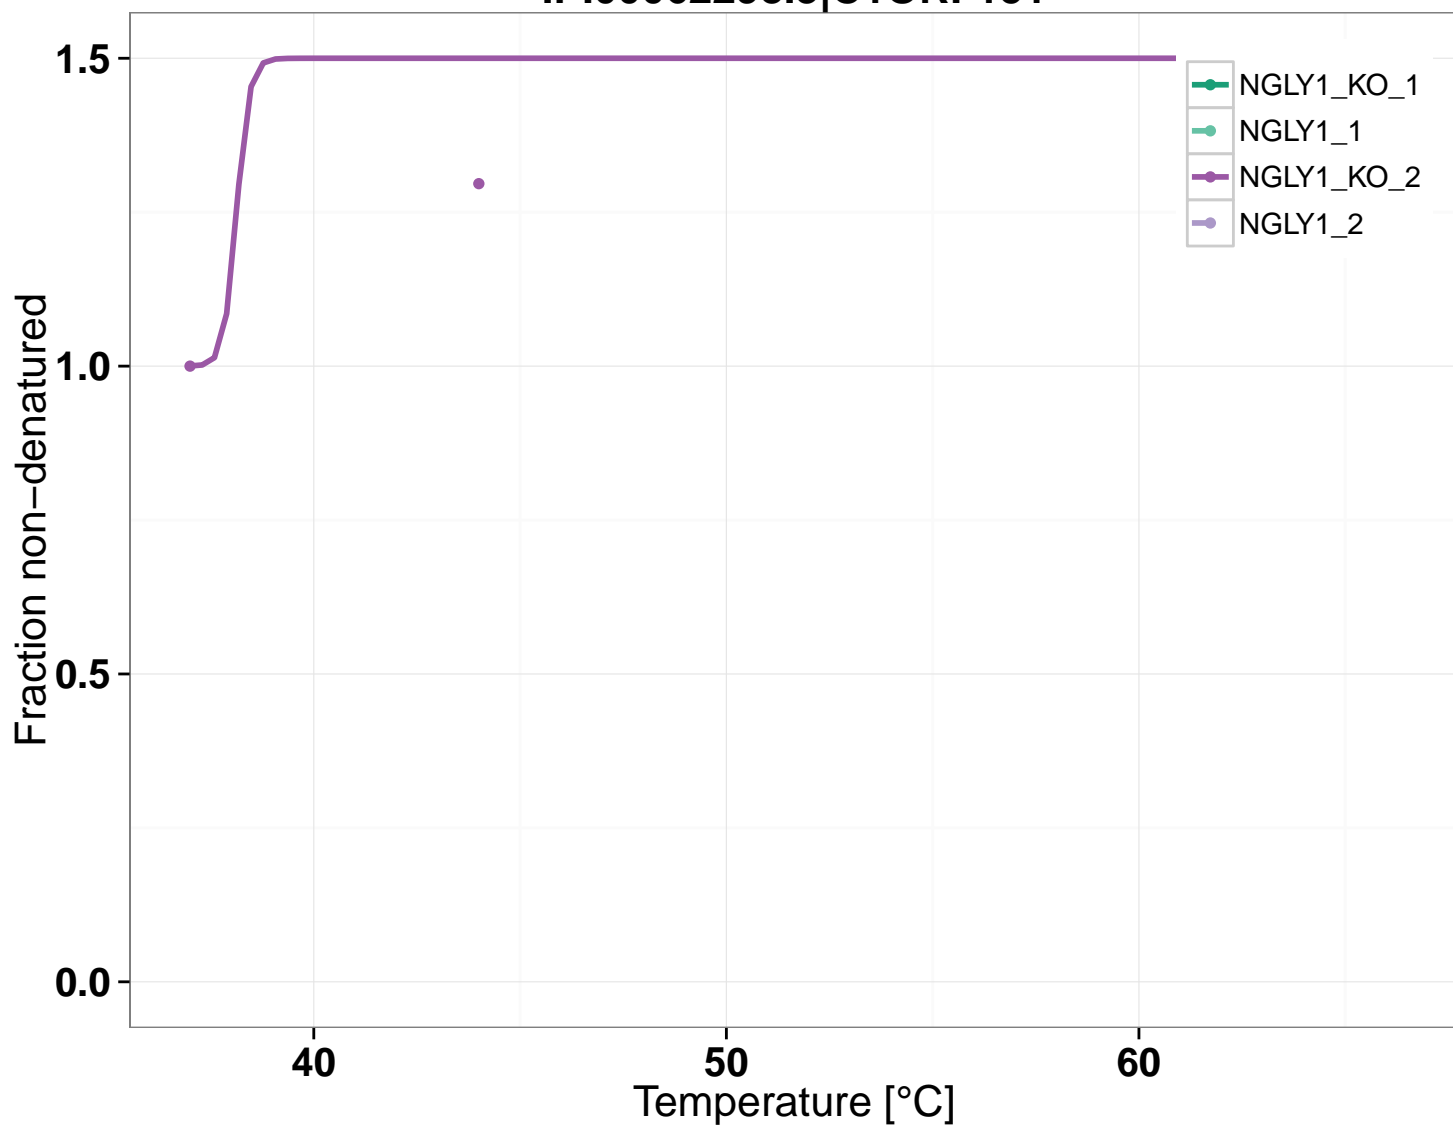

|            | meltPoint | slope | plateau | R2    |
|------------|-----------|-------|---------|-------|
| NGLY1_KO_1 | —         | —     | —       | —     |
| NGLY1_1    | —         | —     | —       | —     |
| NGLY1_KO_2 | —         | 0.82  | 1.5     | −0.19 |
| NGLY1_2    | —         | —     | —       | —     |

Supplement: Supplementary file 2912 [file 1]

IPI00183118.4|MARK3

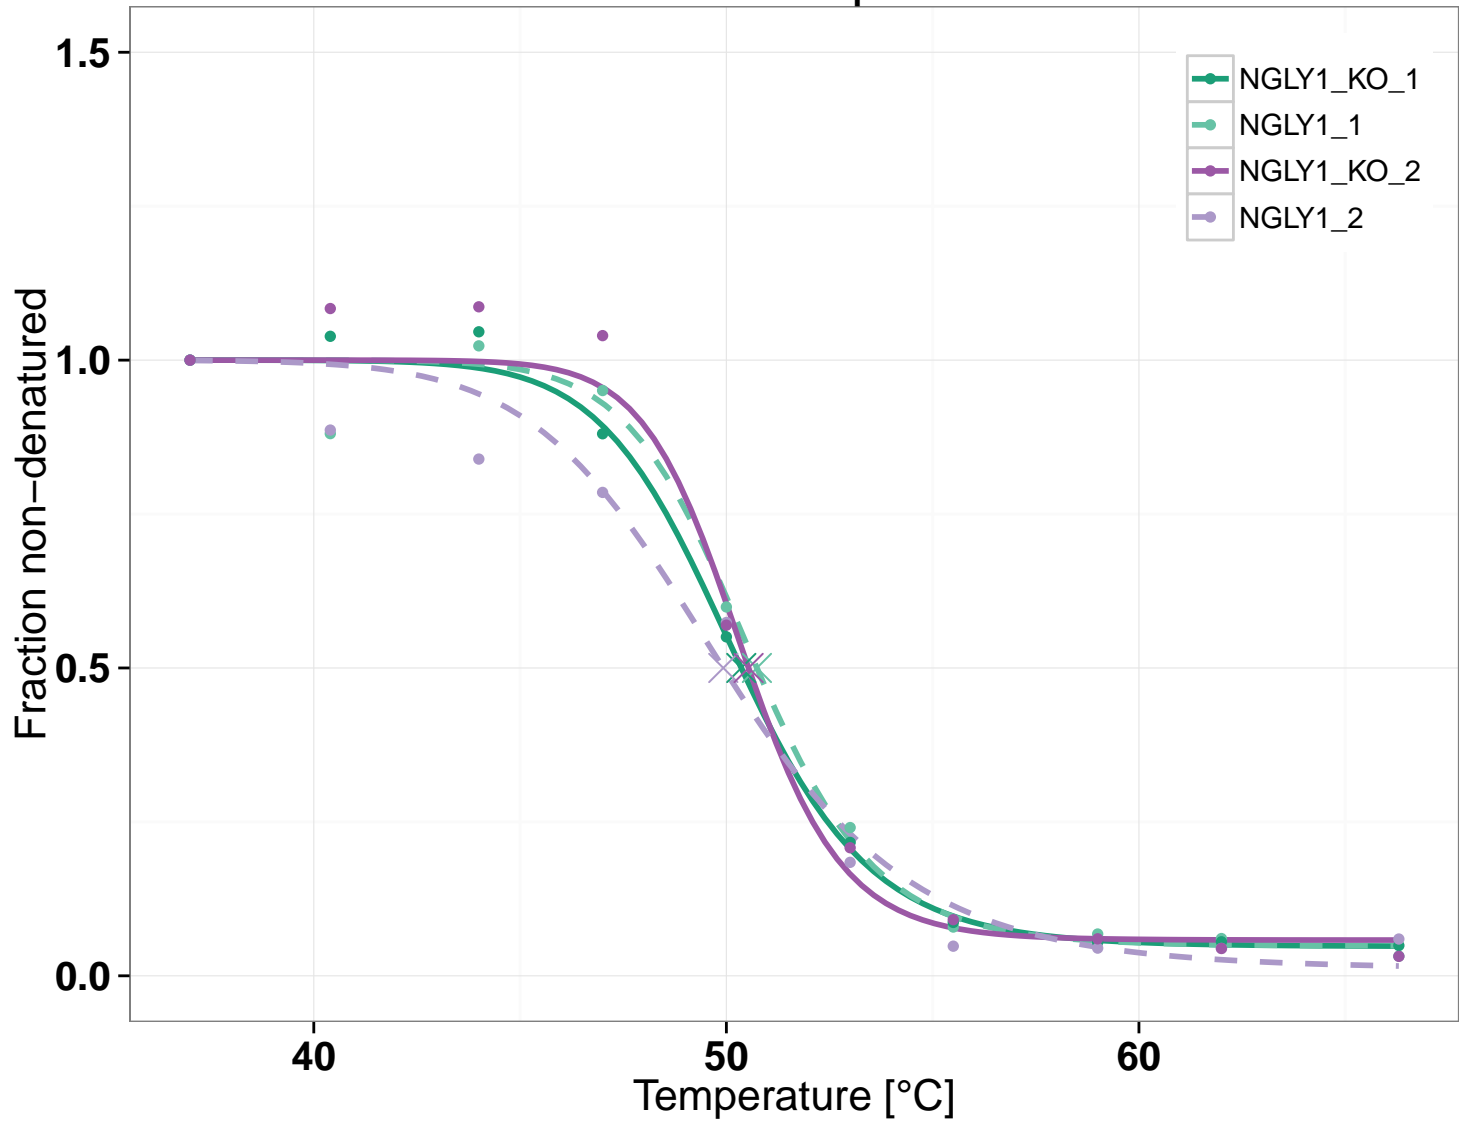

|            | meltPoint | slope | plateau | R2   |
|------------|-----------|-------|---------|------|
| NGLY1_KO_1 | 50.36     | -0.15 | 0.05    | 1    |
| NGLY1_1    | 50.74     | -0.16 | 0.05    | 0.99 |
| NGLY1_KO_2 | 50.54     | -0.2  | 0.06    | 0.99 |
| NGLY1_2    | 49.93     | -0.11 | 0.01    | 0.97 |

Supplement: Supplementary file 2913 [file 1]
