# Supplementary material (part 30 of 85)
Source: publisher figshare collection journal article supplement (https://gsajournals.figshare.com/articles/dataset/_/12014913)

IPI00783559.1|EXOC2

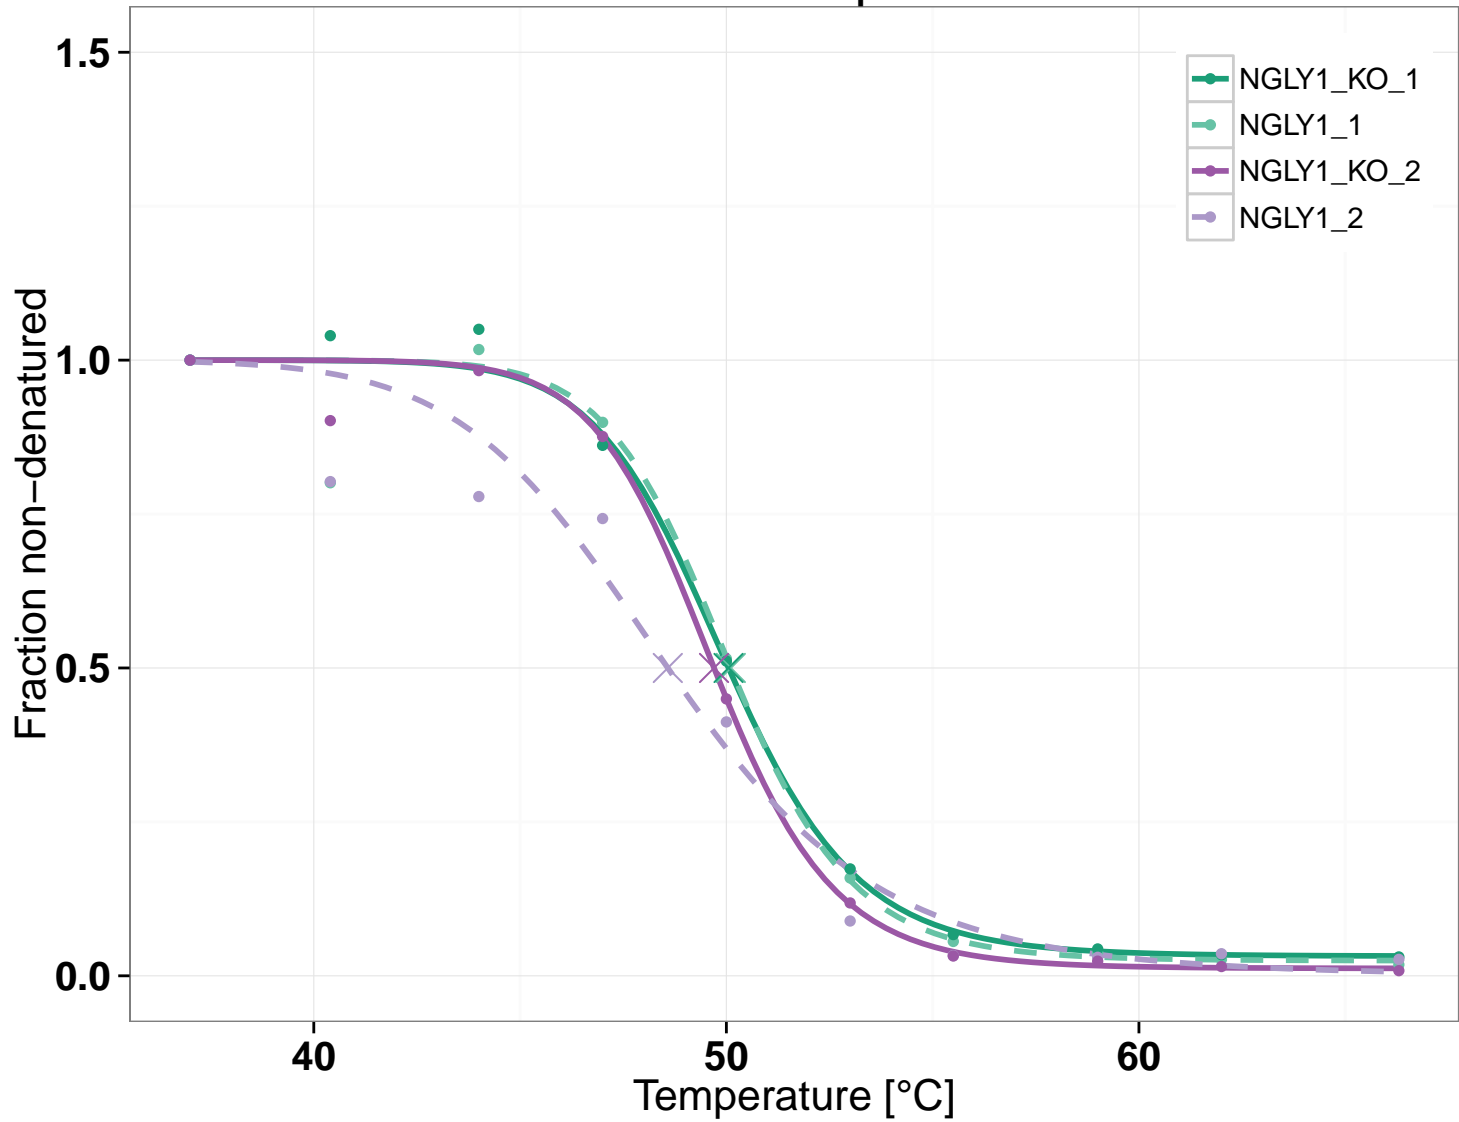

|            | meltPoint | slope  | plateau | R2   |
|------------|-----------|--------|---------|------|
| NGLY1_KO_1 | 50.05     | -0.15  | 0.03    | 1    |
| NGLY1_1    | 50.11     | -0.16  | 0.02    | 0.98 |
| NGLY1_KO_2 | 49.7      | -0.17  | 0.01    | 0.99 |
| NGLY1_2    | 48.58     | -0.098 | 0       | 0.96 |

Supplement: Supplementary file 2914 [file 1]

IPI00332050.4|KBTBD6

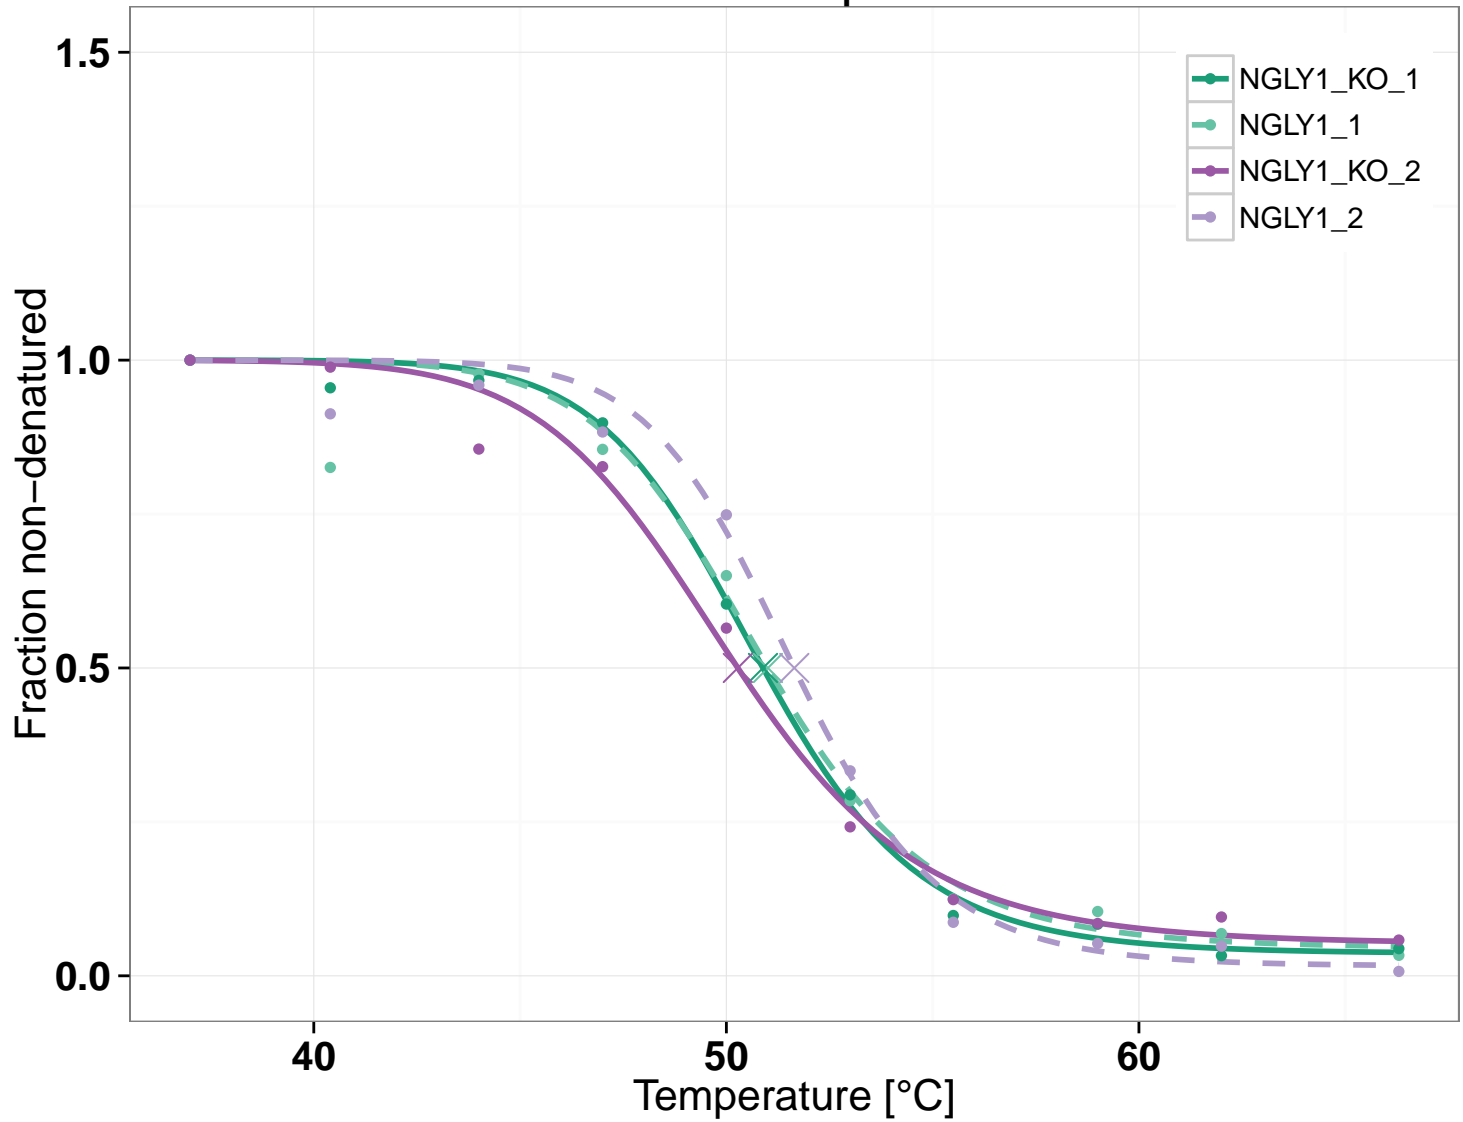

|            | meltPoint | slope | plateau | R2   |
|------------|-----------|-------|---------|------|
| NGLY1_KO_1 | 50.89     | -0.12 | 0.04    | 1    |
| NGLY1_1    | 51.01     | -0.12 | 0.04    | 0.98 |
| NGLY1_KO_2 | 50.28     | -0.1  | 0.05    | 0.99 |
| NGLY1_2    | 51.65     | -0.14 | 0.02    | 0.99 |

Supplement: Supplementary file 2915 [file 1]

# IPI00639982.1|DYNLT3

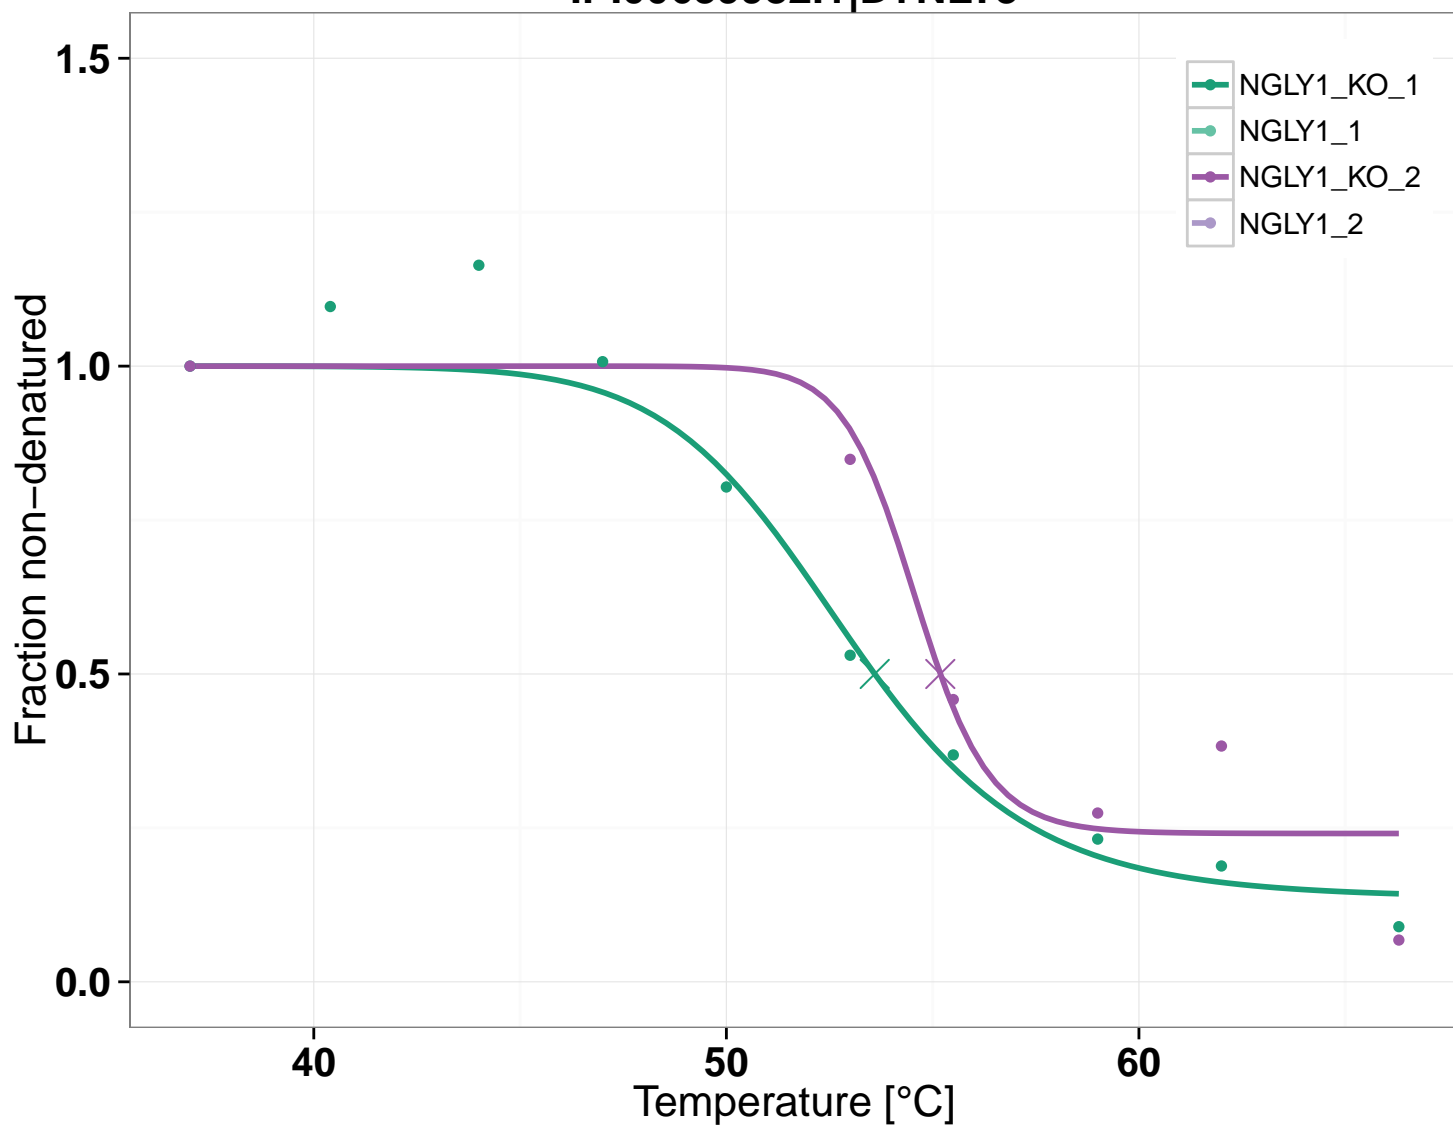

|            | meltPoint | slope  | plateau | R2   |
|------------|-----------|--------|---------|------|
| NGLY1_KO_1 | 53.6      | -0.098 | 0.14    | 0.97 |
| NGLY1_1    | -         | -      | -       | -    |
| NGLY1_KO_2 | 55.19     | -0.21  | 0.24    | 0.36 |
| NGLY1_2    | -         | -      | -       | -    |

Supplement: Supplementary file 2916 [file 1]

IPI00795979.1|FLOT2

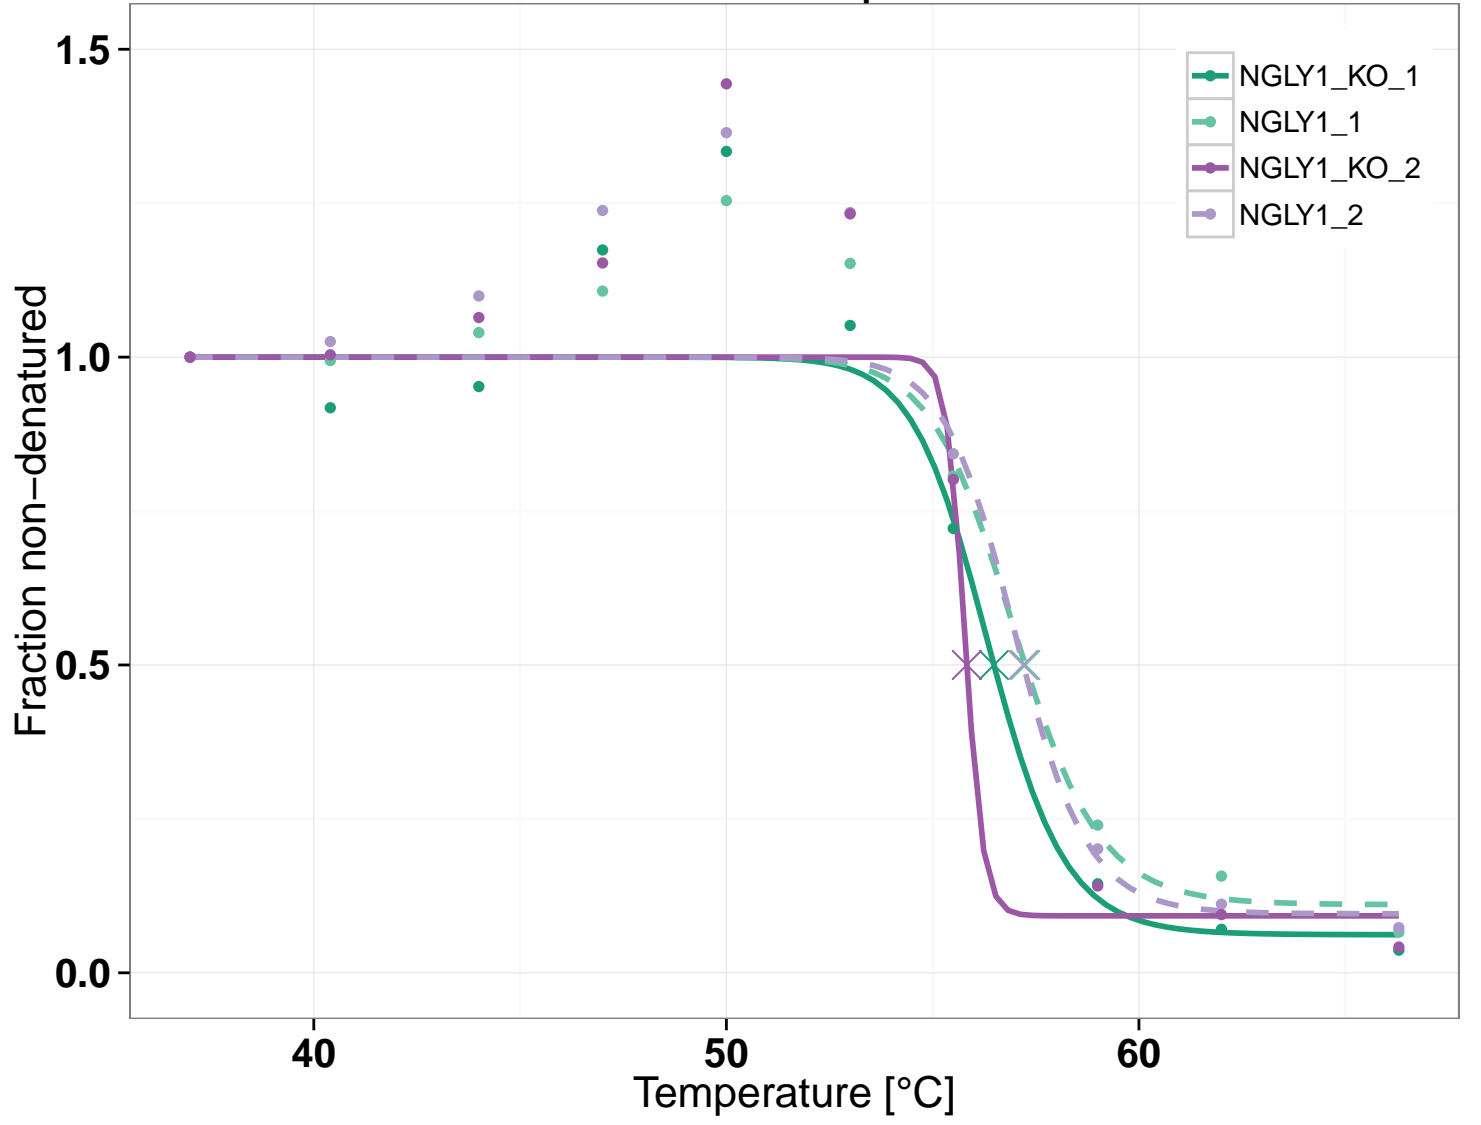

|            | meltPoint | slope | plateau | R2   |
|------------|-----------|-------|---------|------|
| NGLY1_KO_1 | 56.49     | -0.25 | 0.06    | 0.92 |
| NGLY1_1    | 57.24     | -0.22 | 0.11    | 0.94 |
| NGLY1_KO_2 | 55.83     | -1    | 0.09    | 0.88 |
| NGLY1_2    | 57.2      | -0.26 | 0.1     | 0.88 |

Supplement: Supplementary file 2917 [file 1]

# IPI00021370.1|UBE2K

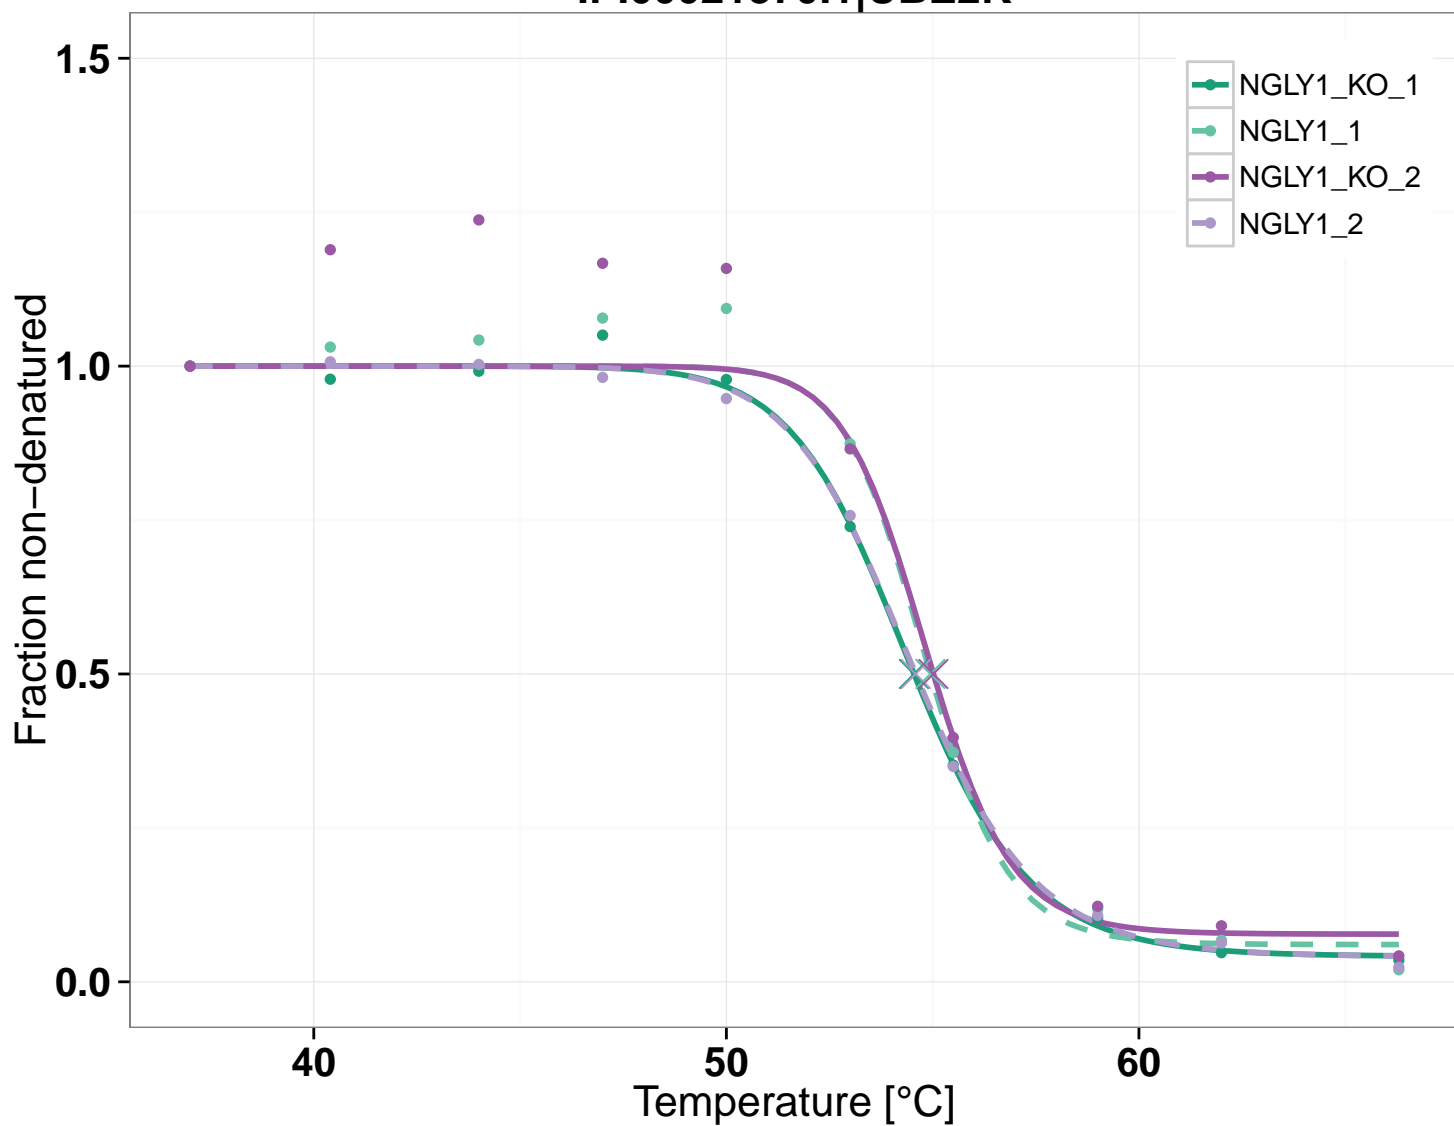

|            | meltPoint | slope | plateau | R2   |
|------------|-----------|-------|---------|------|
| NGLY1_KO_1 | 54.55     | -0.17 | 0.04    | 1    |
| NGLY1_1    | 54.94     | -0.24 | 0.06    | 0.99 |
| NGLY1_KO_2 | 55.02     | -0.23 | 0.08    | 0.94 |
| NGLY1_2    | 54.59     | -0.16 | 0.04    | 1    |

Supplement: Supplementary file 2918 [file 1]

IPI00550038.4|TMEM59

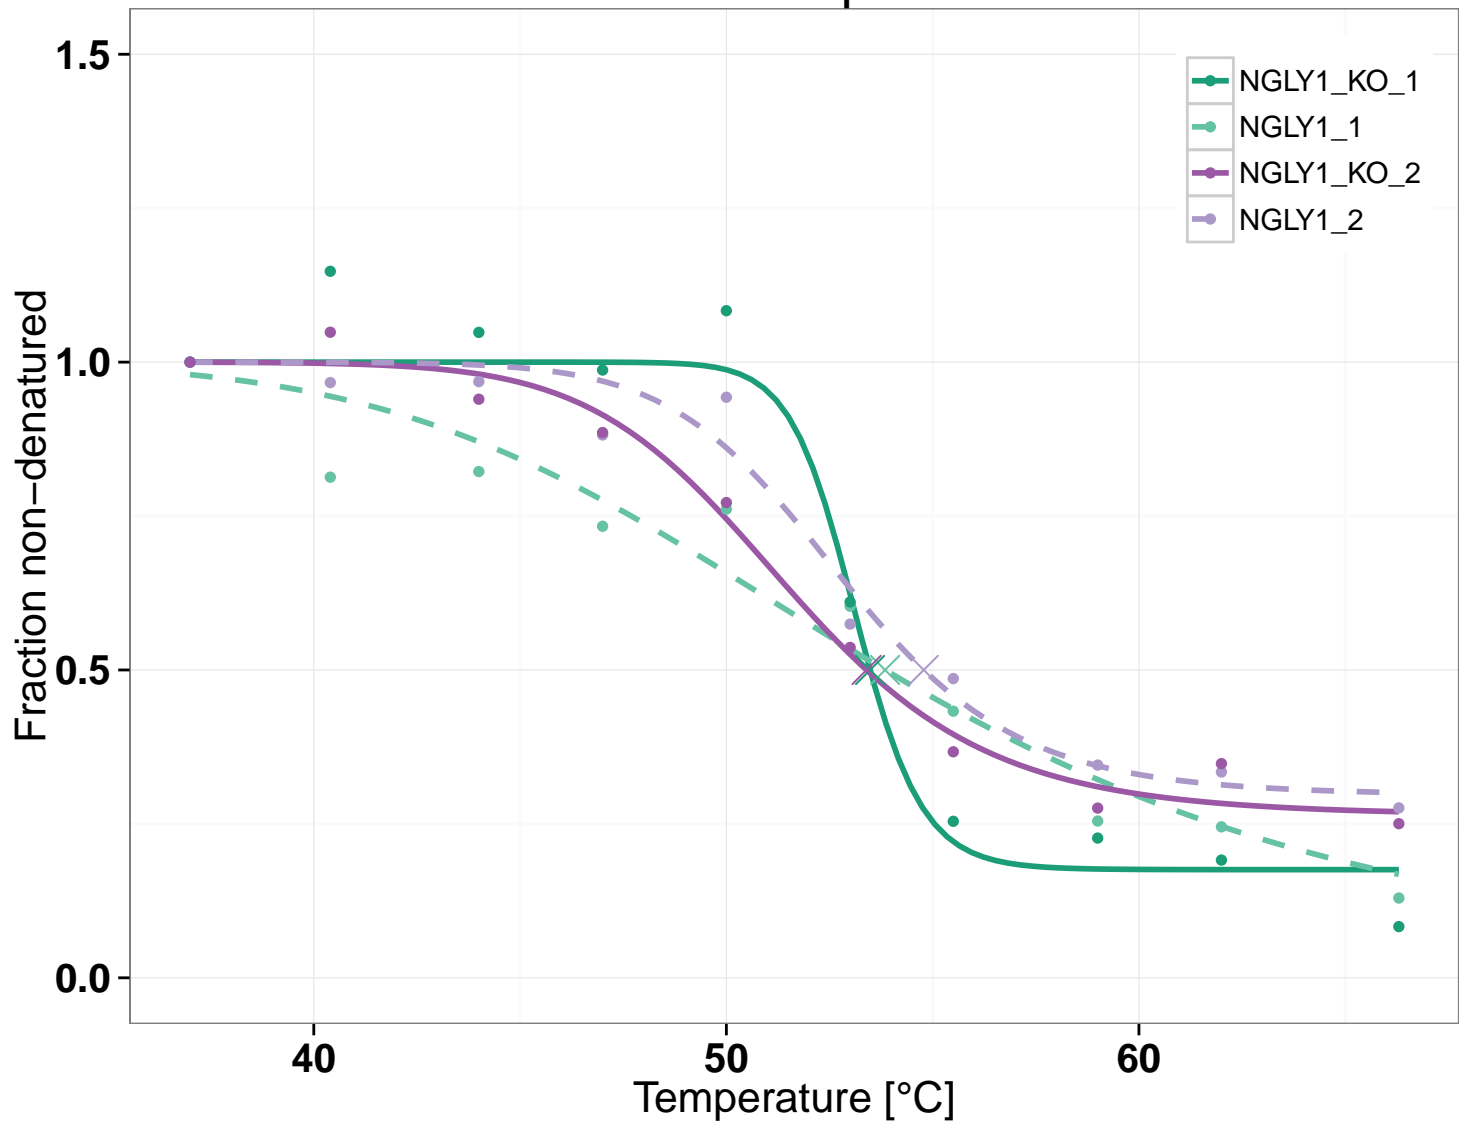

|            | meltPoint | slope  | plateau | R2   |
|------------|-----------|--------|---------|------|
| NGLY1_KO_1 | 53.48     | -0.26  | 0.18    | 0.97 |
| NGLY1_1    | 53.85     | -0.042 | 0       | 0.95 |
| NGLY1_KO_2 | 53.4      | -0.076 | 0.26    | 0.99 |
| NGLY1_2    | 54.78     | -0.084 | 0.3     | 0.97 |

Supplement: Supplementary file 2919 [file 1]

# IPI00910816.1|SNW1

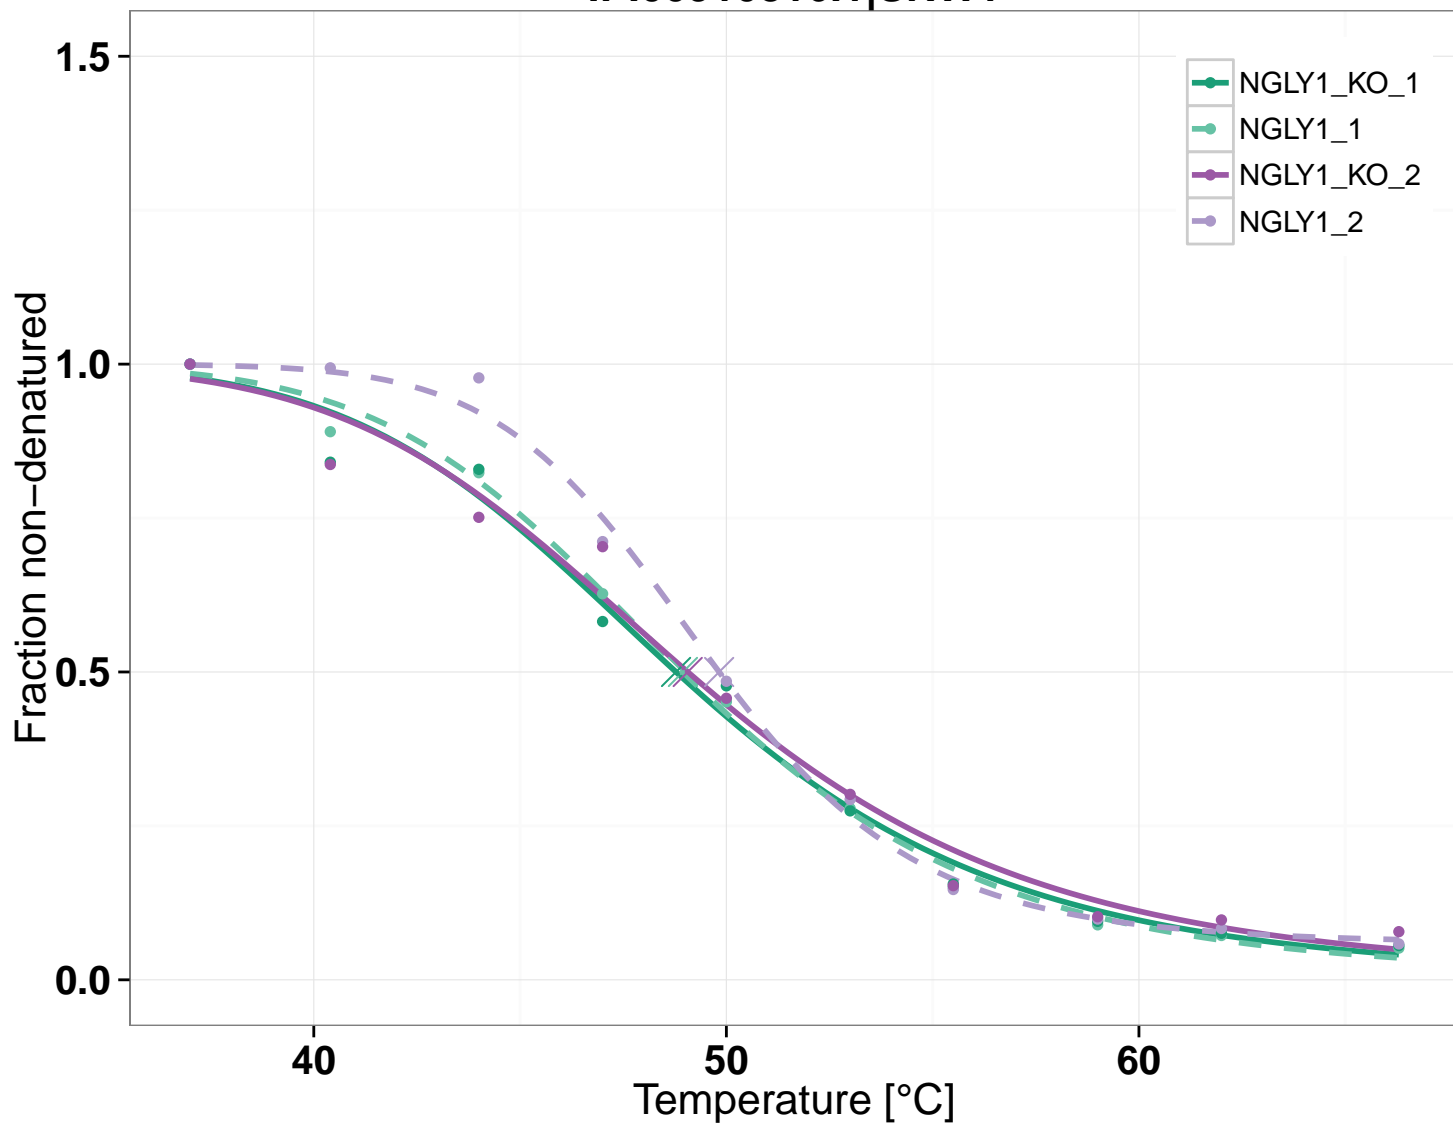

|            | meltPoint | slope  | plateau | R2   |
|------------|-----------|--------|---------|------|
| NGLY1_KO_1 | 48.78     | -0.063 | 0       | 0.99 |
| NGLY1_1    | 48.95     | -0.067 | 0       | 1    |
| NGLY1_KO_2 | 49.06     | -0.06  | 0       | 0.98 |
| NGLY1_2    | 49.82     | -0.092 | 0.06    | 1    |

Supplement: Supplementary file 2920 [file 1]

IPI00887748.1|LOC100129692

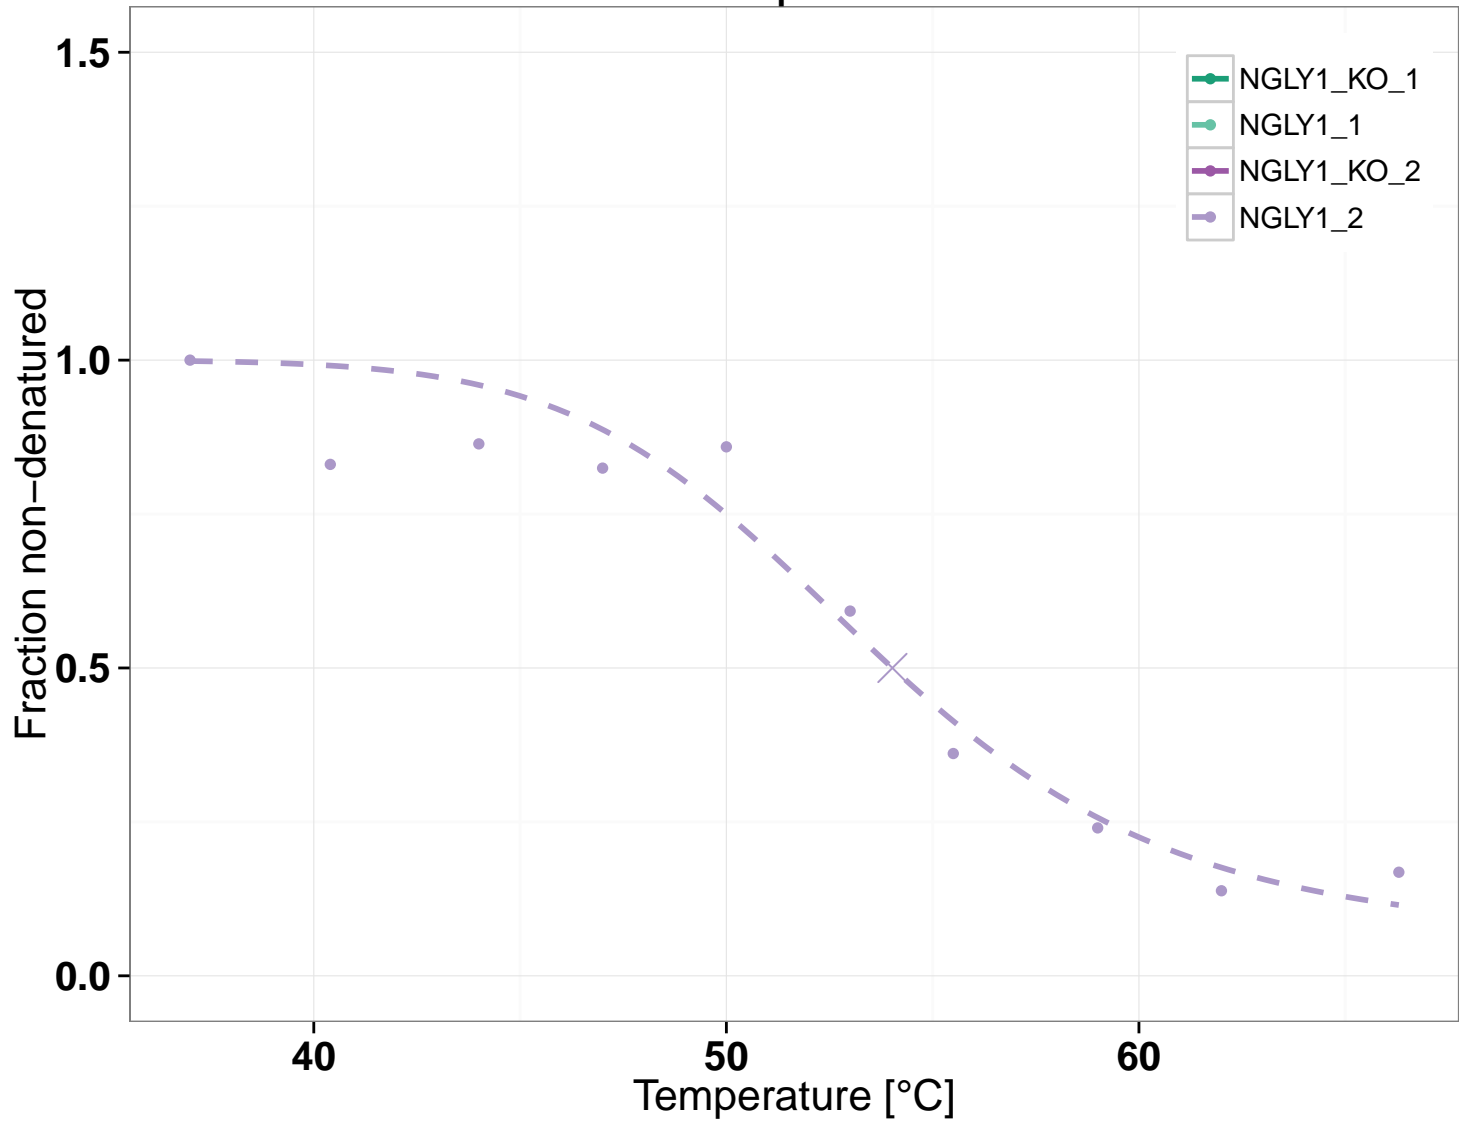

|            | meltPoint | slope  | plateau | R2   |
|------------|-----------|--------|---------|------|
| NGLY1_KO_1 | —         | —      | —       | —    |
| NGLY1_1    | —         | —      | —       | —    |
| NGLY1_KO_2 | —         | —      | —       | —    |
| NGLY1_2    | 54.02     | -0.064 | 0.06    | 0.94 |

Supplement: Supplementary file 2921 [file 1]

# IPI00759749.4|PARG

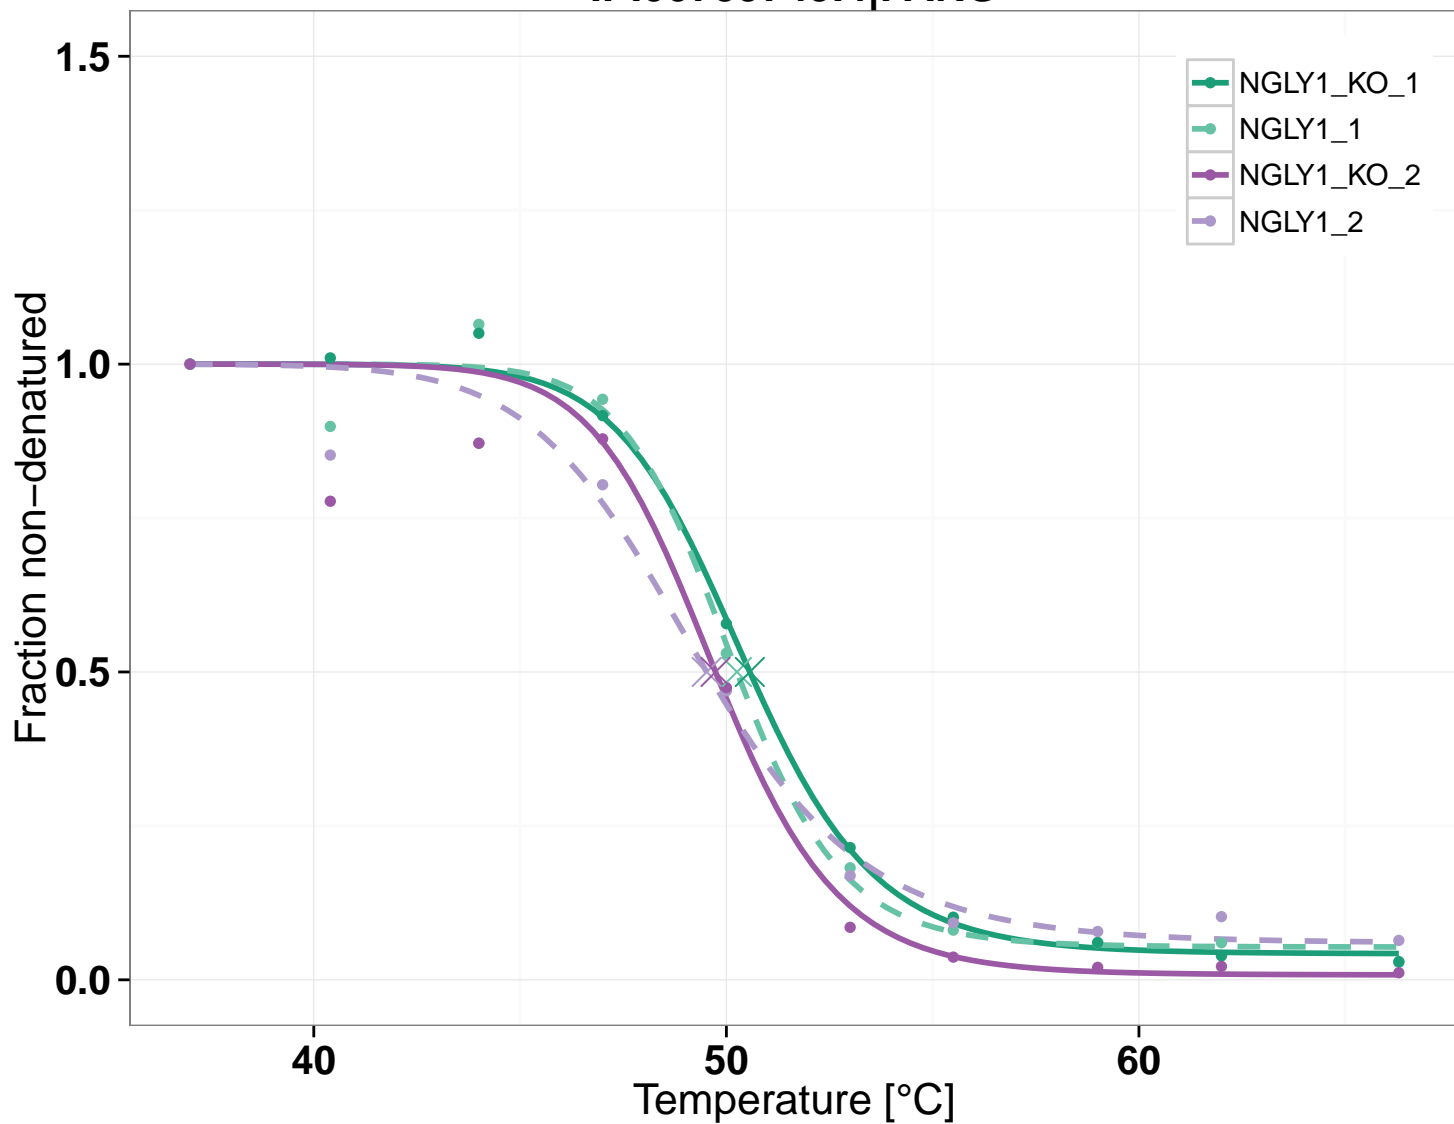

|            | meltPoint | slope | plateau | R2   |
|------------|-----------|-------|---------|------|
| NGLY1_KO_1 | 50.57     | -0.15 | 0.04    | 1    |
| NGLY1_1    | 50.26     | -0.18 | 0.05    | 0.99 |
| NGLY1_KO_2 | 49.74     | -0.17 | 0.01    | 0.96 |
| NGLY1_2    | 49.52     | -0.12 | 0.06    | 0.98 |

Supplement: Supplementary file 2922 [file 1]

IPI00455982.1|HMGXB4

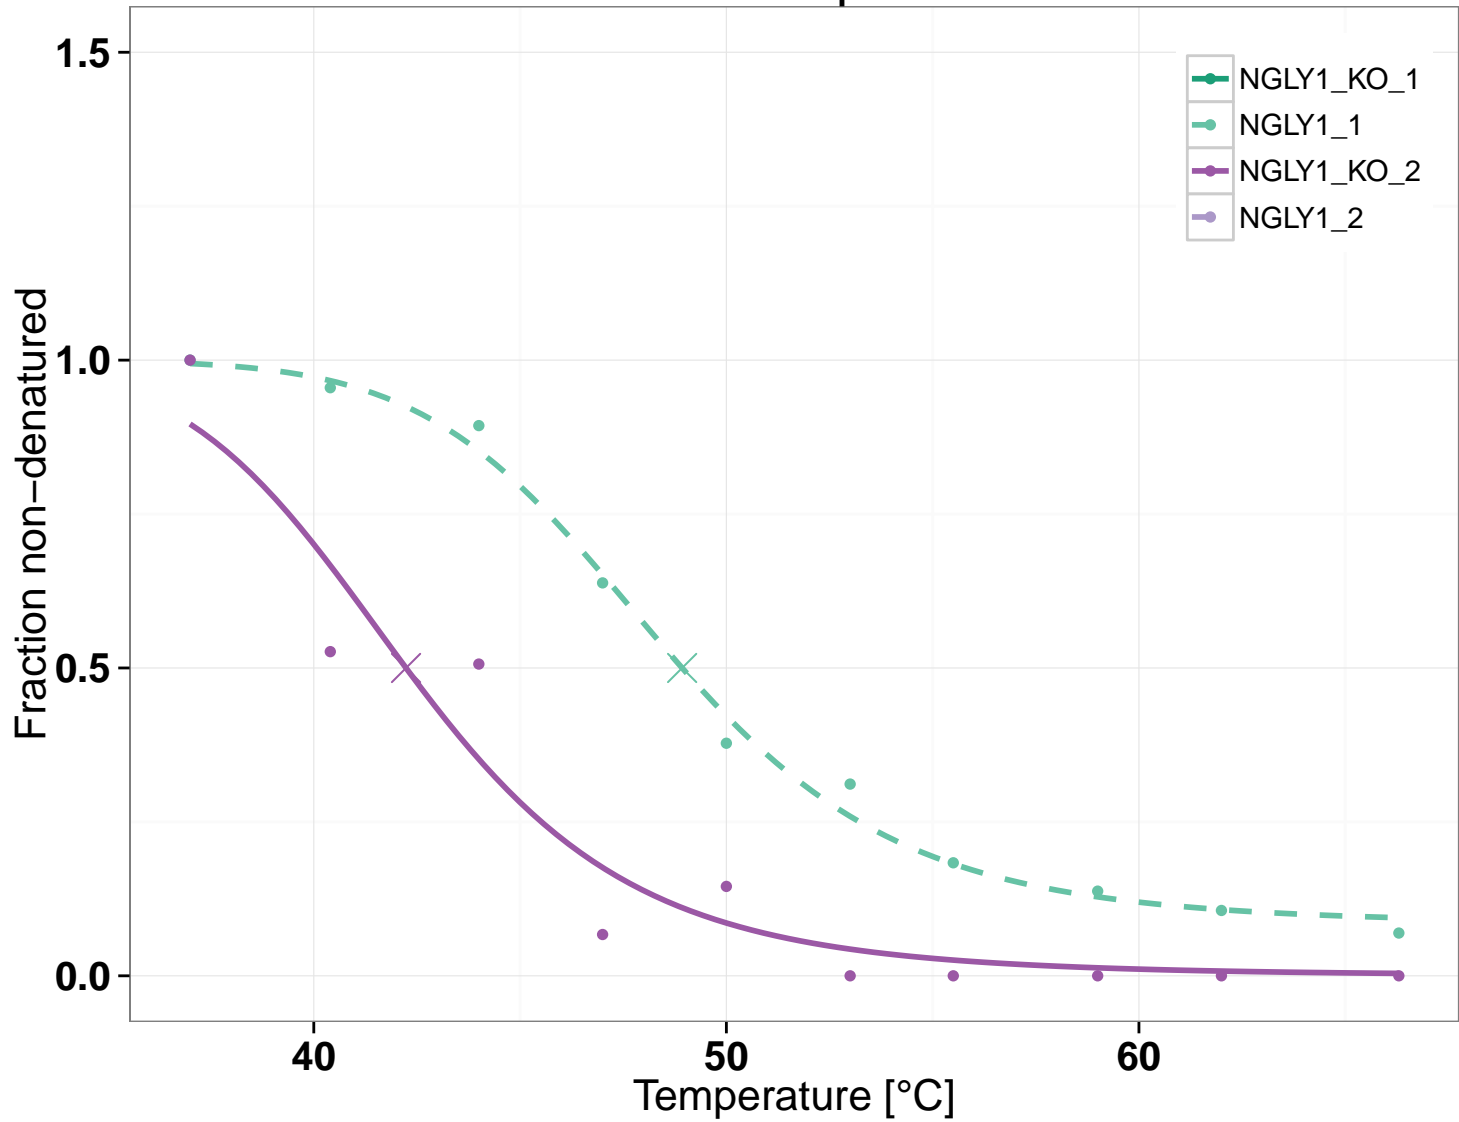

|            | meltPoint | slope  | plateau | R2   |
|------------|-----------|--------|---------|------|
| NGLY1_KO_1 | -         | -      | -       | -    |
| NGLY1_1    | 48.93     | -0.08  | 0.08    | 0.99 |
| NGLY1_KO_2 | 42.24     | -0.092 | 0       | 0.93 |
| NGLY1_2    | -         | -      | -       | -    |

Supplement: Supplementary file 2923 [file 1]

IPI00012573.1|PEX12

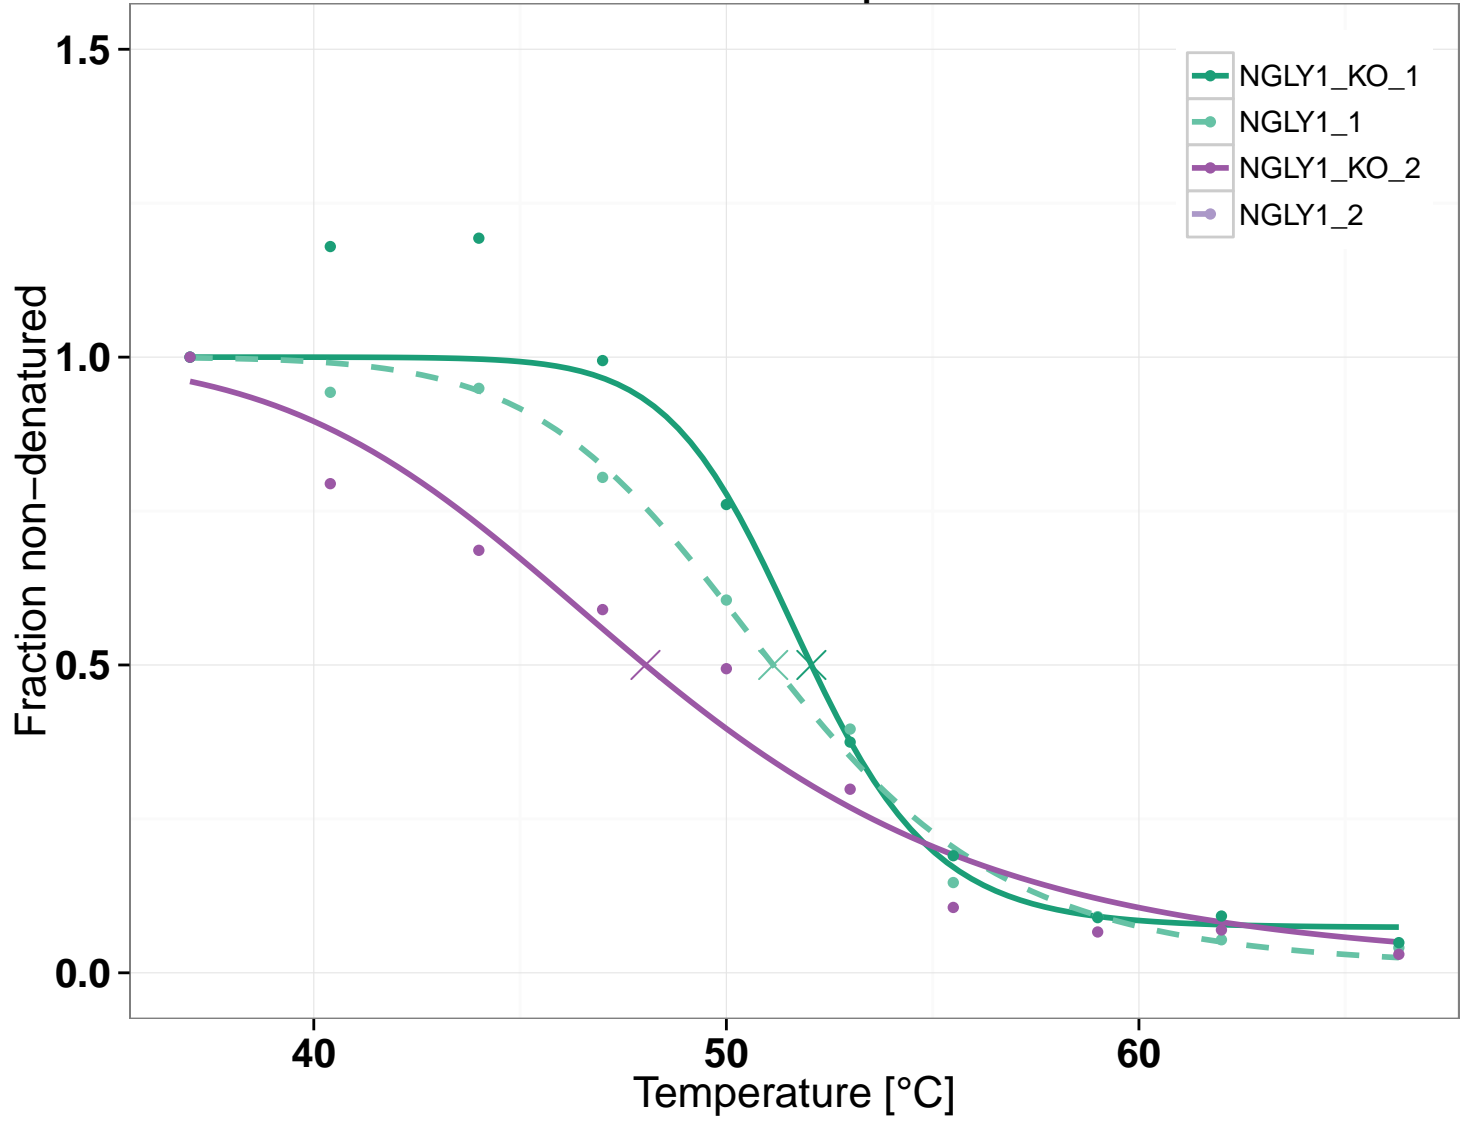

|            | meltPoint | slope  | plateau | R2   |
|------------|-----------|--------|---------|------|
| NGLY1_KO_1 | 52.06     | -0.14  | 0.07    | 0.96 |
| NGLY1_1    | 51.14     | -0.087 | 0.01    | 0.99 |
| NGLY1_KO_2 | 48.04     | -0.058 | 0       | 0.97 |
| NGLY1_2    | -         | -      | -       | -    |

Supplement: Supplementary file 2924 [file 1]

IPI00329410.1|DOLPP1

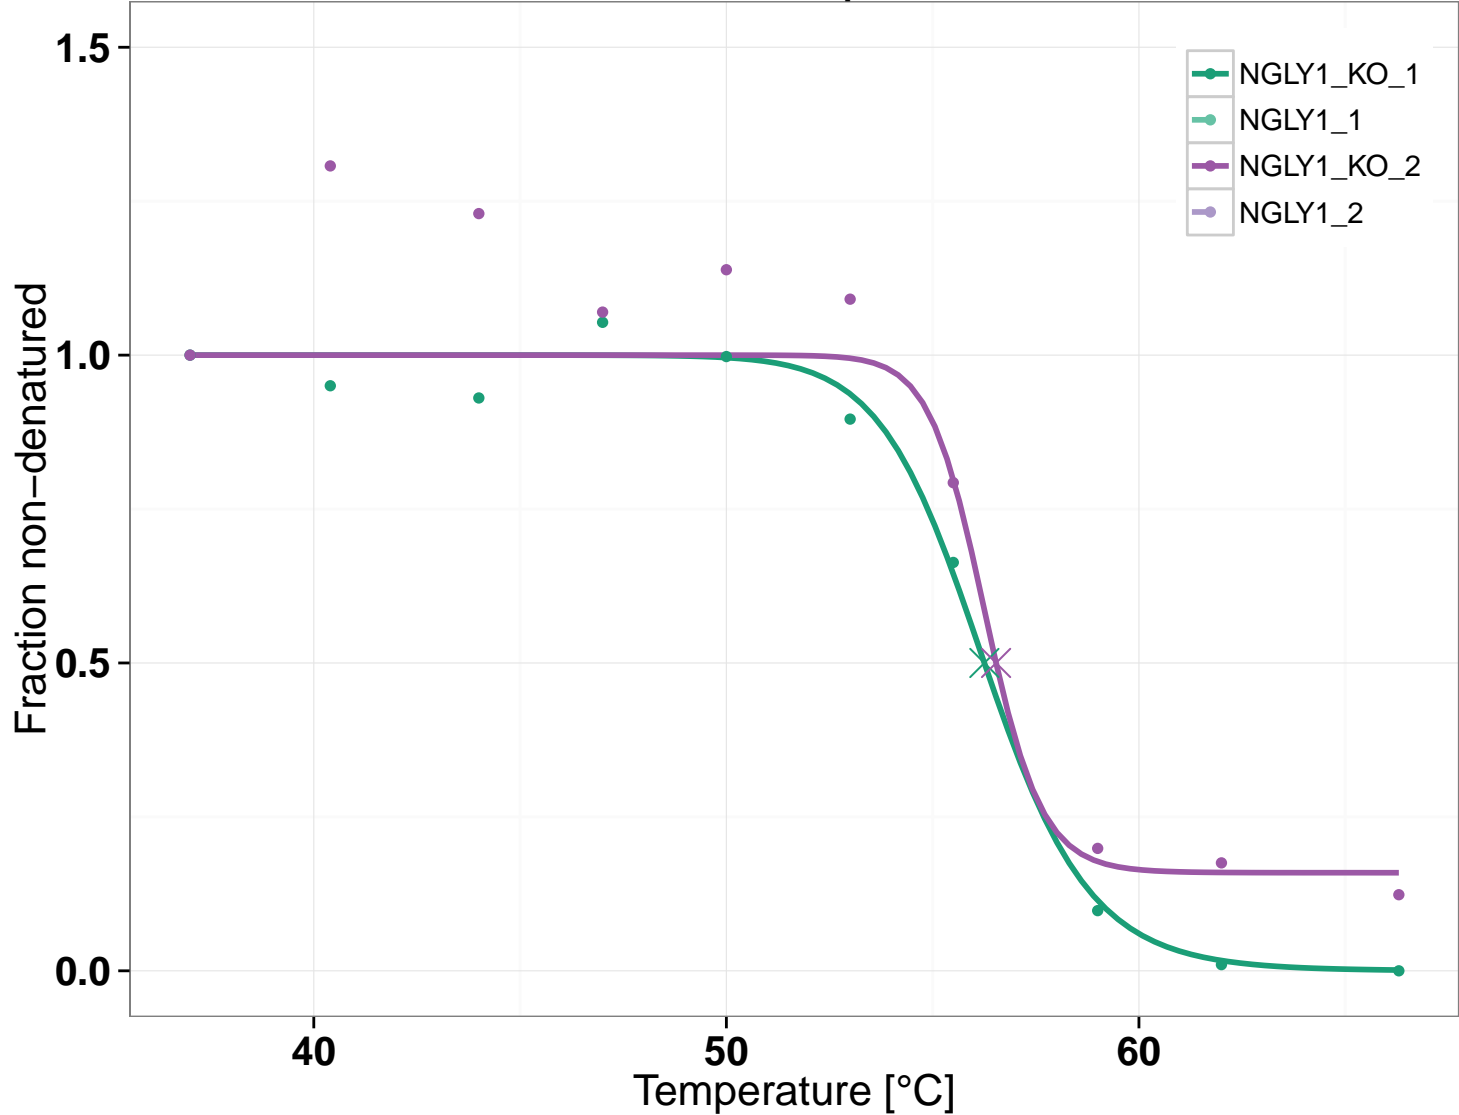

|            | meltPoint | slope | plateau | R2   |
|------------|-----------|-------|---------|------|
| NGLY1_KO_1 | 56.25     | -0.2  | 0       | 0.99 |
| NGLY1_1    | -         | -     | -       | -    |
| NGLY1_KO_2 | 56.54     | -0.31 | 0.16    | 0.91 |
| NGLY1_2    | -         | -     | -       | -    |

Supplement: Supplementary file 2925 [file 1]

IPI00478556.3|ABHD14A

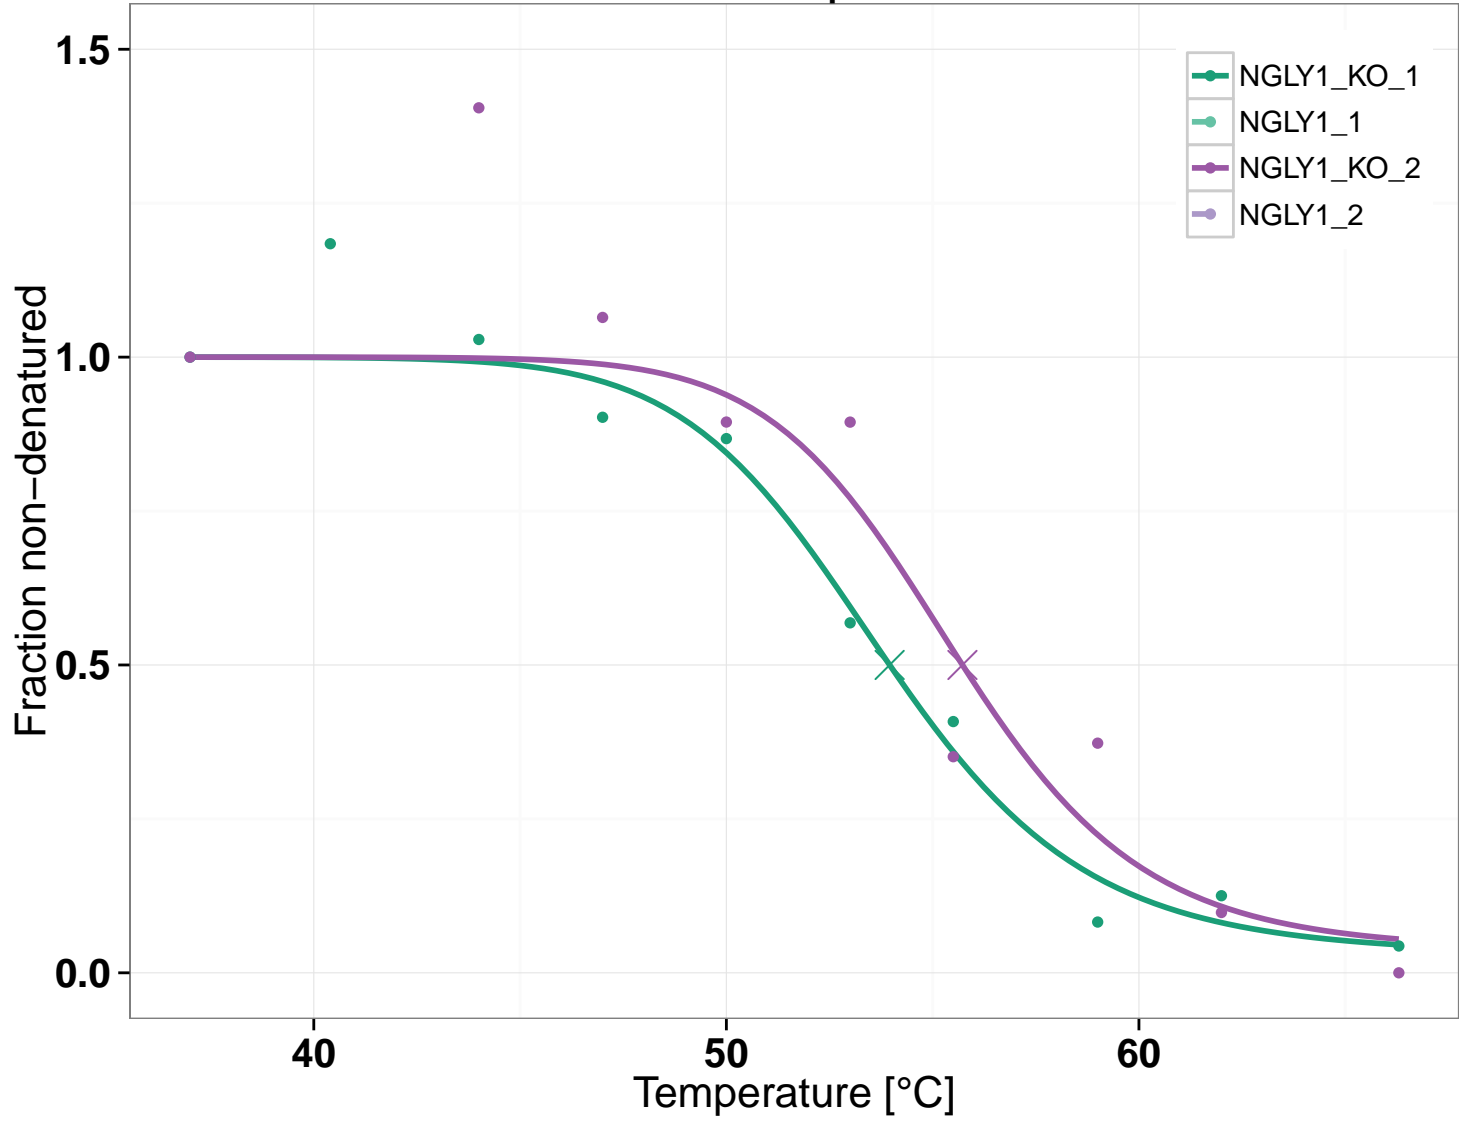

|            | meltPoint | slope  | plateau | R2   |
|------------|-----------|--------|---------|------|
| NGLY1_KO_1 | 53.96     | -0.099 | 0.03    | 0.97 |
| NGLY1_1    | -         | -      | -       | -    |
| NGLY1_KO_2 | 55.72     | -0.11  | 0.04    | 0.69 |
| NGLY1_2    | -         | -      | -       | -    |

Supplement: Supplementary file 2926 [file 1]

# IPI00304740.2|ITSN1

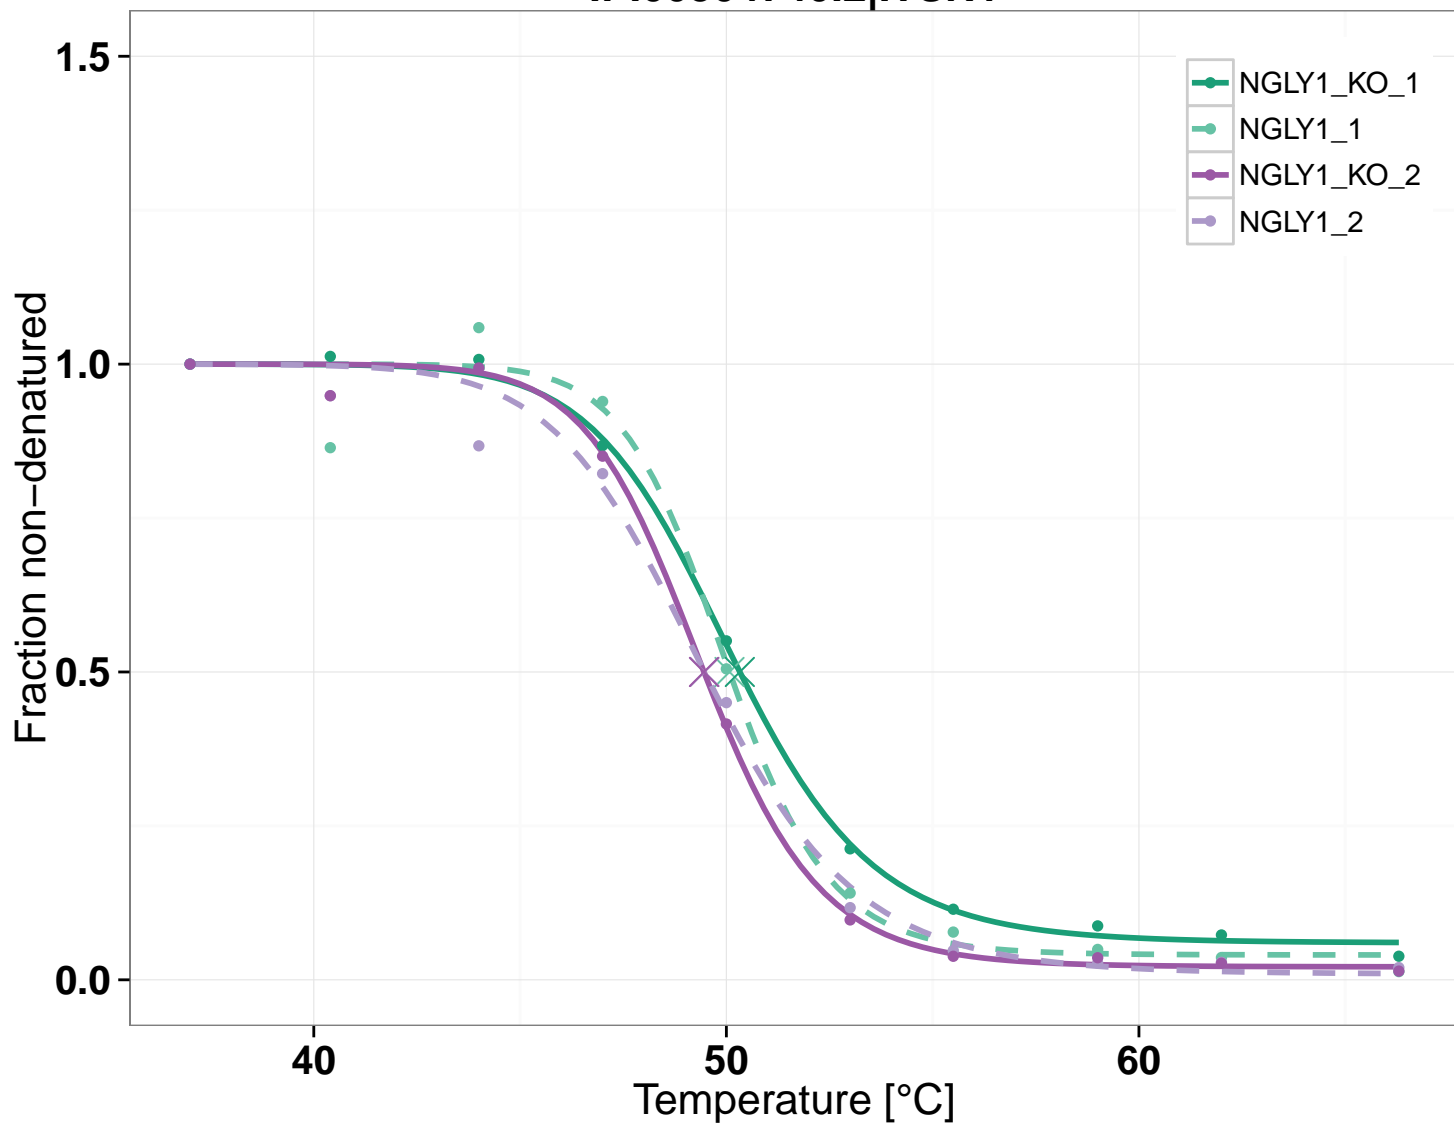

|            | meltPoint | slope | plateau | R2   |
|------------|-----------|-------|---------|------|
| NGLY1_KO_1 | 50.33     | -0.14 | 0.06    | 1    |
| NGLY1_1    | 50.08     | -0.19 | 0.04    | 0.99 |
| NGLY1_KO_2 | 49.46     | -0.17 | 0.02    | 1    |
| NGLY1_2    | 49.47     | -0.13 | 0.01    | 0.99 |

Supplement: Supplementary file 2927 [file 1]

IPI00786974.2|LAPTM4B

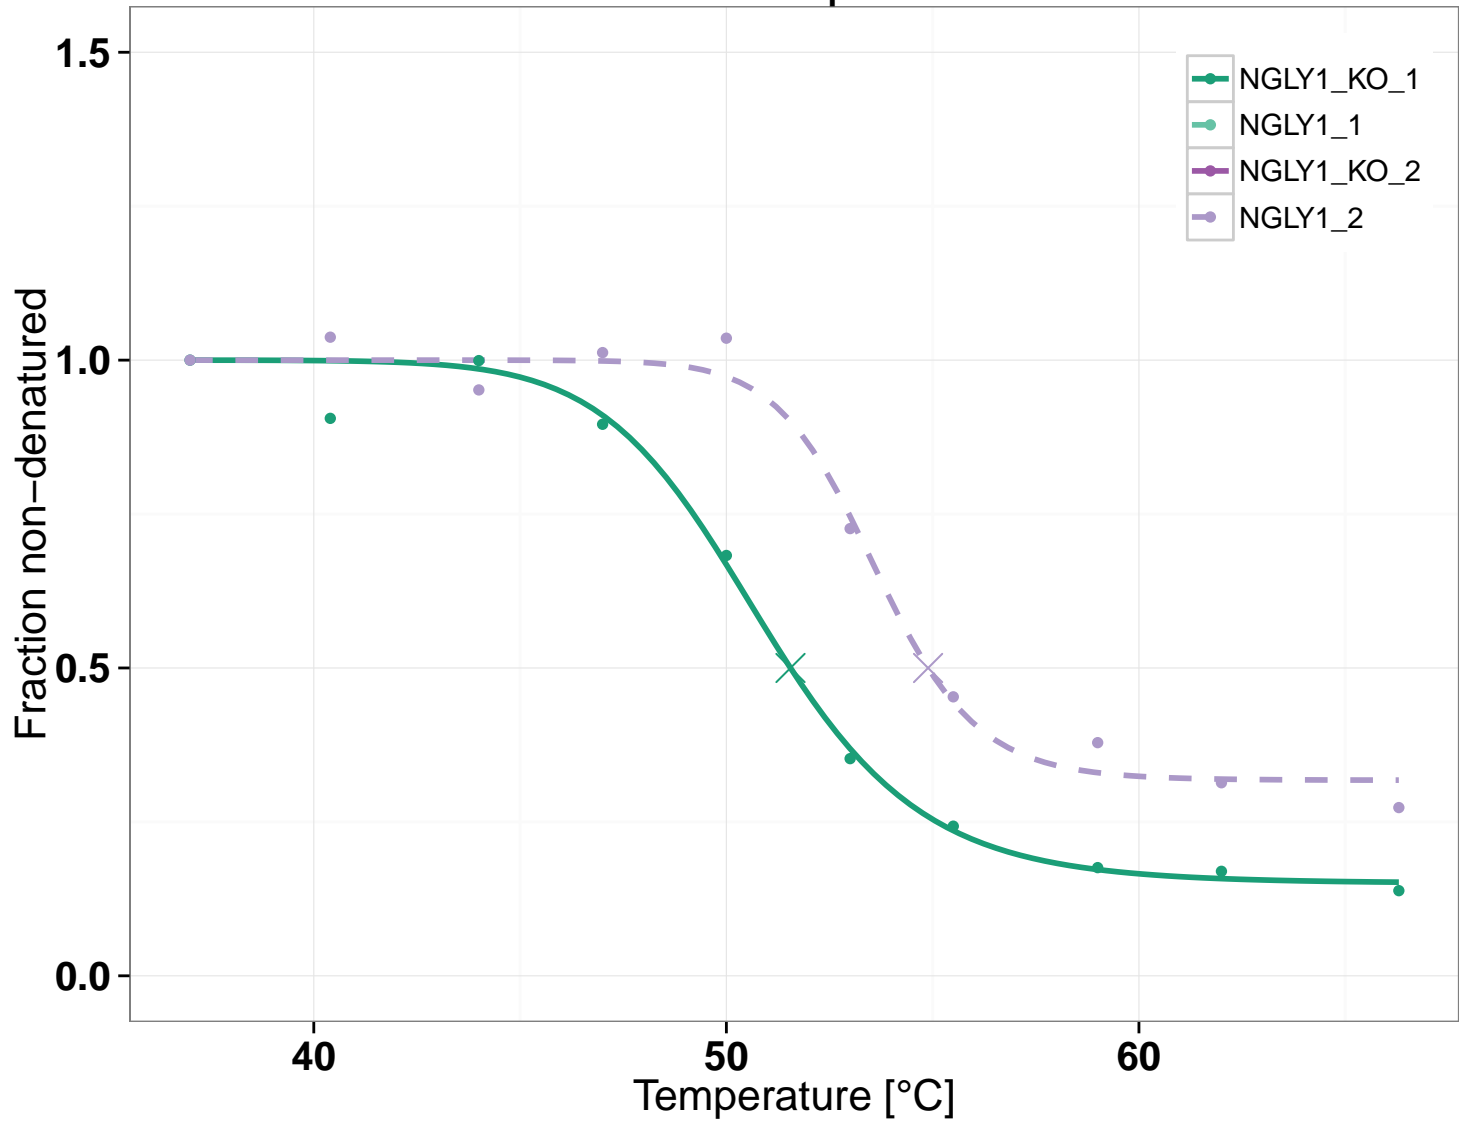

|            | meltPoint | slope | plateau | R2   |
|------------|-----------|-------|---------|------|
| NGLY1_KO_1 | 51.55     | -0.11 | 0.15    | 0.99 |
| NGLY1_1    | -         | -     | -       | -    |
| NGLY1_KO_2 | -         | -     | -       | -    |
| NGLY1_2    | 54.89     | -0.14 | 0.32    | 0.99 |

Supplement: Supplementary file 2928 [file 1]

# IPI00024056.3|WIP12

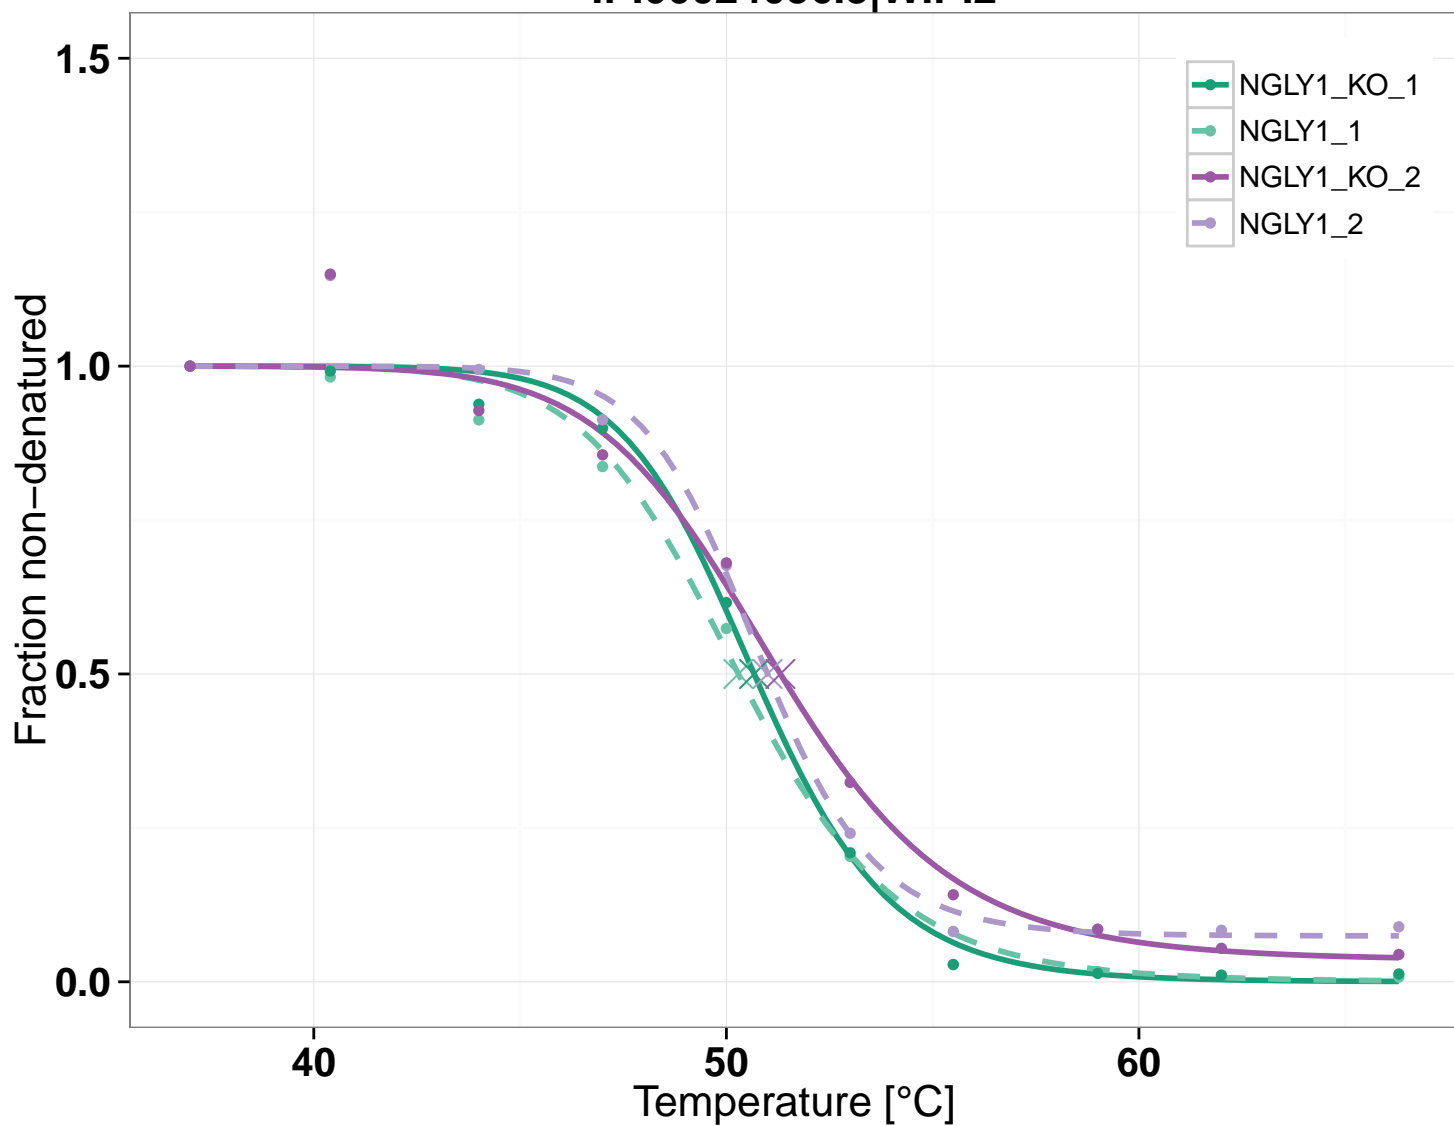

|            | meltPoint | slope | plateau | R2   |
|------------|-----------|-------|---------|------|
| NGLY1_KO_1 | 50.67     | -0.15 | 0       | 1    |
| NGLY1_1    | 50.29     | -0.13 | 0       | 0.99 |
| NGLY1_KO_2 | 51.31     | -0.11 | 0.03    | 0.98 |
| NGLY1_2    | 51        | -0.17 | 0.07    | 0.99 |

Supplement: Supplementary file 2929 [file 1]

IPI00021320.2|MEPCE

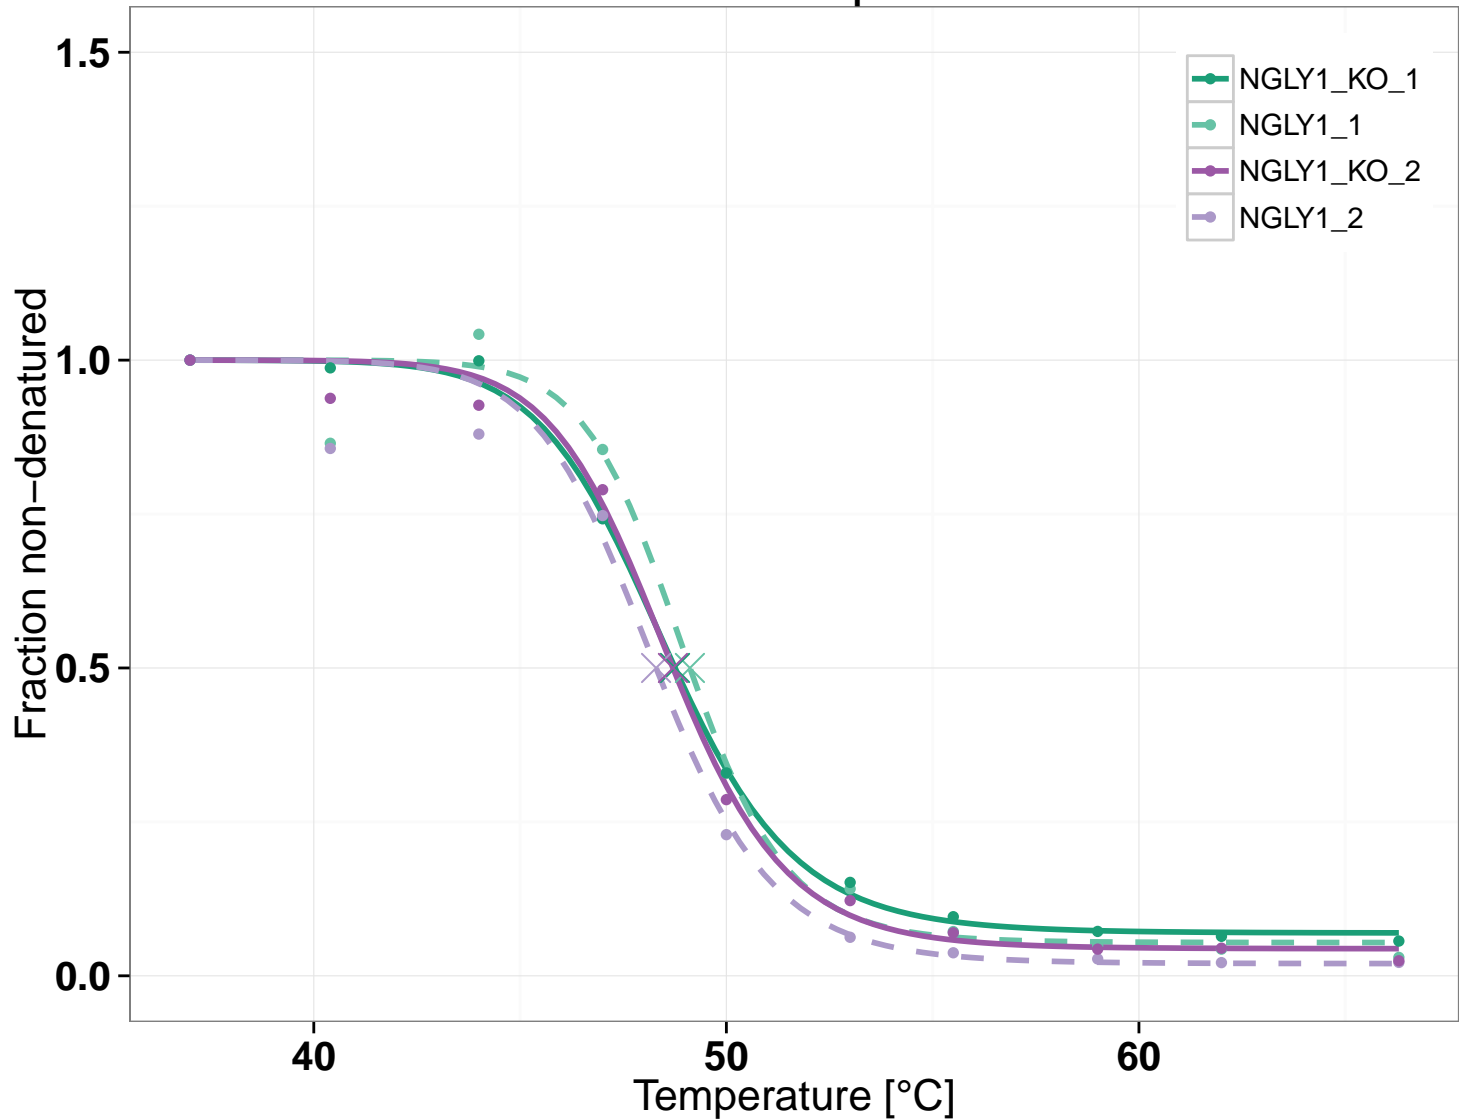

|            | meltPoint | slope | plateau | R2   |
|------------|-----------|-------|---------|------|
| NGLY1_KO_1 | 48.76     | -0.15 | 0.07    | 1    |
| NGLY1_1    | 49.12     | -0.19 | 0.05    | 0.99 |
| NGLY1_KO_2 | 48.71     | -0.17 | 0.04    | 1    |
| NGLY1_2    | 48.3      | -0.17 | 0.02    | 0.98 |

Supplement: Supplementary file 2930 [file 1]

IPI00006072.1|SEC61G

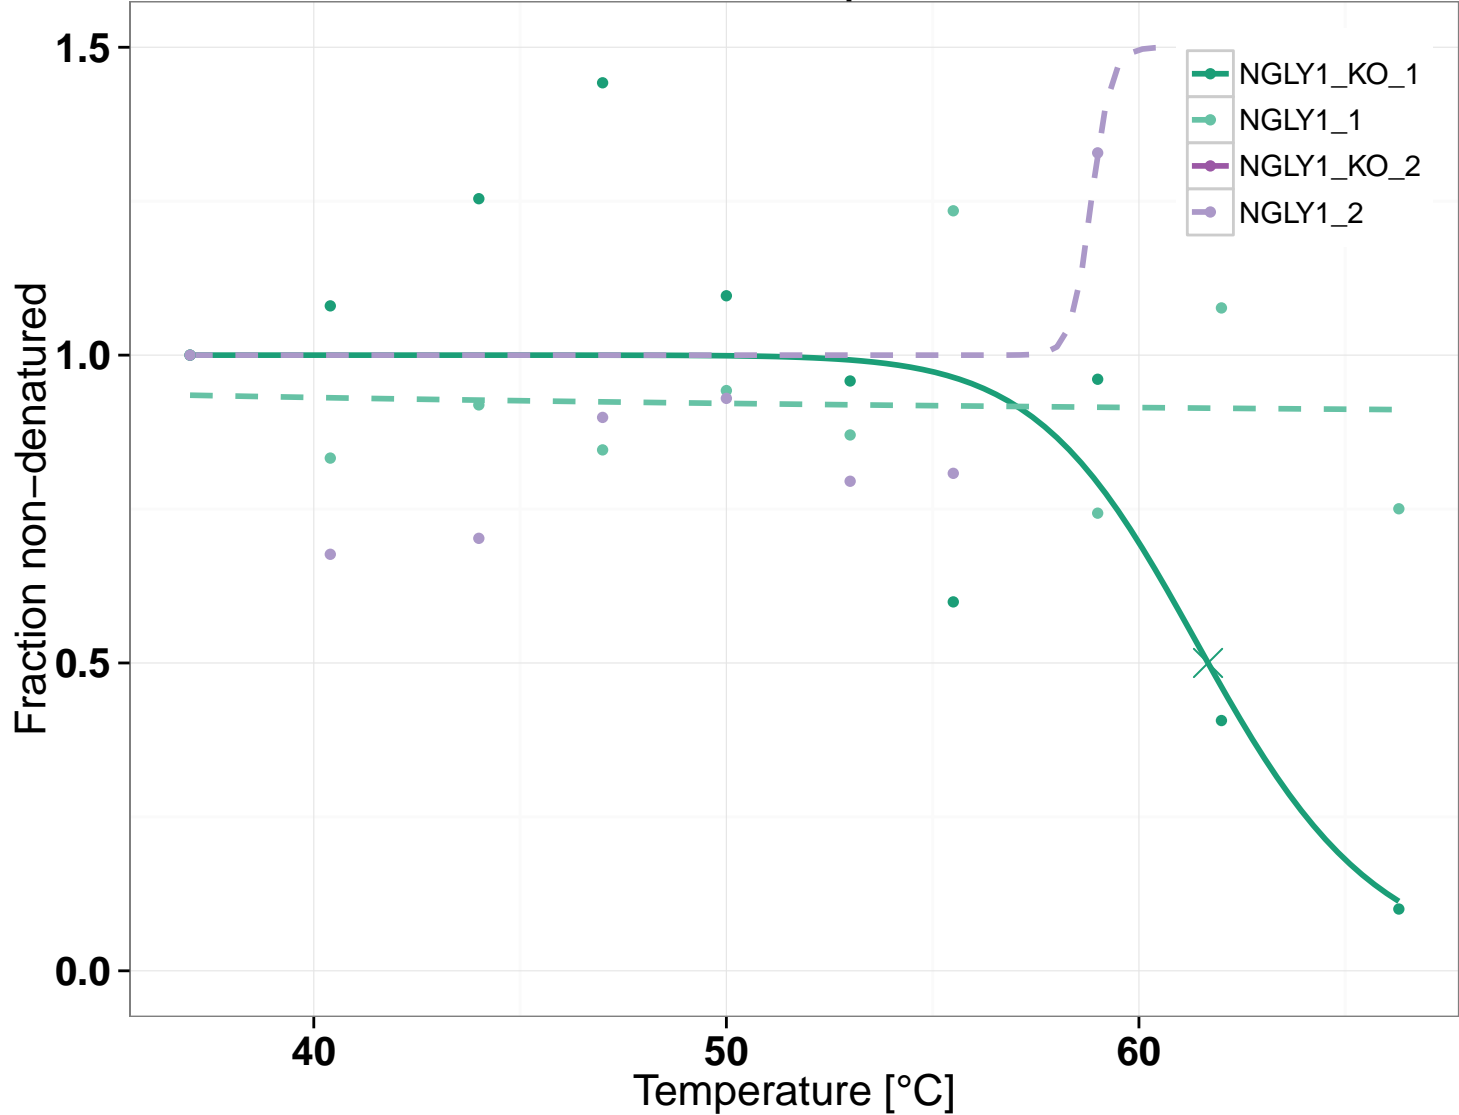

|            | meltPoint | slope | plateau | R2   |
|------------|-----------|-------|---------|------|
| NGLY1_KO_1 | 61.68     | -0.12 | 0       | 0.7  |
| NGLY1_1    | -         | -     | 0.76    | 0    |
| NGLY1_KO_2 | -         | -     | -       | -    |
| NGLY1_2    | -         | 0.53  | 1.5     | 0.68 |

Supplement: Supplementary file 2931 [file 1]

# IPI00031410.1|mTOR

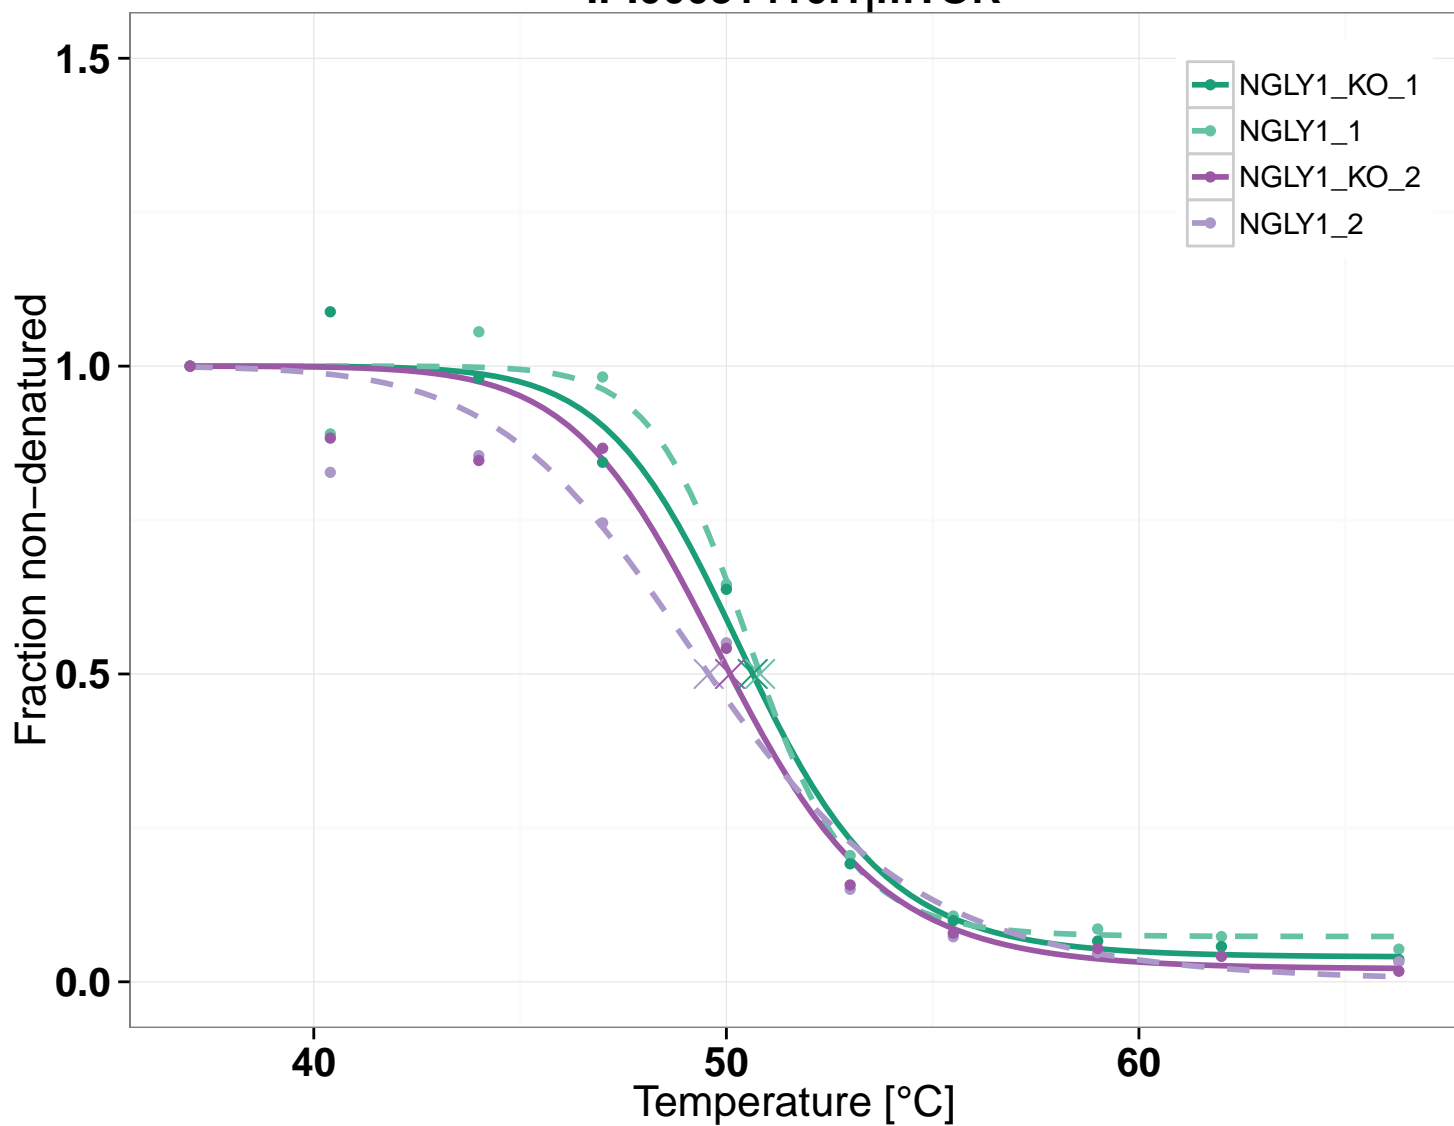

|            | meltPoint | slope  | plateau | R2   |
|------------|-----------|--------|---------|------|
| NGLY1_KO_1 | 50.64     | -0.14  | 0.04    | 0.99 |
| NGLY1_1    | 50.82     | -0.19  | 0.07    | 0.99 |
| NGLY1_KO_2 | 50.09     | -0.13  | 0.02    | 0.98 |
| NGLY1_2    | 49.57     | -0.097 | 0       | 0.97 |

Supplement: Supplementary file 2932 [file 1]

IPI00149650.3|PPWD1

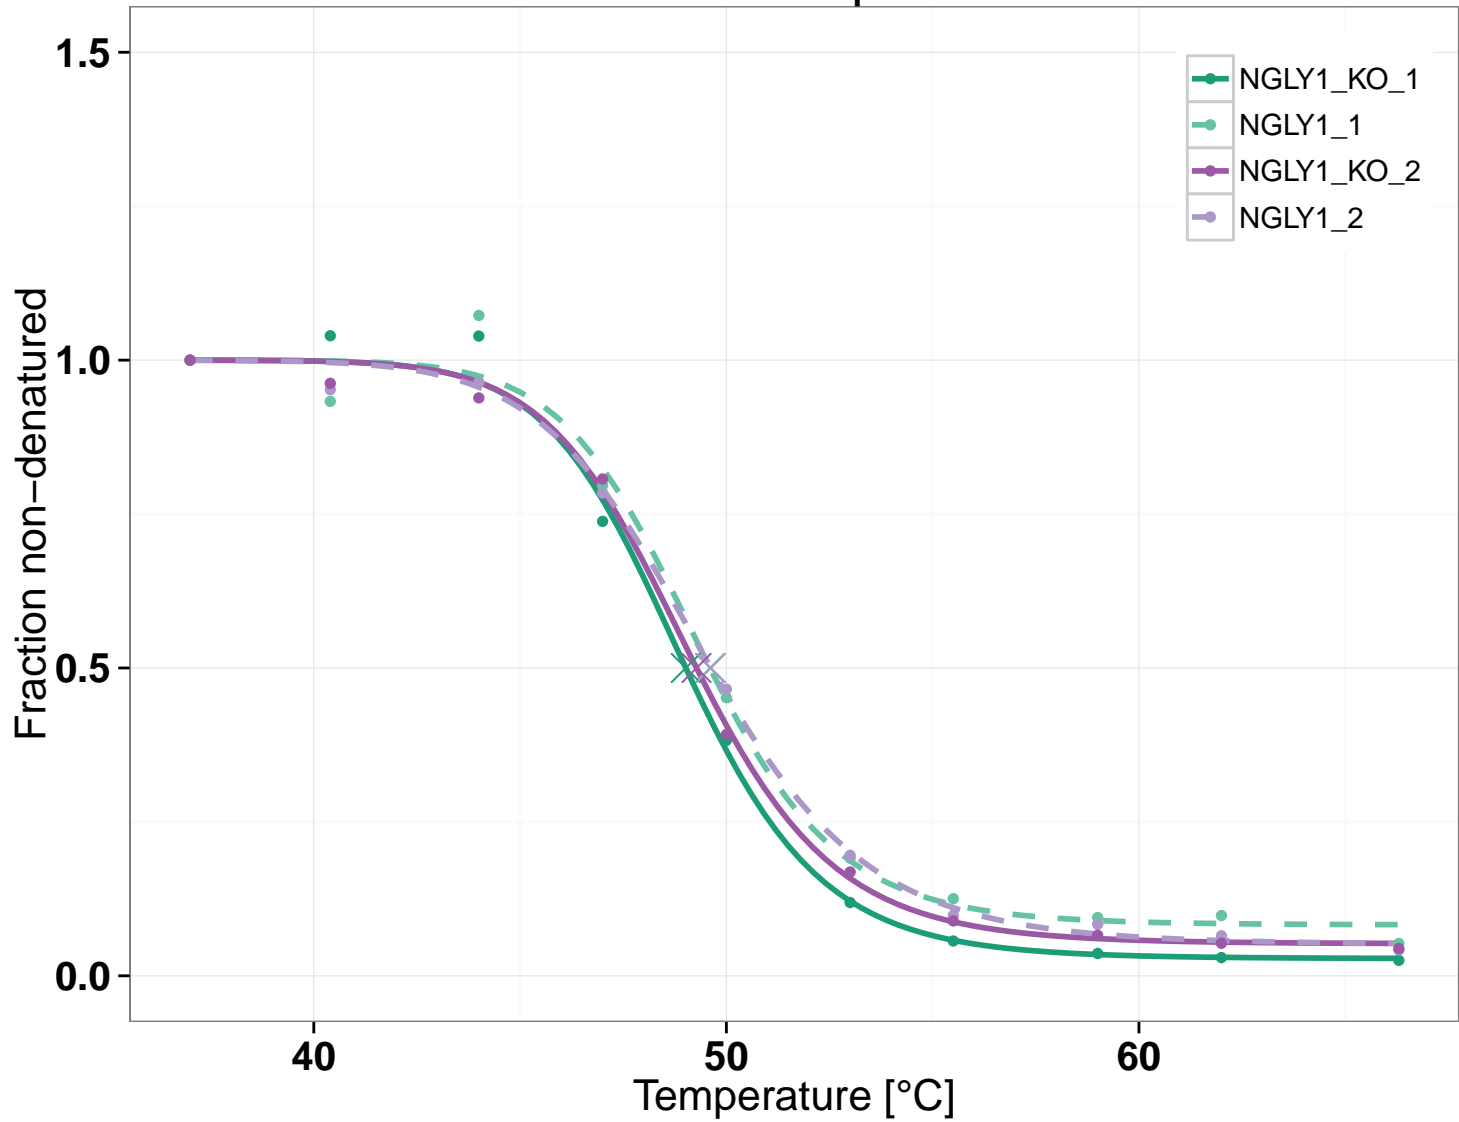

|            | meltPoint | slope | plateau | R2   |
|------------|-----------|-------|---------|------|
| NGLY1_KO_1 | 49.02     | -0.15 | 0.03    | 1    |
| NGLY1_1    | 49.6      | -0.14 | 0.08    | 0.99 |
| NGLY1_KO_2 | 49.28     | -0.14 | 0.05    | 1    |
| NGLY1_2    | 49.63     | -0.12 | 0.05    | 1    |

Supplement: Supplementary file 2933 [file 1]

IPI00013076.1|FGFR1OP

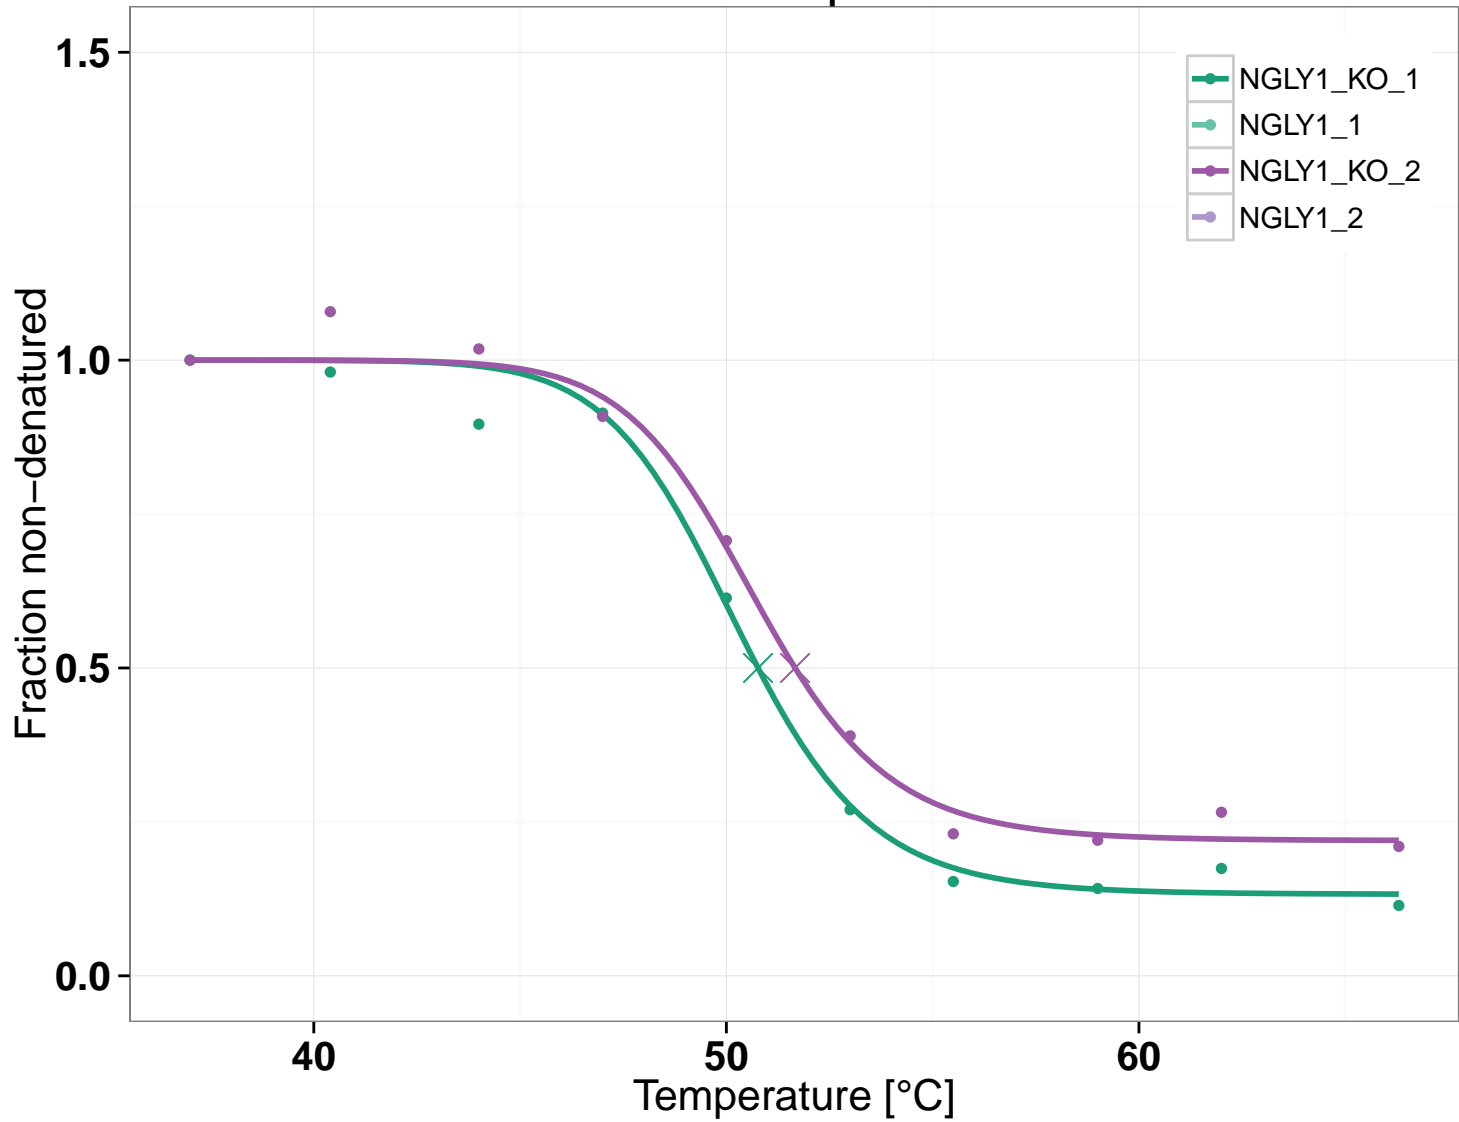

|            | meltPoint | slope | plateau | R2   |
|------------|-----------|-------|---------|------|
| NGLY1_KO_1 | 50.77     | -0.14 | 0.13    | 0.99 |
| NGLY1_1    | -         | -     | -       | -    |
| NGLY1_KO_2 | 51.67     | -0.12 | 0.22    | 0.99 |
| NGLY1_2    | -         | -     | -       | -    |

Supplement: Supplementary file 2934 [file 1]

# IPI00289462.1|MOCS1

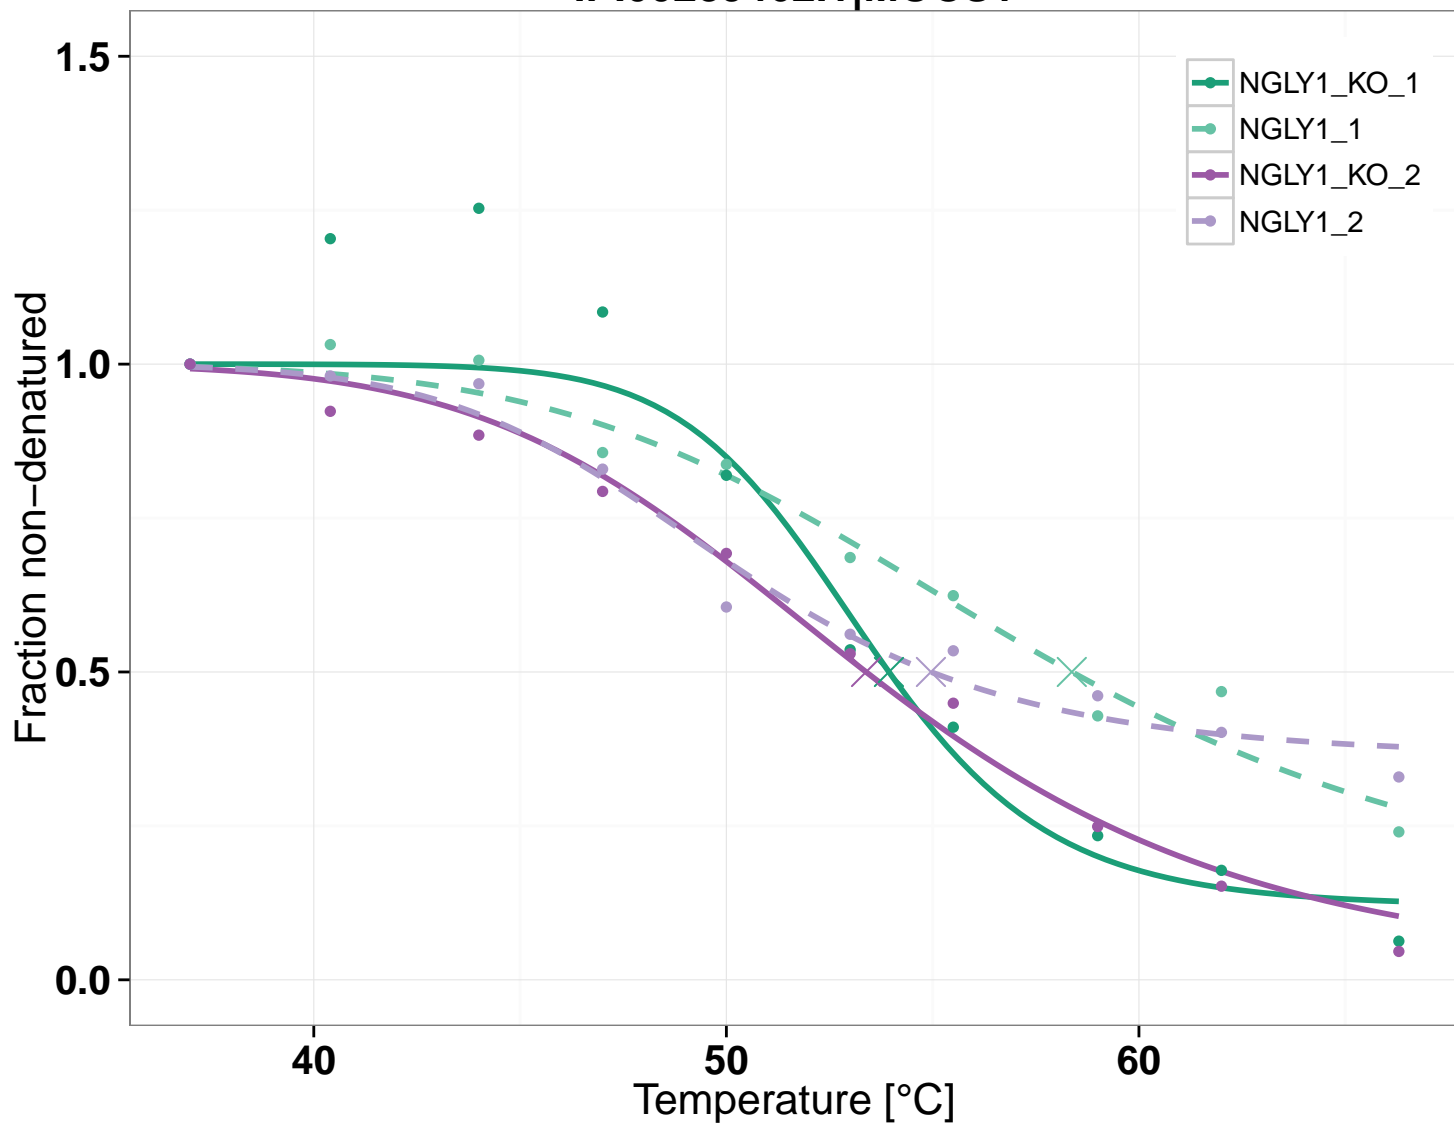

|            | meltPoint | slope  | plateau | R2   |
|------------|-----------|--------|---------|------|
| NGLY1_KO_1 | 53.94     | -0.099 | 0.12    | 0.93 |
| NGLY1_1    | 58.37     | -0.04  | 0.09    | 0.97 |
| NGLY1_KO_2 | 53.39     | -0.054 | 0       | 0.99 |
| NGLY1_2    | 54.96     | -0.046 | 0.36    | 0.98 |

Supplement: Supplementary file 2935 [file 1]

IPI00607557.1|ELF2

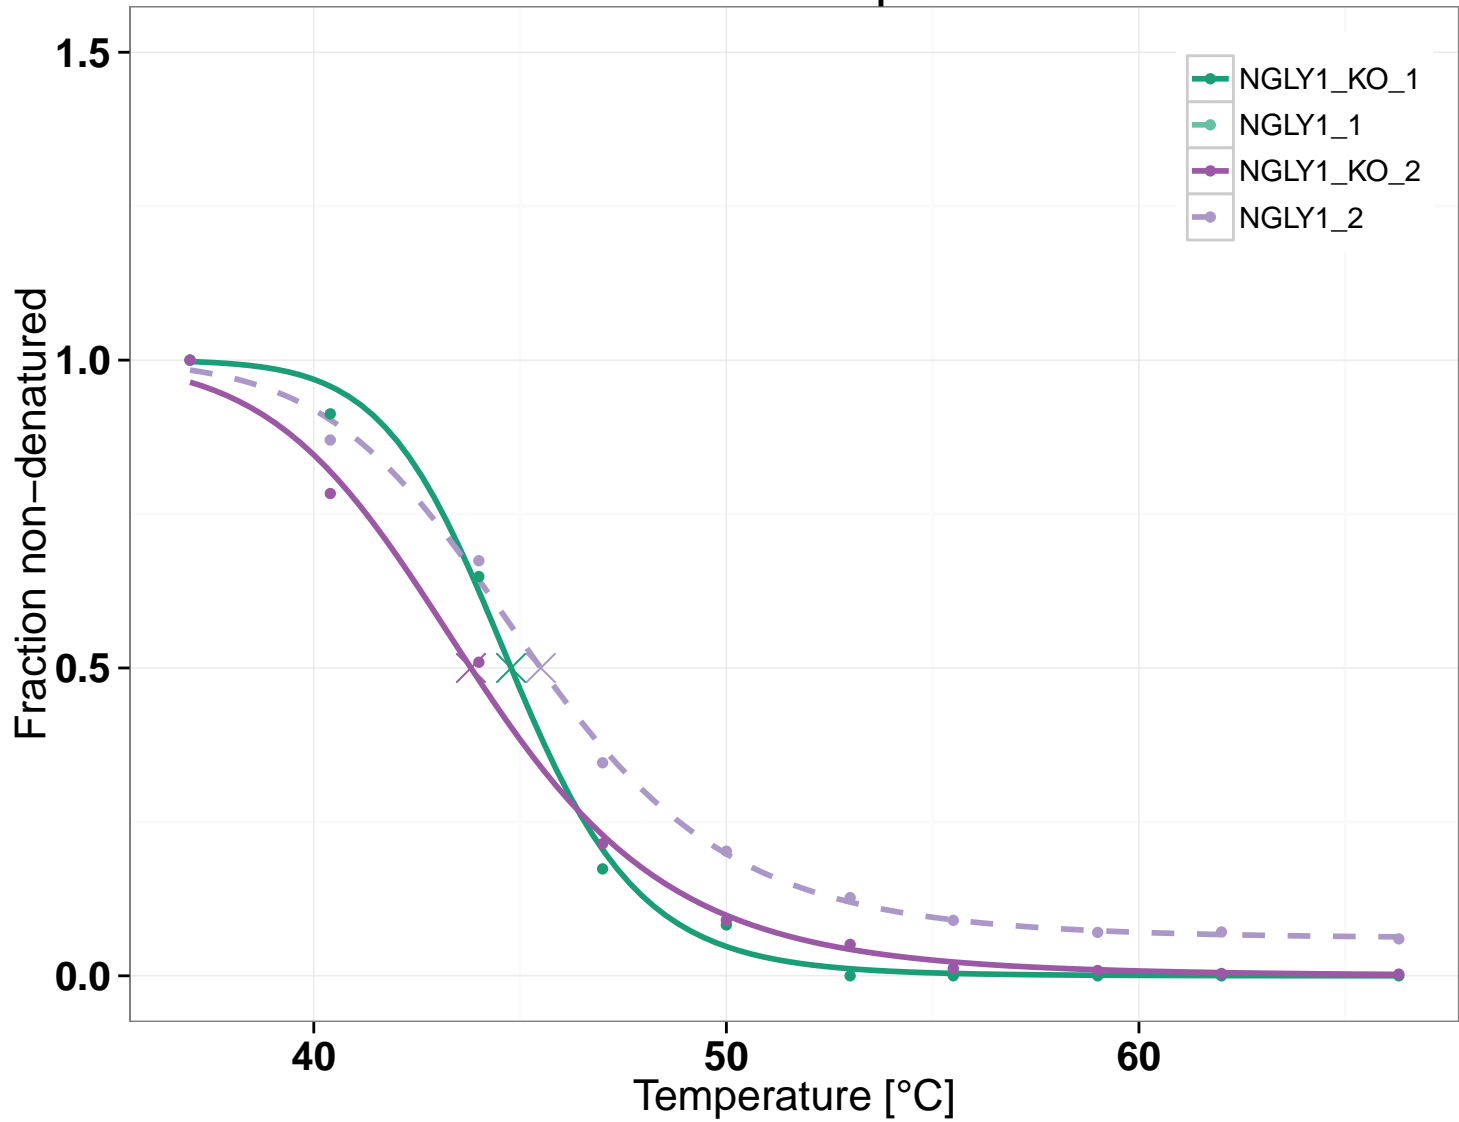

|            | meltPoint | slope  | plateau | R2 |
|------------|-----------|--------|---------|----|
| NGLY1_KO_1 | 44.78     | -0.16  | 0       | 1  |
| NGLY1_1    | -         | -      | -       | -  |
| NGLY1_KO_2 | 43.81     | -0.1   | 0       | 1  |
| NGLY1_2    | 45.5      | -0.096 | 0.06    | 1  |

Supplement: Supplementary file 2936 [file 1]

IPI00916626.1|ATG9A

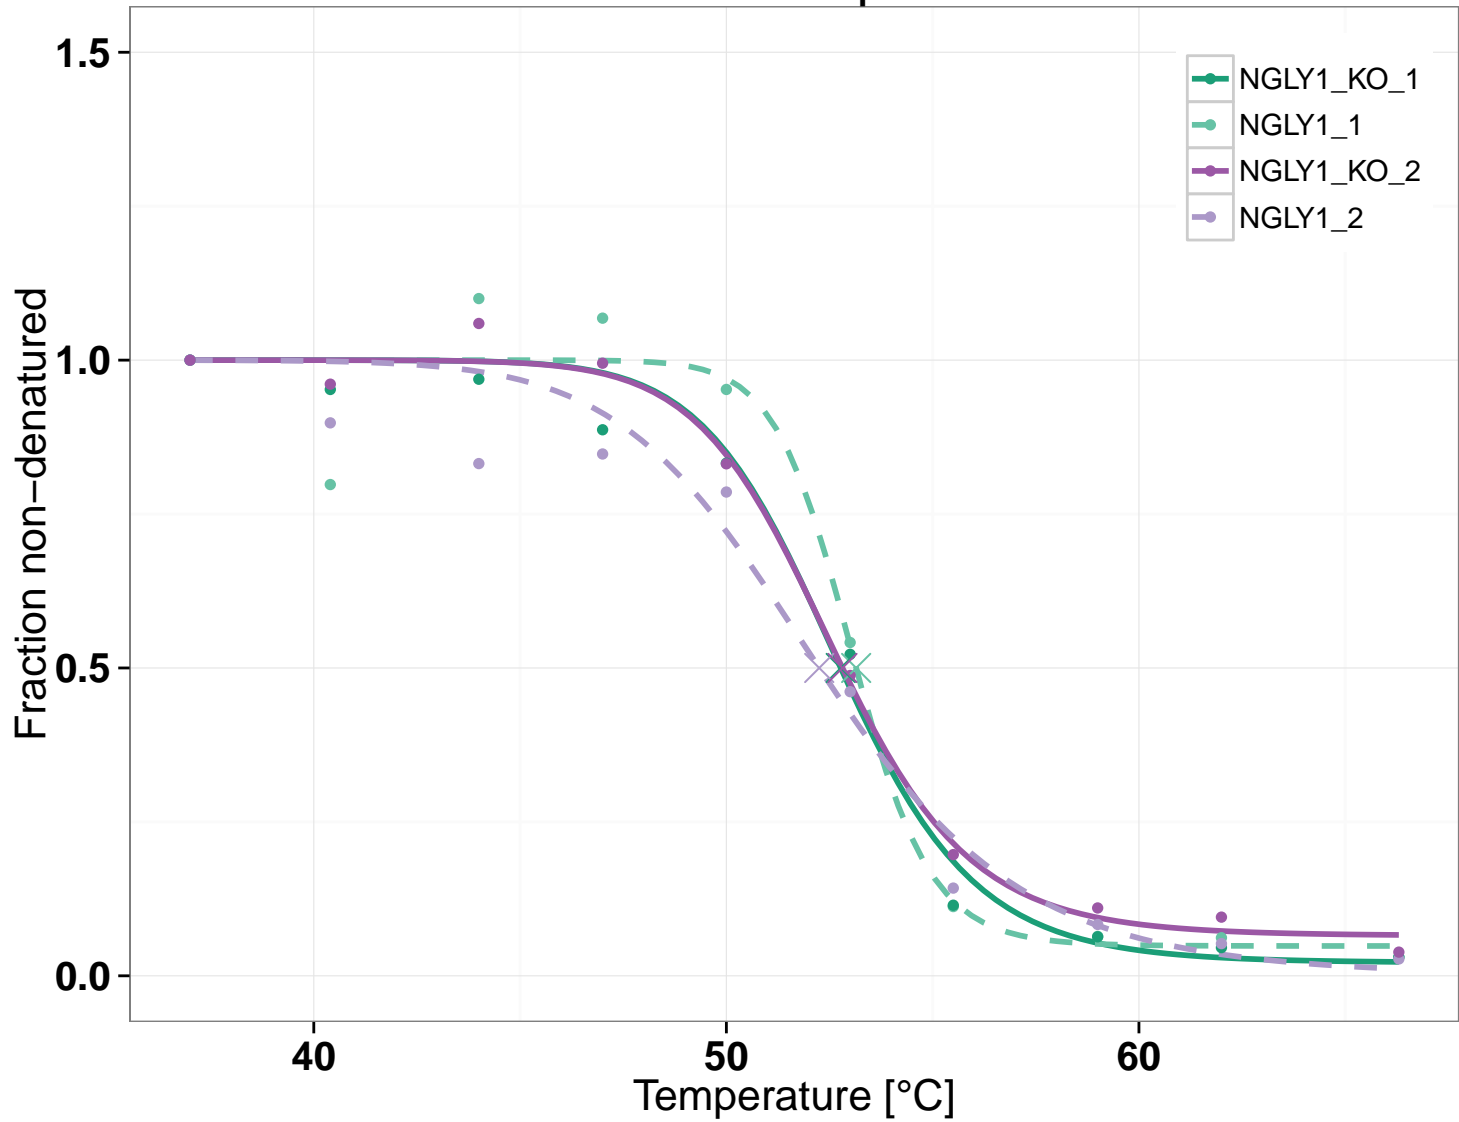

|            | meltPoint | slope | plateau | R2   |
|------------|-----------|-------|---------|------|
| NGLY1_KO_1 | 52.77     | -0.15 | 0.02    | 0.99 |
| NGLY1_1    | 53.15     | -0.25 | 0.05    | 0.97 |
| NGLY1_KO_2 | 52.81     | -0.14 | 0.07    | 1    |
| NGLY1_2    | 52.25     | -0.1  | 0       | 0.97 |

Supplement: Supplementary file 2937 [file 1]

# IPI00028416.1|PBX2

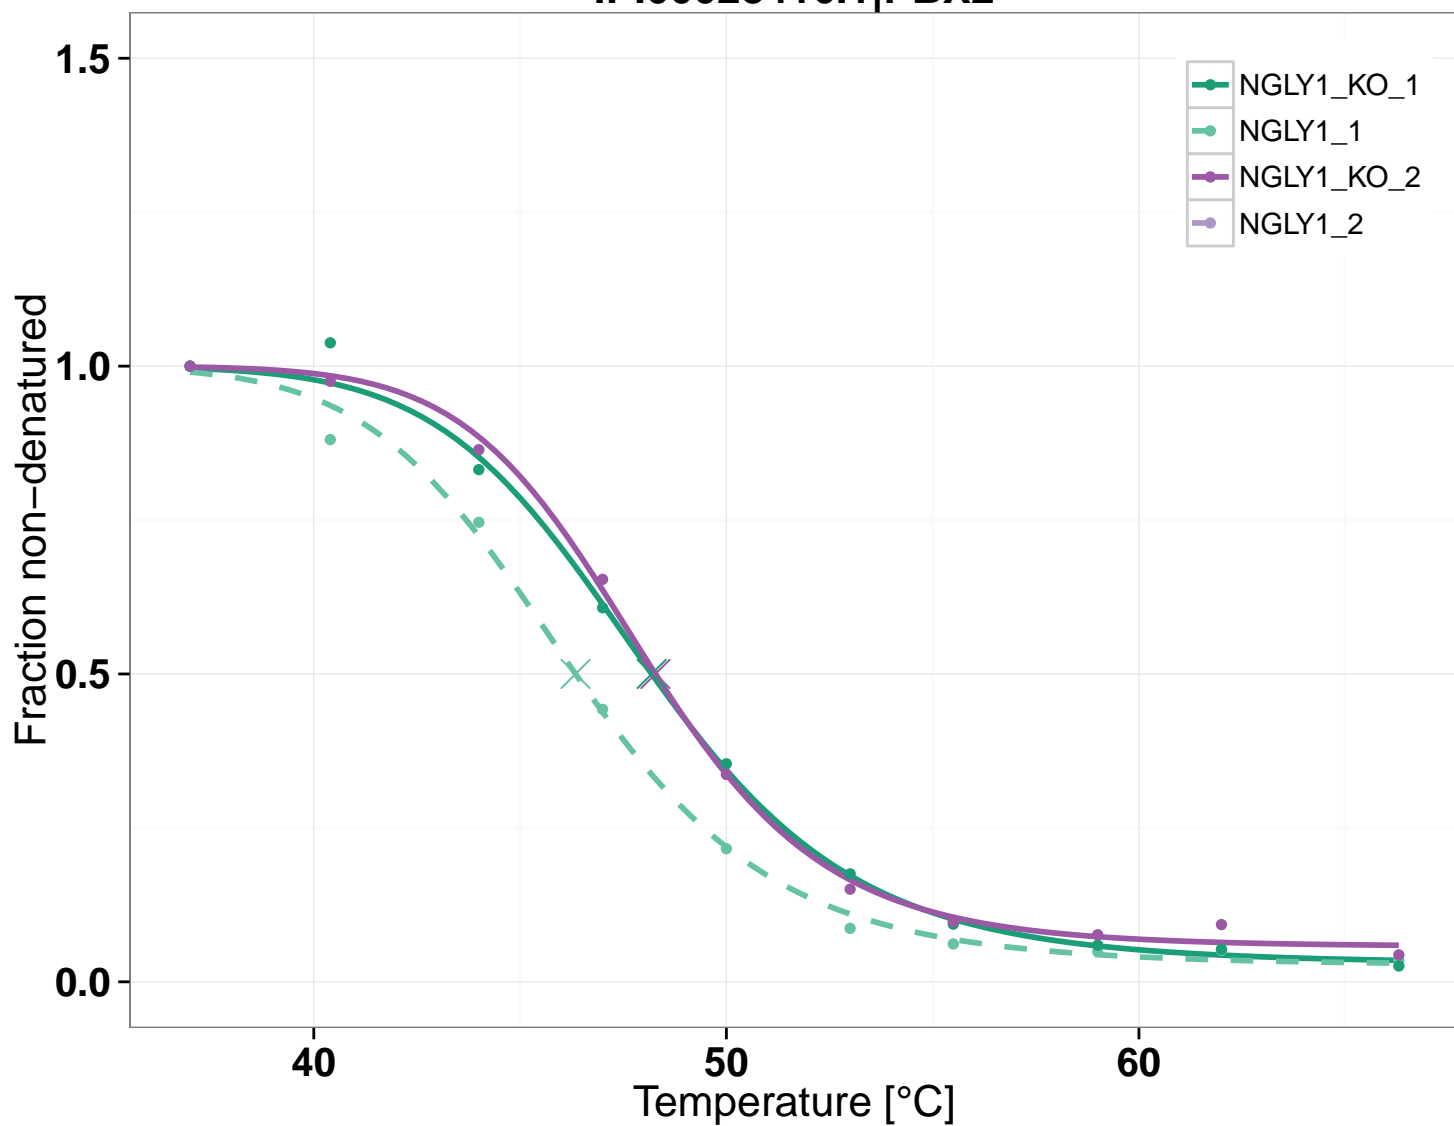

|            | meltPoint | slope  | plateau | R2 |
|------------|-----------|--------|---------|----|
| NGLY1_KO_1 | 48.19     | -0.096 | 0.03    | 1  |
| NGLY1_1    | 46.34     | -0.098 | 0.03    | 1  |
| NGLY1_KO_2 | 48.28     | -0.11  | 0.06    | 1  |
| NGLY1_2    | -         | -      | -       | -  |

Supplement: Supplementary file 2938 [file 1]

# IPI00106762.3|HERPUD2

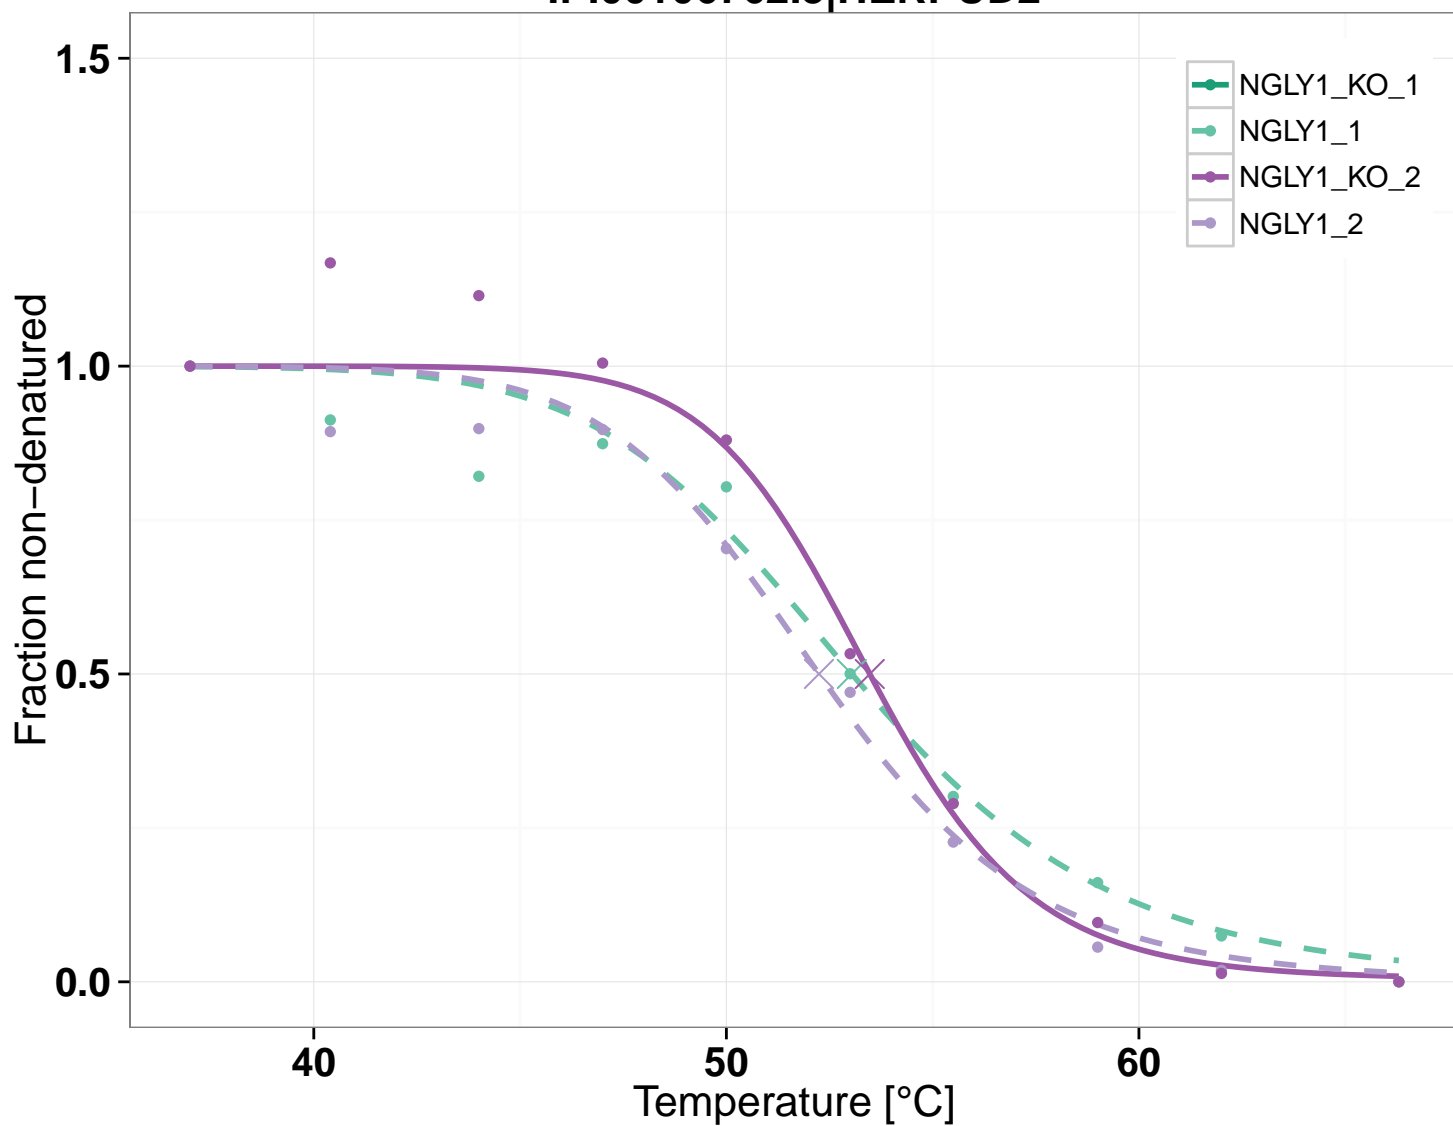

|            | meltPoint | slope  | plateau | R2   |
|------------|-----------|--------|---------|------|
| NGLY1_KO_1 | —         | —      | —       | —    |
| NGLY1_1    | 53.04     | -0.08  | 0       | 0.97 |
| NGLY1_KO_2 | 53.48     | -0.13  | 0       | 0.98 |
| NGLY1_2    | 52.24     | -0.096 | 0       | 0.99 |

Supplement: Supplementary file 2939 [file 1]

IPI00166612.9|CMYA5

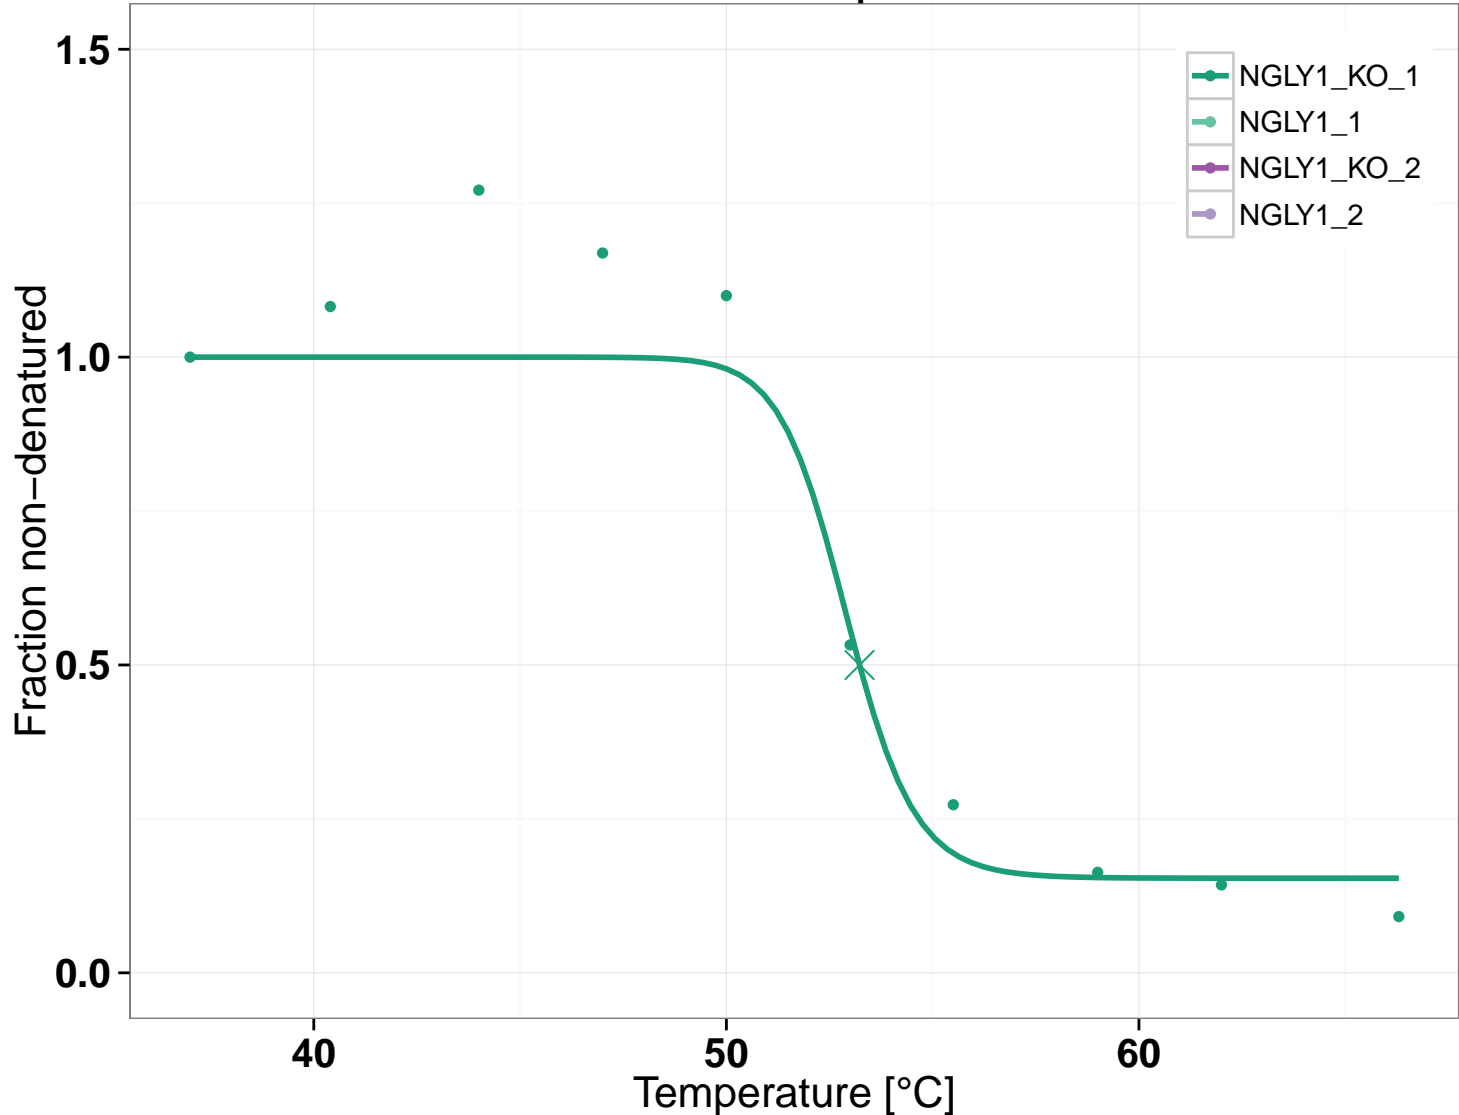

|            | meltPoint | slope | plateau | R2   |
|------------|-----------|-------|---------|------|
| NGLY1_KO_1 | 53.23     | -0.26 | 0.15    | 0.94 |
| NGLY1_1    | -         | -     | -       | -    |
| NGLY1_KO_2 | -         | -     | -       | -    |
| NGLY1_2    | -         | -     | -       | -    |

Supplement: Supplementary file 2940 [file 1]

# IPI00646512.1|RBBP7

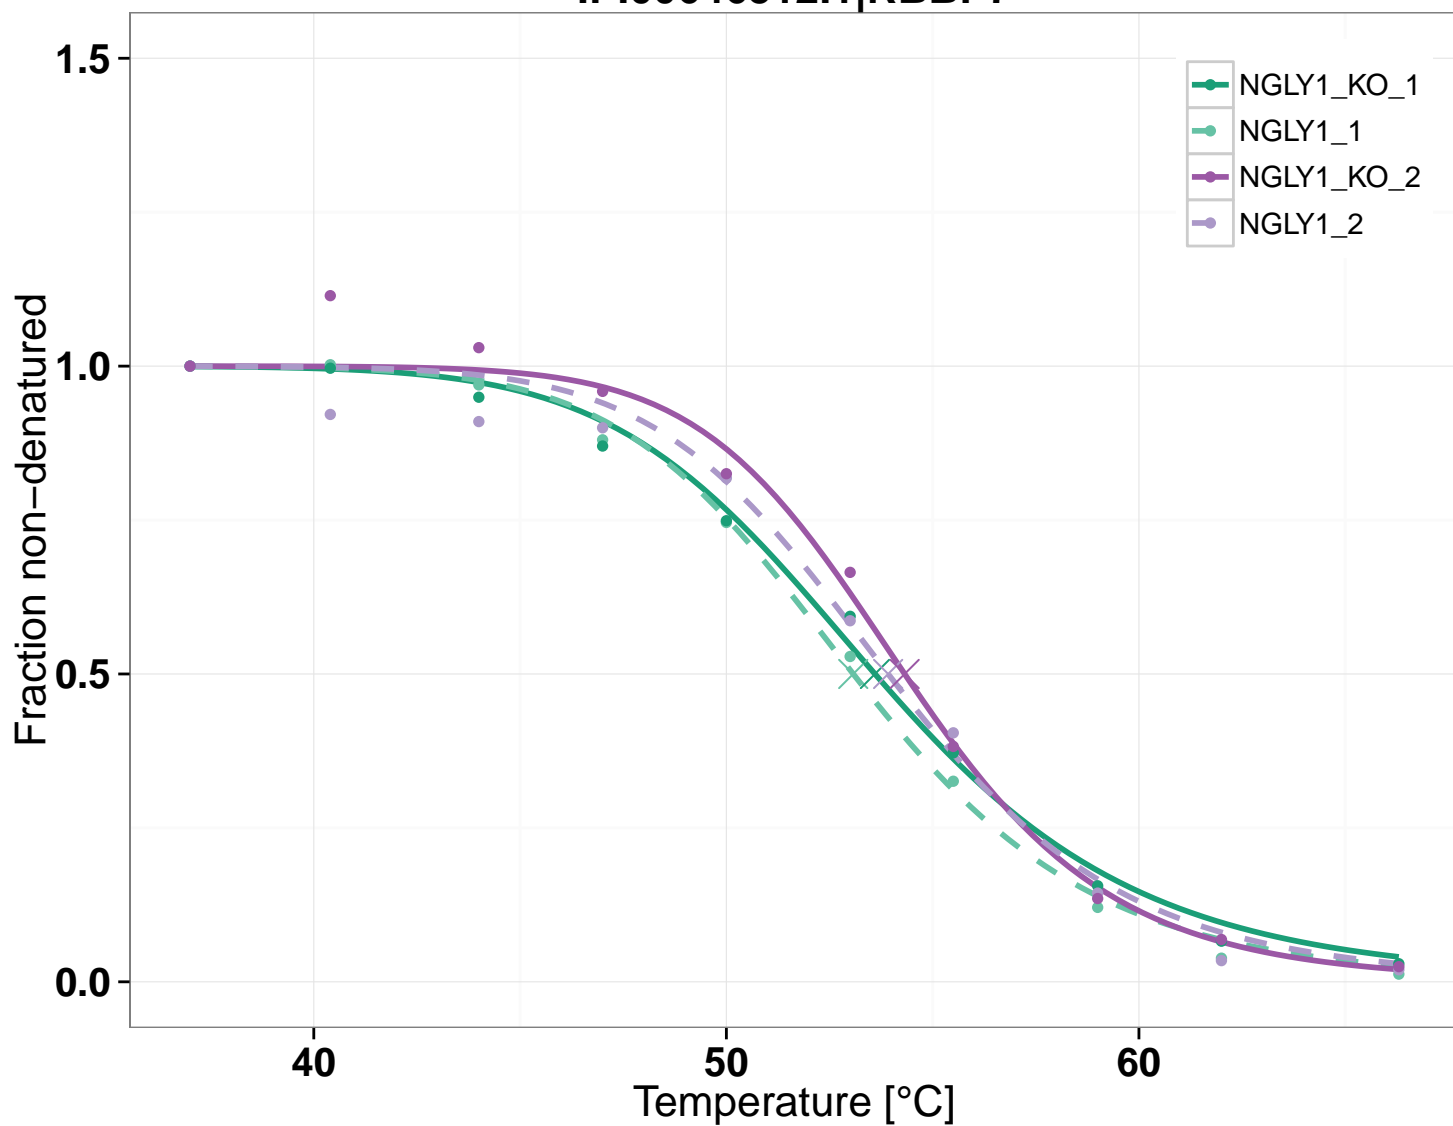

|            | meltPoint | slope  | plateau | R2   |
|------------|-----------|--------|---------|------|
| NGLY1_KO_1 | 53.6      | -0.078 | 0       | 1    |
| NGLY1_1    | 53.08     | -0.086 | 0       | 1    |
| NGLY1_KO_2 | 54.32     | -0.1   | 0       | 0.99 |
| NGLY1_2    | 53.92     | -0.088 | 0       | 0.99 |

Supplement: Supplementary file 2941 [file 1]

IPI00149964.6|C18ORF8

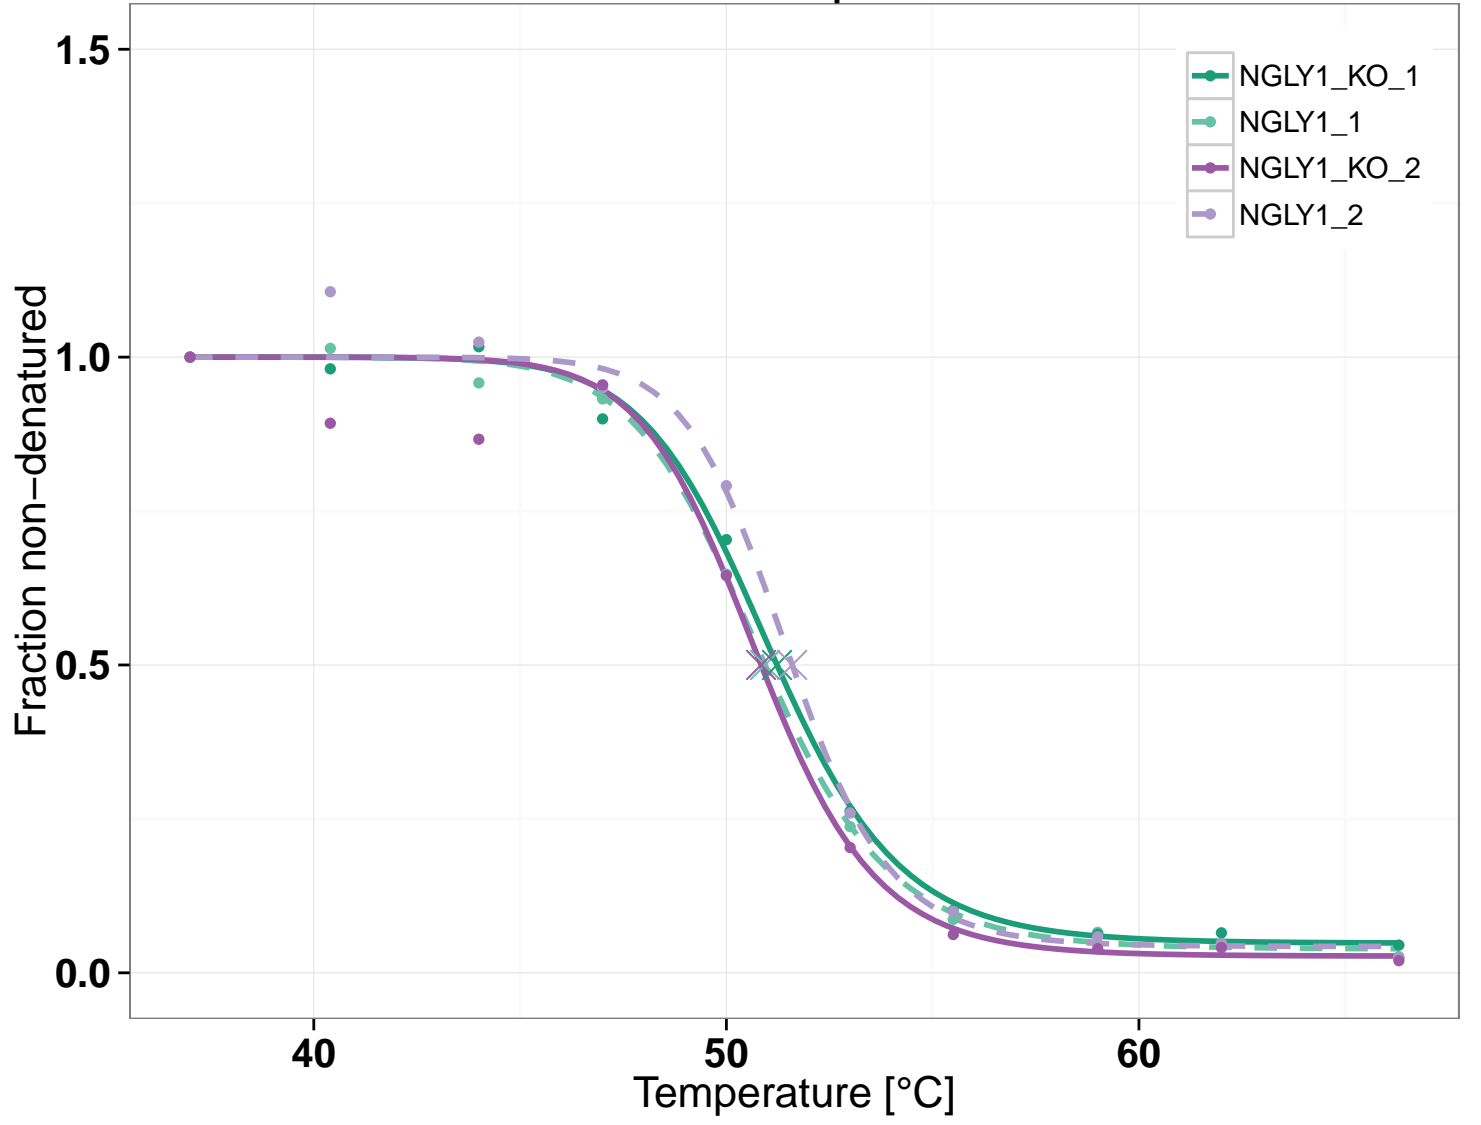

|            | meltPoint | slope | plateau | R2   |
|------------|-----------|-------|---------|------|
| NGLY1_KO_1 | 51.23     | -0.15 | 0.05    | 1    |
| NGLY1_1    | 50.94     | -0.15 | 0.04    | 1    |
| NGLY1_KO_2 | 50.84     | -0.17 | 0.03    | 0.98 |
| NGLY1_2    | 51.6      | -0.19 | 0.04    | 0.99 |

Supplement: Supplementary file 2942 [file 1]

IPI00002993.1|TAF9

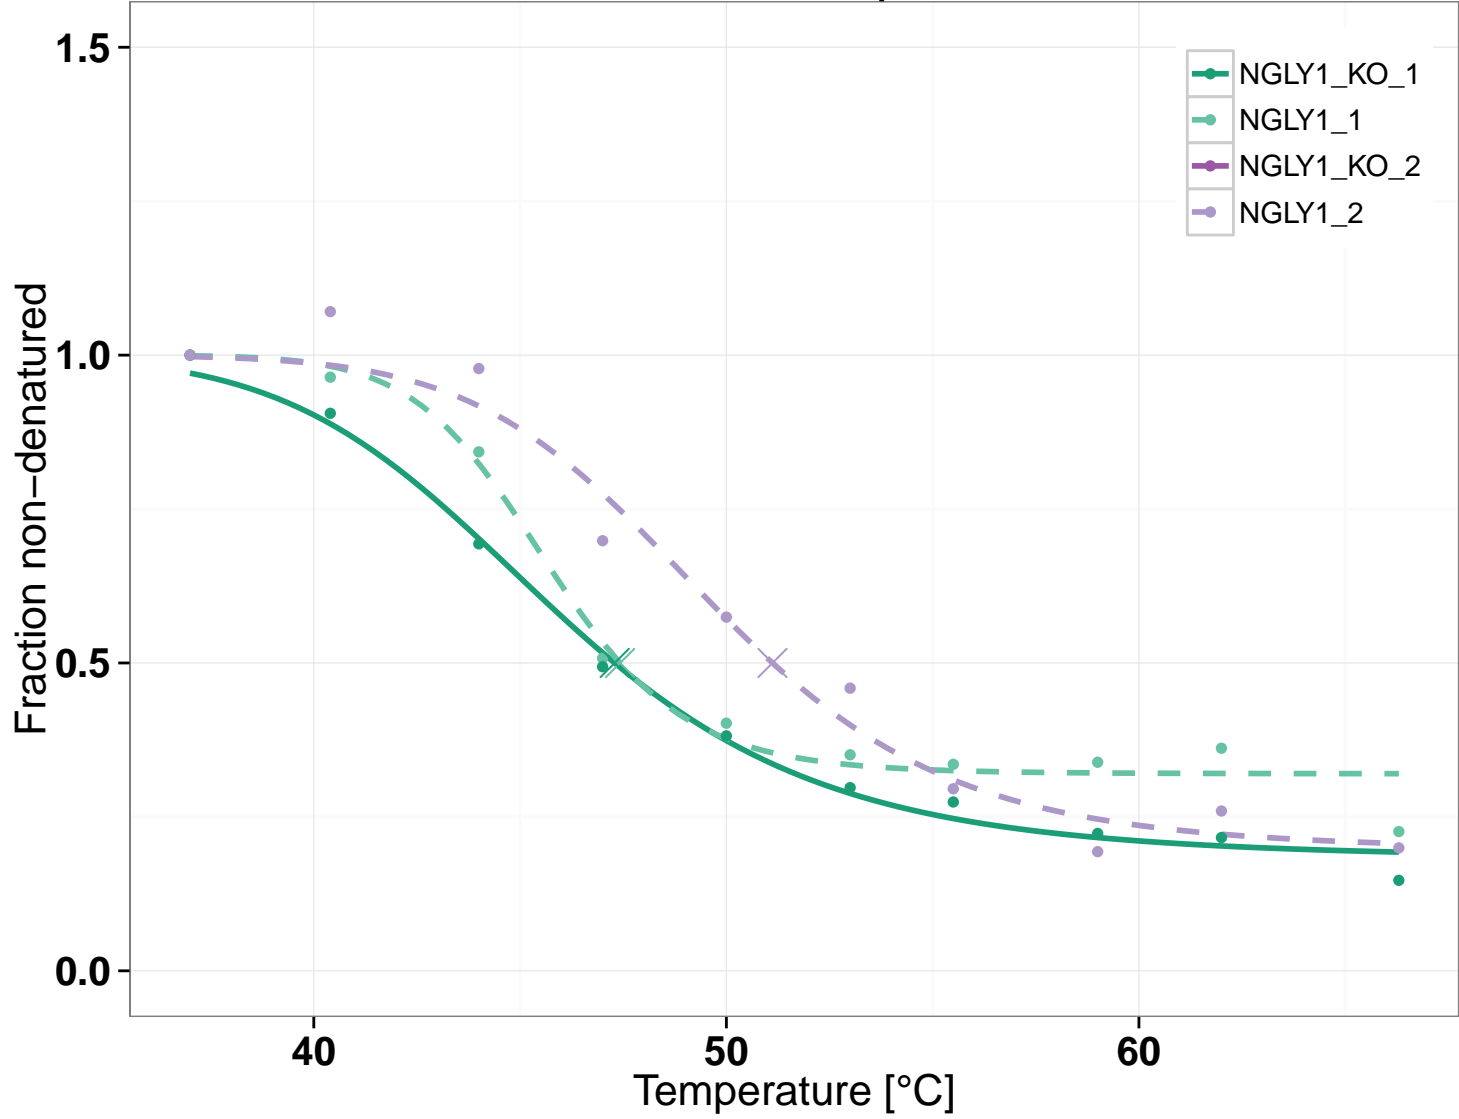

|            | meltPoint | slope  | plateau | R2   |
|------------|-----------|--------|---------|------|
| NGLY1_KO_1 | 47.29     | -0.064 | 0.18    | 0.99 |
| NGLY1_1    | 47.43     | -0.1   | 0.32    | 0.98 |
| NGLY1_KO_2 | -         | -      | -       | -    |
| NGLY1_2    | 51.12     | -0.07  | 0.2     | 0.98 |

Supplement: Supplementary file 2943 [file 1]

IPI00020896.3|XK

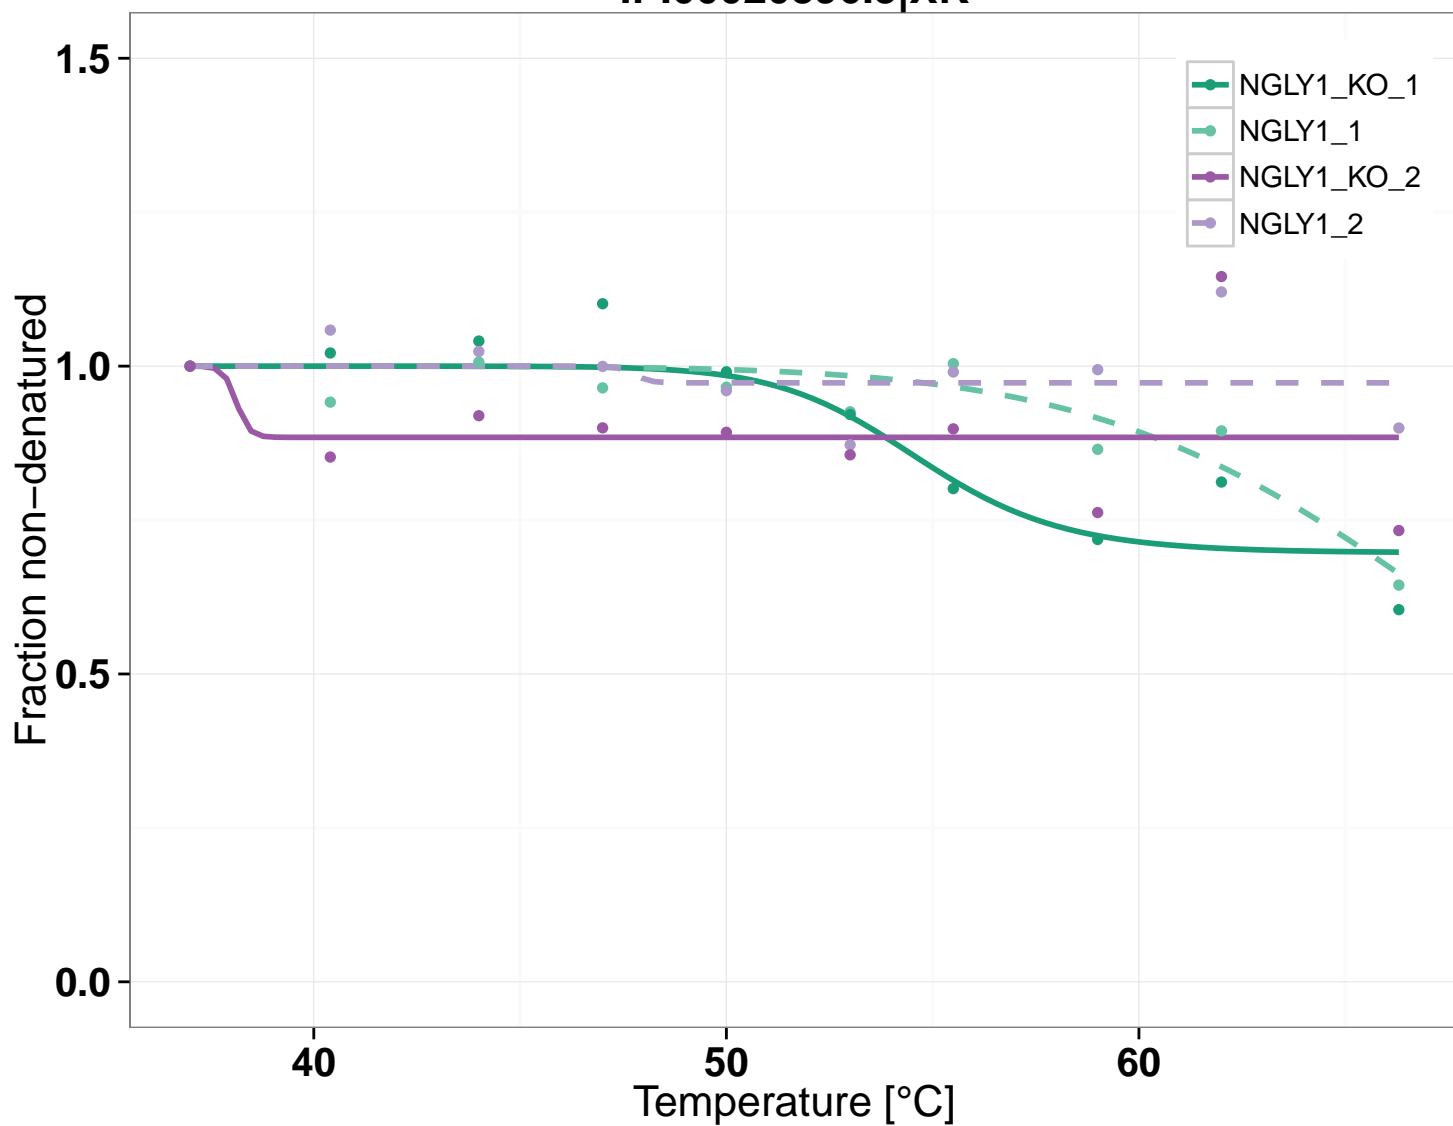

|            | meltPoint | slope  | plateau | R2   |
|------------|-----------|--------|---------|------|
| NGLY1_KO_1 | –         | –0.044 | 0.7     | 0.86 |
| NGLY1_1    | –         | –      | 0       | 0.84 |
| NGLY1_KO_2 | –         | –0.19  | 0.88    | 0.1  |
| NGLY1_2    | –         | –0.036 | 0.97    | 0.08 |

Supplement: Supplementary file 2944 [file 1]

IPI00019992.4|MYBL1

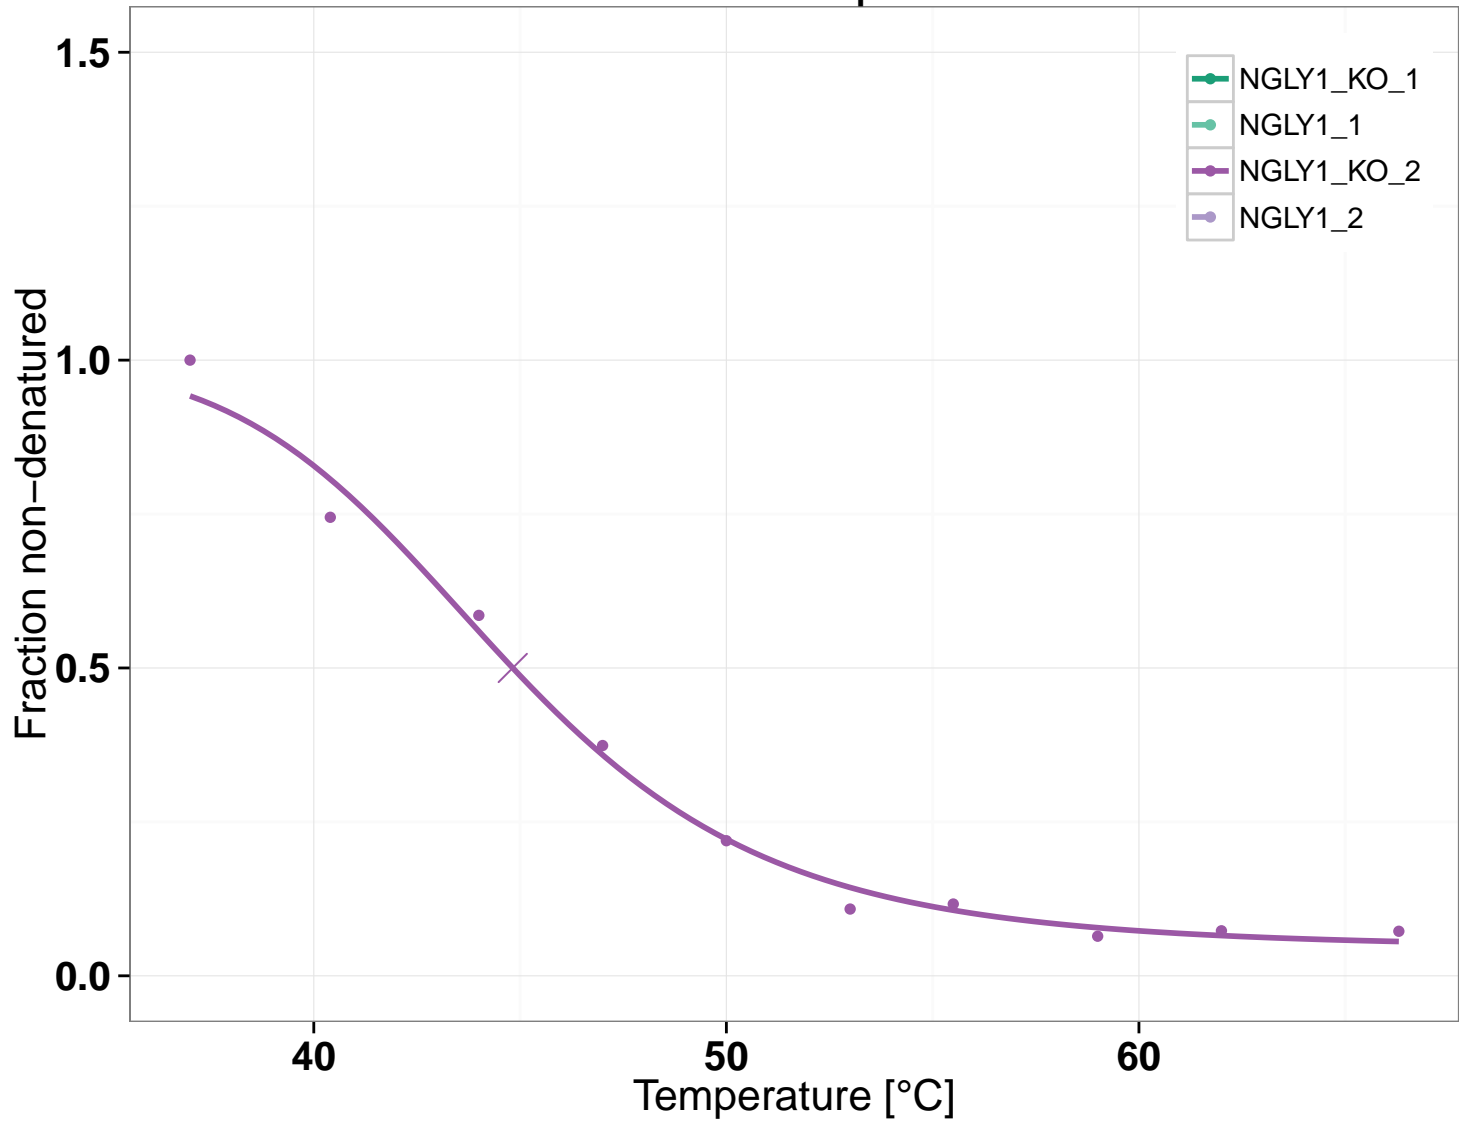

|            | meltPoint | slope  | plateau | R2   |
|------------|-----------|--------|---------|------|
| NGLY1_KO_1 | -         | -      | -       | -    |
| NGLY1_1    | -         | -      | -       | -    |
| NGLY1_KO_2 | 44.82     | -0.074 | 0.04    | 0.99 |
| NGLY1_2    | -         | -      | -       | -    |

Supplement: Supplementary file 2945 [file 1]

IPI00006130.3|KIAA0494

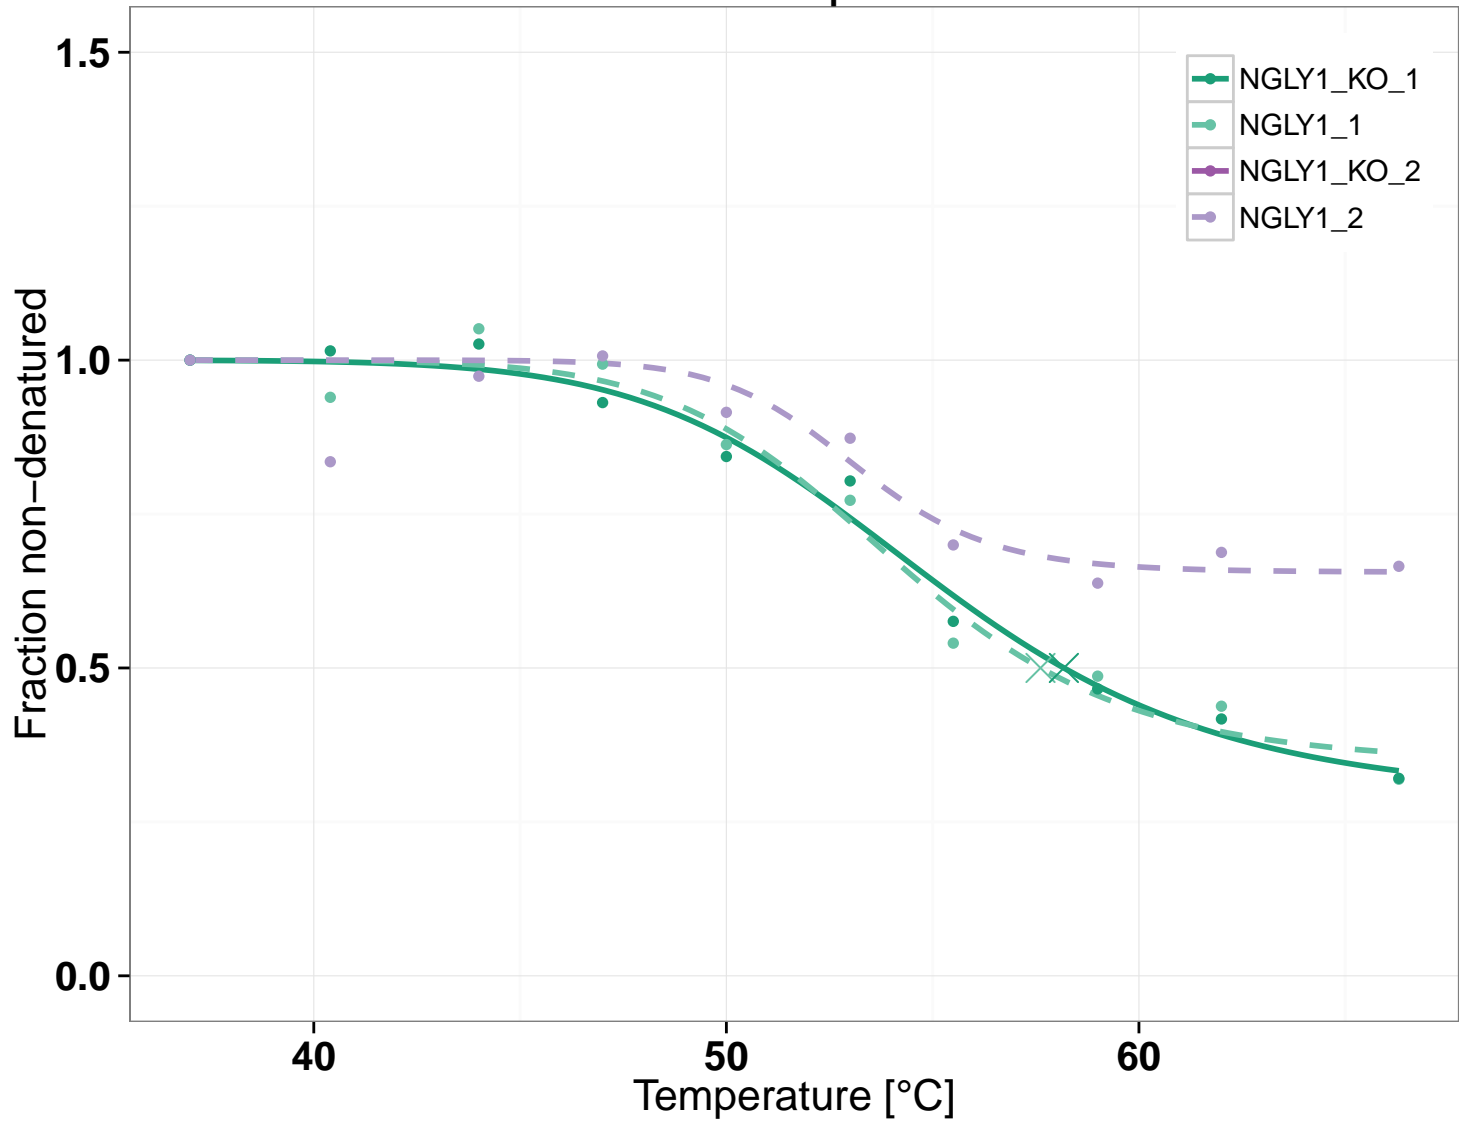

|            | meltPoint | slope  | plateau | R2   |
|------------|-----------|--------|---------|------|
| NGLY1_KO_1 | 58.18     | -0.051 | 0.28    | 0.99 |
| NGLY1_1    | 57.61     | -0.059 | 0.34    | 0.97 |
| NGLY1_KO_2 | -         | -      | -       | -    |
| NGLY1_2    | -         | -0.052 | 0.66    | 0.82 |

Supplement: Supplementary file 2946 [file 1]

# IPI00748567.1|LIPA

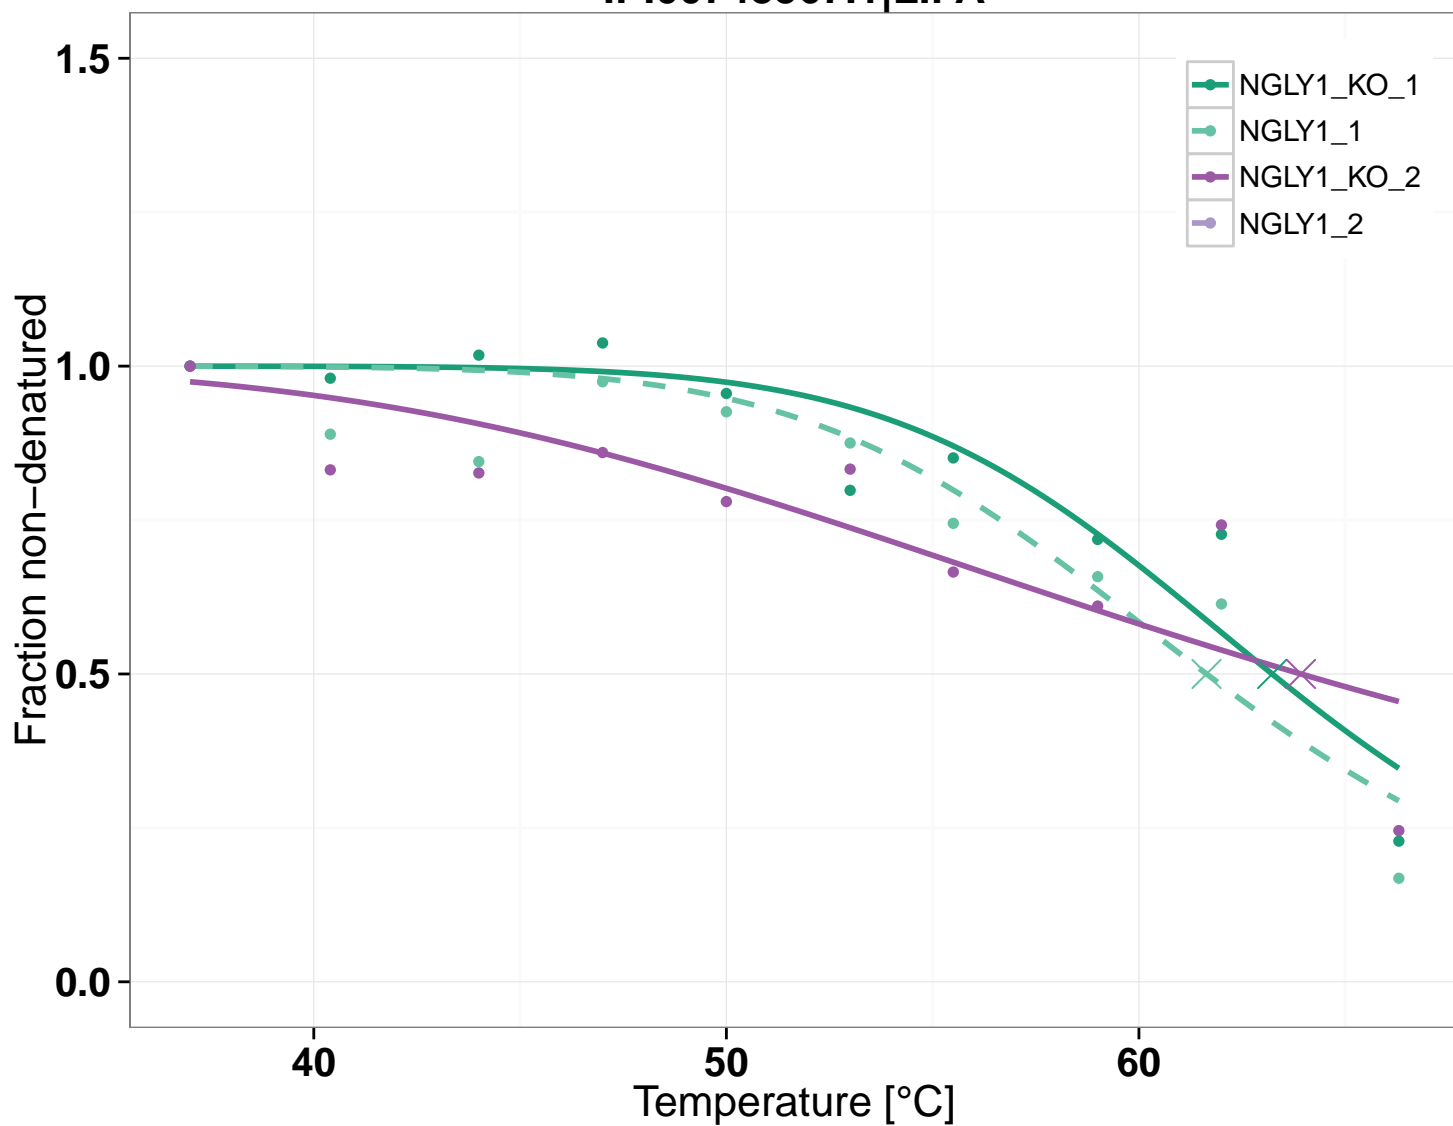

|            | meltPoint | slope  | plateau | R2   |
|------------|-----------|--------|---------|------|
| NGLY1_KO_1 | 63.23     | -0.055 | 0       | 0.88 |
| NGLY1_1    | 61.64     | -0.052 | 0       | 0.87 |
| NGLY1_KO_2 | 63.93     | -0.023 | 0       | 0.69 |
| NGLY1_2    | -         | -      | -       | -    |

Supplement: Supplementary file 2947 [file 1]

IPI00009755.3|METTL3

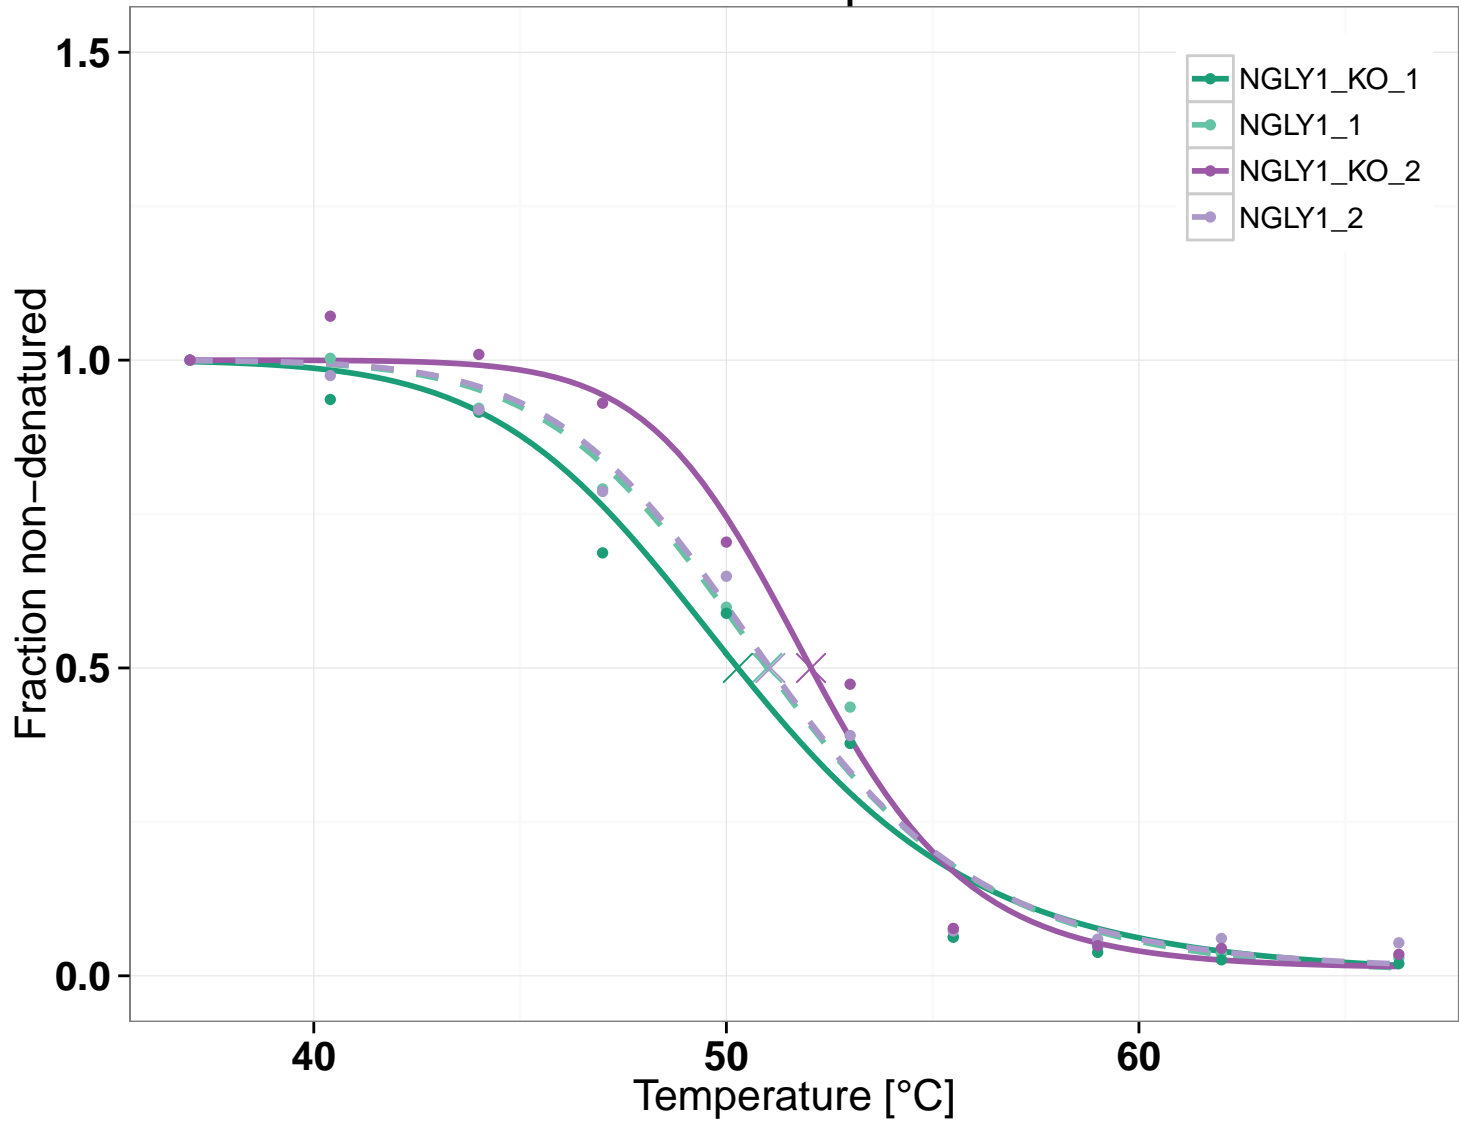

|            | meltPoint | slope  | plateau | R2   |
|------------|-----------|--------|---------|------|
| NGLY1_KO_1 | 50.28     | -0.085 | 0       | 0.98 |
| NGLY1_1    | 50.99     | -0.093 | 0       | 0.98 |
| NGLY1_KO_2 | 52.05     | -0.13  | 0.01    | 0.99 |
| NGLY1_2    | 51.07     | -0.095 | 0.01    | 0.98 |

Supplement: Supplementary file 2948 [file 1]

IPI00872177.1|PPP1CB

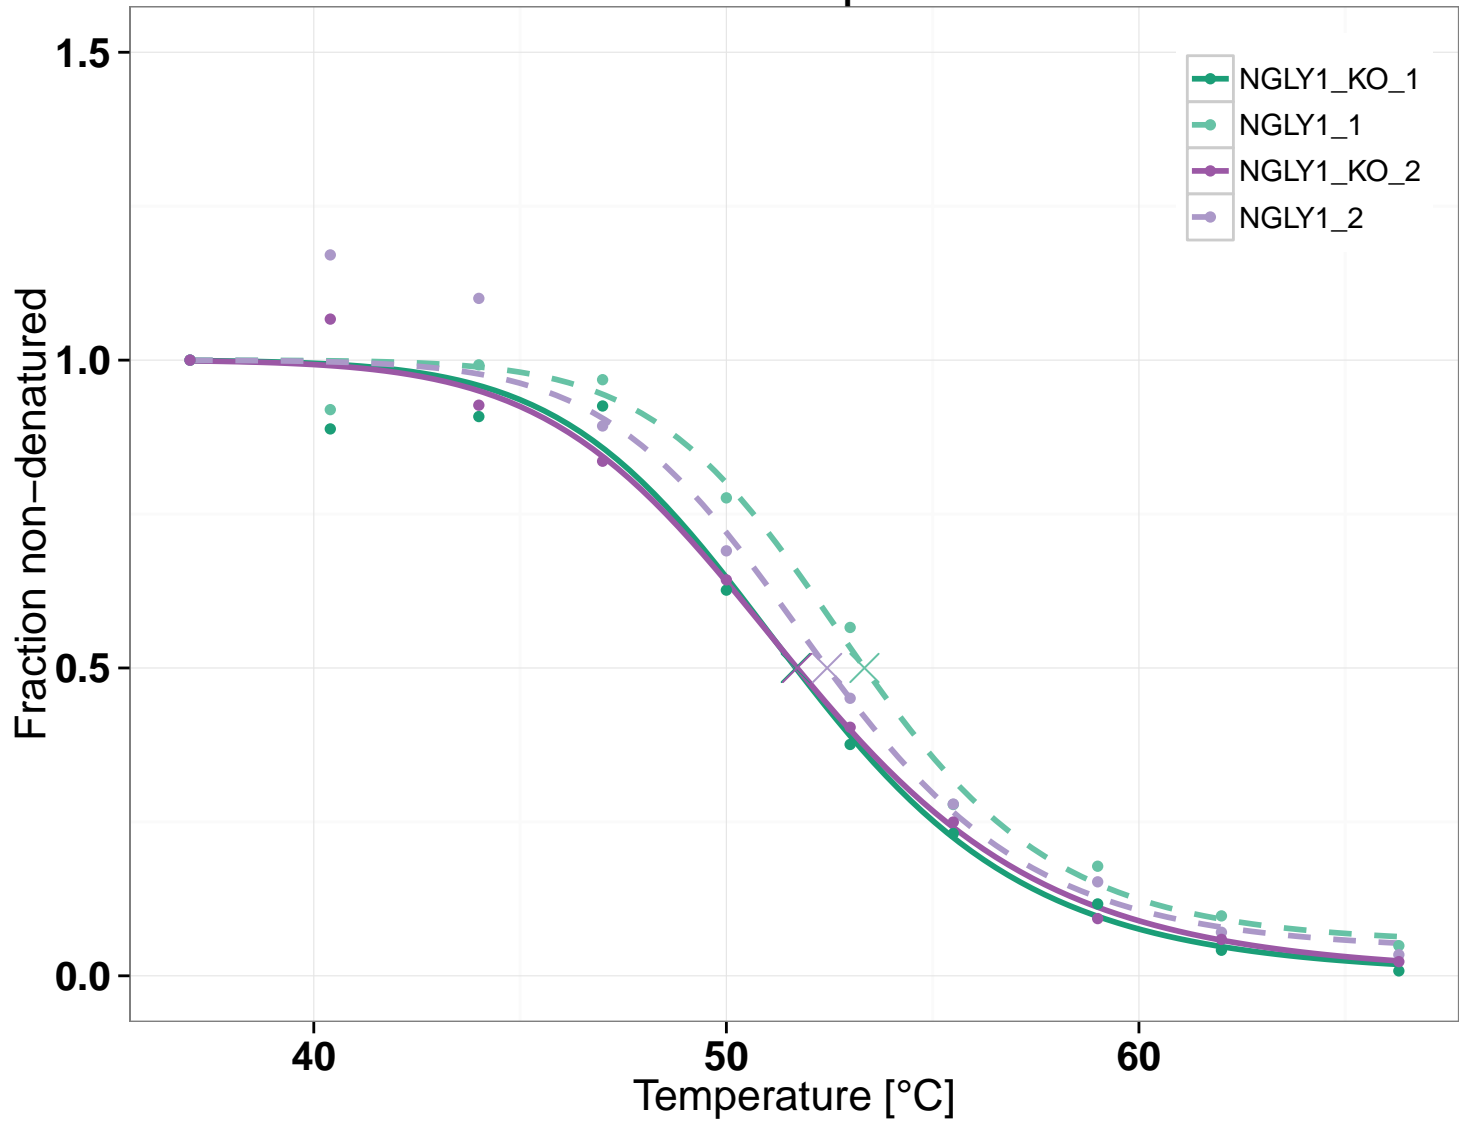

|            | meltPoint | slope  | plateau | R2   |
|------------|-----------|--------|---------|------|
| NGLY1_KO_1 | 51.68     | -0.088 | 0       | 0.99 |
| NGLY1_1    | 53.35     | -0.097 | 0.05    | 0.99 |
| NGLY1_KO_2 | 51.71     | -0.082 | 0       | 1    |
| NGLY1_2    | 52.44     | -0.093 | 0.04    | 0.97 |

Supplement: Supplementary file 2949 [file 1]

# IPI00291417.2|DCAKD

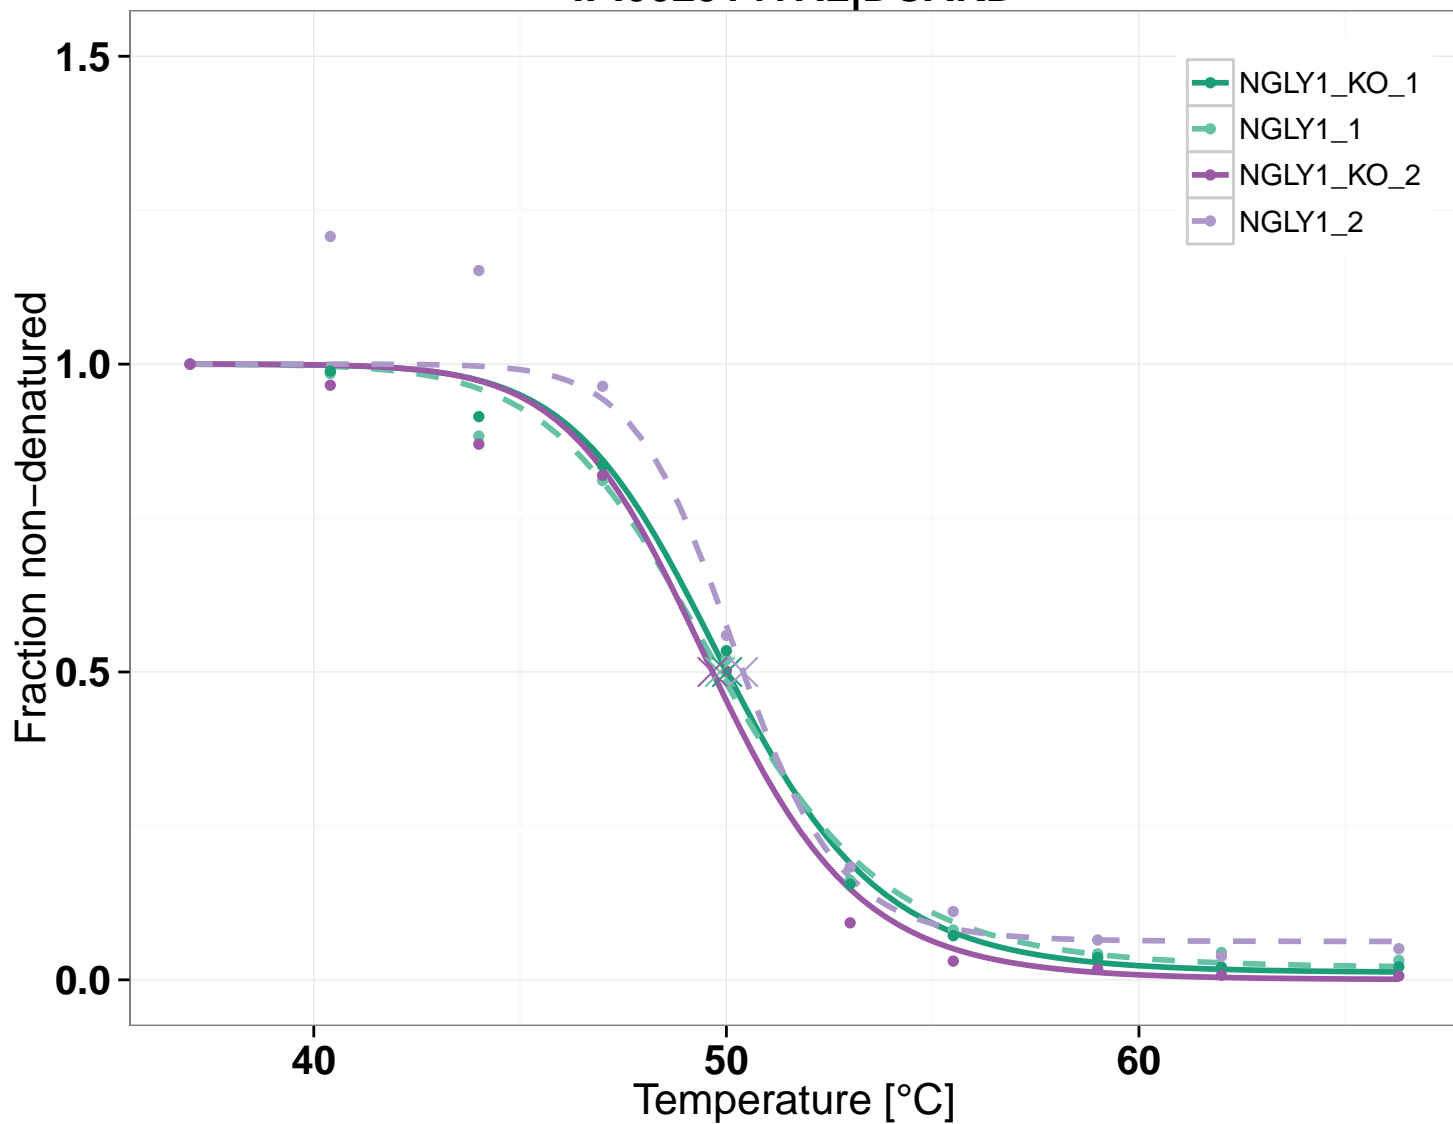

|            | meltPoint | slope | plateau | R2   |
|------------|-----------|-------|---------|------|
| NGLY1_KO_1 | 50.02     | -0.13 | 0.01    | 1    |
| NGLY1_1    | 49.85     | -0.12 | 0.02    | 0.99 |
| NGLY1_KO_2 | 49.66     | -0.14 | 0       | 0.99 |
| NGLY1_2    | 50.4      | -0.19 | 0.06    | 0.97 |

Supplement: Supplementary file 2950 [file 1]

# IPI00307114.2|SCAPER

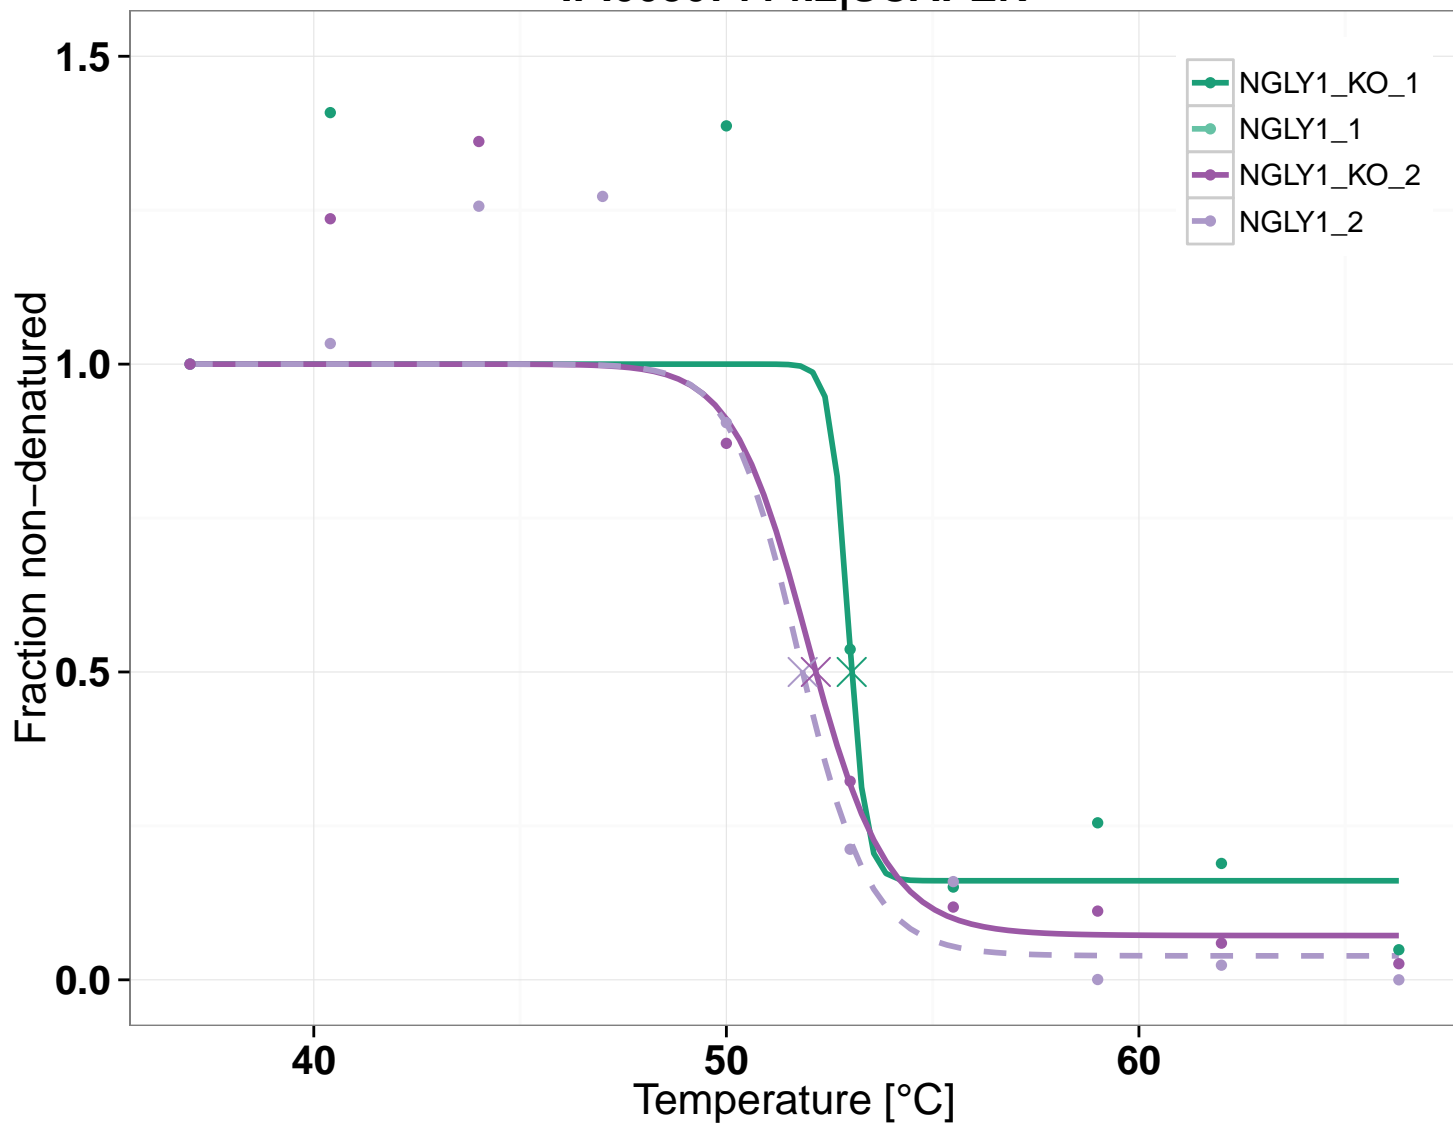

|            | meltPoint | slope | plateau | R2   |
|------------|-----------|-------|---------|------|
| NGLY1_KO_1 | 53.04     | -0.99 | 0.16    | 0.54 |
| NGLY1_1    | -         | -     | -       | -    |
| NGLY1_KO_2 | 52.17     | -0.25 | 0.07    | 0.81 |
| NGLY1_2    | 51.85     | -0.29 | 0.04    | 0.94 |

Supplement: Supplementary file 2951 [file 1]

IPI00028091.3|ACTR3

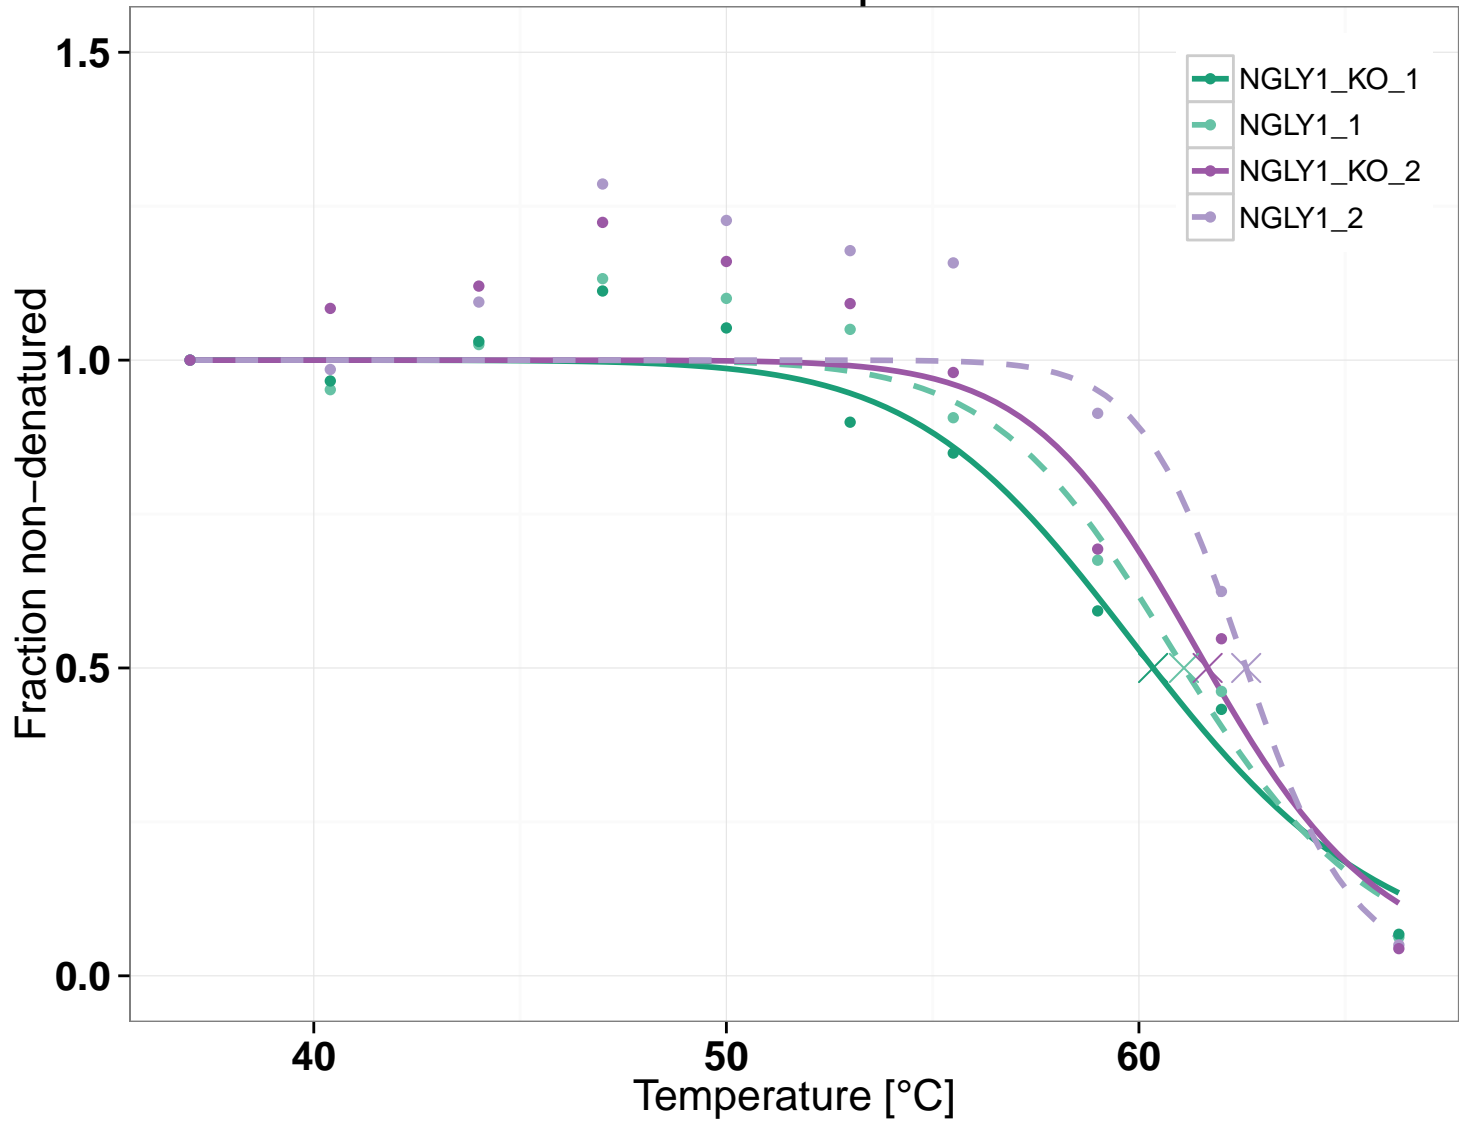

|            | meltPoint | slope  | plateau | R2   |
|------------|-----------|--------|---------|------|
| NGLY1_KO_1 | 60.34     | -0.087 | 0       | 0.97 |
| NGLY1_1    | 61.09     | -0.11  | 0       | 0.96 |
| NGLY1_KO_2 | 61.66     | -0.12  | 0       | 0.89 |
| NGLY1_2    | 62.6      | -0.19  | 0       | 0.84 |

Supplement: Supplementary file 2952 [file 1]

IPI00005692.1|MRPS12

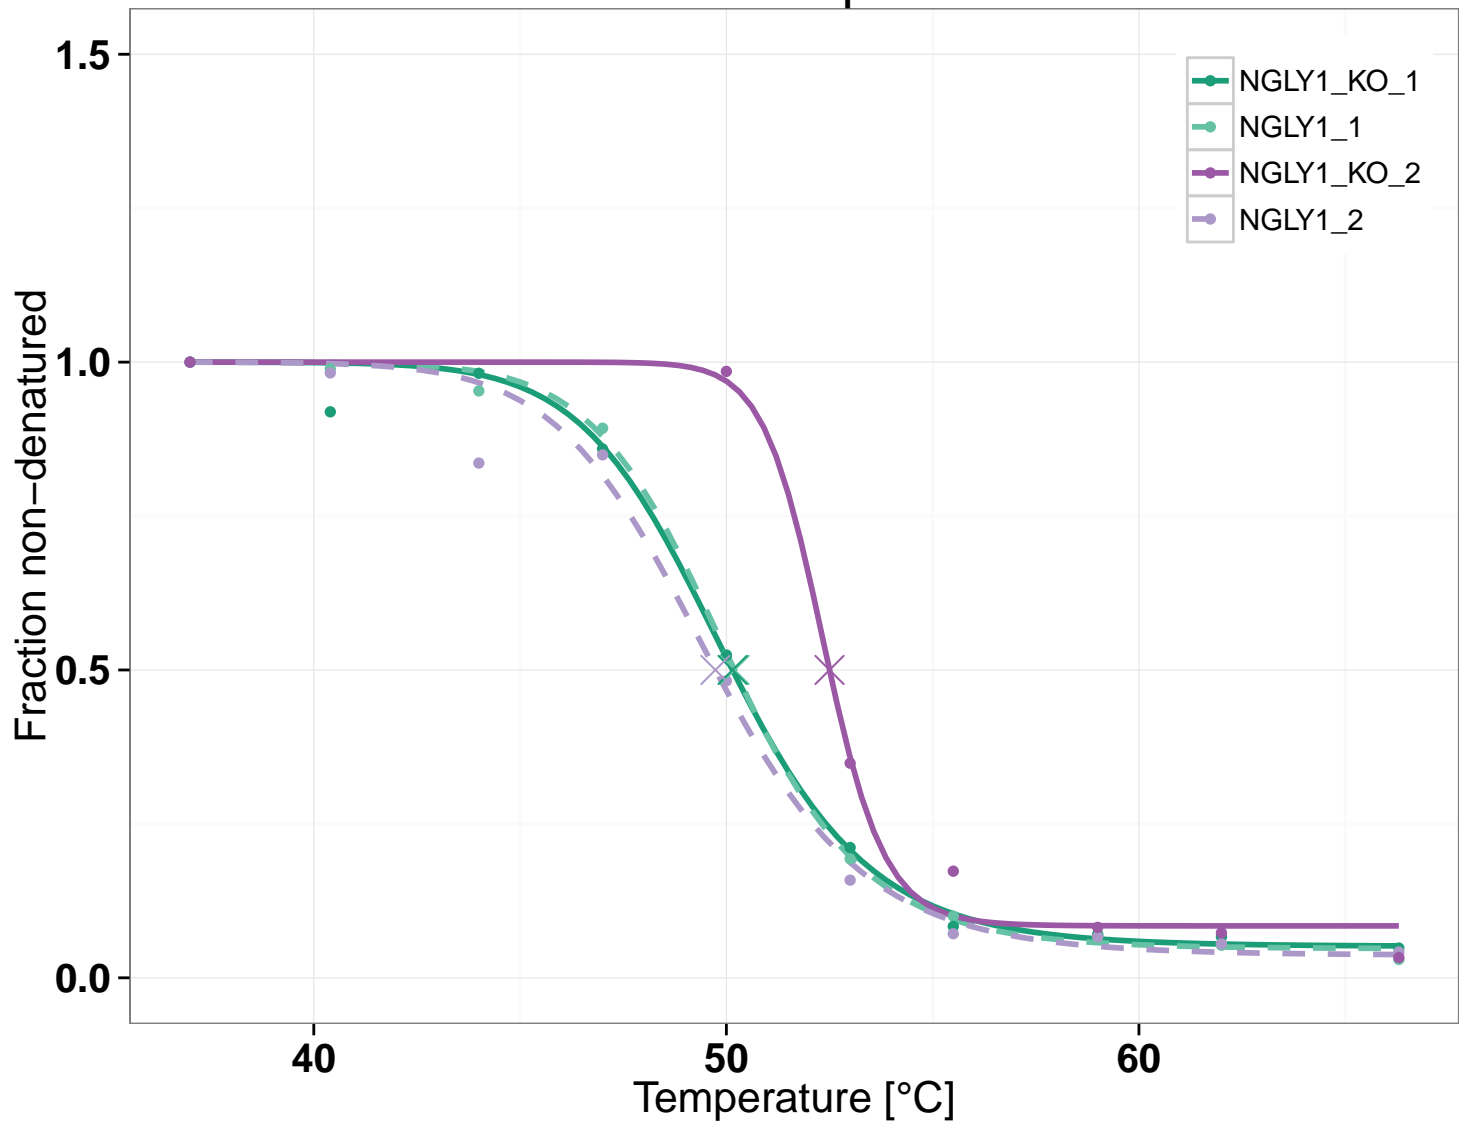

|            | meltPoint | slope | plateau | R2   |
|------------|-----------|-------|---------|------|
| NGLY1_KO_1 | 50.15     | -0.14 | 0.05    | 1    |
| NGLY1_1    | 50.2      | -0.14 | 0.05    | 1    |
| NGLY1_KO_2 | 52.5      | -0.31 | 0.08    | 0.56 |
| NGLY1_2    | 49.73     | -0.13 | 0.04    | 0.99 |

Supplement: Supplementary file 2953 [file 1]

IPI00749254.2|AZIN1

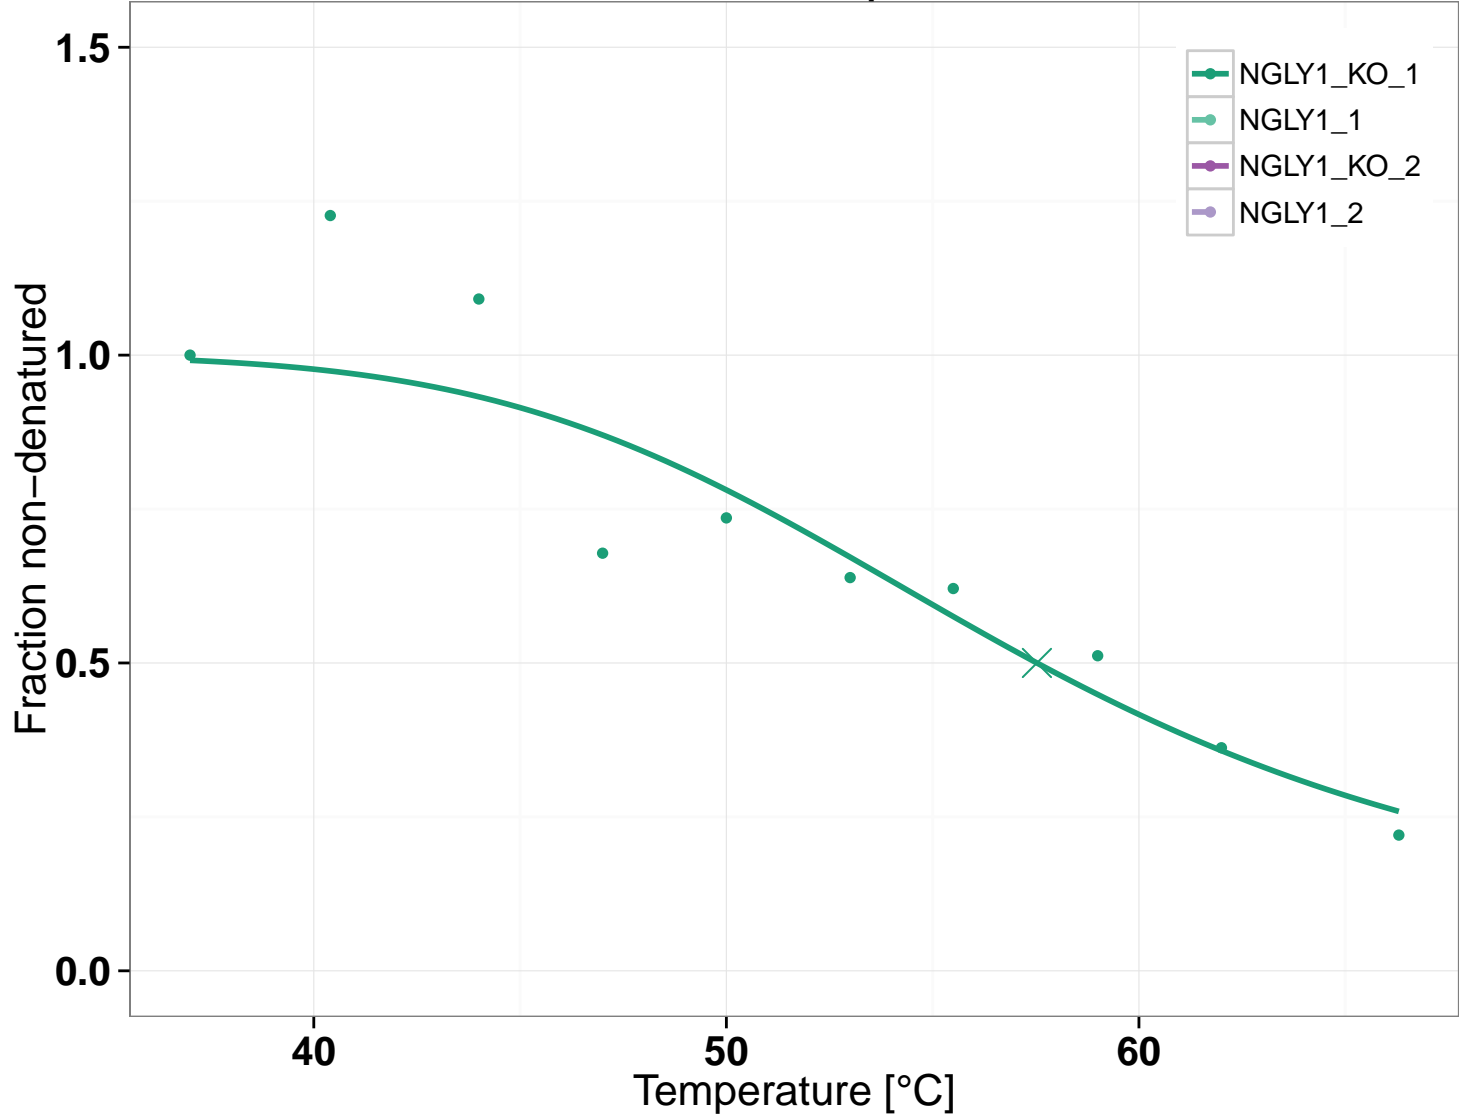

|            | meltPoint | slope  | plateau | R2   |
|------------|-----------|--------|---------|------|
| NGLY1_KO_1 | 57.53     | -0.039 | 0.05    | 0.85 |
| NGLY1_1    | -         | -      | -       | -    |
| NGLY1_KO_2 | -         | -      | -       | -    |
| NGLY1_2    | -         | -      | -       | -    |

Supplement: Supplementary file 2954 [file 1]

IPI00157883.1|SIMILAR TO PX19-LIKE PROTEIN.

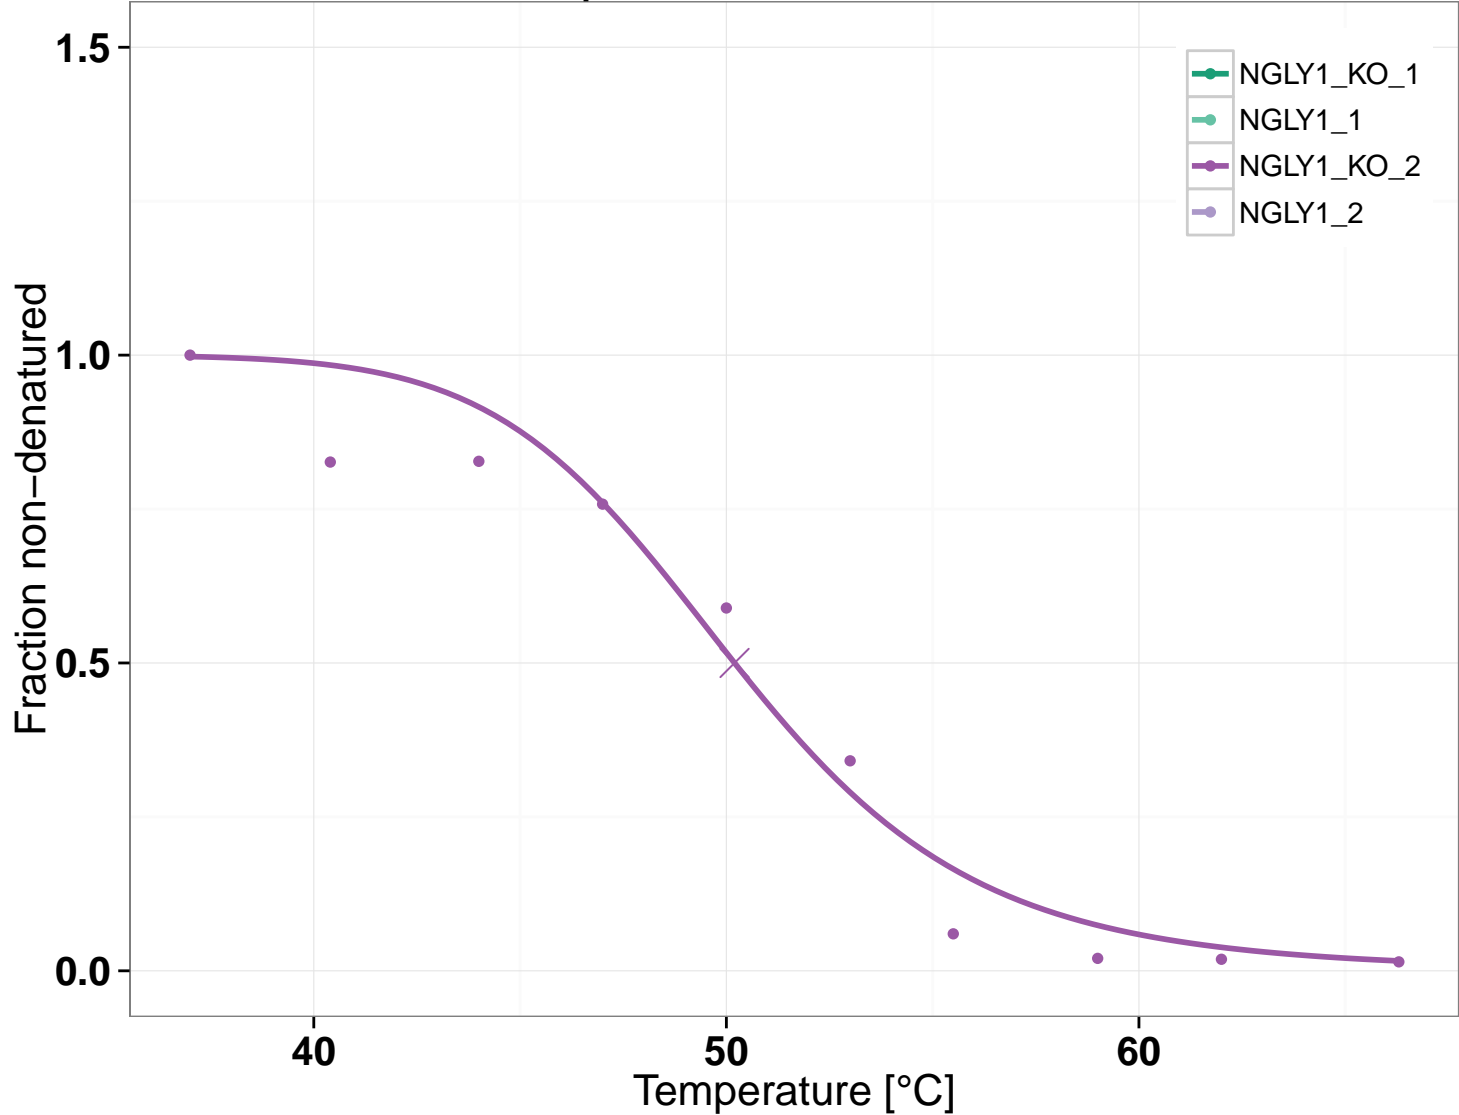

|            | meltPoint | slope  | plateau | R2   |
|------------|-----------|--------|---------|------|
| NGLY1_KO_1 | -         | -      | -       | -    |
| NGLY1_1    | -         | -      | -       | -    |
| NGLY1_KO_2 | 50.2      | -0.086 | 0       | 0.96 |
| NGLY1_2    | -         | -      | -       | -    |

Supplement: Supplementary file 2955 [file 1]

IPI00294787.4|RAD54L2

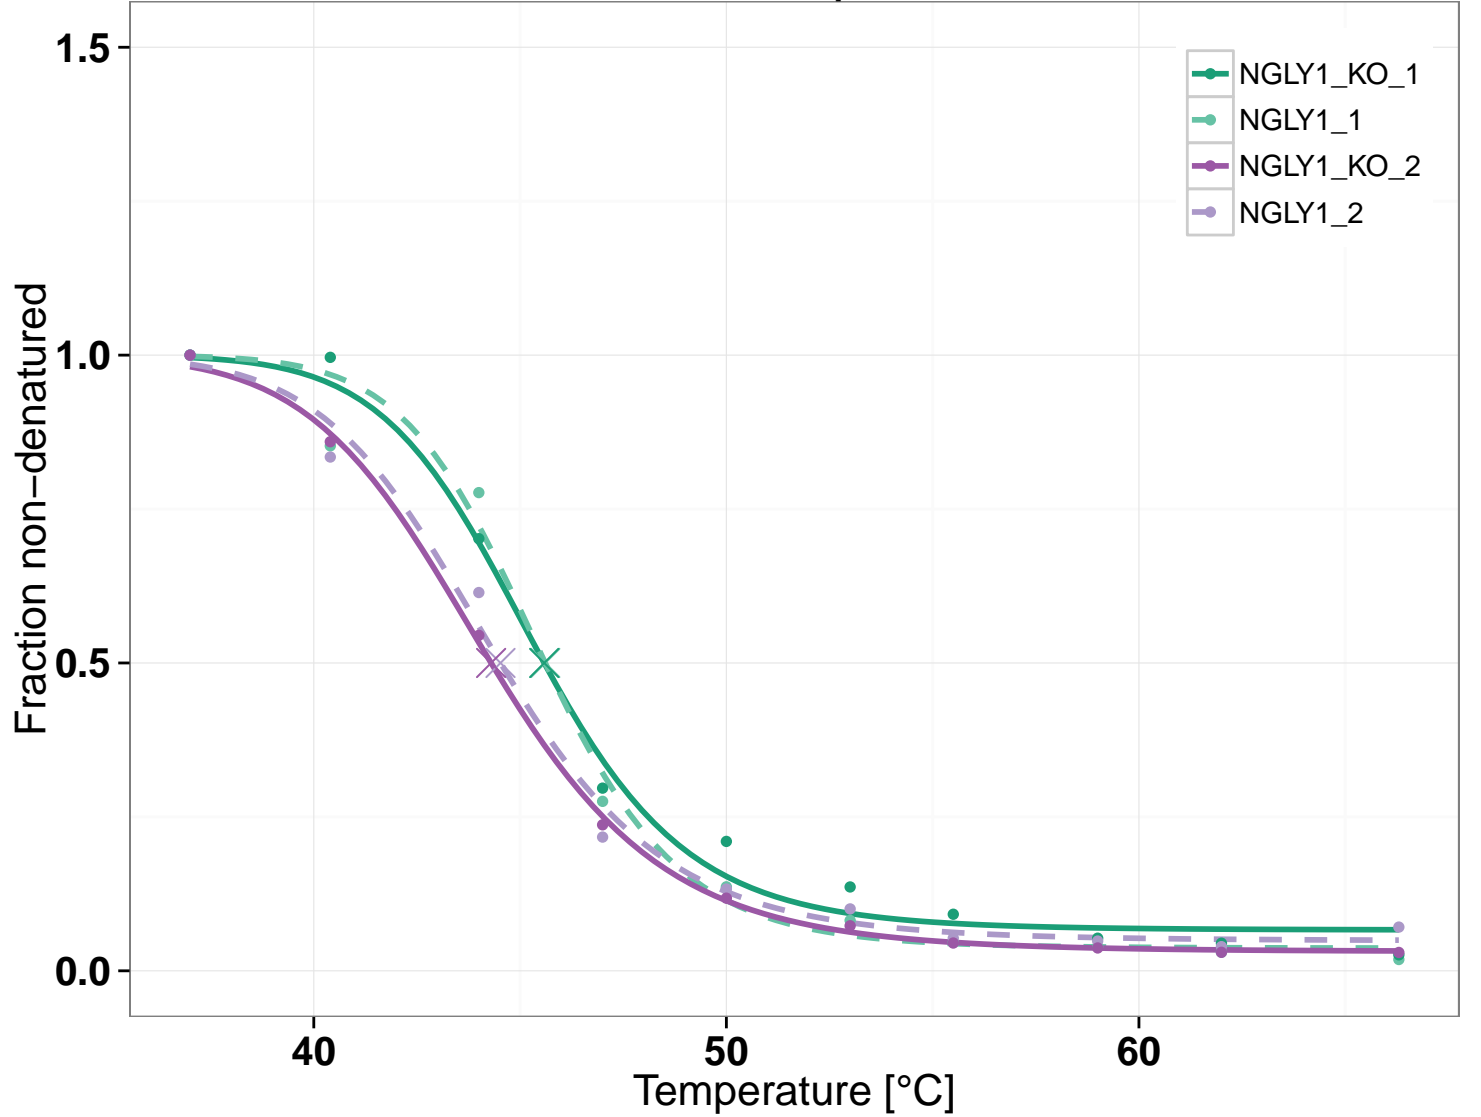

|            | meltPoint | slope | plateau | R2   |
|------------|-----------|-------|---------|------|
| NGLY1_KO_1 | 45.58     | -0.13 | 0.07    | 0.99 |
| NGLY1_1    | 45.61     | -0.14 | 0.04    | 0.99 |
| NGLY1_KO_2 | 44.3      | -0.11 | 0.03    | 1    |
| NGLY1_2    | 44.53     | -0.11 | 0.05    | 0.99 |

Supplement: Supplementary file 2956 [file 1]

# IPI00216260.1|TSFM

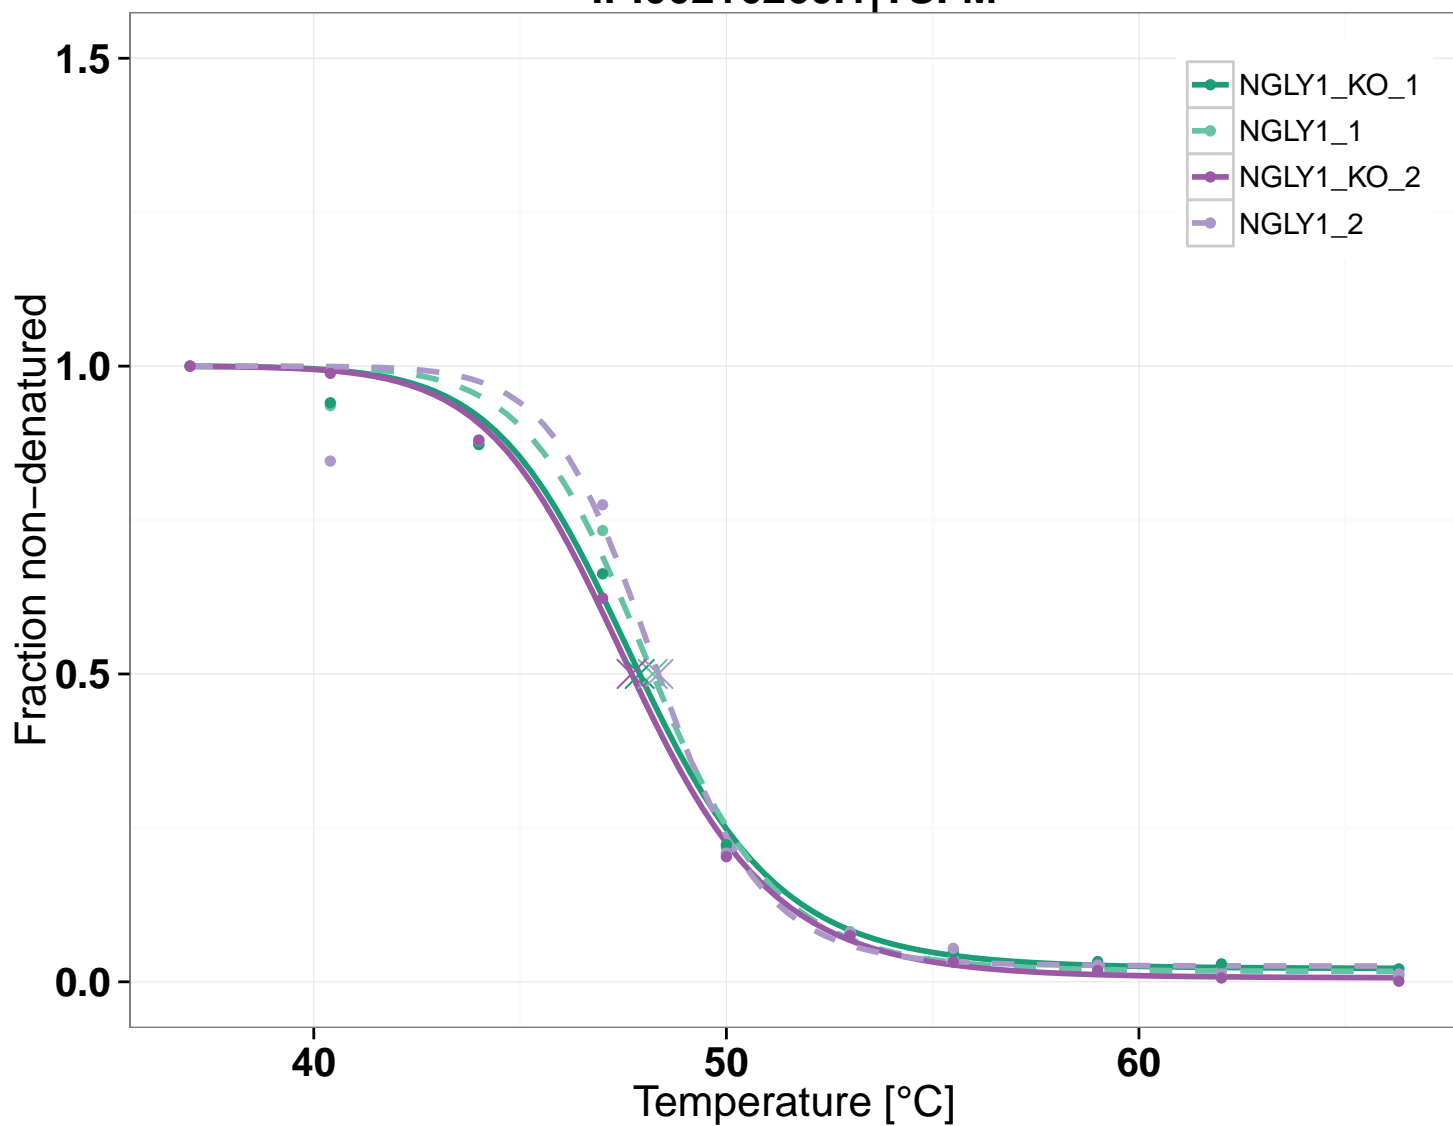

|            | meltPoint | slope | plateau | R2   |
|------------|-----------|-------|---------|------|
| NGLY1_KO_1 | 47.9      | -0.14 | 0.02    | 1    |
| NGLY1_1    | 48.21     | -0.16 | 0.02    | 0.99 |
| NGLY1_KO_2 | 47.7      | -0.14 | 0.01    | 1    |
| NGLY1_2    | 48.35     | -0.19 | 0.03    | 0.98 |

Supplement: Supplementary file 2957 [file 1]

IPI00024709.1|IKBKB

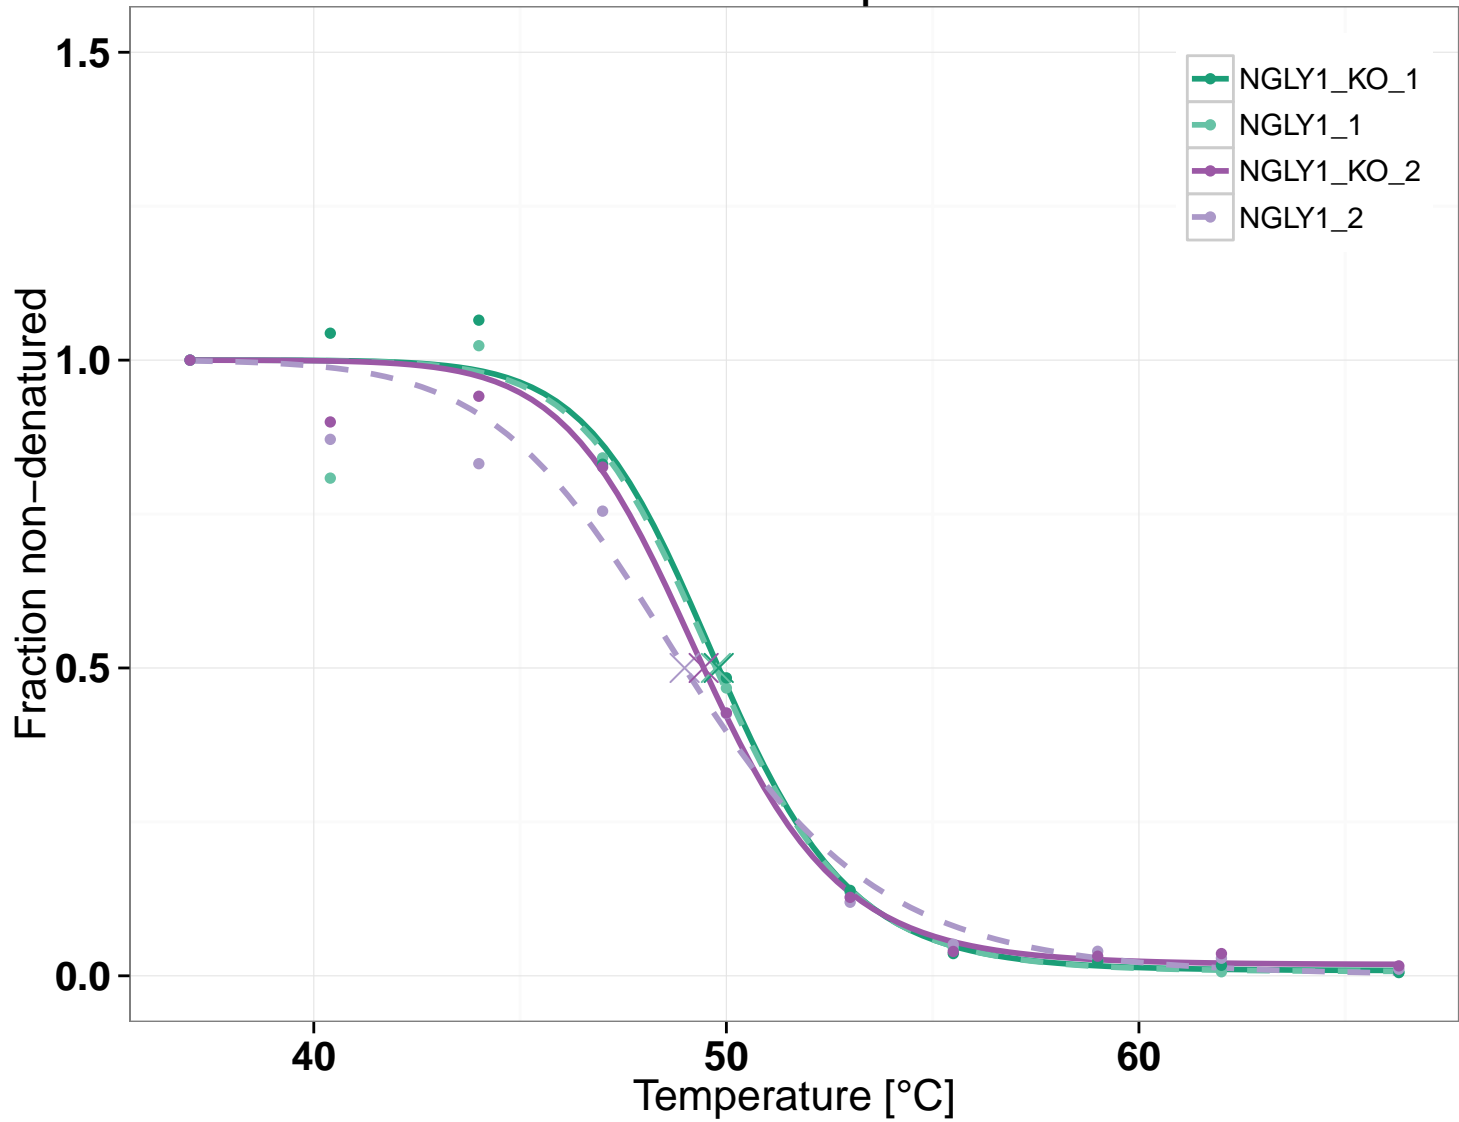

|            | meltPoint | slope | plateau | R2   |
|------------|-----------|-------|---------|------|
| NGLY1_KO_1 | 49.81     | -0.15 | 0.01    | 0.99 |
| NGLY1_1    | 49.75     | -0.15 | 0.01    | 0.98 |
| NGLY1_KO_2 | 49.45     | -0.15 | 0.02    | 0.99 |
| NGLY1_2    | 48.99     | -0.11 | 0       | 0.98 |

Supplement: Supplementary file 2958 [file 1]

IPI00007921.1|NRXN2

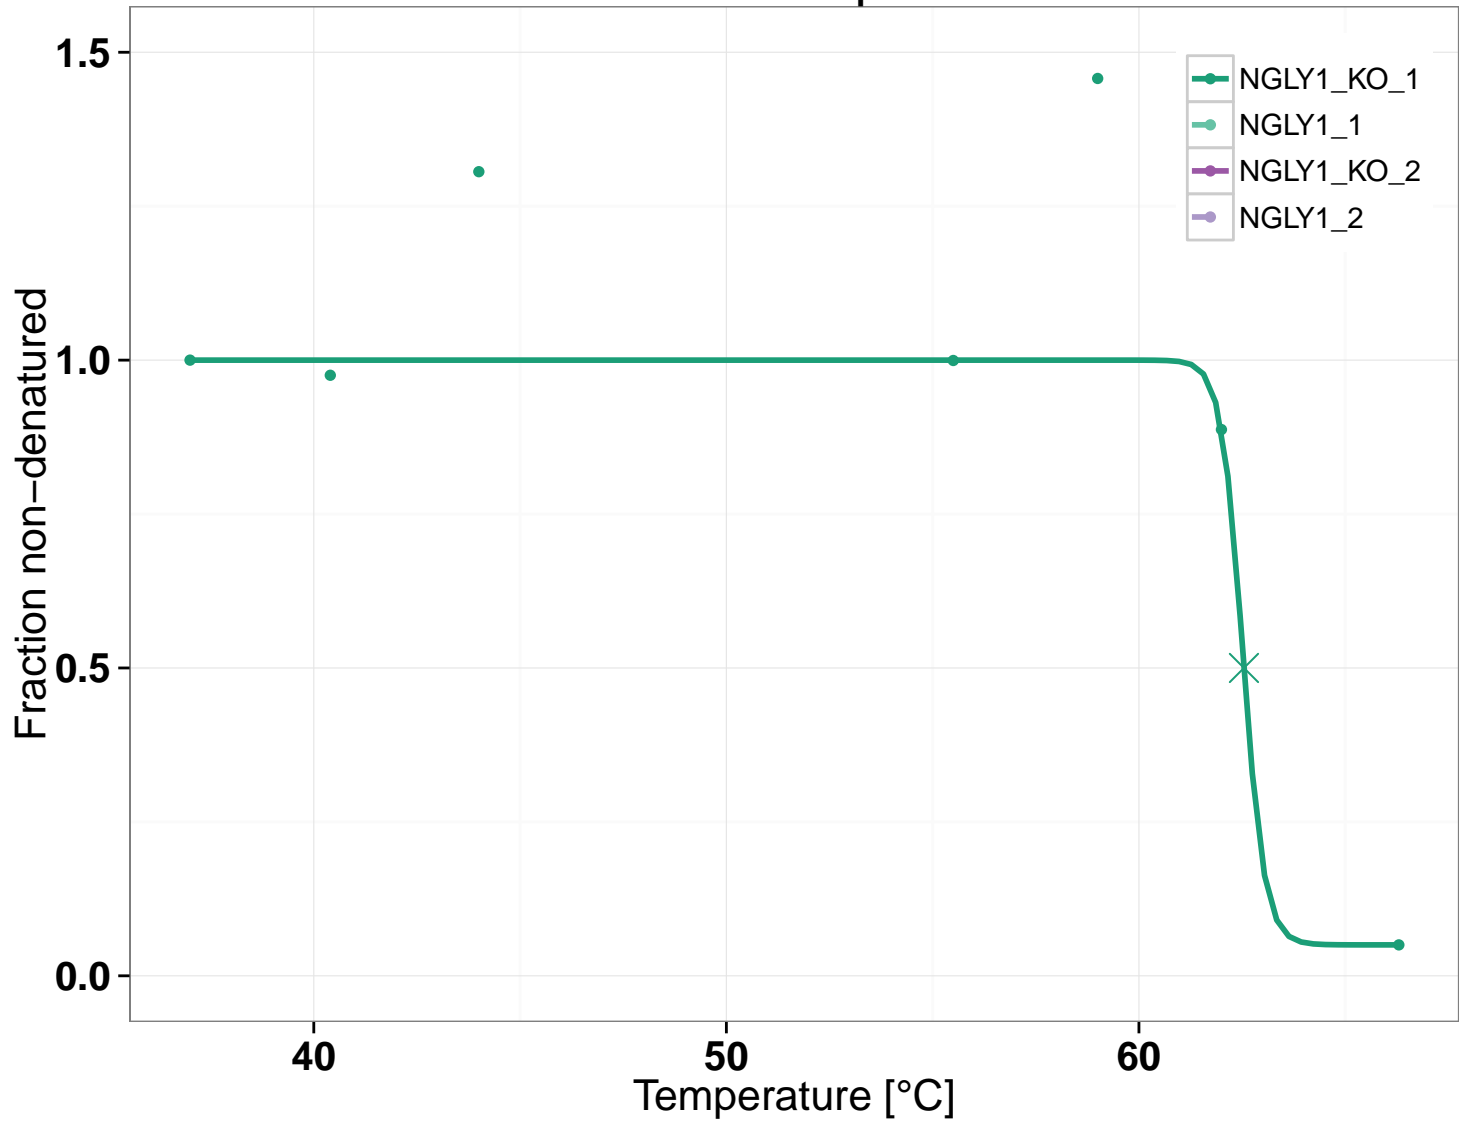

|            | meltPoint | slope | plateau | R2   |
|------------|-----------|-------|---------|------|
| NGLY1_KO_1 | 62.55     | -0.91 | 0.05    | 0.27 |
| NGLY1_1    | -         | -     | -       | -    |
| NGLY1_KO_2 | -         | -     | -       | -    |
| NGLY1_2    | -         | -     | -       | -    |

Supplement: Supplementary file 2959 [file 1]

# IPI00007957.1|TAF6L

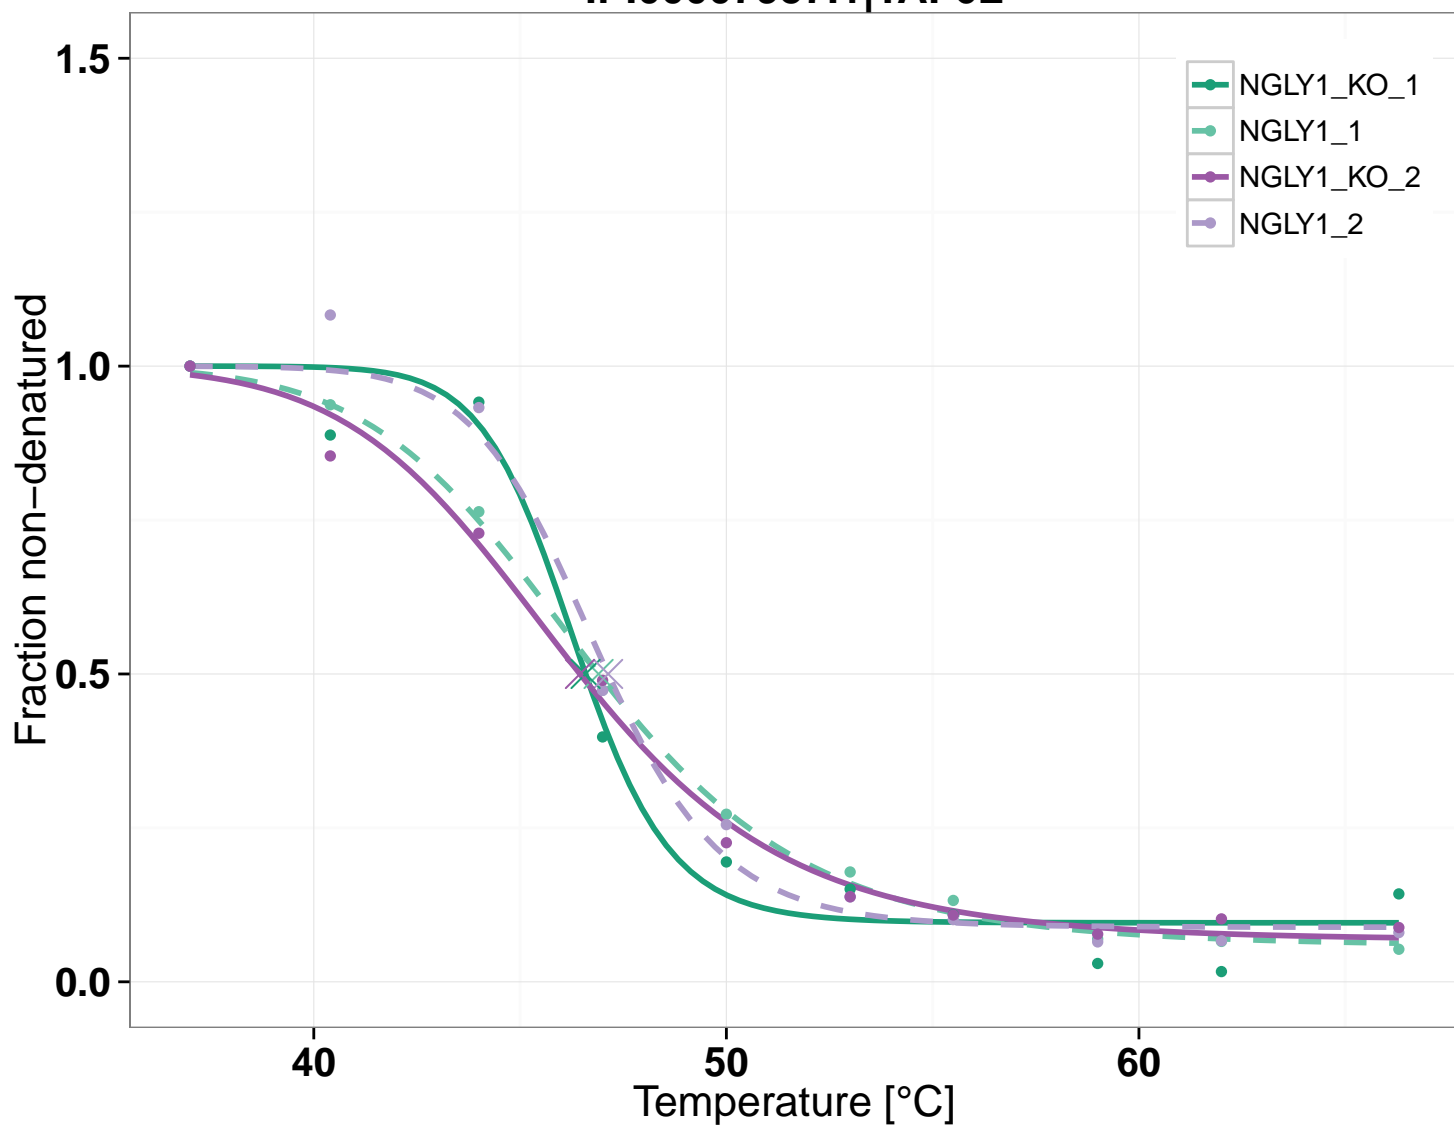

|            | meltPoint | slope  | plateau | R2   |
|------------|-----------|--------|---------|------|
| NGLY1_KO_1 | 46.59     | -0.2   | 0.1     | 0.98 |
| NGLY1_1    | 46.9      | -0.089 | 0.06    | 1    |
| NGLY1_KO_2 | 46.45     | -0.088 | 0.07    | 0.99 |
| NGLY1_2    | 47.13     | -0.15  | 0.09    | 0.99 |

Supplement: Supplementary file 2960 [file 1]

IPI00894235.1|NBEAL2

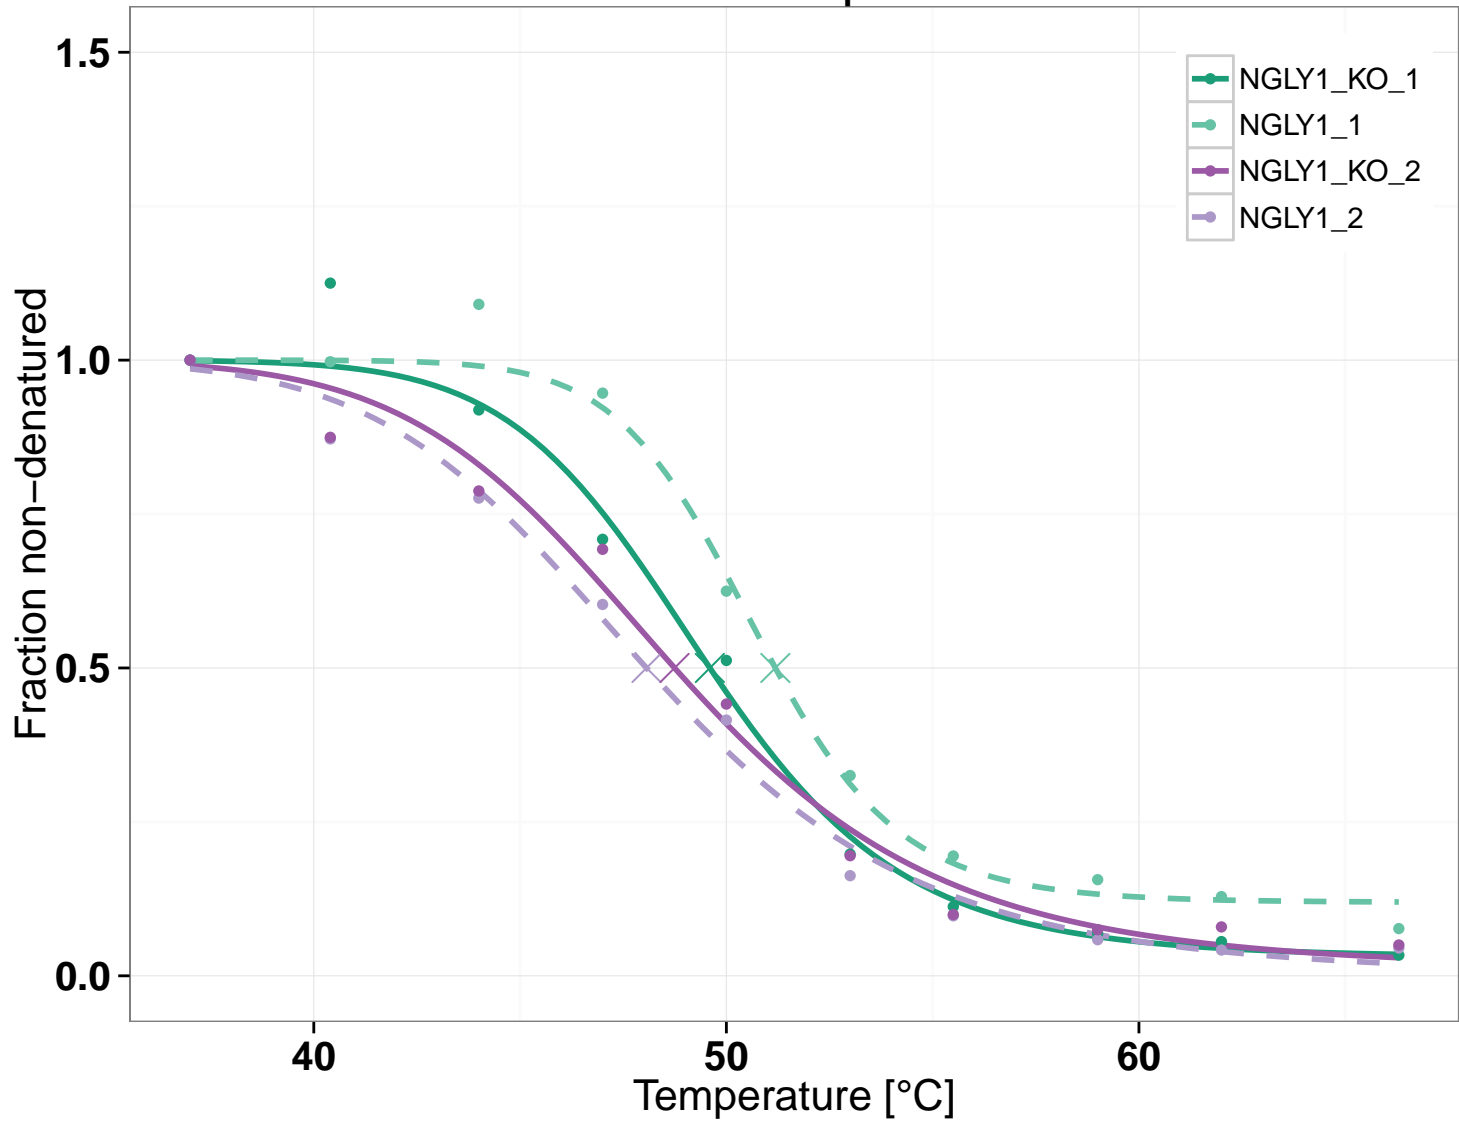

|            | meltPoint | slope  | plateau | R2   |
|------------|-----------|--------|---------|------|
| NGLY1_KO_1 | 49.6      | -0.1   | 0.03    | 0.99 |
| NGLY1_1    | 51.19     | -0.13  | 0.12    | 0.99 |
| NGLY1_KO_2 | 48.74     | -0.077 | 0.01    | 0.99 |
| NGLY1_2    | 48.06     | -0.075 | 0       | 0.99 |

Supplement: Supplementary file 2961 [file 1]

IPI00219344.4|HPCAL1

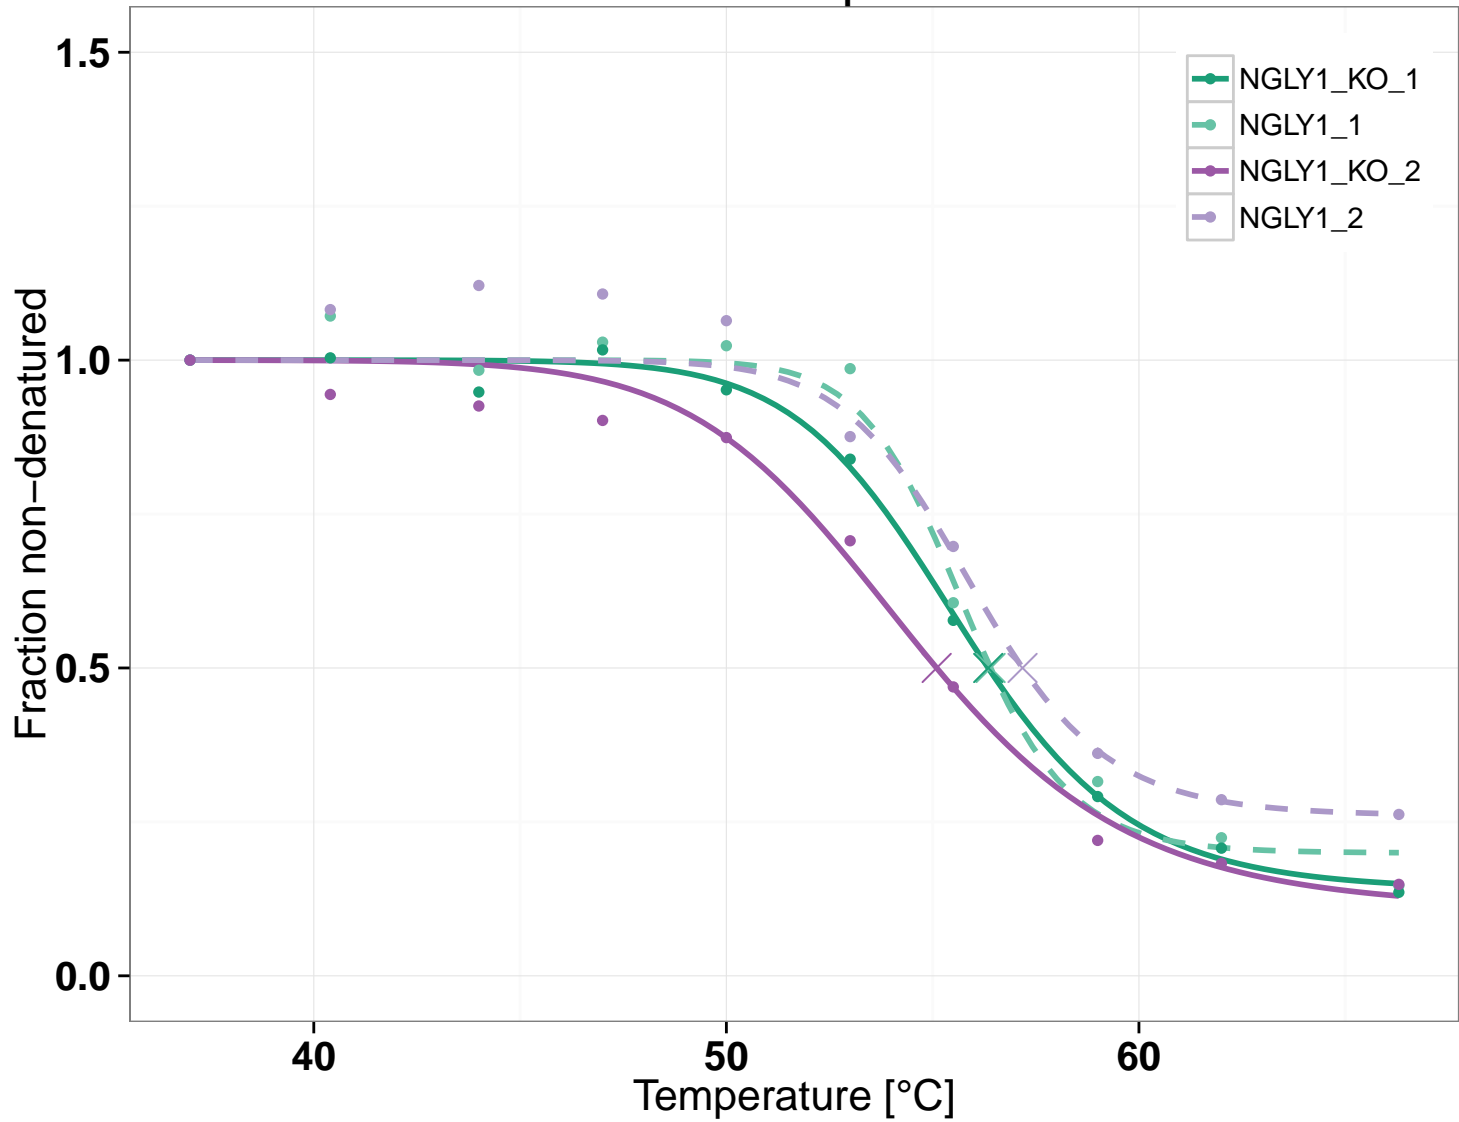

|            | meltPoint | slope  | plateau | R2   |
|------------|-----------|--------|---------|------|
| NGLY1_KO_1 | 56.35     | -0.11  | 0.14    | 1    |
| NGLY1_1    | 56.4      | -0.16  | 0.2     | 0.99 |
| NGLY1_KO_2 | 55.1      | -0.084 | 0.11    | 0.99 |
| NGLY1_2    | 57.18     | -0.12  | 0.26    | 0.97 |

Supplement: Supplementary file 2962 [file 1]

IPI00060627.2|CCDC124

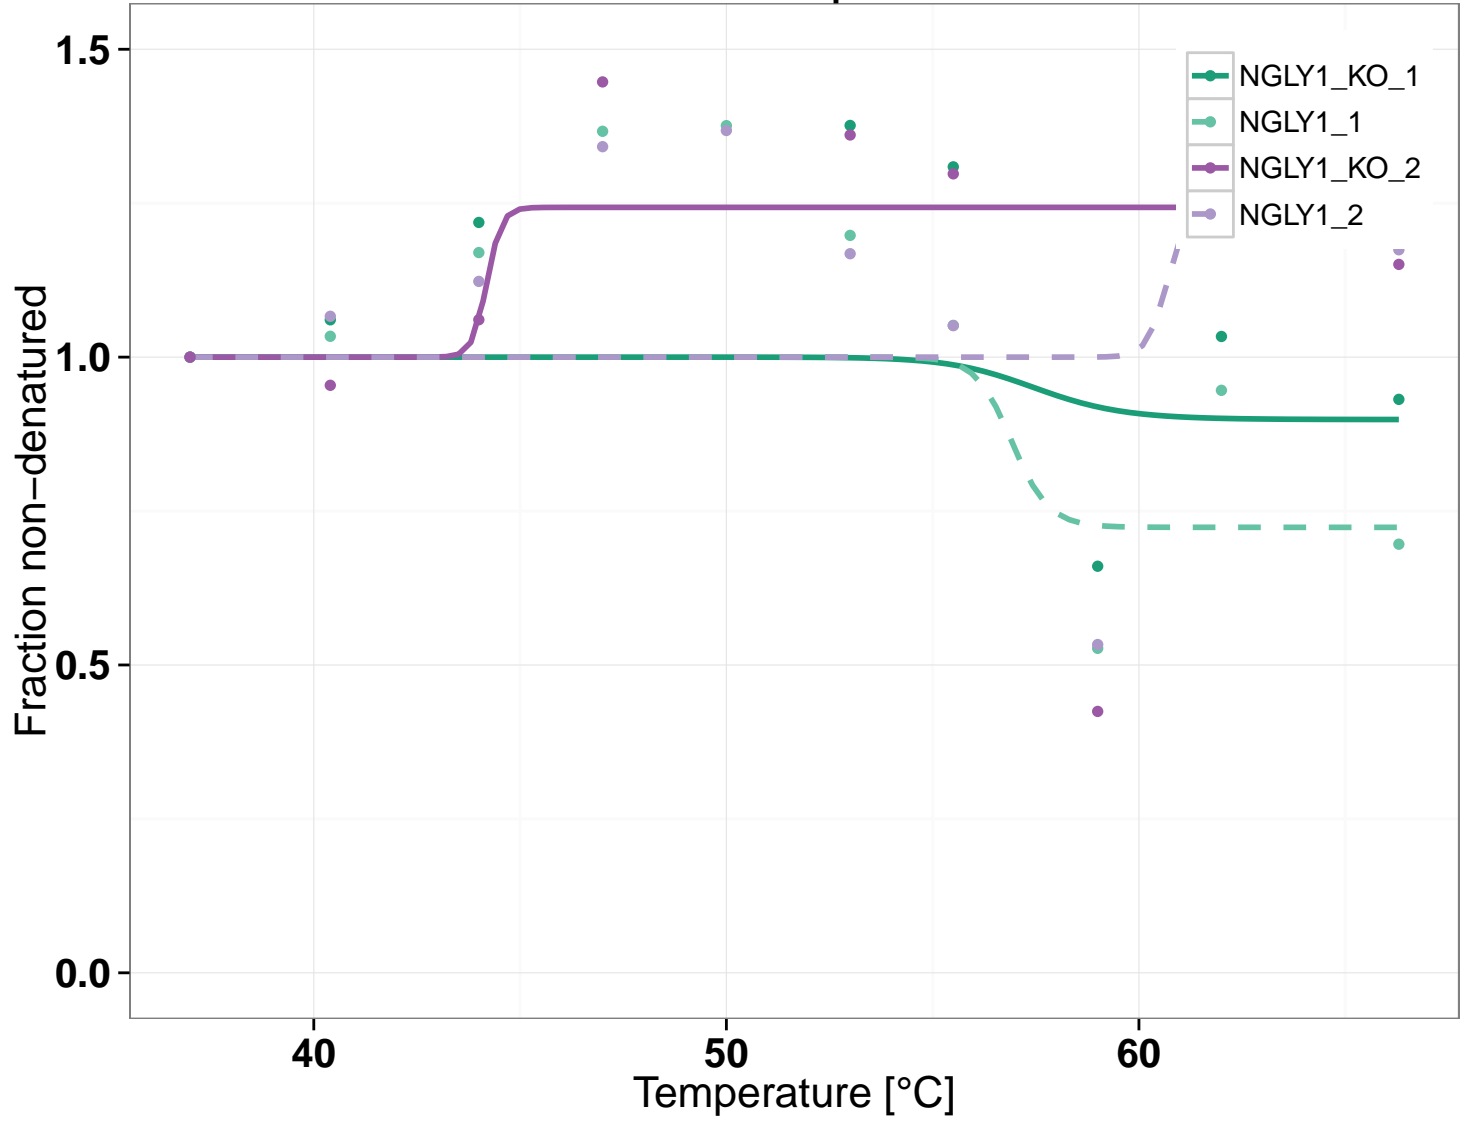

|            | meltPoint | slope  | plateau | R2    |
|------------|-----------|--------|---------|-------|
| NGLY1_KO_1 | -         | -0.024 | 0.9     | -0.36 |
| NGLY1_1    | -         | -0.16  | 0.72    | 0.33  |
| NGLY1_KO_2 | -         | 0.34   | 1.24    | 0.12  |
| NGLY1_2    | -         | 0.25   | 1.25    | -0.02 |

Supplement: Supplementary file 2963 [file 1]

IPI00375600.6|B3GALTL

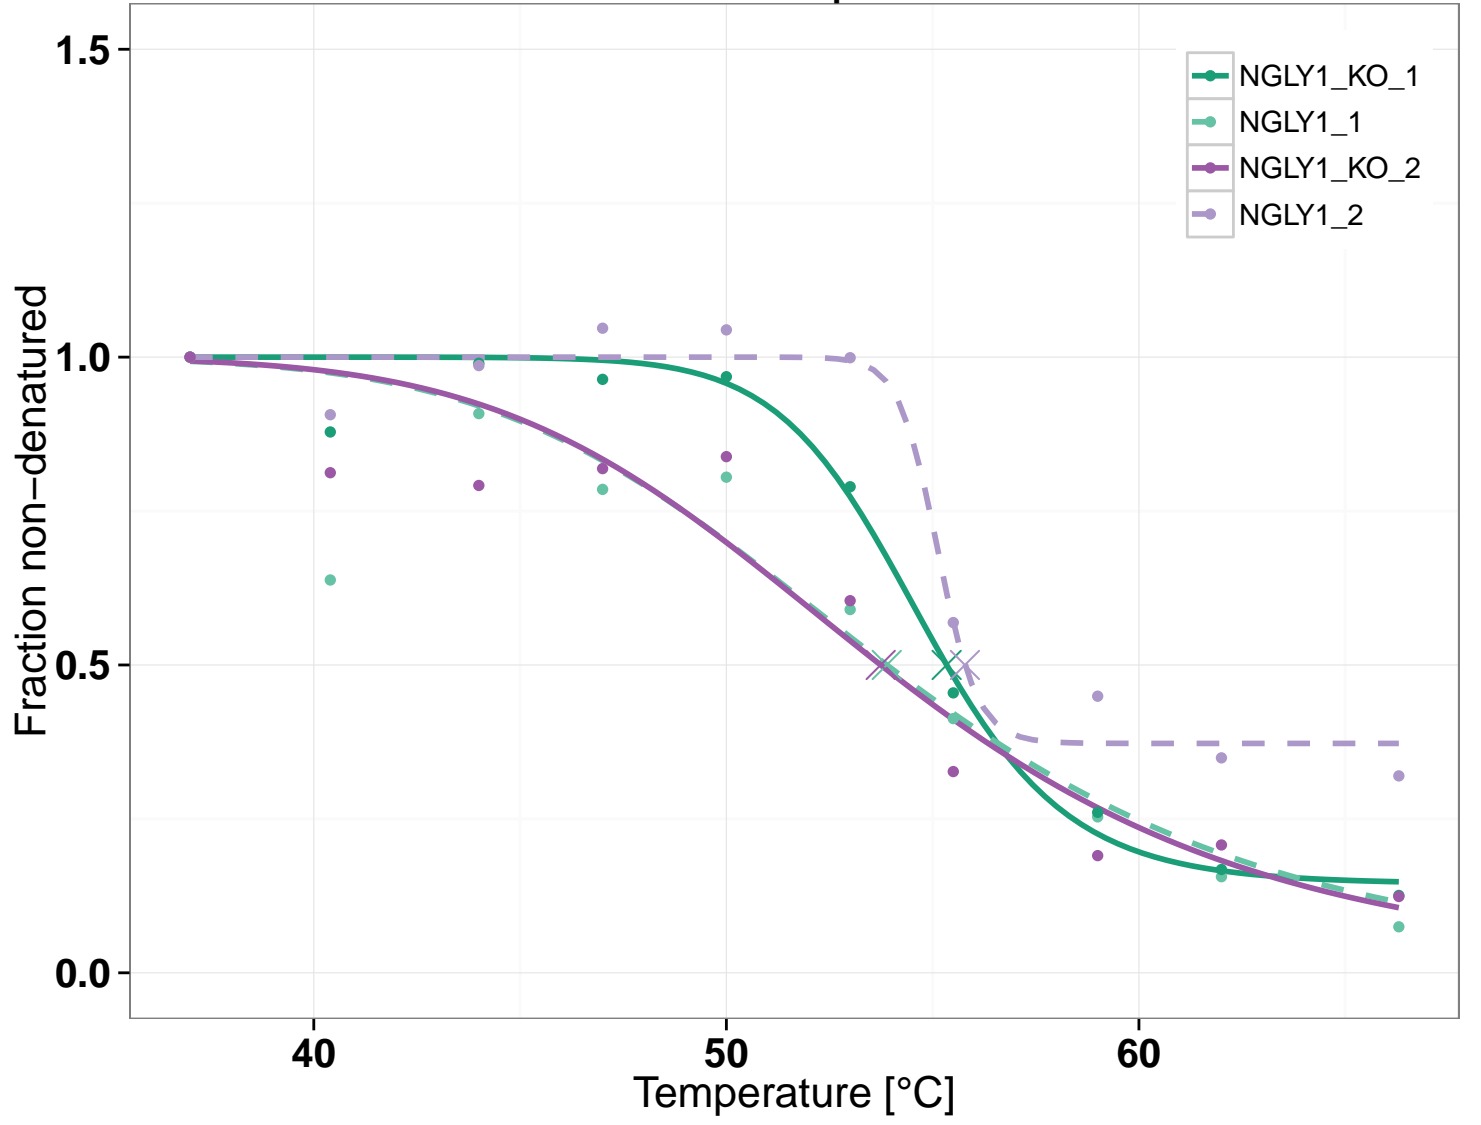

|            | meltPoint | slope  | plateau | R2   |
|------------|-----------|--------|---------|------|
| NGLY1_KO_1 | 55.34     | -0.12  | 0.14    | 0.98 |
| NGLY1_1    | 53.89     | -0.052 | 0       | 0.86 |
| NGLY1_KO_2 | 53.74     | -0.054 | 0       | 0.91 |
| NGLY1_2    | 55.78     | -0.33  | 0.37    | 0.97 |

Supplement: Supplementary file 2964 [file 1]

# IPI00396234.2|ATP11C

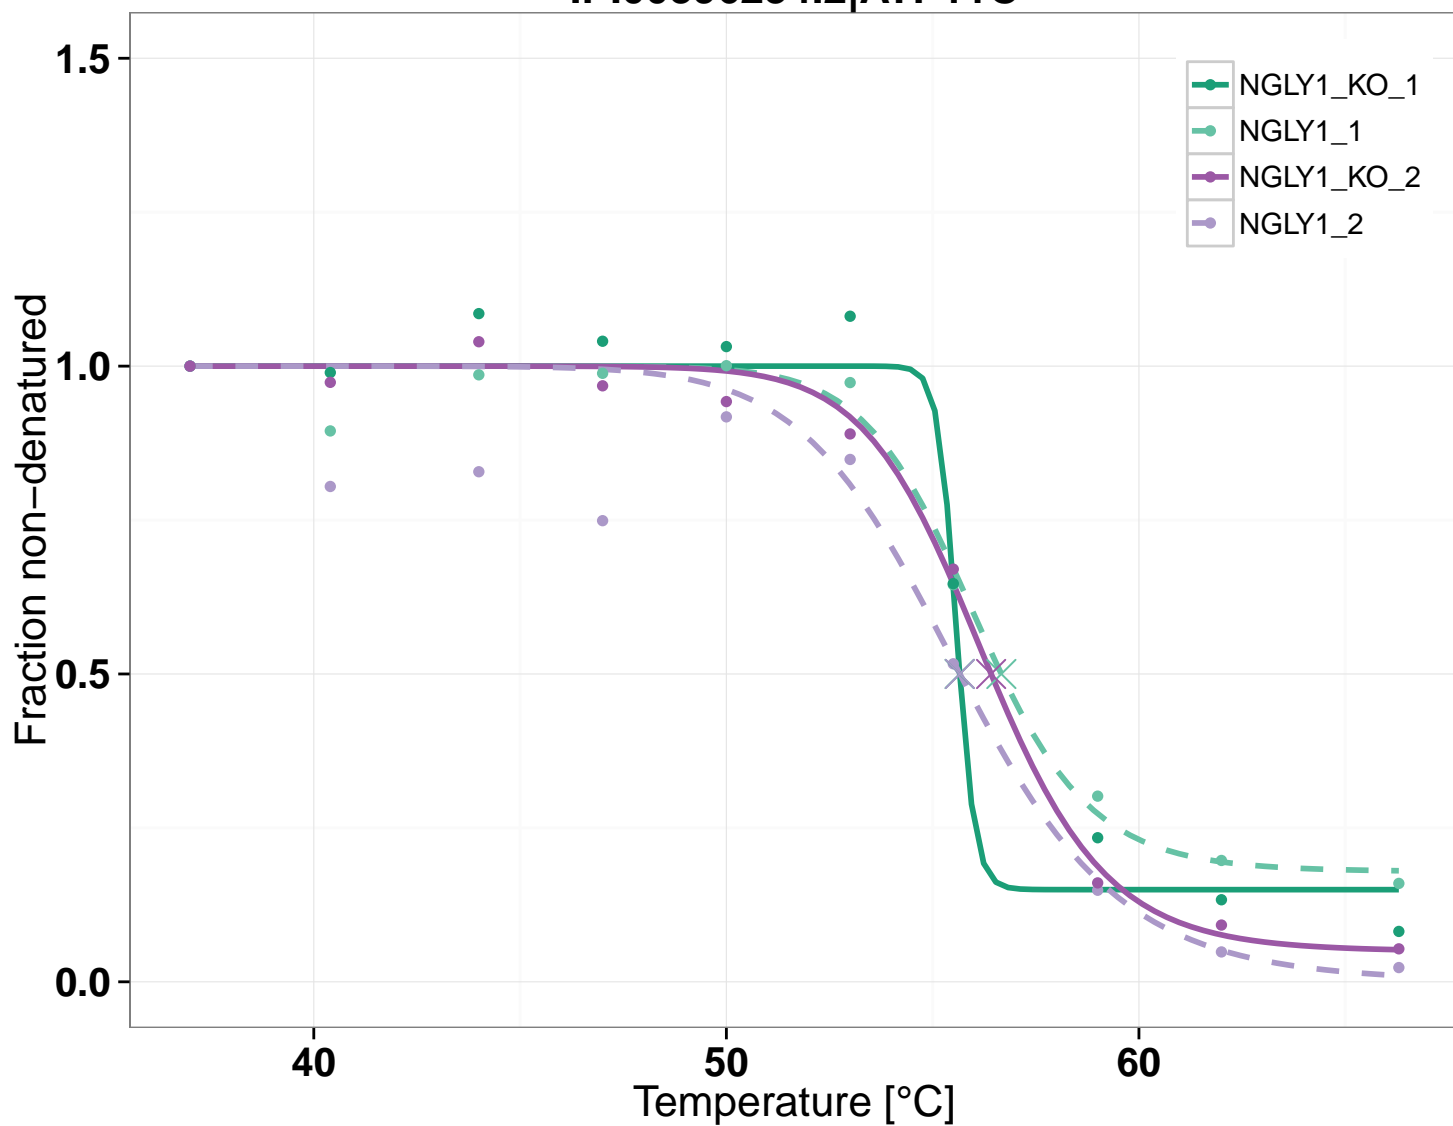

|            | meltPoint | slope | plateau | R2   |
|------------|-----------|-------|---------|------|
| NGLY1_KO_1 | 55.66     | -0.96 | 0.15    | 0.98 |
| NGLY1_1    | 56.67     | -0.15 | 0.18    | 0.99 |
| NGLY1_KO_2 | 56.42     | -0.16 | 0.05    | 0.99 |
| NGLY1_2    | 55.66     | -0.13 | 0       | 0.9  |

Supplement: Supplementary file 2965 [file 1]

IPI00479694.1|HCG\_2033311

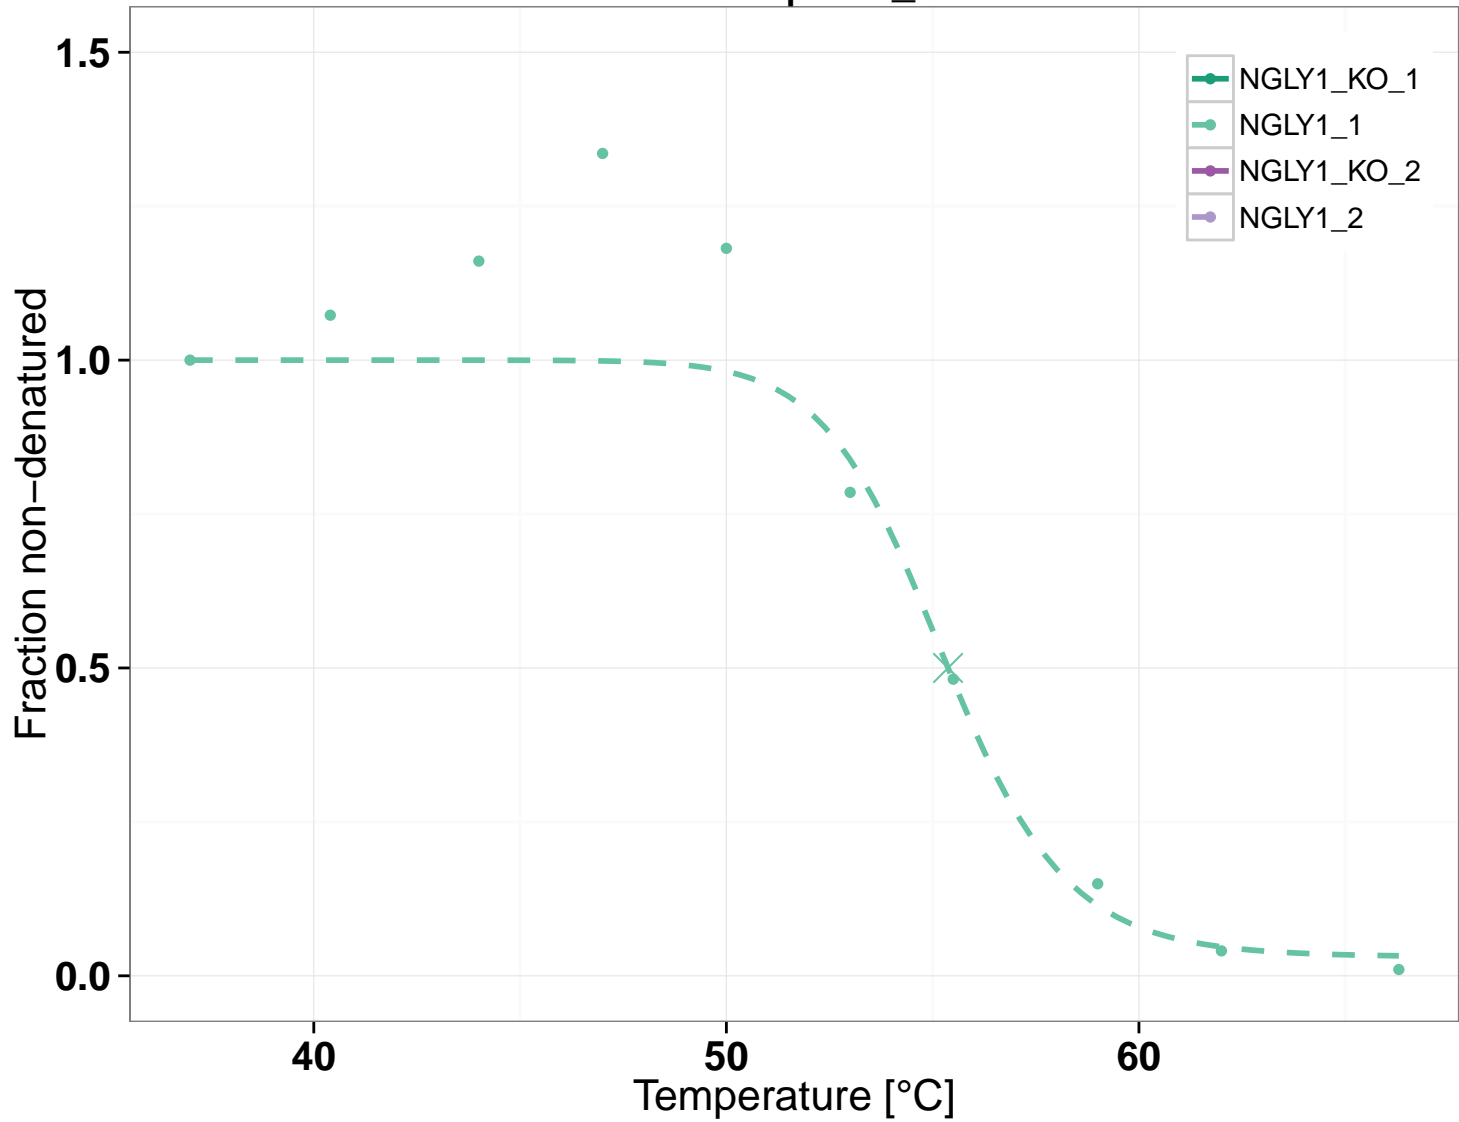

|            | meltPoint | slope | plateau | R2   |
|------------|-----------|-------|---------|------|
| NGLY1_KO_1 | -         | -     | -       | -    |
| NGLY1_1    | 55.37     | -0.16 | 0.03    | 0.92 |
| NGLY1_KO_2 | -         | -     | -       | -    |
| NGLY1_2    | -         | -     | -       | -    |

Supplement: Supplementary file 2966 [file 1]

IPI00034208.2|SLC39A8

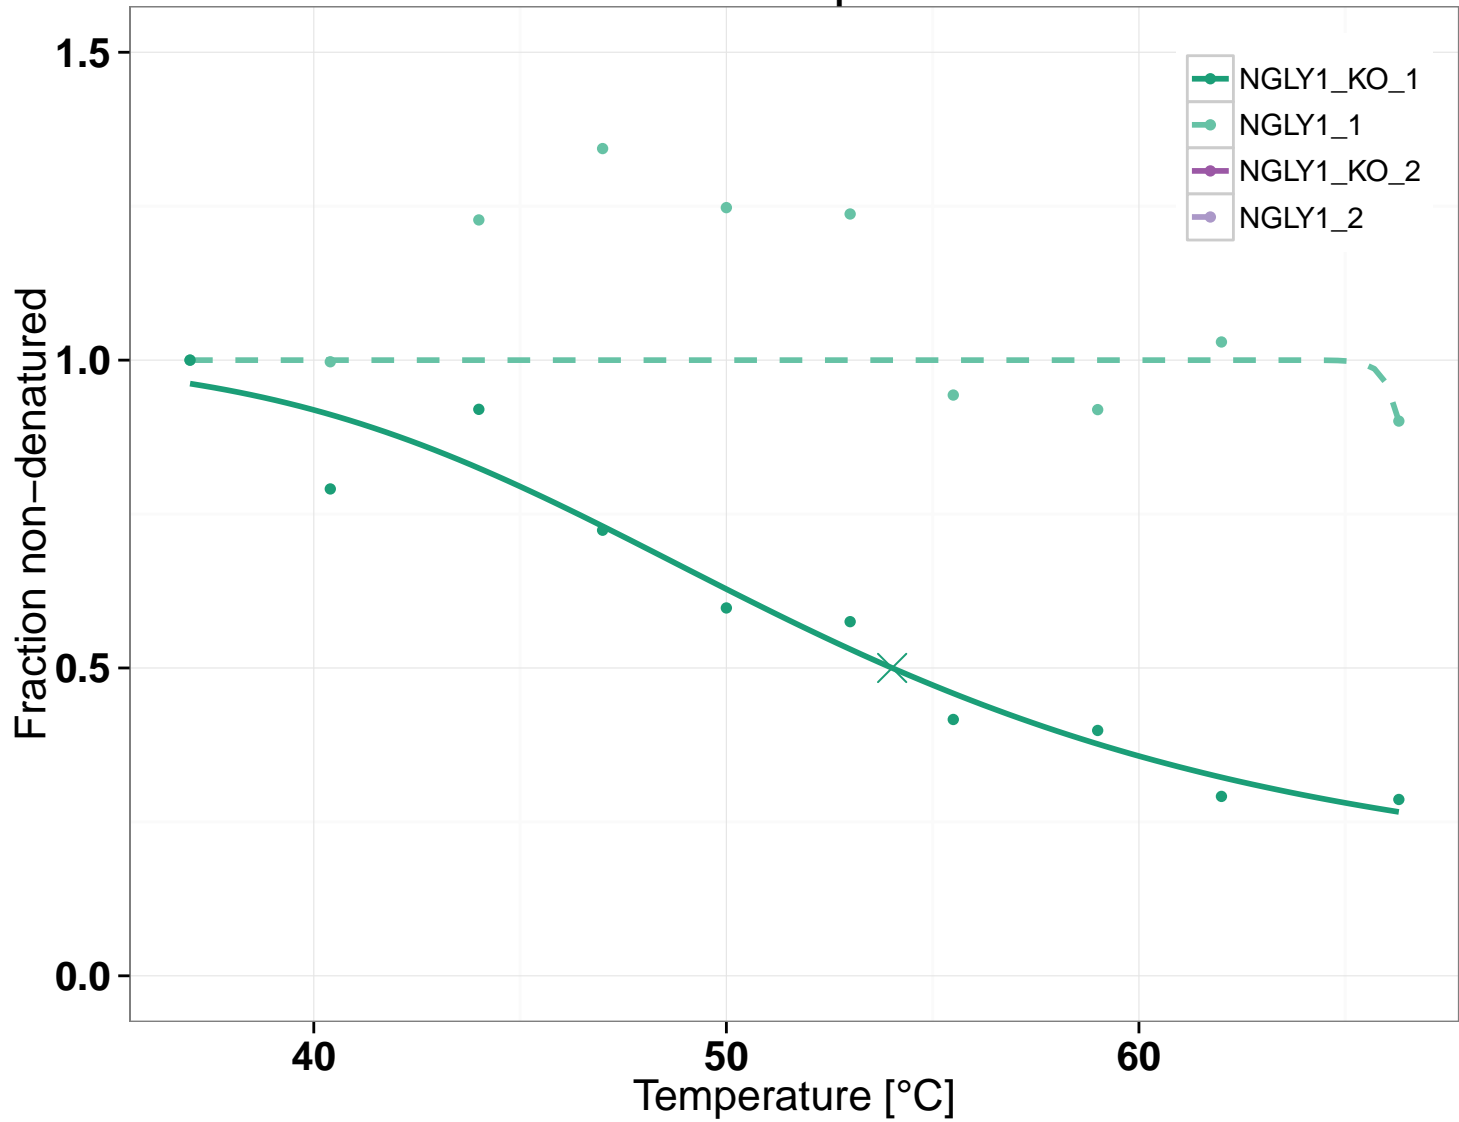

|            | meltPoint | slope  | plateau | R2    |
|------------|-----------|--------|---------|-------|
| NGLY1_KO_1 | 54.02     | -0.034 | 0.12    | 0.95  |
| NGLY1_1    | -         | -      | 0       | -0.26 |
| NGLY1_KO_2 | -         | -      | -       | -     |
| NGLY1_2    | -         | -      | -       | -     |

Supplement: Supplementary file 2967 [file 1]

IPI00152938.1|TOMM40L

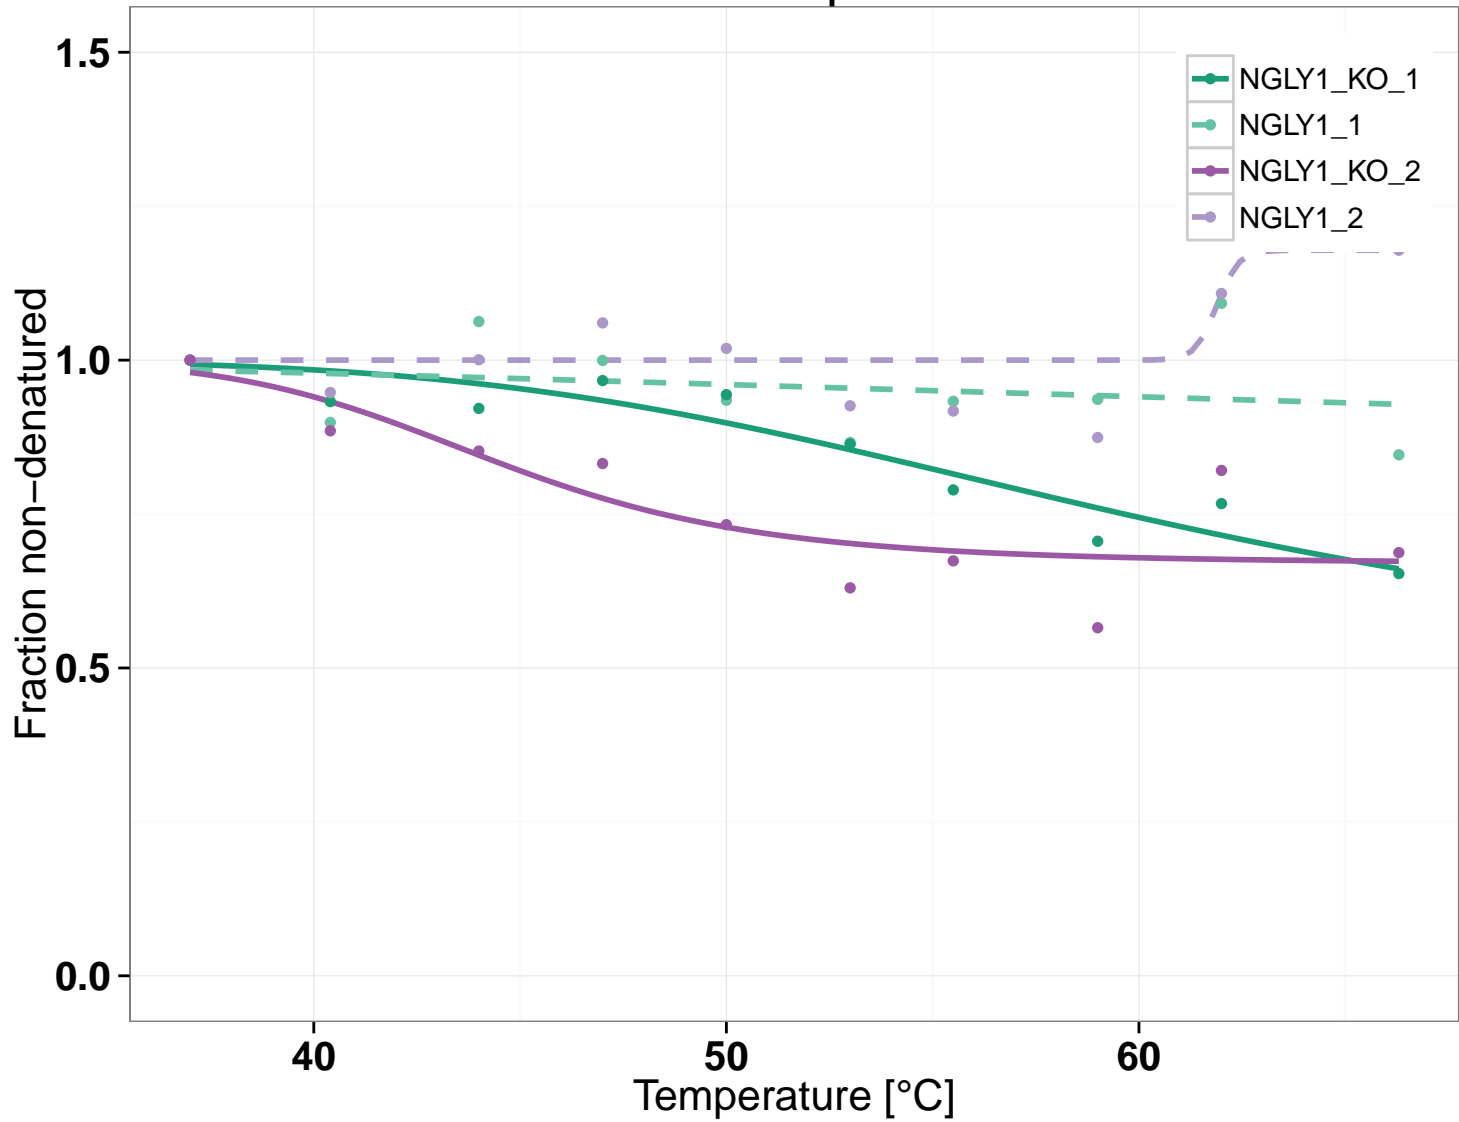

|            | meltPoint | slope  | plateau | R2   |
|------------|-----------|--------|---------|------|
| NGLY1_KO_1 | -         | -0.016 | 0.47    | 0.89 |
| NGLY1_1    | -         | -0.002 | 0.4     | 0.05 |
| NGLY1_KO_2 | -         | -0.026 | 0.67    | 0.71 |
| NGLY1_2    | -         | 0.17   | 1.18    | 0.55 |

Supplement: Supplementary file 2968 [file 1]

IPI00375463.3|C9ORF72

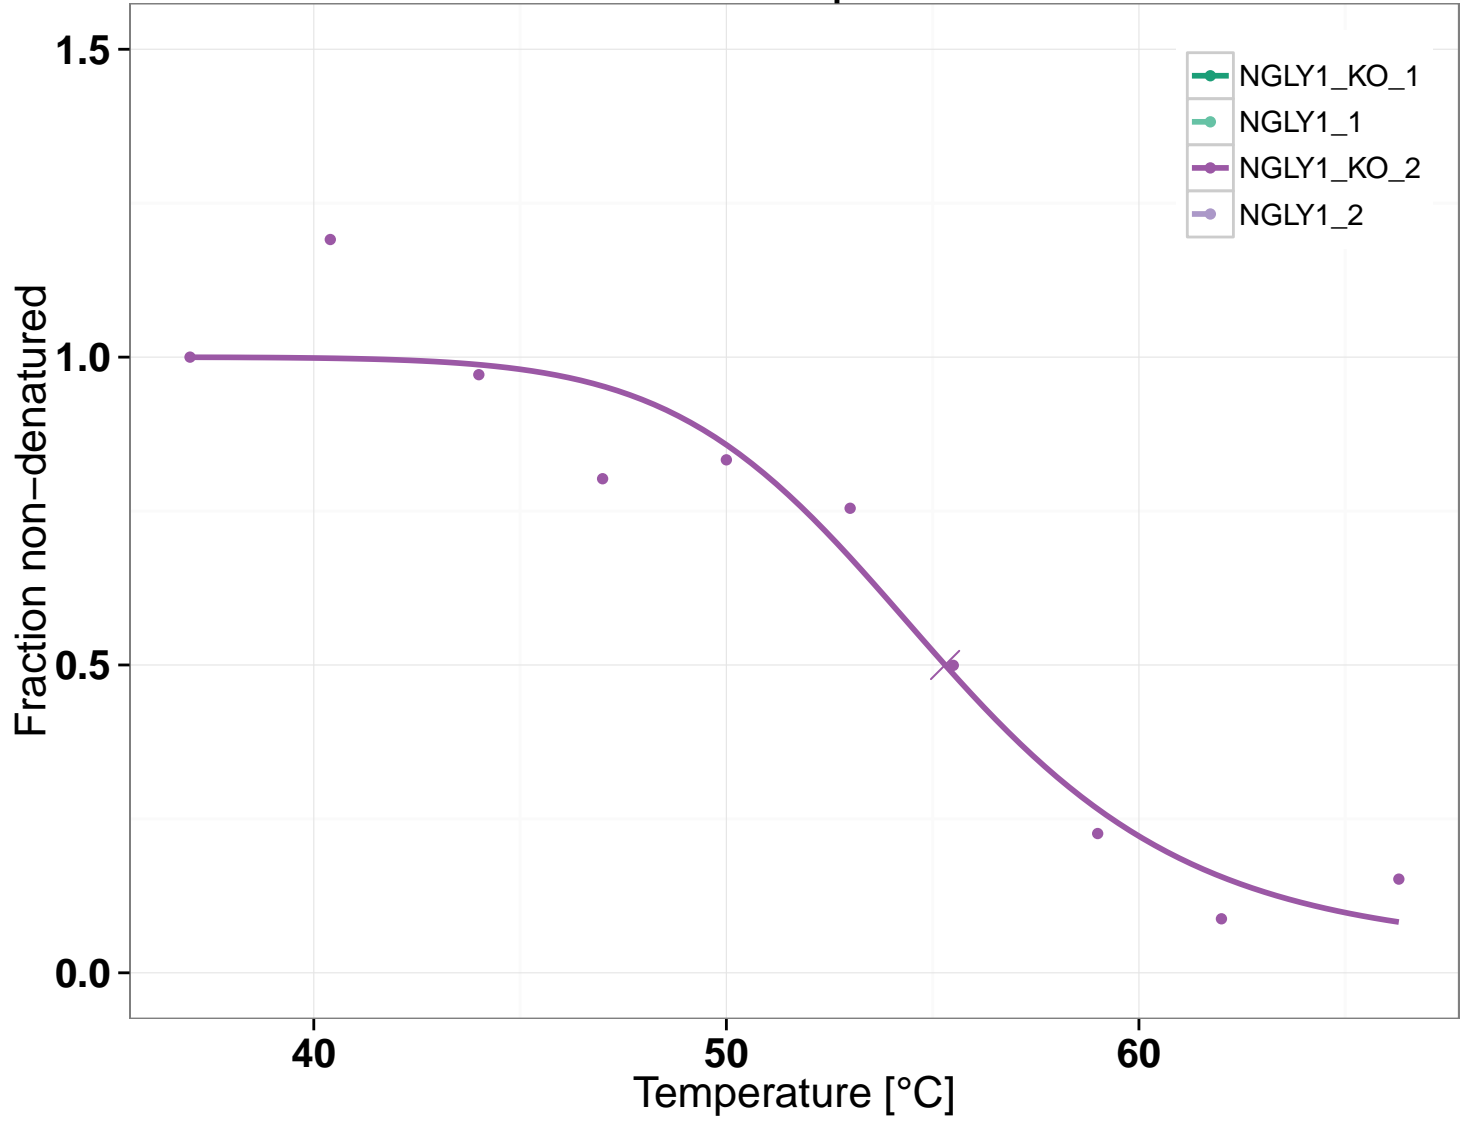

|            | meltPoint | slope  | plateau | R2   |
|------------|-----------|--------|---------|------|
| NGLY1_KO_1 | —         | —      | —       | —    |
| NGLY1_1    | —         | —      | —       | —    |
| NGLY1_KO_2 | 55.3      | -0.077 | 0.03    | 0.94 |
| NGLY1_2    | —         | —      | —       | —    |

Supplement: Supplementary file 2969 [file 1]

# IPI00916703.1|R3HDM1

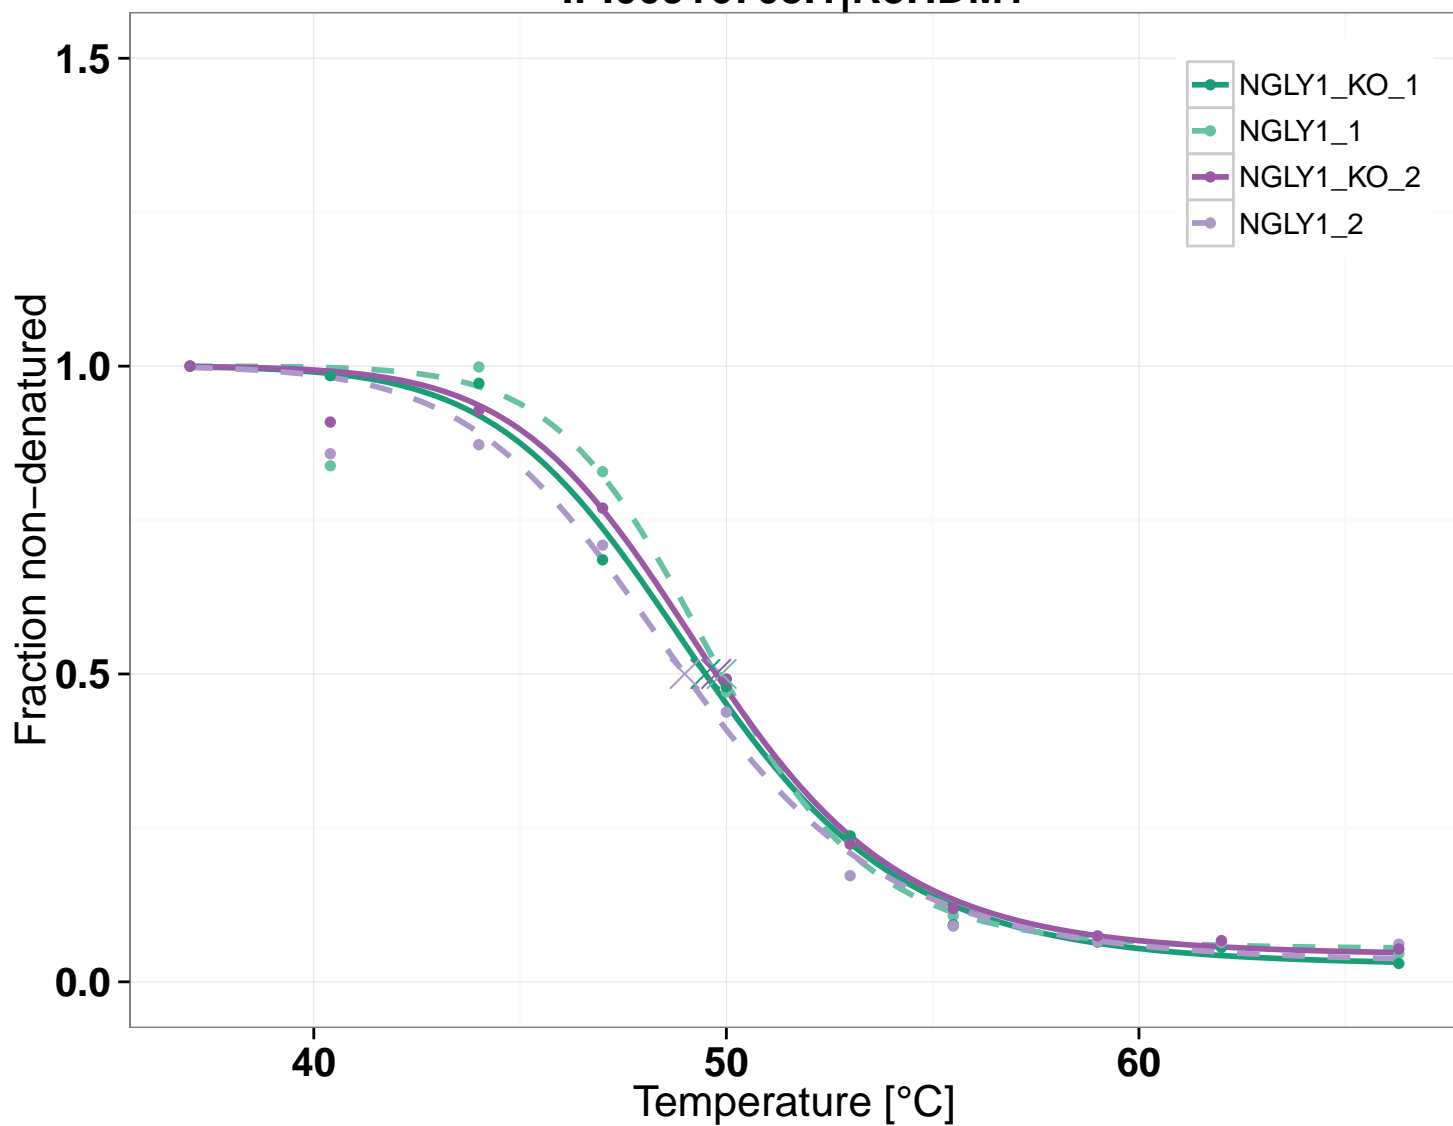

|            | meltPoint | slope  | plateau | R2   |
|------------|-----------|--------|---------|------|
| NGLY1_KO_1 | 49.49     | -0.099 | 0.03    | 1    |
| NGLY1_1    | 49.88     | -0.12  | 0.05    | 0.98 |
| NGLY1_KO_2 | 49.75     | -0.1   | 0.04    | 0.99 |
| NGLY1_2    | 48.99     | -0.095 | 0.03    | 0.99 |

Supplement: Supplementary file 2970 [file 1]

# IPI00470627.3|SHPRH

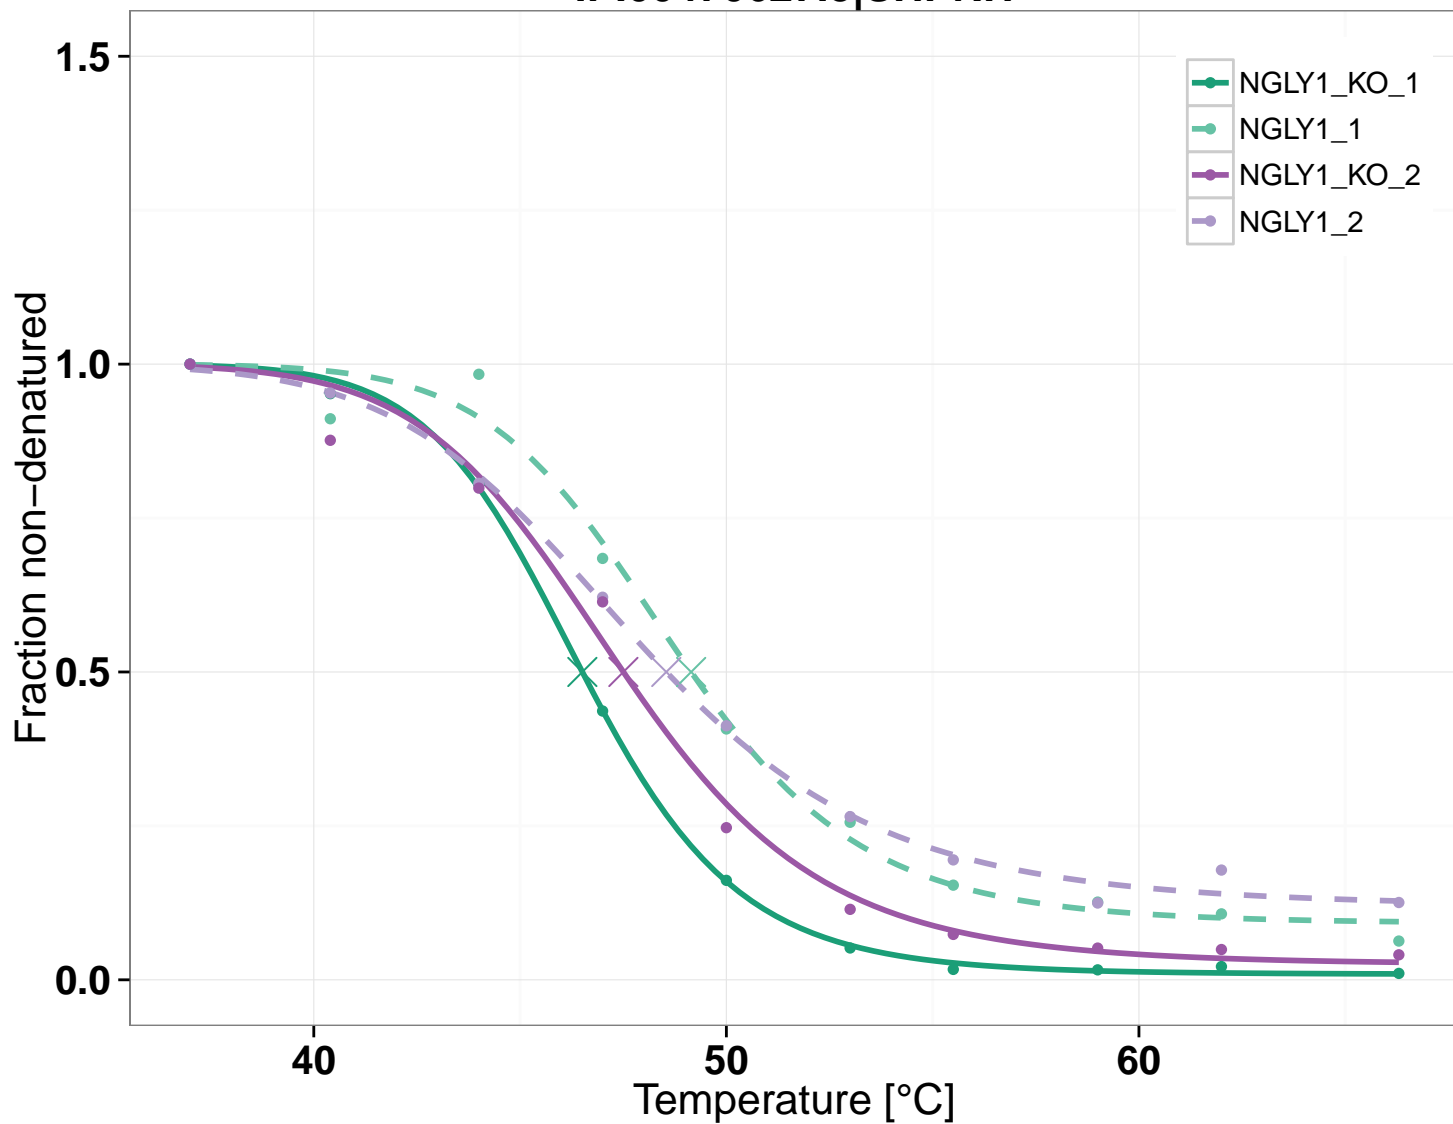

|            | meltPoint | slope  | plateau | R2   |
|------------|-----------|--------|---------|------|
| NGLY1_KO_1 | 46.51     | -0.13  | 0.01    | 1    |
| NGLY1_1    | 49.15     | -0.1   | 0.09    | 0.99 |
| NGLY1_KO_2 | 47.5      | -0.1   | 0.02    | 0.99 |
| NGLY1_2    | 48.54     | -0.075 | 0.12    | 1    |

Supplement: Supplementary file 2971 [file 1]

IPI00384342.3|UIMC1

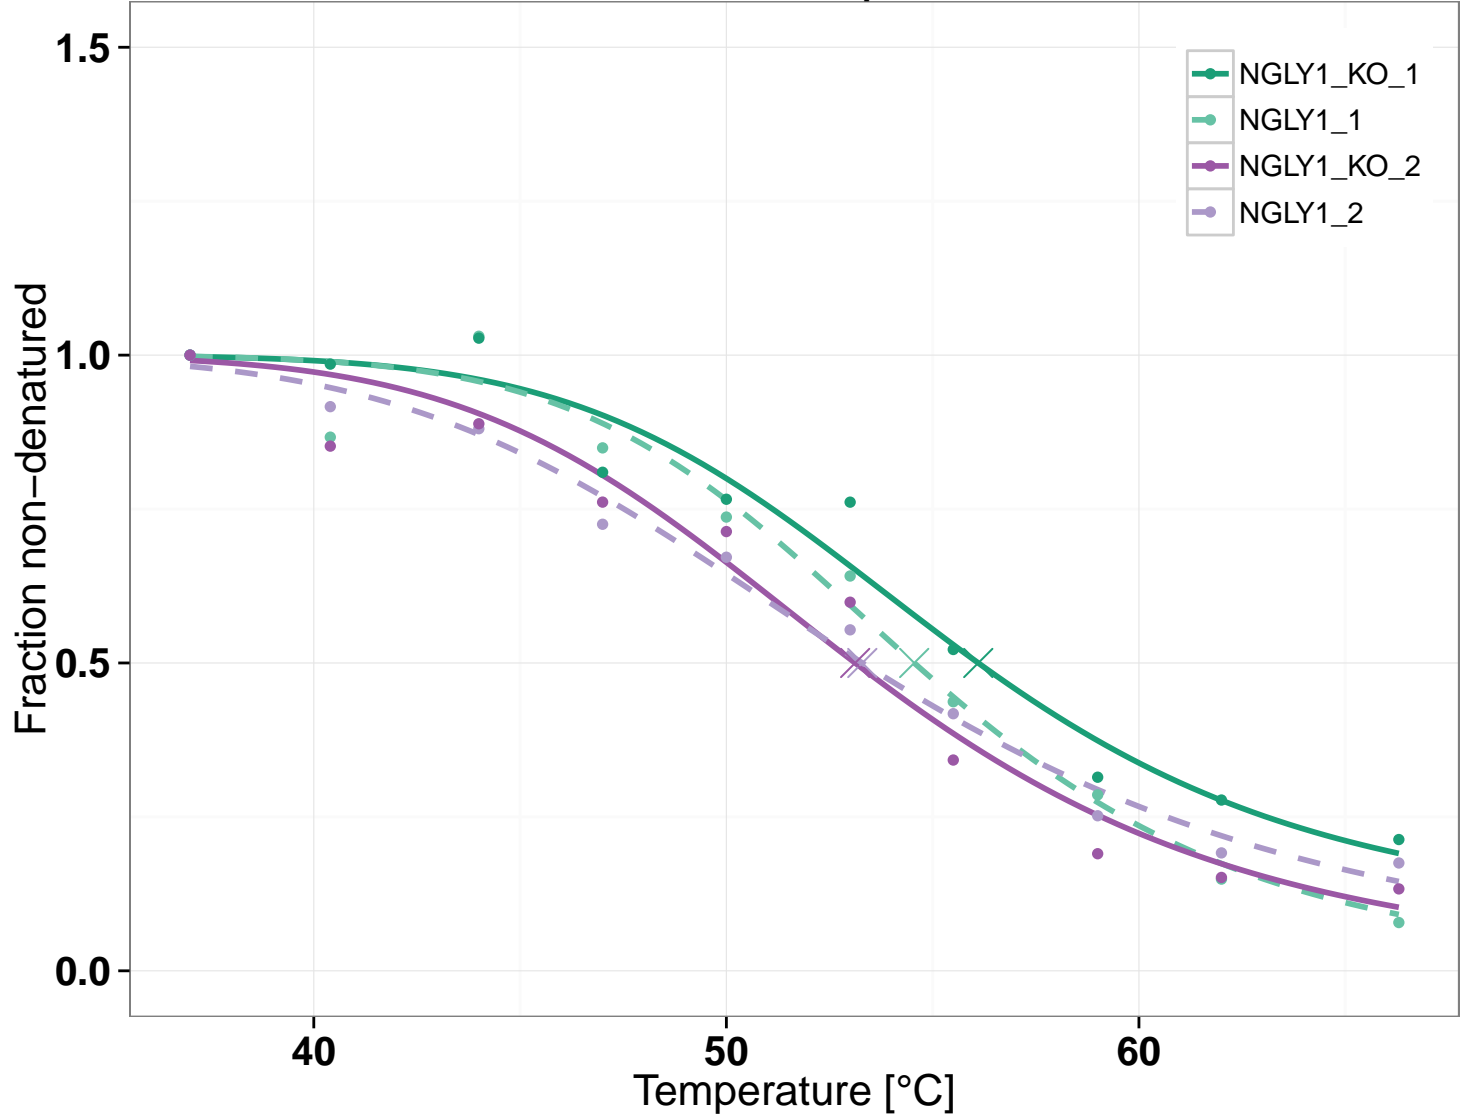

|            | meltPoint | slope  | plateau | R2   |
|------------|-----------|--------|---------|------|
| NGLY1_KO_1 | 56.11     | -0.052 | 0.08    | 0.97 |
| NGLY1_1    | 54.55     | -0.061 | 0       | 0.98 |
| NGLY1_KO_2 | 53.12     | -0.053 | 0       | 0.97 |
| NGLY1_2    | 53.3      | -0.044 | 0       | 0.99 |

Supplement: Supplementary file 2972 [file 1]

IPI00007134.3|KCNK15

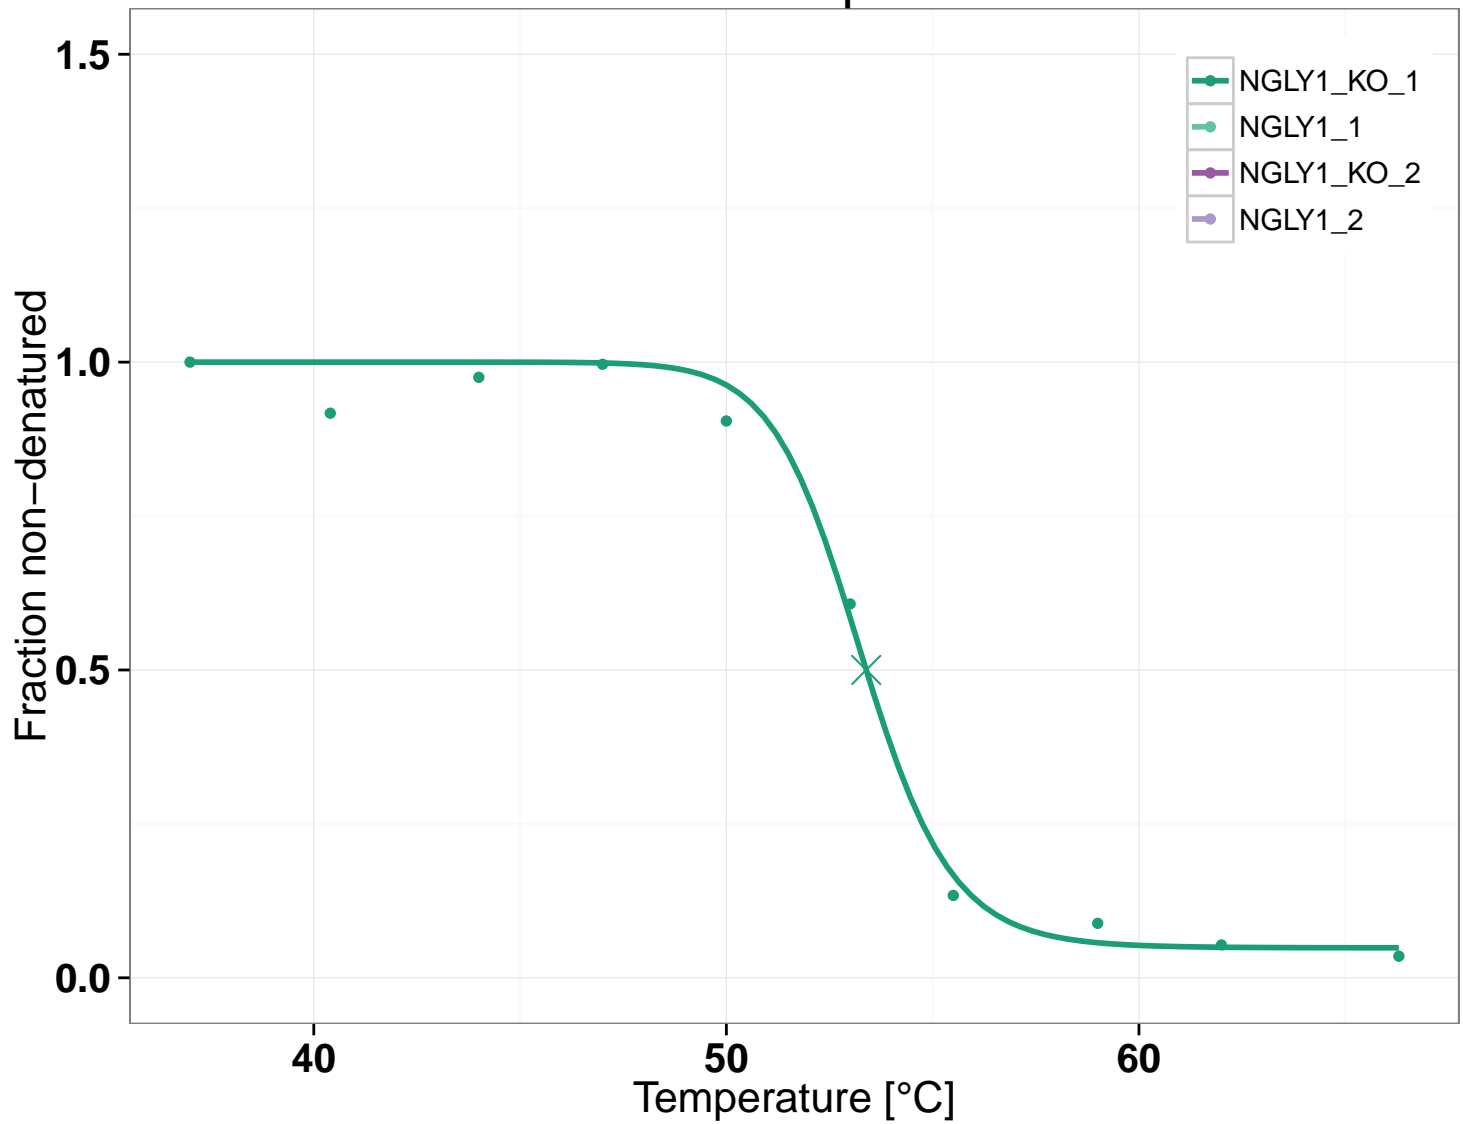

|            | meltPoint | slope | plateau | R2   |
|------------|-----------|-------|---------|------|
| NGLY1_KO_1 | 53.39     | -0.22 | 0.05    | 0.99 |
| NGLY1_1    | -         | -     | -       | -    |
| NGLY1_KO_2 | -         | -     | -       | -    |
| NGLY1_2    | -         | -     | -       | -    |

Supplement: Supplementary file 2973 [file 1]

IPI00012575.1|PIR

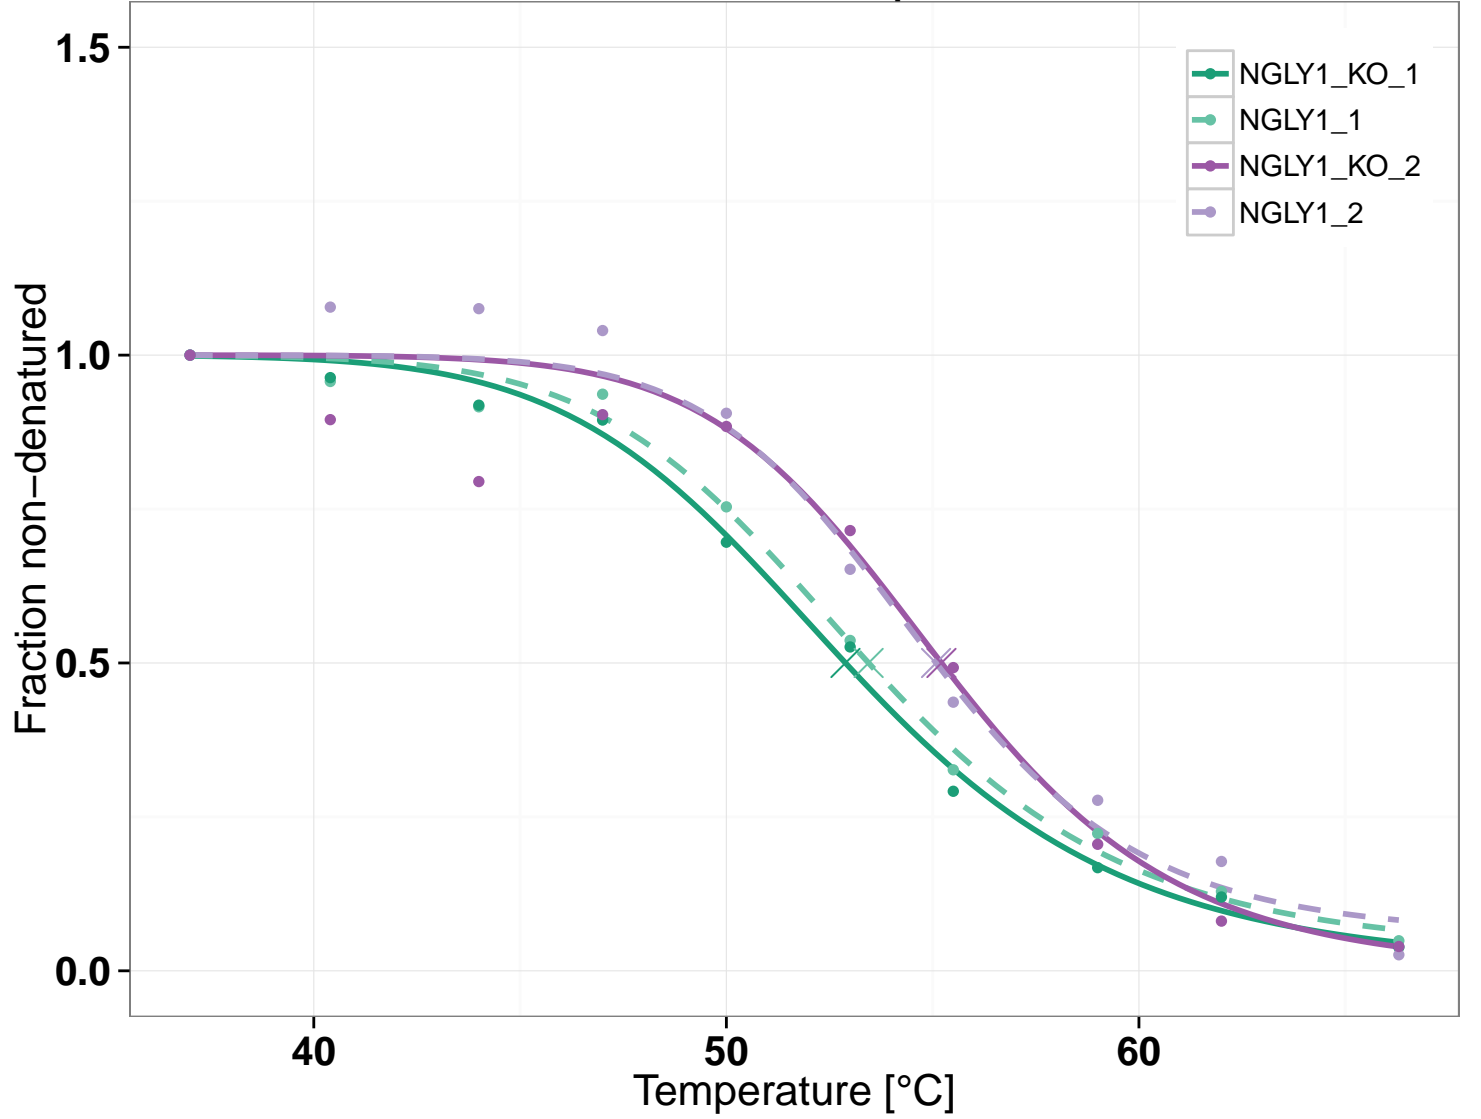

|            | meltPoint | slope  | plateau | R2   |
|------------|-----------|--------|---------|------|
| NGLY1_KO_1 | 52.89     | -0.073 | 0       | 1    |
| NGLY1_1    | 53.45     | -0.075 | 0.03    | 0.99 |
| NGLY1_KO_2 | 55.21     | -0.088 | 0       | 0.95 |
| NGLY1_2    | 55.08     | -0.089 | 0.06    | 0.98 |

Supplement: Supplementary file 2974 [file 1]

# IPI00009305.1|GNPDA1

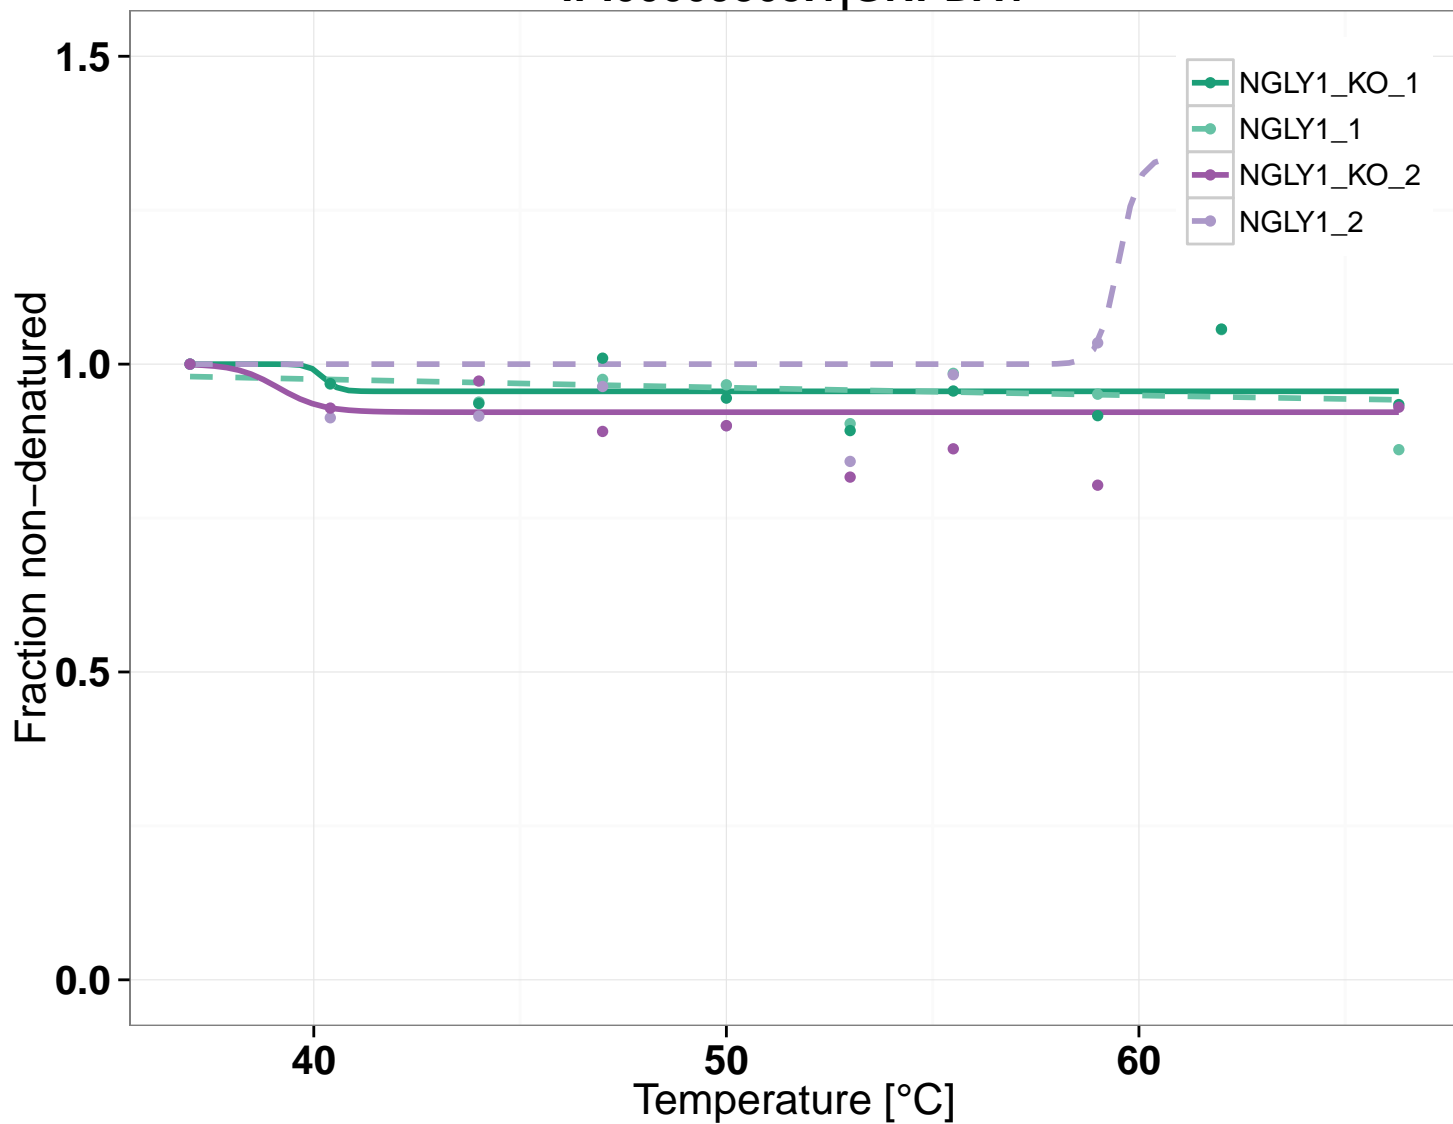

|            | meltPoint | slope   | plateau | R2   |
|------------|-----------|---------|---------|------|
| NGLY1_KO_1 | -         | -0.063  | 0.96    | 0.08 |
| NGLY1_1    | -         | -0.0014 | 0.68    | 0.05 |
| NGLY1_KO_2 | -         | -0.038  | 0.92    | 0.05 |
| NGLY1_2    | -         | 0.35    | 1.34    | 0.81 |

Supplement: Supplementary file 2975 [file 1]

# IPI00297357.1|PINX1

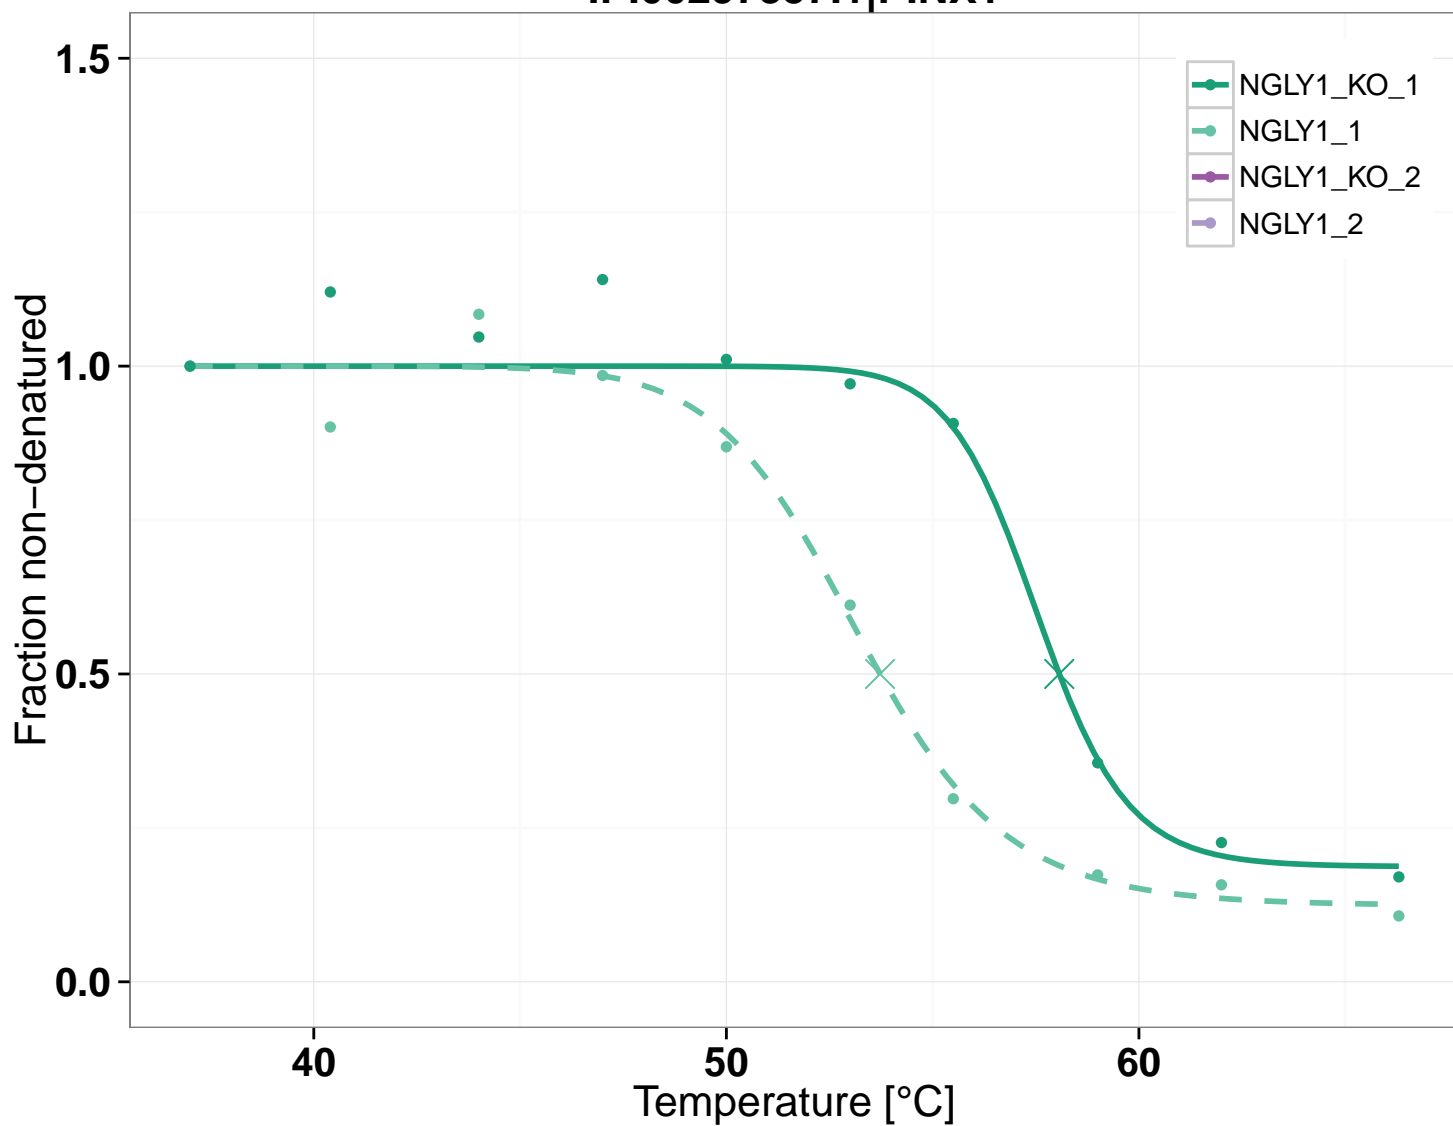

|            | meltPoint | slope | plateau | R2   |
|------------|-----------|-------|---------|------|
| NGLY1_KO_1 | 58.07     | -0.19 | 0.19    | 0.97 |
| NGLY1_1    | 53.73     | -0.12 | 0.12    | 0.99 |
| NGLY1_KO_2 | -         | -     | -       | -    |
| NGLY1_2    | -         | -     | -       | -    |

Supplement: Supplementary file 2976 [file 1]

IPI00216726.1|TGIF2LY

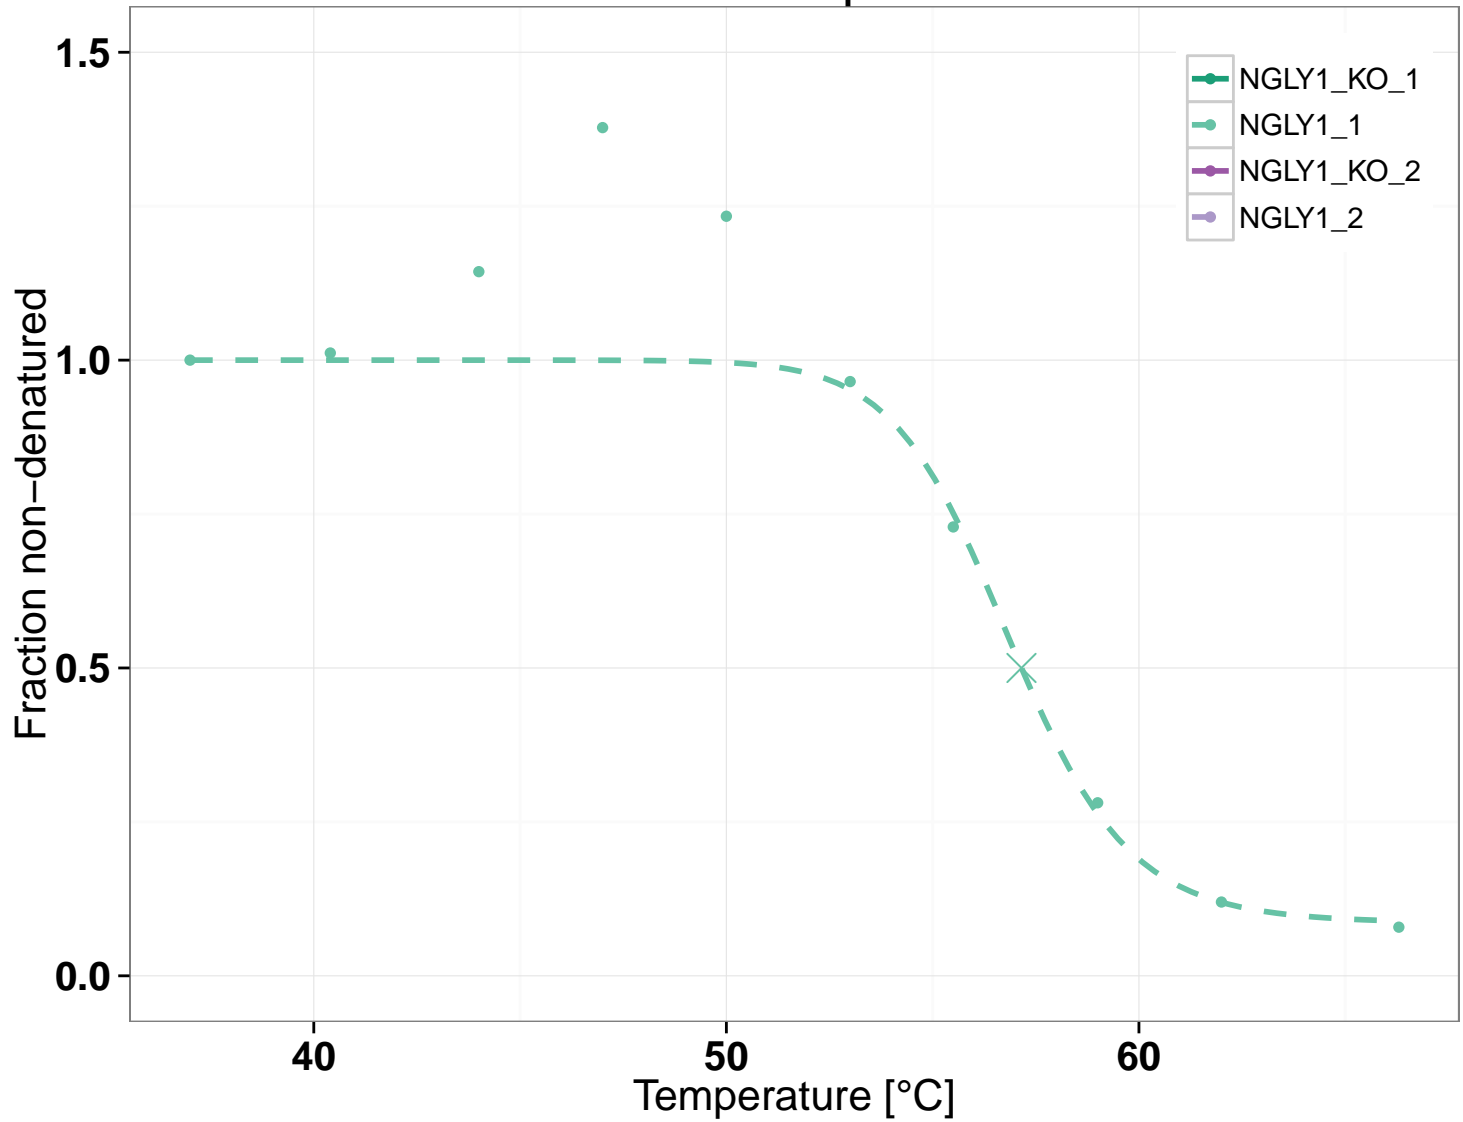

|            | meltPoint | slope | plateau | R2   |
|------------|-----------|-------|---------|------|
| NGLY1_KO_1 | -         | -     | -       | -    |
| NGLY1_1    | 57.15     | -0.16 | 0.09    | 0.89 |
| NGLY1_KO_2 | -         | -     | -       | -    |
| NGLY1_2    | -         | -     | -       | -    |

Supplement: Supplementary file 2977 [file 1]

IPI00029013.2|FAM53B

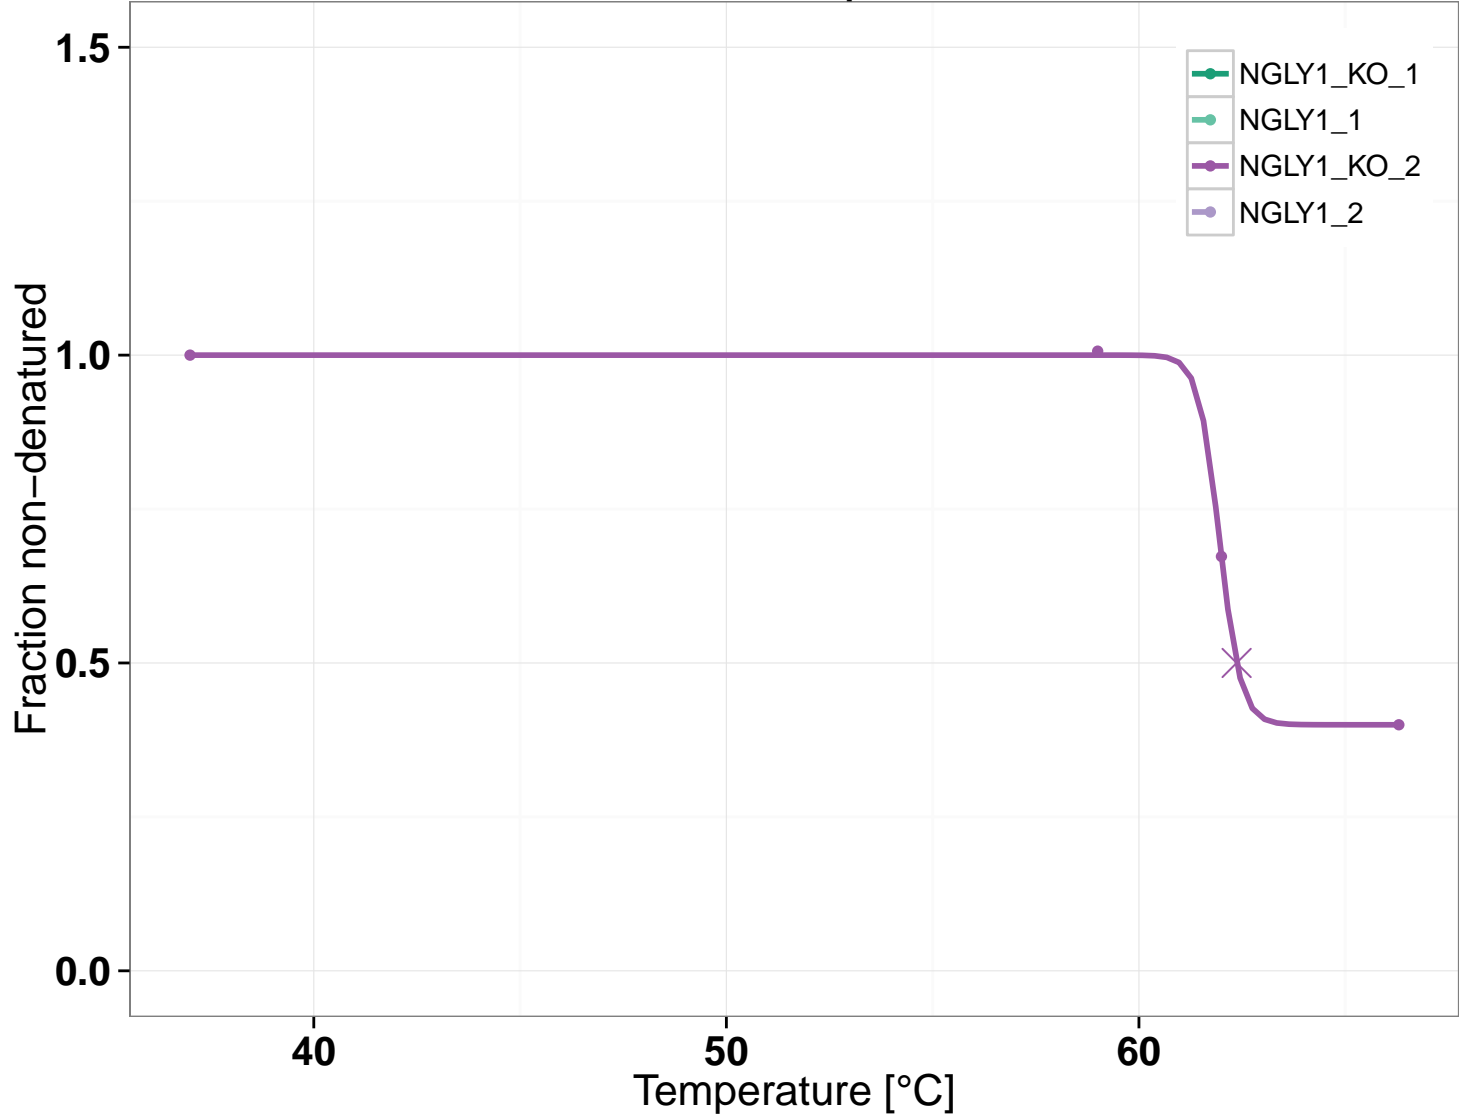

|            | meltPoint | slope | plateau | R2    |
|------------|-----------|-------|---------|-------|
| NGLY1_KO_1 | -         | -     | -       | -     |
| NGLY1_1    | -         | -     | -       | -     |
| NGLY1_KO_2 | 62.37     | -0.59 | 0.4     | -0.59 |
| NGLY1_2    | -         | -     | -       | -     |

Supplement: Supplementary file 2978 [file 1]

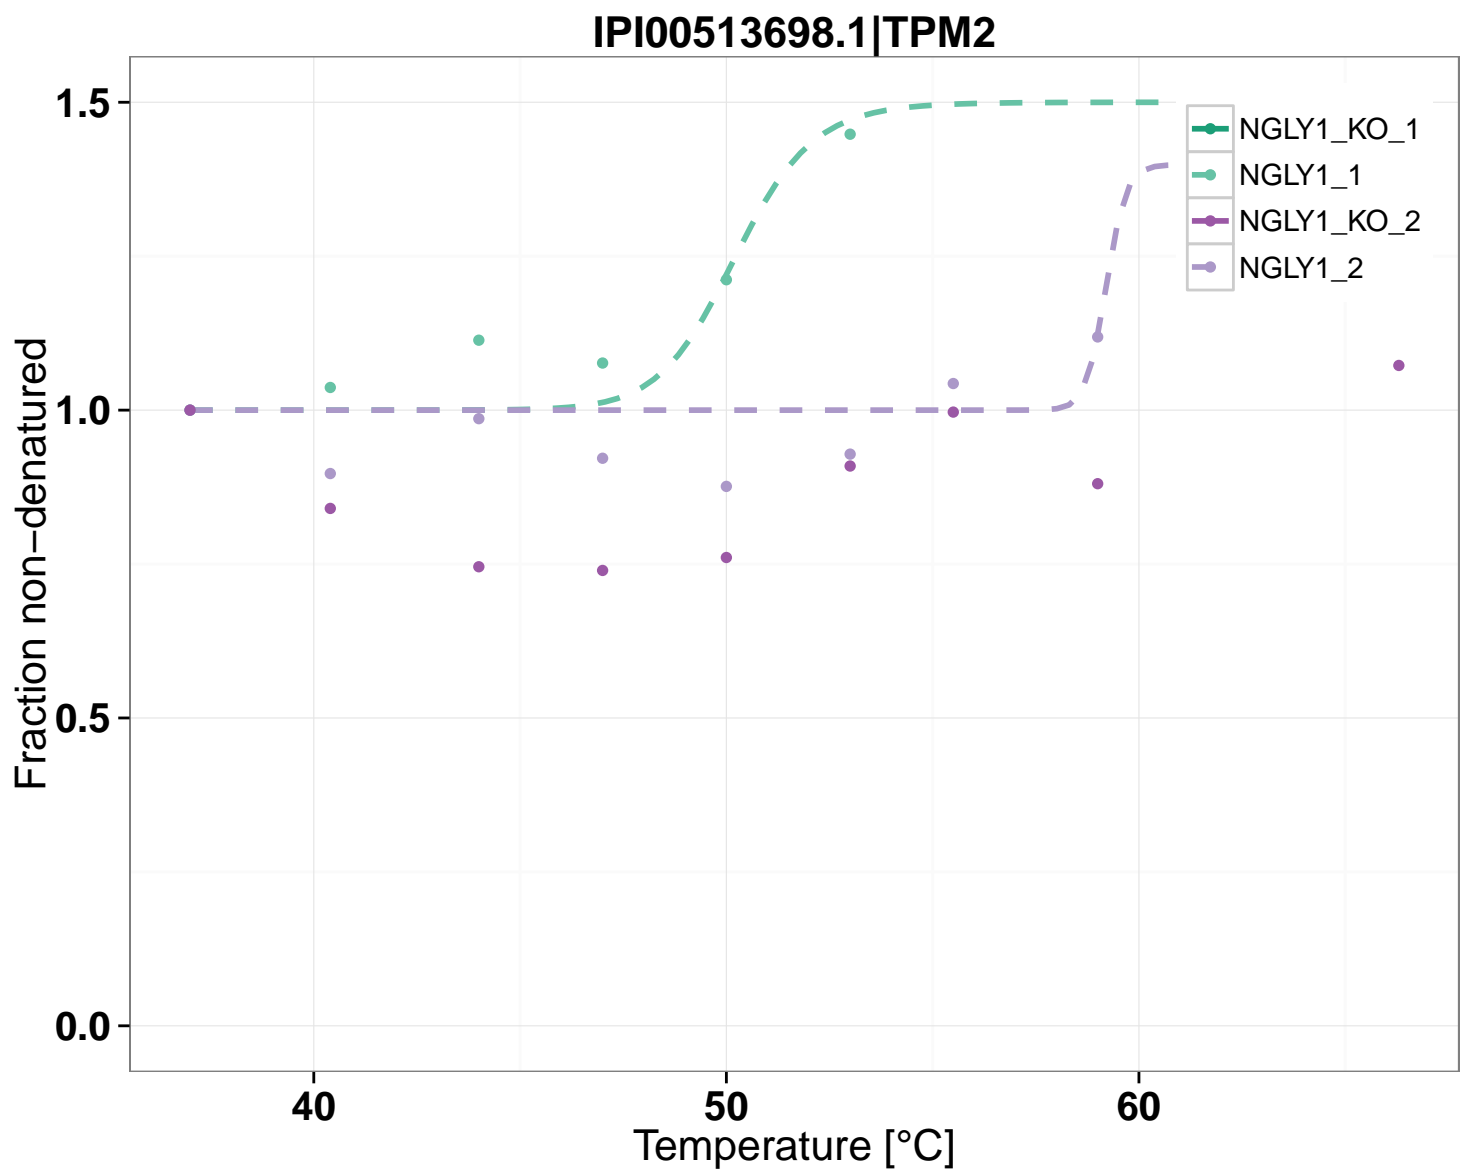

|            | meltPoint | slope | plateau | R2   |
|------------|-----------|-------|---------|------|
| NGLY1_KO_1 | —         | —     | —       | —    |
| NGLY1_1    | —         | 0.13  | 1.5     | 0.55 |
| NGLY1_KO_2 | —         | —     | —       | —    |
| NGLY1_2    | —         | 0.42  | 1.4     | 0.88 |

Supplement: Supplementary file 2979 [file 1]

# IPI00217473.5|HBZ

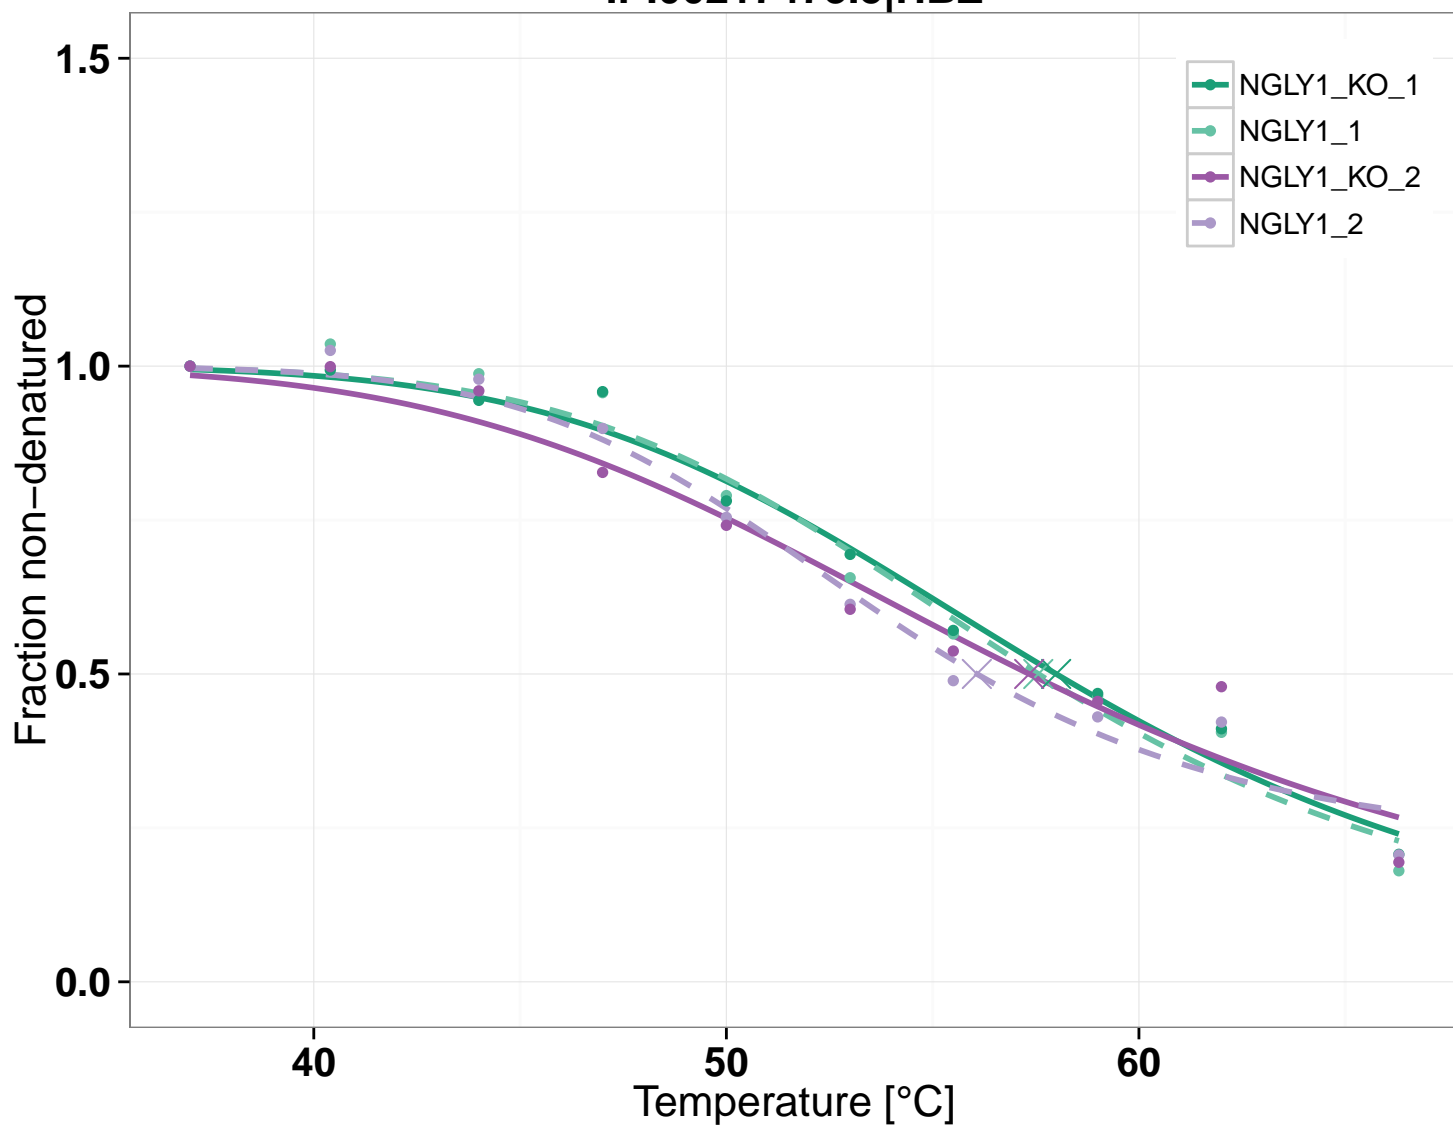

|            | meltPoint | slope  | plateau | R2   |
|------------|-----------|--------|---------|------|
| NGLY1_KO_1 | 57.99     | -0.041 | 0       | 0.99 |
| NGLY1_1    | 57.56     | -0.044 | 0.04    | 0.98 |
| NGLY1_KO_2 | 57.34     | -0.035 | 0.01    | 0.96 |
| NGLY1_2    | 56.07     | -0.047 | 0.21    | 0.98 |

Supplement: Supplementary file 2980 [file 1]

IPI00030313.2|CCNT2

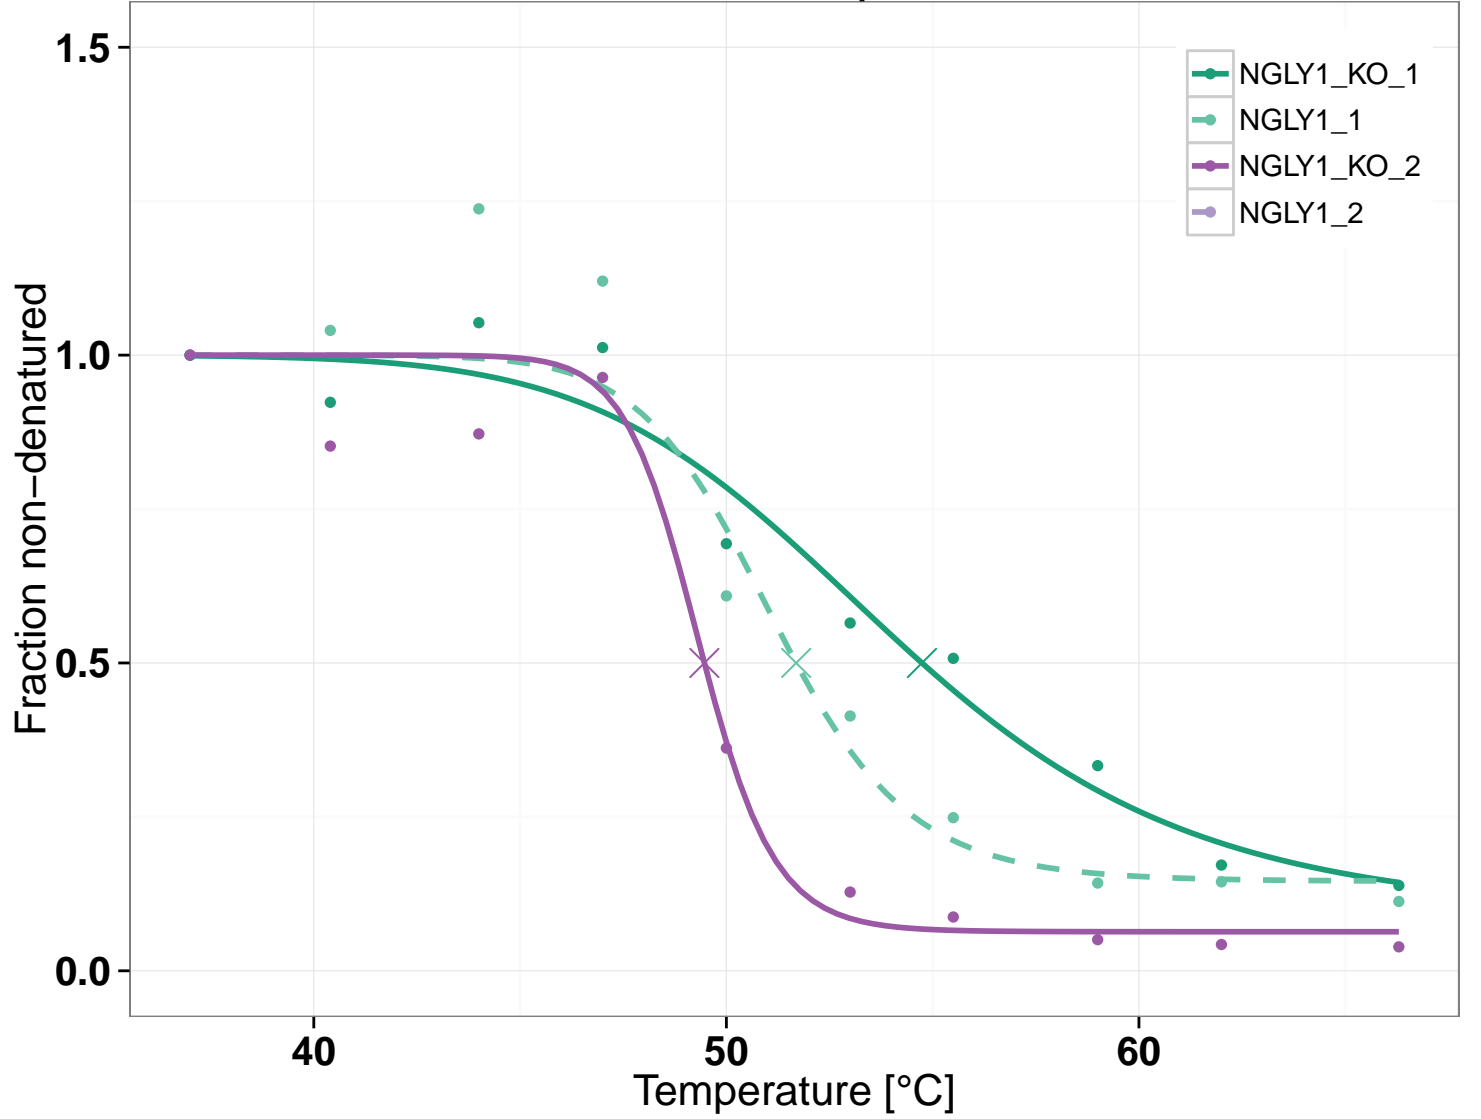

|            | meltPoint | slope  | plateau | R2   |
|------------|-----------|--------|---------|------|
| NGLY1_KO_1 | 54.74     | -0.063 | 0.09    | 0.97 |
| NGLY1_1    | 51.69     | -0.13  | 0.15    | 0.94 |
| NGLY1_KO_2 | 49.47     | -0.26  | 0.06    | 0.97 |
| NGLY1_2    | -         | -      | -       | -    |

Supplement: Supplementary file 2981 [file 1]

# IPI00000878.4|TEC

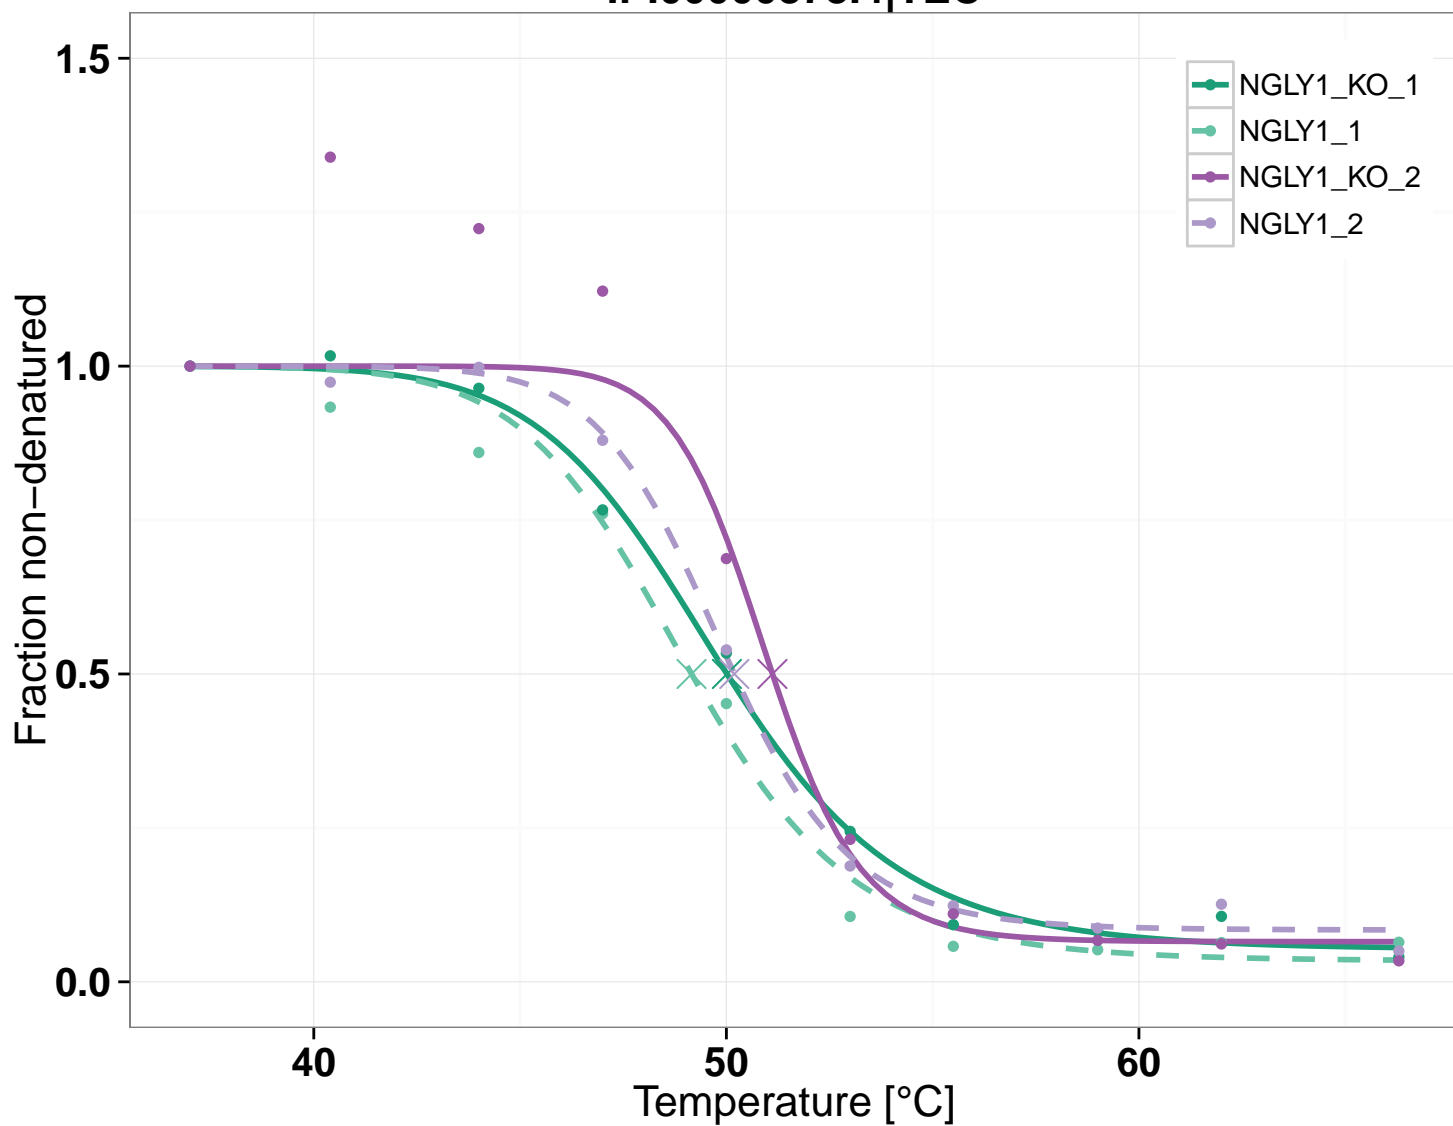

|            | meltPoint | slope | plateau | R2   |
|------------|-----------|-------|---------|------|
| NGLY1_KO_1 | 50.01     | -0.11 | 0.05    | 1    |
| NGLY1_1    | 49.16     | -0.12 | 0.03    | 0.99 |
| NGLY1_KO_2 | 51.12     | -0.21 | 0.07    | 0.93 |
| NGLY1_2    | 50.19     | -0.15 | 0.08    | 1    |

Supplement: Supplementary file 2982 [file 1]

IPI00020758.4|FCHSD1

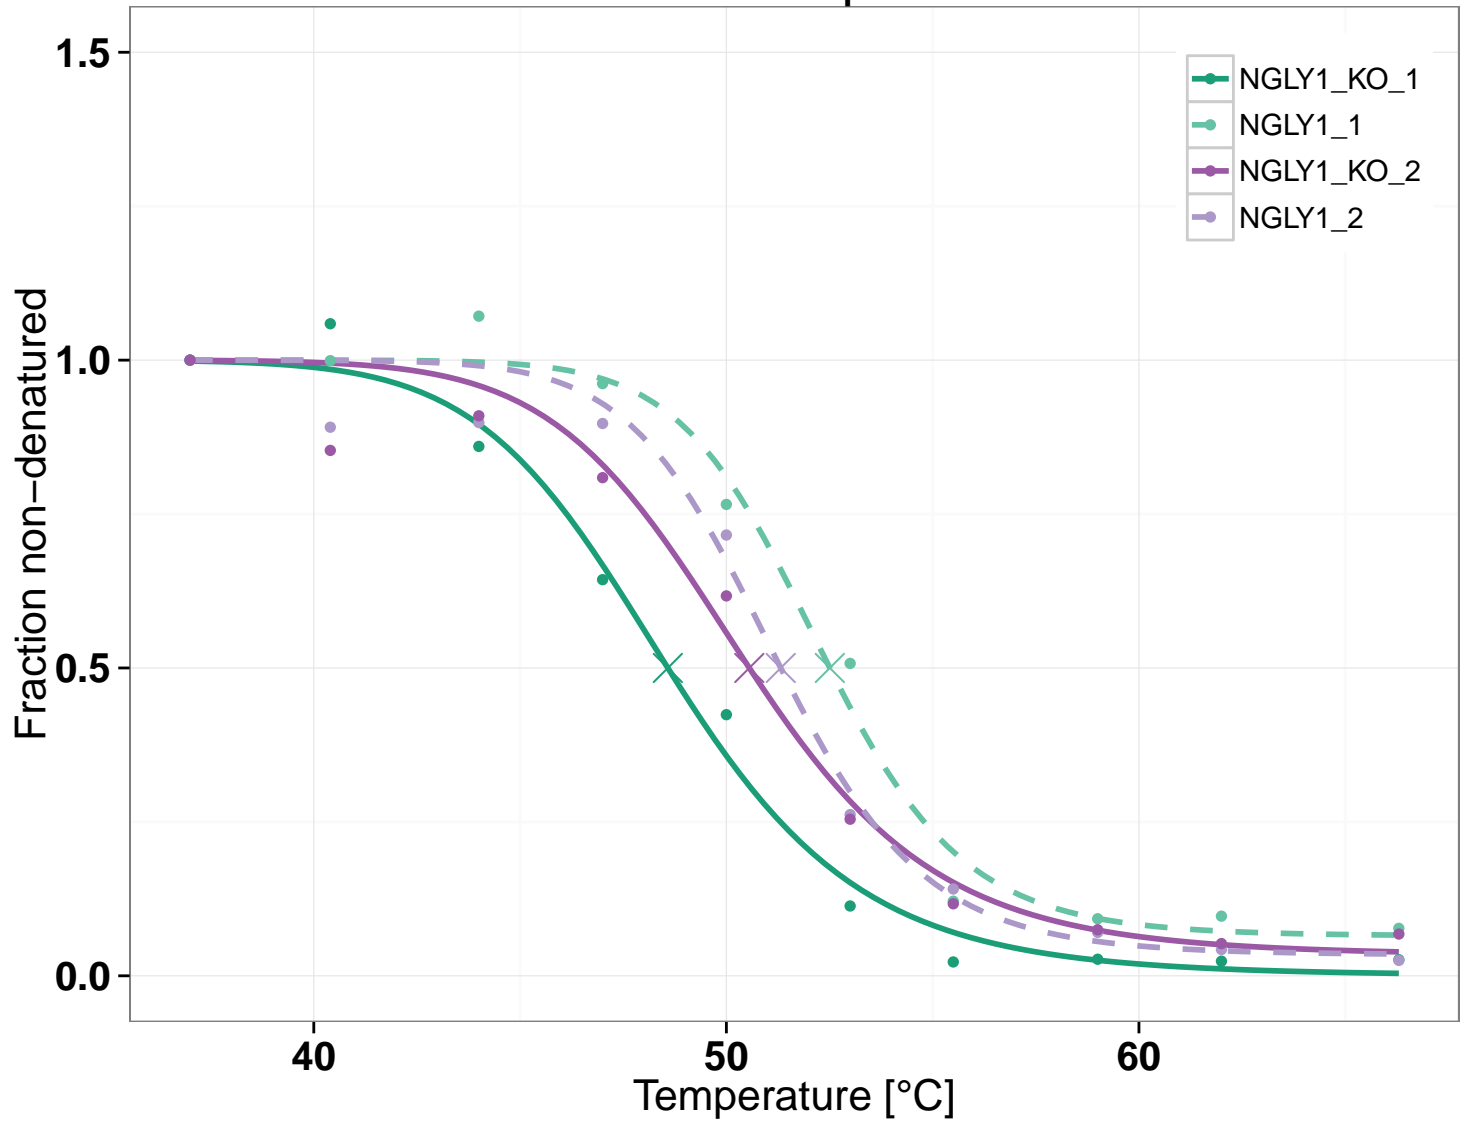

|            | meltPoint | slope | plateau | R2   |
|------------|-----------|-------|---------|------|
| NGLY1_KO_1 | 48.58     | -0.11 | 0       | 0.99 |
| NGLY1_1    | 52.51     | -0.14 | 0.06    | 0.99 |
| NGLY1_KO_2 | 50.56     | -0.1  | 0.03    | 0.98 |
| NGLY1_2    | 51.32     | -0.14 | 0.03    | 0.98 |

Supplement: Supplementary file 2983 [file 1]

# IPI00329638.11|ZAK

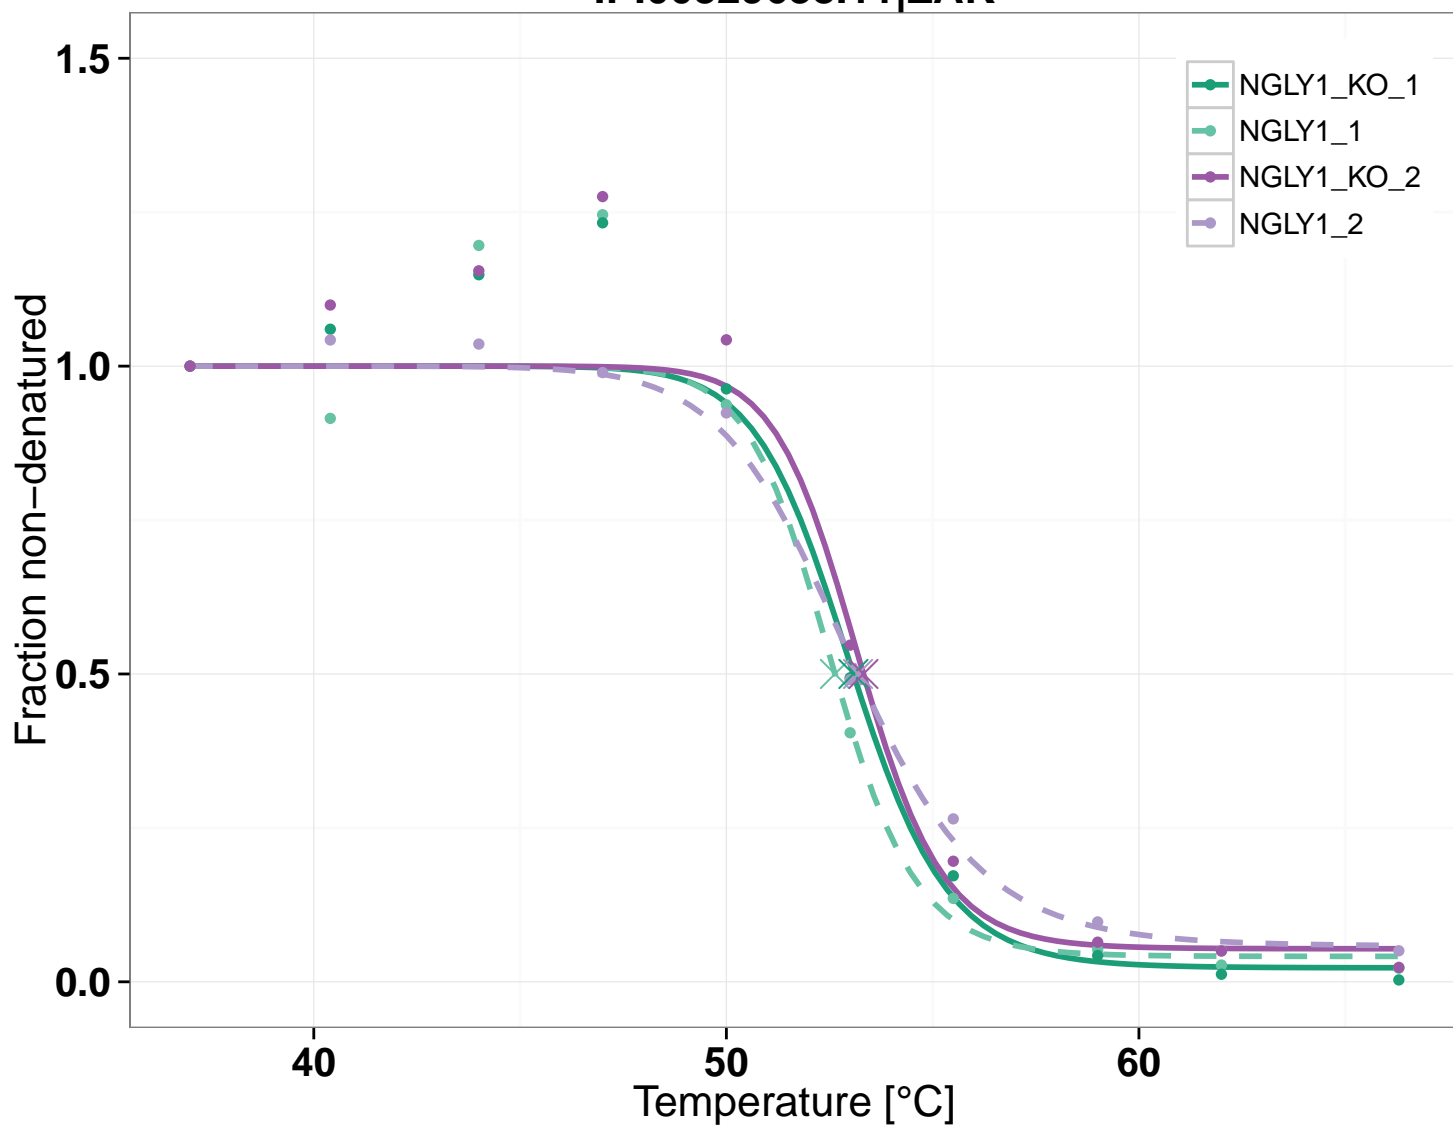

|            | meltPoint | slope | plateau | R2   |
|------------|-----------|-------|---------|------|
| NGLY1_KO_1 | 53.08     | -0.21 | 0.02    | 0.97 |
| NGLY1_1    | 52.63     | -0.23 | 0.04    | 0.95 |
| NGLY1_KO_2 | 53.32     | -0.23 | 0.05    | 0.95 |
| NGLY1_2    | 53.19     | -0.15 | 0.06    | 1    |

Supplement: Supplementary file 2984 [file 1]

IPI00006979.1|LYRM4

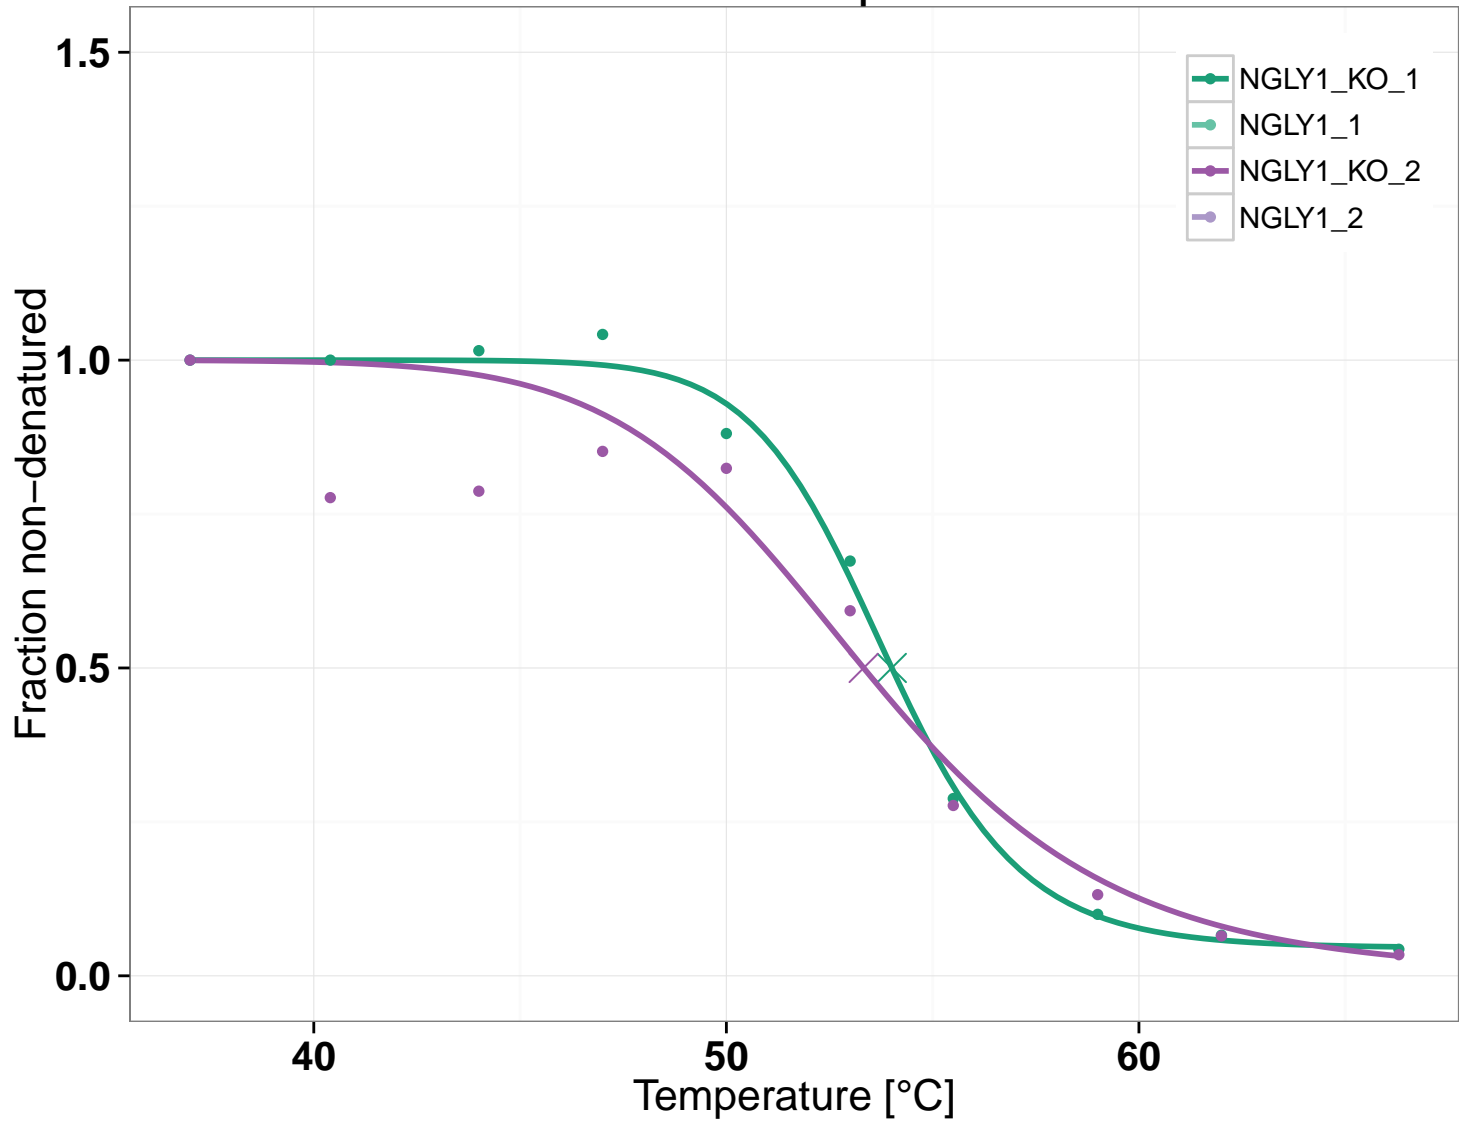

|            | meltPoint | slope  | plateau | R2   |
|------------|-----------|--------|---------|------|
| NGLY1_KO_1 | 54.01     | -0.15  | 0.05    | 1    |
| NGLY1_1    | -         | -      | -       | -    |
| NGLY1_KO_2 | 53.33     | -0.083 | 0       | 0.92 |
| NGLY1_2    | -         | -      | -       | -    |

Supplement: Supplementary file 2985 [file 1]

# IPI00887771.1|DHFR

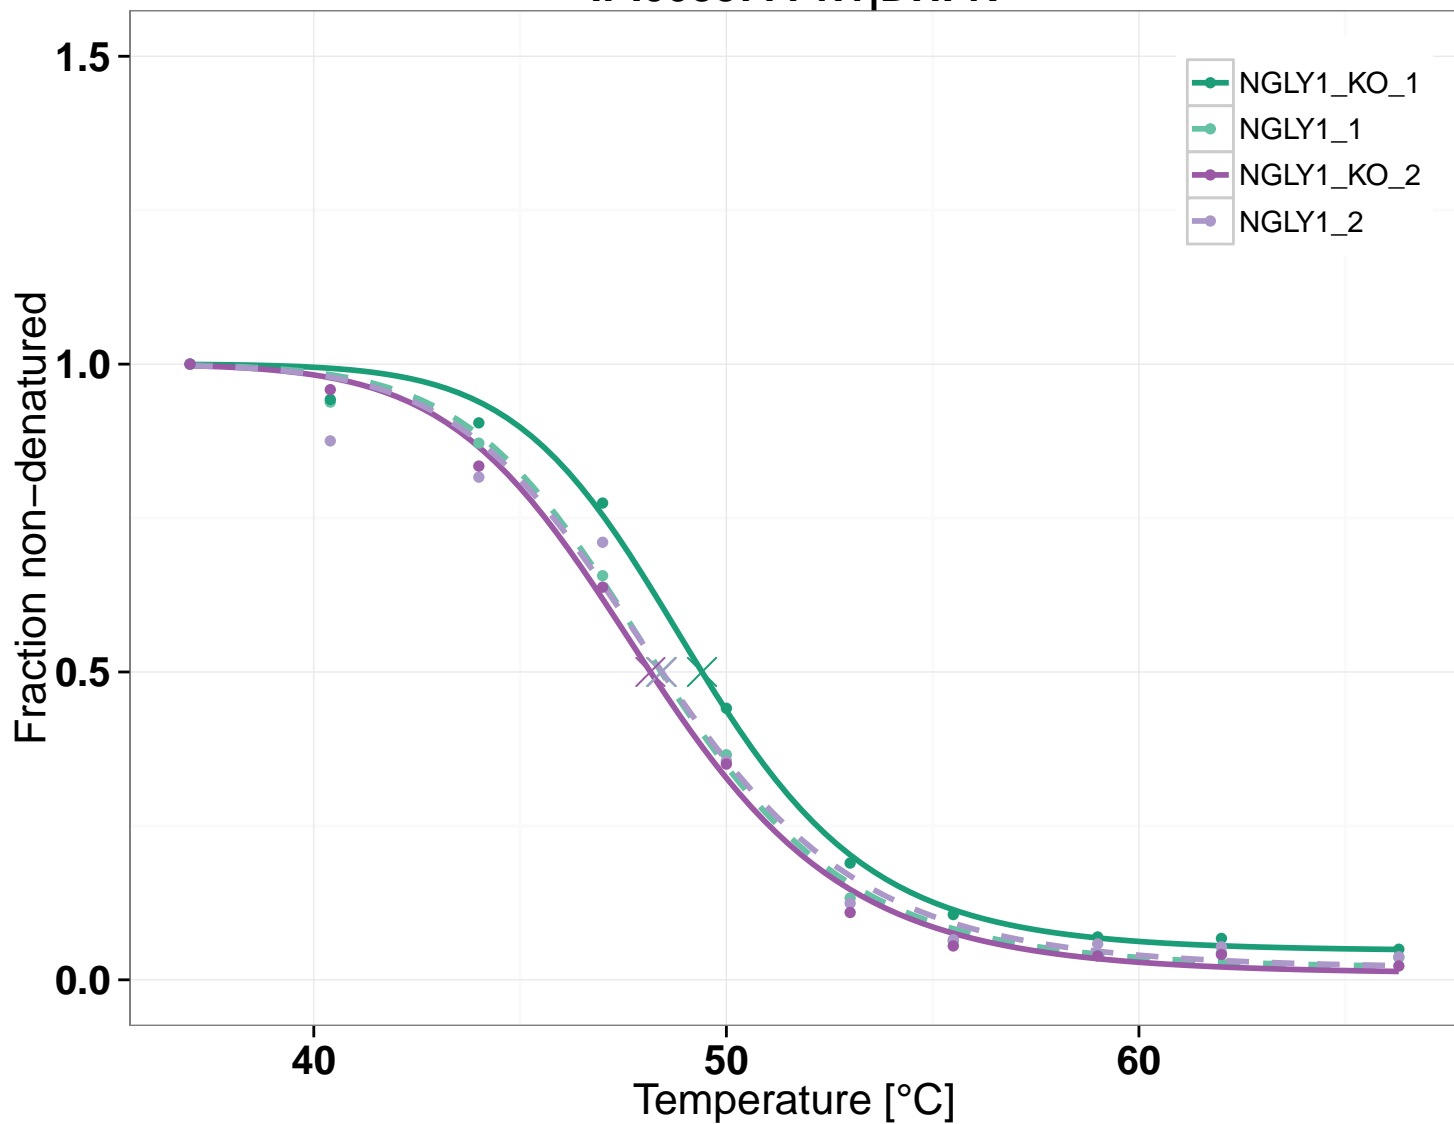

|            | meltPoint | slope | plateau | R2   |
|------------|-----------|-------|---------|------|
| NGLY1_KO_1 | 49.41     | -0.11 | 0.05    | 1    |
| NGLY1_1    | 48.42     | -0.11 | 0.02    | 1    |
| NGLY1_KO_2 | 48.16     | -0.1  | 0.01    | 1    |
| NGLY1_2    | 48.44     | -0.1  | 0.02    | 0.98 |

Supplement: Supplementary file 2986 [file 1]

IPI00014593.2|RCBTB2

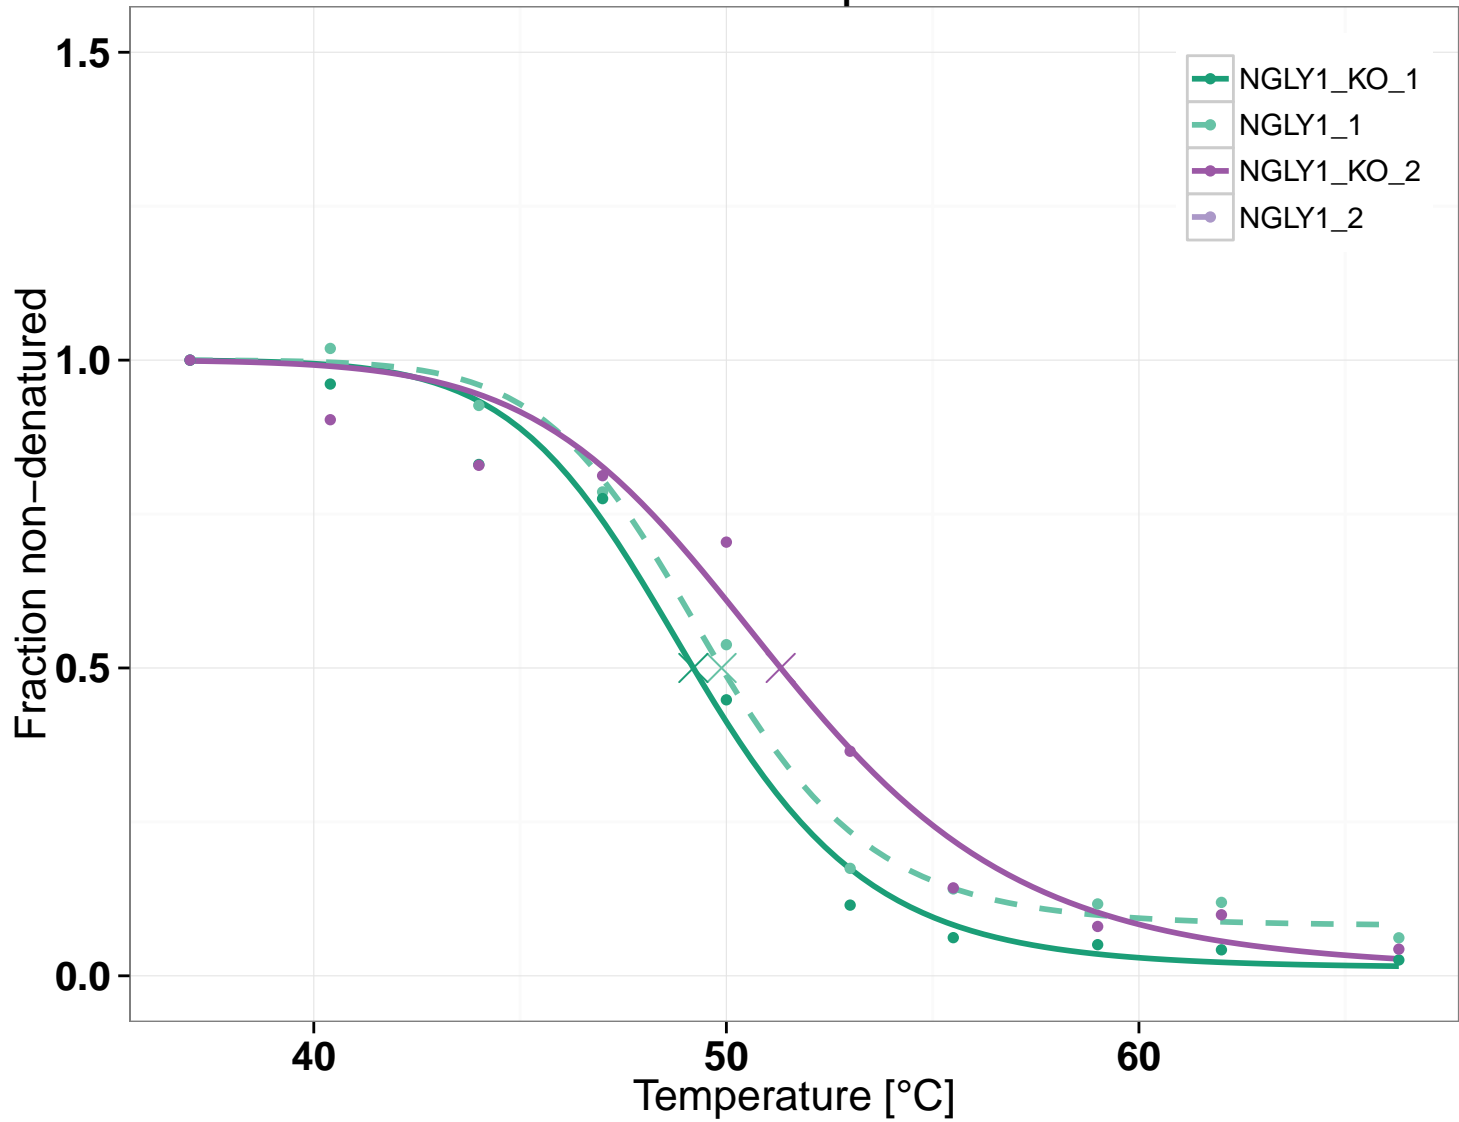

|            | meltPoint | slope  | plateau | R2   |
|------------|-----------|--------|---------|------|
| NGLY1_KO_1 | 49.2      | -0.11  | 0.01    | 0.99 |
| NGLY1_1    | 49.88     | -0.11  | 0.08    | 0.99 |
| NGLY1_KO_2 | 51.32     | -0.084 | 0.01    | 0.97 |
| NGLY1_2    | -         | -      | -       | -    |

Supplement: Supplementary file 2987 [file 1]

IPI00009943.2|TPT1

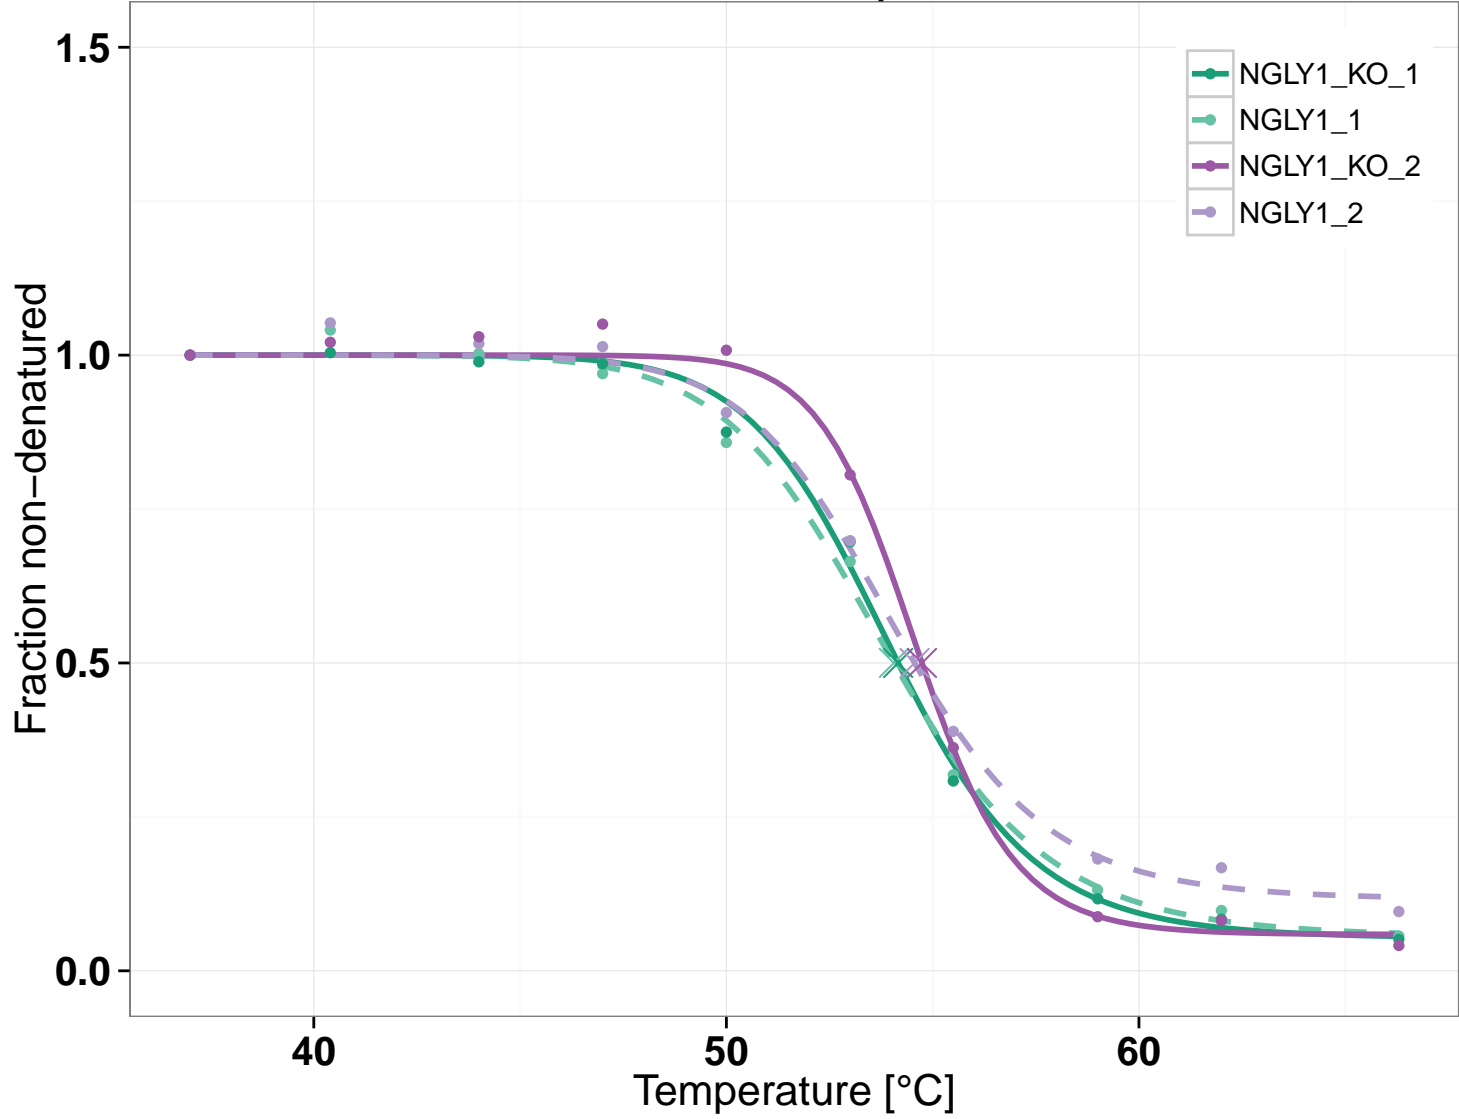

|            | meltPoint | slope | plateau | R2 |
|------------|-----------|-------|---------|----|
| NGLY1_KO_1 | 54.16     | -0.14 | 0.05    | 1  |
| NGLY1_1    | 54.06     | -0.12 | 0.06    | 1  |
| NGLY1_KO_2 | 54.74     | -0.2  | 0.06    | 1  |
| NGLY1_2    | 54.56     | -0.12 | 0.12    | 1  |

Supplement: Supplementary file 2988 [file 1]

IPI00385215.3|NFATC4

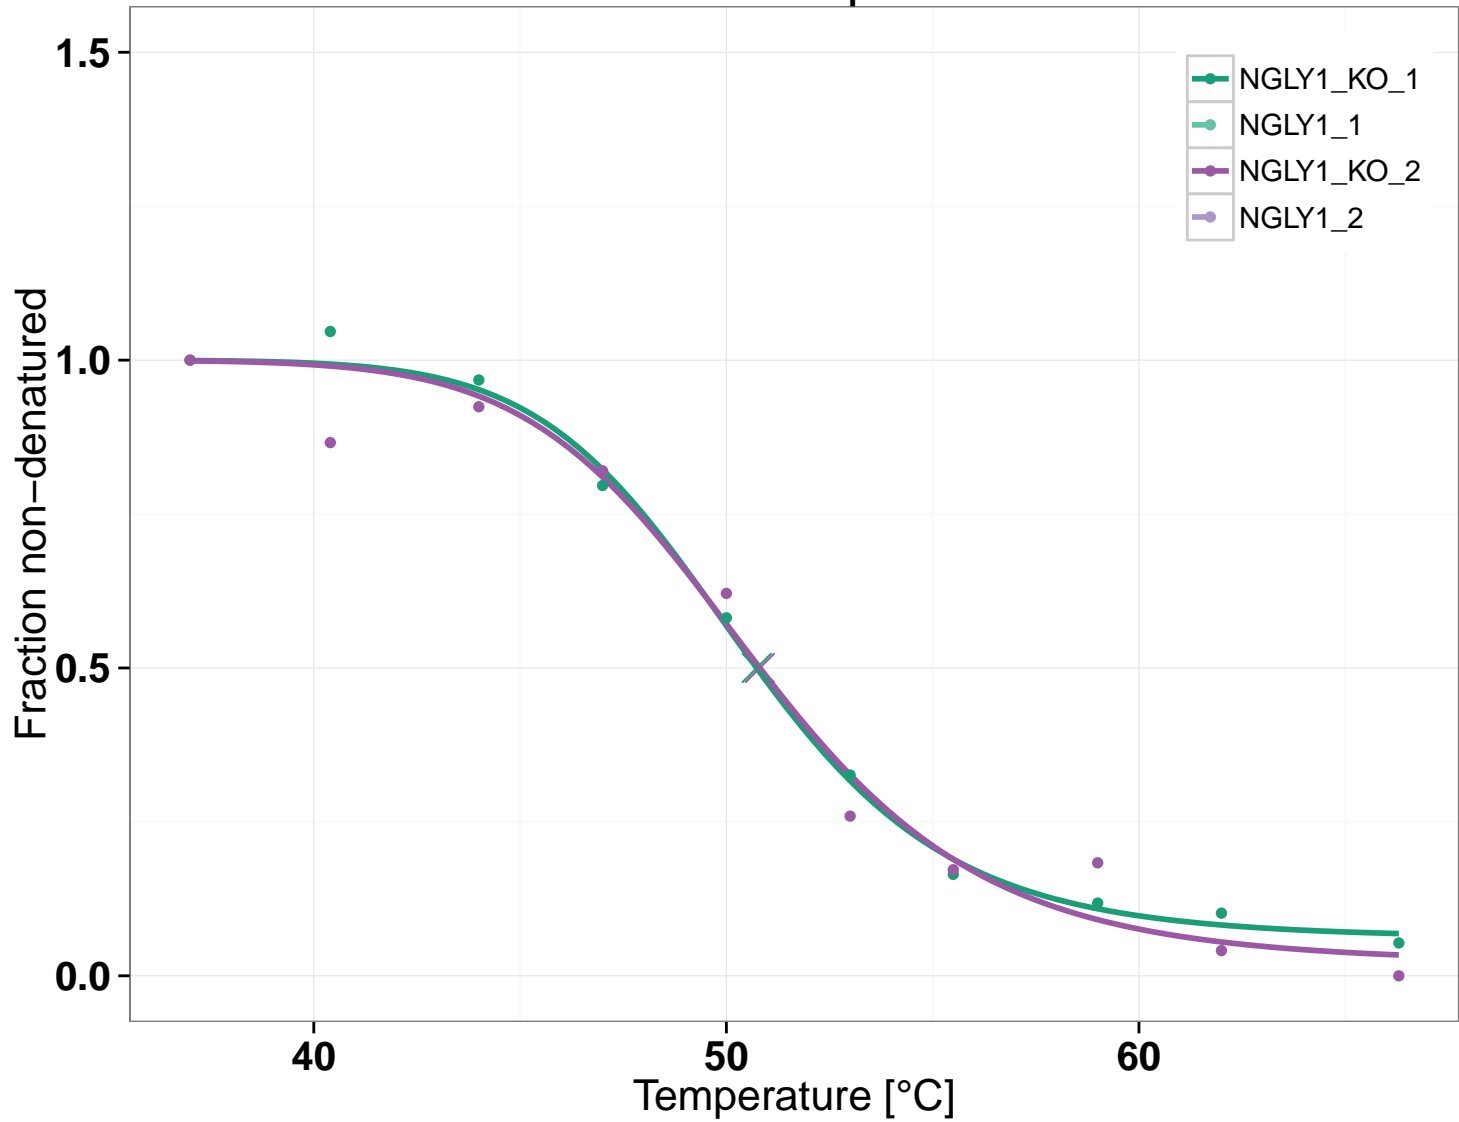

|            | meltPoint | slope  | plateau | R2   |
|------------|-----------|--------|---------|------|
| NGLY1_KO_1 | 50.73     | -0.094 | 0.06    | 1    |
| NGLY1_1    | -         | -      | -       | -    |
| NGLY1_KO_2 | 50.81     | -0.089 | 0.02    | 0.98 |
| NGLY1_2    | -         | -      | -       | -    |

Supplement: Supplementary file 2989 [file 1]

# IPI00294495.5|UFC1

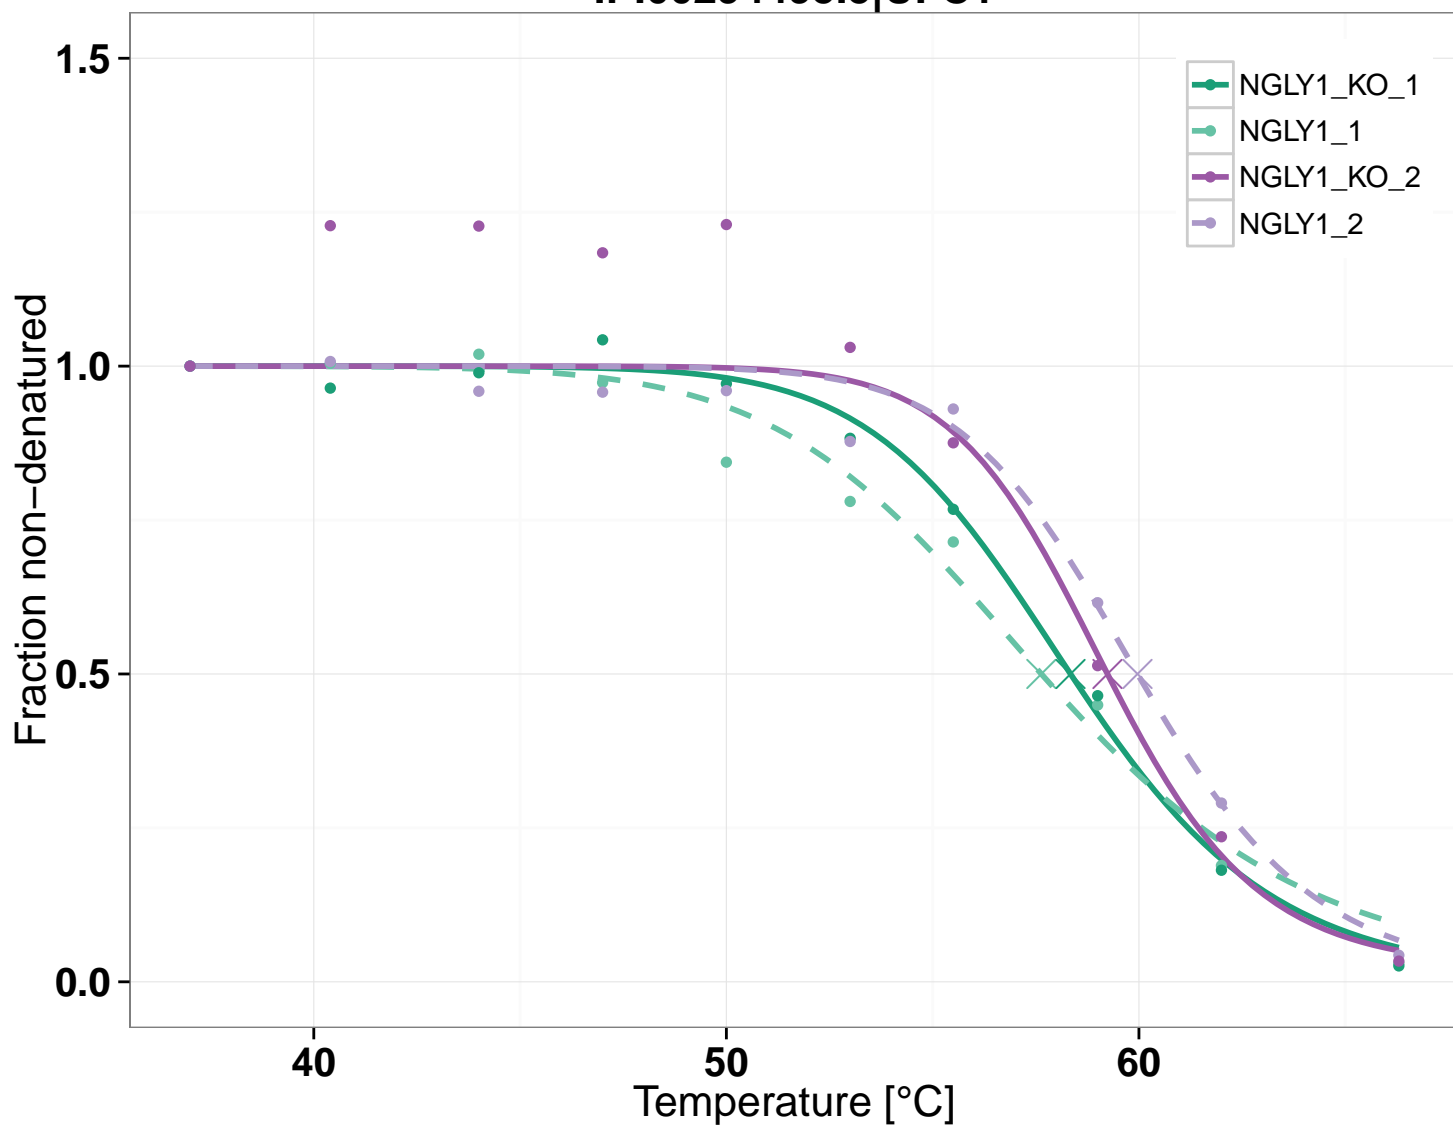

|            | meltPoint | slope  | plateau | R2   |
|------------|-----------|--------|---------|------|
| NGLY1_KO_1 | 58.34     | -0.1   | 0       | 0.99 |
| NGLY1_1    | 57.64     | -0.076 | 0       | 0.98 |
| NGLY1_KO_2 | 59.24     | -0.13  | 0.02    | 0.89 |
| NGLY1_2    | 59.97     | -0.12  | 0       | 0.99 |

Supplement: Supplementary file 2990 [file 1]

# IPI00397366.4|PPFIBP1

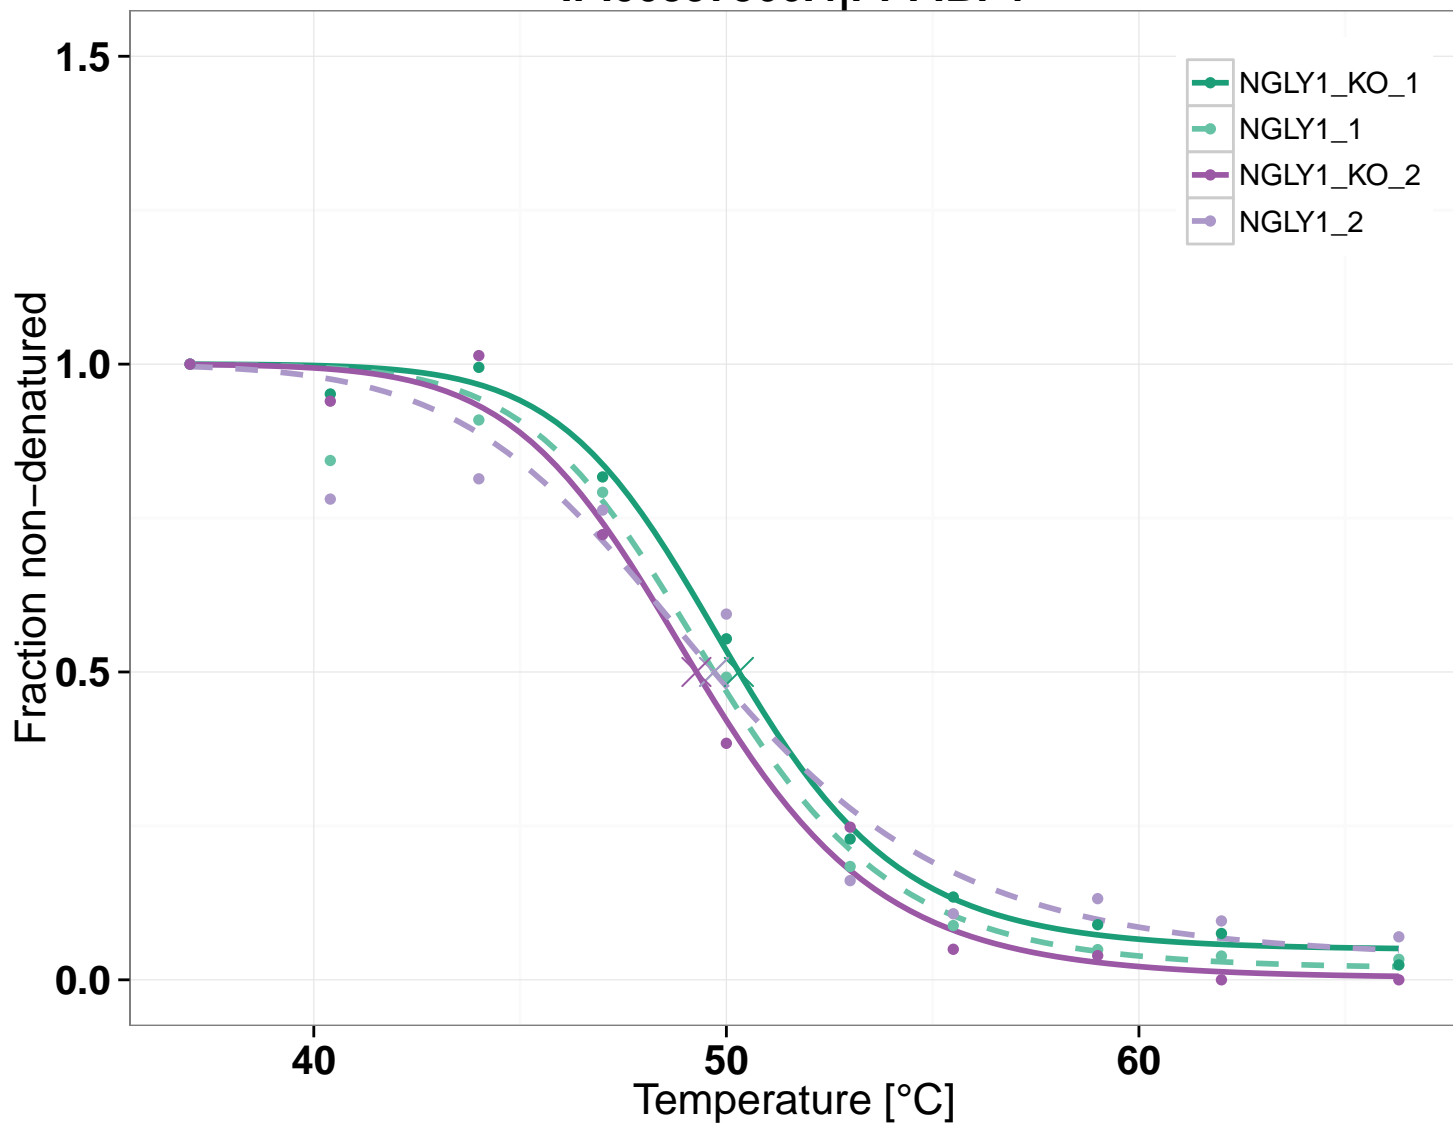

|            | meltPoint | slope  | plateau | R2   |
|------------|-----------|--------|---------|------|
| NGLY1_KO_1 | 50.3      | -0.11  | 0.05    | 1    |
| NGLY1_1    | 49.7      | -0.11  | 0.02    | 0.98 |
| NGLY1_KO_2 | 49.27     | -0.11  | 0       | 0.99 |
| NGLY1_2    | 49.7      | -0.081 | 0.03    | 0.93 |

Supplement: Supplementary file 2991 [file 1]

IPI00639942.2|RPS29

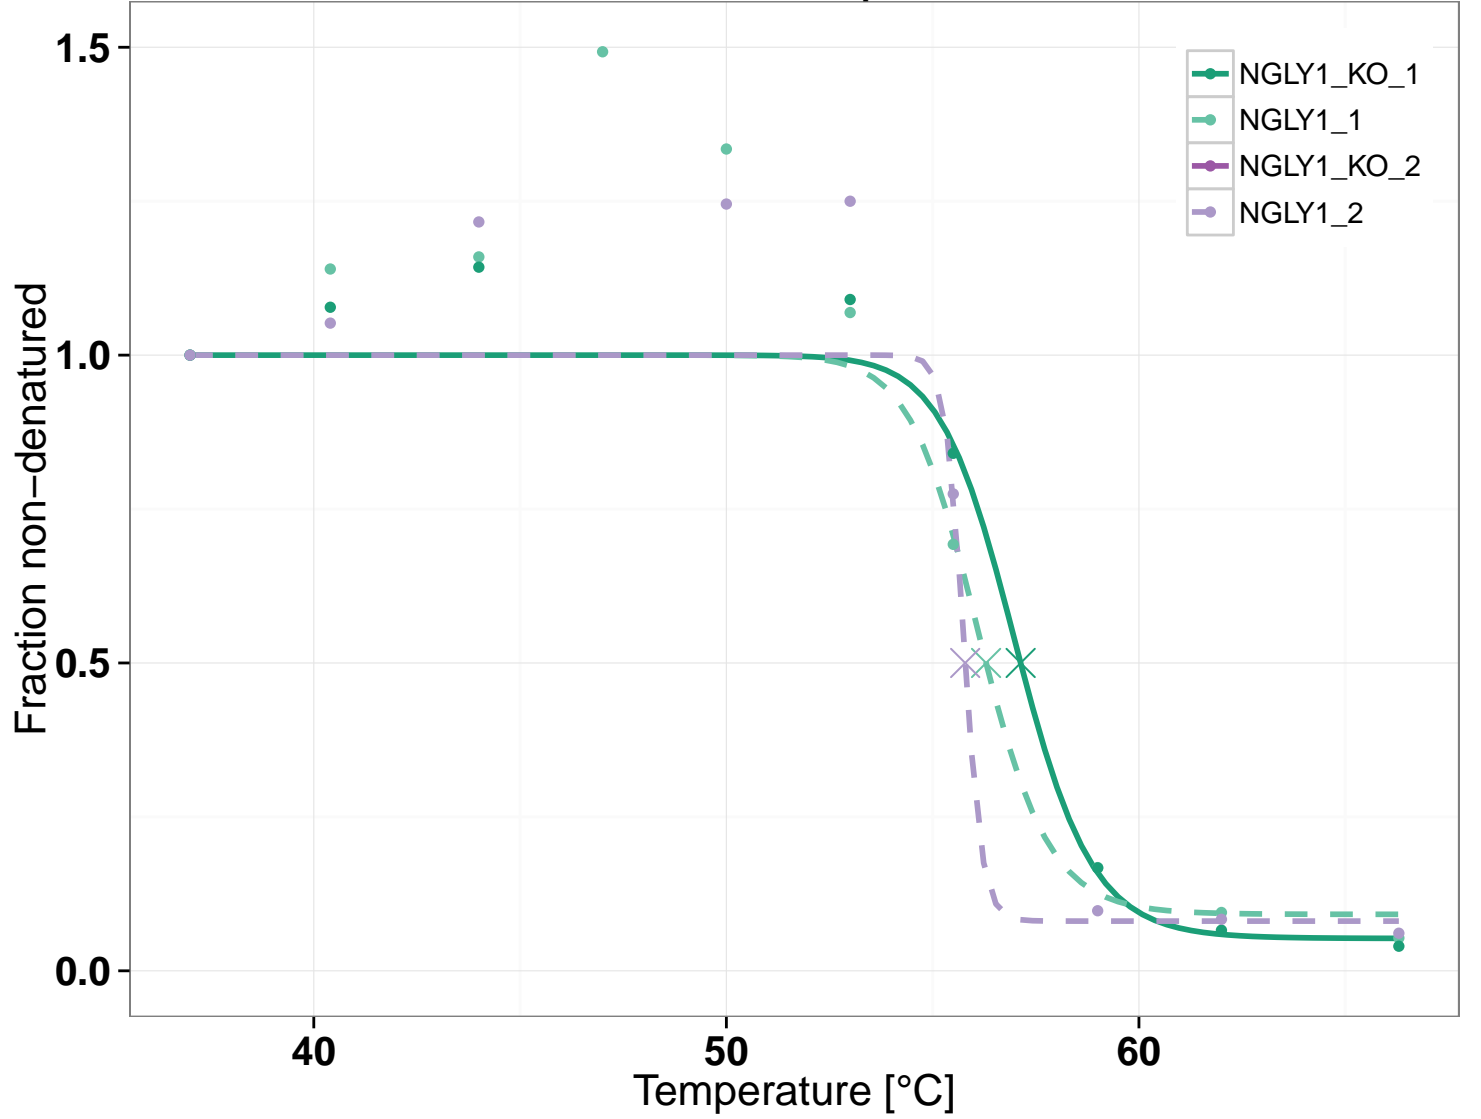

|            | meltPoint | slope | plateau | R2   |
|------------|-----------|-------|---------|------|
| NGLY1_KO_1 | 57.13     | -0.26 | 0.05    | 0.77 |
| NGLY1_1    | 56.29     | -0.27 | 0.09    | 0.84 |
| NGLY1_KO_2 | -         | -     | -       | -    |
| NGLY1_2    | 55.79     | -1    | 0.08    | 0.77 |

Supplement: Supplementary file 2992 [file 1]

# IPI00003389.1|SLC25A15

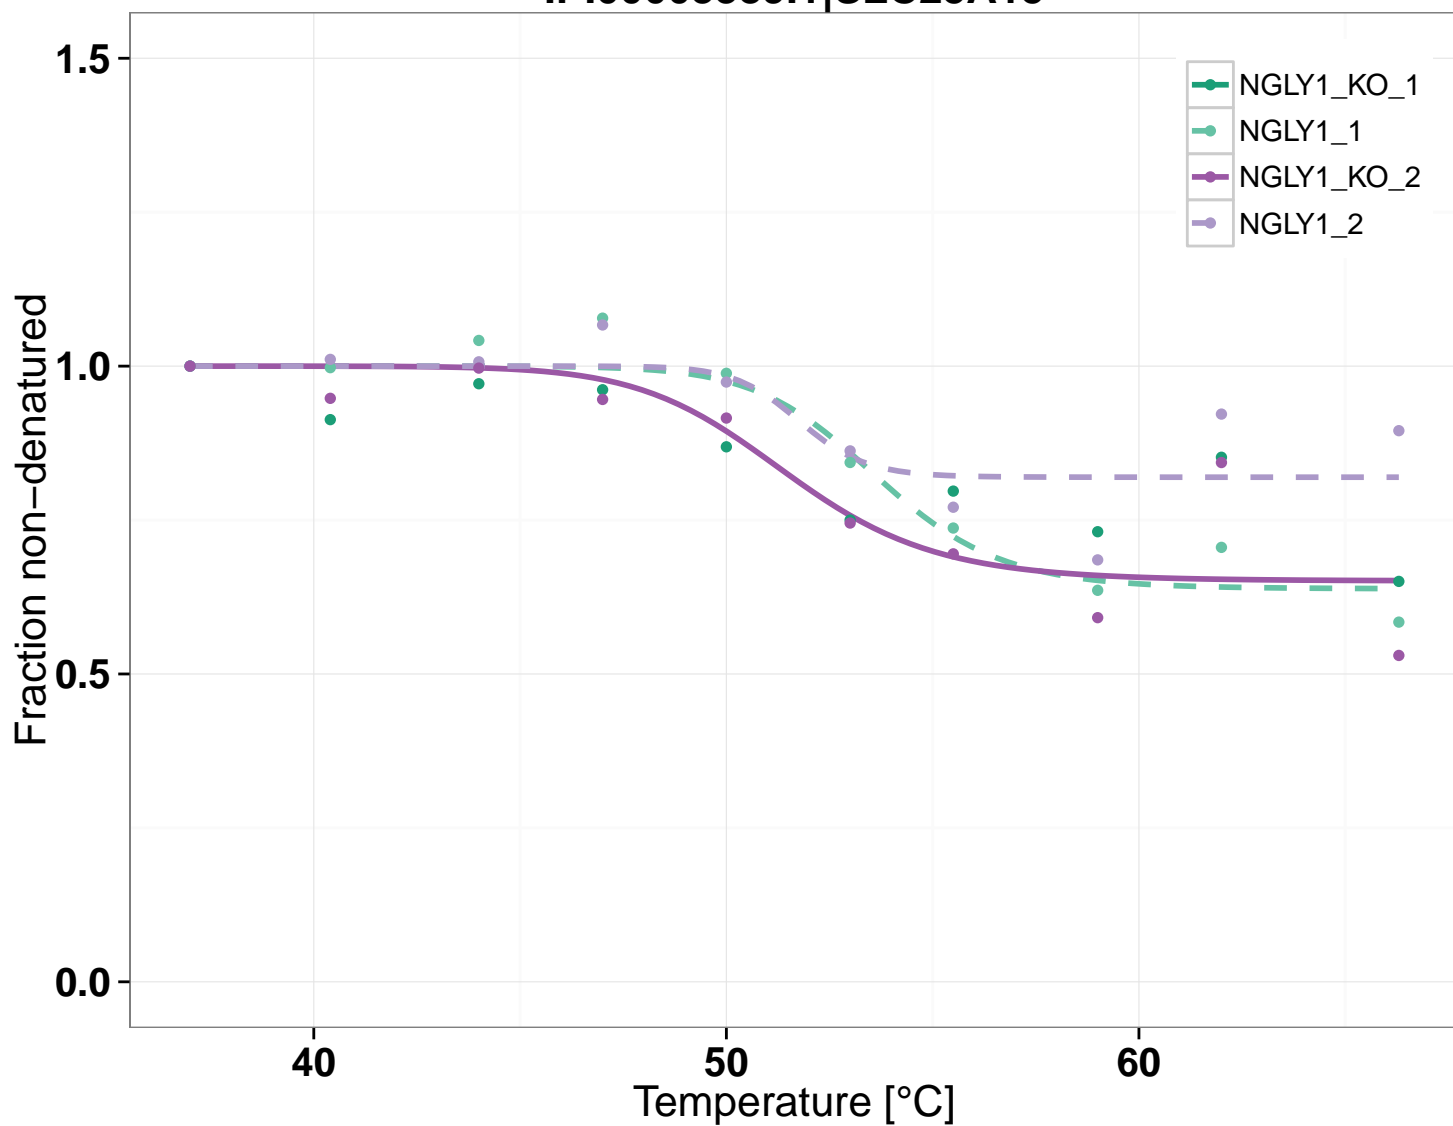

|            | meltPoint | slope  | plateau | R2   |
|------------|-----------|--------|---------|------|
| NGLY1_KO_1 | —         | —      | —       | —    |
| NGLY1_1    | —         | -0.06  | 0.64    | 0.95 |
| NGLY1_KO_2 | —         | -0.048 | 0.65    | 0.77 |
| NGLY1_2    | —         | -0.056 | 0.82    | 0.67 |

Supplement: Supplementary file 2993 [file 1]

IPI00915443.1|CTAGE5

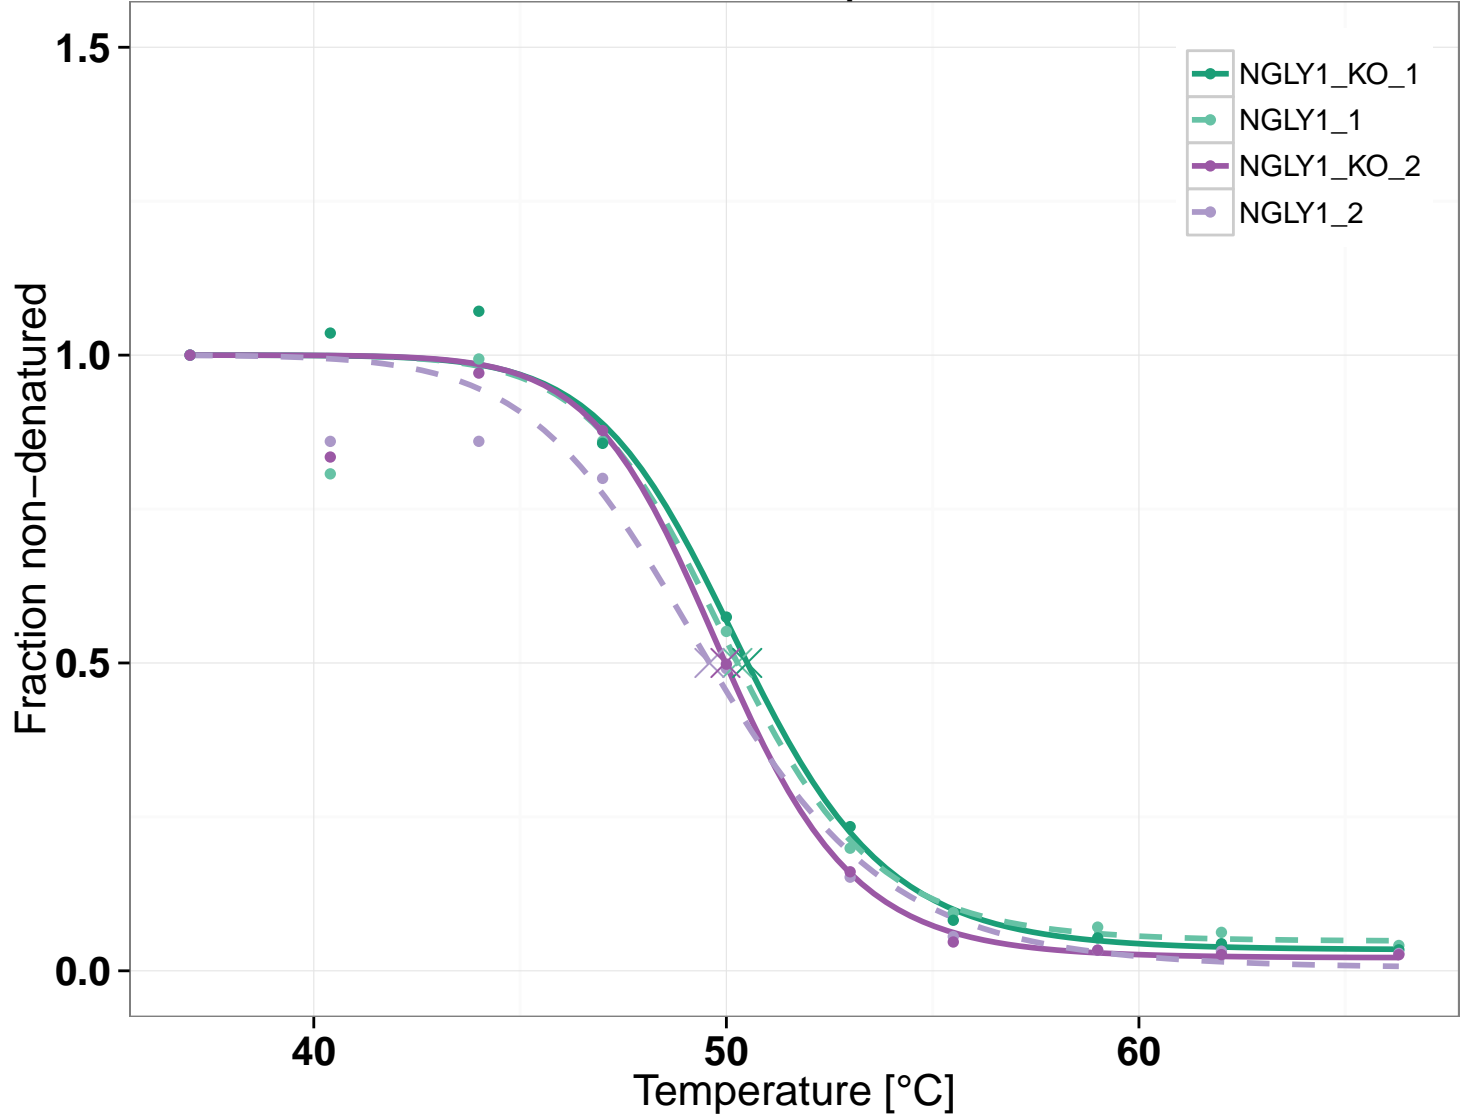

|            | meltPoint | slope | plateau | R2   |
|------------|-----------|-------|---------|------|
| NGLY1_KO_1 | 50.51     | -0.14 | 0.03    | 0.99 |
| NGLY1_1    | 50.27     | -0.14 | 0.05    | 0.98 |
| NGLY1_KO_2 | 49.98     | -0.15 | 0.02    | 0.98 |
| NGLY1_2    | 49.59     | -0.11 | 0       | 0.98 |

Supplement: Supplementary file 2994 [file 1]

# IPI00007089.1|TINP1

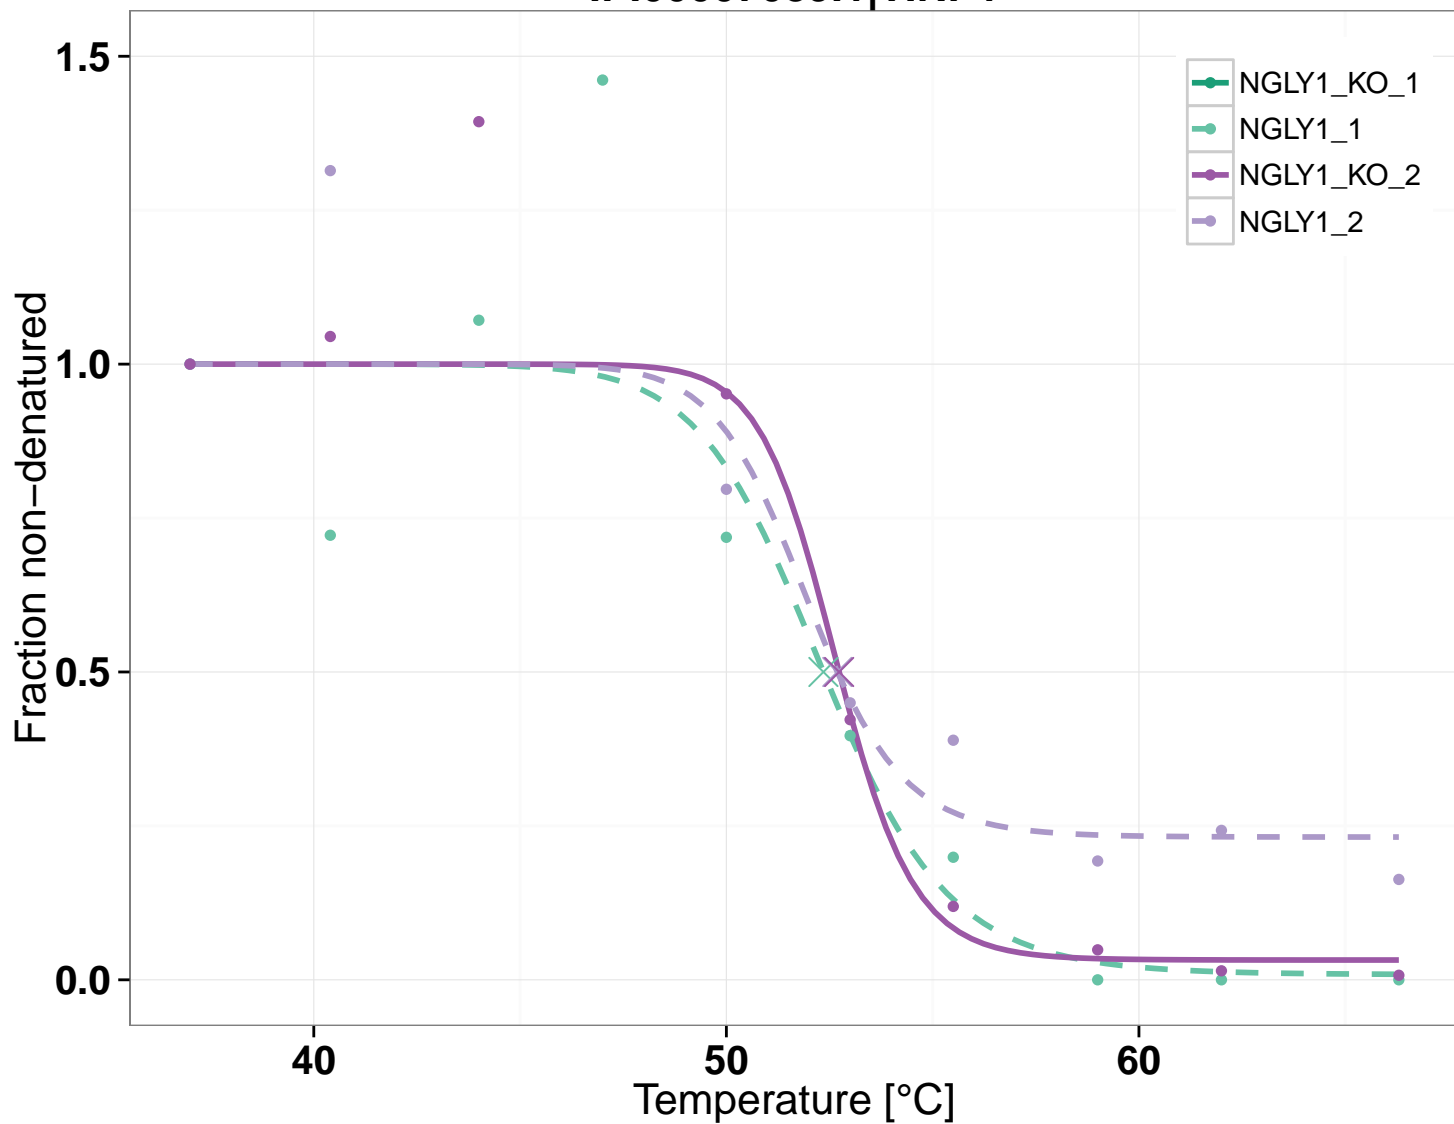

|            | meltPoint | slope | plateau | R2   |
|------------|-----------|-------|---------|------|
| NGLY1_KO_1 | –         | –     | –       | –    |
| NGLY1_1    | 52.35     | -0.16 | 0.01    | 0.86 |
| NGLY1_KO_2 | 52.73     | -0.26 | 0.03    | 0.83 |
| NGLY1_2    | 52.69     | -0.17 | 0.23    | 0.58 |

Supplement: Supplementary file 2995 [file 1]

IPI00844388.1|HELLS

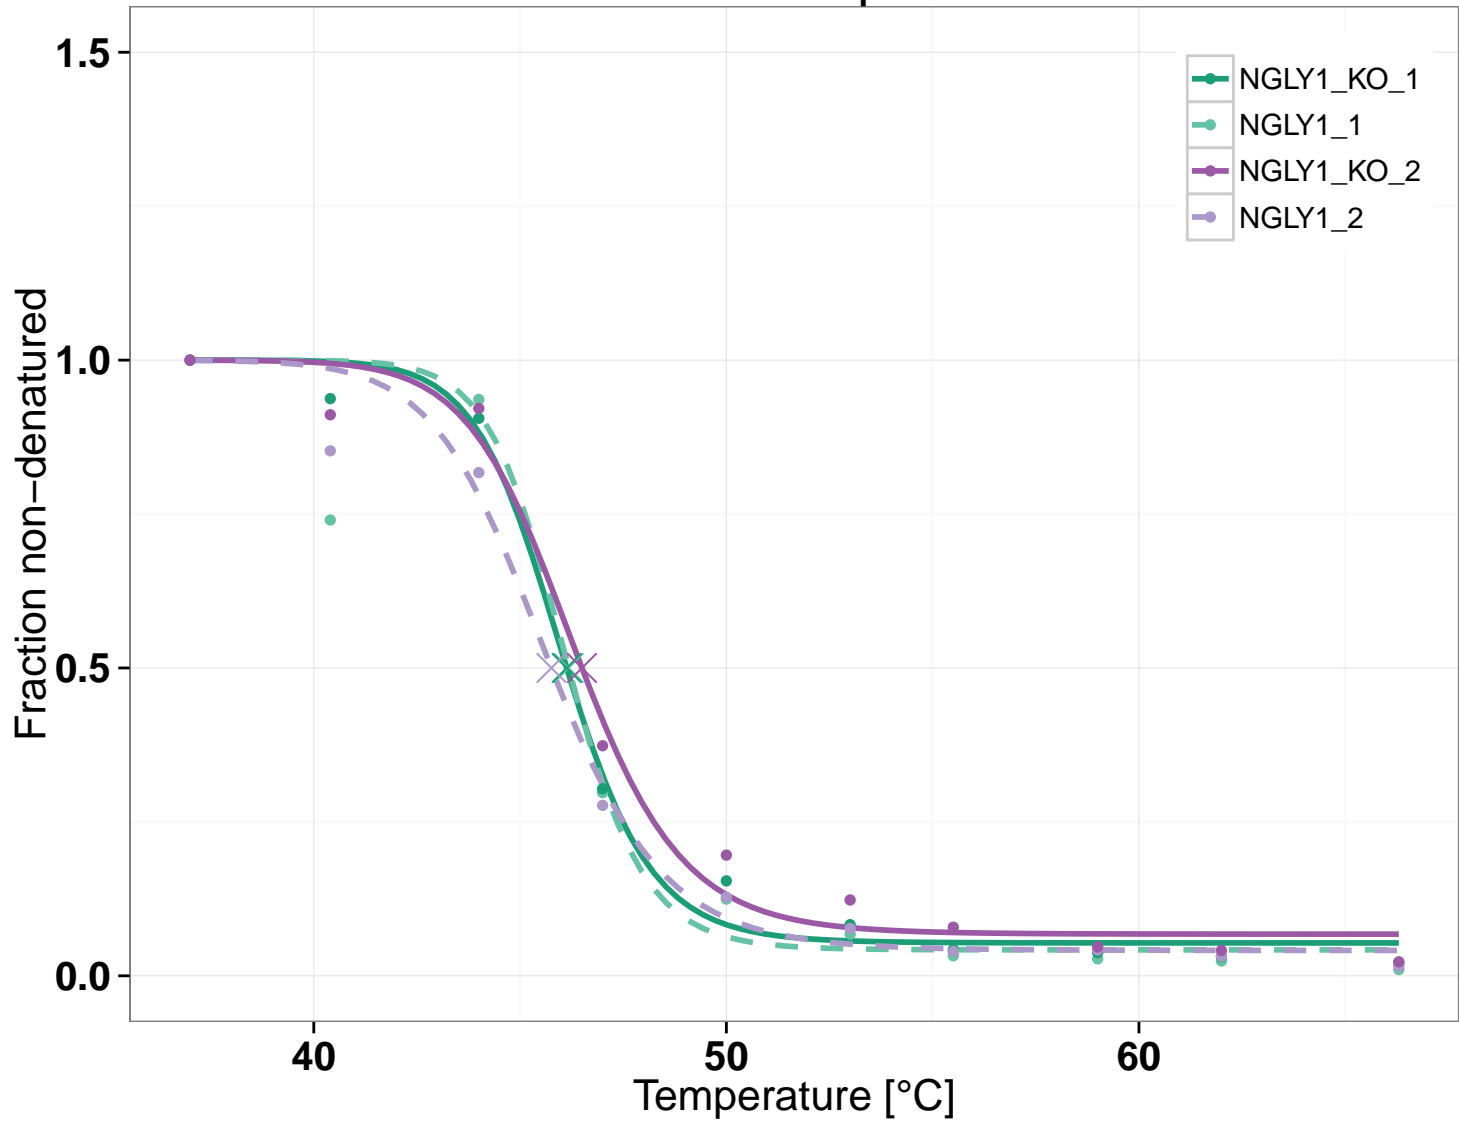

|            | meltPoint | slope | plateau | R2   |
|------------|-----------|-------|---------|------|
| NGLY1_KO_1 | 46.13     | -0.22 | 0.05    | 0.99 |
| NGLY1_1    | 46.18     | -0.25 | 0.04    | 0.95 |
| NGLY1_KO_2 | 46.5      | -0.18 | 0.07    | 0.99 |
| NGLY1_2    | 45.76     | -0.17 | 0.04    | 0.98 |

Supplement: Supplementary file 2996 [file 1]

IPI00550998.1|KLHL26

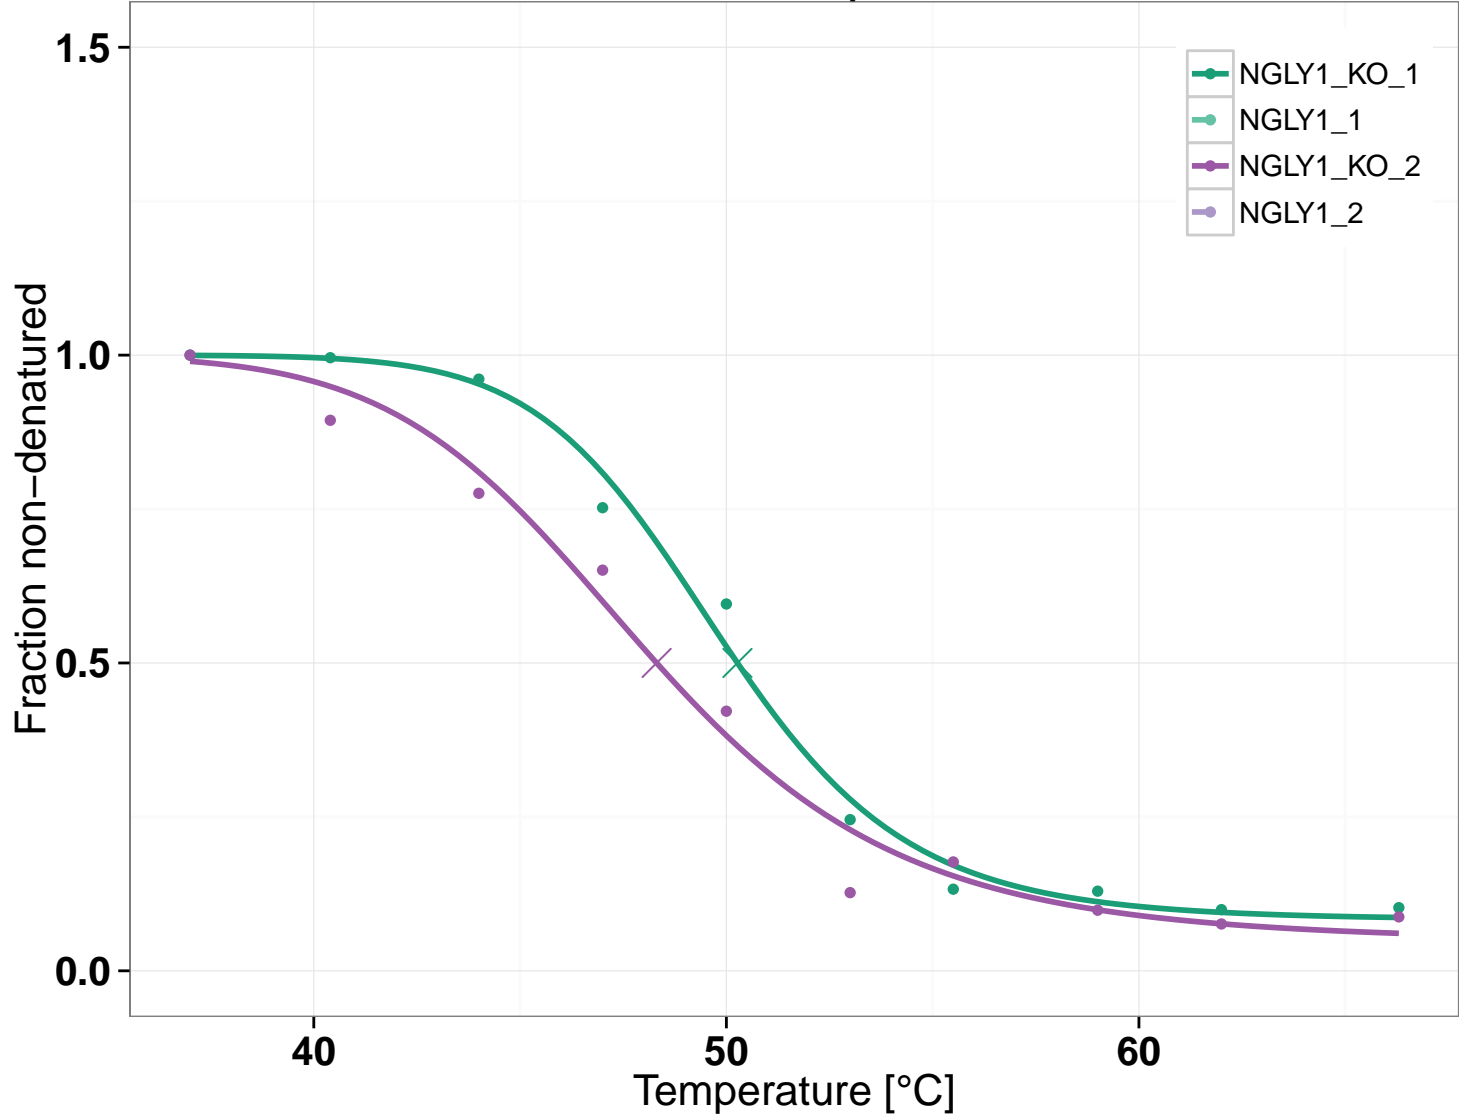

|            | meltPoint | slope  | plateau | R2   |
|------------|-----------|--------|---------|------|
| NGLY1_KO_1 | 50.27     | -0.1   | 0.08    | 0.99 |
| NGLY1_1    | -         | -      | -       | -    |
| NGLY1_KO_2 | 48.31     | -0.077 | 0.05    | 0.98 |
| NGLY1_2    | -         | -      | -       | -    |

Supplement: Supplementary file 2997 [file 1]

# IPI00295081.1|TUBG1

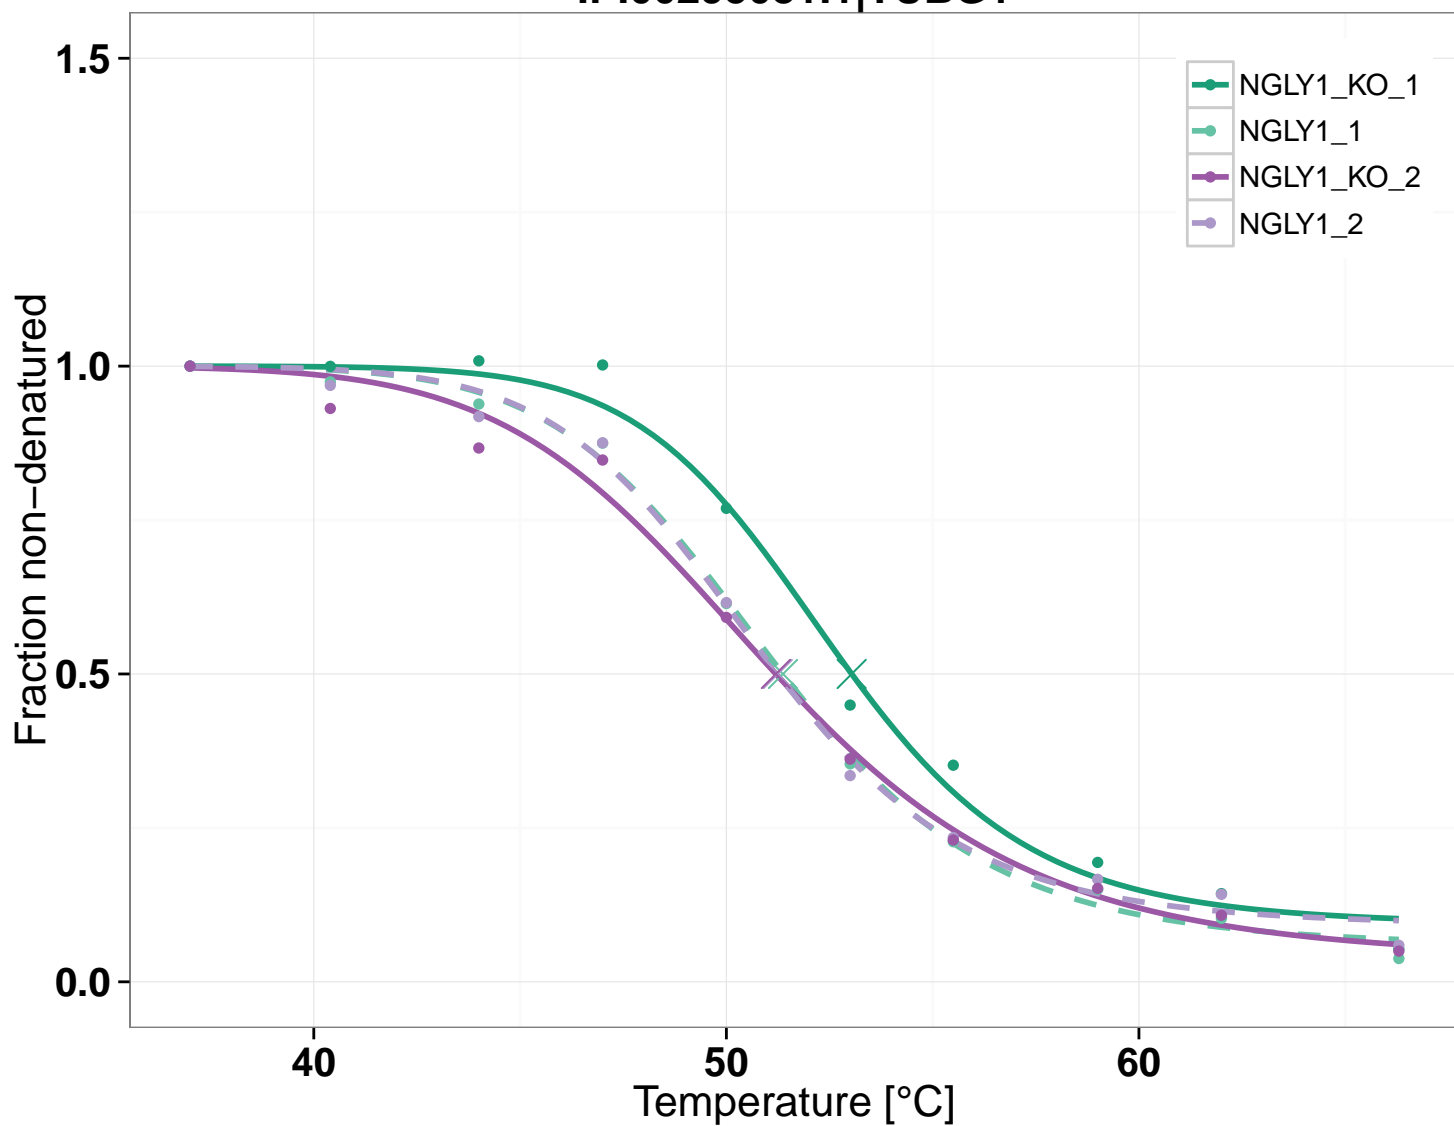

|            | meltPoint | slope  | plateau | R2   |
|------------|-----------|--------|---------|------|
| NGLY1_KO_1 | 53.04     | -0.095 | 0.09    | 0.99 |
| NGLY1_1    | 51.37     | -0.089 | 0.06    | 1    |
| NGLY1_KO_2 | 51.2      | -0.075 | 0.03    | 0.99 |
| NGLY1_2    | 51.24     | -0.091 | 0.09    | 0.99 |

Supplement: Supplementary file 2998 [file 1]

IPI00873518.1|MAD1L1

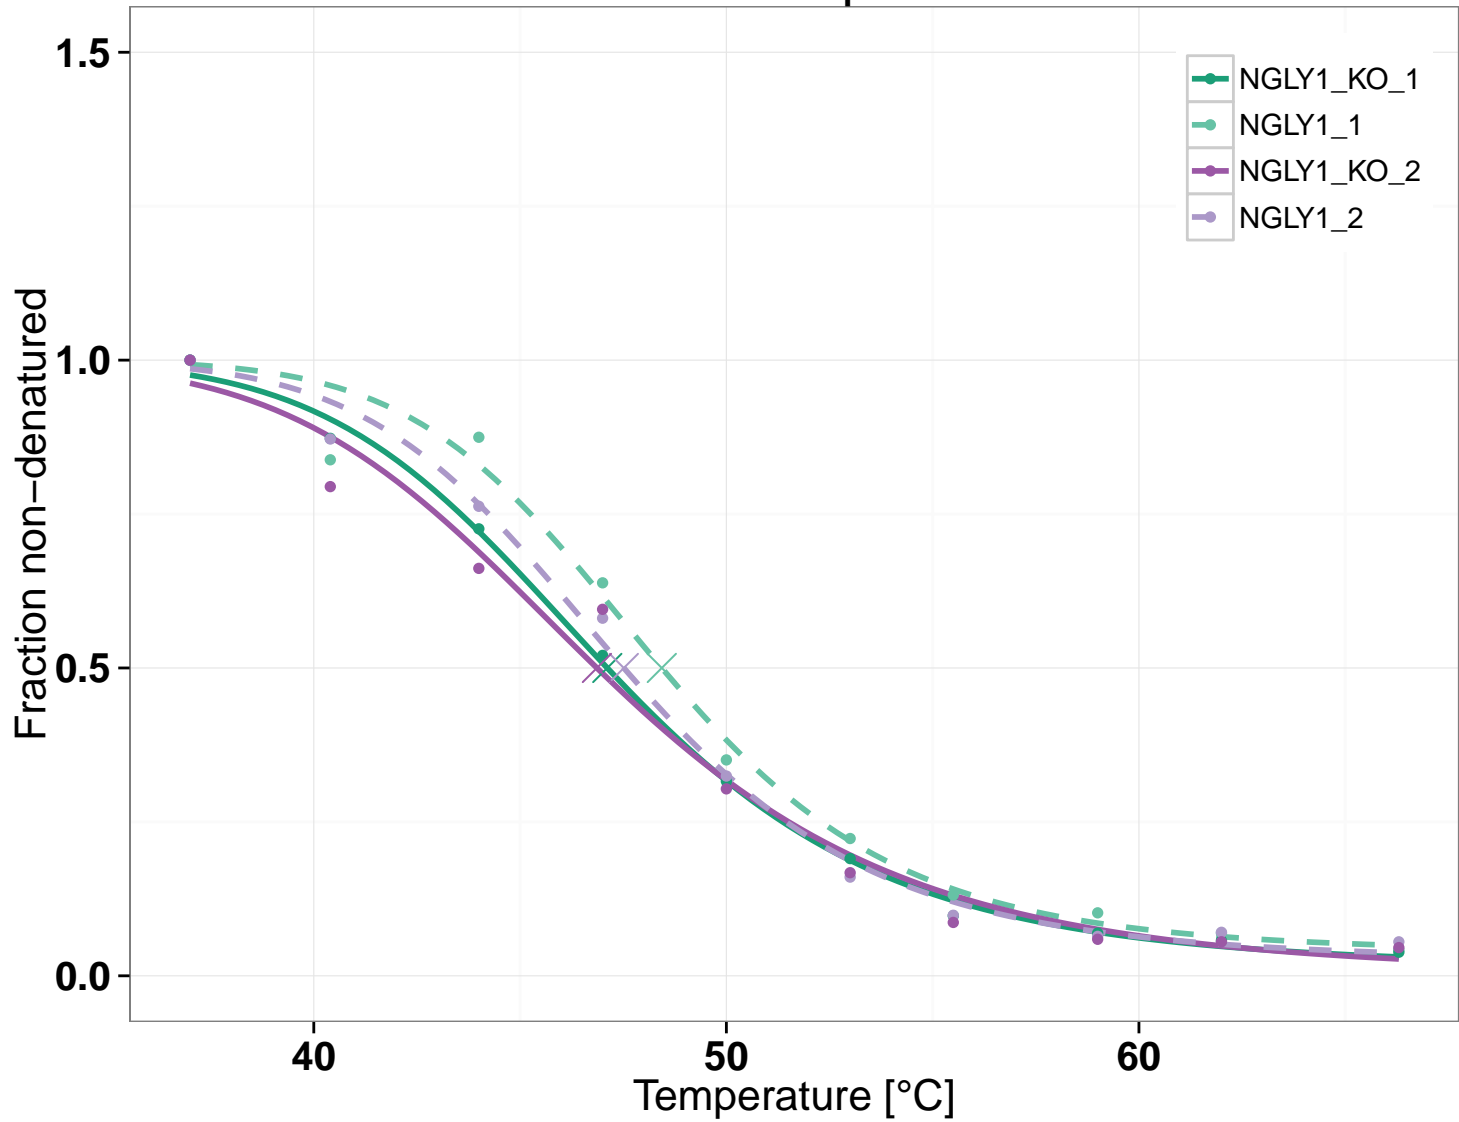

|            | meltPoint | slope  | plateau | R2   |
|------------|-----------|--------|---------|------|
| NGLY1_KO_1 | 47.11     | -0.073 | 0.01    | 1    |
| NGLY1_1    | 48.44     | -0.082 | 0.04    | 0.99 |
| NGLY1_KO_2 | 46.86     | -0.067 | 0       | 0.98 |
| NGLY1_2    | 47.51     | -0.079 | 0.02    | 0.99 |

Supplement: Supplementary file 2999 [file 1]

# IPI00296190.4|C10ORF58

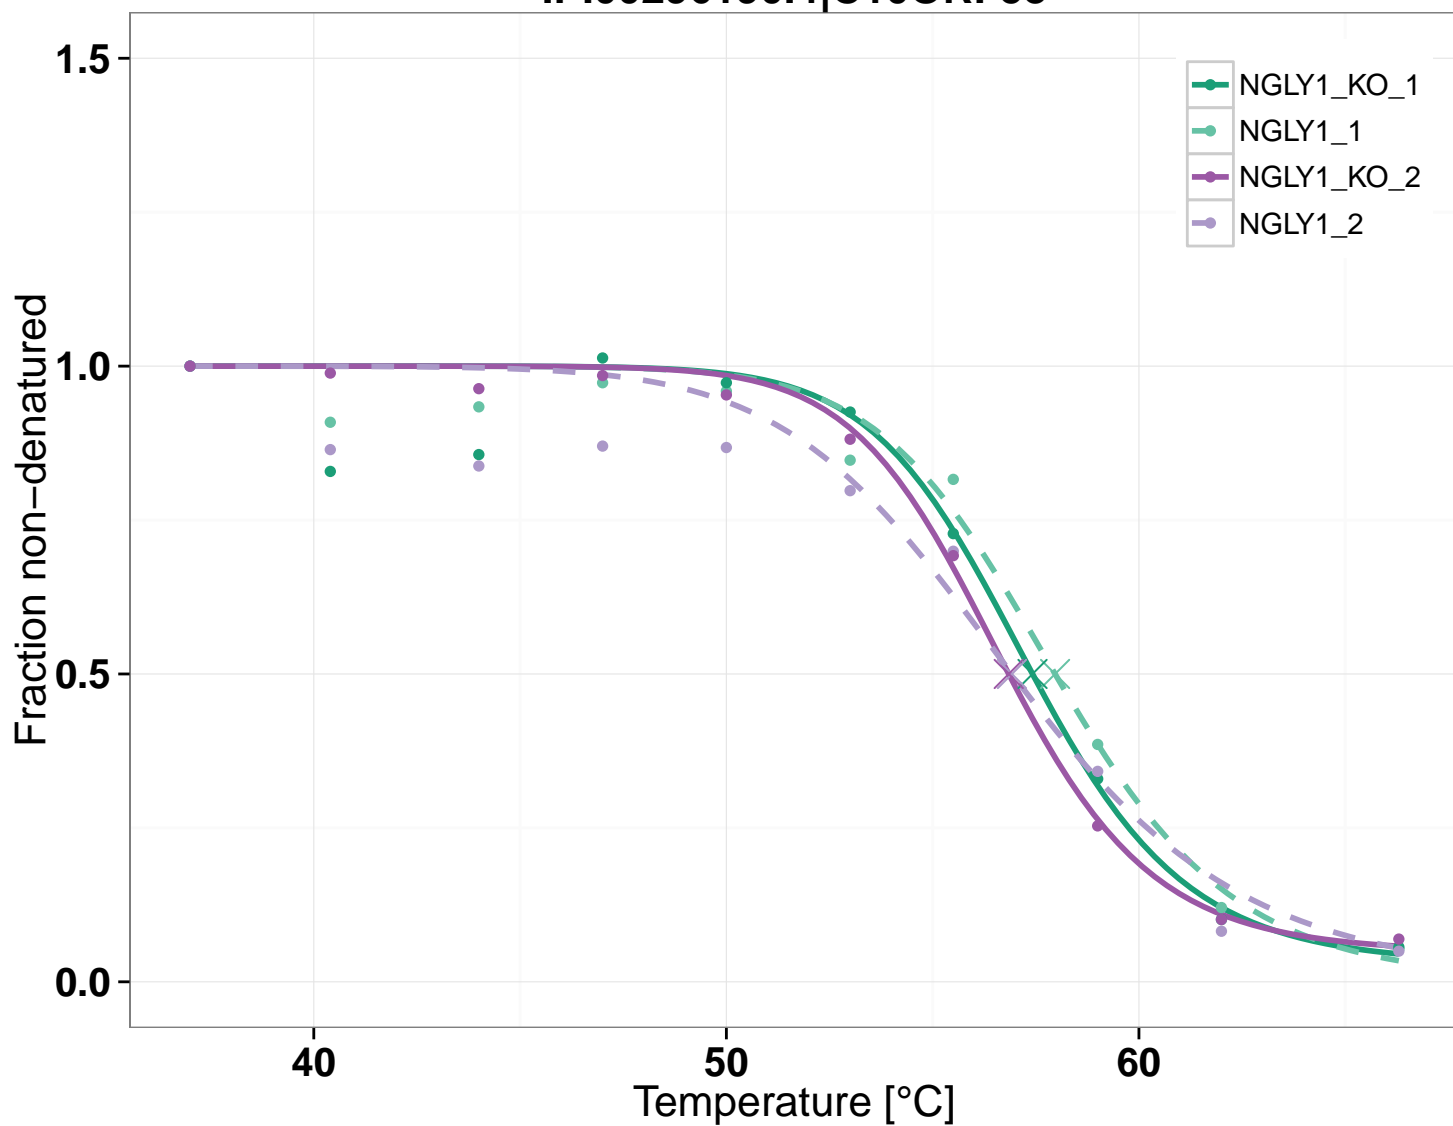

|            | meltPoint | slope  | plateau | R2   |
|------------|-----------|--------|---------|------|
| NGLY1_KO_1 | 57.42     | -0.13  | 0.03    | 0.96 |
| NGLY1_1    | 57.97     | -0.12  | 0       | 0.98 |
| NGLY1_KO_2 | 56.84     | -0.13  | 0.05    | 1    |
| NGLY1_2    | 56.92     | -0.089 | 0       | 0.93 |

Supplement: Supplementary file 3000 [file 1]

# IPI00017799.5|TXN2

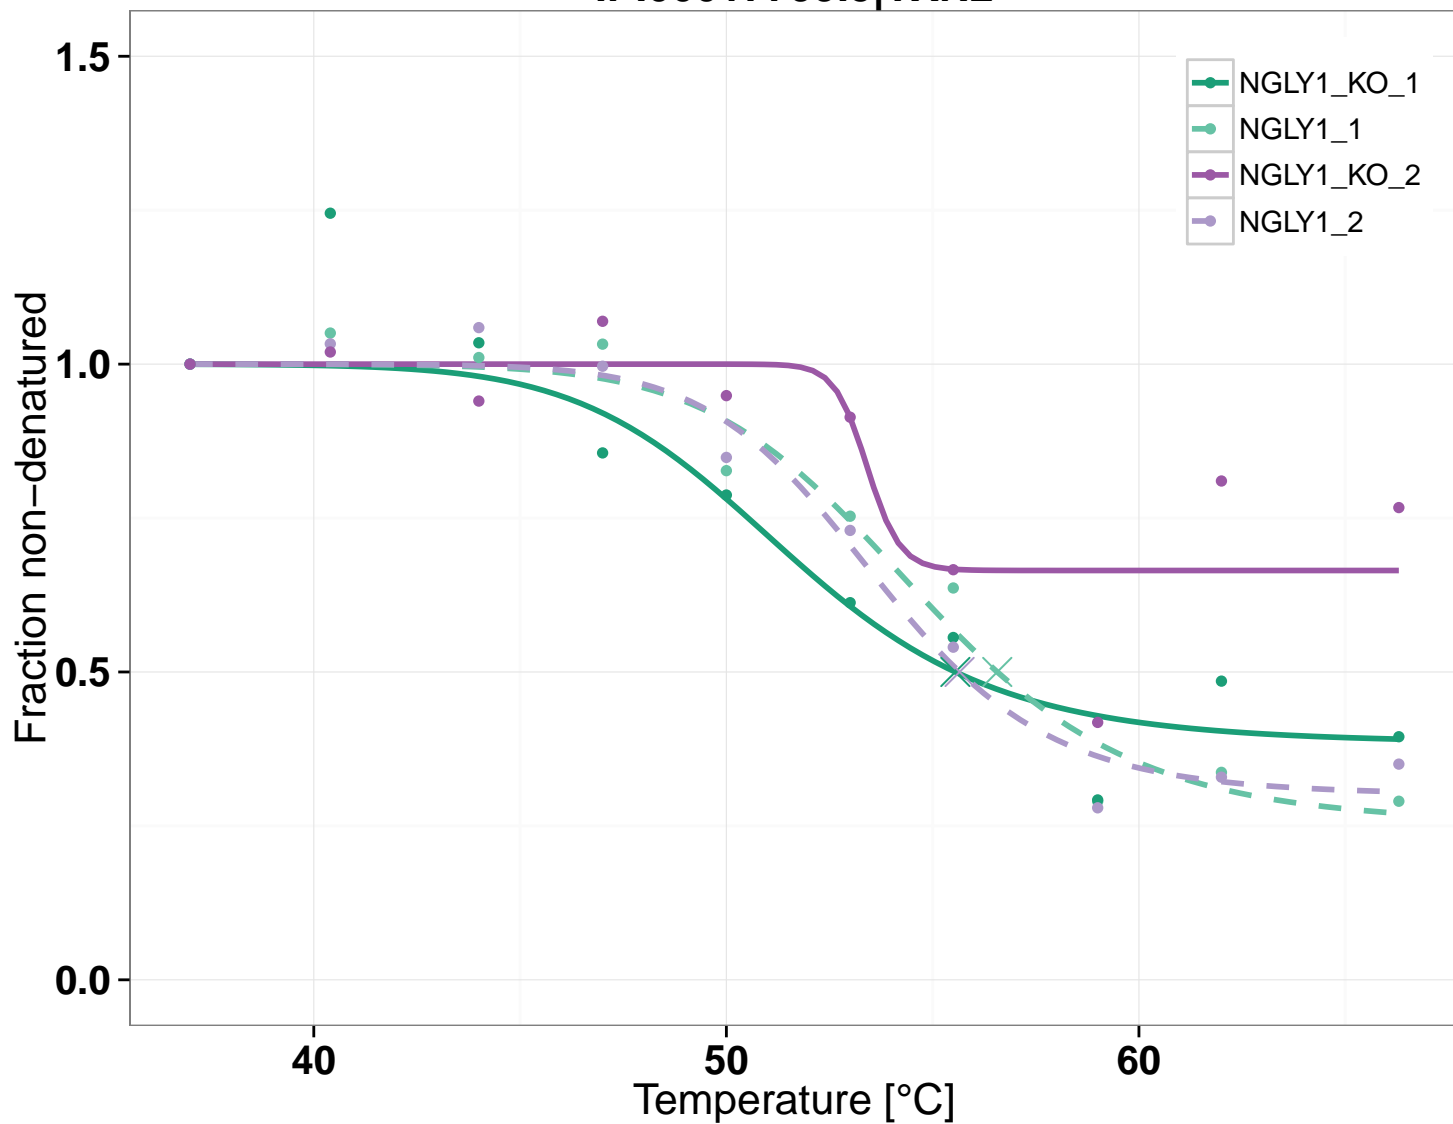

|            | meltPoint | slope  | plateau | R2   |
|------------|-----------|--------|---------|------|
| NGLY1_KO_1 | 55.55     | -0.06  | 0.38    | 0.89 |
| NGLY1_1    | 56.57     | -0.072 | 0.25    | 0.97 |
| NGLY1_KO_2 | -         | -0.21  | 0.66    | 0.7  |
| NGLY1_2    | 55.65     | -0.084 | 0.3     | 0.98 |

Supplement: Supplementary file 3001 [file 1]

IPI00289787.1|RCHY1

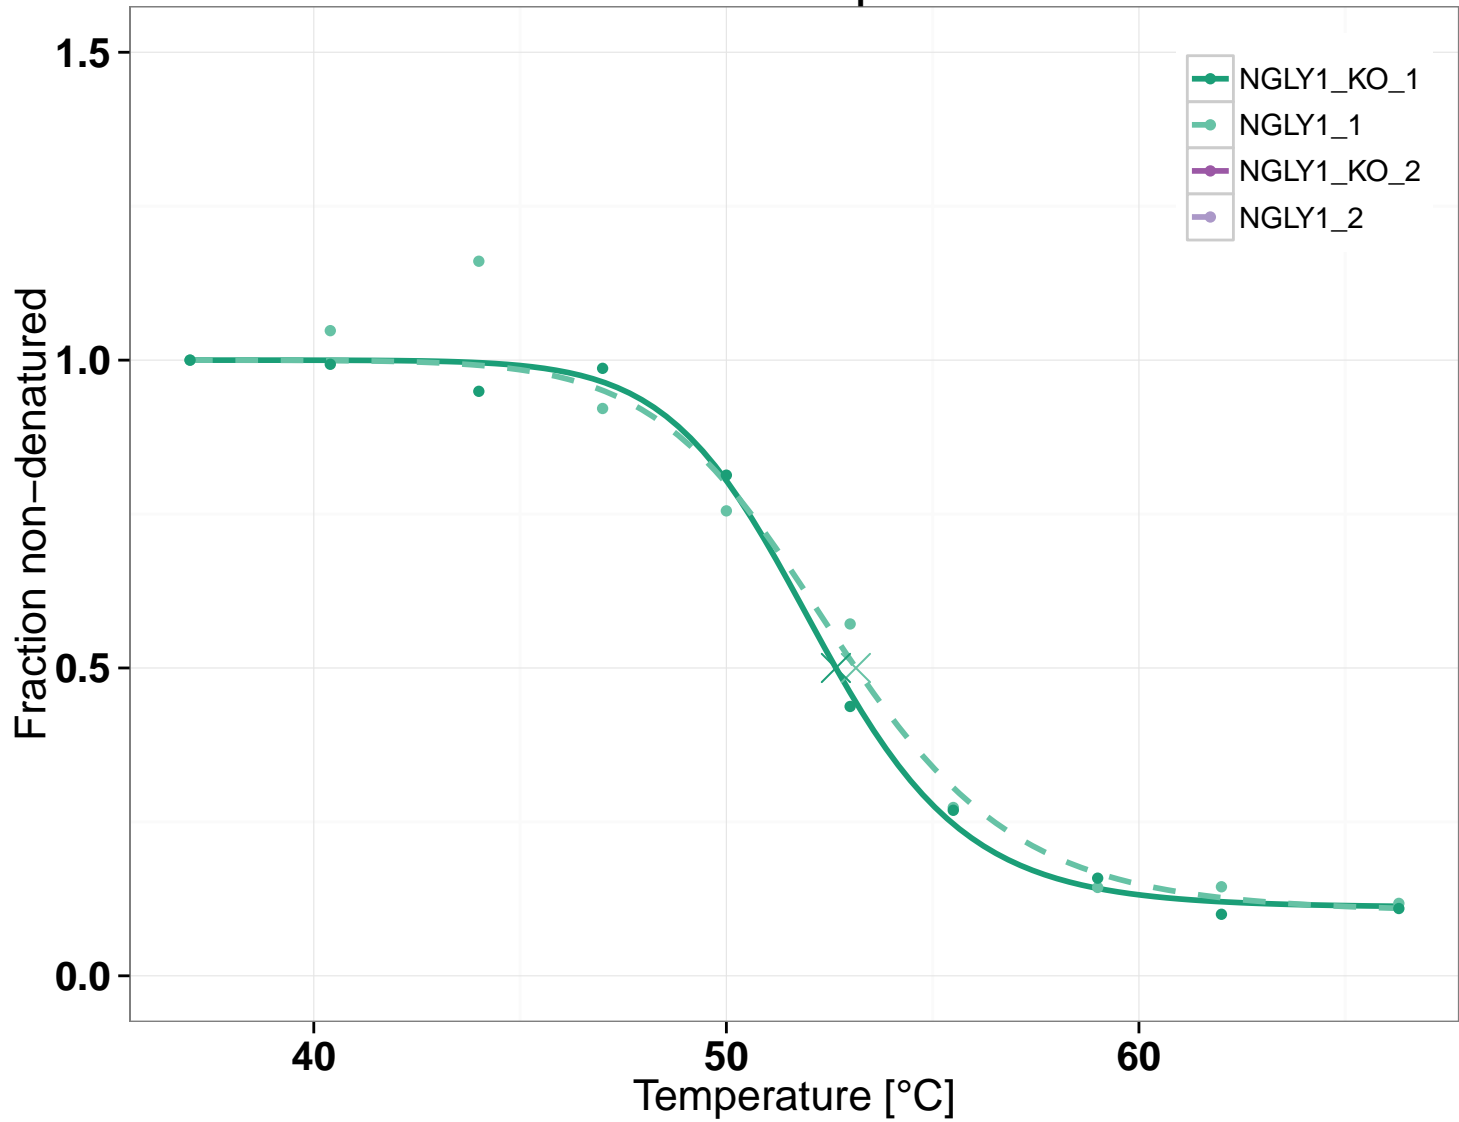

|            | meltPoint | slope | plateau | R2   |
|------------|-----------|-------|---------|------|
| NGLY1_KO_1 | 52.65     | -0.12 | 0.11    | 1    |
| NGLY1_1    | 53.14     | -0.1  | 0.1     | 0.97 |
| NGLY1_KO_2 | -         | -     | -       | -    |
| NGLY1_2    | -         | -     | -       | -    |

Supplement: Supplementary file 3002 [file 1]

IPI00059263.1|ADIPOR1

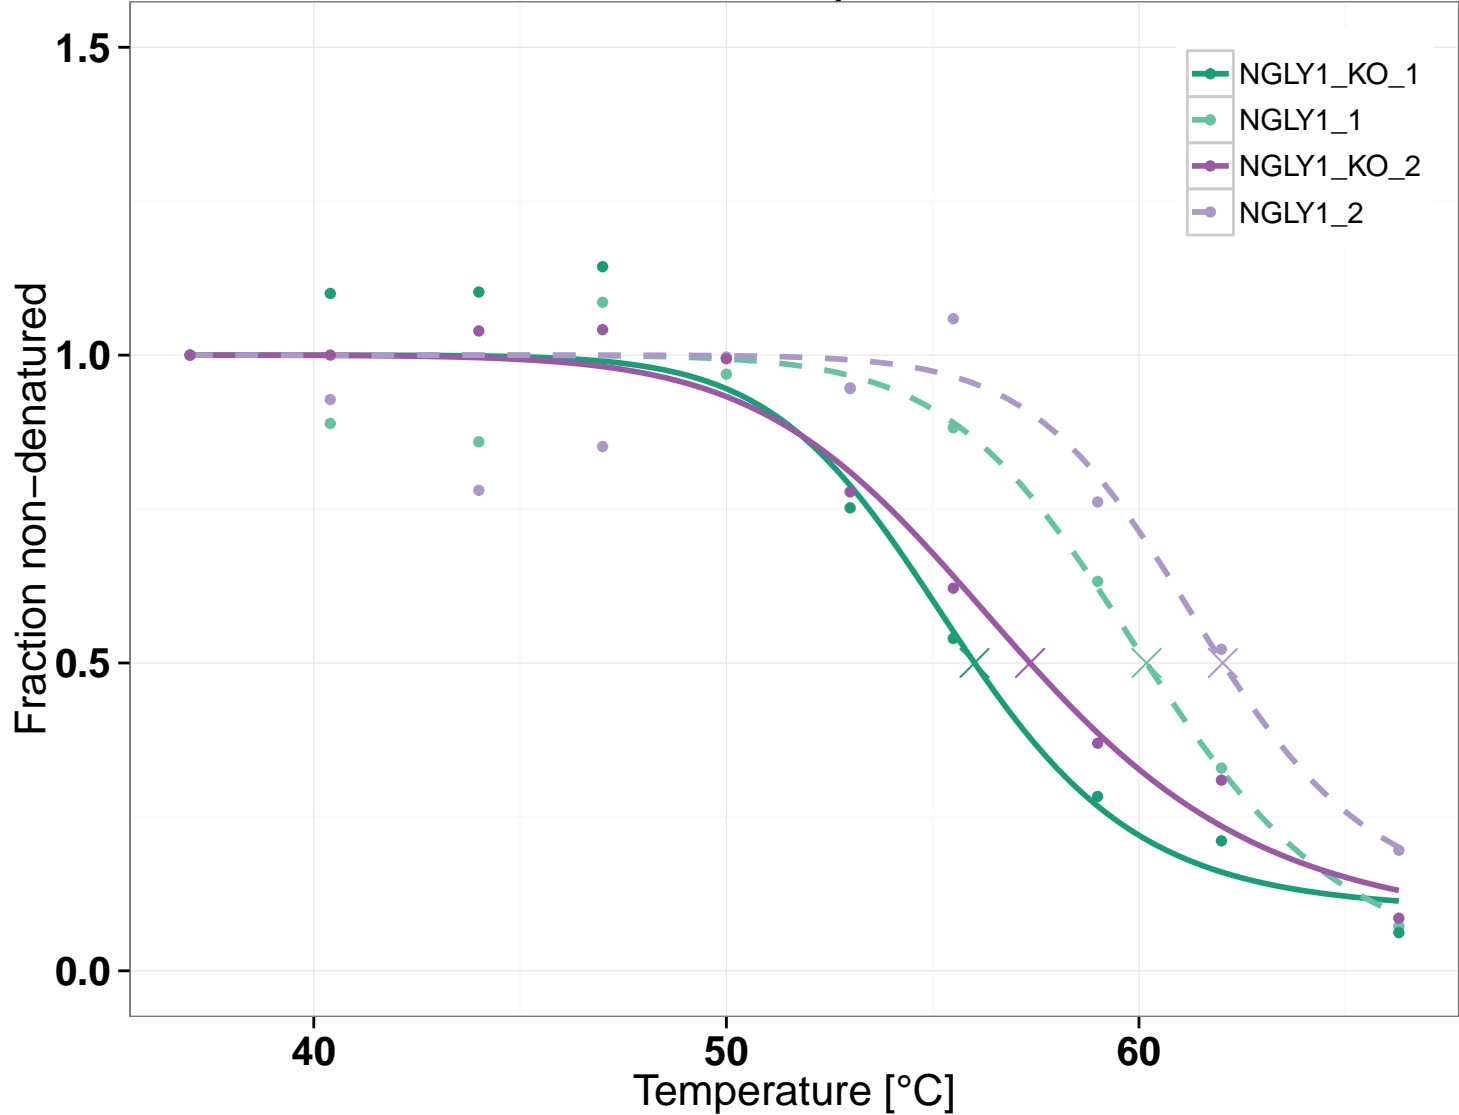

|            | meltPoint | slope  | plateau | R2   |
|------------|-----------|--------|---------|------|
| NGLY1_KO_1 | 56.02     | -0.1   | 0.1     | 0.97 |
| NGLY1_1    | 60.18     | -0.1   | 0       | 0.96 |
| NGLY1_KO_2 | 57.36     | -0.077 | 0.07    | 0.98 |
| NGLY1_2    | 62.03     | -0.11  | 0.1     | 0.86 |

Supplement: Supplementary file 3003 [file 1]

IPI00465176.2|C2ORF15

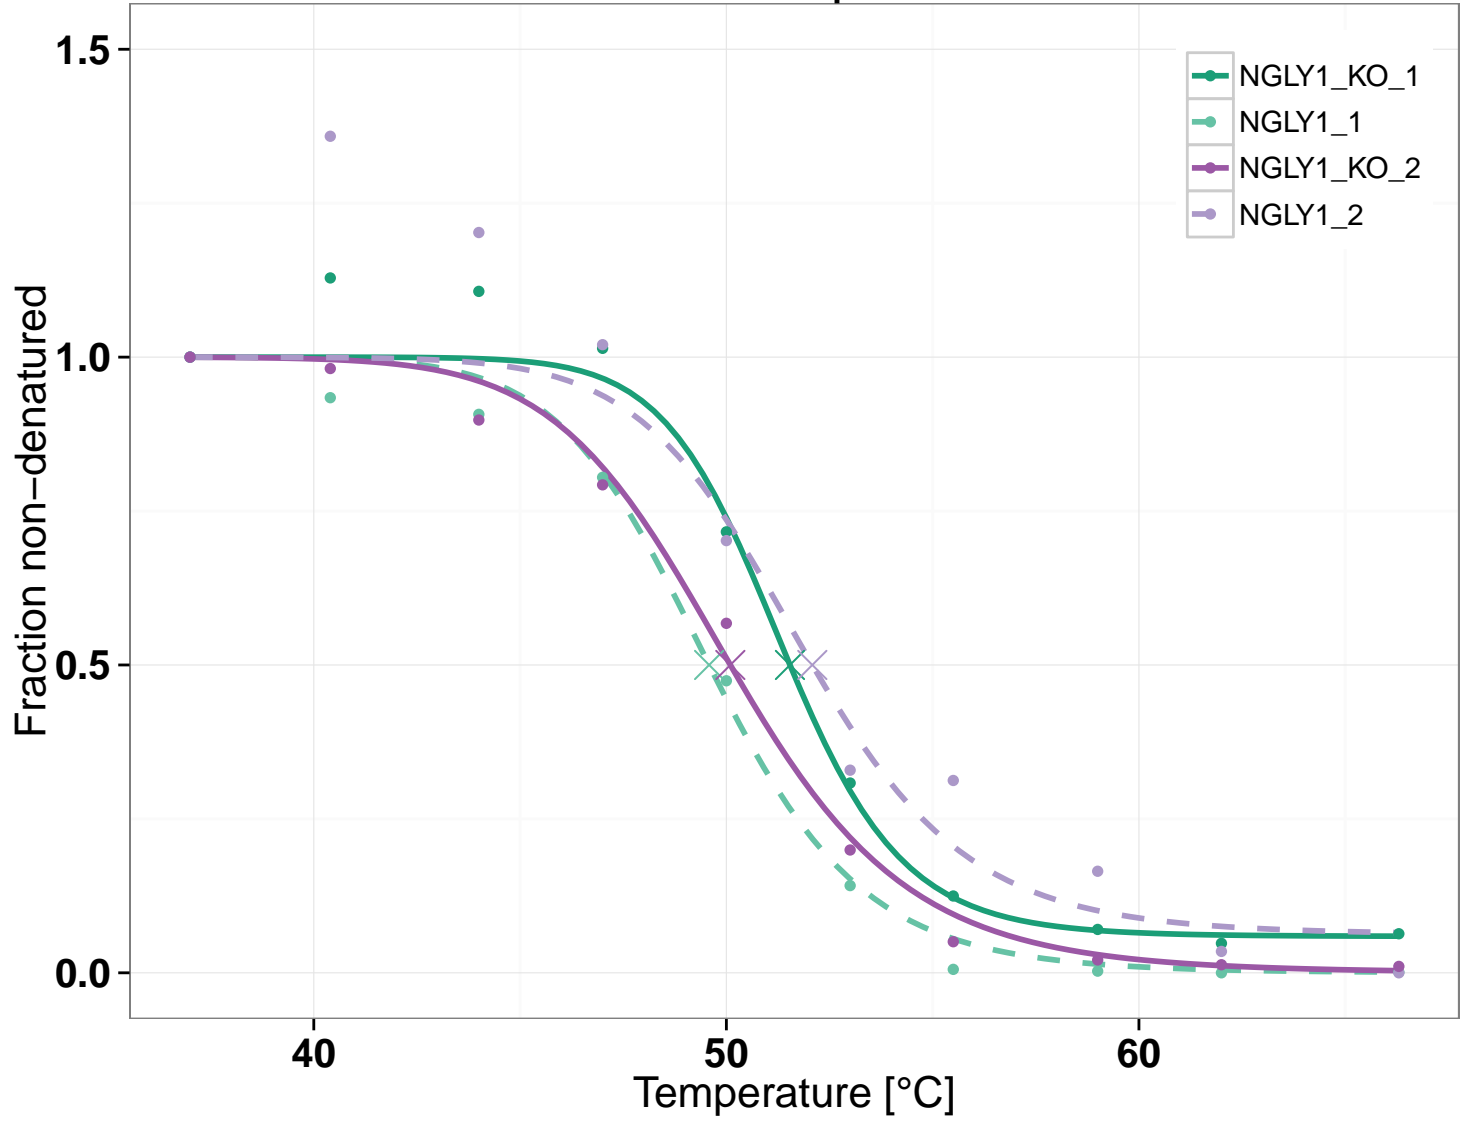

|            | meltPoint | slope | plateau | R2   |
|------------|-----------|-------|---------|------|
| NGLY1_KO_1 | 51.54     | -0.16 | 0.06    | 0.98 |
| NGLY1_1    | 49.58     | -0.13 | 0       | 0.99 |
| NGLY1_KO_2 | 50.1      | -0.12 | 0       | 0.99 |
| NGLY1_2    | 52.08     | -0.12 | 0.06    | 0.91 |

Supplement: Supplementary file 3004 [file 1]

IPI00026328.3|TXNDC12

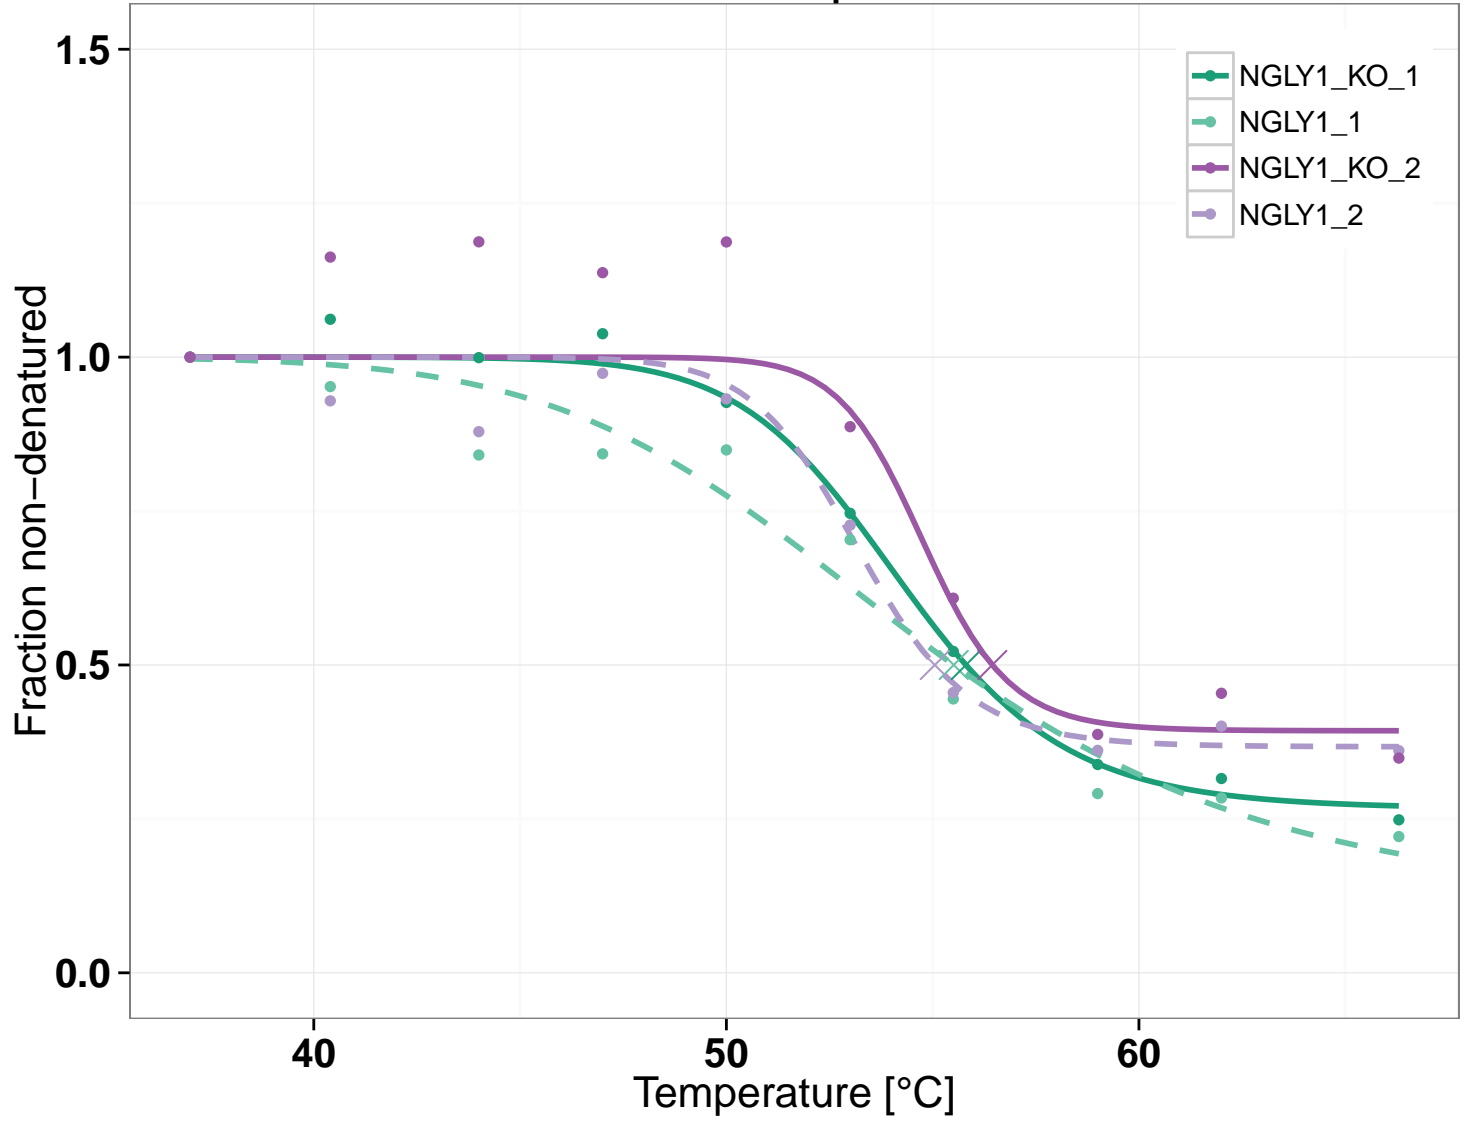

|            | meltPoint | slope  | plateau | R2   |
|------------|-----------|--------|---------|------|
| NGLY1_KO_1 | 55.81     | -0.093 | 0.27    | 0.99 |
| NGLY1_1    | 55.51     | -0.052 | 0.1     | 0.96 |
| NGLY1_KO_2 | 56.45     | -0.15  | 0.39    | 0.89 |
| NGLY1_2    | 55.05     | -0.12  | 0.37    | 0.97 |

Supplement: Supplementary file 3005 [file 1]

# IPI00004951.3|C10ORF84

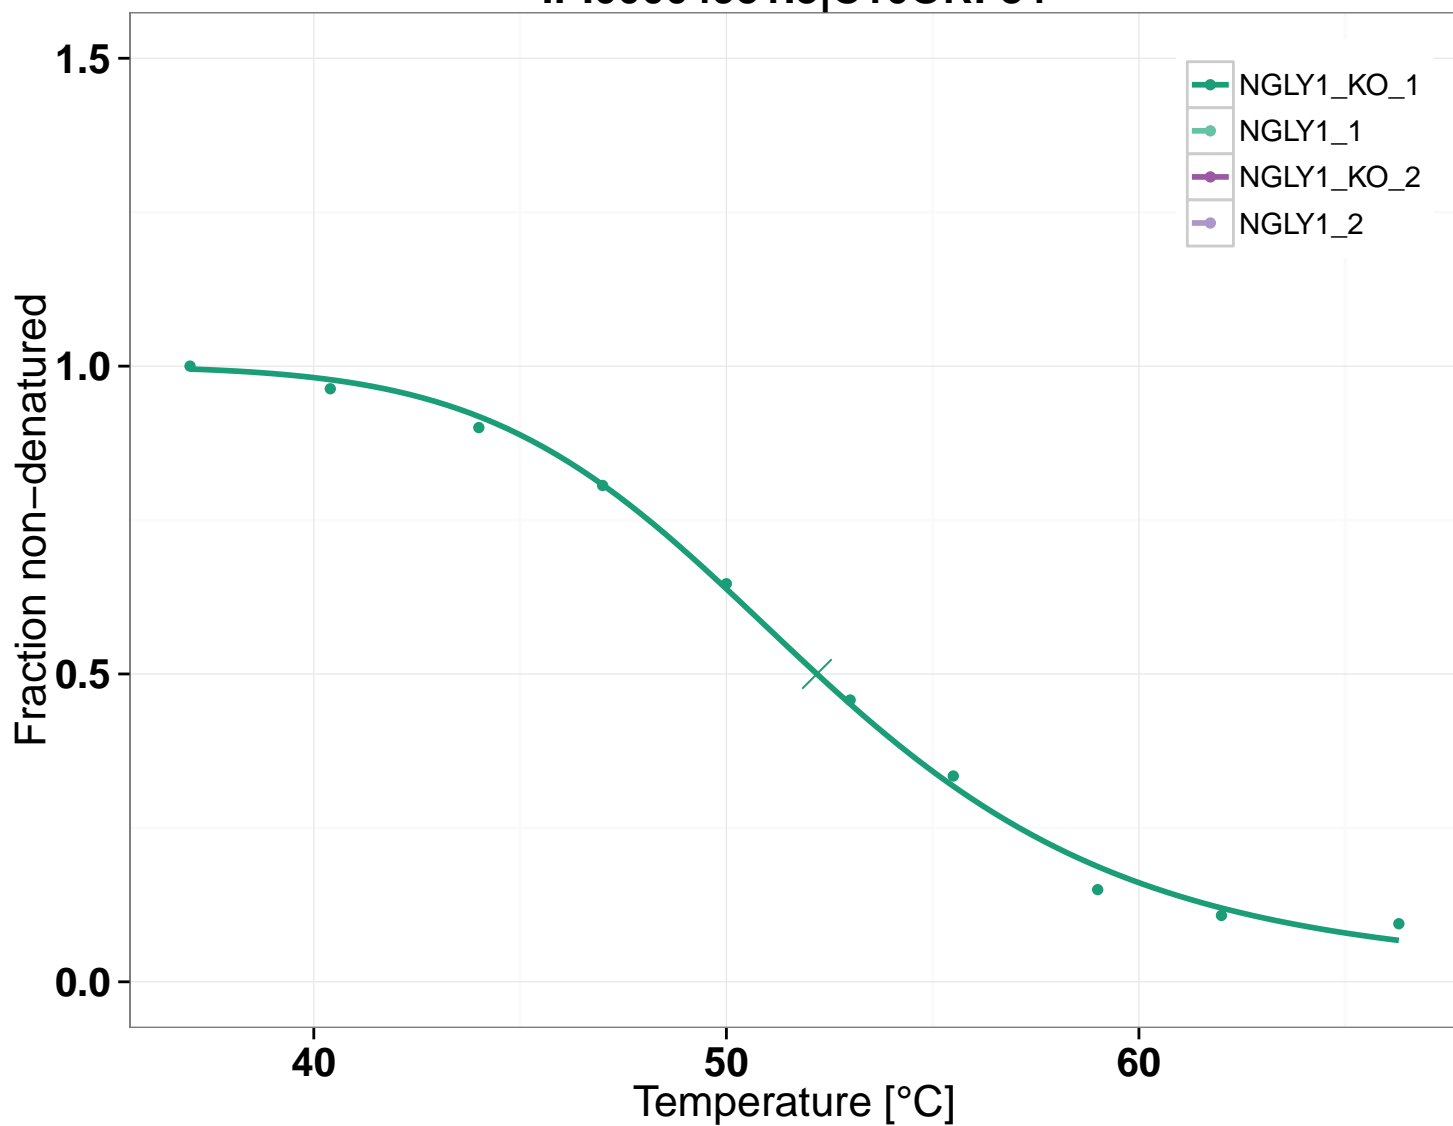

|            | meltPoint | slope  | plateau | R2 |
|------------|-----------|--------|---------|----|
| NGLY1_KO_1 | 52.2      | -0.063 | 0.01    | 1  |
| NGLY1_1    | -         | -      | -       | -  |
| NGLY1_KO_2 | -         | -      | -       | -  |
| NGLY1_2    | -         | -      | -       | -  |

Supplement: Supplementary file 3006 [file 1]

# IPI00793074.1|MPP2

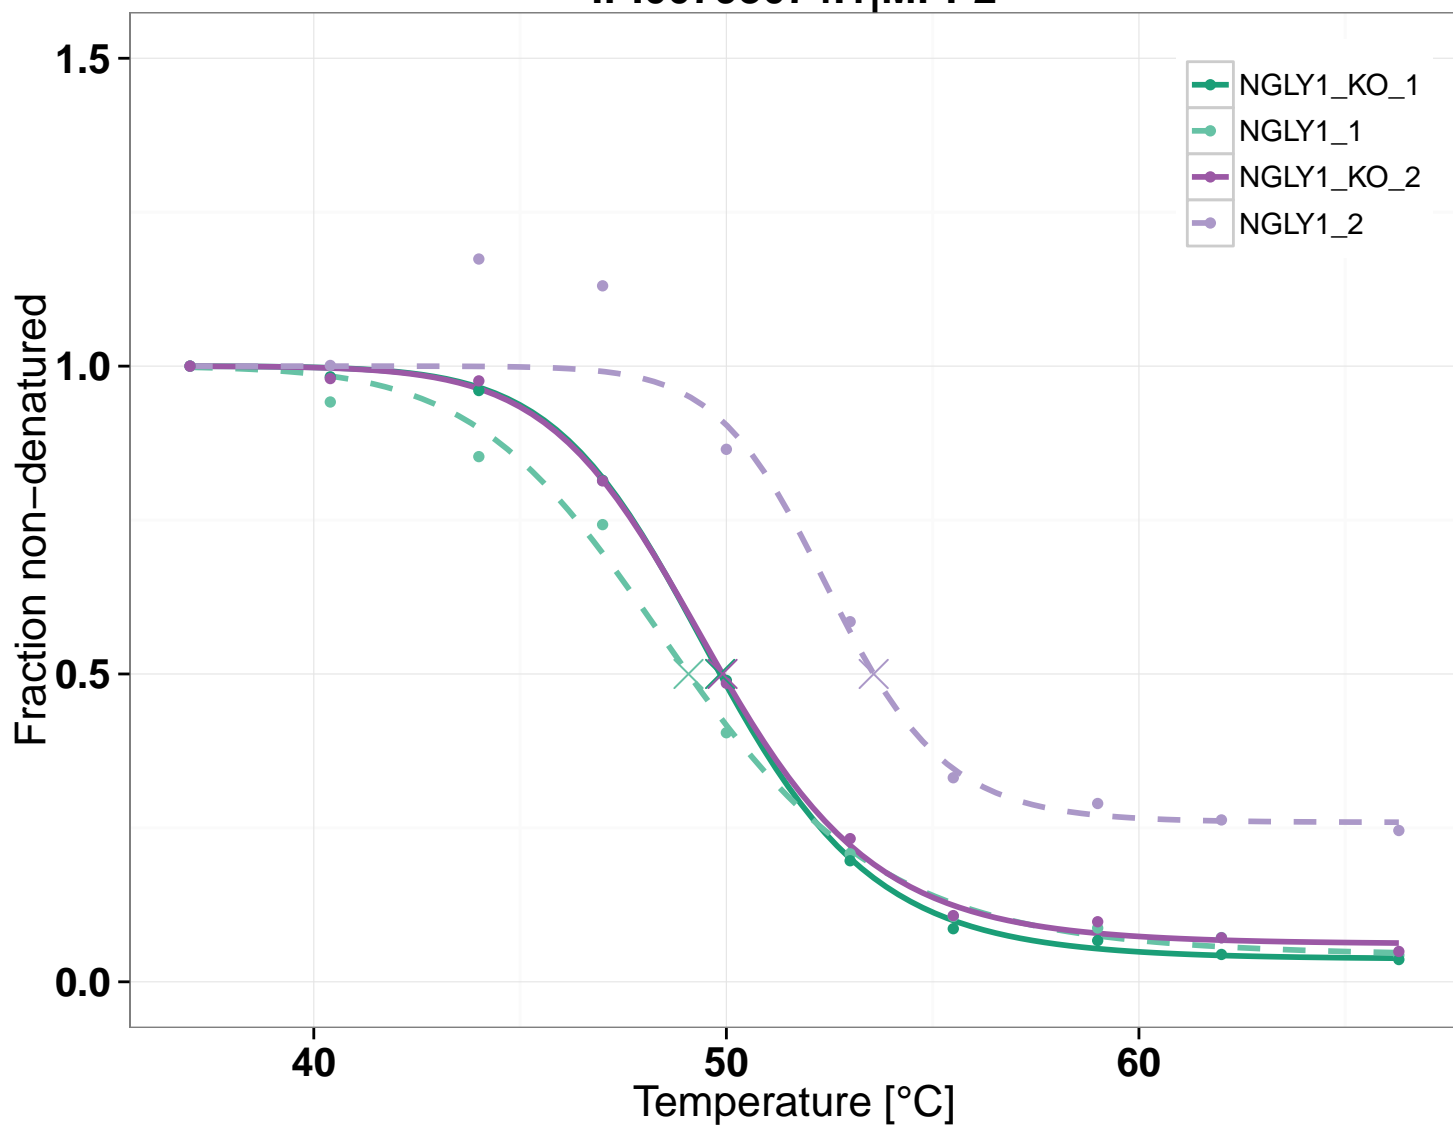

|            | meltPoint | slope  | plateau | R2   |
|------------|-----------|--------|---------|------|
| NGLY1_KO_1 | 49.85     | -0.12  | 0.04    | 1    |
| NGLY1_1    | 49.08     | -0.096 | 0.04    | 0.99 |
| NGLY1_KO_2 | 49.91     | -0.12  | 0.06    | 1    |
| NGLY1_2    | 53.57     | -0.13  | 0.26    | 0.96 |

Supplement: Supplementary file 3007 [file 1]

# IPI00374310.3|CES3

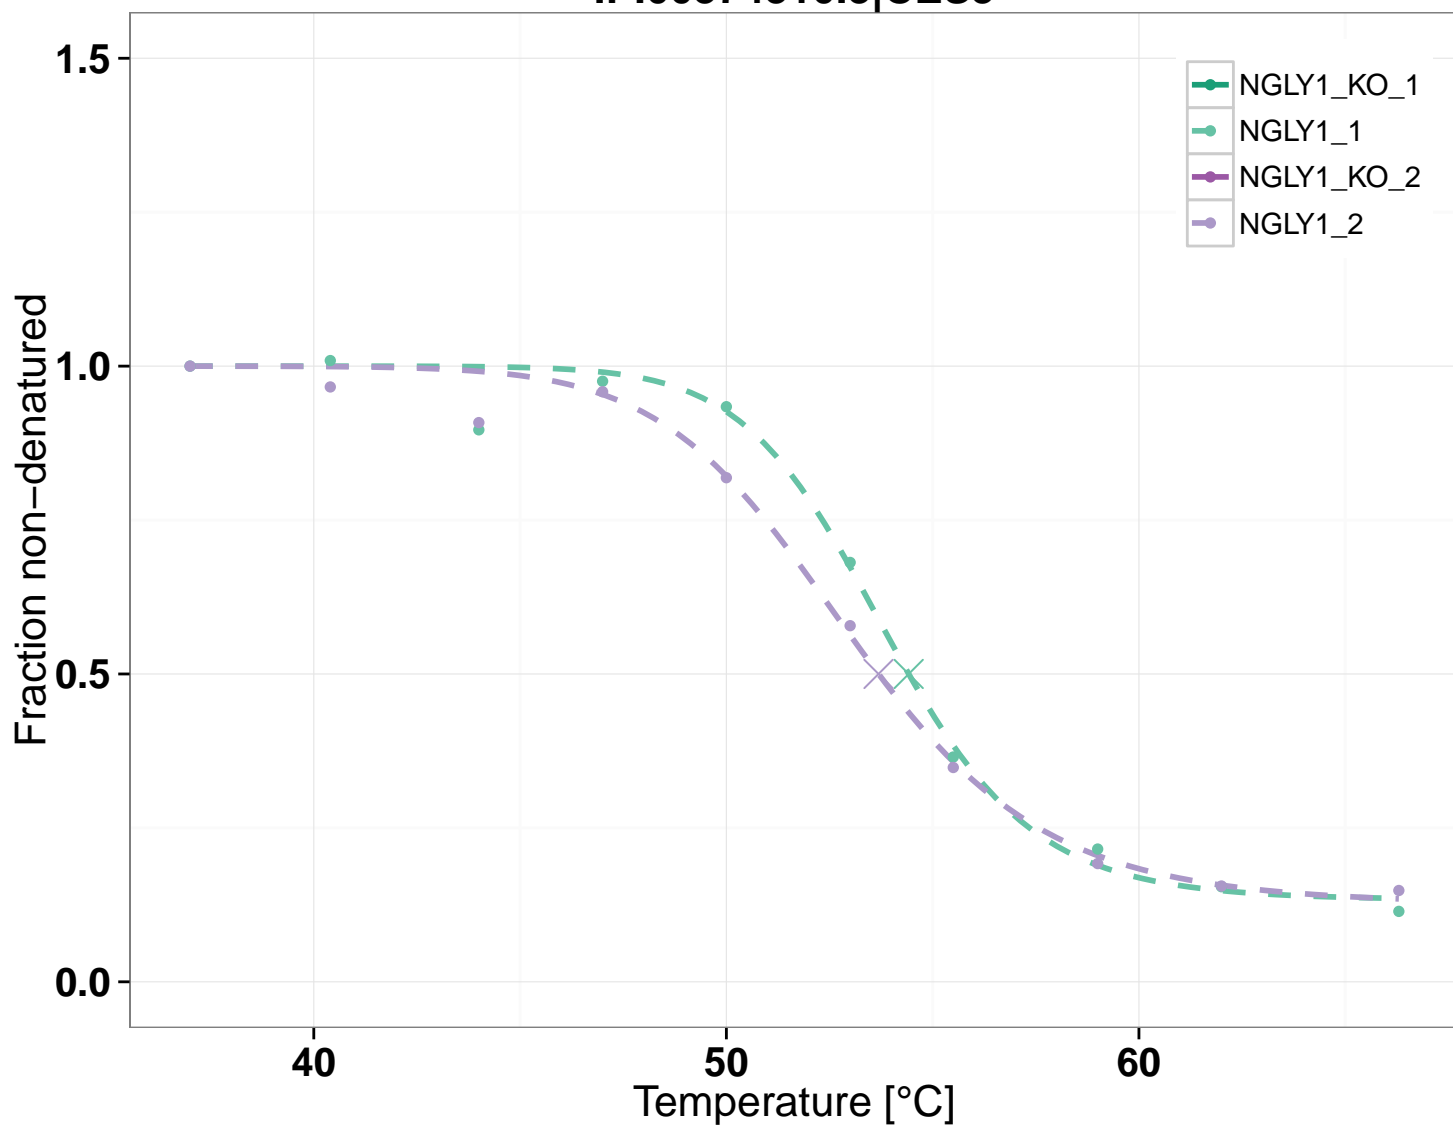

|            | meltPoint | slope  | plateau | R2   |
|------------|-----------|--------|---------|------|
| NGLY1_KO_1 | -         | -      | -       | -    |
| NGLY1_1    | 54.42     | -0.12  | 0.13    | 0.99 |
| NGLY1_KO_2 | -         | -      | -       | -    |
| NGLY1_2    | 53.69     | -0.094 | 0.13    | 0.99 |

Supplement: Supplementary file 3008 [file 1]

IPI00298558.2|PDCD10

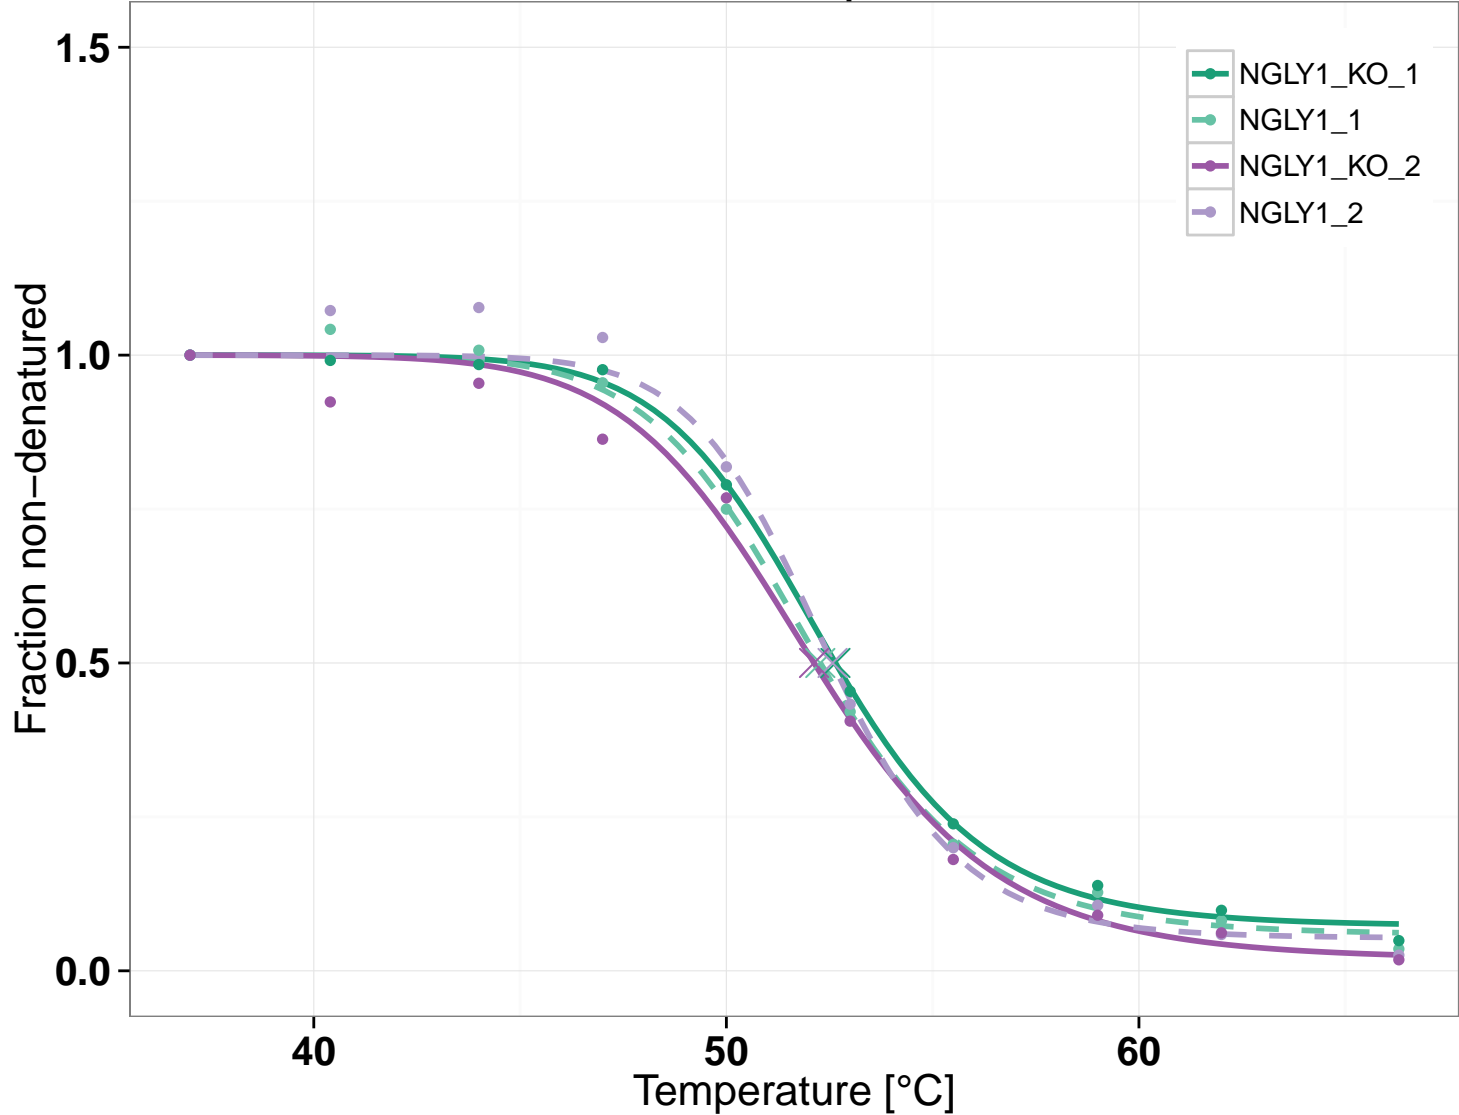

|            | meltPoint | slope | plateau | R2   |
|------------|-----------|-------|---------|------|
| NGLY1_KO_1 | 52.64     | -0.12 | 0.07    | 1    |
| NGLY1_1    | 52.28     | -0.12 | 0.06    | 1    |
| NGLY1_KO_2 | 52.12     | -0.11 | 0.02    | 0.99 |
| NGLY1_2    | 52.57     | -0.14 | 0.05    | 0.99 |

Supplement: Supplementary file 3009 [file 1]

IPI00299667.1|VAMP4

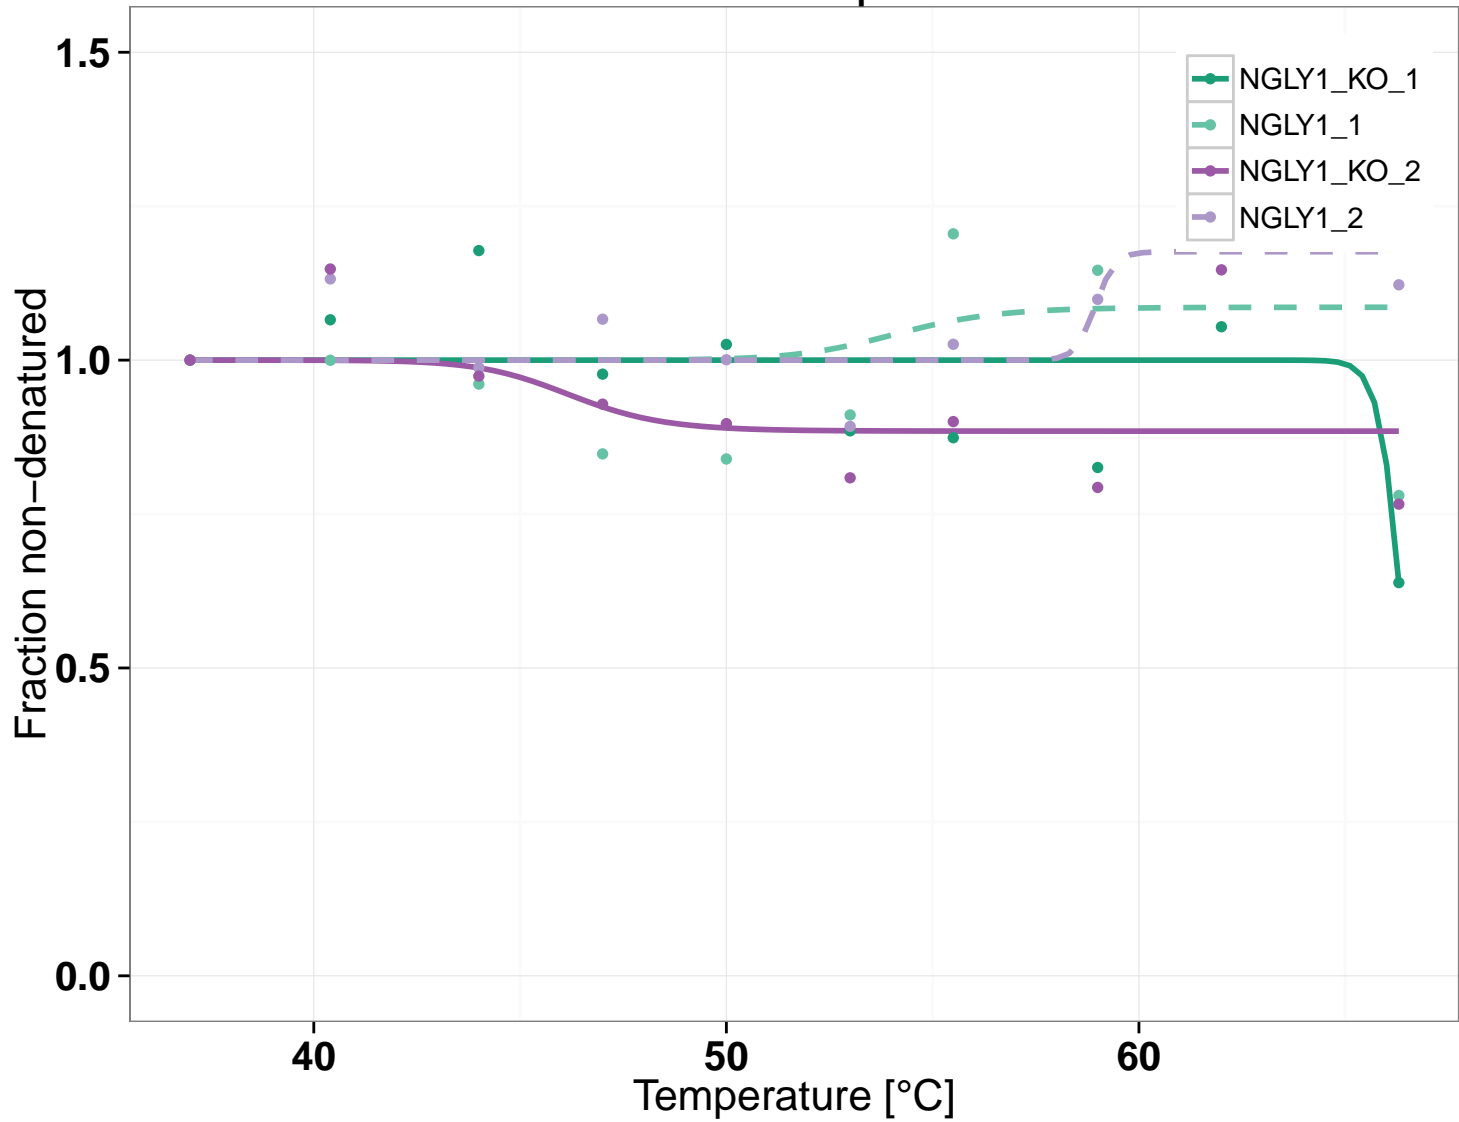

|            | meltPoint | slope  | plateau | R2   |
|------------|-----------|--------|---------|------|
| NGLY1_KO_1 | -         | -      | 0       | 0.52 |
| NGLY1_1    | -         | 0.017  | 1.09    | 0.11 |
| NGLY1_KO_2 | -         | -0.026 | 0.88    | 0.27 |
| NGLY1_2    | -         | 0.19   | 1.18    | 0.51 |

Supplement: Supplementary file 3010 [file 1]

# IPI00031545.3|ITPR2

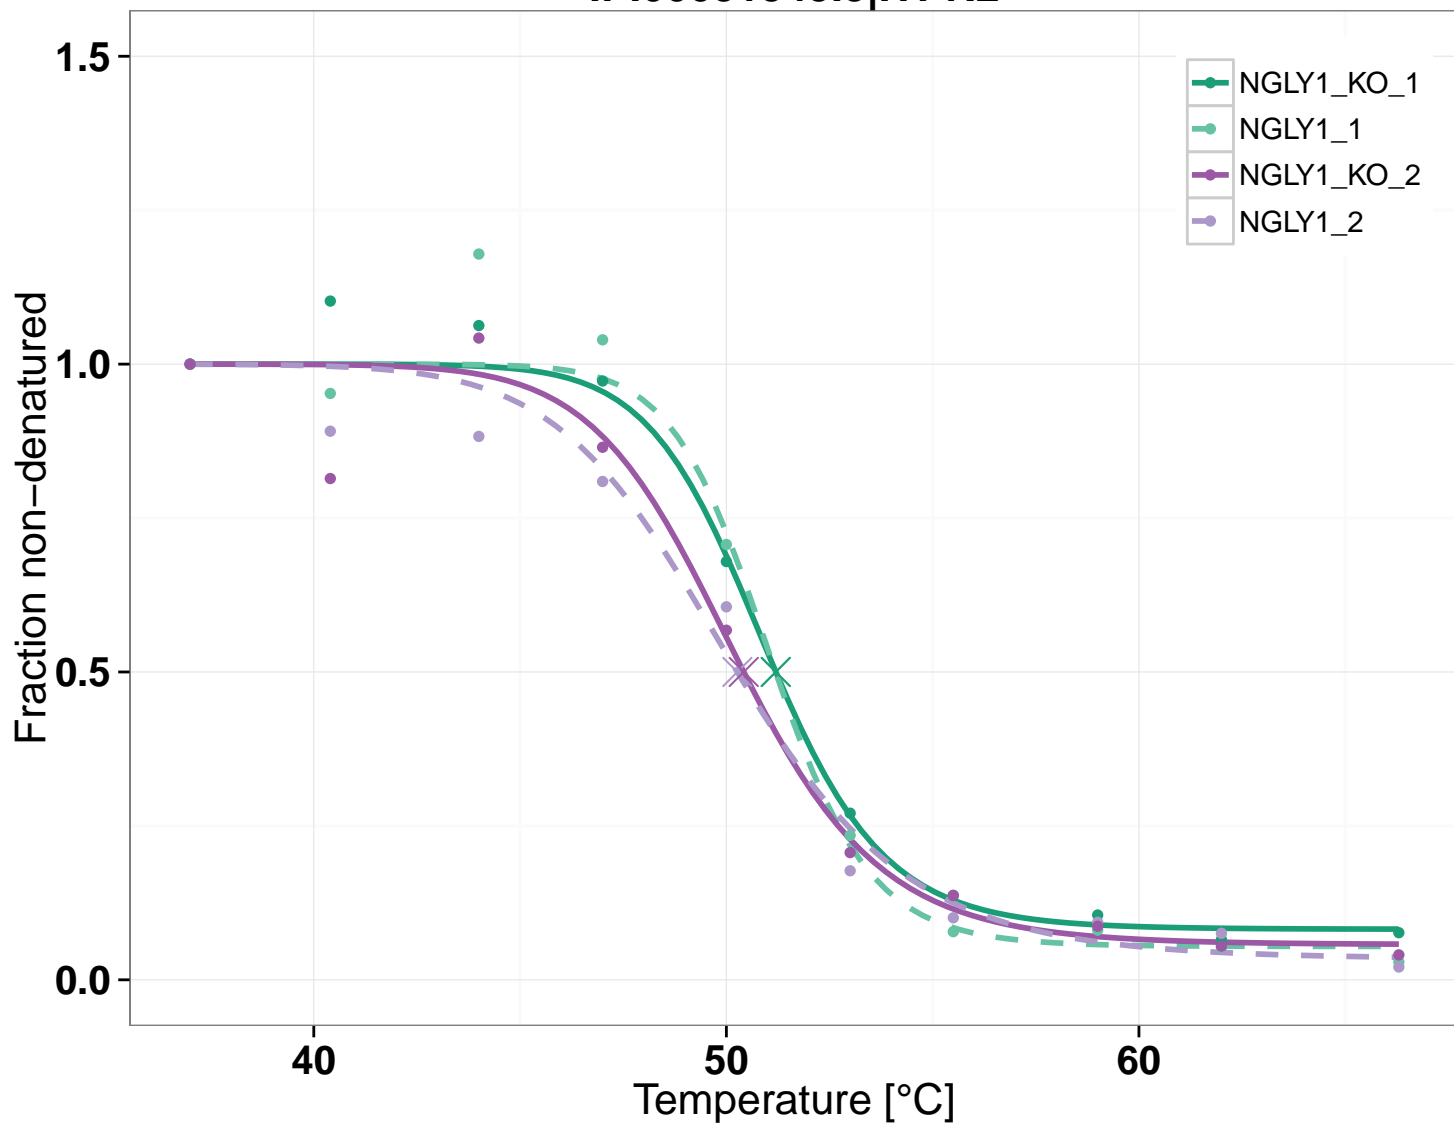

|            | meltPoint | slope | plateau | R2   |
|------------|-----------|-------|---------|------|
| NGLY1_KO_1 | 51.2      | -0.16 | 0.08    | 0.99 |
| NGLY1_1    | 51.19     | -0.2  | 0.05    | 0.98 |
| NGLY1_KO_2 | 50.42     | -0.13 | 0.06    | 0.97 |
| NGLY1_2    | 50.27     | -0.11 | 0.03    | 0.98 |

Supplement: Supplementary file 3011 [file 1]

# IPI00239077.5|HINT1

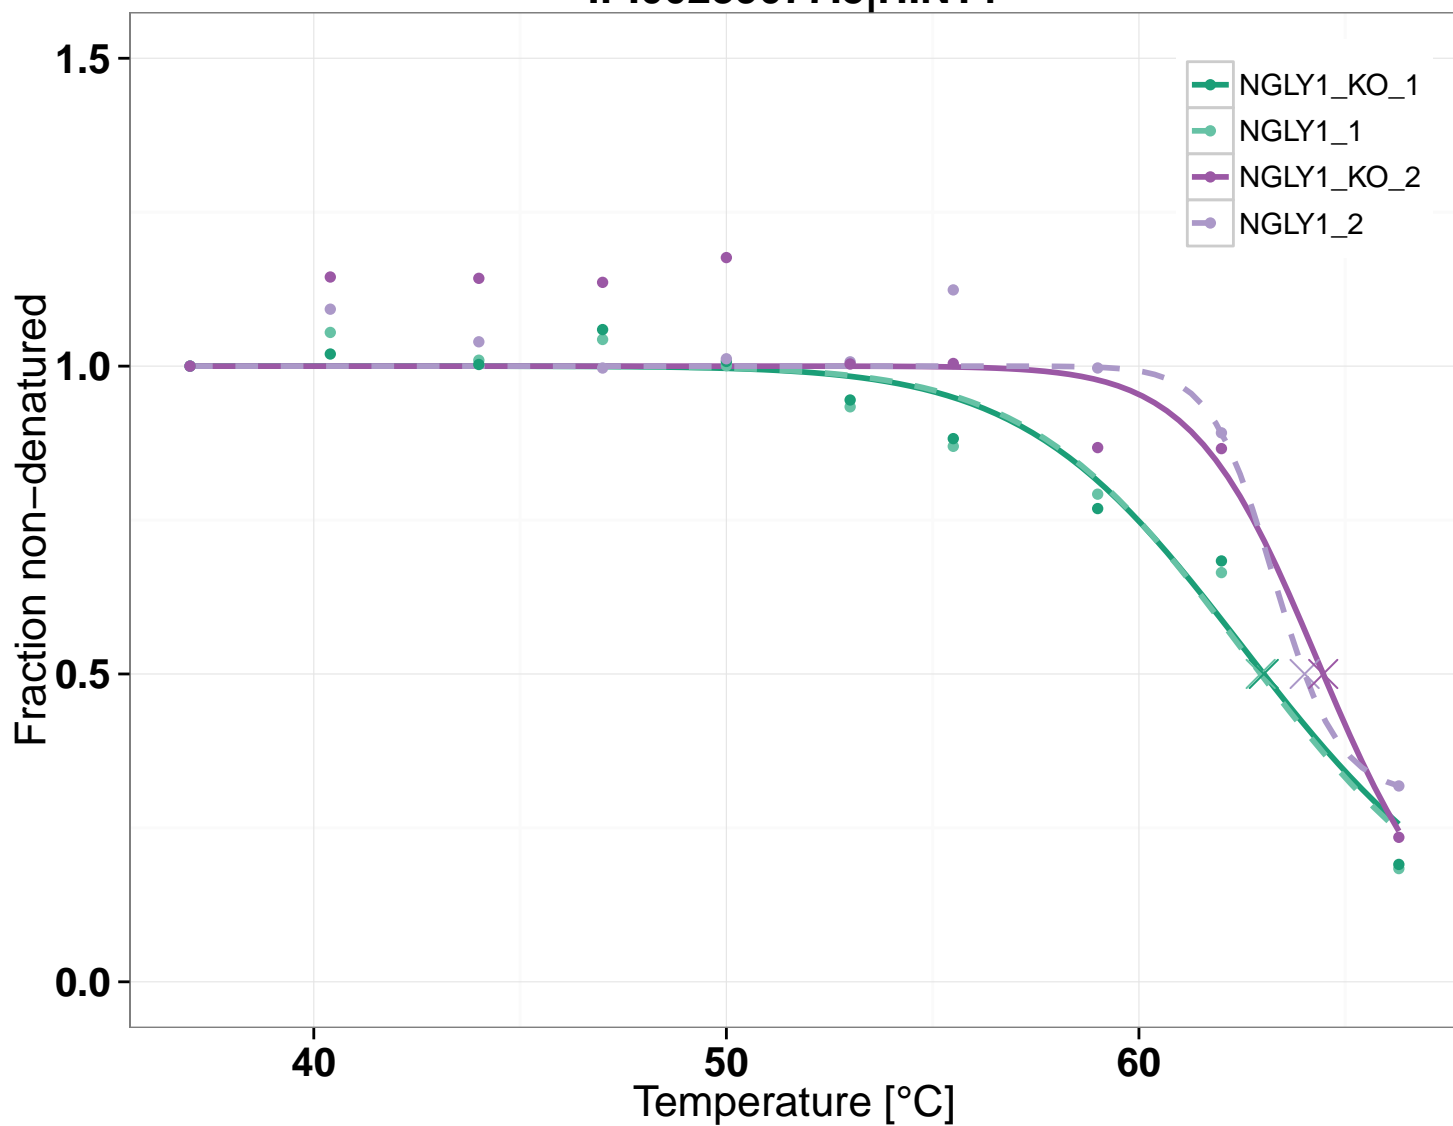

|            | meltPoint | slope  | plateau | R2   |
|------------|-----------|--------|---------|------|
| NGLY1_KO_1 | 63.03     | -0.086 | 0       | 0.96 |
| NGLY1_1    | 62.95     | -0.089 | 0       | 0.96 |
| NGLY1_KO_2 | 64.47     | -0.16  | 0       | 0.85 |
| NGLY1_2    | 64.02     | -0.22  | 0.3     | 0.95 |

Supplement: Supplementary file 3012 [file 1]

# IPI00063669.1|GMCL1

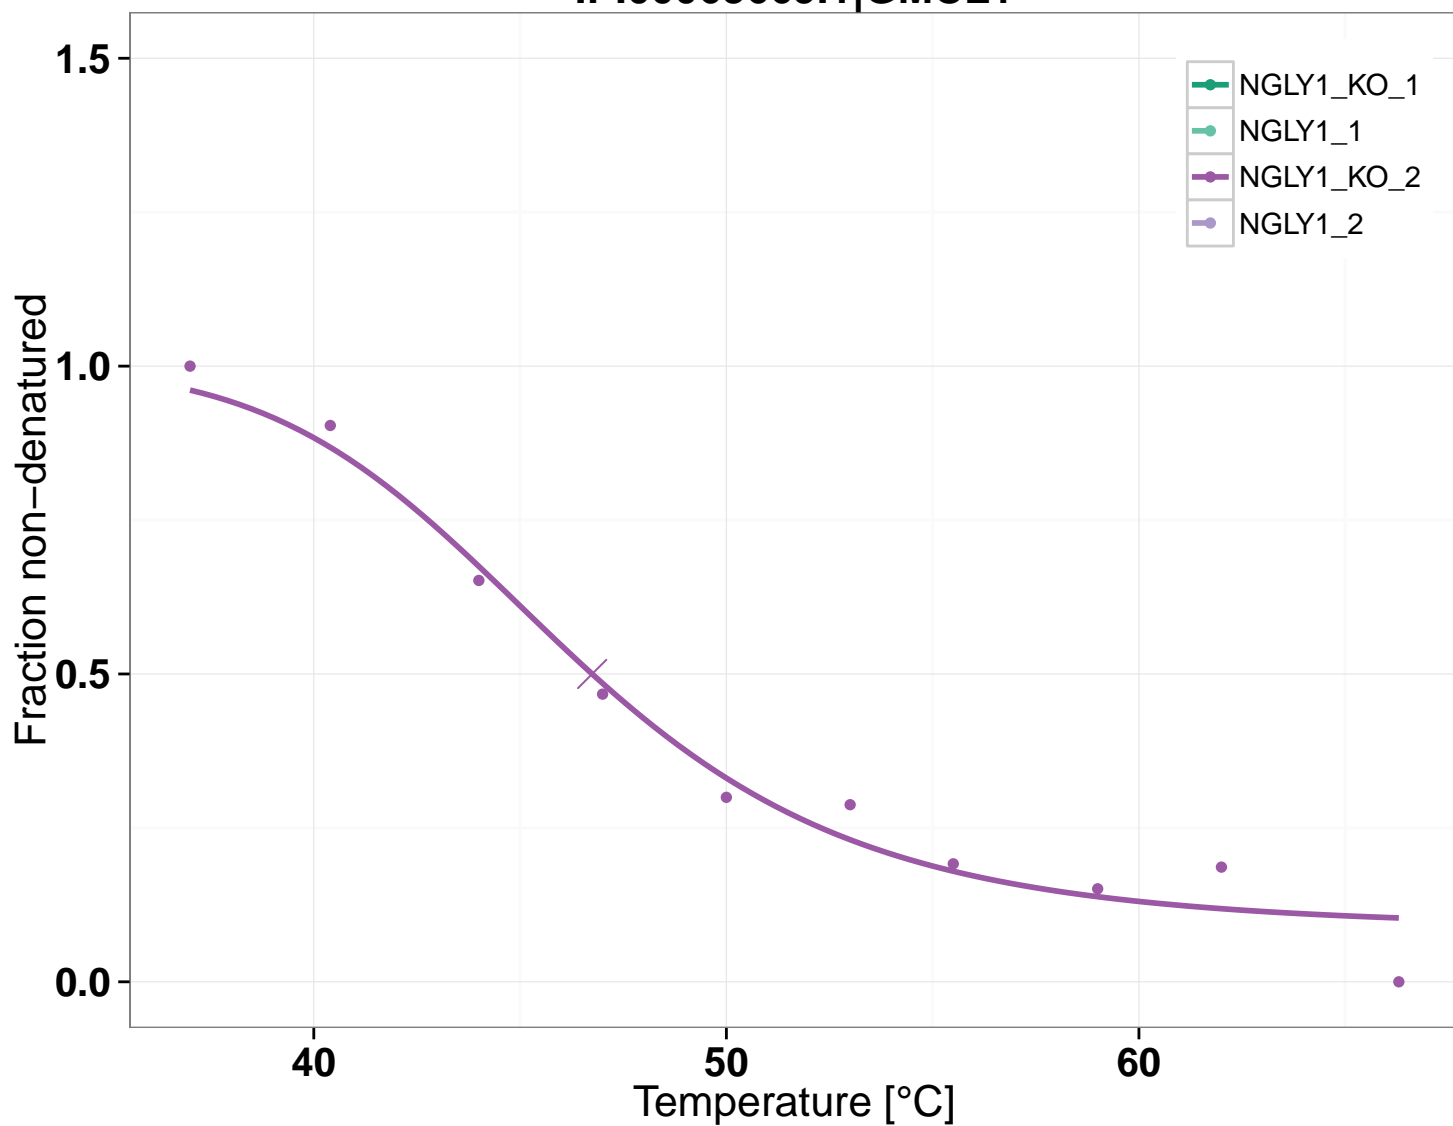

|            | meltPoint | slope  | plateau | R2   |
|------------|-----------|--------|---------|------|
| NGLY1_KO_1 | —         | —      | —       | —    |
| NGLY1_1    | —         | —      | —       | —    |
| NGLY1_KO_2 | 46.75     | -0.065 | 0.09    | 0.98 |
| NGLY1_2    | —         | —      | —       | —    |

Supplement: Supplementary file 3013 [file 1]
