# Supplementary material (part 31 of 85)
Source: publisher figshare collection journal article supplement (https://gsajournals.figshare.com/articles/dataset/_/12014913)

IPI00332157.2|MRPL54

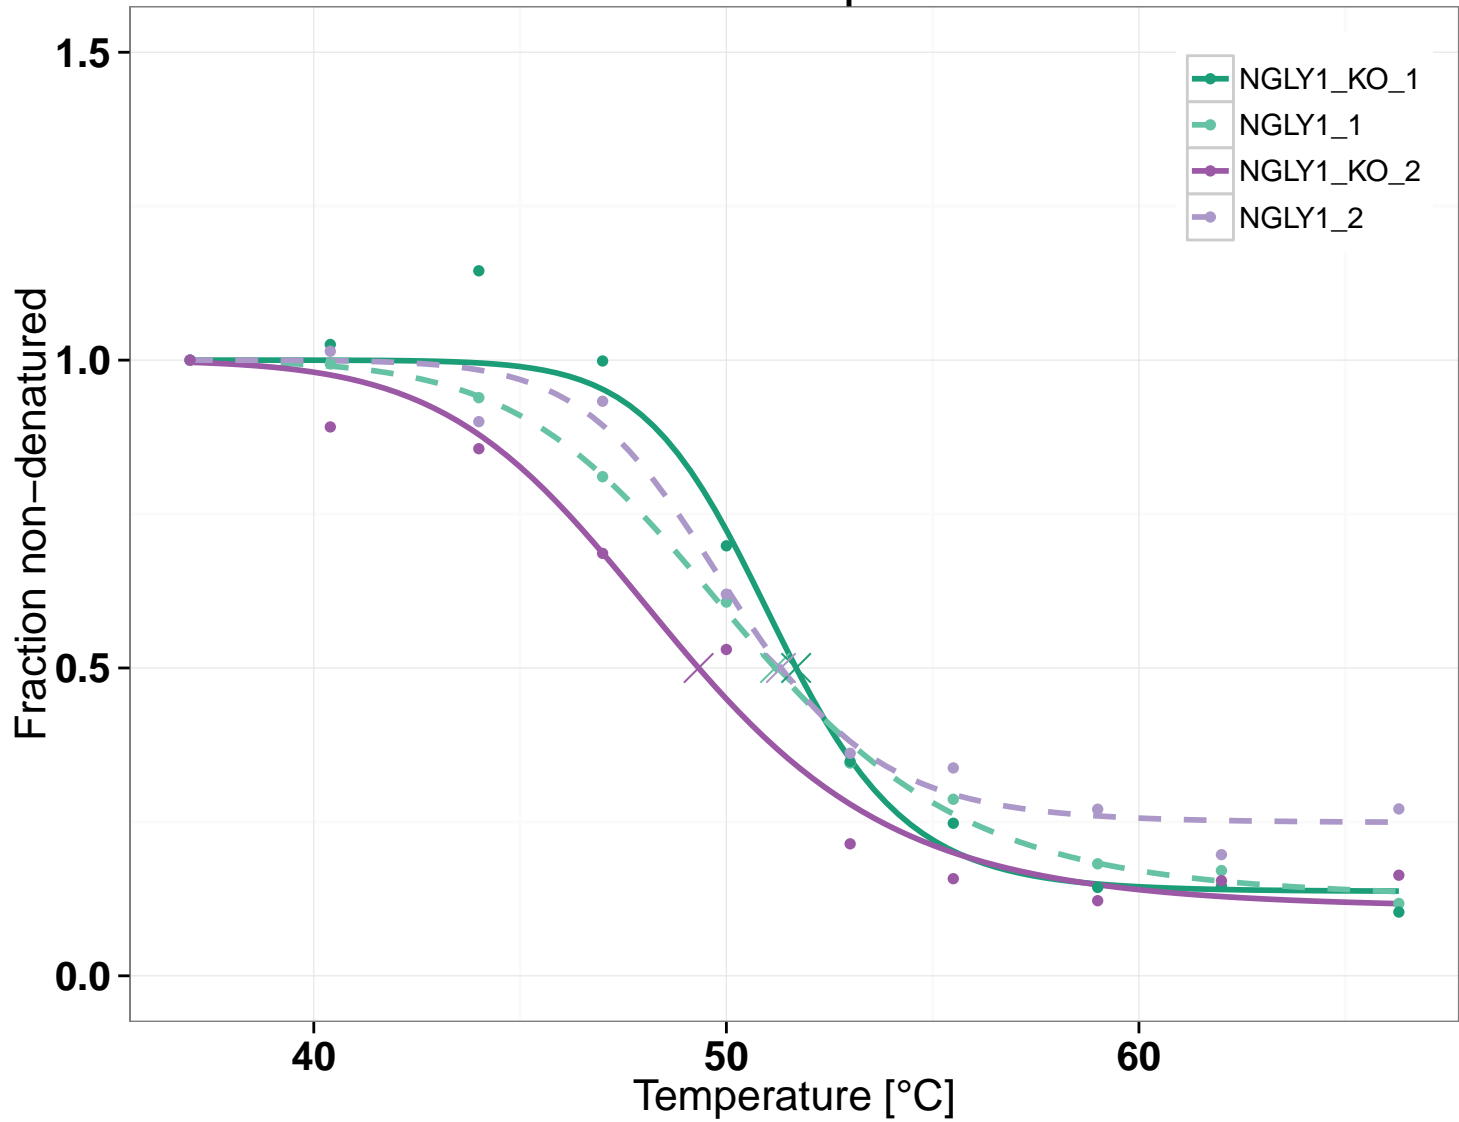

|            | meltPoint | slope  | plateau | R2   |
|------------|-----------|--------|---------|------|
| NGLY1_KO_1 | 51.69     | -0.14  | 0.14    | 0.98 |
| NGLY1_1    | 51.18     | -0.08  | 0.13    | 1    |
| NGLY1_KO_2 | 49.33     | -0.082 | 0.11    | 0.98 |
| NGLY1_2    | 51.32     | -0.11  | 0.25    | 0.99 |

Supplement: Supplementary file 3014 [file 1]

# IPI00296379.1|TNFRSF10B

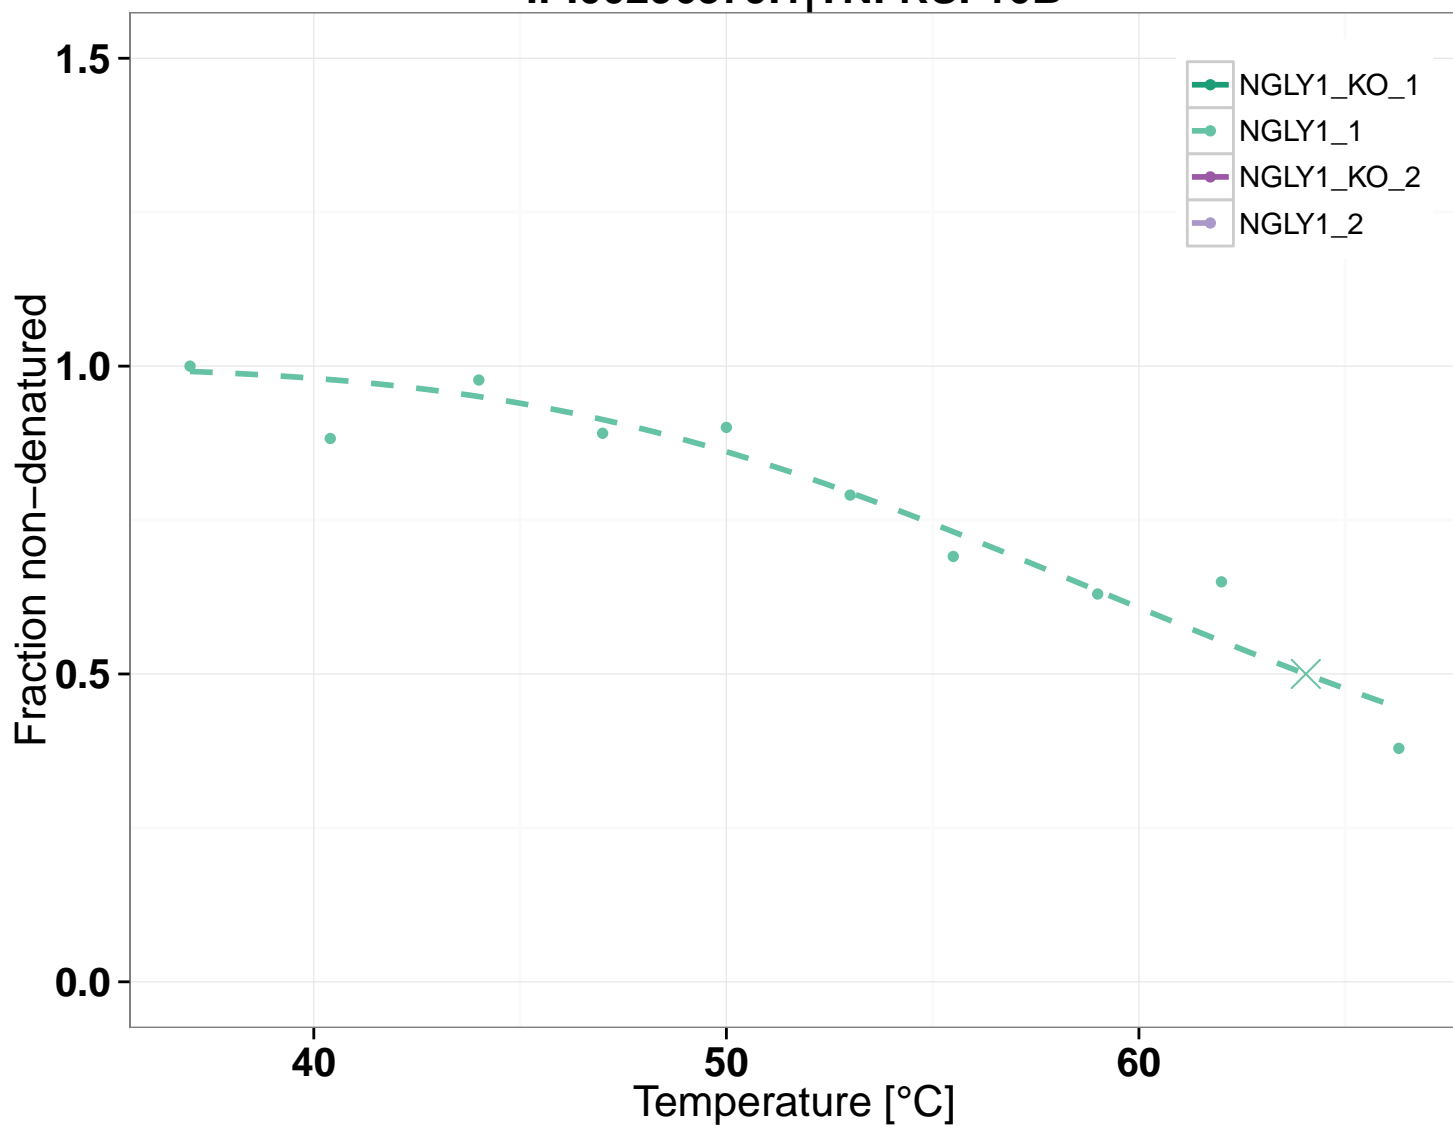

|            | meltPoint | slope  | plateau | R2   |
|------------|-----------|--------|---------|------|
| NGLY1_KO_1 | —         | —      | —       | —    |
| NGLY1_1    | 64.05     | -0.028 | 0       | 0.92 |
| NGLY1_KO_2 | —         | —      | —       | —    |
| NGLY1_2    | —         | —      | —       | —    |

Supplement: Supplementary file 3015 [file 1]

# IPI00102313.3|SRA1

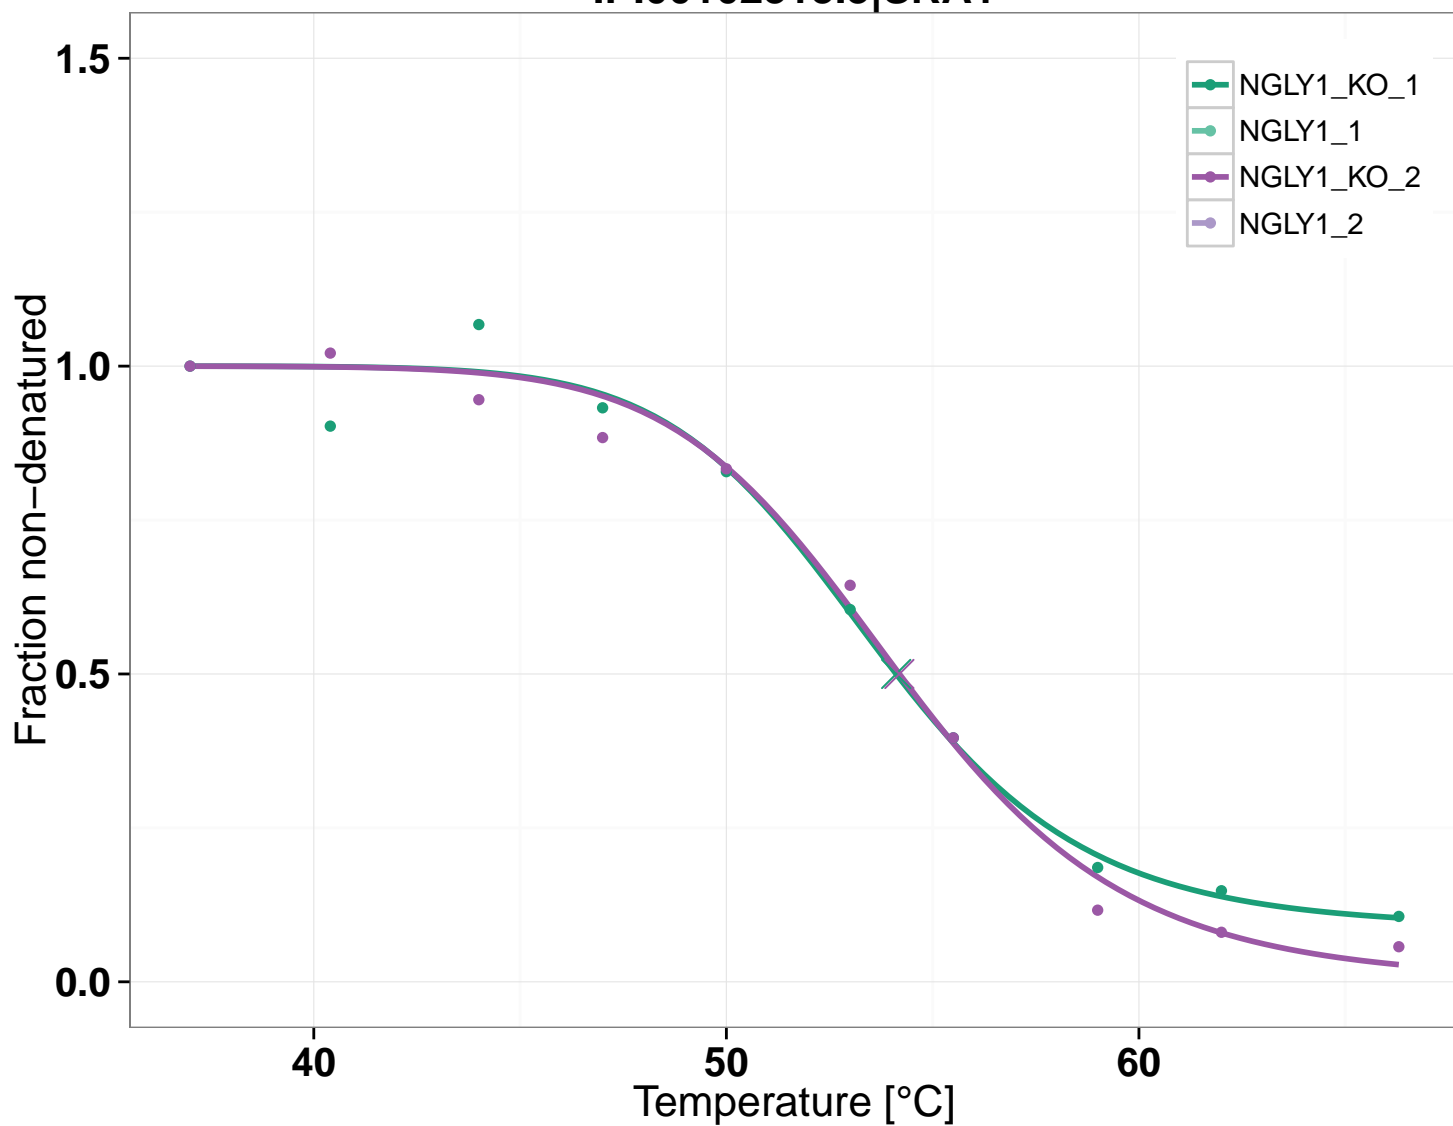

|            | meltPoint | slope  | plateau | R2   |
|------------|-----------|--------|---------|------|
| NGLY1_KO_1 | 54.12     | -0.09  | 0.09    | 0.99 |
| NGLY1_1    | -         | -      | -       | -    |
| NGLY1_KO_2 | 54.19     | -0.091 | 0       | 0.99 |
| NGLY1_2    | -         | -      | -       | -    |

Supplement: Supplementary file 3016 [file 1]

# IPI00010348.1|DNASE2

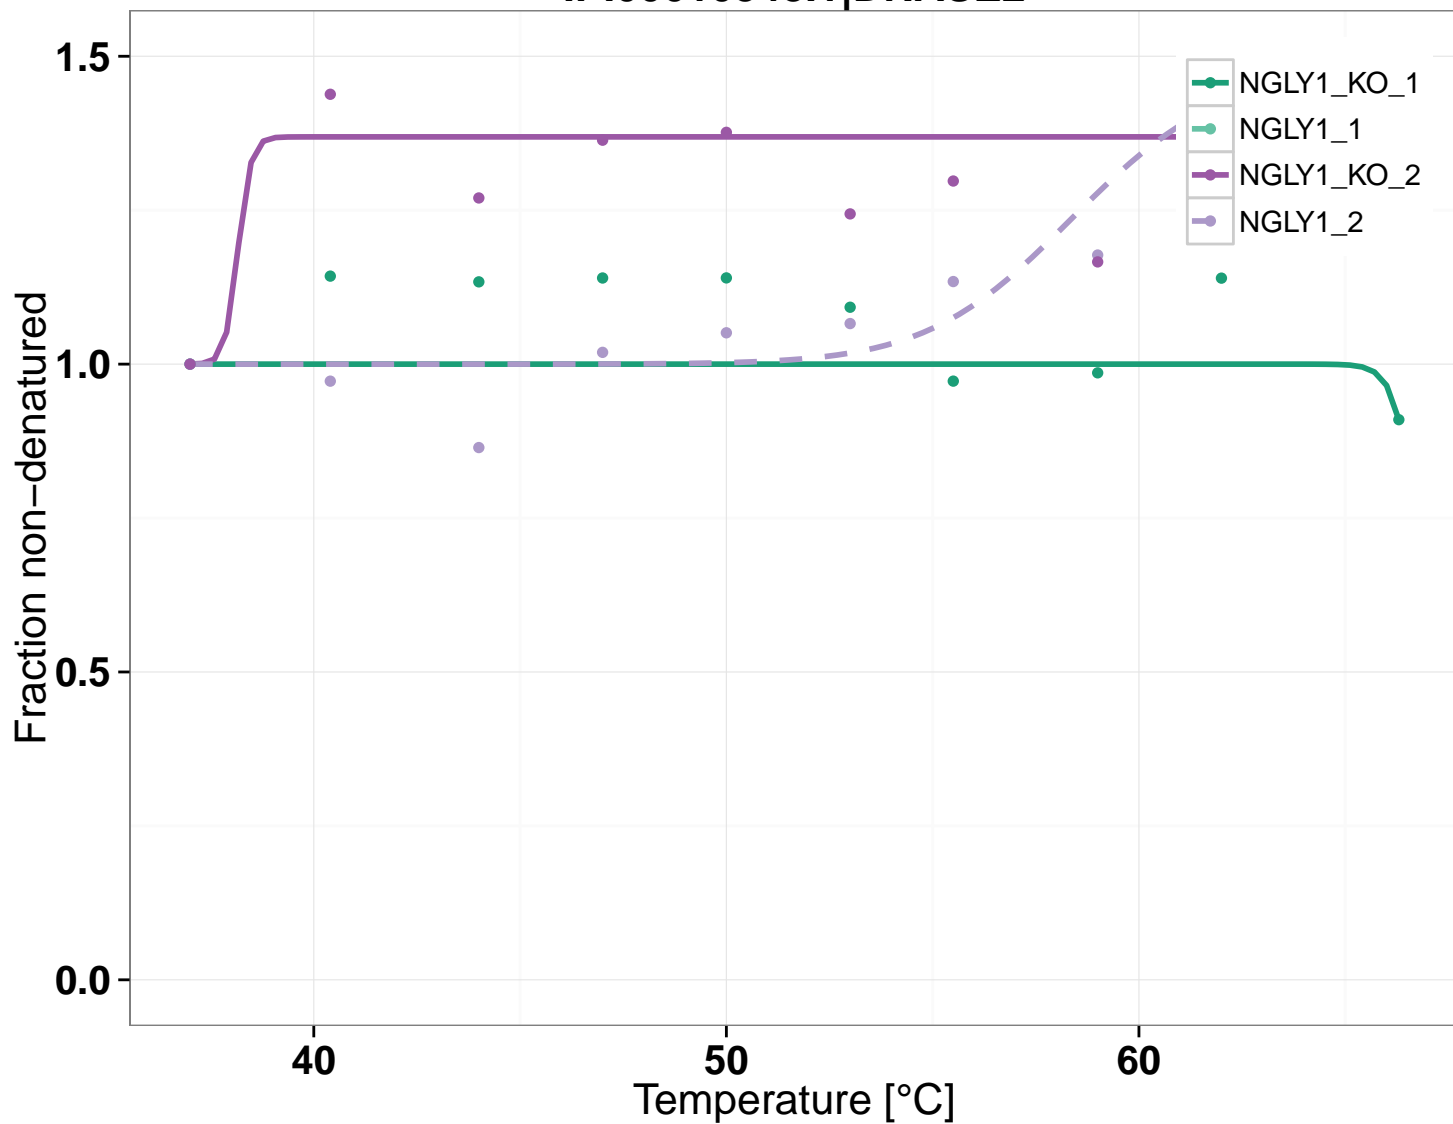

|            | meltPoint | slope | plateau | R2    |
|------------|-----------|-------|---------|-------|
| NGLY1_KO_1 | —         | —     | 0       | −0.49 |
| NGLY1_1    | —         | —     | —       | —     |
| NGLY1_KO_2 | —         | 0.6   | 1.37    | 0.32  |
| NGLY1_2    | —         | 0.067 | 1.5     | 0.87  |

Supplement: Supplementary file 3017 [file 1]

# IPI00872497.3|EI24

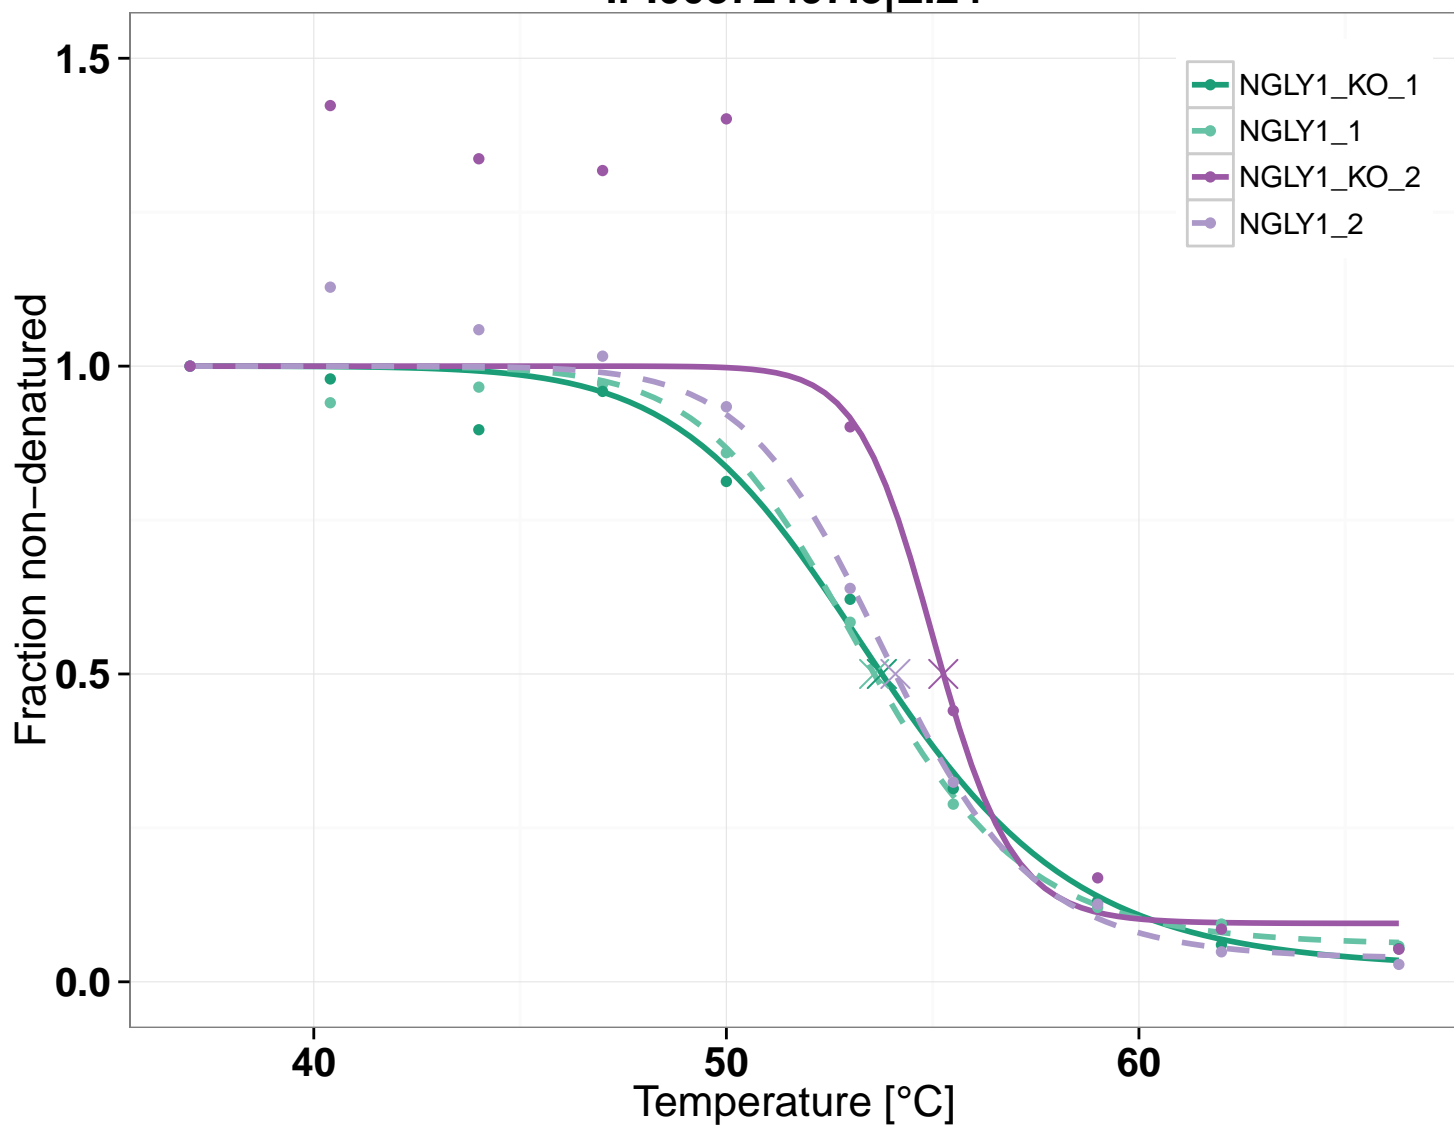

|            | meltPoint | slope | plateau | R2   |
|------------|-----------|-------|---------|------|
| NGLY1_KO_1 | 53.77     | -0.1  | 0.02    | 0.99 |
| NGLY1_1    | 53.58     | -0.12 | 0.06    | 1    |
| NGLY1_KO_2 | 55.26     | -0.24 | 0.09    | 0.81 |
| NGLY1_2    | 54.1      | -0.14 | 0.04    | 0.99 |

Supplement: Supplementary file 3018 [file 1]

# IPI00020042.2|PSMC4

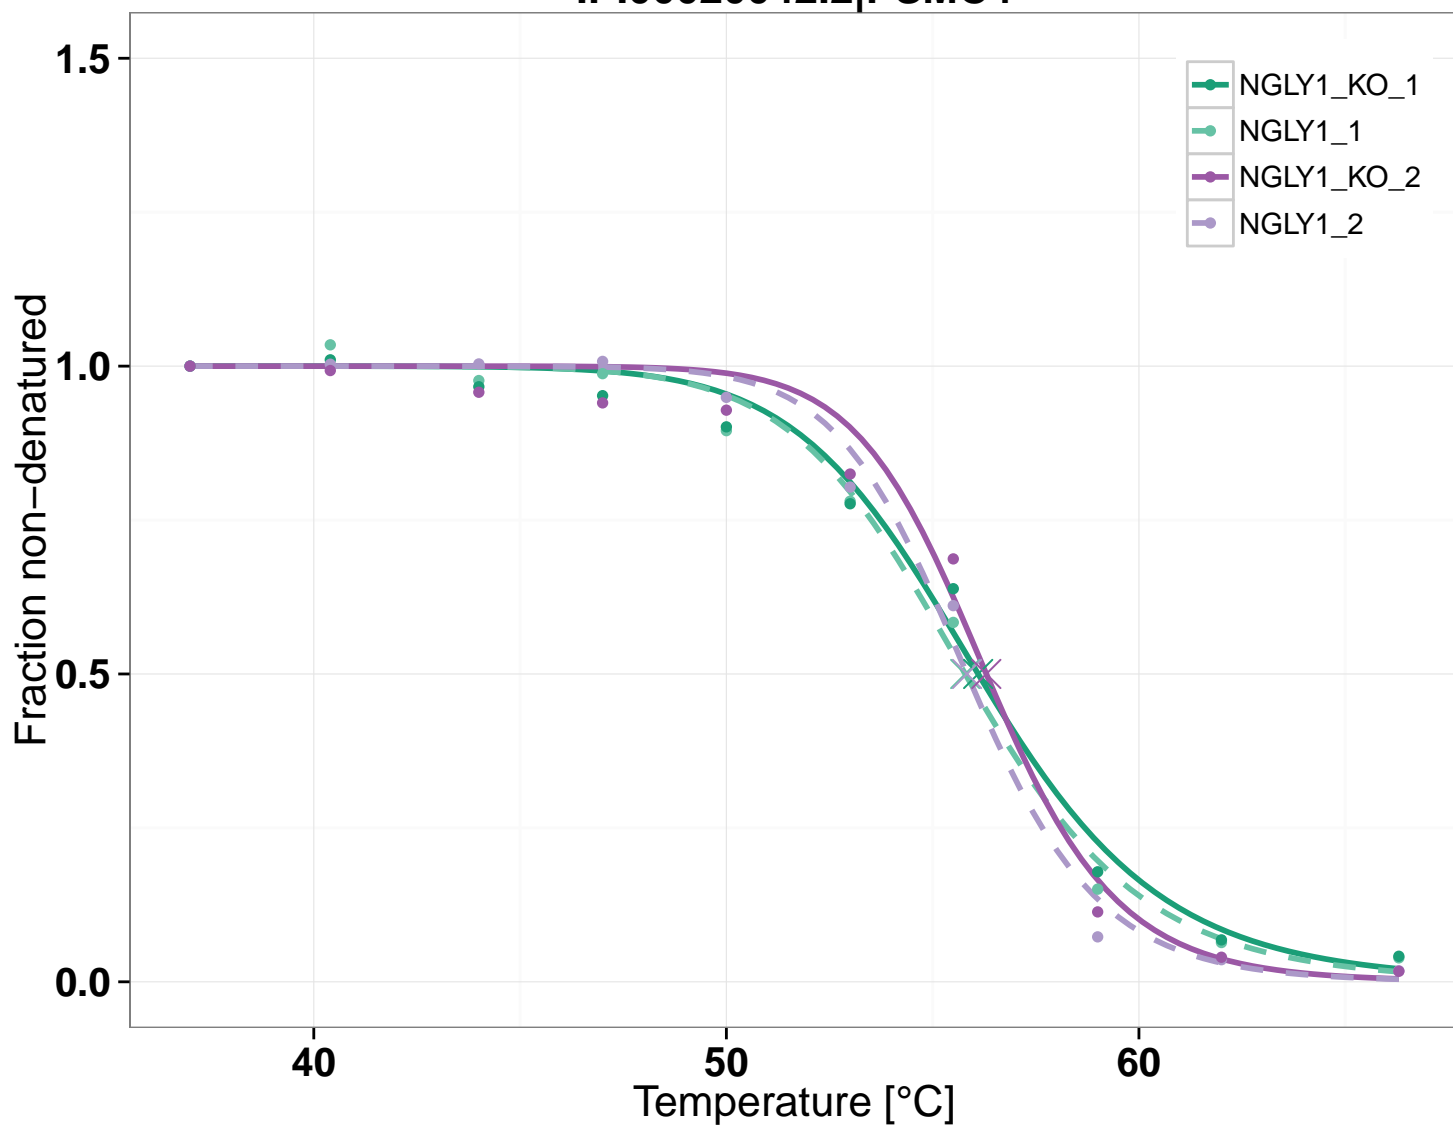

|            | meltPoint | slope | plateau | R2   |
|------------|-----------|-------|---------|------|
| NGLY1_KO_1 | 56.1      | -0.11 | 0       | 0.99 |
| NGLY1_1    | 55.79     | -0.12 | 0       | 0.99 |
| NGLY1_KO_2 | 56.3      | -0.16 | 0       | 0.99 |
| NGLY1_2    | 55.83     | -0.16 | 0       | 0.99 |

Supplement: Supplementary file 3019 [file 1]

IPI00101664.2|NARS2

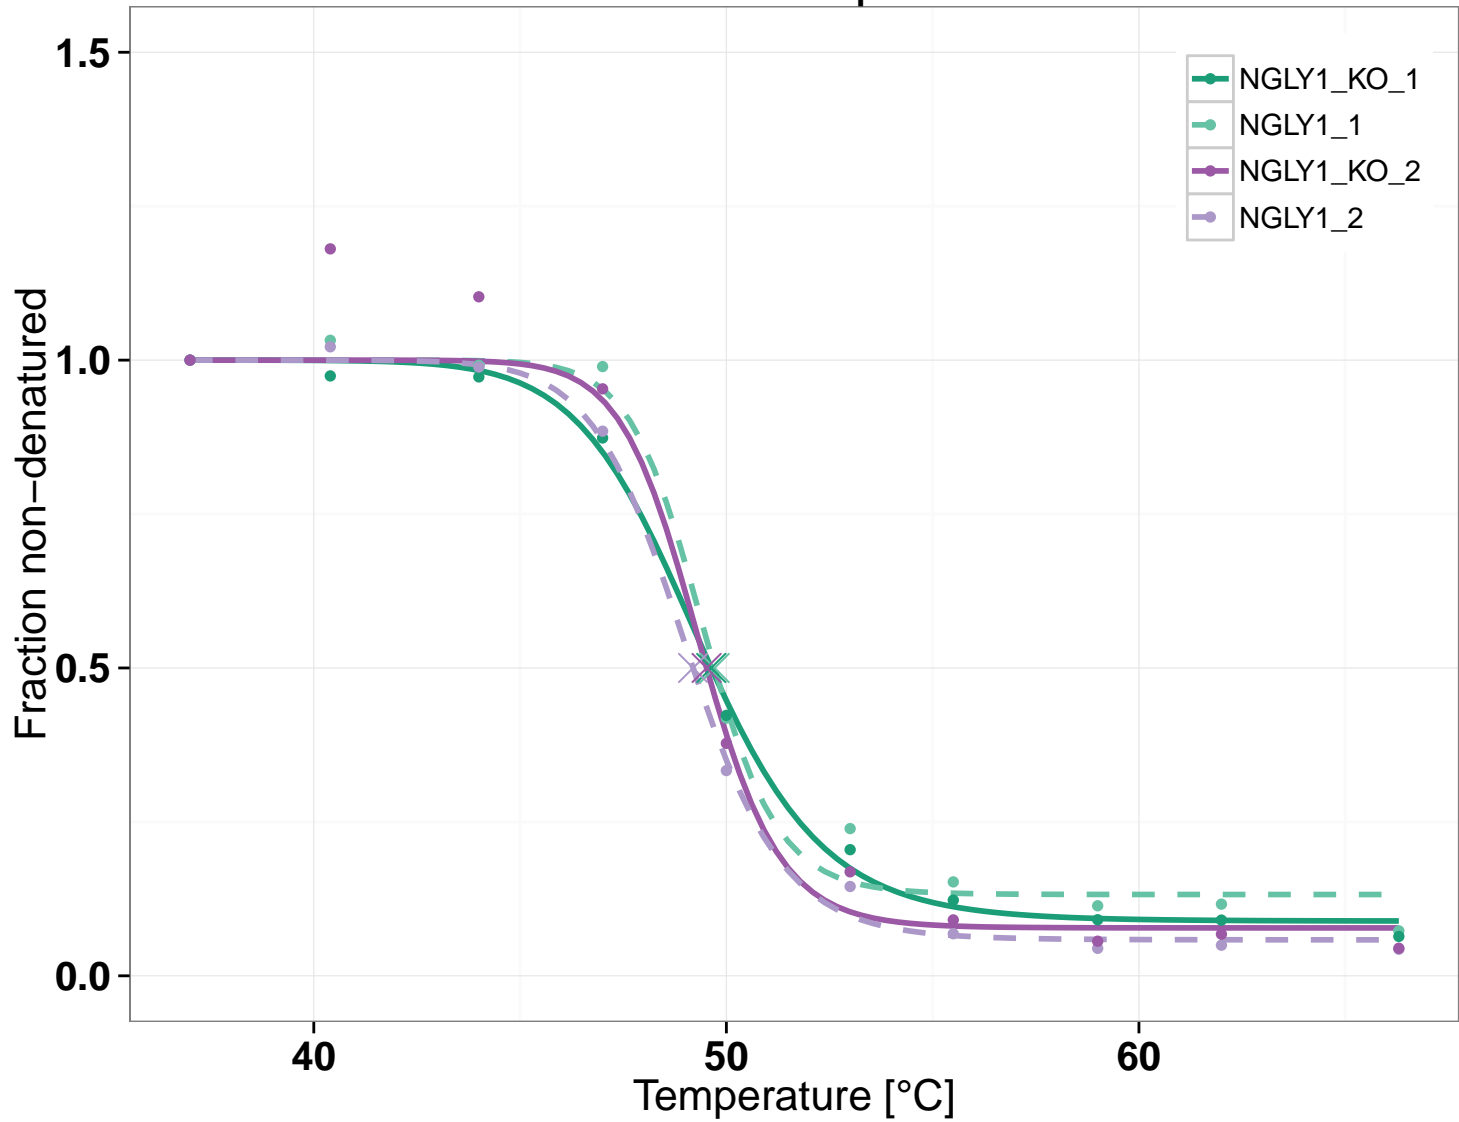

|            | meltPoint | slope | plateau | R2   |
|------------|-----------|-------|---------|------|
| NGLY1_KO_1 | 49.63     | -0.15 | 0.09    | 1    |
| NGLY1_1    | 49.72     | -0.24 | 0.13    | 0.99 |
| NGLY1_KO_2 | 49.52     | -0.24 | 0.08    | 0.98 |
| NGLY1_2    | 49.19     | -0.2  | 0.06    | 1    |

Supplement: Supplementary file 3020 [file 1]

IPI00296772.4|GGA2

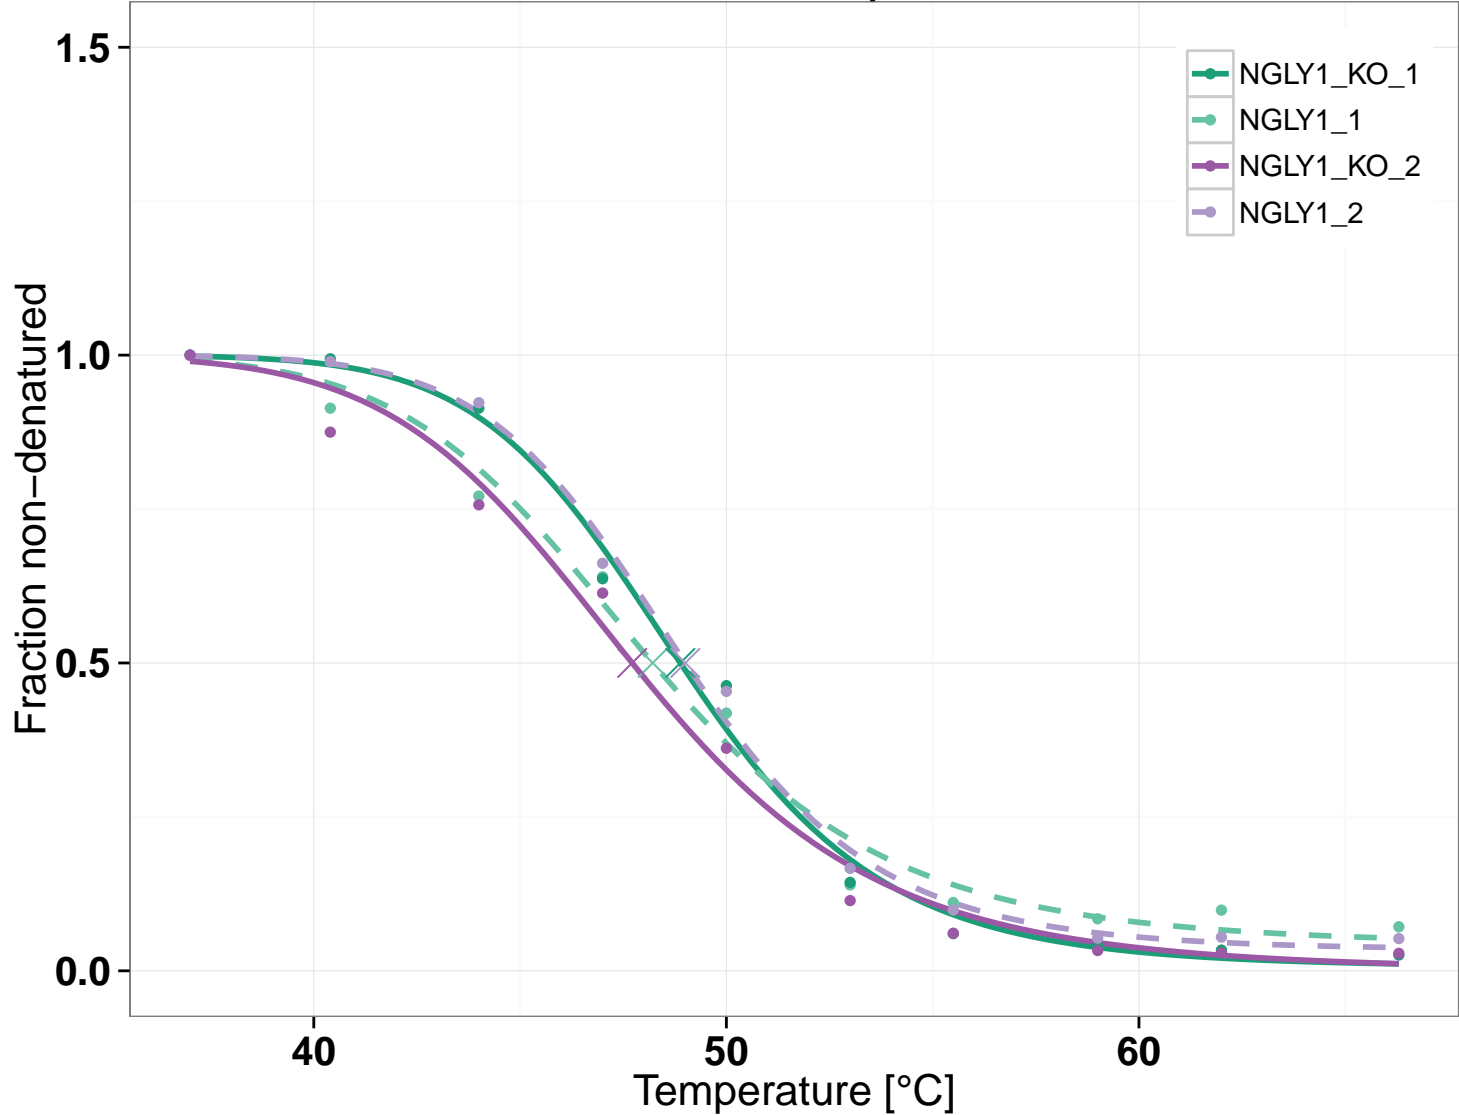

|            | meltPoint | slope  | plateau | R2   |
|------------|-----------|--------|---------|------|
| NGLY1_KO_1 | 48.88     | -0.1   | 0.01    | 0.99 |
| NGLY1_1    | 48.21     | -0.081 | 0.04    | 0.99 |
| NGLY1_KO_2 | 47.72     | -0.084 | 0       | 0.99 |
| NGLY1_2    | 49        | -0.1   | 0.03    | 1    |

Supplement: Supplementary file 3021 [file 1]

IPI00004962.2|GOLIM4

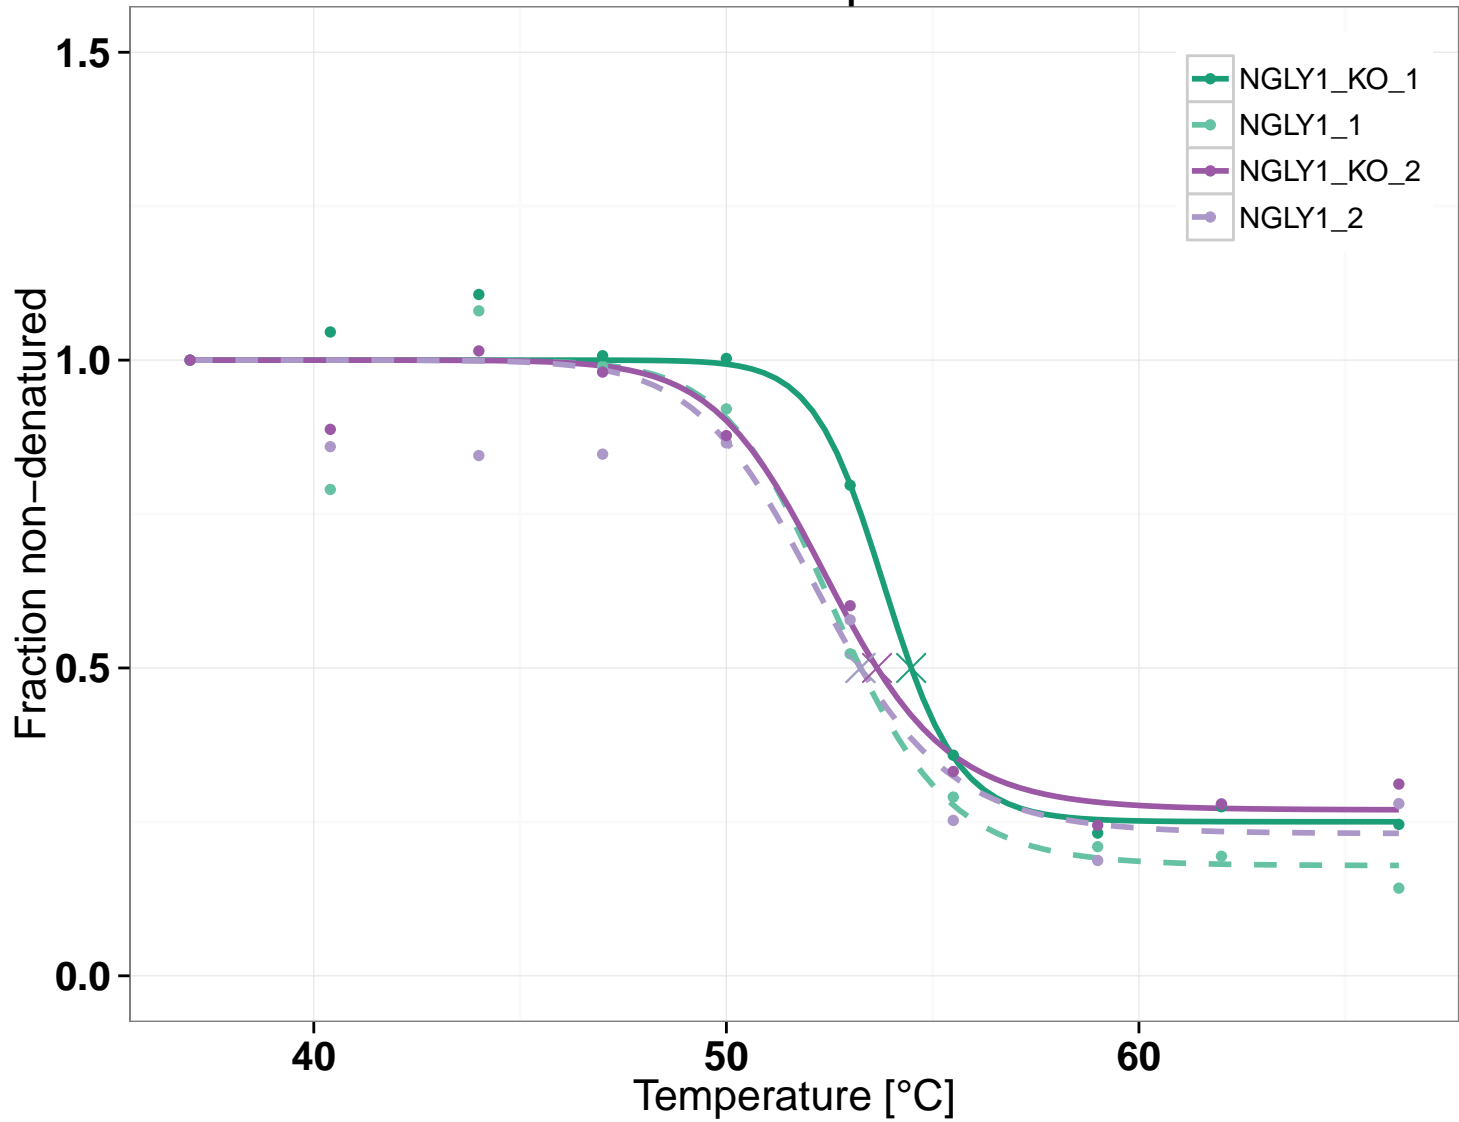

|            | meltPoint | slope | plateau | R2   |
|------------|-----------|-------|---------|------|
| NGLY1_KO_1 | 54.48     | -0.21 | 0.25    | 0.99 |
| NGLY1_1    | 53.25     | -0.15 | 0.18    | 0.96 |
| NGLY1_KO_2 | 53.65     | -0.13 | 0.27    | 0.98 |
| NGLY1_2    | 53.25     | -0.13 | 0.23    | 0.92 |

Supplement: Supplementary file 3022 [file 1]

IPI00304086.4|CTCFL

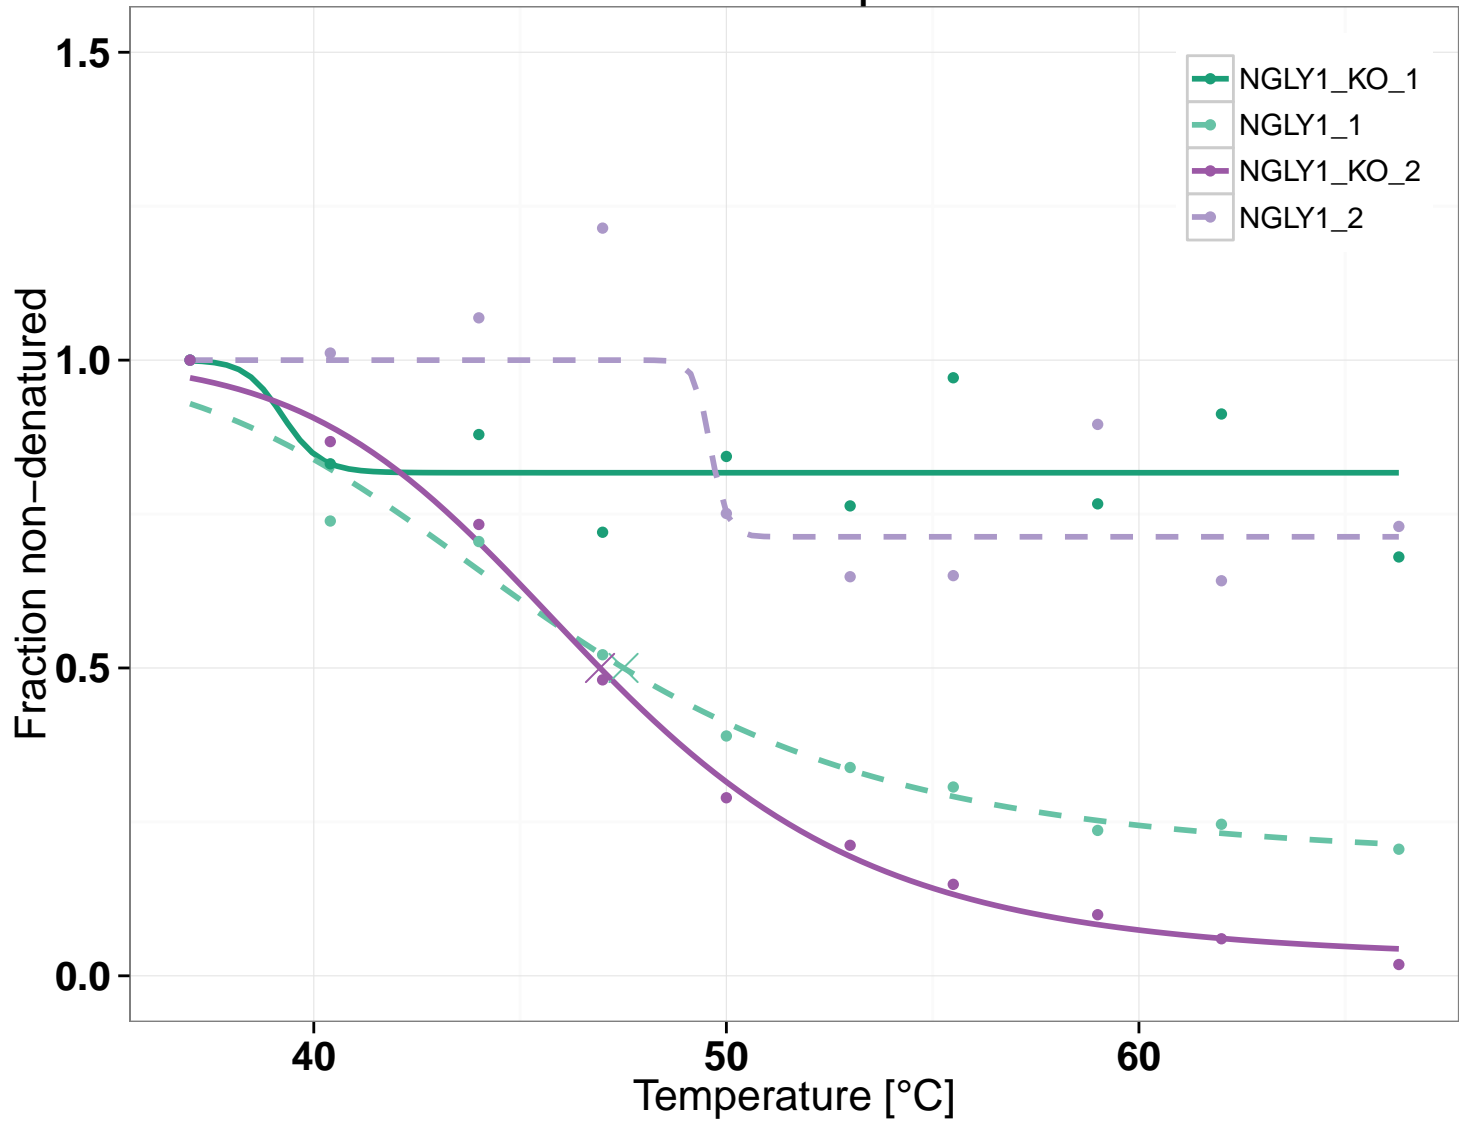

|            | meltPoint | slope  | plateau | R2   |
|------------|-----------|--------|---------|------|
| NGLY1_KO_1 | –         | –0.1   | 0.82    | 0.3  |
| NGLY1_1    | 47.51     | –0.048 | 0.18    | 0.98 |
| NGLY1_KO_2 | 46.94     | –0.071 | 0.02    | 1    |
| NGLY1_2    | –         | –0.36  | 0.71    | 0.74 |

Supplement: Supplementary file 3023 [file 1]

IPI00032107.1|SLC26A2

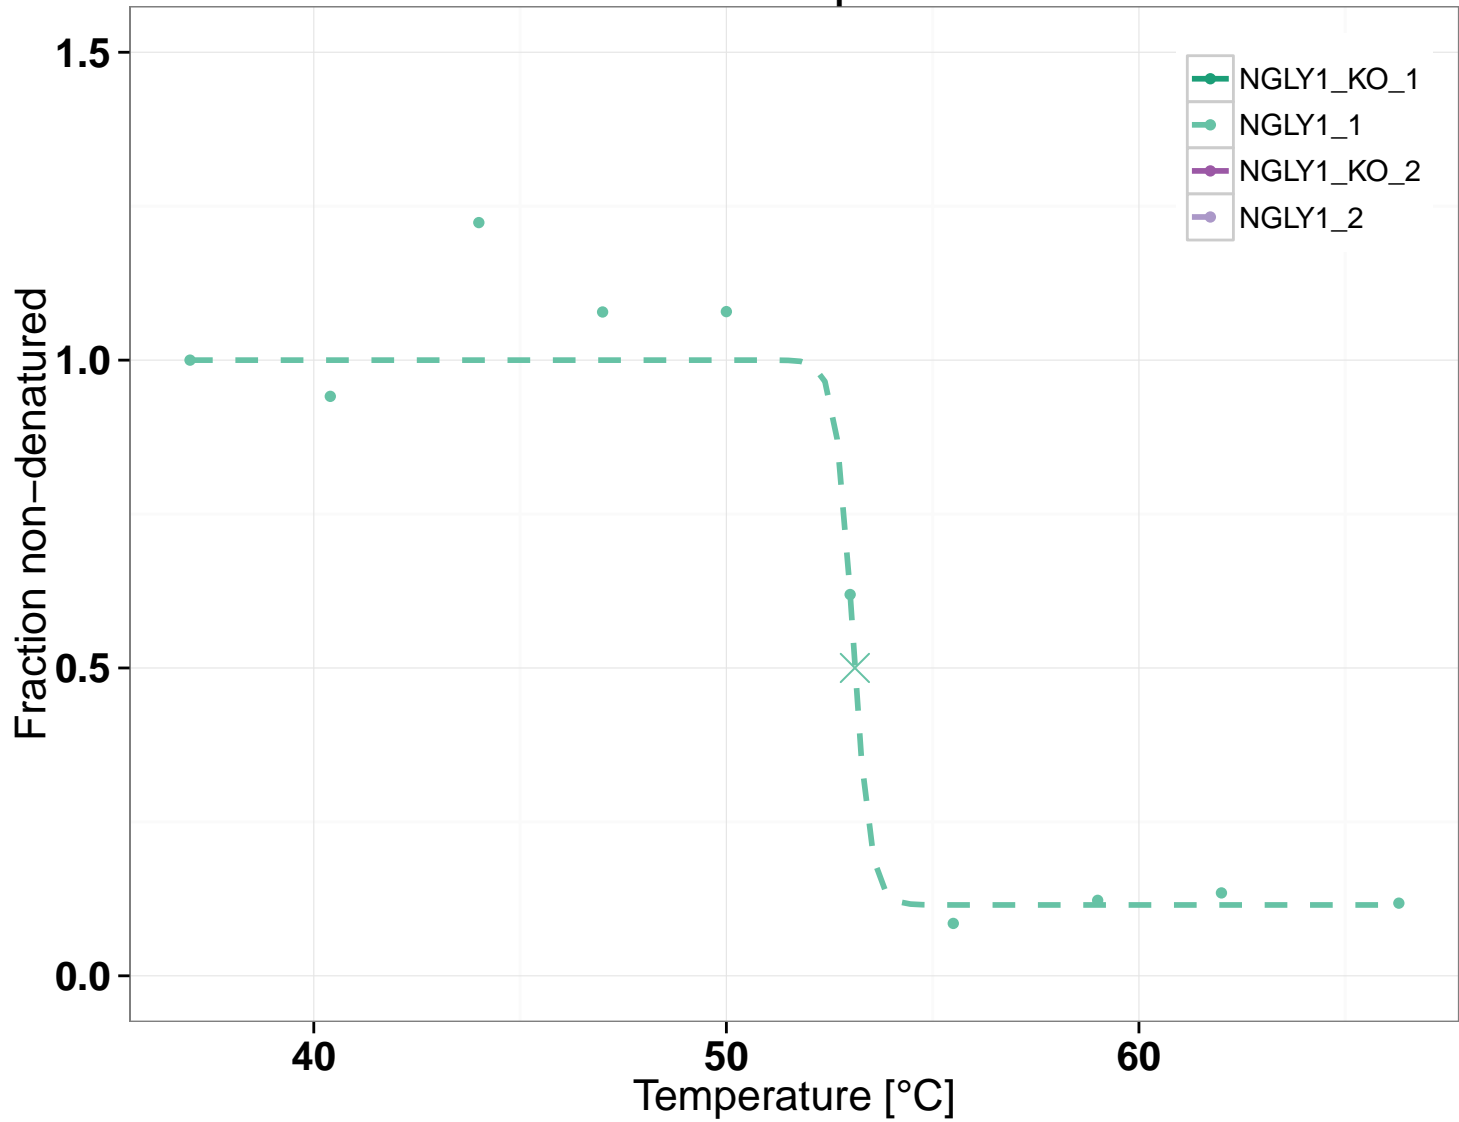

|            | meltPoint | slope | plateau | R2   |
|------------|-----------|-------|---------|------|
| NGLY1_KO_1 | -         | -     | -       | -    |
| NGLY1_1    | 53.12     | -1    | 0.12    | 0.97 |
| NGLY1_KO_2 | -         | -     | -       | -    |
| NGLY1_2    | -         | -     | -       | -    |

Supplement: Supplementary file 3024 [file 1]

# IPI00418414.3|COQ3

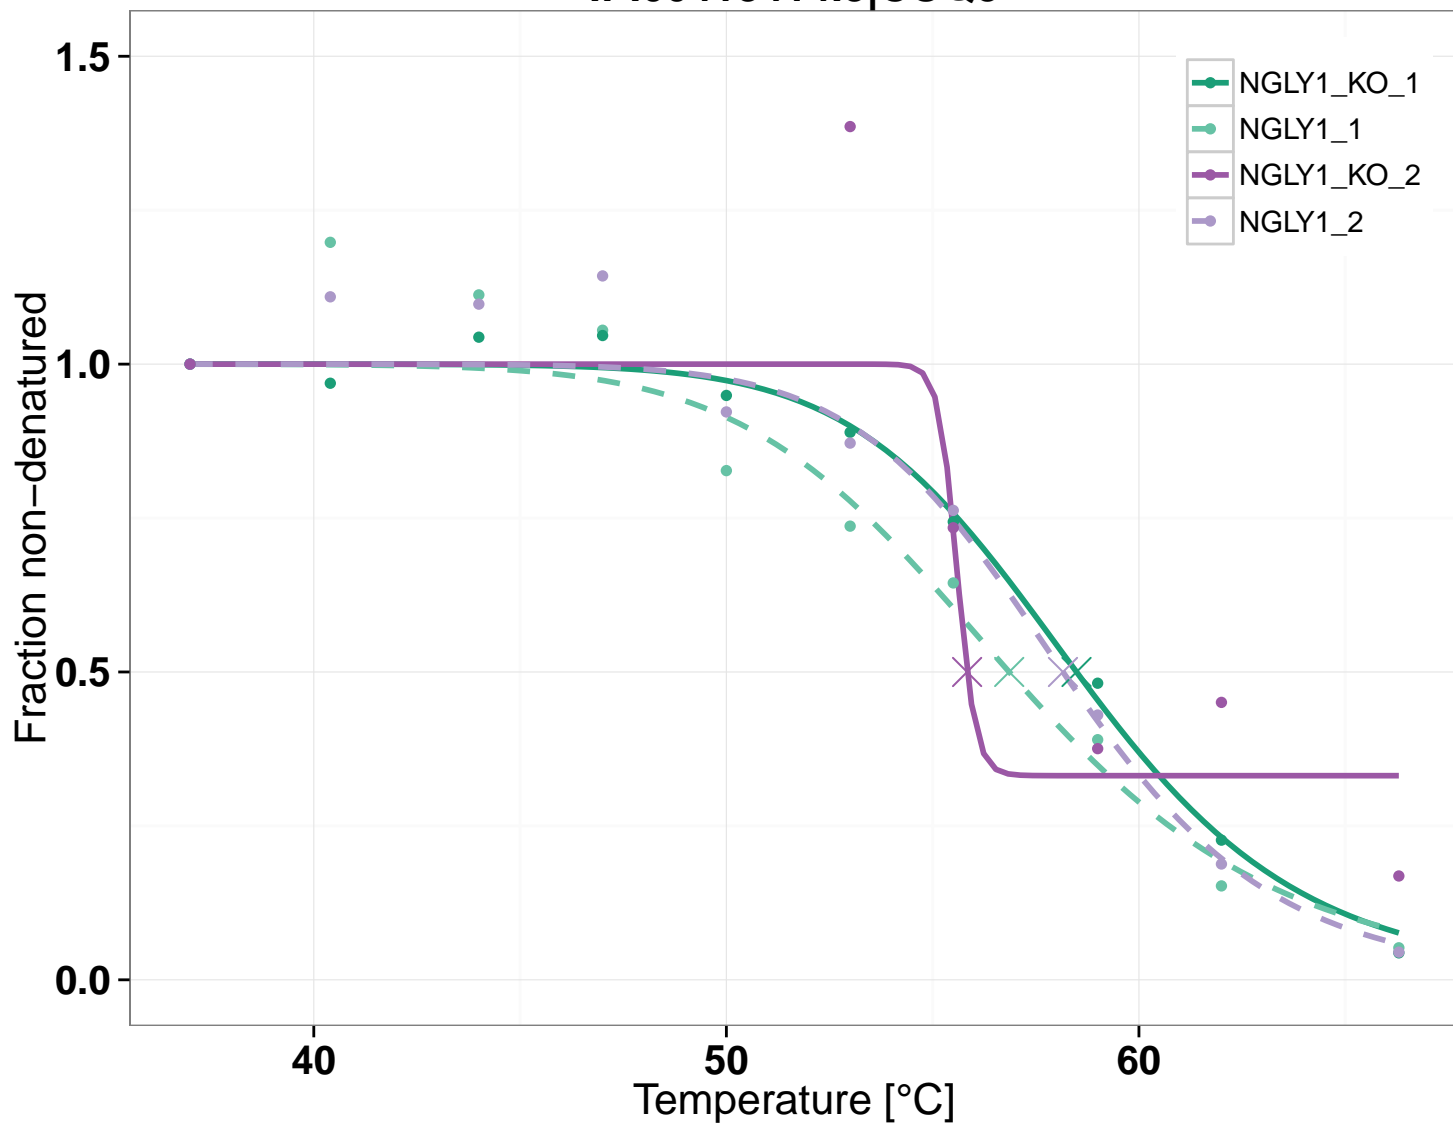

|            | meltPoint | slope  | plateau | R2   |
|------------|-----------|--------|---------|------|
| NGLY1_KO_1 | 58.49     | -0.091 | 0       | 0.99 |
| NGLY1_1    | 56.86     | -0.077 | 0       | 0.95 |
| NGLY1_KO_2 | 55.84     | -0.75  | 0.33    | 0.37 |
| NGLY1_2    | 58.16     | -0.098 | 0       | 0.97 |

Supplement: Supplementary file 3025 [file 1]

IPI00218591.2|SFRS1

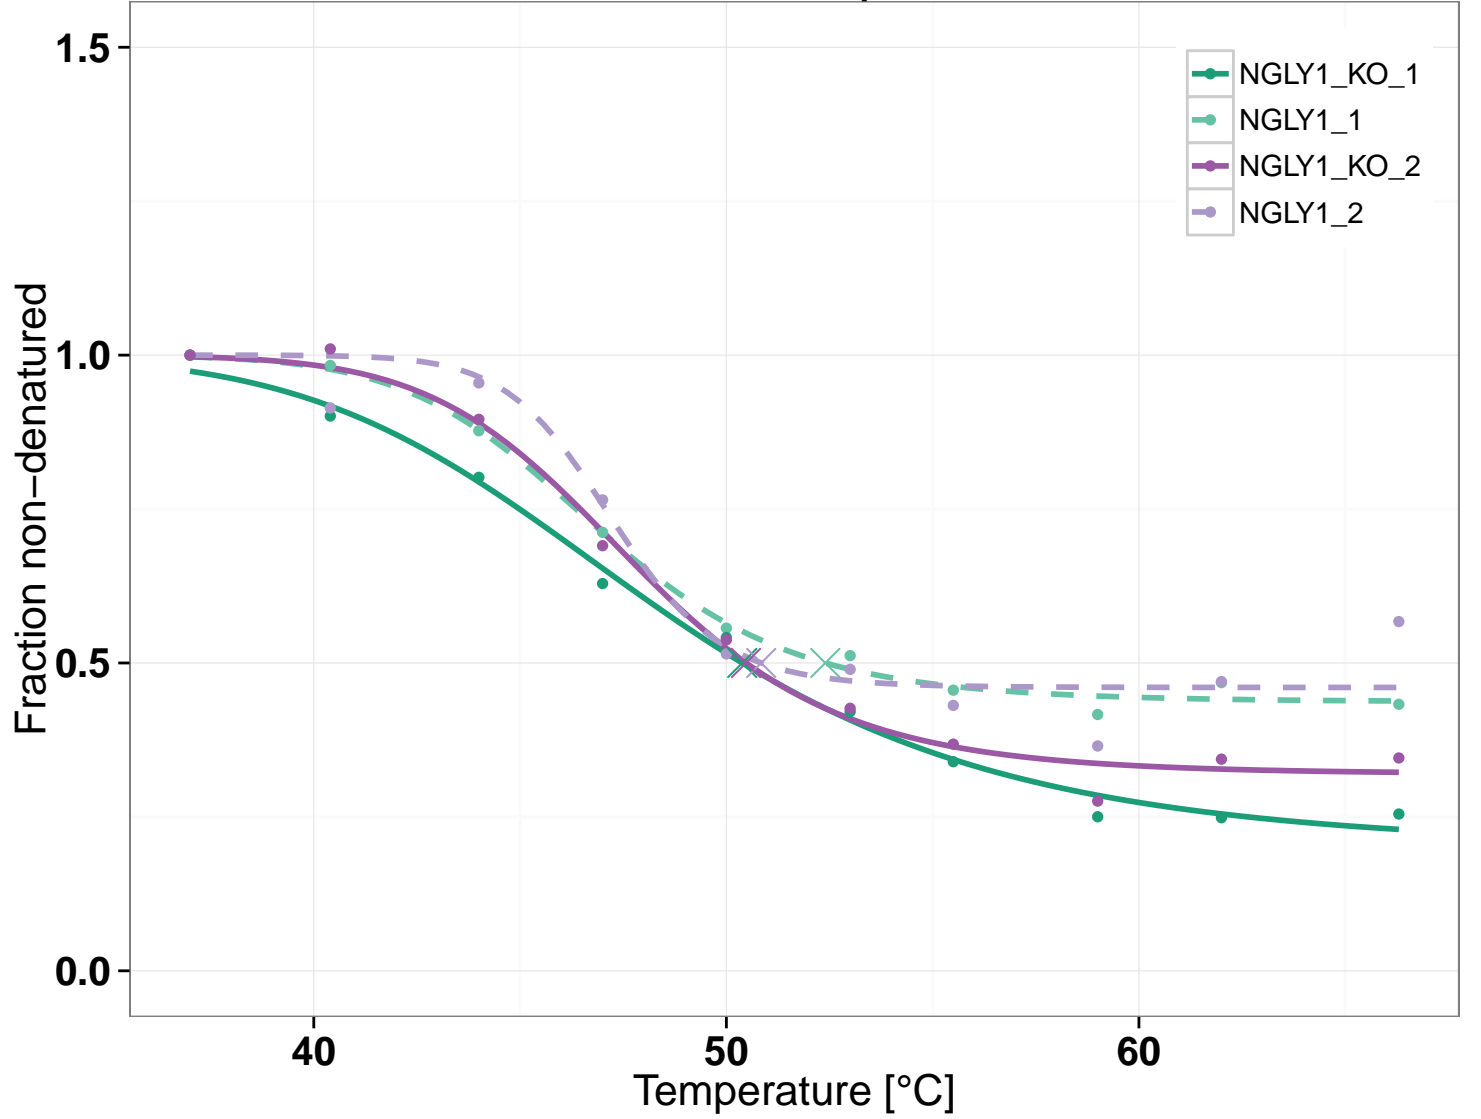

|            | meltPoint | slope  | plateau | R2   |
|------------|-----------|--------|---------|------|
| NGLY1_KO_1 | 50.39     | -0.048 | 0.19    | 0.99 |
| NGLY1_1    | 52.4      | -0.06  | 0.44    | 1    |
| NGLY1_KO_2 | 50.48     | -0.069 | 0.32    | 0.99 |
| NGLY1_2    | 50.85     | -0.1   | 0.46    | 0.94 |

Supplement: Supplementary file 3026 [file 1]

# IPI00797230.1|RPL8

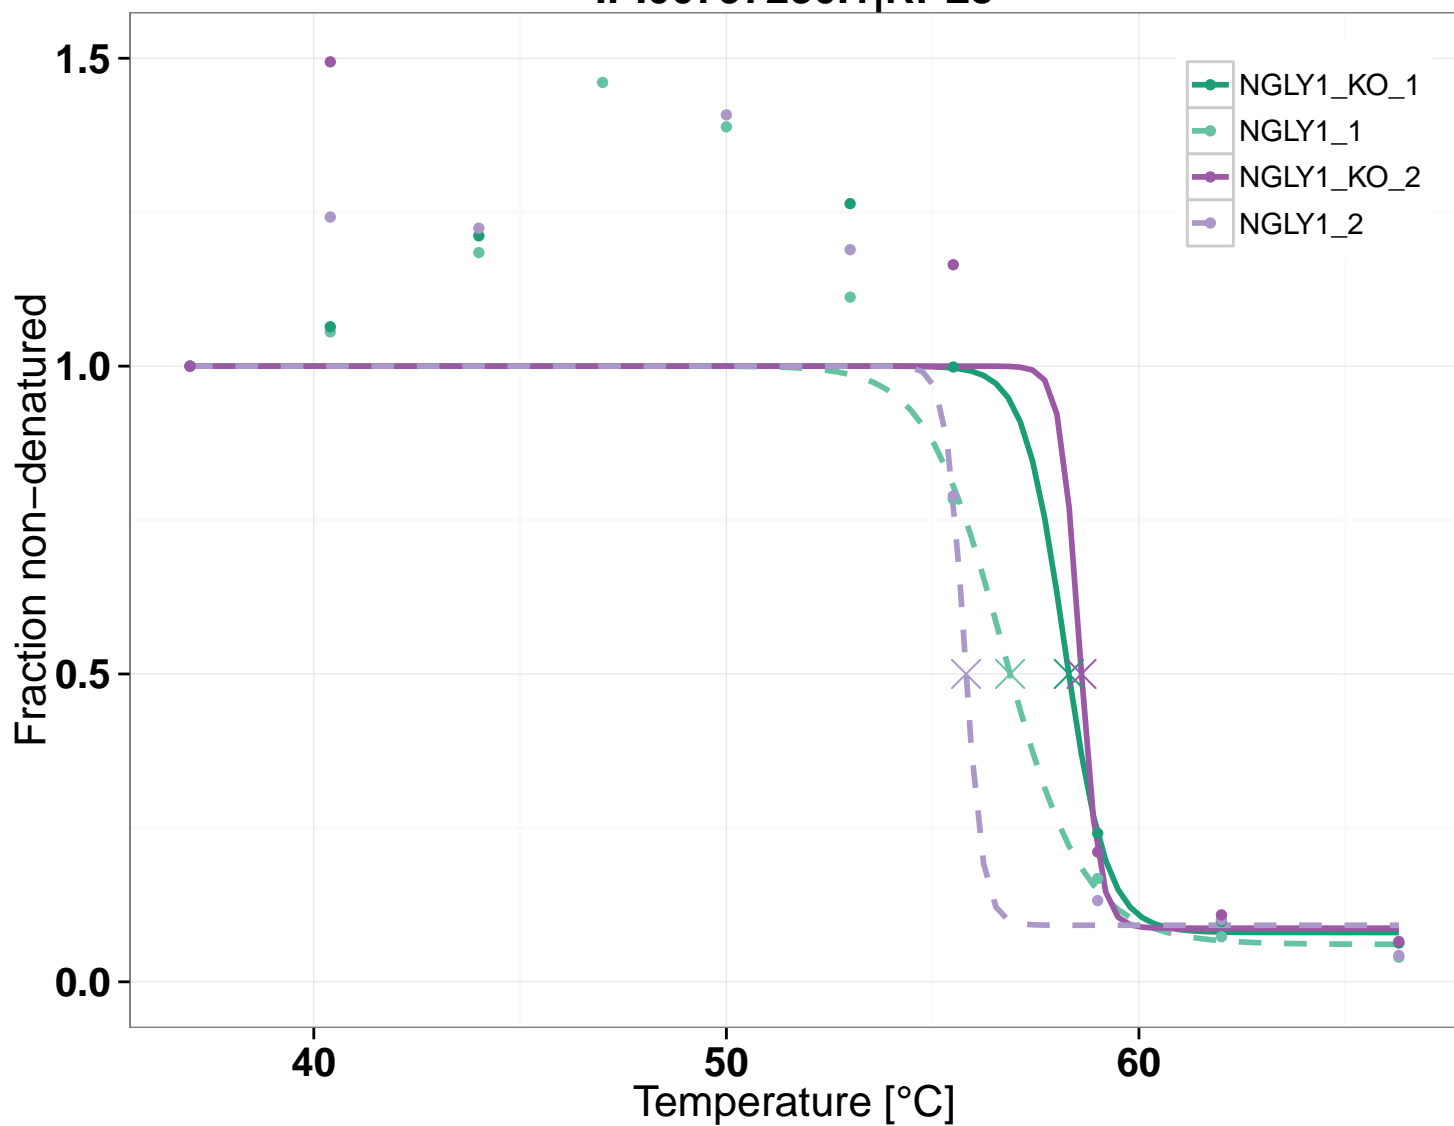

|            | meltPoint | slope | plateau | R2   |
|------------|-----------|-------|---------|------|
| NGLY1_KO_1 | 58.3      | -0.46 | 0.08    | 0.74 |
| NGLY1_1    | 56.88     | -0.25 | 0.06    | 0.84 |
| NGLY1_KO_2 | 58.61     | -0.97 | 0.09    | 0.36 |
| NGLY1_2    | 55.81     | -1    | 0.09    | 0.8  |

Supplement: Supplementary file 3027 [file 1]

# IPI00220687.1|HM13

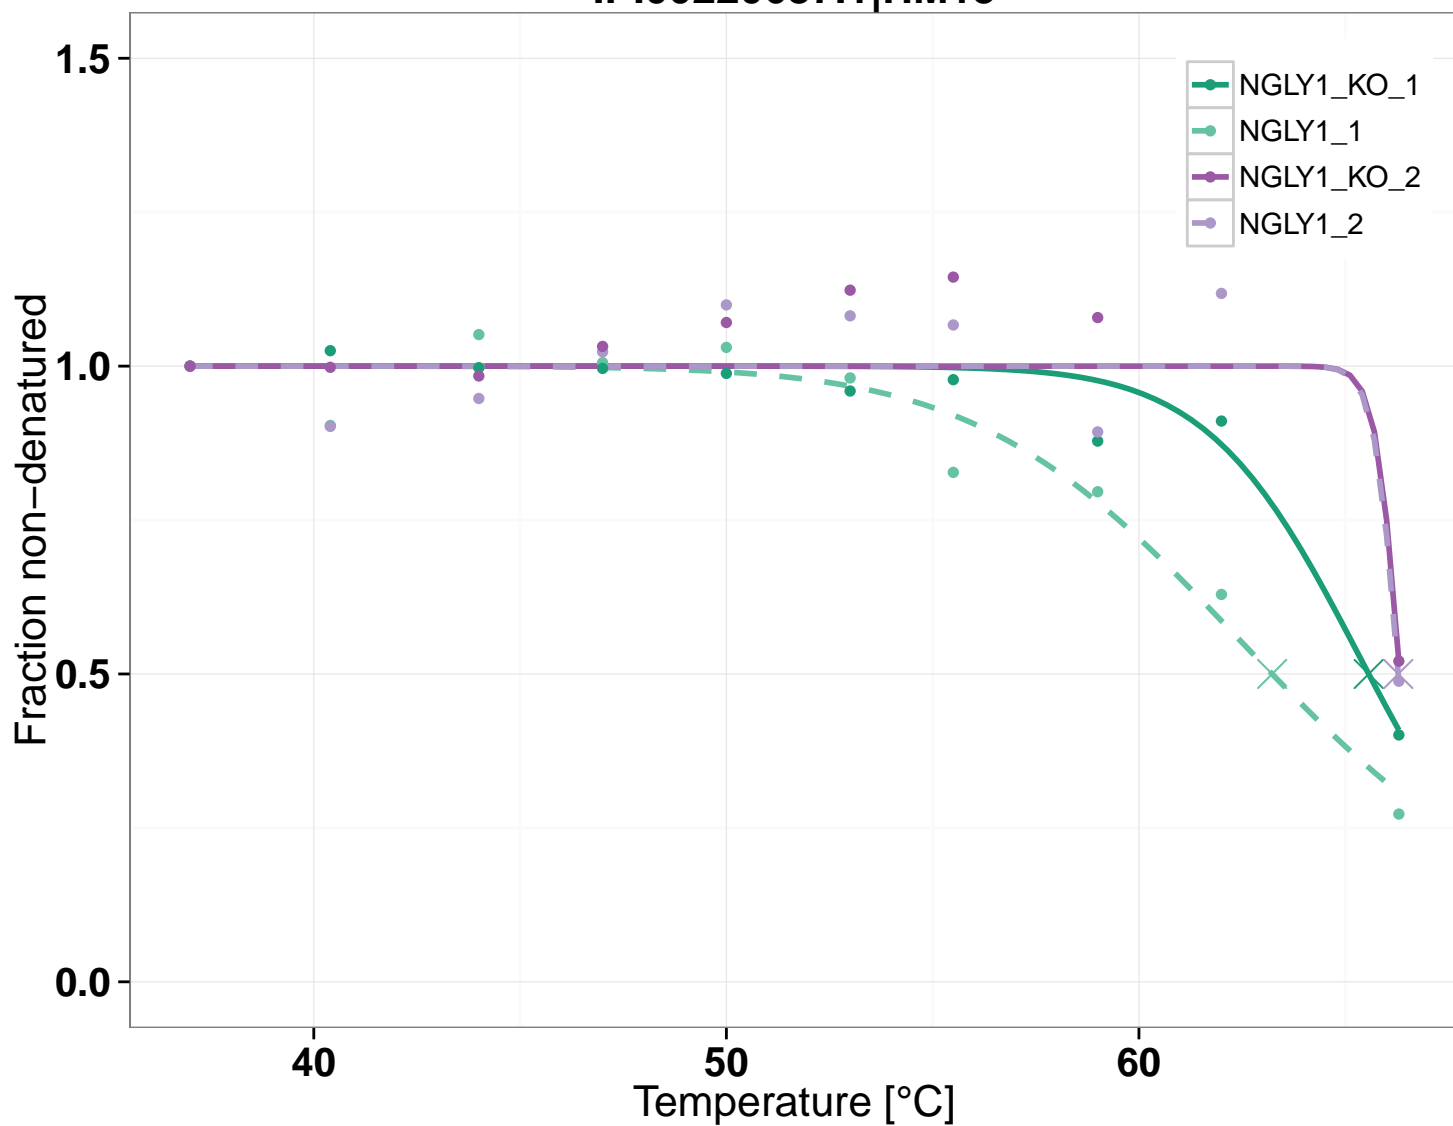

|            | meltPoint | slope | plateau | R2   |
|------------|-----------|-------|---------|------|
| NGLY1_KO_1 | 65.57     | -0.13 | 0       | 0.95 |
| NGLY1_1    | 63.23     | -0.07 | 0       | 0.95 |
| NGLY1_KO_2 | -         | -     | 0       | 0.66 |
| NGLY1_2    | 66.29     | -0.85 | 0       | 0.81 |

Supplement: Supplementary file 3028 [file 1]

# IPI00384690.2|ZNF451

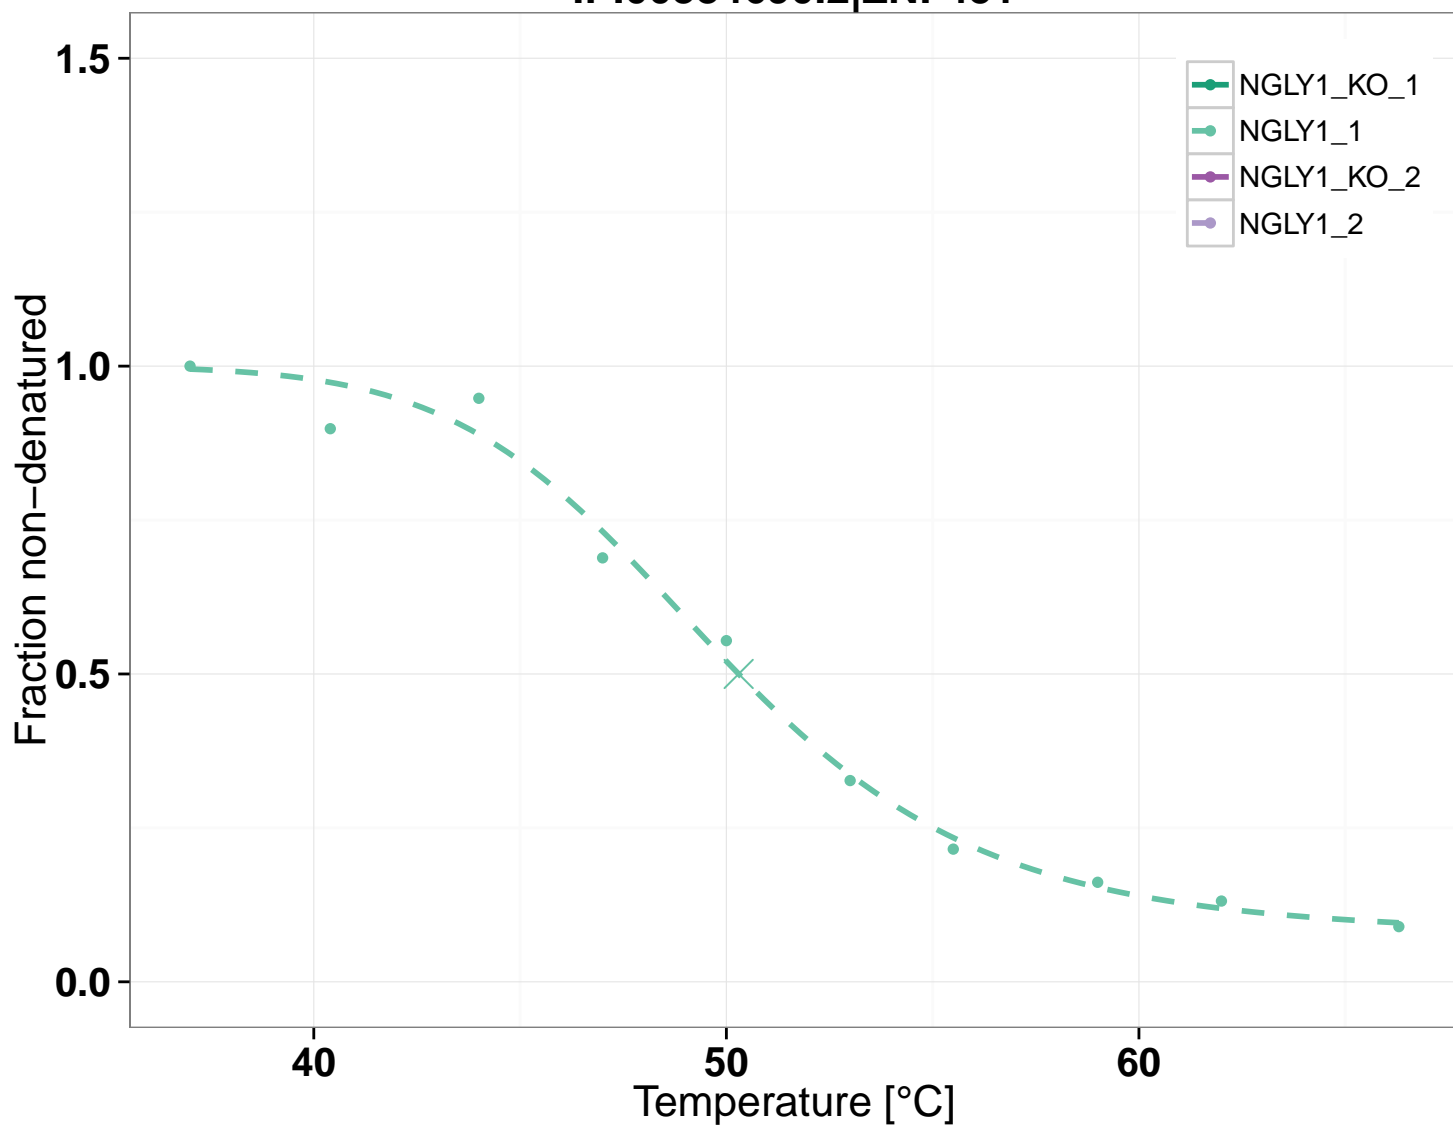

|            | meltPoint | slope  | plateau | R2   |
|------------|-----------|--------|---------|------|
| NGLY1_KO_1 | —         | —      | —       | —    |
| NGLY1_1    | 50.3      | -0.072 | 0.08    | 0.99 |
| NGLY1_KO_2 | —         | —      | —       | —    |
| NGLY1_2    | —         | —      | —       | —    |

Supplement: Supplementary file 3029 [file 1]

IPI00001722.1|NTHL1

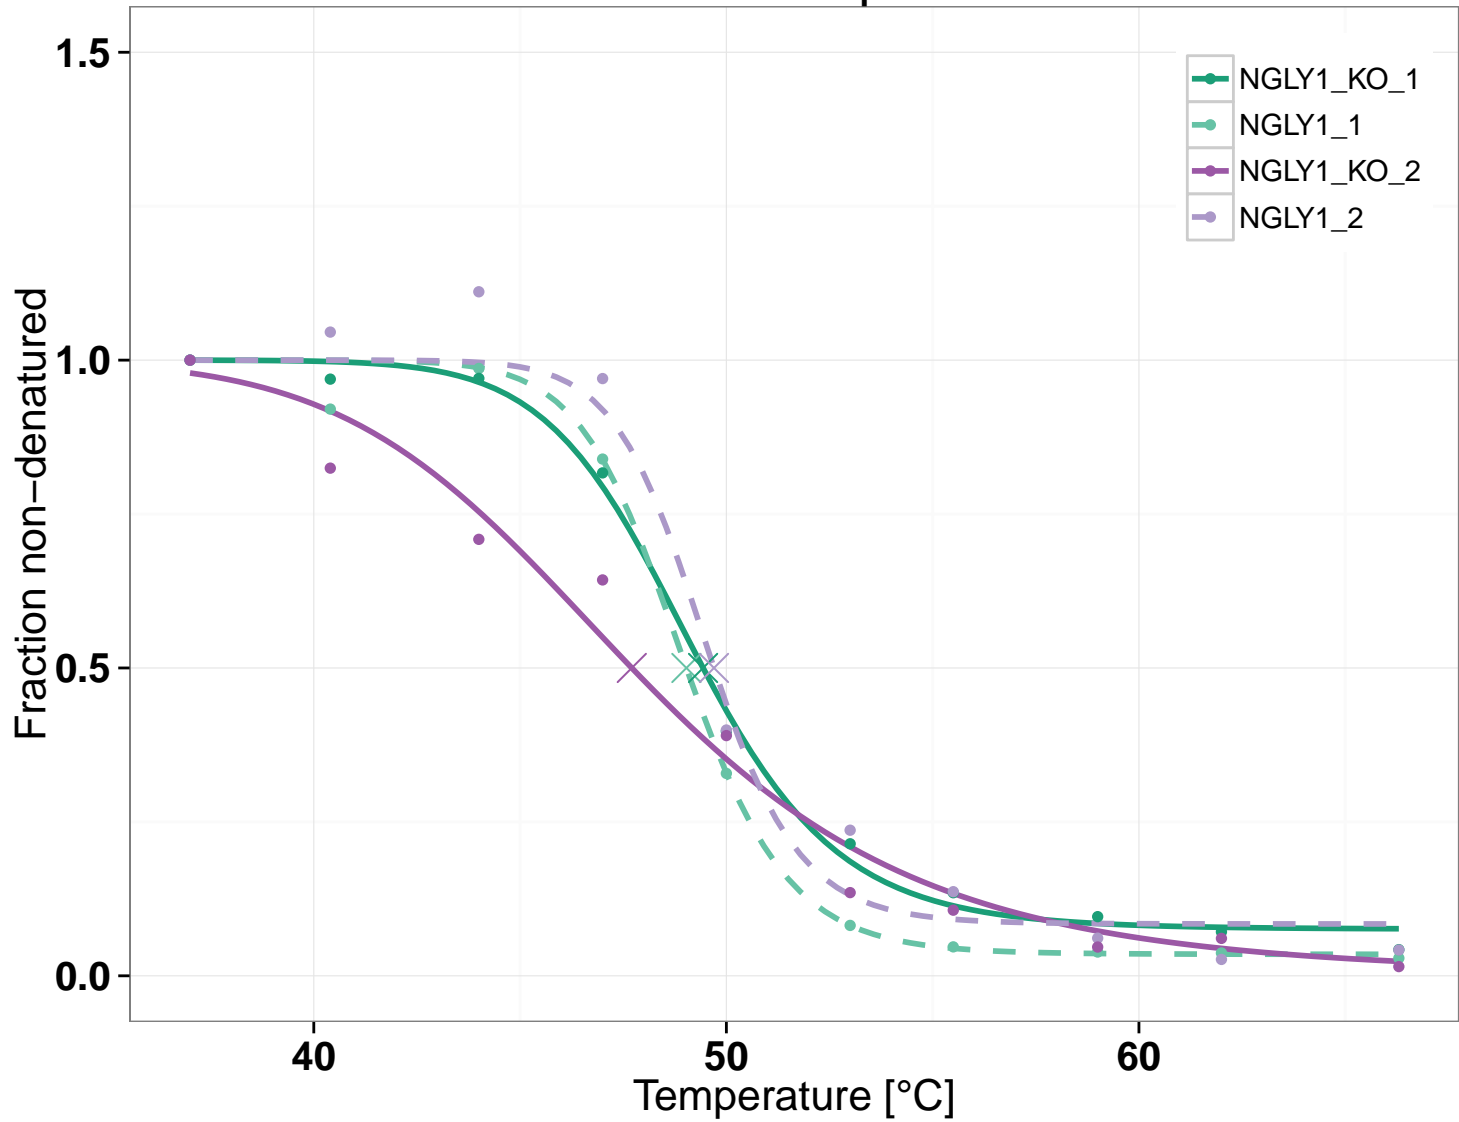

|            | meltPoint | slope  | plateau | R2   |
|------------|-----------|--------|---------|------|
| NGLY1_KO_1 | 49.44     | -0.13  | 0.08    | 1    |
| NGLY1_1    | 49.03     | -0.19  | 0.03    | 1    |
| NGLY1_KO_2 | 47.71     | -0.071 | 0       | 0.98 |
| NGLY1_2    | 49.7      | -0.2   | 0.08    | 0.98 |

Supplement: Supplementary file 3030 [file 1]

IPI00002580.2|PIK3C2A

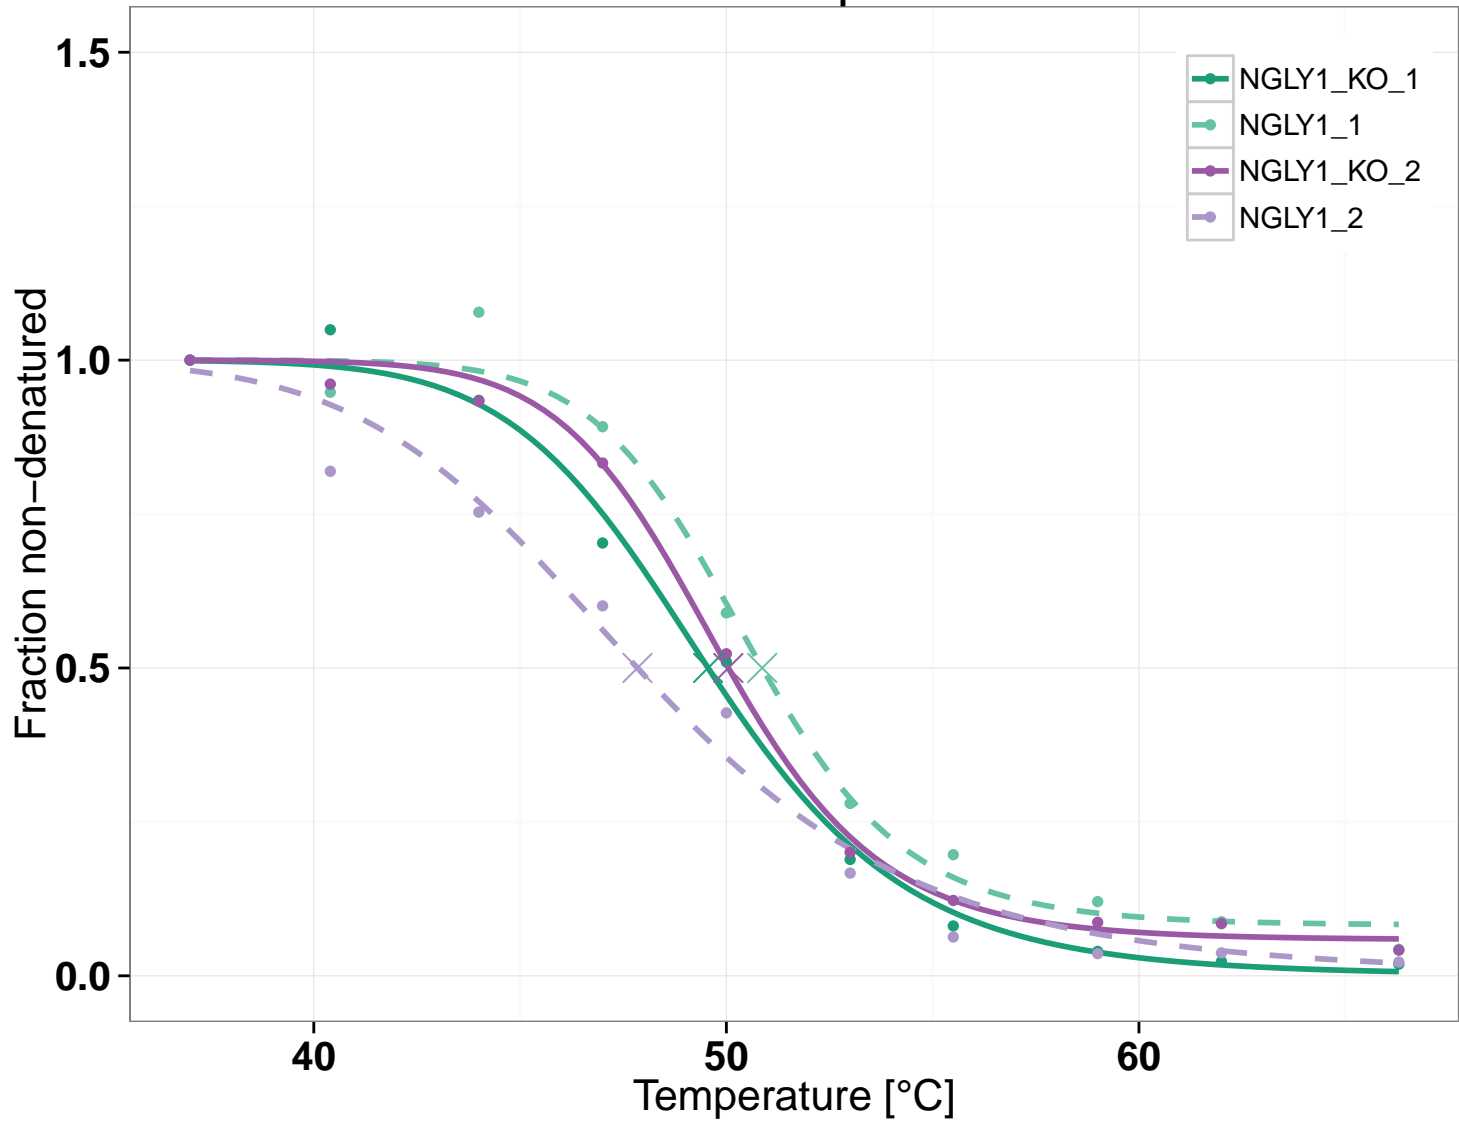

|            | meltPoint | slope  | plateau | R2   |
|------------|-----------|--------|---------|------|
| NGLY1_KO_1 | 49.56     | -0.1   | 0       | 0.99 |
| NGLY1_1    | 50.87     | -0.12  | 0.08    | 0.99 |
| NGLY1_KO_2 | 50.05     | -0.12  | 0.06    | 1    |
| NGLY1_2    | 47.85     | -0.074 | 0       | 0.98 |

Supplement: Supplementary file 3031 [file 1]

IPI00032563.3|ZNF281

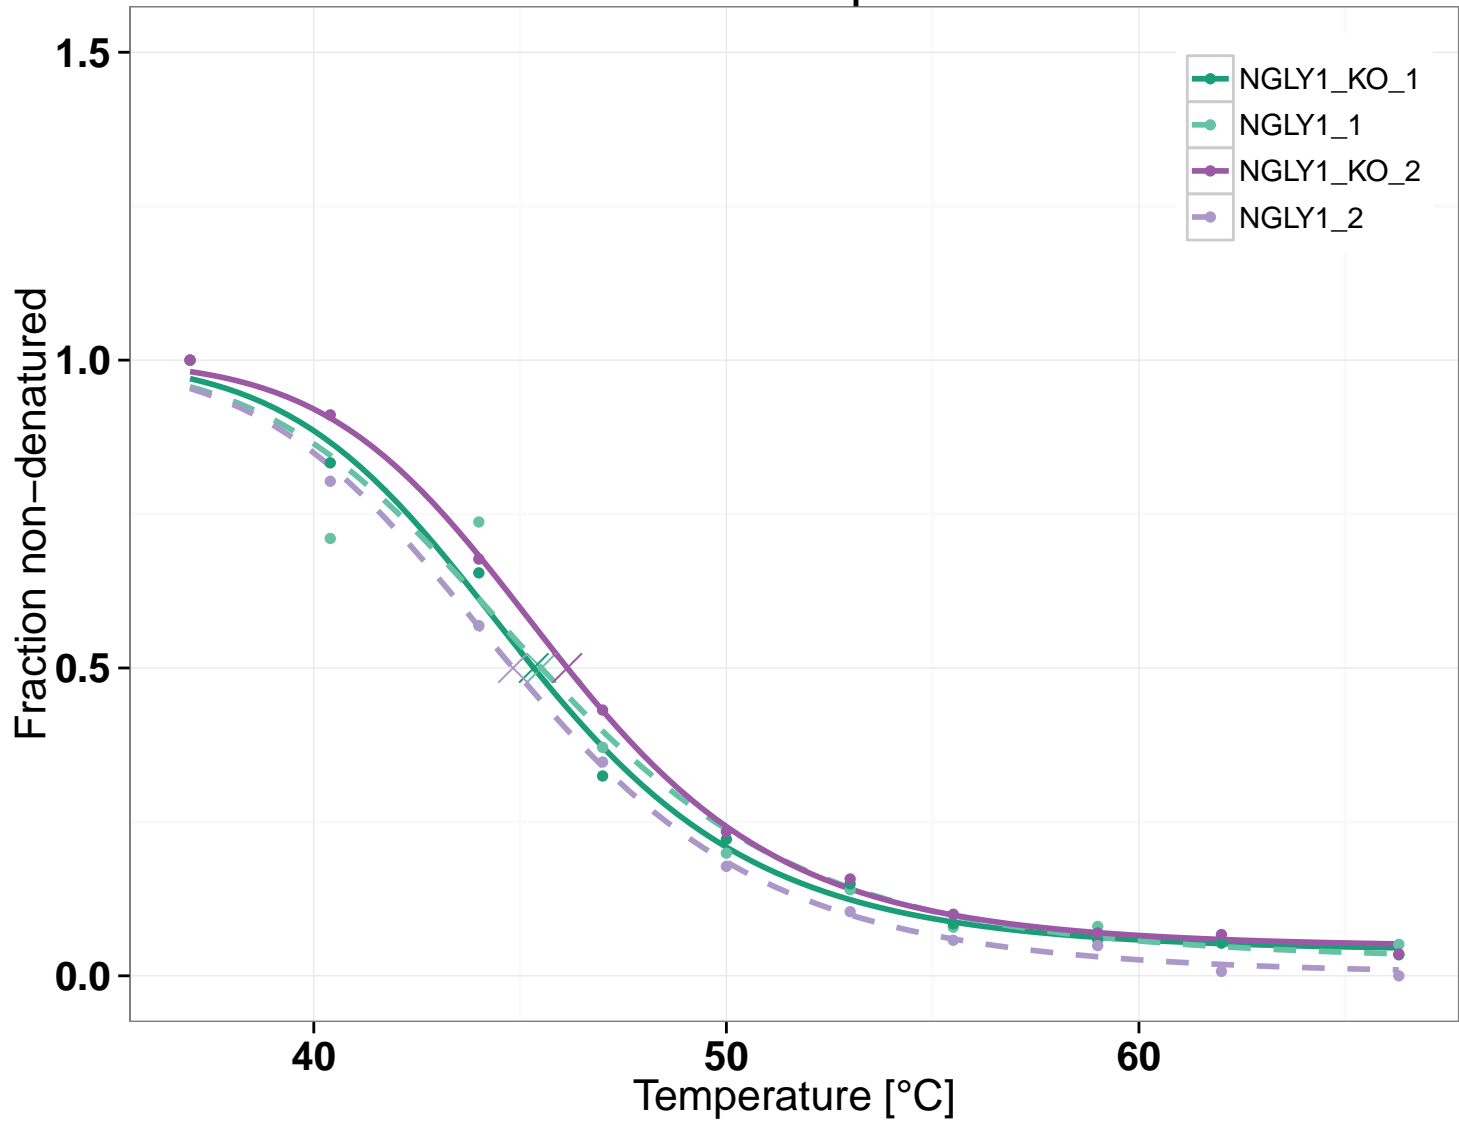

|            | meltPoint | slope  | plateau | R2   |
|------------|-----------|--------|---------|------|
| NGLY1_KO_1 | 45.33     | -0.085 | 0.04    | 0.99 |
| NGLY1_1    | 45.52     | -0.075 | 0.02    | 0.96 |
| NGLY1_KO_2 | 46.14     | -0.086 | 0.05    | 1    |
| NGLY1_2    | 44.83     | -0.081 | 0       | 1    |

Supplement: Supplementary file 3032 [file 1]

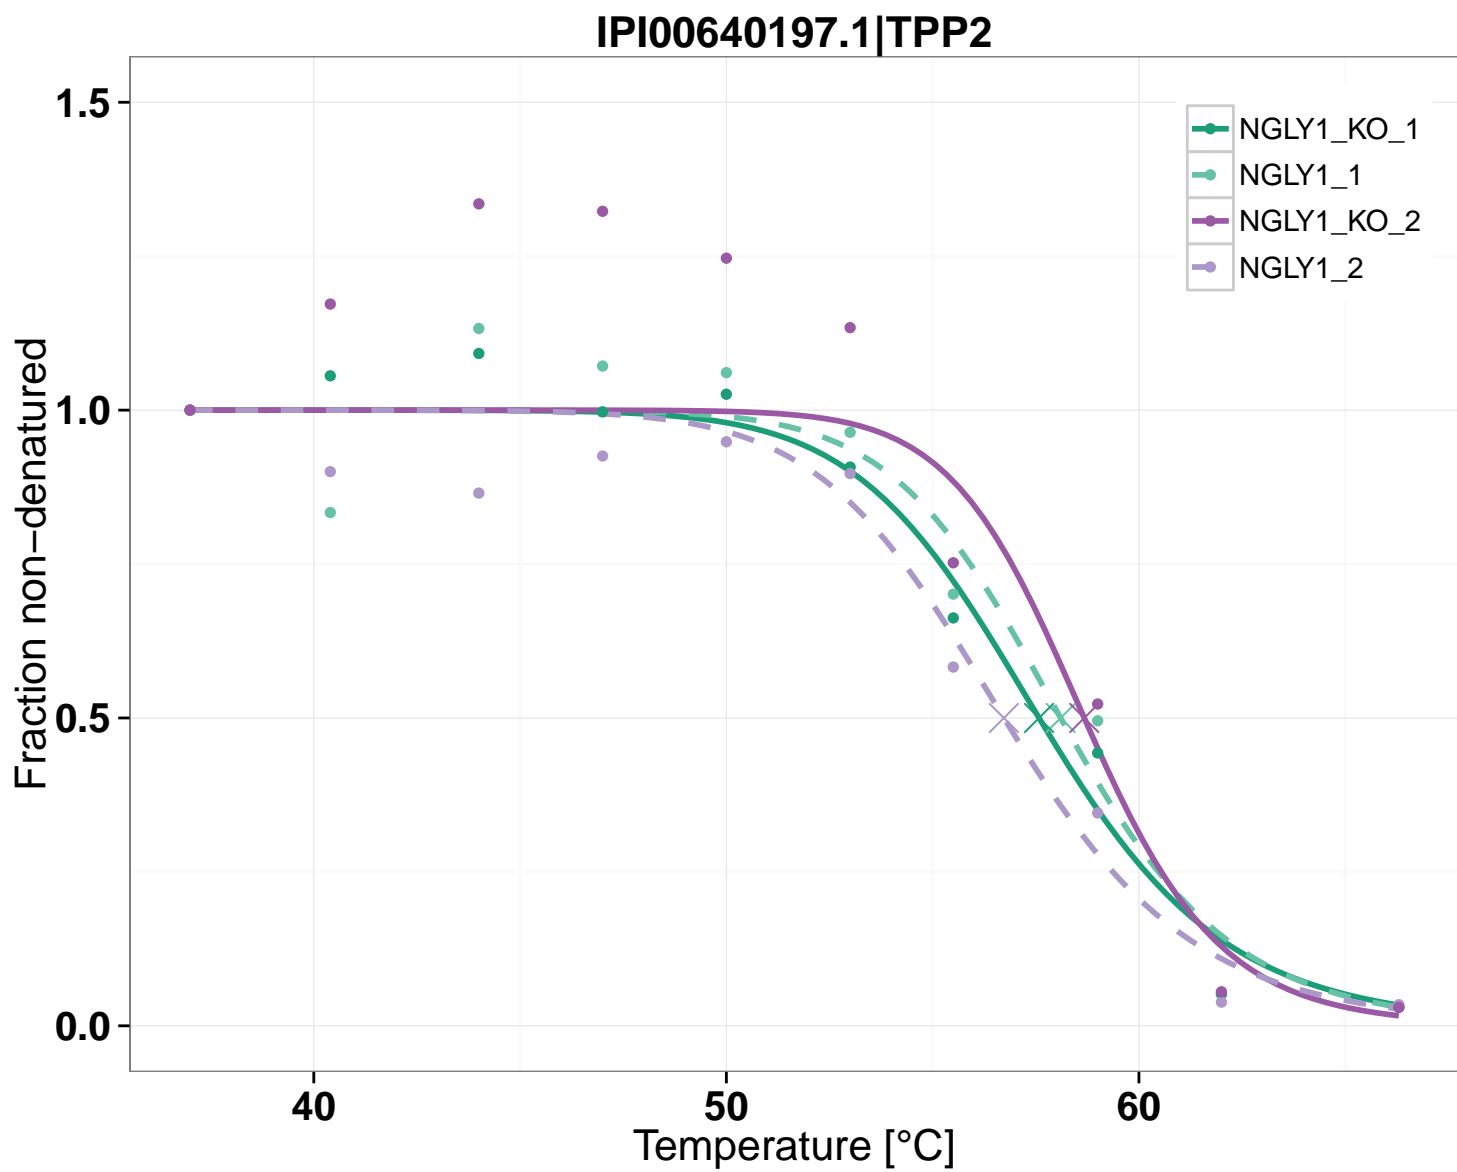

|            | meltPoint | slope | plateau | R2   |
|------------|-----------|-------|---------|------|
| NGLY1_KO_1 | 57.58     | -0.11 | 0       | 0.98 |
| NGLY1_1    | 58.1      | -0.12 | 0       | 0.95 |
| NGLY1_KO_2 | 58.67     | -0.15 | 0       | 0.84 |
| NGLY1_2    | 56.73     | -0.11 | 0       | 0.96 |

Supplement: Supplementary file 3033 [file 1]

IPI00889197.1|LOC728782

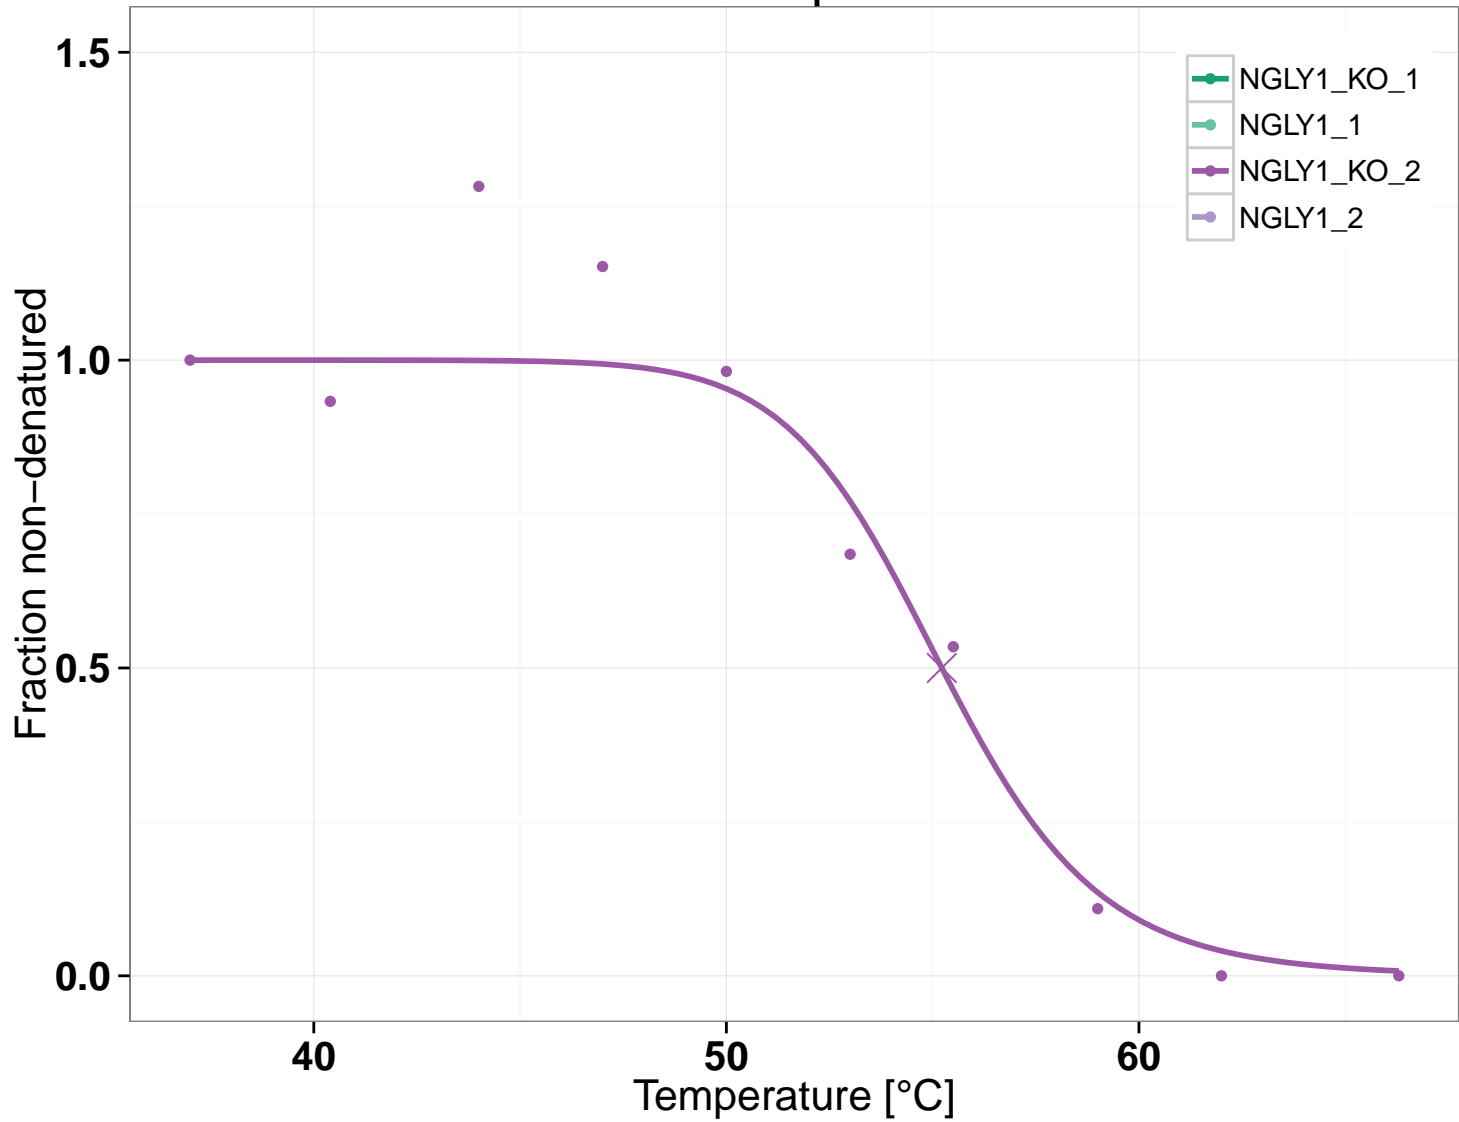

|            | meltPoint | slope | plateau | R2   |
|------------|-----------|-------|---------|------|
| NGLY1_KO_1 | —         | —     | —       | —    |
| NGLY1_1    | —         | —     | —       | —    |
| NGLY1_KO_2 | 55.22     | -0.13 | 0       | 0.94 |
| NGLY1_2    | —         | —     | —       | —    |

Supplement: Supplementary file 3034 [file 1]

IPI00294241.2|GTF3A

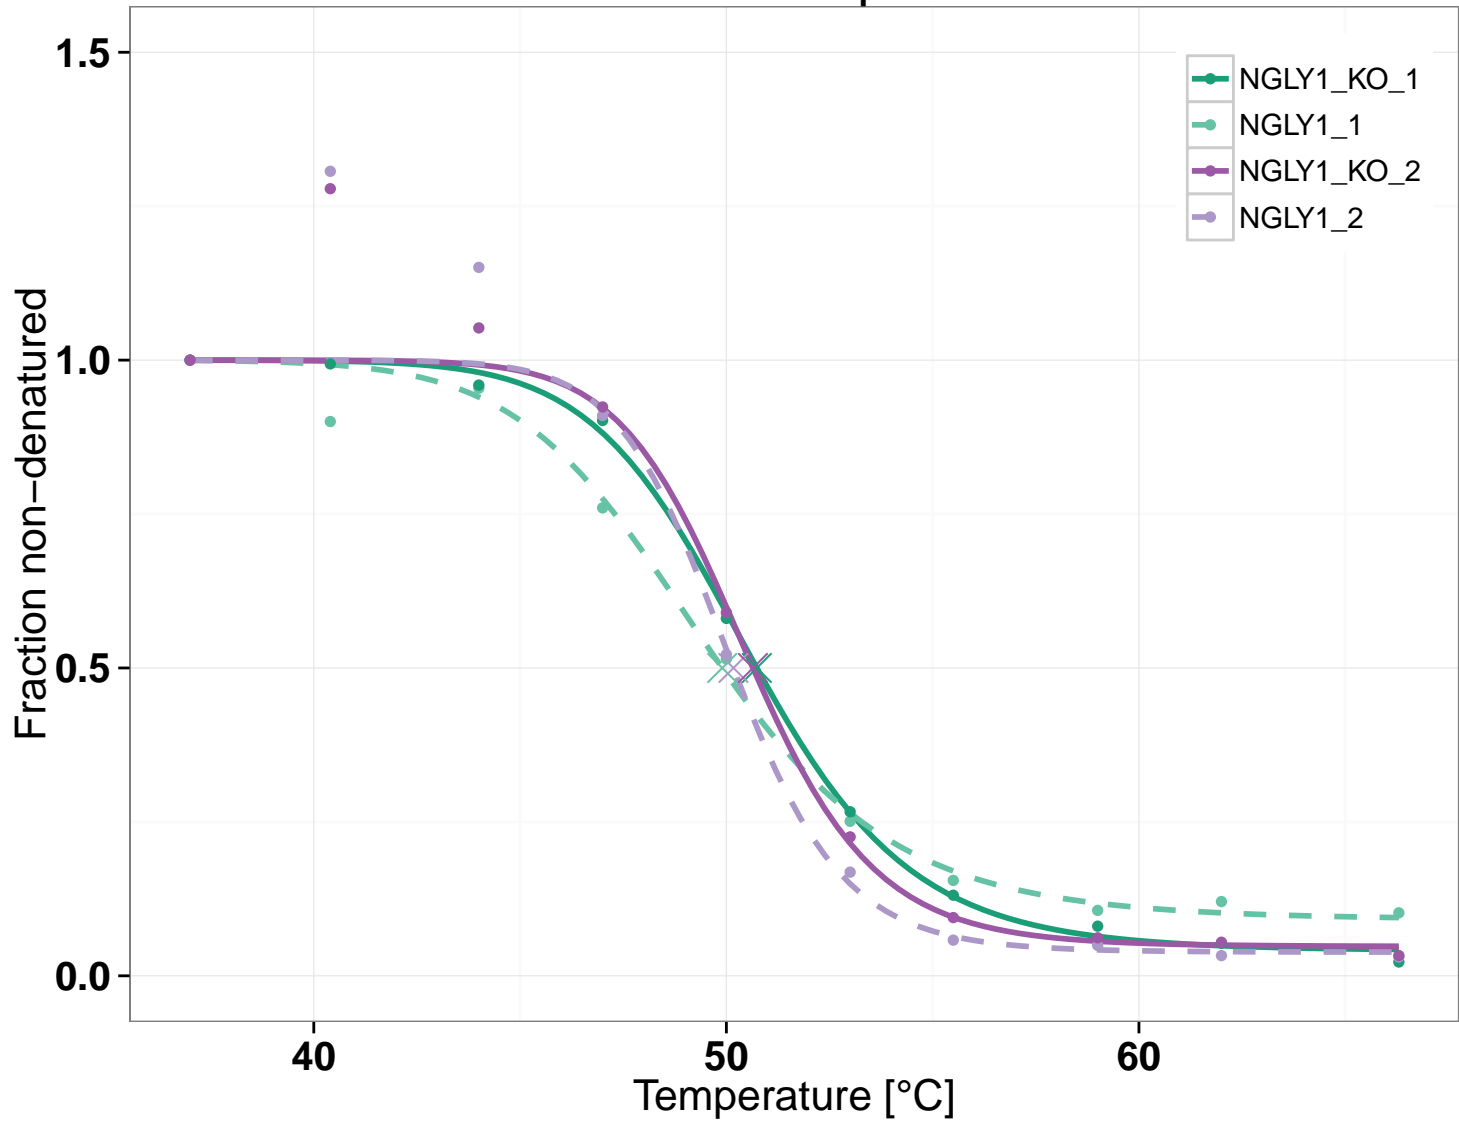

|            | meltPoint | slope | plateau | R2   |
|------------|-----------|-------|---------|------|
| NGLY1_KO_1 | 50.74     | -0.12 | 0.04    | 1    |
| NGLY1_1    | 49.9      | -0.1  | 0.09    | 0.99 |
| NGLY1_KO_2 | 50.64     | -0.15 | 0.05    | 0.96 |
| NGLY1_2    | 50.17     | -0.18 | 0.04    | 0.95 |

Supplement: Supplementary file 3035 [file 1]

# IPI00419504.2|MAP3K7IP2

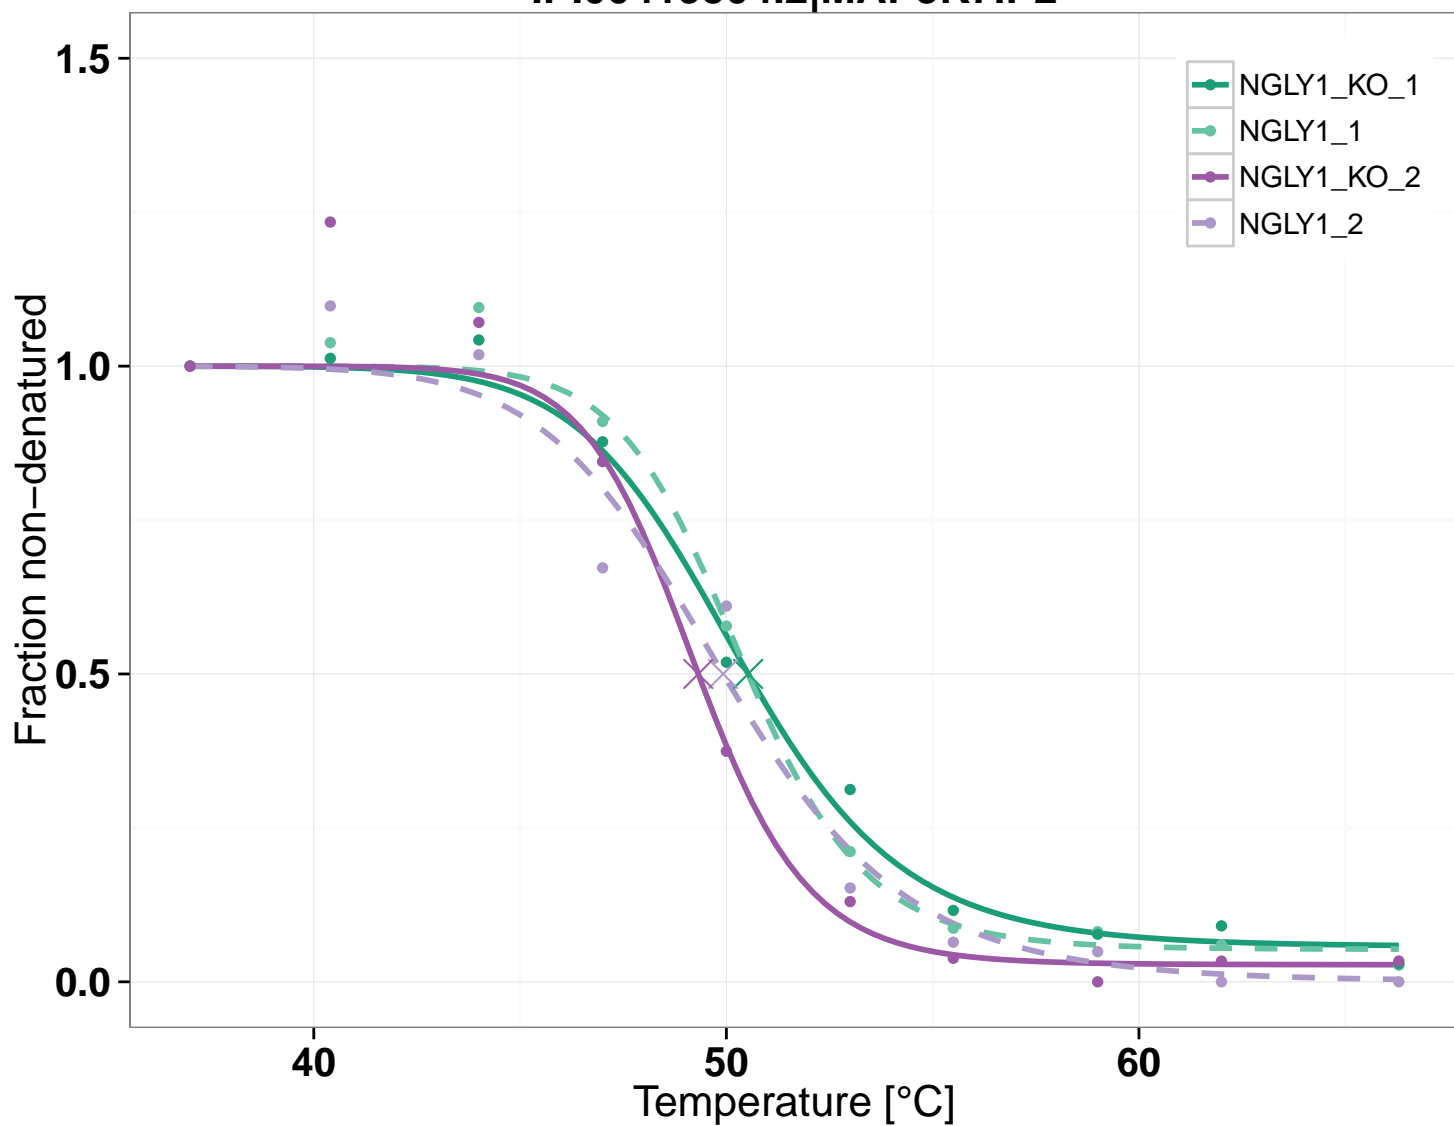

|            | meltPoint | slope | plateau | R2   |
|------------|-----------|-------|---------|------|
| NGLY1_KO_1 | 50.53     | -0.12 | 0.06    | 0.99 |
| NGLY1_1    | 50.52     | -0.16 | 0.05    | 0.99 |
| NGLY1_KO_2 | 49.32     | -0.18 | 0.03    | 0.97 |
| NGLY1_2    | 49.92     | -0.11 | 0       | 0.97 |

Supplement: Supplementary file 3036 [file 1]

# IPI00298406.3|HADH

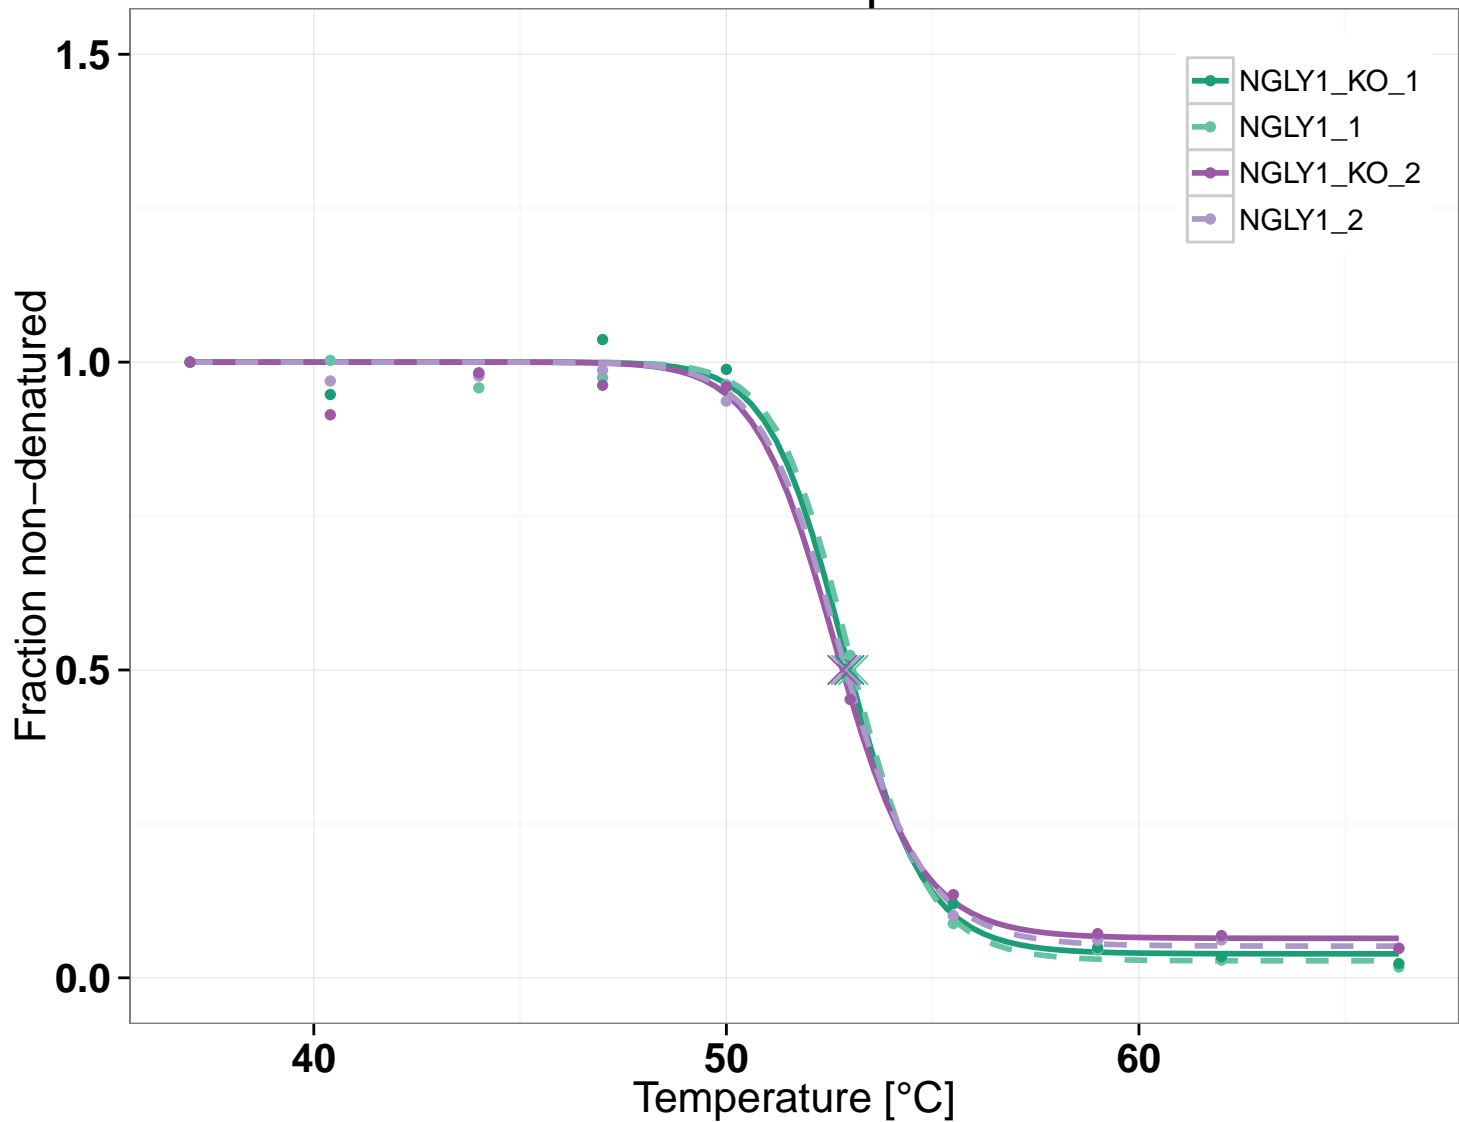

|            | meltPoint | slope | plateau | R2   |
|------------|-----------|-------|---------|------|
| NGLY1_KO_1 | 52.98     | -0.26 | 0.04    | 1    |
| NGLY1_1    | 53.08     | -0.27 | 0.03    | 1    |
| NGLY1_KO_2 | 52.81     | -0.23 | 0.06    | 0.99 |
| NGLY1_2    | 52.9      | -0.24 | 0.05    | 1    |

Supplement: Supplementary file 3037 [file 1]

IPI00465361.4|RPL13

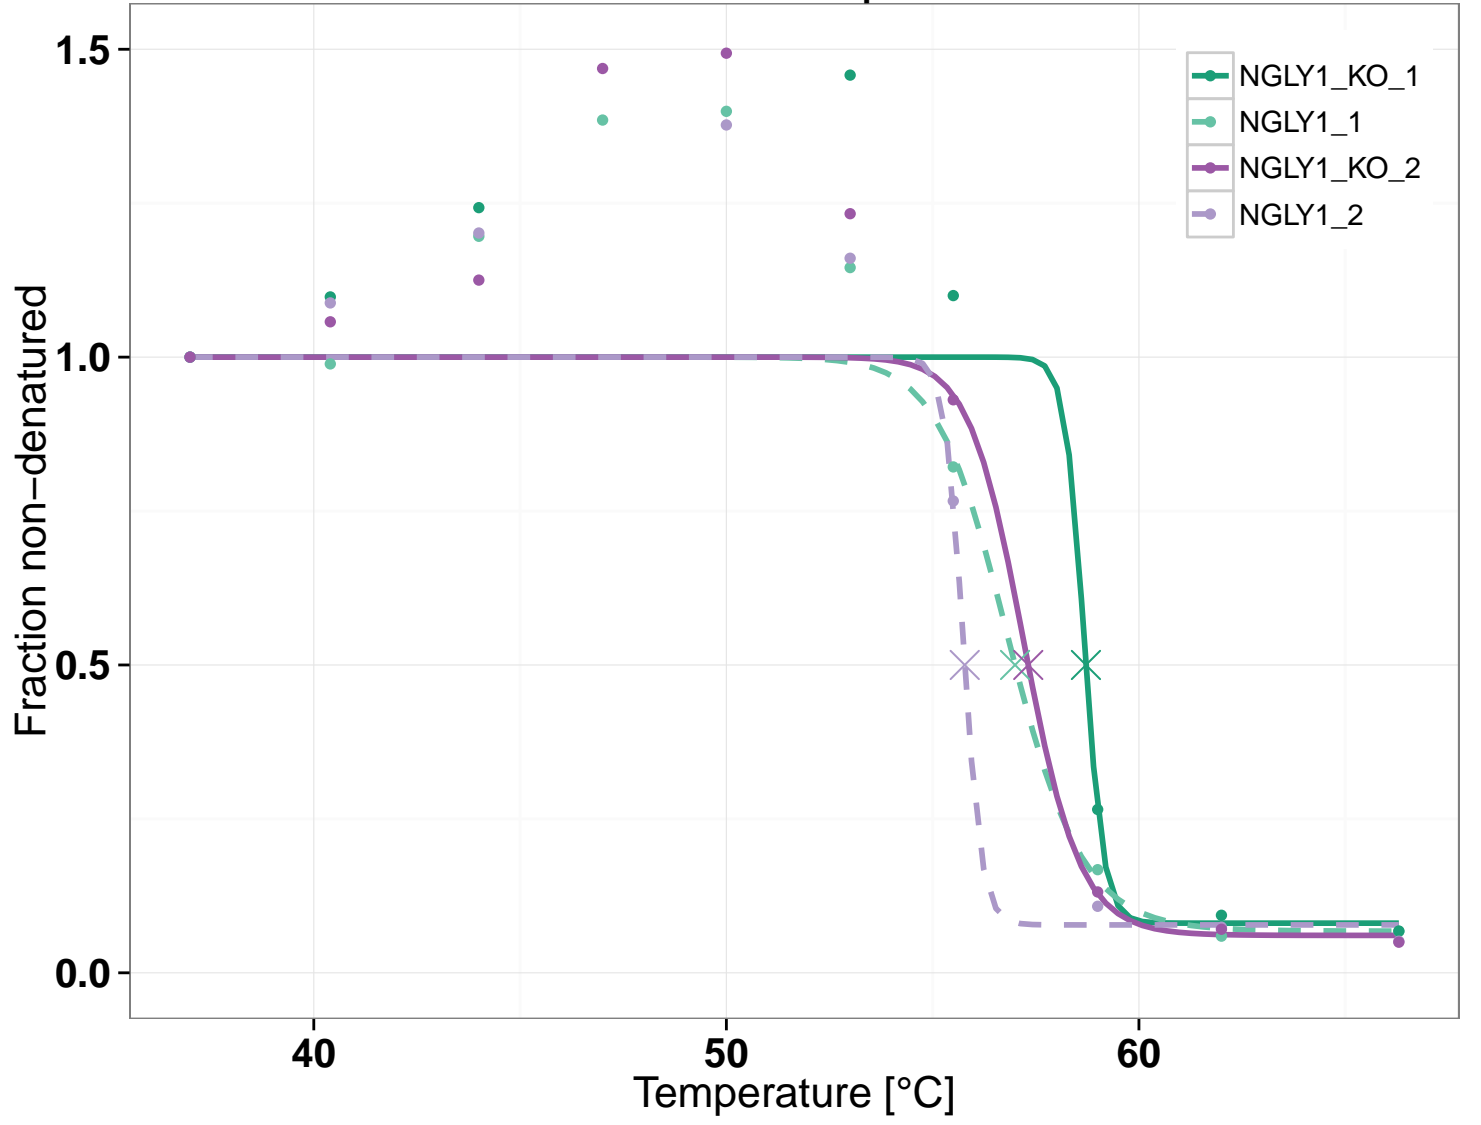

|            | meltPoint | slope | plateau | R2   |
|------------|-----------|-------|---------|------|
| NGLY1_KO_1 | 58.72     | -0.98 | 0.08    | 0.65 |
| NGLY1_1    | 57        | -0.26 | 0.07    | 0.85 |
| NGLY1_KO_2 | 57.32     | -0.35 | 0.06    | 0.81 |
| NGLY1_2    | 55.78     | -1    | 0.08    | 0.83 |

Supplement: Supplementary file 3038 [file 1]

IPI00645963.1|MAD2L2

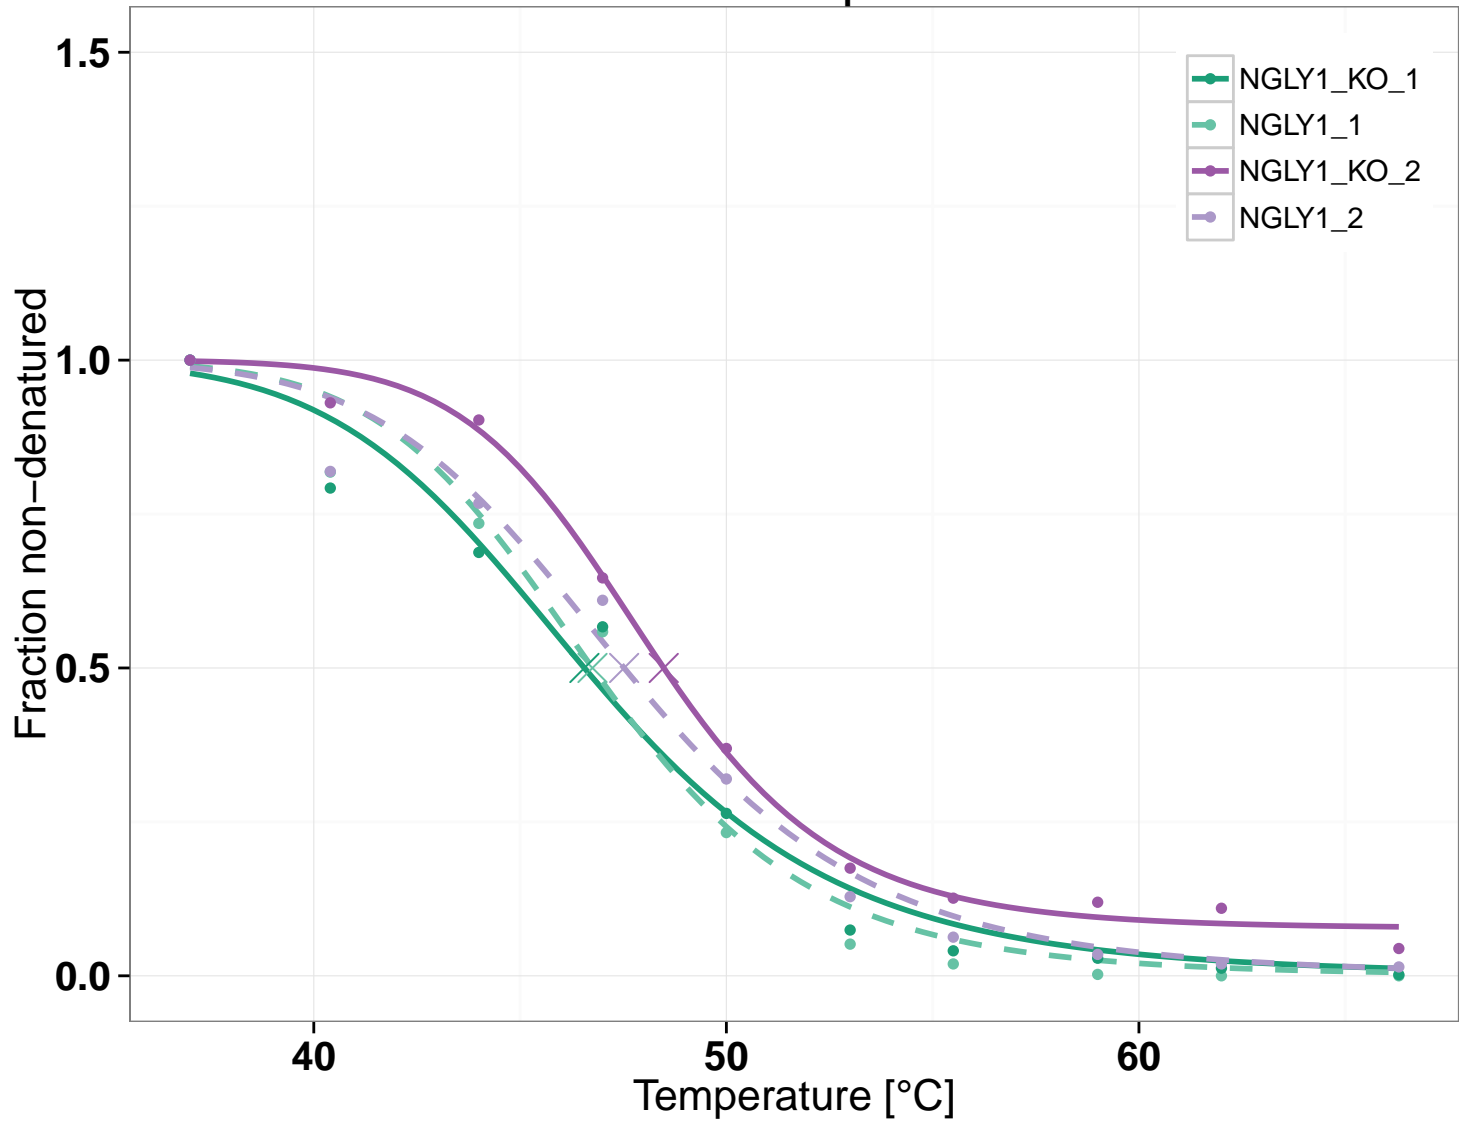

|            | meltPoint | slope  | plateau | R2   |
|------------|-----------|--------|---------|------|
| NGLY1_KO_1 | 46.56     | -0.081 | 0       | 0.98 |
| NGLY1_1    | 46.75     | -0.095 | 0       | 0.98 |
| NGLY1_KO_2 | 48.48     | -0.1   | 0.08    | 1    |
| NGLY1_2    | 47.52     | -0.083 | 0       | 0.98 |

Supplement: Supplementary file 3039 [file 1]

# IPI00290952.6|RRP1B

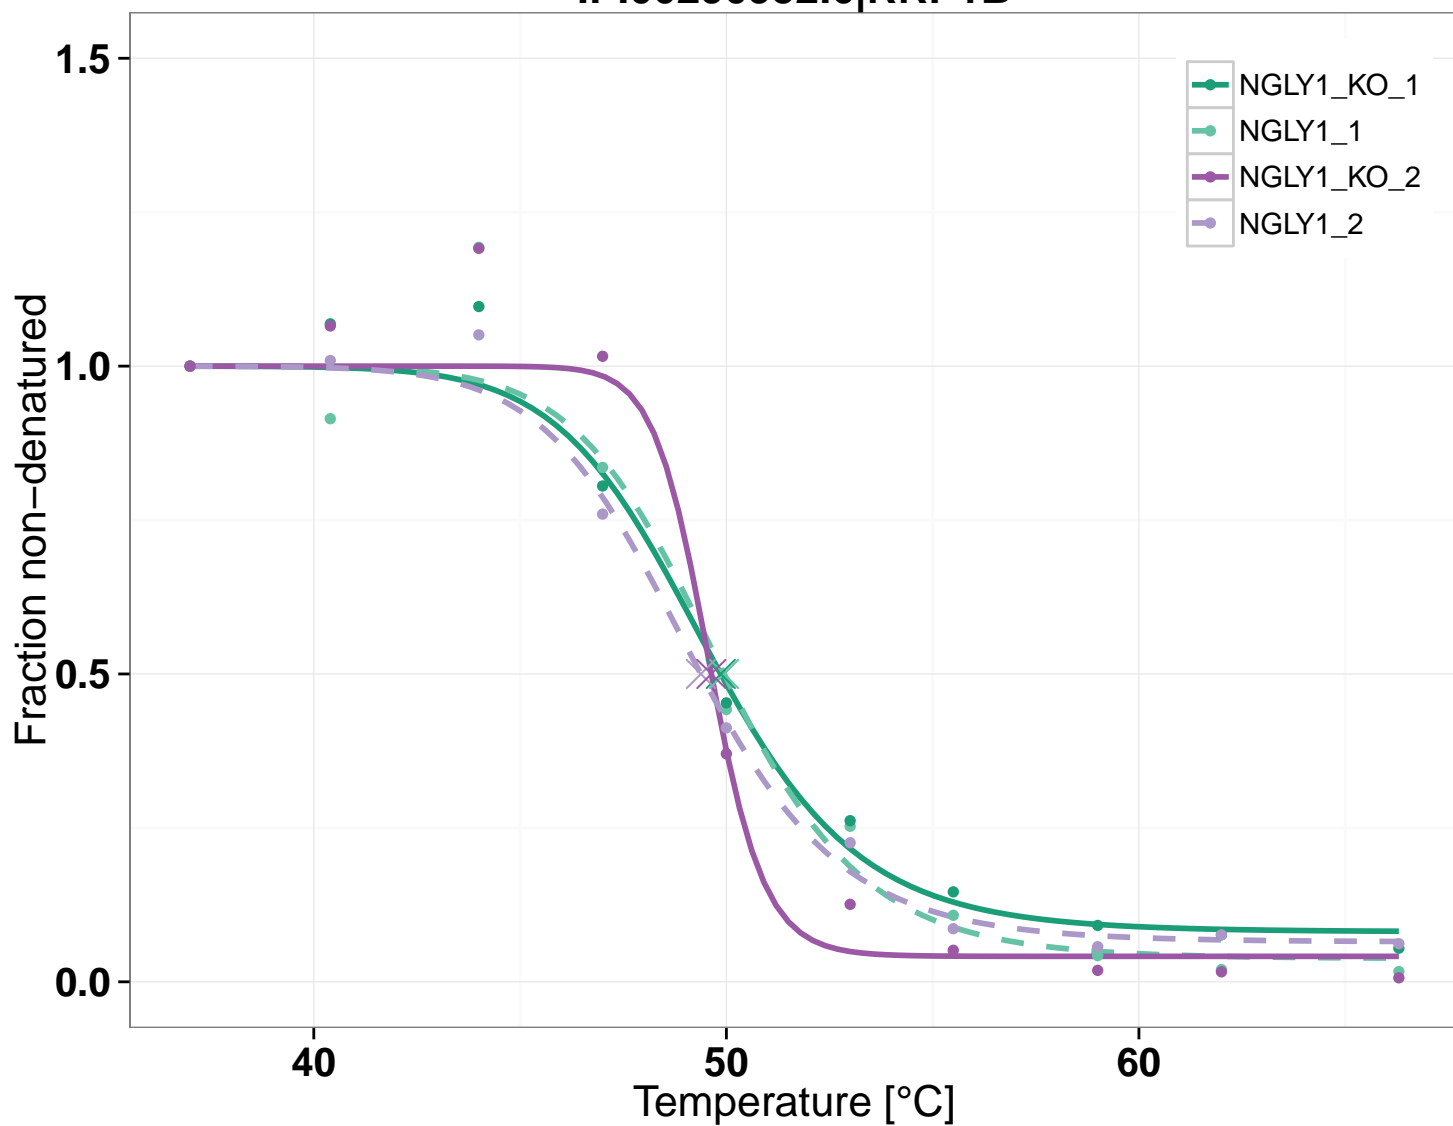

|            | meltPoint | slope | plateau | R2   |
|------------|-----------|-------|---------|------|
| NGLY1_KO_1 | 49.86     | -0.13 | 0.08    | 0.99 |
| NGLY1_1    | 49.95     | -0.14 | 0.04    | 0.97 |
| NGLY1_KO_2 | 49.64     | -0.36 | 0.04    | 0.98 |
| NGLY1_2    | 49.38     | -0.13 | 0.06    | 0.99 |

Supplement: Supplementary file 3040 [file 1]

IPI00514705.2|FAM21C

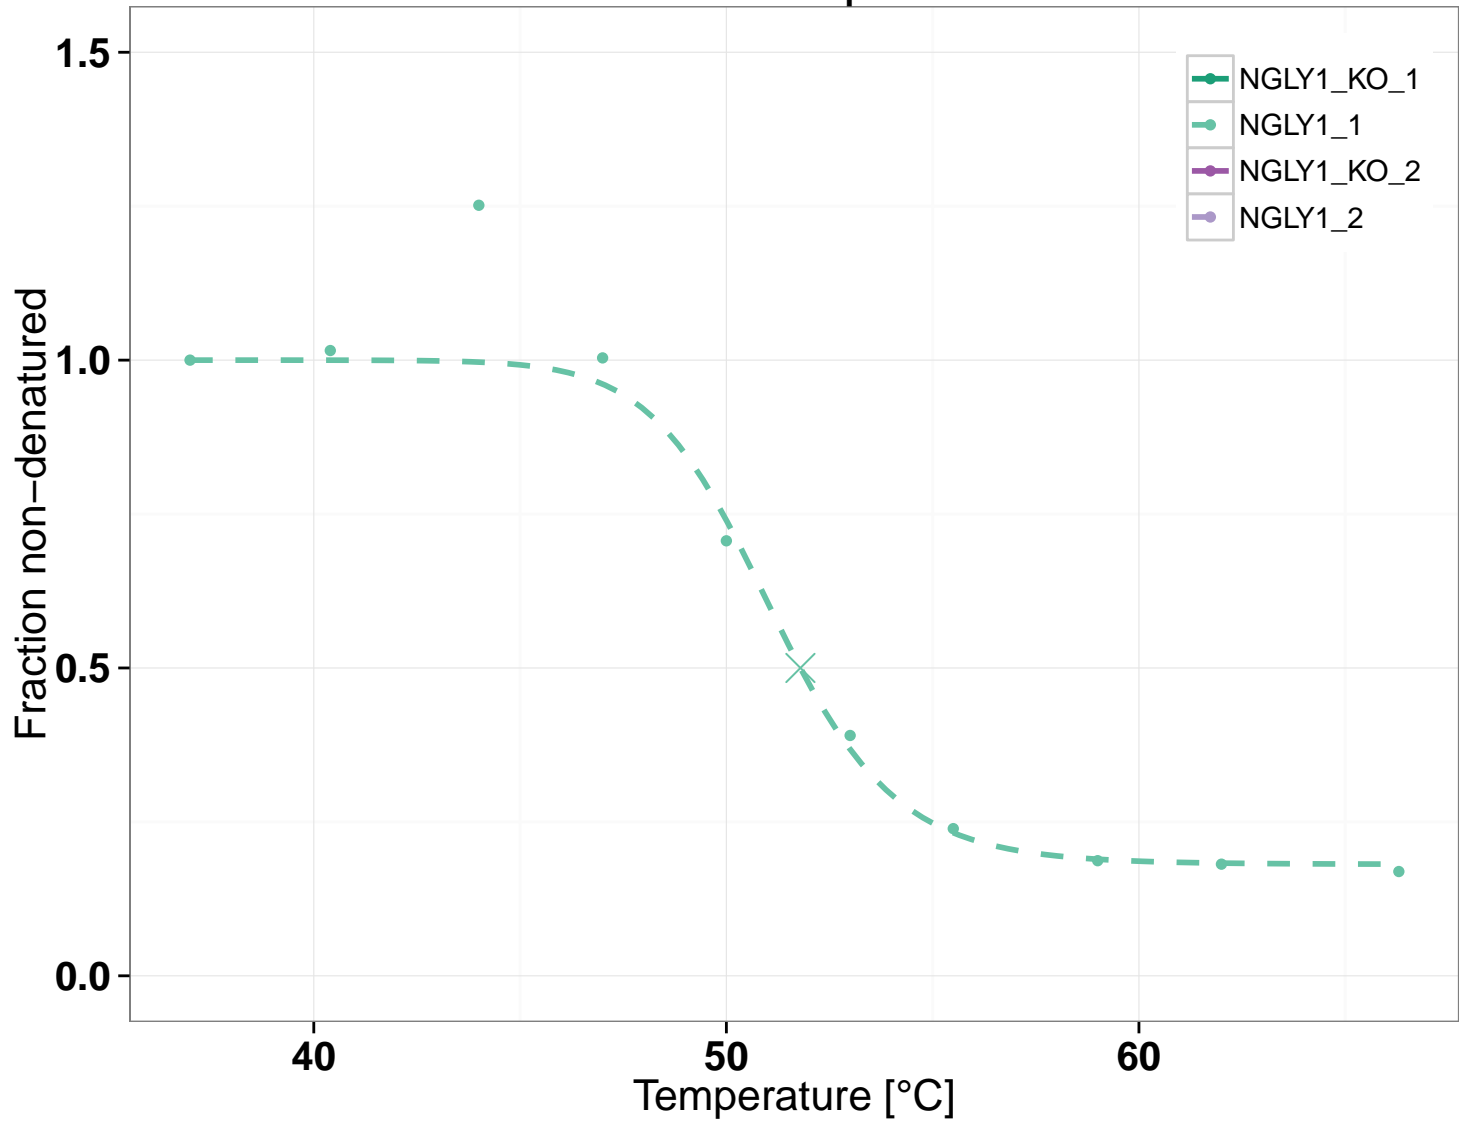

|            | meltPoint | slope | plateau | R2   |
|------------|-----------|-------|---------|------|
| NGLY1_KO_1 | -         | -     | -       | -    |
| NGLY1_1    | 51.79     | -0.14 | 0.18    | 0.96 |
| NGLY1_KO_2 | -         | -     | -       | -    |
| NGLY1_2    | -         | -     | -       | -    |

Supplement: Supplementary file 3041 [file 1]

IPI00018726.3|KLHL11

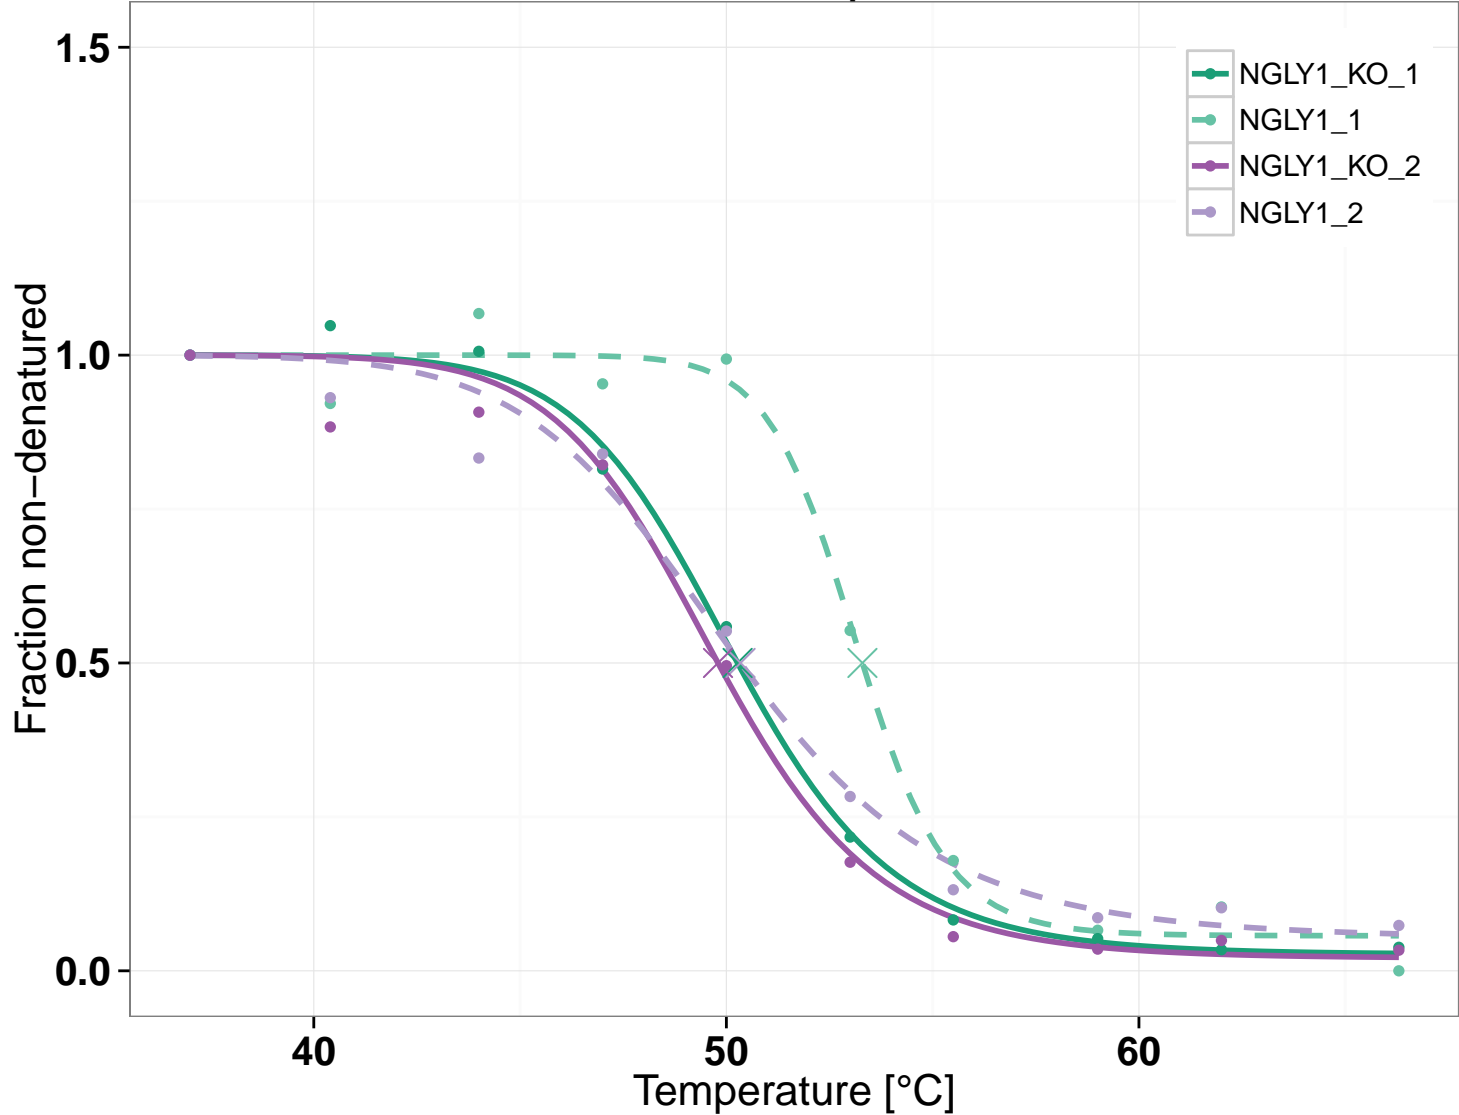

|            | meltPoint | slope  | plateau | R2   |
|------------|-----------|--------|---------|------|
| NGLY1_KO_1 | 50.27     | -0.13  | 0.03    | 1    |
| NGLY1_1    | 53.3      | -0.22  | 0.06    | 0.99 |
| NGLY1_KO_2 | 49.8      | -0.12  | 0.02    | 0.99 |
| NGLY1_2    | 50.34     | -0.094 | 0.05    | 0.98 |

Supplement: Supplementary file 3042 [file 1]

IPI00167998.3|C1ORF55

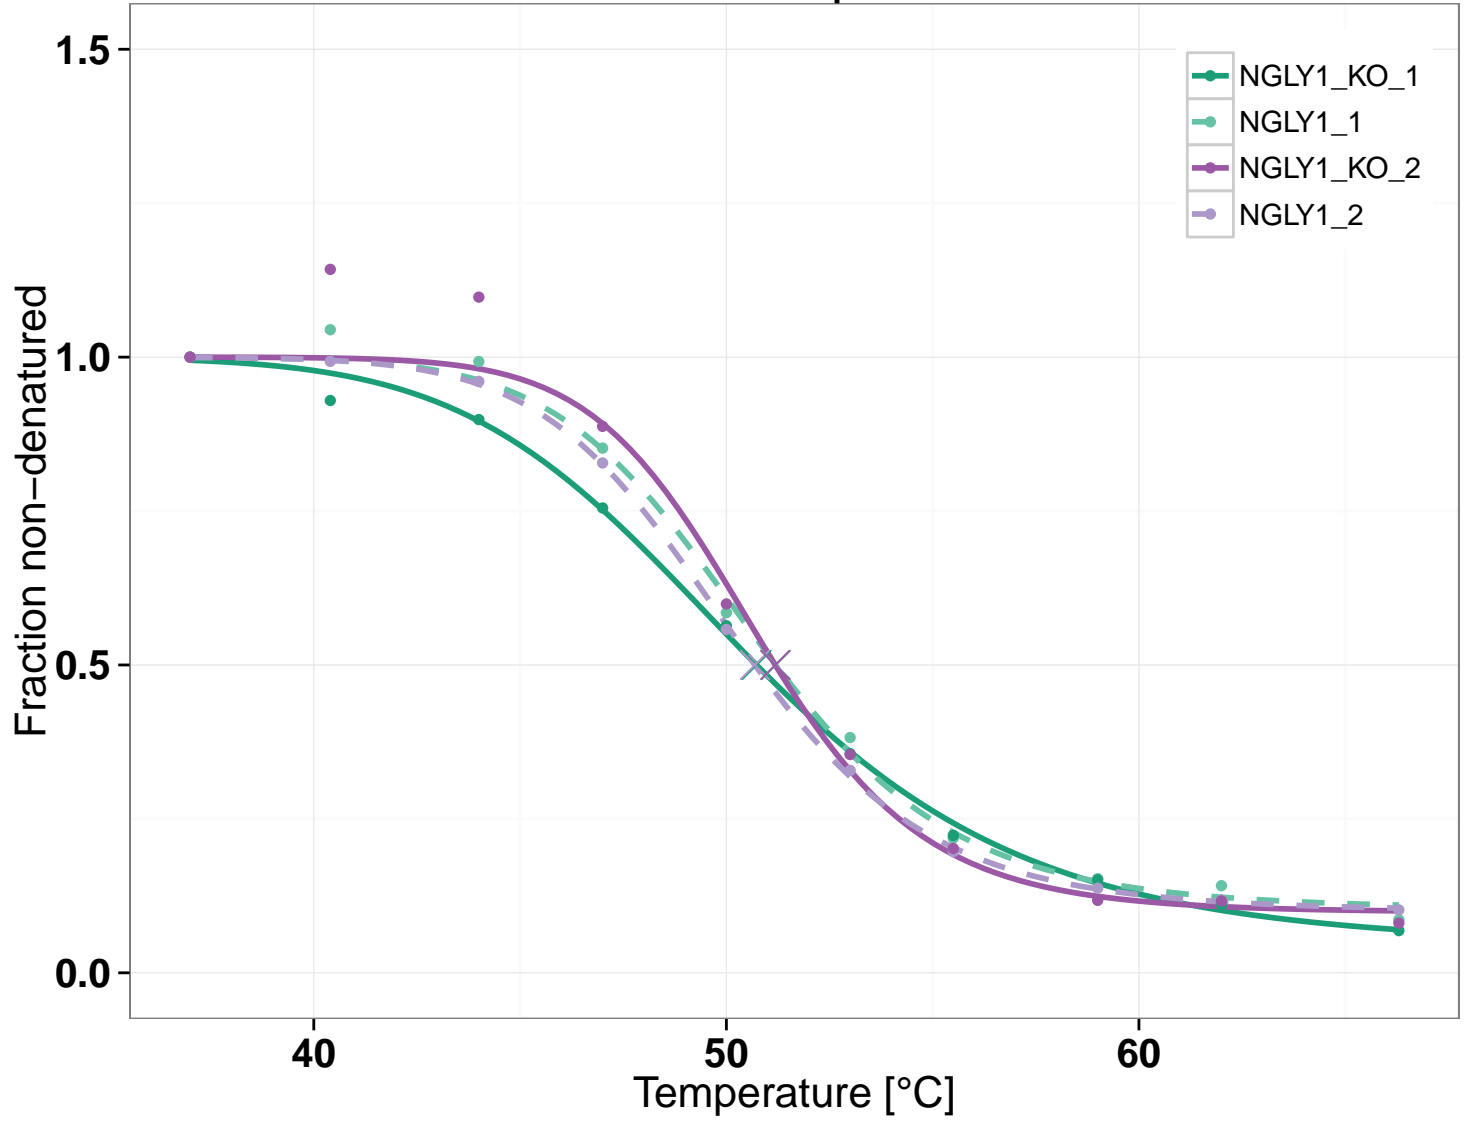

|            | meltPoint | slope  | plateau | R2   |
|------------|-----------|--------|---------|------|
| NGLY1_KO_1 | 50.73     | -0.07  | 0.04    | 1    |
| NGLY1_1    | 51.2      | -0.093 | 0.1     | 1    |
| NGLY1_KO_2 | 51.18     | -0.11  | 0.1     | 0.98 |
| NGLY1_2    | 50.69     | -0.096 | 0.1     | 1    |

Supplement: Supplementary file 3043 [file 1]

IPI00008527.3|RPLP1

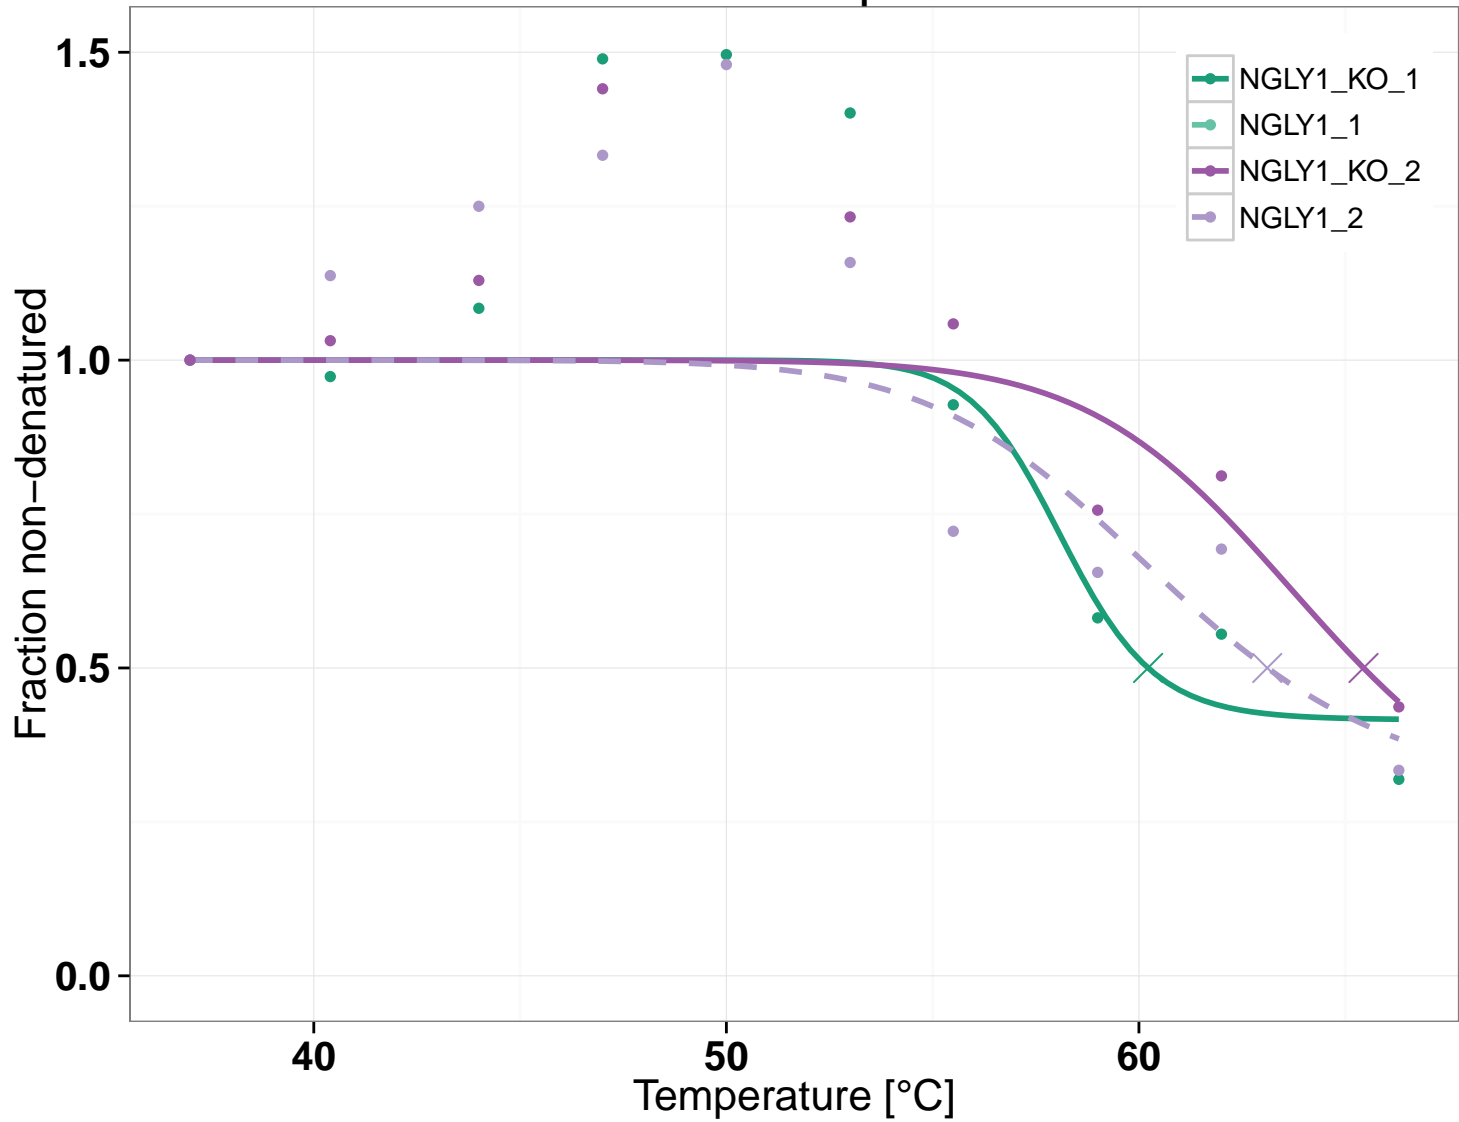

|            | meltPoint | slope  | plateau | R2   |
|------------|-----------|--------|---------|------|
| NGLY1_KO_1 | 60.22     | -0.13  | 0.42    | 0.54 |
| NGLY1_1    | -         | -      | -       | -    |
| NGLY1_KO_2 | 65.44     | -0.076 | 0.19    | 0.39 |
| NGLY1_2    | 63.11     | -0.063 | 0.29    | 0.55 |

Supplement: Supplementary file 3044 [file 1]

# IPI00099996.2|RG9MTD1

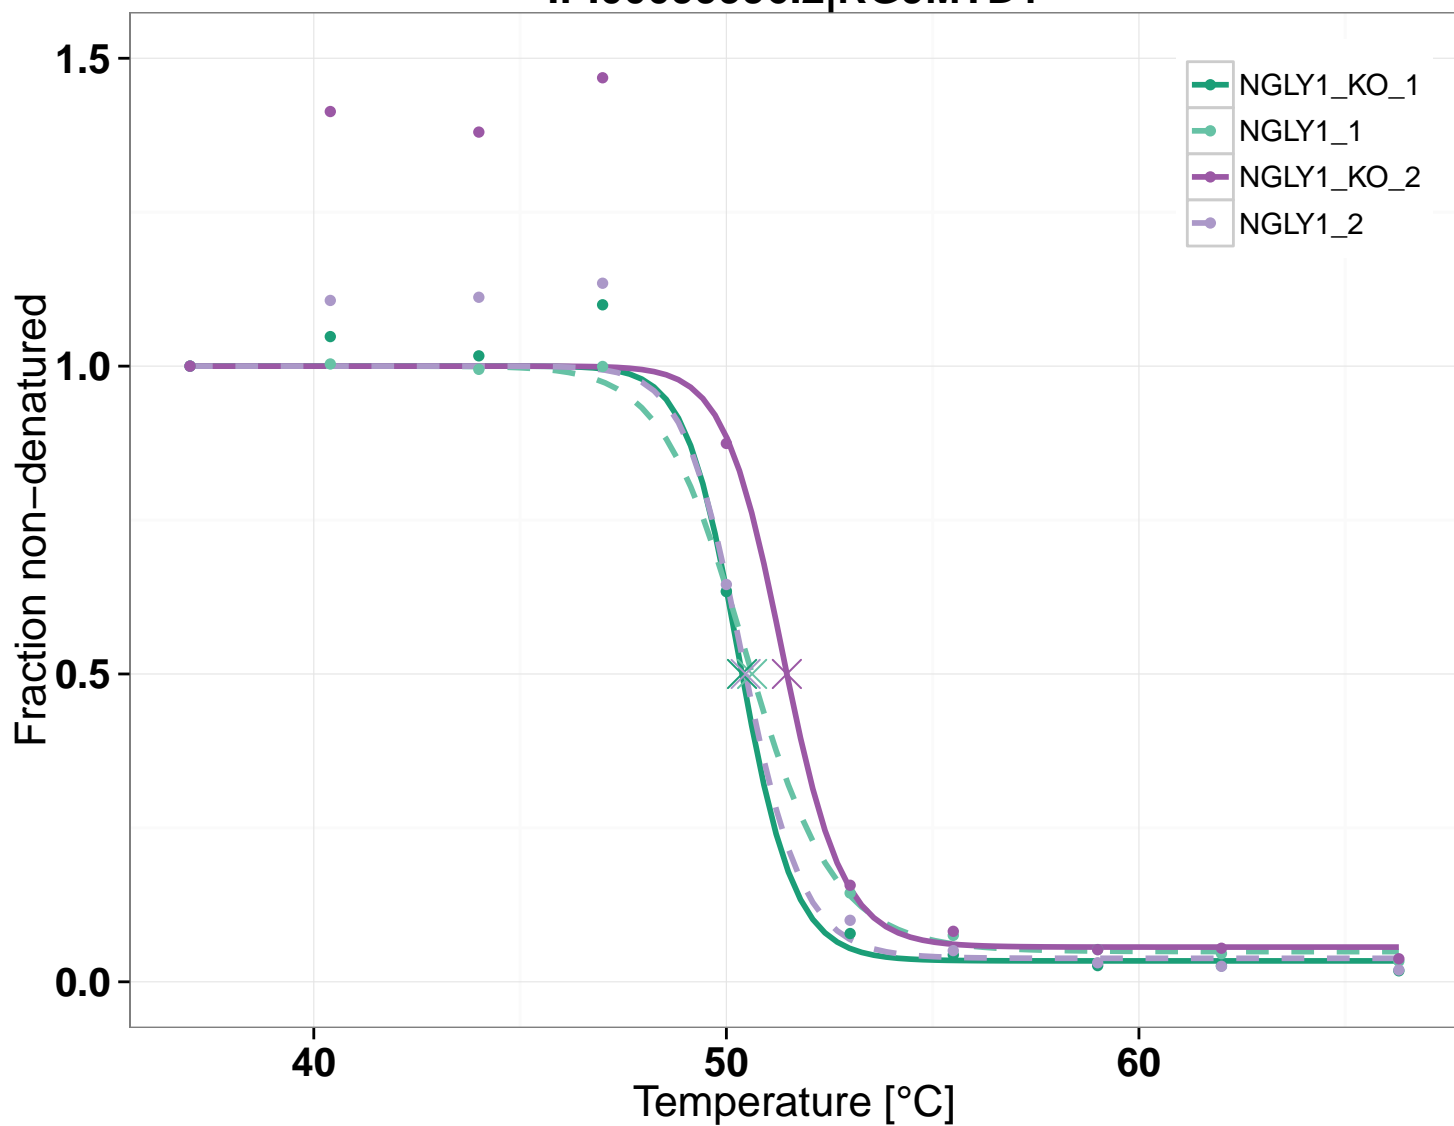

|            | meltPoint | slope | plateau | R2   |
|------------|-----------|-------|---------|------|
| NGLY1_KO_1 | 50.38     | -0.37 | 0.03    | 0.99 |
| NGLY1_1    | 50.62     | -0.23 | 0.05    | 1    |
| NGLY1_KO_2 | 51.47     | -0.33 | 0.06    | 0.85 |
| NGLY1_2    | 50.47     | -0.33 | 0.04    | 0.98 |

Supplement: Supplementary file 3045 [file 1]

IPI00641679.2|ERI3

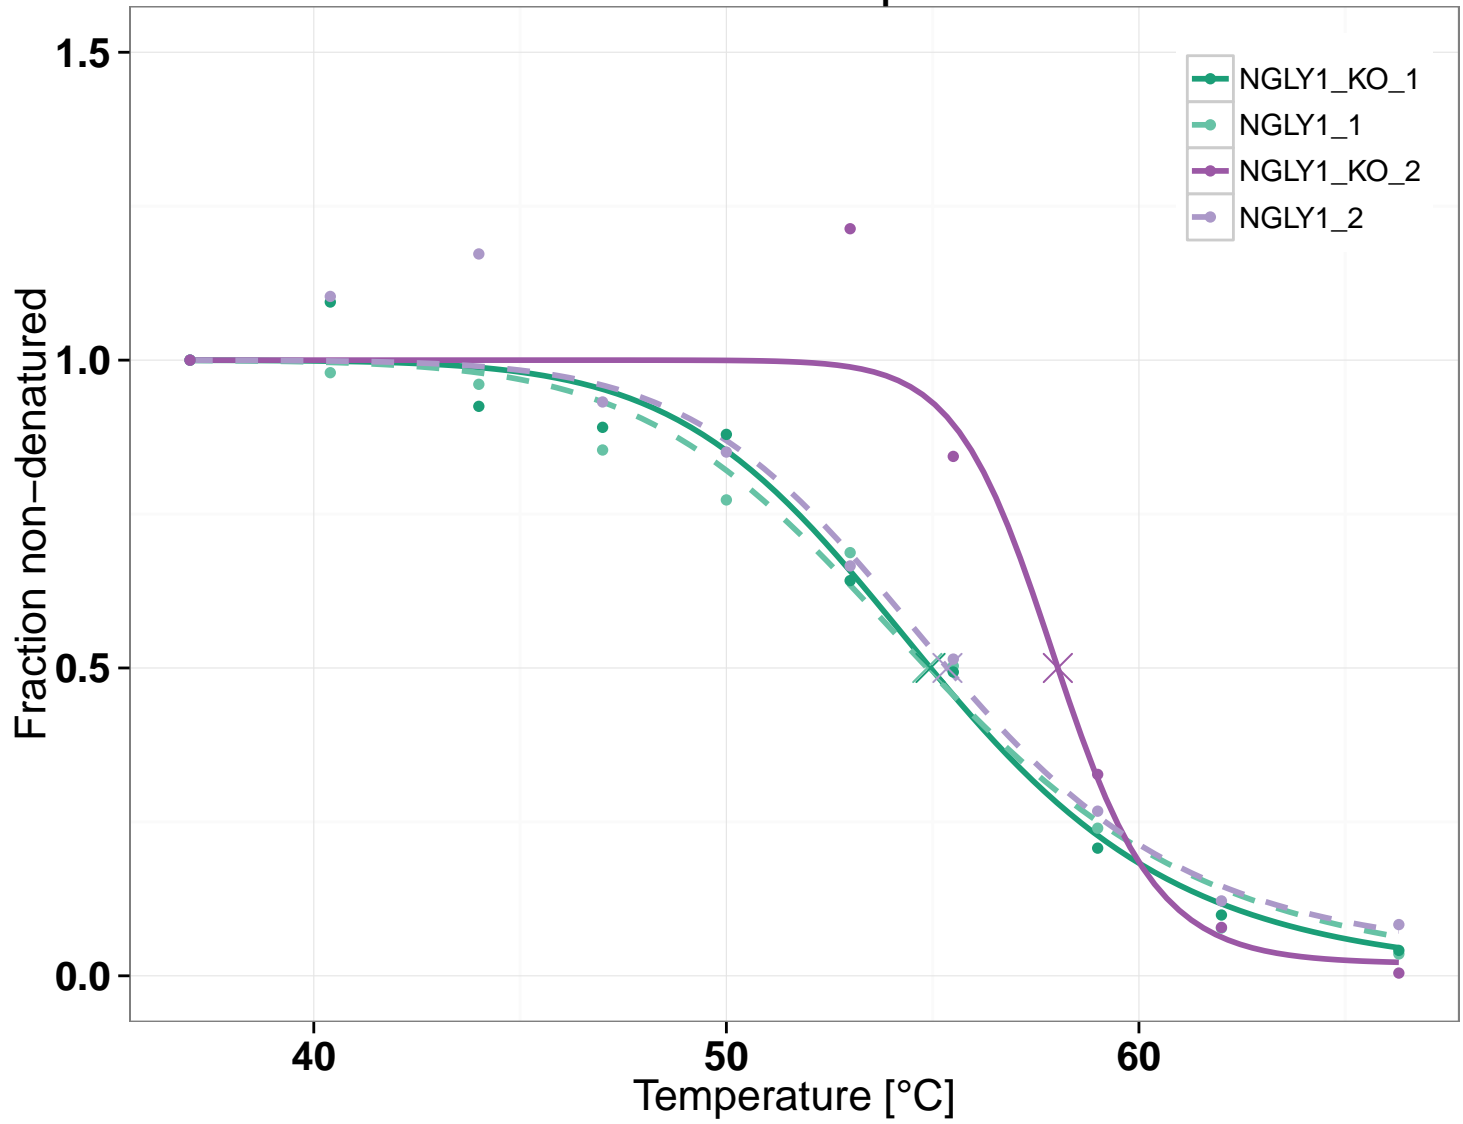

|            | meltPoint | slope  | plateau | R2   |
|------------|-----------|--------|---------|------|
| NGLY1_KO_1 | 54.95     | -0.082 | 0       | 0.99 |
| NGLY1_1    | 54.87     | -0.072 | 0       | 0.98 |
| NGLY1_KO_2 | 58.03     | -0.2   | 0.02    | 0.39 |
| NGLY1_2    | 55.36     | -0.08  | 0.03    | 0.97 |

Supplement: Supplementary file 3046 [file 1]

IPI00014925.1|RECQL4

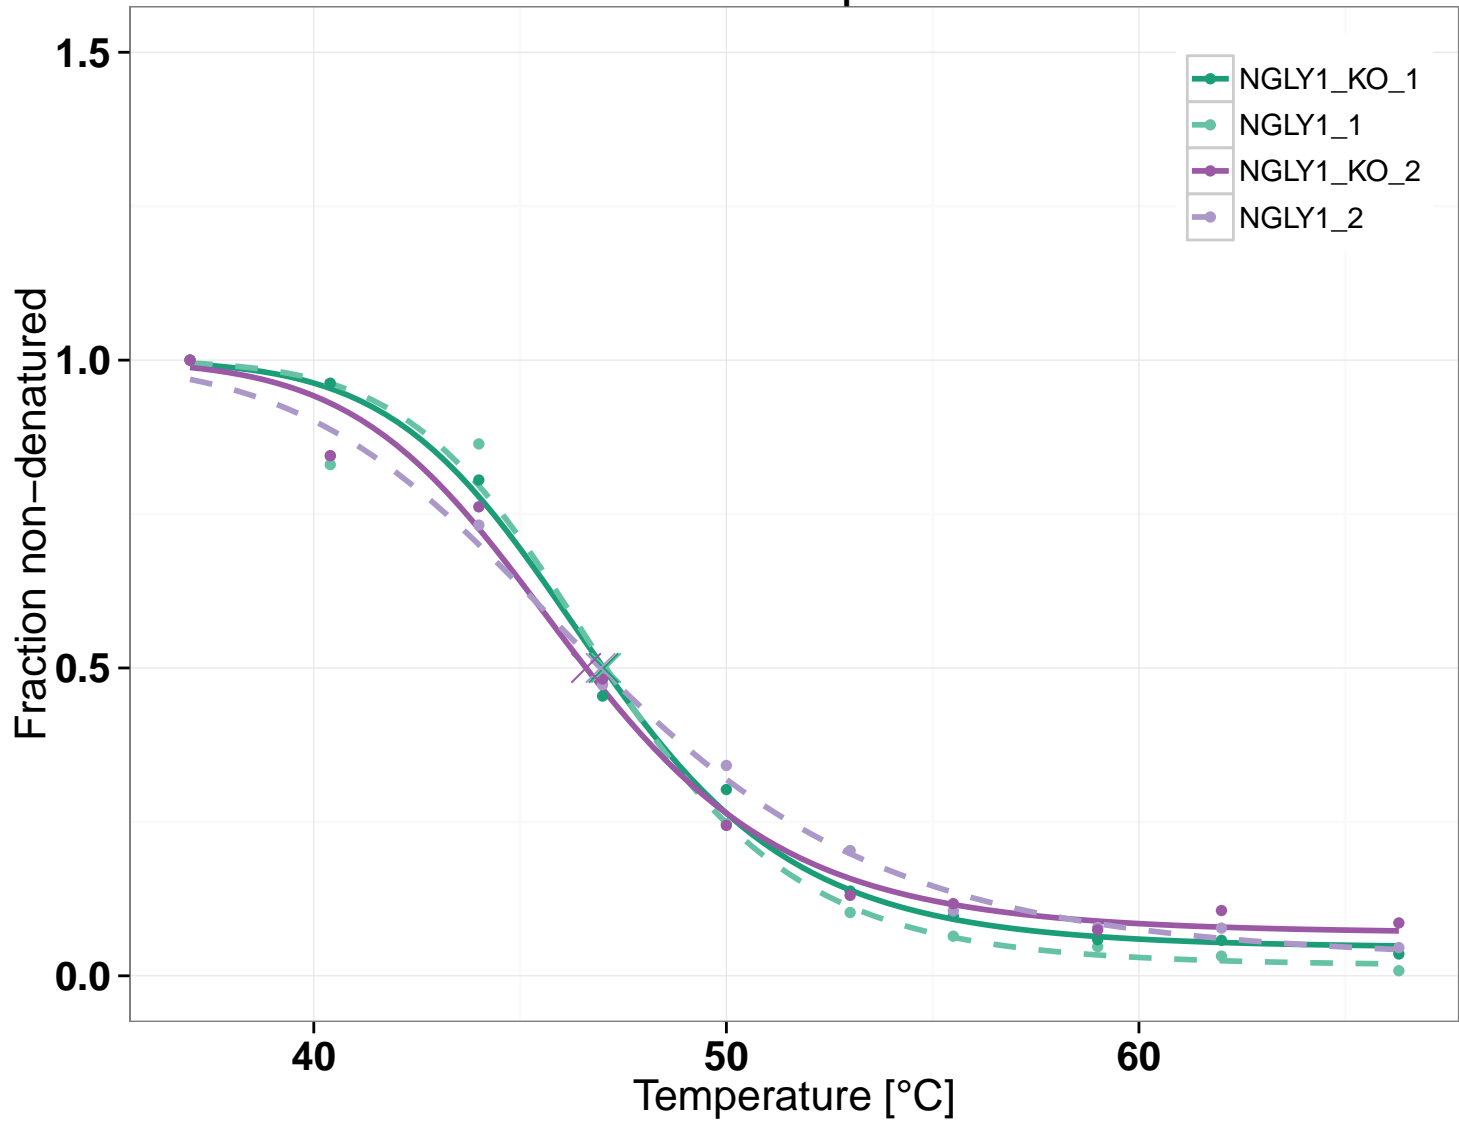

|            | meltPoint | slope  | plateau | R2   |
|------------|-----------|--------|---------|------|
| NGLY1_KO_1 | 47.03     | -0.097 | 0.04    | 1    |
| NGLY1_1    | 47.09     | -0.1   | 0.02    | 0.98 |
| NGLY1_KO_2 | 46.6      | -0.089 | 0.07    | 0.99 |
| NGLY1_2    | 46.95     | -0.069 | 0.02    | 0.99 |

Supplement: Supplementary file 3047 [file 1]

# IPI00019463.3|EIF2AK2

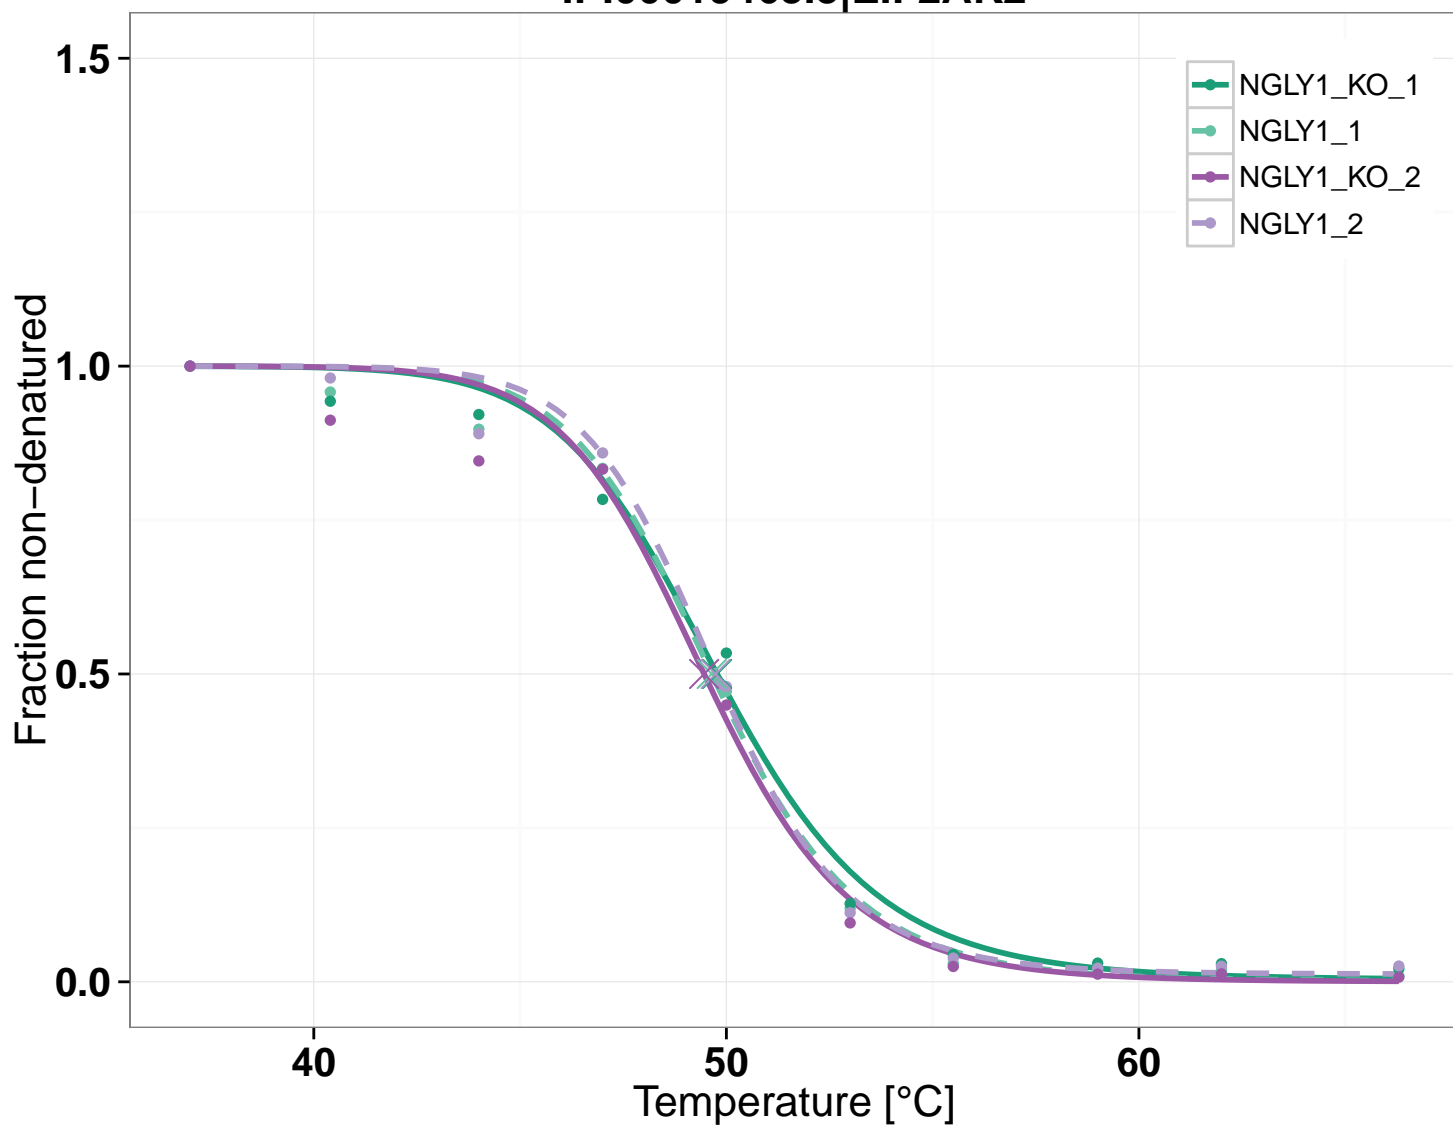

|            | meltPoint | slope | plateau | R2   |
|------------|-----------|-------|---------|------|
| NGLY1_KO_1 | 49.78     | -0.13 | 0       | 0.99 |
| NGLY1_1    | 49.65     | -0.14 | 0       | 0.99 |
| NGLY1_KO_2 | 49.46     | -0.14 | 0       | 0.98 |
| NGLY1_2    | 49.74     | -0.15 | 0.01    | 0.99 |

Supplement: Supplementary file 3048 [file 1]

IPI00020451.3|IMPACT

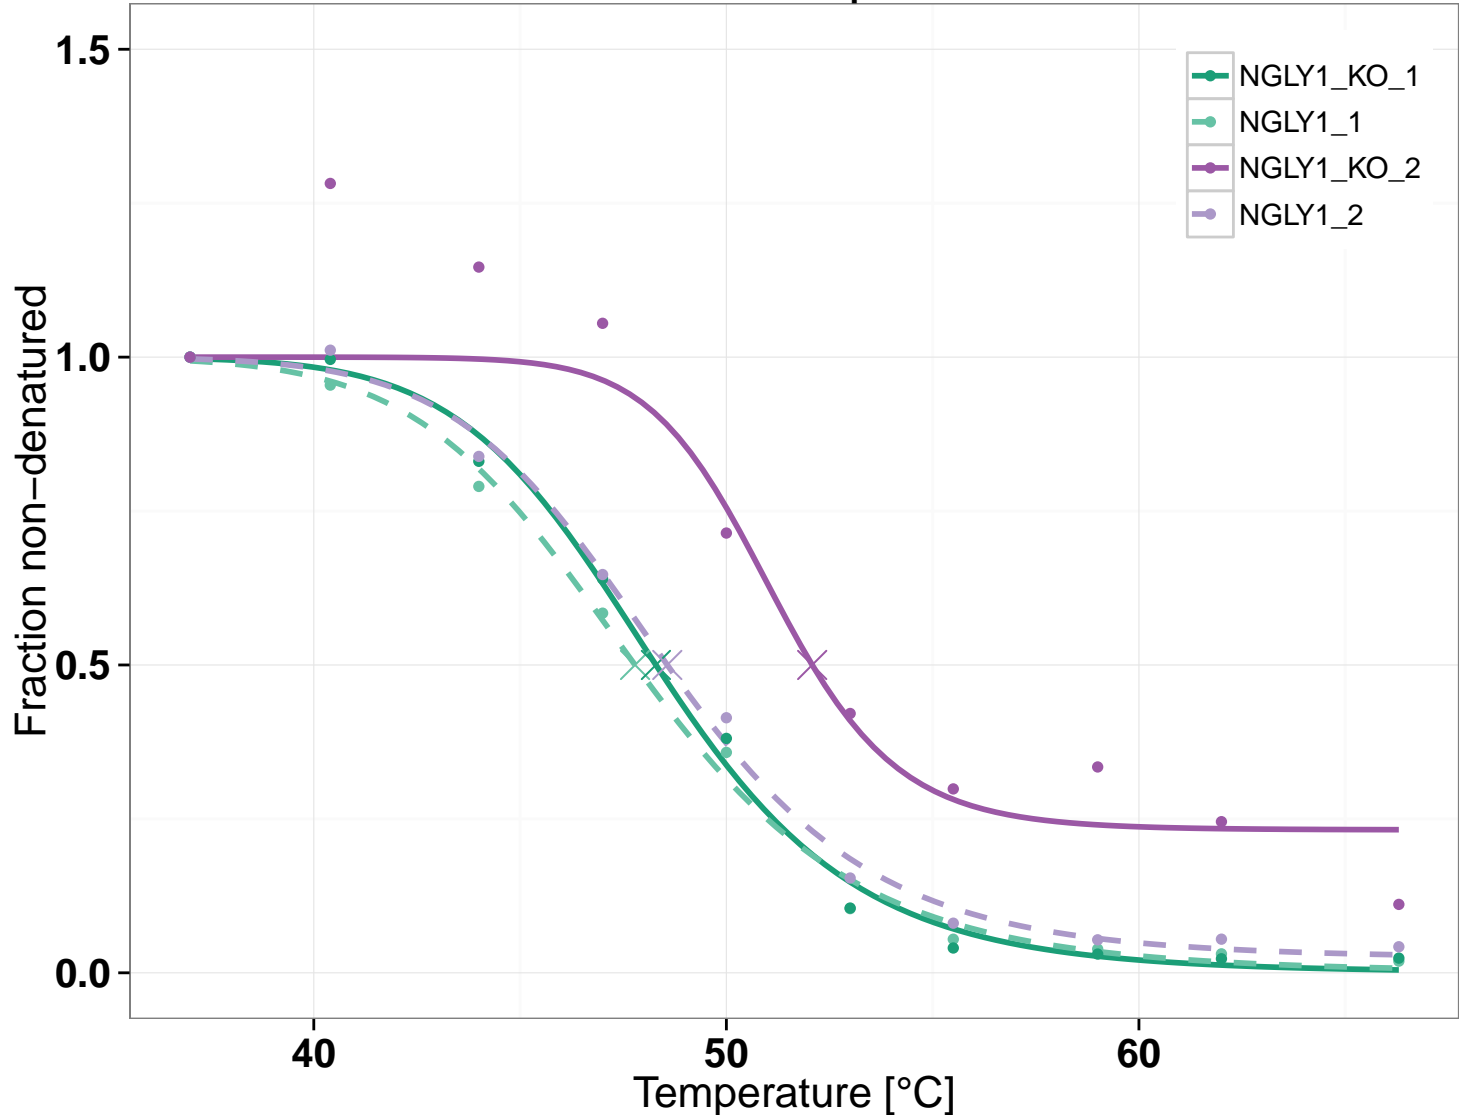

|            | meltPoint | slope  | plateau | R2   |
|------------|-----------|--------|---------|------|
| NGLY1_KO_1 | 48.29     | -0.1   | 0       | 1    |
| NGLY1_1    | 47.79     | -0.093 | 0       | 1    |
| NGLY1_KO_2 | 52.08     | -0.13  | 0.23    | 0.92 |
| NGLY1_2    | 48.57     | -0.096 | 0.02    | 1    |

Supplement: Supplementary file 3049 [file 1]

# IPI00301561.1|TRIP6

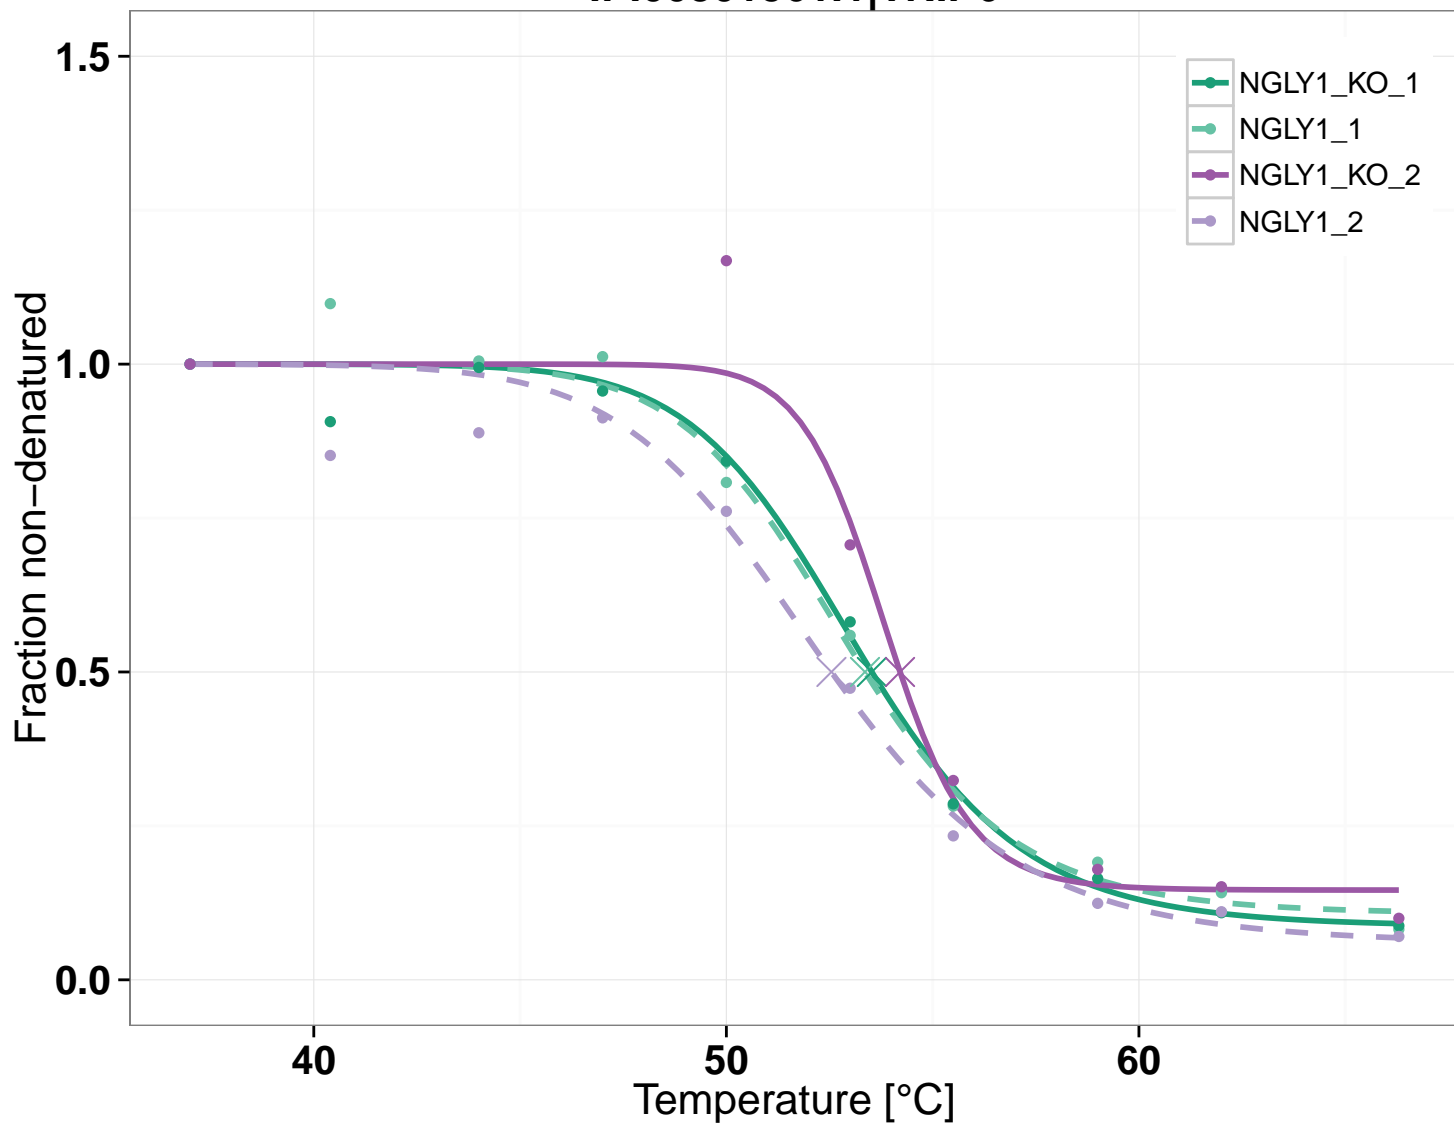

|            | meltPoint | slope  | plateau | R2   |
|------------|-----------|--------|---------|------|
| NGLY1_KO_1 | 53.53     | -0.11  | 0.09    | 0.99 |
| NGLY1_1    | 53.36     | -0.11  | 0.11    | 0.99 |
| NGLY1_KO_2 | 54.21     | -0.21  | 0.15    | 0.7  |
| NGLY1_2    | 52.55     | -0.097 | 0.06    | 0.97 |

Supplement: Supplementary file 3050 [file 1]

IPI00883790.1|SEC14L1

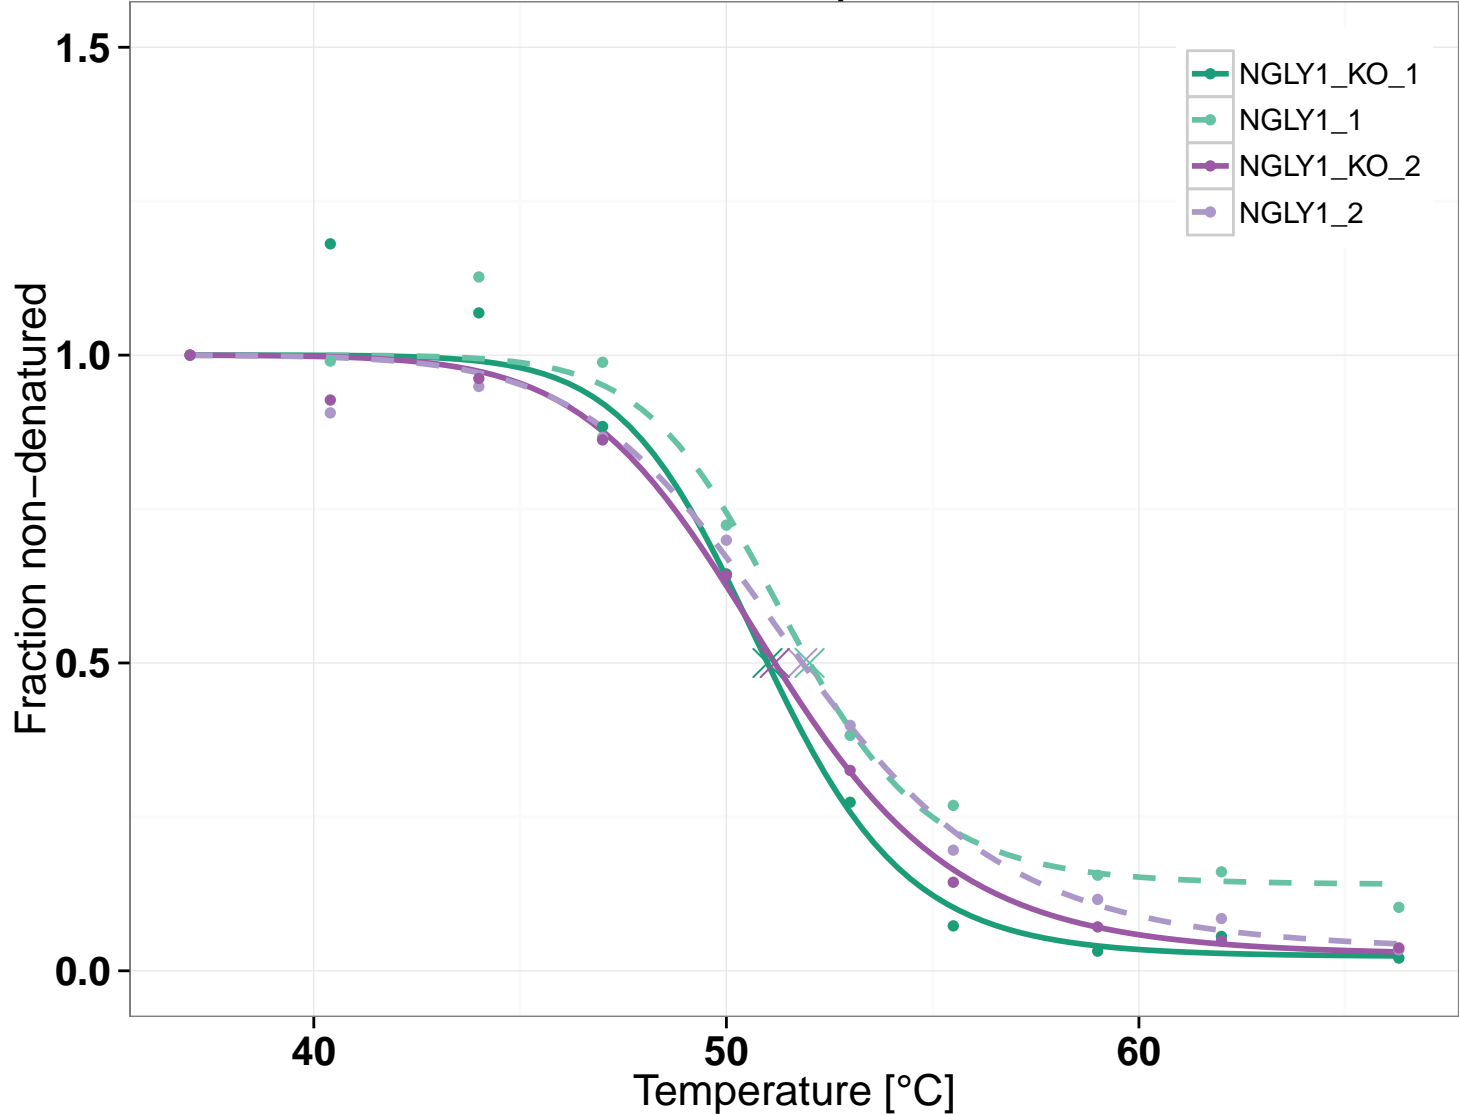

|            | meltPoint | slope  | plateau | R2   |
|------------|-----------|--------|---------|------|
| NGLY1_KO_1 | 51        | -0.14  | 0.02    | 0.98 |
| NGLY1_1    | 52.02     | -0.13  | 0.14    | 0.99 |
| NGLY1_KO_2 | 51.17     | -0.11  | 0.03    | 1    |
| NGLY1_2    | 51.84     | -0.094 | 0.03    | 0.99 |

Supplement: Supplementary file 3051 [file 1]

IPI00034003.1|TRDMT1

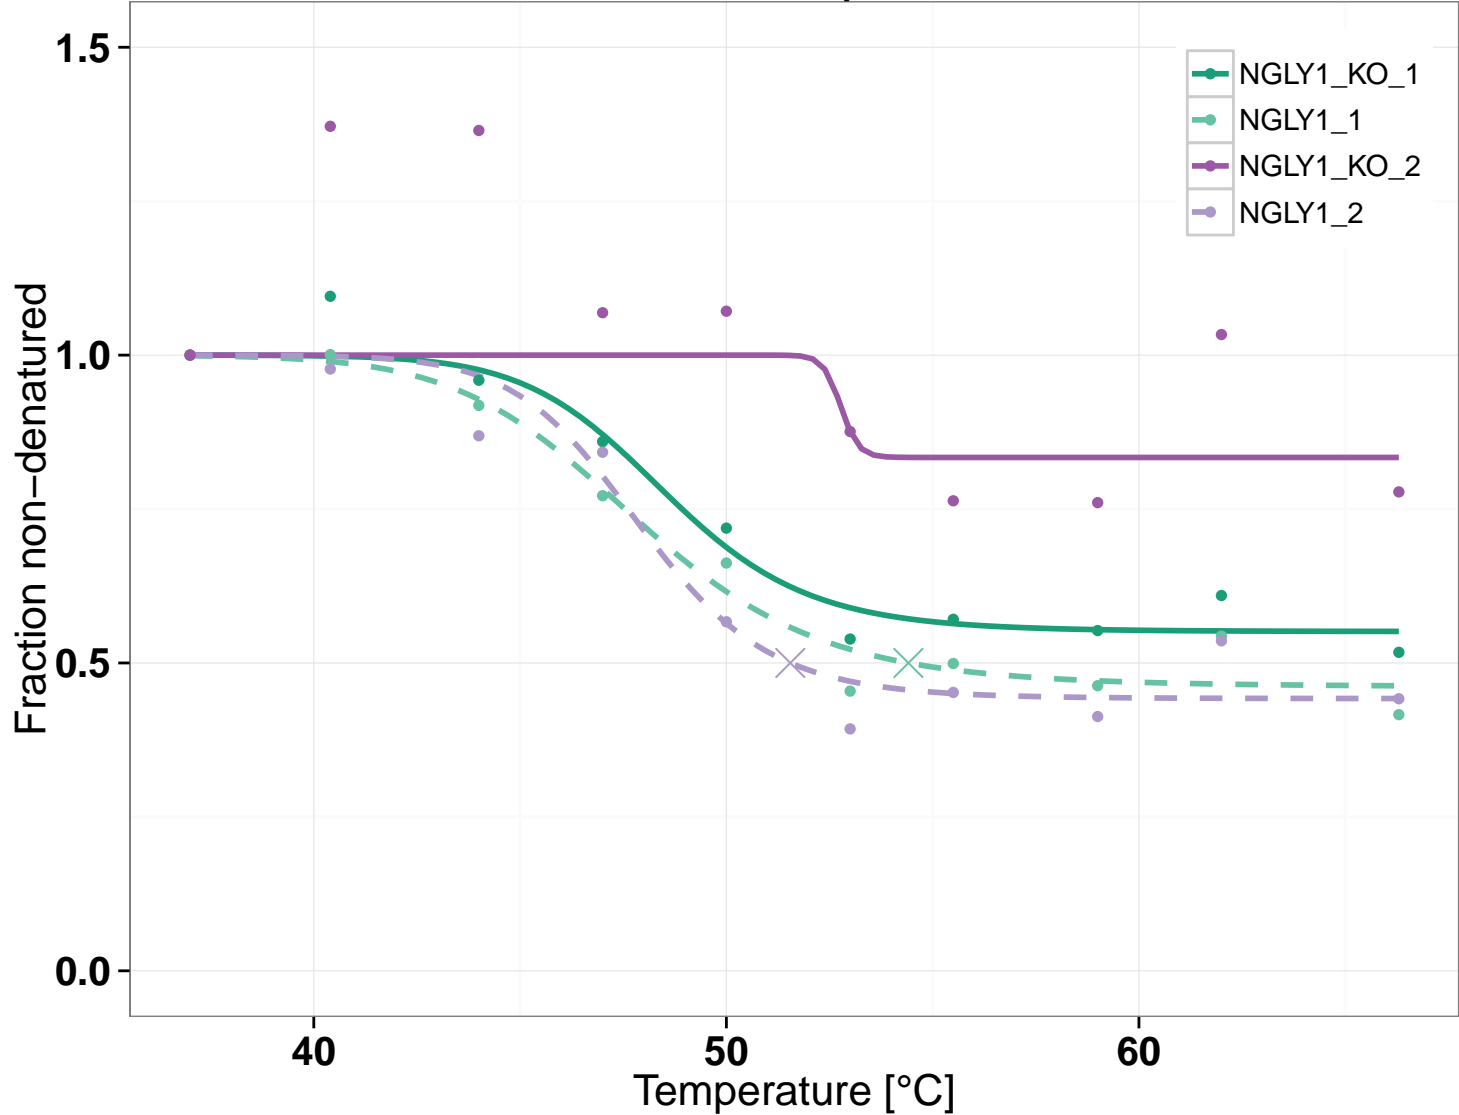

|            | meltPoint | slope  | plateau | R2   |
|------------|-----------|--------|---------|------|
| NGLY1_KO_1 | –         | –0.065 | 0.55    | 0.96 |
| NGLY1_1    | 54.41     | –0.06  | 0.46    | 0.97 |
| NGLY1_KO_2 | –         | –0.2   | 0.83    | 0.27 |
| NGLY1_2    | 51.55     | –0.09  | 0.44    | 0.95 |

Supplement: Supplementary file 3052 [file 1]

# IPI00294946.3|ASB1

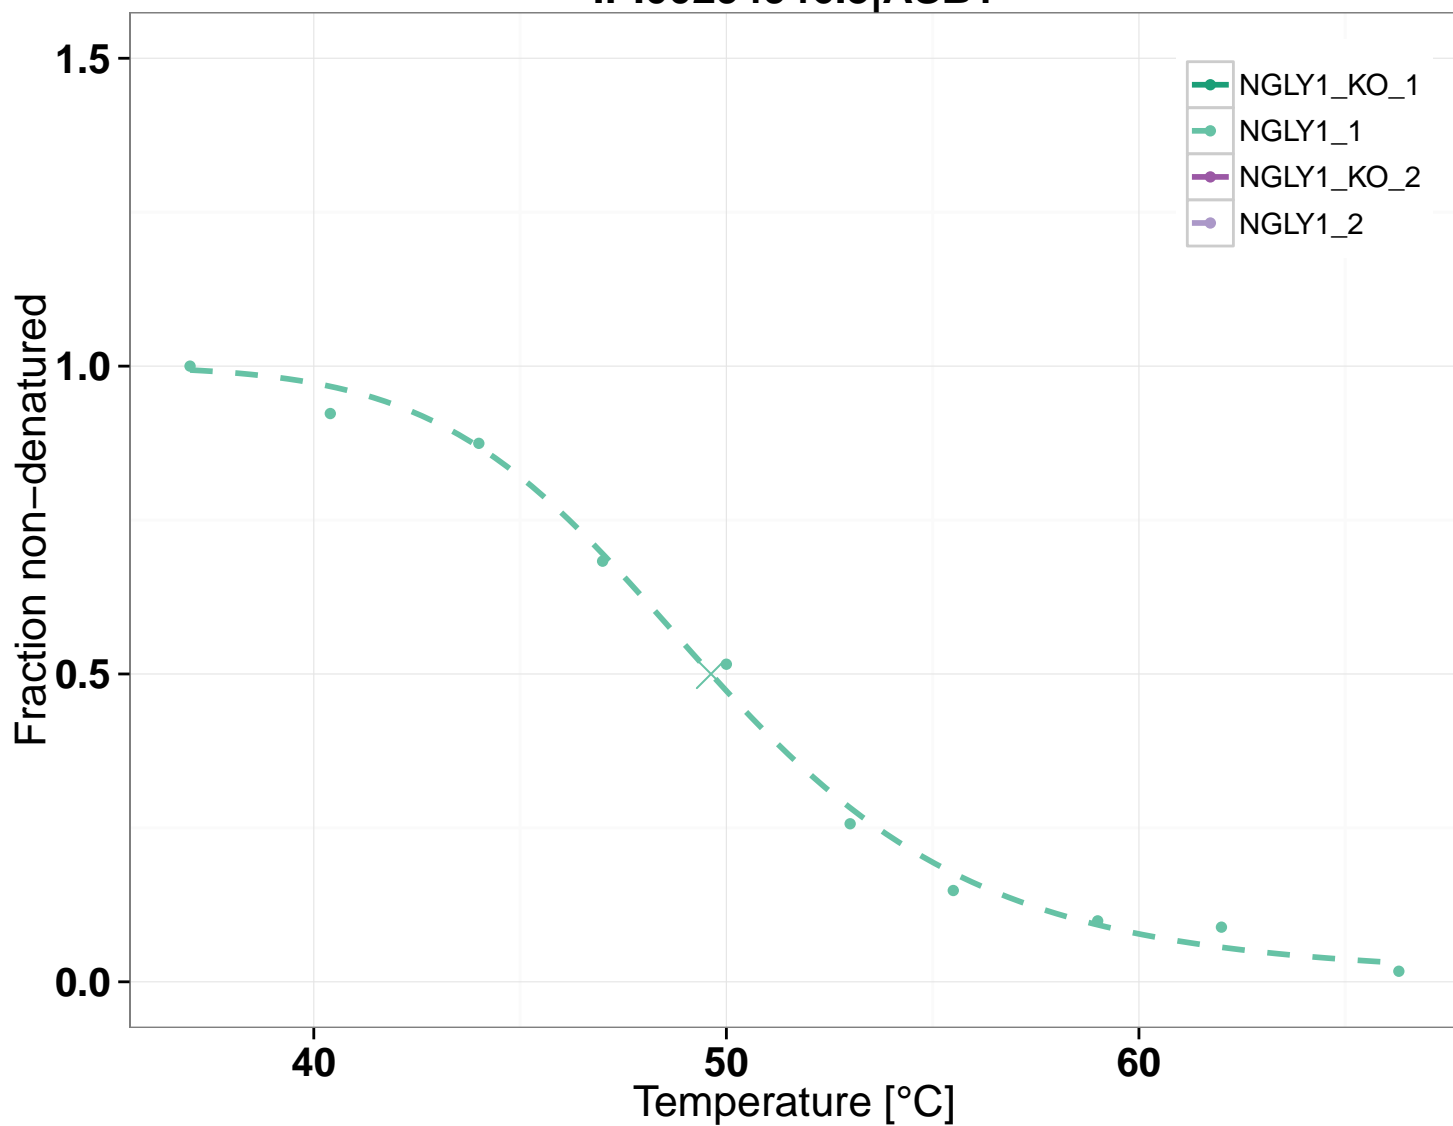

|            | meltPoint | slope  | plateau | R2   |
|------------|-----------|--------|---------|------|
| NGLY1_KO_1 | —         | —      | —       | —    |
| NGLY1_1    | 49.63     | -0.076 | 0.01    | 0.99 |
| NGLY1_KO_2 | —         | —      | —       | —    |
| NGLY1_2    | —         | —      | —       | —    |

Supplement: Supplementary file 3053 [file 1]

# IPI00018090.2|IFT74

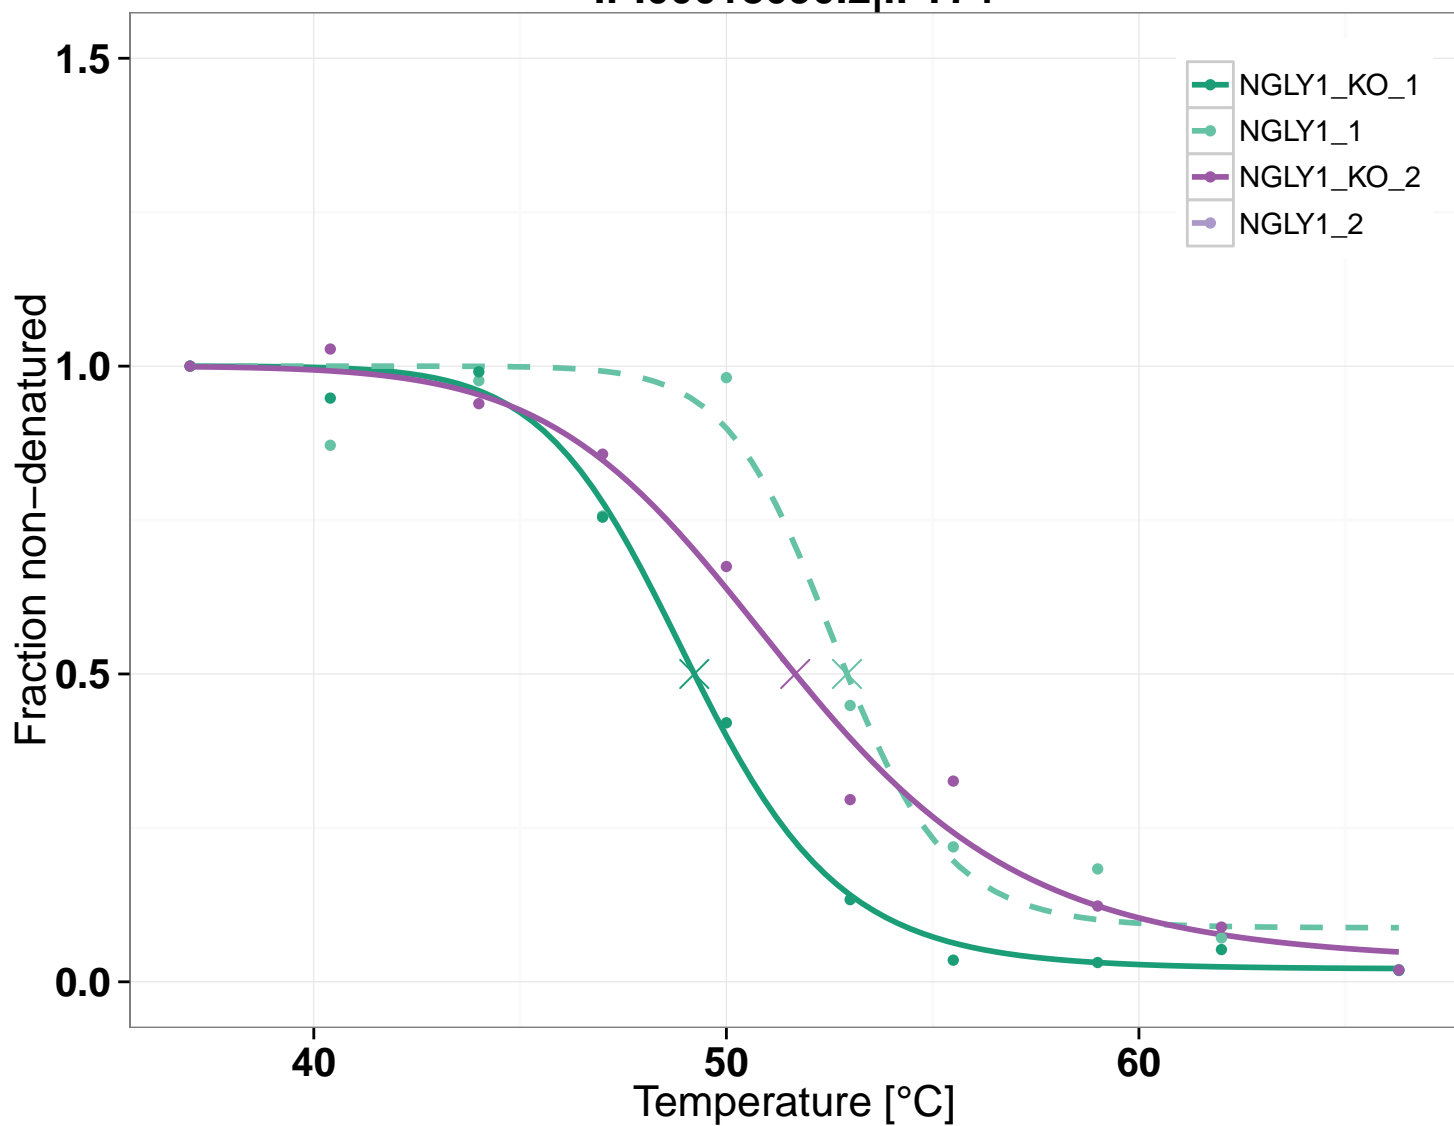

|            | meltPoint | slope  | plateau | R2   |
|------------|-----------|--------|---------|------|
| NGLY1_KO_1 | 49.22     | -0.14  | 0.02    | 1    |
| NGLY1_1    | 52.92     | -0.17  | 0.09    | 0.94 |
| NGLY1_KO_2 | 51.67     | -0.084 | 0.03    | 0.99 |
| NGLY1_2    | -         | -      | -       | -    |

Supplement: Supplementary file 3054 [file 1]

IPI00423156.1|CHEK2

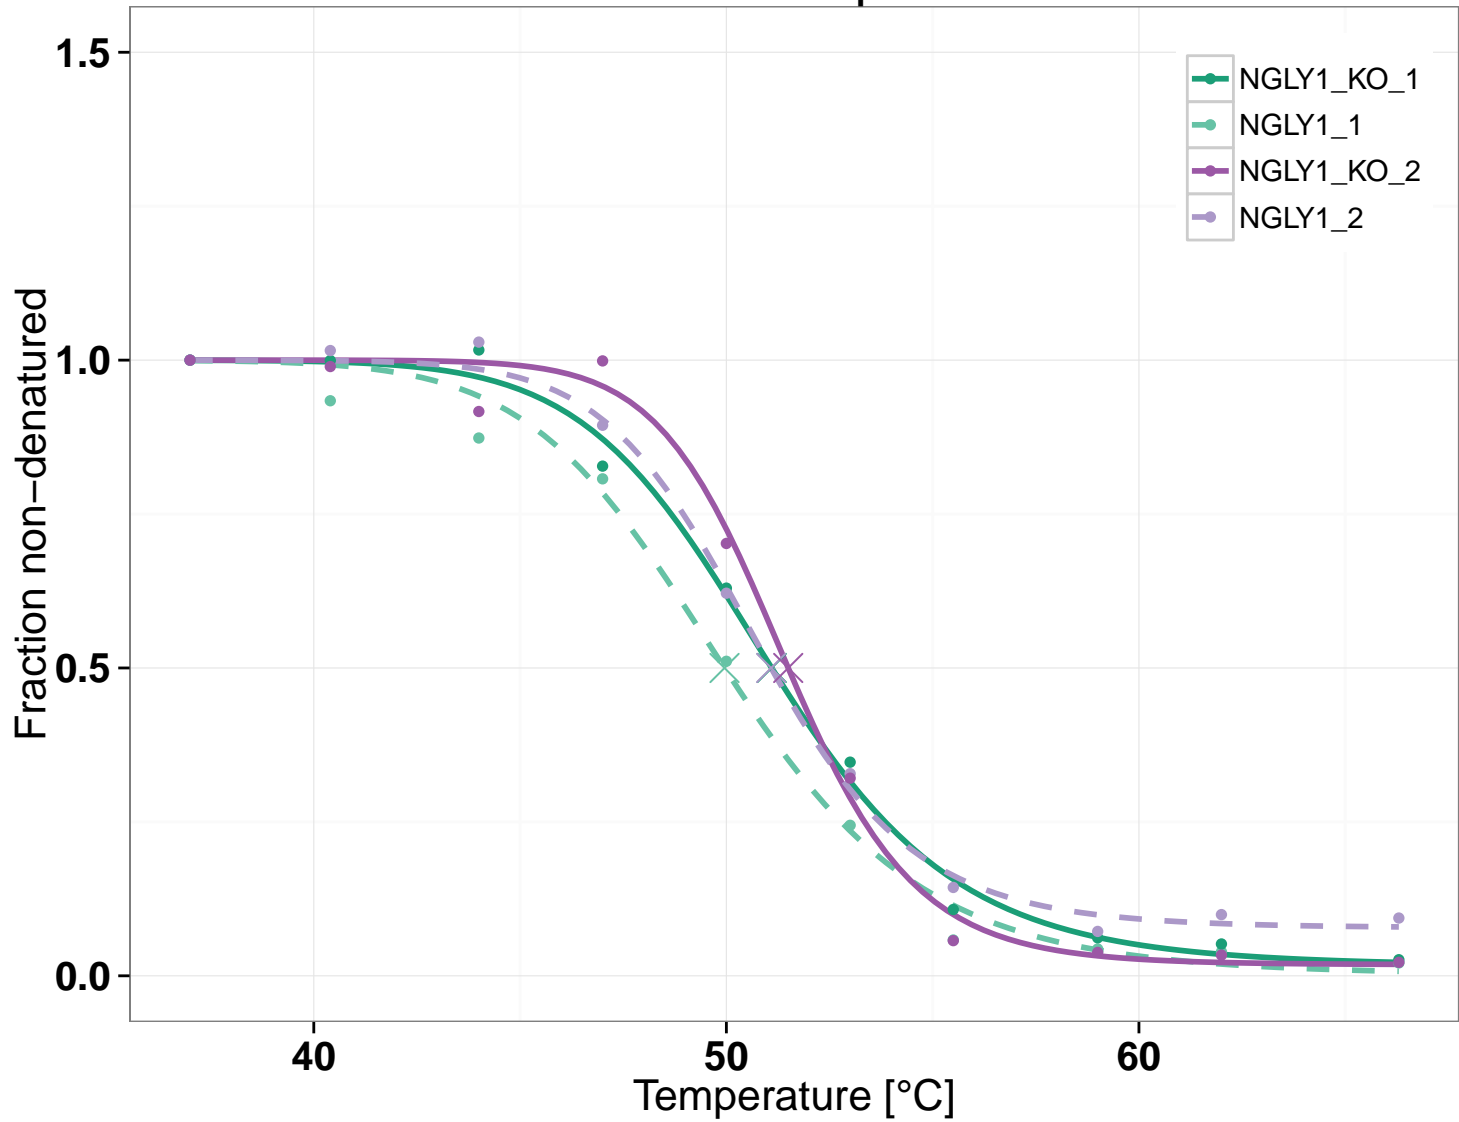

|            | meltPoint | slope | plateau | R2   |
|------------|-----------|-------|---------|------|
| NGLY1_KO_1 | 51.1      | -0.11 | 0.02    | 1    |
| NGLY1_1    | 49.96     | -0.1  | 0       | 0.99 |
| NGLY1_KO_2 | 51.5      | -0.16 | 0.02    | 0.99 |
| NGLY1_2    | 51.08     | -0.12 | 0.08    | 1    |

Supplement: Supplementary file 3055 [file 1]

IPI00784368.1|NDST1

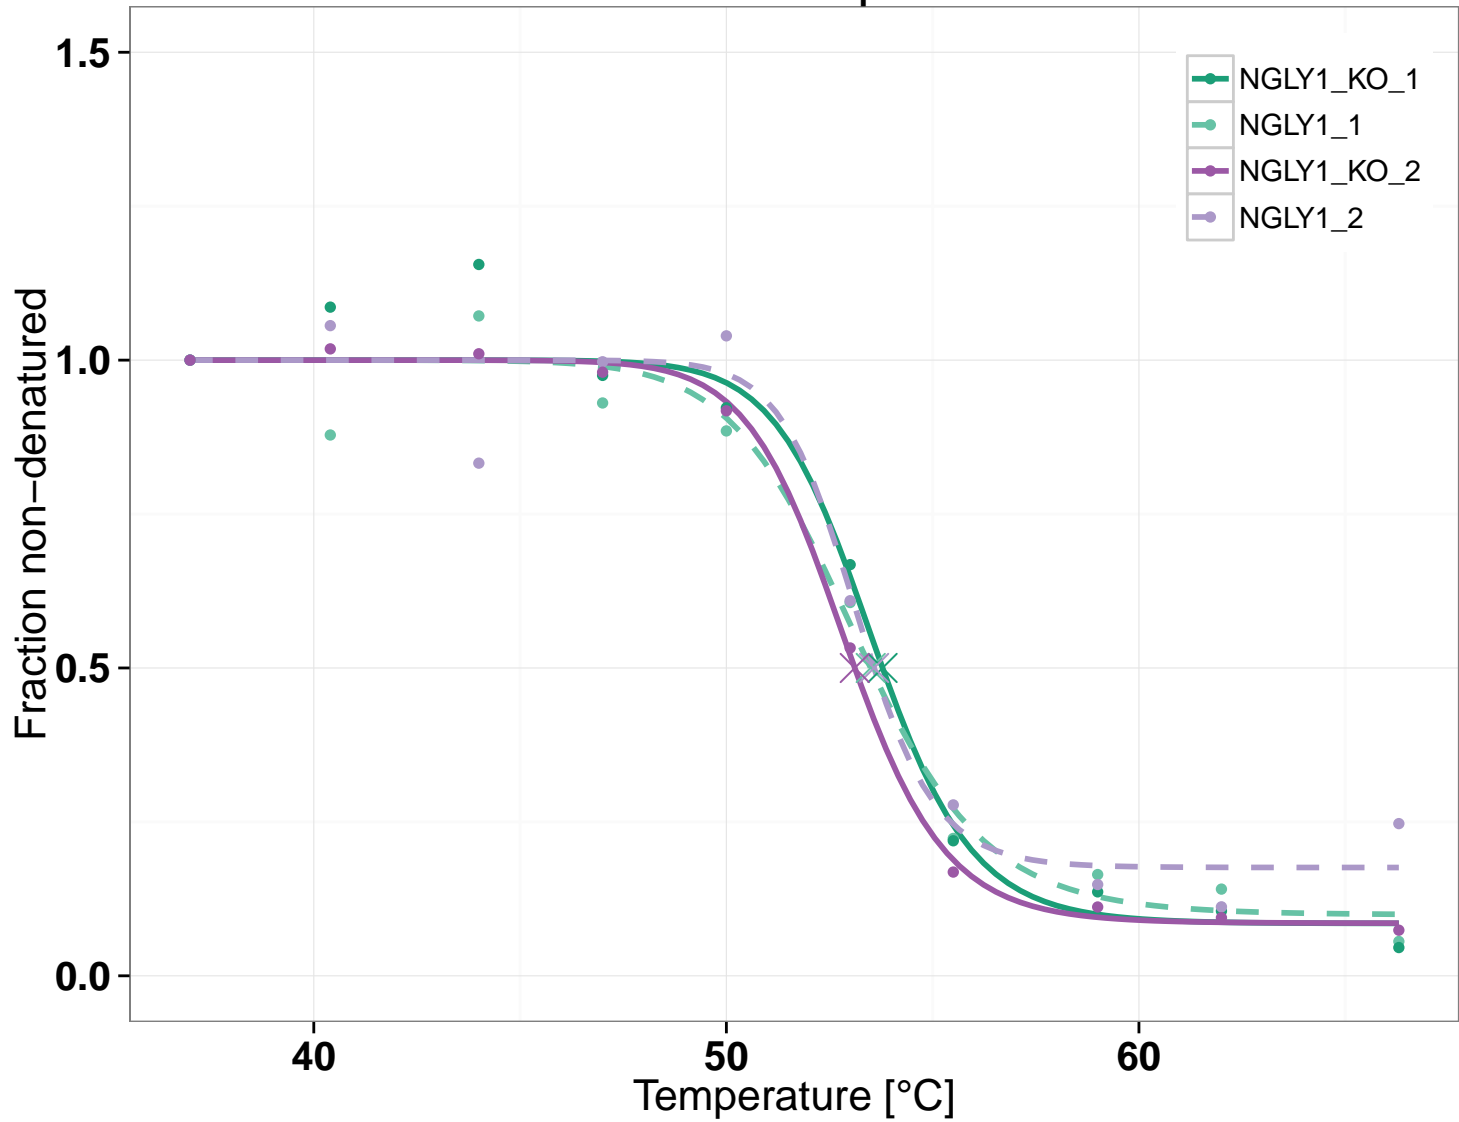

|            | meltPoint | slope | plateau | R2   |
|------------|-----------|-------|---------|------|
| NGLY1_KO_1 | 53.79     | -0.19 | 0.08    | 0.98 |
| NGLY1_1    | 53.5      | -0.14 | 0.1     | 0.98 |
| NGLY1_KO_2 | 53.11     | -0.19 | 0.09    | 1    |
| NGLY1_2    | 53.58     | -0.22 | 0.18    | 0.97 |

Supplement: Supplementary file 3056 [file 1]

IPI00152900.2|LZIC

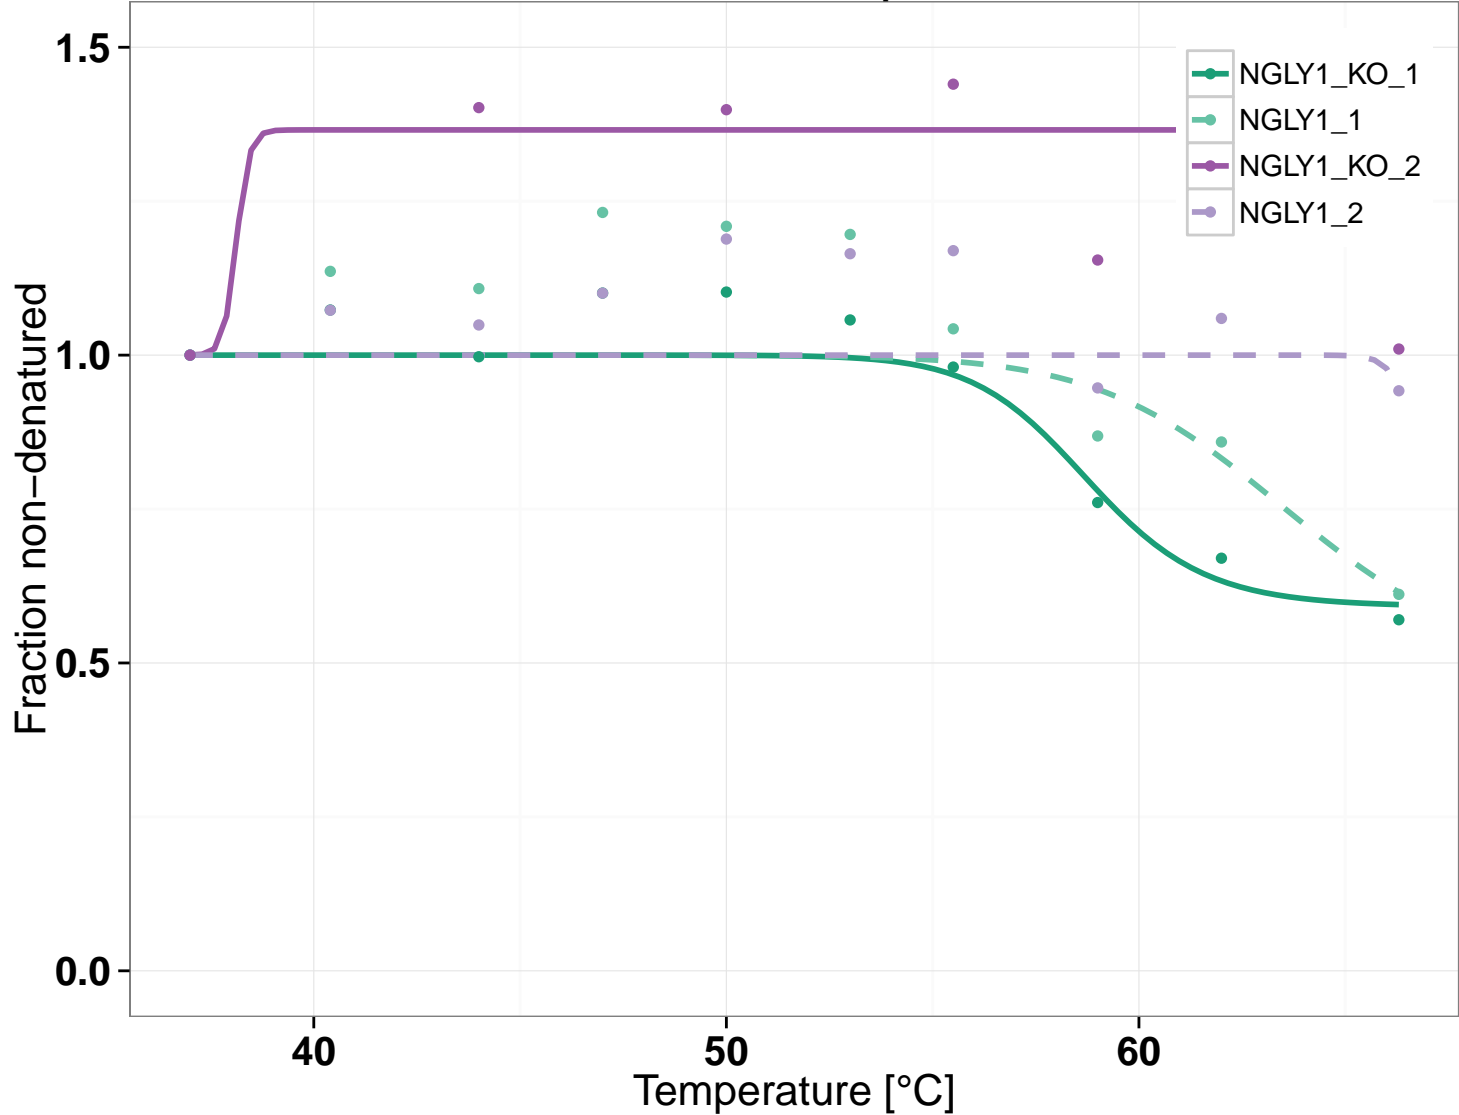

|            | meltPoint | slope  | plateau | R2    |
|------------|-----------|--------|---------|-------|
| NGLY1_KO_1 | -         | -0.073 | 0.59    | 0.9   |
| NGLY1_1    | -         | -0.055 | 0.47    | 0.49  |
| NGLY1_KO_2 | -         | 0.6    | 1.37    | 0.28  |
| NGLY1_2    | -         | -      | 0       | -0.63 |

Supplement: Supplementary file 3057 [file 1]

IPI00478860.4|MANEA

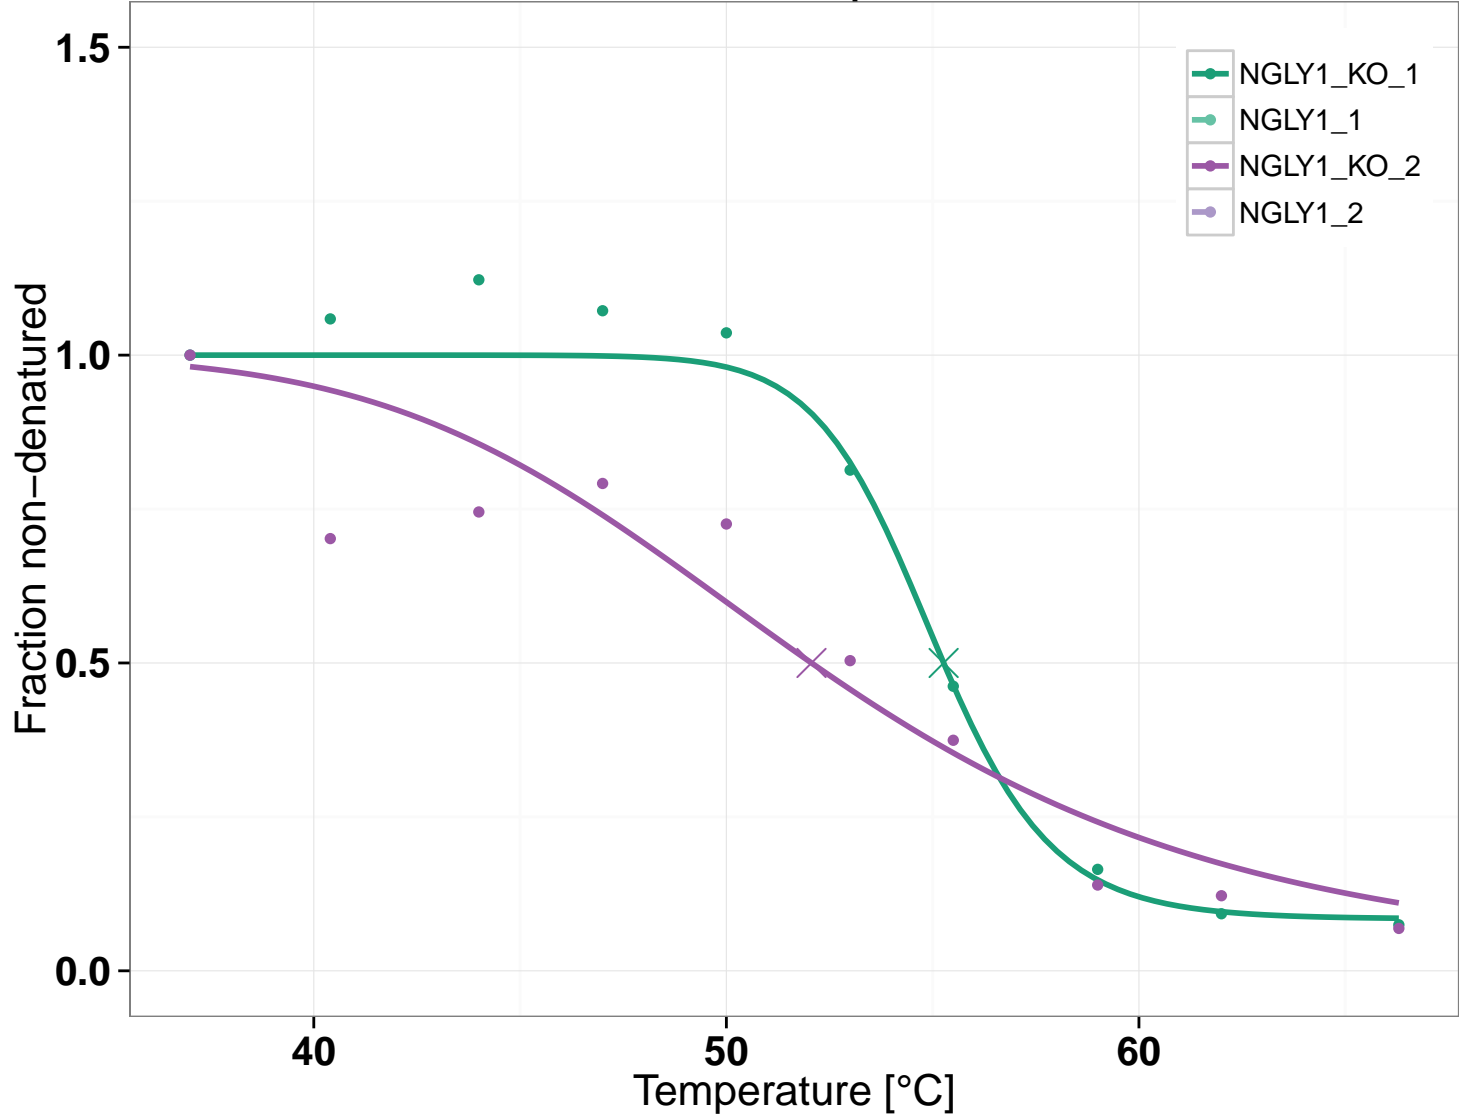

|            | meltPoint | slope  | plateau | R2   |
|------------|-----------|--------|---------|------|
| NGLY1_KO_1 | 55.27     | -0.16  | 0.08    | 0.98 |
| NGLY1_1    | -         | -      | -       | -    |
| NGLY1_KO_2 | 52.06     | -0.049 | 0       | 0.89 |
| NGLY1_2    | -         | -      | -       | -    |

Supplement: Supplementary file 3058 [file 1]

# IPI00019924.1|TBCC

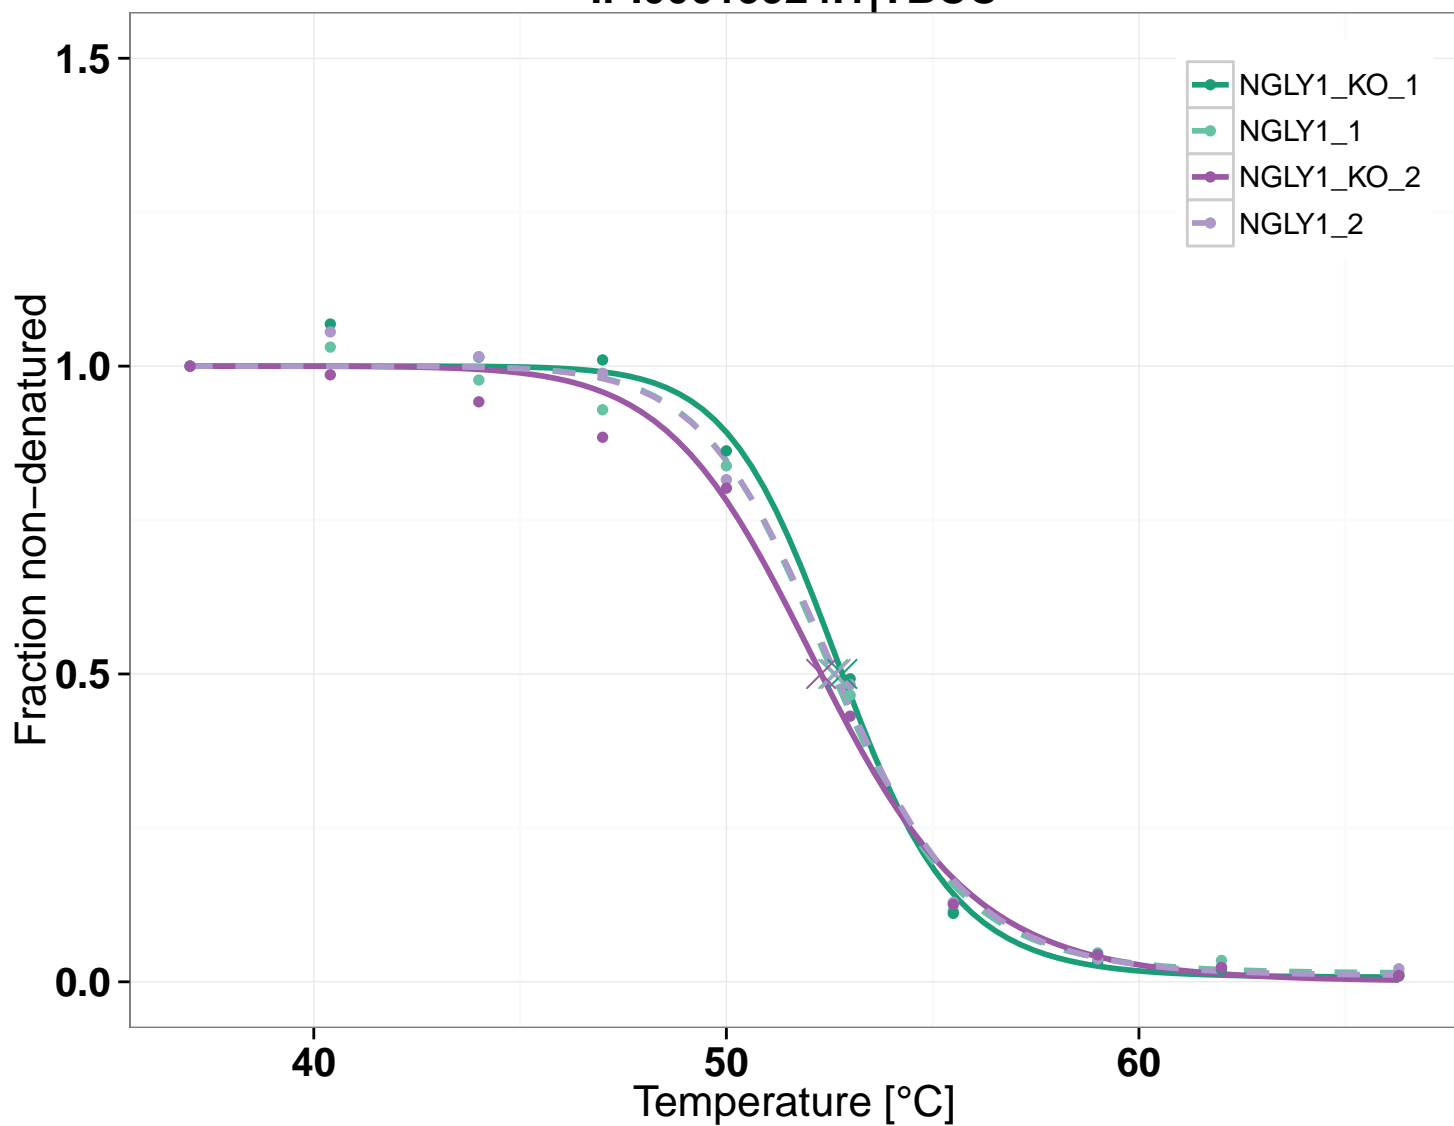

|            | meltPoint | slope | plateau | R2   |
|------------|-----------|-------|---------|------|
| NGLY1_KO_1 | 52.81     | -0.18 | 0.01    | 1    |
| NGLY1_1    | 52.59     | -0.16 | 0.01    | 1    |
| NGLY1_KO_2 | 52.3      | -0.13 | 0       | 0.99 |
| NGLY1_2    | 52.65     | -0.15 | 0.01    | 1    |

Supplement: Supplementary file 3059 [file 1]

IPI00100029.1|7 KDA PROTEIN.

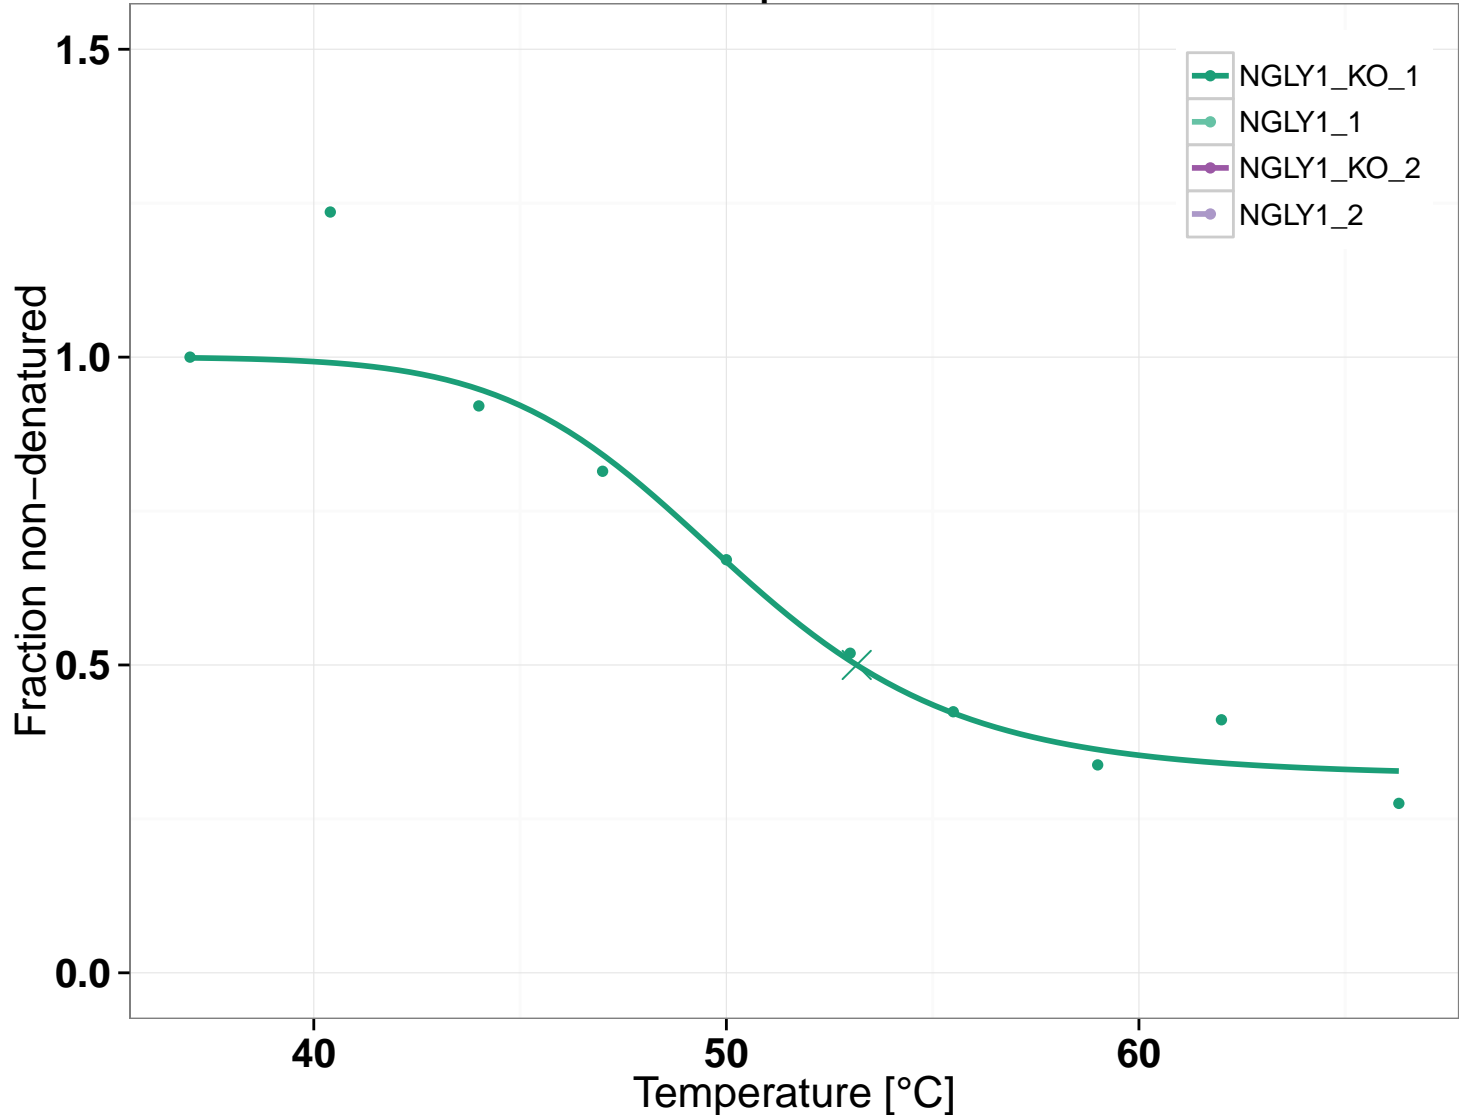

|            | meltPoint | slope  | plateau | R2   |
|------------|-----------|--------|---------|------|
| NGLY1_KO_1 | 53.16     | -0.061 | 0.32    | 0.92 |
| NGLY1_1    | -         | -      | -       | -    |
| NGLY1_KO_2 | -         | -      | -       | -    |
| NGLY1_2    | -         | -      | -       | -    |

Supplement: Supplementary file 3060 [file 1]

IPI00853472.1|C22ORF39

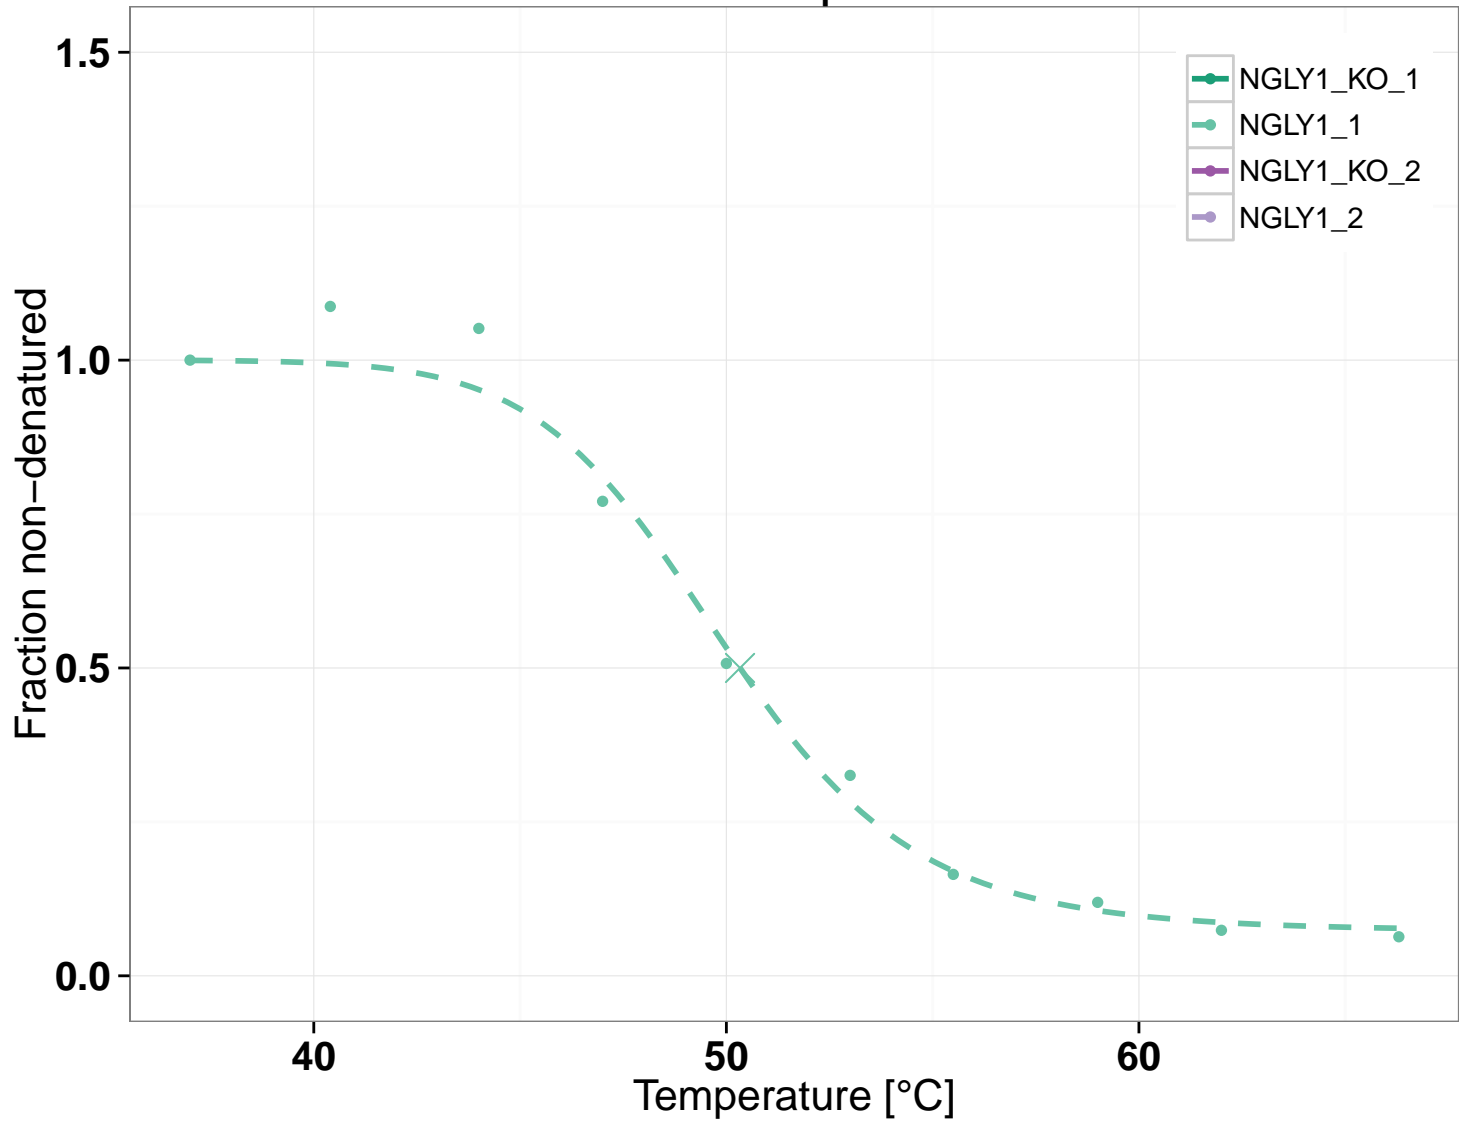

|            | meltPoint | slope | plateau | R2   |
|------------|-----------|-------|---------|------|
| NGLY1_KO_1 | -         | -     | -       | -    |
| NGLY1_1    | 50.33     | -0.1  | 0.07    | 0.99 |
| NGLY1_KO_2 | -         | -     | -       | -    |
| NGLY1_2    | -         | -     | -       | -    |

Supplement: Supplementary file 3061 [file 1]

IPI00413612.2|KIAA0586

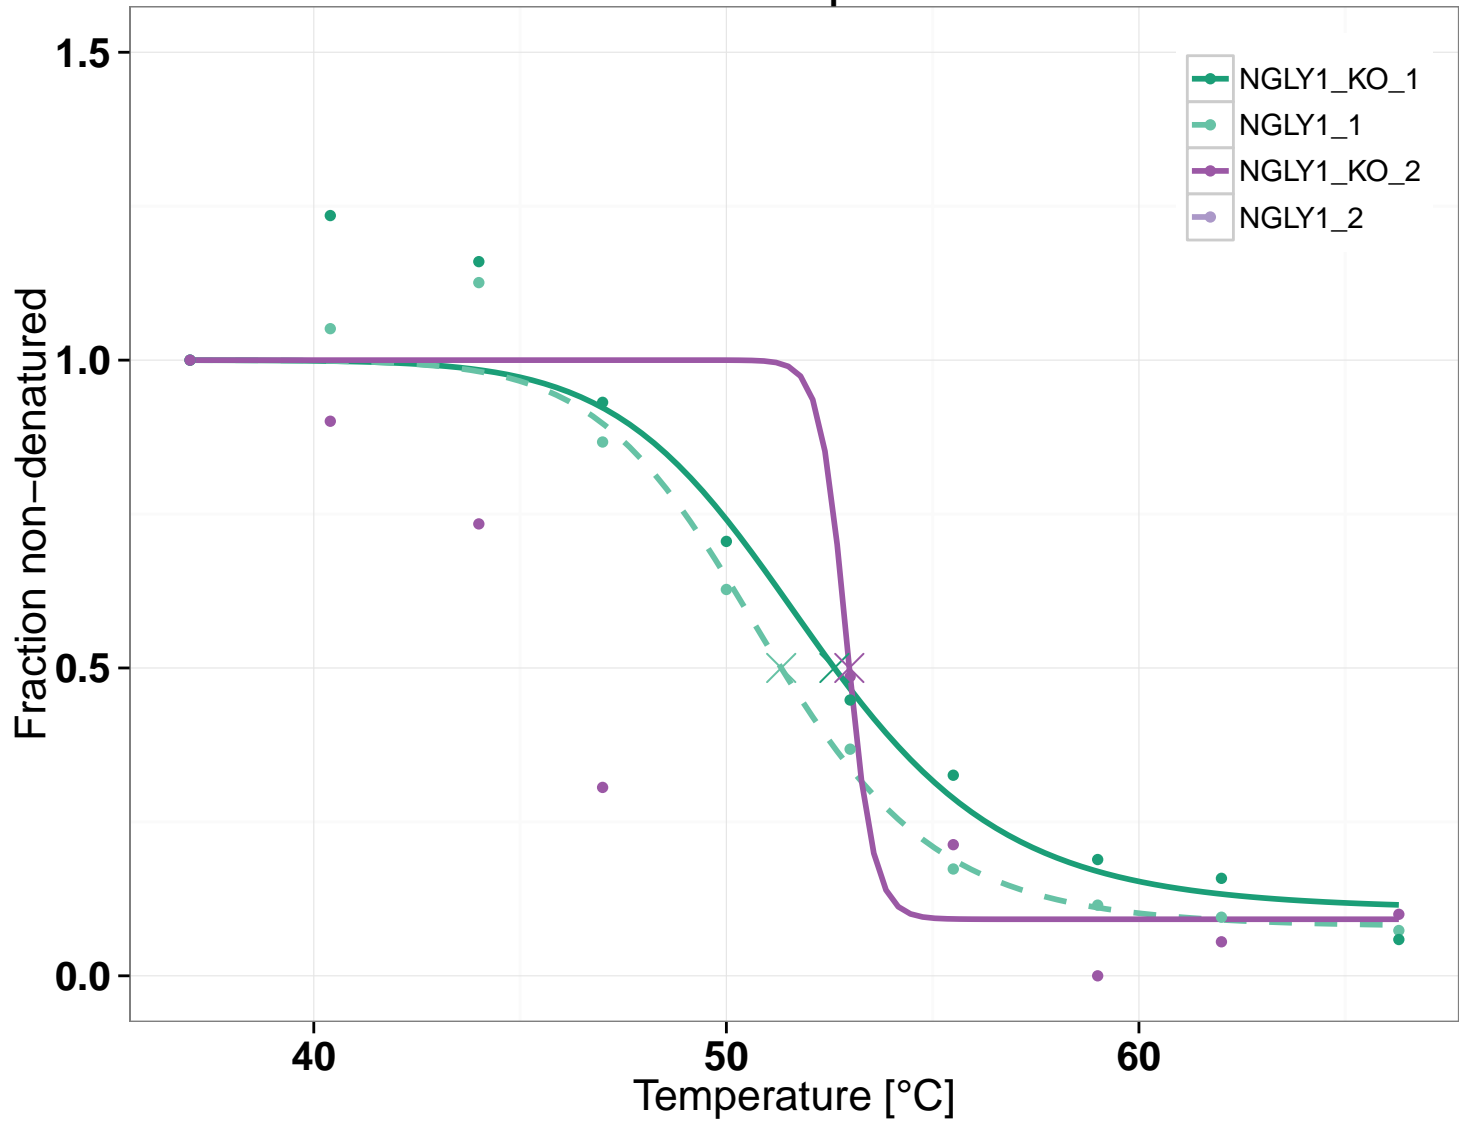

|            | meltPoint | slope  | plateau | R2   |
|------------|-----------|--------|---------|------|
| NGLY1_KO_1 | 52.62     | -0.095 | 0.11    | 0.95 |
| NGLY1_1    | 51.33     | -0.11  | 0.08    | 0.98 |
| NGLY1_KO_2 | 52.98     | -0.7   | 0.09    | 0.6  |
| NGLY1_2    | -         | -      | -       | -    |

Supplement: Supplementary file 3062 [file 1]

IPI00015973.1|EPB41L2

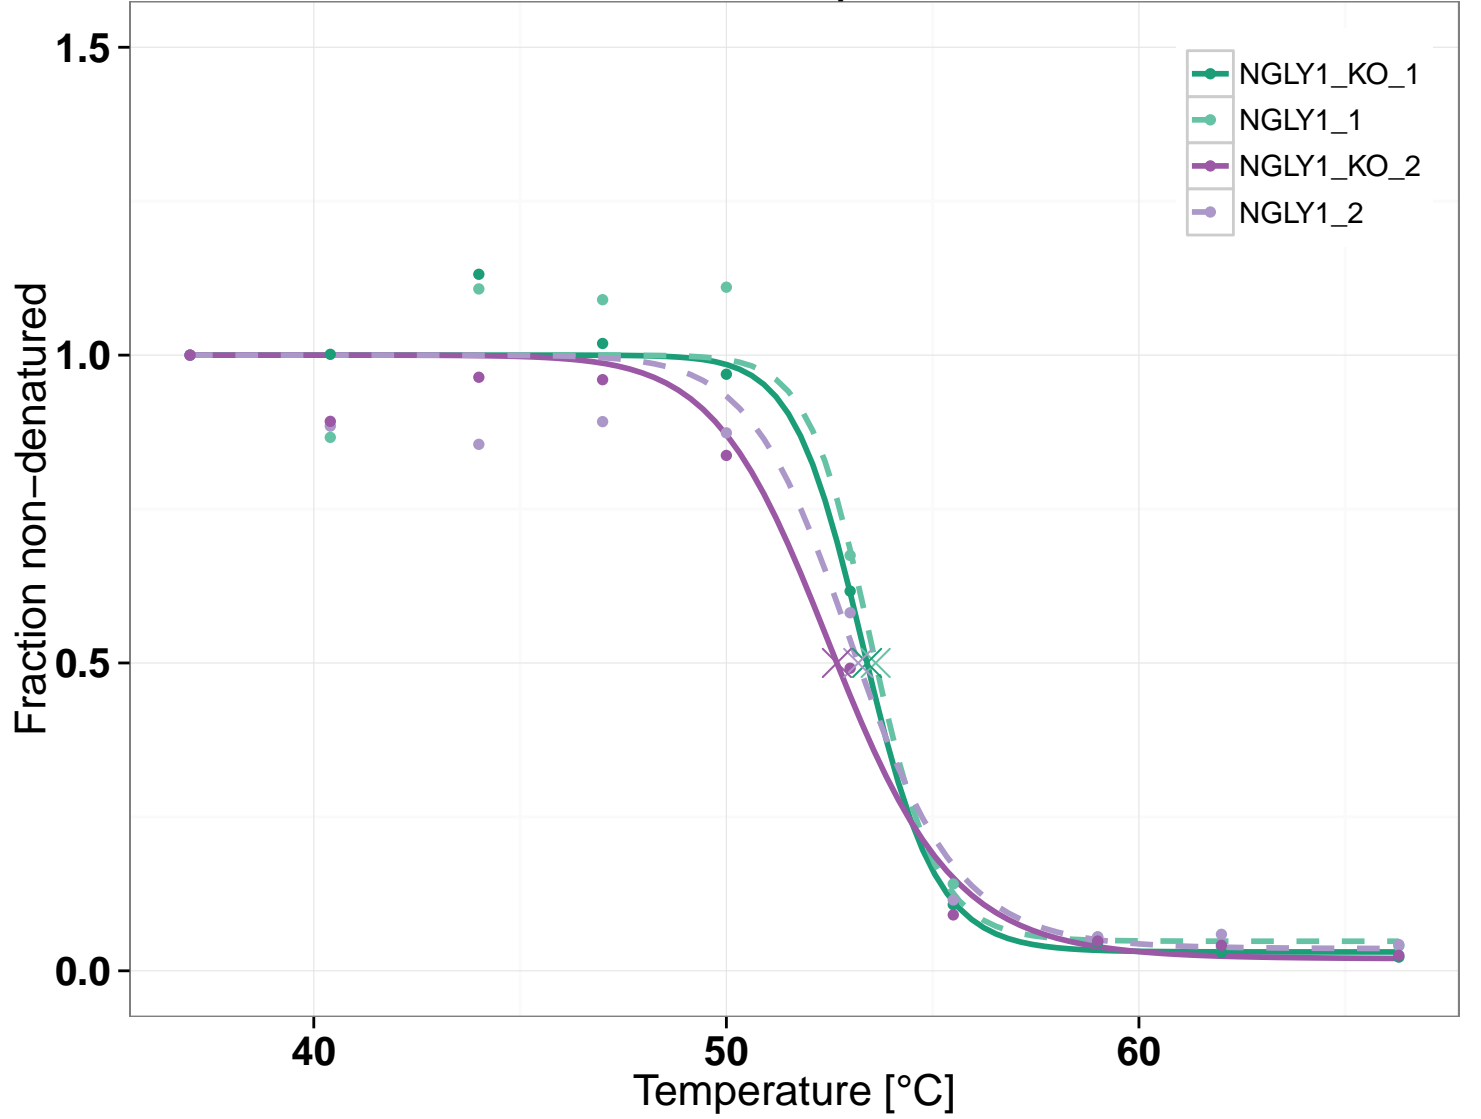

|            | meltPoint | slope | plateau | R2   |
|------------|-----------|-------|---------|------|
| NGLY1_KO_1 | 53.41     | -0.28 | 0.03    | 0.99 |
| NGLY1_1    | 53.62     | -0.31 | 0.05    | 0.98 |
| NGLY1_KO_2 | 52.68     | -0.17 | 0.02    | 0.99 |
| NGLY1_2    | 53.2      | -0.19 | 0.04    | 0.97 |

Supplement: Supplementary file 3063 [file 1]

IPI00550300.3|FAM119A

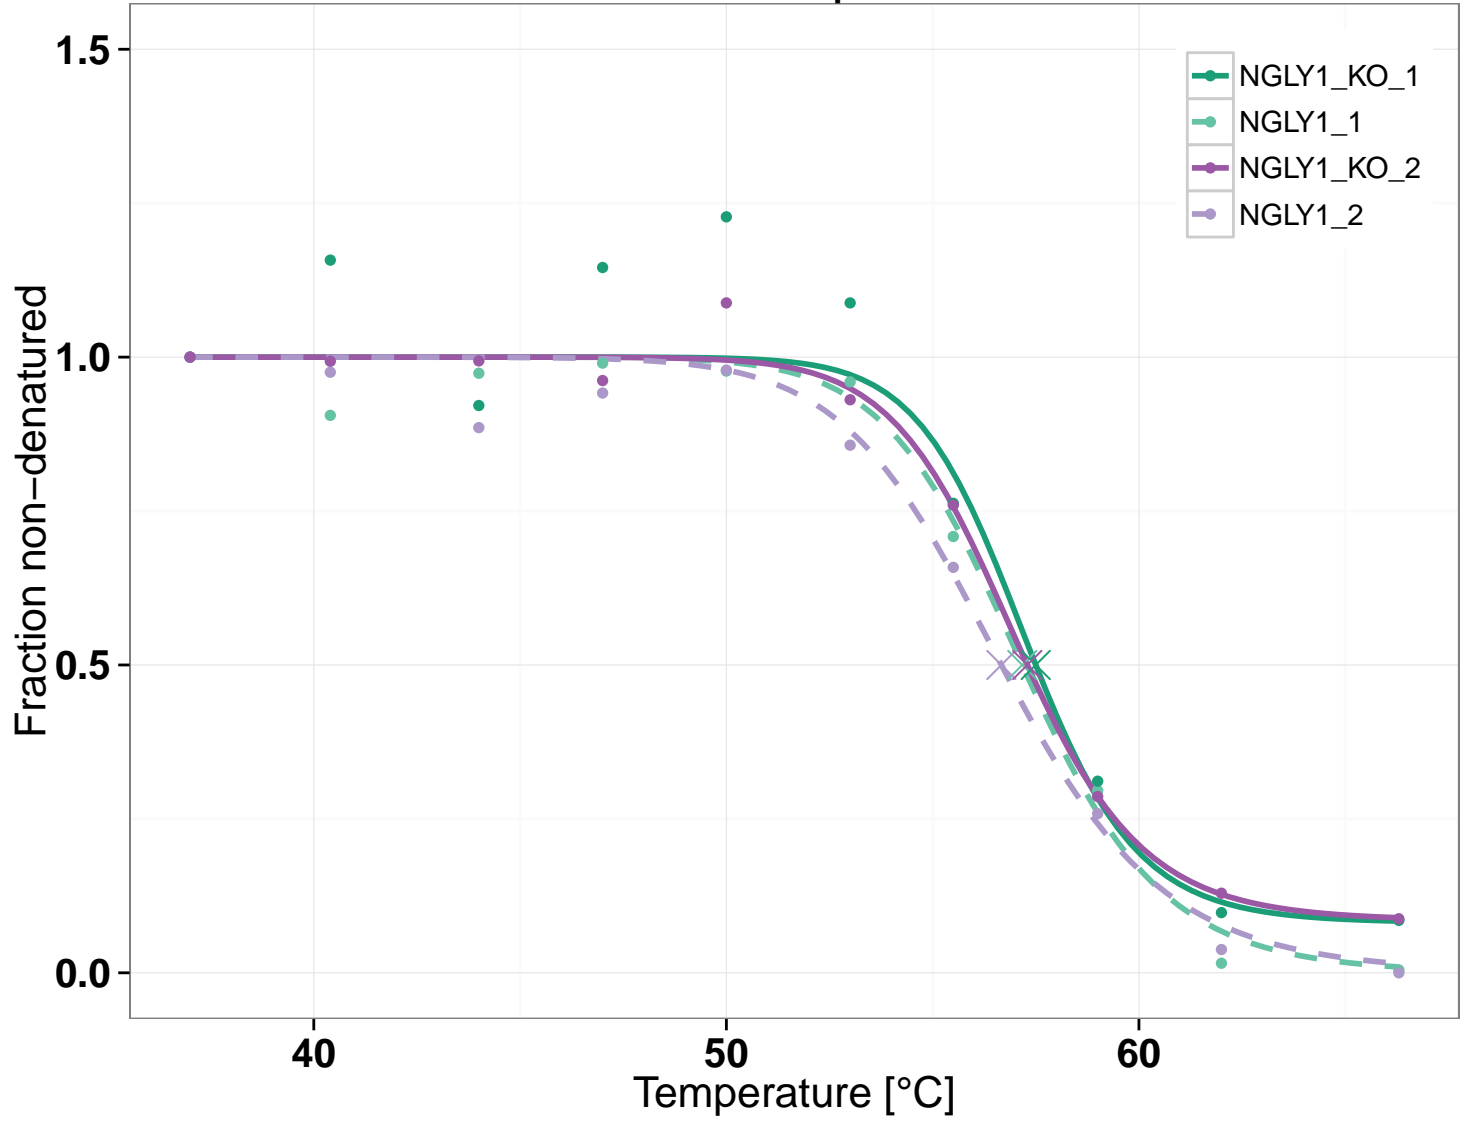

|            | meltPoint | slope | plateau | R2   |
|------------|-----------|-------|---------|------|
| NGLY1_KO_1 | 57.5      | -0.17 | 0.08    | 0.93 |
| NGLY1_1    | 57.17     | -0.15 | 0       | 0.99 |
| NGLY1_KO_2 | 57.29     | -0.15 | 0.08    | 0.99 |
| NGLY1_2    | 56.67     | -0.13 | 0       | 0.99 |

Supplement: Supplementary file 3064 [file 1]

IPI00001734.3|PSAT1

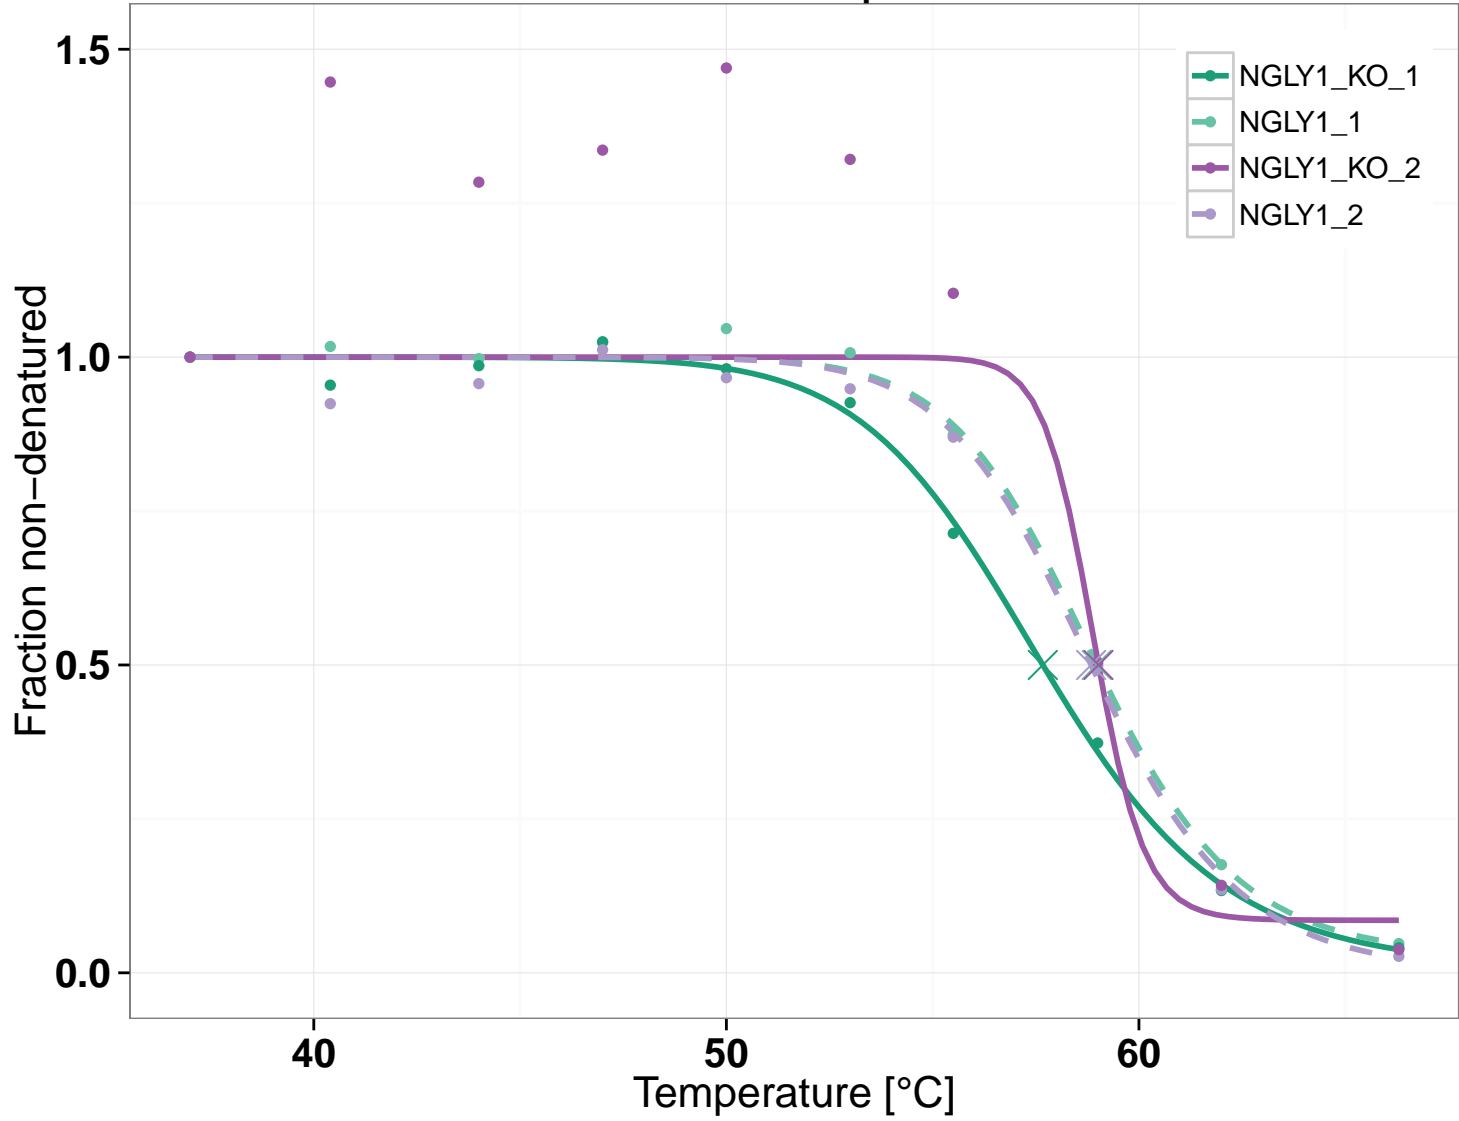

|            | meltPoint | slope | plateau | R2   |
|------------|-----------|-------|---------|------|
| NGLY1_KO_1 | 57.67     | -0.11 | 0.01    | 1    |
| NGLY1_1    | 58.98     | -0.14 | 0.03    | 1    |
| NGLY1_KO_2 | 59.02     | -0.37 | 0.09    | 0.72 |
| NGLY1_2    | 58.84     | -0.14 | 0       | 0.99 |

Supplement: Supplementary file 3065 [file 1]

IPI00024348.1|PEX13

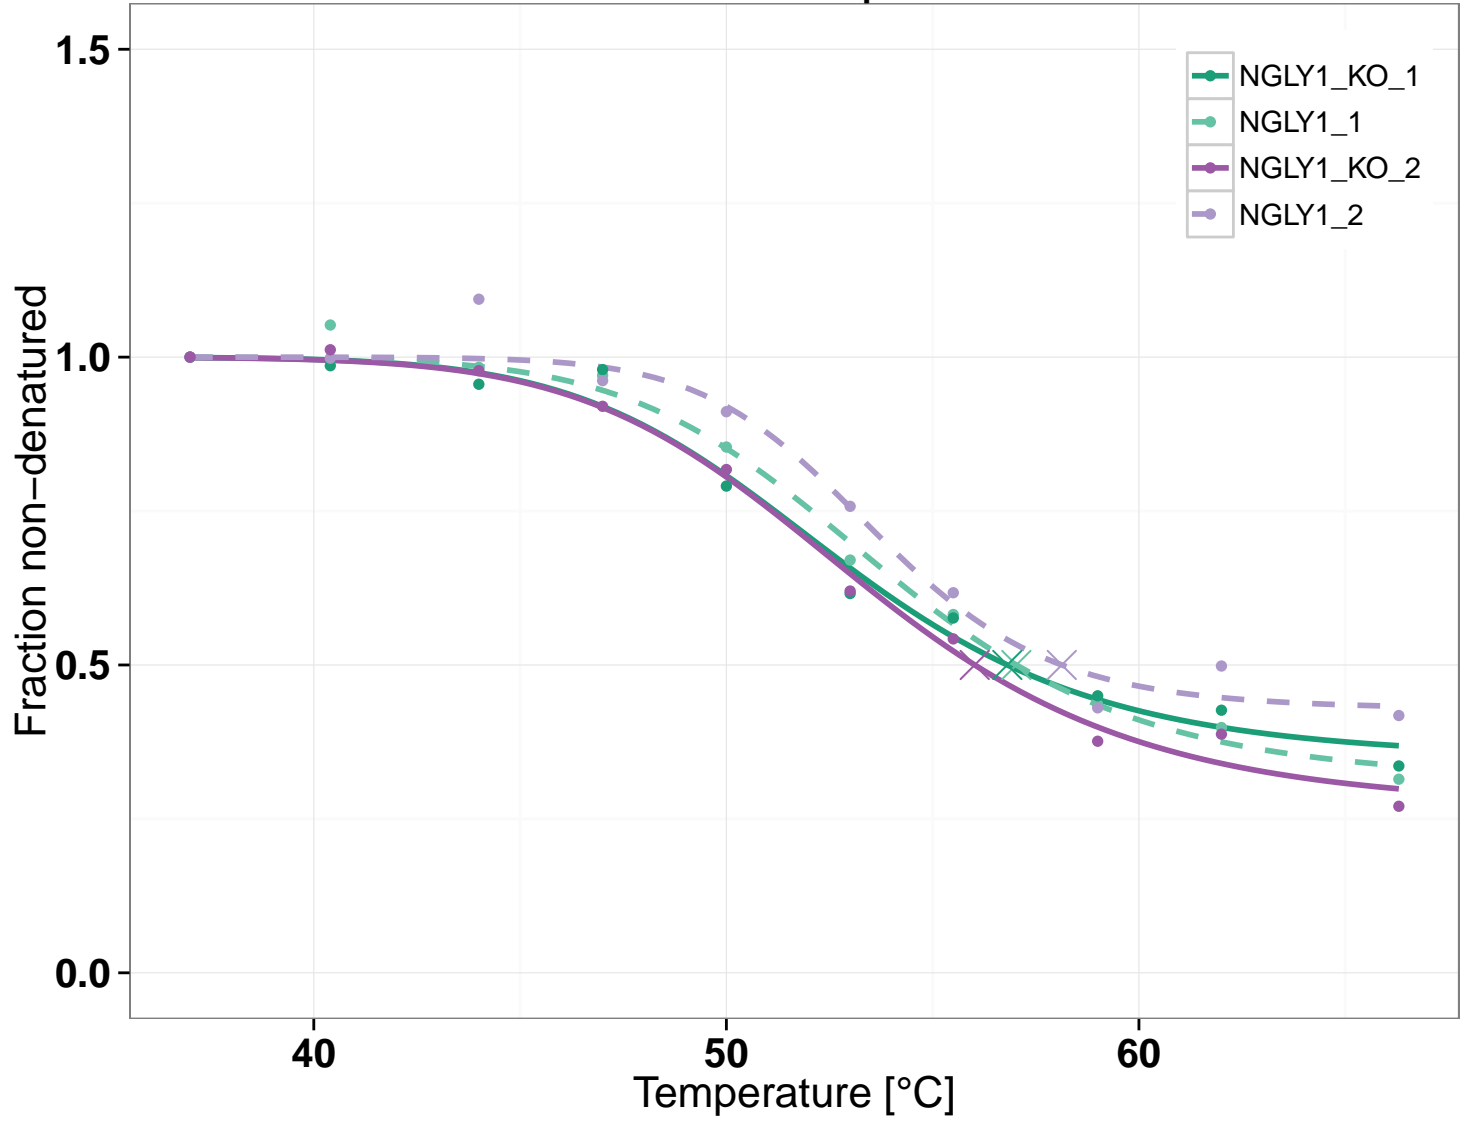

|            | meltPoint | slope  | plateau | R2   |
|------------|-----------|--------|---------|------|
| NGLY1_KO_1 | 56.81     | -0.051 | 0.35    | 0.99 |
| NGLY1_1    | 57.03     | -0.055 | 0.31    | 0.99 |
| NGLY1_KO_2 | 56.02     | -0.054 | 0.27    | 0.99 |
| NGLY1_2    | 58.13     | -0.067 | 0.43    | 0.97 |

Supplement: Supplementary file 3066 [file 1]

IPI00910088.1|AP1M1

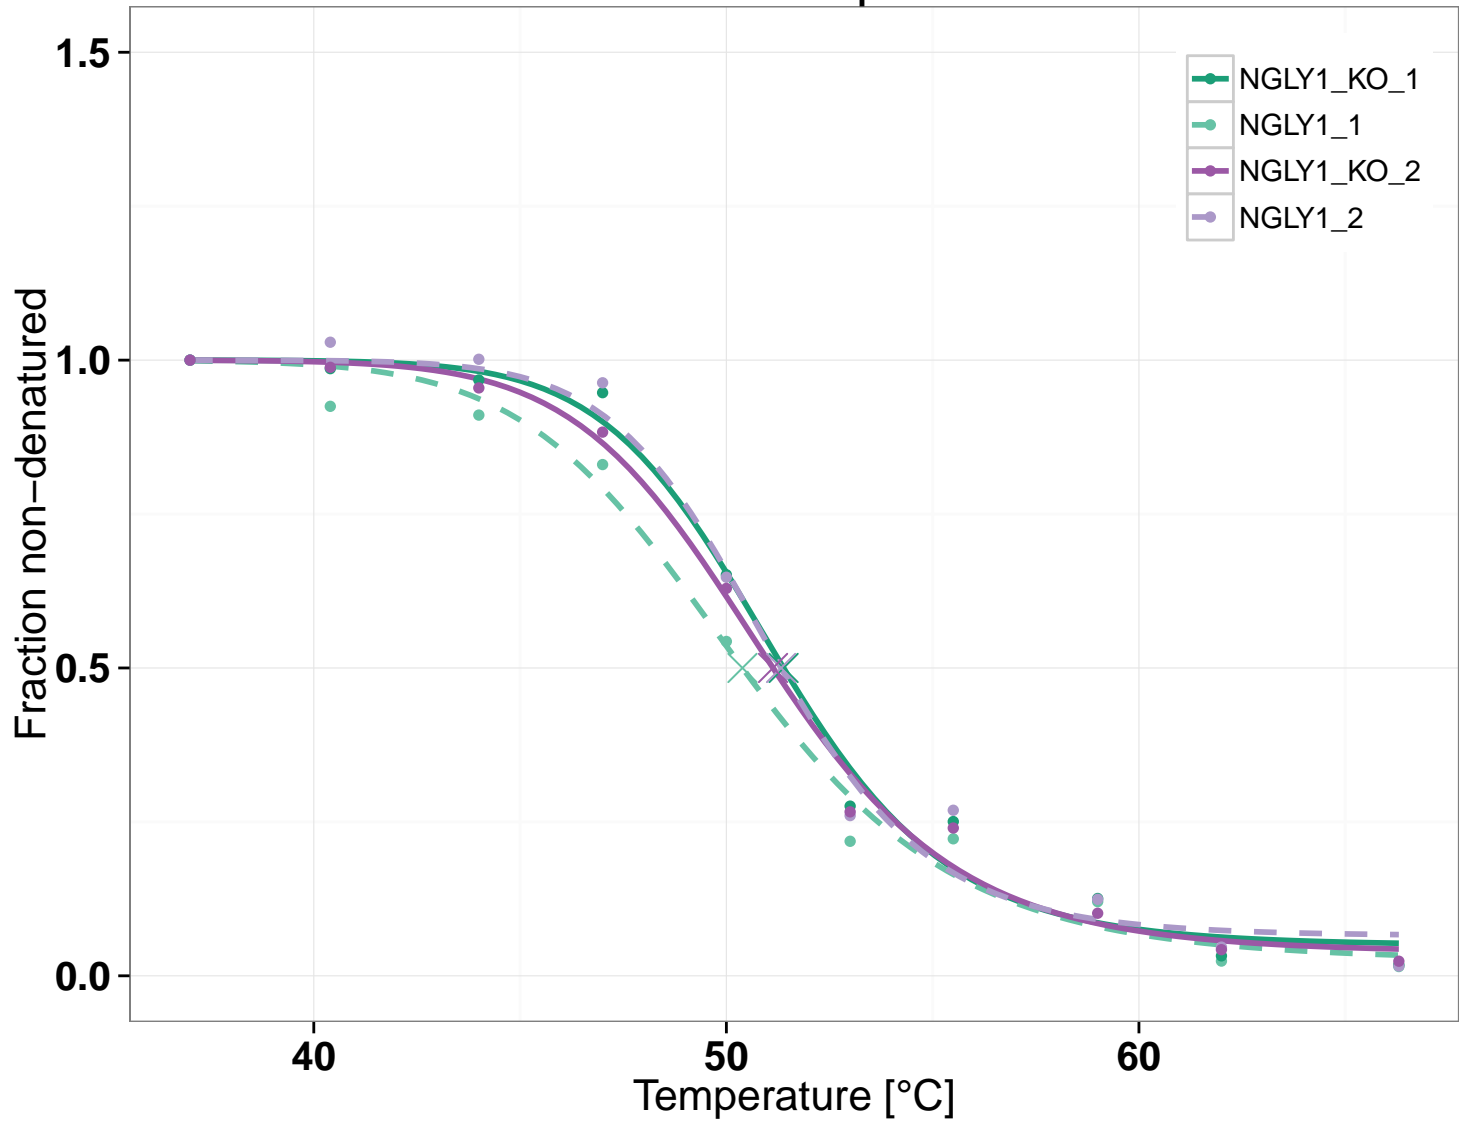

|            | meltPoint | slope  | plateau | R2   |
|------------|-----------|--------|---------|------|
| NGLY1_KO_1 | 51.39     | -0.11  | 0.05    | 0.99 |
| NGLY1_1    | 50.39     | -0.092 | 0.02    | 0.99 |
| NGLY1_KO_2 | 51.13     | -0.1   | 0.04    | 0.99 |
| NGLY1_2    | 51.33     | -0.12  | 0.06    | 0.99 |

Supplement: Supplementary file 3067 [file 1]

# IPI00216346.2|NOL3

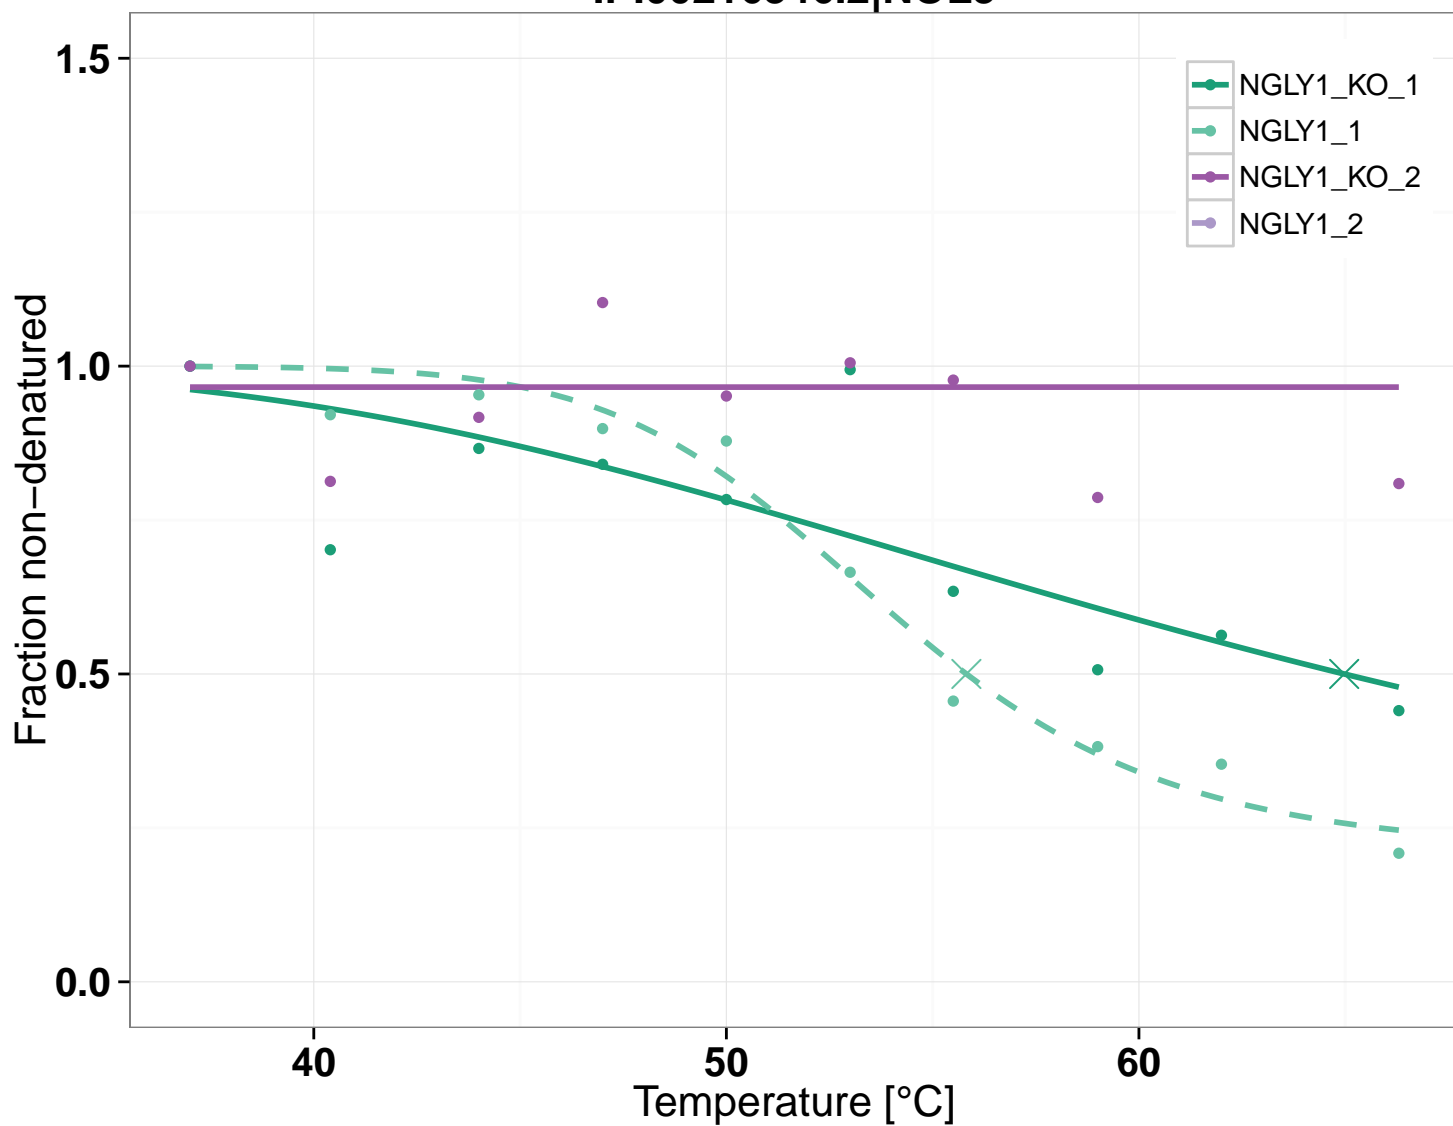

|            | meltPoint | slope  | plateau | R2   |
|------------|-----------|--------|---------|------|
| NGLY1_KO_1 | 64.97     | -0.02  | 0       | 0.6  |
| NGLY1_1    | 55.82     | -0.059 | 0.21    | 0.98 |
| NGLY1_KO_2 | -         | -      | 0.93    | 0    |
| NGLY1_2    | -         | -      | -       | -    |

Supplement: Supplementary file 3068 [file 1]

IPI00744702.2|FAM125A

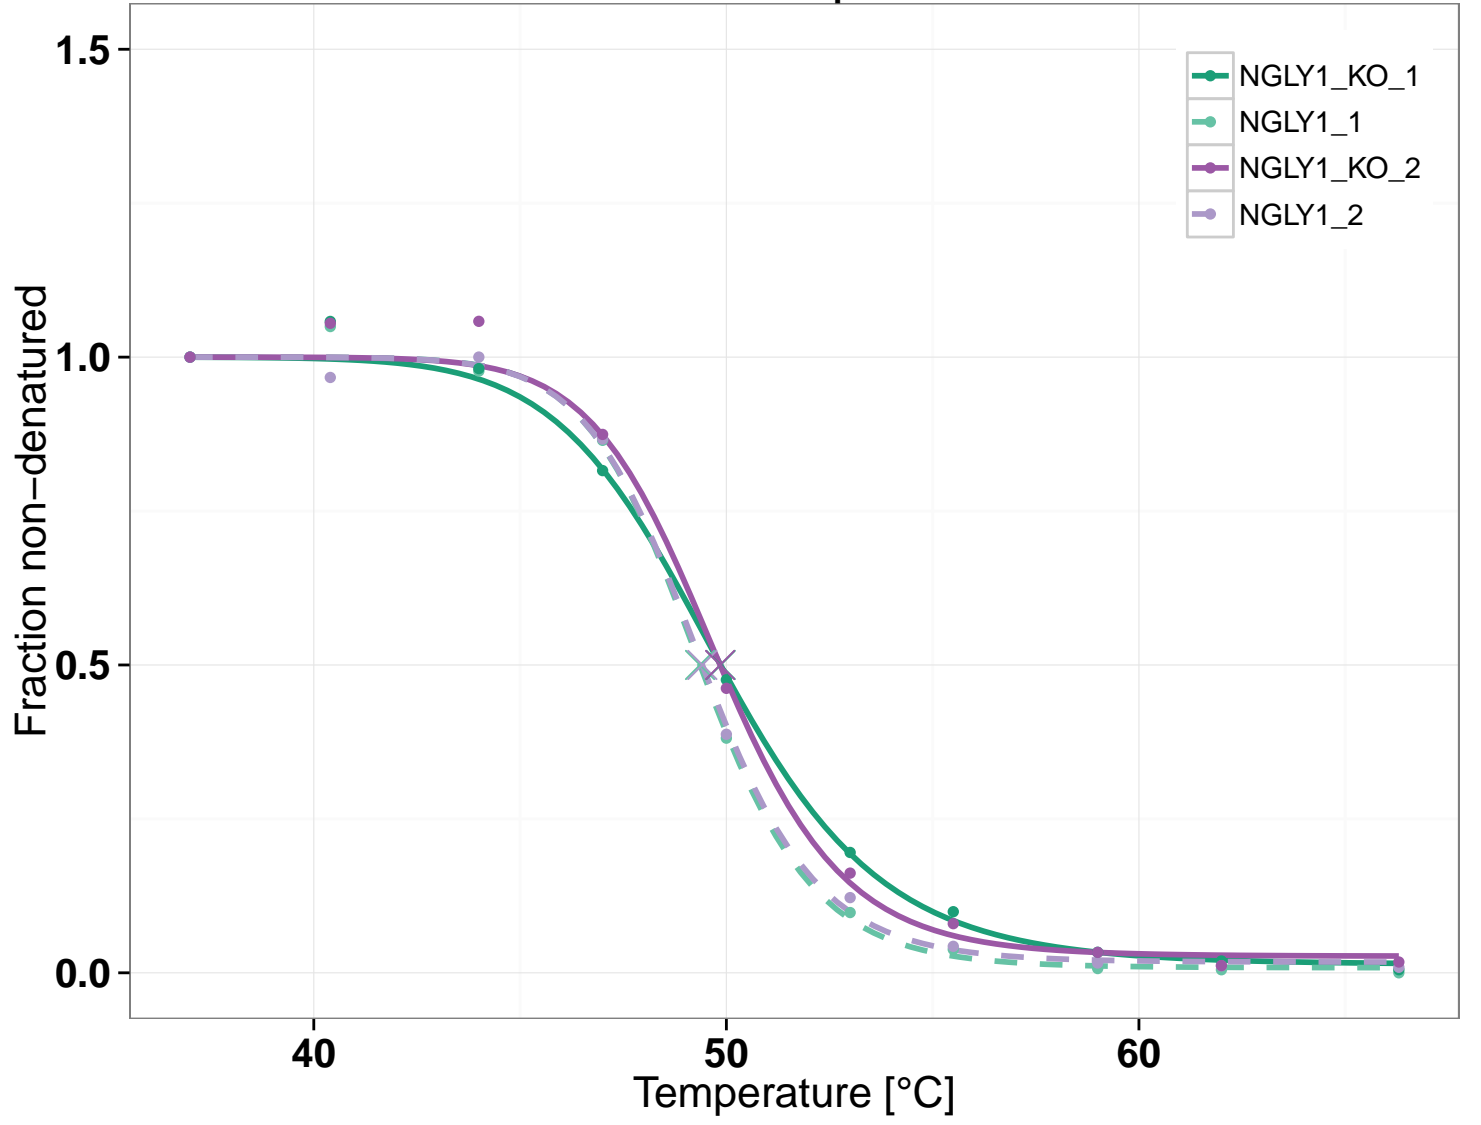

|            | meltPoint | slope | plateau | R2 |
|------------|-----------|-------|---------|----|
| NGLY1_KO_1 | 49.86     | -0.12 | 0.01    | 1  |
| NGLY1_1    | 49.36     | -0.18 | 0.01    | 1  |
| NGLY1_KO_2 | 49.85     | -0.16 | 0.03    | 1  |
| NGLY1_2    | 49.42     | -0.17 | 0.02    | 1  |

Supplement: Supplementary file 3069 [file 1]

# IPI00386260.5|MAP3K4

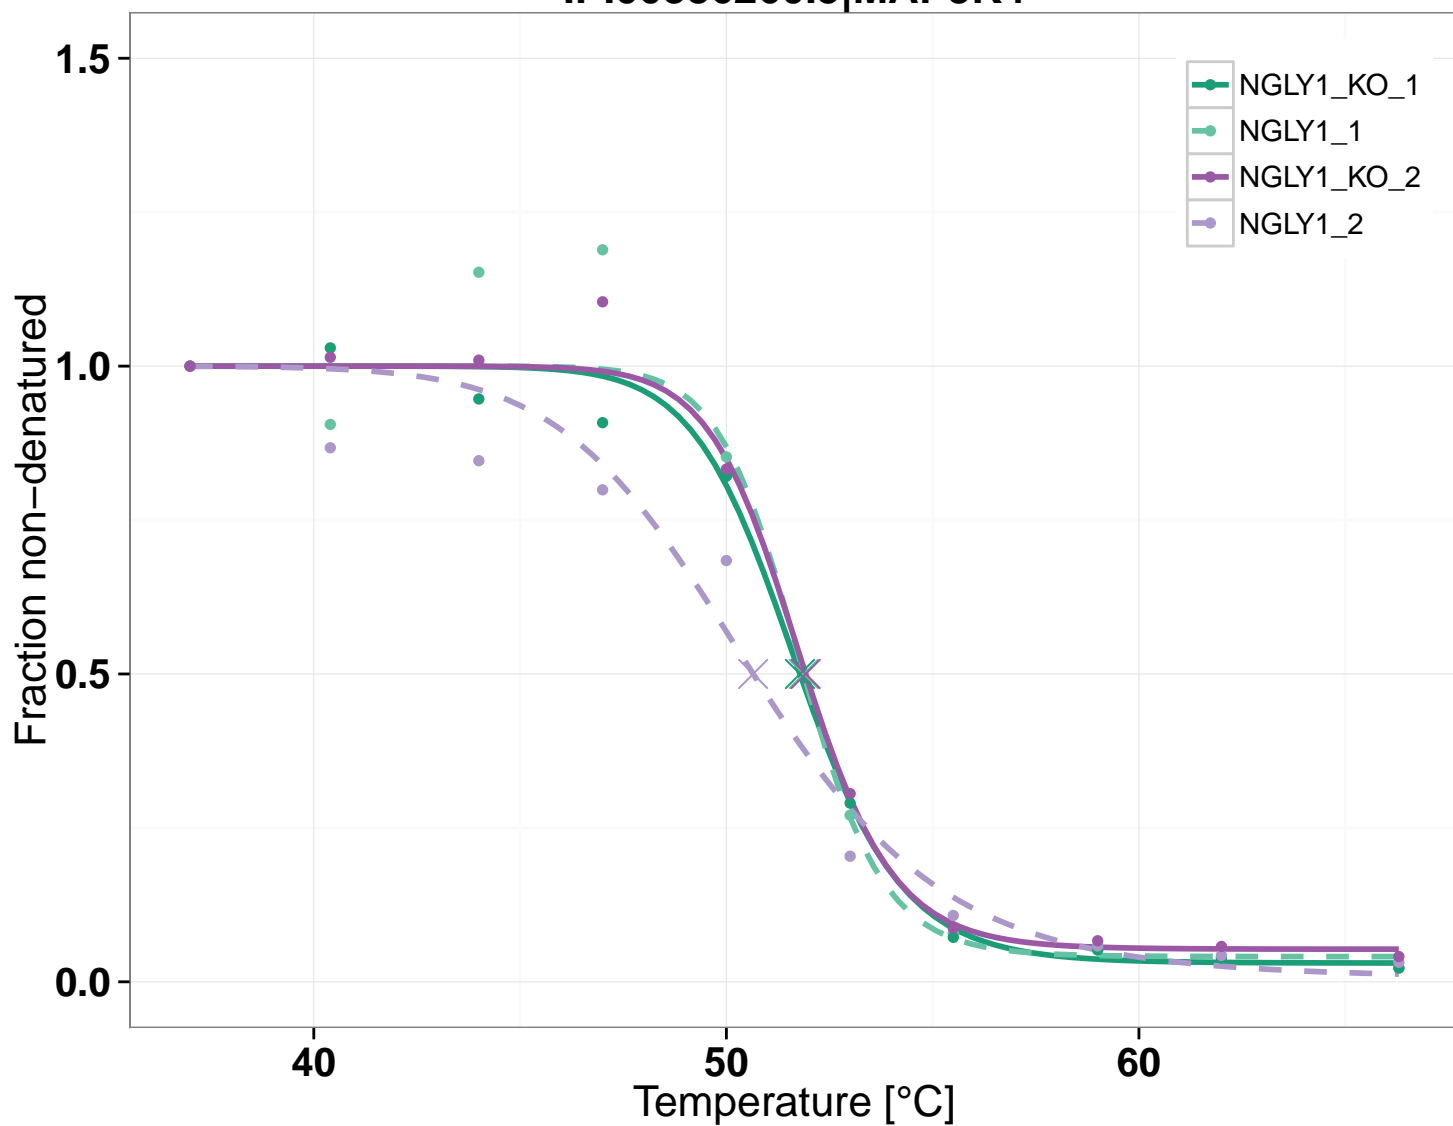

|            | meltPoint | slope | plateau | R2   |
|------------|-----------|-------|---------|------|
| NGLY1_KO_1 | 51.78     | -0.19 | 0.03    | 0.99 |
| NGLY1_1    | 51.88     | -0.24 | 0.04    | 0.97 |
| NGLY1_KO_2 | 51.92     | -0.21 | 0.05    | 0.99 |
| NGLY1_2    | 50.65     | -0.11 | 0.01    | 0.96 |

Supplement: Supplementary file 3070 [file 1]

# IPI00024175.3|PSMA7

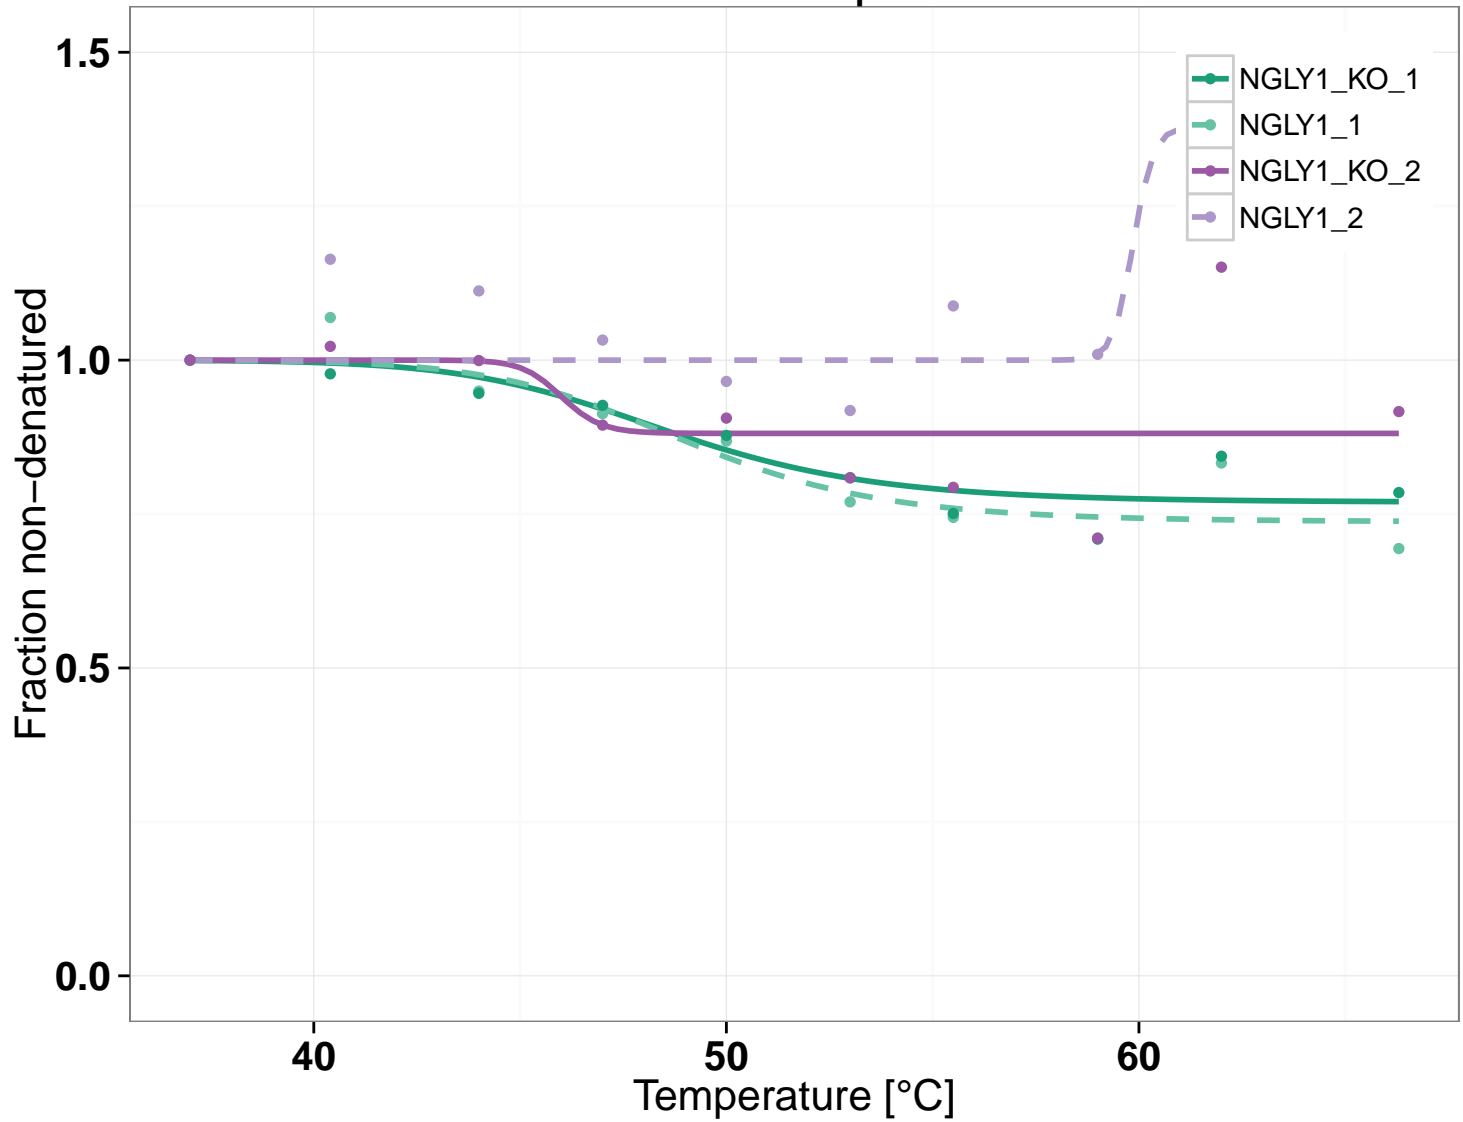

|            | meltPoint | slope  | plateau | R2   |
|------------|-----------|--------|---------|------|
| NGLY1_KO_1 | —         | −0.023 | 0.77    | 0.86 |
| NGLY1_1    | —         | −0.028 | 0.74    | 0.87 |
| NGLY1_KO_2 | —         | −0.063 | 0.88    | 0.22 |
| NGLY1_2    | —         | 0.4    | 1.38    | 0.75 |

Supplement: Supplementary file 3071 [file 1]

# IPI00783017.1|ZEB2

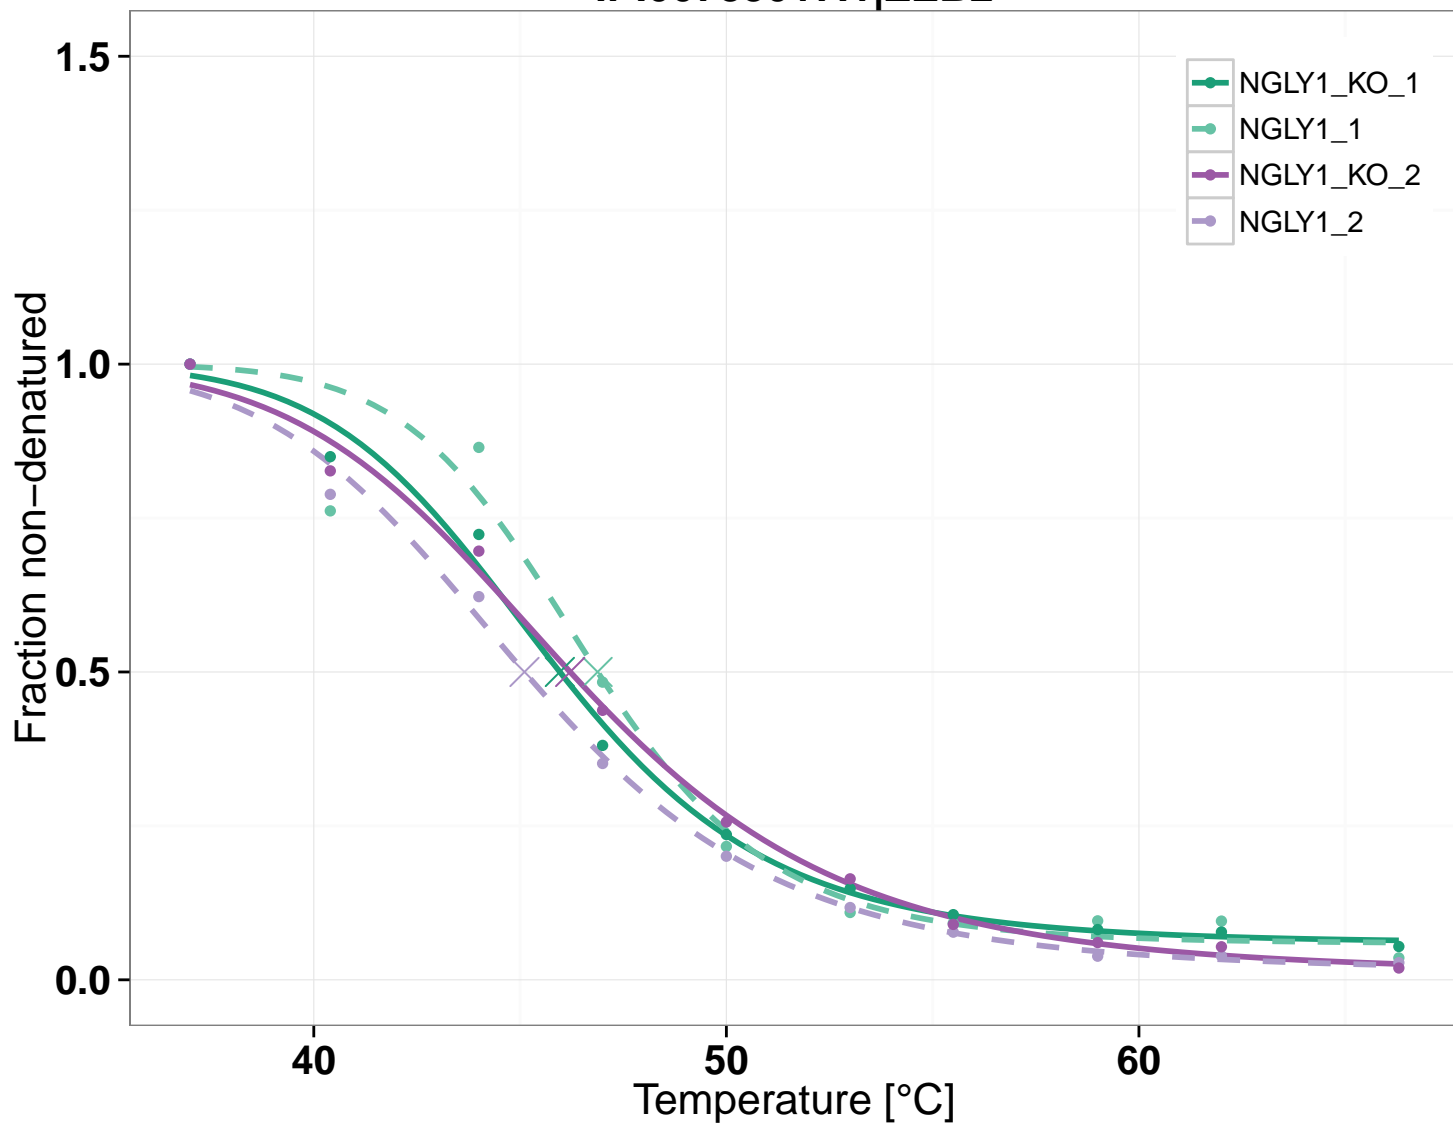

|            | meltPoint | slope  | plateau | R2   |
|------------|-----------|--------|---------|------|
| NGLY1_KO_1 | 45.96     | -0.088 | 0.06    | 0.99 |
| NGLY1_1    | 46.88     | -0.11  | 0.06    | 0.96 |
| NGLY1_KO_2 | 46.21     | -0.074 | 0.01    | 1    |
| NGLY1_2    | 45.11     | -0.08  | 0.01    | 0.99 |

Supplement: Supplementary file 3072 [file 1]

IPI00465041.3|LIN9

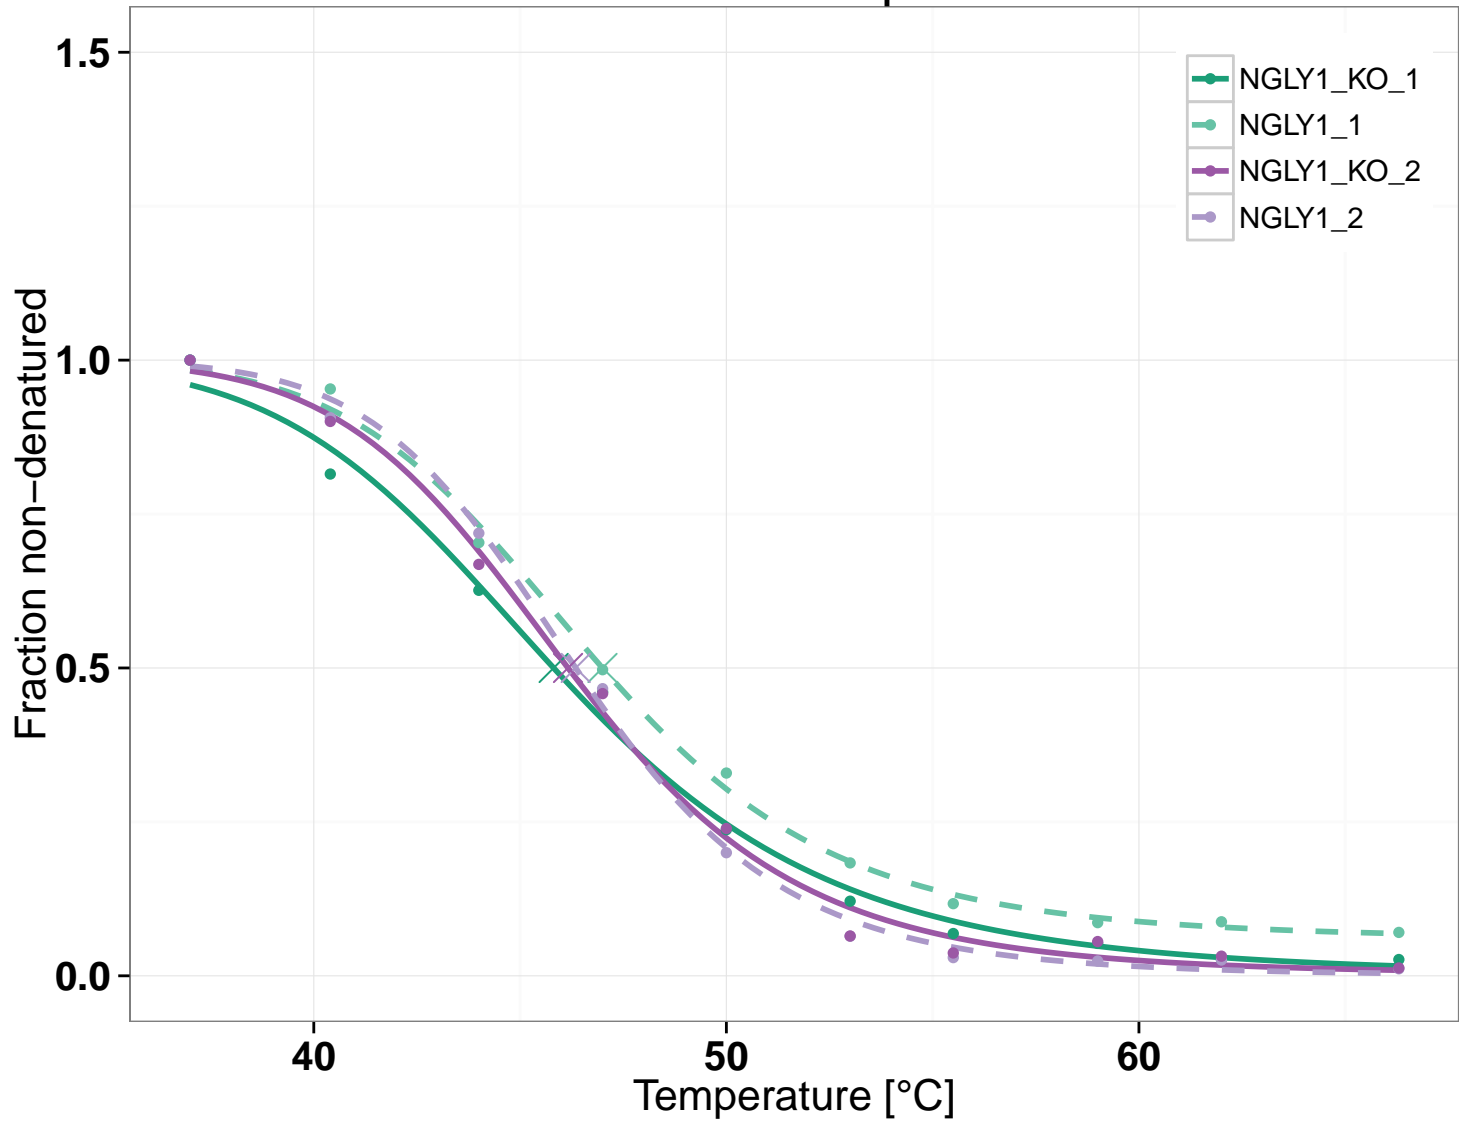

|            | meltPoint | slope  | plateau | R2   |
|------------|-----------|--------|---------|------|
| NGLY1_KO_1 | 45.81     | -0.074 | 0       | 0.99 |
| NGLY1_1    | 47        | -0.079 | 0.06    | 1    |
| NGLY1_KO_2 | 46.16     | -0.089 | 0       | 1    |
| NGLY1_2    | 46.35     | -0.1   | 0       | 1    |

Supplement: Supplementary file 3073 [file 1]

# IPI00303207.3|ABCE1

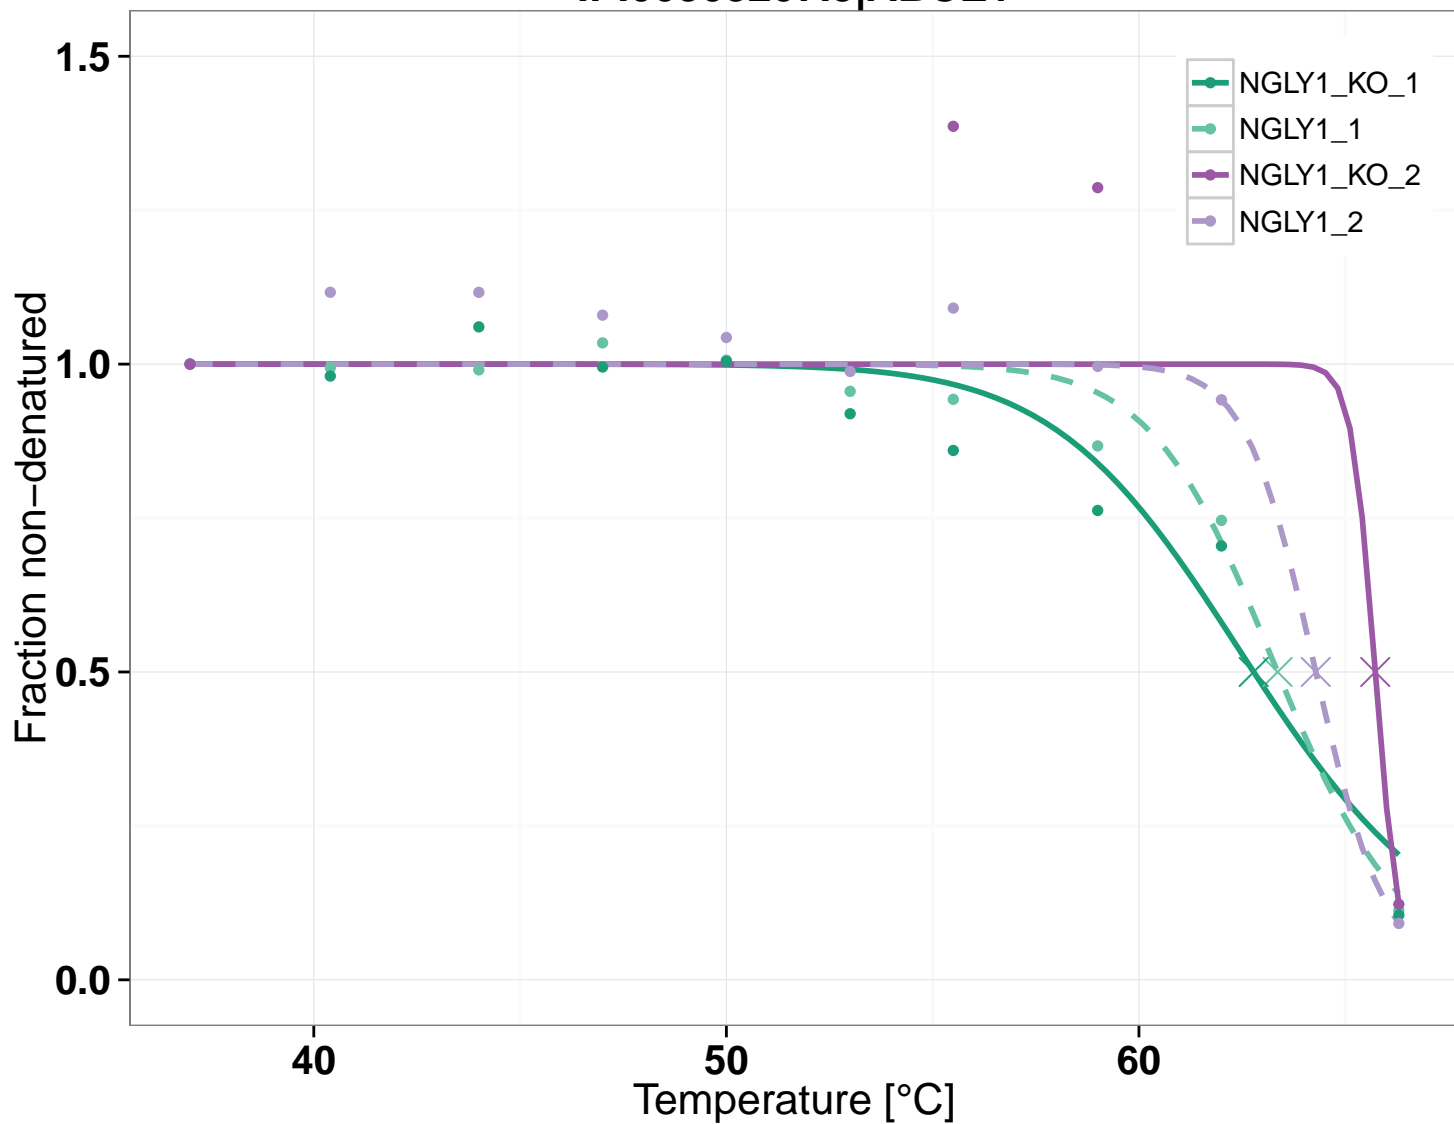

|            | meltPoint | slope | plateau | R2    |
|------------|-----------|-------|---------|-------|
| NGLY1_KO_1 | 62.78     | -0.1  | 0       | 0.93  |
| NGLY1_1    | 63.36     | -0.16 | 0       | 0.98  |
| NGLY1_KO_2 | 65.73     | -0.87 | 0       | -0.33 |
| NGLY1_2    | 64.29     | -0.29 | 0       | 0.95  |

Supplement: Supplementary file 3074 [file 1]

IPI00029056.2|SEPHS1

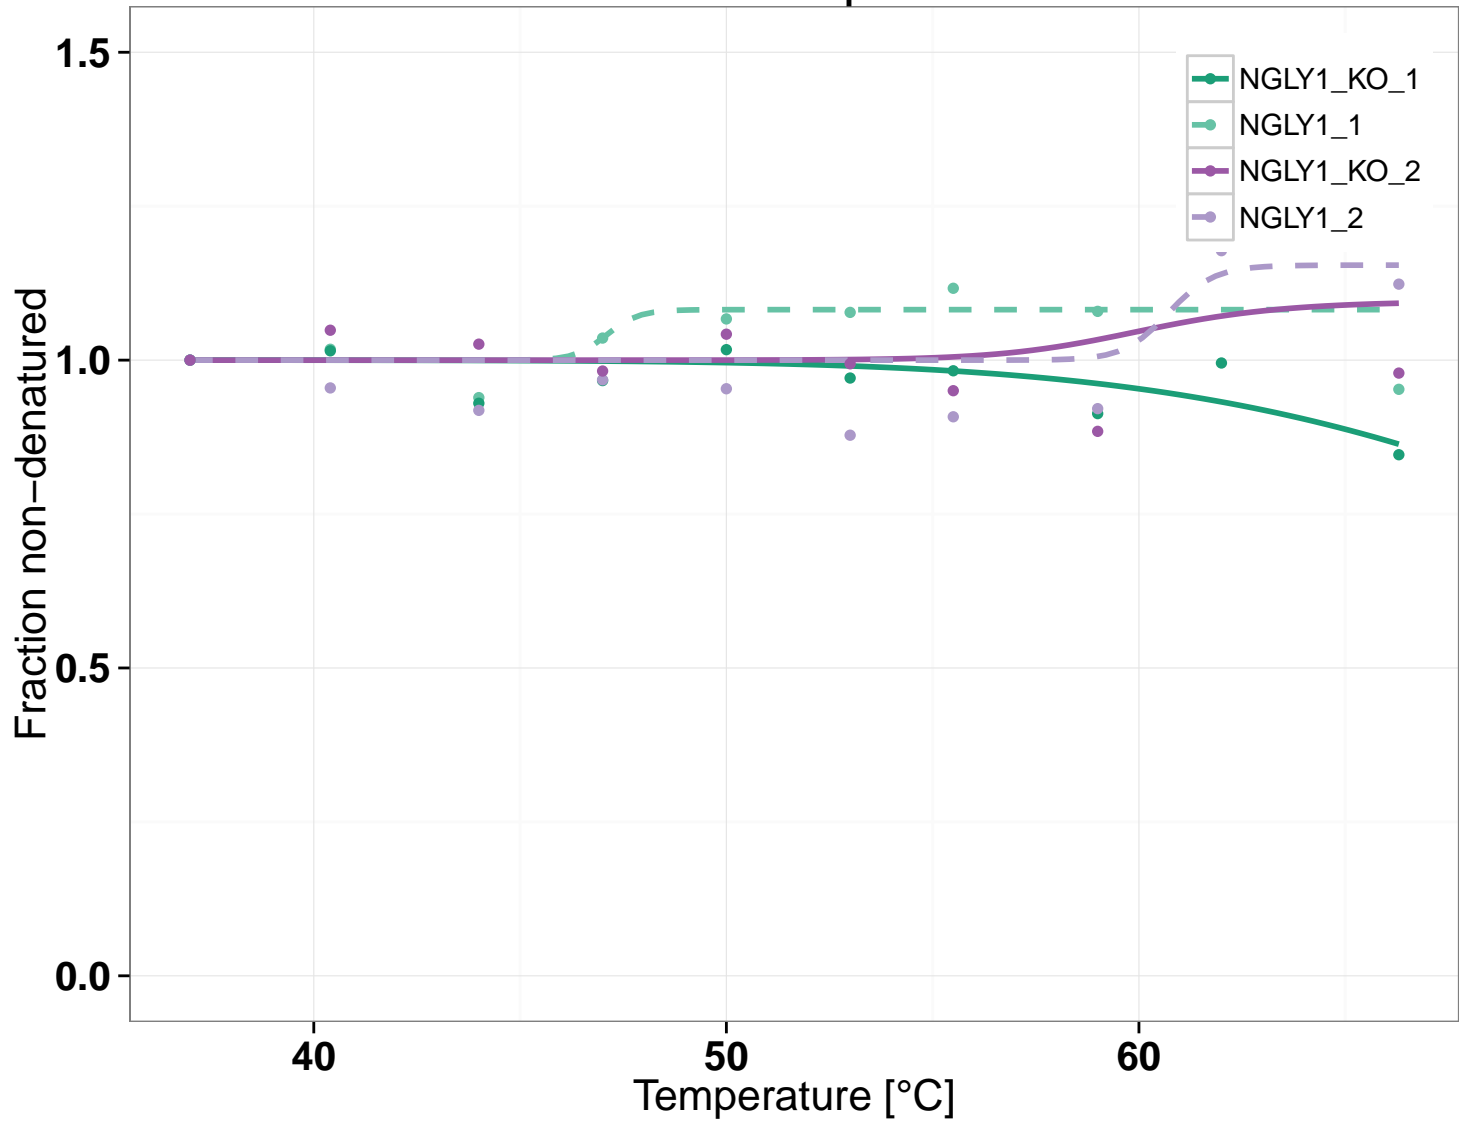

|            | meltPoint | slope | plateau | R2   |
|------------|-----------|-------|---------|------|
| NGLY1_KO_1 | -         | -     | 0       | 0.47 |
| NGLY1_1    | -         | 0.054 | 1.08    | 0.34 |
| NGLY1_KO_2 | -         | 0.014 | 1.1     | 0.11 |
| NGLY1_2    | -         | 0.071 | 1.15    | 0.47 |

Supplement: Supplementary file 3075 [file 1]

# IPI00305092.7|WIBG

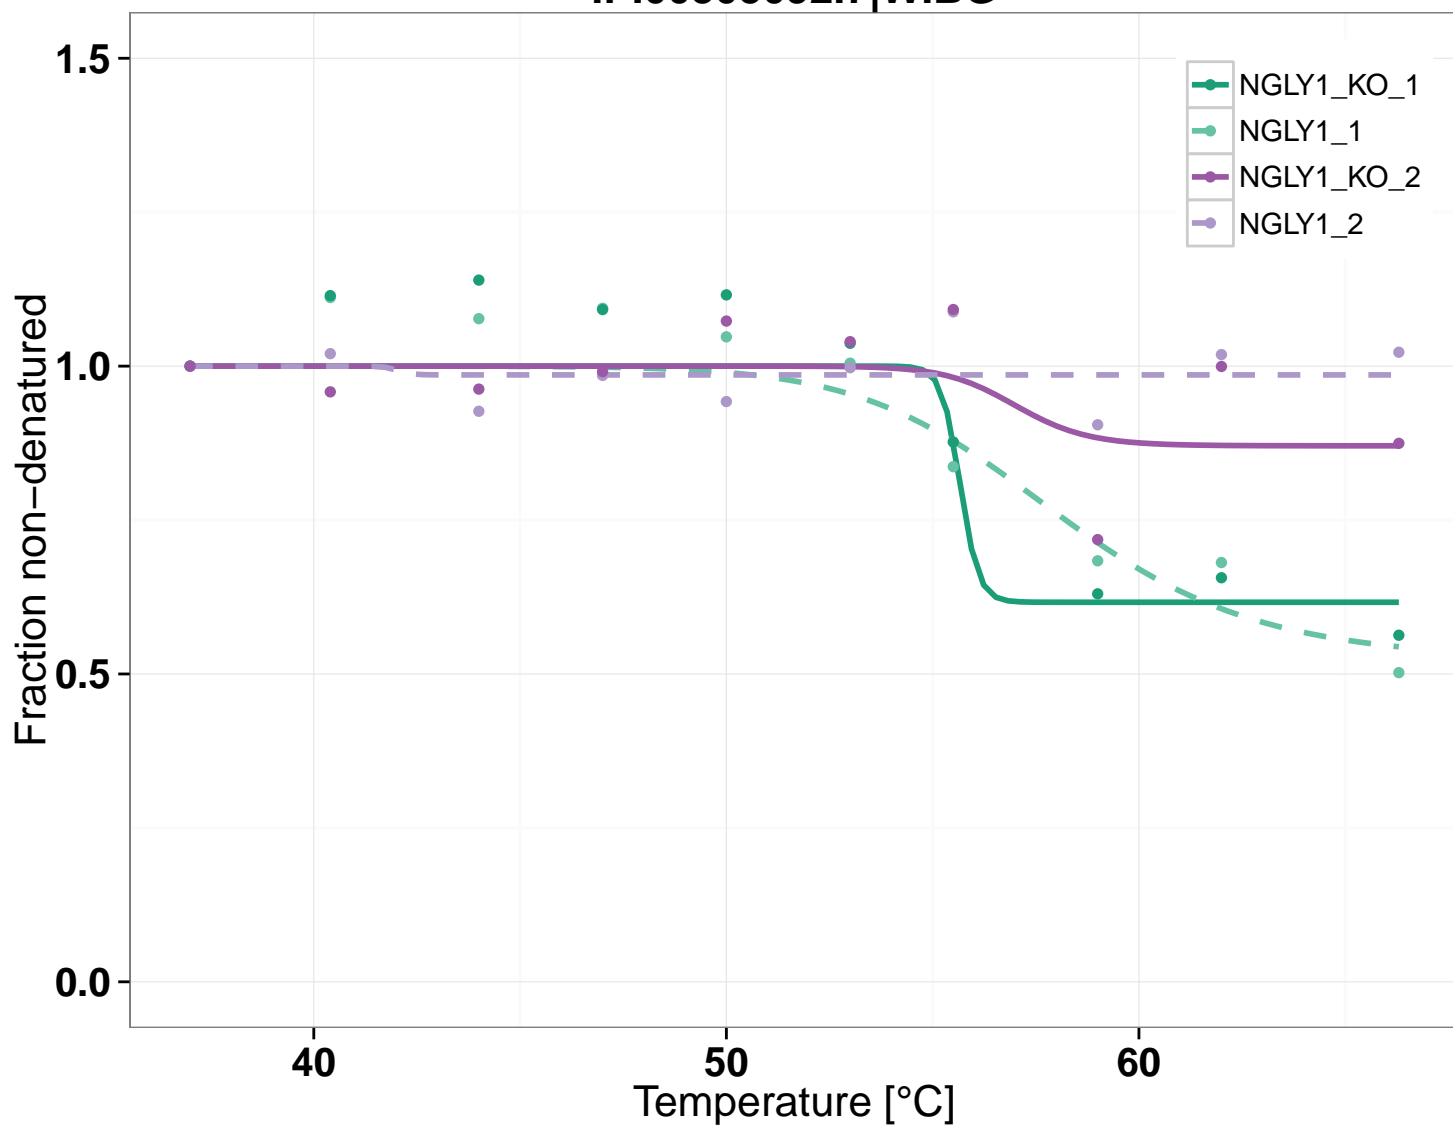

|            | meltPoint | slope  | plateau | R2   |
|------------|-----------|--------|---------|------|
| NGLY1_KO_1 | —         | -0.43  | 0.62    | 0.87 |
| NGLY1_1    | —         | -0.05  | 0.52    | 0.89 |
| NGLY1_KO_2 | —         | -0.037 | 0.87    | 0.37 |
| NGLY1_2    | —         | -0.021 | 0.99    | 0.03 |

Supplement: Supplementary file 3076 [file 1]

IPI00002270.3|C6ORF211

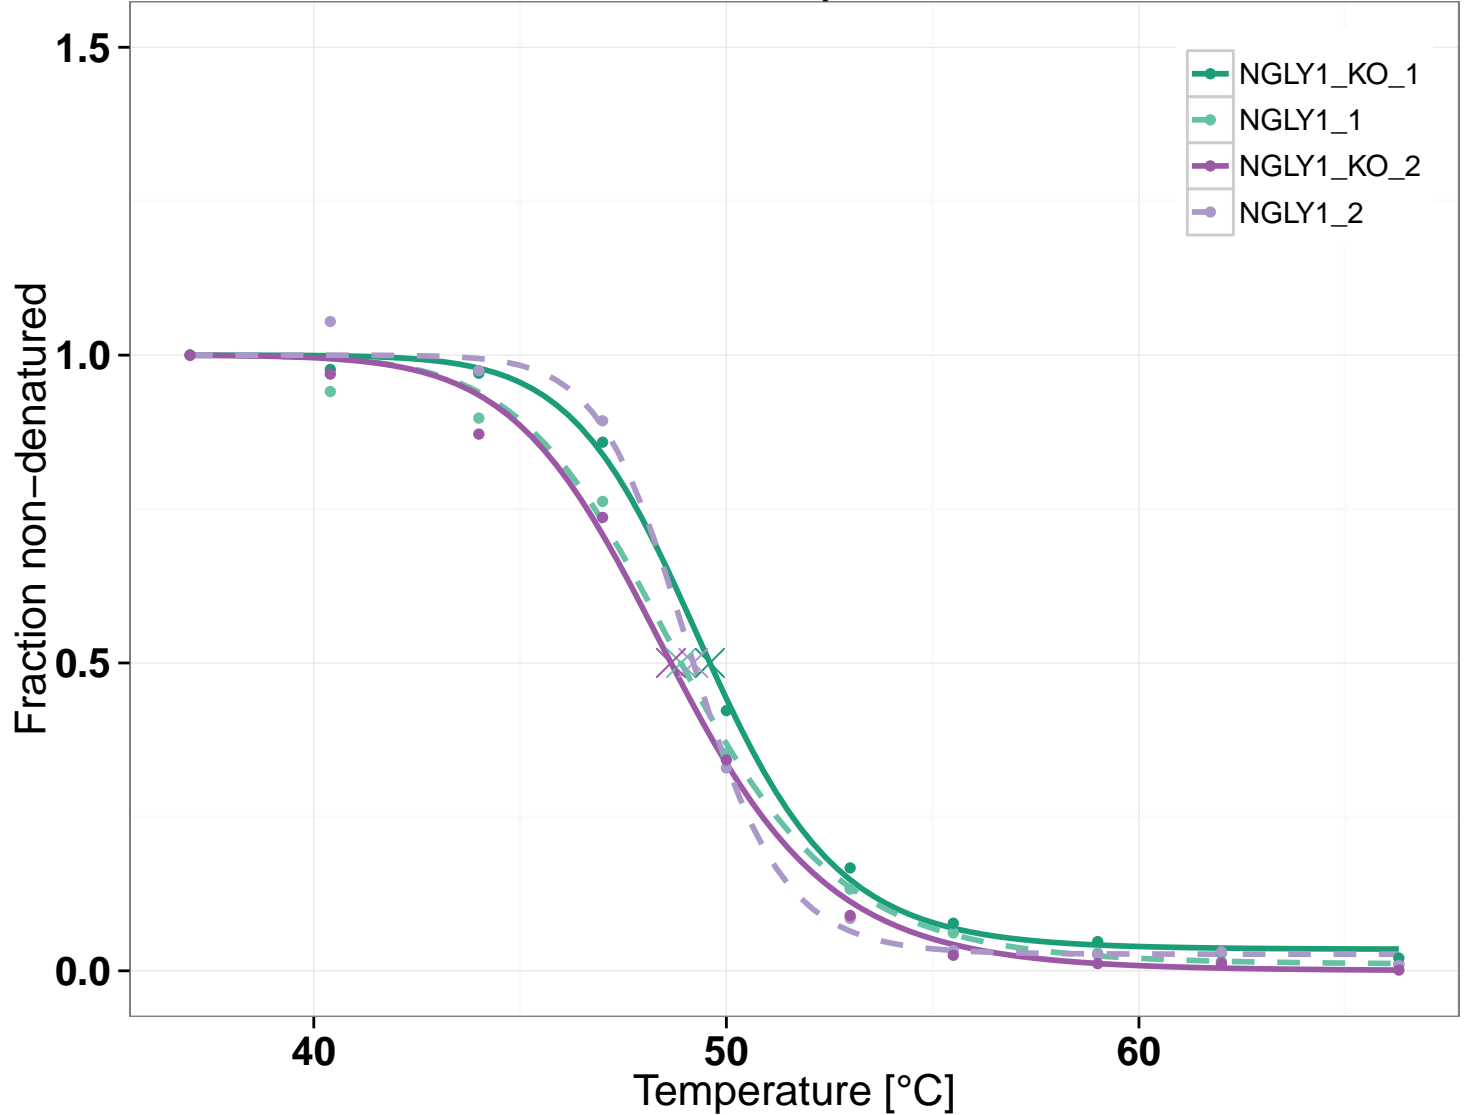

|            | meltPoint | slope | plateau | R2 |
|------------|-----------|-------|---------|----|
| NGLY1_KO_1 | 49.6      | -0.15 | 0.03    | 1  |
| NGLY1_1    | 48.9      | -0.13 | 0.01    | 1  |
| NGLY1_KO_2 | 48.66     | -0.13 | 0       | 1  |
| NGLY1_2    | 49.2      | -0.22 | 0.03    | 1  |

Supplement: Supplementary file 3077 [file 1]

IPI00009504.2|SLC20A2

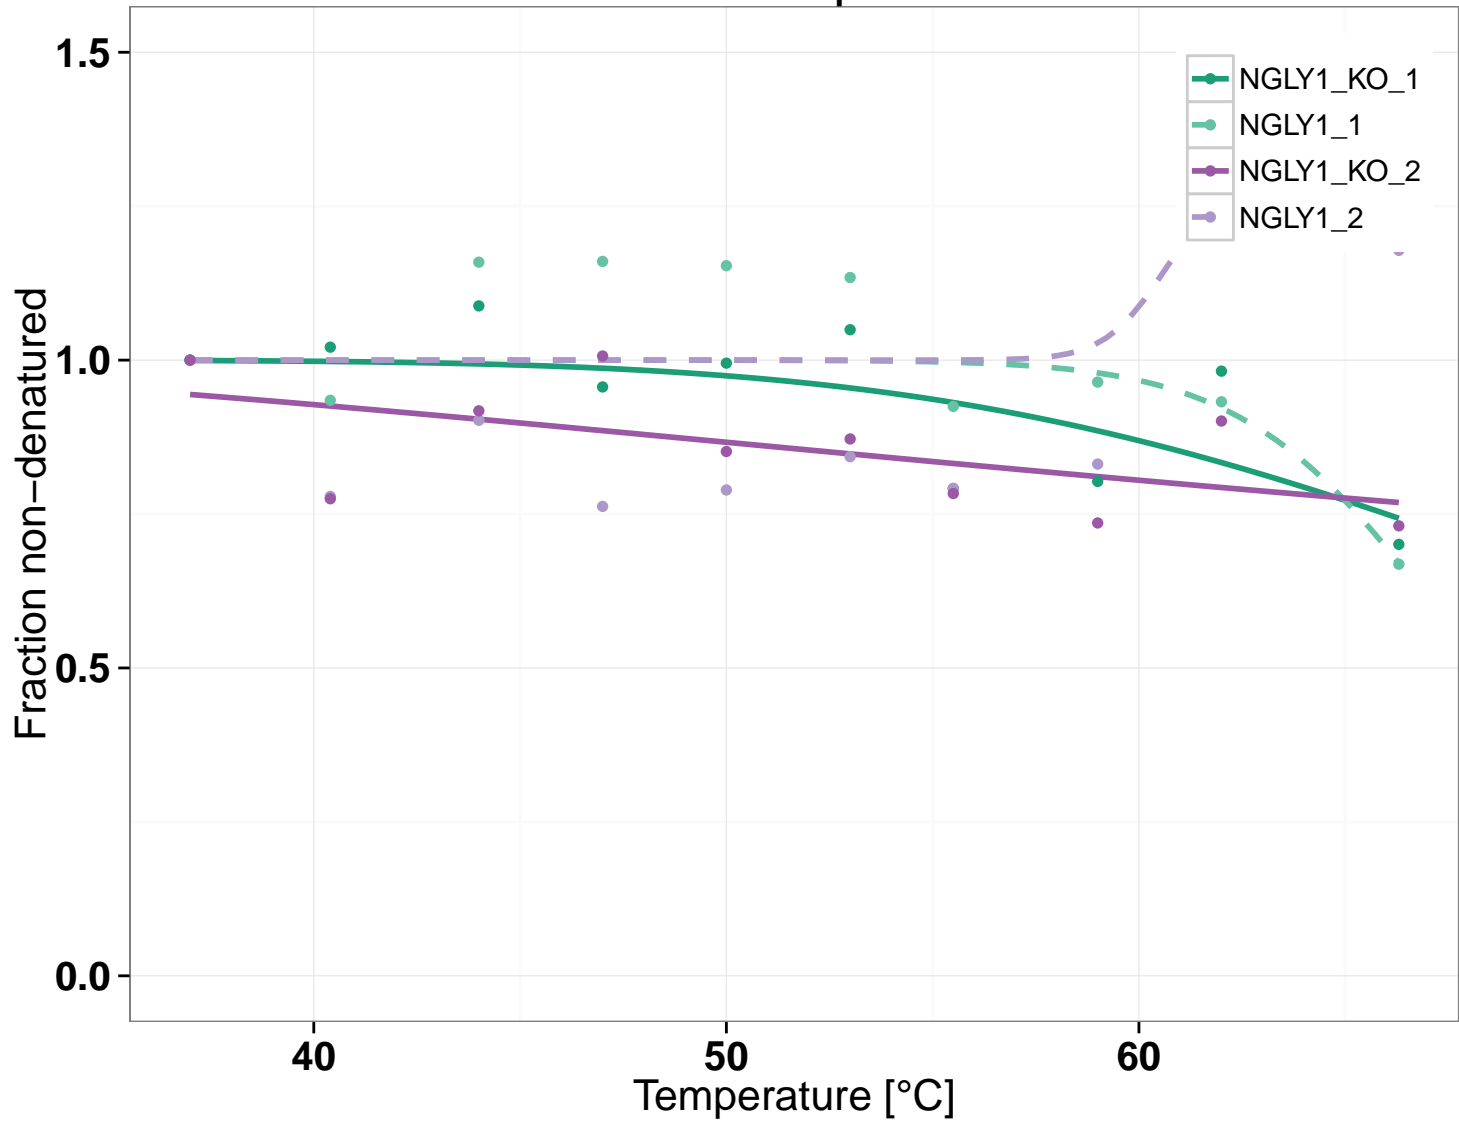

|            | meltPoint | slope   | plateau | R2   |
|------------|-----------|---------|---------|------|
| NGLY1_KO_1 | -         | -       | 0       | 0.53 |
| NGLY1_1    | -         | -       | 0       | 0.53 |
| NGLY1_KO_2 | -         | -0.0063 | 0       | 0.32 |
| NGLY1_2    | -         | 0.1     | 1.3     | 0.25 |

Supplement: Supplementary file 3078 [file 1]

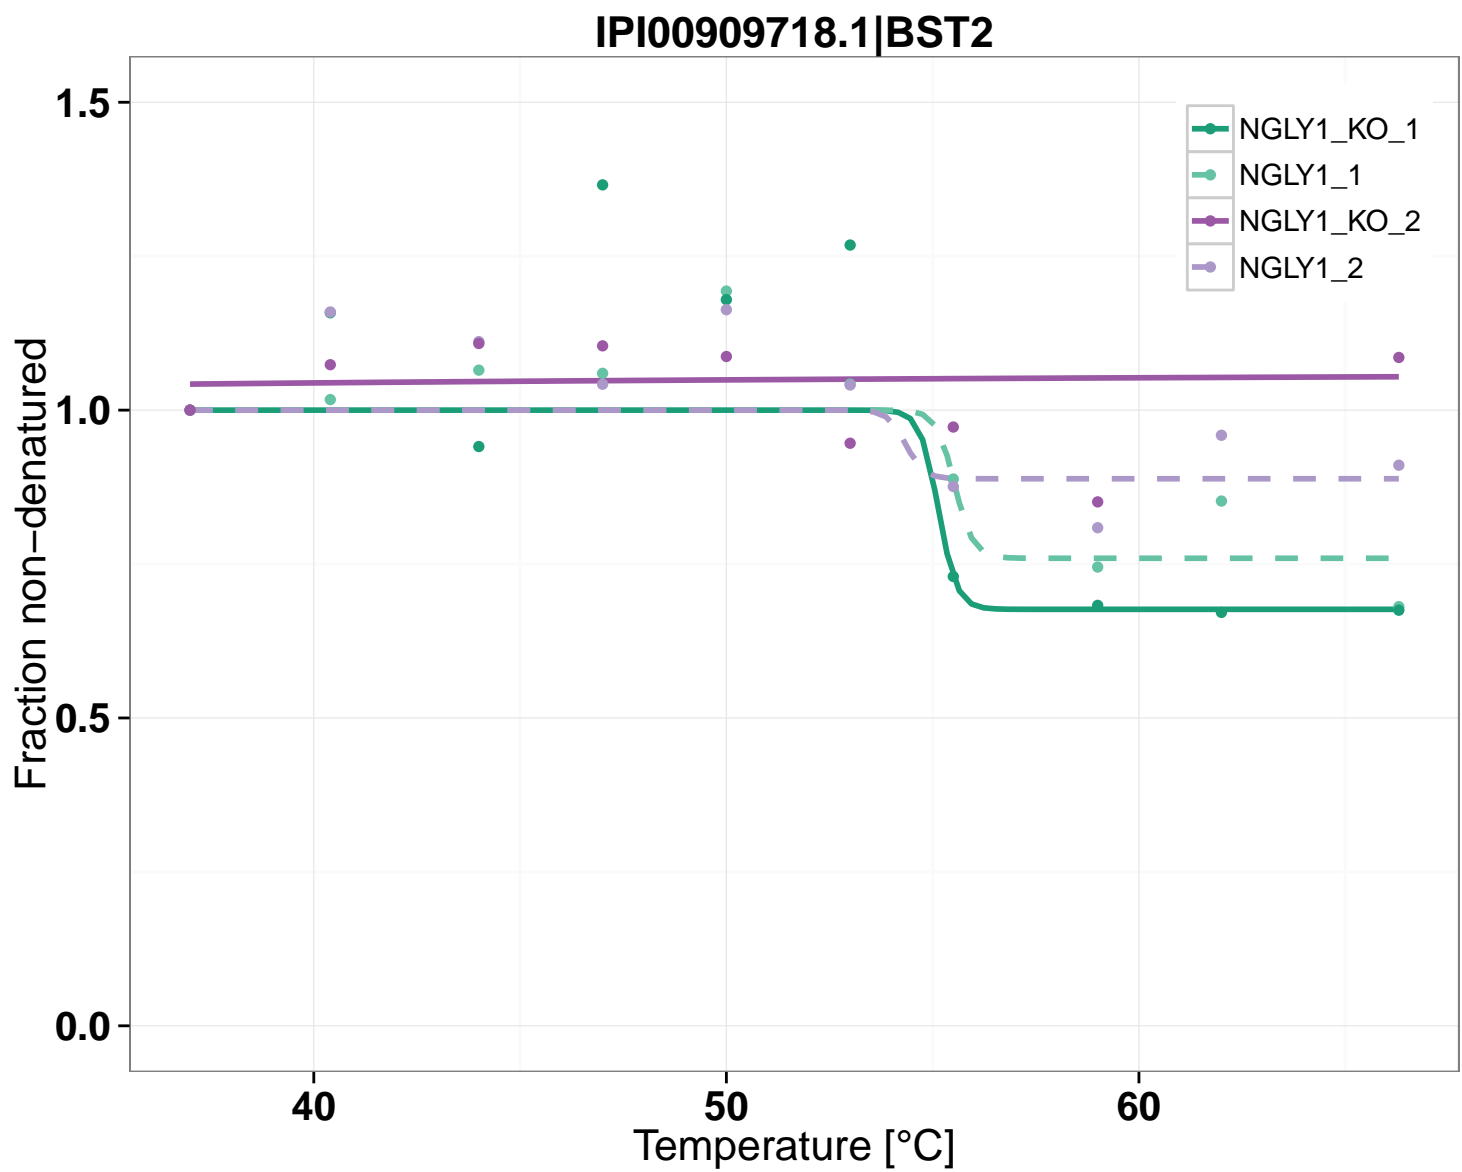

|            | meltPoint | slope | plateau | R2   |
|------------|-----------|-------|---------|------|
| NGLY1_KO_1 | –         | –0.37 | 0.68    | 0.59 |
| NGLY1_1    | –         | –0.27 | 0.76    | 0.73 |
| NGLY1_KO_2 | –         | –     | 1.14    | 0    |
| NGLY1_2    | –         | –0.13 | 0.89    | 0.38 |

Supplement: Supplementary file 3079 [file 1]

# IPI00060379.1|INTS12

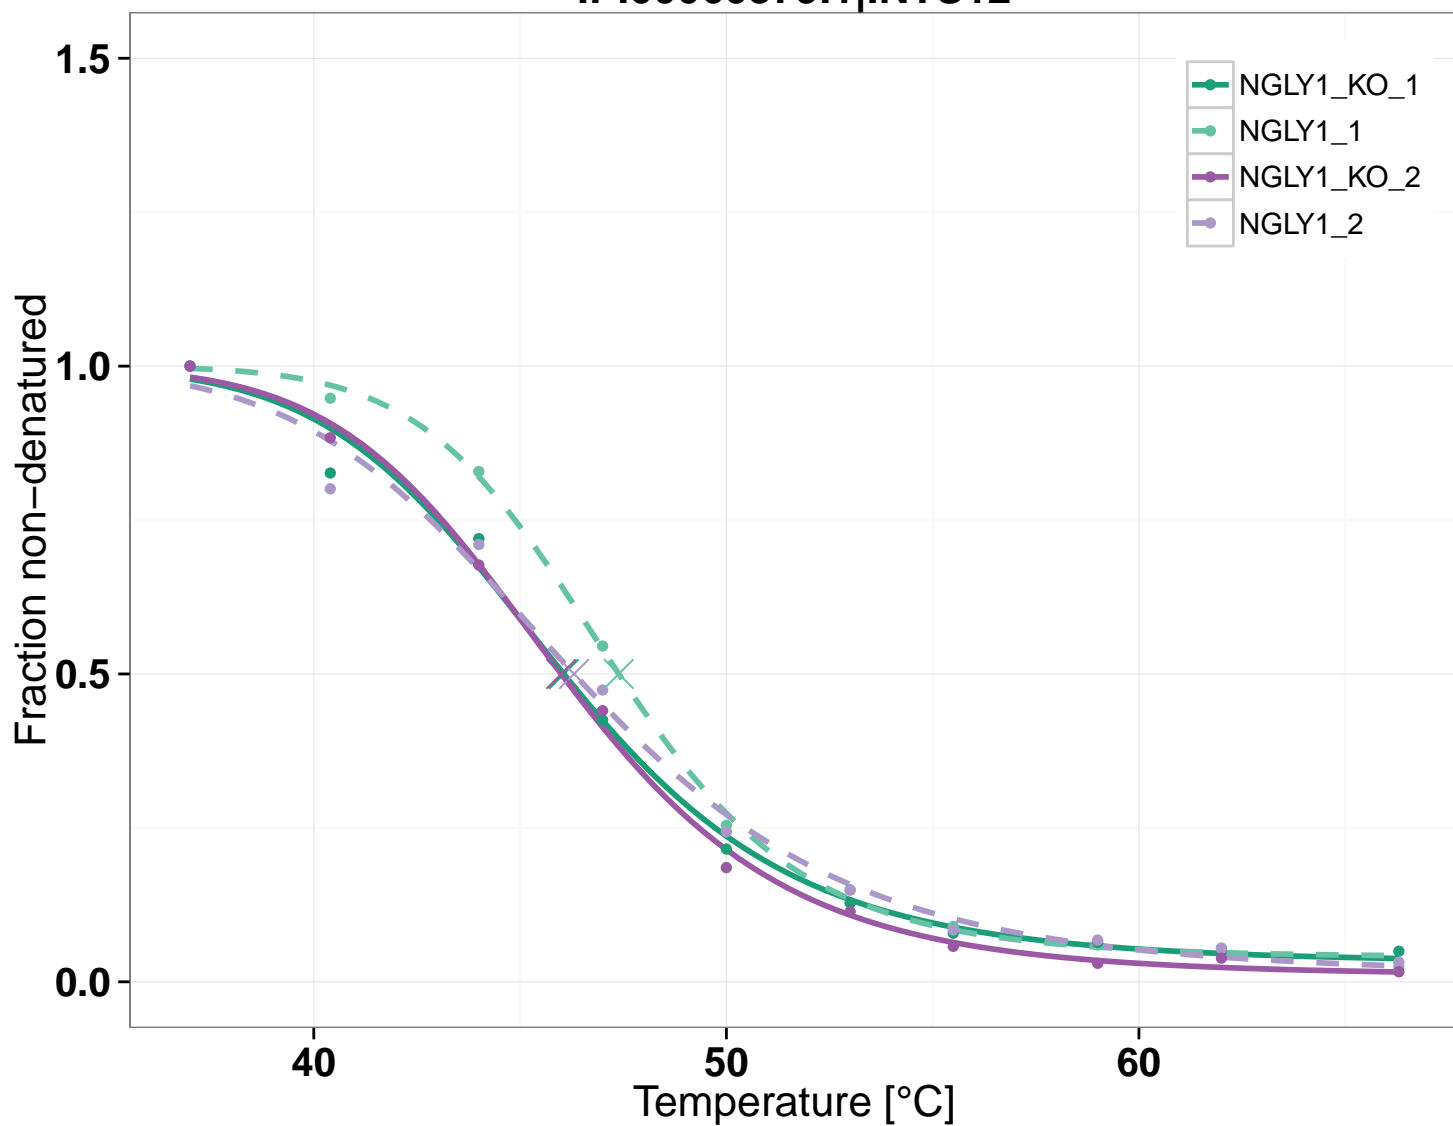

|            | meltPoint | slope  | plateau | R2   |
|------------|-----------|--------|---------|------|
| NGLY1_KO_1 | 46.06     | -0.085 | 0.03    | 0.99 |
| NGLY1_1    | 47.39     | -0.1   | 0.04    | 1    |
| NGLY1_KO_2 | 46        | -0.09  | 0.01    | 1    |
| NGLY1_2    | 46.31     | -0.074 | 0.01    | 0.99 |

Supplement: Supplementary file 3080 [file 1]

# IPI00004942.1|ZNF330

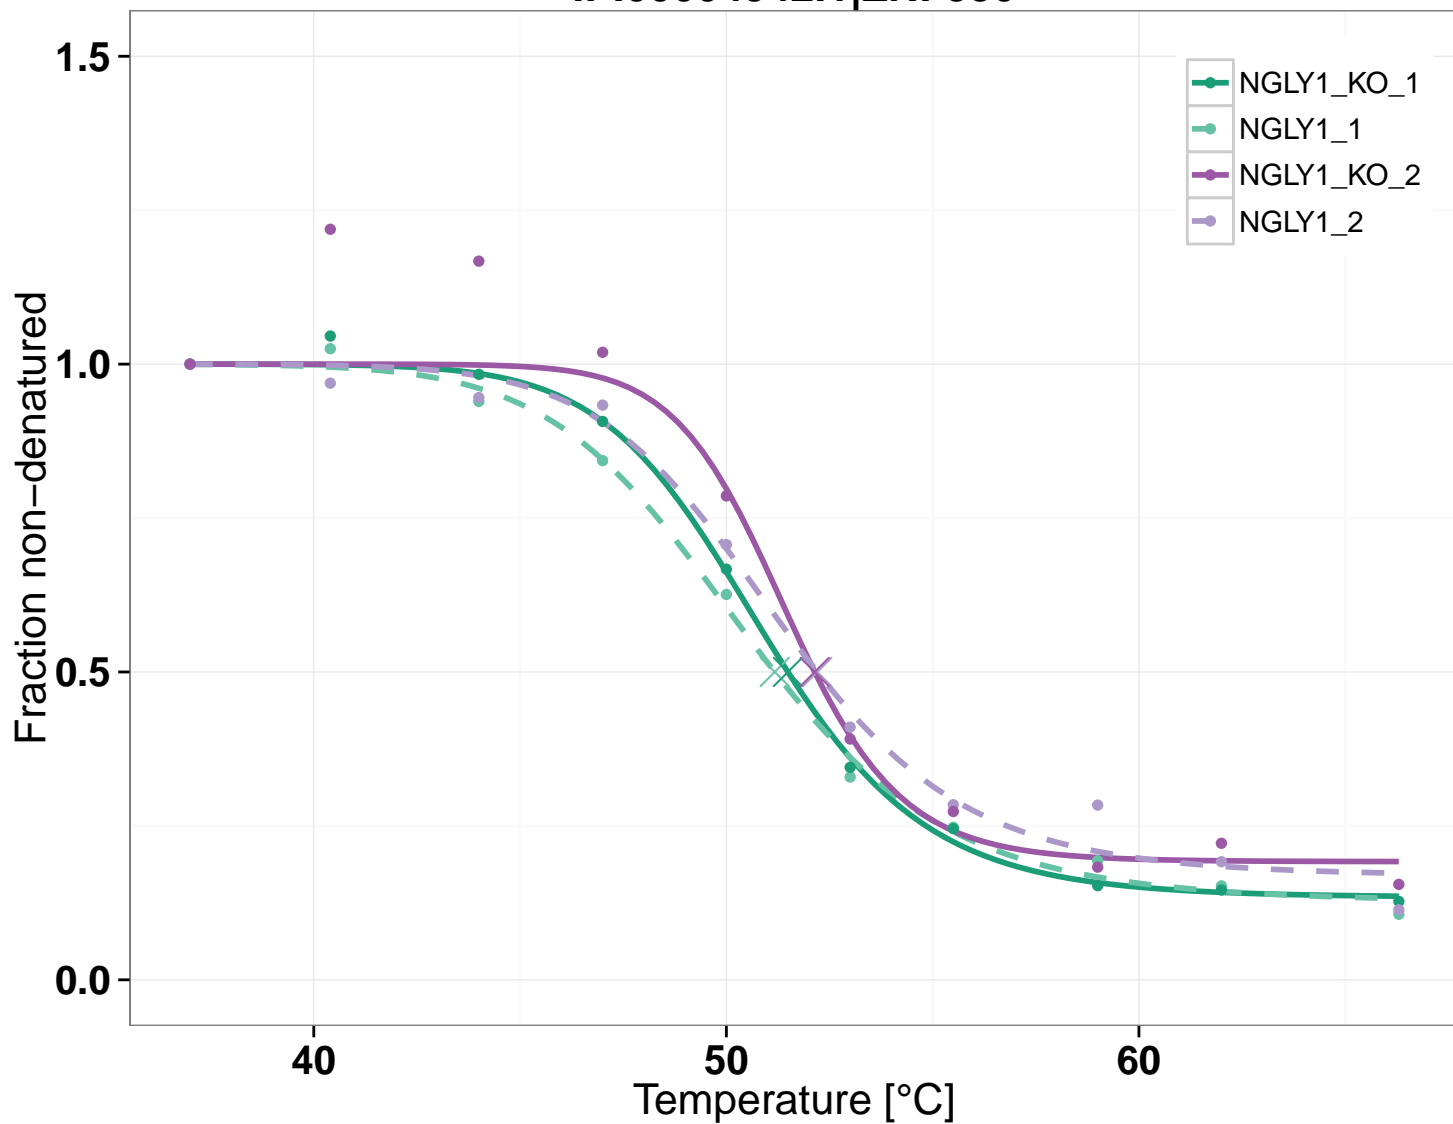

|            | meltPoint | slope  | plateau | R2   |
|------------|-----------|--------|---------|------|
| NGLY1_KO_1 | 51.49     | -0.11  | 0.13    | 1    |
| NGLY1_1    | 51.17     | -0.091 | 0.13    | 1    |
| NGLY1_KO_2 | 52.14     | -0.15  | 0.19    | 0.95 |
| NGLY1_2    | 52.2      | -0.093 | 0.17    | 0.99 |

Supplement: Supplementary file 3081 [file 1]

IPI00008791.1|CIAO1

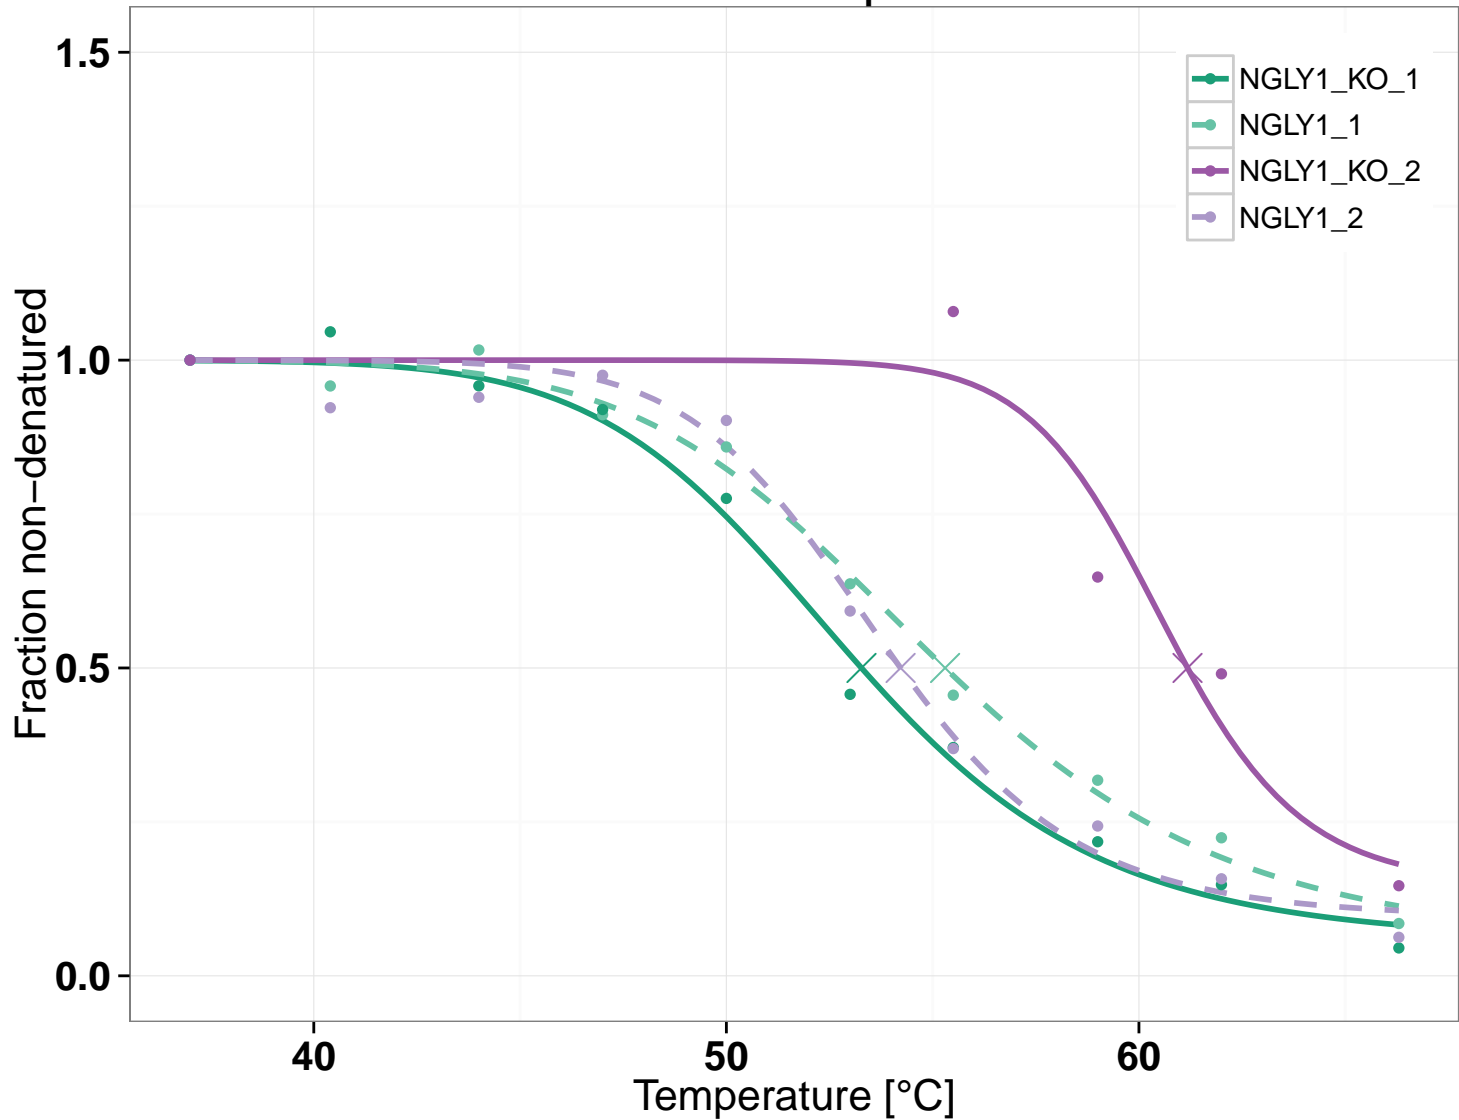

|            | meltPoint | slope  | plateau | R2    |
|------------|-----------|--------|---------|-------|
| NGLY1_KO_1 | 53.27     | -0.078 | 0.05    | 0.99  |
| NGLY1_1    | 55.3      | -0.066 | 0.04    | 0.99  |
| NGLY1_KO_2 | 61.18     | -0.13  | 0.15    | -0.26 |
| NGLY1_2    | 54.22     | -0.097 | 0.09    | 0.99  |

Supplement: Supplementary file 3082 [file 1]

IPI00784651.7|FADS1

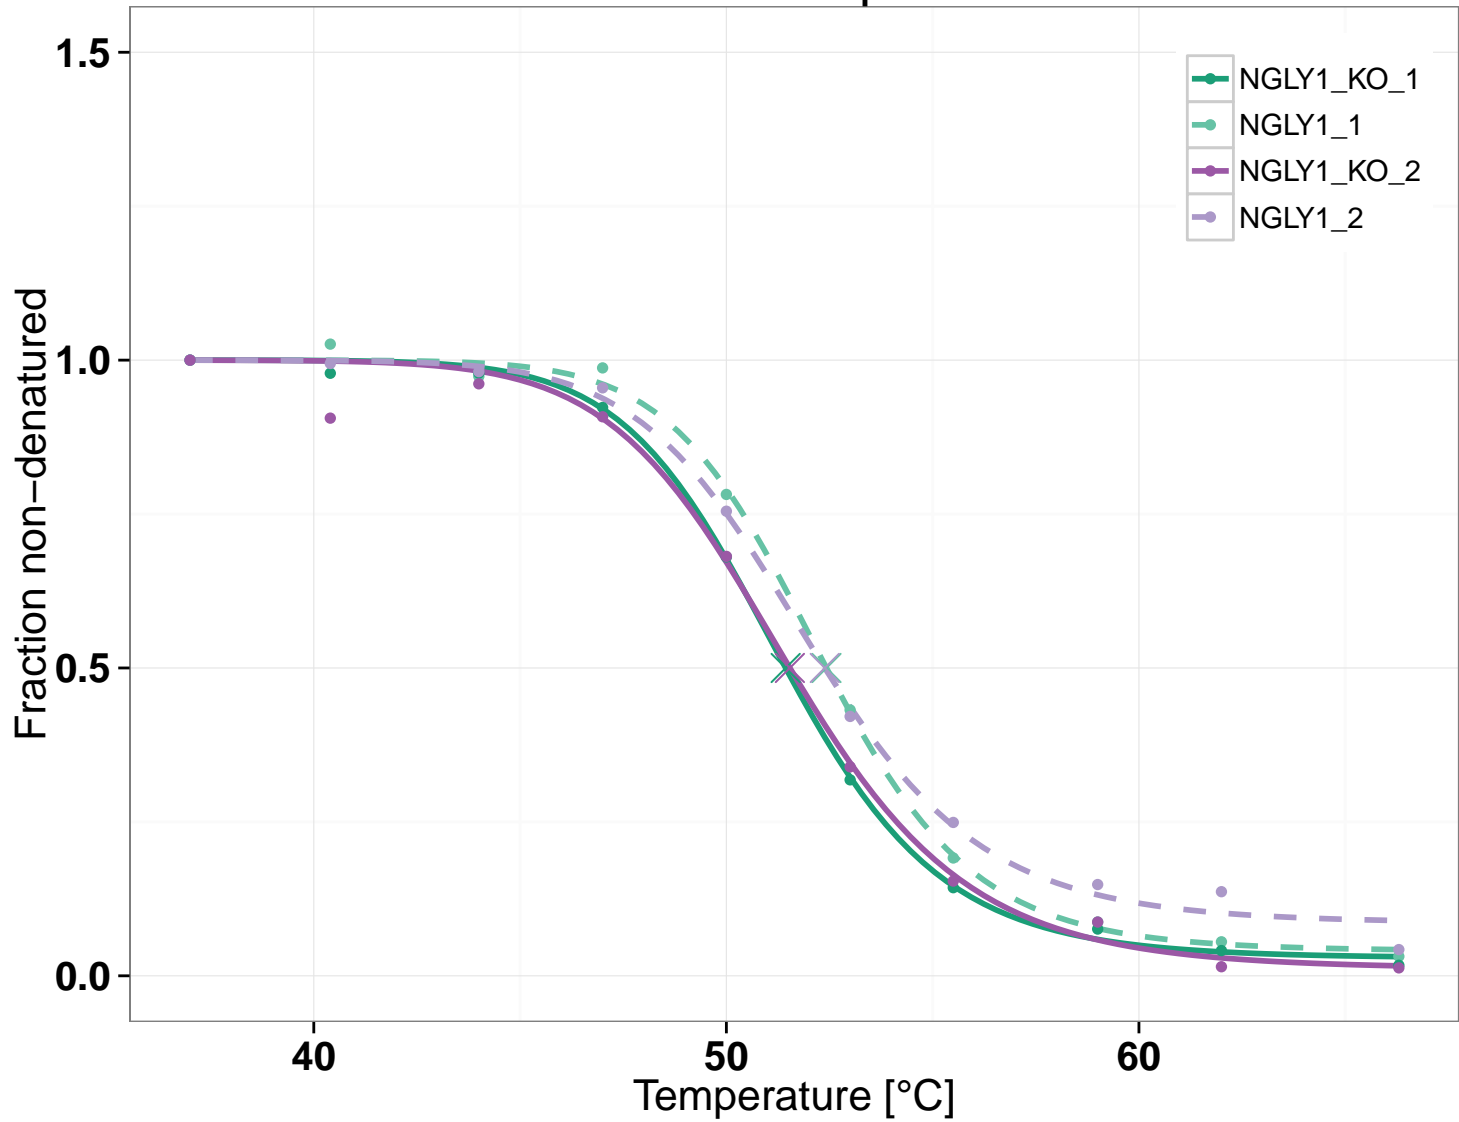

|            | meltPoint | slope | plateau | R2   |
|------------|-----------|-------|---------|------|
| NGLY1_KO_1 | 51.44     | -0.13 | 0.03    | 1    |
| NGLY1_1    | 52.43     | -0.13 | 0.04    | 1    |
| NGLY1_KO_2 | 51.54     | -0.11 | 0.01    | 0.99 |
| NGLY1_2    | 52.39     | -0.11 | 0.09    | 1    |

Supplement: Supplementary file 3083 [file 1]

# IPI00477649.1|TPM3

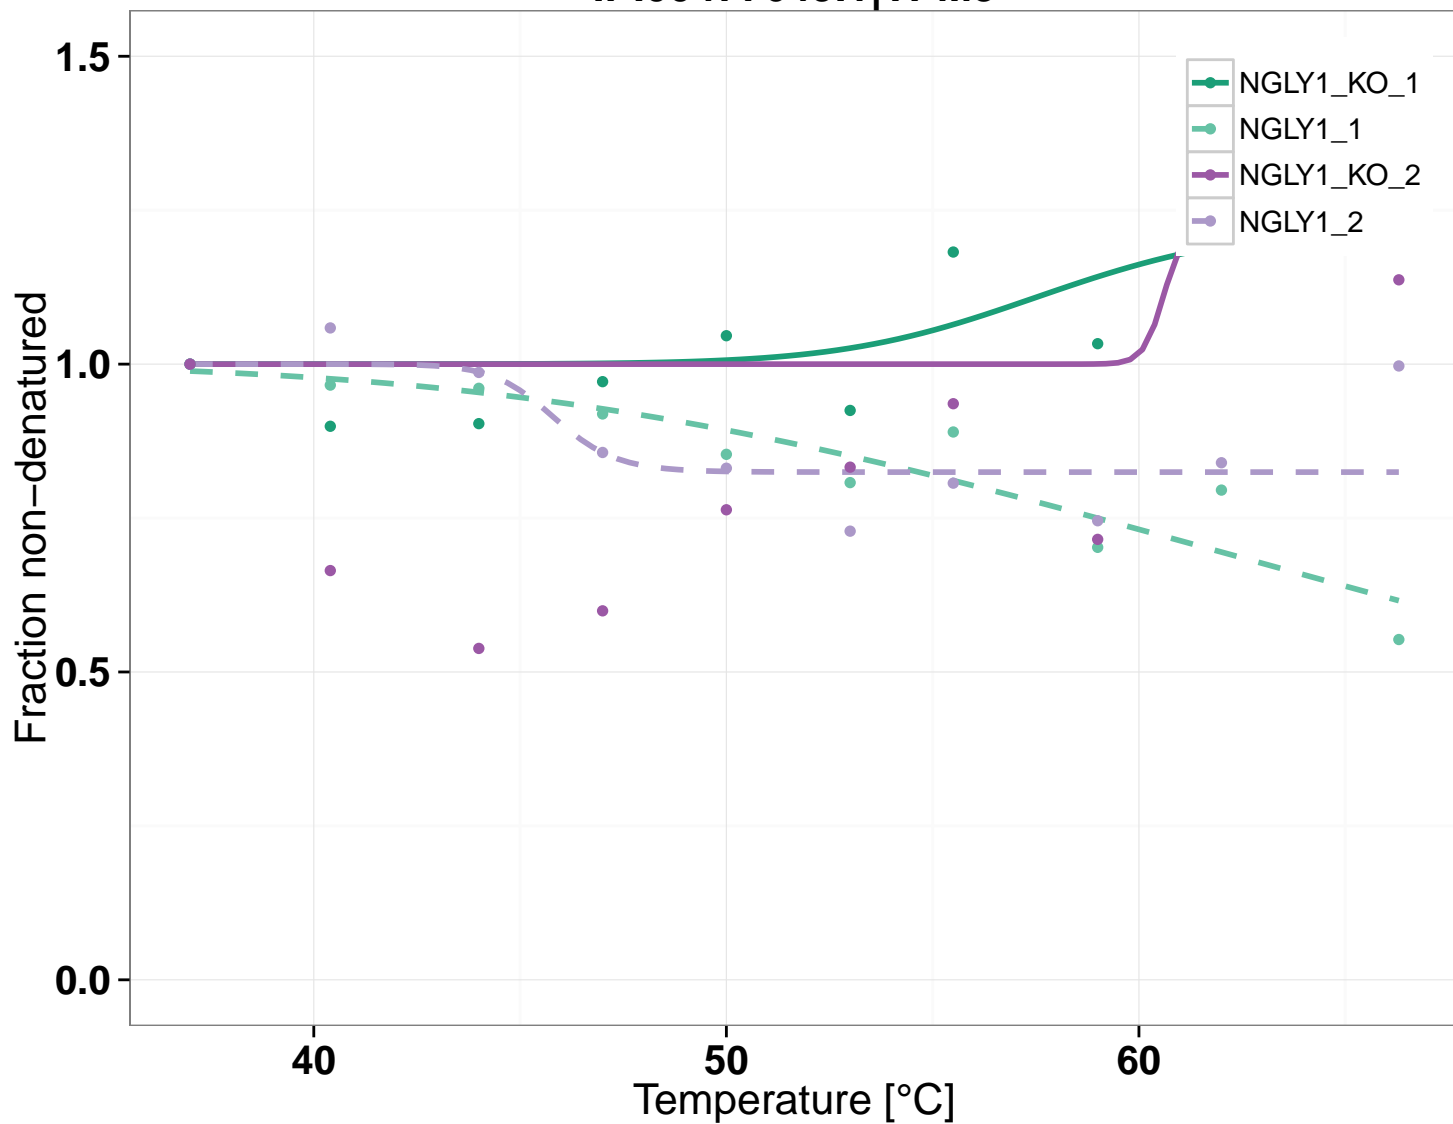

|            | meltPoint | slope  | plateau | R2    |
|------------|-----------|--------|---------|-------|
| NGLY1_KO_1 | –         | 0.023  | 1.24    | 0.58  |
| NGLY1_1    | –         | –0.018 | 0       | 0.84  |
| NGLY1_KO_2 | –         | 0.23   | 1.23    | –0.23 |
| NGLY1_2    | –         | –0.058 | 0.82    | 0.6   |

Supplement: Supplementary file 3084 [file 1]

# IPI00005811.3|MLH3

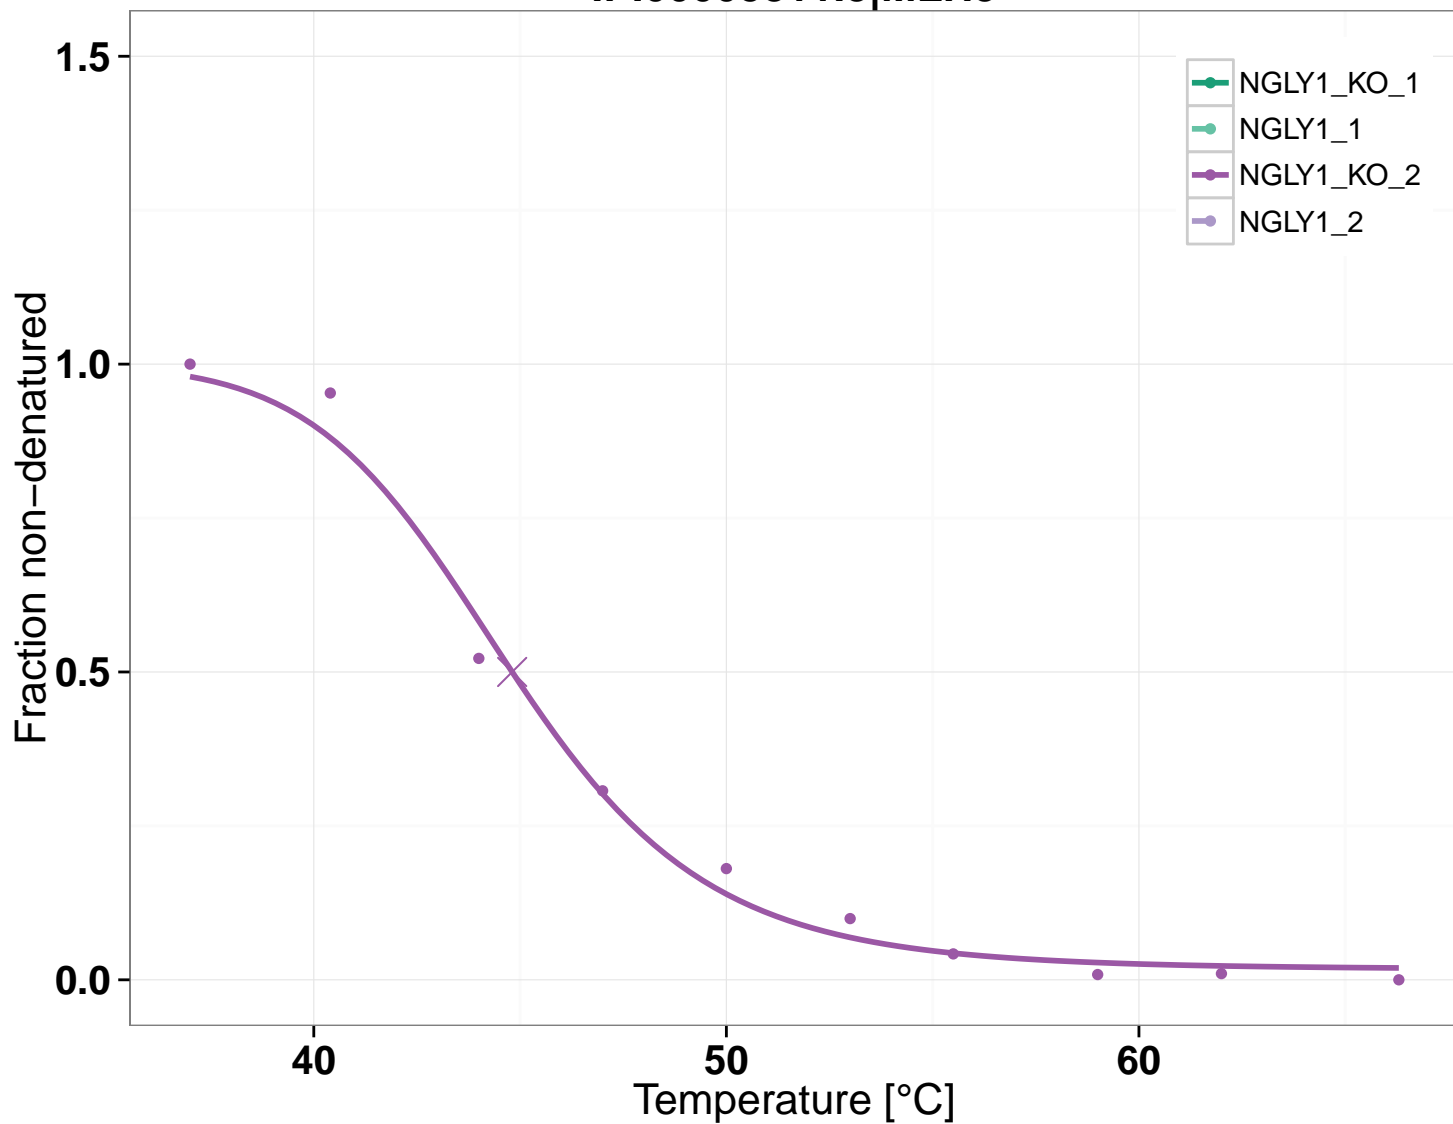

|            | meltPoint | slope | plateau | R2   |
|------------|-----------|-------|---------|------|
| NGLY1_KO_1 | —         | —     | —       | —    |
| NGLY1_1    | —         | —     | —       | —    |
| NGLY1_KO_2 | 44.81     | -0.1  | 0.02    | 0.99 |
| NGLY1_2    | —         | —     | —       | —    |

Supplement: Supplementary file 3085 [file 1]

IPI00008381.2|ZNF696

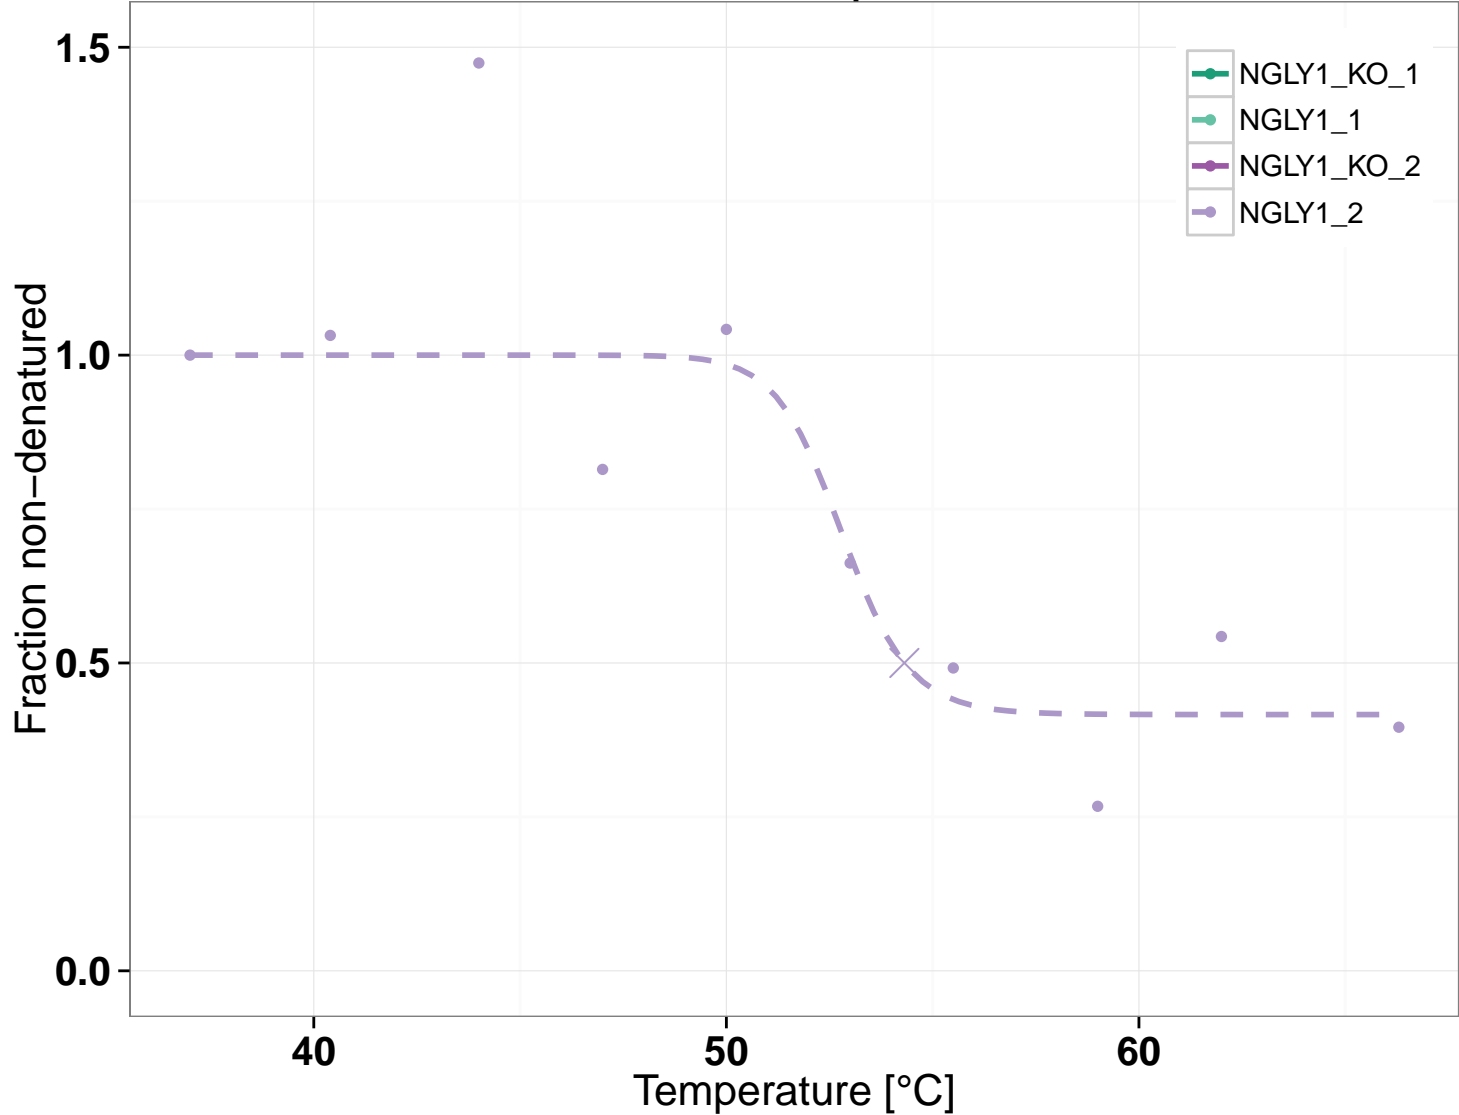

|            | meltPoint | slope | plateau | R2   |
|------------|-----------|-------|---------|------|
| NGLY1_KO_1 | —         | —     | —       | —    |
| NGLY1_1    | —         | —     | —       | —    |
| NGLY1_KO_2 | —         | —     | —       | —    |
| NGLY1_2    | 54.31     | −0.18 | 0.42    | 0.75 |

Supplement: Supplementary file 3086 [file 1]

# IPI00026309.3|GMNN

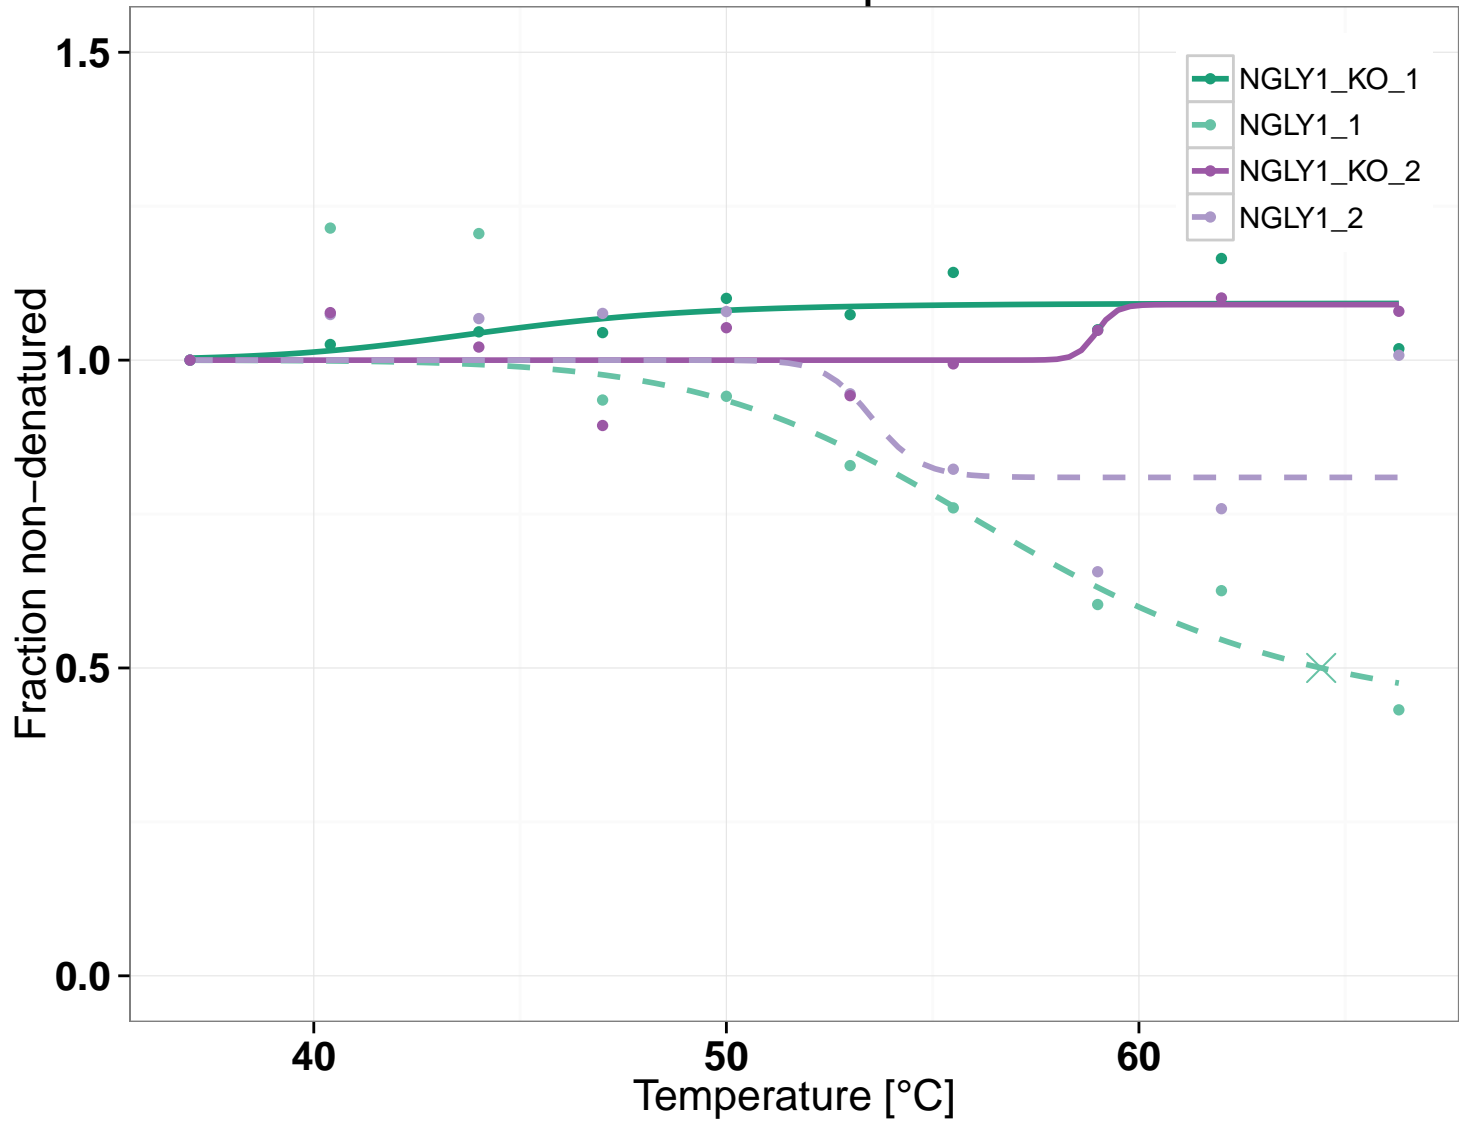

|            | meltPoint | slope  | plateau | R2   |
|------------|-----------|--------|---------|------|
| NGLY1_KO_1 | -         | 0.009  | 1.09    | 0.37 |
| NGLY1_1    | 64.42     | -0.039 | 0.41    | 0.83 |
| NGLY1_KO_2 | -         | 0.096  | 1.09    | 0.37 |
| NGLY1_2    | -         | -0.082 | 0.81    | 0.58 |

Supplement: Supplementary file 3087 [file 1]

IPI00410067.1|ZC3HAV1

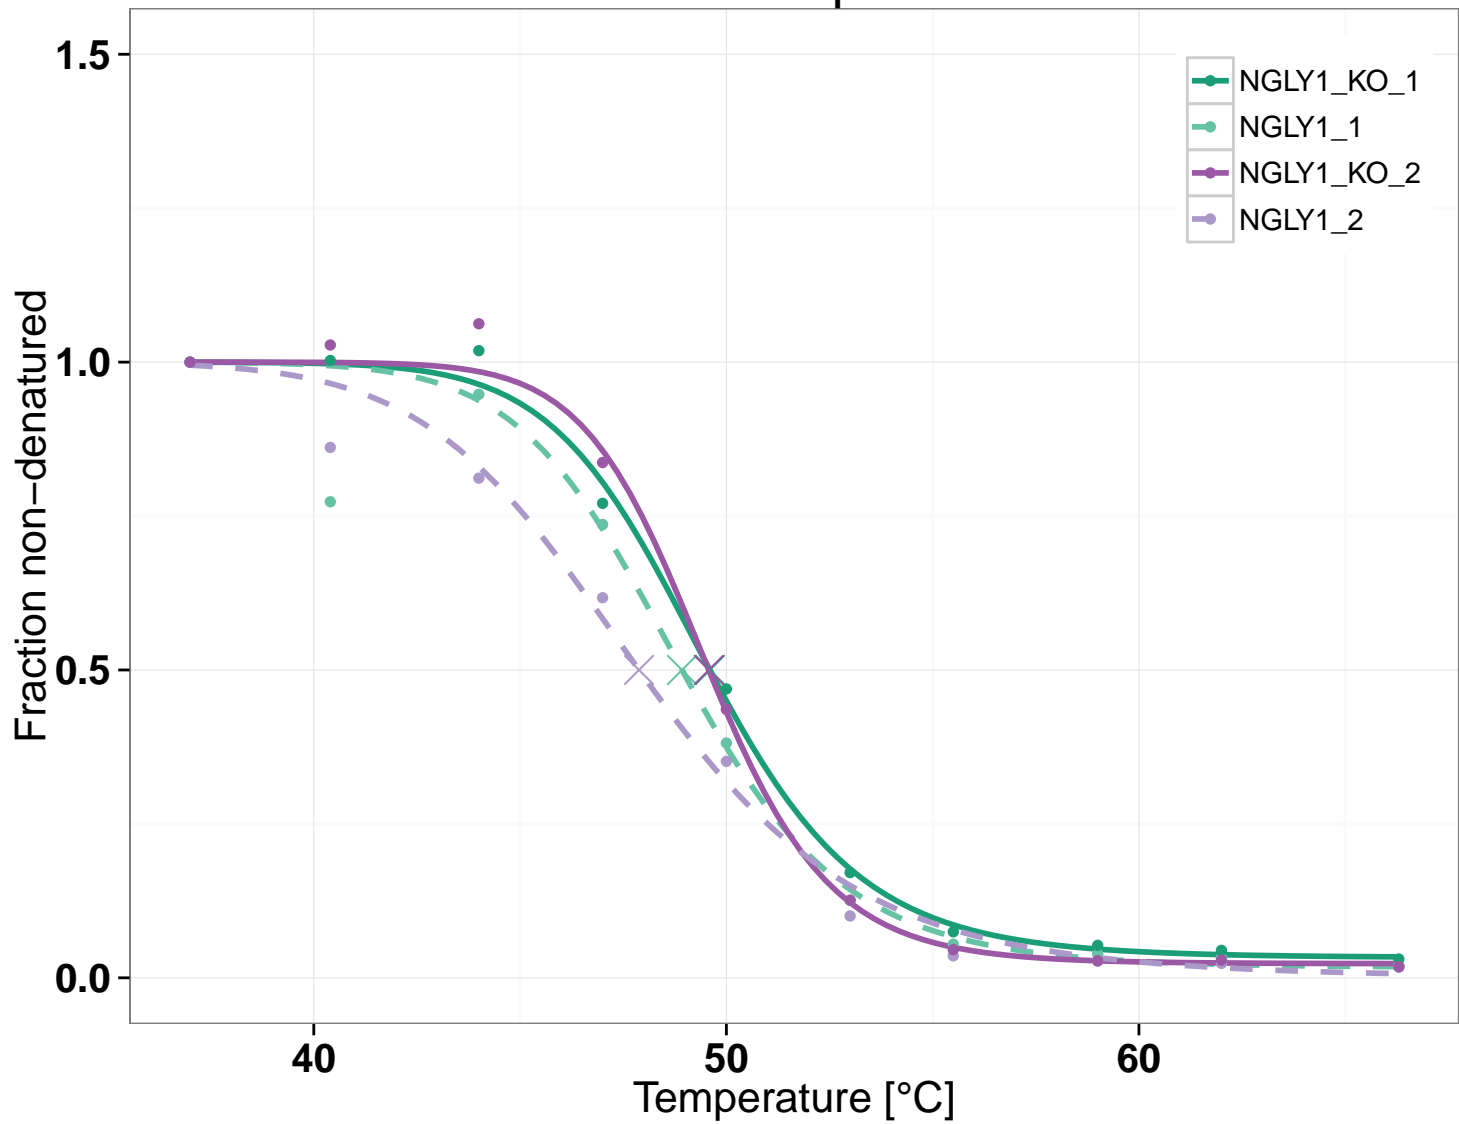

|            | meltPoint | slope  | plateau | R2   |
|------------|-----------|--------|---------|------|
| NGLY1_KO_1 | 49.6      | -0.13  | 0.03    | 1    |
| NGLY1_1    | 48.92     | -0.12  | 0.02    | 0.97 |
| NGLY1_KO_2 | 49.57     | -0.16  | 0.02    | 1    |
| NGLY1_2    | 47.88     | -0.095 | 0       | 0.99 |

Supplement: Supplementary file 3088 [file 1]

# IPI00296197.2|SIL1

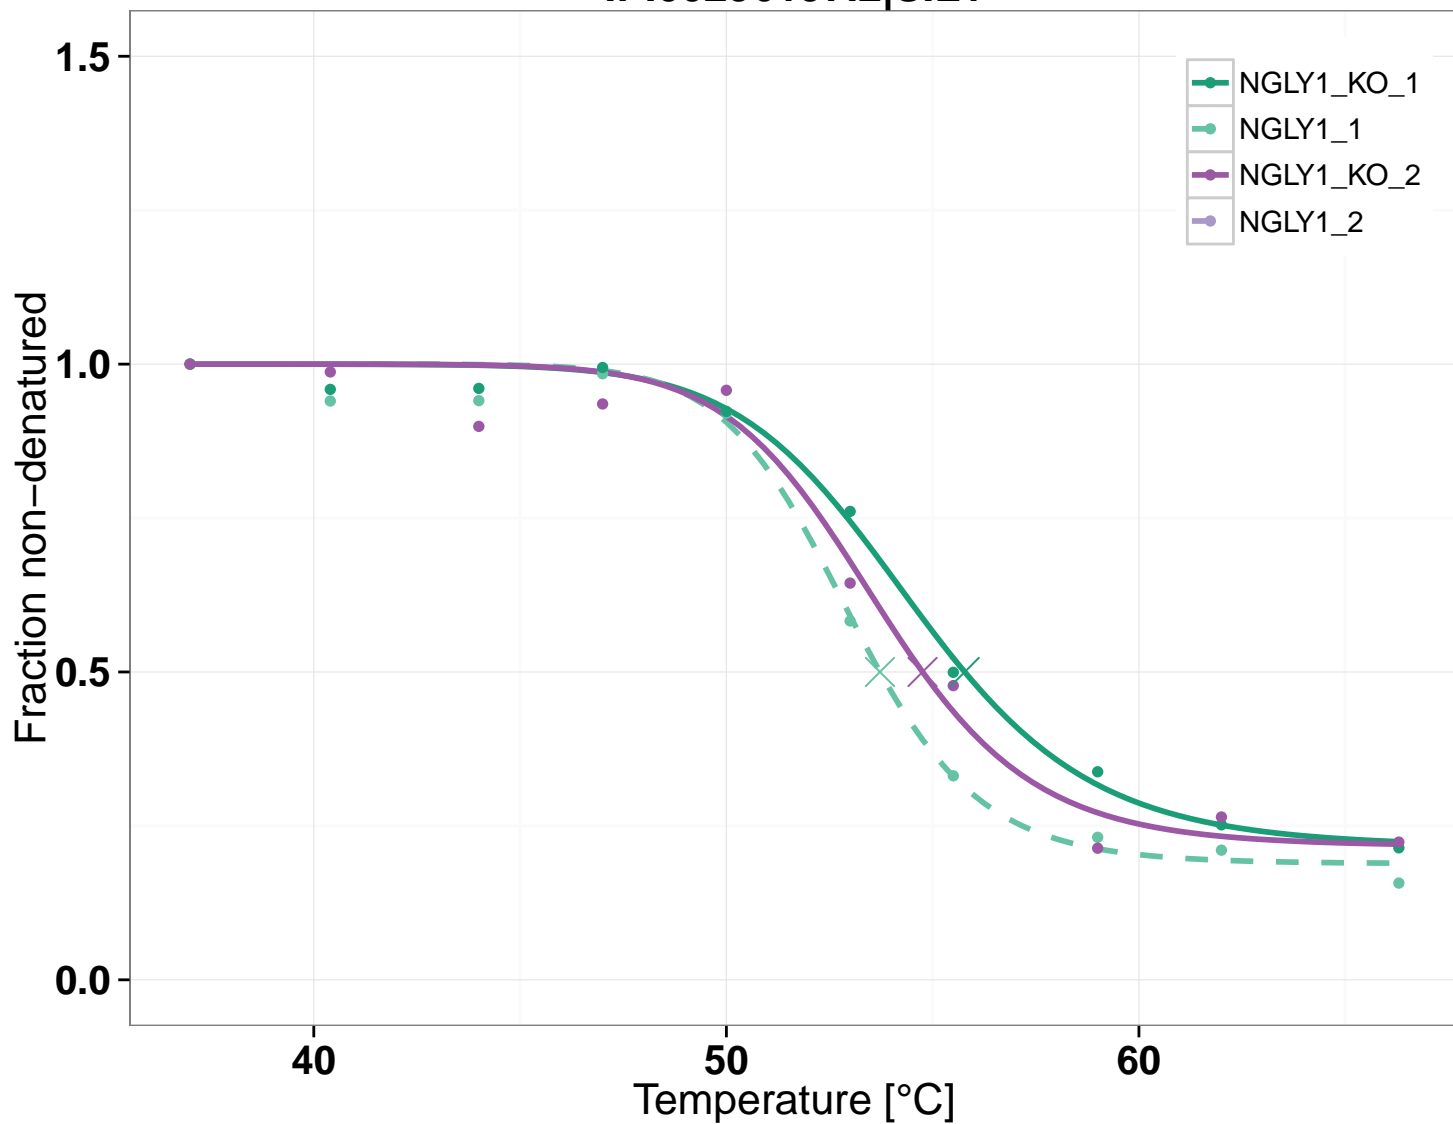

|            | meltPoint | slope  | plateau | R2   |
|------------|-----------|--------|---------|------|
| NGLY1_KO_1 | 55.78     | -0.091 | 0.22    | 1    |
| NGLY1_1    | 53.72     | -0.13  | 0.19    | 0.99 |
| NGLY1_KO_2 | 54.76     | -0.11  | 0.22    | 0.98 |
| NGLY1_2    | -         | -      | -       | -    |

Supplement: Supplementary file 3089 [file 1]

IPI00478741.2|TDRD7

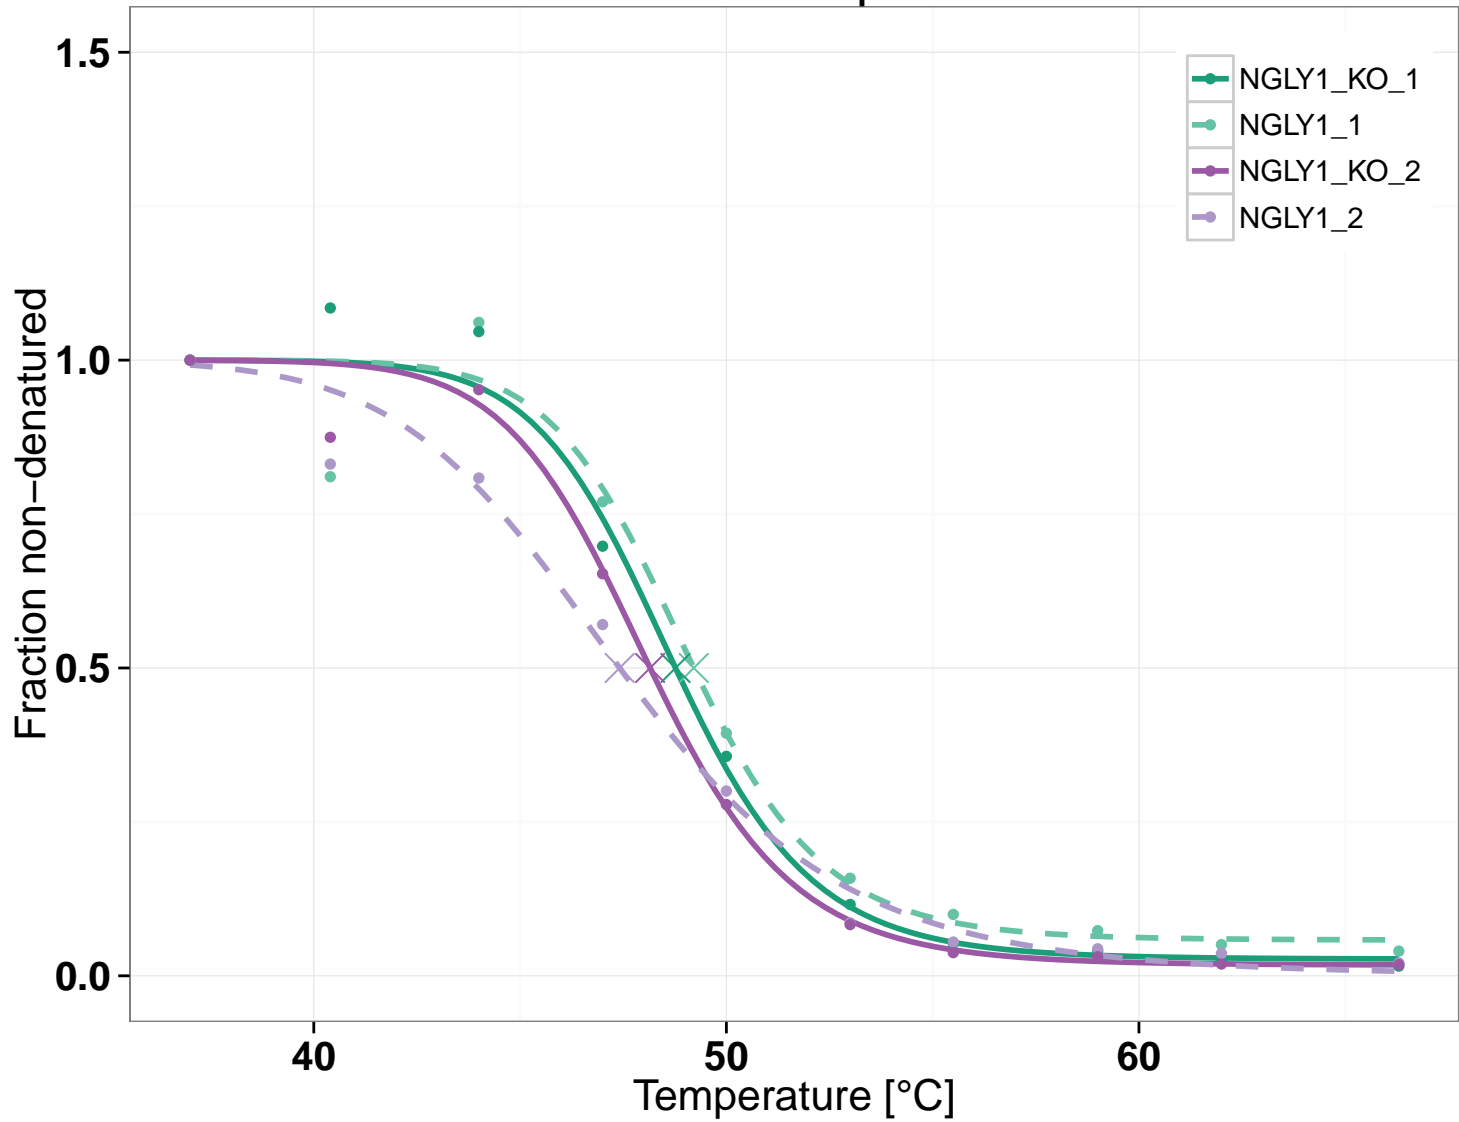

|            | meltPoint | slope  | plateau | R2   |
|------------|-----------|--------|---------|------|
| NGLY1_KO_1 | 48.77     | -0.14  | 0.03    | 0.99 |
| NGLY1_1    | 49.21     | -0.14  | 0.06    | 0.97 |
| NGLY1_KO_2 | 48.15     | -0.14  | 0.02    | 0.99 |
| NGLY1_2    | 47.41     | -0.092 | 0       | 0.99 |

Supplement: Supplementary file 3090 [file 1]

IPI00719053.1|TRIM71

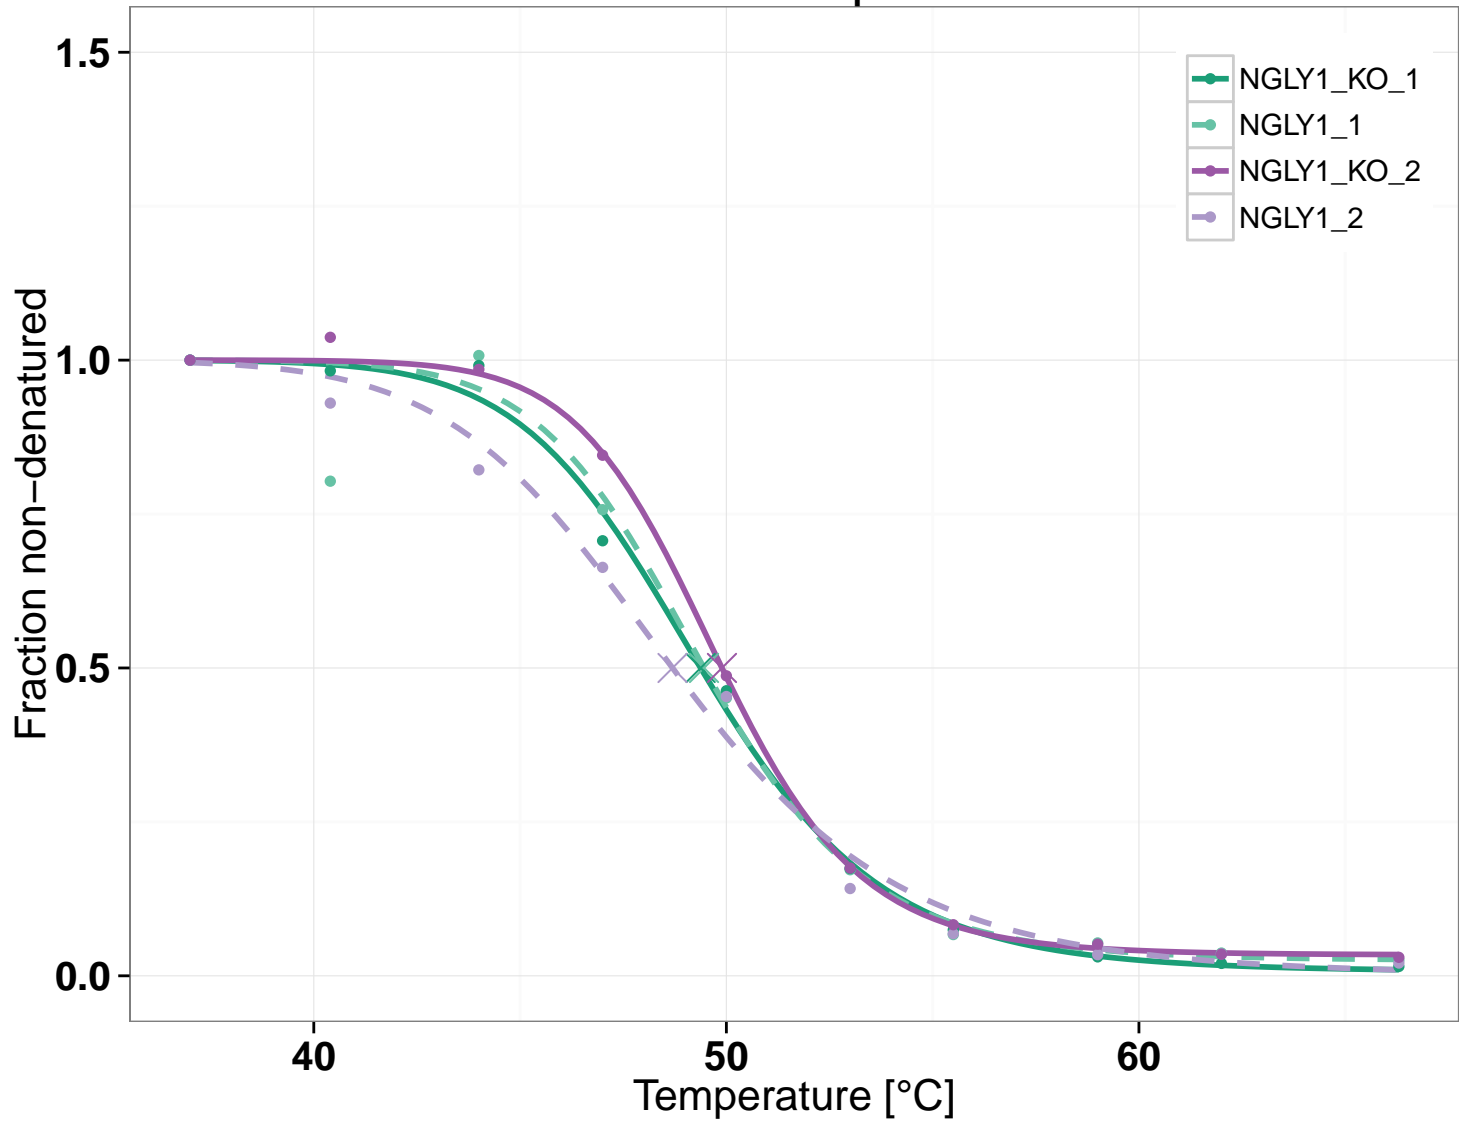

|            | meltPoint | slope  | plateau | R2   |
|------------|-----------|--------|---------|------|
| NGLY1_KO_1 | 49.38     | -0.11  | 0.01    | 1    |
| NGLY1_1    | 49.46     | -0.12  | 0.02    | 0.97 |
| NGLY1_KO_2 | 49.89     | -0.14  | 0.03    | 1    |
| NGLY1_2    | 48.7      | -0.091 | 0       | 0.99 |

Supplement: Supplementary file 3091 [file 1]

# IPI00910280.1|WDR20

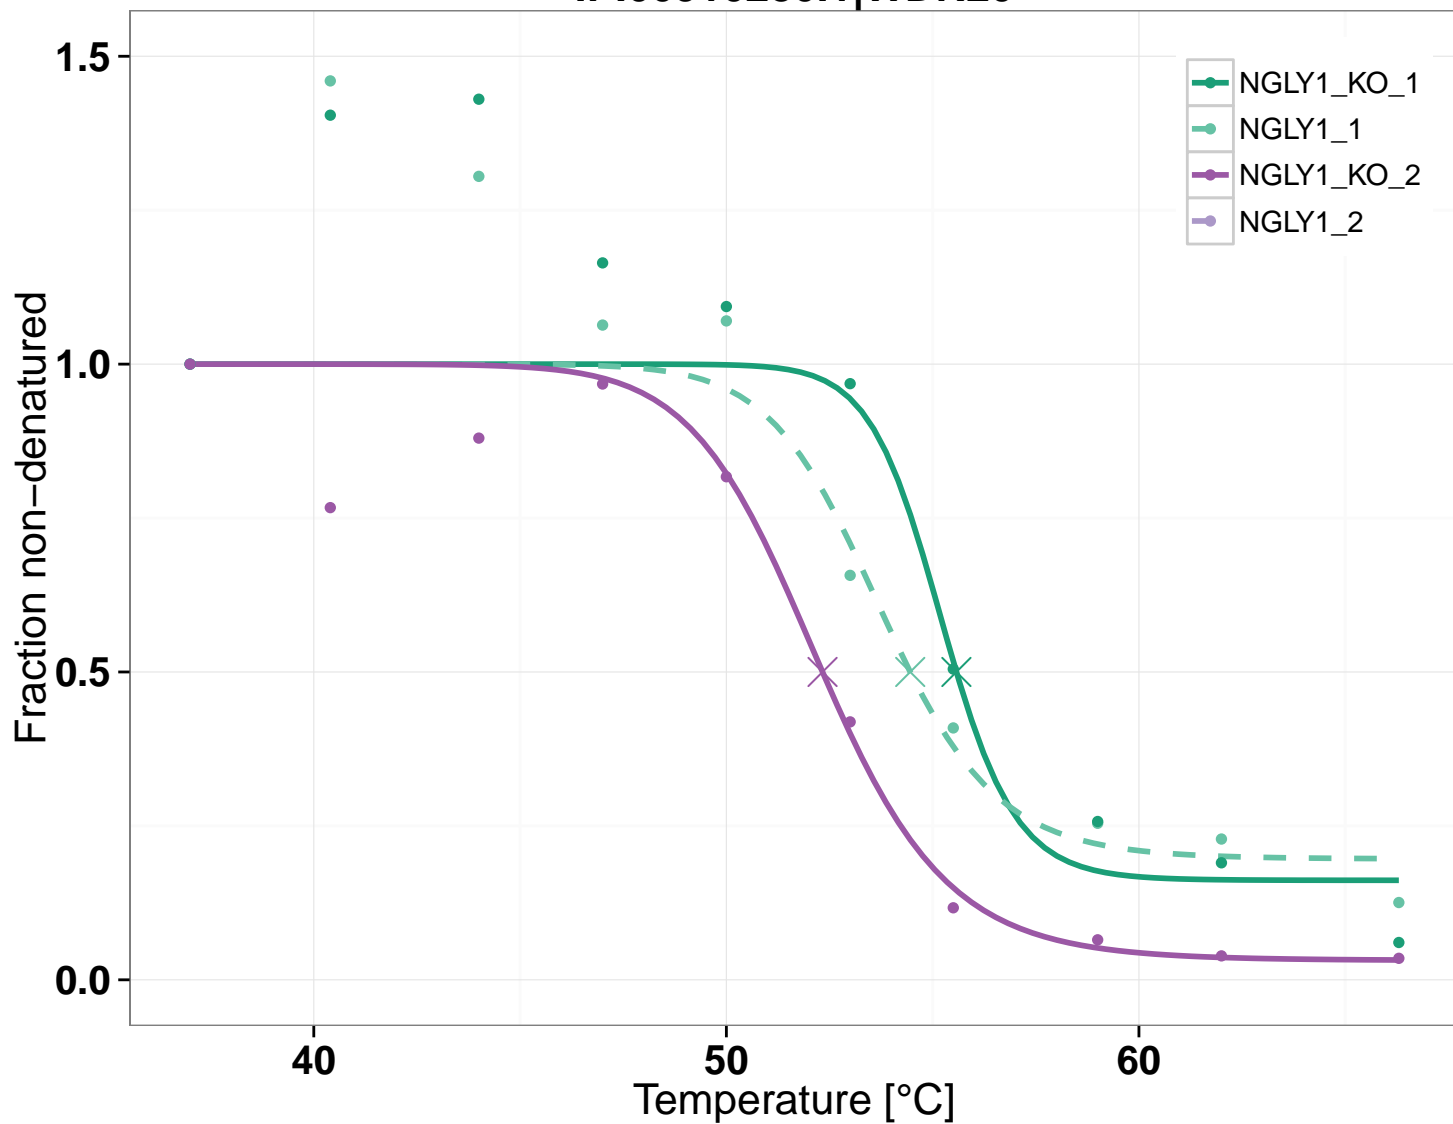

|            | meltPoint | slope | plateau | R2   |
|------------|-----------|-------|---------|------|
| NGLY1_KO_1 | 55.58     | -0.24 | 0.16    | 0.83 |
| NGLY1_1    | 54.46     | -0.15 | 0.2     | 0.84 |
| NGLY1_KO_2 | 52.33     | -0.16 | 0.03    | 0.95 |
| NGLY1_2    | -         | -     | -       | -    |

Supplement: Supplementary file 3092 [file 1]

IPI00329209.1|EFHA2

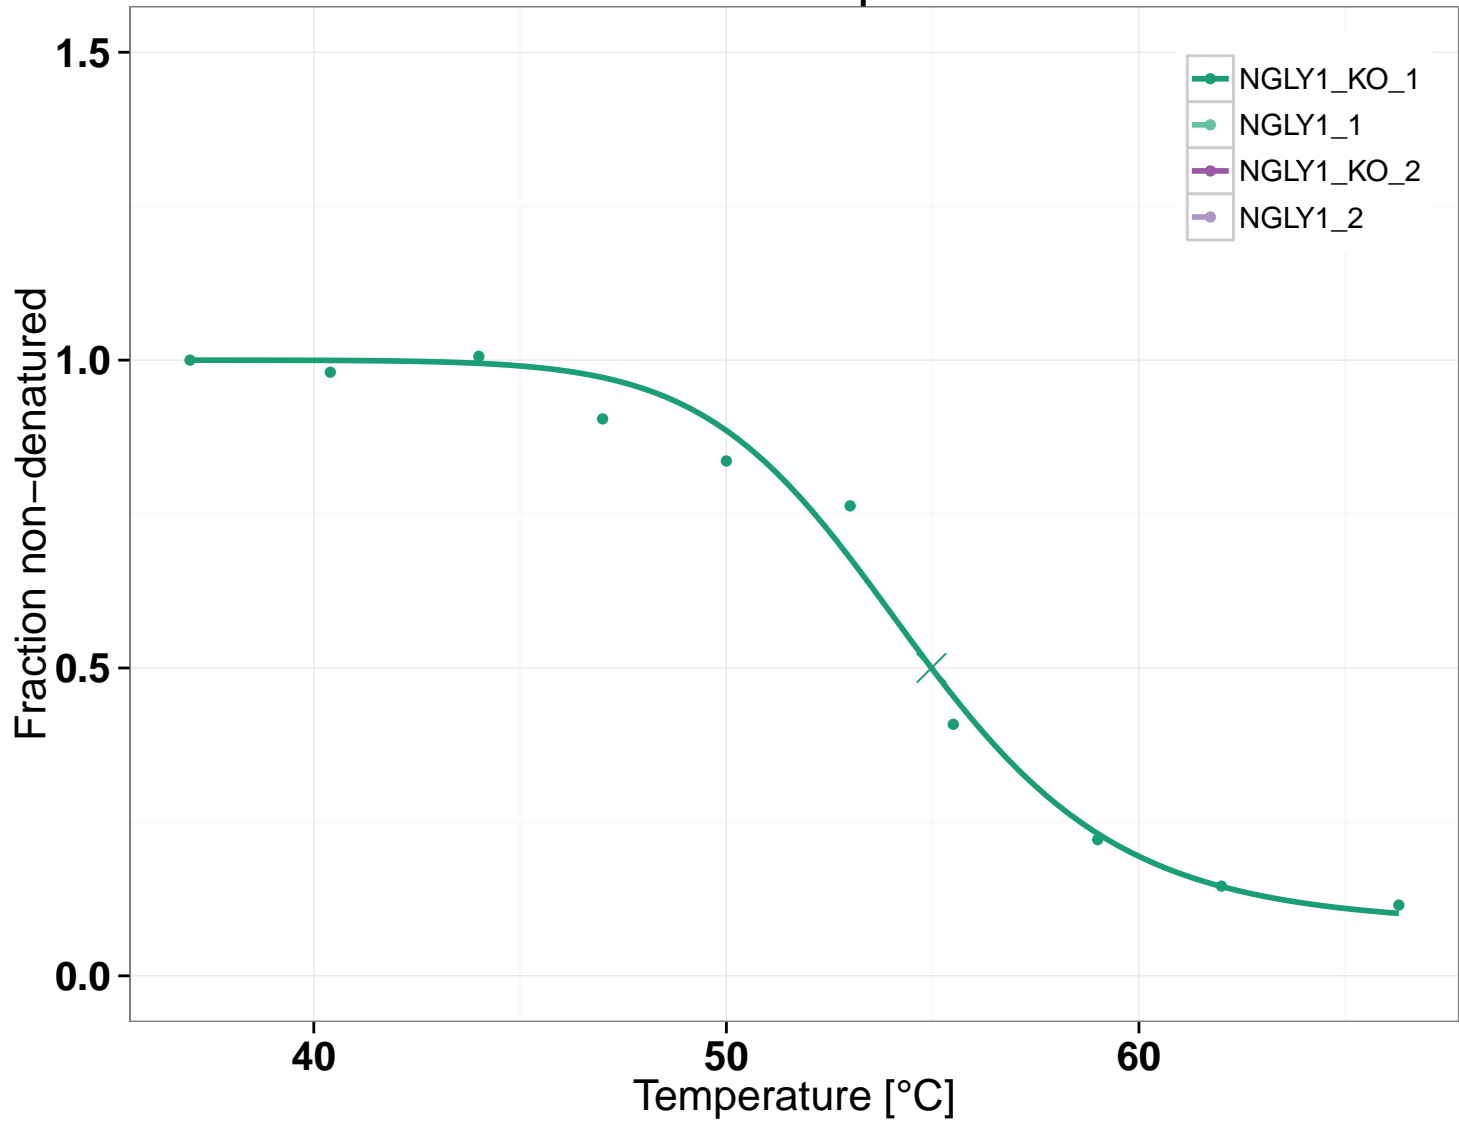

|            | meltPoint | slope  | plateau | R2   |
|------------|-----------|--------|---------|------|
| NGLY1_KO_1 | 54.97     | -0.092 | 0.08    | 0.99 |
| NGLY1_1    | -         | -      | -       | -    |
| NGLY1_KO_2 | -         | -      | -       | -    |
| NGLY1_2    | -         | -      | -       | -    |

Supplement: Supplementary file 3093 [file 1]

IPI00033036.1|METAP2

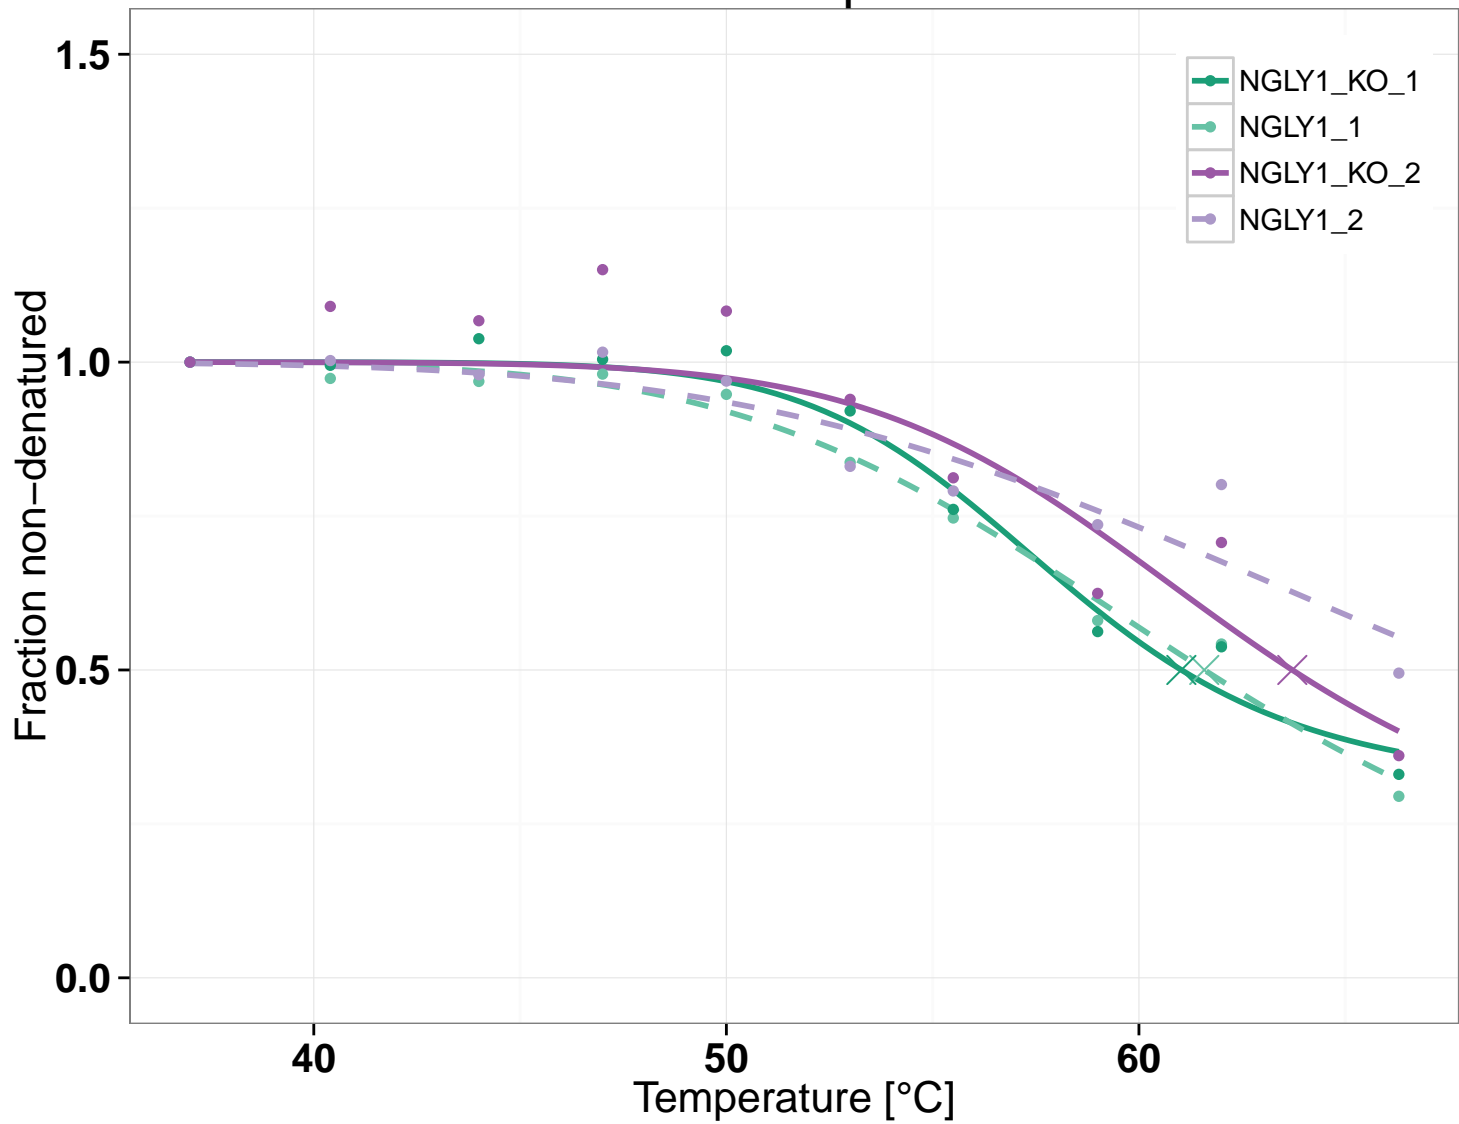

|            | meltPoint | slope  | plateau | R2   |
|------------|-----------|--------|---------|------|
| NGLY1_KO_1 | 61.03     | -0.058 | 0.31    | 0.98 |
| NGLY1_1    | 61.58     | -0.044 | 0       | 0.99 |
| NGLY1_KO_2 | 63.72     | -0.049 | 0.18    | 0.86 |
| NGLY1_2    | -         | -0.029 | 0       | 0.88 |

Supplement: Supplementary file 3094 [file 1]

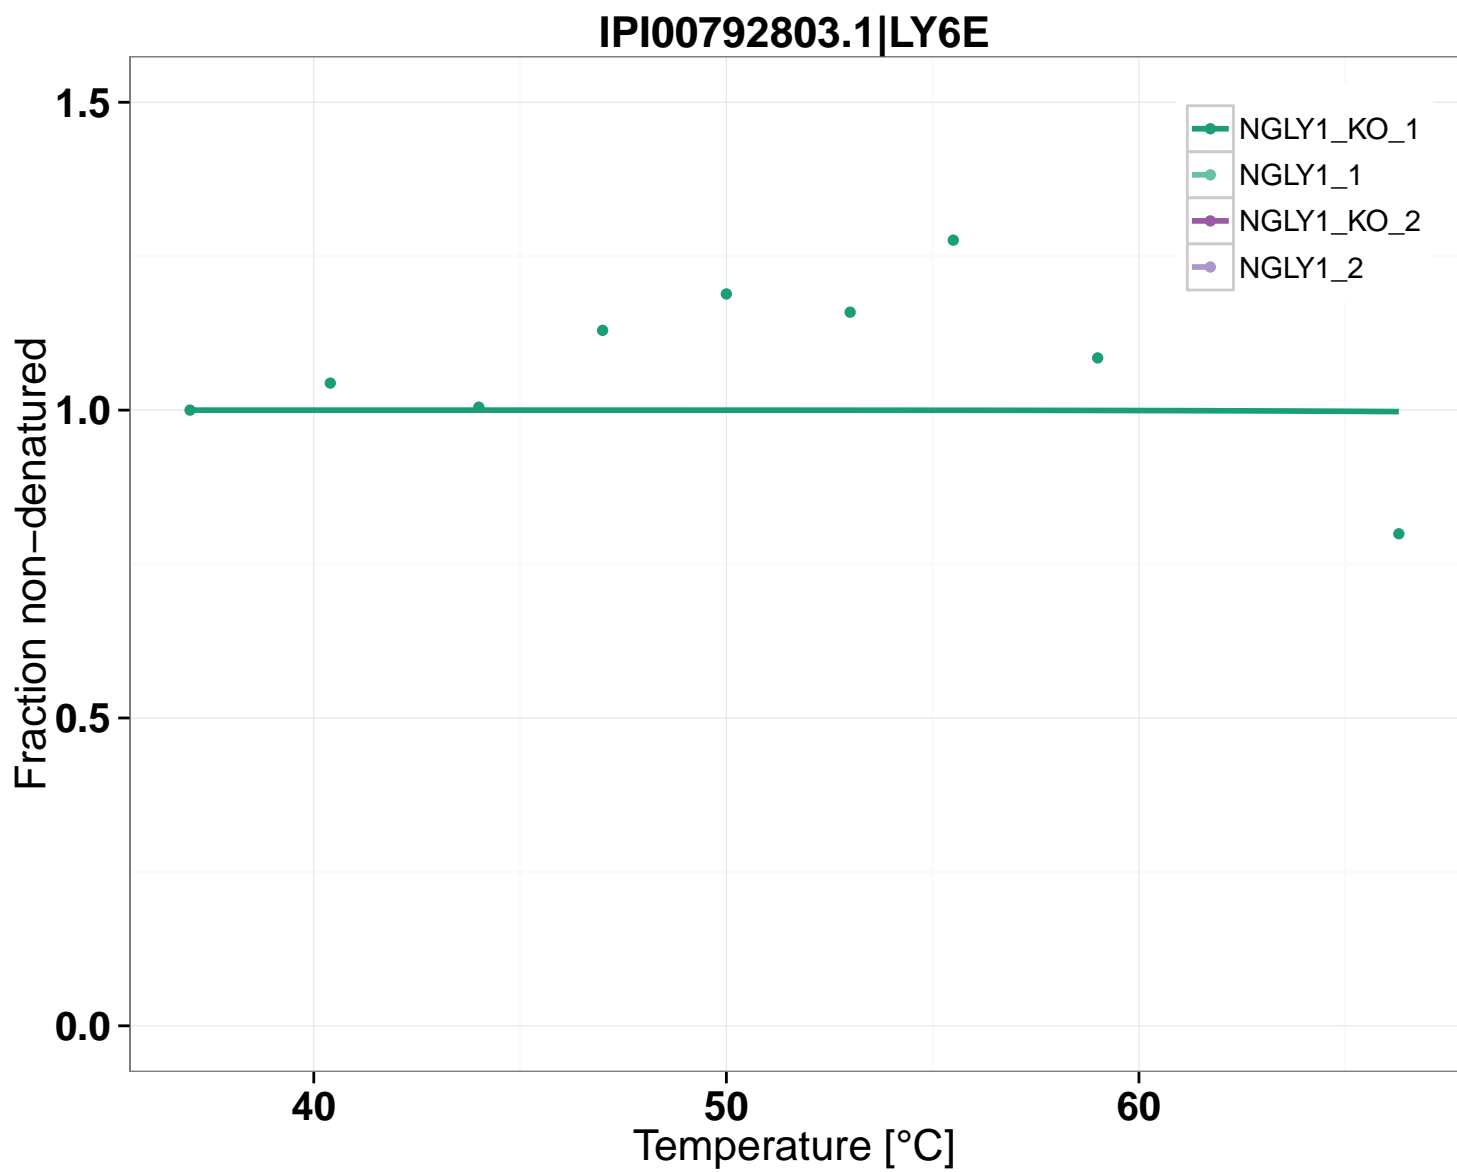

|            | meltPoint | slope | plateau | R2    |
|------------|-----------|-------|---------|-------|
| NGLY1_KO_1 | –         | –     | 0       | –0.49 |
| NGLY1_1    | –         | –     | –       | –     |
| NGLY1_KO_2 | –         | –     | –       | –     |
| NGLY1_2    | –         | –     | –       | –     |

Supplement: Supplementary file 3095 [file 1]

IPI00013406.1|SNAPC2

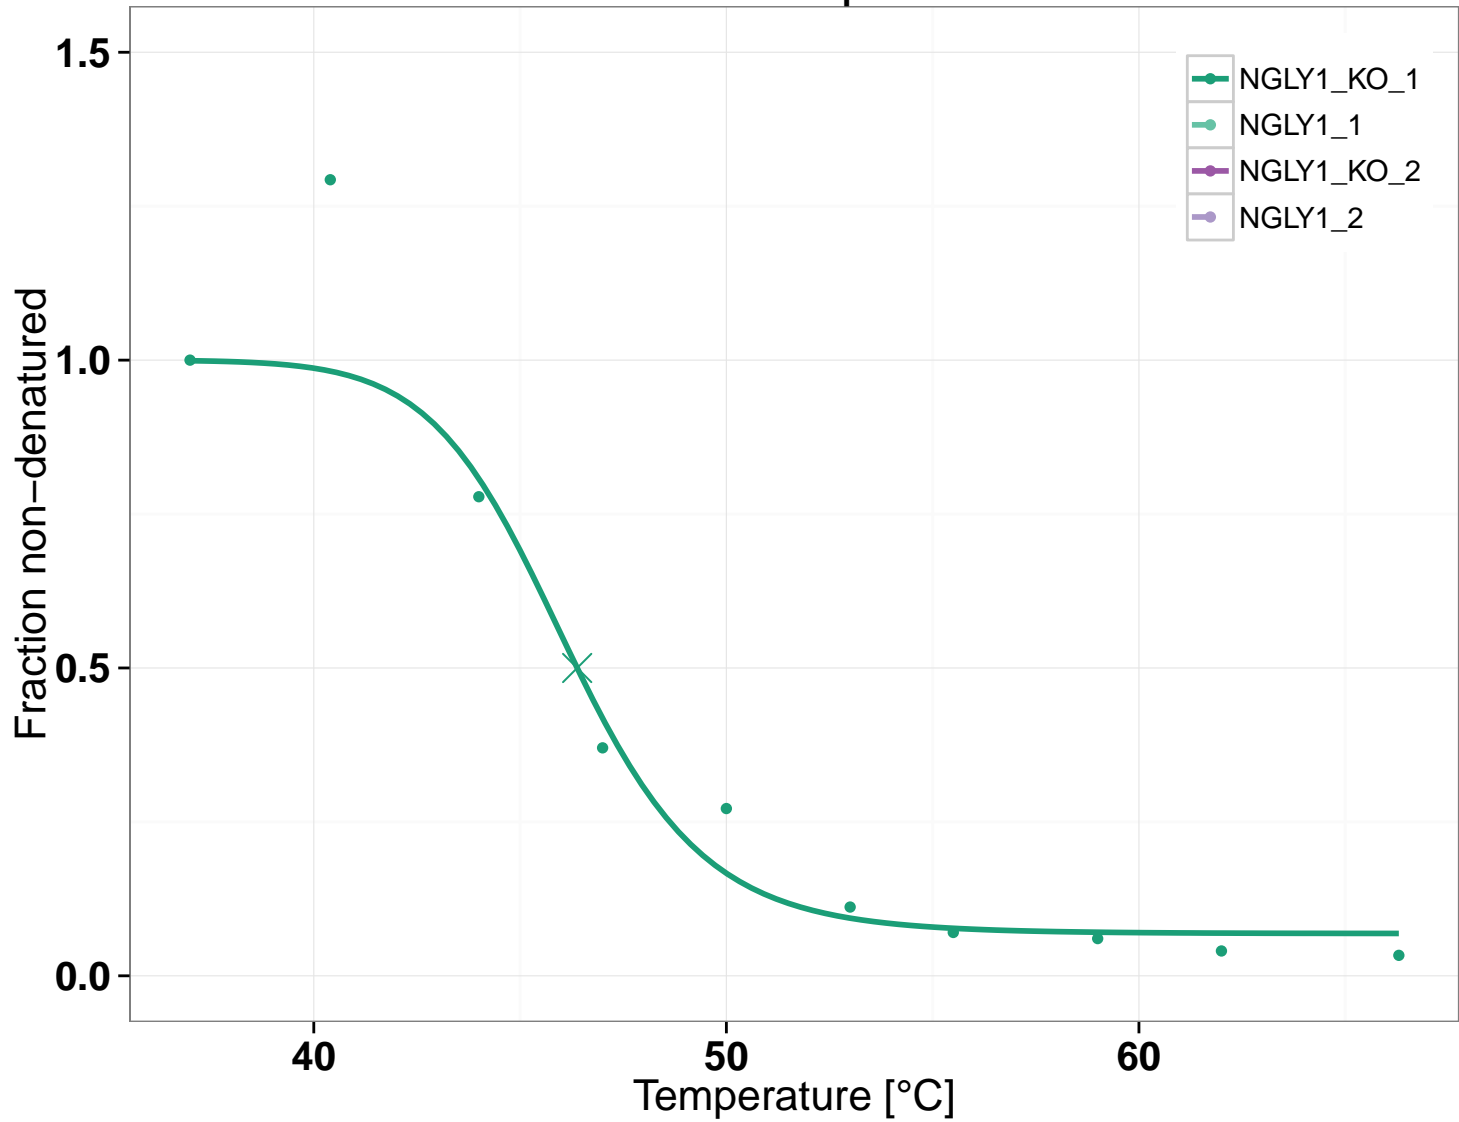

|            | meltPoint | slope | plateau | R2   |
|------------|-----------|-------|---------|------|
| NGLY1_KO_1 | 46.38     | -0.14 | 0.07    | 0.94 |
| NGLY1_1    | -         | -     | -       | -    |
| NGLY1_KO_2 | -         | -     | -       | -    |
| NGLY1_2    | -         | -     | -       | -    |

Supplement: Supplementary file 3096 [file 1]

# IPI00014439.4|QDPR

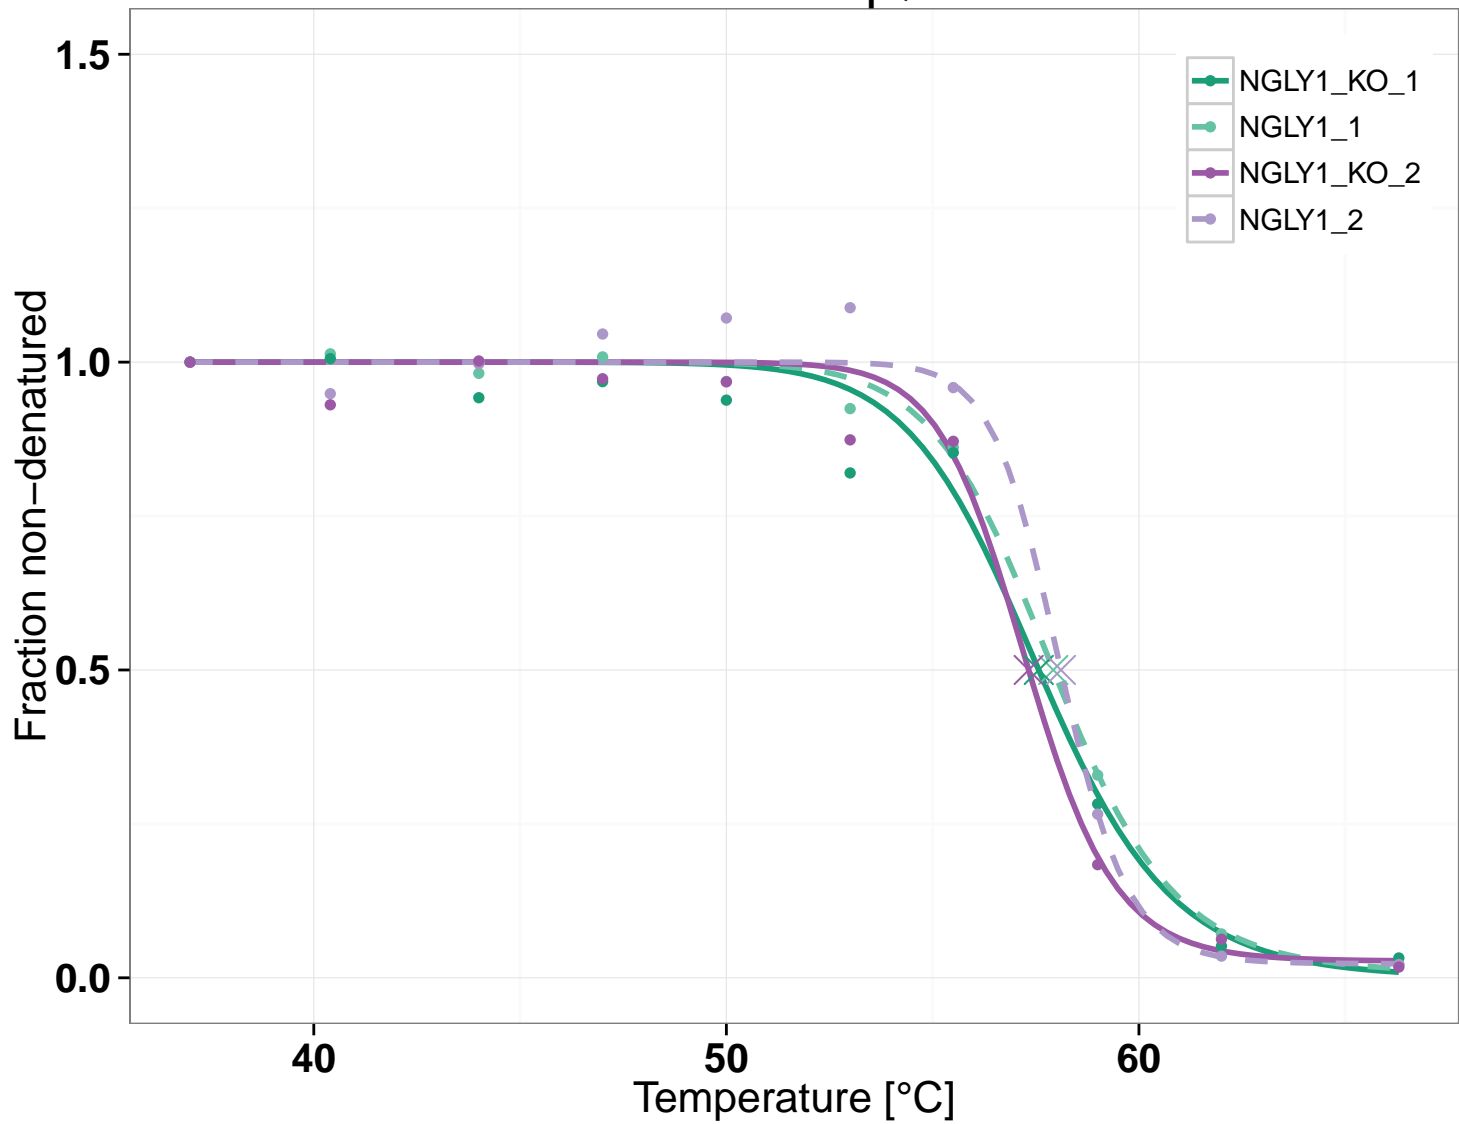

|            | meltPoint | slope | plateau | R2   |
|------------|-----------|-------|---------|------|
| NGLY1_KO_1 | 57.57     | -0.15 | 0       | 0.98 |
| NGLY1_1    | 57.92     | -0.17 | 0.01    | 1    |
| NGLY1_KO_2 | 57.33     | -0.23 | 0.03    | 0.99 |
| NGLY1_2    | 58.11     | -0.3  | 0.02    | 0.99 |

Supplement: Supplementary file 3097 [file 1]

IPI00909821.1|B4DE83\_HUMAN

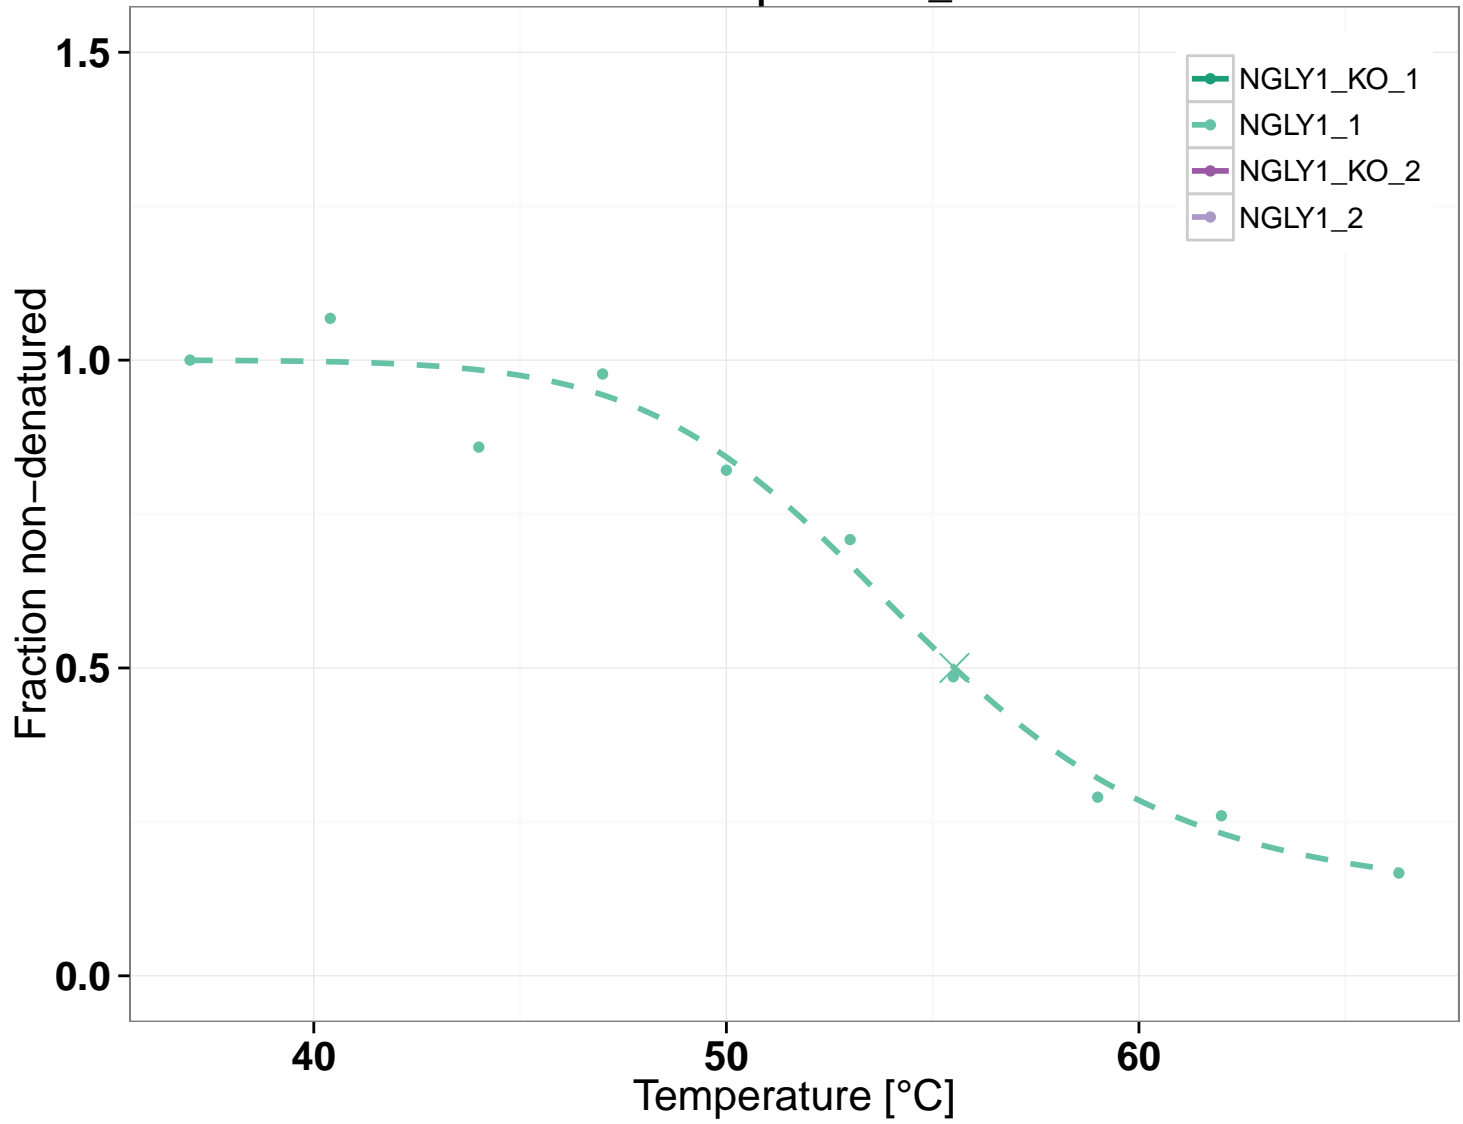

|            | meltPoint | slope  | plateau | R2   |
|------------|-----------|--------|---------|------|
| NGLY1_KO_1 | —         | —      | —       | —    |
| NGLY1_1    | 55.53     | -0.067 | 0.13    | 0.97 |
| NGLY1_KO_2 | —         | —      | —       | —    |
| NGLY1_2    | —         | —      | —       | —    |

Supplement: Supplementary file 3098 [file 1]

# IPI00031133.1|SLC25A33

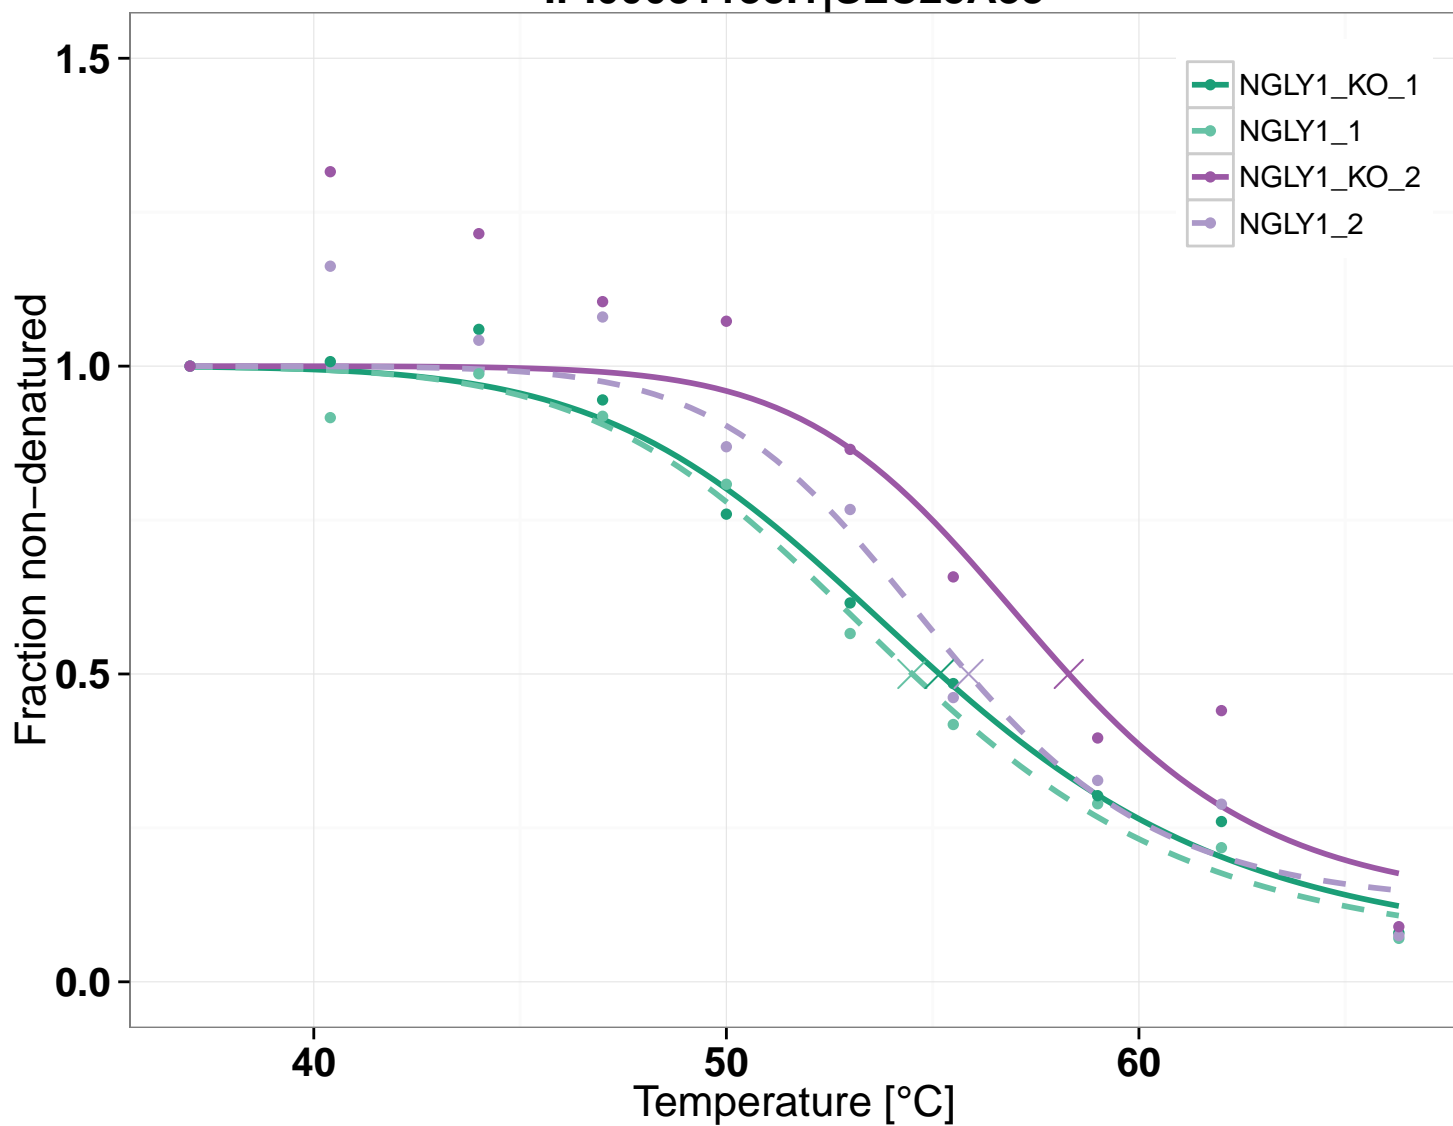

|            | meltPoint | slope  | plateau | R2   |
|------------|-----------|--------|---------|------|
| NGLY1_KO_1 | 55.17     | -0.062 | 0.04    | 0.99 |
| NGLY1_1    | 54.51     | -0.065 | 0.04    | 0.99 |
| NGLY1_KO_2 | 58.3      | -0.078 | 0.12    | 0.86 |
| NGLY1_2    | 55.87     | -0.082 | 0.12    | 0.96 |

Supplement: Supplementary file 3099 [file 1]

IPI00017816.2|ATP5S

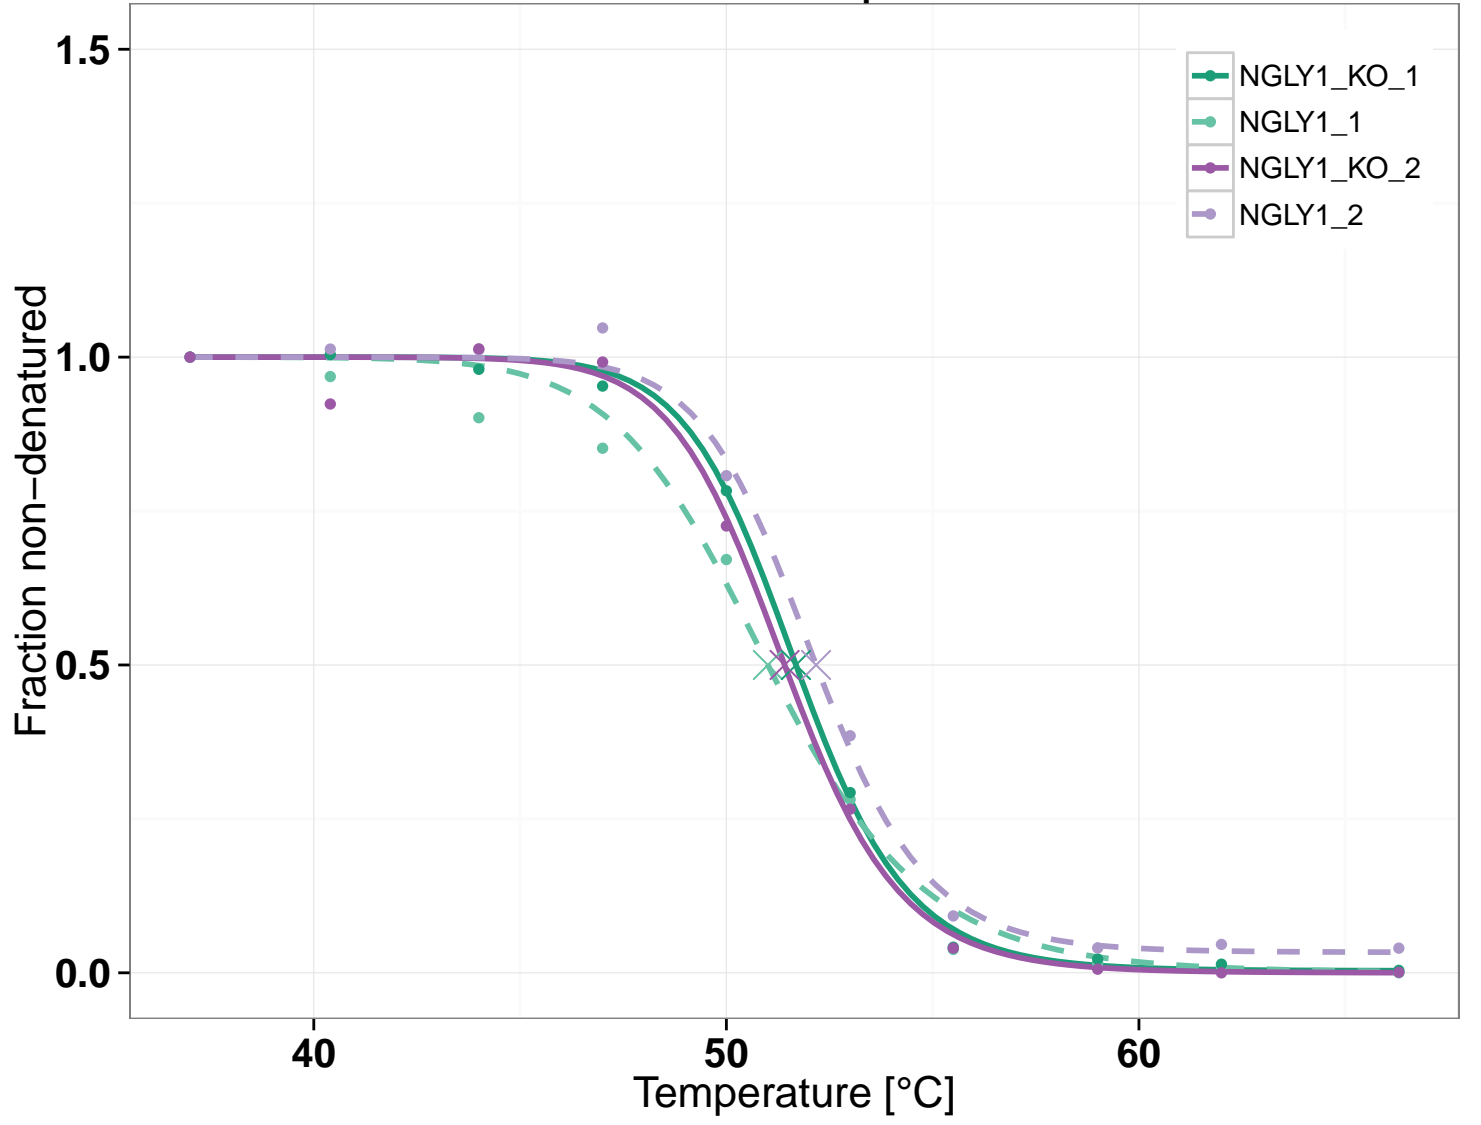

|            | meltPoint | slope | plateau | R2   |
|------------|-----------|-------|---------|------|
| NGLY1_KO_1 | 51.69     | -0.18 | 0       | 1    |
| NGLY1_1    | 51.01     | -0.13 | 0       | 0.99 |
| NGLY1_KO_2 | 51.41     | -0.18 | 0       | 1    |
| NGLY1_2    | 52.17     | -0.18 | 0.03    | 1    |

Supplement: Supplementary file 3100 [file 1]

# IPI00027253.3|GABARAP

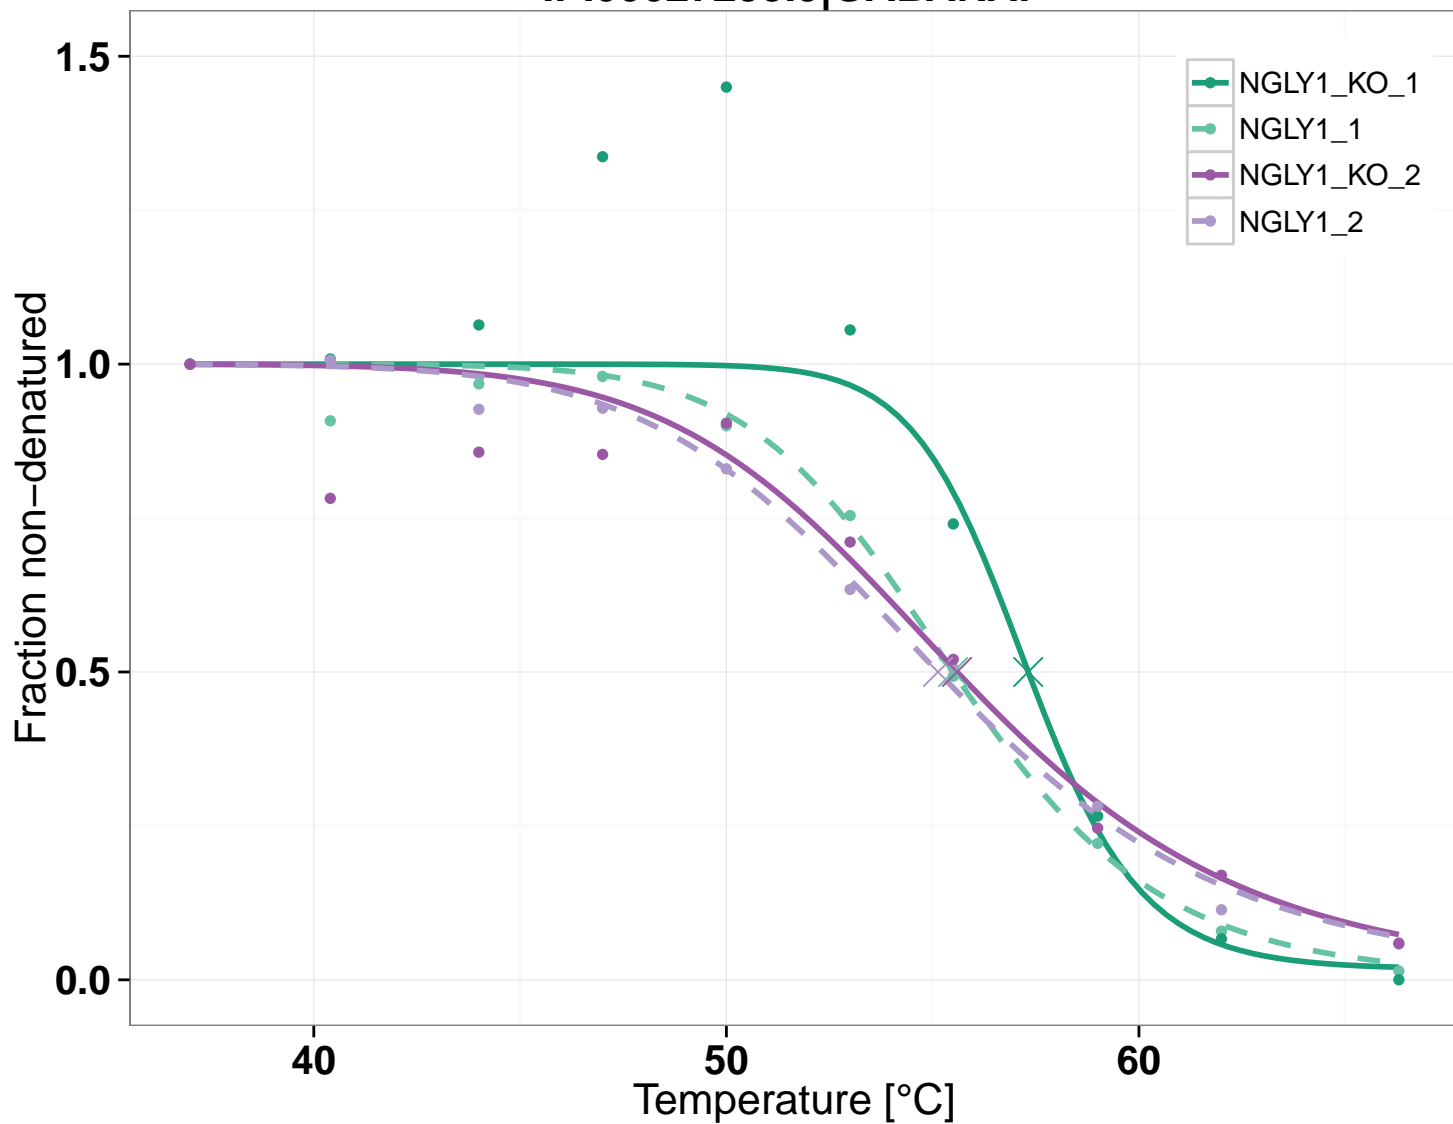

|            | meltPoint | slope  | plateau | R2   |
|------------|-----------|--------|---------|------|
| NGLY1_KO_1 | 57.32     | -0.18  | 0.02    | 0.86 |
| NGLY1_1    | 55.5      | -0.1   | 0       | 0.99 |
| NGLY1_KO_2 | 55.59     | -0.072 | 0       | 0.93 |
| NGLY1_2    | 55.13     | -0.071 | 0       | 0.99 |

Supplement: Supplementary file 3101 [file 1]

# IPI00217421.1|PIGO

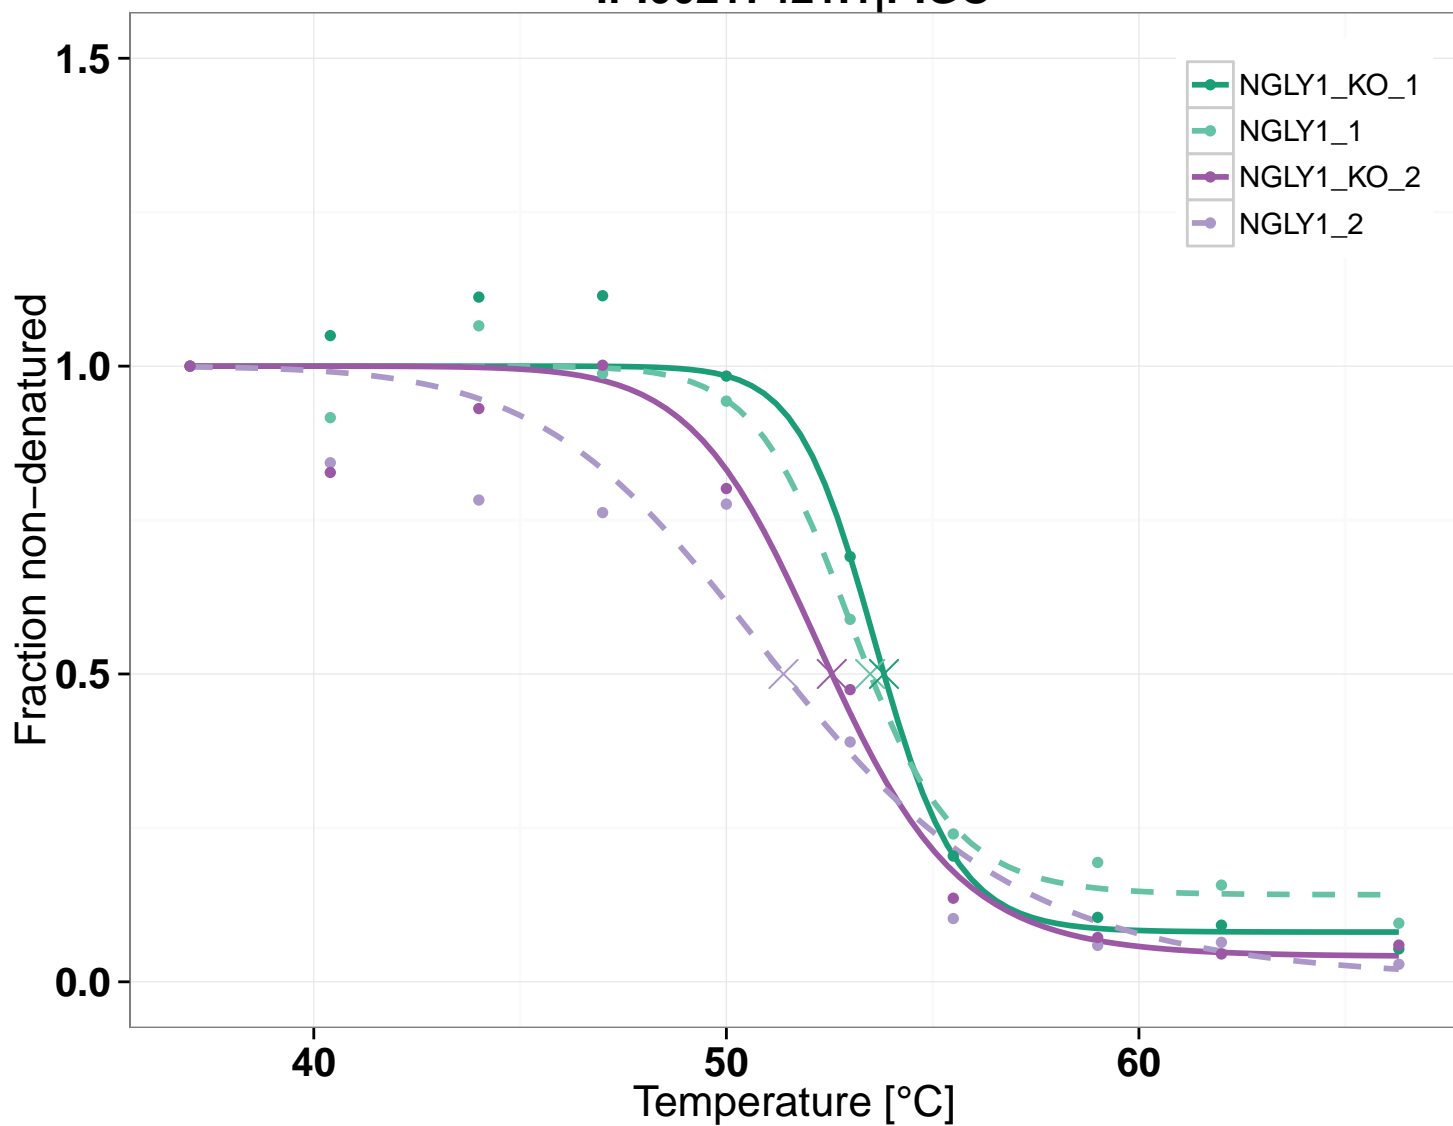

|            | meltPoint | slope  | plateau | R2   |
|------------|-----------|--------|---------|------|
| NGLY1_KO_1 | 53.82     | -0.24  | 0.08    | 0.99 |
| NGLY1_1    | 53.49     | -0.18  | 0.14    | 0.99 |
| NGLY1_KO_2 | 52.56     | -0.15  | 0.04    | 0.98 |
| NGLY1_2    | 51.38     | -0.085 | 0       | 0.93 |

Supplement: Supplementary file 3102 [file 1]

IPI00432655.3|FAM82A1

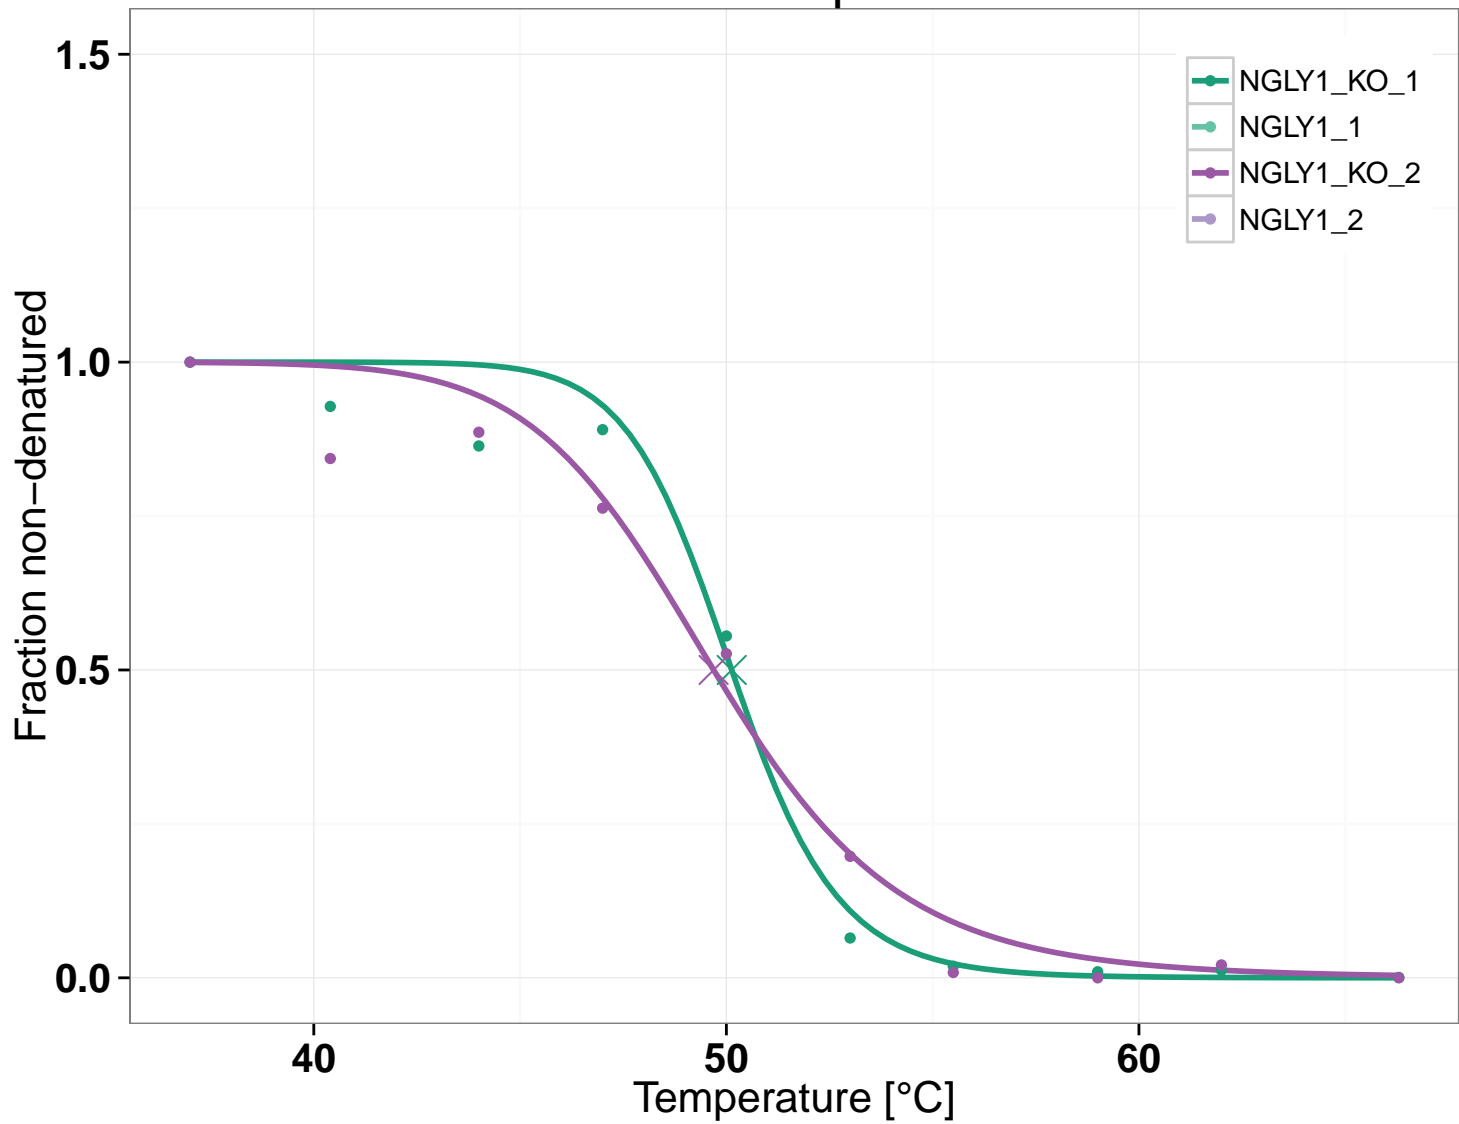

|            | meltPoint | slope | plateau | R2   |
|------------|-----------|-------|---------|------|
| NGLY1_KO_1 | 50.13     | -0.19 | 0       | 0.99 |
| NGLY1_1    | -         | -     | -       | -    |
| NGLY1_KO_2 | 49.69     | -0.11 | 0       | 0.98 |
| NGLY1_2    | -         | -     | -       | -    |

Supplement: Supplementary file 3103 [file 1]

# IPI00217664.2|AMOTL1

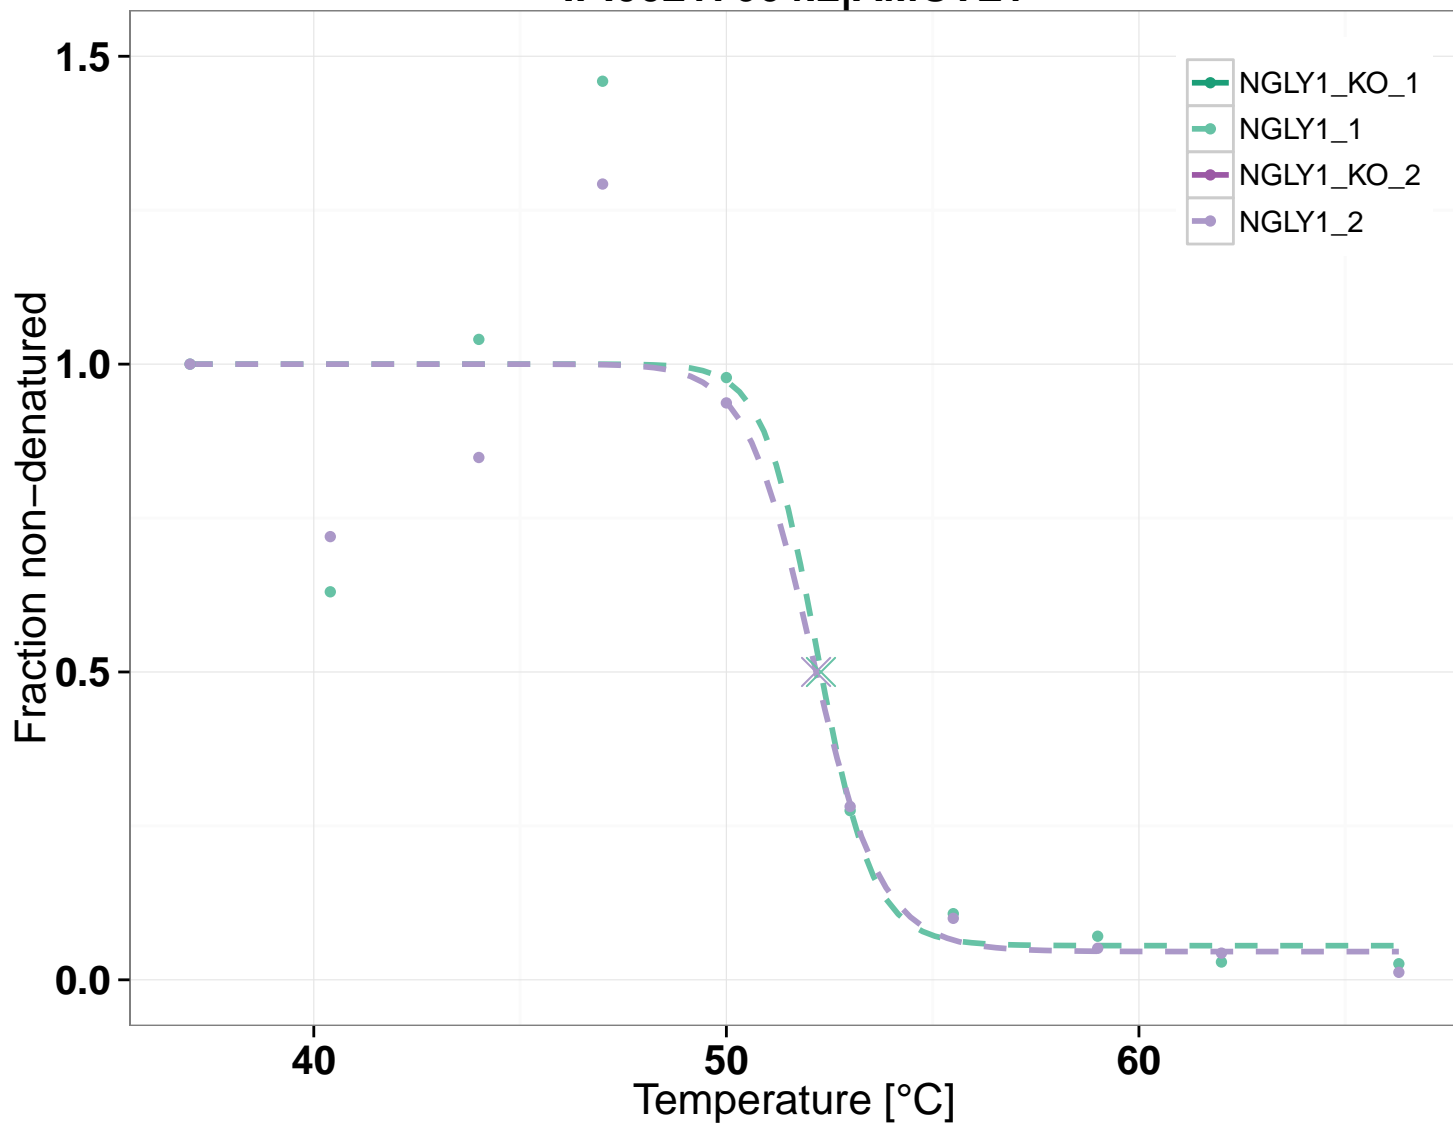

|            | meltPoint | slope | plateau | R2   |
|------------|-----------|-------|---------|------|
| NGLY1_KO_1 | –         | –     | –       | –    |
| NGLY1_1    | 52.29     | –0.36 | 0.06    | 0.86 |
| NGLY1_KO_2 | –         | –     | –       | –    |
| NGLY1_2    | 52.17     | –0.29 | 0.05    | 0.91 |

Supplement: Supplementary file 3104 [file 1]

IPI00454910.1|CDC42BPG

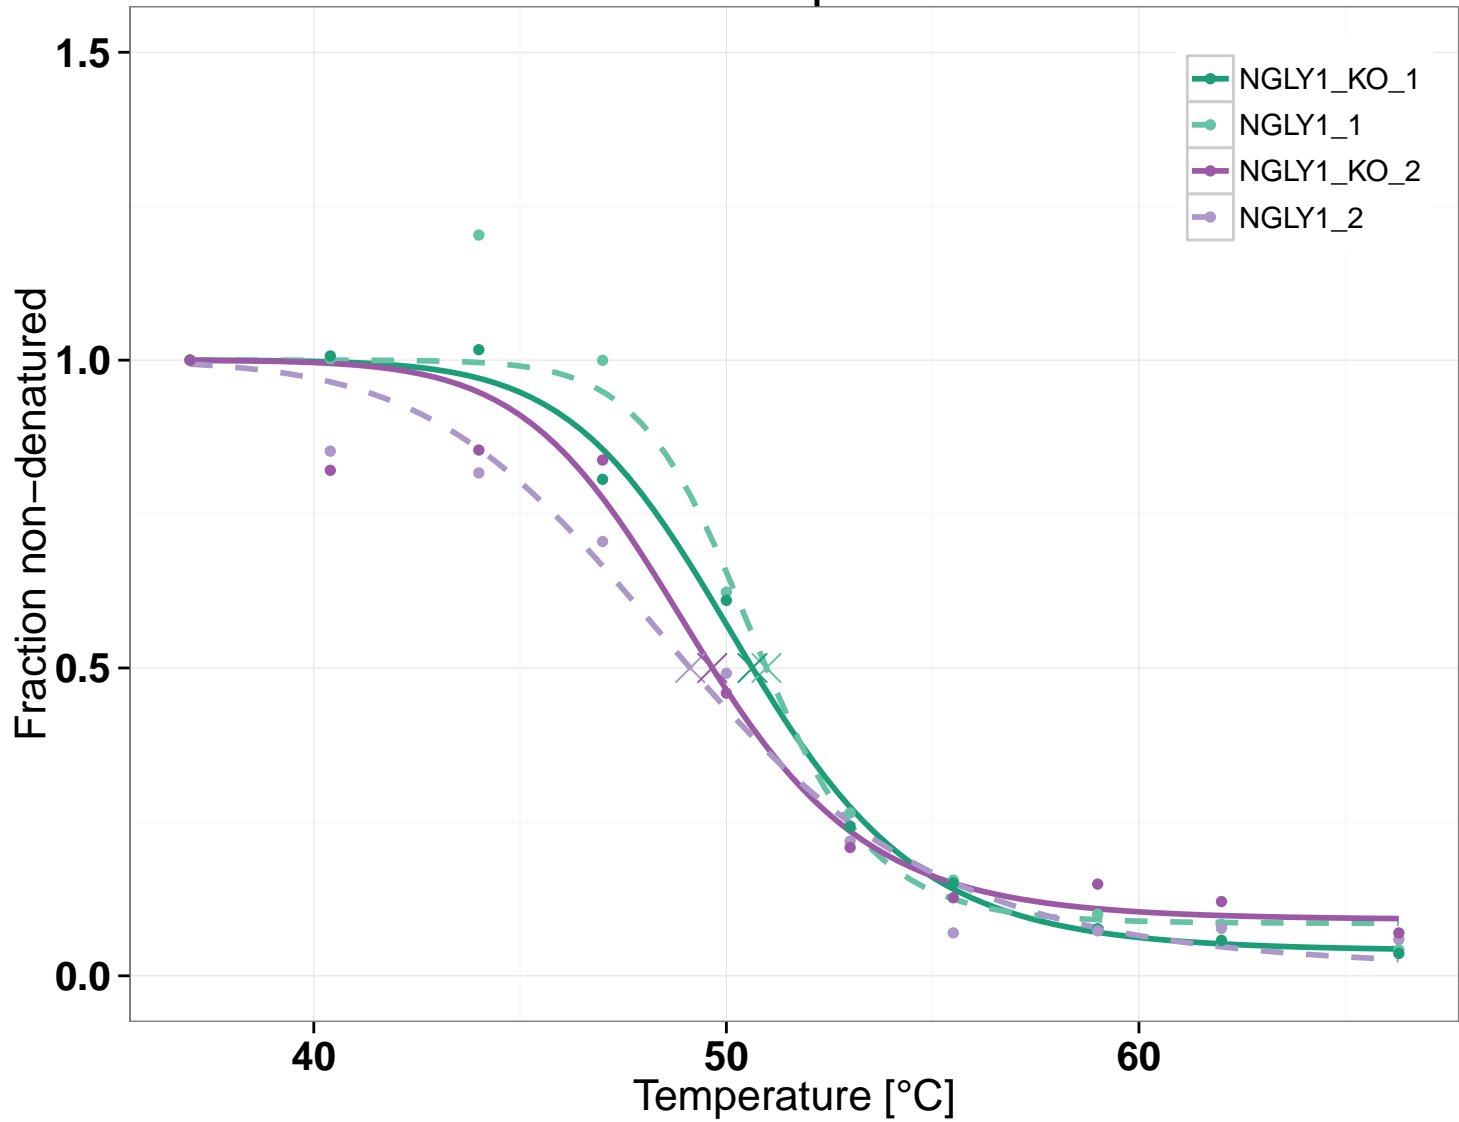

|            | meltPoint | slope  | plateau | R2   |
|------------|-----------|--------|---------|------|
| NGLY1_KO_1 | 50.63     | -0.11  | 0.04    | 1    |
| NGLY1_1    | 50.97     | -0.16  | 0.09    | 0.97 |
| NGLY1_KO_2 | 49.66     | -0.11  | 0.09    | 0.96 |
| NGLY1_2    | 49.12     | -0.079 | 0.01    | 0.98 |

Supplement: Supplementary file 3105 [file 1]

IPI00807557.1|PA2G4

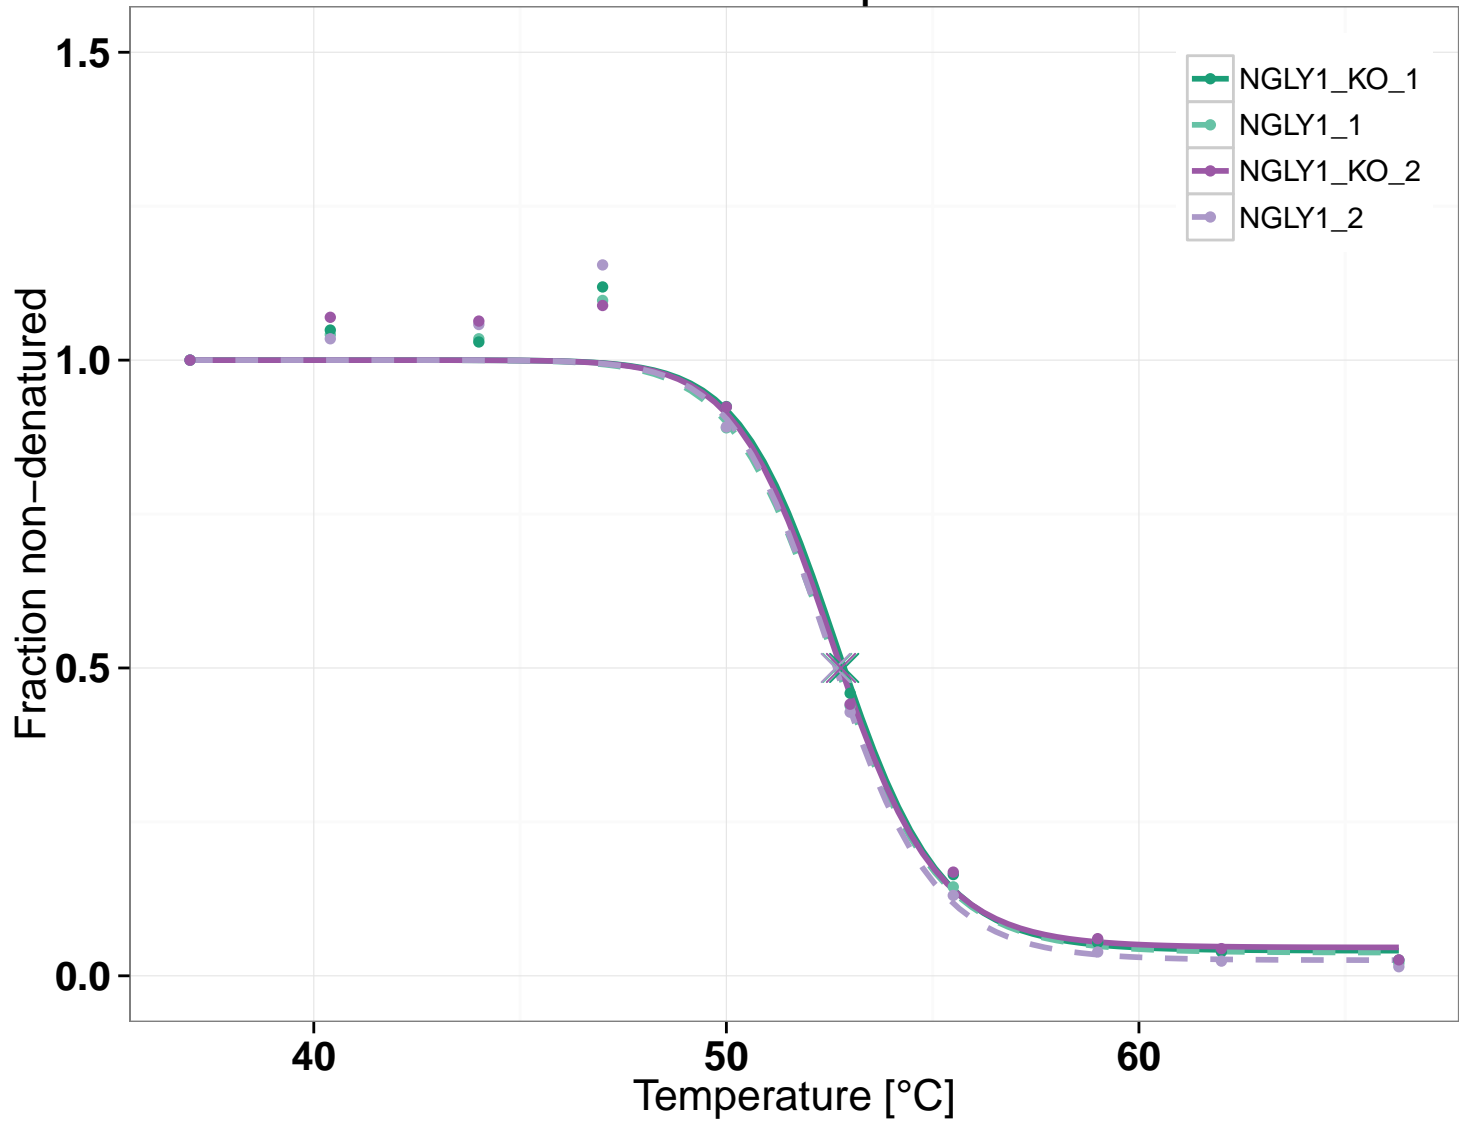

|            | meltPoint | slope | plateau | R2   |
|------------|-----------|-------|---------|------|
| NGLY1_KO_1 | 52.86     | -0.2  | 0.04    | 0.99 |
| NGLY1_1    | 52.69     | -0.19 | 0.04    | 0.99 |
| NGLY1_KO_2 | 52.78     | -0.2  | 0.05    | 0.99 |
| NGLY1_2    | 52.65     | -0.2  | 0.03    | 0.99 |

Supplement: Supplementary file 3106 [file 1]

IPI00011138.1|UPF3A

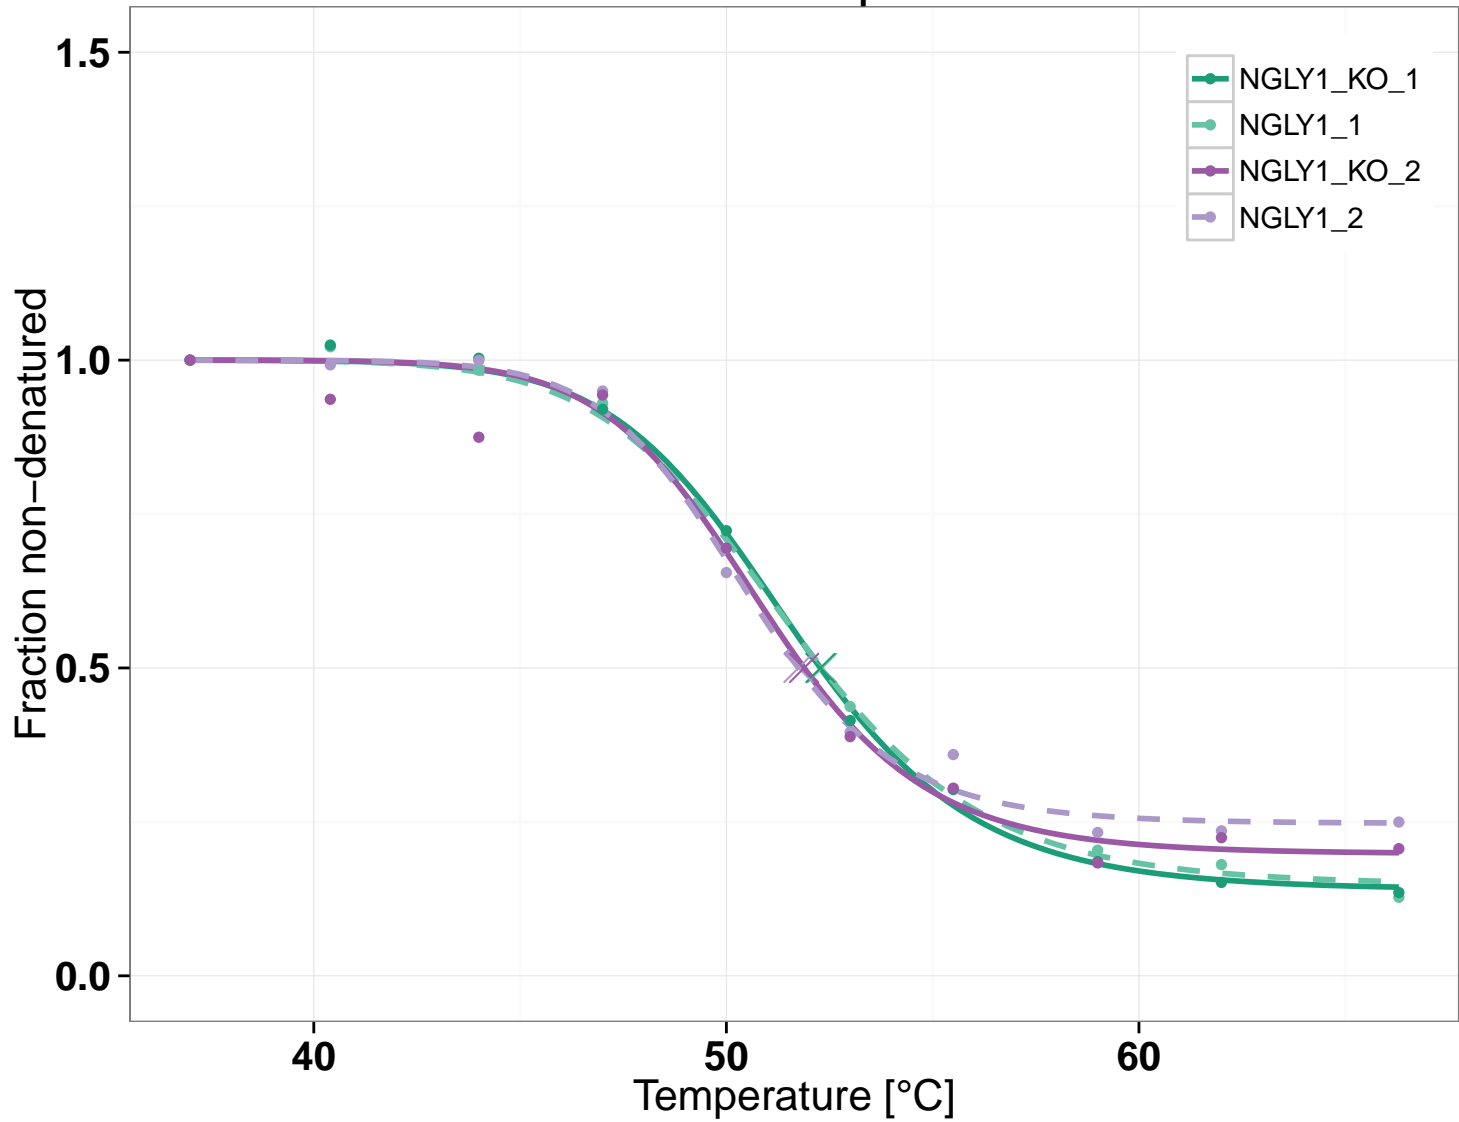

|            | meltPoint | slope  | plateau | R2   |
|------------|-----------|--------|---------|------|
| NGLY1_KO_1 | 52.28     | -0.098 | 0.14    | 1    |
| NGLY1_1    | 52.32     | -0.092 | 0.15    | 1    |
| NGLY1_KO_2 | 51.88     | -0.1   | 0.2     | 0.98 |
| NGLY1_2    | 51.75     | -0.11  | 0.25    | 0.99 |

Supplement: Supplementary file 3107 [file 1]

# IPI00170862.1|UXT

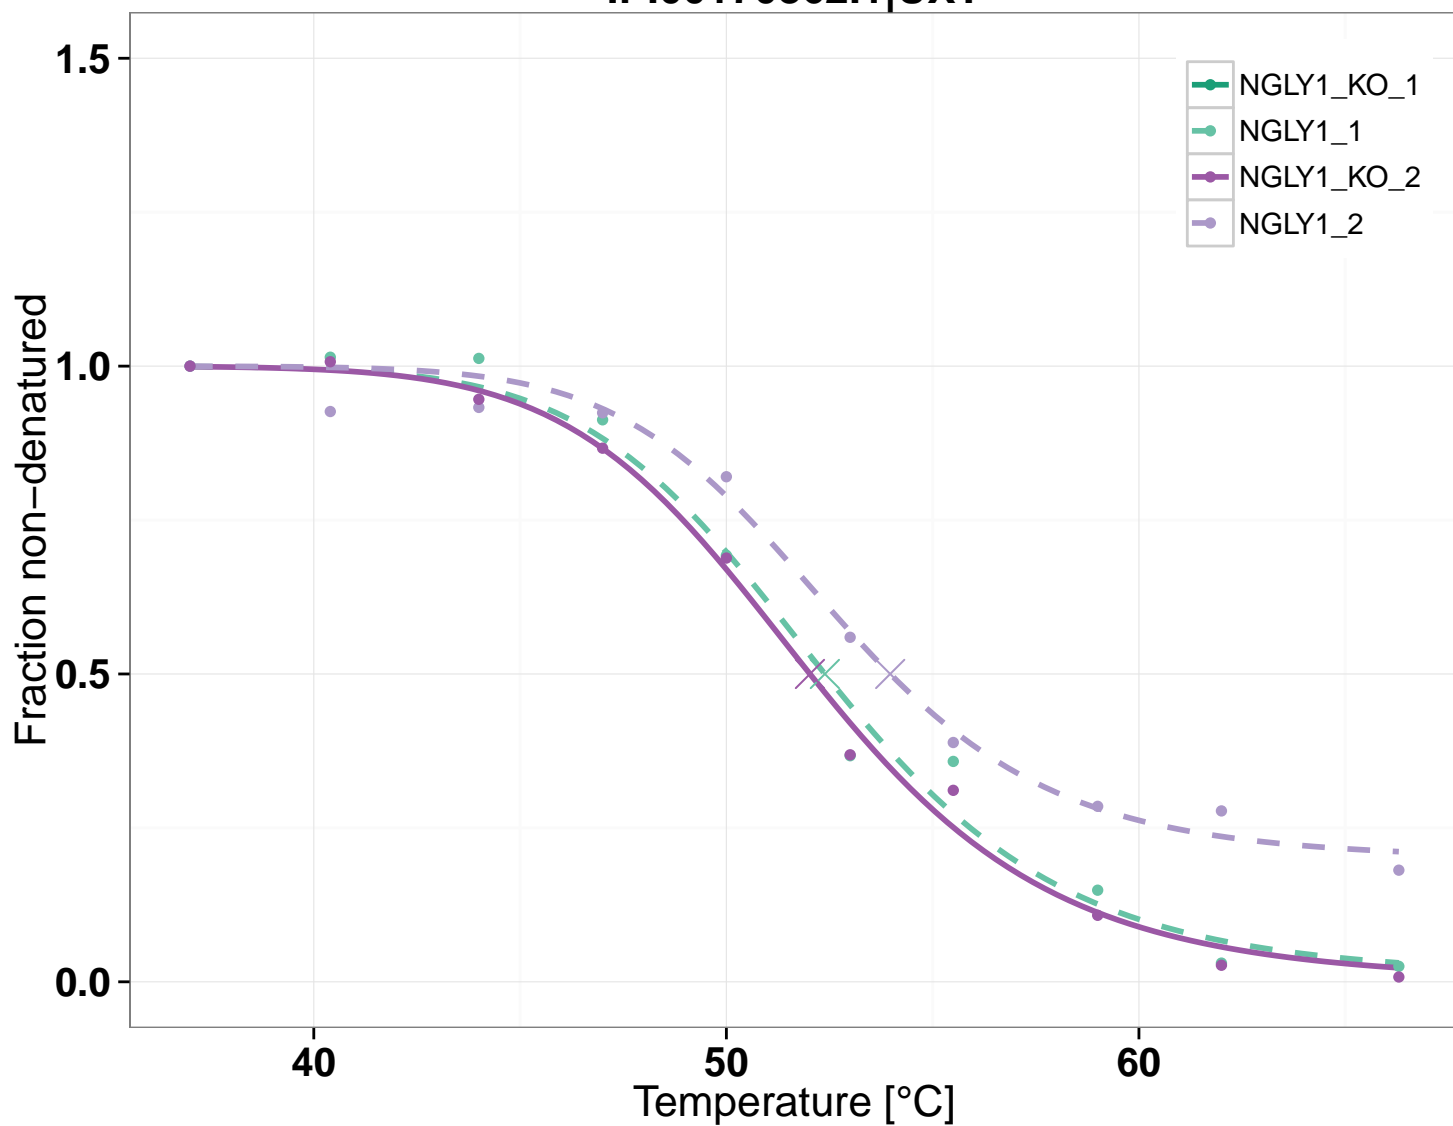

|            | meltPoint | slope  | plateau | R2   |
|------------|-----------|--------|---------|------|
| NGLY1_KO_1 | —         | —      | —       | —    |
| NGLY1_1    | 52.39     | -0.085 | 0.01    | 0.99 |
| NGLY1_KO_2 | 52.03     | -0.085 | 0       | 0.99 |
| NGLY1_2    | 53.97     | -0.076 | 0.2     | 0.99 |

Supplement: Supplementary file 3108 [file 1]

IPI00063827.1|ABHD14B

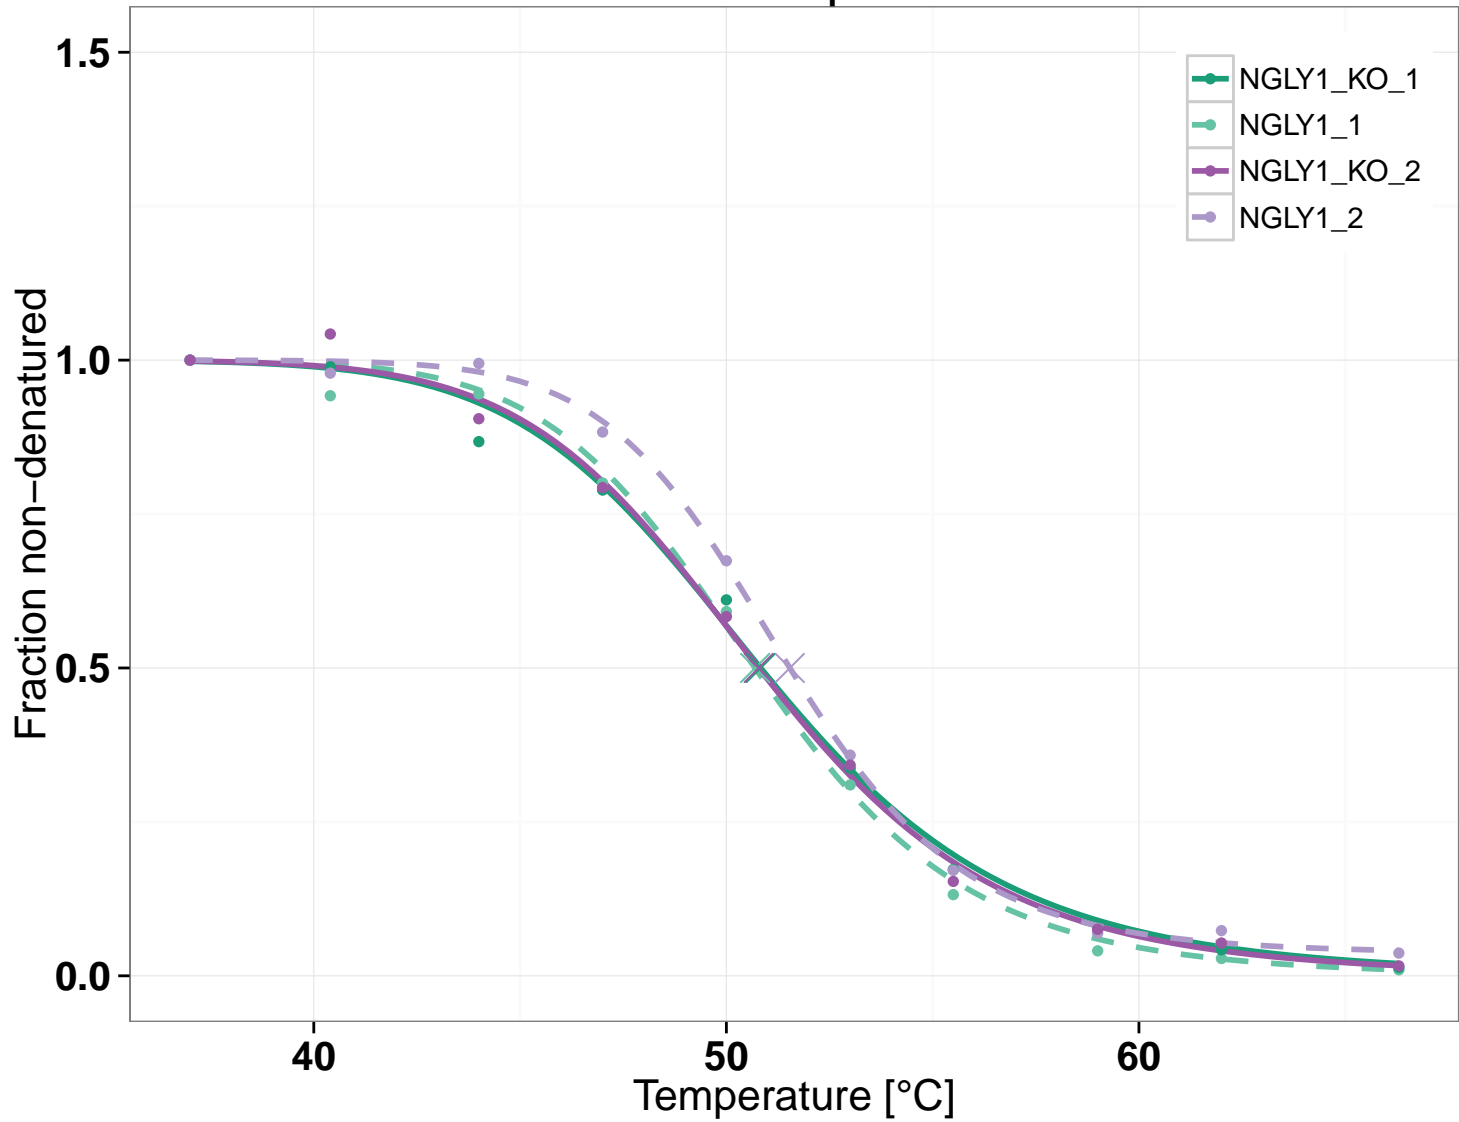

|            | meltPoint | slope  | plateau | R2 |
|------------|-----------|--------|---------|----|
| NGLY1_KO_1 | 50.83     | -0.083 | 0       | 1  |
| NGLY1_1    | 50.7      | -0.098 | 0       | 1  |
| NGLY1_KO_2 | 50.78     | -0.087 | 0       | 1  |
| NGLY1_2    | 51.54     | -0.11  | 0.04    | 1  |

Supplement: Supplementary file 3109 [file 1]

# IPI00784883.4|MSL1

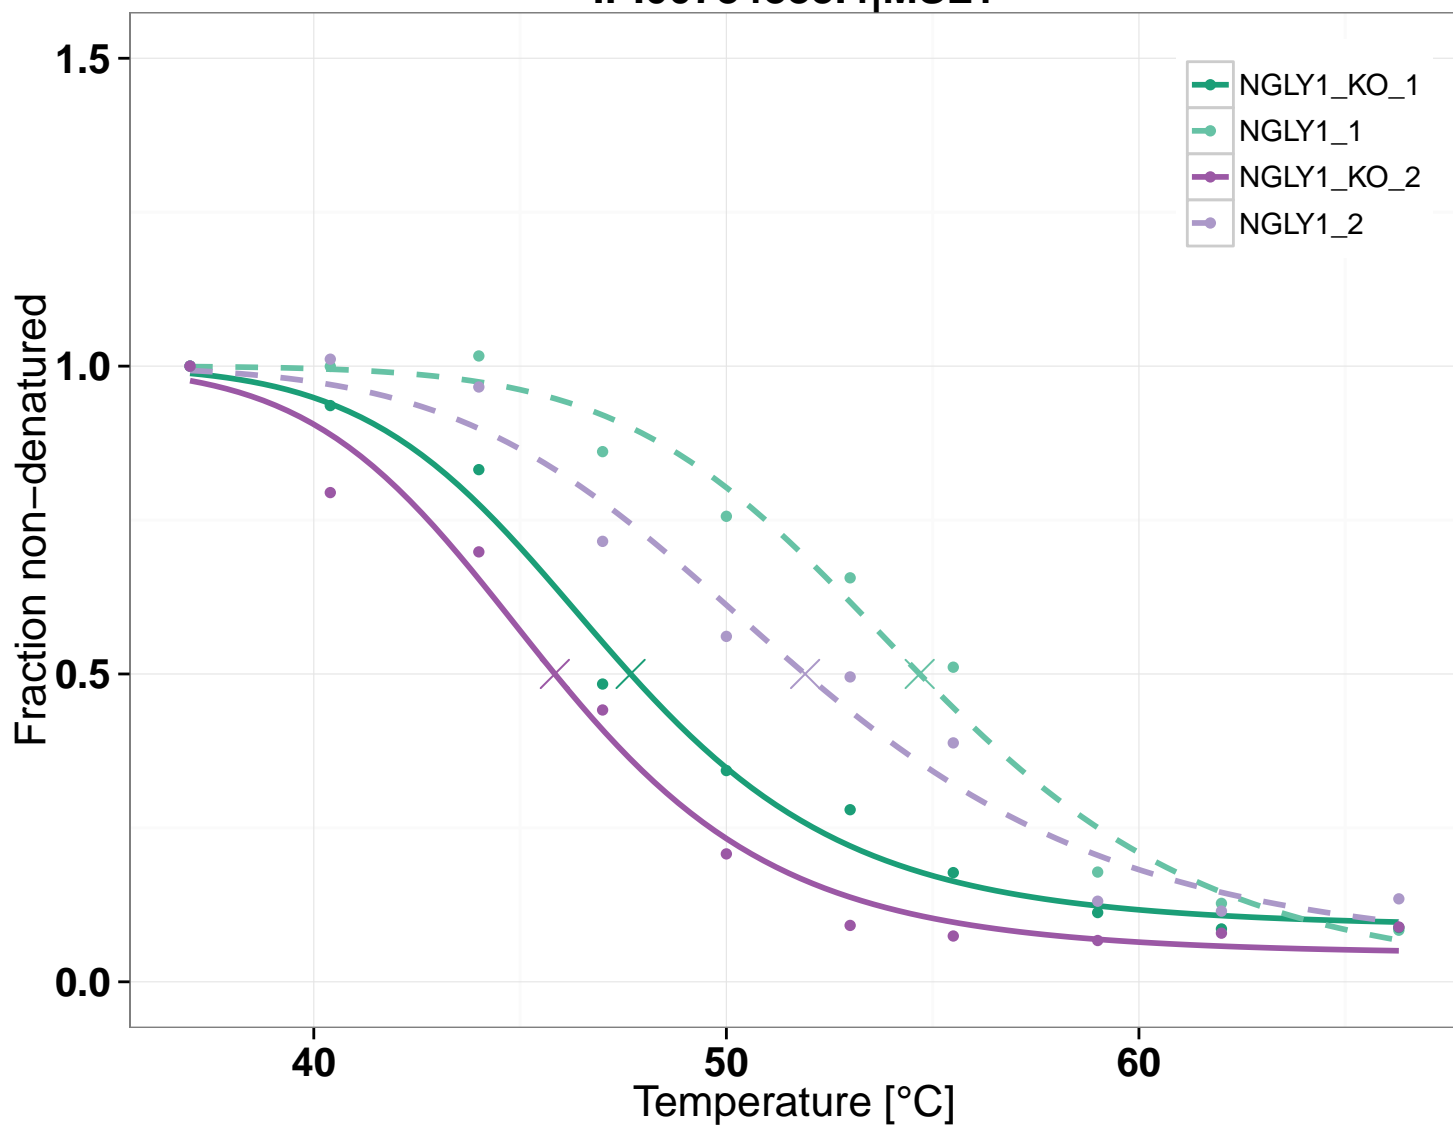

|            | meltPoint | slope  | plateau | R2   |
|------------|-----------|--------|---------|------|
| NGLY1_KO_1 | 47.68     | -0.078 | 0.09    | 0.99 |
| NGLY1_1    | 54.69     | -0.07  | 0       | 0.98 |
| NGLY1_KO_2 | 45.84     | -0.084 | 0.04    | 0.98 |
| NGLY1_2    | 51.91     | -0.059 | 0.04    | 0.98 |

Supplement: Supplementary file 3110 [file 1]

# IPI00102425.1|RPRD1A

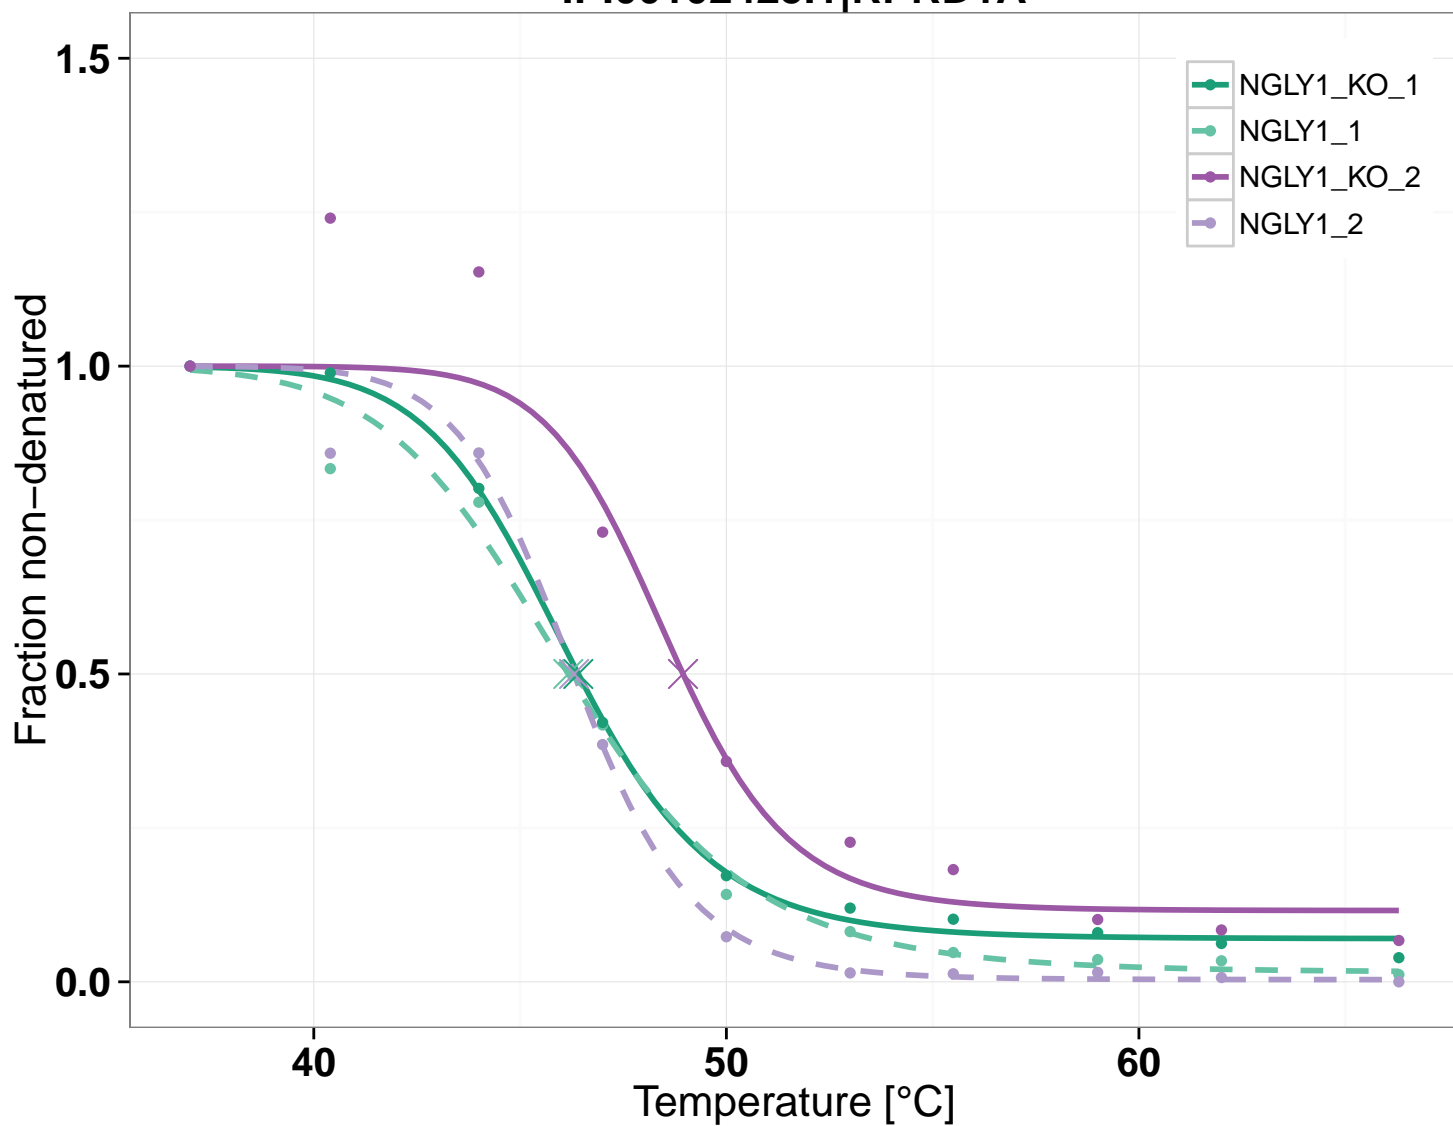

|            | meltPoint | slope | plateau | R2   |
|------------|-----------|-------|---------|------|
| NGLY1_KO_1 | 46.41     | -0.13 | 0.07    | 1    |
| NGLY1_1    | 46.17     | -0.11 | 0.02    | 0.99 |
| NGLY1_KO_2 | 48.95     | -0.15 | 0.12    | 0.95 |
| NGLY1_2    | 46.31     | -0.18 | 0       | 0.99 |

Supplement: Supplementary file 3111 [file 1]

IPI00915263.1|C6ORF203

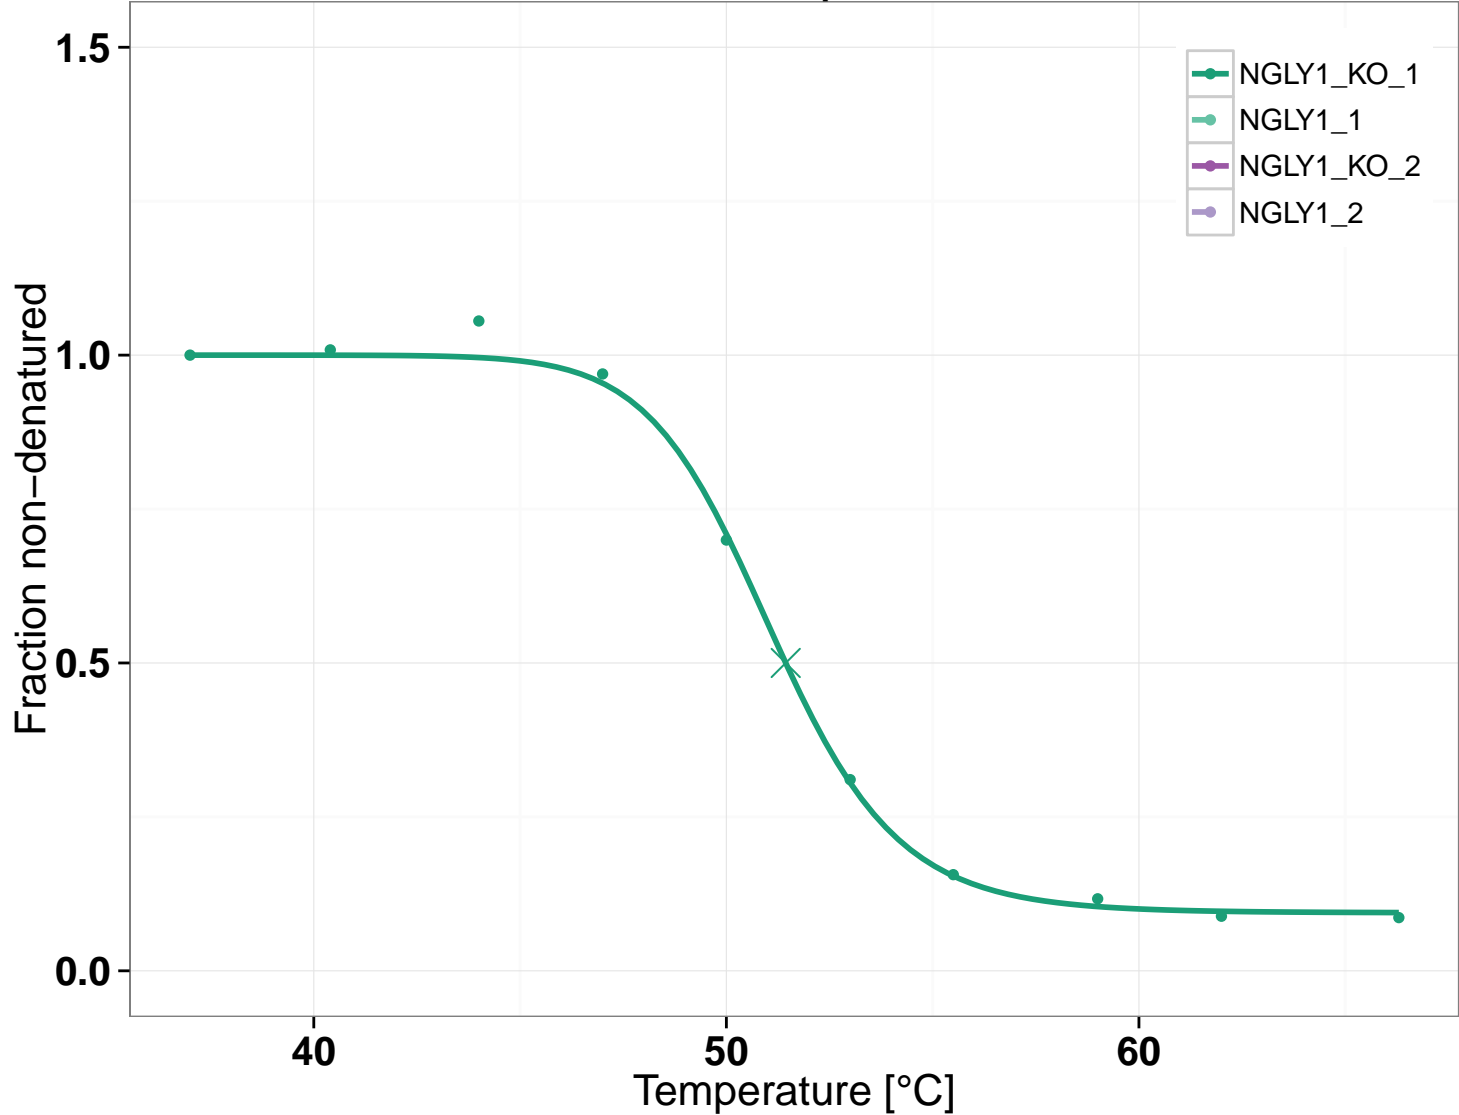

|            | meltPoint | slope | plateau | R2 |
|------------|-----------|-------|---------|----|
| NGLY1_KO_1 | 51.44     | -0.15 | 0.09    | 1  |
| NGLY1_1    | -         | -     | -       | -  |
| NGLY1_KO_2 | -         | -     | -       | -  |
| NGLY1_2    | -         | -     | -       | -  |

Supplement: Supplementary file 3112 [file 1]

# IPI00847285.1|MTG1

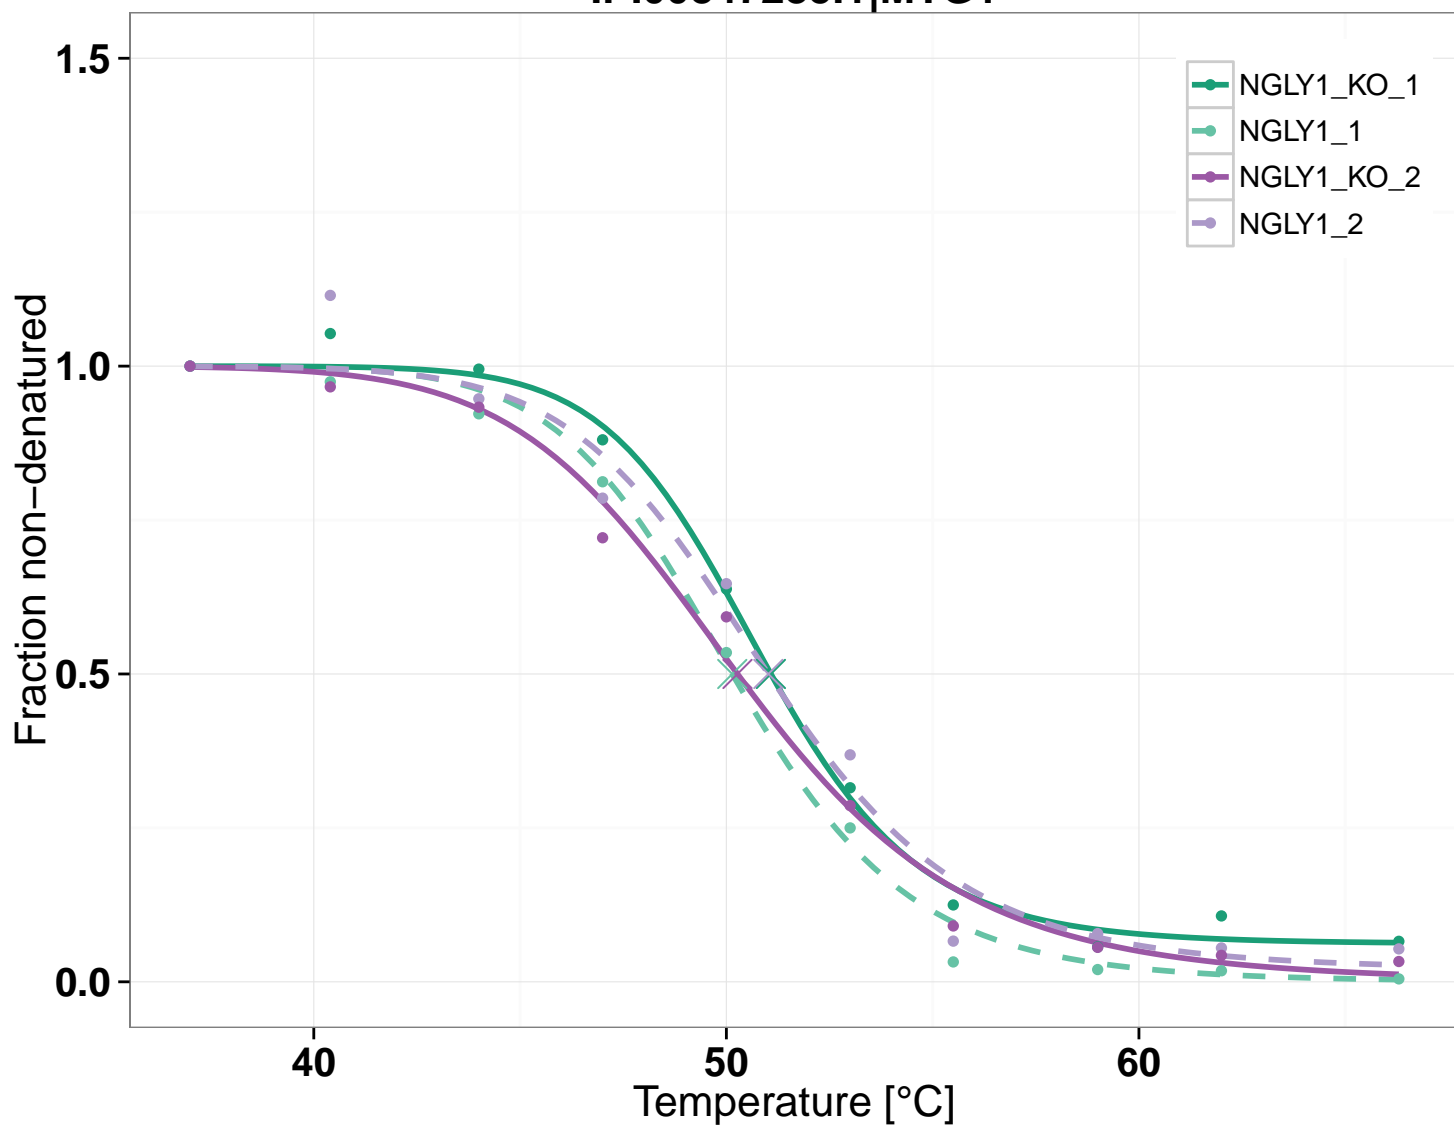

|            | meltPoint | slope  | plateau | R2   |
|------------|-----------|--------|---------|------|
| NGLY1_KO_1 | 51.08     | -0.12  | 0.06    | 1    |
| NGLY1_1    | 50.14     | -0.12  | 0       | 1    |
| NGLY1_KO_2 | 50.27     | -0.092 | 0       | 0.99 |
| NGLY1_2    | 51.02     | -0.1   | 0.02    | 0.98 |

Supplement: Supplementary file 3113 [file 1]
