# Supplementary material (part 32 of 85)
Source: publisher figshare collection journal article supplement (https://gsajournals.figshare.com/articles/dataset/_/12014913)

IPI00740961.5|INTS1

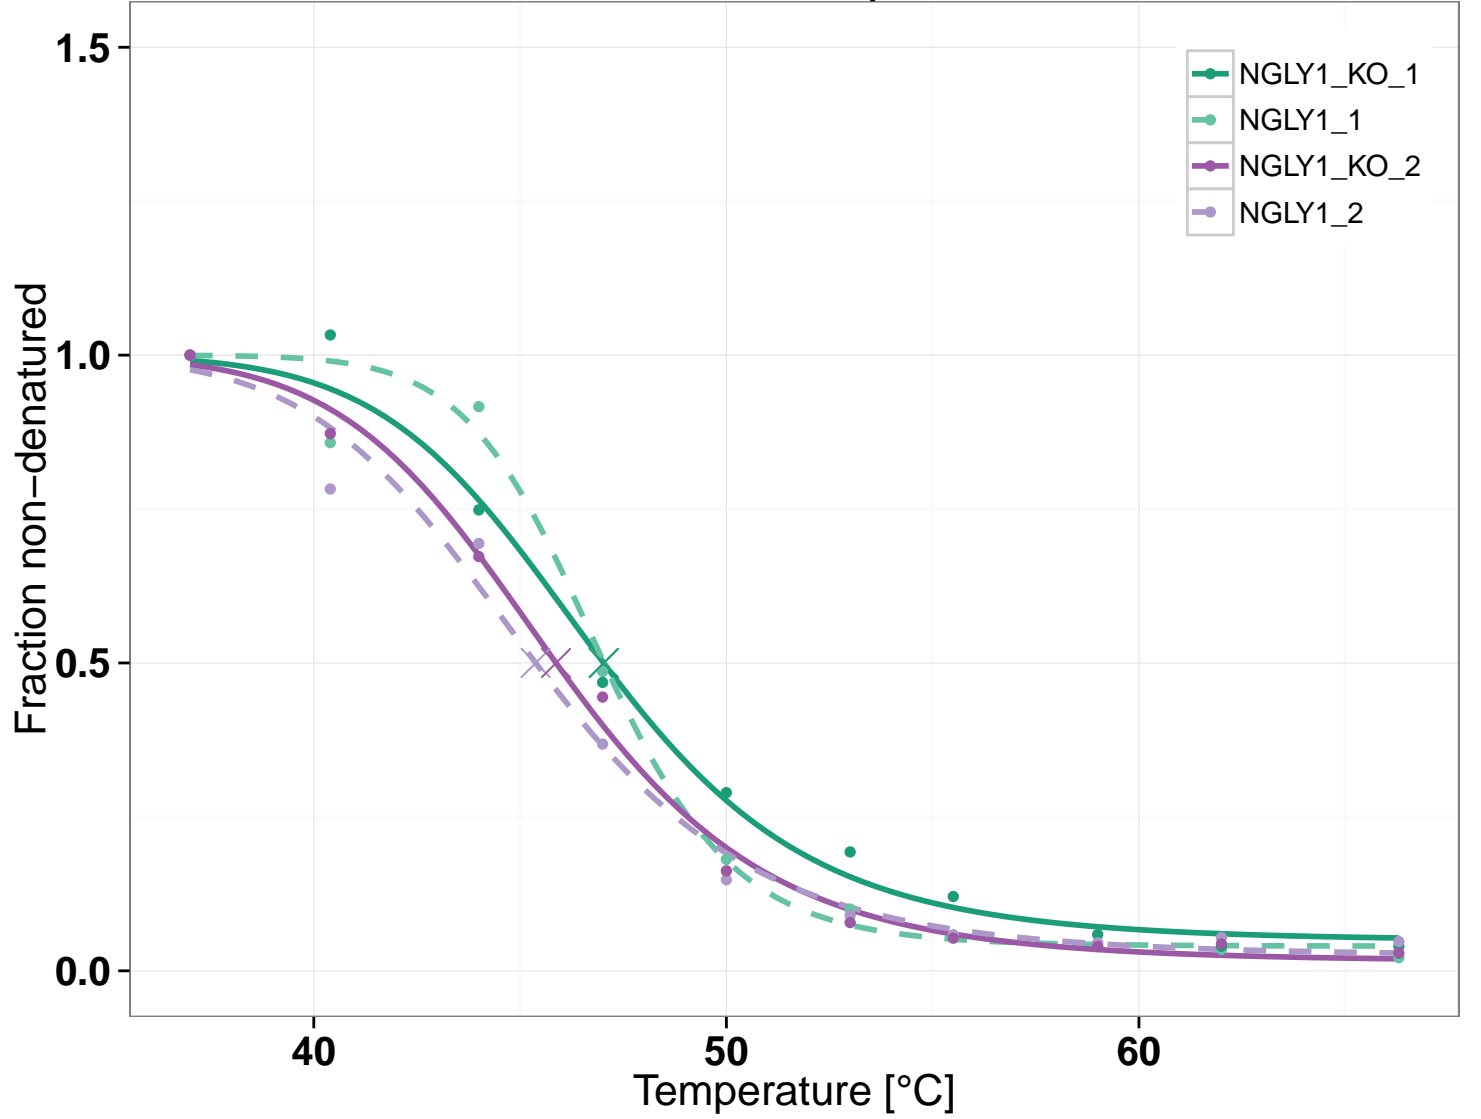

|            | meltPoint | slope  | plateau | R2   |
|------------|-----------|--------|---------|------|
| NGLY1_KO_1 | 47.03     | -0.092 | 0.05    | 0.99 |
| NGLY1_1    | 47.04     | -0.15  | 0.04    | 0.99 |
| NGLY1_KO_2 | 45.87     | -0.095 | 0.01    | 1    |
| NGLY1_2    | 45.38     | -0.091 | 0.02    | 0.98 |

Supplement: Supplementary file 3114 [file 1]

IPI00022820.1|GTF2B

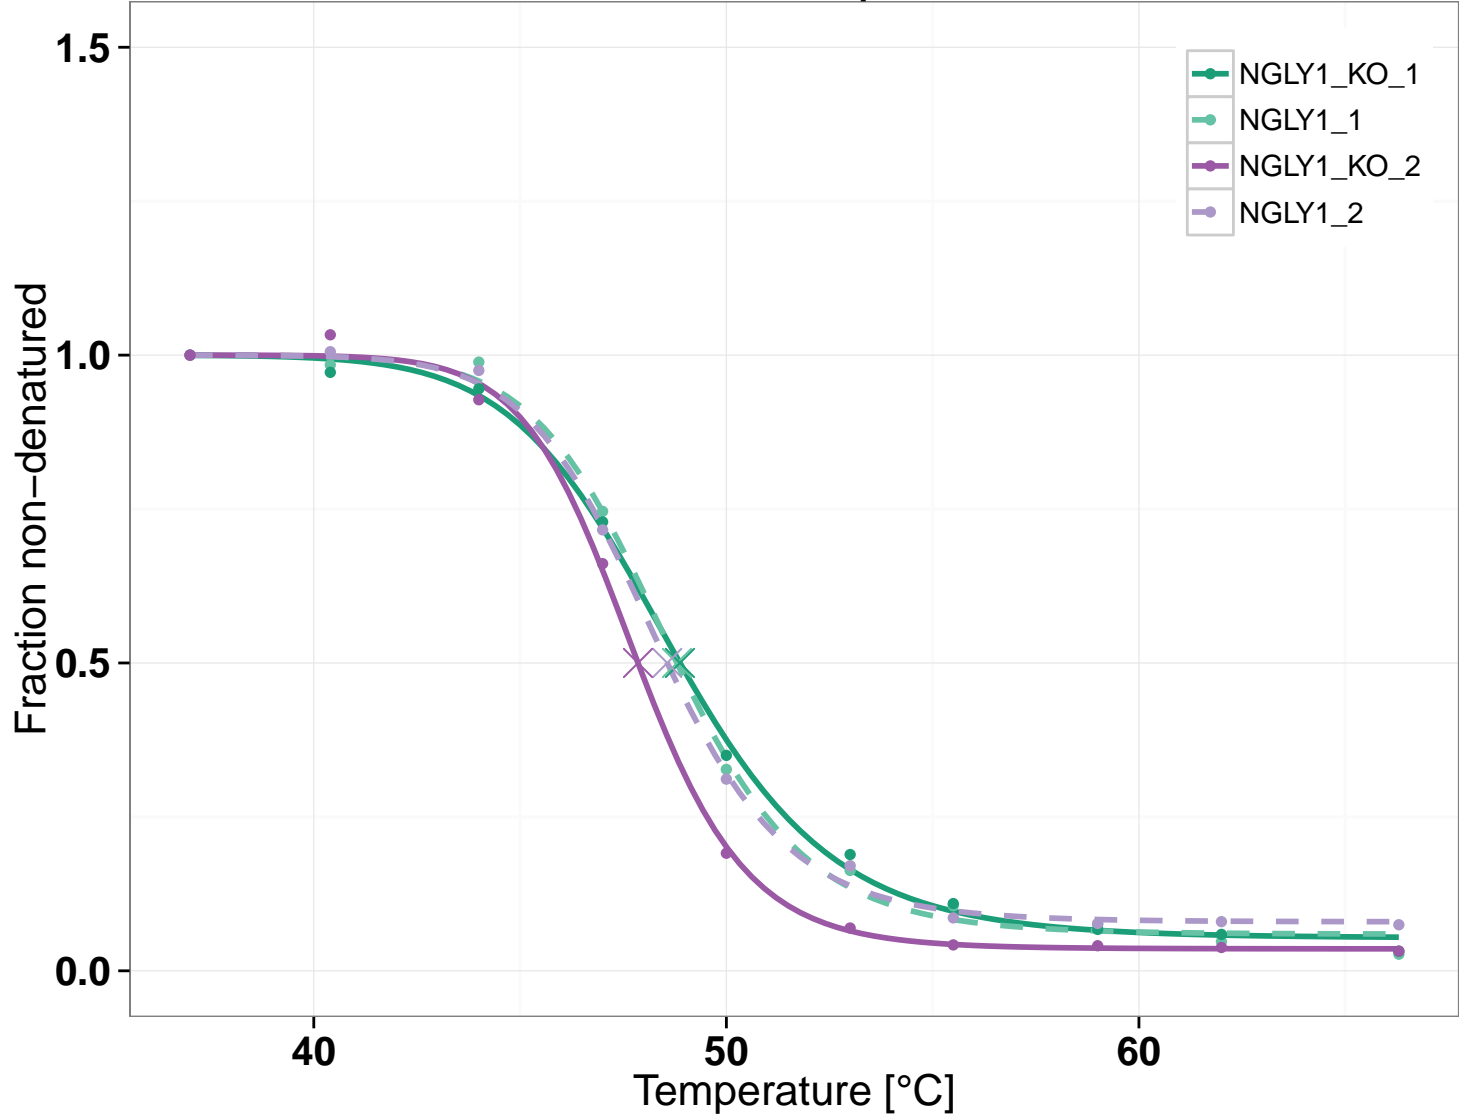

|            | meltPoint | slope | plateau | R2 |
|------------|-----------|-------|---------|----|
| NGLY1_KO_1 | 48.88     | -0.12 | 0.05    | 1  |
| NGLY1_1    | 48.8      | -0.14 | 0.06    | 1  |
| NGLY1_KO_2 | 47.86     | -0.18 | 0.04    | 1  |
| NGLY1_2    | 48.57     | -0.14 | 0.08    | 1  |

Supplement: Supplementary file 3115 [file 1]

# IPI00013232.1||KZF1

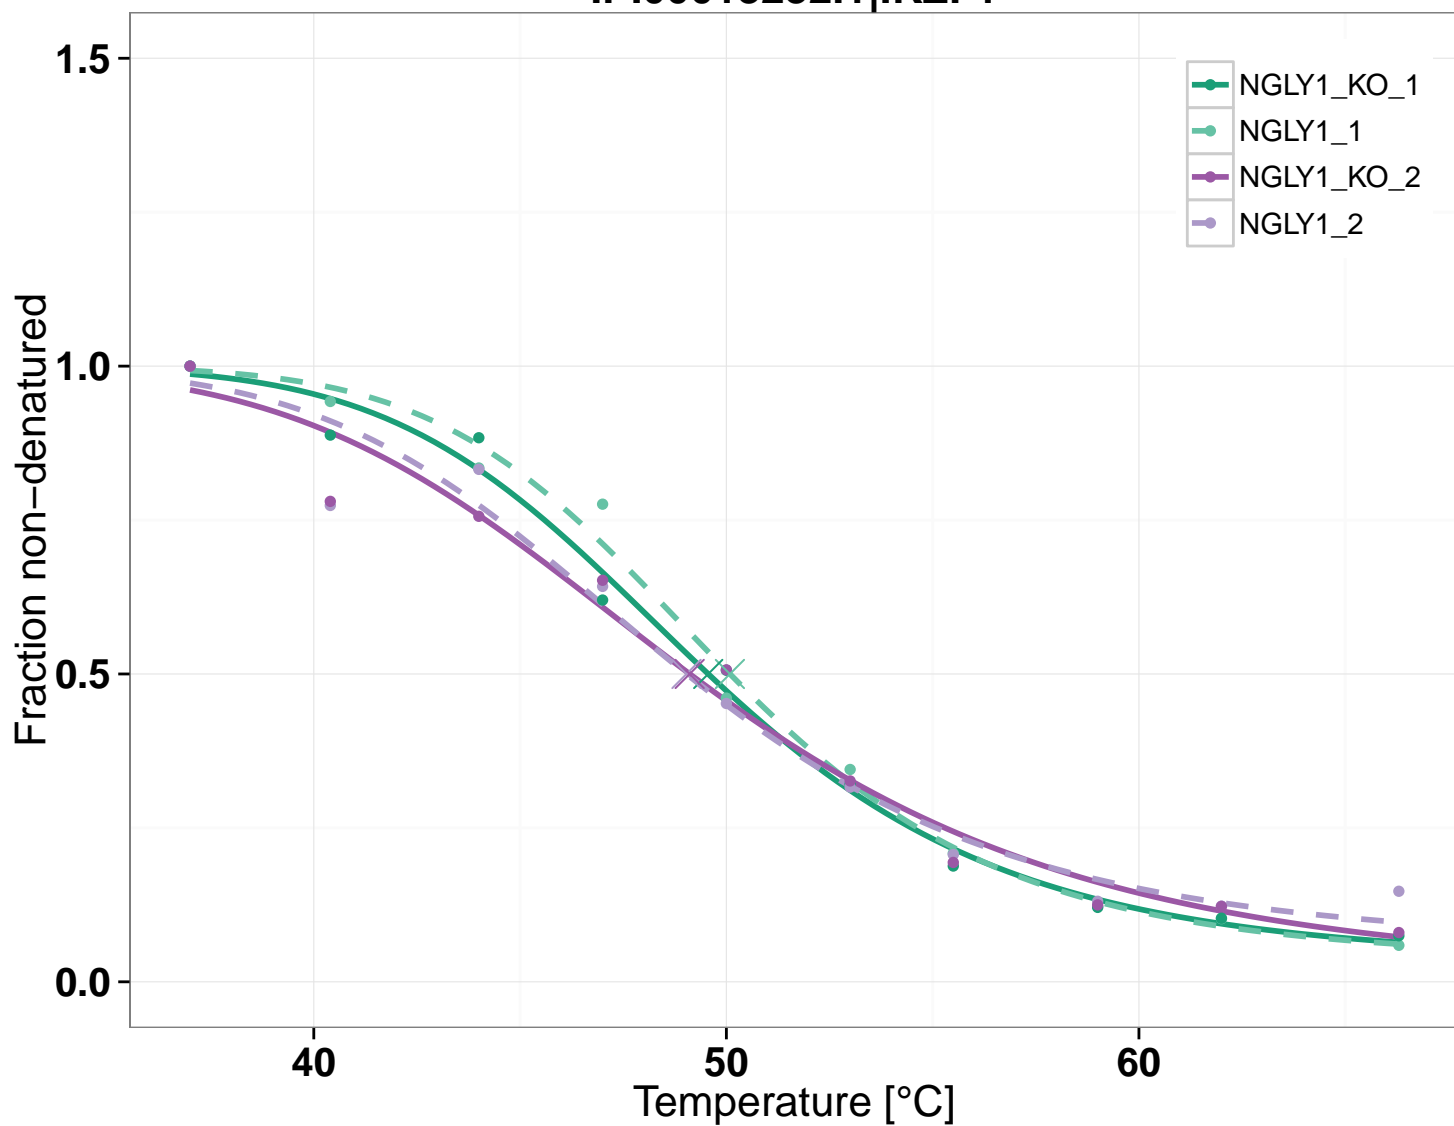

|            | meltPoint | slope  | plateau | R2   |
|------------|-----------|--------|---------|------|
| NGLY1_KO_1 | 49.56     | -0.065 | 0.03    | 0.99 |
| NGLY1_1    | 50.09     | -0.07  | 0.03    | 0.99 |
| NGLY1_KO_2 | 49.11     | -0.052 | 0       | 0.98 |
| NGLY1_2    | 49.03     | -0.057 | 0.05    | 0.97 |

Supplement: Supplementary file 3116 [file 1]

# IPI00410344.3|PLK4

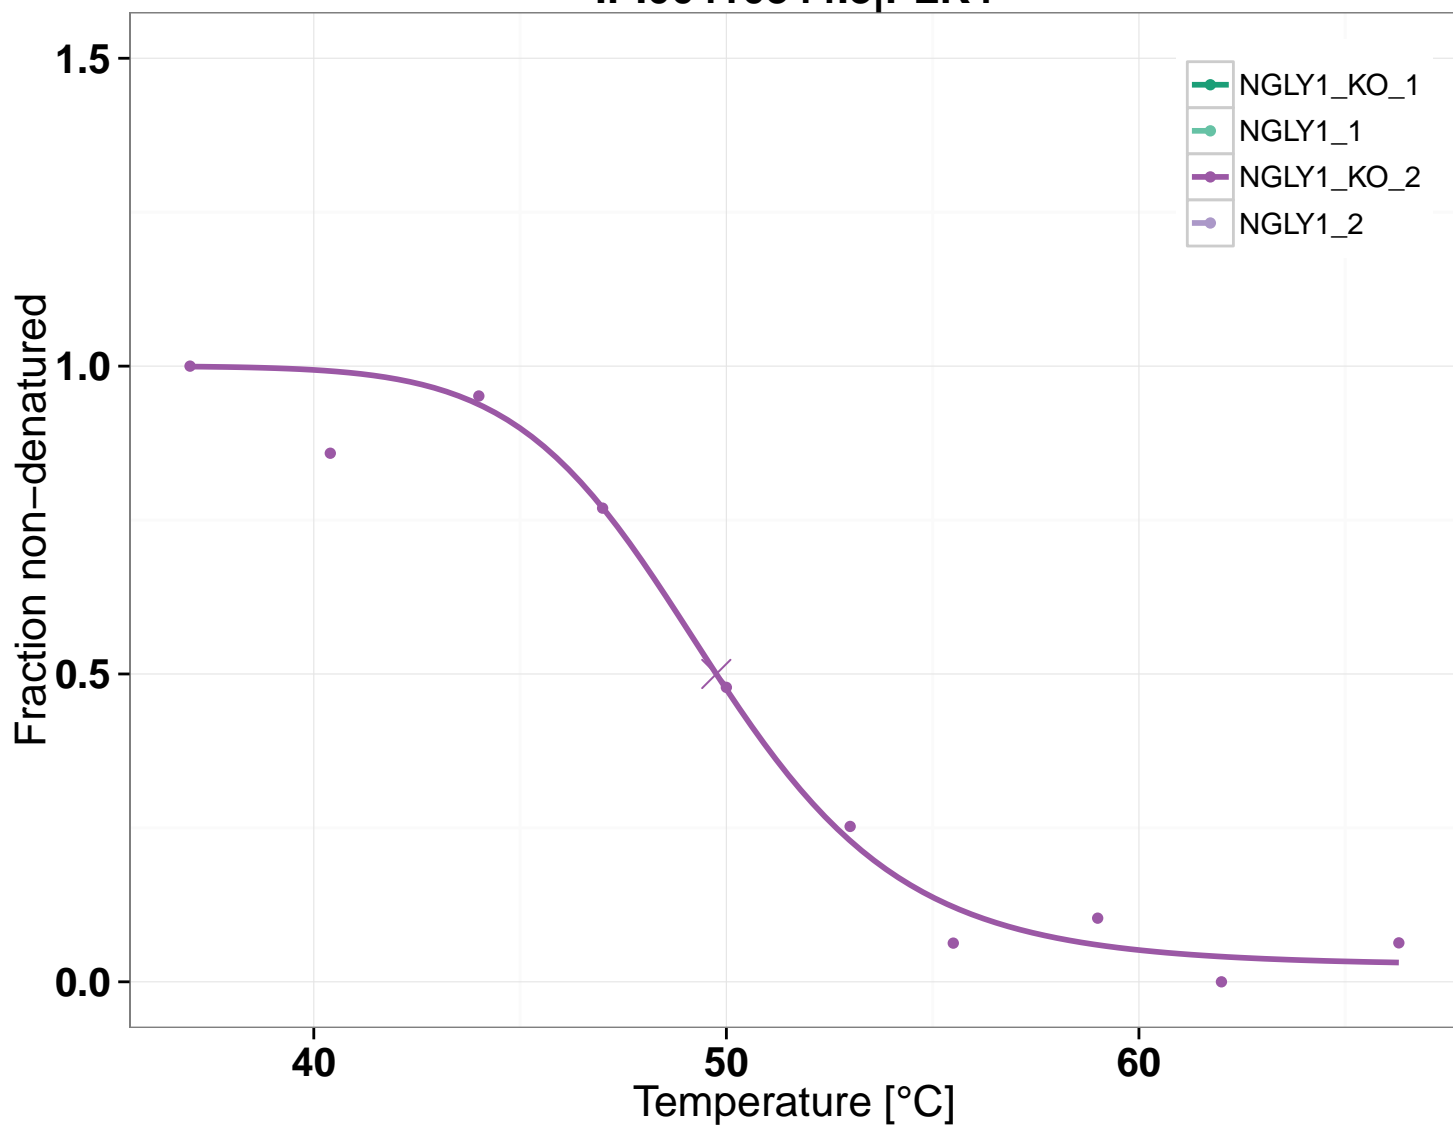

|            | meltPoint | slope | plateau | R2   |
|------------|-----------|-------|---------|------|
| NGLY1_KO_1 | —         | —     | —       | —    |
| NGLY1_1    | —         | —     | —       | —    |
| NGLY1_KO_2 | 49.76     | -0.1  | 0.03    | 0.98 |
| NGLY1_2    | —         | —     | —       | —    |

Supplement: Supplementary file 3117 [file 1]

IPI00828021.2|HSPA4L

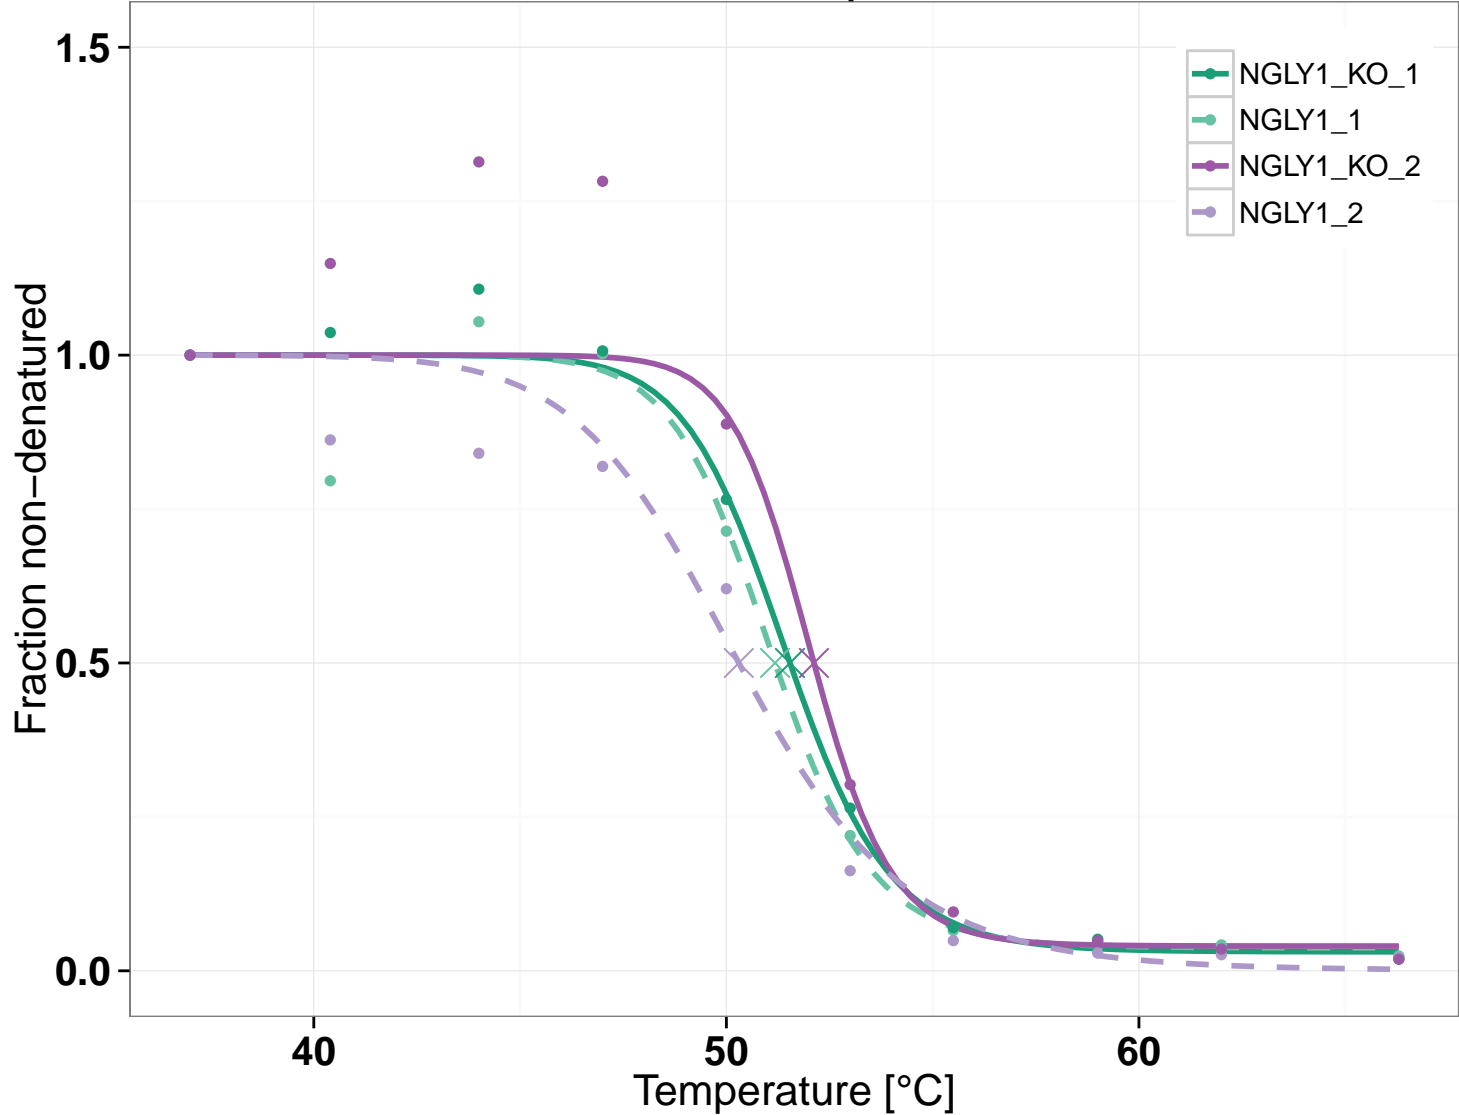

|            | meltPoint | slope | plateau | R2   |
|------------|-----------|-------|---------|------|
| NGLY1_KO_1 | 51.54     | -0.19 | 0.03    | 0.99 |
| NGLY1_1    | 51.18     | -0.2  | 0.04    | 0.98 |
| NGLY1_KO_2 | 52.12     | -0.25 | 0.04    | 0.93 |
| NGLY1_2    | 50.3      | -0.12 | 0       | 0.97 |

Supplement: Supplementary file 3118 [file 1]

# IPI00027505.2|ITGAV

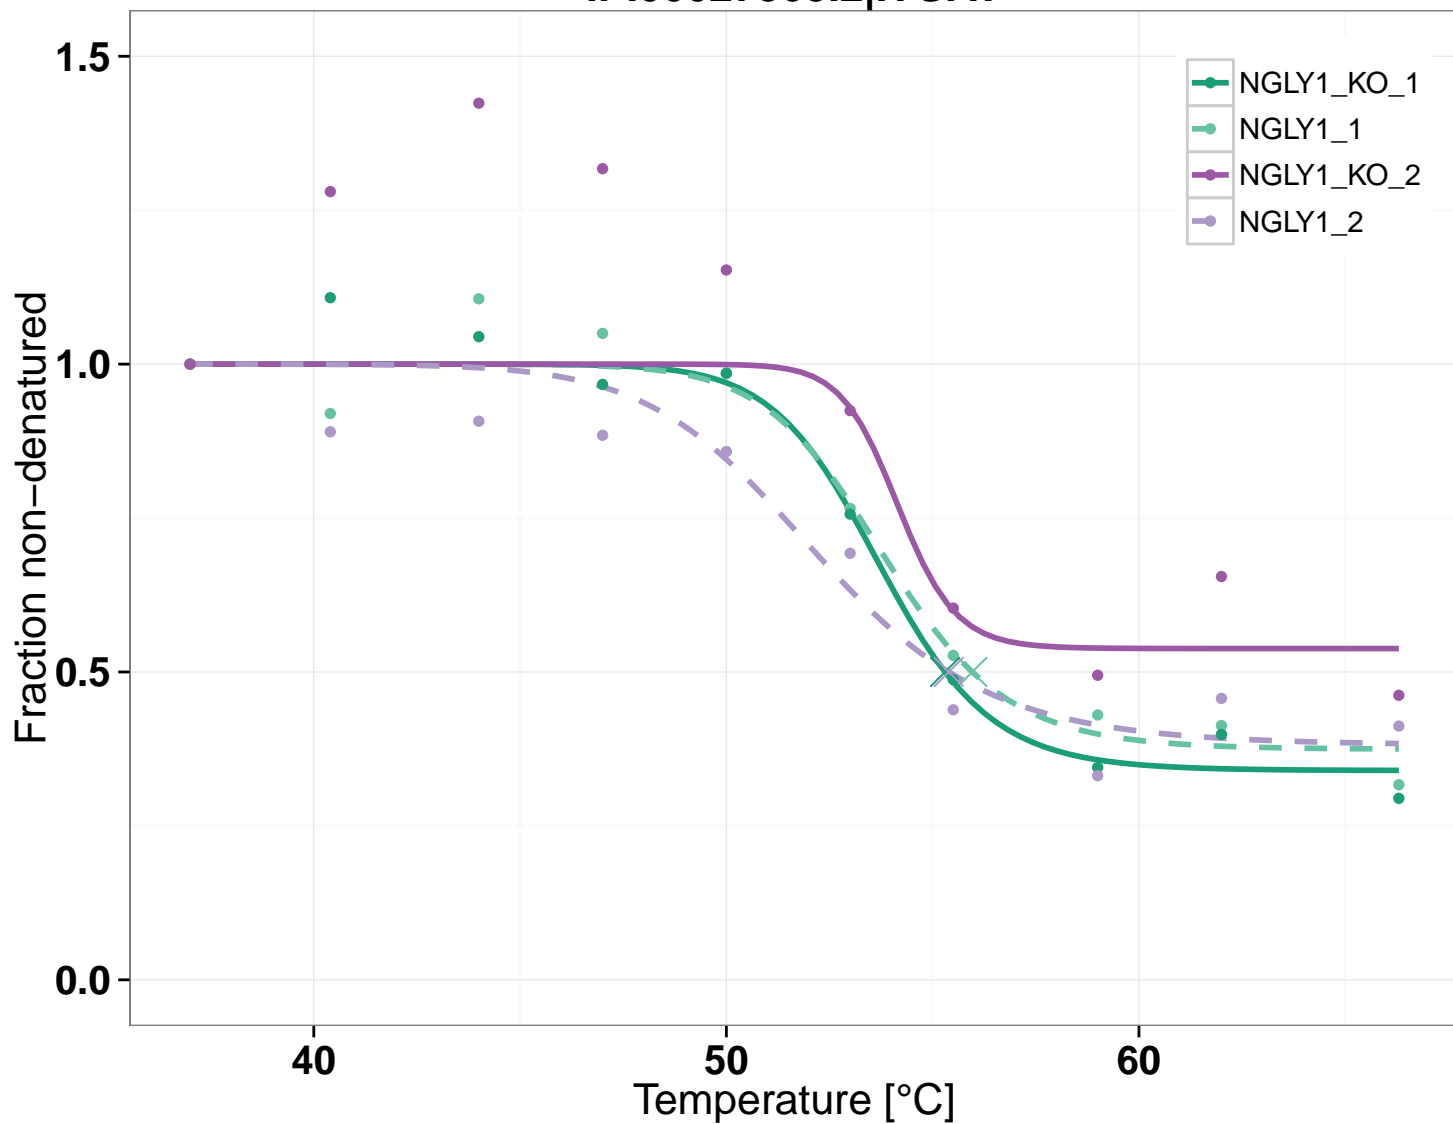

|            | meltPoint | slope  | plateau | R2   |
|------------|-----------|--------|---------|------|
| NGLY1_KO_1 | 55.3      | -0.12  | 0.34    | 0.98 |
| NGLY1_1    | 55.96     | -0.11  | 0.37    | 0.97 |
| NGLY1_KO_2 | -         | -0.17  | 0.54    | 0.65 |
| NGLY1_2    | 55.39     | -0.074 | 0.38    | 0.92 |

Supplement: Supplementary file 3119 [file 1]

IPI00657642.1|CCDC75

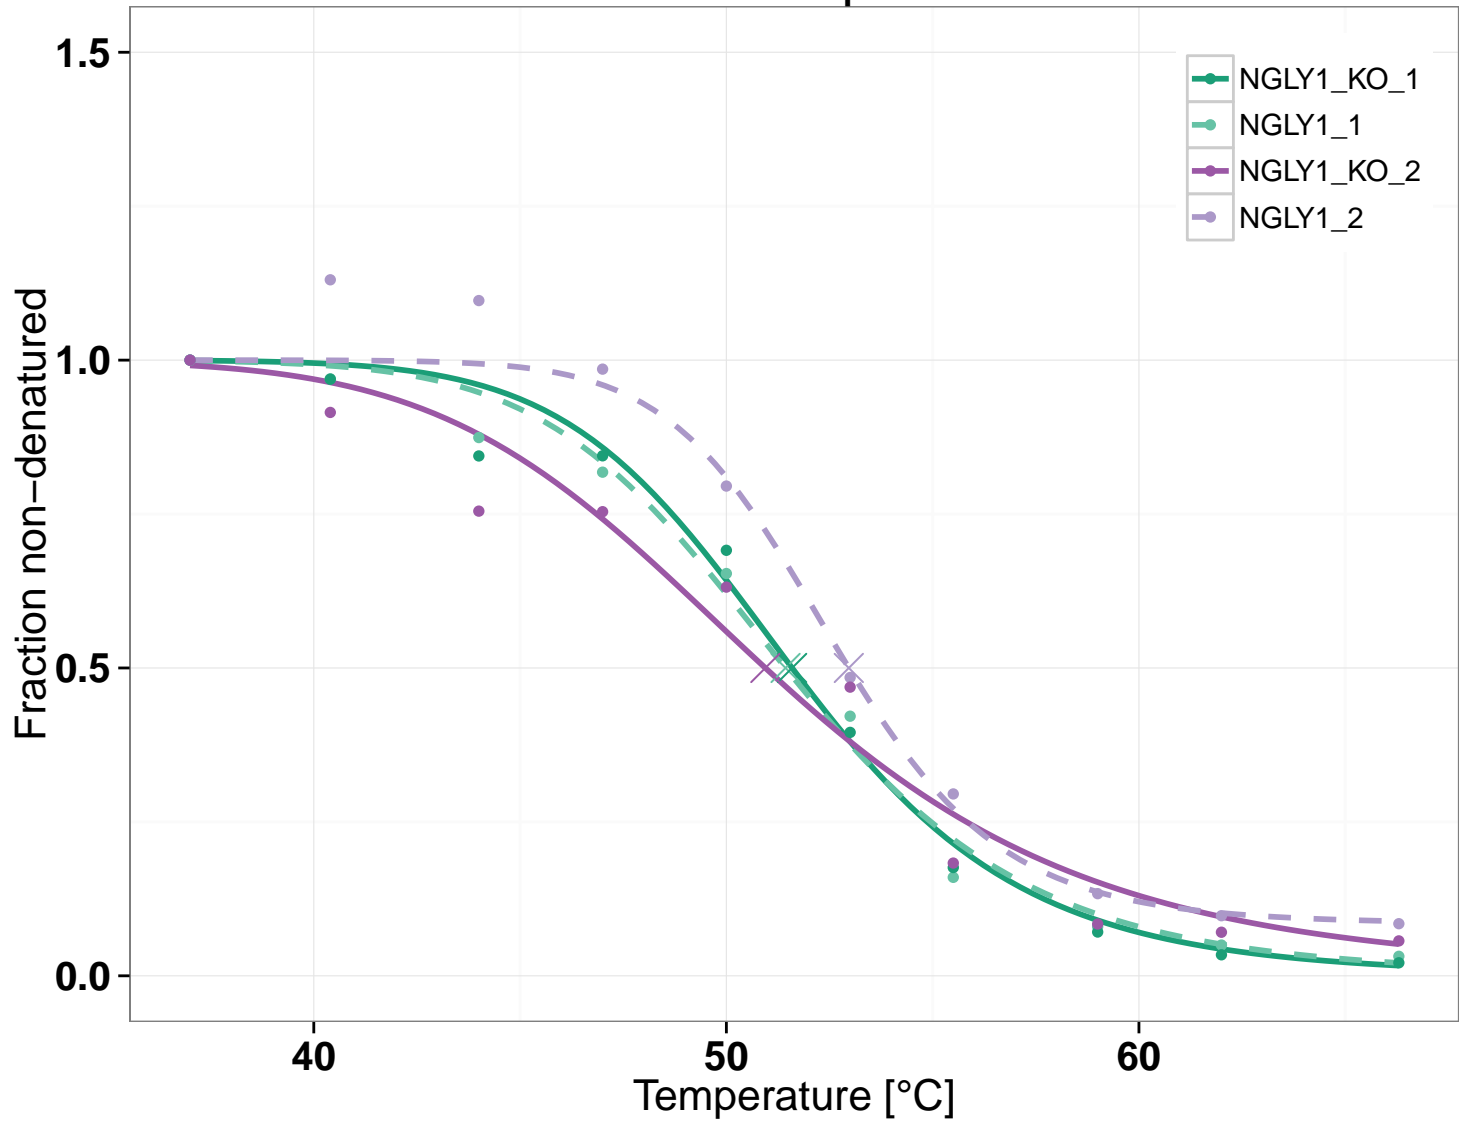

|            | meltPoint | slope  | plateau | R2   |
|------------|-----------|--------|---------|------|
| NGLY1_KO_1 | 51.59     | -0.09  | 0       | 0.99 |
| NGLY1_1    | 51.43     | -0.084 | 0       | 0.99 |
| NGLY1_KO_2 | 50.95     | -0.063 | 0       | 0.97 |
| NGLY1_2    | 52.97     | -0.11  | 0.08    | 0.98 |

Supplement: Supplementary file 3120 [file 1]

# IPI00886929.1|LOC100131813

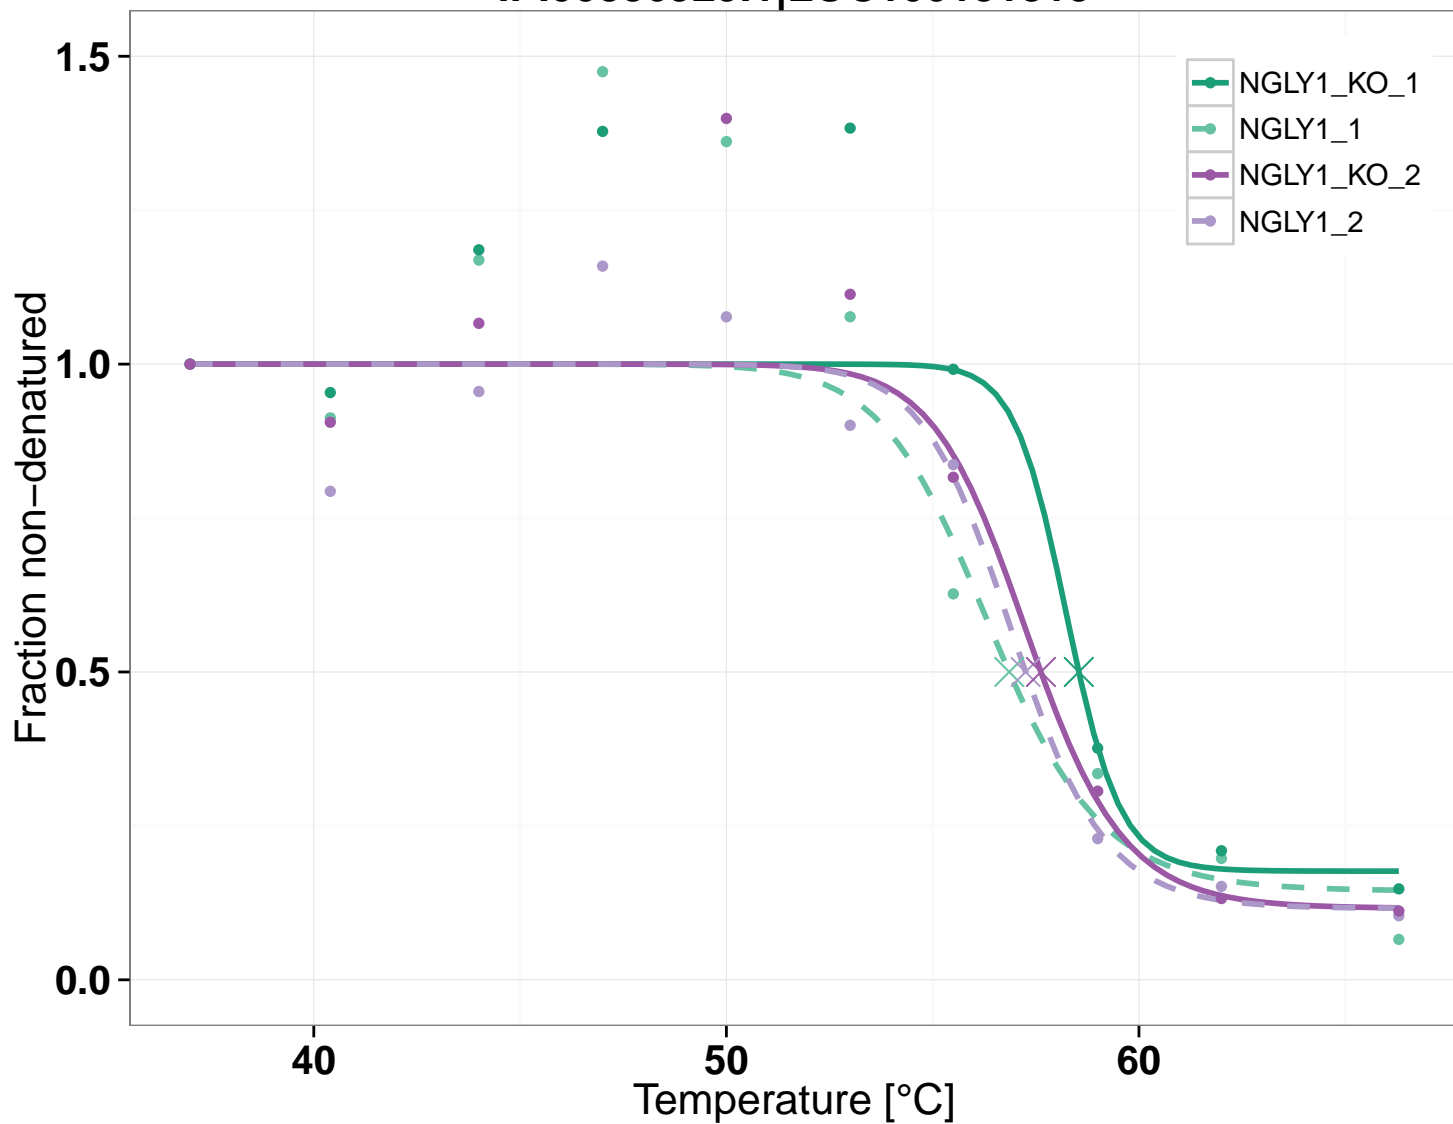

|            | meltPoint | slope | plateau | R2   |
|------------|-----------|-------|---------|------|
| NGLY1_KO_1 | 58.54     | -0.32 | 0.18    | 0.73 |
| NGLY1_1    | 56.86     | -0.16 | 0.14    | 0.8  |
| NGLY1_KO_2 | 57.62     | -0.19 | 0.12    | 0.79 |
| NGLY1_2    | 57.25     | -0.2  | 0.12    | 0.94 |

Supplement: Supplementary file 3121 [file 1]

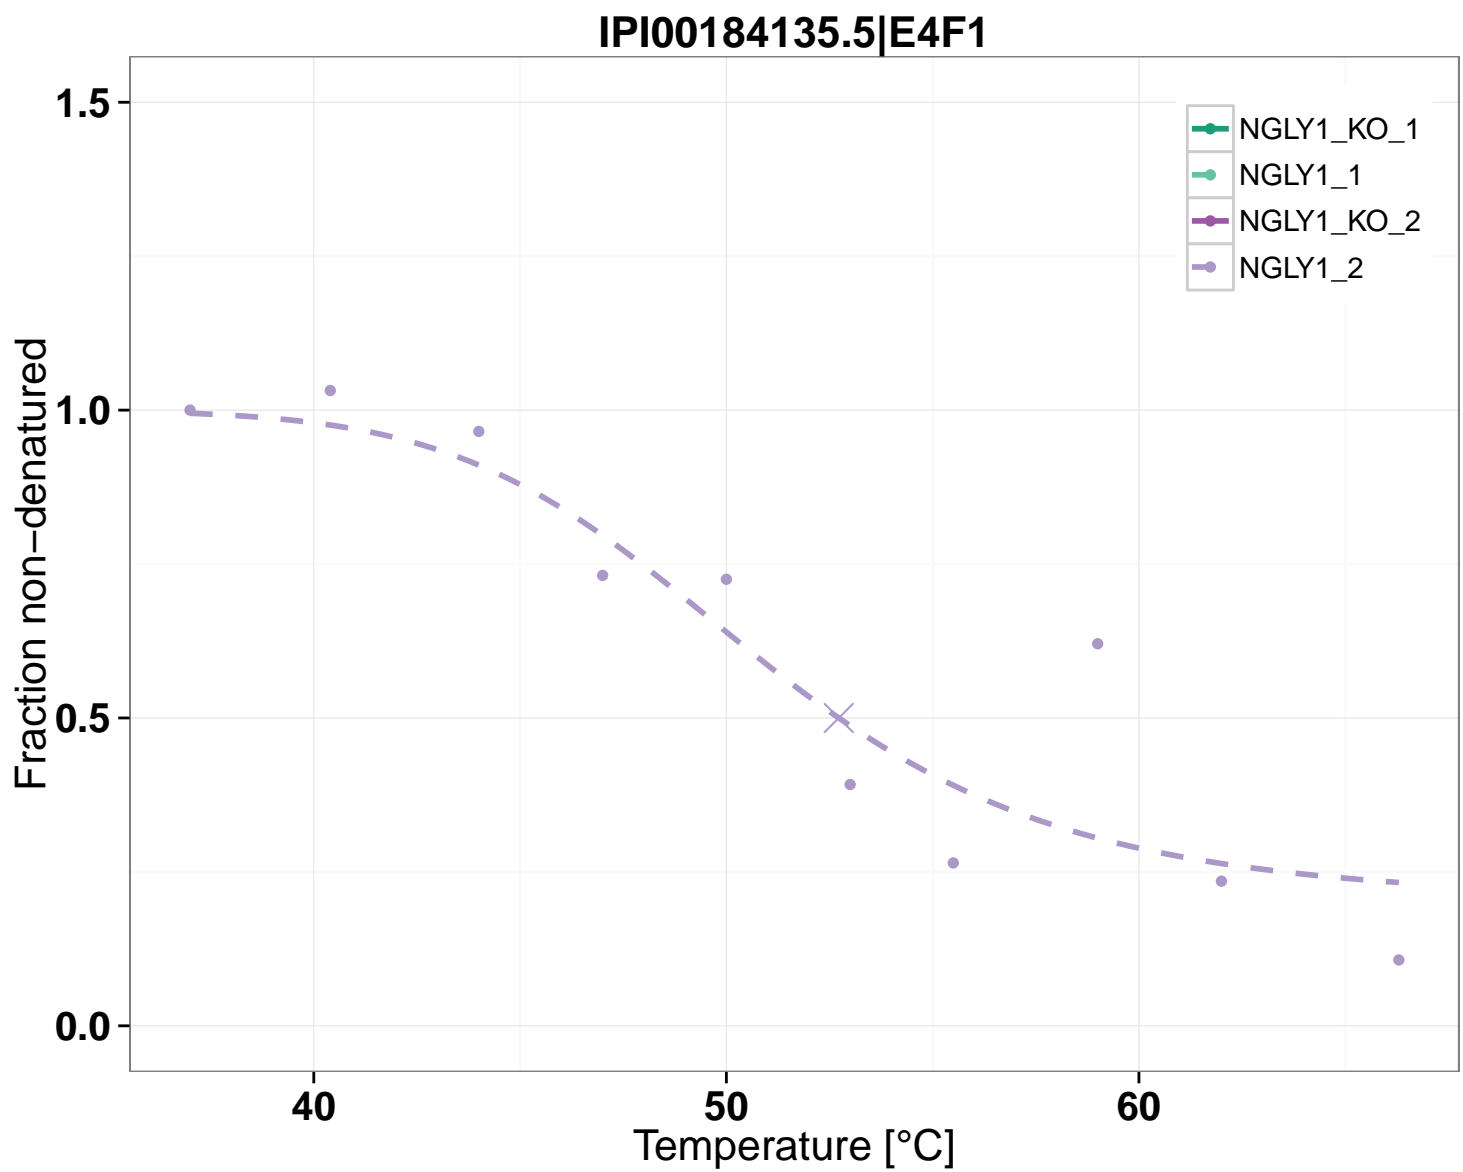

|            | meltPoint | slope  | plateau | R2   |
|------------|-----------|--------|---------|------|
| NGLY1_KO_1 | —         | —      | —       | —    |
| NGLY1_1    | —         | —      | —       | —    |
| NGLY1_KO_2 | —         | —      | —       | —    |
| NGLY1_2    | 52.72     | −0.055 | 0.2     | 0.85 |

Supplement: Supplementary file 3122 [file 1]

# IPI00003369.1|LIMD1

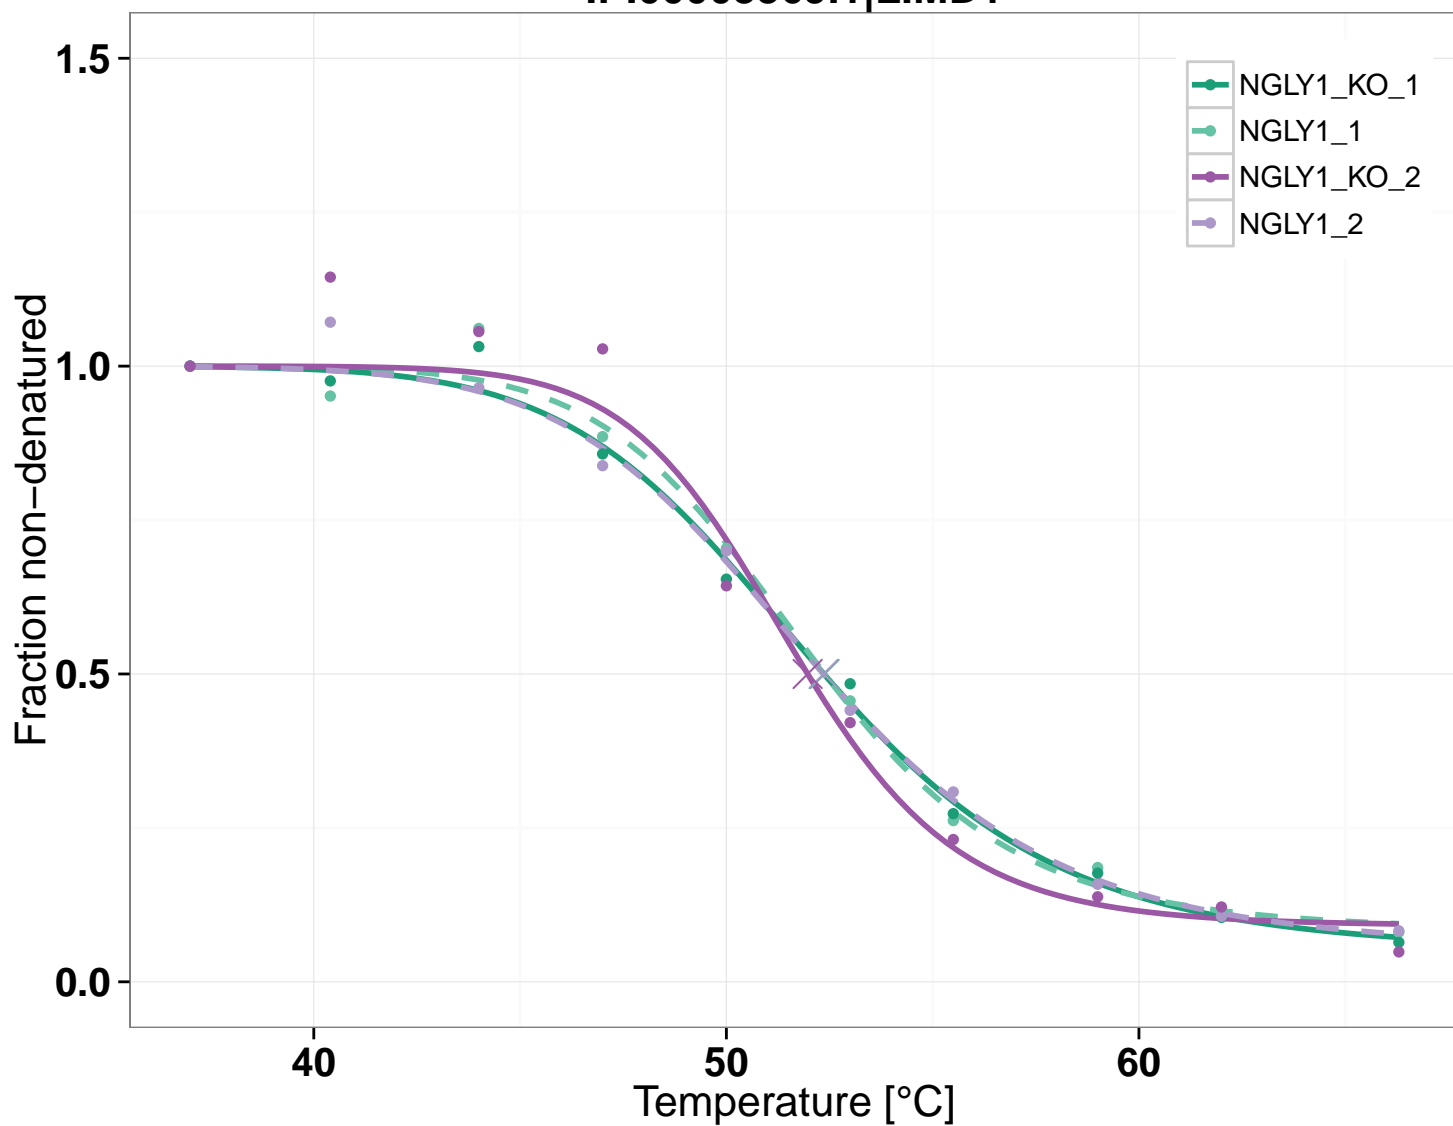

|            | meltPoint | slope  | plateau | R2   |
|------------|-----------|--------|---------|------|
| NGLY1_KO_1 | 52.36     | -0.079 | 0.05    | 0.99 |
| NGLY1_1    | 52.38     | -0.091 | 0.08    | 0.99 |
| NGLY1_KO_2 | 51.97     | -0.11  | 0.09    | 0.97 |
| NGLY1_2    | 52.36     | -0.078 | 0.05    | 0.99 |

Supplement: Supplementary file 3123 [file 1]

IPI00007068.1|ACTR3B

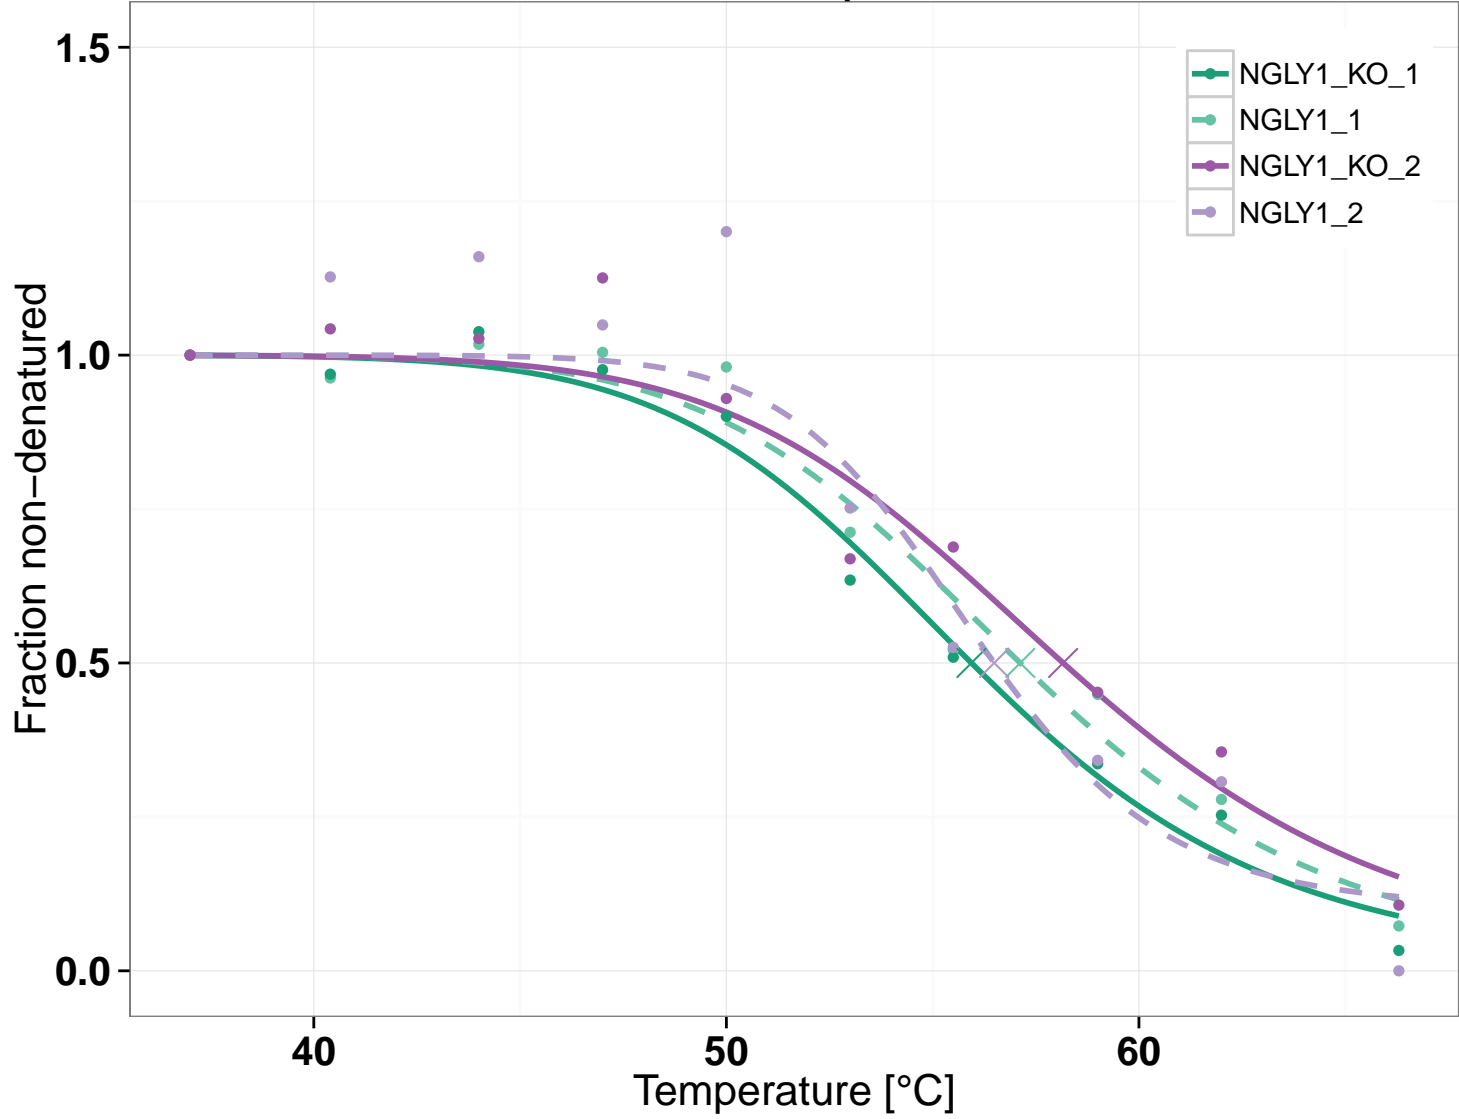

|            | meltPoint | slope  | plateau | R2   |
|------------|-----------|--------|---------|------|
| NGLY1_KO_1 | 55.94     | -0.068 | 0       | 0.98 |
| NGLY1_1    | 57.12     | -0.066 | 0       | 0.97 |
| NGLY1_KO_2 | 58.16     | -0.061 | 0       | 0.95 |
| NGLY1_2    | 56.49     | -0.098 | 0.1     | 0.91 |

Supplement: Supplementary file 3124 [file 1]

# IPI00410544.4|UXS1

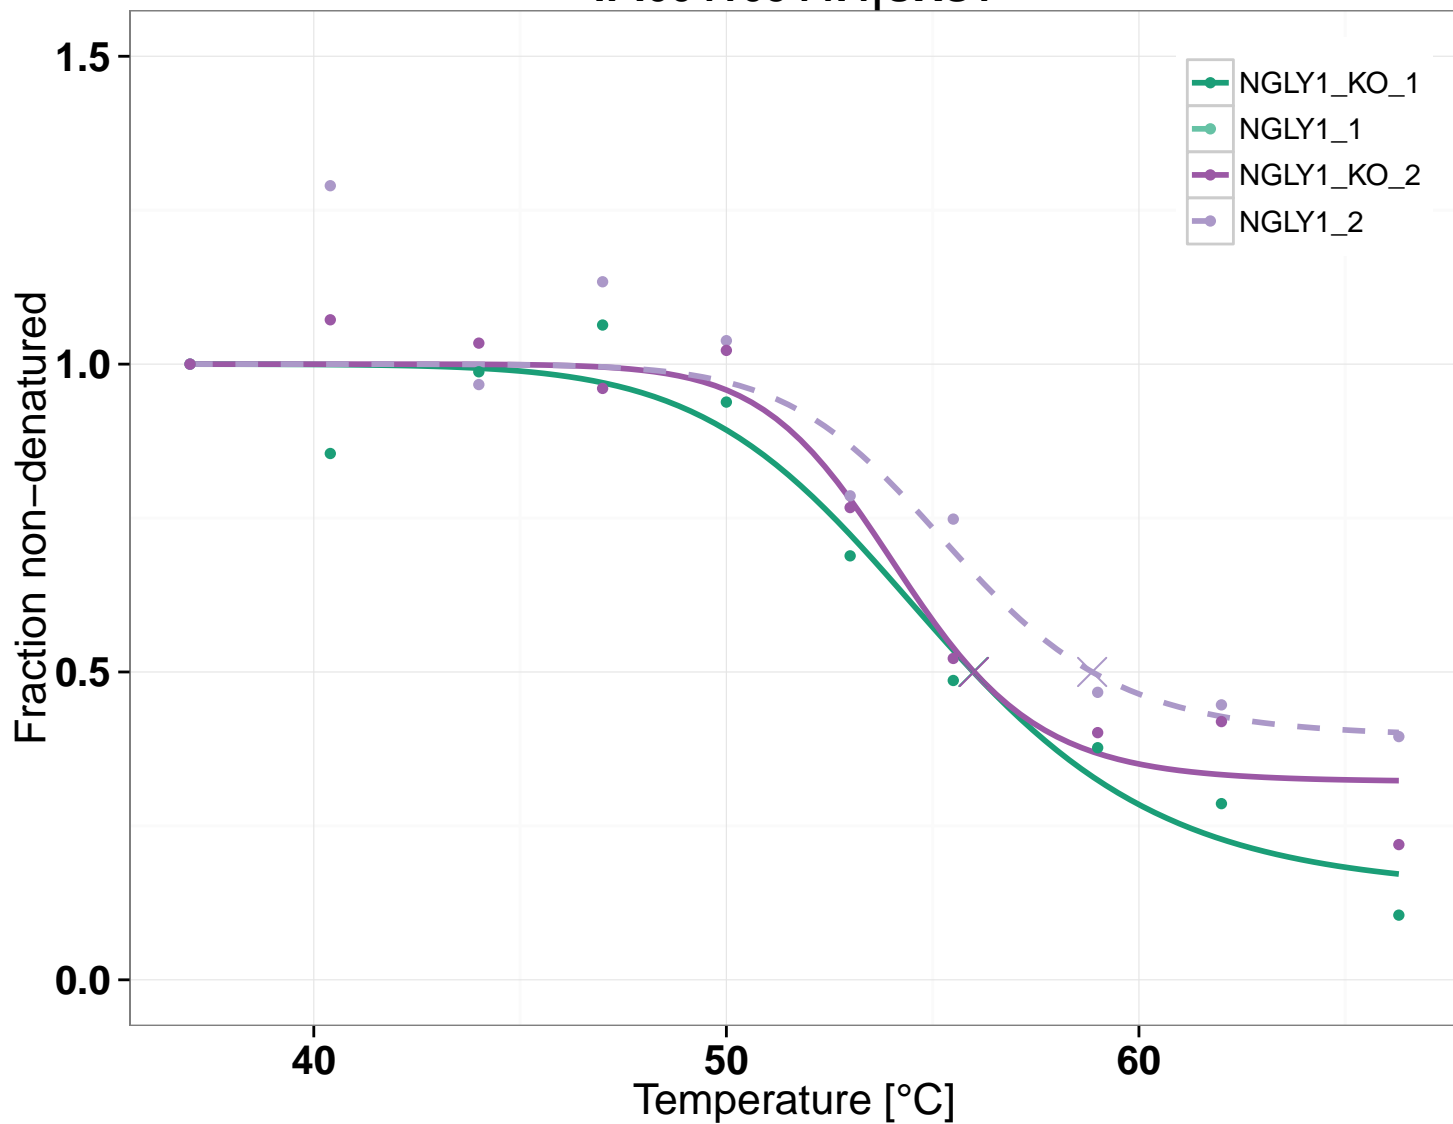

|            | meltPoint | slope  | plateau | R2   |
|------------|-----------|--------|---------|------|
| NGLY1_KO_1 | 55.99     | -0.076 | 0.14    | 0.96 |
| NGLY1_1    | —         | —      | —       | —    |
| NGLY1_KO_2 | 56        | -0.1   | 0.32    | 0.97 |
| NGLY1_2    | 58.87     | -0.074 | 0.39    | 0.86 |

Supplement: Supplementary file 3125 [file 1]

# IPI00418262.4|ALDOC

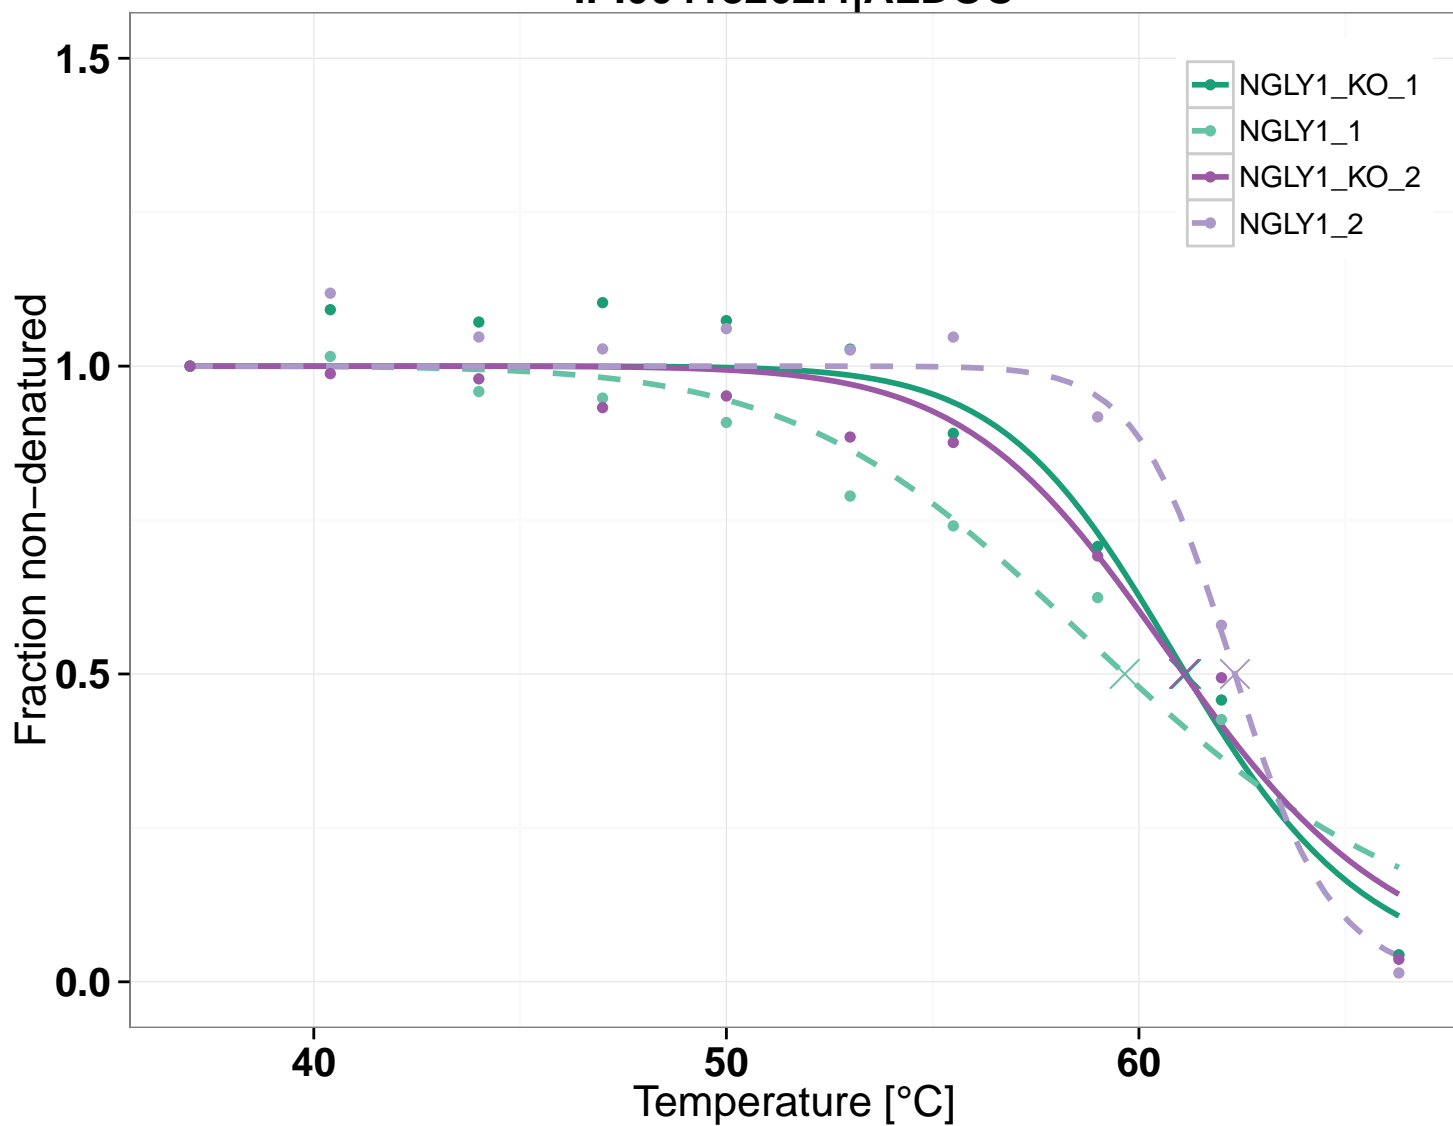

|            | meltPoint | slope  | plateau | R2   |
|------------|-----------|--------|---------|------|
| NGLY1_KO_1 | 61.14     | -0.11  | 0       | 0.96 |
| NGLY1_1    | 59.66     | -0.063 | 0       | 0.95 |
| NGLY1_KO_2 | 61.09     | -0.094 | 0       | 0.96 |
| NGLY1_2    | 62.33     | -0.21  | 0       | 0.98 |

Supplement: Supplementary file 3126 [file 1]

IPI00001710.3|C11ORF2

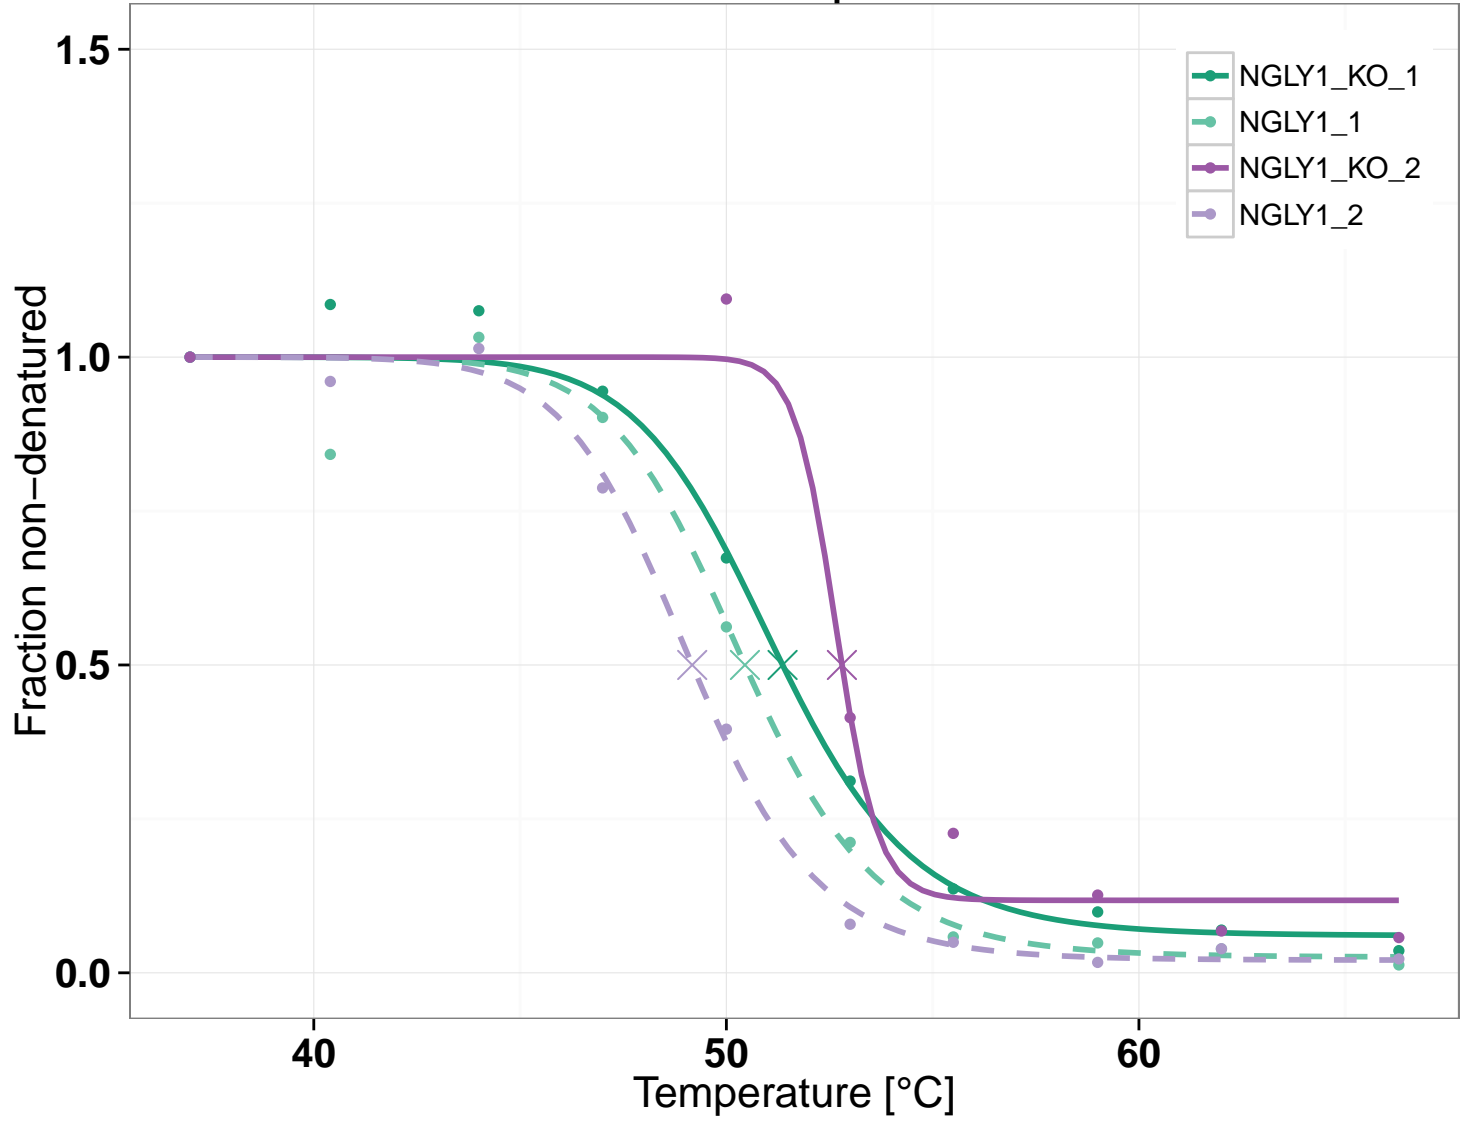

|            | meltPoint | slope | plateau | R2   |
|------------|-----------|-------|---------|------|
| NGLY1_KO_1 | 51.36     | -0.14 | 0.06    | 0.99 |
| NGLY1_1    | 50.45     | -0.15 | 0.03    | 0.98 |
| NGLY1_KO_2 | 52.8      | -0.44 | 0.12    | 0.67 |
| NGLY1_2    | 49.17     | -0.16 | 0.02    | 1    |

Supplement: Supplementary file 3127 [file 1]

IPI00029219.1|ACVR1

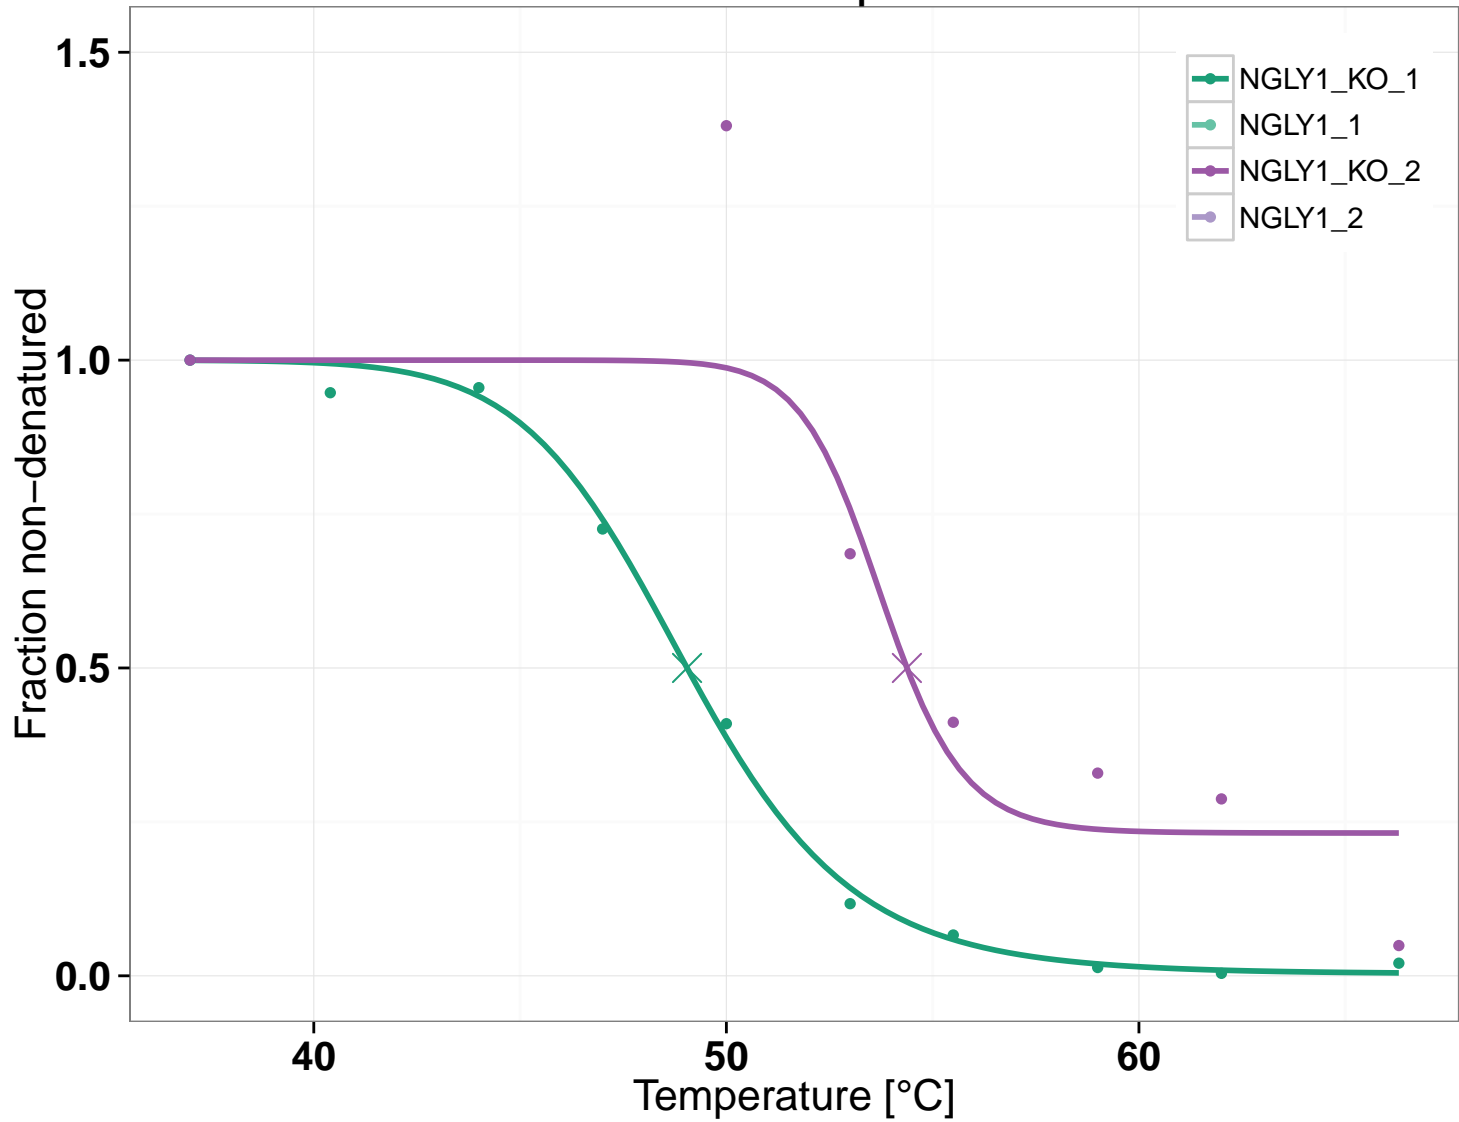

|            | meltPoint | slope | plateau | R2   |
|------------|-----------|-------|---------|------|
| NGLY1_KO_1 | 49.05     | -0.12 | 0       | 1    |
| NGLY1_1    | -         | -     | -       | -    |
| NGLY1_KO_2 | 54.38     | -0.2  | 0.23    | 0.25 |
| NGLY1_2    | -         | -     | -       | -    |

Supplement: Supplementary file 3128 [file 1]

# IPI00456664.1|NIT1

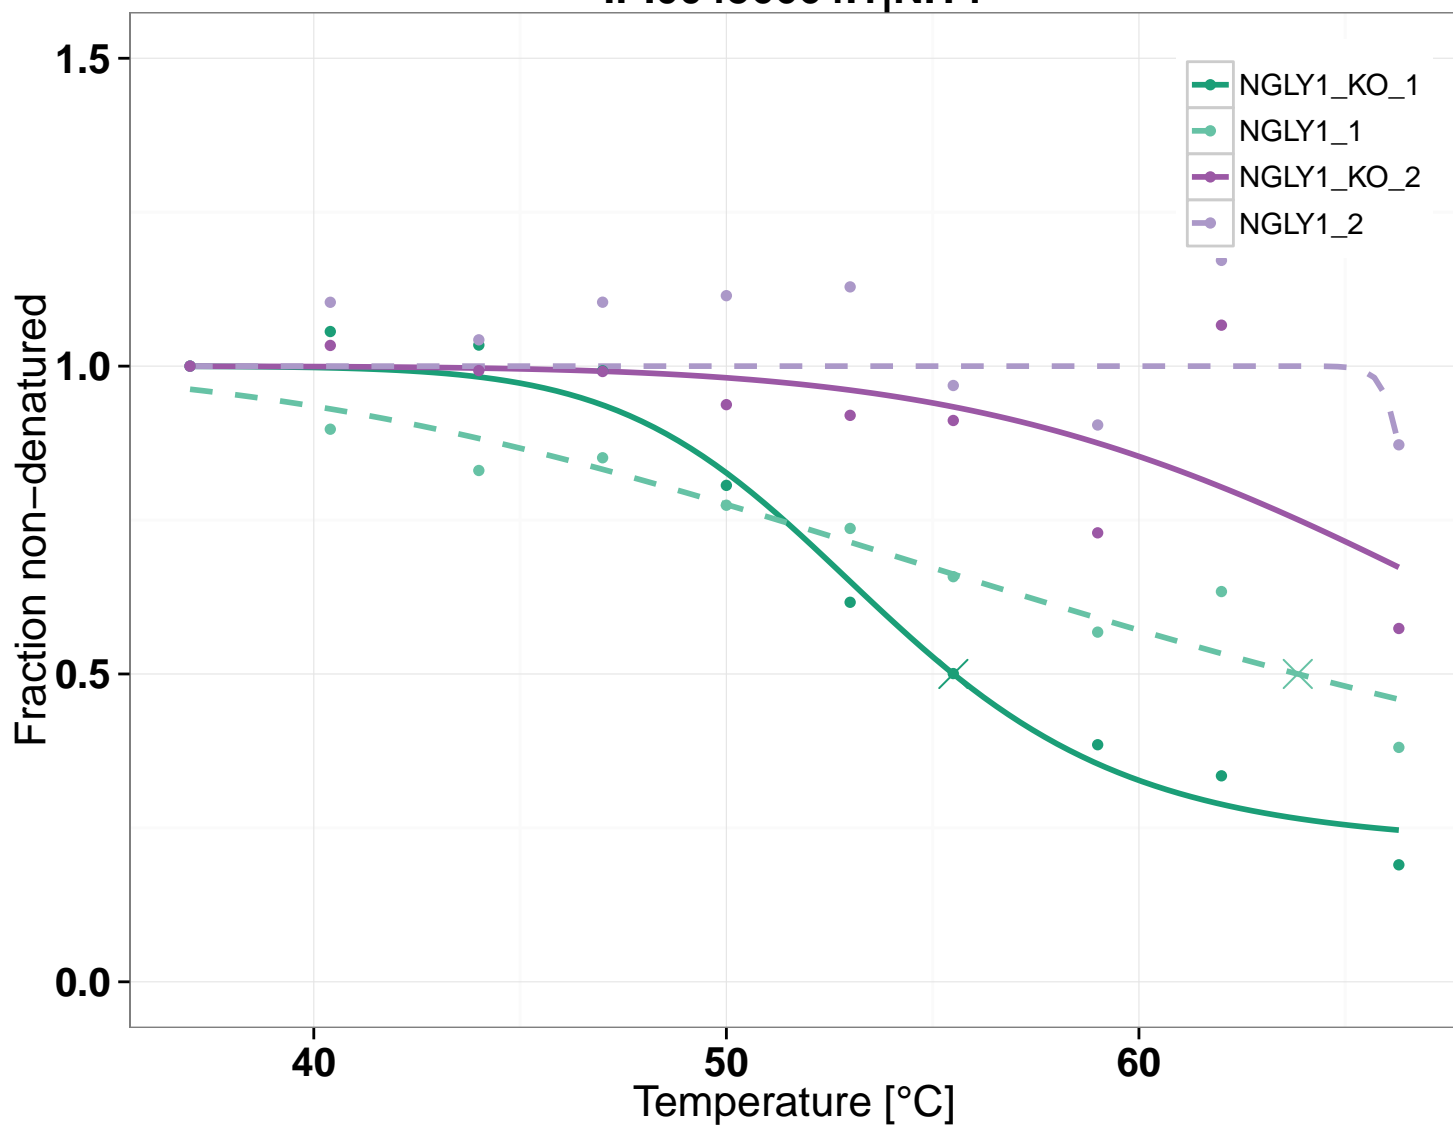

|            | meltPoint | slope  | plateau | R2    |
|------------|-----------|--------|---------|-------|
| NGLY1_KO_1 | 55.5      | -0.063 | 0.22    | 0.98  |
| NGLY1_1    | 63.85     | -0.021 | 0       | 0.92  |
| NGLY1_KO_2 | -         | -      | 0       | 0.49  |
| NGLY1_2    | -         | -      | 0       | -0.01 |

Supplement: Supplementary file 3129 [file 1]

IPI00168631.1|C3ORF58

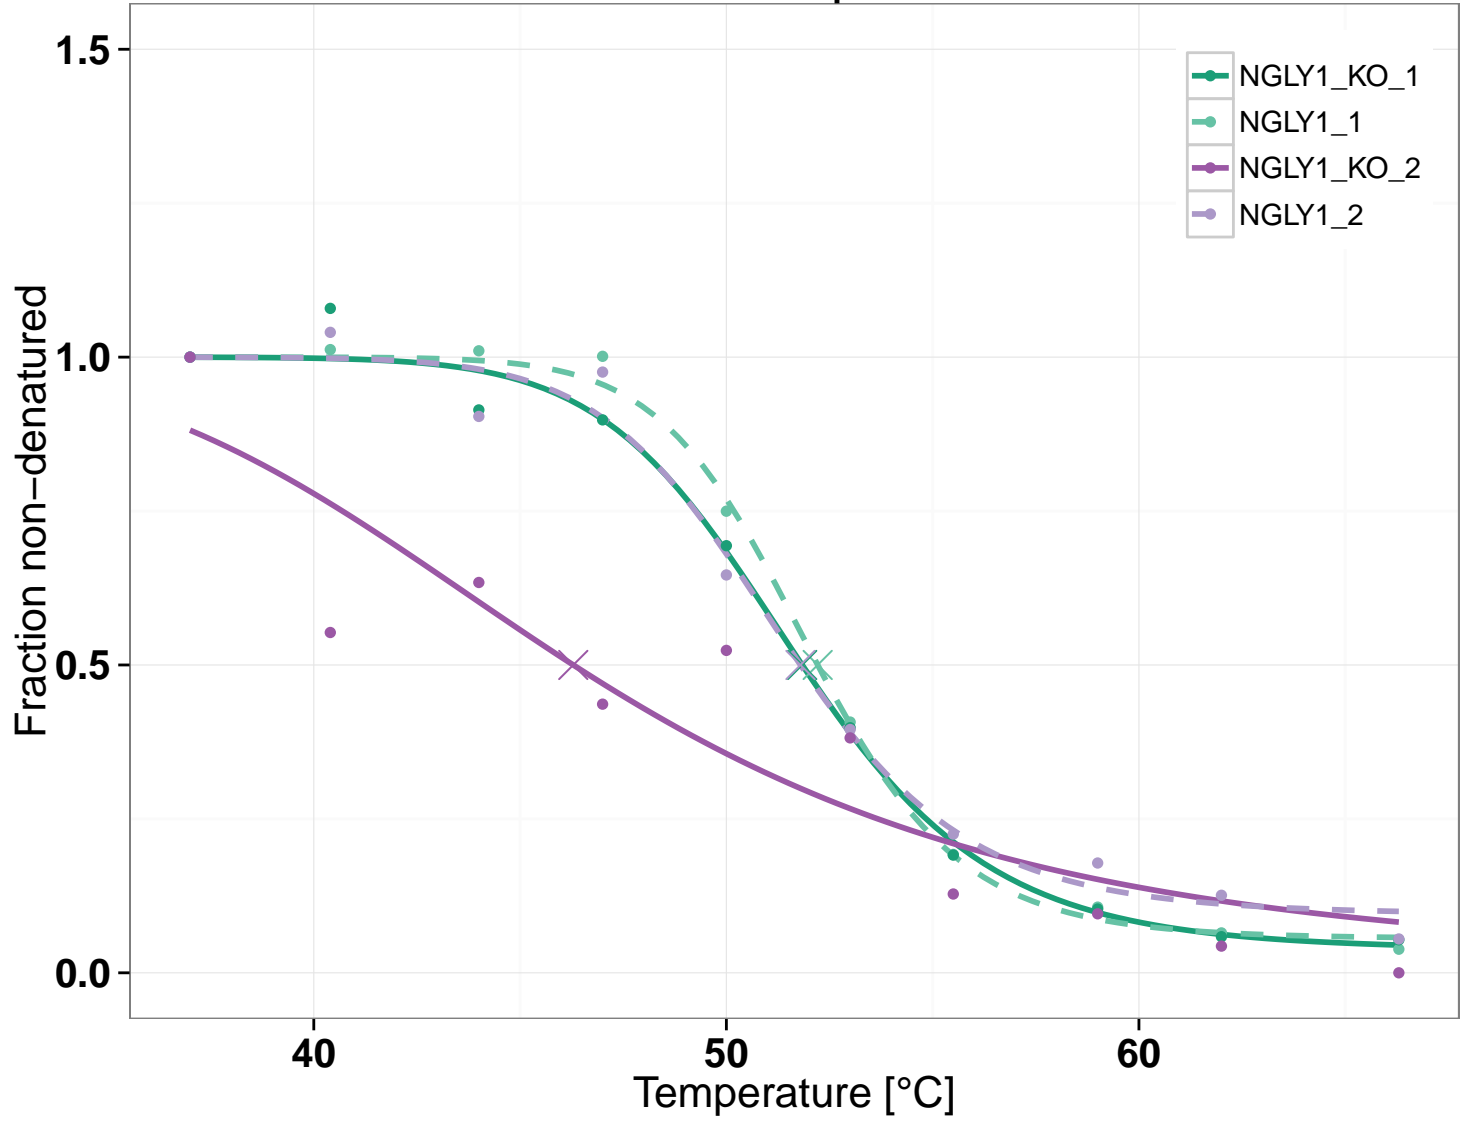

|            | meltPoint | slope  | plateau | R2   |
|------------|-----------|--------|---------|------|
| NGLY1_KO_1 | 51.84     | -0.1   | 0.04    | 0.99 |
| NGLY1_1    | 52.21     | -0.13  | 0.06    | 1    |
| NGLY1_KO_2 | 46.29     | -0.046 | 0       | 0.86 |
| NGLY1_2    | 51.8      | -0.1   | 0.09    | 0.99 |

Supplement: Supplementary file 3130 [file 1]

IPI00006713.1|DNAJC3

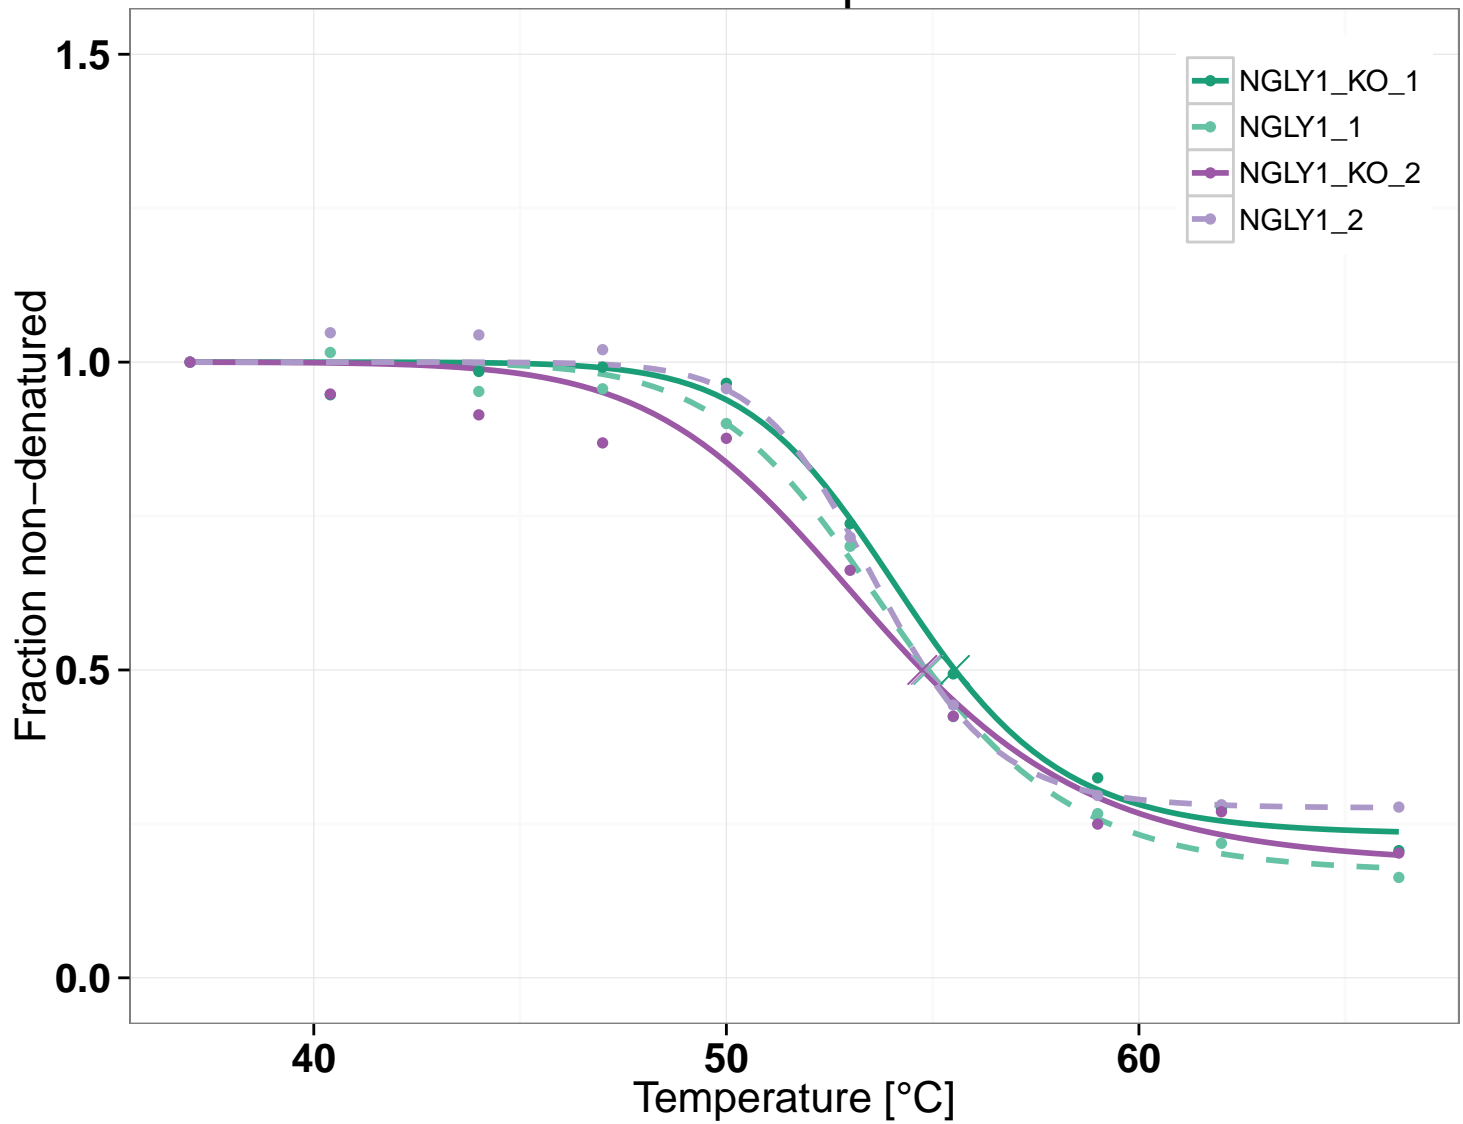

|            | meltPoint | slope  | plateau | R2   |
|------------|-----------|--------|---------|------|
| NGLY1_KO_1 | 55.54     | -0.1   | 0.23    | 0.99 |
| NGLY1_1    | 54.9      | -0.097 | 0.17    | 1    |
| NGLY1_KO_2 | 54.75     | -0.077 | 0.18    | 0.98 |
| NGLY1_2    | 54.83     | -0.13  | 0.28    | 1    |

Supplement: Supplementary file 3131 [file 1]

IPI00828081.1|CAMK2D

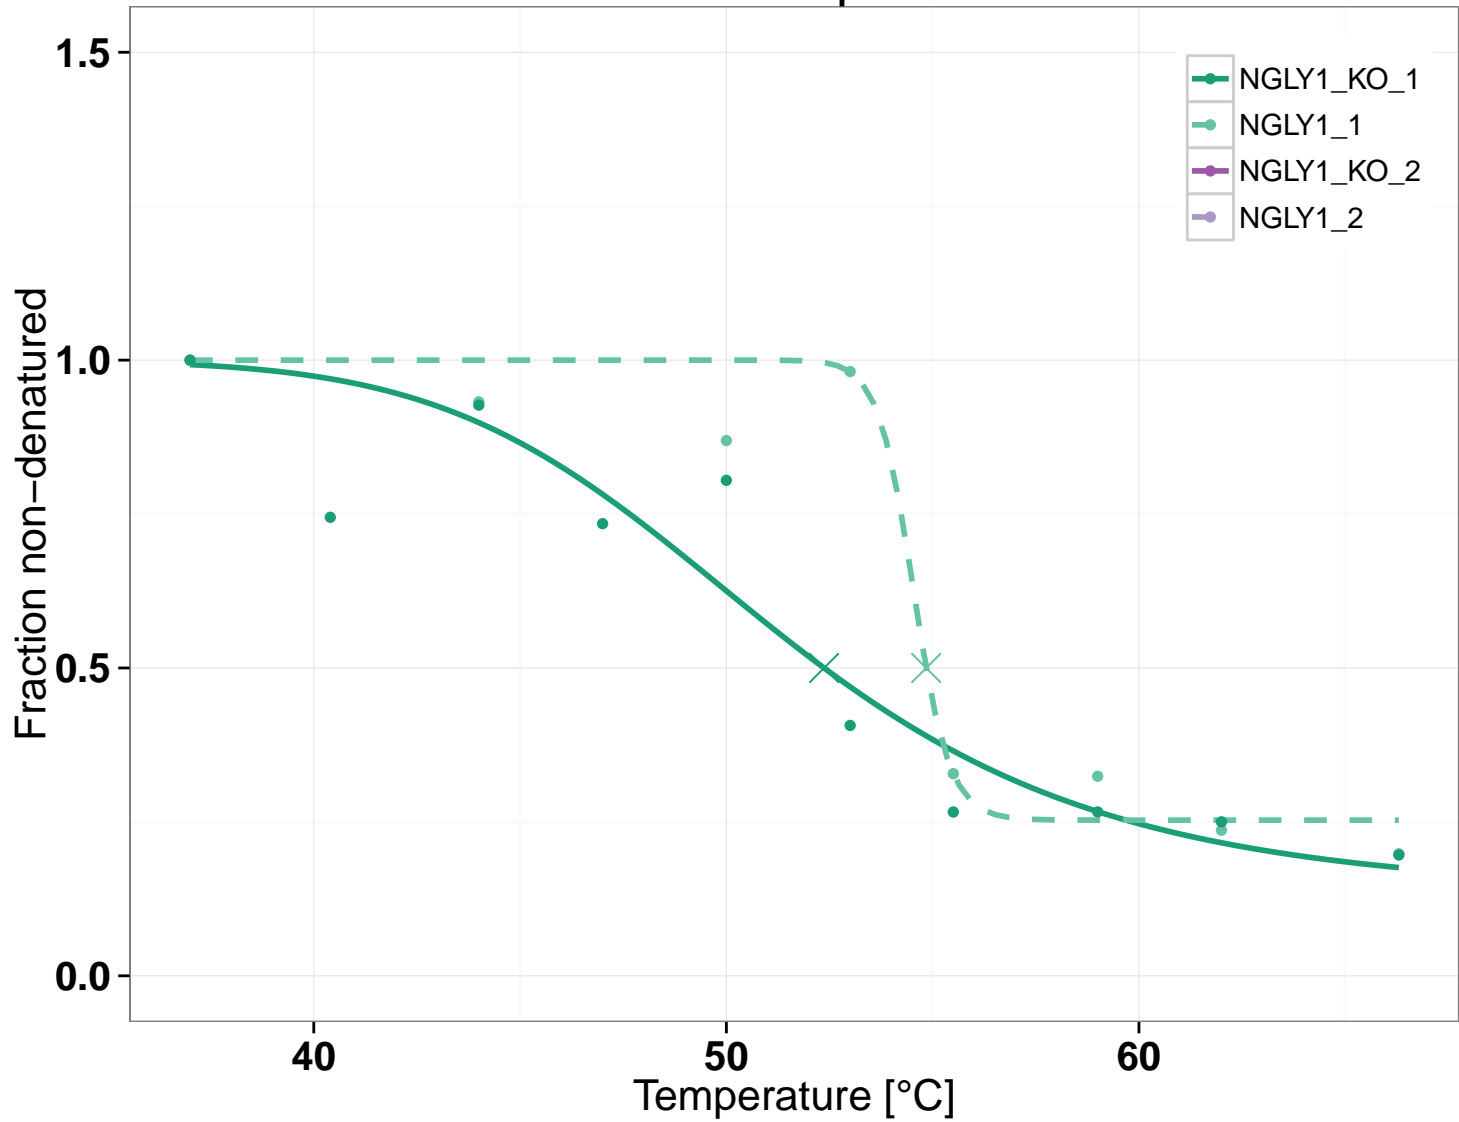

|            | meltPoint | slope  | plateau | R2   |
|------------|-----------|--------|---------|------|
| NGLY1_KO_1 | 52.37     | -0.055 | 0.13    | 0.88 |
| NGLY1_1    | 54.84     | -0.43  | 0.25    | 0.69 |
| NGLY1_KO_2 | -         | -      | -       | -    |
| NGLY1_2    | -         | -      | -       | -    |

Supplement: Supplementary file 3132 [file 1]

IPI00022447.3|LPGAT1

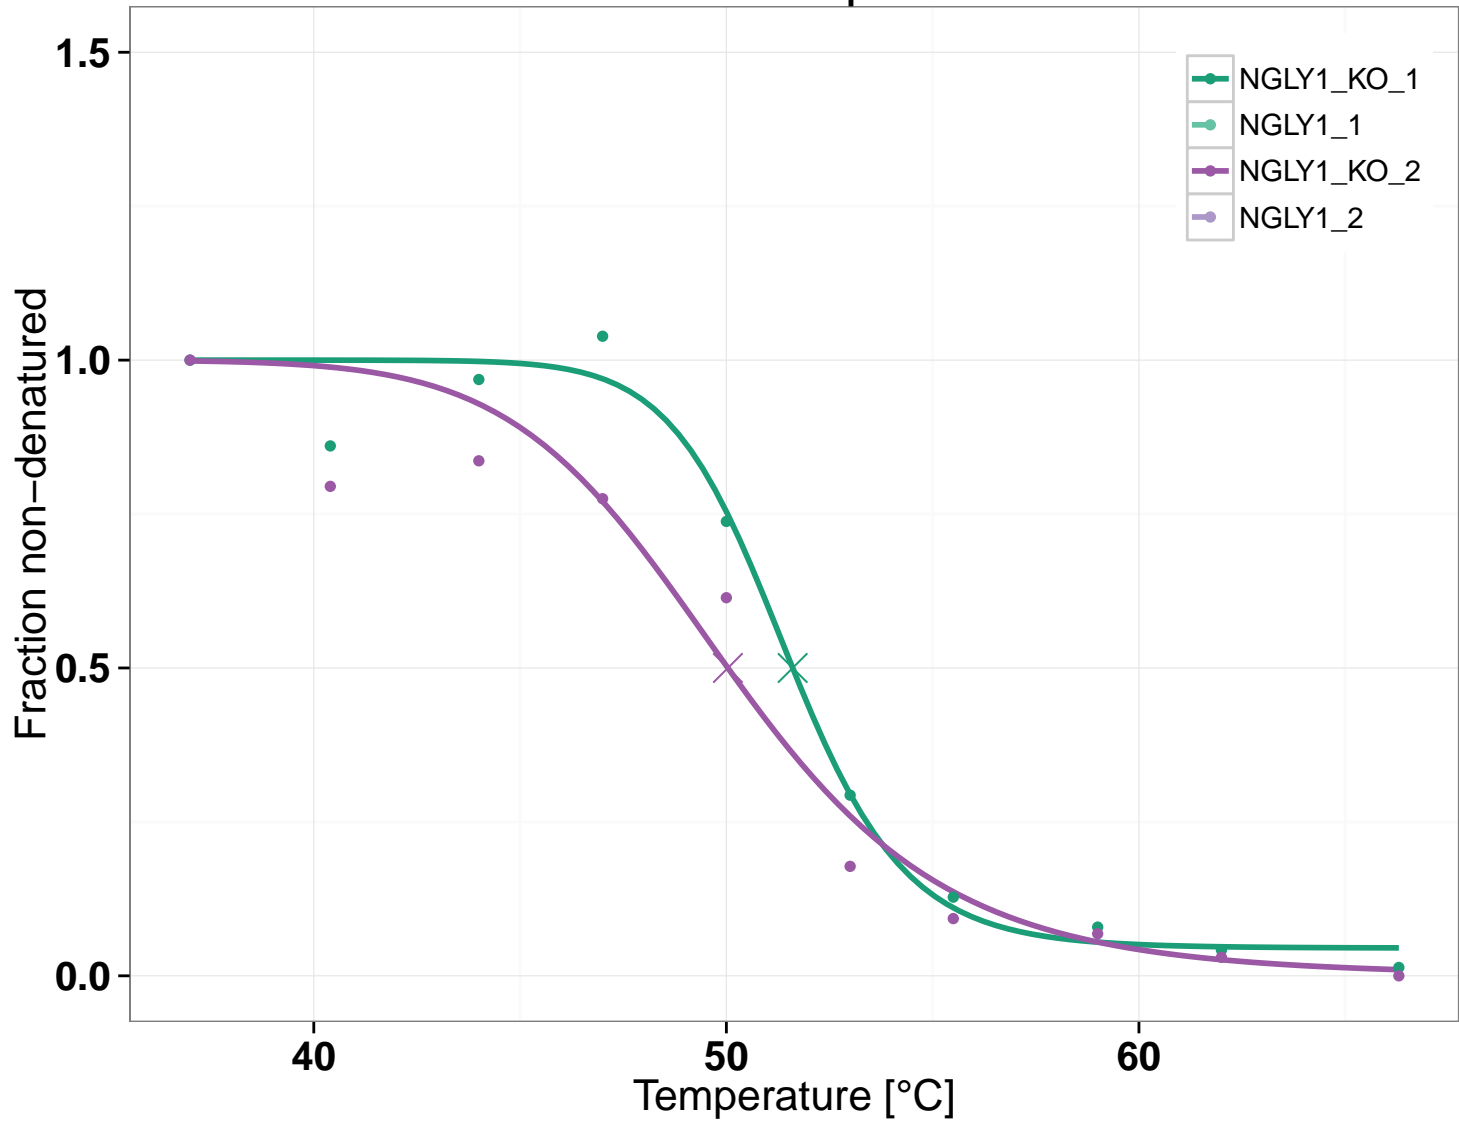

|            | meltPoint | slope  | plateau | R2   |
|------------|-----------|--------|---------|------|
| NGLY1_KO_1 | 51.61     | -0.17  | 0.05    | 0.98 |
| NGLY1_1    | -         | -      | -       | -    |
| NGLY1_KO_2 | 50.04     | -0.095 | 0       | 0.95 |
| NGLY1_2    | -         | -      | -       | -    |

Supplement: Supplementary file 3133 [file 1]

IPI00160901.4|GTSE1

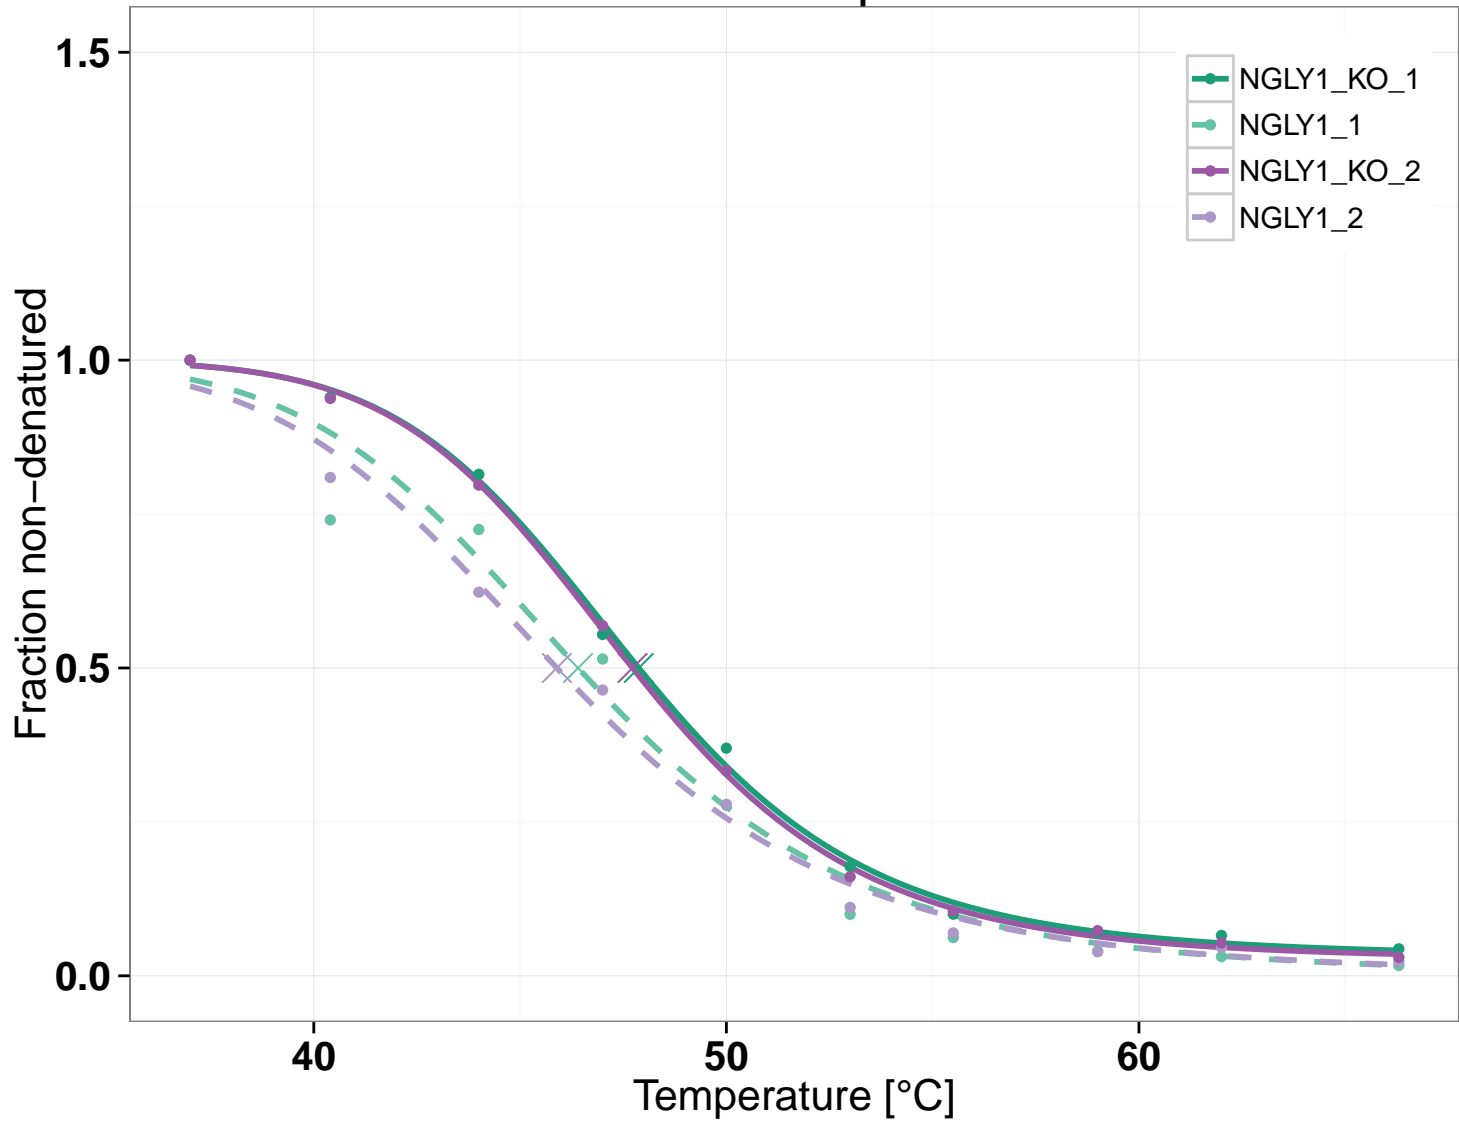

|            | meltPoint | slope  | plateau | R2   |
|------------|-----------|--------|---------|------|
| NGLY1_KO_1 | 47.88     | -0.084 | 0.03    | 1    |
| NGLY1_1    | 46.41     | -0.074 | 0       | 0.97 |
| NGLY1_KO_2 | 47.73     | -0.086 | 0.03    | 1    |
| NGLY1_2    | 45.89     | -0.072 | 0       | 0.99 |

Supplement: Supplementary file 3134 [file 1]

# IPI00874149.1|SEC61A2

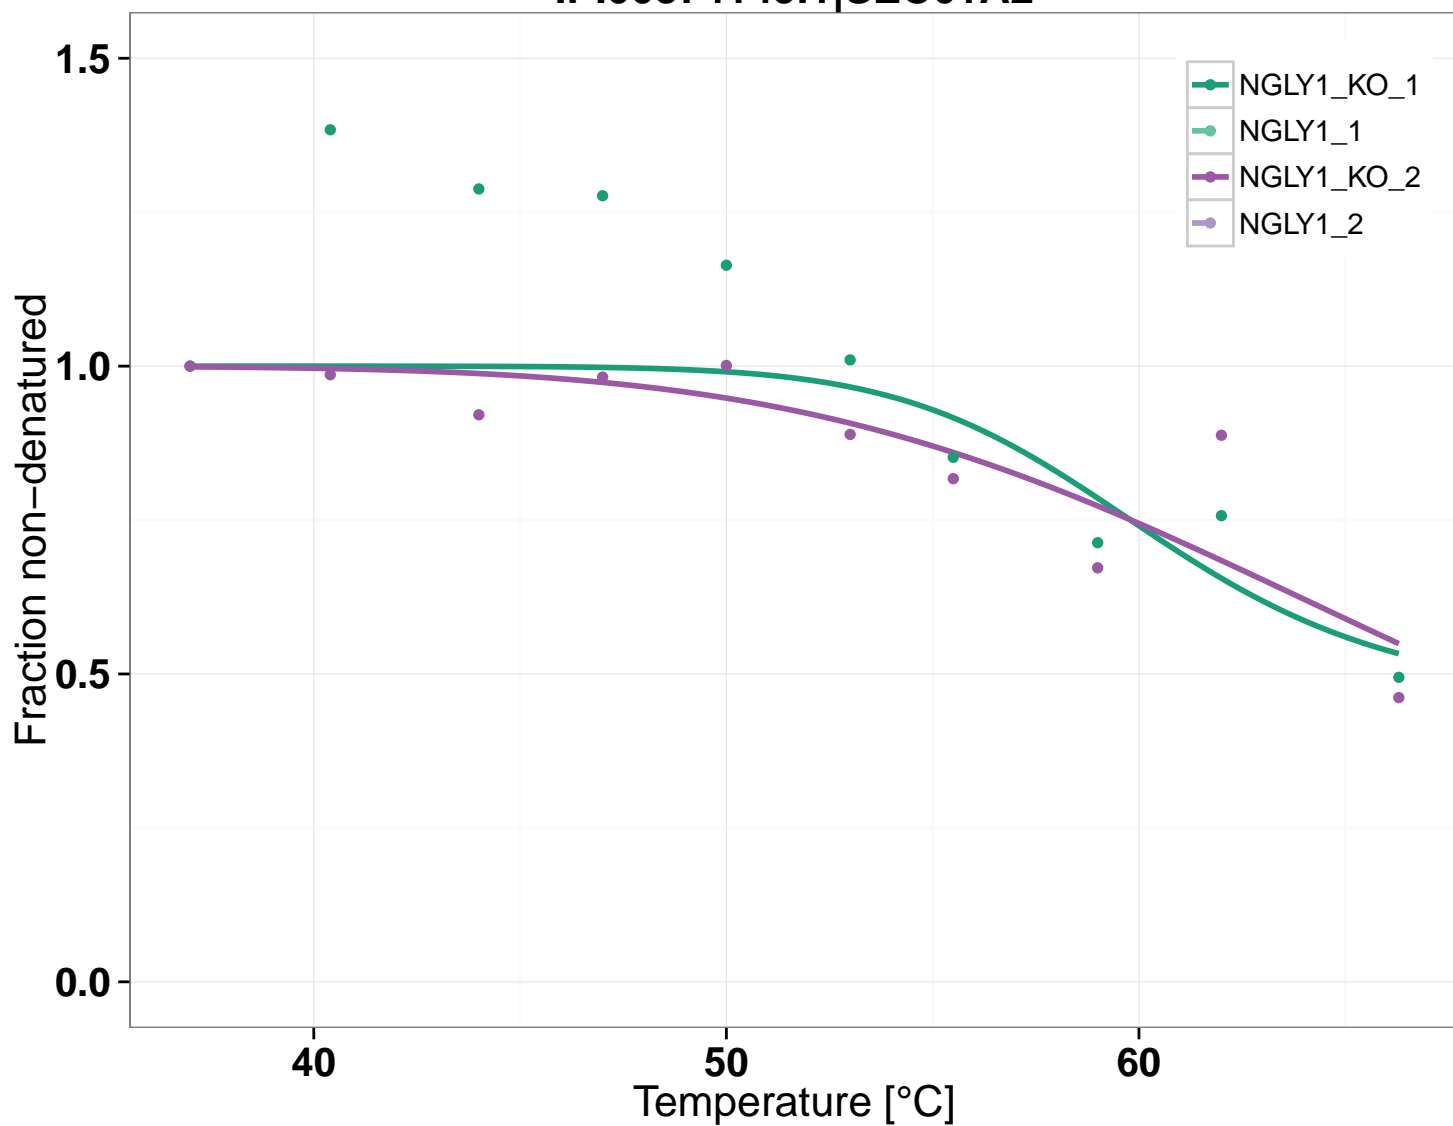

|            | meltPoint | slope  | plateau | R2   |
|------------|-----------|--------|---------|------|
| NGLY1_KO_1 | —         | −0.045 | 0.45    | 0.52 |
| NGLY1_1    | —         | —      | —       | —    |
| NGLY1_KO_2 | —         | −0.032 | 0       | 0.75 |
| NGLY1_2    | —         | —      | —       | —    |

Supplement: Supplementary file 3135 [file 1]

IPI00329025.1|JAGN1

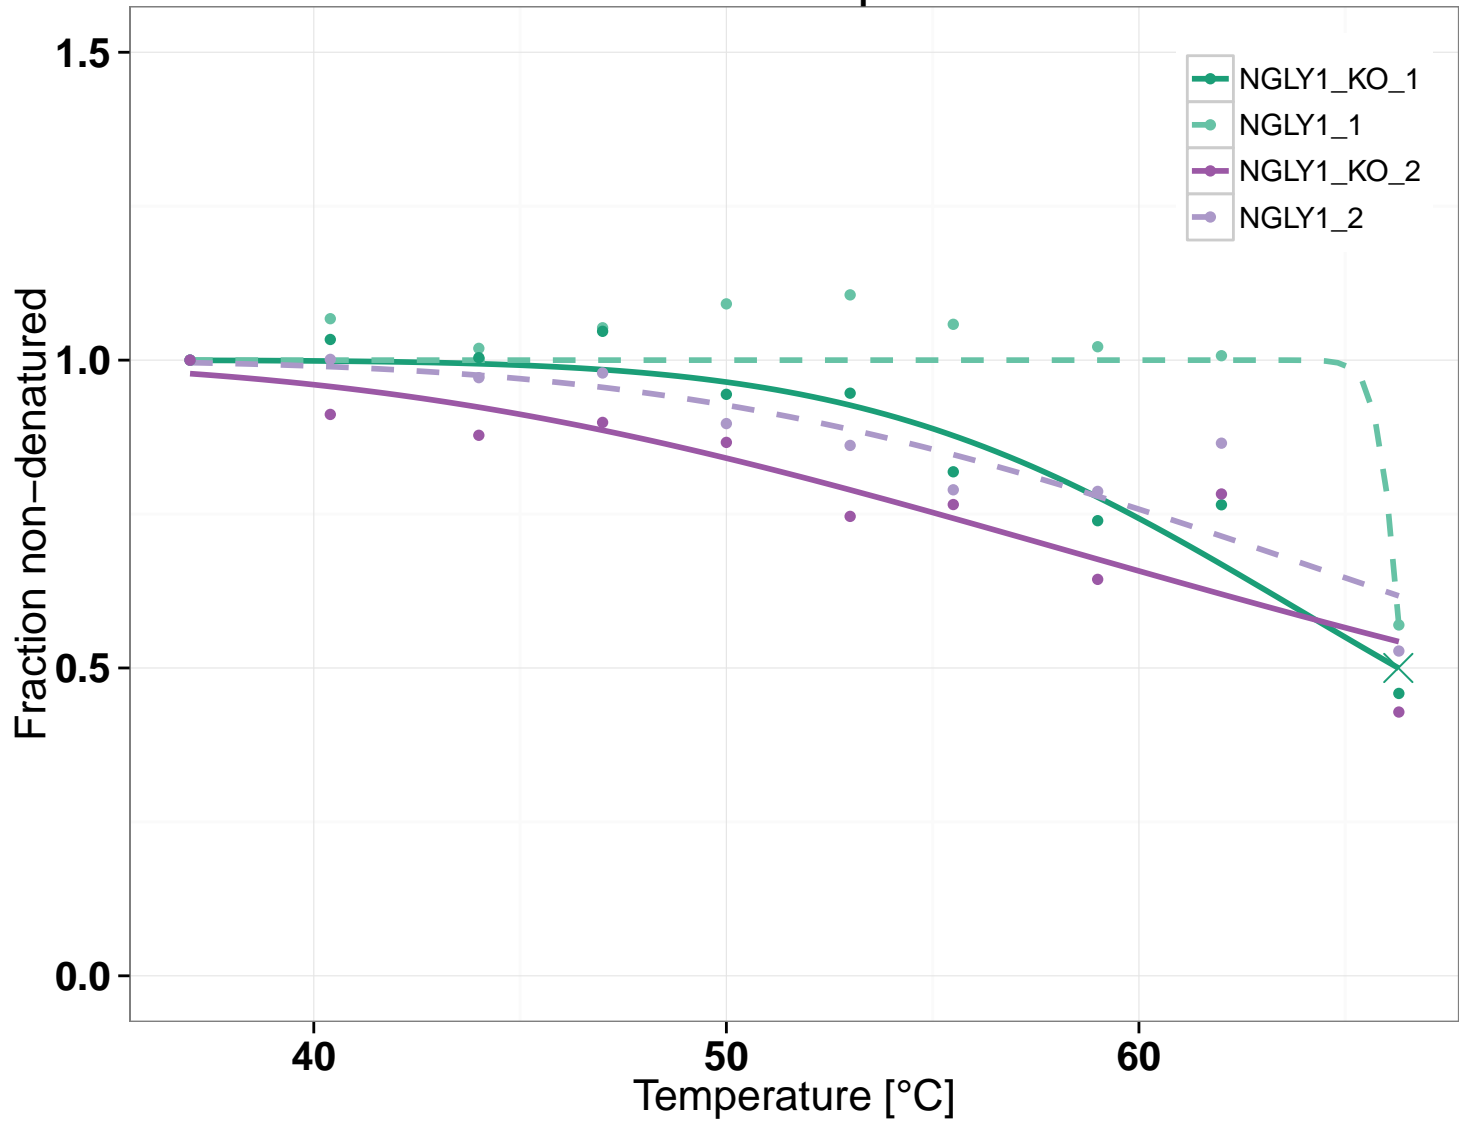

|            | meltPoint | slope  | plateau | R2   |
|------------|-----------|--------|---------|------|
| NGLY1_KO_1 | 66.29     | -0.04  | 0       | 0.93 |
| NGLY1_1    | -         | -      | 0       | 0.86 |
| NGLY1_KO_2 | -         | -0.019 | 0       | 0.8  |
| NGLY1_2    | -         | -0.023 | 0       | 0.81 |

Supplement: Supplementary file 3136 [file 1]

# IPI00025255.1|SNN

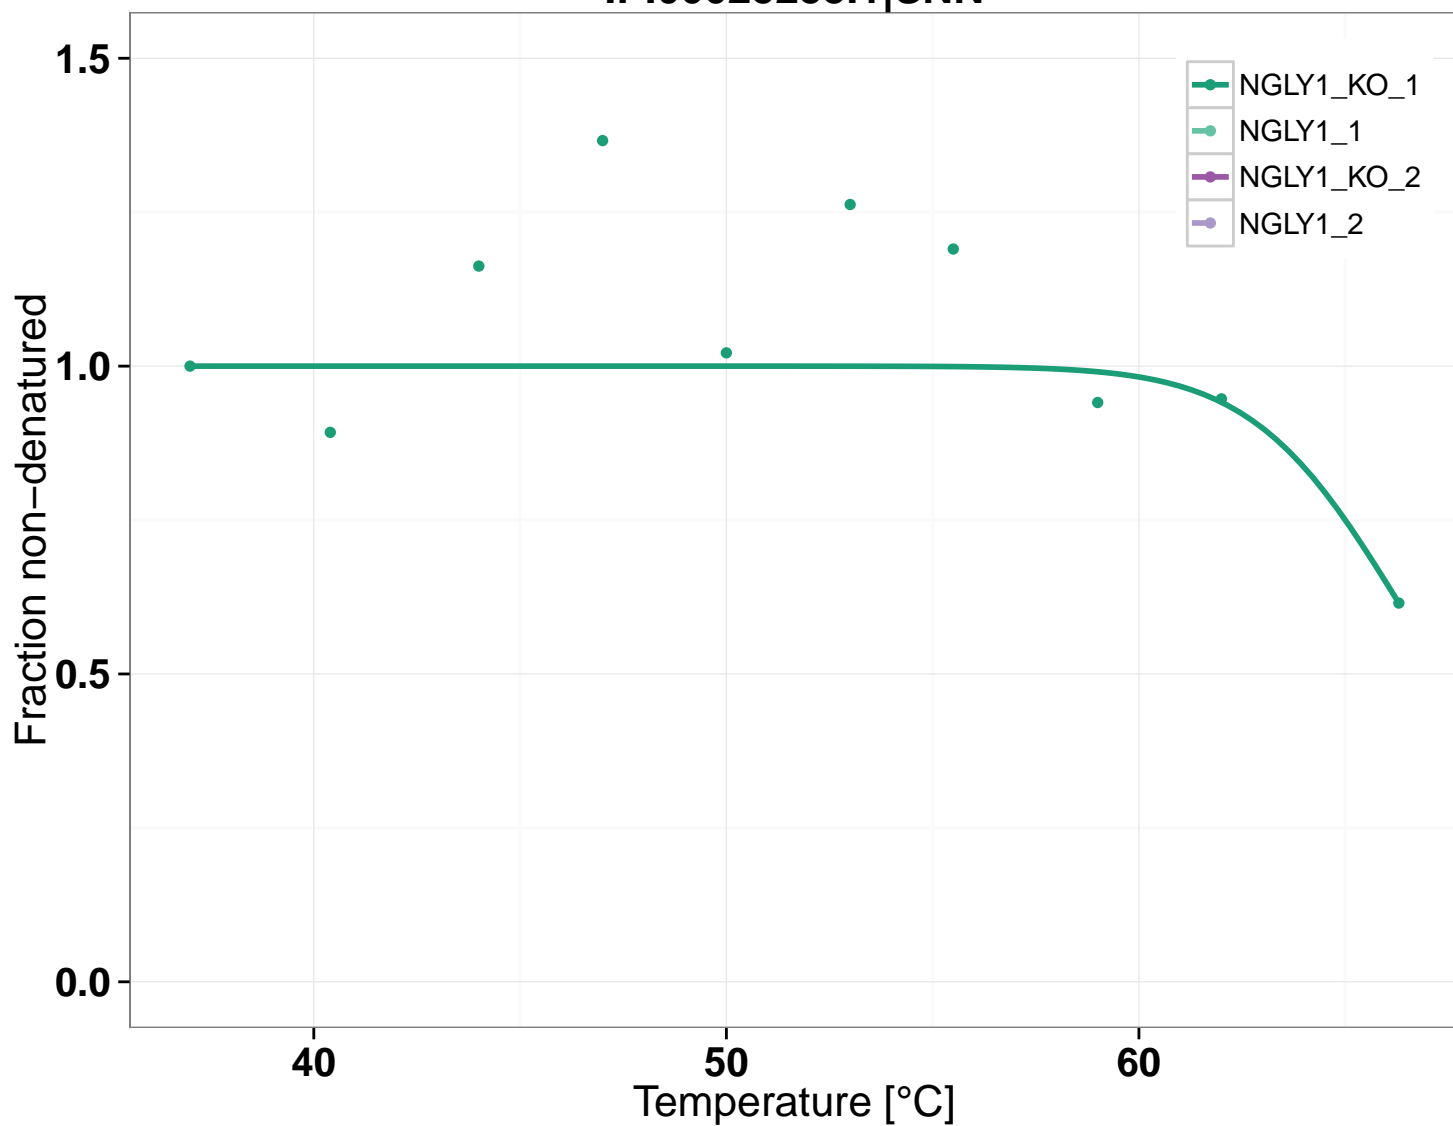

|            | meltPoint | slope | plateau | R2   |
|------------|-----------|-------|---------|------|
| NGLY1_KO_1 | —         | −0.11 | 0.19    | 0.33 |
| NGLY1_1    | —         | —     | —       | —    |
| NGLY1_KO_2 | —         | —     | —       | —    |
| NGLY1_2    | —         | —     | —       | —    |

Supplement: Supplementary file 3137 [file 1]

# IPI00217540.7|LSD1

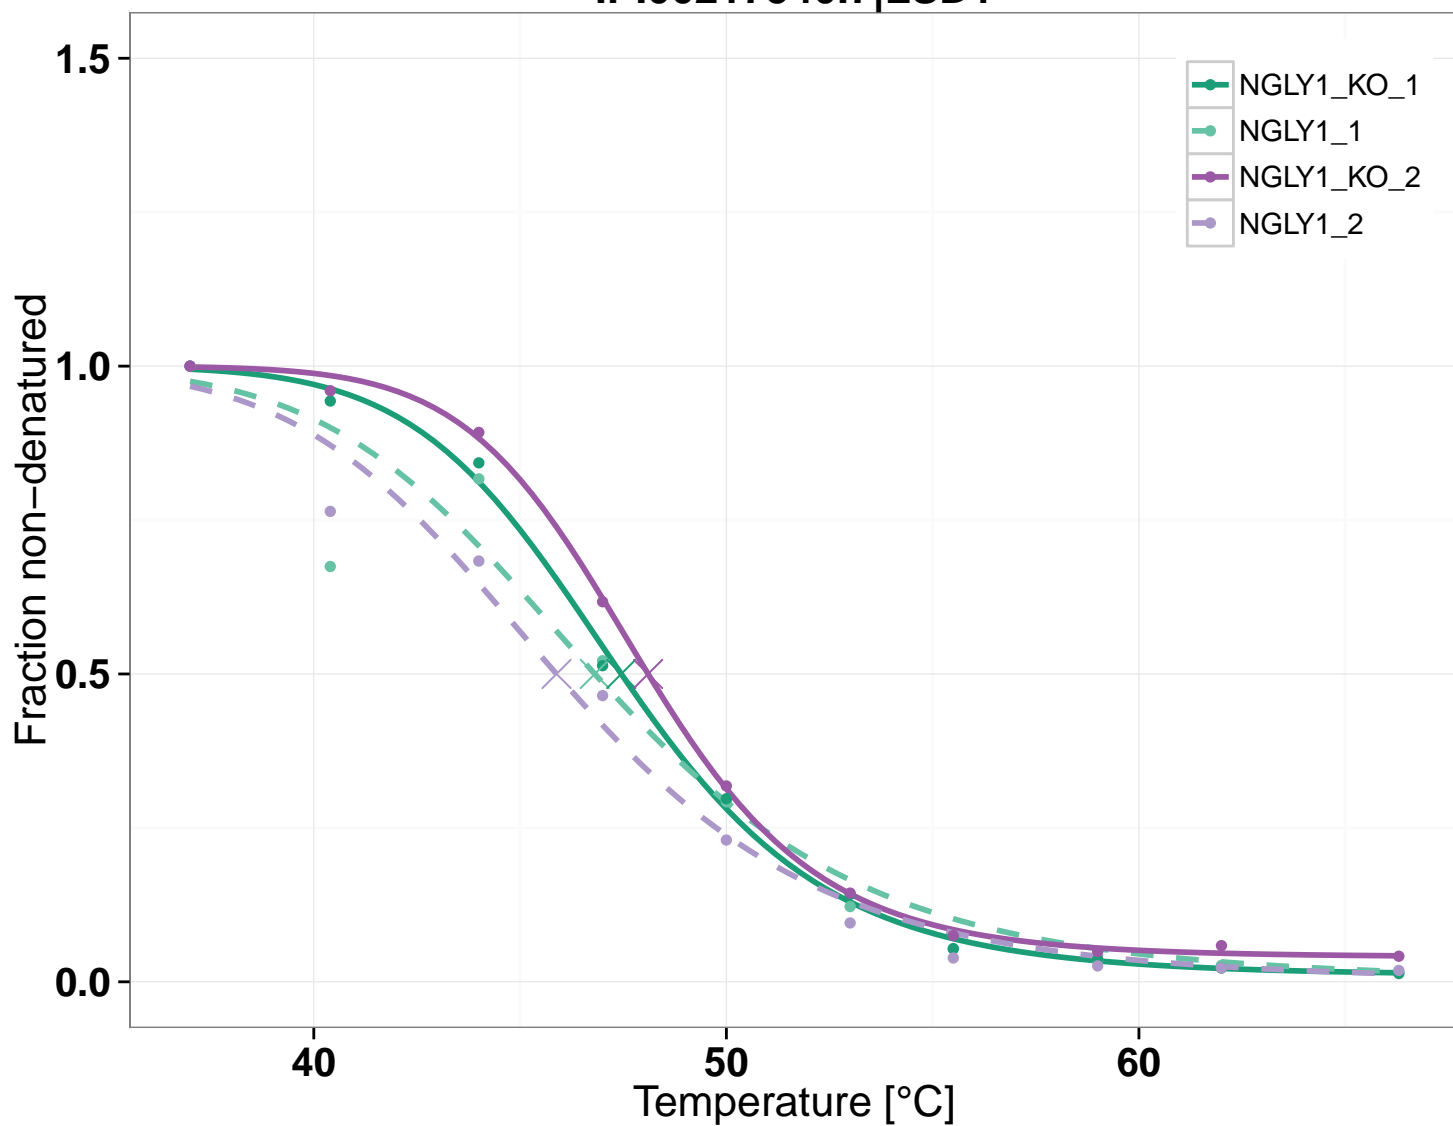

|            | meltPoint | slope  | plateau | R2   |
|------------|-----------|--------|---------|------|
| NGLY1_KO_1 | 47.45     | -0.099 | 0.01    | 1    |
| NGLY1_1    | 46.81     | -0.076 | 0       | 0.94 |
| NGLY1_KO_2 | 48.1      | -0.11  | 0.04    | 1    |
| NGLY1_2    | 45.88     | -0.078 | 0       | 0.98 |

Supplement: Supplementary file 3138 [file 1]

IPI00301323.1|DDX18

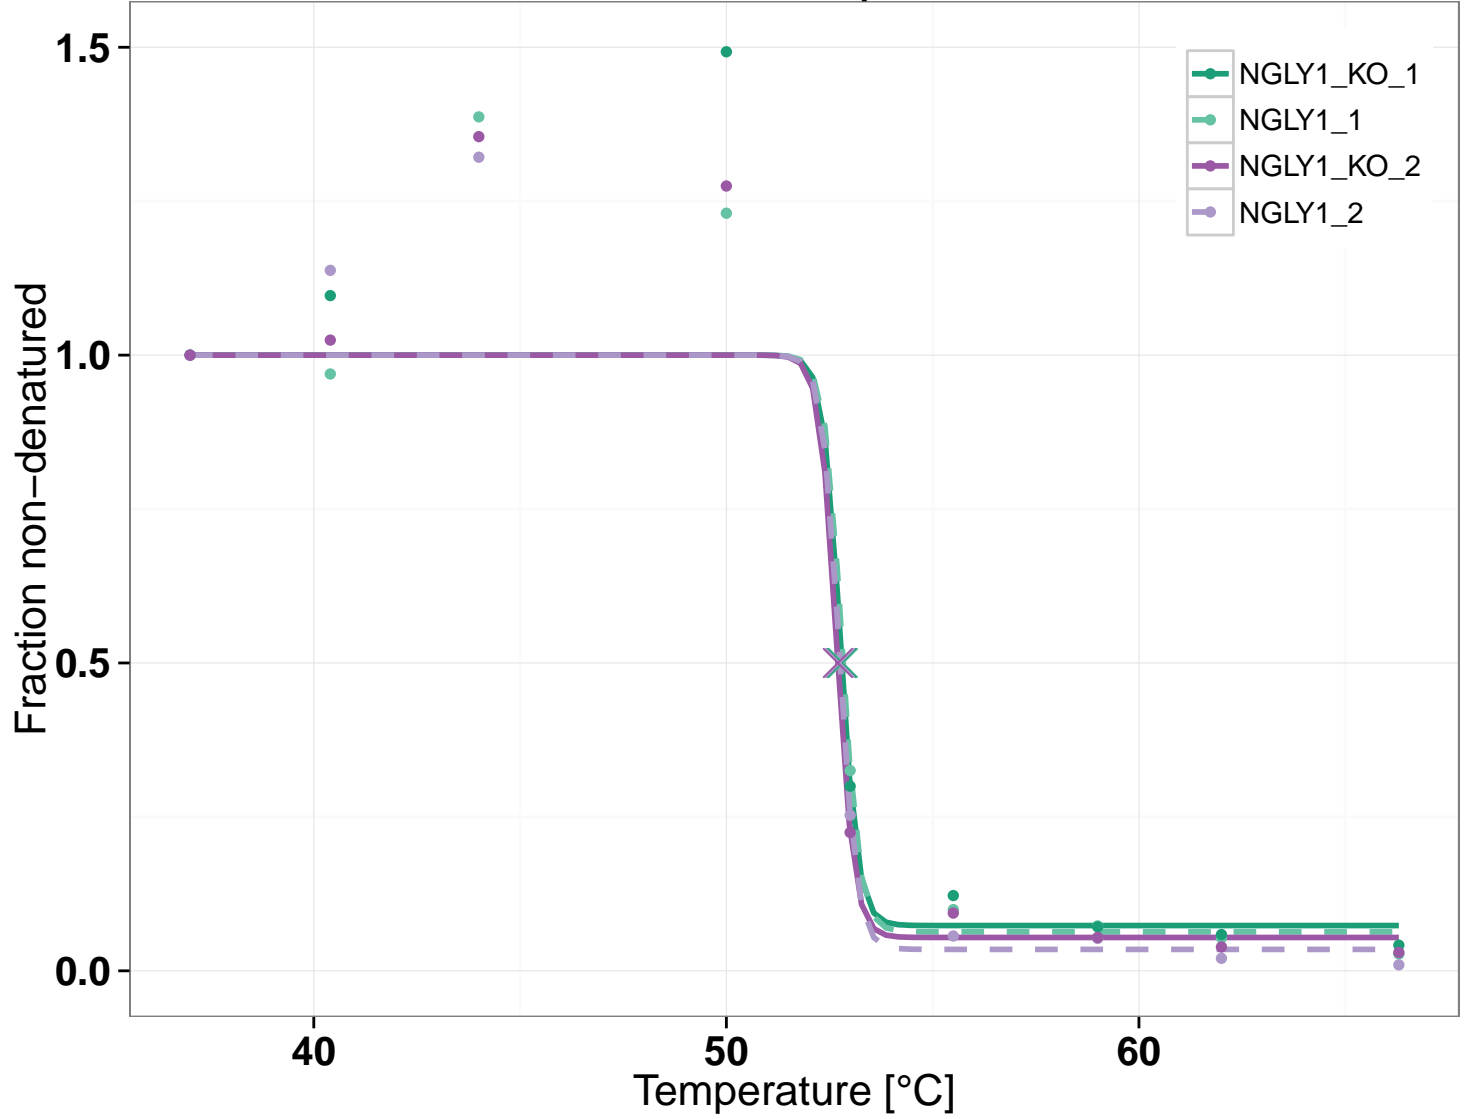

|            | meltPoint | slope | plateau | R2   |
|------------|-----------|-------|---------|------|
| NGLY1_KO_1 | 52.79     | -1.1  | 0.07    | 0.56 |
| NGLY1_1    | 52.83     | -1.1  | 0.06    | 0.75 |
| NGLY1_KO_2 | 52.7      | -1.1  | 0.05    | 0.63 |
| NGLY1_2    | 52.75     | -1.1  | 0.03    | 0.67 |

Supplement: Supplementary file 3139 [file 1]

# IPI00156793.5|XPC

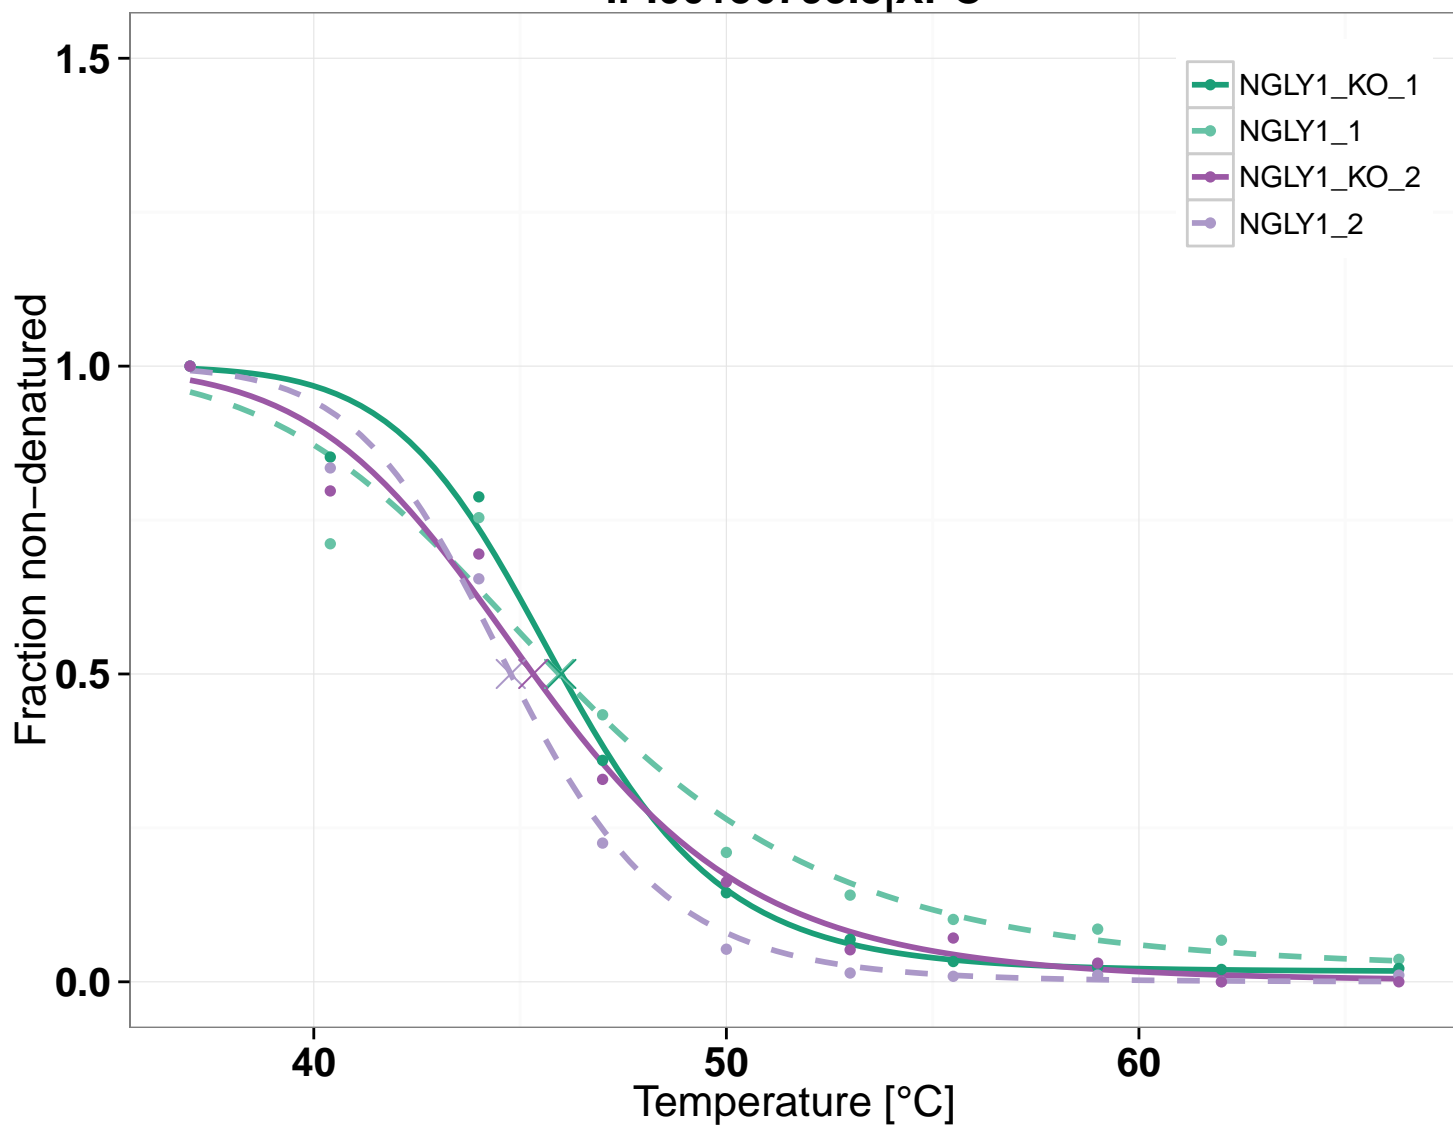

|            | meltPoint | slope  | plateau | R2   |
|------------|-----------|--------|---------|------|
| NGLY1_KO_1 | 46        | -0.12  | 0.02    | 0.99 |
| NGLY1_1    | 45.94     | -0.072 | 0.02    | 0.96 |
| NGLY1_KO_2 | 45.32     | -0.094 | 0       | 0.99 |
| NGLY1_2    | 44.77     | -0.13  | 0       | 0.99 |

Supplement: Supplementary file 3140 [file 1]

# IPI00296999.9|ATPAF2

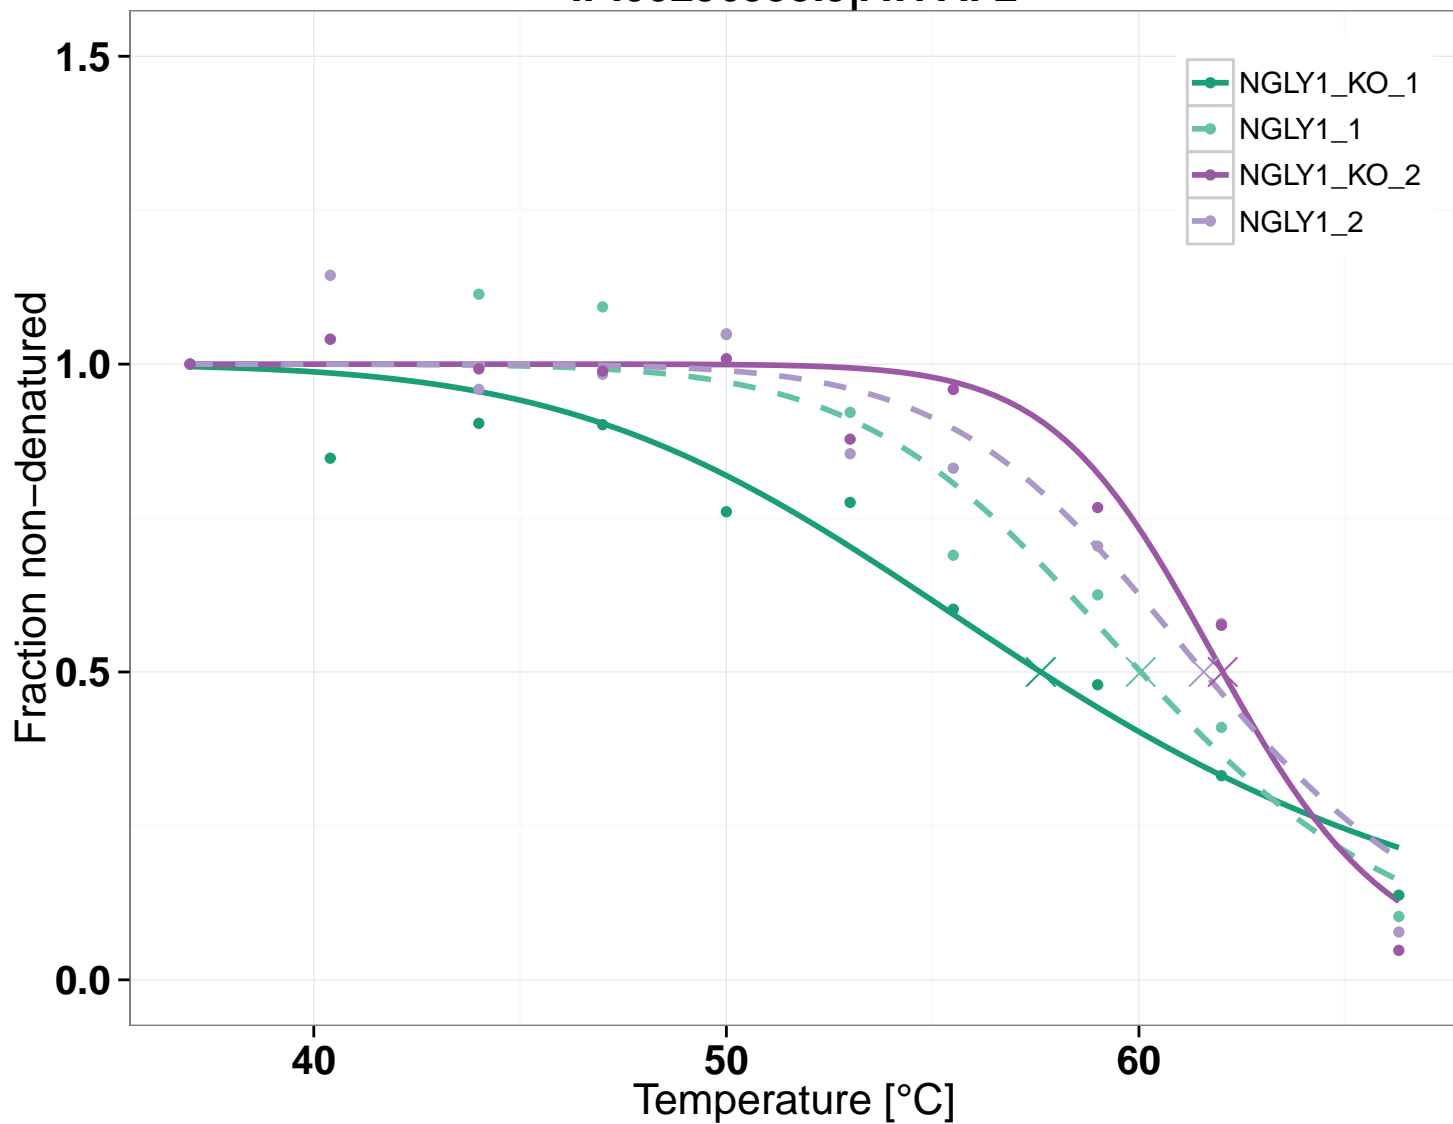

|            | meltPoint | slope  | plateau | R2   |
|------------|-----------|--------|---------|------|
| NGLY1_KO_1 | 57.62     | -0.045 | 0       | 0.95 |
| NGLY1_1    | 60.04     | -0.074 | 0       | 0.95 |
| NGLY1_KO_2 | 62.03     | -0.12  | 0       | 0.96 |
| NGLY1_2    | 61.57     | -0.081 | 0       | 0.92 |

Supplement: Supplementary file 3141 [file 1]

IPI00023696.1|MEIS2

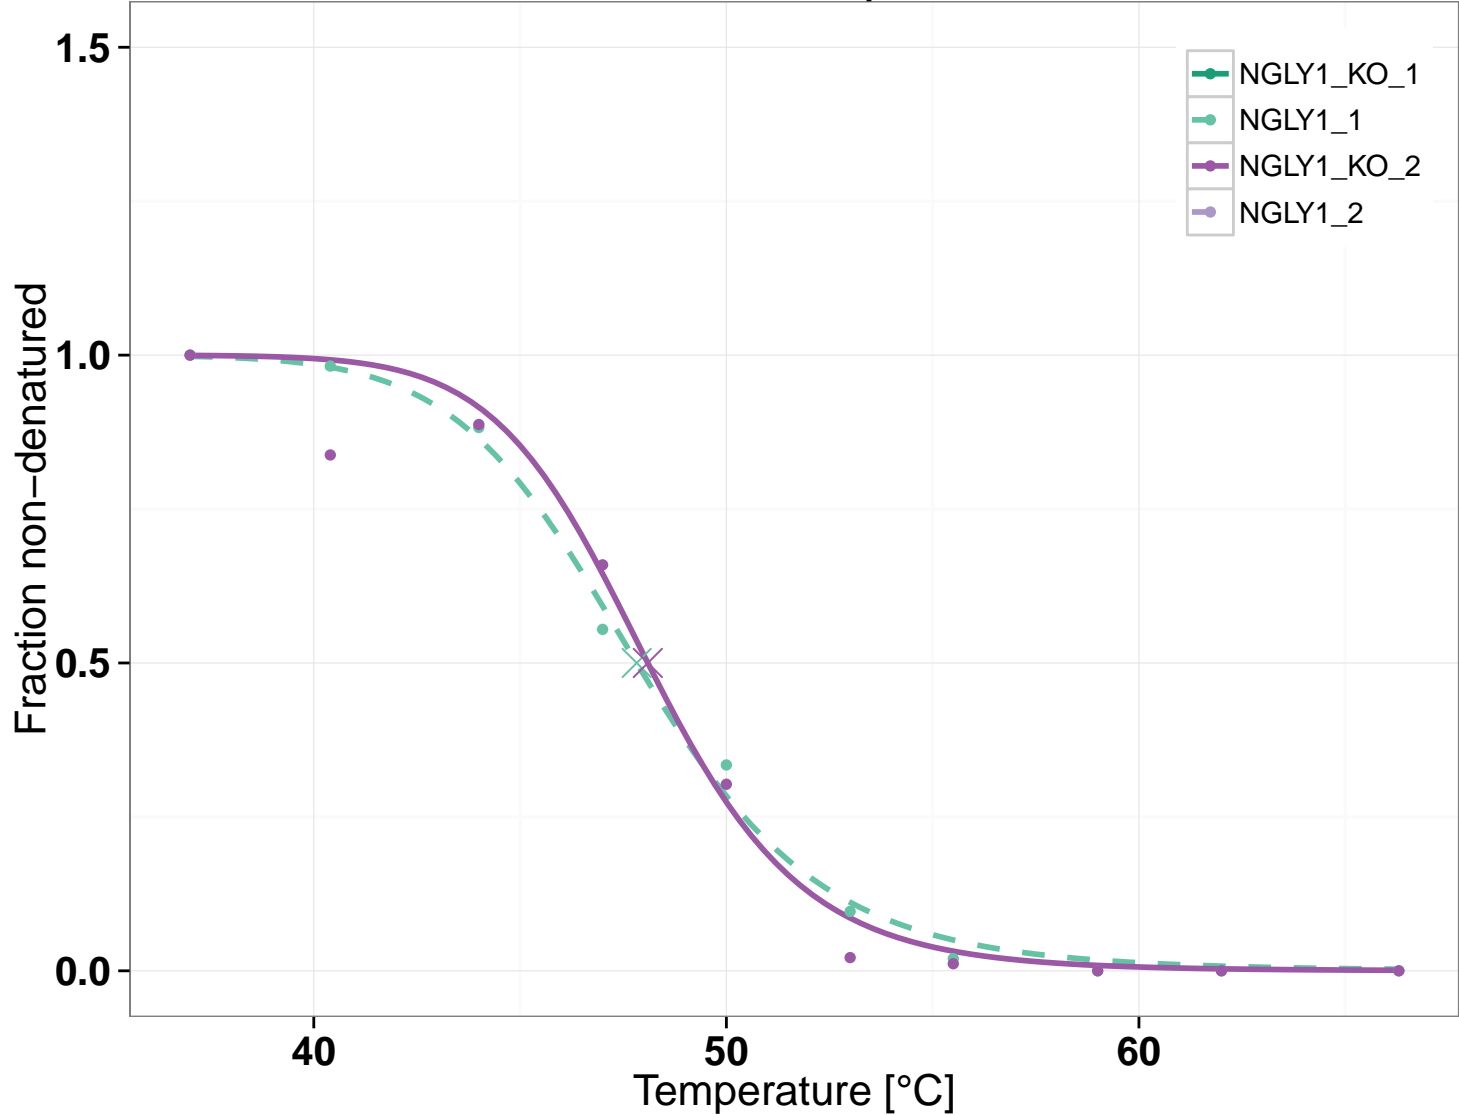

|            | meltPoint | slope | plateau | R2   |
|------------|-----------|-------|---------|------|
| NGLY1_KO_1 | -         | -     | -       | -    |
| NGLY1_1    | 47.83     | -0.11 | 0       | 1    |
| NGLY1_KO_2 | 48.1      | -0.13 | 0       | 0.98 |
| NGLY1_2    | -         | -     | -       | -    |

Supplement: Supplementary file 3142 [file 1]

IPI00014843.5|LRRC16A

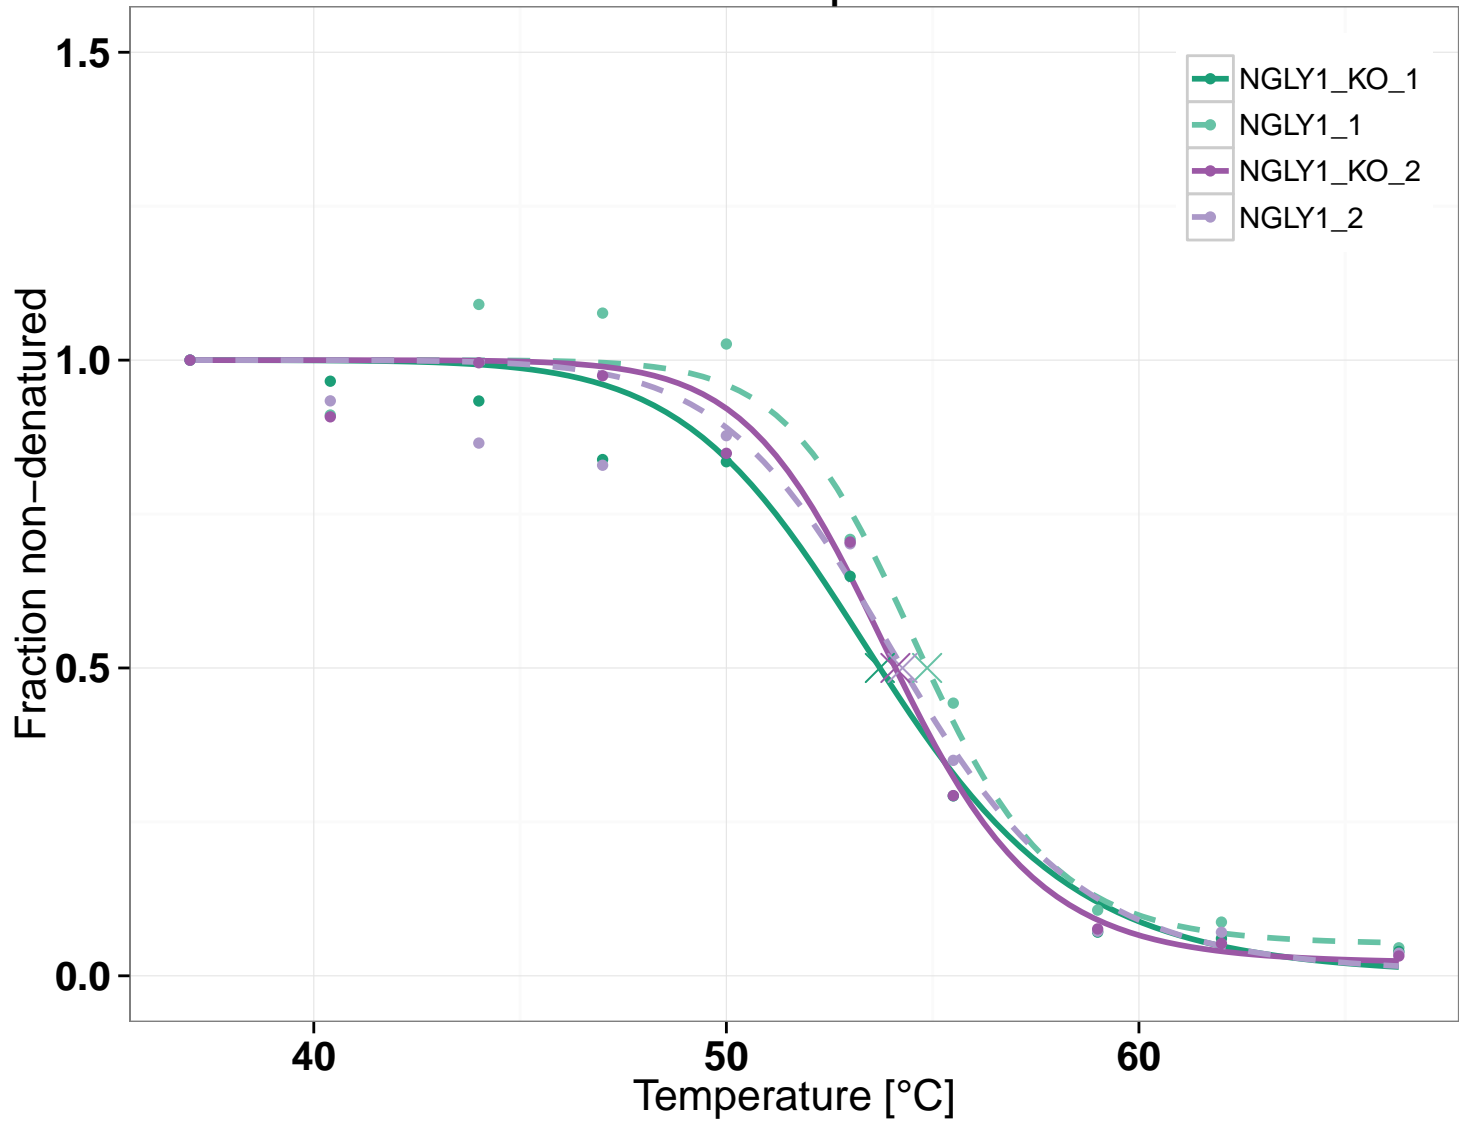

|            | meltPoint | slope | plateau | R2   |
|------------|-----------|-------|---------|------|
| NGLY1_KO_1 | 53.72     | -0.1  | 0       | 0.98 |
| NGLY1_1    | 54.87     | -0.14 | 0.05    | 0.98 |
| NGLY1_KO_2 | 54.1      | -0.14 | 0.02    | 0.99 |
| NGLY1_2    | 54.27     | -0.11 | 0       | 0.96 |

Supplement: Supplementary file 3143 [file 1]

# IPI00790251.1|FBRs

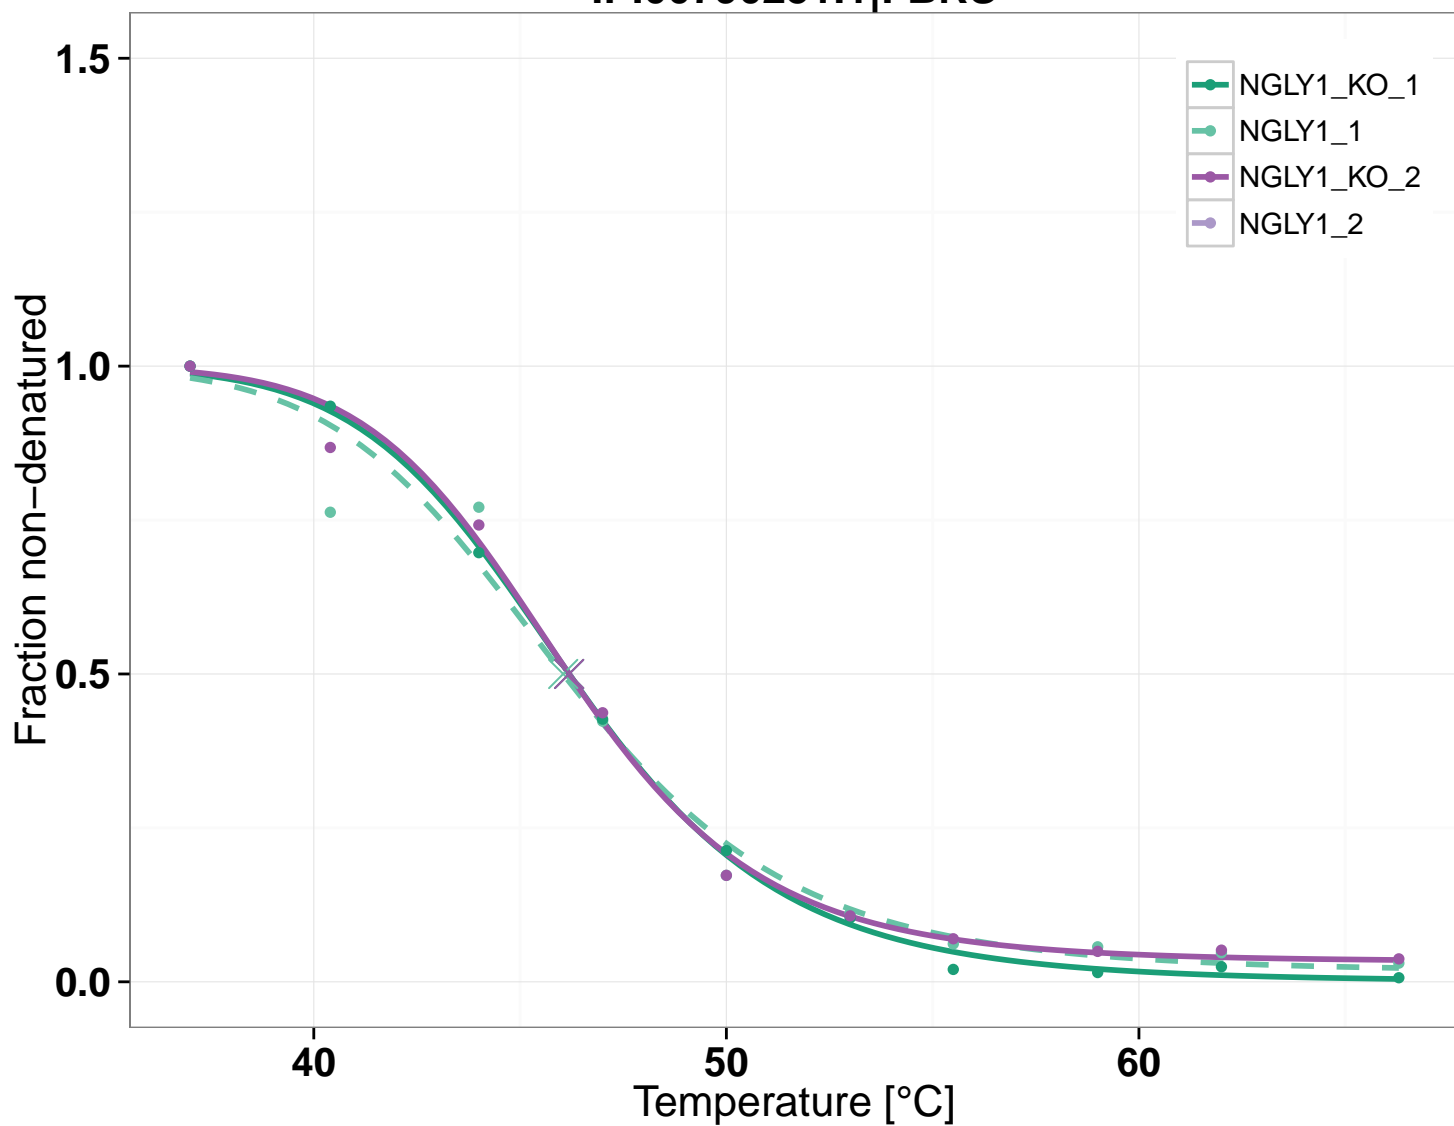

|            | meltPoint | slope  | plateau | R2   |
|------------|-----------|--------|---------|------|
| NGLY1_KO_1 | 46.19     | -0.097 | 0       | 1    |
| NGLY1_1    | 46.05     | -0.088 | 0.02    | 0.97 |
| NGLY1_KO_2 | 46.19     | -0.1   | 0.03    | 0.99 |
| NGLY1_2    | -         | -      | -       | -    |

Supplement: Supplementary file 3144 [file 1]

IPI00024364.2|TNPO1

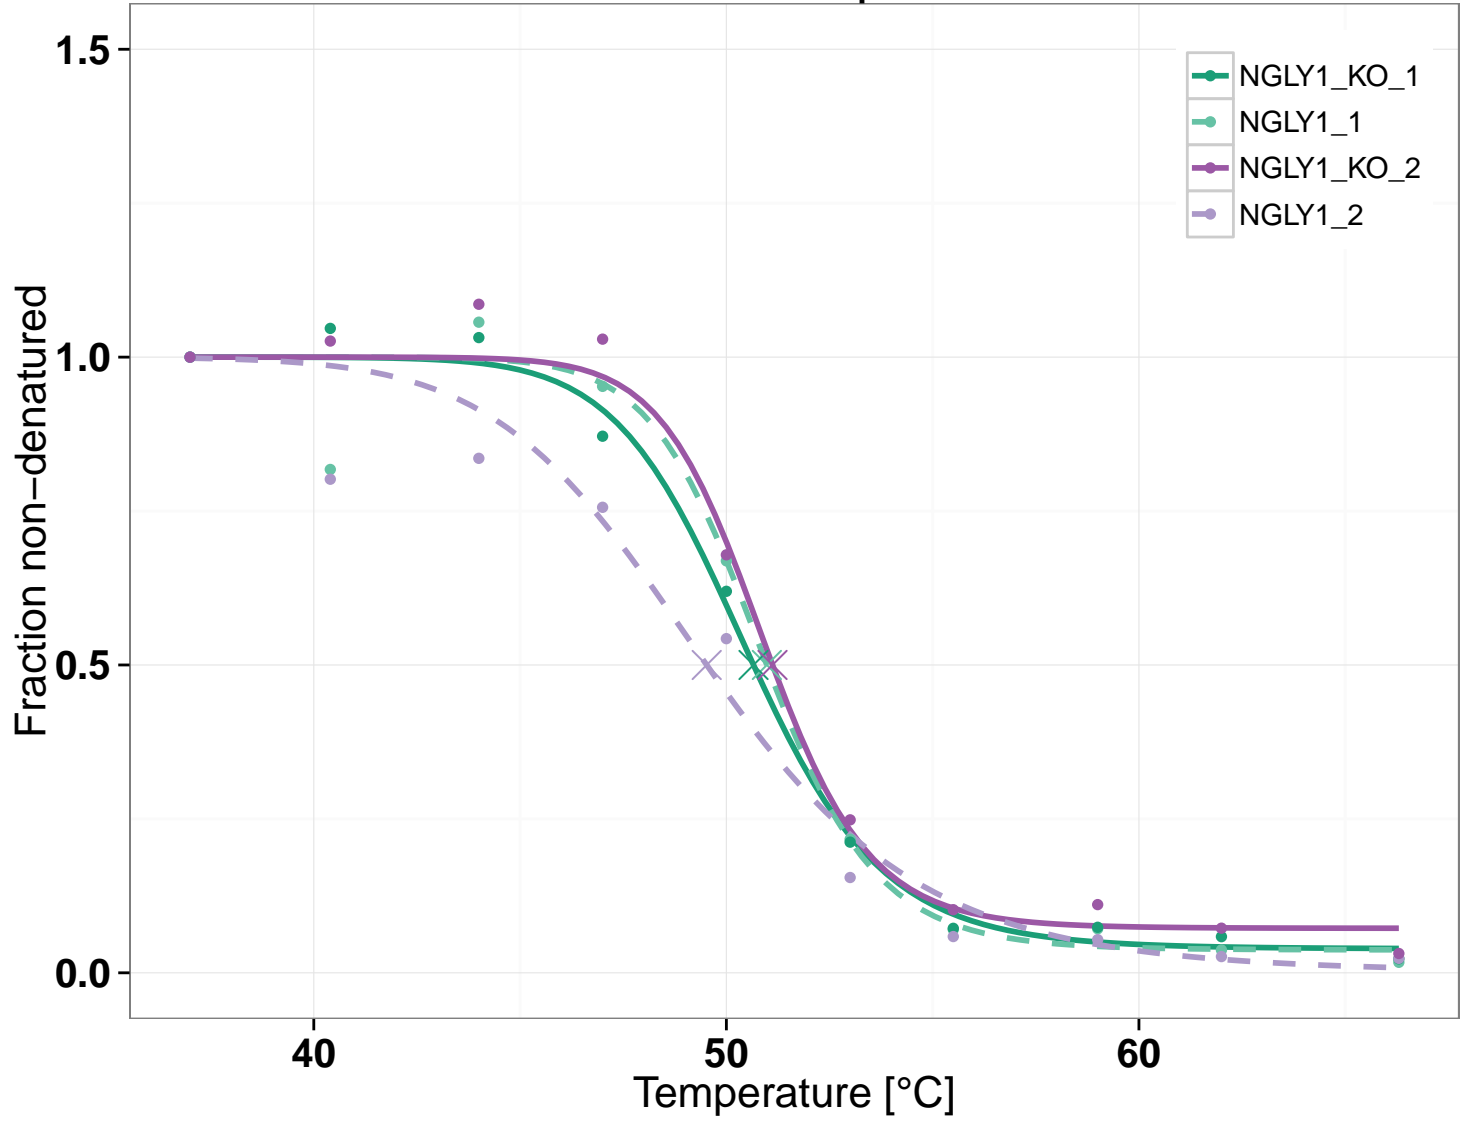

|            | meltPoint | slope  | plateau | R2   |
|------------|-----------|--------|---------|------|
| NGLY1_KO_1 | 50.66     | -0.15  | 0.04    | 1    |
| NGLY1_1    | 50.98     | -0.18  | 0.04    | 0.98 |
| NGLY1_KO_2 | 51.12     | -0.18  | 0.07    | 0.99 |
| NGLY1_2    | 49.52     | -0.096 | 0       | 0.96 |

Supplement: Supplementary file 3145 [file 1]

IPI00297480.3|ANKRD13C

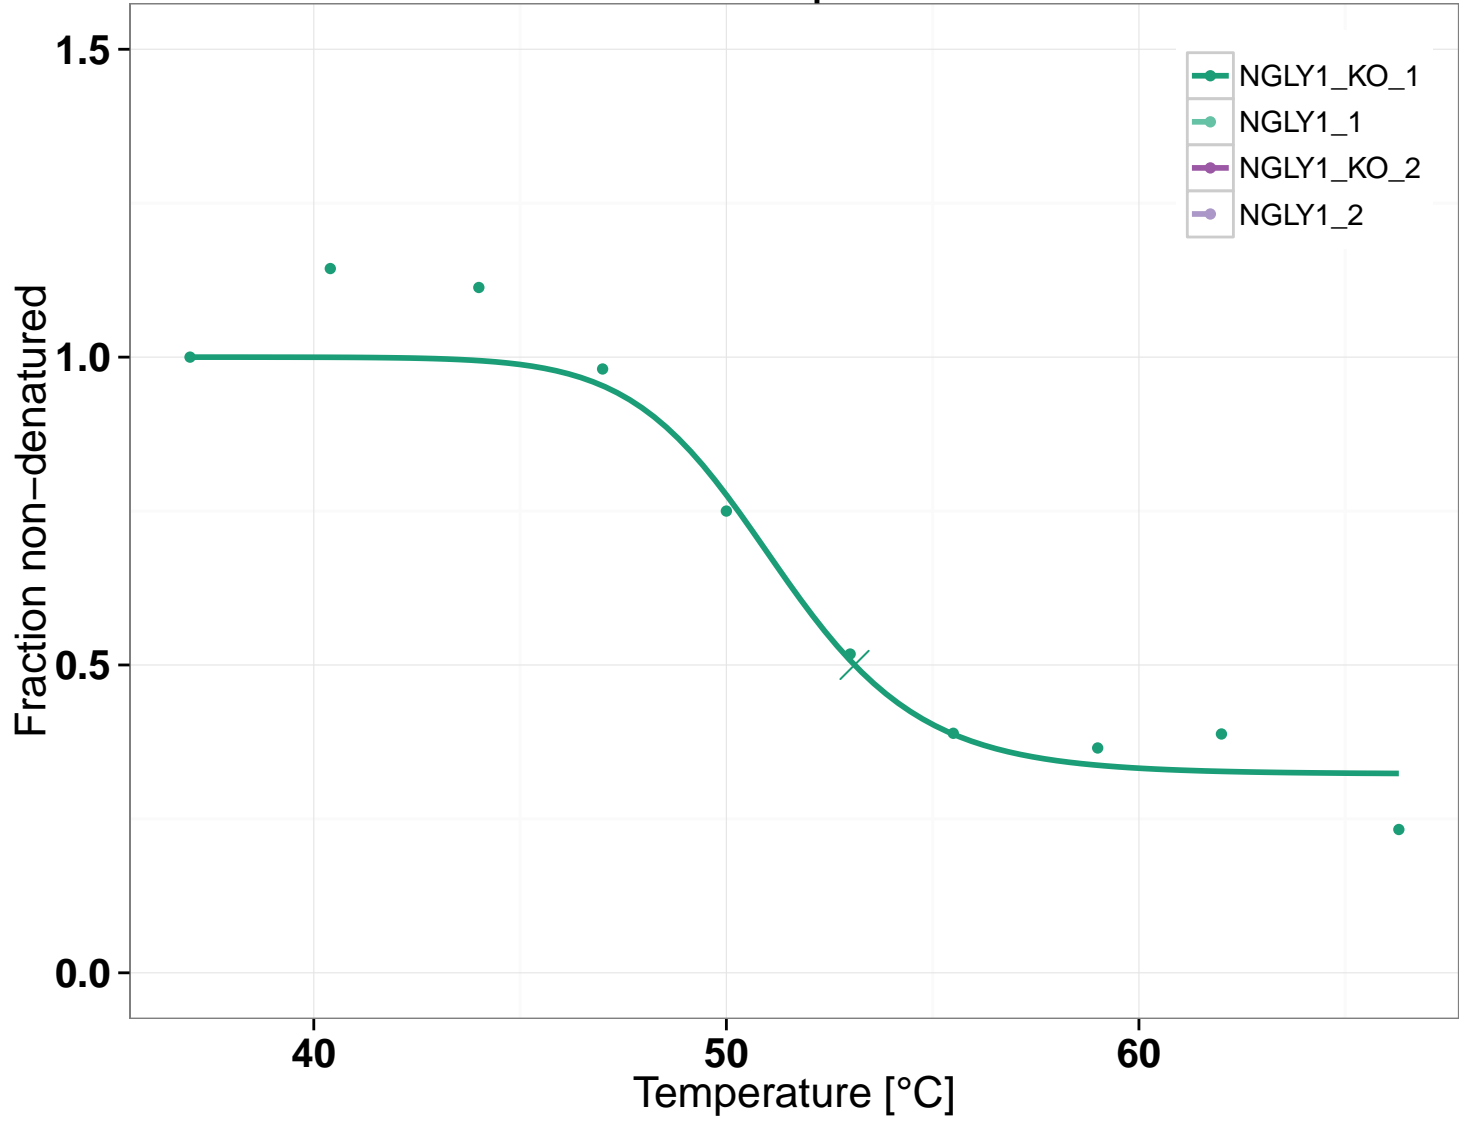

|            | meltPoint | slope  | plateau | R2   |
|------------|-----------|--------|---------|------|
| NGLY1_KO_1 | 53.11     | -0.097 | 0.32    | 0.96 |
| NGLY1_1    | -         | -      | -       | -    |
| NGLY1_KO_2 | -         | -      | -       | -    |
| NGLY1_2    | -         | -      | -       | -    |

Supplement: Supplementary file 3146 [file 1]

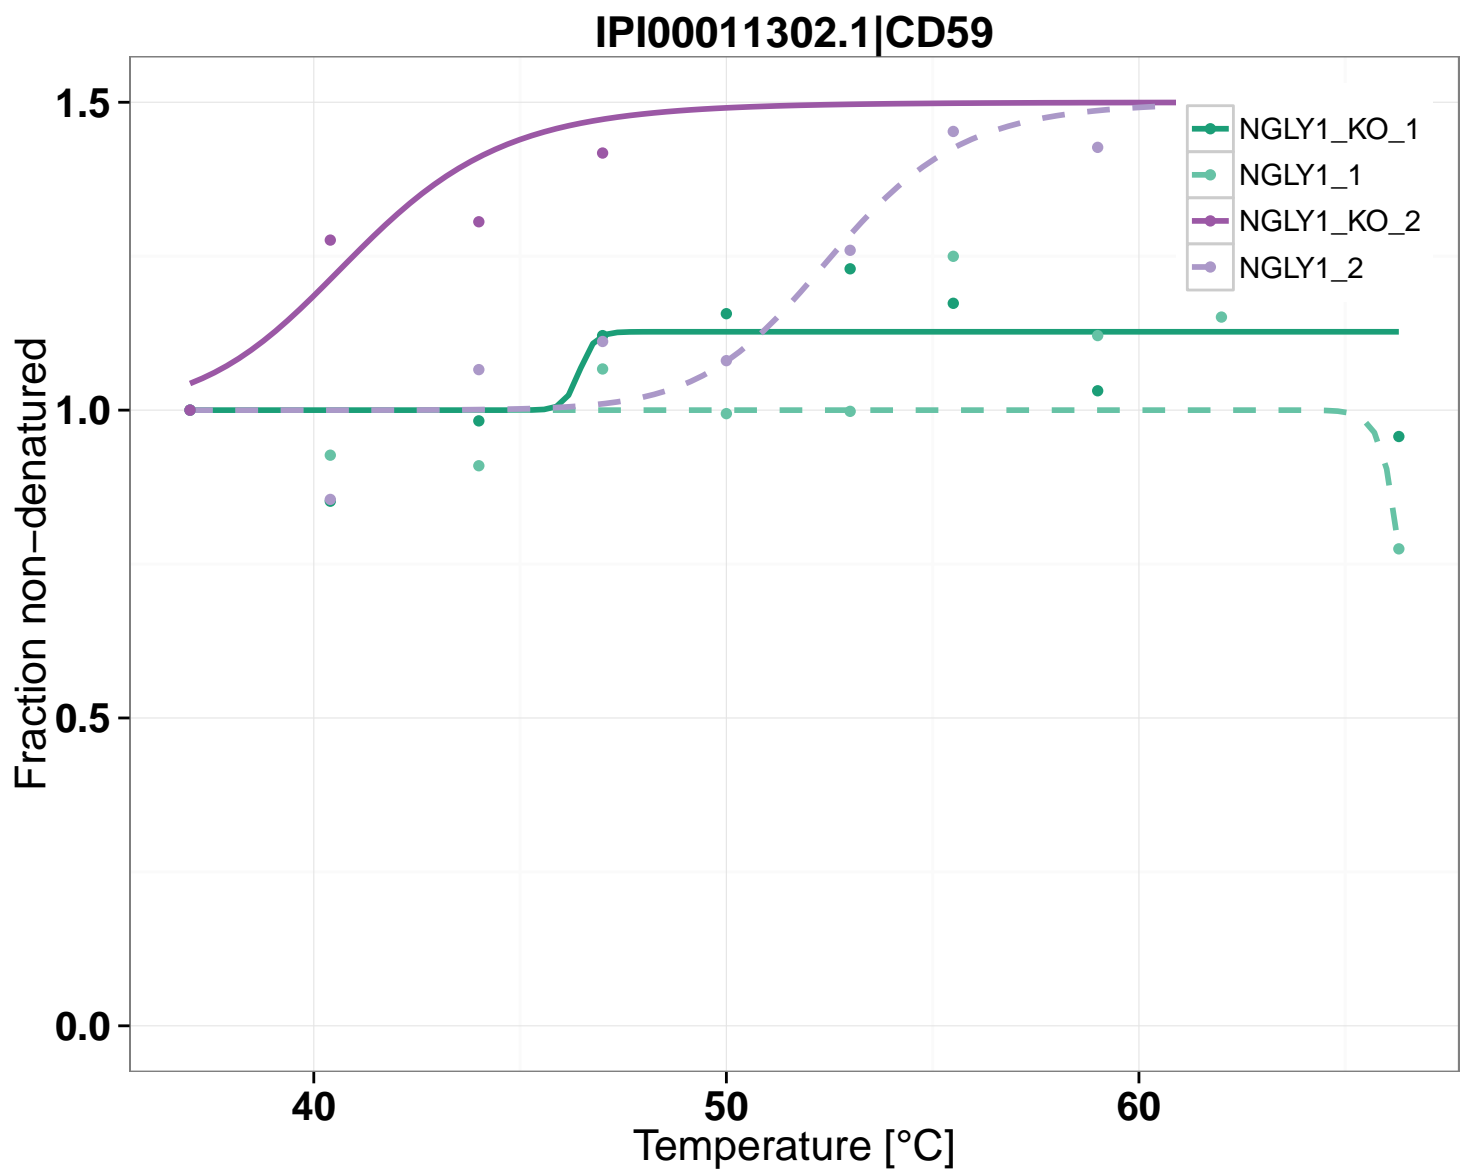

|            | meltPoint | slope | plateau | R2   |
|------------|-----------|-------|---------|------|
| NGLY1_KO_1 | —         | 0.17  | 1.13    | 0.42 |
| NGLY1_1    | —         | —     | 0       | 0.29 |
| NGLY1_KO_2 | —         | 0.068 | 1.5     | 0.26 |
| NGLY1_2    | —         | 0.078 | 1.5     | 0.81 |

Supplement: Supplementary file 3147 [file 1]

IPI00394815.4|RSBN1L

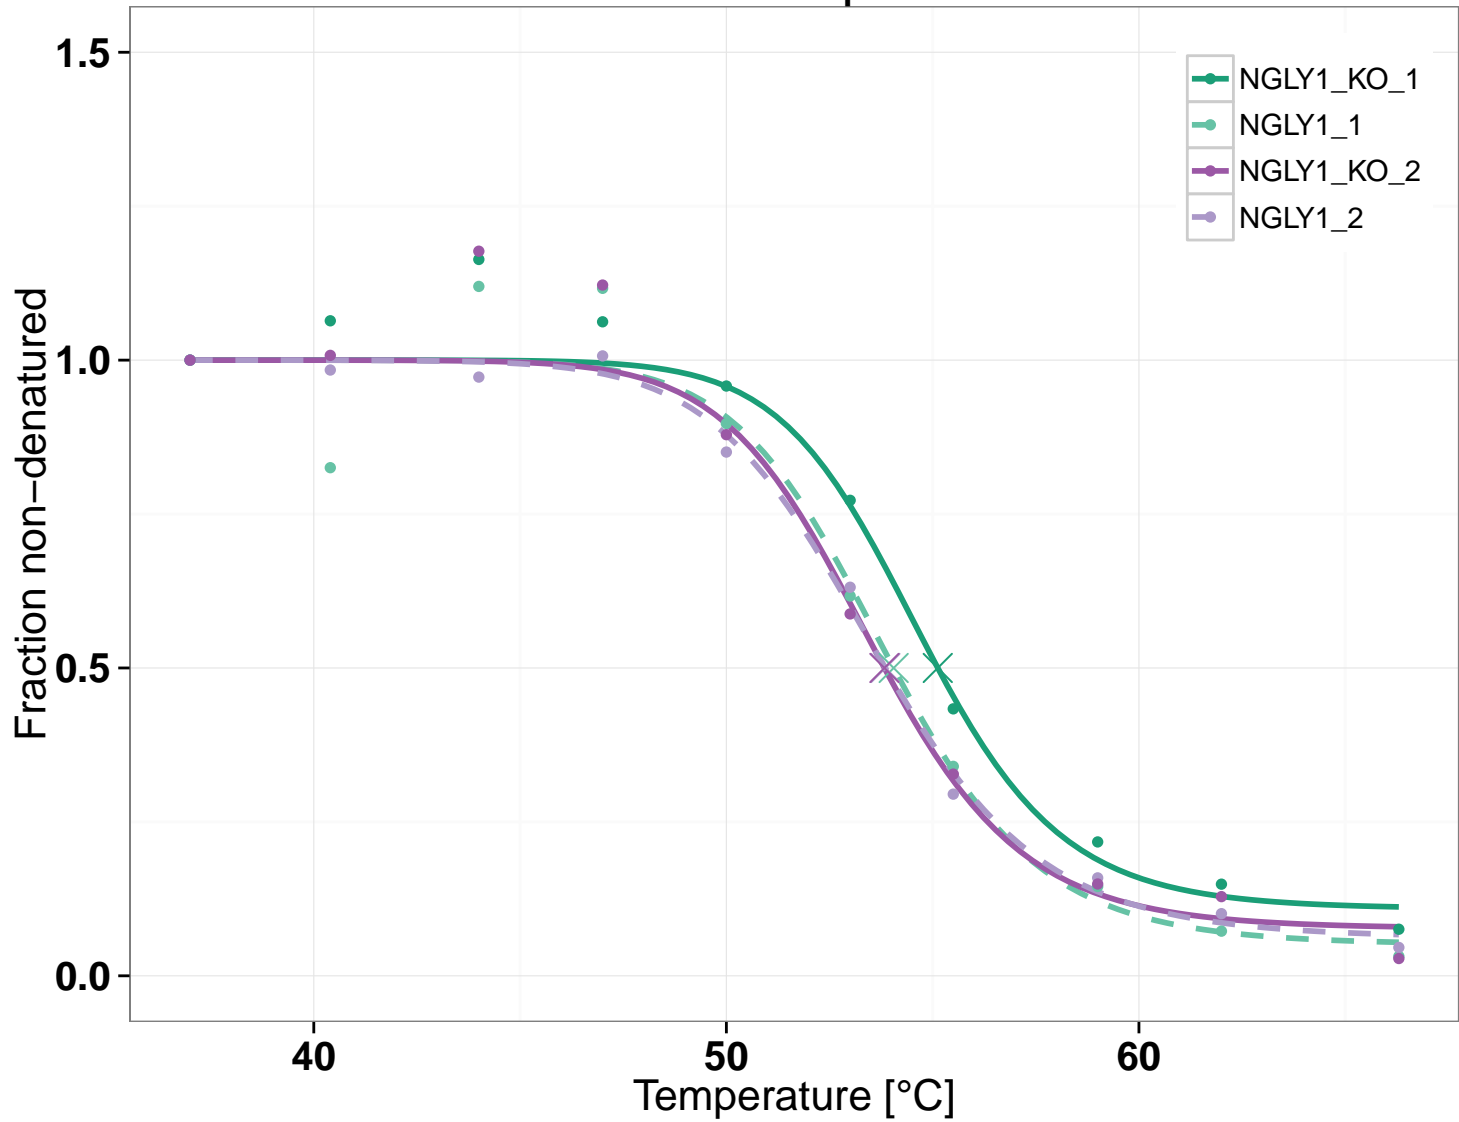

|            | meltPoint | slope | plateau | R2   |
|------------|-----------|-------|---------|------|
| NGLY1_KO_1 | 55.12     | -0.13 | 0.11    | 0.98 |
| NGLY1_1    | 54.05     | -0.13 | 0.05    | 0.96 |
| NGLY1_KO_2 | 53.83     | -0.13 | 0.08    | 0.97 |
| NGLY1_2    | 53.85     | -0.12 | 0.06    | 1    |

Supplement: Supplementary file 3148 [file 1]

# IPI00303335.2|NEB

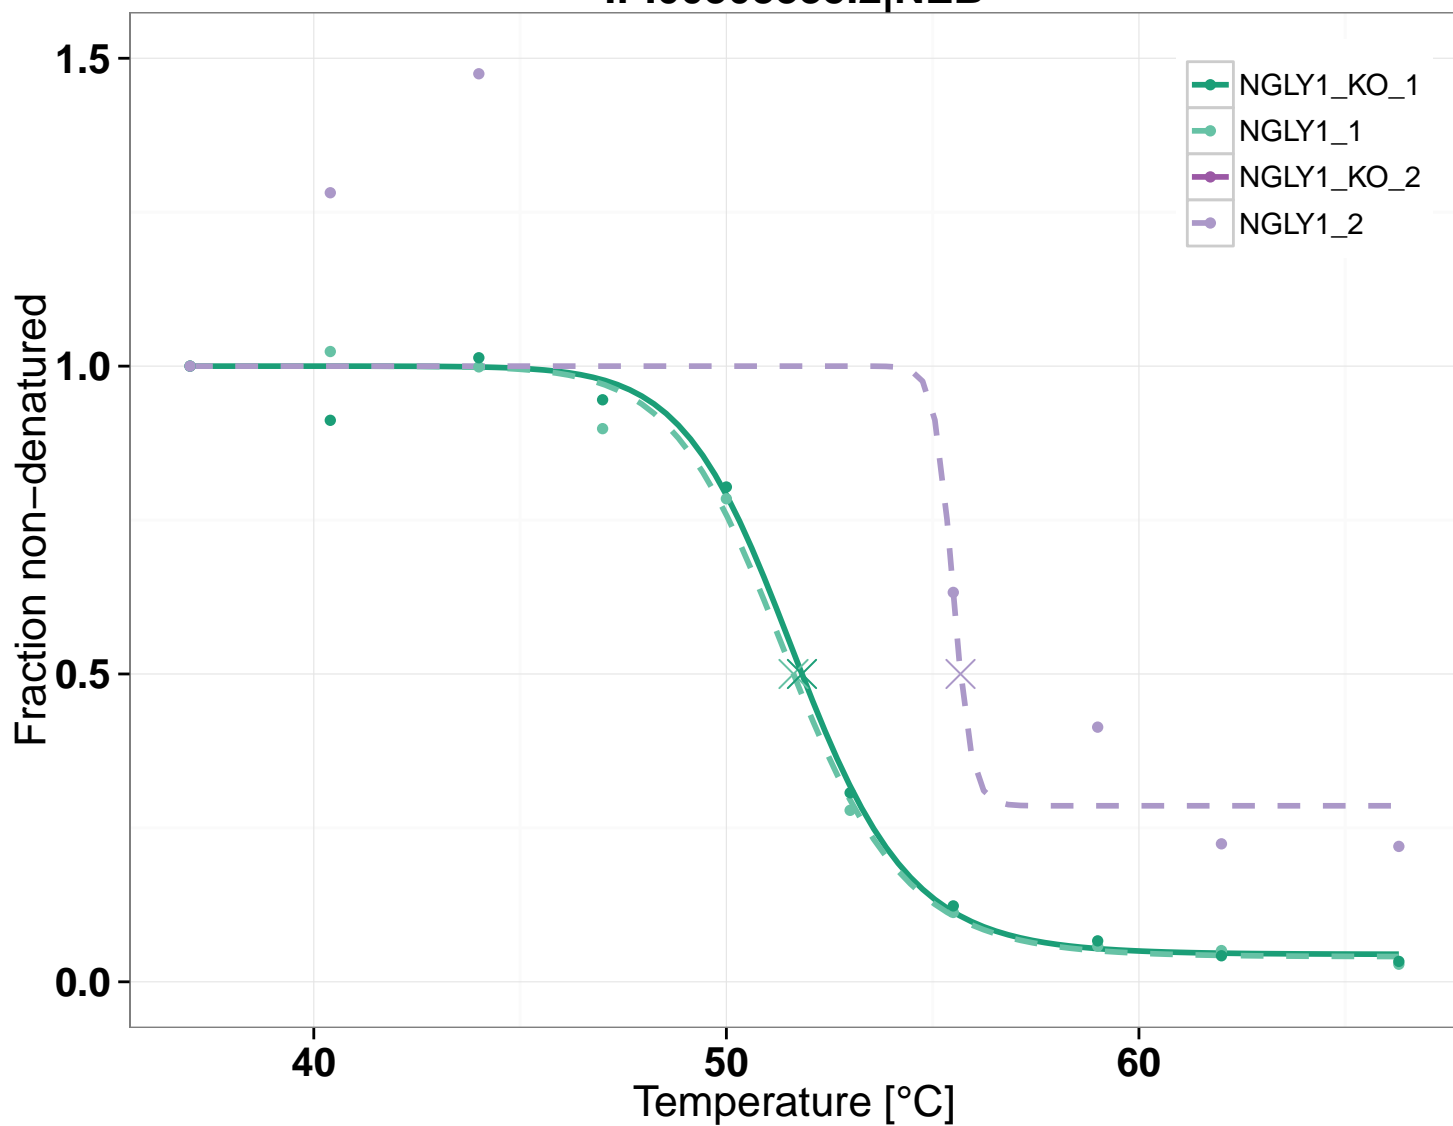

|            | meltPoint | slope | plateau | R2   |
|------------|-----------|-------|---------|------|
| NGLY1_KO_1 | 51.83     | -0.17 | 0.04    | 0.99 |
| NGLY1_1    | 51.63     | -0.17 | 0.04    | 1    |
| NGLY1_KO_2 | -         | -     | -       | -    |
| NGLY1_2    | 55.68     | -0.8  | 0.29    | 0.37 |

Supplement: Supplementary file 3149 [file 1]

IPI00060628.3|RNF12

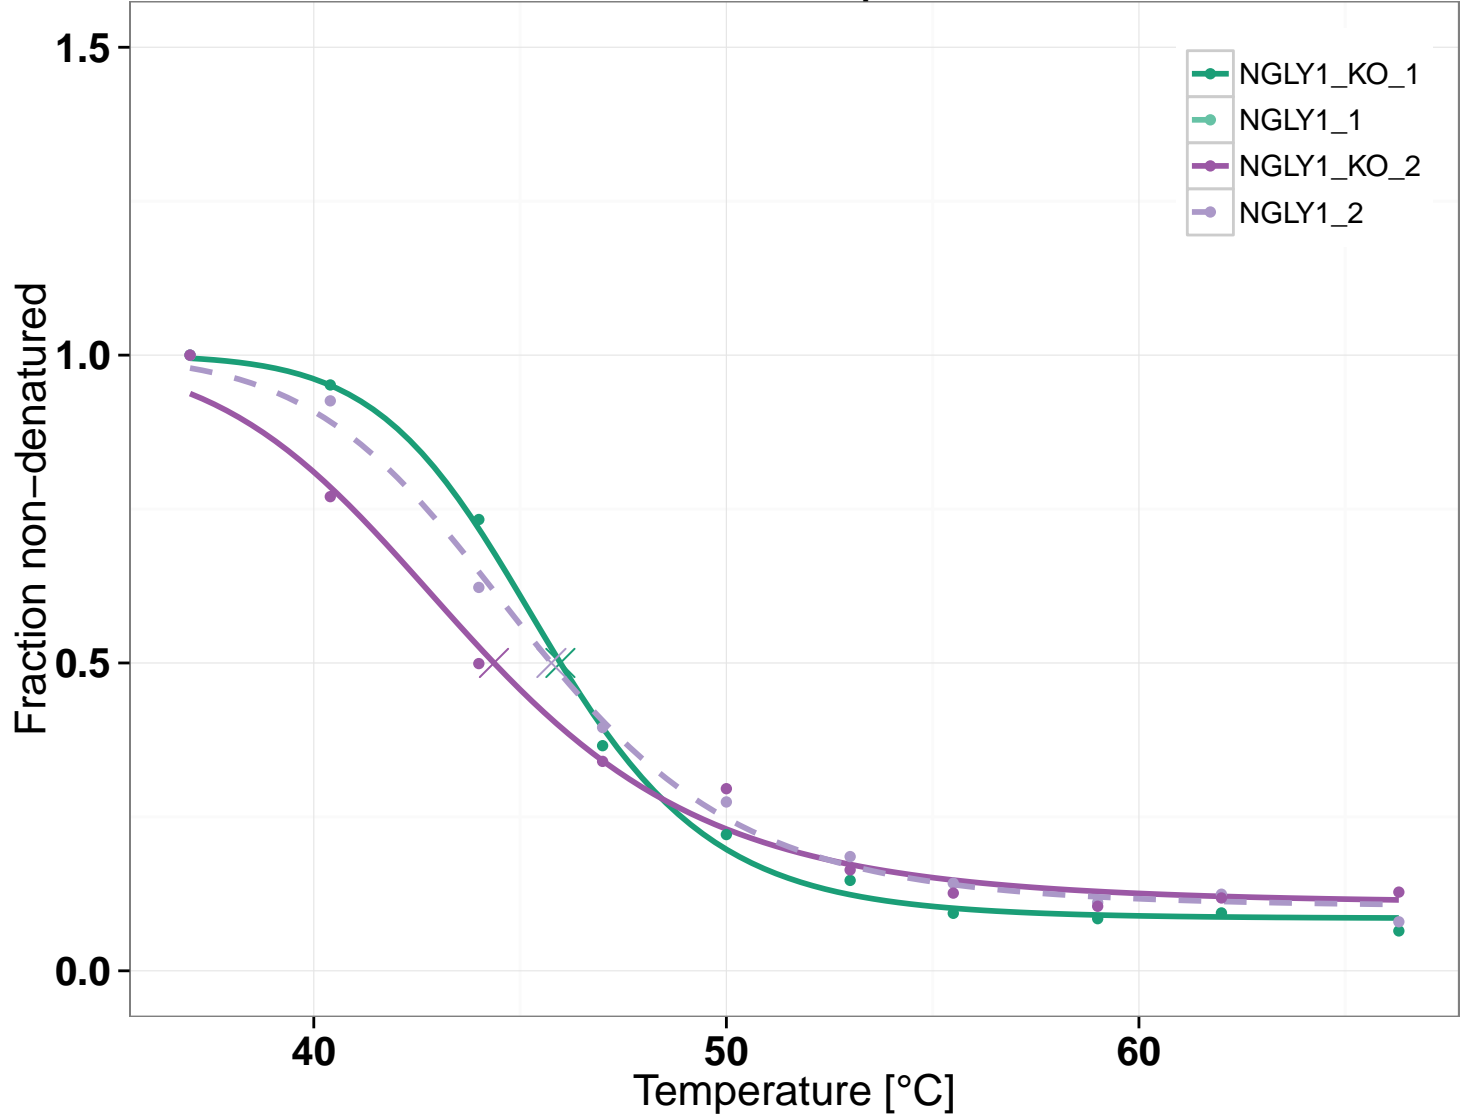

|            | meltPoint | slope  | plateau | R2   |
|------------|-----------|--------|---------|------|
| NGLY1_KO_1 | 45.98     | -0.11  | 0.08    | 1    |
| NGLY1_1    | -         | -      | -       | -    |
| NGLY1_KO_2 | 44.37     | -0.075 | 0.11    | 0.99 |
| NGLY1_2    | 45.76     | -0.085 | 0.1     | 1    |

Supplement: Supplementary file 3150 [file 1]

# IPI00002902.5|NOL9

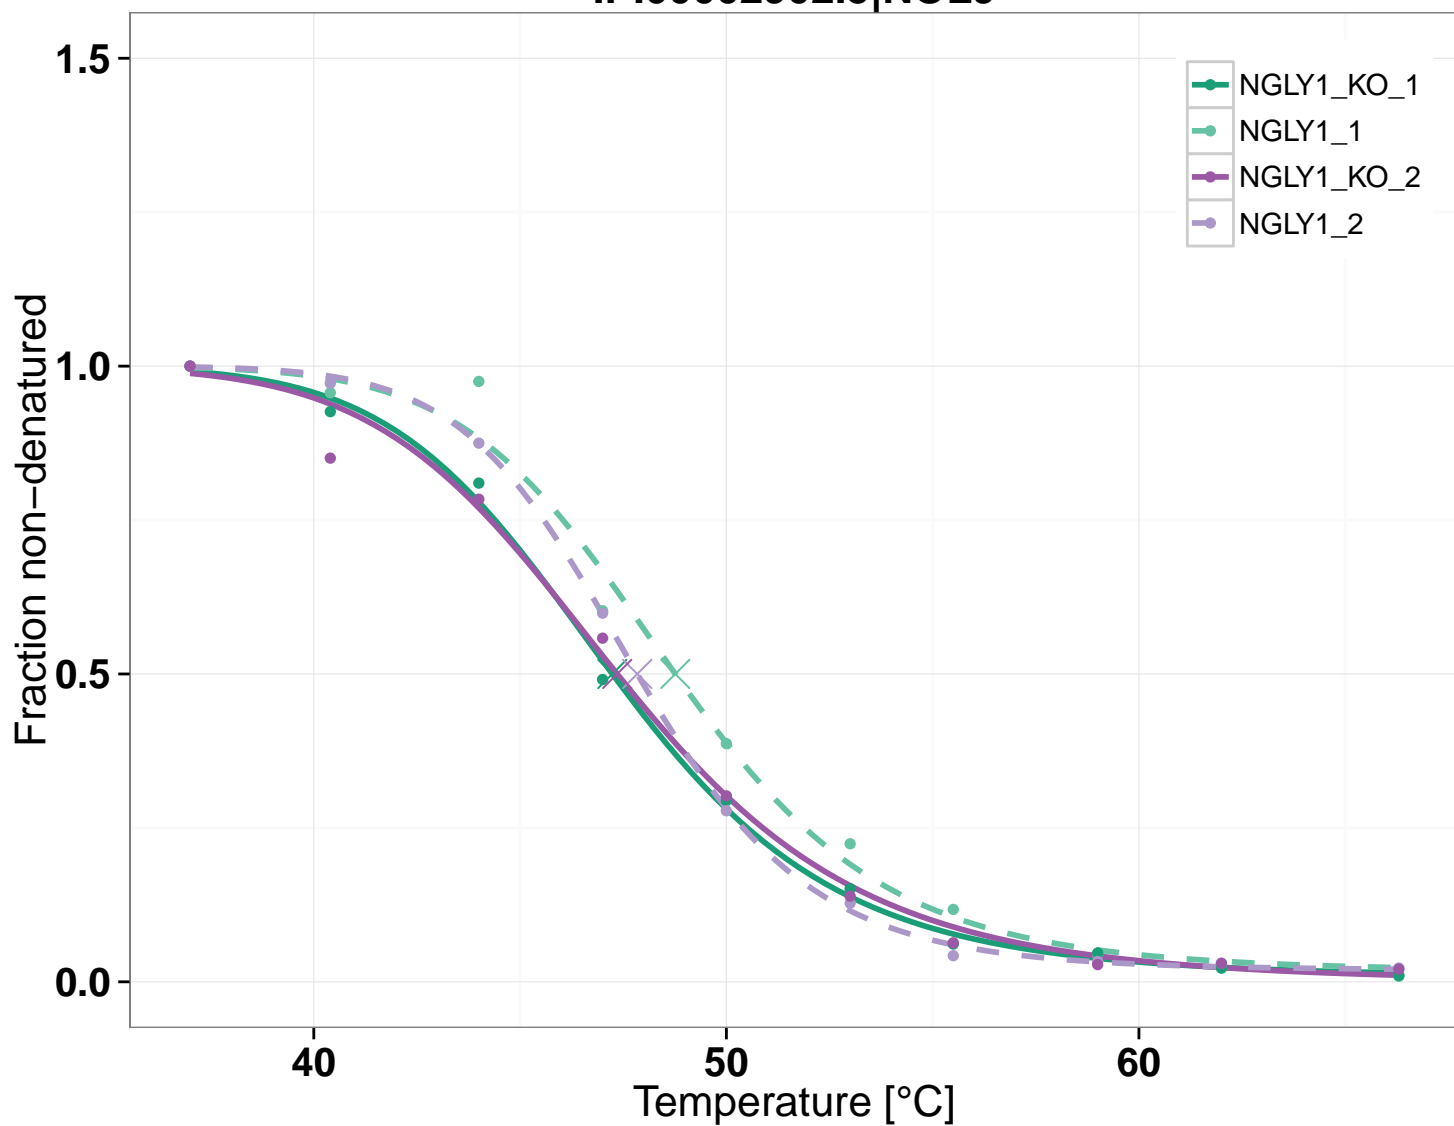

|            | meltPoint | slope  | plateau | R2   |
|------------|-----------|--------|---------|------|
| NGLY1_KO_1 | 47.24     | -0.092 | 0.01    | 1    |
| NGLY1_1    | 48.76     | -0.096 | 0.02    | 0.99 |
| NGLY1_KO_2 | 47.35     | -0.085 | 0       | 0.99 |
| NGLY1_2    | 47.84     | -0.12  | 0.02    | 1    |

Supplement: Supplementary file 3151 [file 1]

IPI00853149.1|TMEM131

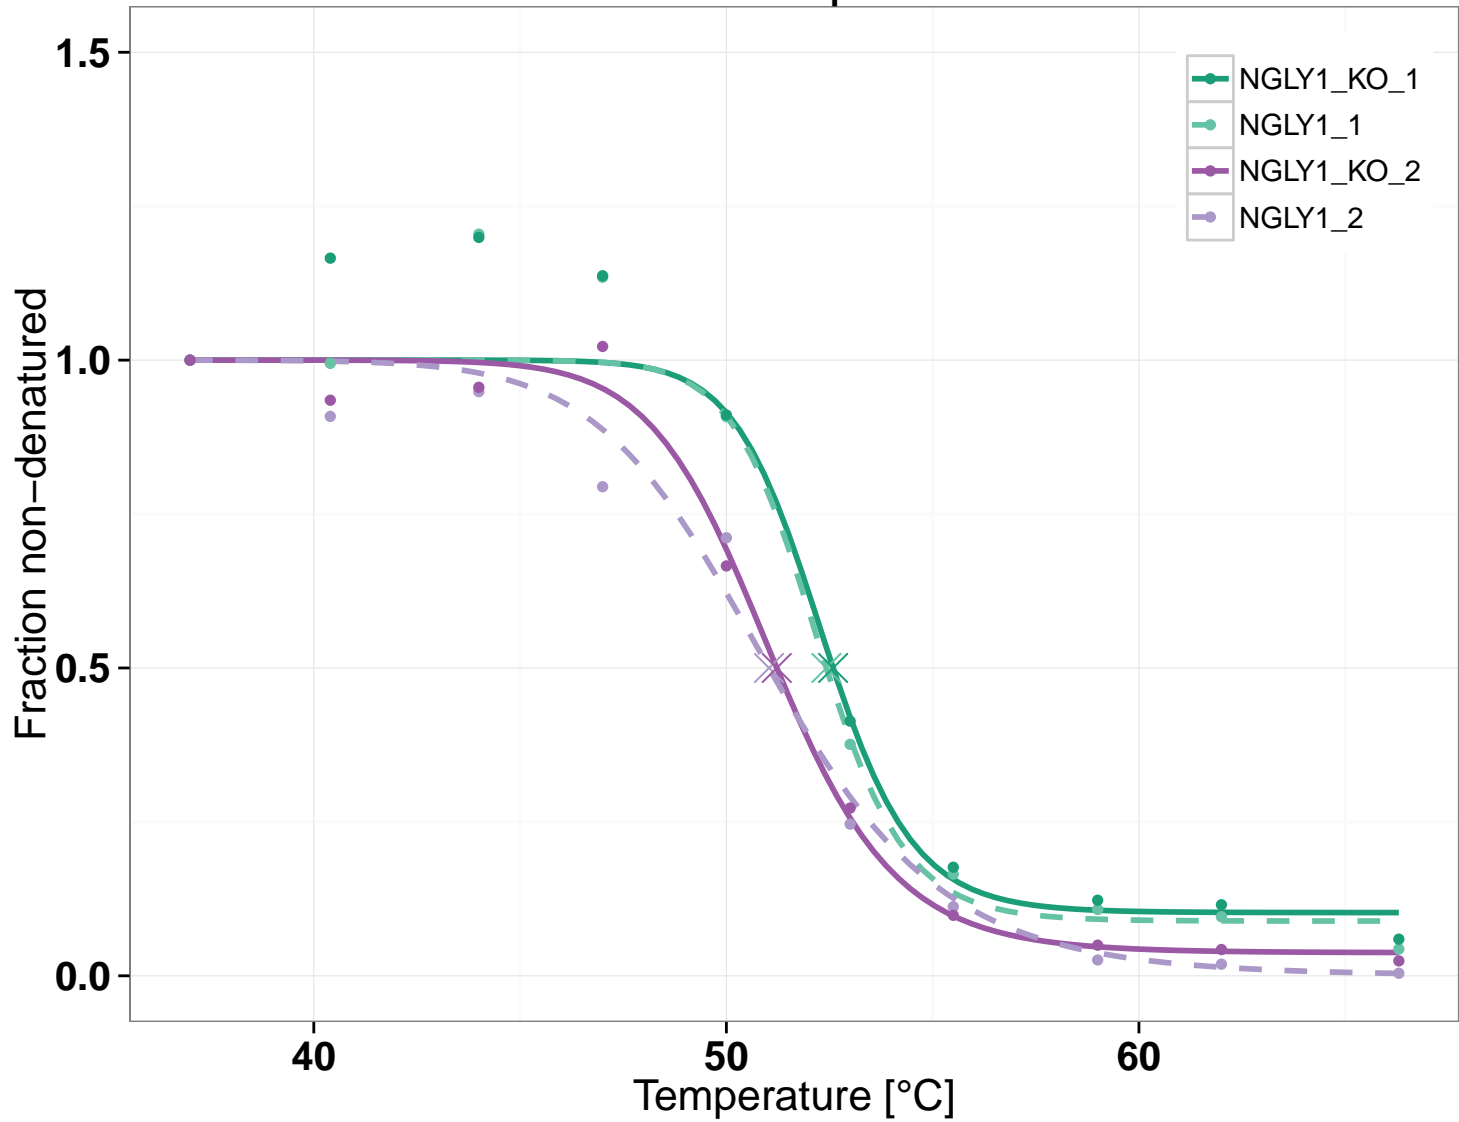

|            | meltPoint | slope | plateau | R2   |
|------------|-----------|-------|---------|------|
| NGLY1_KO_1 | 52.59     | -0.21 | 0.1     | 0.96 |
| NGLY1_1    | 52.43     | -0.22 | 0.09    | 0.97 |
| NGLY1_KO_2 | 51.22     | -0.16 | 0.04    | 0.99 |
| NGLY1_2    | 51.03     | -0.12 | 0       | 0.98 |

Supplement: Supplementary file 3152 [file 1]

IPI00294242.2|MRPS31

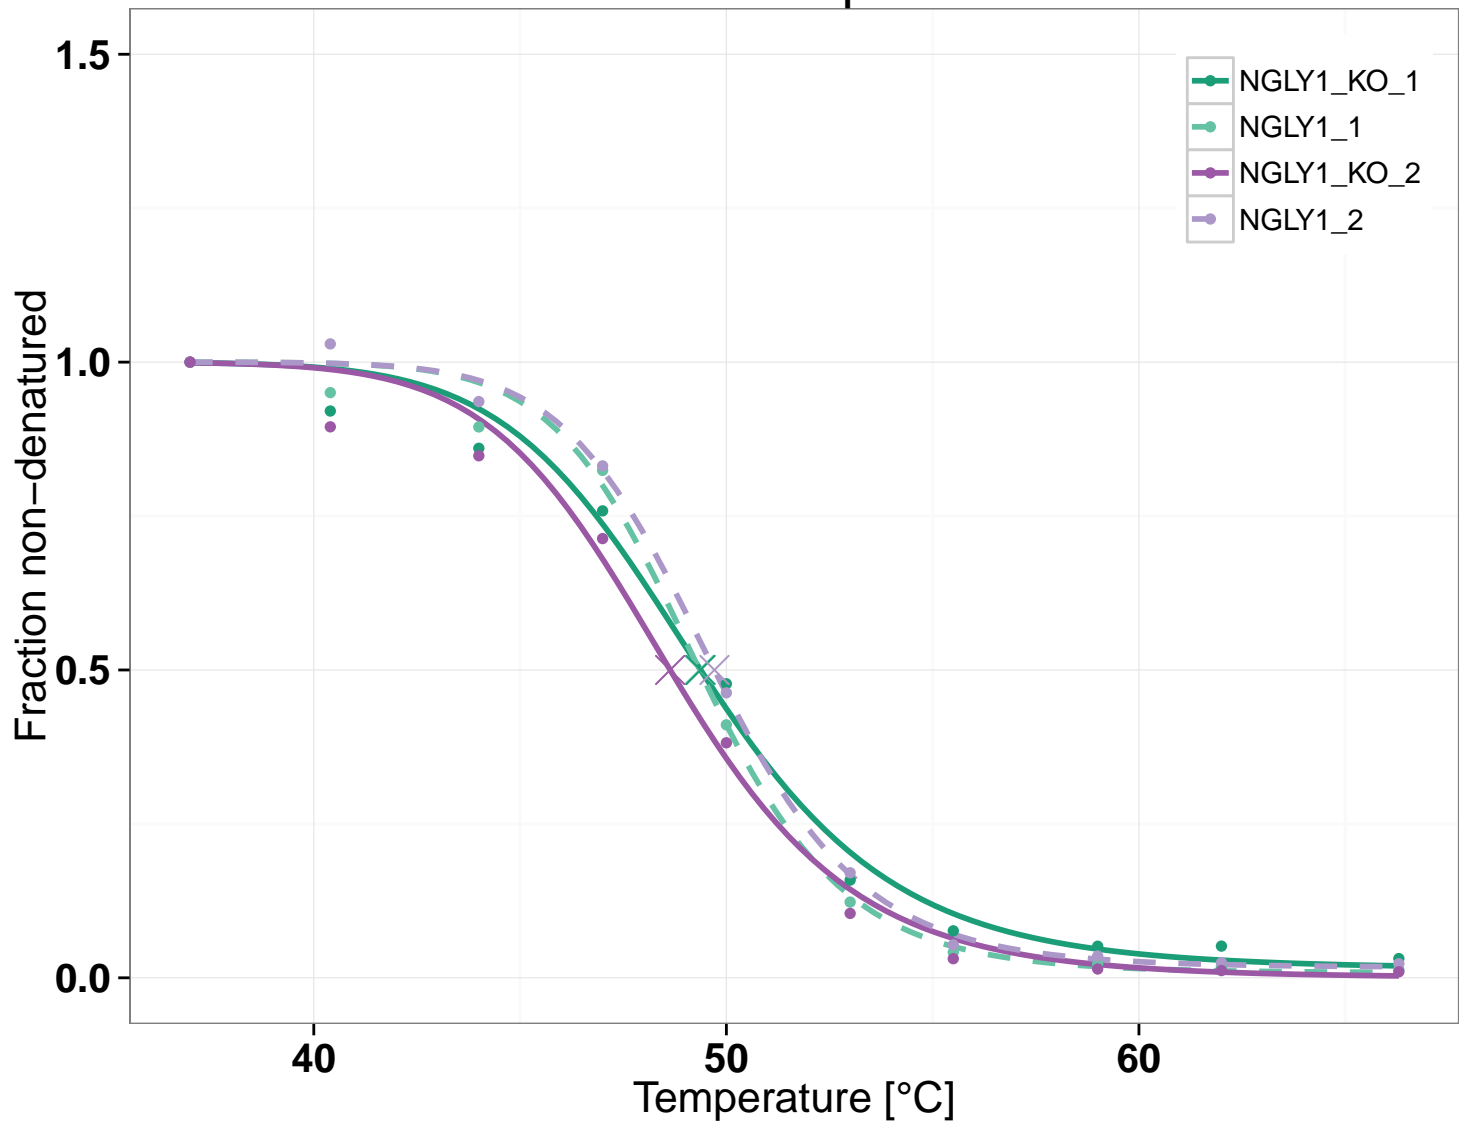

|            | meltPoint | slope | plateau | R2   |
|------------|-----------|-------|---------|------|
| NGLY1_KO_1 | 49.38     | -0.1  | 0.01    | 0.99 |
| NGLY1_1    | 49.35     | -0.14 | 0.01    | 1    |
| NGLY1_KO_2 | 48.64     | -0.11 | 0       | 0.99 |
| NGLY1_2    | 49.71     | -0.13 | 0.02    | 1    |

Supplement: Supplementary file 3153 [file 1]

IPI00155199.4|ZYG11B

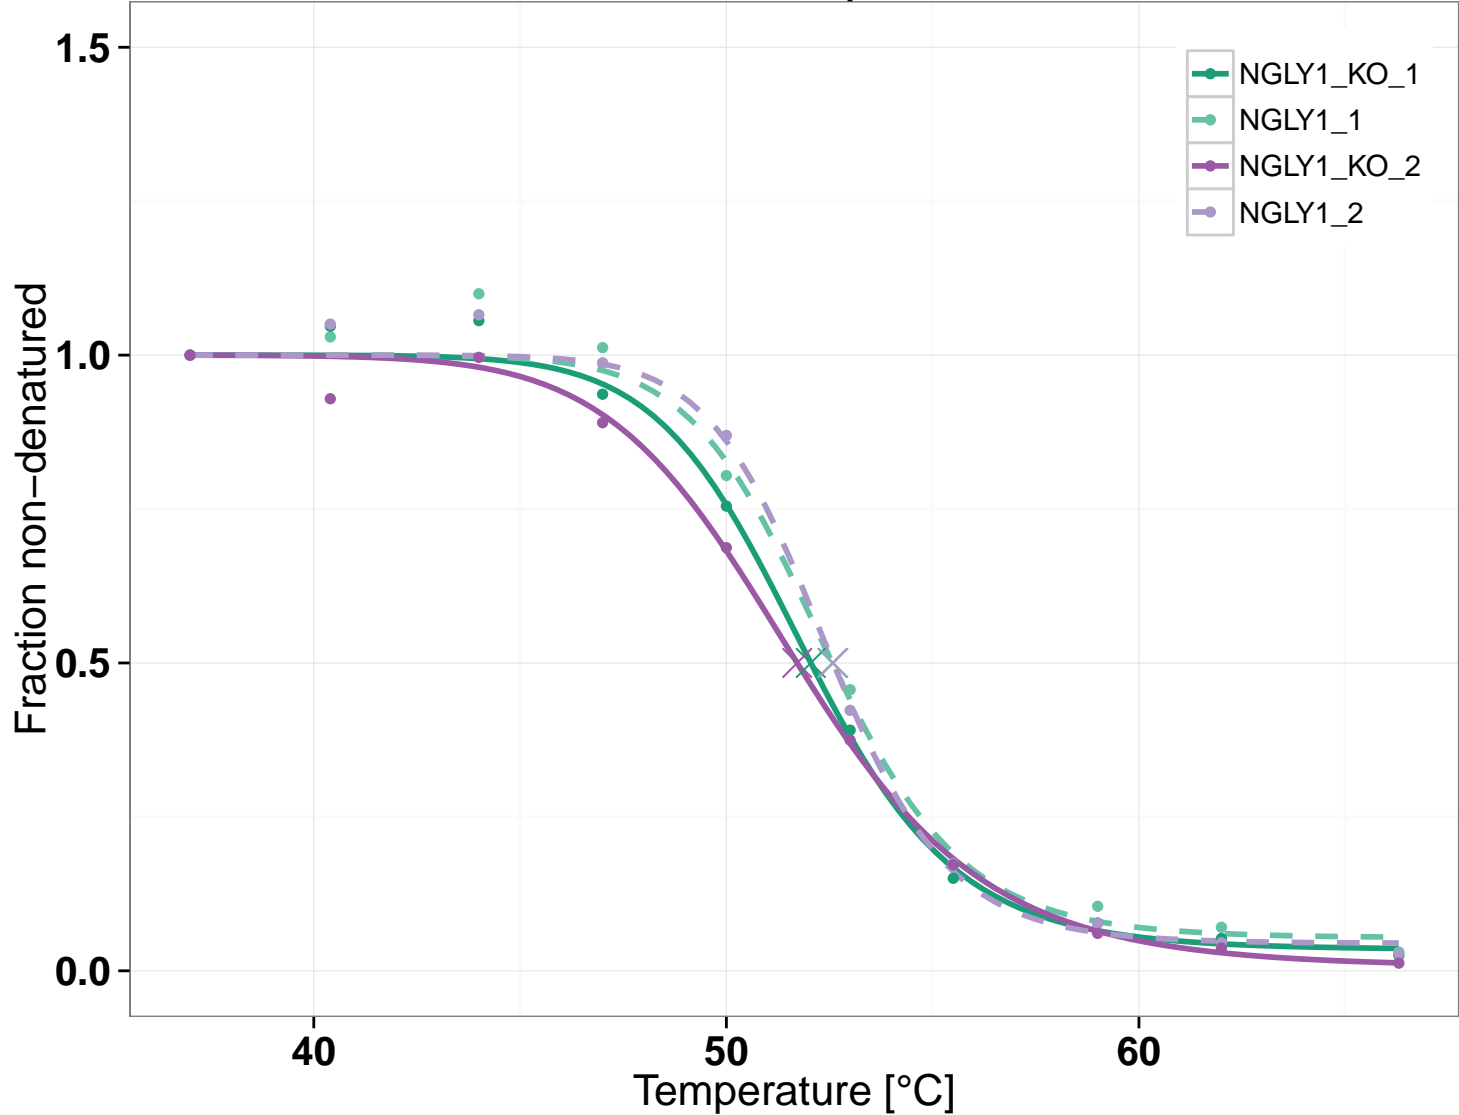

|            | meltPoint | slope | plateau | R2   |
|------------|-----------|-------|---------|------|
| NGLY1_KO_1 | 52.05     | -0.13 | 0.03    | 1    |
| NGLY1_1    | 52.57     | -0.14 | 0.05    | 0.99 |
| NGLY1_KO_2 | 51.72     | -0.11 | 0.01    | 1    |
| NGLY1_2    | 52.59     | -0.16 | 0.04    | 1    |

Supplement: Supplementary file 3154 [file 1]

IPI00791333.1|C20ORF4

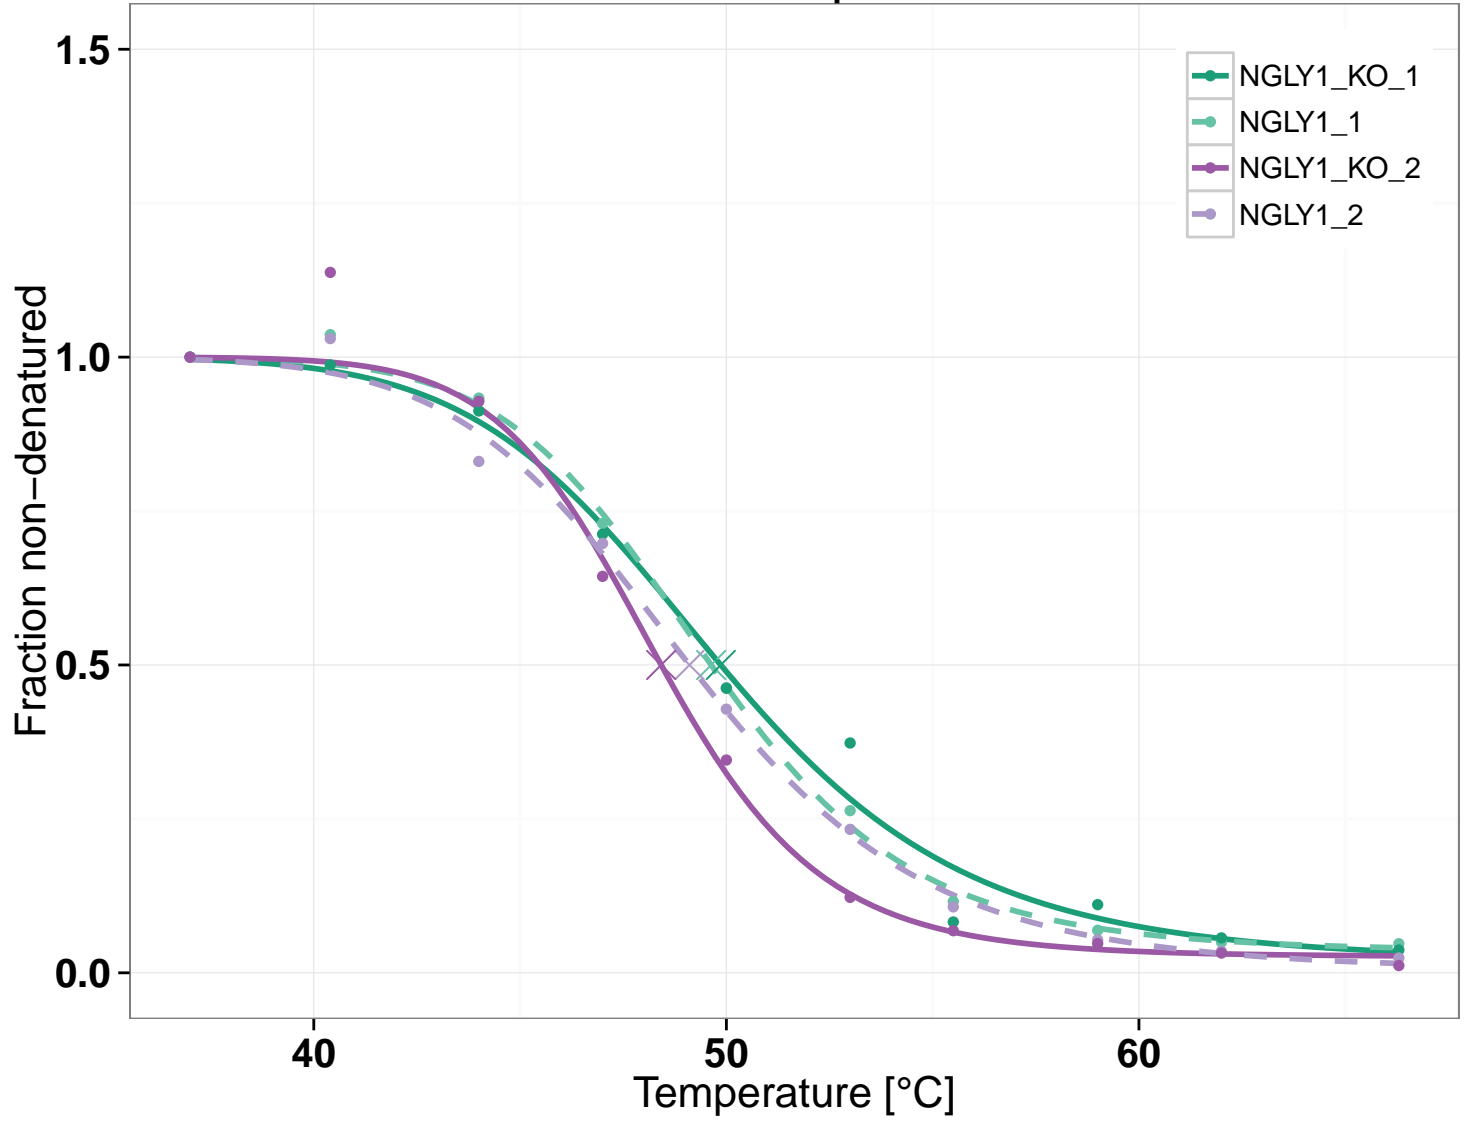

|            | meltPoint | slope  | plateau | R2   |
|------------|-----------|--------|---------|------|
| NGLY1_KO_1 | 49.86     | -0.082 | 0.02    | 0.99 |
| NGLY1_1    | 49.63     | -0.097 | 0.03    | 1    |
| NGLY1_KO_2 | 48.42     | -0.12  | 0.03    | 0.99 |
| NGLY1_2    | 49.11     | -0.087 | 0       | 1    |

Supplement: Supplementary file 3155 [file 1]

# IPI00031386.2|PIK3CA

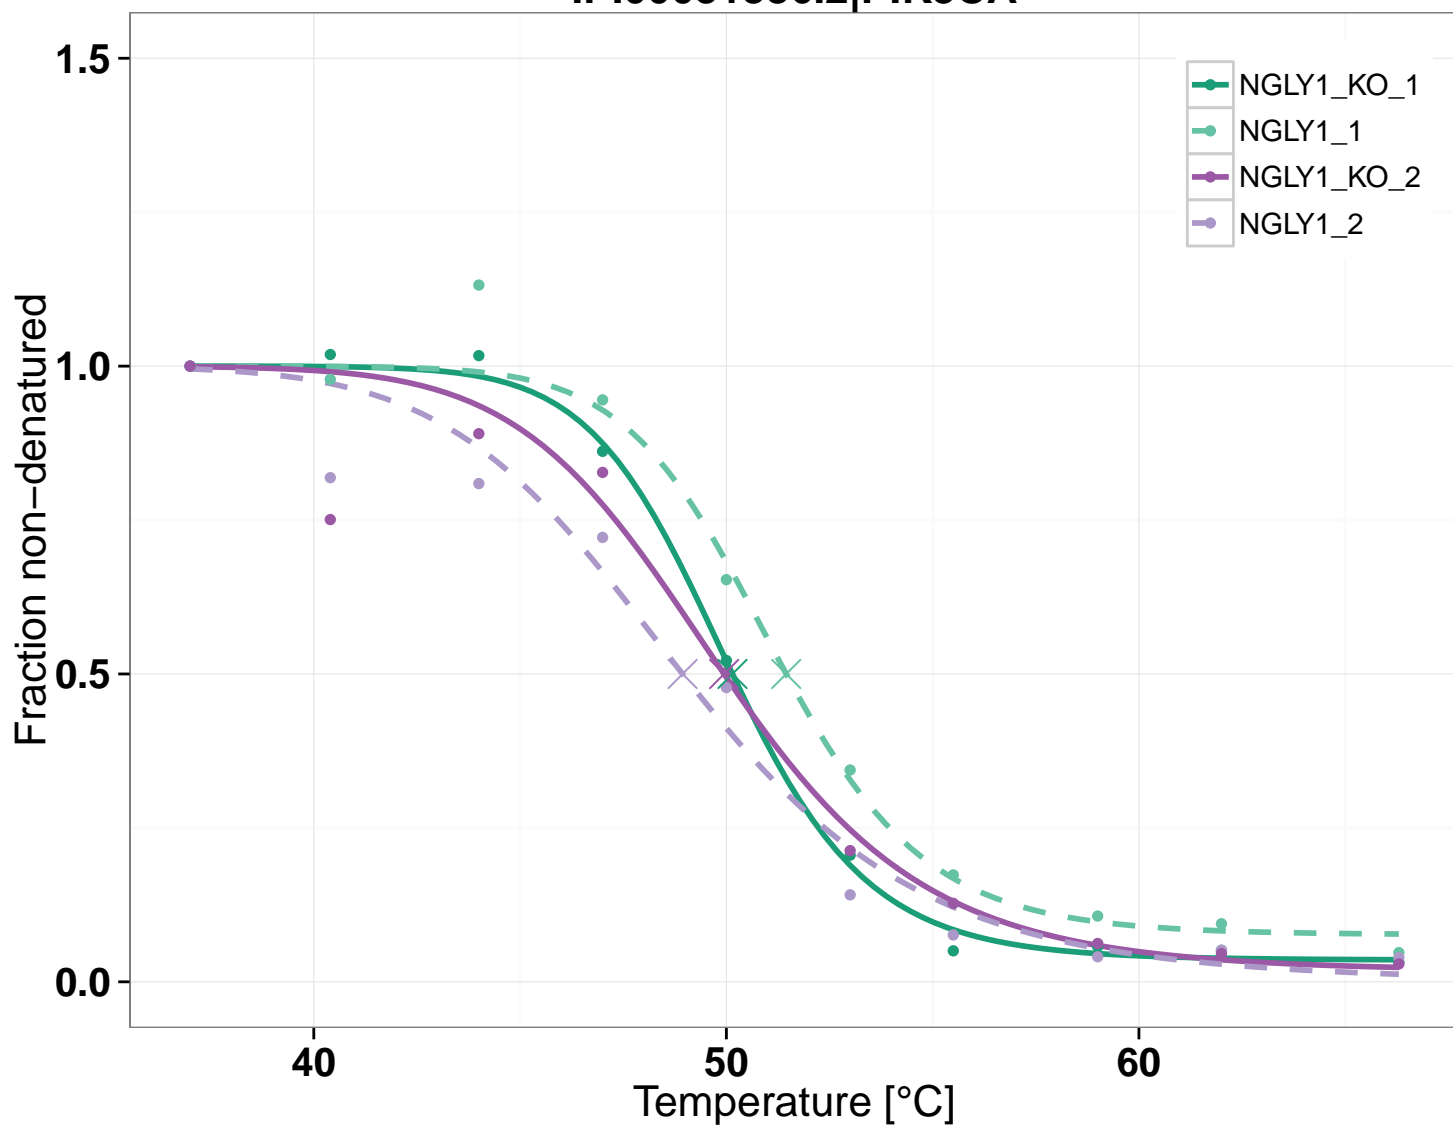

Supplement: Supplementary file 3156 [file 1]

IPI00221393.1|SLC44A1

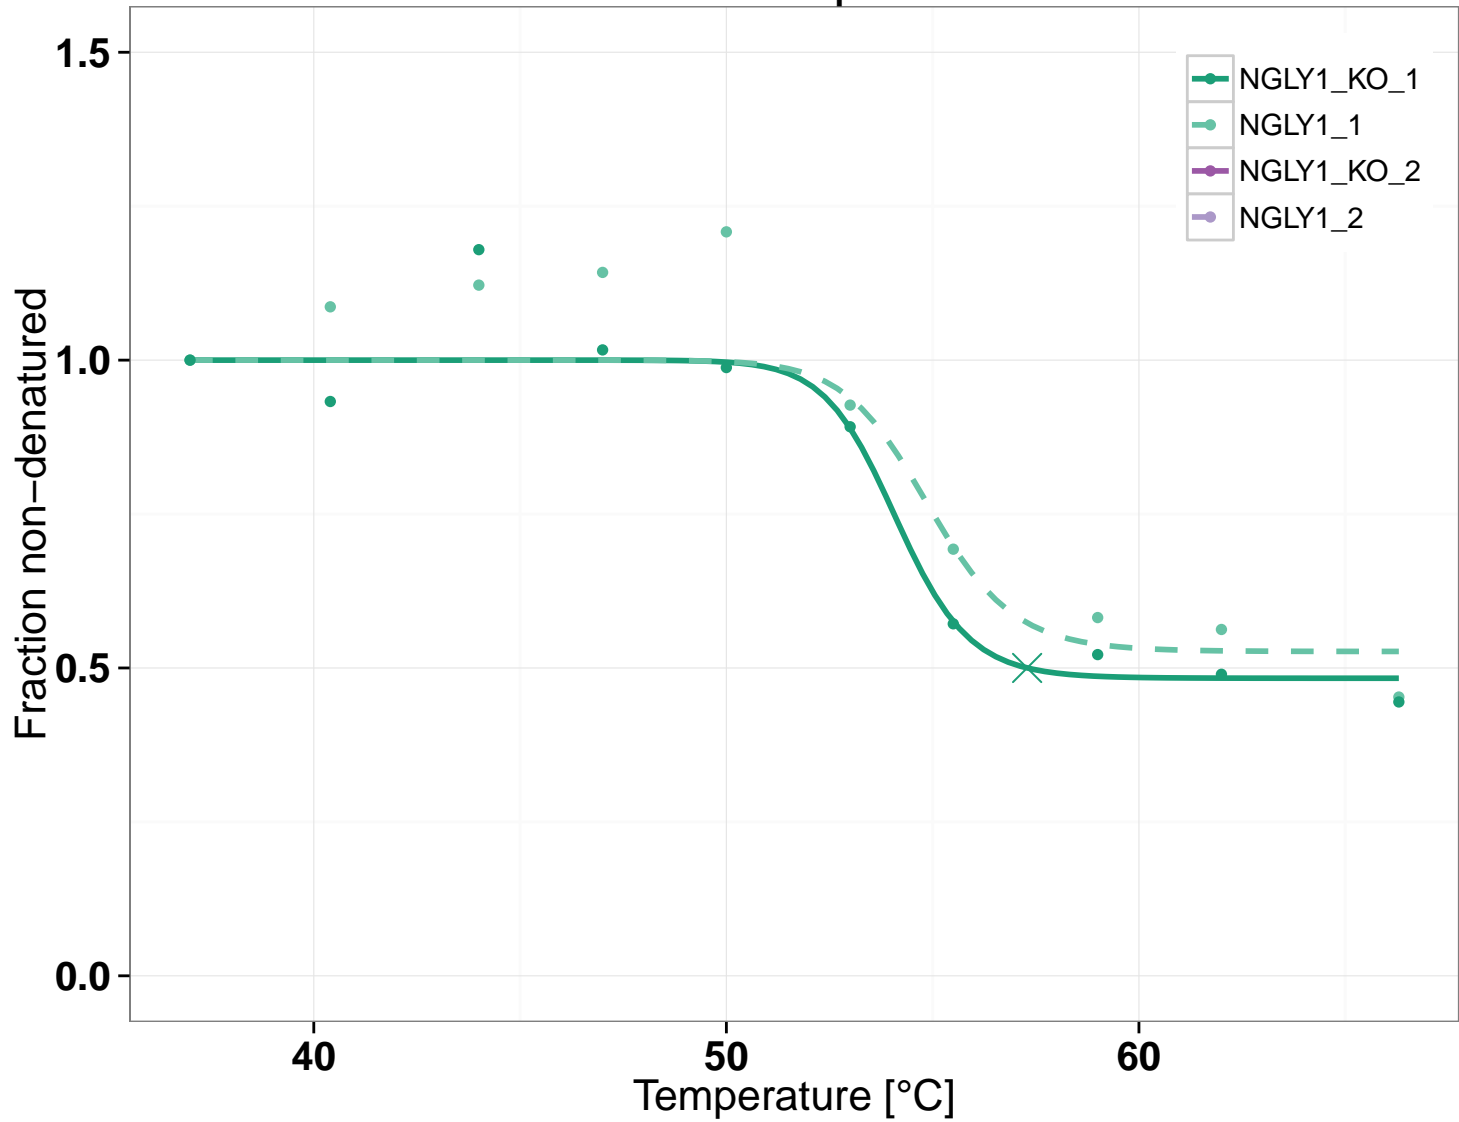

|            | meltPoint | slope | plateau | R2   |
|------------|-----------|-------|---------|------|
| NGLY1_KO_1 | 57.29     | -0.15 | 0.48    | 0.94 |
| NGLY1_1    | -         | -0.11 | 0.53    | 0.86 |
| NGLY1_KO_2 | -         | -     | -       | -    |
| NGLY1_2    | -         | -     | -       | -    |

Supplement: Supplementary file 3157 [file 1]

IPI00013378.1|TOP3A

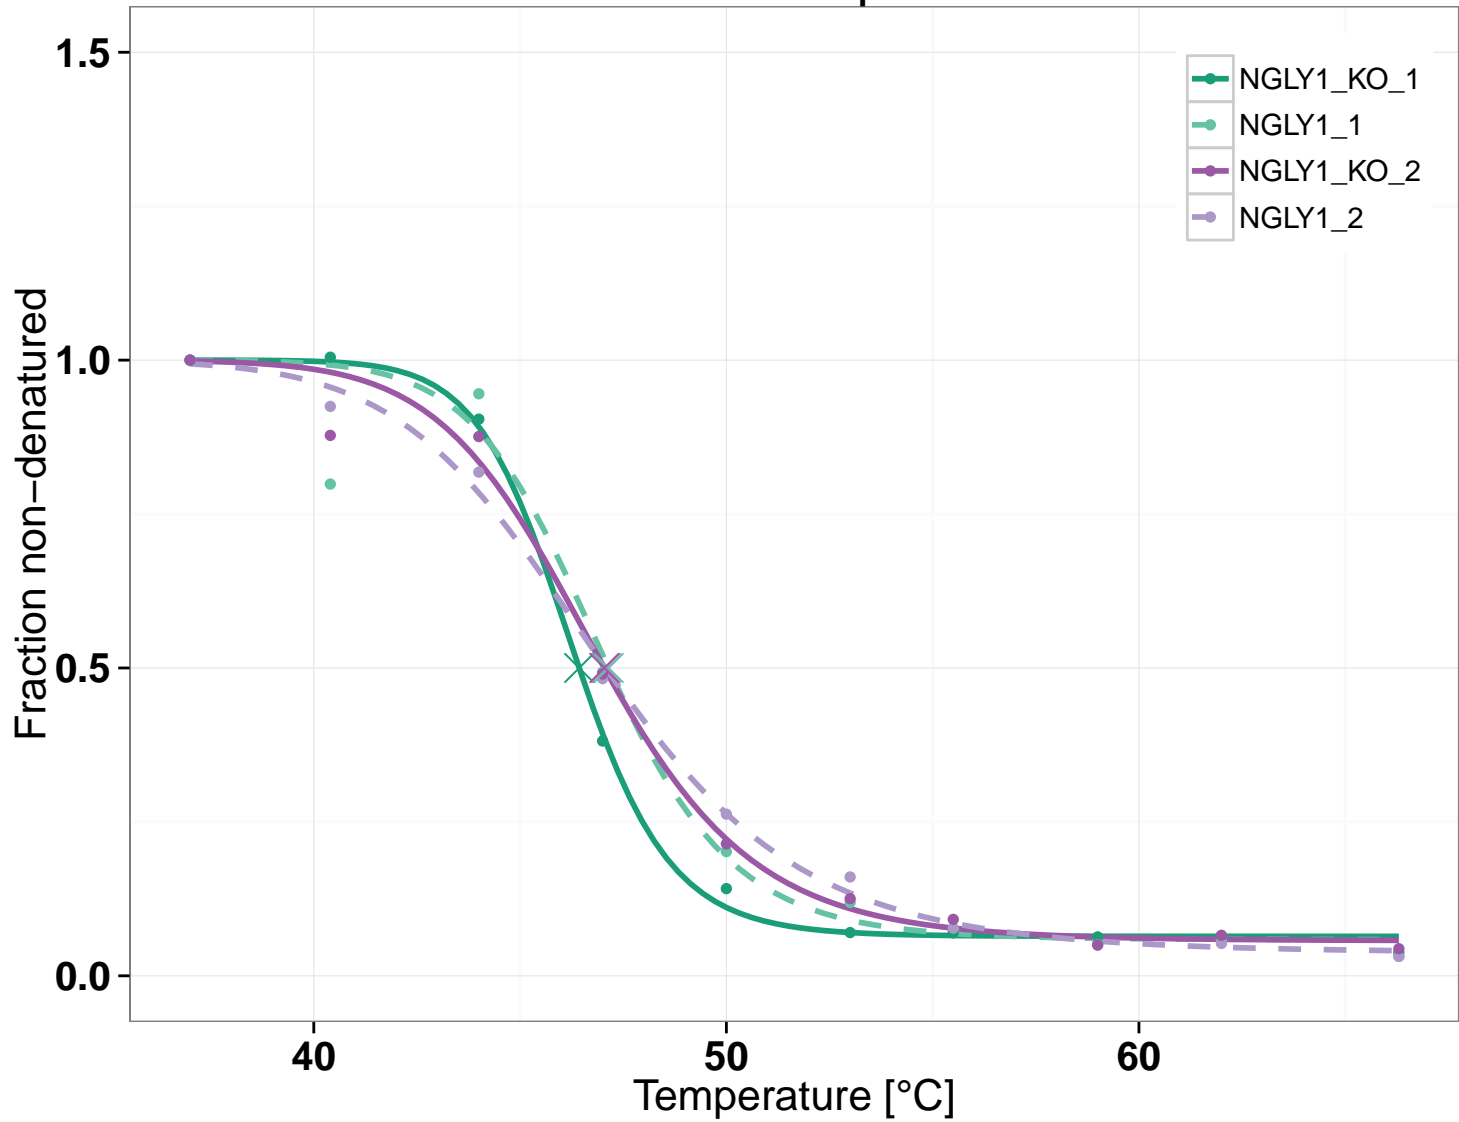

|            | meltPoint | slope  | plateau | R2   |
|------------|-----------|--------|---------|------|
| NGLY1_KO_1 | 46.43     | -0.2   | 0.06    | 1    |
| NGLY1_1    | 47.15     | -0.15  | 0.06    | 0.97 |
| NGLY1_KO_2 | 47.04     | -0.12  | 0.06    | 0.99 |
| NGLY1_2    | 47.08     | -0.098 | 0.04    | 1    |

Supplement: Supplementary file 3158 [file 1]

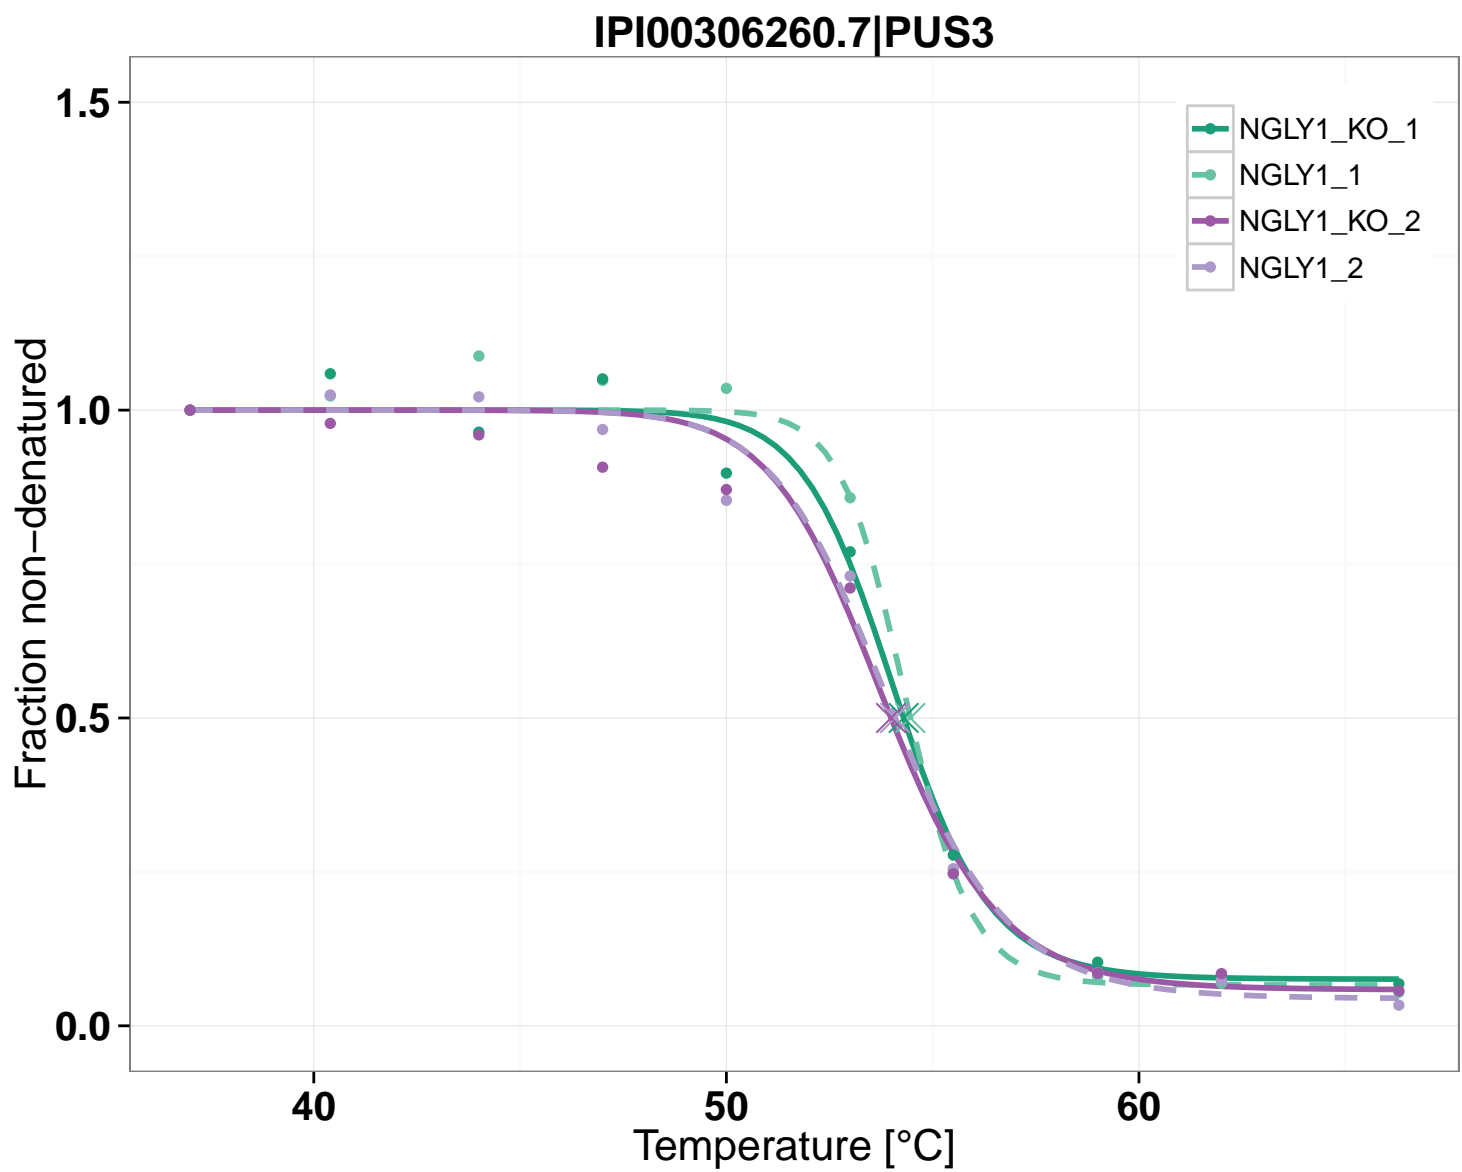

|            | meltPoint | slope | plateau | R2   |
|------------|-----------|-------|---------|------|
| NGLY1_KO_1 | 54.3      | -0.2  | 0.08    | 0.99 |
| NGLY1_1    | 54.46     | -0.29 | 0.07    | 0.99 |
| NGLY1_KO_2 | 53.99     | -0.17 | 0.06    | 0.99 |
| NGLY1_2    | 54.09     | -0.17 | 0.04    | 0.99 |

Supplement: Supplementary file 3159 [file 1]

IPI00299507.6|NCAPH

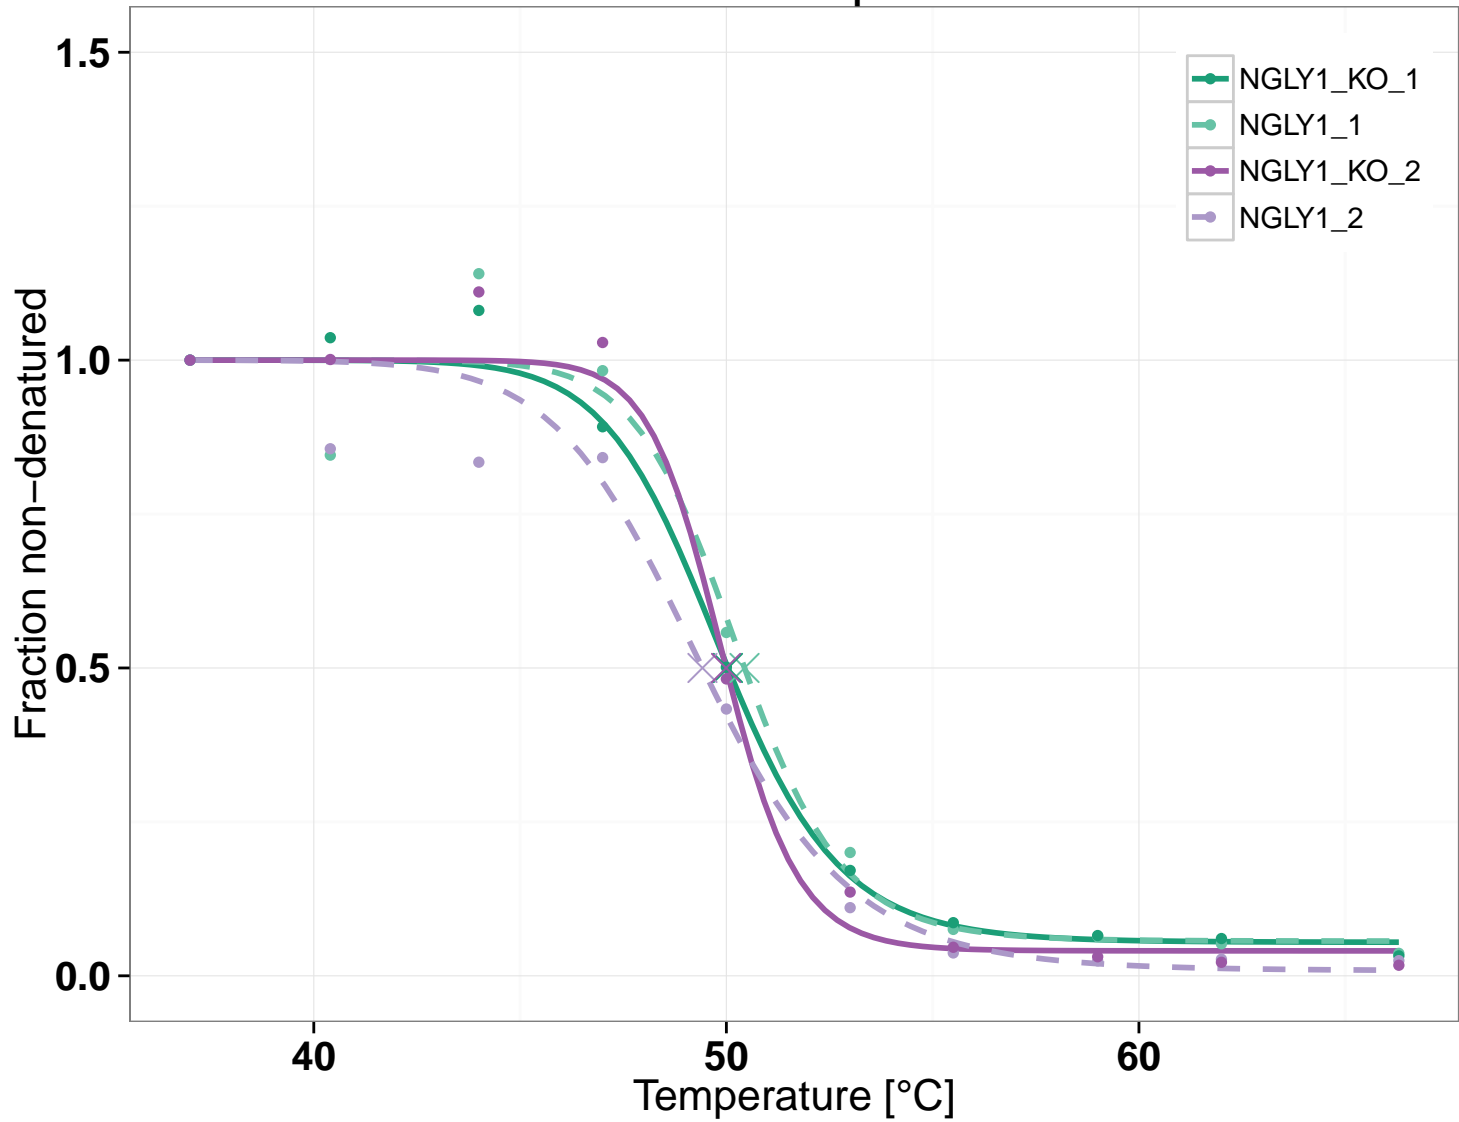

|            | meltPoint | slope | plateau | R2   |
|------------|-----------|-------|---------|------|
| NGLY1_KO_1 | 50.04     | -0.17 | 0.05    | 0.99 |
| NGLY1_1    | 50.44     | -0.19 | 0.06    | 0.97 |
| NGLY1_KO_2 | 49.99     | -0.27 | 0.04    | 0.99 |
| NGLY1_2    | 49.42     | -0.14 | 0.01    | 0.97 |

Supplement: Supplementary file 3160 [file 1]

IPI00221327.1|RTCD1

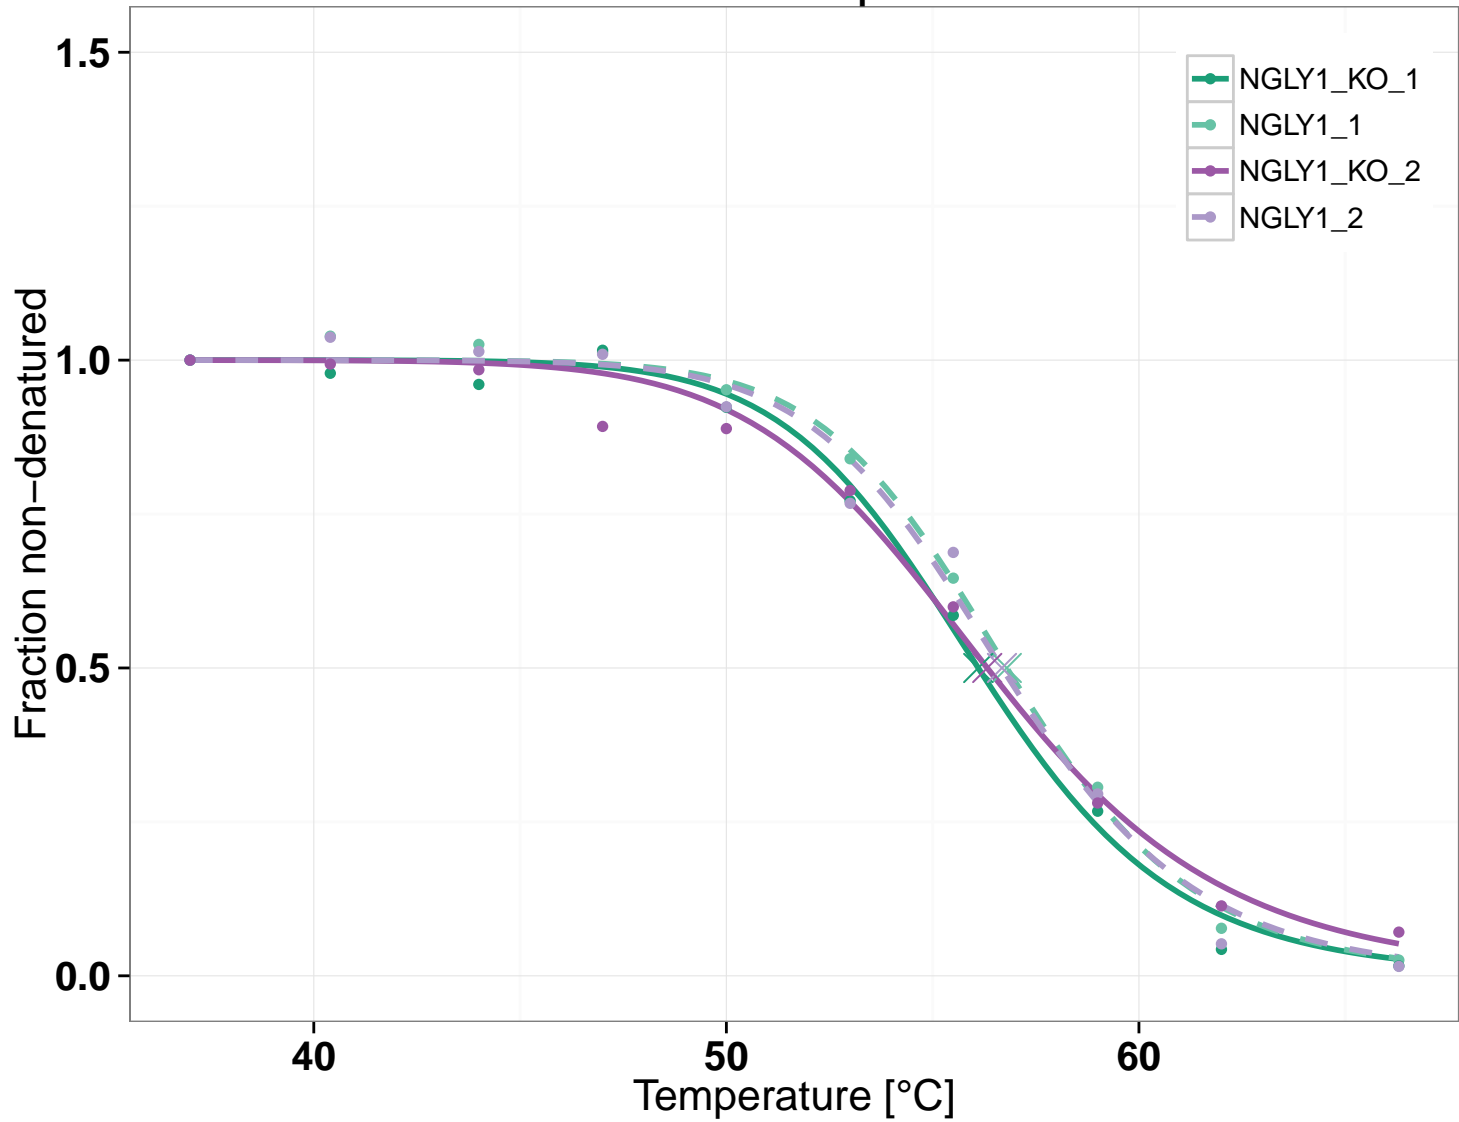

|            | meltPoint | slope  | plateau | R2   |
|------------|-----------|--------|---------|------|
| NGLY1_KO_1 | 56.11     | -0.1   | 0       | 0.99 |
| NGLY1_1    | 56.8      | -0.11  | 0       | 1    |
| NGLY1_KO_2 | 56.32     | -0.087 | 0       | 0.99 |
| NGLY1_2    | 56.68     | -0.11  | 0       | 0.99 |

Supplement: Supplementary file 3161 [file 1]

# IPI00021305.1|CCNH

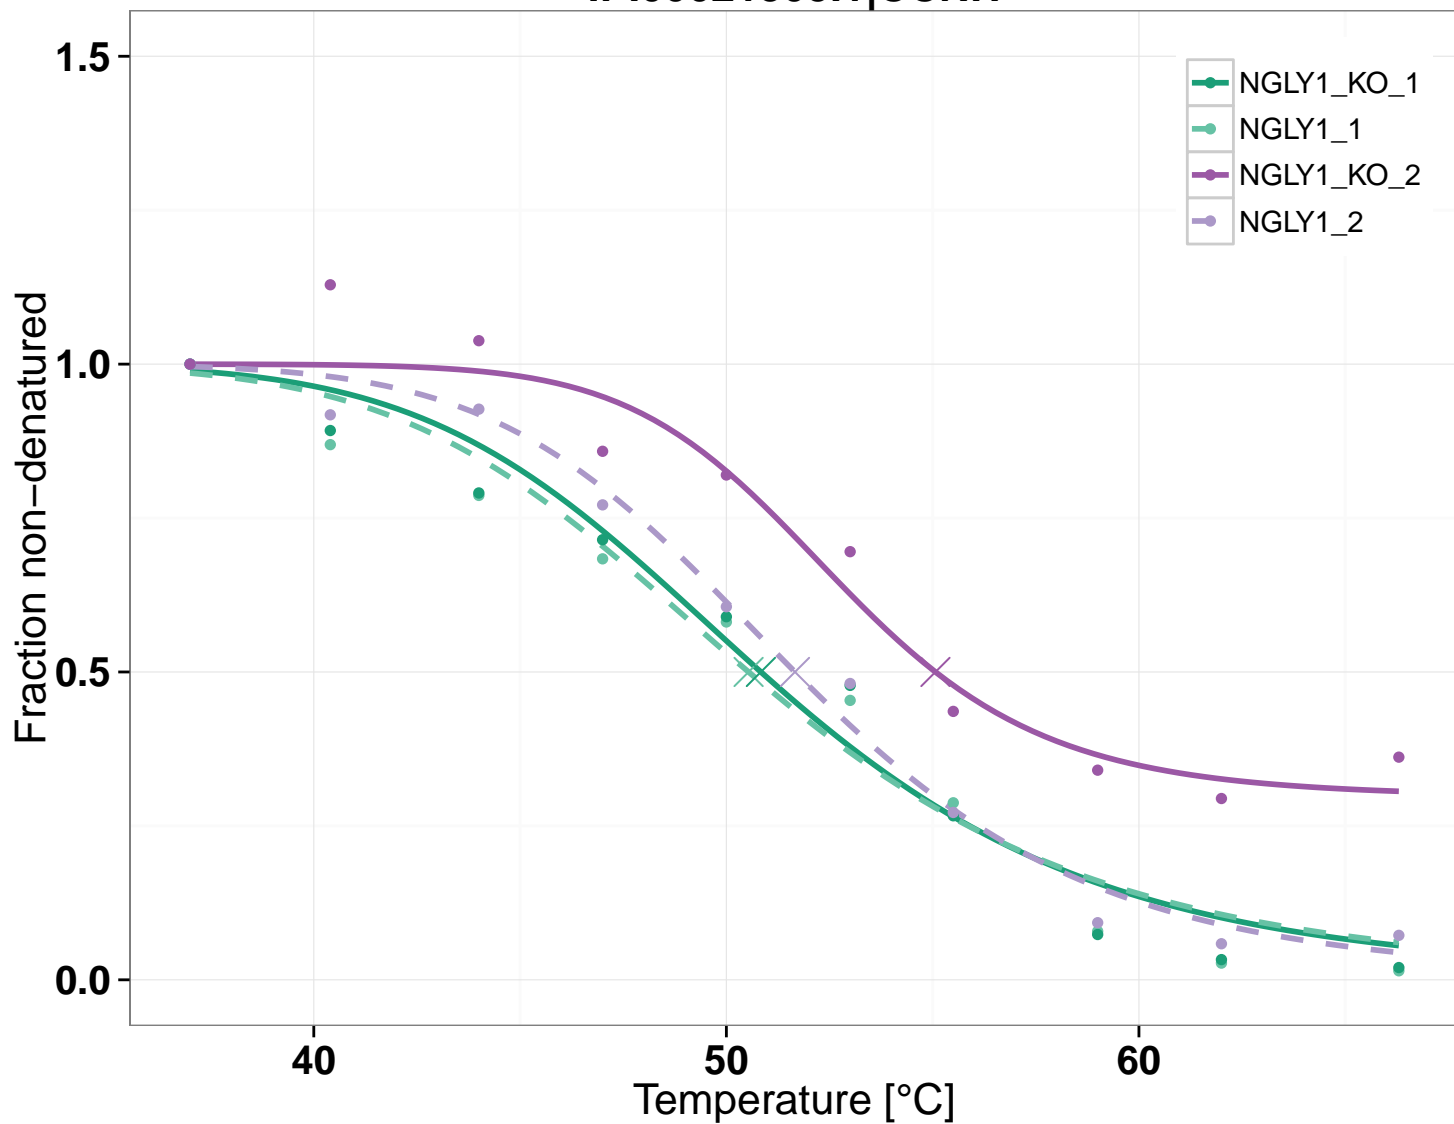

|            | meltPoint | slope  | plateau | R2   |
|------------|-----------|--------|---------|------|
| NGLY1_KO_1 | 50.84     | -0.061 | 0       | 0.97 |
| NGLY1_1    | 50.54     | -0.059 | 0       | 0.97 |
| NGLY1_KO_2 | 55.07     | -0.07  | 0.3     | 0.96 |
| NGLY1_2    | 51.66     | -0.069 | 0       | 0.99 |

Supplement: Supplementary file 3162 [file 1]

IPI00894531.1|TANC2

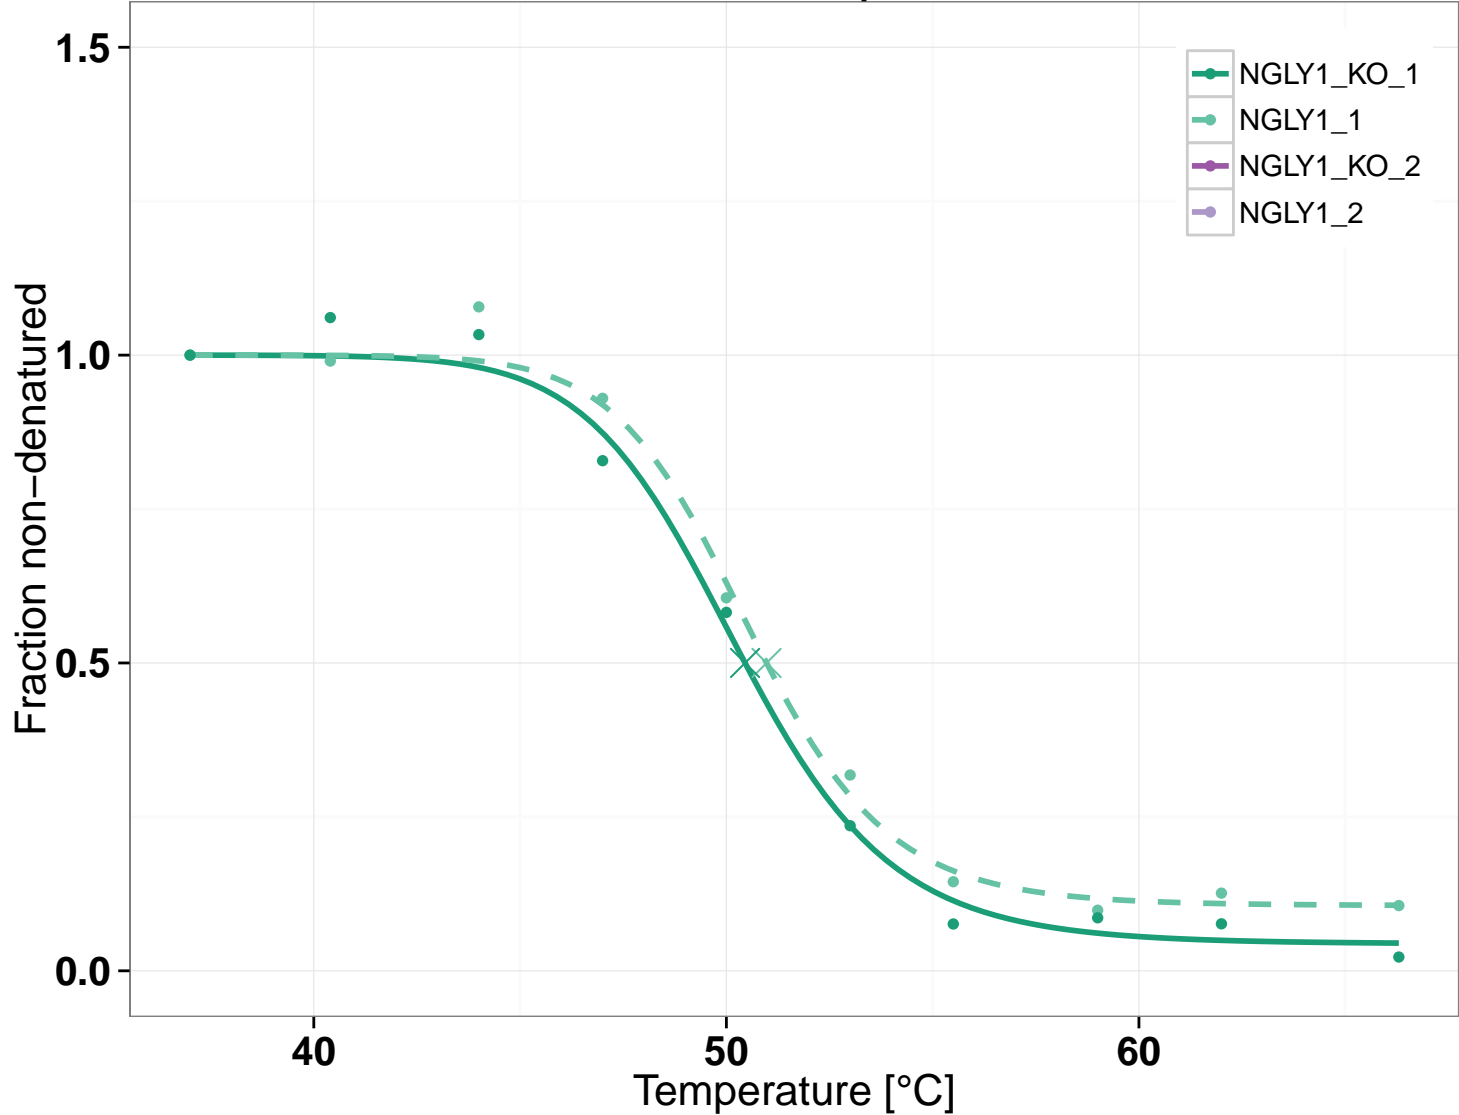

|            | meltPoint | slope | plateau | R2   |
|------------|-----------|-------|---------|------|
| NGLY1_KO_1 | 50.45     | -0.13 | 0.04    | 0.99 |
| NGLY1_1    | 50.97     | -0.13 | 0.11    | 0.99 |
| NGLY1_KO_2 | -         | -     | -       | -    |
| NGLY1_2    | -         | -     | -       | -    |

Supplement: Supplementary file 3163 [file 1]

IPI00873330.1|SFRS12IP1

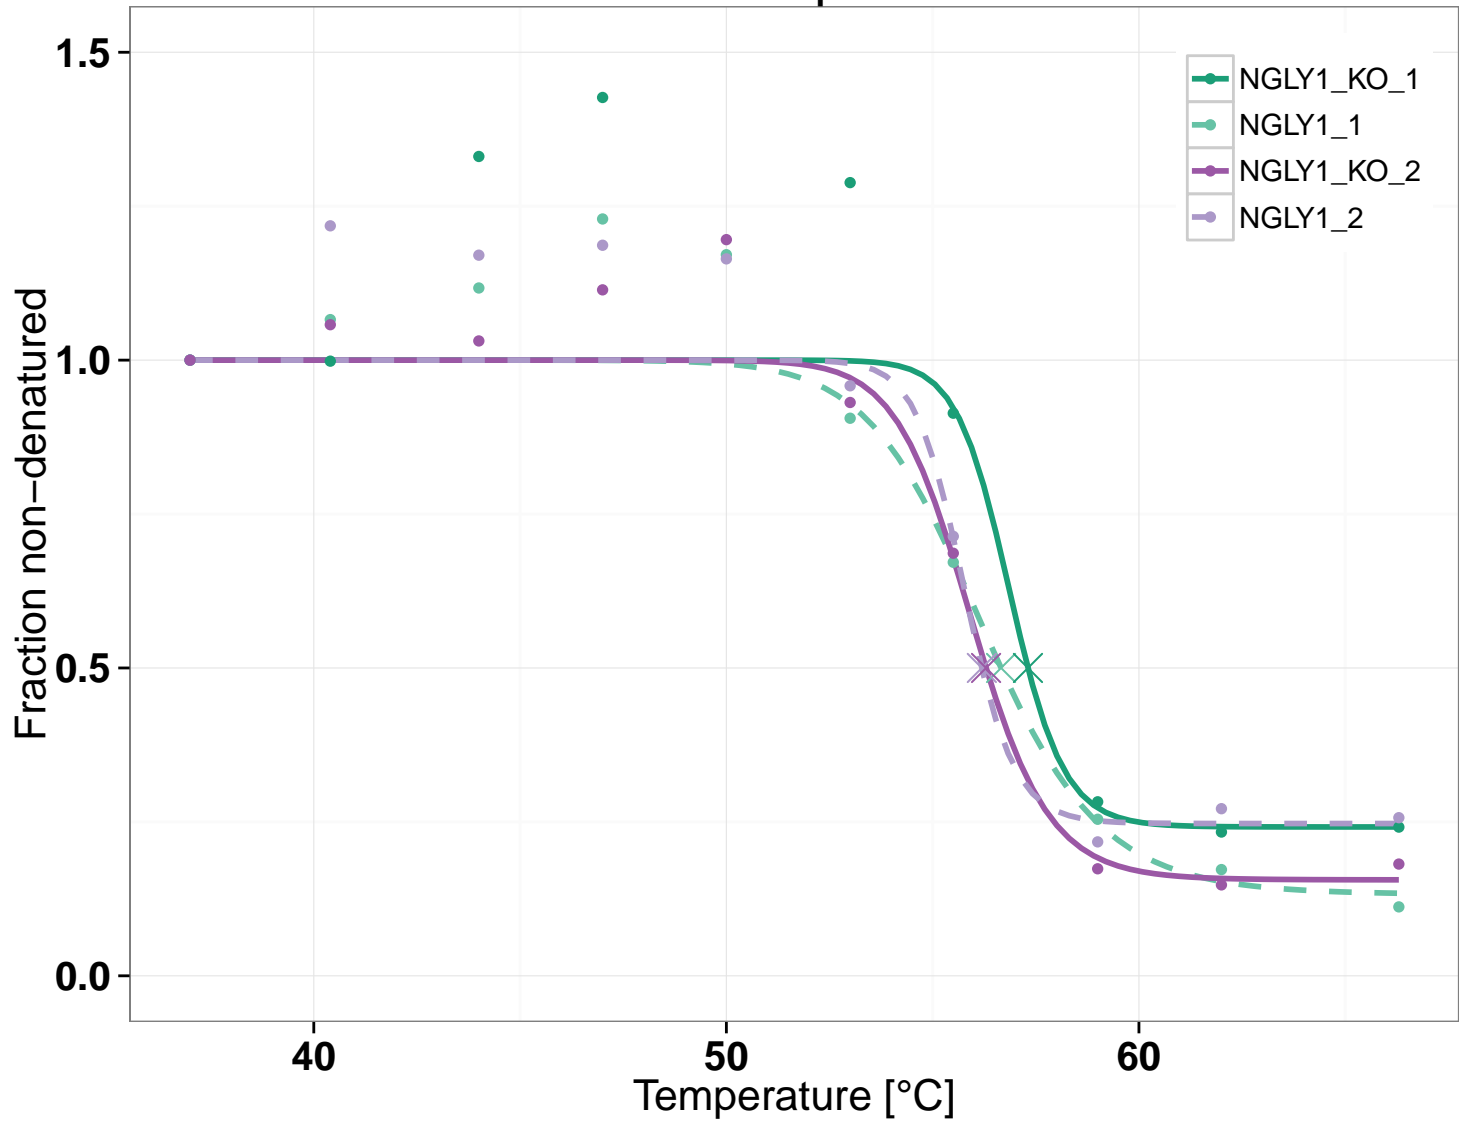

|            | meltPoint | slope | plateau | R2   |
|------------|-----------|-------|---------|------|
| NGLY1_KO_1 | 57.31     | -0.29 | 0.24    | 0.71 |
| NGLY1_1    | 56.66     | -0.15 | 0.13    | 0.94 |
| NGLY1_KO_2 | 56.3      | -0.23 | 0.16    | 0.96 |
| NGLY1_2    | 56.19     | -0.32 | 0.25    | 0.91 |

Supplement: Supplementary file 3165 [file 1]

IPI00747149.1|ZNF550

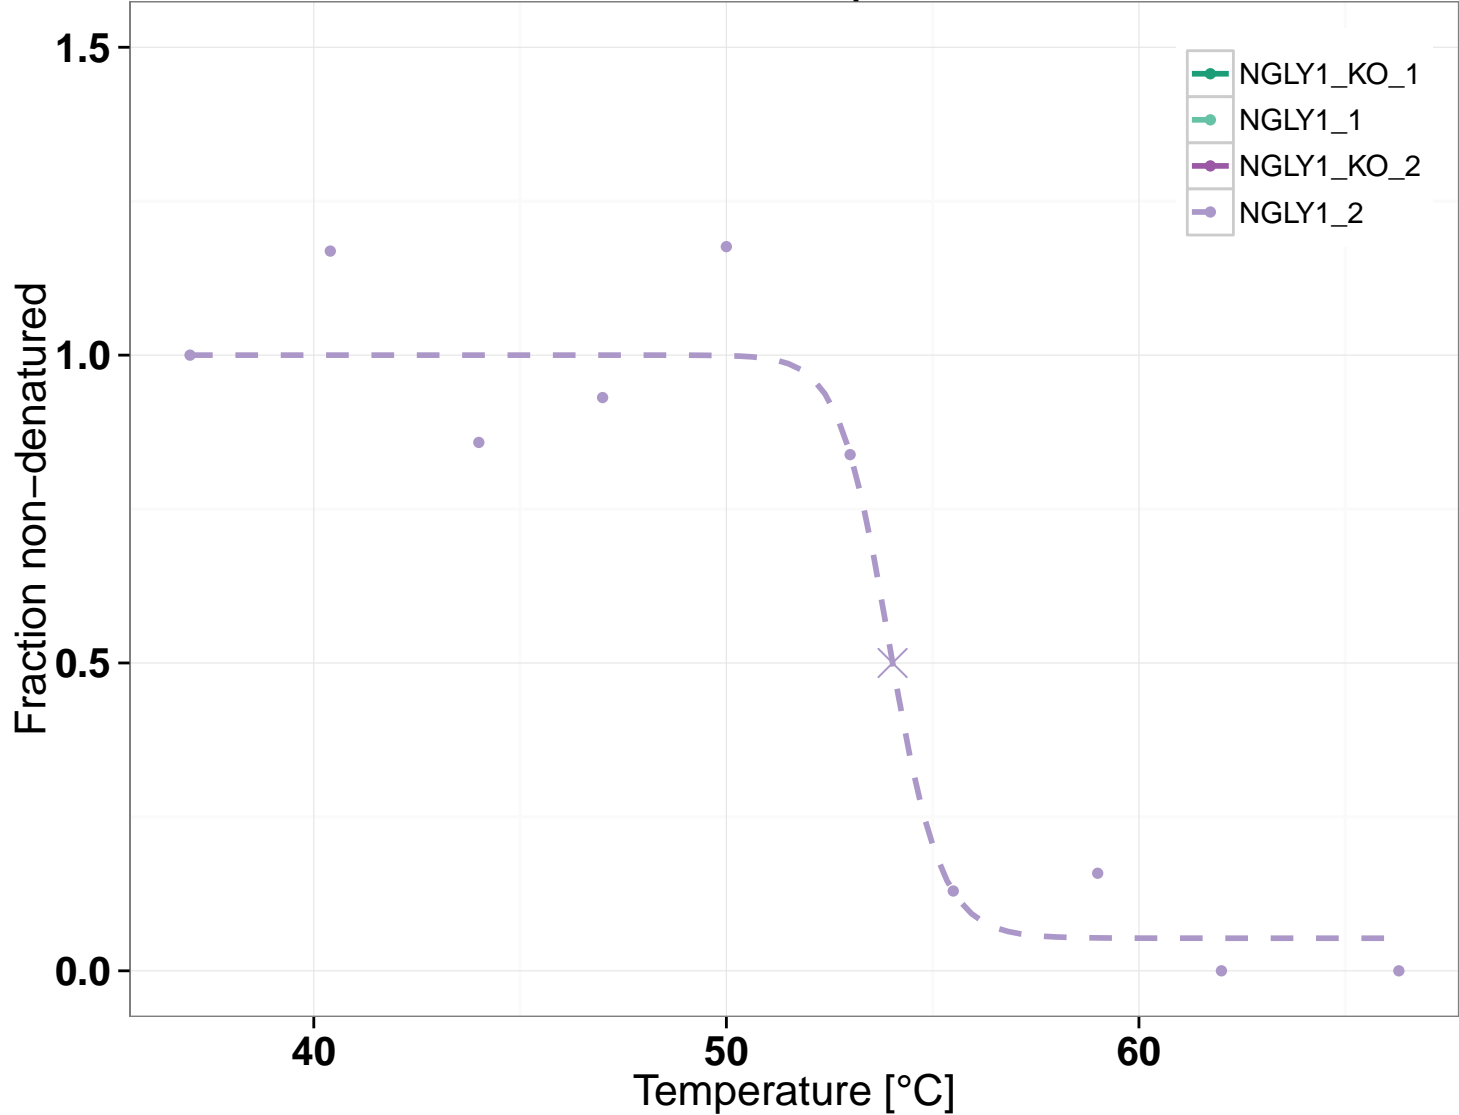

|            | meltPoint | slope | plateau | R2   |
|------------|-----------|-------|---------|------|
| NGLY1_KO_1 | —         | —     | —       | —    |
| NGLY1_1    | —         | —     | —       | —    |
| NGLY1_KO_2 | —         | —     | —       | —    |
| NGLY1_2    | 54.03     | −0.39 | 0.05    | 0.95 |

Supplement: Supplementary file 3166 [file 1]

IPI00398772.3|PRDM10

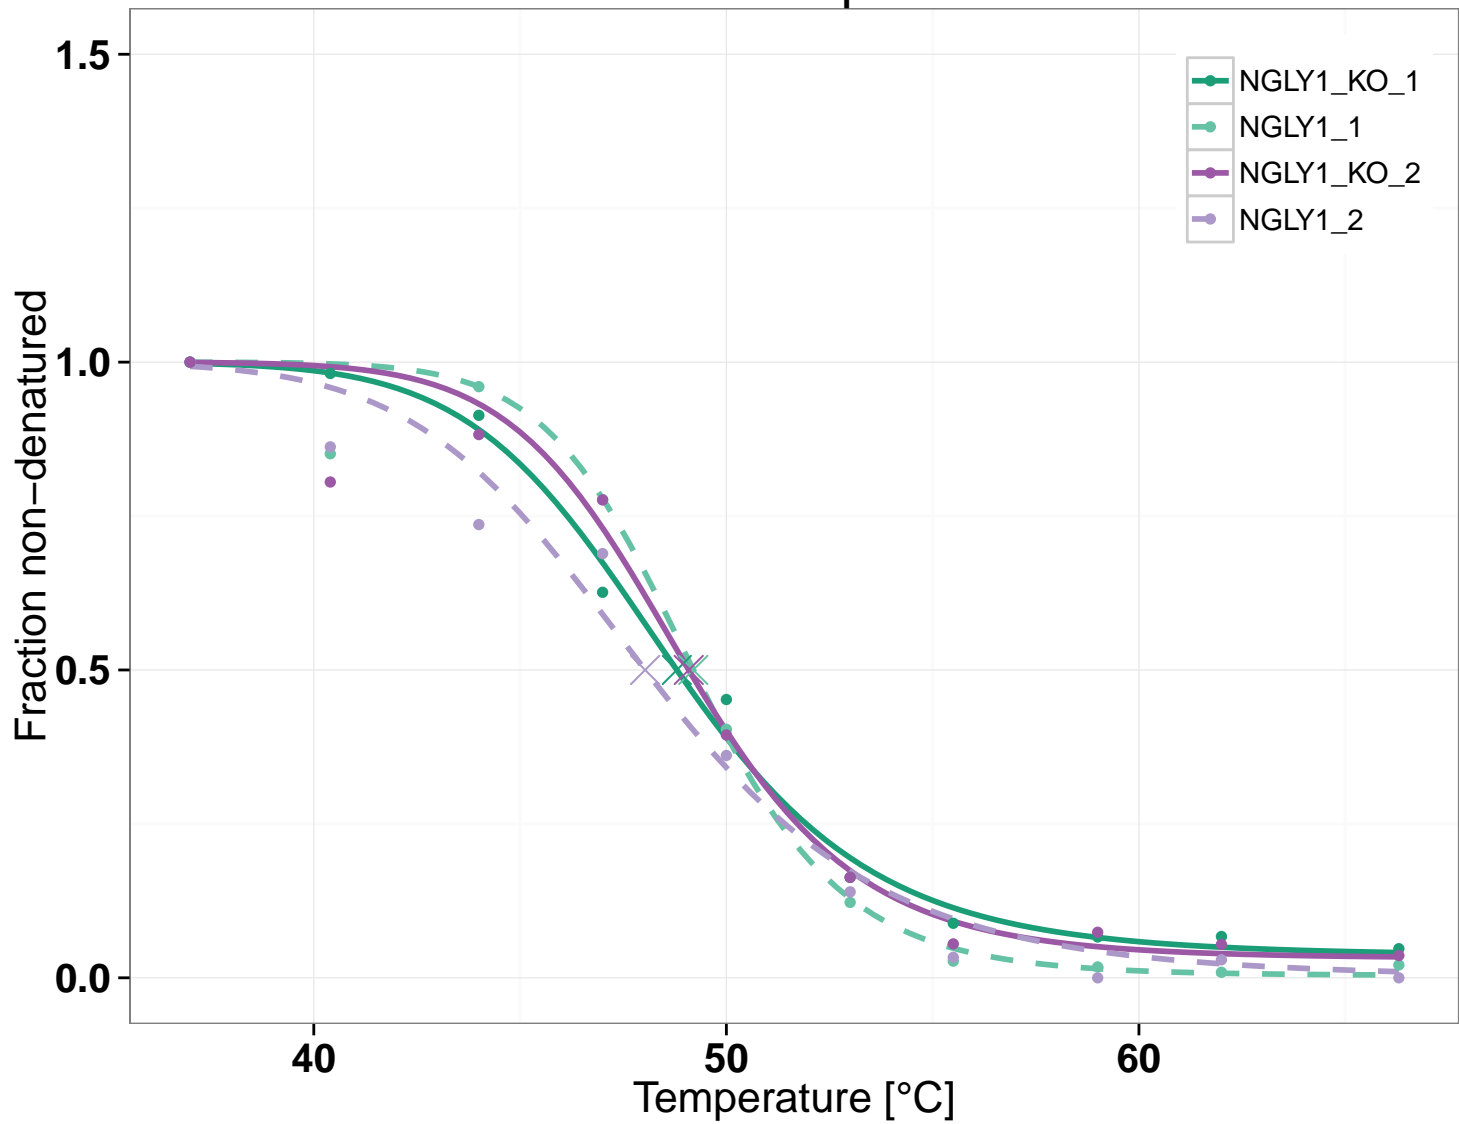

|            | meltPoint | slope  | plateau | R2   |
|------------|-----------|--------|---------|------|
| NGLY1_KO_1 | 48.8      | -0.098 | 0.04    | 0.99 |
| NGLY1_1    | 49.2      | -0.14  | 0       | 0.99 |
| NGLY1_KO_2 | 49.09     | -0.11  | 0.03    | 0.97 |
| NGLY1_2    | 48.03     | -0.088 | 0       | 0.98 |

Supplement: Supplementary file 3167 [file 1]

IPI00019211.2|C12ORF65

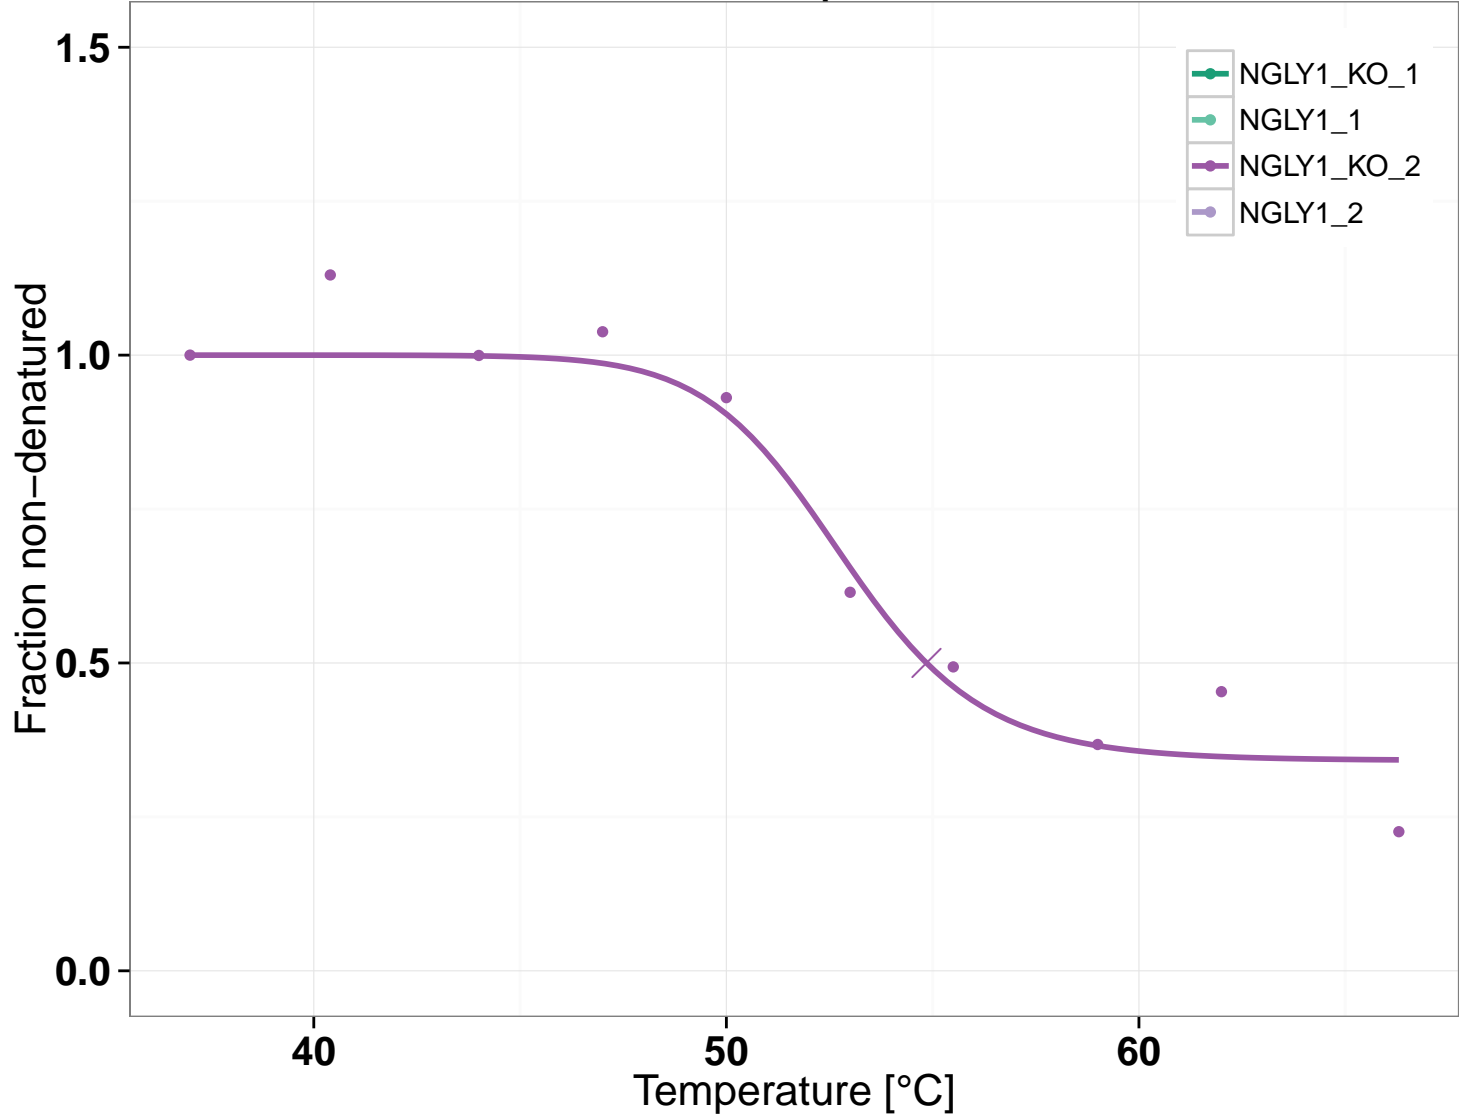

|            | meltPoint | slope  | plateau | R2   |
|------------|-----------|--------|---------|------|
| NGLY1_KO_1 | —         | —      | —       | —    |
| NGLY1_1    | —         | —      | —       | —    |
| NGLY1_KO_2 | 54.85     | -0.098 | 0.34    | 0.95 |
| NGLY1_2    | —         | —      | —       | —    |

Supplement: Supplementary file 3168 [file 1]

IPI00028390.1|MRPL34

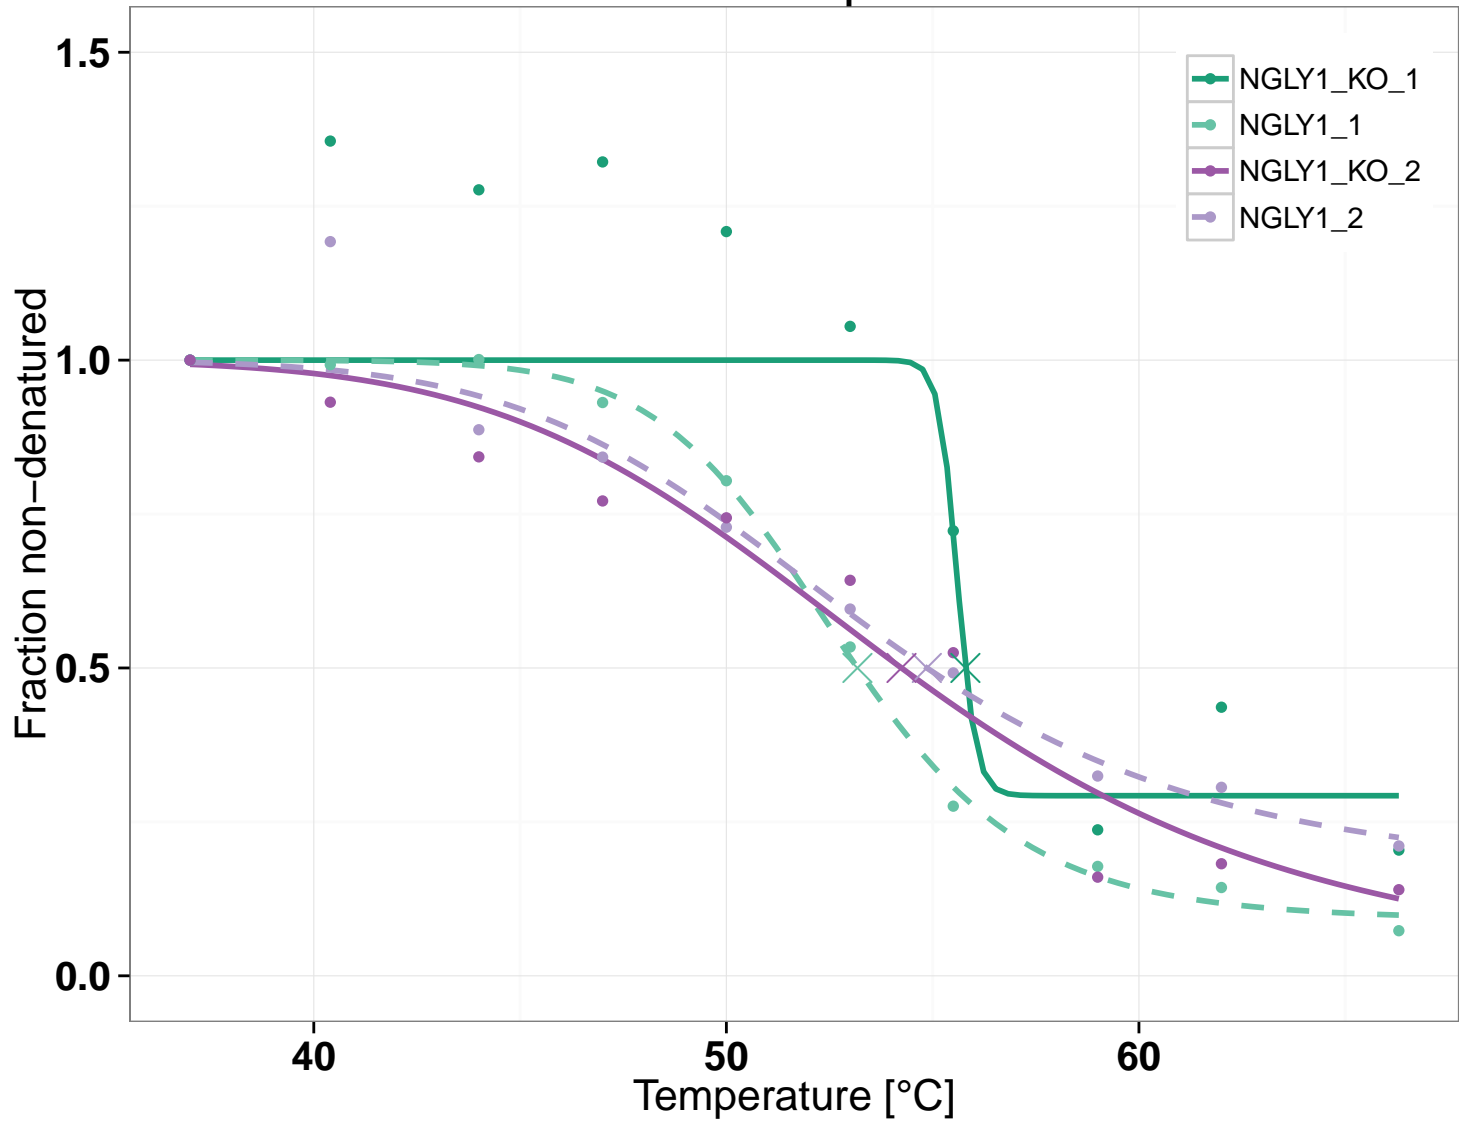

|            | meltPoint | slope  | plateau | R2   |
|------------|-----------|--------|---------|------|
| NGLY1_KO_1 | 55.79     | -0.8   | 0.29    | 0.79 |
| NGLY1_1    | 53.18     | -0.1   | 0.09    | 1    |
| NGLY1_KO_2 | 54.24     | -0.051 | 0       | 0.95 |
| NGLY1_2    | 54.86     | -0.051 | 0.16    | 0.95 |

Supplement: Supplementary file 3169 [file 1]

IPI00398349.2|CLCN3

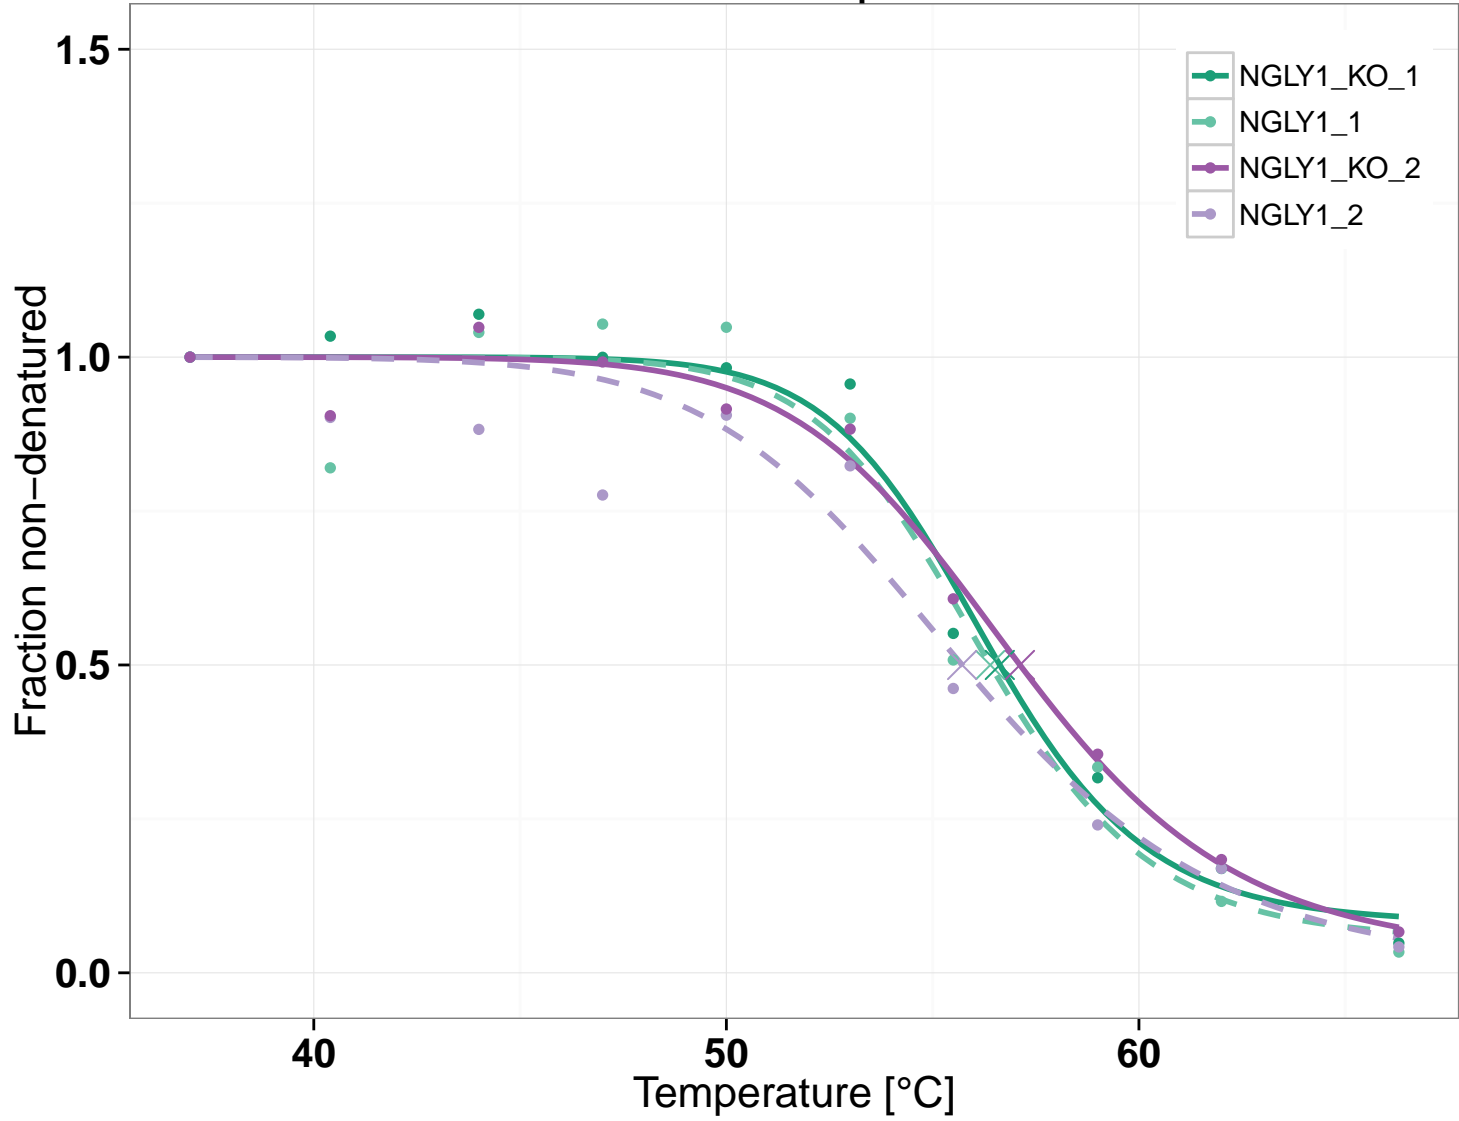

|            | meltPoint | slope | plateau | R2   |
|------------|-----------|-------|---------|------|
| NGLY1_KO_1 | 56.63     | -0.12 | 0.08    | 0.98 |
| NGLY1_1    | 56.4      | -0.12 | 0.05    | 0.96 |
| NGLY1_KO_2 | 57.12     | -0.09 | 0.03    | 0.99 |
| NGLY1_2    | 55.71     | -0.08 | 0       | 0.94 |

Supplement: Supplementary file 3170 [file 1]

# IPI00419894.1|CUX1

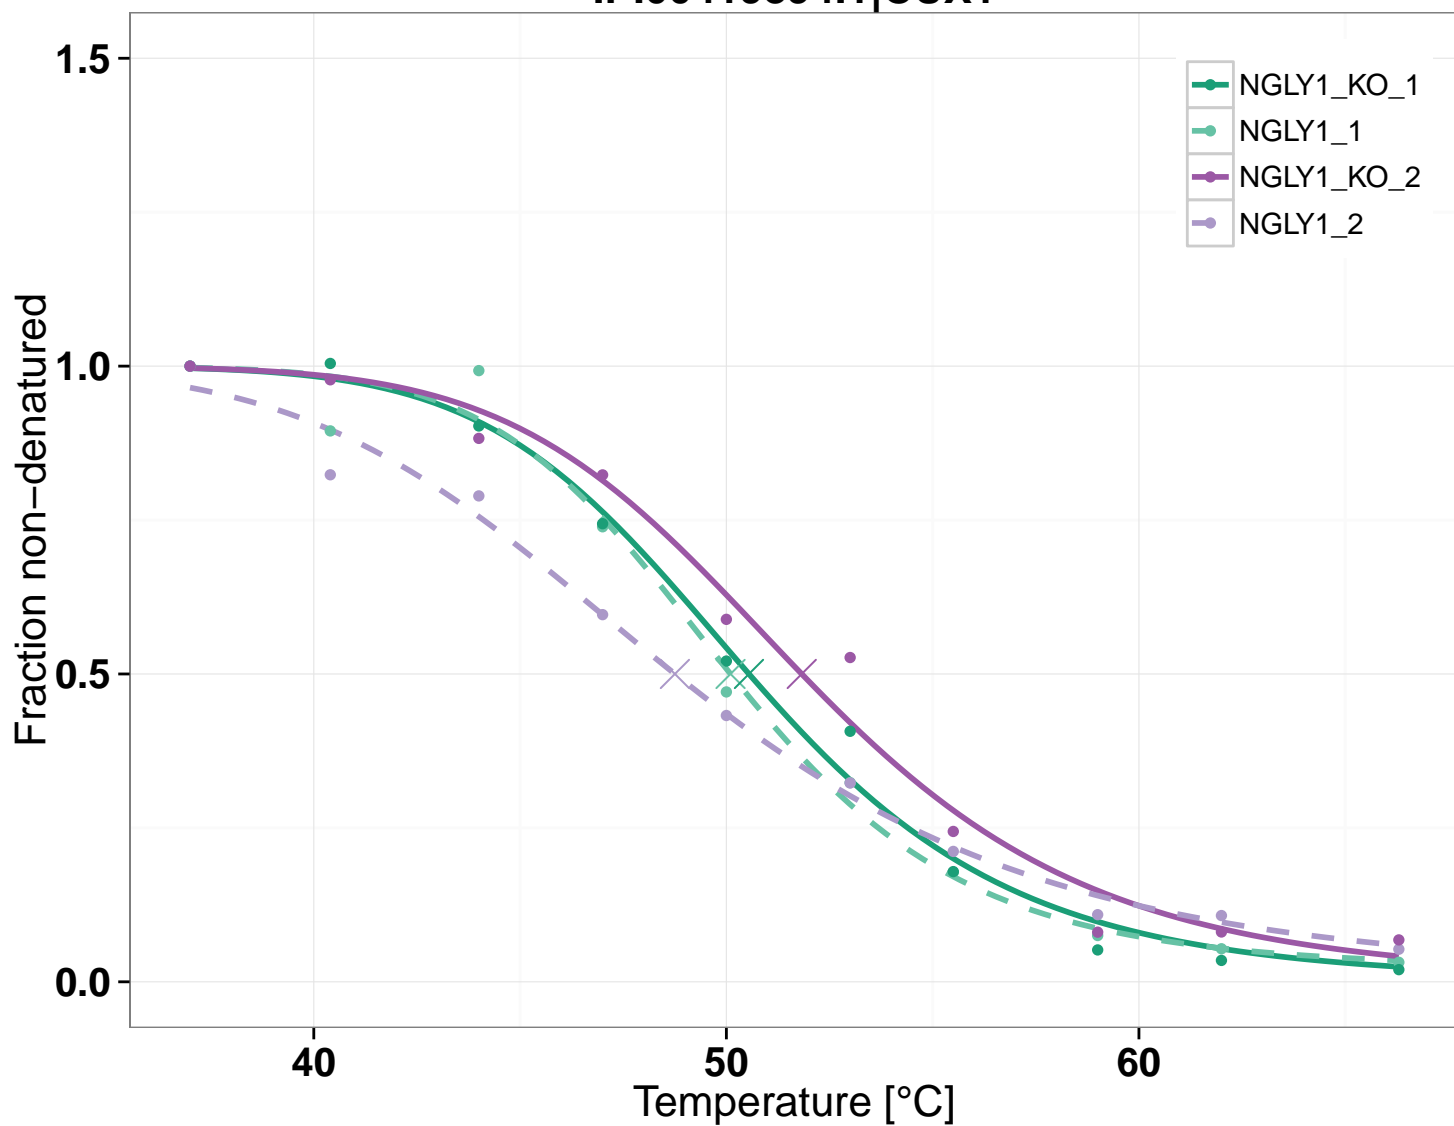

|            | meltPoint | slope  | plateau | R2   |
|------------|-----------|--------|---------|------|
| NGLY1_KO_1 | 50.55     | -0.078 | 0       | 0.99 |
| NGLY1_1    | 50.1      | -0.085 | 0.02    | 0.99 |
| NGLY1_KO_2 | 51.83     | -0.071 | 0       | 0.98 |
| NGLY1_2    | 48.75     | -0.056 | 0       | 0.99 |

Supplement: Supplementary file 3171 [file 1]

# IPI00027790.3|AMMECR1L

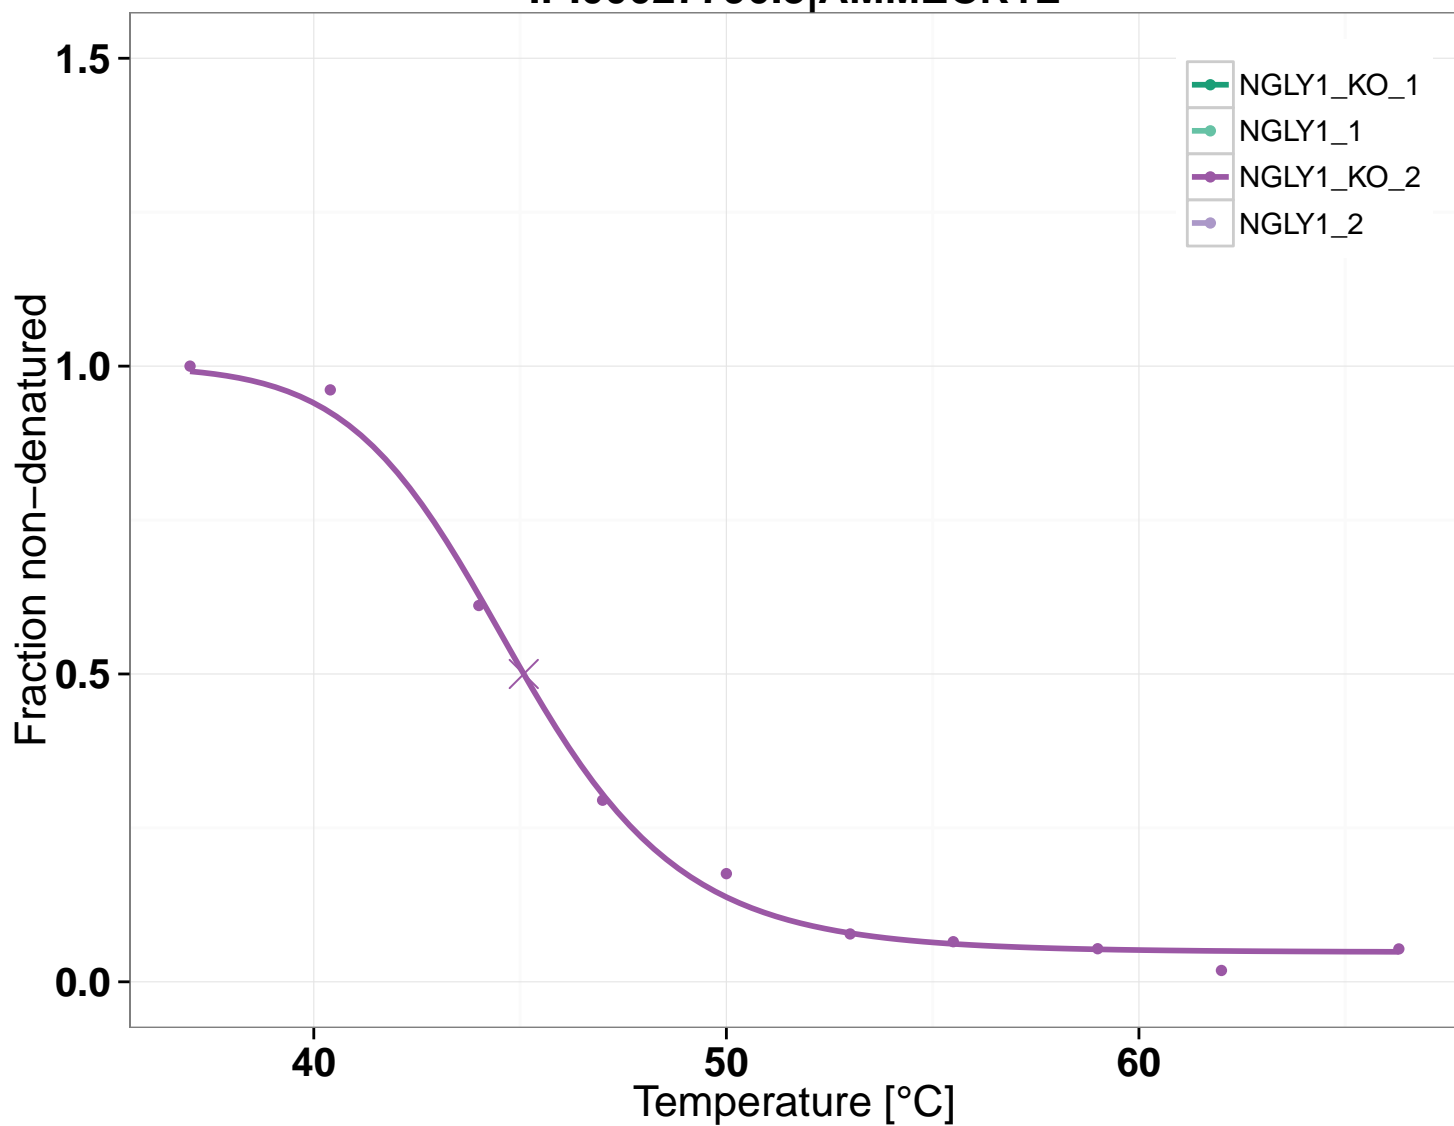

|            | meltPoint | slope | plateau | R2 |
|------------|-----------|-------|---------|----|
| NGLY1_KO_1 | —         | —     | —       | —  |
| NGLY1_1    | —         | —     | —       | —  |
| NGLY1_KO_2 | 45.09     | -0.12 | 0.05    | 1  |
| NGLY1_2    | —         | —     | —       | —  |

Supplement: Supplementary file 3172 [file 1]

IPI00794952.1|VGLL4

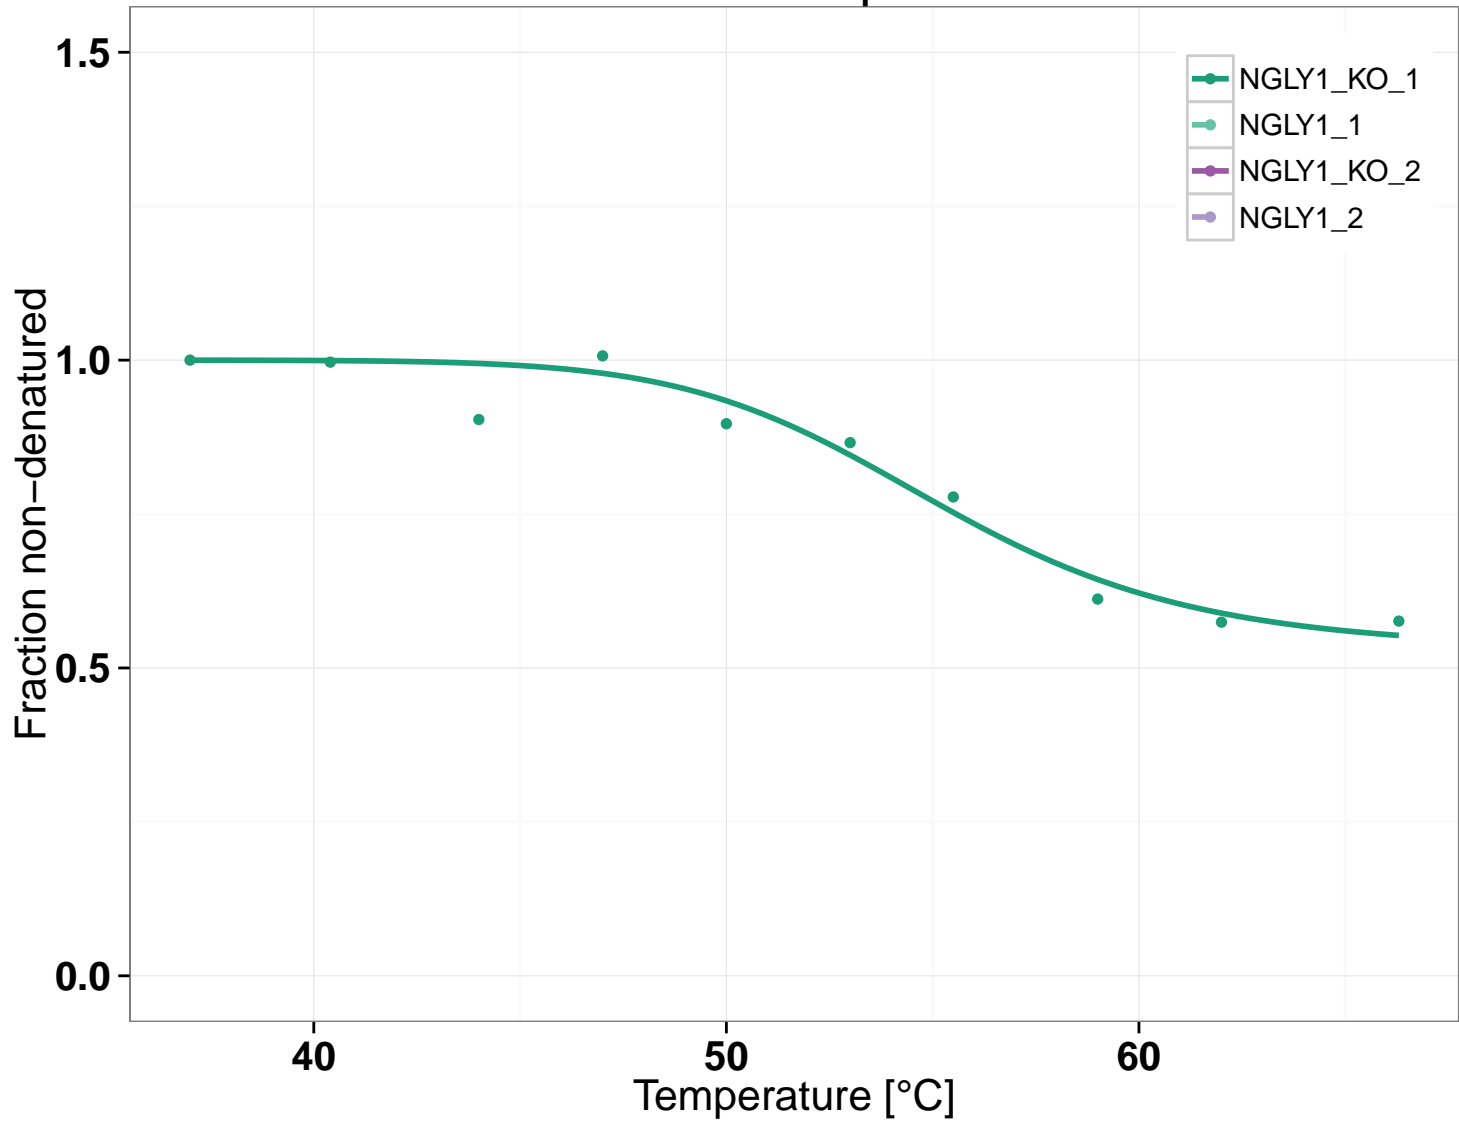

|            | meltPoint | slope  | plateau | R2   |
|------------|-----------|--------|---------|------|
| NGLY1_KO_1 | —         | −0.038 | 0.53    | 0.95 |
| NGLY1_1    | —         | —      | —       | —    |
| NGLY1_KO_2 | —         | —      | —       | —    |
| NGLY1_2    | —         | —      | —       | —    |

Supplement: Supplementary file 3173 [file 1]

IPI00176706.1|RBM17

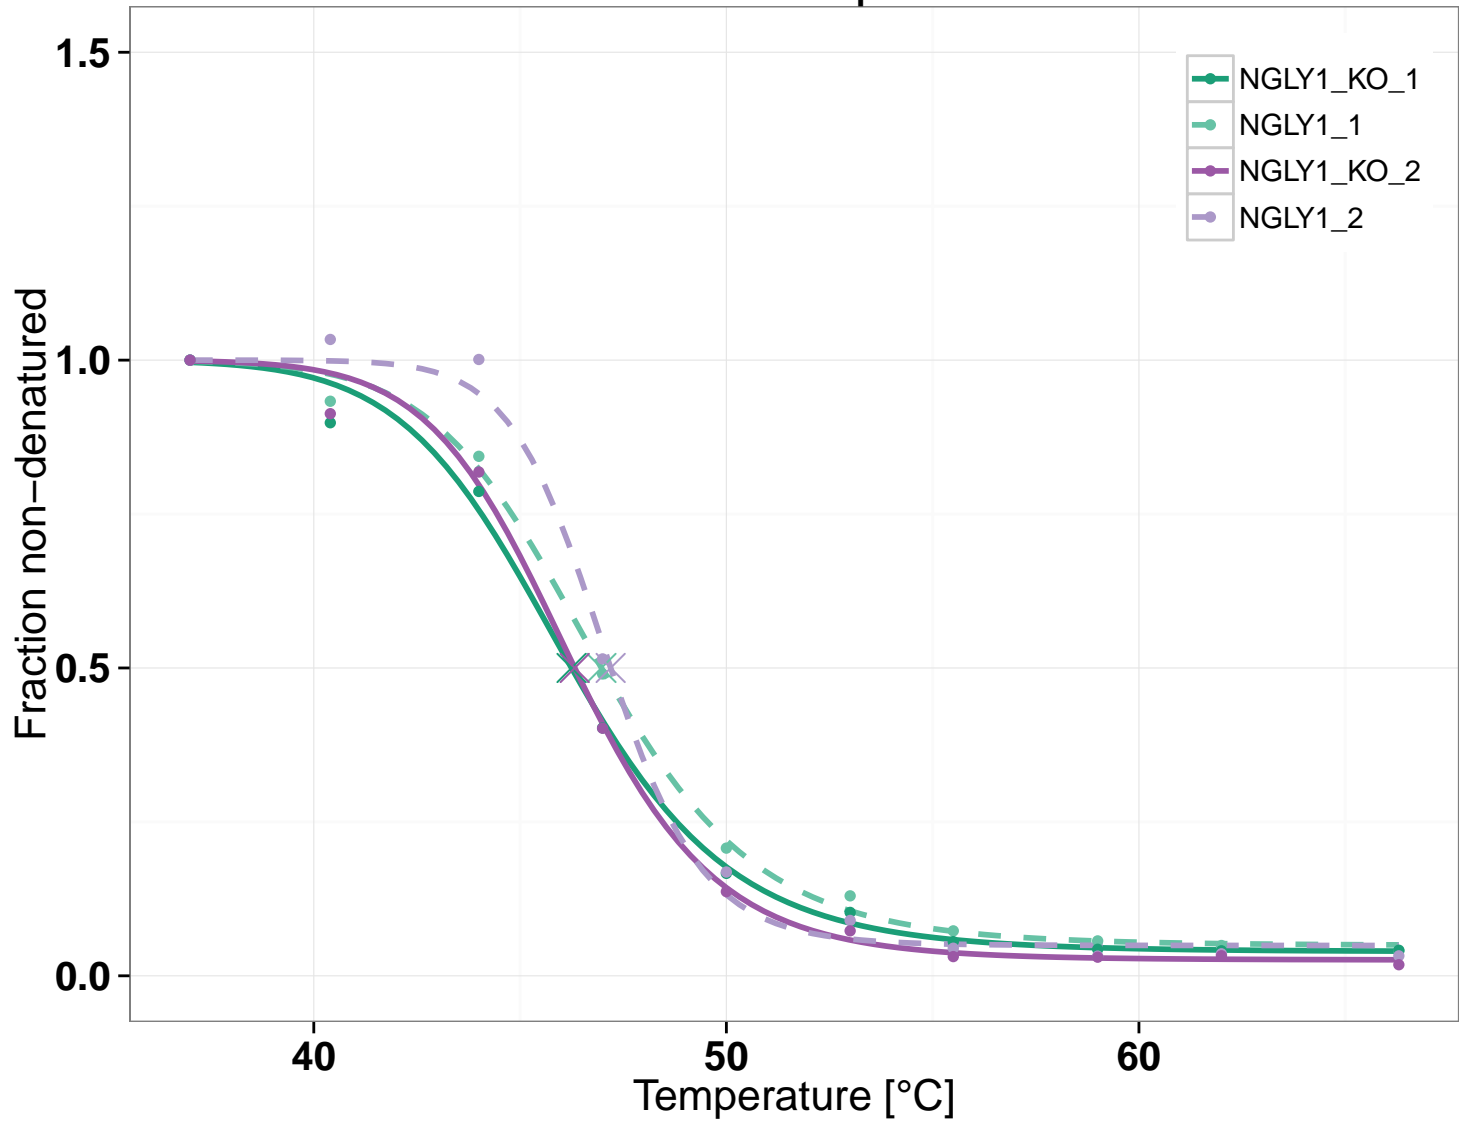

|            | meltPoint | slope | plateau | R2 |
|------------|-----------|-------|---------|----|
| NGLY1_KO_1 | 46.25     | -0.12 | 0.04    | 1  |
| NGLY1_1    | 46.97     | -0.12 | 0.05    | 1  |
| NGLY1_KO_2 | 46.32     | -0.14 | 0.03    | 1  |
| NGLY1_2    | 47.2      | -0.2  | 0.05    | 1  |

Supplement: Supplementary file 3174 [file 1]

IPI00305380.3|IGFBP4

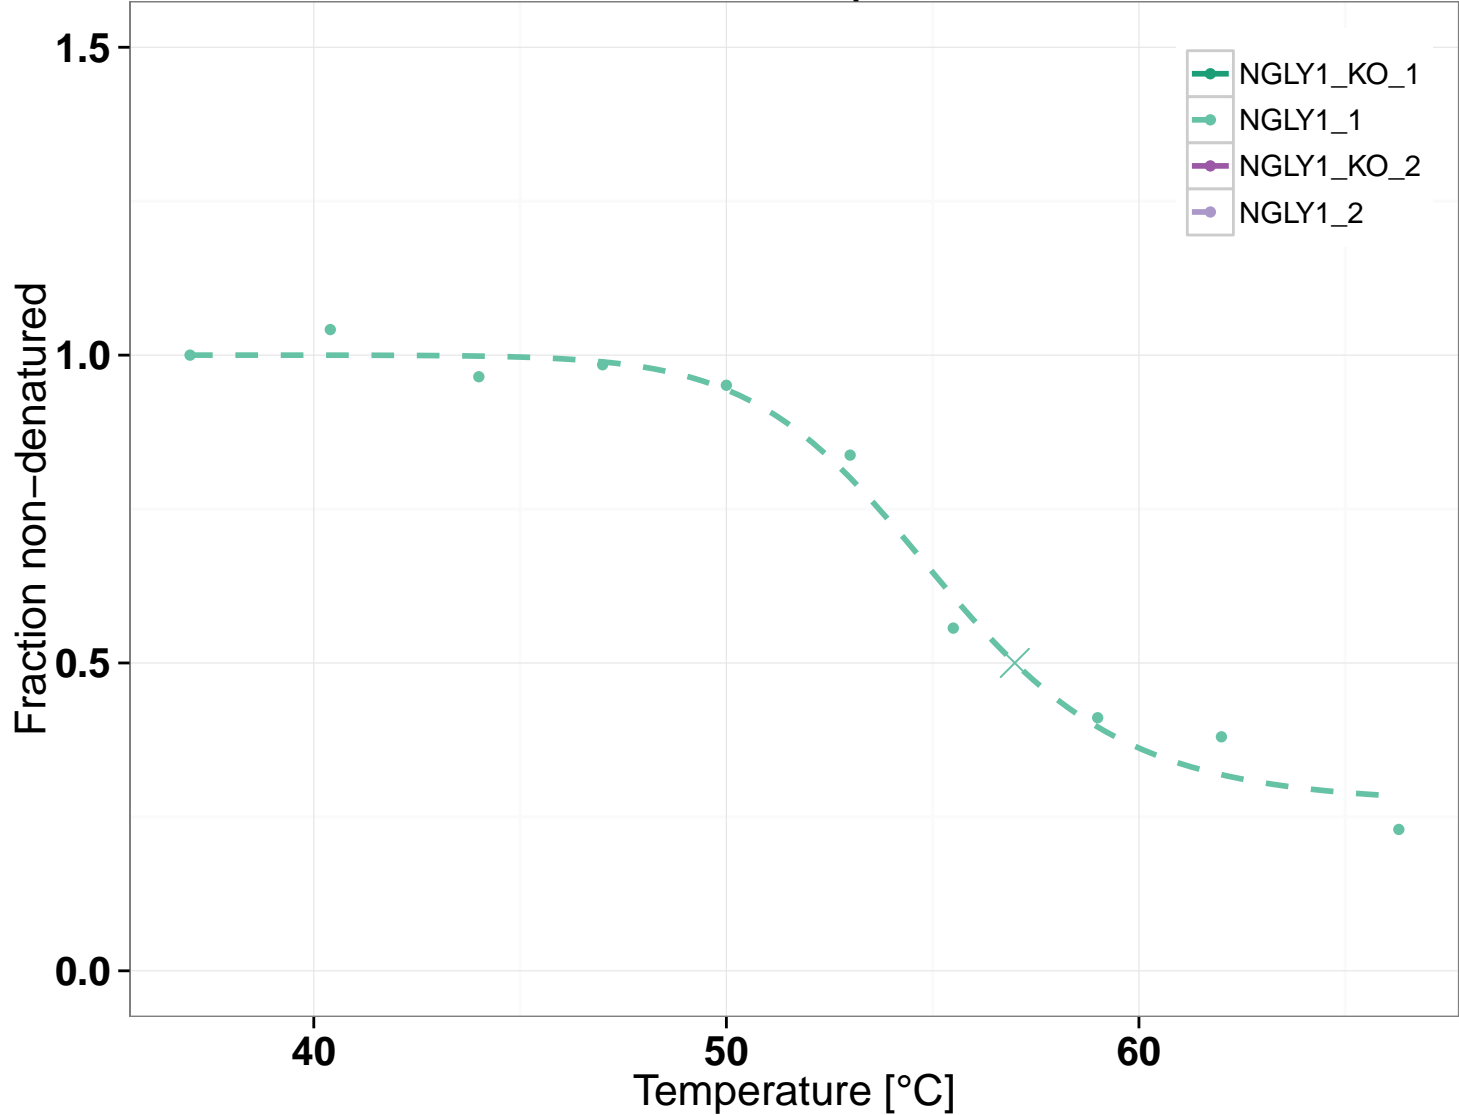

|            | meltPoint | slope | plateau | R2   |
|------------|-----------|-------|---------|------|
| NGLY1_KO_1 | -         | -     | -       | -    |
| NGLY1_1    | 56.99     | -0.08 | 0.27    | 0.98 |
| NGLY1_KO_2 | -         | -     | -       | -    |
| NGLY1_2    | -         | -     | -       | -    |

Supplement: Supplementary file 3175 [file 1]

IPI00009379.1|IGHMBP2

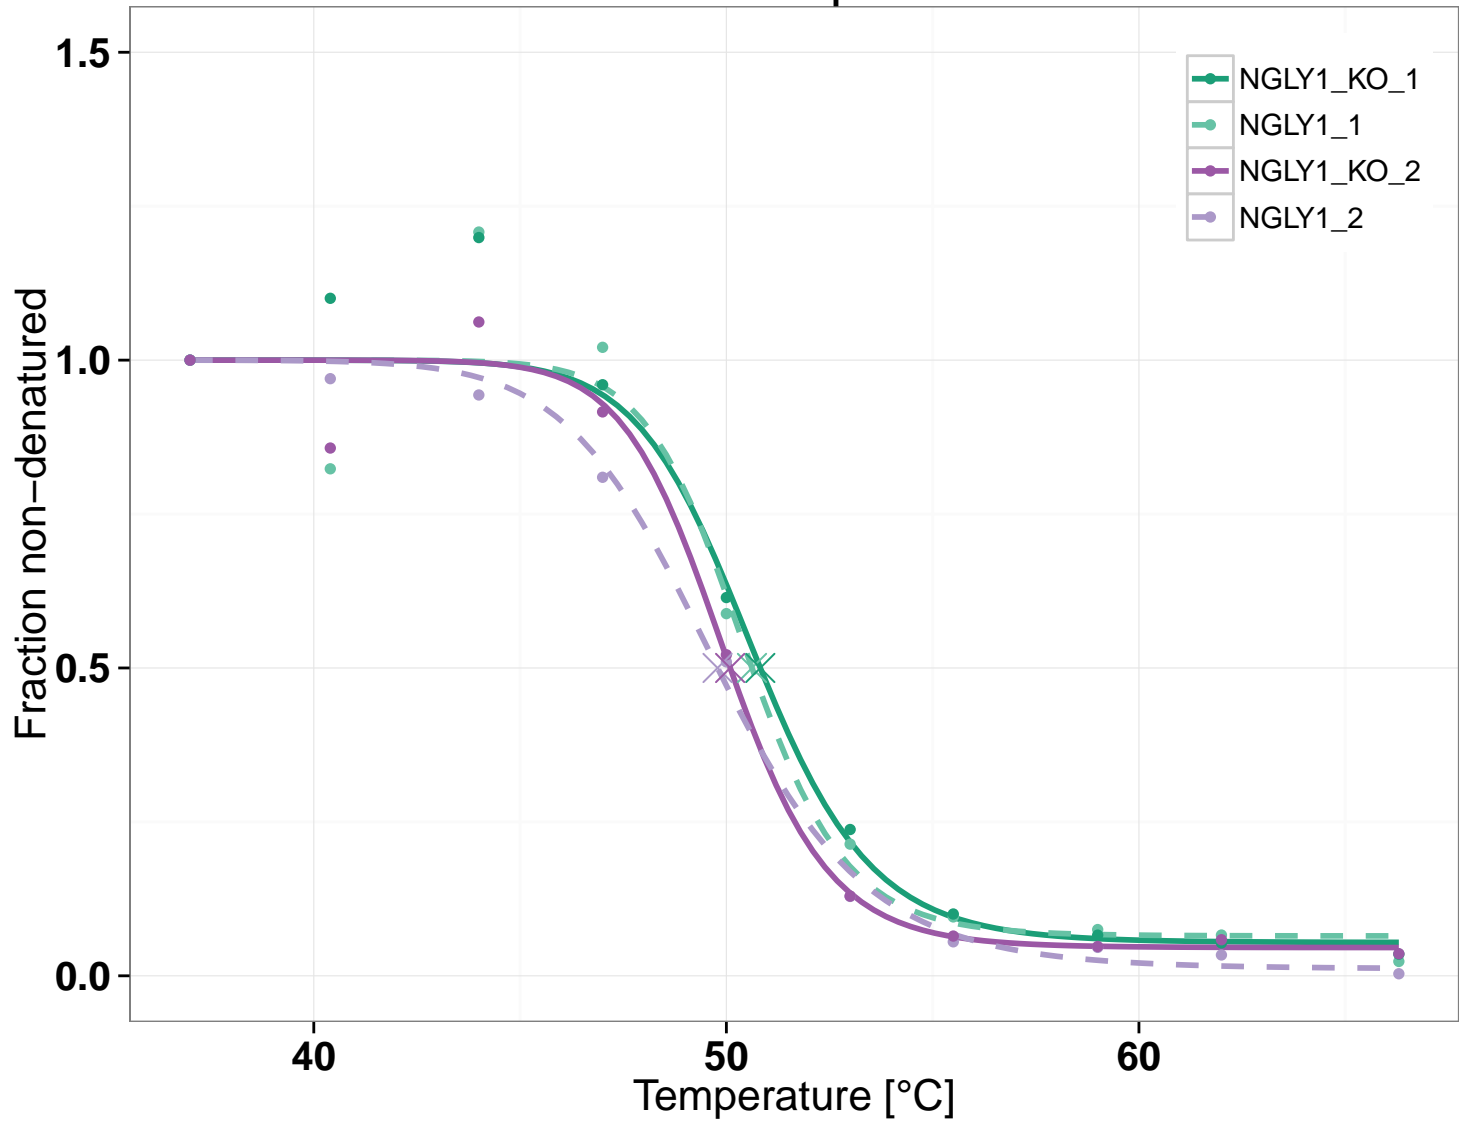

|            | meltPoint | slope | plateau | R2   |
|------------|-----------|-------|---------|------|
| NGLY1_KO_1 | 50.82     | -0.17 | 0.05    | 0.98 |
| NGLY1_1    | 50.62     | -0.19 | 0.06    | 0.96 |
| NGLY1_KO_2 | 50.09     | -0.19 | 0.05    | 0.99 |
| NGLY1_2    | 49.79     | -0.14 | 0.01    | 1    |

Supplement: Supplementary file 3176 [file 1]

# IPI00004712.1|HUS1

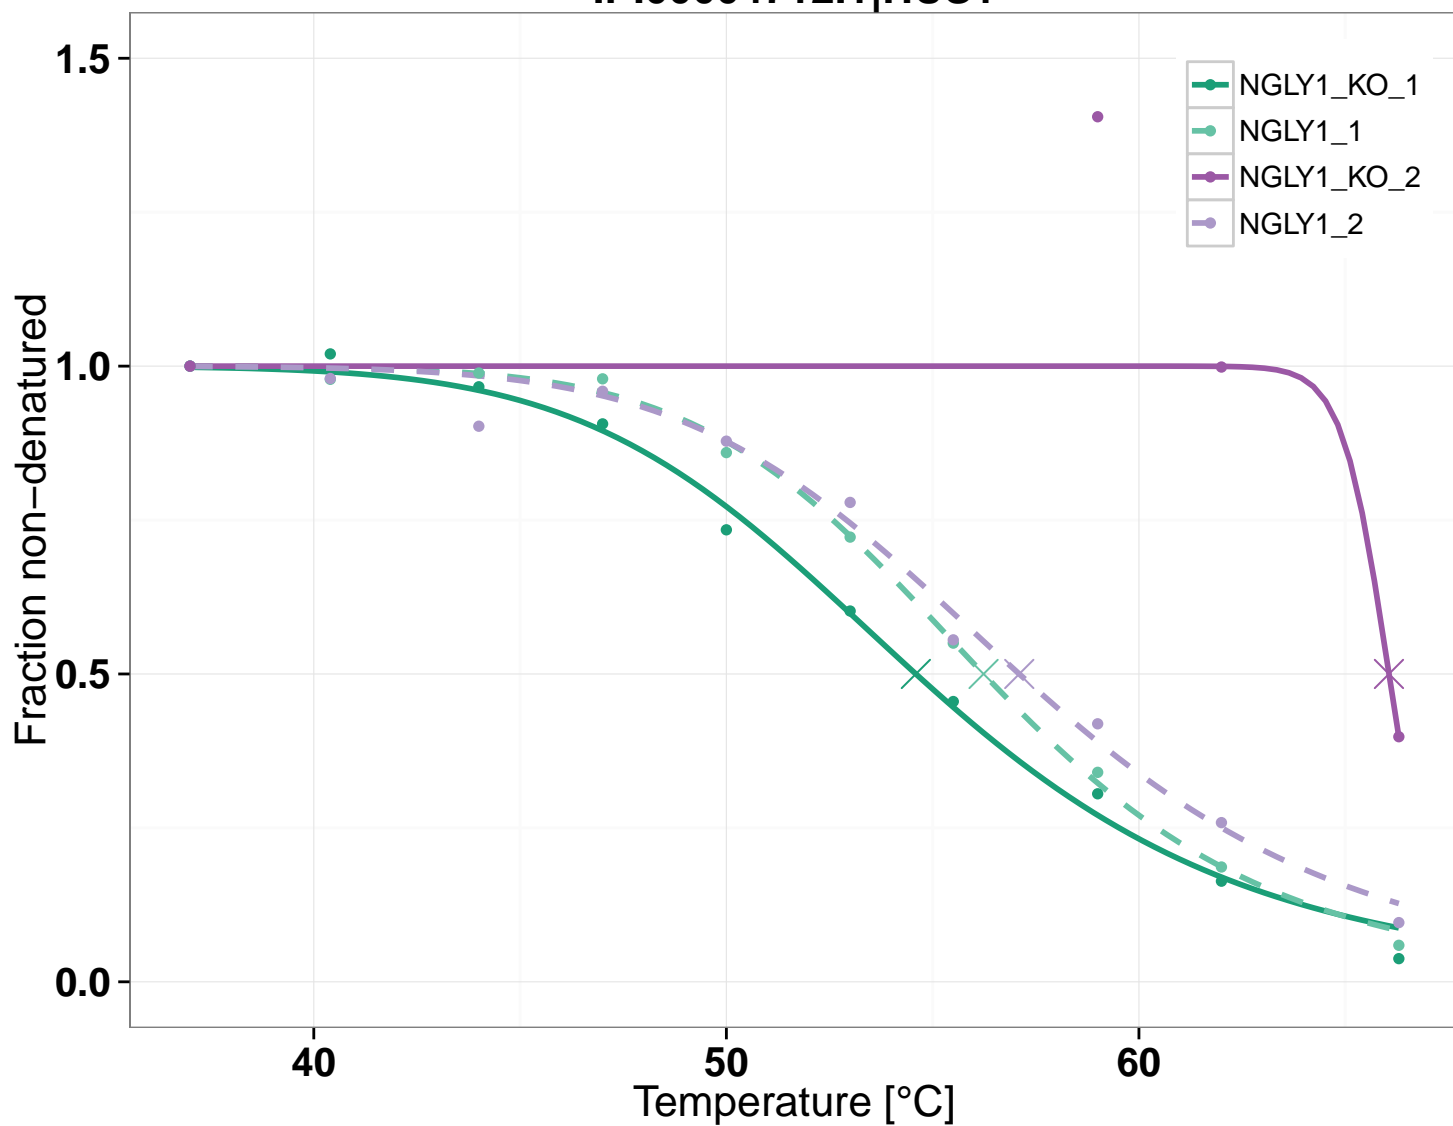

|            | meltPoint | slope  | plateau | R2    |
|------------|-----------|--------|---------|-------|
| NGLY1_KO_1 | 54.59     | -0.062 | 0       | 0.99  |
| NGLY1_1    | 56.23     | -0.071 | 0       | 1     |
| NGLY1_KO_2 | 66.06     | -0.44  | 0.03    | -1.01 |
| NGLY1_2    | 57.1      | -0.062 | 0       | 0.99  |

Supplement: Supplementary file 3177 [file 1]

IPI00855728.1|A7E2U1\_HUMAN

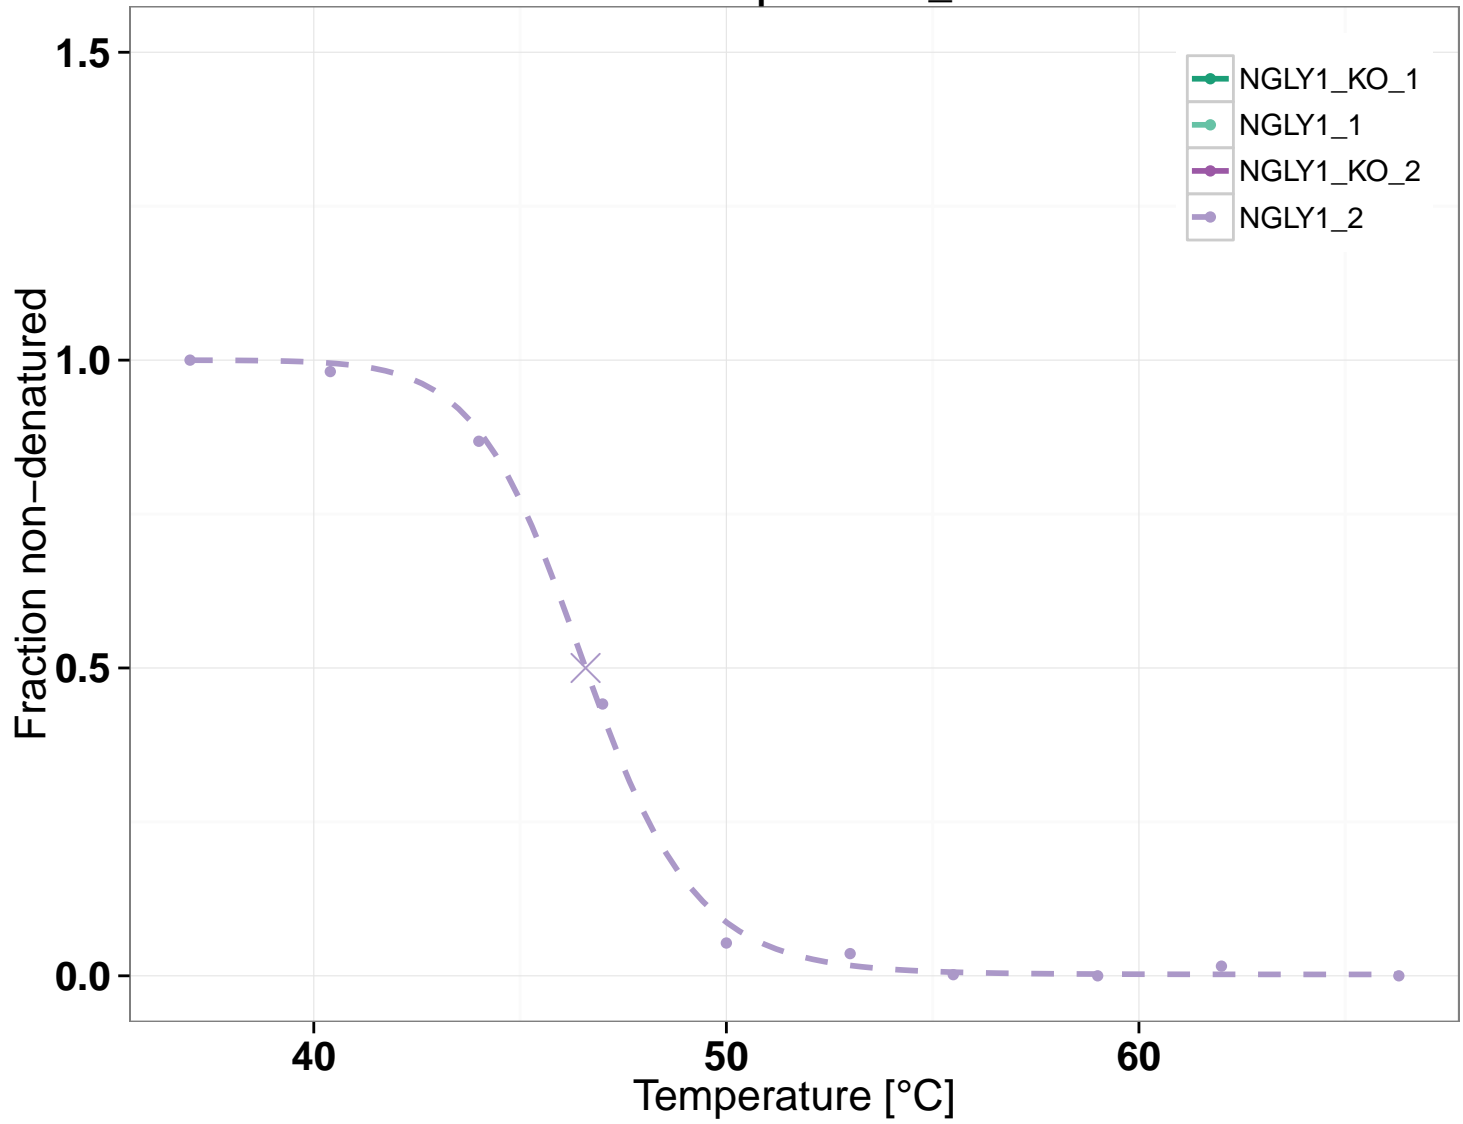

|            | meltPoint | slope | plateau | R2 |
|------------|-----------|-------|---------|----|
| NGLY1_KO_1 | -         | -     | -       | -  |
| NGLY1_1    | -         | -     | -       | -  |
| NGLY1_KO_2 | -         | -     | -       | -  |
| NGLY1_2    | 46.59     | -0.19 | 0       | 1  |

Supplement: Supplementary file 3178 [file 1]

IPI00306195.6|AKT1S1

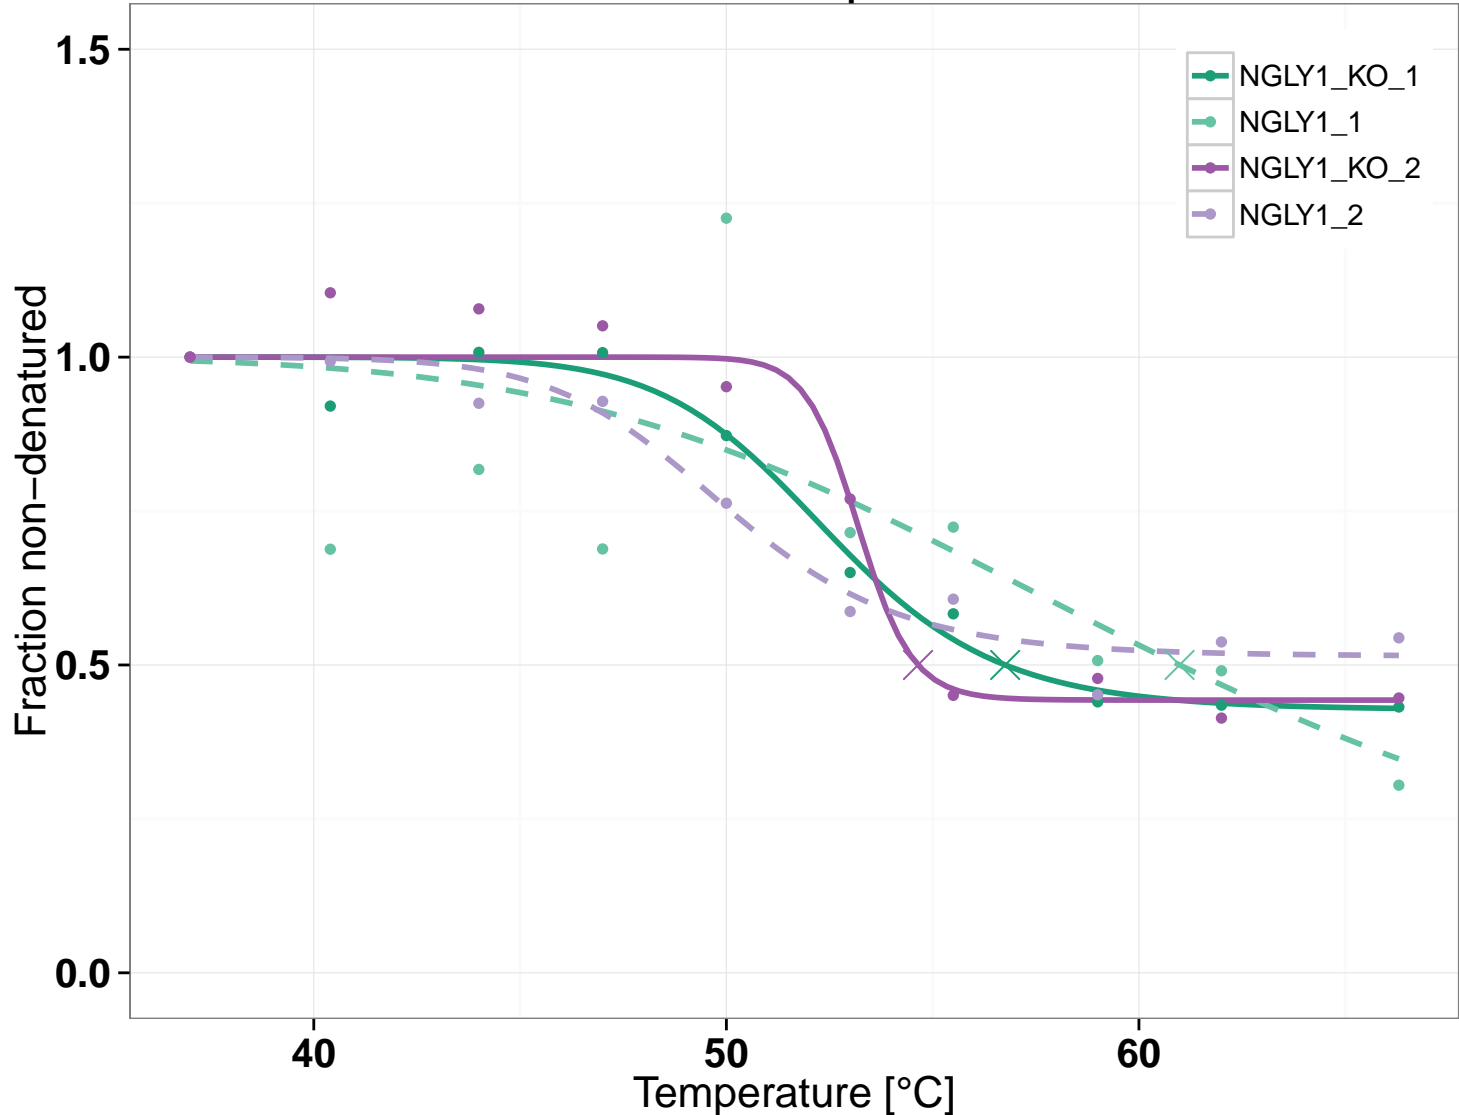

|            | meltPoint | slope  | plateau | R2   |
|------------|-----------|--------|---------|------|
| NGLY1_KO_1 | 56.76     | -0.07  | 0.43    | 0.98 |
| NGLY1_1    | 60.99     | -0.034 | 0       | 0.5  |
| NGLY1_KO_2 | 54.65     | -0.22  | 0.44    | 0.97 |
| NGLY1_2    | -         | -0.057 | 0.51    | 0.97 |

Supplement: Supplementary file 3179 [file 1]

IPI00339381.3|HLTF

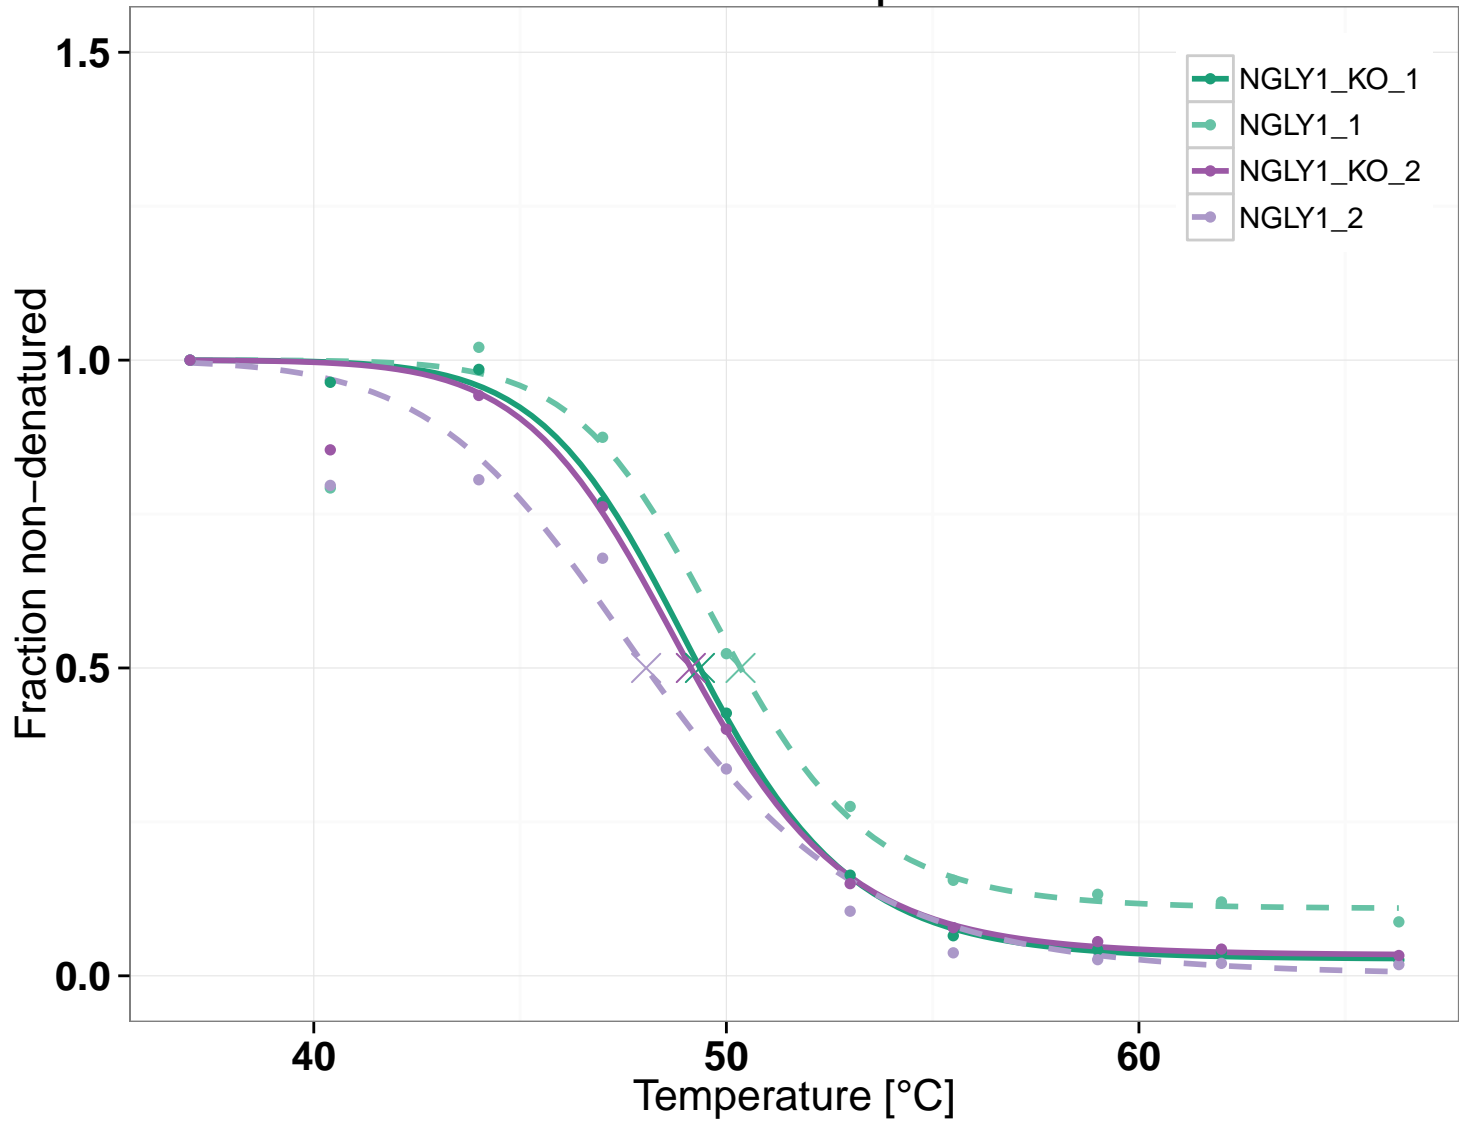

|            | meltPoint | slope  | plateau | R2   |
|------------|-----------|--------|---------|------|
| NGLY1_KO_1 | 49.36     | -0.13  | 0.03    | 1    |
| NGLY1_1    | 50.34     | -0.12  | 0.11    | 0.97 |
| NGLY1_KO_2 | 49.14     | -0.12  | 0.03    | 0.99 |
| NGLY1_2    | 48.06     | -0.096 | 0       | 0.97 |

Supplement: Supplementary file 3180 [file 1]

IPI00295738.1|MAP3K7

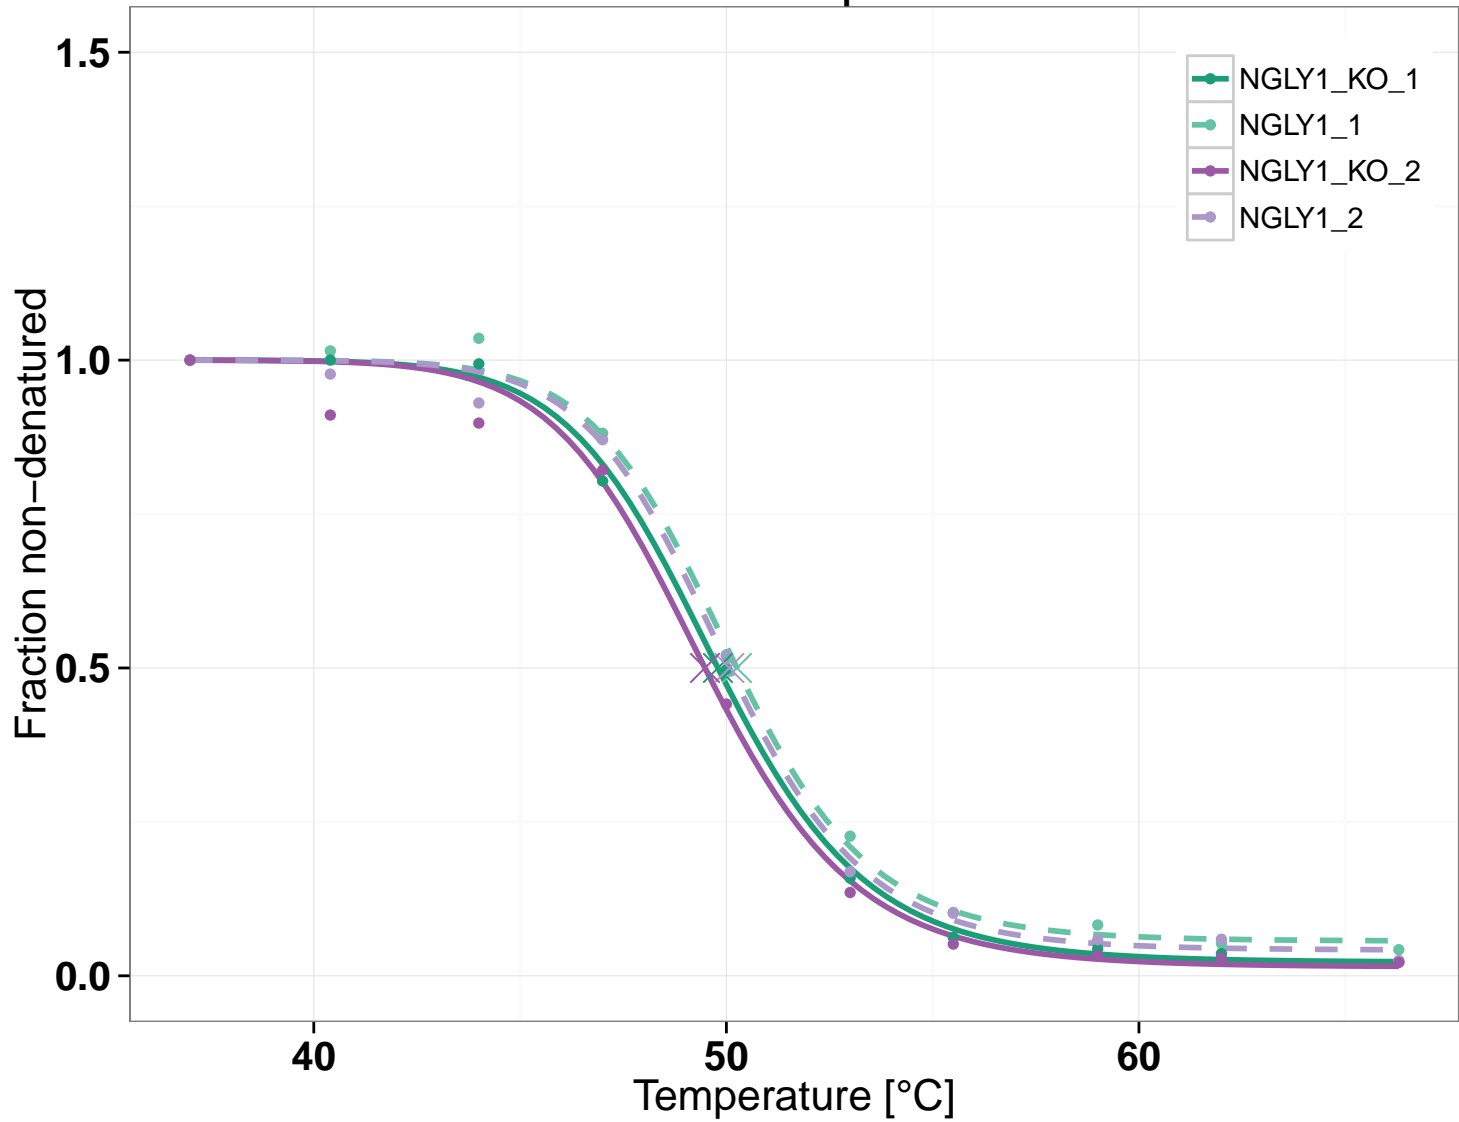

|            | meltPoint | slope | plateau | R2   |
|------------|-----------|-------|---------|------|
| NGLY1_KO_1 | 49.8      | -0.13 | 0.02    | 1    |
| NGLY1_1    | 50.26     | -0.14 | 0.06    | 1    |
| NGLY1_KO_2 | 49.48     | -0.13 | 0.01    | 0.99 |
| NGLY1_2    | 50.07     | -0.14 | 0.04    | 1    |

Supplement: Supplementary file 3181 [file 1]

IPI00456149.2|GALNT12

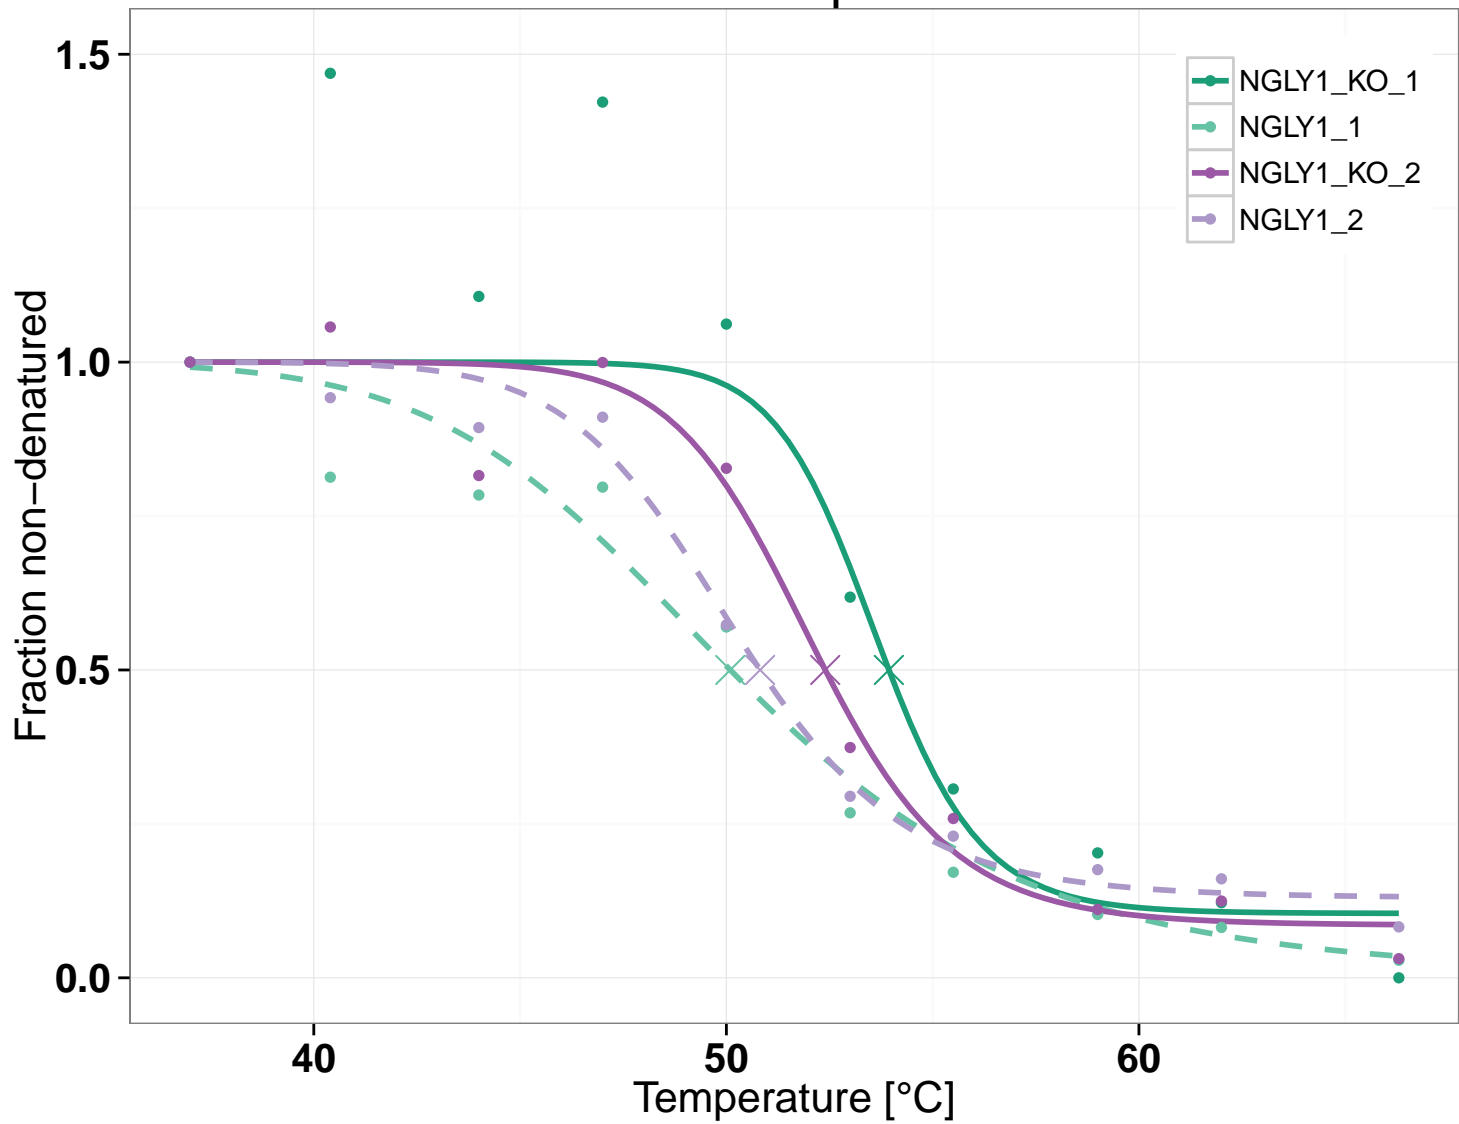

|            | meltPoint | slope  | plateau | R2   |
|------------|-----------|--------|---------|------|
| NGLY1_KO_1 | 53.94     | -0.18  | 0.1     | 0.84 |
| NGLY1_1    | 50.09     | -0.069 | 0       | 0.96 |
| NGLY1_KO_2 | 52.4      | -0.13  | 0.09    | 0.97 |
| NGLY1_2    | 50.82     | -0.11  | 0.13    | 0.99 |

Supplement: Supplementary file 3182 [file 1]

IPI00852983.1|C8ORF38

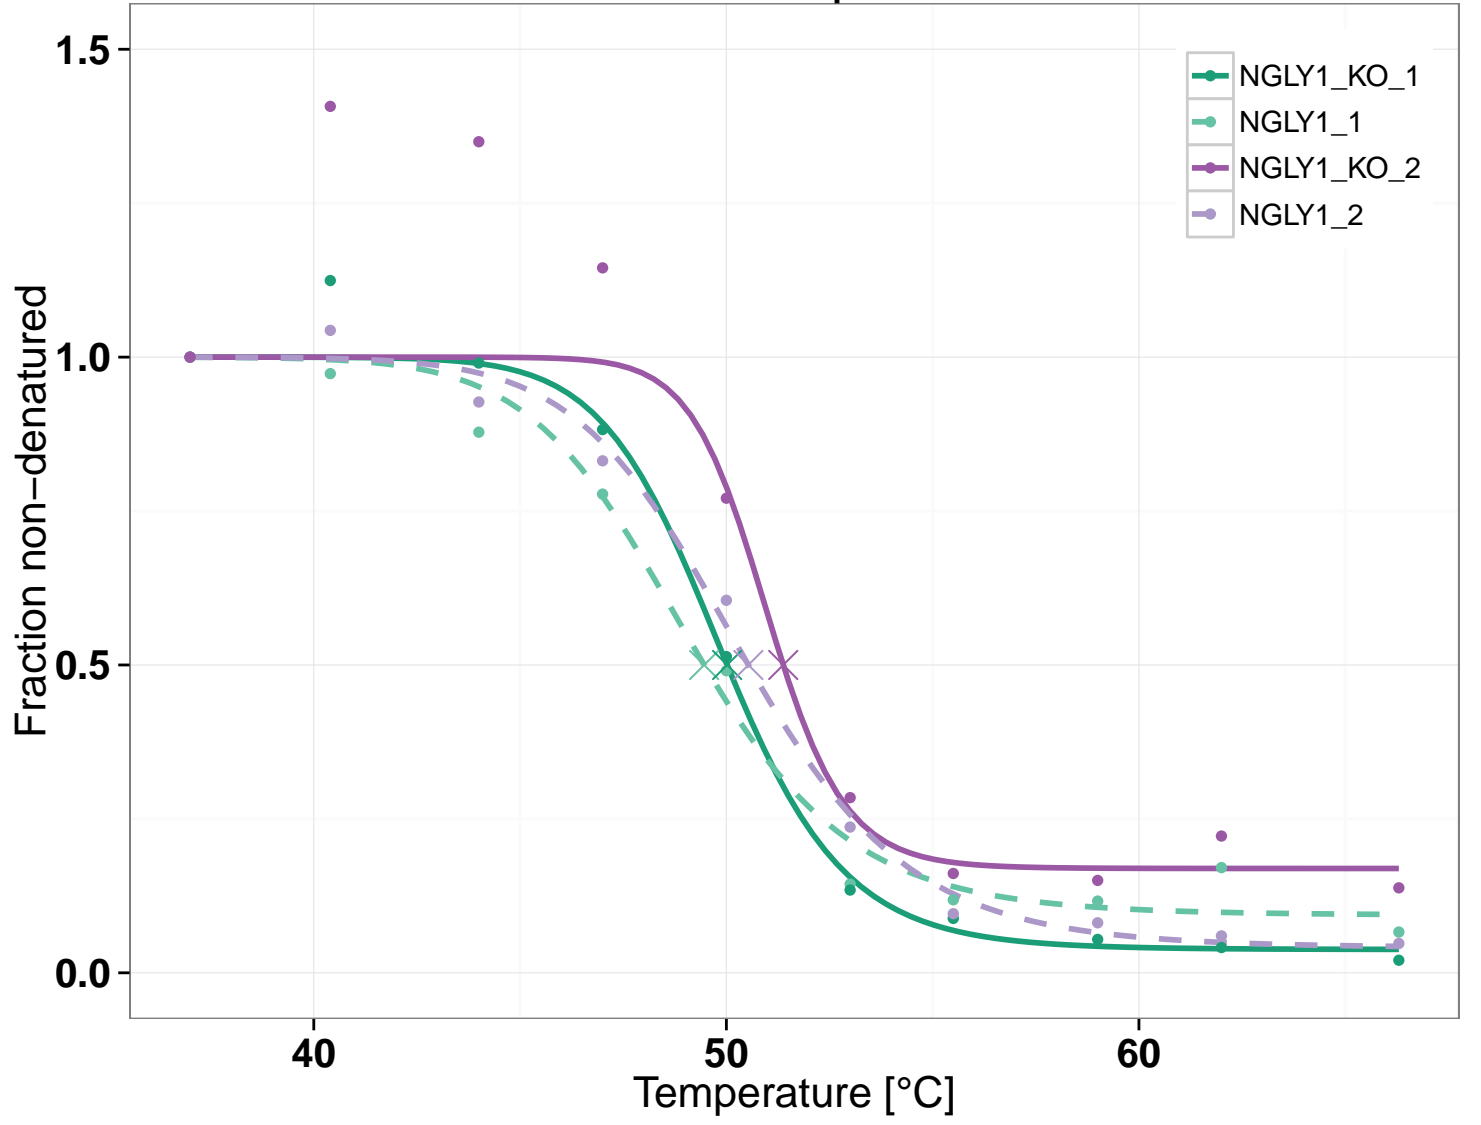

|            | meltPoint | slope | plateau | R2   |
|------------|-----------|-------|---------|------|
| NGLY1_KO_1 | 50.02     | -0.16 | 0.04    | 0.99 |
| NGLY1_1    | 49.46     | -0.12 | 0.09    | 0.99 |
| NGLY1_KO_2 | 51.38     | -0.22 | 0.17    | 0.87 |
| NGLY1_2    | 50.53     | -0.12 | 0.04    | 0.99 |

Supplement: Supplementary file 3183 [file 1]

IPI00304935.6|SAAL1

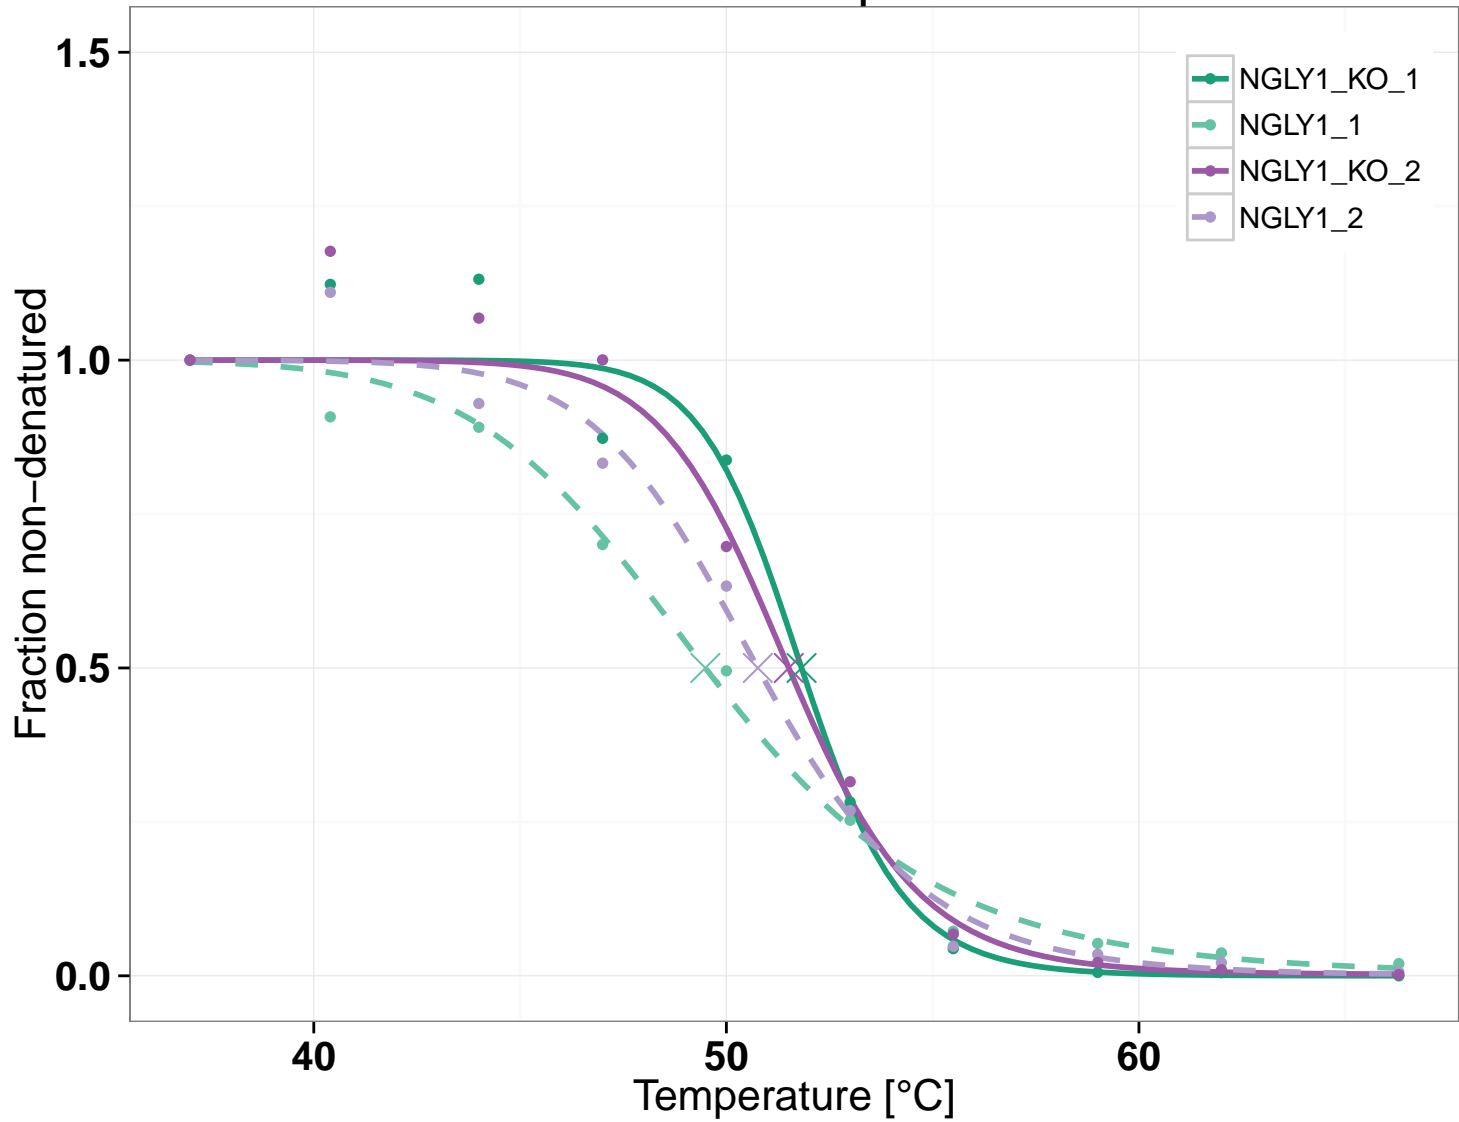

|            | meltPoint | slope  | plateau | R2   |
|------------|-----------|--------|---------|------|
| NGLY1_KO_1 | 51.82     | -0.2   | 0       | 0.98 |
| NGLY1_1    | 49.49     | -0.088 | 0       | 0.99 |
| NGLY1_KO_2 | 51.51     | -0.16  | 0       | 0.98 |
| NGLY1_2    | 50.76     | -0.12  | 0       | 0.99 |

Supplement: Supplementary file 3184 [file 1]

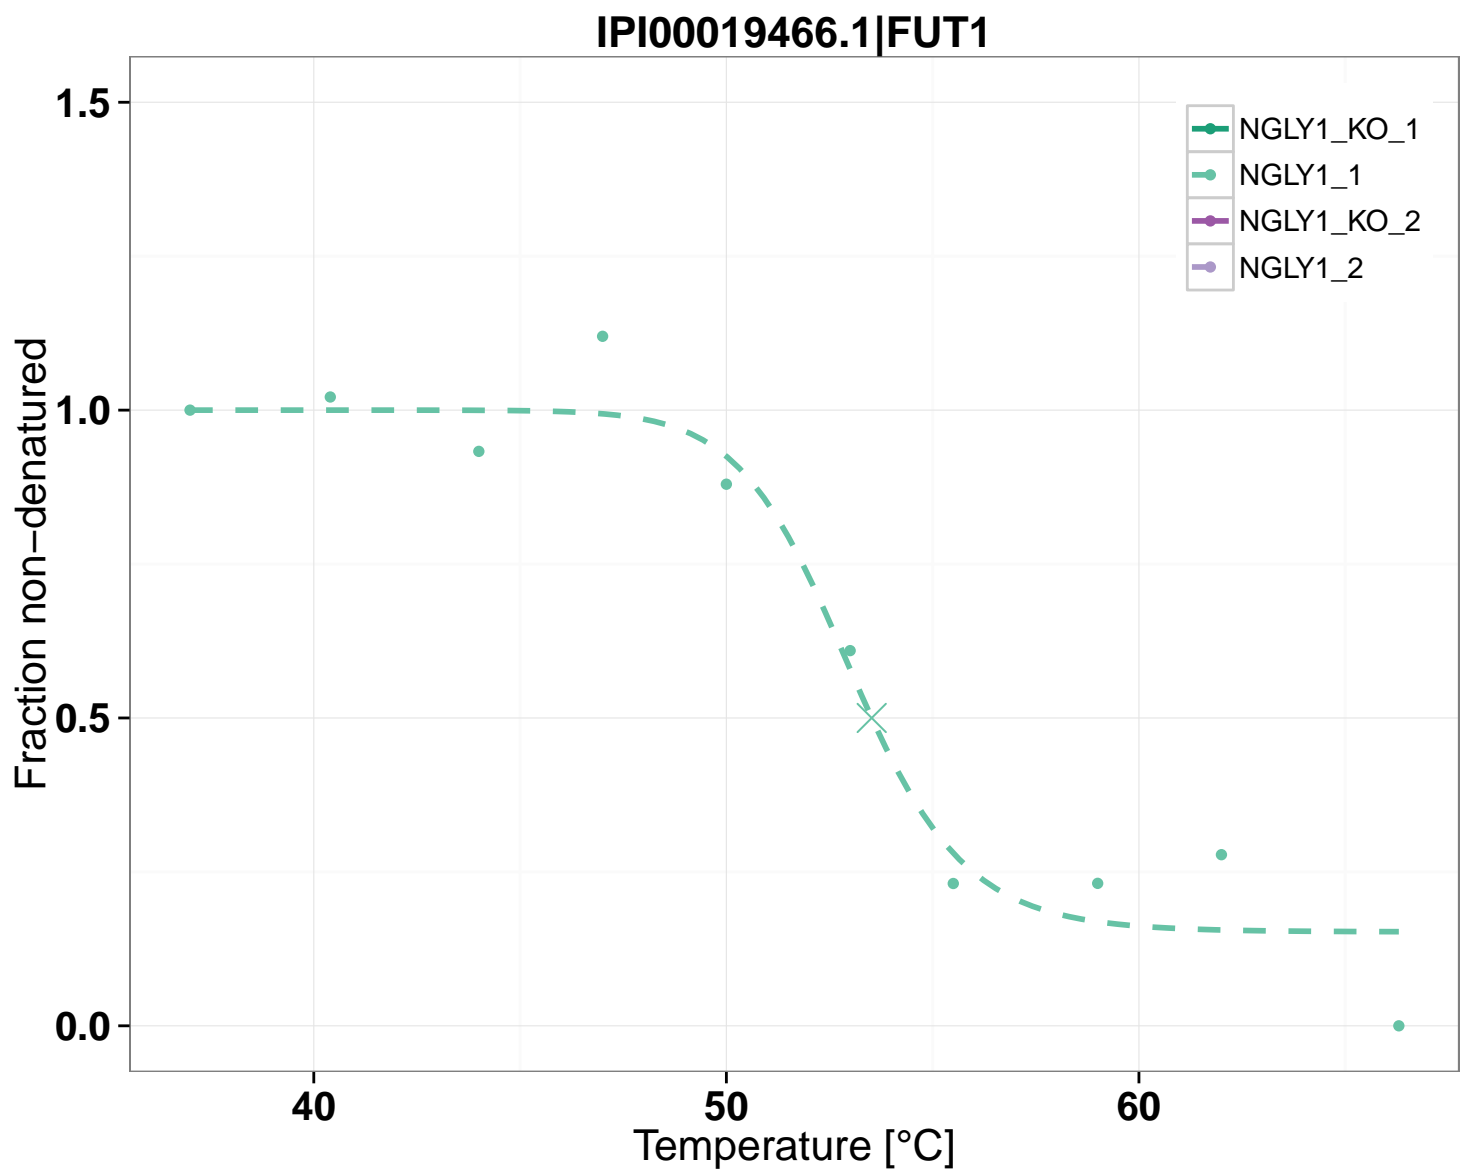

|            | meltPoint | slope | plateau | R2   |
|------------|-----------|-------|---------|------|
| NGLY1_KO_1 | —         | —     | —       | —    |
| NGLY1_1    | 53.52     | -0.15 | 0.15    | 0.96 |
| NGLY1_KO_2 | —         | —     | —       | —    |
| NGLY1_2    | —         | —     | —       | —    |

Supplement: Supplementary file 3185 [file 1]

IPI00017409.1|ZNF587

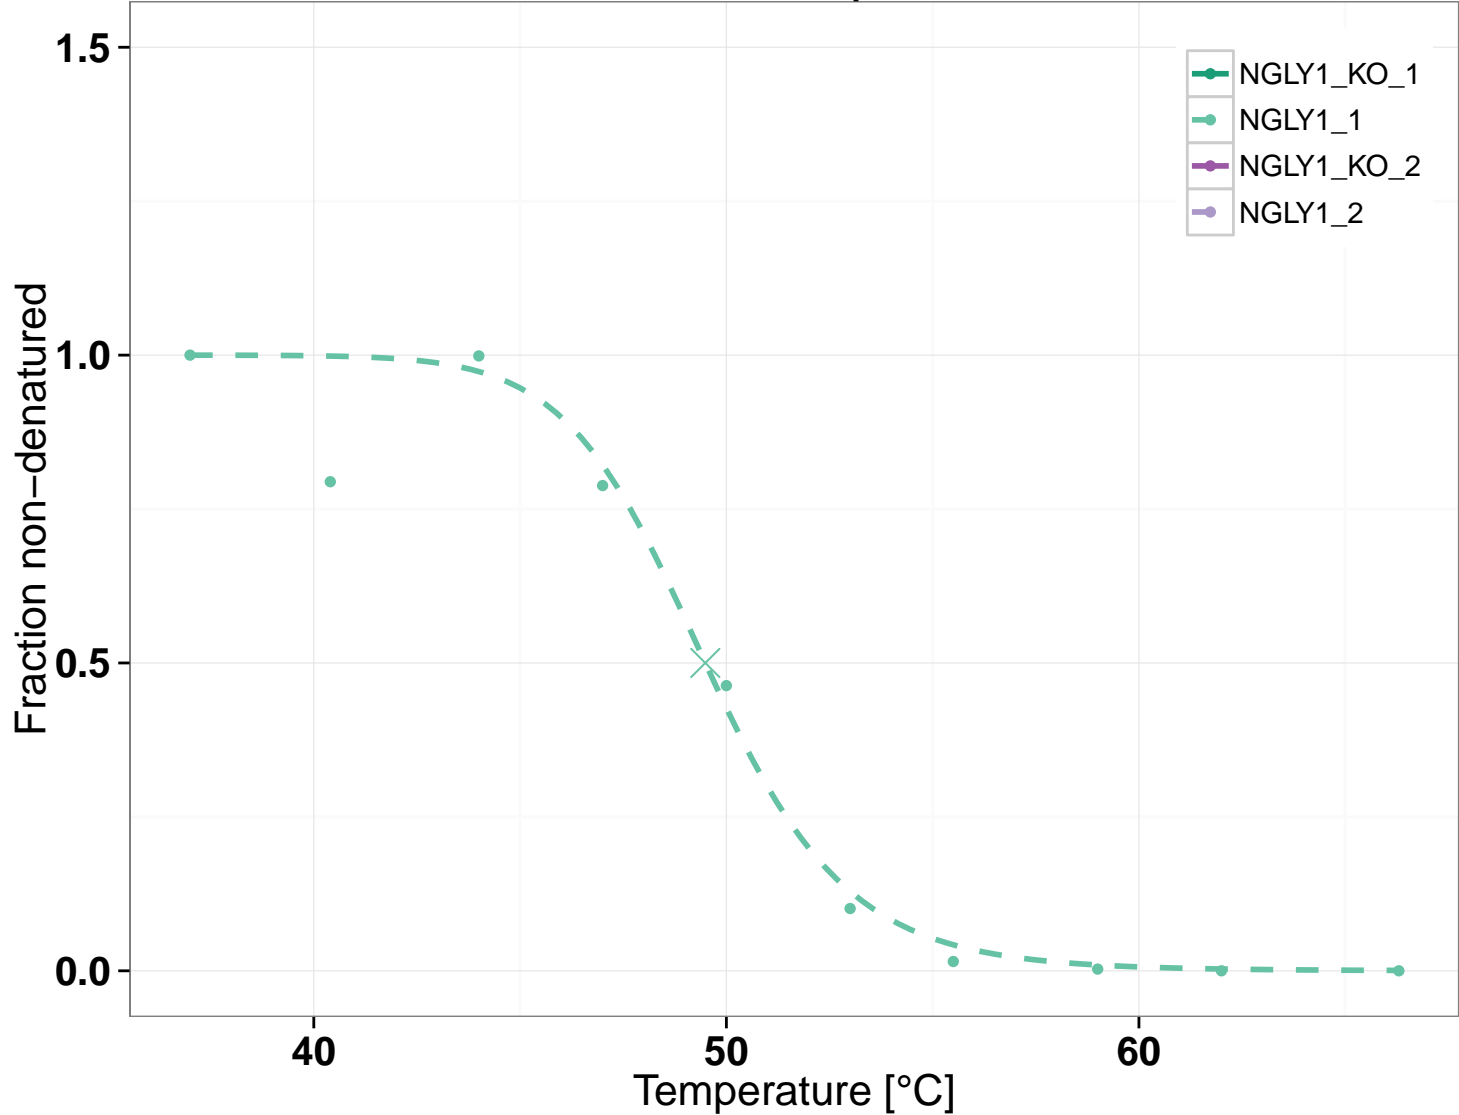

|            | meltPoint | slope | plateau | R2   |
|------------|-----------|-------|---------|------|
| NGLY1_KO_1 | -         | -     | -       | -    |
| NGLY1_1    | 49.49     | -0.15 | 0       | 0.97 |
| NGLY1_KO_2 | -         | -     | -       | -    |
| NGLY1_2    | -         | -     | -       | -    |

Supplement: Supplementary file 3186 [file 1]

IPI00302281.1|DDX56

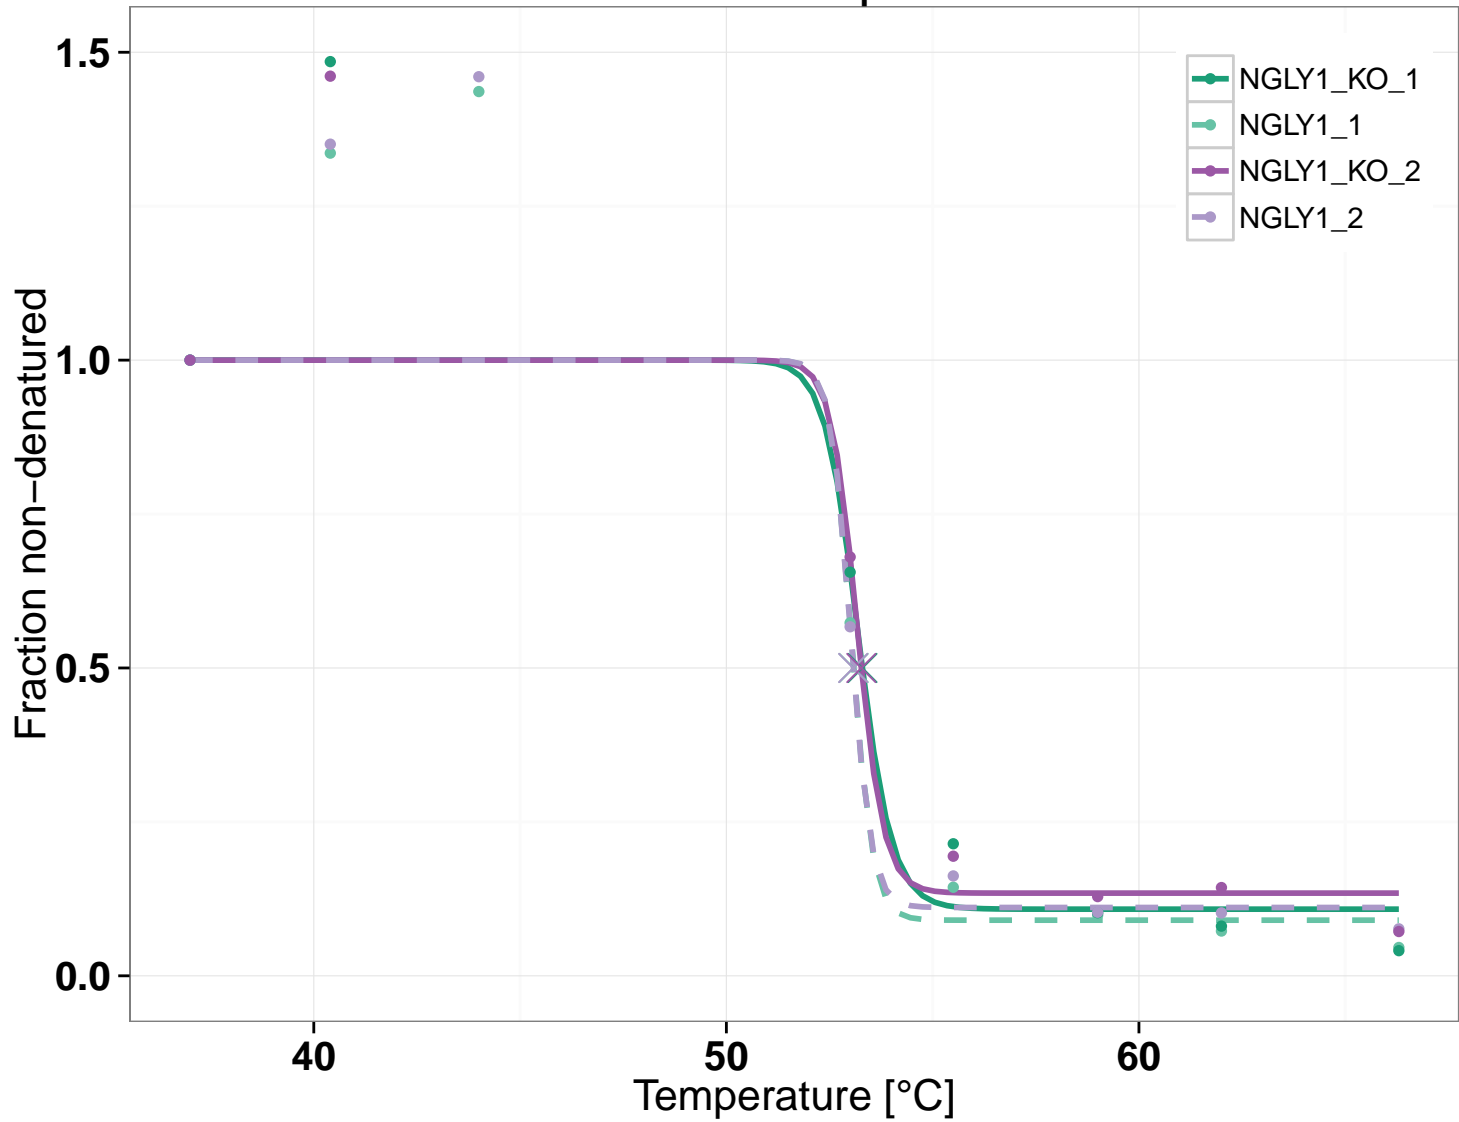

|            | meltPoint | slope | plateau | R2   |
|------------|-----------|-------|---------|------|
| NGLY1_KO_1 | 53.3      | -0.54 | 0.11    | 0.43 |
| NGLY1_1    | 53.08     | -0.89 | 0.09    | 0.55 |
| NGLY1_KO_2 | 53.27     | -0.67 | 0.13    | 0.38 |
| NGLY1_2    | 53.07     | -0.9  | 0.11    | 0.55 |

Supplement: Supplementary file 3187 [file 1]

IPI00028517.1|RAB33A

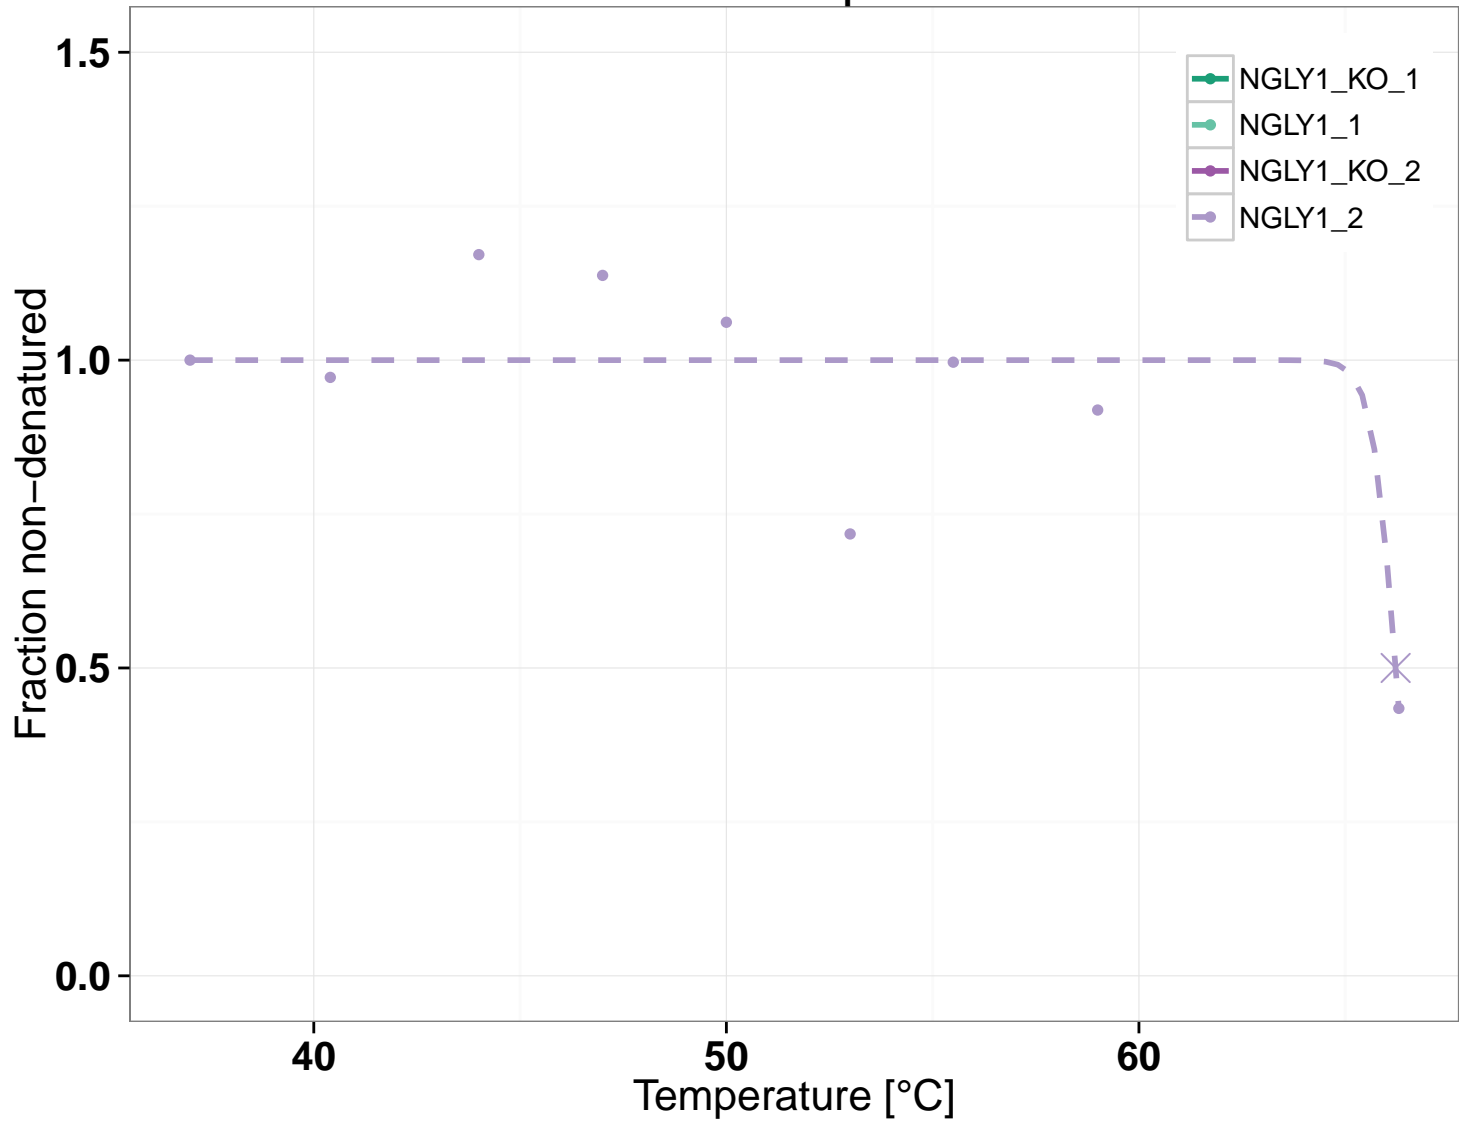

|            | meltPoint | slope | plateau | R2   |
|------------|-----------|-------|---------|------|
| NGLY1_KO_1 | —         | —     | —       | —    |
| NGLY1_1    | —         | —     | —       | —    |
| NGLY1_KO_2 | —         | —     | —       | —    |
| NGLY1_2    | 66.22     | -0.86 | 0       | 0.58 |

Supplement: Supplementary file 3188 [file 1]

IPI00008982.1|ALDH18A1

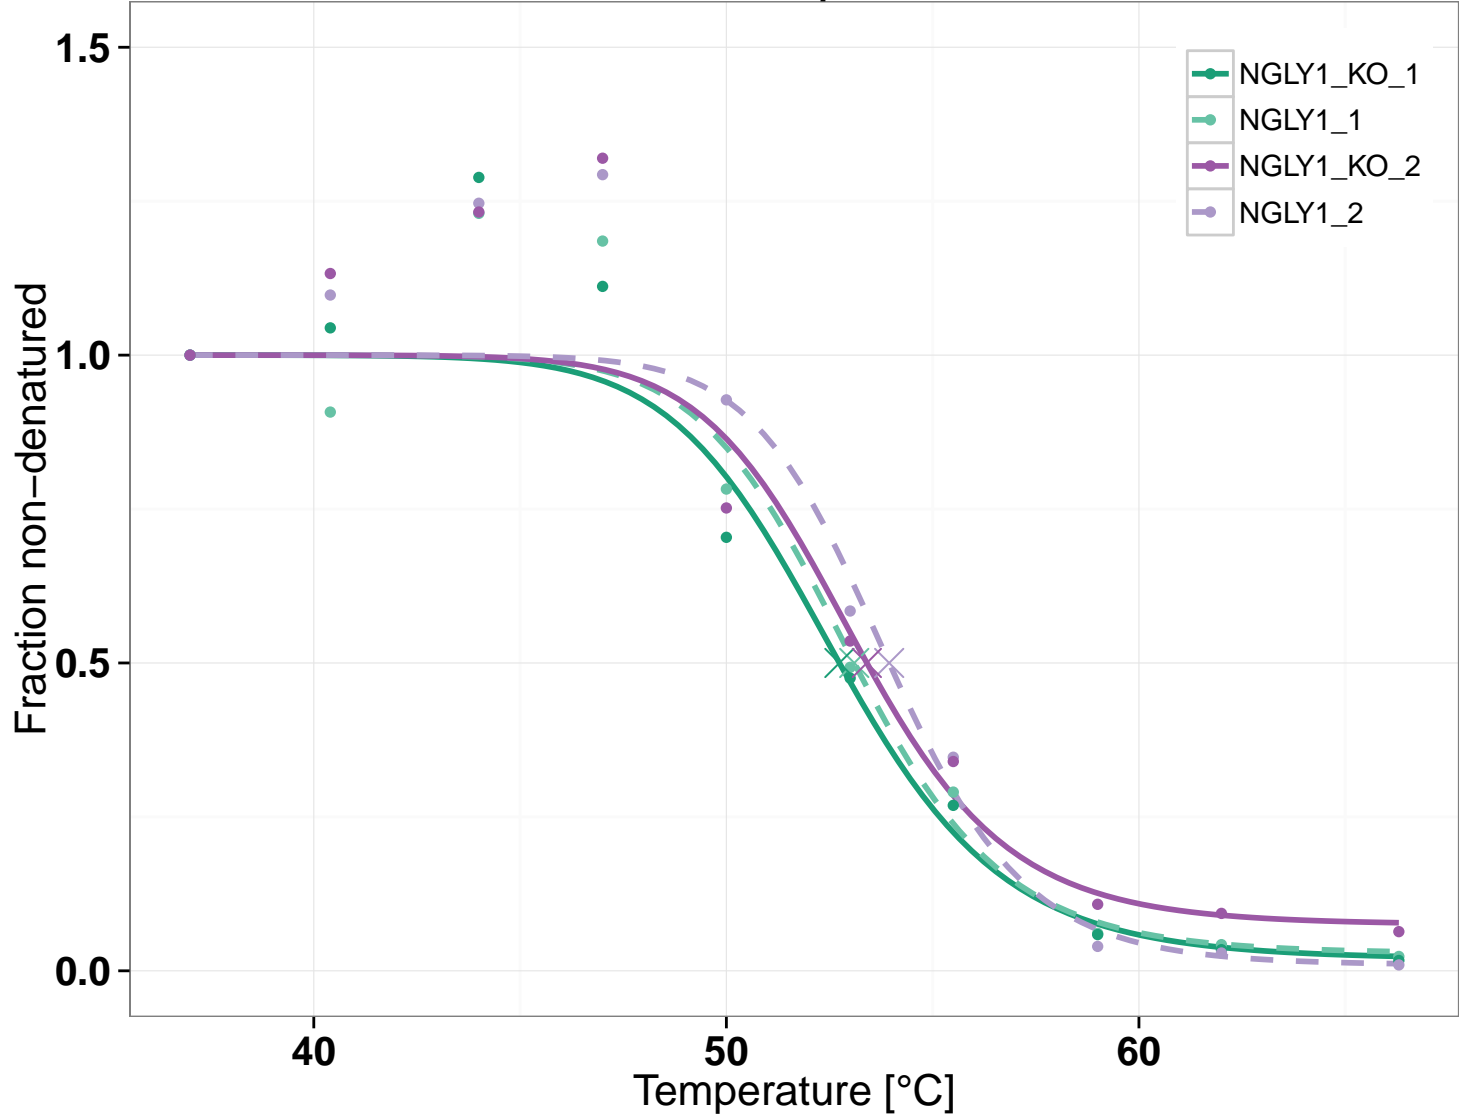

|            | meltPoint | slope | plateau | R2   |
|------------|-----------|-------|---------|------|
| NGLY1_KO_1 | 52.74     | -0.12 | 0.02    | 0.94 |
| NGLY1_1    | 53.1      | -0.13 | 0.03    | 0.94 |
| NGLY1_KO_2 | 53.41     | -0.12 | 0.07    | 0.91 |
| NGLY1_2    | 53.95     | -0.15 | 0.01    | 0.93 |

Supplement: Supplementary file 3189 [file 1]

IPI00414985.2|C13ORF27

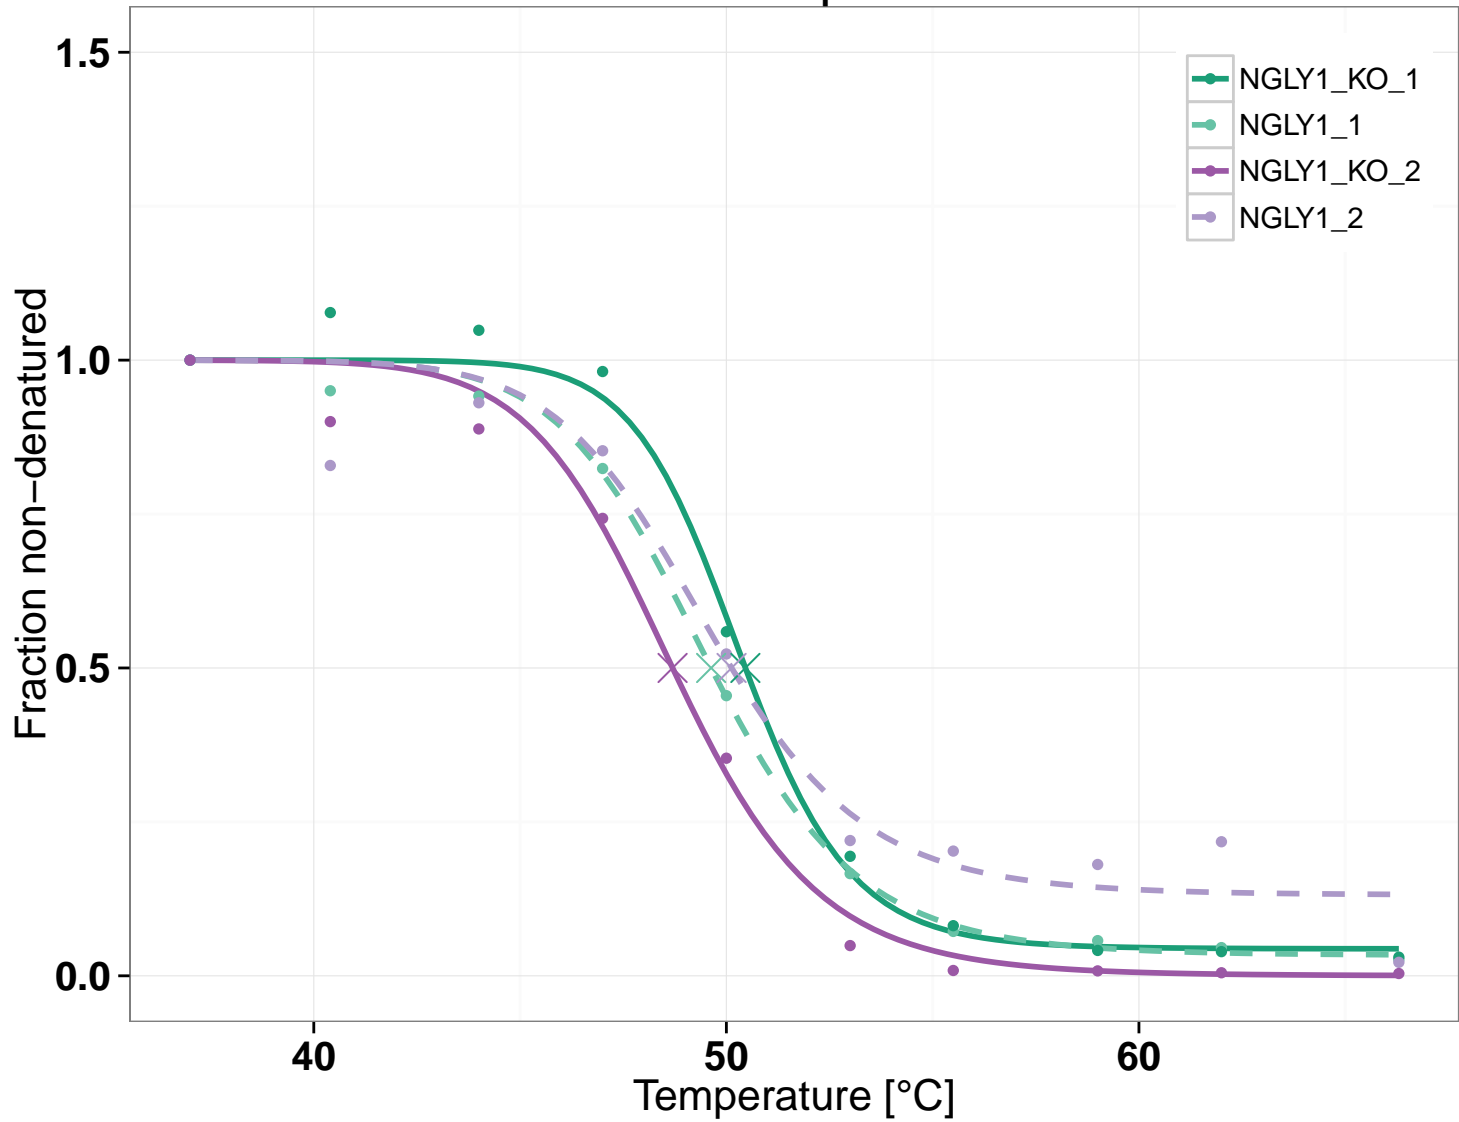

|            | meltPoint | slope | plateau | R2   |
|------------|-----------|-------|---------|------|
| NGLY1_KO_1 | 50.46     | -0.18 | 0.04    | 0.99 |
| NGLY1_1    | 49.63     | -0.13 | 0.03    | 1    |
| NGLY1_KO_2 | 48.7      | -0.14 | 0       | 0.99 |
| NGLY1_2    | 50.13     | -0.12 | 0.13    | 0.96 |

Supplement: Supplementary file 3190 [file 1]

IPI00004497.2|BCR

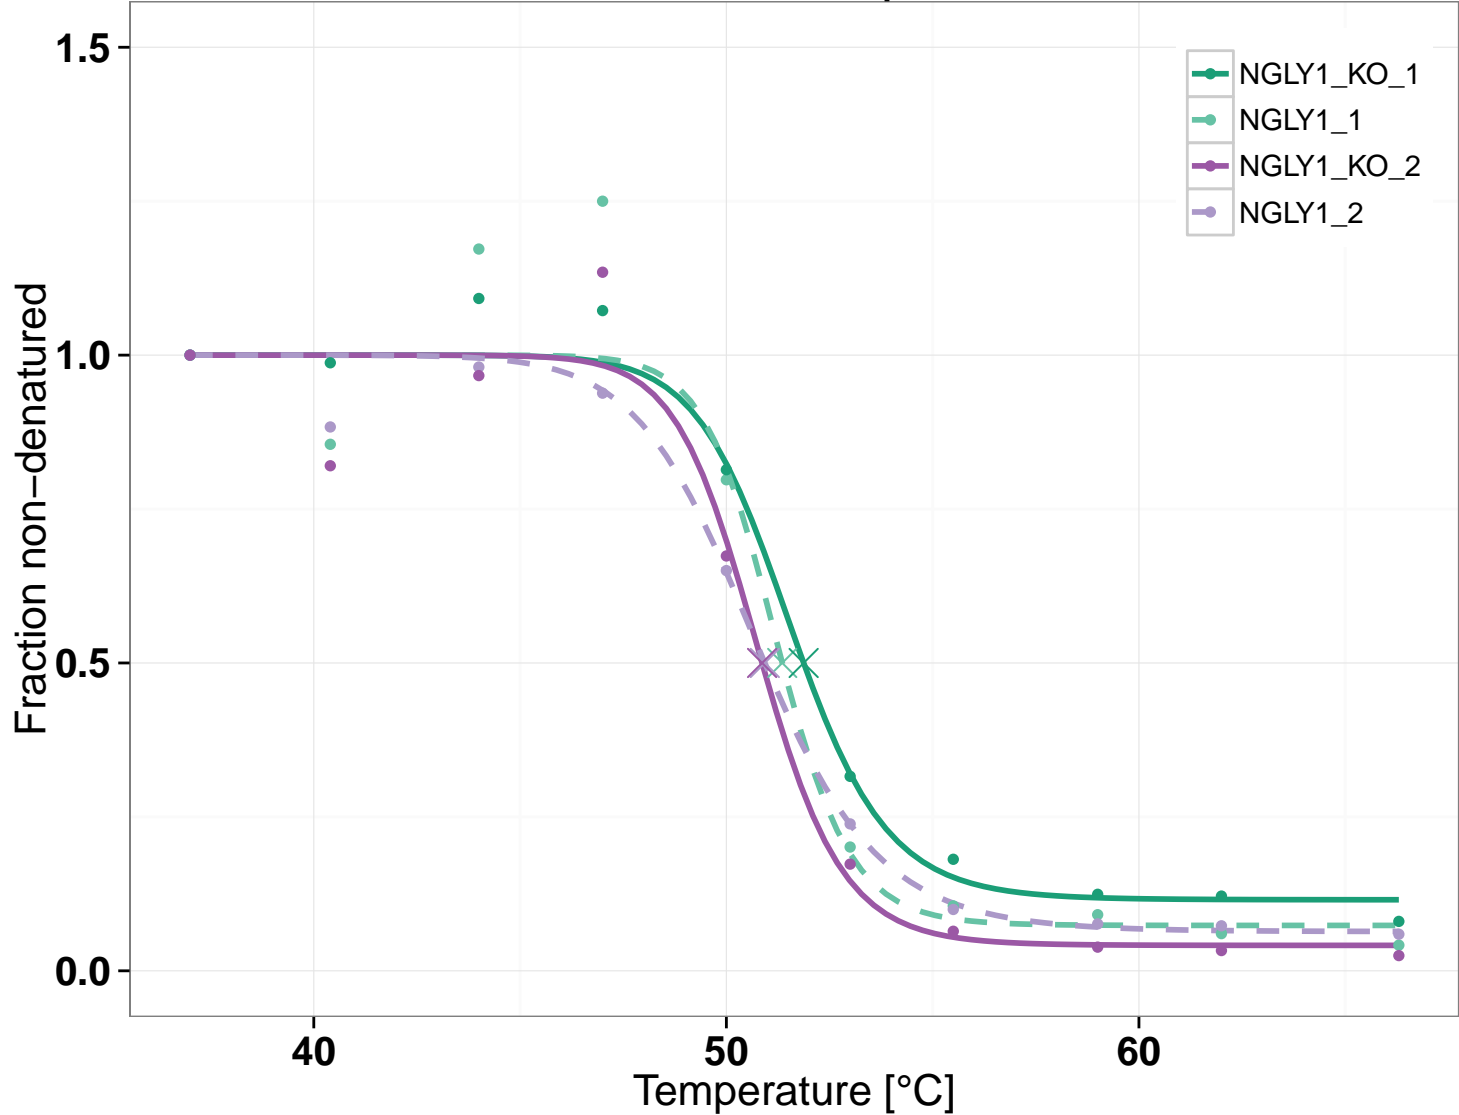

|            | meltPoint | slope | plateau | R2   |
|------------|-----------|-------|---------|------|
| NGLY1_KO_1 | 51.87     | -0.19 | 0.12    | 0.99 |
| NGLY1_1    | 51.35     | -0.26 | 0.07    | 0.95 |
| NGLY1_KO_2 | 50.87     | -0.24 | 0.04    | 0.97 |
| NGLY1_2    | 50.93     | -0.16 | 0.06    | 0.99 |

Supplement: Supplementary file 3191 [file 1]

# IPI00024934.4|MUT

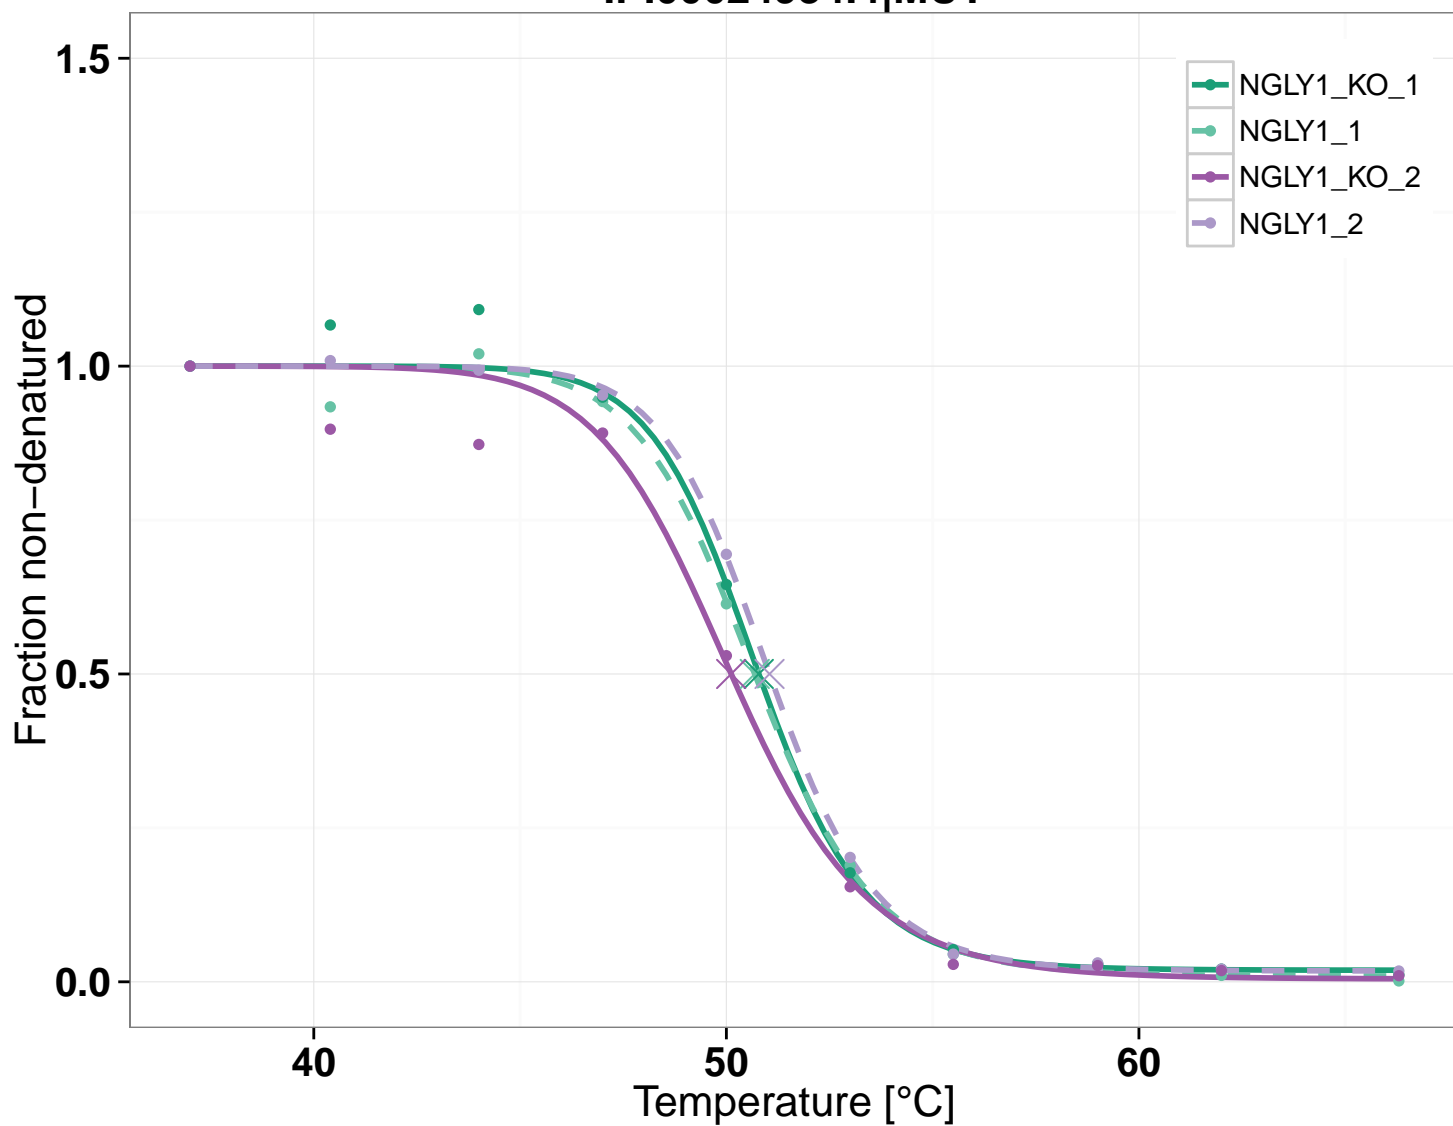

|            | meltPoint | slope | plateau | R2   |
|------------|-----------|-------|---------|------|
| NGLY1_KO_1 | 50.79     | -0.19 | 0.02    | 0.99 |
| NGLY1_1    | 50.69     | -0.17 | 0.01    | 1    |
| NGLY1_KO_2 | 50.12     | -0.15 | 0       | 0.99 |
| NGLY1_2    | 51.05     | -0.19 | 0.02    | 1    |

Supplement: Supplementary file 3192 [file 1]

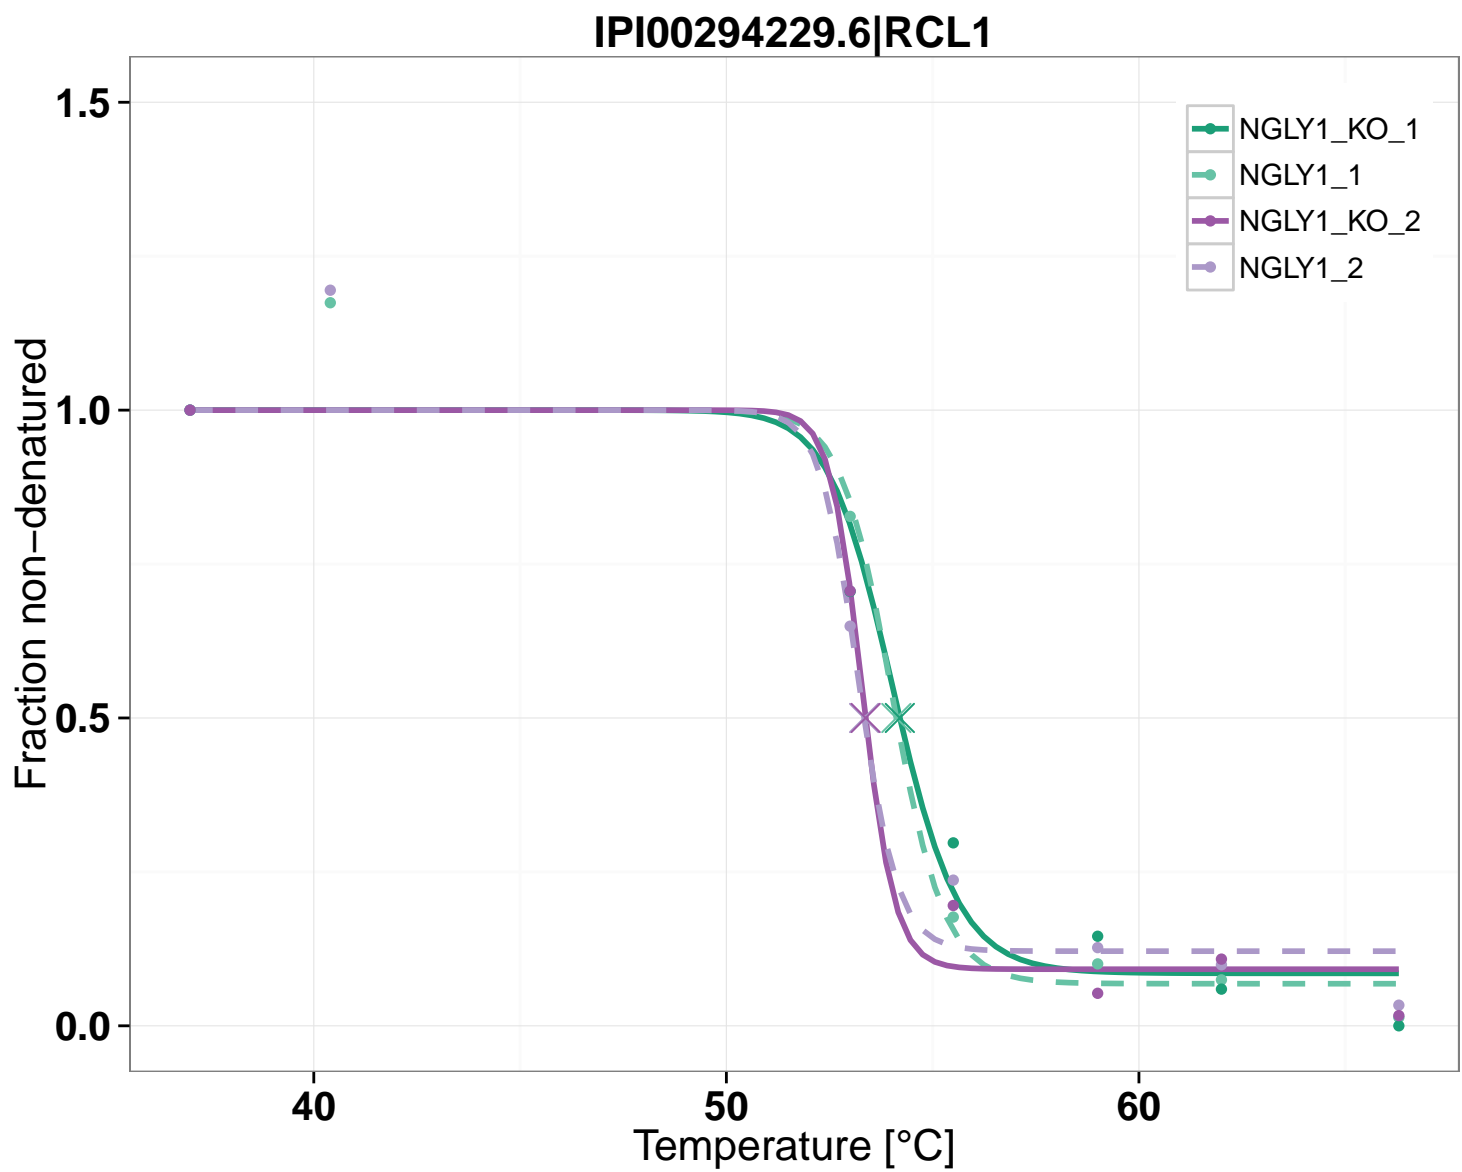

|            | meltPoint | slope | plateau | R2    |
|------------|-----------|-------|---------|-------|
| NGLY1_KO_1 | 54.21     | -0.29 | 0.09    | 0.02  |
| NGLY1_1    | 54.12     | -0.37 | 0.07    | 0.18  |
| NGLY1_KO_2 | 53.38     | -0.58 | 0.09    | -0.05 |
| NGLY1_2    | 53.34     | -0.47 | 0.12    | 0.2   |

Supplement: Supplementary file 3193 [file 1]

IPI00337772.4|HMMR

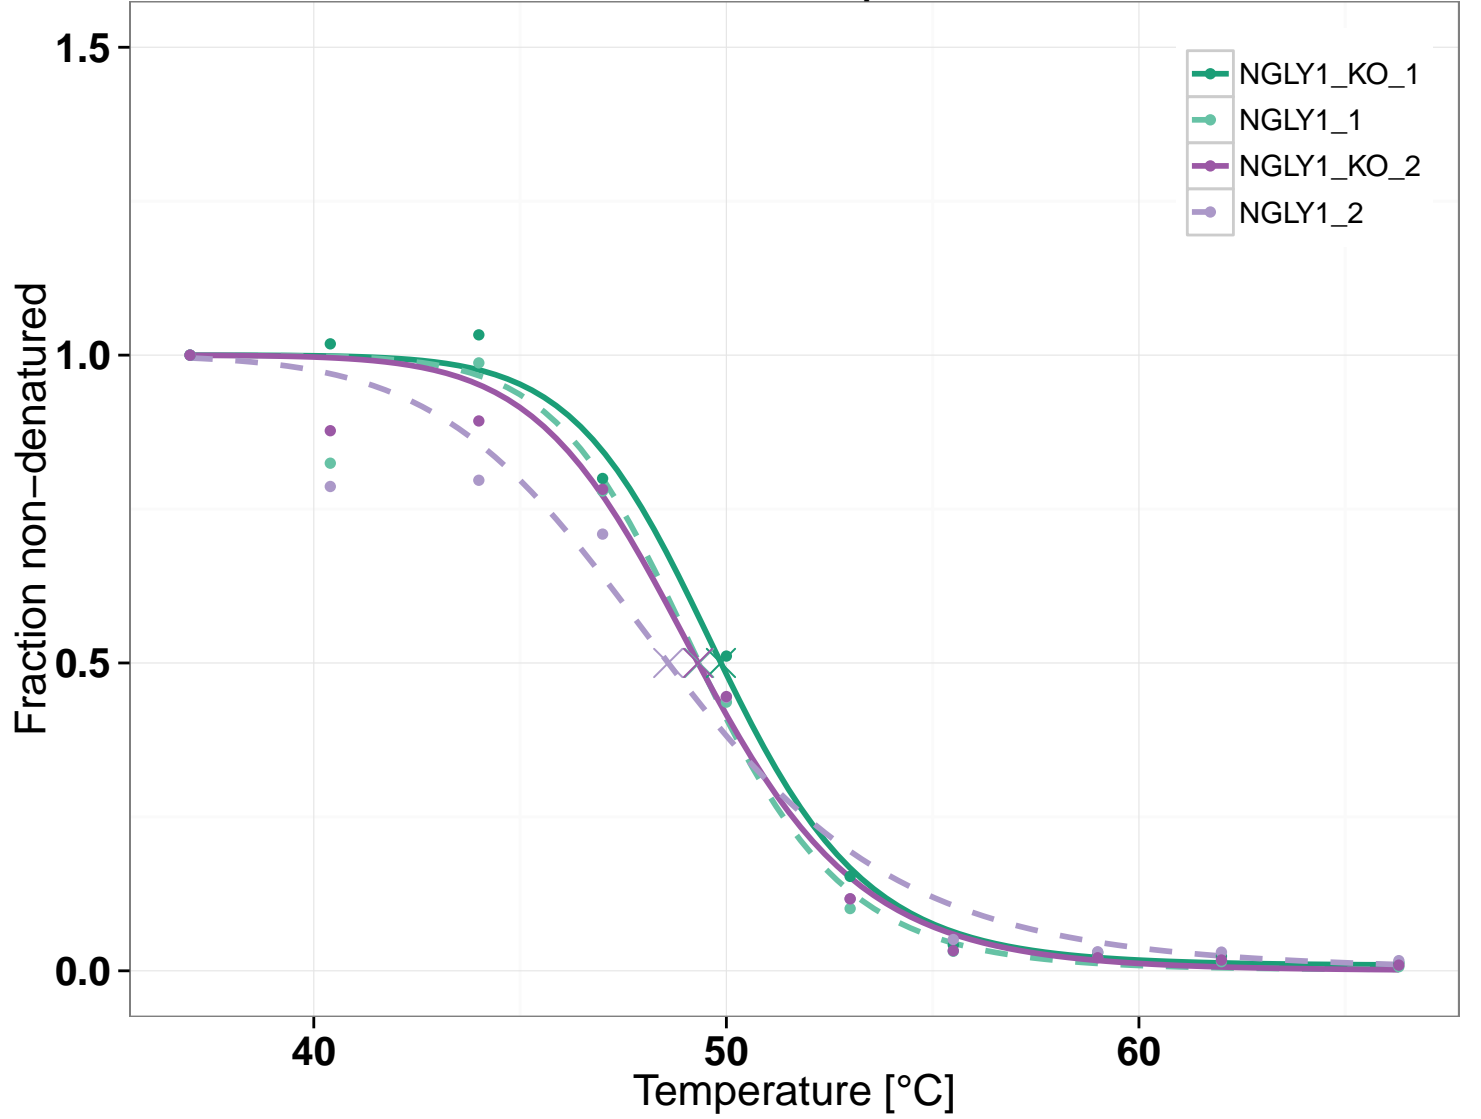

|            | meltPoint | slope  | plateau | R2   |
|------------|-----------|--------|---------|------|
| NGLY1_KO_1 | 49.87     | -0.14  | 0.01    | 1    |
| NGLY1_1    | 49.34     | -0.14  | 0       | 0.98 |
| NGLY1_KO_2 | 49.31     | -0.13  | 0       | 0.99 |
| NGLY1_2    | 48.59     | -0.089 | 0       | 0.96 |

Supplement: Supplementary file 3194 [file 1]

# IPI00303292.1|KPNA1

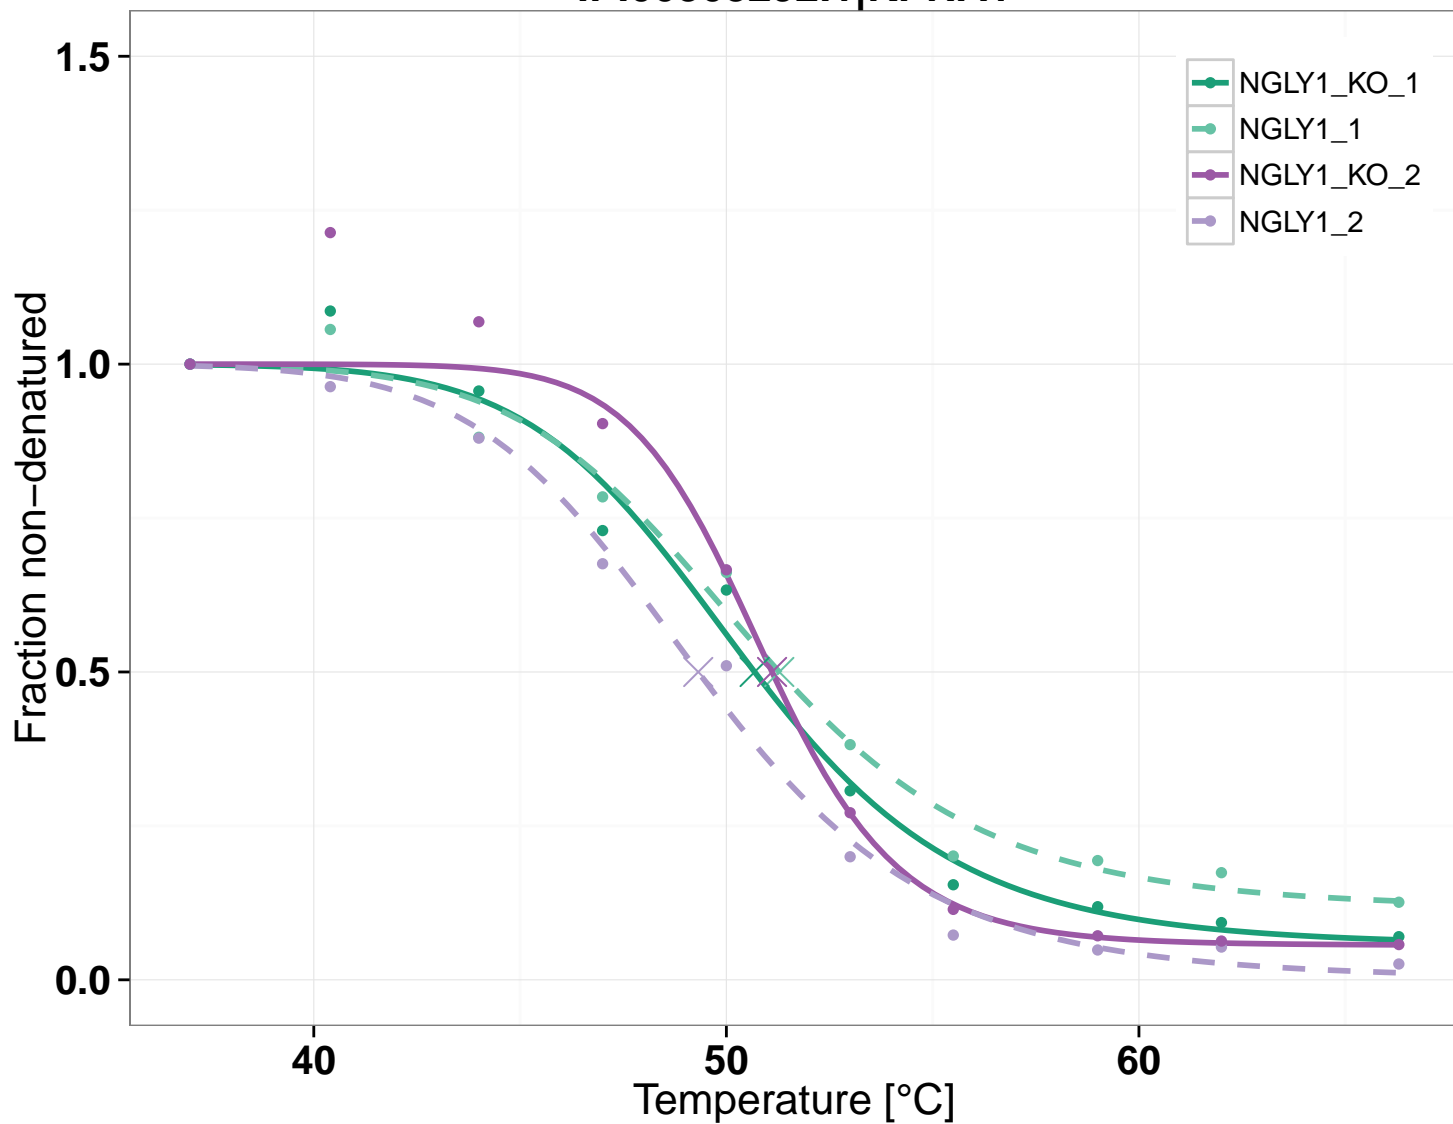

|            | meltPoint | slope  | plateau | R2   |
|------------|-----------|--------|---------|------|
| NGLY1_KO_1 | 50.68     | -0.09  | 0.06    | 0.99 |
| NGLY1_1    | 51.28     | -0.078 | 0.11    | 0.99 |
| NGLY1_KO_2 | 51.11     | -0.14  | 0.06    | 0.97 |
| NGLY1_2    | 49.32     | -0.091 | 0       | 0.99 |

Supplement: Supplementary file 3195 [file 1]

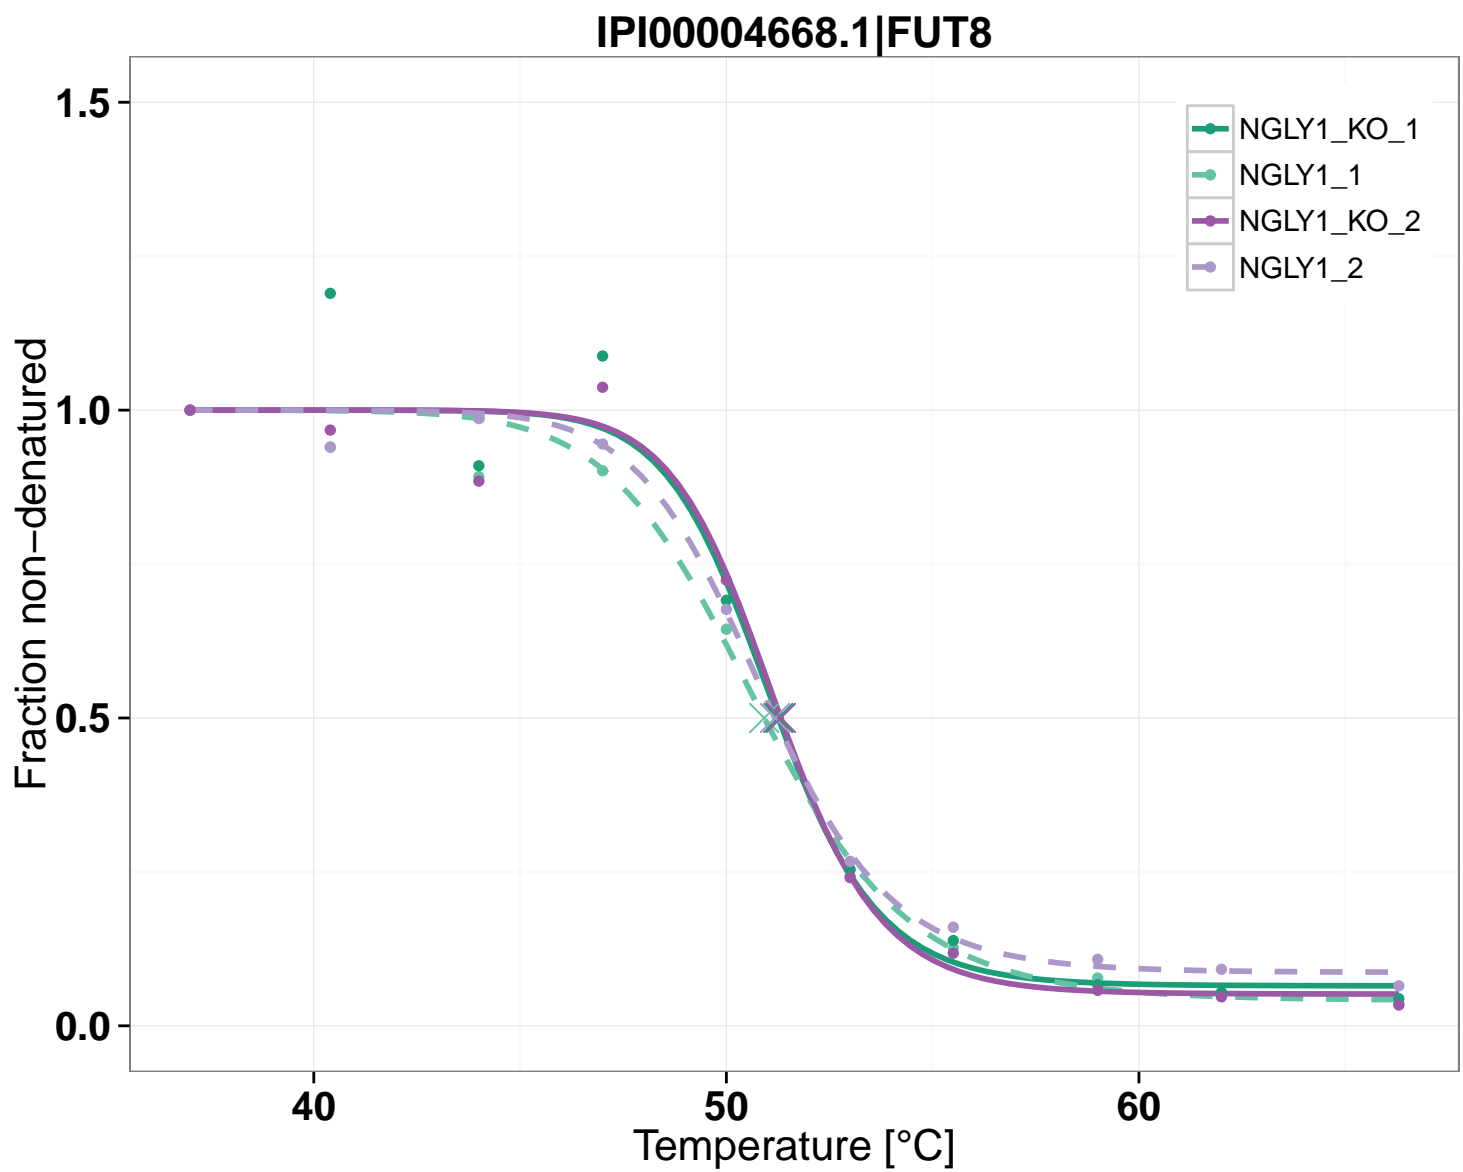

|            | meltPoint | slope | plateau | R2   |
|------------|-----------|-------|---------|------|
| NGLY1_KO_1 | 51.26     | -0.18 | 0.06    | 0.97 |
| NGLY1_1    | 50.92     | -0.13 | 0.04    | 0.99 |
| NGLY1_KO_2 | 51.32     | -0.19 | 0.05    | 0.99 |
| NGLY1_2    | 51.18     | -0.15 | 0.09    | 1    |

Supplement: Supplementary file 3196 [file 1]

IPI00411426.3|VPS26A

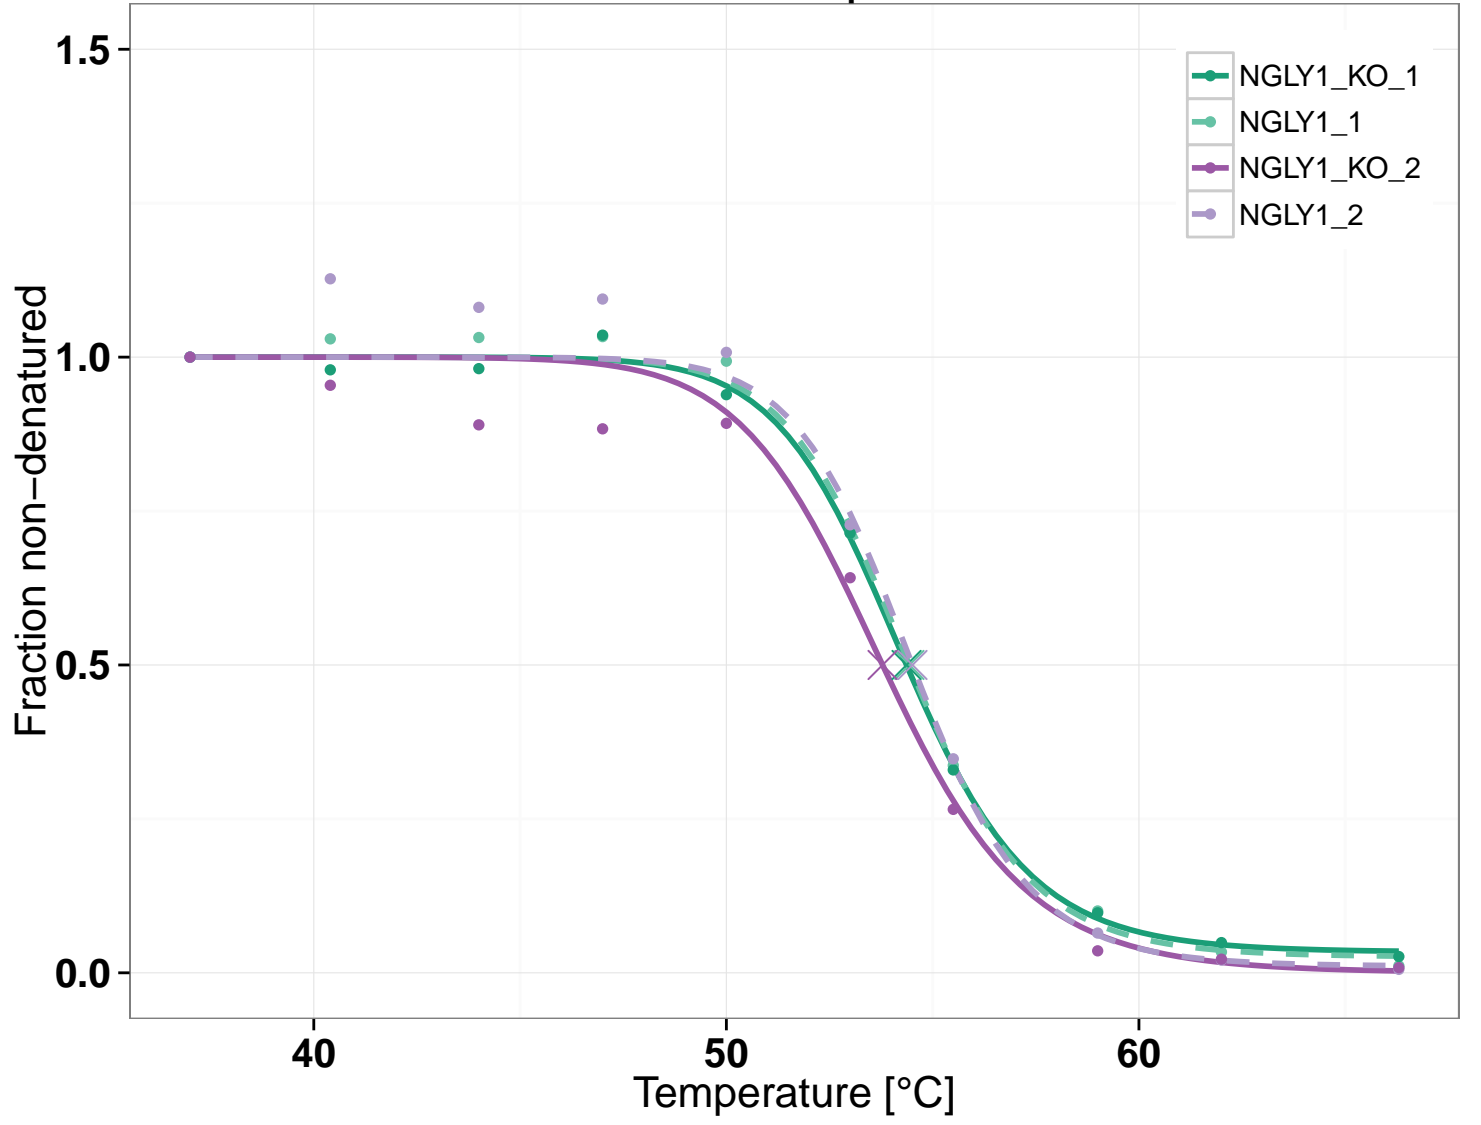

|            | meltPoint | slope | plateau | R2   |
|------------|-----------|-------|---------|------|
| NGLY1_KO_1 | 54.37     | -0.16 | 0.03    | 1    |
| NGLY1_1    | 54.44     | -0.16 | 0.03    | 1    |
| NGLY1_KO_2 | 53.79     | -0.14 | 0       | 0.98 |
| NGLY1_2    | 54.51     | -0.17 | 0.01    | 0.98 |

Supplement: Supplementary file 3197 [file 1]

IPI00290827.3|SLC25A40

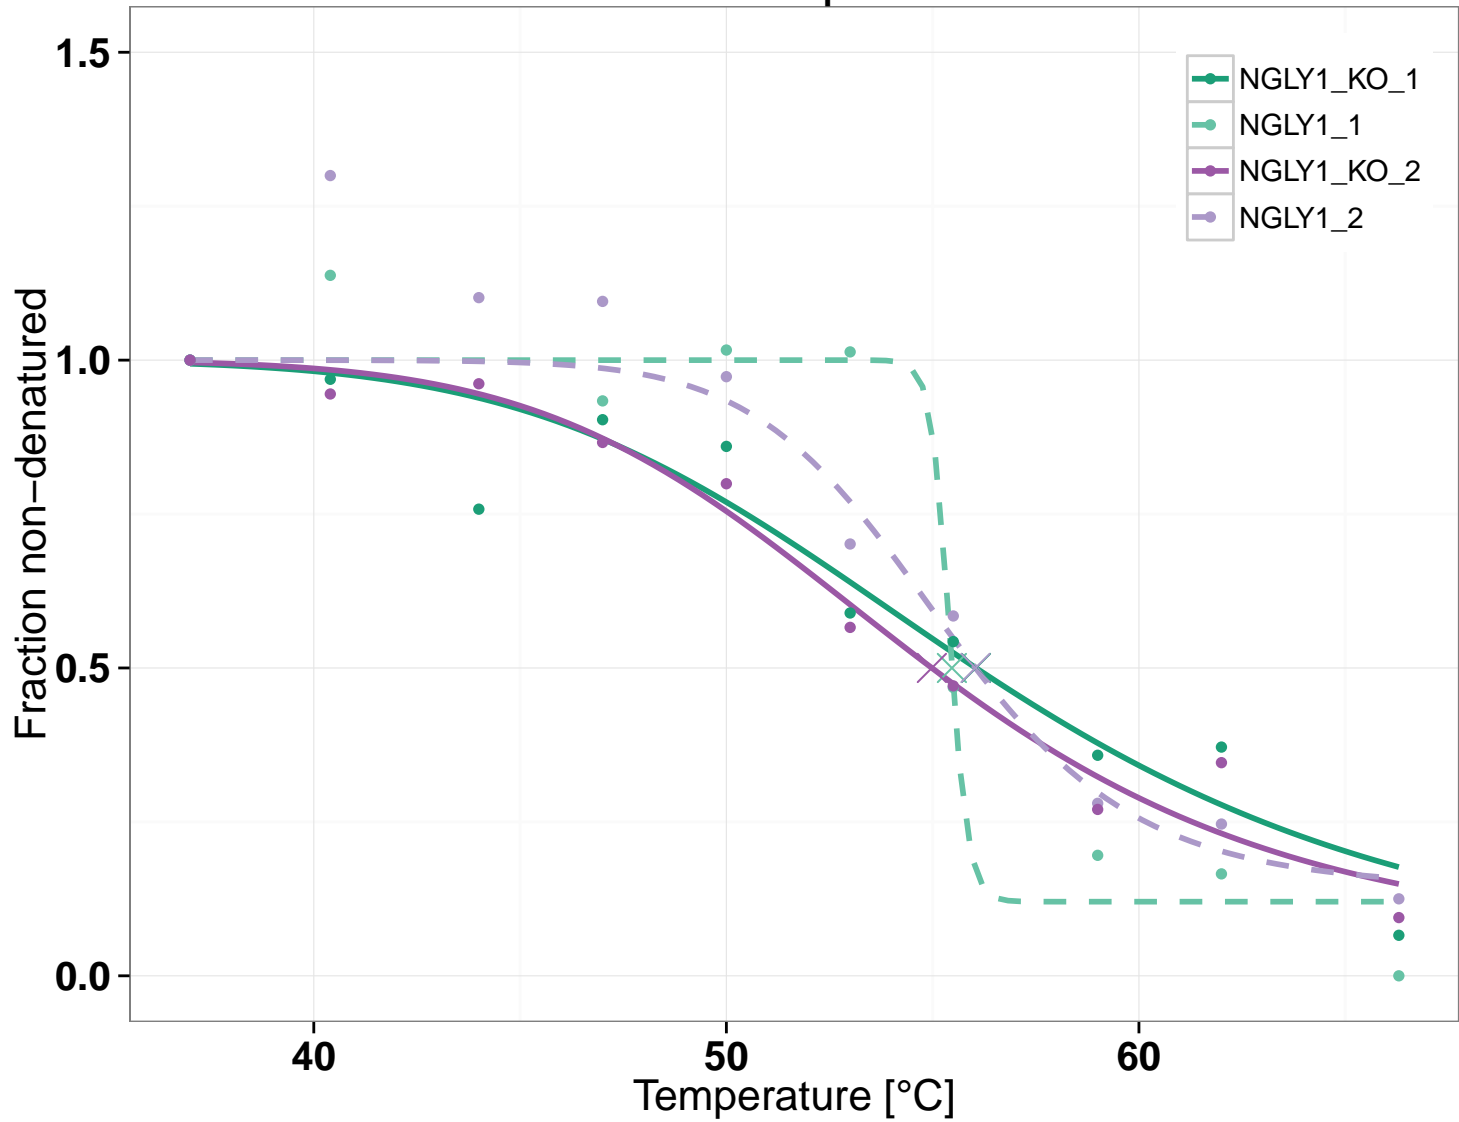

|            | meltPoint | slope  | plateau | R2   |
|------------|-----------|--------|---------|------|
| NGLY1_KO_1 | 56.05     | -0.046 | 0       | 0.92 |
| NGLY1_1    | 55.47     | -0.99  | 0.12    | 0.79 |
| NGLY1_KO_2 | 54.98     | -0.053 | 0.04    | 0.97 |
| NGLY1_2    | 56.04     | -0.093 | 0.14    | 0.92 |

Supplement: Supplementary file 3198 [file 1]

# IPI00742988.2|C14ORF80

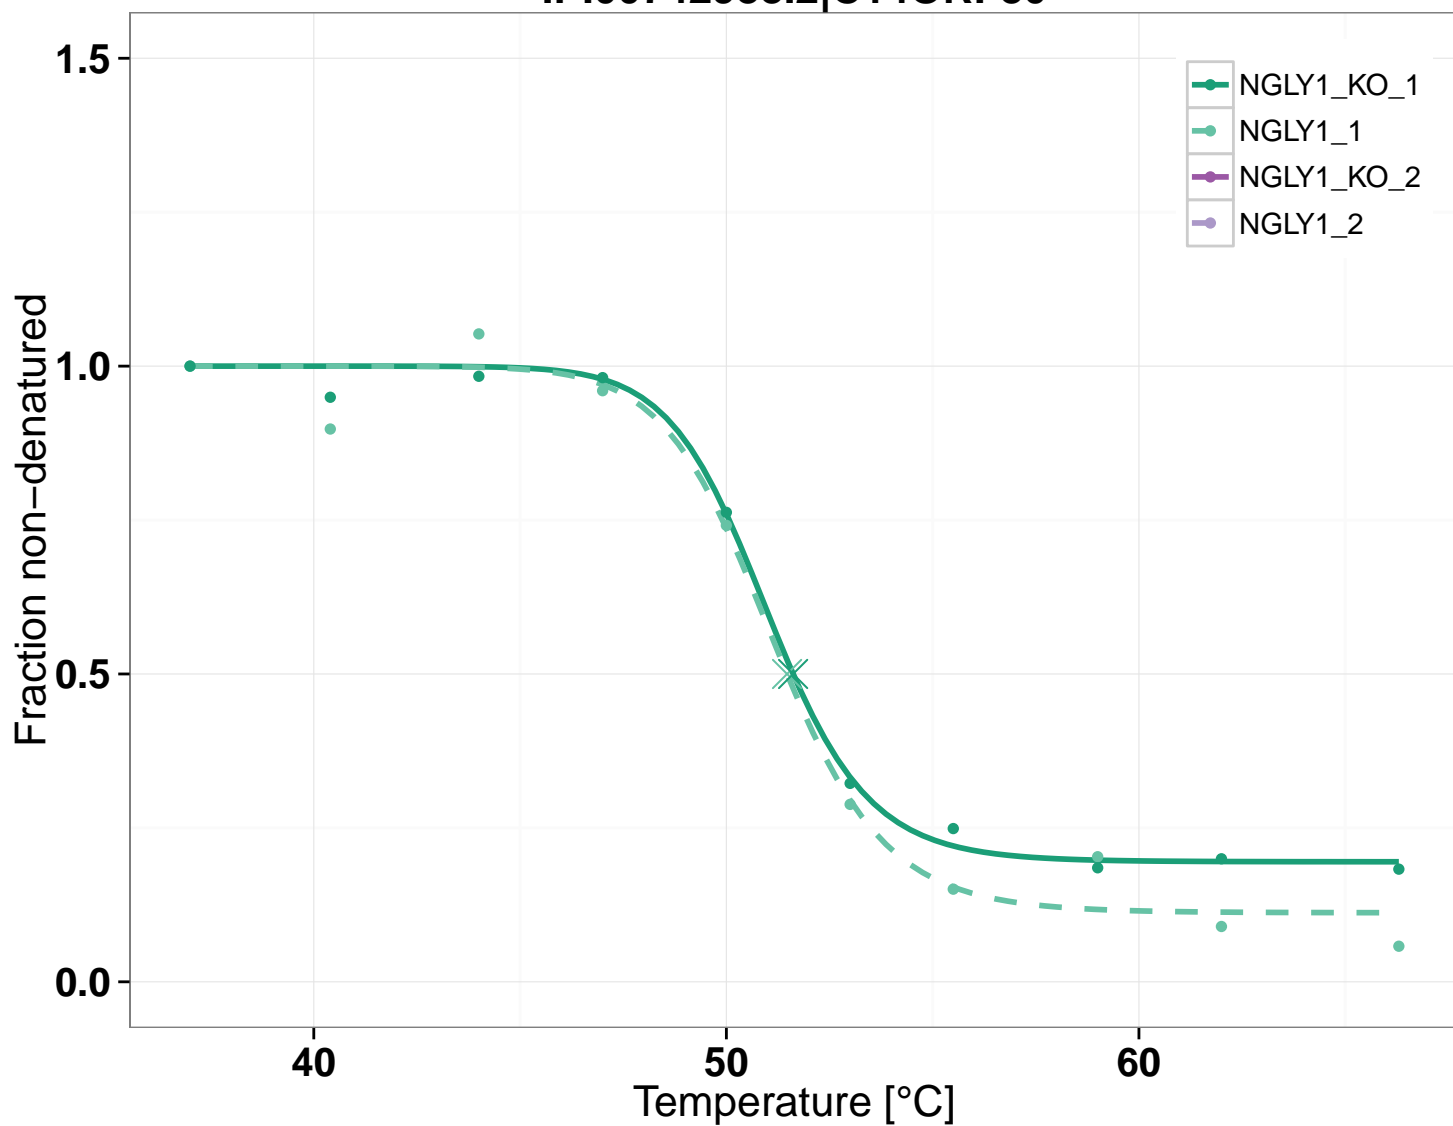

|            | meltPoint | slope | plateau | R2   |
|------------|-----------|-------|---------|------|
| NGLY1_KO_1 | 51.62     | -0.17 | 0.19    | 1    |
| NGLY1_1    | 51.47     | -0.17 | 0.11    | 0.98 |
| NGLY1_KO_2 | -         | -     | -       | -    |
| NGLY1_2    | -         | -     | -       | -    |

Supplement: Supplementary file 3199 [file 1]

IPI00871157.1|SRPK2

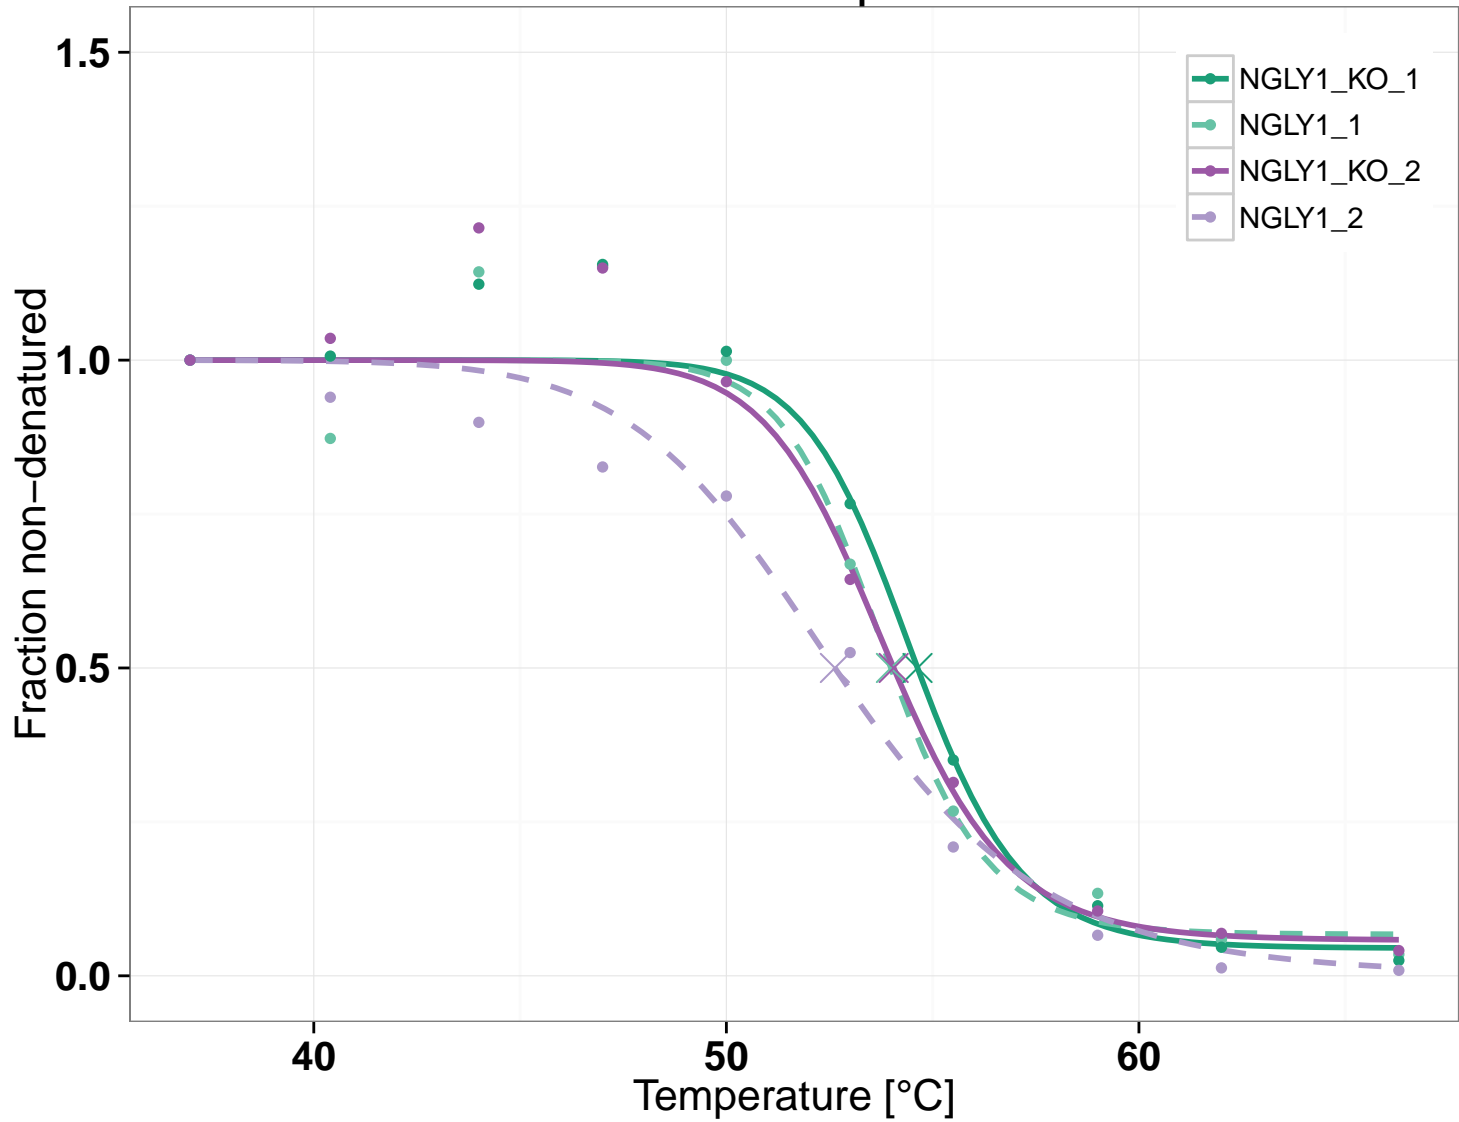

|            | meltPoint | slope  | plateau | R2   |
|------------|-----------|--------|---------|------|
| NGLY1_KO_1 | 54.63     | -0.18  | 0.04    | 0.98 |
| NGLY1_1    | 53.99     | -0.19  | 0.07    | 0.97 |
| NGLY1_KO_2 | 54.05     | -0.16  | 0.06    | 0.96 |
| NGLY1_2    | 52.63     | -0.099 | 0       | 0.98 |

Supplement: Supplementary file 3200 [file 1]

IPI00470626.5|NTAN1

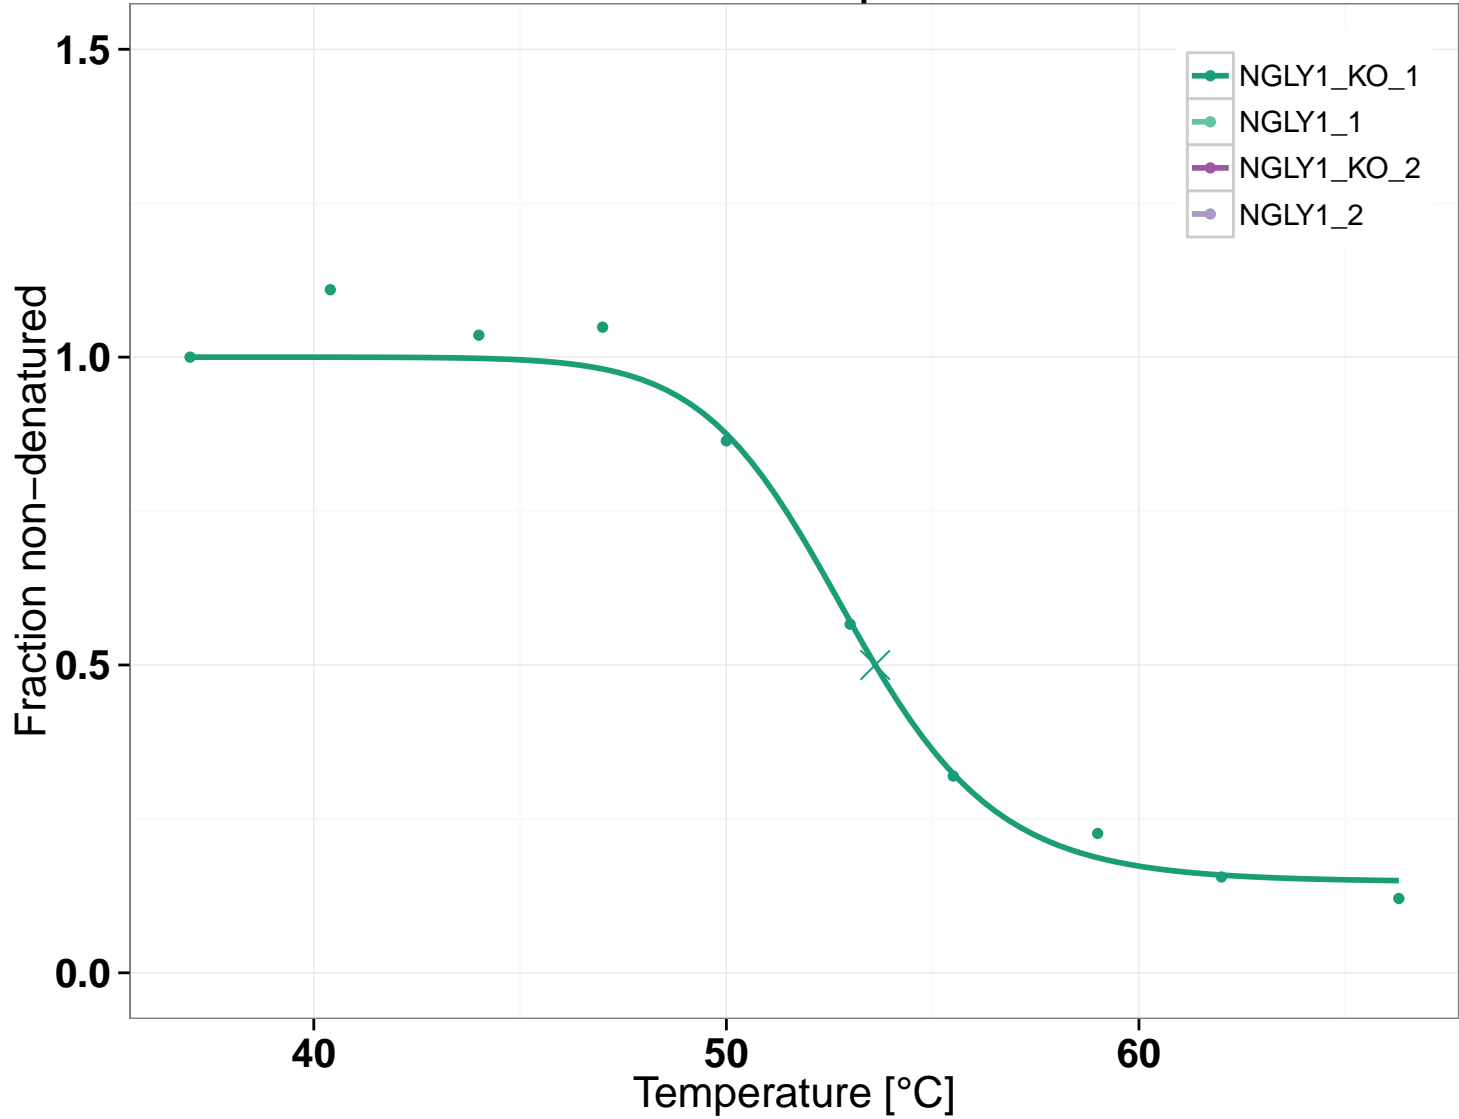

|            | meltPoint | slope | plateau | R2   |
|------------|-----------|-------|---------|------|
| NGLY1_KO_1 | 53.61     | -0.12 | 0.15    | 0.99 |
| NGLY1_1    | -         | -     | -       | -    |
| NGLY1_KO_2 | -         | -     | -       | -    |
| NGLY1_2    | -         | -     | -       | -    |

Supplement: Supplementary file 3201 [file 1]

IPI00220007.6|APOL2

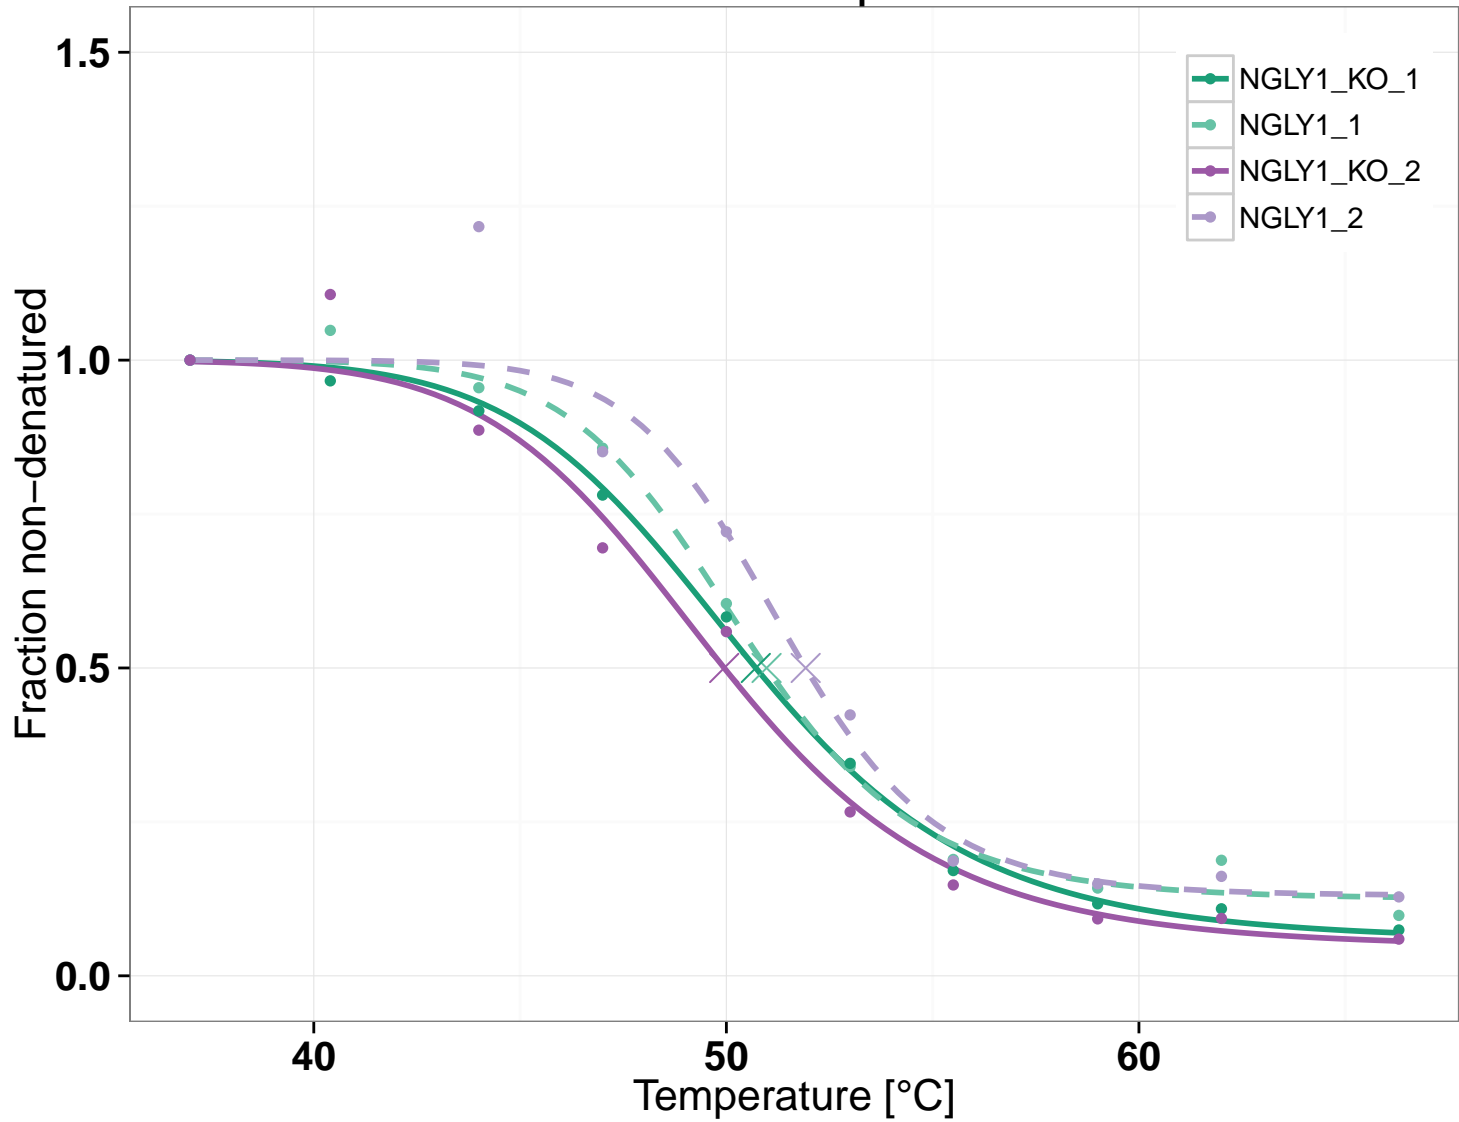

|            | meltPoint | slope  | plateau | R2   |
|------------|-----------|--------|---------|------|
| NGLY1_KO_1 | 50.71     | -0.084 | 0.06    | 1    |
| NGLY1_1    | 50.97     | -0.1   | 0.12    | 0.99 |
| NGLY1_KO_2 | 49.95     | -0.086 | 0.05    | 0.98 |
| NGLY1_2    | 51.92     | -0.12  | 0.13    | 0.79 |

Supplement: Supplementary file 3202 [file 1]

IPI00396008.3|SPTY2D1

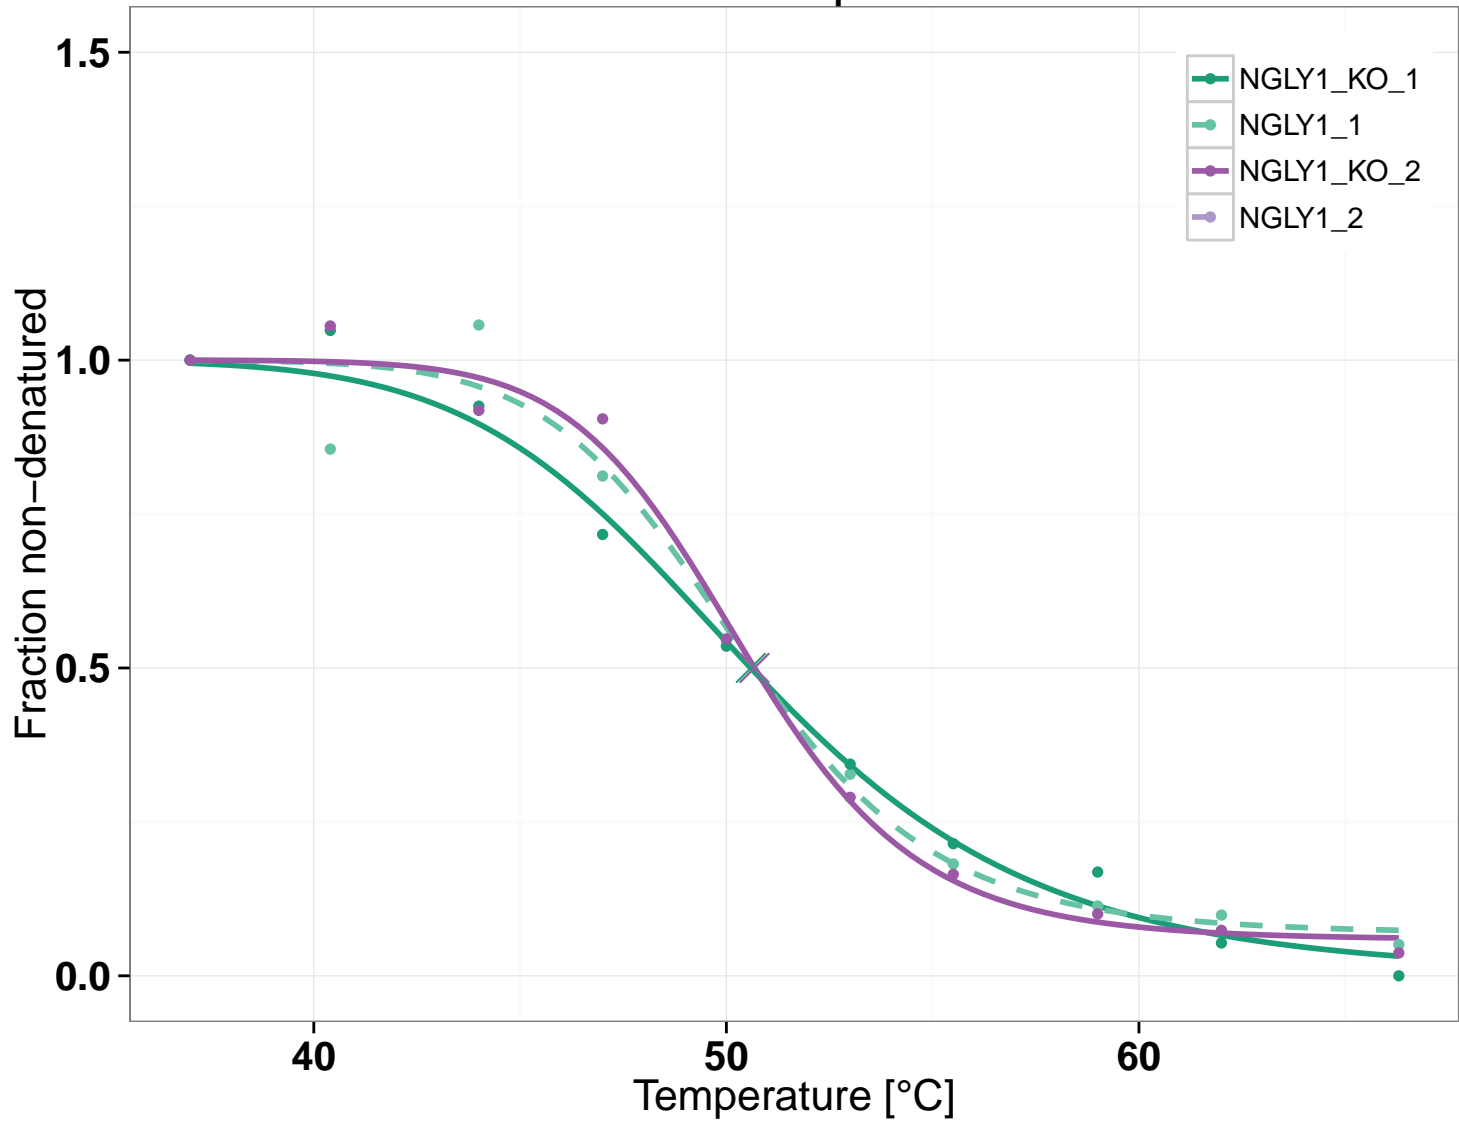

|            | meltPoint | slope  | plateau | R2   |
|------------|-----------|--------|---------|------|
| NGLY1_KO_1 | 50.59     | -0.073 | 0       | 0.99 |
| NGLY1_1    | 50.68     | -0.098 | 0.07    | 0.98 |
| NGLY1_KO_2 | 50.68     | -0.11  | 0.06    | 0.99 |
| NGLY1_2    | -         | -      | -       | -    |

Supplement: Supplementary file 3203 [file 1]

IPI00003515.1|TRIP11

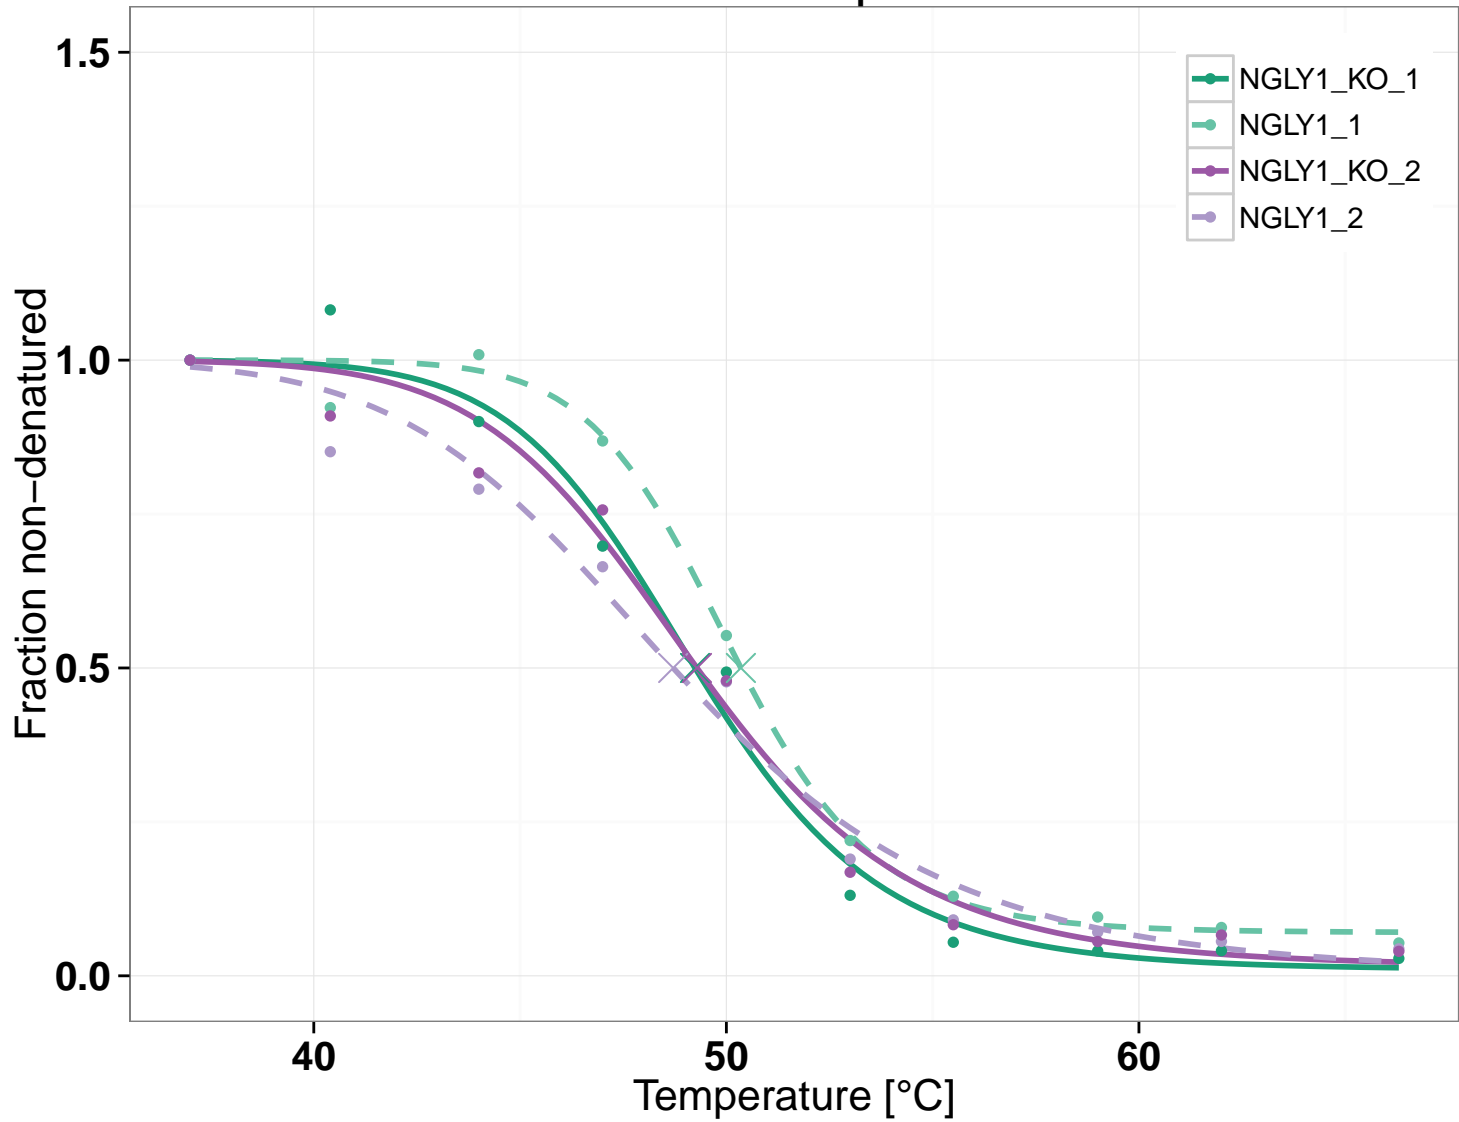

|            | meltPoint | slope  | plateau | R2   |
|------------|-----------|--------|---------|------|
| NGLY1_KO_1 | 49.24     | -0.11  | 0.01    | 0.99 |
| NGLY1_1    | 50.35     | -0.13  | 0.07    | 1    |
| NGLY1_KO_2 | 49.29     | -0.094 | 0.01    | 0.98 |
| NGLY1_2    | 48.71     | -0.074 | 0       | 0.98 |

Supplement: Supplementary file 3204 [file 1]

# IPI00176903.2|PTRF

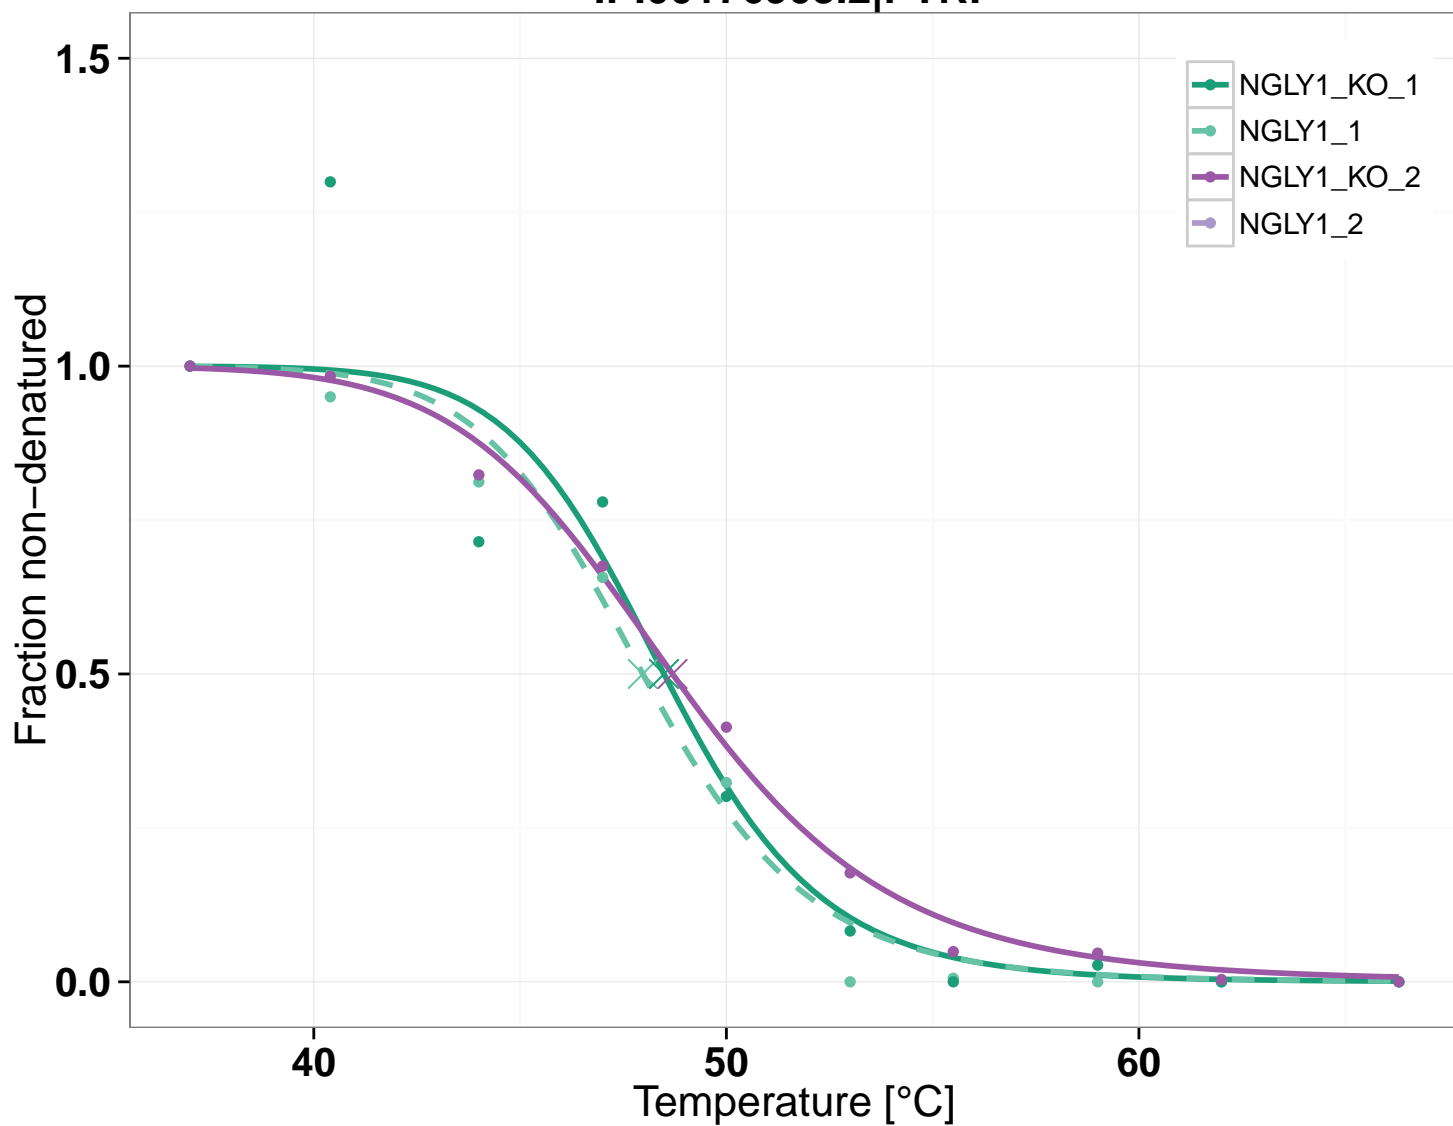

|            | meltPoint | slope  | plateau | R2   |
|------------|-----------|--------|---------|------|
| NGLY1_KO_1 | 48.49     | -0.13  | 0       | 0.93 |
| NGLY1_1    | 47.97     | -0.12  | 0       | 0.99 |
| NGLY1_KO_2 | 48.69     | -0.095 | 0       | 1    |
| NGLY1_2    | -         | -      | -       | -    |

Supplement: Supplementary file 3205 [file 1]

IPI00018954.3|ZRSR2

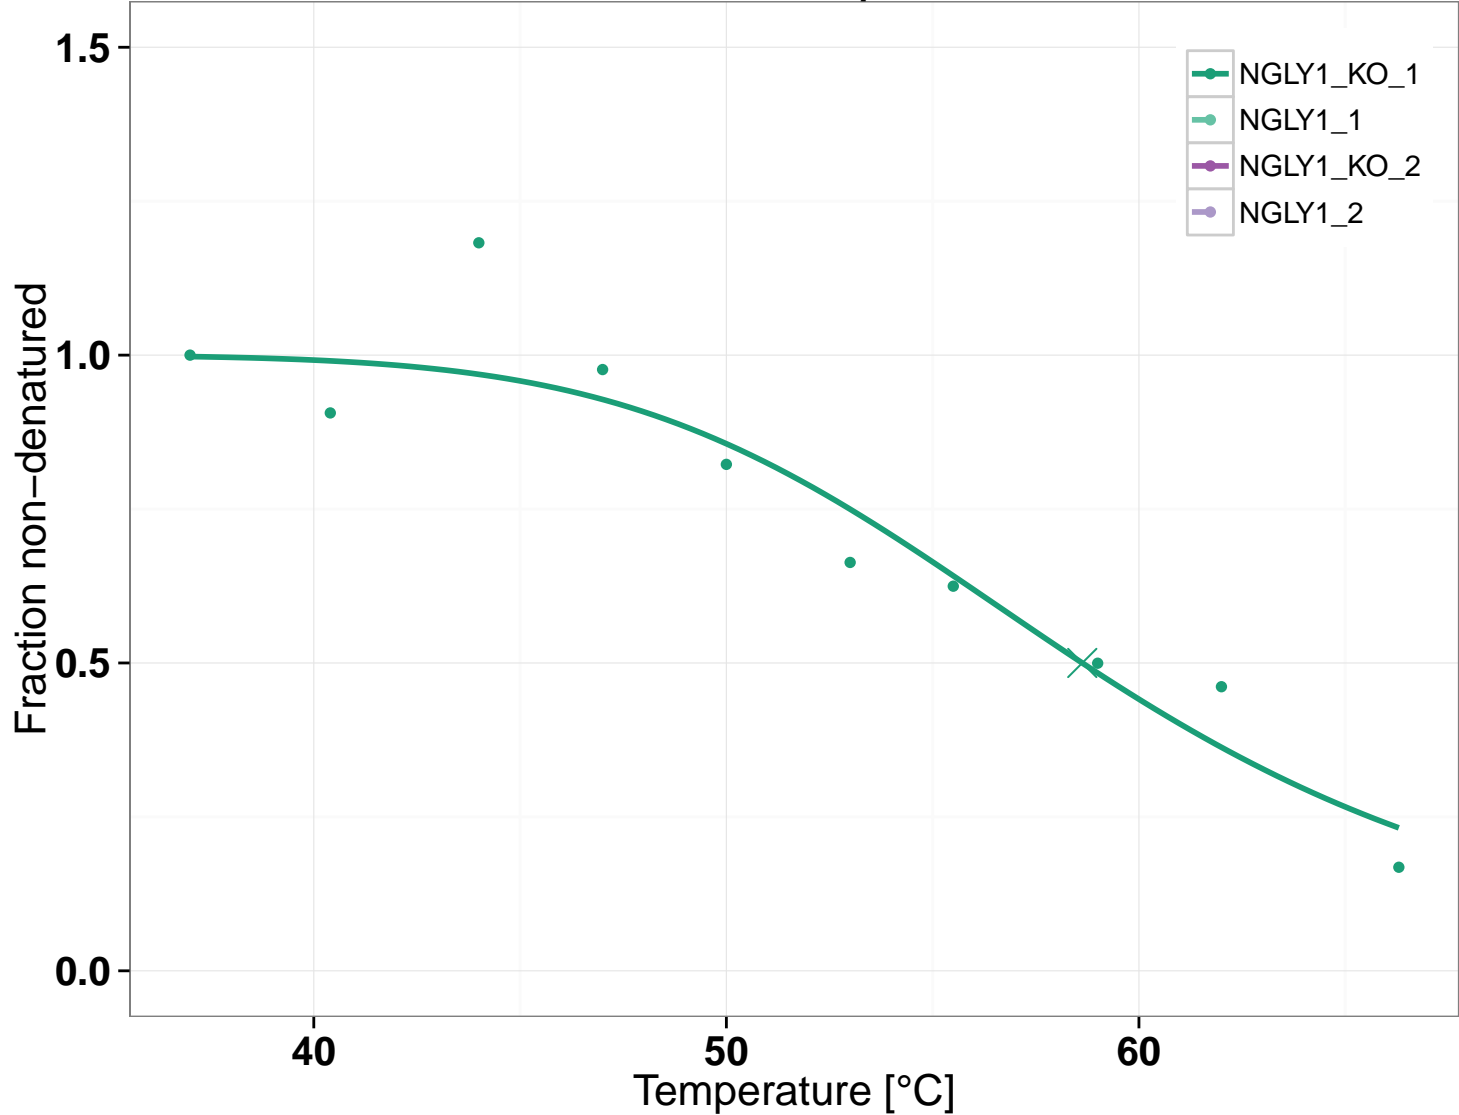

|            | meltPoint | slope  | plateau | R2   |
|------------|-----------|--------|---------|------|
| NGLY1_KO_1 | 58.63     | -0.046 | 0       | 0.91 |
| NGLY1_1    | -         | -      | -       | -    |
| NGLY1_KO_2 | -         | -      | -       | -    |
| NGLY1_2    | -         | -      | -       | -    |

Supplement: Supplementary file 3206 [file 1]

# IPI00304596.3|NONO

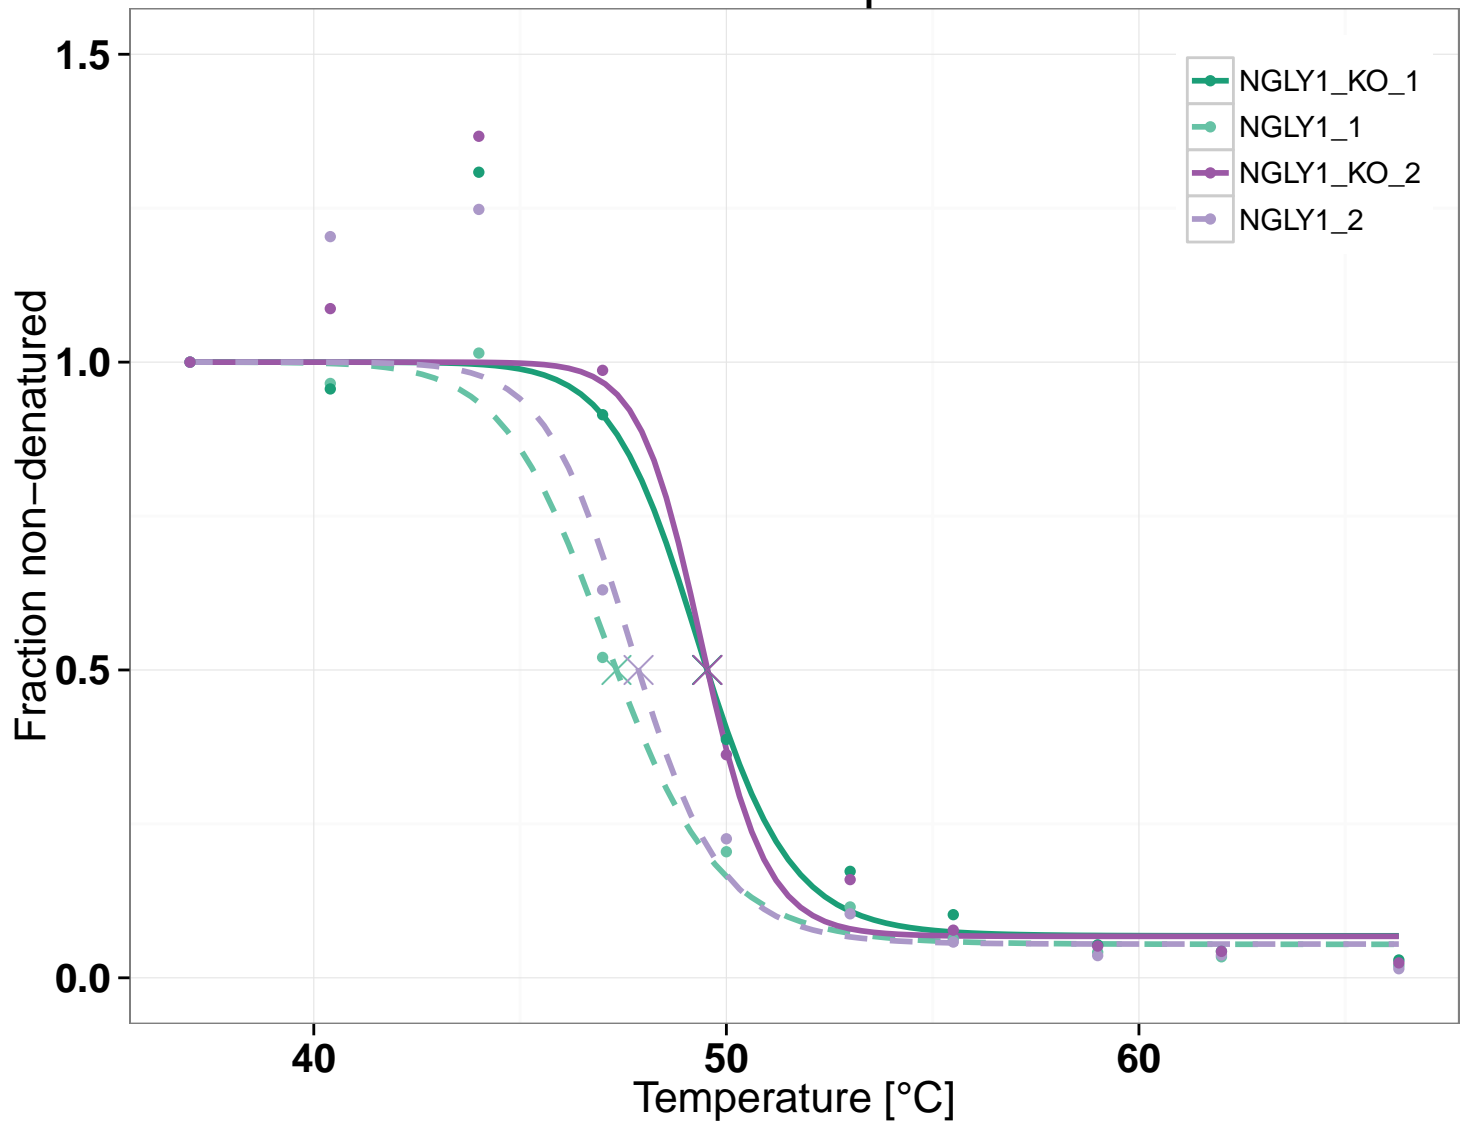

|            | meltPoint | slope | plateau | R2   |
|------------|-----------|-------|---------|------|
| NGLY1_KO_1 | 49.53     | -0.21 | 0.07    | 0.95 |
| NGLY1_1    | 47.34     | -0.18 | 0.05    | 0.99 |
| NGLY1_KO_2 | 49.54     | -0.3  | 0.07    | 0.94 |
| NGLY1_2    | 47.87     | -0.22 | 0.05    | 0.95 |

Supplement: Supplementary file 3207 [file 1]

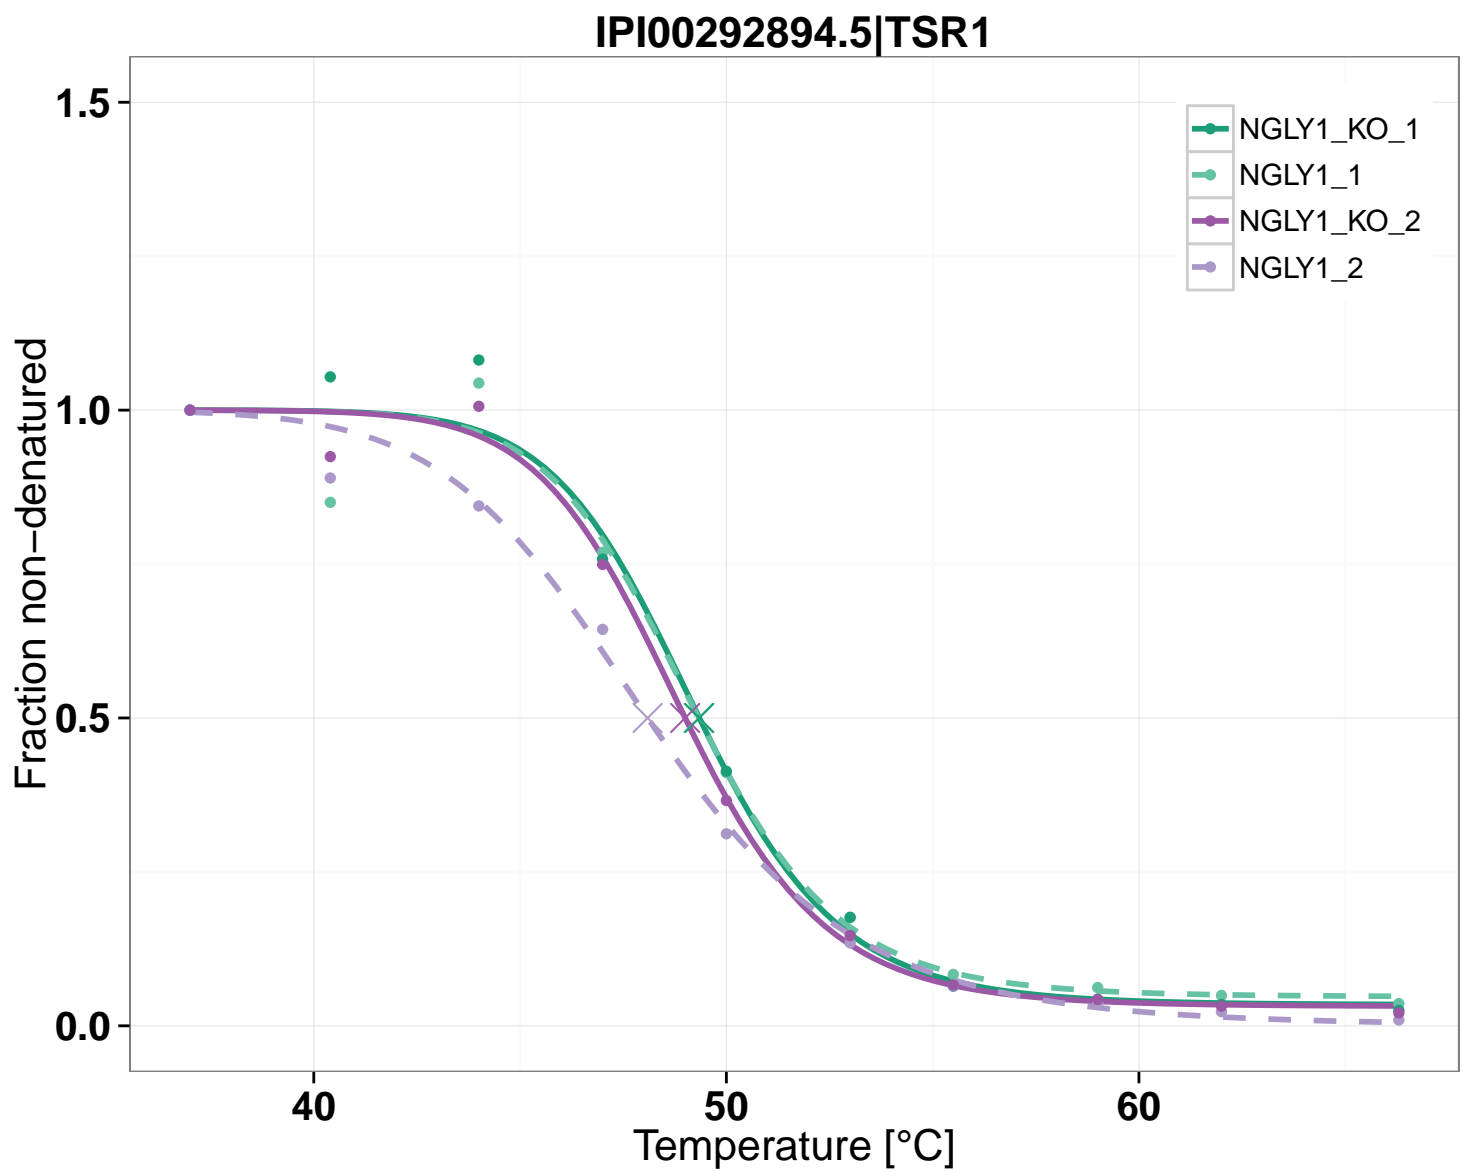

|            | meltPoint | slope  | plateau | R2   |
|------------|-----------|--------|---------|------|
| NGLY1_KO_1 | 49.35     | -0.14  | 0.03    | 0.99 |
| NGLY1_1    | 49.33     | -0.13  | 0.05    | 0.98 |
| NGLY1_KO_2 | 49        | -0.14  | 0.03    | 1    |
| NGLY1_2    | 48.09     | -0.099 | 0       | 0.99 |

Supplement: Supplementary file 3209 [file 1]

# IPI00301224.2|TMLHE

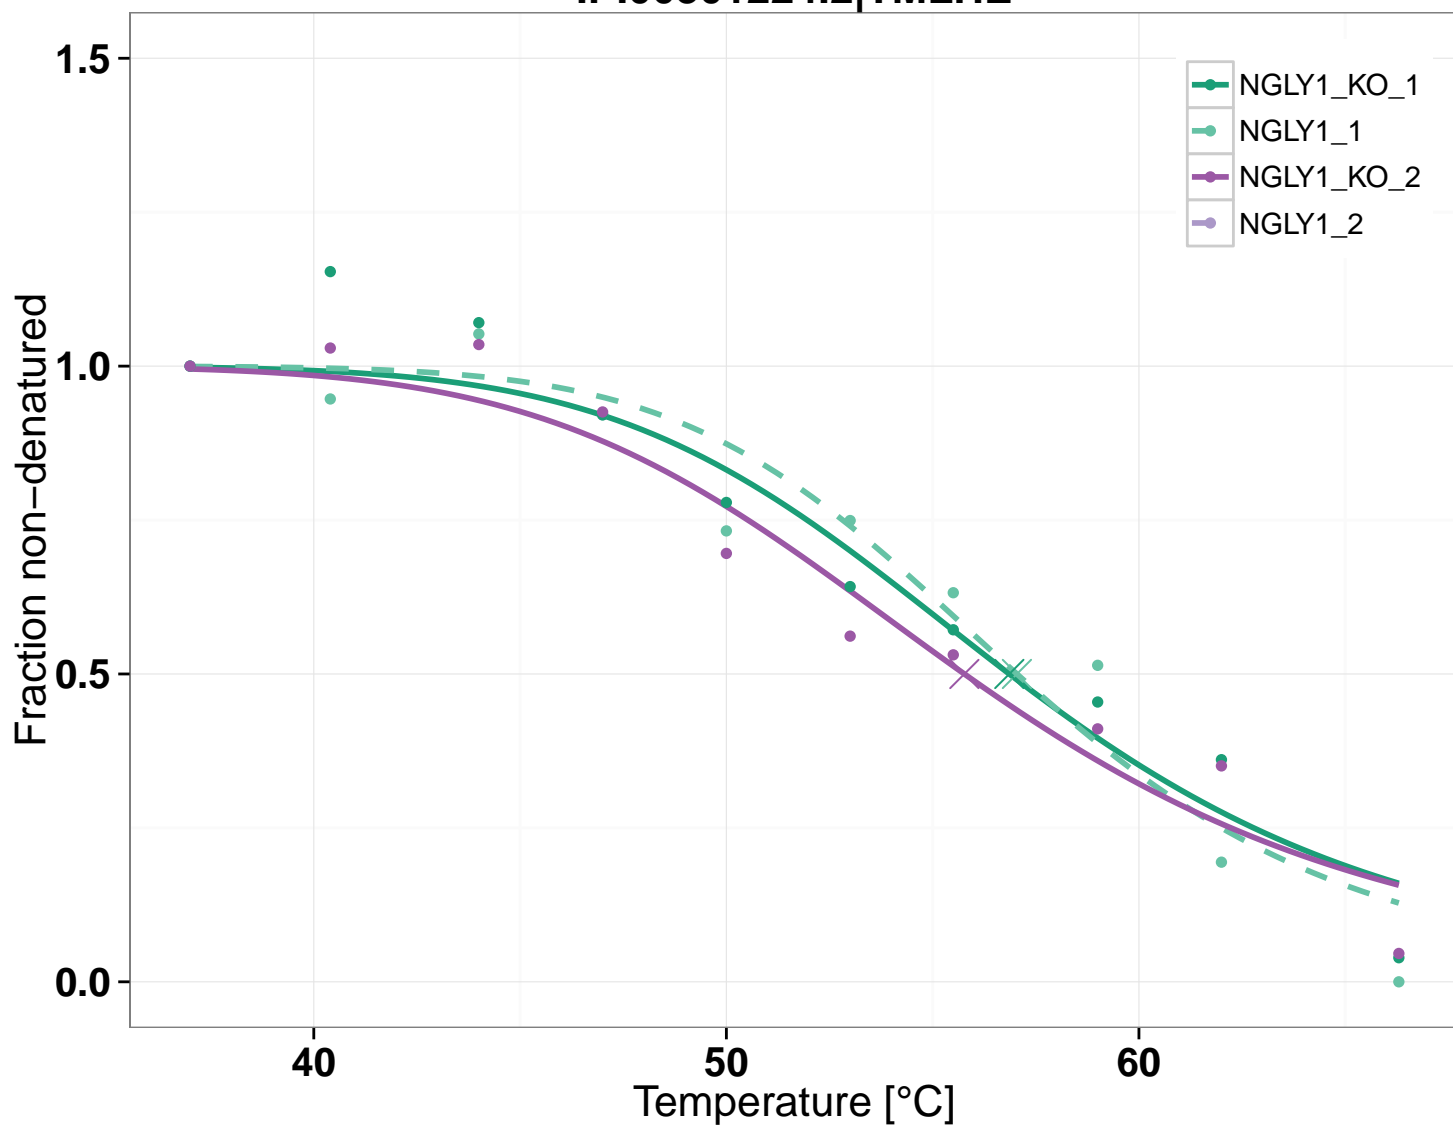

|            | meltPoint | slope  | plateau | R2   |
|------------|-----------|--------|---------|------|
| NGLY1_KO_1 | 56.86     | -0.053 | 0       | 0.94 |
| NGLY1_1    | 57.04     | -0.061 | 0       | 0.94 |
| NGLY1_KO_2 | 55.77     | -0.049 | 0       | 0.95 |
| NGLY1_2    | -         | -      | -       | -    |

Supplement: Supplementary file 3210 [file 1]

IPI00219772.3|NDUFB7

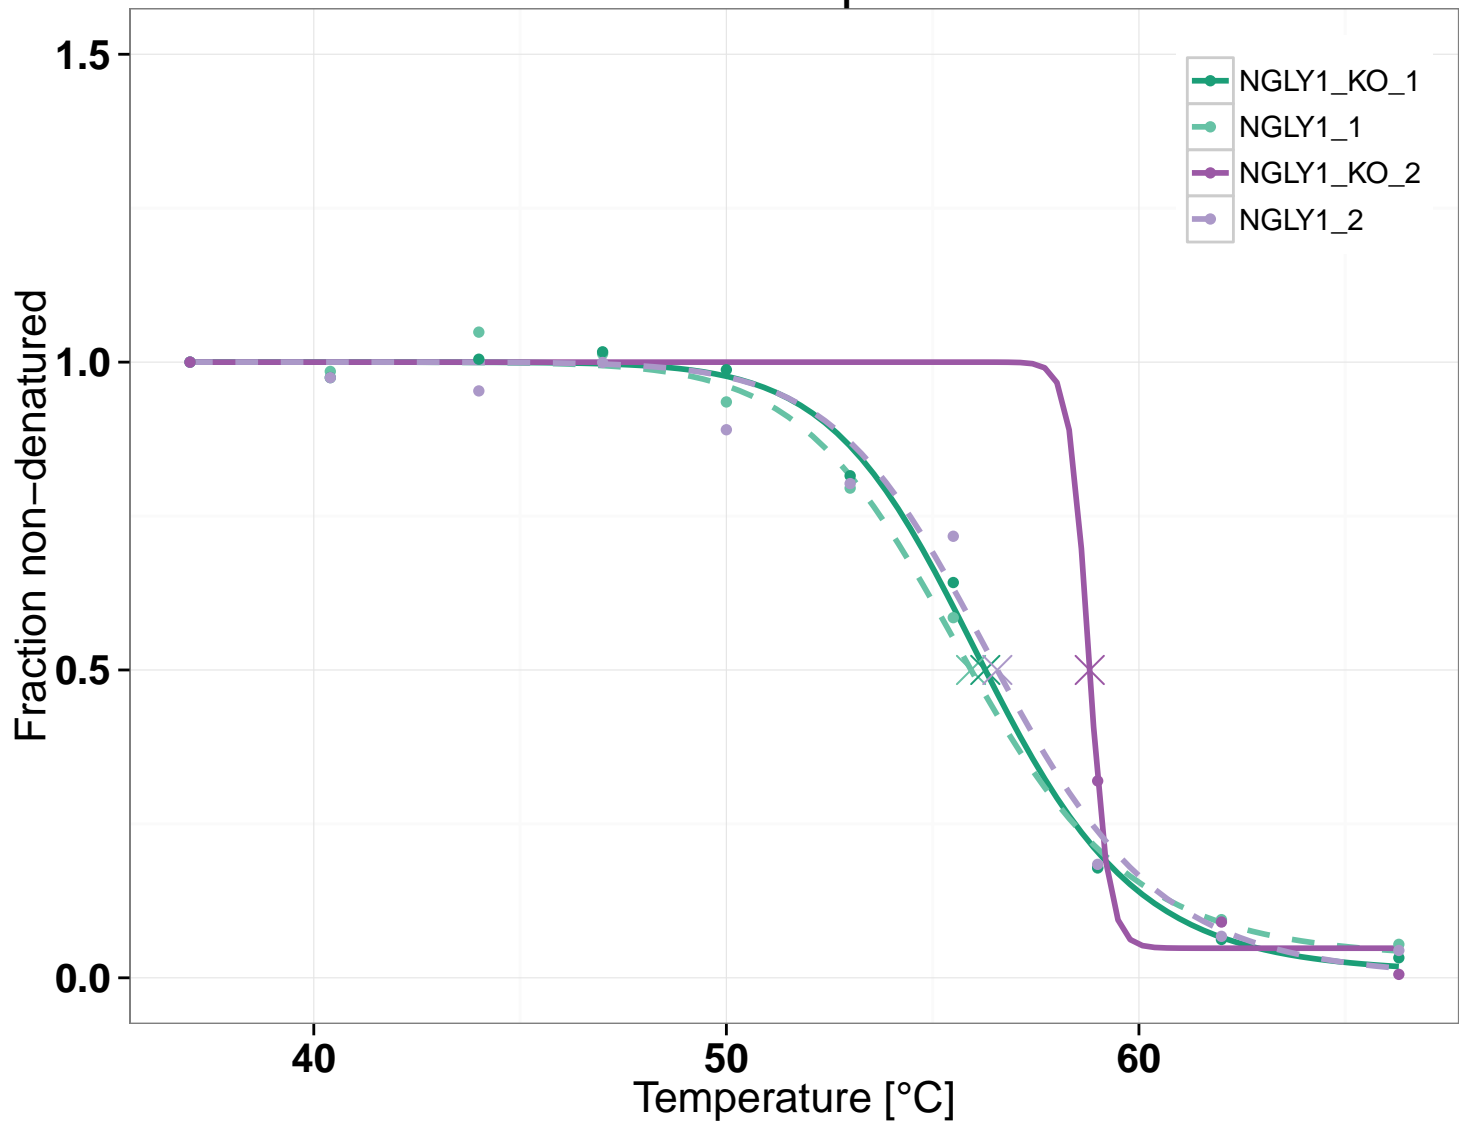

|            | meltPoint | slope | plateau | R2   |
|------------|-----------|-------|---------|------|
| NGLY1_KO_1 | 56.28     | -0.13 | 0.01    | 1    |
| NGLY1_1    | 55.93     | -0.12 | 0.03    | 1    |
| NGLY1_KO_2 | 58.81     | -1    | 0.05    | 0.01 |
| NGLY1_2    | 56.57     | -0.13 | 0       | 0.98 |

Supplement: Supplementary file 3211 [file 1]

IPI00791169.2|C3ORF31

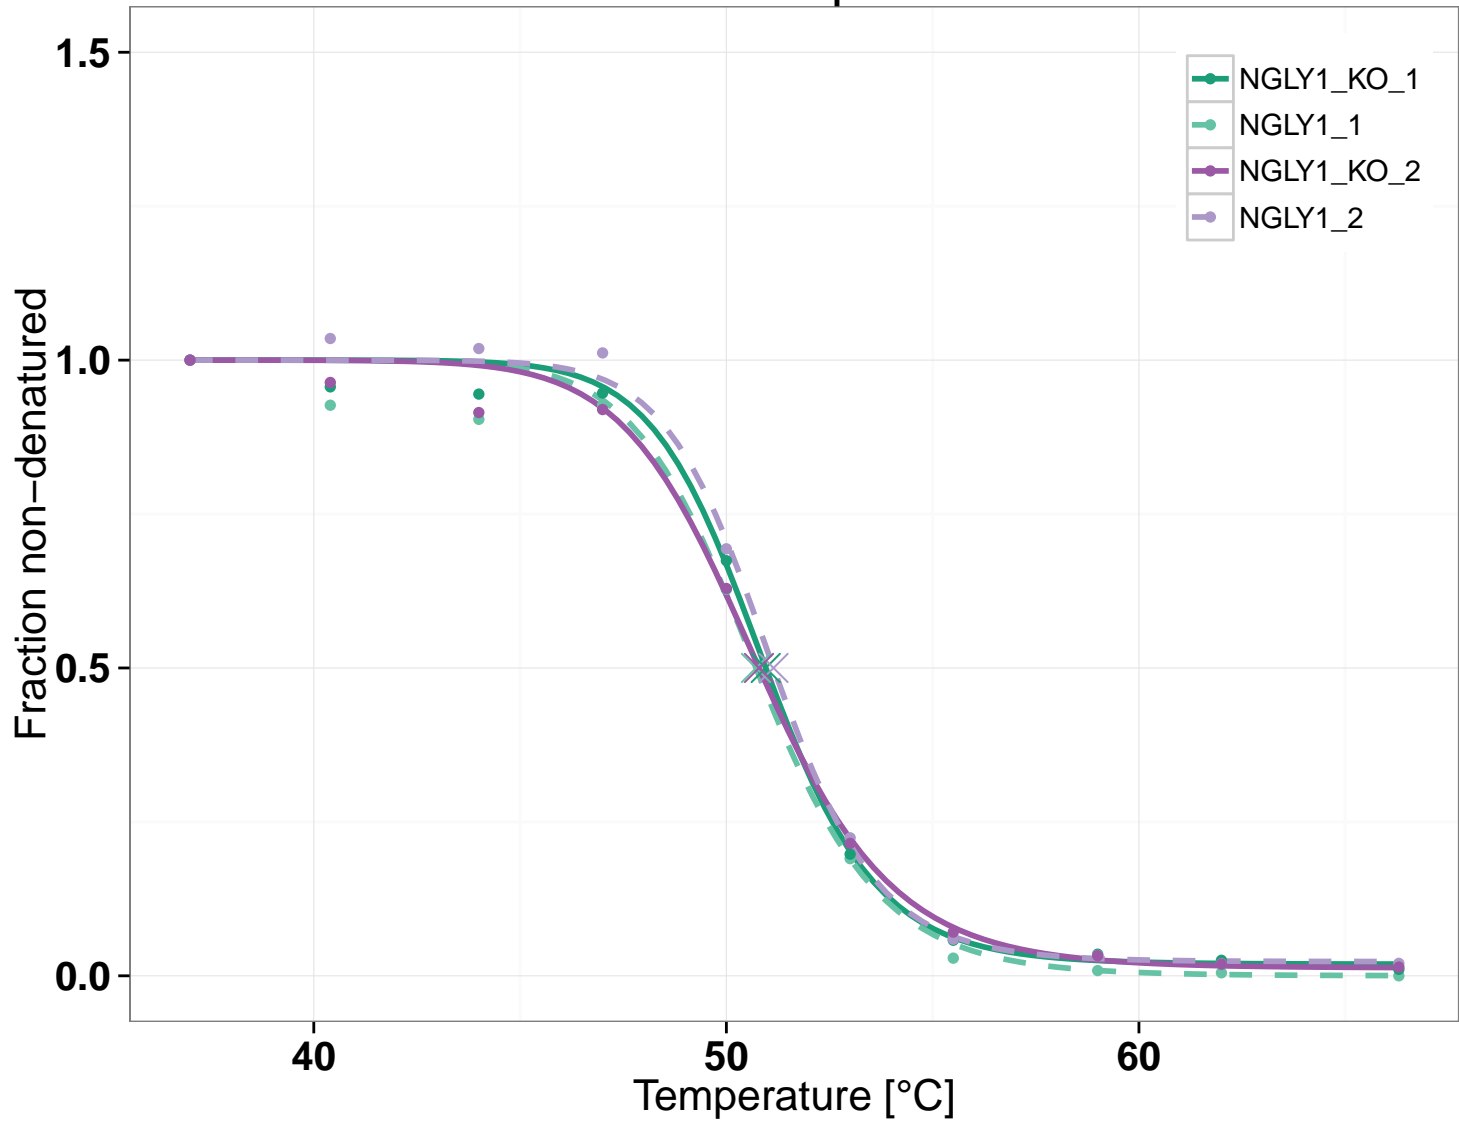

|            | meltPoint | slope | plateau | R2   |
|------------|-----------|-------|---------|------|
| NGLY1_KO_1 | 50.95     | -0.18 | 0.02    | 1    |
| NGLY1_1    | 50.72     | -0.17 | 0       | 0.99 |
| NGLY1_KO_2 | 50.79     | -0.15 | 0.01    | 1    |
| NGLY1_2    | 51.14     | -0.19 | 0.02    | 1    |

Supplement: Supplementary file 3212 [file 1]

# IPI00002564.3|XRCC1

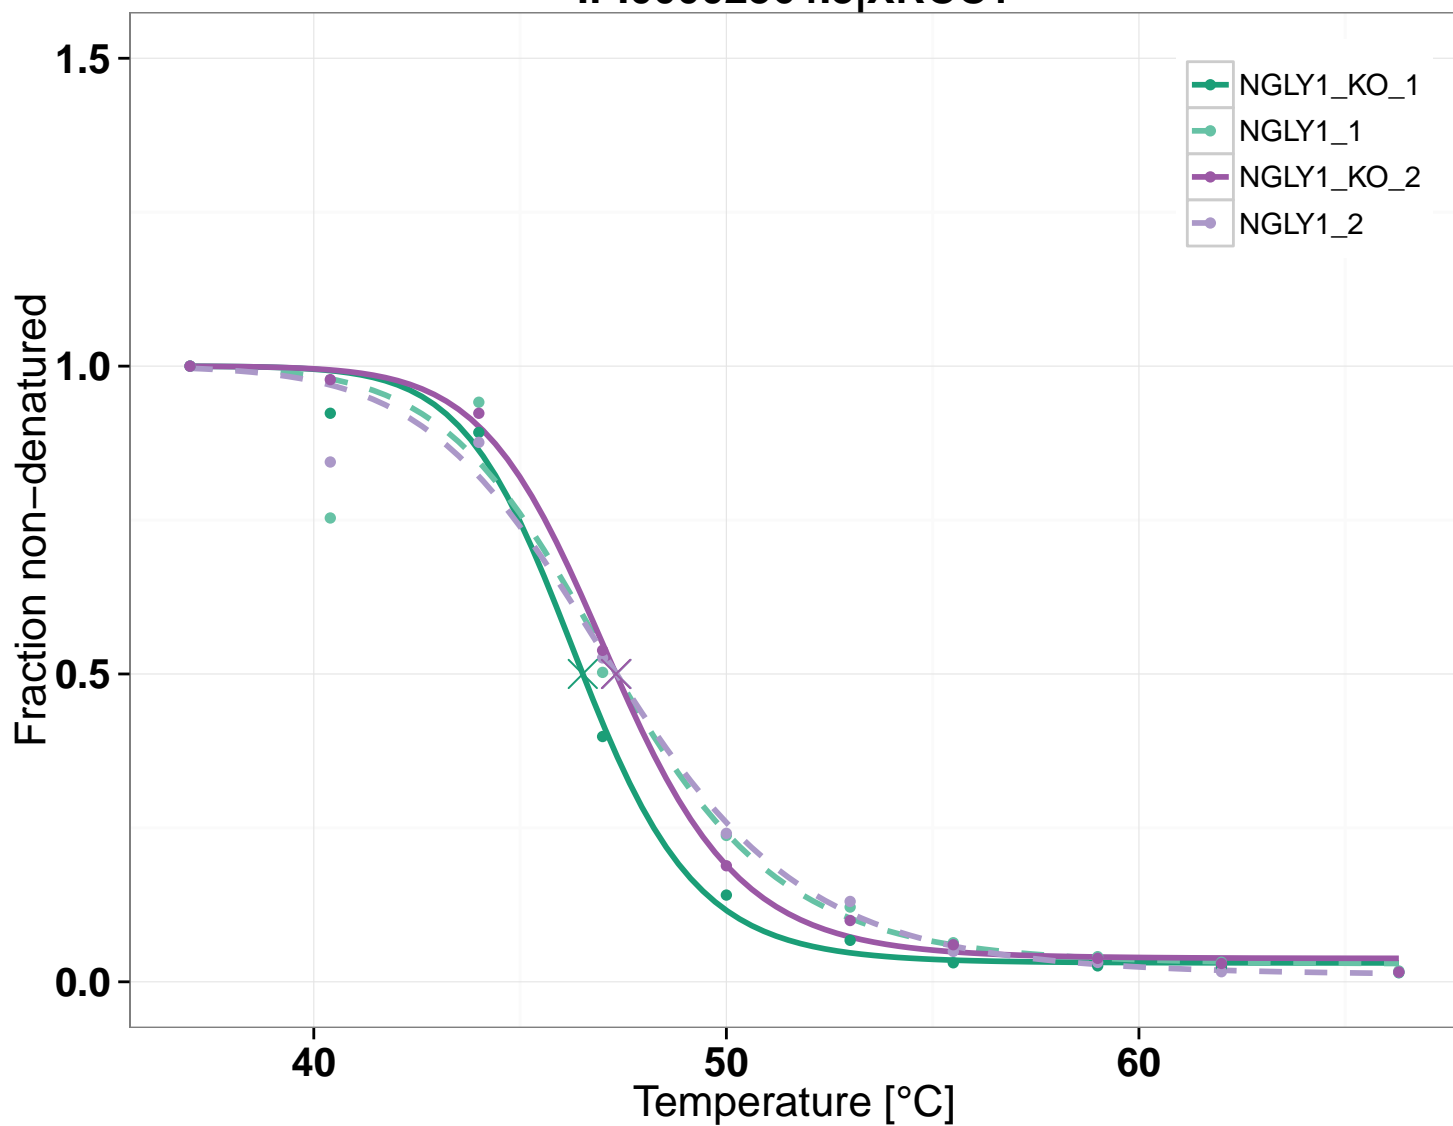

|            | meltPoint | slope | plateau | R2   |
|------------|-----------|-------|---------|------|
| NGLY1_KO_1 | 46.52     | -0.17 | 0.03    | 1    |
| NGLY1_1    | 47.33     | -0.12 | 0.03    | 0.96 |
| NGLY1_KO_2 | 47.32     | -0.15 | 0.04    | 1    |
| NGLY1_2    | 47.34     | -0.11 | 0.01    | 0.99 |

Supplement: Supplementary file 3213 [file 1]

IPI00063106.4|SENP5

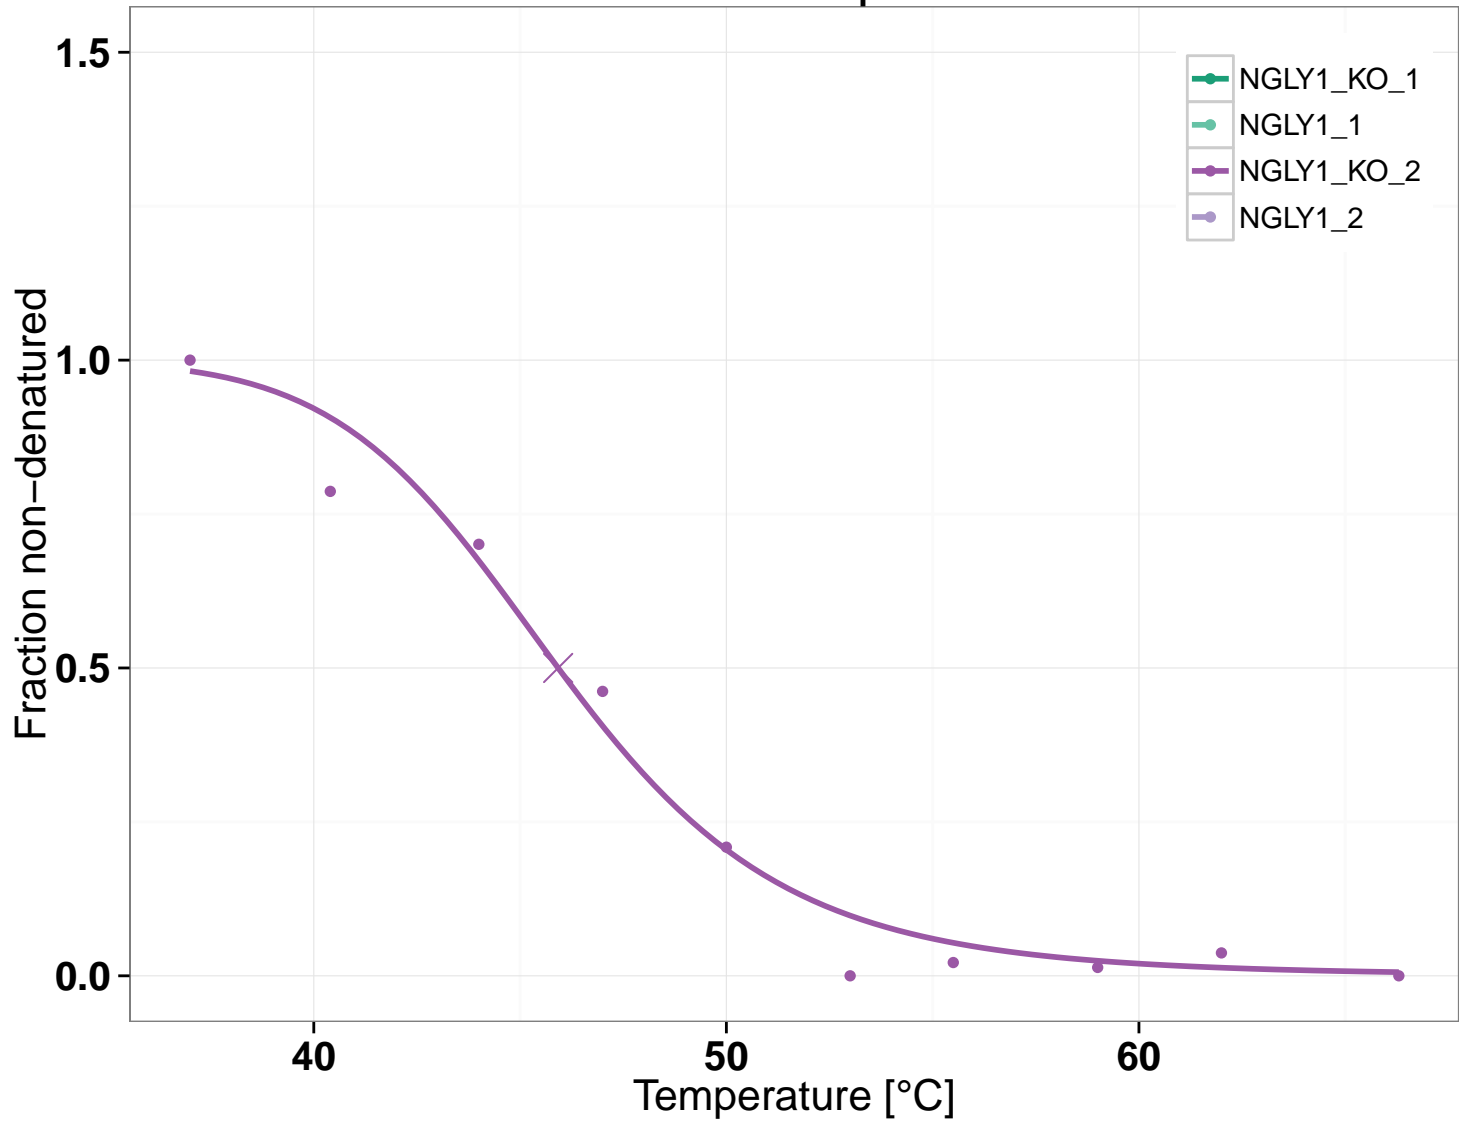

|            | meltPoint | slope  | plateau | R2   |
|------------|-----------|--------|---------|------|
| NGLY1_KO_1 | -         | -      | -       | -    |
| NGLY1_1    | -         | -      | -       | -    |
| NGLY1_KO_2 | 45.92     | -0.092 | 0       | 0.98 |
| NGLY1_2    | -         | -      | -       | -    |

Supplement: Supplementary file 3214 [file 1]

IPI00793443.1|IPO5

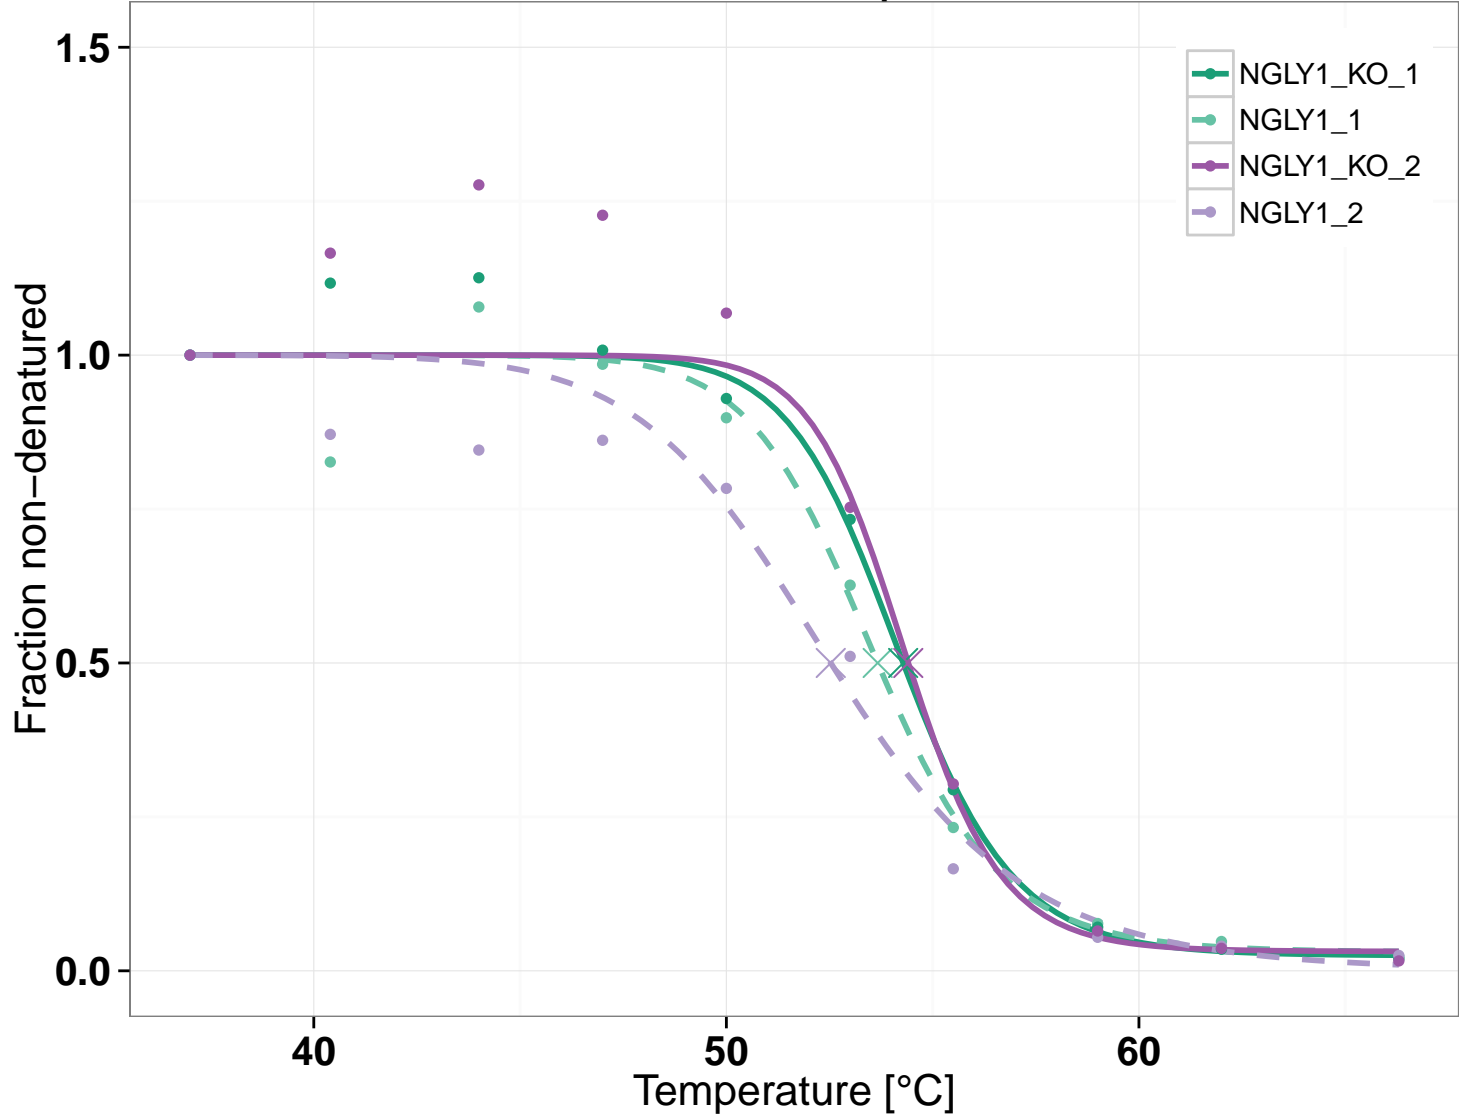

|            | meltPoint | slope | plateau | R2   |
|------------|-----------|-------|---------|------|
| NGLY1_KO_1 | 54.29     | -0.18 | 0.02    | 0.98 |
| NGLY1_1    | 53.67     | -0.16 | 0.03    | 0.98 |
| NGLY1_KO_2 | 54.41     | -0.21 | 0.03    | 0.94 |
| NGLY1_2    | 52.53     | -0.11 | 0       | 0.97 |

Supplement: Supplementary file 3215 [file 1]
