# Supplementary material (part 33 of 85)
Source: publisher figshare collection journal article supplement (https://gsajournals.figshare.com/articles/dataset/_/12014913)

# IPI00909112.1|FNTB

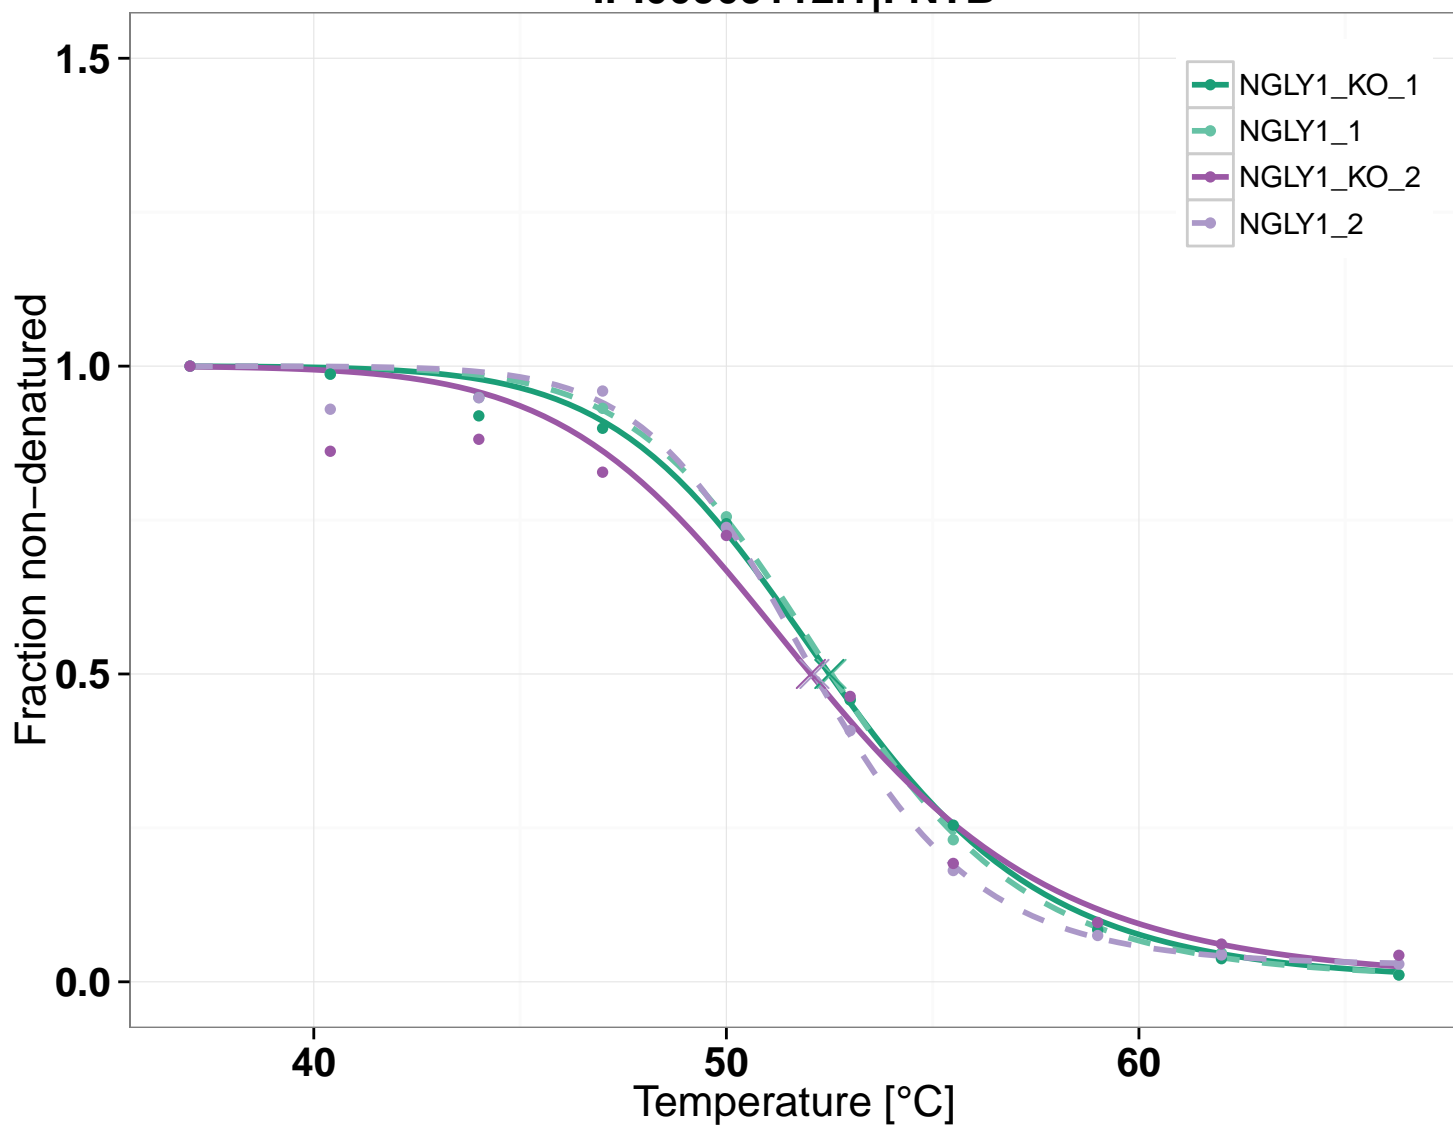

|            | meltPoint | slope  | plateau | R2   |
|------------|-----------|--------|---------|------|
| NGLY1_KO_1 | 52.5      | -0.096 | 0       | 1    |
| NGLY1_1    | 52.55     | -0.1   | 0       | 1    |
| NGLY1_KO_2 | 52.05     | -0.083 | 0       | 0.97 |
| NGLY1_2    | 52.13     | -0.12  | 0.03    | 1    |

Supplement: Supplementary file 3216 [file 1]

IPI00014898.3|PLEC1

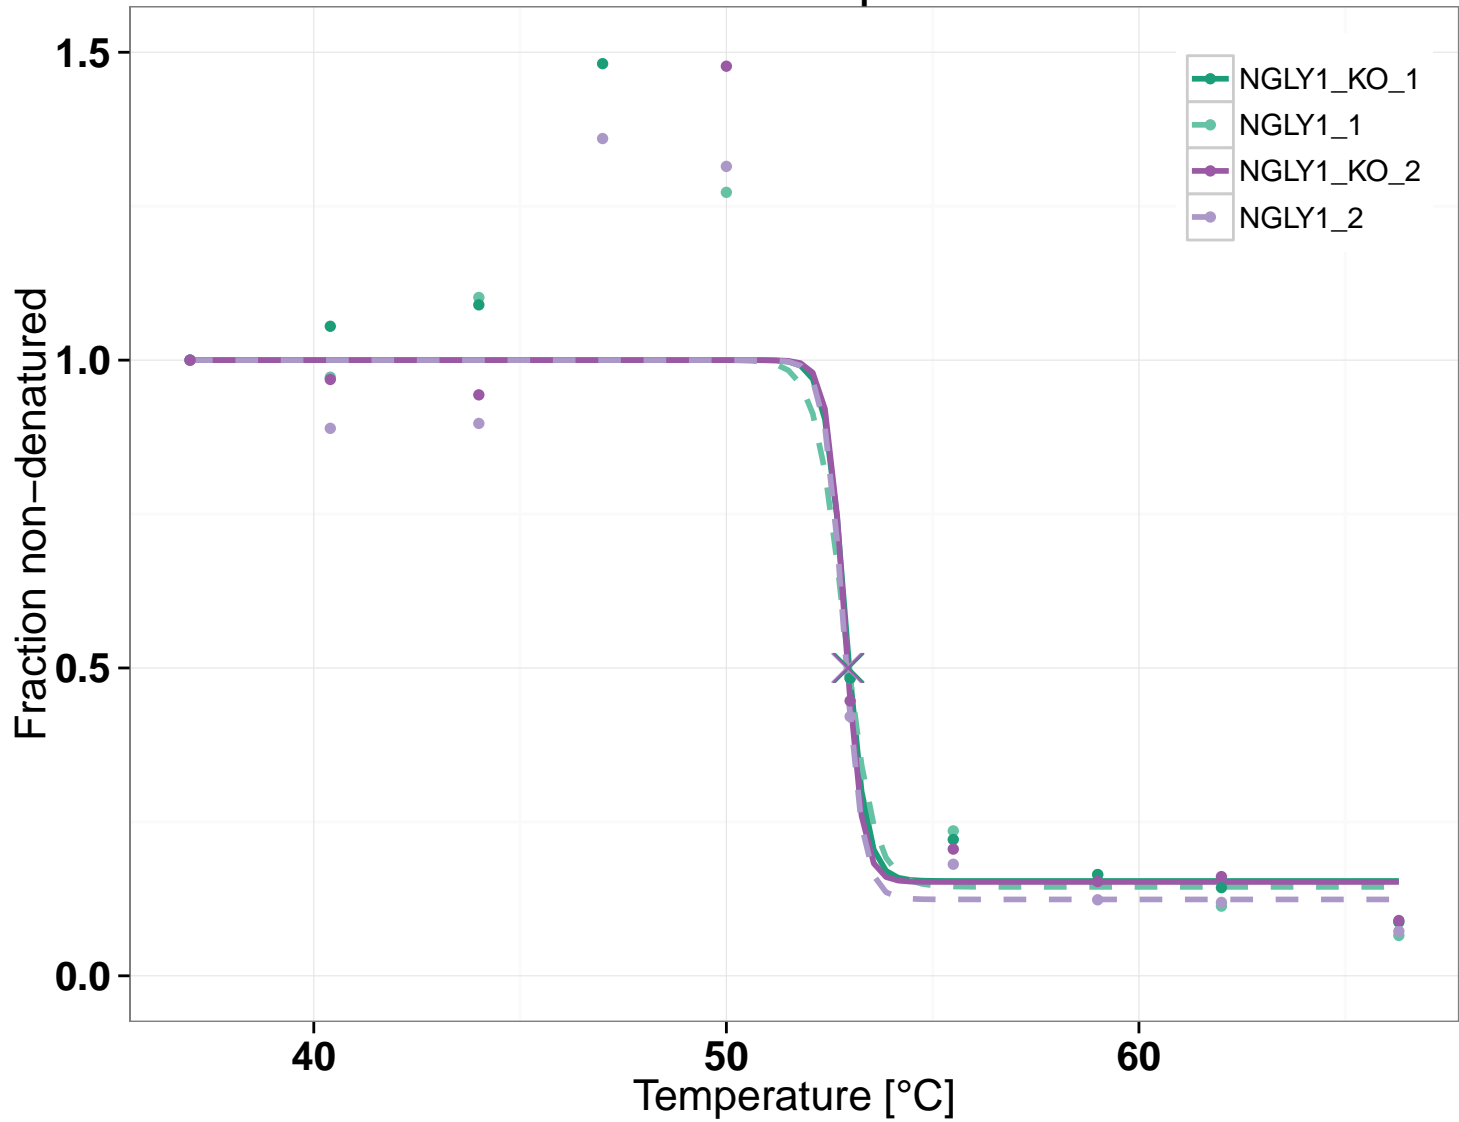

|            | meltPoint | slope | plateau | R2   |
|------------|-----------|-------|---------|------|
| NGLY1_KO_1 | 52.98     | -0.86 | 0.15    | 0.82 |
| NGLY1_1    | 52.97     | -0.61 | 0.14    | 0.86 |
| NGLY1_KO_2 | 52.94     | -1    | 0.15    | 0.72 |
| NGLY1_2    | 52.91     | -0.94 | 0.12    | 0.89 |

Supplement: Supplementary file 3217 [file 1]

IPI00909850.1|B4DVU6\_HUMAN

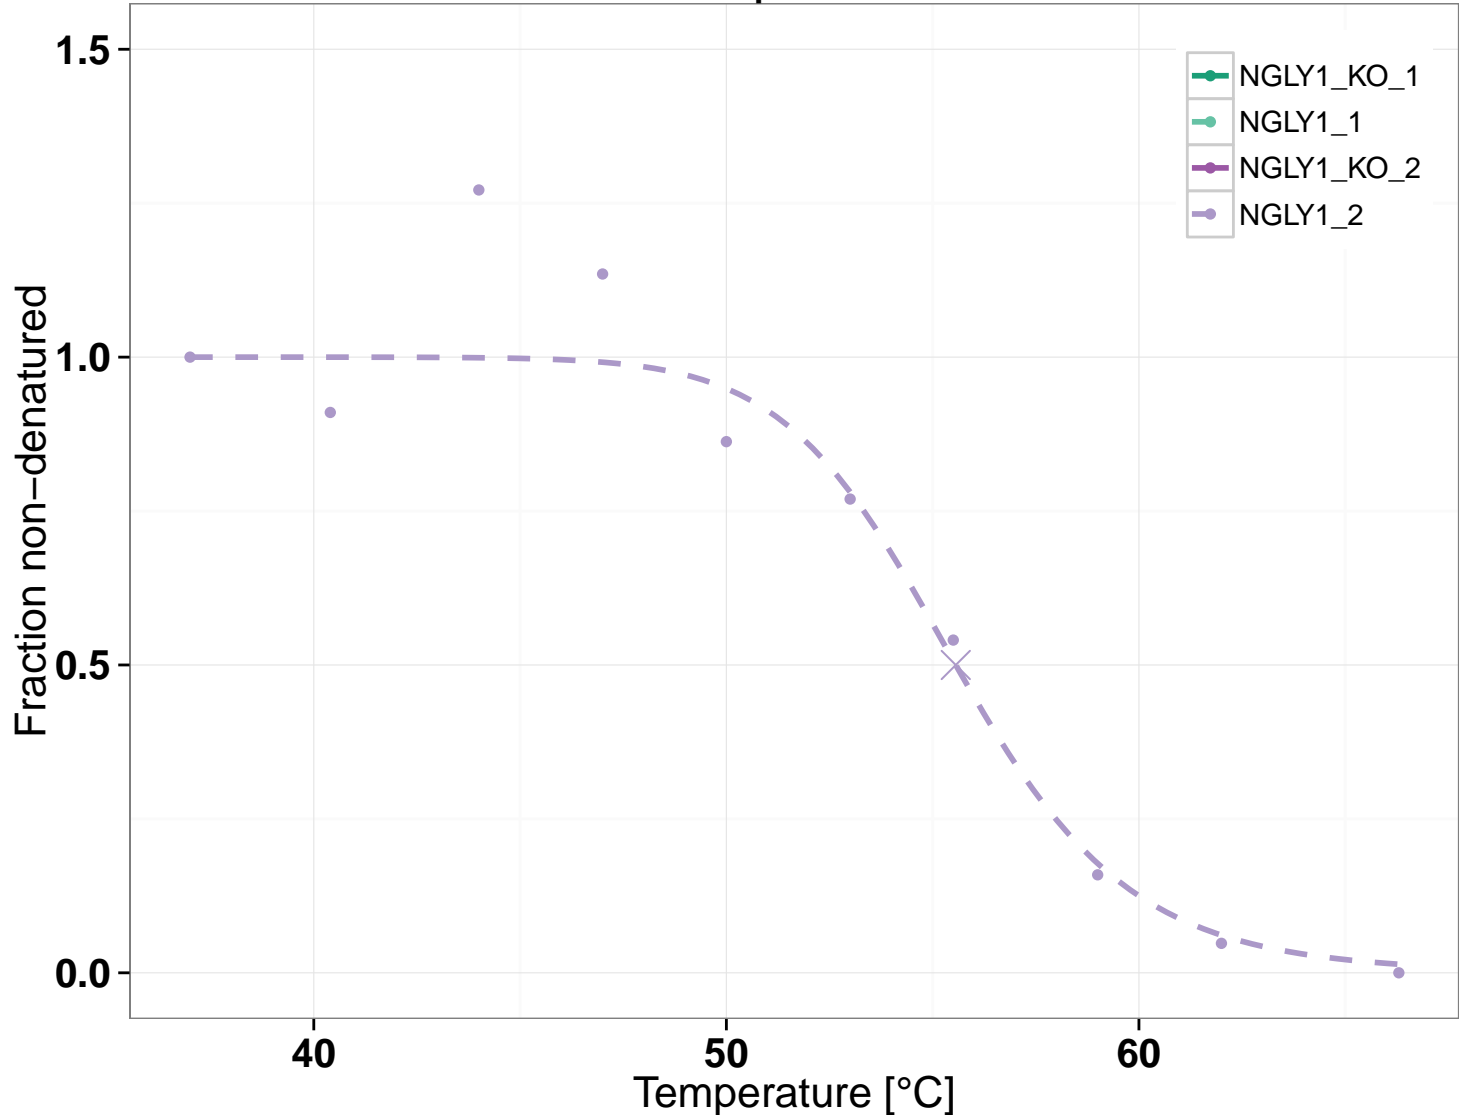

|            | meltPoint | slope | plateau | R2   |
|------------|-----------|-------|---------|------|
| NGLY1_KO_1 | -         | -     | -       | -    |
| NGLY1_1    | -         | -     | -       | -    |
| NGLY1_KO_2 | -         | -     | -       | -    |
| NGLY1_2    | 55.56     | -0.12 | 0       | 0.94 |

Supplement: Supplementary file 3218 [file 1]

IPI00910513.1|GSPT1

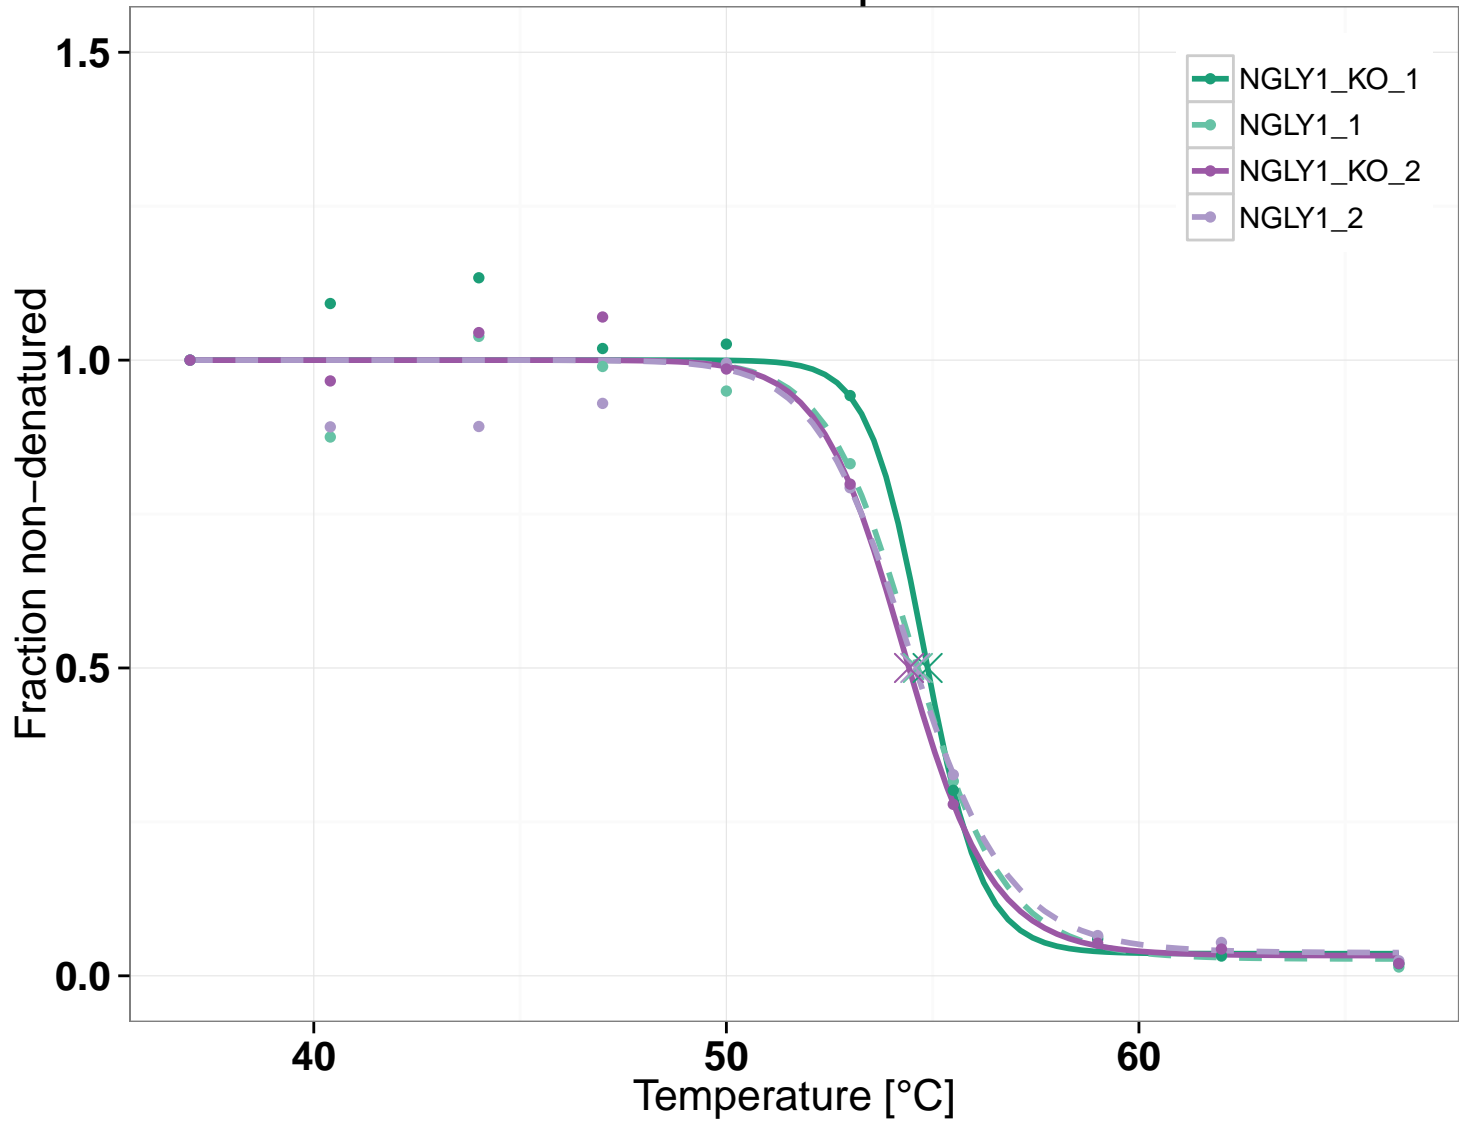

|            | meltPoint | slope | plateau | R2   |
|------------|-----------|-------|---------|------|
| NGLY1_KO_1 | 54.88     | −0.35 | 0.04    | 0.99 |
| NGLY1_1    | 54.64     | −0.22 | 0.03    | 0.99 |
| NGLY1_KO_2 | 54.43     | −0.23 | 0.03    | 1    |
| NGLY1_2    | 54.58     | −0.2  | 0.04    | 0.98 |

Supplement: Supplementary file 3219 [file 1]

IPI00438923.3|CRYZL1

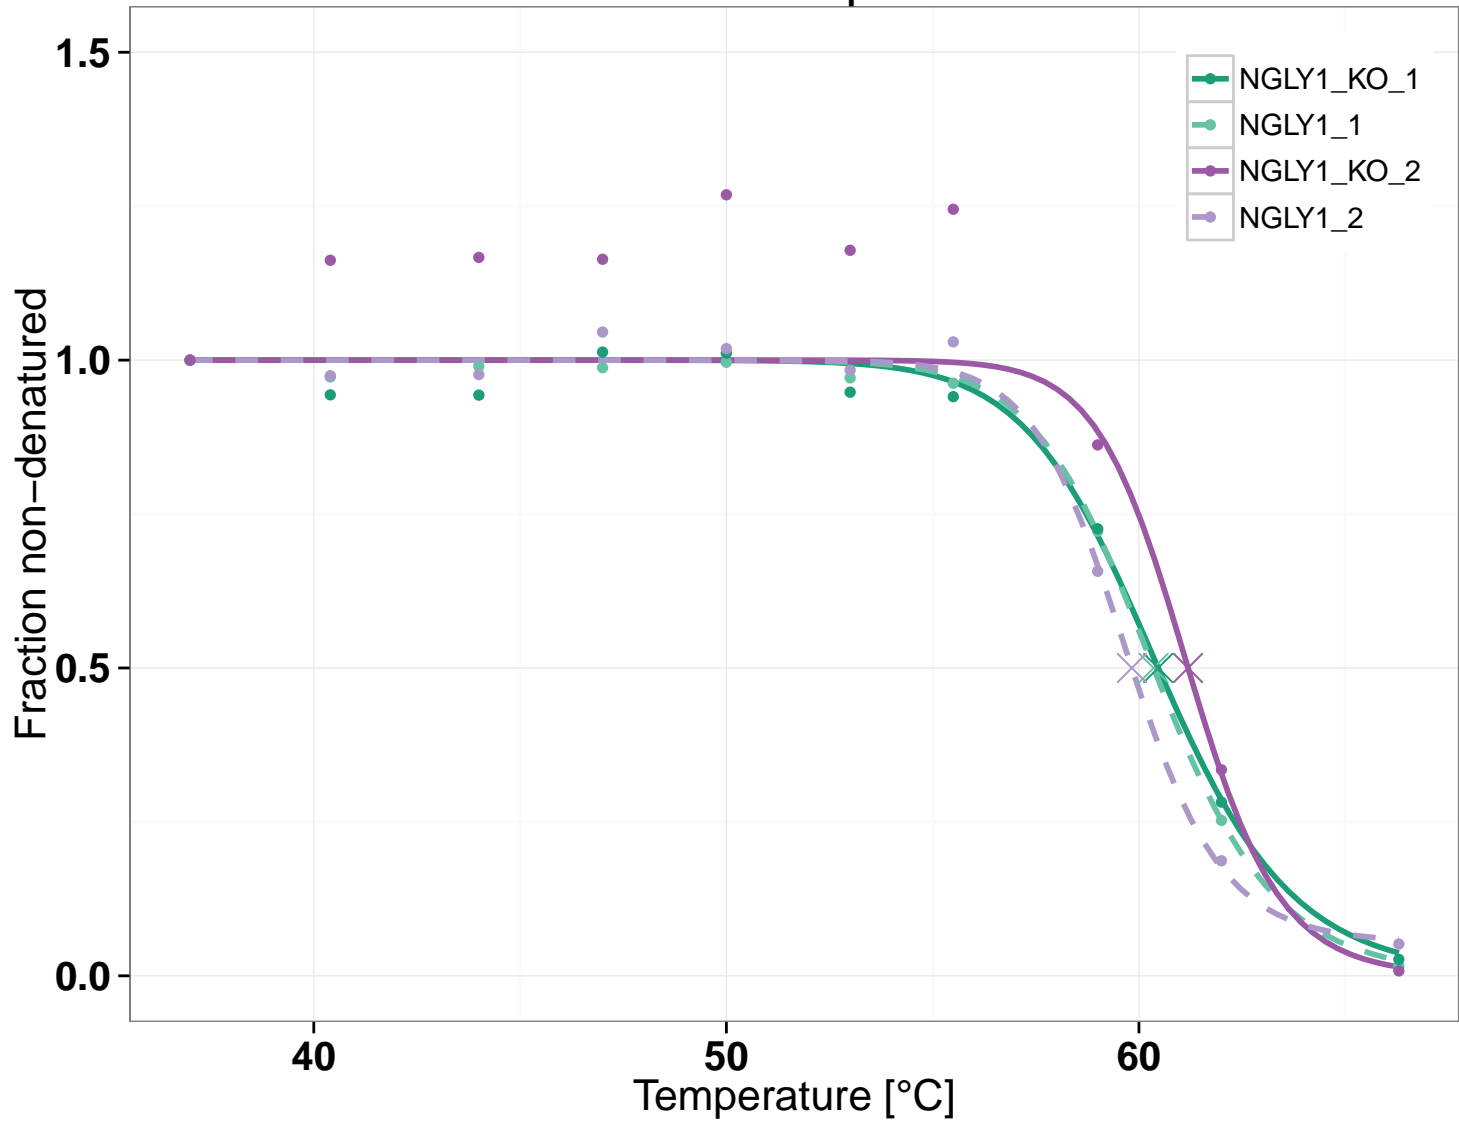

|            | meltPoint | slope | plateau | R2   |
|------------|-----------|-------|---------|------|
| NGLY1_KO_1 | 60.47     | -0.15 | 0       | 0.99 |
| NGLY1_1    | 60.36     | -0.17 | 0       | 1    |
| NGLY1_KO_2 | 61.19     | -0.22 | 0       | 0.85 |
| NGLY1_2    | 59.83     | -0.2  | 0.05    | 0.99 |

Supplement: Supplementary file 3220 [file 1]

IPI00217030.10|RPS4X

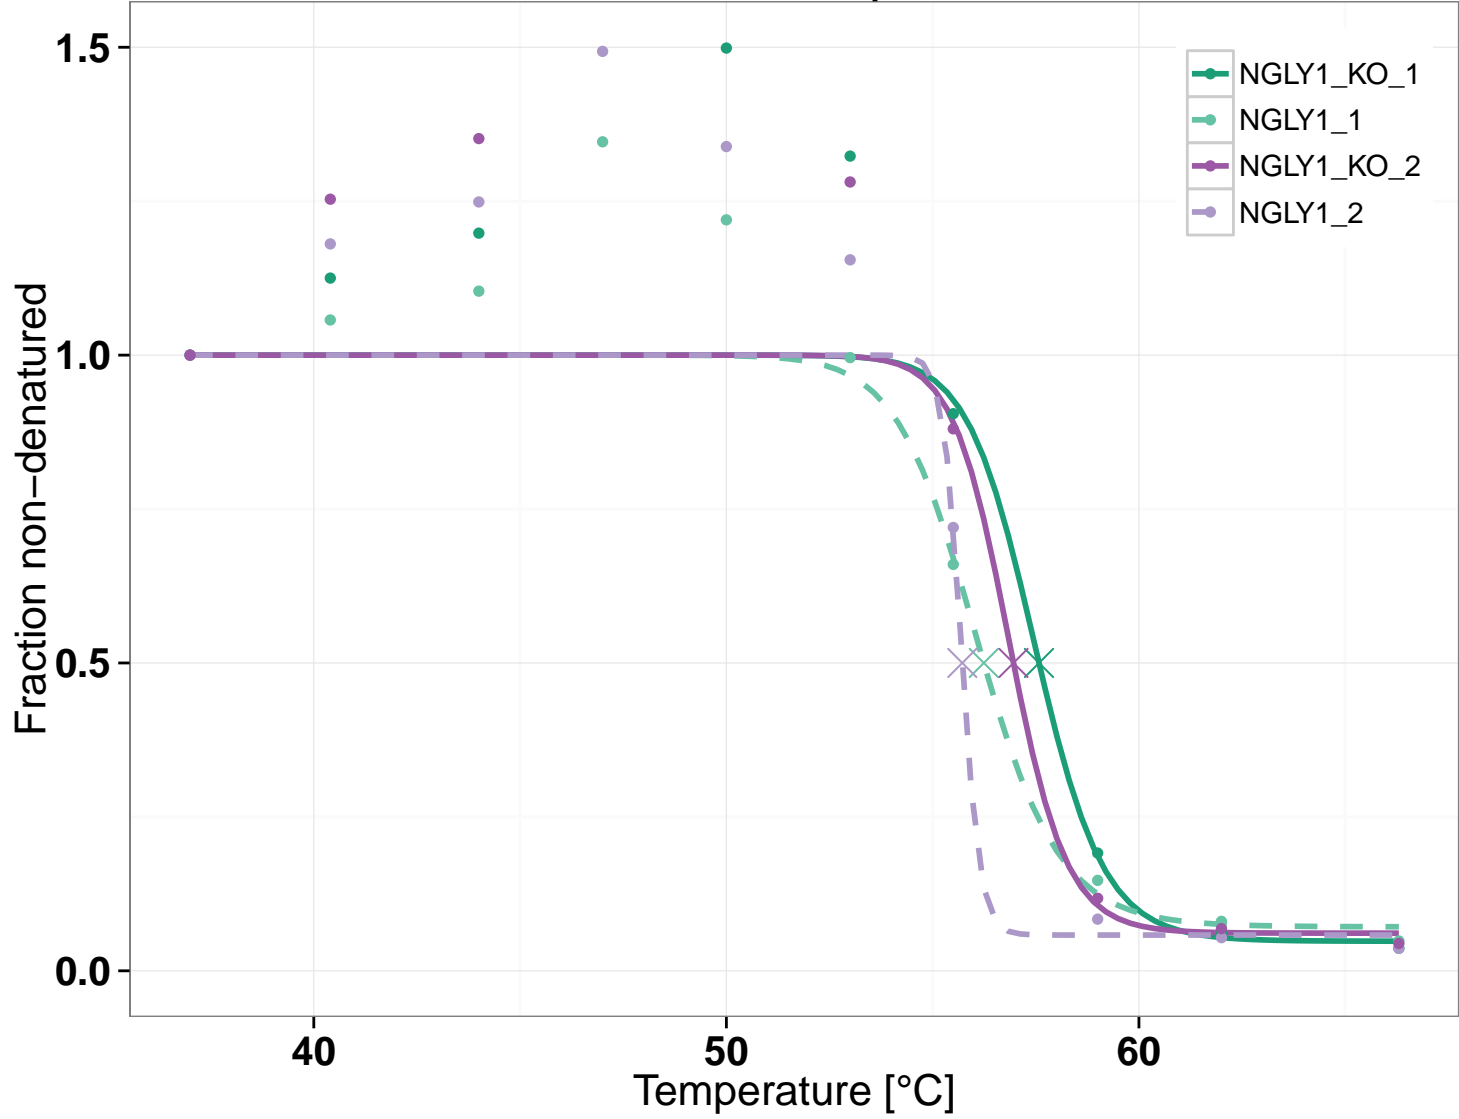

|            | meltPoint | slope | plateau | R2   |
|------------|-----------|-------|---------|------|
| NGLY1_KO_1 | 57.58     | -0.29 | 0.05    | 0.74 |
| NGLY1_1    | 56.24     | -0.23 | 0.07    | 0.92 |
| NGLY1_KO_2 | 56.96     | -0.34 | 0.06    | 0.7  |
| NGLY1_2    | 55.72     | -1.1  | 0.06    | 0.84 |

Supplement: Supplementary file 3221 [file 1]

IPI00045939.4|ADO

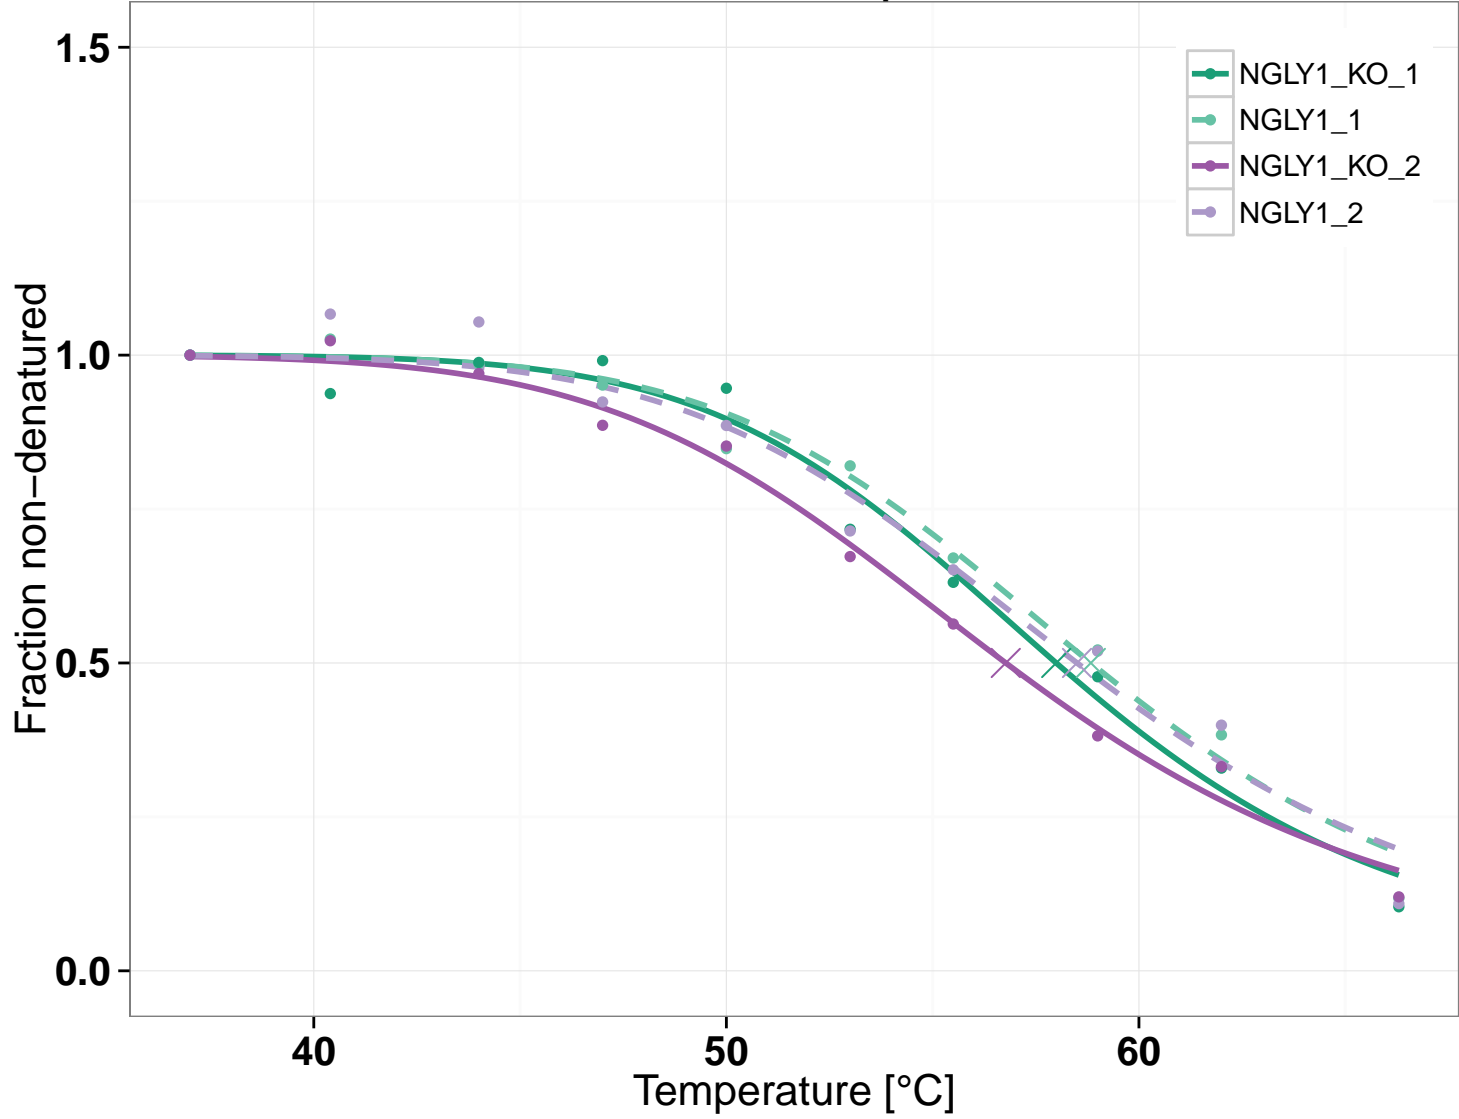

|            | meltPoint | slope  | plateau | R2   |
|------------|-----------|--------|---------|------|
| NGLY1_KO_1 | 58        | -0.059 | 0       | 0.98 |
| NGLY1_1    | 58.83     | -0.056 | 0       | 0.98 |
| NGLY1_KO_2 | 56.77     | -0.052 | 0       | 0.99 |
| NGLY1_2    | 58.5      | -0.052 | 0       | 0.97 |

Supplement: Supplementary file 3222 [file 1]

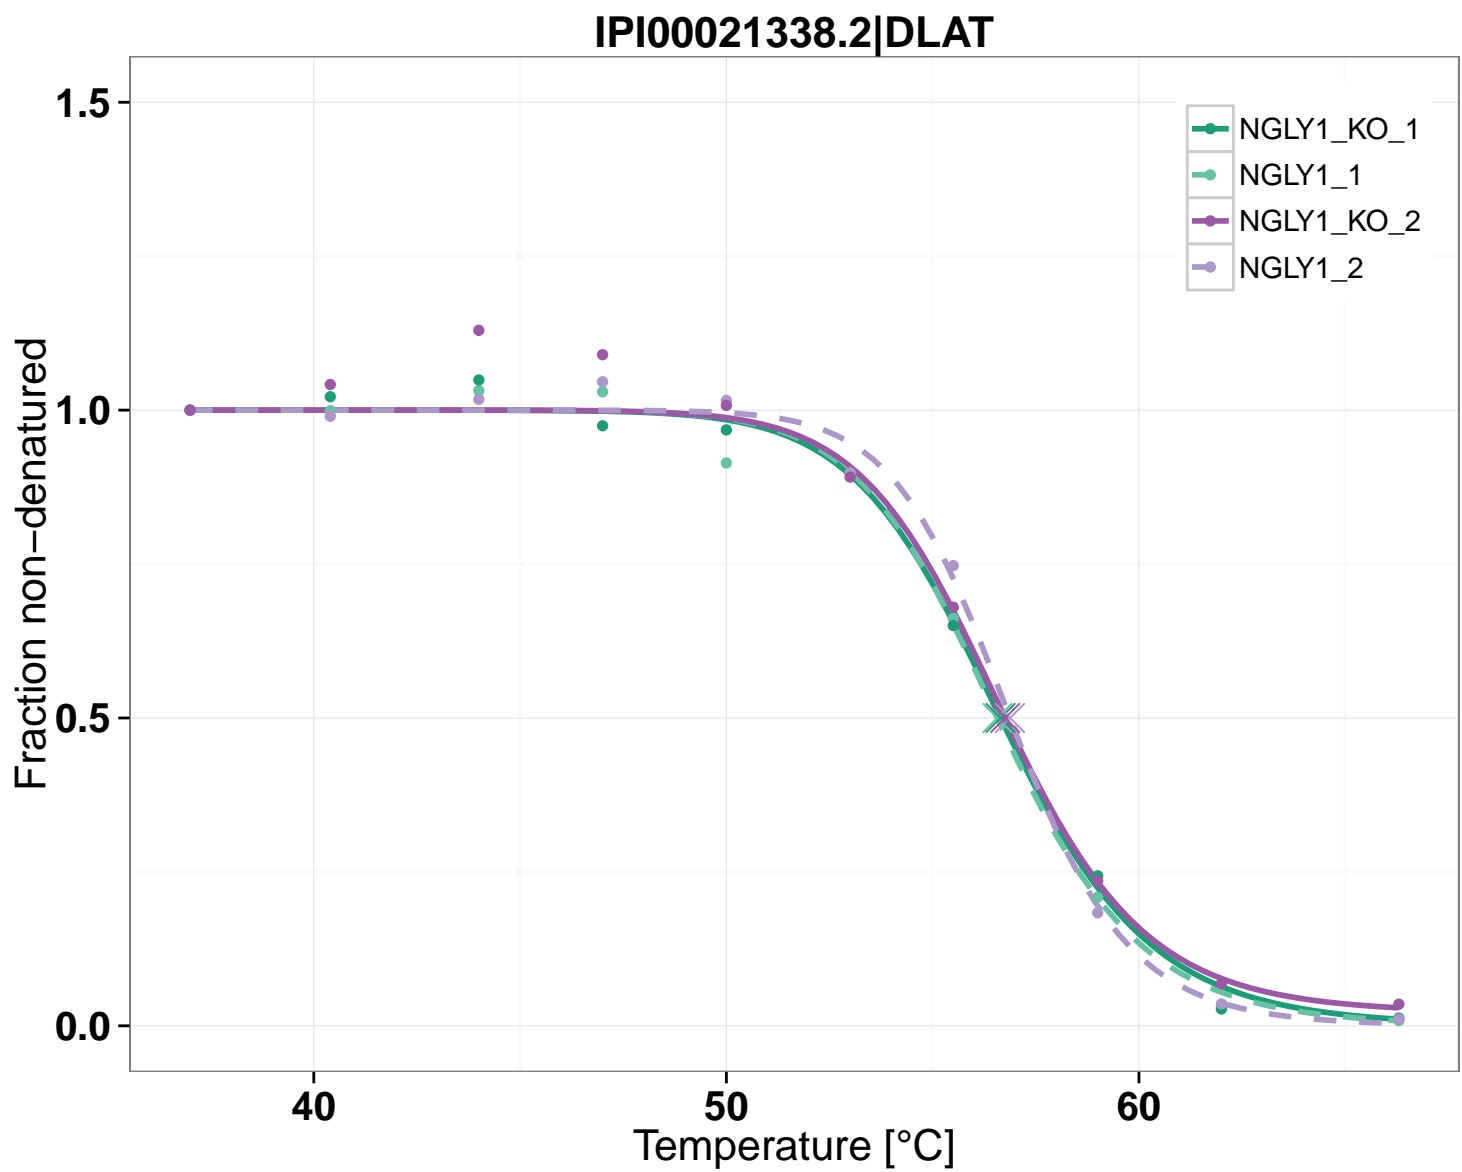

|            | meltPoint | slope | plateau | R2   |
|------------|-----------|-------|---------|------|
| NGLY1_KO_1 | 56.65     | -0.14 | 0       | 1    |
| NGLY1_1    | 56.57     | -0.14 | 0       | 1    |
| NGLY1_KO_2 | 56.76     | -0.14 | 0.02    | 0.98 |
| NGLY1_2    | 56.88     | -0.17 | 0       | 1    |

Supplement: Supplementary file 3223 [file 1]

# IPI00908469.1|TUBB6

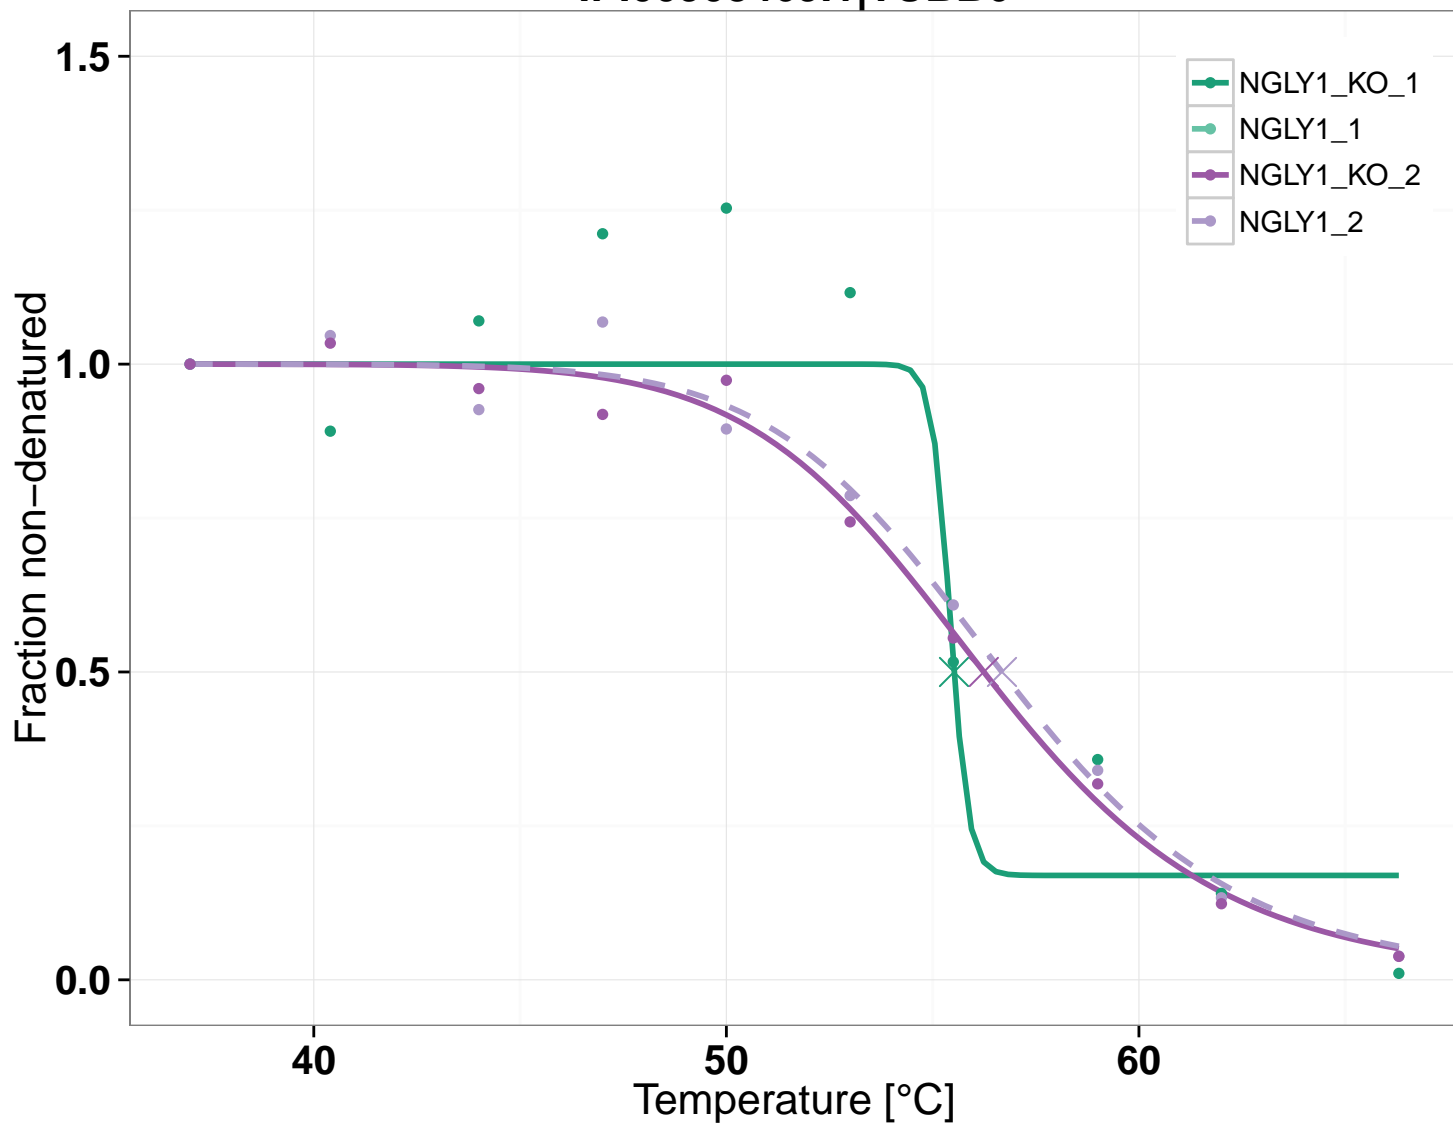

|            | meltPoint | slope  | plateau | R2   |
|------------|-----------|--------|---------|------|
| NGLY1_KO_1 | 55.52     | -0.94  | 0.17    | 0.89 |
| NGLY1_1    | -         | -      | -       | -    |
| NGLY1_KO_2 | 56.24     | -0.087 | 0       | 0.99 |
| NGLY1_2    | 56.68     | -0.088 | 0       | 0.99 |

Supplement: Supplementary file 3224 [file 1]

IPI00784869.4|DNAH10

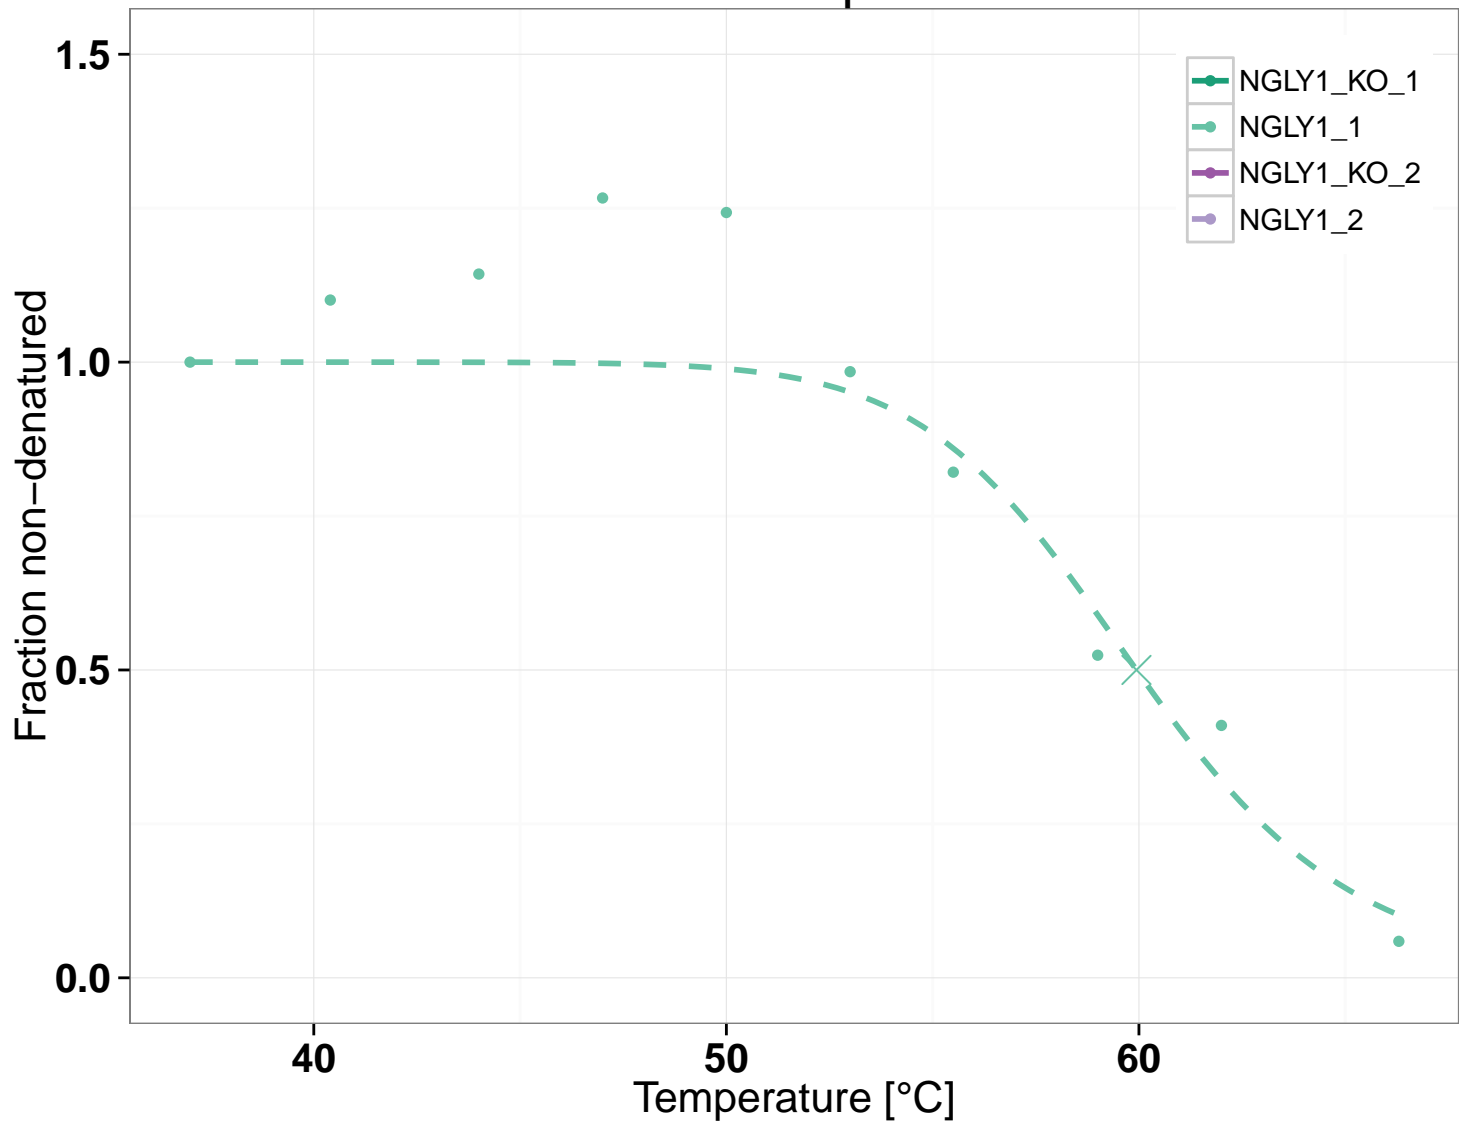

|            | meltPoint | slope  | plateau | R2   |
|------------|-----------|--------|---------|------|
| NGLY1_KO_1 | –         | –      | –       | –    |
| NGLY1_1    | 59.94     | –0.095 | 0       | 0.87 |
| NGLY1_KO_2 | –         | –      | –       | –    |
| NGLY1_2    | –         | –      | –       | –    |

Supplement: Supplementary file 3225 [file 1]

# IPI00021626.2|RBM42

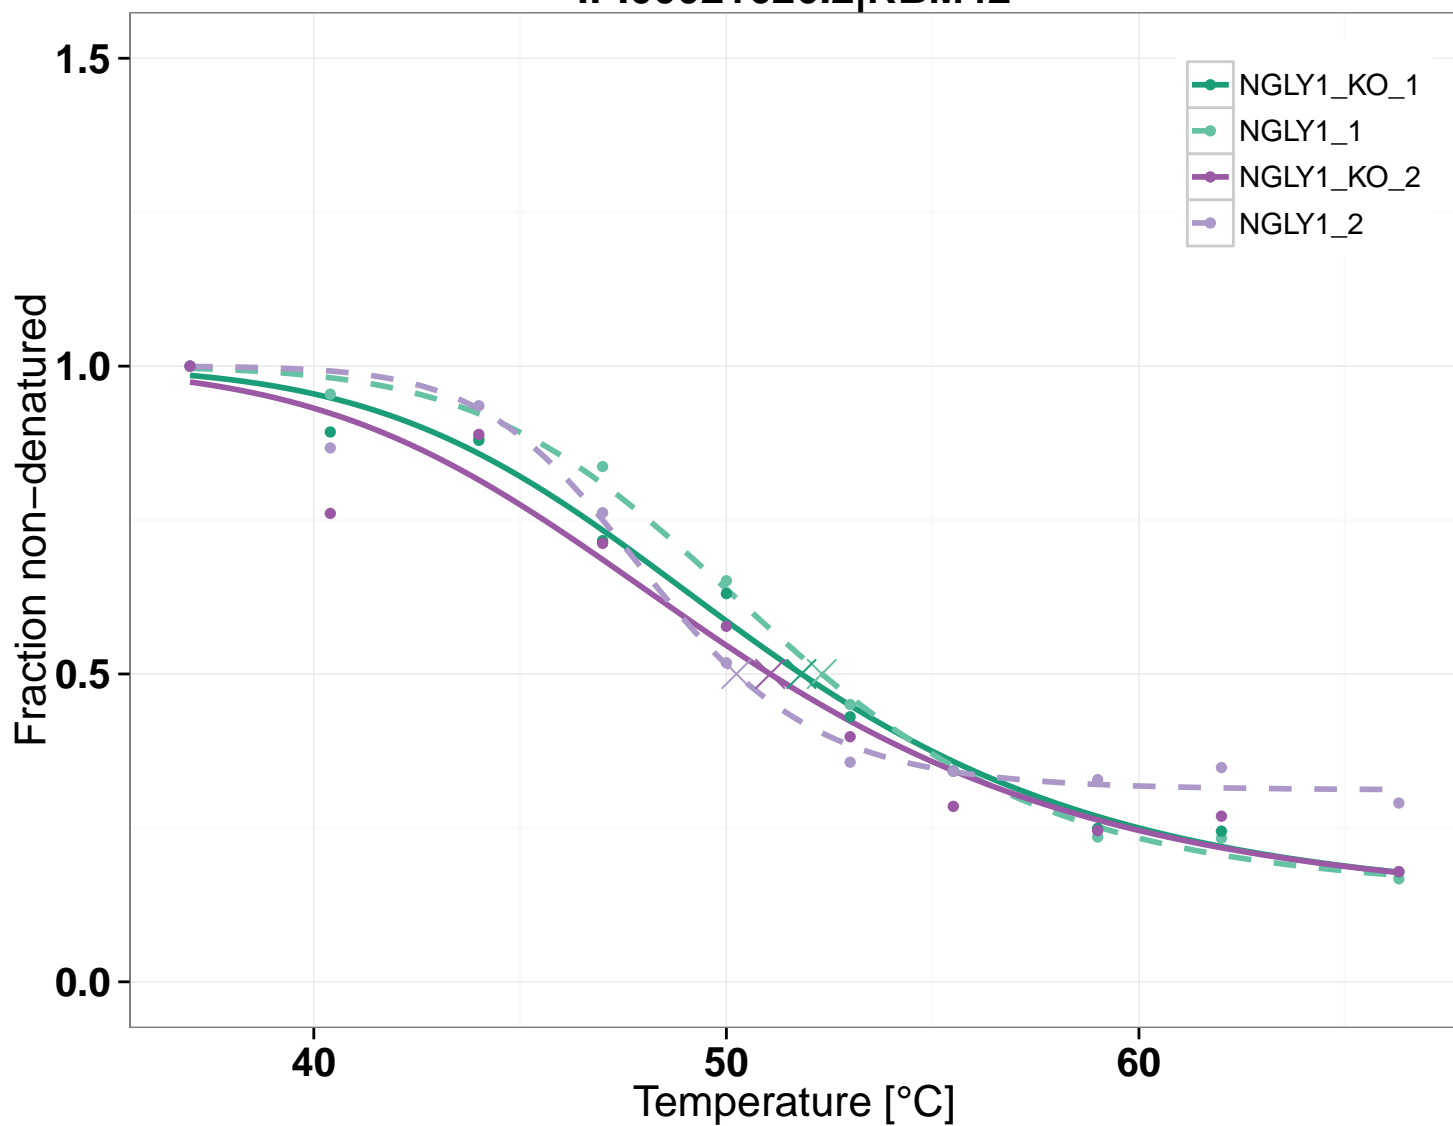

|            | meltPoint | slope  | plateau | R2   |
|------------|-----------|--------|---------|------|
| NGLY1_KO_1 | 51.82     | -0.05  | 0.12    | 0.99 |
| NGLY1_1    | 52.31     | -0.061 | 0.14    | 1    |
| NGLY1_KO_2 | 51.06     | -0.047 | 0.11    | 0.95 |
| NGLY1_2    | 50.24     | -0.084 | 0.31    | 0.98 |

Supplement: Supplementary file 3226 [file 1]

IPI00185919.3|LARP1

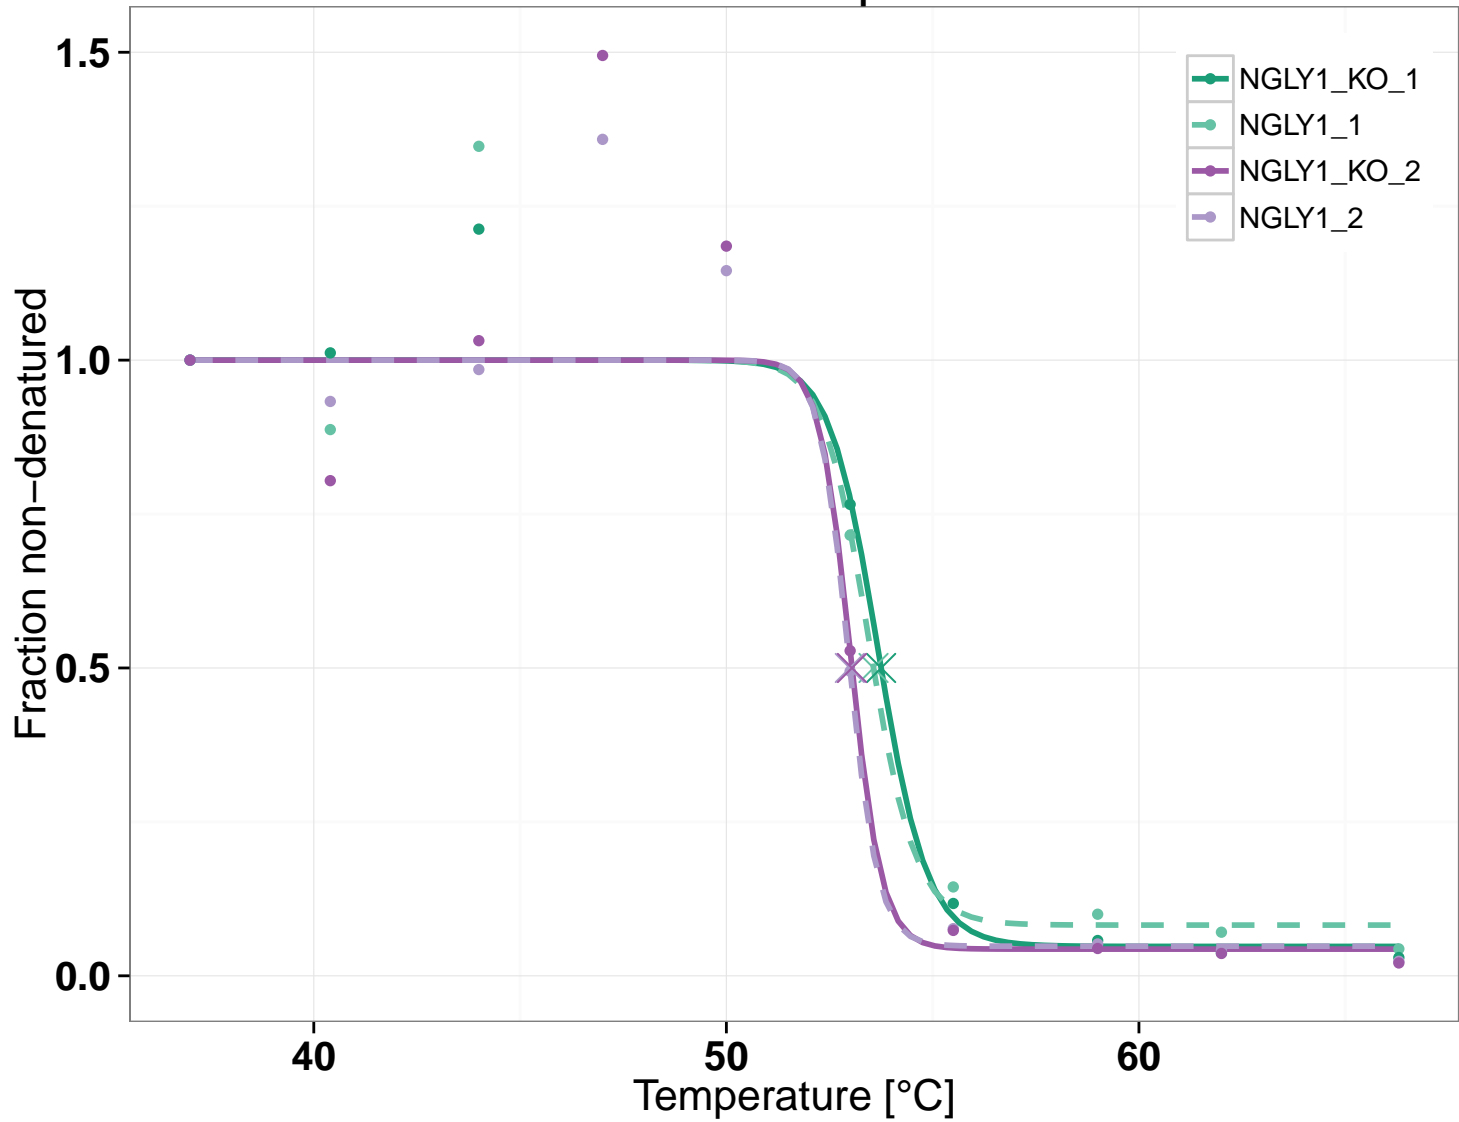

|            | meltPoint | slope | plateau | R2   |
|------------|-----------|-------|---------|------|
| NGLY1_KO_1 | 53.75     | -0.4  | 0.05    | 0.76 |
| NGLY1_1    | 53.57     | -0.41 | 0.08    | 0.74 |
| NGLY1_KO_2 | 53.04     | -0.63 | 0.04    | 0.88 |
| NGLY1_2    | 52.99     | -0.66 | 0.05    | 0.94 |

Supplement: Supplementary file 3227 [file 1]

IPI00013746.2|SERINC3

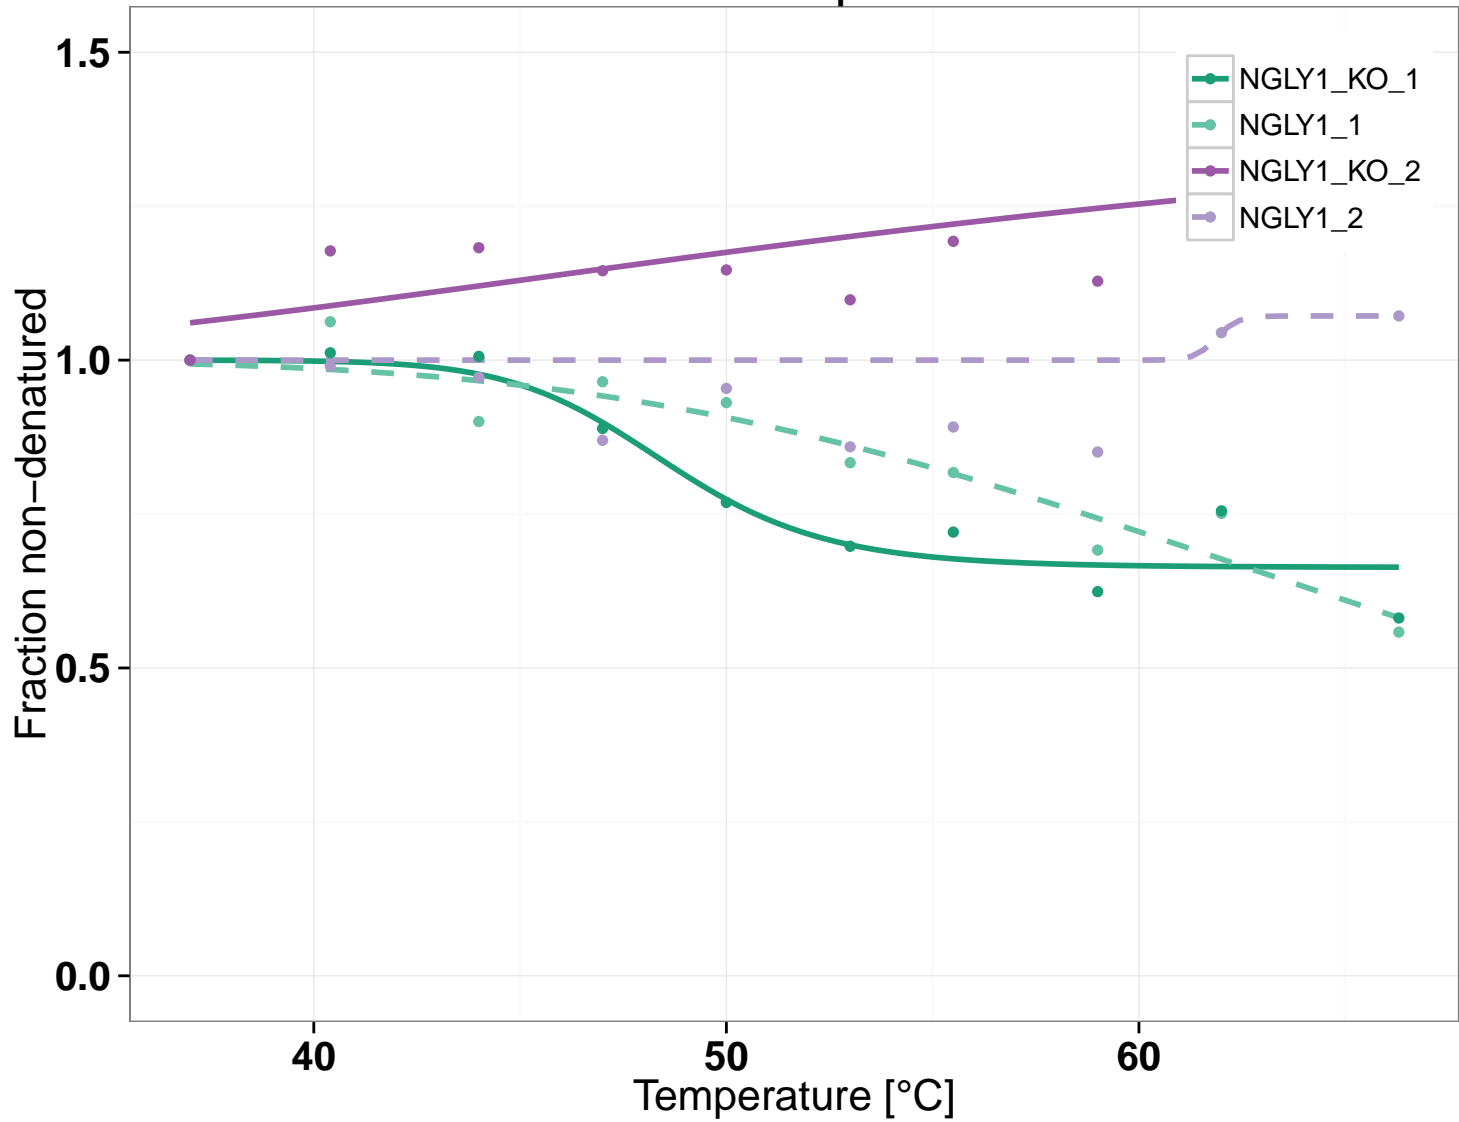

|            | meltPoint | slope  | plateau | R2    |
|------------|-----------|--------|---------|-------|
| NGLY1_KO_1 | -         | -0.044 | 0.66    | 0.91  |
| NGLY1_1    | -         | -0.022 | 0.03    | 0.9   |
| NGLY1_KO_2 | -         | 0.0092 | 1.5     | 0.31  |
| NGLY1_2    | -         | 0.07   | 1.07    | -0.31 |

Supplement: Supplementary file 3228 [file 1]

IPI00300299.6|SPCS3

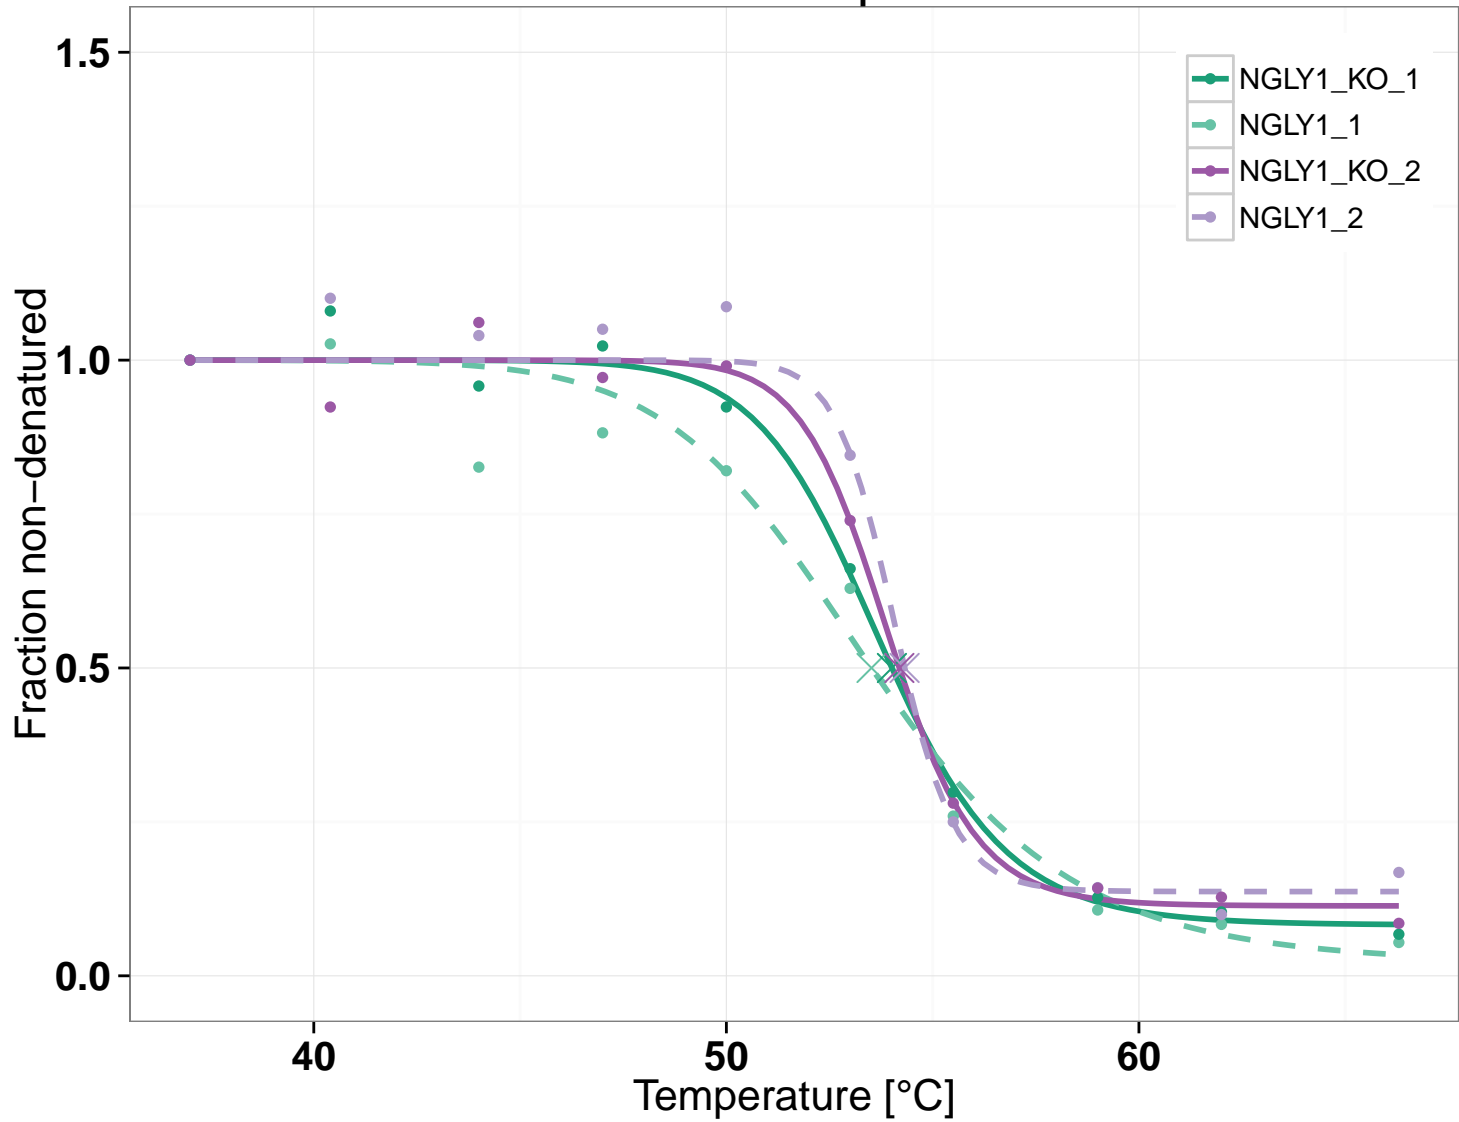

|            | meltPoint | slope  | plateau | R2   |
|------------|-----------|--------|---------|------|
| NGLY1_KO_1 | 54.01     | -0.15  | 0.08    | 0.99 |
| NGLY1_1    | 53.52     | -0.099 | 0.02    | 0.97 |
| NGLY1_KO_2 | 54.19     | -0.21  | 0.11    | 0.99 |
| NGLY1_2    | 54.32     | -0.3   | 0.14    | 0.99 |

Supplement: Supplementary file 3229 [file 1]

IPI00181702.3|SFRS15

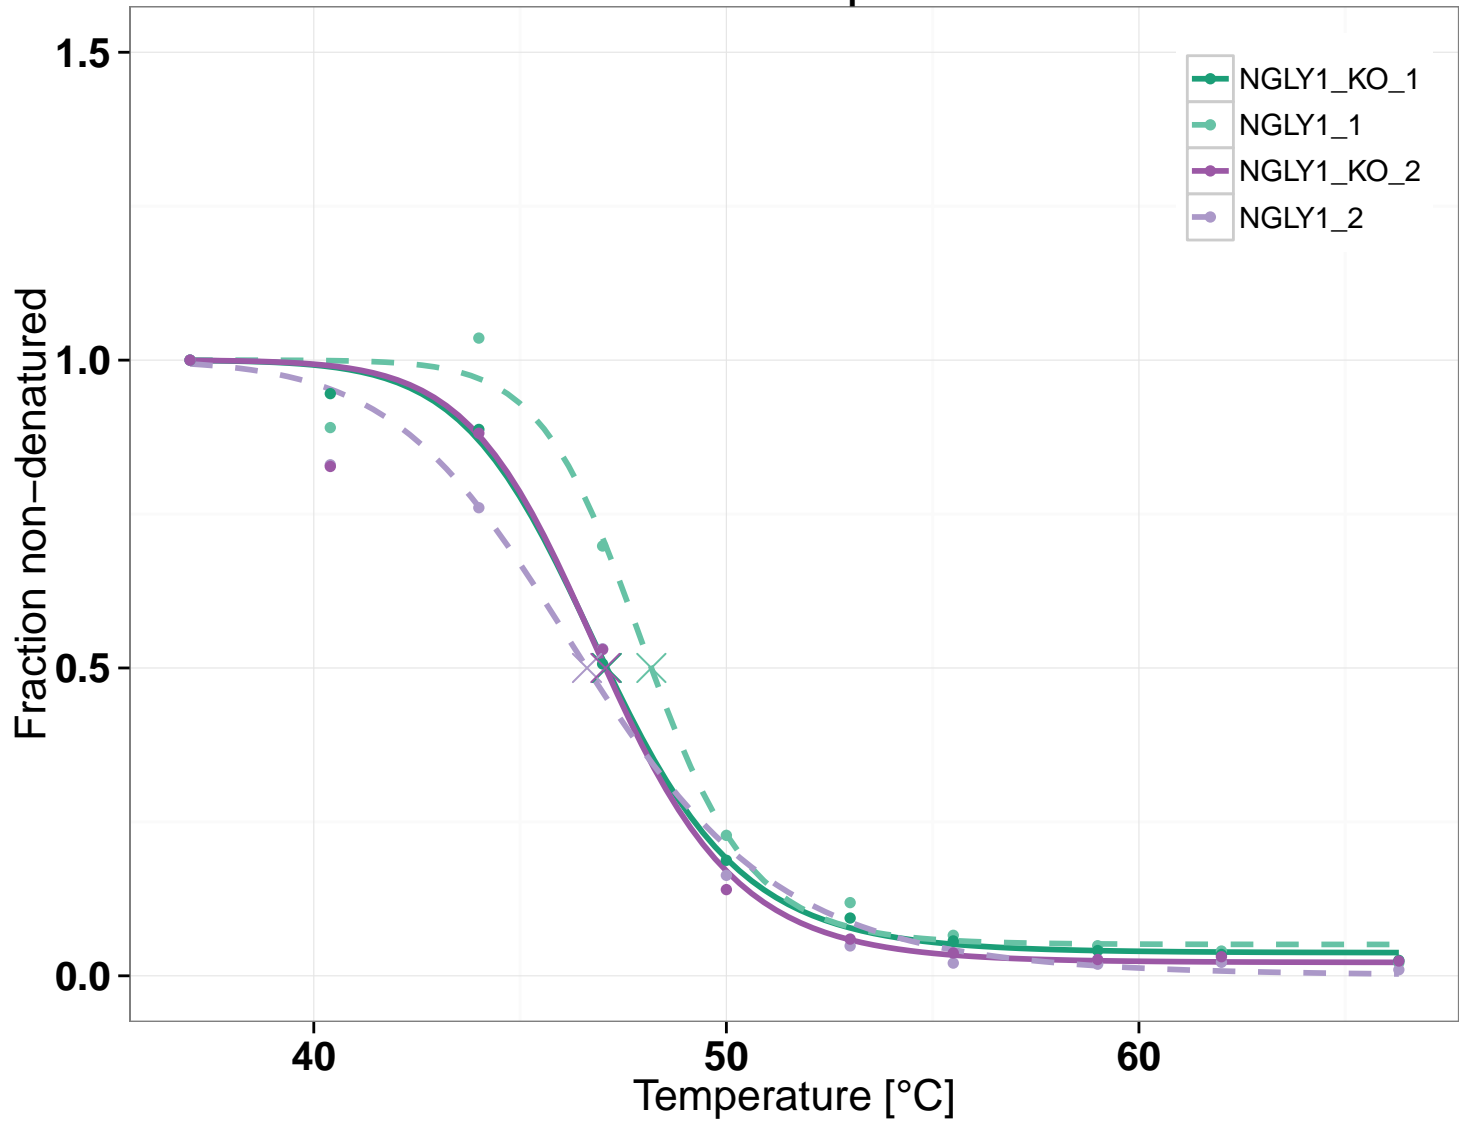

|            | meltPoint | slope | plateau | R2   |
|------------|-----------|-------|---------|------|
| NGLY1_KO_1 | 47.1      | -0.14 | 0.04    | 1    |
| NGLY1_1    | 48.18     | -0.18 | 0.05    | 0.99 |
| NGLY1_KO_2 | 47.07     | -0.15 | 0.02    | 0.98 |
| NGLY1_2    | 46.62     | -0.11 | 0       | 0.98 |

Supplement: Supplementary file 3230 [file 1]

IPI00029178.1|BACH2

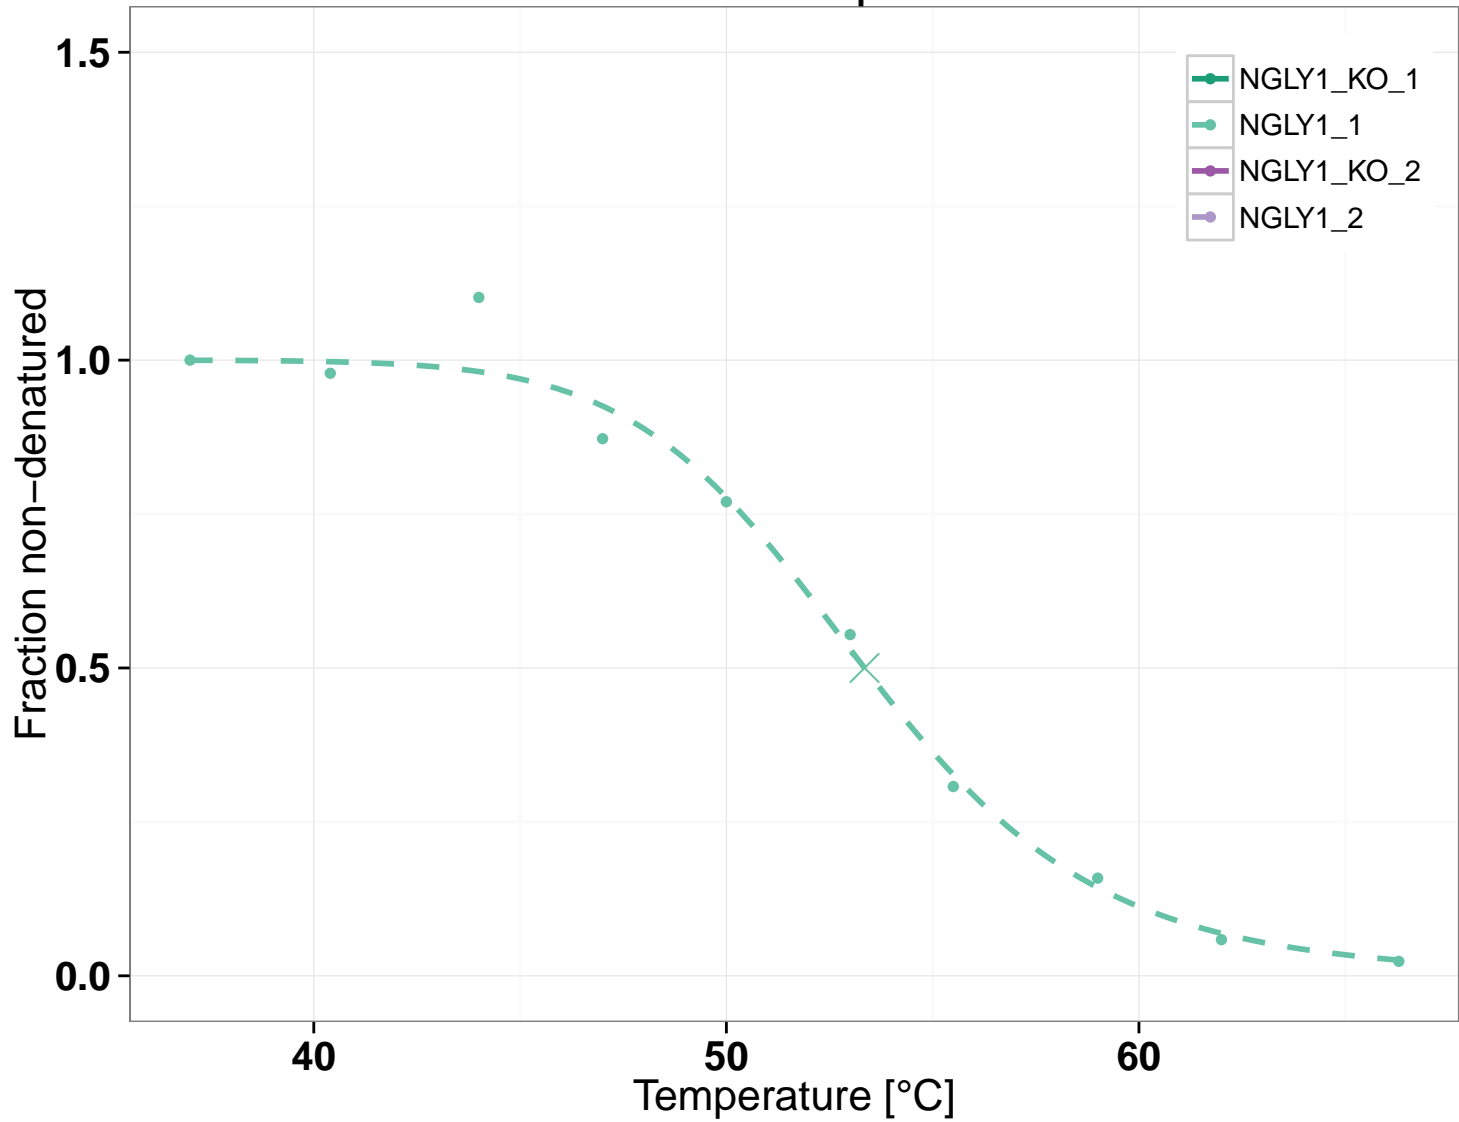

|            | meltPoint | slope  | plateau | R2   |
|------------|-----------|--------|---------|------|
| NGLY1_KO_1 | -         | -      | -       | -    |
| NGLY1_1    | 53.35     | -0.088 | 0       | 0.99 |
| NGLY1_KO_2 | -         | -      | -       | -    |
| NGLY1_2    | -         | -      | -       | -    |

Supplement: Supplementary file 3231 [file 1]

IPI00783380.1|TMEM87B

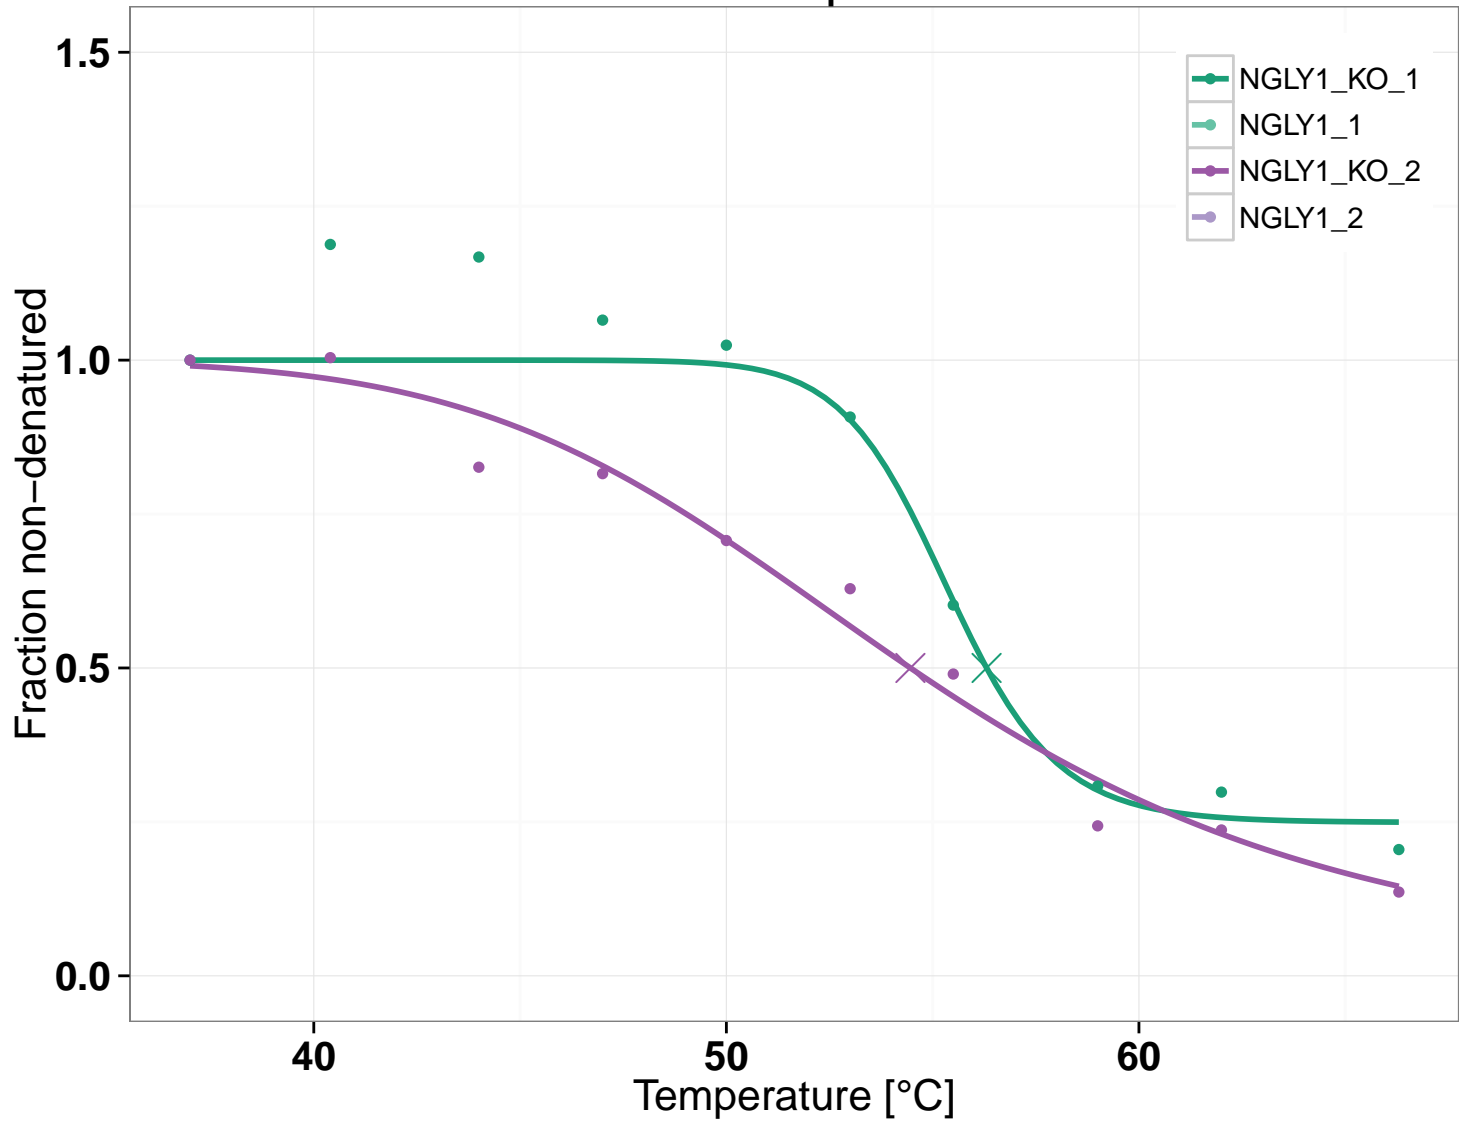

|            | meltPoint | slope  | plateau | R2   |
|------------|-----------|--------|---------|------|
| NGLY1_KO_1 | 56.31     | -0.14  | 0.25    | 0.95 |
| NGLY1_1    | -         | -      | -       | -    |
| NGLY1_KO_2 | 54.46     | -0.047 | 0       | 0.98 |
| NGLY1_2    | -         | -      | -       | -    |

Supplement: Supplementary file 3232 [file 1]

IPI00297572.5|AQR

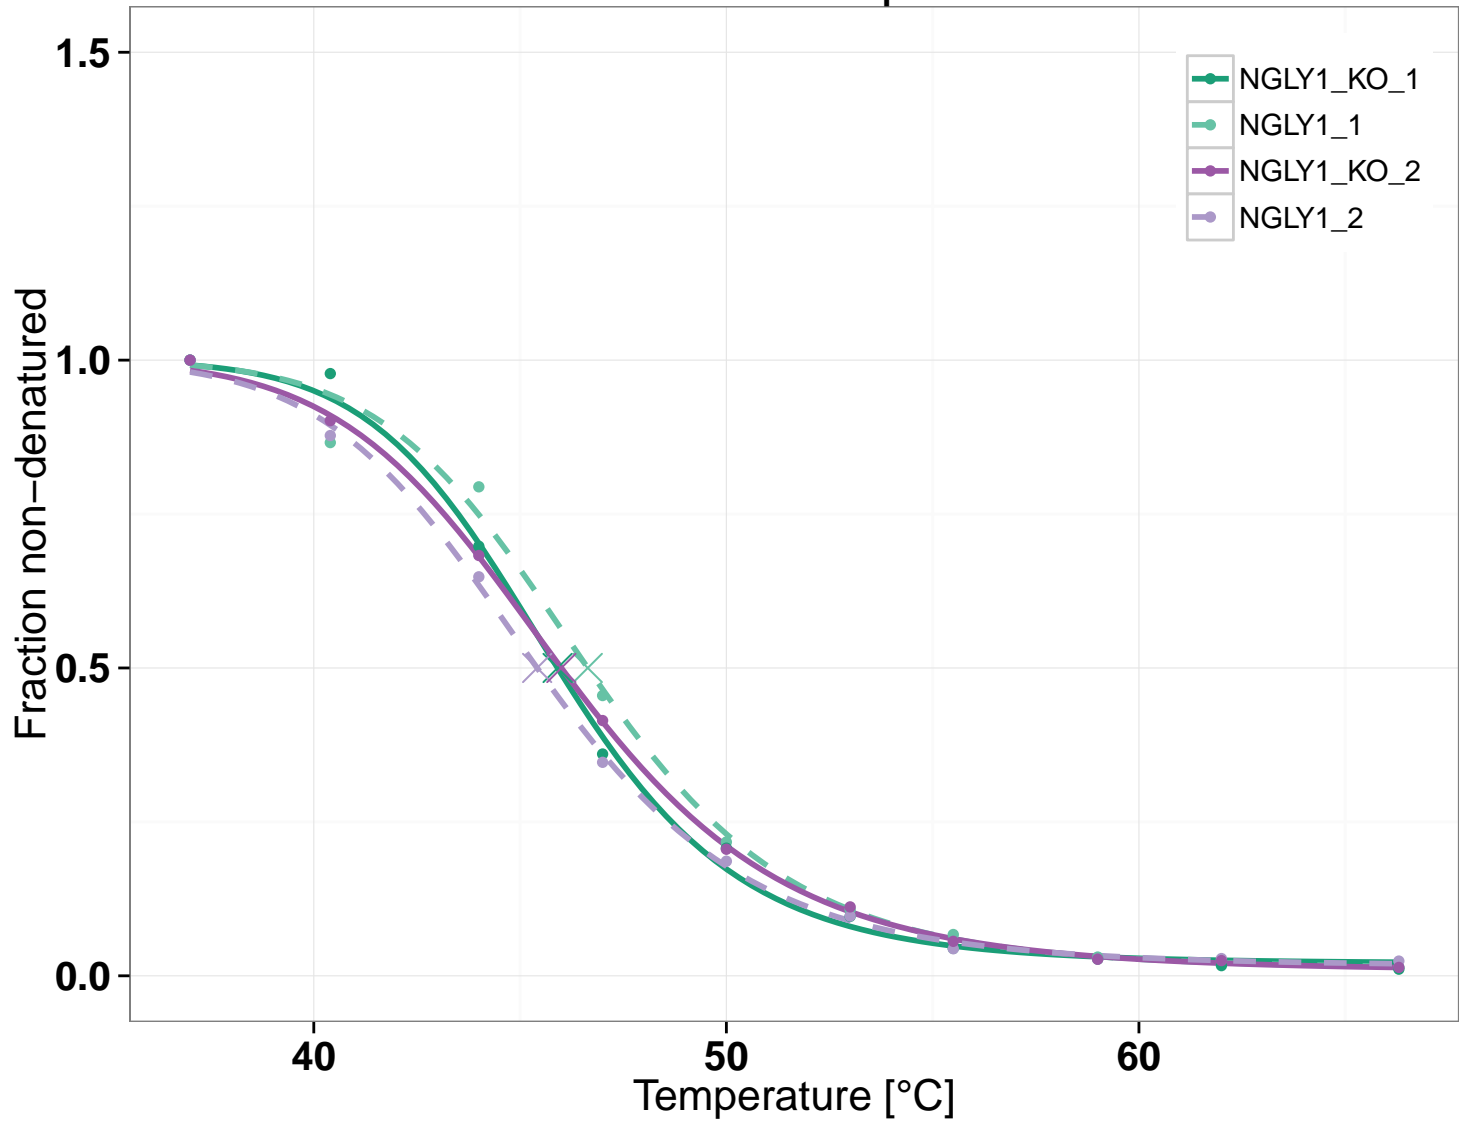

|            | meltPoint | slope  | plateau | R2   |
|------------|-----------|--------|---------|------|
| NGLY1_KO_1 | 45.91     | -0.11  | 0.02    | 1    |
| NGLY1_1    | 46.64     | -0.099 | 0.01    | 0.99 |
| NGLY1_KO_2 | 46        | -0.092 | 0.01    | 1    |
| NGLY1_2    | 45.41     | -0.096 | 0.02    | 1    |

Supplement: Supplementary file 3233 [file 1]

# IPI00102685.1|MYADM

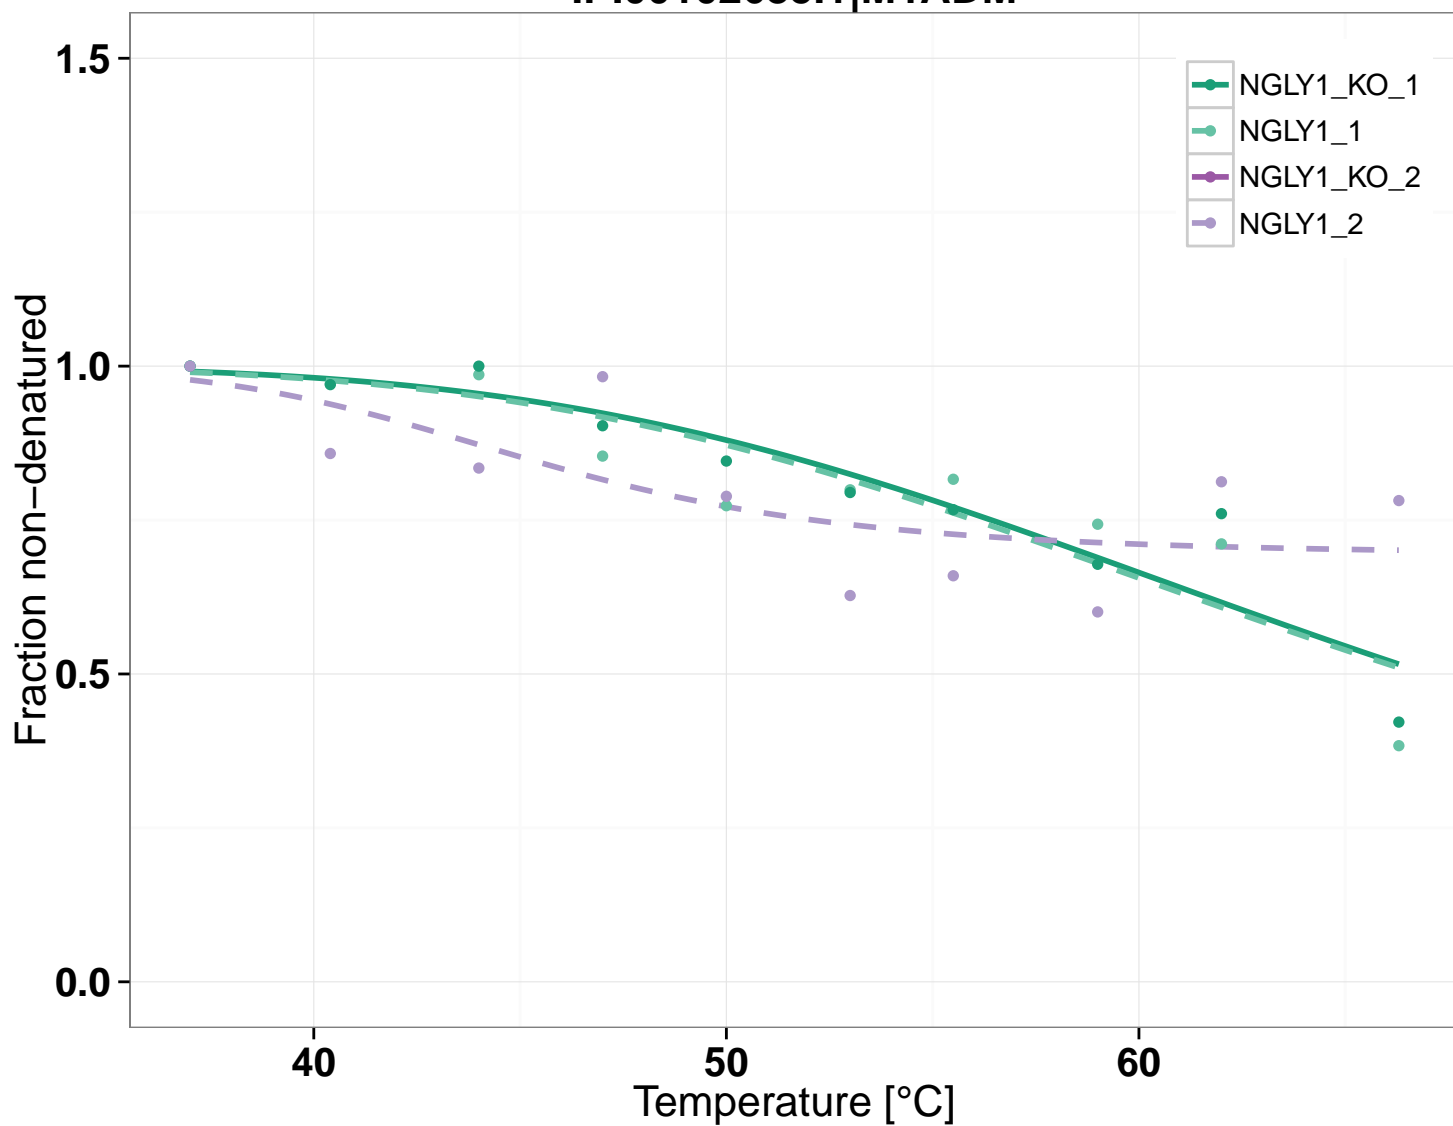

|            | meltPoint | slope  | plateau | R2   |
|------------|-----------|--------|---------|------|
| NGLY1_KO_1 | —         | −0.024 | 0       | 0.88 |
| NGLY1_1    | —         | −0.024 | 0       | 0.83 |
| NGLY1_KO_2 | —         | —      | —       | —    |
| NGLY1_2    | —         | −0.02  | 0.69    | 0.49 |

Supplement: Supplementary file 3234 [file 1]

# IPI00007365.1|TRIM38

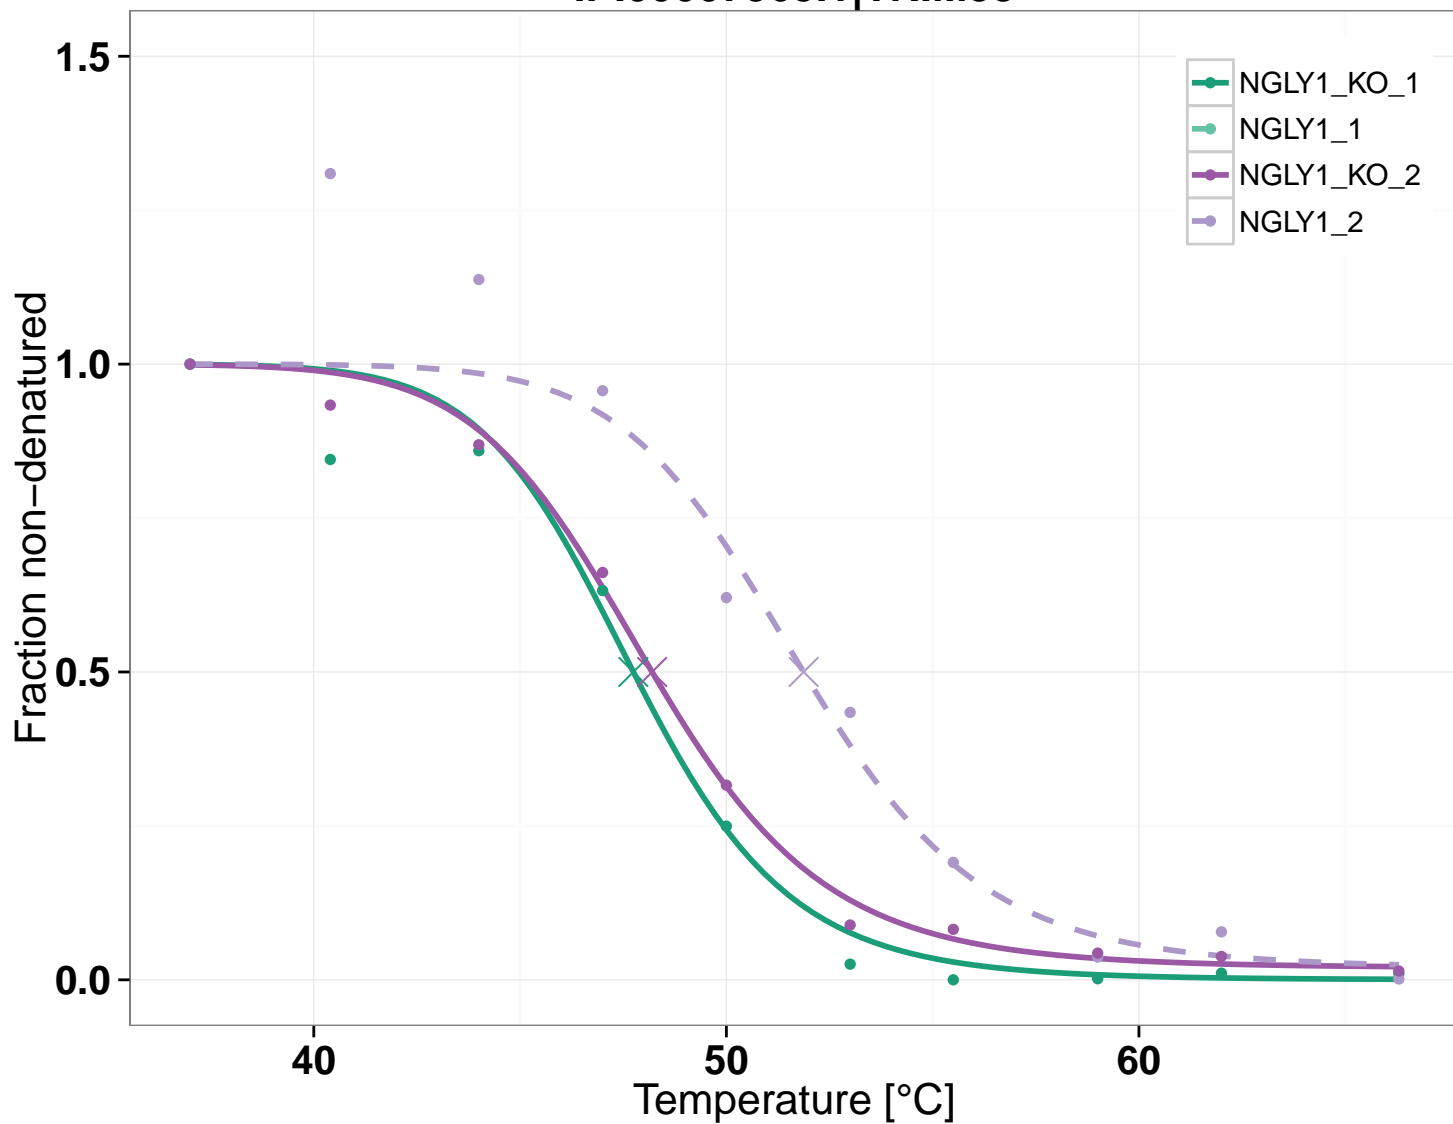

|            | meltPoint | slope | plateau | R2   |
|------------|-----------|-------|---------|------|
| NGLY1_KO_1 | 47.75     | -0.13 | 0       | 0.98 |
| NGLY1_1    | —         | —     | —       | —    |
| NGLY1_KO_2 | 48.2      | -0.12 | 0.02    | 1    |
| NGLY1_2    | 51.87     | -0.11 | 0.02    | 0.94 |

Supplement: Supplementary file 3235 [file 1]

IPI00184533.1|USP11

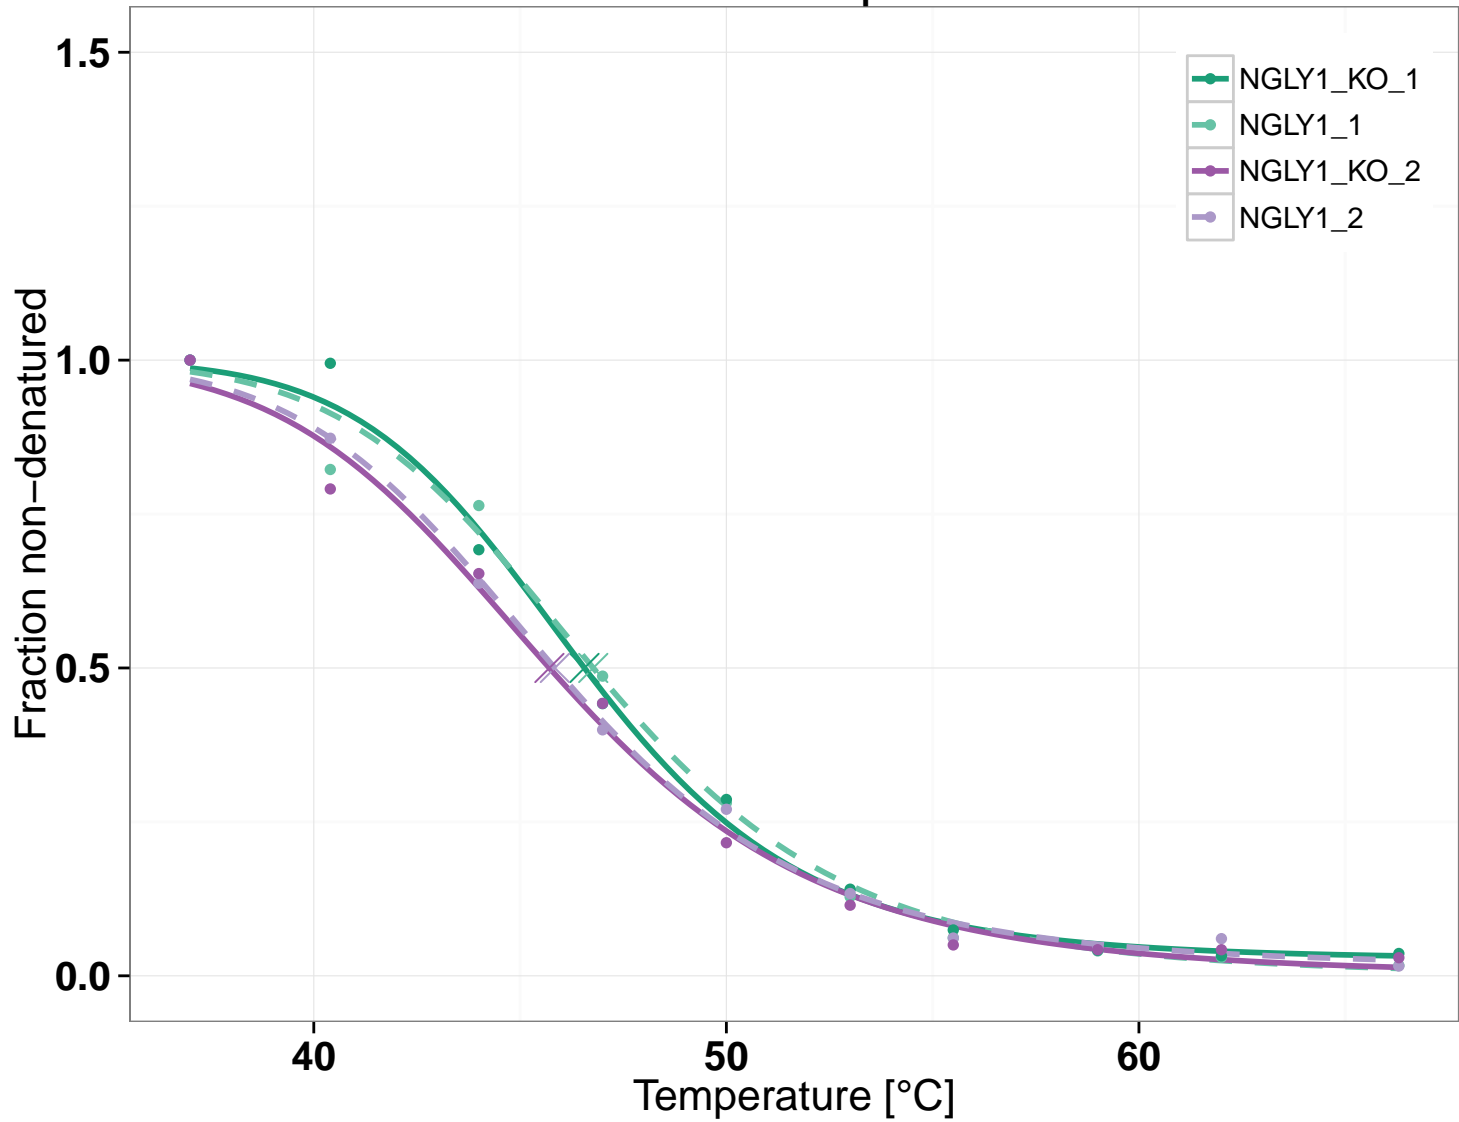

|            | meltPoint | slope  | plateau | R2   |
|------------|-----------|--------|---------|------|
| NGLY1_KO_1 | 46.56     | -0.09  | 0.03    | 0.99 |
| NGLY1_1    | 46.77     | -0.081 | 0       | 0.99 |
| NGLY1_KO_2 | 45.71     | -0.077 | 0       | 0.99 |
| NGLY1_2    | 45.84     | -0.079 | 0.01    | 1    |

Supplement: Supplementary file 3236 [file 1]

IPI00290358.2|LOC283951

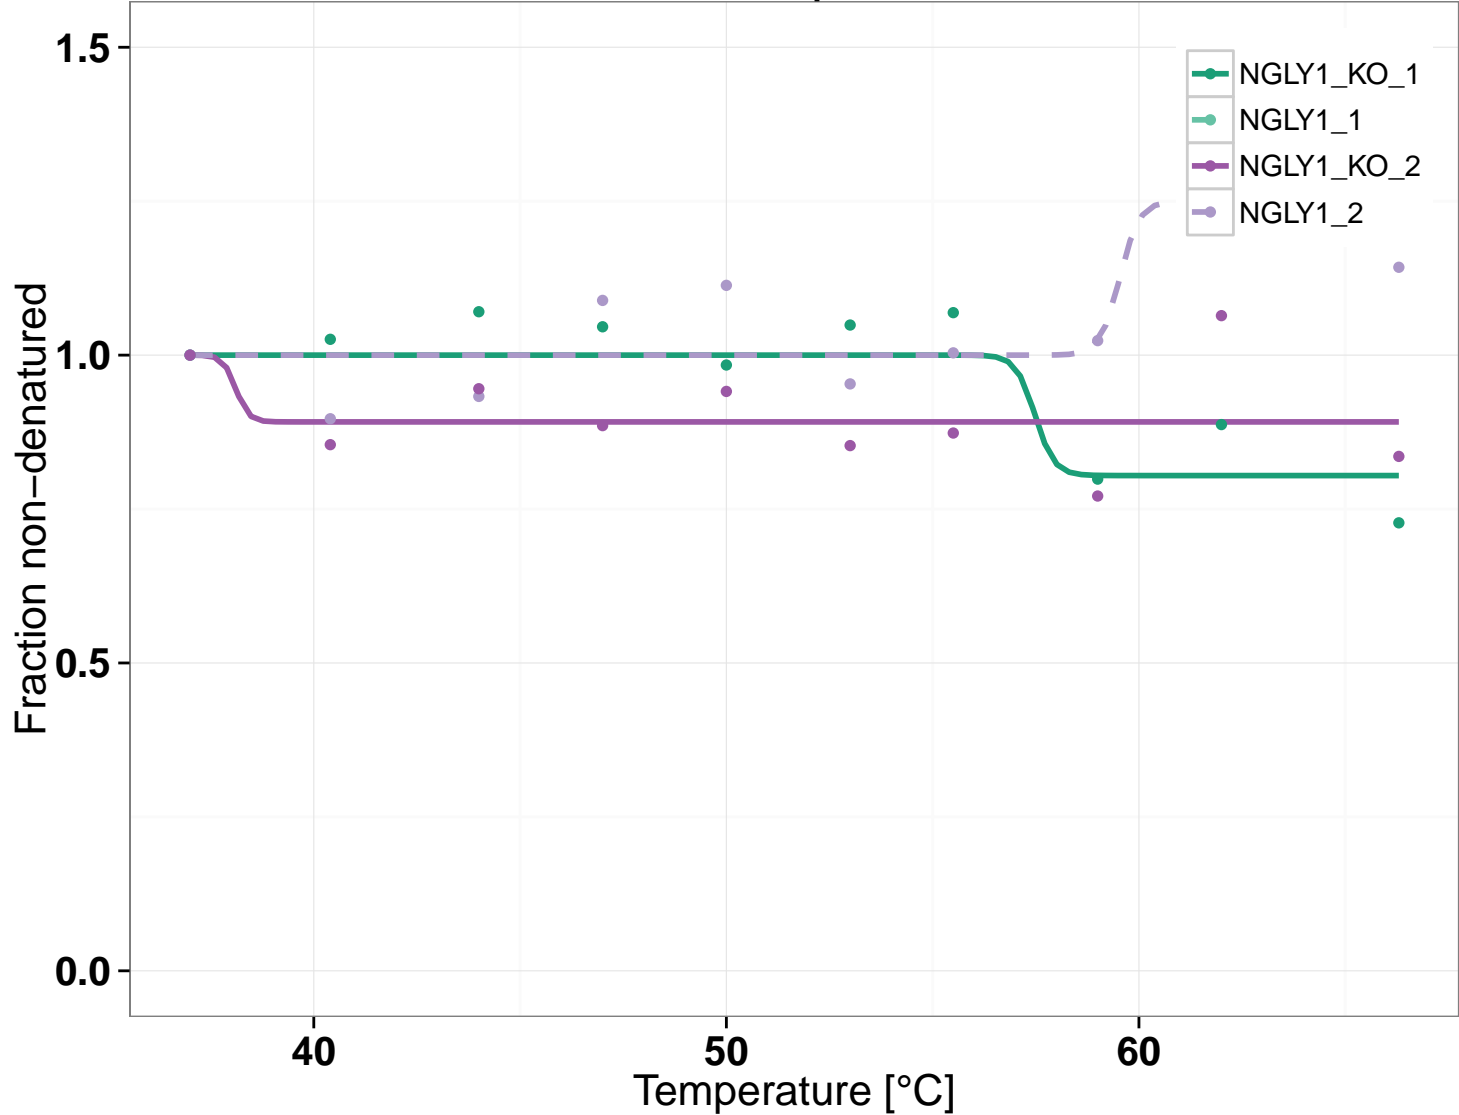

|            | meltPoint | slope | plateau | R2   |
|------------|-----------|-------|---------|------|
| NGLY1_KO_1 | —         | -0.21 | 0.8     | 0.79 |
| NGLY1_1    | —         | —     | —       | —    |
| NGLY1_KO_2 | —         | -0.18 | 0.89    | 0.16 |
| NGLY1_2    | —         | 0.26  | 1.25    | 0.62 |

Supplement: Supplementary file 3237 [file 1]

# IPI00514593.1|TTC4

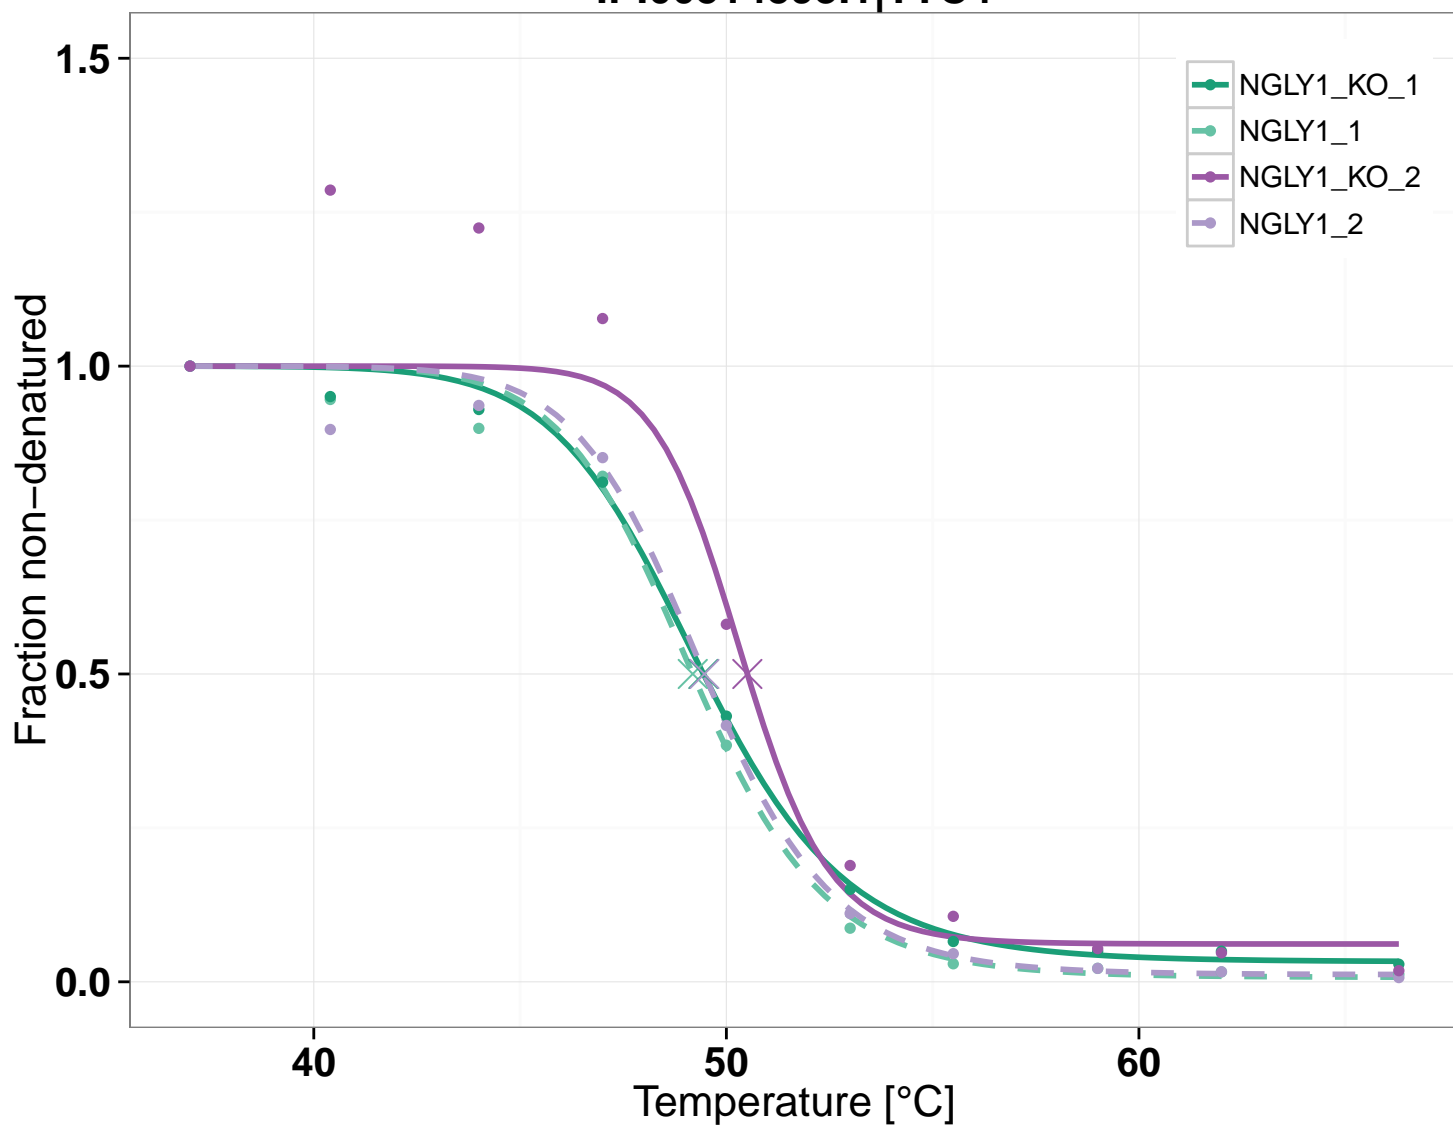

|            | meltPoint | slope | plateau | R2   |
|------------|-----------|-------|---------|------|
| NGLY1_KO_1 | 49.44     | -0.13 | 0.03    | 1    |
| NGLY1_1    | 49.19     | -0.15 | 0.01    | 0.99 |
| NGLY1_KO_2 | 50.51     | -0.22 | 0.06    | 0.94 |
| NGLY1_2    | 49.47     | -0.16 | 0.01    | 0.99 |

Supplement: Supplementary file 3238 [file 1]

IPI00002549.1|ANAPC2

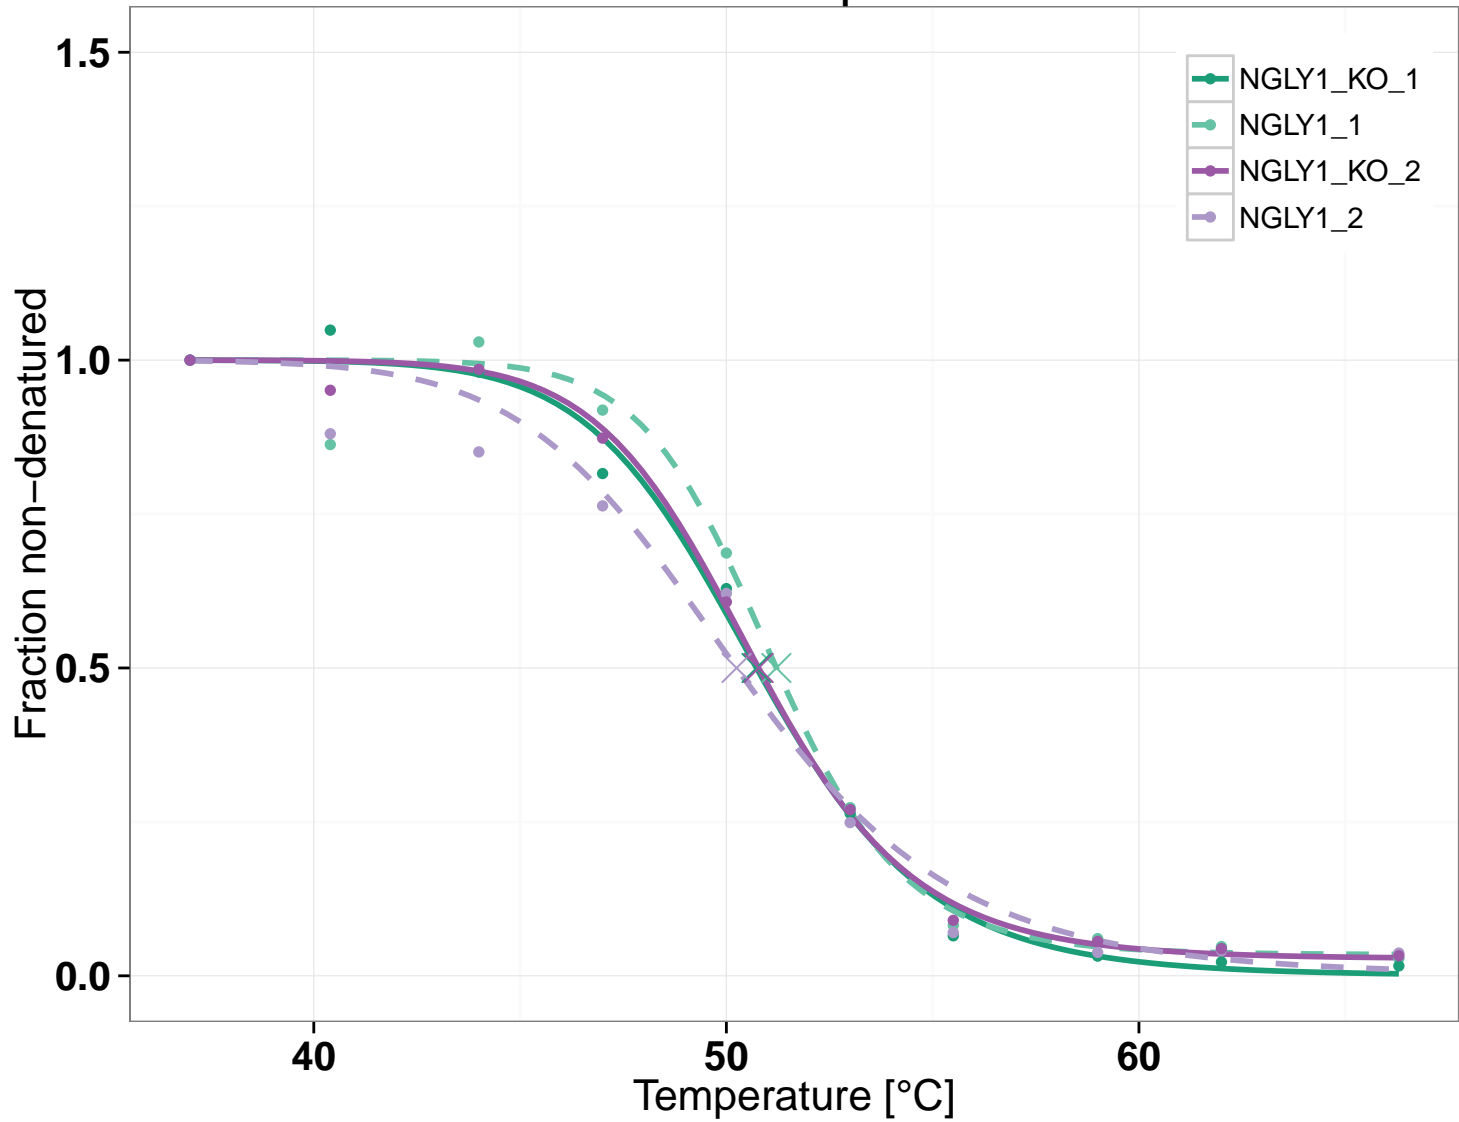

|            | meltPoint | slope  | plateau | R2   |
|------------|-----------|--------|---------|------|
| NGLY1_KO_1 | 50.73     | -0.12  | 0       | 0.99 |
| NGLY1_1    | 51.21     | -0.15  | 0.03    | 0.99 |
| NGLY1_KO_2 | 50.78     | -0.13  | 0.03    | 1    |
| NGLY1_2    | 50.25     | -0.095 | 0       | 0.98 |

Supplement: Supplementary file 3239 [file 1]

IPI00304806.2|PIGP

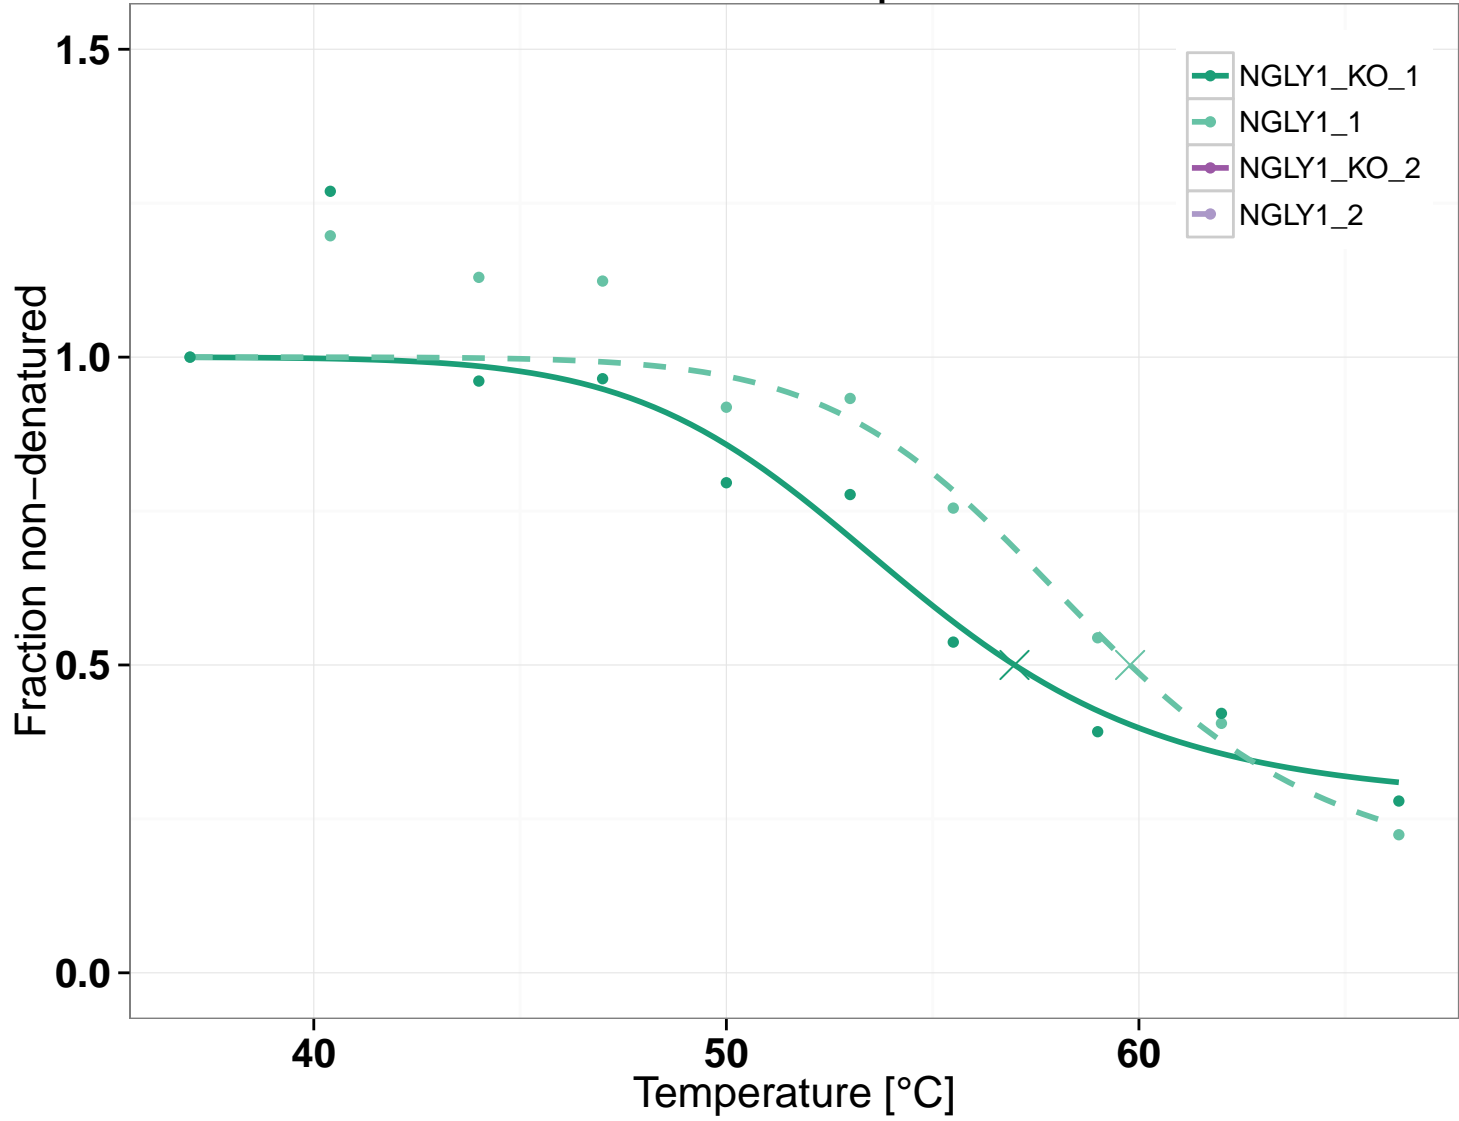

|            | meltPoint | slope  | plateau | R2   |
|------------|-----------|--------|---------|------|
| NGLY1_KO_1 | 56.98     | -0.056 | 0.28    | 0.9  |
| NGLY1_1    | 59.79     | -0.069 | 0.15    | 0.92 |
| NGLY1_KO_2 | -         | -      | -       | -    |
| NGLY1_2    | -         | -      | -       | -    |

Supplement: Supplementary file 3240 [file 1]

# IPI00017342.1|RHOG

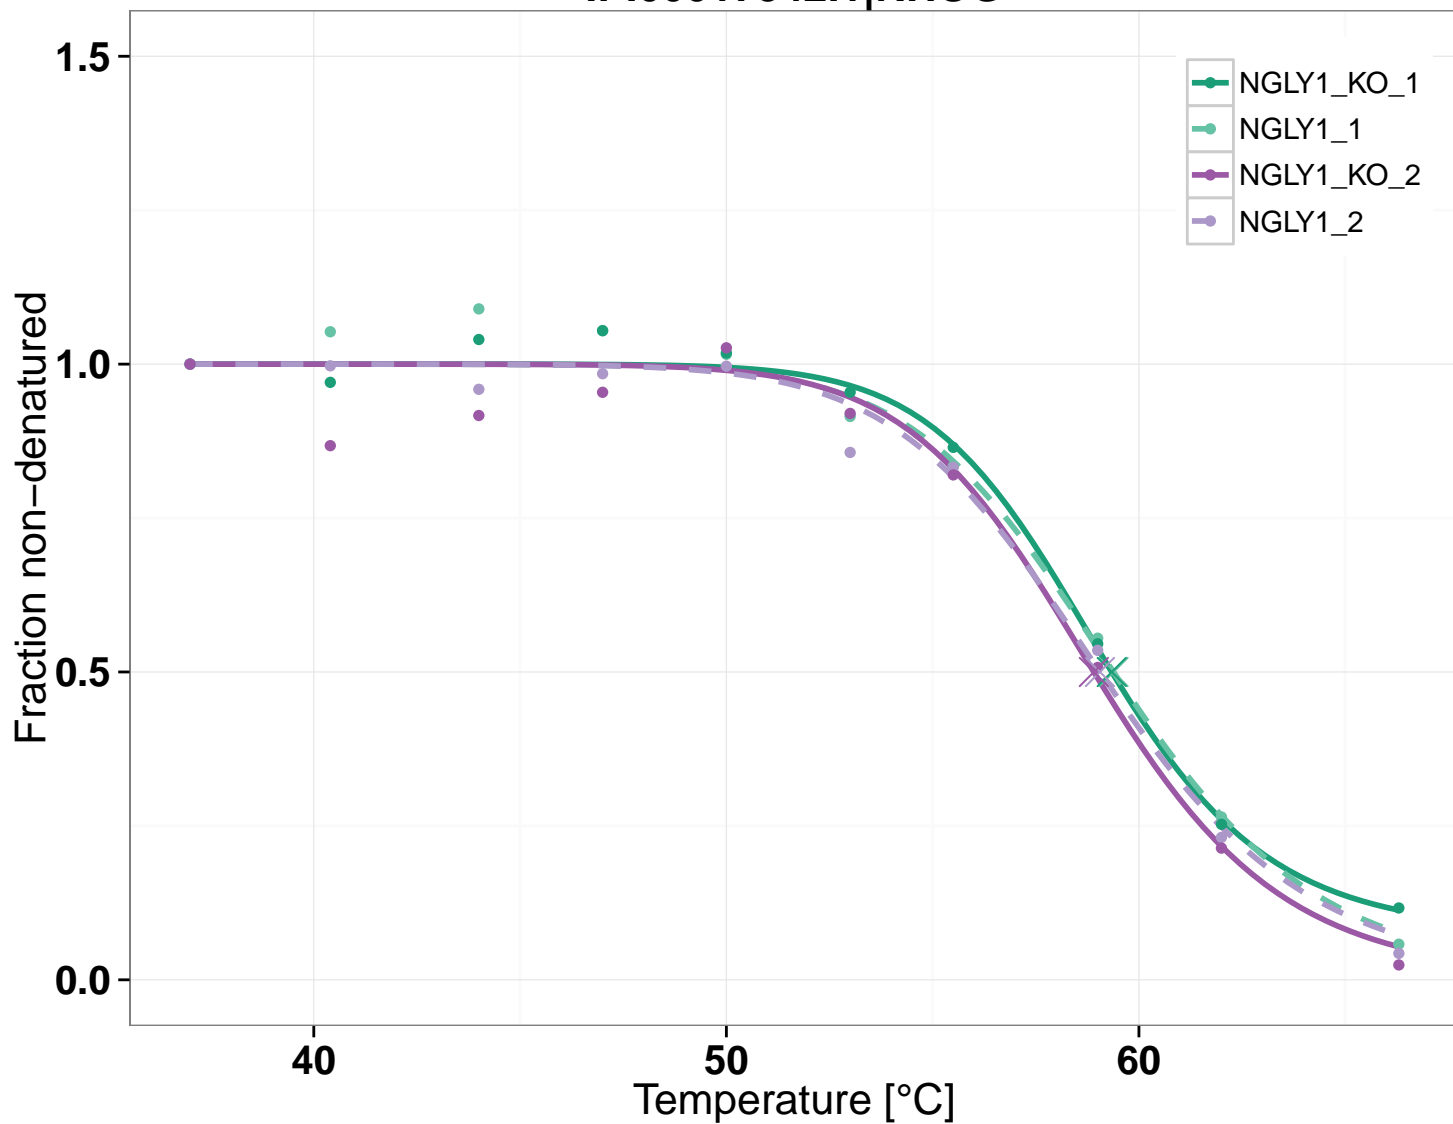

|            | meltPoint | slope  | plateau | R2   |
|------------|-----------|--------|---------|------|
| NGLY1_KO_1 | 59.34     | -0.11  | 0.08    | 0.99 |
| NGLY1_1    | 59.38     | -0.1   | 0       | 0.99 |
| NGLY1_KO_2 | 58.91     | -0.11  | 0       | 0.97 |
| NGLY1_2    | 59.05     | -0.099 | 0       | 0.99 |

Supplement: Supplementary file 3241 [file 1]

IPI00332451.3|NR2C2

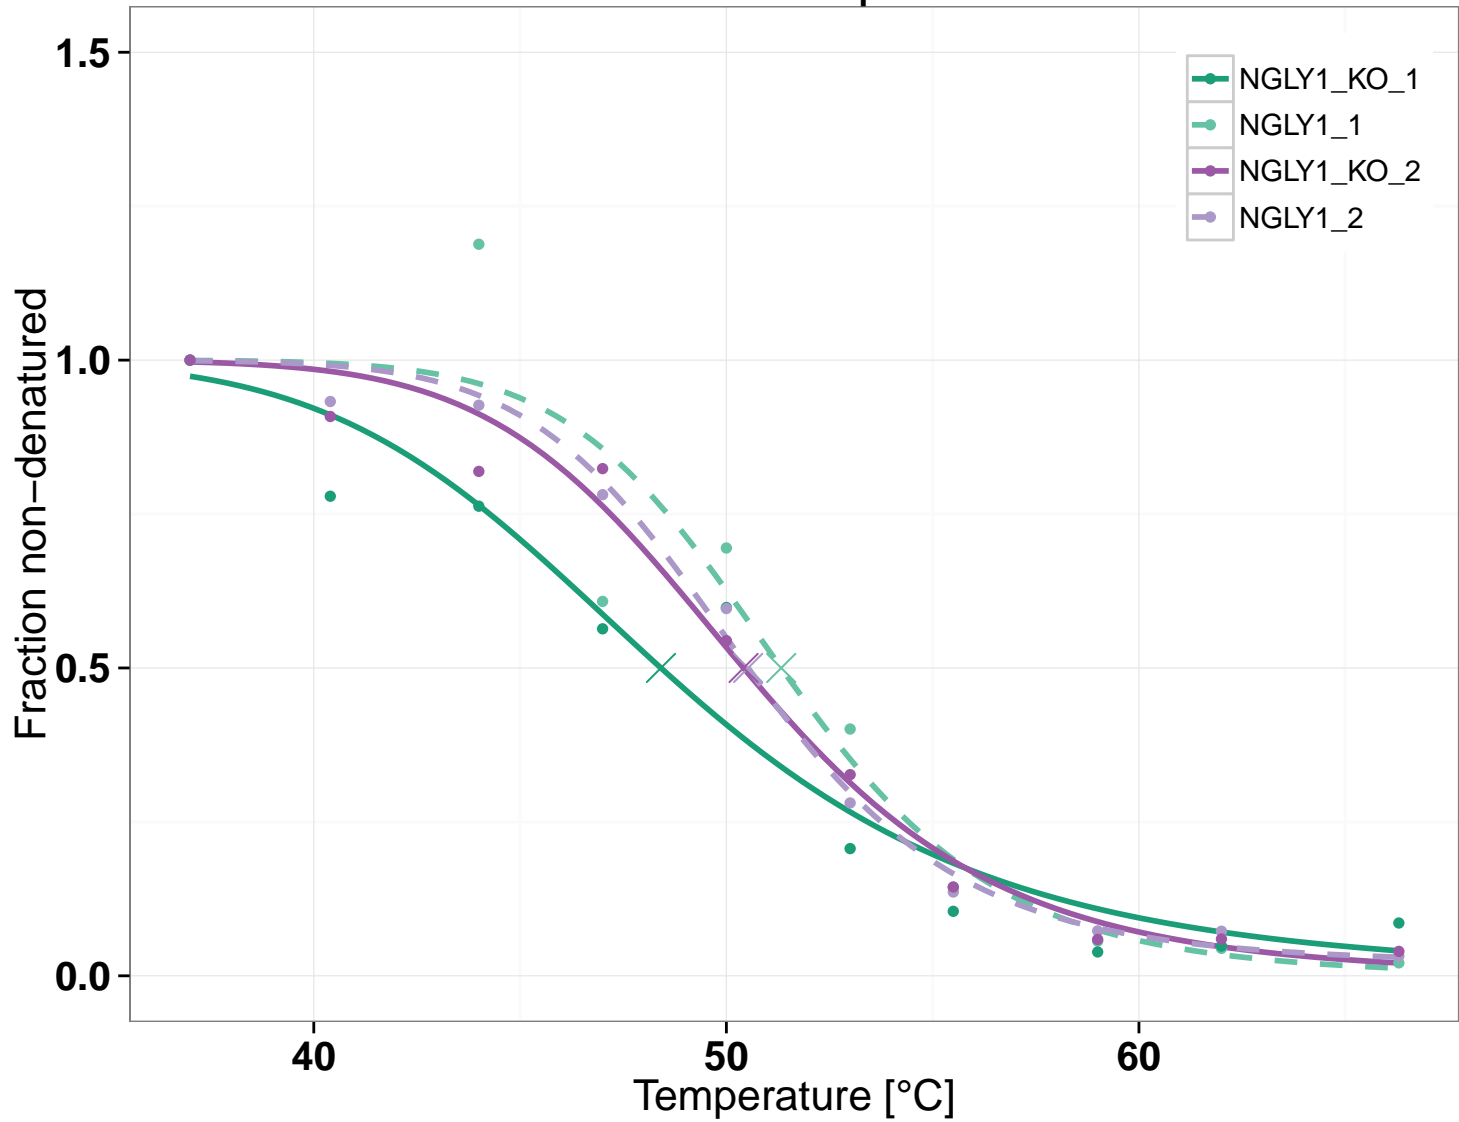

|            | meltPoint | slope  | plateau | R2   |
|------------|-----------|--------|---------|------|
| NGLY1_KO_1 | 48.41     | -0.062 | 0       | 0.94 |
| NGLY1_1    | 51.33     | -0.095 | 0       | 0.84 |
| NGLY1_KO_2 | 50.42     | -0.081 | 0       | 0.98 |
| NGLY1_2    | 50.53     | -0.094 | 0.02    | 0.99 |

Supplement: Supplementary file 3242 [file 1]

IPI00465170.1|NT5DC3

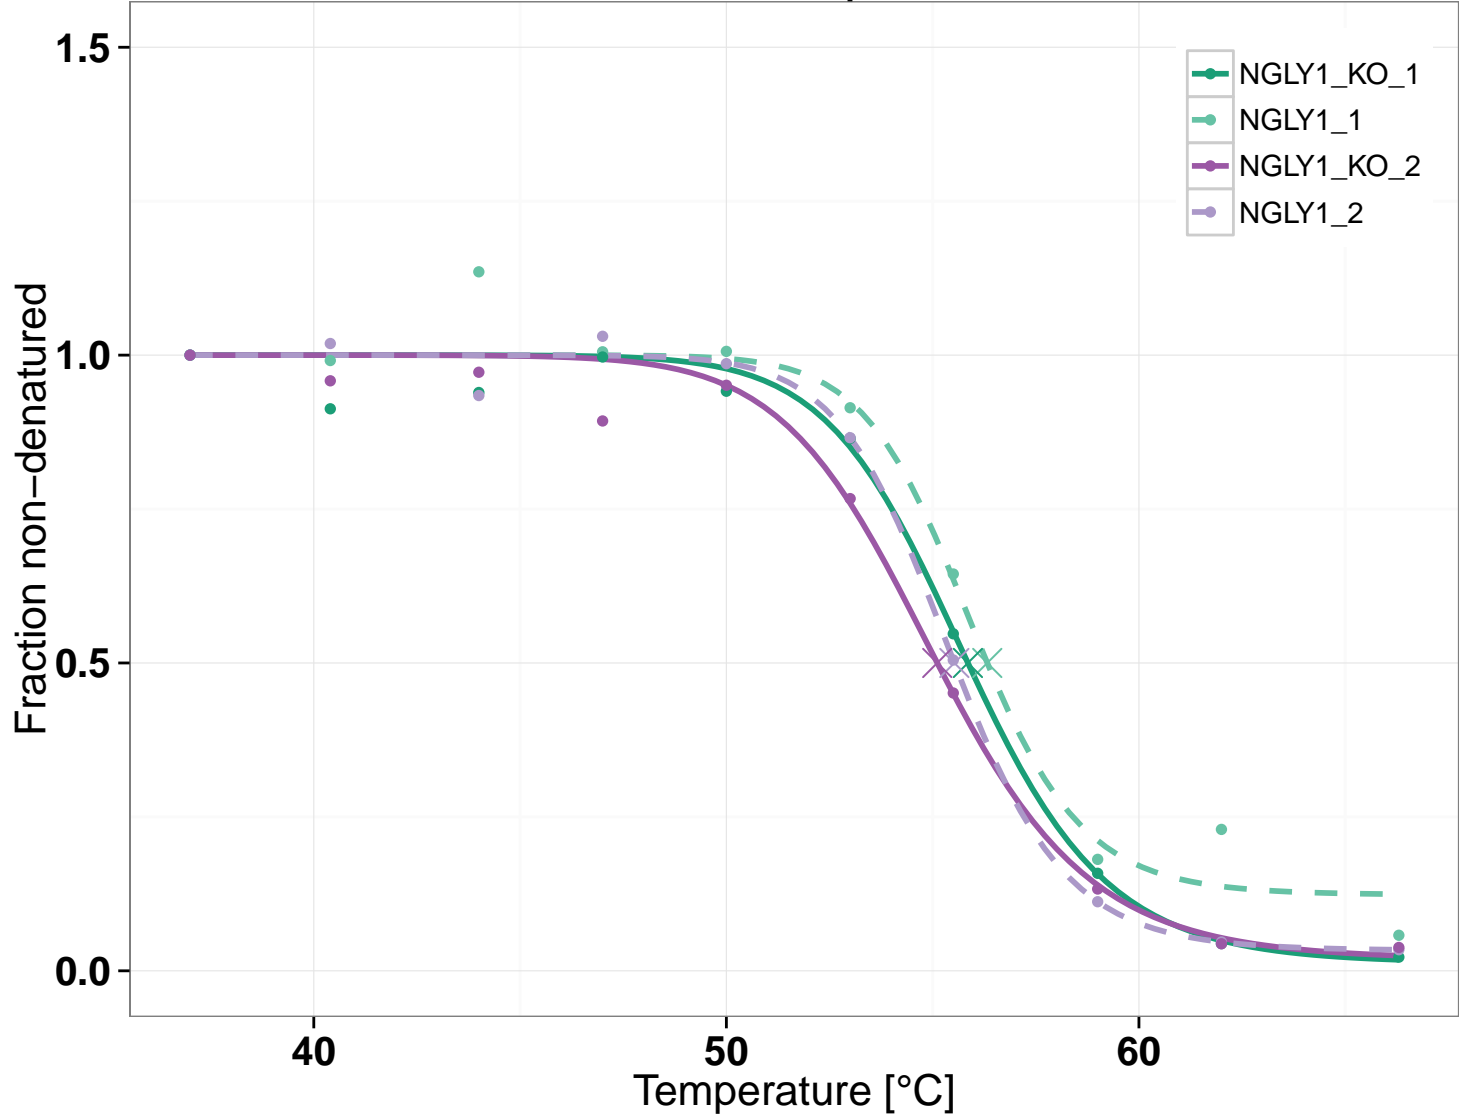

|            | meltPoint | slope | plateau | R2   |
|------------|-----------|-------|---------|------|
| NGLY1_KO_1 | 55.85     | -0.14 | 0.01    | 0.99 |
| NGLY1_1    | 56.32     | -0.17 | 0.12    | 0.98 |
| NGLY1_KO_2 | 55.11     | -0.13 | 0.02    | 0.99 |
| NGLY1_2    | 55.53     | -0.17 | 0.03    | 1    |

Supplement: Supplementary file 3243 [file 1]

IPI00009328.4|EIF4A3

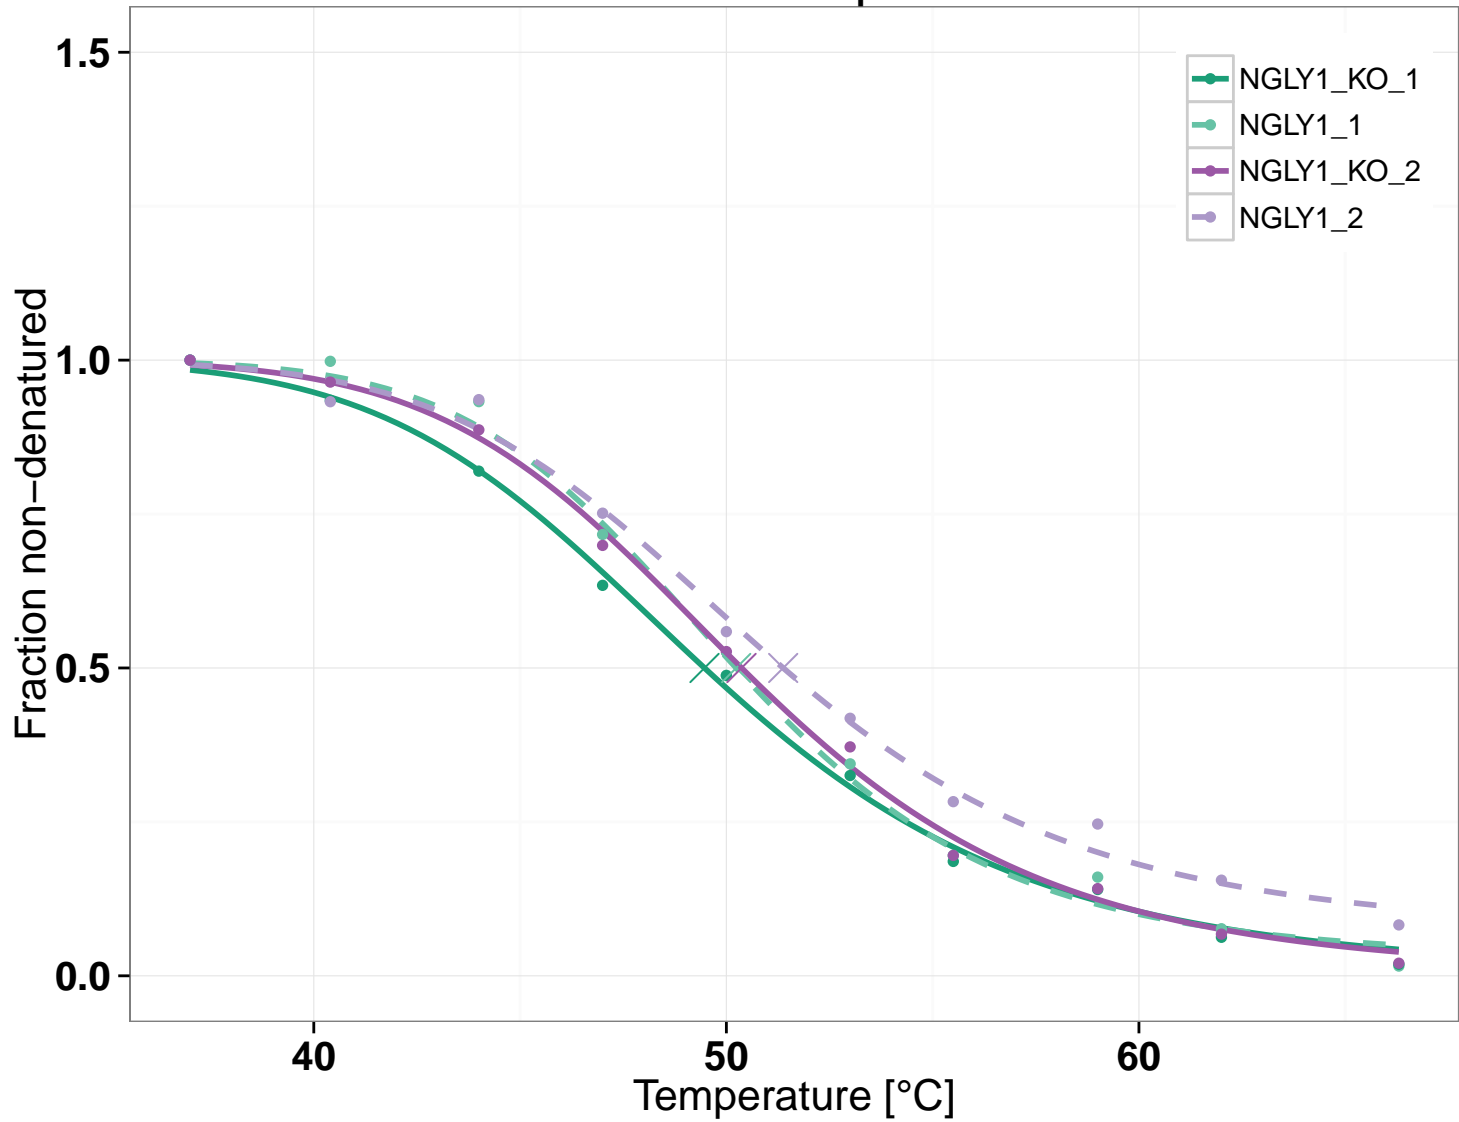

|            | meltPoint | slope  | plateau | R2   |
|------------|-----------|--------|---------|------|
| NGLY1_KO_1 | 49.47     | -0.063 | 0       | 1    |
| NGLY1_1    | 50.24     | -0.075 | 0.03    | 0.99 |
| NGLY1_KO_2 | 50.37     | -0.068 | 0       | 1    |
| NGLY1_2    | 51.38     | -0.061 | 0.07    | 0.99 |

Supplement: Supplementary file 3244 [file 1]

IPI00152959.2|MFSD1

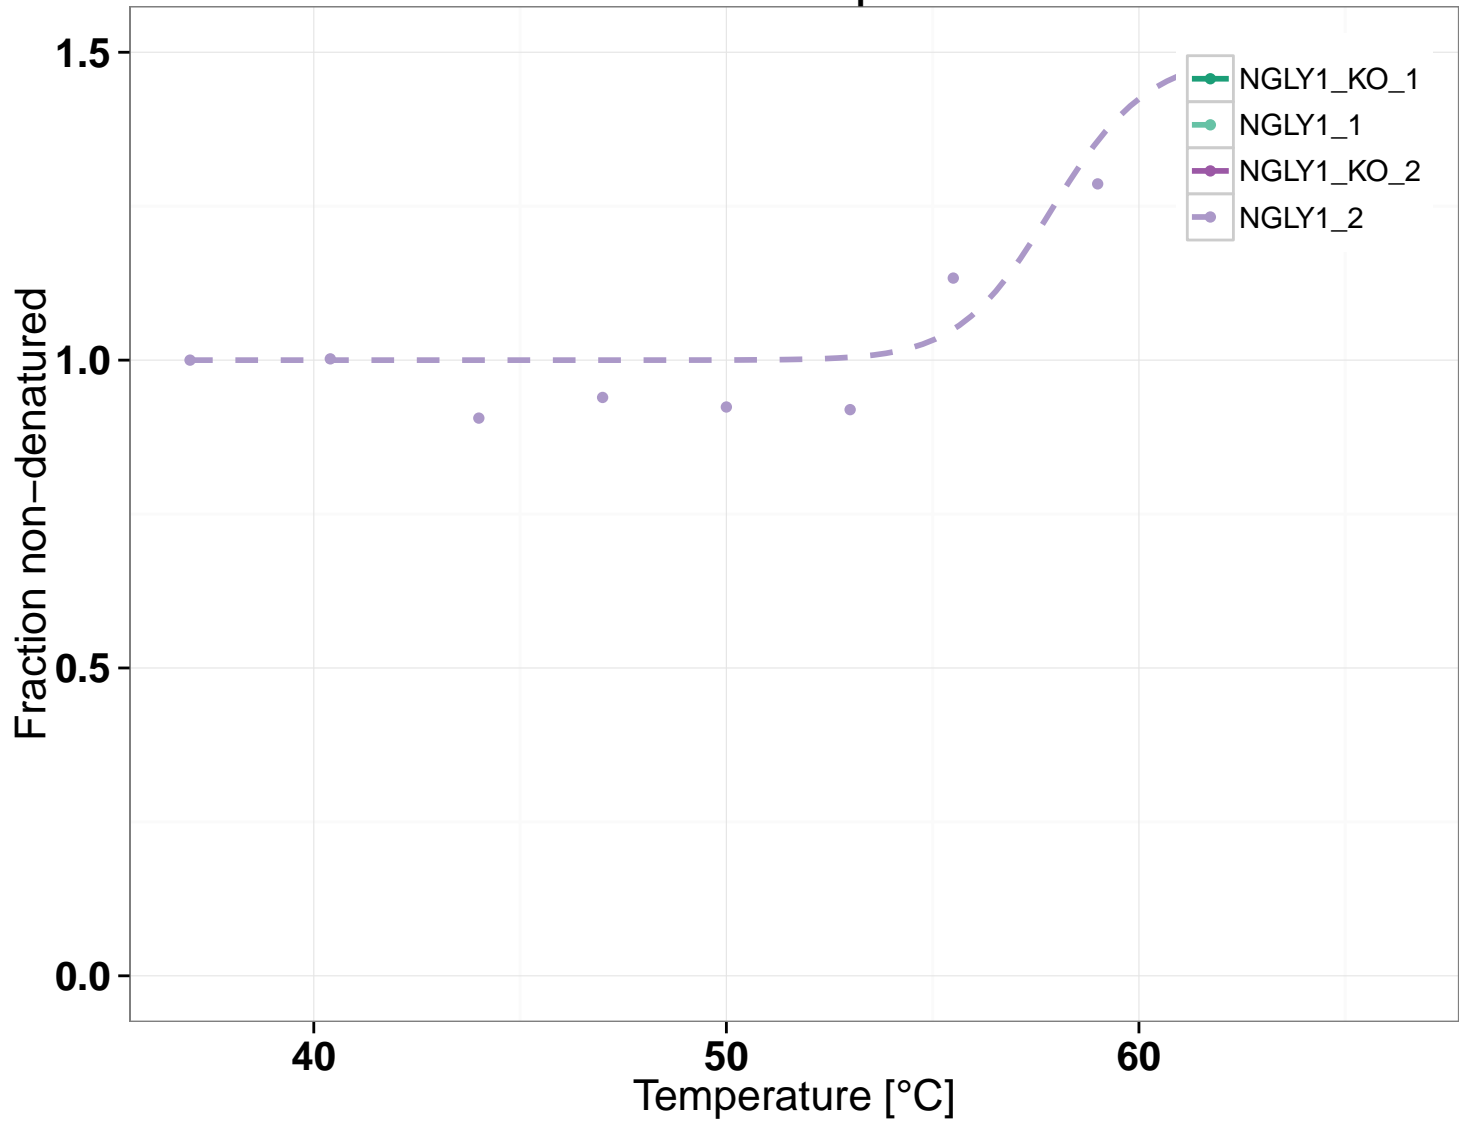

|            | meltPoint | slope | plateau | R2   |
|------------|-----------|-------|---------|------|
| NGLY1_KO_1 | -         | -     | -       | -    |
| NGLY1_1    | -         | -     | -       | -    |
| NGLY1_KO_2 | -         | -     | -       | -    |
| NGLY1_2    | -         | 0.11  | 1.5     | 0.88 |

Supplement: Supplementary file 3245 [file 1]

IPI00172591.5|MRPL17

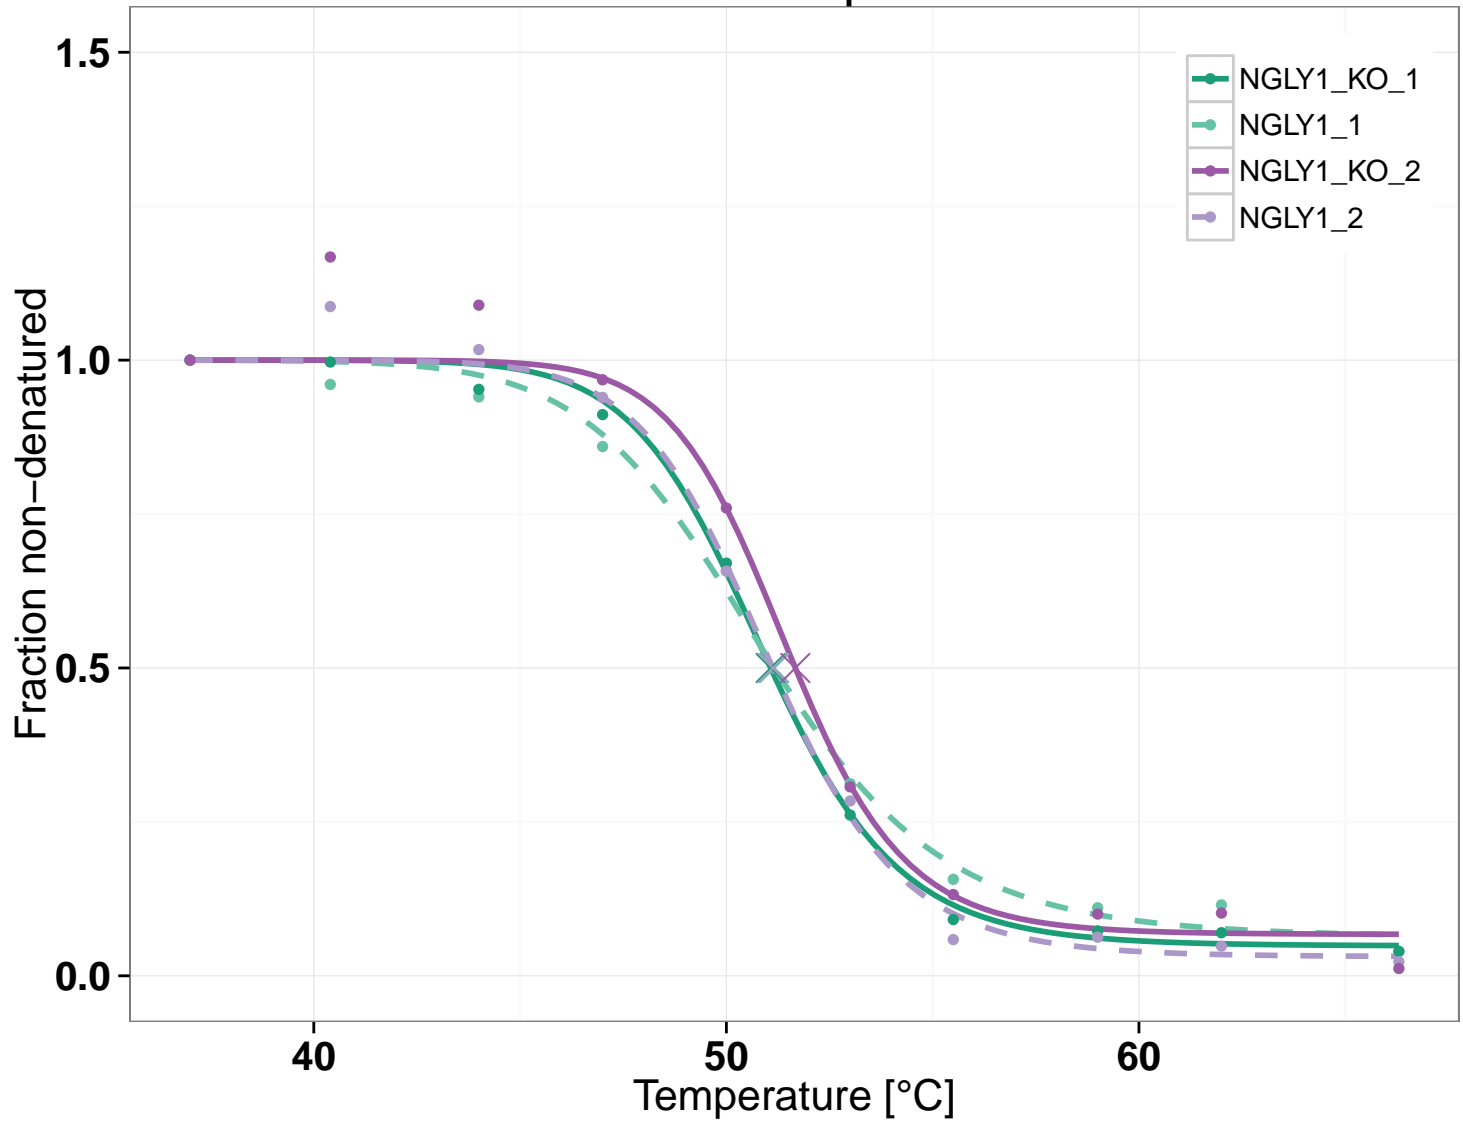

|            | meltPoint | slope | plateau | R2   |
|------------|-----------|-------|---------|------|
| NGLY1_KO_1 | 51.07     | -0.15 | 0.05    | 1    |
| NGLY1_1    | 51.16     | -0.11 | 0.06    | 1    |
| NGLY1_KO_2 | 51.67     | -0.16 | 0.07    | 0.98 |
| NGLY1_2    | 51.13     | -0.15 | 0.03    | 0.99 |

Supplement: Supplementary file 3246 [file 1]

# IPI00744319.2|PRRC1

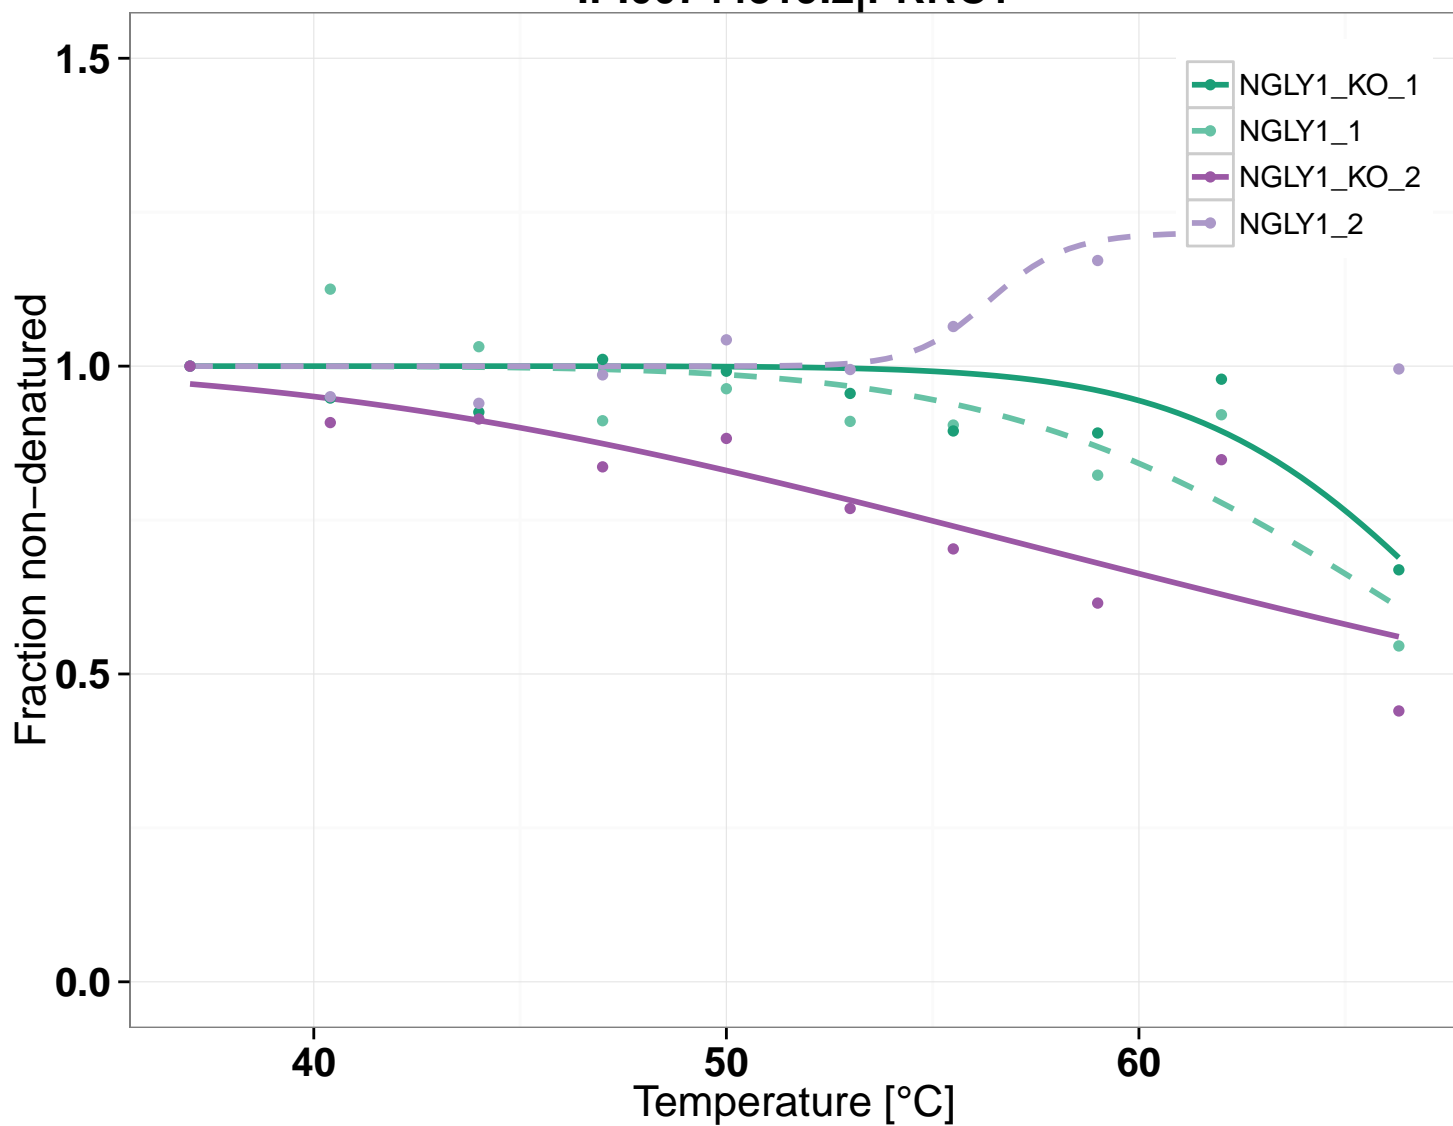

|            | meltPoint | slope  | plateau | R2   |
|------------|-----------|--------|---------|------|
| NGLY1_KO_1 | –         | –      | 0       | 0.65 |
| NGLY1_1    | –         | –      | 0       | 0.74 |
| NGLY1_KO_2 | –         | –0.017 | 0       | 0.7  |
| NGLY1_2    | –         | 0.058  | 1.22    | 0.45 |

Supplement: Supplementary file 3247 [file 1]

IPI00856098.1|RRBP1

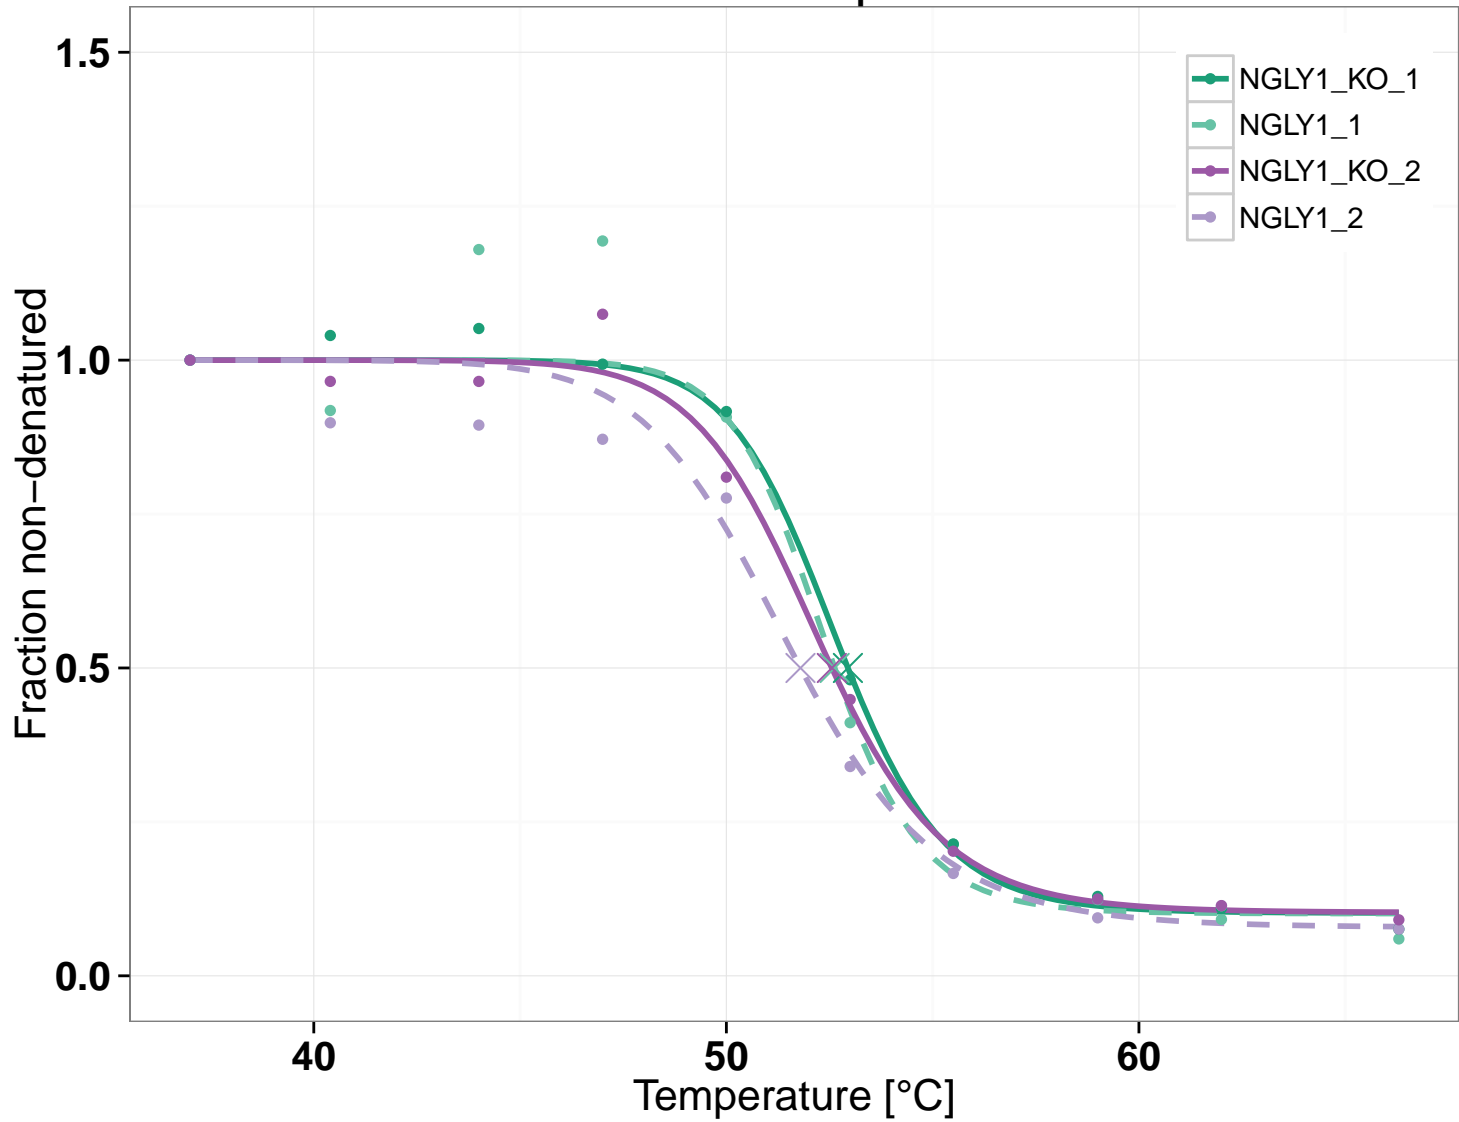

|            | meltPoint | slope | plateau | R2   |
|------------|-----------|-------|---------|------|
| NGLY1_KO_1 | 52.95     | -0.17 | 0.1     | 1    |
| NGLY1_1    | 52.62     | -0.2  | 0.1     | 0.96 |
| NGLY1_KO_2 | 52.56     | -0.15 | 0.1     | 0.99 |
| NGLY1_2    | 51.8      | -0.13 | 0.08    | 0.98 |

Supplement: Supplementary file 3248 [file 1]

IPI00002895.1|SUPT4H1

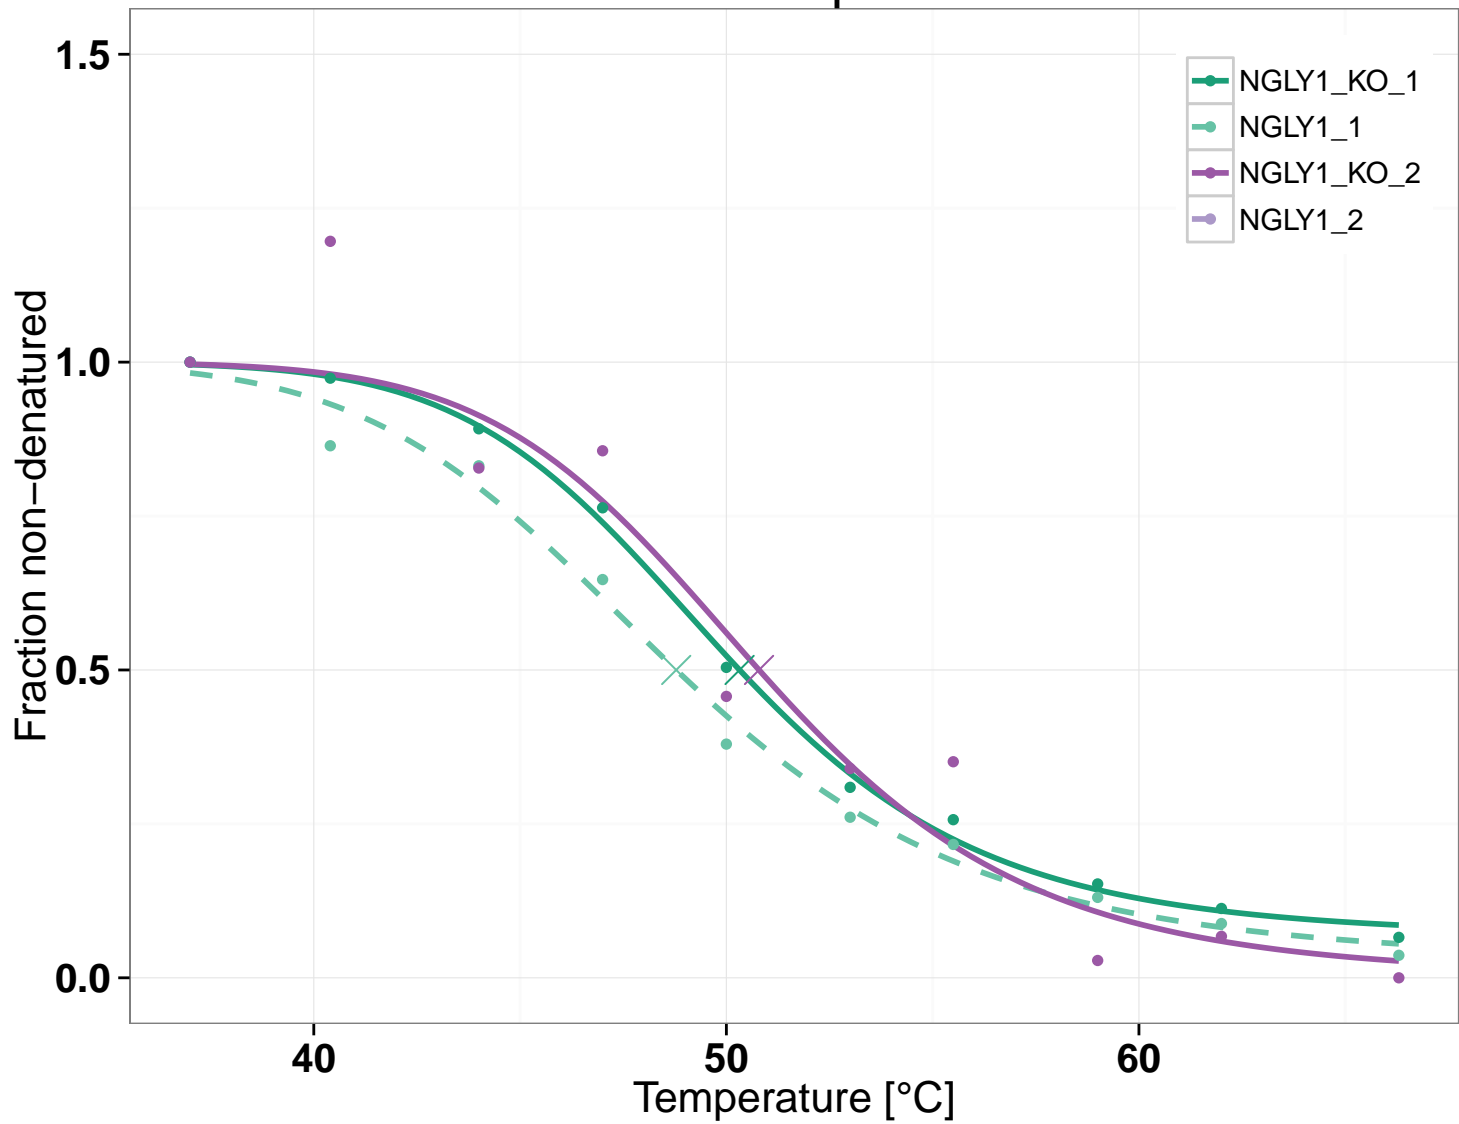

|            | meltPoint | slope  | plateau | R2   |
|------------|-----------|--------|---------|------|
| NGLY1_KO_1 | 50.32     | -0.074 | 0.07    | 1    |
| NGLY1_1    | 48.78     | -0.066 | 0.02    | 0.99 |
| NGLY1_KO_2 | 50.79     | -0.076 | 0       | 0.94 |
| NGLY1_2    | -         | -      | -       | -    |

Supplement: Supplementary file 3249 [file 1]

IPI00171445.1|ATAD1

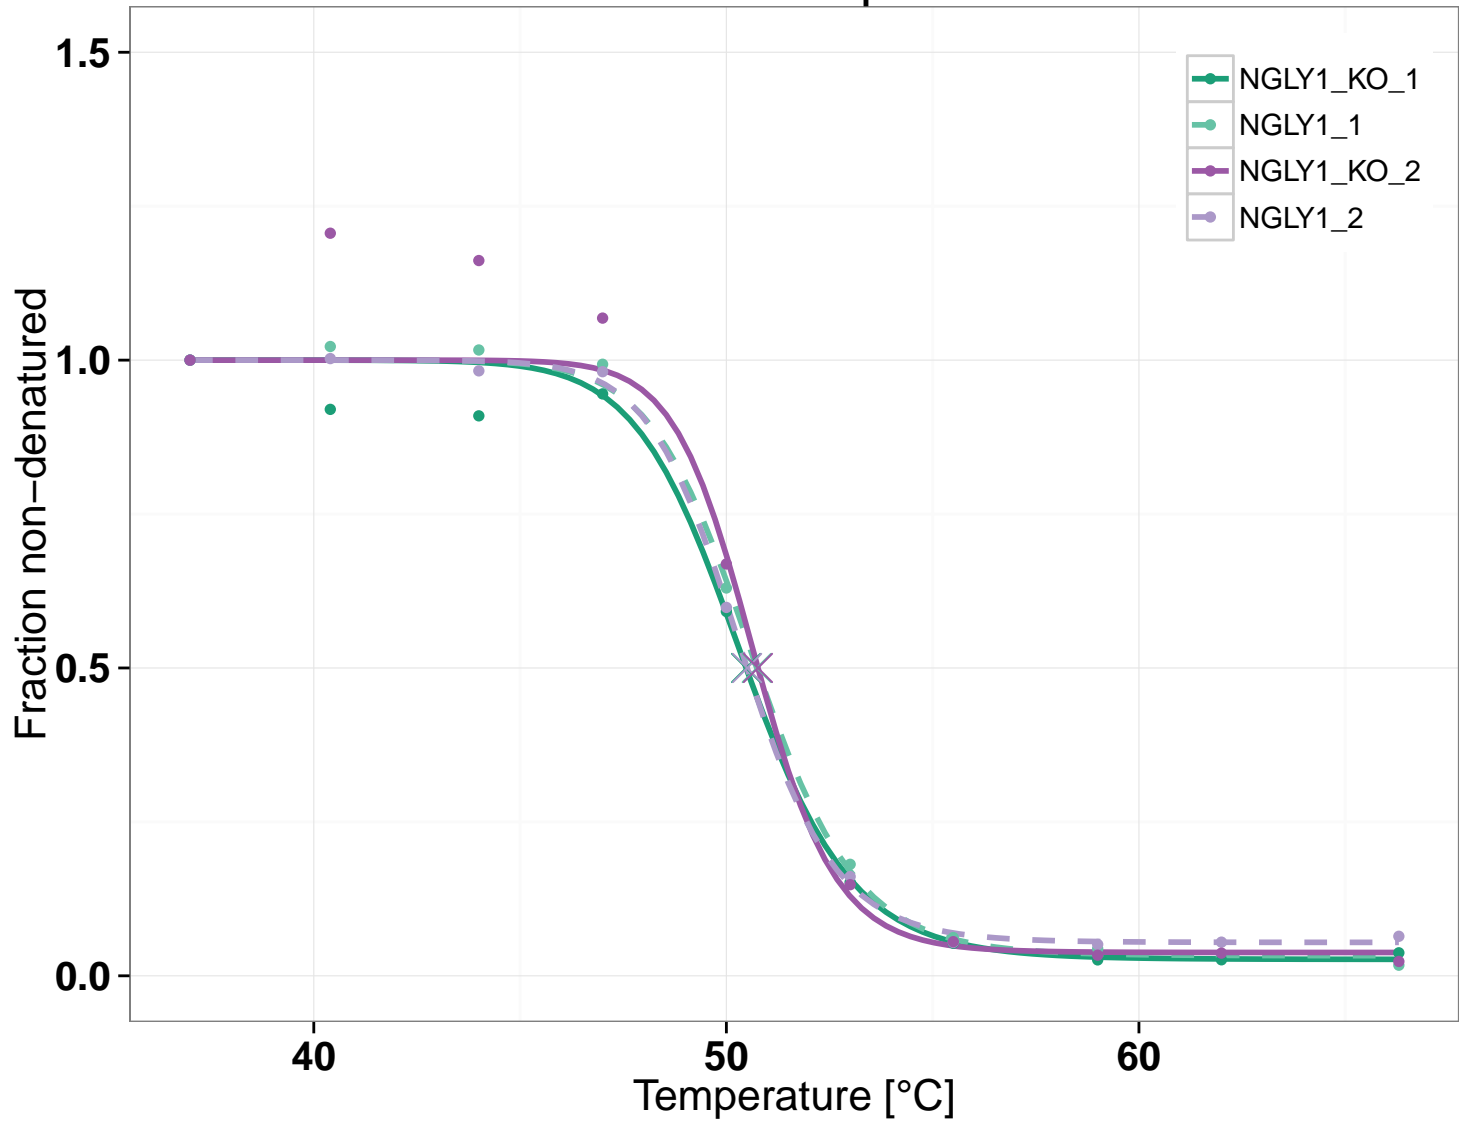

|            | meltPoint | slope | plateau | R2   |
|------------|-----------|-------|---------|------|
| NGLY1_KO_1 | 50.48     | -0.19 | 0.03    | 0.99 |
| NGLY1_1    | 50.74     | -0.19 | 0.03    | 1    |
| NGLY1_KO_2 | 50.77     | -0.25 | 0.04    | 0.97 |
| NGLY1_2    | 50.5      | -0.21 | 0.05    | 1    |

Supplement: Supplementary file 3250 [file 1]

IPI00005163.3|ARL15

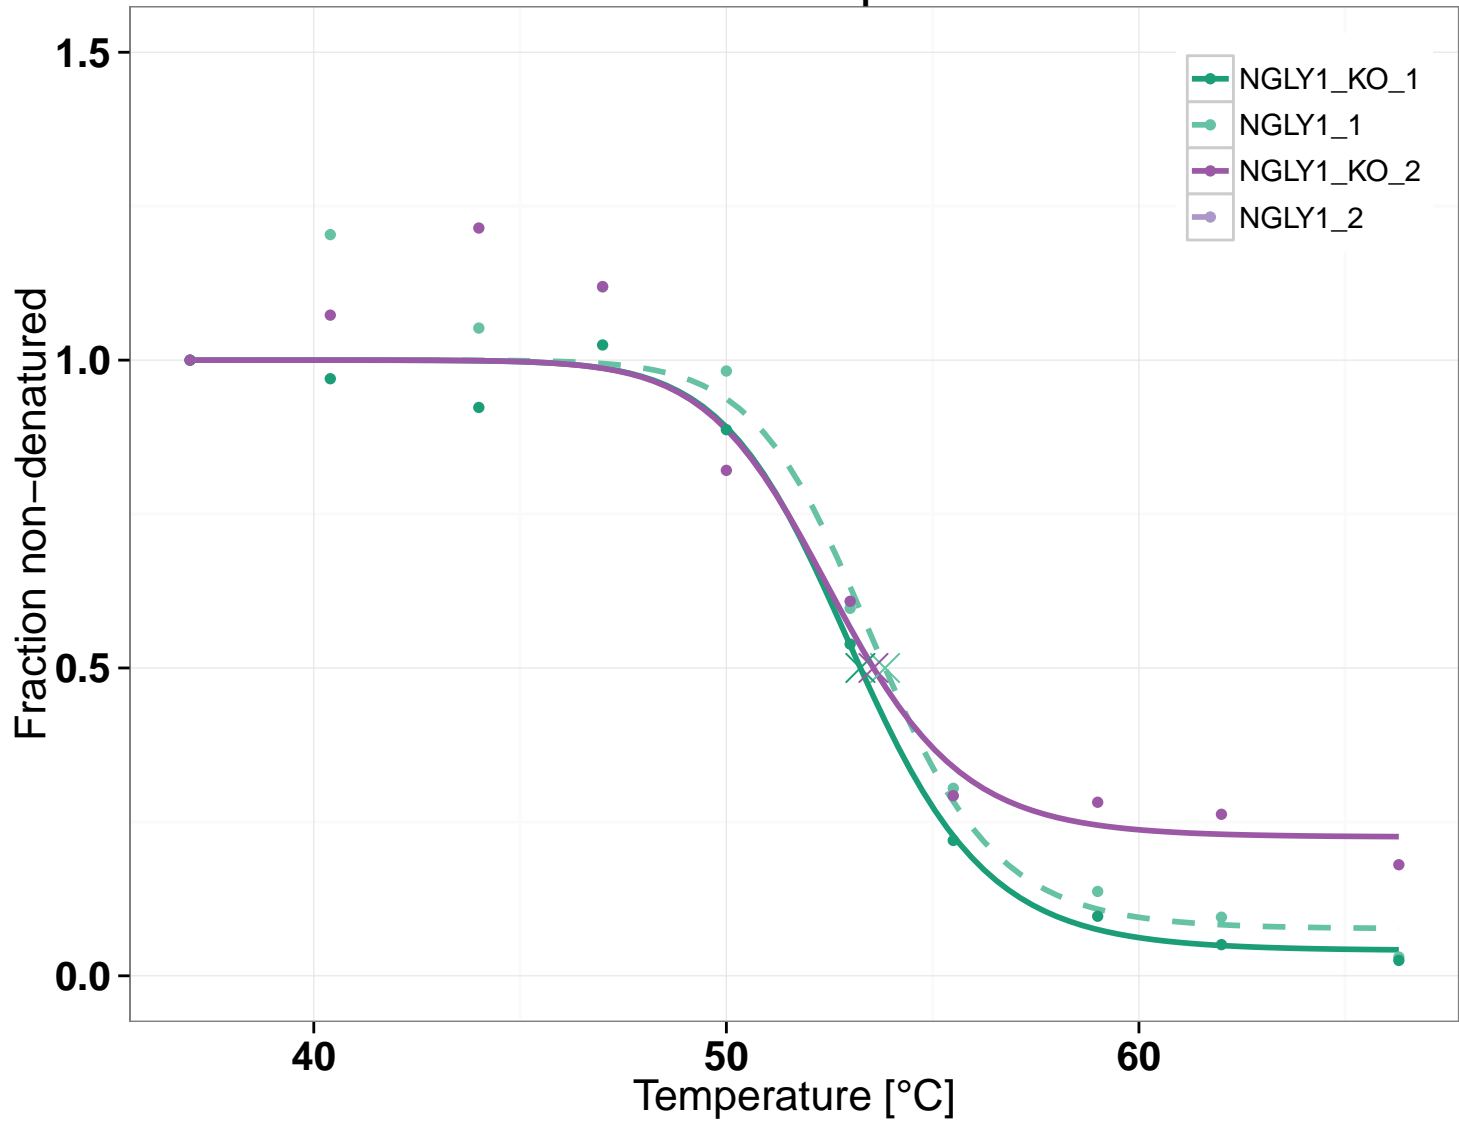

|            | meltPoint | slope | plateau | R2   |
|------------|-----------|-------|---------|------|
| NGLY1_KO_1 | 53.25     | -0.15 | 0.04    | 0.99 |
| NGLY1_1    | 53.85     | -0.16 | 0.08    | 0.97 |
| NGLY1_KO_2 | 53.56     | -0.13 | 0.23    | 0.94 |
| NGLY1_2    | -         | -     | -       | -    |

Supplement: Supplementary file 3251 [file 1]

IPI00102575.4|ATAD5

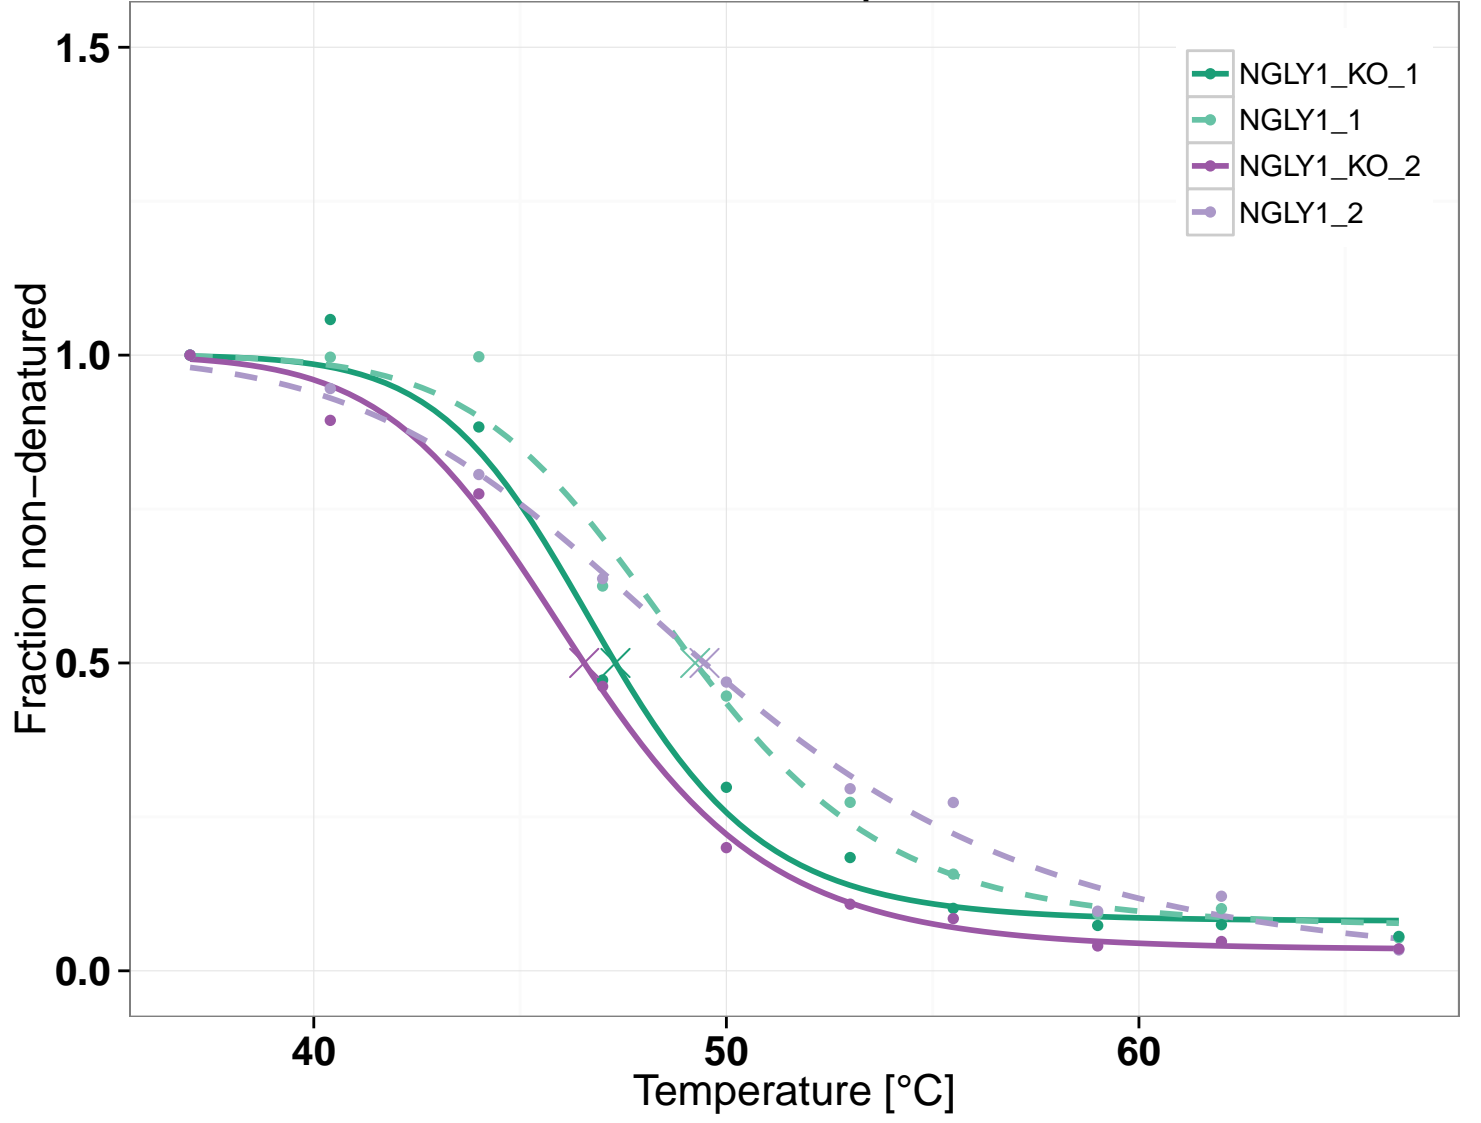

|            | meltPoint | slope  | plateau | R2   |
|------------|-----------|--------|---------|------|
| NGLY1_KO_1 | 47.31     | -0.12  | 0.08    | 0.99 |
| NGLY1_1    | 49.24     | -0.092 | 0.07    | 0.99 |
| NGLY1_KO_2 | 46.55     | -0.1   | 0.03    | 1    |
| NGLY1_2    | 49.47     | -0.06  | 0       | 0.99 |

Supplement: Supplementary file 3252 [file 1]

# IPI00333197.4|GCC2

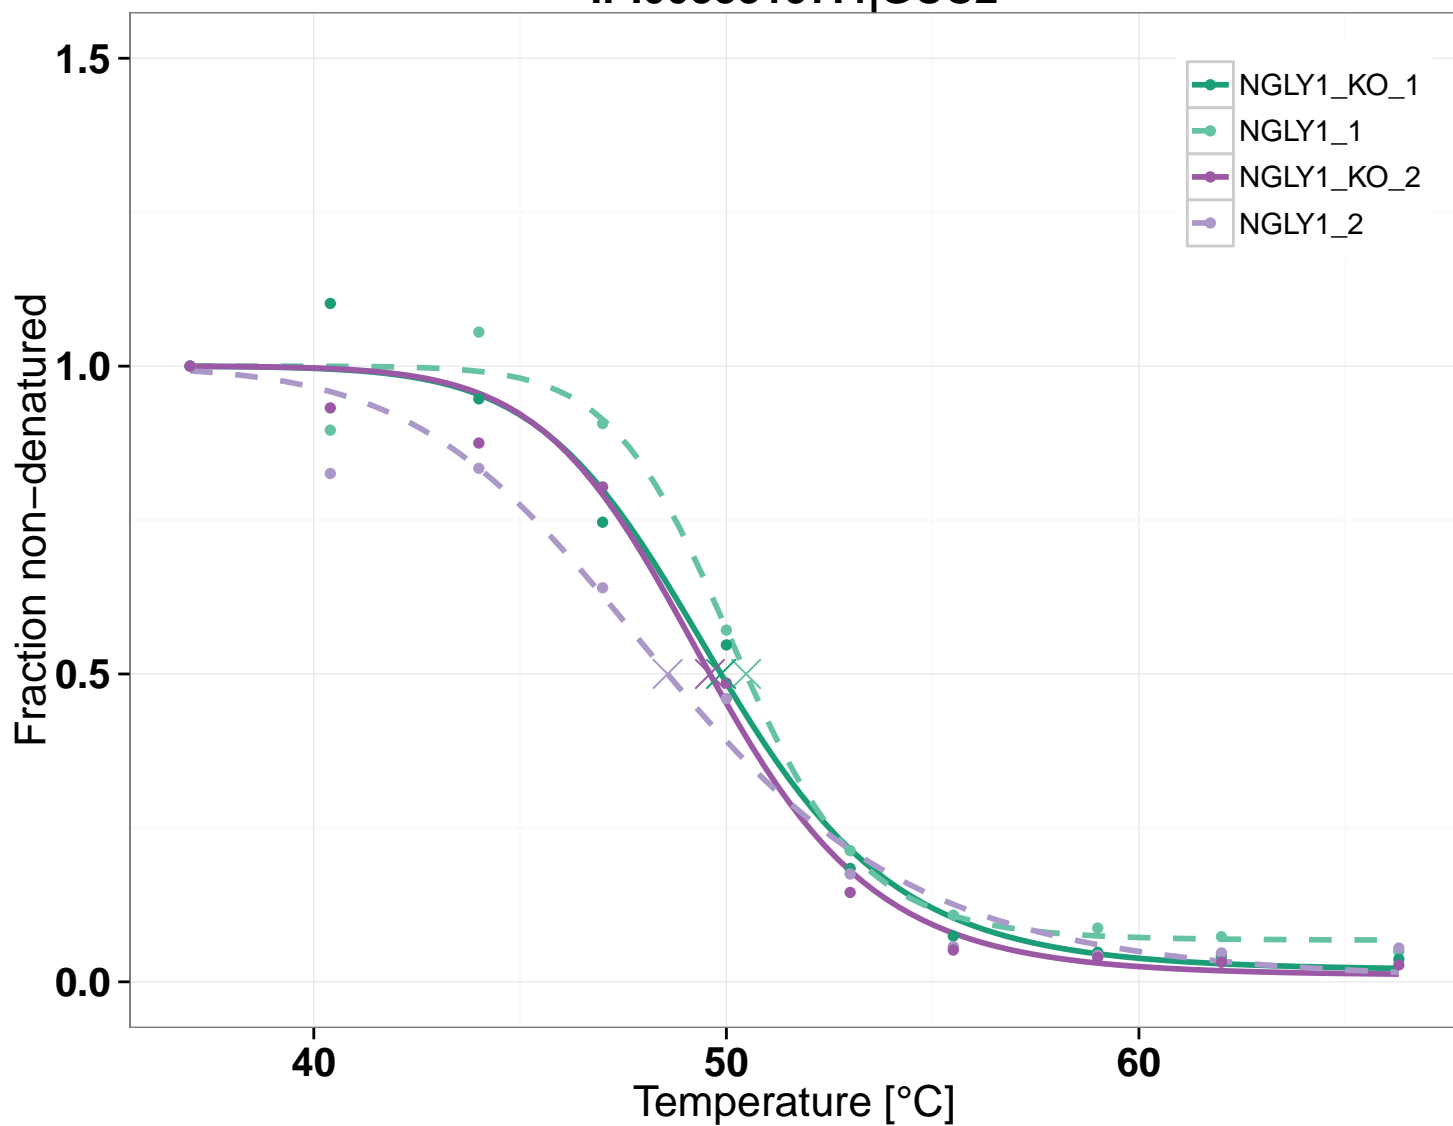

|            | meltPoint | slope  | plateau | R2   |
|------------|-----------|--------|---------|------|
| NGLY1_KO_1 | 49.87     | -0.11  | 0.02    | 0.99 |
| NGLY1_1    | 50.48     | -0.15  | 0.07    | 0.99 |
| NGLY1_KO_2 | 49.6      | -0.12  | 0.01    | 0.99 |
| NGLY1_2    | 48.58     | -0.081 | 0       | 0.98 |

Supplement: Supplementary file 3253 [file 1]

IPI00008437.7|C15ORF15

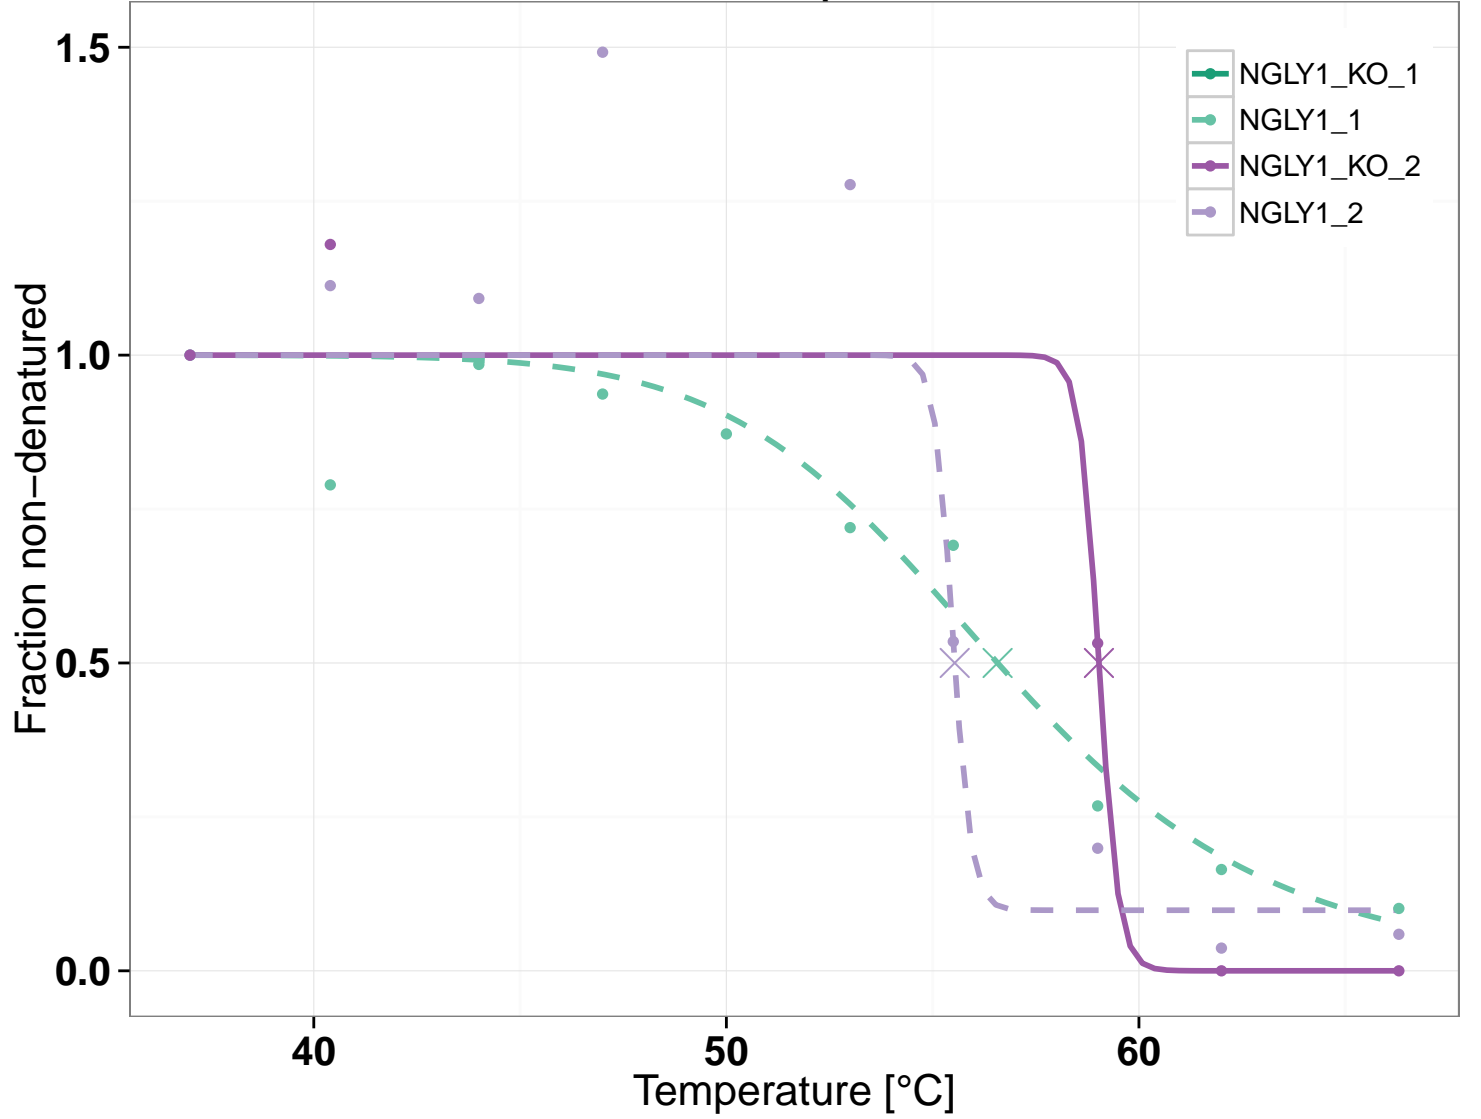

|            | meltPoint | slope  | plateau | R2   |
|------------|-----------|--------|---------|------|
| NGLY1_KO_1 | -         | -      | -       | -    |
| NGLY1_1    | 56.57     | -0.076 | 0       | 0.94 |
| NGLY1_KO_2 | 59.03     | -1.1   | 0       | -0.4 |
| NGLY1_2    | 55.53     | -1     | 0.1     | 0.68 |

Supplement: Supplementary file 3254 [file 1]

# IPI00021812.2|AHNAK

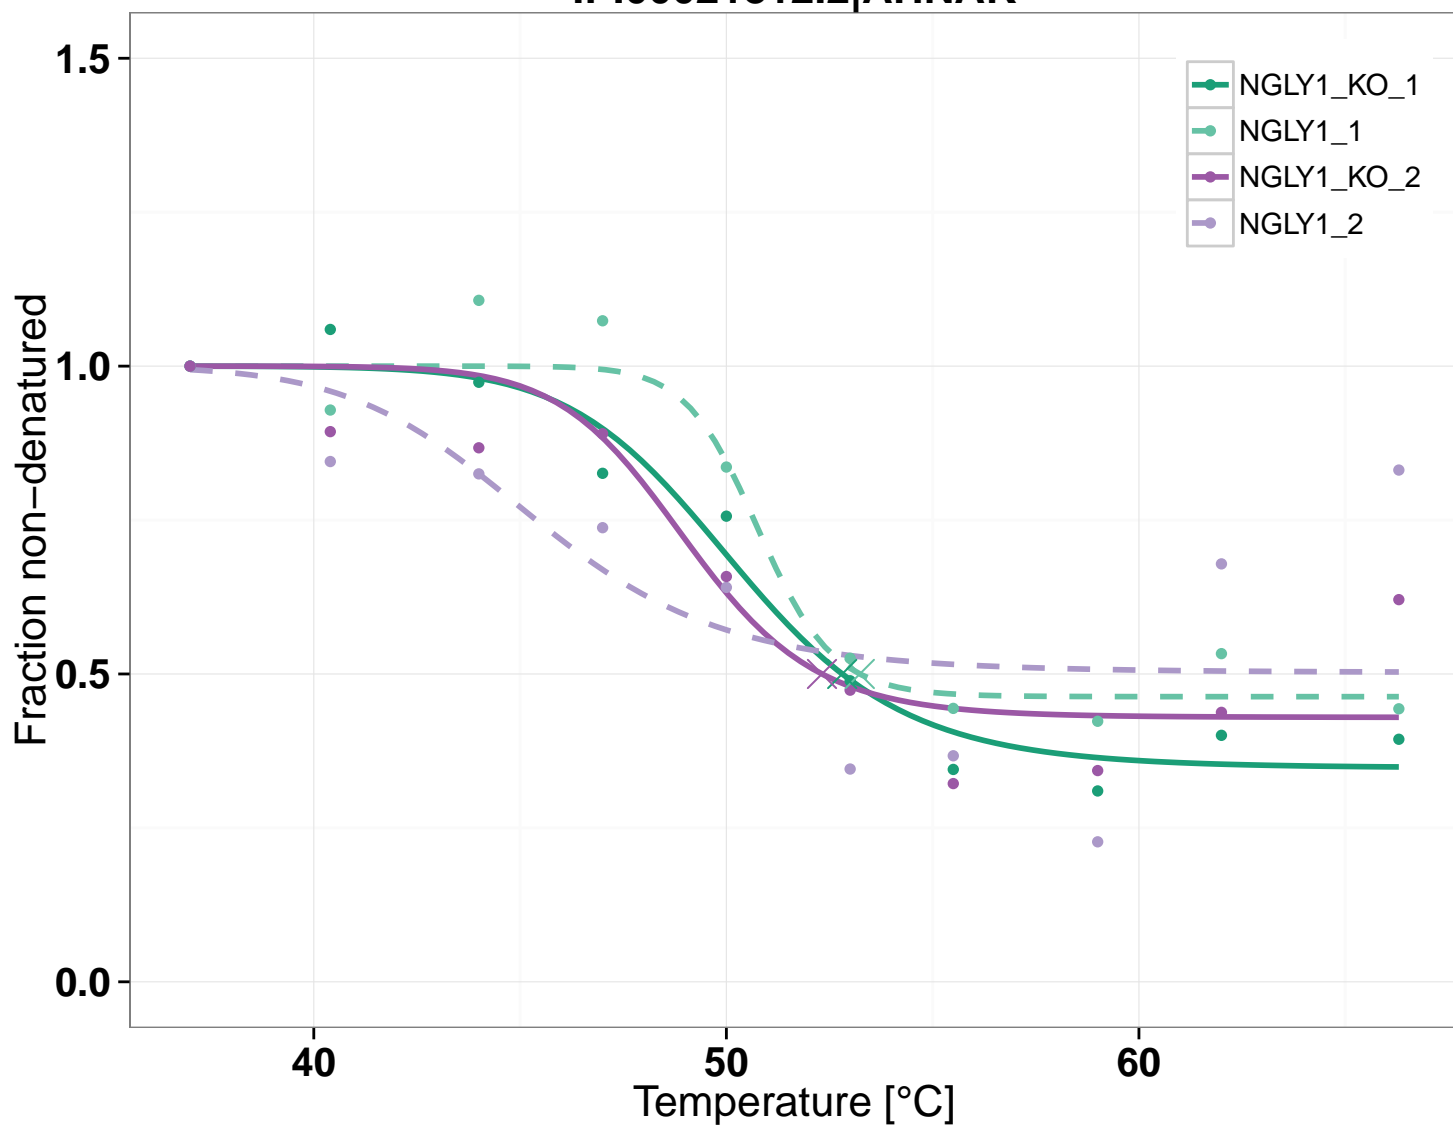

|            | meltPoint | slope  | plateau | R2   |
|------------|-----------|--------|---------|------|
| NGLY1_KO_1 | 52.81     | -0.08  | 0.35    | 0.97 |
| NGLY1_1    | 53.23     | -0.15  | 0.46    | 0.96 |
| NGLY1_KO_2 | 52.32     | -0.091 | 0.43    | 0.85 |
| NGLY1_2    | -         | -0.054 | 0.5     | 0.5  |

Supplement: Supplementary file 3255 [file 1]

# IPI00152863.4|SMCR8

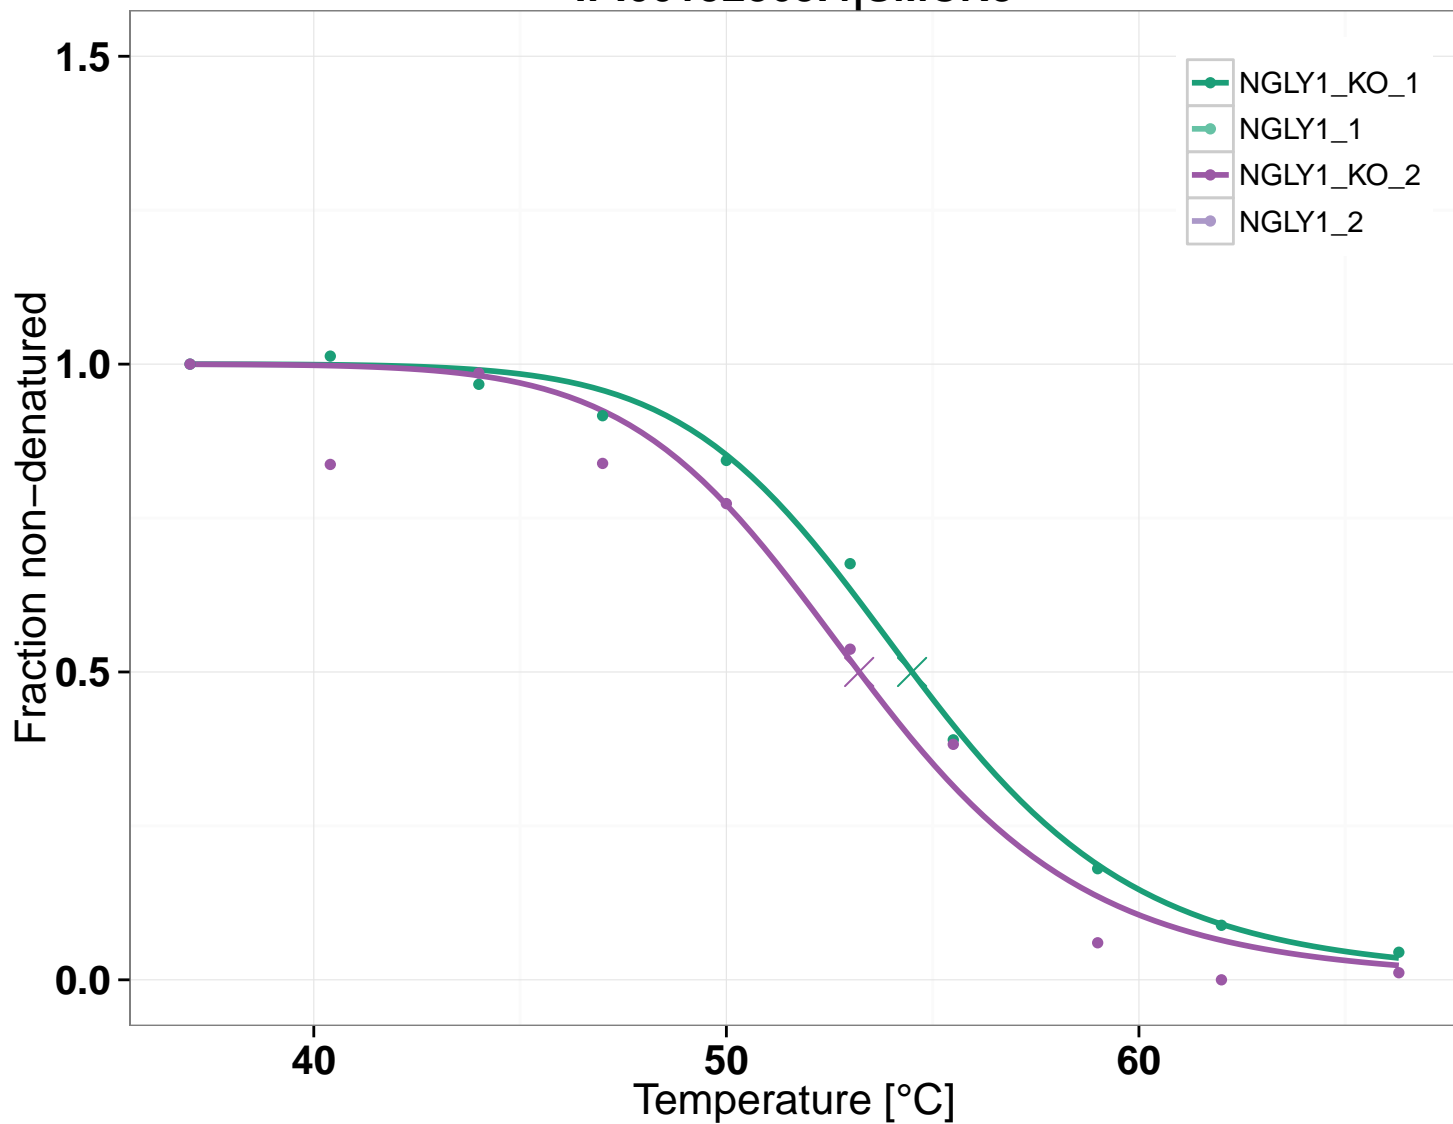

|            | meltPoint | slope | plateau | R2   |
|------------|-----------|-------|---------|------|
| NGLY1_KO_1 | 54.5      | -0.09 | 0.01    | 1    |
| NGLY1_1    | -         | -     | -       | -    |
| NGLY1_KO_2 | 53.22     | -0.09 | 0       | 0.97 |
| NGLY1_2    | -         | -     | -       | -    |

Supplement: Supplementary file 3256 [file 1]

IPI00164352.6|ZNF292

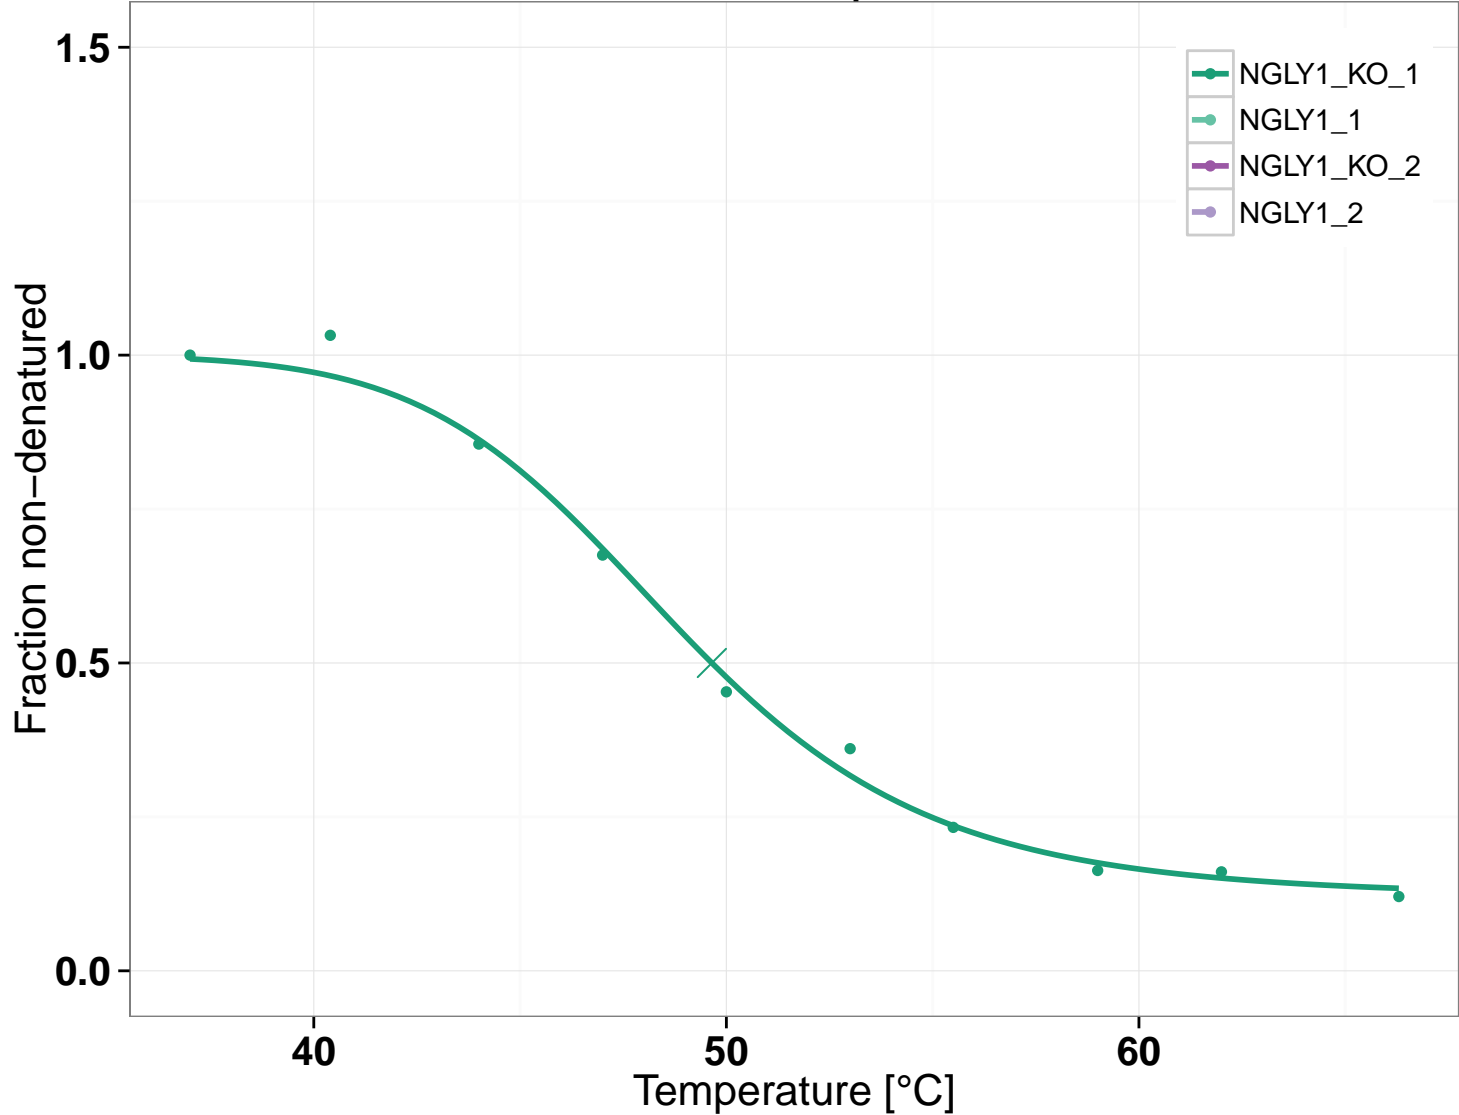

|            | meltPoint | slope  | plateau | R2   |
|------------|-----------|--------|---------|------|
| NGLY1_KO_1 | 49.65     | -0.071 | 0.12    | 0.99 |
| NGLY1_1    | -         | -      | -       | -    |
| NGLY1_KO_2 | -         | -      | -       | -    |
| NGLY1_2    | -         | -      | -       | -    |

Supplement: Supplementary file 3257 [file 1]

IPI00014515.3|PPP4R4

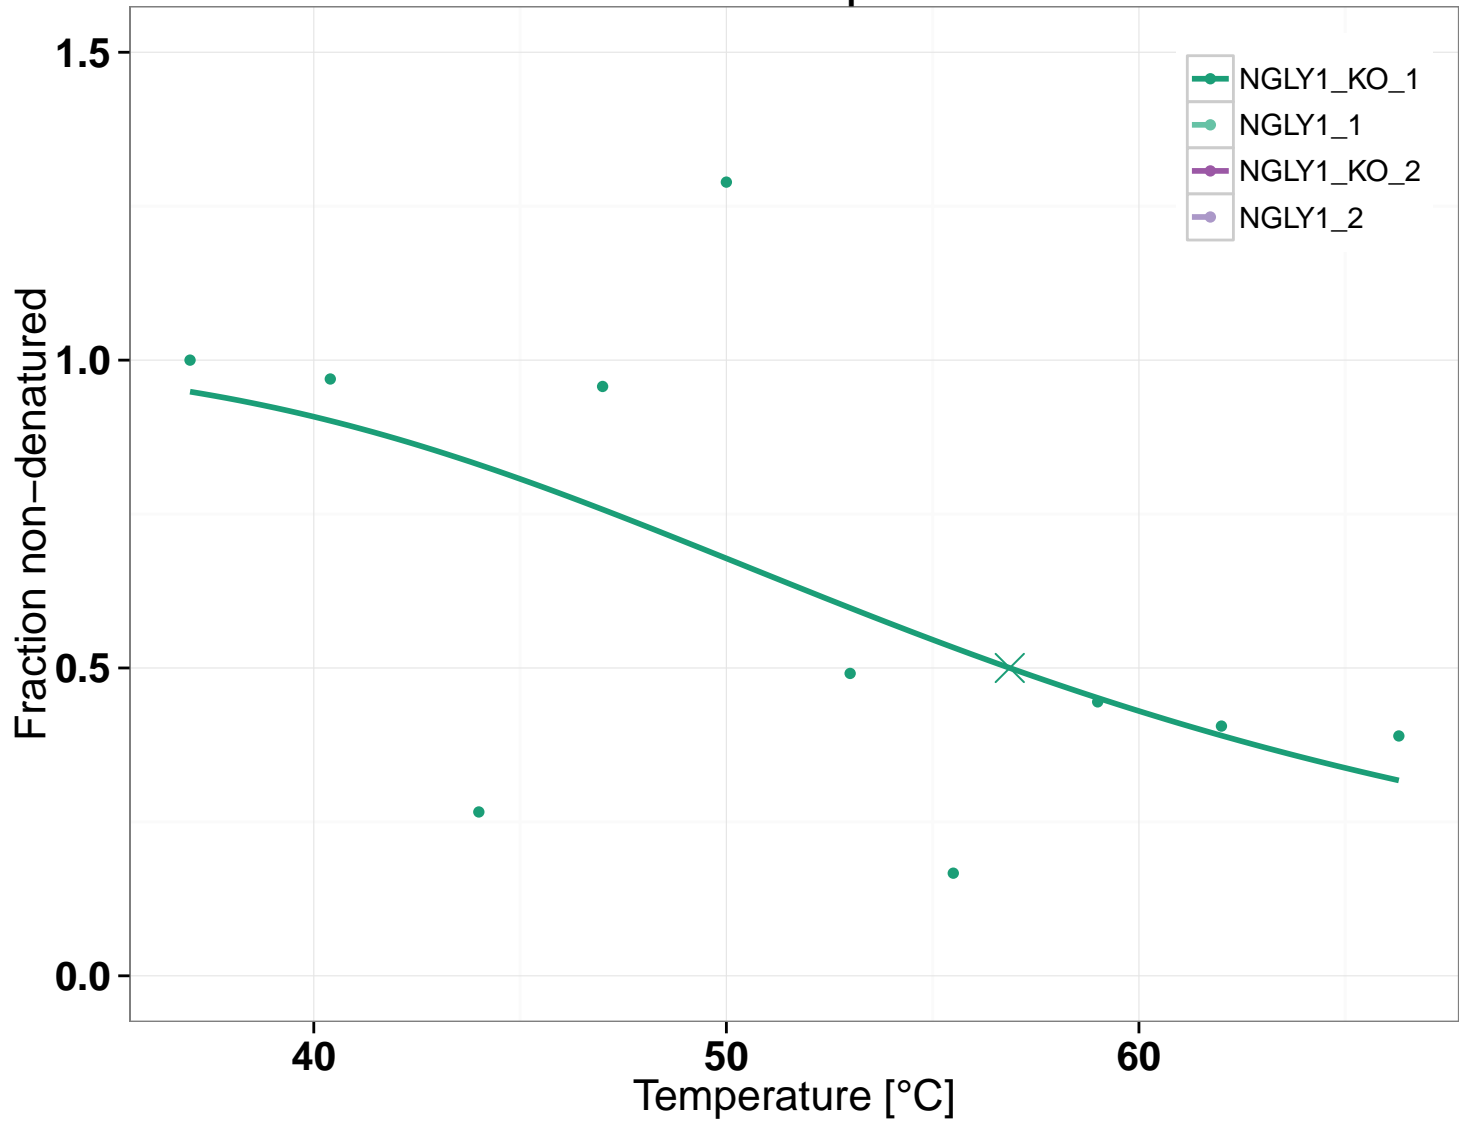

|            | meltPoint | slope  | plateau | R2   |
|------------|-----------|--------|---------|------|
| NGLY1_KO_1 | 56.87     | -0.027 | 0.01    | 0.32 |
| NGLY1_1    | -         | -      | -       | -    |
| NGLY1_KO_2 | -         | -      | -       | -    |
| NGLY1_2    | -         | -      | -       | -    |

Supplement: Supplementary file 3258 [file 1]

# IPI00397098.1|FAU

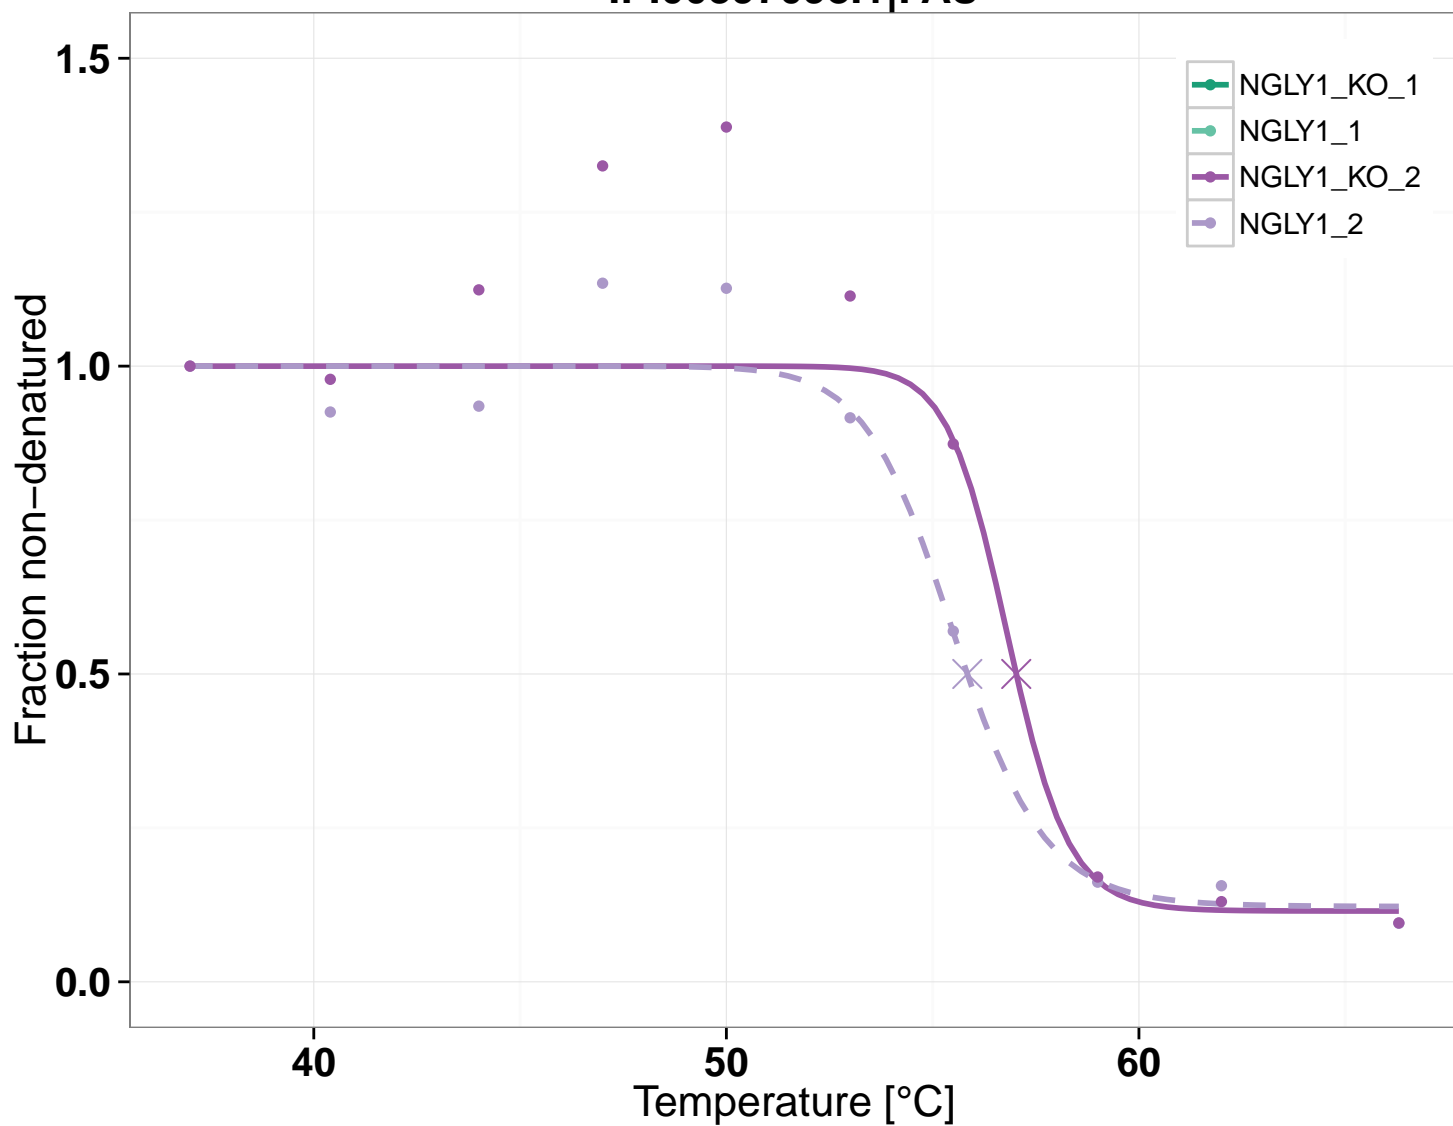

|            | meltPoint | slope | plateau | R2   |
|------------|-----------|-------|---------|------|
| NGLY1_KO_1 | —         | —     | —       | —    |
| NGLY1_1    | —         | —     | —       | —    |
| NGLY1_KO_2 | 57.03     | -0.3  | 0.11    | 0.87 |
| NGLY1_2    | 55.84     | -0.2  | 0.12    | 0.97 |

Supplement: Supplementary file 3259 [file 1]

IPI00640917.1|TBL1X

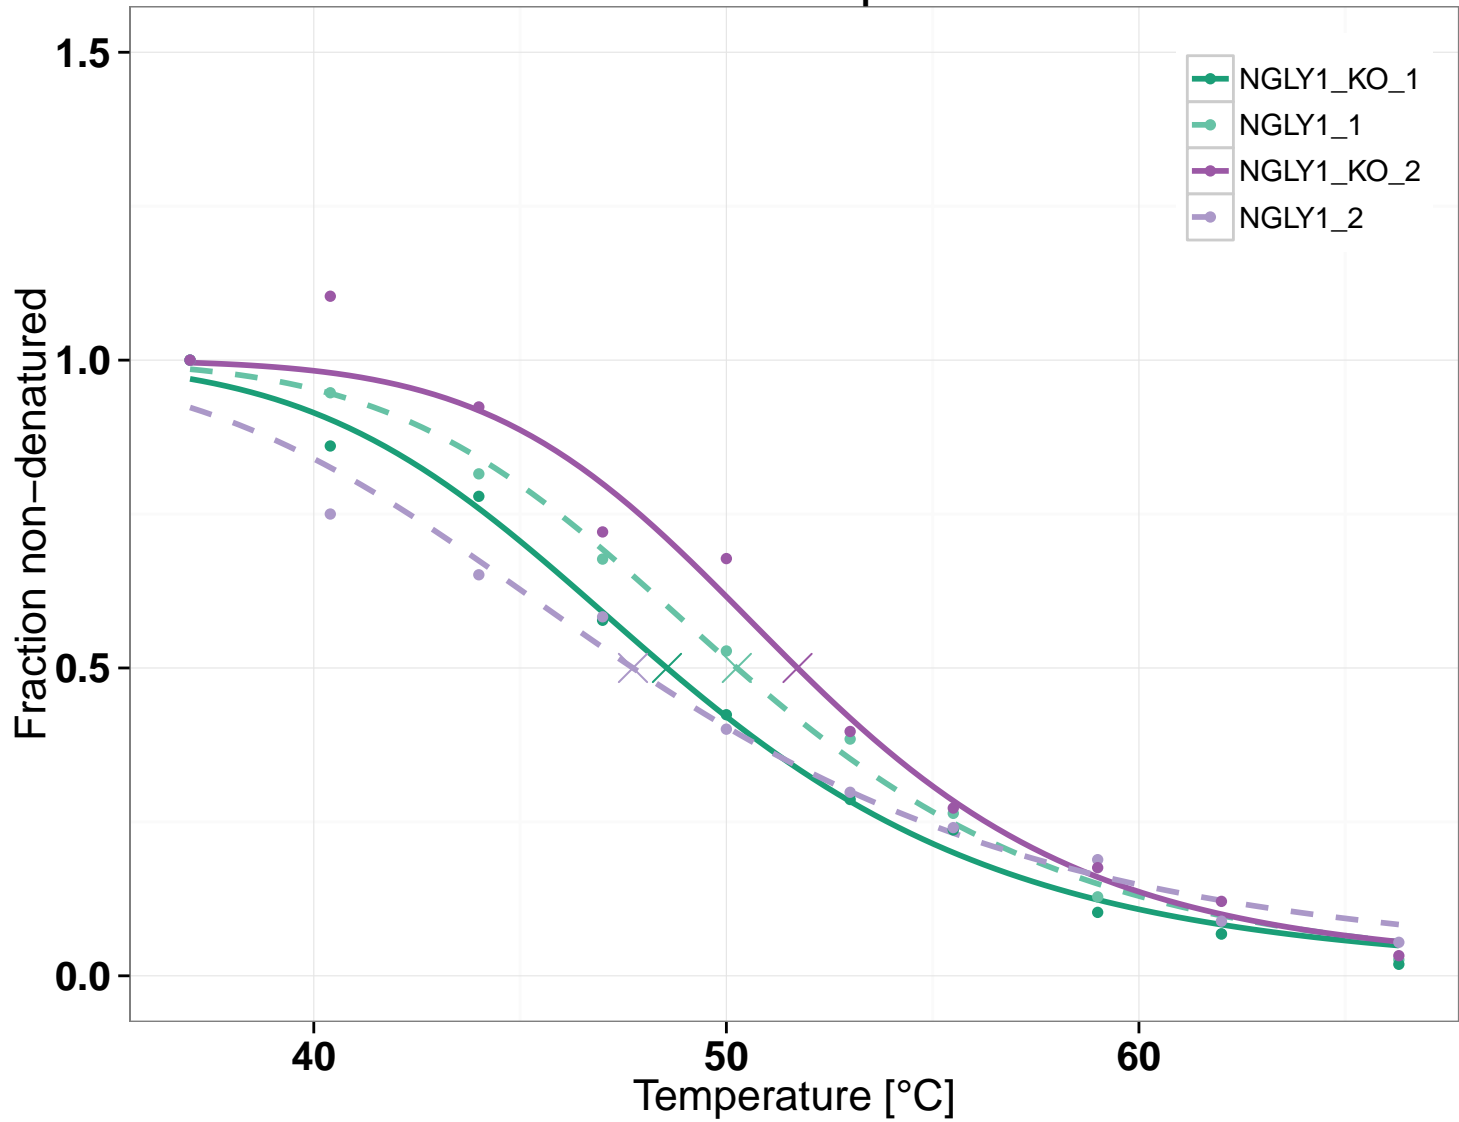

|            | meltPoint | slope  | plateau | R2   |
|------------|-----------|--------|---------|------|
| NGLY1_KO_1 | 48.56     | -0.059 | 0       | 0.99 |
| NGLY1_1    | 50.25     | -0.06  | 0       | 1    |
| NGLY1_KO_2 | 51.72     | -0.068 | 0.01    | 0.98 |
| NGLY1_2    | 47.74     | -0.047 | 0       | 0.98 |

Supplement: Supplementary file 3260 [file 1]

IPI00001663.1|HTRA2

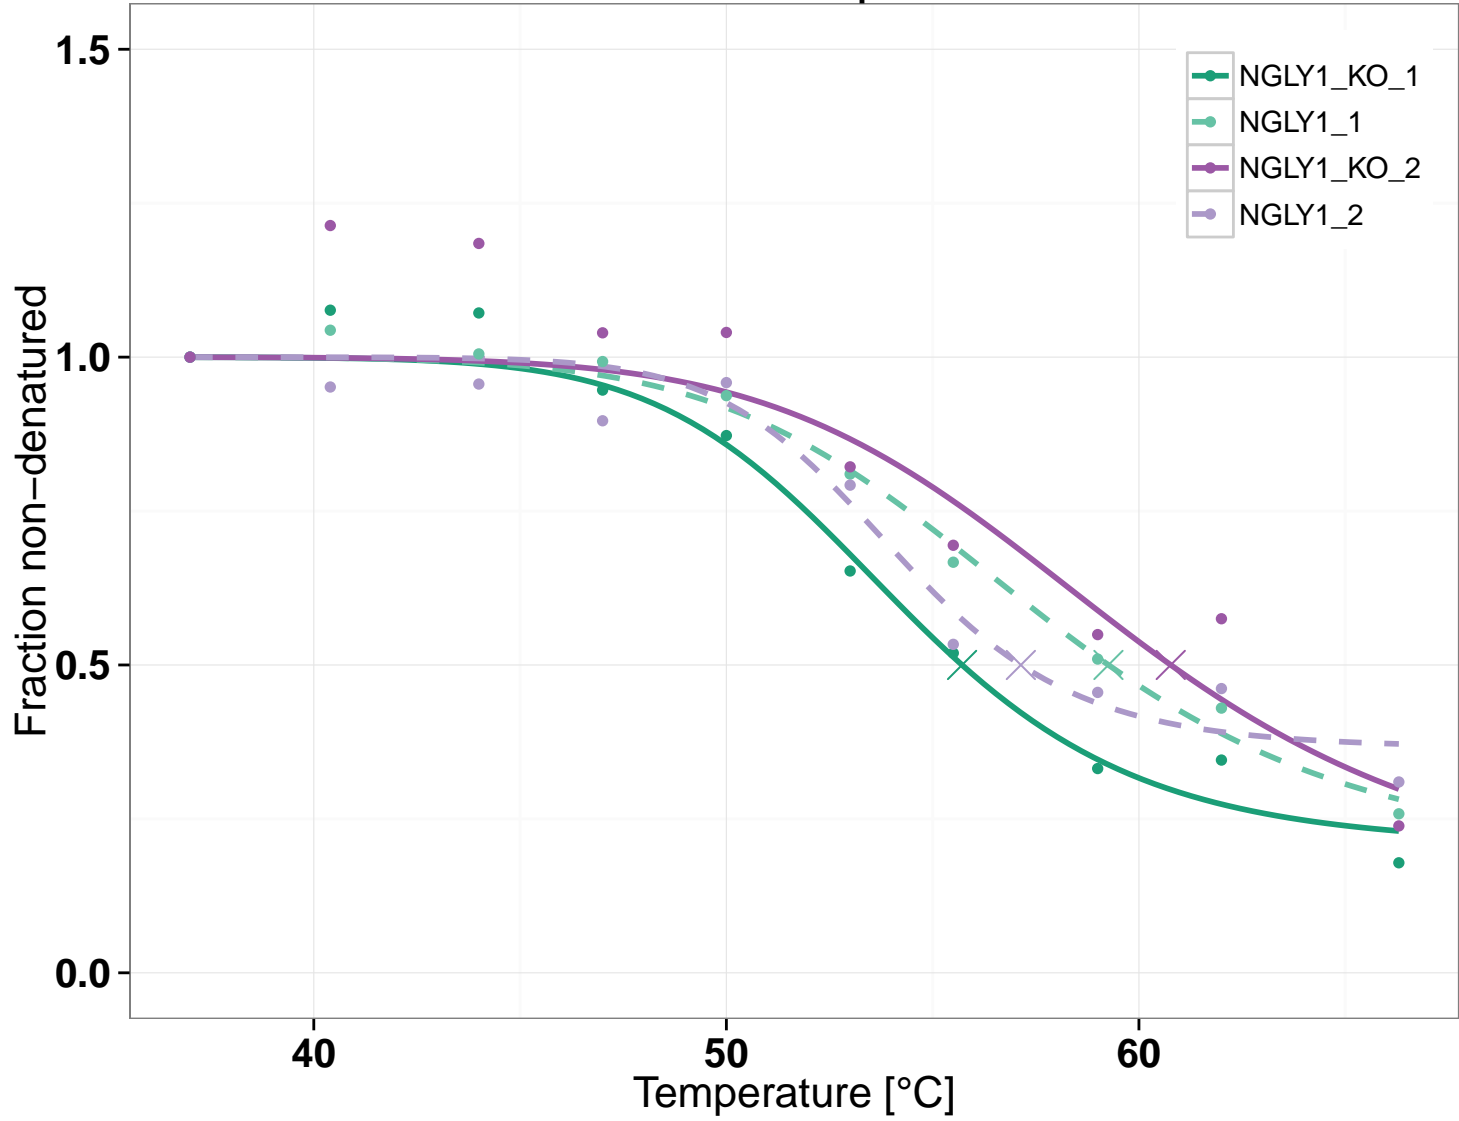

|            | meltPoint | slope  | plateau | R2   |
|------------|-----------|--------|---------|------|
| NGLY1_KO_1 | 55.71     | -0.069 | 0.2     | 0.98 |
| NGLY1_1    | 59.26     | -0.053 | 0.18    | 0.99 |
| NGLY1_KO_2 | 60.77     | -0.052 | 0.14    | 0.86 |
| NGLY1_2    | 57.14     | -0.073 | 0.36    | 0.96 |

Supplement: Supplementary file 3261 [file 1]

# IPI00023510.1|RAB5A

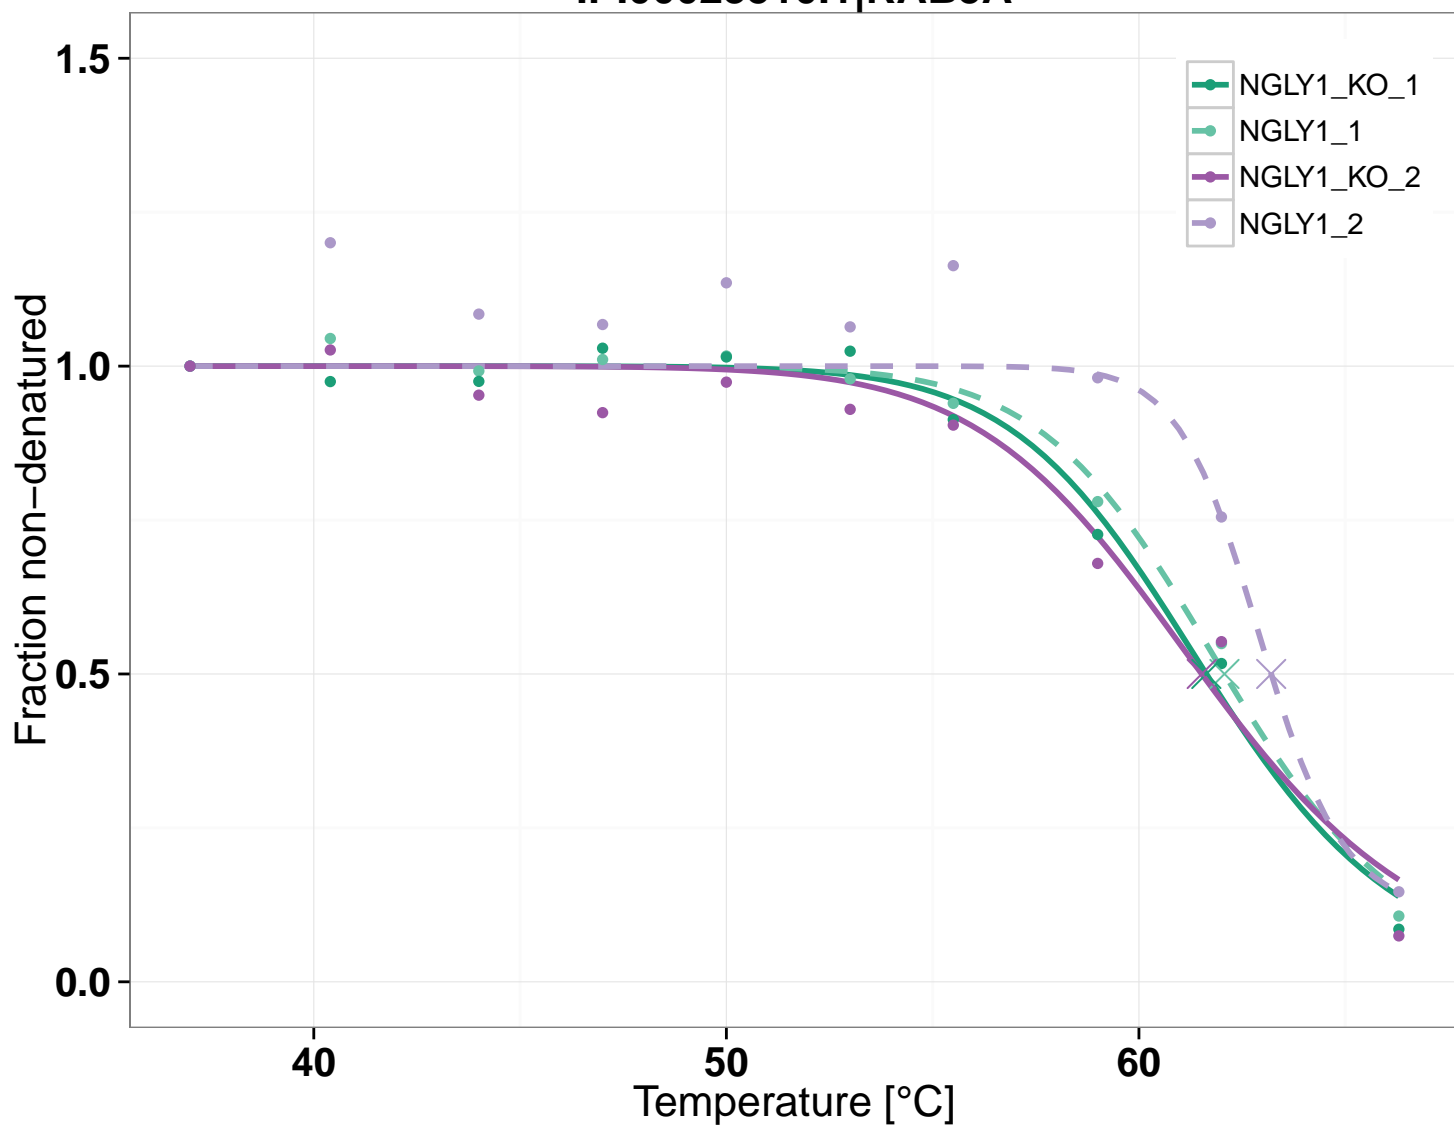

|            | meltPoint | slope  | plateau | R2   |
|------------|-----------|--------|---------|------|
| NGLY1_KO_1 | 61.63     | -0.11  | 0       | 0.99 |
| NGLY1_1    | 62.07     | -0.11  | 0       | 0.99 |
| NGLY1_KO_2 | 61.52     | -0.092 | 0       | 0.96 |
| NGLY1_2    | 63.21     | -0.22  | 0.11    | 0.88 |

Supplement: Supplementary file 3262 [file 1]

# IPI00183938.6|TTC27

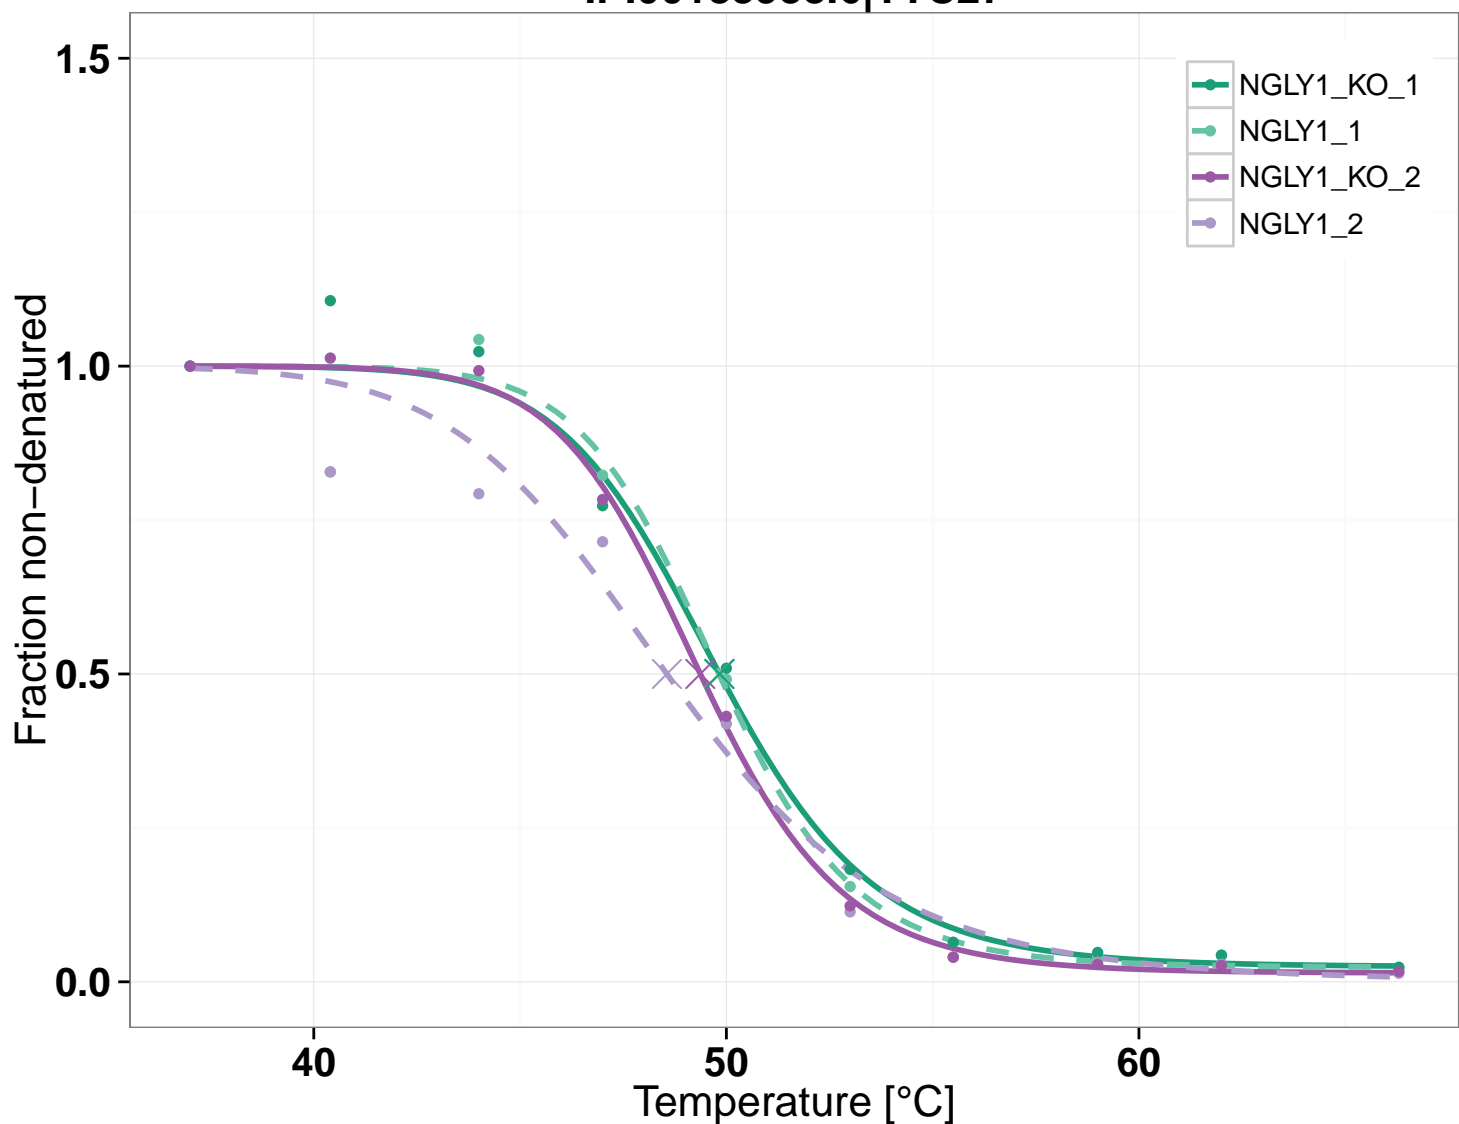

|            | meltPoint | slope  | plateau | R2   |
|------------|-----------|--------|---------|------|
| NGLY1_KO_1 | 49.84     | -0.13  | 0.02    | 0.99 |
| NGLY1_1    | 49.82     | -0.15  | 0.02    | 0.98 |
| NGLY1_KO_2 | 49.37     | -0.14  | 0.01    | 1    |
| NGLY1_2    | 48.56     | -0.094 | 0       | 0.97 |

Supplement: Supplementary file 3263 [file 1]

IPI00006265.1|ITGB1BP1

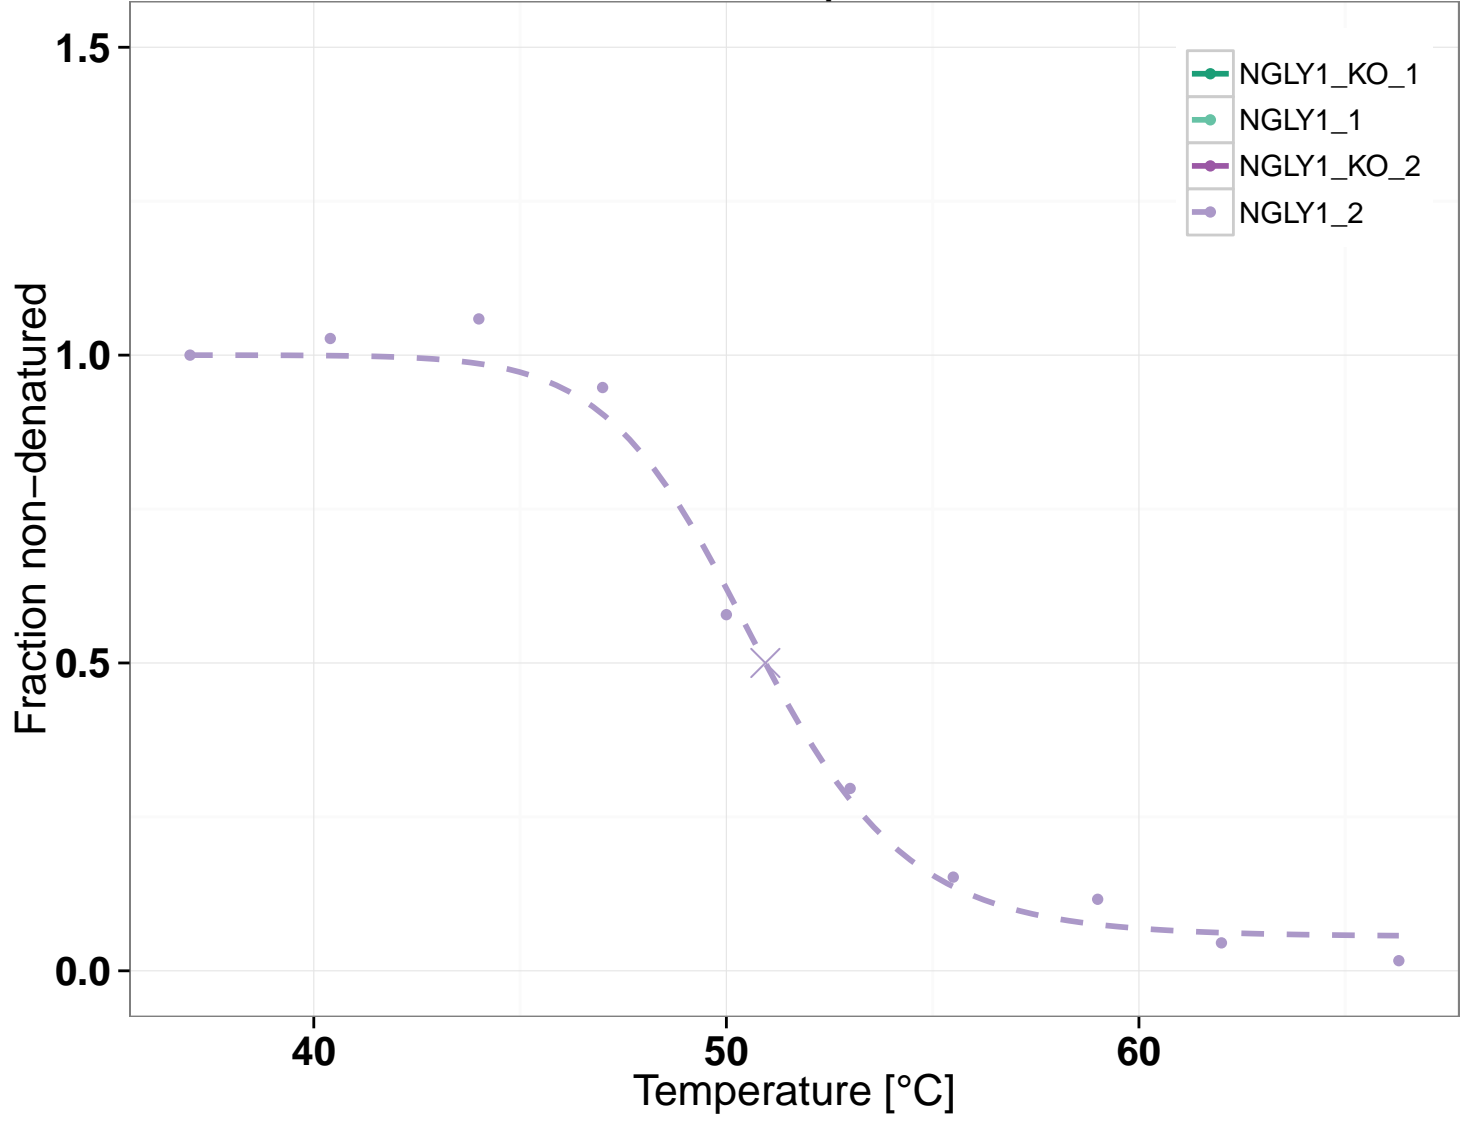

|            | meltPoint | slope | plateau | R2   |
|------------|-----------|-------|---------|------|
| NGLY1_KO_1 | -         | -     | -       | -    |
| NGLY1_1    | -         | -     | -       | -    |
| NGLY1_KO_2 | -         | -     | -       | -    |
| NGLY1_2    | 50.95     | -0.13 | 0.06    | 0.99 |

Supplement: Supplementary file 3264 [file 1]

# IPI00607861.2|H6PD

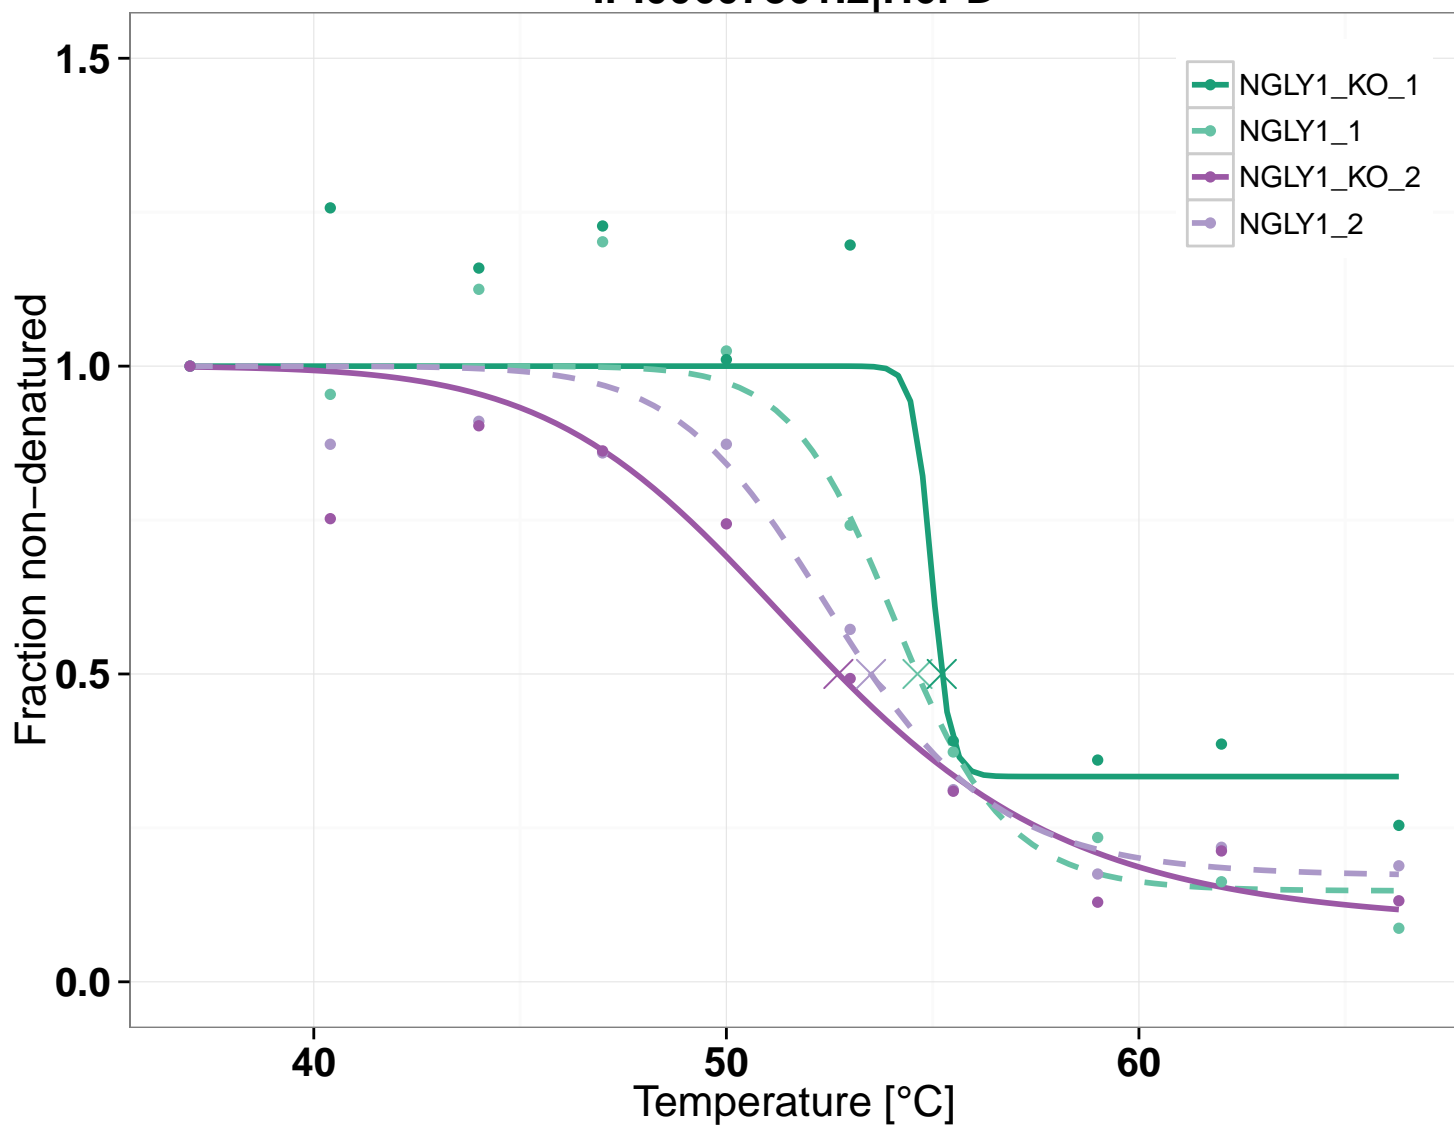

|            | meltPoint | slope  | plateau | R2   |
|------------|-----------|--------|---------|------|
| NGLY1_KO_1 | 55.22     | -0.76  | 0.33    | 0.88 |
| NGLY1_1    | 54.63     | -0.16  | 0.15    | 0.96 |
| NGLY1_KO_2 | 52.72     | -0.071 | 0.09    | 0.93 |
| NGLY1_2    | 53.51     | -0.11  | 0.17    | 0.96 |

Supplement: Supplementary file 3265 [file 1]

IPI00291467.7|SLC25A6

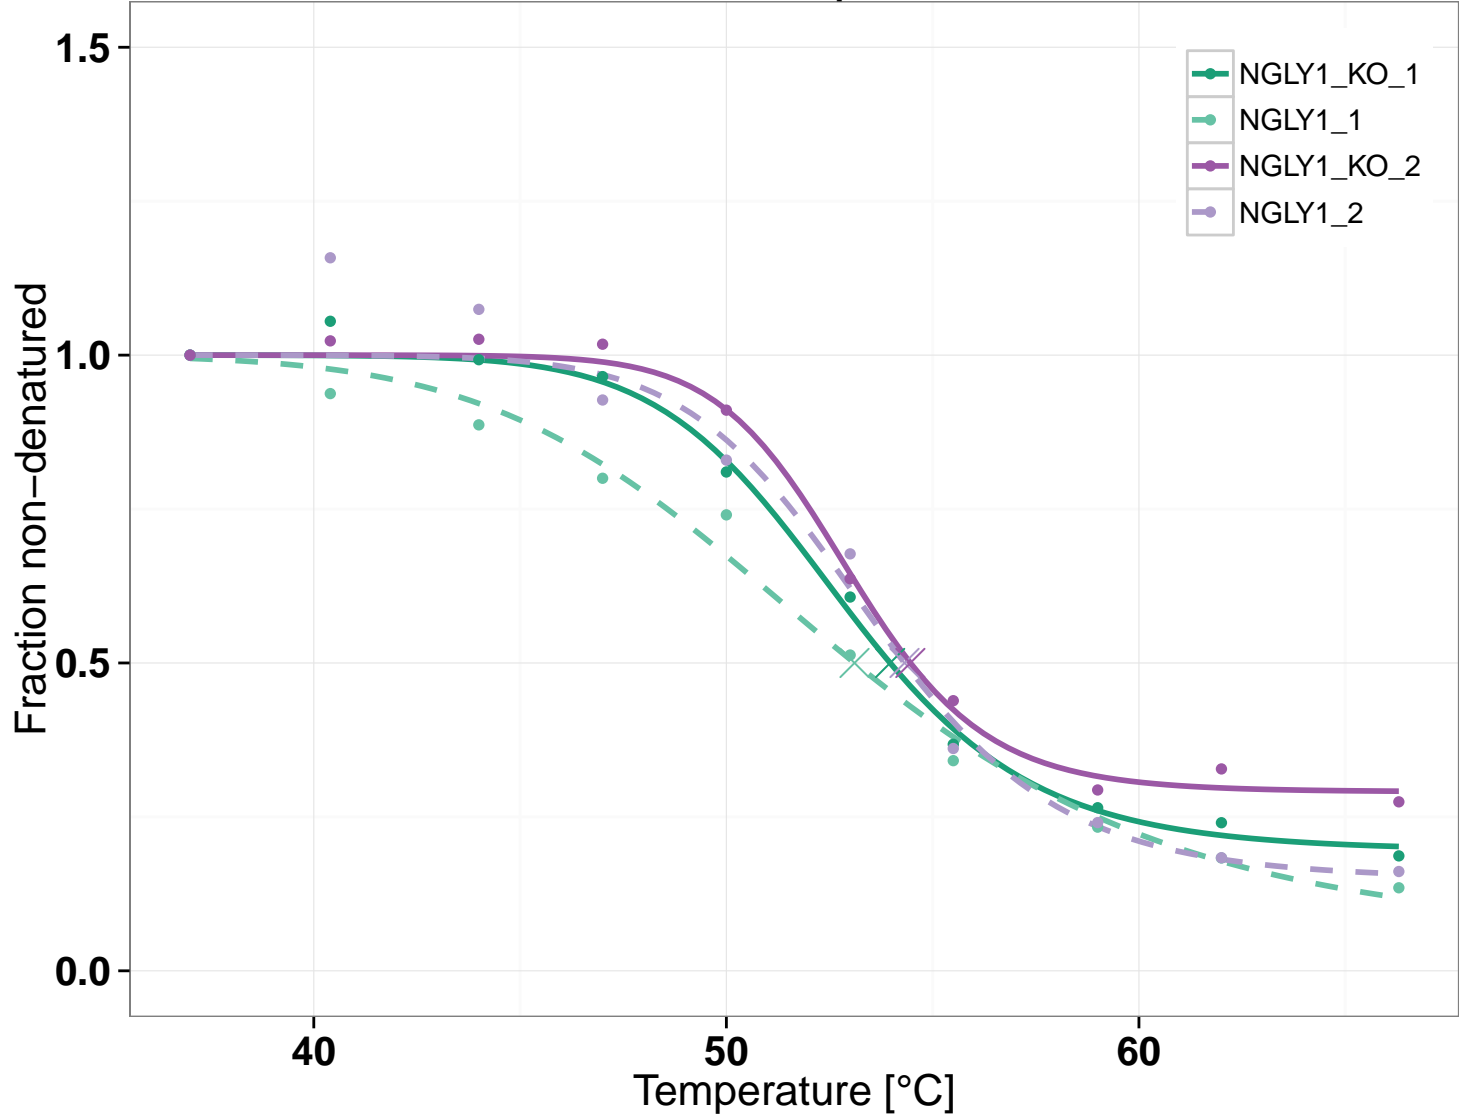

|            | meltPoint | slope  | plateau | R2   |
|------------|-----------|--------|---------|------|
| NGLY1_KO_1 | 53.97     | -0.089 | 0.19    | 1    |
| NGLY1_1    | 53.11     | -0.057 | 0.05    | 0.99 |
| NGLY1_KO_2 | 54.46     | -0.11  | 0.29    | 1    |
| NGLY1_2    | 54.32     | -0.094 | 0.15    | 0.97 |

Supplement: Supplementary file 3266 [file 1]

IPI00180240.2|TMSL3

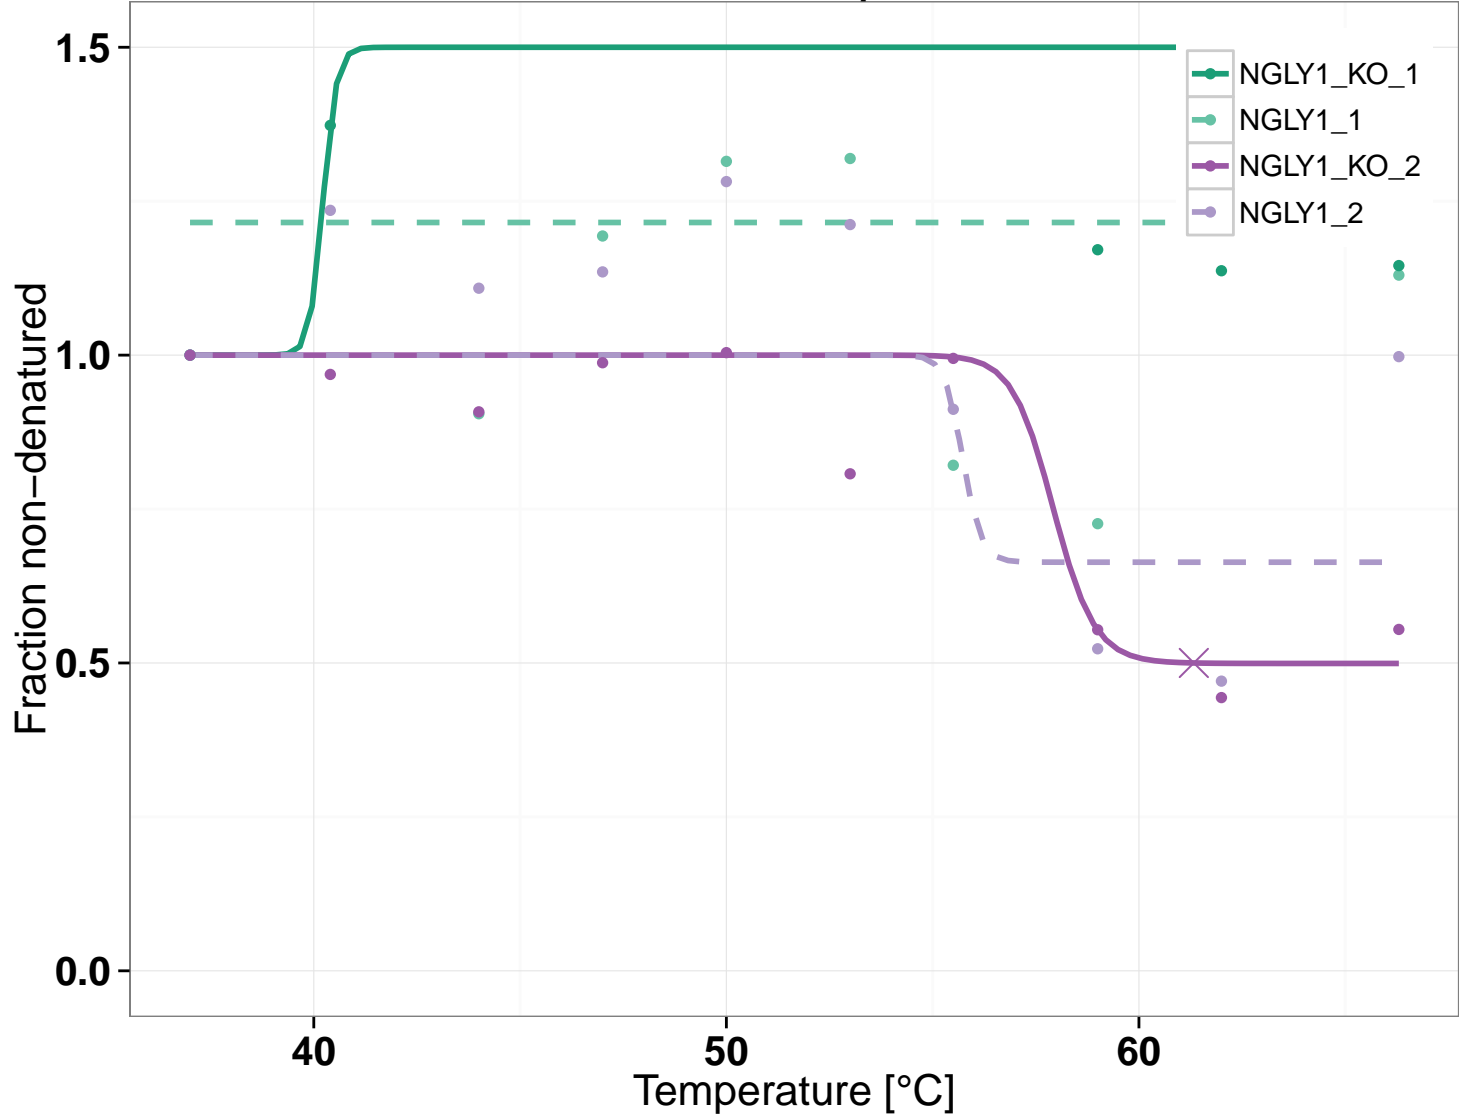

|            | meltPoint | slope | plateau | R2   |
|------------|-----------|-------|---------|------|
| NGLY1_KO_1 | -         | 0.78  | 1.5     | 0.22 |
| NGLY1_1    | -         | -     | 1.43    | 0    |
| NGLY1_KO_2 | 61.33     | -0.25 | 0.5     | 0.88 |
| NGLY1_2    | -         | -0.38 | 0.66    | 0.48 |

Supplement: Supplementary file 3267 [file 1]

IPI00061245.4|MRPS10

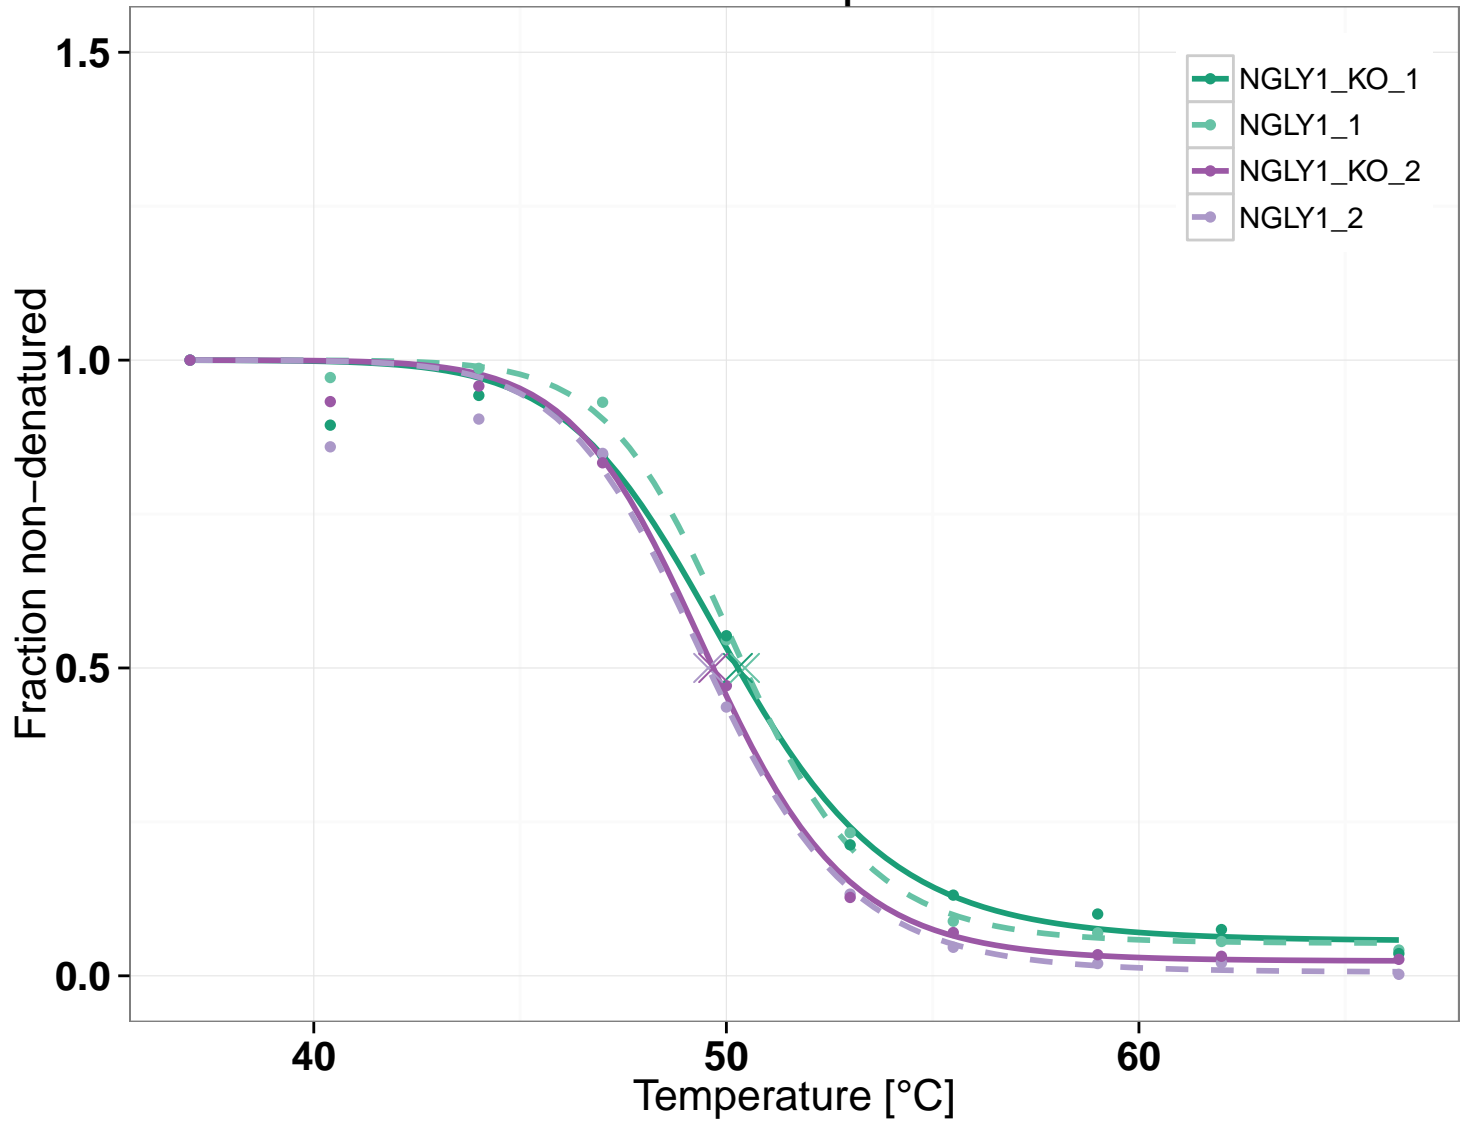

|            | meltPoint | slope | plateau | R2   |
|------------|-----------|-------|---------|------|
| NGLY1_KO_1 | 50.28     | -0.12 | 0.06    | 0.99 |
| NGLY1_1    | 50.45     | -0.15 | 0.05    | 1    |
| NGLY1_KO_2 | 49.68     | -0.15 | 0.02    | 1    |
| NGLY1_2    | 49.56     | -0.14 | 0.01    | 0.98 |

Supplement: Supplementary file 3268 [file 1]

IPI00007402.3|IPO7

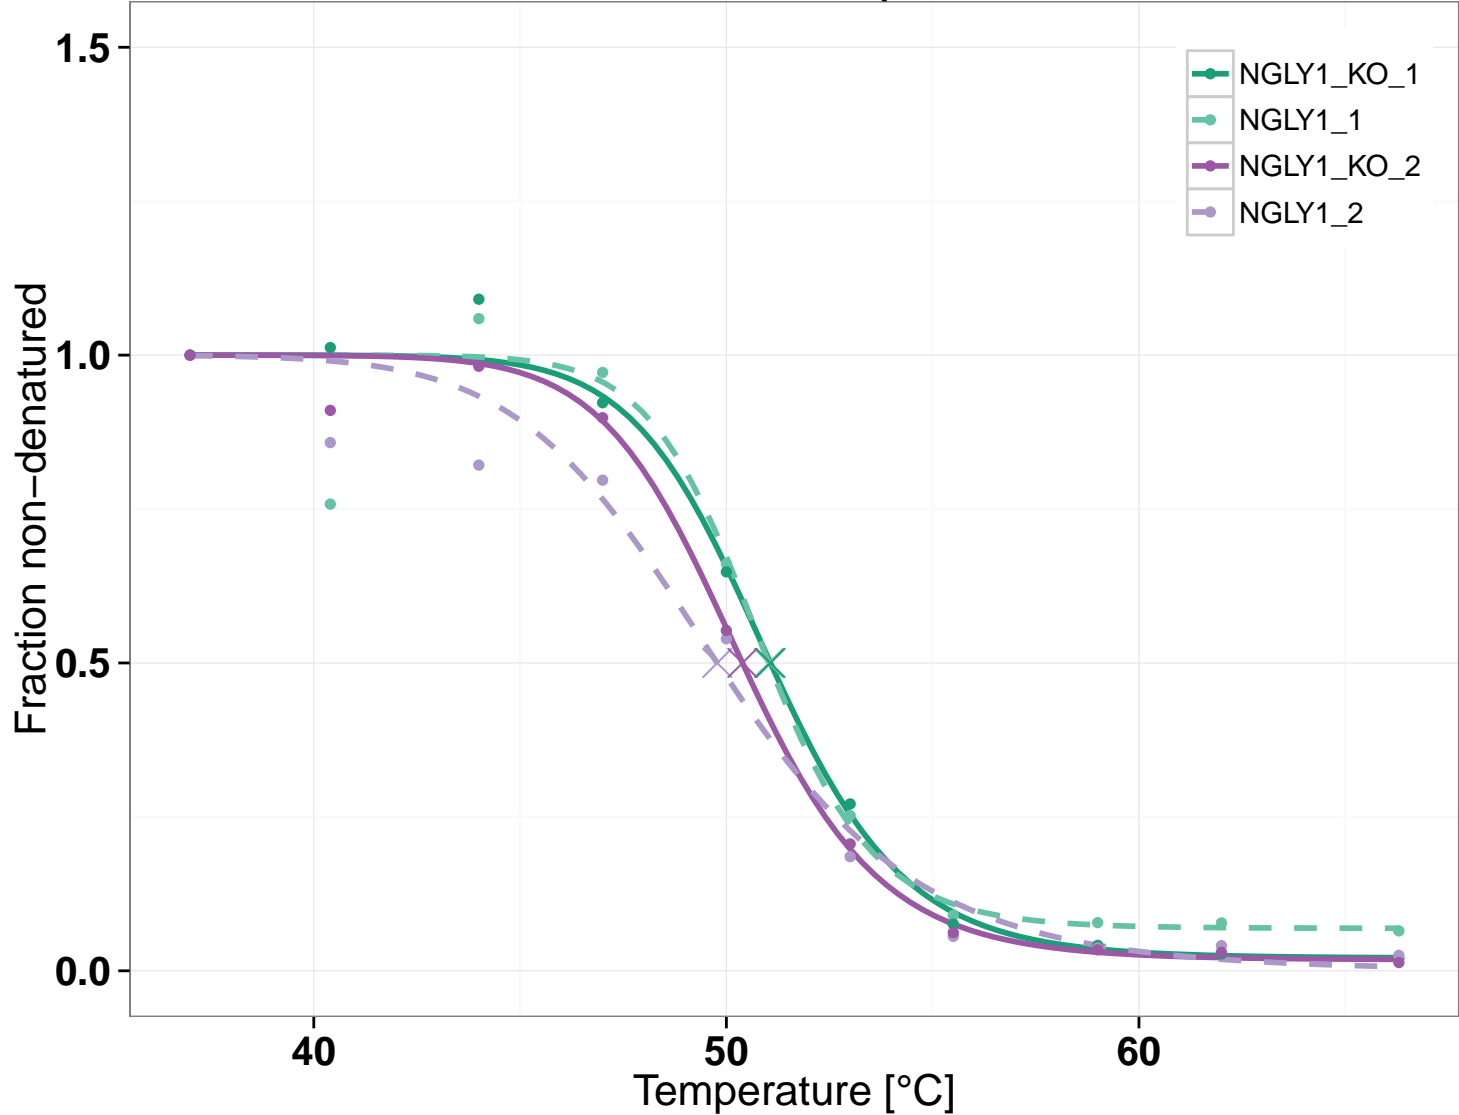

|            | meltPoint | slope | plateau | R2   |
|------------|-----------|-------|---------|------|
| NGLY1_KO_1 | 51.07     | -0.15 | 0.02    | 0.99 |
| NGLY1_1    | 51.03     | -0.17 | 0.07    | 0.96 |
| NGLY1_KO_2 | 50.39     | -0.15 | 0.02    | 1    |
| NGLY1_2    | 49.78     | -0.1  | 0       | 0.97 |

Supplement: Supplementary file 3269 [file 1]

IPI00003031.3|ISOC2

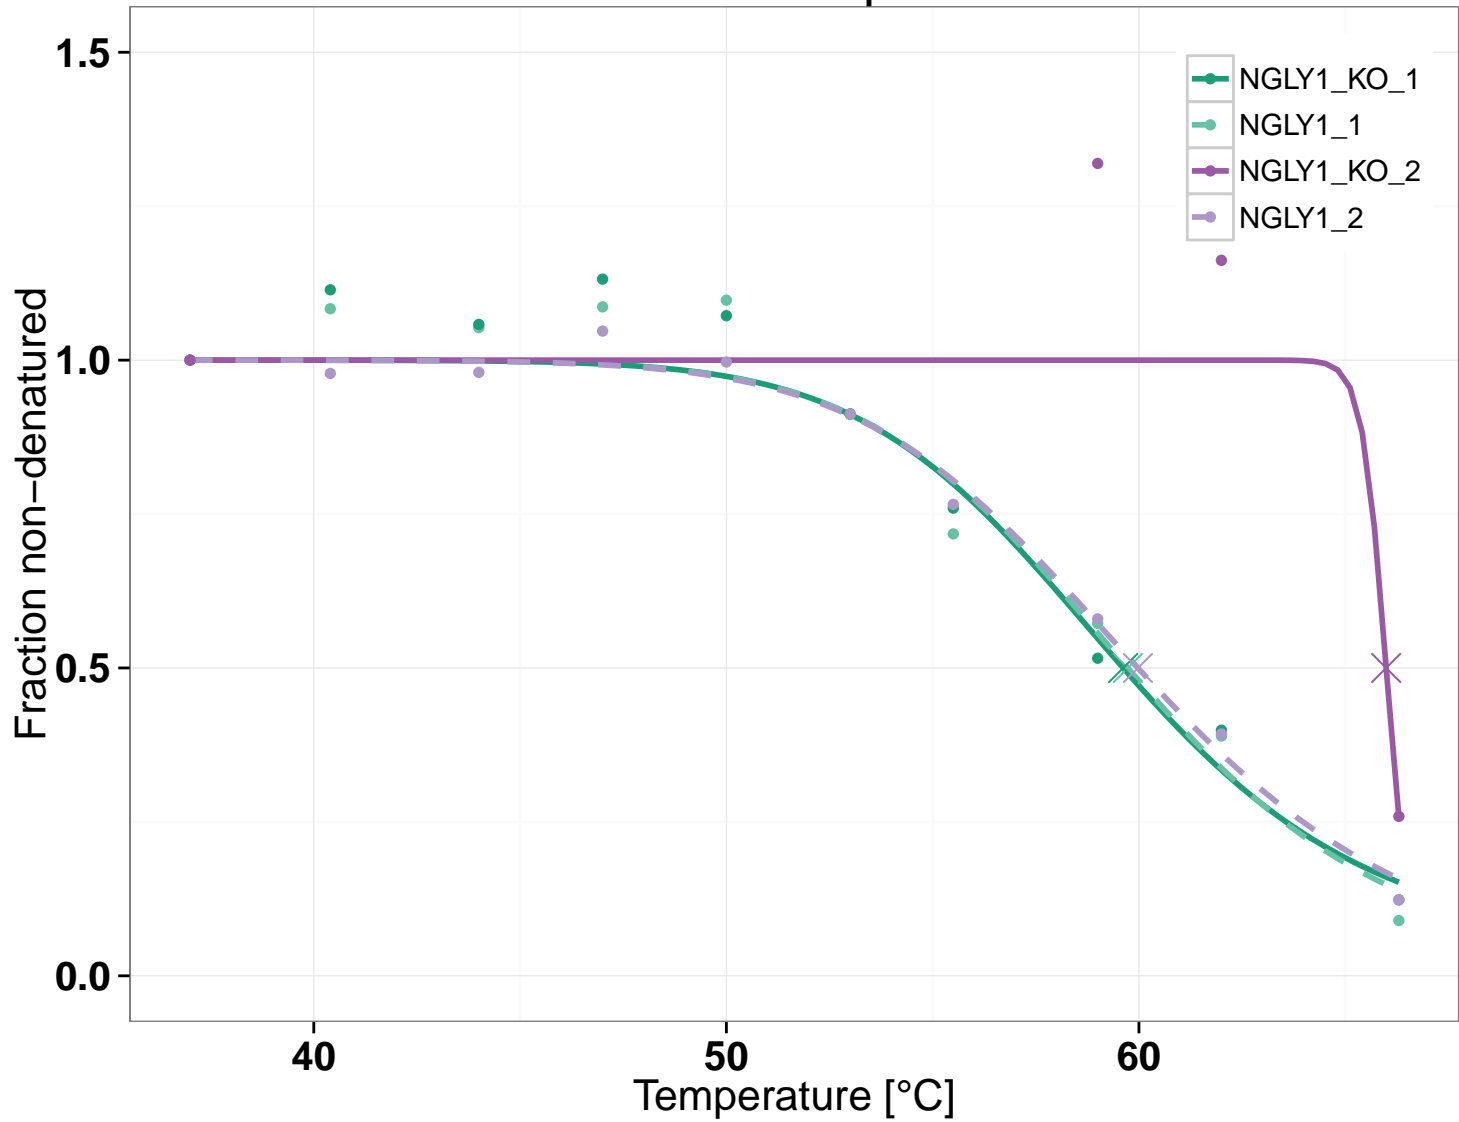

|            | meltPoint | slope  | plateau | R2    |
|------------|-----------|--------|---------|-------|
| NGLY1_KO_1 | 59.62     | -0.078 | 0.04    | 0.95  |
| NGLY1_1    | 59.73     | -0.078 | 0       | 0.96  |
| NGLY1_KO_2 | 65.99     | -0.86  | 0       | -0.87 |
| NGLY1_2    | 59.98     | -0.074 | 0       | 0.99  |

Supplement: Supplementary file 3270 [file 1]

IPI00909772.1|AP2M1

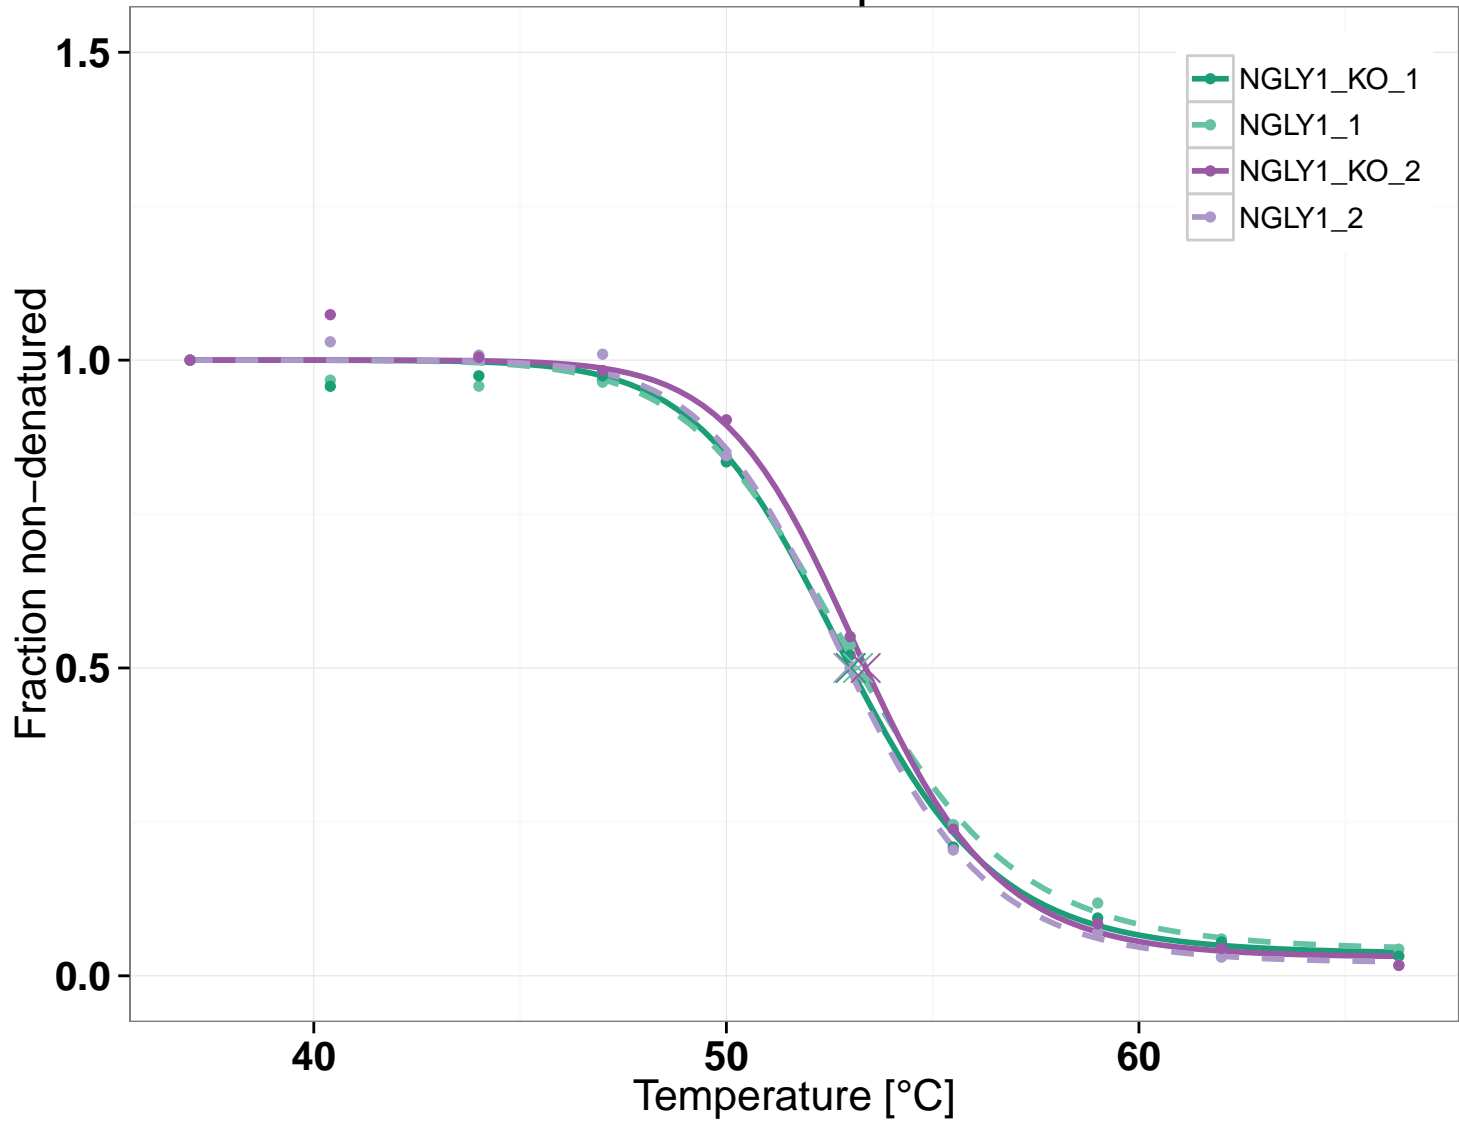

|            | meltPoint | slope | plateau | R2 |
|------------|-----------|-------|---------|----|
| NGLY1_KO_1 | 53.01     | -0.13 | 0.04    | 1  |
| NGLY1_1    | 53.19     | -0.12 | 0.04    | 1  |
| NGLY1_KO_2 | 53.38     | -0.15 | 0.03    | 1  |
| NGLY1_2    | 52.96     | -0.14 | 0.02    | 1  |

Supplement: Supplementary file 3271 [file 1]

IPI00026031.3|C6ORF72

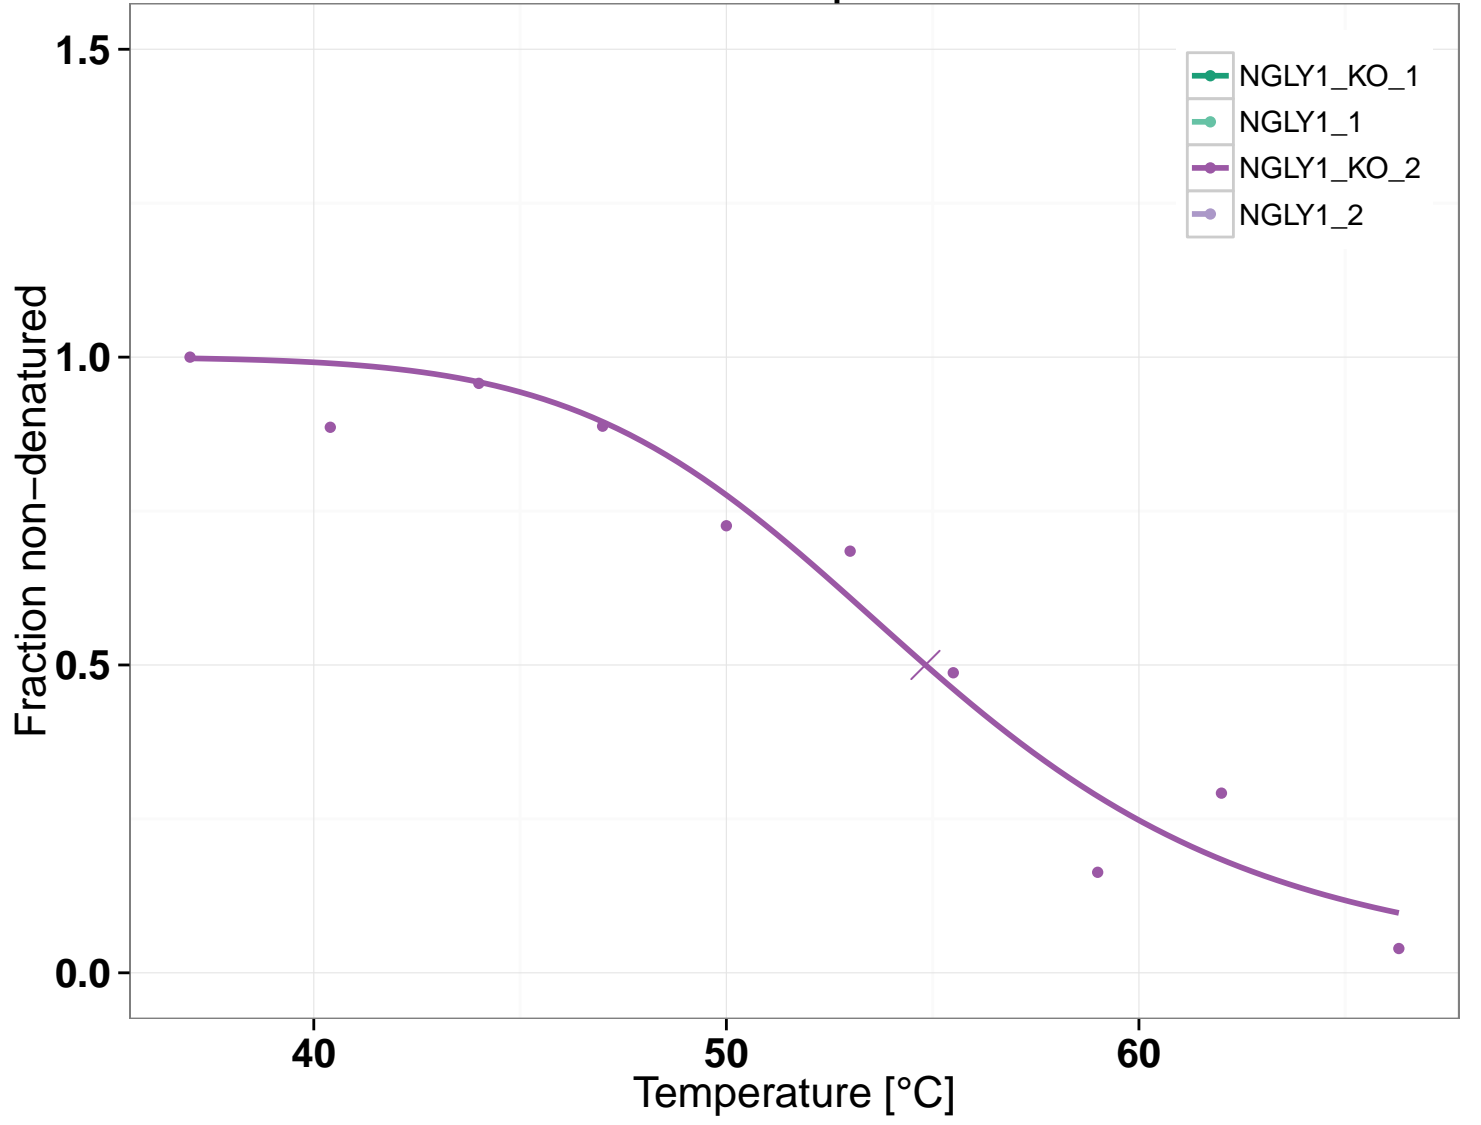

|            | meltPoint | slope | plateau | R2   |
|------------|-----------|-------|---------|------|
| NGLY1_KO_1 | —         | —     | —       | —    |
| NGLY1_1    | —         | —     | —       | —    |
| NGLY1_KO_2 | 54.83     | -0.06 | 0       | 0.95 |
| NGLY1_2    | —         | —     | —       | —    |

Supplement: Supplementary file 3272 [file 1]

IPI00016763.3|GTPBP6

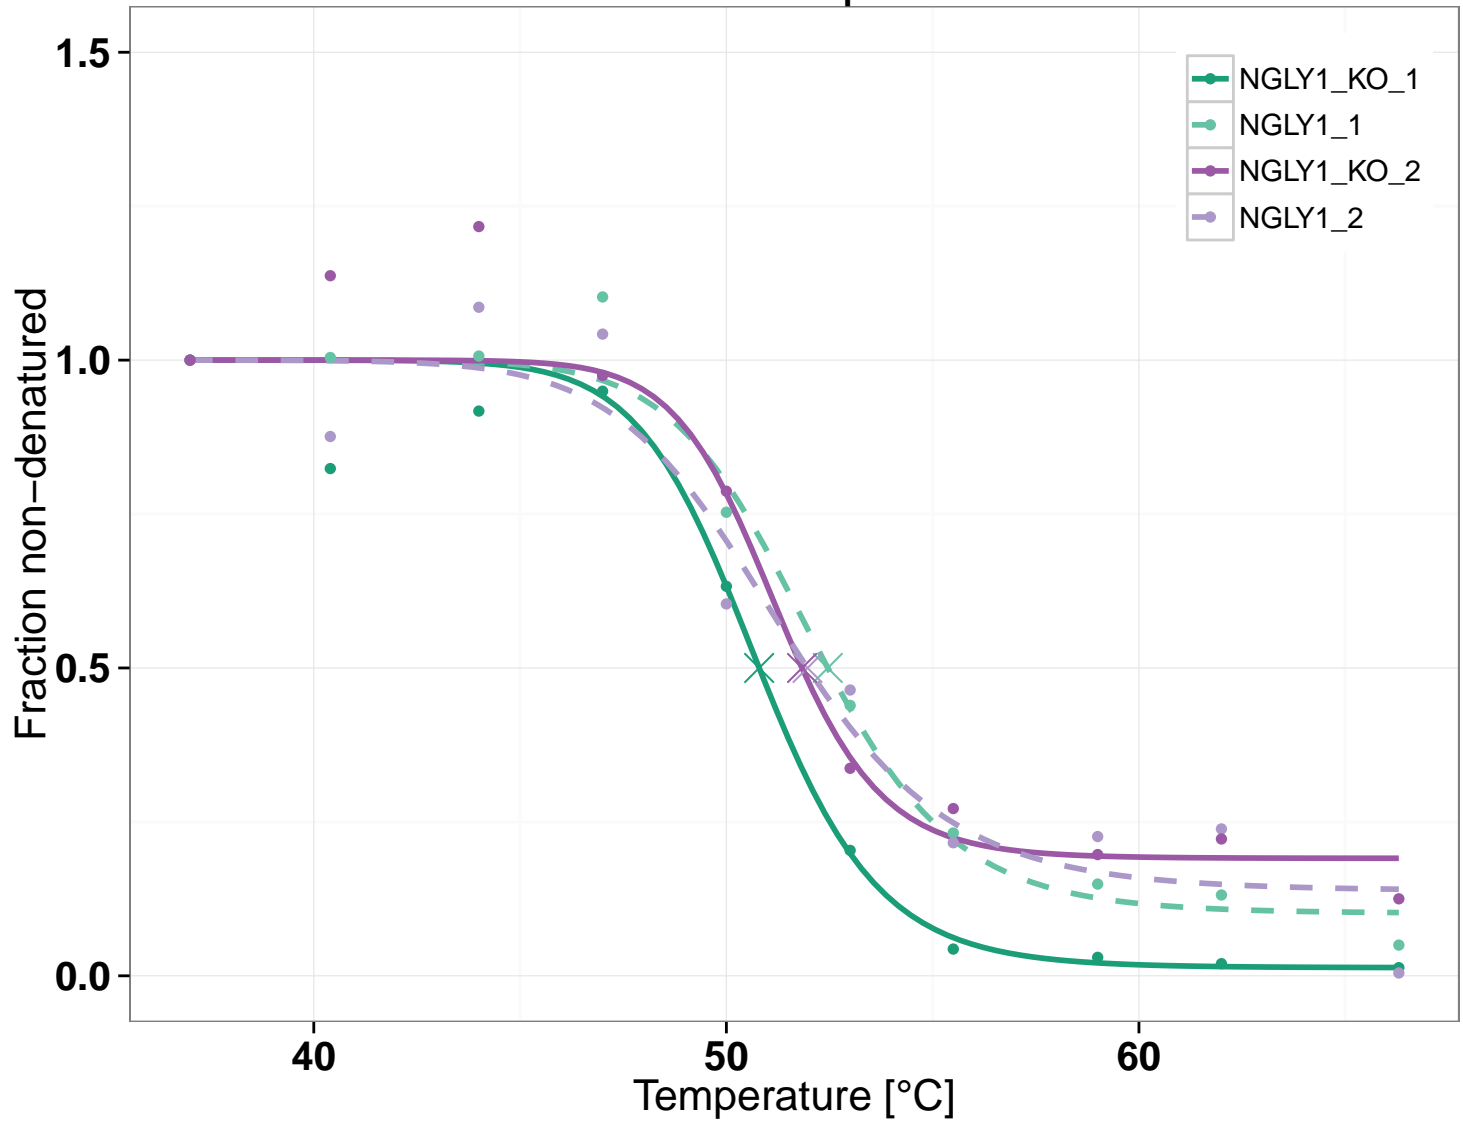

|            | meltPoint | slope | plateau | R2   |
|------------|-----------|-------|---------|------|
| NGLY1_KO_1 | 50.8      | -0.17 | 0.01    | 0.98 |
| NGLY1_1    | 52.46     | -0.13 | 0.1     | 0.99 |
| NGLY1_KO_2 | 51.83     | -0.16 | 0.19    | 0.96 |
| NGLY1_2    | 51.97     | -0.11 | 0.14    | 0.94 |

Supplement: Supplementary file 3273 [file 1]

IPI00219155.5|RPL27

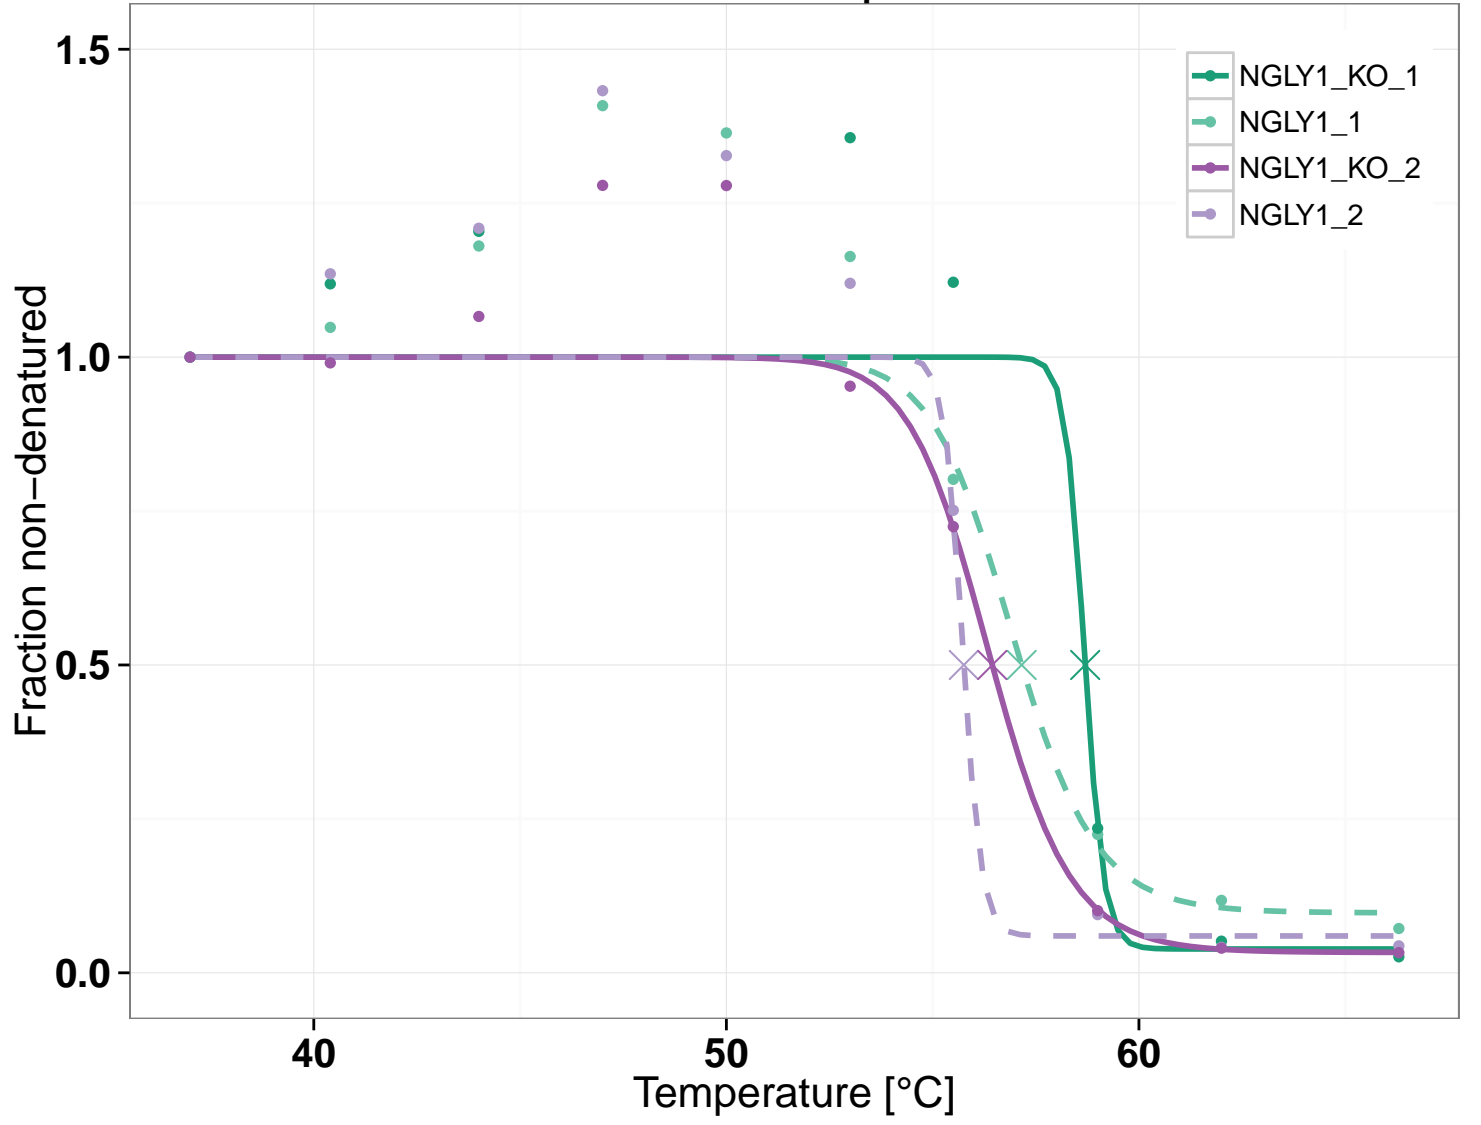

|            | meltPoint | slope | plateau | R2   |
|------------|-----------|-------|---------|------|
| NGLY1_KO_1 | 58.7      | -1    | 0.04    | 0.72 |
| NGLY1_1    | 57.16     | -0.23 | 0.1     | 0.85 |
| NGLY1_KO_2 | 56.45     | -0.25 | 0.03    | 0.93 |
| NGLY1_2    | 55.76     | -1.1  | 0.06    | 0.86 |

Supplement: Supplementary file 3274 [file 1]

IPI00058192.1|POFUT1

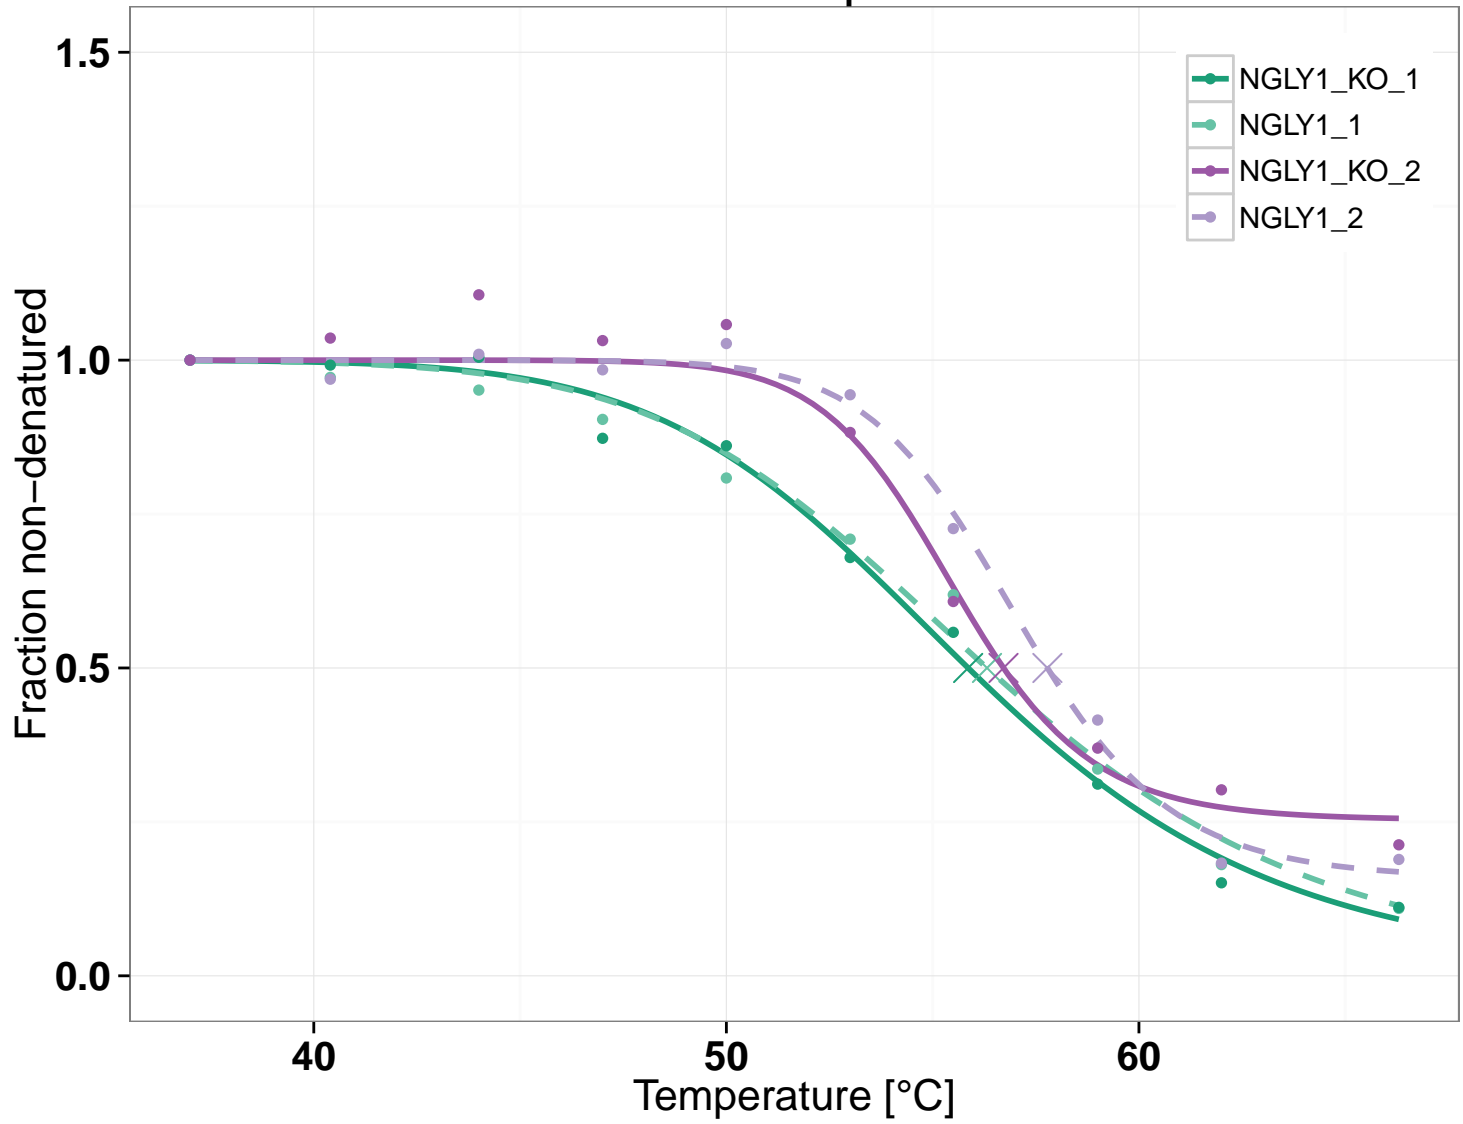

|            | meltPoint | slope  | plateau | R2   |
|------------|-----------|--------|---------|------|
| NGLY1_KO_1 | 55.86     | -0.066 | 0       | 0.99 |
| NGLY1_1    | 56.32     | -0.062 | 0       | 0.99 |
| NGLY1_KO_2 | 56.72     | -0.11  | 0.25    | 0.98 |
| NGLY1_2    | 57.78     | -0.11  | 0.16    | 0.99 |

Supplement: Supplementary file 3275 [file 1]

IPI00015793.7|SMG6

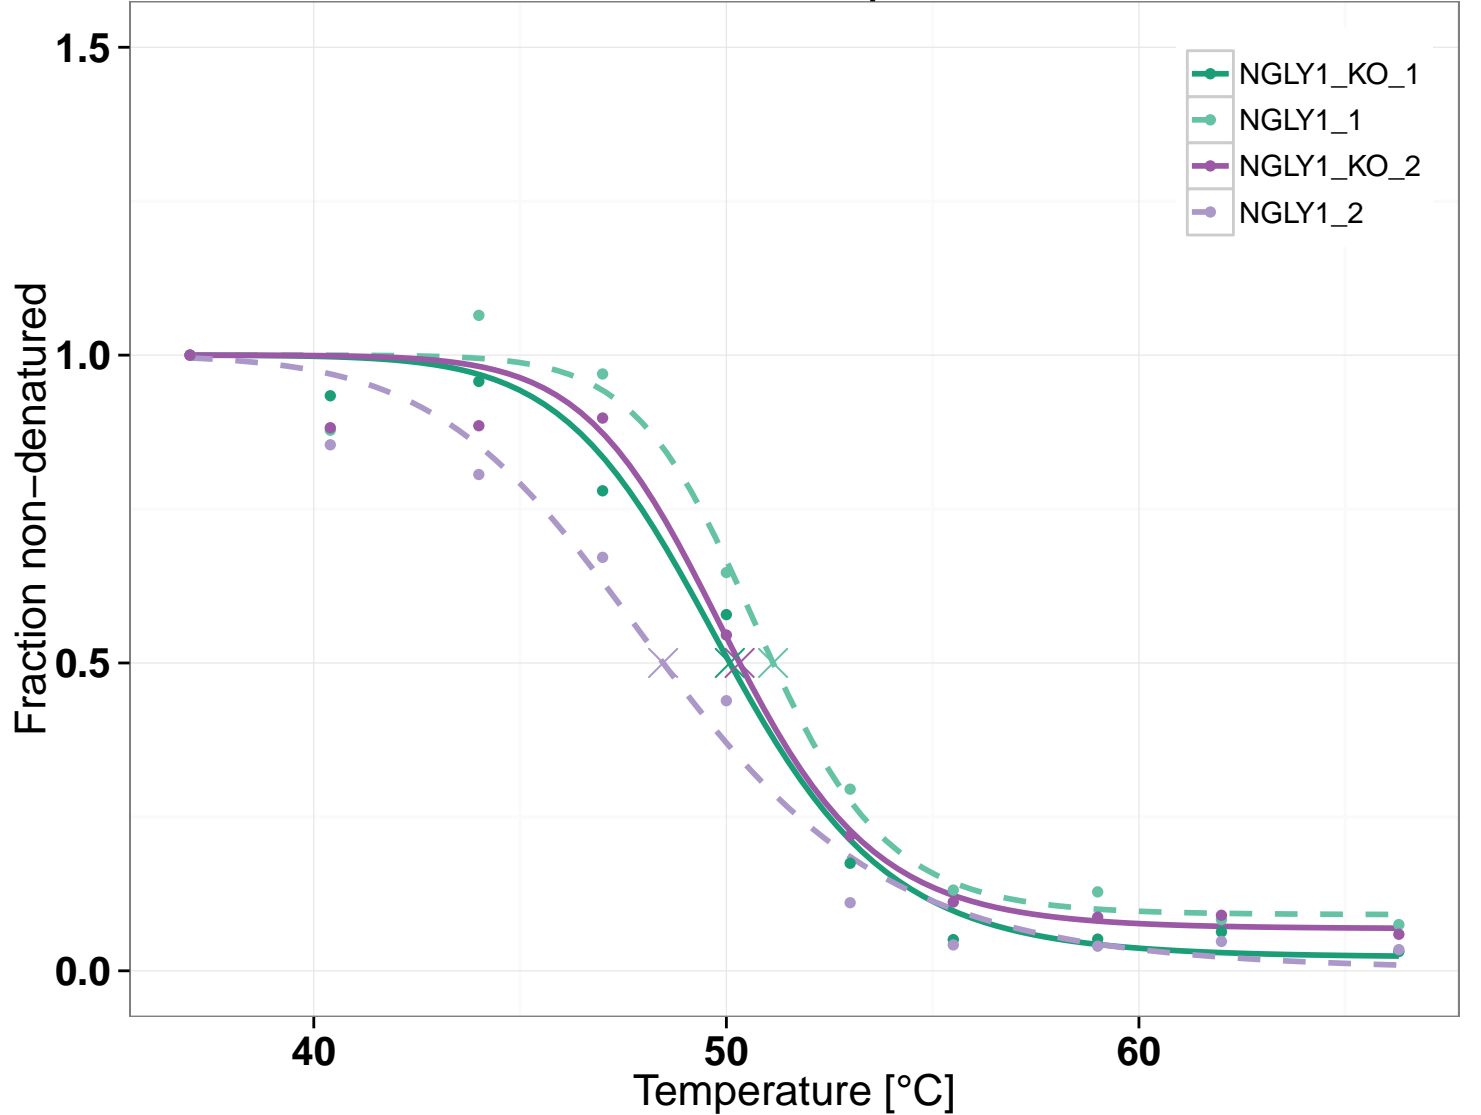

|            | meltPoint | slope  | plateau | R2   |
|------------|-----------|--------|---------|------|
| NGLY1_KO_1 | 50.08     | -0.12  | 0.02    | 0.99 |
| NGLY1_1    | 51.13     | -0.15  | 0.09    | 0.99 |
| NGLY1_KO_2 | 50.32     | -0.13  | 0.07    | 0.98 |
| NGLY1_2    | 48.47     | -0.091 | 0       | 0.98 |

Supplement: Supplementary file 3276 [file 1]

IPI00640764.1|HYPOTHETICAL PROTEIN.

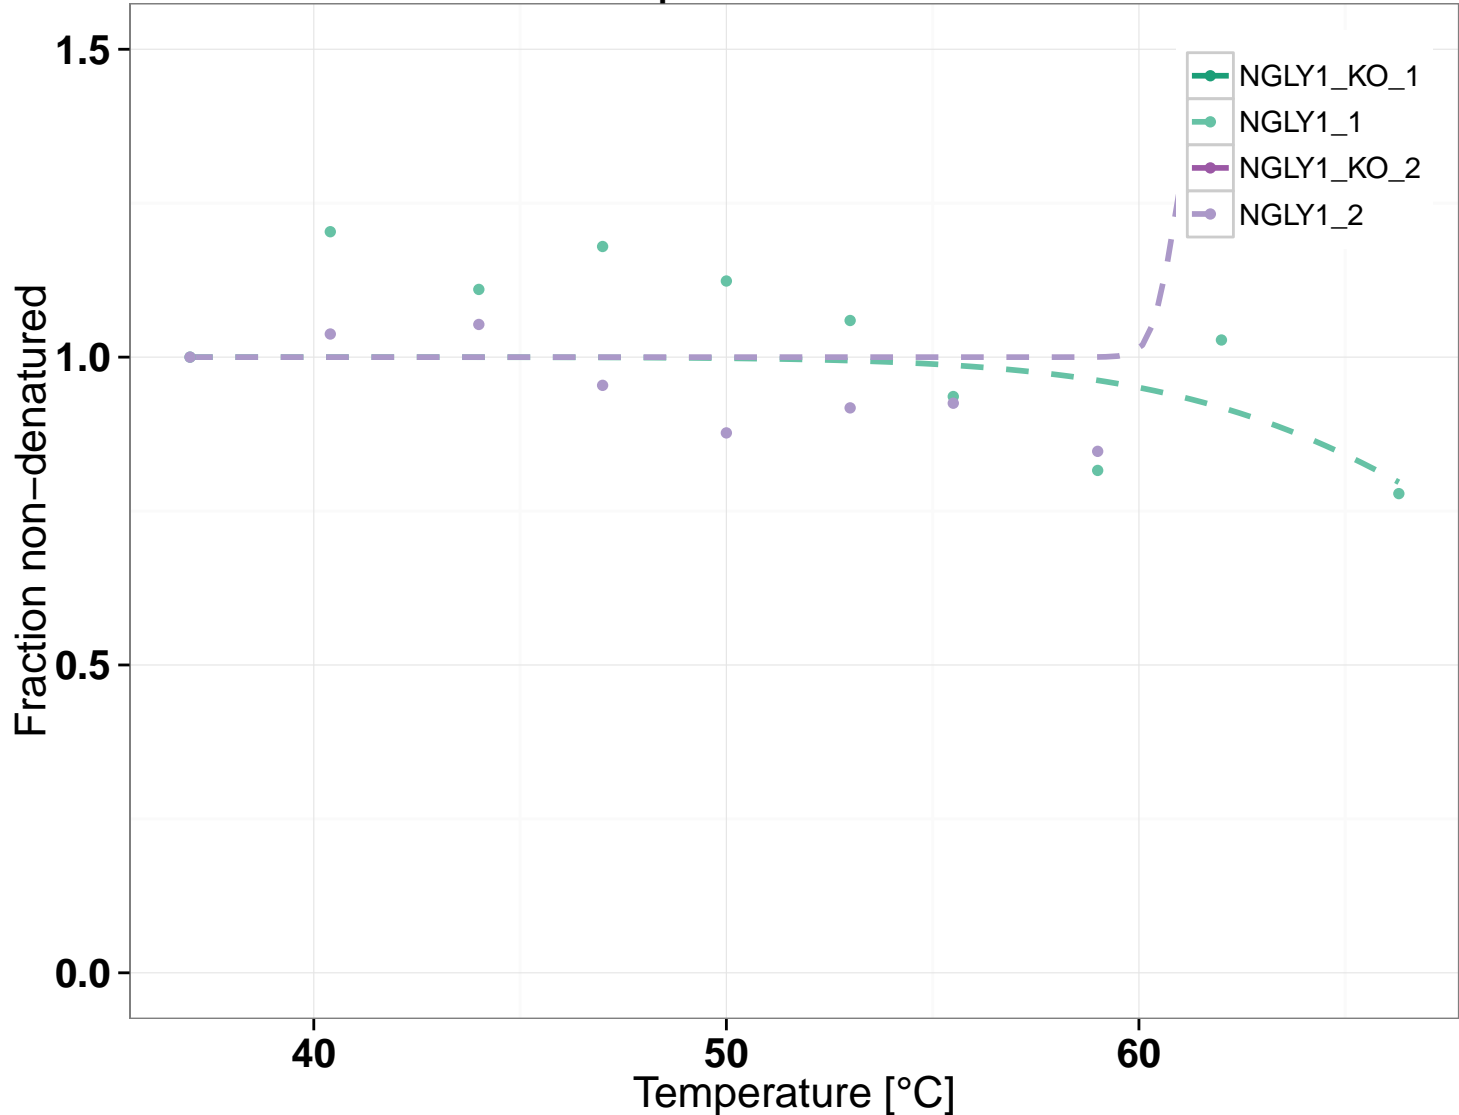

|            | meltPoint | slope | plateau | R2   |
|------------|-----------|-------|---------|------|
| NGLY1_KO_1 | -         | -     | -       | -    |
| NGLY1_1    | -         | -     | 0       | 0.24 |
| NGLY1_KO_2 | -         | -     | -       | -    |
| NGLY1_2    | -         | 0.41  | 1.41    | 0.84 |

Supplement: Supplementary file 3277 [file 1]

IPI00015980.3|MPDZ

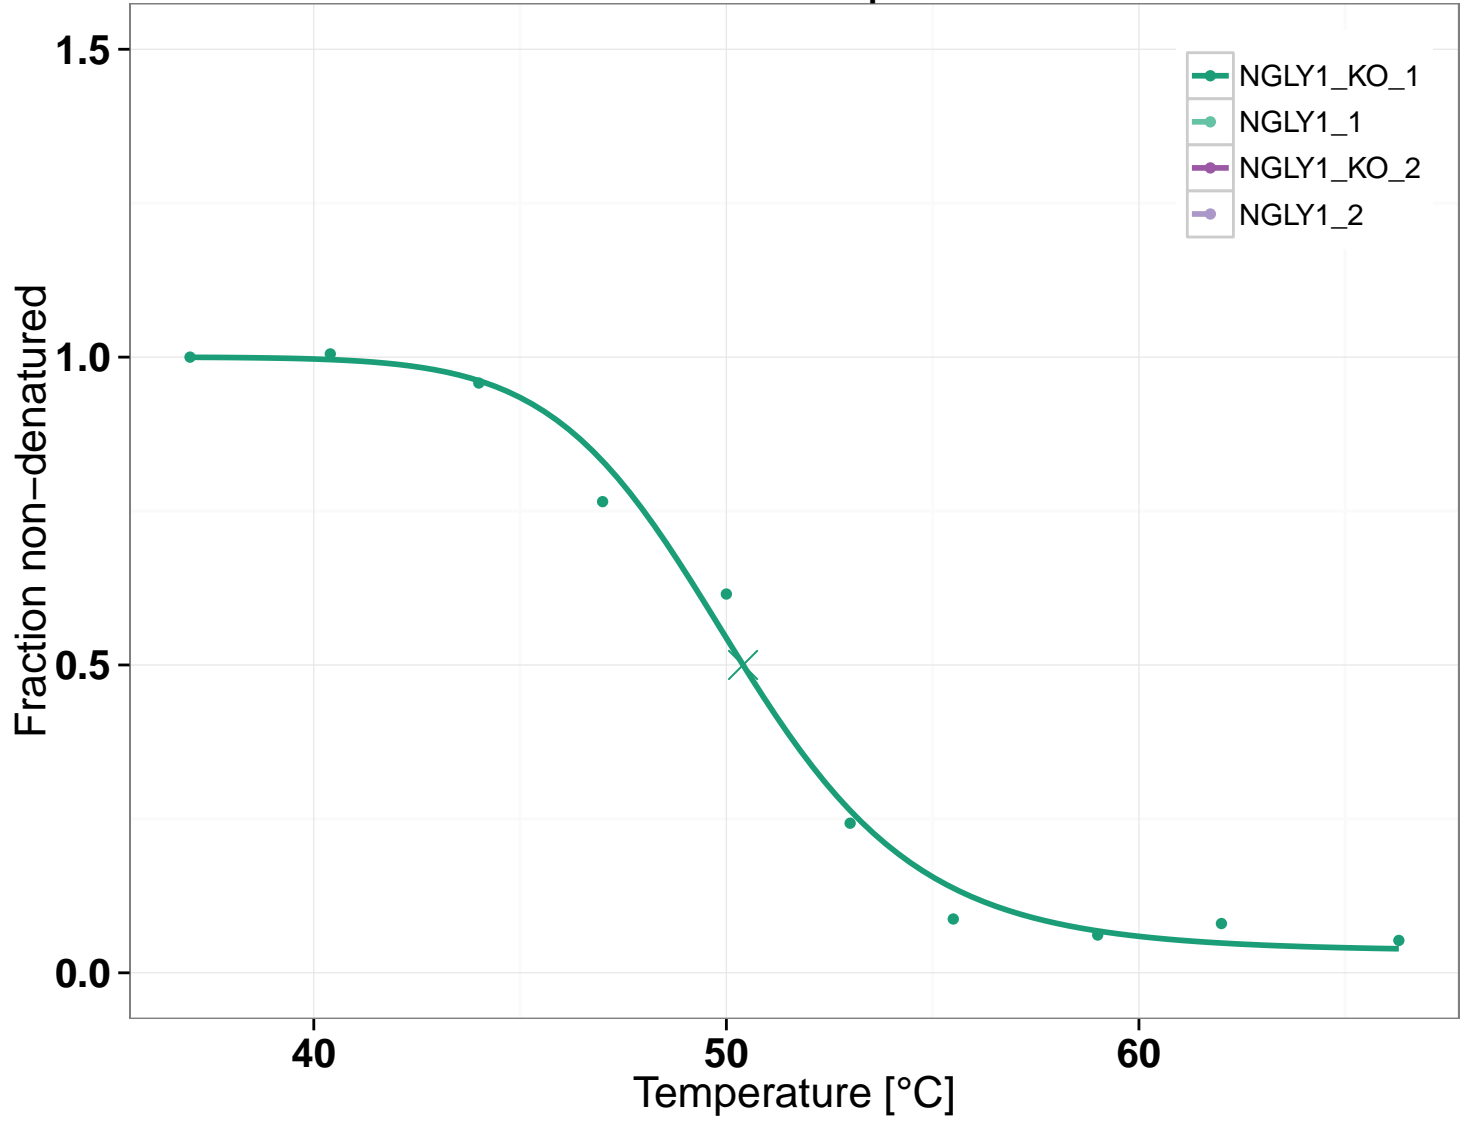

|            | meltPoint | slope | plateau | R2   |
|------------|-----------|-------|---------|------|
| NGLY1_KO_1 | 50.4      | -0.11 | 0.03    | 0.99 |
| NGLY1_1    | -         | -     | -       | -    |
| NGLY1_KO_2 | -         | -     | -       | -    |
| NGLY1_2    | -         | -     | -       | -    |

Supplement: Supplementary file 3278 [file 1]

IPI00397676.4|LOC388474

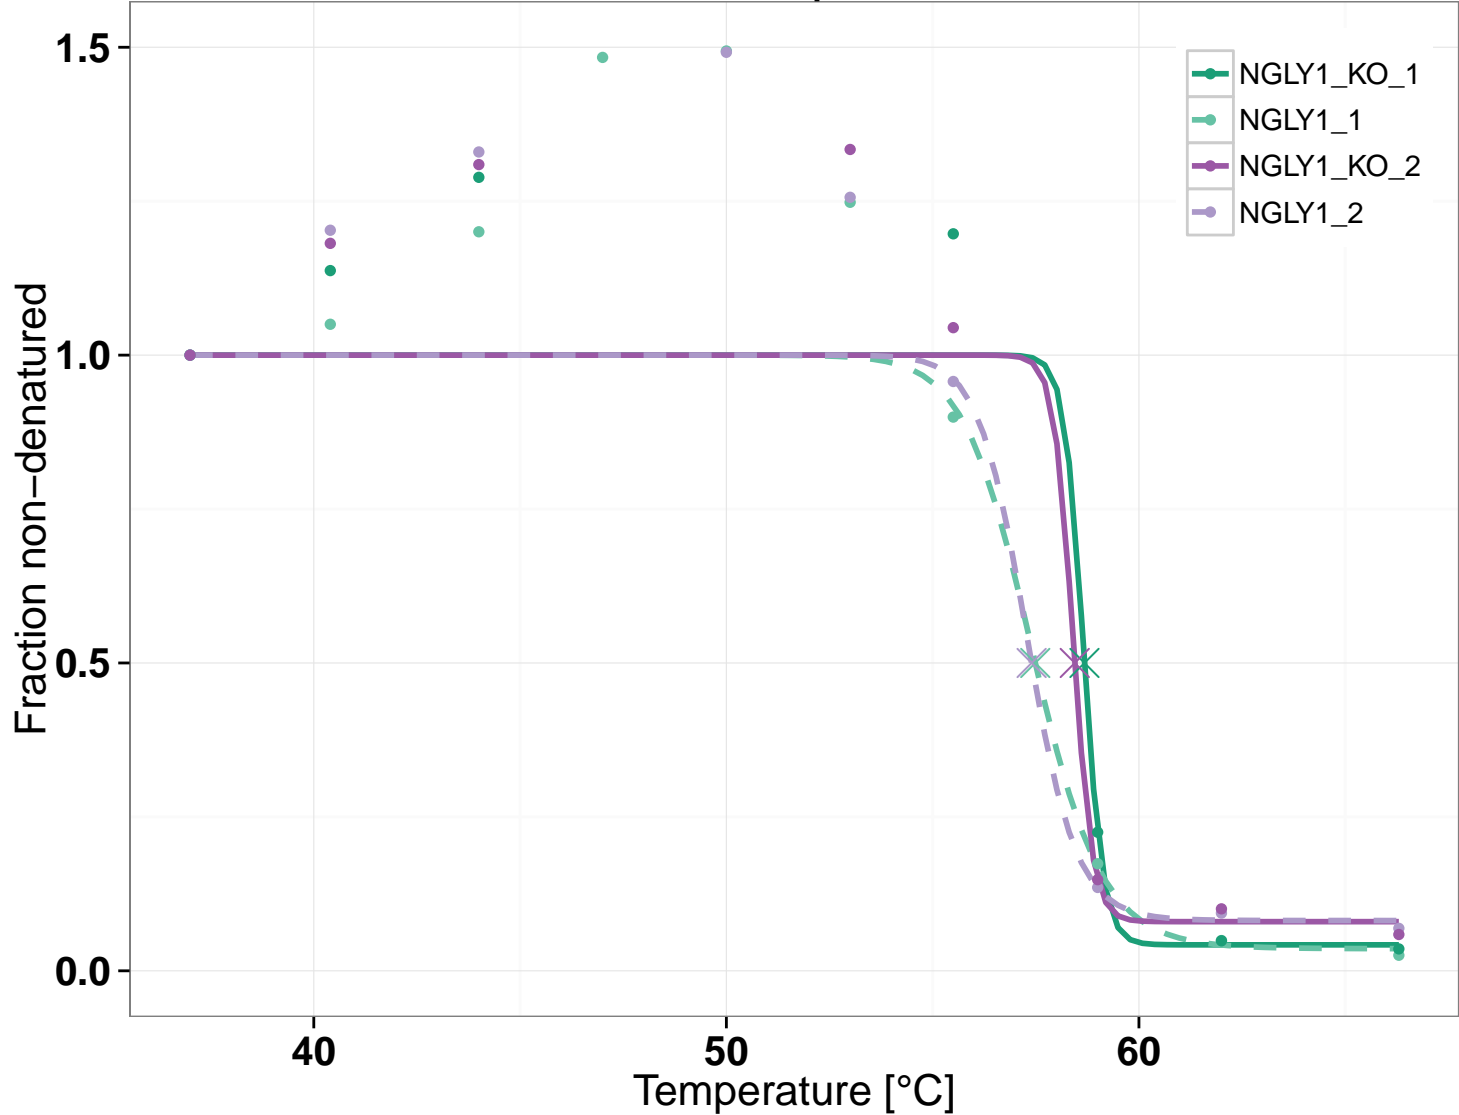

|            | meltPoint | slope | plateau | R2   |
|------------|-----------|-------|---------|------|
| NGLY1_KO_1 | 58.68     | -1    | 0.04    | 0.58 |
| NGLY1_1    | 57.49     | -0.29 | 0.04    | 0.8  |
| NGLY1_KO_2 | 58.44     | -0.98 | 0.08    | 0.64 |
| NGLY1_2    | 57.4      | -0.39 | 0.08    | 0.73 |

Supplement: Supplementary file 3279 [file 1]

IPI00009365.3|COX16

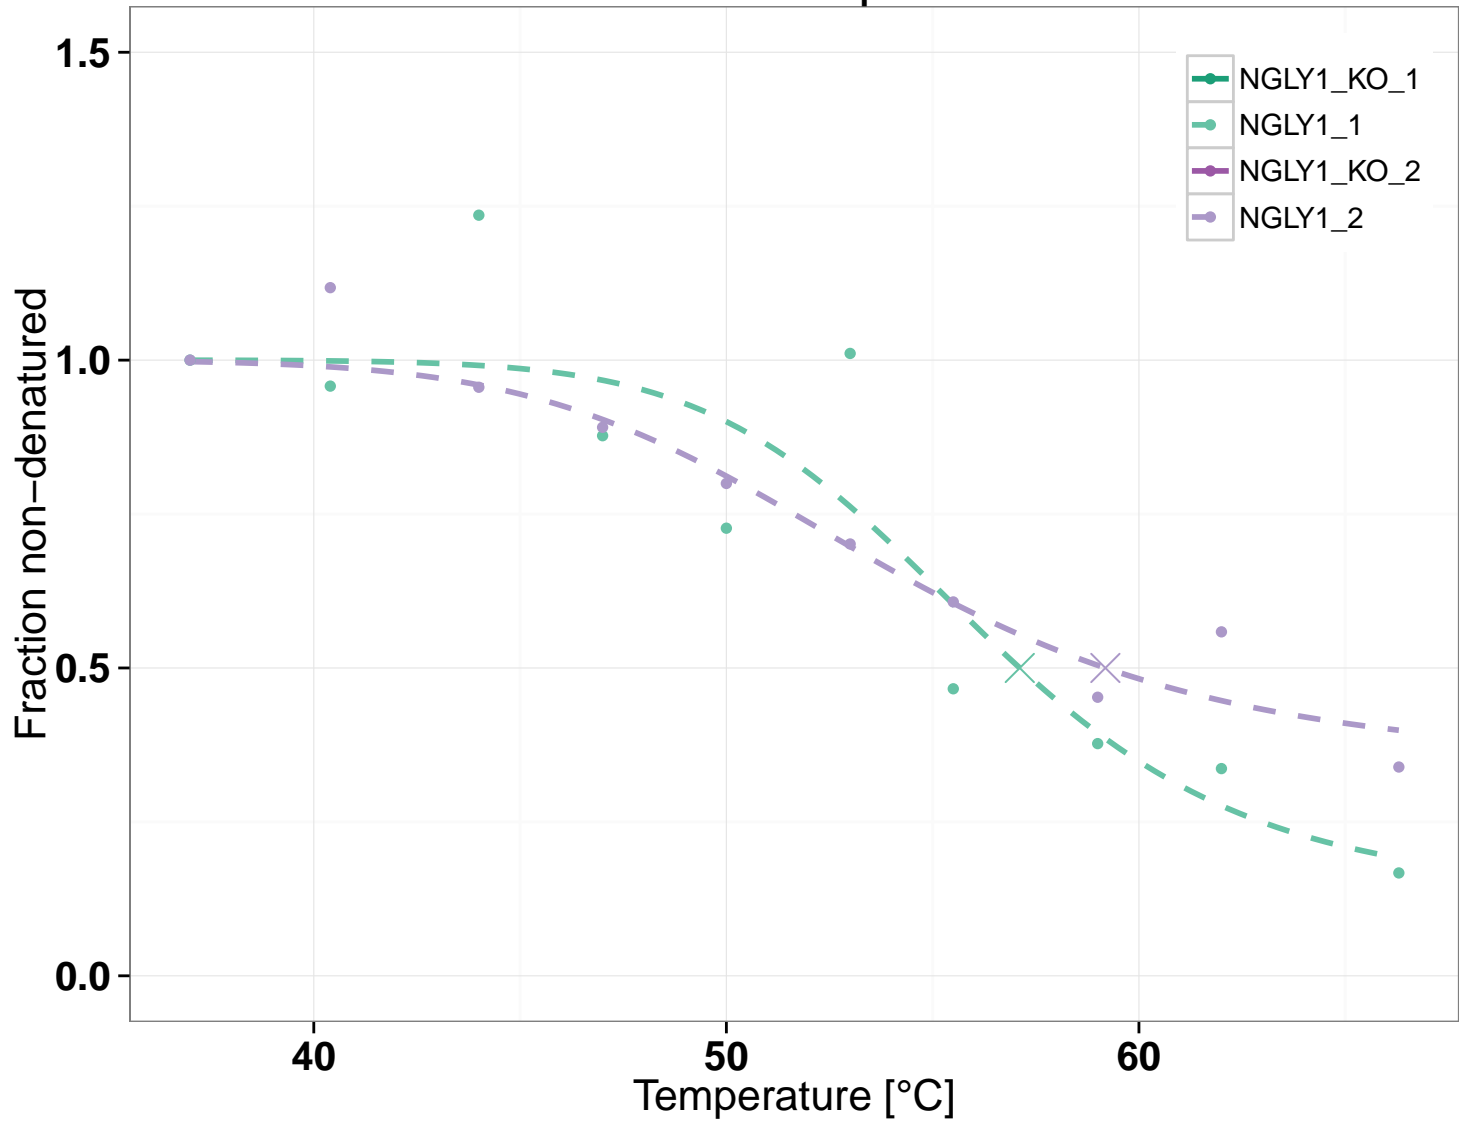

|            | meltPoint | slope  | plateau | R2   |
|------------|-----------|--------|---------|------|
| NGLY1_KO_1 | -         | -      | -       | -    |
| NGLY1_1    | 57.11     | -0.066 | 0.13    | 0.84 |
| NGLY1_KO_2 | -         | -      | -       | -    |
| NGLY1_2    | 59.19     | -0.039 | 0.34    | 0.94 |

Supplement: Supplementary file 3280 [file 1]

# IPI00002922.5|TBL1XR1

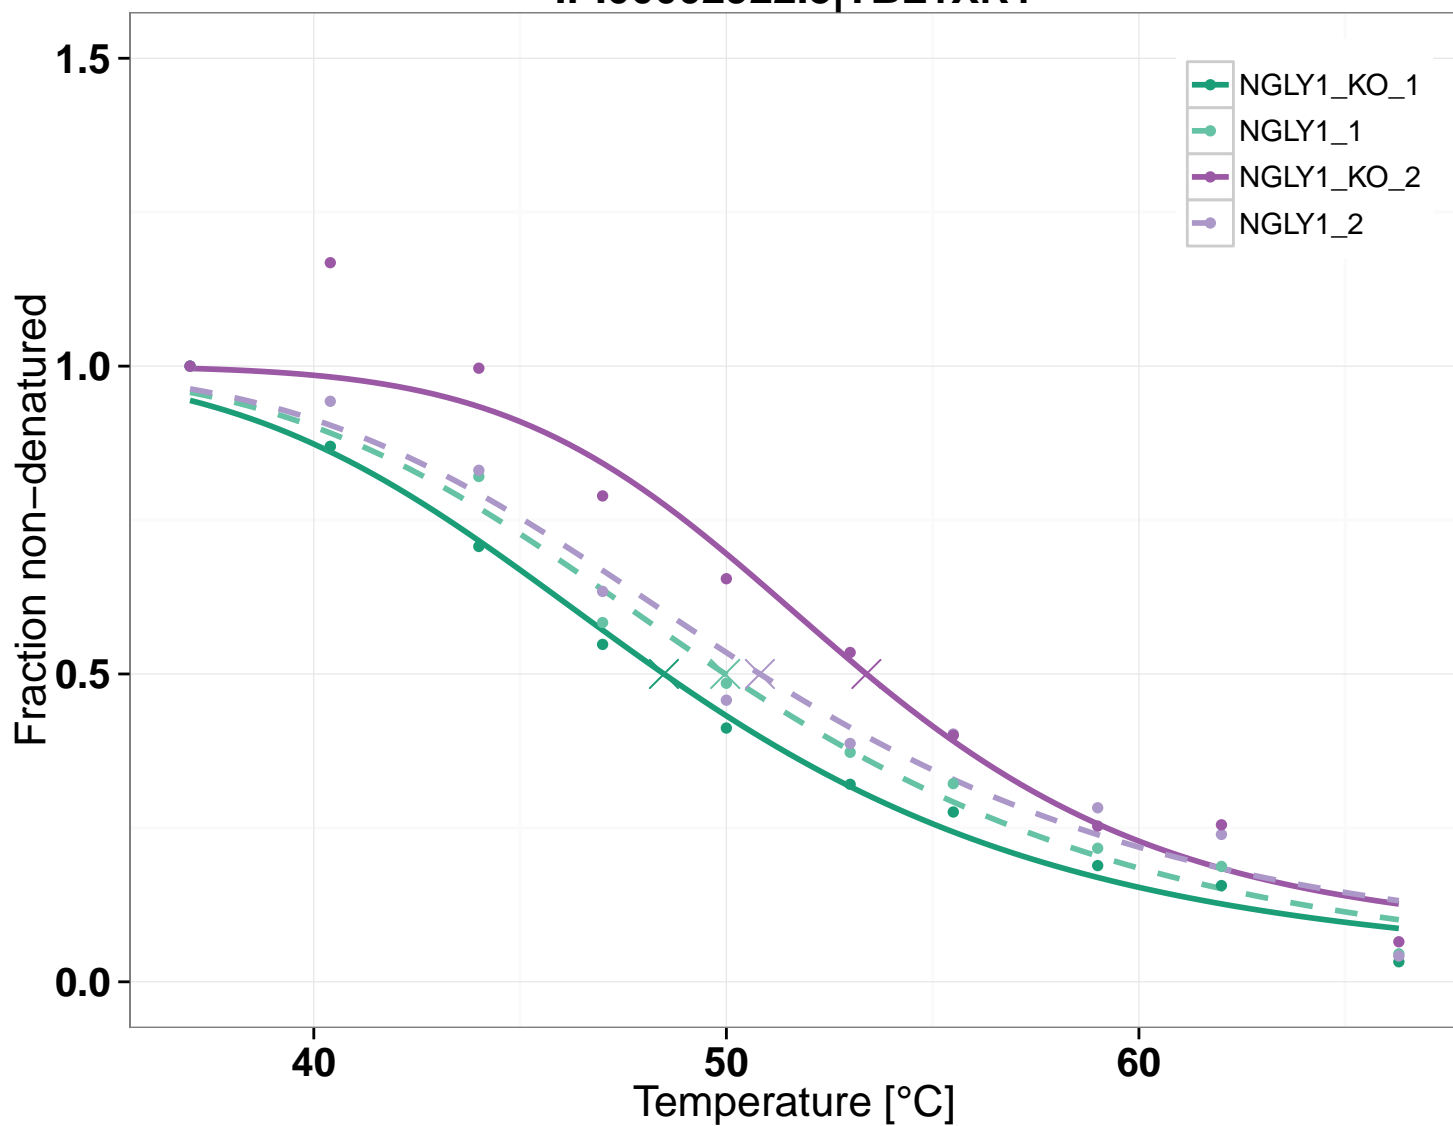

|            | meltPoint | slope  | plateau | R2   |
|------------|-----------|--------|---------|------|
| NGLY1_KO_1 | 48.49     | -0.049 | 0.01    | 0.99 |
| NGLY1_1    | 49.97     | -0.047 | 0       | 0.99 |
| NGLY1_KO_2 | 53.39     | -0.058 | 0.06    | 0.96 |
| NGLY1_2    | 50.81     | -0.045 | 0.03    | 0.97 |

Supplement: Supplementary file 3281 [file 1]

IPI00744711.2|PNPT1

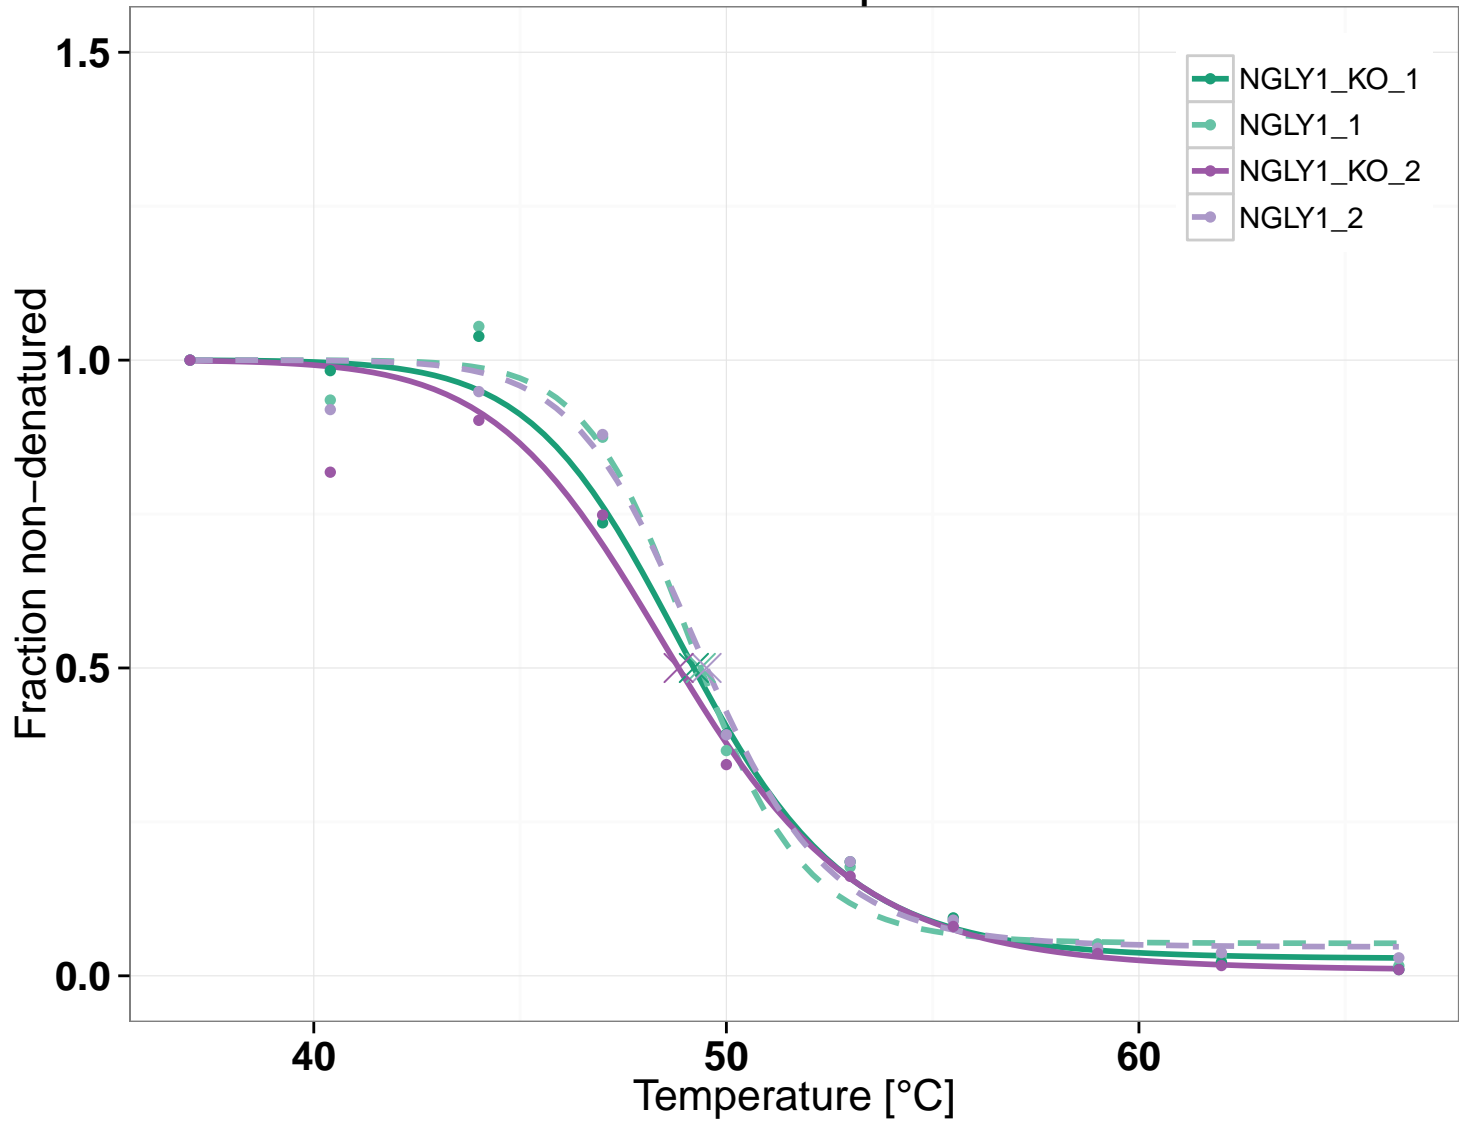

|            | meltPoint | slope | plateau | R2   |
|------------|-----------|-------|---------|------|
| NGLY1_KO_1 | 49.21     | -0.13 | 0.03    | 0.99 |
| NGLY1_1    | 49.38     | -0.18 | 0.05    | 0.99 |
| NGLY1_KO_2 | 48.84     | -0.11 | 0.01    | 0.98 |
| NGLY1_2    | 49.52     | -0.15 | 0.05    | 0.99 |

Supplement: Supplementary file 3282 [file 1]

IPI00784327.1|PLCB2

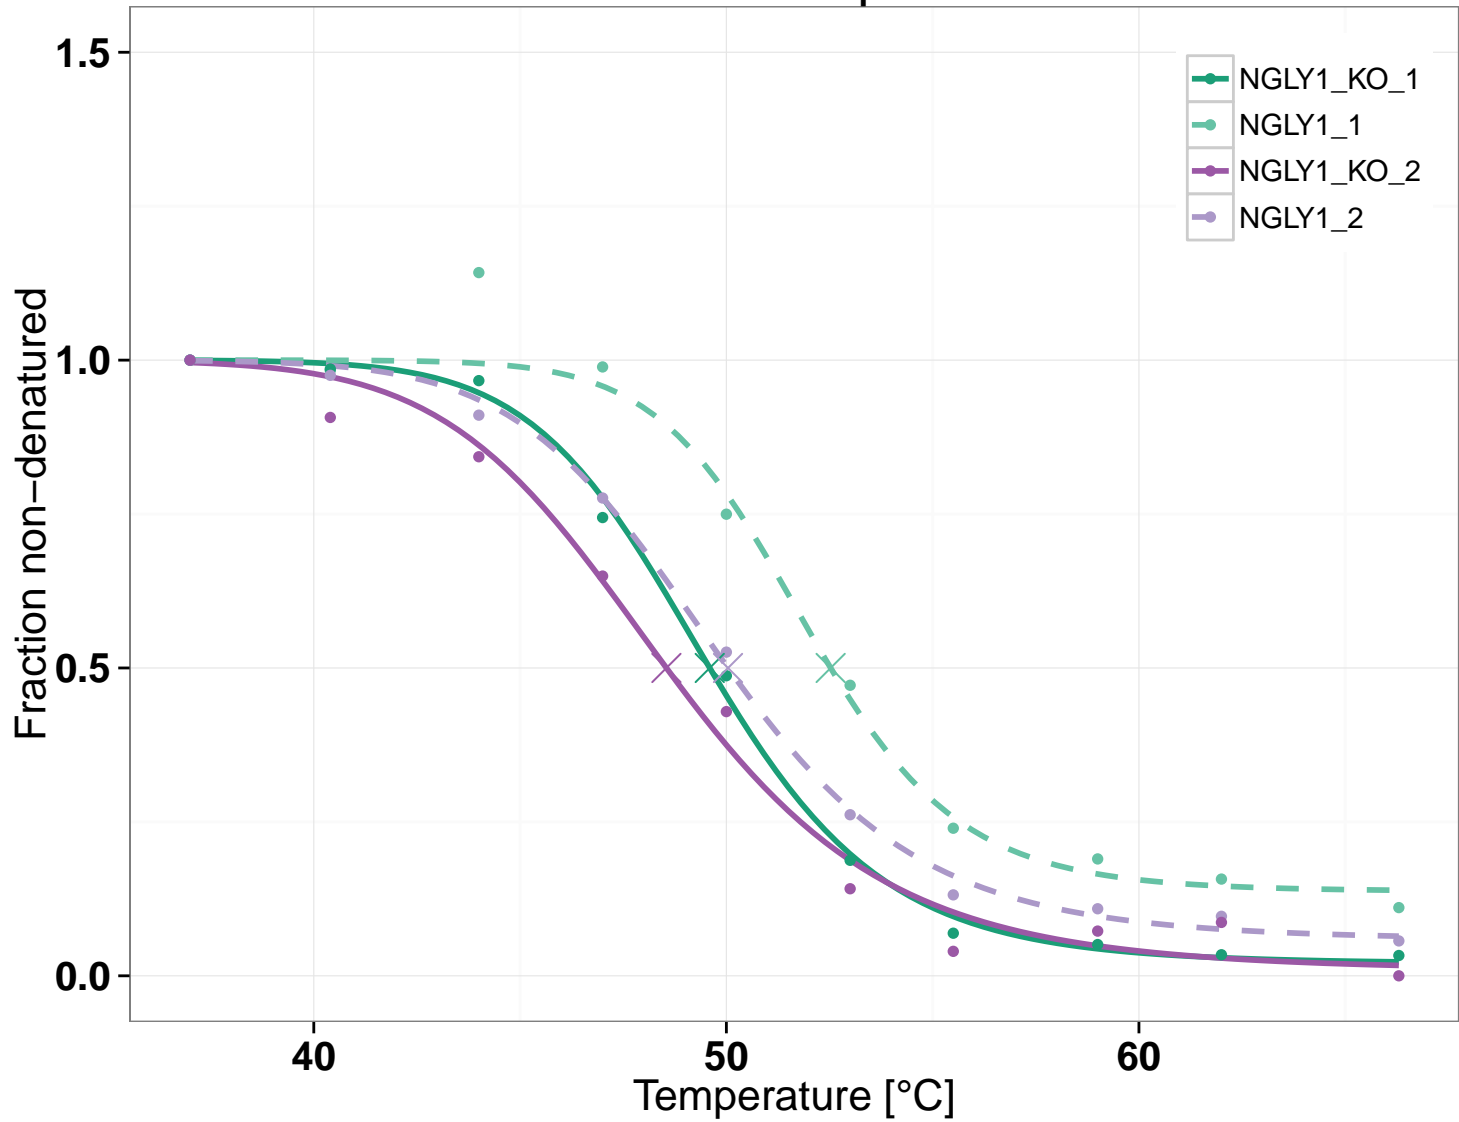

|            | meltPoint | slope  | plateau | R2   |
|------------|-----------|--------|---------|------|
| NGLY1_KO_1 | 49.6      | -0.11  | 0.02    | 1    |
| NGLY1_1    | 52.53     | -0.12  | 0.14    | 0.98 |
| NGLY1_KO_2 | 48.55     | -0.092 | 0.01    | 0.99 |
| NGLY1_2    | 50.04     | -0.096 | 0.06    | 1    |

Supplement: Supplementary file 3283 [file 1]

IPI00009895.1|ZDHHC3

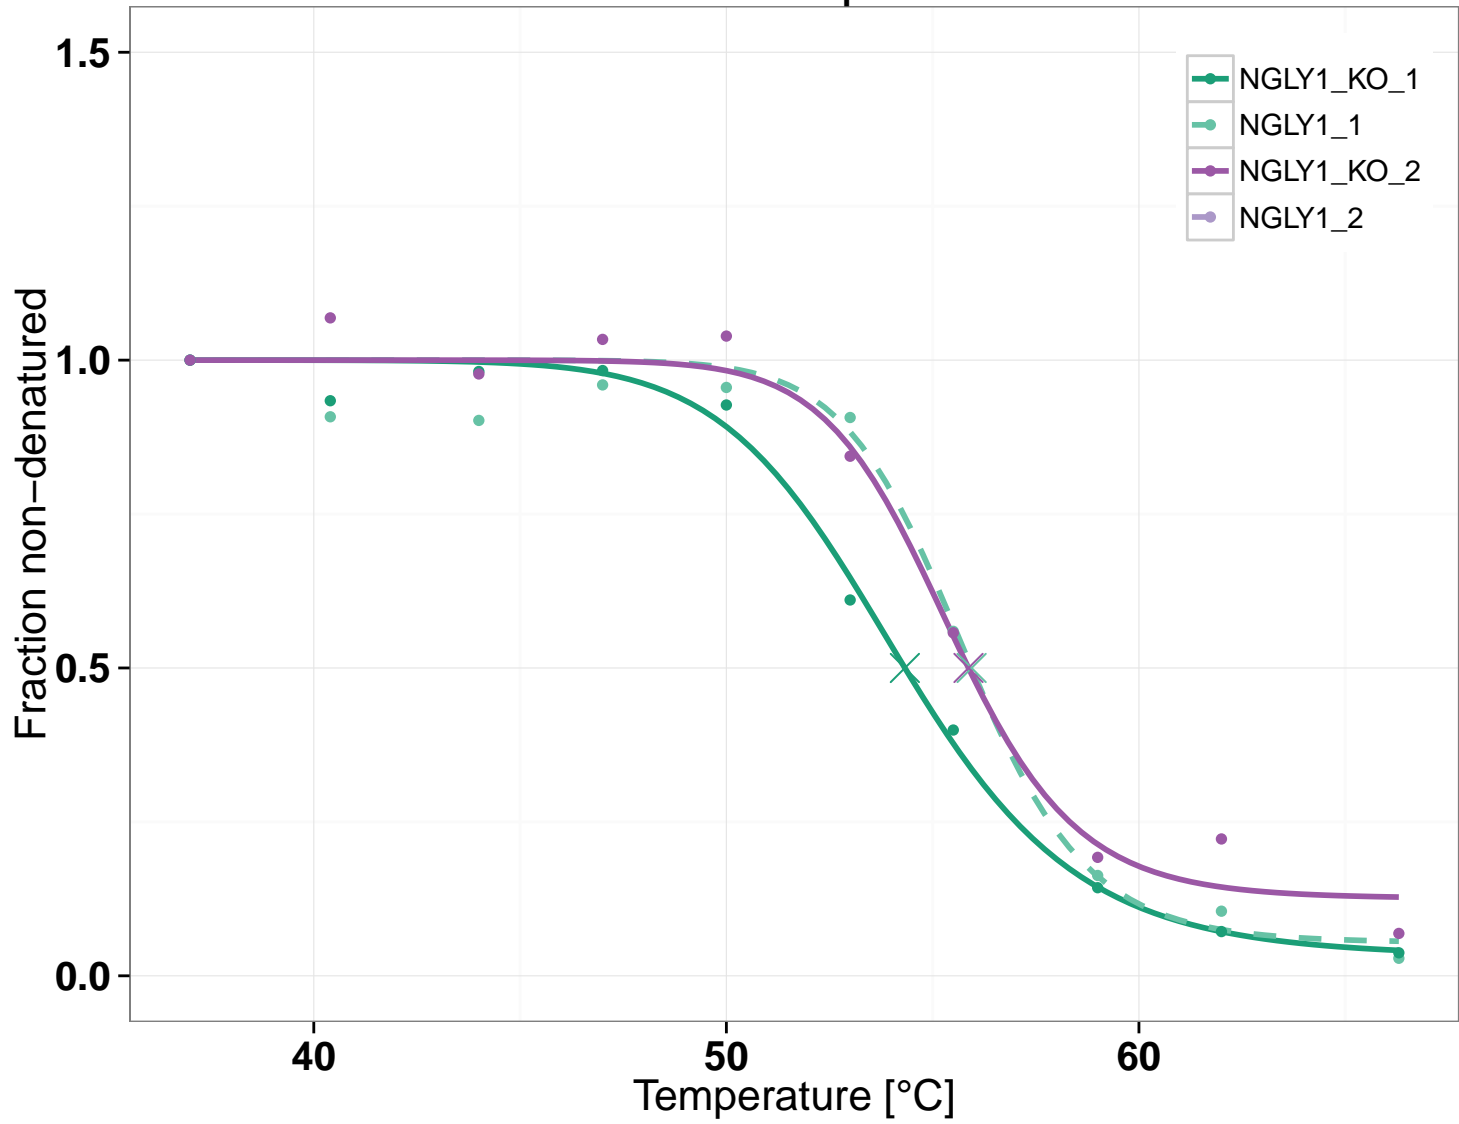

|            | meltPoint | slope | plateau | R2   |
|------------|-----------|-------|---------|------|
| NGLY1_KO_1 | 54.33     | -0.11 | 0.03    | 0.99 |
| NGLY1_1    | 55.94     | -0.16 | 0.05    | 0.98 |
| NGLY1_KO_2 | 55.87     | -0.14 | 0.13    | 0.99 |
| NGLY1_2    | -         | -     | -       | -    |

Supplement: Supplementary file 3284 [file 1]

IPI00827508.2|RPL10A

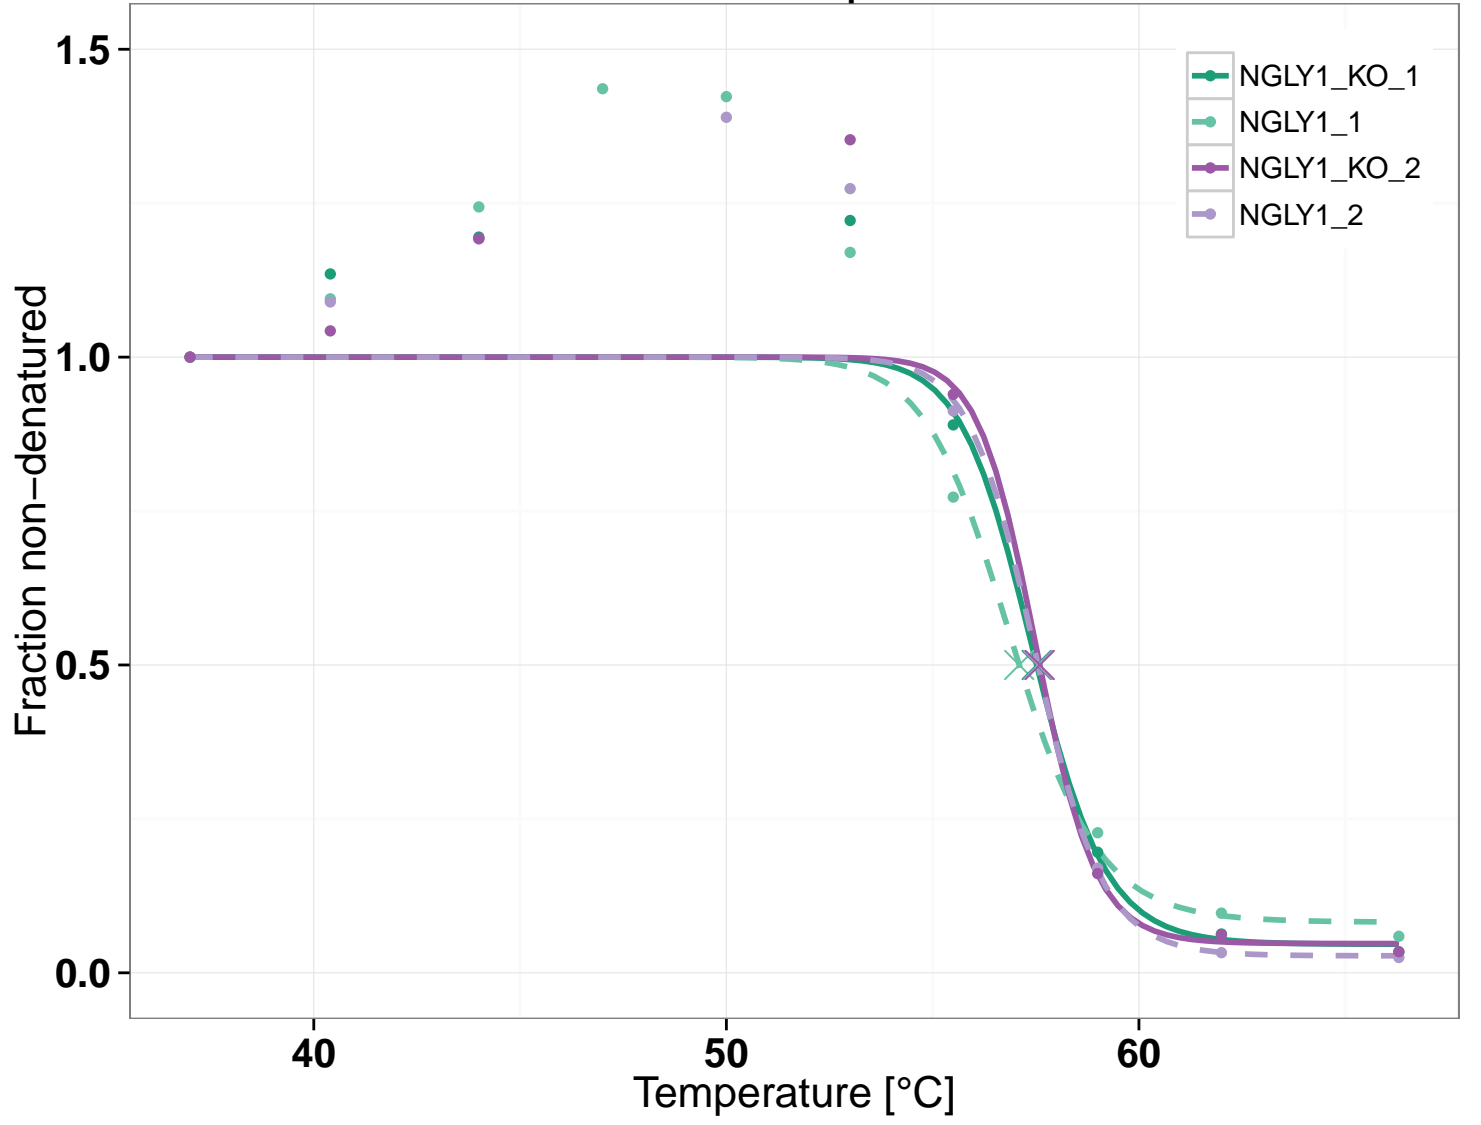

|            | meltPoint | slope | plateau | R2   |
|------------|-----------|-------|---------|------|
| NGLY1_KO_1 | 57.52     | -0.27 | 0.05    | 0.75 |
| NGLY1_1    | 57.1      | -0.22 | 0.08    | 0.82 |
| NGLY1_KO_2 | 57.6      | -0.33 | 0.05    | 0.72 |
| NGLY1_2    | 57.55     | -0.3  | 0.03    | 0.81 |

Supplement: Supplementary file 3285 [file 1]

# IPI00218326.1|SP100

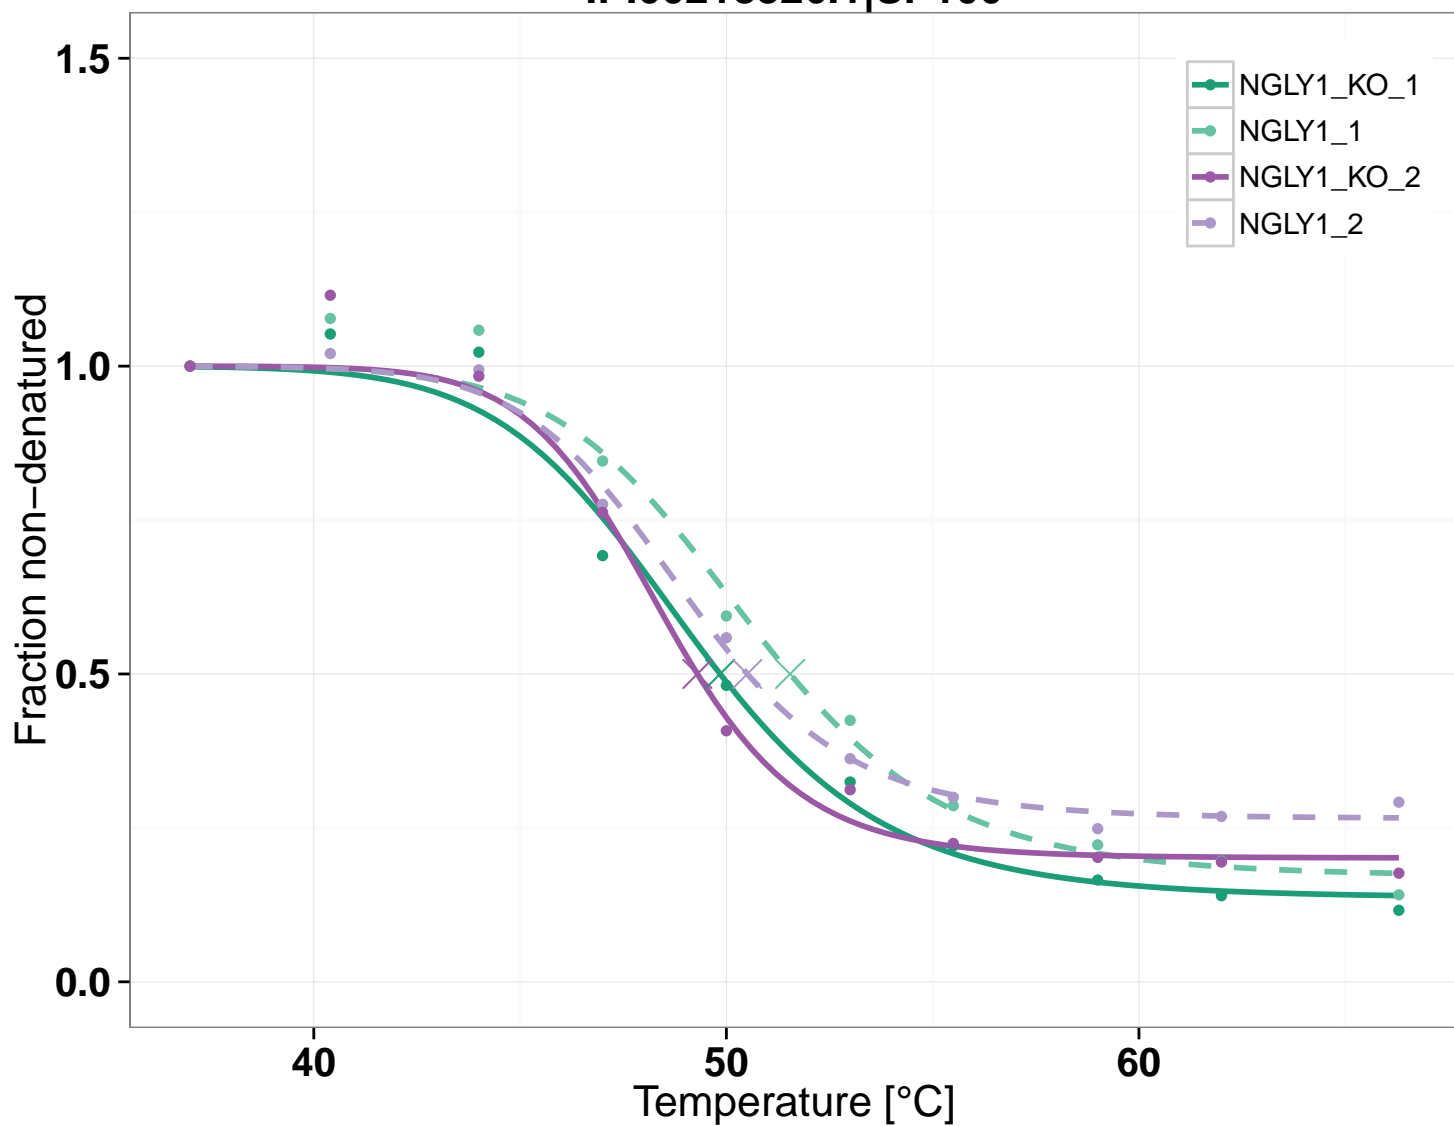

|            | meltPoint | slope  | plateau | R2   |
|------------|-----------|--------|---------|------|
| NGLY1_KO_1 | 49.85     | -0.092 | 0.14    | 0.99 |
| NGLY1_1    | 51.54     | -0.088 | 0.17    | 0.99 |
| NGLY1_KO_2 | 49.3      | -0.12  | 0.2     | 0.99 |
| NGLY1_2    | 50.51     | -0.093 | 0.27    | 1    |

Supplement: Supplementary file 3286 [file 1]

IPI00002432.3|HOOK2

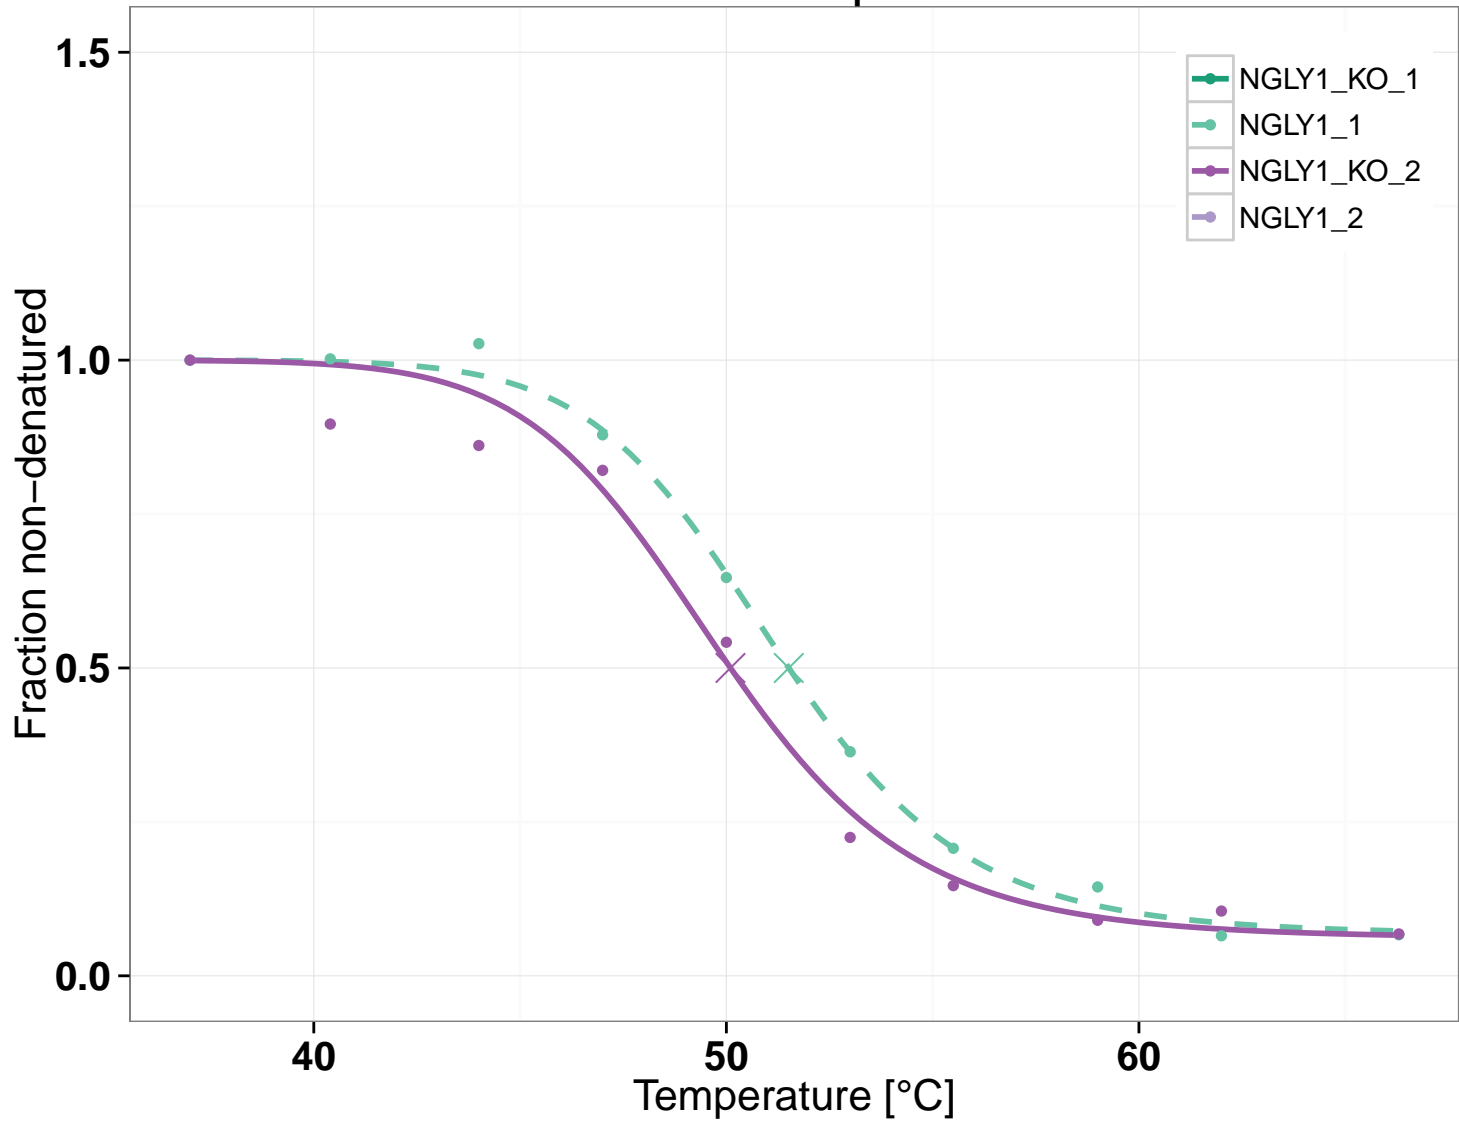

|            | meltPoint | slope | plateau | R2   |
|------------|-----------|-------|---------|------|
| NGLY1_KO_1 | -         | -     | -       | -    |
| NGLY1_1    | 51.51     | -0.1  | 0.07    | 1    |
| NGLY1_KO_2 | 50.1      | -0.1  | 0.06    | 0.98 |
| NGLY1_2    | -         | -     | -       | -    |

Supplement: Supplementary file 3287 [file 1]

IPI00144003.2|SALL2

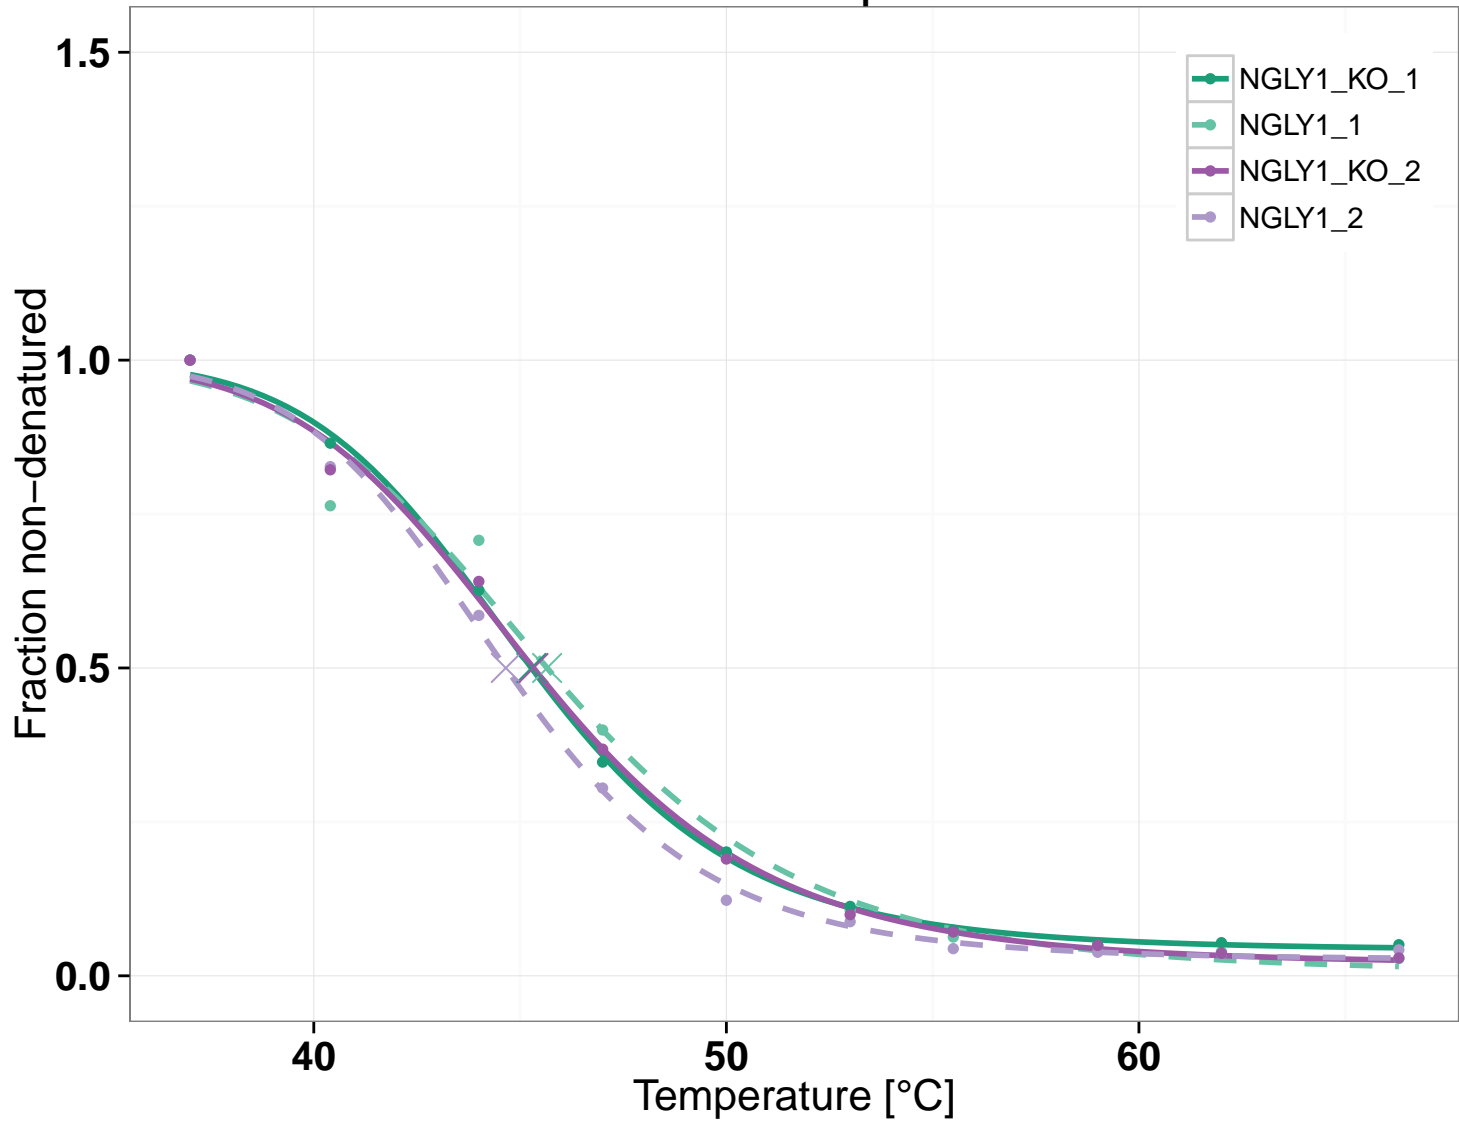

|            | meltPoint | slope  | plateau | R2   |
|------------|-----------|--------|---------|------|
| NGLY1_KO_1 | 45.27     | -0.092 | 0.04    | 1    |
| NGLY1_1    | 45.66     | -0.08  | 0       | 0.98 |
| NGLY1_KO_2 | 45.32     | -0.085 | 0.02    | 1    |
| NGLY1_2    | 44.65     | -0.098 | 0.03    | 1    |

Supplement: Supplementary file 3288 [file 1]

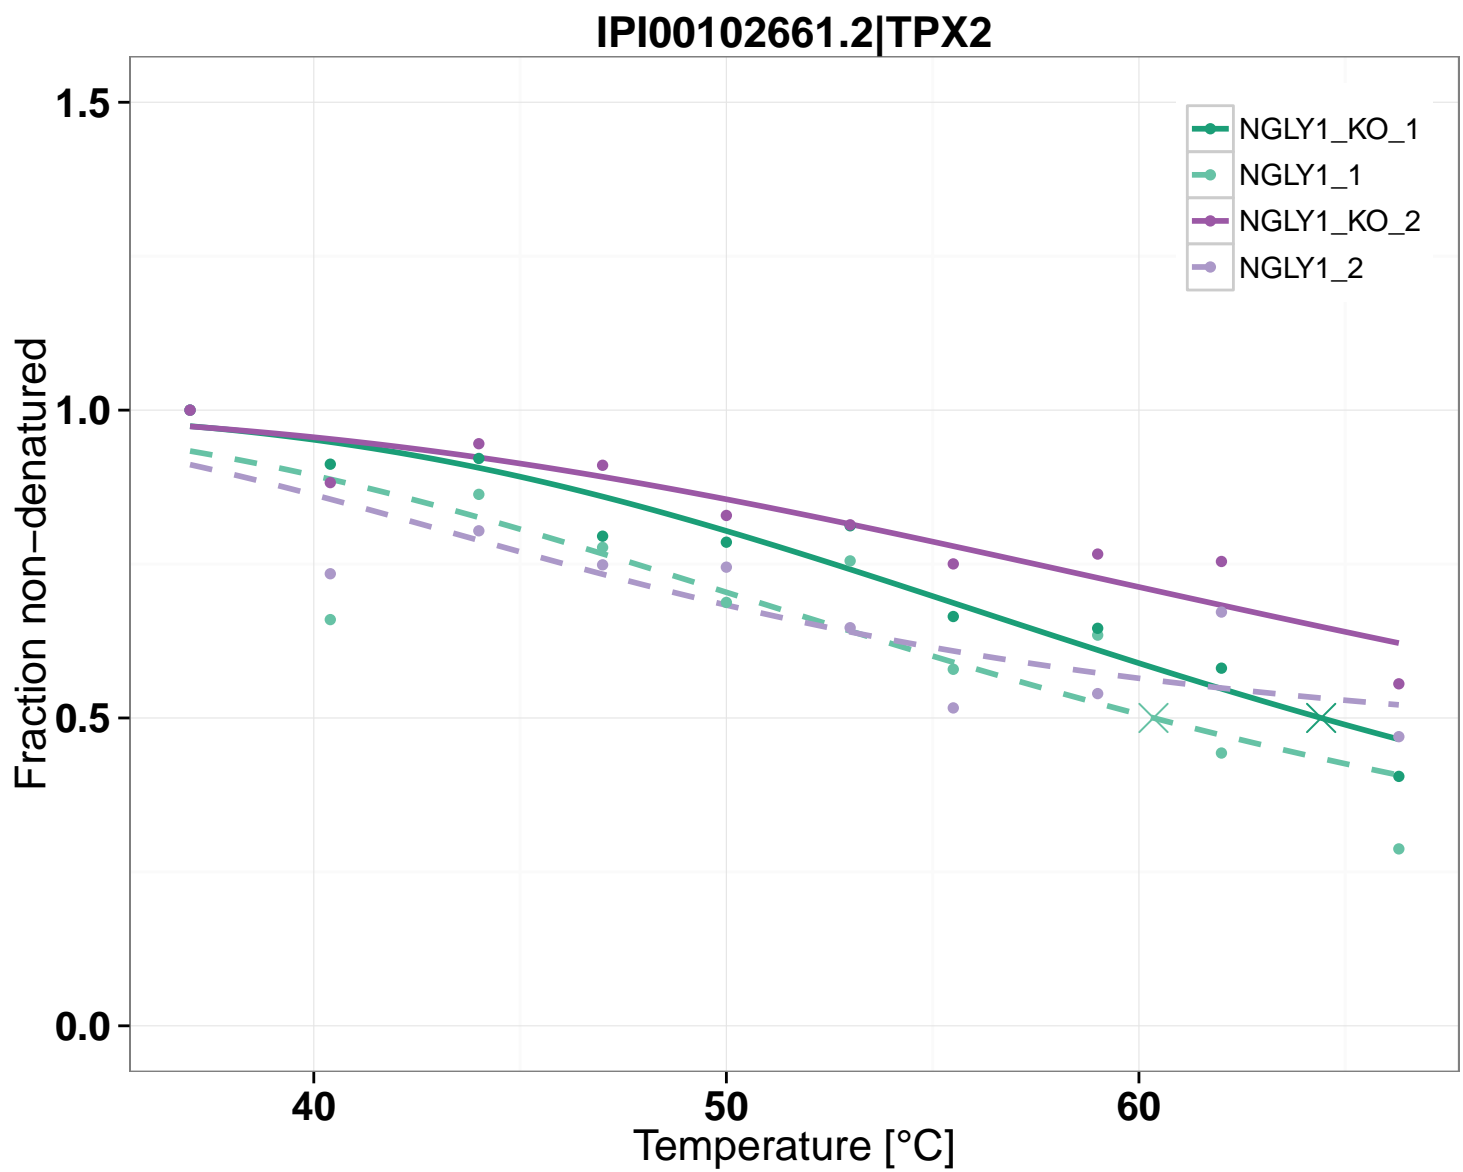

|            | meltPoint | slope  | plateau | R2   |
|------------|-----------|--------|---------|------|
| NGLY1_KO_1 | 64.42     | -0.022 | 0       | 0.94 |
| NGLY1_1    | 60.35     | -0.021 | 0       | 0.74 |
| NGLY1_KO_2 | -         | -0.015 | 0       | 0.87 |
| NGLY1_2    | -         | -0.019 | 0.41    | 0.75 |

Supplement: Supplementary file 3289 [file 1]

# IPI00294744.7|PARN

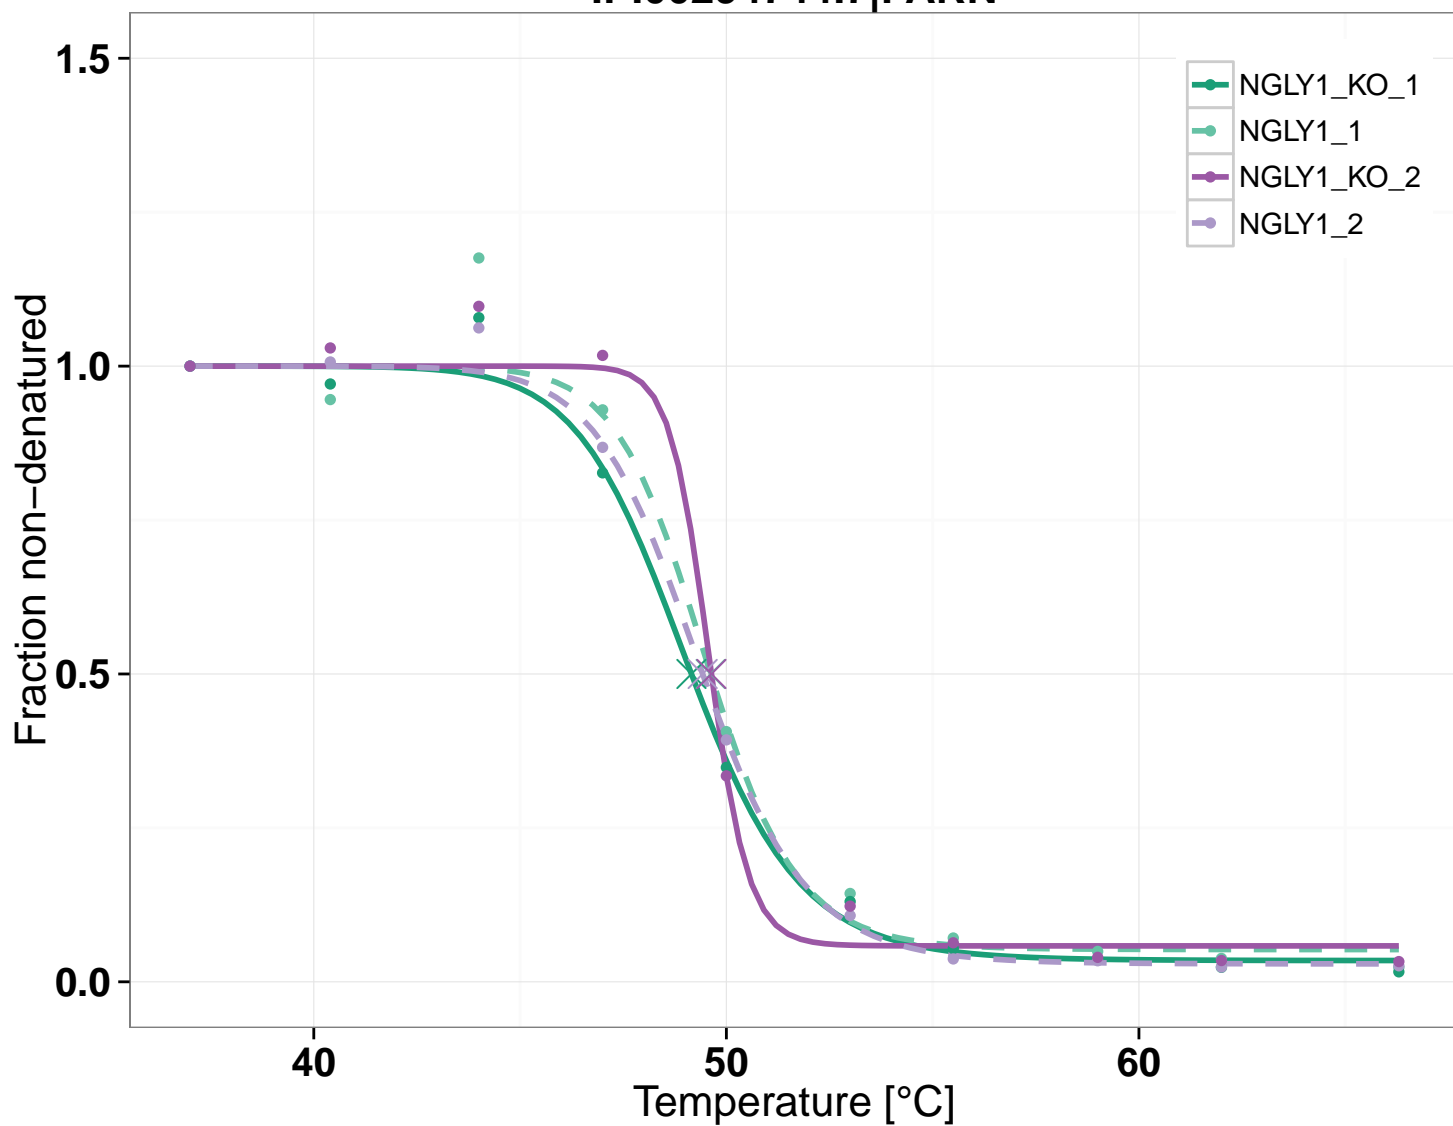

|            | meltPoint | slope | plateau | R2   |
|------------|-----------|-------|---------|------|
| NGLY1_KO_1 | 49.15     | -0.18 | 0.03    | 0.99 |
| NGLY1_1    | 49.62     | -0.22 | 0.05    | 0.98 |
| NGLY1_KO_2 | 49.64     | -0.49 | 0.06    | 0.99 |
| NGLY1_2    | 49.43     | -0.19 | 0.03    | 1    |

Supplement: Supplementary file 3290 [file 1]

IPI00217858.1|LENG8

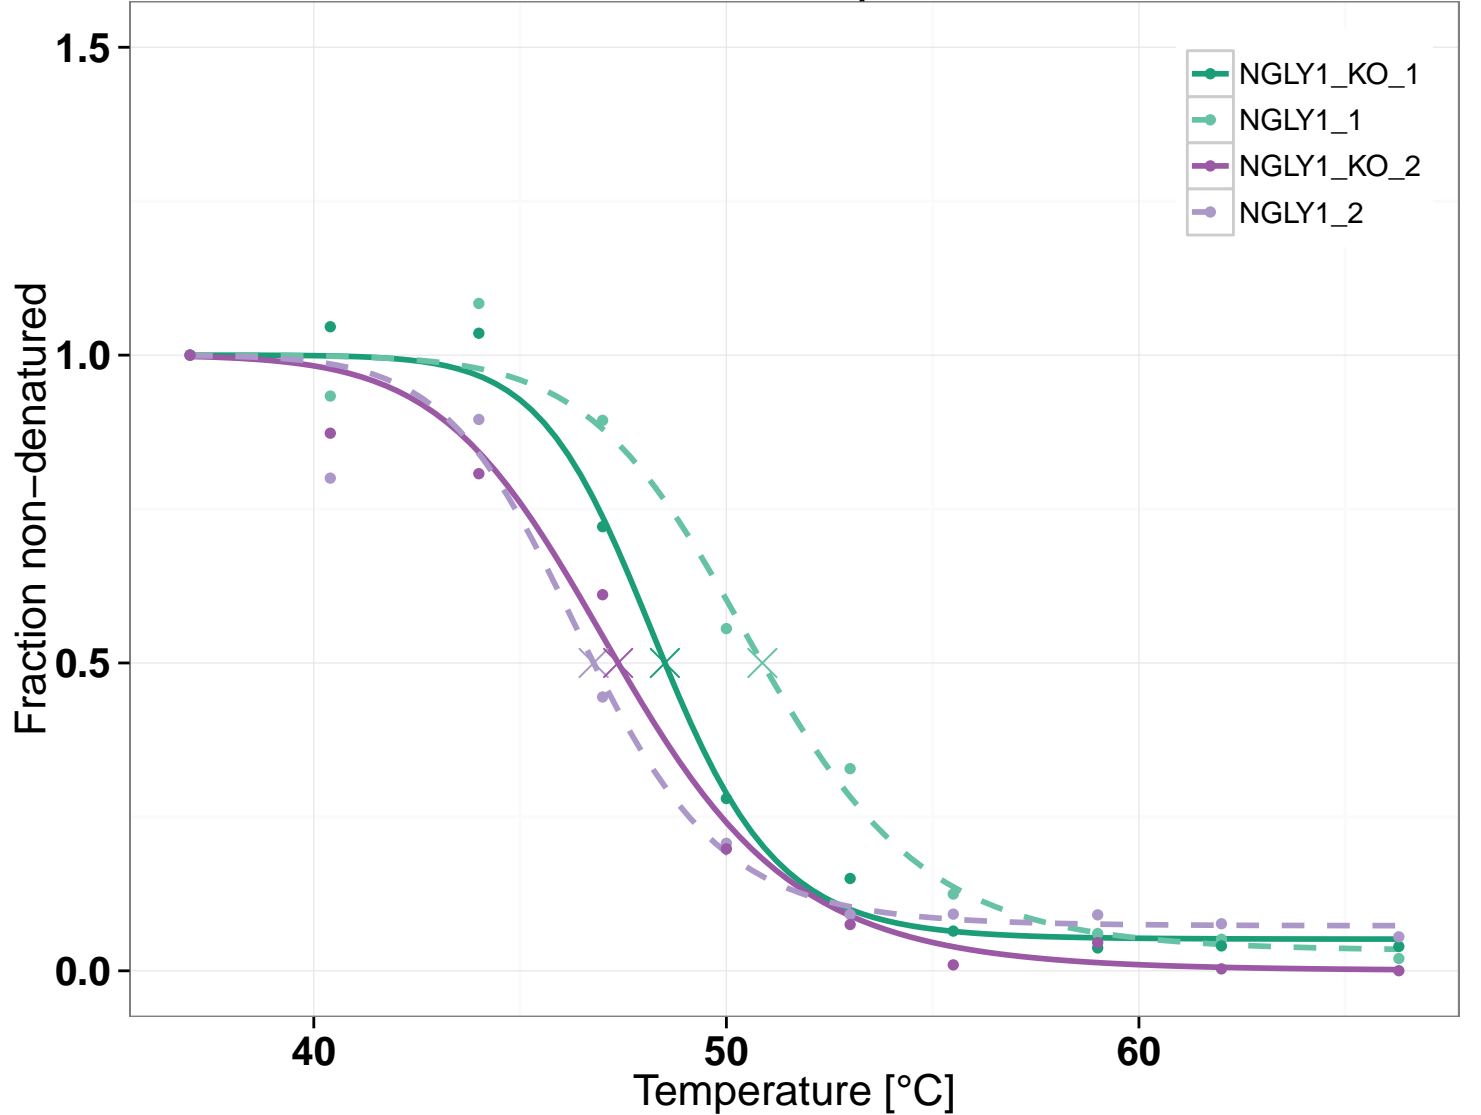

|            | meltPoint | slope | plateau | R2   |
|------------|-----------|-------|---------|------|
| NGLY1_KO_1 | 48.51     | -0.16 | 0.05    | 0.99 |
| NGLY1_1    | 50.87     | -0.12 | 0.03    | 0.99 |
| NGLY1_KO_2 | 47.38     | -0.12 | 0       | 0.99 |
| NGLY1_2    | 46.78     | -0.14 | 0.07    | 0.97 |

Supplement: Supplementary file 3291 [file 1]

IPI00000735.5|TSPAN13

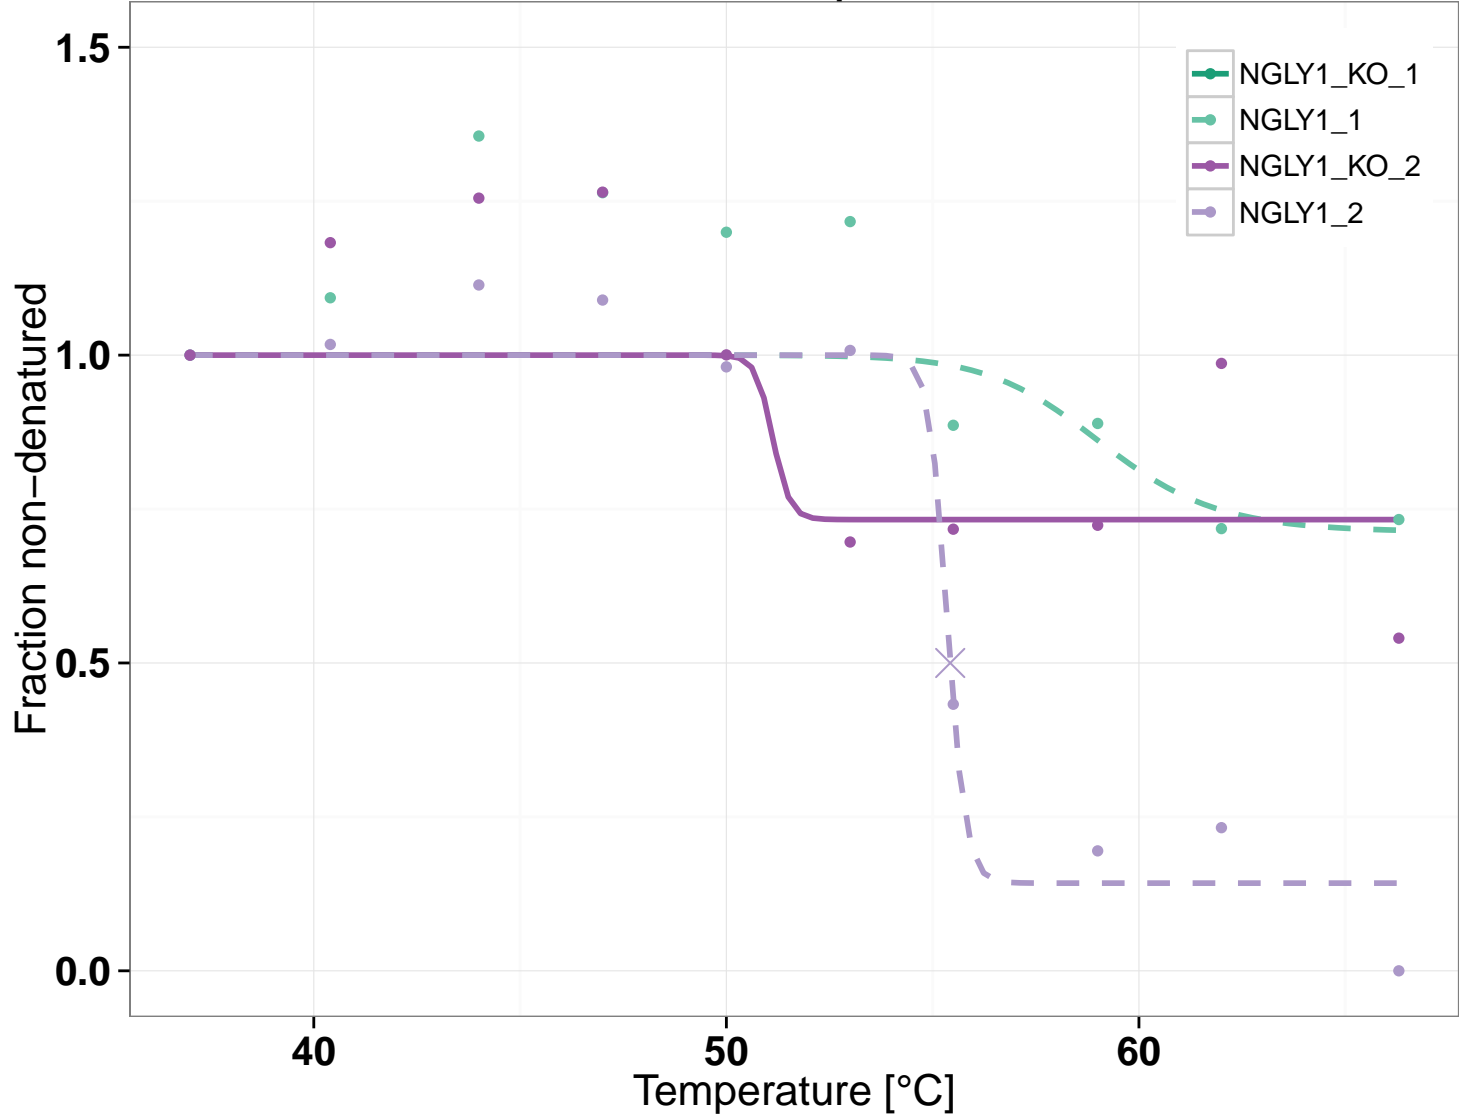

|            | meltPoint | slope  | plateau | R2   |
|------------|-----------|--------|---------|------|
| NGLY1_KO_1 | –         | –      | –       | –    |
| NGLY1_1    | –         | –0.051 | 0.71    | 0.33 |
| NGLY1_KO_2 | –         | –0.33  | 0.73    | 0.54 |
| NGLY1_2    | 55.43     | –0.97  | 0.14    | 0.97 |

Supplement: Supplementary file 3292 [file 1]

IPI00299526.7|SUZ12

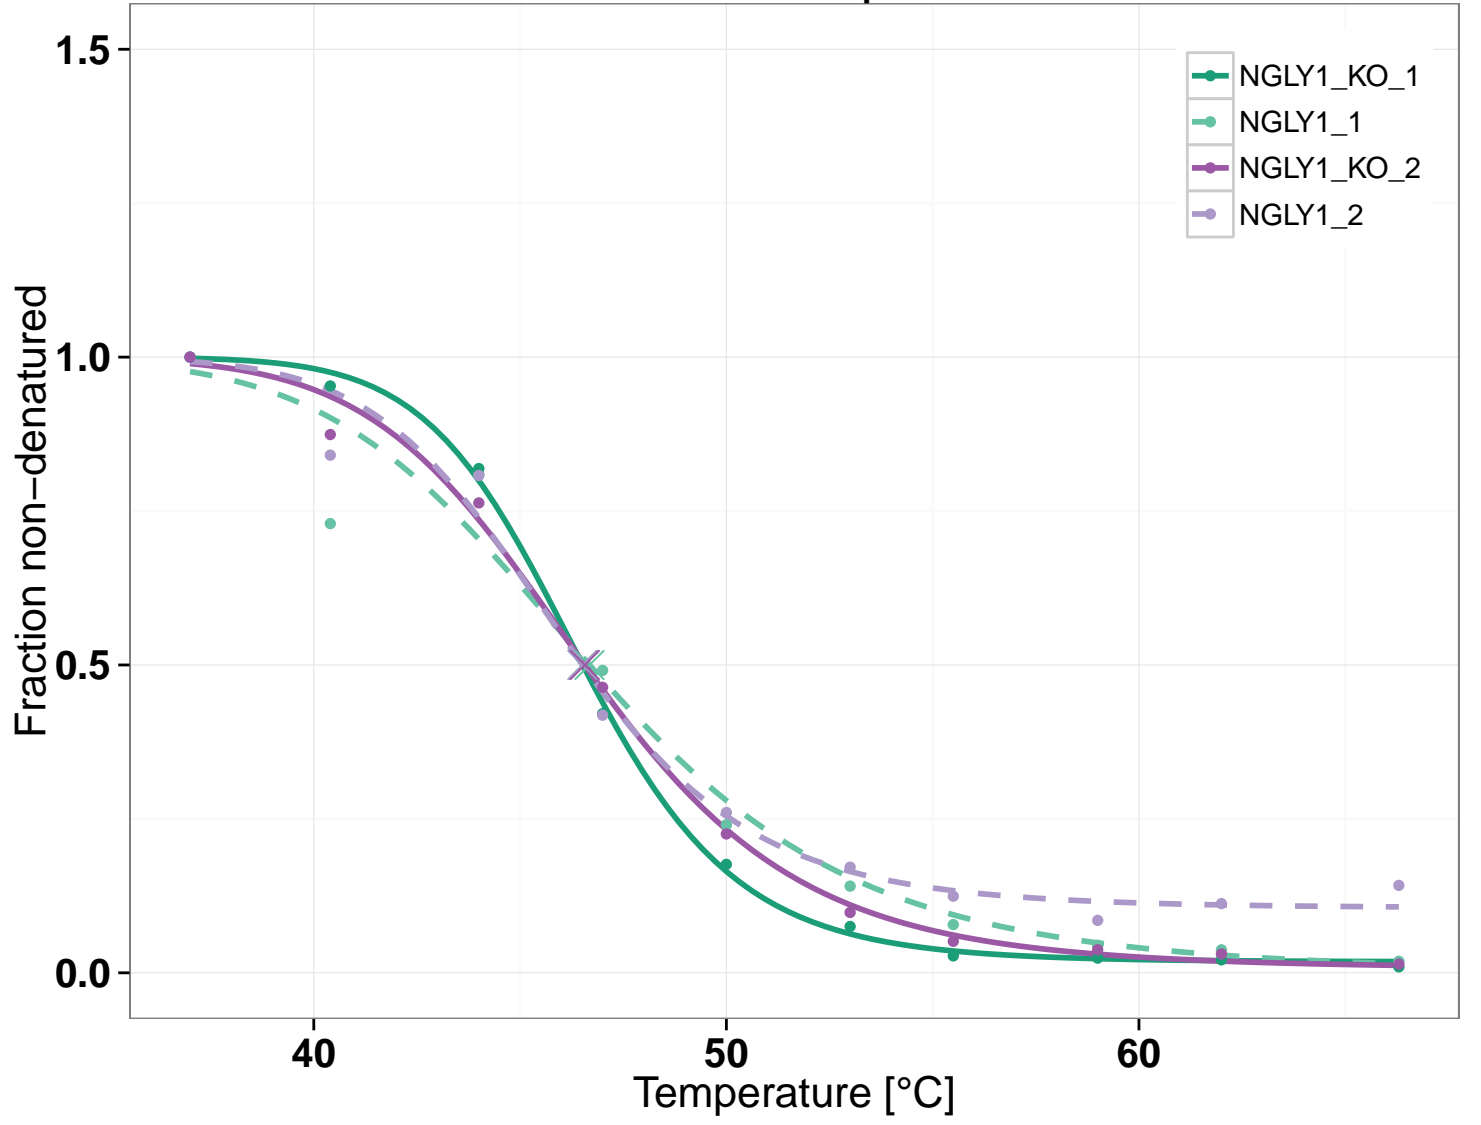

|            | meltPoint | slope  | plateau | R2   |
|------------|-----------|--------|---------|------|
| NGLY1_KO_1 | 46.52     | -0.13  | 0.02    | 1    |
| NGLY1_1    | 46.68     | -0.078 | 0       | 0.96 |
| NGLY1_KO_2 | 46.57     | -0.095 | 0.01    | 1    |
| NGLY1_2    | 46.51     | -0.098 | 0.11    | 0.98 |

Supplement: Supplementary file 3293 [file 1]

# IPI00852685.1|DIAPH1

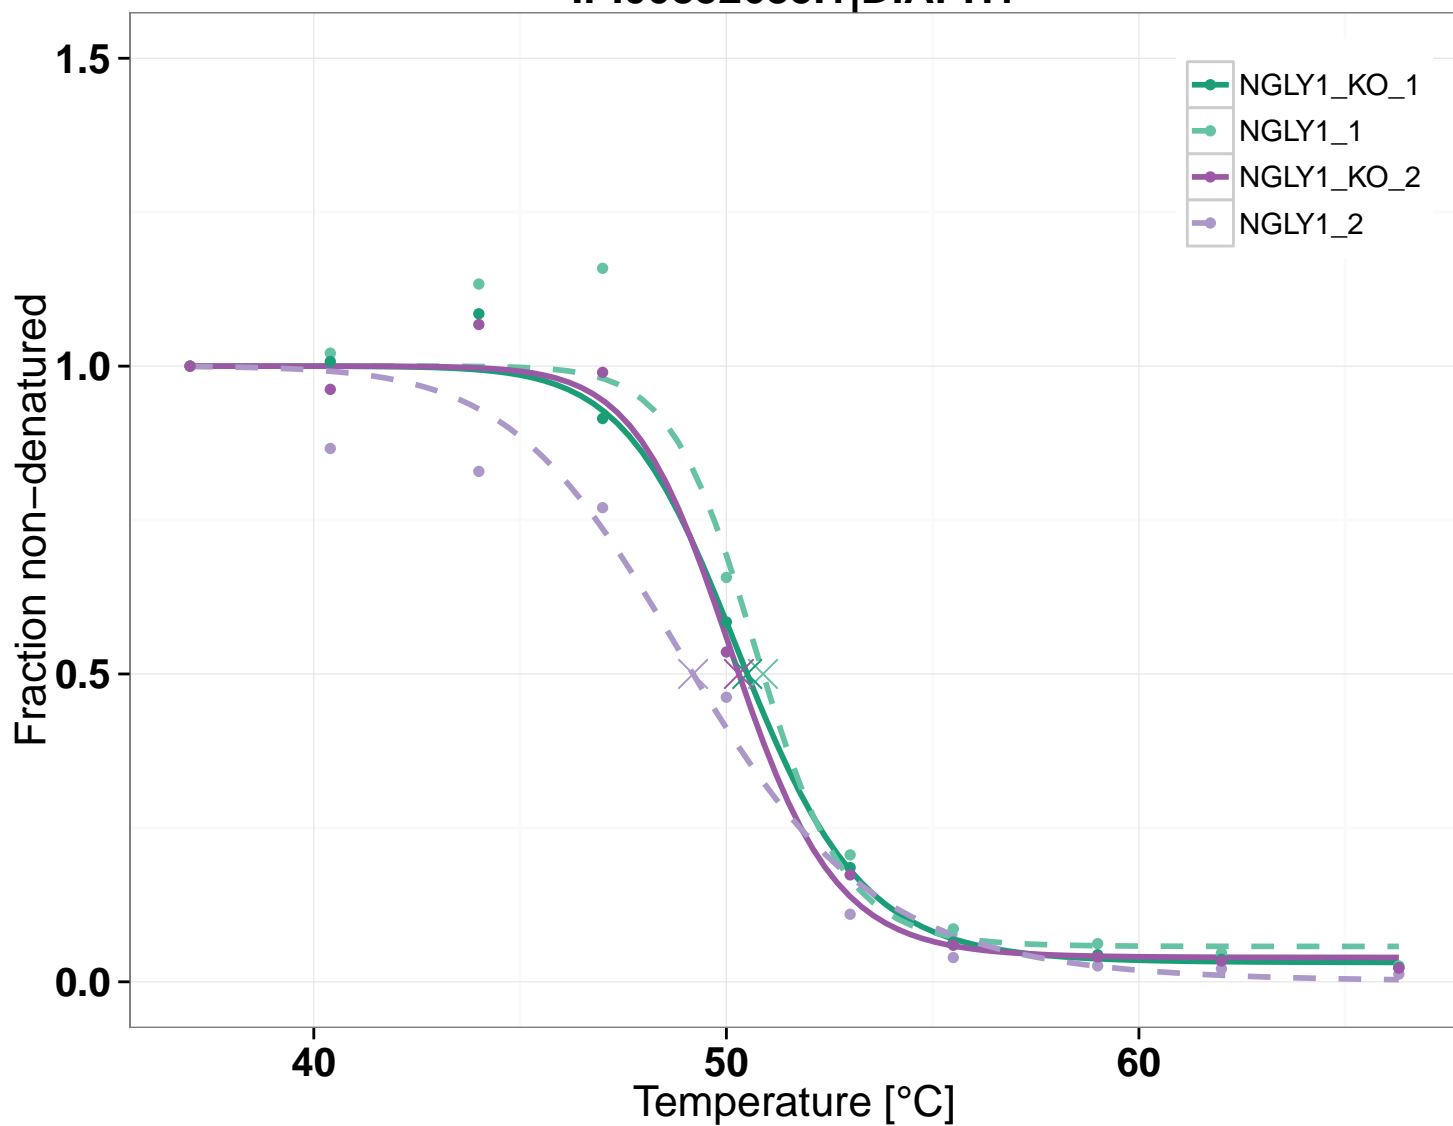

|            | meltPoint | slope | plateau | R2   |
|------------|-----------|-------|---------|------|
| NGLY1_KO_1 | 50.51     | -0.17 | 0.03    | 1    |
| NGLY1_1    | 50.89     | -0.22 | 0.06    | 0.98 |
| NGLY1_KO_2 | 50.3      | -0.2  | 0.04    | 0.99 |
| NGLY1_2    | 49.19     | -0.11 | 0       | 0.98 |

Supplement: Supplementary file 3294 [file 1]

# IPI00010105.1|EIF6

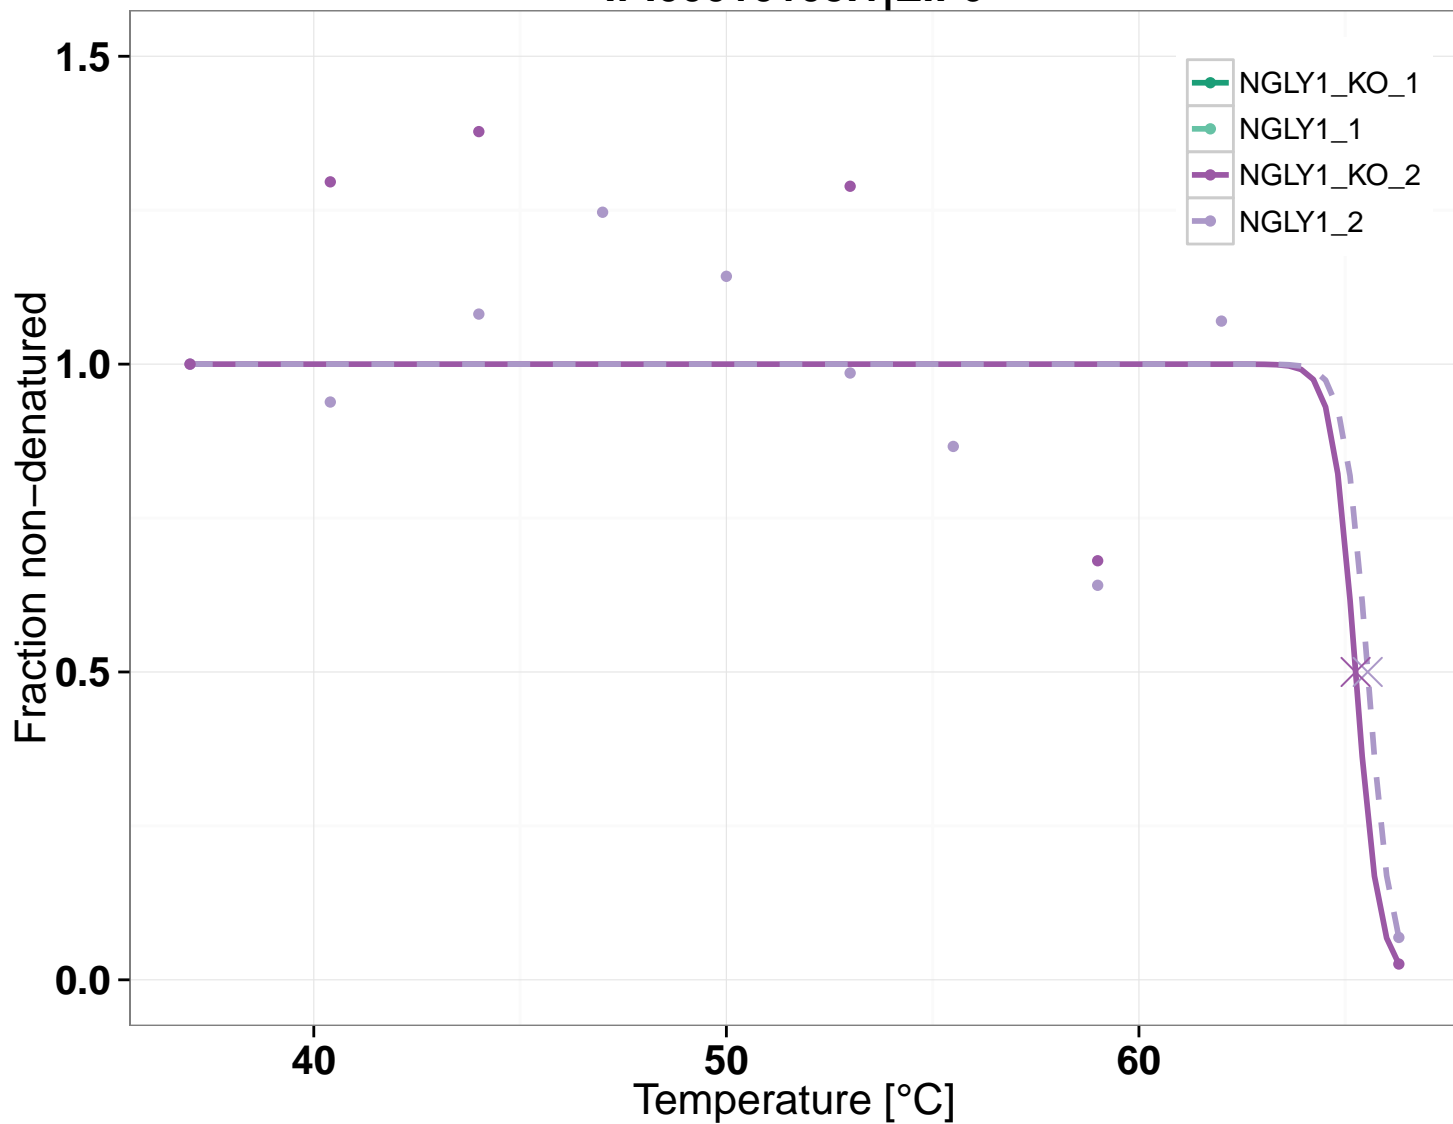

|            | meltPoint | slope | plateau | R2   |
|------------|-----------|-------|---------|------|
| NGLY1_KO_1 | —         | —     | —       | —    |
| NGLY1_1    | —         | —     | —       | —    |
| NGLY1_KO_2 | 65.25     | -0.88 | 0       | 0.32 |
| NGLY1_2    | 65.55     | -0.87 | 0       | 0.76 |

Supplement: Supplementary file 3295 [file 1]

# IPI00019383.2|GALK1

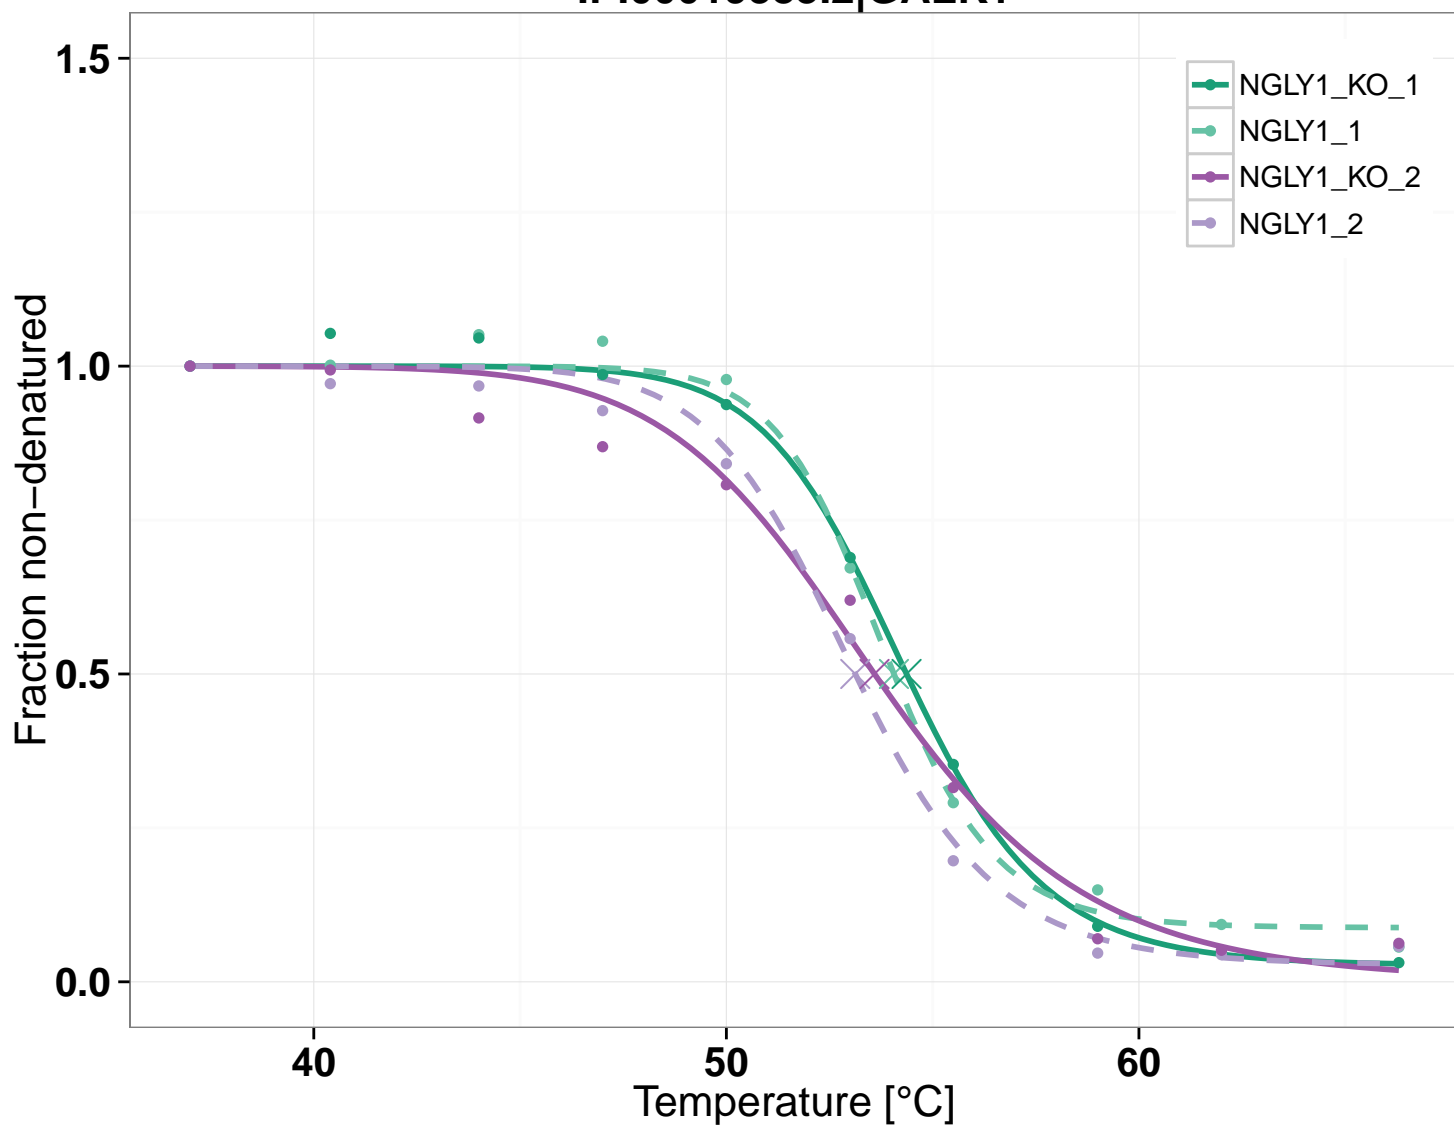

|            | meltPoint | slope  | plateau | R2   |
|------------|-----------|--------|---------|------|
| NGLY1_KO_1 | 54.37     | -0.14  | 0.03    | 1    |
| NGLY1_1    | 54.06     | -0.17  | 0.09    | 1    |
| NGLY1_KO_2 | 53.59     | -0.097 | 0       | 0.99 |
| NGLY1_2    | 53.12     | -0.14  | 0.03    | 0.99 |

Supplement: Supplementary file 3296 [file 1]

# IPI00301618.6|SDCCAG1

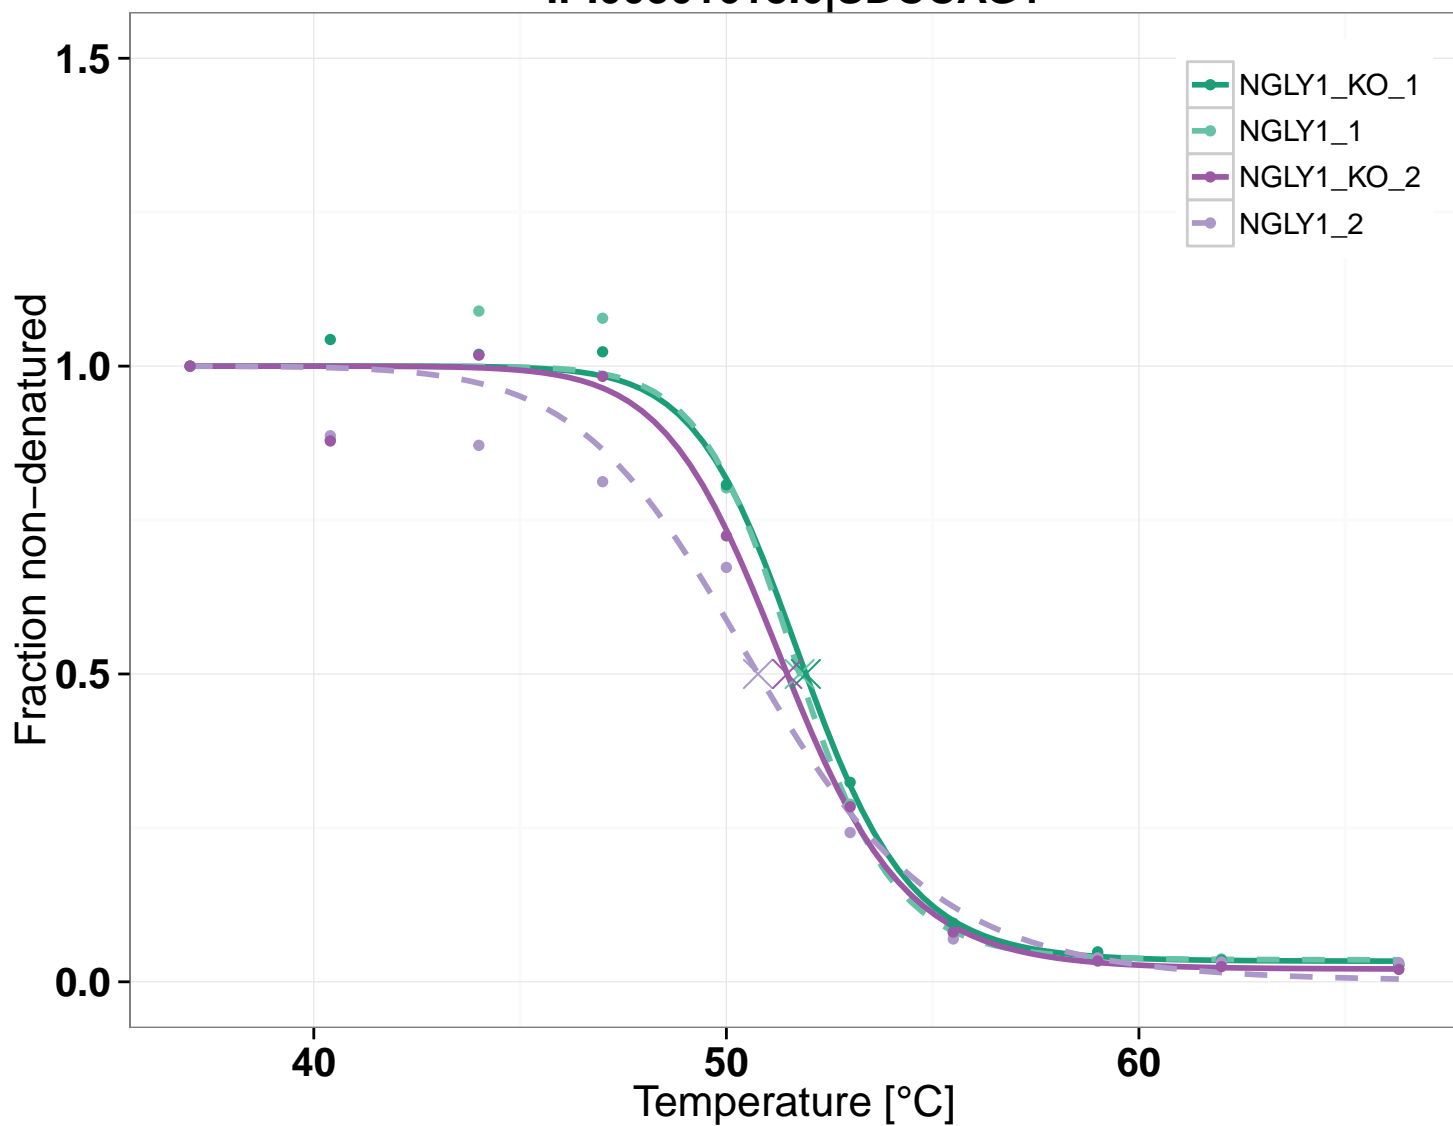

|            | meltPoint | slope | plateau | R2   |
|------------|-----------|-------|---------|------|
| NGLY1_KO_1 | 51.93     | -0.19 | 0.03    | 1    |
| NGLY1_1    | 51.78     | -0.2  | 0.04    | 0.98 |
| NGLY1_KO_2 | 51.47     | -0.17 | 0.02    | 0.99 |
| NGLY1_2    | 50.77     | -0.11 | 0       | 0.98 |

Supplement: Supplementary file 3297 [file 1]

IPI00029697.3|EXOSC9

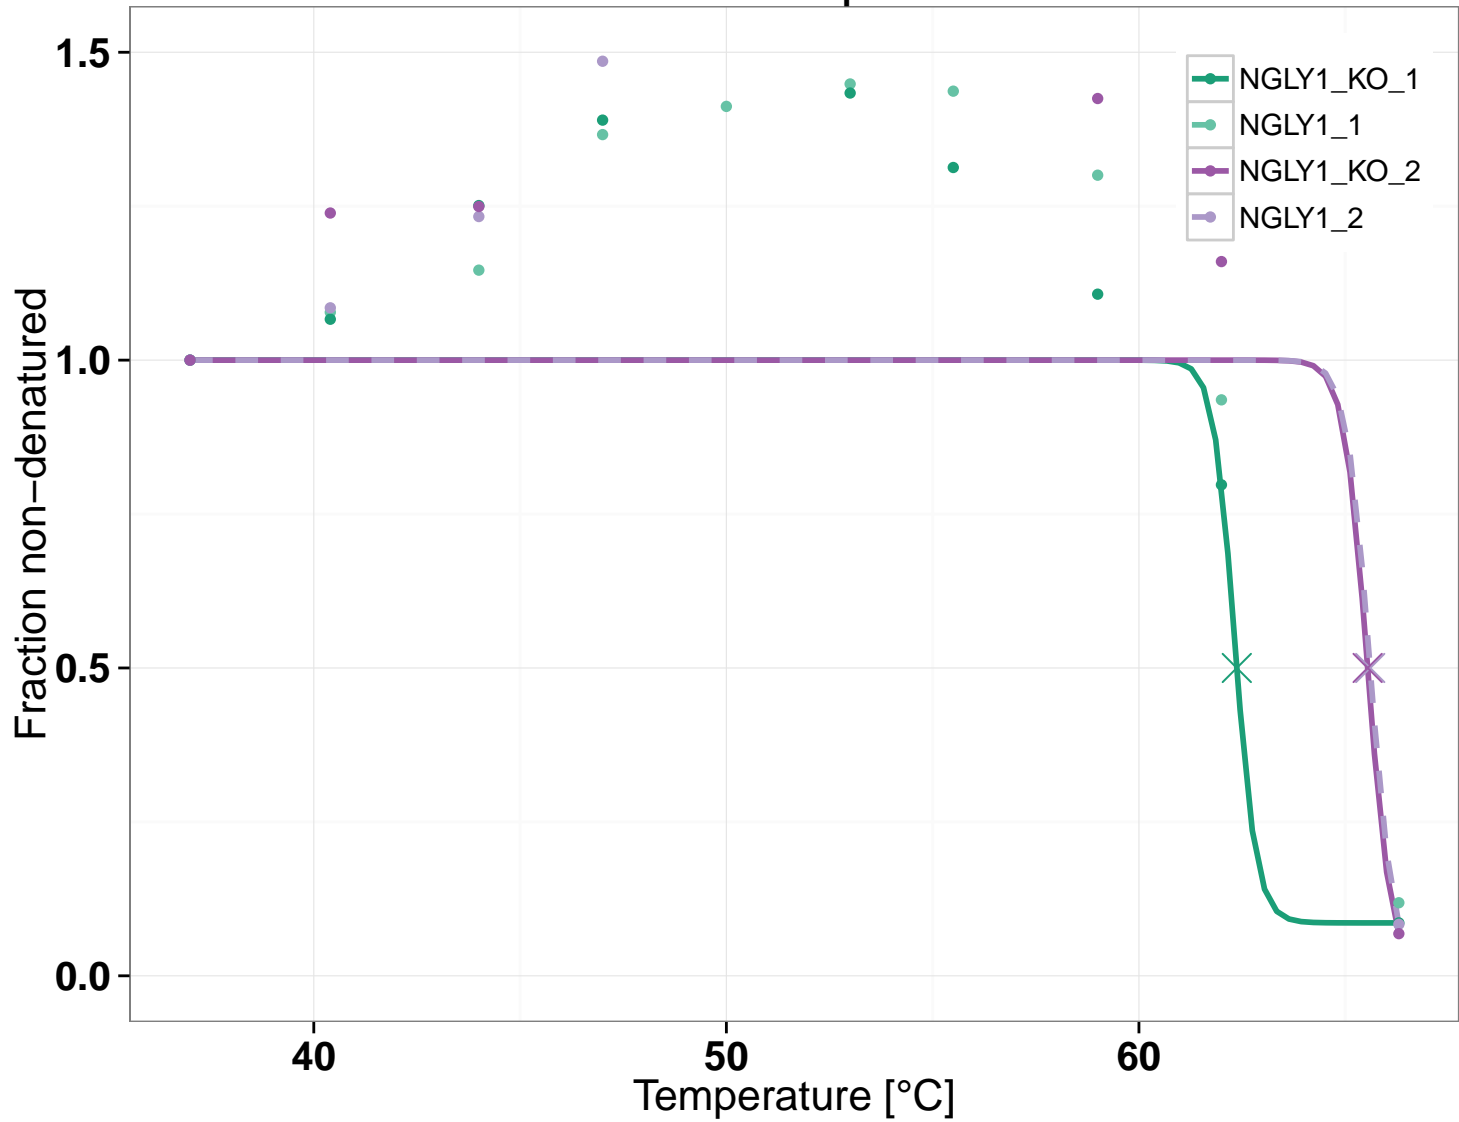

|            | meltPoint | slope | plateau | R2   |
|------------|-----------|-------|---------|------|
| NGLY1_KO_1 | 62.37     | -0.88 | 0.09    | 0.49 |
| NGLY1_1    | -         | -     | -       | -    |
| NGLY1_KO_2 | 65.54     | -0.87 | 0       | 0.08 |
| NGLY1_2    | 65.61     | -0.87 | 0       | 0.07 |

Supplement: Supplementary file 3298 [file 1]

IPI00025442.2|PLEKHG4

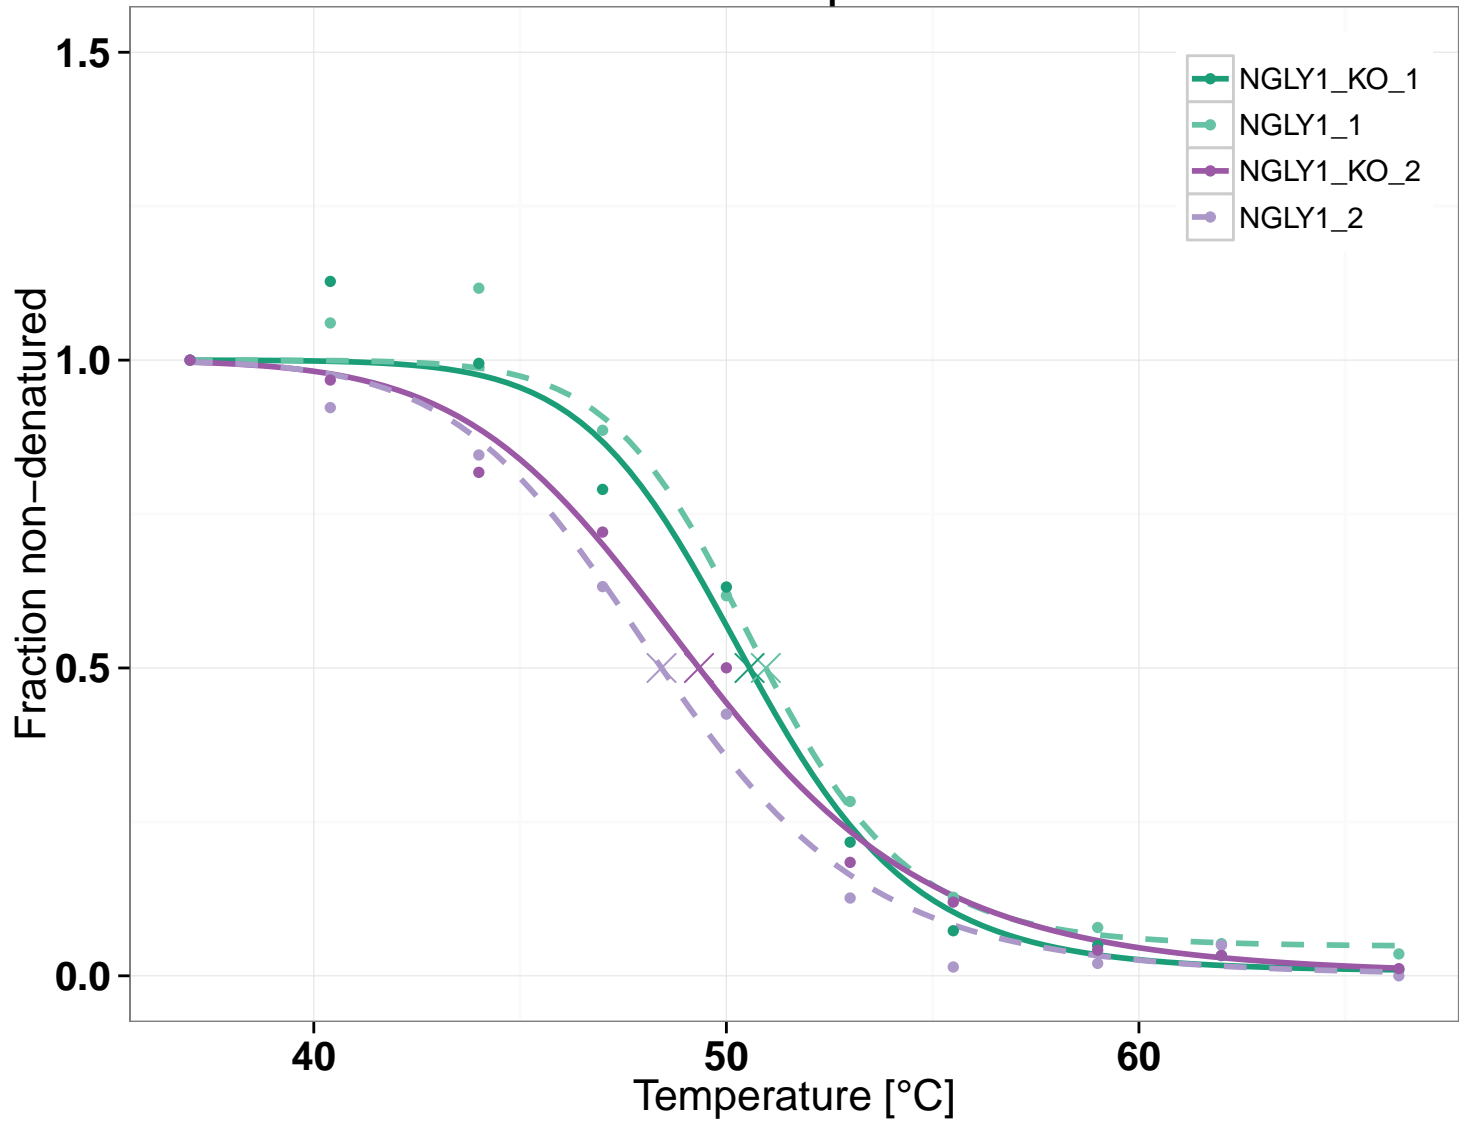

|            | meltPoint | slope  | plateau | R2   |
|------------|-----------|--------|---------|------|
| NGLY1_KO_1 | 50.56     | -0.12  | 0.01    | 0.98 |
| NGLY1_1    | 50.96     | -0.13  | 0.05    | 0.99 |
| NGLY1_KO_2 | 49.34     | -0.088 | 0       | 0.99 |
| NGLY1_2    | 48.43     | -0.099 | 0       | 0.99 |

Supplement: Supplementary file 3299 [file 1]

IPI00000057.1|COG2

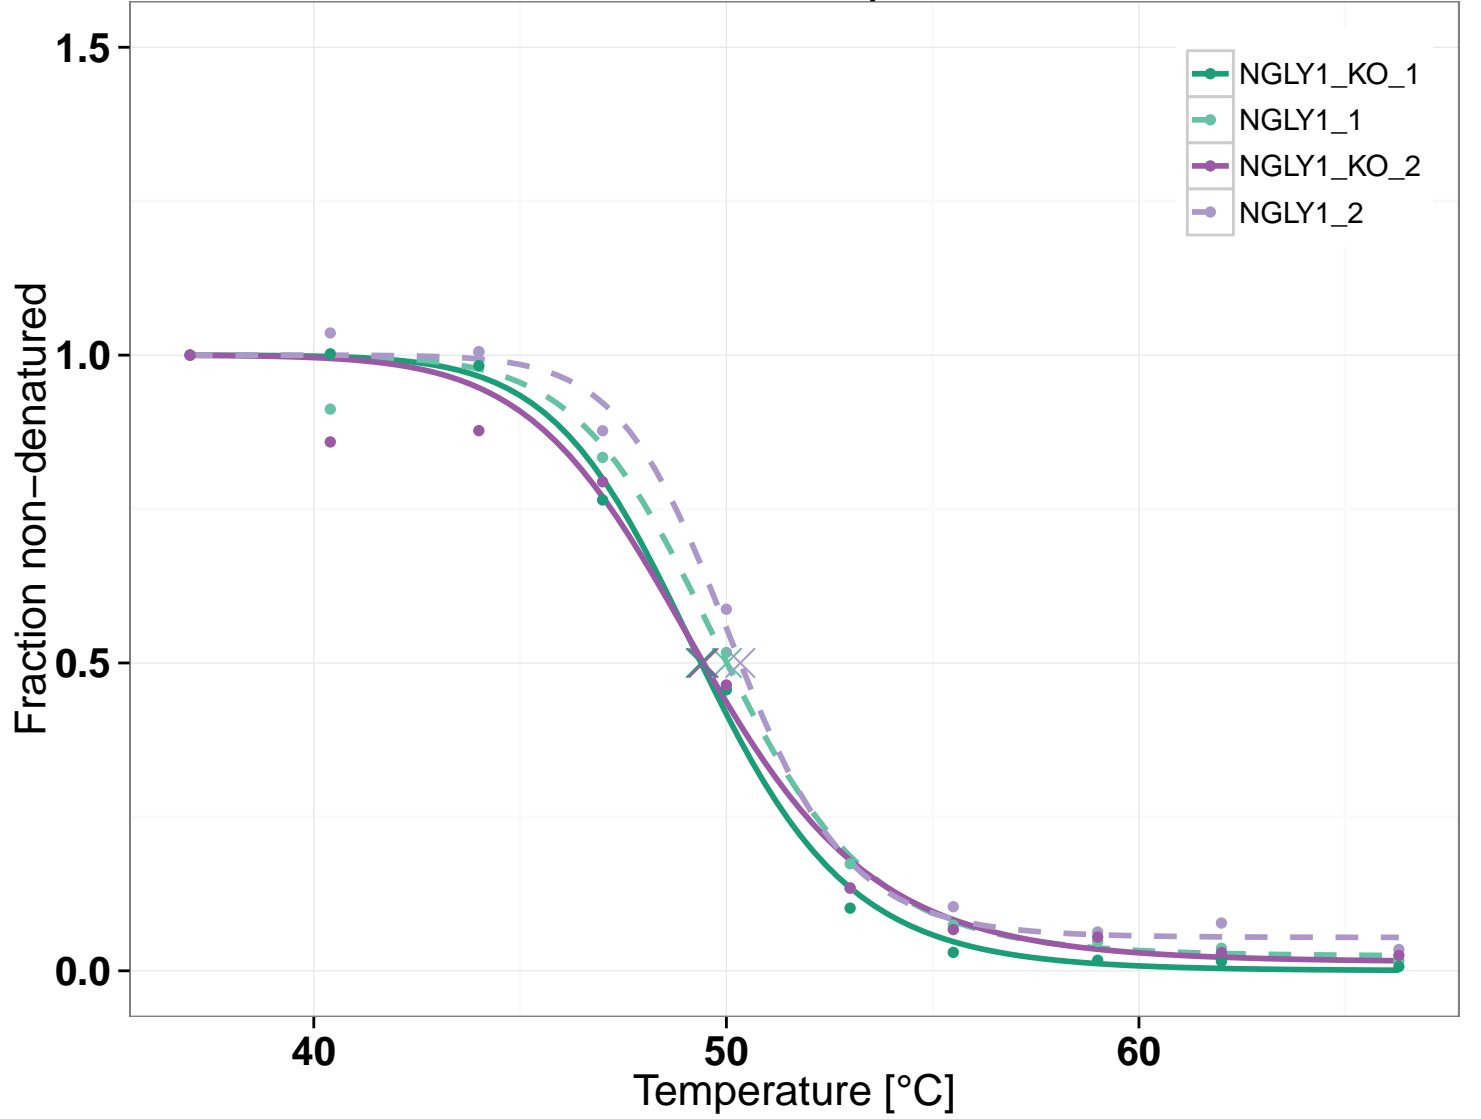

|            | meltPoint | slope | plateau | R2   |
|------------|-----------|-------|---------|------|
| NGLY1_KO_1 | 49.39     | -0.14 | 0       | 1    |
| NGLY1_1    | 50.01     | -0.14 | 0.02    | 0.99 |
| NGLY1_KO_2 | 49.45     | -0.12 | 0.01    | 0.98 |
| NGLY1_2    | 50.34     | -0.17 | 0.05    | 1    |

Supplement: Supplementary file 3300 [file 1]

# IPI00010346.1|NLN

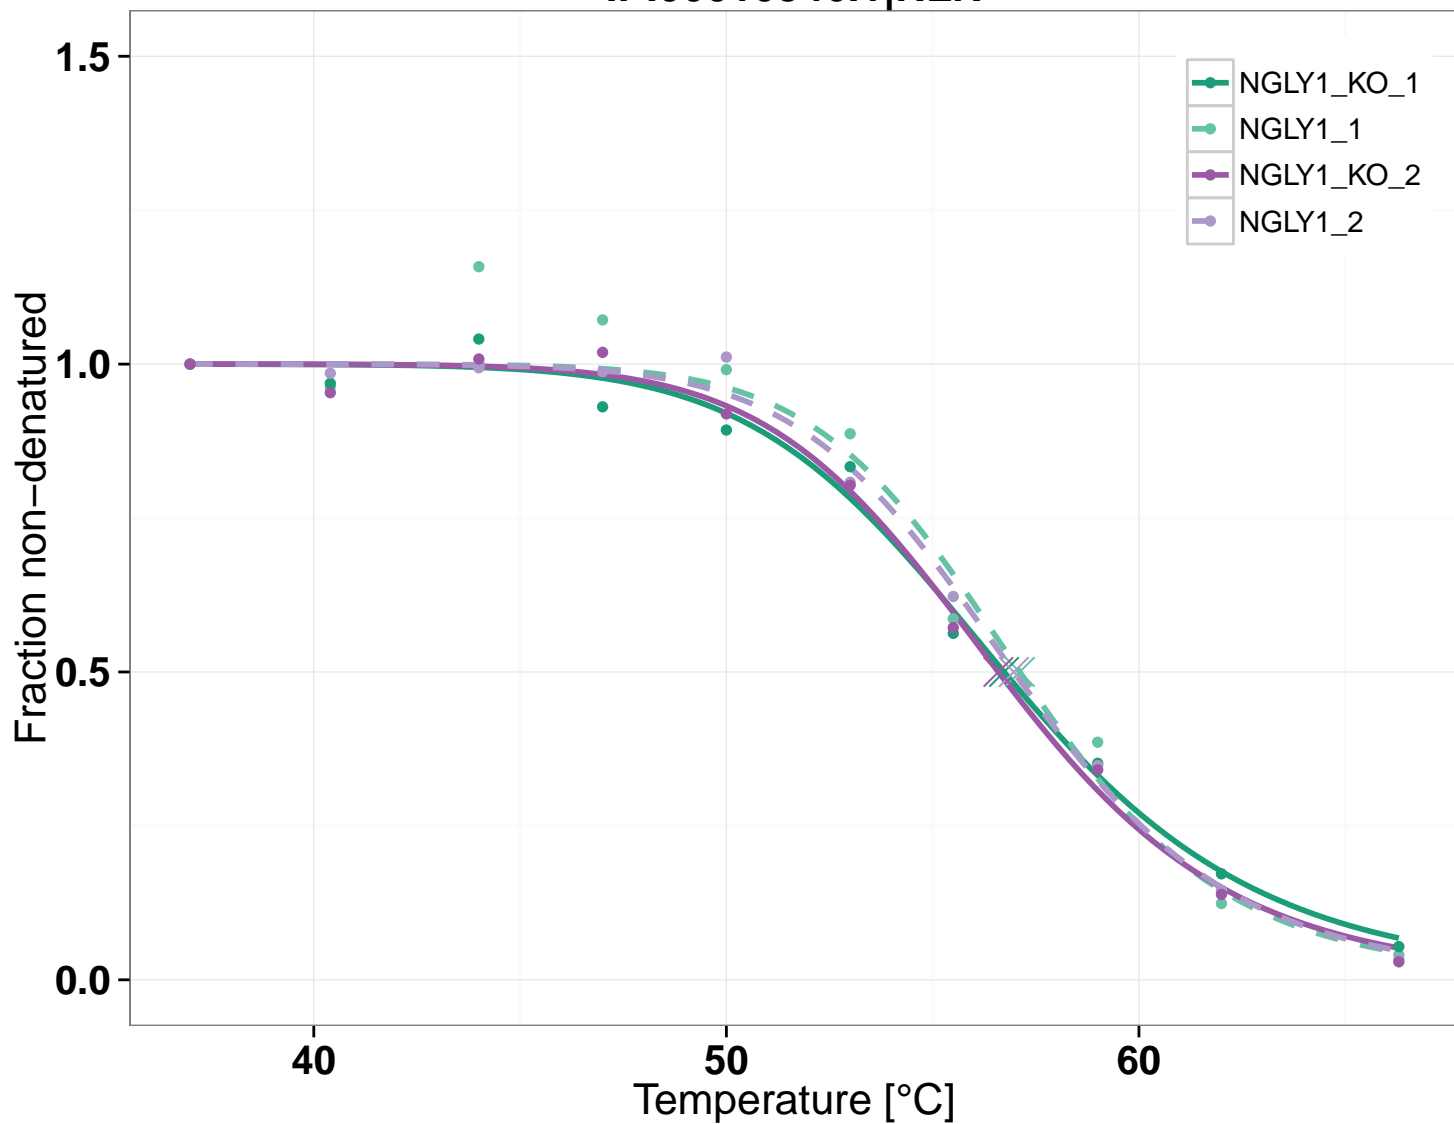

|            | meltPoint | slope  | plateau | R2   |
|------------|-----------|--------|---------|------|
| NGLY1_KO_1 | 56.73     | -0.081 | 0       | 0.99 |
| NGLY1_1    | 57.11     | -0.1   | 0       | 0.97 |
| NGLY1_KO_2 | 56.59     | -0.089 | 0       | 1    |
| NGLY1_2    | 56.97     | -0.094 | 0       | 1    |

Supplement: Supplementary file 3301 [file 1]

# IPI00015911.1|DLD

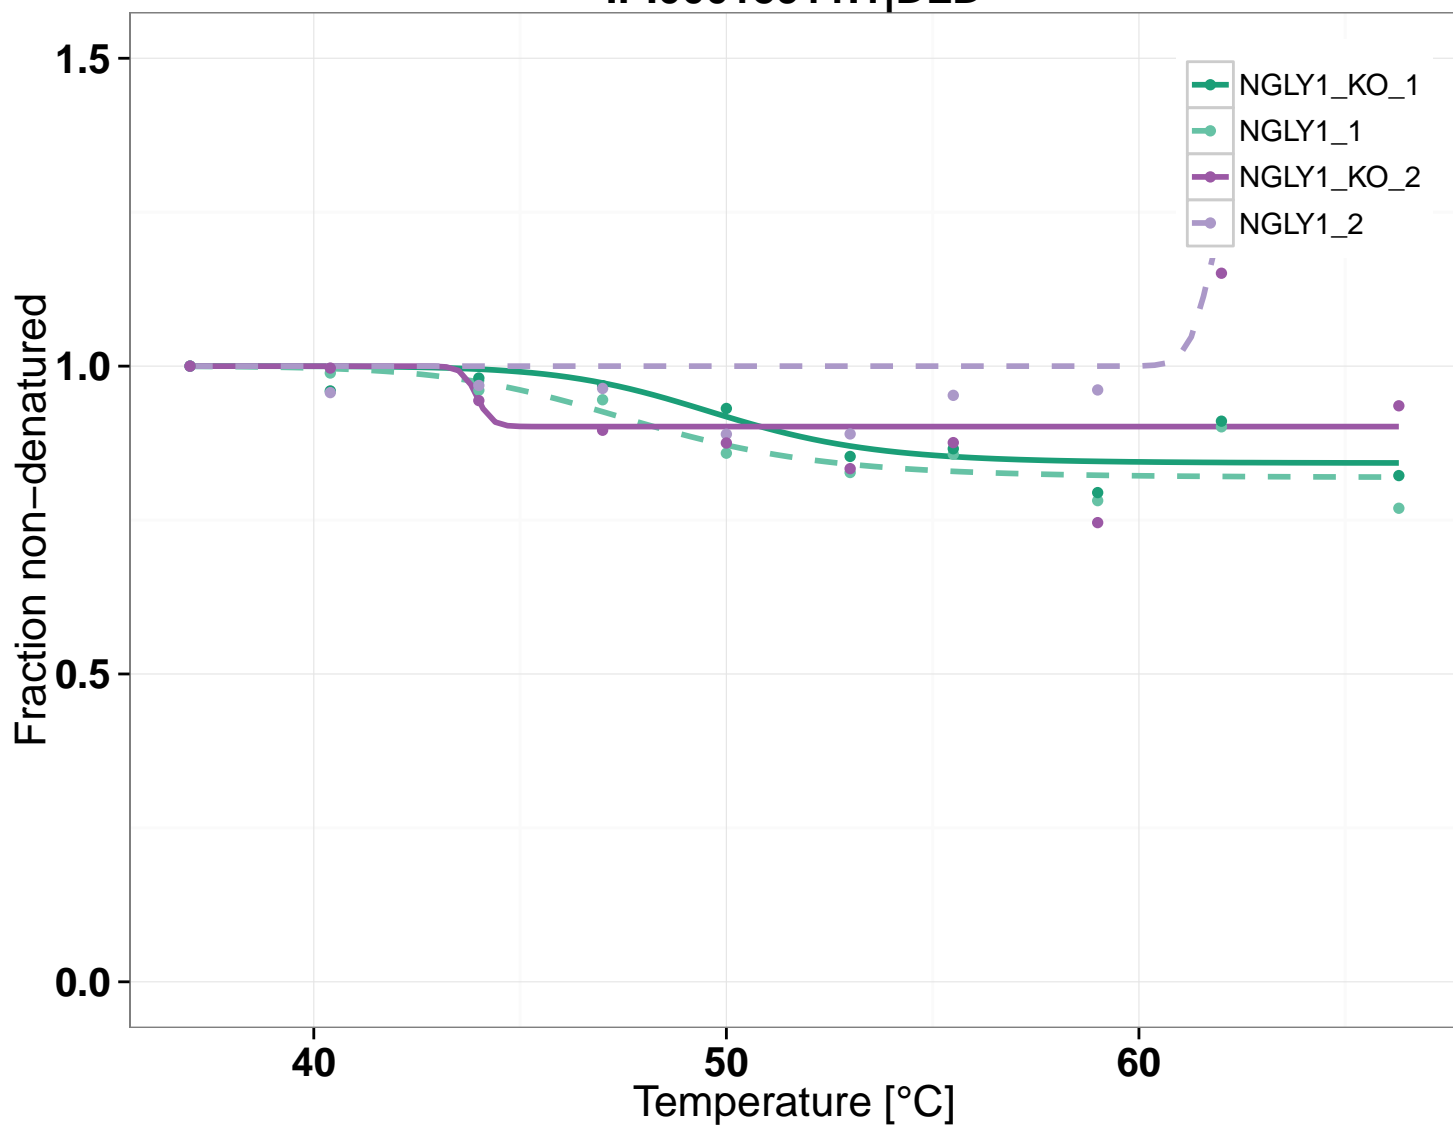

|            | meltPoint | slope  | plateau | R2   |
|------------|-----------|--------|---------|------|
| NGLY1_KO_1 | —         | −0.021 | 0.84    | 0.78 |
| NGLY1_1    | —         | −0.02  | 0.82    | 0.8  |
| NGLY1_KO_2 | —         | −0.14  | 0.9     | 0.14 |
| NGLY1_2    | —         | 0.29   | 1.3     | 0.81 |

Supplement: Supplementary file 3302 [file 1]

IPI00002249.2|KLHL9

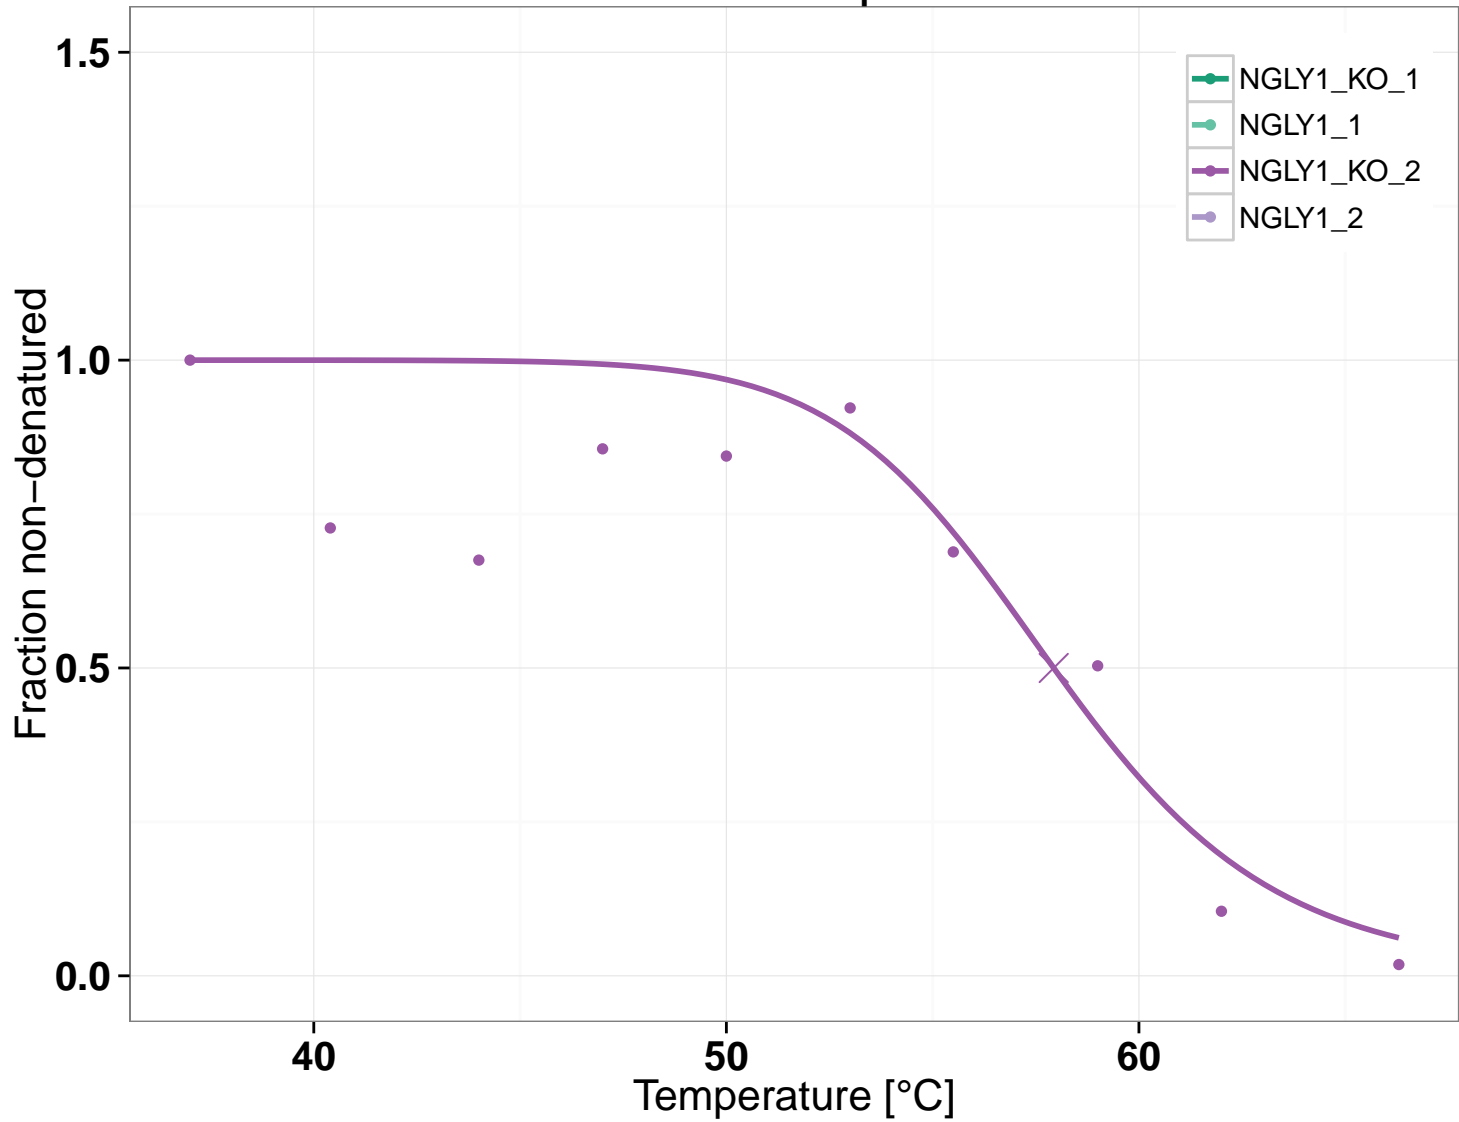

|            | meltPoint | slope  | plateau | R2   |
|------------|-----------|--------|---------|------|
| NGLY1_KO_1 | -         | -      | -       | -    |
| NGLY1_1    | -         | -      | -       | -    |
| NGLY1_KO_2 | 57.93     | -0.094 | 0       | 0.76 |
| NGLY1_2    | -         | -      | -       | -    |

Supplement: Supplementary file 3303 [file 1]

# IPI00024781.1|HYPK

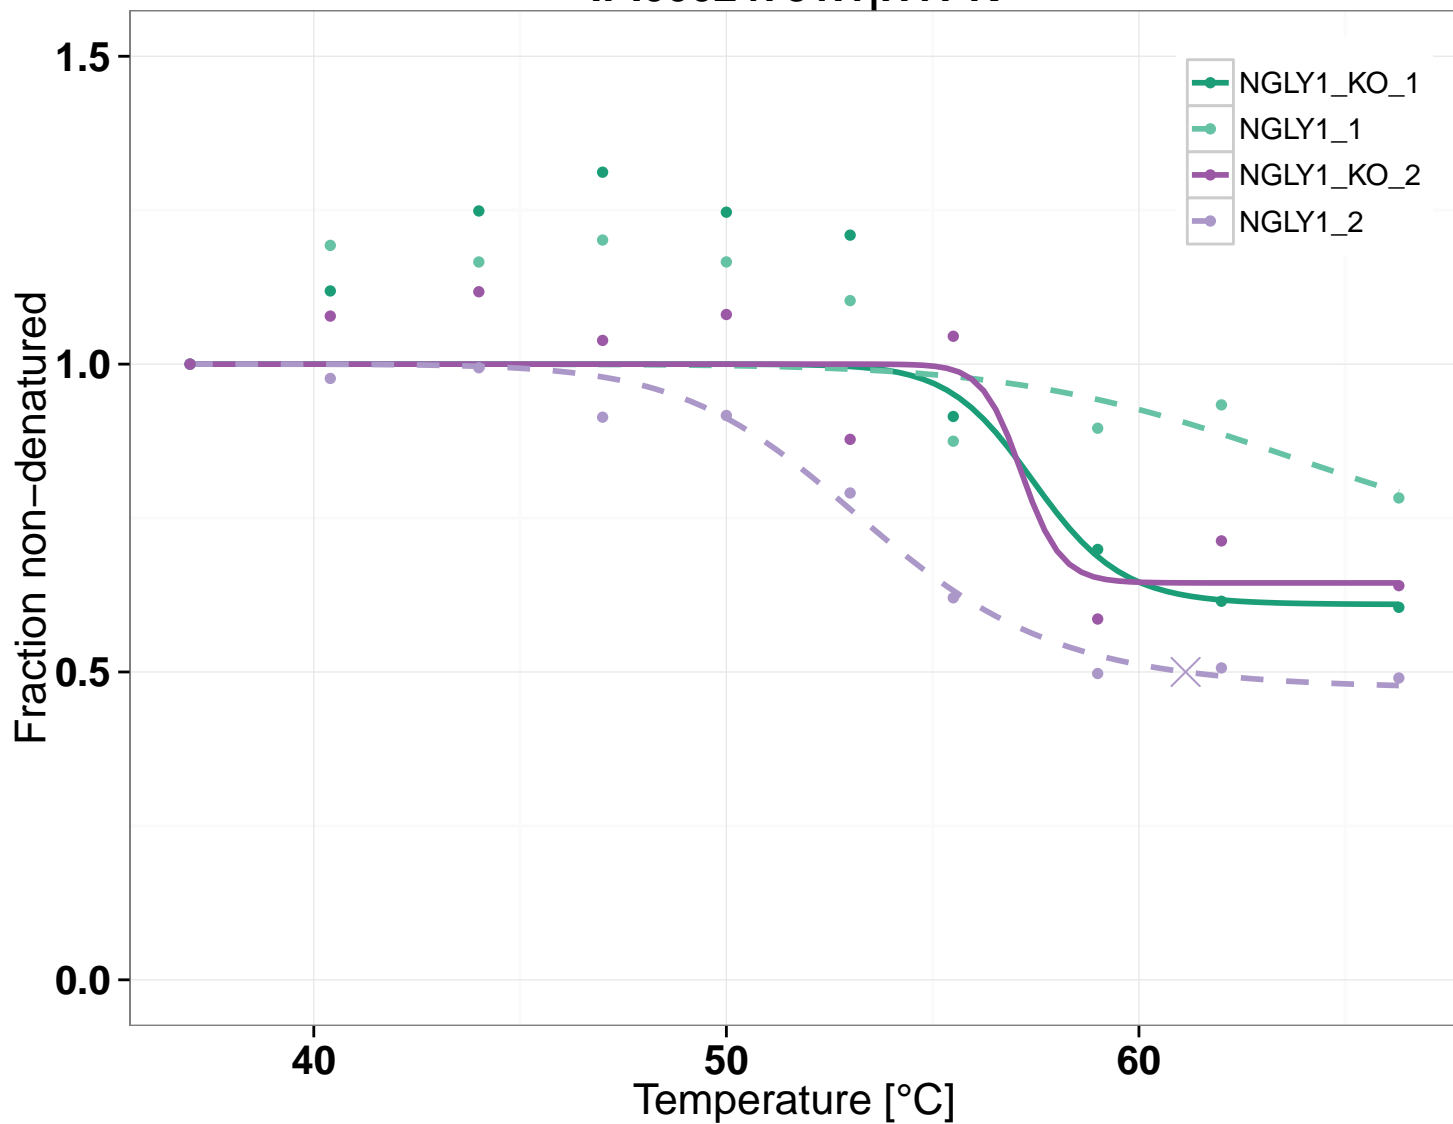

|            | meltPoint | slope  | plateau | R2   |
|------------|-----------|--------|---------|------|
| NGLY1_KO_1 | –         | –0.093 | 0.61    | 0.59 |
| NGLY1_1    | –         | –0.023 | 0.66    | 0.24 |
| NGLY1_KO_2 | –         | –0.19  | 0.64    | 0.85 |
| NGLY1_2    | 61.13     | –0.057 | 0.47    | 0.98 |

Supplement: Supplementary file 3304 [file 1]

# IPI00470490.2|NCOA1

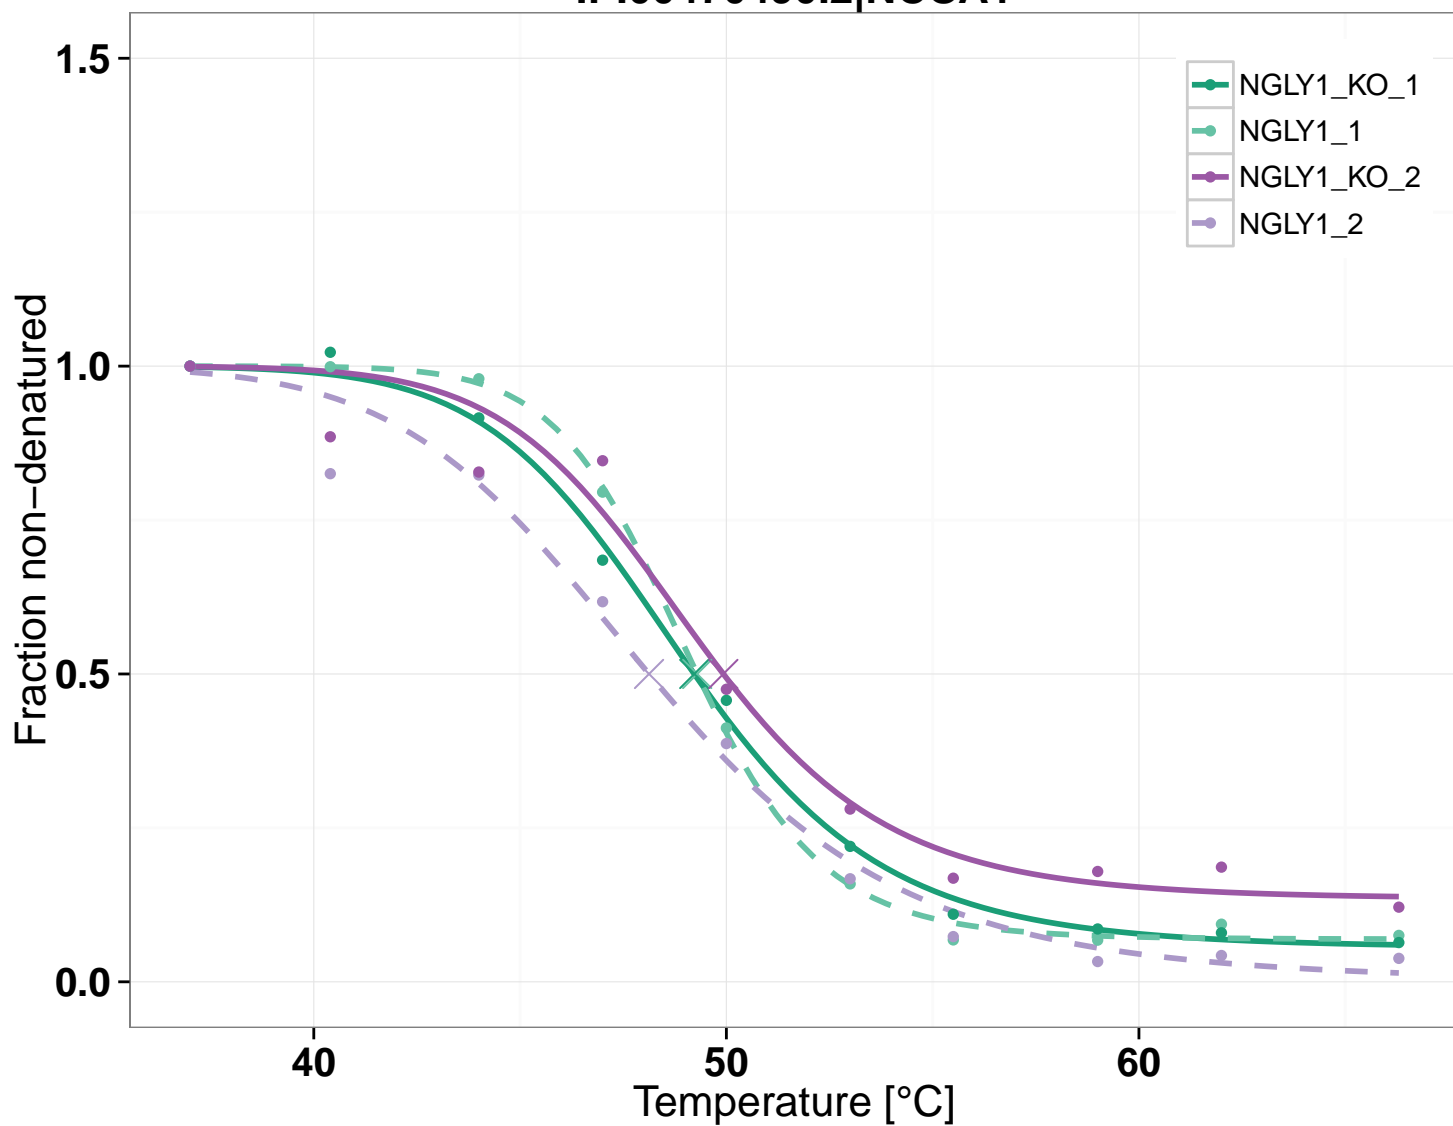

|            | meltPoint | slope  | plateau | R2   |
|------------|-----------|--------|---------|------|
| NGLY1_KO_1 | 49.22     | -0.098 | 0.06    | 1    |
| NGLY1_1    | 49.29     | -0.14  | 0.07    | 1    |
| NGLY1_KO_2 | 49.93     | -0.093 | 0.13    | 0.97 |
| NGLY1_2    | 48.13     | -0.081 | 0       | 0.98 |

Supplement: Supplementary file 3305 [file 1]

IPI00796891.2|GOLGB1

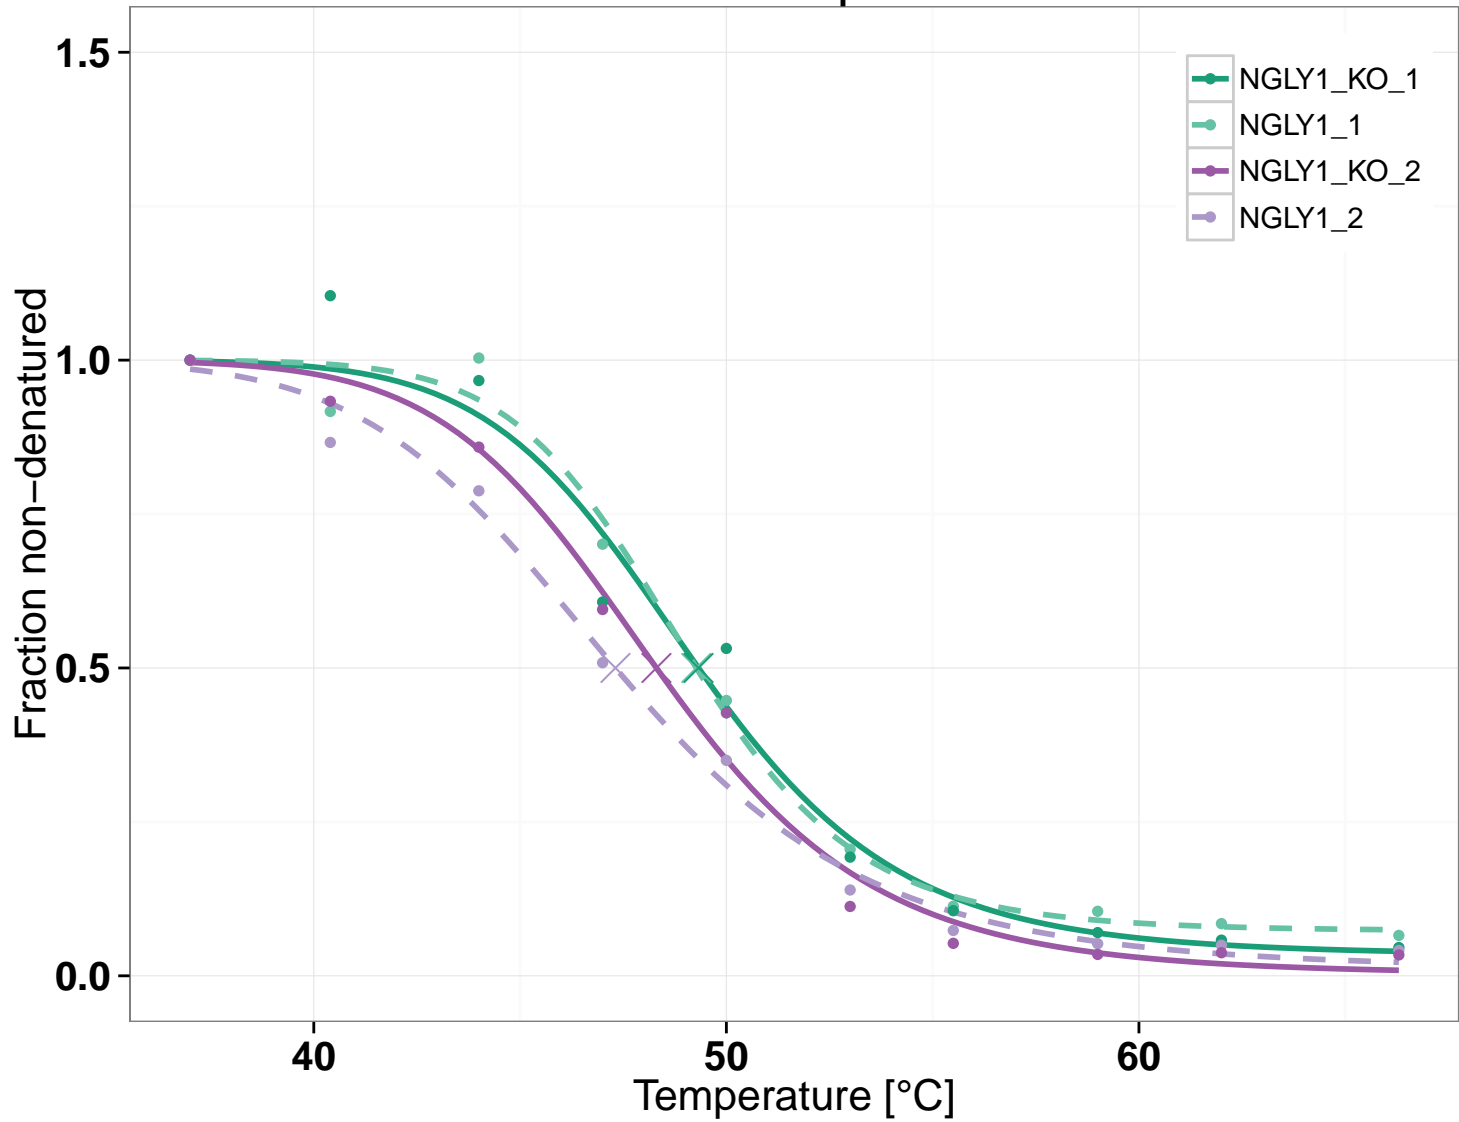

|            | meltPoint | slope  | plateau | R2   |
|------------|-----------|--------|---------|------|
| NGLY1_KO_1 | 49.32     | -0.097 | 0.03    | 0.98 |
| NGLY1_1    | 49.27     | -0.11  | 0.07    | 0.99 |
| NGLY1_KO_2 | 48.31     | -0.095 | 0       | 0.99 |
| NGLY1_2    | 47.31     | -0.081 | 0.01    | 0.99 |

Supplement: Supplementary file 3306 [file 1]

# IPI00103742.3|SSH1

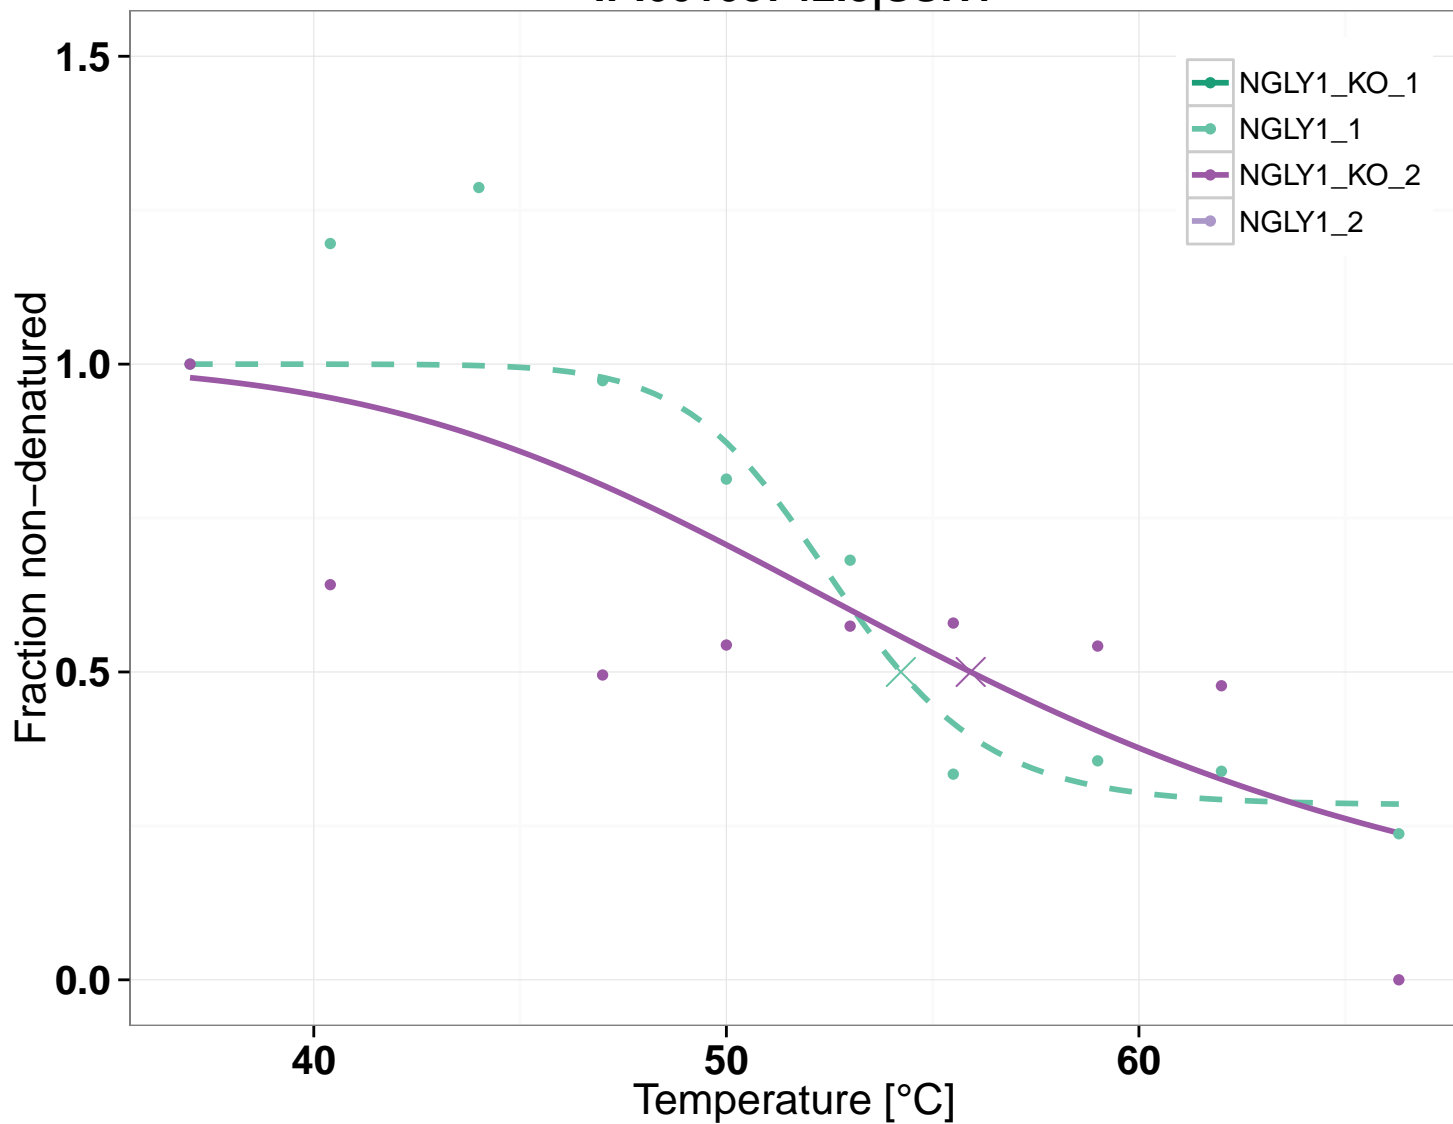

|            | meltPoint | slope  | plateau | R2   |
|------------|-----------|--------|---------|------|
| NGLY1_KO_1 | –         | –      | –       | –    |
| NGLY1_1    | 54.23     | –0.099 | 0.28    | 0.89 |
| NGLY1_KO_2 | 55.92     | –0.036 | 0       | 0.48 |
| NGLY1_2    | –         | –      | –       | –    |

Supplement: Supplementary file 3307 [file 1]

IPI00434983.2|ZFYVE27

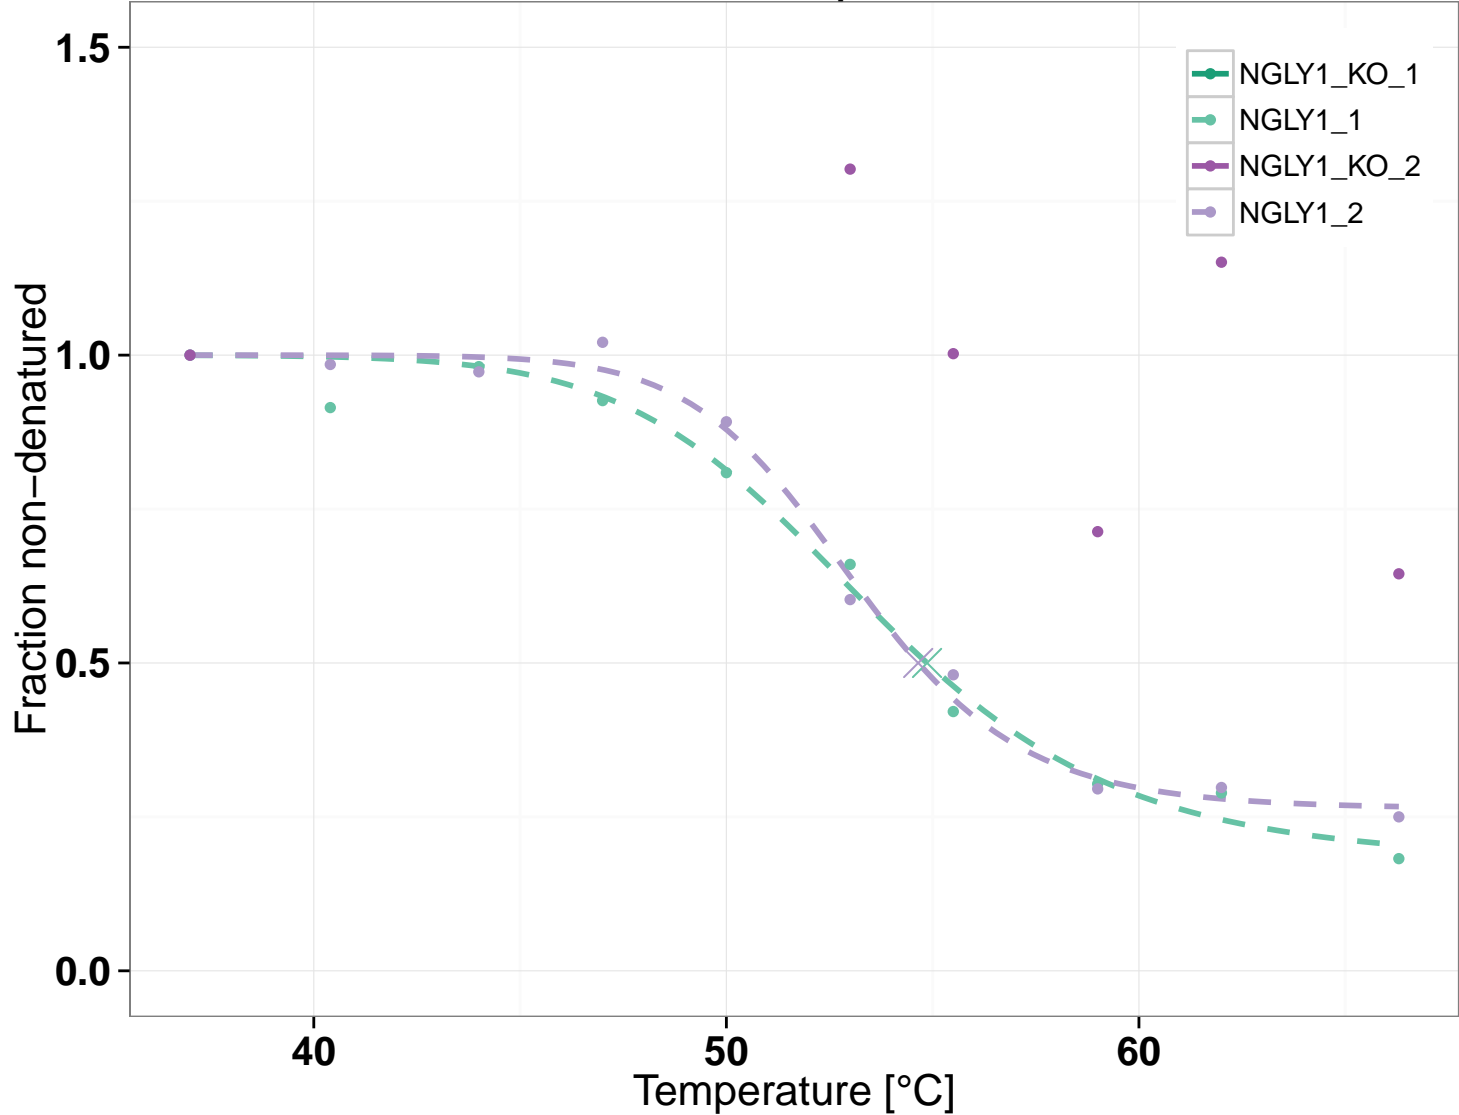

|            | meltPoint | slope  | plateau | R2   |
|------------|-----------|--------|---------|------|
| NGLY1_KO_1 | –         | –      | –       | –    |
| NGLY1_1    | 54.86     | –0.068 | 0.18    | 0.99 |
| NGLY1_KO_2 | –         | –      | –       | –    |
| NGLY1_2    | 54.65     | –0.092 | 0.26    | 0.99 |

Supplement: Supplementary file 3308 [file 1]

# IPI00217467.3|HIST1H1C

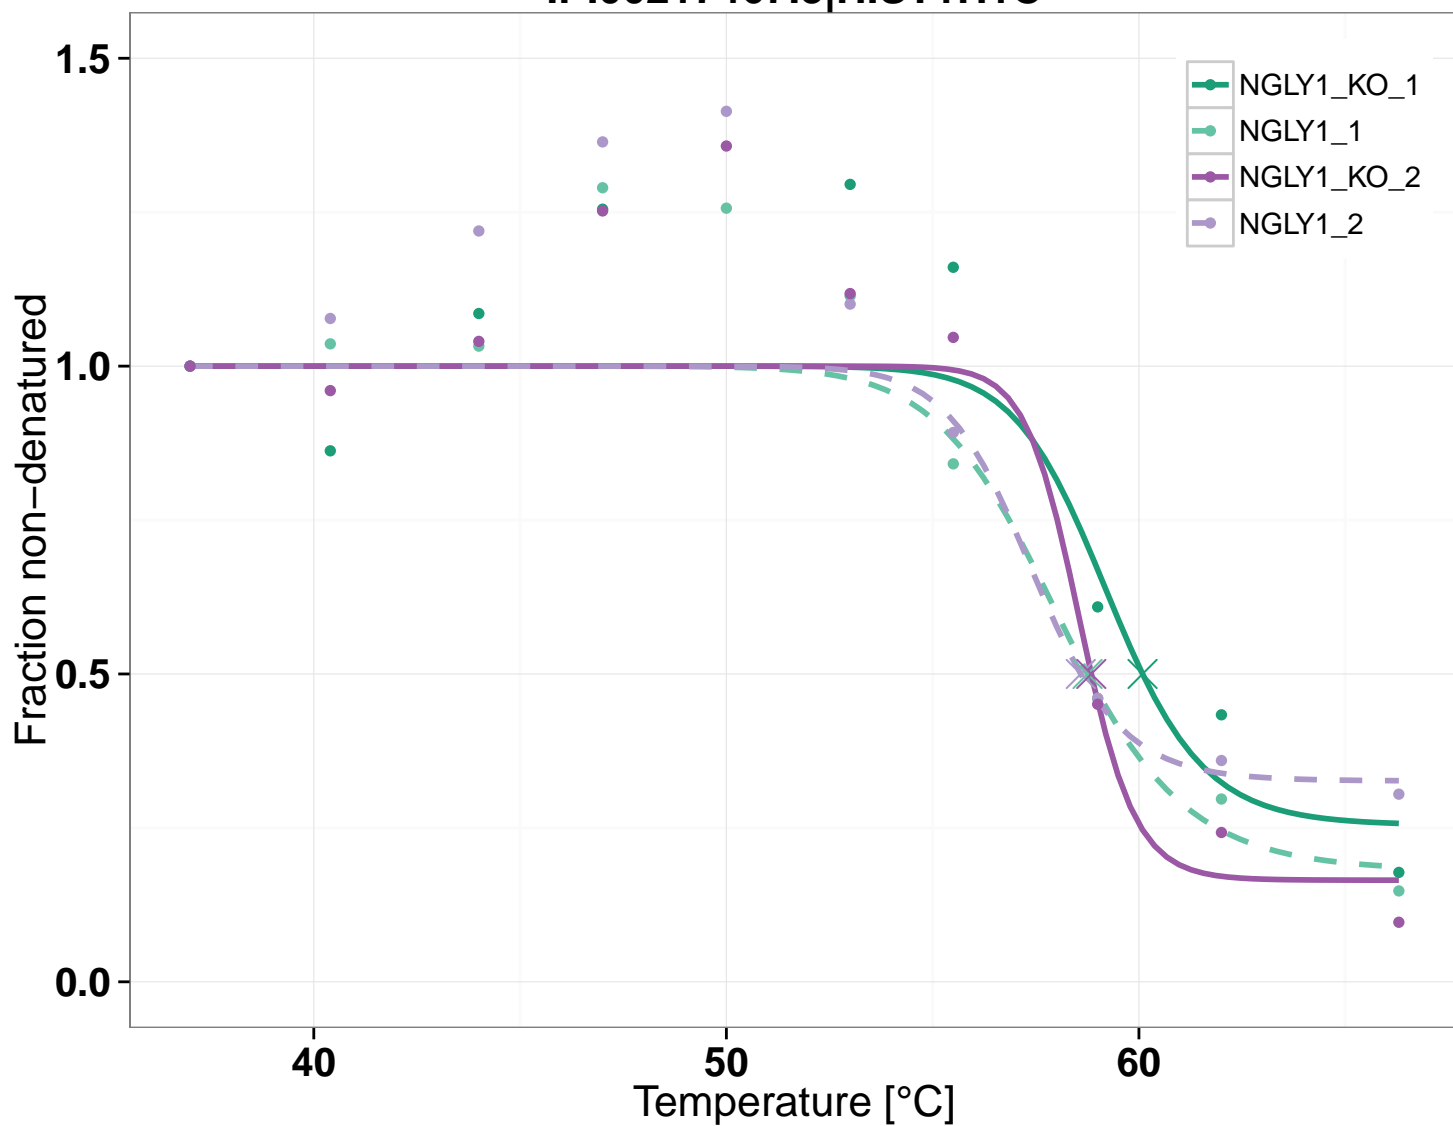

|            | meltPoint | slope | plateau | R2   |
|------------|-----------|-------|---------|------|
| NGLY1_KO_1 | 60.09     | -0.16 | 0.25    | 0.67 |
| NGLY1_1    | 58.76     | -0.14 | 0.18    | 0.88 |
| NGLY1_KO_2 | 58.85     | -0.32 | 0.17    | 0.87 |
| NGLY1_2    | 58.59     | -0.16 | 0.33    | 0.75 |

Supplement: Supplementary file 3309 [file 1]

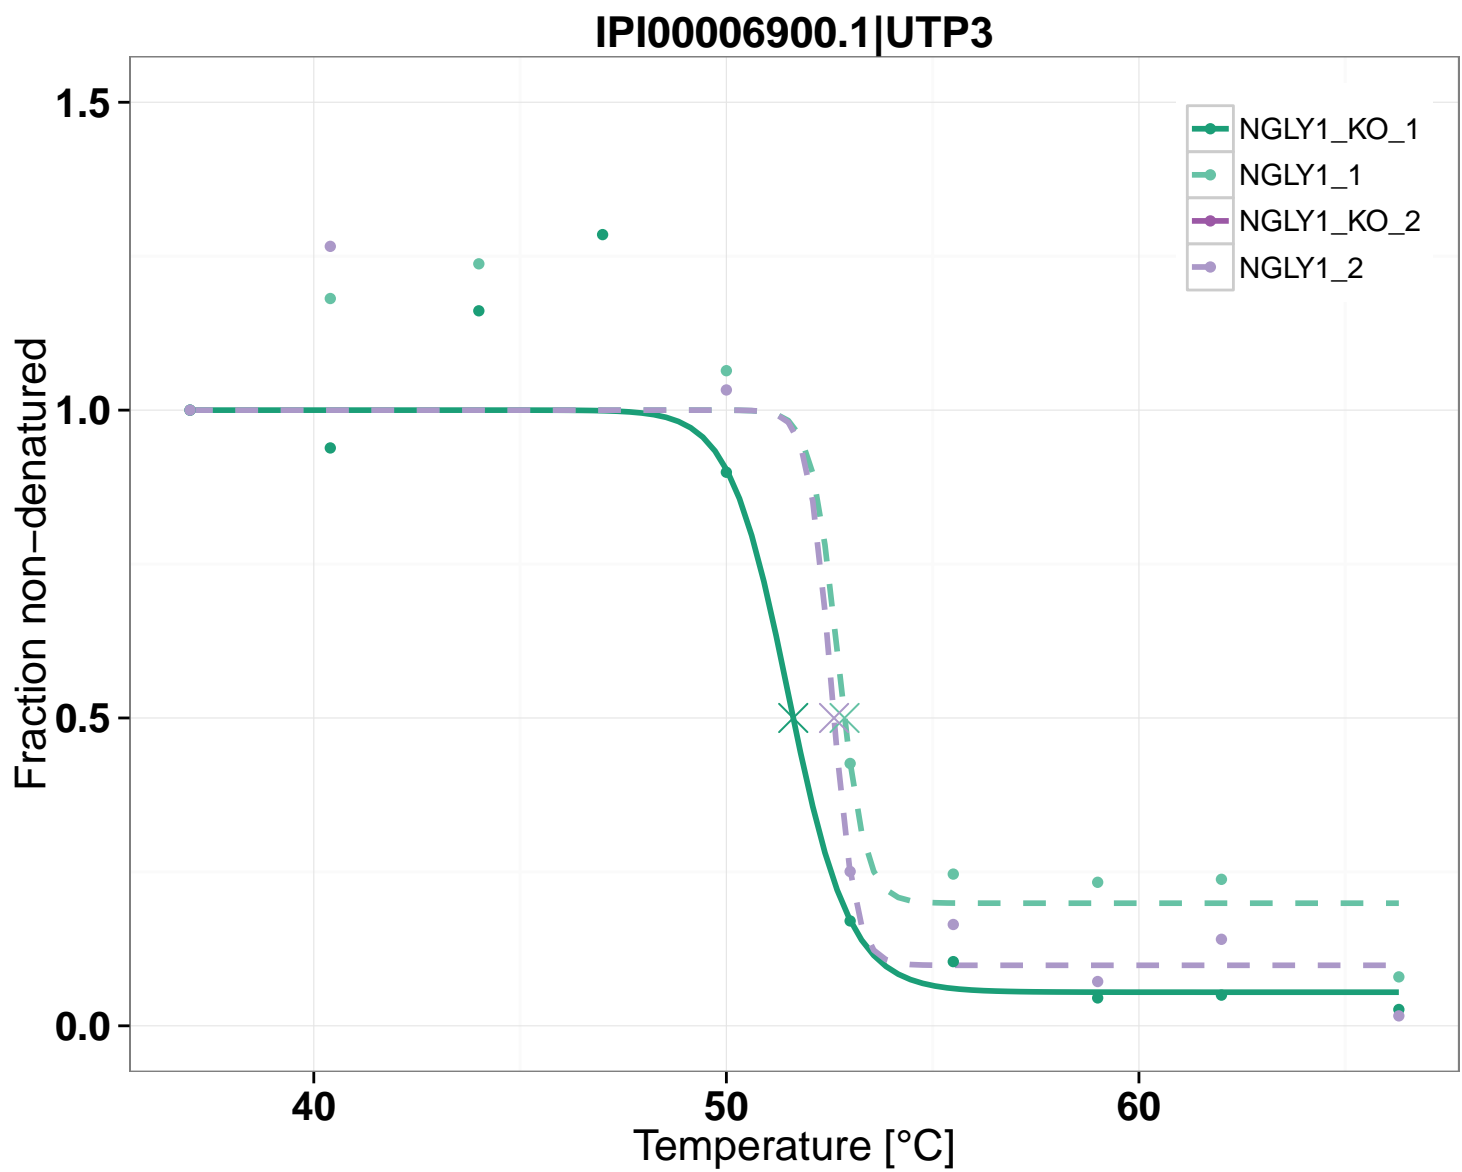

|            | meltPoint | slope | plateau | R2   |
|------------|-----------|-------|---------|------|
| NGLY1_KO_1 | 51.62     | -0.33 | 0.05    | 0.95 |
| NGLY1_1    | 52.86     | -0.62 | 0.2     | 0.84 |
| NGLY1_KO_2 | -         | -     | -       | -    |
| NGLY1_2    | 52.61     | -0.8  | 0.1     | 0.73 |

Supplement: Supplementary file 3310 [file 1]

IPI00028369.6|KIAA1715

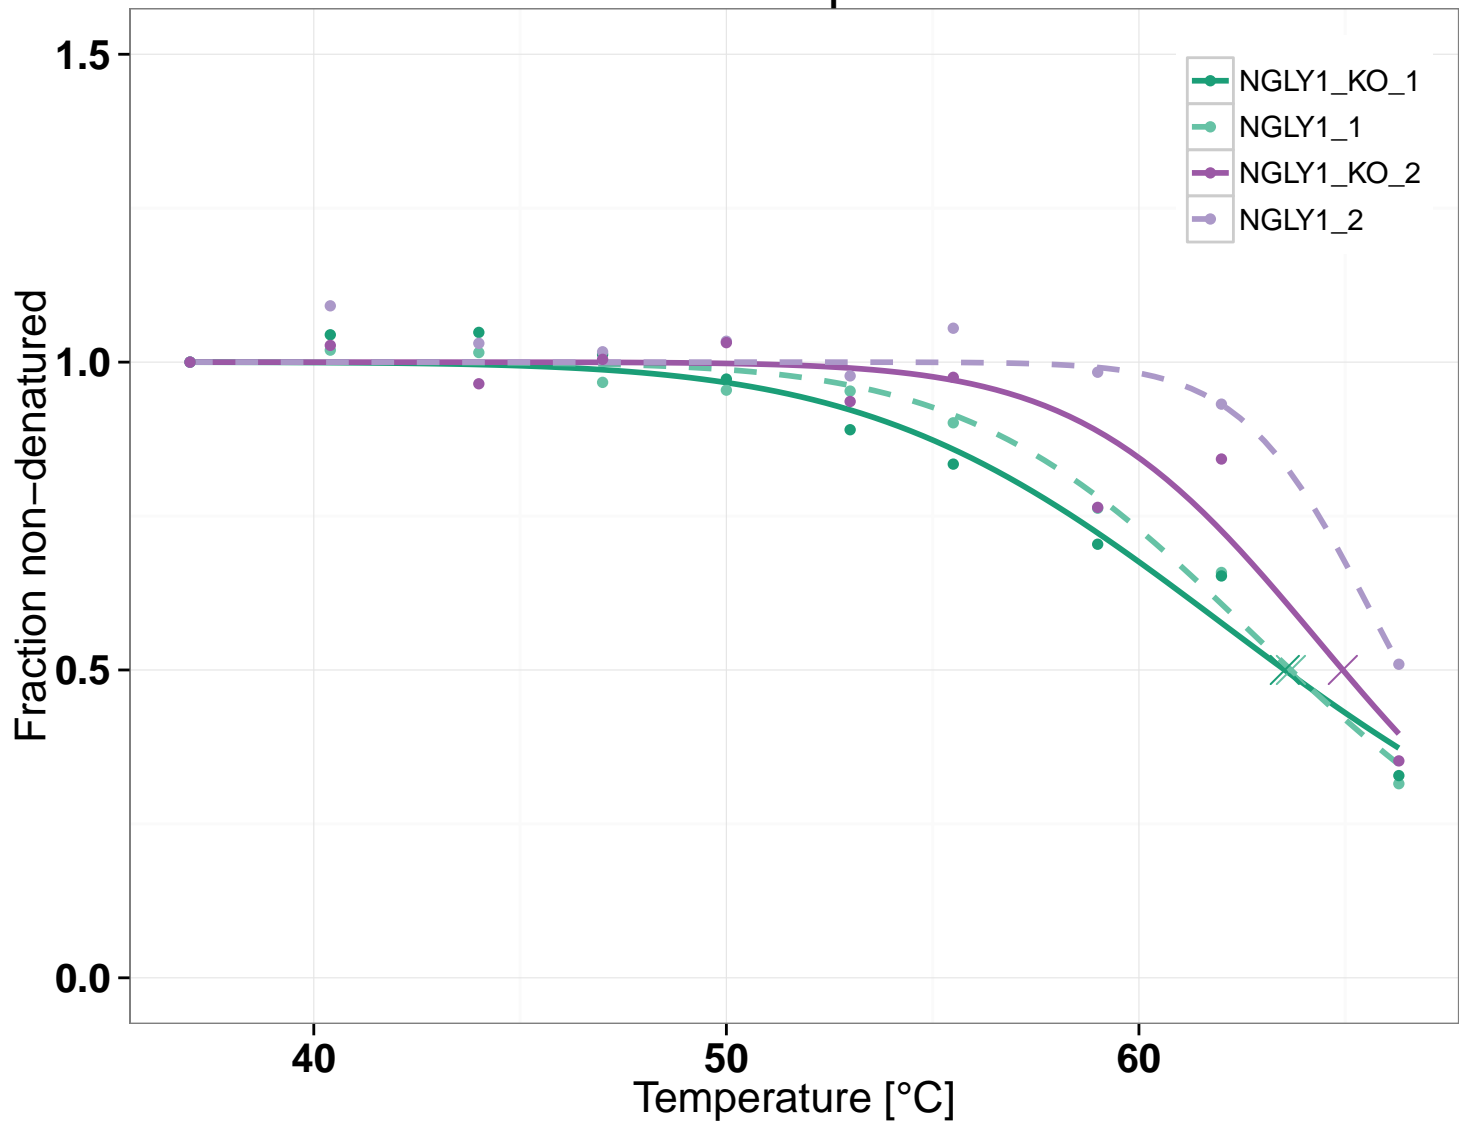

|            | meltPoint | slope  | plateau | R2   |
|------------|-----------|--------|---------|------|
| NGLY1_KO_1 | 63.54     | -0.05  | 0       | 0.97 |
| NGLY1_1    | 63.68     | -0.064 | 0       | 0.98 |
| NGLY1_KO_2 | 64.94     | -0.08  | 0       | 0.9  |
| NGLY1_2    | -         | -0.13  | 0.15    | 0.94 |

Supplement: Supplementary file 3311 [file 1]

IPI00886838.1|LOC123855

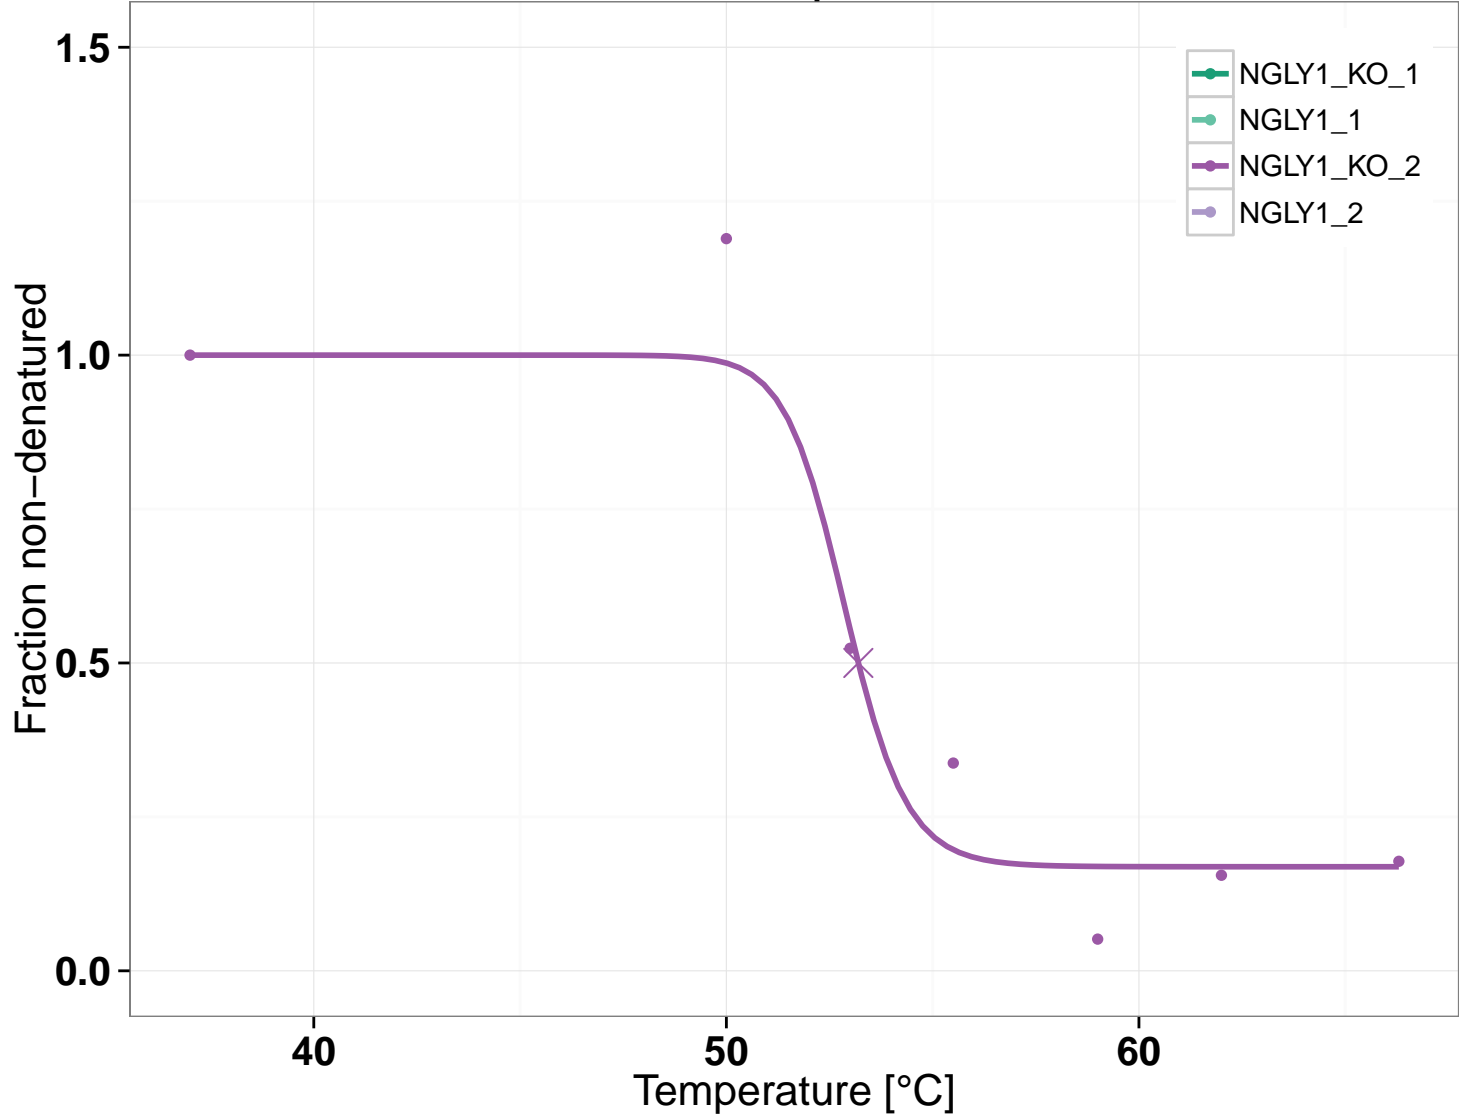

|            | meltPoint | slope | plateau | R2   |
|------------|-----------|-------|---------|------|
| NGLY1_KO_1 | -         | -     | -       | -    |
| NGLY1_1    | -         | -     | -       | -    |
| NGLY1_KO_2 | 53.2      | -0.28 | 0.17    | 0.28 |
| NGLY1_2    | -         | -     | -       | -    |

Supplement: Supplementary file 3312 [file 1]

# IPI00442323.1|AGAP3

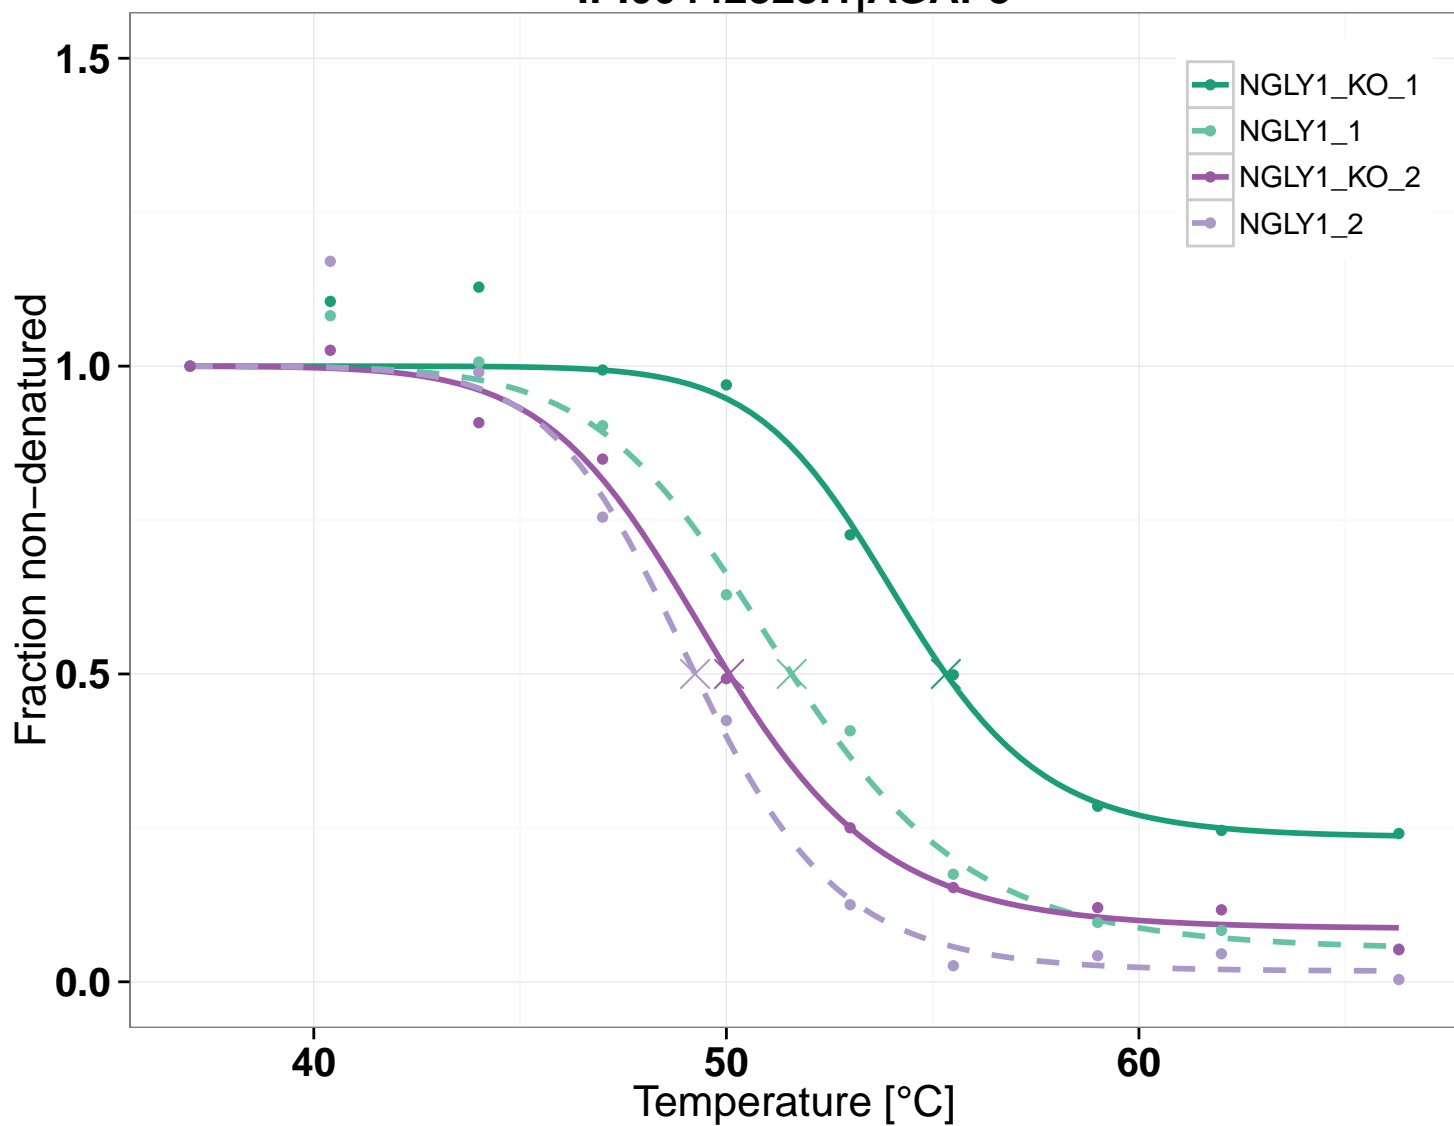

|            | meltPoint | slope | plateau | R2   |
|------------|-----------|-------|---------|------|
| NGLY1_KO_1 | 55.32     | -0.11 | 0.23    | 0.98 |
| NGLY1_1    | 51.58     | -0.1  | 0.05    | 0.99 |
| NGLY1_KO_2 | 50.07     | -0.11 | 0.09    | 1    |
| NGLY1_2    | 49.24     | -0.14 | 0.02    | 0.98 |

Supplement: Supplementary file 3313 [file 1]

# IPI00011693.4|C16ORF42

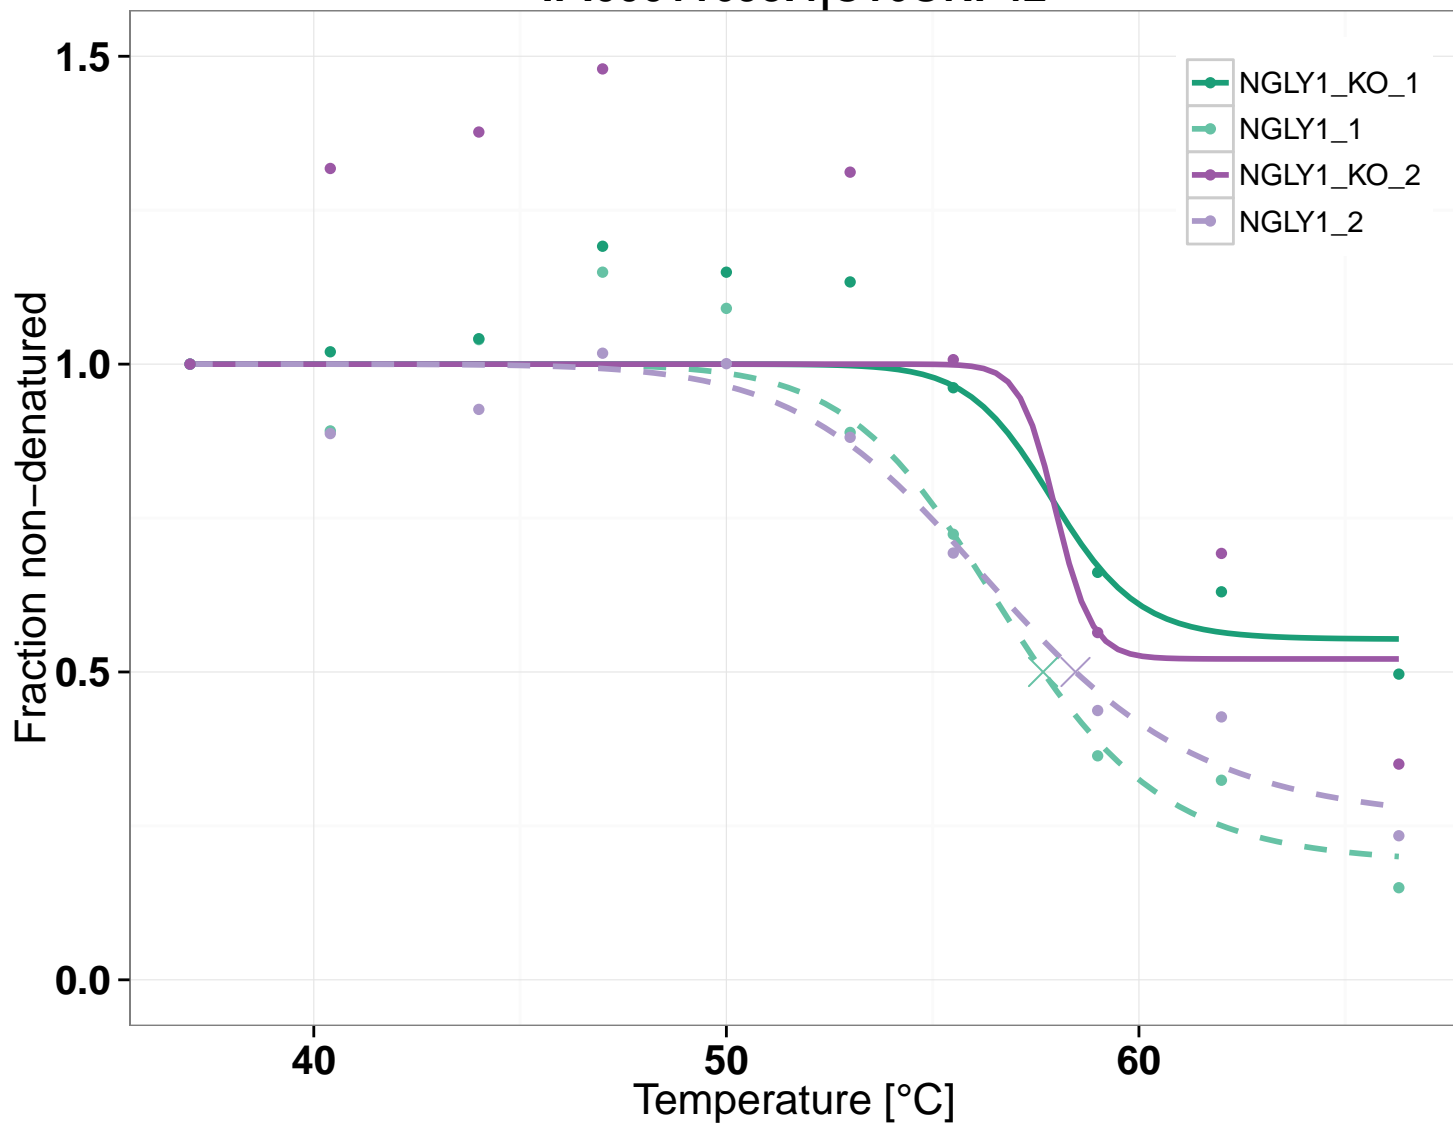

|            | meltPoint | slope  | plateau | R2   |
|------------|-----------|--------|---------|------|
| NGLY1_KO_1 | –         | –0.11  | 0.55    | 0.84 |
| NGLY1_1    | 57.68     | –0.11  | 0.19    | 0.95 |
| NGLY1_KO_2 | –         | –0.28  | 0.52    | 0.4  |
| NGLY1_2    | 58.46     | –0.075 | 0.25    | 0.96 |

Supplement: Supplementary file 3314 [file 1]

IPI00150269.1|PRPF4

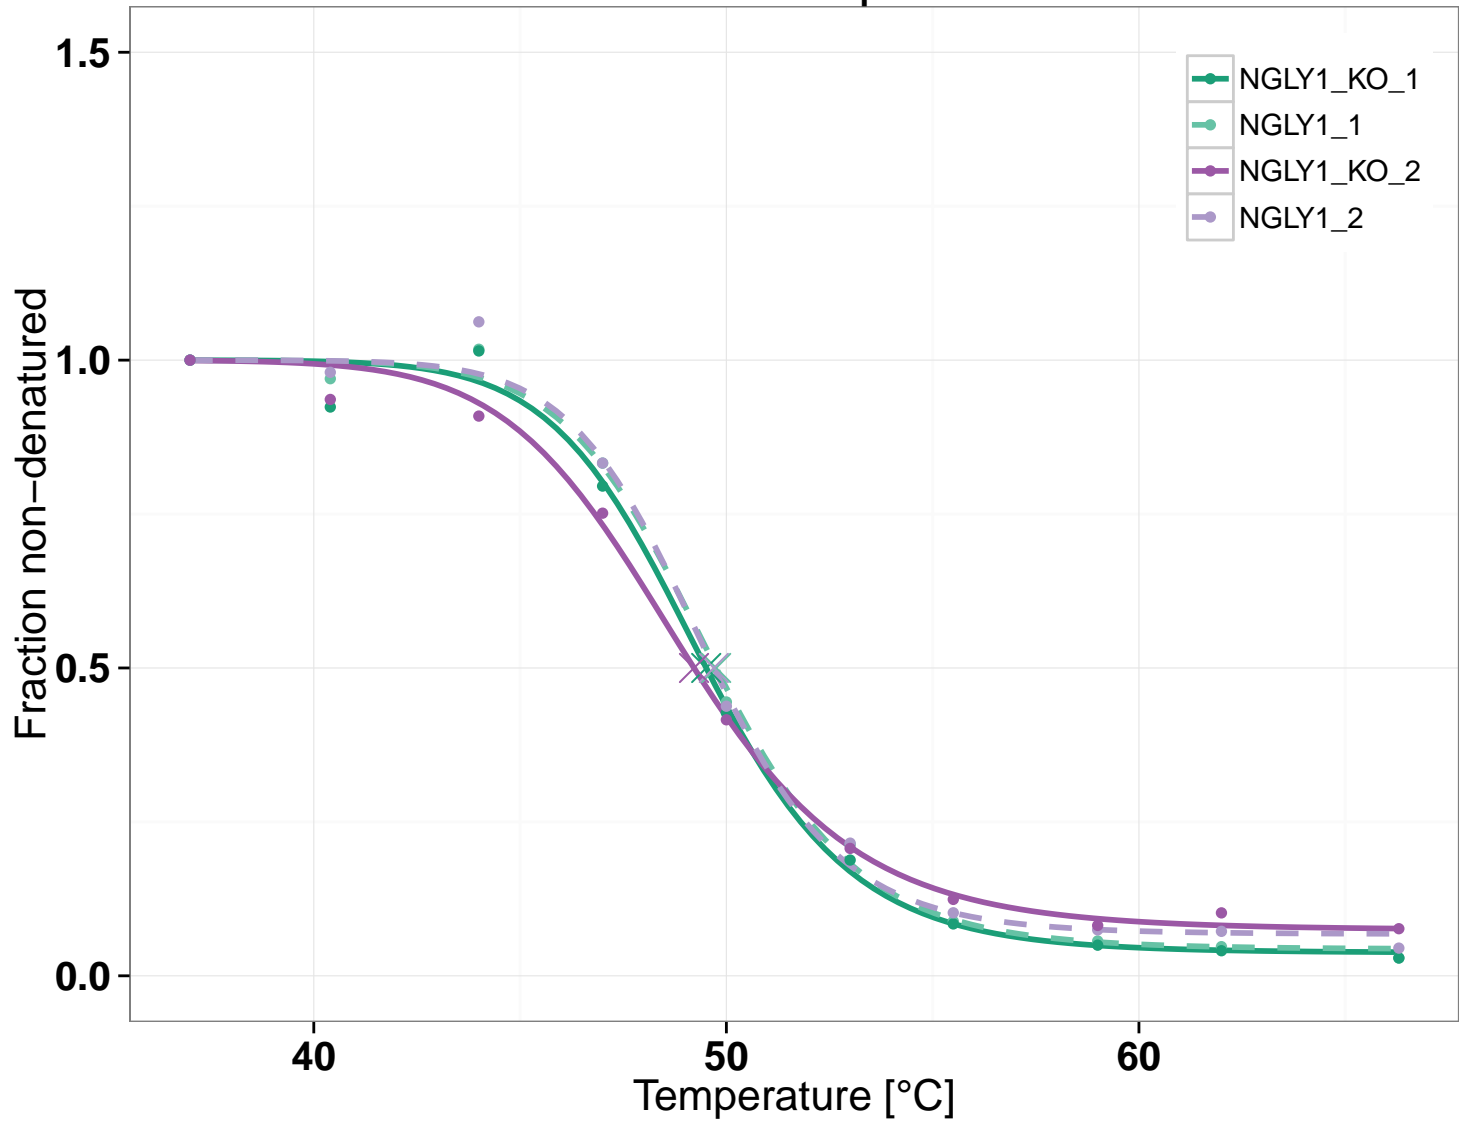

|            | meltPoint | slope | plateau | R2   |
|------------|-----------|-------|---------|------|
| NGLY1_KO_1 | 49.51     | -0.13 | 0.04    | 0.99 |
| NGLY1_1    | 49.75     | -0.13 | 0.04    | 1    |
| NGLY1_KO_2 | 49.22     | -0.11 | 0.07    | 1    |
| NGLY1_2    | 49.7      | -0.14 | 0.07    | 0.99 |

Supplement: Supplementary file 3315 [file 1]
