# Supplementary material (part 34 of 85)
Source: publisher figshare collection journal article supplement (https://gsajournals.figshare.com/articles/dataset/_/12014913)

IPI00455620.3|RUFY3

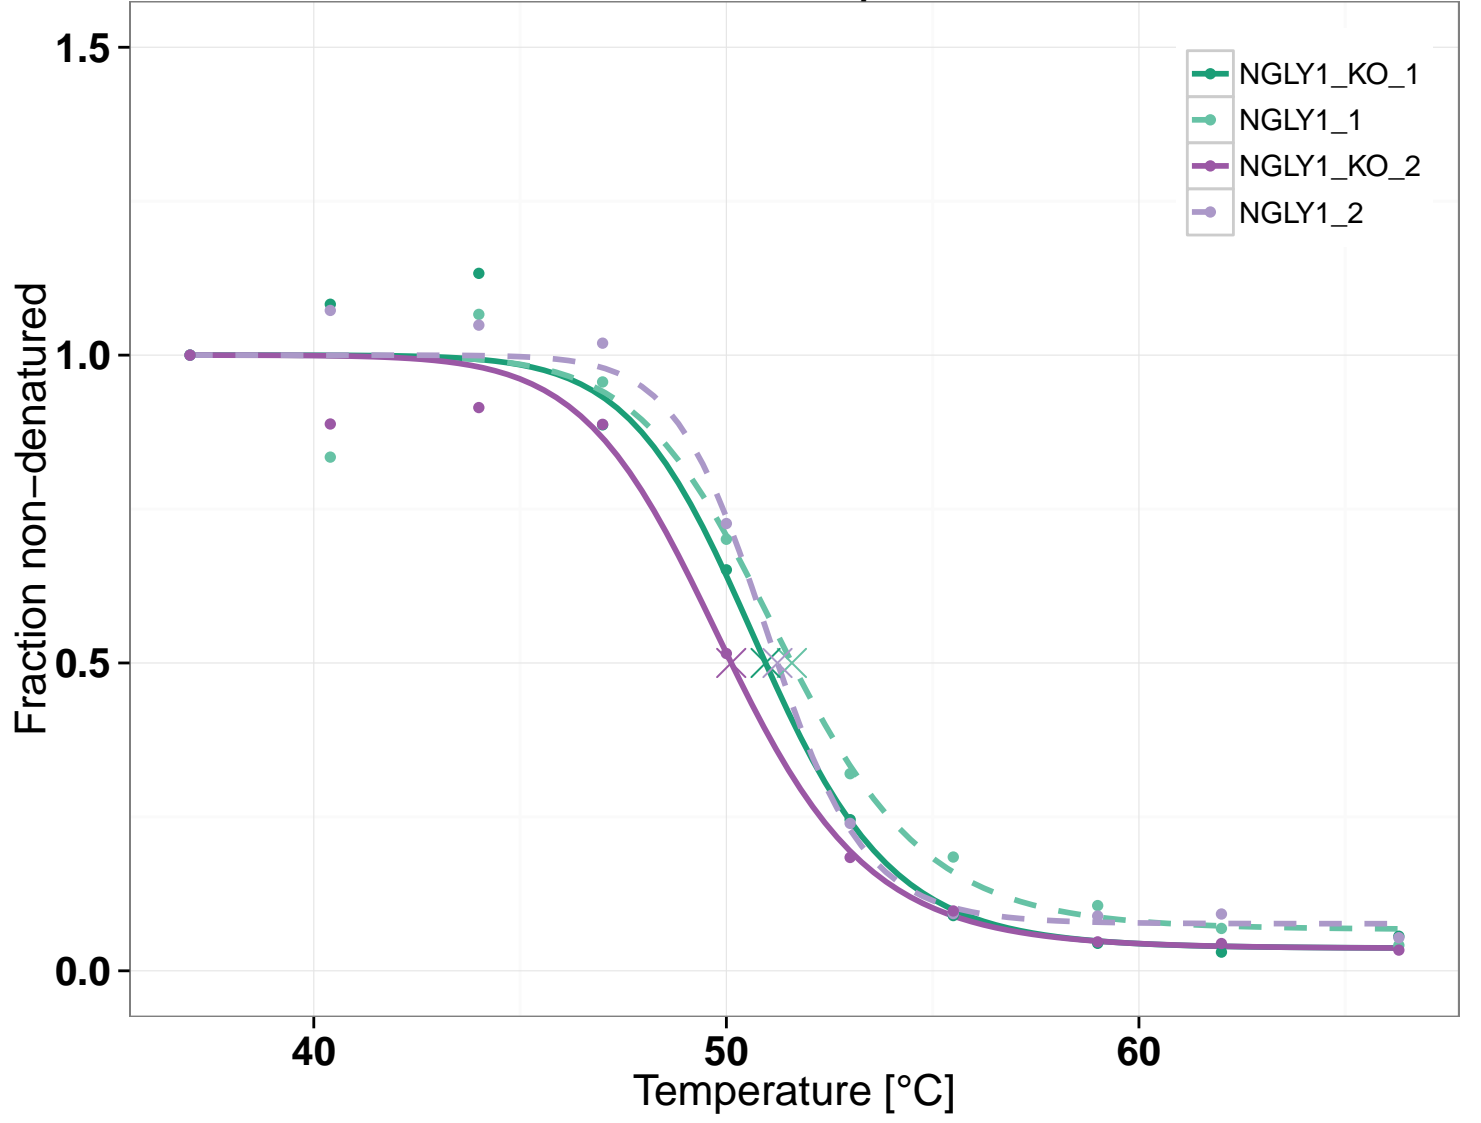

|            | meltPoint | slope | plateau | R2   |
|------------|-----------|-------|---------|------|
| NGLY1_KO_1 | 50.95     | -0.15 | 0.04    | 0.99 |
| NGLY1_1    | 51.59     | -0.13 | 0.07    | 0.98 |
| NGLY1_KO_2 | 50.12     | -0.14 | 0.04    | 0.99 |
| NGLY1_2    | 51.24     | -0.2  | 0.08    | 0.99 |

Supplement: Supplementary file 3316 [file 1]

IPI00385055.6|CTNNA2

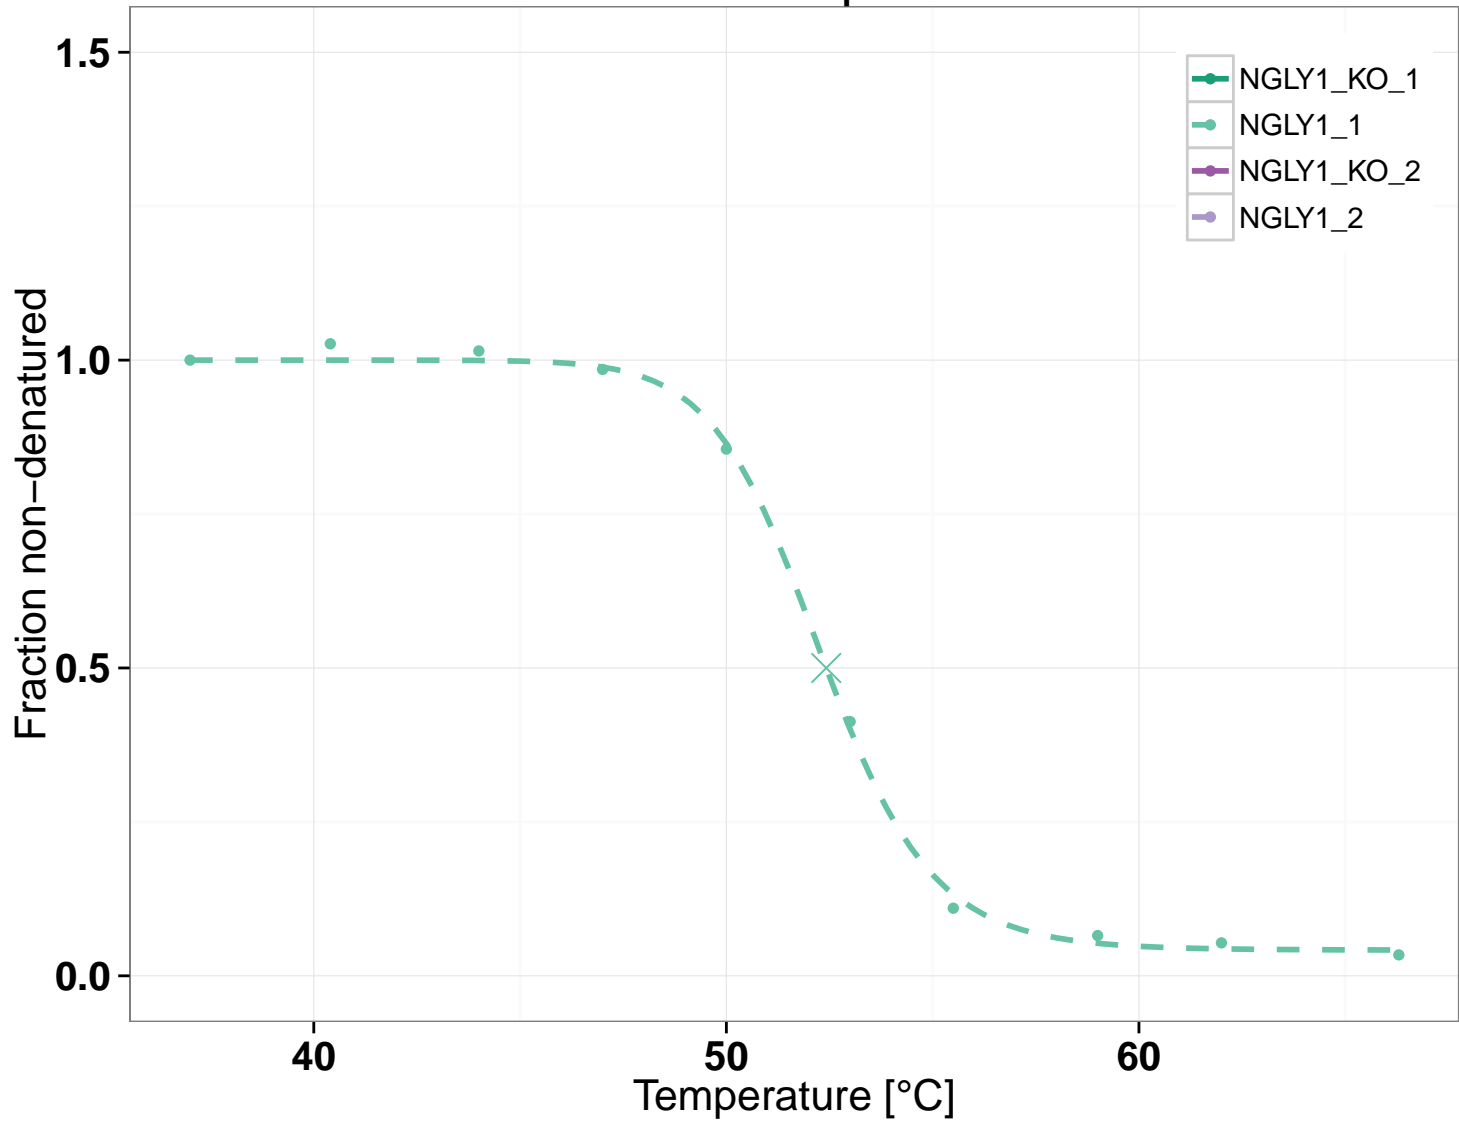

|            | meltPoint | slope | plateau | R2 |
|------------|-----------|-------|---------|----|
| NGLY1_KO_1 | -         | -     | -       | -  |
| NGLY1_1    | 52.42     | -0.18 | 0.04    | 1  |
| NGLY1_KO_2 | -         | -     | -       | -  |
| NGLY1_2    | -         | -     | -       | -  |

Supplement: Supplementary file 3317 [file 1]

IPI00329088.4|CHD1L

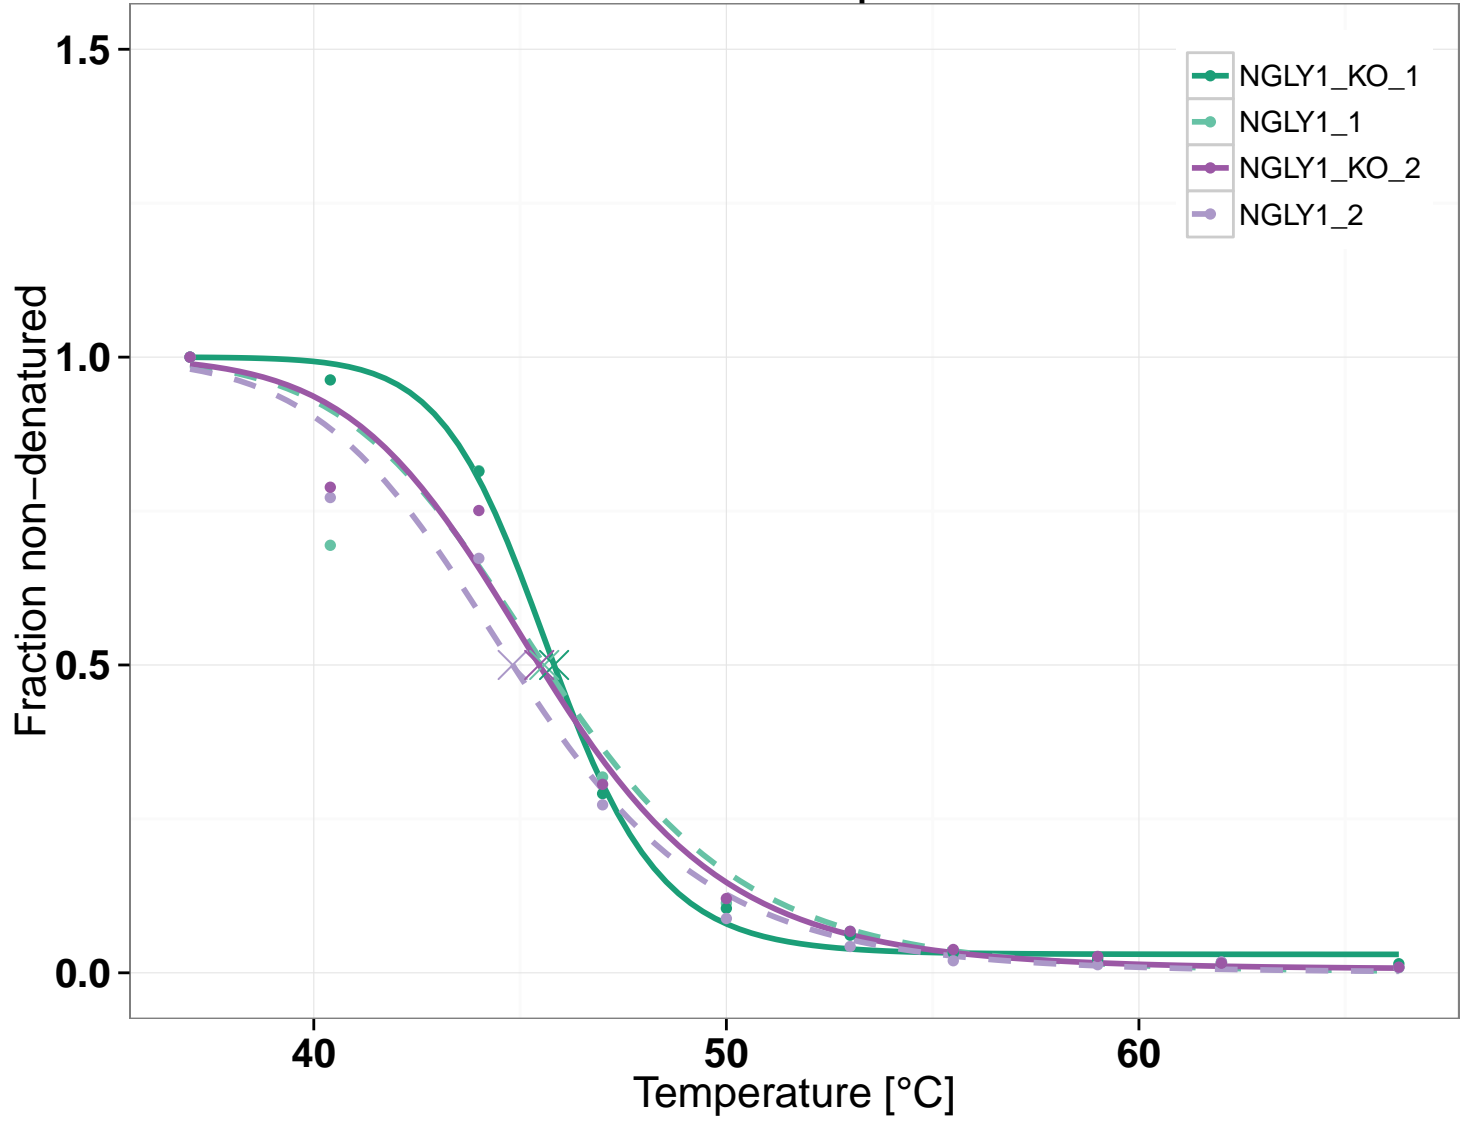

|            | meltPoint | slope | plateau | R2   |
|------------|-----------|-------|---------|------|
| NGLY1_KO_1 | 45.82     | -0.18 | 0.03    | 1    |
| NGLY1_1    | 45.59     | -0.1  | 0       | 0.94 |
| NGLY1_KO_2 | 45.46     | -0.11 | 0.01    | 0.98 |
| NGLY1_2    | 44.82     | -0.1  | 0       | 0.98 |

Supplement: Supplementary file 3318 [file 1]

IPI00022091.3|CDC16

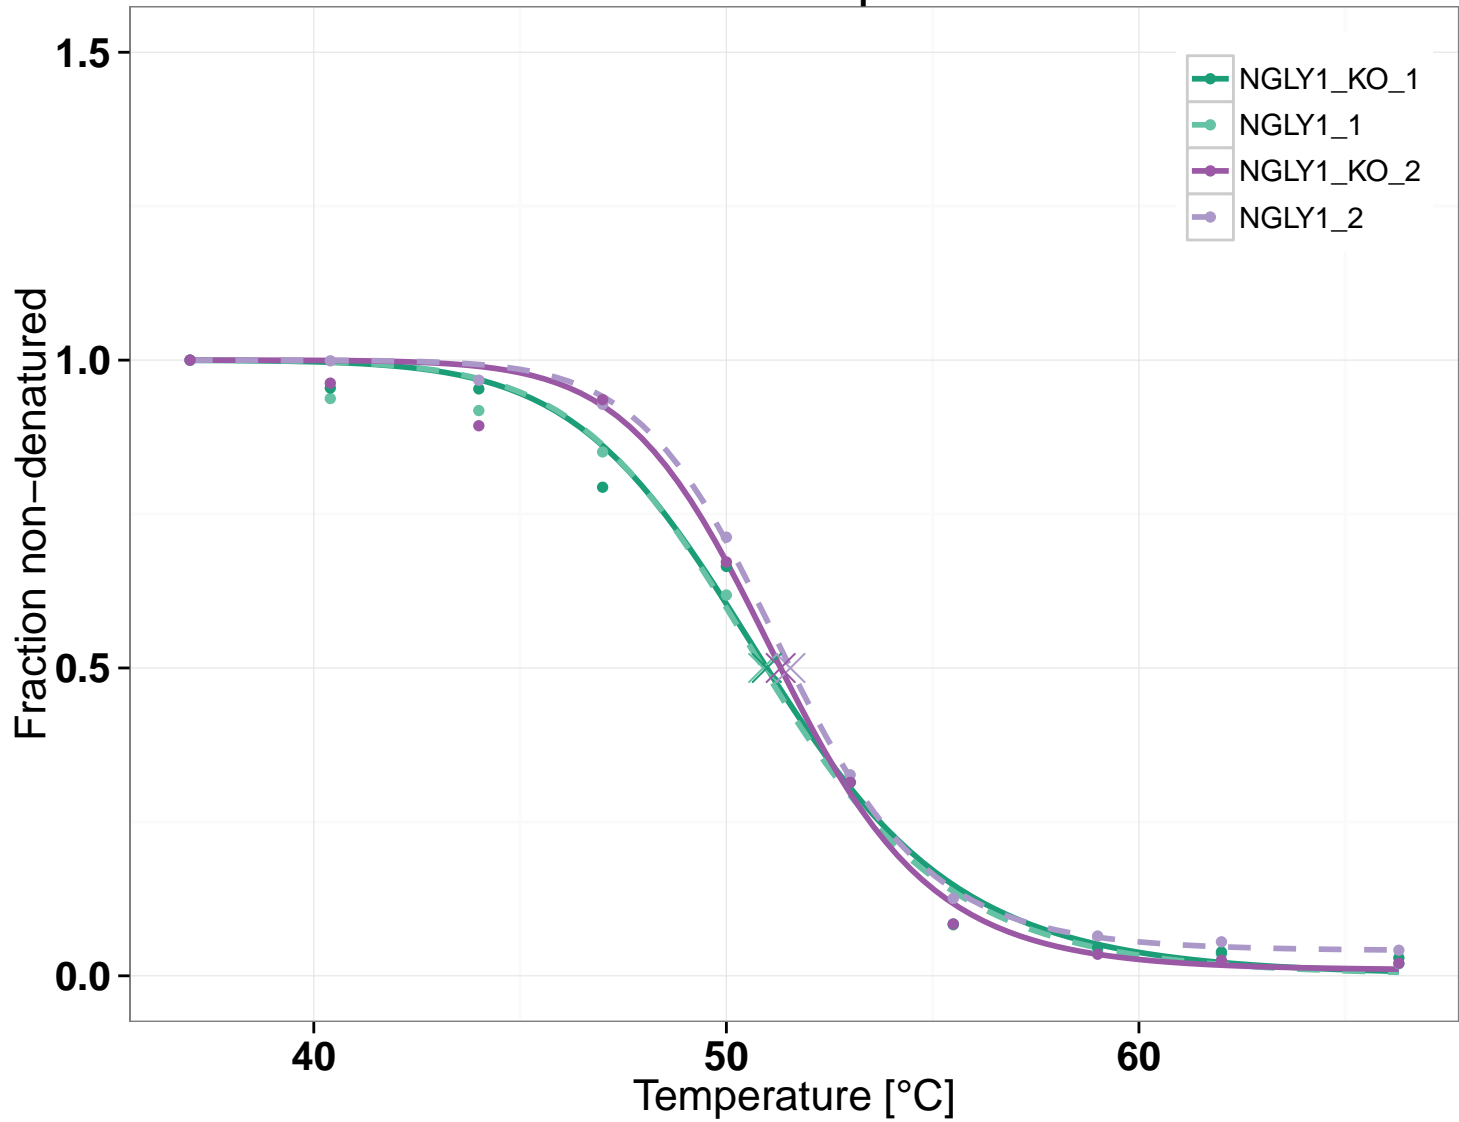

|            | meltPoint | slope | plateau | R2   |
|------------|-----------|-------|---------|------|
| NGLY1_KO_1 | 50.98     | -0.11 | 0       | 0.99 |
| NGLY1_1    | 50.89     | -0.11 | 0       | 0.99 |
| NGLY1_KO_2 | 51.32     | -0.13 | 0.01    | 0.99 |
| NGLY1_2    | 51.55     | -0.14 | 0.04    | 1    |

Supplement: Supplementary file 3319 [file 1]

# IPI00642708.2|CARD8

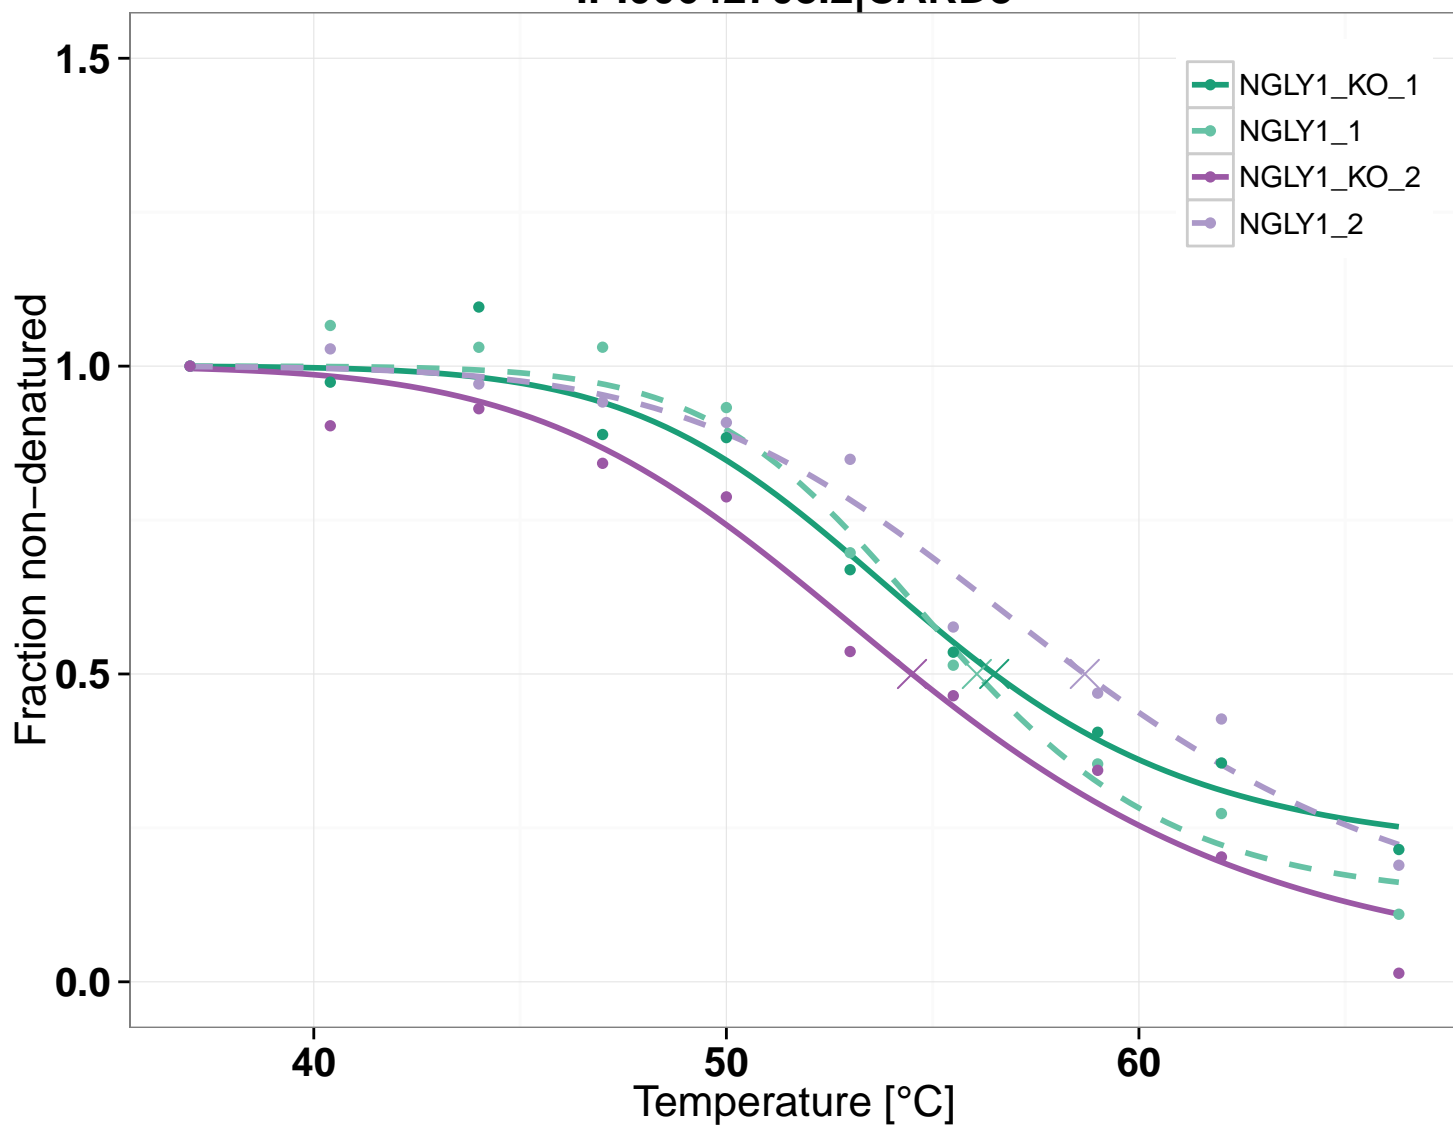

|            | meltPoint | slope  | plateau | R2   |
|------------|-----------|--------|---------|------|
| NGLY1_KO_1 | 56.49     | -0.058 | 0.2     | 0.97 |
| NGLY1_1    | 56.07     | -0.077 | 0.13    | 0.98 |
| NGLY1_KO_2 | 54.5      | -0.055 | 0       | 0.98 |
| NGLY1_2    | 58.69     | -0.052 | 0.06    | 0.97 |

Supplement: Supplementary file 3320 [file 1]

# IPI00024971.1|OSBP

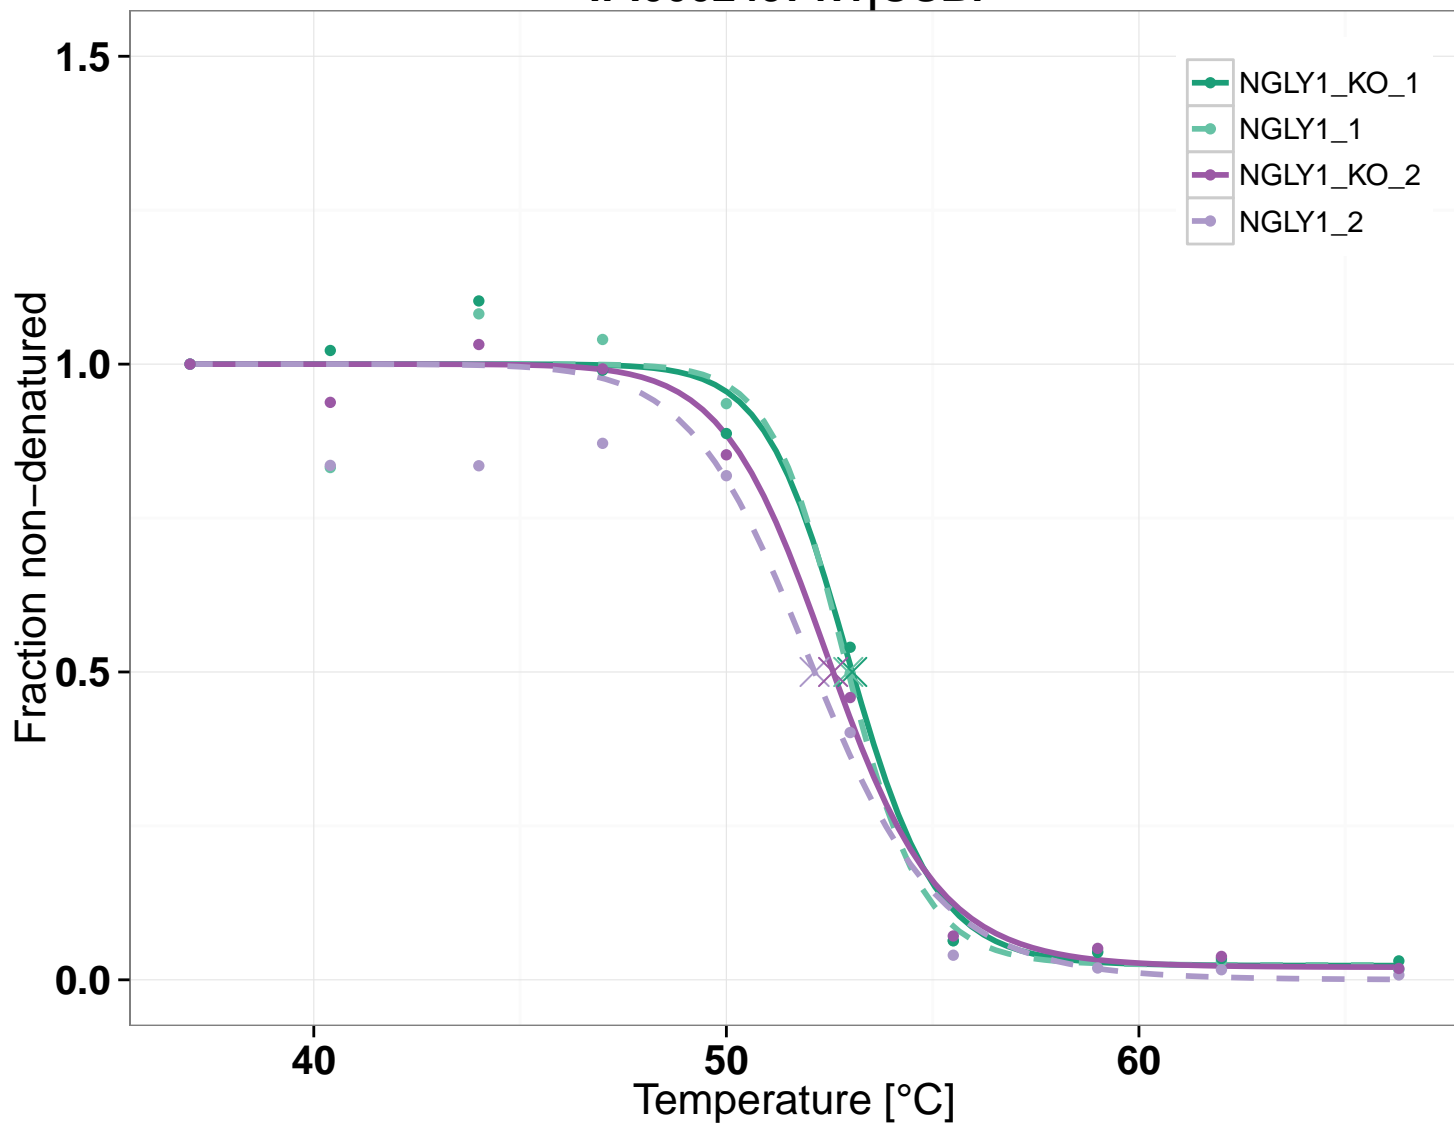

|            | meltPoint | slope | plateau | R2   |
|------------|-----------|-------|---------|------|
| NGLY1_KO_1 | 53.05     | -0.23 | 0.02    | 0.99 |
| NGLY1_1    | 52.95     | -0.27 | 0.02    | 0.98 |
| NGLY1_KO_2 | 52.59     | -0.19 | 0.02    | 0.99 |
| NGLY1_2    | 52.14     | -0.17 | 0       | 0.96 |

Supplement: Supplementary file 3321 [file 1]

IPI00893746.1|NHP2L1

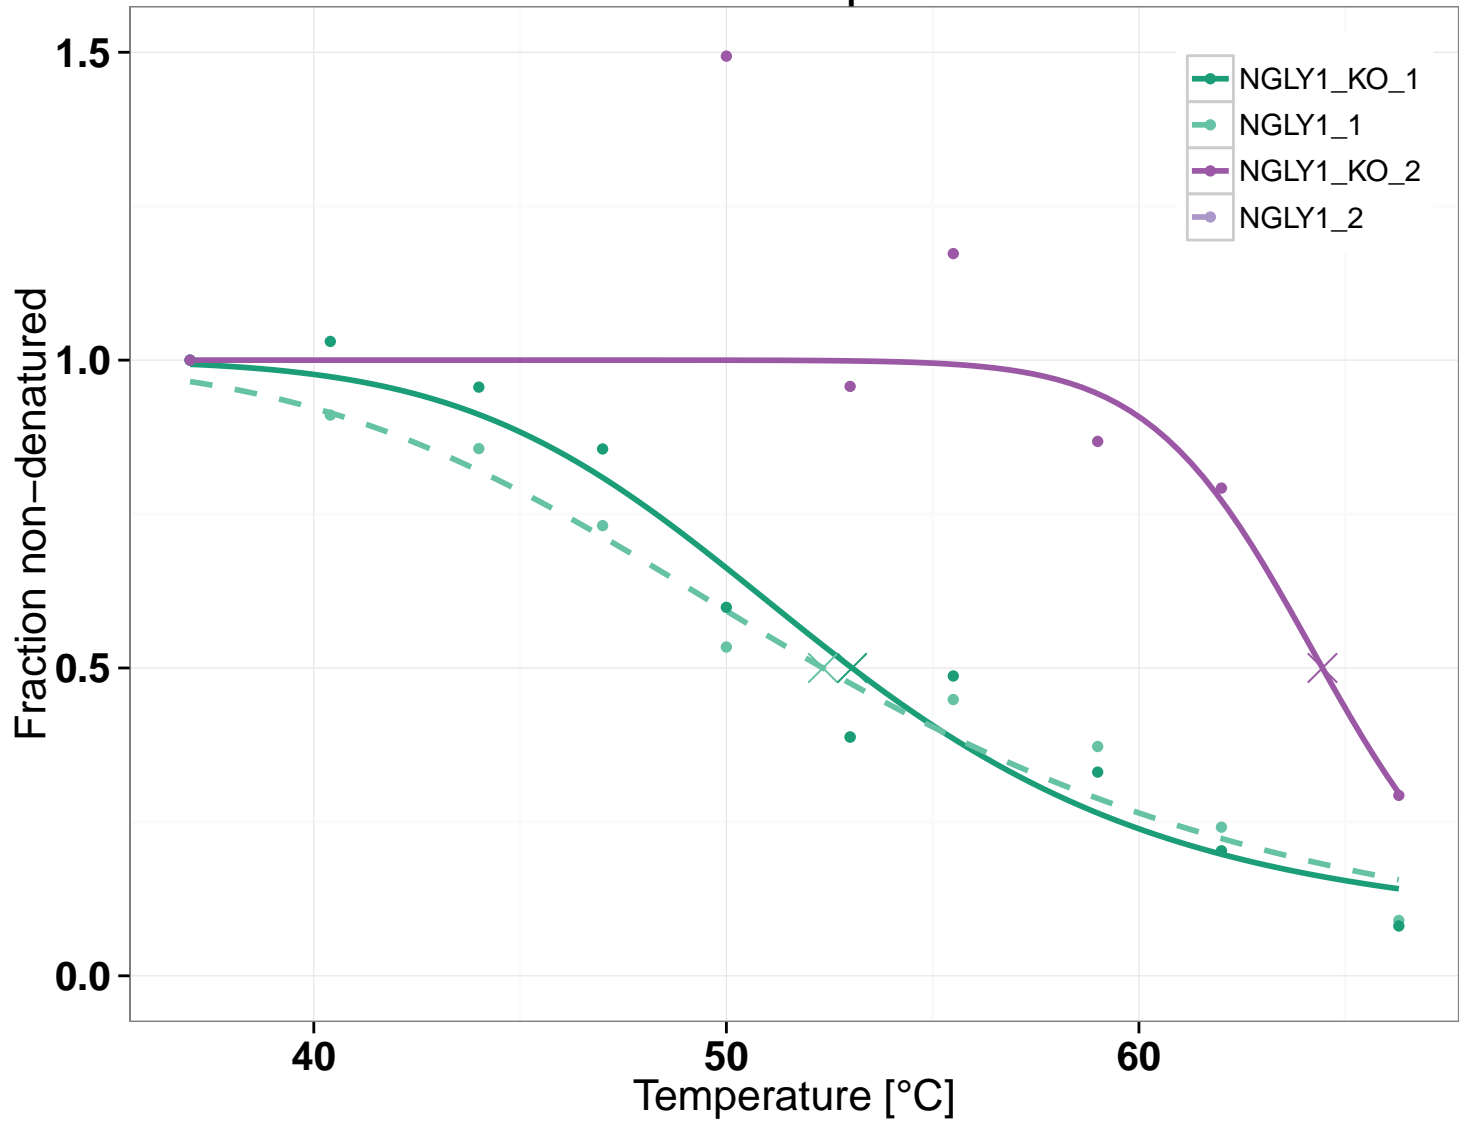

|            | meltPoint | slope  | plateau | R2    |
|------------|-----------|--------|---------|-------|
| NGLY1_KO_1 | 53.05     | -0.054 | 0.07    | 0.96  |
| NGLY1_1    | 52.34     | -0.041 | 0       | 0.96  |
| NGLY1_KO_2 | 64.45     | -0.12  | 0       | -0.08 |
| NGLY1_2    | -         | -      | -       | -     |

Supplement: Supplementary file 3322 [file 1]

IPI00002732.2|EXTL2

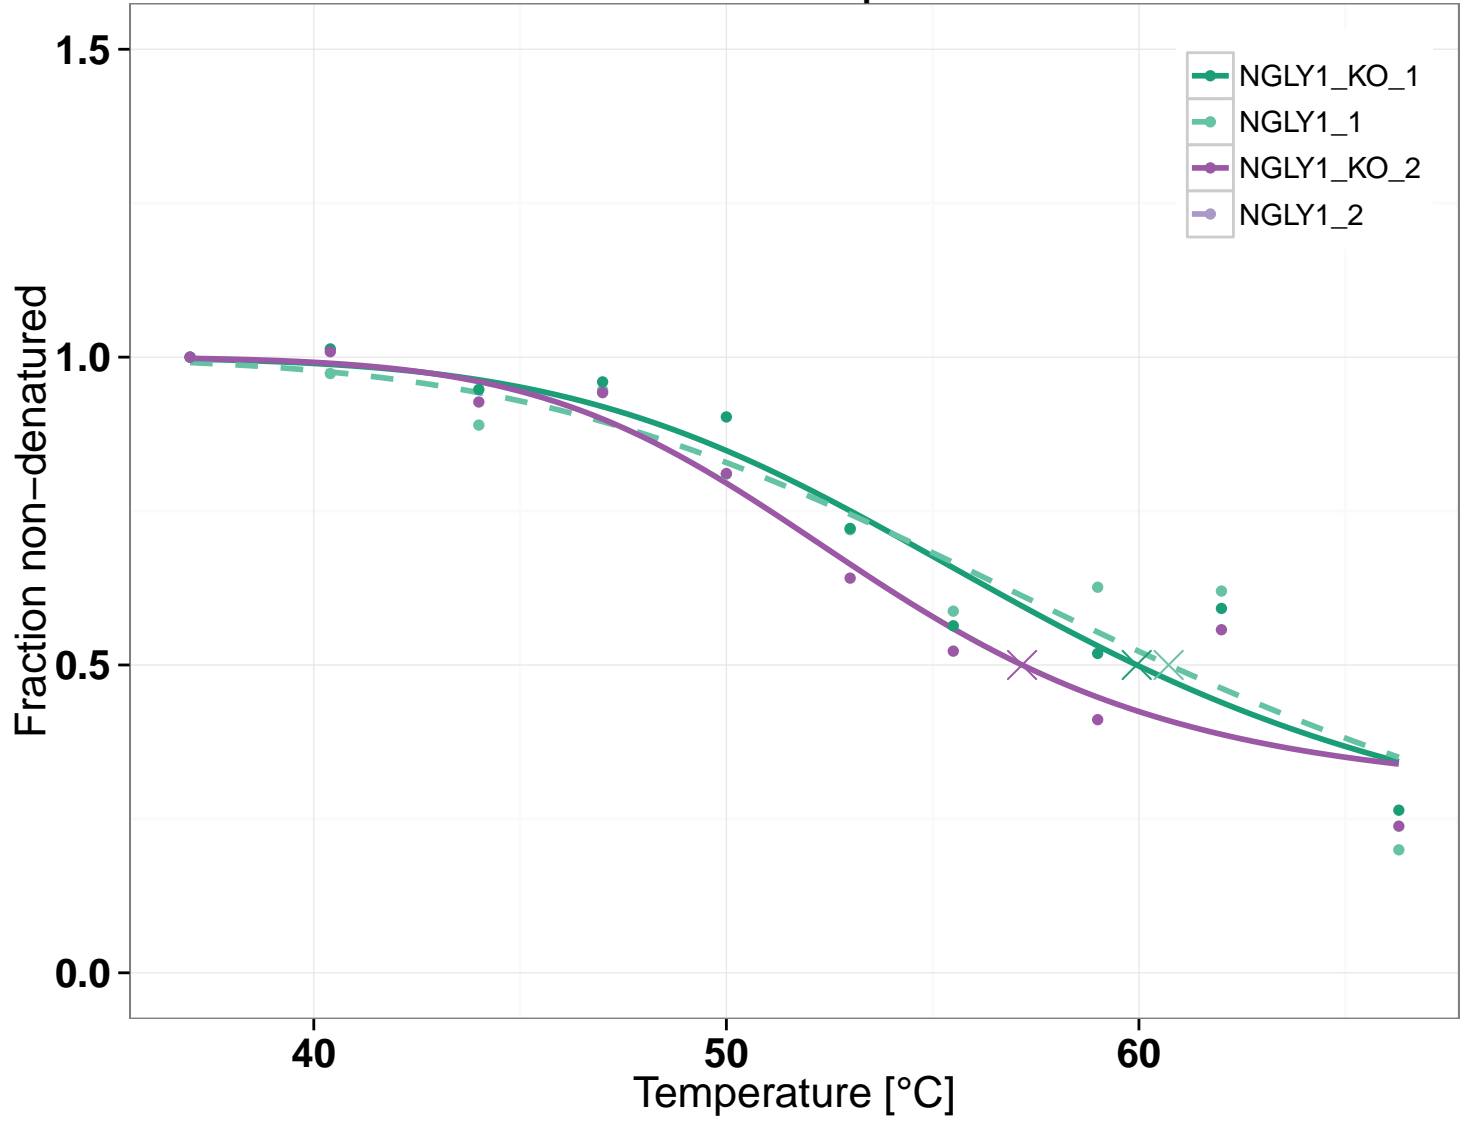

|            | meltPoint | slope  | plateau | R2   |
|------------|-----------|--------|---------|------|
| NGLY1_KO_1 | 59.95     | -0.038 | 0.17    | 0.92 |
| NGLY1_1    | 60.72     | -0.032 | 0       | 0.88 |
| NGLY1_KO_2 | 57.17     | -0.045 | 0.29    | 0.93 |
| NGLY1_2    | -         | -      | -       | -    |

Supplement: Supplementary file 3323 [file 1]

IPI00025725.2|NDUFB1

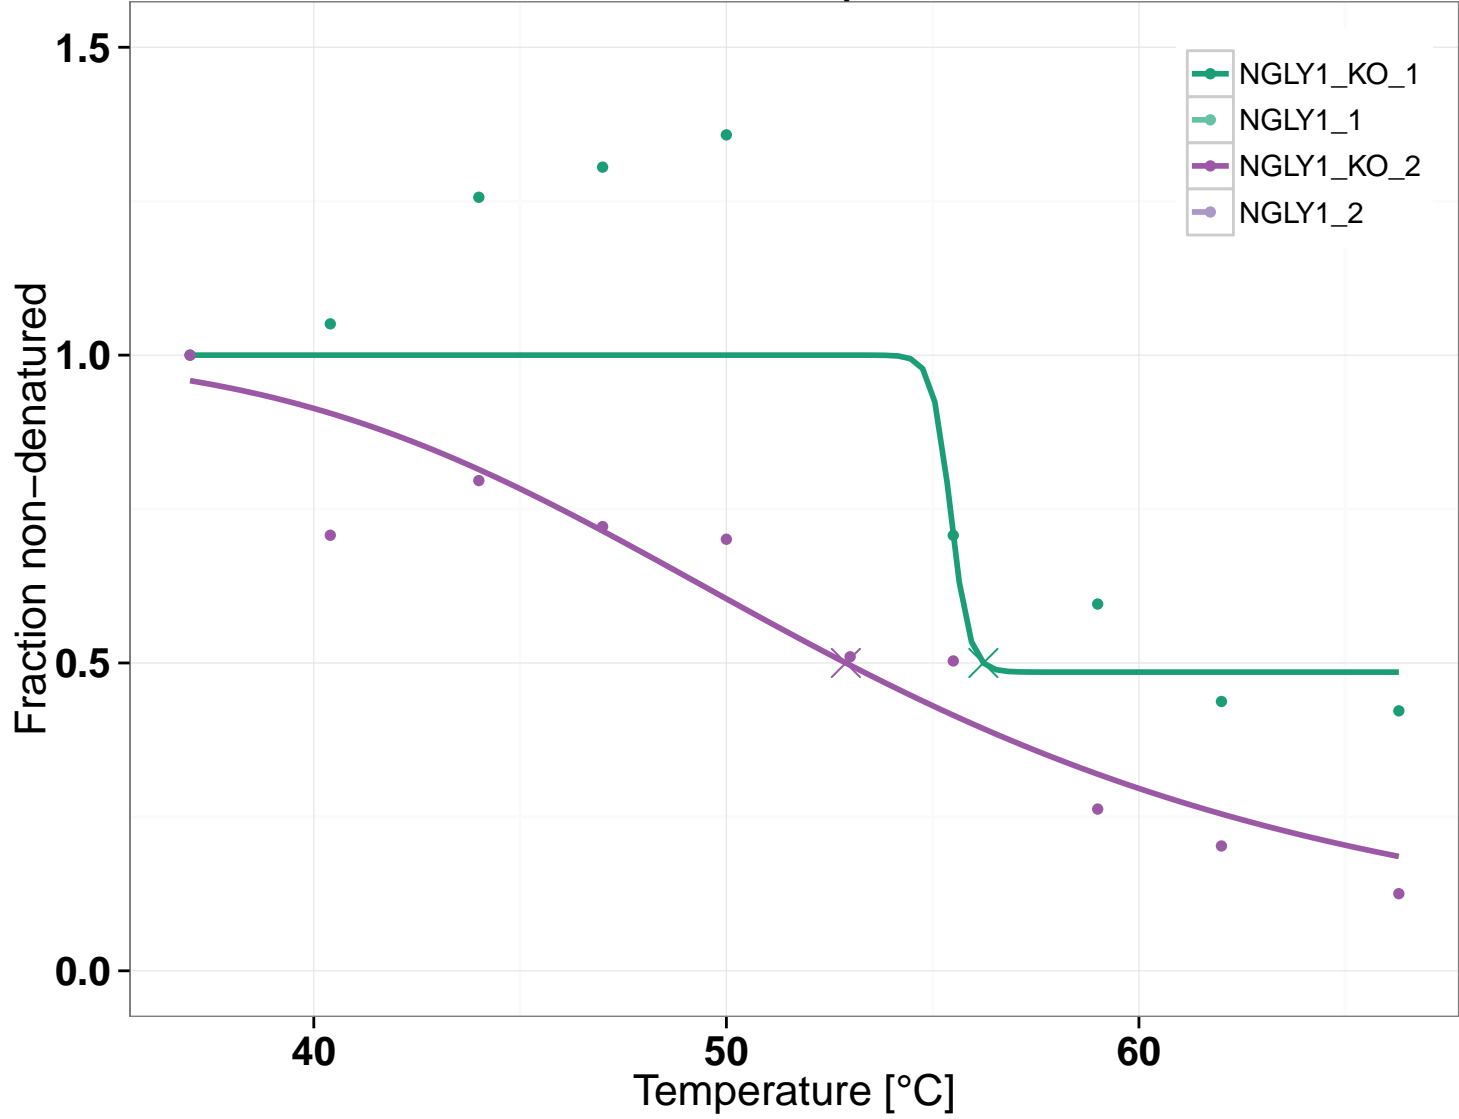

|            | meltPoint | slope  | plateau | R2   |
|------------|-----------|--------|---------|------|
| NGLY1_KO_1 | 56.23     | -0.58  | 0.49    | 0.58 |
| NGLY1_1    | -         | -      | -       | -    |
| NGLY1_KO_2 | 52.9      | -0.037 | 0       | 0.91 |
| NGLY1_2    | -         | -      | -       | -    |

Supplement: Supplementary file 3324 [file 1]

# IPI00220694.2|CASC5

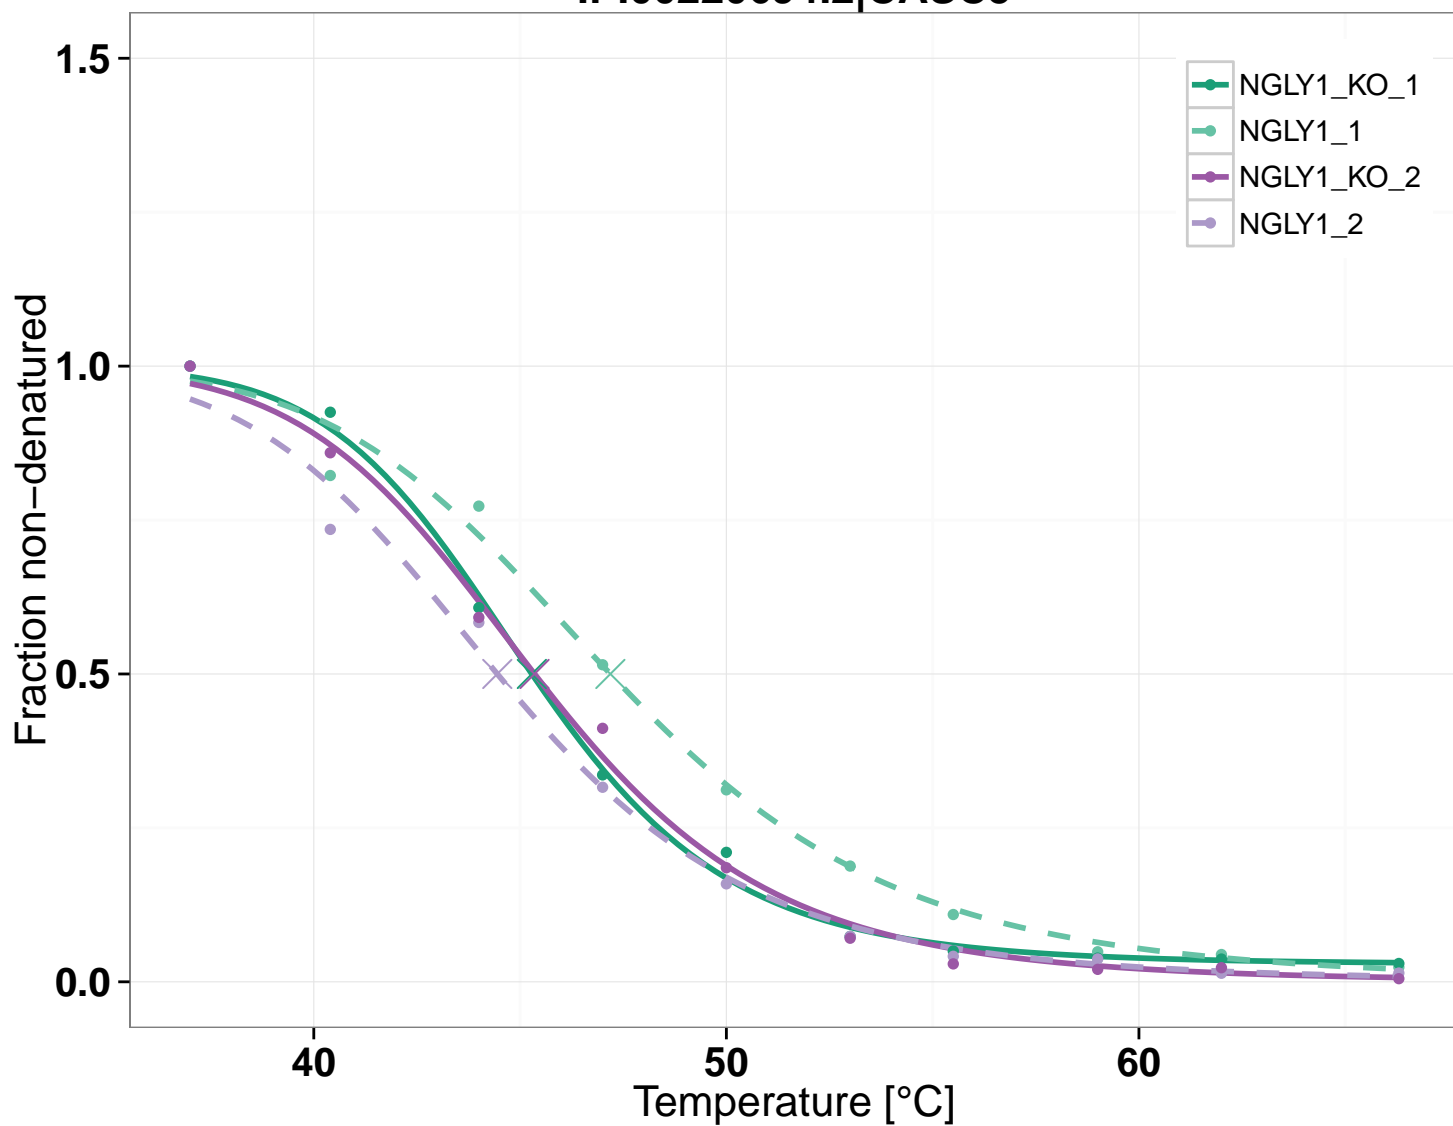

|            | meltPoint | slope  | plateau | R2   |
|------------|-----------|--------|---------|------|
| NGLY1_KO_1 | 45.29     | -0.1   | 0.03    | 1    |
| NGLY1_1    | 47.19     | -0.073 | 0       | 0.99 |
| NGLY1_KO_2 | 45.35     | -0.088 | 0       | 1    |
| NGLY1_2    | 44.45     | -0.082 | 0       | 0.99 |

Supplement: Supplementary file 3325 [file 1]

# IPI00033892.3|GZF1

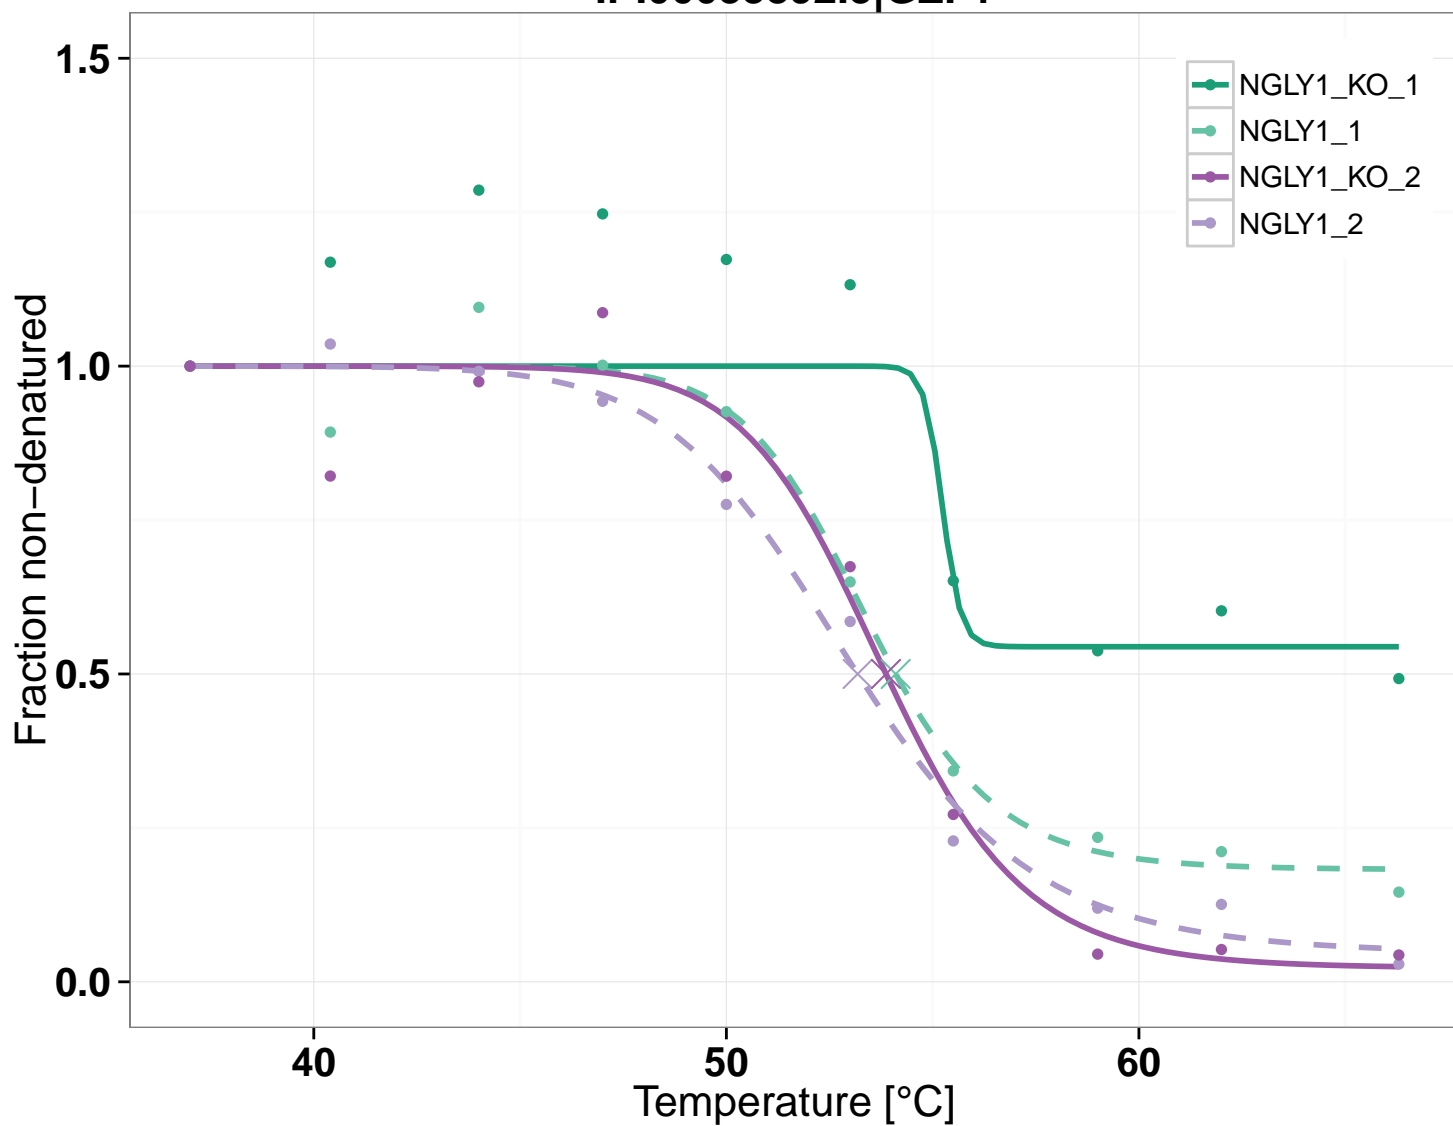

|            | meltPoint | slope | plateau | R2   |
|------------|-----------|-------|---------|------|
| NGLY1_KO_1 | –         | –0.52 | 0.54    | 0.76 |
| NGLY1_1    | 54.1      | –0.13 | 0.18    | 0.98 |
| NGLY1_KO_2 | 53.87     | –0.14 | 0.02    | 0.97 |
| NGLY1_2    | 53.18     | –0.11 | 0.04    | 0.99 |

Supplement: Supplementary file 3326 [file 1]

# IPI00844014.1|C9ORF114

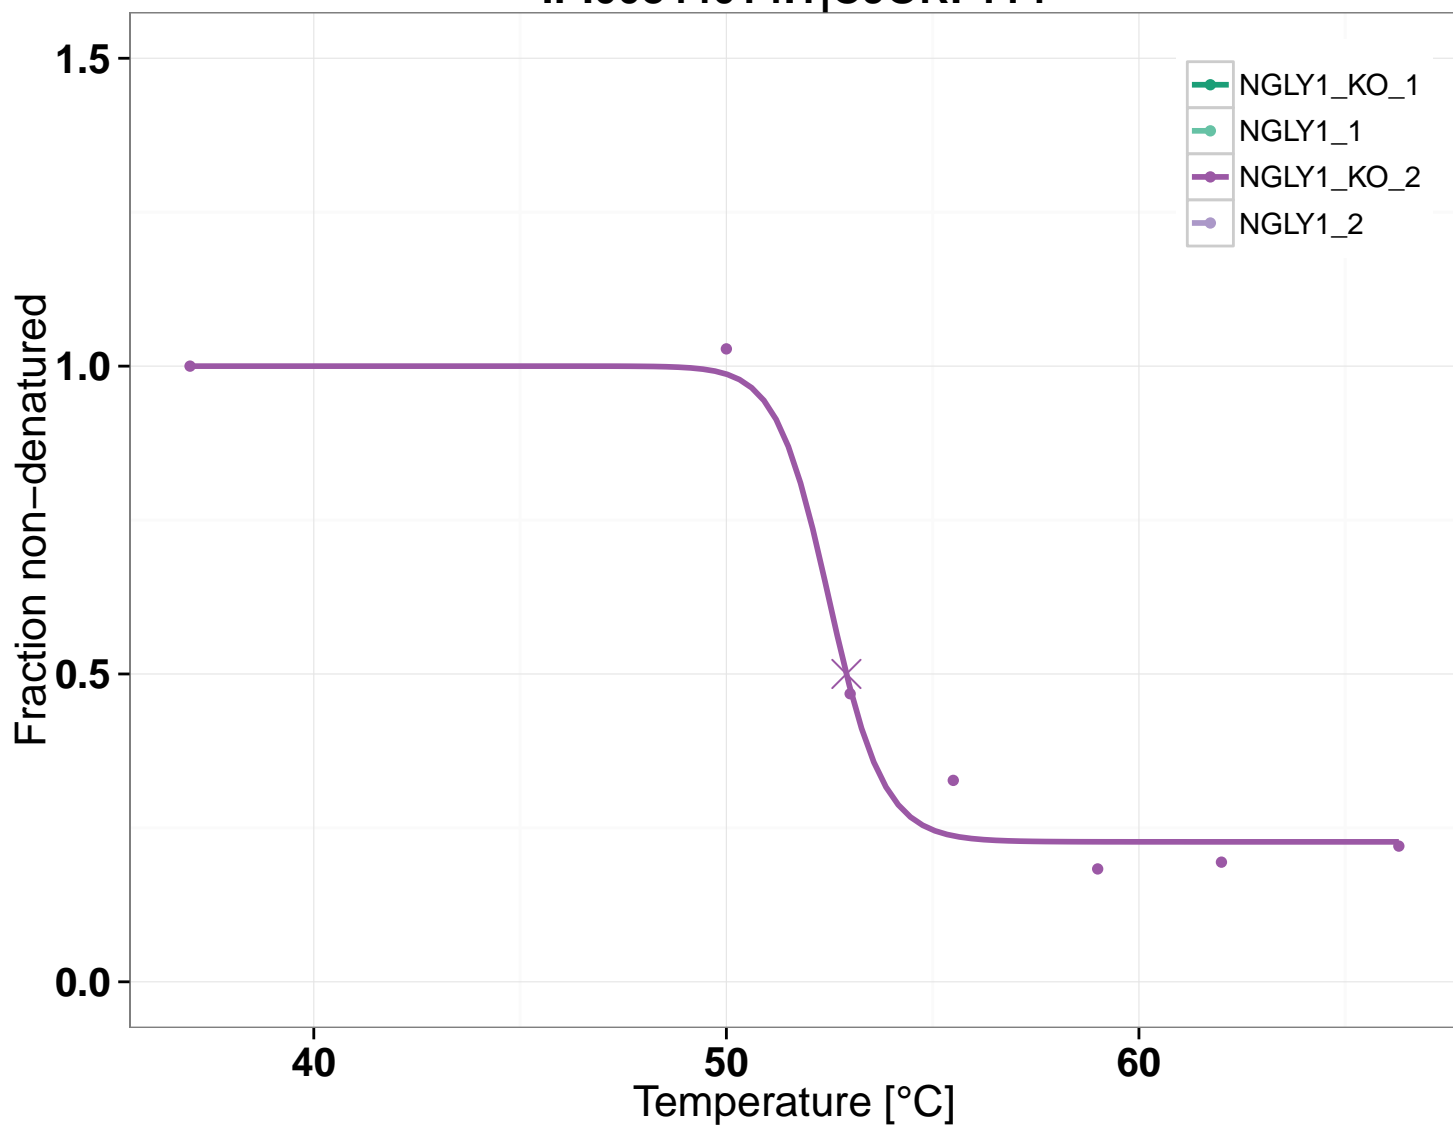

|            | meltPoint | slope | plateau | R2   |
|------------|-----------|-------|---------|------|
| NGLY1_KO_1 | —         | —     | —       | —    |
| NGLY1_1    | —         | —     | —       | —    |
| NGLY1_KO_2 | 52.91     | -0.3  | 0.23    | 0.54 |
| NGLY1_2    | —         | —     | —       | —    |

Supplement: Supplementary file 3327 [file 1]

# IPI00550987.1|CEP135

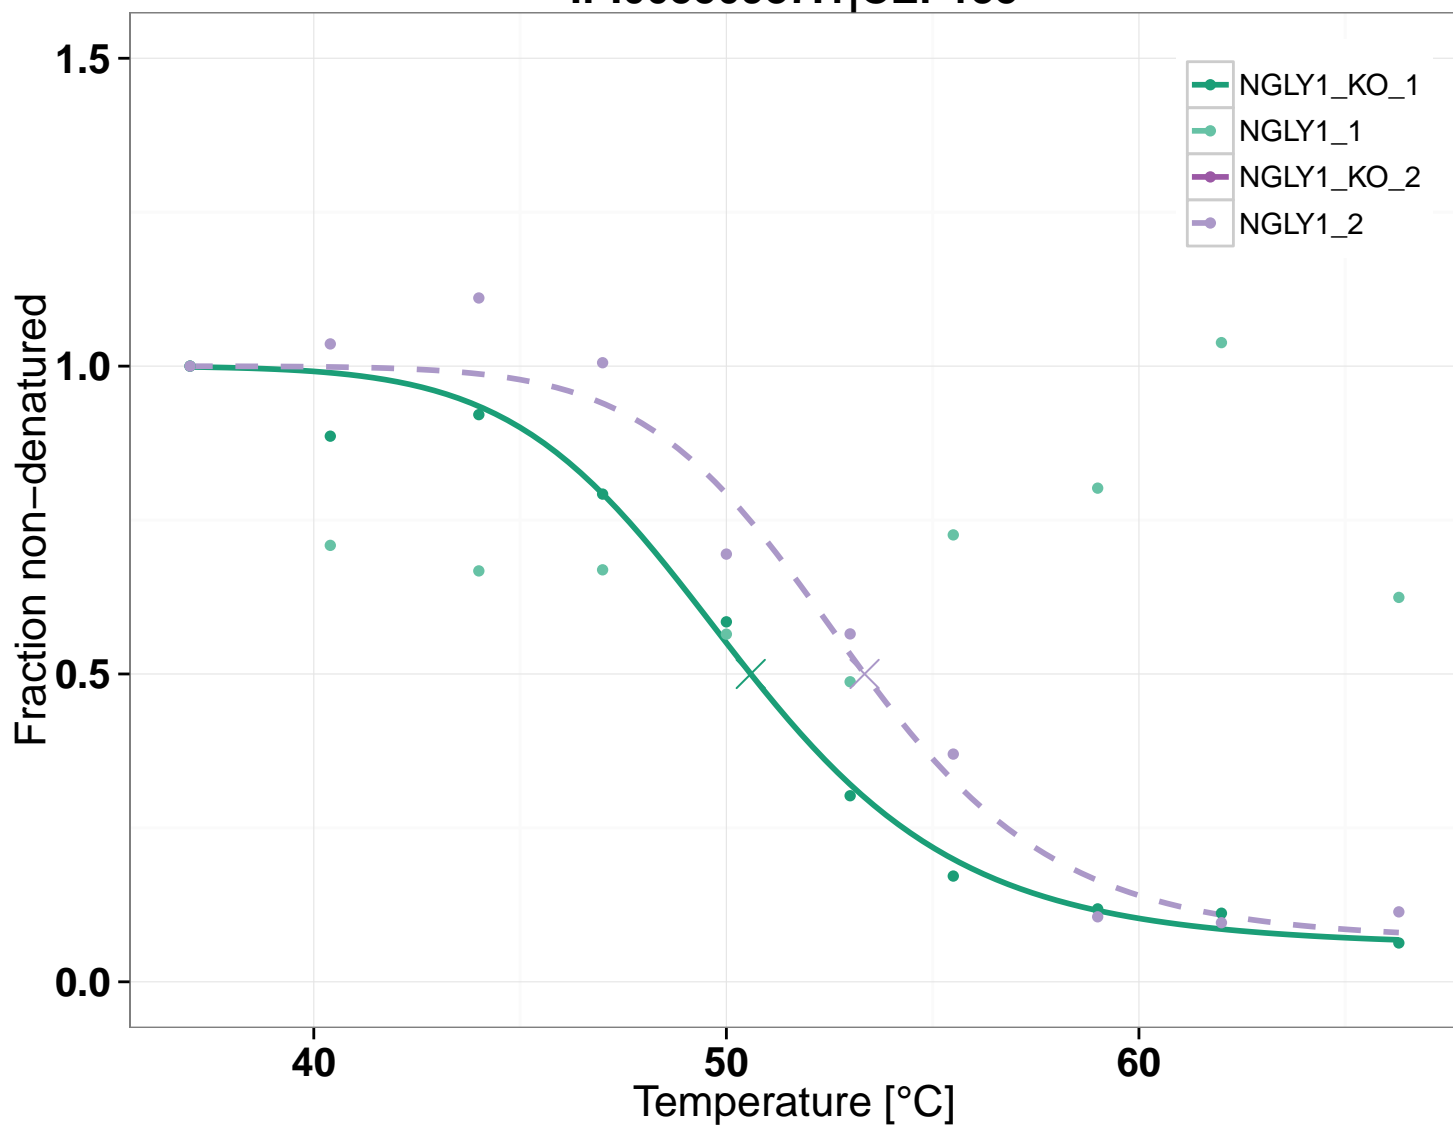

|            | meltPoint | slope  | plateau | R2   |
|------------|-----------|--------|---------|------|
| NGLY1_KO_1 | 50.59     | -0.087 | 0.06    | 0.99 |
| NGLY1_1    | -         | -      | -       | -    |
| NGLY1_KO_2 | -         | -      | -       | -    |
| NGLY1_2    | 53.35     | -0.093 | 0.07    | 0.98 |

Supplement: Supplementary file 3328 [file 1]

IPI00257508.4|DPYSL2

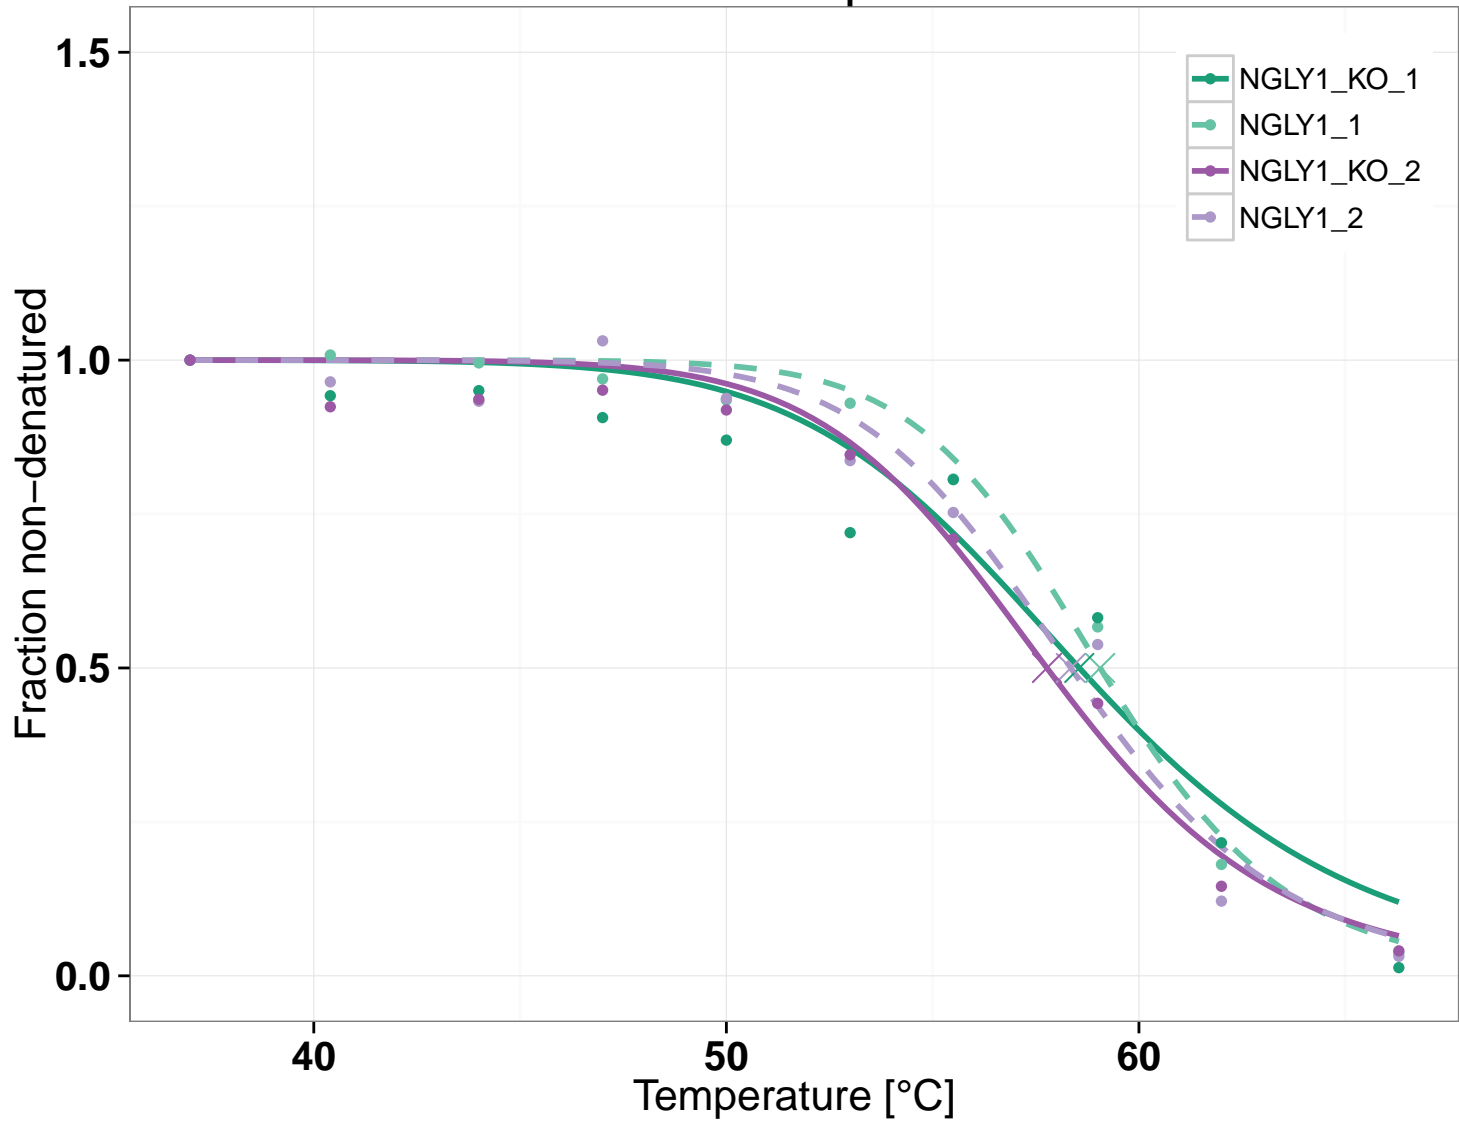

|            | meltPoint | slope  | plateau | R2   |
|------------|-----------|--------|---------|------|
| NGLY1_KO_1 | 58.55     | -0.074 | 0       | 0.93 |
| NGLY1_1    | 59.06     | -0.11  | 0       | 0.99 |
| NGLY1_KO_2 | 57.77     | -0.091 | 0       | 0.98 |
| NGLY1_2    | 58.35     | -0.098 | 0       | 0.97 |

Supplement: Supplementary file 3329 [file 1]

# IPI00555565.1|HSP90AB4P

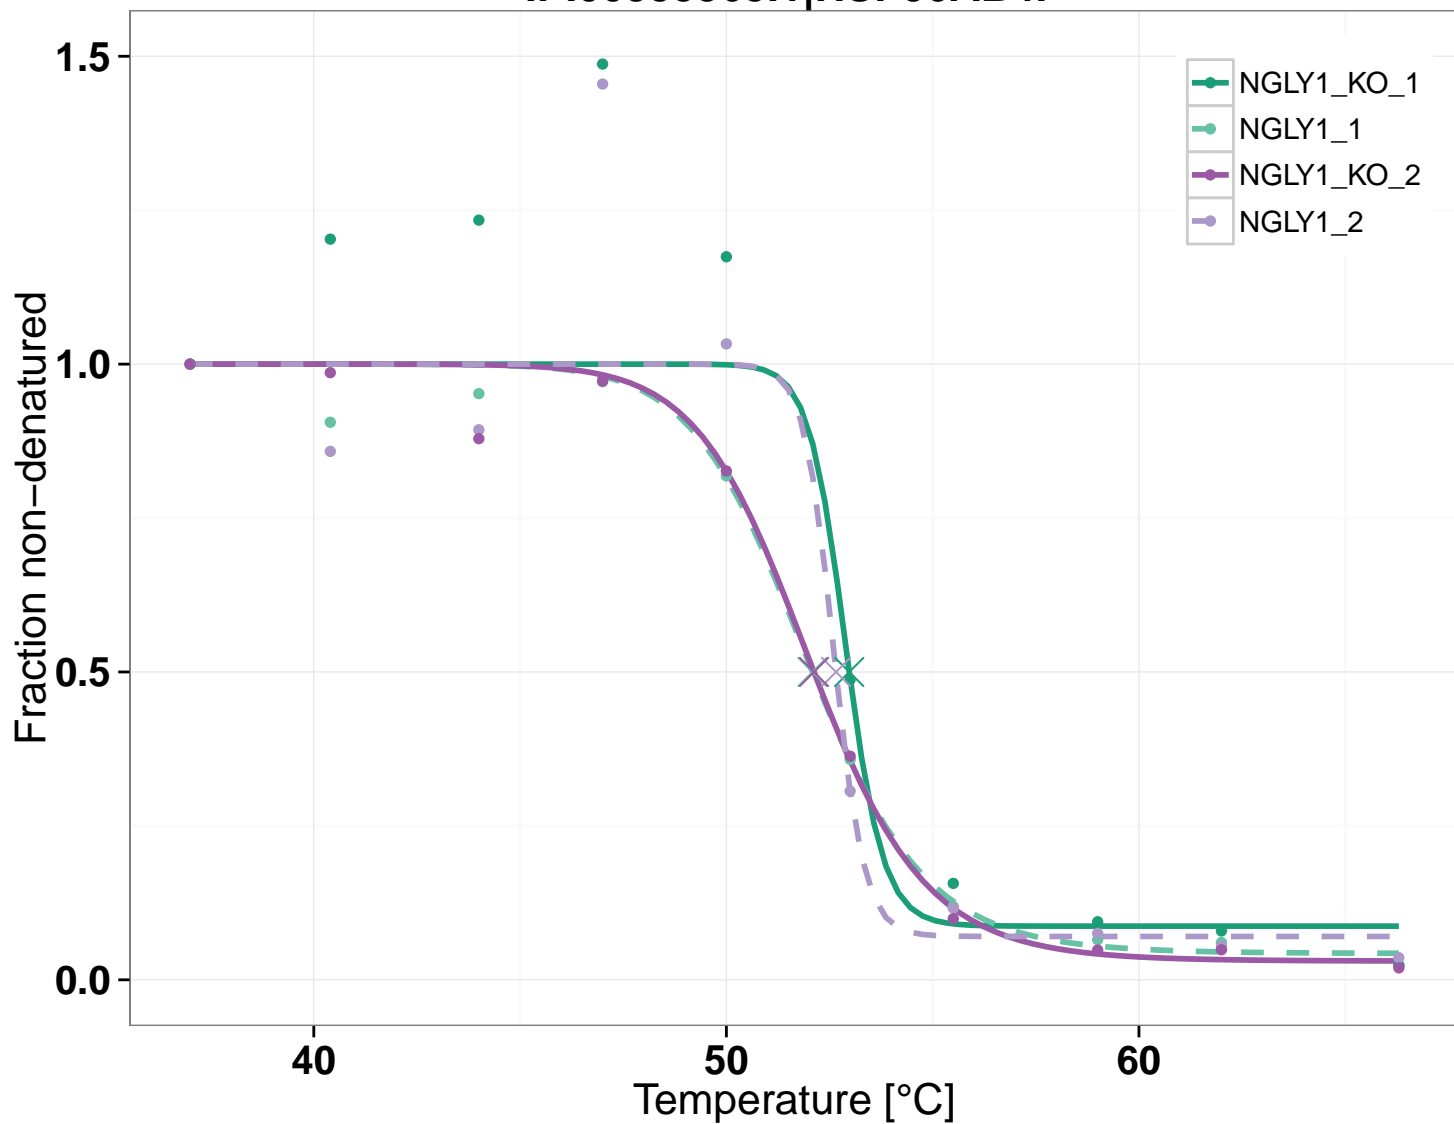

|            | meltPoint | slope | plateau | R2   |
|------------|-----------|-------|---------|------|
| NGLY1_KO_1 | 52.98     | -0.51 | 0.09    | 0.88 |
| NGLY1_1    | 52.09     | -0.17 | 0.04    | 0.99 |
| NGLY1_KO_2 | 52.12     | -0.17 | 0.03    | 0.99 |
| NGLY1_2    | 52.66     | -0.63 | 0.07    | 0.9  |

Supplement: Supplementary file 3330 [file 1]

IPI00797279.1|UHRF1

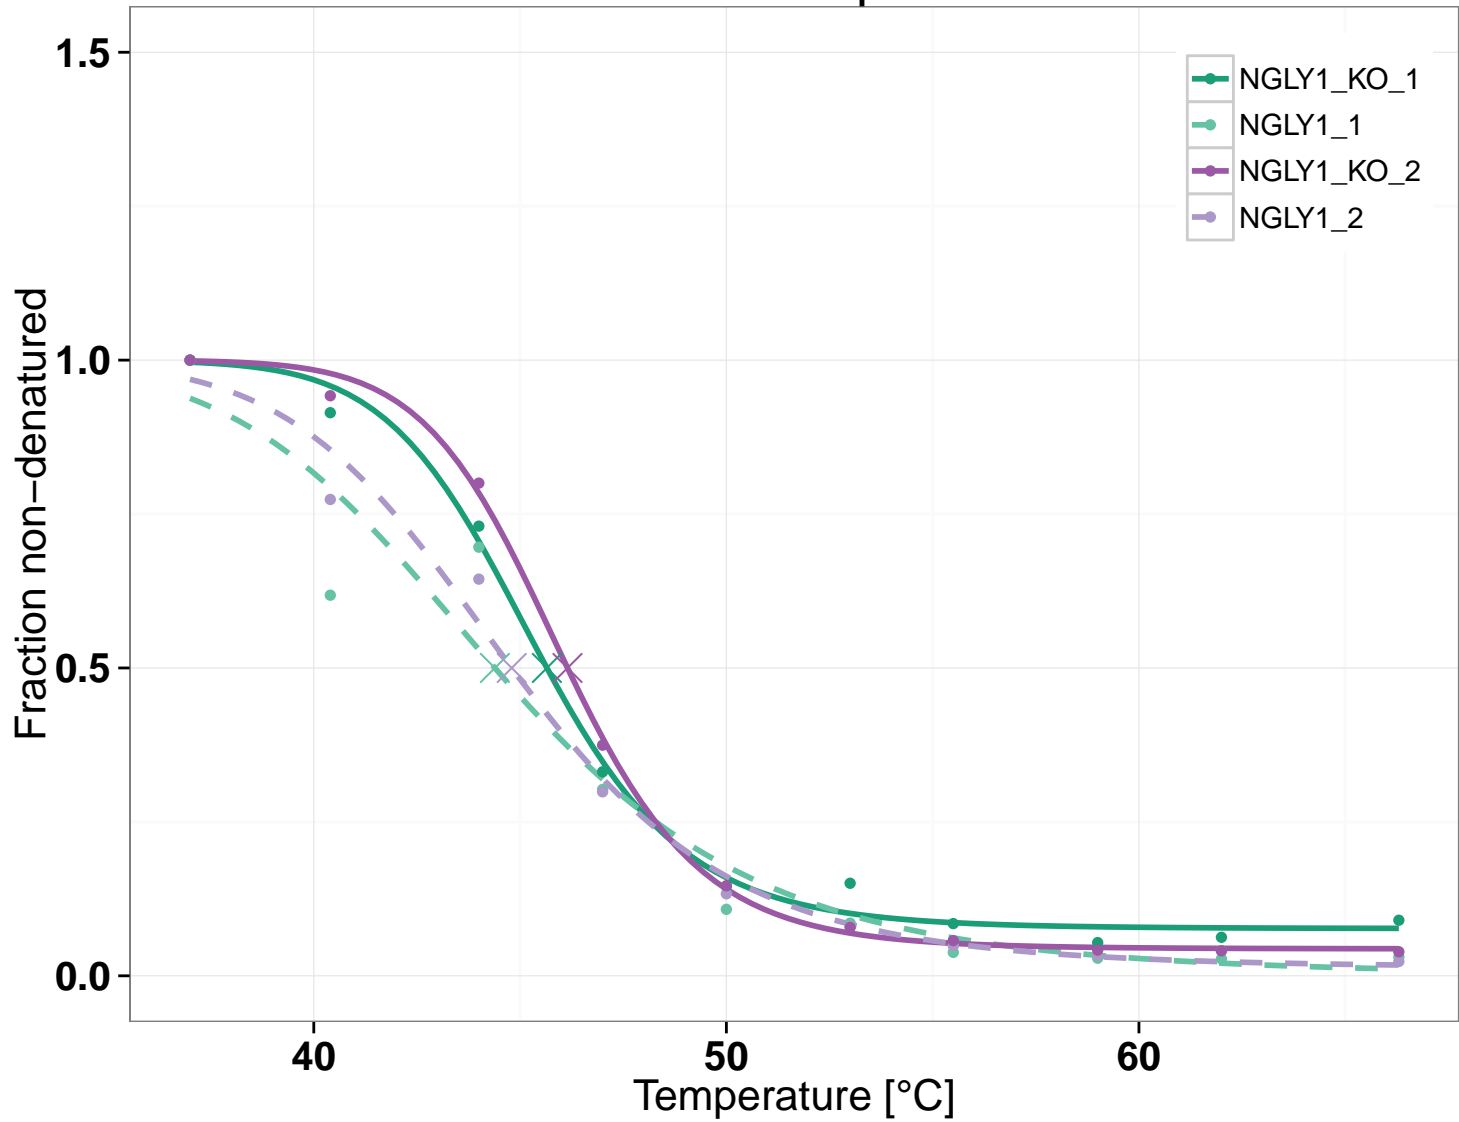

|            | meltPoint | slope  | plateau | R2   |
|------------|-----------|--------|---------|------|
| NGLY1_KO_1 | 45.65     | -0.13  | 0.08    | 0.99 |
| NGLY1_1    | 44.39     | -0.078 | 0       | 0.94 |
| NGLY1_KO_2 | 46.15     | -0.14  | 0.04    | 1    |
| NGLY1_2    | 44.8      | -0.092 | 0.01    | 0.99 |

Supplement: Supplementary file 3331 [file 1]

# IPI00736813.1|YIF1B

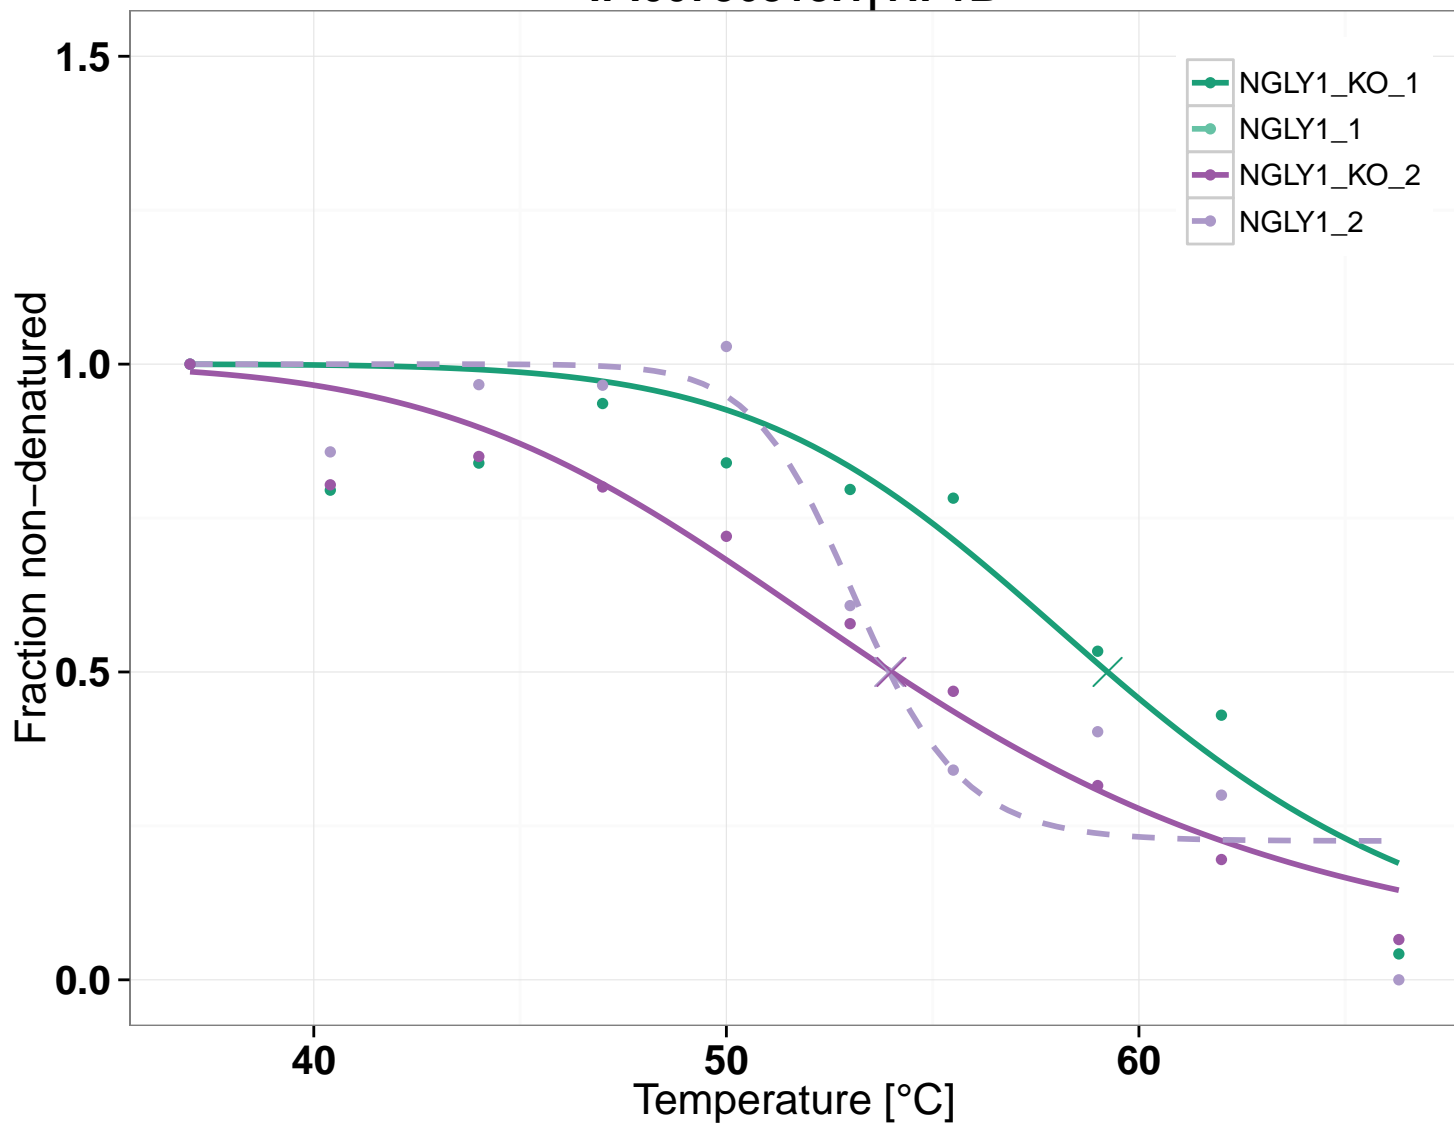

|            | meltPoint | slope  | plateau | R2   |
|------------|-----------|--------|---------|------|
| NGLY1_KO_1 | 59.24     | -0.059 | 0       | 0.86 |
| NGLY1_1    | -         | -      | -       | -    |
| NGLY1_KO_2 | 54        | -0.046 | 0       | 0.96 |
| NGLY1_2    | 53.95     | -0.15  | 0.23    | 0.91 |

Supplement: Supplementary file 3332 [file 1]

IPI00152151.4|FAM122B

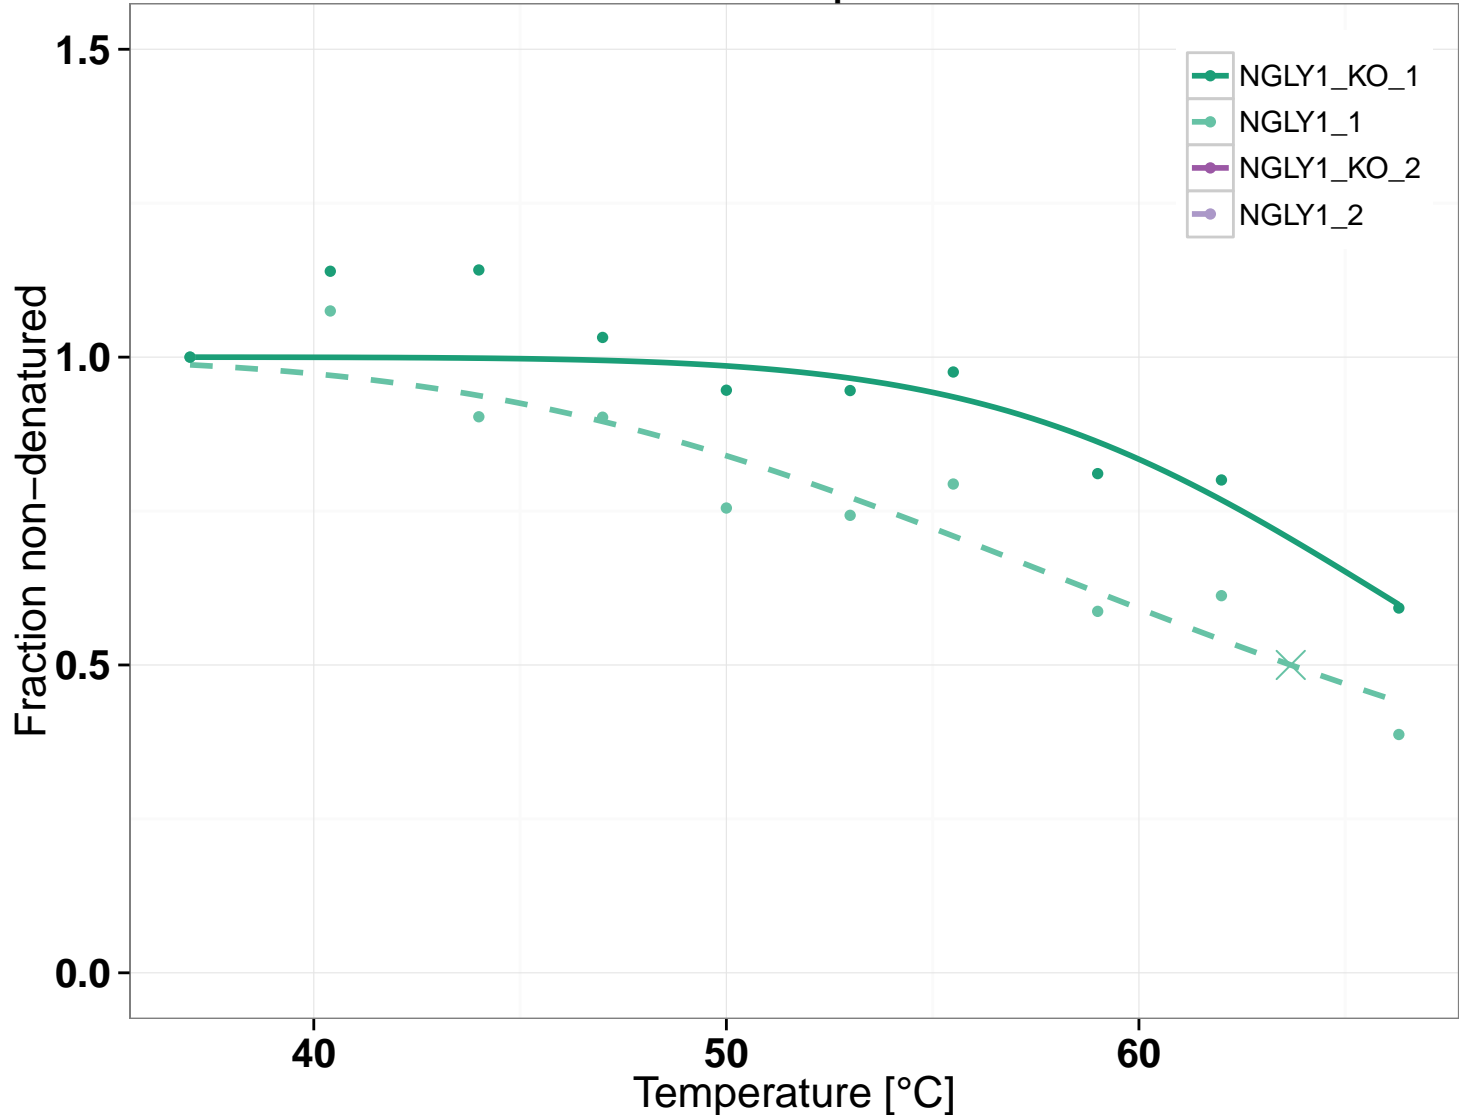

|            | meltPoint | slope  | plateau | R2   |
|------------|-----------|--------|---------|------|
| NGLY1_KO_1 | -         | -0.041 | 0.06    | 0.81 |
| NGLY1_1    | 63.68     | -0.026 | 0       | 0.91 |
| NGLY1_KO_2 | -         | -      | -       | -    |
| NGLY1_2    | -         | -      | -       | -    |

Supplement: Supplementary file 3333 [file 1]

# IPI00029811.5|WDR54

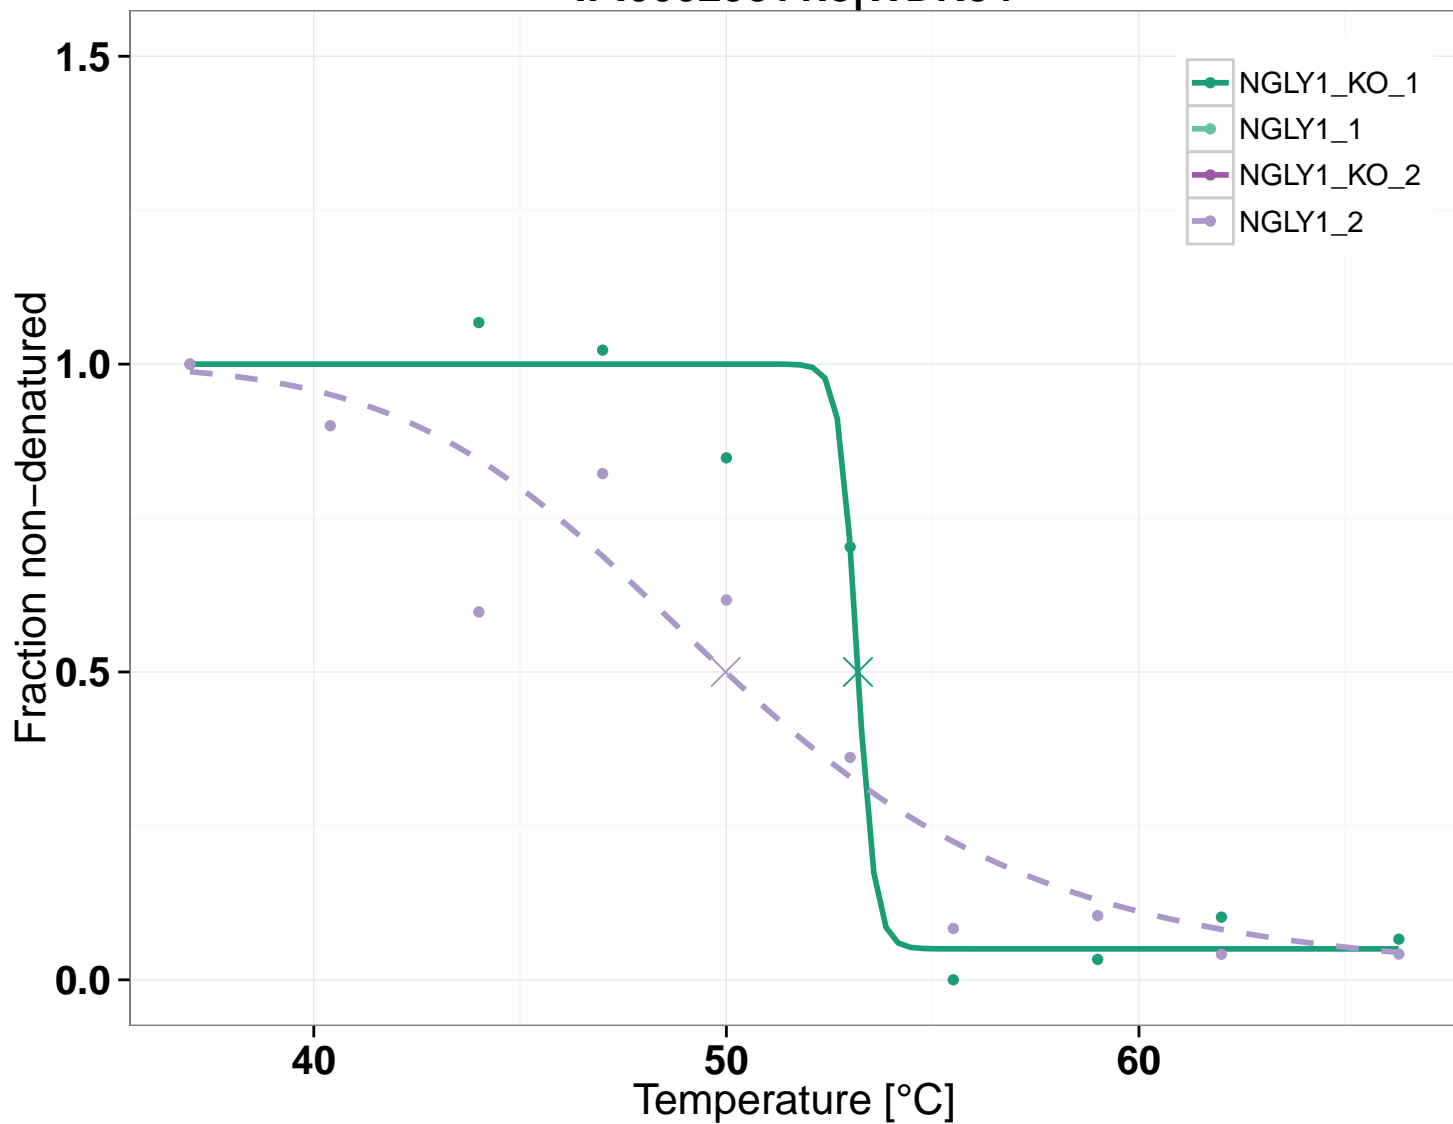

|            | meltPoint | slope  | plateau | R2   |
|------------|-----------|--------|---------|------|
| NGLY1_KO_1 | 53.19     | -1.1   | 0.05    | 0.88 |
| NGLY1_1    | -         | -      | -       | -    |
| NGLY1_KO_2 | -         | -      | -       | -    |
| NGLY1_2    | 49.98     | -0.064 | 0       | 0.91 |

Supplement: Supplementary file 3334 [file 1]

IPI00334453.1|TMEM179B

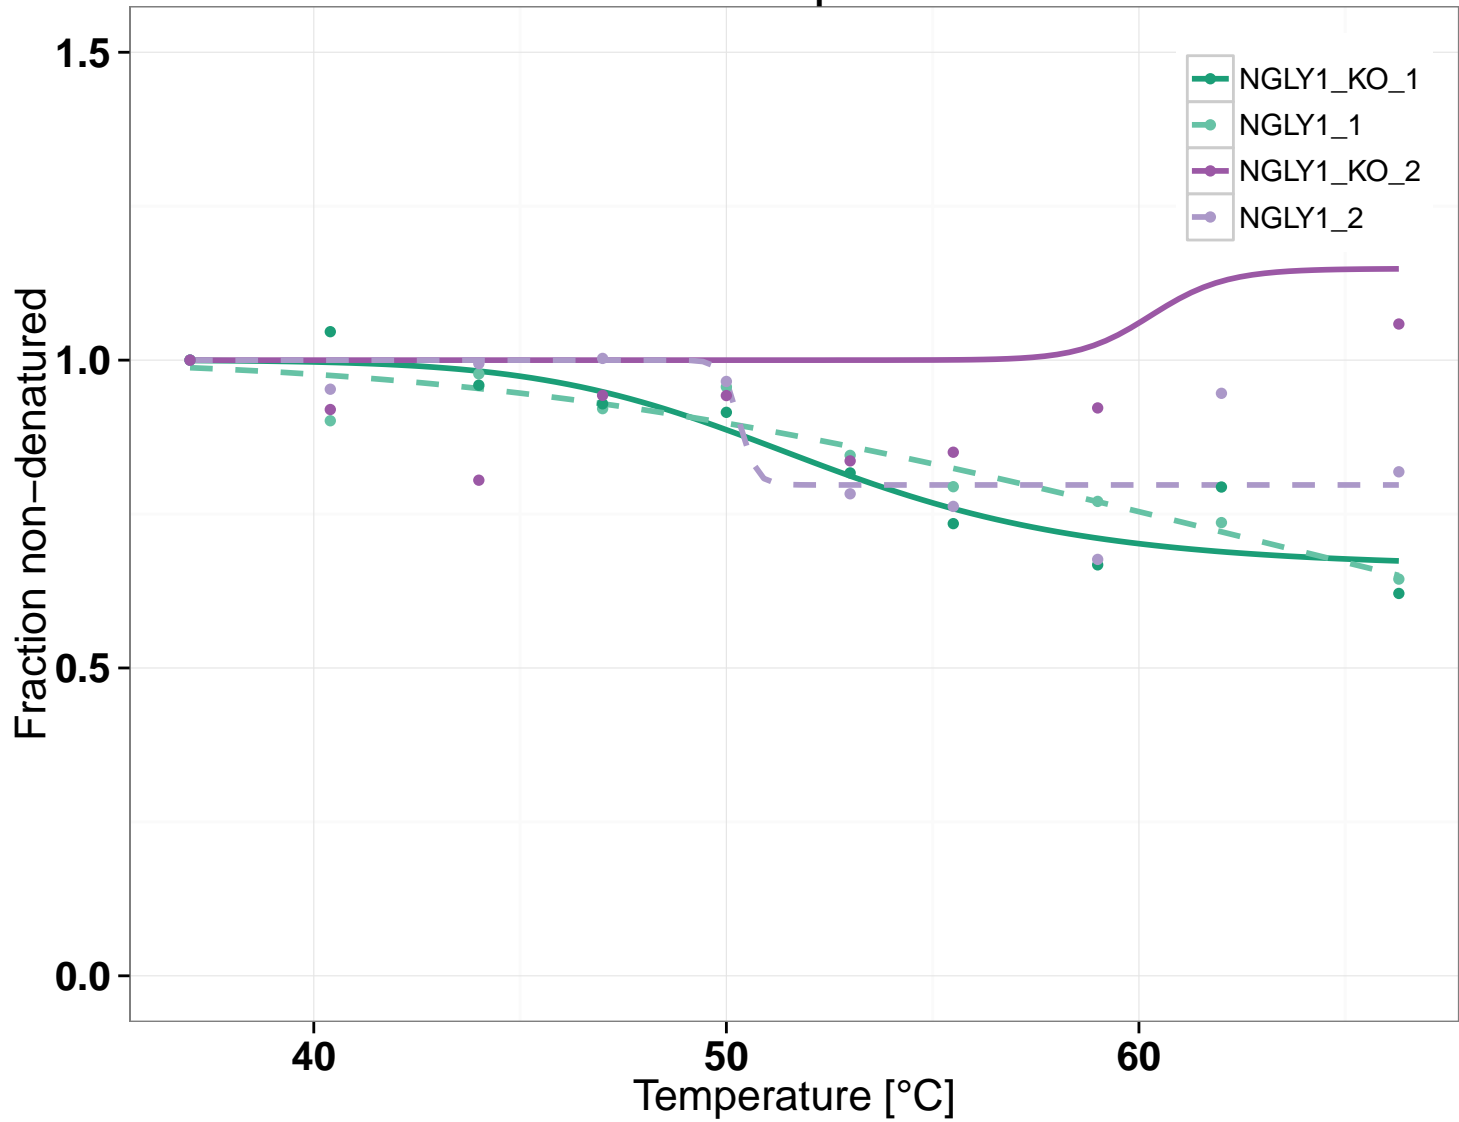

|            | meltPoint | slope  | plateau | R2   |
|------------|-----------|--------|---------|------|
| NGLY1_KO_1 | -         | -0.025 | 0.66    | 0.89 |
| NGLY1_1    | -         | -0.017 | 0       | 0.91 |
| NGLY1_KO_2 | -         | 0.042  | 1.15    | 0.15 |
| NGLY1_2    | -         | -0.25  | 0.8     | 0.68 |

Supplement: Supplementary file 3335 [file 1]

# IPI00017344.3|RAB5B

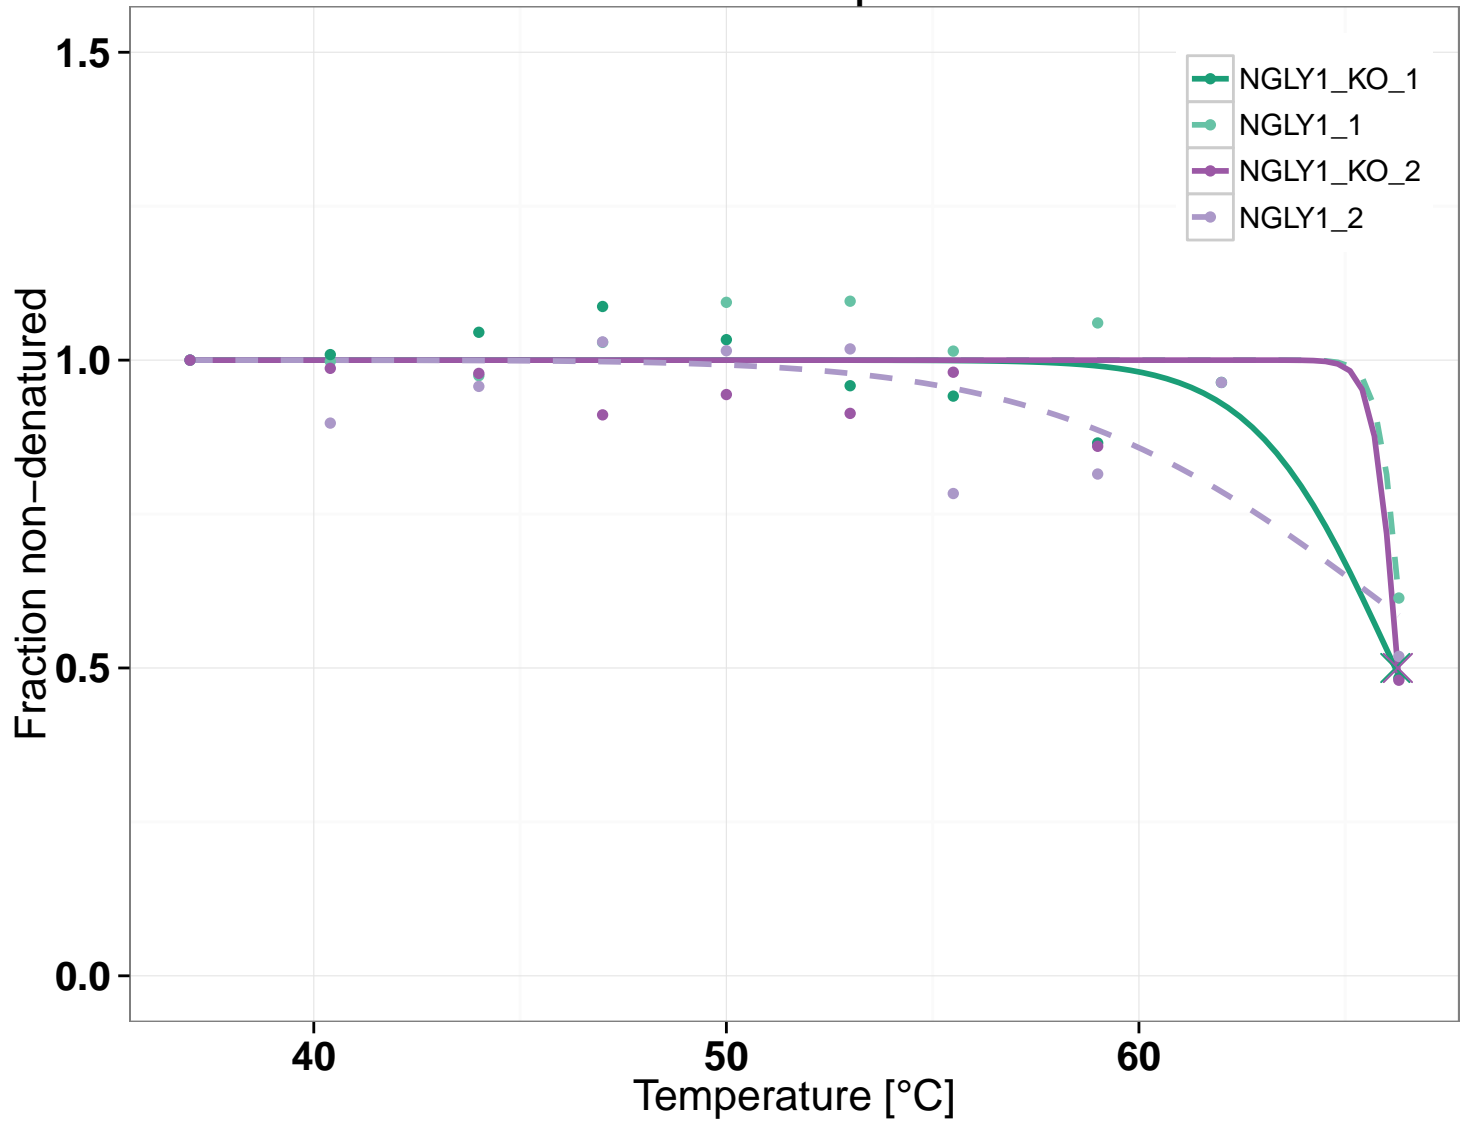

|            | meltPoint | slope | plateau | R2   |
|------------|-----------|-------|---------|------|
| NGLY1_KO_1 | 66.21     | -0.14 | 0       | 0.88 |
| NGLY1_1    | -         | -     | 0       | 0.68 |
| NGLY1_KO_2 | 66.28     | -0.85 | 0       | 0.69 |
| NGLY1_2    | -         | -     | 0       | 0.62 |

Supplement: Supplementary file 3336 [file 1]

IPI00917487.1|PPP3R1

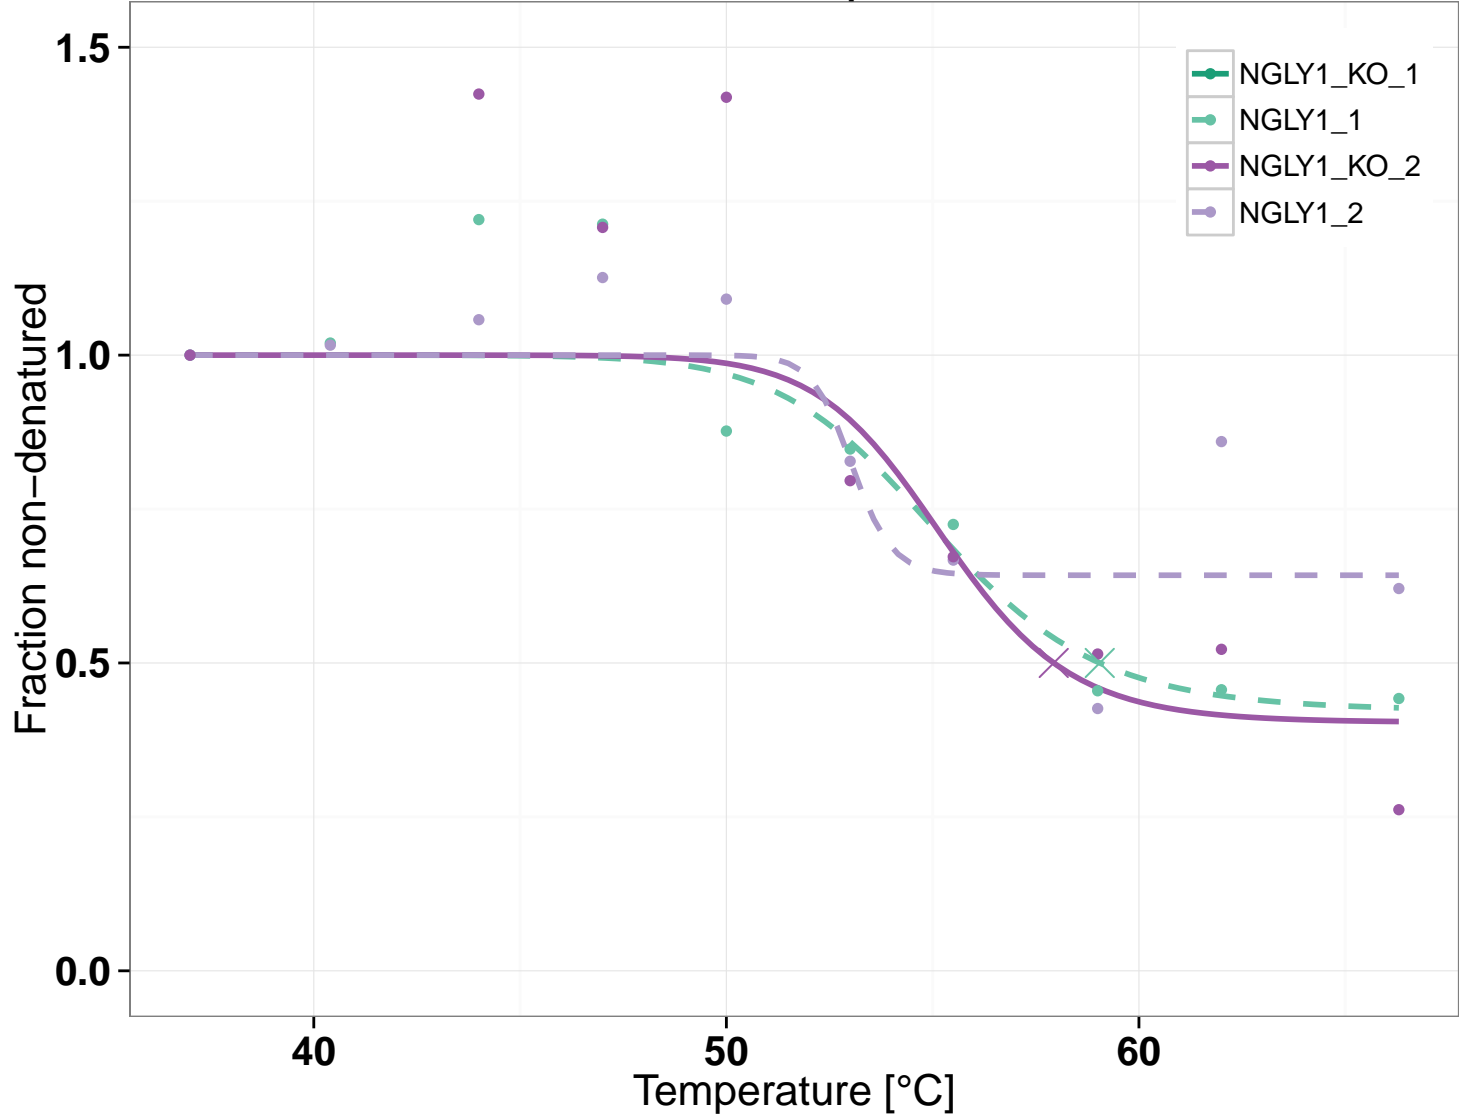

|            | meltPoint | slope  | plateau | R2   |
|------------|-----------|--------|---------|------|
| NGLY1_KO_1 | –         | –      | –       | –    |
| NGLY1_1    | 59.05     | –0.074 | 0.42    | 0.86 |
| NGLY1_KO_2 | 57.93     | –0.097 | 0.4     | 0.51 |
| NGLY1_2    | –         | –0.18  | 0.64    | 0.75 |

Supplement: Supplementary file 3337 [file 1]

IPI00166044.1|KIAA1303

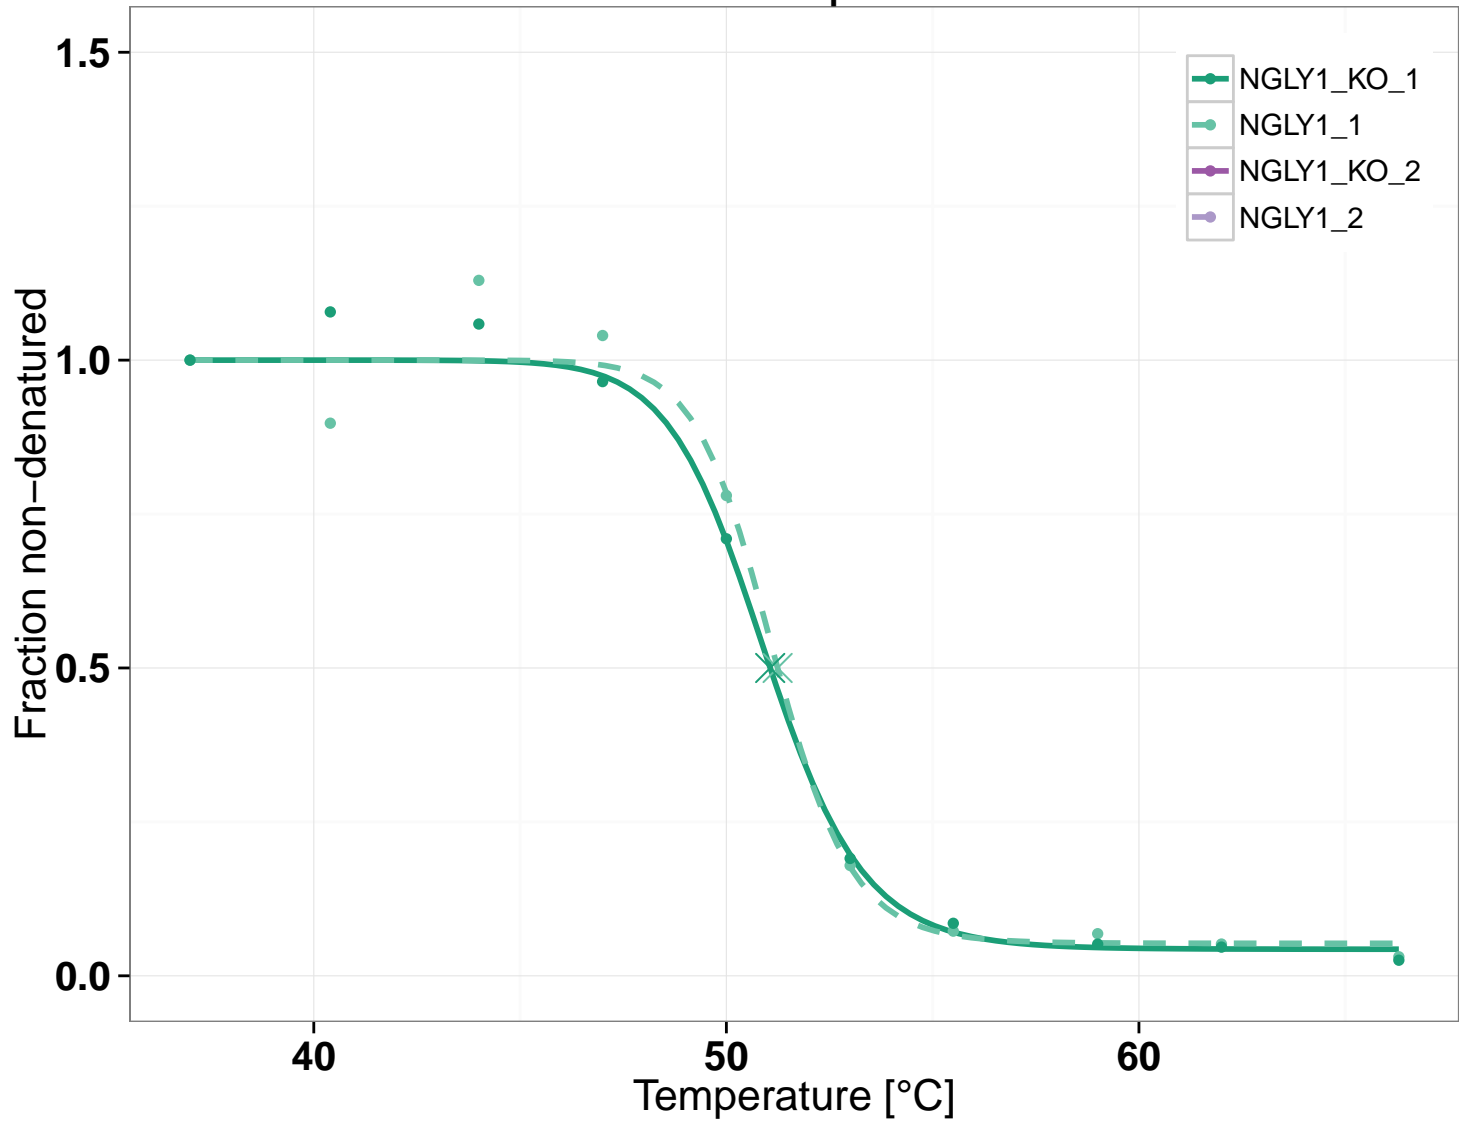

|            | meltPoint | slope | plateau | R2   |
|------------|-----------|-------|---------|------|
| NGLY1_KO_1 | 51.06     | -0.2  | 0.04    | 0.99 |
| NGLY1_1    | 51.24     | -0.25 | 0.05    | 0.99 |
| NGLY1_KO_2 | -         | -     | -       | -    |
| NGLY1_2    | -         | -     | -       | -    |

Supplement: Supplementary file 3338 [file 1]

IPI00878817.1|LOC440258

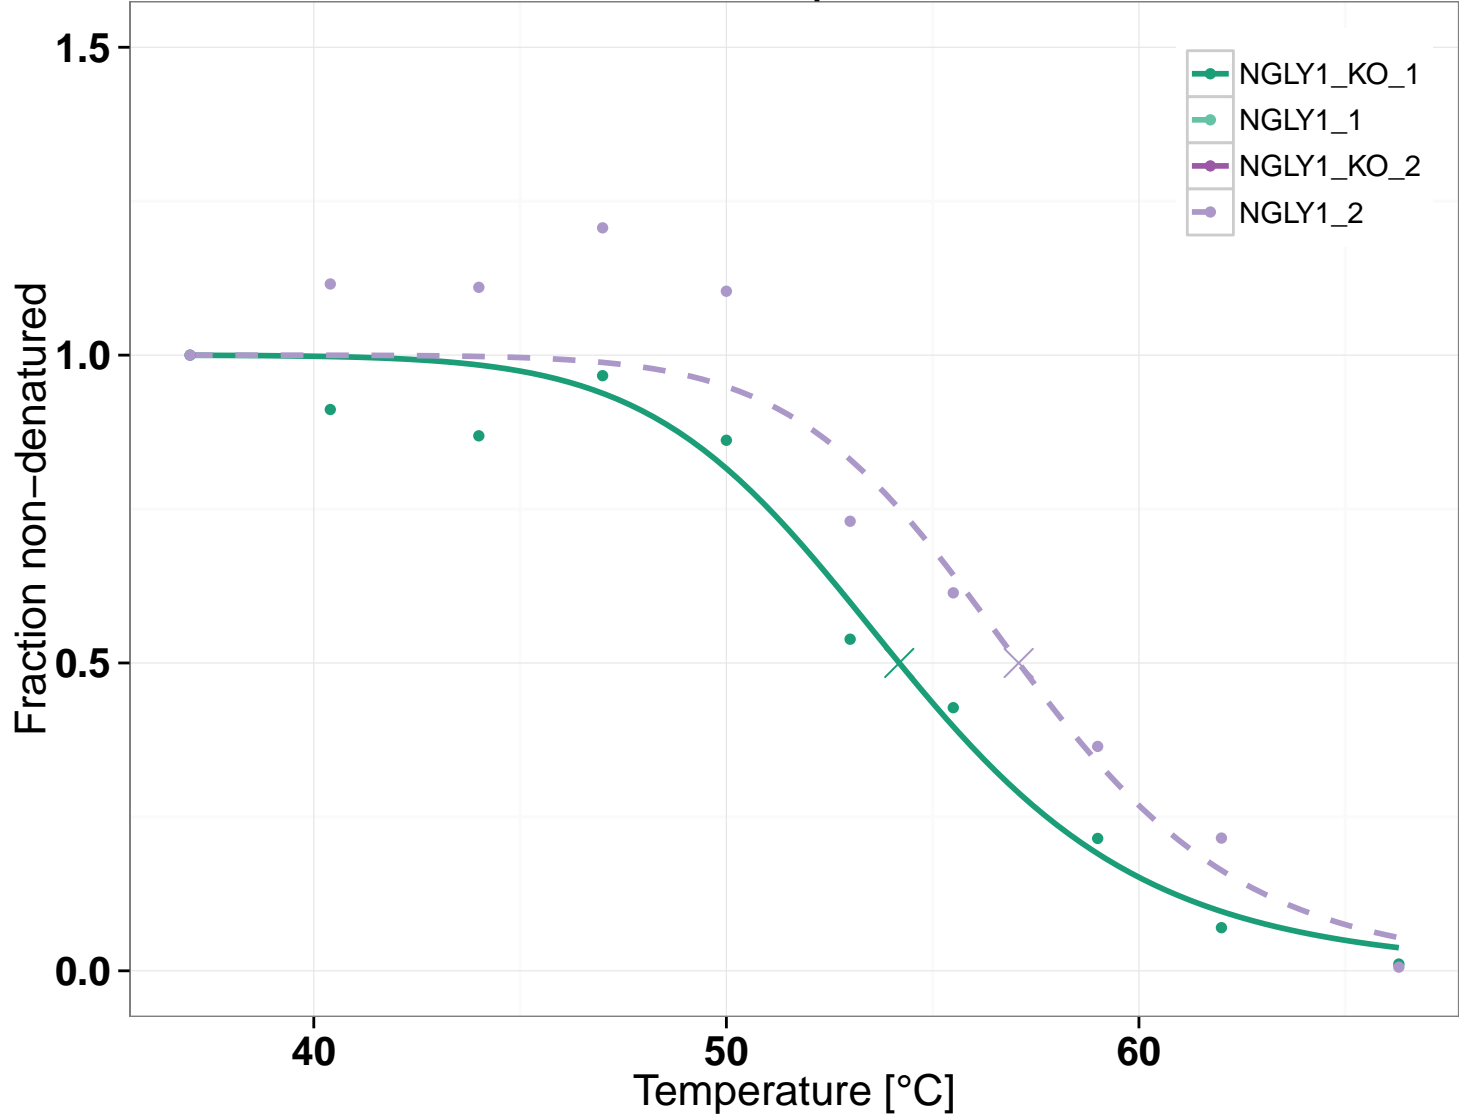

|            | meltPoint | slope  | plateau | R2   |
|------------|-----------|--------|---------|------|
| NGLY1_KO_1 | 54.19     | -0.083 | 0       | 0.98 |
| NGLY1_1    | -         | -      | -       | -    |
| NGLY1_KO_2 | -         | -      | -       | -    |
| NGLY1_2    | 57.09     | -0.091 | 0       | 0.93 |

Supplement: Supplementary file 3339 [file 1]

# IPI00012504.3|ZNF44

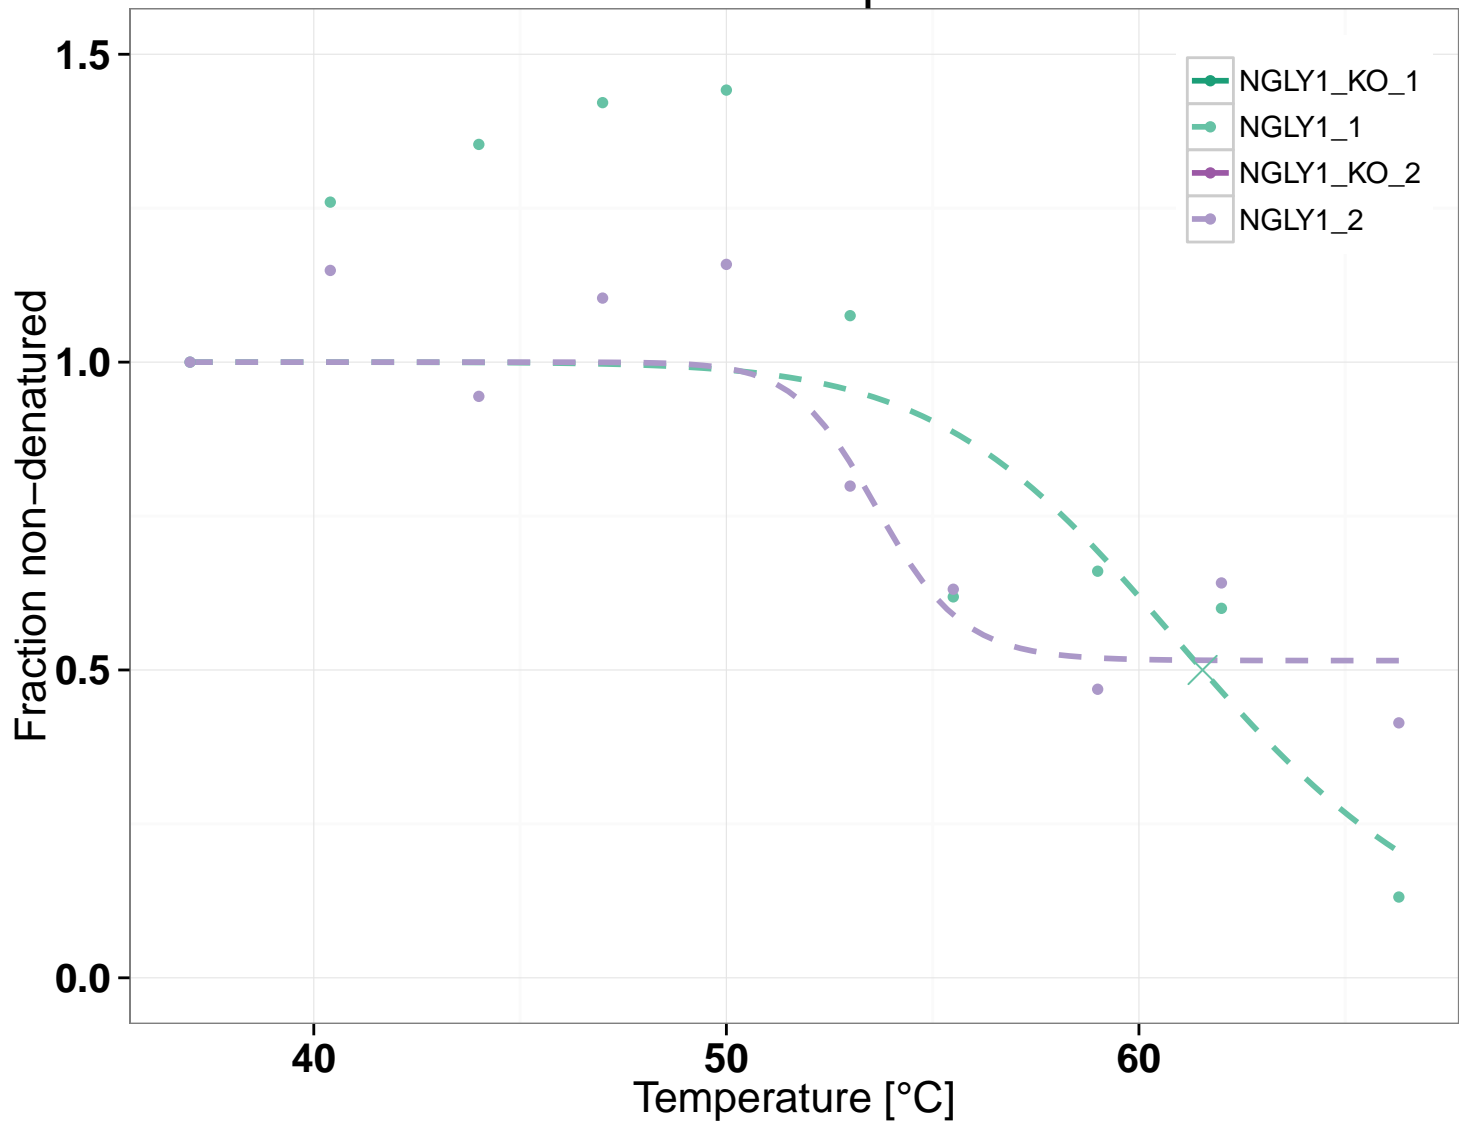

|            | meltPoint | slope  | plateau | R2   |
|------------|-----------|--------|---------|------|
| NGLY1_KO_1 | -         | -      | -       | -    |
| NGLY1_1    | 61.54     | -0.078 | 0       | 0.6  |
| NGLY1_KO_2 | -         | -      | -       | -    |
| NGLY1_2    | -         | -0.12  | 0.52    | 0.86 |

Supplement: Supplementary file 3340 [file 1]

# IPI00644482.1|PSMG2

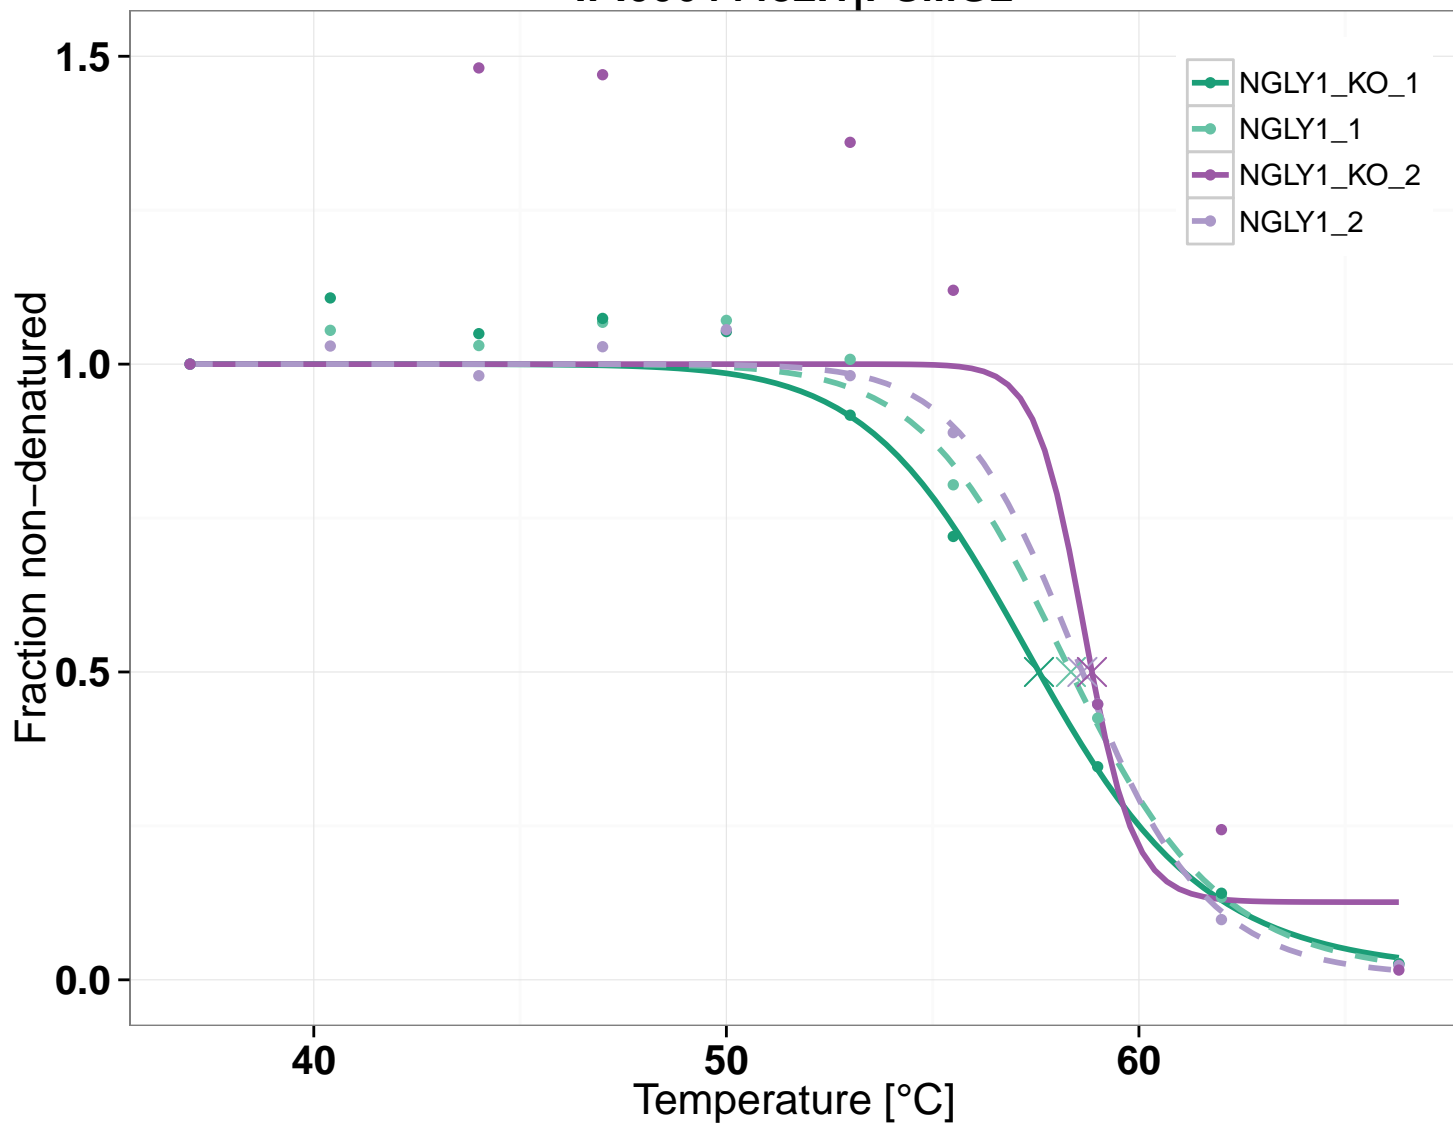

|            | meltPoint | slope | plateau | R2   |
|------------|-----------|-------|---------|------|
| NGLY1_KO_1 | 57.58     | -0.12 | 0.01    | 0.98 |
| NGLY1_1    | 58.35     | -0.14 | 0.01    | 0.99 |
| NGLY1_KO_2 | 58.86     | -0.37 | 0.13    | 0.61 |
| NGLY1_2    | 58.63     | -0.17 | 0       | 1    |

Supplement: Supplementary file 3341 [file 1]

IPI00888096.1|ANKRD18B

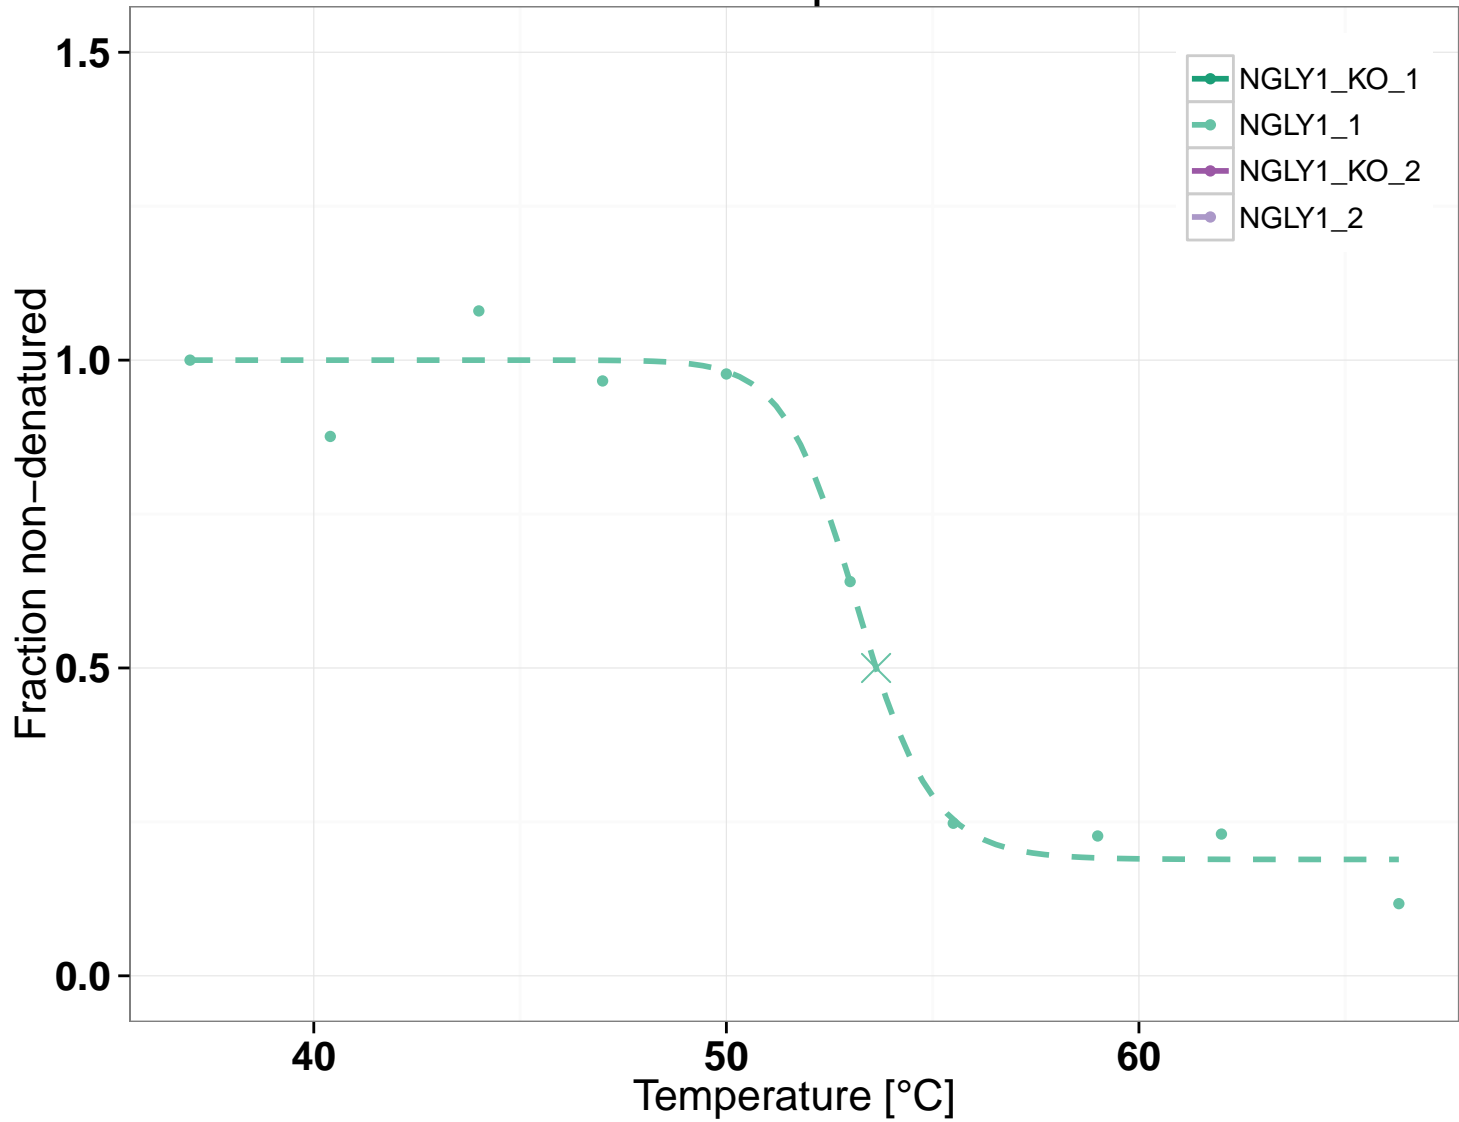

|            | meltPoint | slope | plateau | R2   |
|------------|-----------|-------|---------|------|
| NGLY1_KO_1 | -         | -     | -       | -    |
| NGLY1_1    | 53.63     | -0.22 | 0.19    | 0.98 |
| NGLY1_KO_2 | -         | -     | -       | -    |
| NGLY1_2    | -         | -     | -       | -    |

Supplement: Supplementary file 3342 [file 1]

# IPI00018500.1|ARID3A

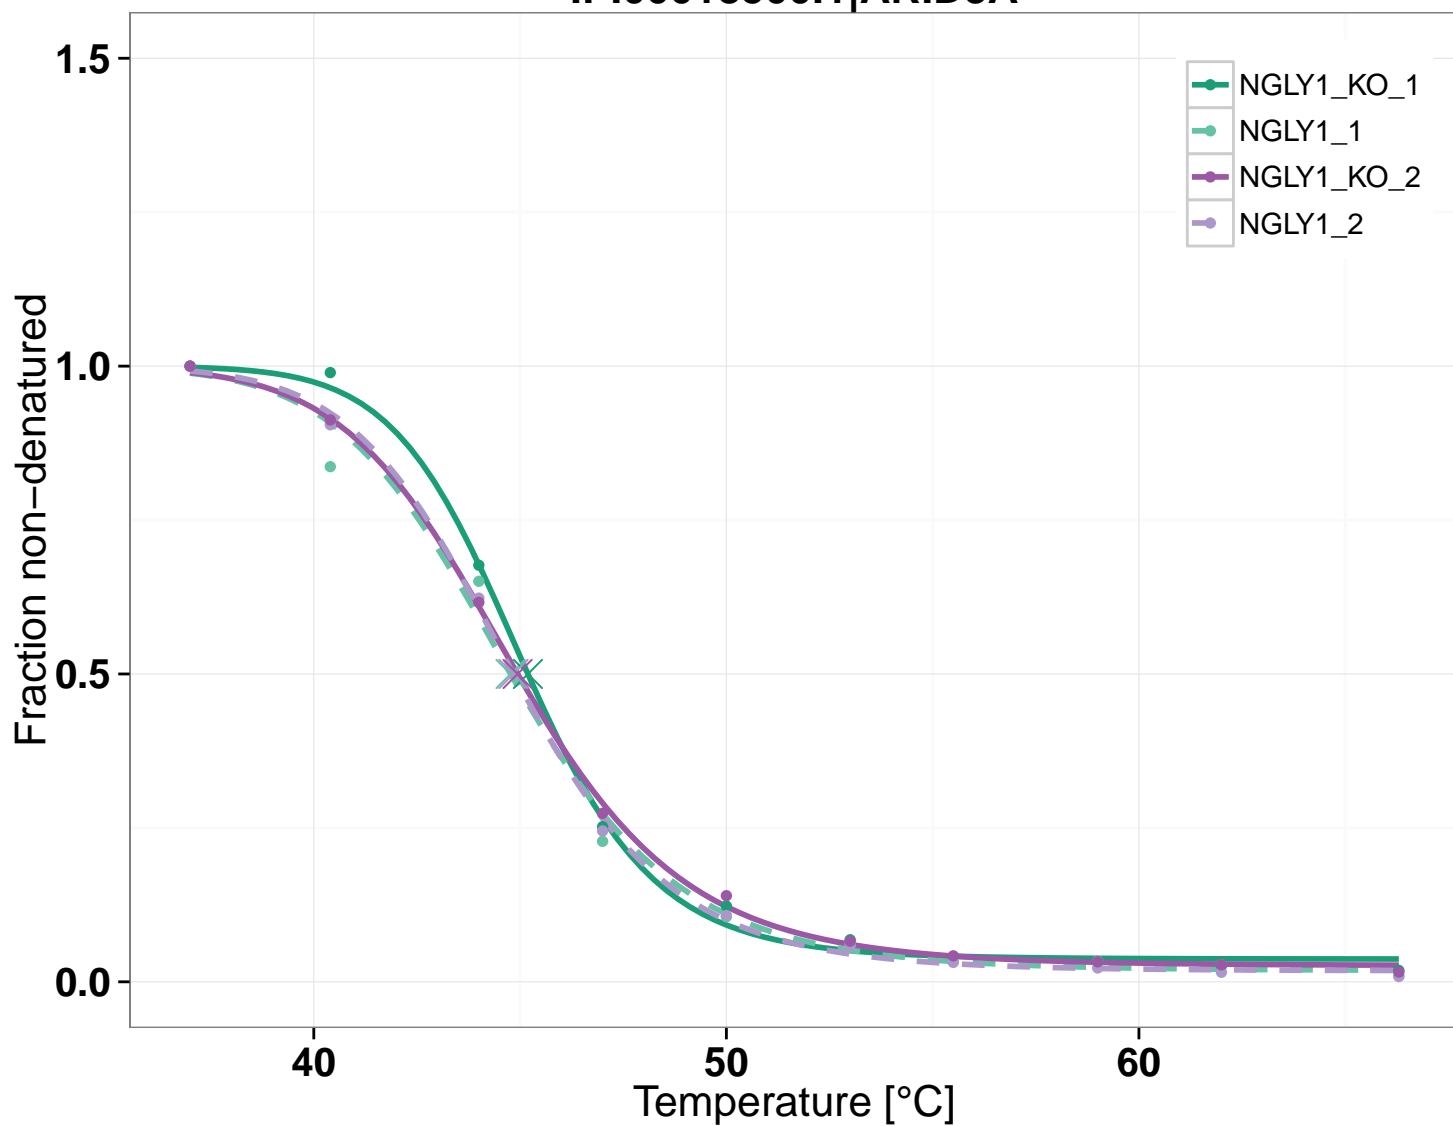

|            | meltPoint | slope | plateau | R2   |
|------------|-----------|-------|---------|------|
| NGLY1_KO_1 | 45.19     | -0.15 | 0.04    | 1    |
| NGLY1_1    | 44.77     | -0.12 | 0.02    | 0.99 |
| NGLY1_KO_2 | 44.94     | -0.12 | 0.03    | 1    |
| NGLY1_2    | 44.84     | -0.13 | 0.02    | 1    |

Supplement: Supplementary file 3343 [file 1]

# IPI00024071.1|HSF1

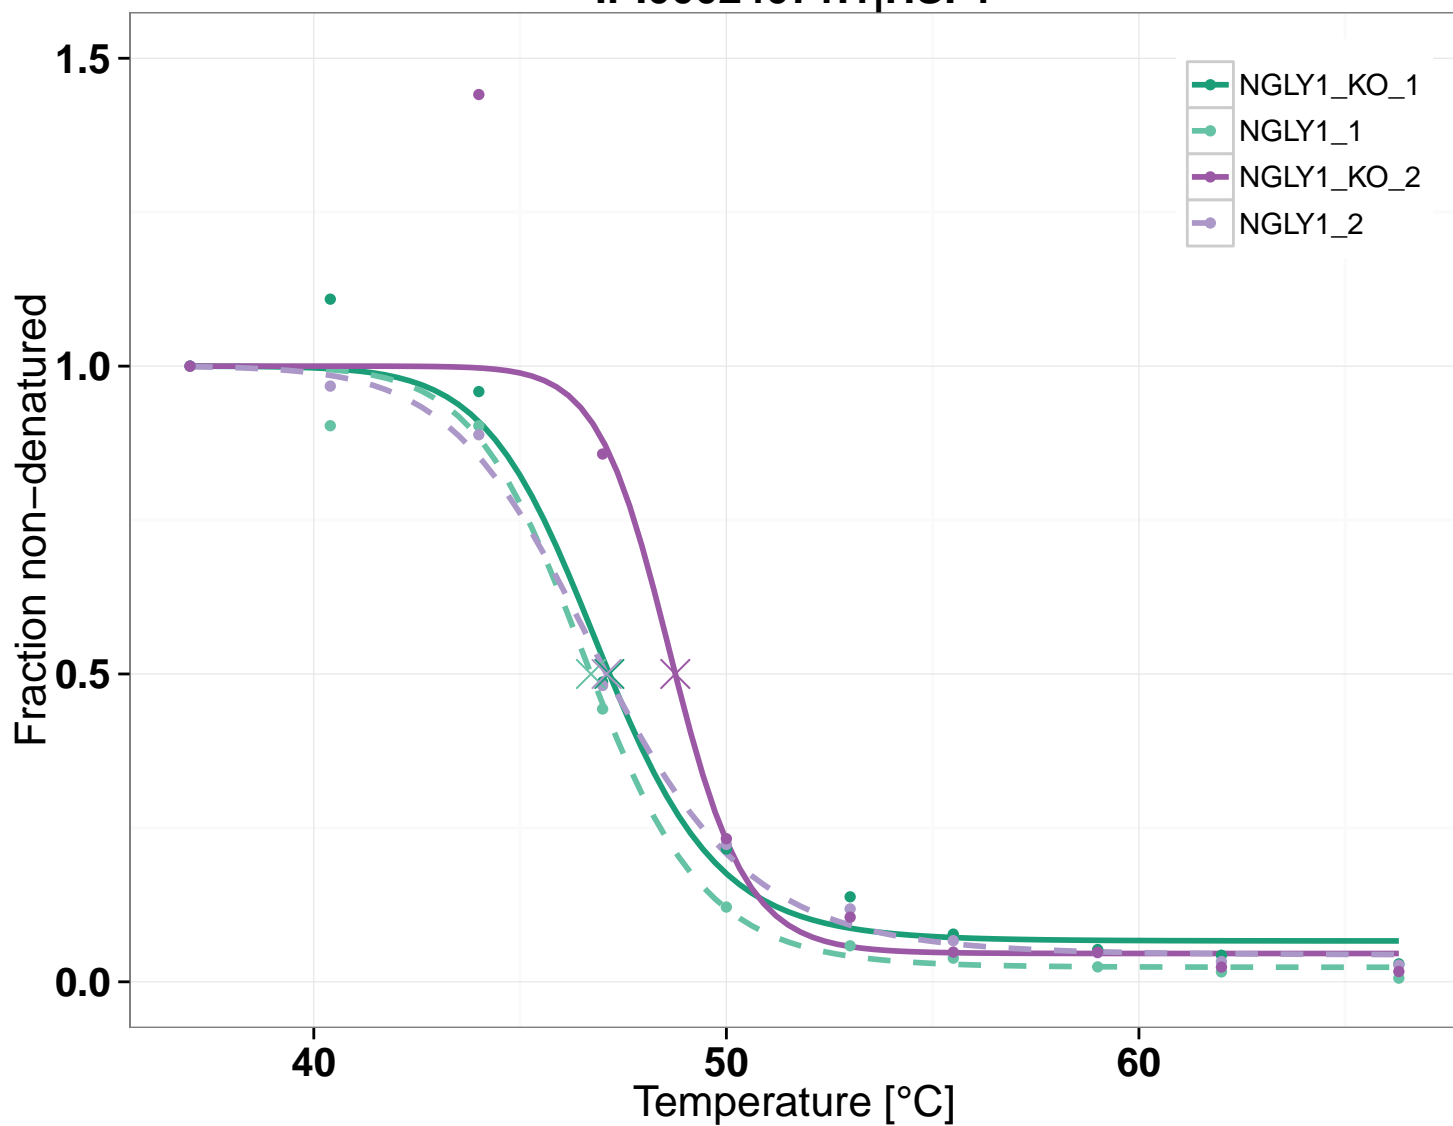

|            | meltPoint | slope | plateau | R2   |
|------------|-----------|-------|---------|------|
| NGLY1_KO_1 | 47.16     | -0.17 | 0.07    | 0.99 |
| NGLY1_1    | 46.72     | -0.17 | 0.02    | 0.99 |
| NGLY1_KO_2 | 48.76     | -0.27 | 0.05    | 0.83 |
| NGLY1_2    | 47.1      | -0.13 | 0.04    | 1    |

Supplement: Supplementary file 3344 [file 1]

# IPI00003327.1|ARL3

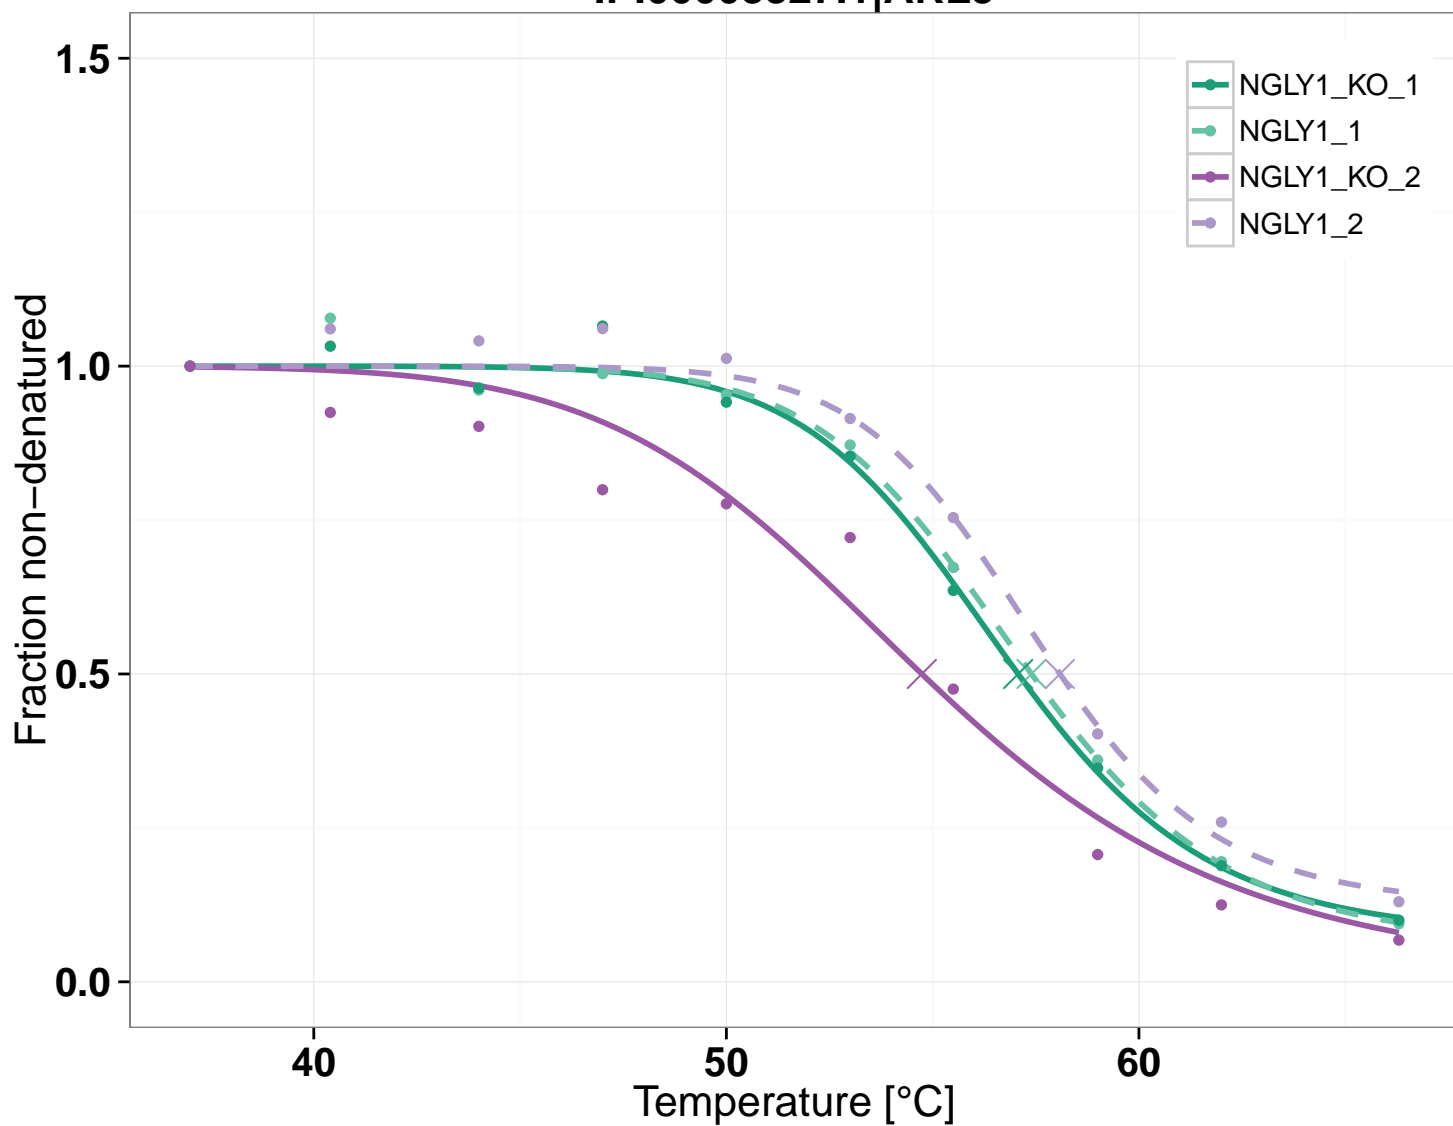

|            | meltPoint | slope  | plateau | R2   |
|------------|-----------|--------|---------|------|
| NGLY1_KO_1 | 57.07     | -0.095 | 0.07    | 0.99 |
| NGLY1_1    | 57.4      | -0.095 | 0.06    | 0.99 |
| NGLY1_KO_2 | 54.74     | -0.065 | 0       | 0.97 |
| NGLY1_2    | 58.08     | -0.1   | 0.12    | 0.99 |

Supplement: Supplementary file 3345 [file 1]

# IPI00644708.1|TIAL1

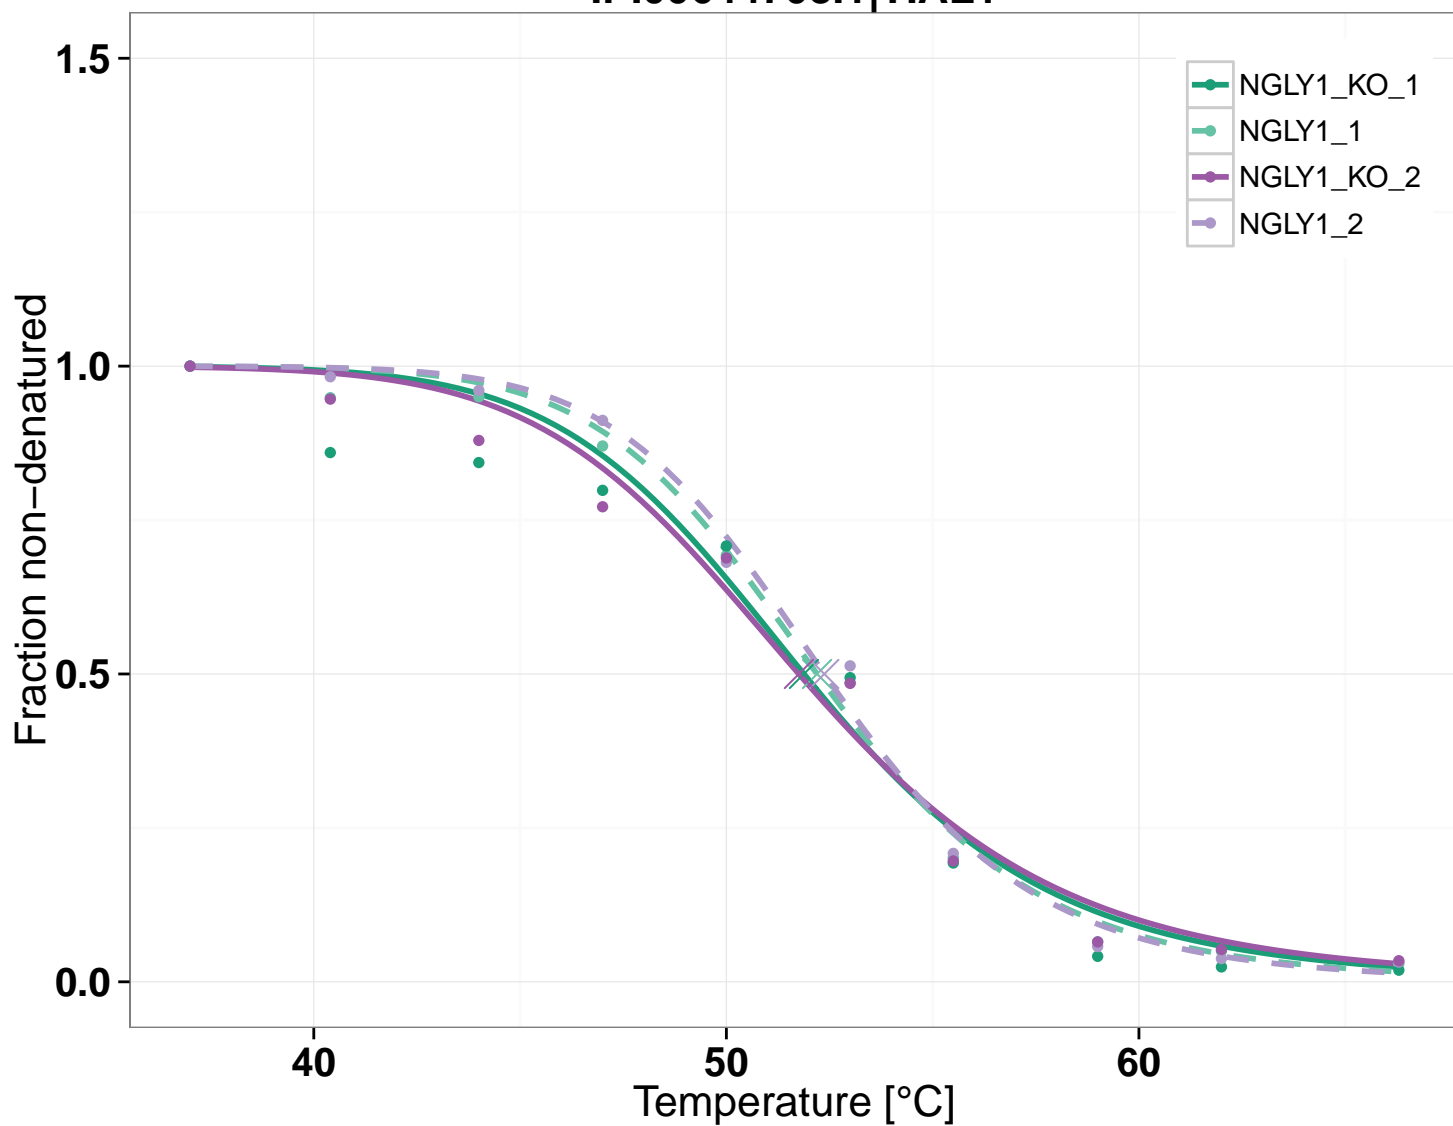

|            | meltPoint | slope  | plateau | R2   |
|------------|-----------|--------|---------|------|
| NGLY1_KO_1 | 51.88     | -0.083 | 0       | 0.96 |
| NGLY1_1    | 52.2      | -0.093 | 0       | 0.99 |
| NGLY1_KO_2 | 51.76     | -0.078 | 0       | 0.98 |
| NGLY1_2    | 52.37     | -0.097 | 0       | 0.99 |

Supplement: Supplementary file 3346 [file 1]

# IPI00792312.1|INTS3

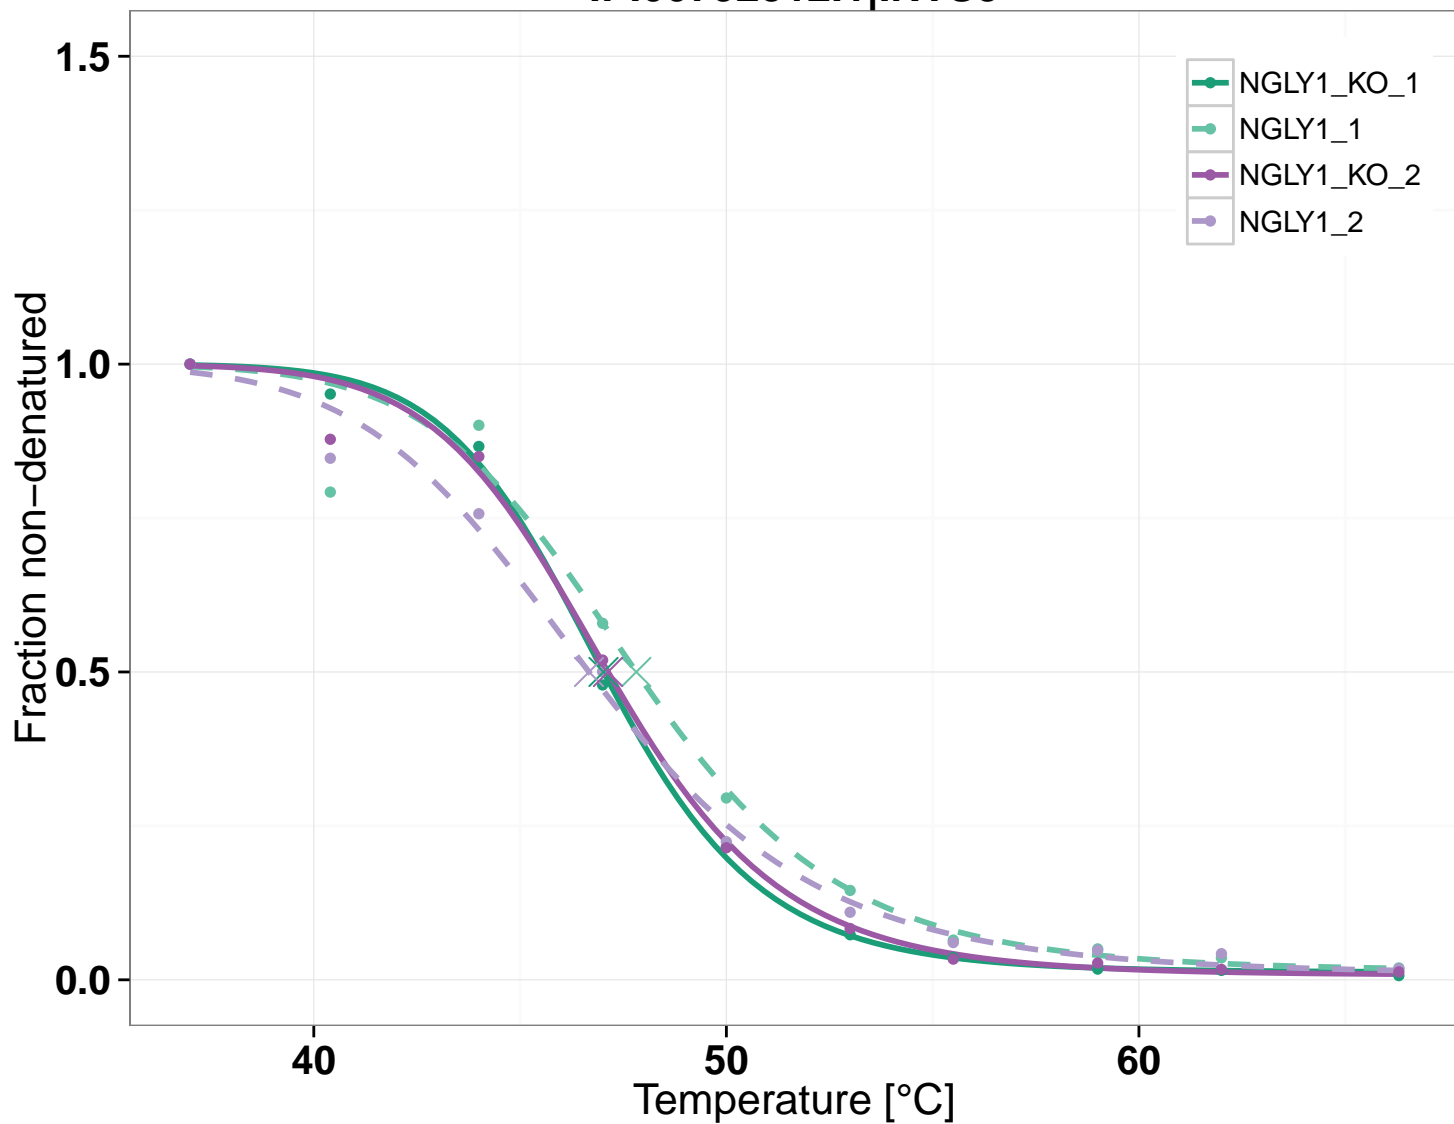

|            | meltPoint | slope  | plateau | R2   |
|------------|-----------|--------|---------|------|
| NGLY1_KO_1 | 47.02     | -0.13  | 0.01    | 1    |
| NGLY1_1    | 47.82     | -0.098 | 0.01    | 0.97 |
| NGLY1_KO_2 | 47.13     | -0.12  | 0.01    | 0.99 |
| NGLY1_2    | 46.67     | -0.09  | 0.01    | 0.99 |

Supplement: Supplementary file 3347 [file 1]

IPI00031698.4|C2ORF49

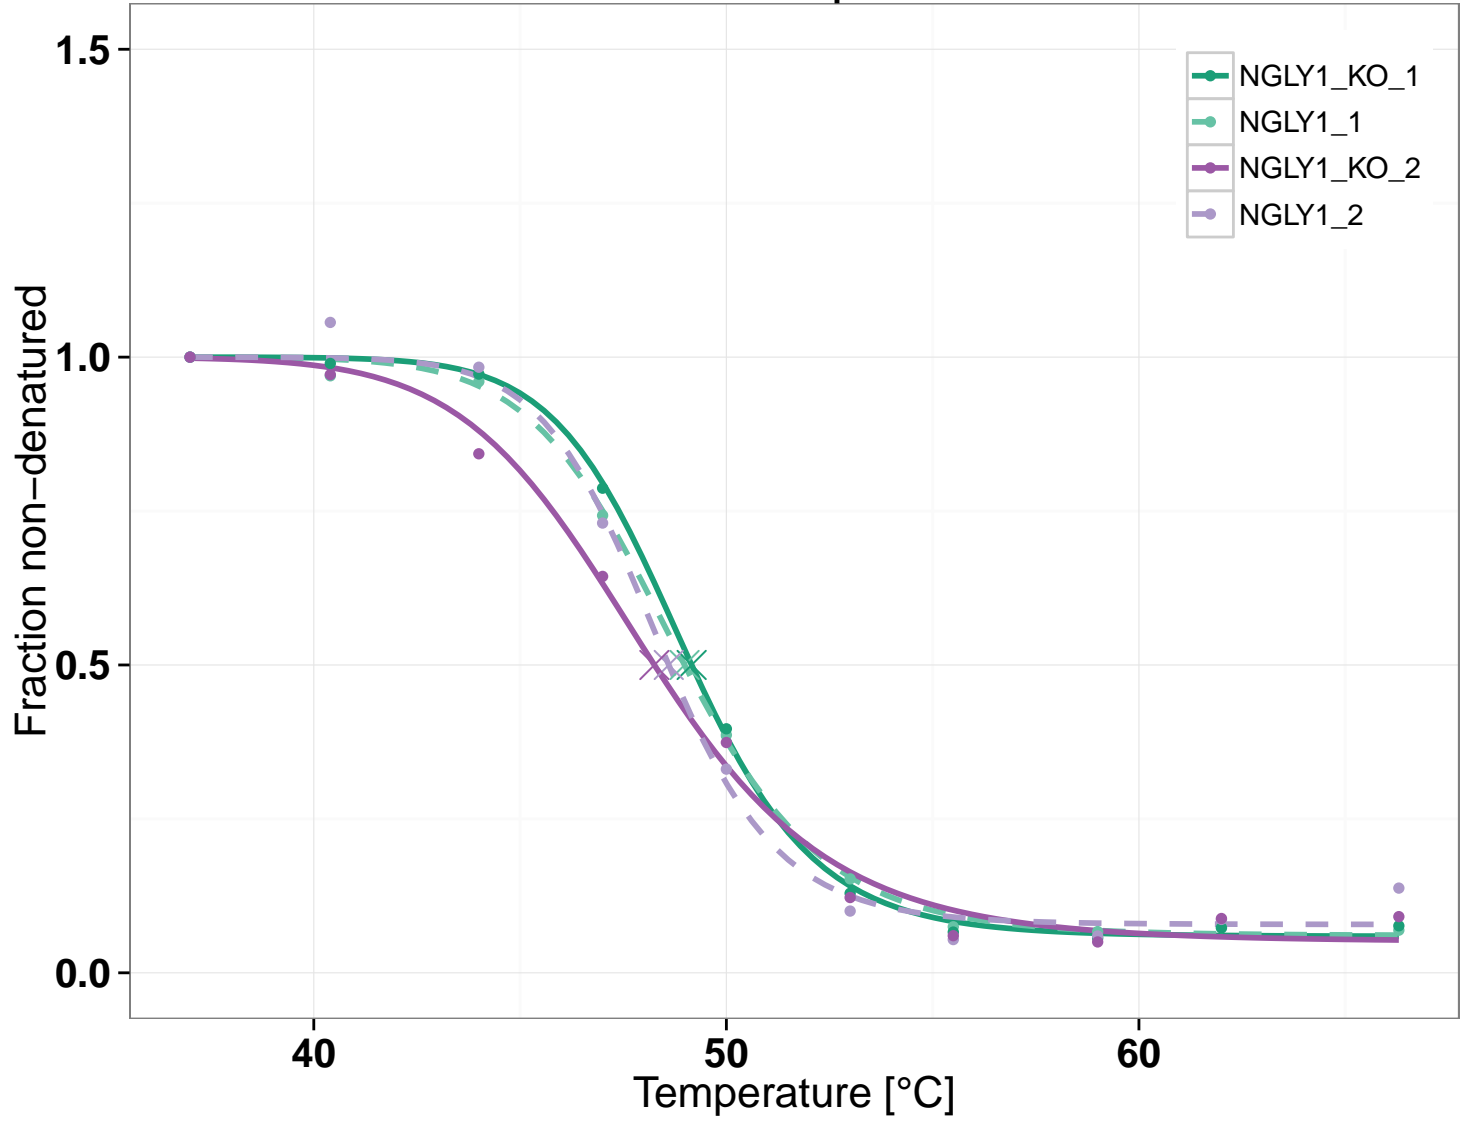

|            | meltPoint | slope | plateau | R2   |
|------------|-----------|-------|---------|------|
| NGLY1_KO_1 | 49.16     | -0.15 | 0.06    | 1    |
| NGLY1_1    | 48.99     | -0.13 | 0.06    | 1    |
| NGLY1_KO_2 | 48.26     | -0.11 | 0.05    | 0.99 |
| NGLY1_2    | 48.6      | -0.16 | 0.08    | 0.99 |

Supplement: Supplementary file 3348 [file 1]

# IPI00604464.3|UBE3C

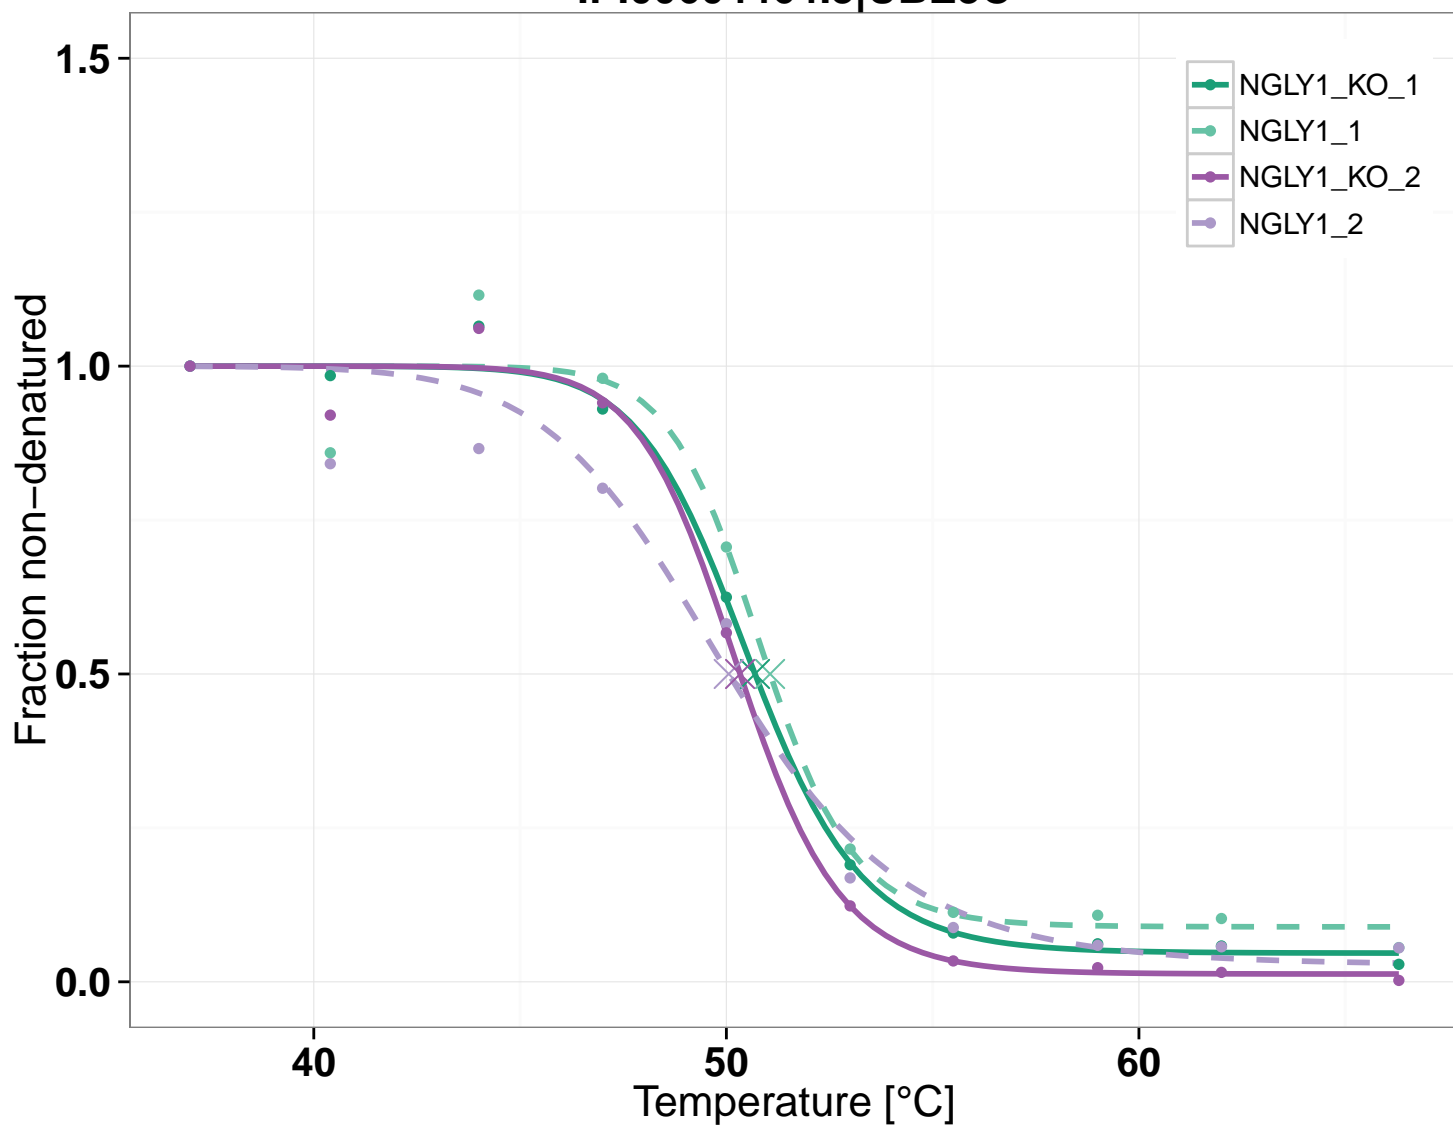

|            | meltPoint | slope | plateau | R2   |
|------------|-----------|-------|---------|------|
| NGLY1_KO_1 | 50.69     | -0.18 | 0.05    | 1    |
| NGLY1_1    | 51.06     | -0.2  | 0.09    | 0.98 |
| NGLY1_KO_2 | 50.33     | -0.2  | 0.01    | 0.99 |
| NGLY1_2    | 50.06     | -0.11 | 0.03    | 0.97 |

Supplement: Supplementary file 3349 [file 1]

# IPI00432357.2|SLC25A25

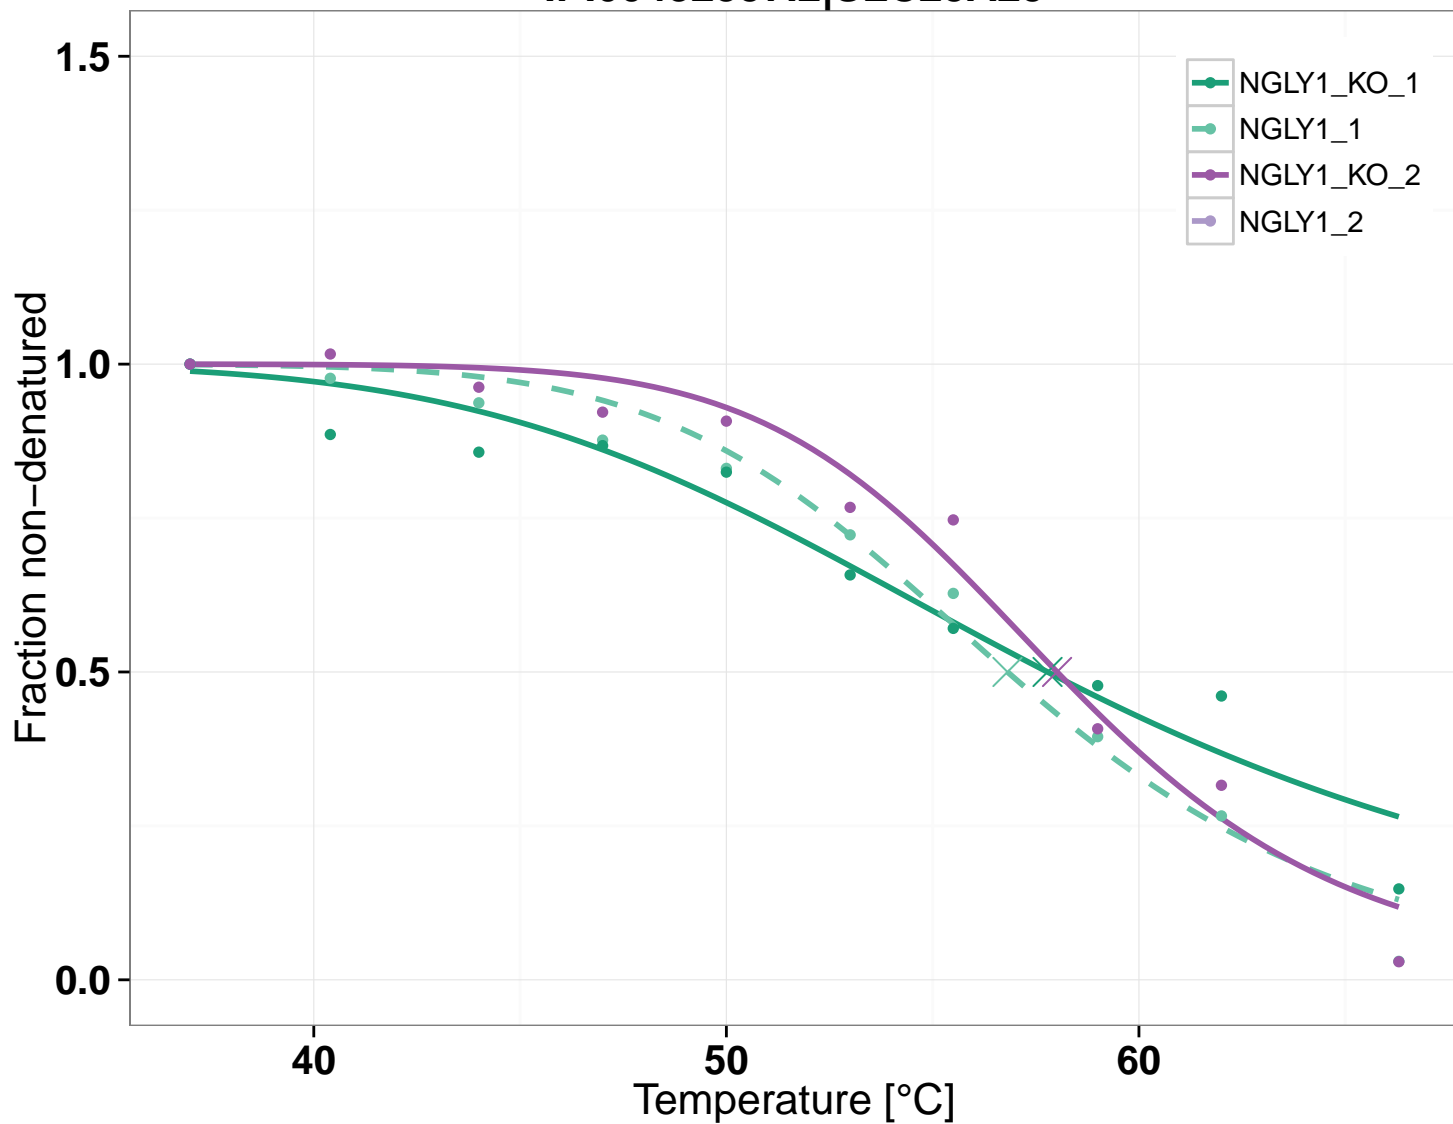

|            | meltPoint | slope  | plateau | R2   |
|------------|-----------|--------|---------|------|
| NGLY1_KO_1 | 57.79     | -0.037 | 0       | 0.94 |
| NGLY1_1    | 56.81     | -0.06  | 0       | 0.98 |
| NGLY1_KO_2 | 58.02     | -0.07  | 0       | 0.98 |
| NGLY1_2    | —         | —      | —       | —    |

Supplement: Supplementary file 3350 [file 1]

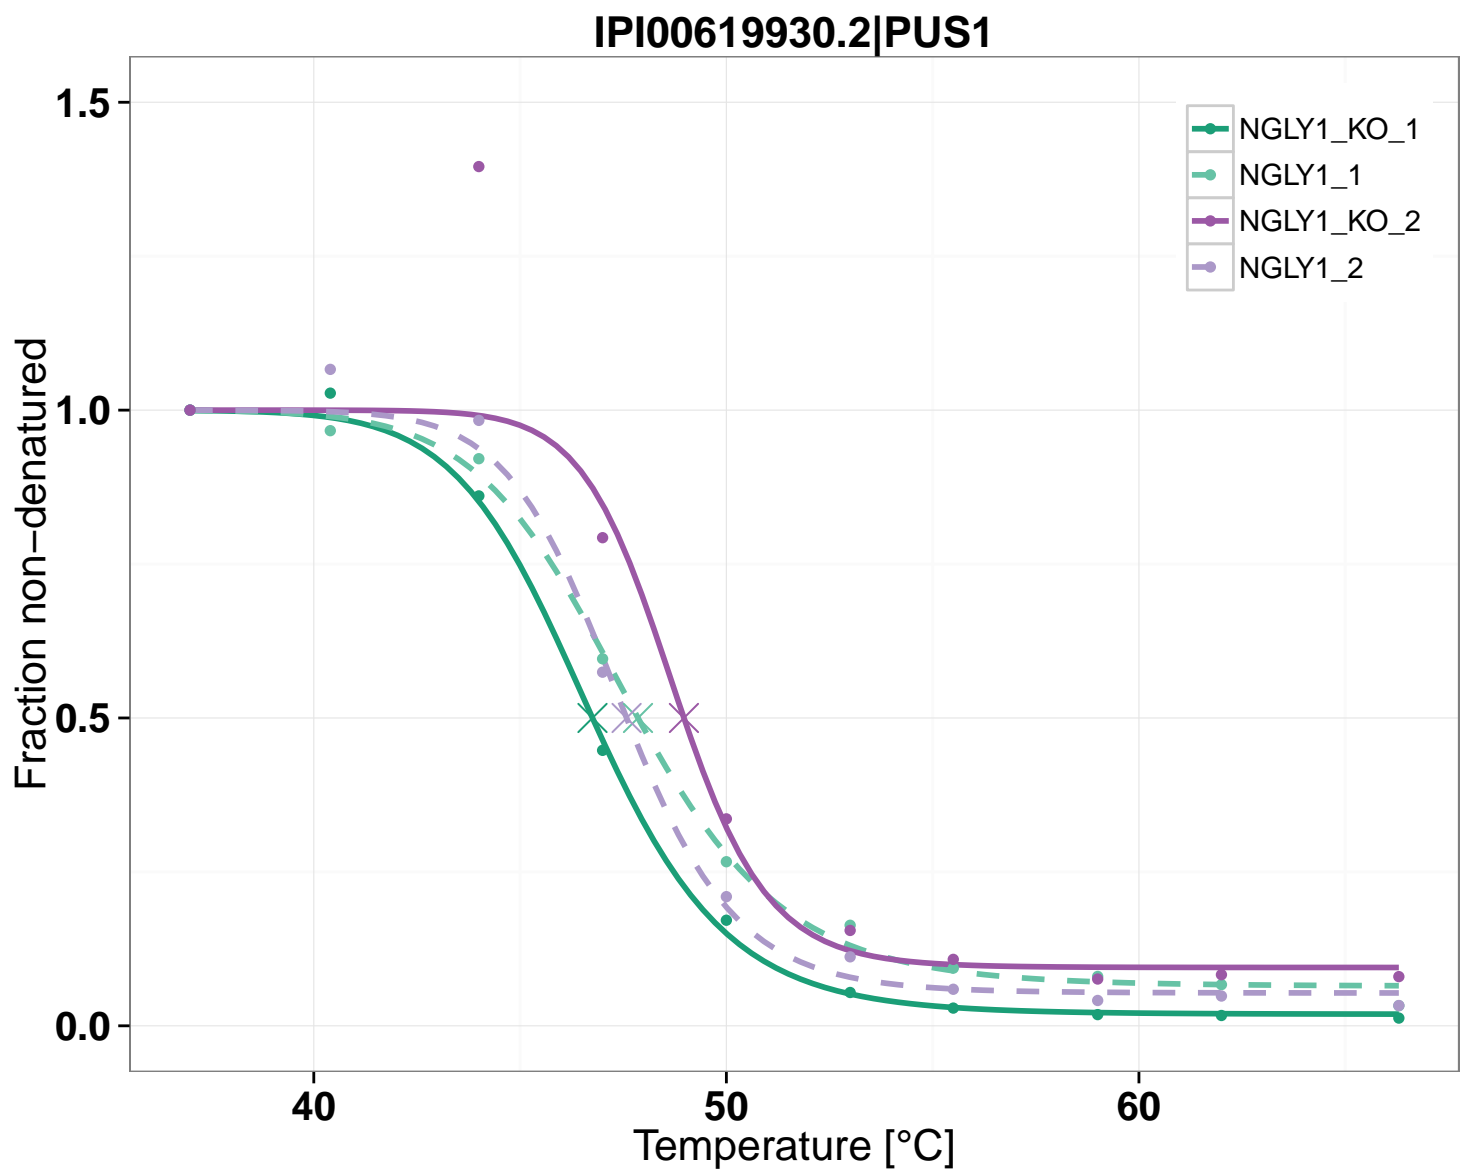

|            | meltPoint | slope | plateau | R2   |
|------------|-----------|-------|---------|------|
| NGLY1_KO_1 | 46.76     | -0.15 | 0.02    | 1    |
| NGLY1_1    | 47.86     | -0.12 | 0.06    | 1    |
| NGLY1_KO_2 | 48.97     | -0.2  | 0.09    | 0.85 |
| NGLY1_2    | 47.58     | -0.17 | 0.05    | 0.99 |

Supplement: Supplementary file 3351 [file 1]

# IPI00298947.5|MEST

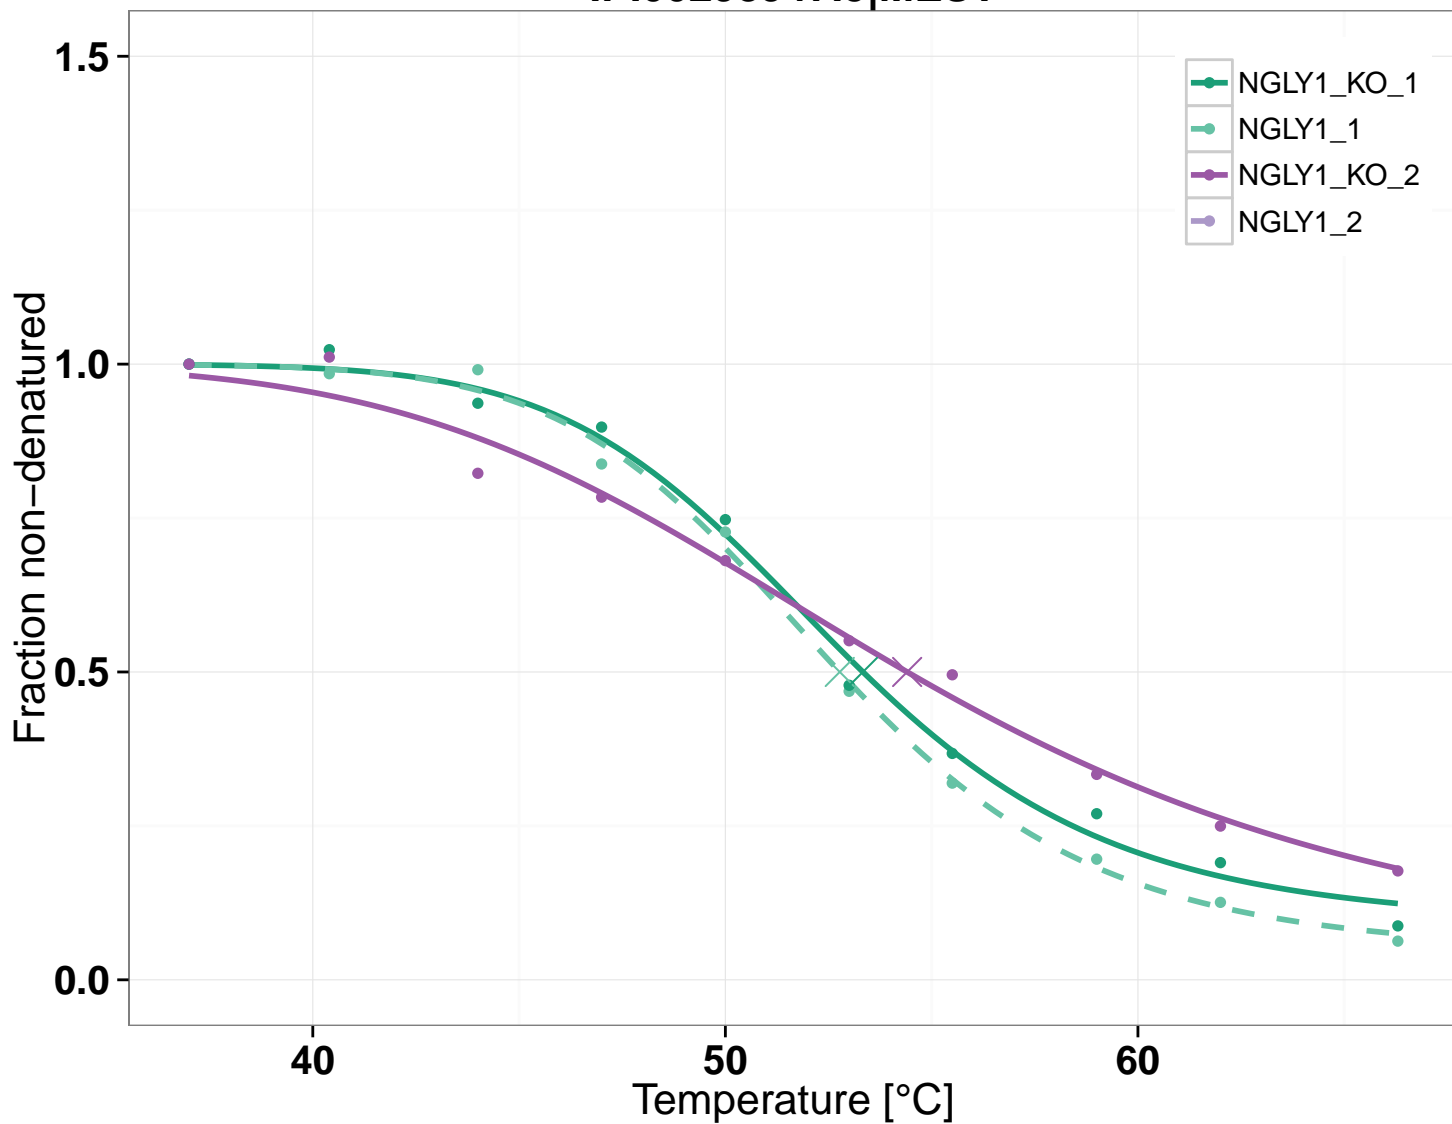

|            | meltPoint | slope  | plateau | R2   |
|------------|-----------|--------|---------|------|
| NGLY1_KO_1 | 53.33     | -0.069 | 0.09    | 0.99 |
| NGLY1_1    | 52.77     | -0.074 | 0.04    | 1    |
| NGLY1_KO_2 | 54.41     | -0.041 | 0       | 0.99 |
| NGLY1_2    | -         | -      | -       | -    |

Supplement: Supplementary file 3352 [file 1]

# IPI00642305.1|MCM8

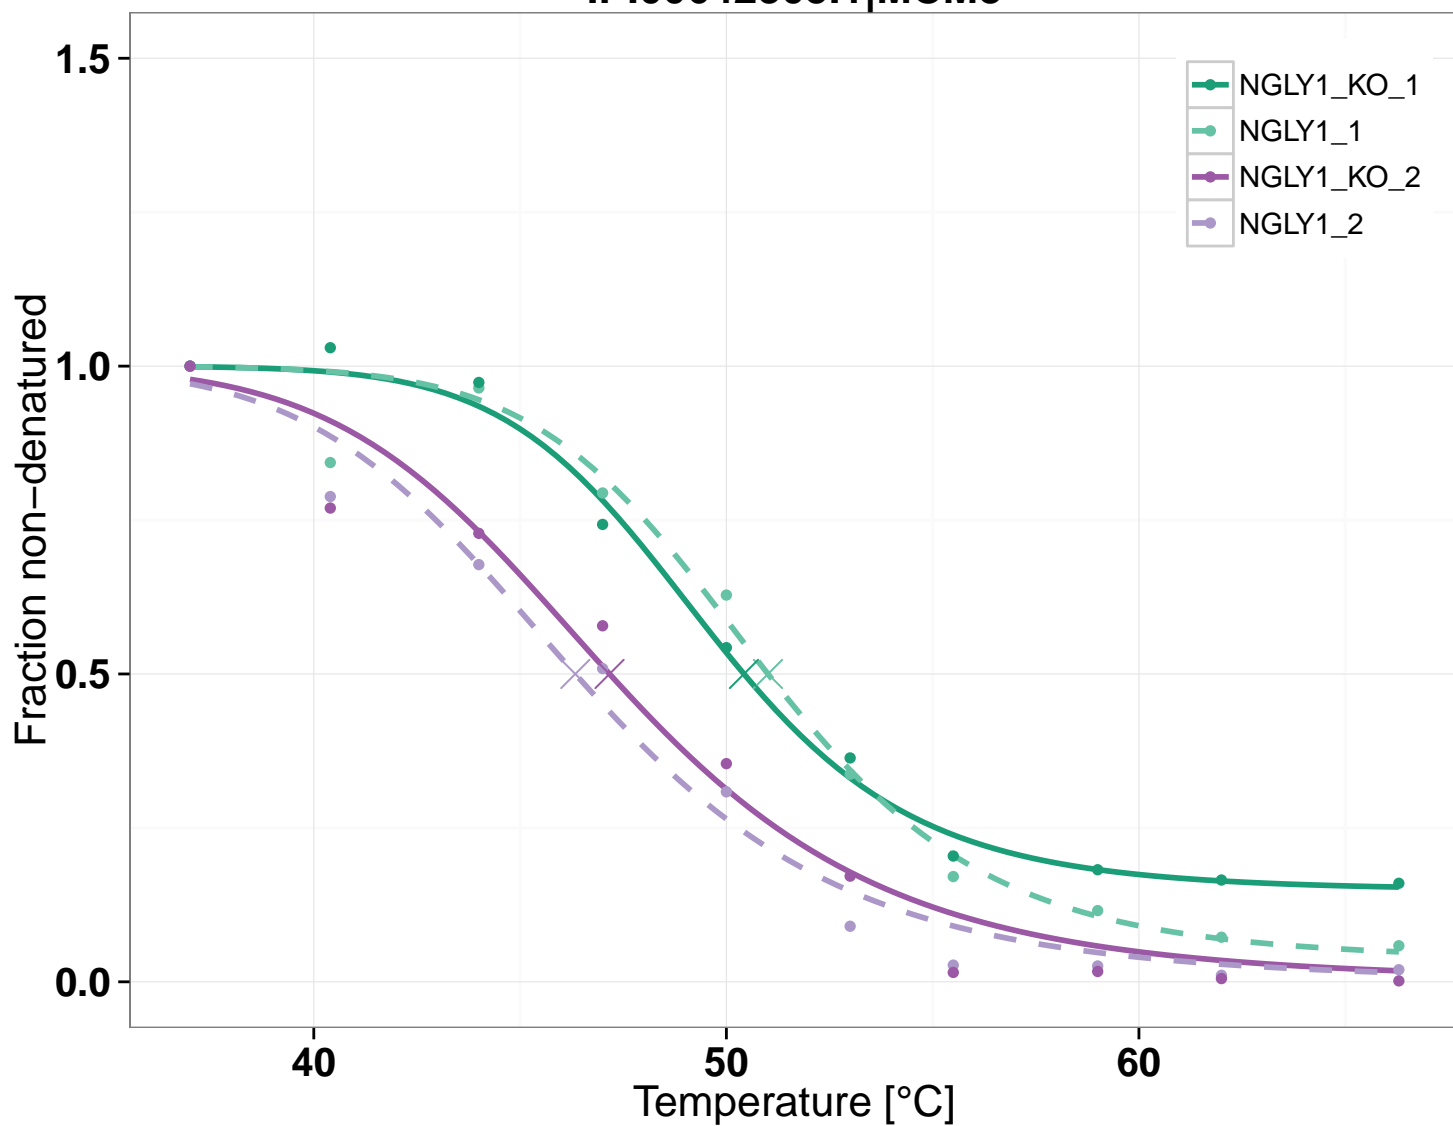

|            | meltPoint | slope  | plateau | R2   |
|------------|-----------|--------|---------|------|
| NGLY1_KO_1 | 50.43     | -0.086 | 0.15    | 0.99 |
| NGLY1_1    | 51.01     | -0.087 | 0.04    | 0.98 |
| NGLY1_KO_2 | 47.17     | -0.075 | 0       | 0.97 |
| NGLY1_2    | 46.34     | -0.077 | 0       | 0.98 |

Supplement: Supplementary file 3353 [file 1]

IPI00009822.1|SRP54

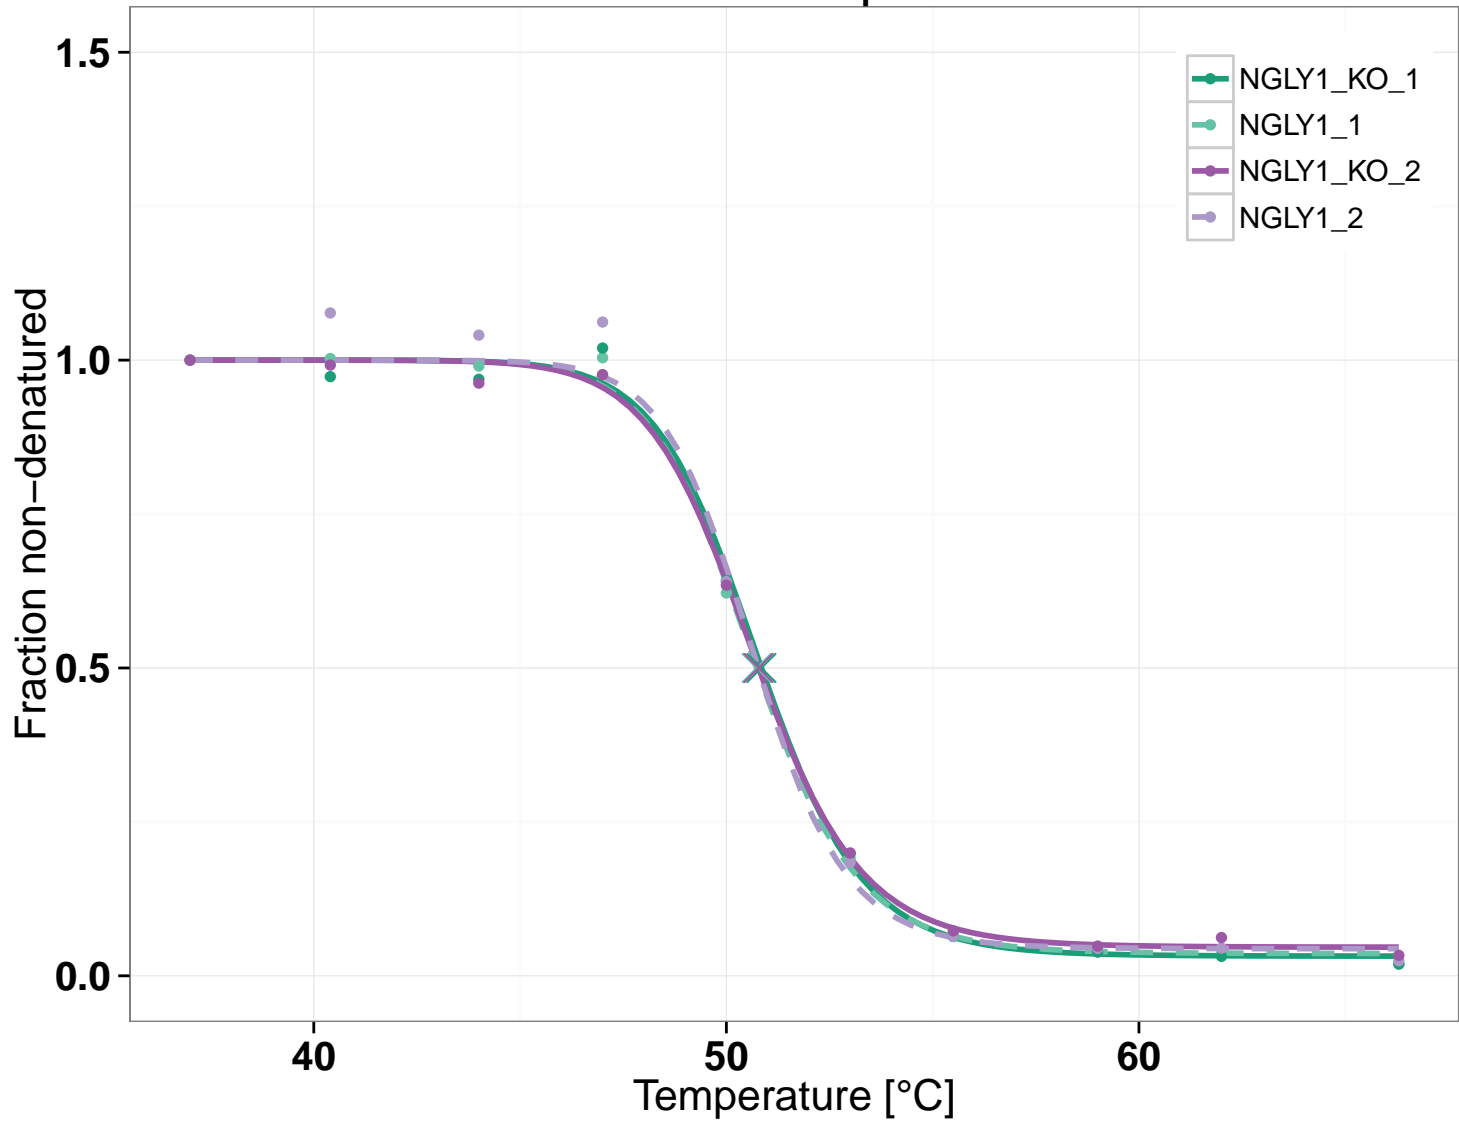

|            | meltPoint | slope | plateau | R2   |
|------------|-----------|-------|---------|------|
| NGLY1_KO_1 | 50.85     | -0.19 | 0.03    | 1    |
| NGLY1_1    | 50.73     | -0.19 | 0.04    | 1    |
| NGLY1_KO_2 | 50.78     | -0.18 | 0.05    | 1    |
| NGLY1_2    | 50.77     | -0.21 | 0.04    | 0.99 |

Supplement: Supplementary file 3354 [file 1]

IPI00872831.3|IQSEC2

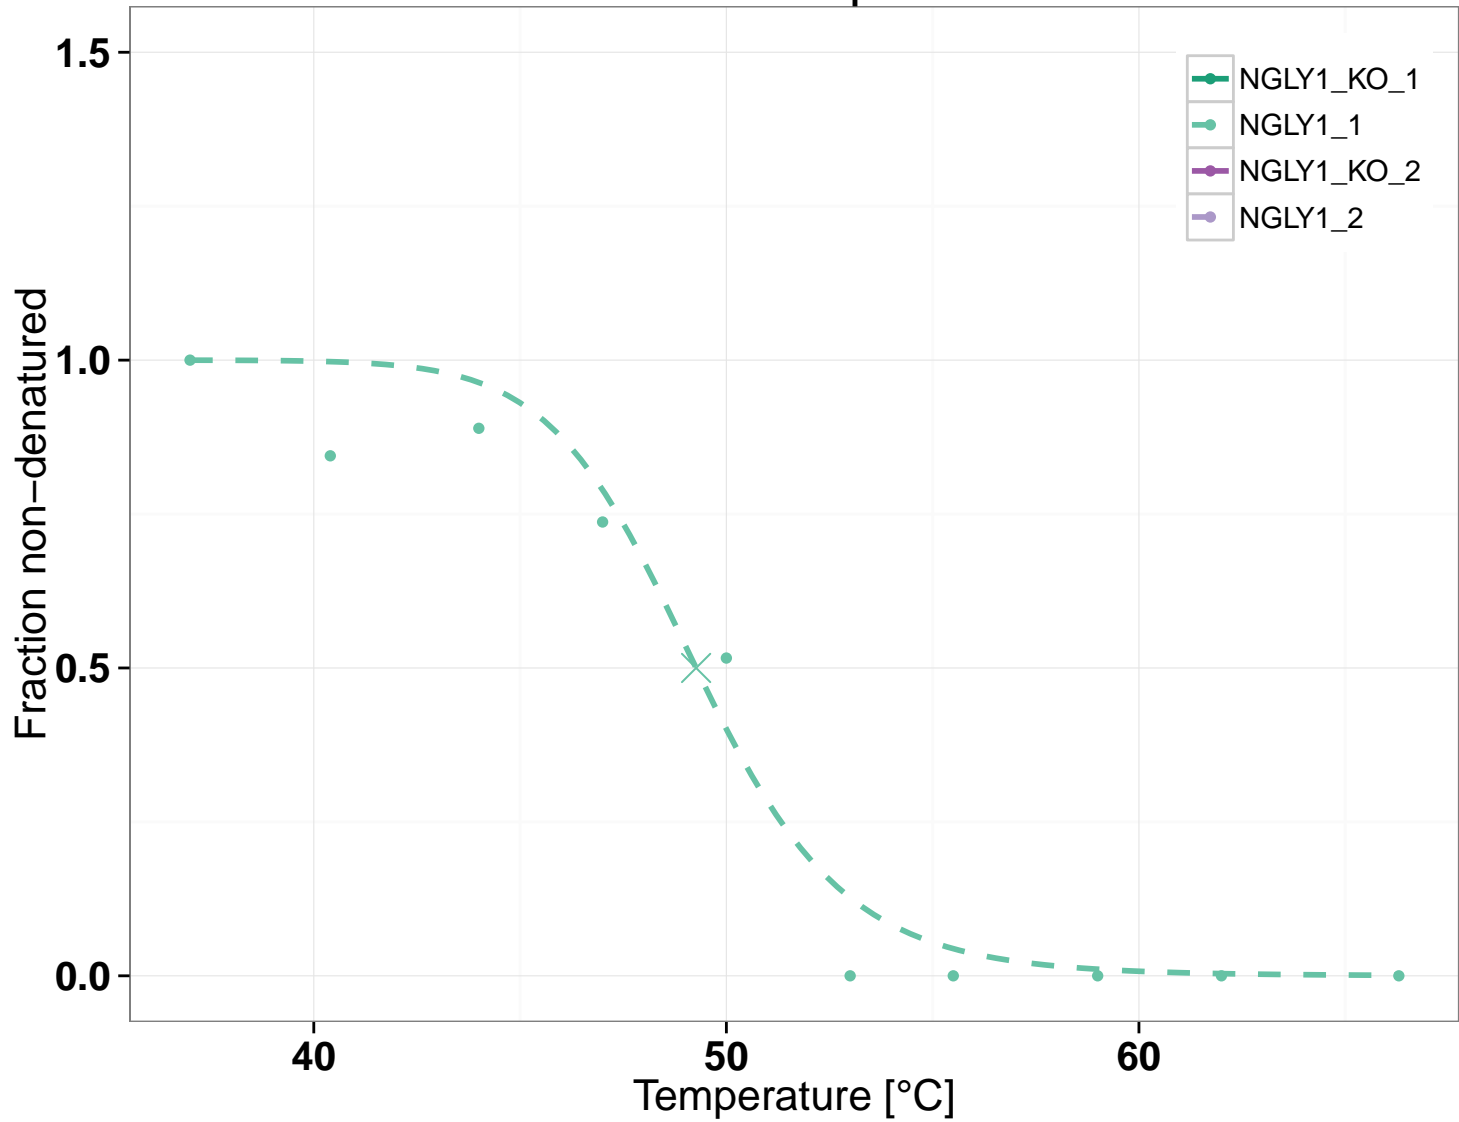

|            | meltPoint | slope | plateau | R2   |
|------------|-----------|-------|---------|------|
| NGLY1_KO_1 | -         | -     | -       | -    |
| NGLY1_1    | 49.27     | -0.14 | 0       | 0.96 |
| NGLY1_KO_2 | -         | -     | -       | -    |
| NGLY1_2    | -         | -     | -       | -    |

Supplement: Supplementary file 3355 [file 1]

IPI00896449.1|LOC388588

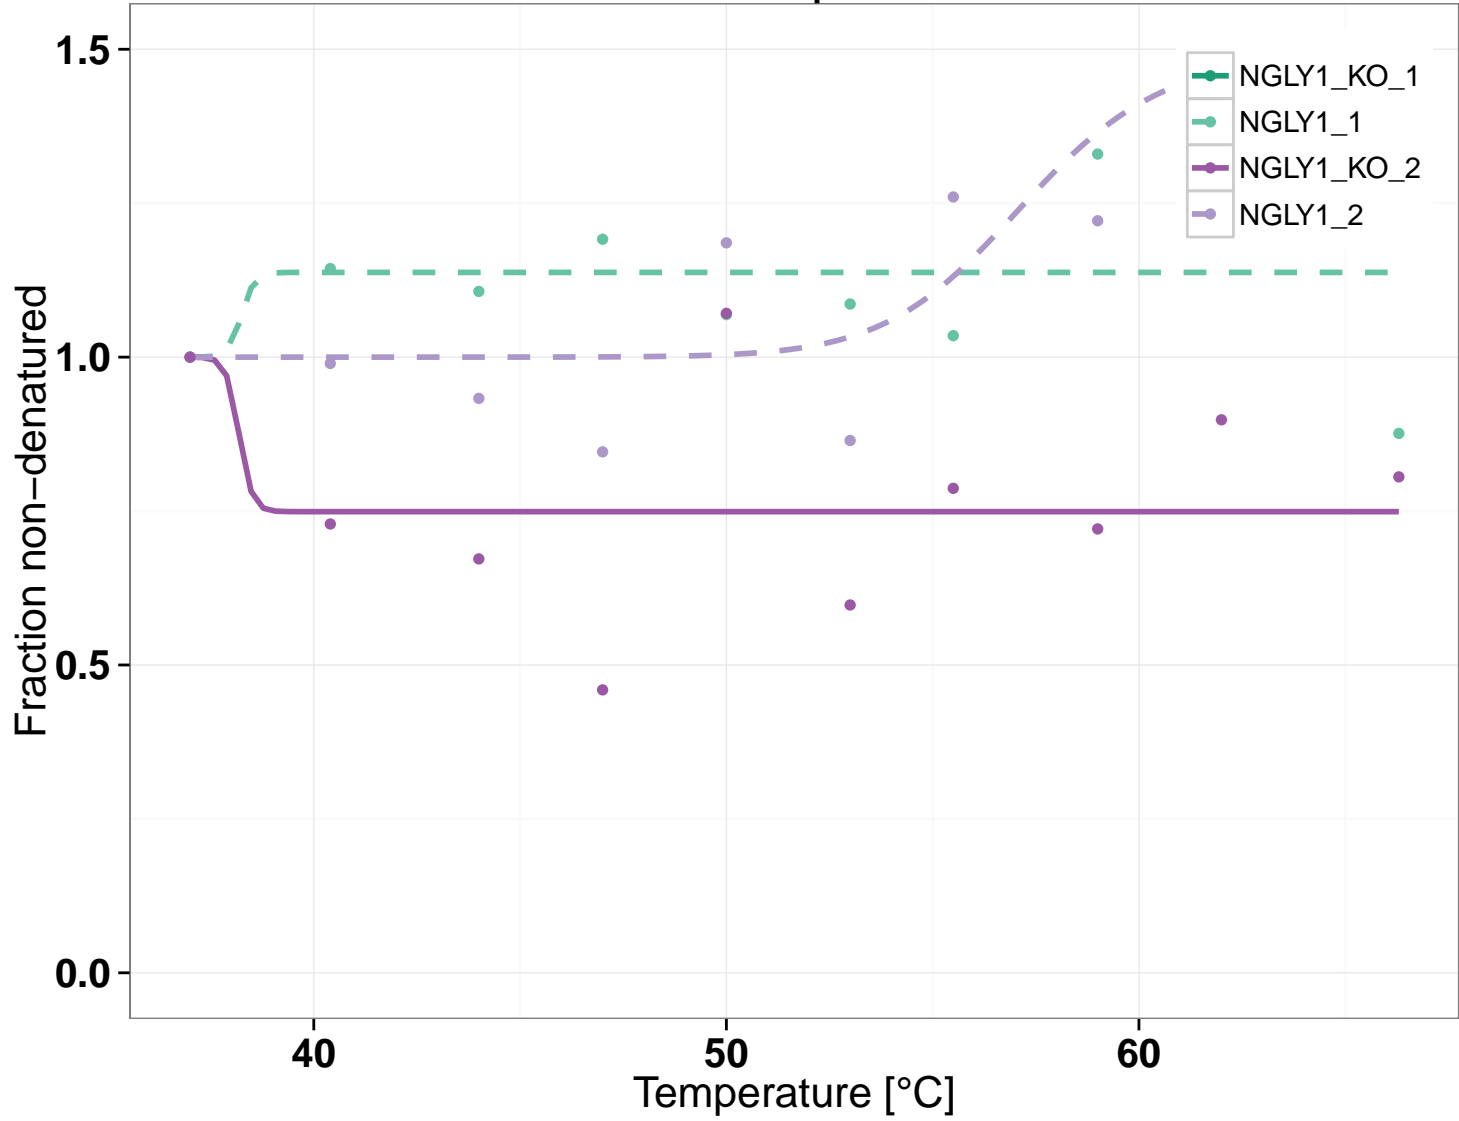

|            | meltPoint | slope | plateau | R2   |
|------------|-----------|-------|---------|------|
| NGLY1_KO_1 | -         | -     | -       | -    |
| NGLY1_1    | -         | 0.22  | 1.14    | 0.08 |
| NGLY1_KO_2 | -         | -0.41 | 0.75    | 0.19 |
| NGLY1_2    | -         | 0.073 | 1.5     | 0.77 |

Supplement: Supplementary file 3356 [file 1]

IPI00398994.3|KIAA1305

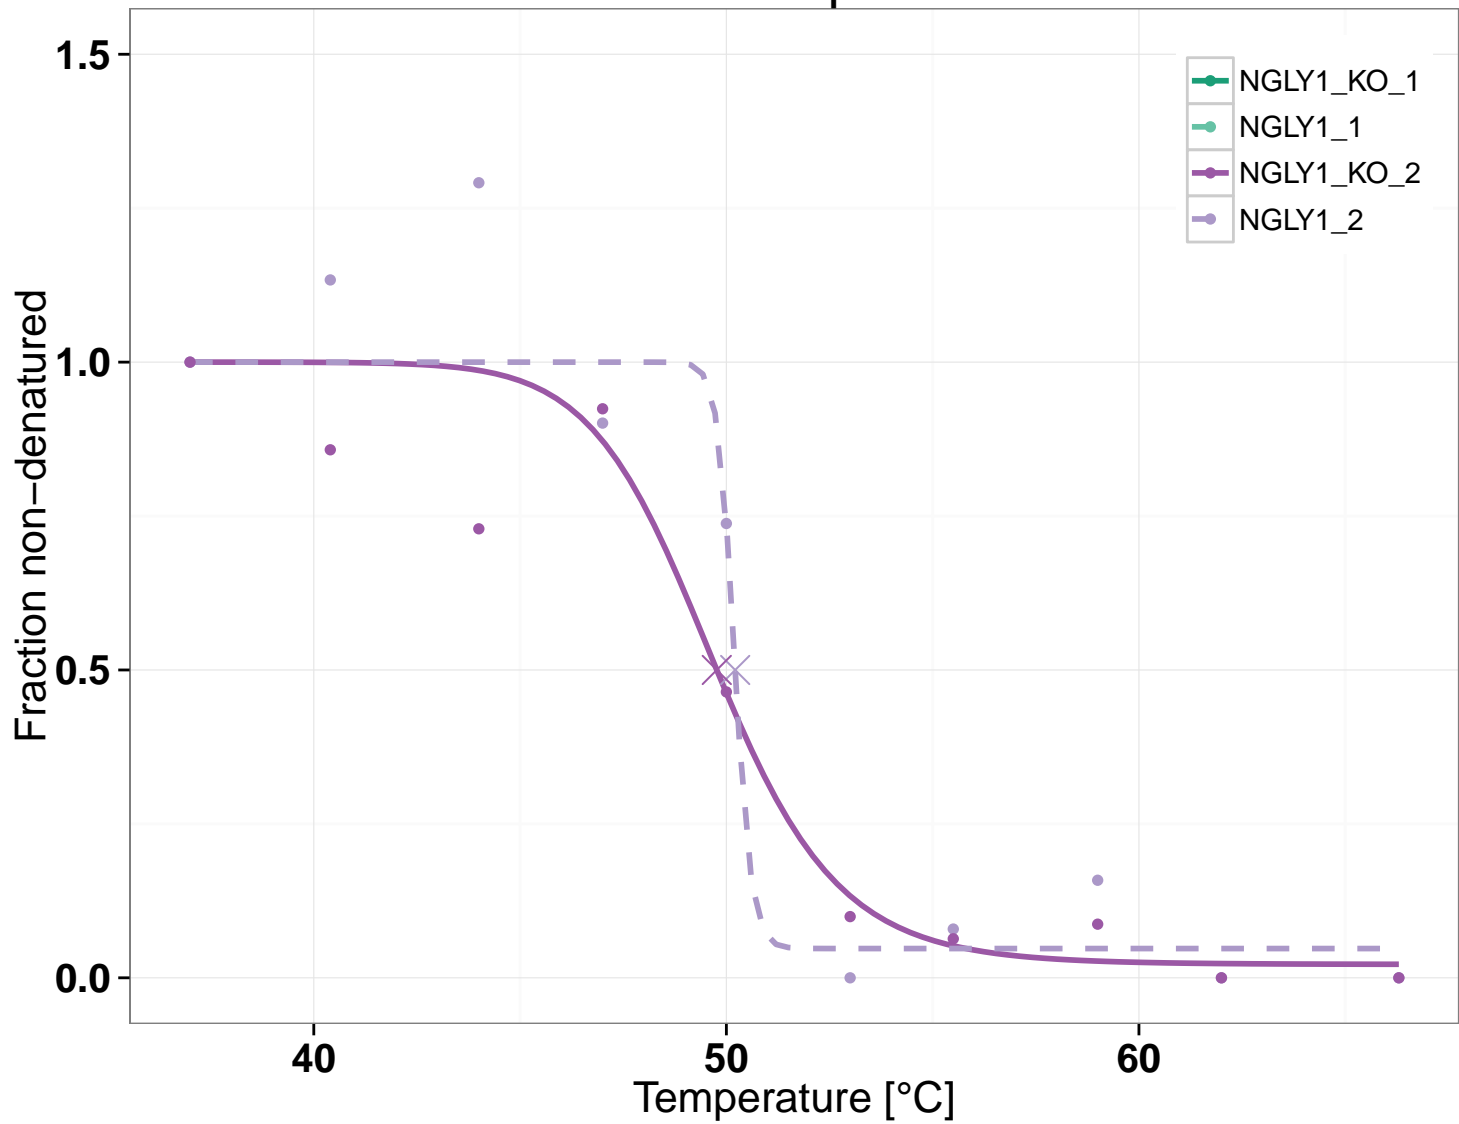

|            | meltPoint | slope | plateau | R2   |
|------------|-----------|-------|---------|------|
| NGLY1_KO_1 | —         | —     | —       | —    |
| NGLY1_1    | —         | —     | —       | —    |
| NGLY1_KO_2 | 49.77     | -0.16 | 0.02    | 0.94 |
| NGLY1_2    | 50.21     | -1.2  | 0.05    | 0.95 |

Supplement: Supplementary file 3357 [file 1]

# IPI00293015.3|WDR8

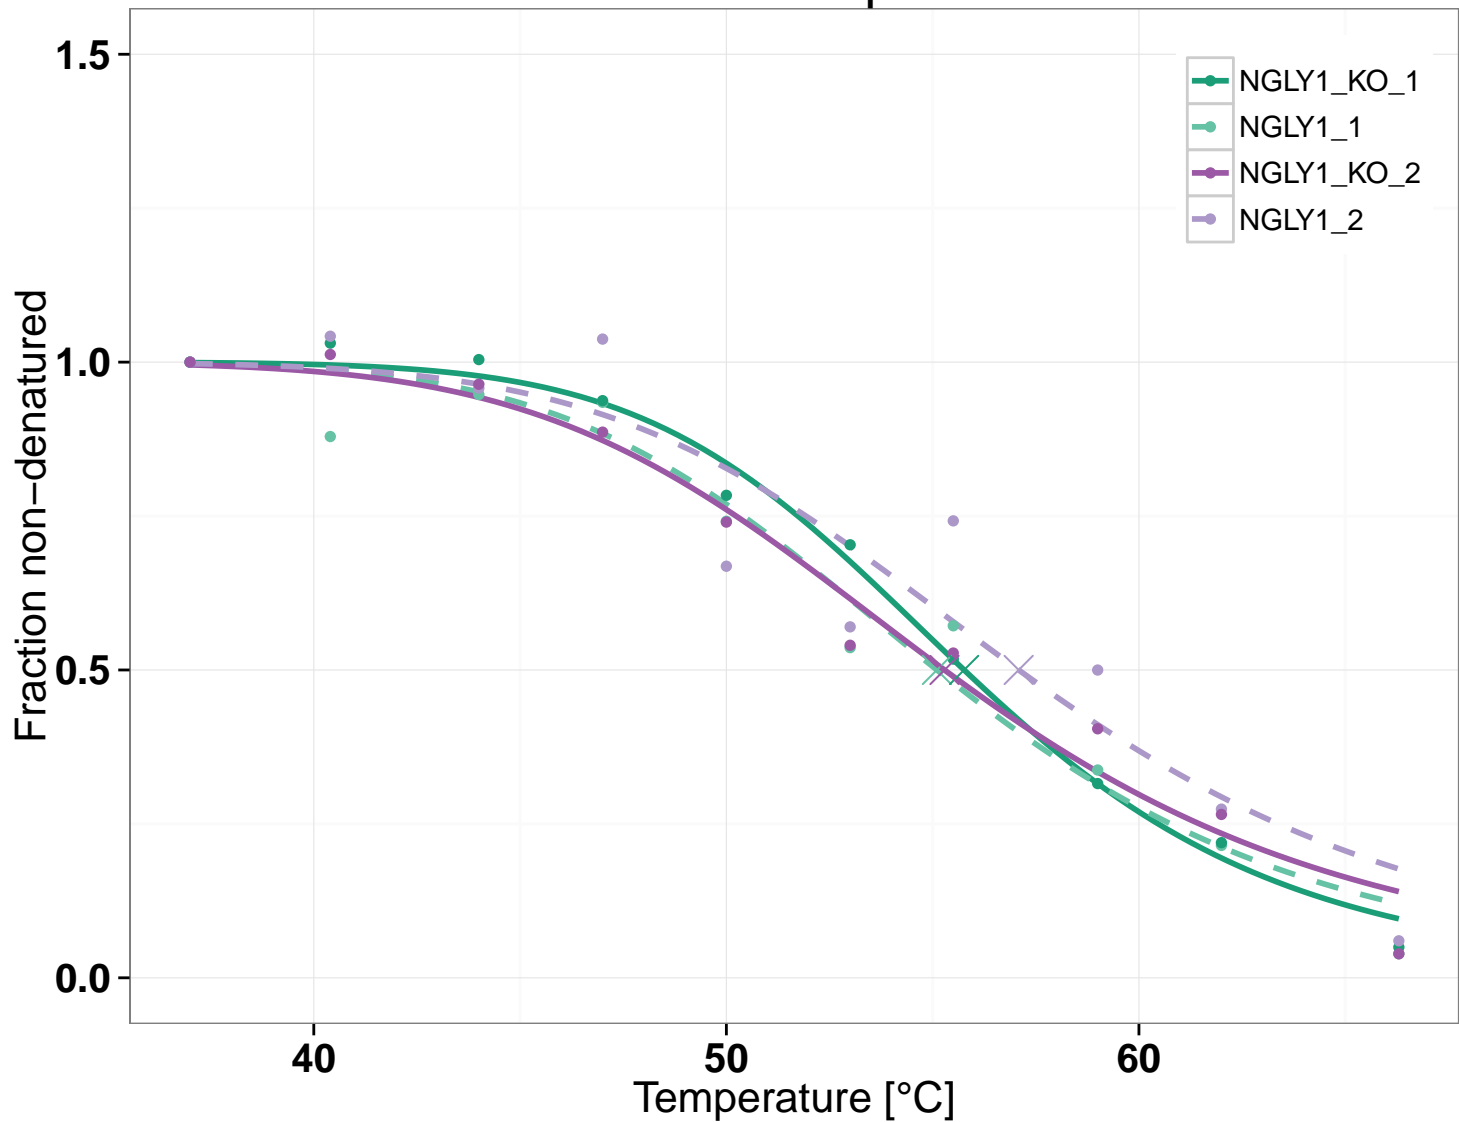

|            | meltPoint | slope  | plateau | R2   |
|------------|-----------|--------|---------|------|
| NGLY1_KO_1 | 55.76     | -0.065 | 0       | 0.99 |
| NGLY1_1    | 55.1      | -0.055 | 0       | 0.96 |
| NGLY1_KO_2 | 55.29     | -0.051 | 0       | 0.98 |
| NGLY1_2    | 57.09     | -0.05  | 0       | 0.89 |

Supplement: Supplementary file 3358 [file 1]

# IPI00306794.4|CARD6

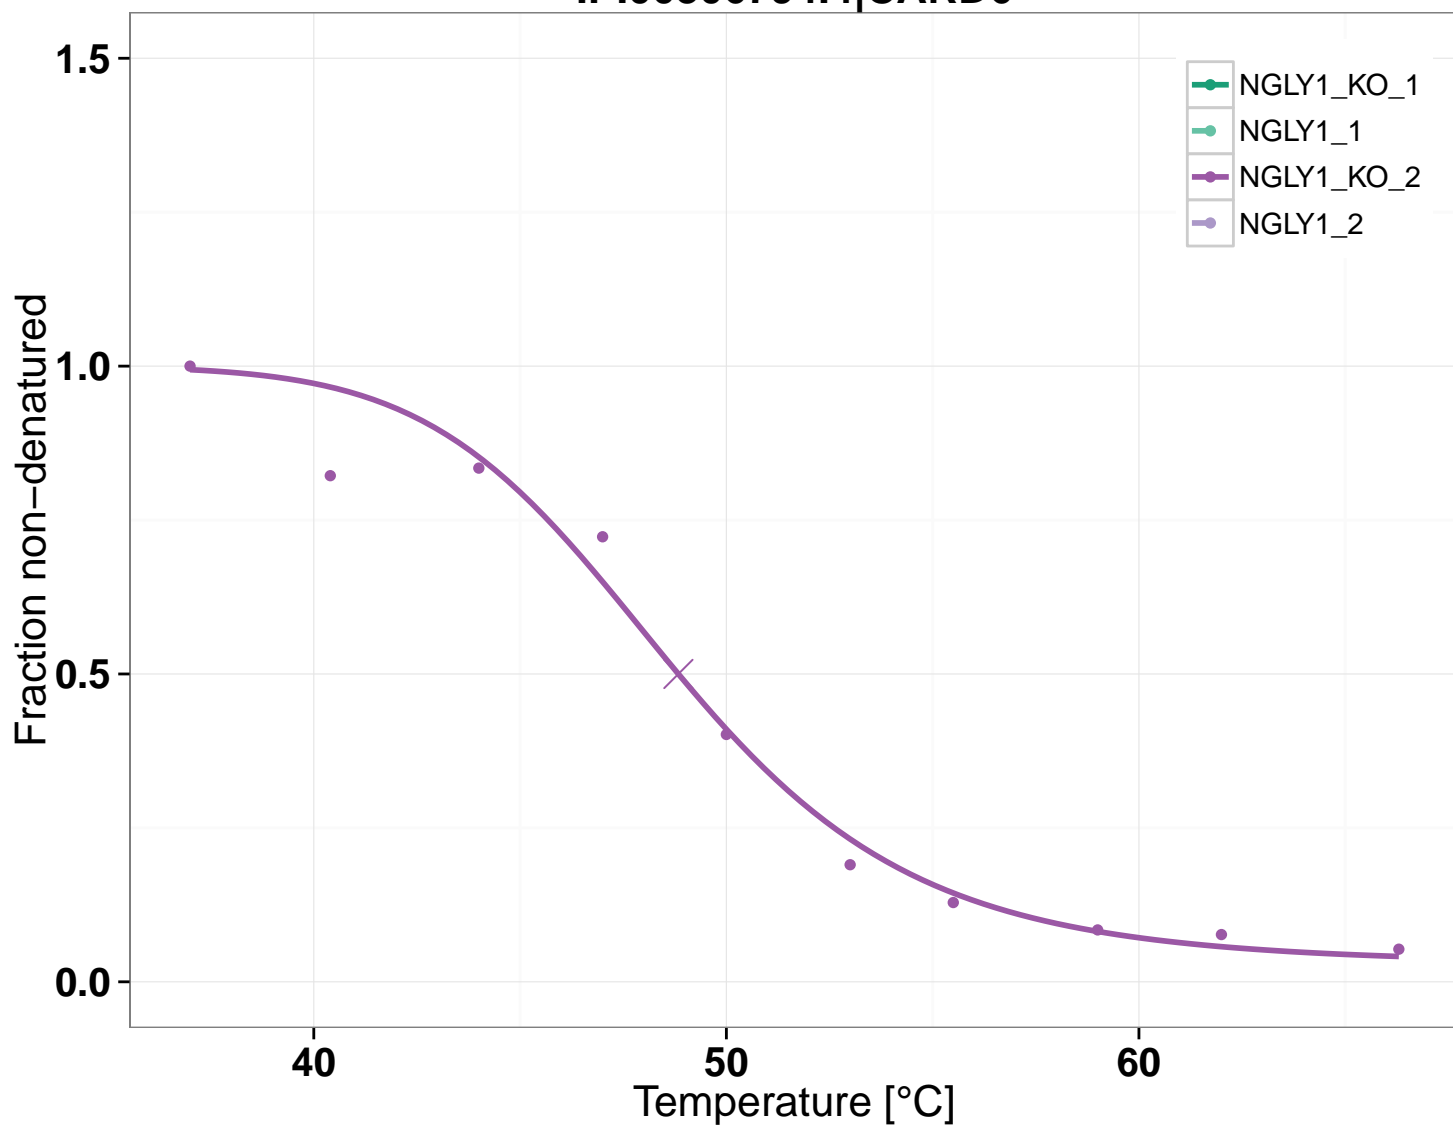

|            | meltPoint | slope  | plateau | R2   |
|------------|-----------|--------|---------|------|
| NGLY1_KO_1 | —         | —      | —       | —    |
| NGLY1_1    | —         | —      | —       | —    |
| NGLY1_KO_2 | 48.84     | -0.082 | 0.03    | 0.98 |
| NGLY1_2    | —         | —      | —       | —    |

Supplement: Supplementary file 3359 [file 1]

IPI00410039.1|PPHLN1

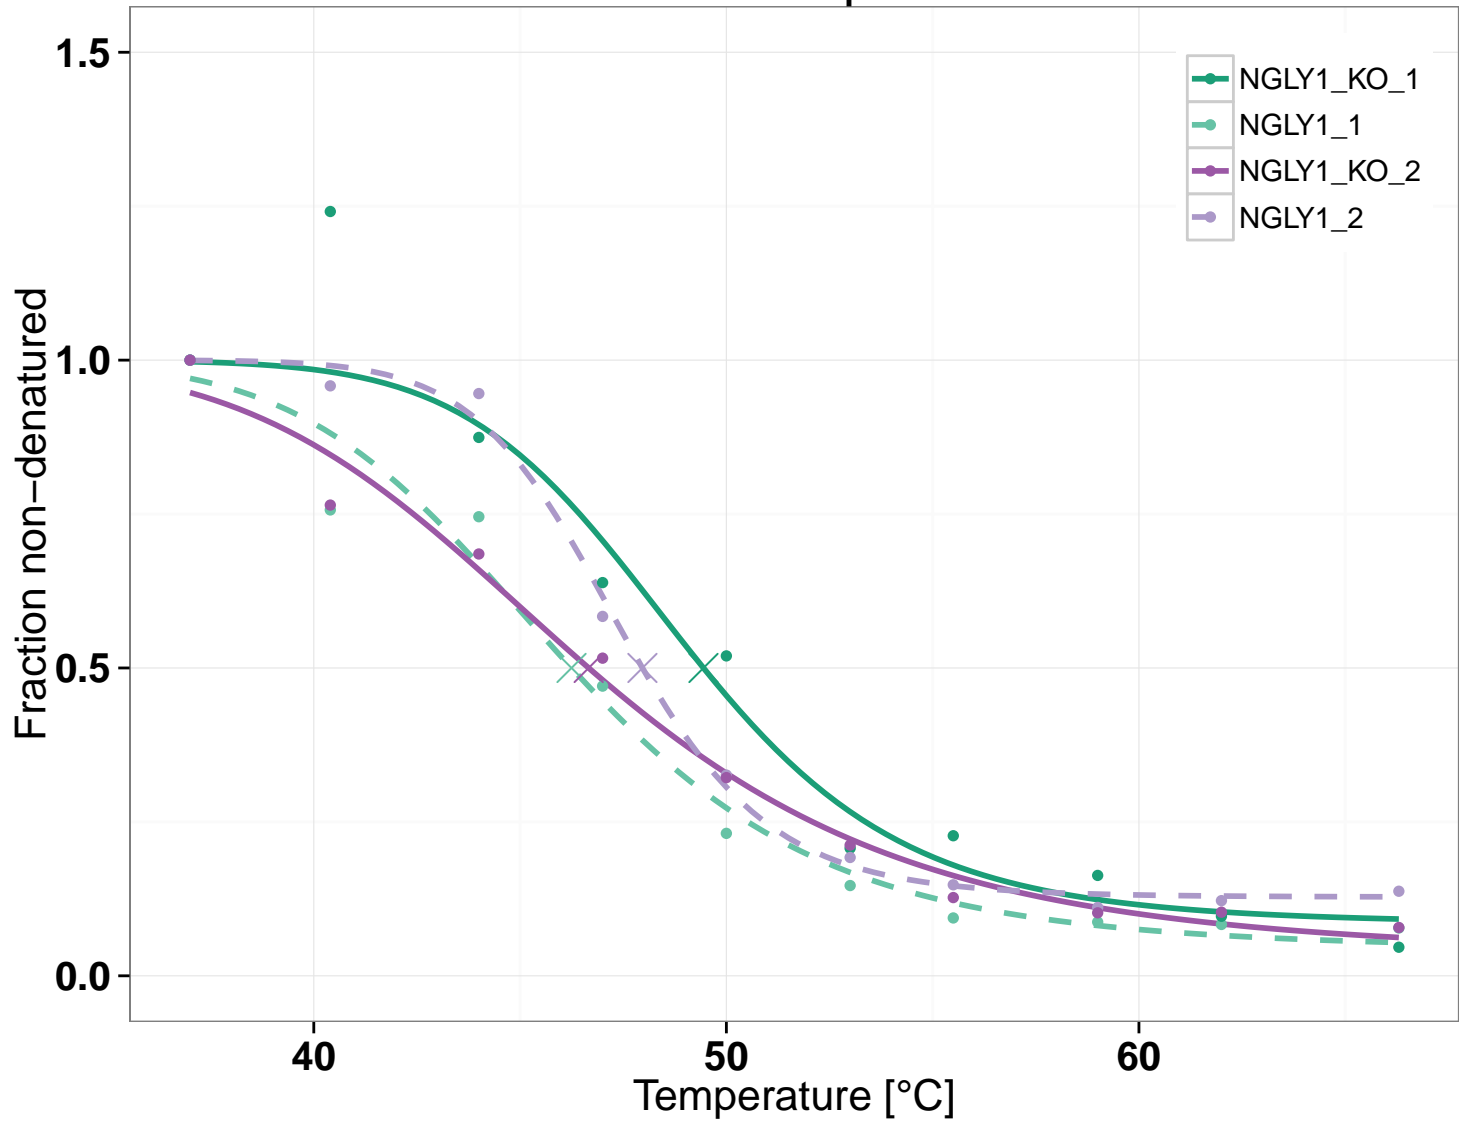

|            | meltPoint | slope  | plateau | R2   |
|------------|-----------|--------|---------|------|
| NGLY1_KO_1 | 49.45     | -0.086 | 0.08    | 0.95 |
| NGLY1_1    | 46.25     | -0.076 | 0.04    | 0.98 |
| NGLY1_KO_2 | 46.66     | -0.061 | 0.03    | 0.99 |
| NGLY1_2    | 47.97     | -0.12  | 0.13    | 1    |

Supplement: Supplementary file 3360 [file 1]

IPI00848045.1|HYI

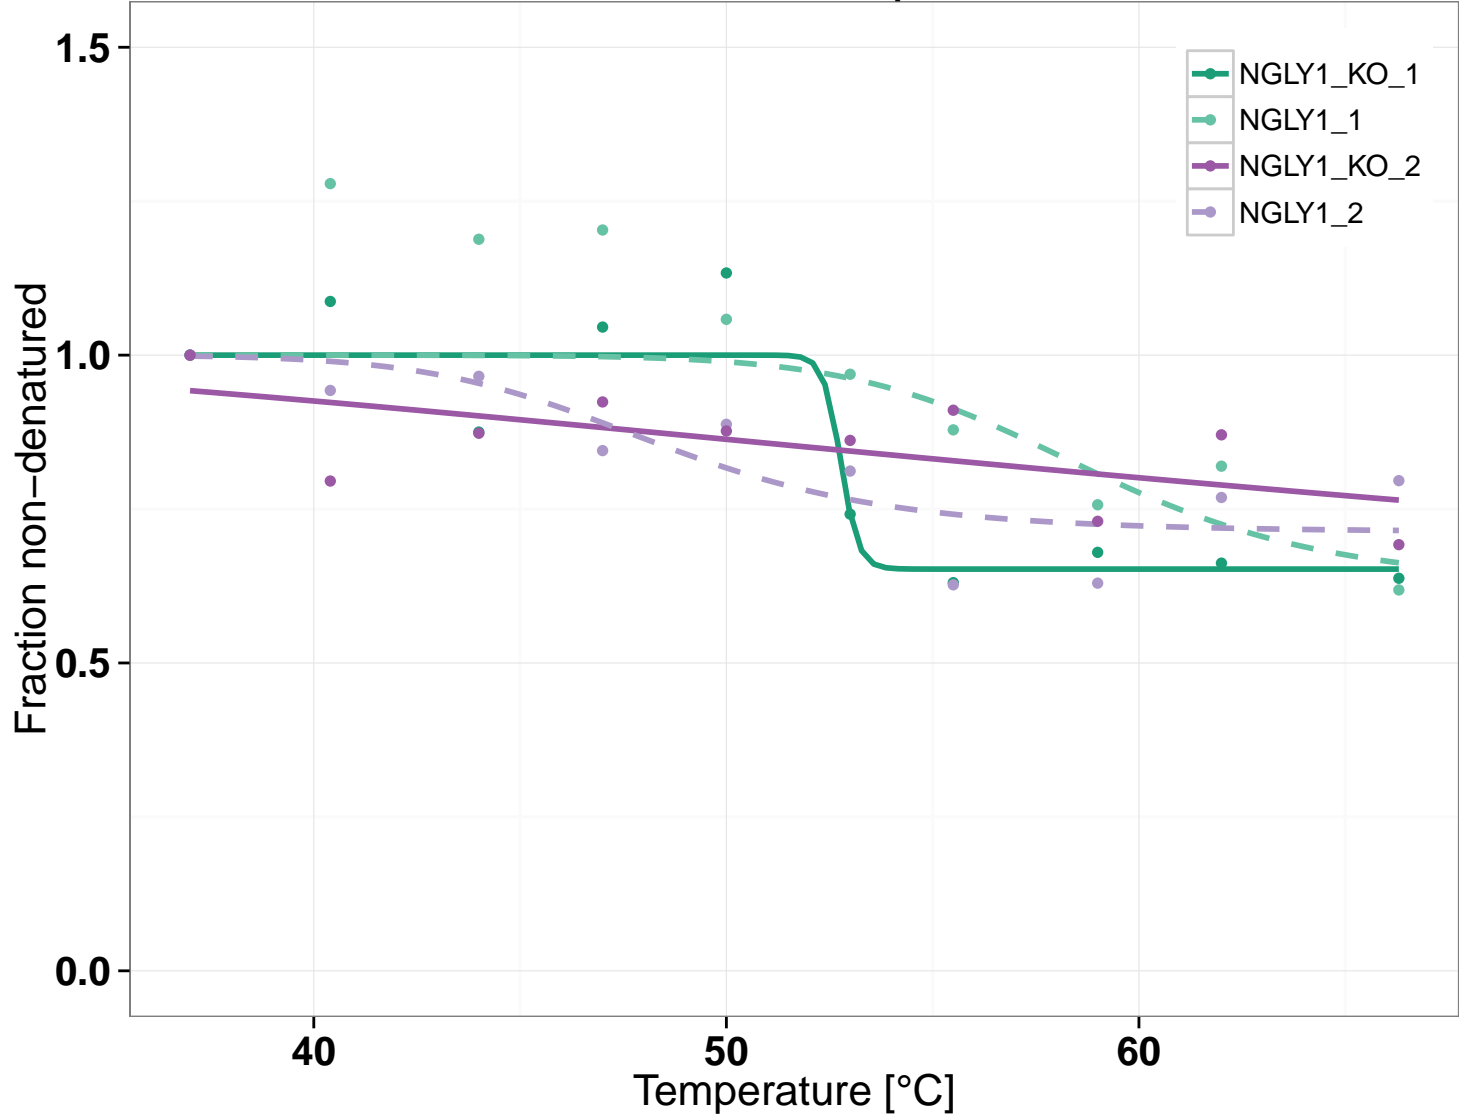

|            | meltPoint | slope   | plateau | R2   |
|------------|-----------|---------|---------|------|
| NGLY1_KO_1 | -         | -0.41   | 0.65    | 0.88 |
| NGLY1_1    | -         | -0.032  | 0.63    | 0.57 |
| NGLY1_KO_2 | -         | -0.0064 | 0       | 0.38 |
| NGLY1_2    | -         | -0.025  | 0.71    | 0.71 |

Supplement: Supplementary file 3361 [file 1]

IPI00024802.1|BTAF1

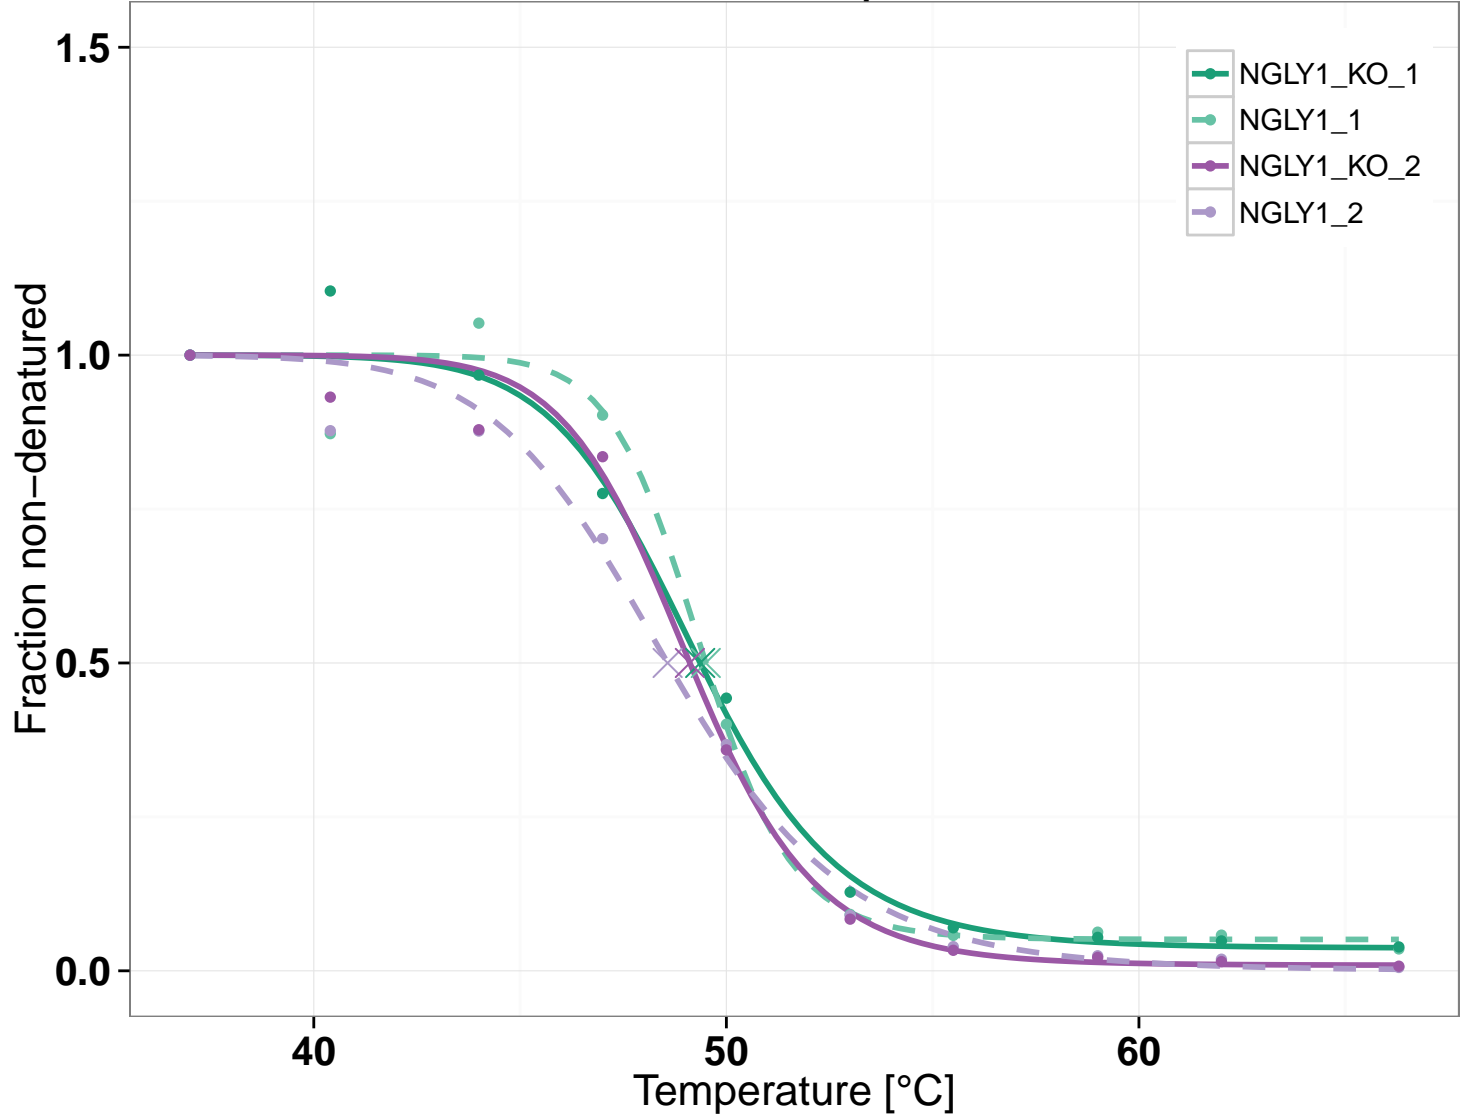

|            | meltPoint | slope | plateau | R2   |
|------------|-----------|-------|---------|------|
| NGLY1_KO_1 | 49.37     | -0.14 | 0.04    | 0.99 |
| NGLY1_1    | 49.5      | -0.21 | 0.05    | 0.99 |
| NGLY1_KO_2 | 49.12     | -0.16 | 0.01    | 0.99 |
| NGLY1_2    | 48.58     | -0.12 | 0       | 0.99 |

Supplement: Supplementary file 3362 [file 1]

# IPI00218035.2|NFIC

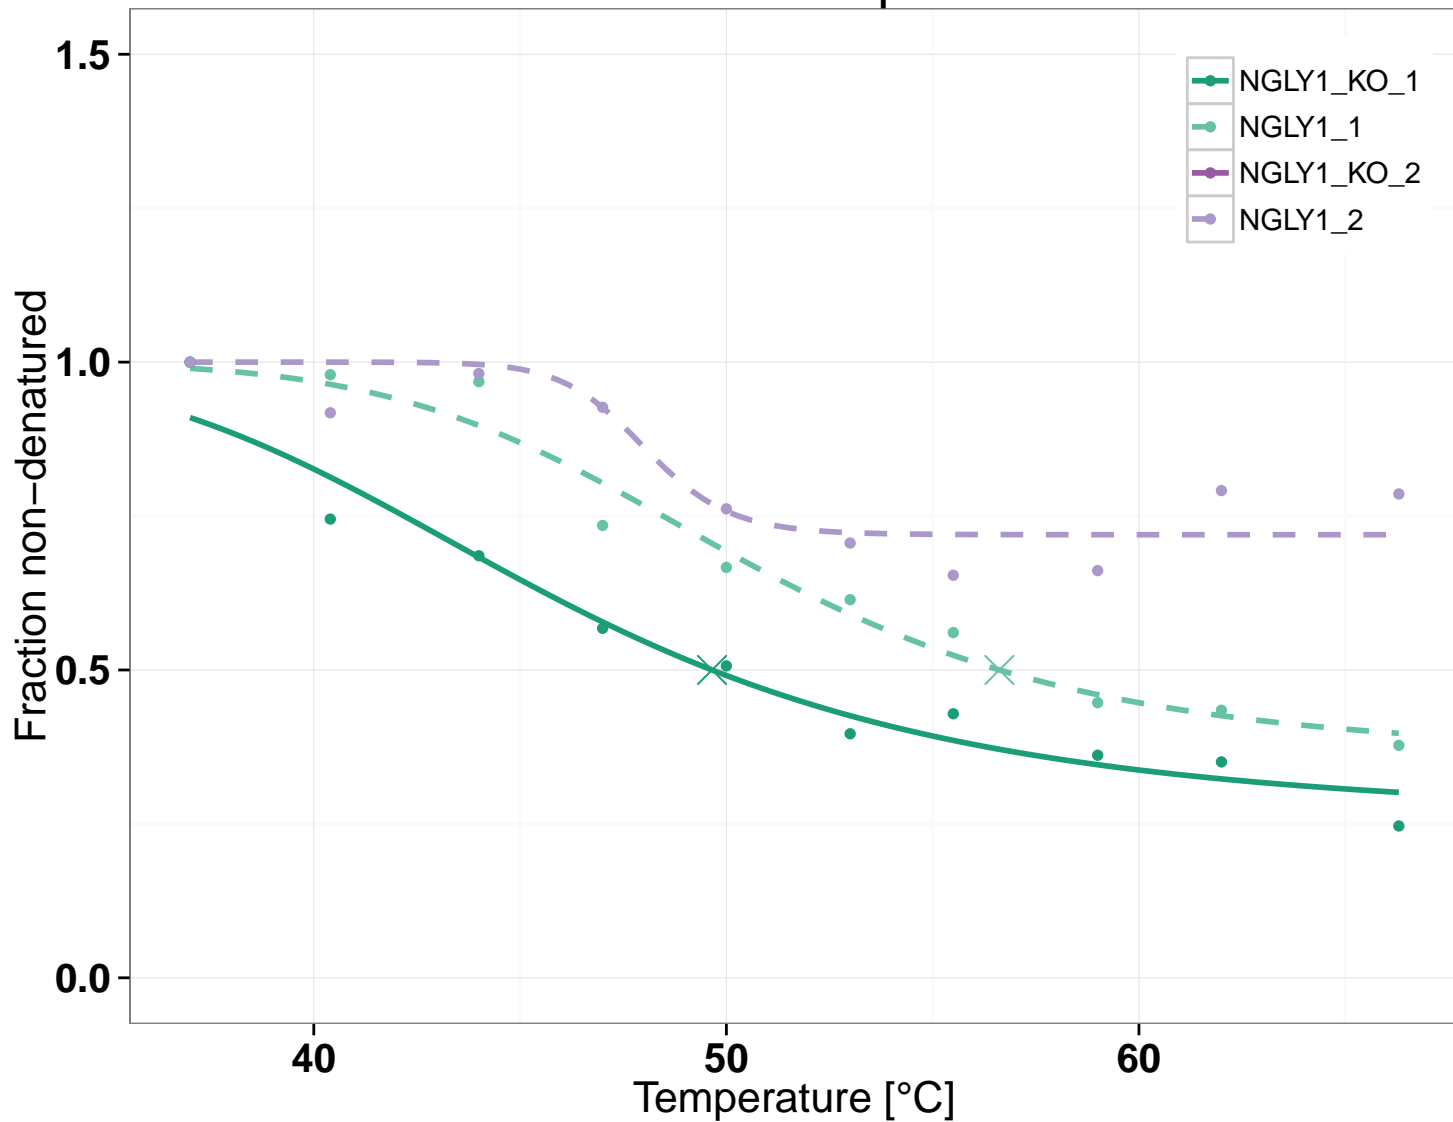

|            | meltPoint | slope  | plateau | R2   |
|------------|-----------|--------|---------|------|
| NGLY1_KO_1 | 49.65     | -0.037 | 0.25    | 0.96 |
| NGLY1_1    | 56.62     | -0.038 | 0.36    | 0.97 |
| NGLY1_KO_2 | -         | -      | -       | -    |
| NGLY1_2    | -         | -0.069 | 0.72    | 0.84 |

Supplement: Supplementary file 3363 [file 1]

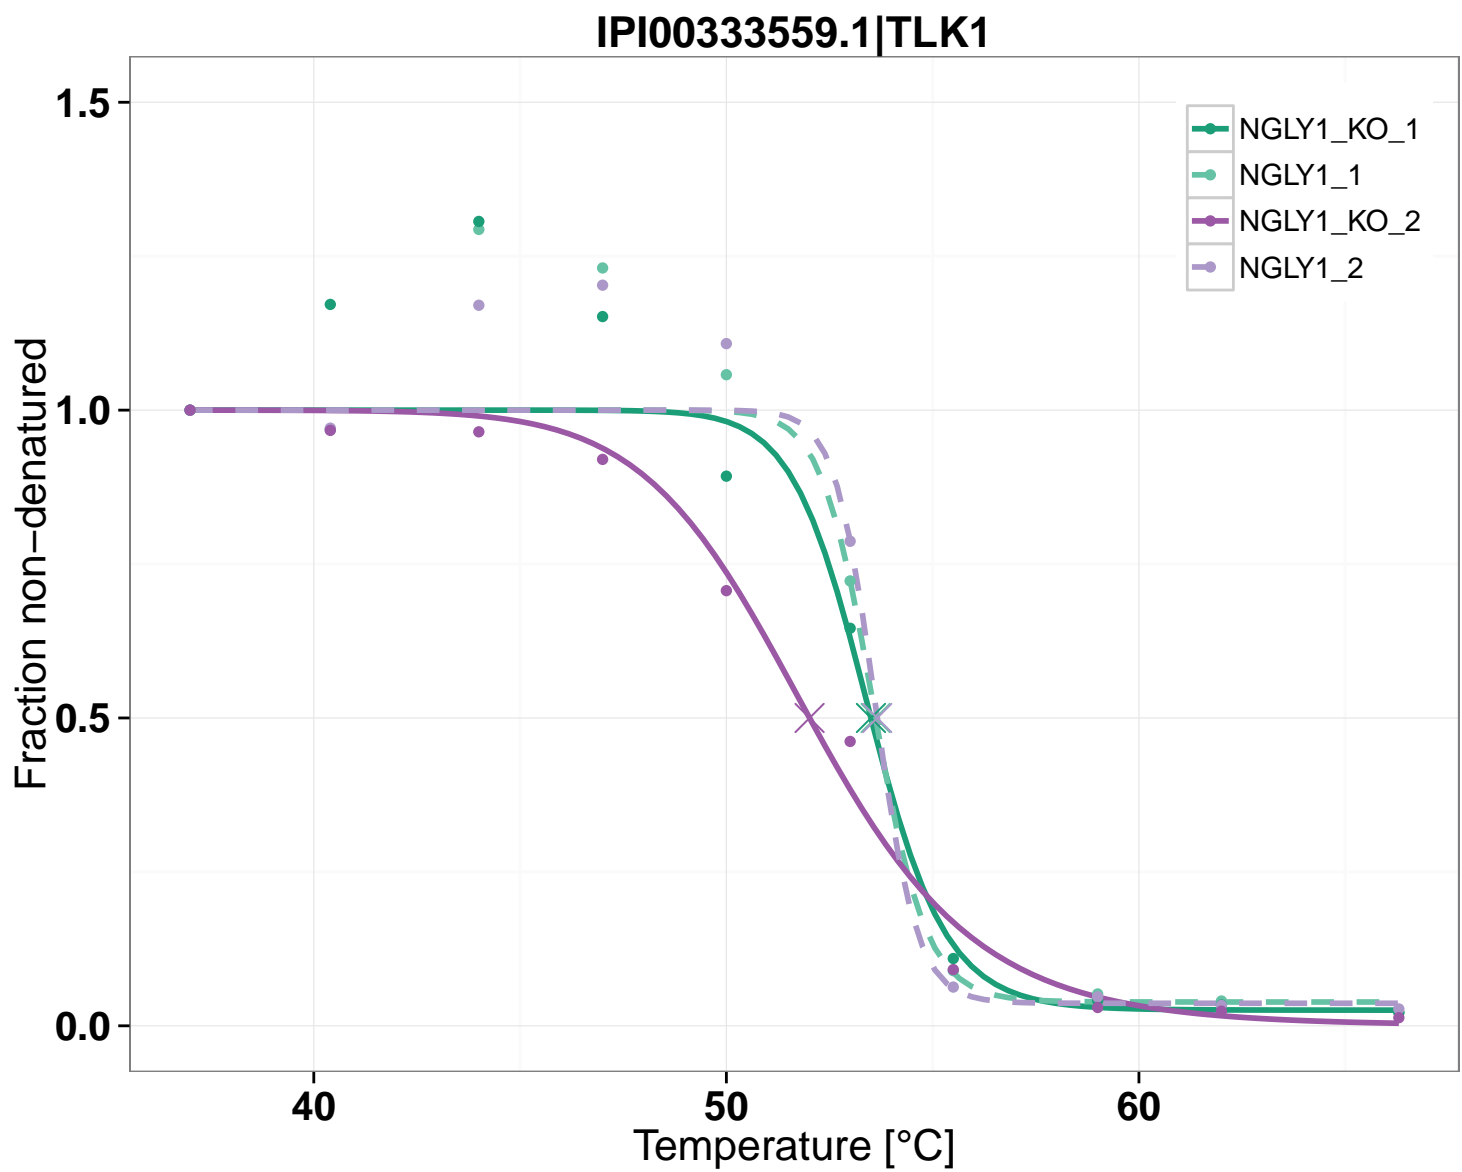

|            | meltPoint | slope | plateau | R2   |
|------------|-----------|-------|---------|------|
| NGLY1_KO_1 | 53.5      | -0.26 | 0.03    | 0.94 |
| NGLY1_1    | 53.62     | -0.38 | 0.04    | 0.94 |
| NGLY1_KO_2 | 52.02     | -0.12 | 0       | 0.99 |
| NGLY1_2    | 53.66     | -0.49 | 0.04    | 0.97 |

Supplement: Supplementary file 3364 [file 1]

IPI00185361.5|DDX55

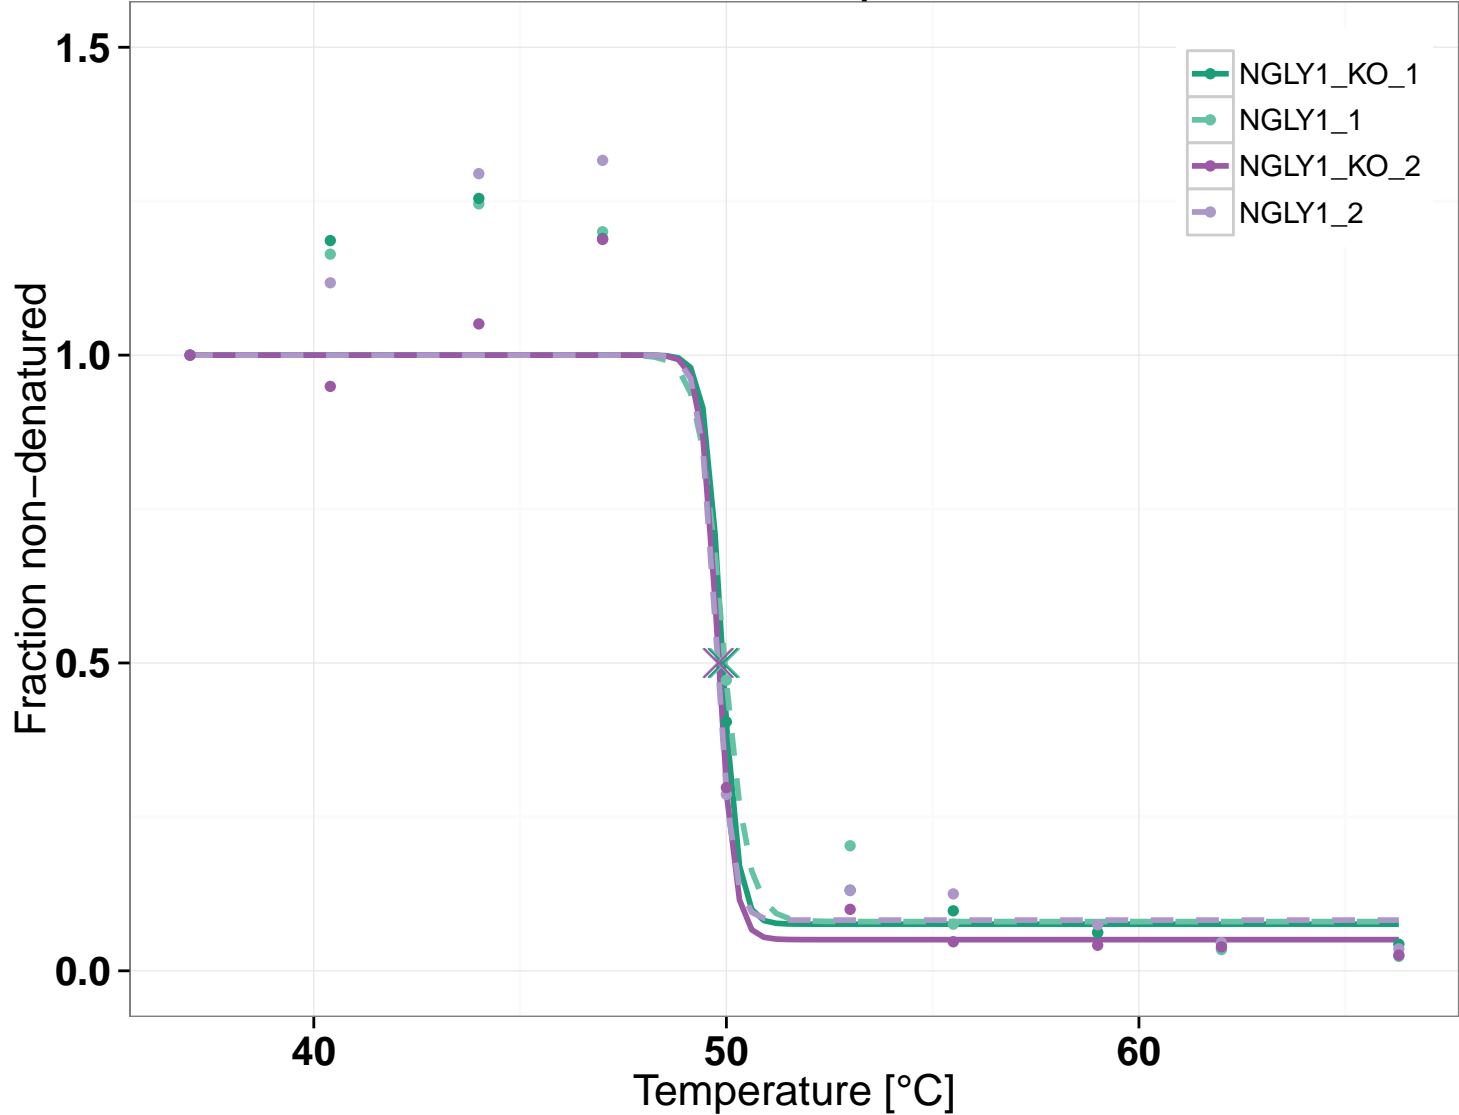

|            | meltPoint | slope | plateau | R2   |
|------------|-----------|-------|---------|------|
| NGLY1_KO_1 | 49.91     | -1.2  | 0.08    | 0.95 |
| NGLY1_1    | 49.96     | -0.77 | 0.08    | 0.94 |
| NGLY1_KO_2 | 49.81     | -1.2  | 0.05    | 0.98 |
| NGLY1_2    | 49.79     | -1.2  | 0.08    | 0.93 |

Supplement: Supplementary file 3365 [file 1]

IPI00019141.1|AGPAT1

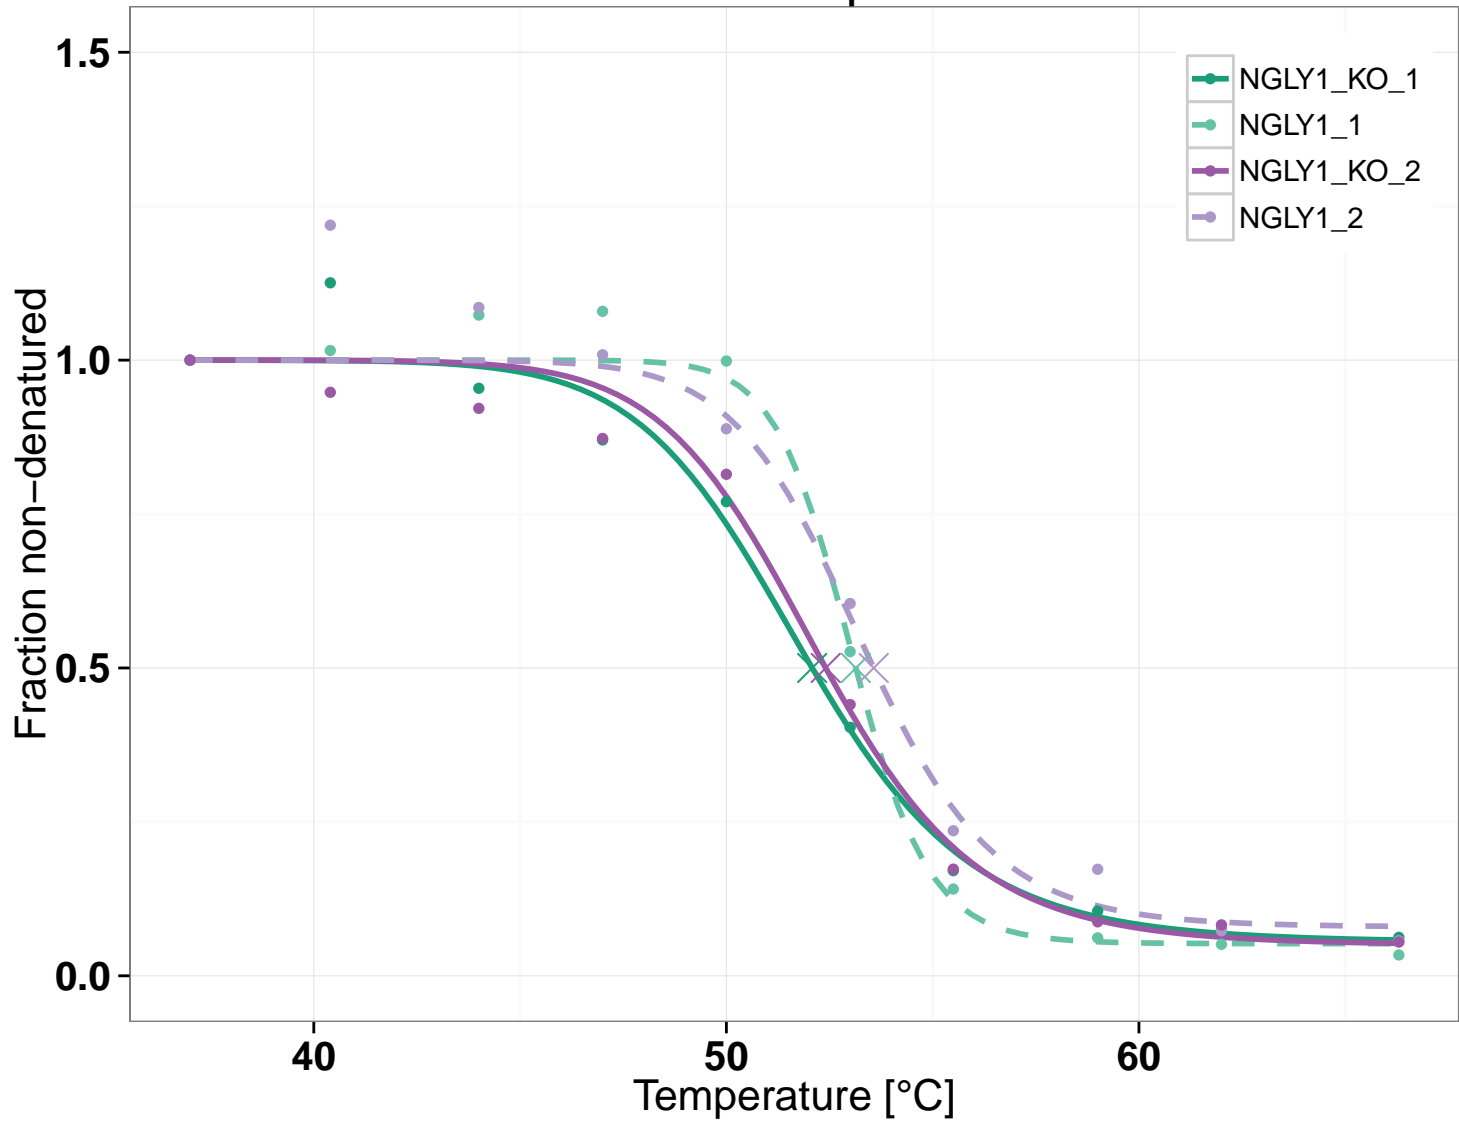

|            | meltPoint | slope | plateau | R2   |
|------------|-----------|-------|---------|------|
| NGLY1_KO_1 | 52.08     | -0.12 | 0.05    | 0.99 |
| NGLY1_1    | 53.14     | -0.25 | 0.05    | 0.99 |
| NGLY1_KO_2 | 52.41     | -0.12 | 0.05    | 0.99 |
| NGLY1_2    | 53.57     | -0.15 | 0.08    | 0.97 |

Supplement: Supplementary file 3366 [file 1]

# IPI00293073.4|MFN1

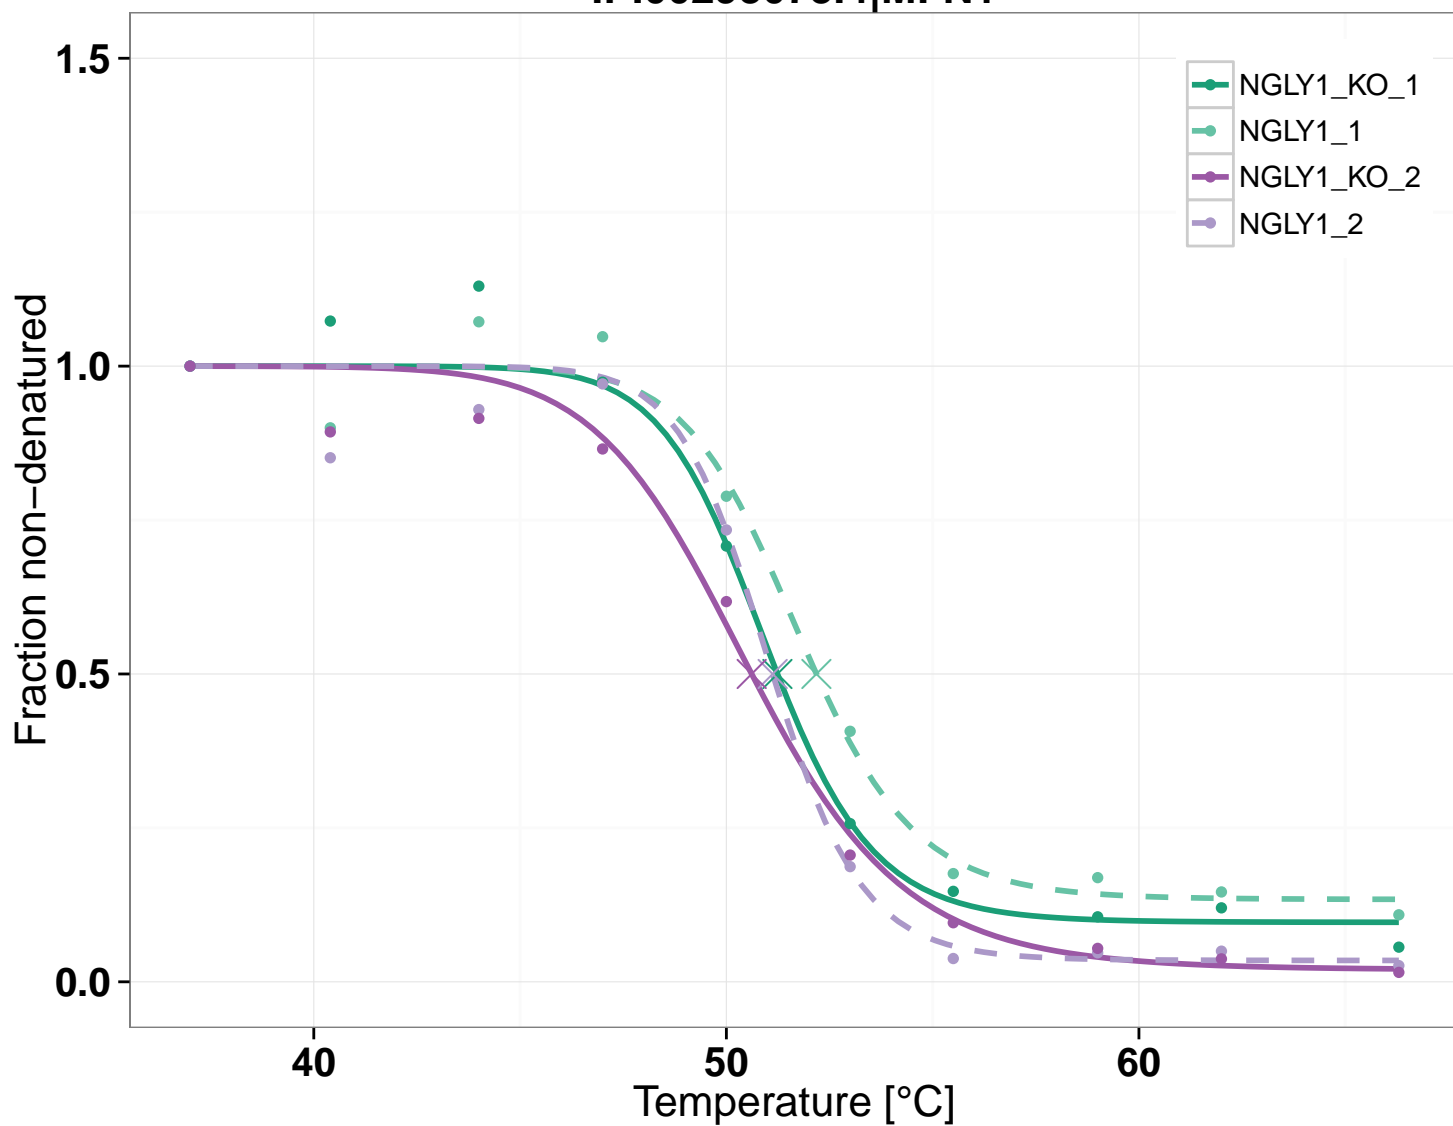

|            | meltPoint | slope | plateau | R2   |
|------------|-----------|-------|---------|------|
| NGLY1_KO_1 | 51.24     | -0.18 | 0.1     | 0.99 |
| NGLY1_1    | 52.18     | -0.16 | 0.13    | 0.99 |
| NGLY1_KO_2 | 50.61     | -0.13 | 0.02    | 0.99 |
| NGLY1_2    | 51.12     | -0.22 | 0.03    | 0.98 |

Supplement: Supplementary file 3367 [file 1]

# IPI00300213.5|MEX3B

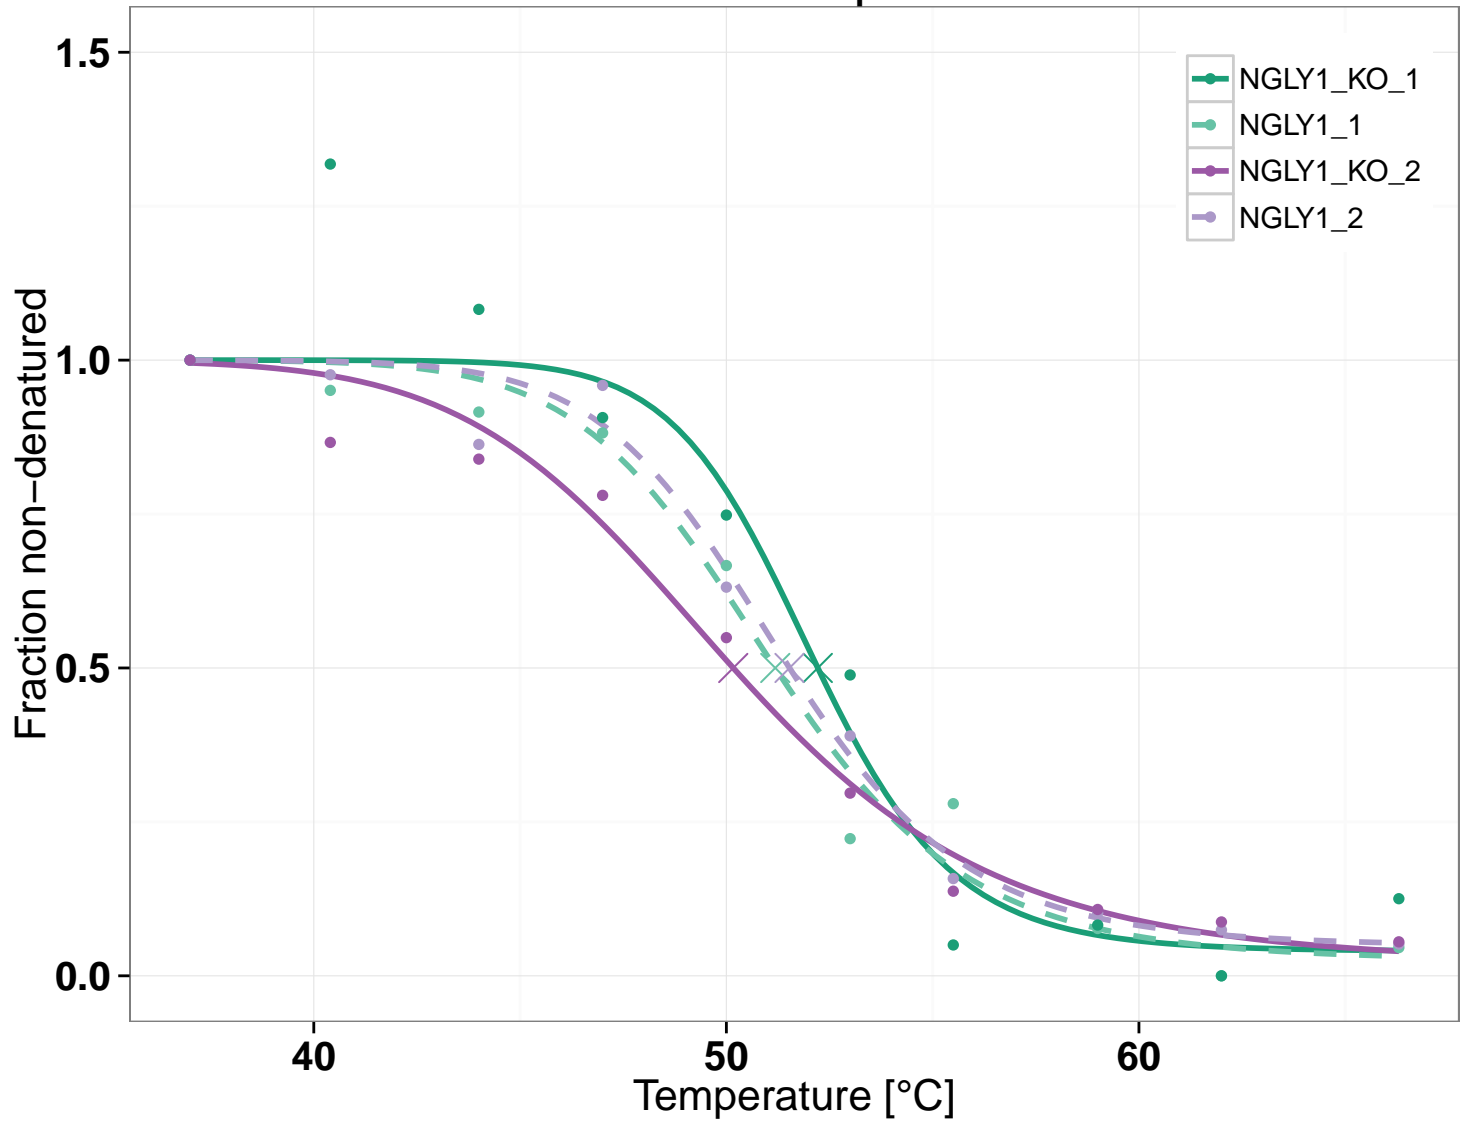

|            | meltPoint | slope  | plateau | R2   |
|------------|-----------|--------|---------|------|
| NGLY1_KO_1 | 52.22     | -0.14  | 0.04    | 0.93 |
| NGLY1_1    | 51.18     | -0.1   | 0.02    | 0.98 |
| NGLY1_KO_2 | 50.17     | -0.076 | 0.02    | 0.98 |
| NGLY1_2    | 51.53     | -0.11  | 0.05    | 0.99 |

Supplement: Supplementary file 3368 [file 1]

IPI00032851.1|COPZ1

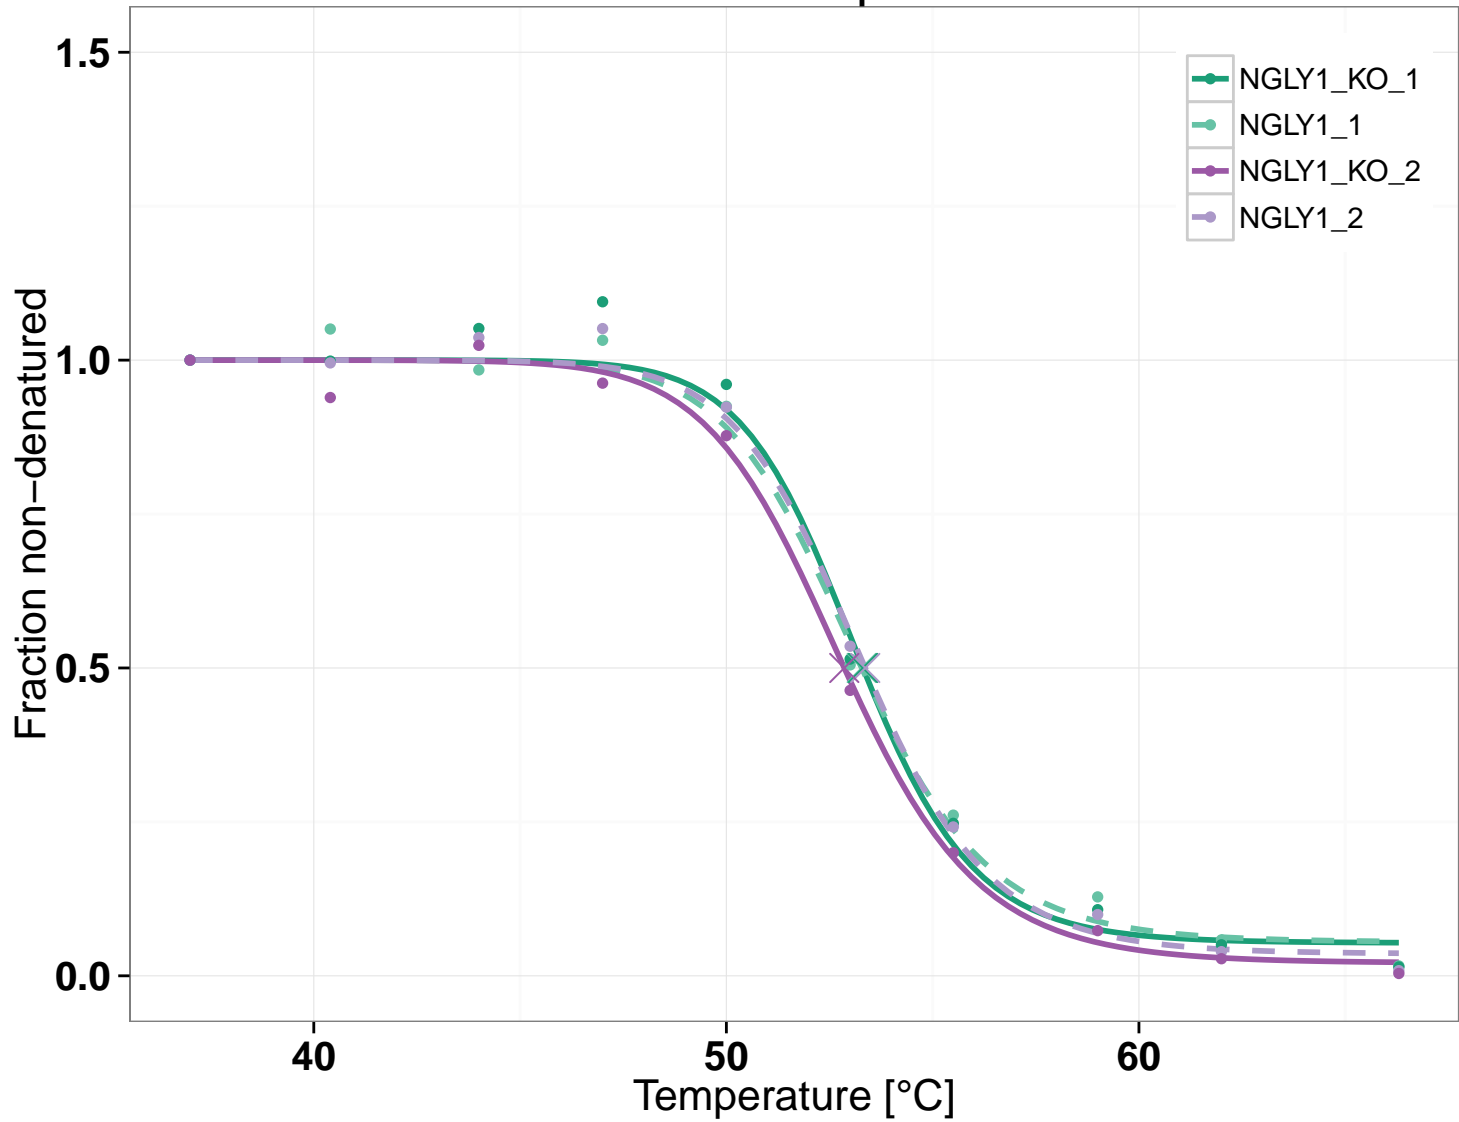

|            | meltPoint | slope | plateau | R2   |
|------------|-----------|-------|---------|------|
| NGLY1_KO_1 | 53.31     | -0.17 | 0.05    | 0.99 |
| NGLY1_1    | 53.28     | -0.15 | 0.05    | 0.99 |
| NGLY1_KO_2 | 52.86     | -0.15 | 0.02    | 1    |
| NGLY1_2    | 53.37     | -0.16 | 0.04    | 1    |

Supplement: Supplementary file 3369 [file 1]

IPI00024618.2|C3ORF37

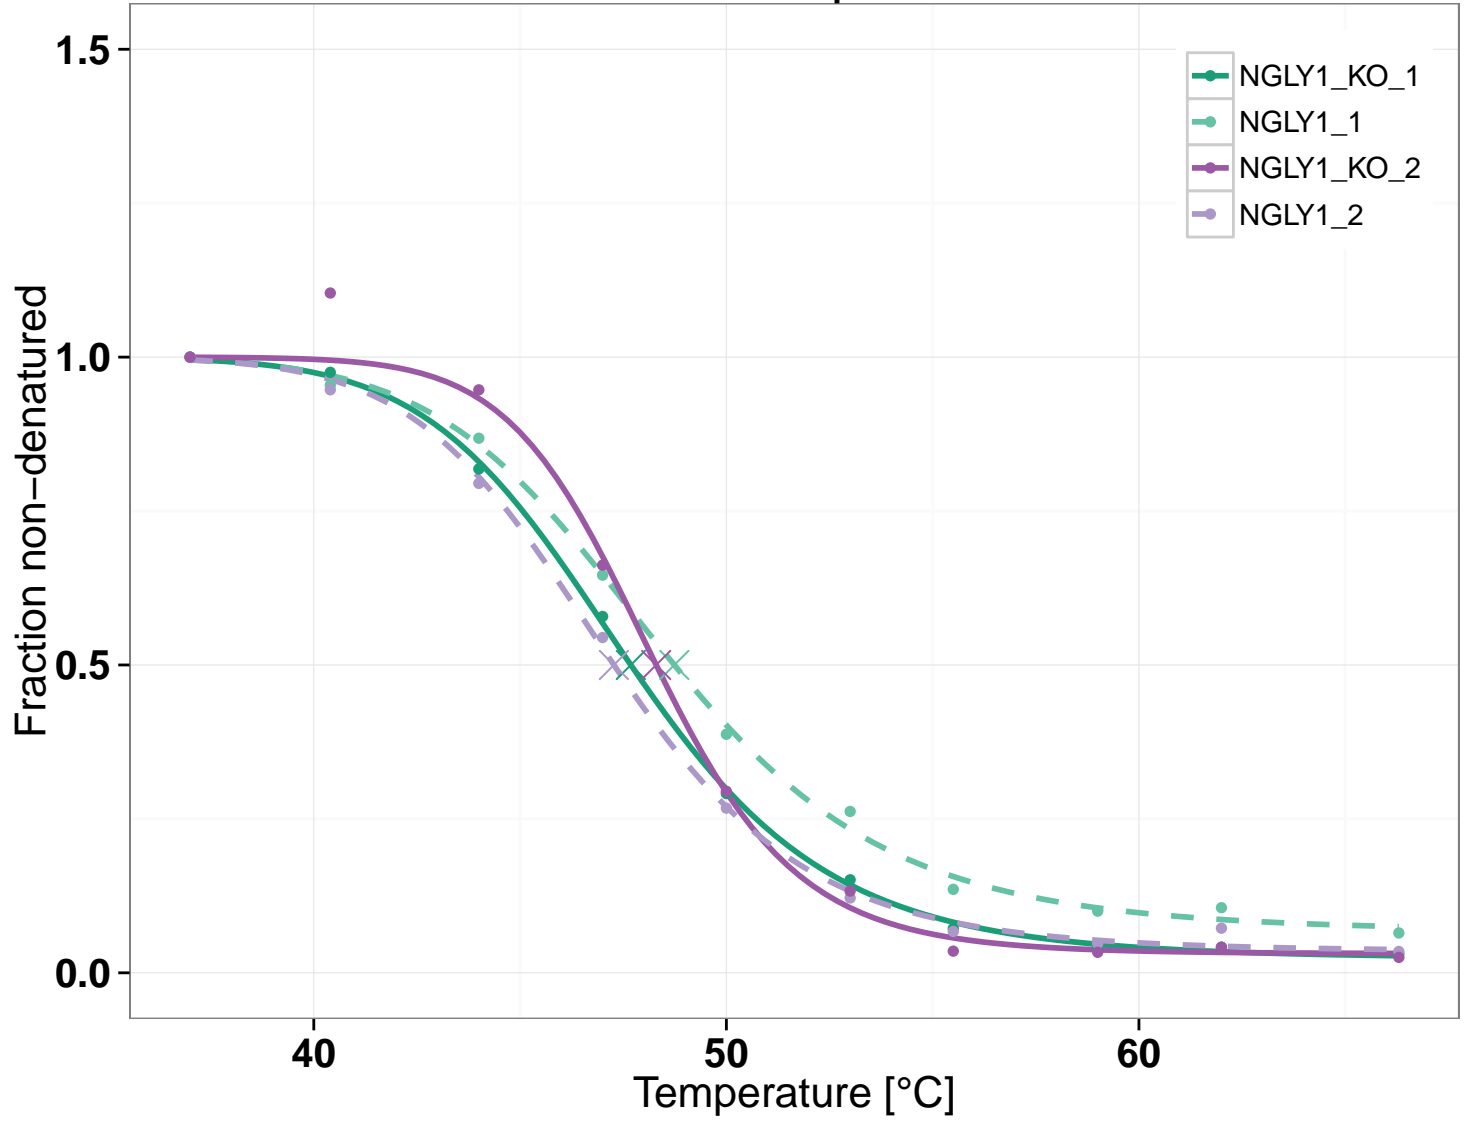

|            | meltPoint | slope  | plateau | R2   |
|------------|-----------|--------|---------|------|
| NGLY1_KO_1 | 47.68     | -0.1   | 0.02    | 1    |
| NGLY1_1    | 48.74     | -0.085 | 0.07    | 1    |
| NGLY1_KO_2 | 48.3      | -0.14  | 0.03    | 0.99 |
| NGLY1_2    | 47.27     | -0.1   | 0.03    | 1    |

Supplement: Supplementary file 3370 [file 1]

IPI00014808.1|PAFAH1B3

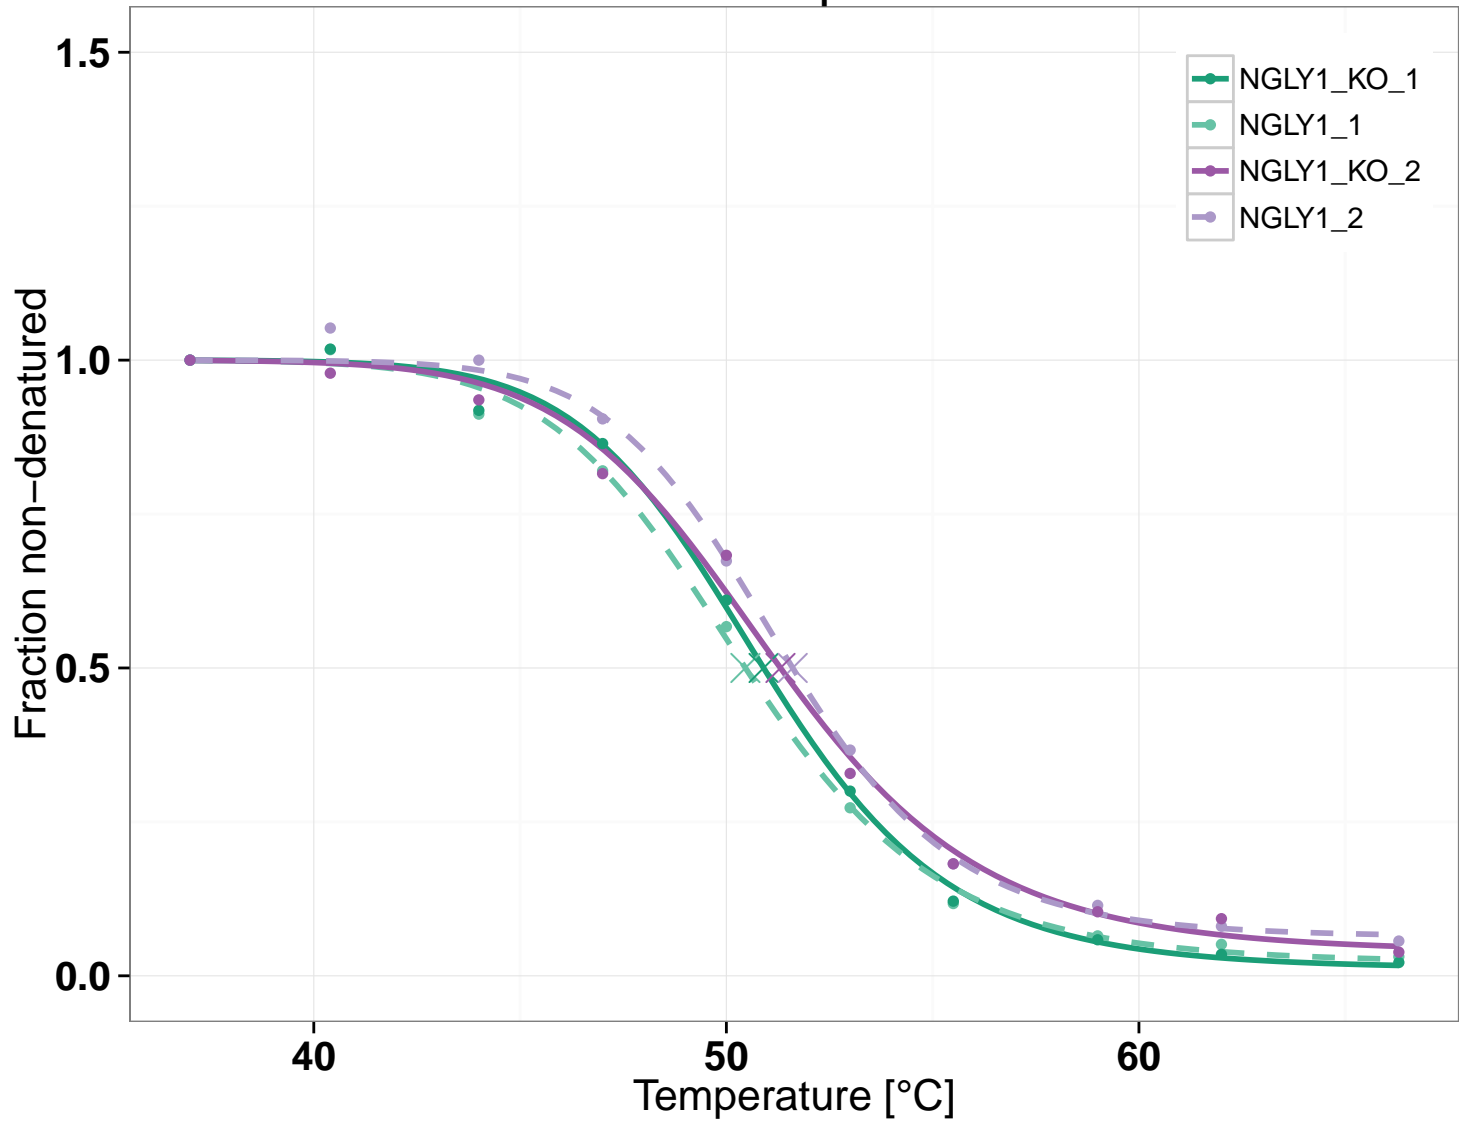

|            | meltPoint | slope  | plateau | R2   |
|------------|-----------|--------|---------|------|
| NGLY1_KO_1 | 50.9      | -0.11  | 0.01    | 1    |
| NGLY1_1    | 50.46     | -0.1   | 0.02    | 1    |
| NGLY1_KO_2 | 51.31     | -0.094 | 0.04    | 0.99 |
| NGLY1_2    | 51.61     | -0.11  | 0.06    | 1    |

Supplement: Supplementary file 3371 [file 1]

# IPI00028481.1|RAB8A

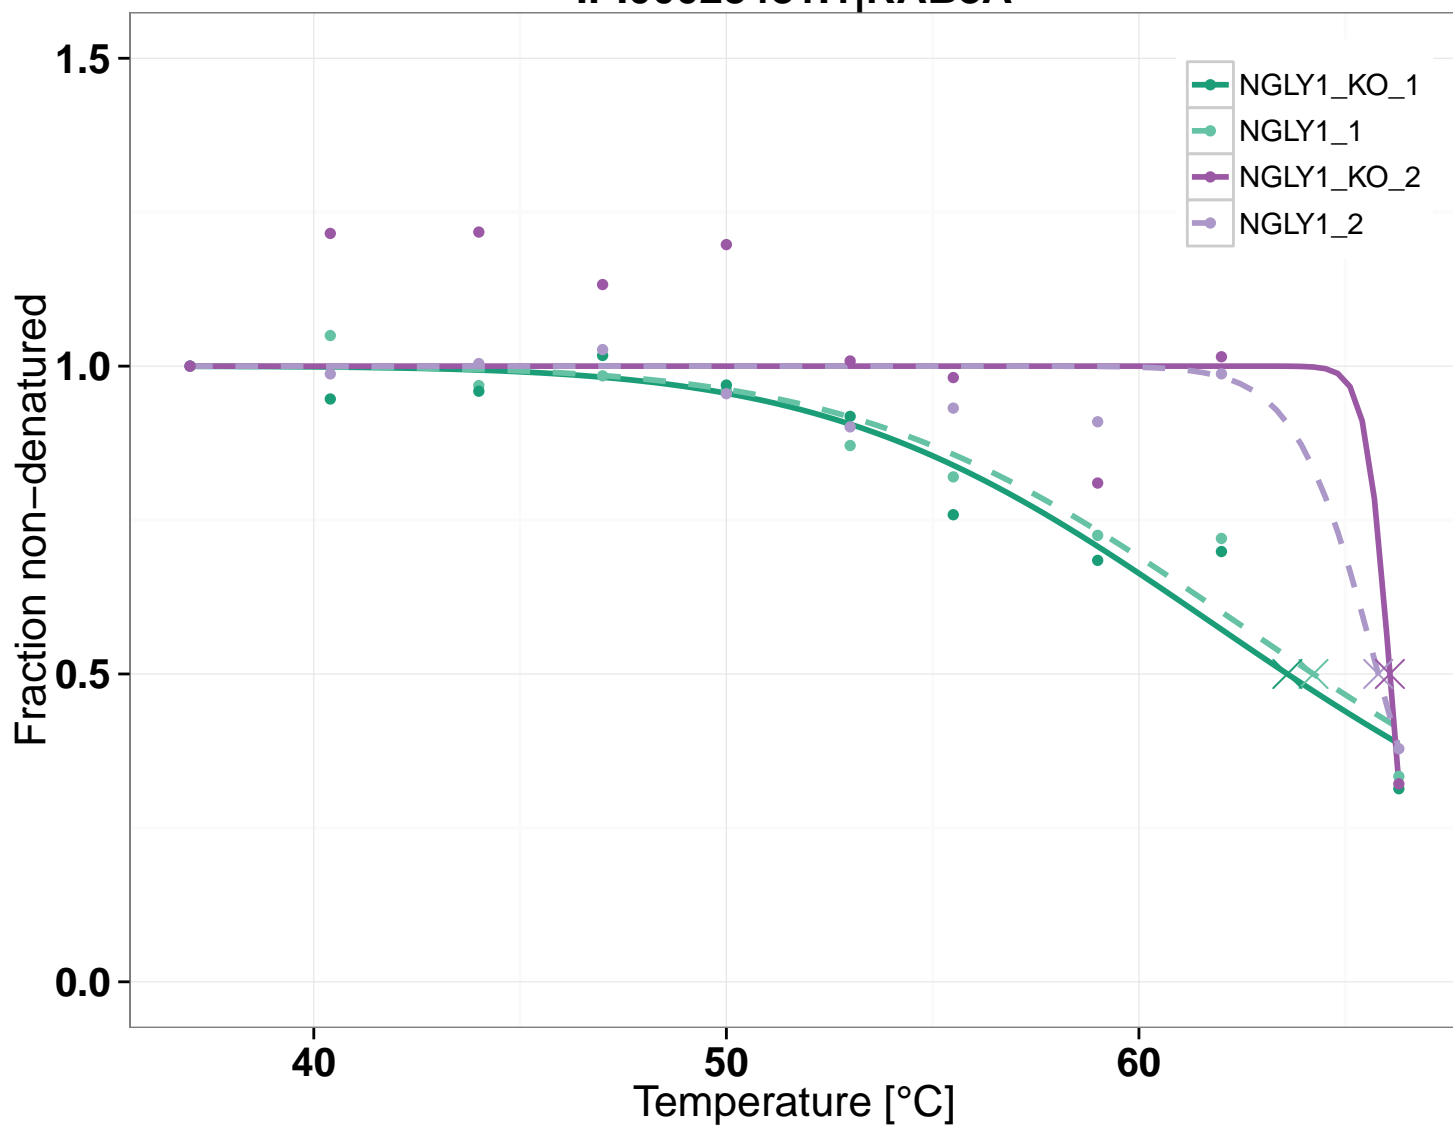

|            | meltPoint | slope  | plateau | R2   |
|------------|-----------|--------|---------|------|
| NGLY1_KO_1 | 63.6      | -0.046 | 0       | 0.92 |
| NGLY1_1    | 64.23     | -0.046 | 0       | 0.93 |
| NGLY1_KO_2 | 66.08     | -0.86  | 0       | 0.71 |
| NGLY1_2    | 65.8      | -0.25  | 0       | 0.92 |

Supplement: Supplementary file 3372 [file 1]

IPI00376798.3|RPL11

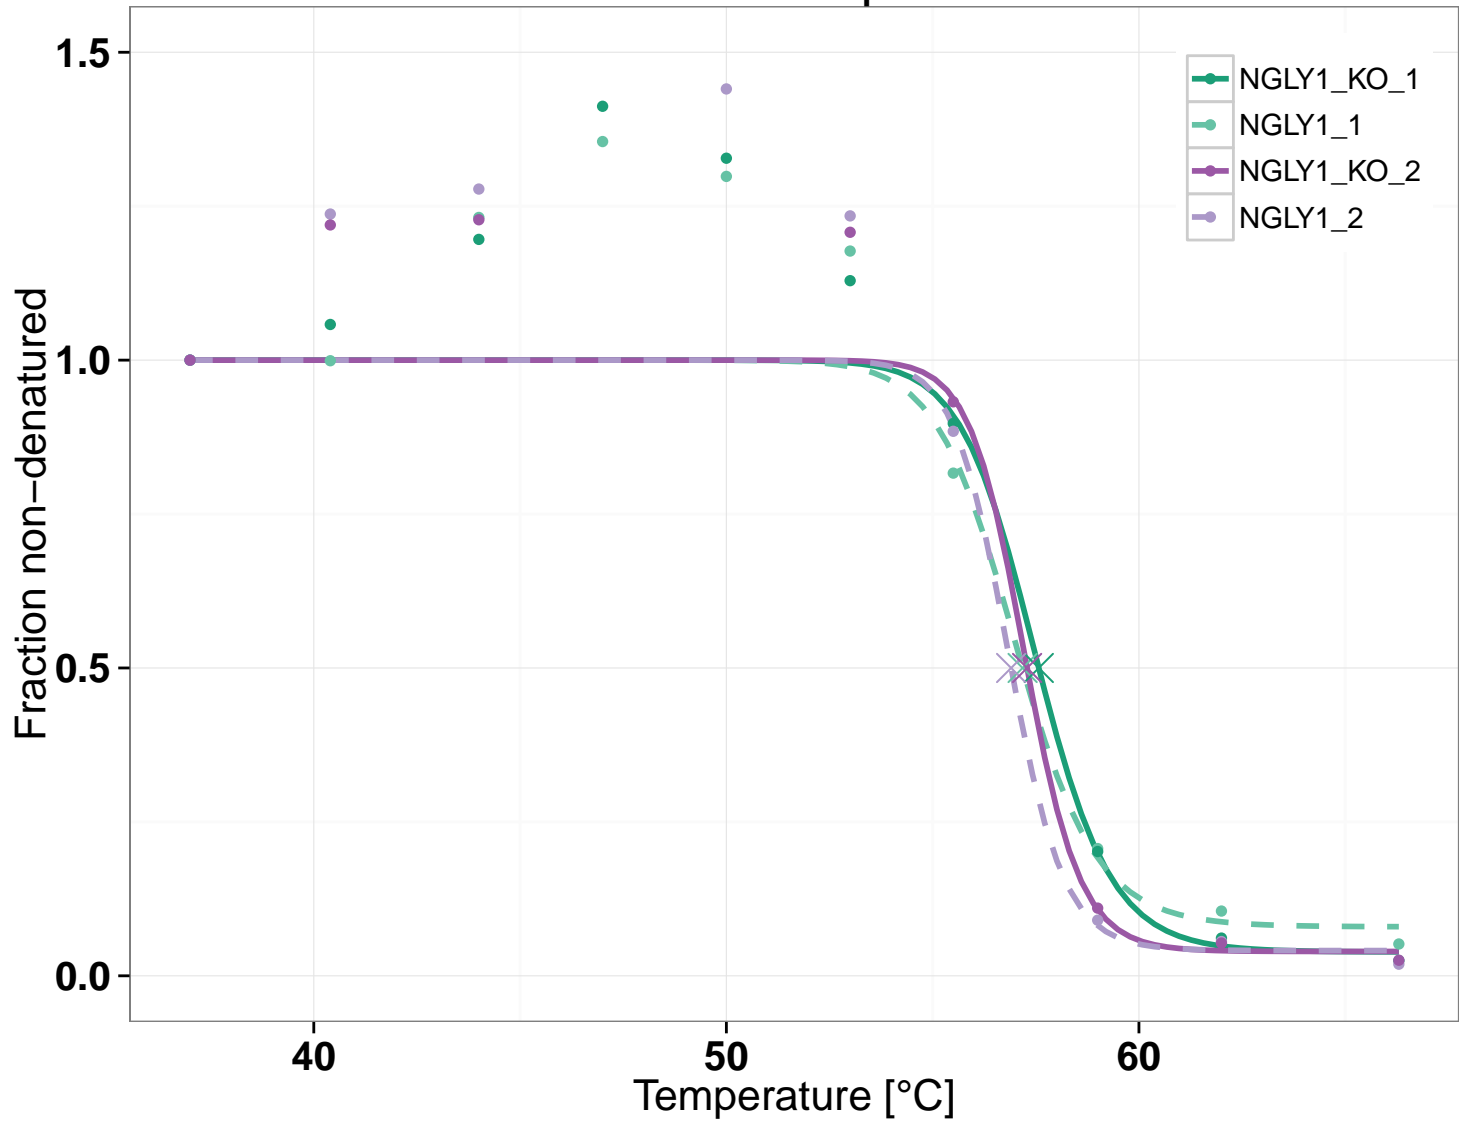

|            | meltPoint | slope | plateau | R2   |
|------------|-----------|-------|---------|------|
| NGLY1_KO_1 | 57.57     | -0.26 | 0.04    | 0.87 |
| NGLY1_1    | 57.18     | -0.24 | 0.08    | 0.87 |
| NGLY1_KO_2 | 57.29     | -0.36 | 0.04    | 0.78 |
| NGLY1_2    | 56.9      | -0.36 | 0.04    | 0.78 |

Supplement: Supplementary file 3373 [file 1]

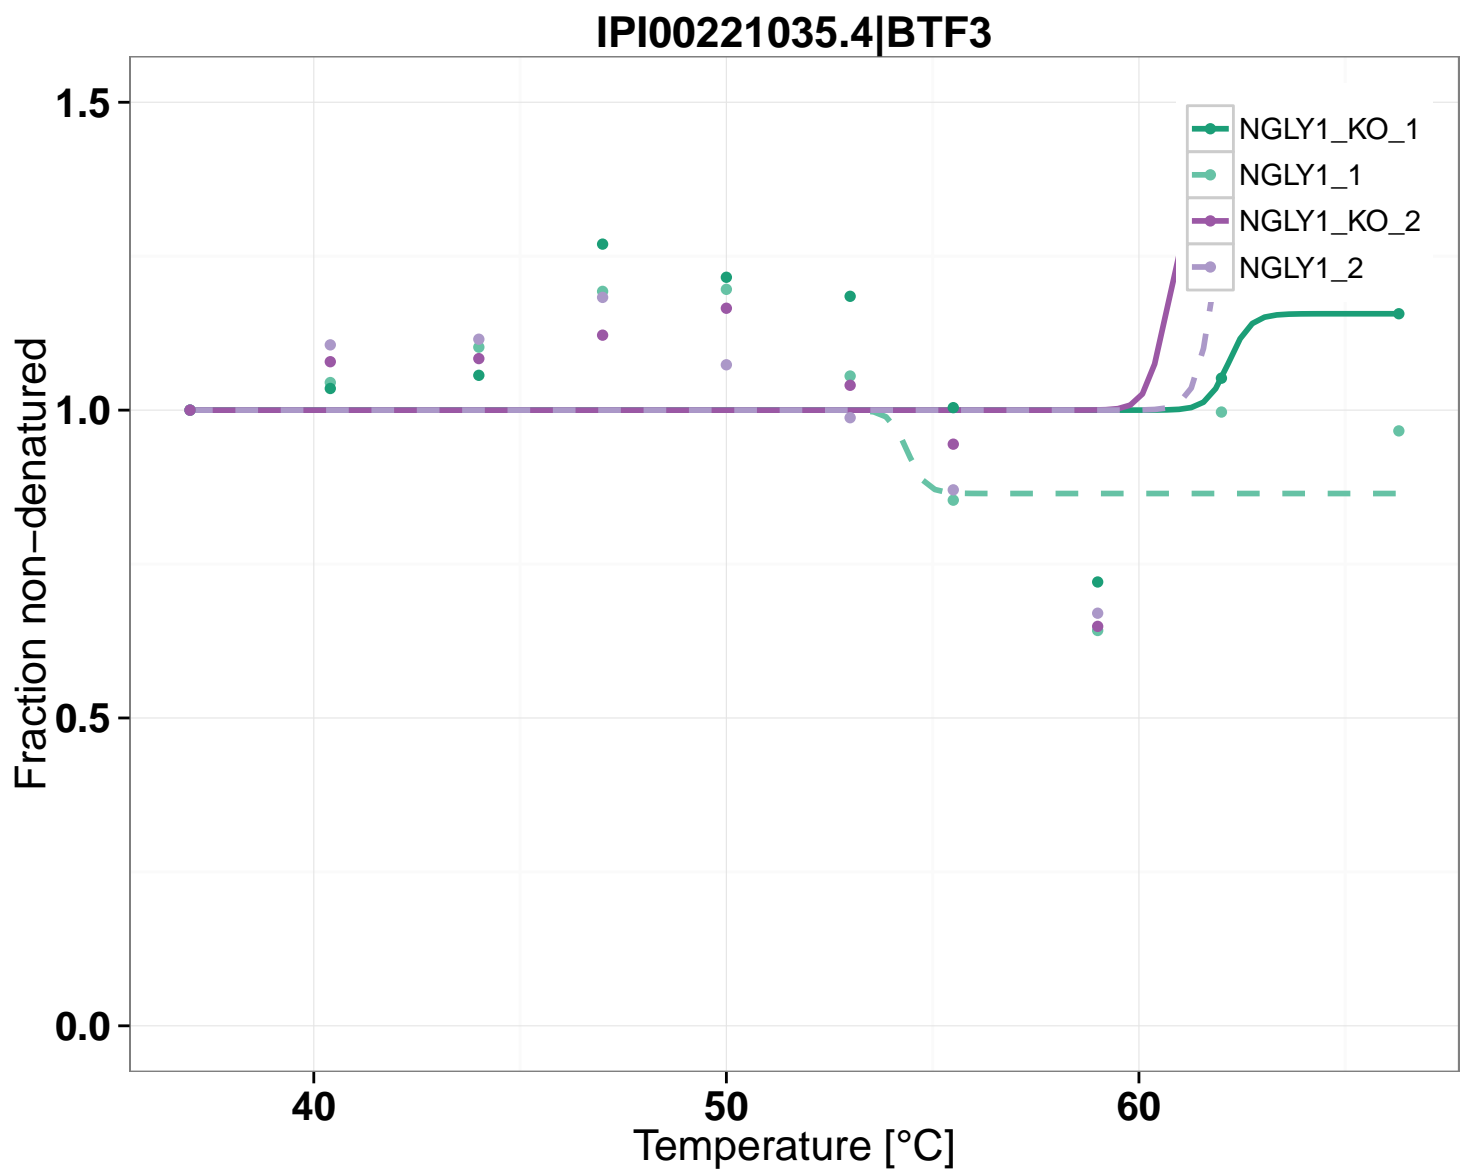

|            | meltPoint | slope | plateau | R2   |
|------------|-----------|-------|---------|------|
| NGLY1_KO_1 | –         | 0.15  | 1.16    | –0.1 |
| NGLY1_1    | –         | –0.16 | 0.86    | 0.3  |
| NGLY1_KO_2 | –         | 0.33  | 1.33    | 0.46 |
| NGLY1_2    | –         | 0.49  | 1.5     | 0.62 |

Supplement: Supplementary file 3374 [file 1]

IPI00872808.1|DOCK1

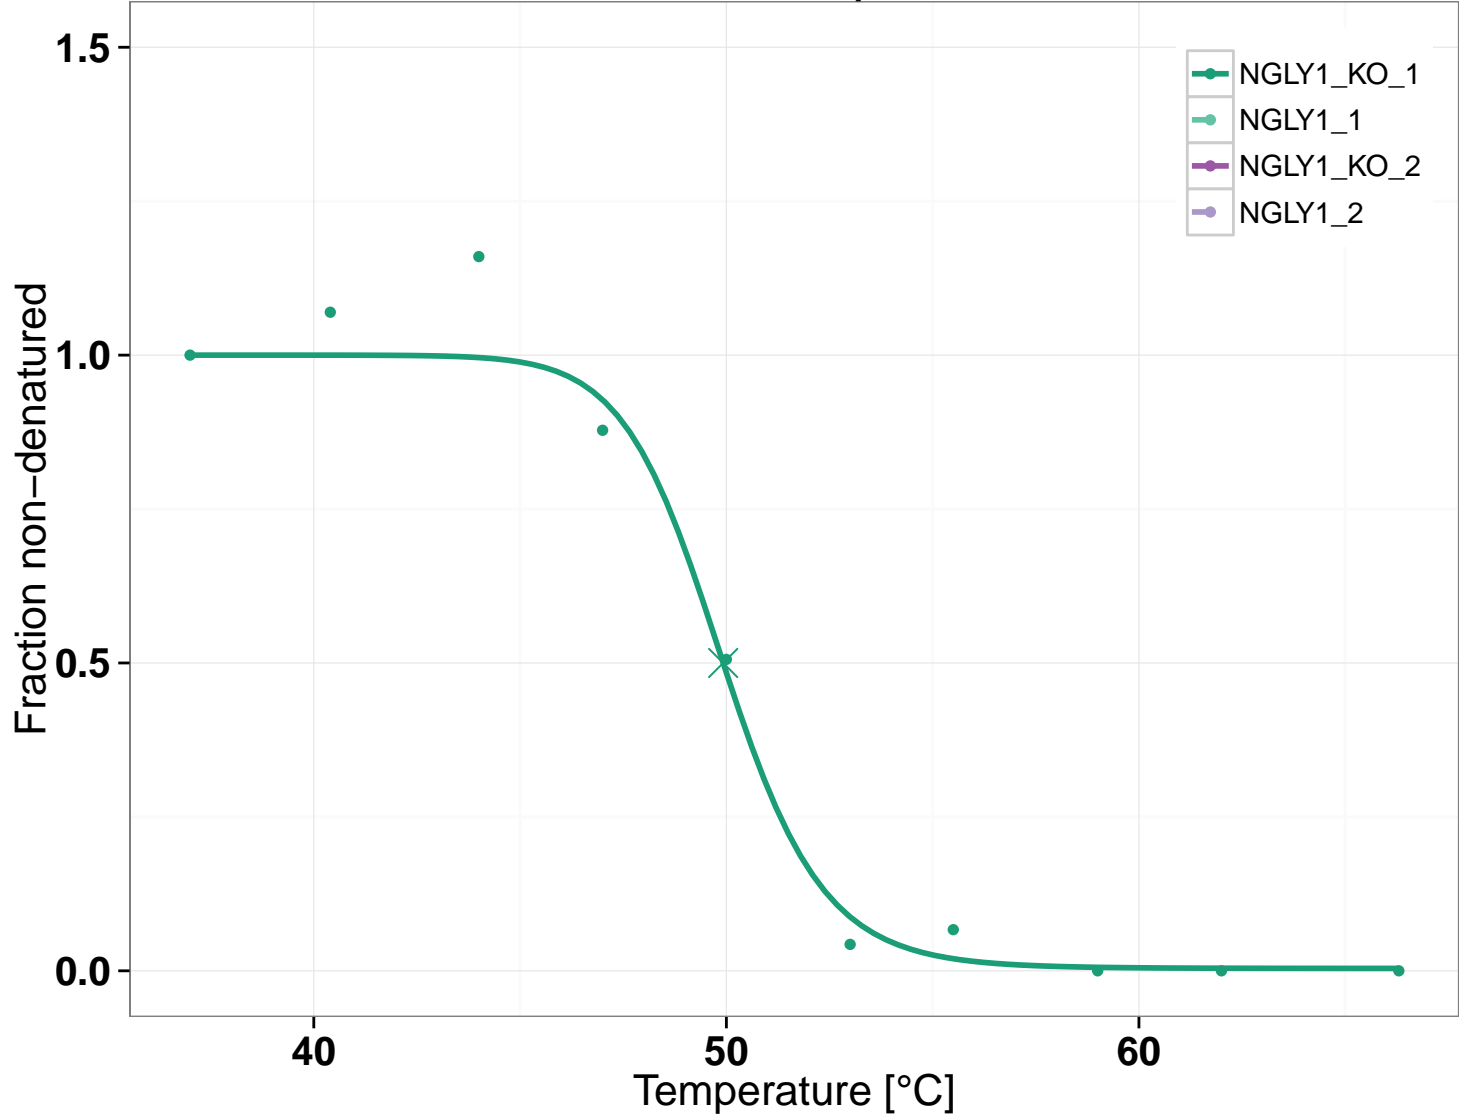

|            | meltPoint | slope | plateau | R2   |
|------------|-----------|-------|---------|------|
| NGLY1_KO_1 | 49.92     | -0.21 | 0       | 0.98 |
| NGLY1_1    | -         | -     | -       | -    |
| NGLY1_KO_2 | -         | -     | -       | -    |
| NGLY1_2    | -         | -     | -       | -    |

Supplement: Supplementary file 3375 [file 1]

IPI00019962.3|C4ORF43

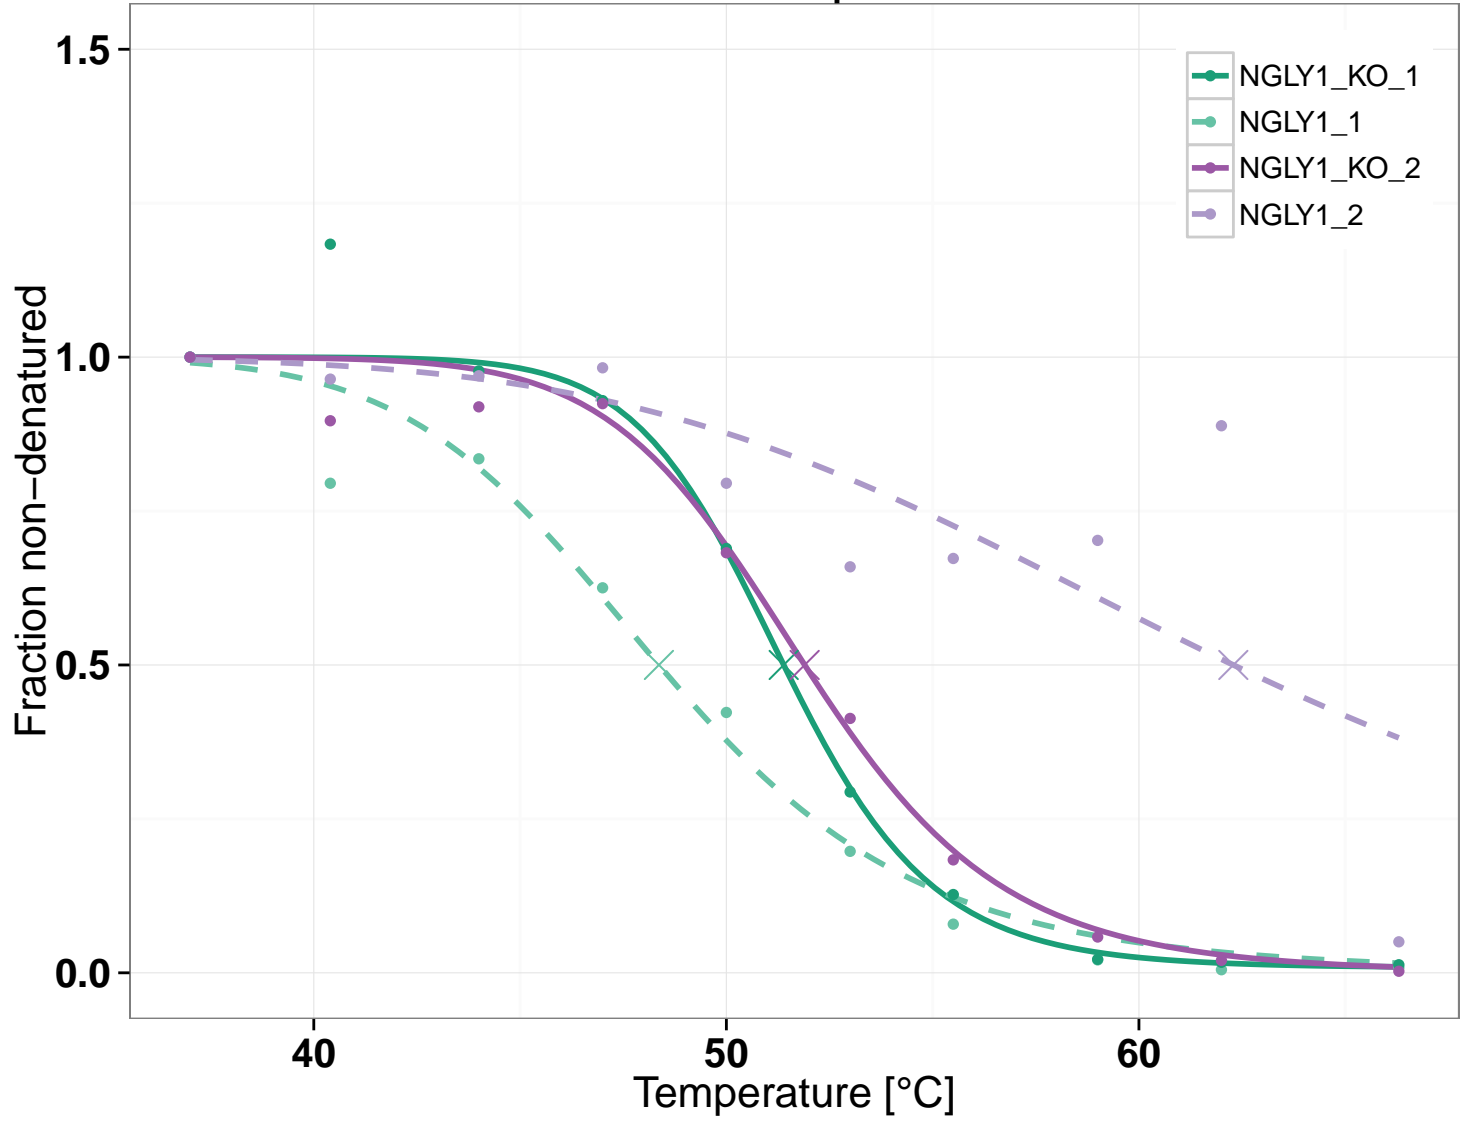

|            | meltPoint | slope  | plateau | R2   |
|------------|-----------|--------|---------|------|
| NGLY1_KO_1 | 51.39     | -0.14  | 0.01    | 0.98 |
| NGLY1_1    | 48.37     | -0.08  | 0       | 0.98 |
| NGLY1_KO_2 | 51.9      | -0.1   | 0       | 0.99 |
| NGLY1_2    | 62.29     | -0.034 | 0       | 0.6  |

Supplement: Supplementary file 3376 [file 1]

# IPI00005728.2|RER1

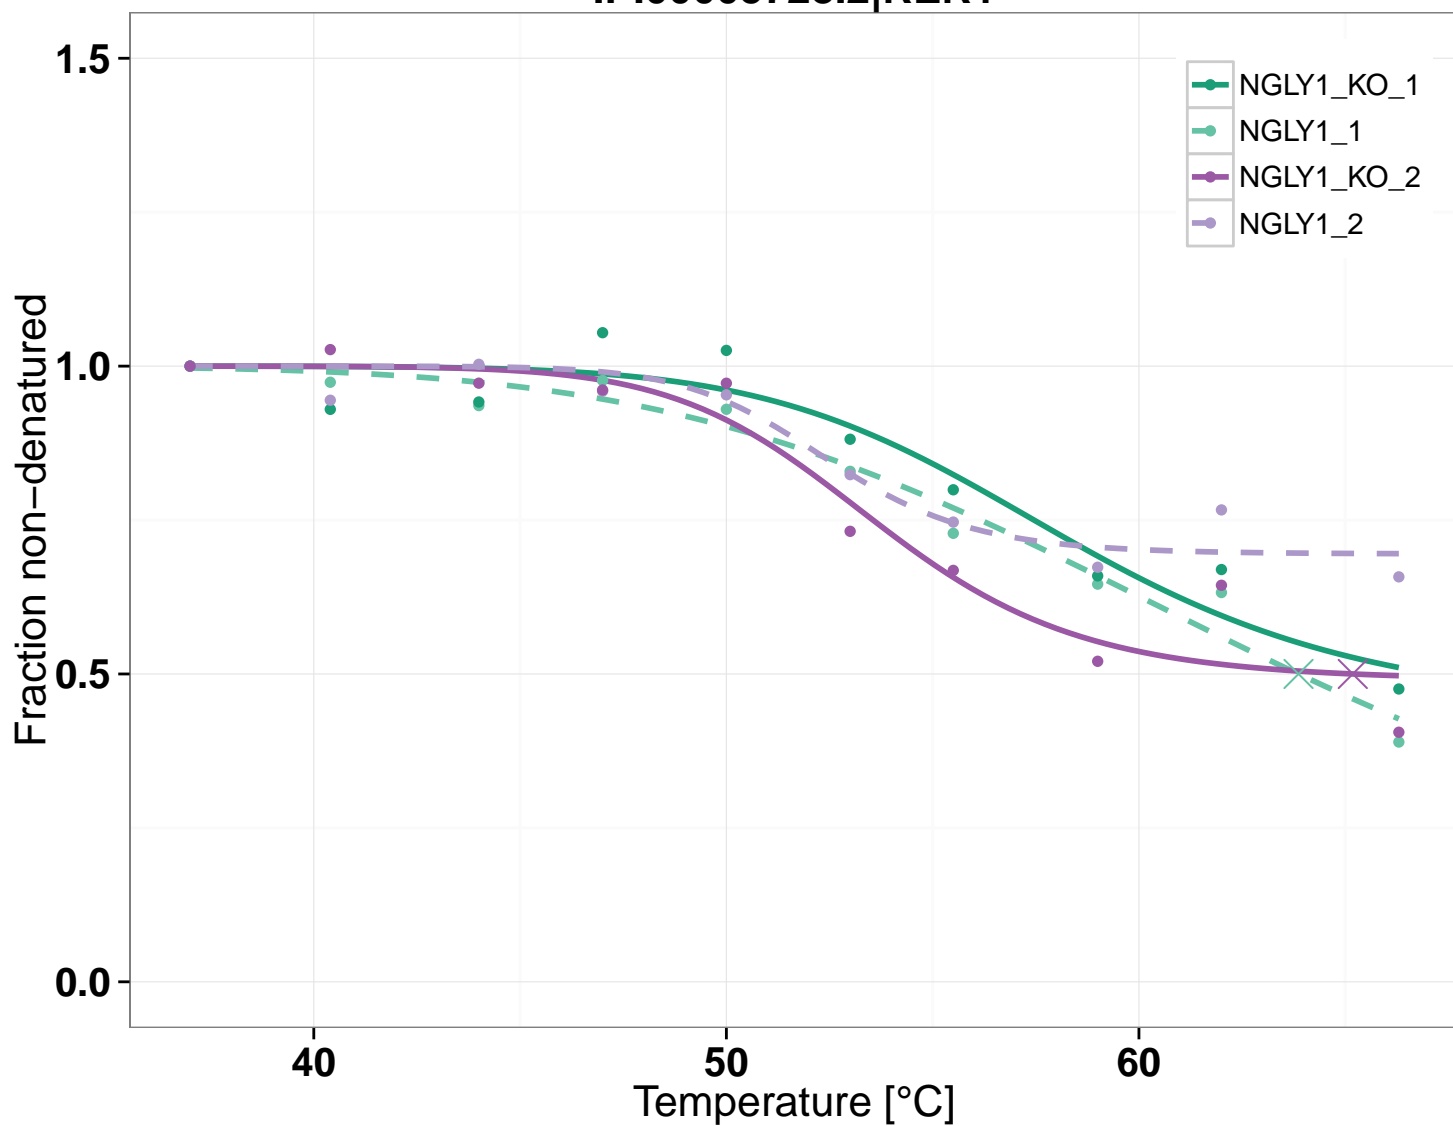

|            | meltPoint | slope  | plateau | R2   |
|------------|-----------|--------|---------|------|
| NGLY1_KO_1 | –         | –0.039 | 0.44    | 0.92 |
| NGLY1_1    | 63.87     | –0.033 | 0       | 0.97 |
| NGLY1_KO_2 | 65.18     | –0.052 | 0.49    | 0.93 |
| NGLY1_2    | –         | –0.043 | 0.69    | 0.93 |

Supplement: Supplementary file 3377 [file 1]

IPI00556439.1|E4F1

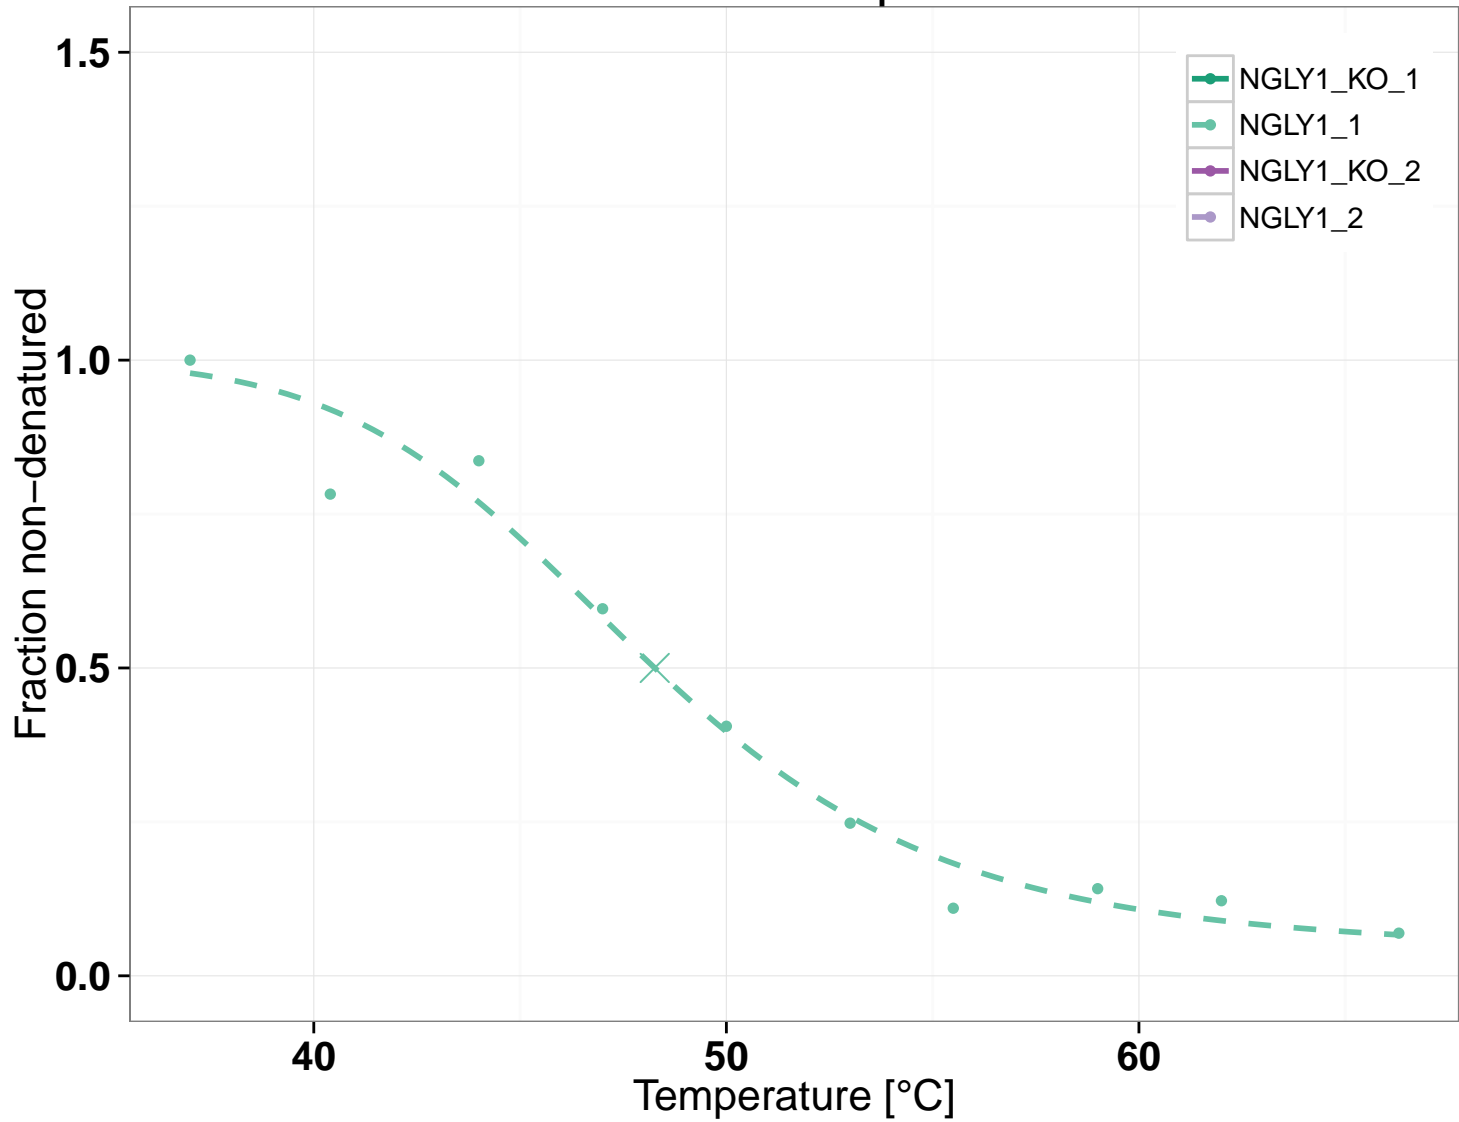

|            | meltPoint | slope  | plateau | R2   |
|------------|-----------|--------|---------|------|
| NGLY1_KO_1 | -         | -      | -       | -    |
| NGLY1_1    | 48.26     | -0.066 | 0.04    | 0.97 |
| NGLY1_KO_2 | -         | -      | -       | -    |
| NGLY1_2    | -         | -      | -       | -    |

Supplement: Supplementary file 3378 [file 1]

IPI00478810.1|RPS10

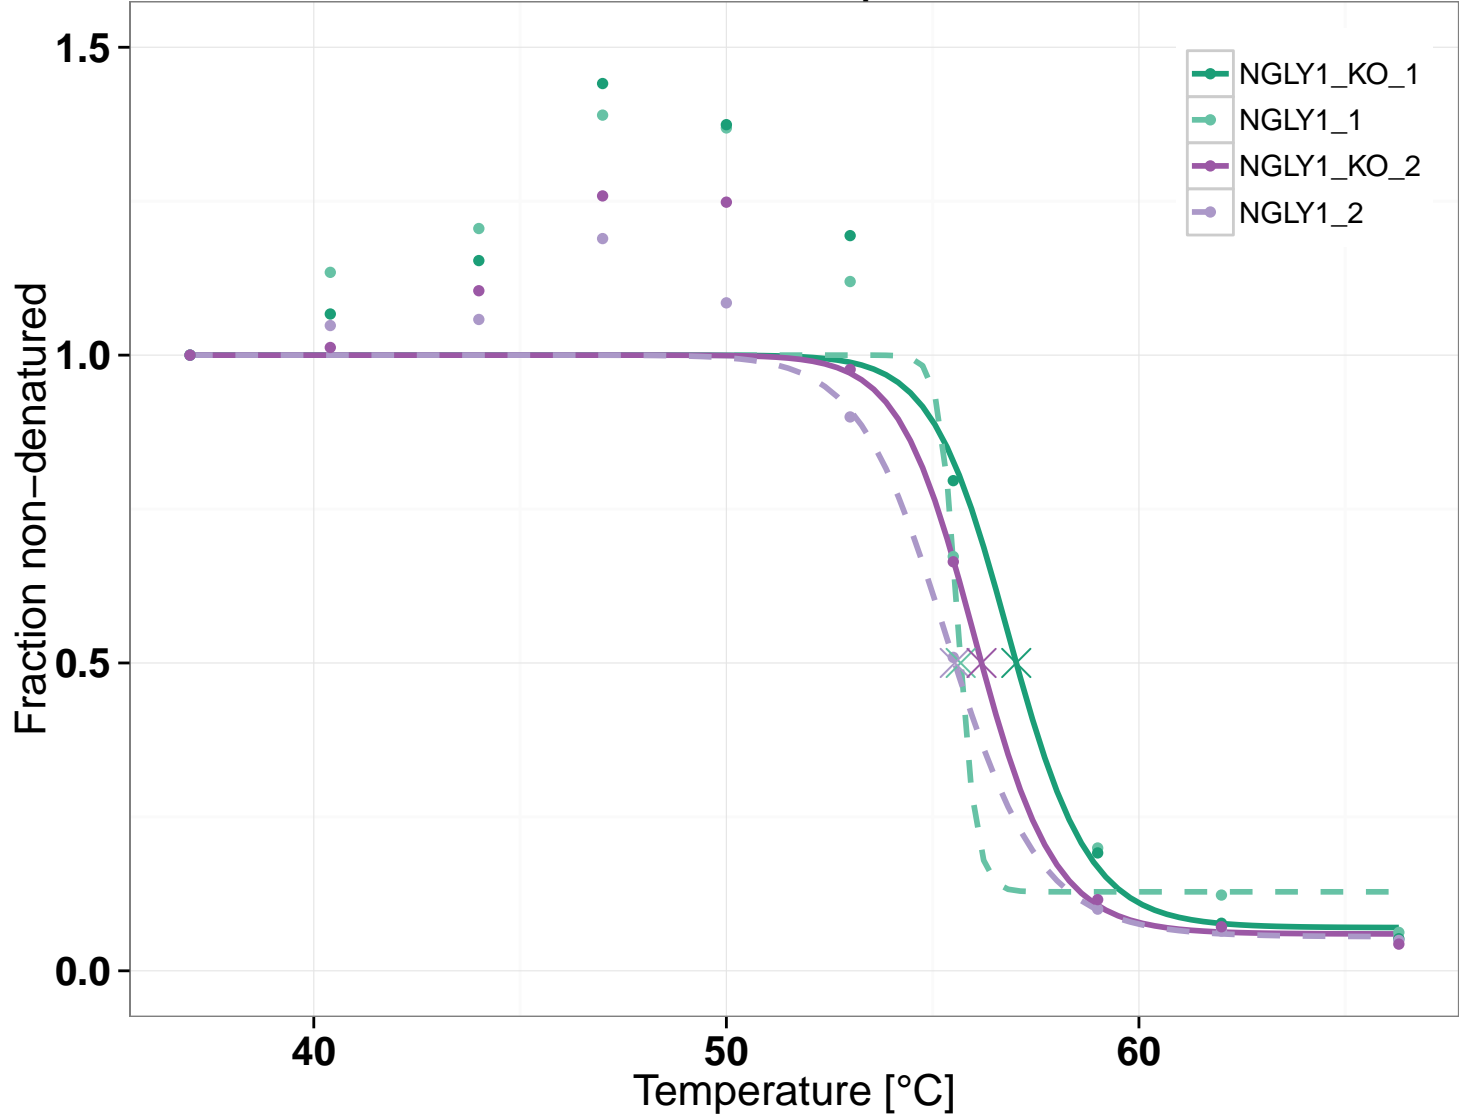

|            | meltPoint | slope | plateau | R2   |
|------------|-----------|-------|---------|------|
| NGLY1_KO_1 | 57.03     | -0.24 | 0.07    | 0.84 |
| NGLY1_1    | 55.68     | -0.98 | 0.13    | 0.85 |
| NGLY1_KO_2 | 56.19     | -0.25 | 0.06    | 0.94 |
| NGLY1_2    | 55.54     | -0.21 | 0.06    | 0.98 |

Supplement: Supplementary file 3379 [file 1]

IPI00043740.3|SCLT1

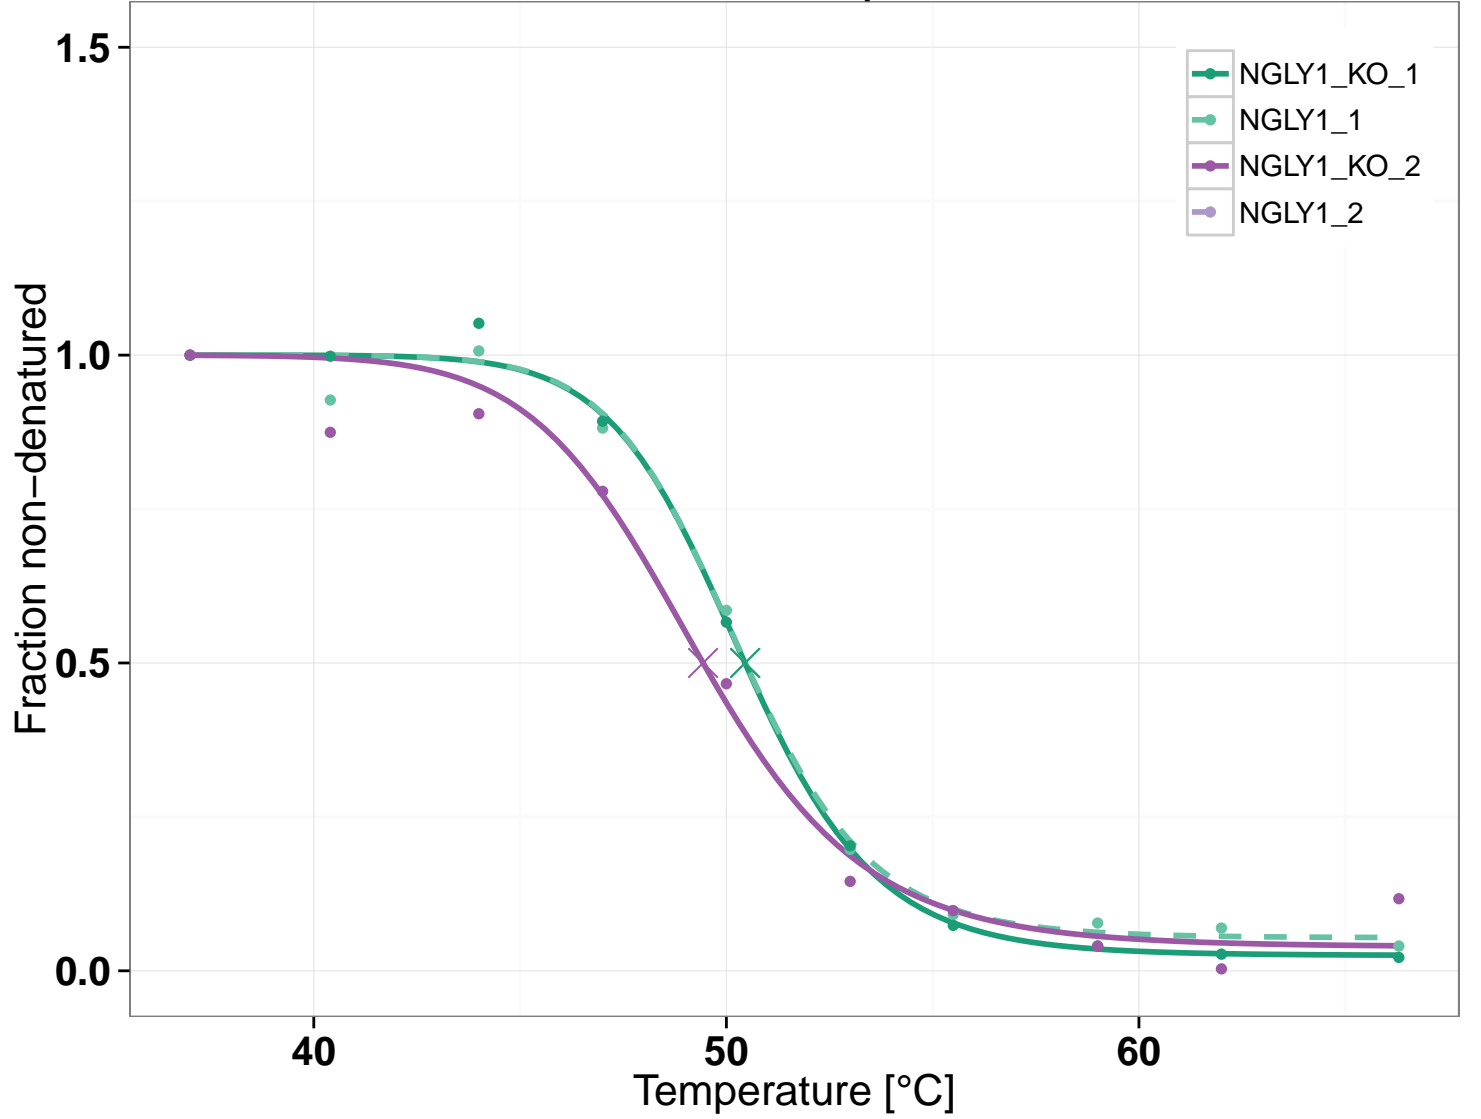

|            | meltPoint | slope | plateau | R2   |
|------------|-----------|-------|---------|------|
| NGLY1_KO_1 | 50.45     | -0.15 | 0.02    | 1    |
| NGLY1_1    | 50.46     | -0.15 | 0.05    | 1    |
| NGLY1_KO_2 | 49.44     | -0.12 | 0.04    | 0.98 |
| NGLY1_2    | -         | -     | -       | -    |

Supplement: Supplementary file 3380 [file 1]

IPI00220063.5|NDUFS5

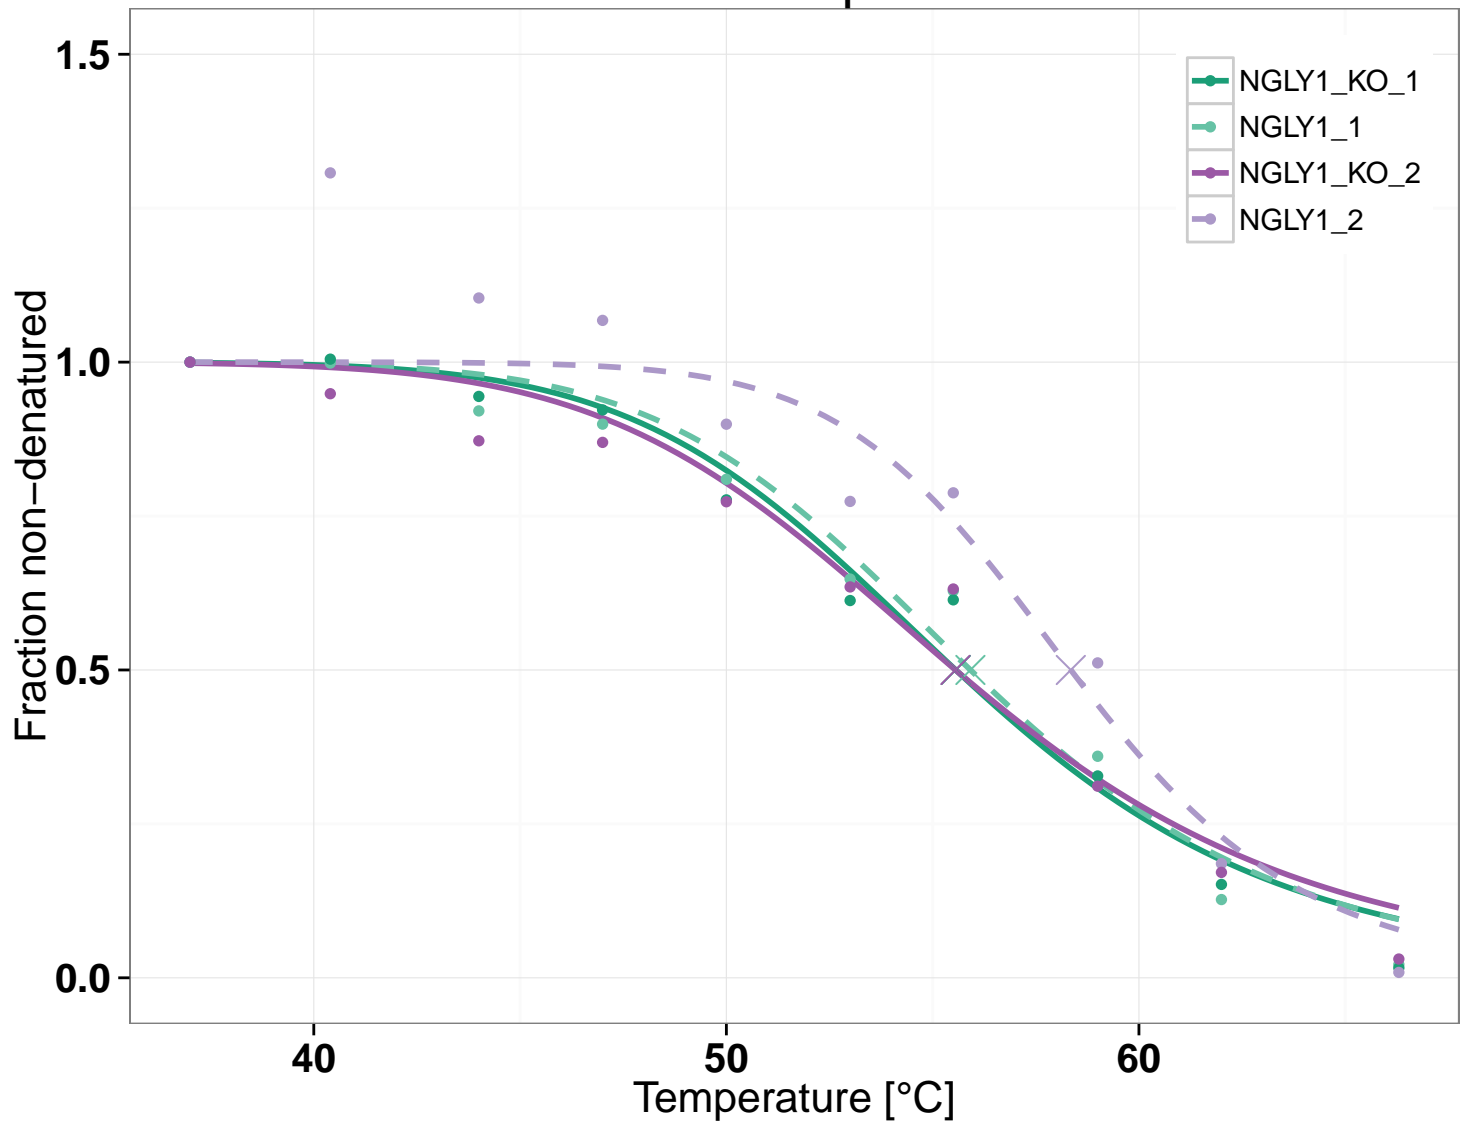

|            | meltPoint | slope  | plateau | R2   |
|------------|-----------|--------|---------|------|
| NGLY1_KO_1 | 55.56     | -0.064 | 0       | 0.98 |
| NGLY1_1    | 55.92     | -0.066 | 0       | 0.97 |
| NGLY1_KO_2 | 55.55     | -0.058 | 0       | 0.96 |
| NGLY1_2    | 58.35     | -0.089 | 0       | 0.91 |

Supplement: Supplementary file 3381 [file 1]

IPI00032288.3|MANSC1

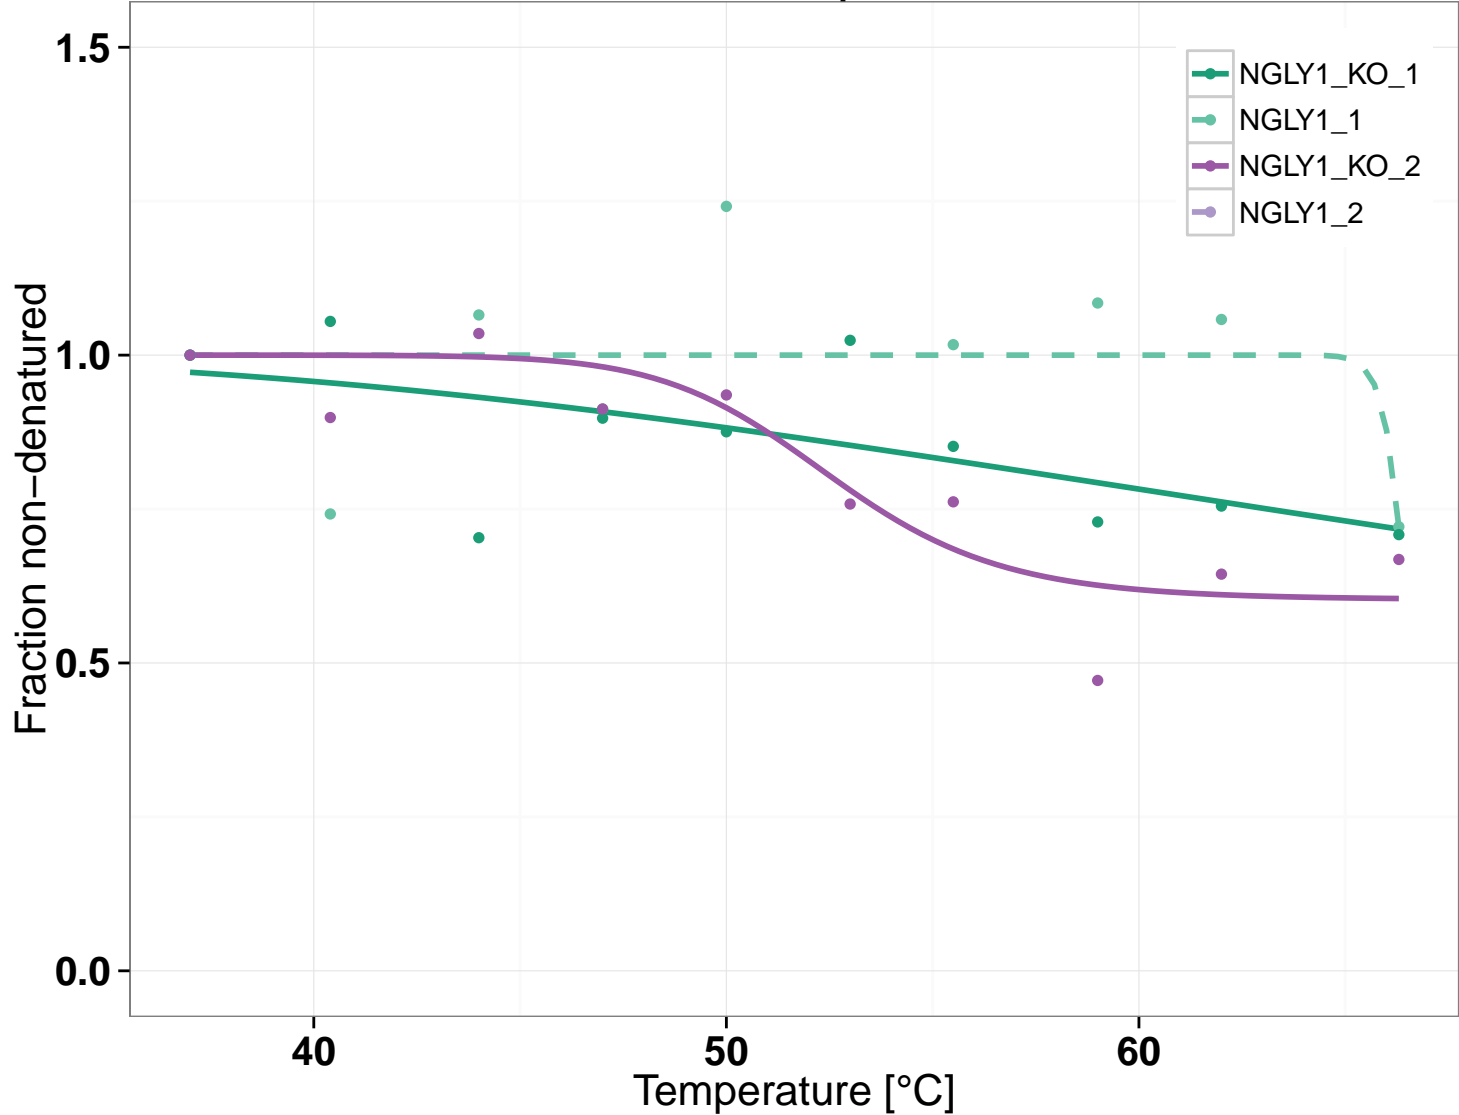

|            | meltPoint | slope  | plateau | R2   |
|------------|-----------|--------|---------|------|
| NGLY1_KO_1 | -         | -0.01  | 0       | 0.4  |
| NGLY1_1    | -         | -      | 0       | 0.13 |
| NGLY1_KO_2 | -         | -0.048 | 0.6     | 0.82 |
| NGLY1_2    | -         | -      | -       | -    |

Supplement: Supplementary file 3382 [file 1]

IPI00005948.1|MGC3207

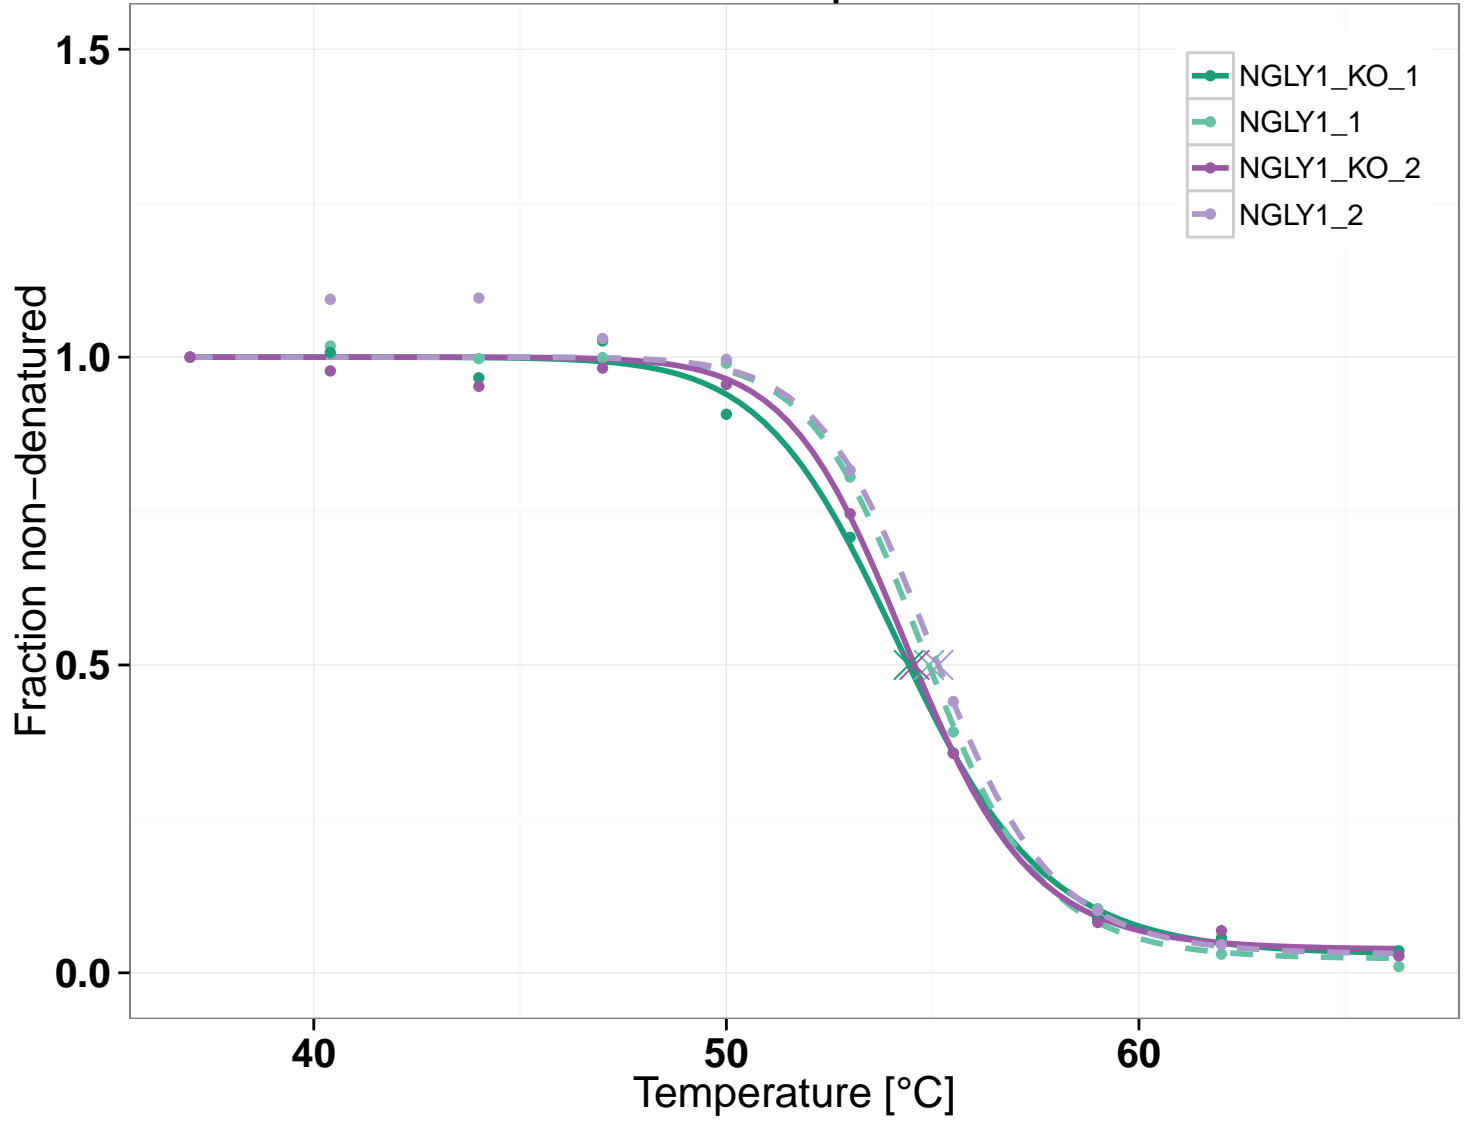

|            | meltPoint | slope | plateau | R2   |
|------------|-----------|-------|---------|------|
| NGLY1_KO_1 | 54.42     | -0.14 | 0.03    | 1    |
| NGLY1_1    | 54.91     | -0.17 | 0.02    | 1    |
| NGLY1_KO_2 | 54.56     | -0.16 | 0.04    | 1    |
| NGLY1_2    | 55.14     | -0.17 | 0.03    | 0.99 |

Supplement: Supplementary file 3383 [file 1]

# IPI00013415.1|RPS7

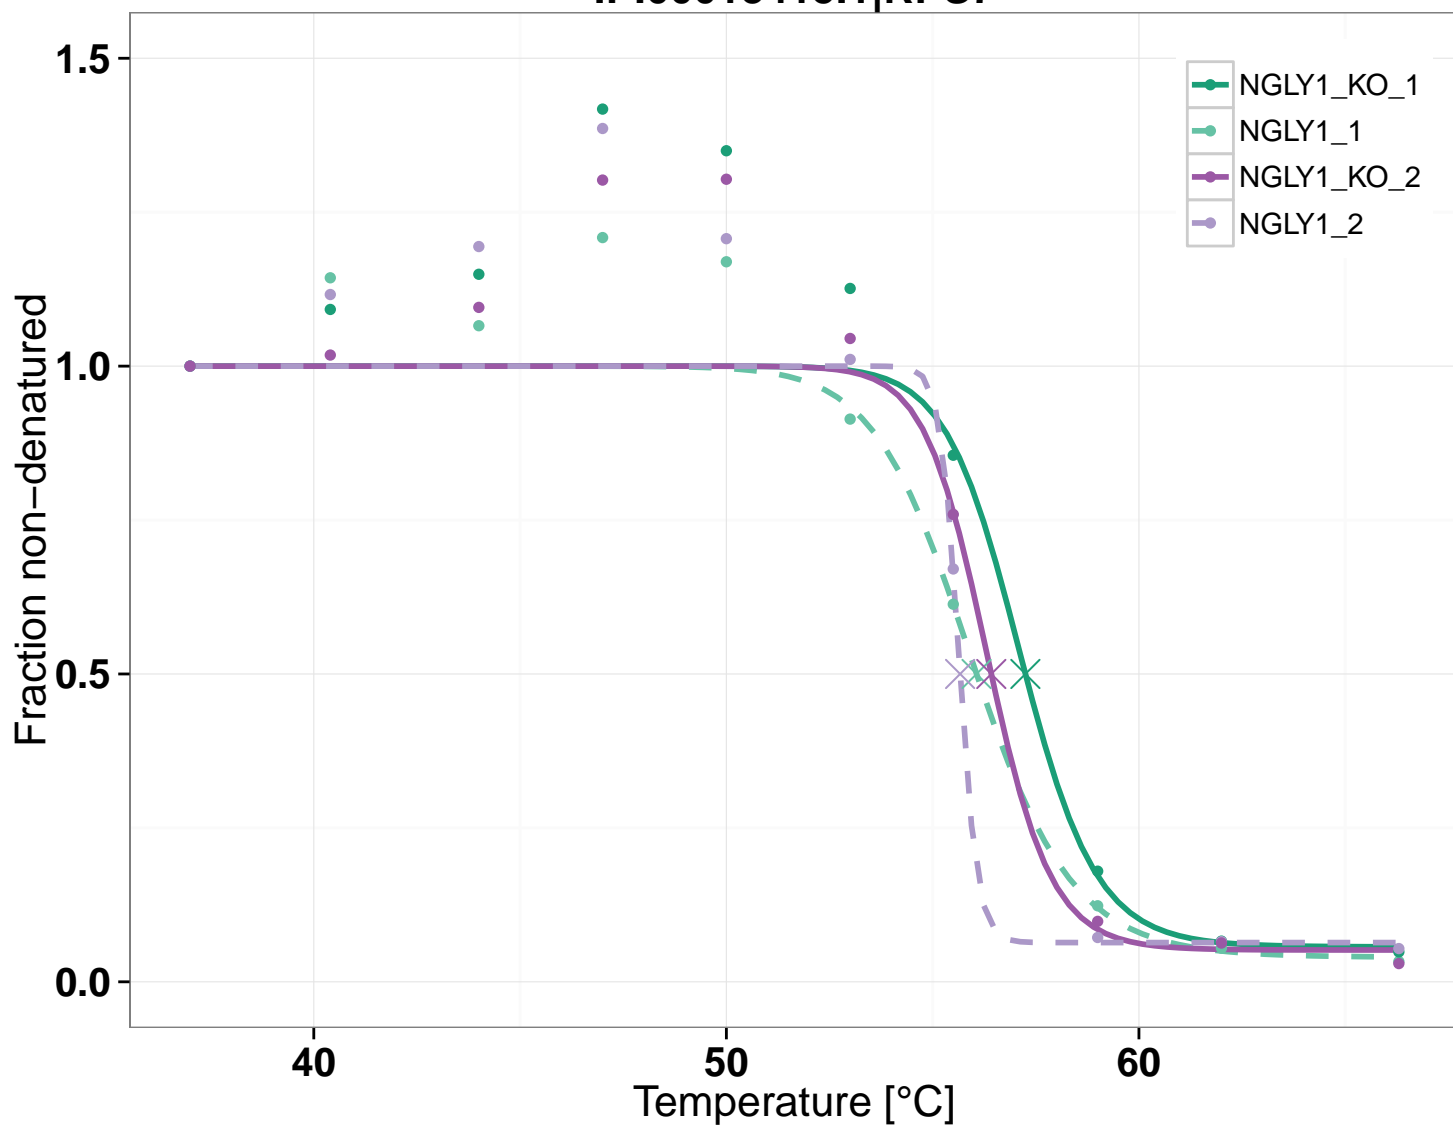

|            | meltPoint | slope | plateau | R2   |
|------------|-----------|-------|---------|------|
| NGLY1_KO_1 | 57.25     | -0.26 | 0.06    | 0.86 |
| NGLY1_1    | 56.06     | -0.2  | 0.04    | 0.95 |
| NGLY1_KO_2 | 56.42     | -0.31 | 0.05    | 0.92 |
| NGLY1_2    | 55.67     | -1.1  | 0.06    | 0.9  |

Supplement: Supplementary file 3384 [file 1]

IPI000000001.2|STAU1

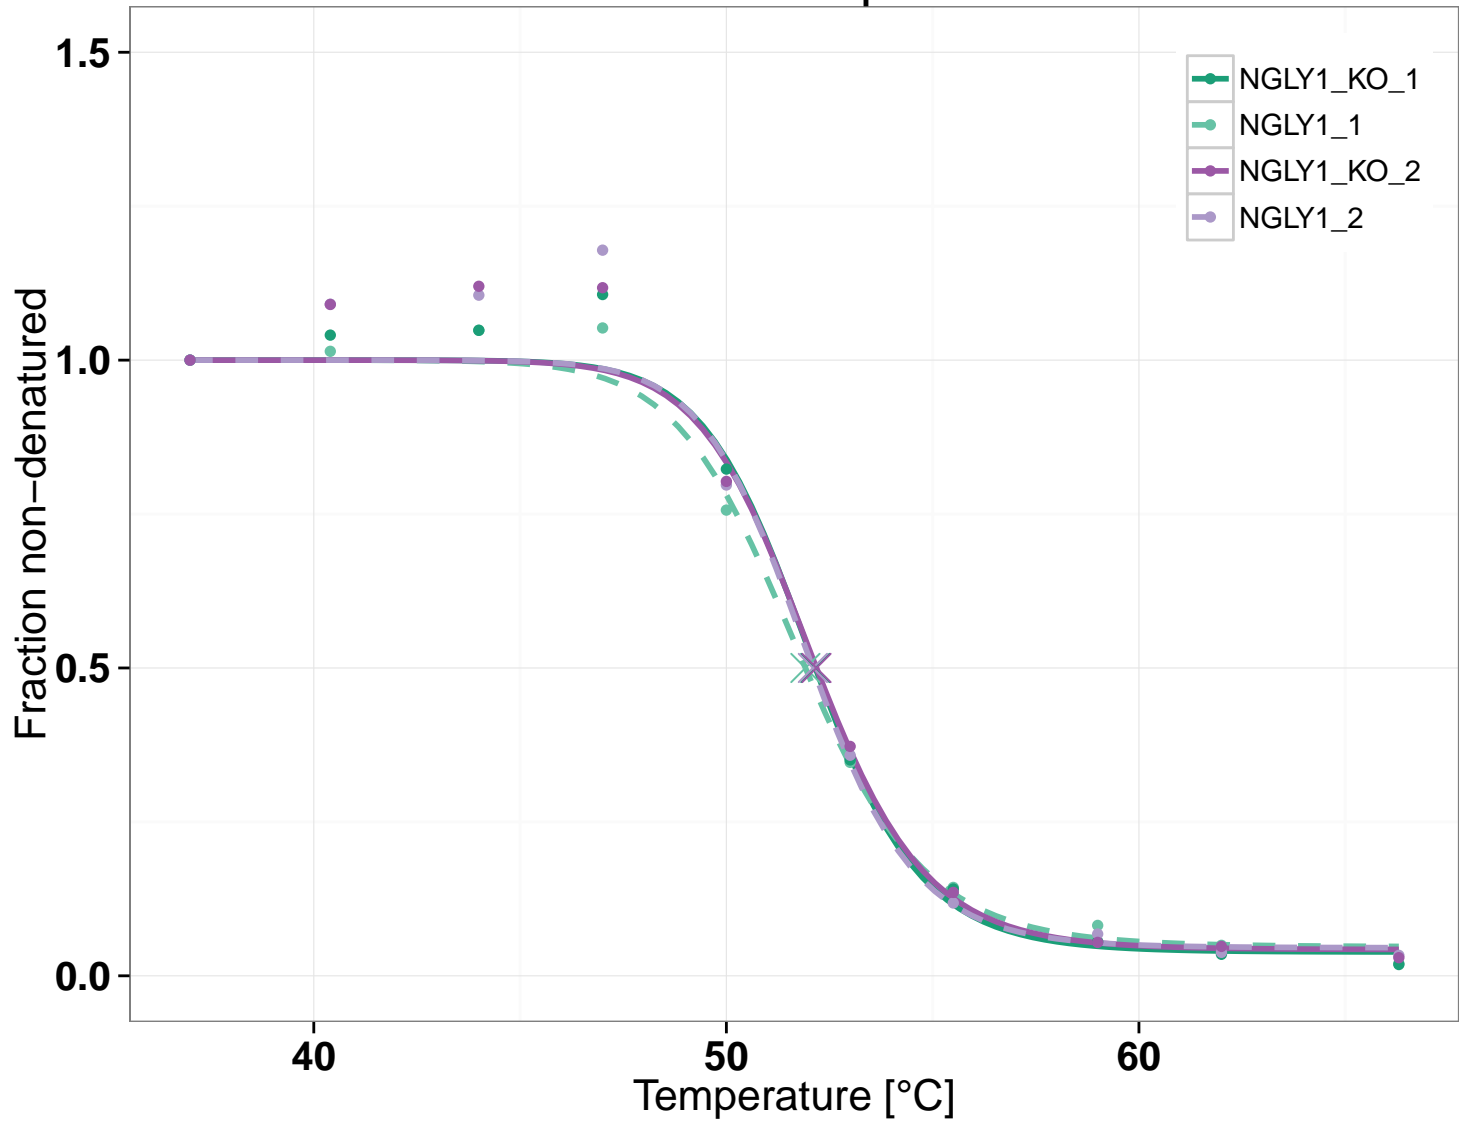

|            | meltPoint | slope | plateau | R2   |
|------------|-----------|-------|---------|------|
| NGLY1_KO_1 | 52.16     | -0.18 | 0.04    | 0.99 |
| NGLY1_1    | 51.92     | -0.16 | 0.05    | 0.99 |
| NGLY1_KO_2 | 52.18     | -0.17 | 0.04    | 0.98 |
| NGLY1_2    | 52.1      | -0.18 | 0.05    | 0.97 |

Supplement: Supplementary file 3385 [file 1]

IPI00304925.5|HSPA1A

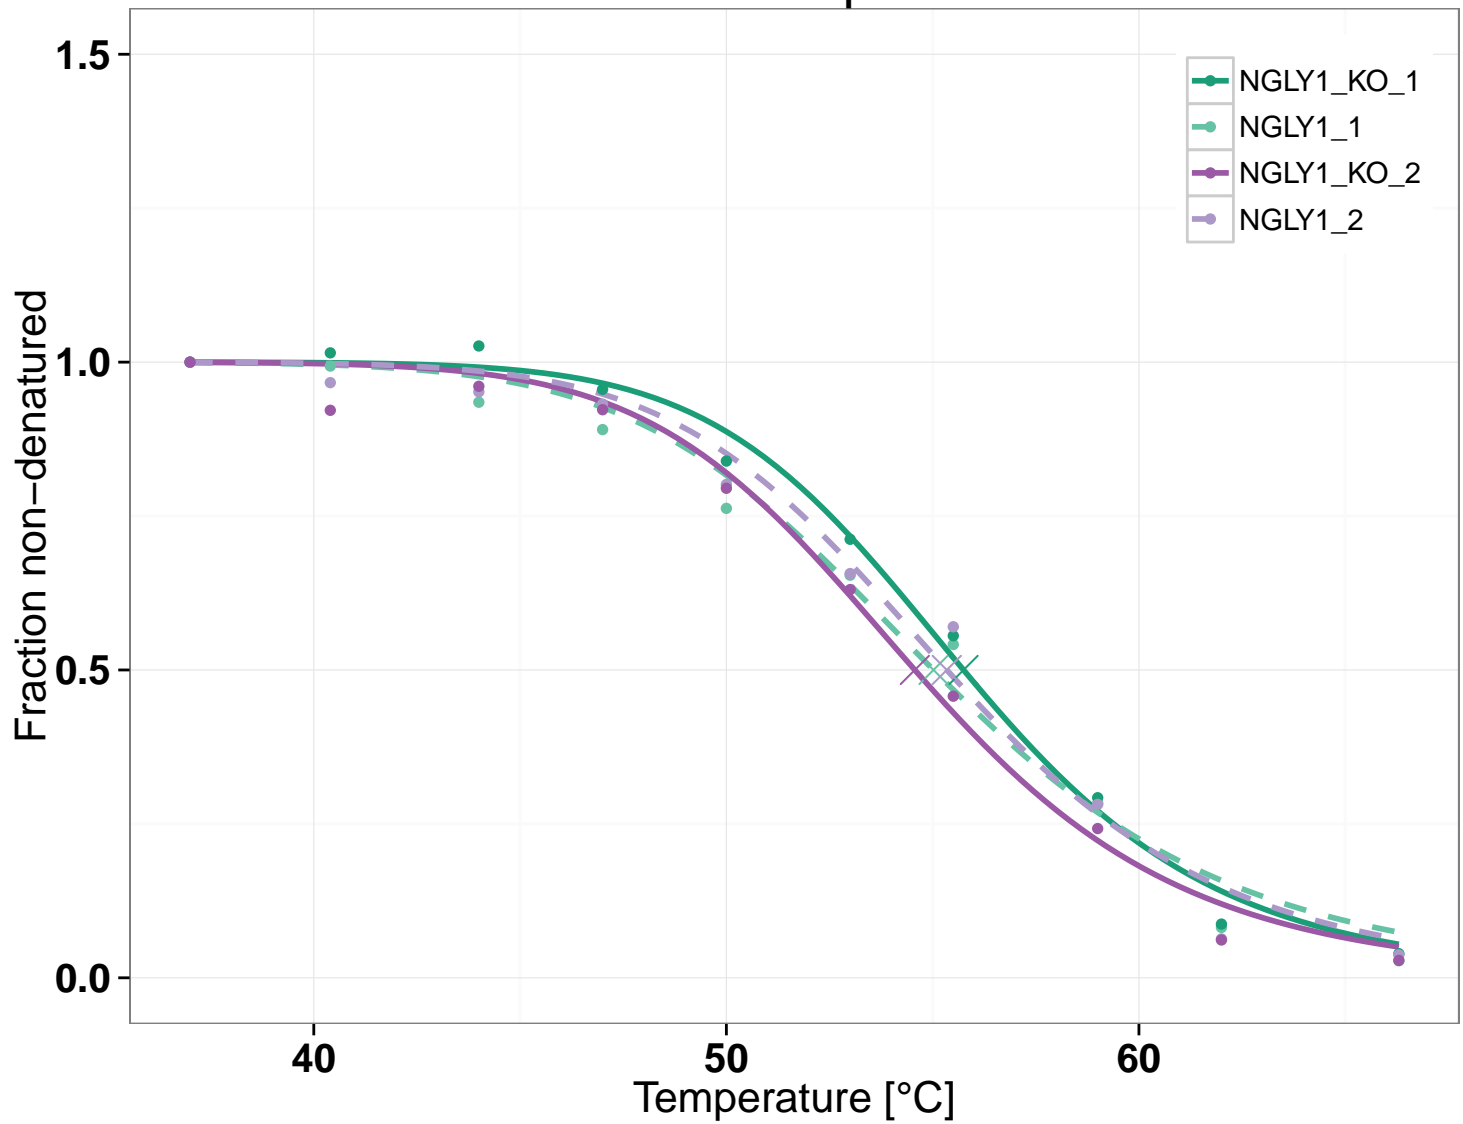

|            | meltPoint | slope  | plateau | R2   |
|------------|-----------|--------|---------|------|
| NGLY1_KO_1 | 55.75     | -0.081 | 0       | 0.99 |
| NGLY1_1    | 55.02     | -0.069 | 0       | 0.98 |
| NGLY1_KO_2 | 54.57     | -0.077 | 0       | 0.99 |
| NGLY1_2    | 55.34     | -0.075 | 0       | 0.98 |

Supplement: Supplementary file 3386 [file 1]

IPI00029196.6|PRKCQ

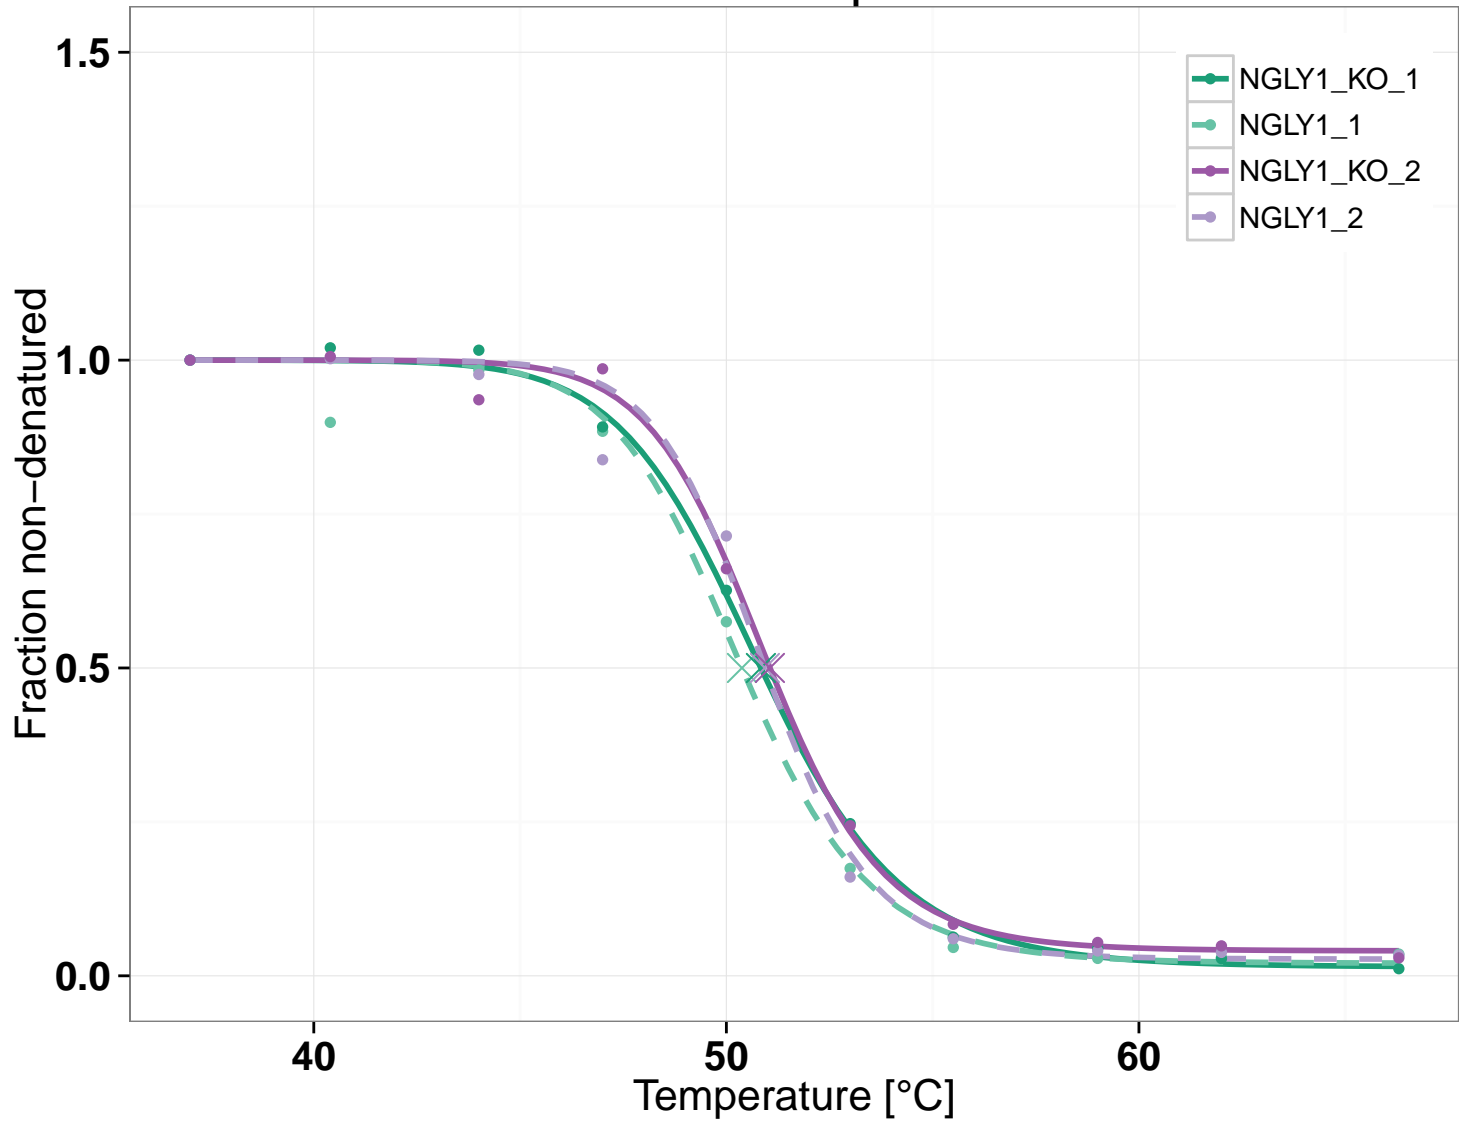

|            | meltPoint | slope | plateau | R2   |
|------------|-----------|-------|---------|------|
| NGLY1_KO_1 | 50.84     | -0.14 | 0.01    | 1    |
| NGLY1_1    | 50.38     | -0.16 | 0.02    | 0.99 |
| NGLY1_KO_2 | 51.06     | -0.17 | 0.04    | 1    |
| NGLY1_2    | 50.93     | -0.18 | 0.03    | 0.99 |

Supplement: Supplementary file 3387 [file 1]

IPI00290511.2|LRRC68

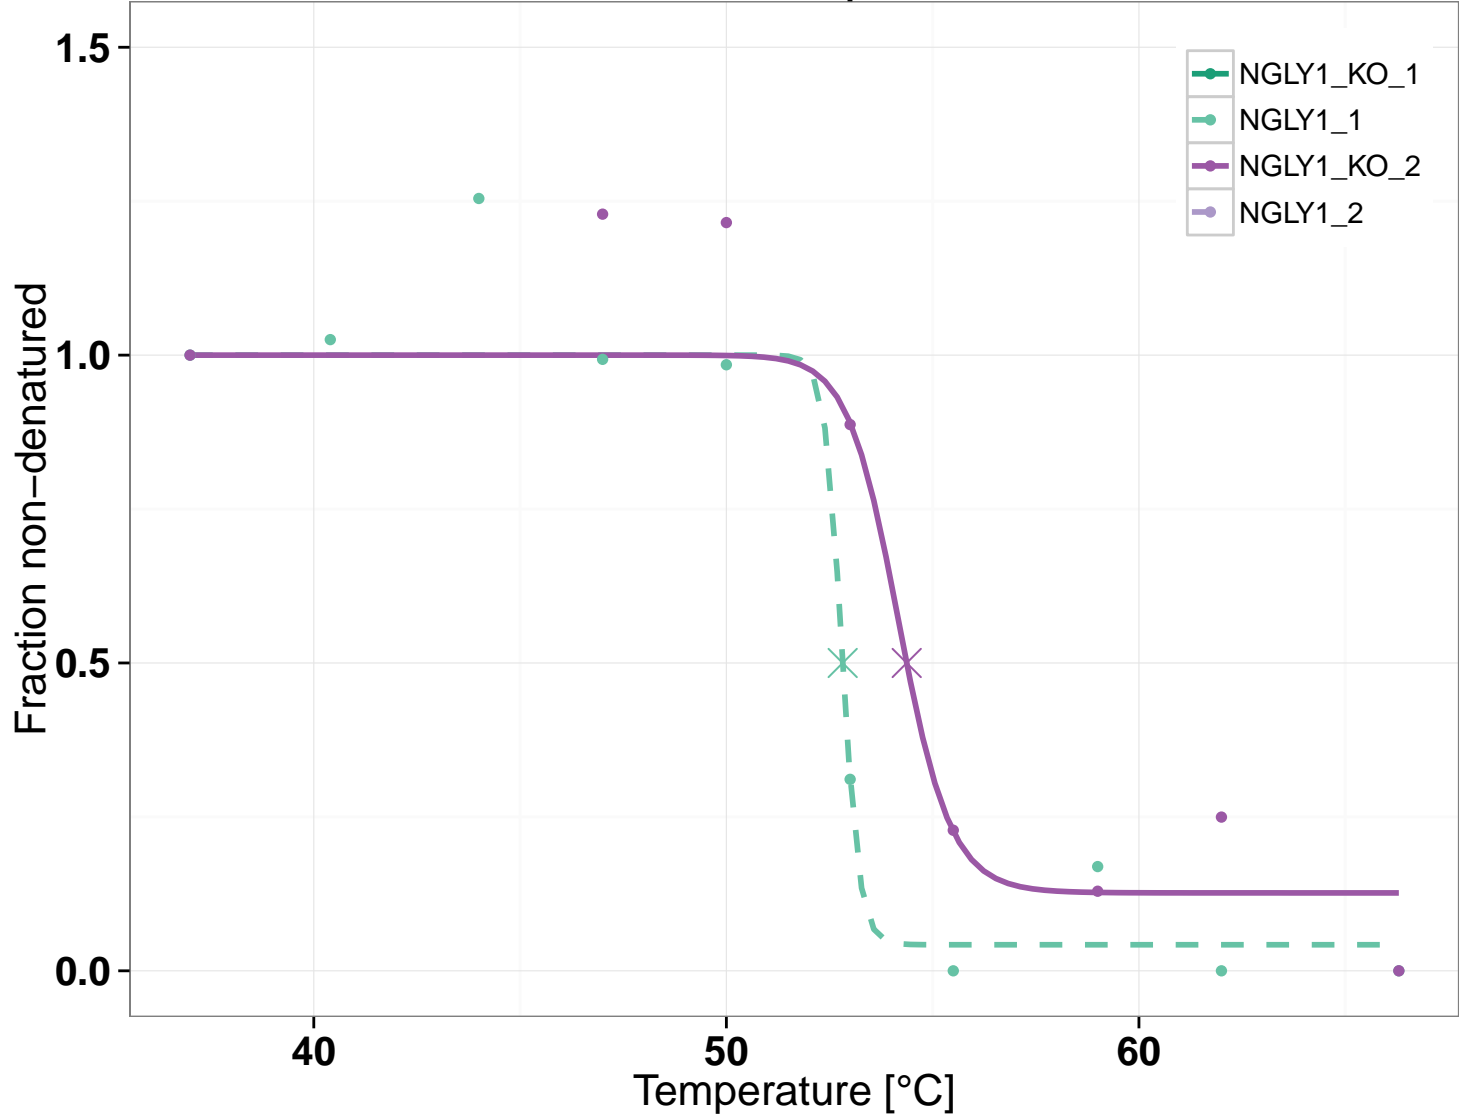

|            | meltPoint | slope | plateau | R2   |
|------------|-----------|-------|---------|------|
| NGLY1_KO_1 | —         | —     | —       | —    |
| NGLY1_1    | 52.82     | -1.1  | 0.04    | 0.96 |
| NGLY1_KO_2 | 54.37     | -0.35 | 0.13    | 0.73 |
| NGLY1_2    | —         | —     | —       | —    |

Supplement: Supplementary file 3388 [file 1]

IPI00031768.1|HOOK3

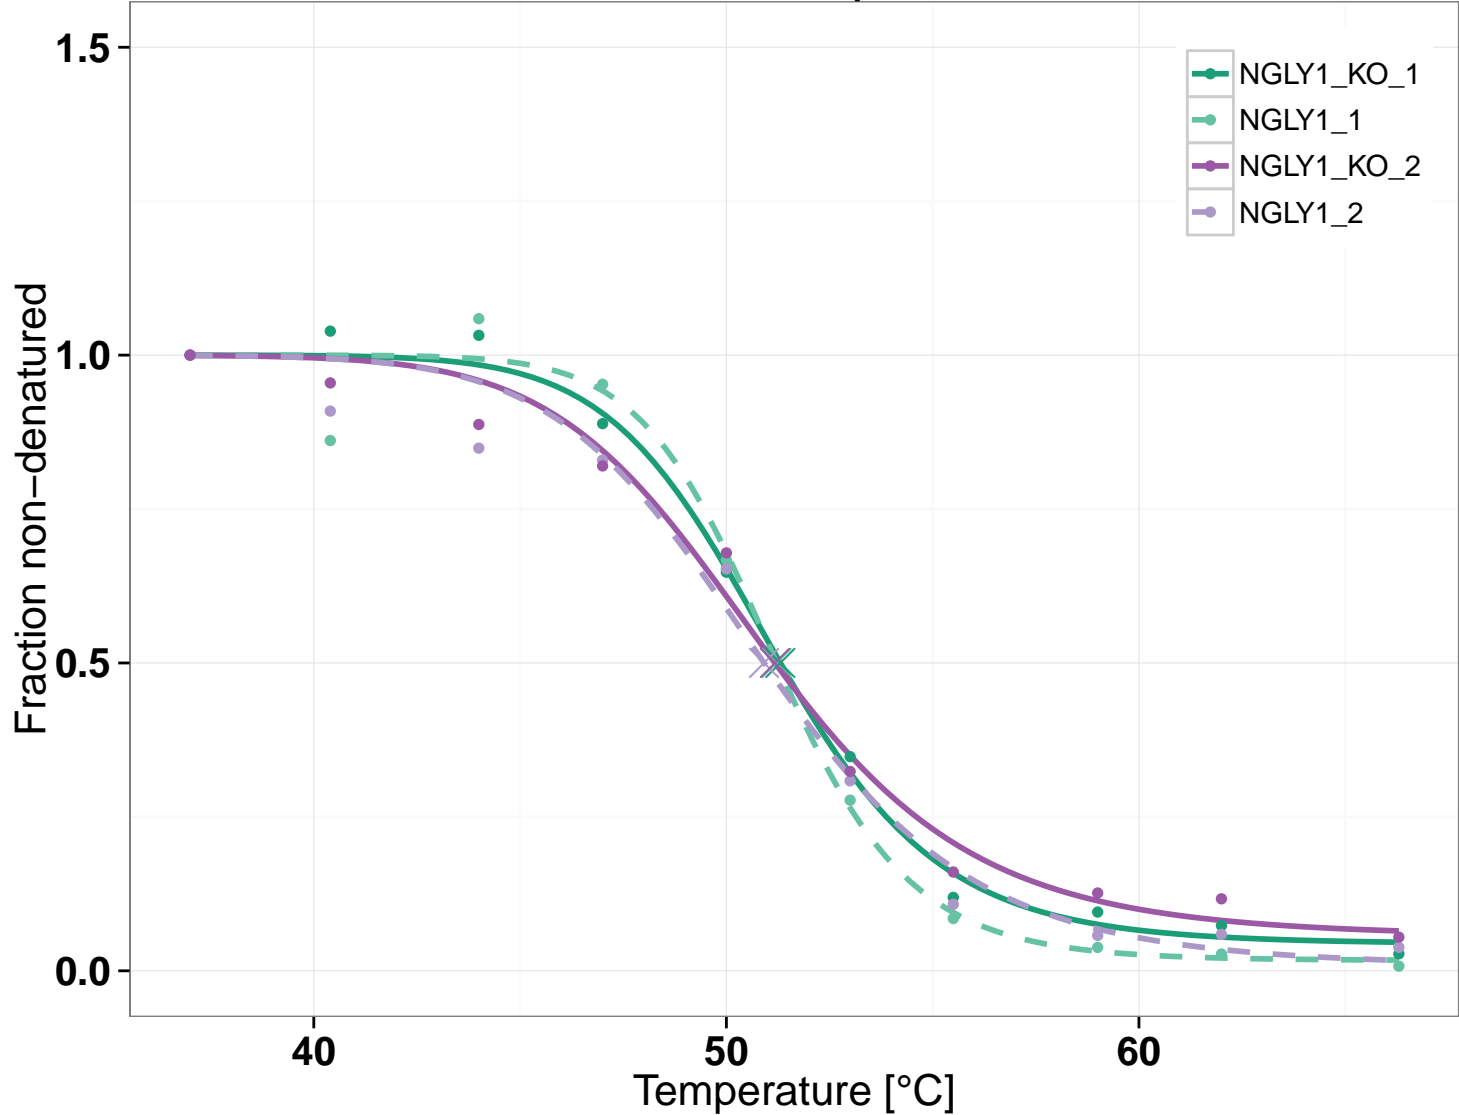

|            | meltPoint | slope  | plateau | R2   |
|------------|-----------|--------|---------|------|
| NGLY1_KO_1 | 51.31     | -0.12  | 0.04    | 1    |
| NGLY1_1    | 51.22     | -0.15  | 0.02    | 0.99 |
| NGLY1_KO_2 | 51.18     | -0.093 | 0.06    | 0.99 |
| NGLY1_2    | 50.91     | -0.098 | 0.01    | 0.98 |

Supplement: Supplementary file 3389 [file 1]

IPI00004341.7|FBXL17

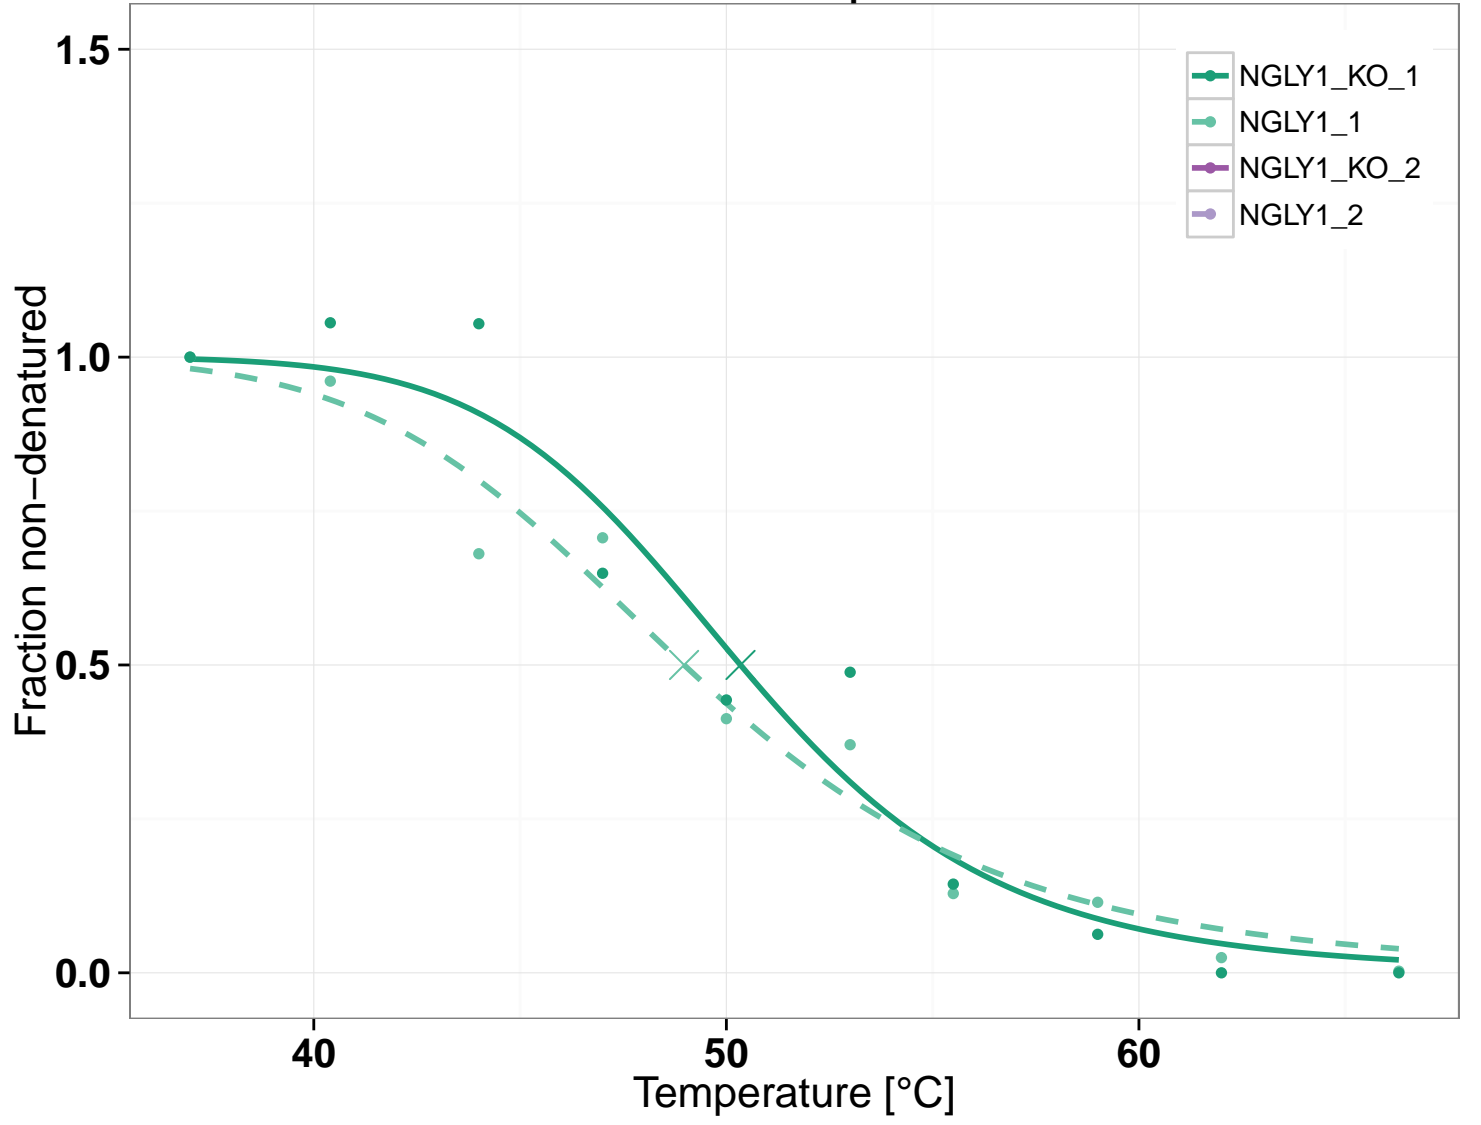

|            | meltPoint | slope  | plateau | R2   |
|------------|-----------|--------|---------|------|
| NGLY1_KO_1 | 50.34     | -0.08  | 0       | 0.95 |
| NGLY1_1    | 48.98     | -0.064 | 0       | 0.97 |
| NGLY1_KO_2 | -         | -      | -       | -    |
| NGLY1_2    | -         | -      | -       | -    |

Supplement: Supplementary file 3390 [file 1]

IPI00291916.5|PHIP

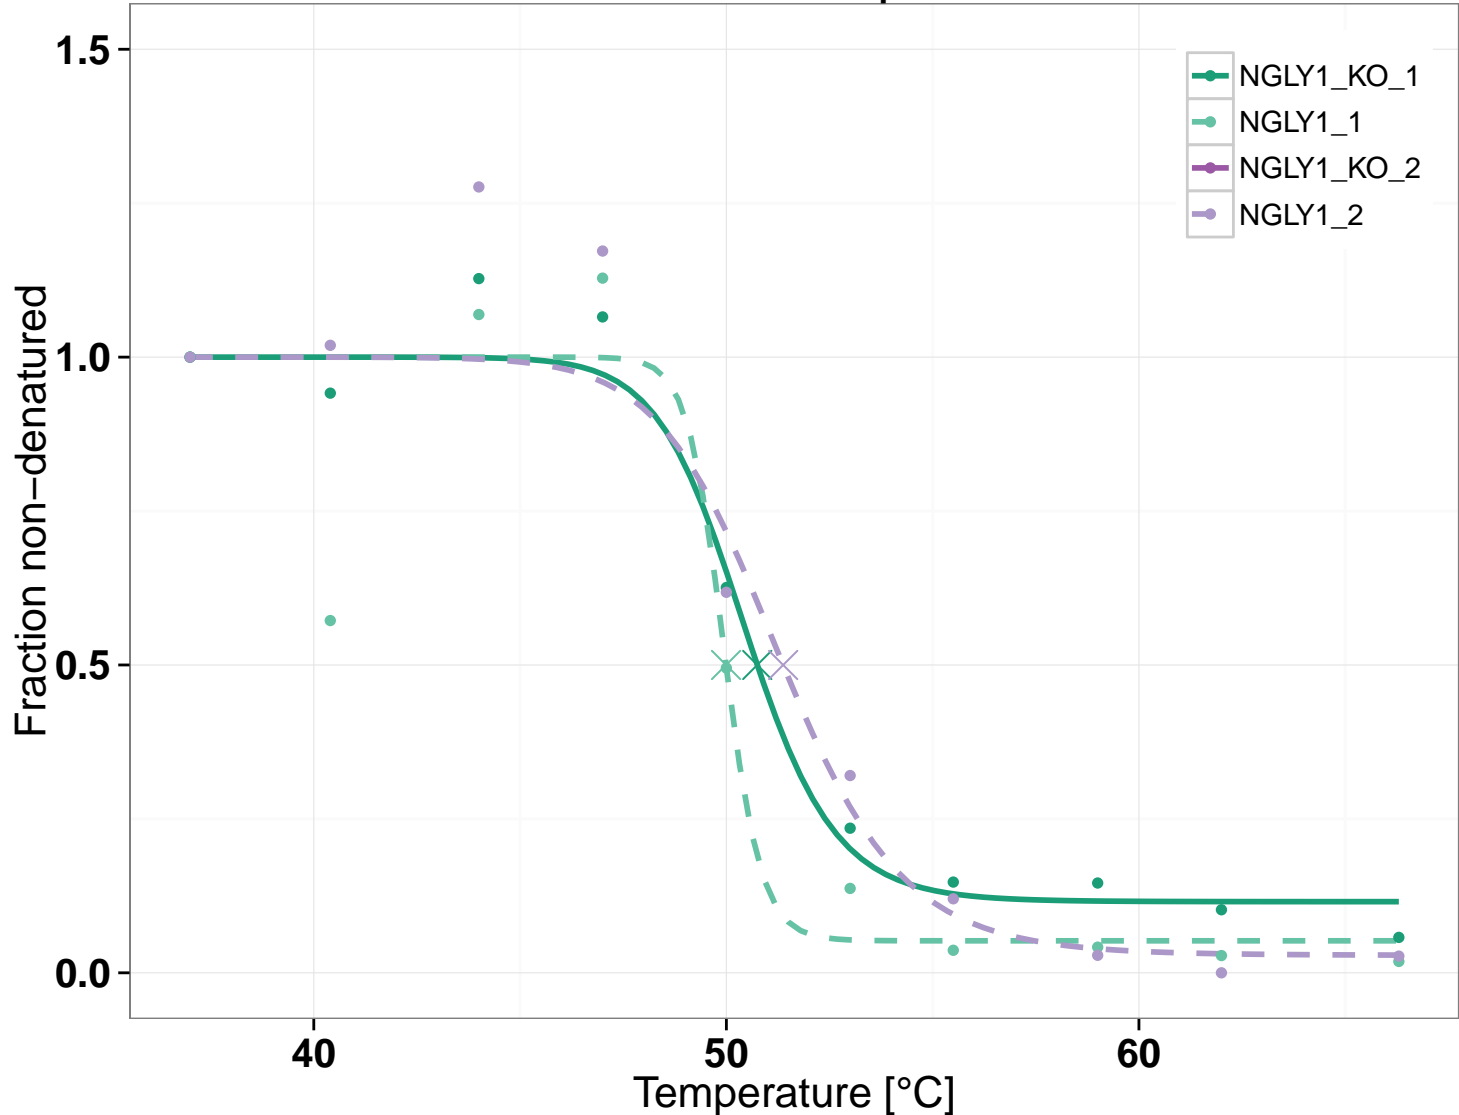

|            | meltPoint | slope | plateau | R2   |
|------------|-----------|-------|---------|------|
| NGLY1_KO_1 | 50.75     | -0.2  | 0.12    | 0.98 |
| NGLY1_1    | 49.99     | -0.53 | 0.05    | 0.89 |
| NGLY1_KO_2 | -         | -     | -       | -    |
| NGLY1_2    | 51.38     | -0.16 | 0.03    | 0.94 |

Supplement: Supplementary file 3391 [file 1]

IPI00853240.1|TAF3

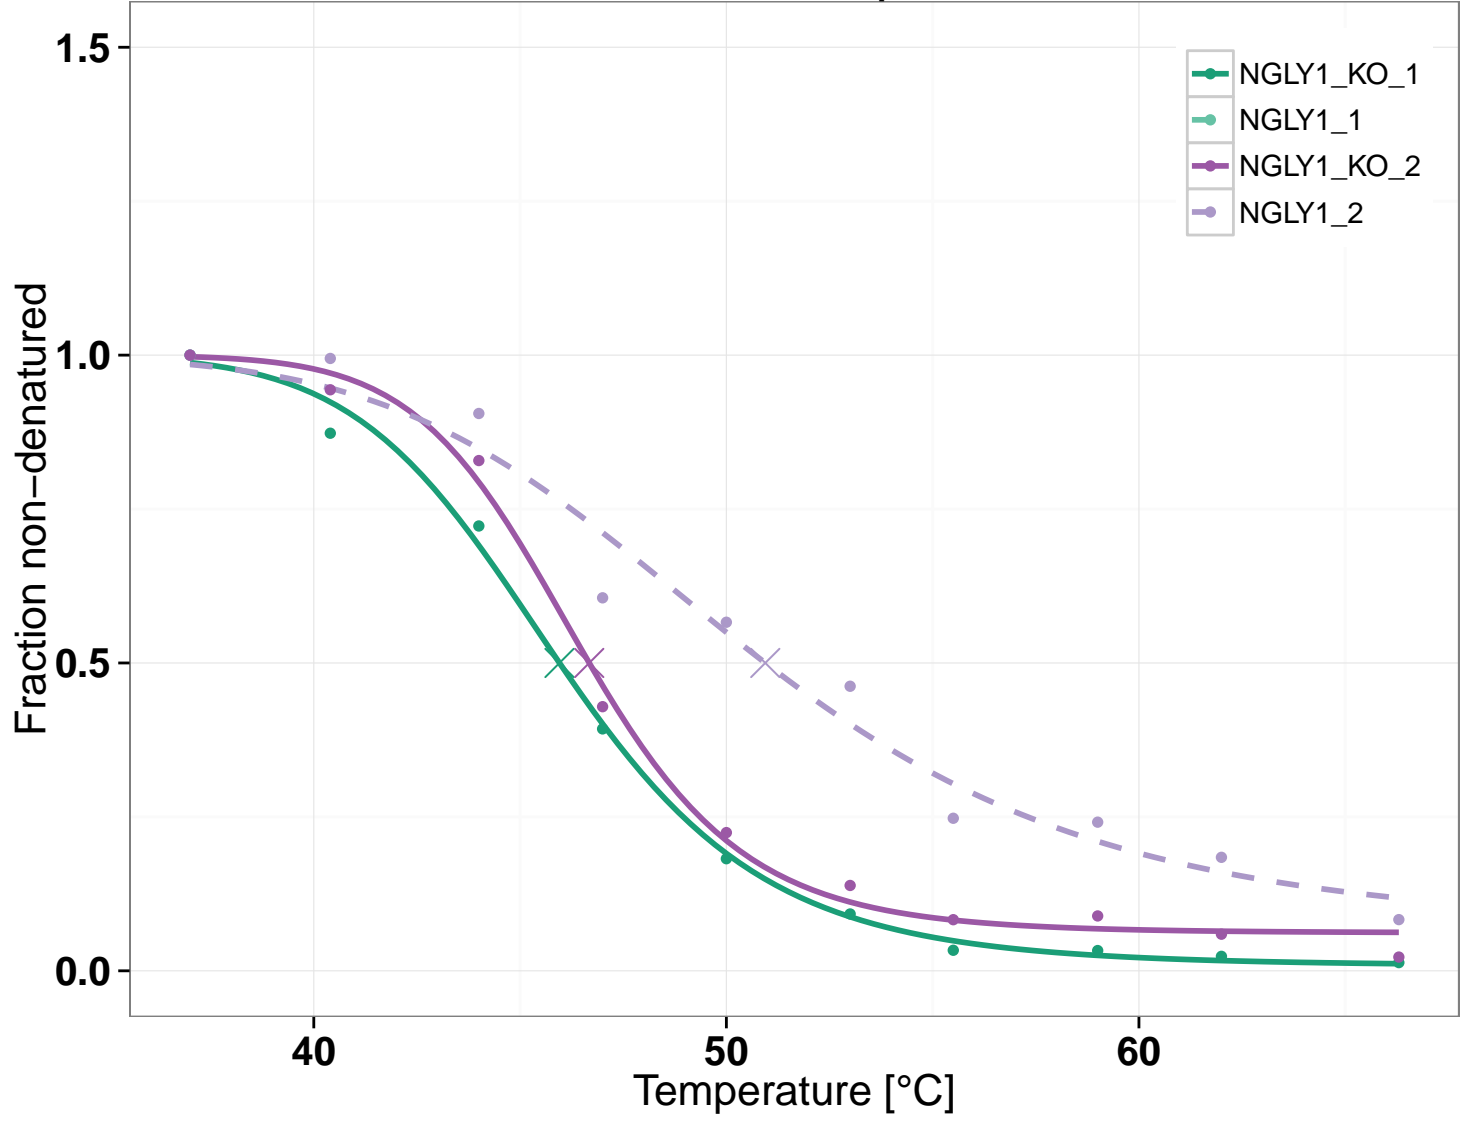

|            | meltPoint | slope  | plateau | R2   |
|------------|-----------|--------|---------|------|
| NGLY1_KO_1 | 45.96     | -0.1   | 0.01    | 1    |
| NGLY1_1    | -         | -      | -       | -    |
| NGLY1_KO_2 | 46.68     | -0.12  | 0.06    | 1    |
| NGLY1_2    | 50.94     | -0.055 | 0.06    | 0.97 |

Supplement: Supplementary file 3392 [file 1]

# IPI00647185.3|CEP170

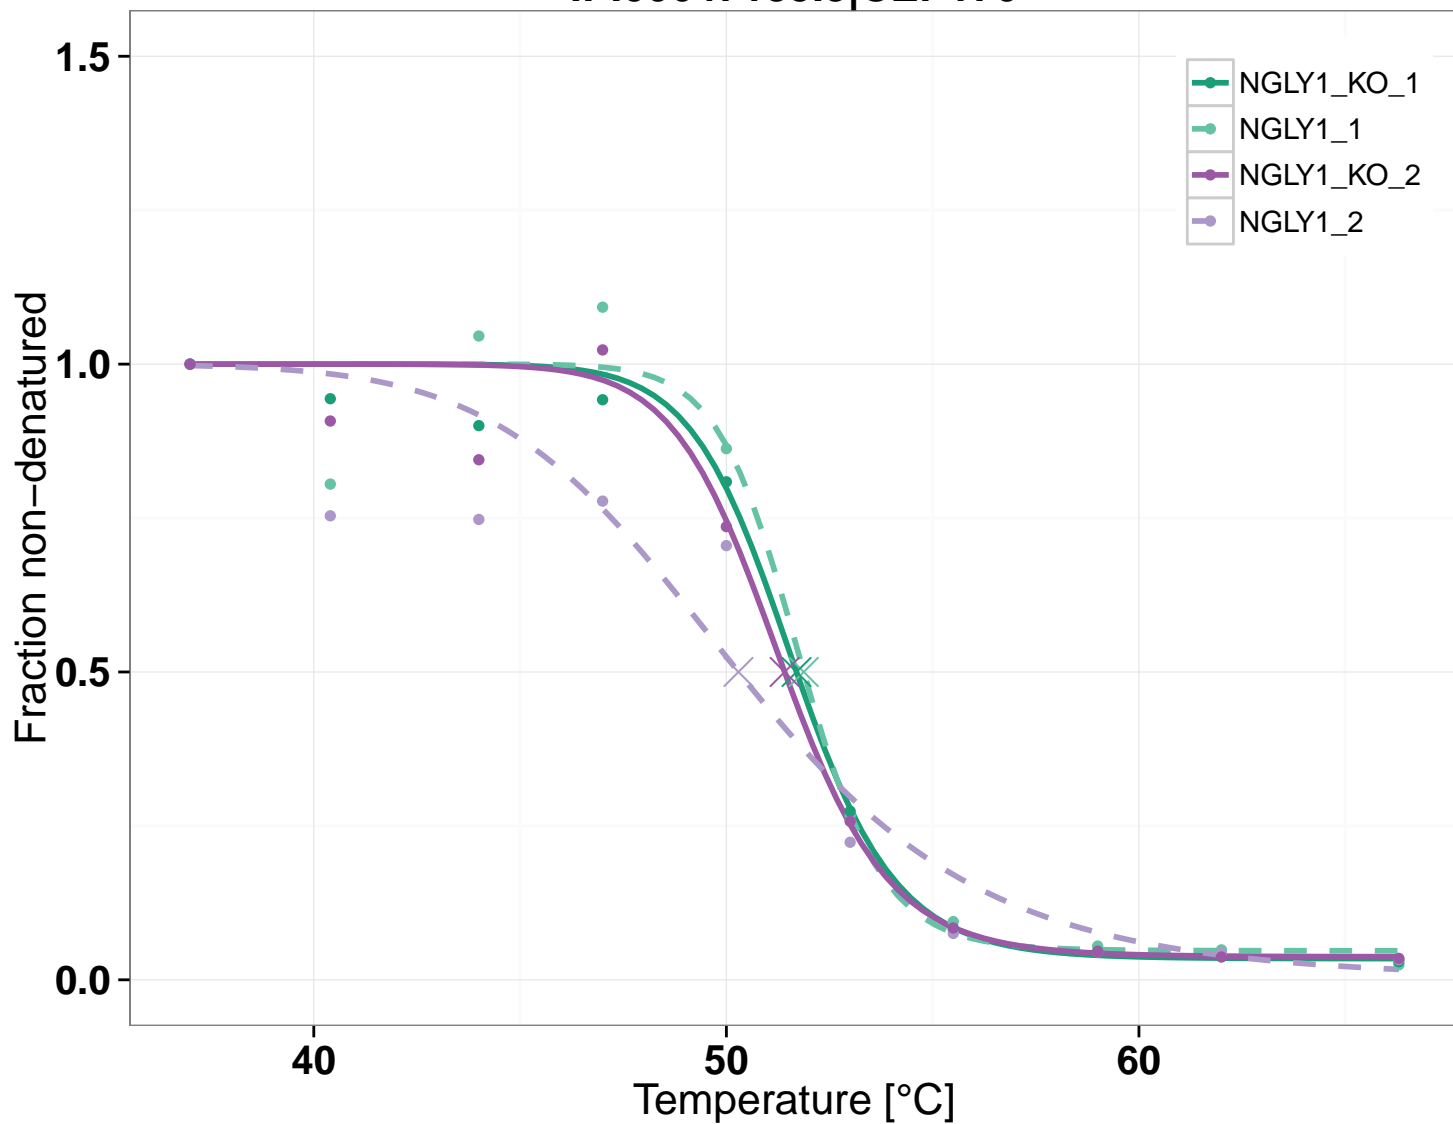

|            | meltPoint | slope  | plateau | R2   |
|------------|-----------|--------|---------|------|
| NGLY1_KO_1 | 51.7      | -0.19  | 0.03    | 0.99 |
| NGLY1_1    | 51.88     | -0.24  | 0.05    | 0.97 |
| NGLY1_KO_2 | 51.41     | -0.18  | 0.04    | 0.98 |
| NGLY1_2    | 50.29     | -0.085 | 0       | 0.9  |

Supplement: Supplementary file 3393 [file 1]

IPI00004482.2|ZNF544

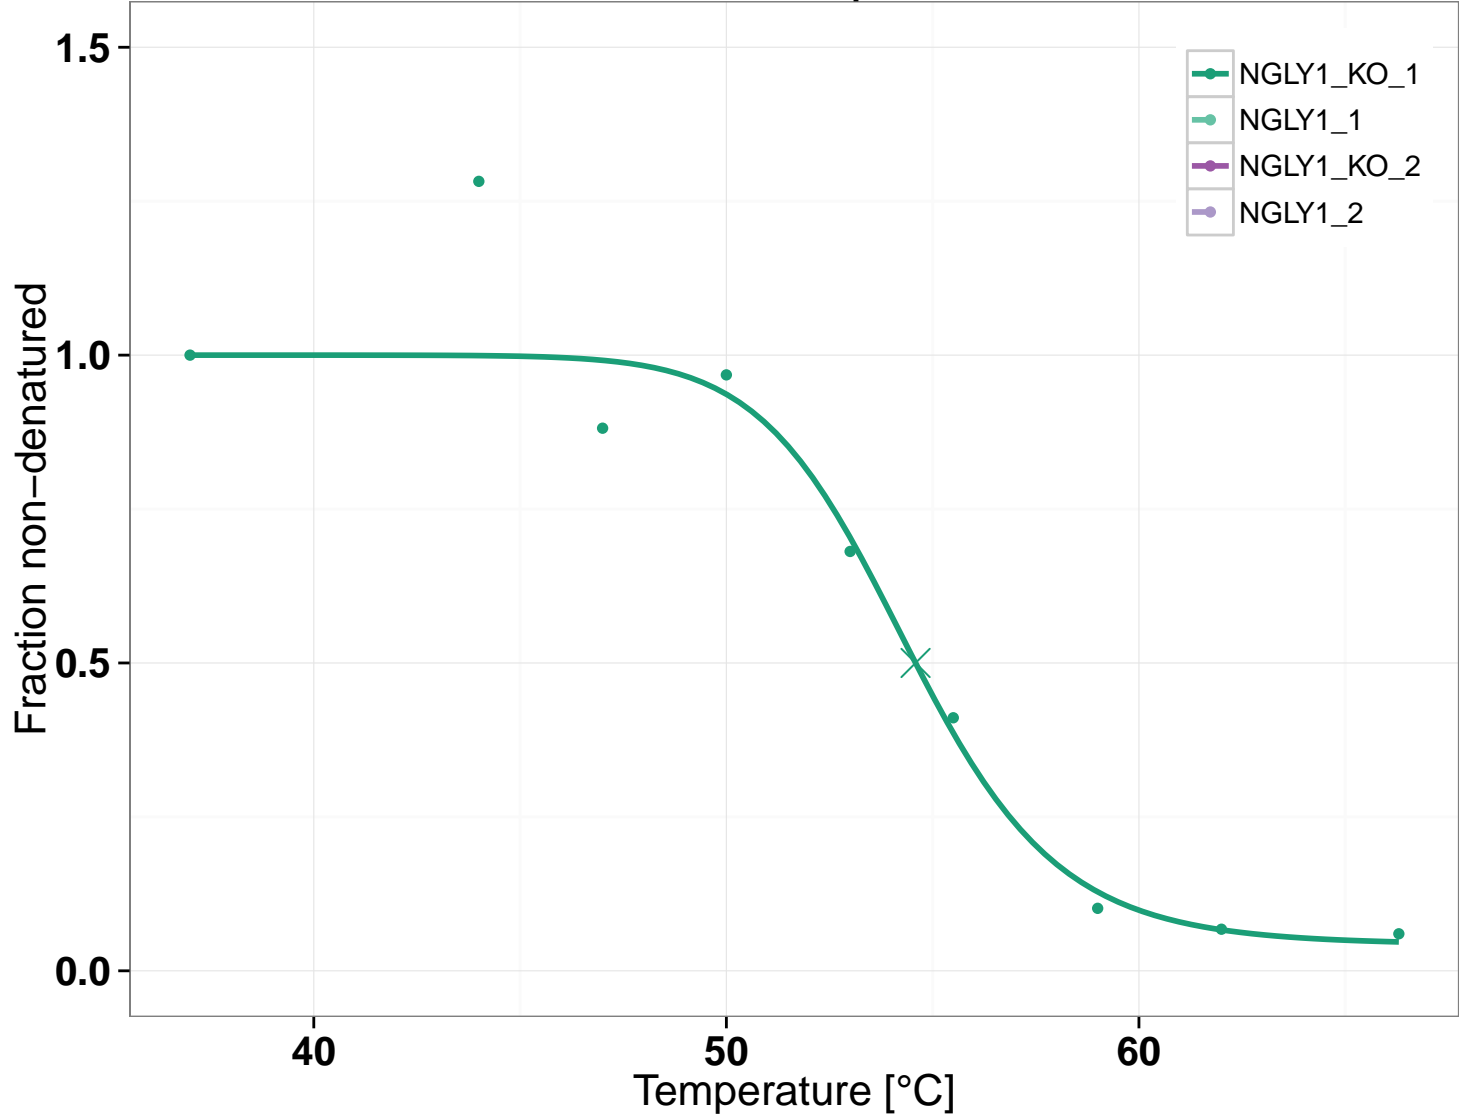

|            | meltPoint | slope | plateau | R2  |
|------------|-----------|-------|---------|-----|
| NGLY1_KO_1 | 54.59     | -0.13 | 0.04    | 0.7 |
| NGLY1_1    | -         | -     | -       | -   |
| NGLY1_KO_2 | -         | -     | -       | -   |
| NGLY1_2    | -         | -     | -       | -   |

Supplement: Supplementary file 3394 [file 1]

# IPI00306667.5|CNP

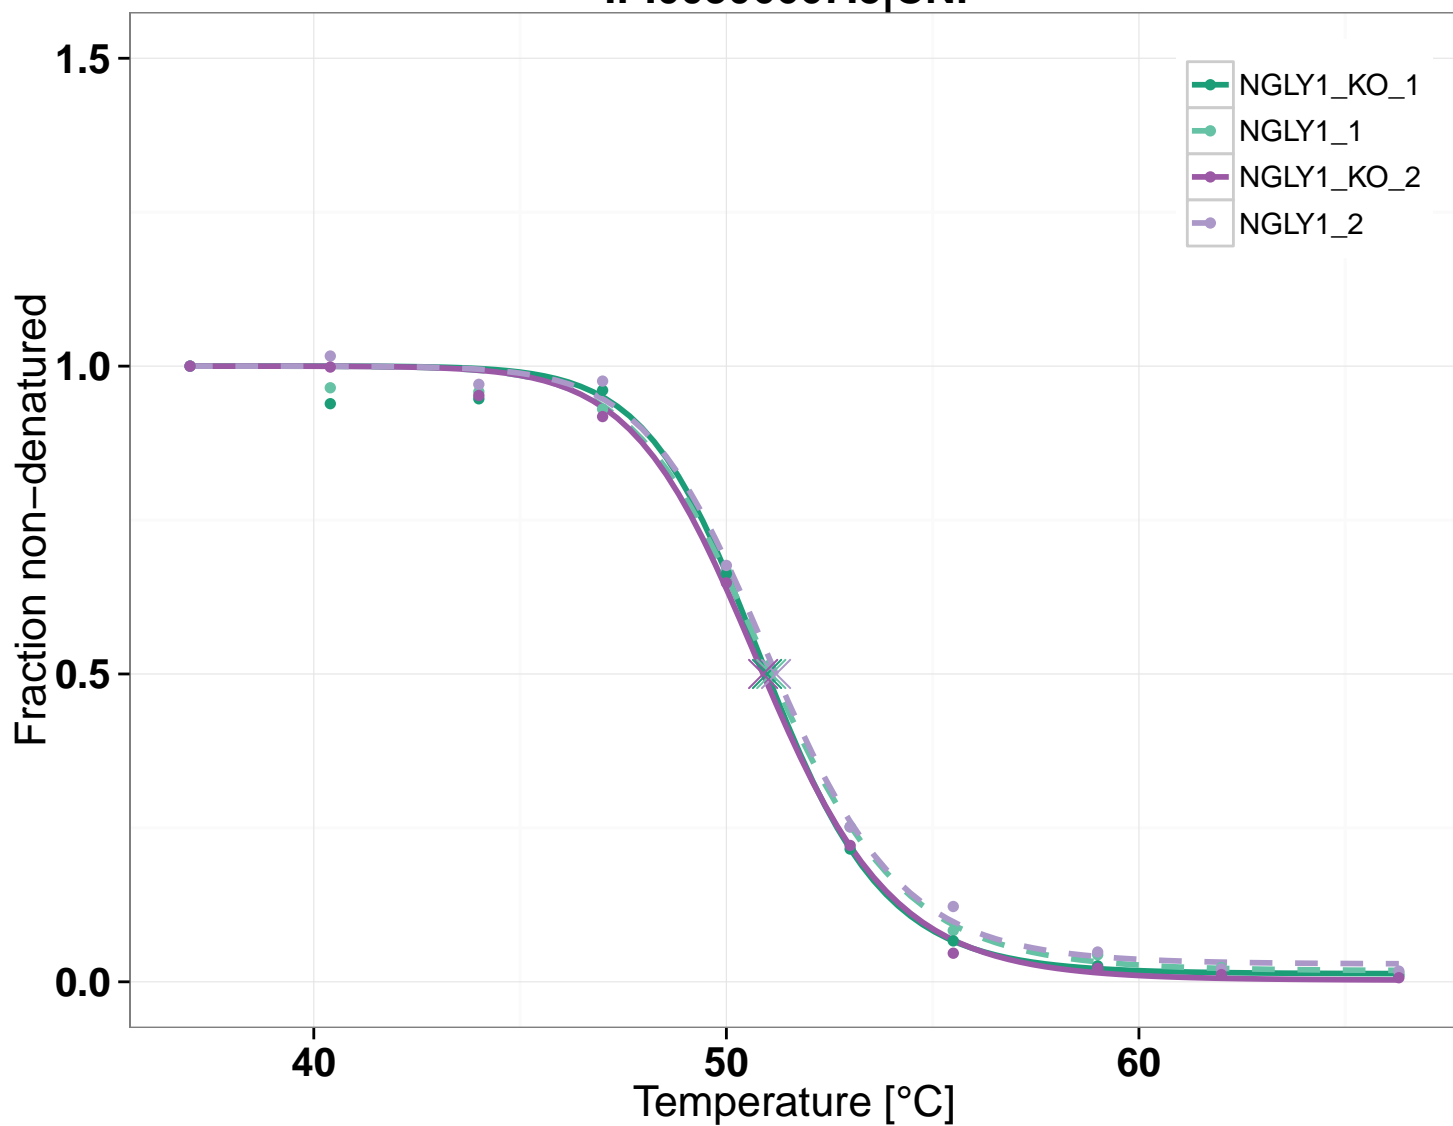

|            | meltPoint | slope | plateau | R2 |
|------------|-----------|-------|---------|----|
| NGLY1_KO_1 | 50.99     | -0.17 | 0.01    | 1  |
| NGLY1_1    | 51.09     | -0.15 | 0.02    | 1  |
| NGLY1_KO_2 | 50.89     | -0.16 | 0       | 1  |
| NGLY1_2    | 51.2      | -0.16 | 0.03    | 1  |

Supplement: Supplementary file 3395 [file 1]

IPI00018961.1|ACER3

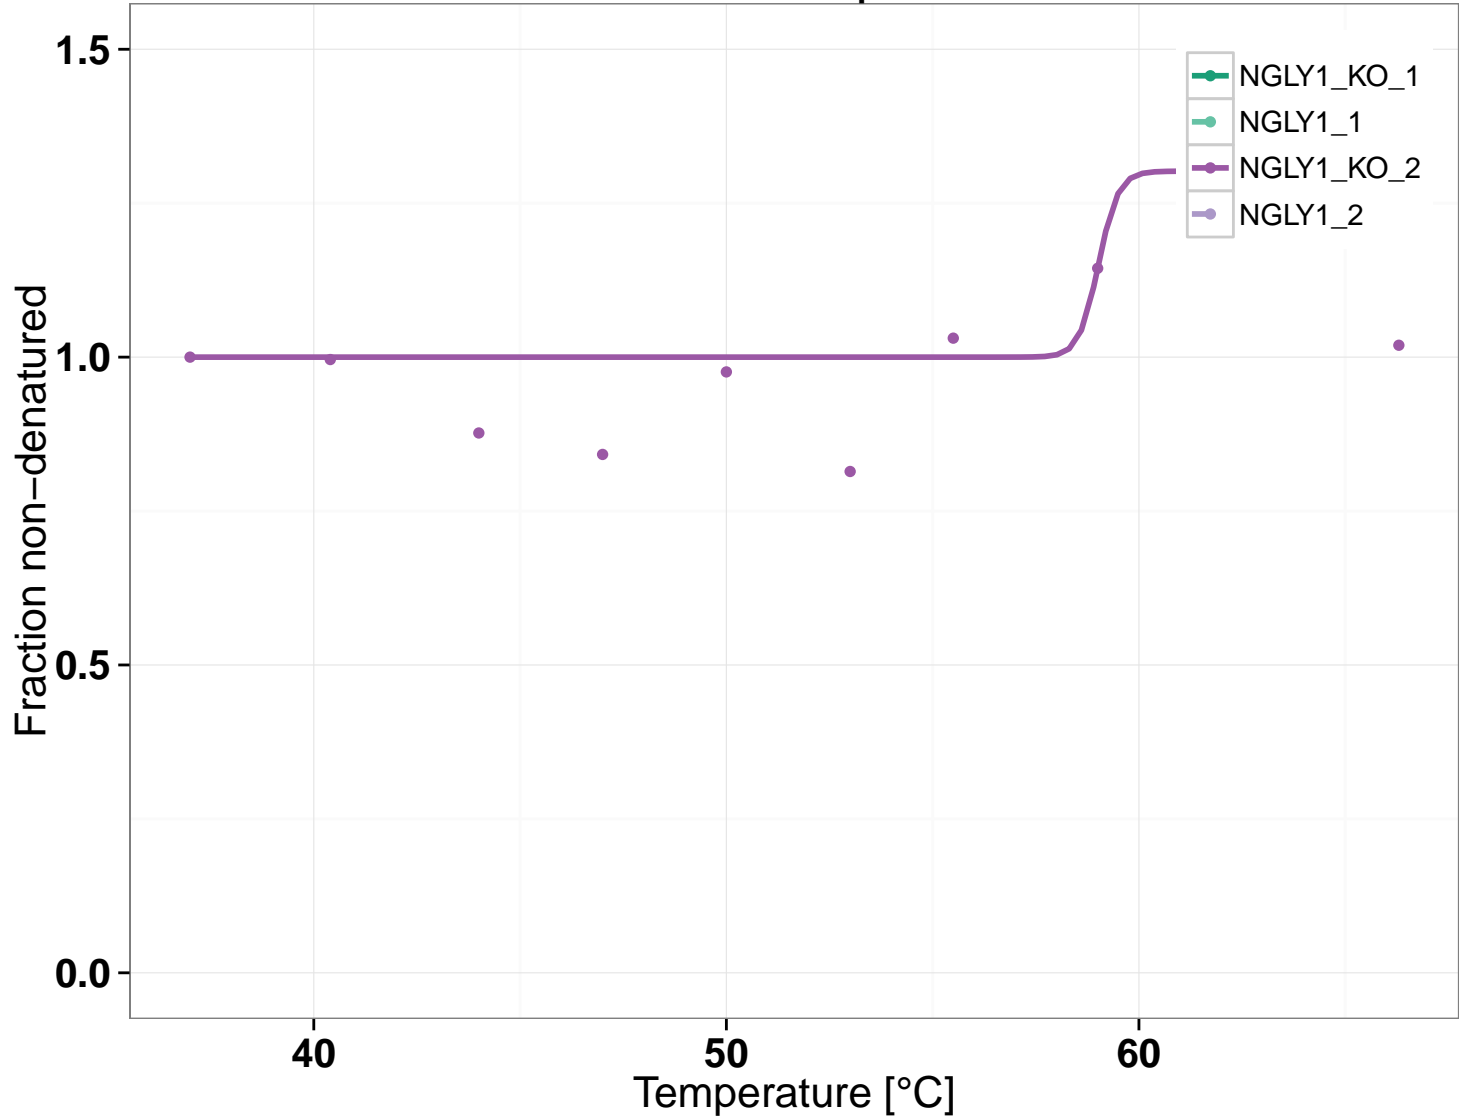

|            | meltPoint | slope | plateau | R2   |
|------------|-----------|-------|---------|------|
| NGLY1_KO_1 | —         | —     | —       | —    |
| NGLY1_1    | —         | —     | —       | —    |
| NGLY1_KO_2 | —         | 0.32  | 1.3     | 0.45 |
| NGLY1_2    | —         | —     | —       | —    |

Supplement: Supplementary file 3396 [file 1]

IPI00432355.4|SDCCAG3

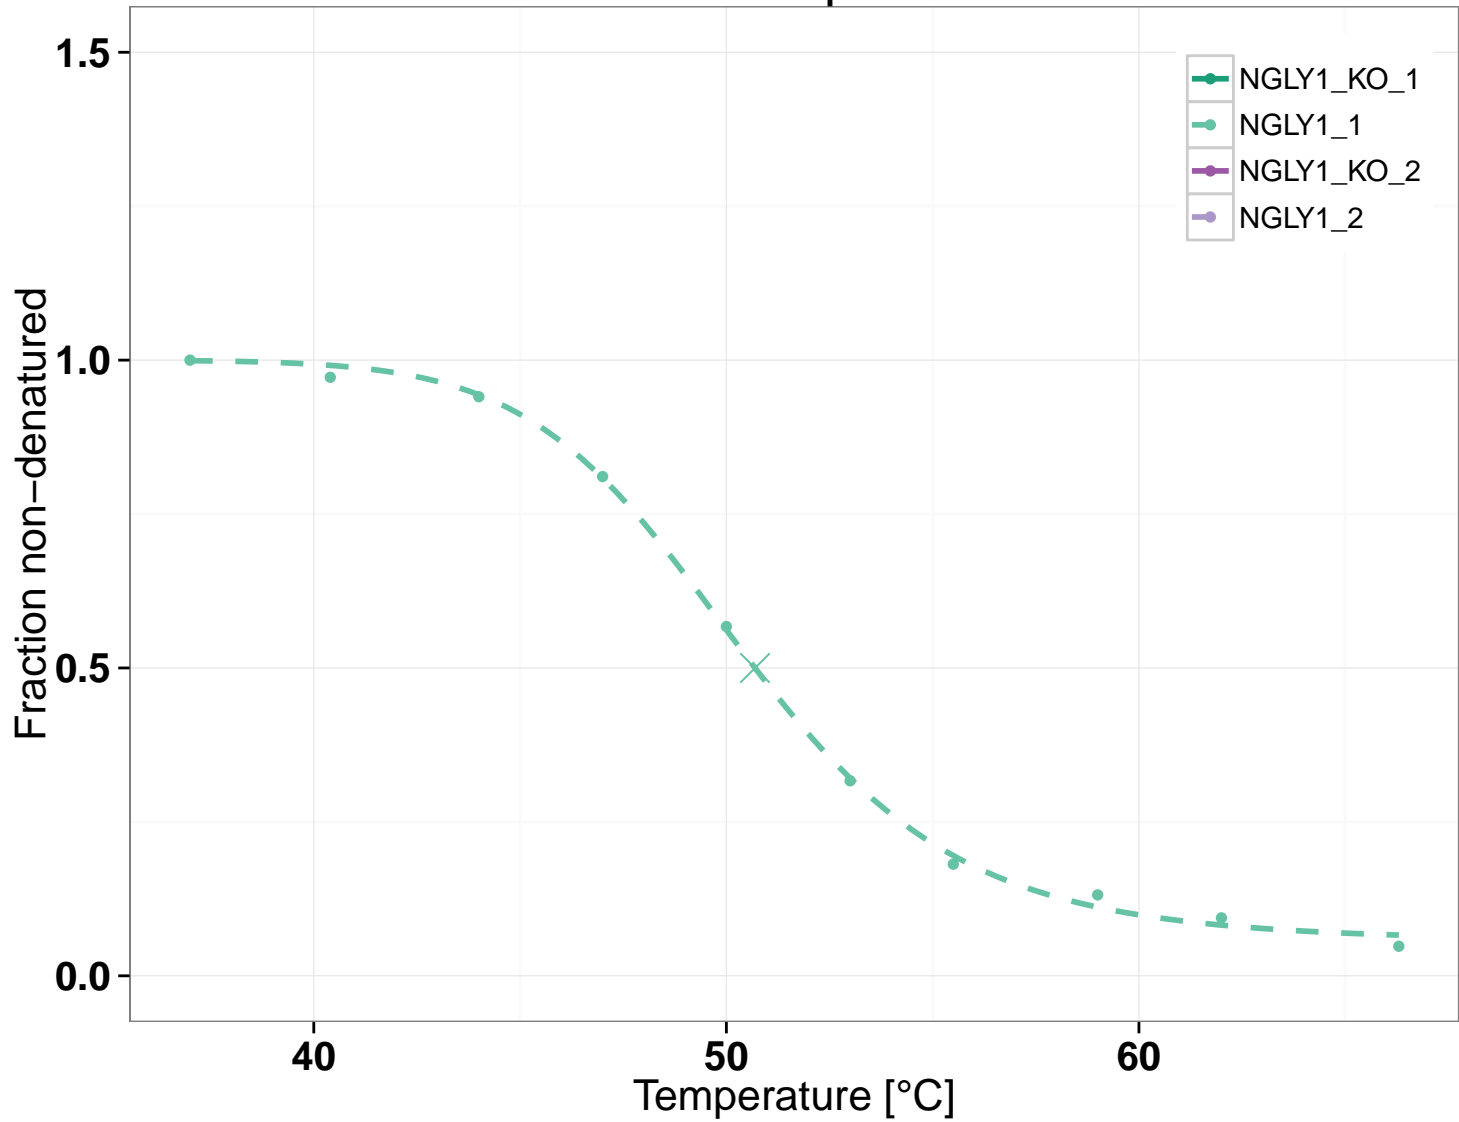

|            | meltPoint | slope | plateau | R2 |
|------------|-----------|-------|---------|----|
| NGLY1_KO_1 | -         | -     | -       | -  |
| NGLY1_1    | 50.69     | -0.09 | 0.06    | 1  |
| NGLY1_KO_2 | -         | -     | -       | -  |
| NGLY1_2    | -         | -     | -       | -  |

Supplement: Supplementary file 3397 [file 1]

# IPI00005656.1|RGL2

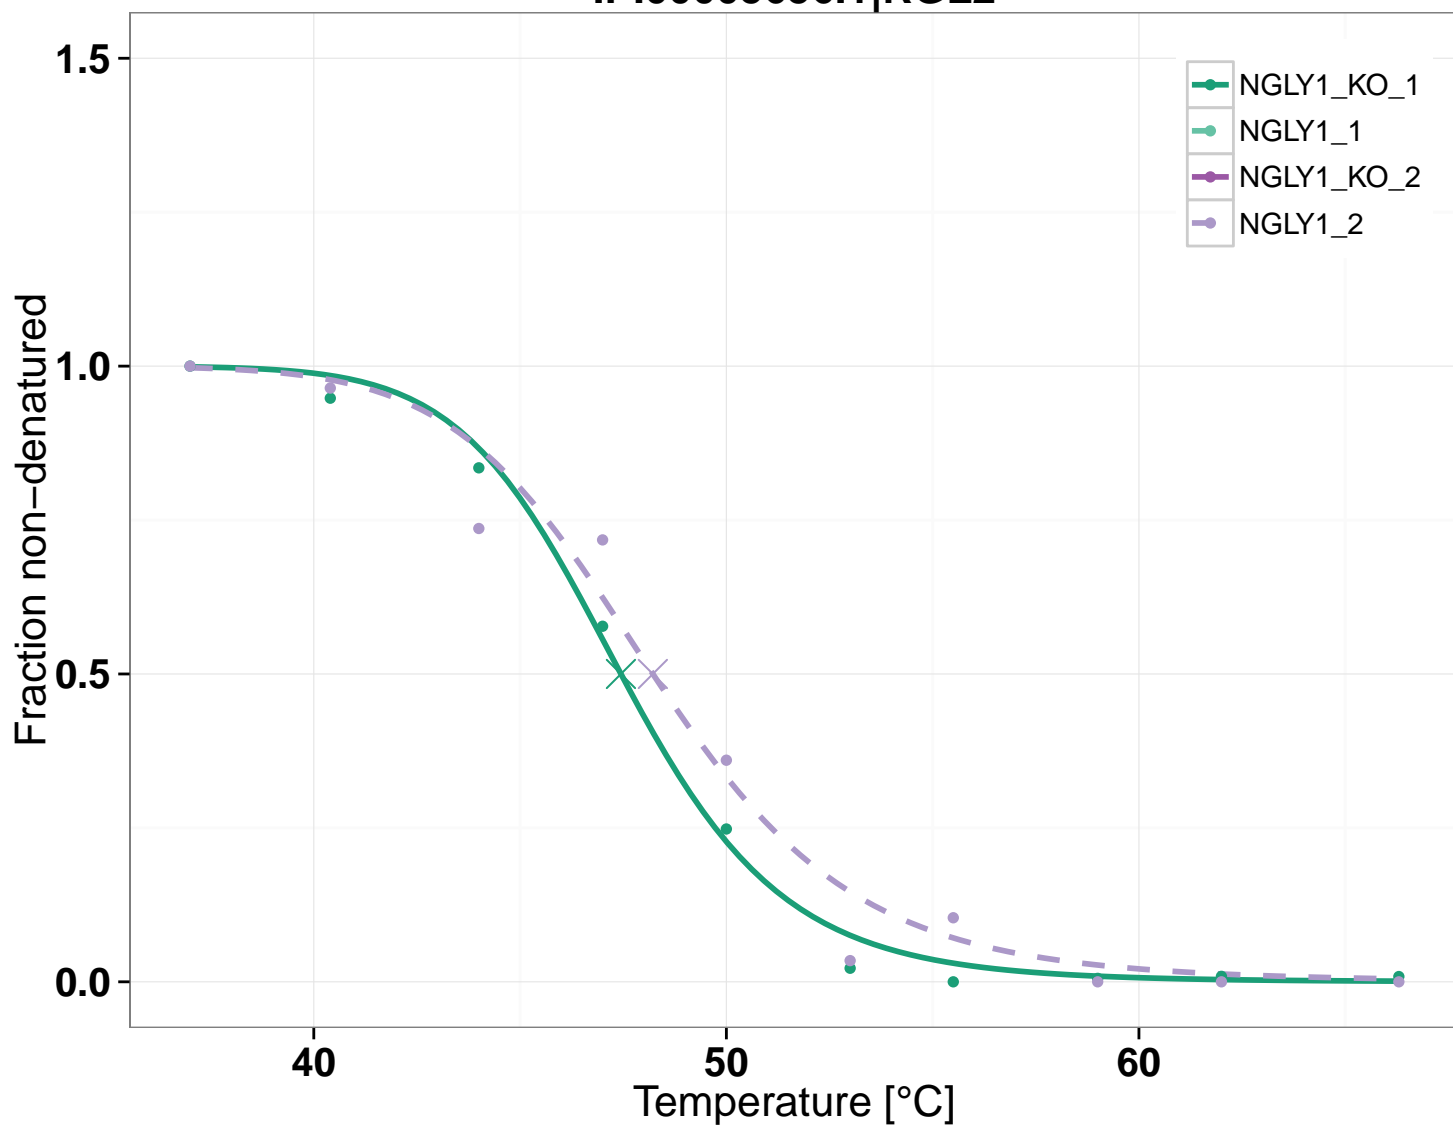

|            | meltPoint | slope | plateau | R2   |
|------------|-----------|-------|---------|------|
| NGLY1_KO_1 | 47.44     | -0.13 | 0       | 1    |
| NGLY1_1    | -         | -     | -       | -    |
| NGLY1_KO_2 | -         | -     | -       | -    |
| NGLY1_2    | 48.22     | -0.1  | 0       | 0.97 |

Supplement: Supplementary file 3398 [file 1]

IPI00790290.2|SPHK1

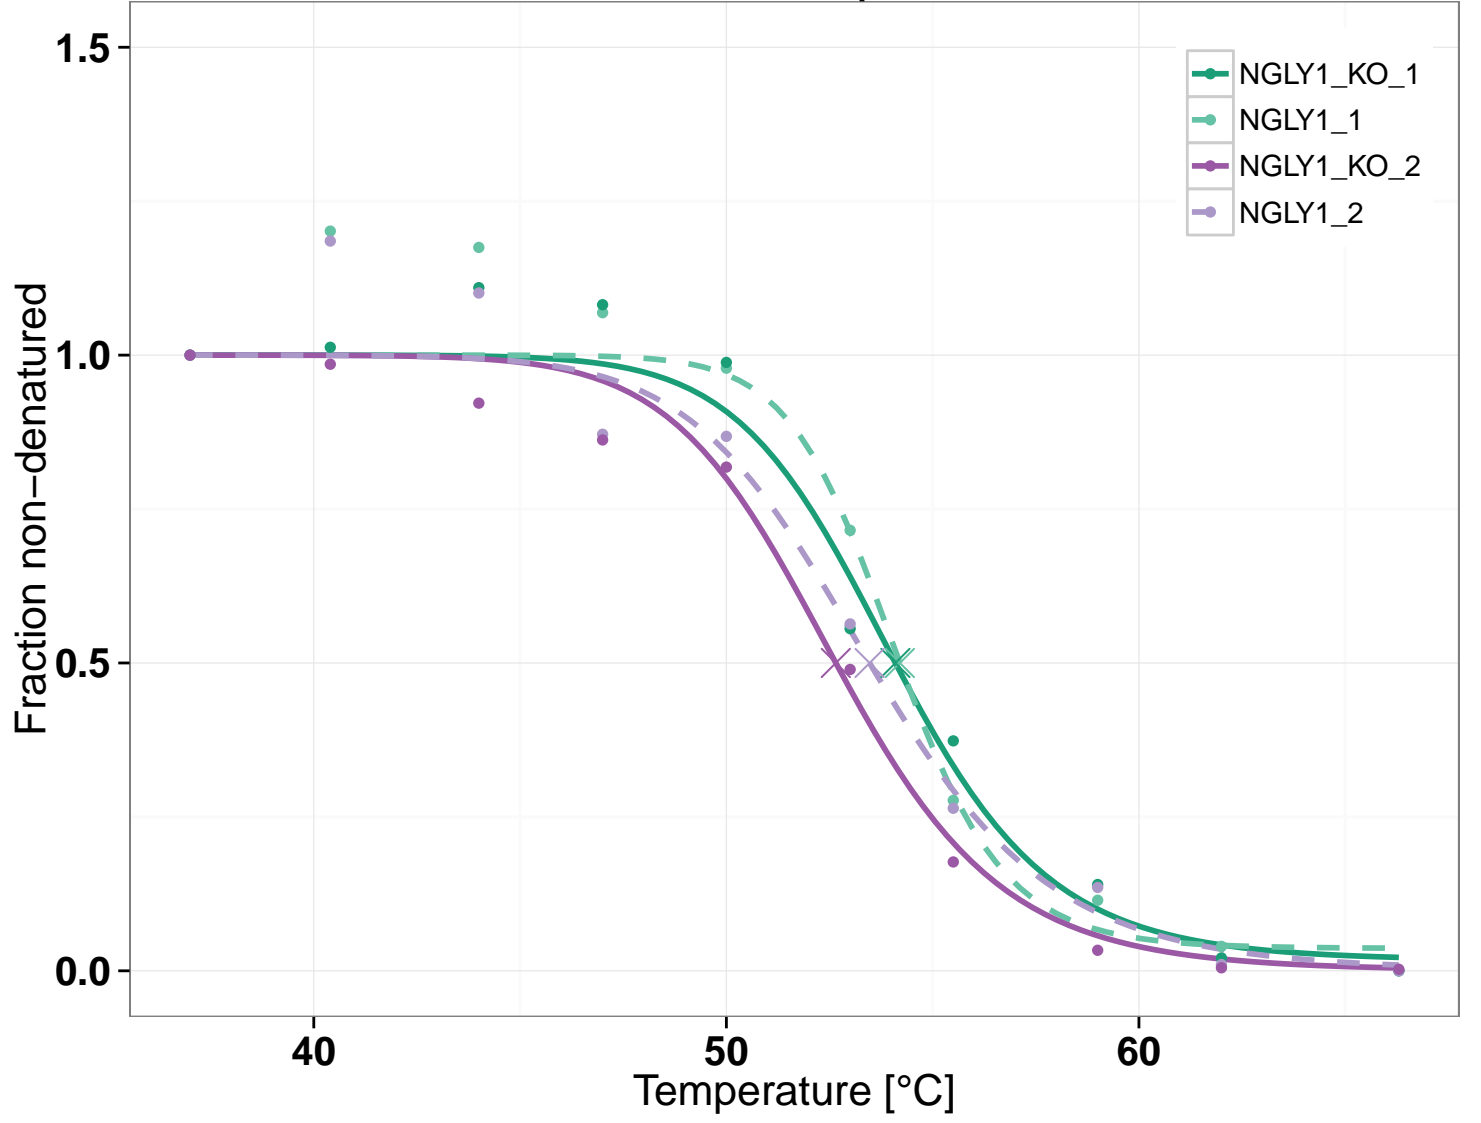

|            | meltPoint | slope | plateau | R2   |
|------------|-----------|-------|---------|------|
| NGLY1_KO_1 | 54.1      | -0.13 | 0.02    | 0.98 |
| NGLY1_1    | 54.21     | -0.18 | 0.04    | 0.96 |
| NGLY1_KO_2 | 52.65     | -0.12 | 0       | 0.99 |
| NGLY1_2    | 53.47     | -0.11 | 0       | 0.97 |

Supplement: Supplementary file 3399 [file 1]

# IPI00003348.3|GNB2

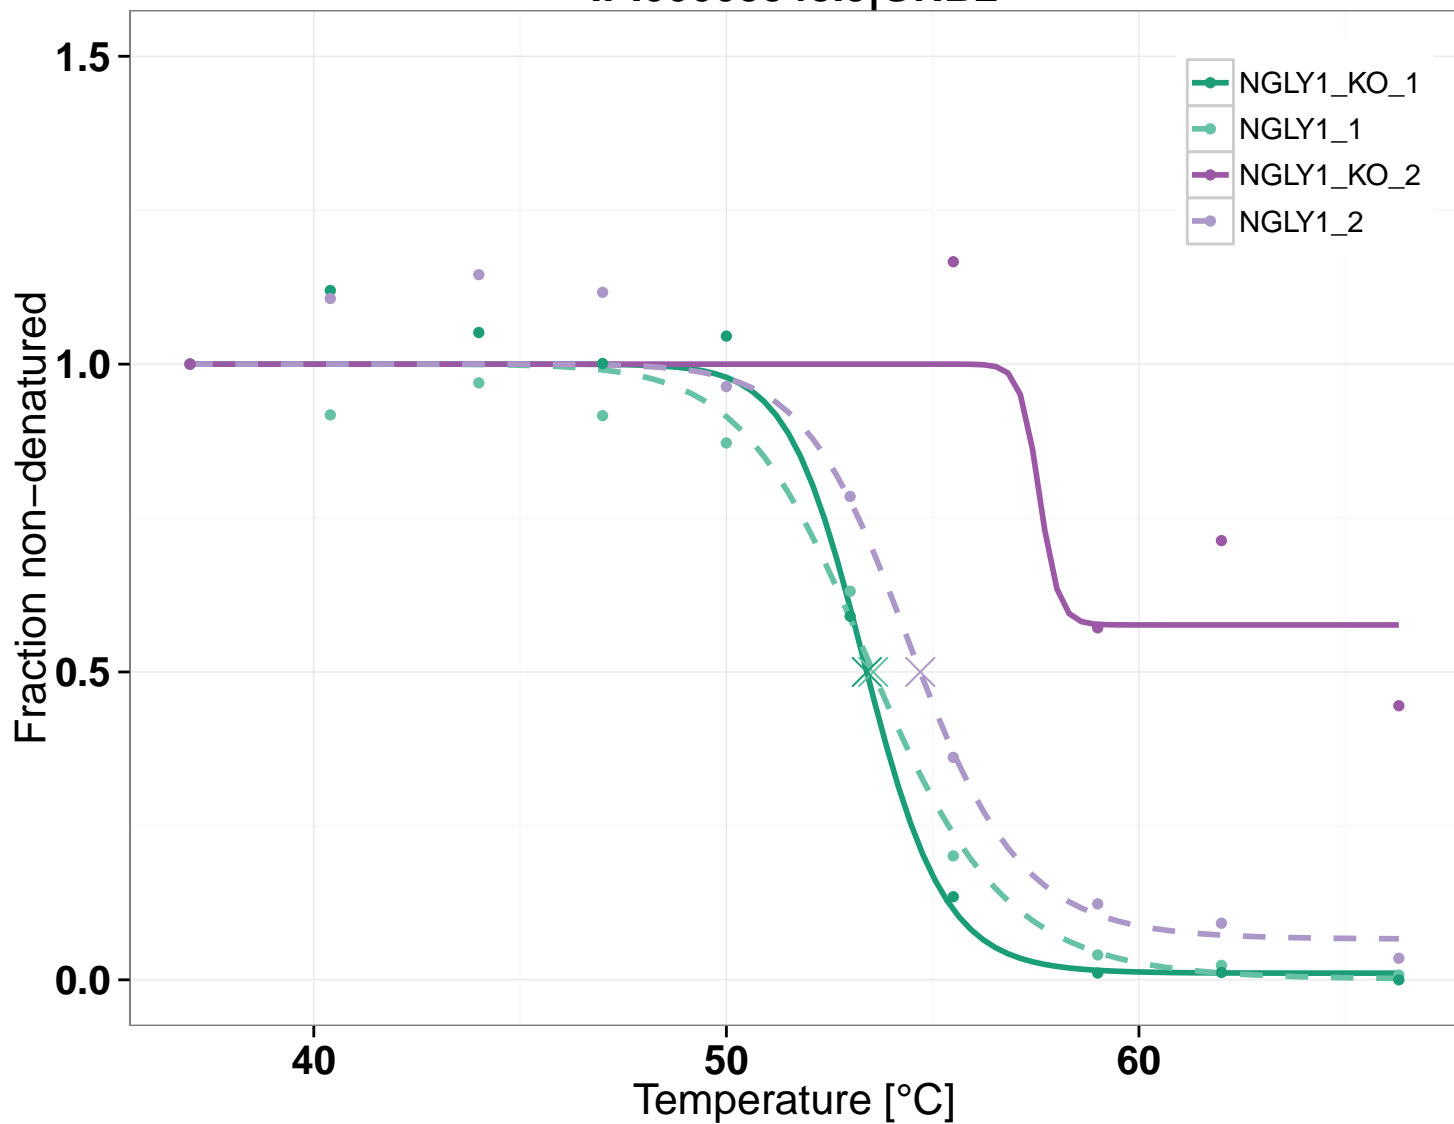

|            | meltPoint | slope | plateau | R2    |
|------------|-----------|-------|---------|-------|
| NGLY1_KO_1 | 53.4      | -0.26 | 0.01    | 0.99  |
| NGLY1_1    | 53.56     | -0.16 | 0       | 0.99  |
| NGLY1_KO_2 | -         | -0.46 | 0.58    | -0.66 |
| NGLY1_2    | 54.7      | -0.18 | 0.07    | 0.98  |

Supplement: Supplementary file 3400 [file 1]

# IPI00031755.1|RCE1

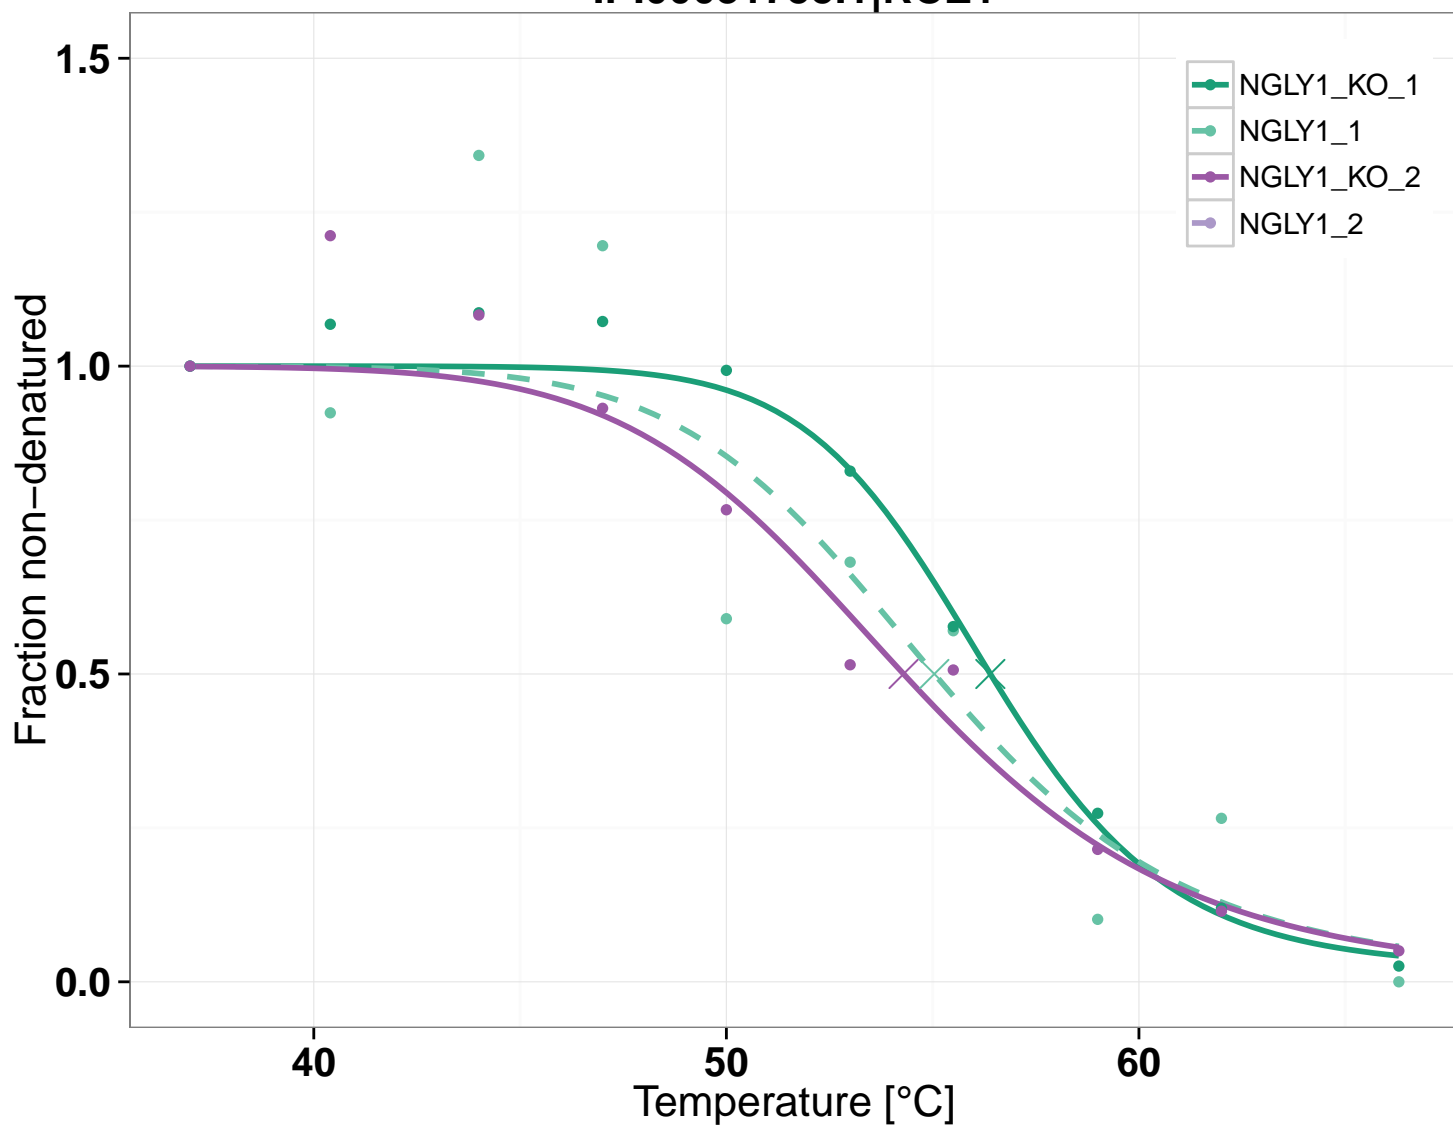

|            | meltPoint | slope  | plateau | R2   |
|------------|-----------|--------|---------|------|
| NGLY1_KO_1 | 56.4      | -0.11  | 0.02    | 0.99 |
| NGLY1_1    | 55.04     | -0.08  | 0.01    | 0.83 |
| NGLY1_KO_2 | 54.29     | -0.074 | 0       | 0.95 |
| NGLY1_2    | -         | -      | -       | -    |

Supplement: Supplementary file 3401 [file 1]

IPI00107113.3|UTP14A

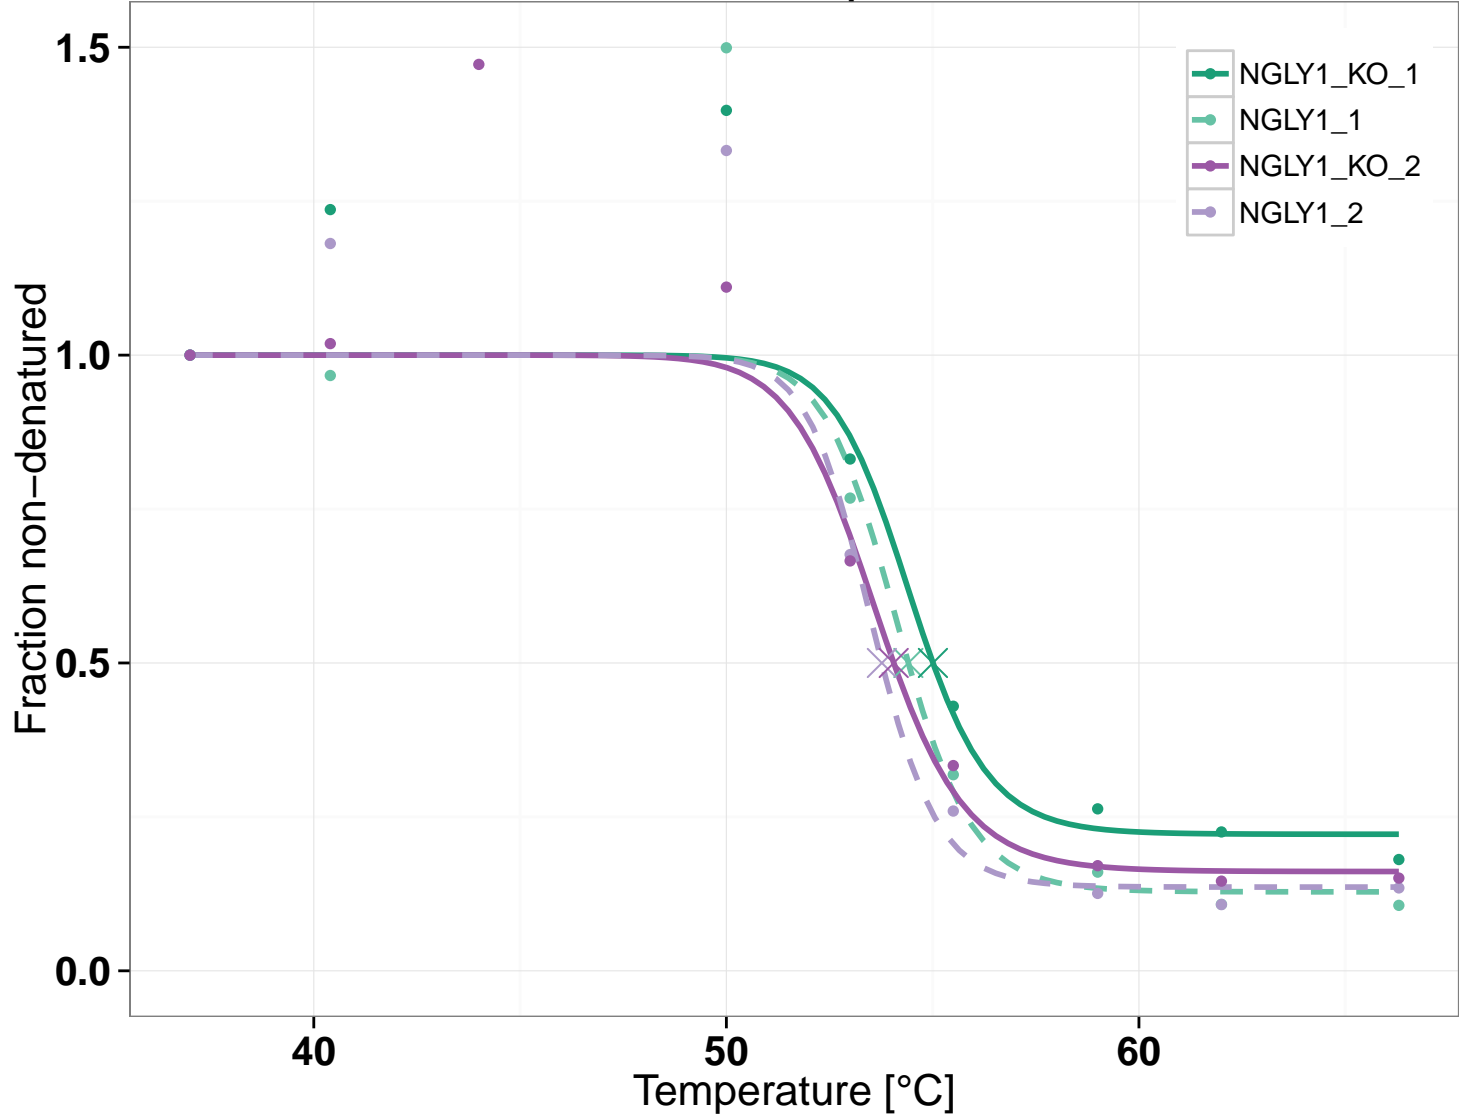

|            | meltPoint | slope | plateau | R2   |
|------------|-----------|-------|---------|------|
| NGLY1_KO_1 | 55.01     | -0.21 | 0.22    | 0.63 |
| NGLY1_1    | 54.41     | -0.24 | 0.13    | 0.55 |
| NGLY1_KO_2 | 54.06     | -0.2  | 0.16    | 0.75 |
| NGLY1_2    | 53.77     | -0.27 | 0.14    | 0.69 |

Supplement: Supplementary file 3402 [file 1]

IPI00172513.4|APPL2

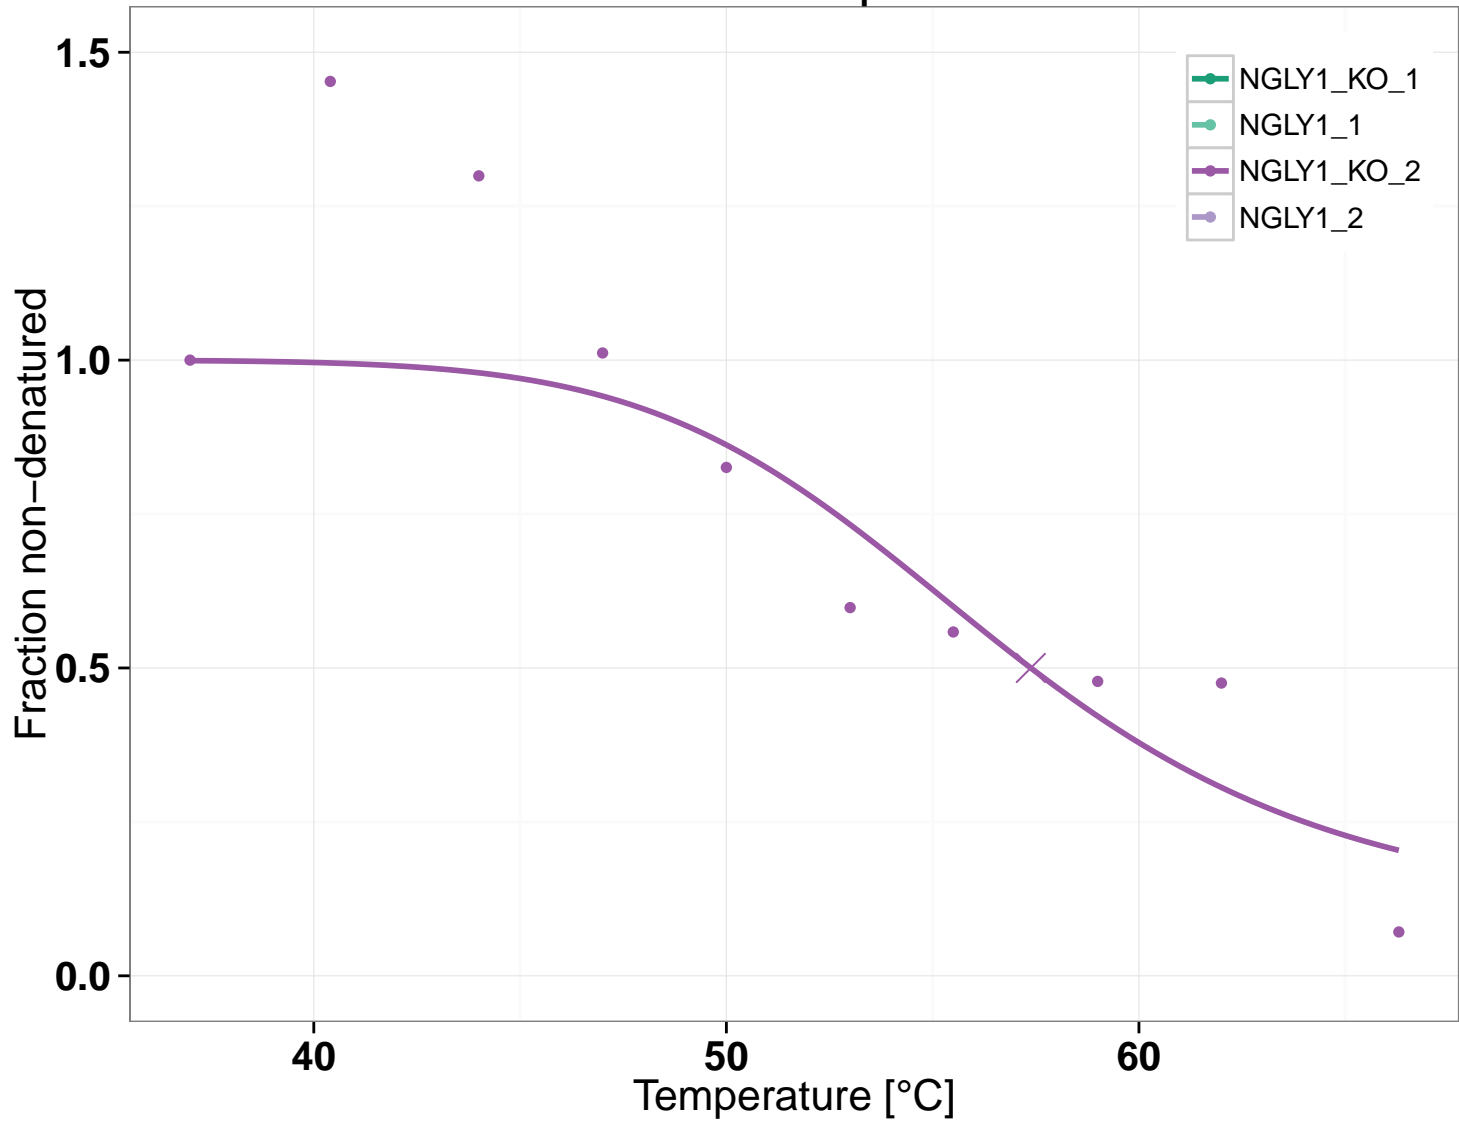

|            | meltPoint | slope  | plateau | R2   |
|------------|-----------|--------|---------|------|
| NGLY1_KO_1 | —         | —      | —       | —    |
| NGLY1_1    | —         | —      | —       | —    |
| NGLY1_KO_2 | 57.38     | -0.054 | 0.09    | 0.76 |
| NGLY1_2    | —         | —      | —       | —    |

Supplement: Supplementary file 3403 [file 1]

IPI00010433.3|SATB2

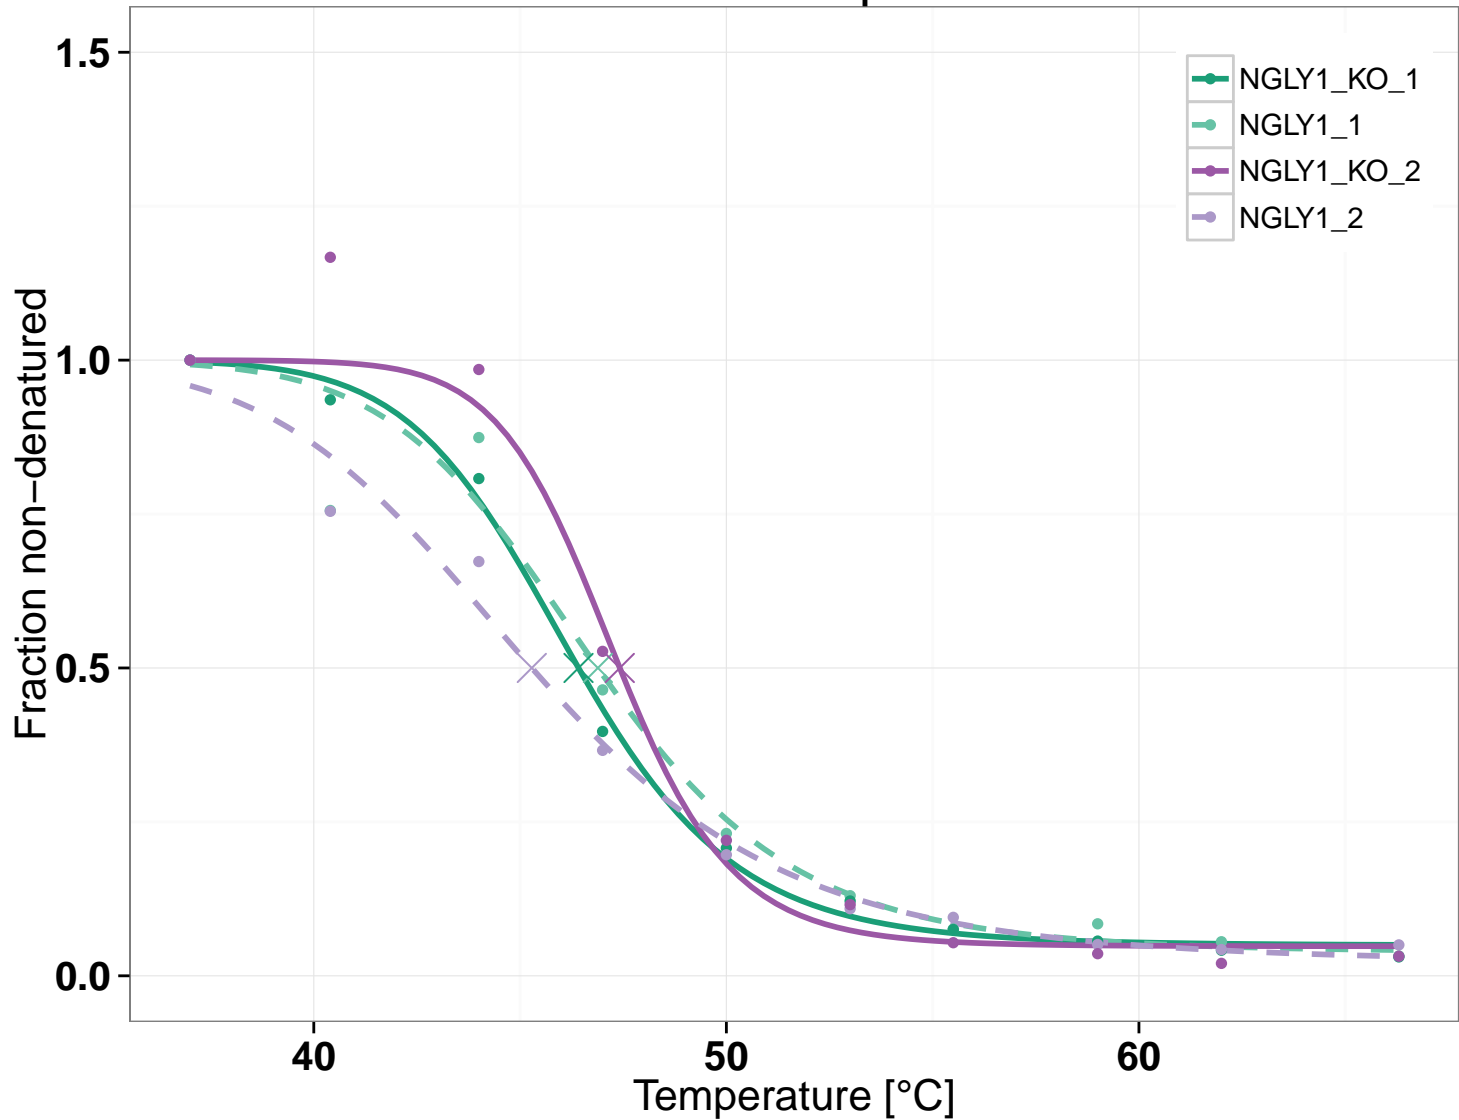

|            | meltPoint | slope  | plateau | R2   |
|------------|-----------|--------|---------|------|
| NGLY1_KO_1 | 46.42     | -0.12  | 0.05    | 1    |
| NGLY1_1    | 46.89     | -0.097 | 0.04    | 0.96 |
| NGLY1_KO_2 | 47.42     | -0.17  | 0.05    | 0.98 |
| NGLY1_2    | 45.28     | -0.078 | 0.02    | 0.99 |

Supplement: Supplementary file 3404 [file 1]

IPI00020002.3|CNO

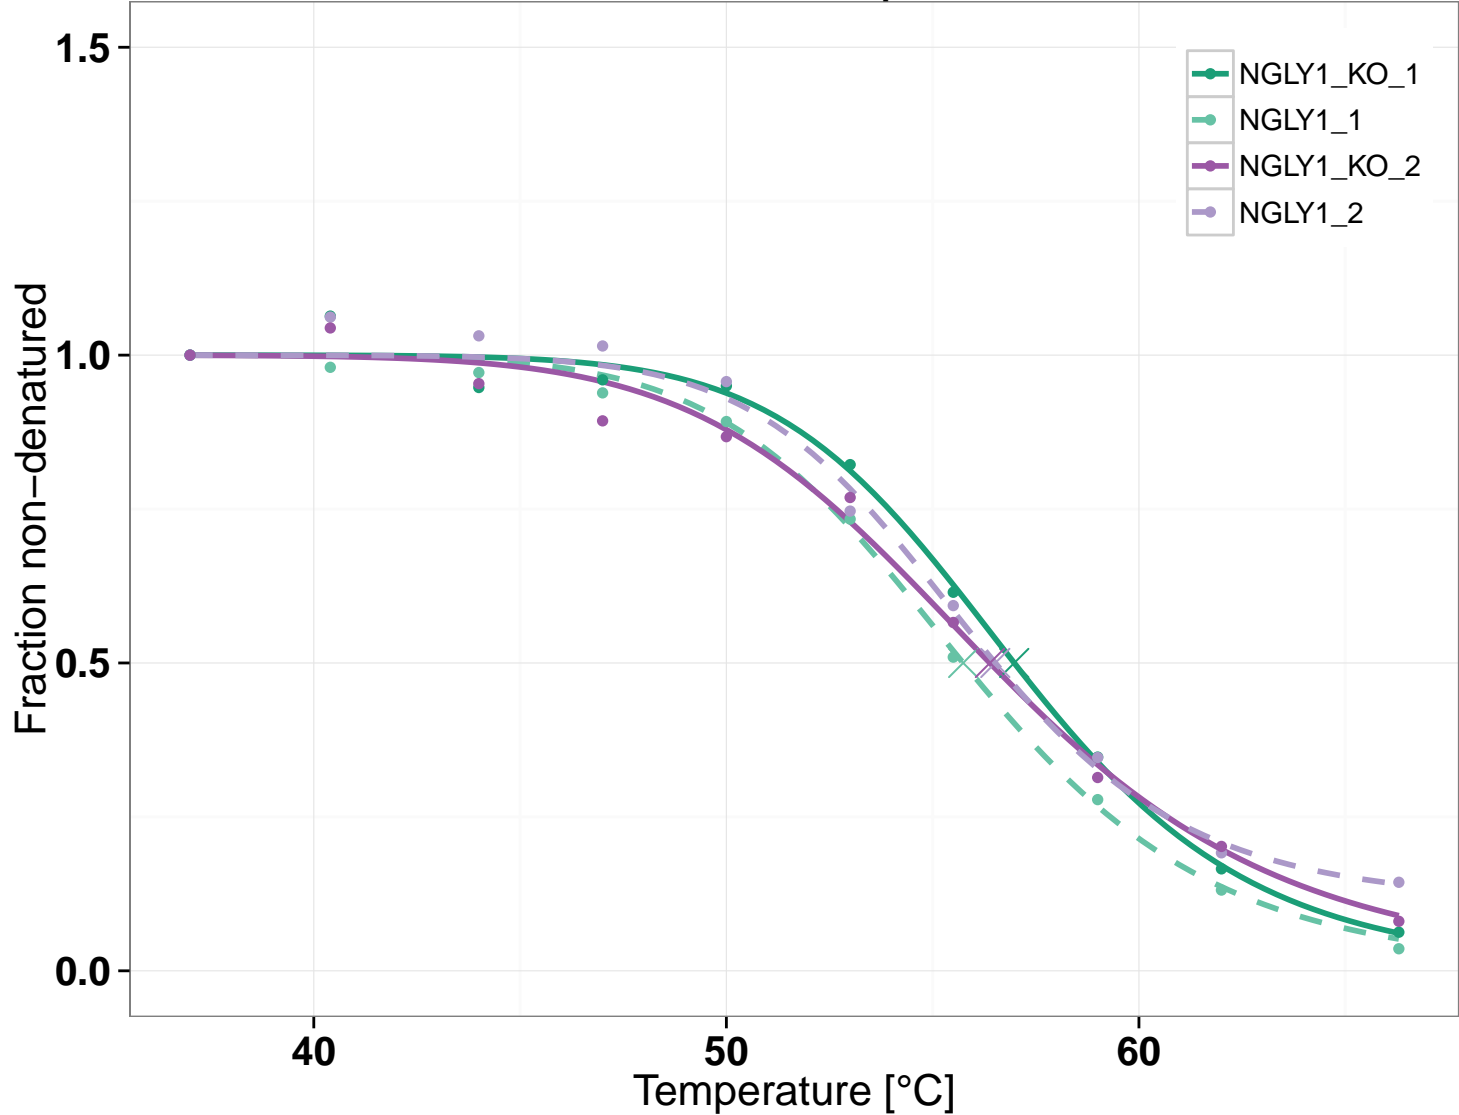

|            | meltPoint | slope  | plateau | R2   |
|------------|-----------|--------|---------|------|
| NGLY1_KO_1 | 56.98     | -0.086 | 0       | 0.99 |
| NGLY1_1    | 55.74     | -0.083 | 0       | 1    |
| NGLY1_KO_2 | 56.39     | -0.07  | 0       | 0.99 |
| NGLY1_2    | 56.52     | -0.085 | 0.11    | 0.99 |

Supplement: Supplementary file 3405 [file 1]

IPI00303980.6|C14ORF93

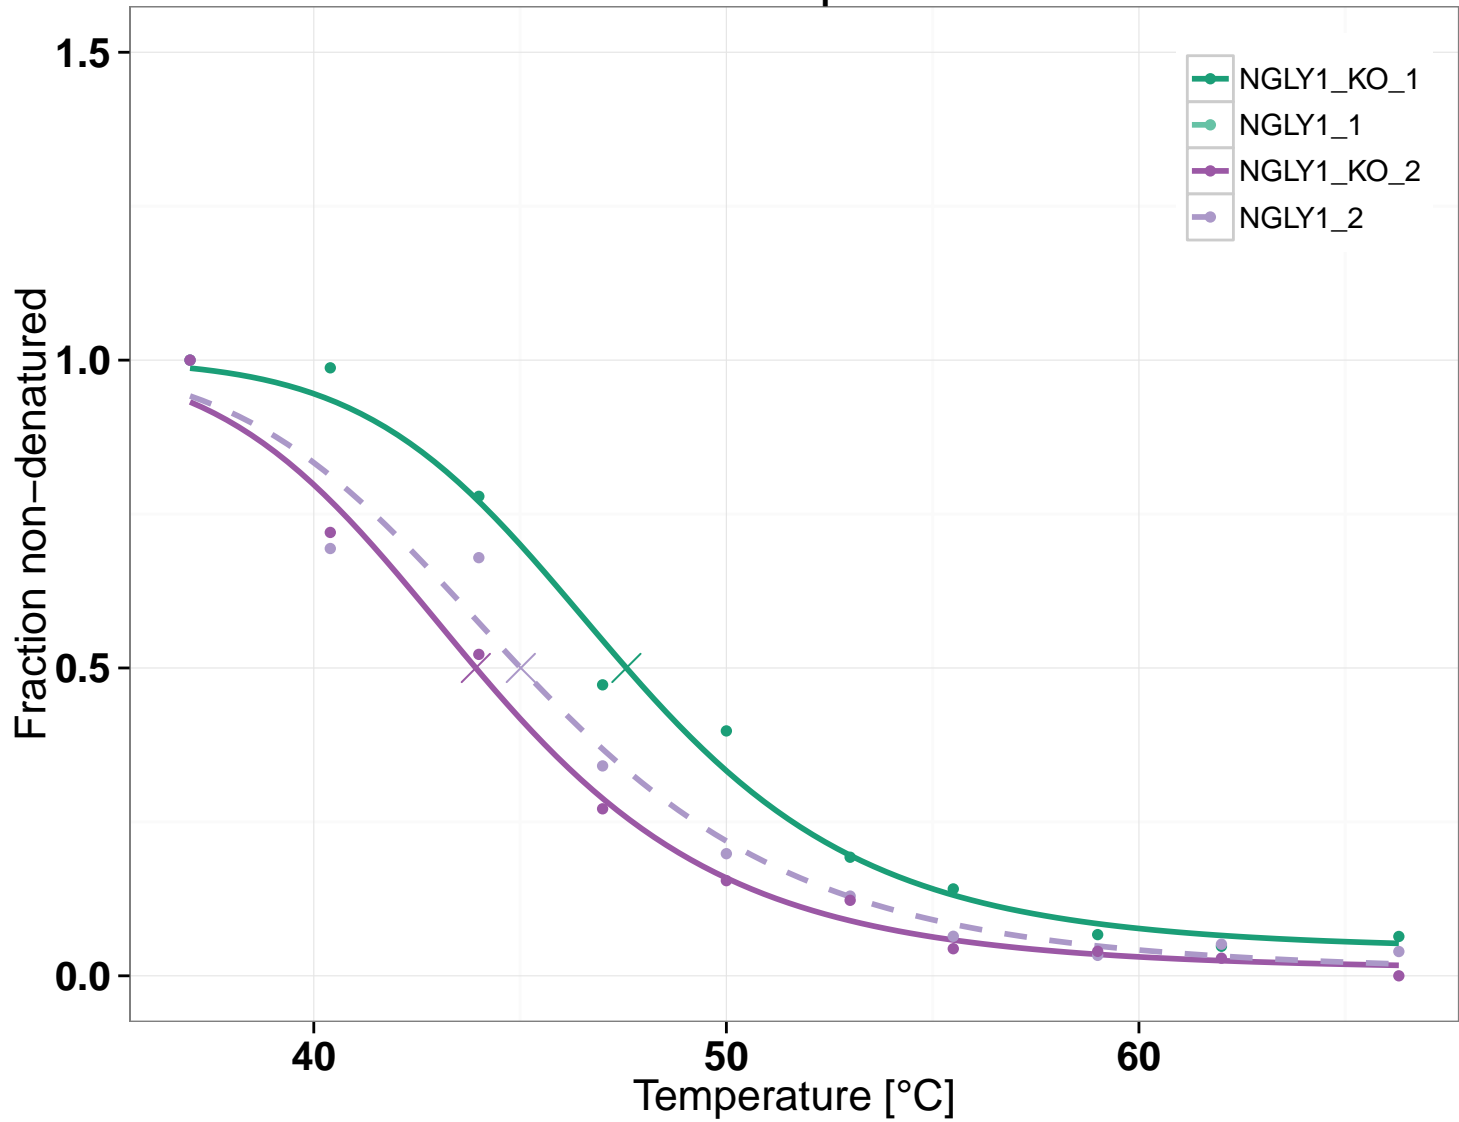

|            | meltPoint | slope  | plateau | R2   |
|------------|-----------|--------|---------|------|
| NGLY1_KO_1 | 47.58     | -0.079 | 0.04    | 0.99 |
| NGLY1_1    | -         | -      | -       | -    |
| NGLY1_KO_2 | 43.93     | -0.081 | 0.01    | 0.99 |
| NGLY1_2    | 45.02     | -0.073 | 0       | 0.97 |

Supplement: Supplementary file 3406 [file 1]

IPI00737545.3|SGK269

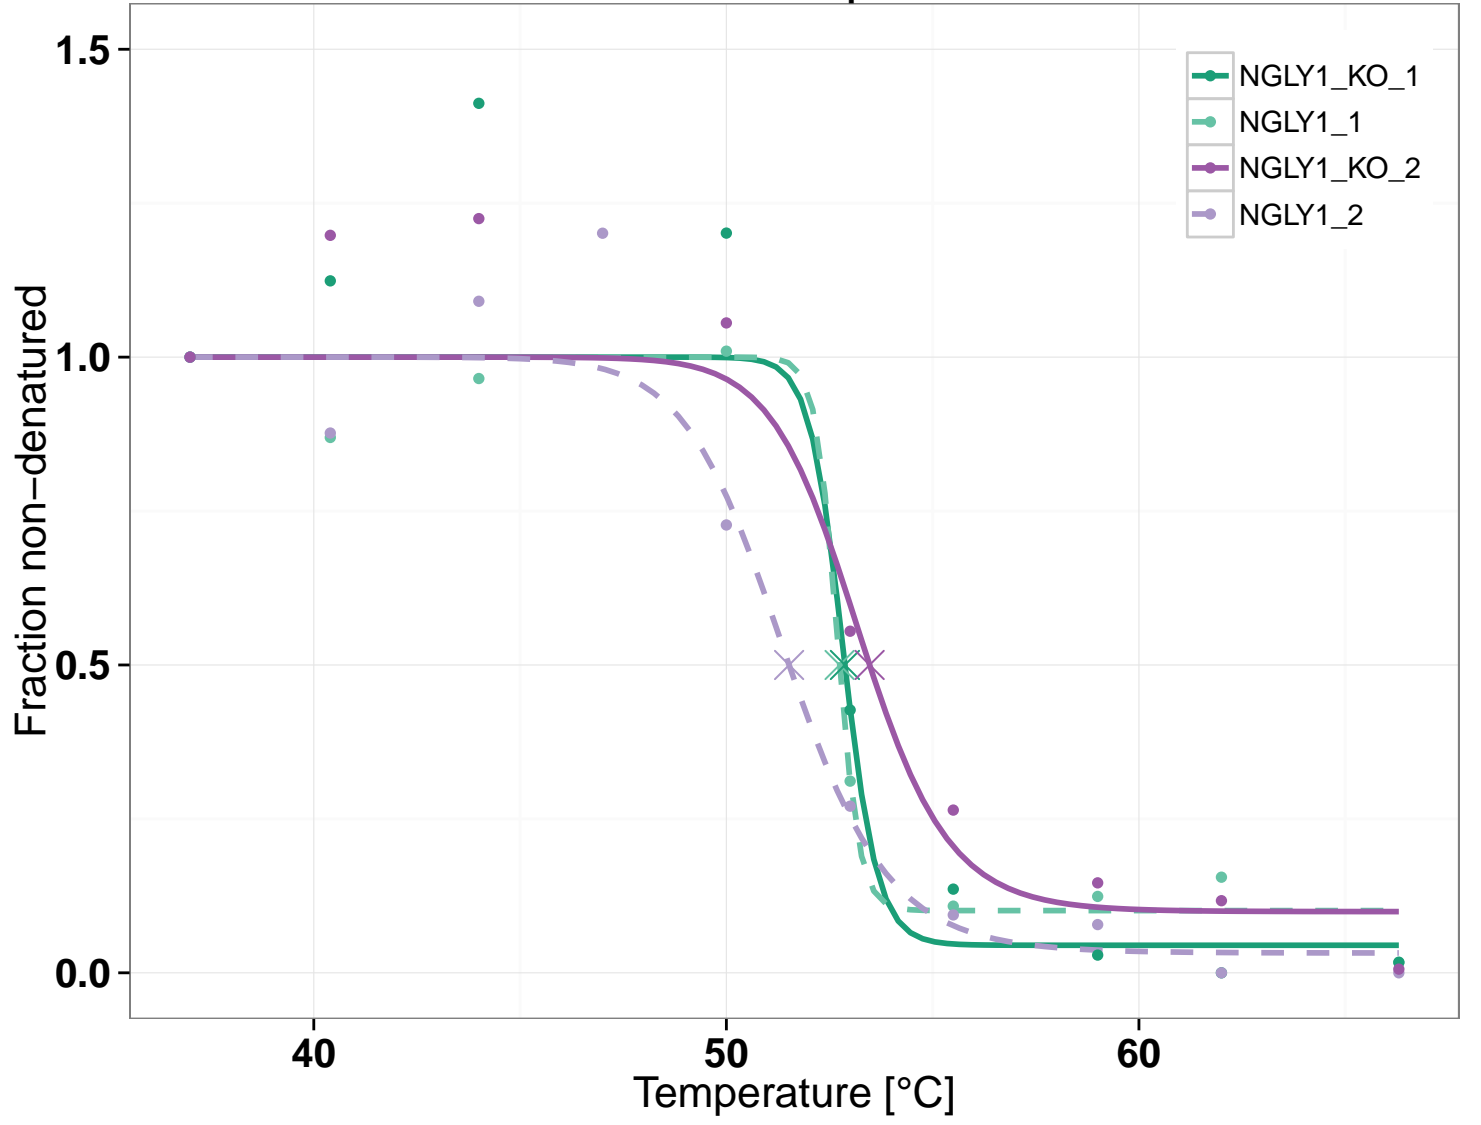

|            | meltPoint | slope | plateau | R2   |
|------------|-----------|-------|---------|------|
| NGLY1_KO_1 | 52.87     | -0.58 | 0.04    | 0.83 |
| NGLY1_1    | 52.74     | -0.85 | 0.1     | 0.85 |
| NGLY1_KO_2 | 53.47     | -0.21 | 0.1     | 0.85 |
| NGLY1_2    | 51.52     | -0.2  | 0.03    | 0.96 |

Supplement: Supplementary file 3407 [file 1]

IPI00741097.2|GSTT1

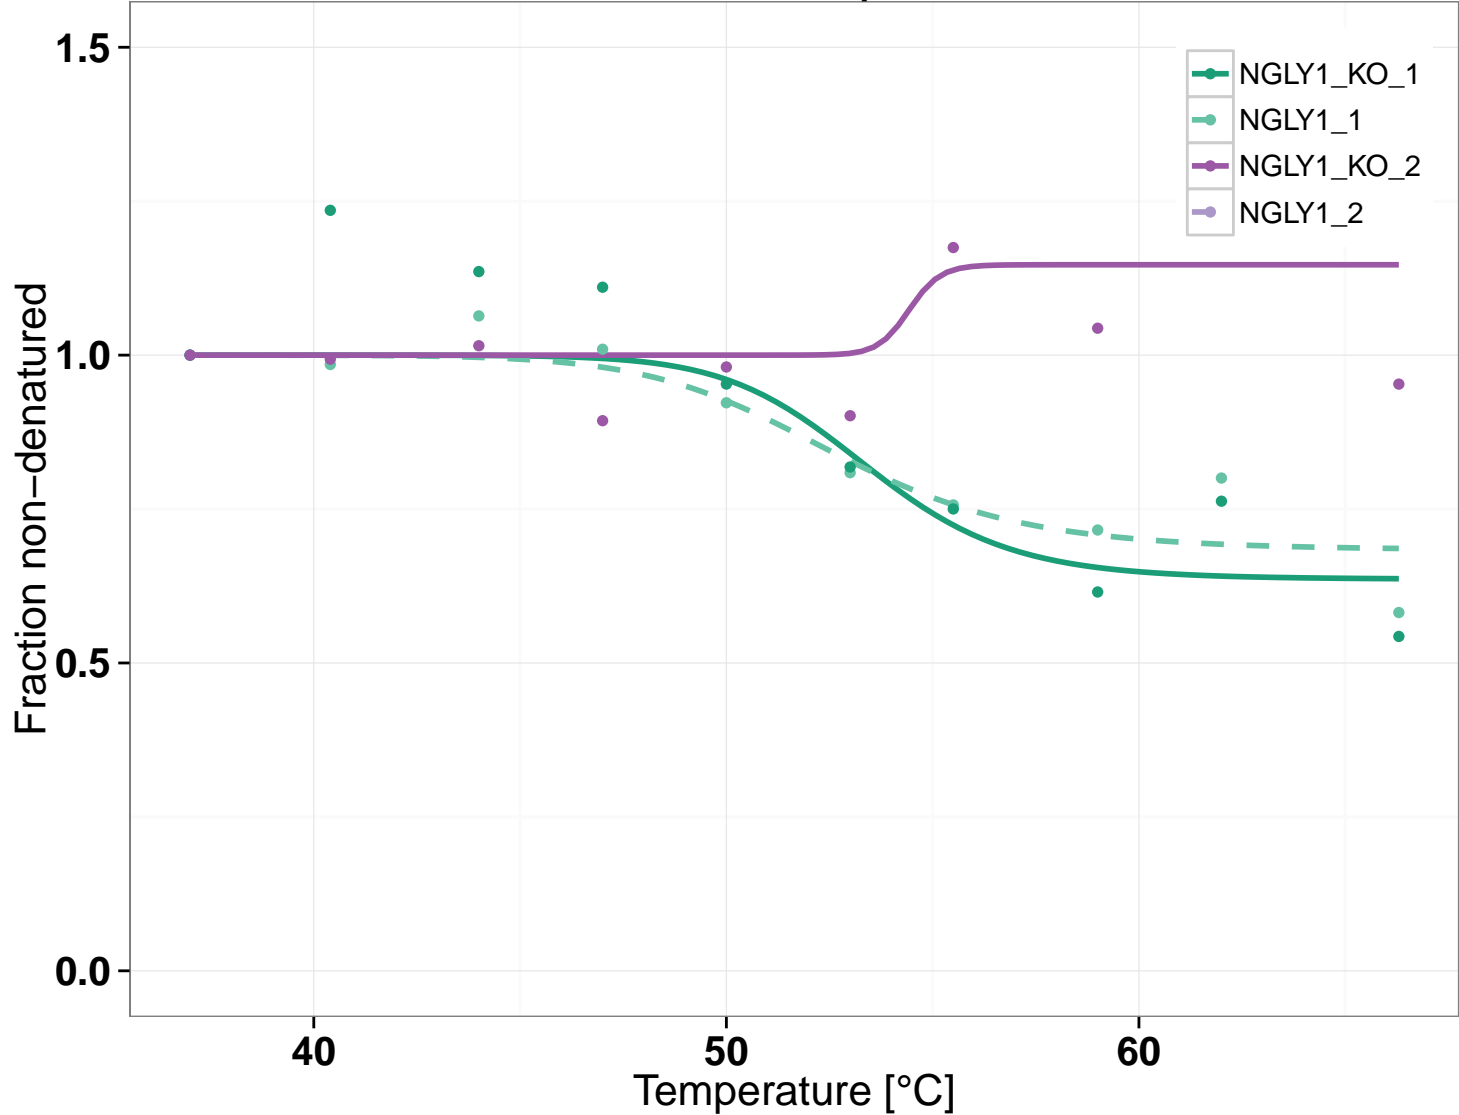

|            | meltPoint | slope  | plateau | R2   |
|------------|-----------|--------|---------|------|
| NGLY1_KO_1 | -         | -0.052 | 0.64    | 0.76 |
| NGLY1_1    | -         | -0.035 | 0.68    | 0.87 |
| NGLY1_KO_2 | -         | 0.098  | 1.15    | 0.33 |
| NGLY1_2    | -         | -      | -       | -    |

Supplement: Supplementary file 3408 [file 1]

# IPI00007277.2|LRRFIP2

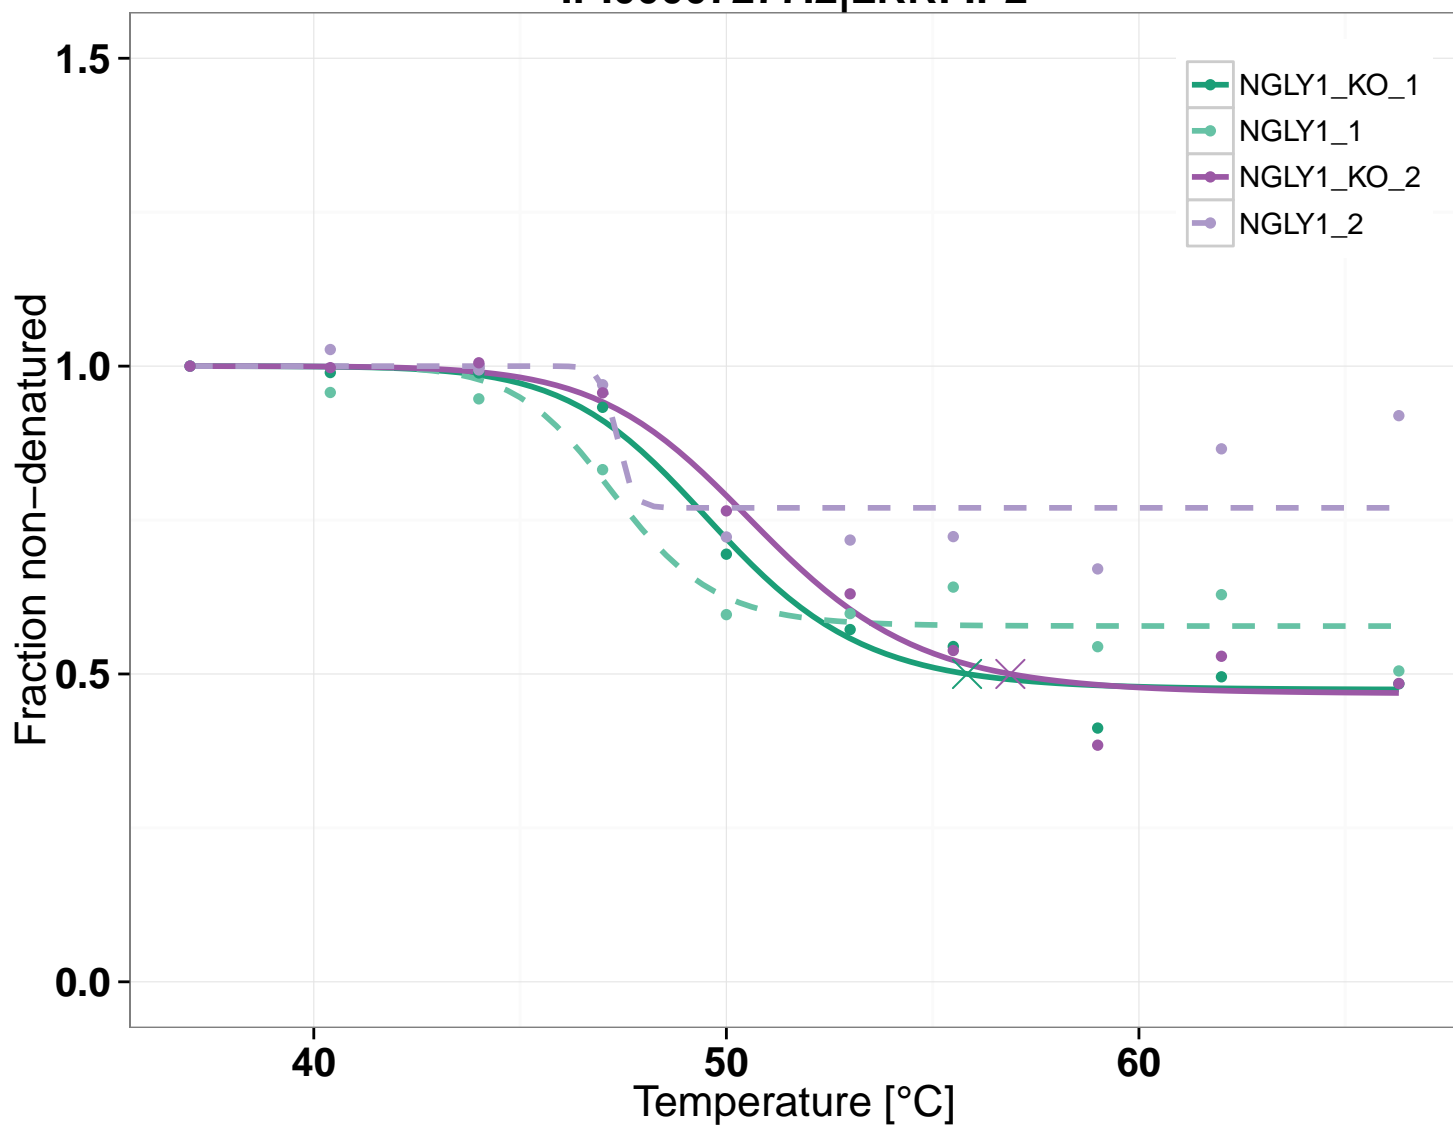

|            | meltPoint | slope  | plateau | R2   |
|------------|-----------|--------|---------|------|
| NGLY1_KO_1 | 55.83     | -0.072 | 0.47    | 0.98 |
| NGLY1_1    | -         | -0.087 | 0.58    | 0.95 |
| NGLY1_KO_2 | 56.88     | -0.068 | 0.47    | 0.97 |
| NGLY1_2    | -         | -0.3   | 0.77    | 0.72 |

Supplement: Supplementary file 3409 [file 1]

# IPI00418446.4|ASA1

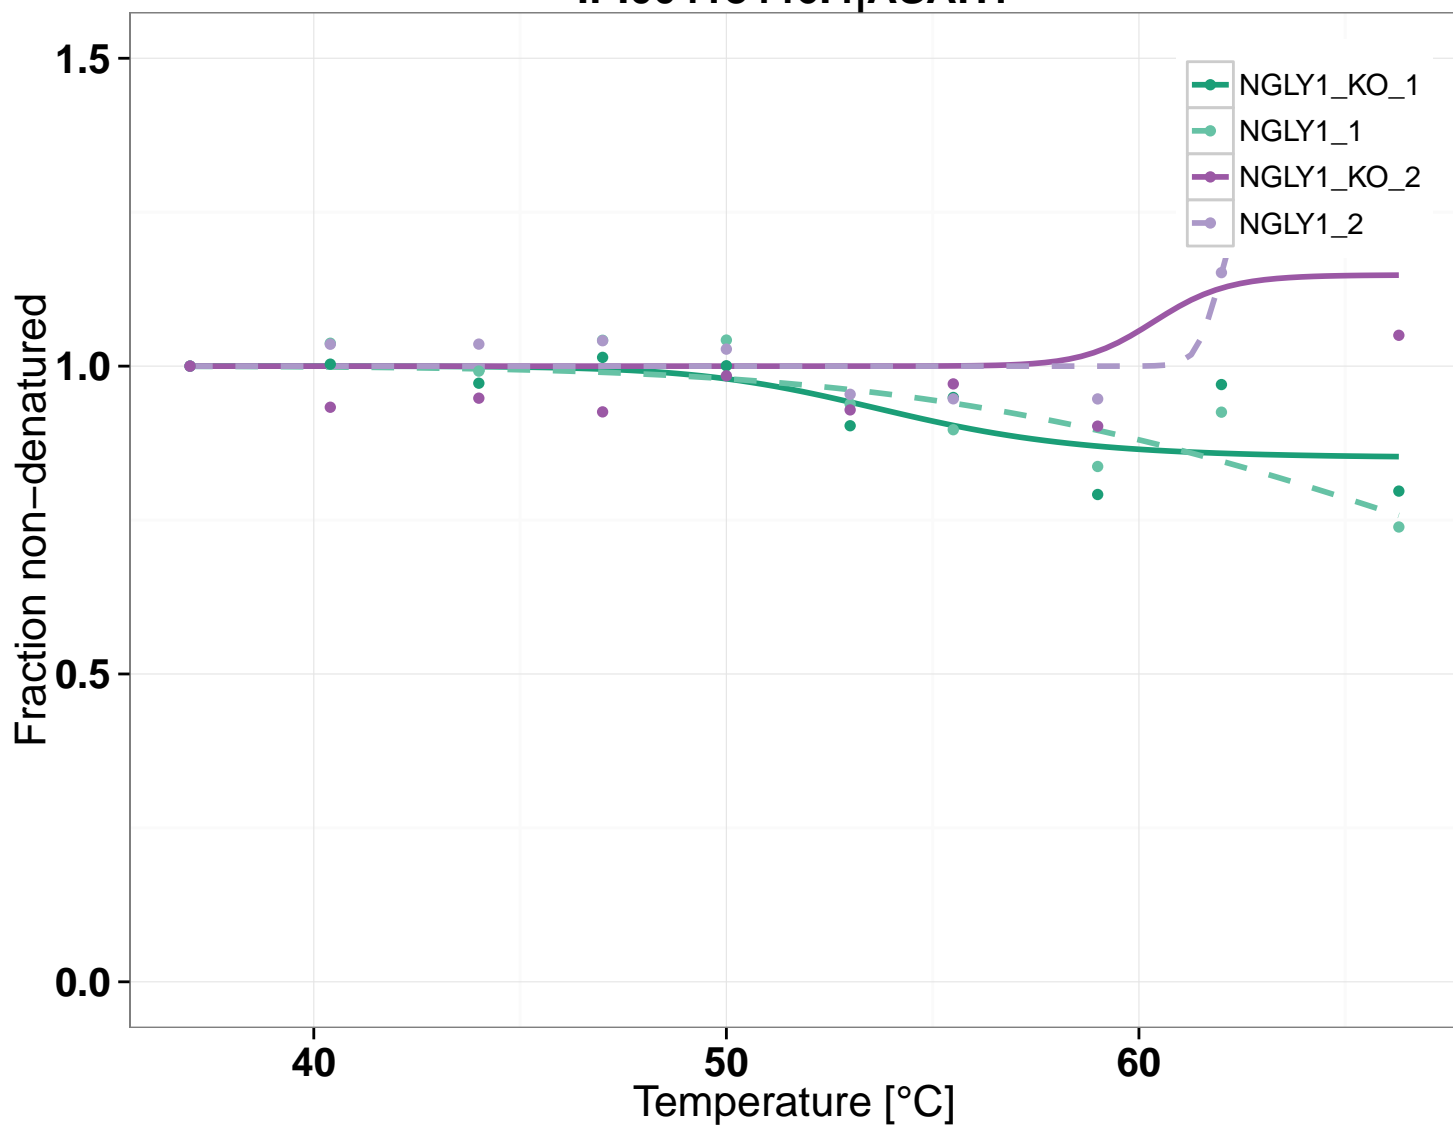

|            | meltPoint | slope  | plateau | R2   |
|------------|-----------|--------|---------|------|
| NGLY1_KO_1 | –         | –0.016 | 0.85    | 0.57 |
| NGLY1_1    | –         | –      | 0.19    | 0.77 |
| NGLY1_KO_2 | –         | 0.042  | 1.15    | 0.38 |
| NGLY1_2    | –         | 0.26   | 1.26    | 0.86 |

Supplement: Supplementary file 3410 [file 1]

IPI00101952.5|SLC35E1

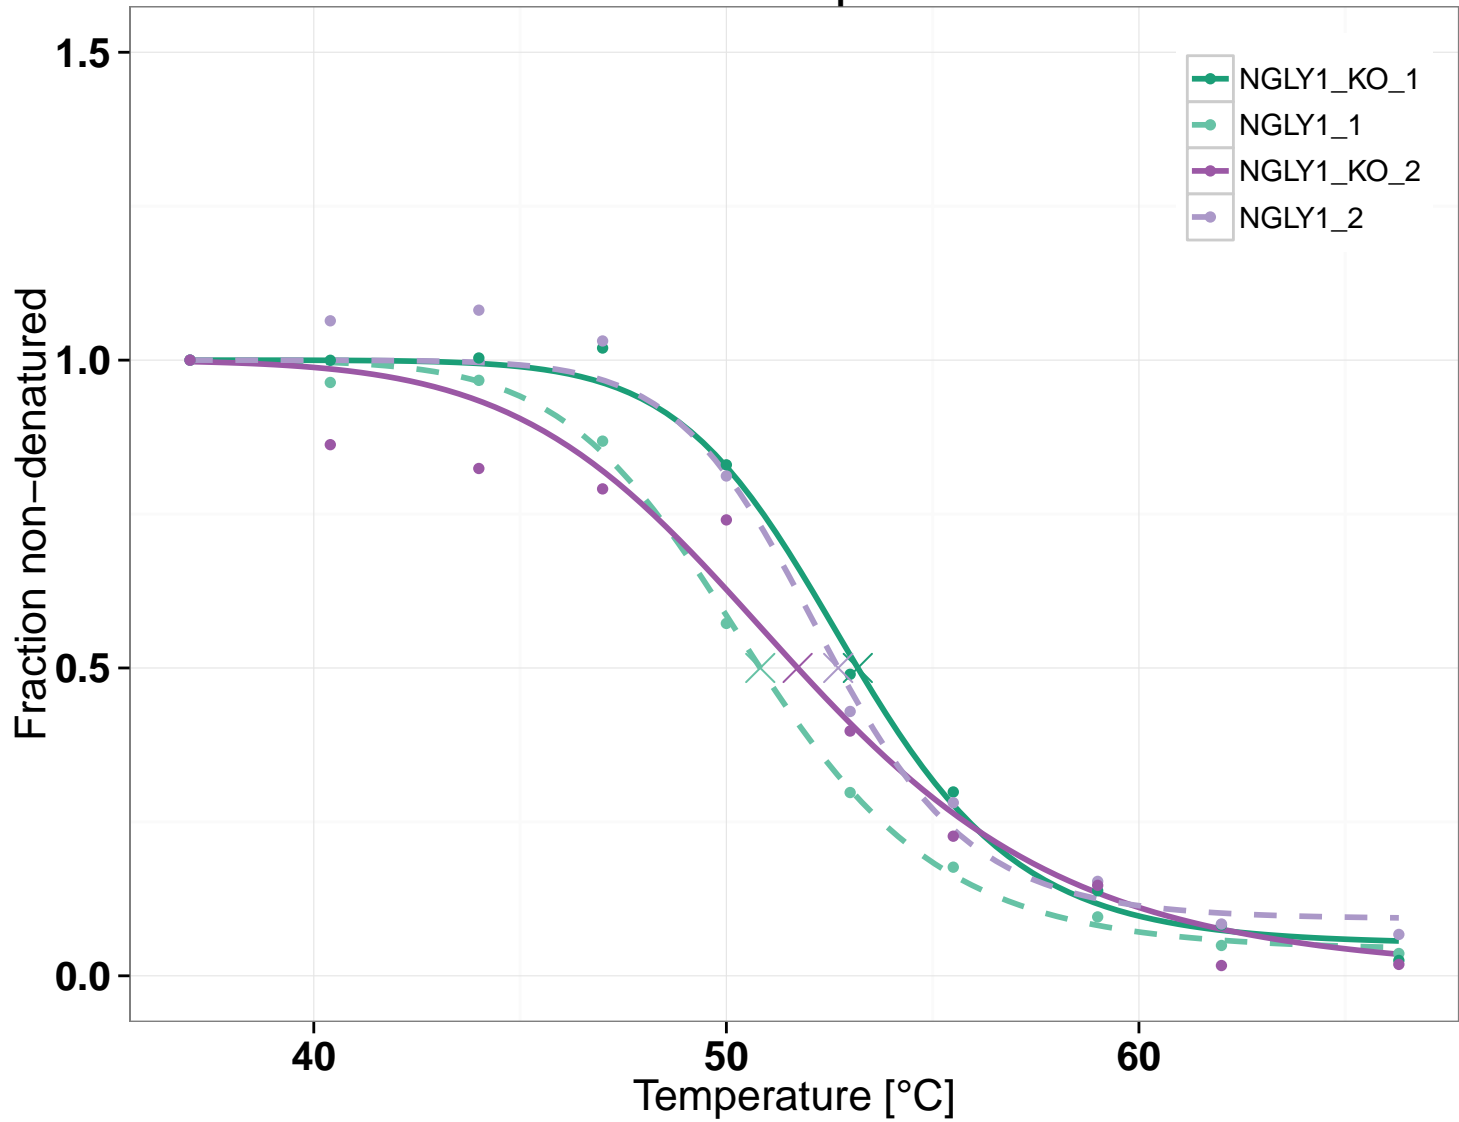

|            | meltPoint | slope  | plateau | R2   |
|------------|-----------|--------|---------|------|
| NGLY1_KO_1 | 53.19     | -0.11  | 0.05    | 1    |
| NGLY1_1    | 50.82     | -0.1   | 0.04    | 1    |
| NGLY1_KO_2 | 51.73     | -0.074 | 0       | 0.96 |
| NGLY1_2    | 52.71     | -0.13  | 0.09    | 0.99 |

Supplement: Supplementary file 3411 [file 1]

IPI00032387.1|GINS1

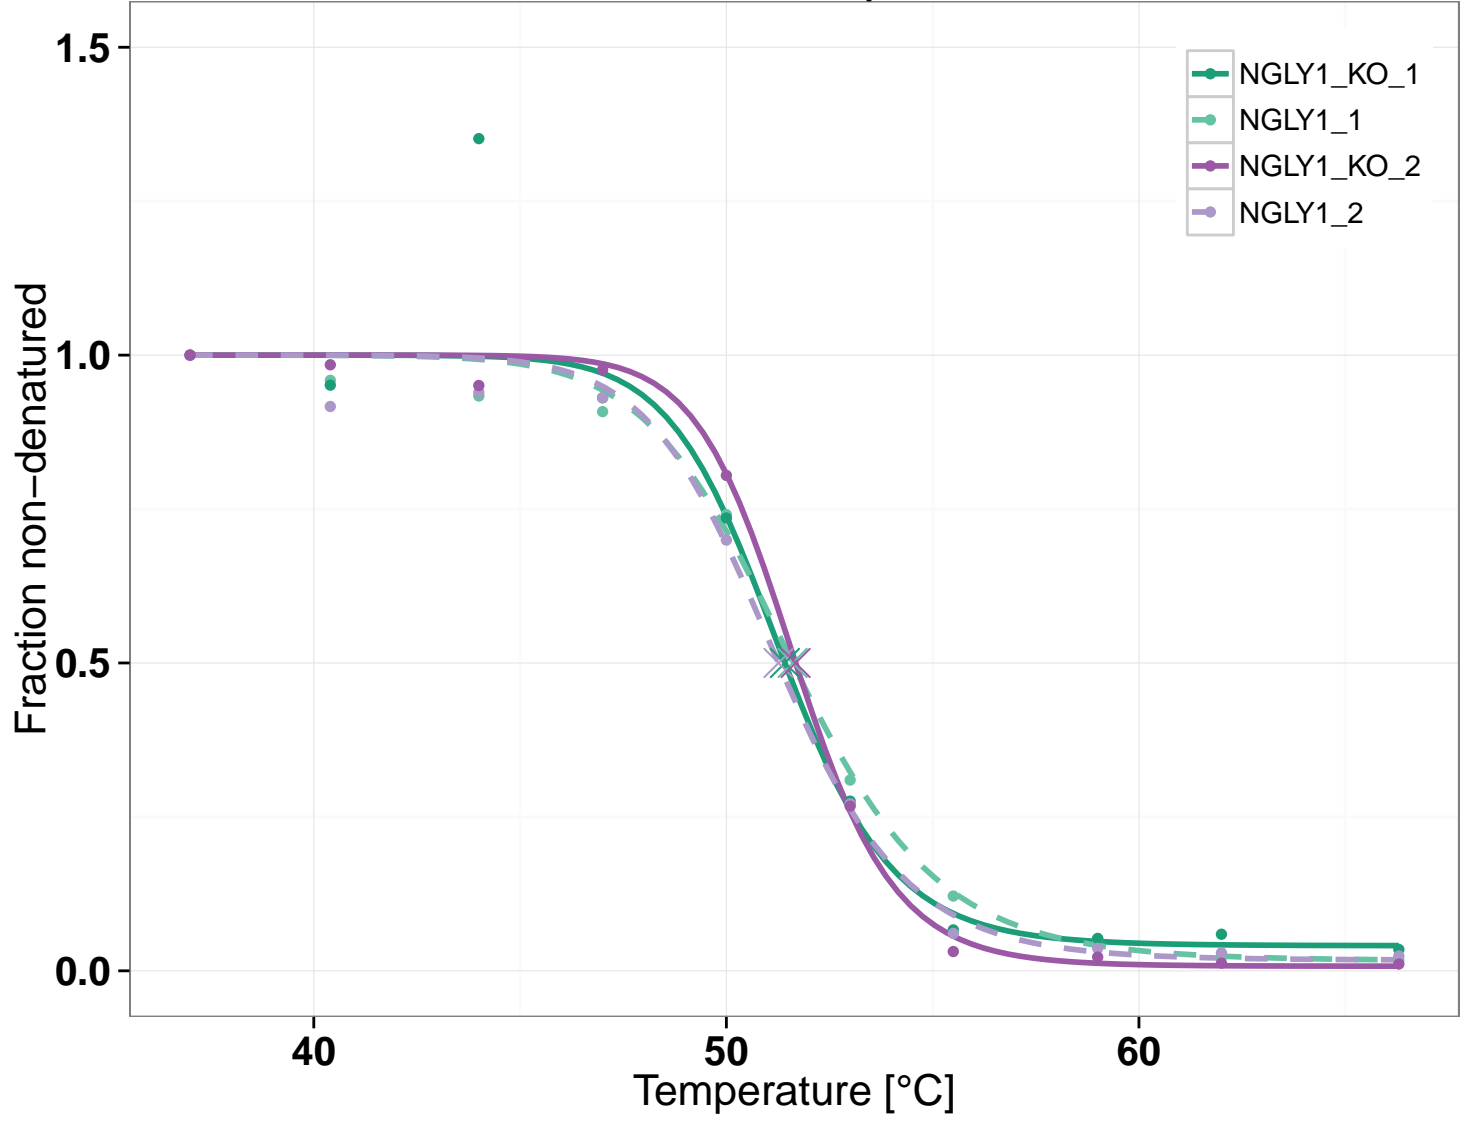

|            | meltPoint | slope | plateau | R2   |
|------------|-----------|-------|---------|------|
| NGLY1_KO_1 | 51.42     | -0.18 | 0.04    | 0.94 |
| NGLY1_1    | 51.6      | -0.14 | 0.02    | 1    |
| NGLY1_KO_2 | 51.68     | -0.21 | 0.01    | 1    |
| NGLY1_2    | 51.26     | -0.16 | 0.02    | 0.99 |

Supplement: Supplementary file 3412 [file 1]

IPI00169441.4|CLEC16A

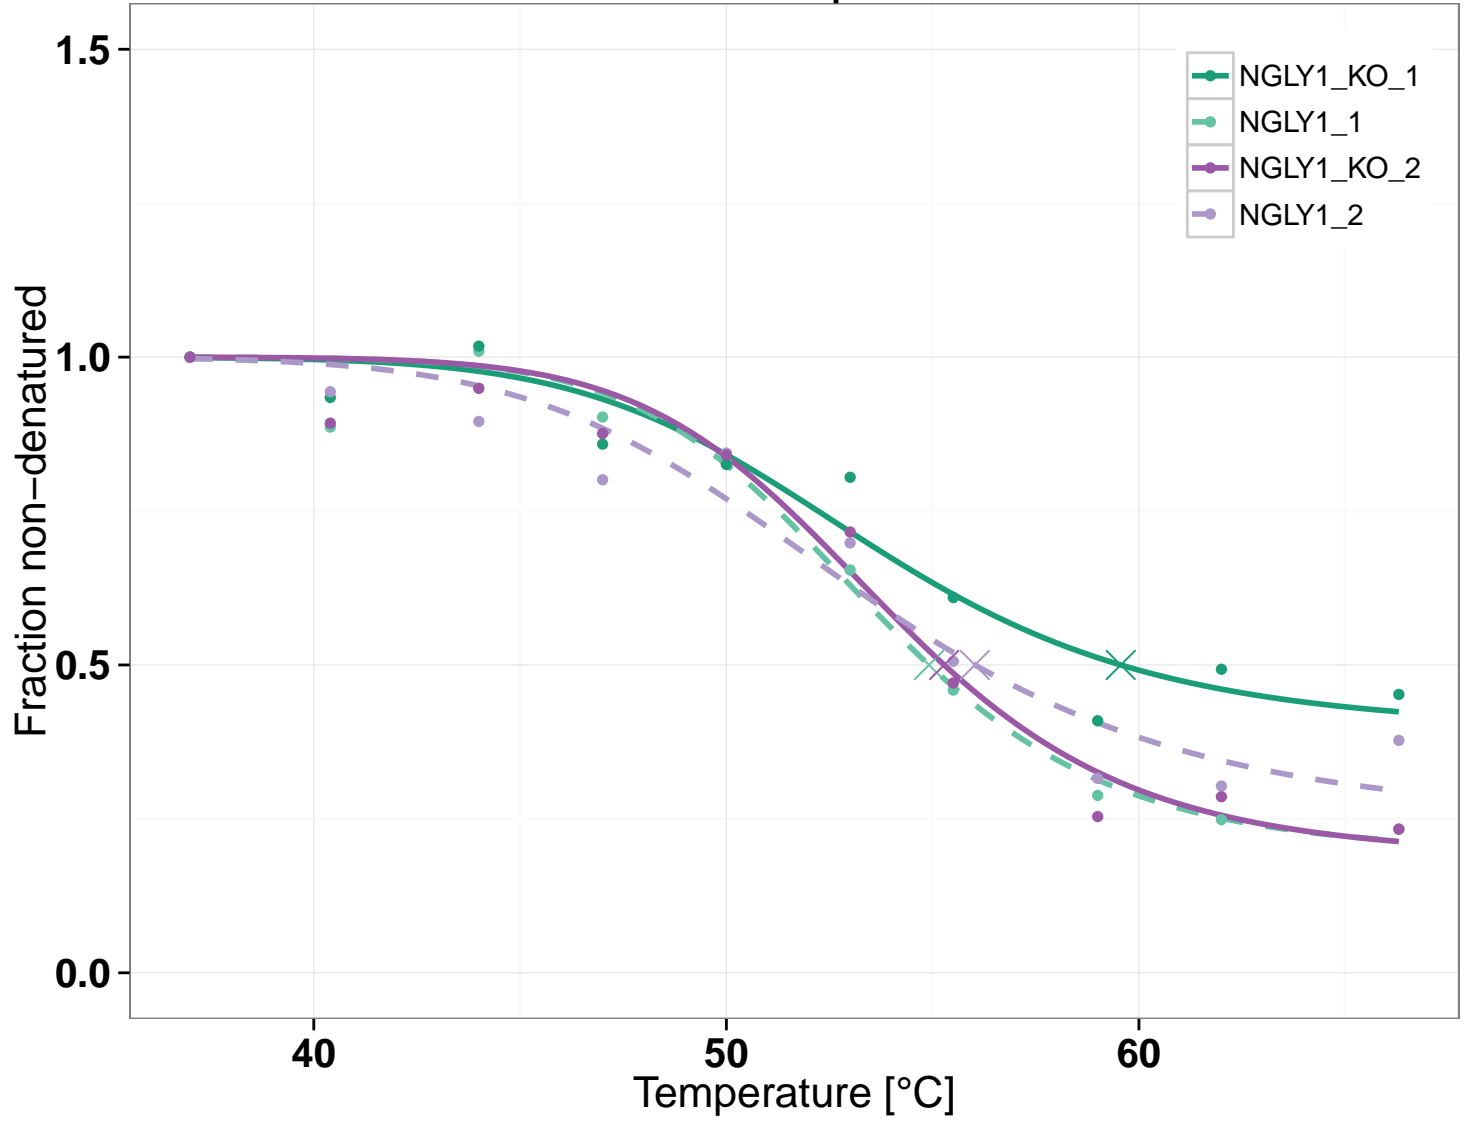

|            | meltPoint | slope  | plateau | R2   |
|------------|-----------|--------|---------|------|
| NGLY1_KO_1 | 59.56     | -0.043 | 0.39    | 0.93 |
| NGLY1_1    | 54.91     | -0.071 | 0.19    | 0.98 |
| NGLY1_KO_2 | 55.28     | -0.069 | 0.19    | 0.97 |
| NGLY1_2    | 56.02     | -0.048 | 0.24    | 0.94 |

Supplement: Supplementary file 3413 [file 1]

IPI00872209.1|PPP3CA

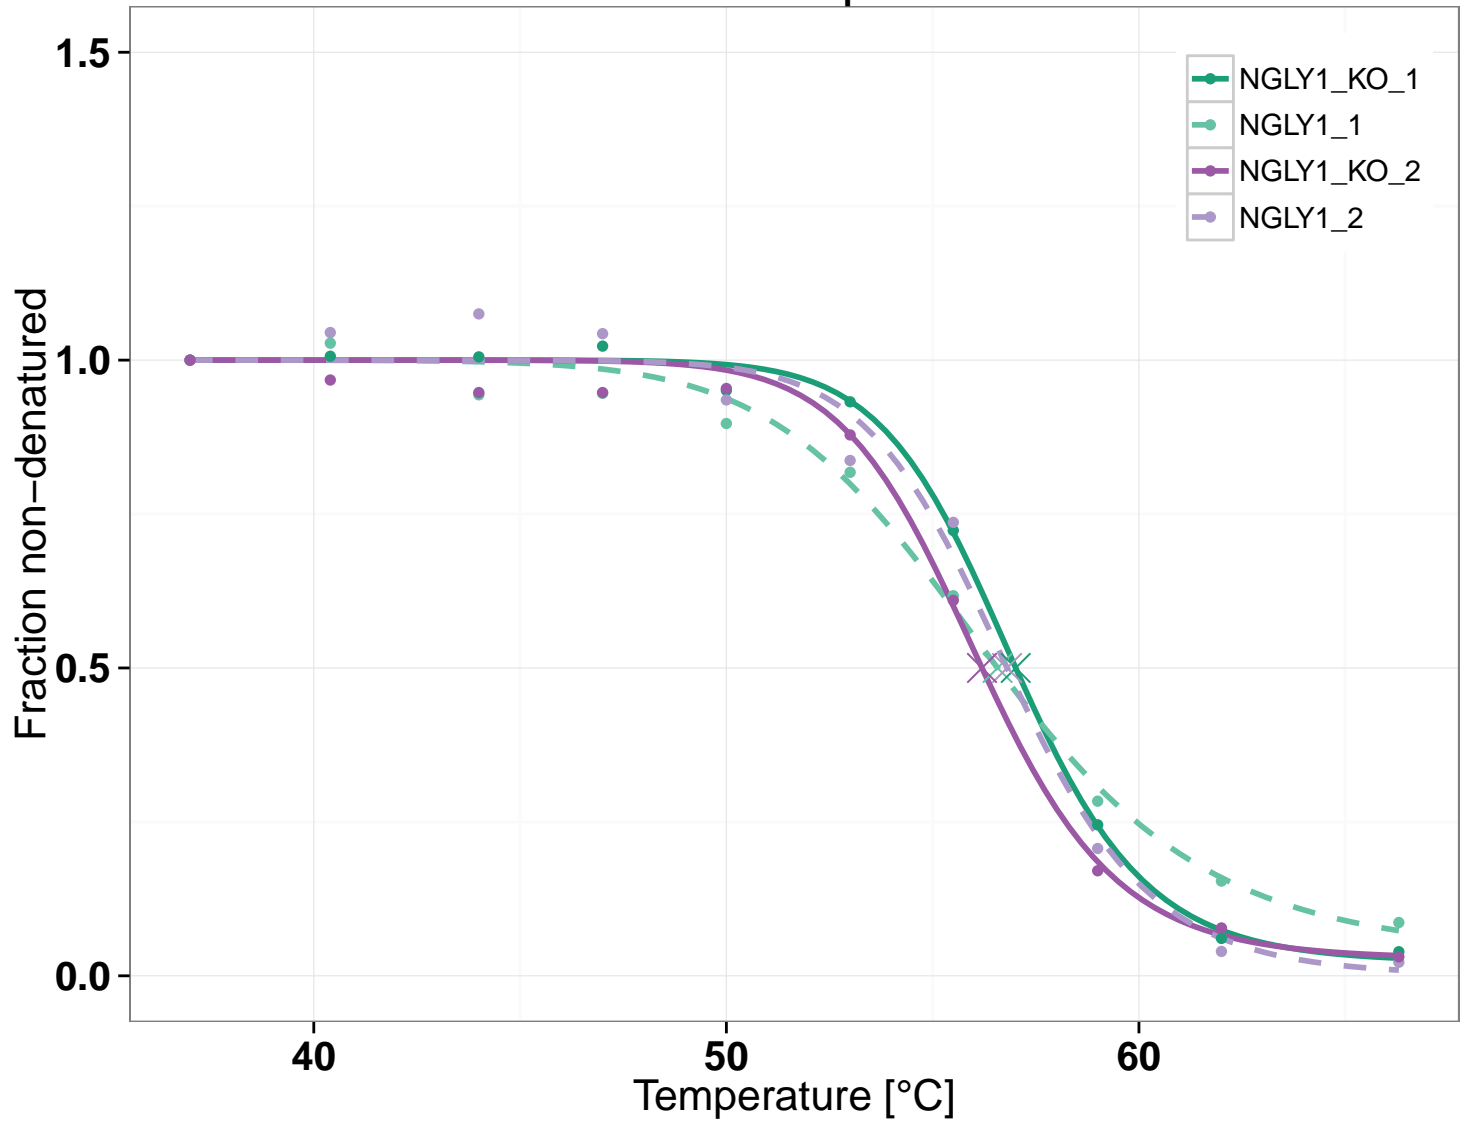

|            | meltPoint | slope  | plateau | R2   |
|------------|-----------|--------|---------|------|
| NGLY1_KO_1 | 57.01     | -0.15  | 0.02    | 1    |
| NGLY1_1    | 56.57     | -0.091 | 0.03    | 0.99 |
| NGLY1_KO_2 | 56.2      | -0.15  | 0.03    | 0.99 |
| NGLY1_2    | 56.8      | -0.14  | 0       | 0.99 |

Supplement: Supplementary file 3414 [file 1]

# IPI00303550.2|MAPK9

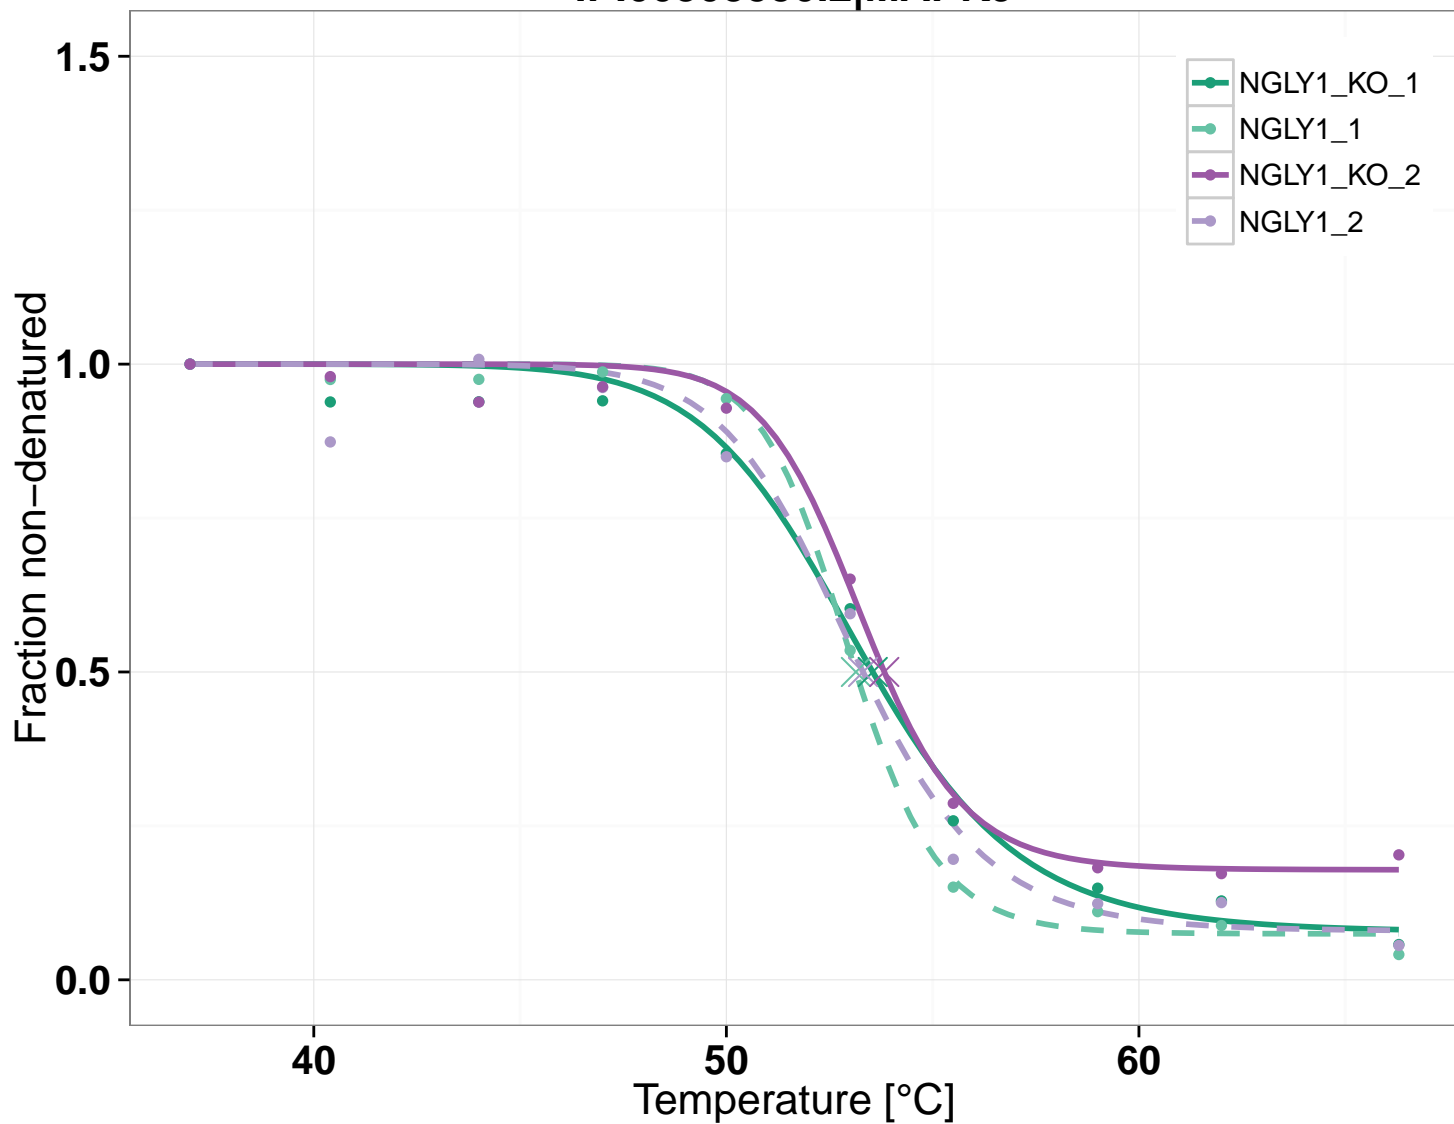

|            | meltPoint | slope | plateau | R2   |
|------------|-----------|-------|---------|------|
| NGLY1_KO_1 | 53.55     | -0.12 | 0.08    | 0.99 |
| NGLY1_1    | 53.14     | -0.22 | 0.07    | 1    |
| NGLY1_KO_2 | 53.83     | -0.17 | 0.18    | 0.99 |
| NGLY1_2    | 53.31     | -0.14 | 0.08    | 0.98 |

Supplement: Supplementary file 3415 [file 1]
