# Supplementary material (part 35 of 85)
Source: publisher figshare collection journal article supplement (https://gsajournals.figshare.com/articles/dataset/_/12014913)

IPI00012441.2|SYNJ1

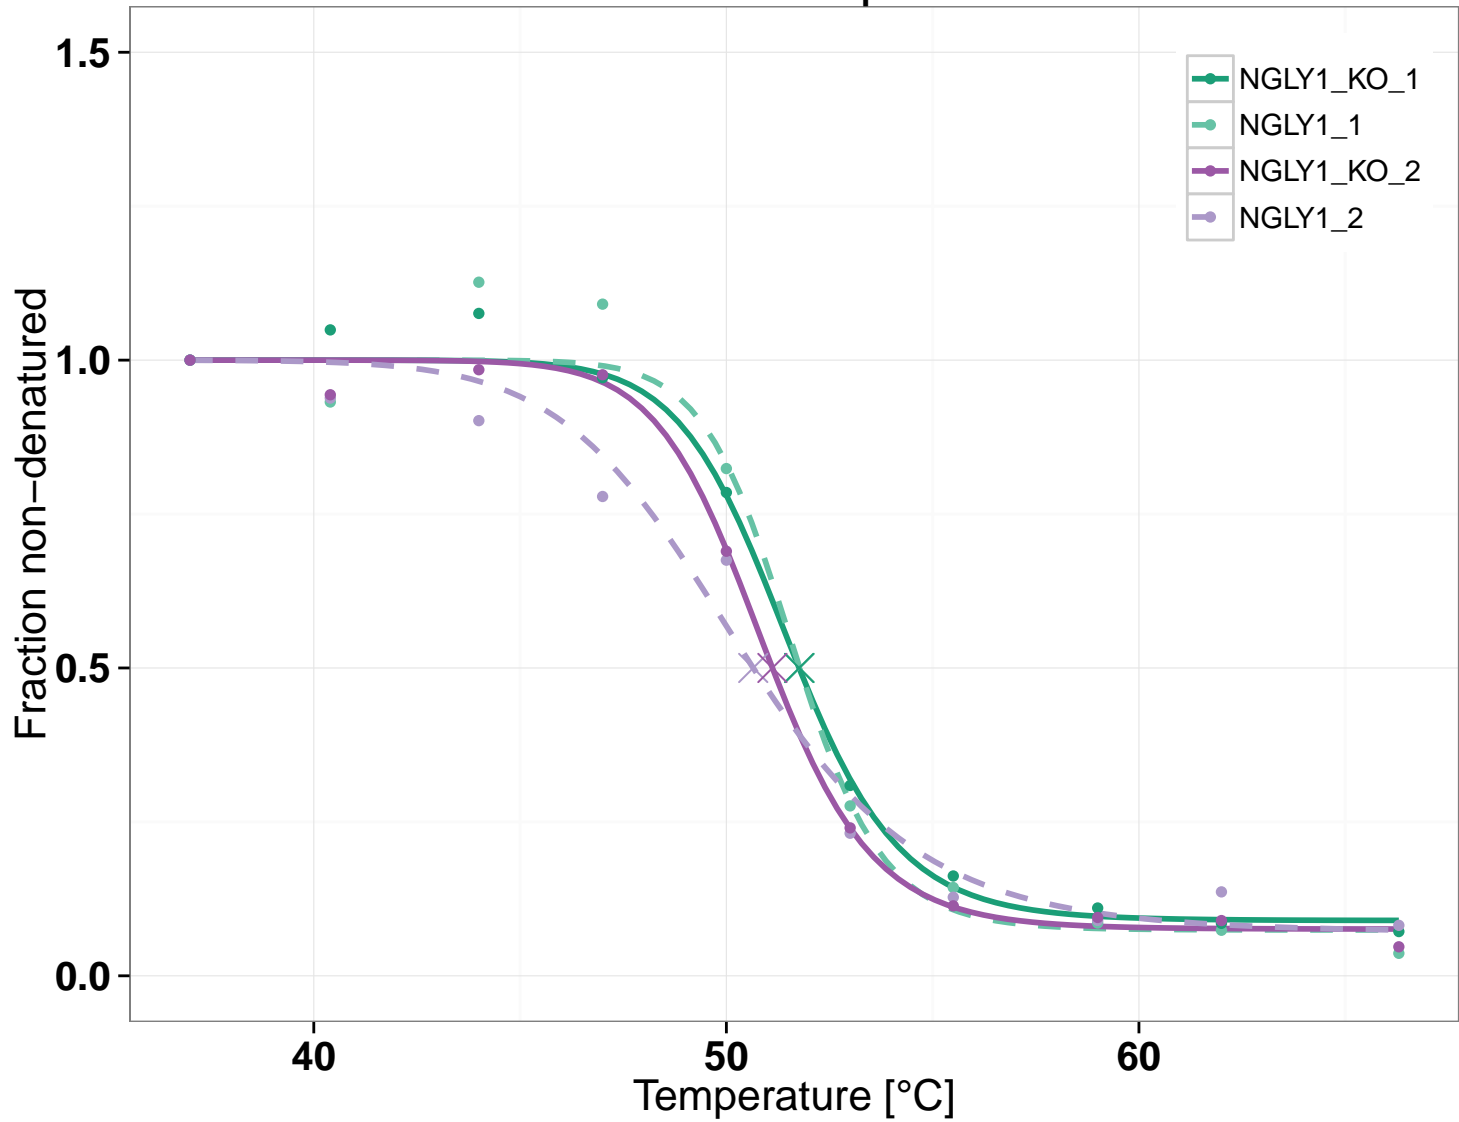

|            | meltPoint | slope | plateau | R2   |
|------------|-----------|-------|---------|------|
| NGLY1_KO_1 | 51.76     | -0.17 | 0.09    | 0.99 |
| NGLY1_1    | 51.78     | -0.21 | 0.07    | 0.98 |
| NGLY1_KO_2 | 51.12     | -0.18 | 0.08    | 1    |
| NGLY1_2    | 50.65     | -0.11 | 0.07    | 0.98 |

Supplement: Supplementary file 3416 [file 1]

IPI00010949.3|SIAE

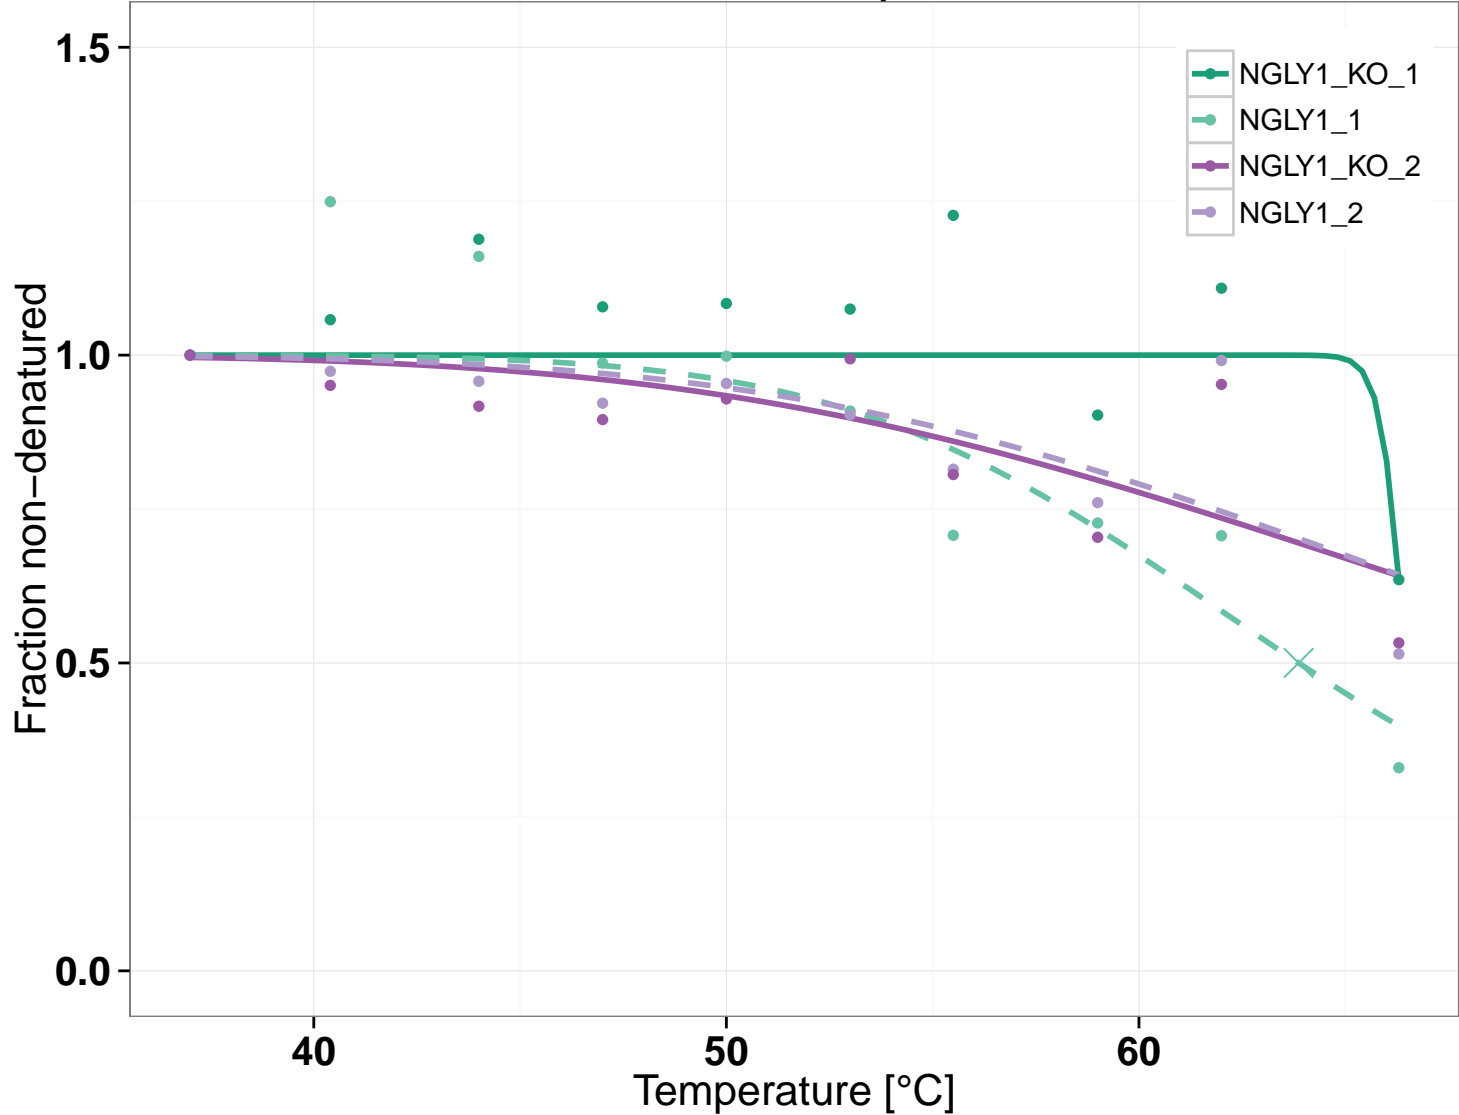

|            | meltPoint | slope  | plateau | R2   |
|------------|-----------|--------|---------|------|
| NGLY1_KO_1 | –         | –      | 0       | 0.48 |
| NGLY1_1    | 63.87     | –0.046 | 0       | 0.8  |
| NGLY1_KO_2 | –         | –0.022 | 0       | 0.55 |
| NGLY1_2    | –         | –      | 0       | 0.57 |

Supplement: Supplementary file 3417 [file 1]

IPI00018262.1|ANP32C

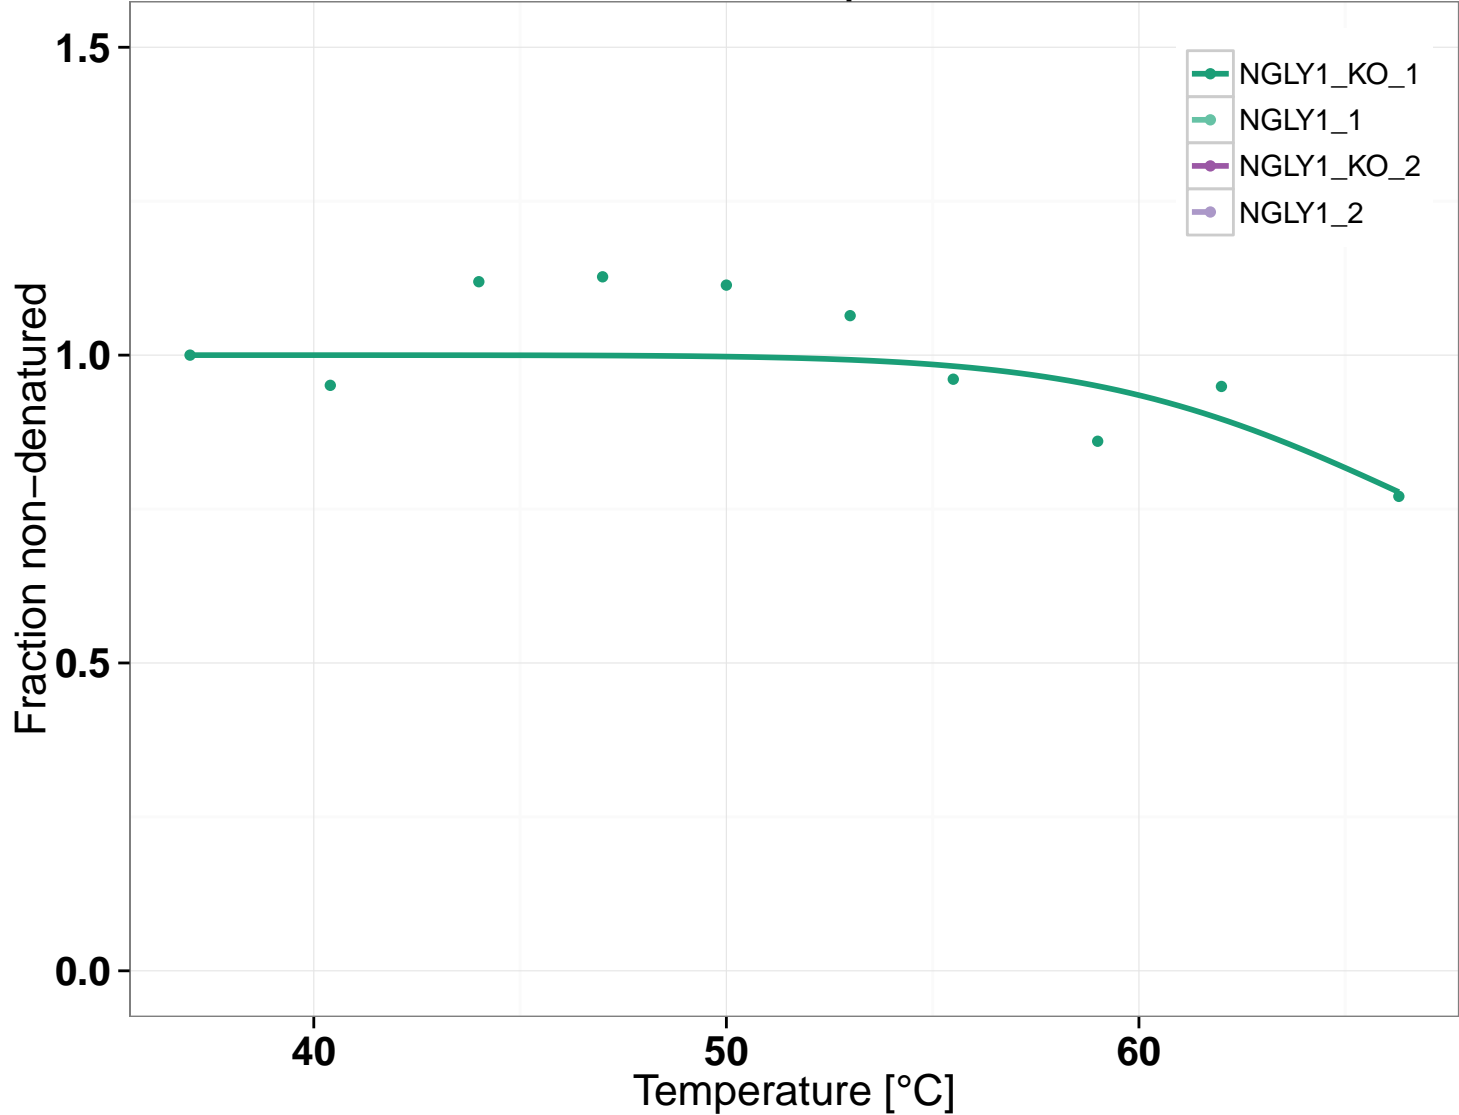

|            | meltPoint | slope | plateau | R2  |
|------------|-----------|-------|---------|-----|
| NGLY1_KO_1 | —         | —     | 0.45    | 0.5 |
| NGLY1_1    | —         | —     | —       | —   |
| NGLY1_KO_2 | —         | —     | —       | —   |
| NGLY1_2    | —         | —     | —       | —   |

Supplement: Supplementary file 3418 [file 1]

IPI00642226.2|COMMD6

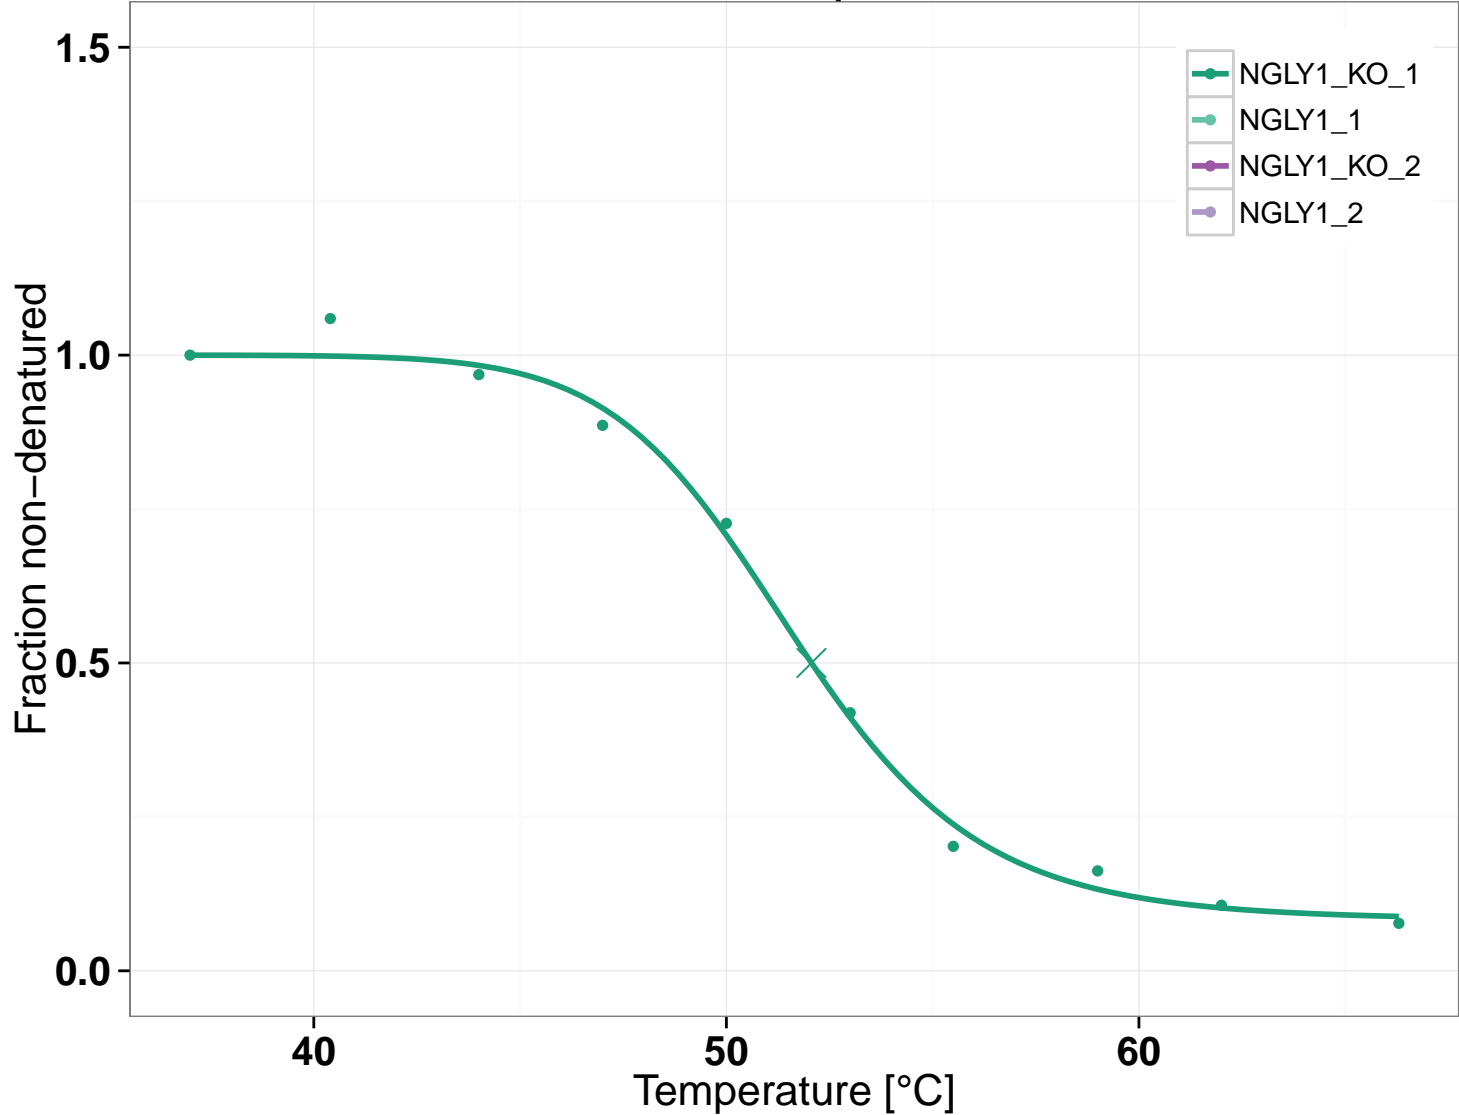

|            | meltPoint | slope | plateau | R2   |
|------------|-----------|-------|---------|------|
| NGLY1_KO_1 | 52.06     | -0.1  | 0.08    | 0.99 |
| NGLY1_1    | -         | -     | -       | -    |
| NGLY1_KO_2 | -         | -     | -       | -    |
| NGLY1_2    | -         | -     | -       | -    |

Supplement: Supplementary file 3419 [file 1]

IPI00152331.4|MTSS1

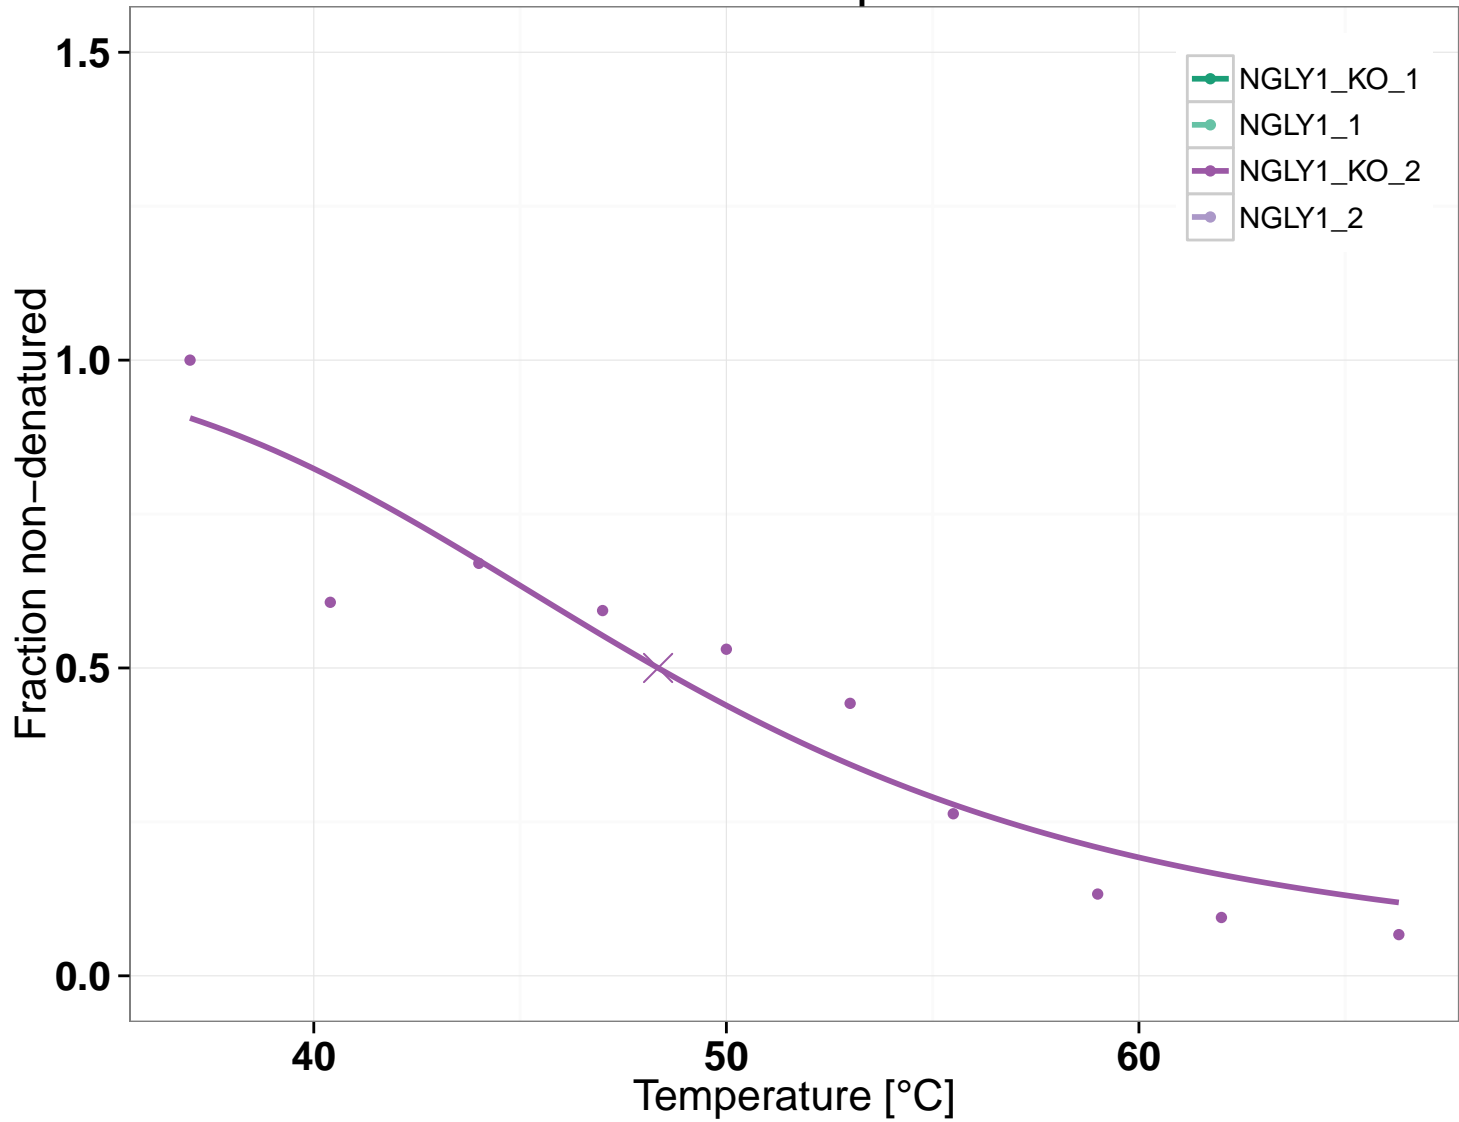

|            | meltPoint | slope  | plateau | R2  |
|------------|-----------|--------|---------|-----|
| NGLY1_KO_1 | —         | —      | —       | —   |
| NGLY1_1    | —         | —      | —       | —   |
| NGLY1_KO_2 | 48.35     | -0.041 | 0       | 0.9 |
| NGLY1_2    | —         | —      | —       | —   |

Supplement: Supplementary file 3420 [file 1]

IPI00107595.4|ZNF653

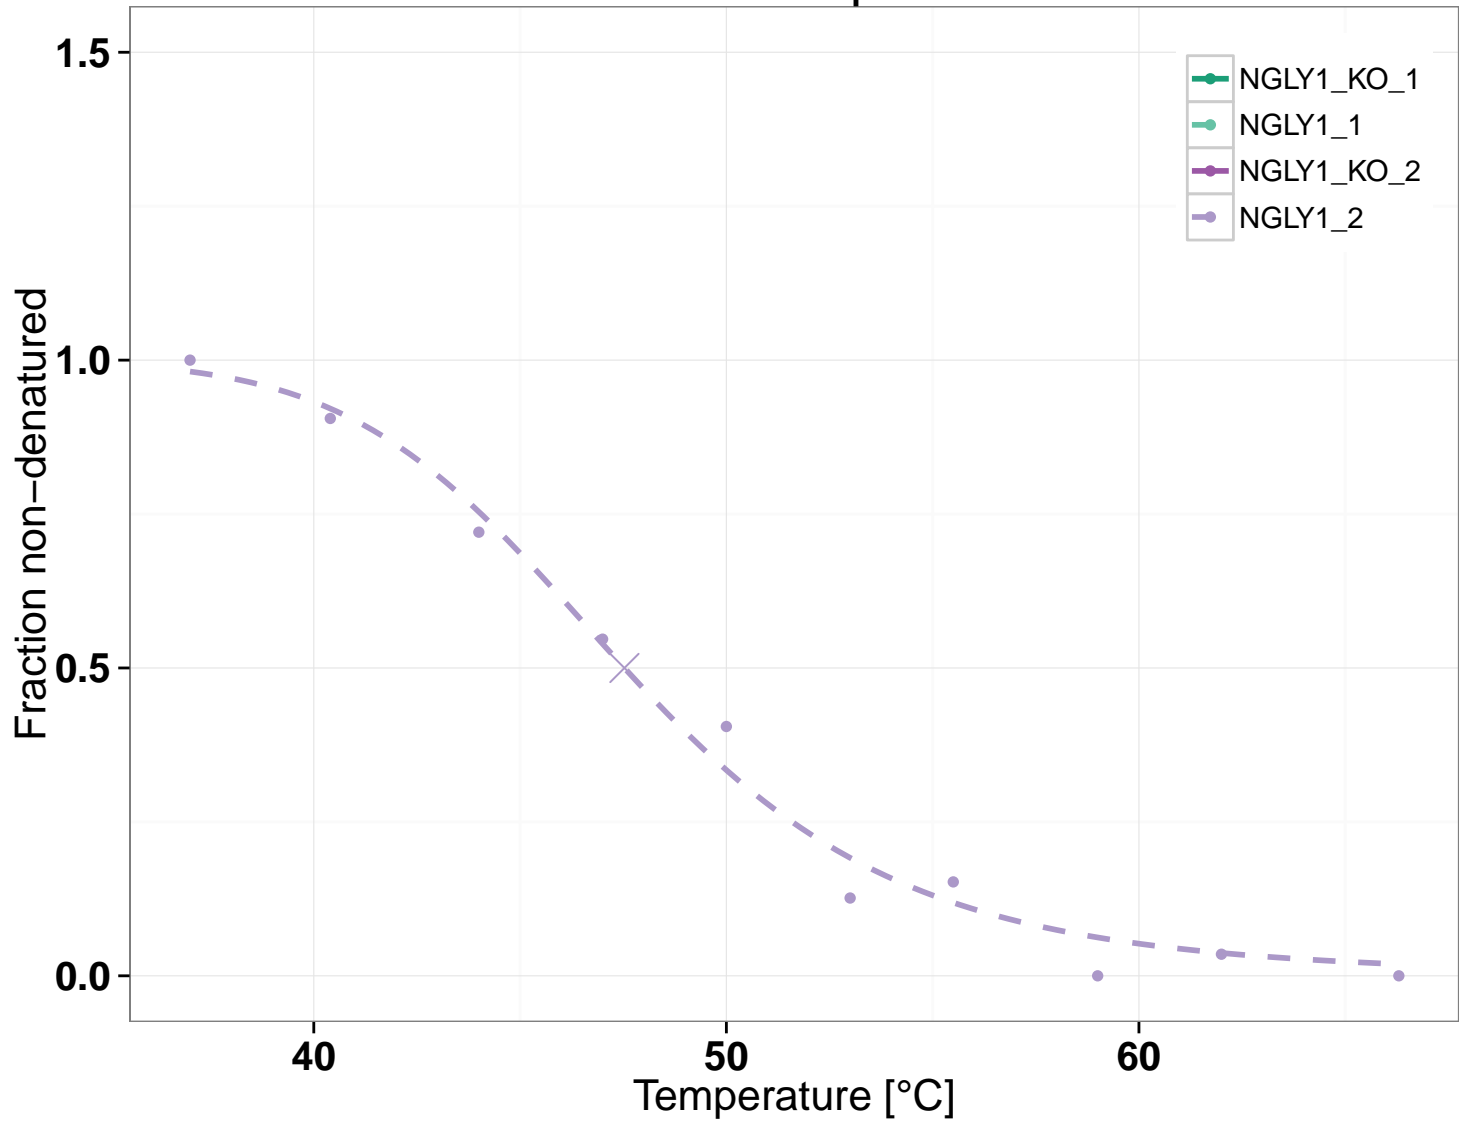

|            | meltPoint | slope  | plateau | R2   |
|------------|-----------|--------|---------|------|
| NGLY1_KO_1 | -         | -      | -       | -    |
| NGLY1_1    | -         | -      | -       | -    |
| NGLY1_KO_2 | -         | -      | -       | -    |
| NGLY1_2    | 47.53     | -0.075 | 0       | 0.99 |

Supplement: Supplementary file 3421 [file 1]

IPI00011916.1|JTV1

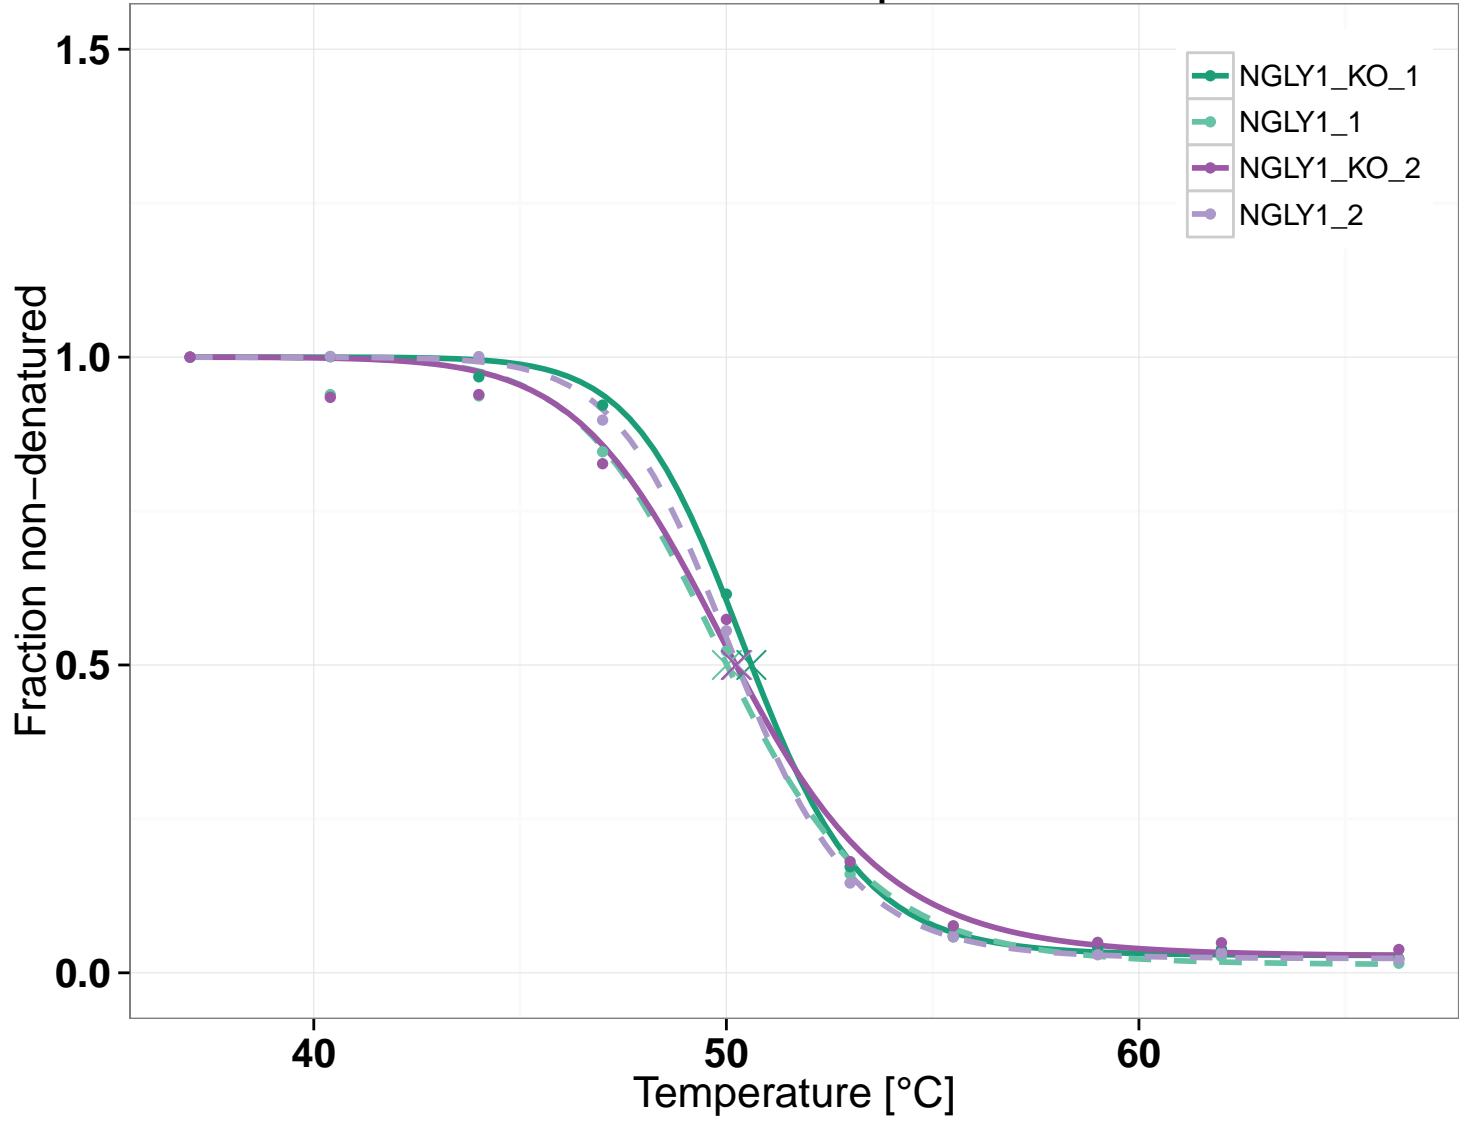

|            | meltPoint | slope | plateau | R2   |
|------------|-----------|-------|---------|------|
| NGLY1_KO_1 | 50.61     | -0.17 | 0.03    | 1    |
| NGLY1_1    | 50.01     | -0.14 | 0.01    | 1    |
| NGLY1_KO_2 | 50.23     | -0.13 | 0.03    | 0.99 |
| NGLY1_2    | 50.26     | -0.17 | 0.02    | 1    |

Supplement: Supplementary file 3422 [file 1]

# IPI00004859.1|BLM

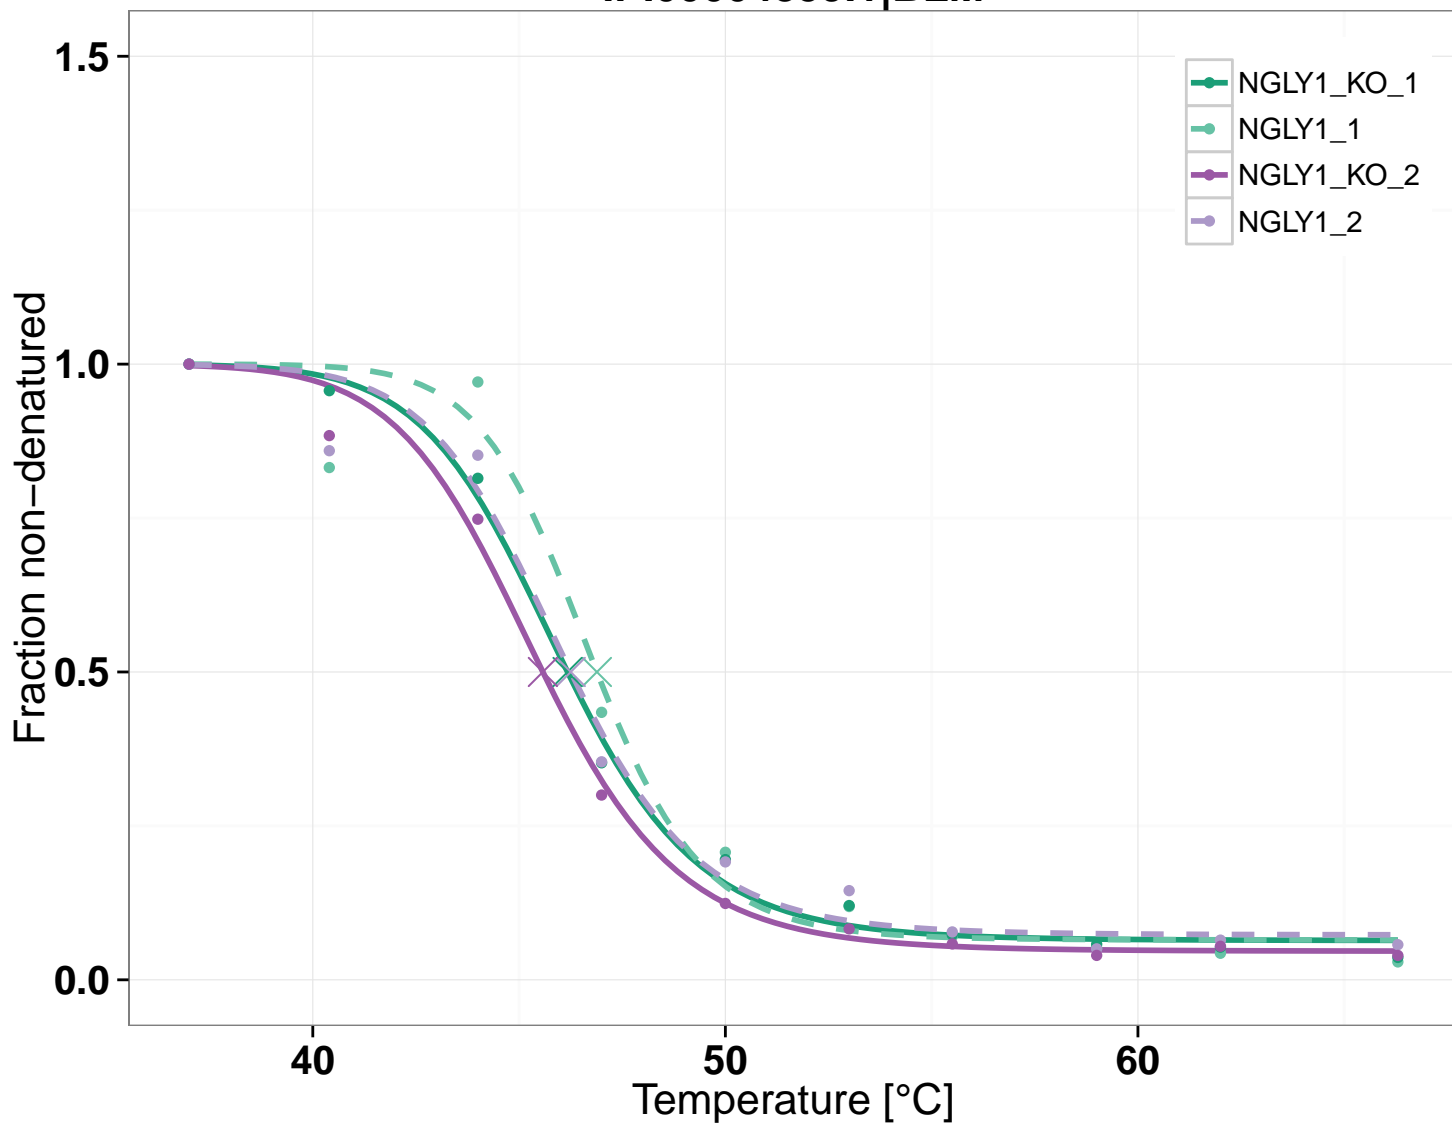

|            | meltPoint | slope | plateau | R2   |
|------------|-----------|-------|---------|------|
| NGLY1_KO_1 | 46.18     | -0.14 | 0.06    | 1    |
| NGLY1_1    | 46.89     | -0.17 | 0.06    | 0.97 |
| NGLY1_KO_2 | 45.58     | -0.14 | 0.05    | 0.99 |
| NGLY1_2    | 46.25     | -0.14 | 0.07    | 0.98 |

Supplement: Supplementary file 3423 [file 1]

IPI00072224.7|RINT1

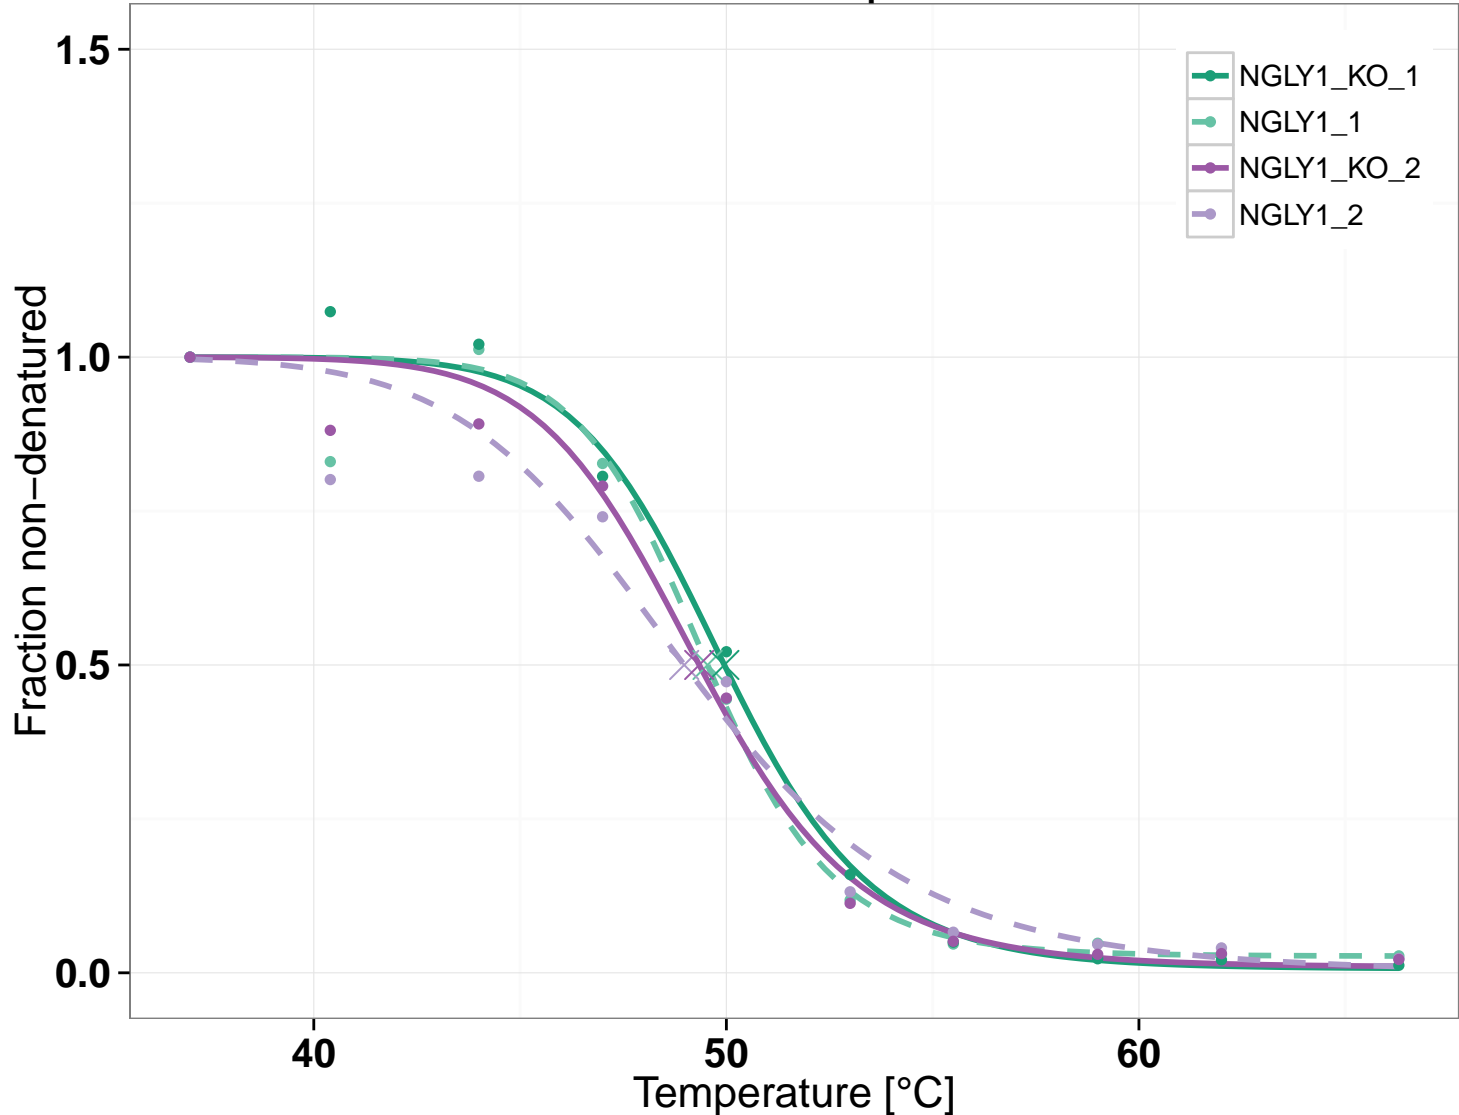

|            | meltPoint | slope  | plateau | R2   |
|------------|-----------|--------|---------|------|
| NGLY1_KO_1 | 49.95     | -0.14  | 0.01    | 0.99 |
| NGLY1_1    | 49.54     | -0.16  | 0.03    | 0.98 |
| NGLY1_KO_2 | 49.34     | -0.13  | 0.01    | 0.99 |
| NGLY1_2    | 48.98     | -0.091 | 0       | 0.96 |

Supplement: Supplementary file 3424 [file 1]

# IPI00012079.3|EIF4B

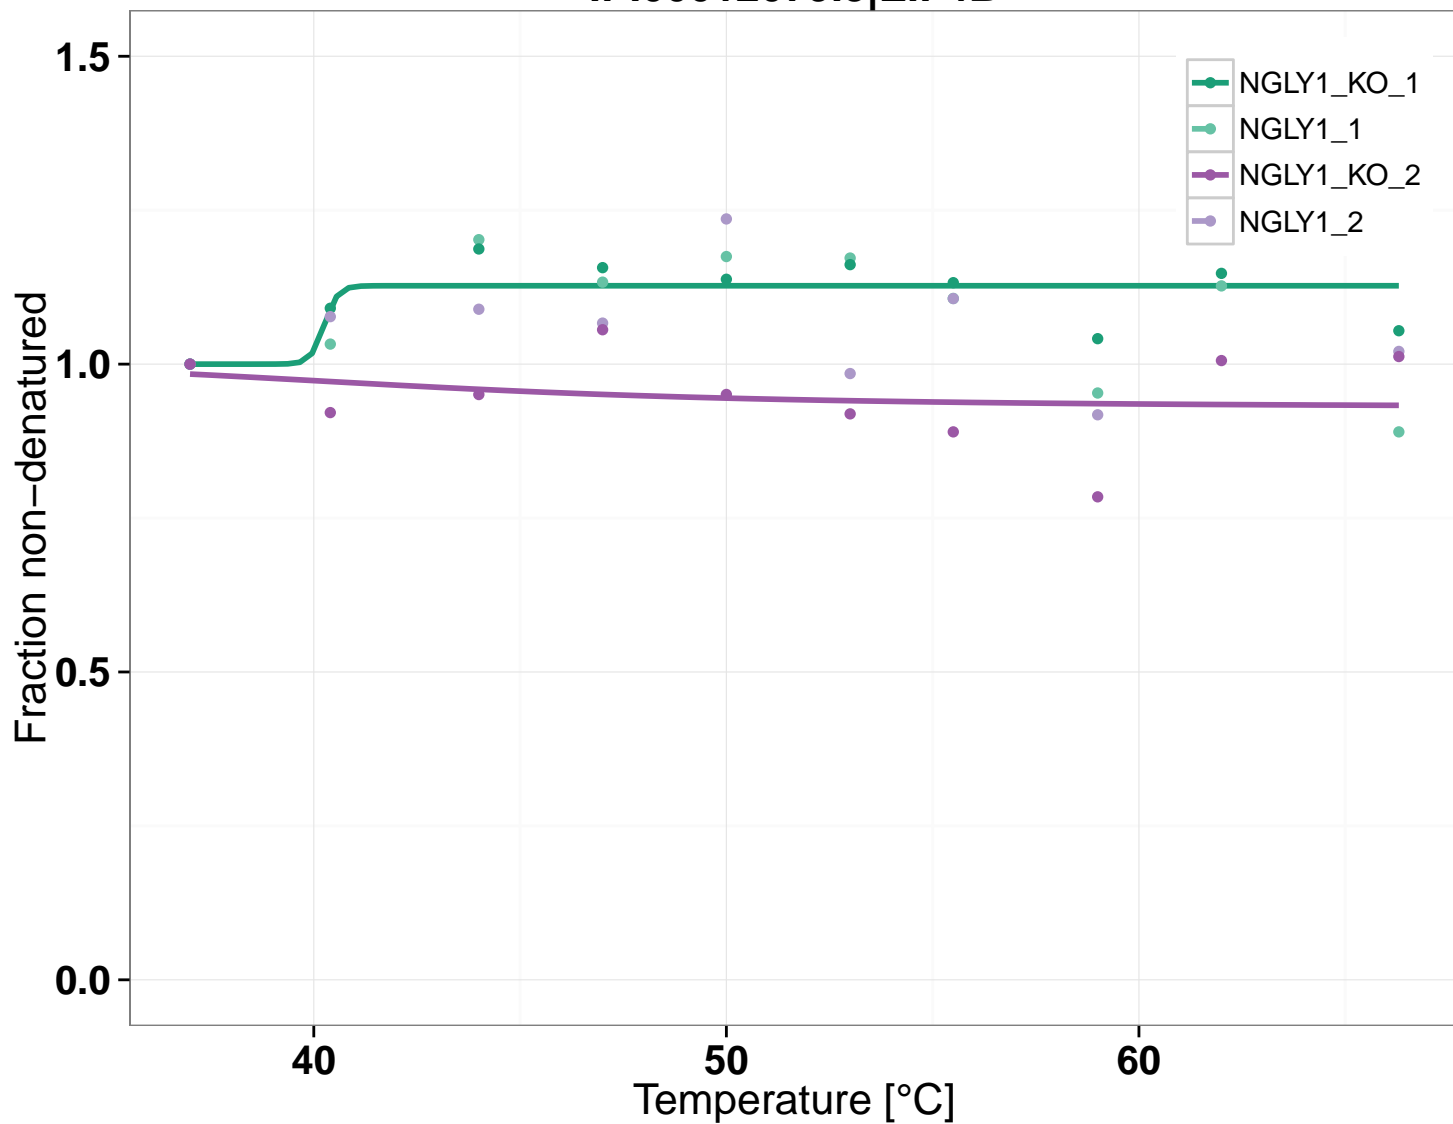

|            | meltPoint | slope   | plateau | R2   |
|------------|-----------|---------|---------|------|
| NGLY1_KO_1 | —         | 0.2     | 1.13    | 0.44 |
| NGLY1_1    | —         | —       | —       | —    |
| NGLY1_KO_2 | —         | -0.0037 | 0.93    | 0.05 |
| NGLY1_2    | —         | —       | —       | —    |

Supplement: Supplementary file 3425 [file 1]

# IPI00170855.2|TTC19

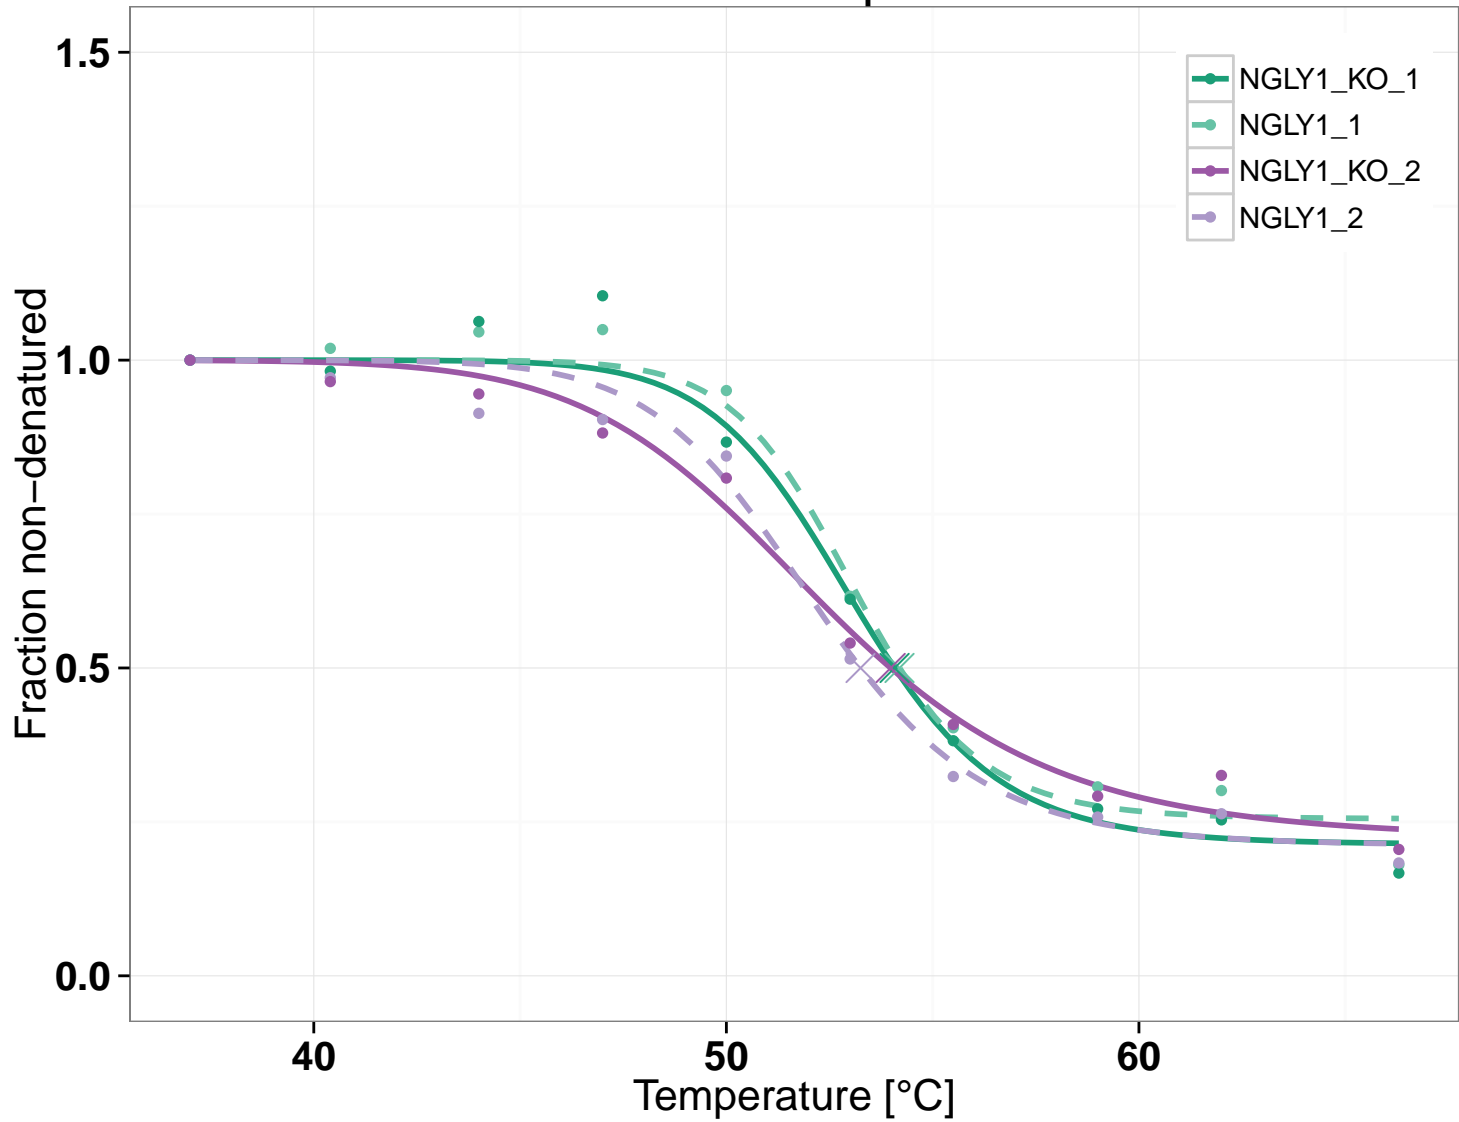

|            | meltPoint | slope  | plateau | R2   |
|------------|-----------|--------|---------|------|
| NGLY1_KO_1 | 54.08     | -0.11  | 0.21    | 0.98 |
| NGLY1_1    | 54.2      | -0.12  | 0.25    | 0.99 |
| NGLY1_KO_2 | 53.98     | -0.068 | 0.22    | 0.99 |
| NGLY1_2    | 53.25     | -0.099 | 0.21    | 0.99 |

Supplement: Supplementary file 3426 [file 1]

IPI00166395.4|ACSF3

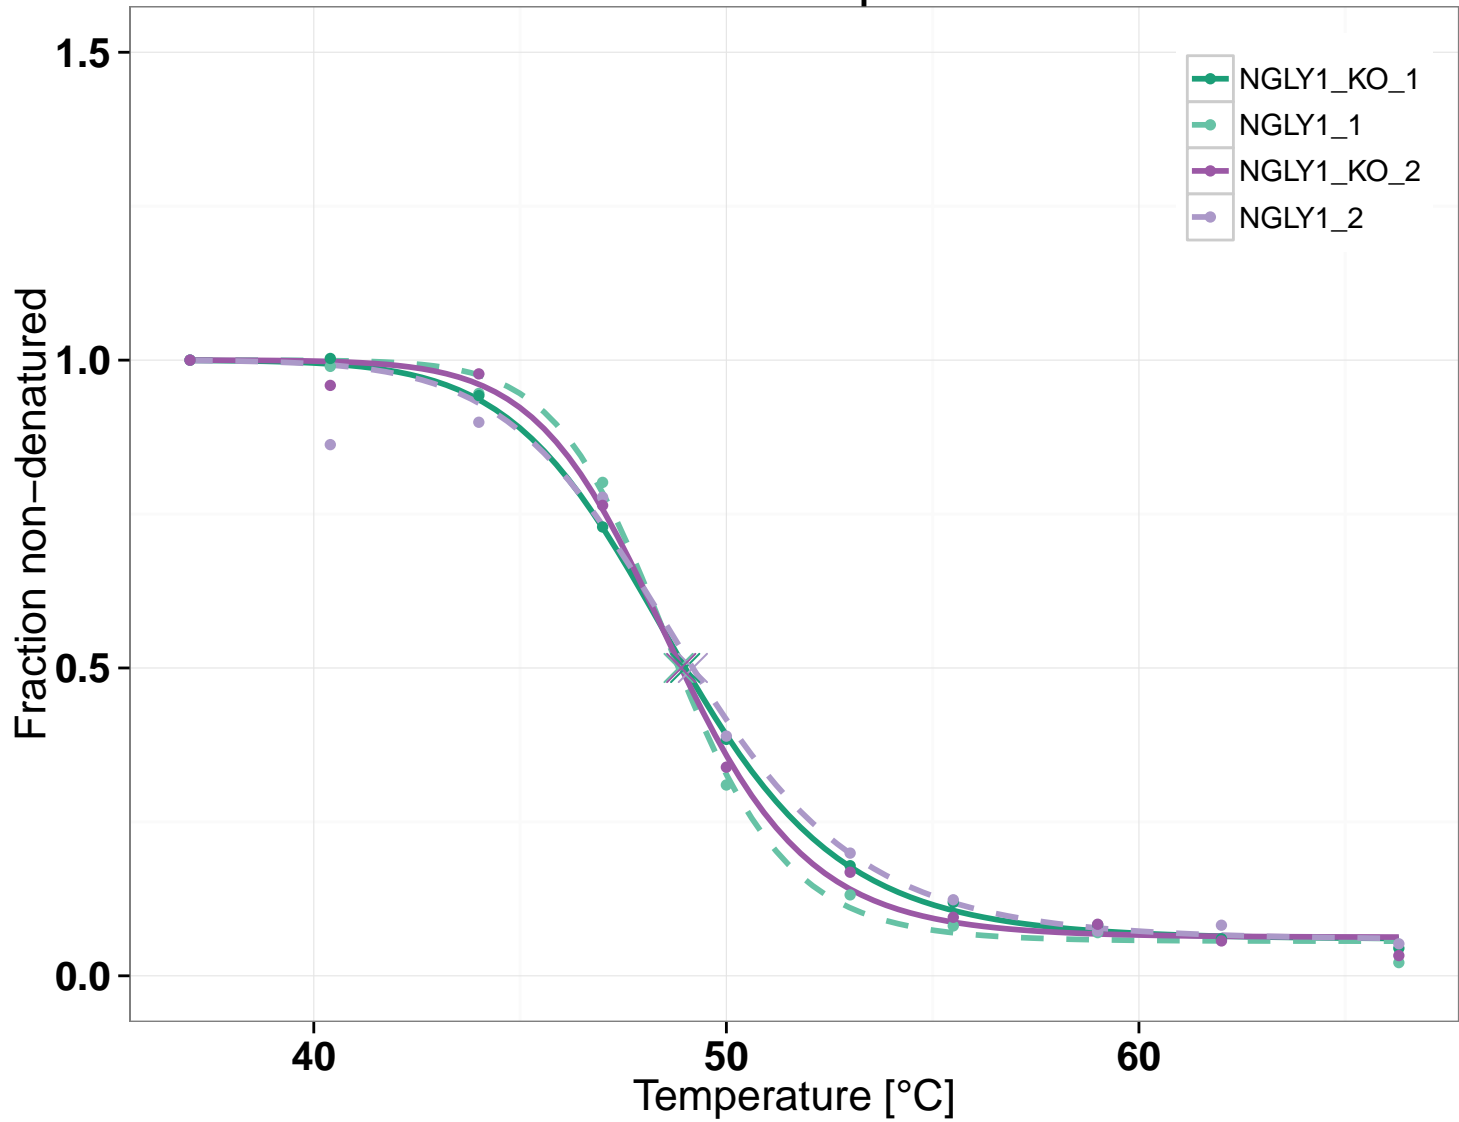

|            | meltPoint | slope | plateau | R2   |
|------------|-----------|-------|---------|------|
| NGLY1_KO_1 | 49        | -0.12 | 0.06    | 1    |
| NGLY1_1    | 48.84     | -0.17 | 0.06    | 1    |
| NGLY1_KO_2 | 48.91     | -0.14 | 0.06    | 1    |
| NGLY1_2    | 49.19     | -0.11 | 0.06    | 0.99 |

Supplement: Supplementary file 3427 [file 1]

IPI00030166.1|ST7

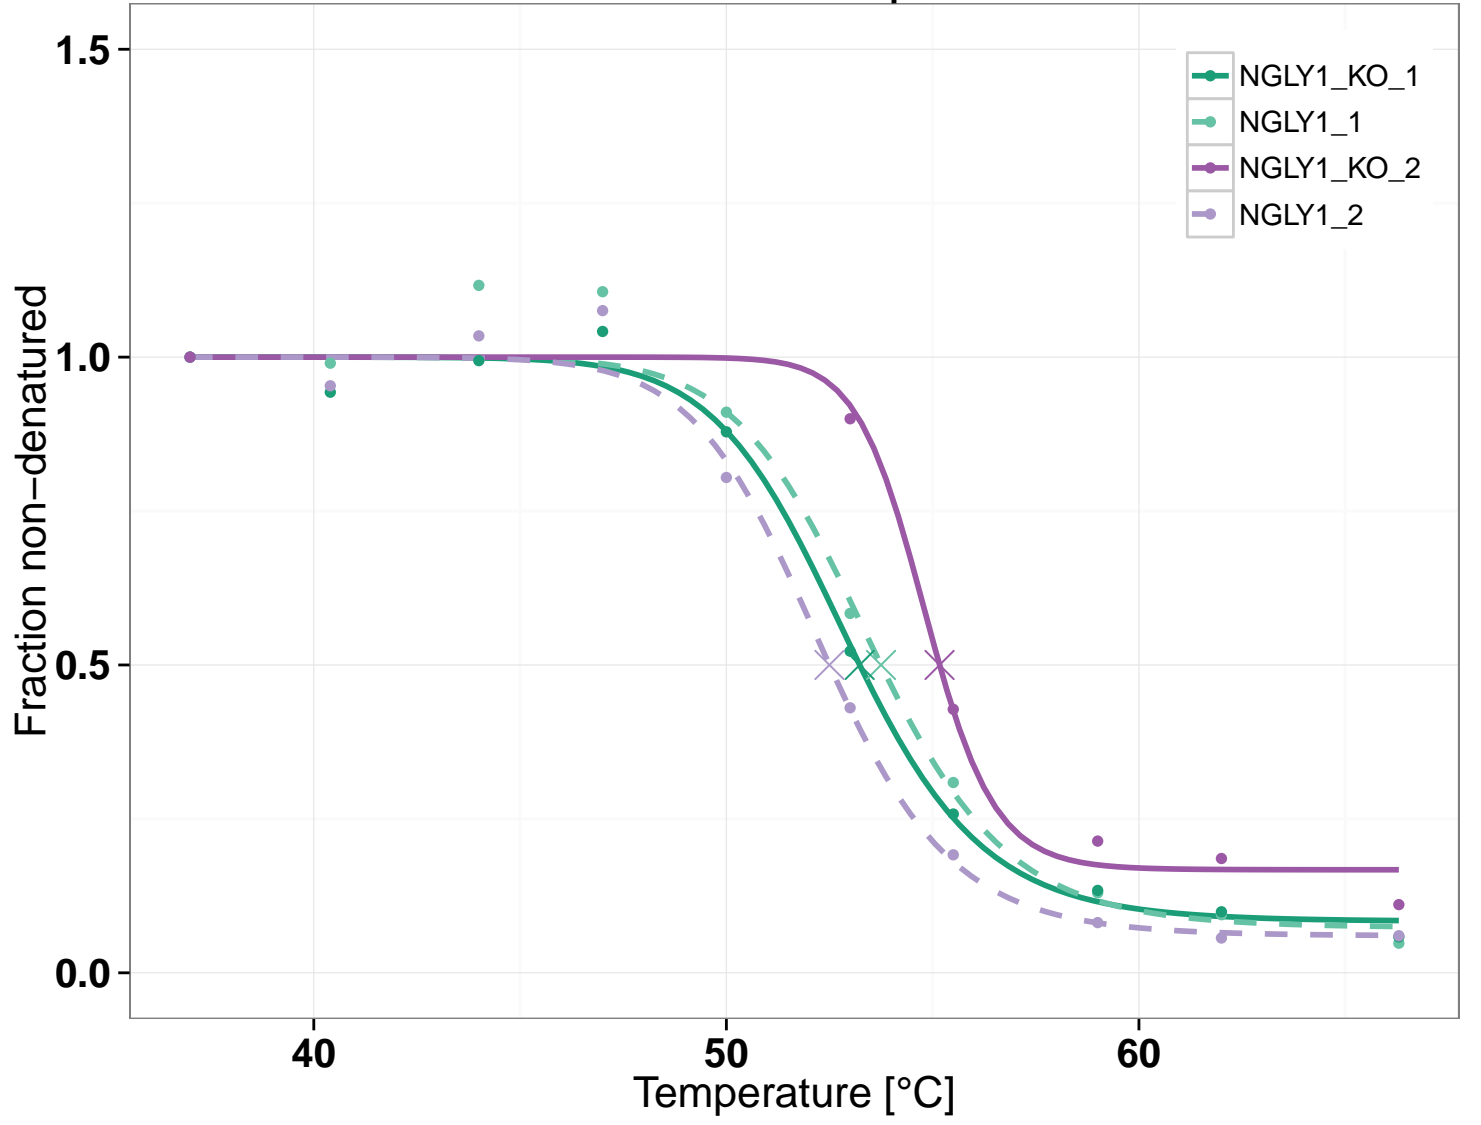

|            | meltPoint | slope | plateau | R2   |
|------------|-----------|-------|---------|------|
| NGLY1_KO_1 | 53.23     | -0.14 | 0.08    | 1    |
| NGLY1_1    | 53.75     | -0.14 | 0.07    | 0.98 |
| NGLY1_KO_2 | 55.17     | -0.25 | 0.17    | 0.51 |
| NGLY1_2    | 52.5      | -0.15 | 0.06    | 0.99 |

Supplement: Supplementary file 3428 [file 1]

# IPI00784477.3|MRM1

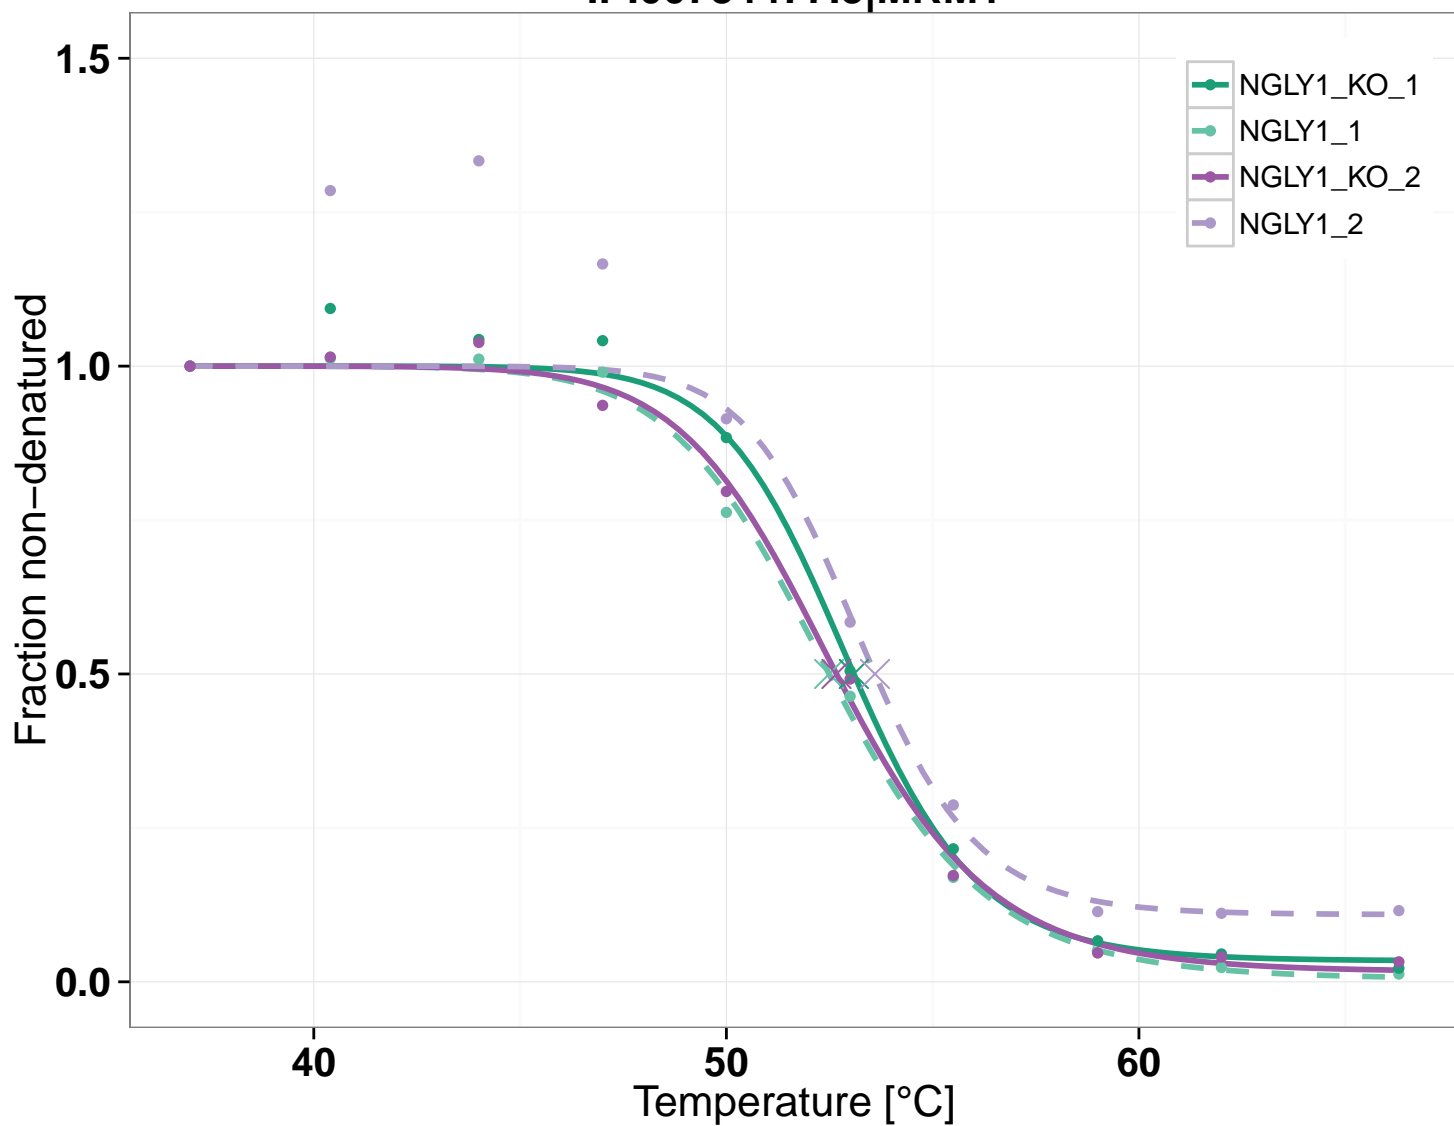

|            | meltPoint | slope | plateau | R2   |
|------------|-----------|-------|---------|------|
| NGLY1_KO_1 | 53.09     | -0.15 | 0.03    | 0.99 |
| NGLY1_1    | 52.49     | -0.13 | 0       | 1    |
| NGLY1_KO_2 | 52.67     | -0.13 | 0.02    | 1    |
| NGLY1_2    | 53.6      | -0.16 | 0.11    | 0.9  |

Supplement: Supplementary file 3429 [file 1]

IPI00103013.2|SNX33

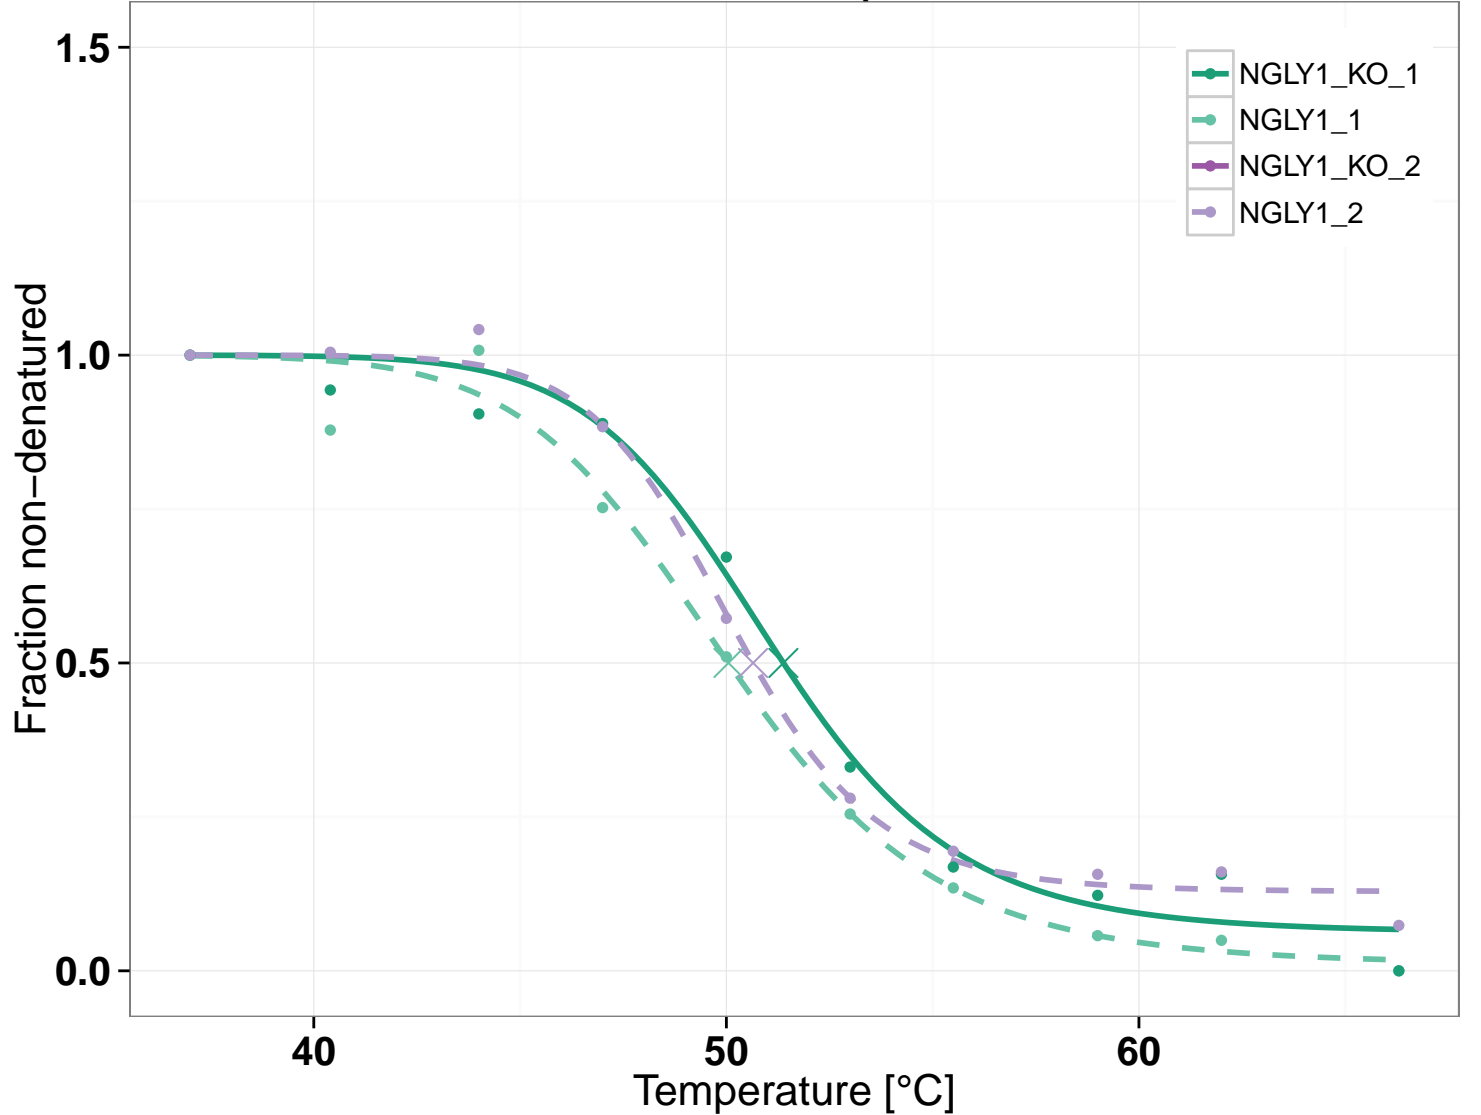

|            | meltPoint | slope  | plateau | R2   |
|------------|-----------|--------|---------|------|
| NGLY1_KO_1 | 51.38     | -0.1   | 0.06    | 0.99 |
| NGLY1_1    | 50.05     | -0.098 | 0.01    | 0.99 |
| NGLY1_KO_2 | -         | -      | -       | -    |
| NGLY1_2    | 50.65     | -0.12  | 0.13    | 0.99 |

Supplement: Supplementary file 3430 [file 1]

IPI00414463.3|LCMT1

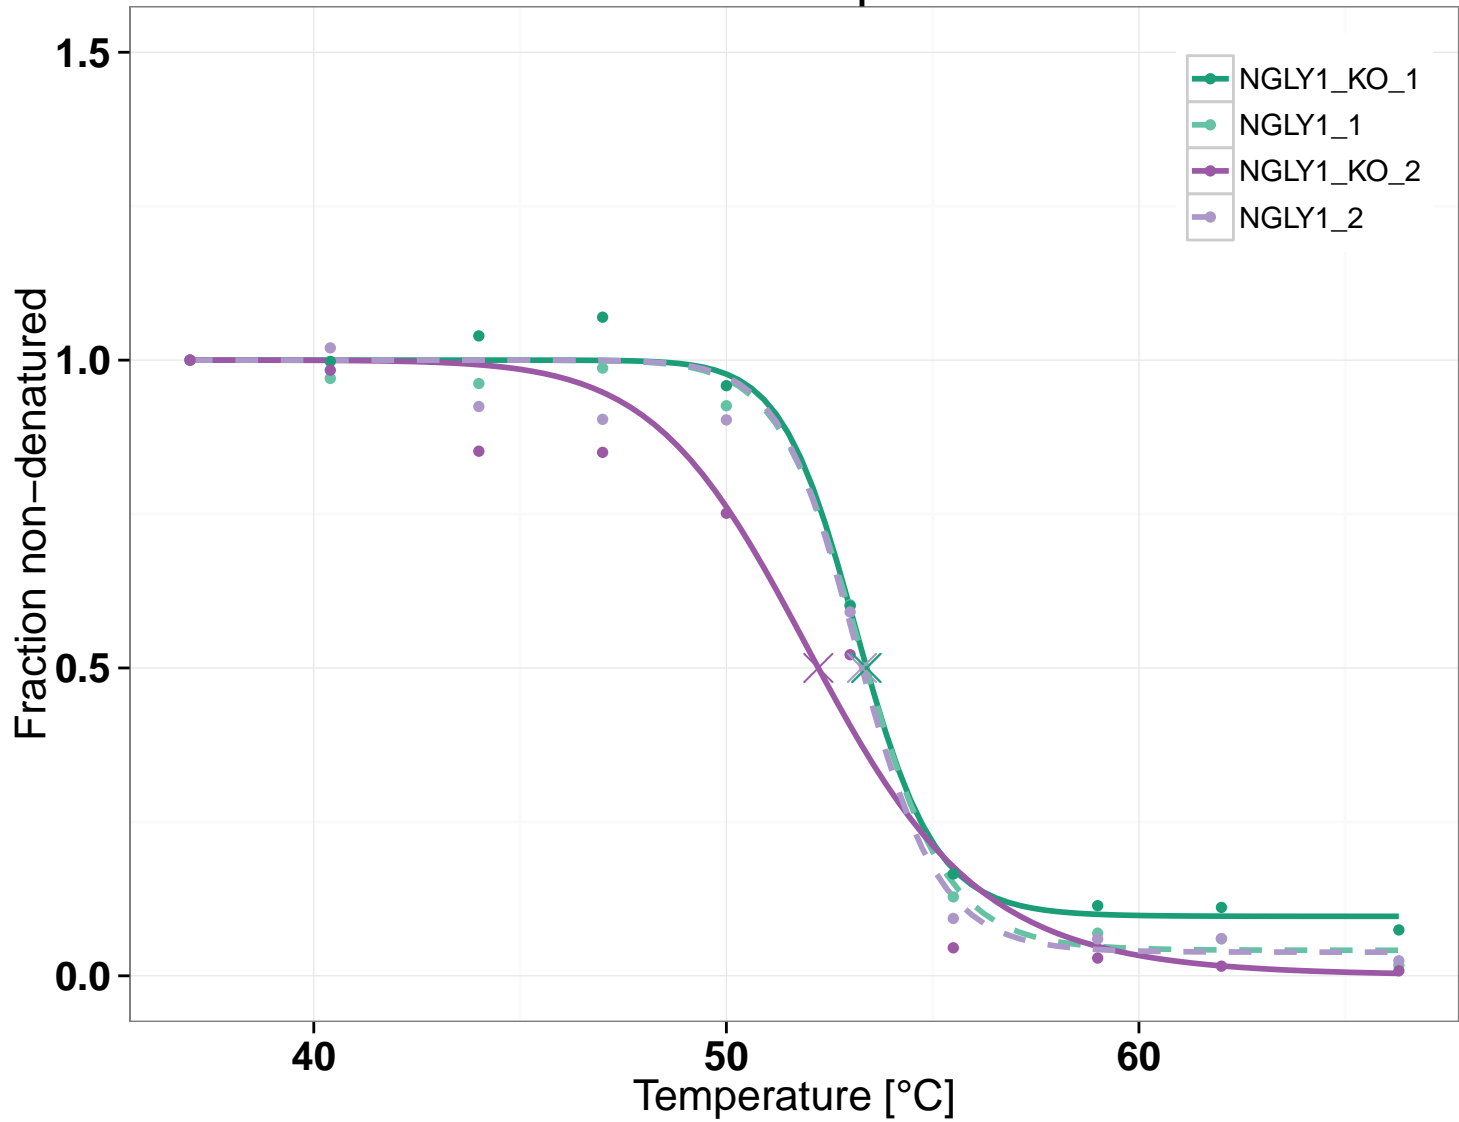

|            | meltPoint | slope | plateau | R2   |
|------------|-----------|-------|---------|------|
| NGLY1_KO_1 | 53.4      | -0.24 | 0.1     | 1    |
| NGLY1_1    | 53.38     | -0.23 | 0.04    | 1    |
| NGLY1_KO_2 | 52.23     | -0.13 | 0       | 0.96 |
| NGLY1_2    | 53.29     | -0.25 | 0.04    | 0.99 |

Supplement: Supplementary file 3431 [file 1]

# IPI00006451.6|NSF

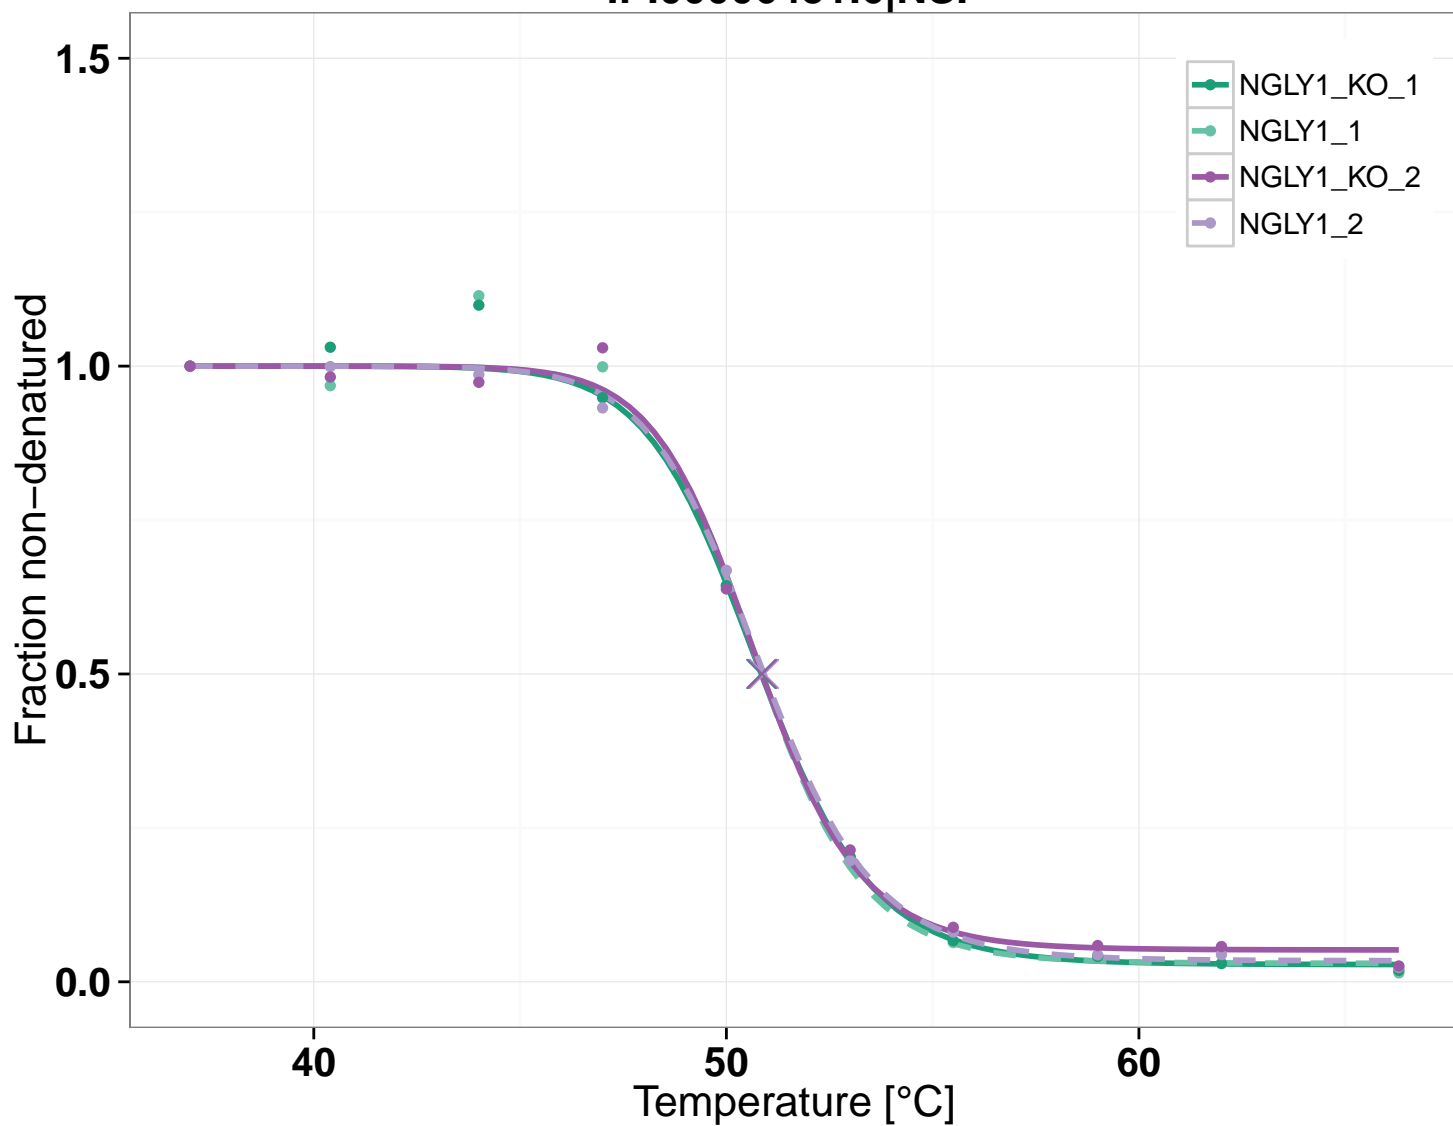

|            | meltPoint | slope | plateau | R2   |
|------------|-----------|-------|---------|------|
| NGLY1_KO_1 | 50.85     | -0.18 | 0.03    | 0.99 |
| NGLY1_1    | 50.86     | -0.19 | 0.03    | 0.99 |
| NGLY1_KO_2 | 50.87     | -0.19 | 0.05    | 1    |
| NGLY1_2    | 50.91     | -0.18 | 0.03    | 1    |

Supplement: Supplementary file 3432 [file 1]

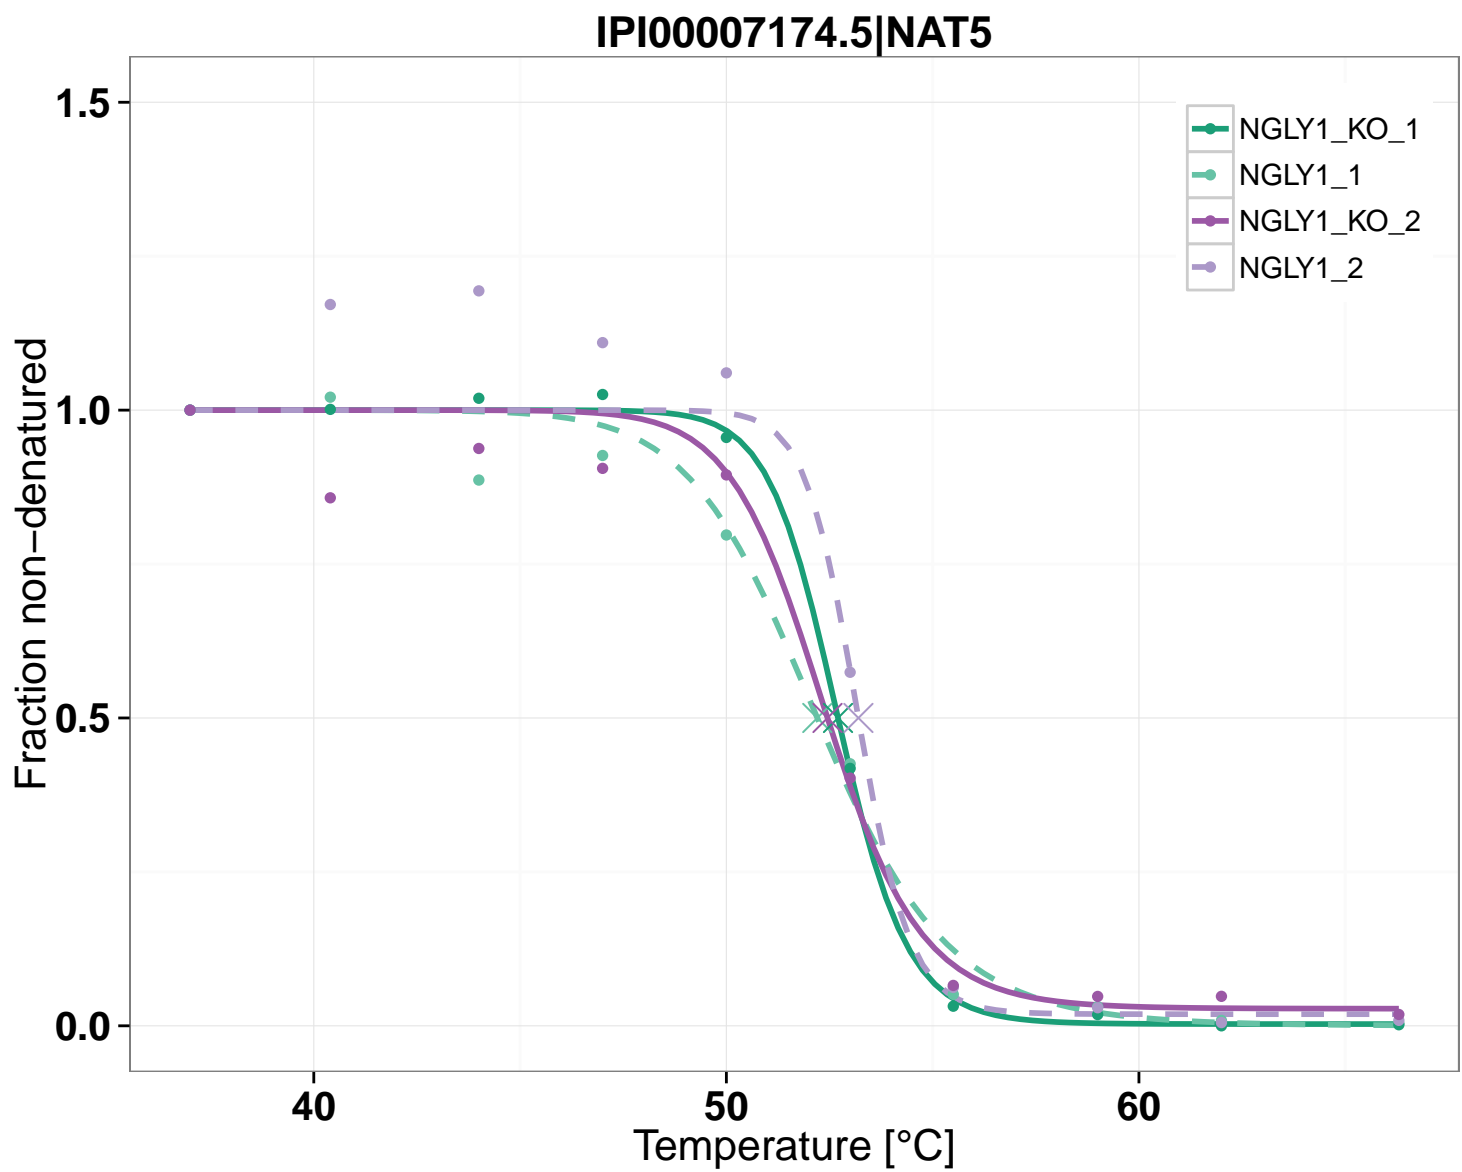

|            | meltPoint | slope | plateau | R2   |
|------------|-----------|-------|---------|------|
| NGLY1_KO_1 | 52.71     | -0.3  | 0       | 1    |
| NGLY1_1    | 52.2      | -0.16 | 0       | 0.99 |
| NGLY1_KO_2 | 52.45     | -0.21 | 0.03    | 0.98 |
| NGLY1_2    | 53.2      | -0.39 | 0.02    | 0.97 |

Supplement: Supplementary file 3433 [file 1]

# IPI00002919.2|DIRAS1

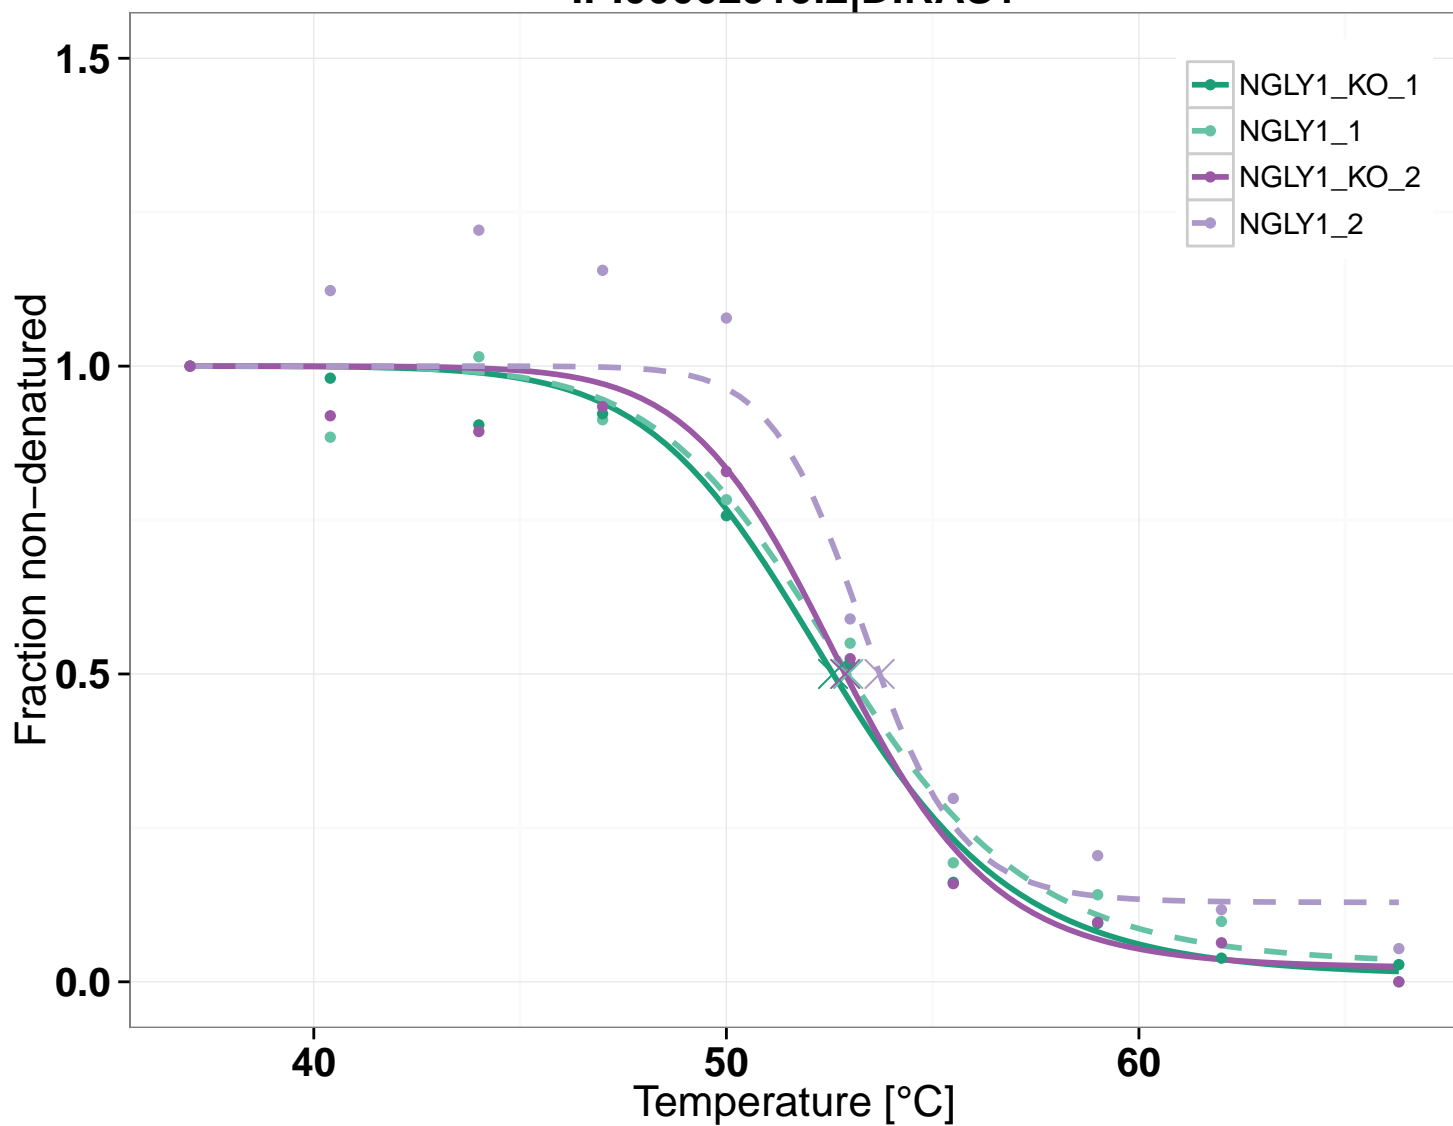

|            | meltPoint | slope | plateau | R2   |
|------------|-----------|-------|---------|------|
| NGLY1_KO_1 | 52.59     | -0.11 | 0.01    | 0.99 |
| NGLY1_1    | 52.95     | -0.11 | 0.03    | 0.98 |
| NGLY1_KO_2 | 52.88     | -0.13 | 0.02    | 0.98 |
| NGLY1_2    | 53.71     | -0.19 | 0.13    | 0.94 |

Supplement: Supplementary file 3434 [file 1]

# IPI00847415.1|CLK3

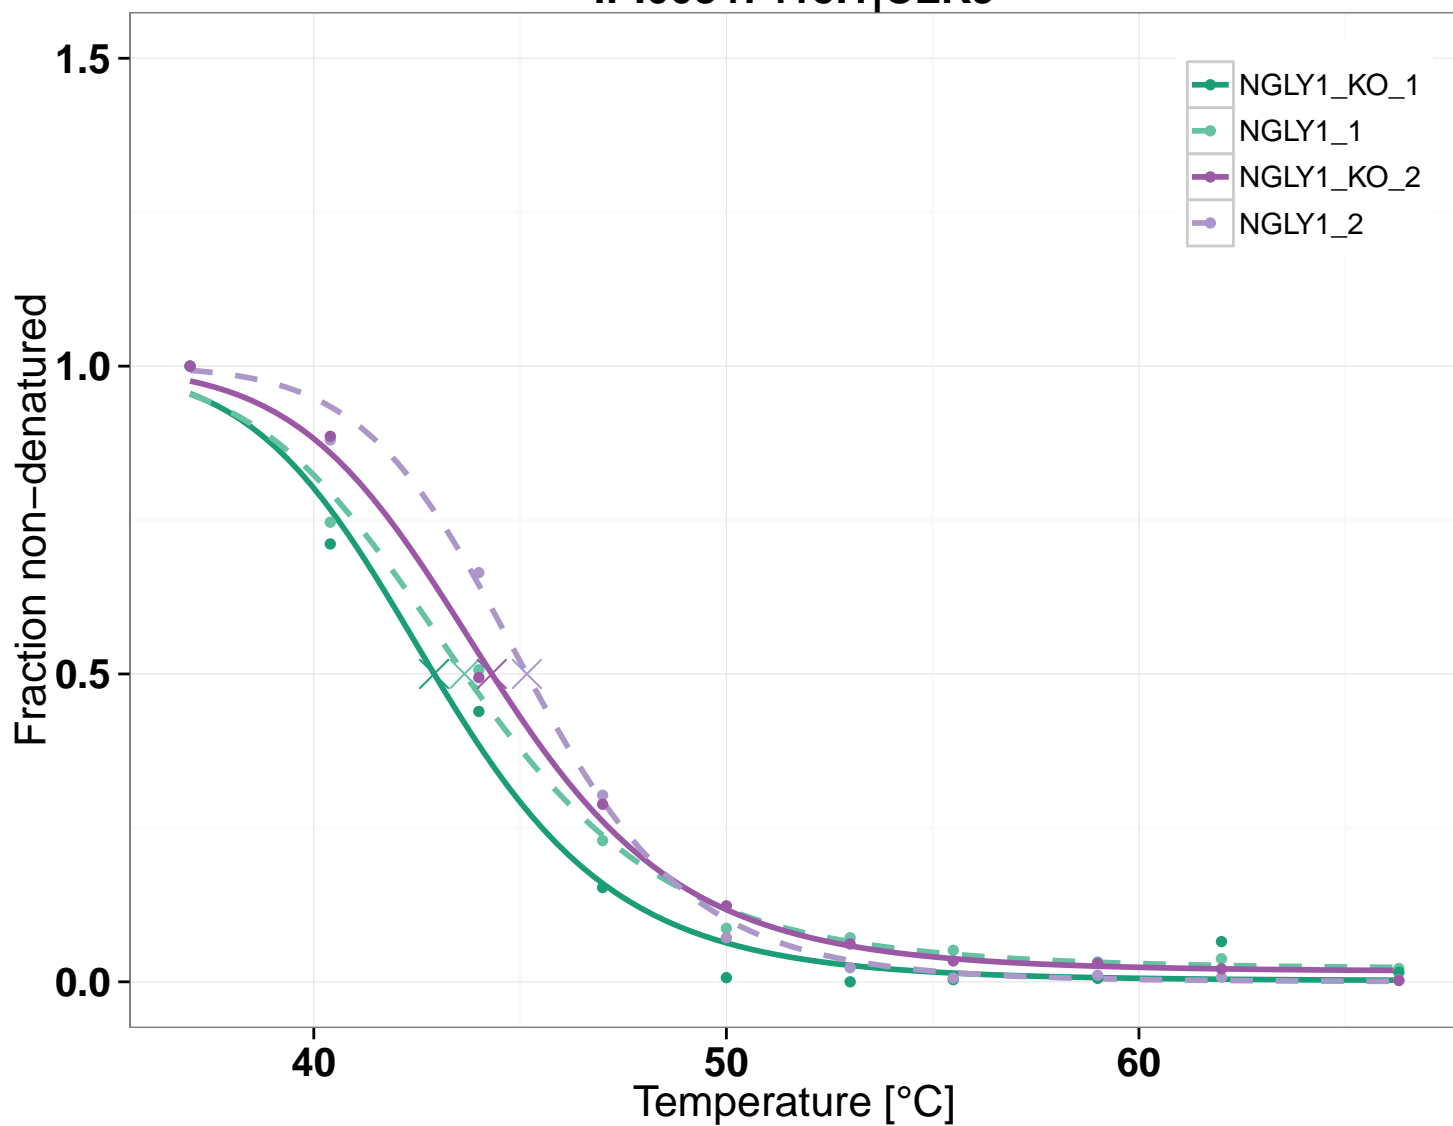

|            | meltPoint | slope  | plateau | R2   |
|------------|-----------|--------|---------|------|
| NGLY1_KO_1 | 42.92     | -0.11  | 0       | 0.99 |
| NGLY1_1    | 43.65     | -0.097 | 0.02    | 0.99 |
| NGLY1_KO_2 | 44.31     | -0.11  | 0.02    | 1    |
| NGLY1_2    | 45.17     | -0.13  | 0       | 1    |

Supplement: Supplementary file 3435 [file 1]

IPI00219038.9|H3F3A

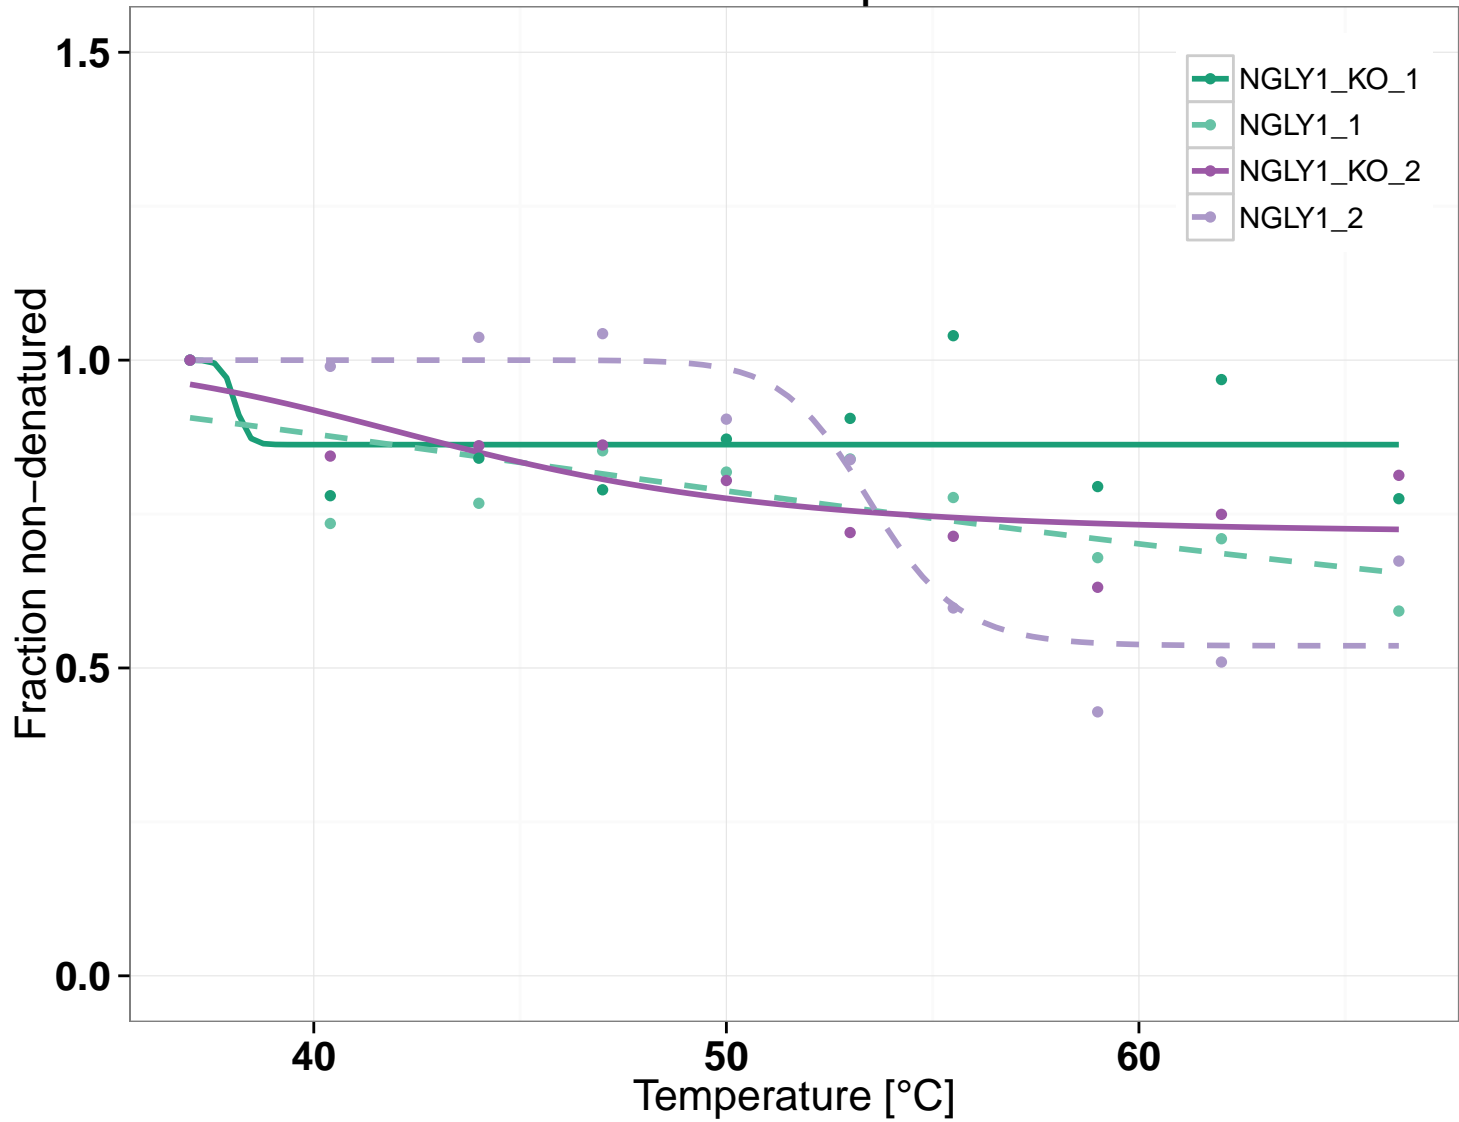

|            | meltPoint | slope   | plateau | R2   |
|------------|-----------|---------|---------|------|
| NGLY1_KO_1 | -         | -0.23   | 0.86    | 0.2  |
| NGLY1_1    | -         | -0.0093 | 0       | 0.55 |
| NGLY1_KO_2 | -         | -0.017  | 0.72    | 0.67 |
| NGLY1_2    | -         | -0.11   | 0.54    | 0.91 |

Supplement: Supplementary file 3436 [file 1]

# IPI00328379.4|GPSM2

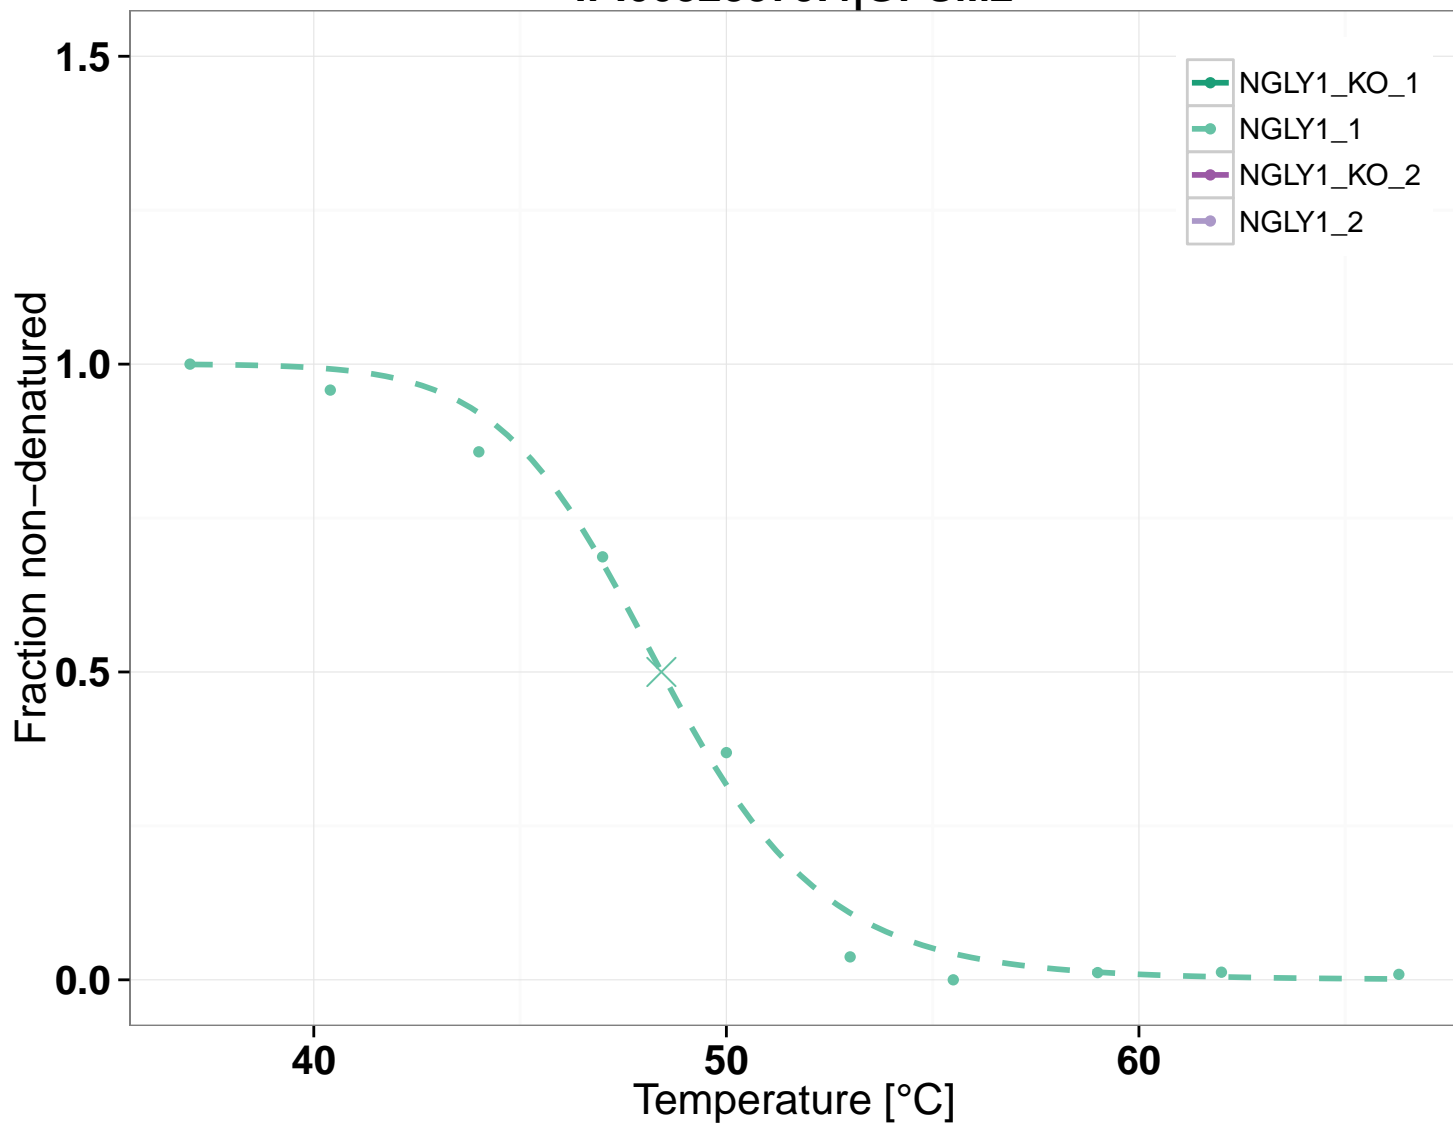

|            | meltPoint | slope | plateau | R2   |
|------------|-----------|-------|---------|------|
| NGLY1_KO_1 | -         | -     | -       | -    |
| NGLY1_1    | 48.43     | -0.13 | 0       | 0.99 |
| NGLY1_KO_2 | -         | -     | -       | -    |
| NGLY1_2    | -         | -     | -       | -    |

Supplement: Supplementary file 3437 [file 1]

# IPI00013004.1|PDXK

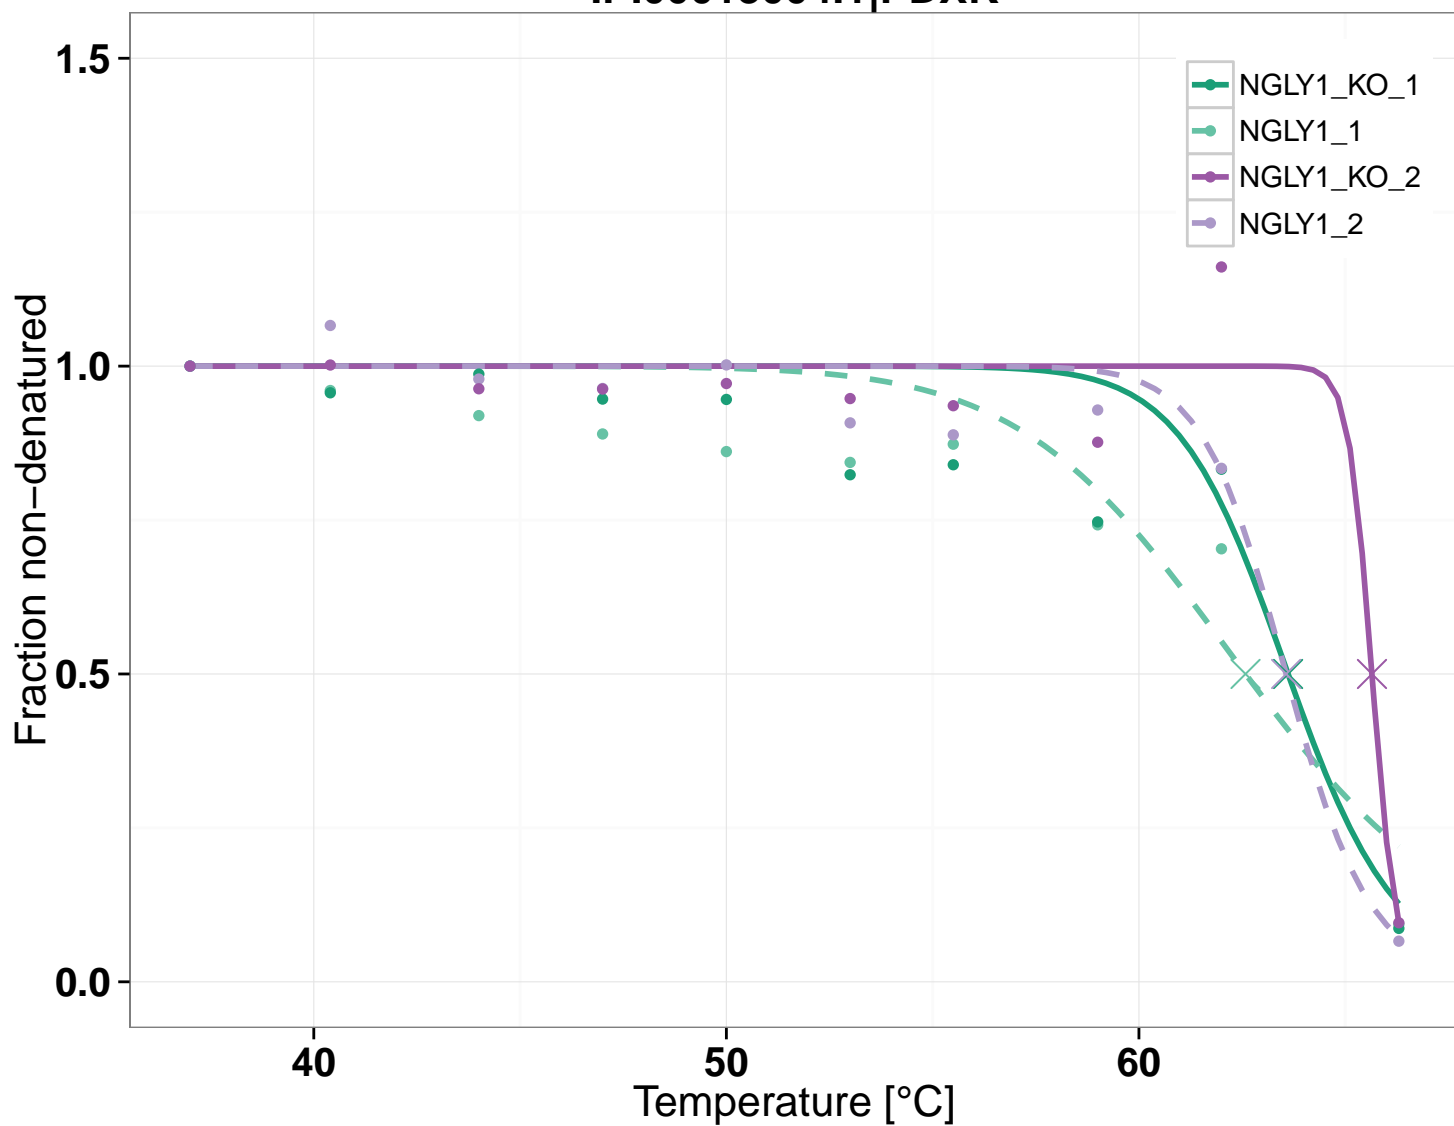

|            | meltPoint | slope  | plateau | R2   |
|------------|-----------|--------|---------|------|
| NGLY1_KO_1 | 63.62     | -0.19  | 0       | 0.81 |
| NGLY1_1    | 62.58     | -0.091 | 0       | 0.83 |
| NGLY1_KO_2 | 65.65     | -0.87  | 0       | 0.93 |
| NGLY1_2    | 63.57     | -0.24  | 0       | 0.96 |

Supplement: Supplementary file 3438 [file 1]

# IPI00011919.1|FADD

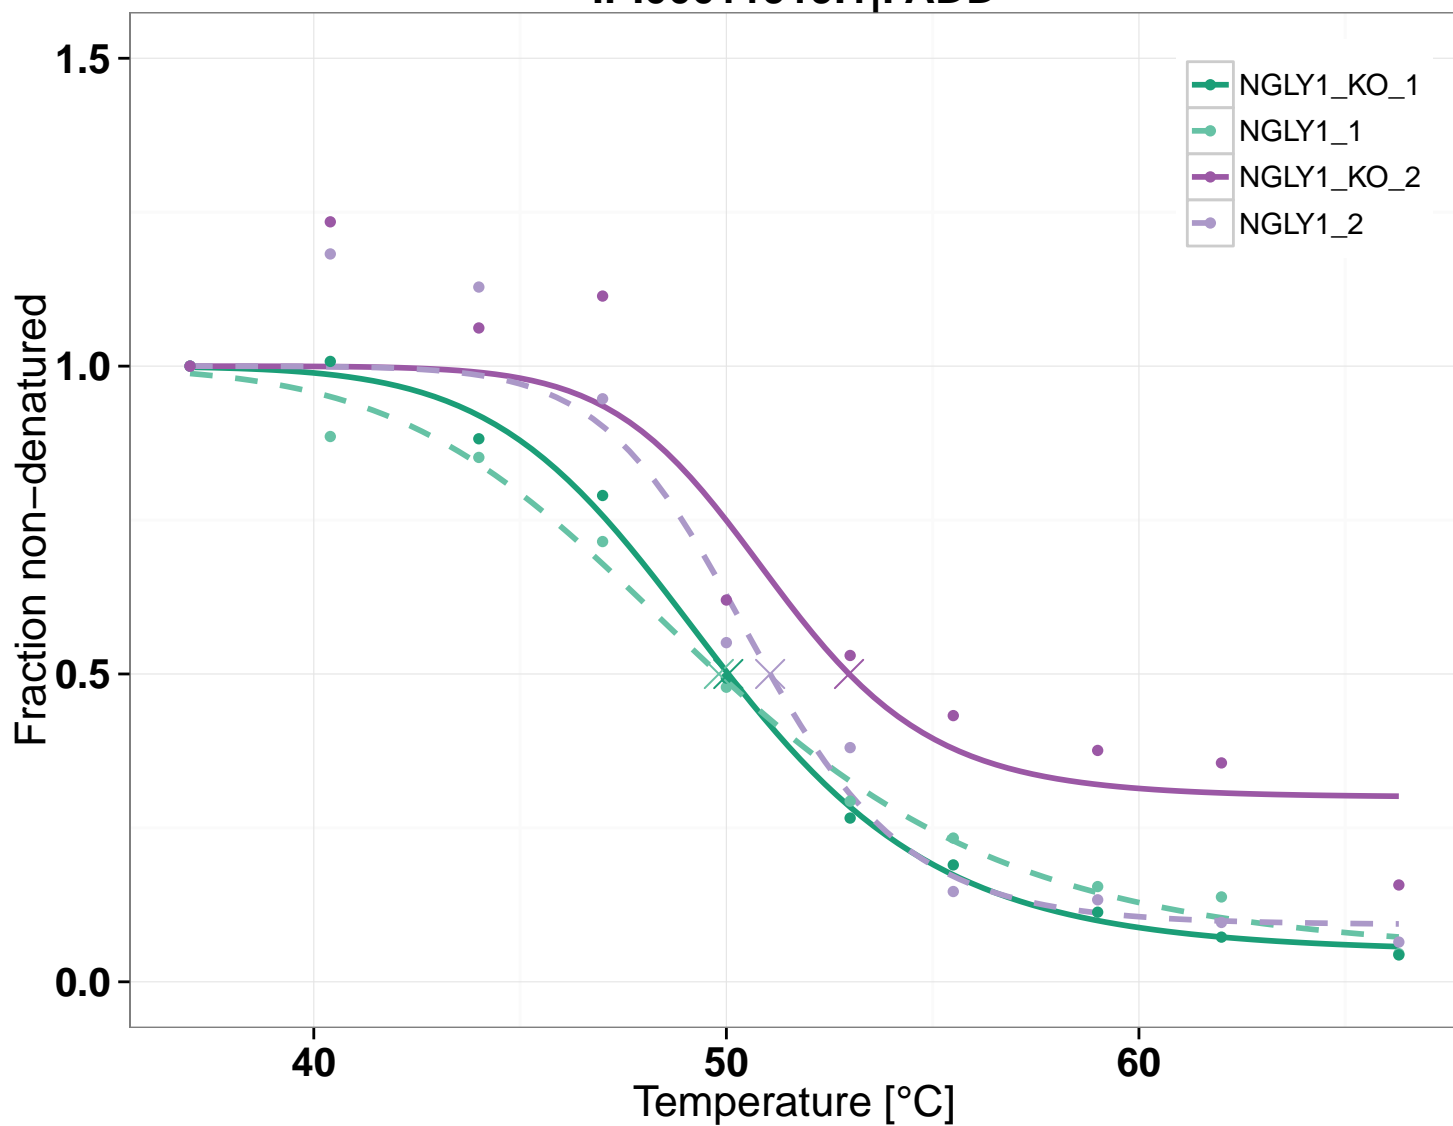

|            | meltPoint | slope  | plateau | R2   |
|------------|-----------|--------|---------|------|
| NGLY1_KO_1 | 50.05     | -0.088 | 0.05    | 1    |
| NGLY1_1    | 49.82     | -0.064 | 0.04    | 0.99 |
| NGLY1_KO_2 | 52.97     | -0.09  | 0.3     | 0.89 |
| NGLY1_2    | 51.06     | -0.12  | 0.09    | 0.96 |

Supplement: Supplementary file 3439 [file 1]

# IPI00395987.4|RAD51L1

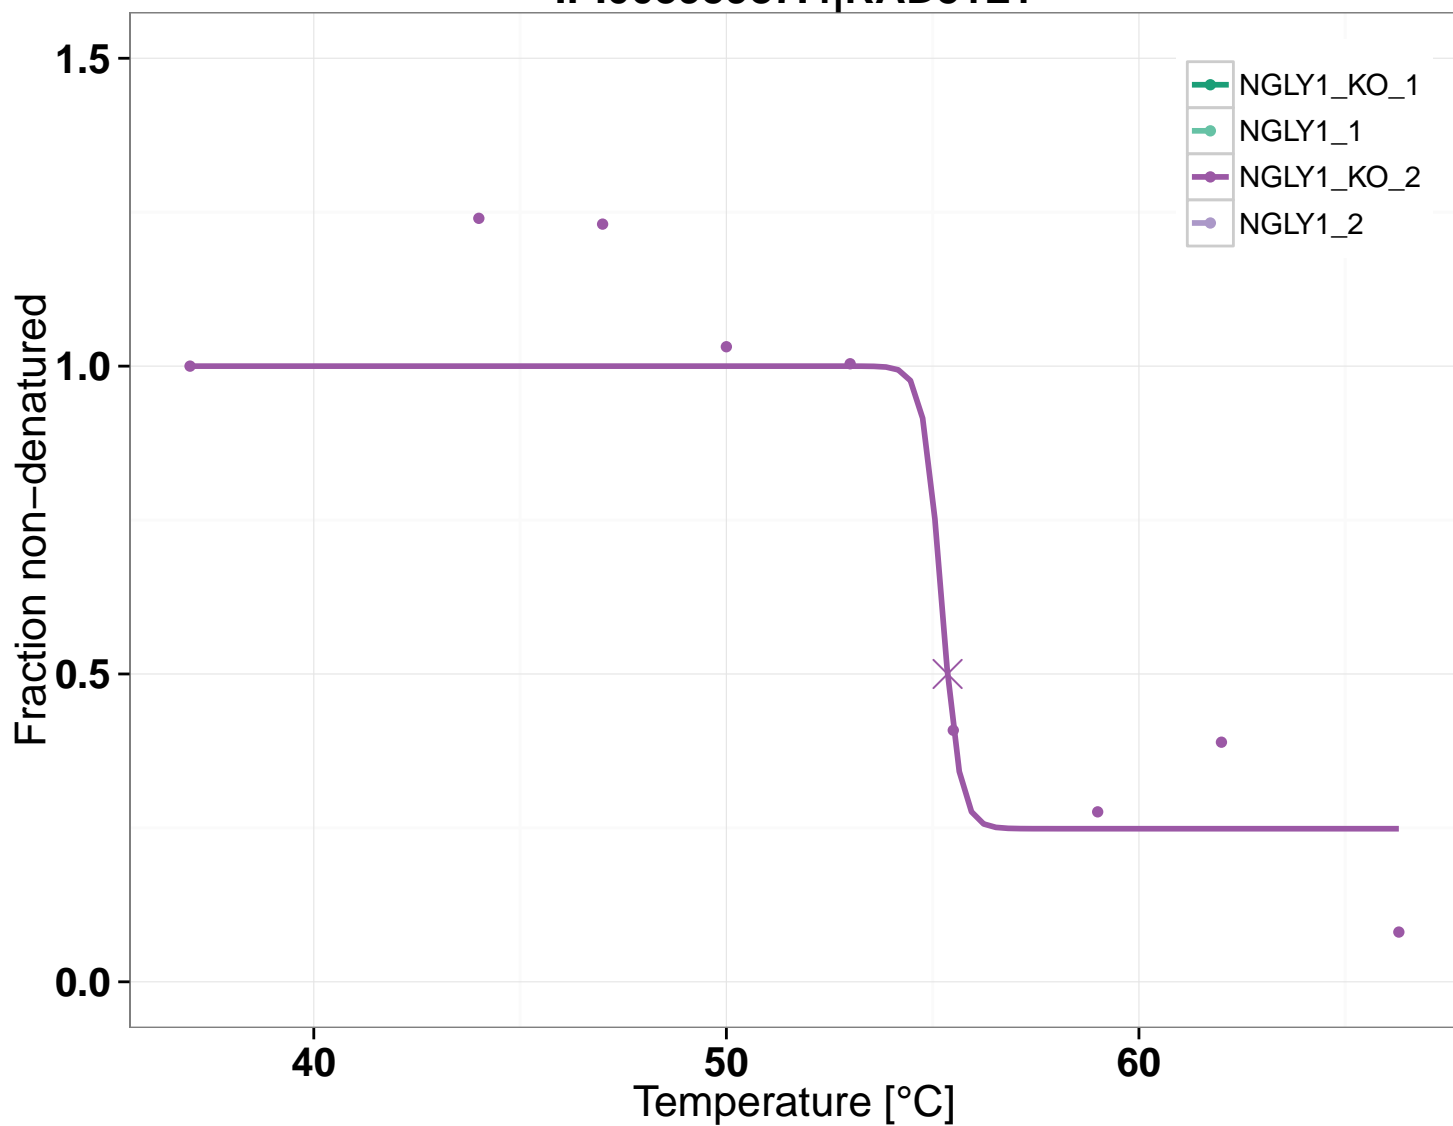

|            | meltPoint | slope | plateau | R2   |
|------------|-----------|-------|---------|------|
| NGLY1_KO_1 | —         | —     | —       | —    |
| NGLY1_1    | —         | —     | —       | —    |
| NGLY1_KO_2 | 55.36     | -0.85 | 0.25    | 0.79 |
| NGLY1_2    | —         | —     | —       | —    |

Supplement: Supplementary file 3440 [file 1]

IPI00719277.1|ZBTB7C

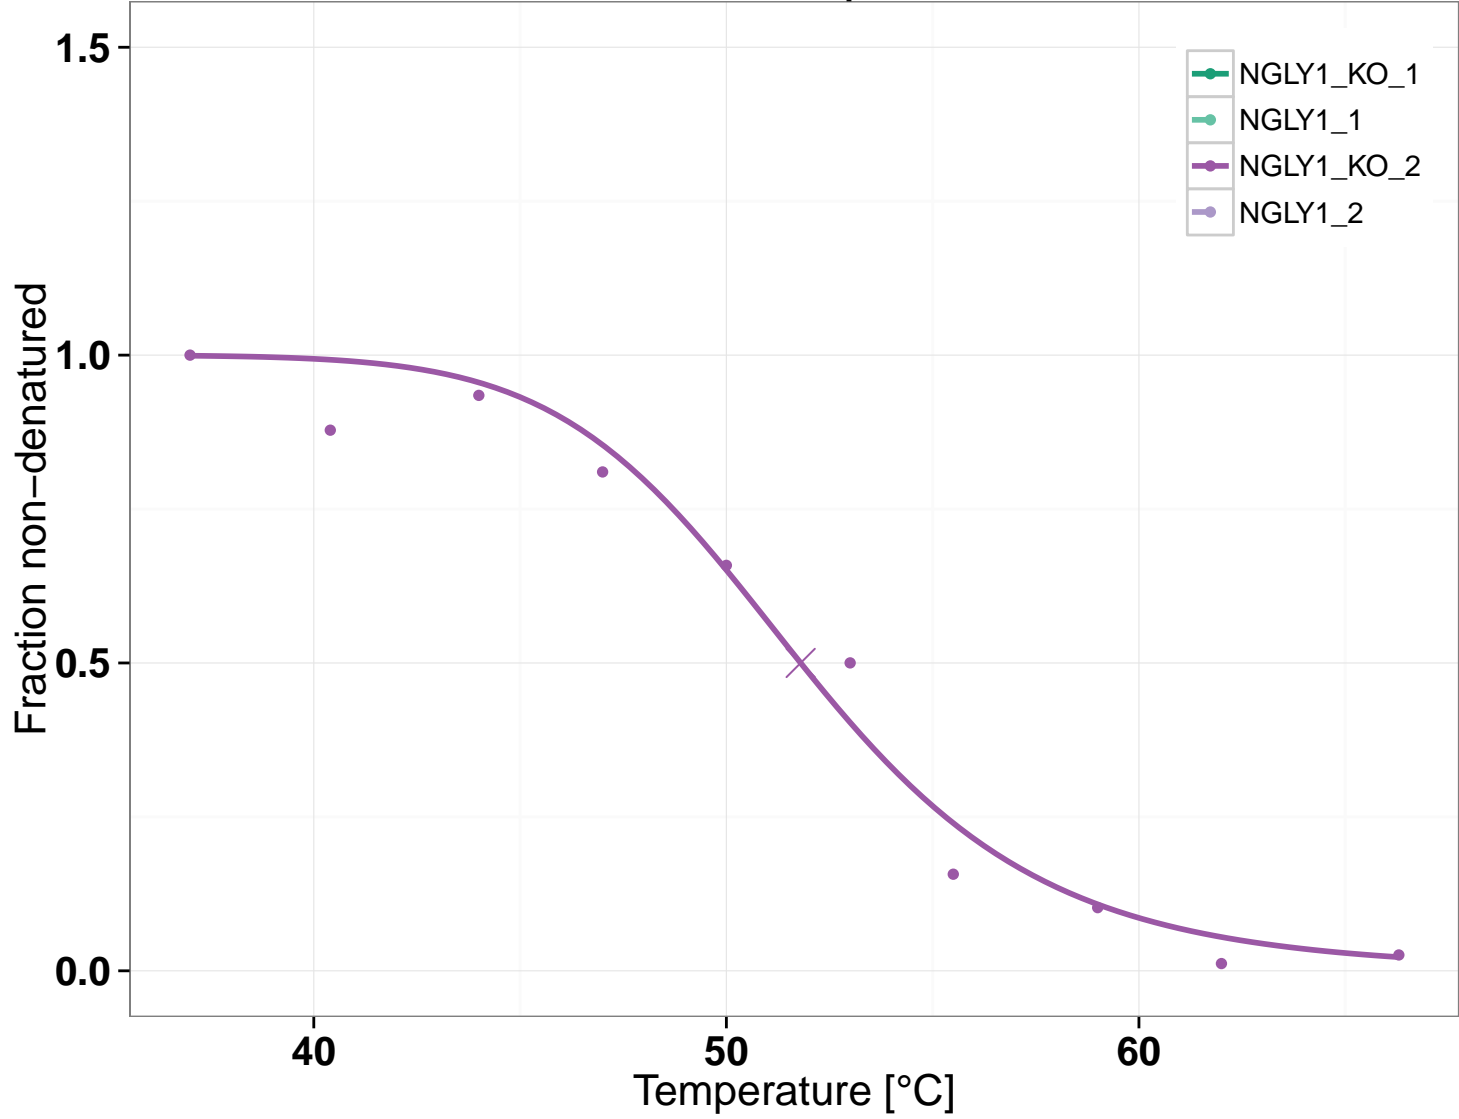

|            | meltPoint | slope  | plateau | R2   |
|------------|-----------|--------|---------|------|
| NGLY1_KO_1 | -         | -      | -       | -    |
| NGLY1_1    | -         | -      | -       | -    |
| NGLY1_KO_2 | 51.8      | -0.085 | 0       | 0.98 |
| NGLY1_2    | -         | -      | -       | -    |

Supplement: Supplementary file 3441 [file 1]

# IPI00335643.3|MKL2

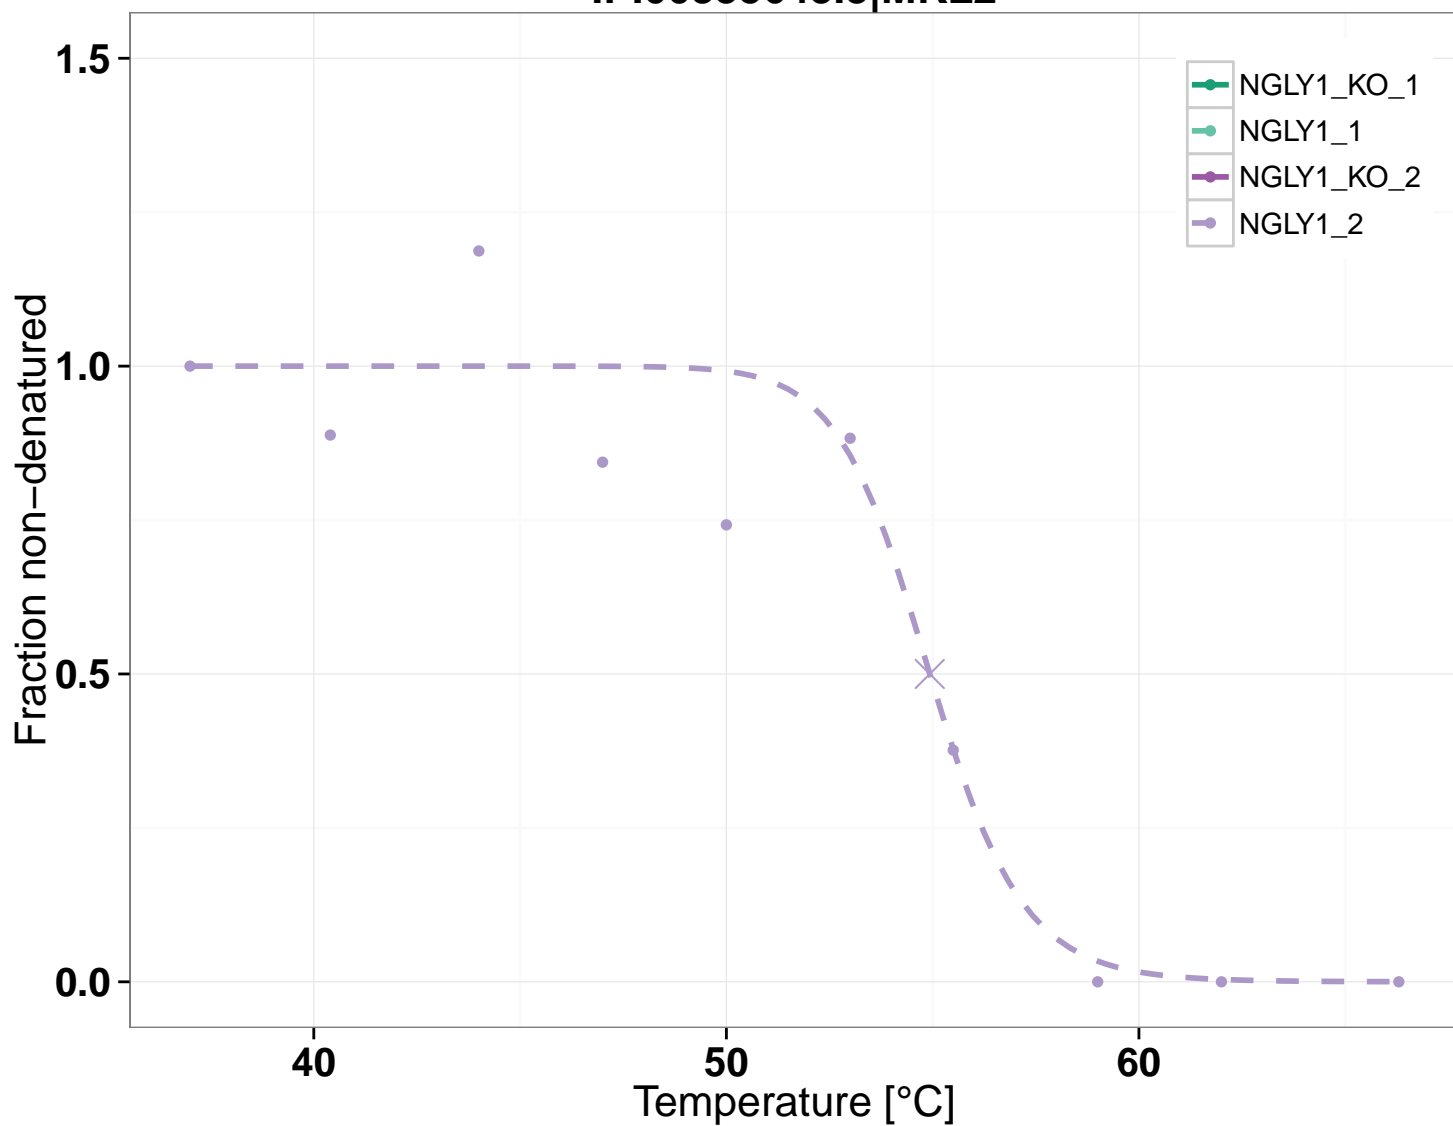

|            | meltPoint | slope | plateau | R2   |
|------------|-----------|-------|---------|------|
| NGLY1_KO_1 | —         | —     | —       | —    |
| NGLY1_1    | —         | —     | —       | —    |
| NGLY1_KO_2 | —         | —     | —       | —    |
| NGLY1_2    | 54.93     | -0.22 | 0       | 0.93 |

Supplement: Supplementary file 3442 [file 1]

IPI00028123.3|DMTF1

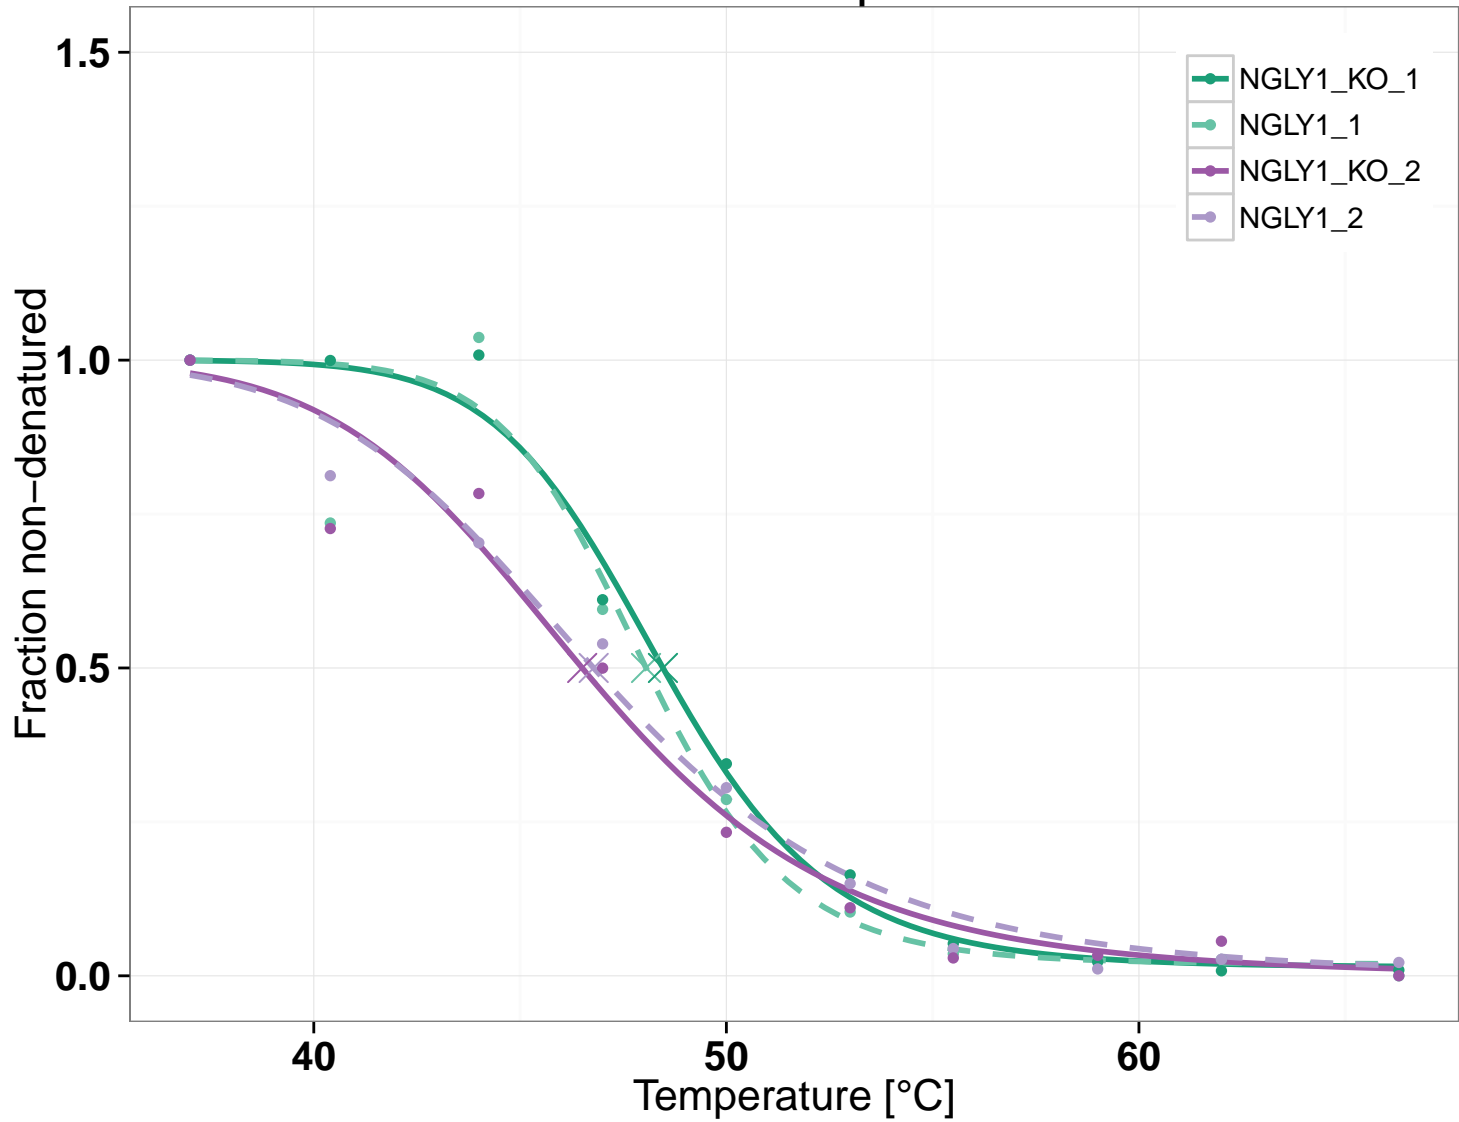

|            | meltPoint | slope  | plateau | R2   |
|------------|-----------|--------|---------|------|
| NGLY1_KO_1 | 48.46     | -0.12  | 0.01    | 0.99 |
| NGLY1_1    | 48.05     | -0.14  | 0.02    | 0.95 |
| NGLY1_KO_2 | 46.51     | -0.082 | 0       | 0.96 |
| NGLY1_2    | 46.78     | -0.076 | 0       | 0.99 |

Supplement: Supplementary file 3443 [file 1]

IPI00291351.1|RPS6KC1

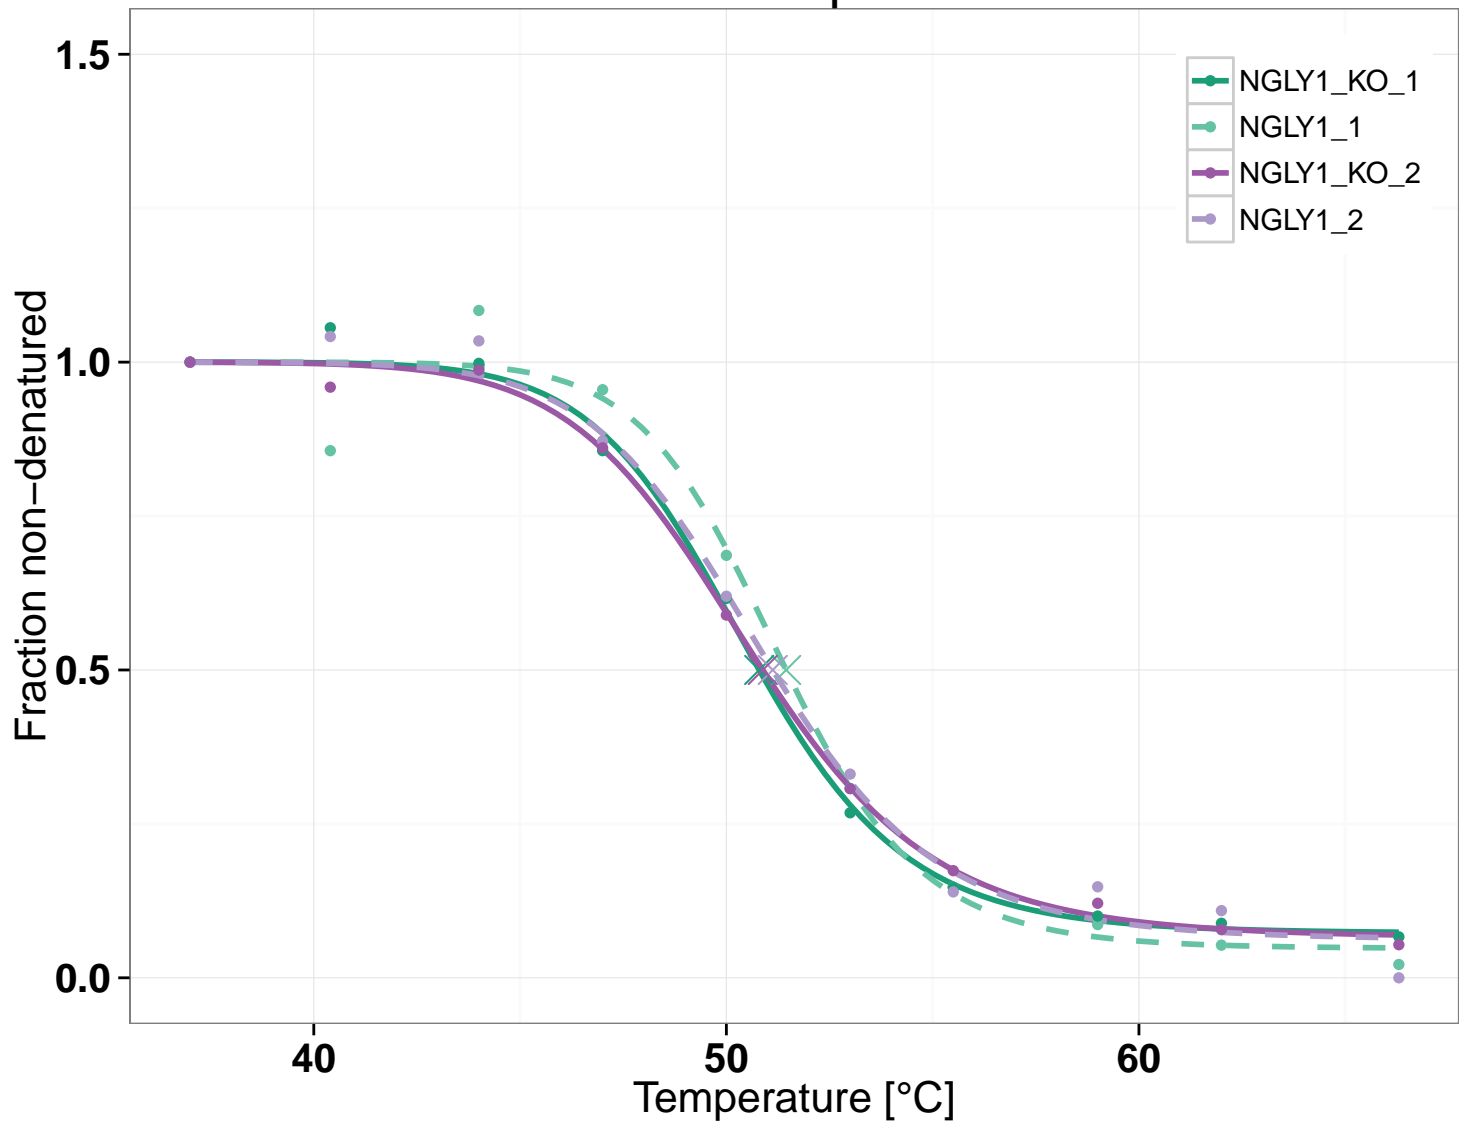

|            | meltPoint | slope | plateau | R2   |
|------------|-----------|-------|---------|------|
| NGLY1_KO_1 | 50.8      | -0.12 | 0.07    | 1    |
| NGLY1_1    | 51.45     | -0.14 | 0.05    | 0.98 |
| NGLY1_KO_2 | 50.88     | -0.11 | 0.07    | 1    |
| NGLY1_2    | 51.12     | -0.11 | 0.06    | 0.99 |

Supplement: Supplementary file 3444 [file 1]

IPI00550689.3|C22ORF28

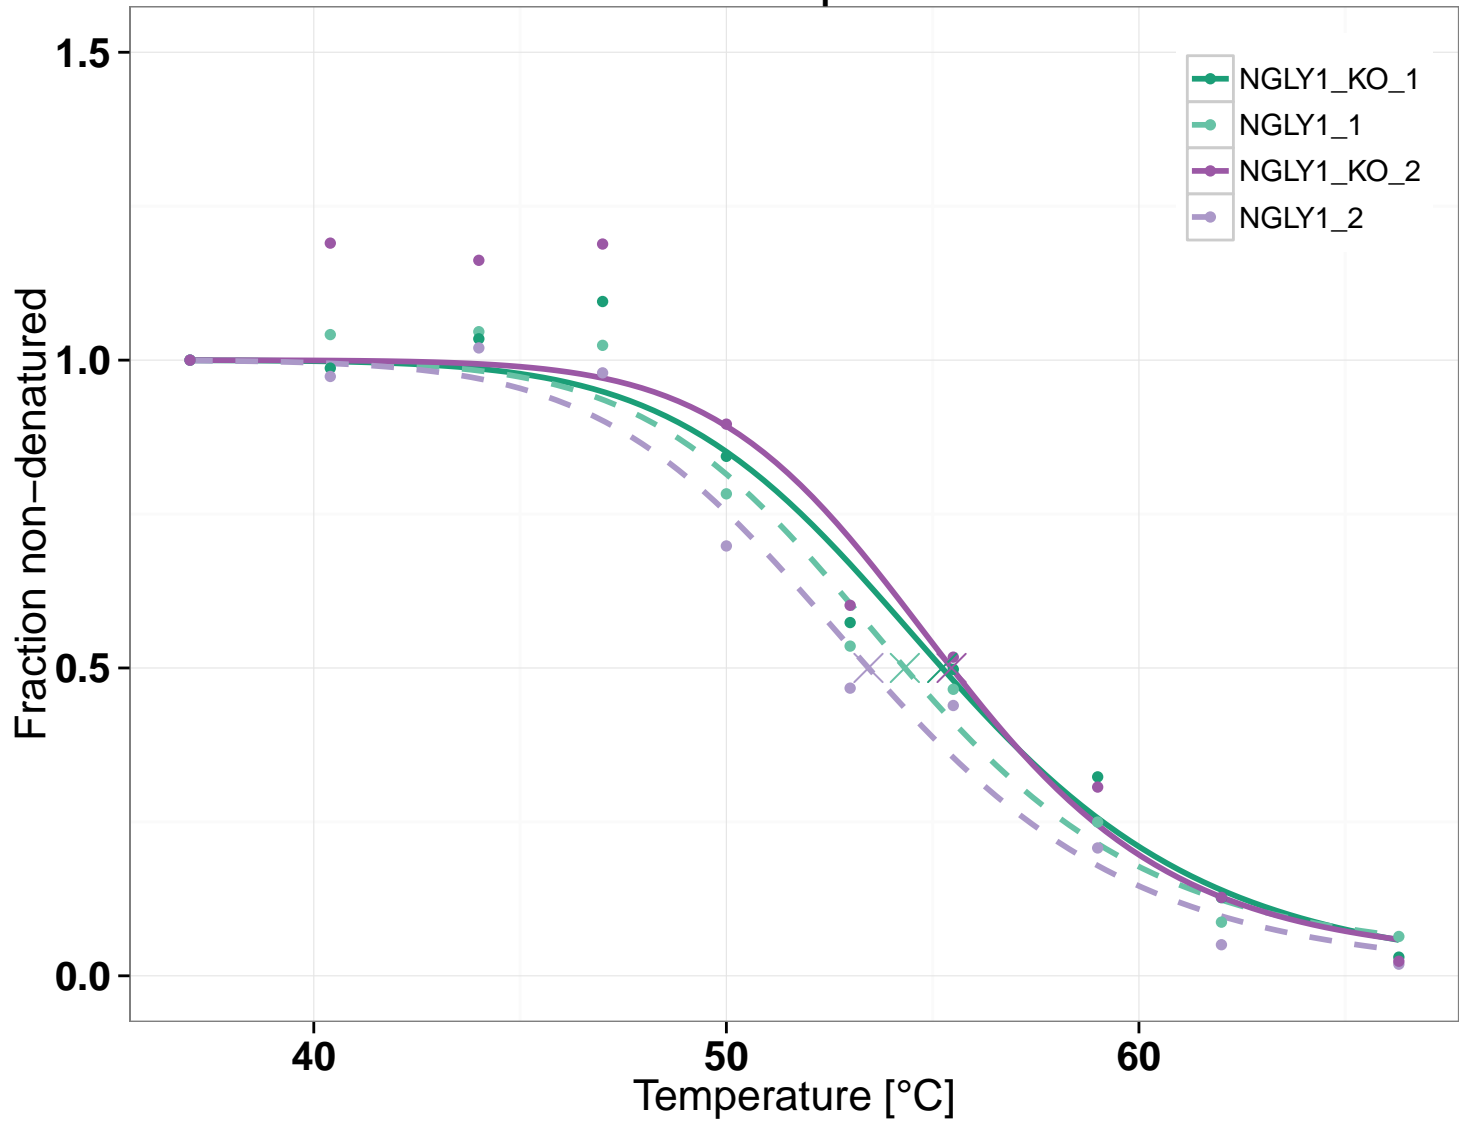

|            | meltPoint | slope  | plateau | R2   |
|------------|-----------|--------|---------|------|
| NGLY1_KO_1 | 55.23     | -0.077 | 0       | 0.97 |
| NGLY1_1    | 54.33     | -0.079 | 0.03    | 0.98 |
| NGLY1_KO_2 | 55.46     | -0.088 | 0.02    | 0.93 |
| NGLY1_2    | 53.44     | -0.077 | 0       | 0.98 |

Supplement: Supplementary file 3445 [file 1]

# IPI00031708.1|FAH

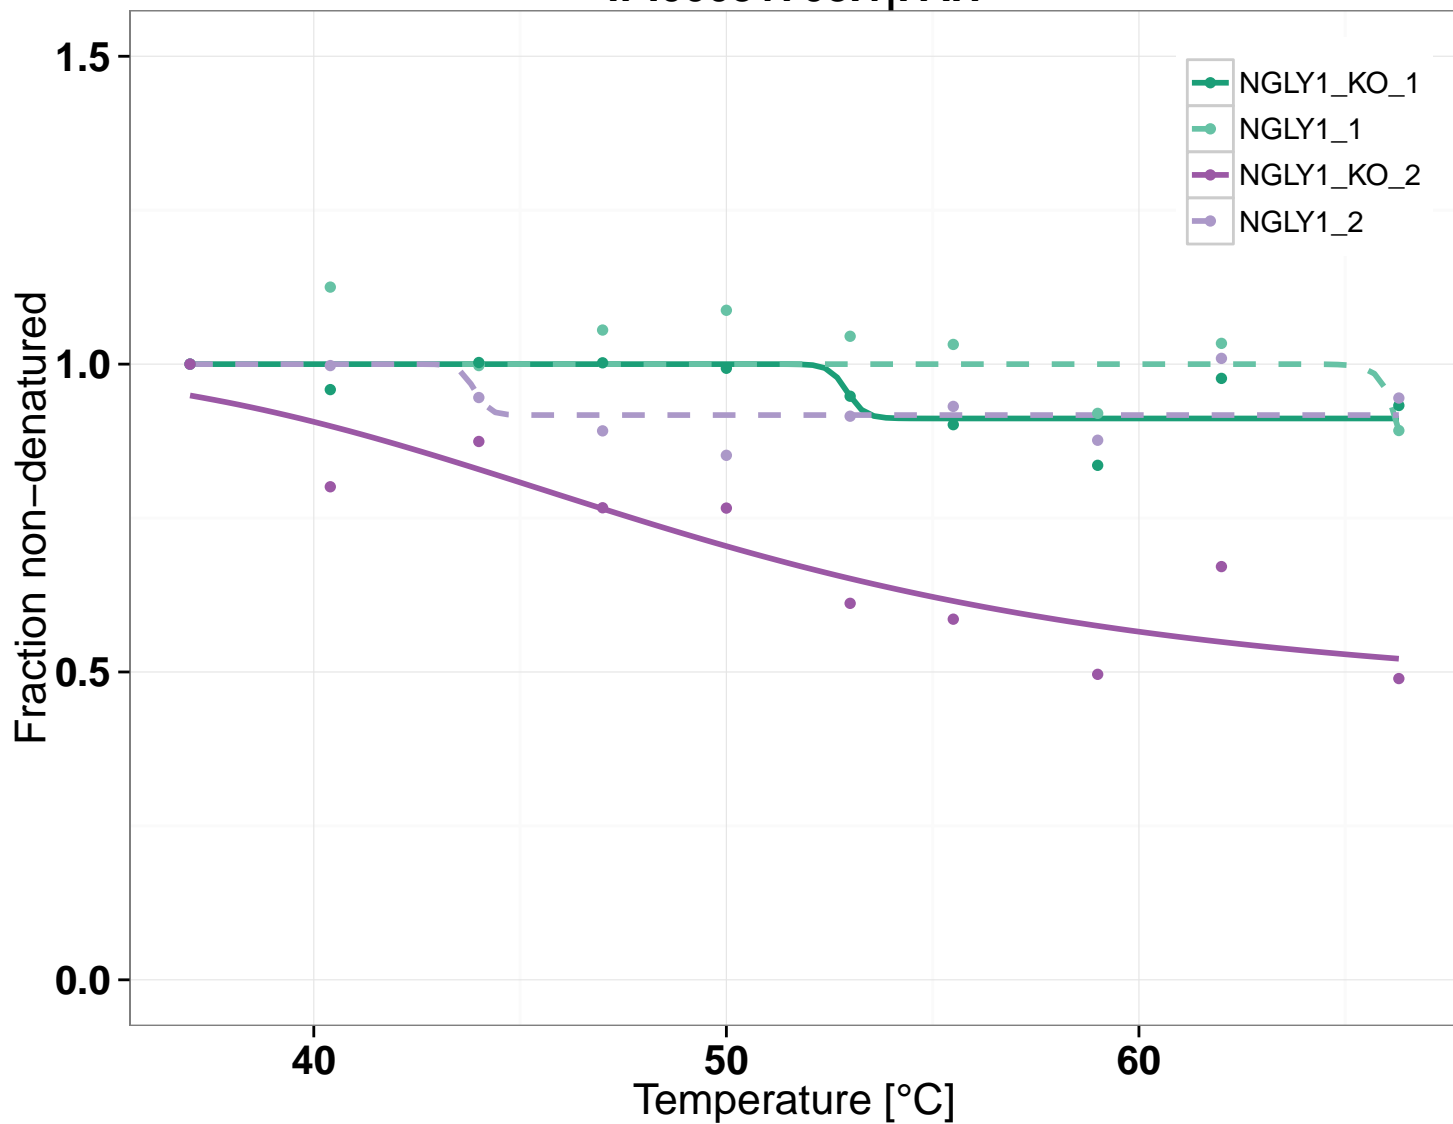

|            | meltPoint | slope  | plateau | R2   |
|------------|-----------|--------|---------|------|
| NGLY1_KO_1 | -         | -0.1   | 0.91    | 0.53 |
| NGLY1_1    | -         | -      | 0       | 0.18 |
| NGLY1_KO_2 | -         | -0.021 | 0.44    | 0.83 |
| NGLY1_2    | -         | -0.12  | 0.92    | 0.39 |

Supplement: Supplementary file 3446 [file 1]

IPI00739876.3|TCTN3

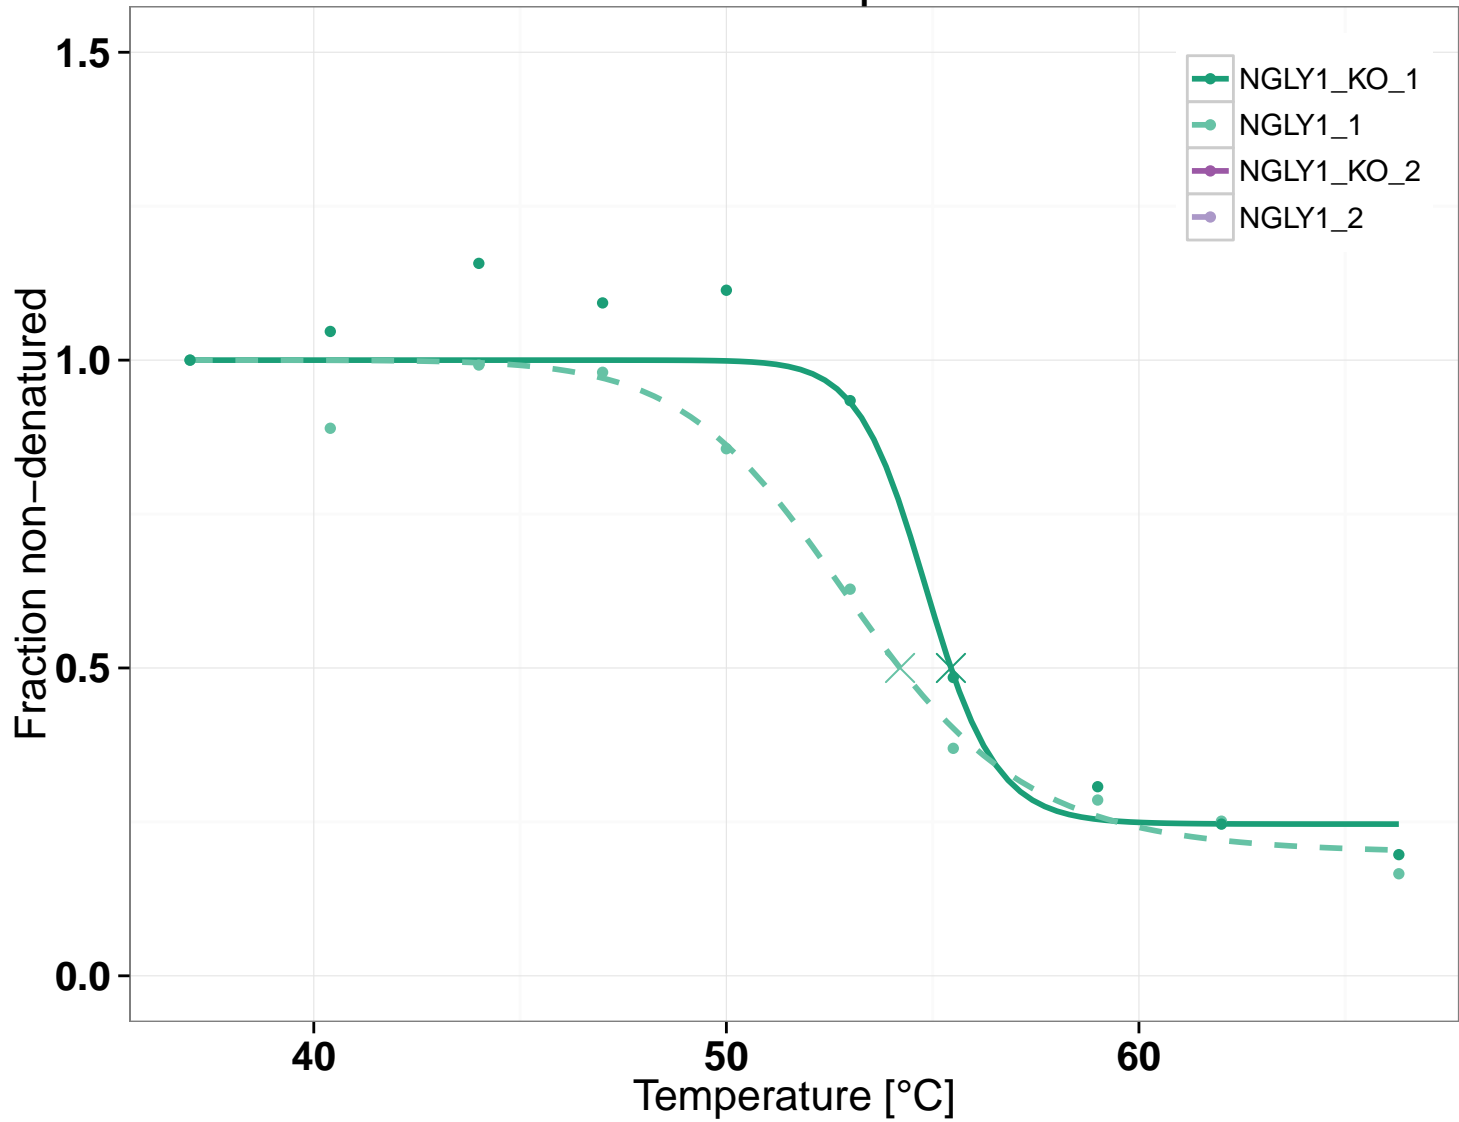

|            | meltPoint | slope  | plateau | R2   |
|------------|-----------|--------|---------|------|
| NGLY1_KO_1 | 55.44     | -0.22  | 0.25    | 0.96 |
| NGLY1_1    | 54.21     | -0.095 | 0.2     | 0.98 |
| NGLY1_KO_2 | -         | -      | -       | -    |
| NGLY1_2    | -         | -      | -       | -    |

Supplement: Supplementary file 3447 [file 1]

IPI00069734.2|ZMAT2

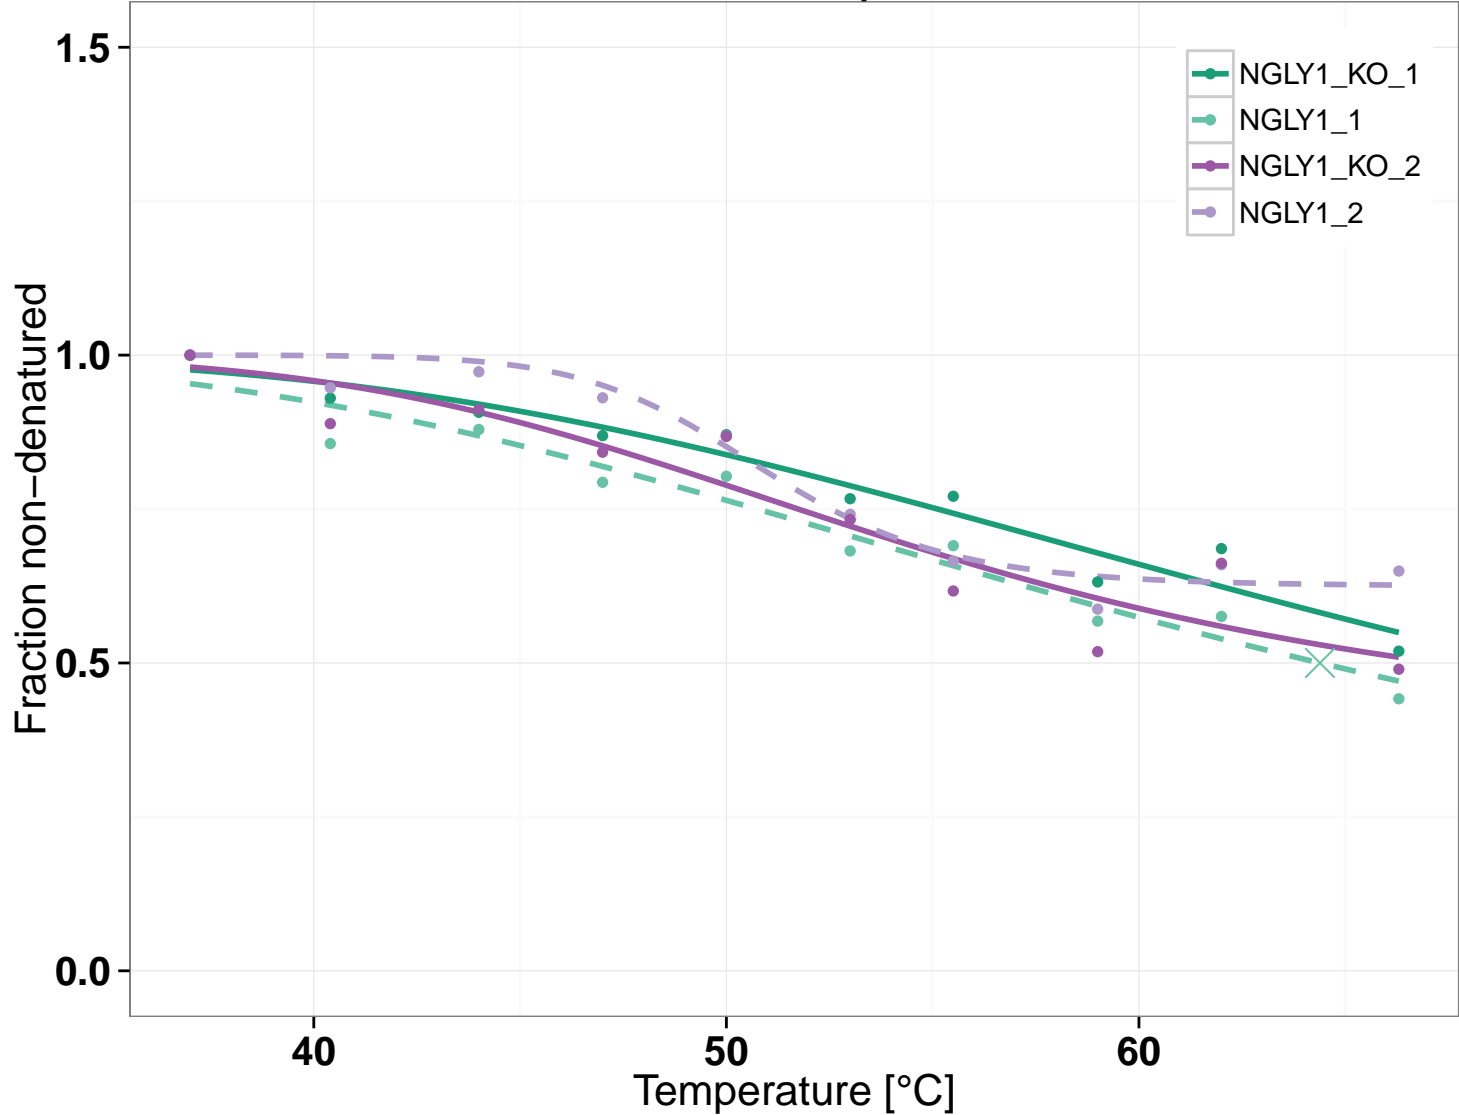

|            | meltPoint | slope  | plateau | R2   |
|------------|-----------|--------|---------|------|
| NGLY1_KO_1 | -         | -0.018 | 0       | 0.95 |
| NGLY1_1    | 64.39     | -0.019 | 0       | 0.95 |
| NGLY1_KO_2 | -         | -0.022 | 0.37    | 0.88 |
| NGLY1_2    | -         | -0.042 | 0.62    | 0.96 |

Supplement: Supplementary file 3448 [file 1]

# IPI00551059.2|GPN2

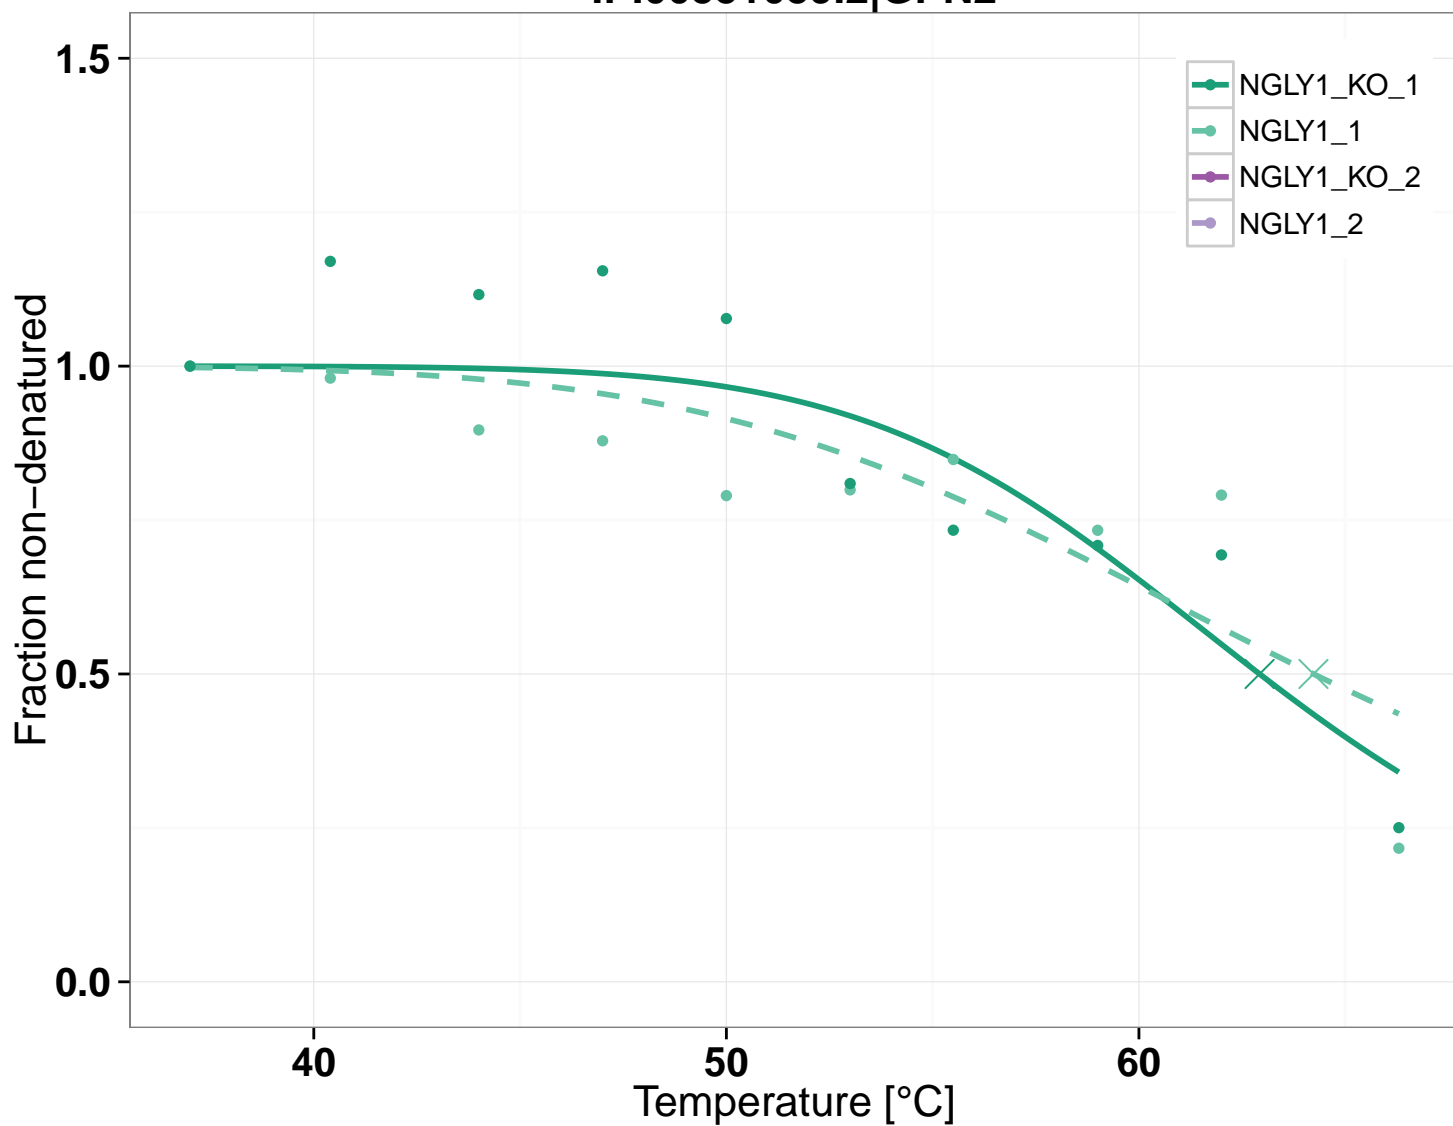

|            | meltPoint | slope  | plateau | R2   |
|------------|-----------|--------|---------|------|
| NGLY1_KO_1 | 62.92     | -0.053 | 0       | 0.82 |
| NGLY1_1    | 64.23     | -0.034 | 0       | 0.69 |
| NGLY1_KO_2 | -         | -      | -       | -    |
| NGLY1_2    | -         | -      | -       | -    |

Supplement: Supplementary file 3449 [file 1]

# IPI00152658.1|NEK7

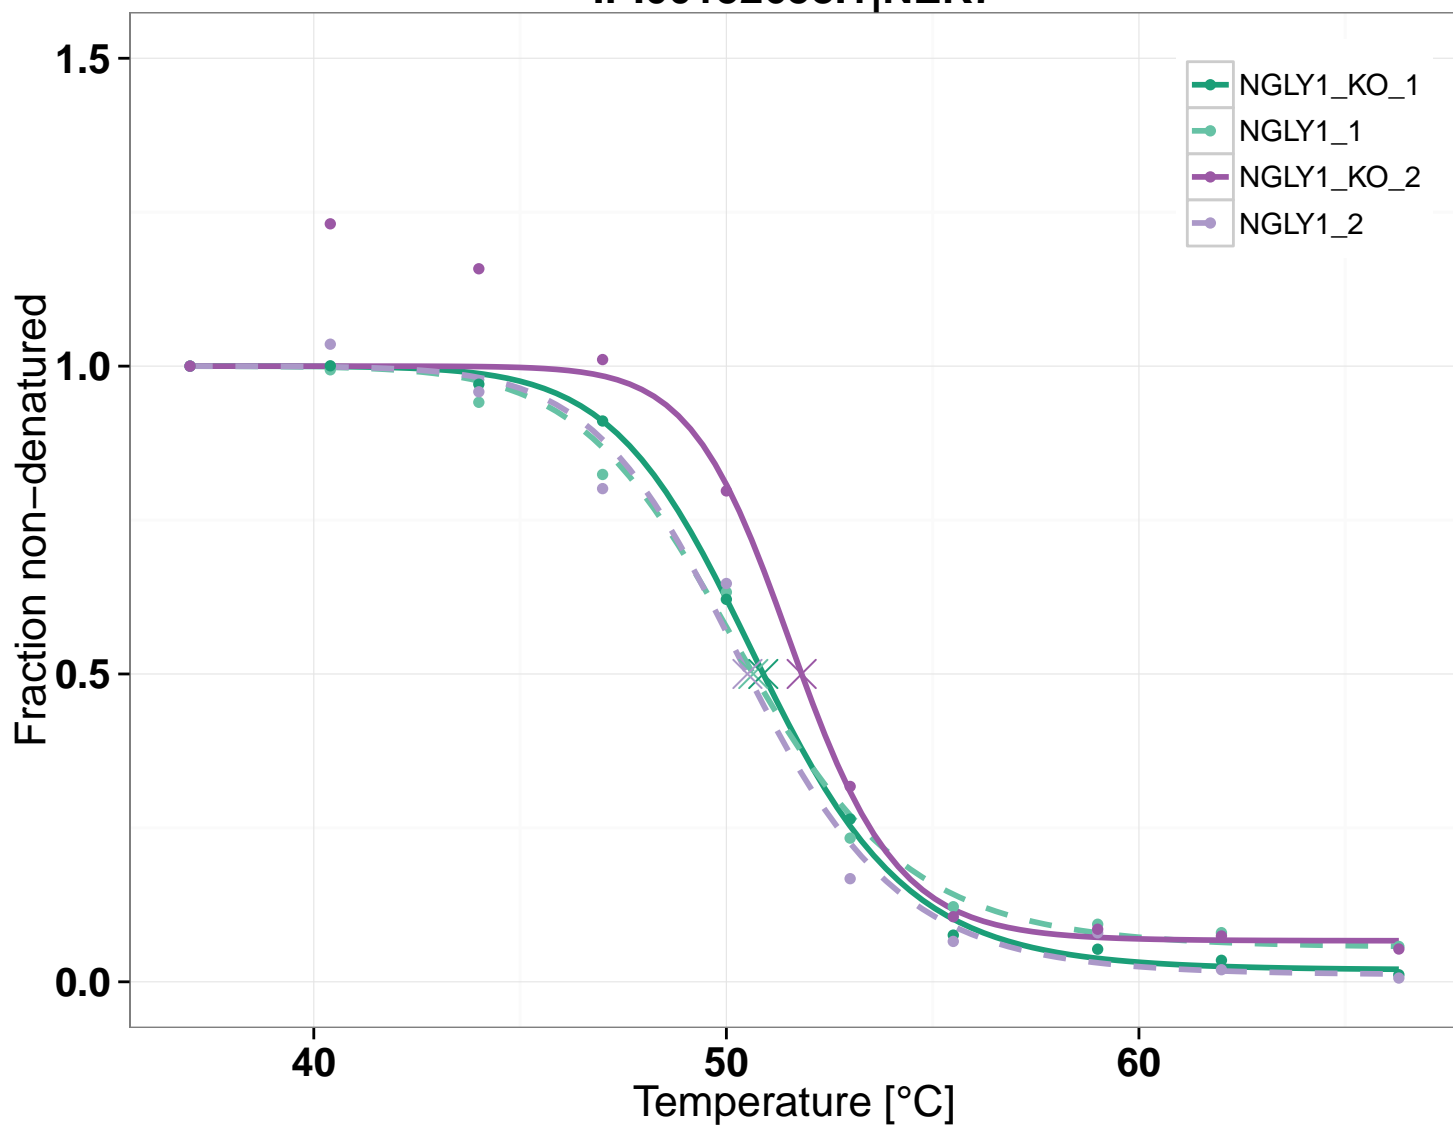

|            | meltPoint | slope | plateau | R2   |
|------------|-----------|-------|---------|------|
| NGLY1_KO_1 | 50.89     | -0.14 | 0.02    | 1    |
| NGLY1_1    | 50.65     | -0.12 | 0.06    | 0.99 |
| NGLY1_KO_2 | 51.82     | -0.19 | 0.07    | 0.96 |
| NGLY1_2    | 50.51     | -0.13 | 0.01    | 0.99 |

Supplement: Supplementary file 3450 [file 1]

IPI00787343.4|MGC33894

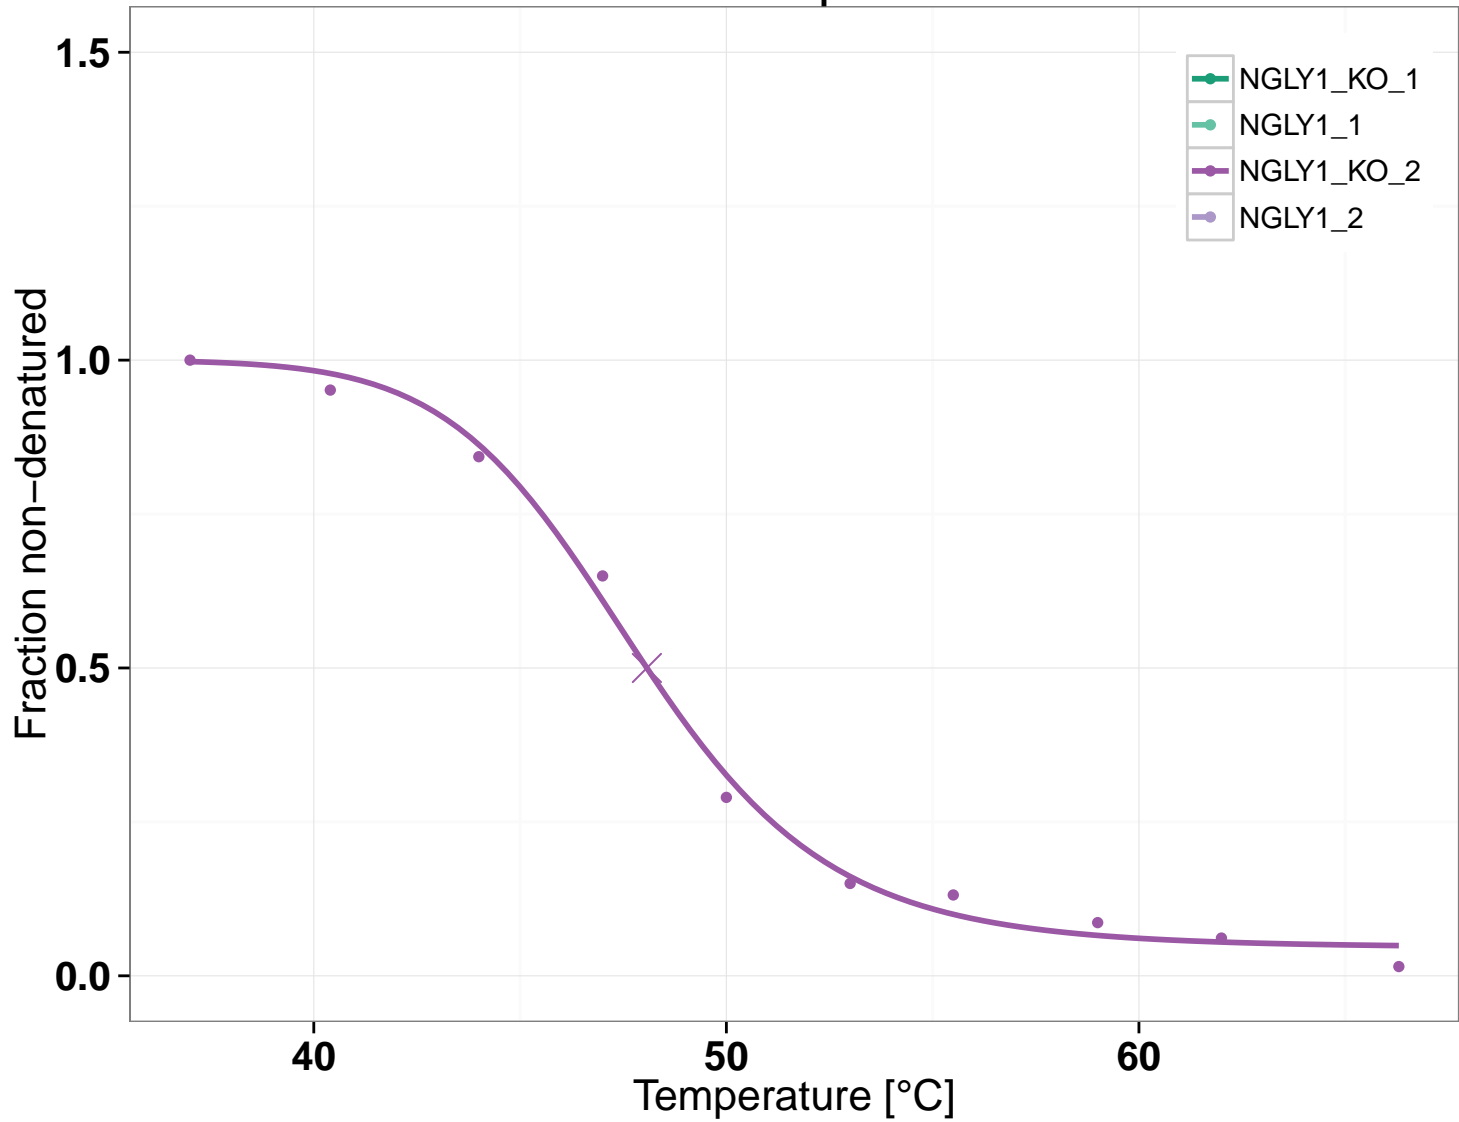

|            | meltPoint | slope | plateau | R2 |
|------------|-----------|-------|---------|----|
| NGLY1_KO_1 | -         | -     | -       | -  |
| NGLY1_1    | -         | -     | -       | -  |
| NGLY1_KO_2 | 48.07     | -0.1  | 0.05    | 1  |
| NGLY1_2    | -         | -     | -       | -  |

Supplement: Supplementary file 3451 [file 1]

IPI00015905.1|EXOSC2

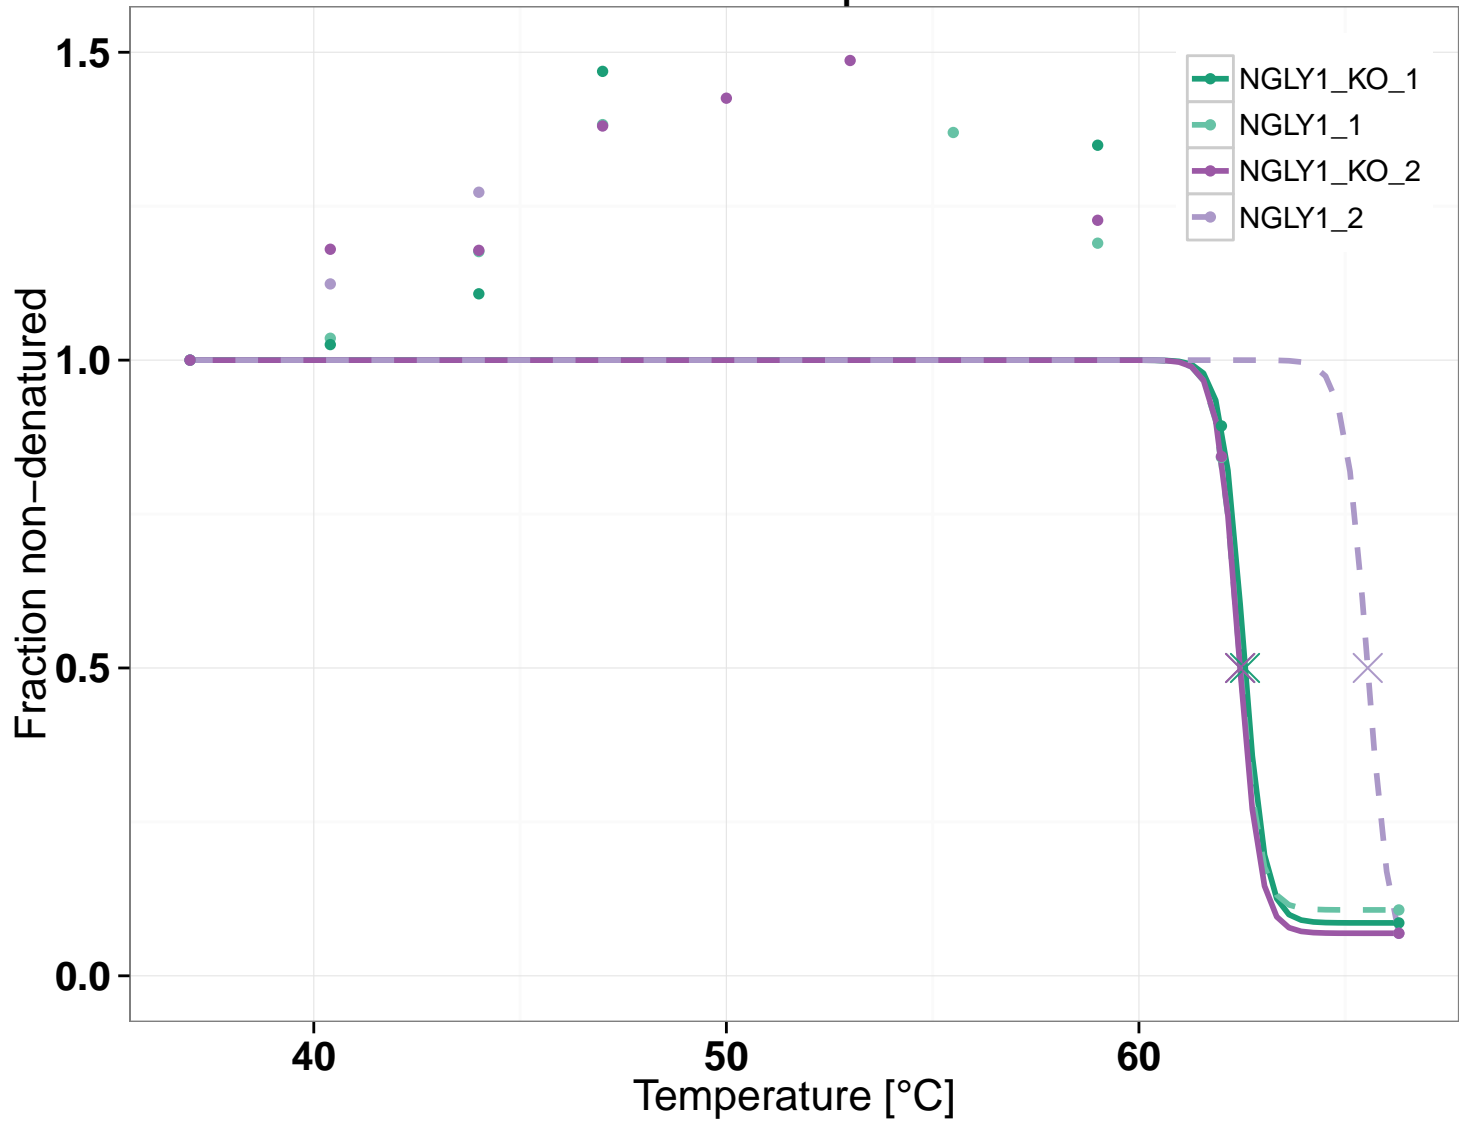

|            | meltPoint | slope | plateau | R2    |
|------------|-----------|-------|---------|-------|
| NGLY1_KO_1 | 62.57     | -0.88 | 0.09    | 0.29  |
| NGLY1_1    | 62.46     | -0.86 | 0.11    | 0.43  |
| NGLY1_KO_2 | 62.45     | -0.9  | 0.07    | 0.4   |
| NGLY1_2    | 65.55     | -0.87 | 0       | -0.22 |

Supplement: Supplementary file 3452 [file 1]

# IPI00556451.2|ETFB

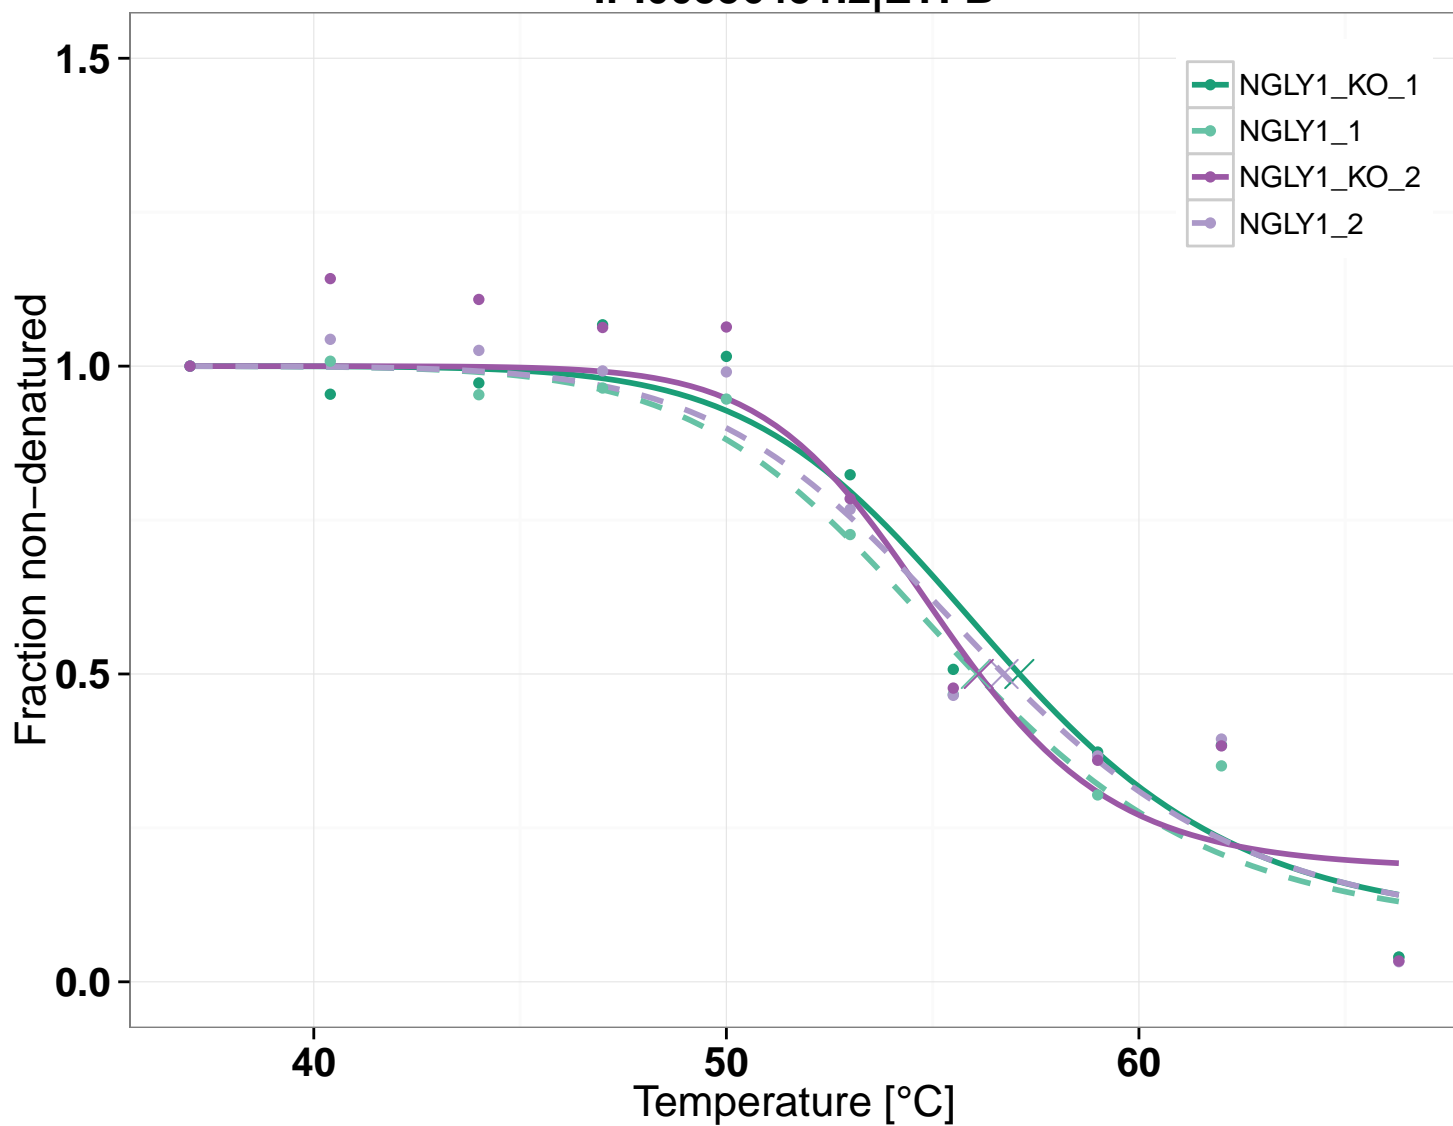

|            | meltPoint | slope  | plateau | R2   |
|------------|-----------|--------|---------|------|
| NGLY1_KO_1 | 57.1      | -0.077 | 0.09    | 0.94 |
| NGLY1_1    | 56.05     | -0.073 | 0.08    | 0.96 |
| NGLY1_KO_2 | 56.12     | -0.097 | 0.18    | 0.92 |
| NGLY1_2    | 56.72     | -0.071 | 0.08    | 0.95 |

Supplement: Supplementary file 3453 [file 1]

IPI00397721.1|BLOC1S3

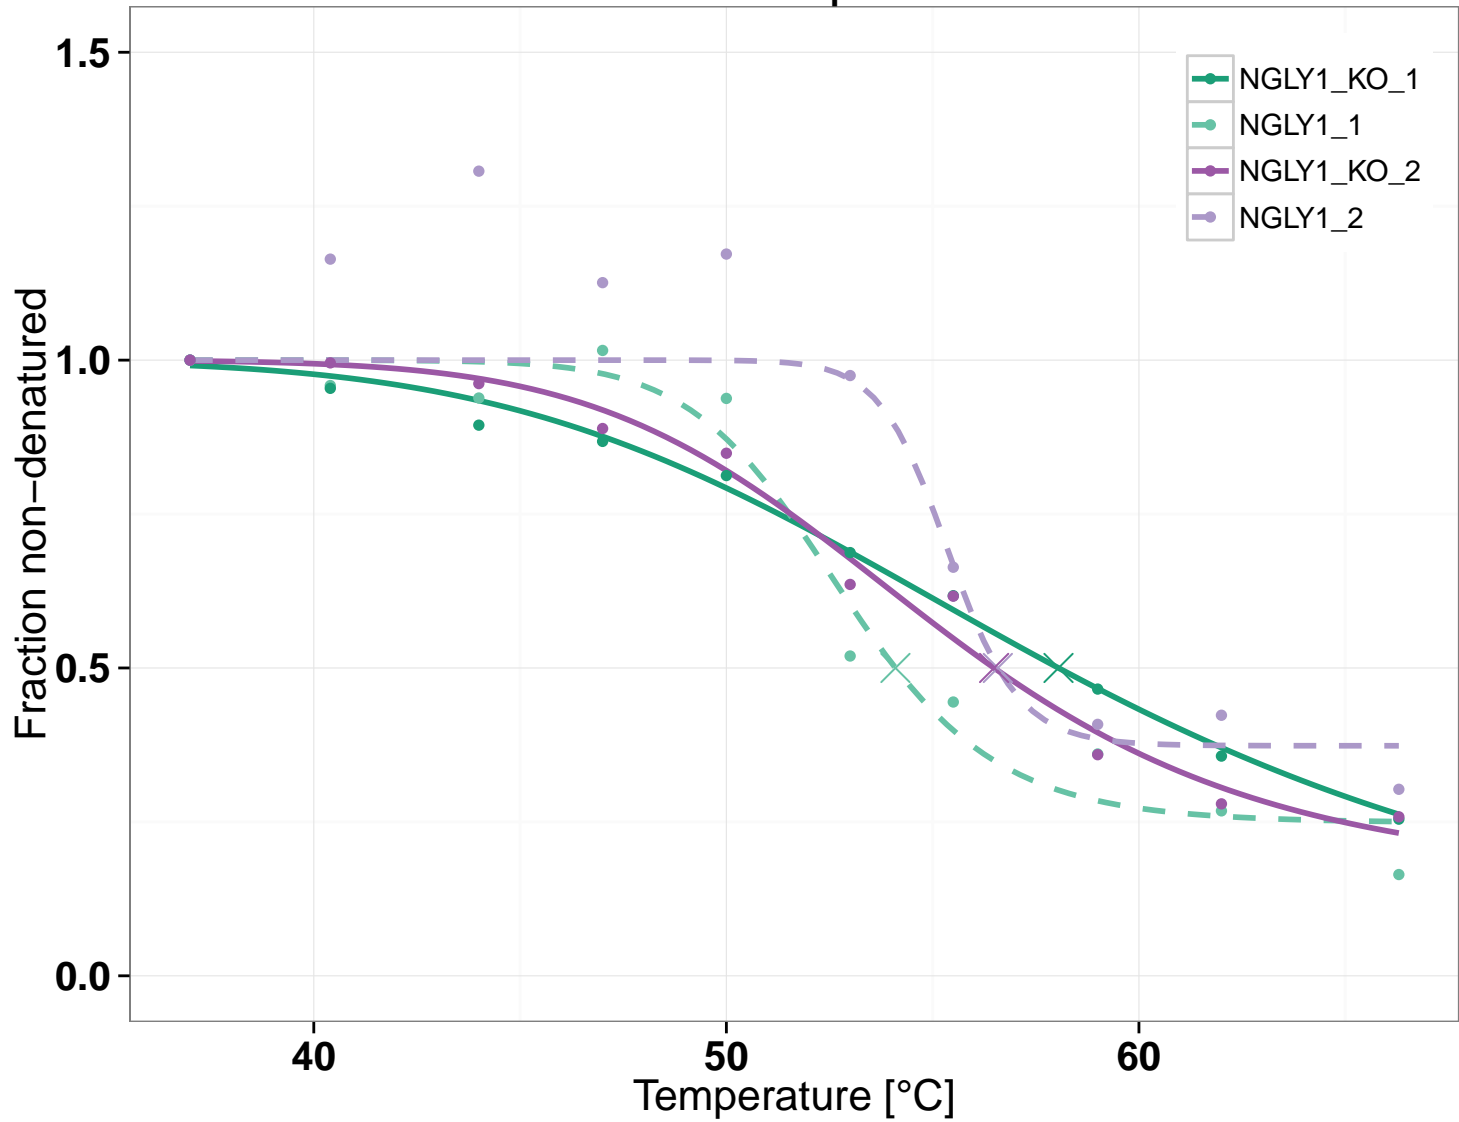

|            | meltPoint | slope  | plateau | R2   |
|------------|-----------|--------|---------|------|
| NGLY1_KO_1 | 58.05     | -0.038 | 0       | 0.99 |
| NGLY1_1    | 54.1      | -0.1   | 0.25    | 0.97 |
| NGLY1_KO_2 | 56.49     | -0.052 | 0.15    | 0.99 |
| NGLY1_2    | 56.58     | -0.19  | 0.37    | 0.86 |

Supplement: Supplementary file 3454 [file 1]

IPI00641743.2|HCFC1

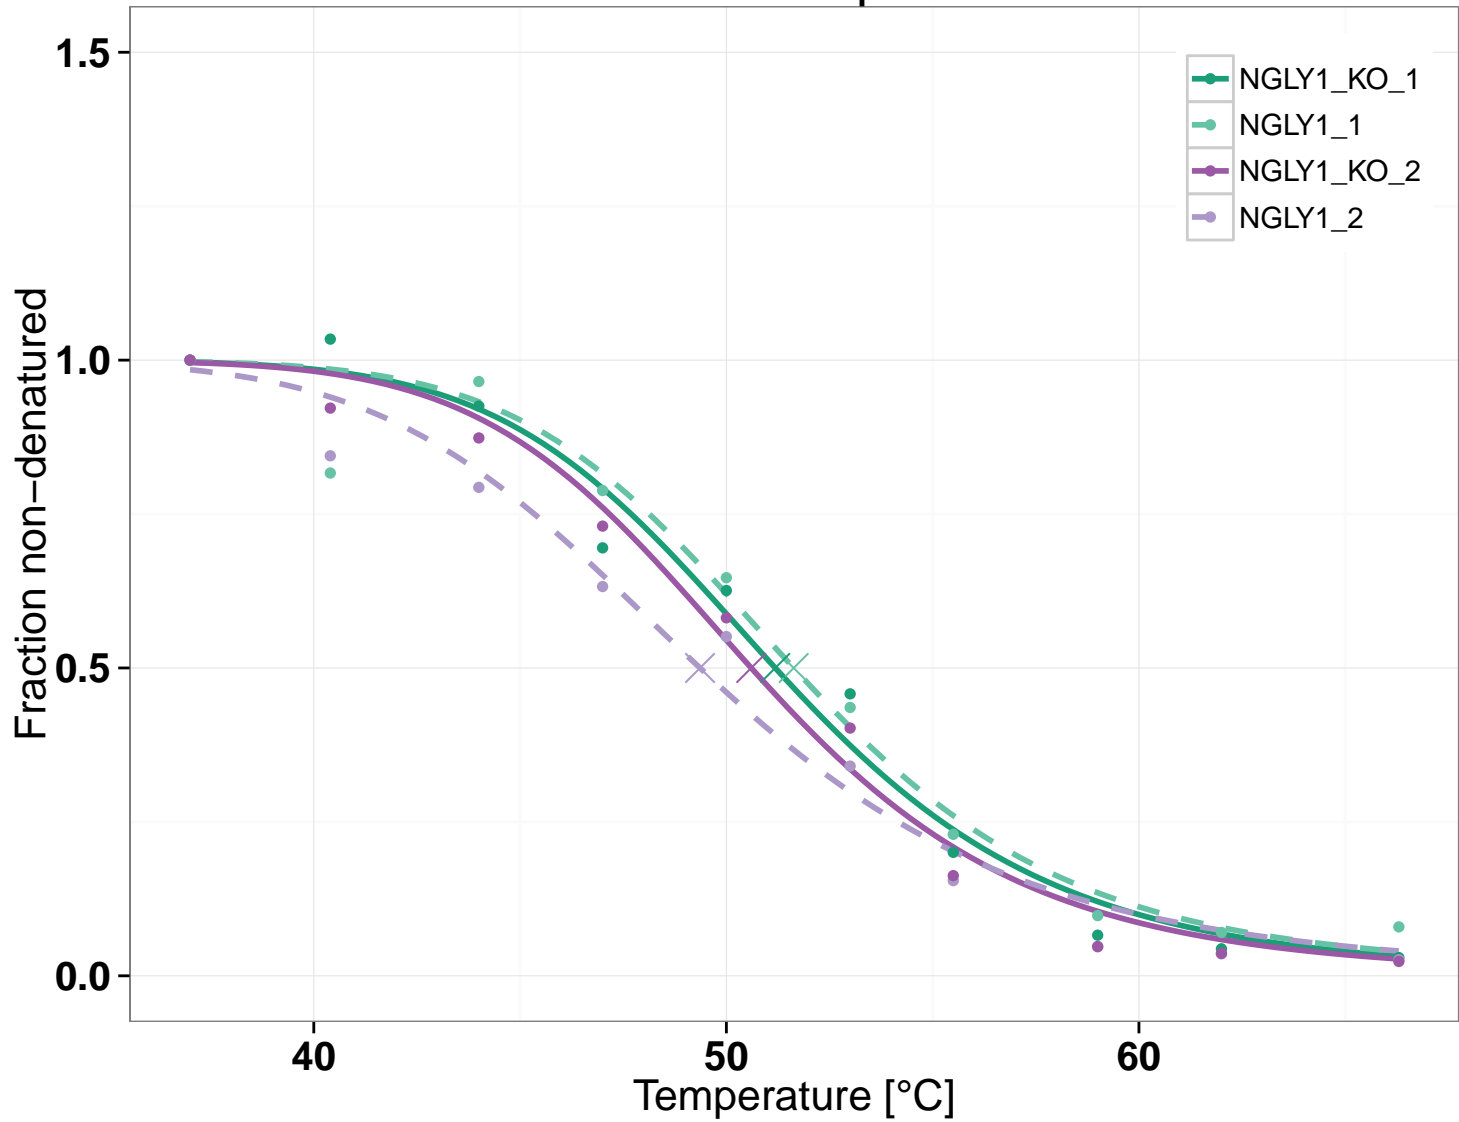

|            | meltPoint | slope  | plateau | R2   |
|------------|-----------|--------|---------|------|
| NGLY1_KO_1 | 51.19     | -0.075 | 0       | 0.98 |
| NGLY1_1    | 51.63     | -0.074 | 0.01    | 0.97 |
| NGLY1_KO_2 | 50.6      | -0.076 | 0       | 0.99 |
| NGLY1_2    | 49.36     | -0.064 | 0       | 0.98 |

Supplement: Supplementary file 3455 [file 1]

IPI00552587.1|GADD45GIP1

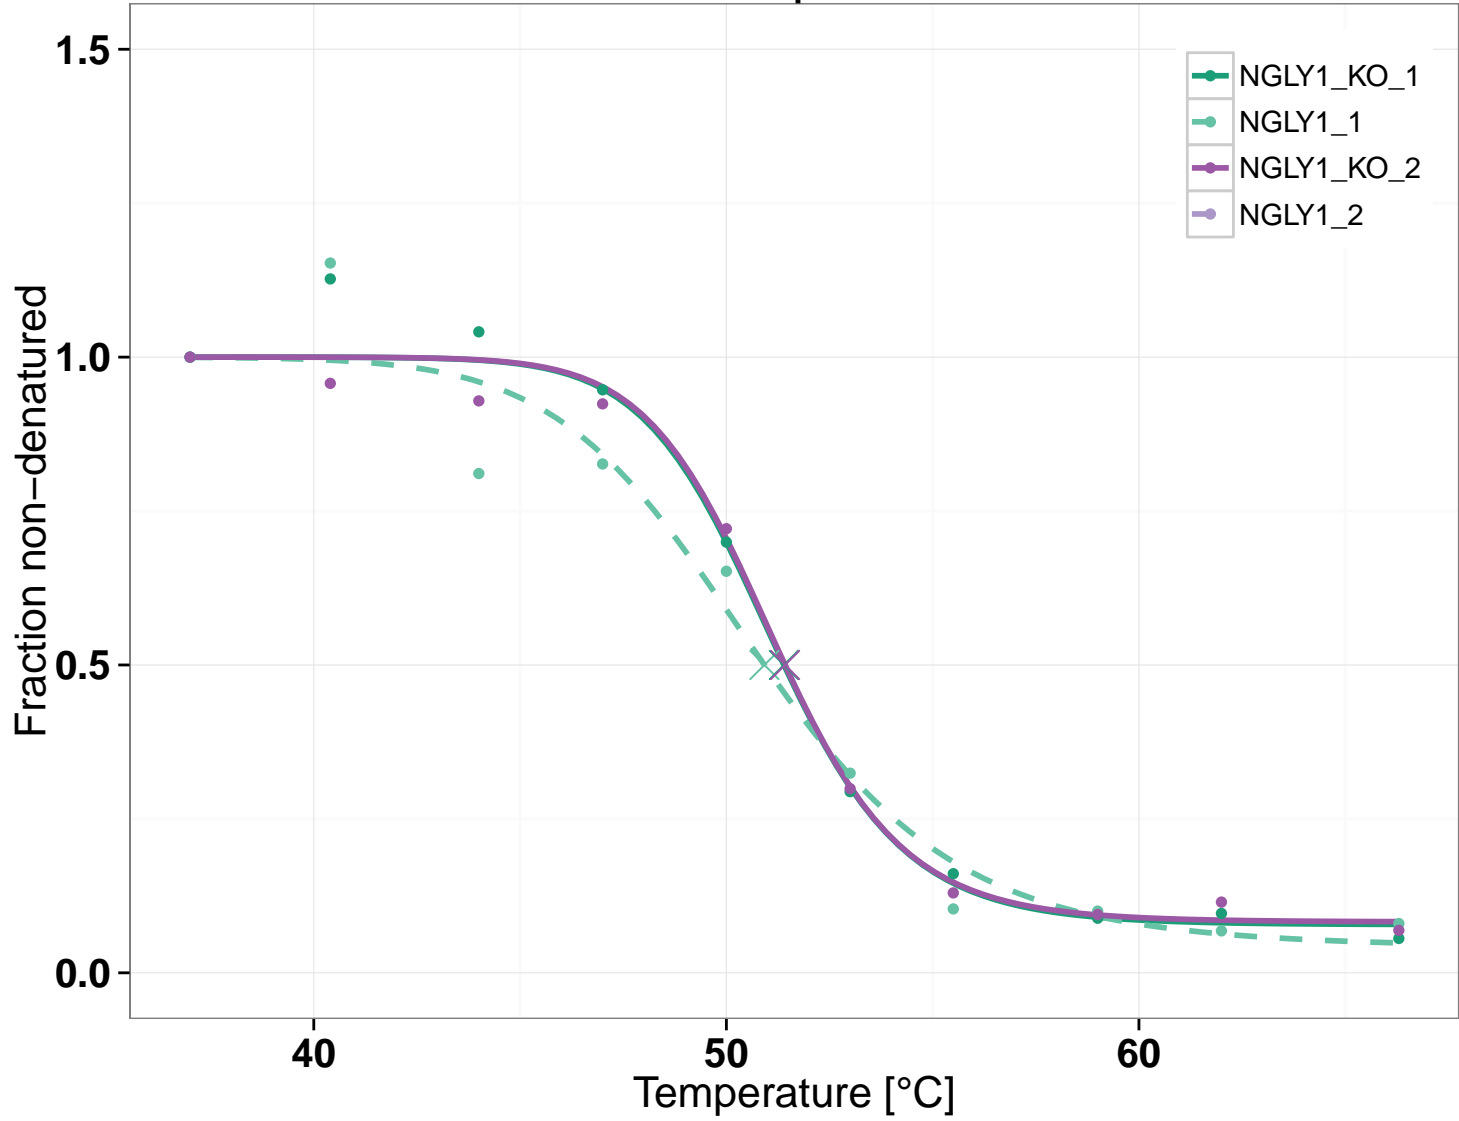

|            | meltPoint | slope  | plateau | R2   |
|------------|-----------|--------|---------|------|
| NGLY1_KO_1 | 51.4      | -0.15  | 0.08    | 0.99 |
| NGLY1_1    | 50.92     | -0.098 | 0.04    | 0.96 |
| NGLY1_KO_2 | 51.42     | -0.15  | 0.08    | 0.99 |
| NGLY1_2    | -         | -      | -       | -    |

Supplement: Supplementary file 3456 [file 1]

IPI00178743.4|ALMS1

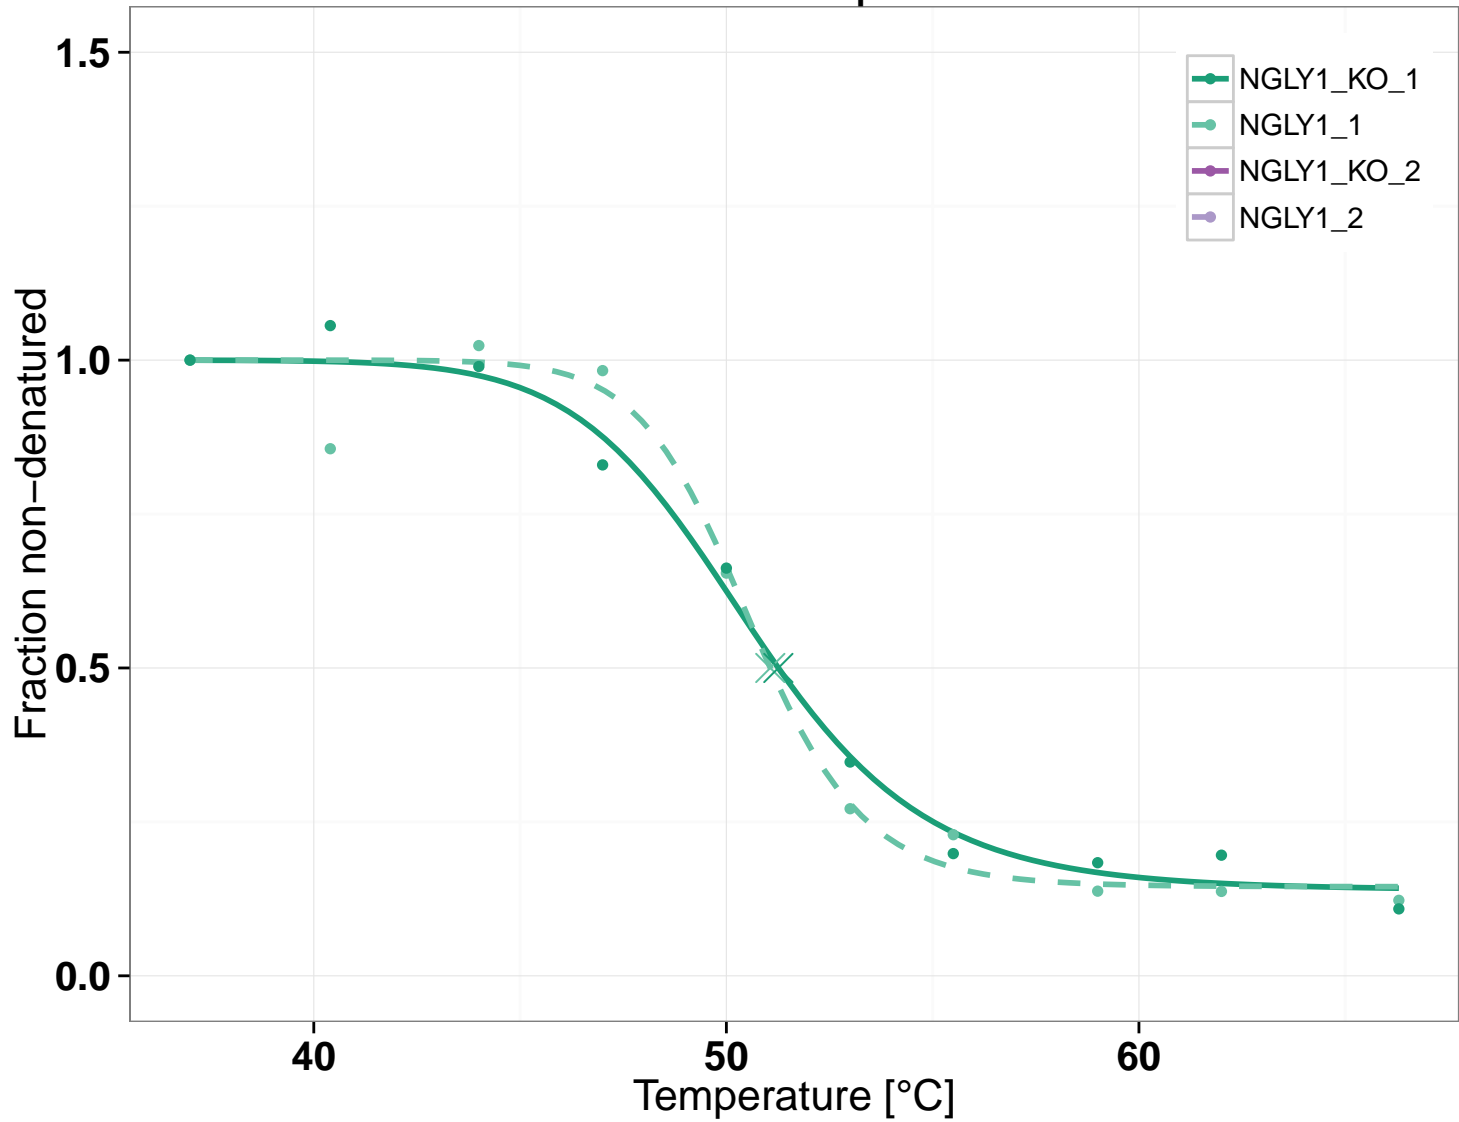

|            | meltPoint | slope | plateau | R2   |
|------------|-----------|-------|---------|------|
| NGLY1_KO_1 | 51.26     | -0.1  | 0.14    | 0.99 |
| NGLY1_1    | 51.06     | -0.16 | 0.14    | 0.98 |
| NGLY1_KO_2 | -         | -     | -       | -    |
| NGLY1_2    | -         | -     | -       | -    |

Supplement: Supplementary file 3457 [file 1]

IPI00171459.3|HSDL1

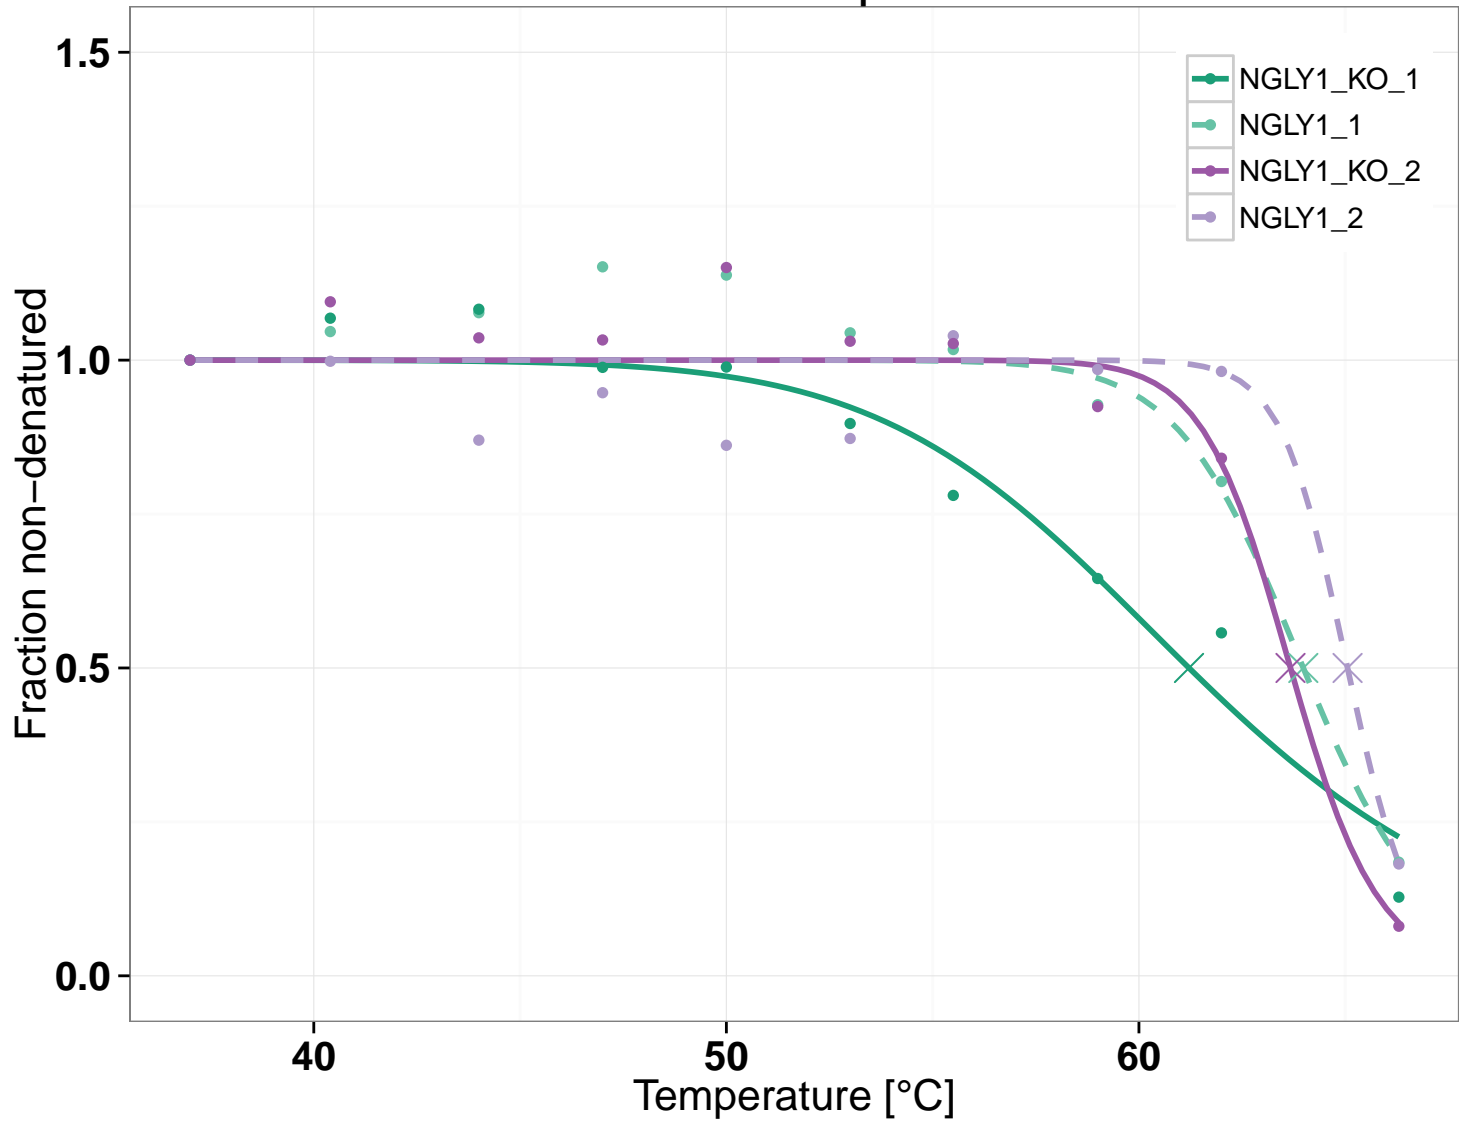

|            | meltPoint | slope  | plateau | R2   |
|------------|-----------|--------|---------|------|
| NGLY1_KO_1 | 61.21     | -0.067 | 0       | 0.95 |
| NGLY1_1    | 63.98     | -0.16  | 0       | 0.92 |
| NGLY1_KO_2 | 63.67     | -0.23  | 0       | 0.95 |
| NGLY1_2    | 65.06     | -0.31  | 0       | 0.9  |

Supplement: Supplementary file 3458 [file 1]

IPI00023344.2|SYMPK

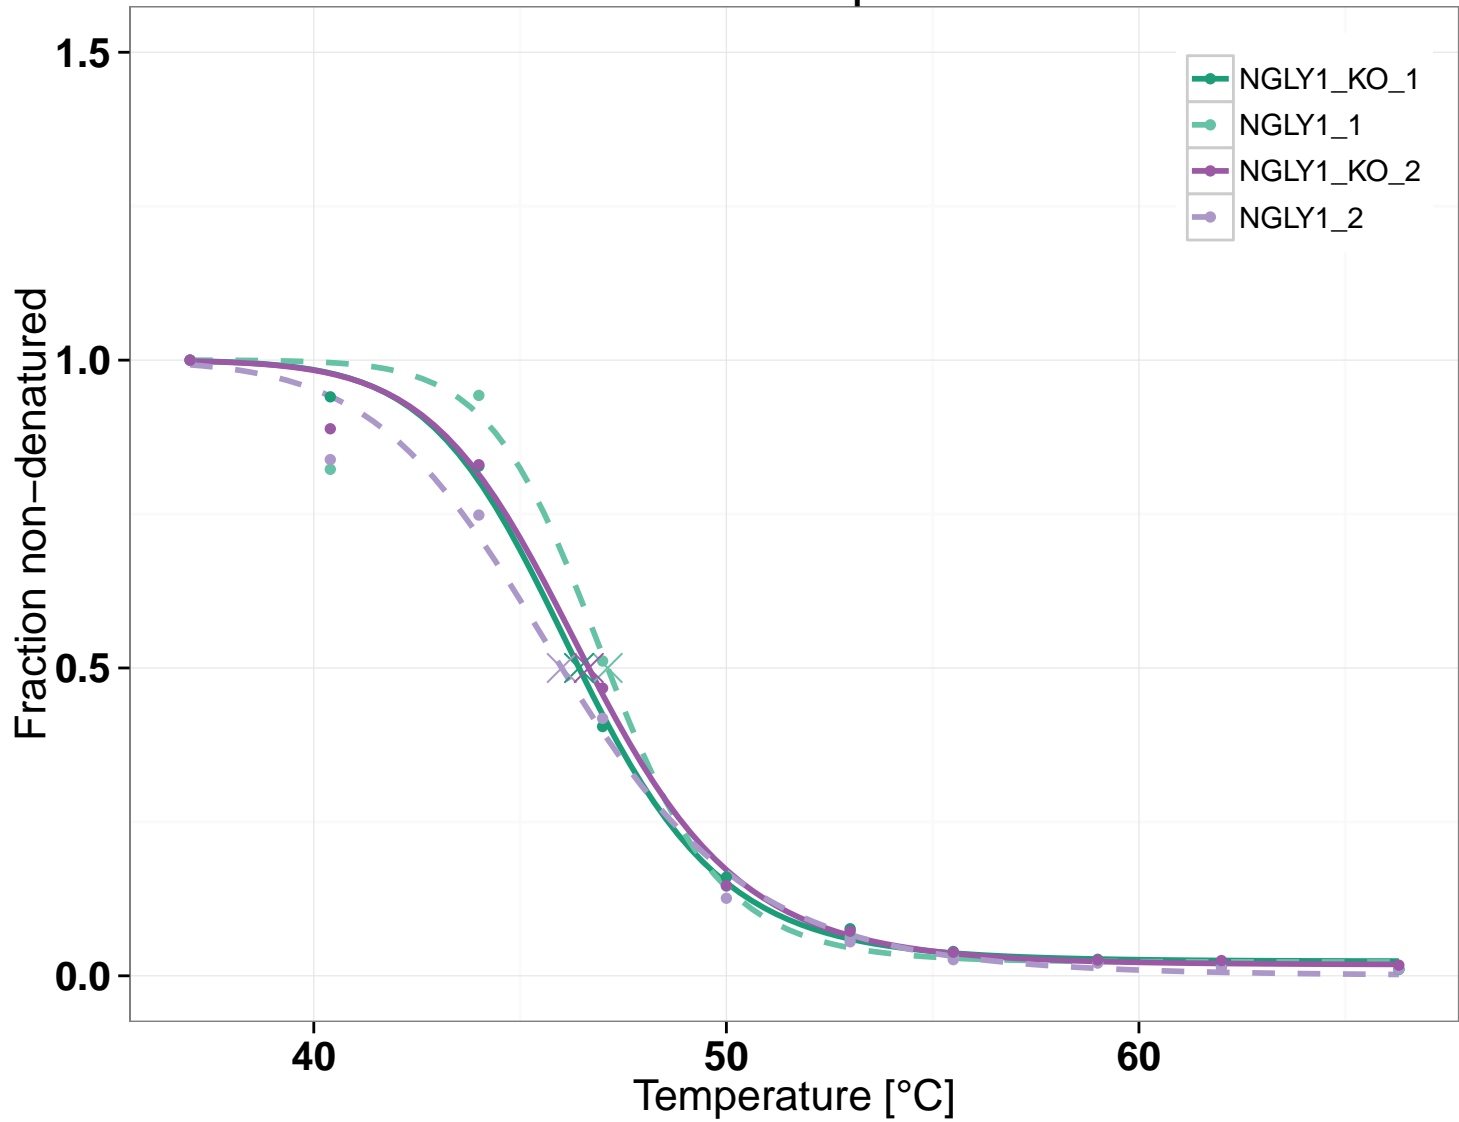

|            | meltPoint | slope | plateau | R2   |
|------------|-----------|-------|---------|------|
| NGLY1_KO_1 | 46.43     | -0.14 | 0.02    | 1    |
| NGLY1_1    | 47.12     | -0.17 | 0.02    | 0.98 |
| NGLY1_KO_2 | 46.67     | -0.13 | 0.02    | 0.99 |
| NGLY1_2    | 46.01     | -0.11 | 0       | 0.99 |

Supplement: Supplementary file 3459 [file 1]

IPI00029819.3|NOTCH3

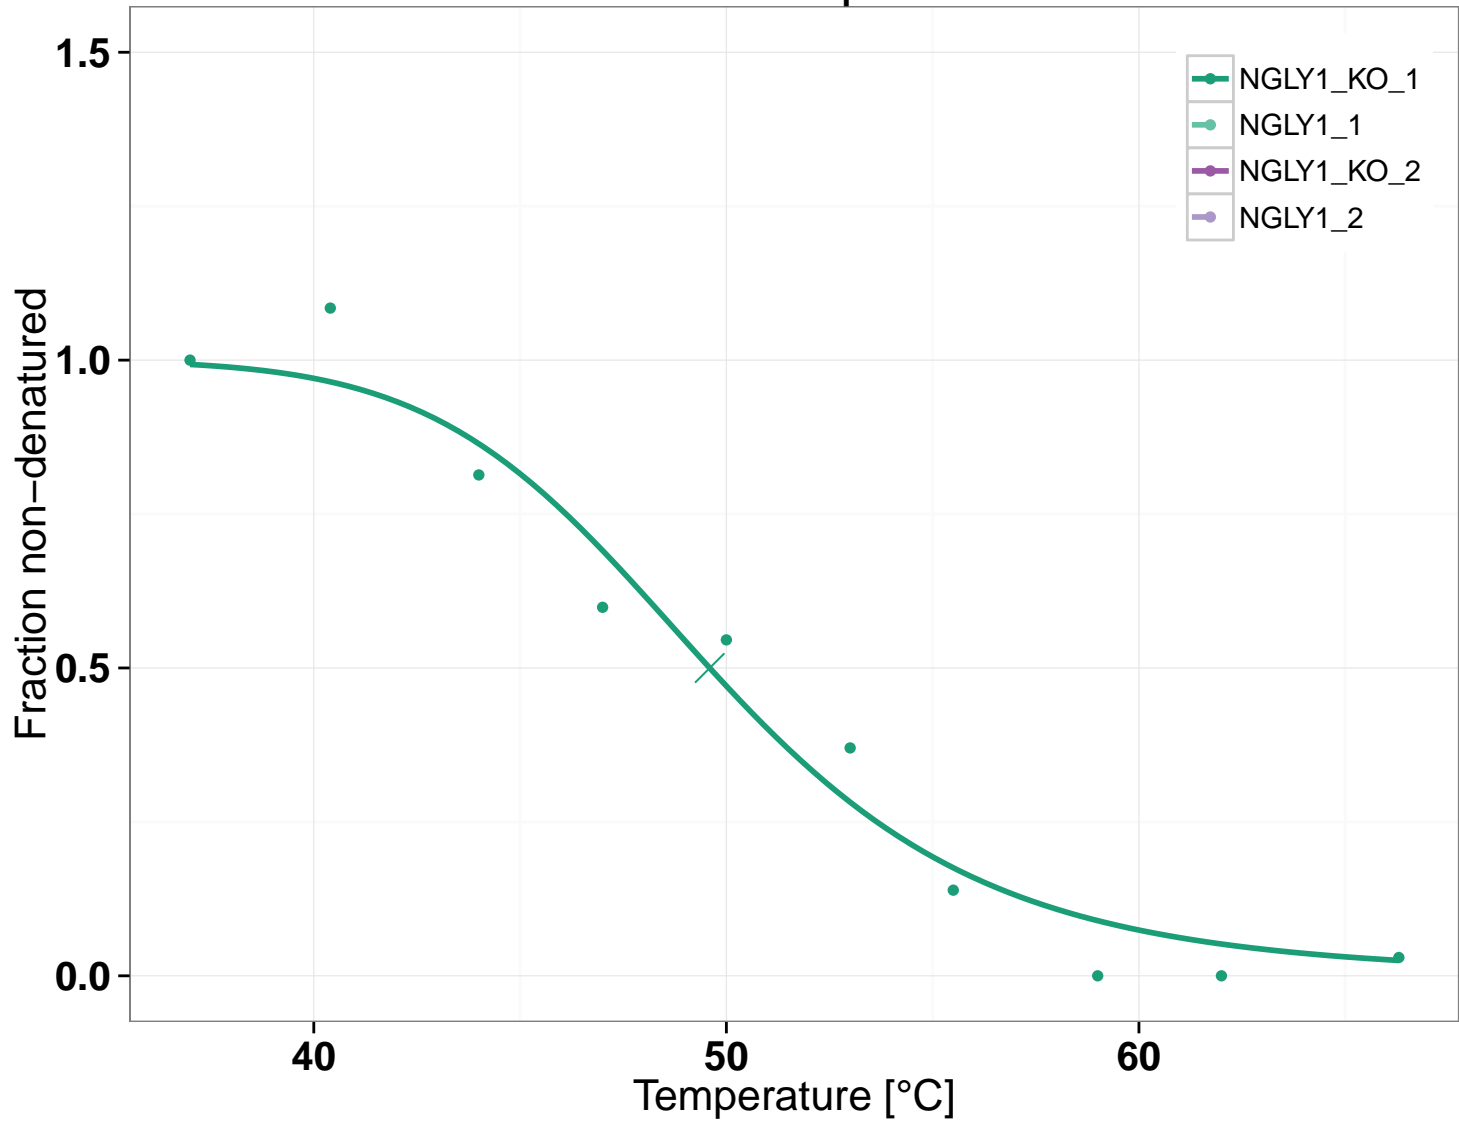

|            | meltPoint | slope  | plateau | R2   |
|------------|-----------|--------|---------|------|
| NGLY1_KO_1 | 49.6      | -0.075 | 0       | 0.97 |
| NGLY1_1    | -         | -      | -       | -    |
| NGLY1_KO_2 | -         | -      | -       | -    |
| NGLY1_2    | -         | -      | -       | -    |

Supplement: Supplementary file 3460 [file 1]

IPI00647561.5|C7ORF60

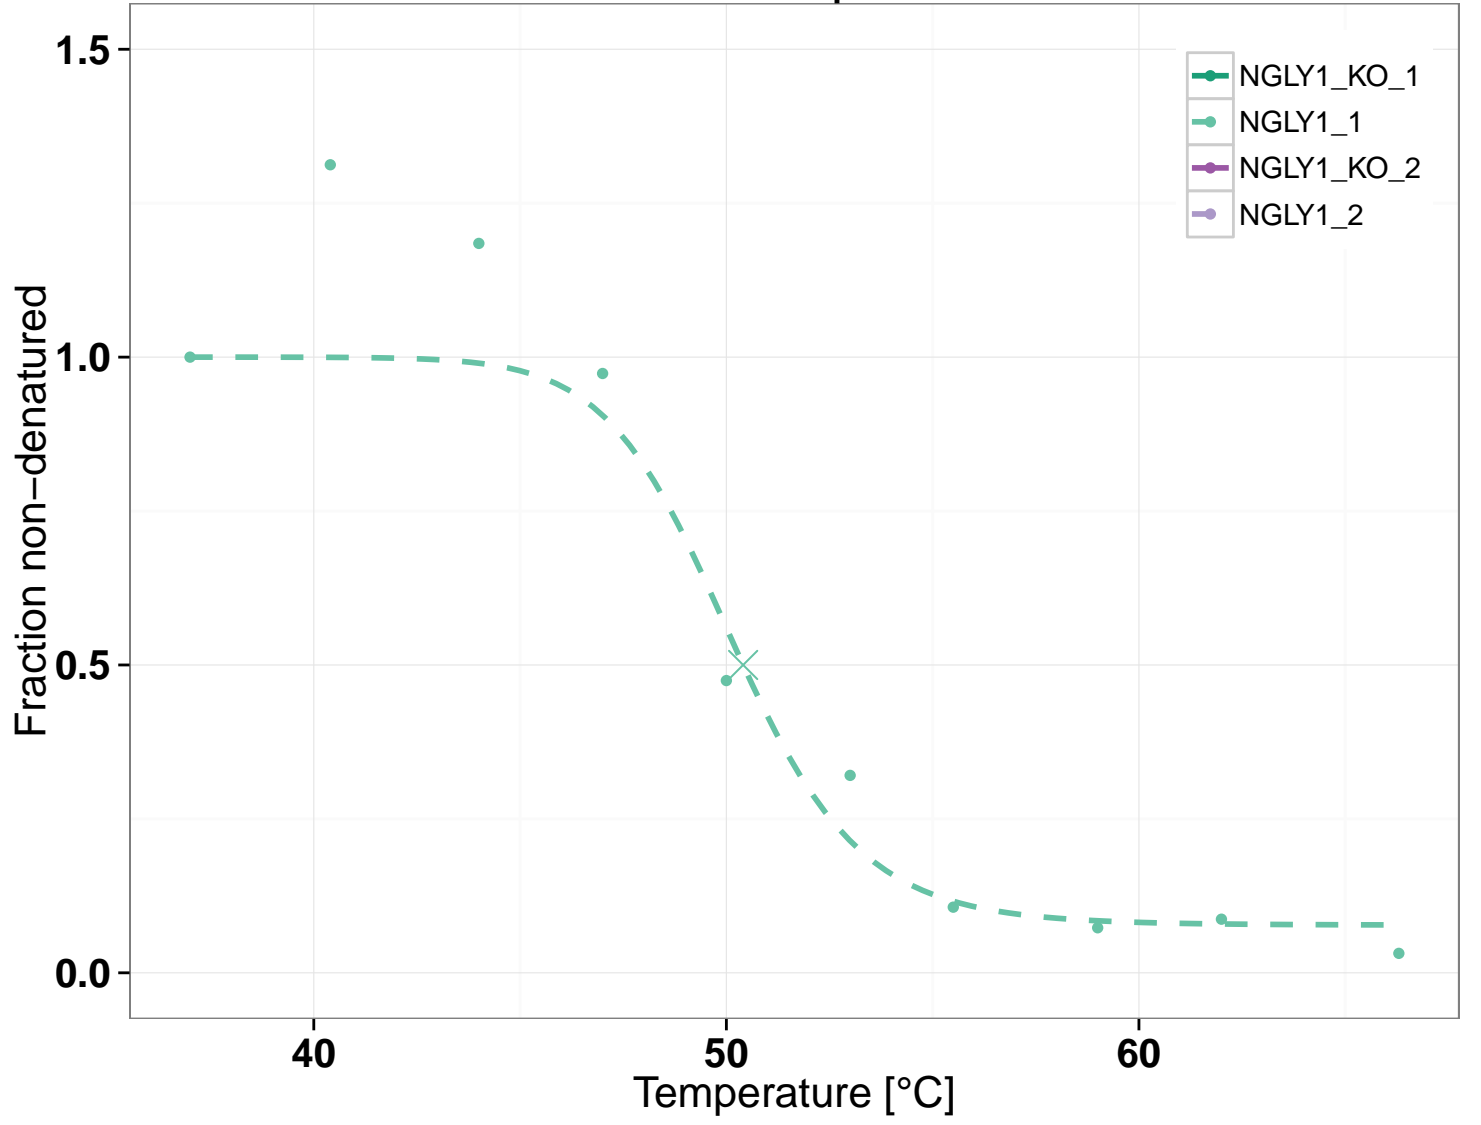

|            | meltPoint | slope | plateau | R2   |
|------------|-----------|-------|---------|------|
| NGLY1_KO_1 | –         | –     | –       | –    |
| NGLY1_1    | 50.41     | –0.15 | 0.08    | 0.93 |
| NGLY1_KO_2 | –         | –     | –       | –    |
| NGLY1_2    | –         | –     | –       | –    |

Supplement: Supplementary file 3461 [file 1]

# IPI00413794.8|DOPEY1

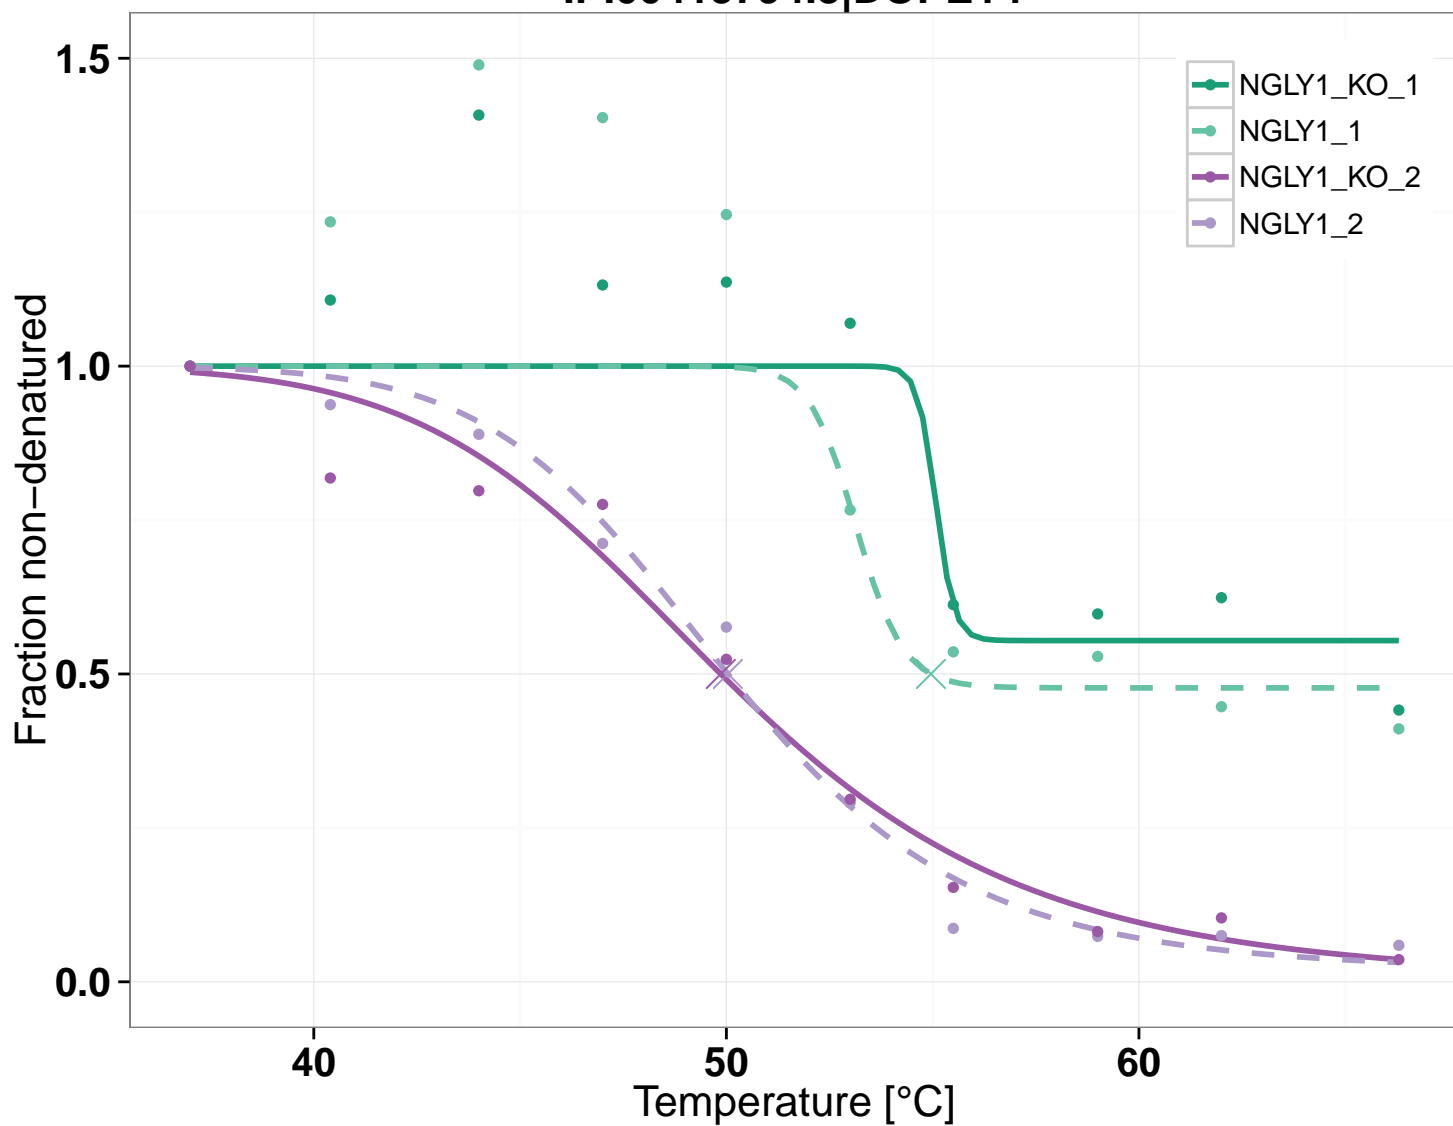

|            | meltPoint | slope  | plateau | R2   |
|------------|-----------|--------|---------|------|
| NGLY1_KO_1 | –         | –0.51  | 0.55    | 0.74 |
| NGLY1_1    | 54.96     | –0.23  | 0.48    | 0.66 |
| NGLY1_KO_2 | 49.86     | –0.068 | 0       | 0.97 |
| NGLY1_2    | 50.04     | –0.085 | 0.02    | 0.99 |

Supplement: Supplementary file 3462 [file 1]

IPI00030706.1|AHSA1

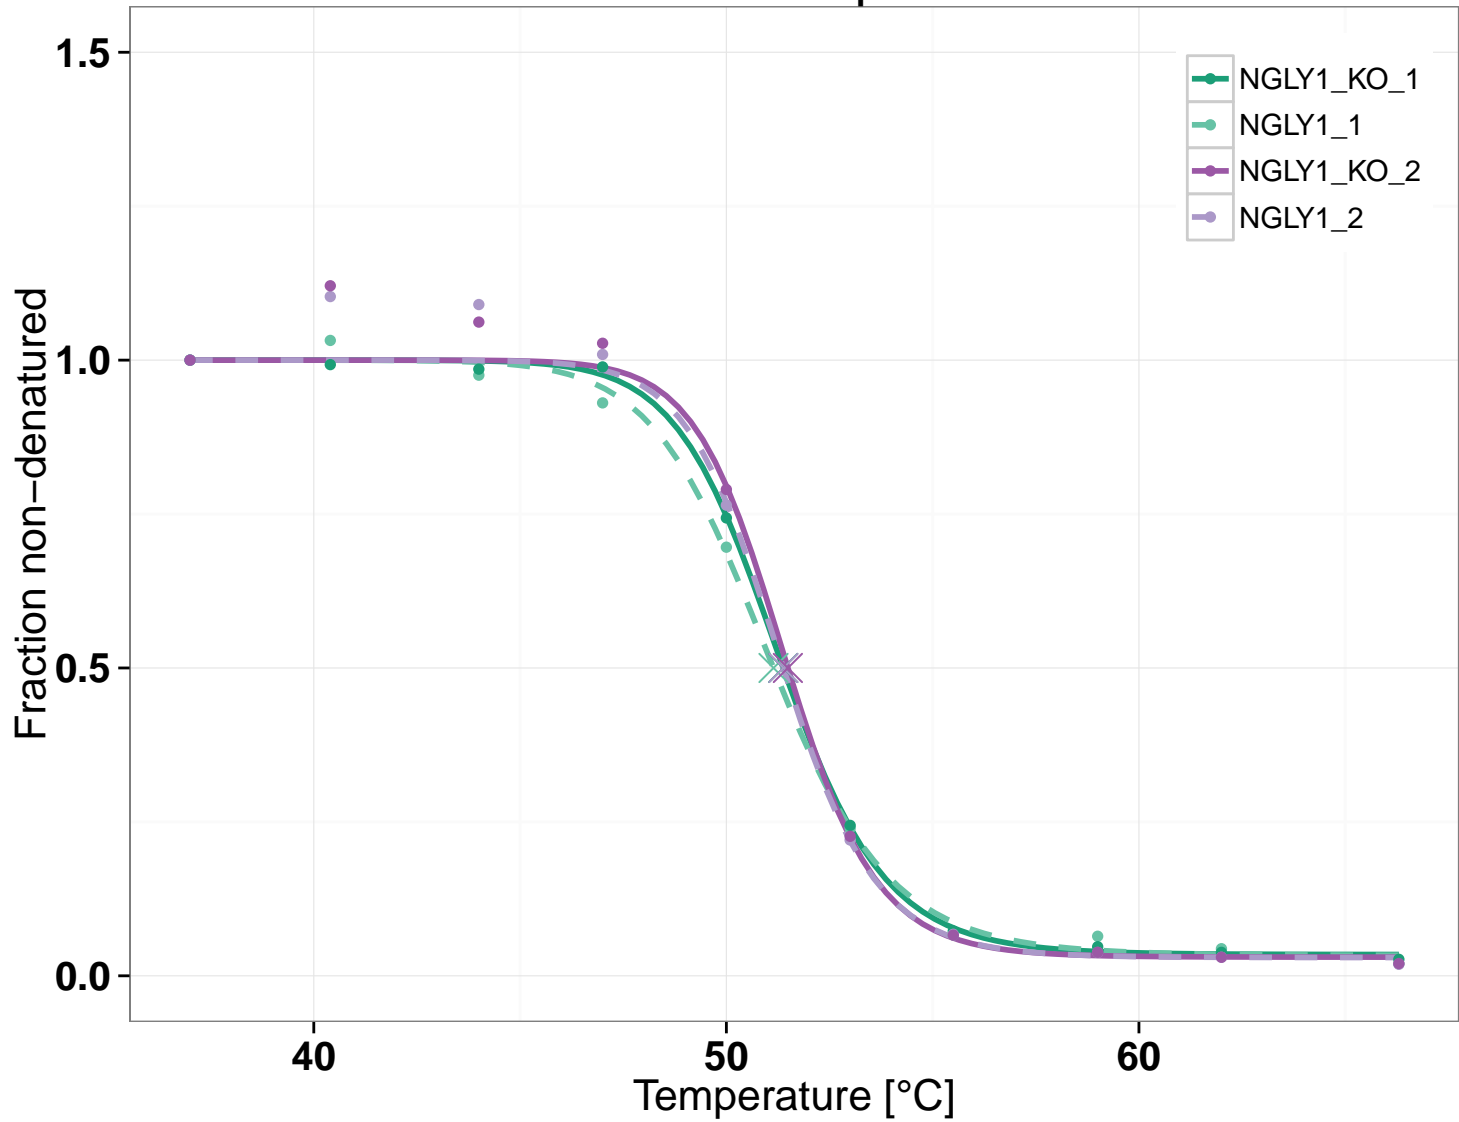

|            | meltPoint | slope | plateau | R2   |
|------------|-----------|-------|---------|------|
| NGLY1_KO_1 | 51.38     | -0.19 | 0.03    | 1    |
| NGLY1_1    | 51.14     | -0.17 | 0.03    | 1    |
| NGLY1_KO_2 | 51.49     | -0.22 | 0.03    | 0.99 |
| NGLY1_2    | 51.38     | -0.21 | 0.03    | 0.99 |

Supplement: Supplementary file 3463 [file 1]

# IPI00018873.1|NAMPT

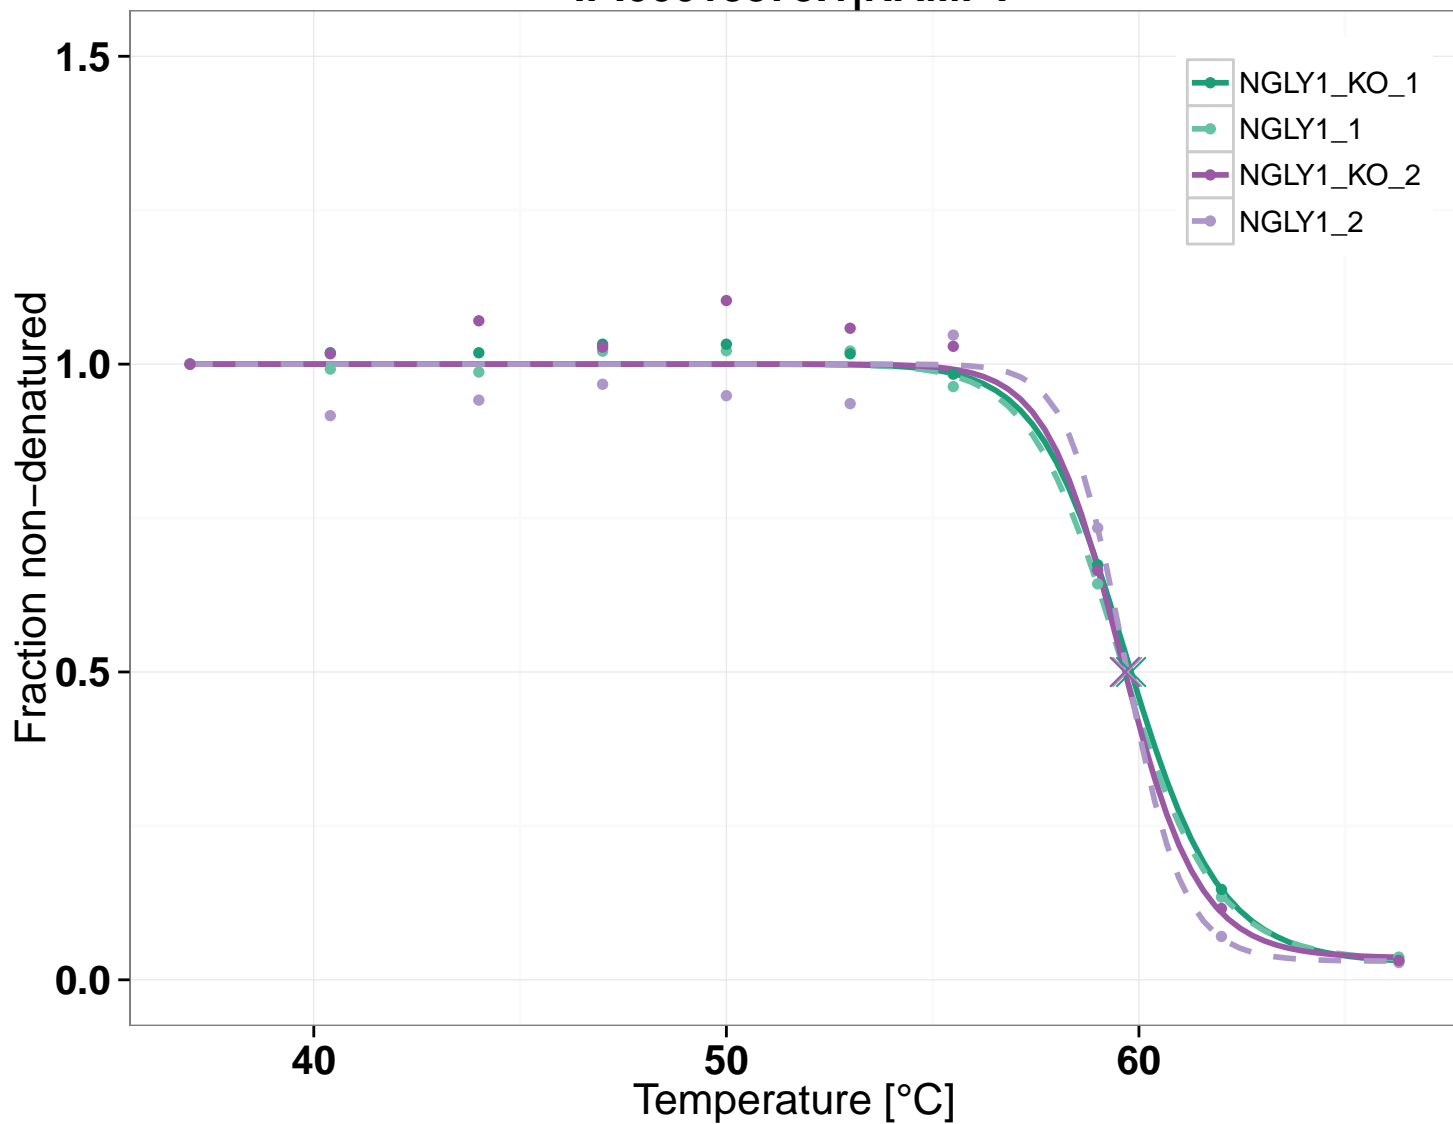

|            | meltPoint | slope | plateau | R2   |
|------------|-----------|-------|---------|------|
| NGLY1_KO_1 | 59.81     | -0.22 | 0.03    | 1    |
| NGLY1_1    | 59.66     | -0.22 | 0.03    | 1    |
| NGLY1_KO_2 | 59.66     | -0.26 | 0.04    | 0.99 |
| NGLY1_2    | 59.72     | -0.35 | 0.03    | 0.98 |

Supplement: Supplementary file 3464 [file 1]

IPI00411628.7|STEAP3

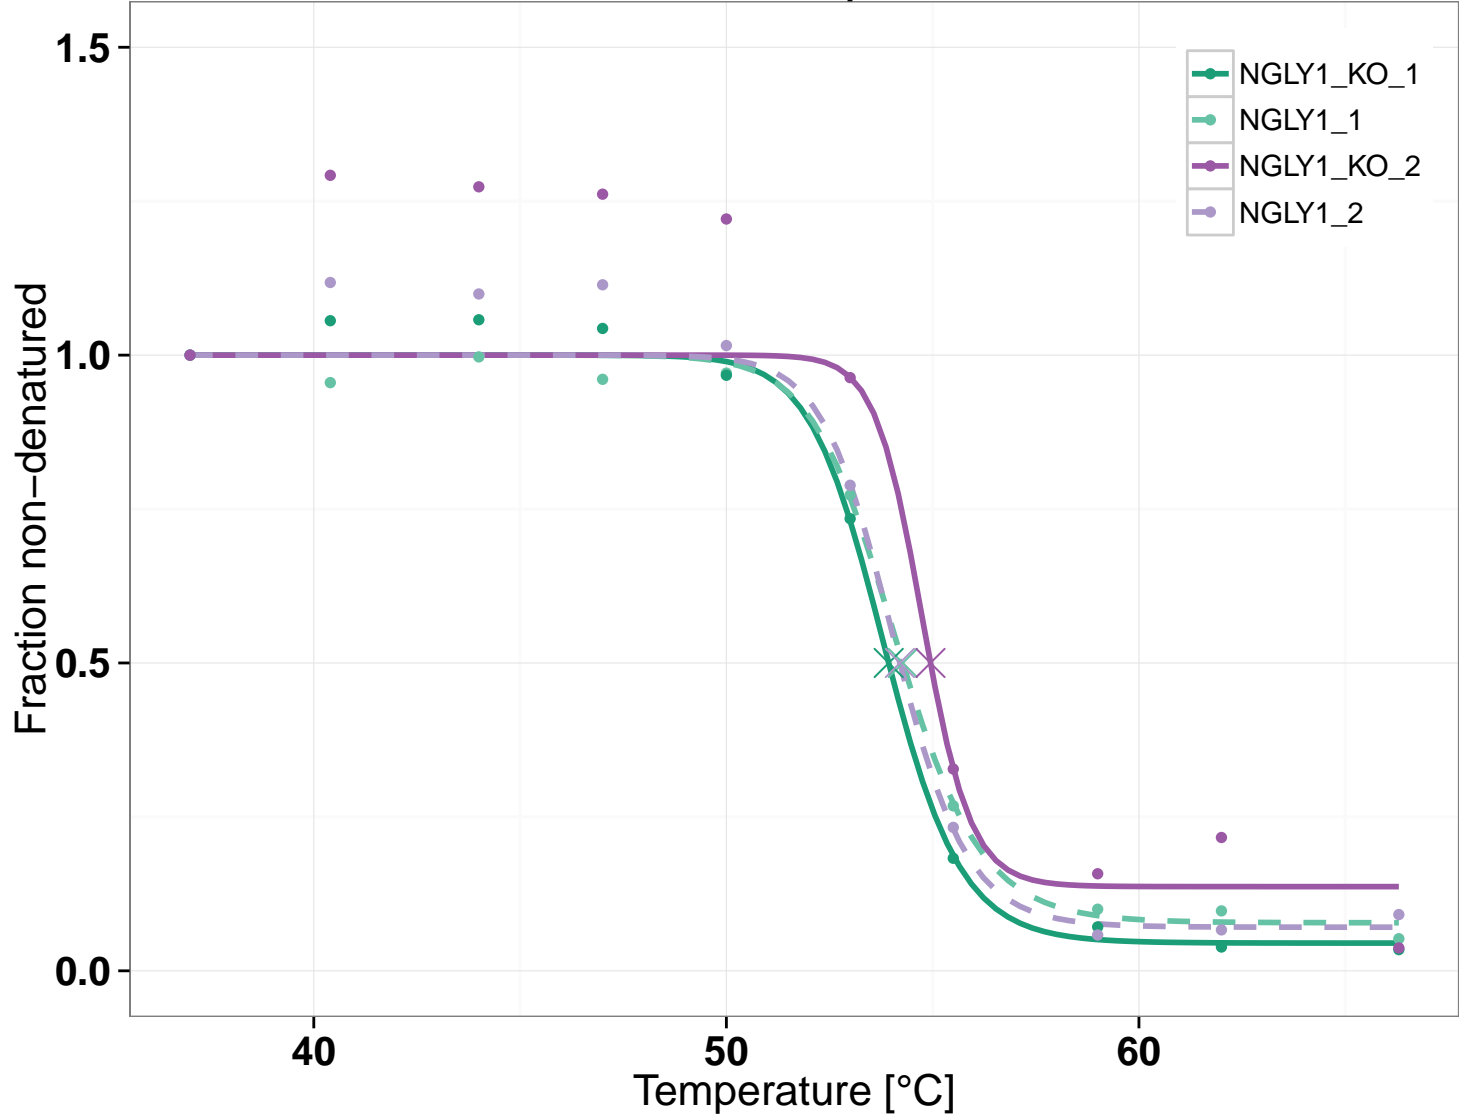

|            | meltPoint | slope | plateau | R2   |
|------------|-----------|-------|---------|------|
| NGLY1_KO_1 | 53.93     | -0.26 | 0.05    | 1    |
| NGLY1_1    | 54.28     | -0.22 | 0.08    | 1    |
| NGLY1_KO_2 | 54.95     | -0.37 | 0.14    | 0.88 |
| NGLY1_2    | 54.21     | -0.26 | 0.07    | 0.98 |

Supplement: Supplementary file 3465 [file 1]

IPI00021793.1|COX6A1

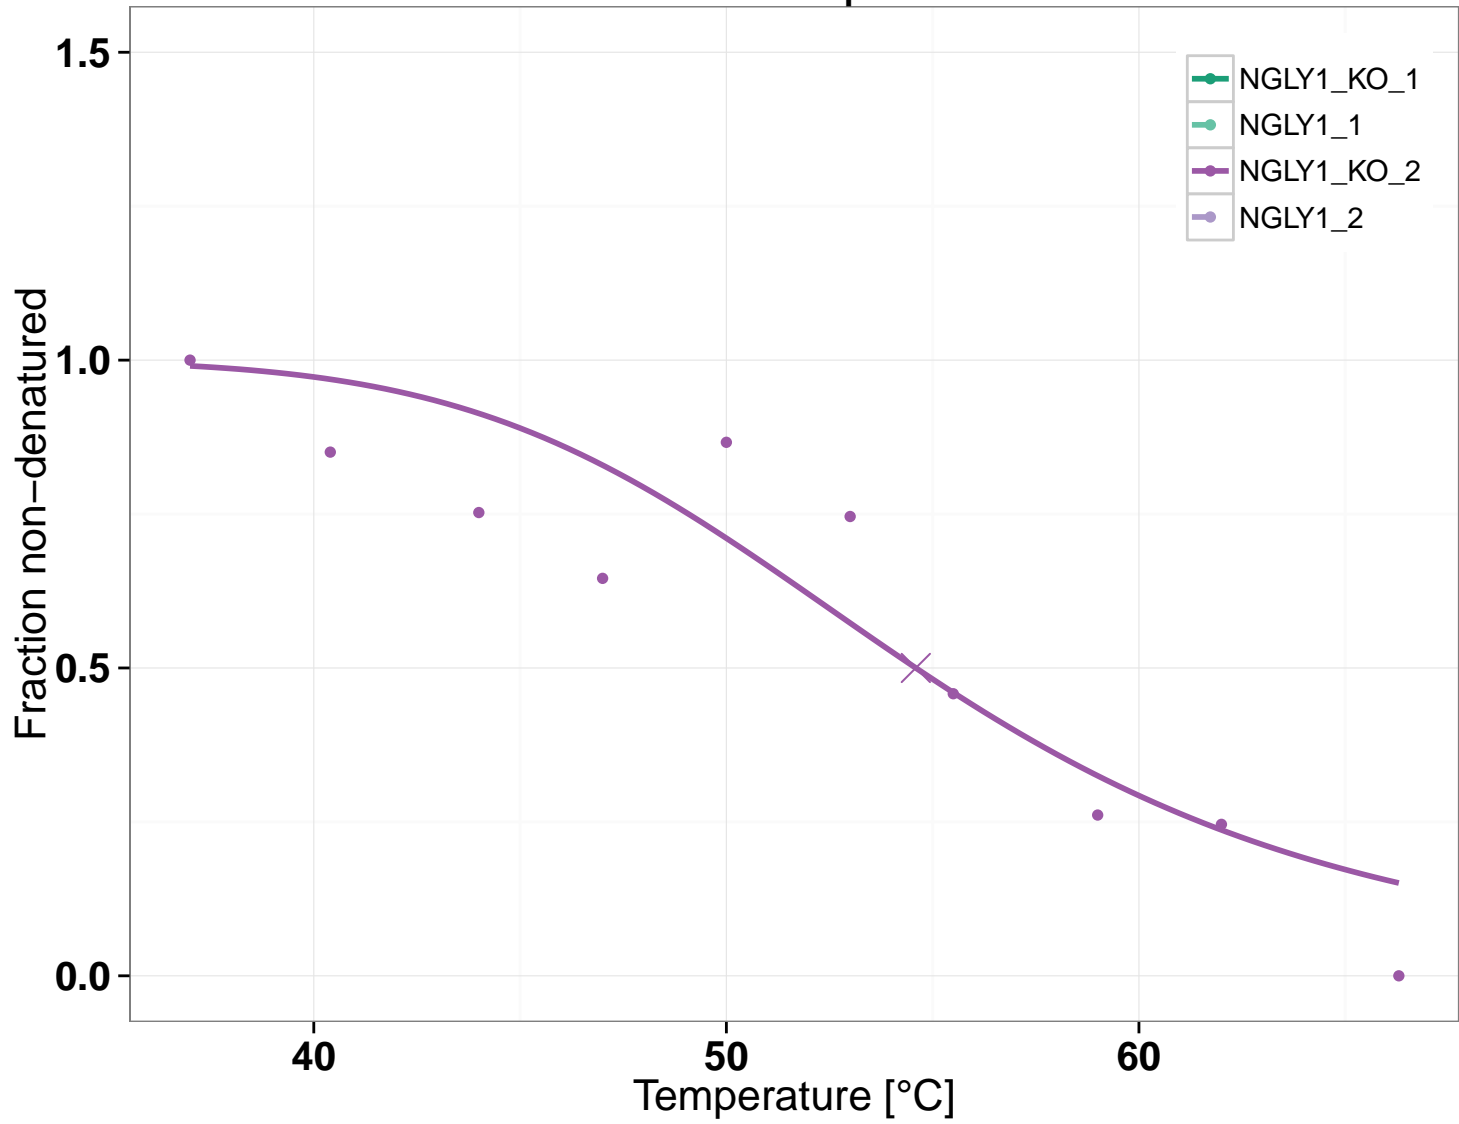

|            | meltPoint | slope  | plateau | R2   |
|------------|-----------|--------|---------|------|
| NGLY1_KO_1 | —         | —      | —       | —    |
| NGLY1_1    | —         | —      | —       | —    |
| NGLY1_KO_2 | 54.59     | −0.047 | 0       | 0.84 |
| NGLY1_2    | —         | —      | —       | —    |

Supplement: Supplementary file 3466 [file 1]

IPI00023605.1|CDC42EP1

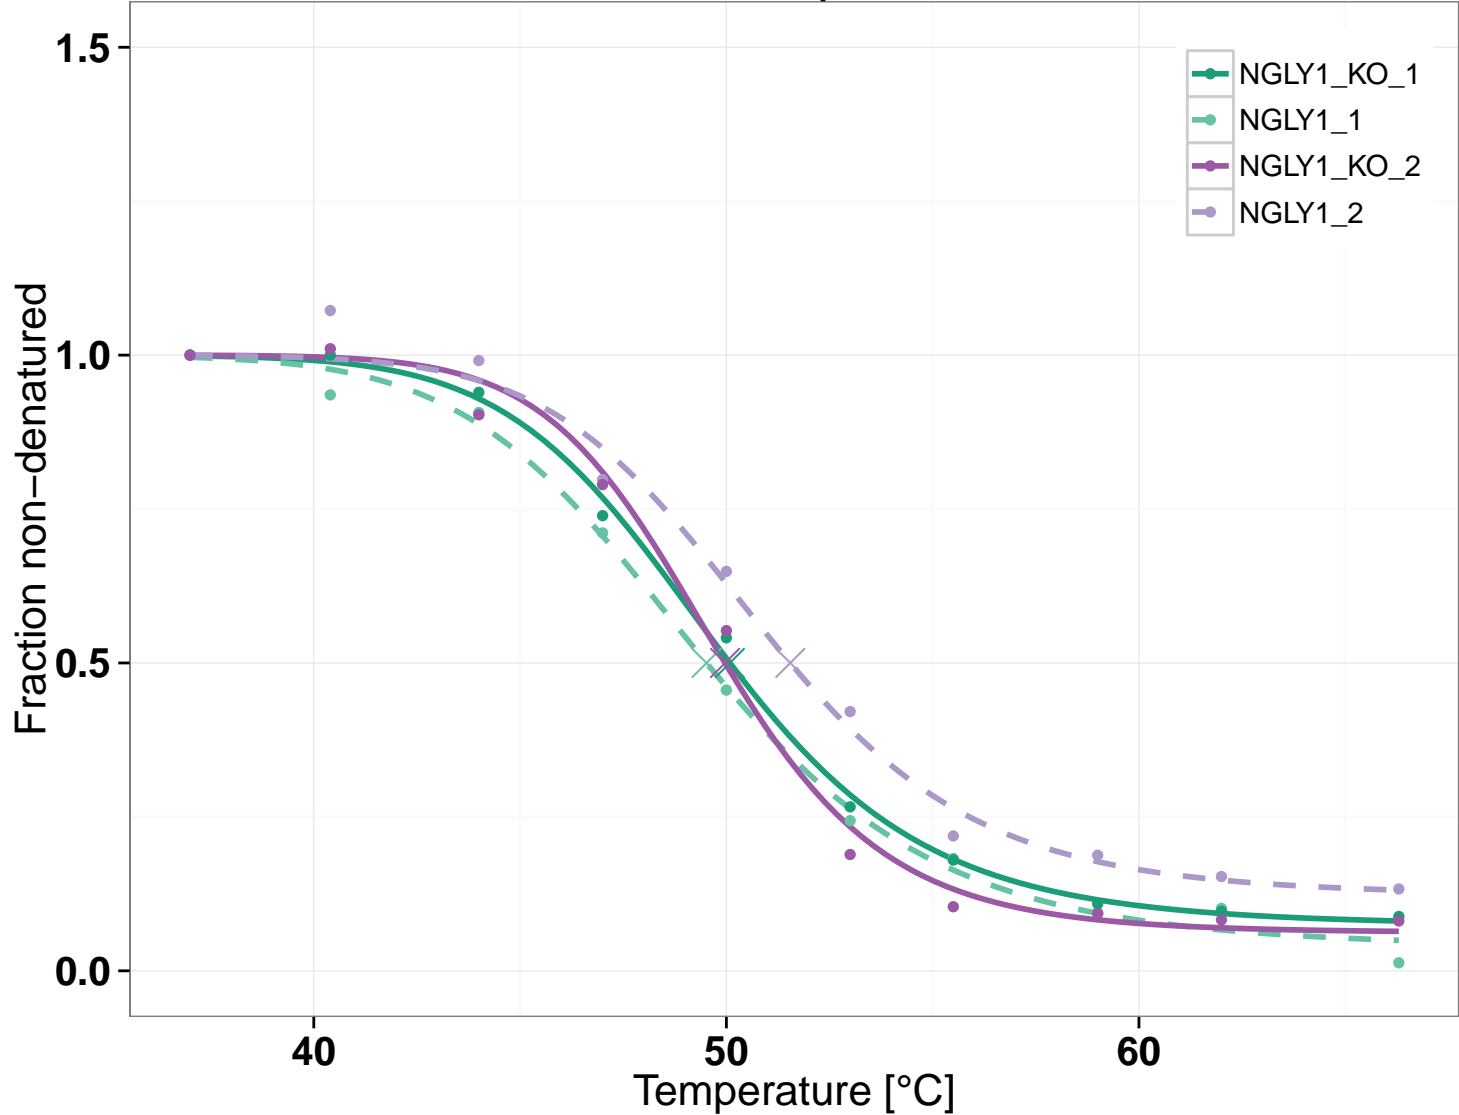

|            | meltPoint | slope  | plateau | R2   |
|------------|-----------|--------|---------|------|
| NGLY1_KO_1 | 50.08     | -0.091 | 0.07    | 1    |
| NGLY1_1    | 49.52     | -0.084 | 0.04    | 1    |
| NGLY1_KO_2 | 49.97     | -0.11  | 0.06    | 0.99 |
| NGLY1_2    | 51.55     | -0.085 | 0.12    | 0.99 |

Supplement: Supplementary file 3467 [file 1]

# IPI00306299.4|EAPP

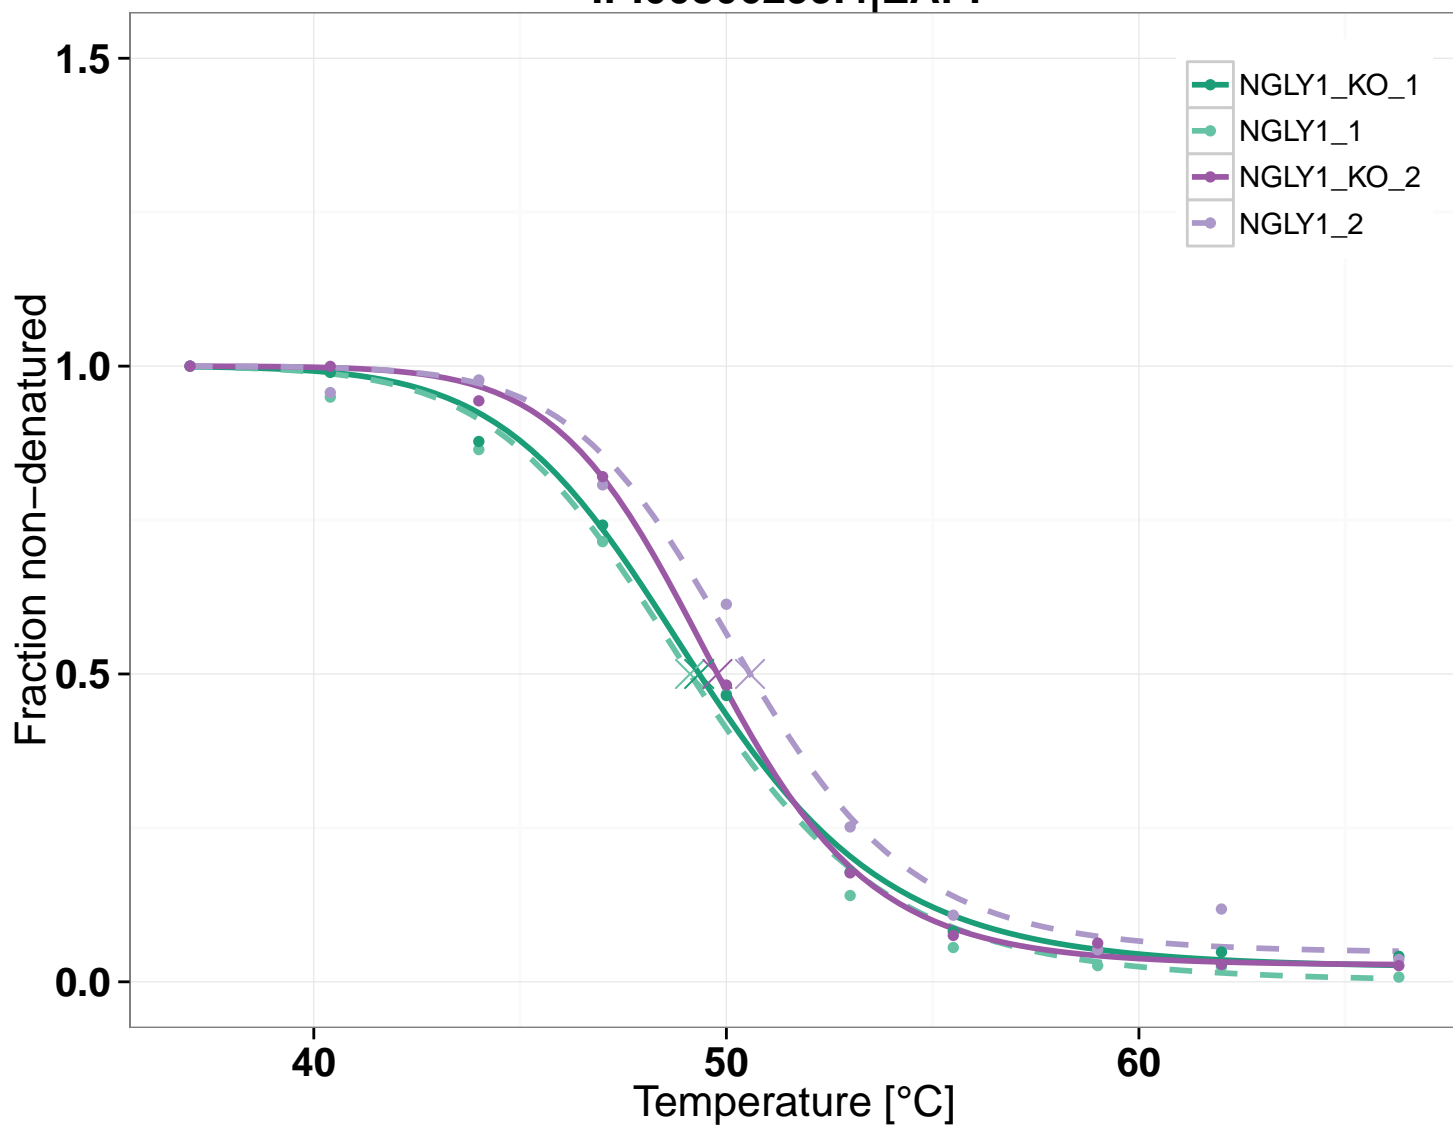

|            | meltPoint | slope | plateau | R2   |
|------------|-----------|-------|---------|------|
| NGLY1_KO_1 | 49.34     | -0.1  | 0.02    | 1    |
| NGLY1_1    | 49.12     | -0.1  | 0       | 0.99 |
| NGLY1_KO_2 | 49.78     | -0.13 | 0.03    | 1    |
| NGLY1_2    | 50.57     | -0.12 | 0.05    | 0.99 |

Supplement: Supplementary file 3468 [file 1]

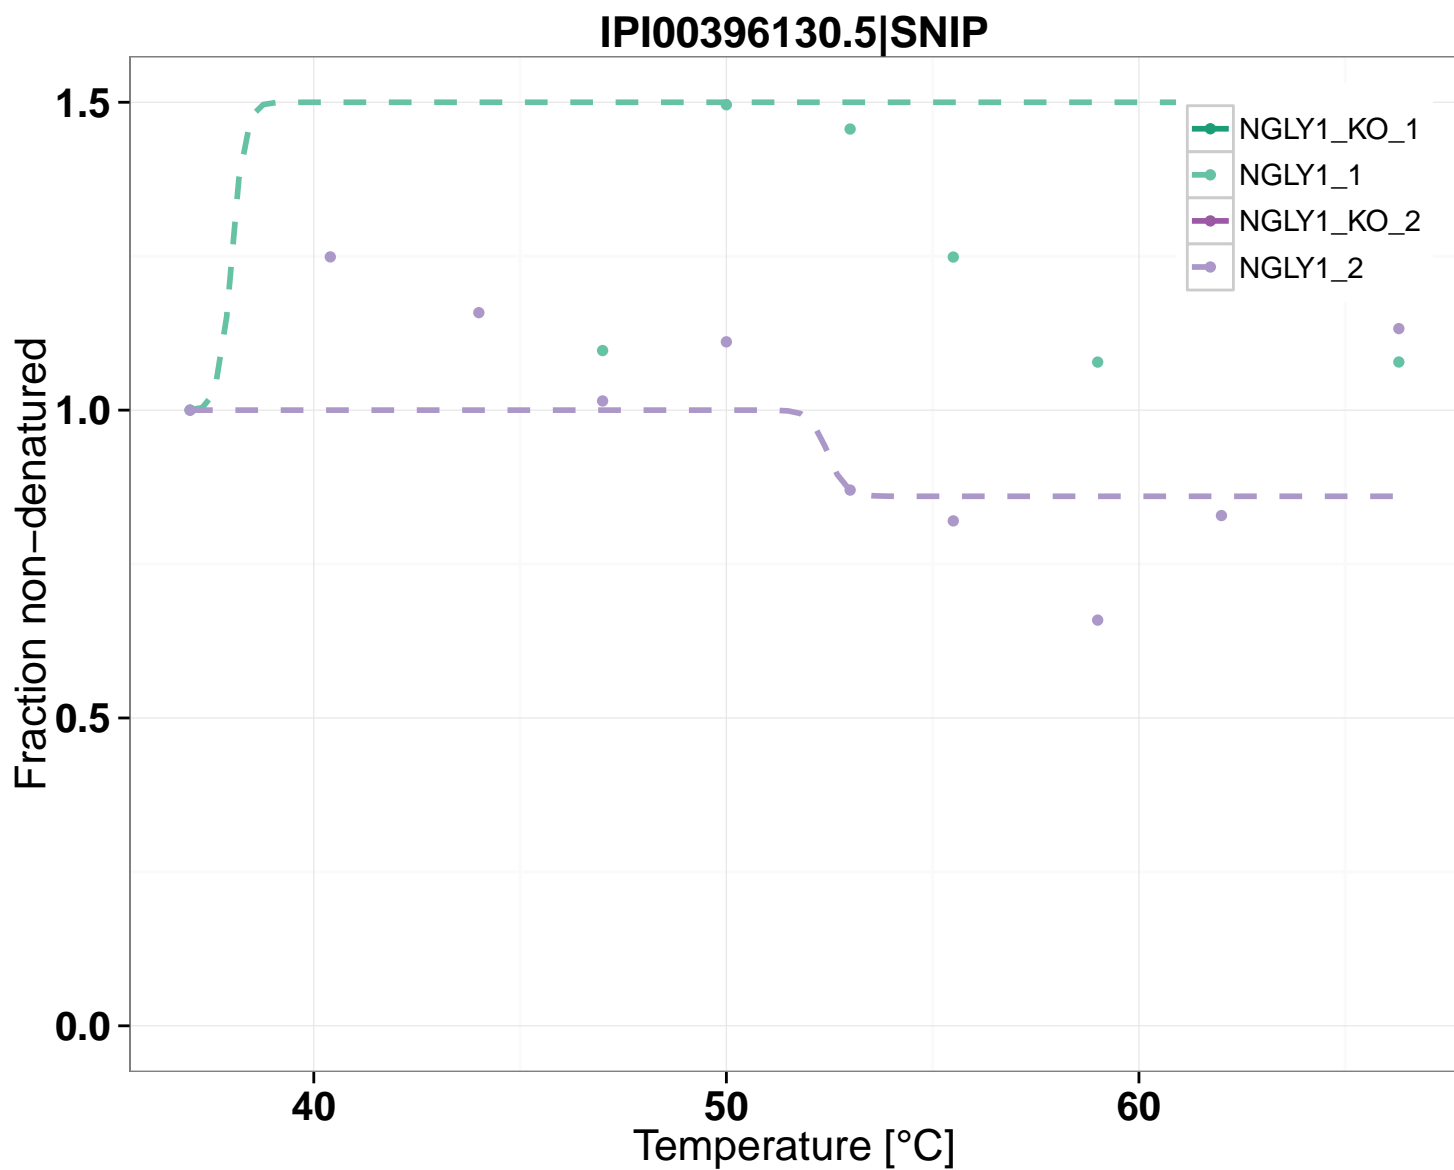

|            | meltPoint | slope | plateau | R2   |
|------------|-----------|-------|---------|------|
| NGLY1_KO_1 | —         | —     | —       | —    |
| NGLY1_1    | —         | 0.82  | 1.5     | 0.06 |
| NGLY1_KO_2 | —         | —     | —       | —    |
| NGLY1_2    | —         | -0.17 | 0.86    | 0.3  |

Supplement: Supplementary file 3469 [file 1]

IPI00063213.1|MED30

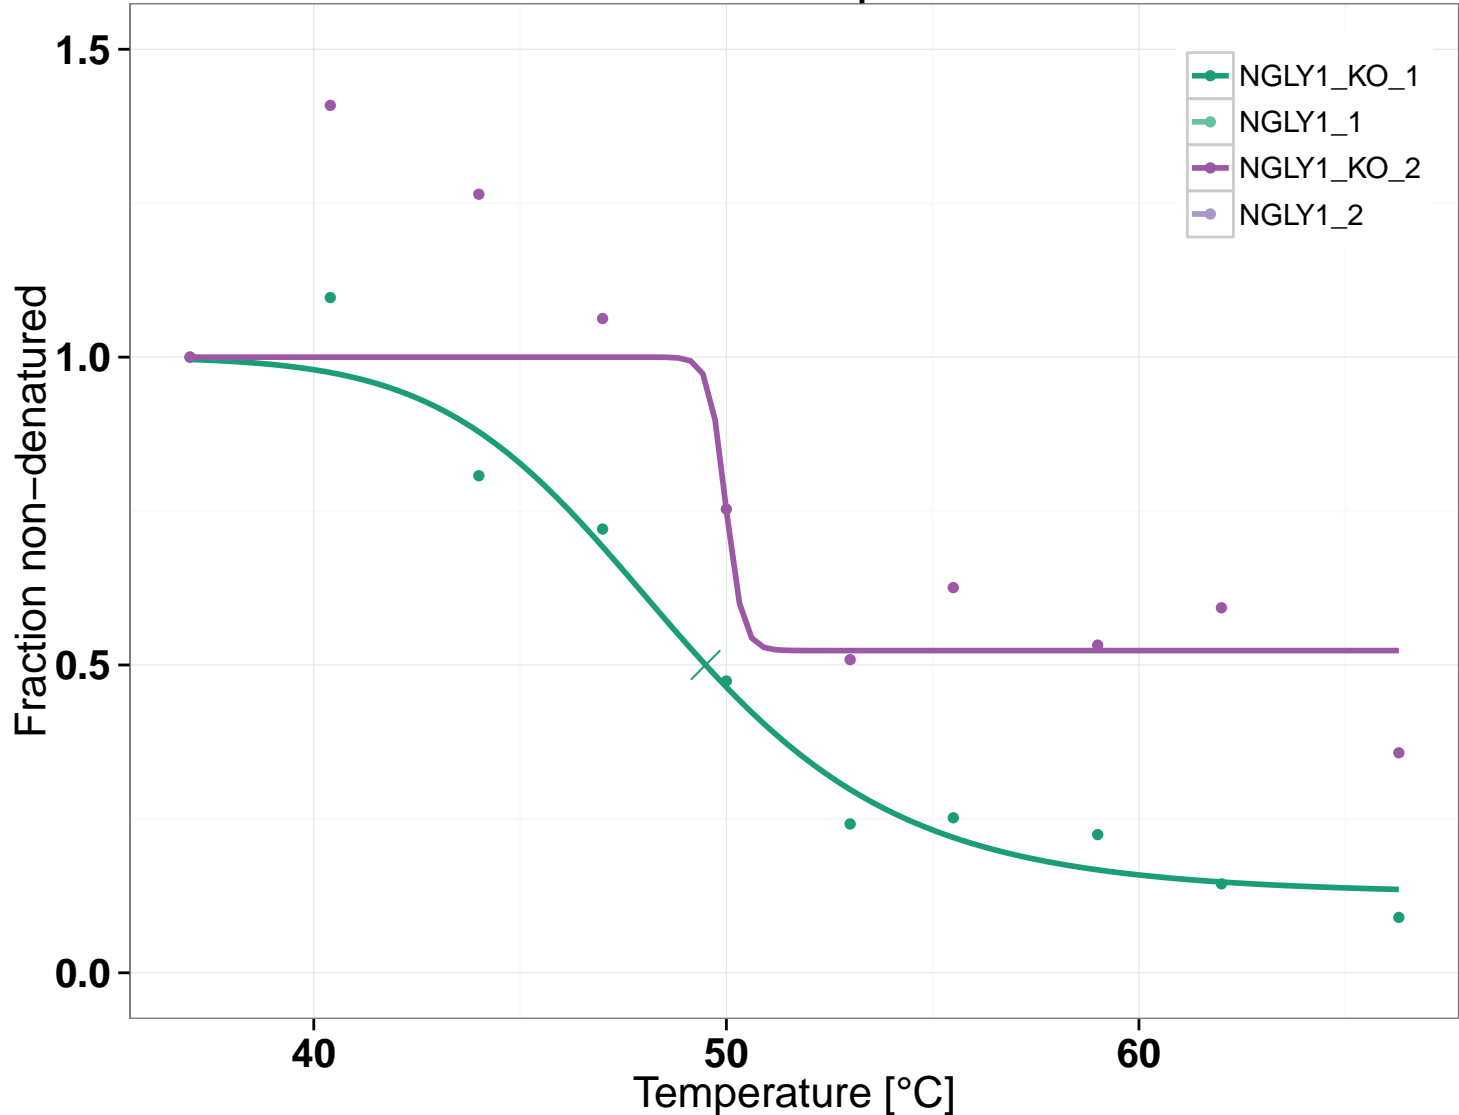

|            | meltPoint | slope  | plateau | R2   |
|------------|-----------|--------|---------|------|
| NGLY1_KO_1 | 49.5      | -0.078 | 0.13    | 0.98 |
| NGLY1_1    | -         | -      | -       | -    |
| NGLY1_KO_2 | -         | -0.6   | 0.52    | 0.75 |
| NGLY1_2    | -         | -      | -       | -    |

Supplement: Supplementary file 3470 [file 1]

IPI00175029.1|TMEM55A

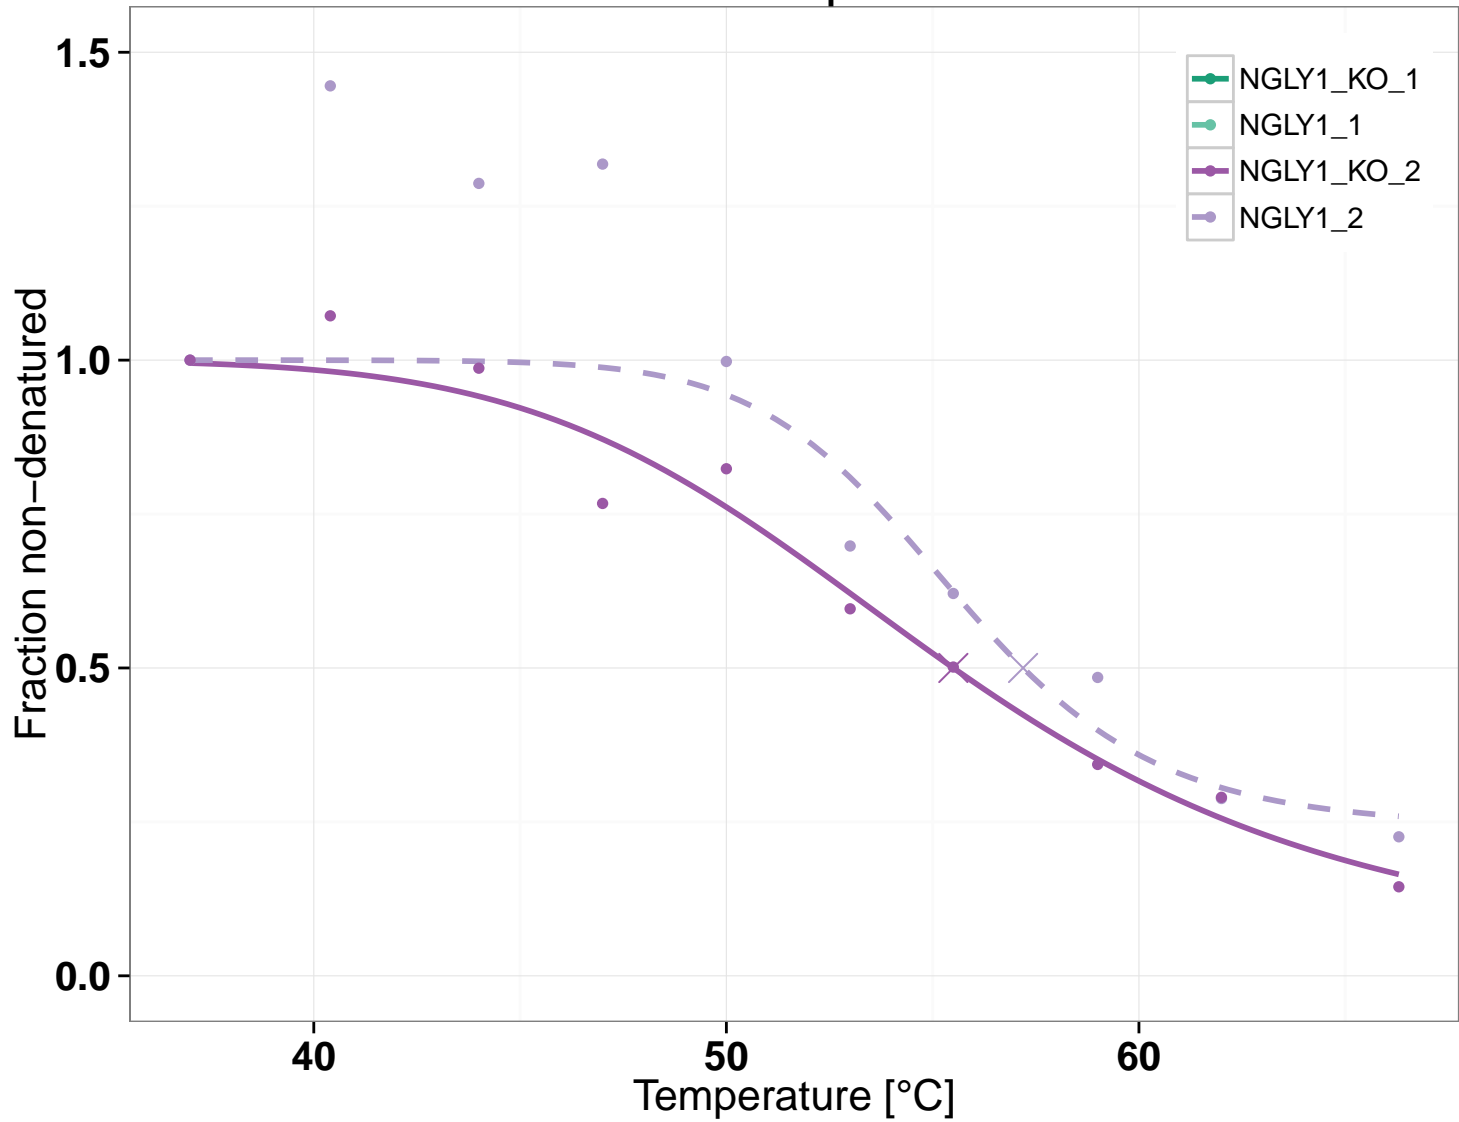

|            | meltPoint | slope  | plateau | R2   |
|------------|-----------|--------|---------|------|
| NGLY1_KO_1 | —         | —      | —       | —    |
| NGLY1_1    | —         | —      | —       | —    |
| NGLY1_KO_2 | 55.5      | -0.049 | 0.03    | 0.97 |
| NGLY1_2    | 57.19     | -0.078 | 0.24    | 0.76 |

Supplement: Supplementary file 3471 [file 1]

IPI00556369.3|SMG1

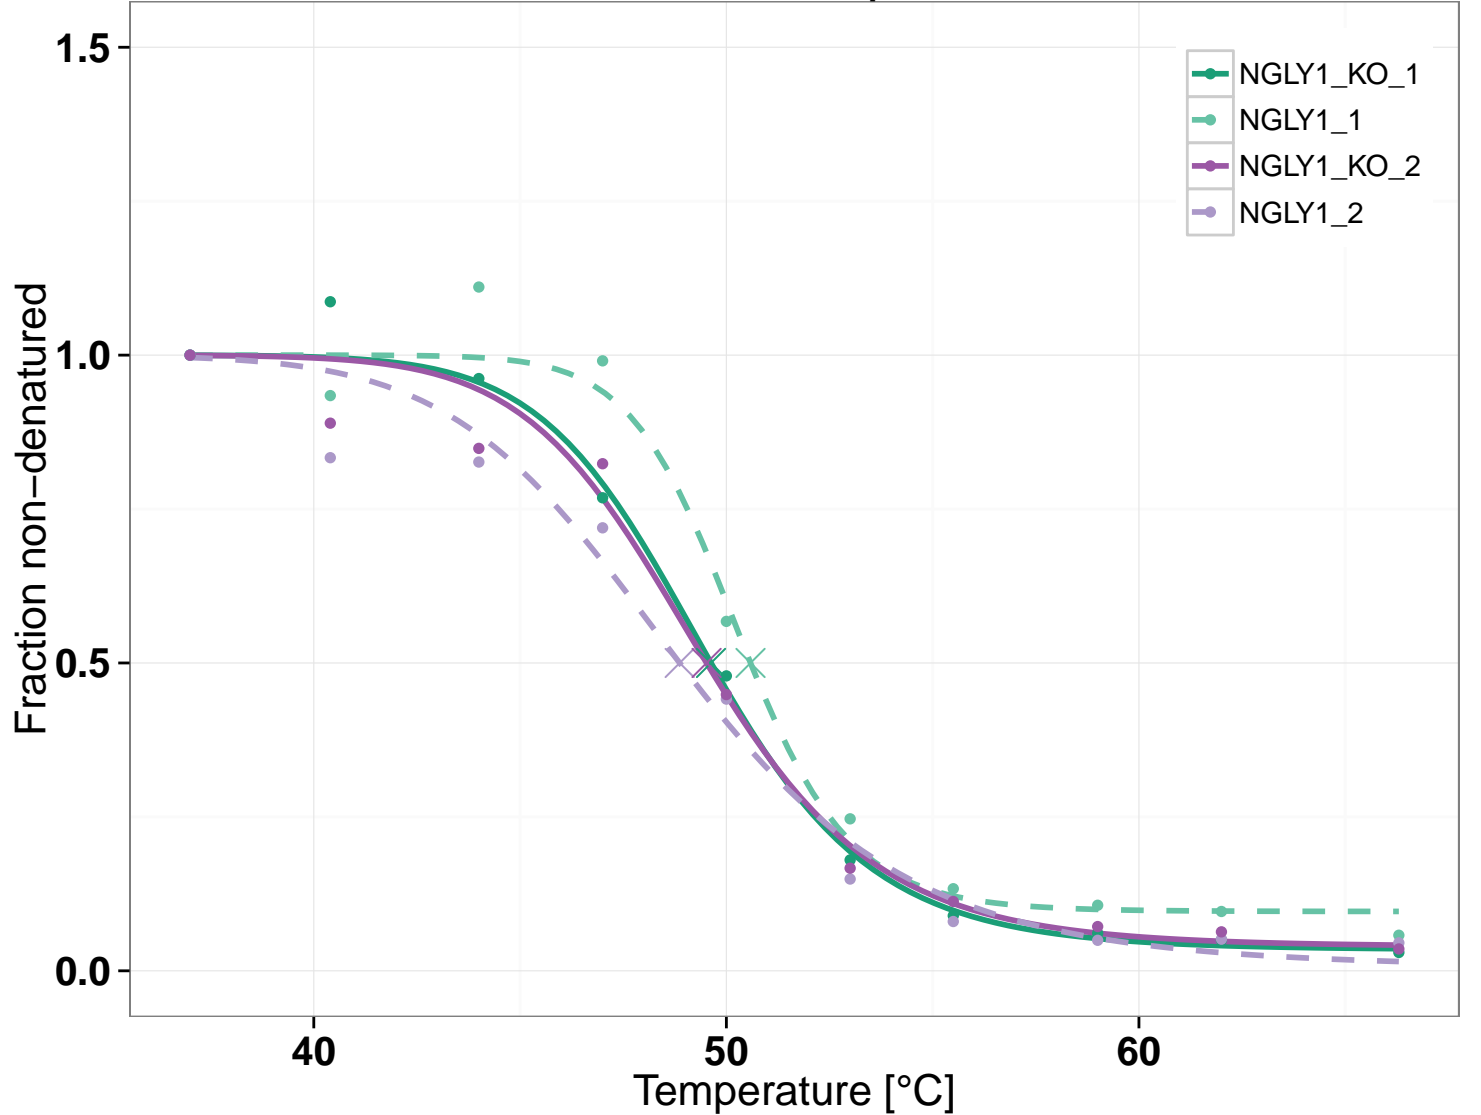

|            | meltPoint | slope  | plateau | R2   |
|------------|-----------|--------|---------|------|
| NGLY1_KO_1 | 49.63     | -0.12  | 0.03    | 0.99 |
| NGLY1_1    | 50.59     | -0.17  | 0.1     | 0.99 |
| NGLY1_KO_2 | 49.52     | -0.11  | 0.04    | 0.98 |
| NGLY1_2    | 48.87     | -0.089 | 0       | 0.98 |

Supplement: Supplementary file 3472 [file 1]

# IPI00872697.1|A8MVE9\_HUMAN

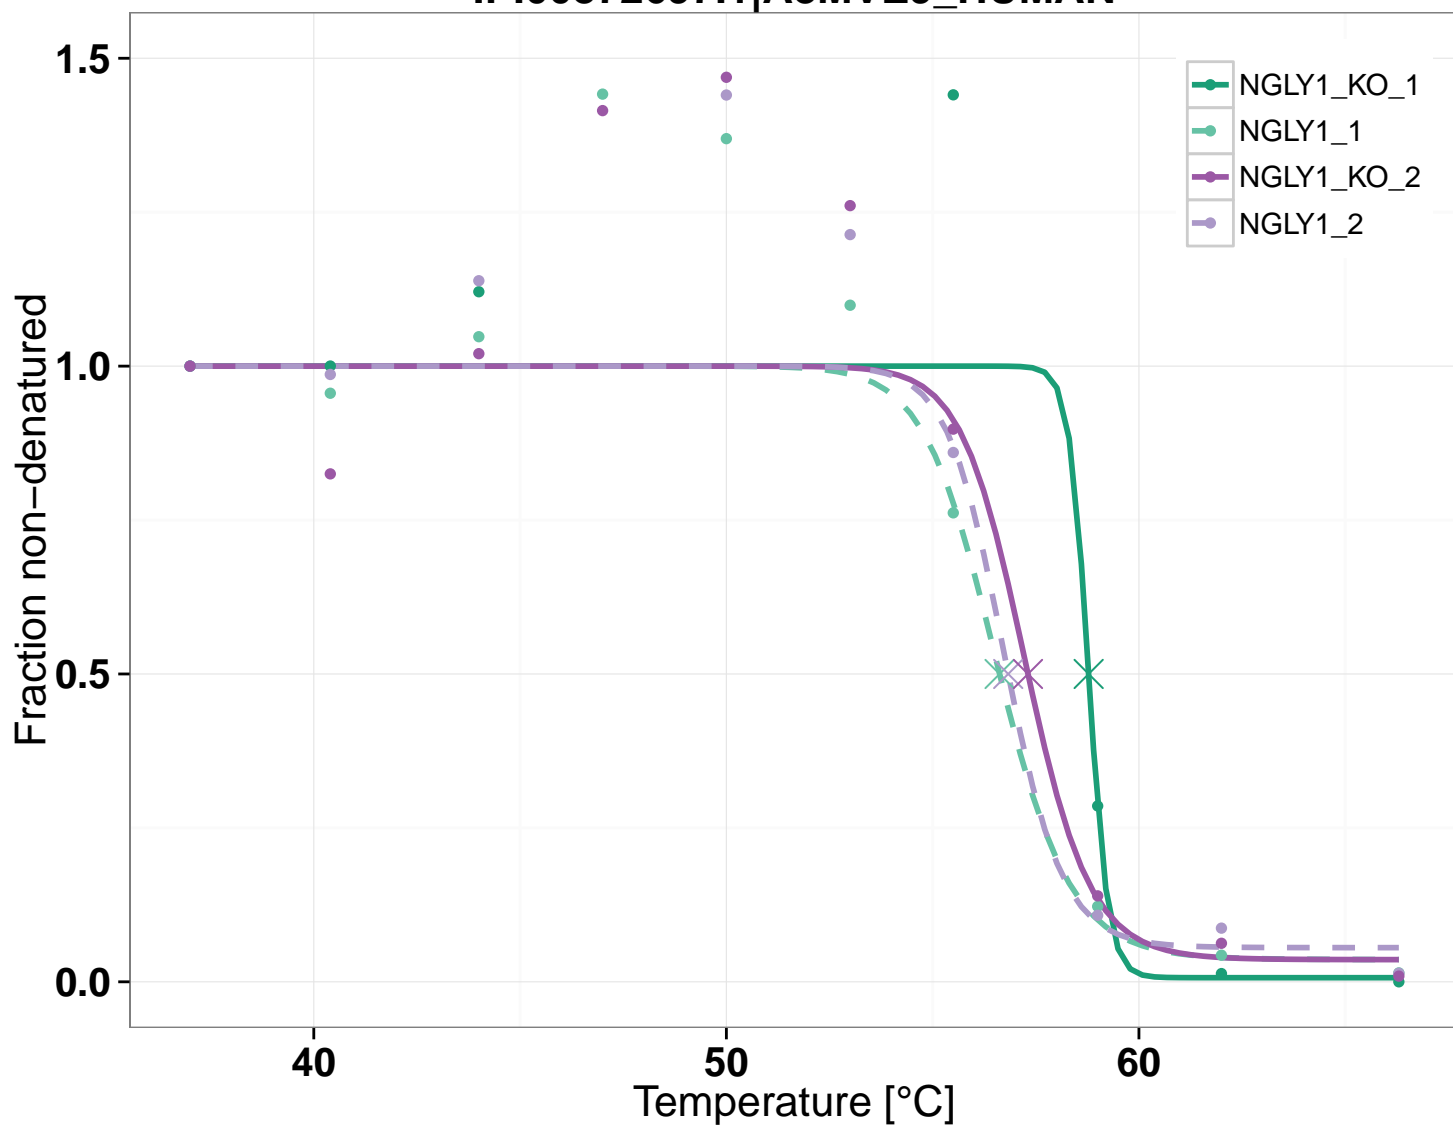

|            | meltPoint | slope | plateau | R2   |
|------------|-----------|-------|---------|------|
| NGLY1_KO_1 | 58.78     | -1.1  | 0.01    | 0.56 |
| NGLY1_1    | 56.62     | -0.27 | 0.04    | 0.87 |
| NGLY1_KO_2 | 57.31     | -0.31 | 0.04    | 0.82 |
| NGLY1_2    | 56.83     | -0.34 | 0.06    | 0.82 |

Supplement: Supplementary file 3473 [file 1]

IPI00030941.5|TSPAN3

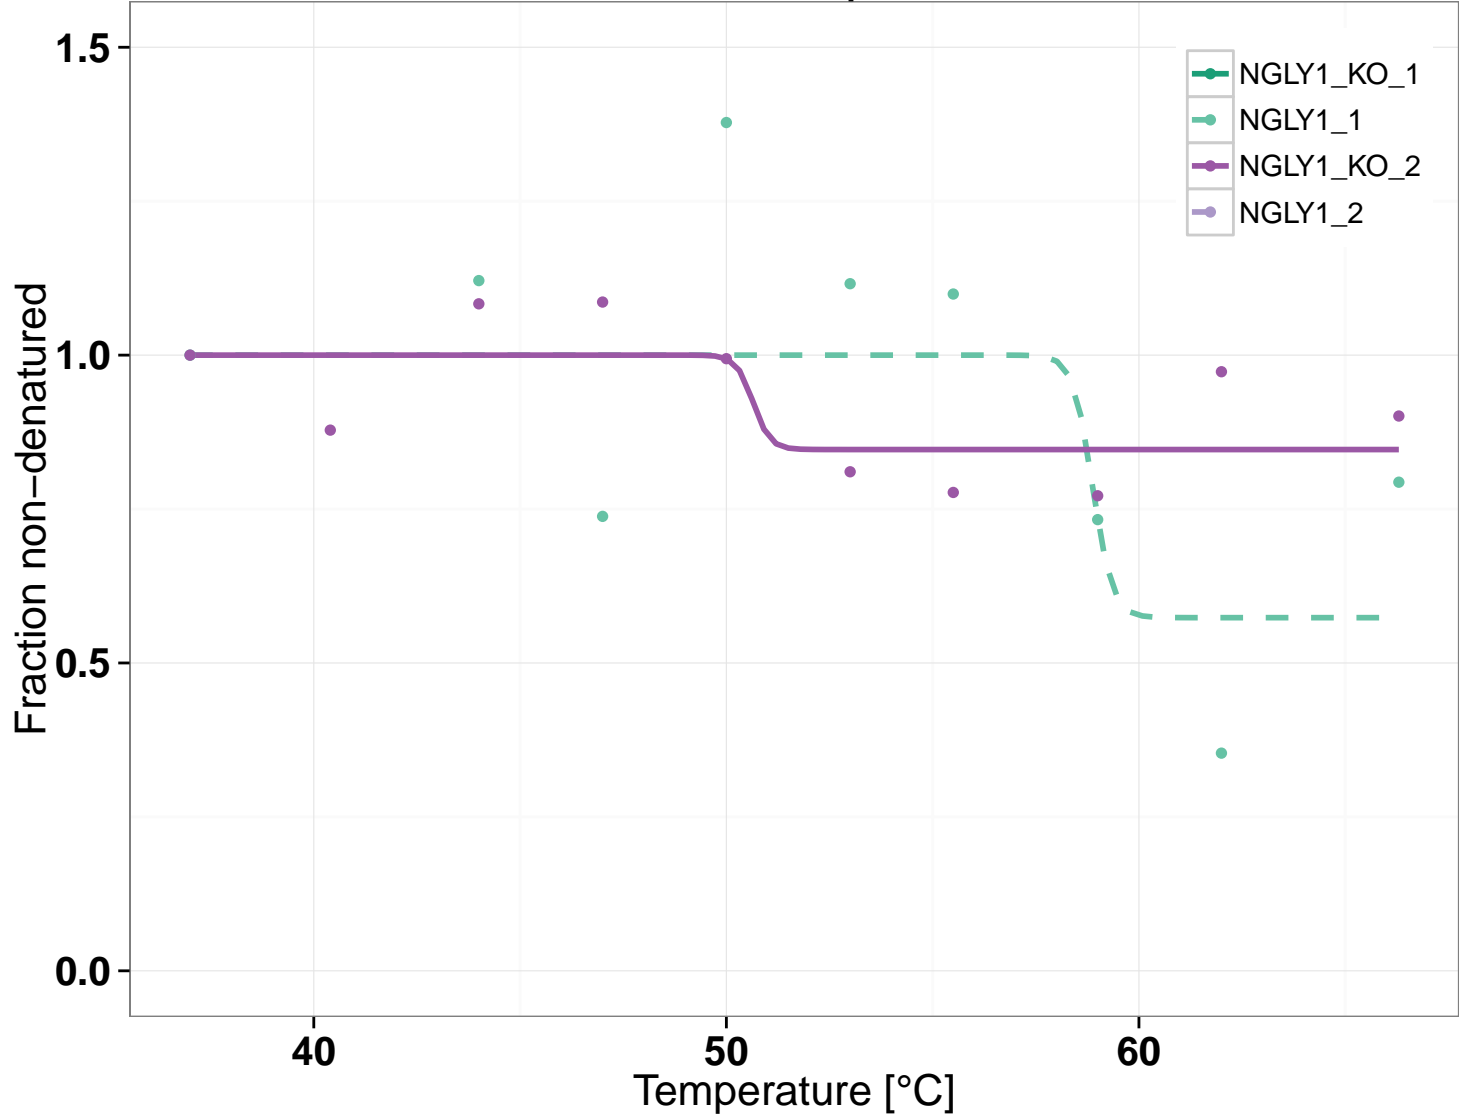

|            | meltPoint | slope | plateau | R2   |
|------------|-----------|-------|---------|------|
| NGLY1_KO_1 | -         | -     | -       | -    |
| NGLY1_1    | -         | -0.45 | 0.57    | 0.37 |
| NGLY1_KO_2 | -         | -0.19 | 0.85    | 0.52 |
| NGLY1_2    | -         | -     | -       | -    |

Supplement: Supplementary file 3474 [file 1]

# IPI00376941.1|DDHD1

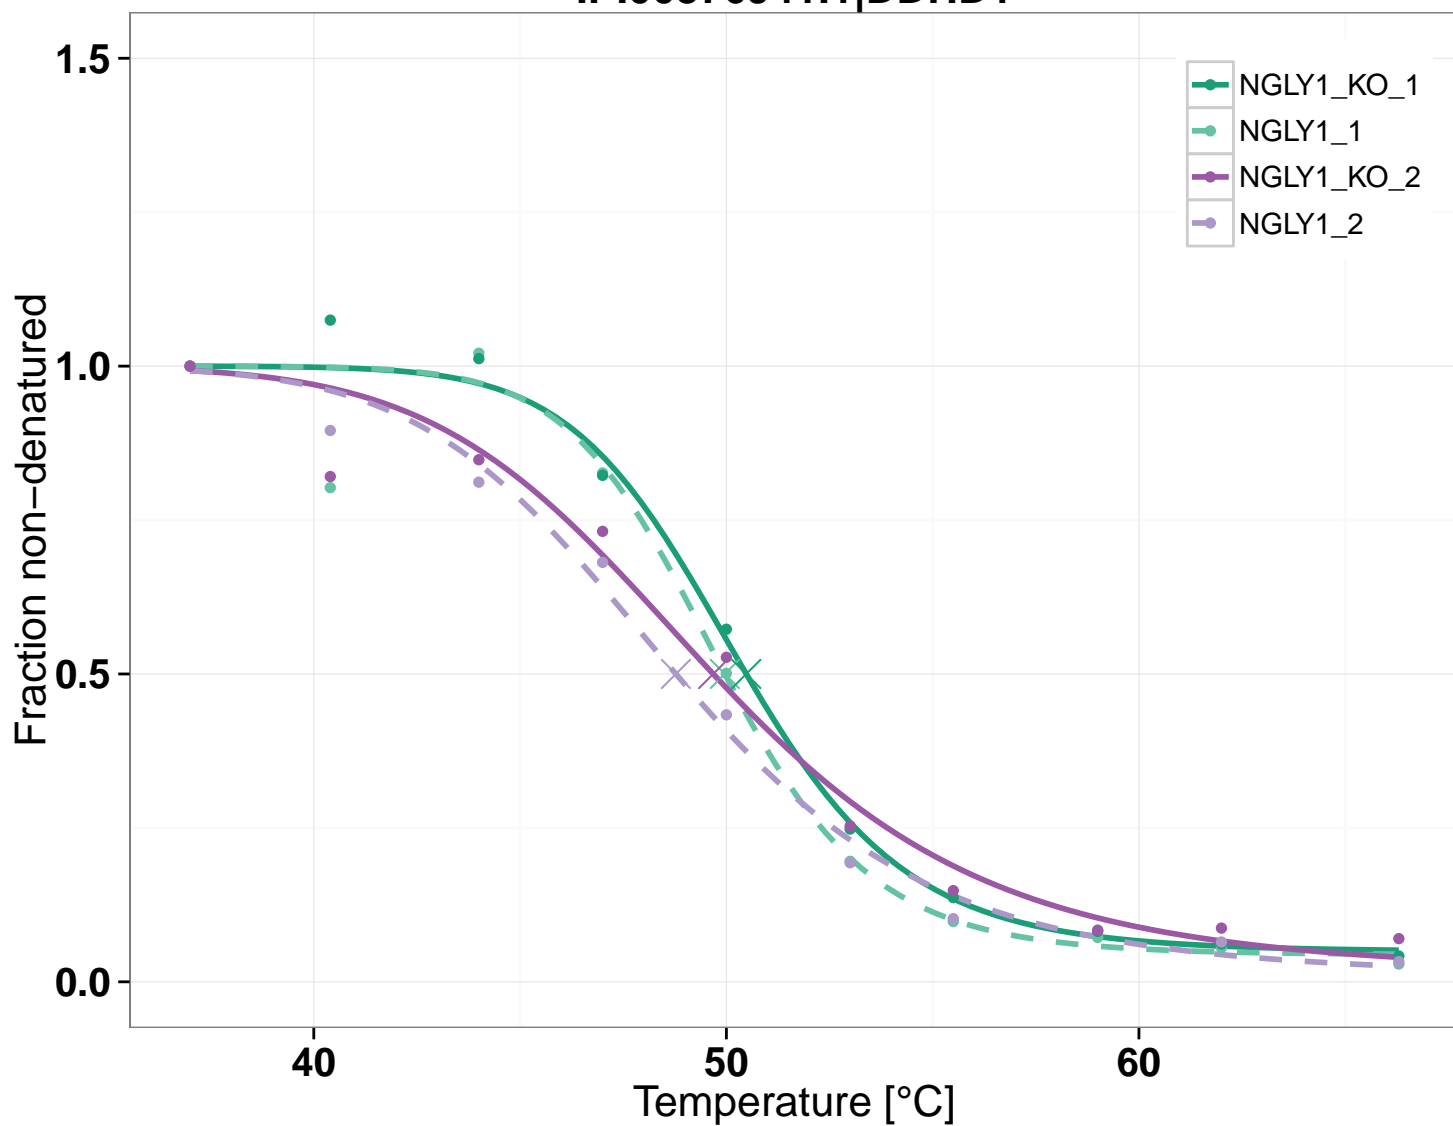

|            | meltPoint | slope  | plateau | R2   |
|------------|-----------|--------|---------|------|
| NGLY1_KO_1 | 50.48     | -0.12  | 0.05    | 0.99 |
| NGLY1_1    | 49.96     | -0.13  | 0.04    | 0.97 |
| NGLY1_KO_2 | 49.68     | -0.073 | 0.01    | 0.98 |
| NGLY1_2    | 48.78     | -0.08  | 0.01    | 0.99 |

Supplement: Supplementary file 3475 [file 1]

# IPI00873158.2|COX3

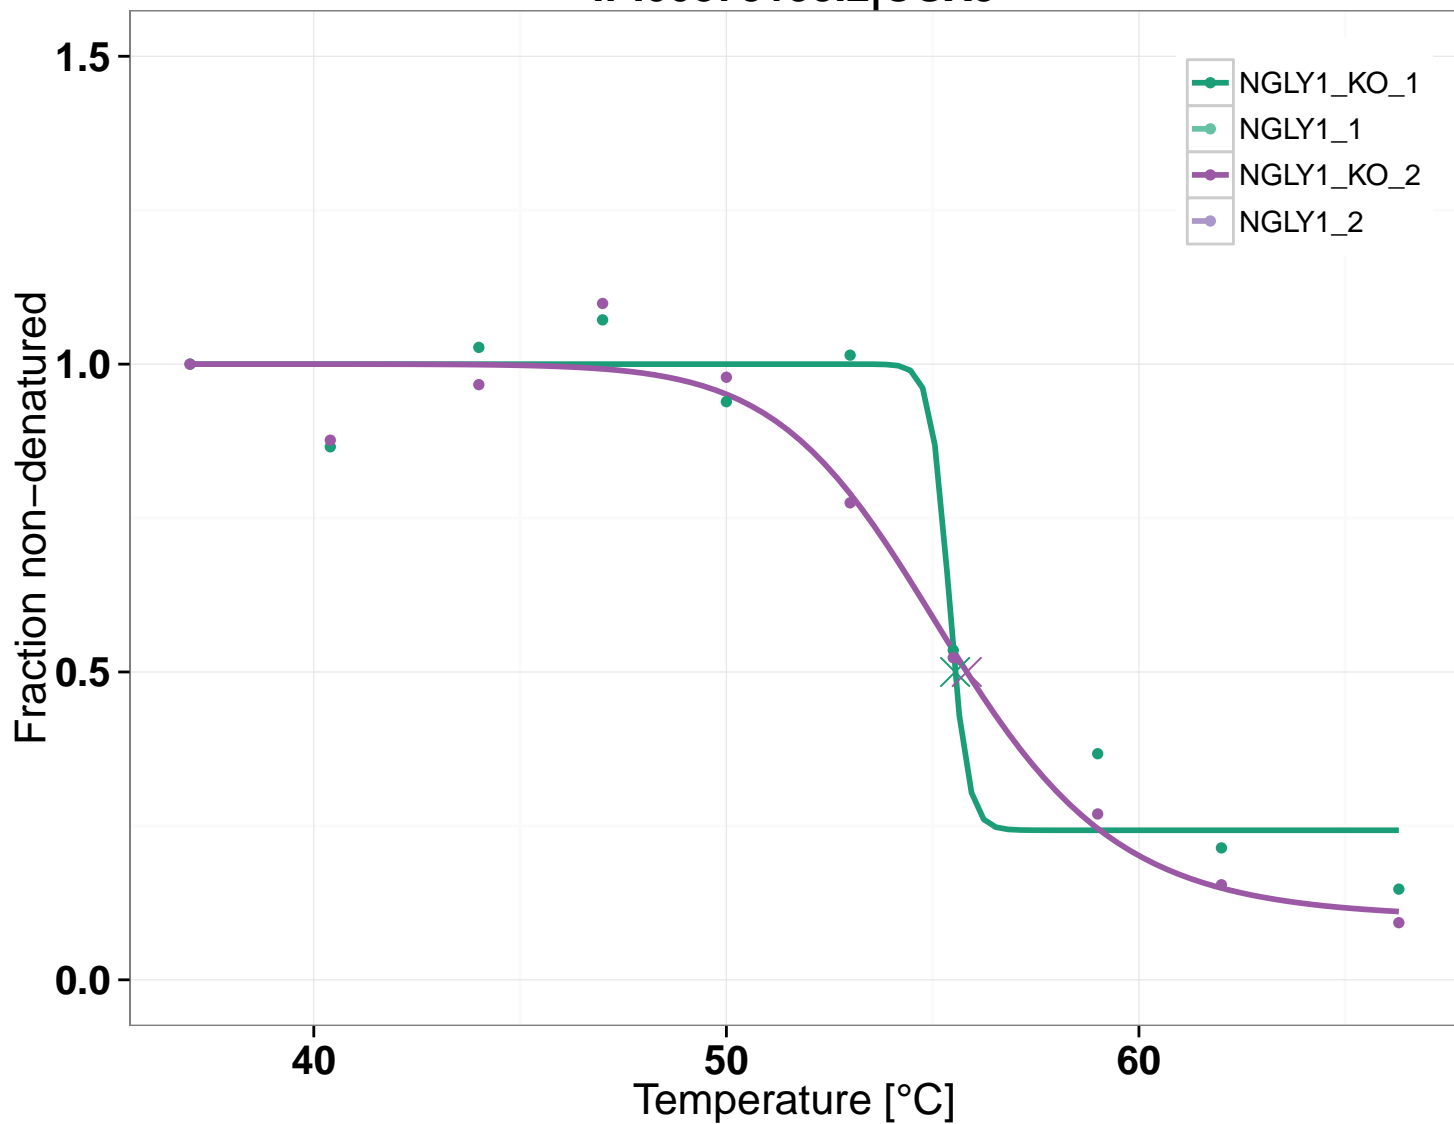

|            | meltPoint | slope | plateau | R2   |
|------------|-----------|-------|---------|------|
| NGLY1_KO_1 | 55.54     | -0.85 | 0.24    | 0.96 |
| NGLY1_1    | -         | -     | -       | -    |
| NGLY1_KO_2 | 55.83     | -0.11 | 0.1     | 0.98 |
| NGLY1_2    | -         | -     | -       | -    |

Supplement: Supplementary file 3476 [file 1]

IPI00021346.1|UBE2E1

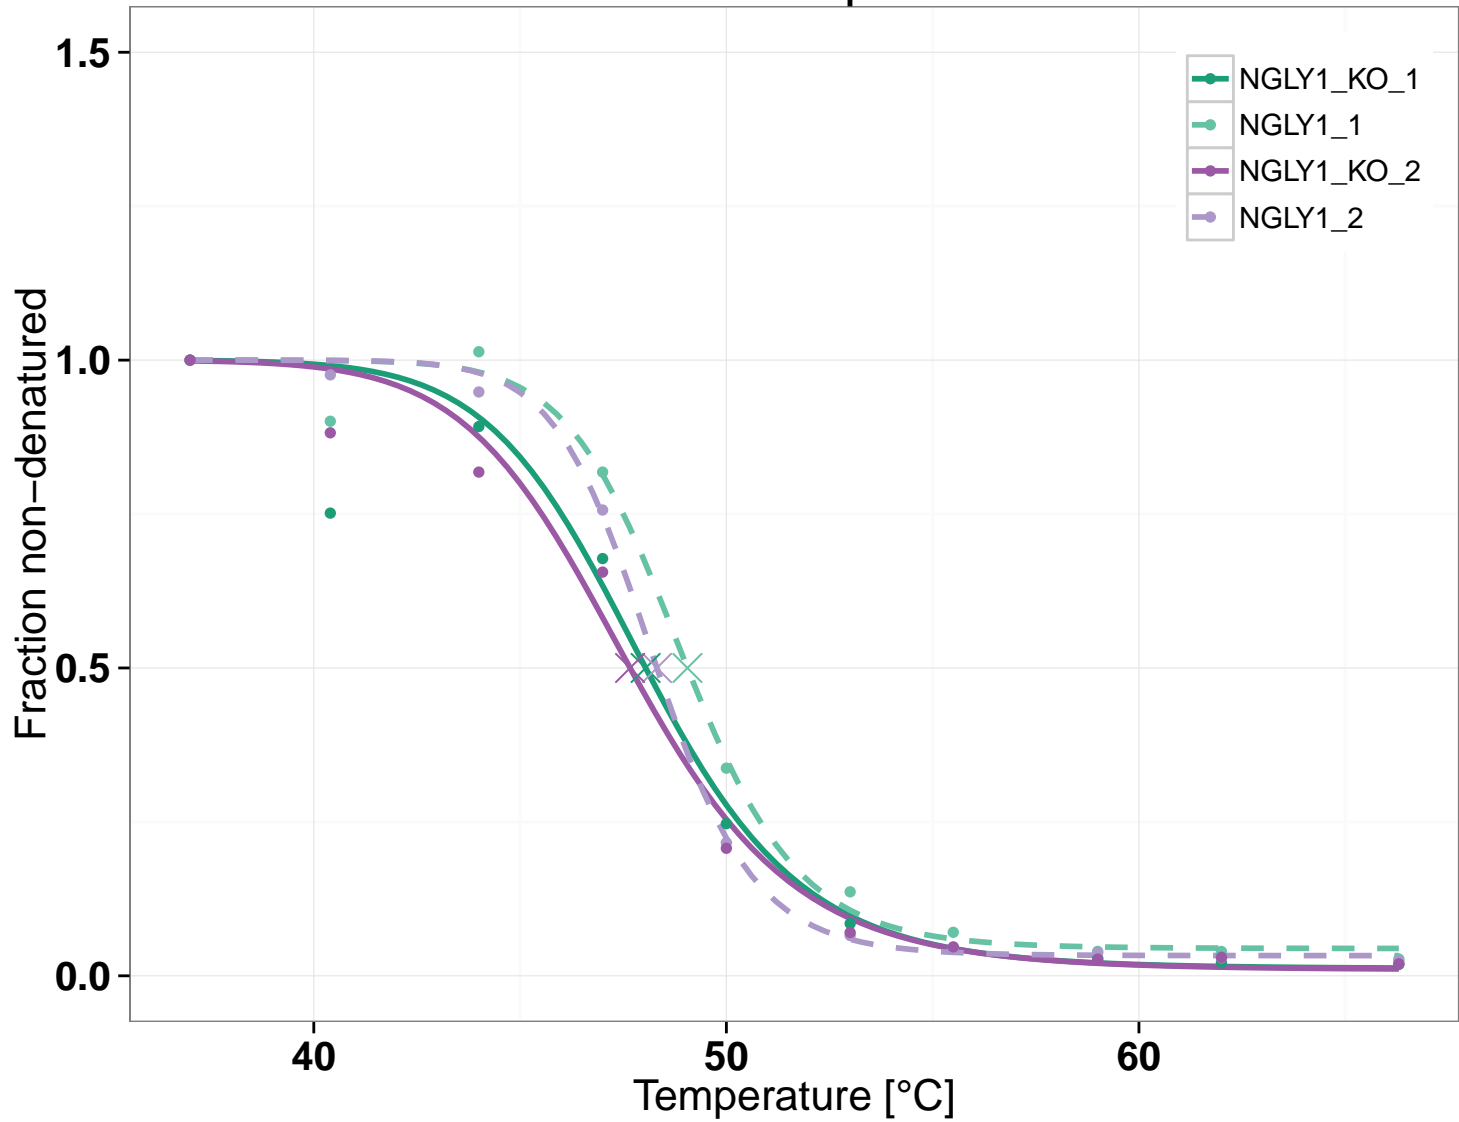

|            | meltPoint | slope | plateau | R2   |
|------------|-----------|-------|---------|------|
| NGLY1_KO_1 | 48.04     | -0.13 | 0.01    | 0.96 |
| NGLY1_1    | 49.06     | -0.17 | 0.04    | 0.99 |
| NGLY1_KO_2 | 47.67     | -0.12 | 0.01    | 0.99 |
| NGLY1_2    | 48.32     | -0.2  | 0.03    | 1    |

Supplement: Supplementary file 3477 [file 1]

IPI00299048.6|IQGAP2

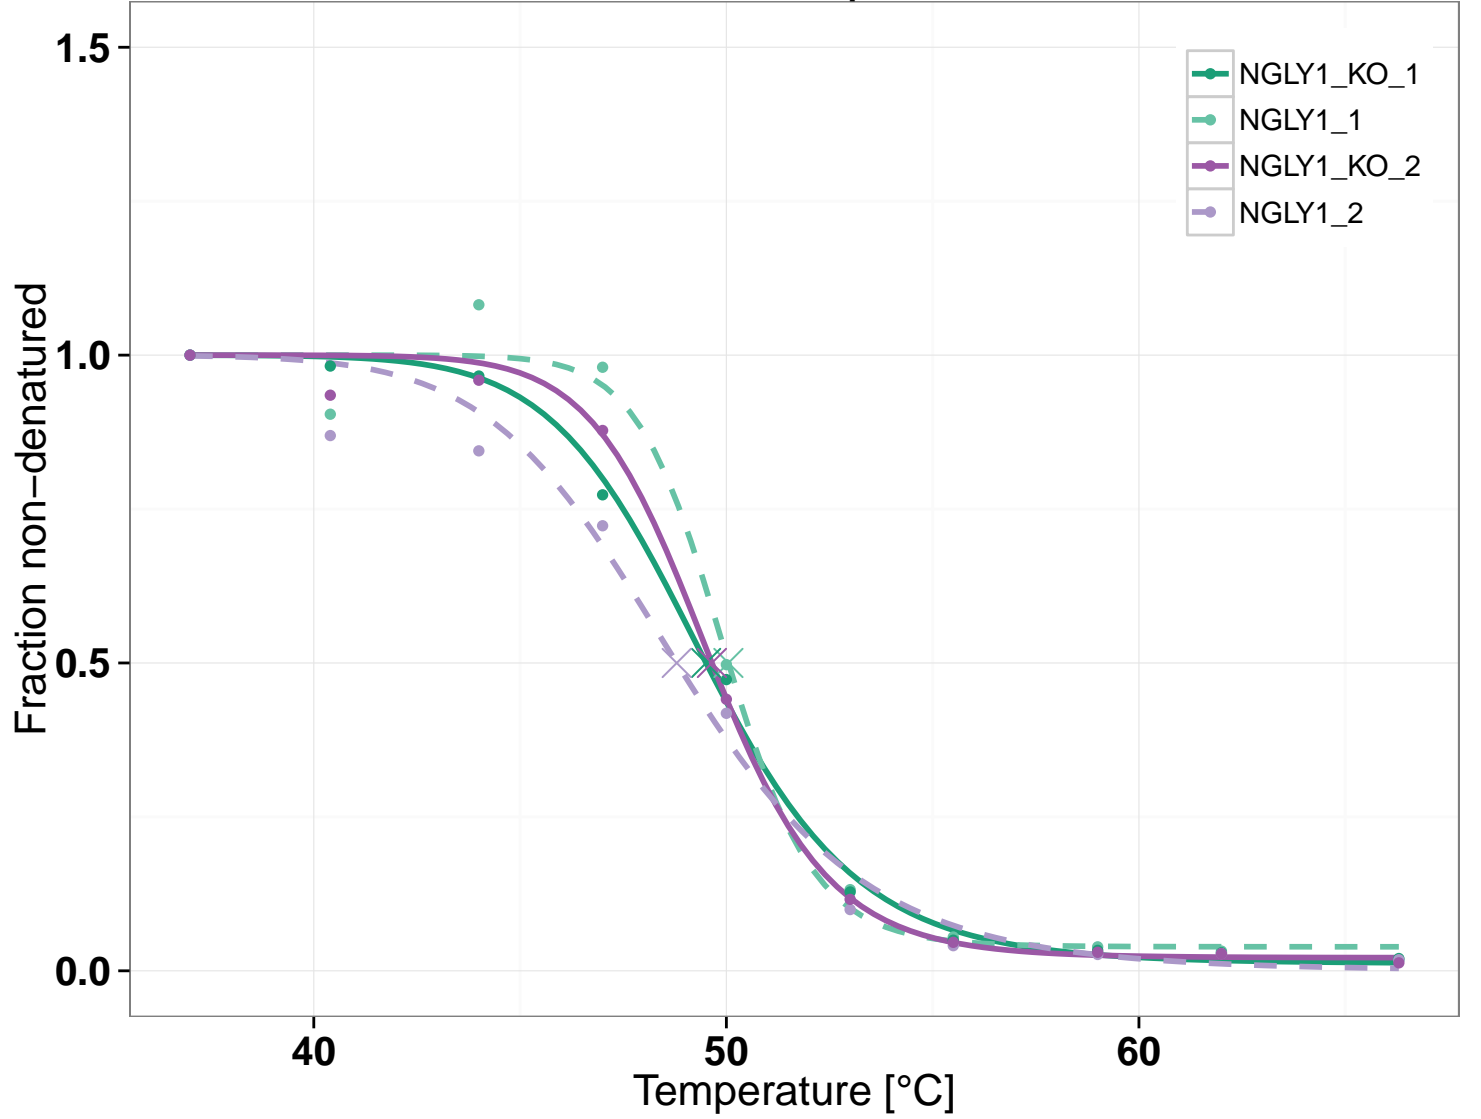

|            | meltPoint | slope | plateau | R2   |
|------------|-----------|-------|---------|------|
| NGLY1_KO_1 | 49.51     | -0.13 | 0.01    | 1    |
| NGLY1_1    | 50.05     | -0.22 | 0.04    | 0.99 |
| NGLY1_KO_2 | 49.65     | -0.17 | 0.02    | 1    |
| NGLY1_2    | 48.8      | -0.11 | 0       | 0.98 |

Supplement: Supplementary file 3478 [file 1]

# IPI00005490.1|GOLPH3

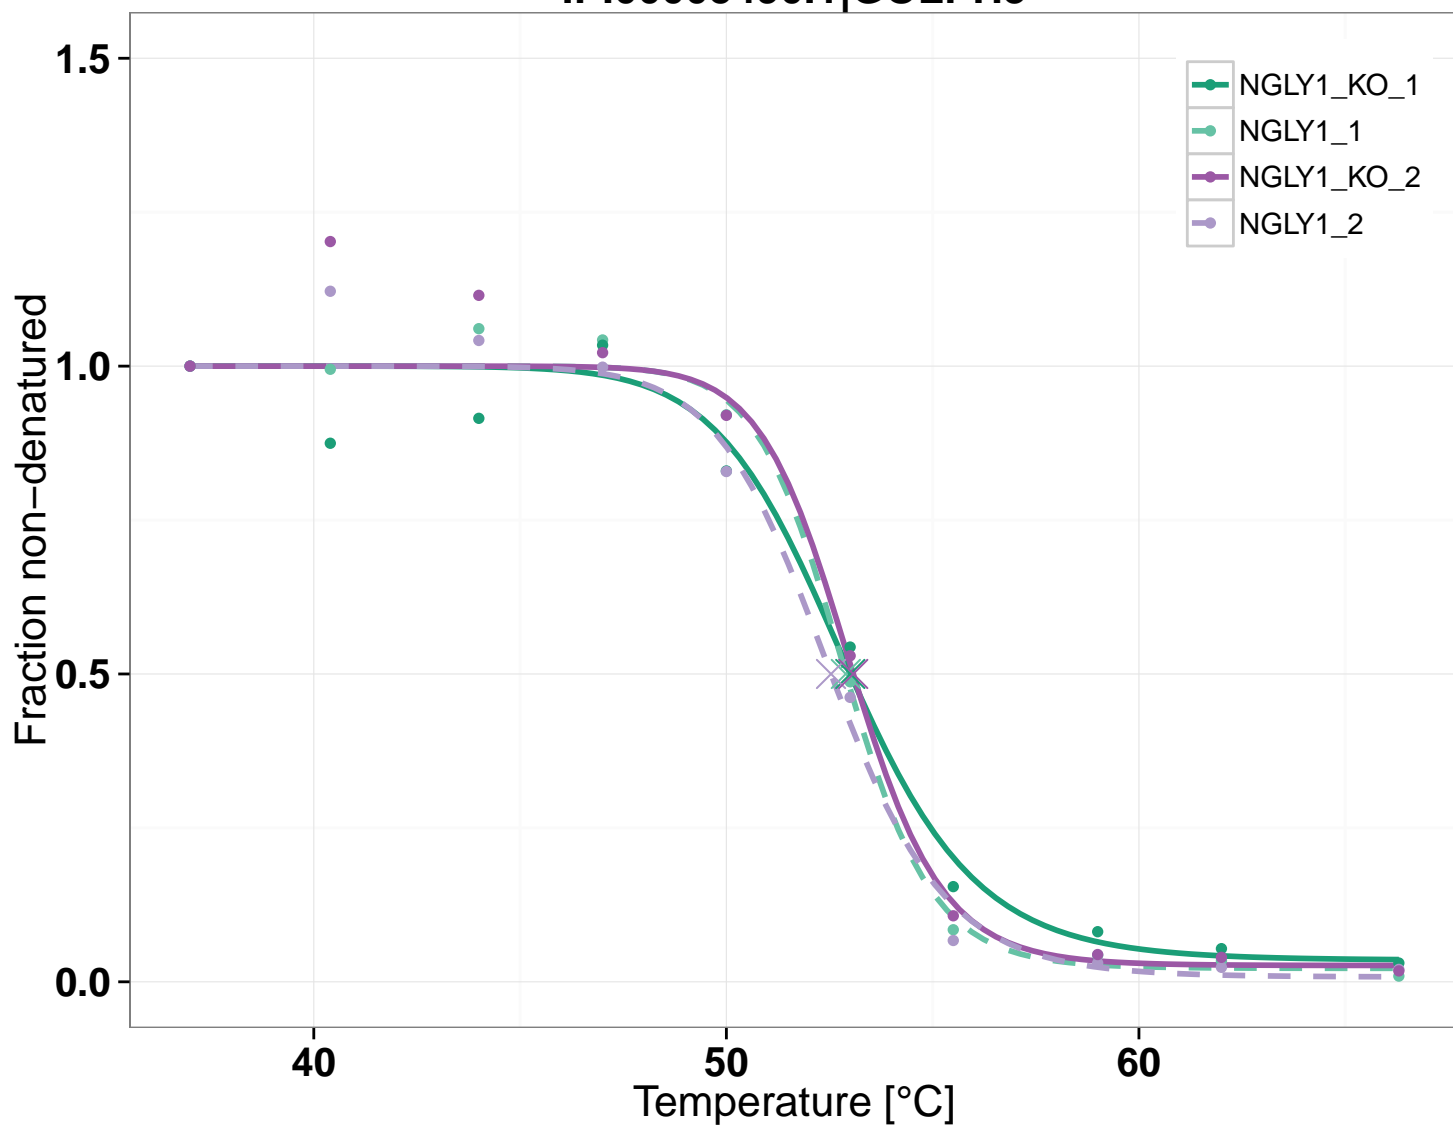

|            | meltPoint | slope | plateau | R2   |
|------------|-----------|-------|---------|------|
| NGLY1_KO_1 | 53        | -0.15 | 0.03    | 0.98 |
| NGLY1_1    | 52.9      | -0.23 | 0.02    | 1    |
| NGLY1_KO_2 | 53.08     | -0.22 | 0.03    | 0.98 |
| NGLY1_2    | 52.54     | -0.18 | 0.01    | 0.99 |

Supplement: Supplementary file 3479 [file 1]

IPI00843979.2|ARHGEF6

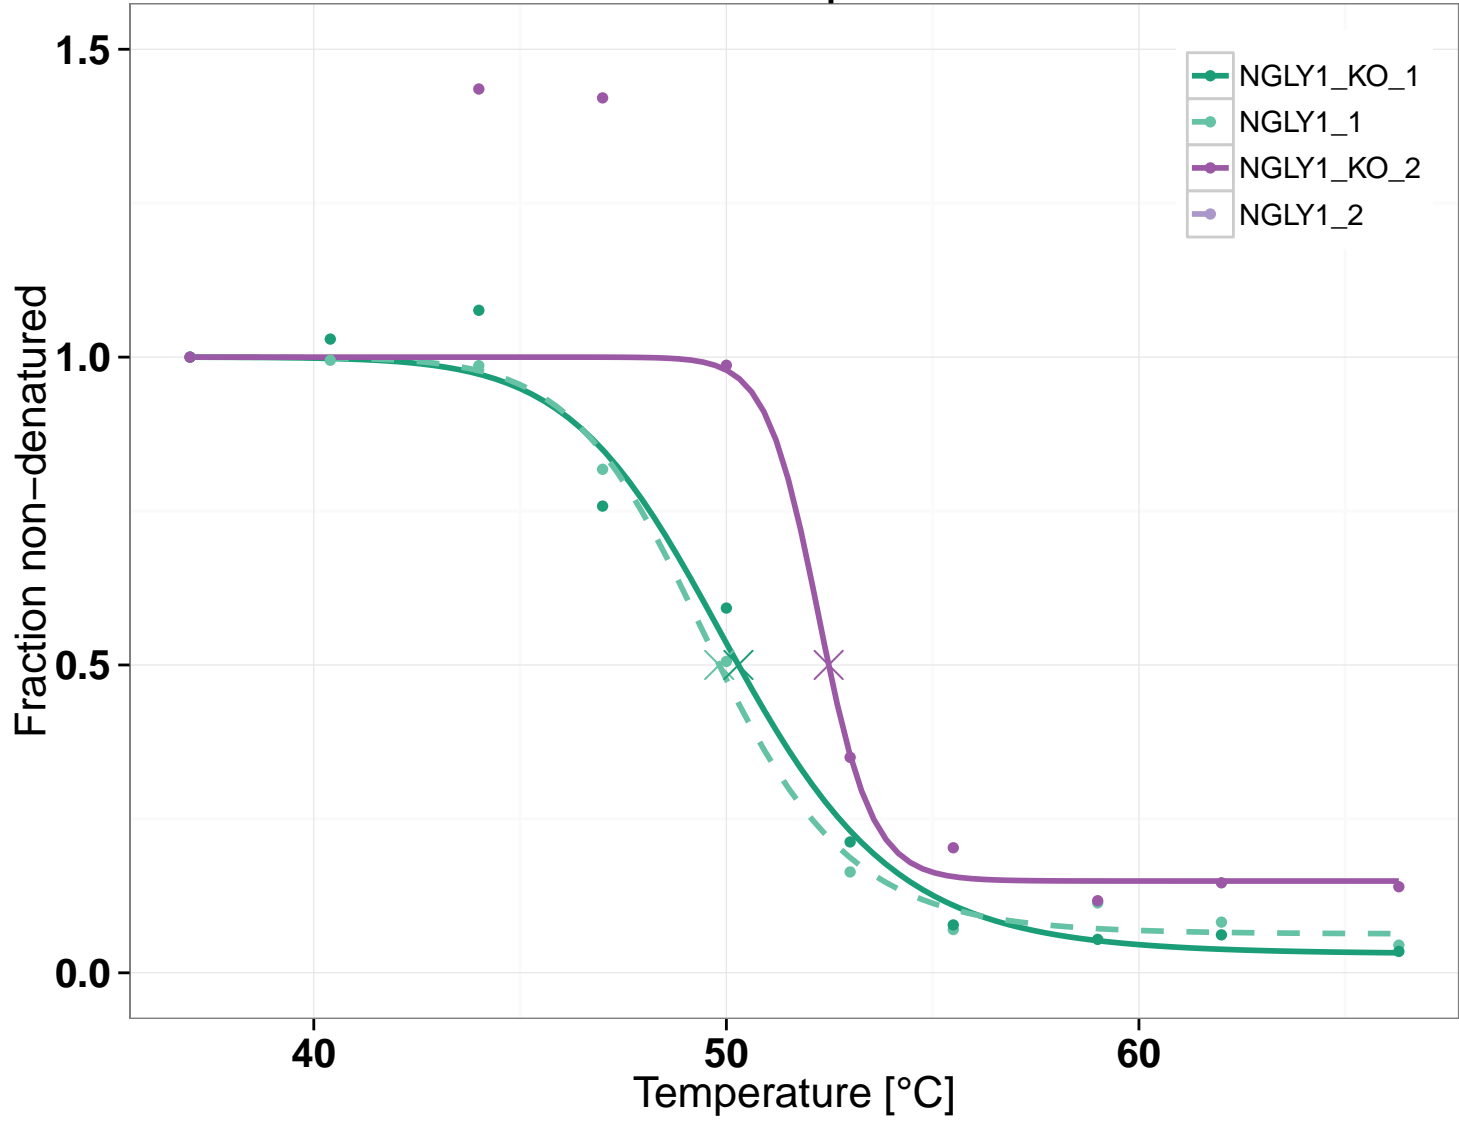

|            | meltPoint | slope | plateau | R2   |
|------------|-----------|-------|---------|------|
| NGLY1_KO_1 | 50.29     | -0.12 | 0.03    | 0.99 |
| NGLY1_1    | 49.83     | -0.14 | 0.06    | 1    |
| NGLY1_KO_2 | 52.48     | -0.33 | 0.15    | 0.8  |
| NGLY1_2    | -         | -     | -       | -    |

Supplement: Supplementary file 3480 [file 1]

# IPI00739149.3|HGSNAT

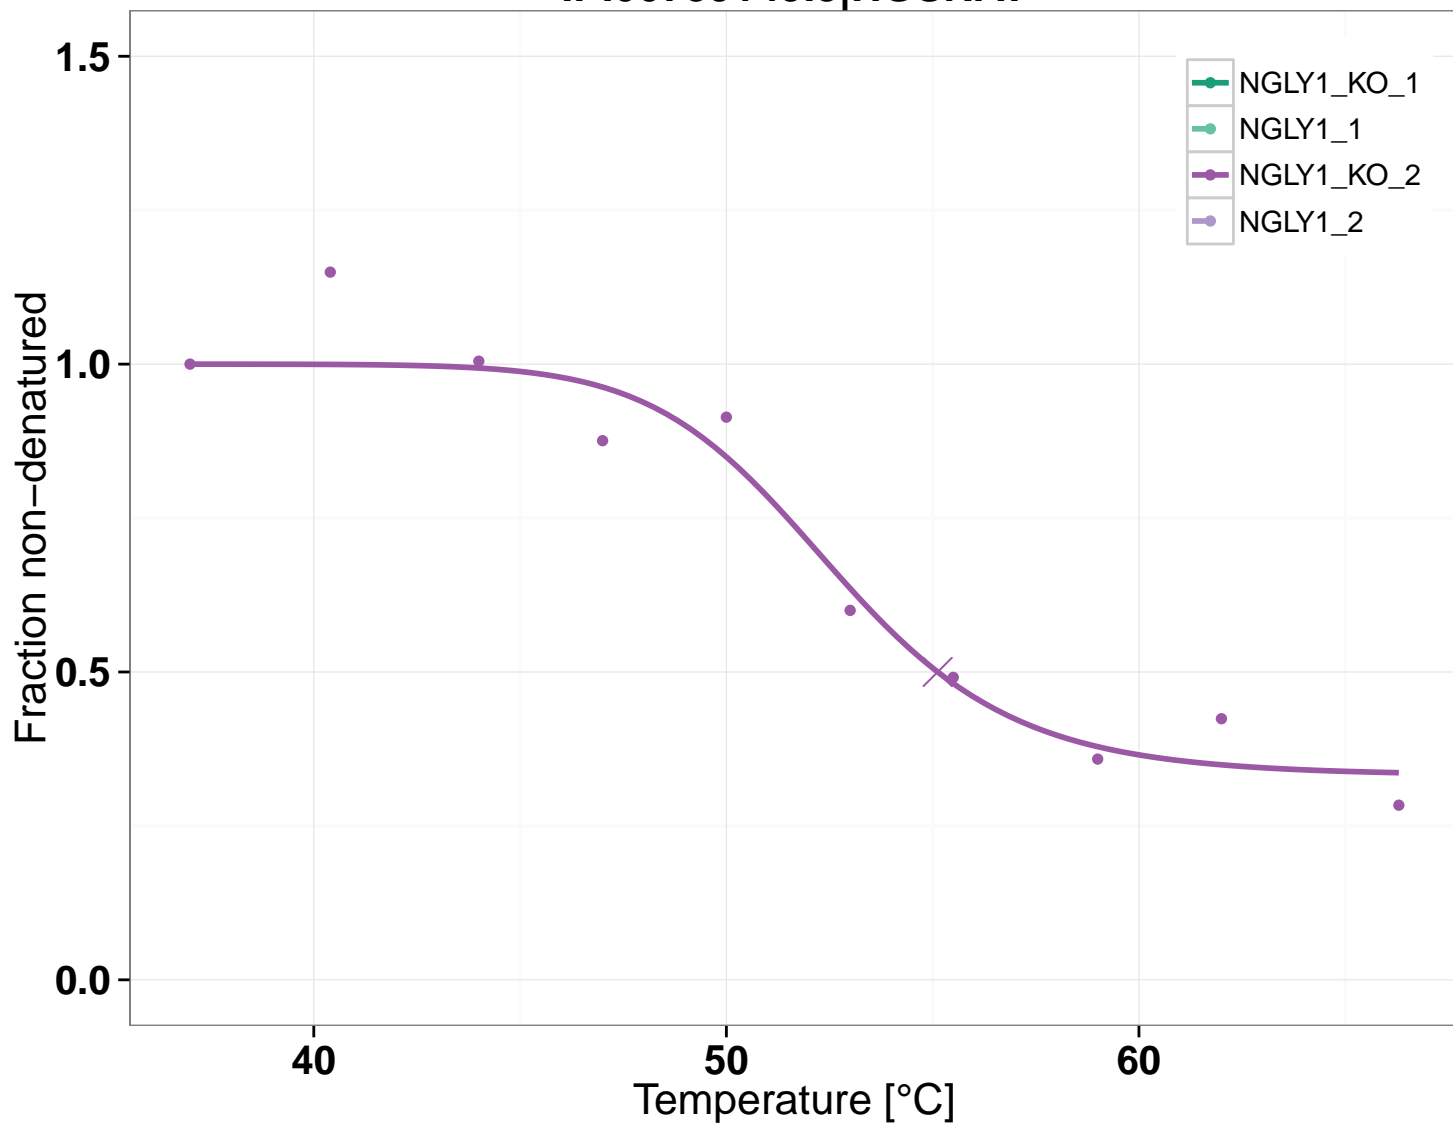

|            | meltPoint | slope  | plateau | R2   |
|------------|-----------|--------|---------|------|
| NGLY1_KO_1 | —         | —      | —       | —    |
| NGLY1_1    | —         | —      | —       | —    |
| NGLY1_KO_2 | 55.12     | -0.076 | 0.33    | 0.95 |
| NGLY1_2    | —         | —      | —       | —    |

Supplement: Supplementary file 3481 [file 1]

# IPI00003944.1|DBT

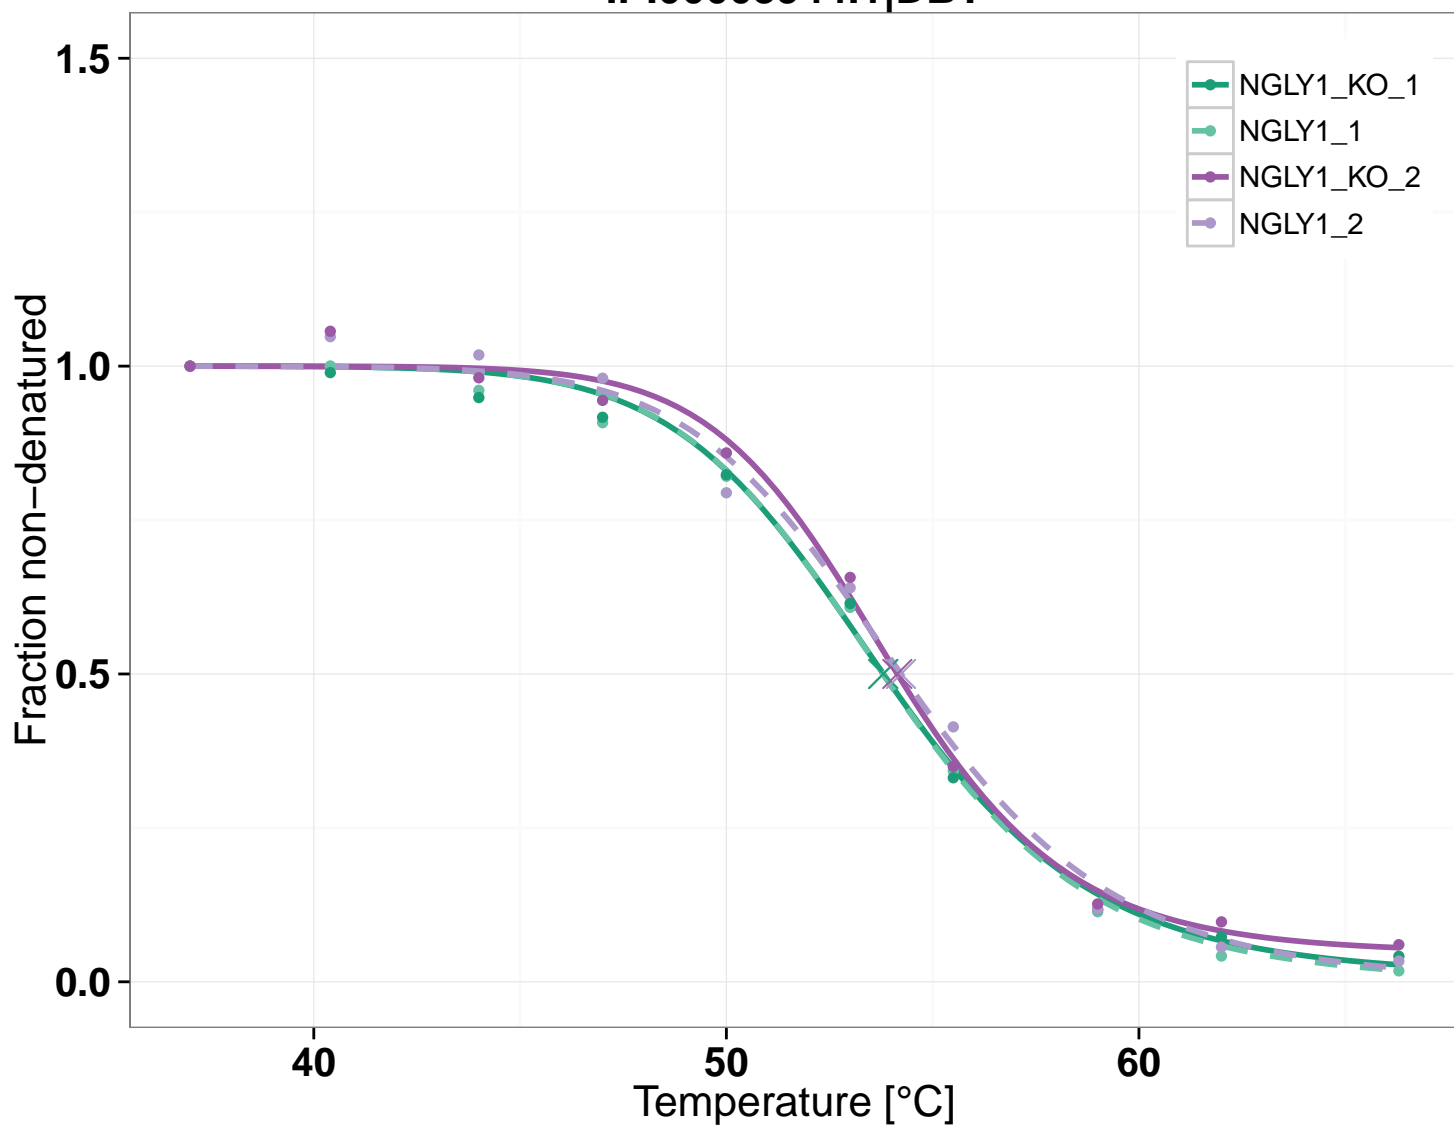

|            | meltPoint | slope  | plateau | R2   |
|------------|-----------|--------|---------|------|
| NGLY1_KO_1 | 53.81     | -0.098 | 0.01    | 1    |
| NGLY1_1    | 53.79     | -0.099 | 0       | 1    |
| NGLY1_KO_2 | 54.14     | -0.11  | 0.05    | 1    |
| NGLY1_2    | 54.23     | -0.096 | 0       | 0.99 |

Supplement: Supplementary file 3482 [file 1]

IPI00797500.1|BAHD1

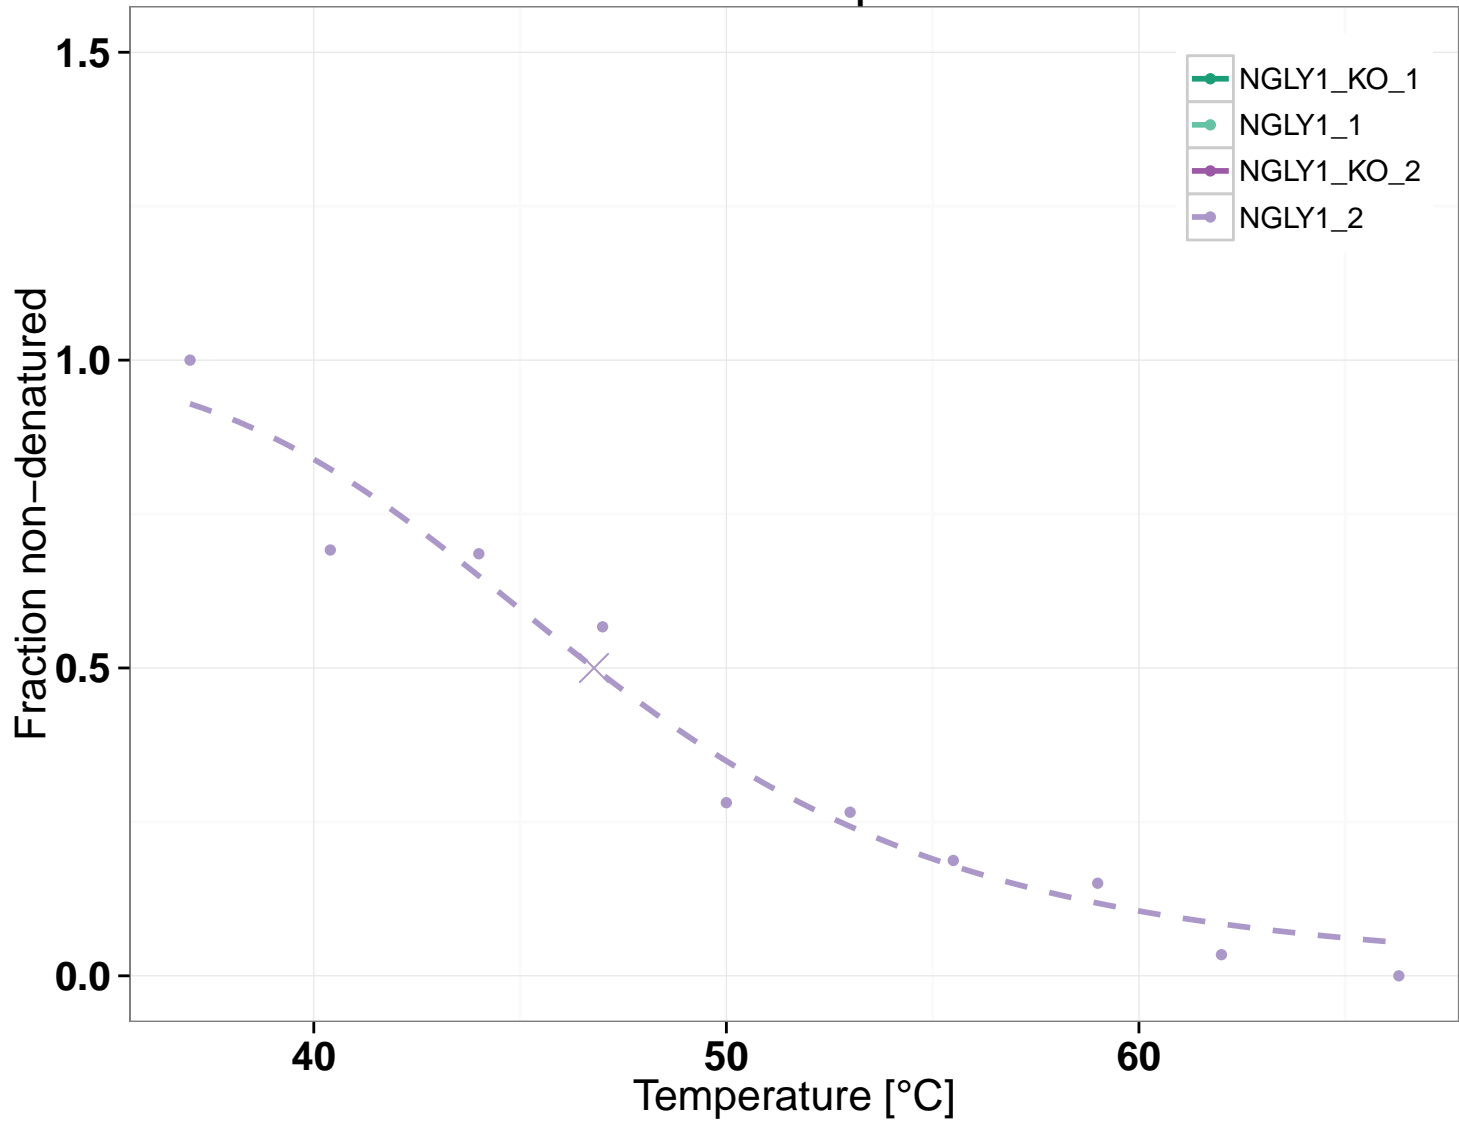

|            | meltPoint | slope  | plateau | R2   |
|------------|-----------|--------|---------|------|
| NGLY1_KO_1 | —         | —      | —       | —    |
| NGLY1_1    | —         | —      | —       | —    |
| NGLY1_KO_2 | —         | —      | —       | —    |
| NGLY1_2    | 46.79     | -0.054 | 0       | 0.96 |

Supplement: Supplementary file 3483 [file 1]

IPI00151462.3|MAP1LC3B2

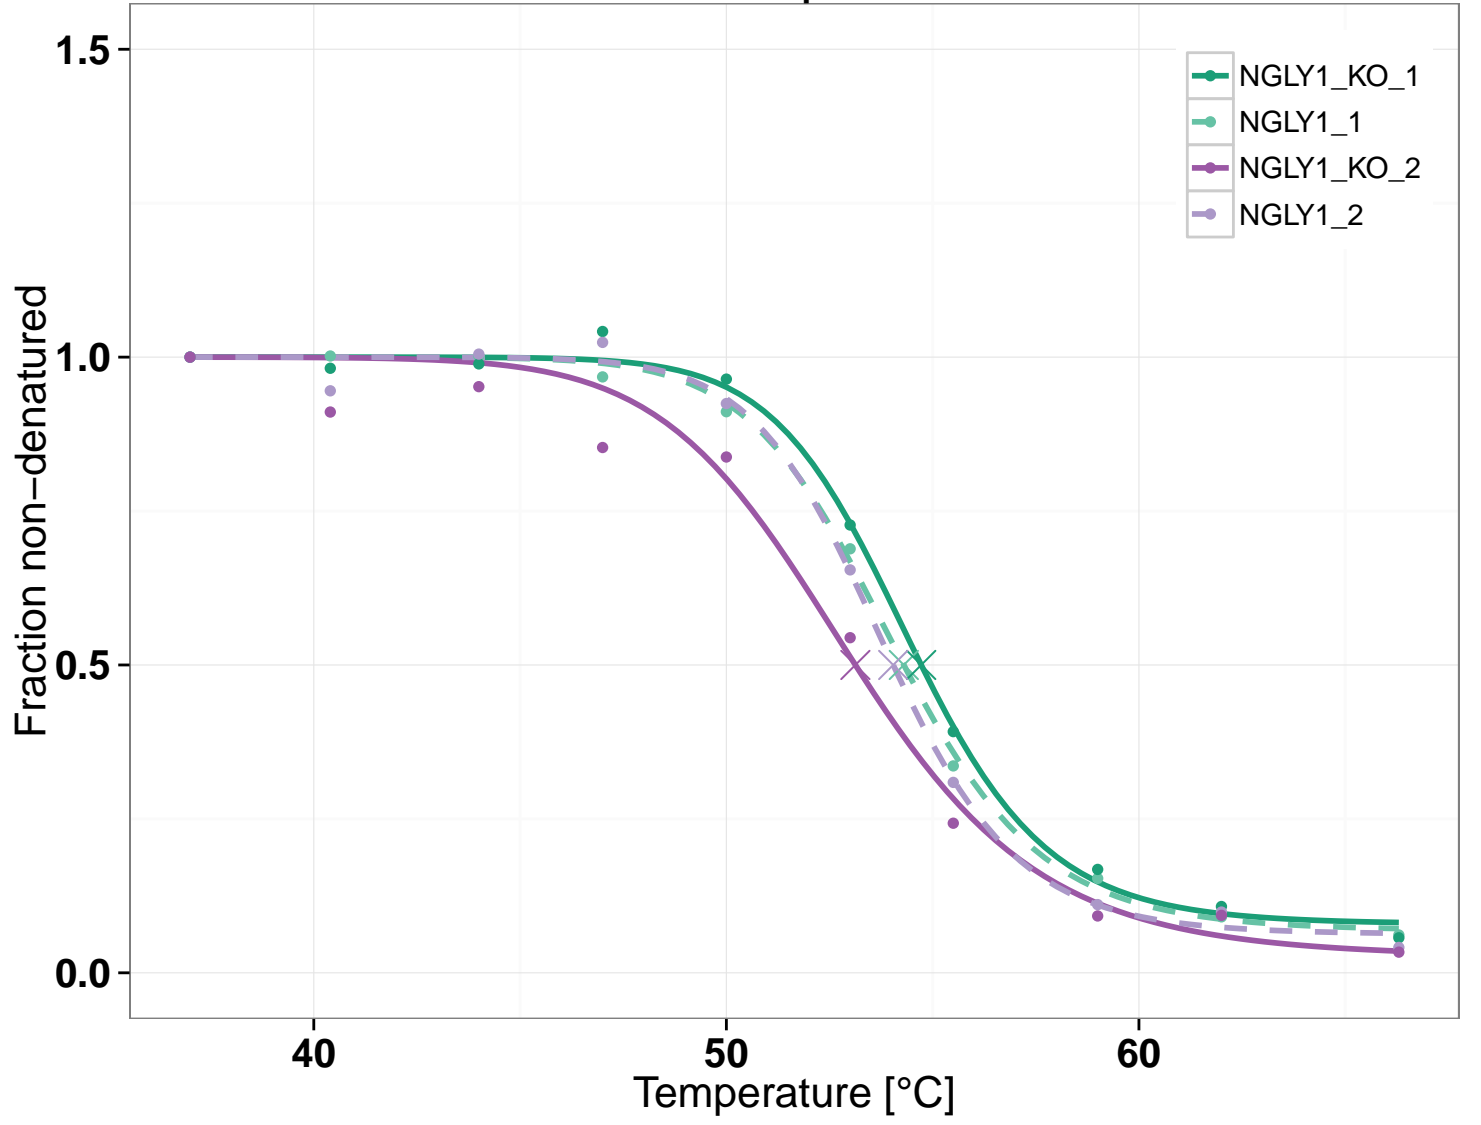

|            | meltPoint | slope | plateau | R2   |
|------------|-----------|-------|---------|------|
| NGLY1_KO_1 | 54.72     | -0.14 | 0.08    | 1    |
| NGLY1_1    | 54.3      | -0.13 | 0.07    | 1    |
| NGLY1_KO_2 | 53.13     | -0.11 | 0.03    | 0.98 |
| NGLY1_2    | 54.04     | -0.15 | 0.06    | 1    |

Supplement: Supplementary file 3484 [file 1]

IPI00514611.1|BCAP29

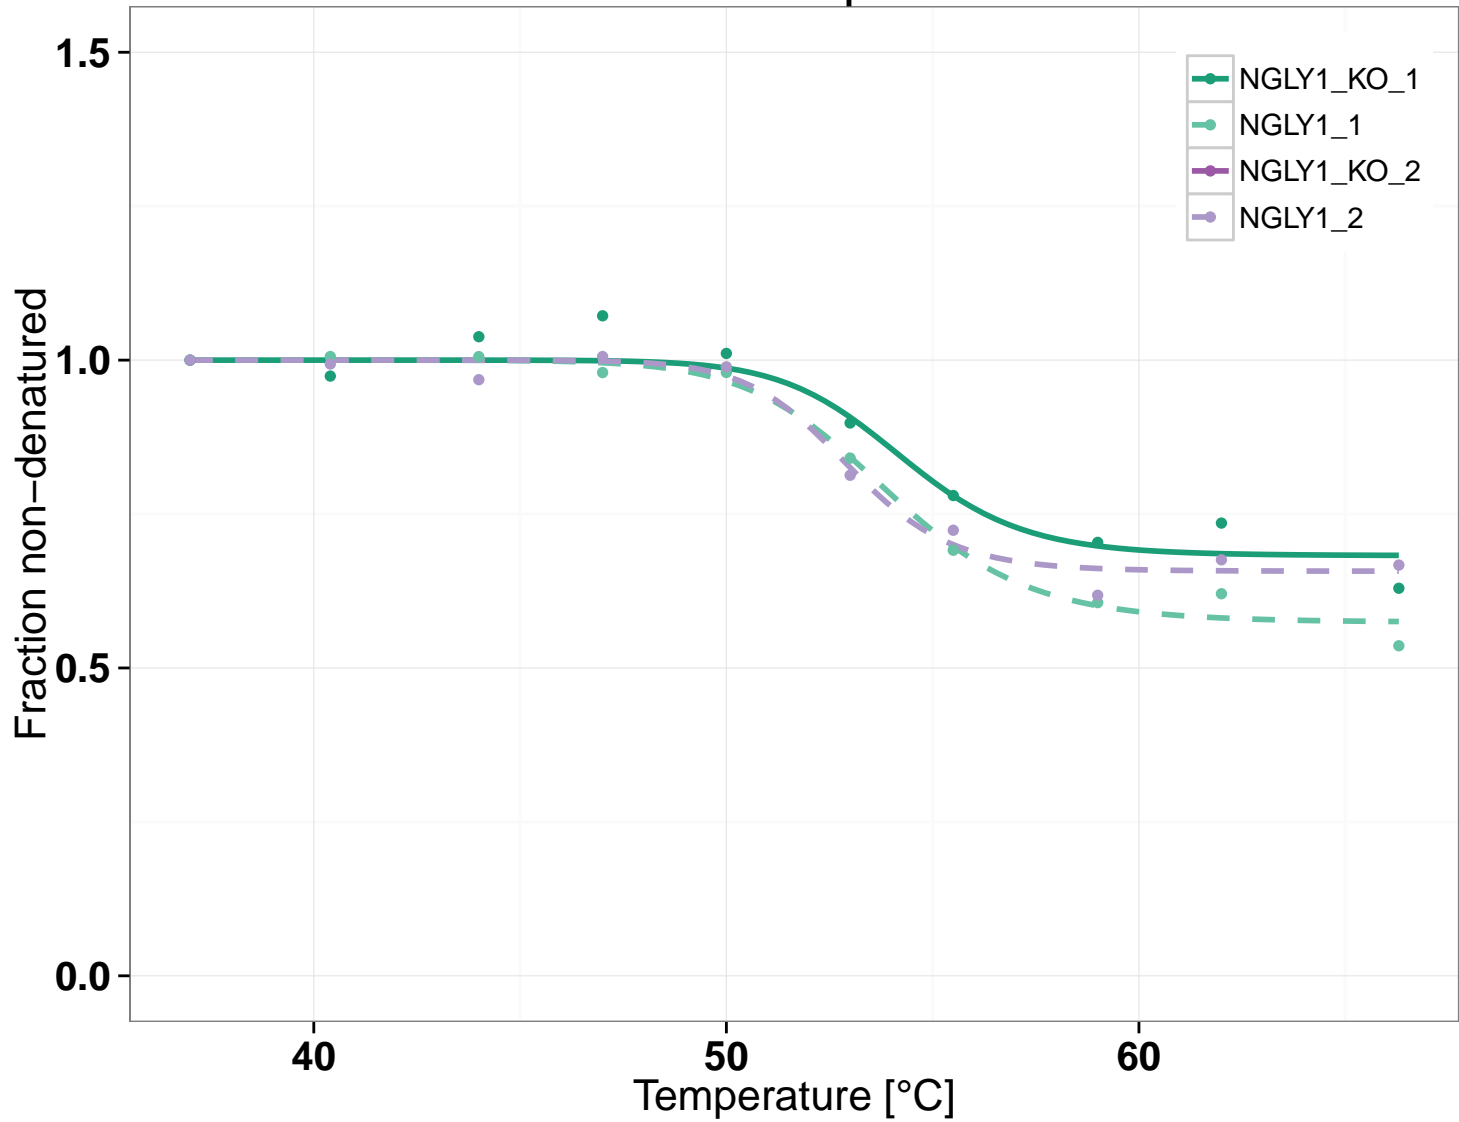

|            | meltPoint | slope  | plateau | R2   |
|------------|-----------|--------|---------|------|
| NGLY1_KO_1 | —         | -0.054 | 0.68    | 0.94 |
| NGLY1_1    | —         | -0.062 | 0.57    | 0.99 |
| NGLY1_KO_2 | —         | —      | —       | —    |
| NGLY1_2    | —         | -0.069 | 0.66    | 0.98 |

Supplement: Supplementary file 3485 [file 1]

IPI00013887.1|ST6GAL1

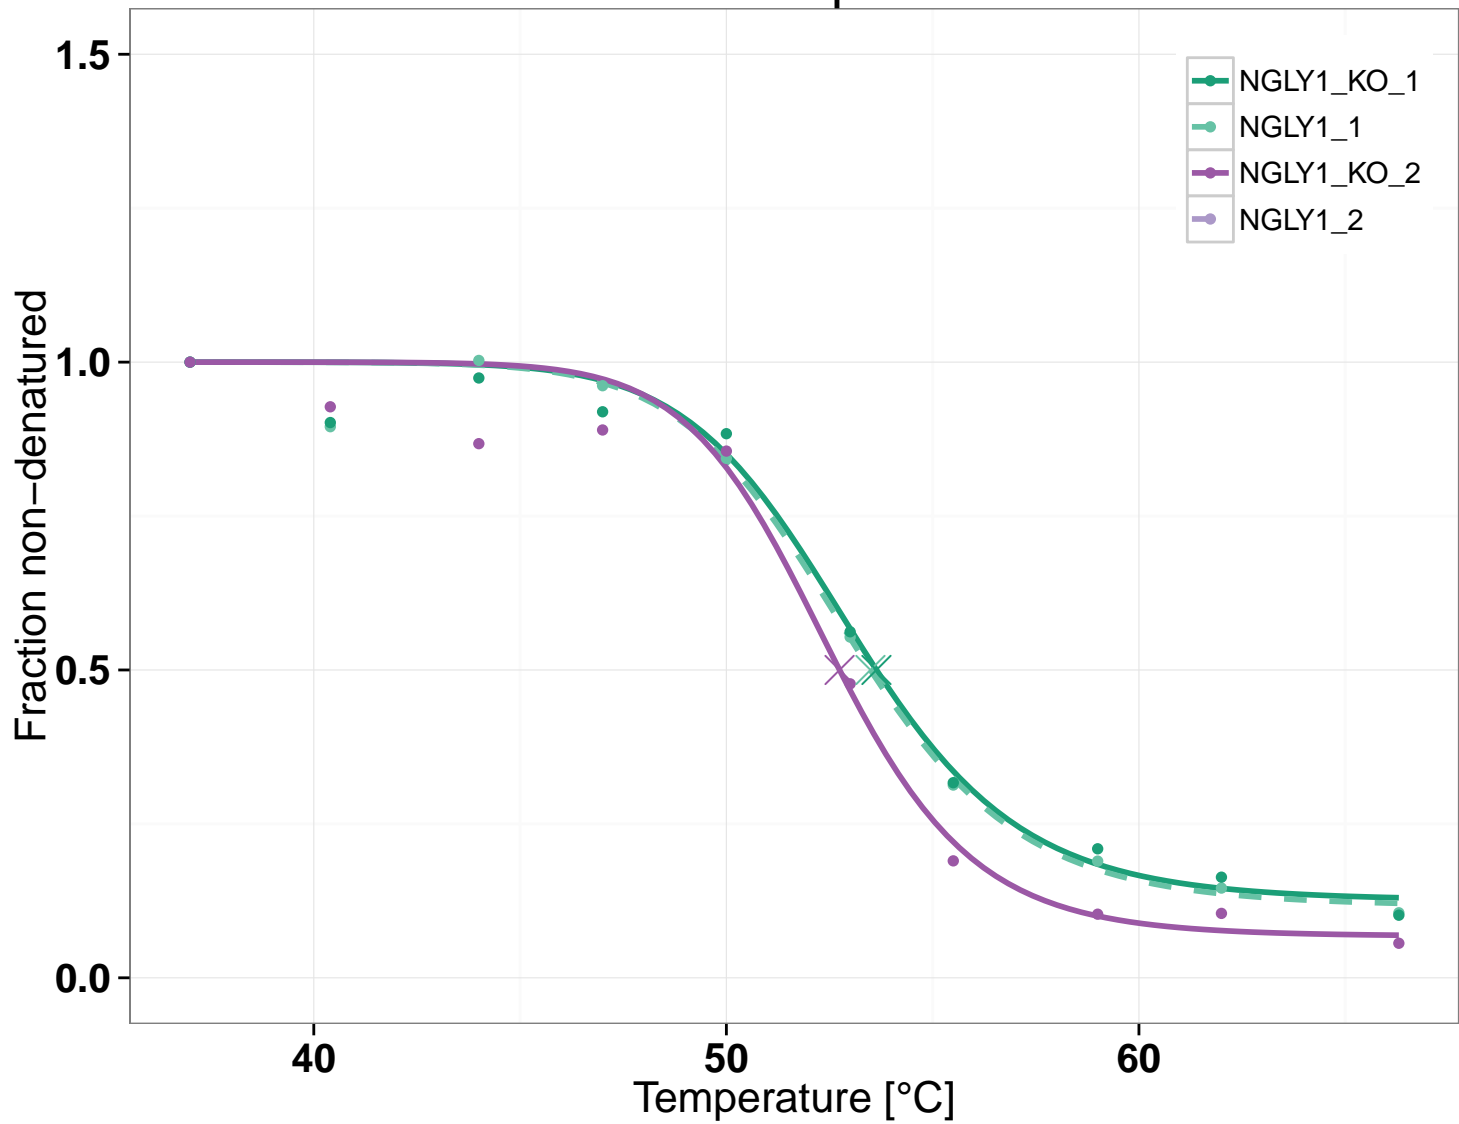

|            | meltPoint | slope | plateau | R2   |
|------------|-----------|-------|---------|------|
| NGLY1_KO_1 | 53.64     | -0.11 | 0.13    | 0.99 |
| NGLY1_1    | 53.49     | -0.11 | 0.12    | 0.99 |
| NGLY1_KO_2 | 52.74     | -0.13 | 0.07    | 0.98 |
| NGLY1_2    | -         | -     | -       | -    |

Supplement: Supplementary file 3486 [file 1]

# IPI00152981.1|ACAD9

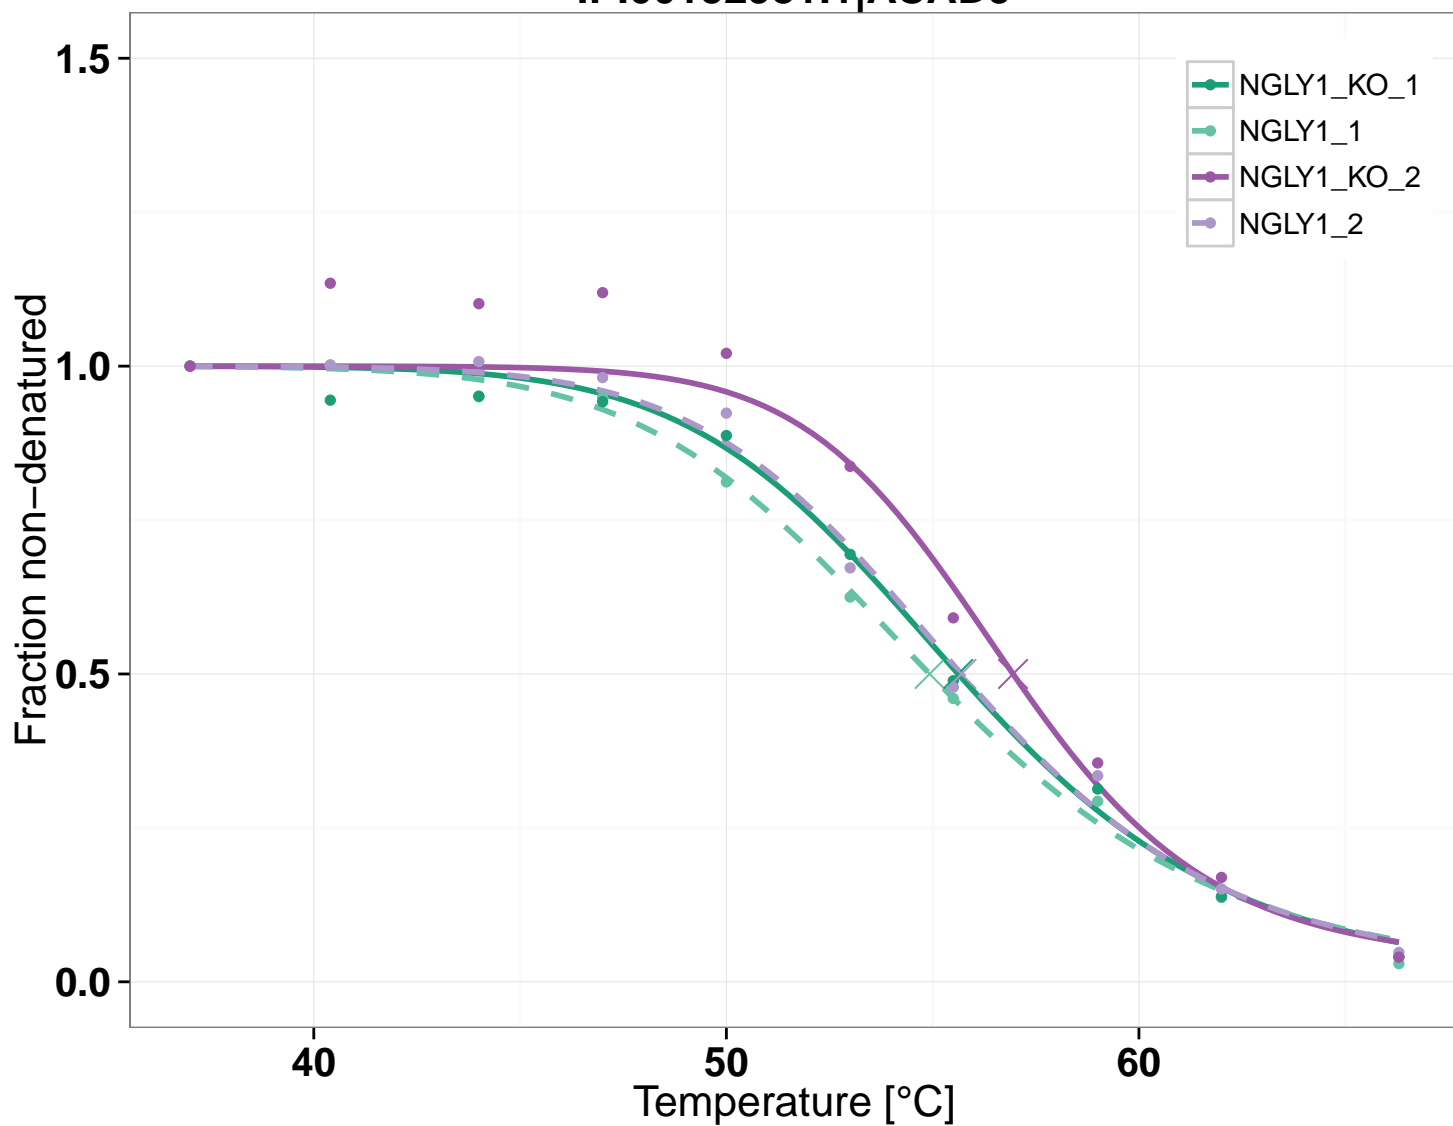

|            | meltPoint | slope  | plateau | R2   |
|------------|-----------|--------|---------|------|
| NGLY1_KO_1 | 55.62     | -0.076 | 0       | 0.99 |
| NGLY1_1    | 54.93     | -0.071 | 0       | 1    |
| NGLY1_KO_2 | 56.95     | -0.098 | 0.03    | 0.97 |
| NGLY1_2    | 55.7      | -0.078 | 0.01    | 0.99 |

Supplement: Supplementary file 3487 [file 1]

IPI00908578.1|B4DQ06\_HUMAN

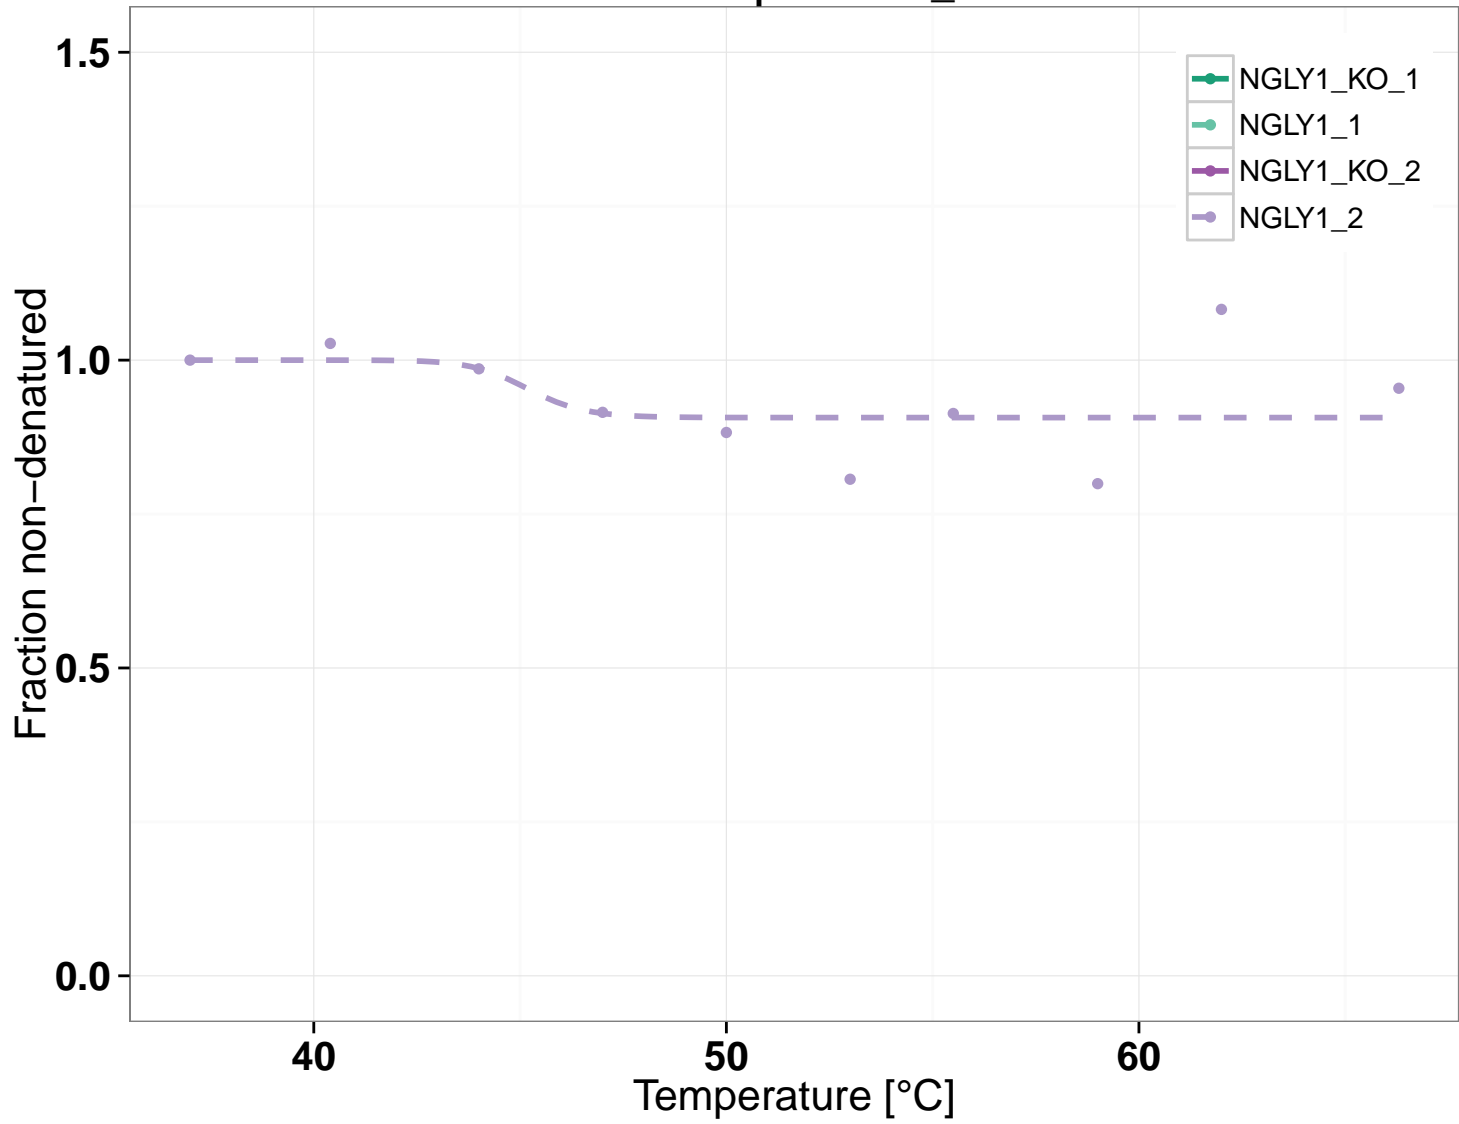

|            | meltPoint | slope  | plateau | R2   |
|------------|-----------|--------|---------|------|
| NGLY1_KO_1 | —         | —      | —       | —    |
| NGLY1_1    | —         | —      | —       | —    |
| NGLY1_KO_2 | —         | —      | —       | —    |
| NGLY1_2    | —         | -0.034 | 0.91    | 0.26 |

Supplement: Supplementary file 3488 [file 1]

# IPI00183018.3|MICAL2

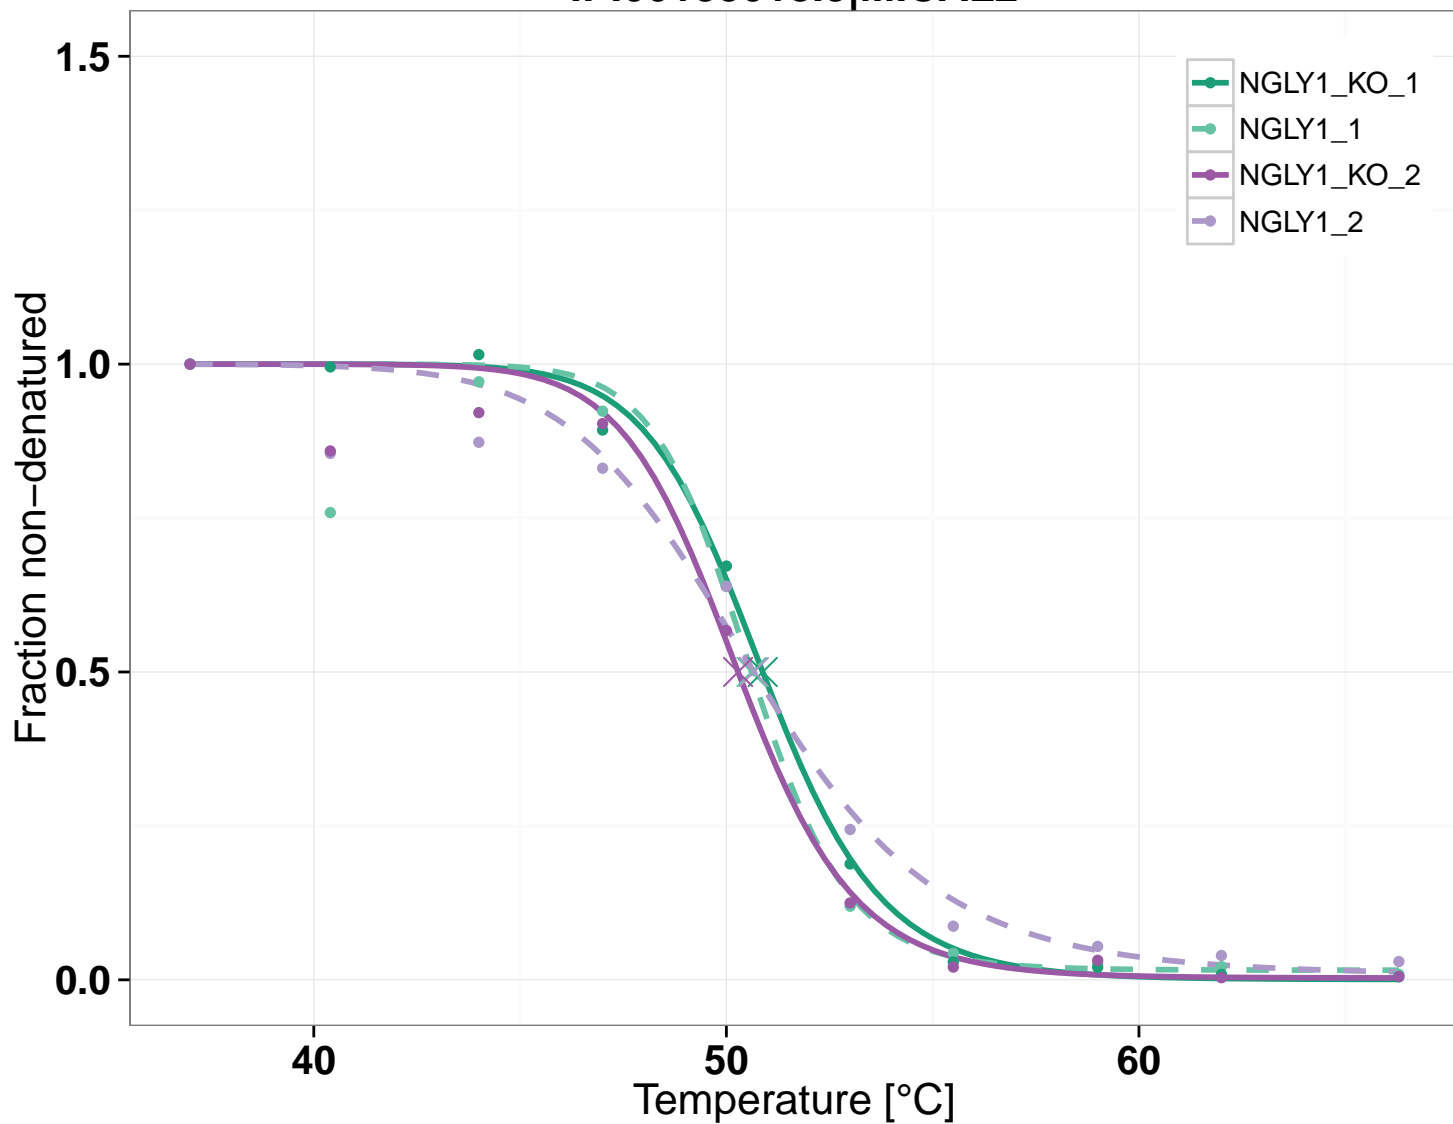

|            | meltPoint | slope | plateau | R2   |
|------------|-----------|-------|---------|------|
| NGLY1_KO_1 | 50.88     | -0.17 | 0       | 1    |
| NGLY1_1    | 50.61     | -0.21 | 0.02    | 0.97 |
| NGLY1_KO_2 | 50.28     | -0.18 | 0       | 0.98 |
| NGLY1_2    | 50.67     | -0.11 | 0.01    | 0.98 |

Supplement: Supplementary file 3489 [file 1]

# IPI00218895.6|POLR2G

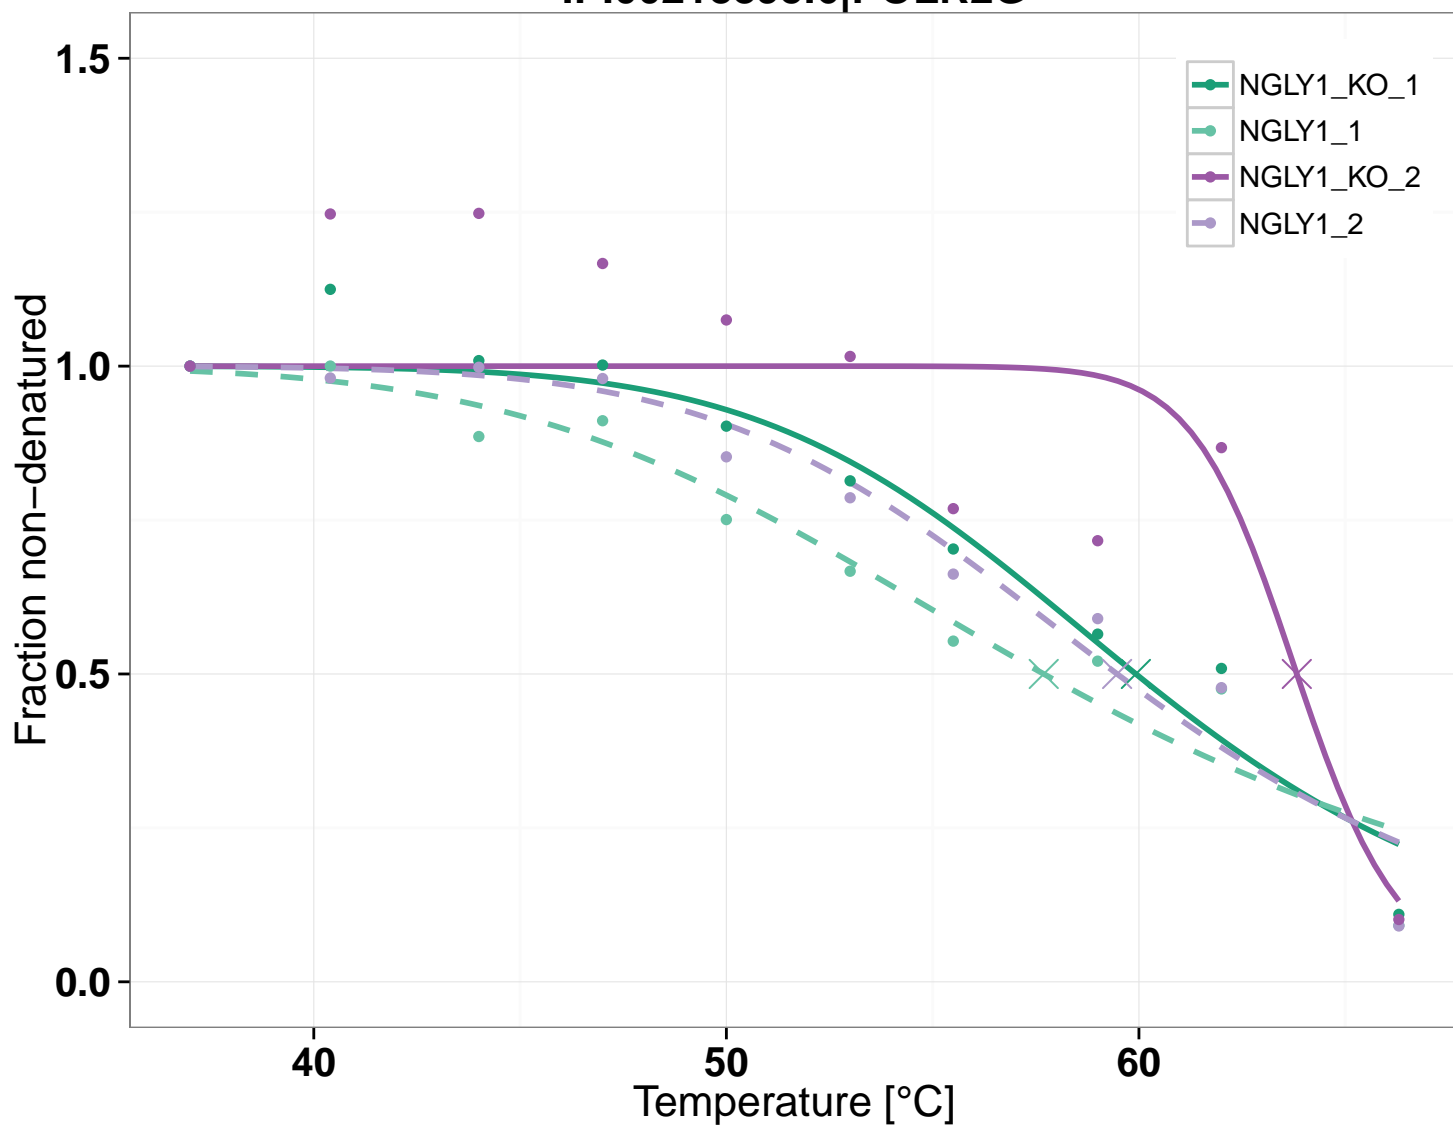

|            | meltPoint | slope  | plateau | R2   |
|------------|-----------|--------|---------|------|
| NGLY1_KO_1 | 59.93     | -0.055 | 0       | 0.95 |
| NGLY1_1    | 57.69     | -0.039 | 0       | 0.93 |
| NGLY1_KO_2 | 63.83     | -0.2   | 0       | 0.73 |
| NGLY1_2    | 59.47     | -0.052 | 0       | 0.95 |

Supplement: Supplementary file 3490 [file 1]

IPI00008986.1|SLC7A5

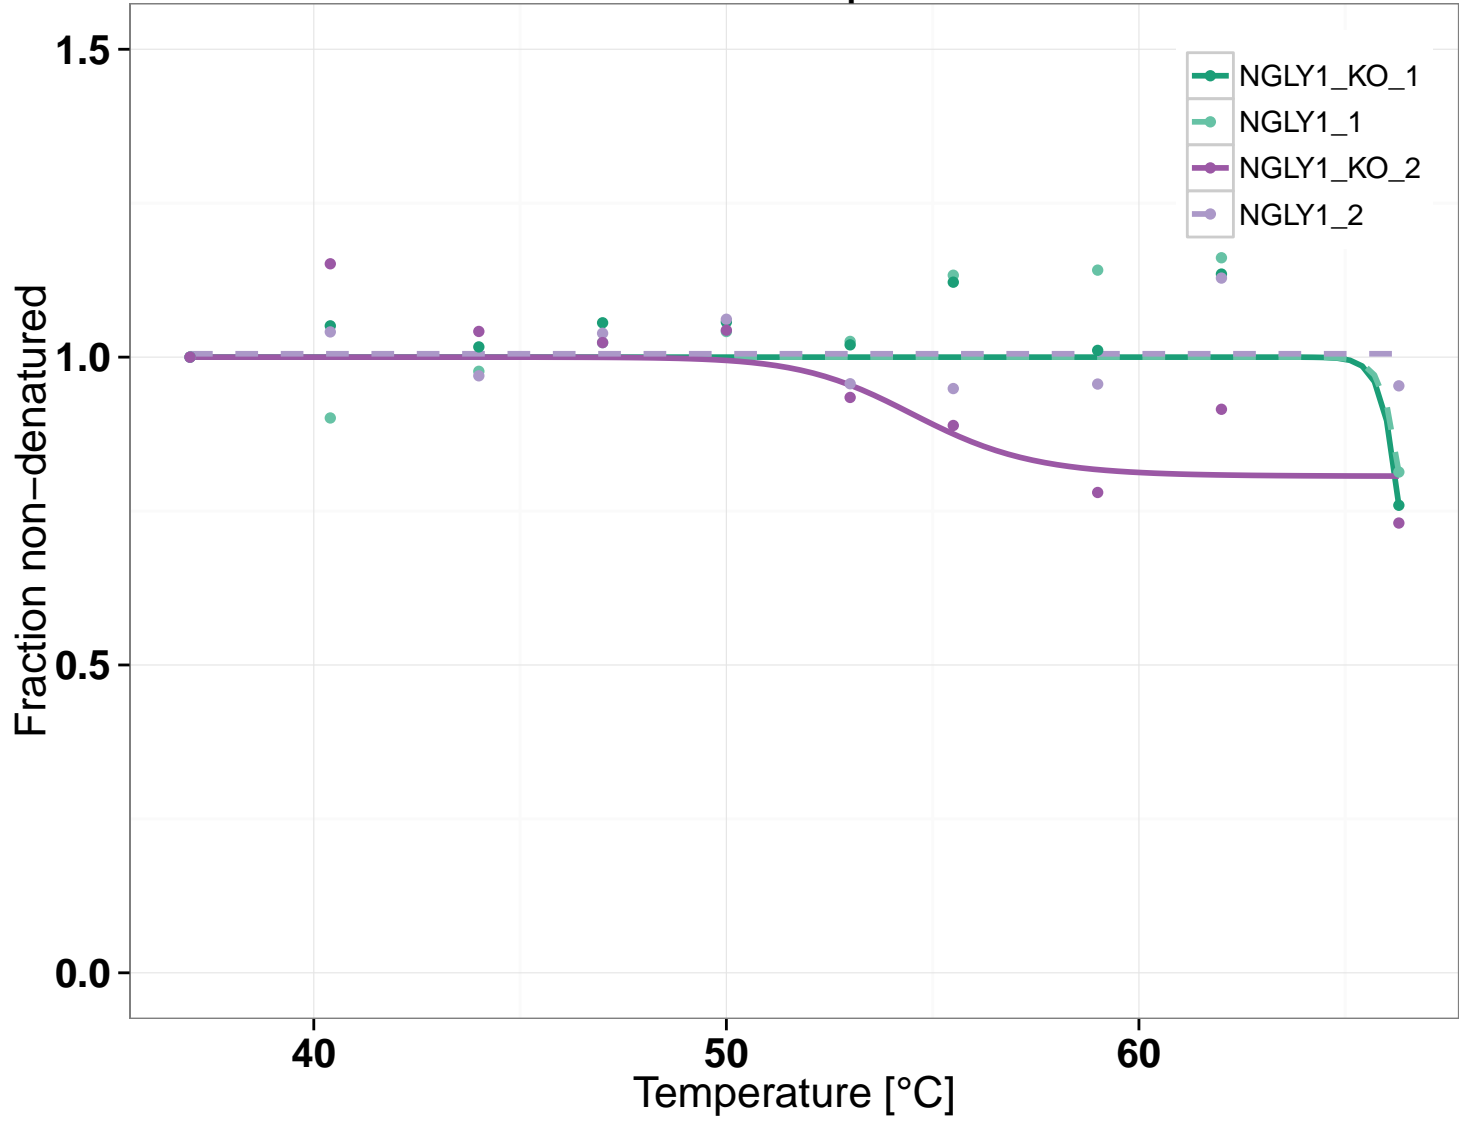

|            | meltPoint | slope  | plateau | R2   |
|------------|-----------|--------|---------|------|
| NGLY1_KO_1 | -         | -      | 0       | 0.55 |
| NGLY1_1    | -         | -      | 0       | 0.28 |
| NGLY1_KO_2 | -         | -0.034 | 0.81    | 0.68 |
| NGLY1_2    | -         | -      | 1.01    | 0    |

Supplement: Supplementary file 3491 [file 1]

# IPI00305698.2|GGCX

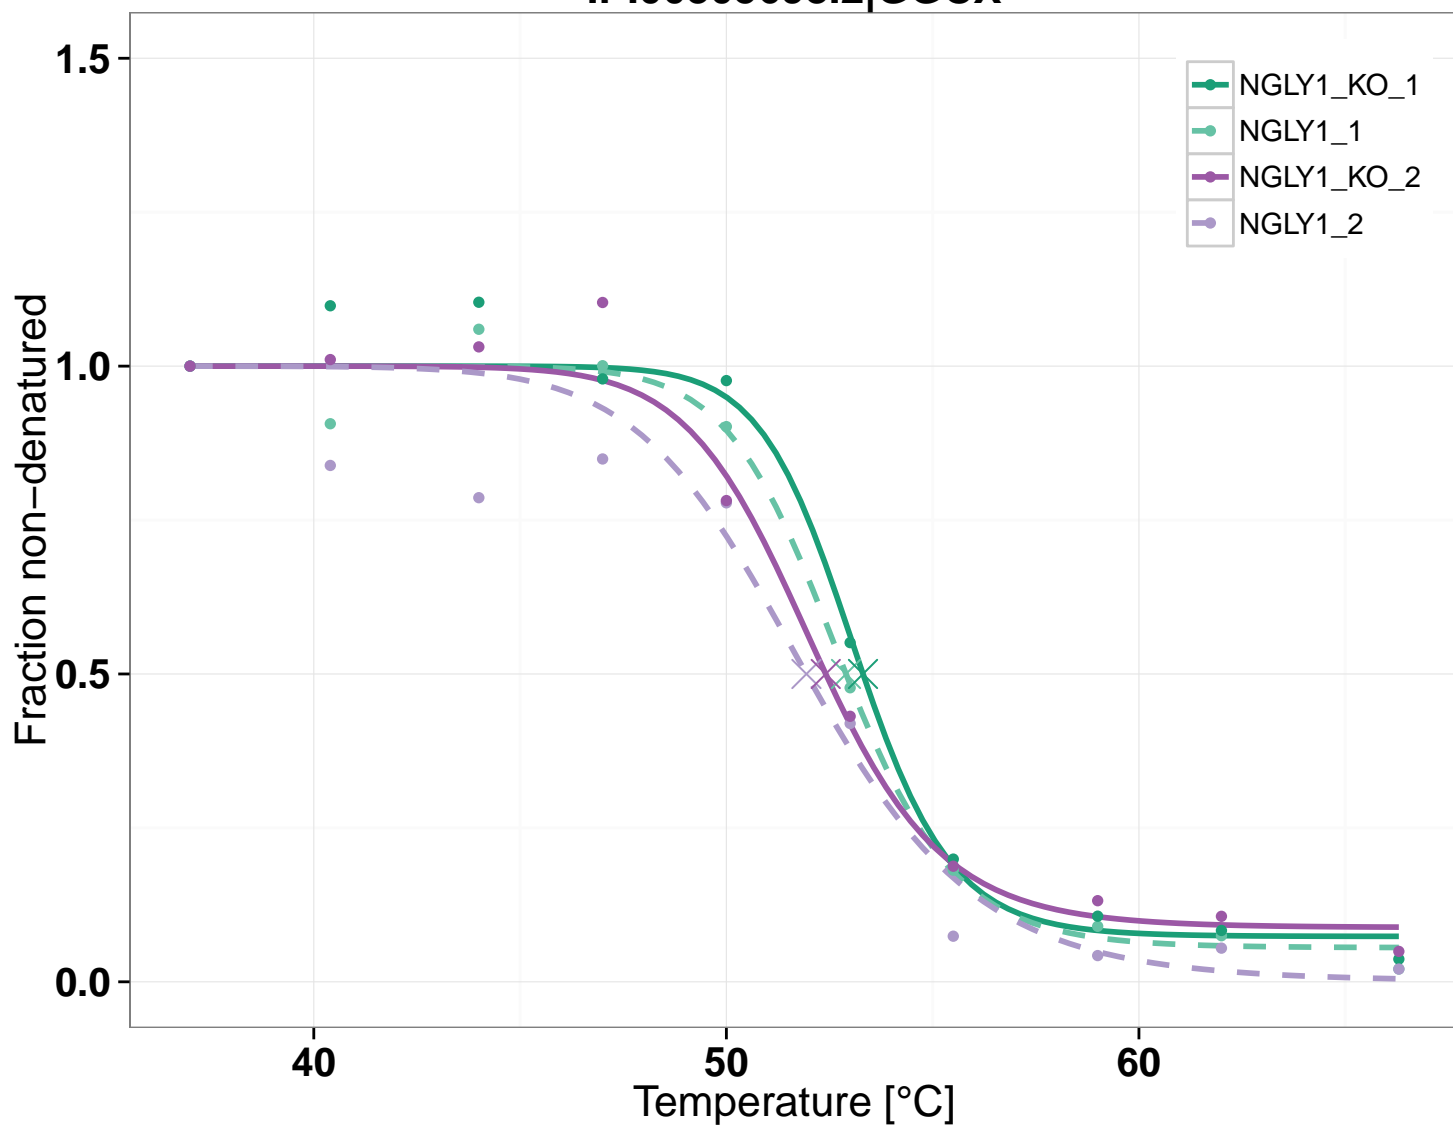

|            | meltPoint | slope | plateau | R2   |
|------------|-----------|-------|---------|------|
| NGLY1_KO_1 | 53.31     | -0.2  | 0.07    | 0.99 |
| NGLY1_1    | 52.9      | -0.17 | 0.06    | 0.99 |
| NGLY1_KO_2 | 52.41     | -0.15 | 0.09    | 0.99 |
| NGLY1_2    | 51.94     | -0.12 | 0       | 0.94 |

Supplement: Supplementary file 3492 [file 1]

IPI00103925.2|FKSG27

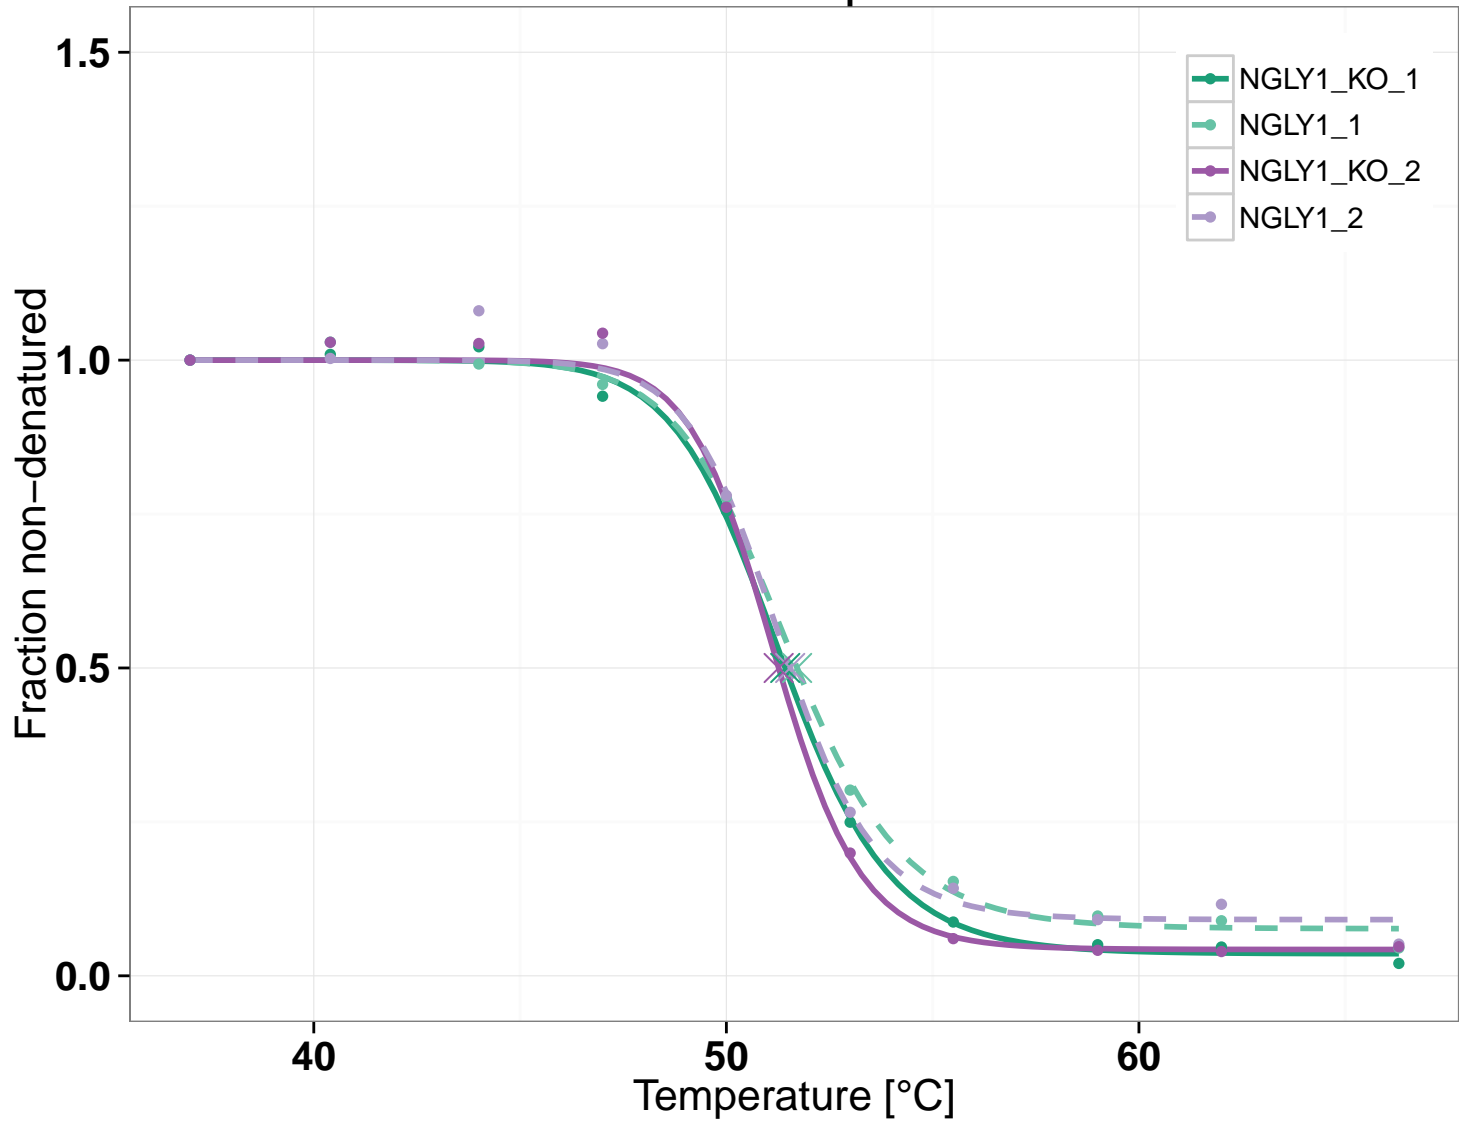

|            | meltPoint | slope | plateau | R2   |
|------------|-----------|-------|---------|------|
| NGLY1_KO_1 | 51.43     | -0.18 | 0.04    | 1    |
| NGLY1_1    | 51.72     | -0.17 | 0.08    | 1    |
| NGLY1_KO_2 | 51.27     | -0.23 | 0.04    | 1    |
| NGLY1_2    | 51.55     | -0.2  | 0.09    | 0.99 |

Supplement: Supplementary file 3493 [file 1]

IPI00855713.1|RPP21

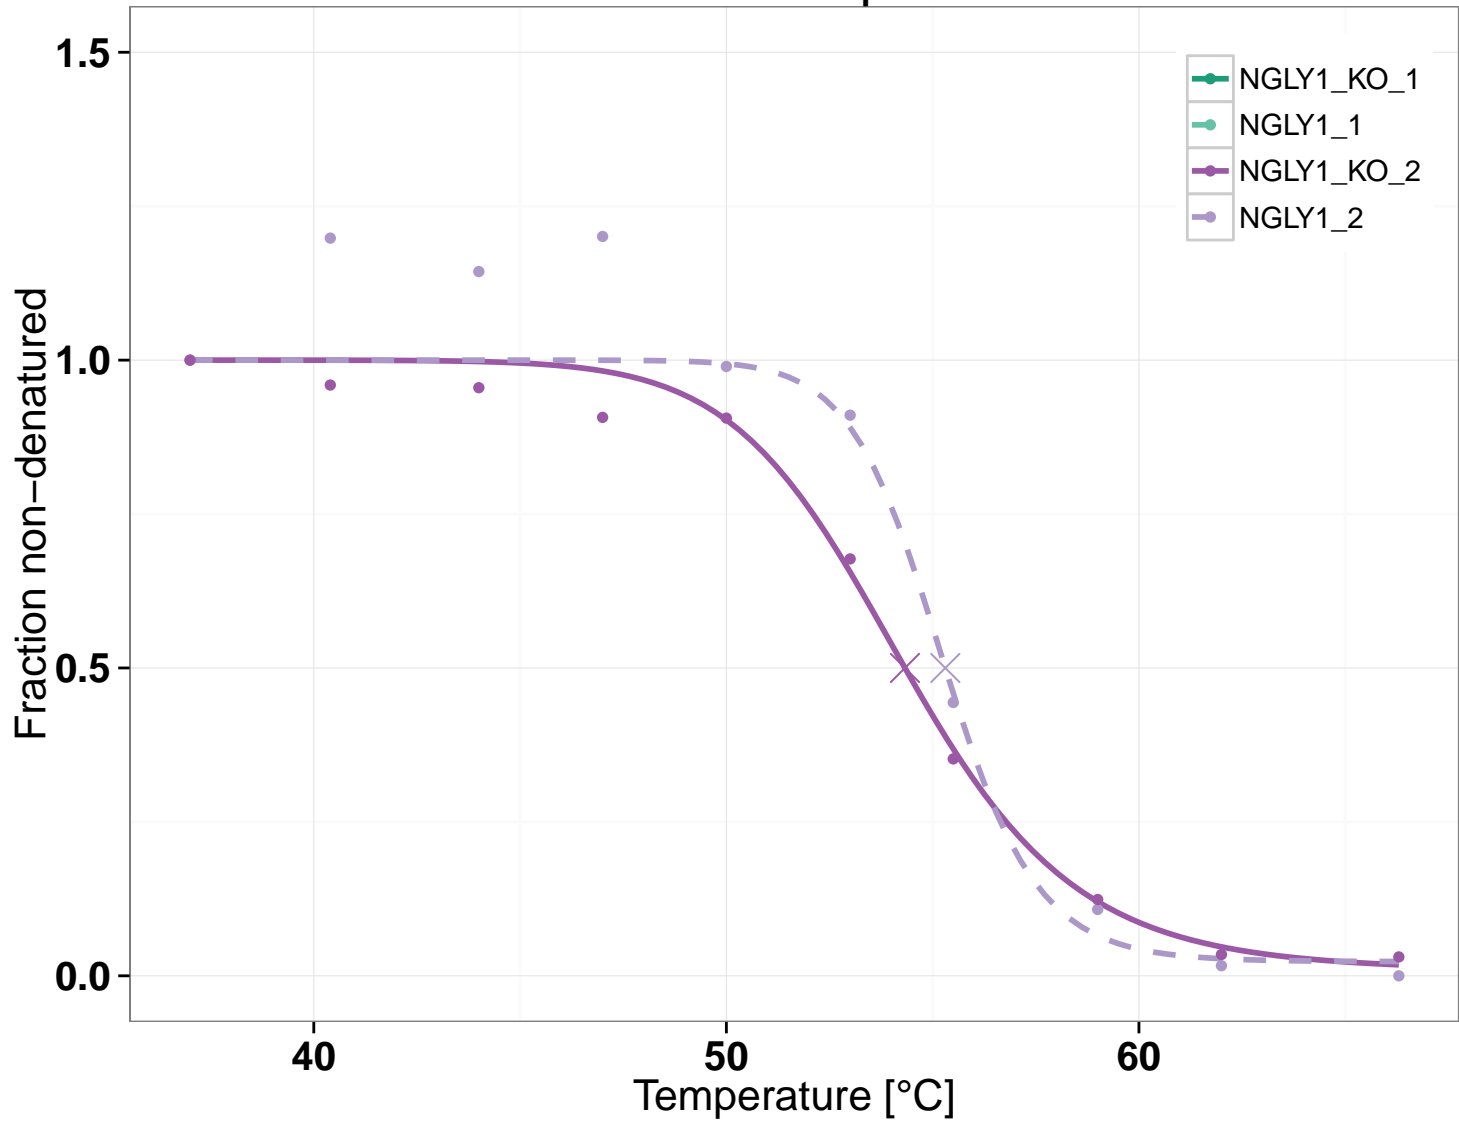

|            | meltPoint | slope | plateau | R2   |
|------------|-----------|-------|---------|------|
| NGLY1_KO_1 | —         | —     | —       | —    |
| NGLY1_1    | —         | —     | —       | —    |
| NGLY1_KO_2 | 54.33     | -0.12 | 0.01    | 0.99 |
| NGLY1_2    | 55.31     | -0.22 | 0.02    | 0.95 |

Supplement: Supplementary file 3494 [file 1]

IPI00065276.2|ASPSCR1

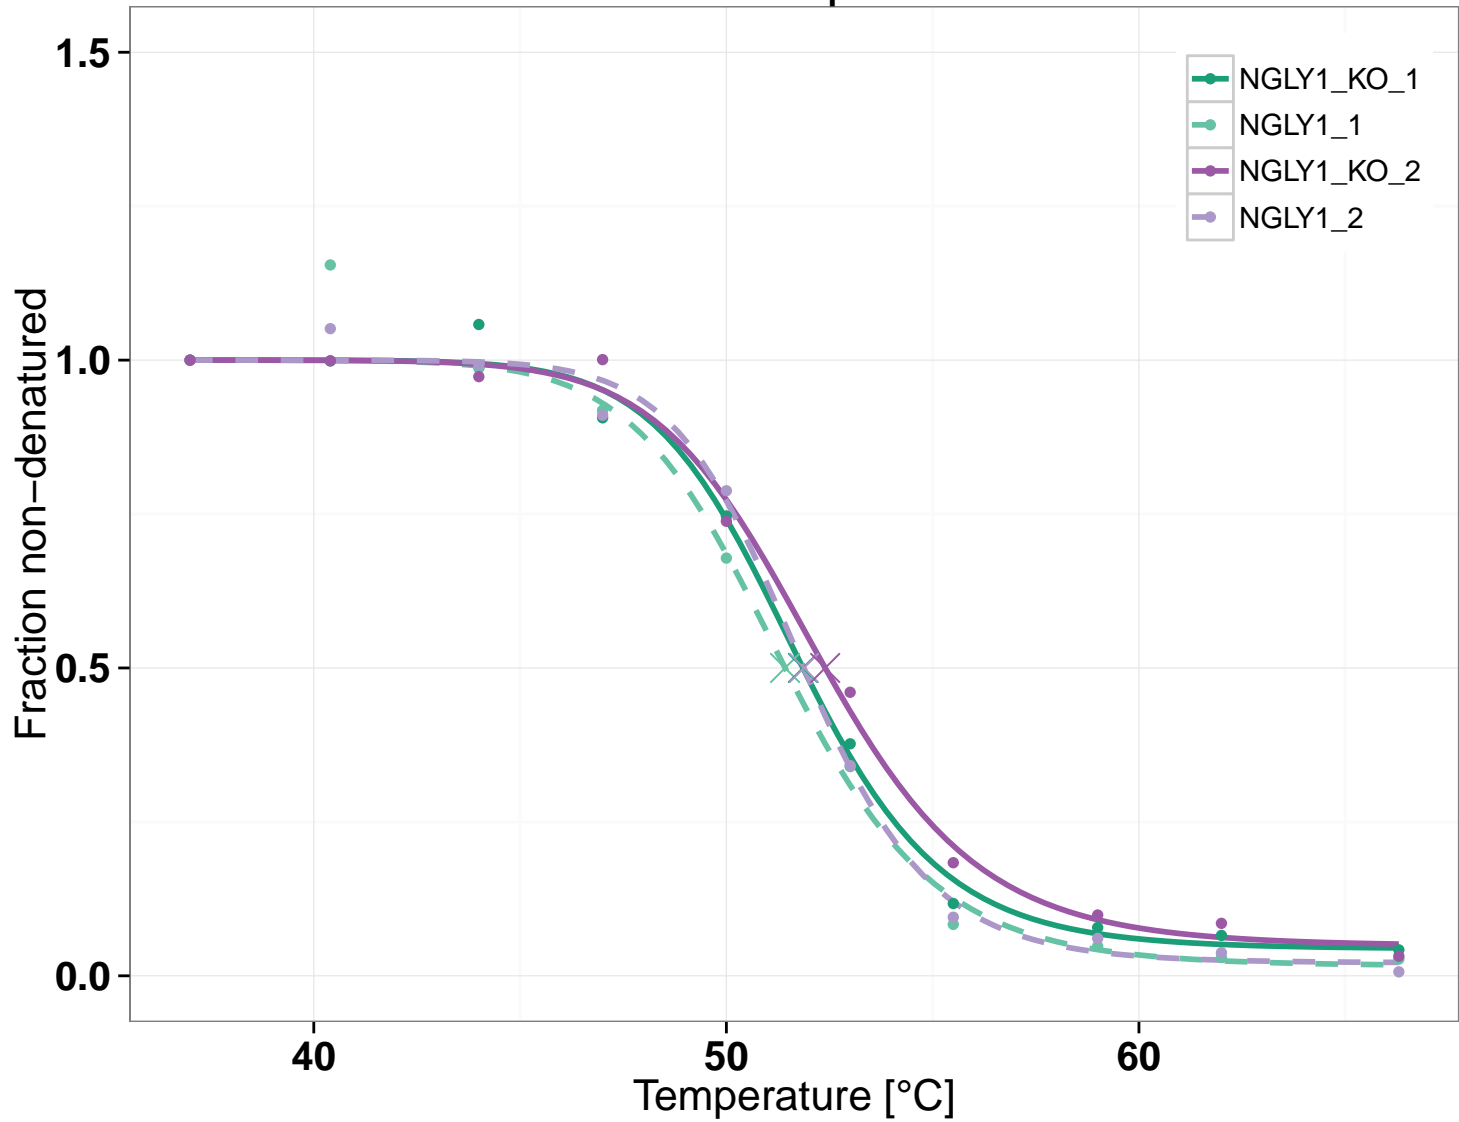

|            | meltPoint | slope | plateau | R2   |
|------------|-----------|-------|---------|------|
| NGLY1_KO_1 | 51.86     | -0.14 | 0.04    | 1    |
| NGLY1_1    | 51.42     | -0.13 | 0.02    | 0.99 |
| NGLY1_KO_2 | 52.4      | -0.12 | 0.05    | 1    |
| NGLY1_2    | 51.88     | -0.16 | 0.02    | 1    |

Supplement: Supplementary file 3495 [file 1]

IPI00016510.2|RPUSD1

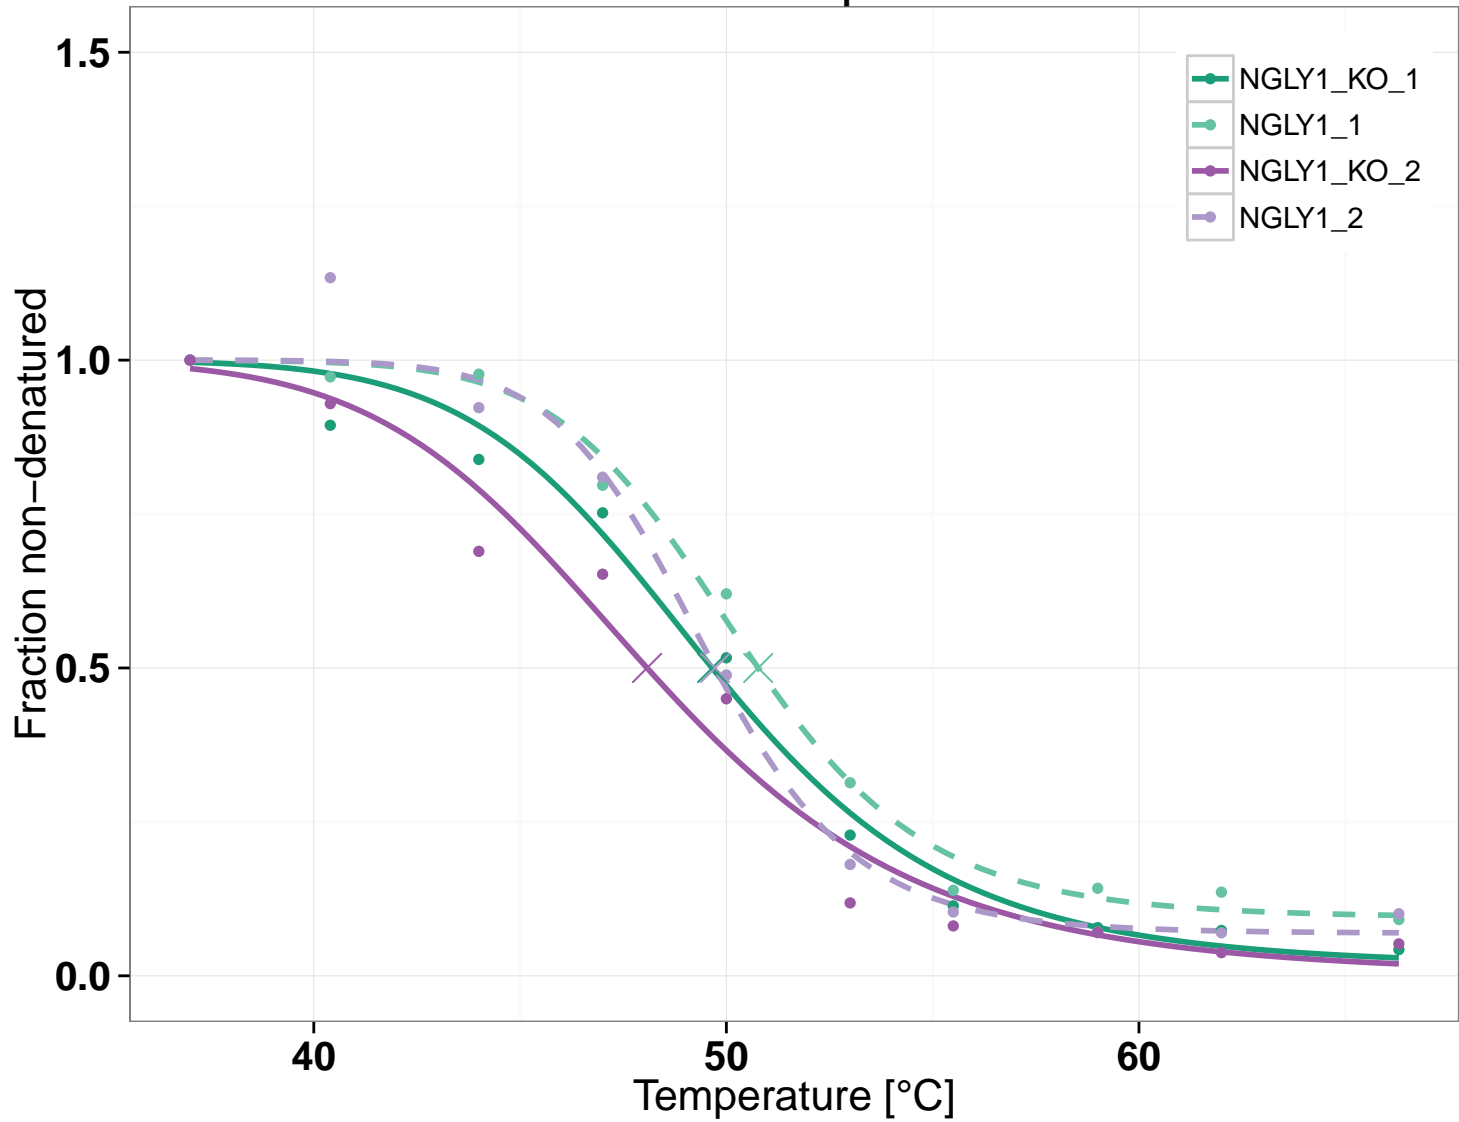

|            | meltPoint | slope  | plateau | R2   |
|------------|-----------|--------|---------|------|
| NGLY1_KO_1 | 49.66     | -0.084 | 0.01    | 0.99 |
| NGLY1_1    | 50.77     | -0.1   | 0.09    | 0.99 |
| NGLY1_KO_2 | 48.08     | -0.076 | 0       | 0.97 |
| NGLY1_2    | 49.73     | -0.13  | 0.07    | 0.99 |

Supplement: Supplementary file 3496 [file 1]

# IPI00845516.1|ITFG3

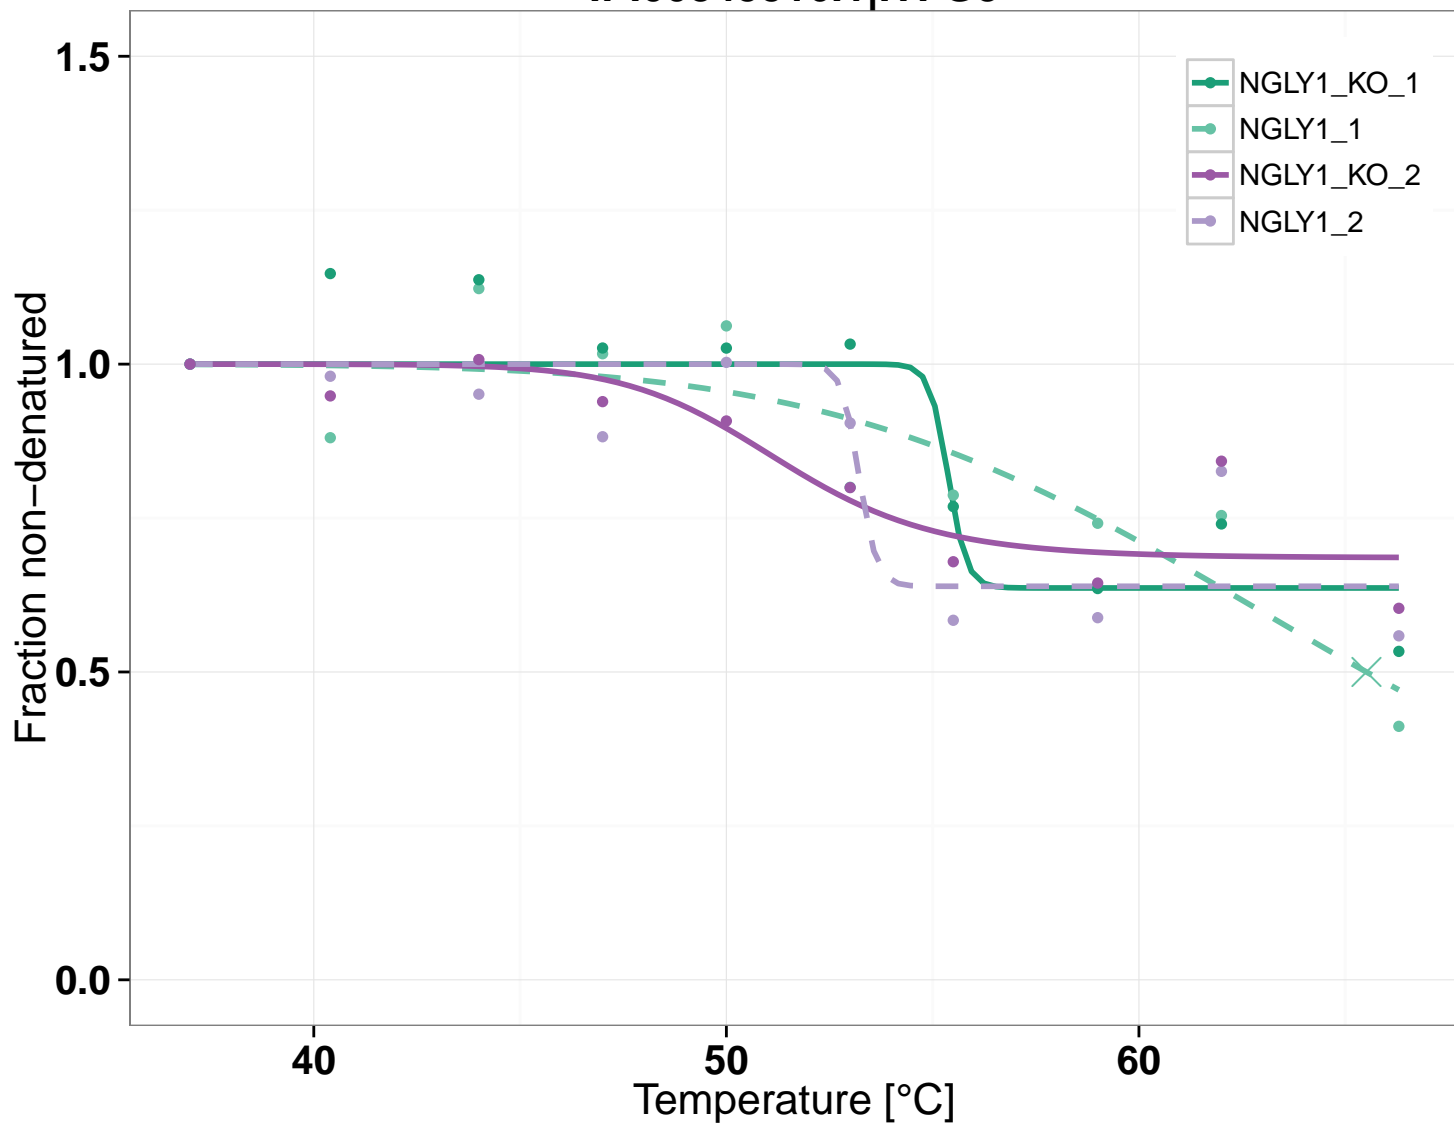

|            | meltPoint | slope  | plateau | R2   |
|------------|-----------|--------|---------|------|
| NGLY1_KO_1 | –         | –0.41  | 0.64    | 0.85 |
| NGLY1_1    | 65.51     | –0.039 | 0       | 0.8  |
| NGLY1_KO_2 | –         | –0.042 | 0.69    | 0.8  |
| NGLY1_2    | –         | –0.42  | 0.64    | 0.79 |

Supplement: Supplementary file 3497 [file 1]

IPI00747001.2|FAM57A

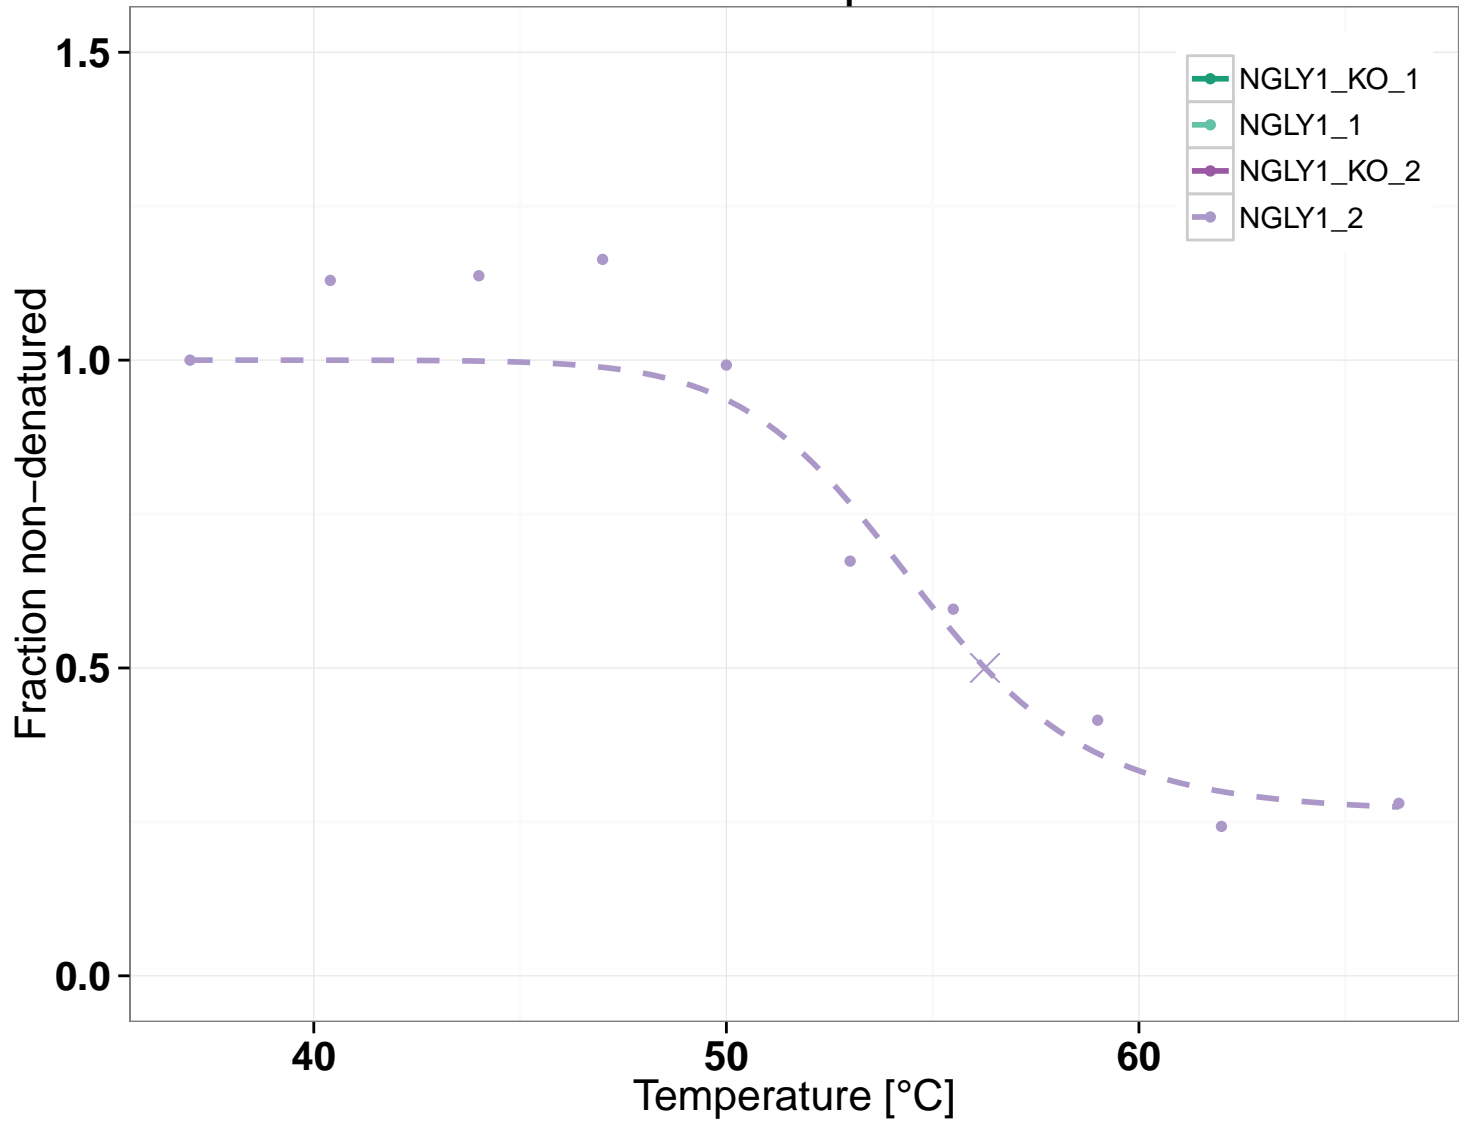

|            | meltPoint | slope  | plateau | R2   |
|------------|-----------|--------|---------|------|
| NGLY1_KO_1 | —         | —      | —       | —    |
| NGLY1_1    | —         | —      | —       | —    |
| NGLY1_KO_2 | —         | —      | —       | —    |
| NGLY1_2    | 56.27     | −0.086 | 0.27    | 0.93 |

Supplement: Supplementary file 3498 [file 1]

# IPI00032808.1|RAB3D

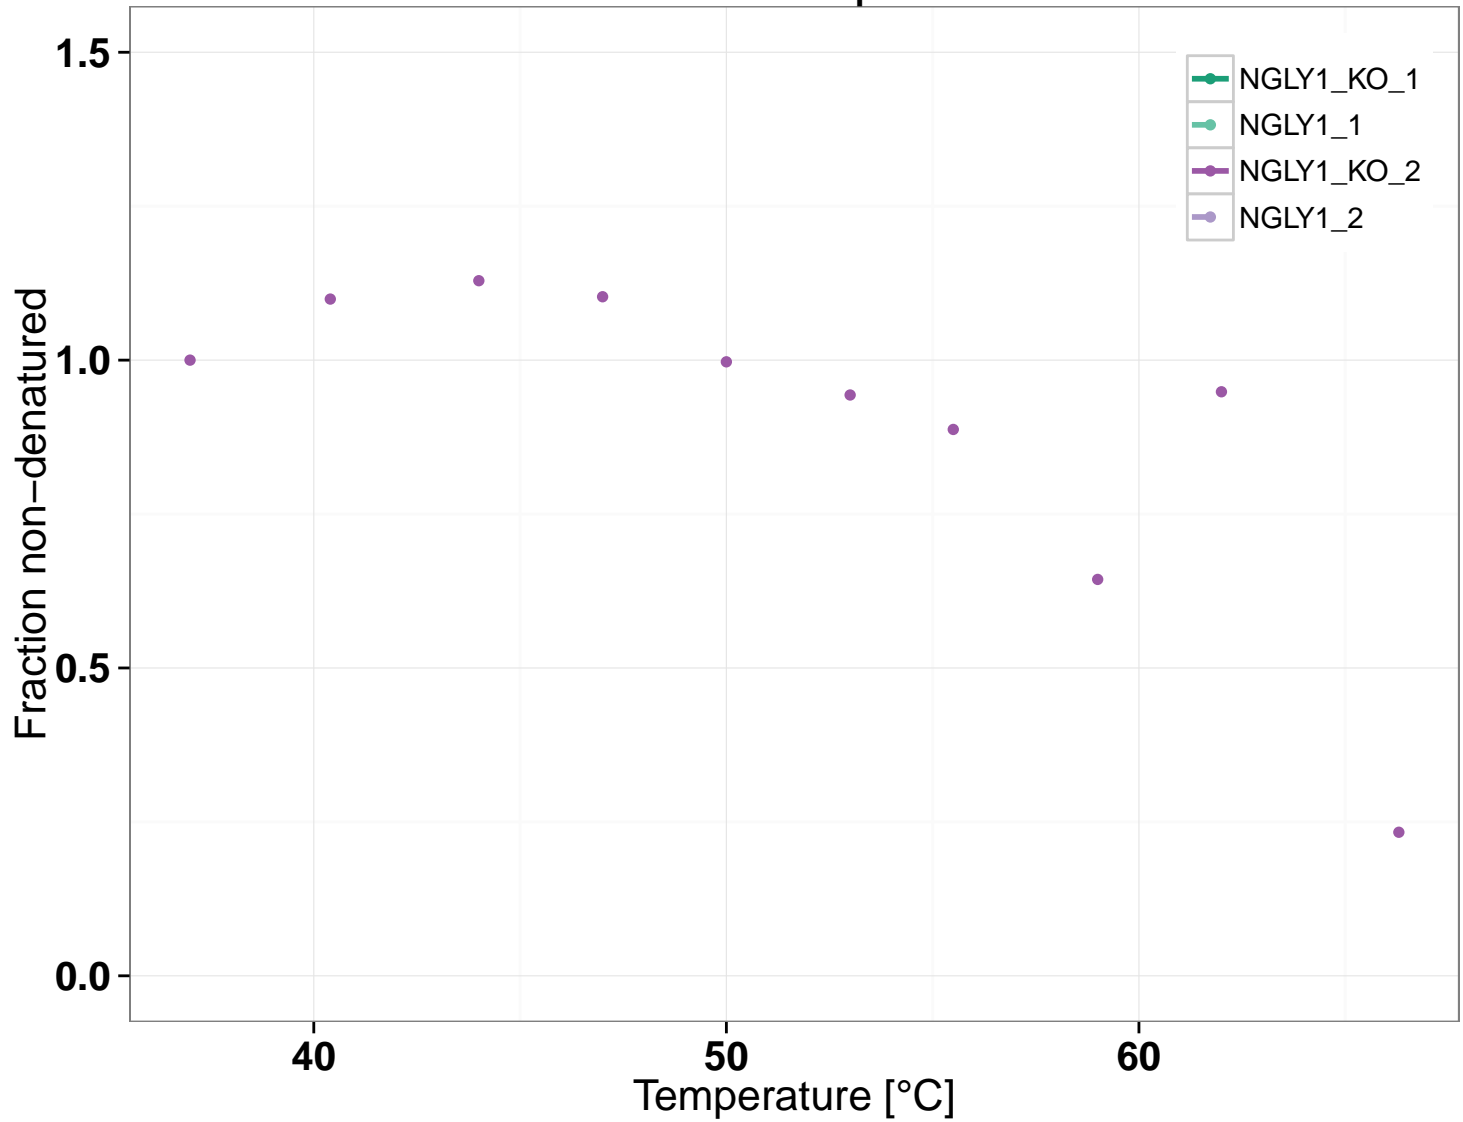

|            | meltPoint | slope | plateau | R2 |
|------------|-----------|-------|---------|----|
| NGLY1_KO_1 | —         | —     | —       | —  |
| NGLY1_1    | —         | —     | —       | —  |
| NGLY1_KO_2 | —         | —     | —       | —  |
| NGLY1_2    | —         | —     | —       | —  |

Supplement: Supplementary file 3499 [file 1]

# IPI00011420.2|BAK1

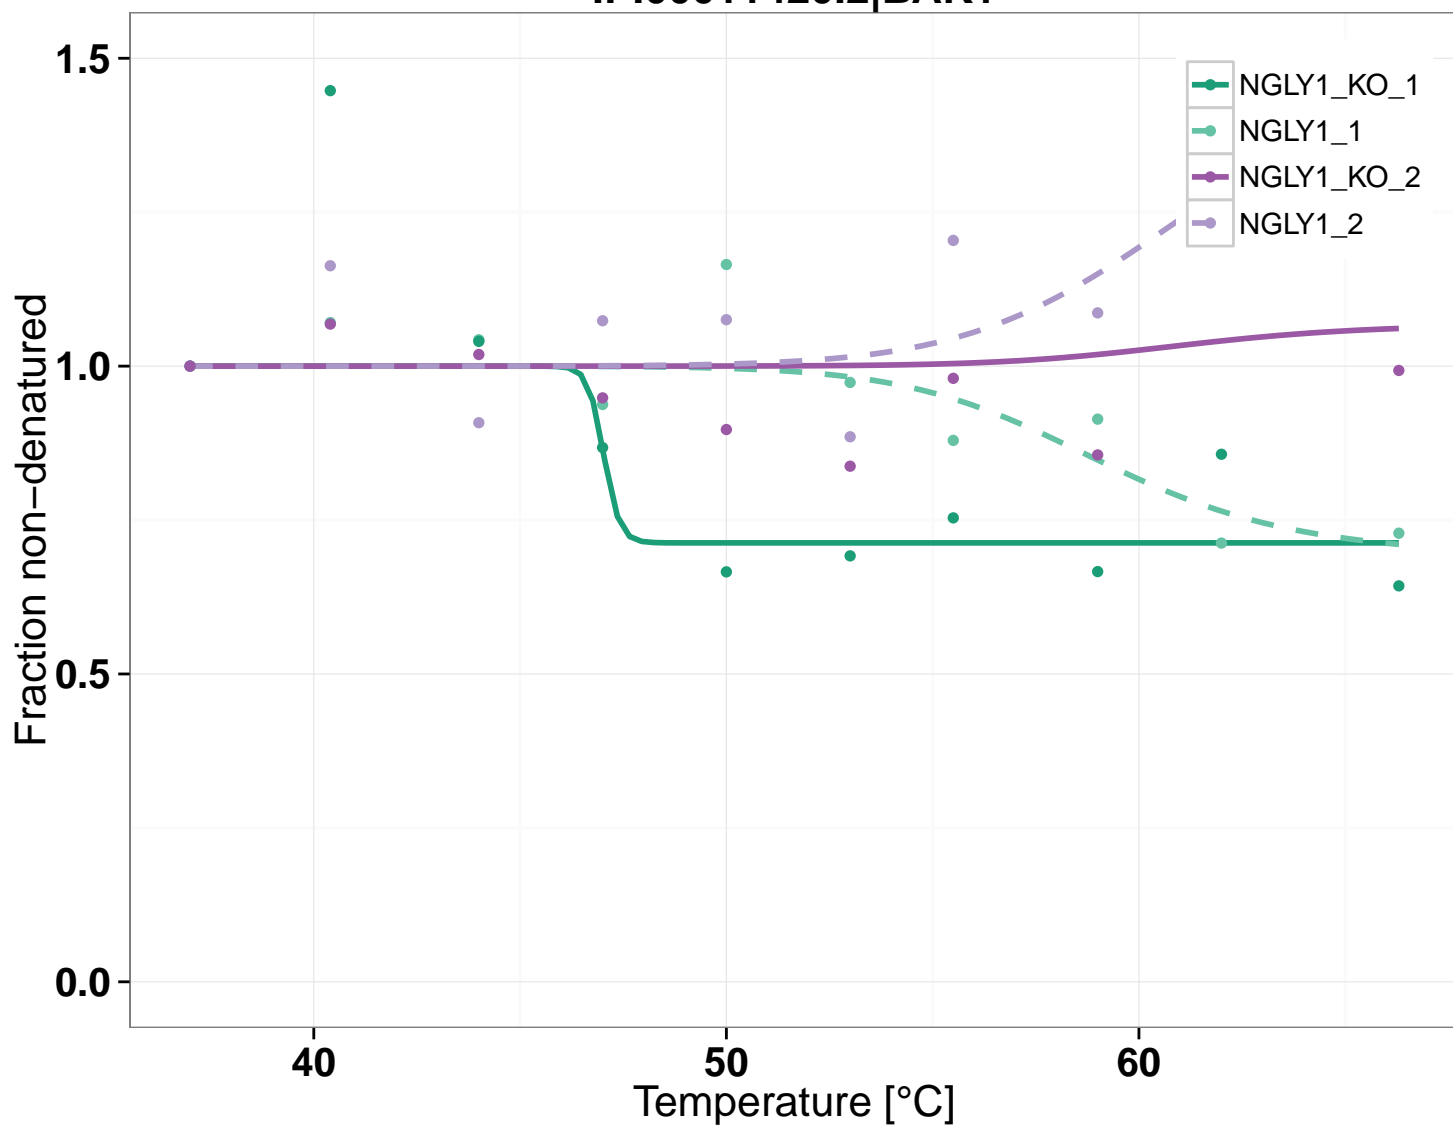

|            | meltPoint | slope  | plateau | R2   |
|------------|-----------|--------|---------|------|
| NGLY1_KO_1 | —         | −0.38  | 0.71    | 0.58 |
| NGLY1_1    | —         | −0.032 | 0.69    | 0.72 |
| NGLY1_KO_2 | —         | 0.0077 | 1.07    | 0.03 |
| NGLY1_2    | —         | 0.046  | 1.5     | 0.65 |

Supplement: Supplementary file 3500 [file 1]

IPI00478300.2|LSM14A

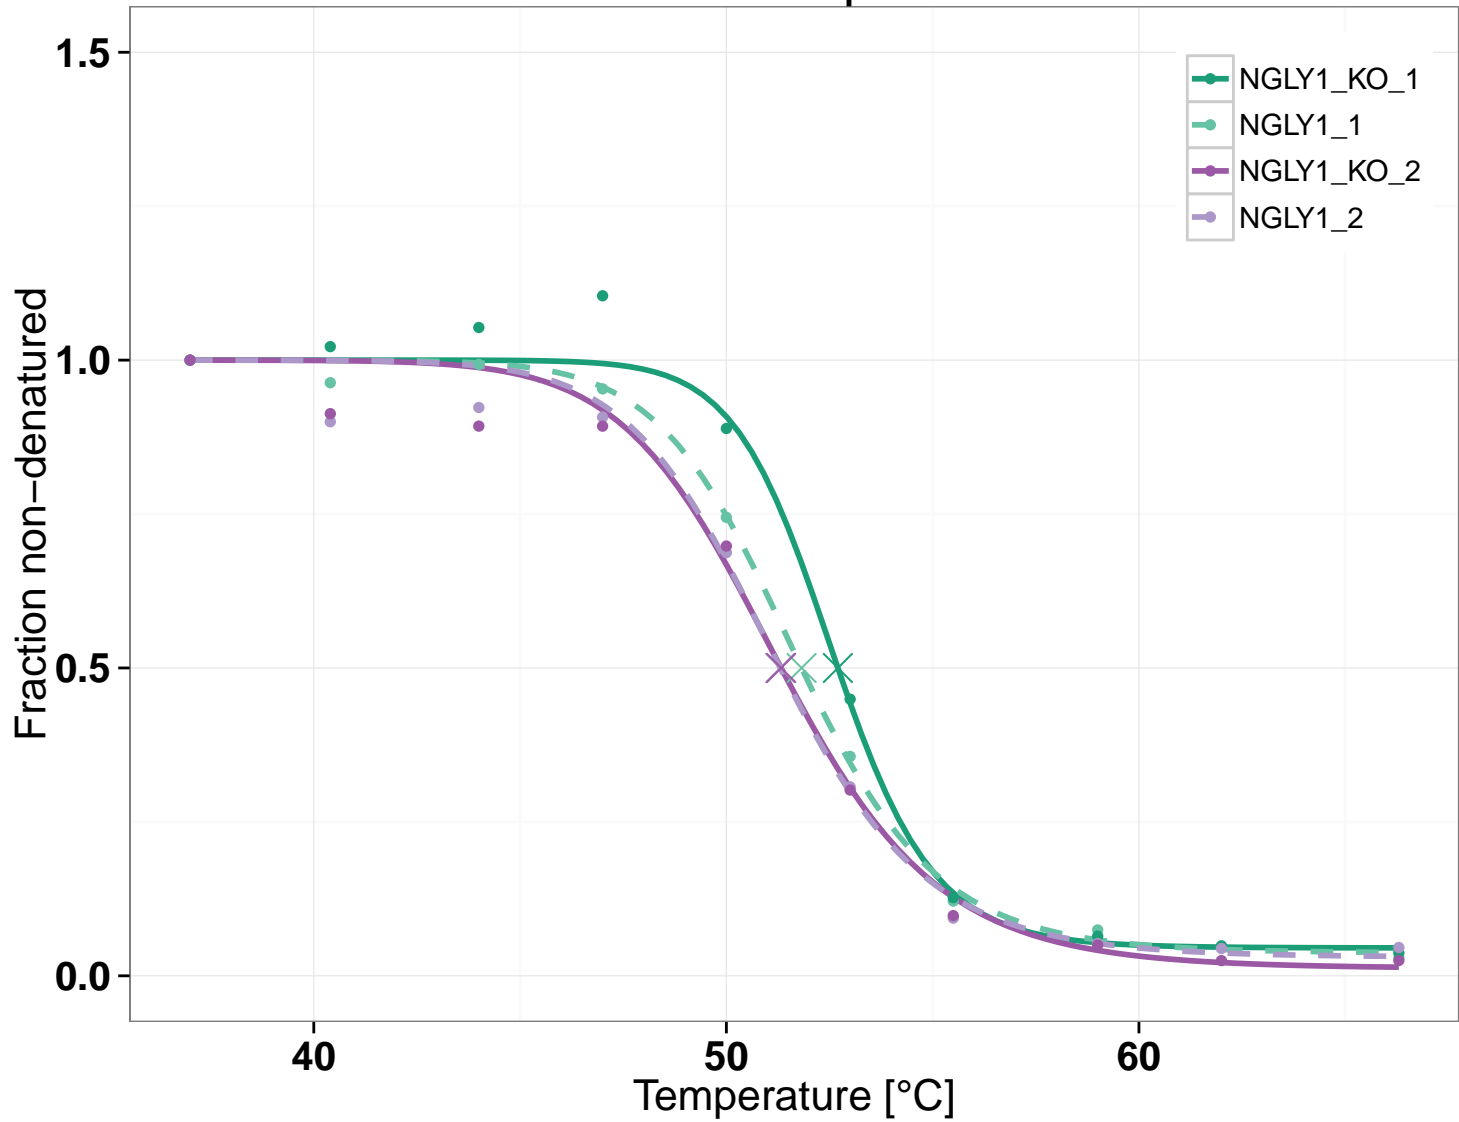

|            | meltPoint | slope | plateau | R2   |
|------------|-----------|-------|---------|------|
| NGLY1_KO_1 | 52.7      | -0.2  | 0.05    | 0.99 |
| NGLY1_1    | 51.82     | -0.14 | 0.04    | 1    |
| NGLY1_KO_2 | 51.33     | -0.13 | 0.01    | 0.99 |
| NGLY1_2    | 51.31     | -0.13 | 0.03    | 0.99 |

Supplement: Supplementary file 3501 [file 1]

IPI00299921.7|SLC35B4

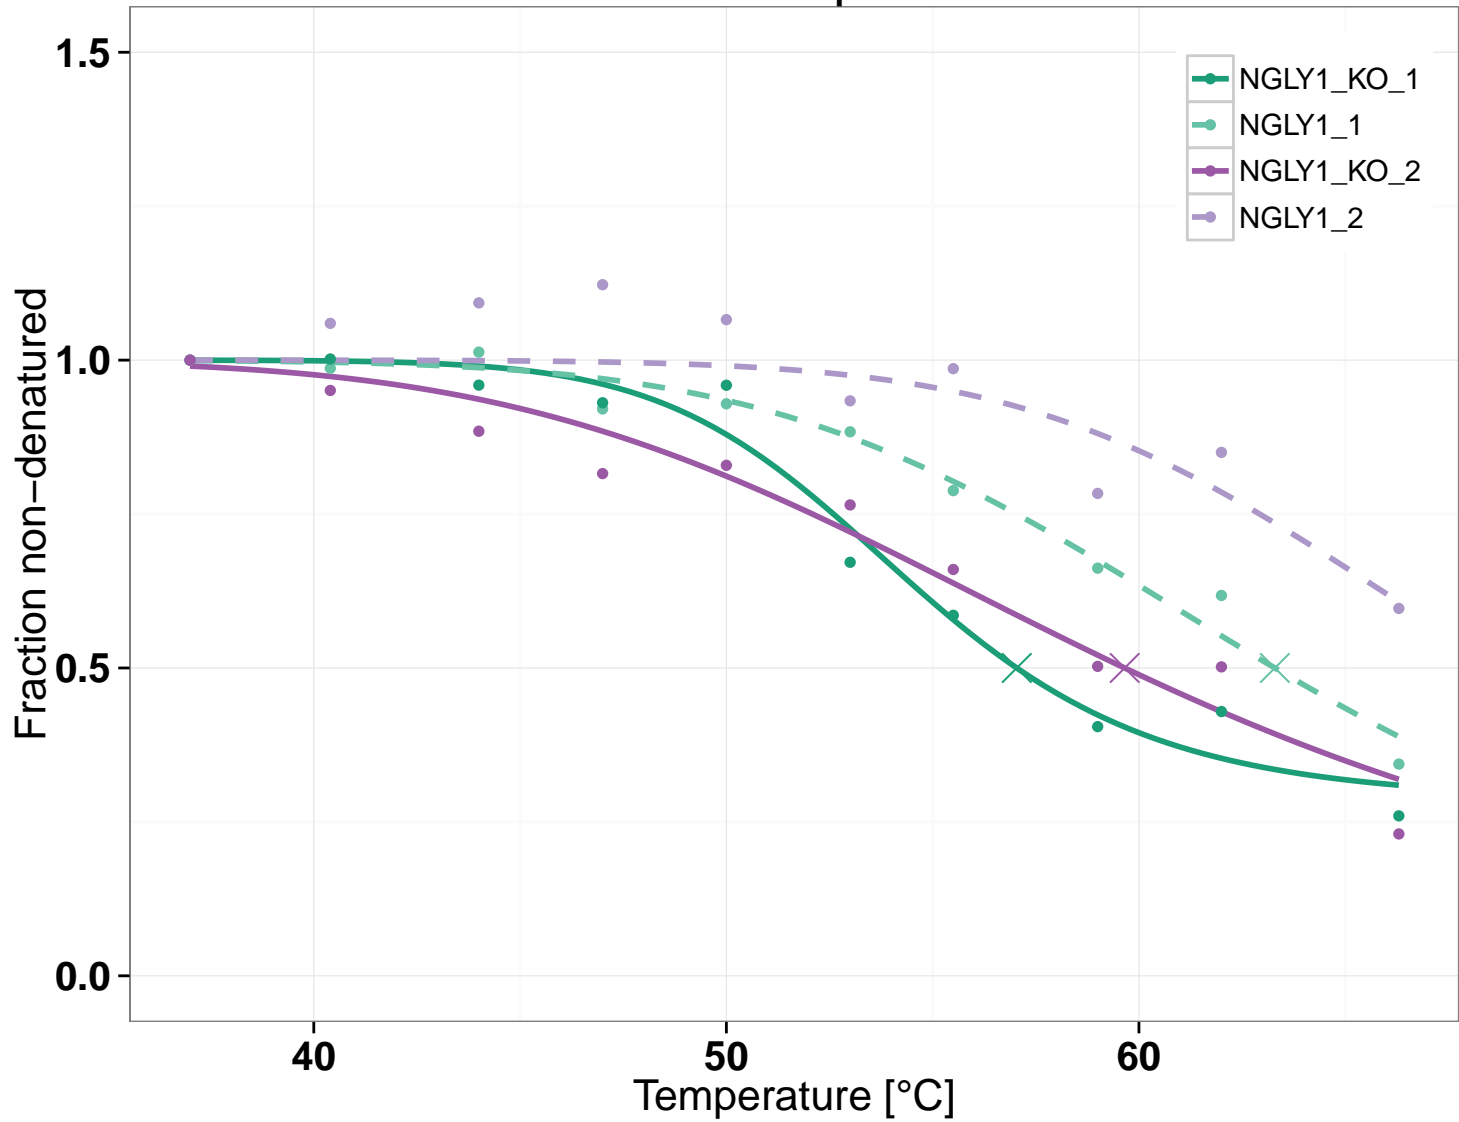

|            | meltPoint | slope  | plateau | R2   |
|------------|-----------|--------|---------|------|
| NGLY1_KO_1 | 57.04     | -0.06  | 0.28    | 0.97 |
| NGLY1_1    | 63.29     | -0.041 | 0       | 0.98 |
| NGLY1_KO_2 | 59.65     | -0.034 | 0       | 0.95 |
| NGLY1_2    | -         | -0.043 | 0.13    | 0.79 |

Supplement: Supplementary file 3502 [file 1]

# IPI00004308.1|FTSJ1

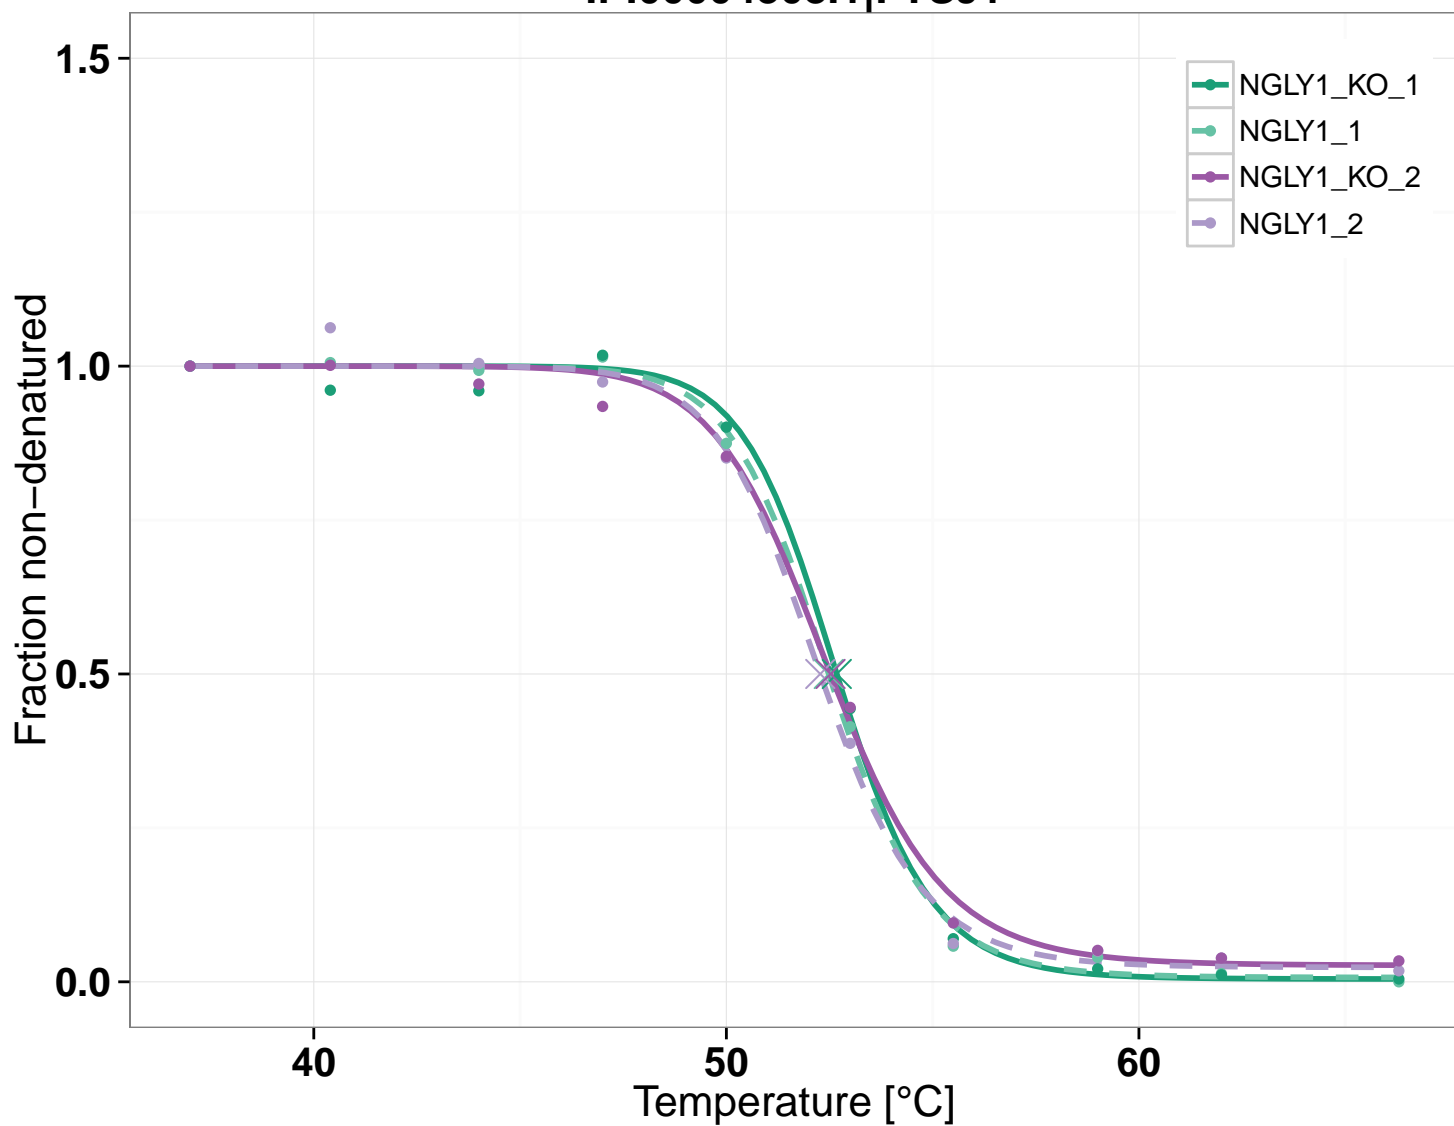

|            | meltPoint | slope | plateau | R2 |
|------------|-----------|-------|---------|----|
| NGLY1_KO_1 | 52.68     | -0.22 | 0       | 1  |
| NGLY1_1    | 52.48     | -0.21 | 0.01    | 1  |
| NGLY1_KO_2 | 52.52     | -0.17 | 0.03    | 1  |
| NGLY1_2    | 52.28     | -0.19 | 0.02    | 1  |

Supplement: Supplementary file 3503 [file 1]

# IPI00250297.3|AASDHPPT

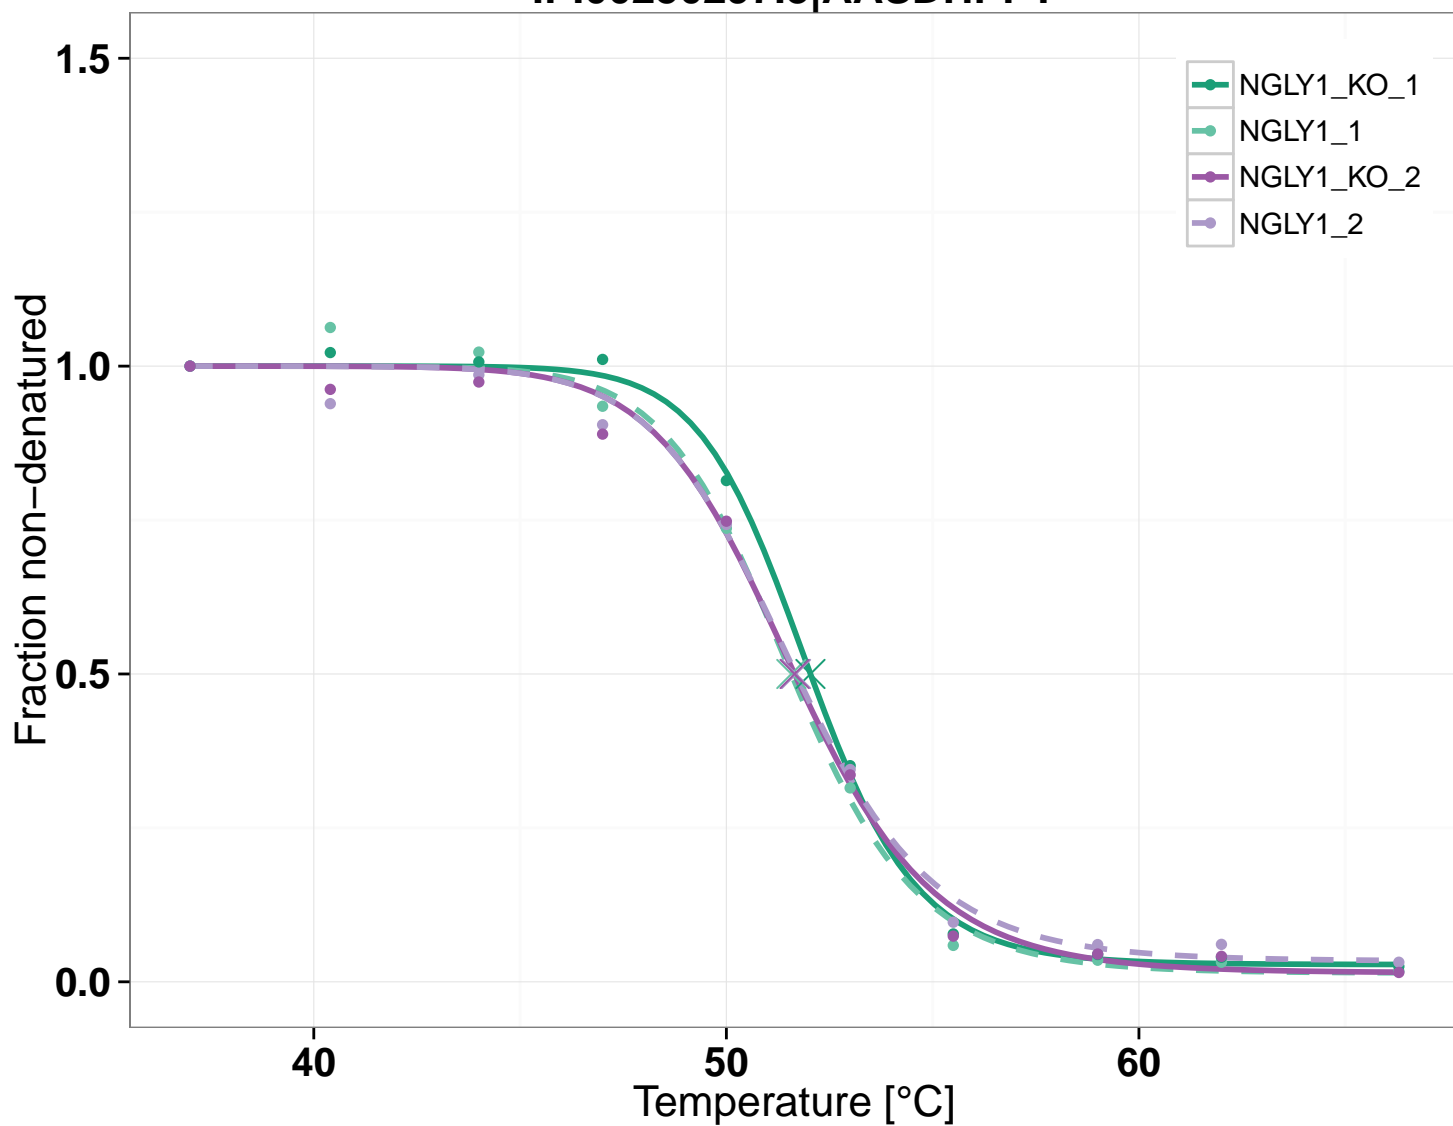

|            | meltPoint | slope | plateau | R2   |
|------------|-----------|-------|---------|------|
| NGLY1_KO_1 | 52.04     | -0.18 | 0.03    | 1    |
| NGLY1_1    | 51.57     | -0.16 | 0.01    | 1    |
| NGLY1_KO_2 | 51.65     | -0.14 | 0.01    | 0.99 |
| NGLY1_2    | 51.69     | -0.14 | 0.03    | 1    |

Supplement: Supplementary file 3504 [file 1]

IPI00006538.1|PTDSS2

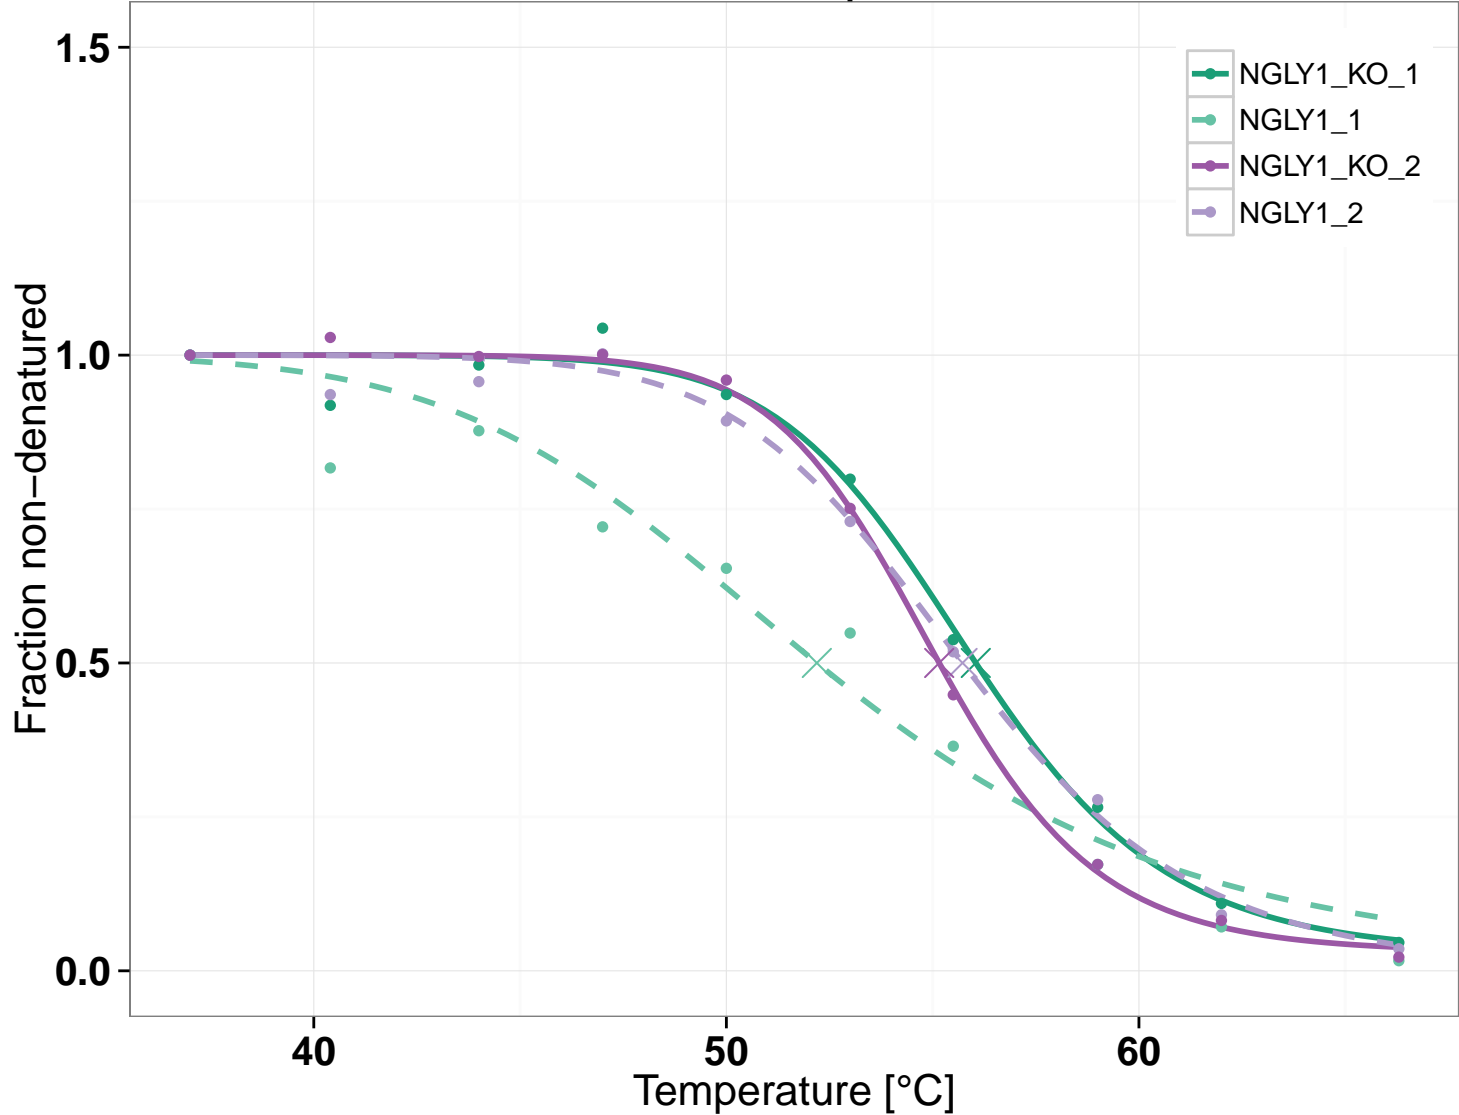

|            | meltPoint | slope  | plateau | R2   |
|------------|-----------|--------|---------|------|
| NGLY1_KO_1 | 56.05     | -0.1   | 0.03    | 0.99 |
| NGLY1_1    | 52.19     | -0.056 | 0       | 0.96 |
| NGLY1_KO_2 | 55.16     | -0.12  | 0.03    | 1    |
| NGLY1_2    | 55.72     | -0.089 | 0       | 0.99 |

Supplement: Supplementary file 3505 [file 1]

IPI00011371.4|FBXO42

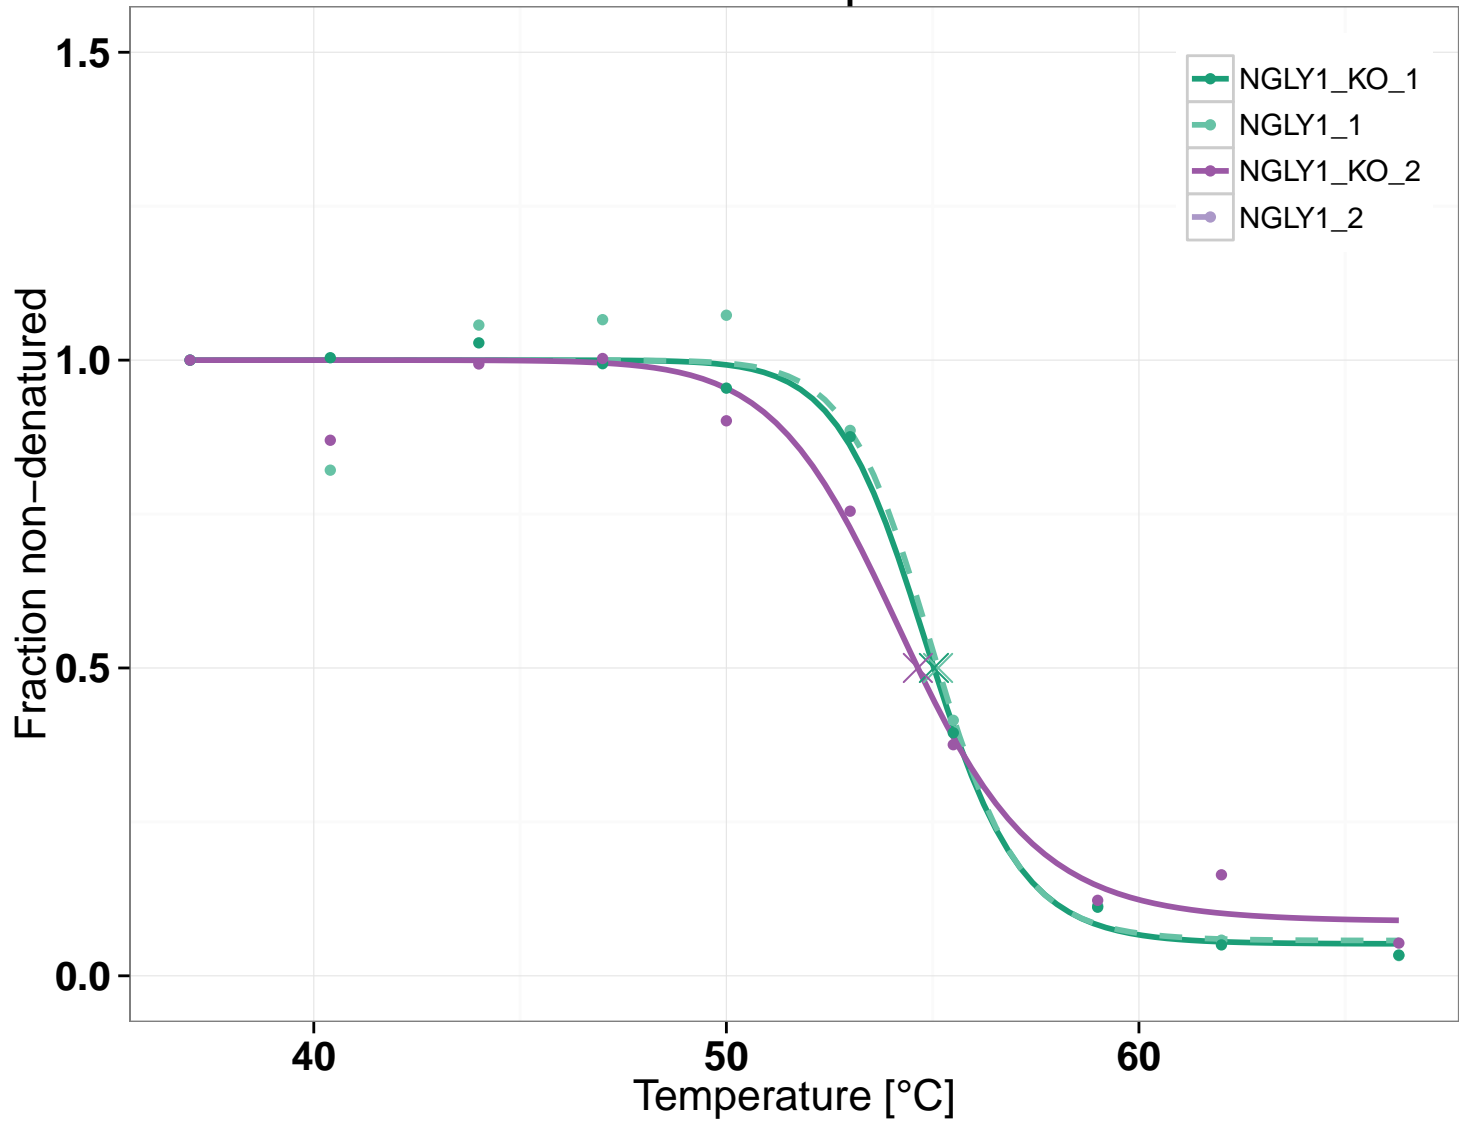

|            | meltPoint | slope | plateau | R2   |
|------------|-----------|-------|---------|------|
| NGLY1_KO_1 | 55.03     | -0.21 | 0.05    | 1    |
| NGLY1_1    | 55.13     | -0.22 | 0.06    | 0.97 |
| NGLY1_KO_2 | 54.64     | -0.14 | 0.09    | 0.98 |
| NGLY1_2    | -         | -     | -       | -    |

Supplement: Supplementary file 3506 [file 1]

# IPI00069084.2|TRRAP

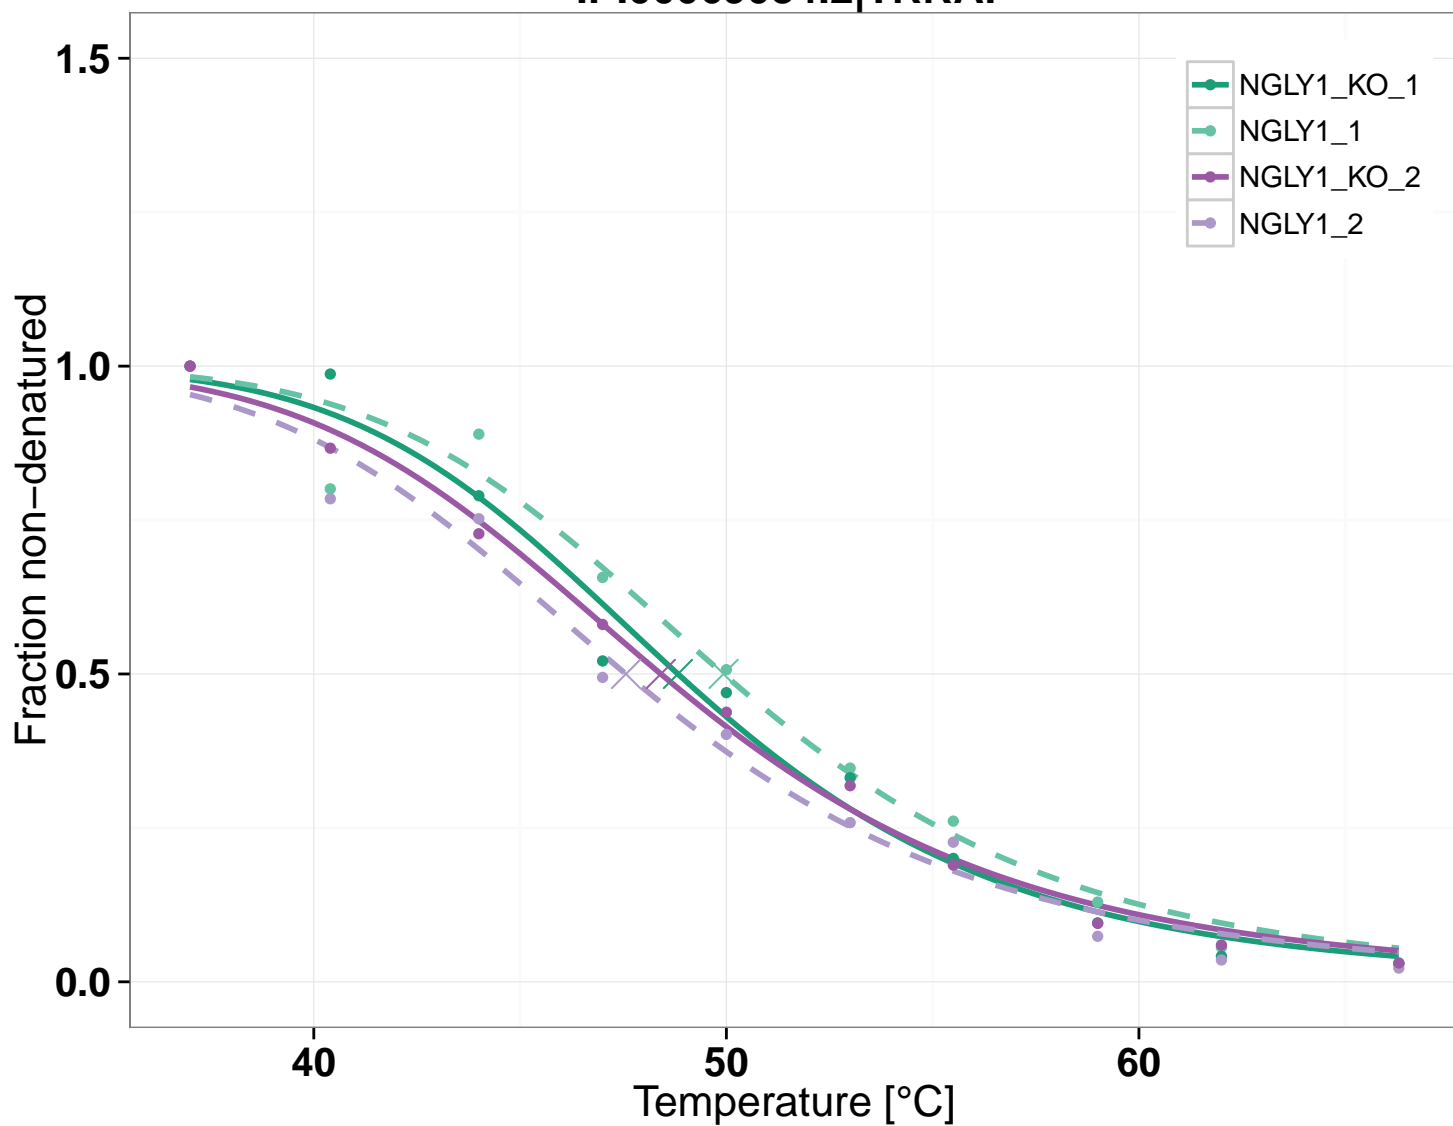

|            | meltPoint | slope  | plateau | R2   |
|------------|-----------|--------|---------|------|
| NGLY1_KO_1 | 48.83     | -0.063 | 0       | 0.99 |
| NGLY1_1    | 49.93     | -0.06  | 0       | 0.98 |
| NGLY1_KO_2 | 48.41     | -0.058 | 0       | 0.99 |
| NGLY1_2    | 47.57     | -0.058 | 0       | 0.98 |

Supplement: Supplementary file 3507 [file 1]

IPI00719210.1|FAM29A

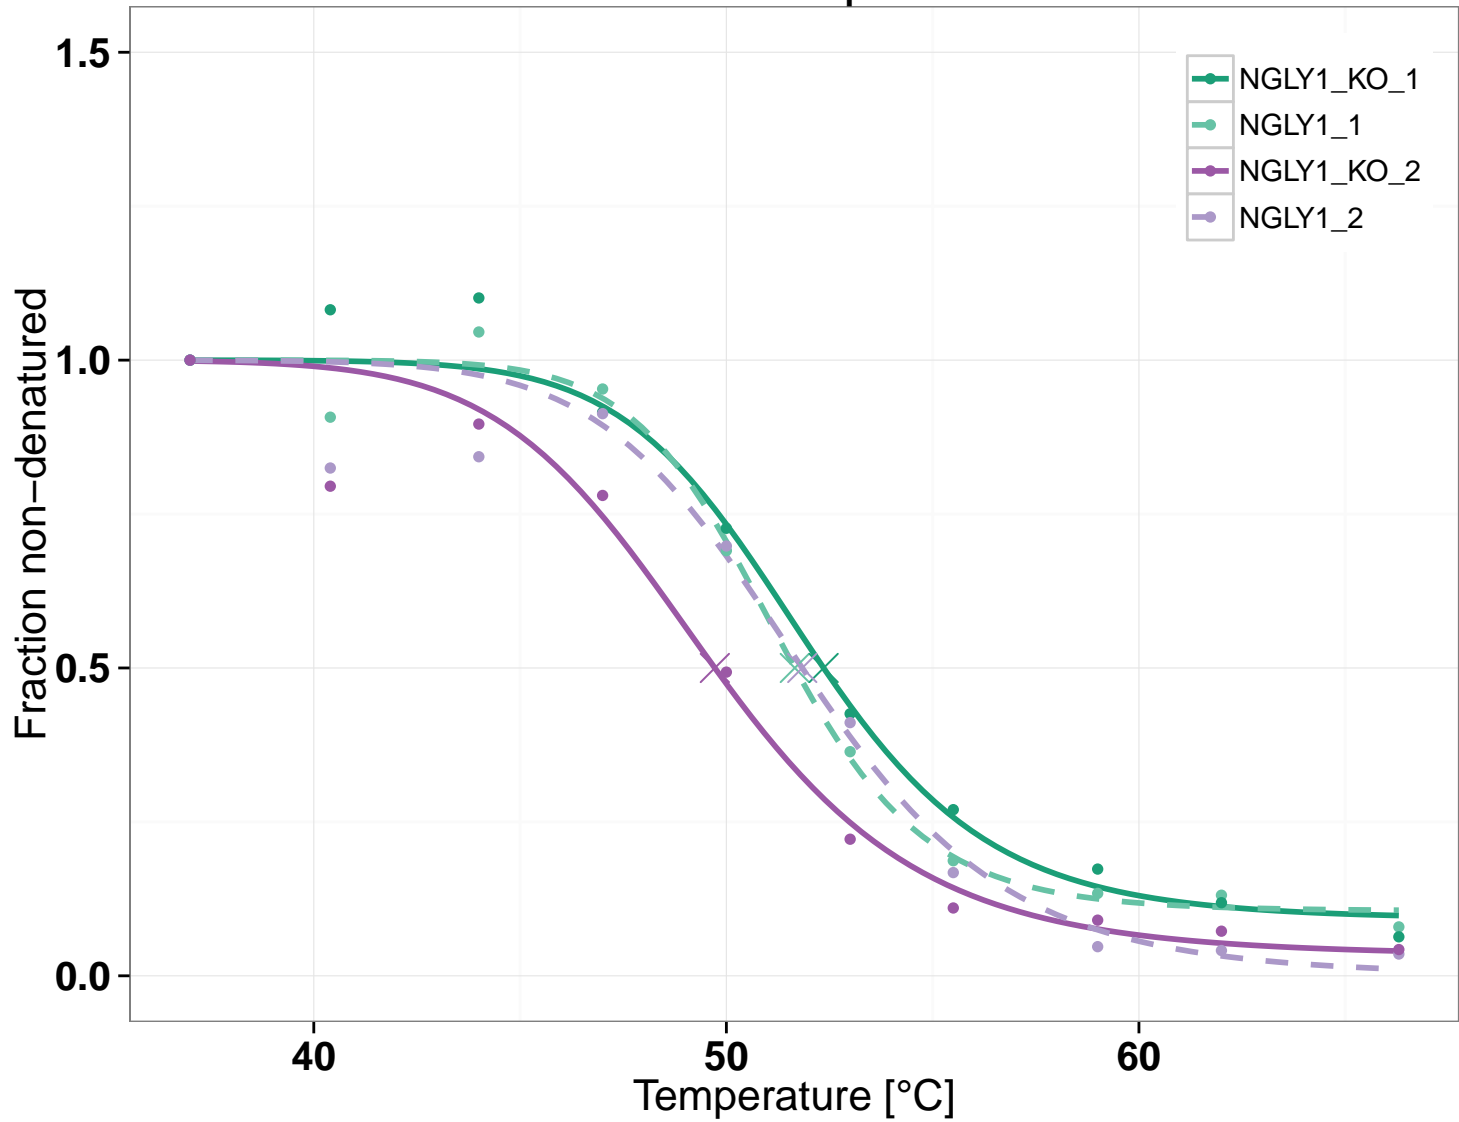

|            | meltPoint | slope  | plateau | R2   |
|------------|-----------|--------|---------|------|
| NGLY1_KO_1 | 52.36     | -0.1   | 0.09    | 0.99 |
| NGLY1_1    | 51.66     | -0.13  | 0.11    | 0.99 |
| NGLY1_KO_2 | 49.72     | -0.094 | 0.03    | 0.97 |
| NGLY1_2    | 51.84     | -0.1   | 0       | 0.96 |

Supplement: Supplementary file 3508 [file 1]

# IPI00175647.2|IFT80

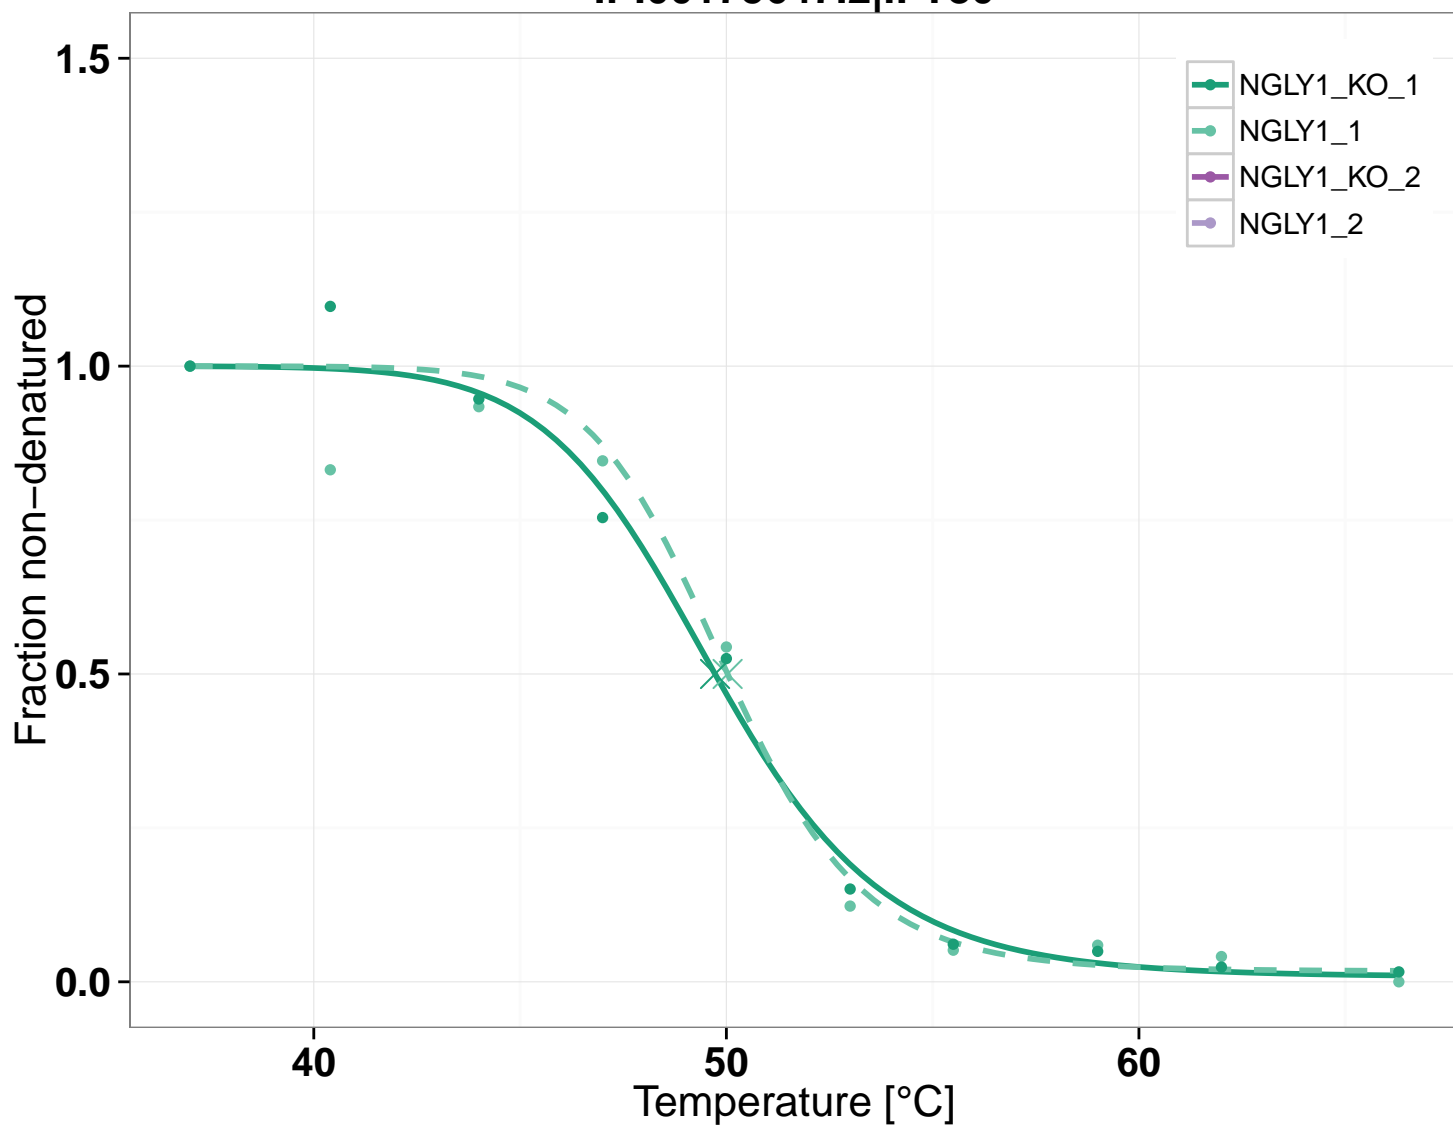

|            | meltPoint | slope | plateau | R2   |
|------------|-----------|-------|---------|------|
| NGLY1_KO_1 | 49.73     | -0.12 | 0.01    | 0.99 |
| NGLY1_1    | 50.03     | -0.15 | 0.02    | 0.98 |
| NGLY1_KO_2 | -         | -     | -       | -    |
| NGLY1_2    | -         | -     | -       | -    |

Supplement: Supplementary file 3509 [file 1]

# IPI00107039.3|ABHD6

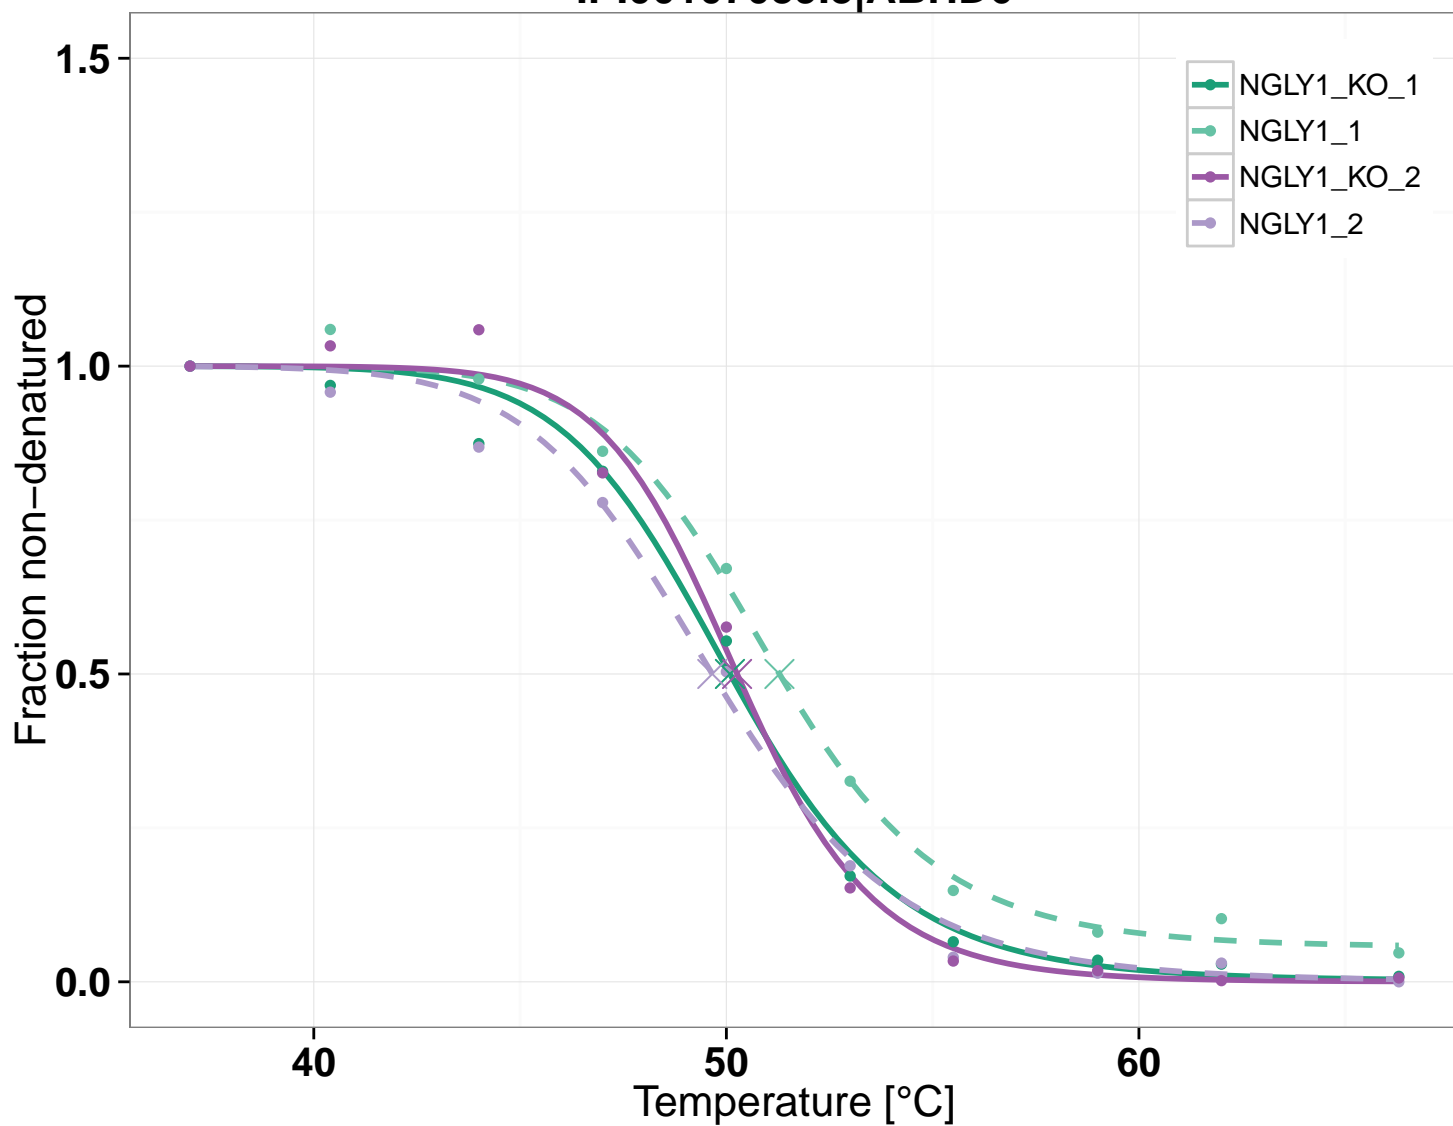

|            | meltPoint | slope | plateau | R2   |
|------------|-----------|-------|---------|------|
| NGLY1_KO_1 | 50.09     | -0.12 | 0       | 0.99 |
| NGLY1_1    | 51.29     | -0.11 | 0.06    | 1    |
| NGLY1_KO_2 | 50.26     | -0.15 | 0       | 0.99 |
| NGLY1_2    | 49.66     | -0.11 | 0       | 0.99 |

Supplement: Supplementary file 3510 [file 1]

IPI00074870.1|DNAJC1

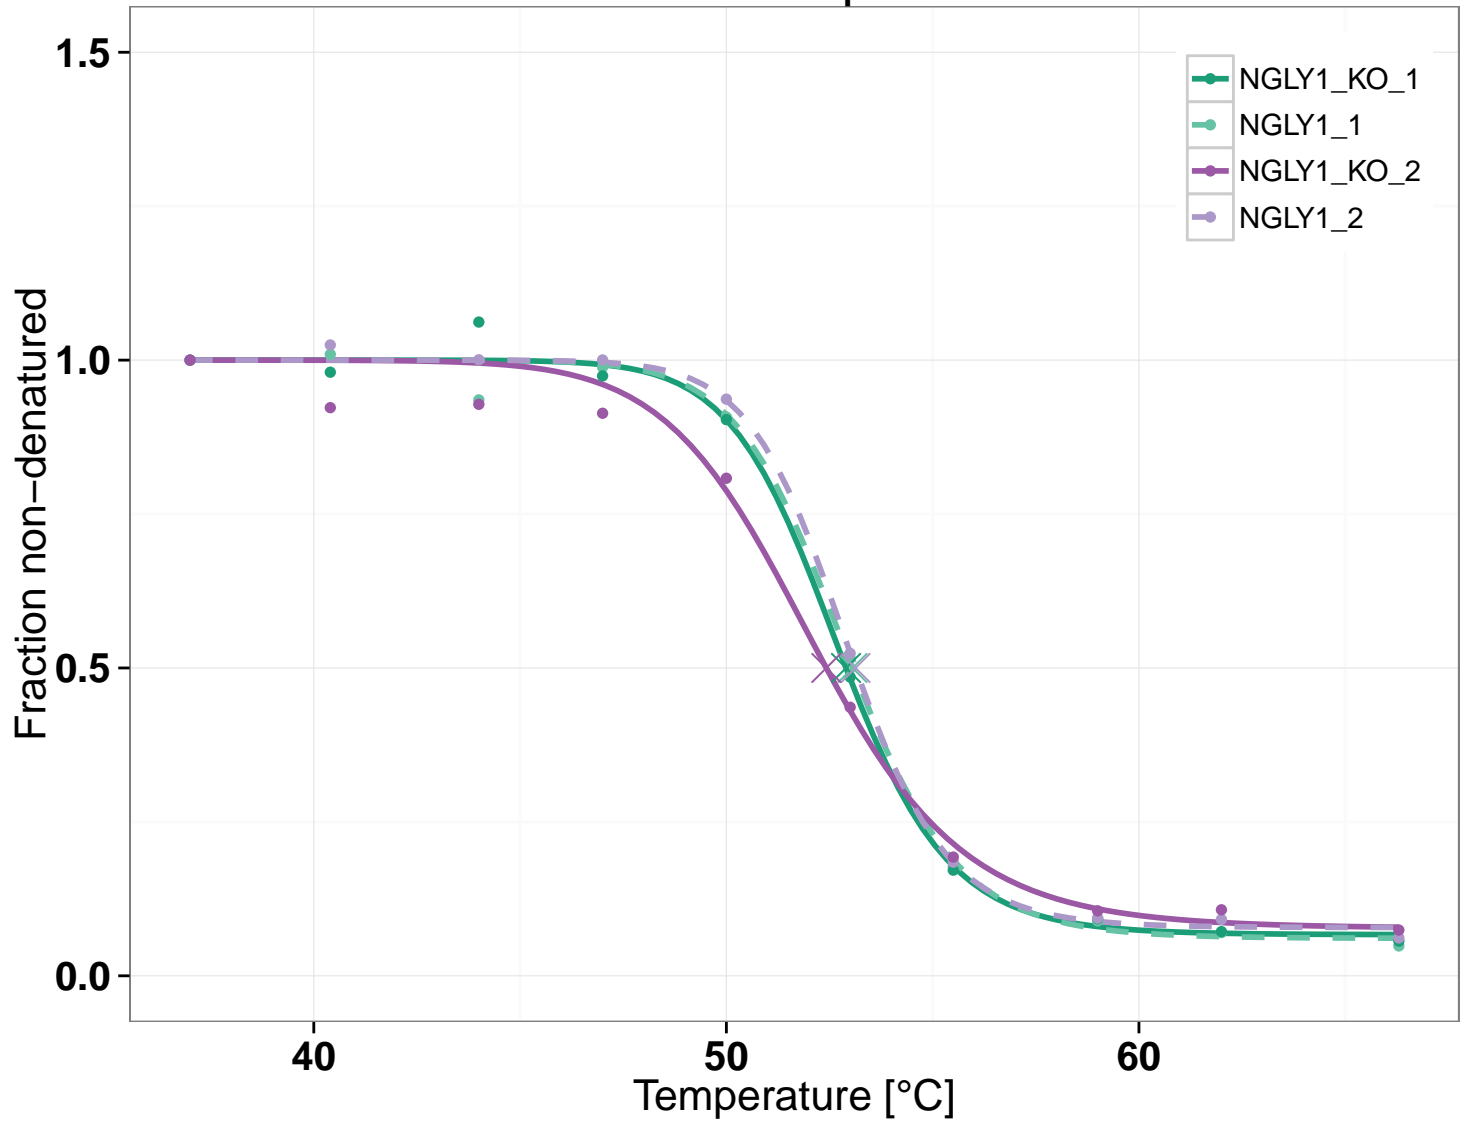

|            | meltPoint | slope | plateau | R2   |
|------------|-----------|-------|---------|------|
| NGLY1_KO_1 | 52.9      | -0.18 | 0.07    | 1    |
| NGLY1_1    | 53.06     | -0.18 | 0.06    | 1    |
| NGLY1_KO_2 | 52.42     | -0.13 | 0.08    | 0.99 |
| NGLY1_2    | 53.13     | -0.19 | 0.08    | 1    |

Supplement: Supplementary file 3511 [file 1]

IPI00294742.6|LARP7

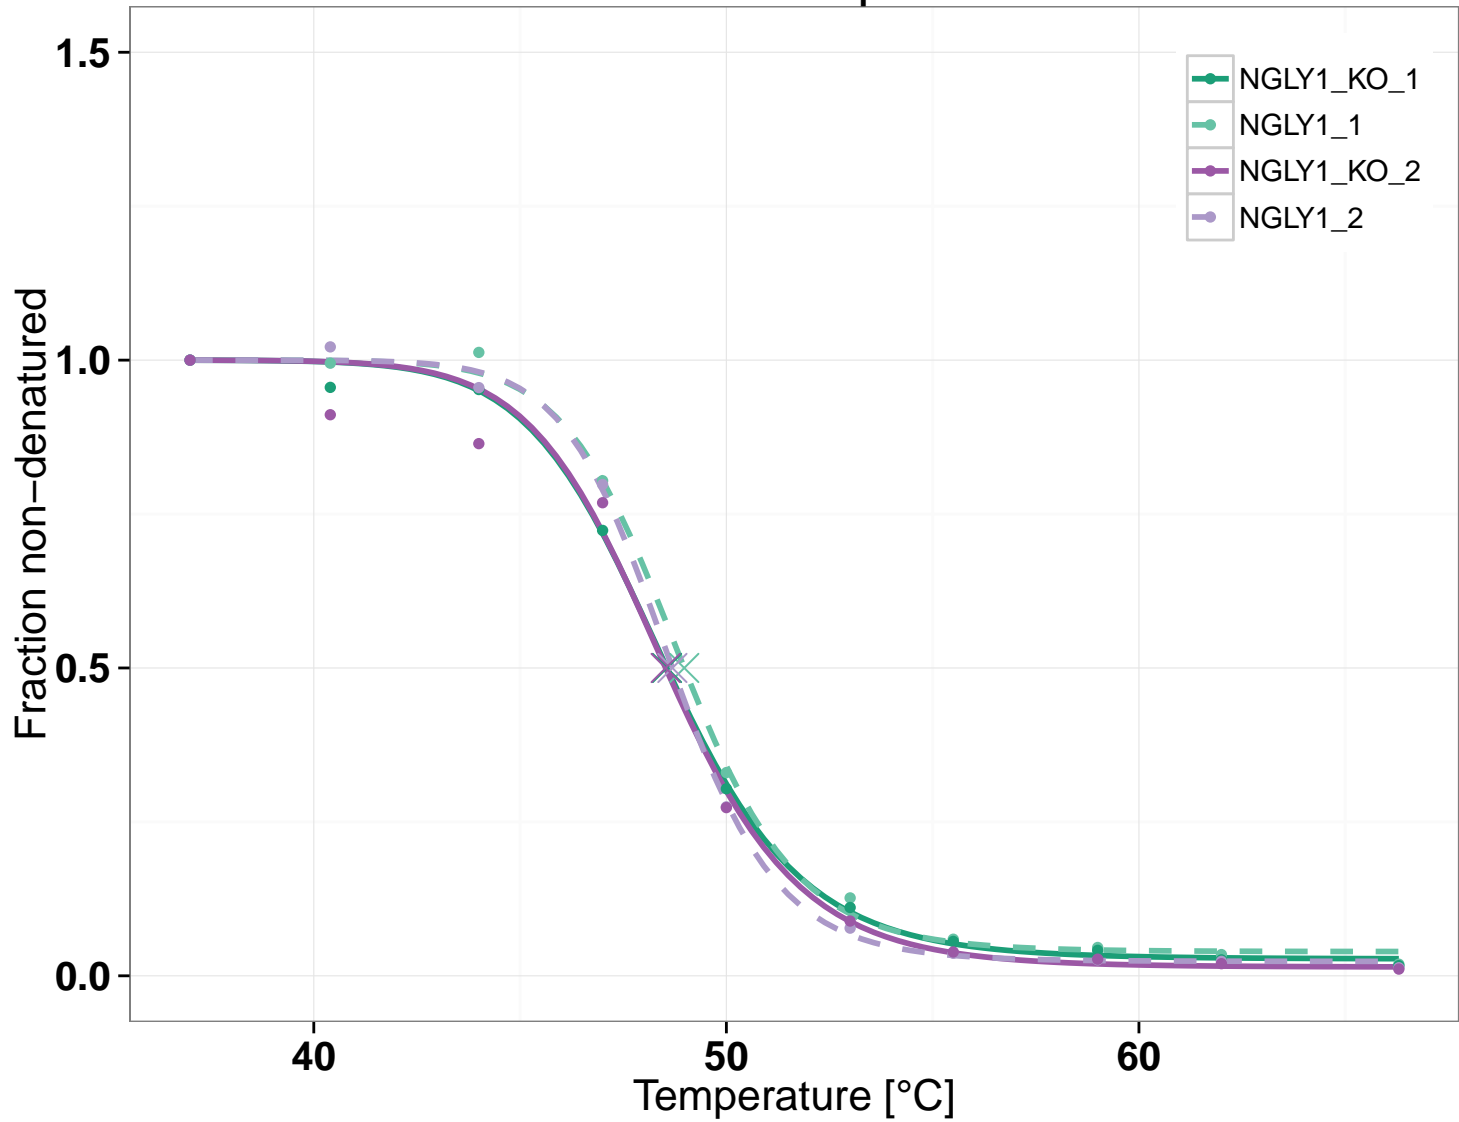

|            | meltPoint | slope | plateau | R2   |
|------------|-----------|-------|---------|------|
| NGLY1_KO_1 | 48.56     | -0.15 | 0.03    | 1    |
| NGLY1_1    | 48.98     | -0.17 | 0.04    | 1    |
| NGLY1_KO_2 | 48.53     | -0.15 | 0.01    | 0.99 |
| NGLY1_2    | 48.69     | -0.19 | 0.02    | 1    |

Supplement: Supplementary file 3512 [file 1]

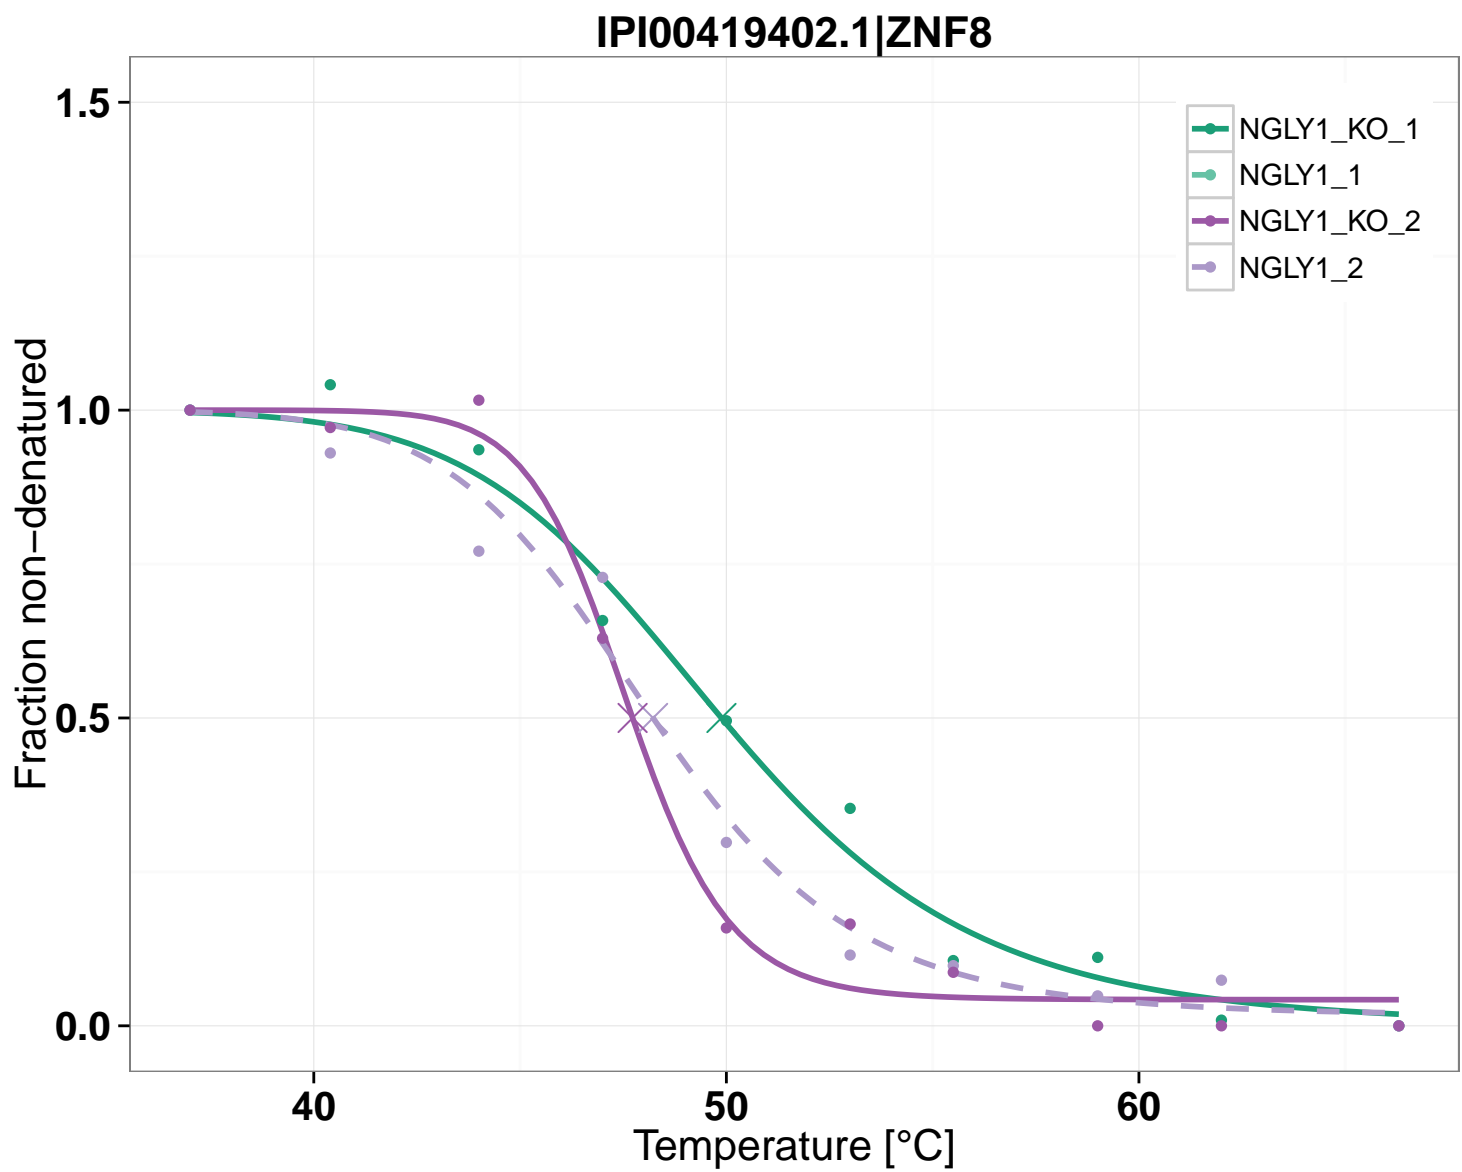

|            | meltPoint | slope  | plateau | R2   |
|------------|-----------|--------|---------|------|
| NGLY1_KO_1 | 49.88     | -0.081 | 0       | 0.99 |
| NGLY1_1    | -         | -      | -       | -    |
| NGLY1_KO_2 | 47.73     | -0.19  | 0.04    | 0.99 |
| NGLY1_2    | 48.22     | -0.1   | 0.02    | 0.98 |

Supplement: Supplementary file 3513 [file 1]

IPI00012486.3|SPNS1

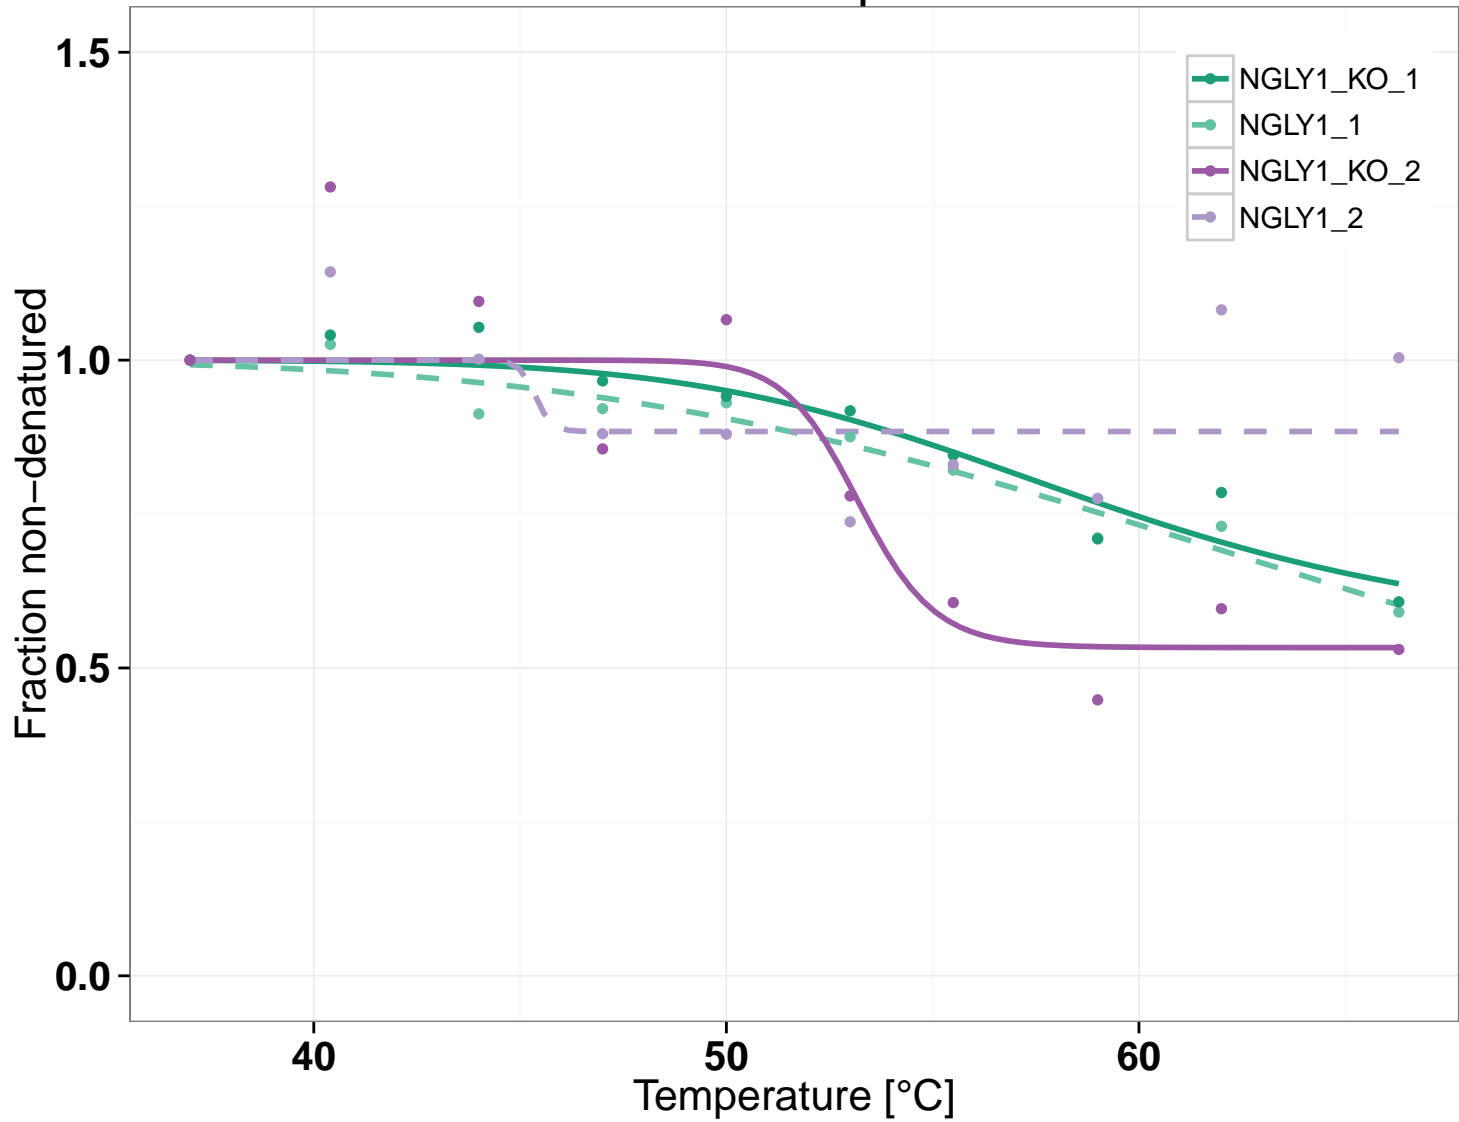

|            | meltPoint | slope  | plateau | R2   |
|------------|-----------|--------|---------|------|
| NGLY1_KO_1 | –         | –0.024 | 0.54    | 0.91 |
| NGLY1_1    | –         | –0.021 | 0       | 0.95 |
| NGLY1_KO_2 | –         | –0.13  | 0.53    | 0.82 |
| NGLY1_2    | –         | –0.15  | 0.88    | 0.31 |

Supplement: Supplementary file 3514 [file 1]

IPI00884898.1|FAM178B

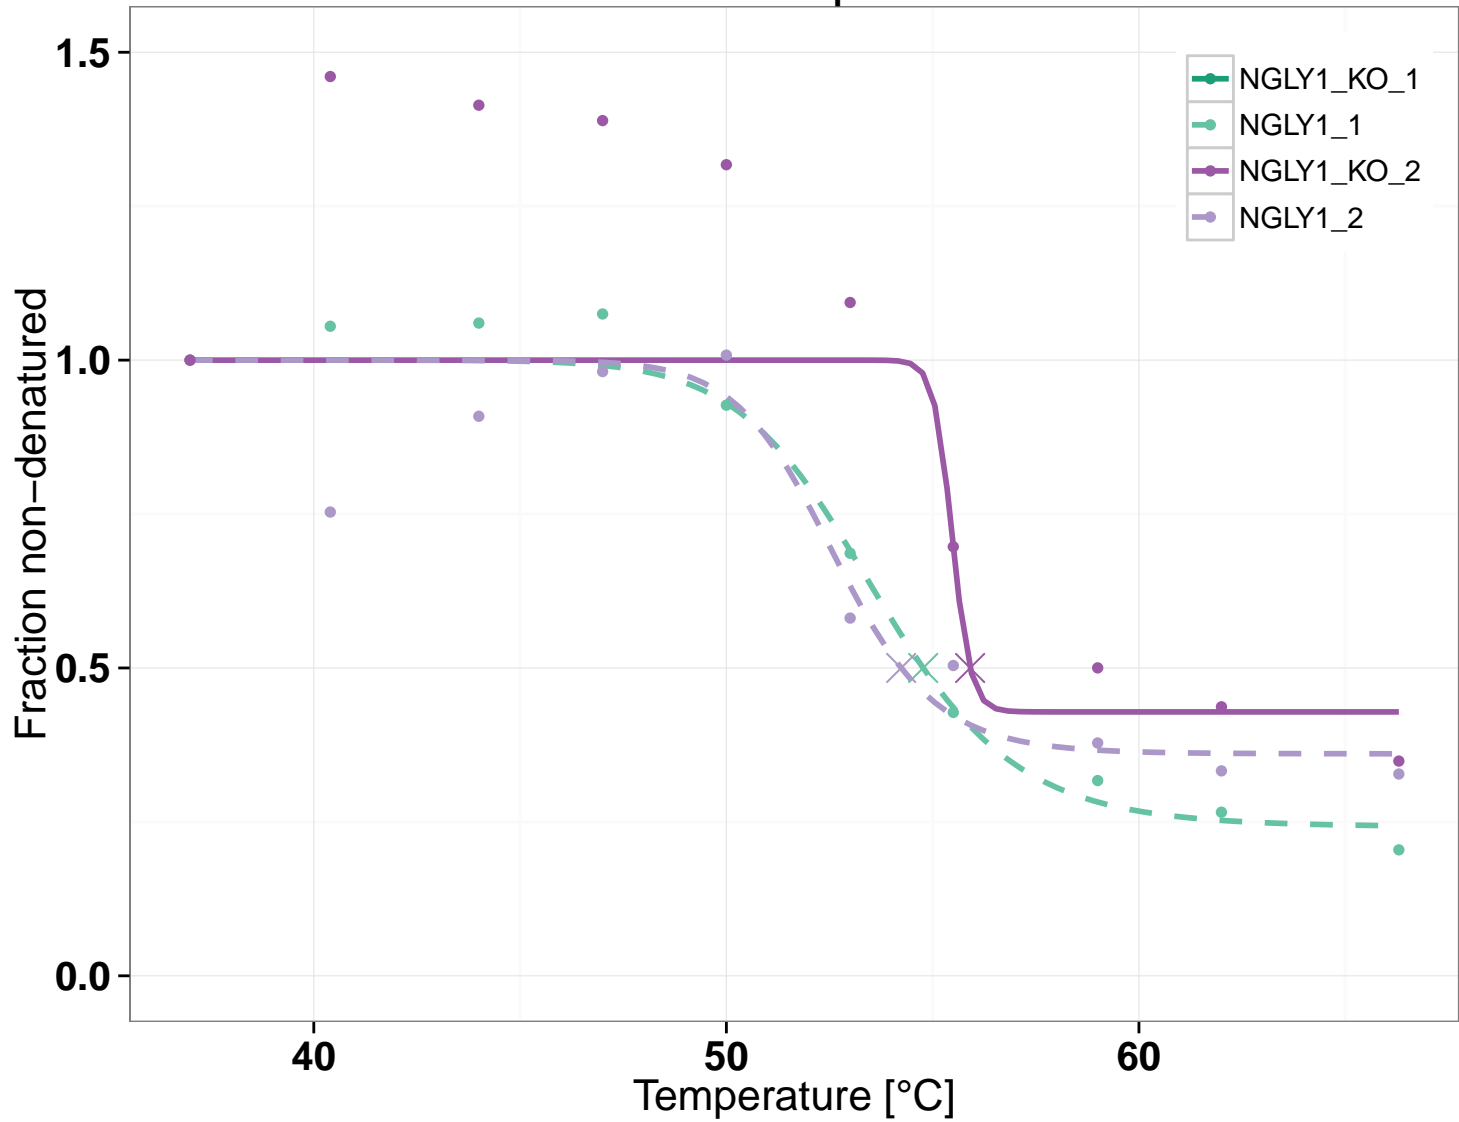

|            | meltPoint | slope | plateau | R2   |
|------------|-----------|-------|---------|------|
| NGLY1_KO_1 | —         | —     | —       | —    |
| NGLY1_1    | 54.77     | -0.11 | 0.24    | 0.99 |
| NGLY1_KO_2 | 55.91     | -0.64 | 0.43    | 0.62 |
| NGLY1_2    | 54.24     | -0.13 | 0.36    | 0.88 |

Supplement: Supplementary file 3515 [file 1]
