# Supplementary material (part 36 of 85)
Source: publisher figshare collection journal article supplement (https://gsajournals.figshare.com/articles/dataset/_/12014913)

# IPI00376259.1|SRGAP1

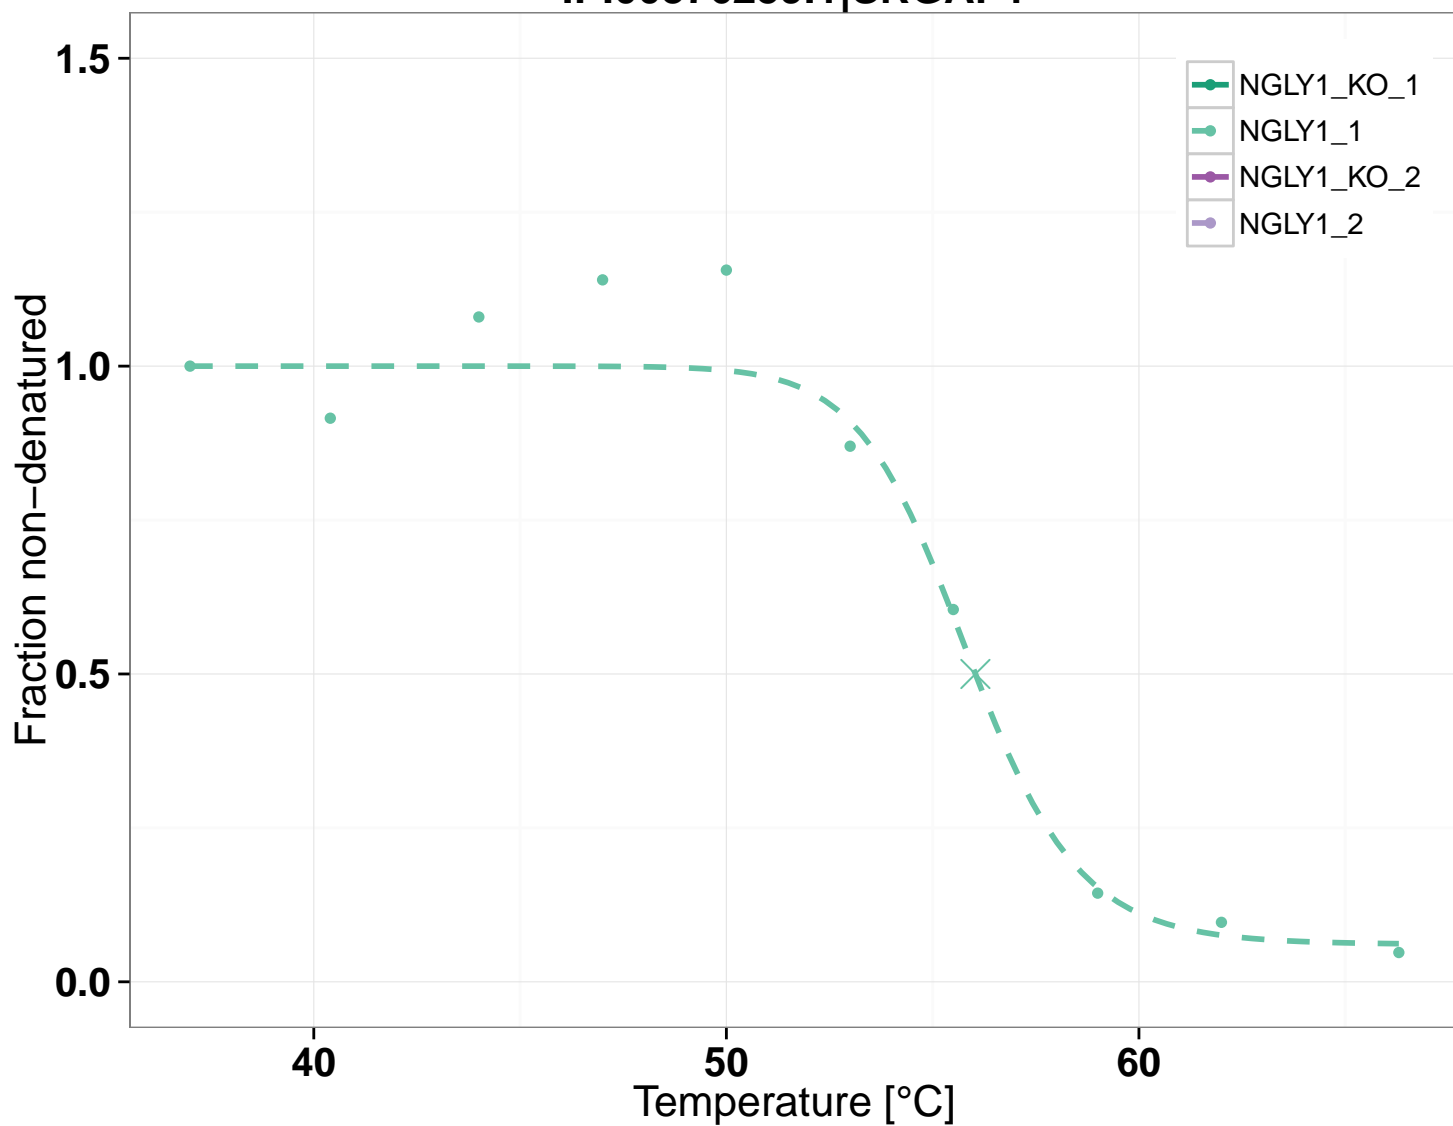

|            | meltPoint | slope | plateau | R2   |
|------------|-----------|-------|---------|------|
| NGLY1_KO_1 | —         | —     | —       | —    |
| NGLY1_1    | 56.04     | -0.18 | 0.06    | 0.97 |
| NGLY1_KO_2 | —         | —     | —       | —    |
| NGLY1_2    | —         | —     | —       | —    |

Supplement: Supplementary file 3516 [file 1]

IPI00061523.4|THAP11

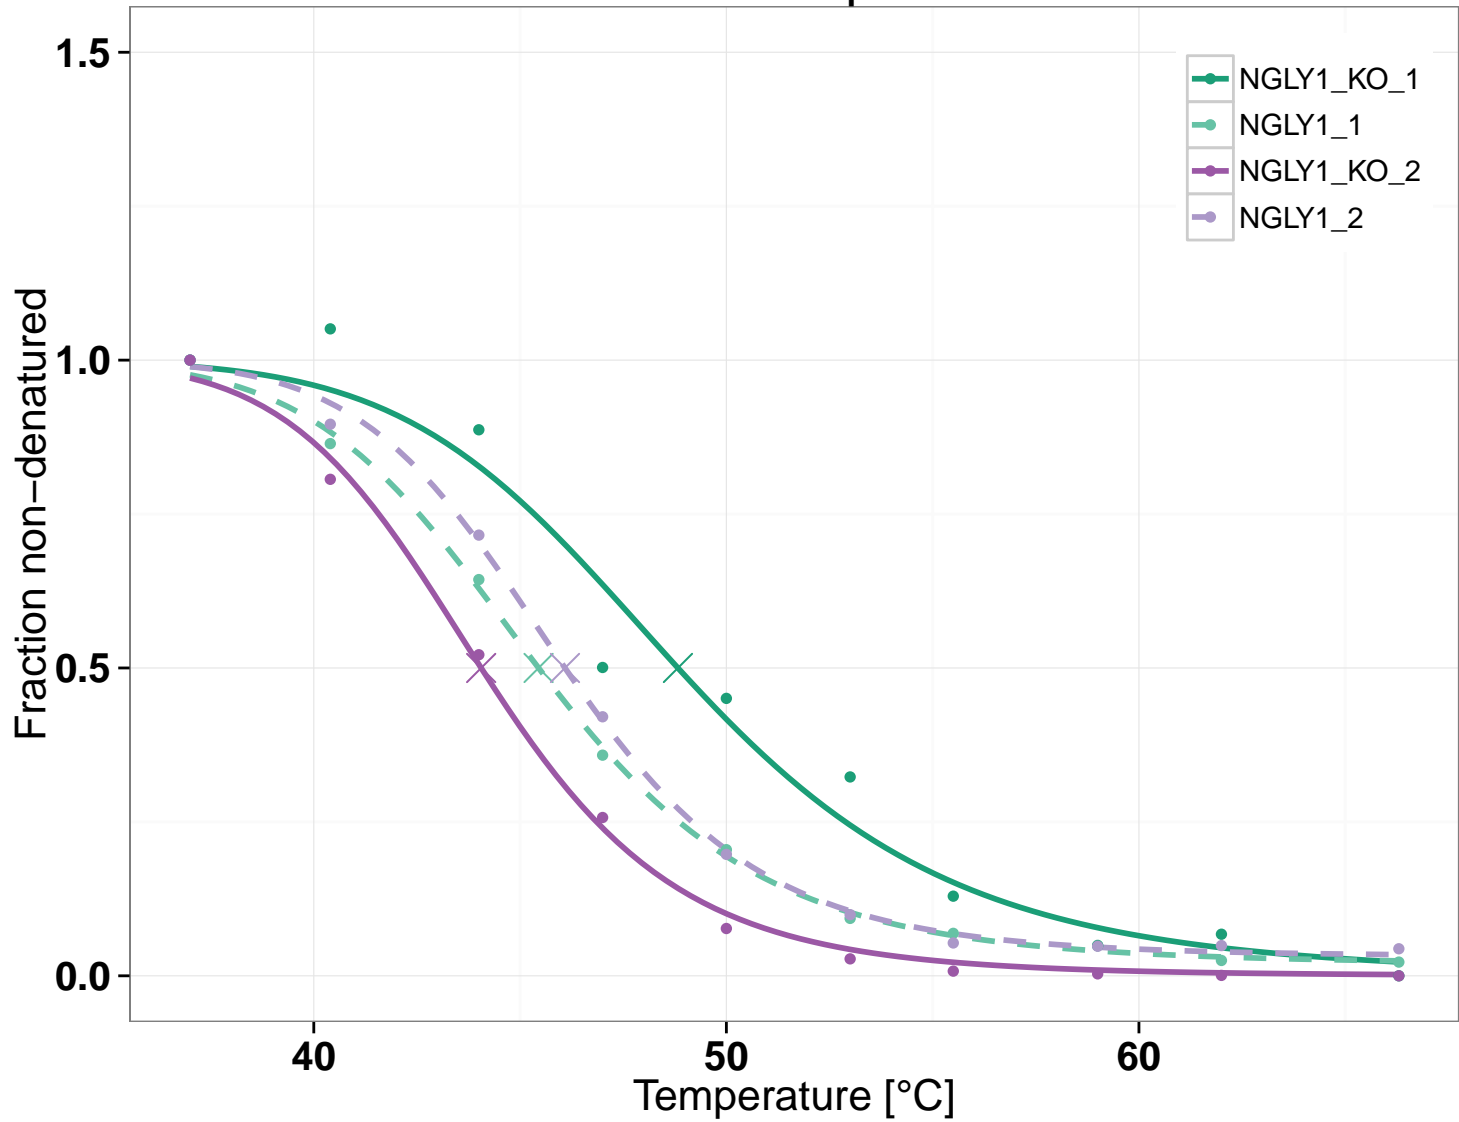

|            | meltPoint | slope  | plateau | R2   |
|------------|-----------|--------|---------|------|
| NGLY1_KO_1 | 48.83     | -0.075 | 0       | 0.97 |
| NGLY1_1    | 45.45     | -0.09  | 0.02    | 1    |
| NGLY1_KO_2 | 44.06     | -0.11  | 0       | 1    |
| NGLY1_2    | 46.09     | -0.1   | 0.03    | 1    |

Supplement: Supplementary file 3517 [file 1]

# IPI00018783.1|ITPA

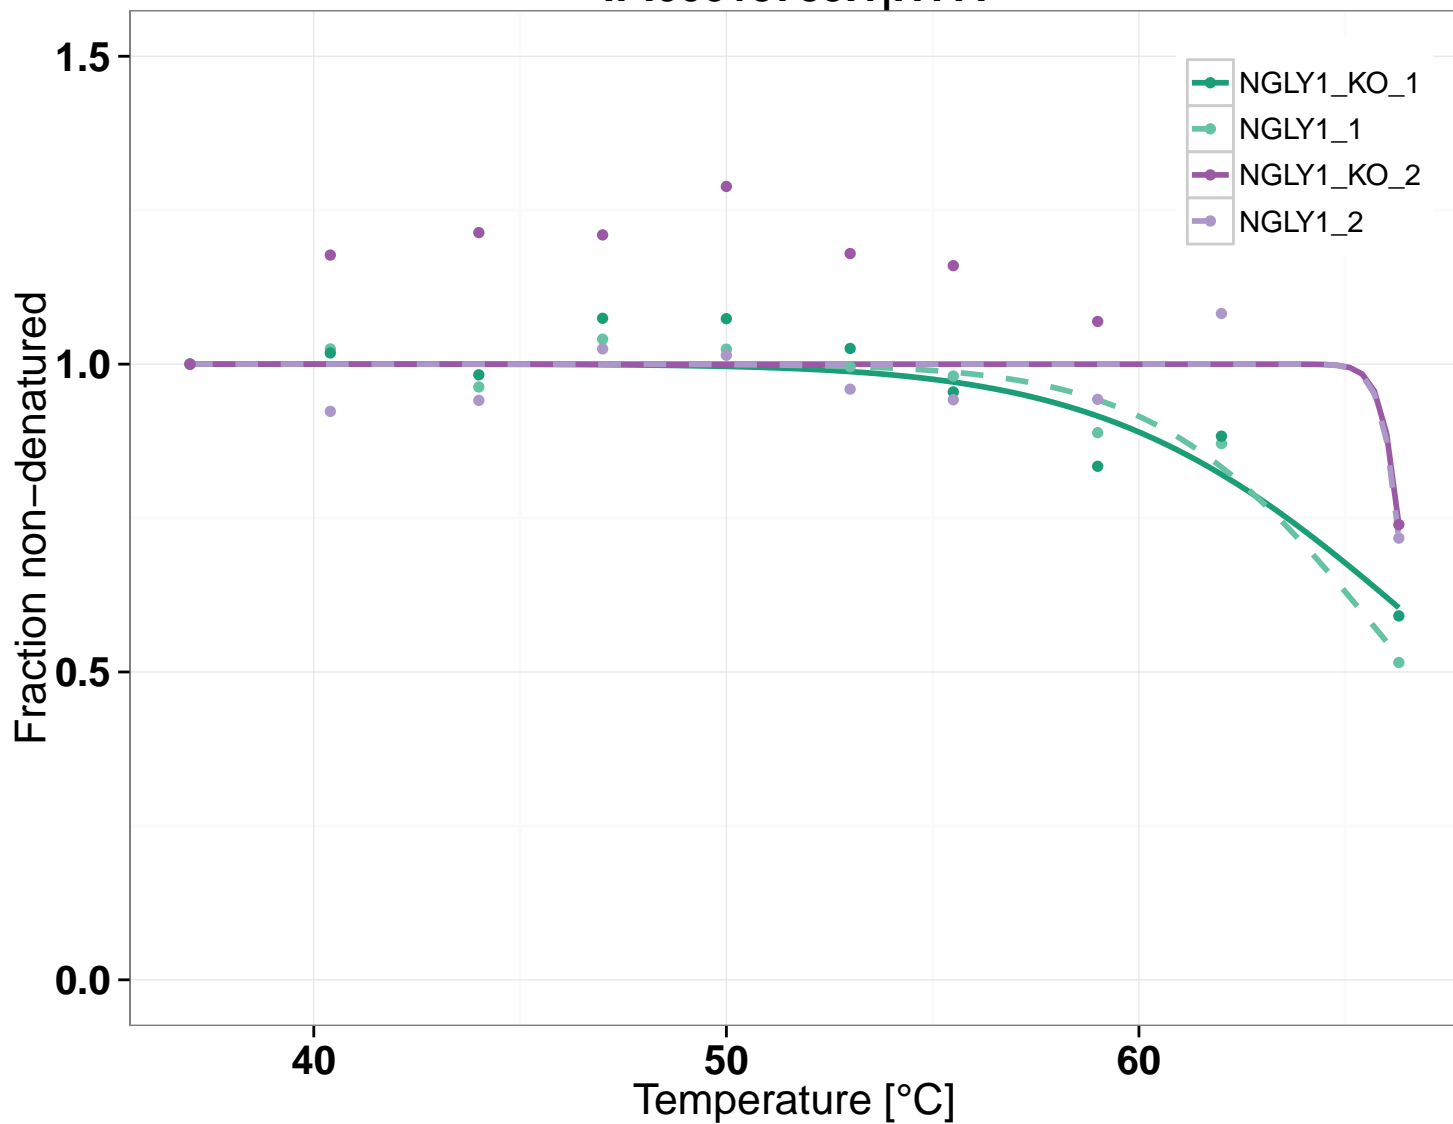

|            | meltPoint | slope  | plateau | R2    |
|------------|-----------|--------|---------|-------|
| NGLY1_KO_1 | —         | —      | 0       | 0.87  |
| NGLY1_1    | —         | -0.082 | 0       | 0.96  |
| NGLY1_KO_2 | —         | —      | 0       | -0.47 |
| NGLY1_2    | —         | —      | 0       | 0.7   |

Supplement: Supplementary file 3518 [file 1]

IPI00645849.1|ECM1

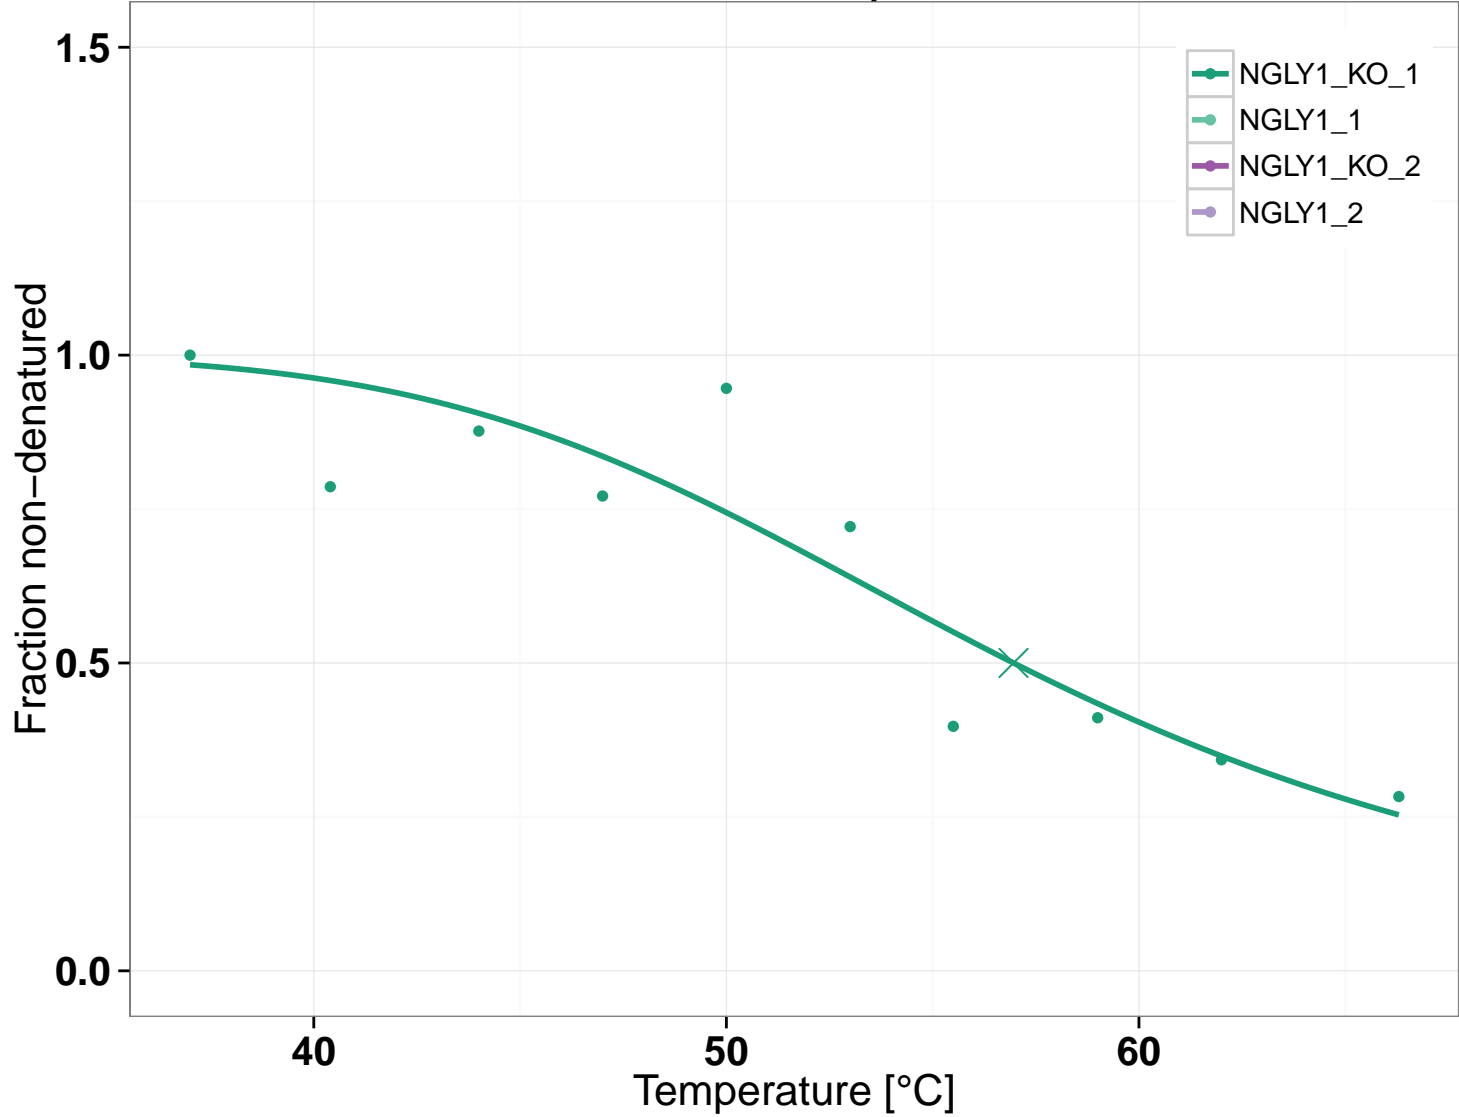

|            | meltPoint | slope  | plateau | R2   |
|------------|-----------|--------|---------|------|
| NGLY1_KO_1 | 56.96     | -0.036 | 0       | 0.83 |
| NGLY1_1    | -         | -      | -       | -    |
| NGLY1_KO_2 | -         | -      | -       | -    |
| NGLY1_2    | -         | -      | -       | -    |

Supplement: Supplementary file 3519 [file 1]

# IPI00401264.5|TXNDC4

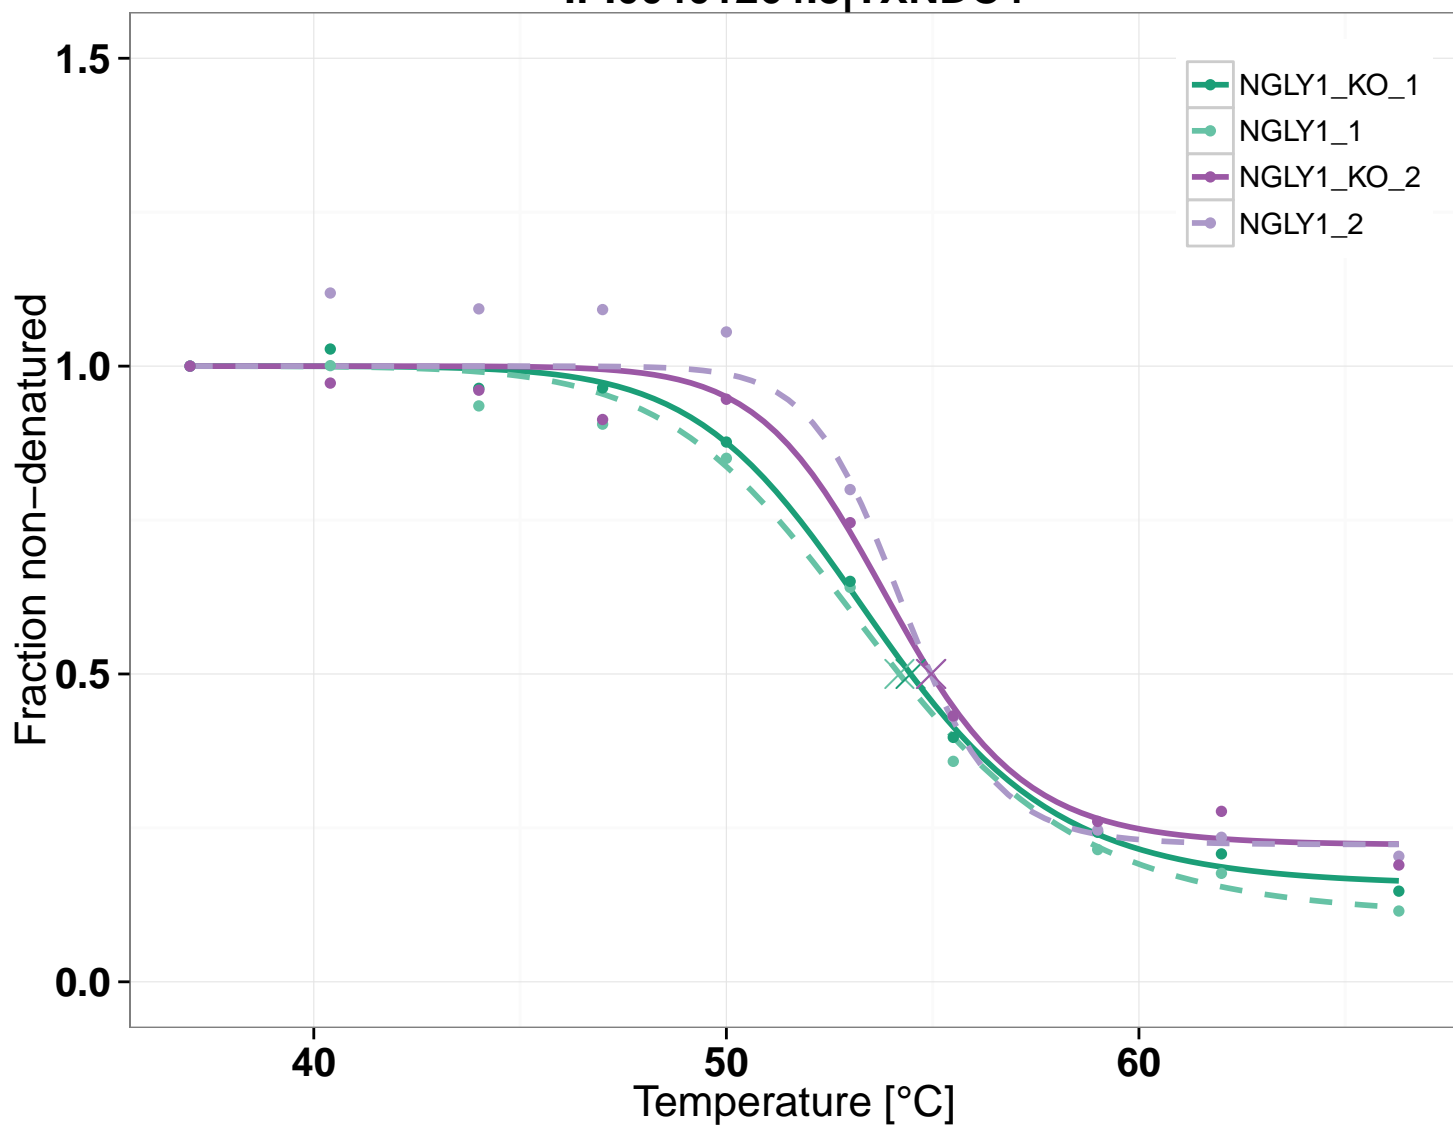

|            | meltPoint | slope  | plateau | R2   |
|------------|-----------|--------|---------|------|
| NGLY1_KO_1 | 54.46     | -0.096 | 0.16    | 1    |
| NGLY1_1    | 54.19     | -0.088 | 0.11    | 0.99 |
| NGLY1_KO_2 | 54.97     | -0.12  | 0.22    | 0.99 |
| NGLY1_2    | 54.95     | -0.17  | 0.22    | 0.97 |

Supplement: Supplementary file 3520 [file 1]

IPI00165459.7|SETD1B

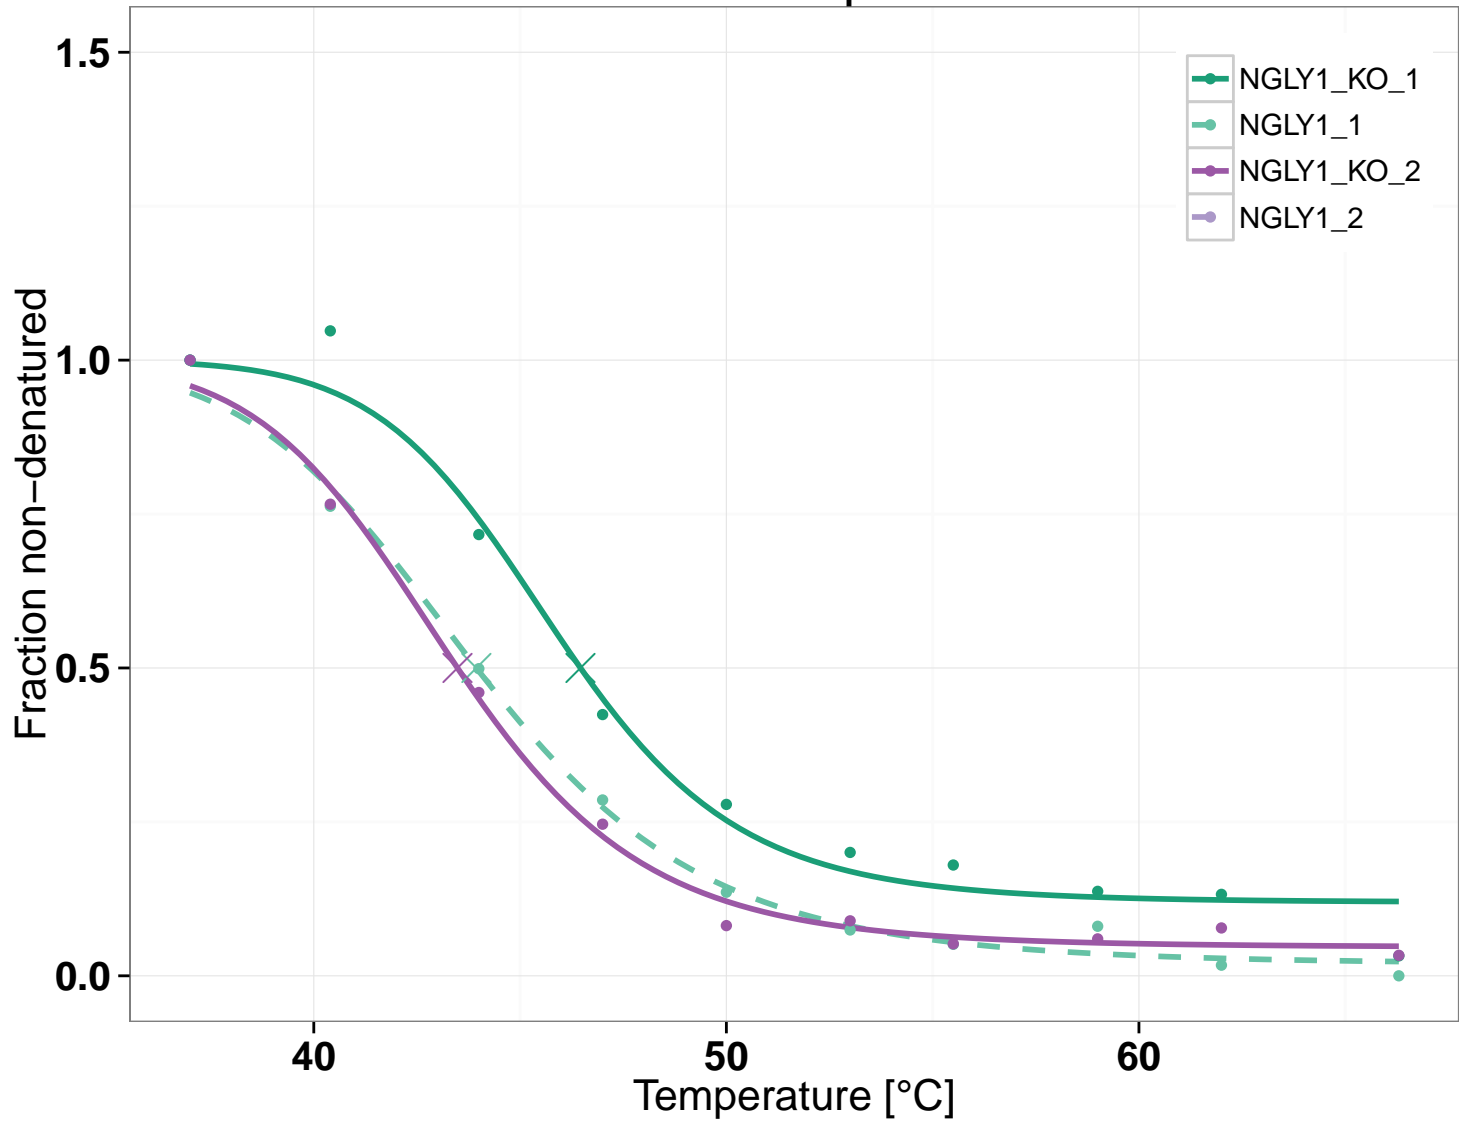

|            | meltPoint | slope  | plateau | R2   |
|------------|-----------|--------|---------|------|
| NGLY1_KO_1 | 46.46     | -0.1   | 0.12    | 0.98 |
| NGLY1_1    | 43.94     | -0.088 | 0.02    | 0.99 |
| NGLY1_KO_2 | 43.48     | -0.1   | 0.05    | 0.99 |
| NGLY1_2    | -         | -      | -       | -    |

Supplement: Supplementary file 3521 [file 1]

# IPI00513761.2|ECHDC1

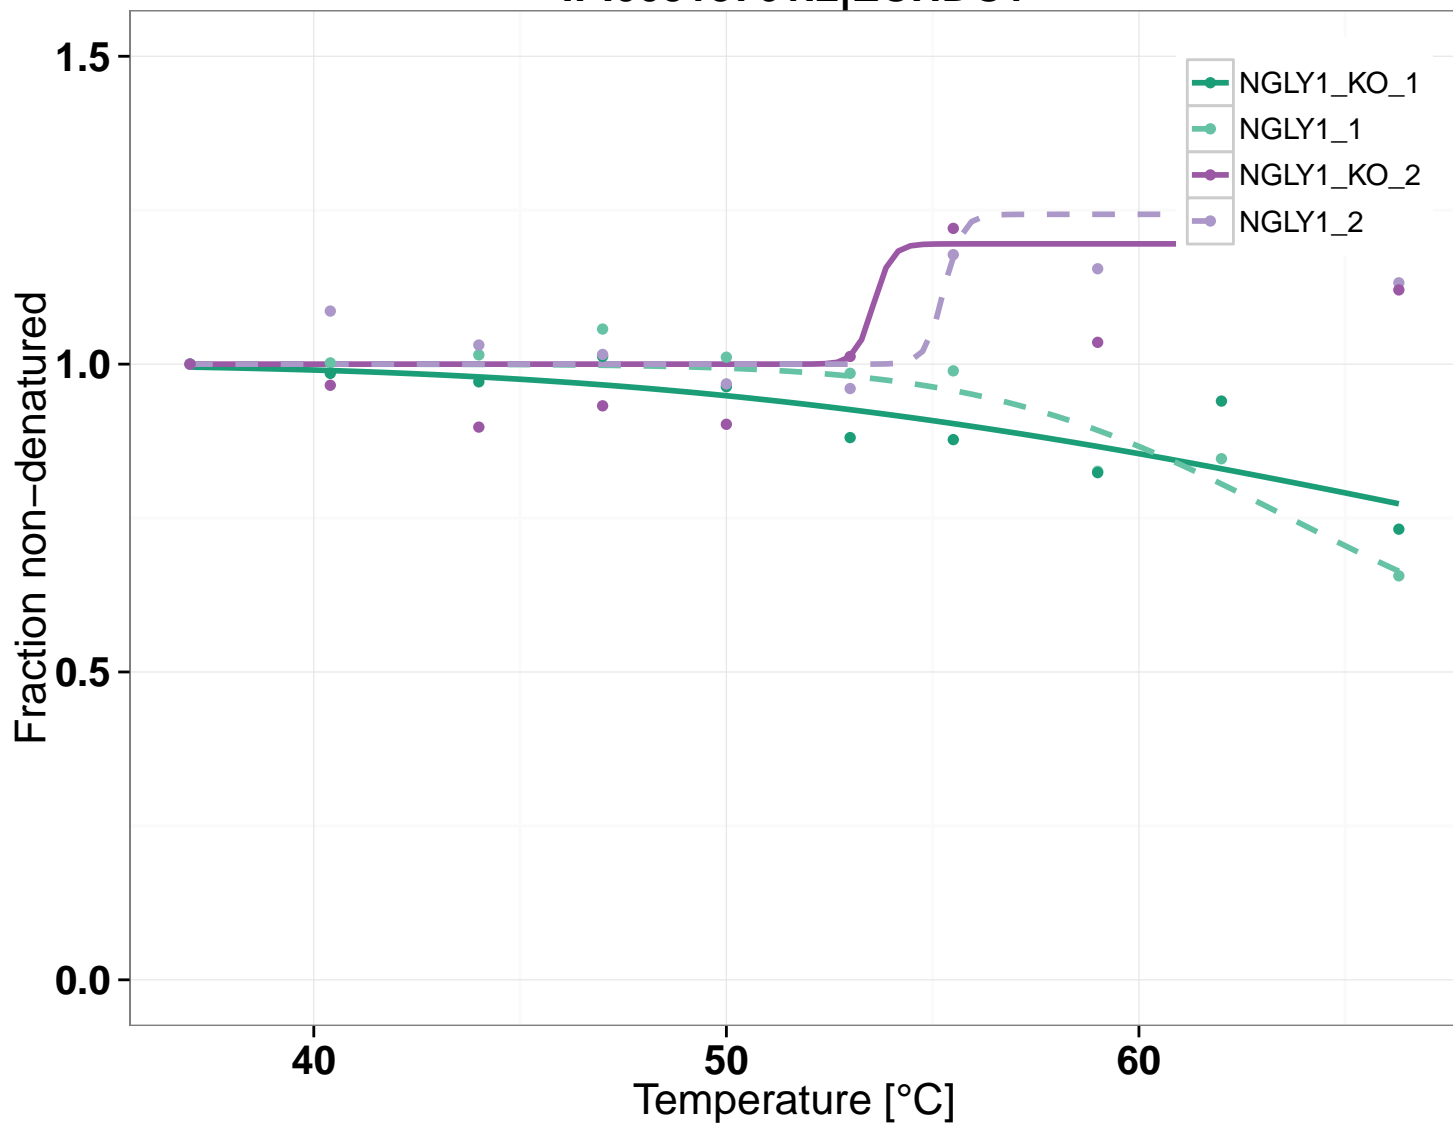

|            | meltPoint | slope  | plateau | R2   |
|------------|-----------|--------|---------|------|
| NGLY1_KO_1 | –         | –      | 0       | 0.71 |
| NGLY1_1    | –         | –0.034 | 0.43    | 0.92 |
| NGLY1_KO_2 | –         | 0.23   | 1.2     | 0.56 |
| NGLY1_2    | –         | 0.28   | 1.24    | 0.62 |

Supplement: Supplementary file 3522 [file 1]

IPI00385034.6|SLC9A3R2

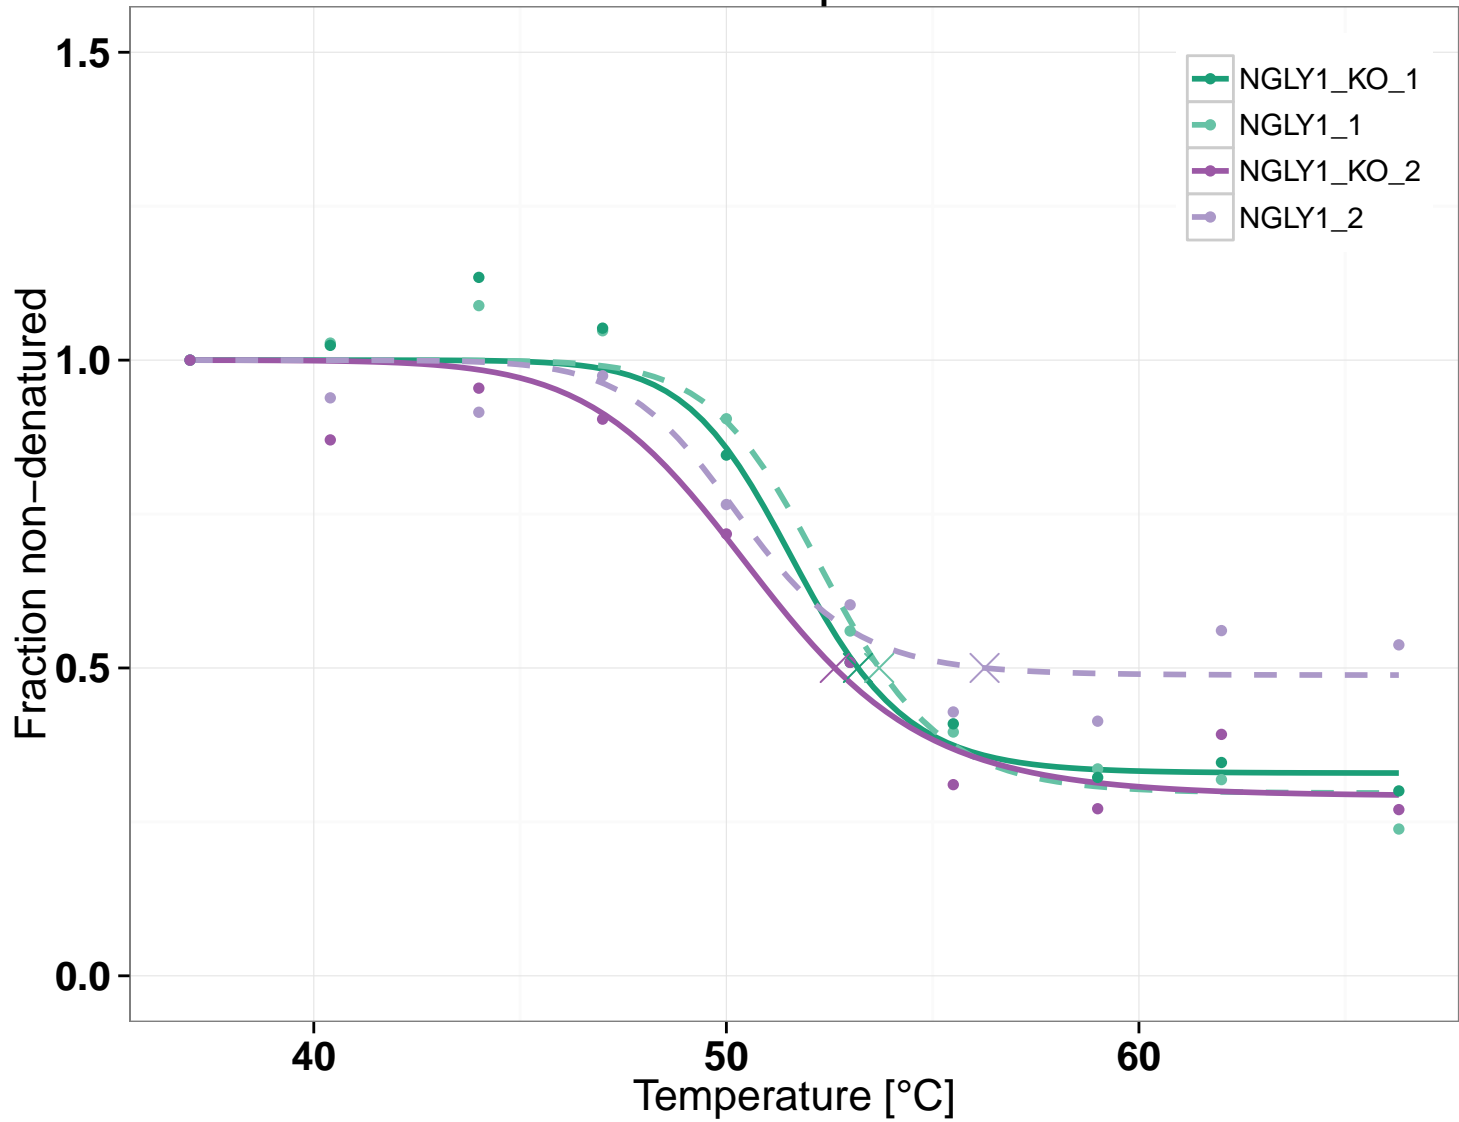

|            | meltPoint | slope  | plateau | R2   |
|------------|-----------|--------|---------|------|
| NGLY1_KO_1 | 53.19     | -0.12  | 0.33    | 0.98 |
| NGLY1_1    | 53.7      | -0.13  | 0.3     | 0.98 |
| NGLY1_KO_2 | 52.63     | -0.087 | 0.29    | 0.96 |
| NGLY1_2    | 56.26     | -0.091 | 0.49    | 0.93 |

Supplement: Supplementary file 3523 [file 1]

# IPI00217652.4|GLT8D3

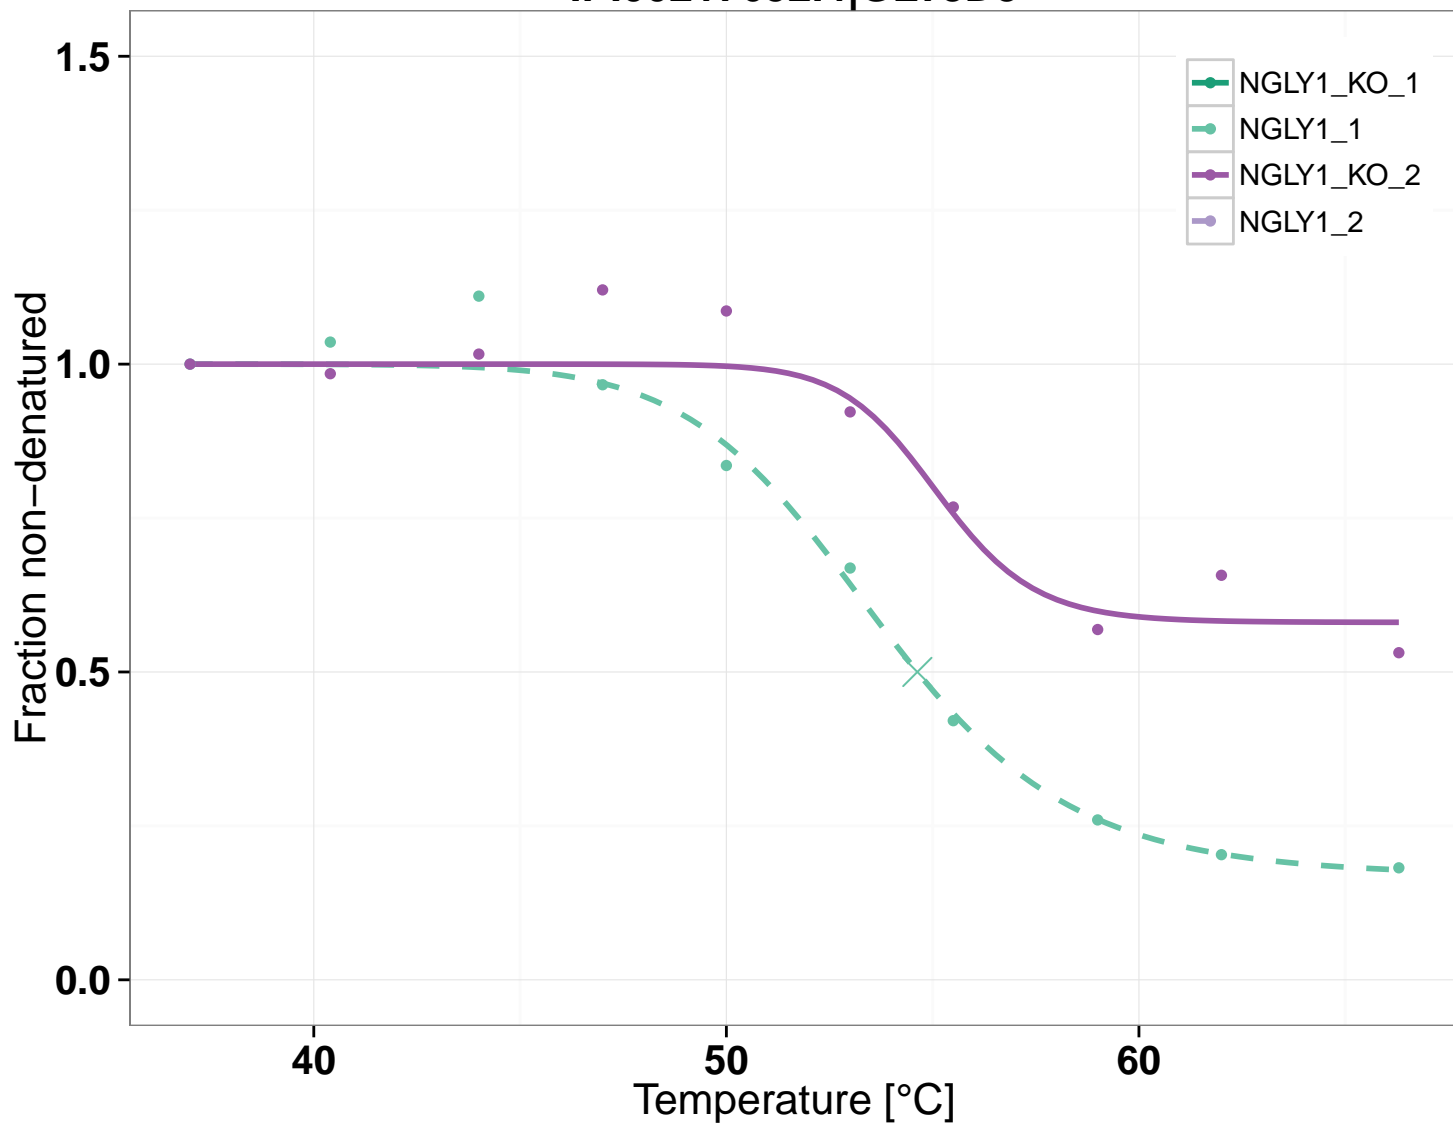

|            | meltPoint | slope | plateau | R2   |
|------------|-----------|-------|---------|------|
| NGLY1_KO_1 | –         | –     | –       | –    |
| NGLY1_1    | 54.63     | –0.09 | 0.17    | 0.99 |
| NGLY1_KO_2 | –         | –0.09 | 0.58    | 0.92 |
| NGLY1_2    | –         | –     | –       | –    |

Supplement: Supplementary file 3524 [file 1]

IPI00217442.2|ANKHD1-EIF4EBP3

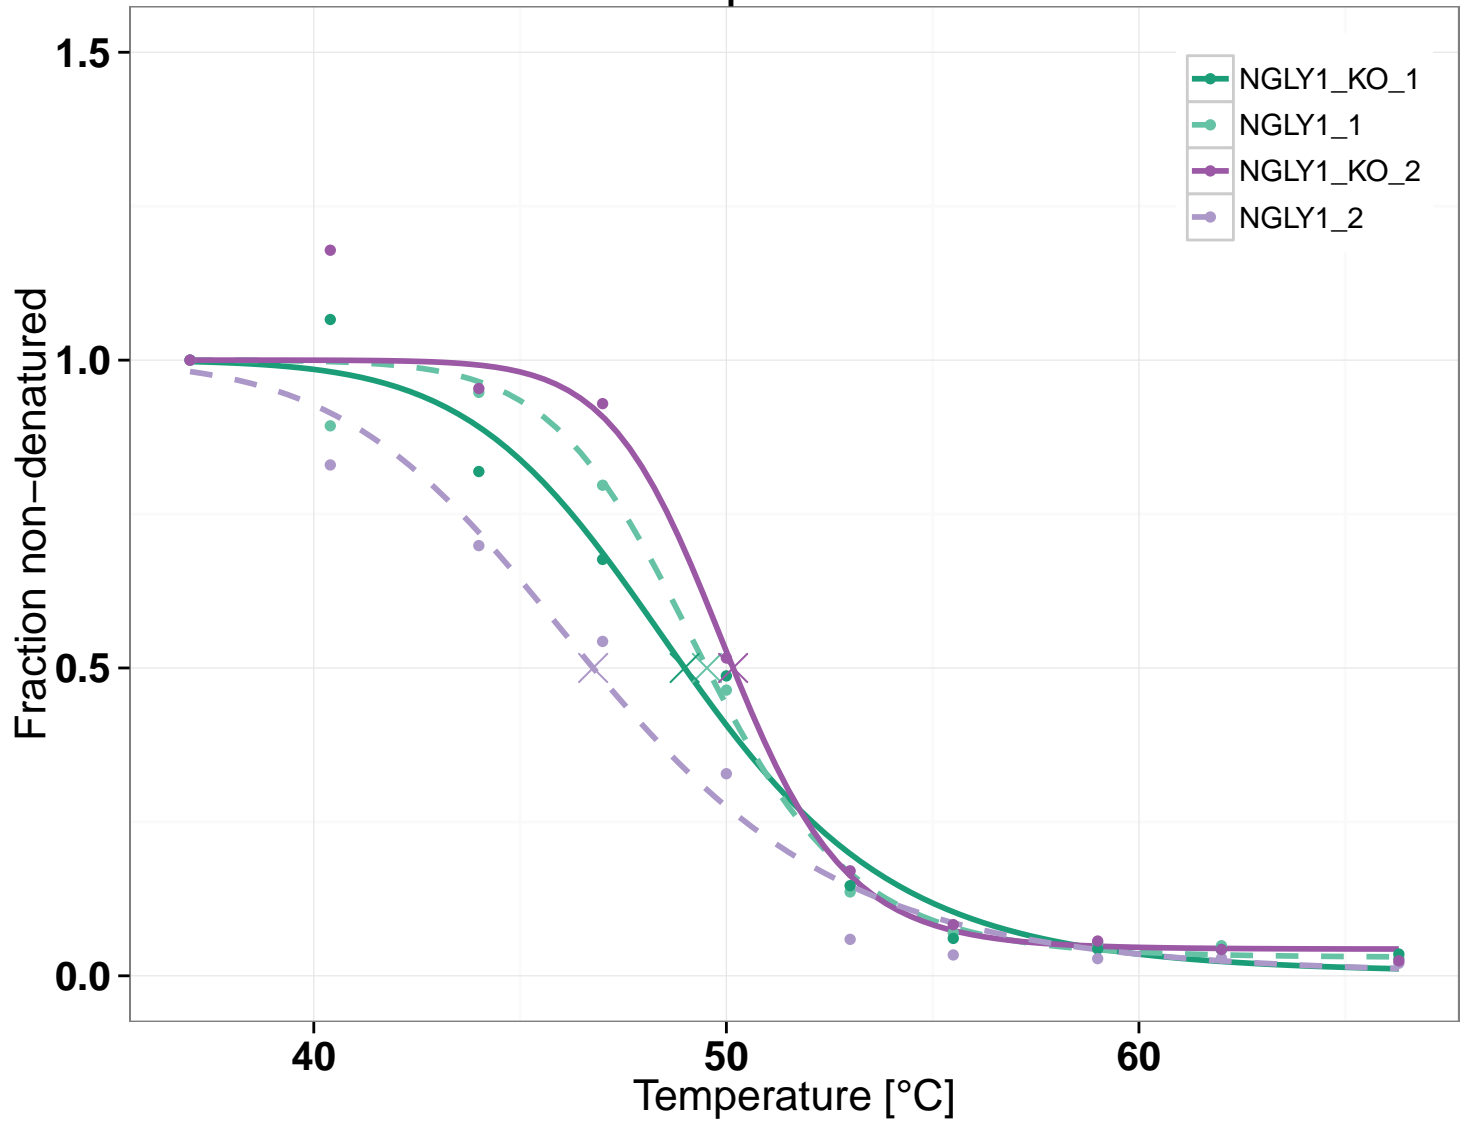

|            | meltPoint | slope  | plateau | R2   |
|------------|-----------|--------|---------|------|
| NGLY1_KO_1 | 48.99     | -0.096 | 0       | 0.98 |
| NGLY1_1    | 49.53     | -0.13  | 0.03    | 0.99 |
| NGLY1_KO_2 | 50.16     | -0.17  | 0.04    | 0.98 |
| NGLY1_2    | 46.77     | -0.082 | 0       | 0.98 |

Supplement: Supplementary file 3525 [file 1]

IPI00872897.1|TRAF3IP2

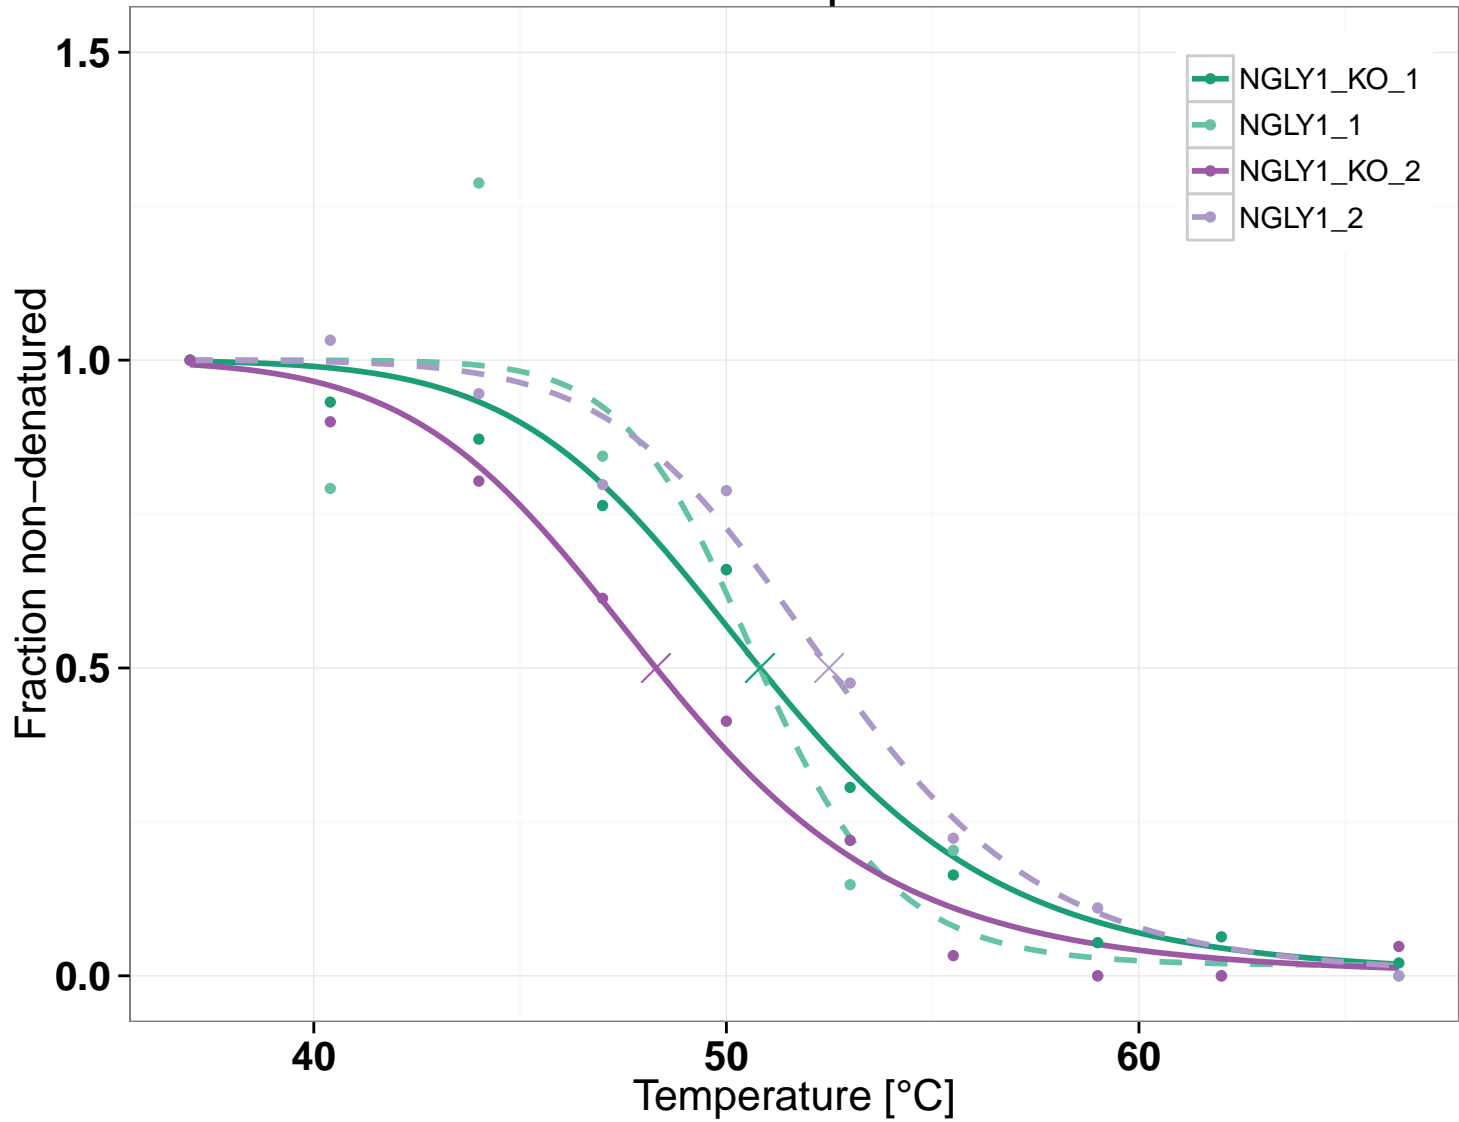

|            | meltPoint | slope  | plateau | R2   |
|------------|-----------|--------|---------|------|
| NGLY1_KO_1 | 50.82     | -0.084 | 0       | 0.99 |
| NGLY1_1    | 50.81     | -0.15  | 0.02    | 0.92 |
| NGLY1_KO_2 | 48.29     | -0.084 | 0       | 0.99 |
| NGLY1_2    | 52.49     | -0.095 | 0       | 0.99 |

Supplement: Supplementary file 3526 [file 1]

IPI00879210.1|GTF3C5

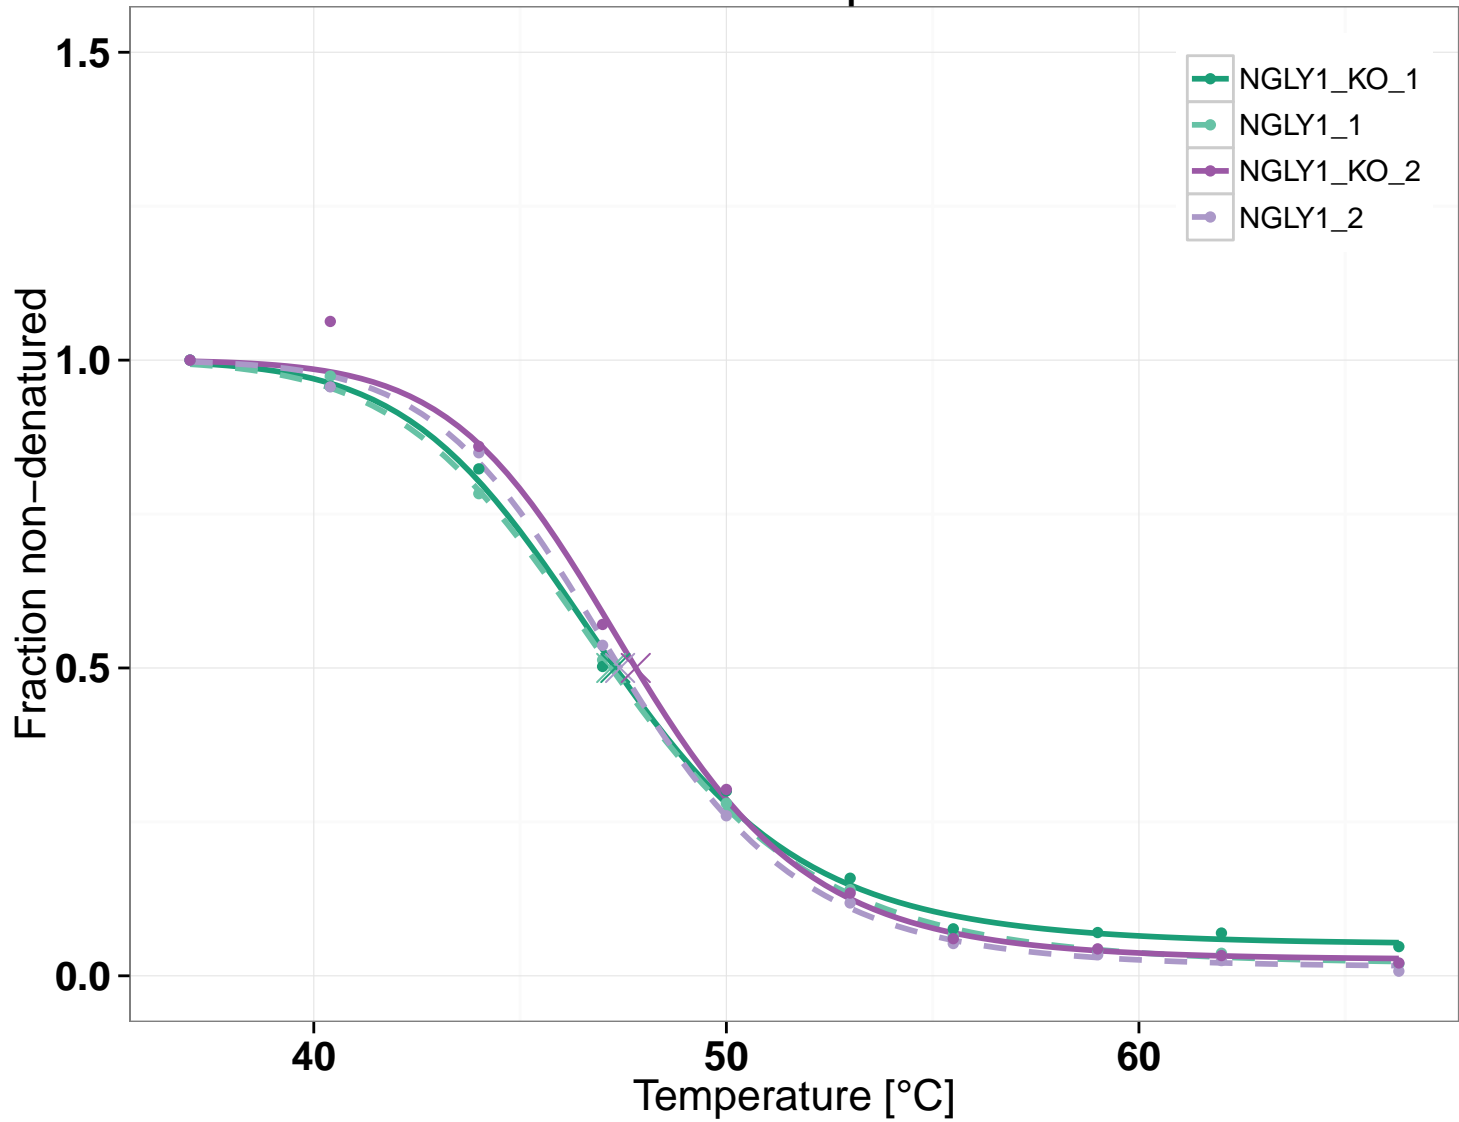

|            | meltPoint | slope  | plateau | R2 |
|------------|-----------|--------|---------|----|
| NGLY1_KO_1 | 47.31     | -0.099 | 0.05    | 1  |
| NGLY1_1    | 47.21     | -0.096 | 0.02    | 1  |
| NGLY1_KO_2 | 47.8      | -0.11  | 0.03    | 1  |
| NGLY1_2    | 47.42     | -0.11  | 0.01    | 1  |

Supplement: Supplementary file 3527 [file 1]

# IPI00026314.1|GSN

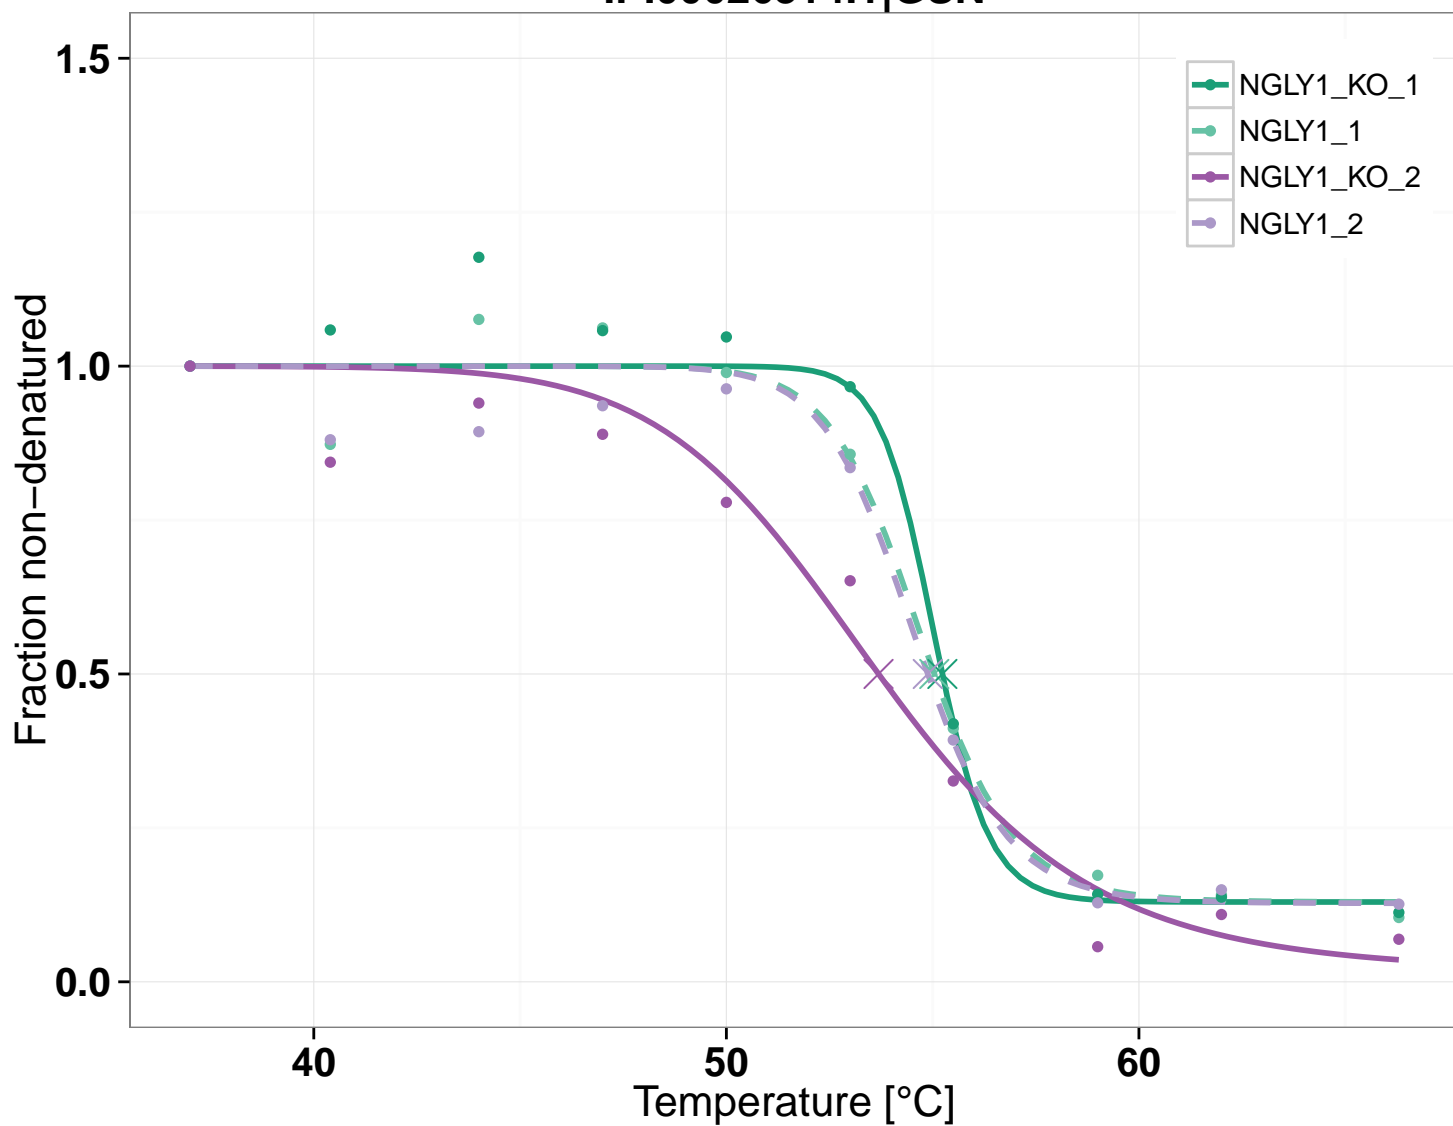

|            | meltPoint | slope  | plateau | R2   |
|------------|-----------|--------|---------|------|
| NGLY1_KO_1 | 55.24     | -0.33  | 0.13    | 0.98 |
| NGLY1_1    | 55.04     | -0.2   | 0.13    | 0.98 |
| NGLY1_KO_2 | 53.69     | -0.094 | 0.02    | 0.96 |
| NGLY1_2    | 54.88     | -0.2   | 0.13    | 0.98 |

Supplement: Supplementary file 3528 [file 1]

IPI00334281.7|DPY19L4

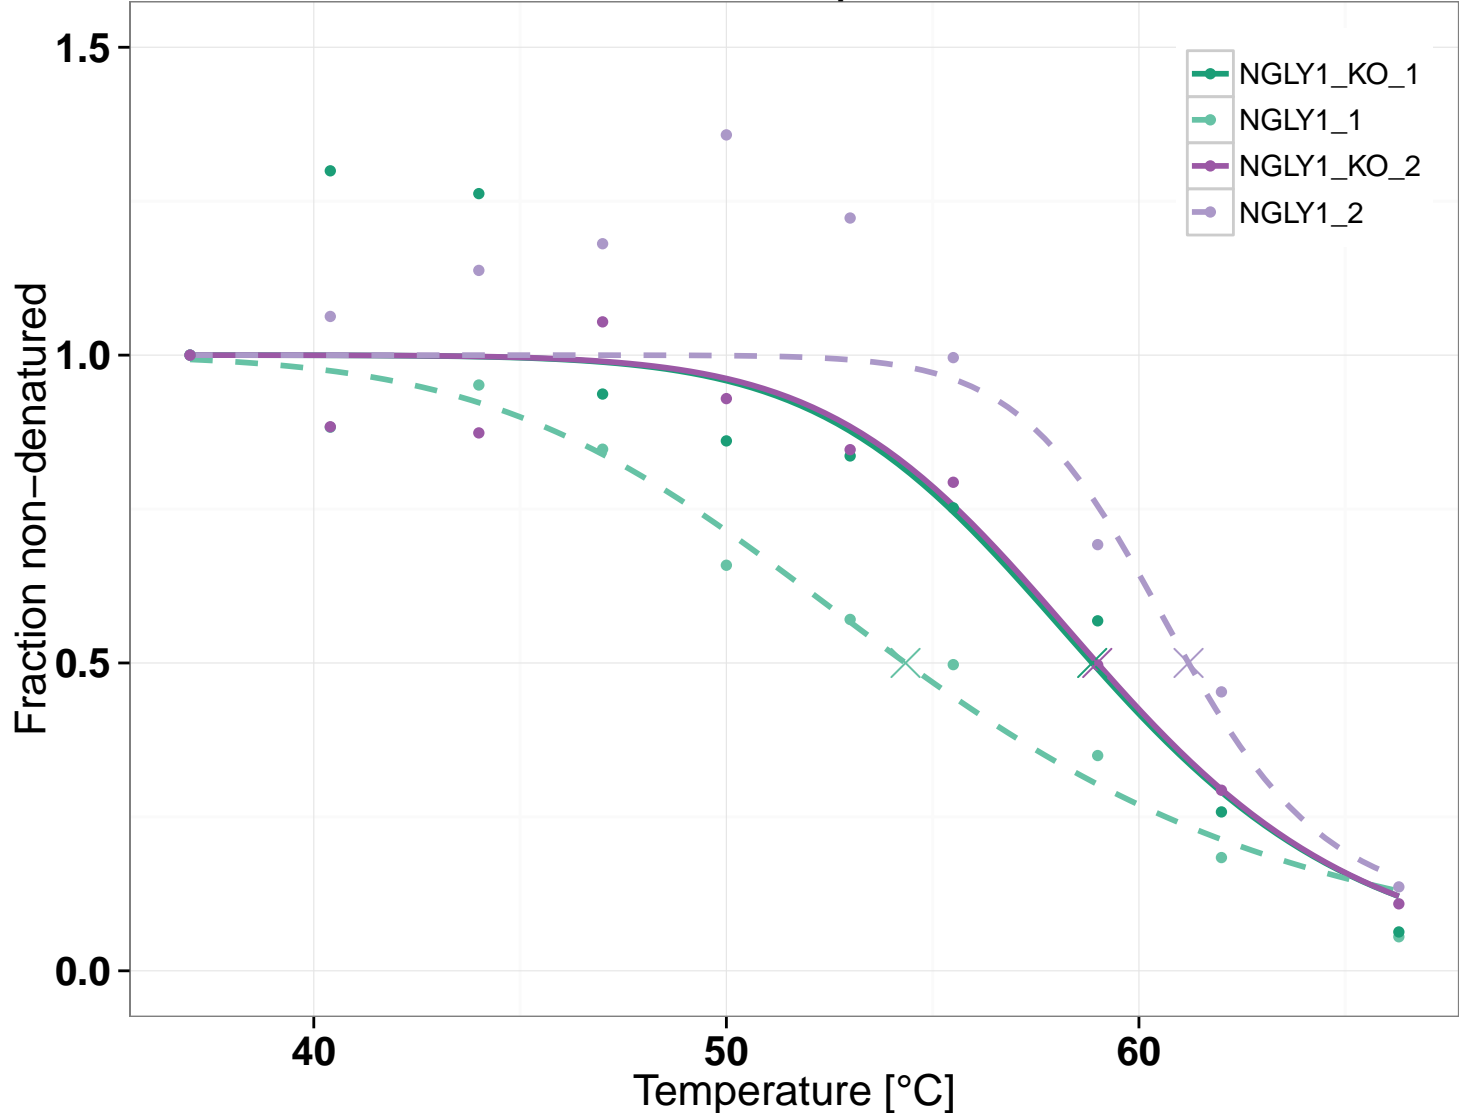

|            | meltPoint | slope  | plateau | R2   |
|------------|-----------|--------|---------|------|
| NGLY1_KO_1 | 58.87     | -0.076 | 0       | 0.87 |
| NGLY1_1    | 54.34     | -0.05  | 0       | 0.98 |
| NGLY1_KO_2 | 58.99     | -0.077 | 0       | 0.96 |
| NGLY1_2    | 61.2      | -0.12  | 0.09    | 0.81 |

Supplement: Supplementary file 3529 [file 1]

IPI00016255.4|FLJ22662

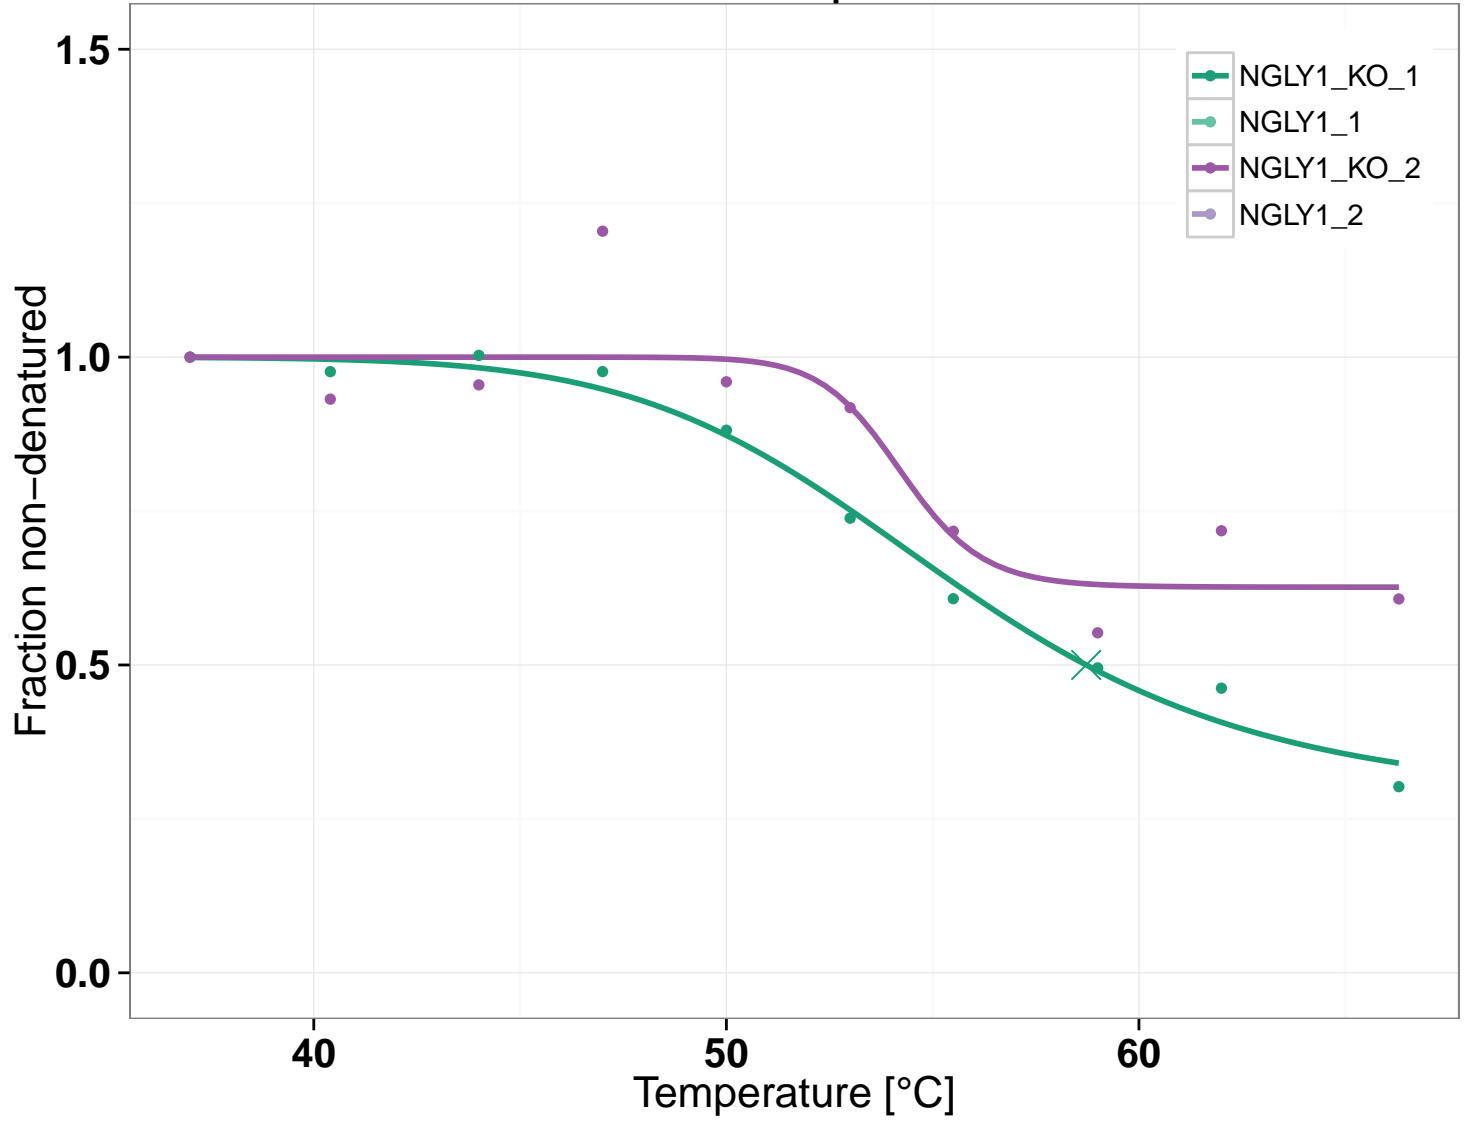

|            | meltPoint | slope  | plateau | R2   |
|------------|-----------|--------|---------|------|
| NGLY1_KO_1 | 58.72     | -0.048 | 0.28    | 0.99 |
| NGLY1_1    | -         | -      | -       | -    |
| NGLY1_KO_2 | -         | -0.095 | 0.63    | 0.82 |
| NGLY1_2    | -         | -      | -       | -    |

Supplement: Supplementary file 3530 [file 1]

# IPI00021199.2|STMN3

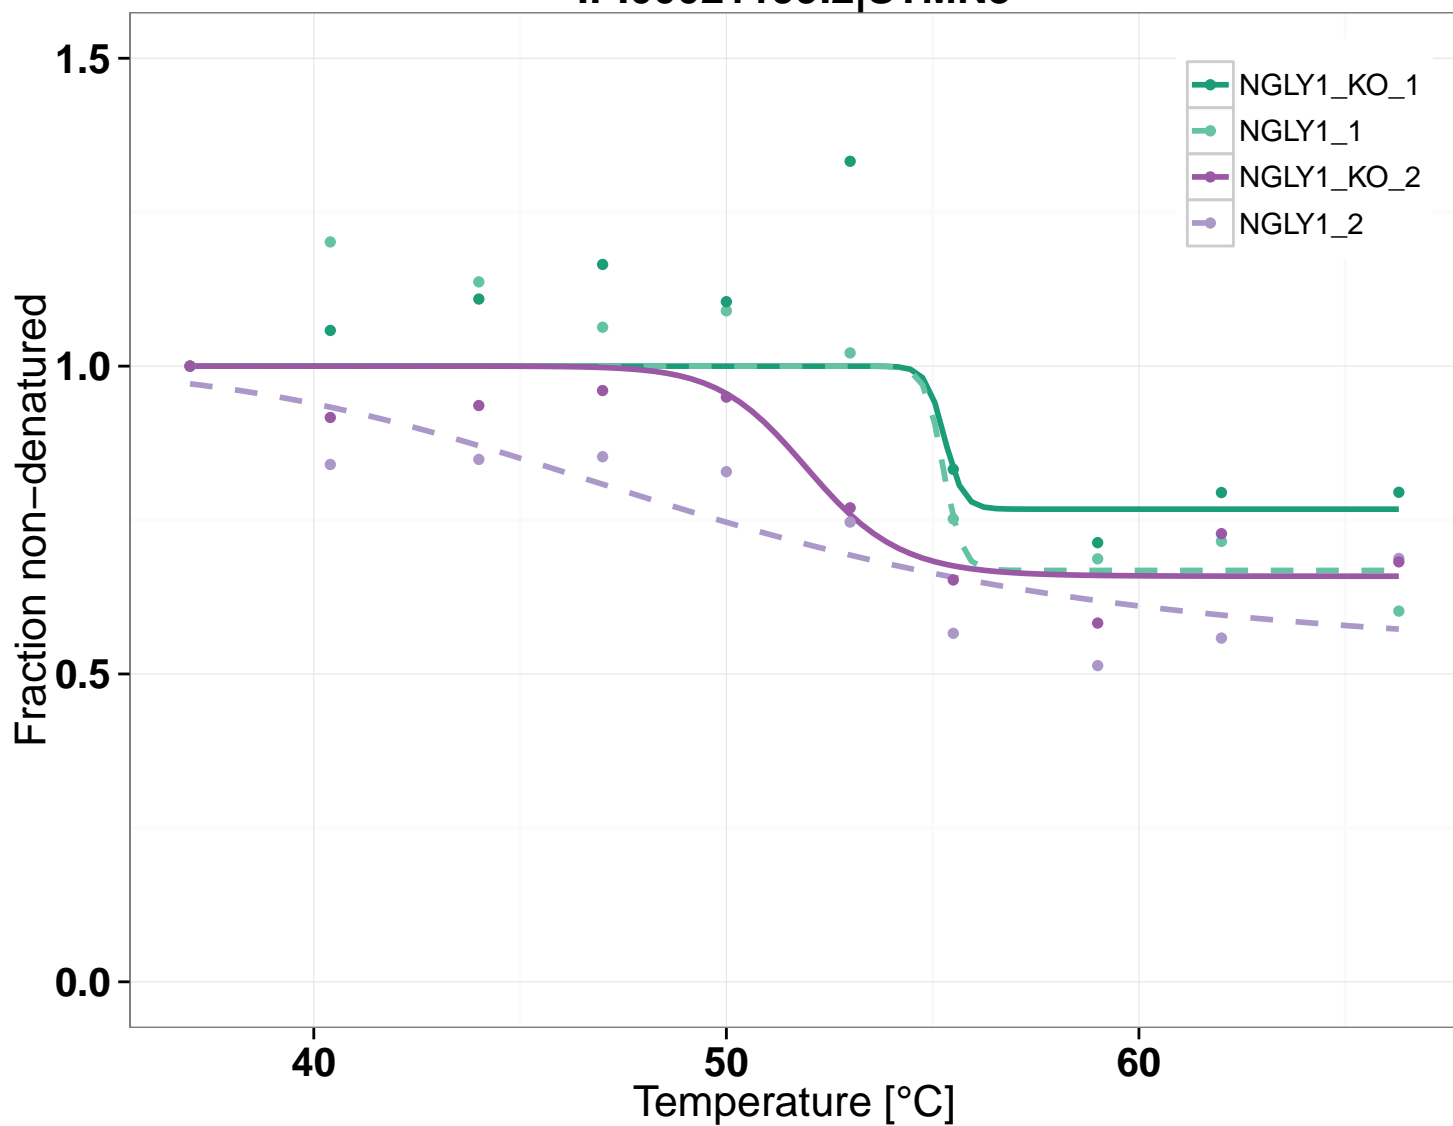

|            | meltPoint | slope  | plateau | R2   |
|------------|-----------|--------|---------|------|
| NGLY1_KO_1 | —         | -0.26  | 0.77    | 0.53 |
| NGLY1_1    | —         | -0.38  | 0.67    | 0.81 |
| NGLY1_KO_2 | —         | -0.077 | 0.66    | 0.88 |
| NGLY1_2    | —         | -0.021 | 0.52    | 0.76 |

Supplement: Supplementary file 3531 [file 1]

# IPI00001767.2|PTPRO

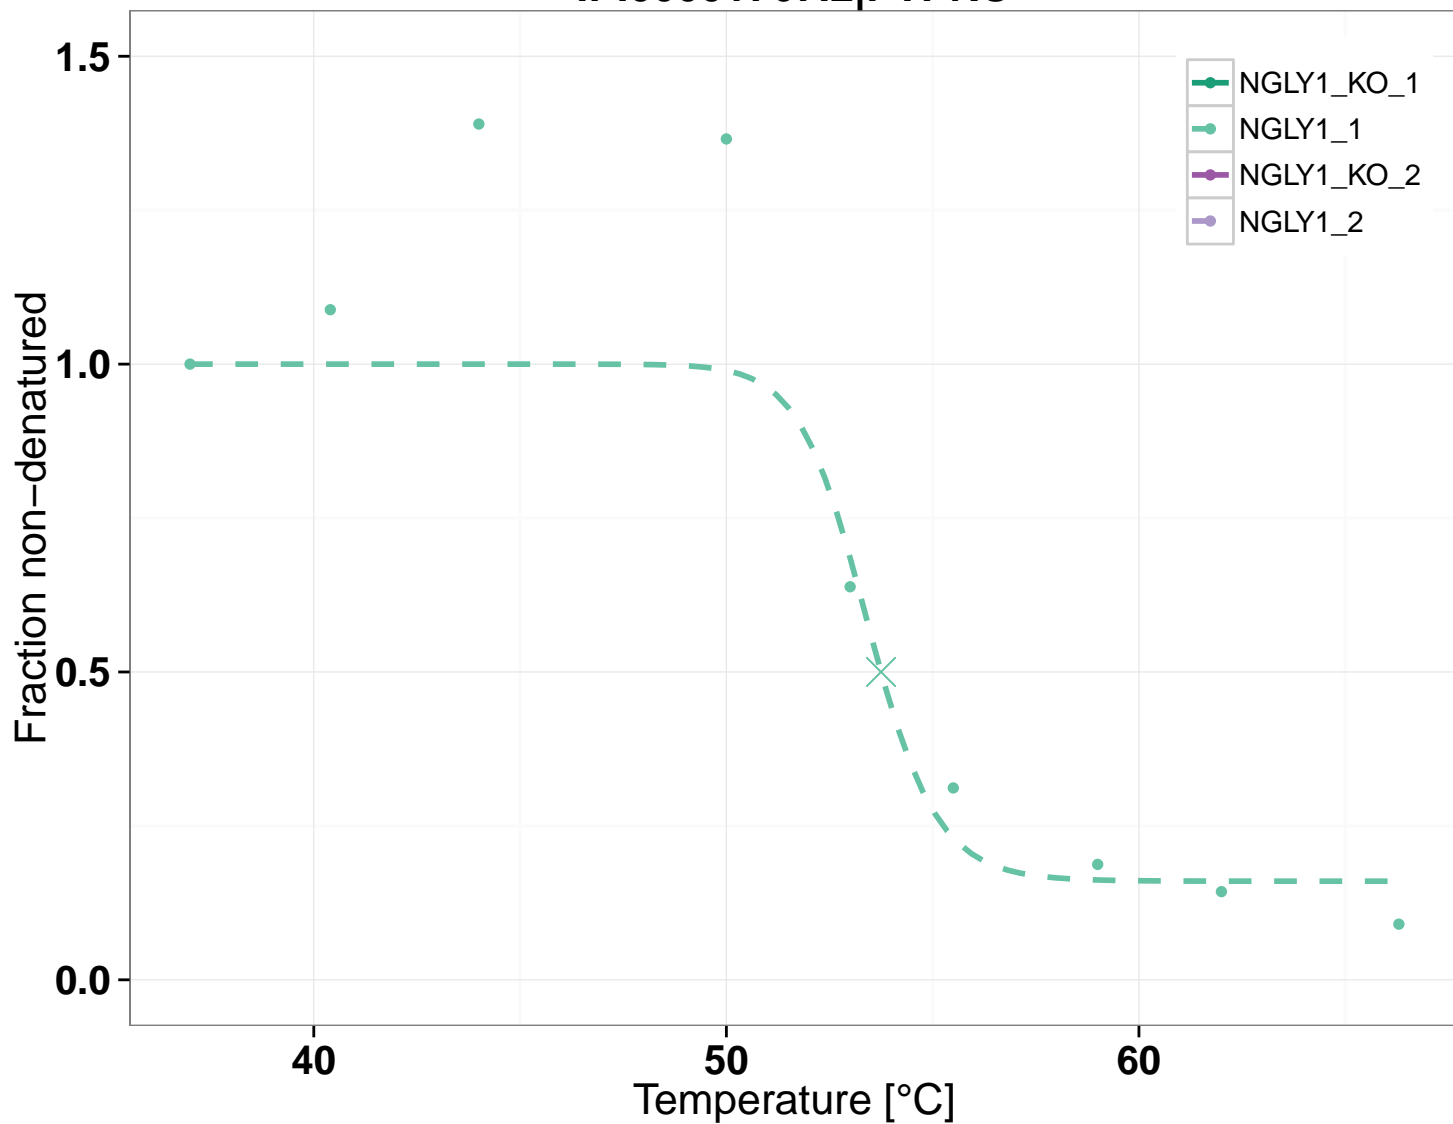

|            | meltPoint | slope | plateau | R2  |
|------------|-----------|-------|---------|-----|
| NGLY1_KO_1 | —         | —     | —       | —   |
| NGLY1_1    | 53.75     | -0.25 | 0.16    | 0.8 |
| NGLY1_KO_2 | —         | —     | —       | —   |
| NGLY1_2    | —         | —     | —       | —   |

Supplement: Supplementary file 3532 [file 1]

# IPI00216247.2|PSMD4

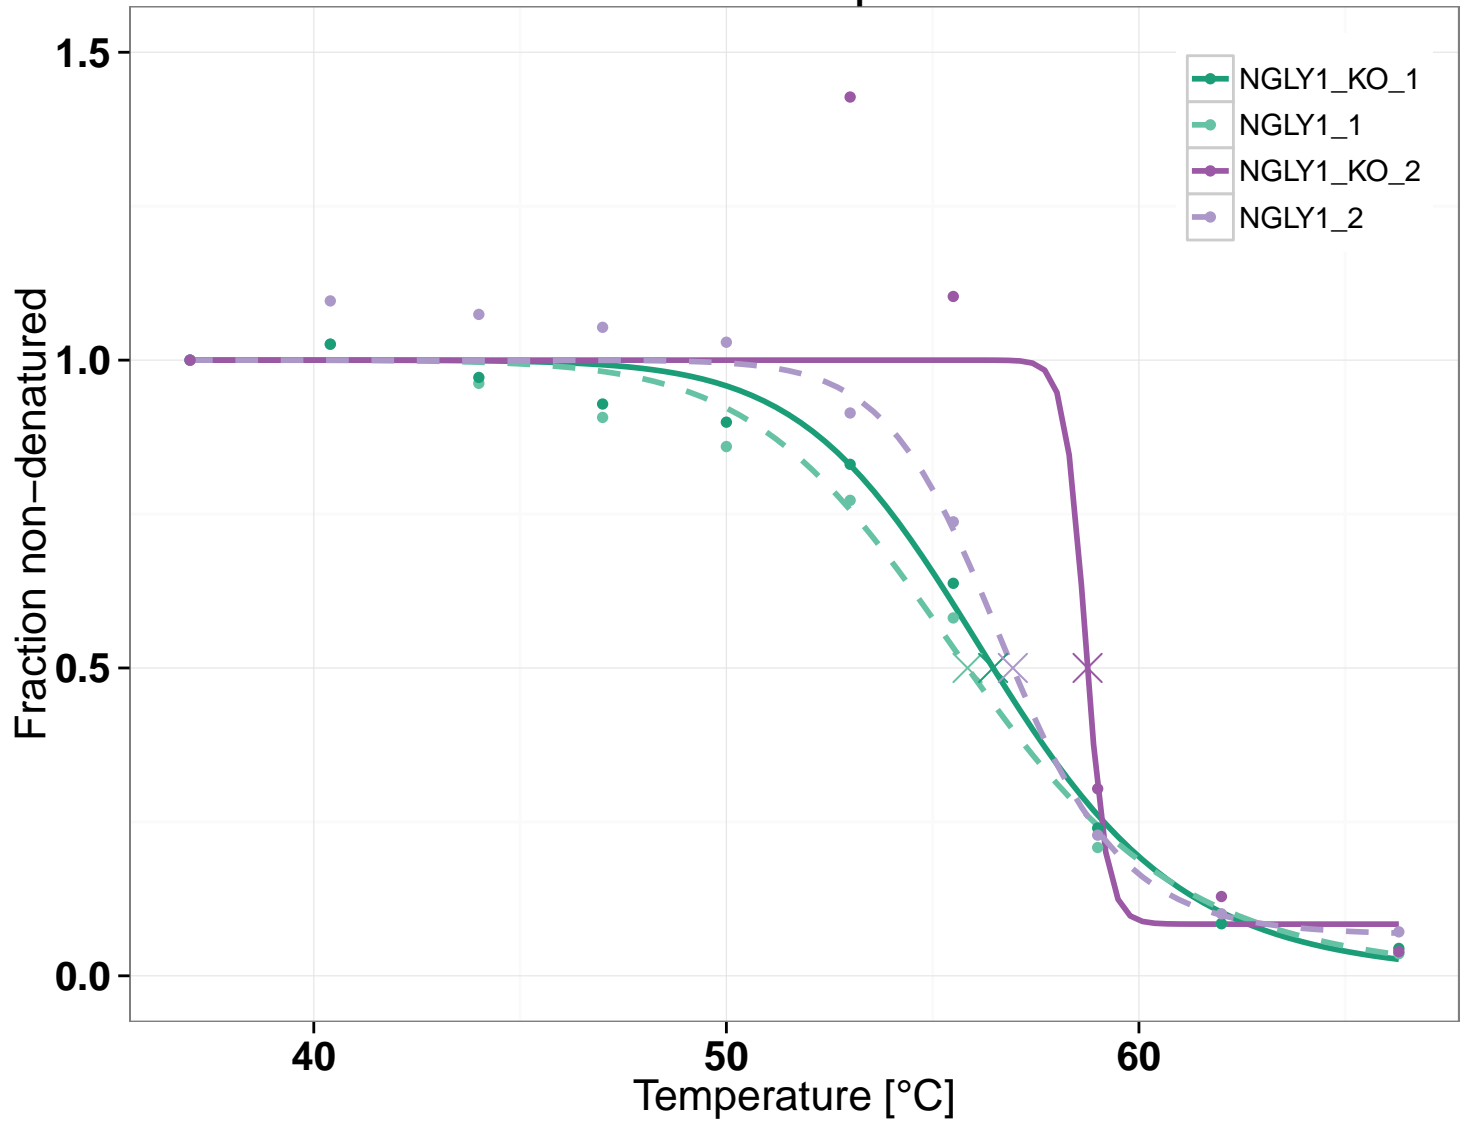

|            | meltPoint | slope  | plateau | R2   |
|------------|-----------|--------|---------|------|
| NGLY1_KO_1 | 56.47     | -0.11  | 0       | 0.99 |
| NGLY1_1    | 55.85     | -0.096 | 0       | 0.99 |
| NGLY1_KO_2 | 58.75     | -0.91  | 0.08    | 0.44 |
| NGLY1_2    | 56.94     | -0.16  | 0.07    | 0.99 |

Supplement: Supplementary file 3533 [file 1]

IPI00879253.1|ZFYVE26

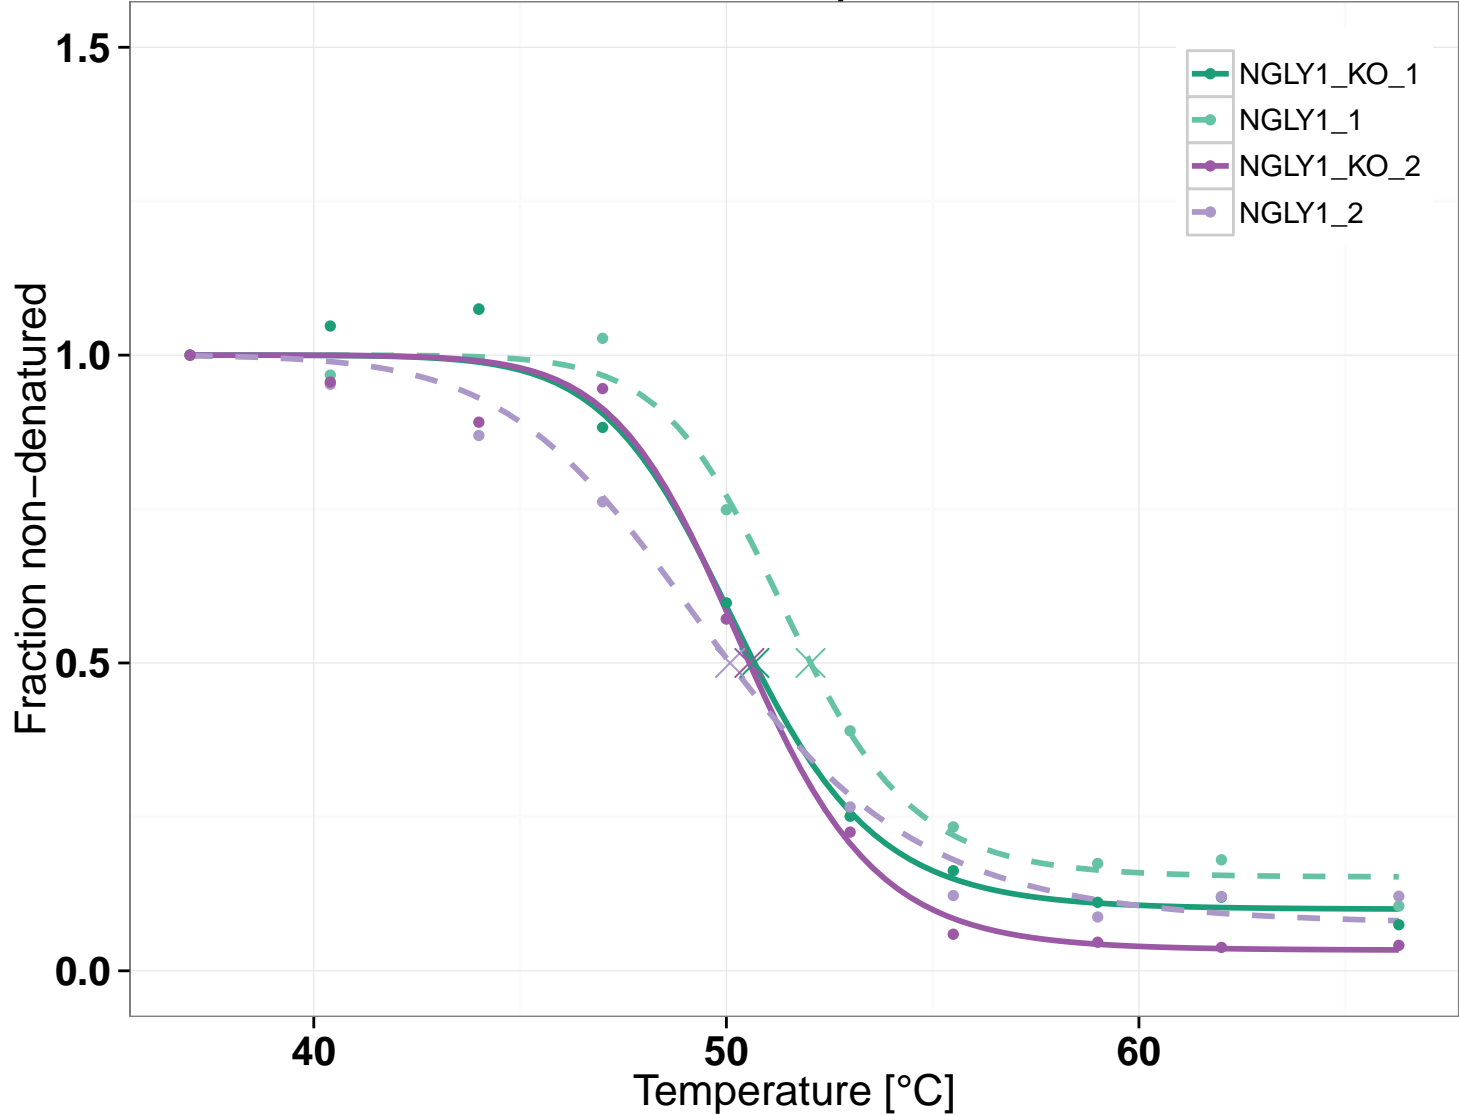

|            | meltPoint | slope  | plateau | R2   |
|------------|-----------|--------|---------|------|
| NGLY1_KO_1 | 50.68     | -0.14  | 0.1     | 0.99 |
| NGLY1_1    | 52.04     | -0.14  | 0.15    | 0.99 |
| NGLY1_KO_2 | 50.56     | -0.15  | 0.03    | 0.99 |
| NGLY1_2    | 50.09     | -0.092 | 0.07    | 0.99 |

Supplement: Supplementary file 3534 [file 1]

IPI00013621.4|THTPA

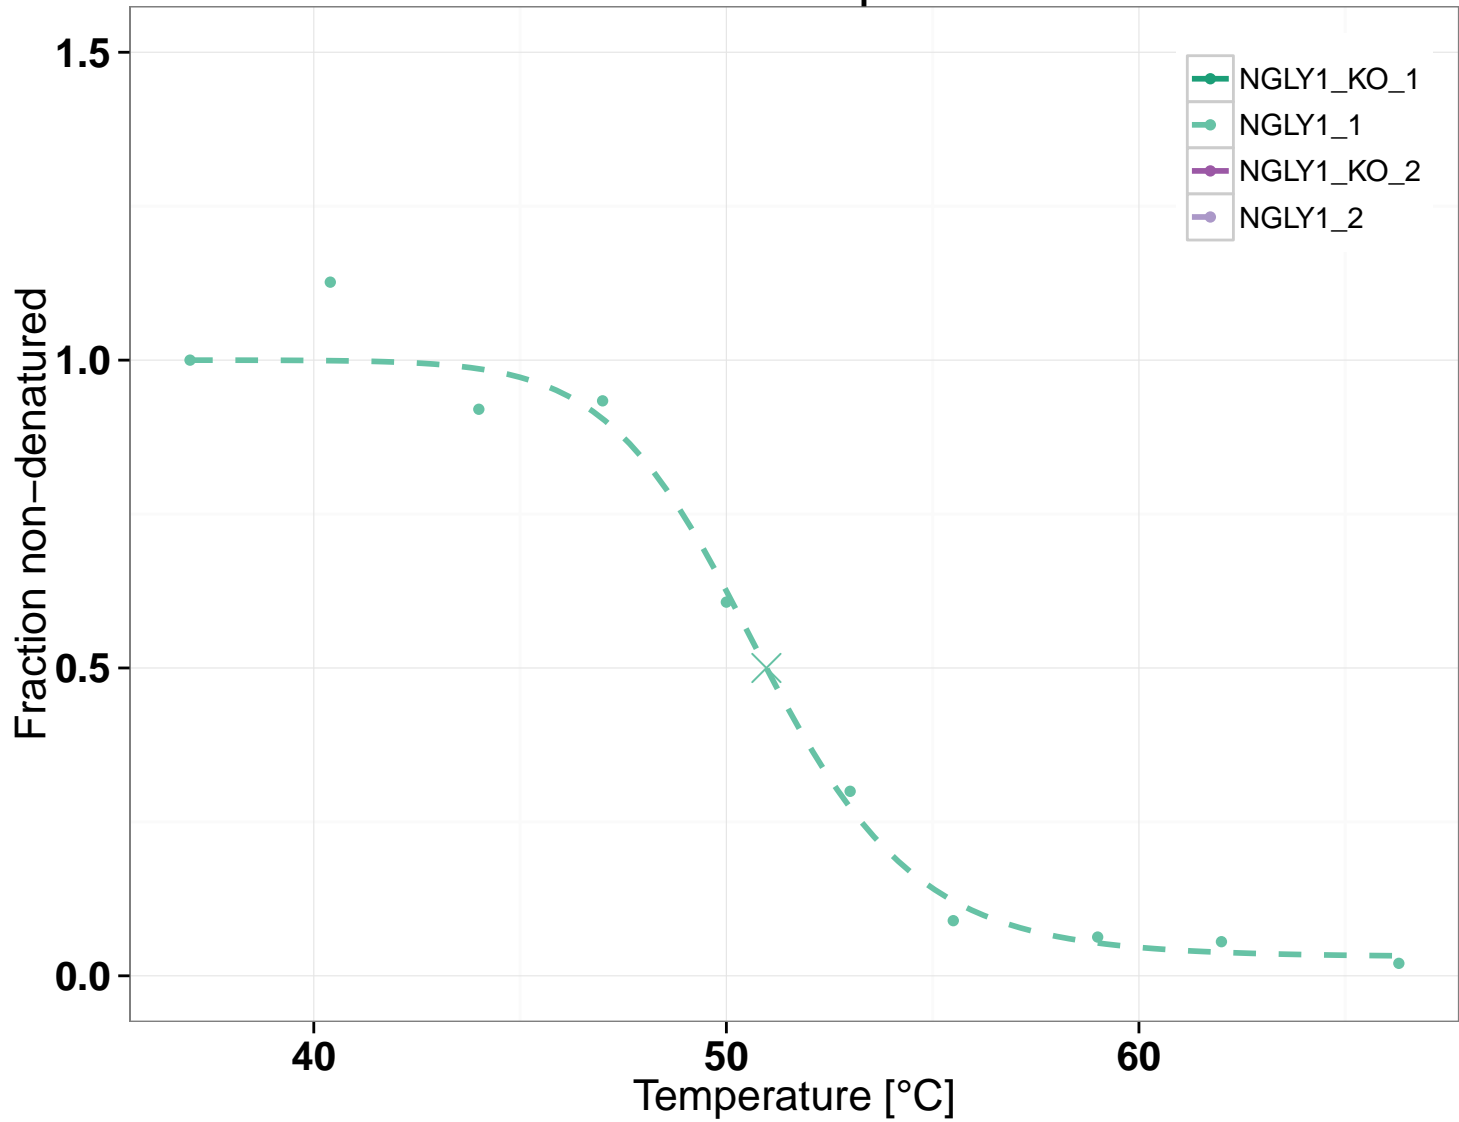

|            | meltPoint | slope | plateau | R2   |
|------------|-----------|-------|---------|------|
| NGLY1_KO_1 | -         | -     | -       | -    |
| NGLY1_1    | 50.97     | -0.13 | 0.03    | 0.99 |
| NGLY1_KO_2 | -         | -     | -       | -    |
| NGLY1_2    | -         | -     | -       | -    |

Supplement: Supplementary file 3535 [file 1]

IPI00005861.1|PRPF3

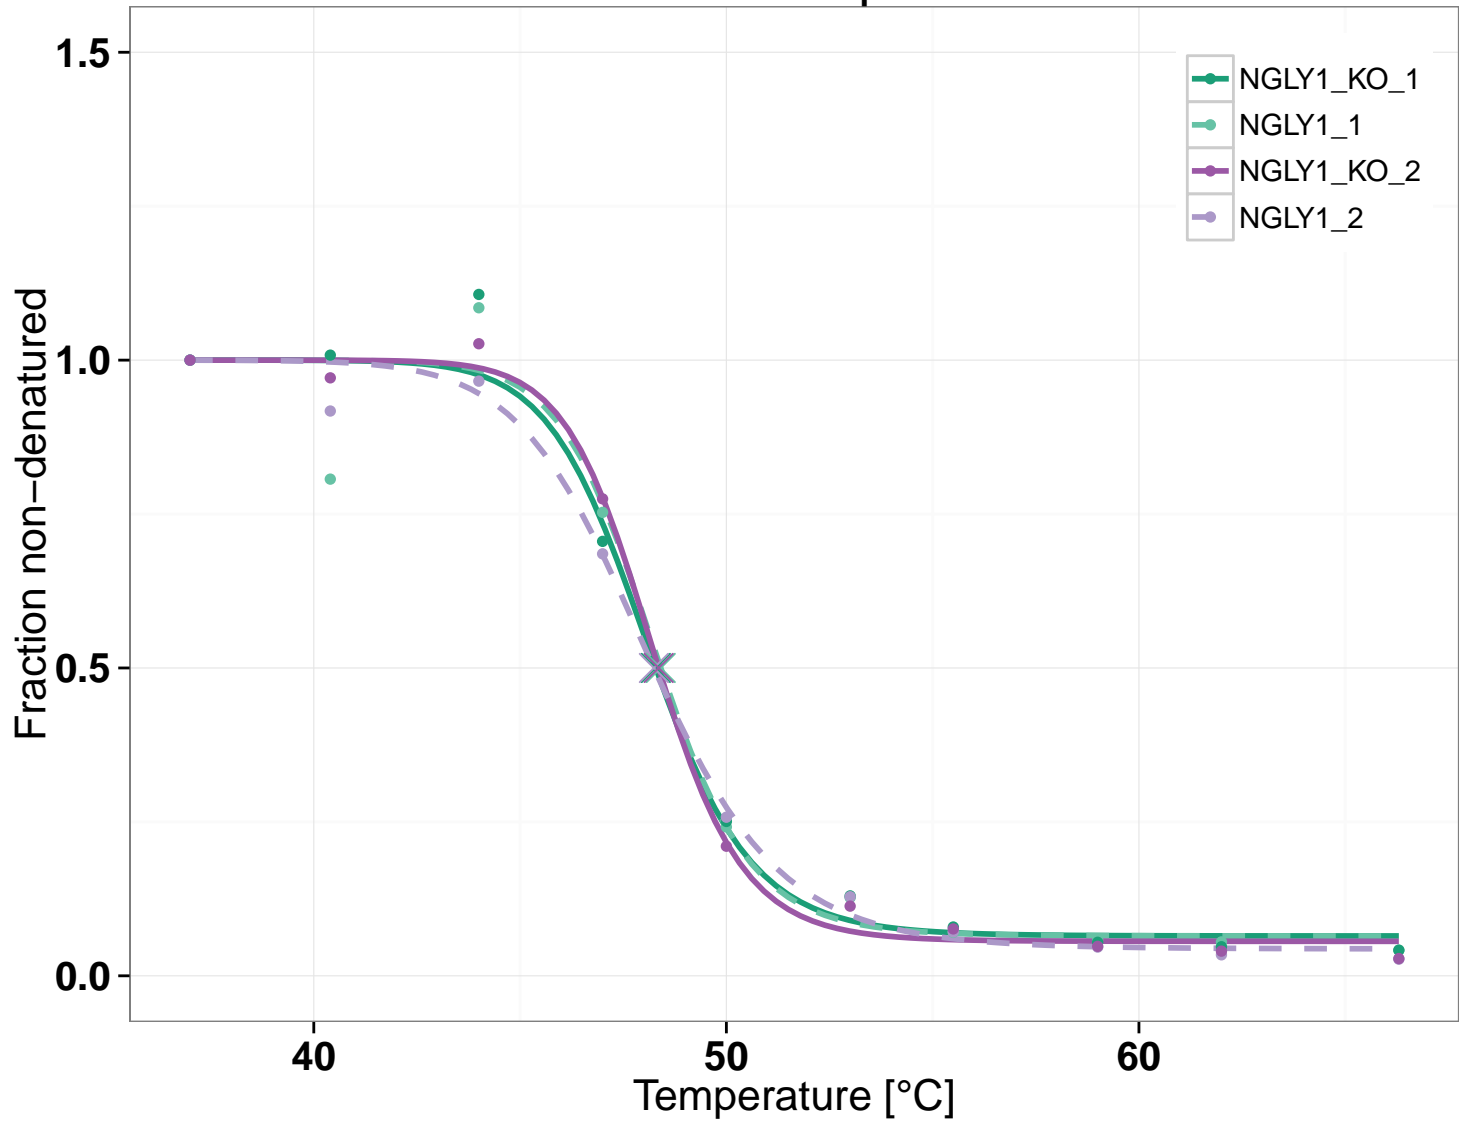

|            | meltPoint | slope | plateau | R2   |
|------------|-----------|-------|---------|------|
| NGLY1_KO_1 | 48.29     | -0.19 | 0.06    | 0.99 |
| NGLY1_1    | 48.41     | -0.2  | 0.06    | 0.97 |
| NGLY1_KO_2 | 48.36     | -0.22 | 0.06    | 1    |
| NGLY1_2    | 48.24     | -0.15 | 0.04    | 0.99 |

Supplement: Supplementary file 3536 [file 1]

IPI00019025.2|PARD6B

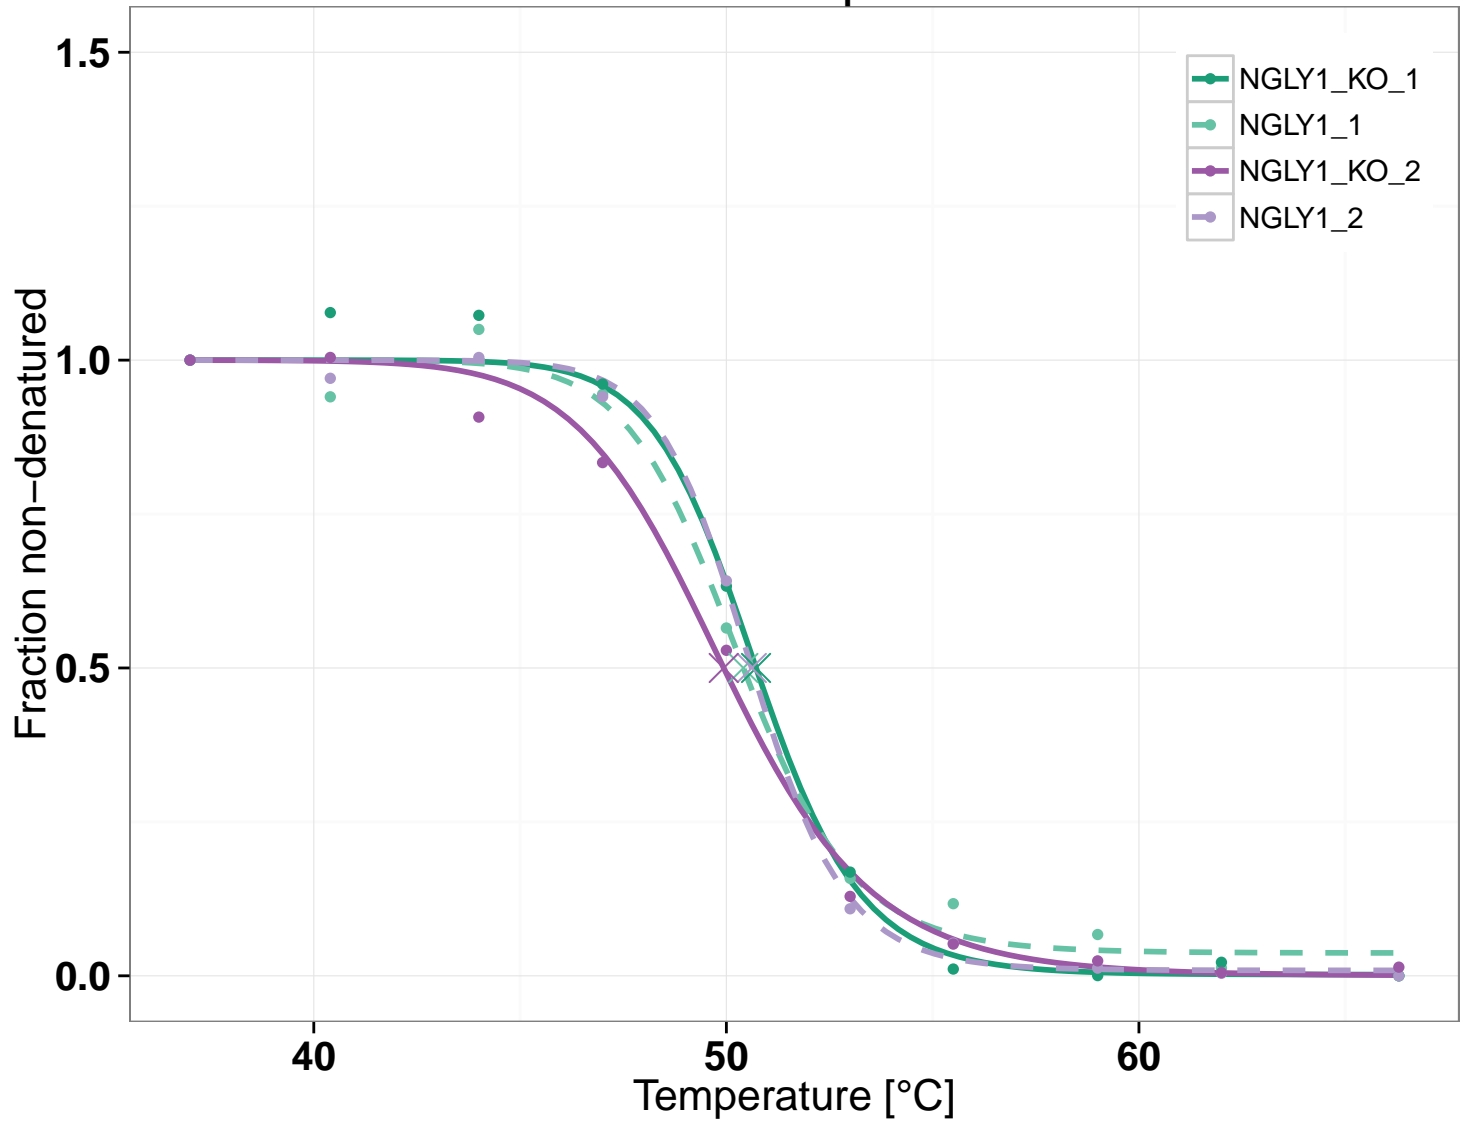

|            | meltPoint | slope | plateau | R2   |
|------------|-----------|-------|---------|------|
| NGLY1_KO_1 | 50.72     | -0.2  | 0       | 0.99 |
| NGLY1_1    | 50.41     | -0.17 | 0.04    | 0.99 |
| NGLY1_KO_2 | 49.94     | -0.14 | 0       | 1    |
| NGLY1_2    | 50.62     | -0.22 | 0.01    | 1    |

Supplement: Supplementary file 3537 [file 1]

IPI00607576.1|C9ORF5

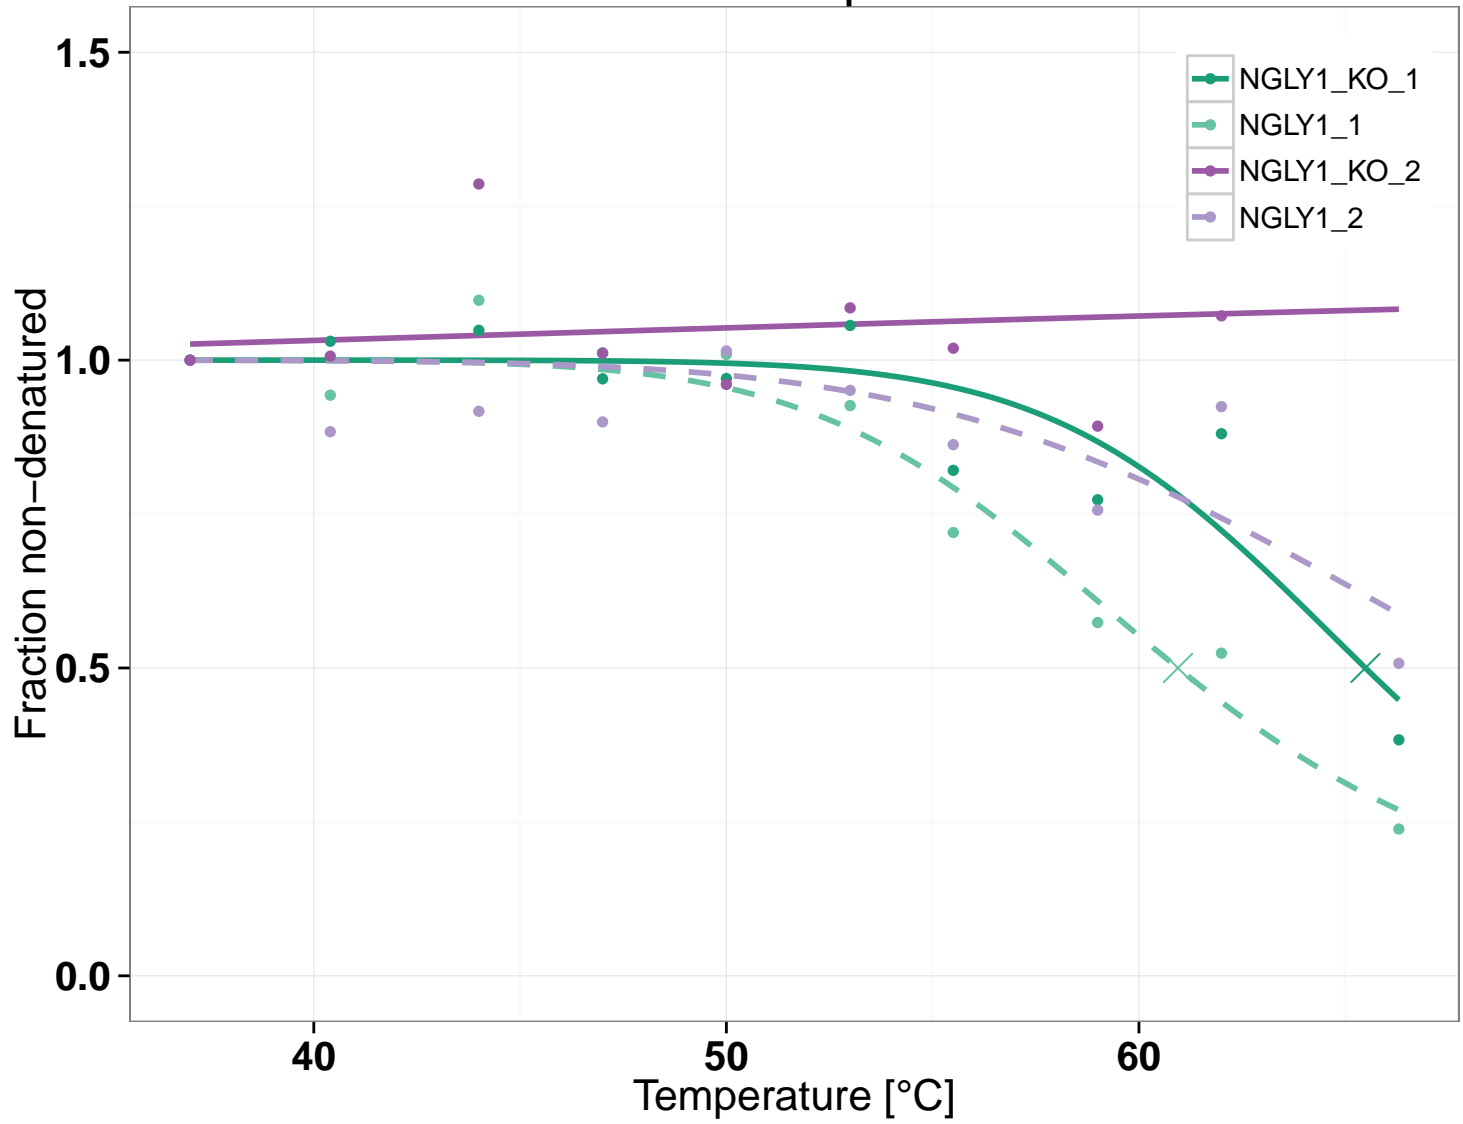

|            | meltPoint | slope  | plateau | R2   |
|------------|-----------|--------|---------|------|
| NGLY1_KO_1 | 65.49     | -0.066 | 0       | 0.82 |
| NGLY1_1    | 60.95     | -0.057 | 0.07    | 0.95 |
| NGLY1_KO_2 | -         | 0.002  | 1.5     | 0.01 |
| NGLY1_2    | -         | -0.037 | 0       | 0.6  |

Supplement: Supplementary file 3538 [file 1]

IPI00470779.2|TXLNA

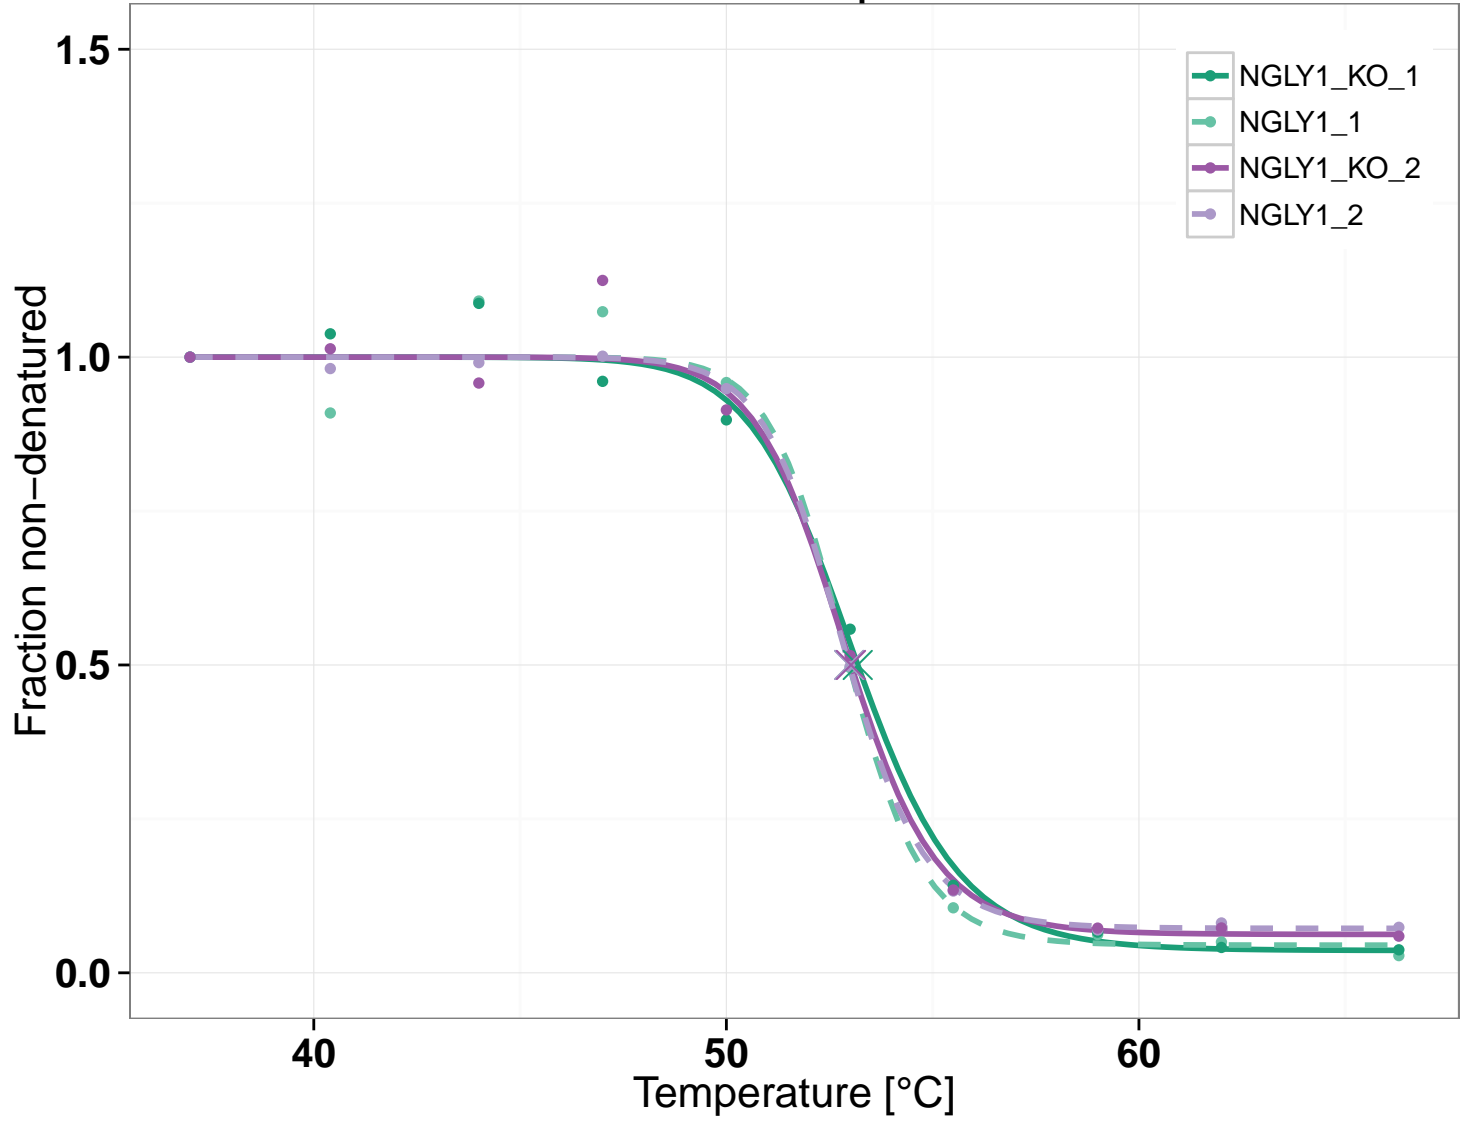

|            | meltPoint | slope | plateau | R2   |
|------------|-----------|-------|---------|------|
| NGLY1_KO_1 | 53.18     | -0.19 | 0.04    | 0.99 |
| NGLY1_1    | 52.98     | -0.25 | 0.04    | 0.99 |
| NGLY1_KO_2 | 53.02     | -0.21 | 0.06    | 0.99 |
| NGLY1_2    | 52.98     | -0.23 | 0.07    | 1    |

Supplement: Supplementary file 3539 [file 1]

IPI00297261.3|PTPN1

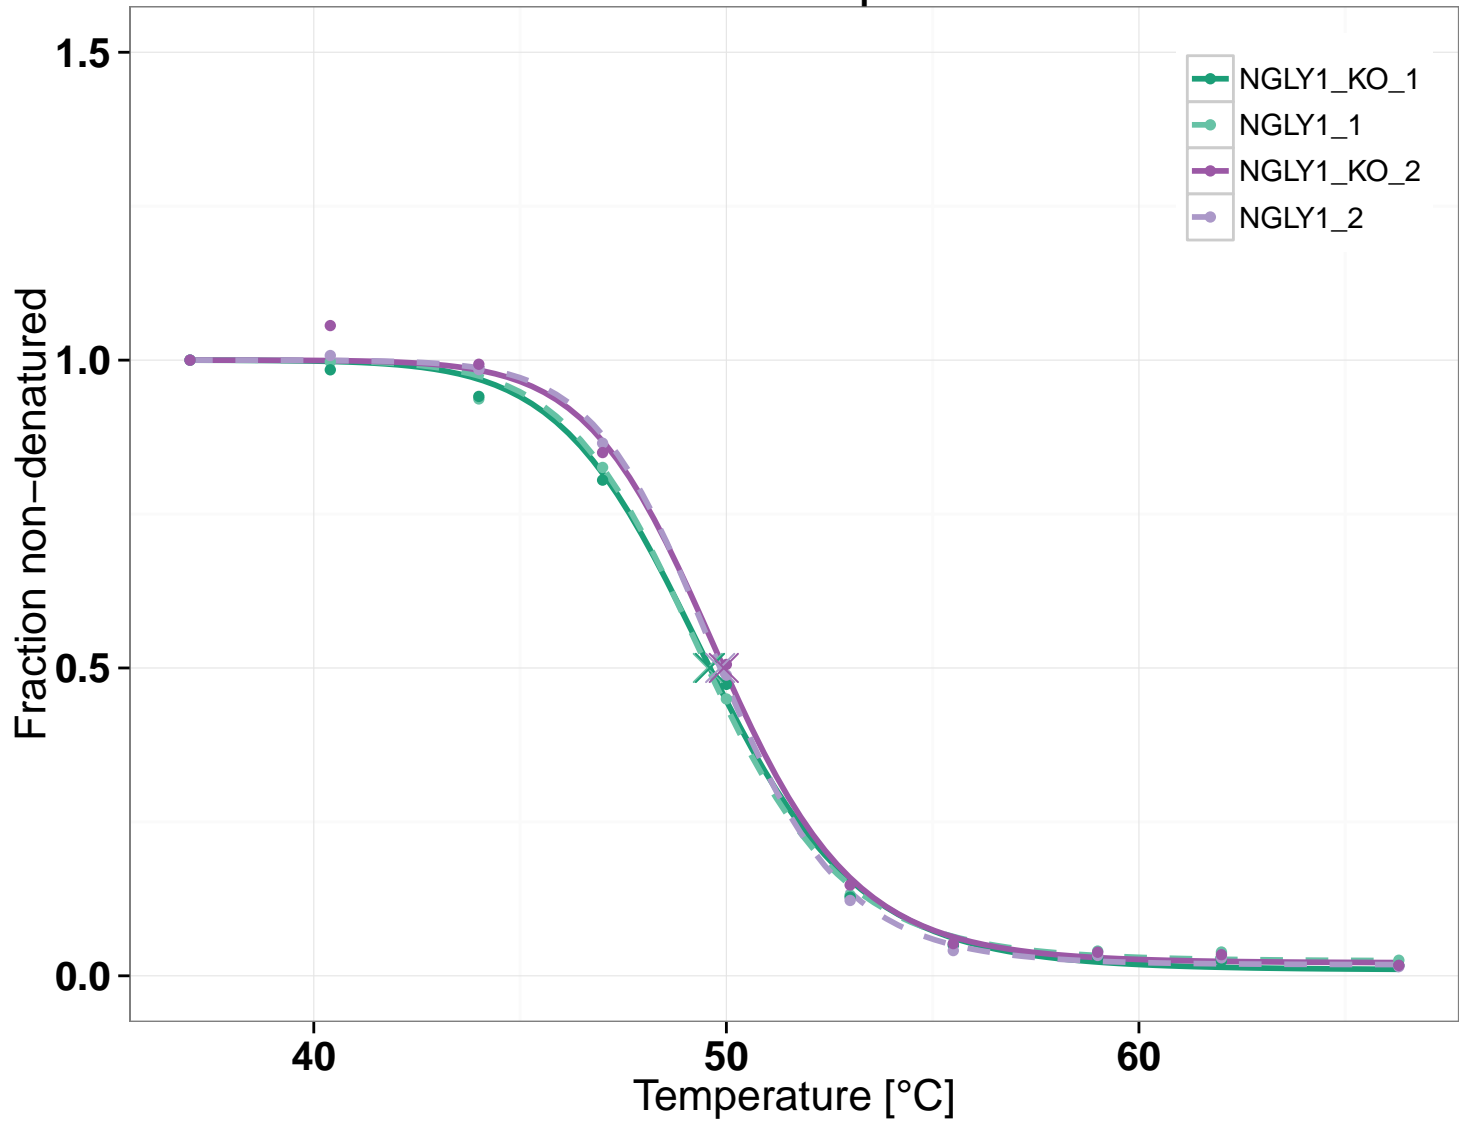

|            | meltPoint | slope | plateau | R2 |
|------------|-----------|-------|---------|----|
| NGLY1_KO_1 | 49.6      | -0.14 | 0.01    | 1  |
| NGLY1_1    | 49.55     | -0.14 | 0.02    | 1  |
| NGLY1_KO_2 | 49.94     | -0.15 | 0.02    | 1  |
| NGLY1_2    | 49.85     | -0.16 | 0.02    | 1  |

Supplement: Supplementary file 3540 [file 1]

# IPI00000769.2|KIF22

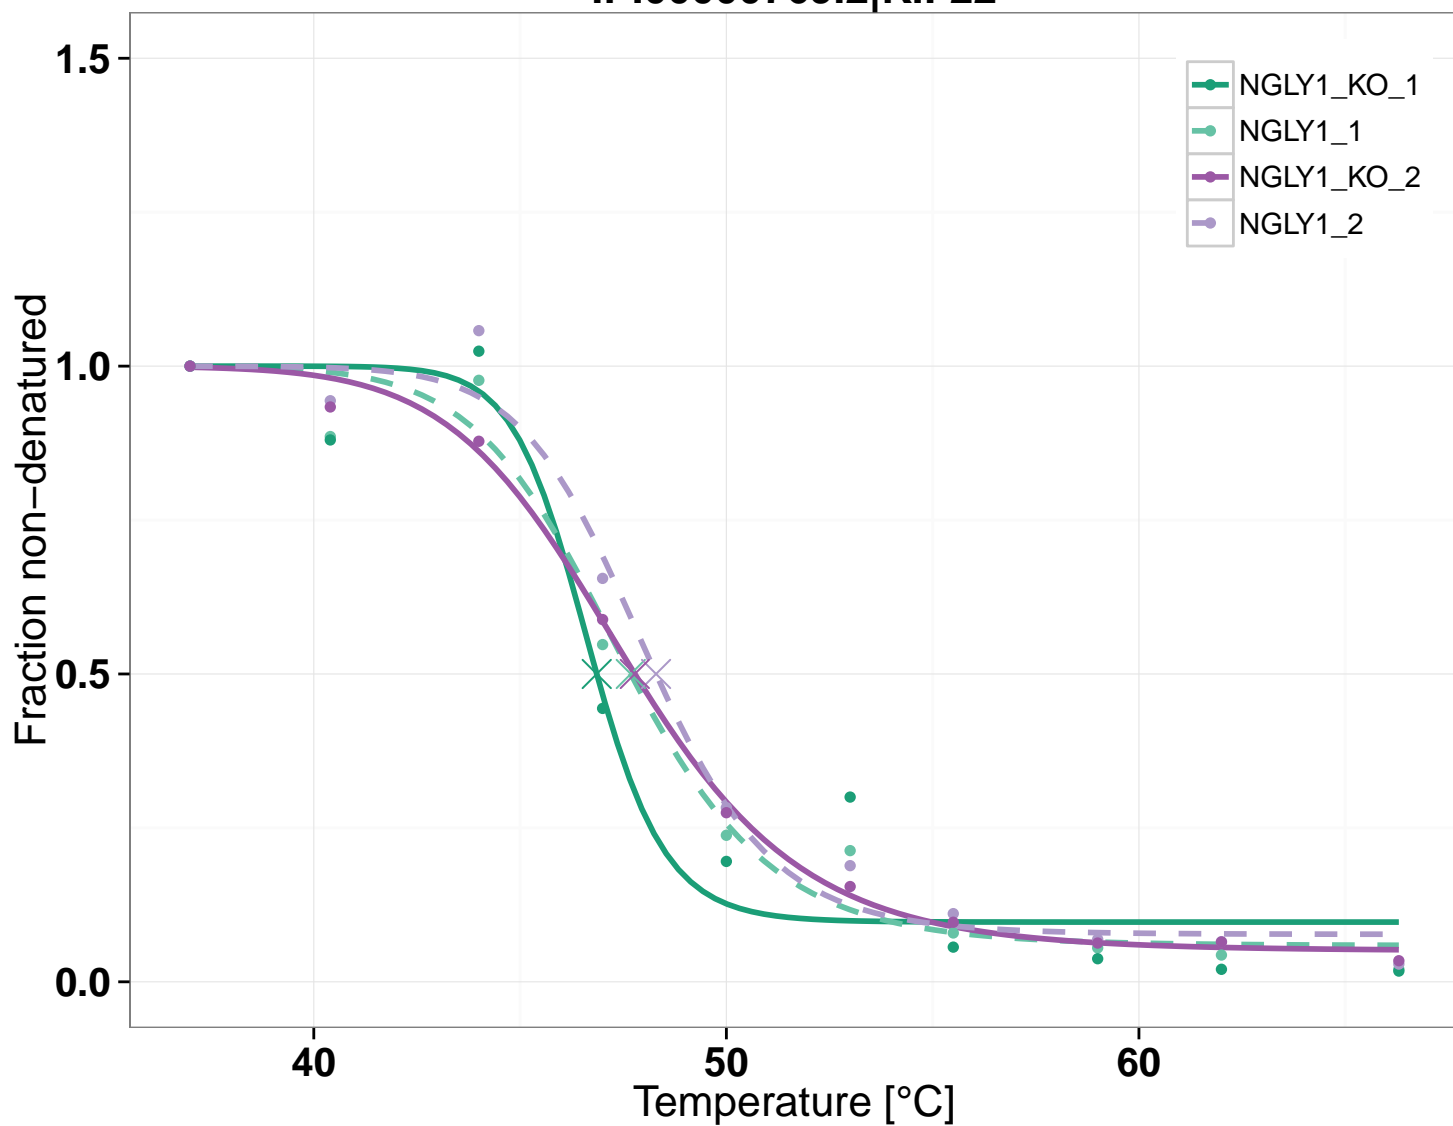

|            | meltPoint | slope | plateau | R2   |
|------------|-----------|-------|---------|------|
| NGLY1_KO_1 | 46.86     | -0.25 | 0.1     | 0.95 |
| NGLY1_1    | 47.68     | -0.13 | 0.06    | 0.98 |
| NGLY1_KO_2 | 47.78     | -0.11 | 0.05    | 1    |
| NGLY1_2    | 48.3      | -0.15 | 0.08    | 0.99 |

Supplement: Supplementary file 3541 [file 1]

IPI00477040.1|NUP188

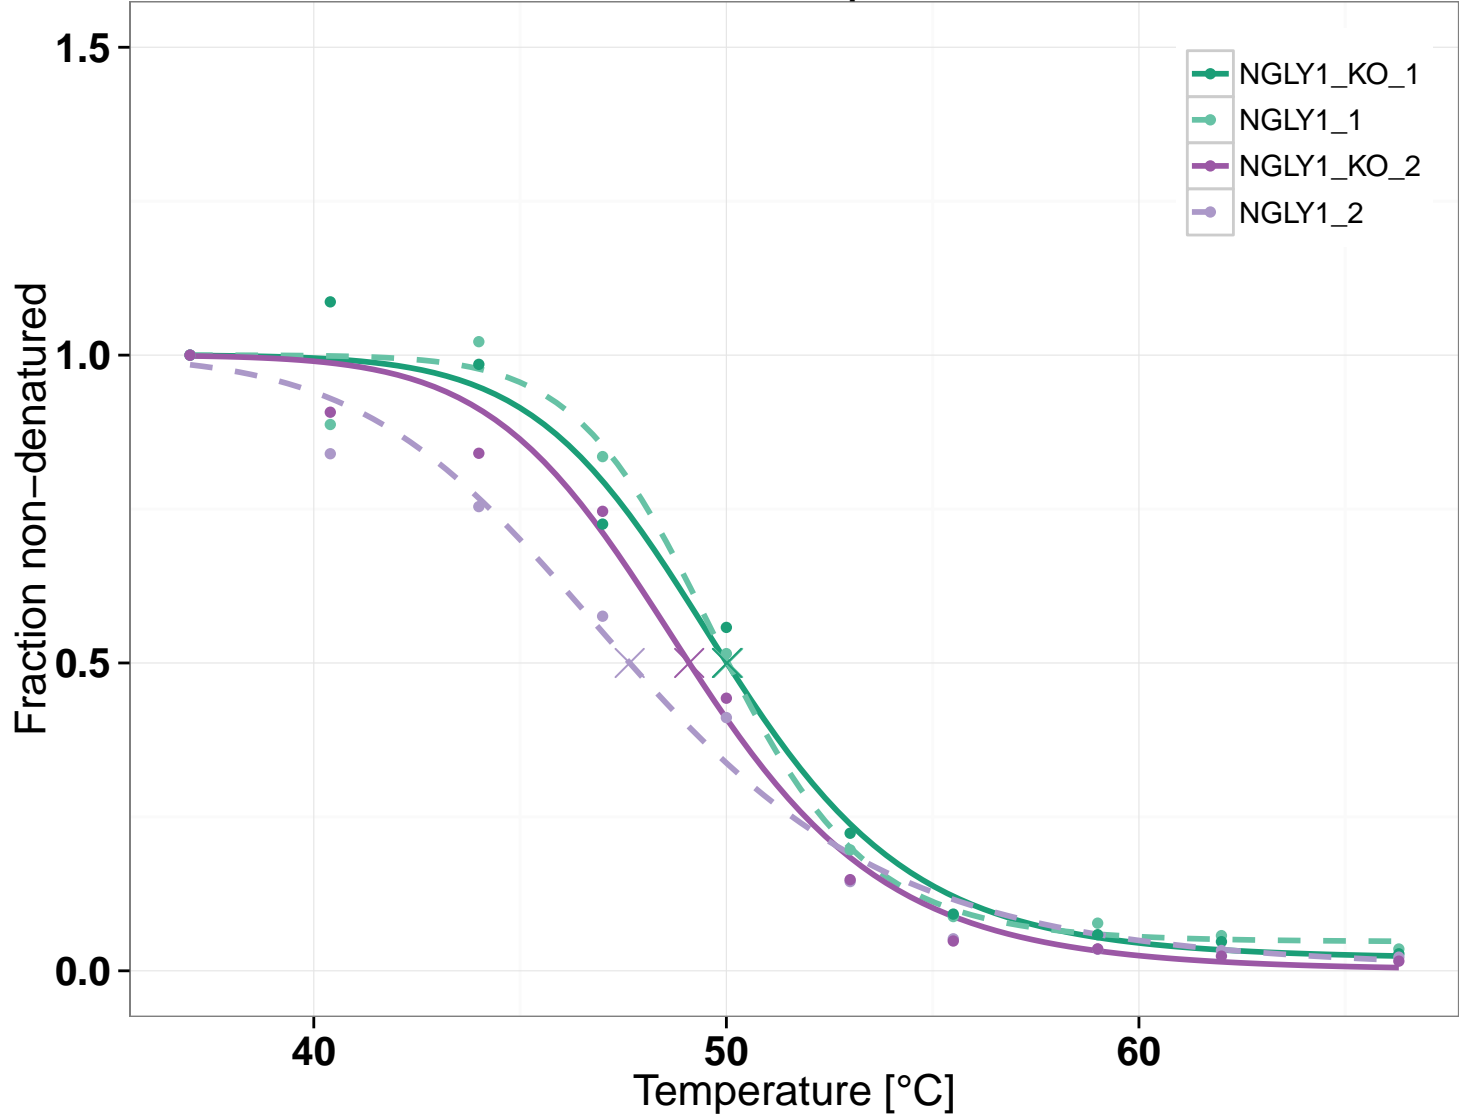

|            | meltPoint | slope  | plateau | R2   |
|------------|-----------|--------|---------|------|
| NGLY1_KO_1 | 50.01     | -0.11  | 0.02    | 0.99 |
| NGLY1_1    | 50.04     | -0.13  | 0.05    | 0.99 |
| NGLY1_KO_2 | 49.1      | -0.1   | 0       | 0.99 |
| NGLY1_2    | 47.66     | -0.077 | 0       | 0.98 |

Supplement: Supplementary file 3542 [file 1]

IPI00234446.2|ATF2

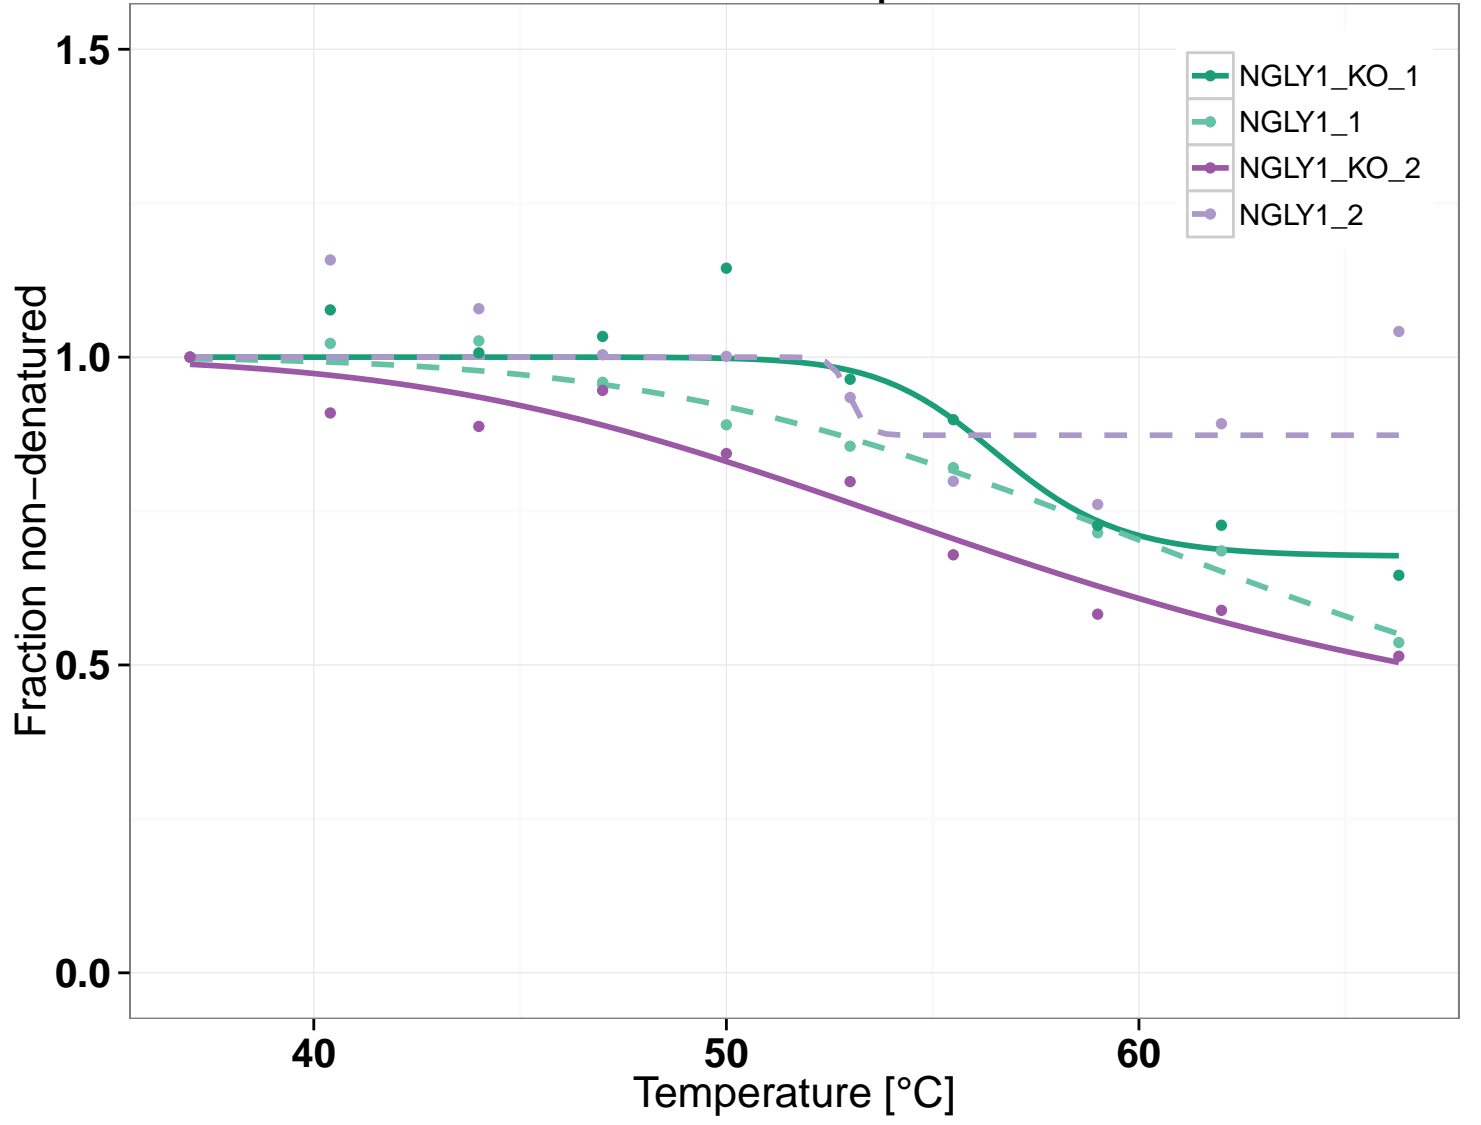

|            | meltPoint | slope  | plateau | R2   |
|------------|-----------|--------|---------|------|
| NGLY1_KO_1 | -         | -0.055 | 0.68    | 0.88 |
| NGLY1_1    | -         | -0.026 | 0.22    | 0.98 |
| NGLY1_KO_2 | -         | -0.023 | 0.31    | 0.95 |
| NGLY1_2    | -         | -0.15  | 0.87    | 0.42 |

Supplement: Supplementary file 3543 [file 1]

IPI00166055.5|C8ORF59

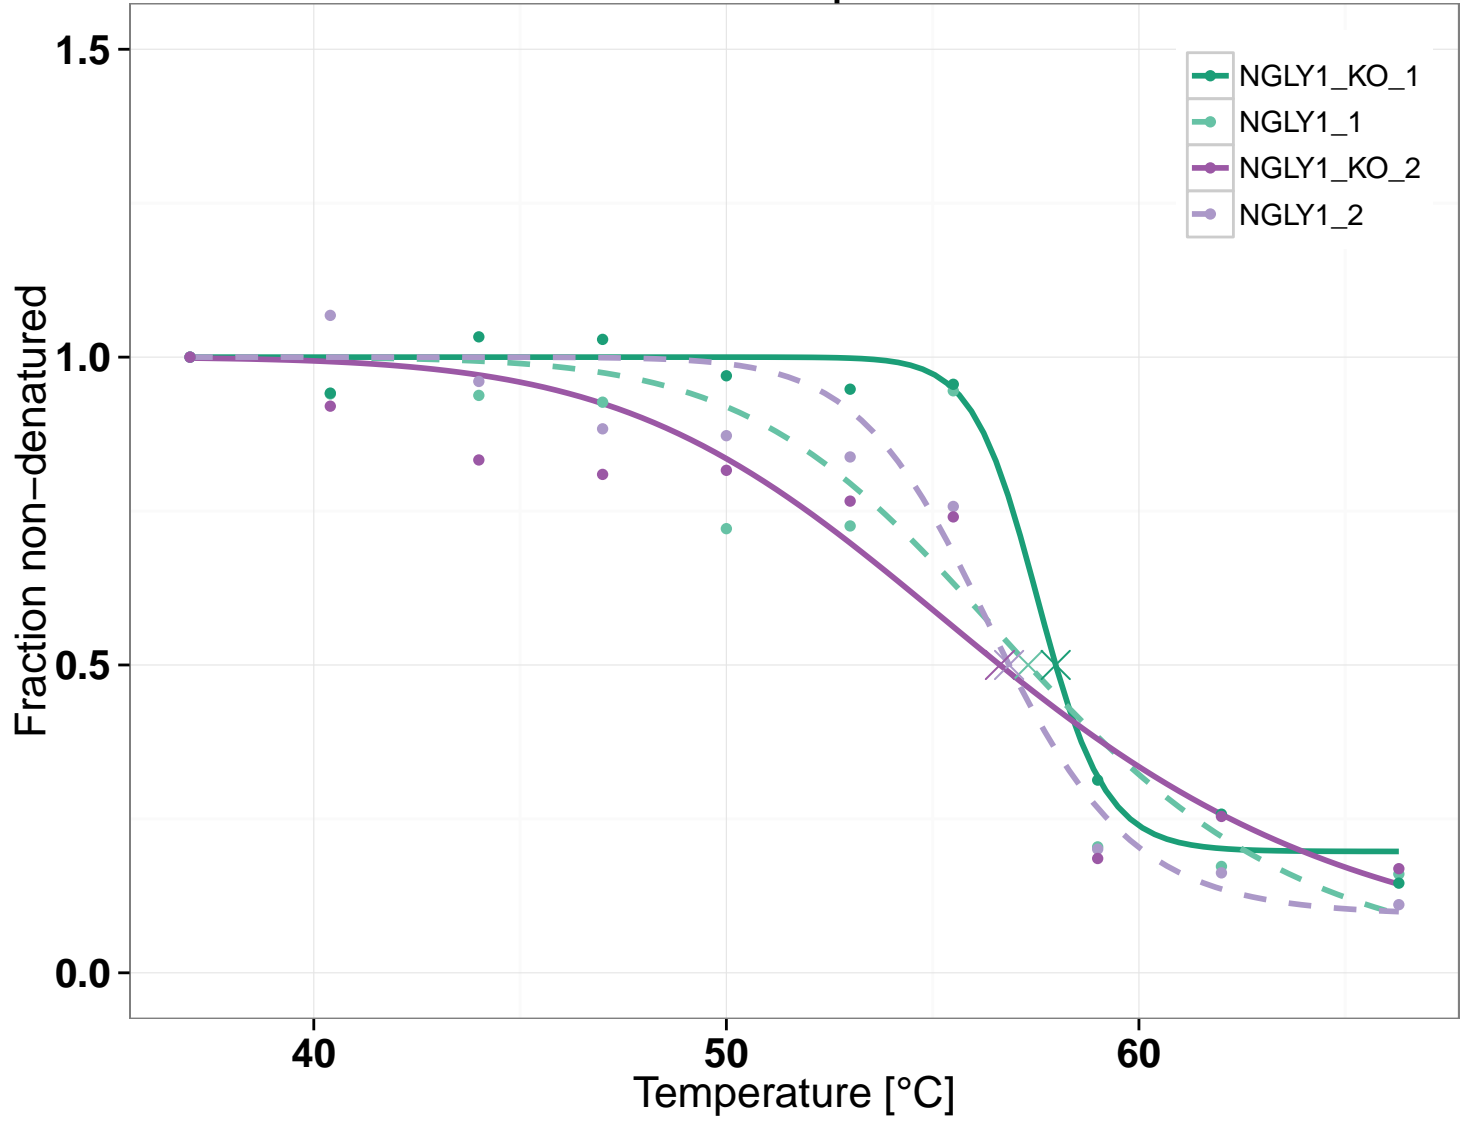

|            | meltPoint | slope  | plateau | R2   |
|------------|-----------|--------|---------|------|
| NGLY1_KO_1 | 57.98     | -0.25  | 0.2     | 0.99 |
| NGLY1_1    | 57.32     | -0.074 | 0       | 0.83 |
| NGLY1_KO_2 | 56.63     | -0.055 | 0       | 0.88 |
| NGLY1_2    | 56.85     | -0.14  | 0.09    | 0.96 |

Supplement: Supplementary file 3544 [file 1]

IPI00000764.3|PLEKHM1

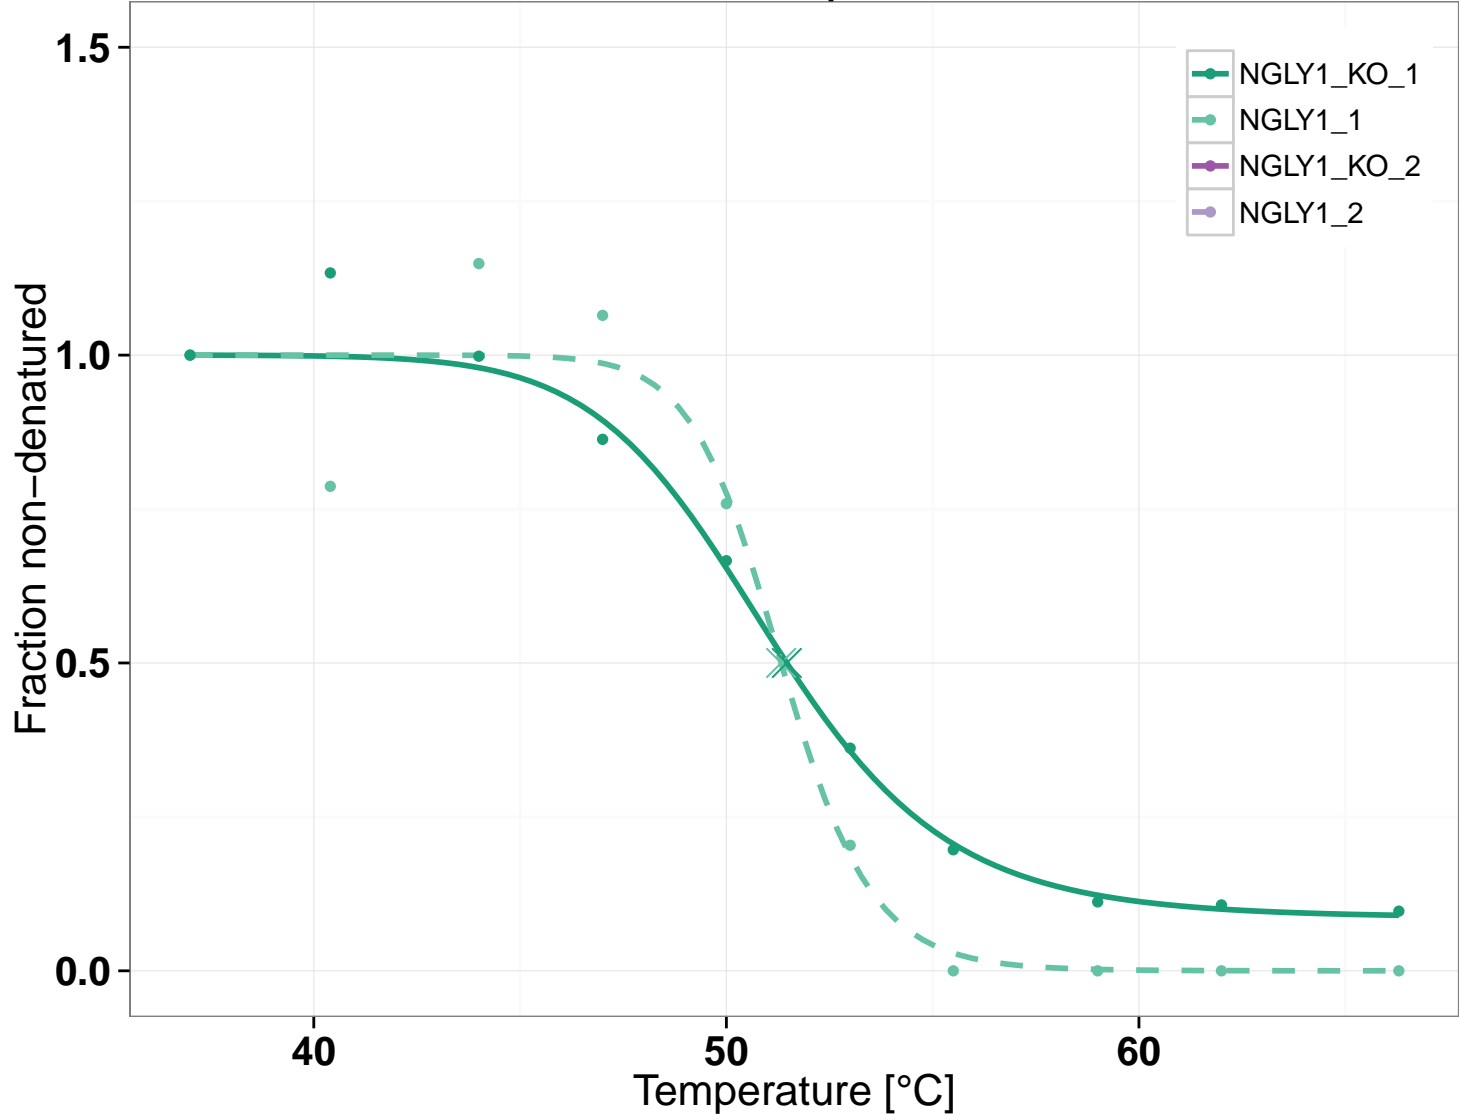

|            | meltPoint | slope | plateau | R2   |
|------------|-----------|-------|---------|------|
| NGLY1_KO_1 | 51.46     | -0.11 | 0.09    | 0.99 |
| NGLY1_1    | 51.33     | -0.23 | 0       | 0.97 |
| NGLY1_KO_2 | -         | -     | -       | -    |
| NGLY1_2    | -         | -     | -       | -    |

Supplement: Supplementary file 3545 [file 1]

IPI00550891.3|TGFBRAP1

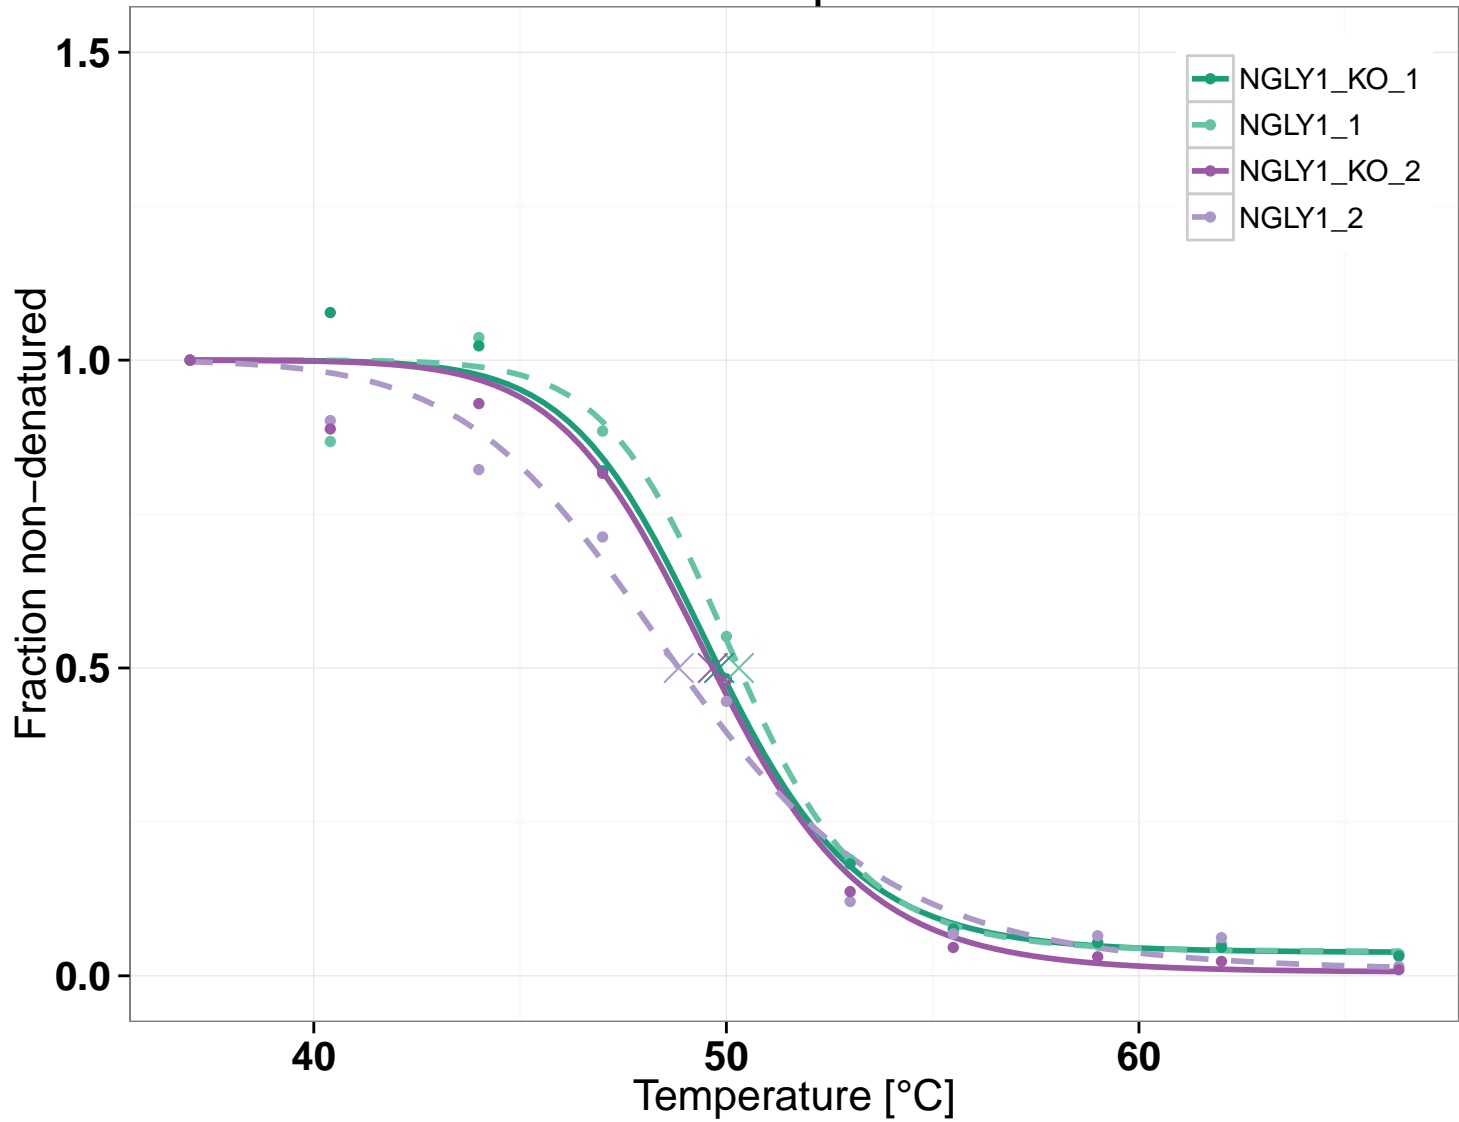

|            | meltPoint | slope  | plateau | R2   |
|------------|-----------|--------|---------|------|
| NGLY1_KO_1 | 49.83     | -0.14  | 0.04    | 1    |
| NGLY1_1    | 50.3      | -0.15  | 0.04    | 0.99 |
| NGLY1_KO_2 | 49.67     | -0.13  | 0.01    | 0.99 |
| NGLY1_2    | 48.85     | -0.095 | 0.01    | 0.98 |

Supplement: Supplementary file 3546 [file 1]

# IPI00018208.2|TTC33

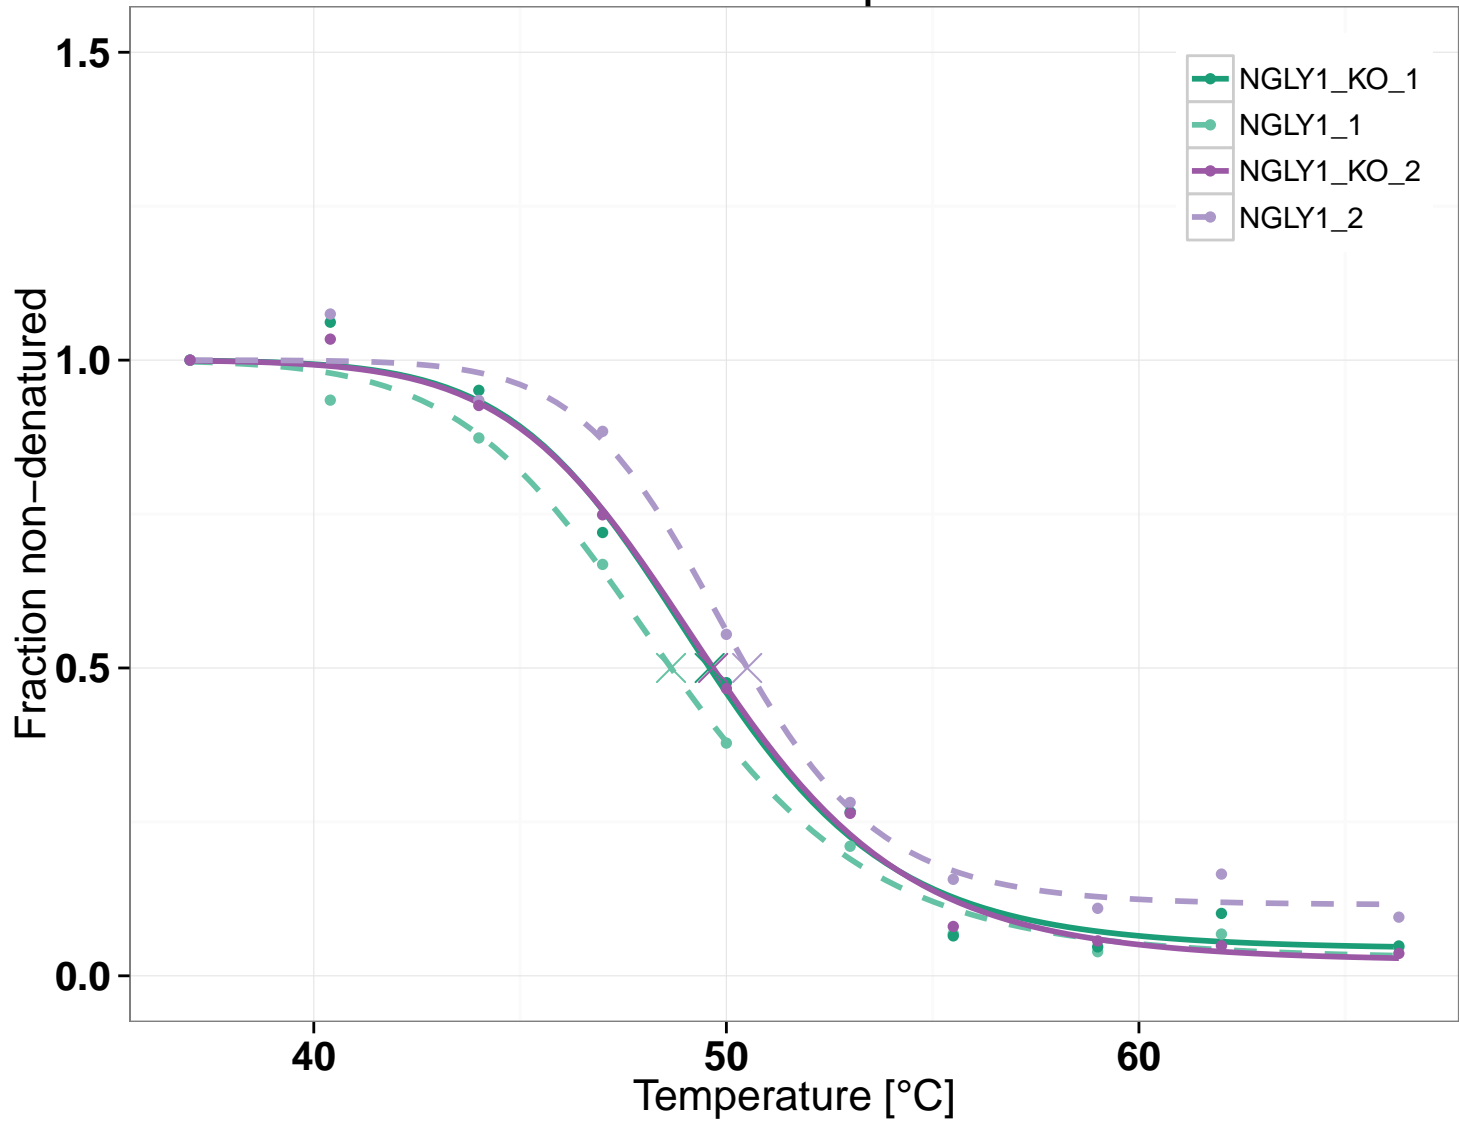

|            | meltPoint | slope  | plateau | R2   |
|------------|-----------|--------|---------|------|
| NGLY1_KO_1 | 49.6      | -0.1   | 0.04    | 0.99 |
| NGLY1_1    | 48.66     | -0.096 | 0.03    | 1    |
| NGLY1_KO_2 | 49.68     | -0.1   | 0.02    | 1    |
| NGLY1_2    | 50.51     | -0.12  | 0.12    | 0.99 |

Supplement: Supplementary file 3547 [file 1]

IPI00328415.11|CYB5R3

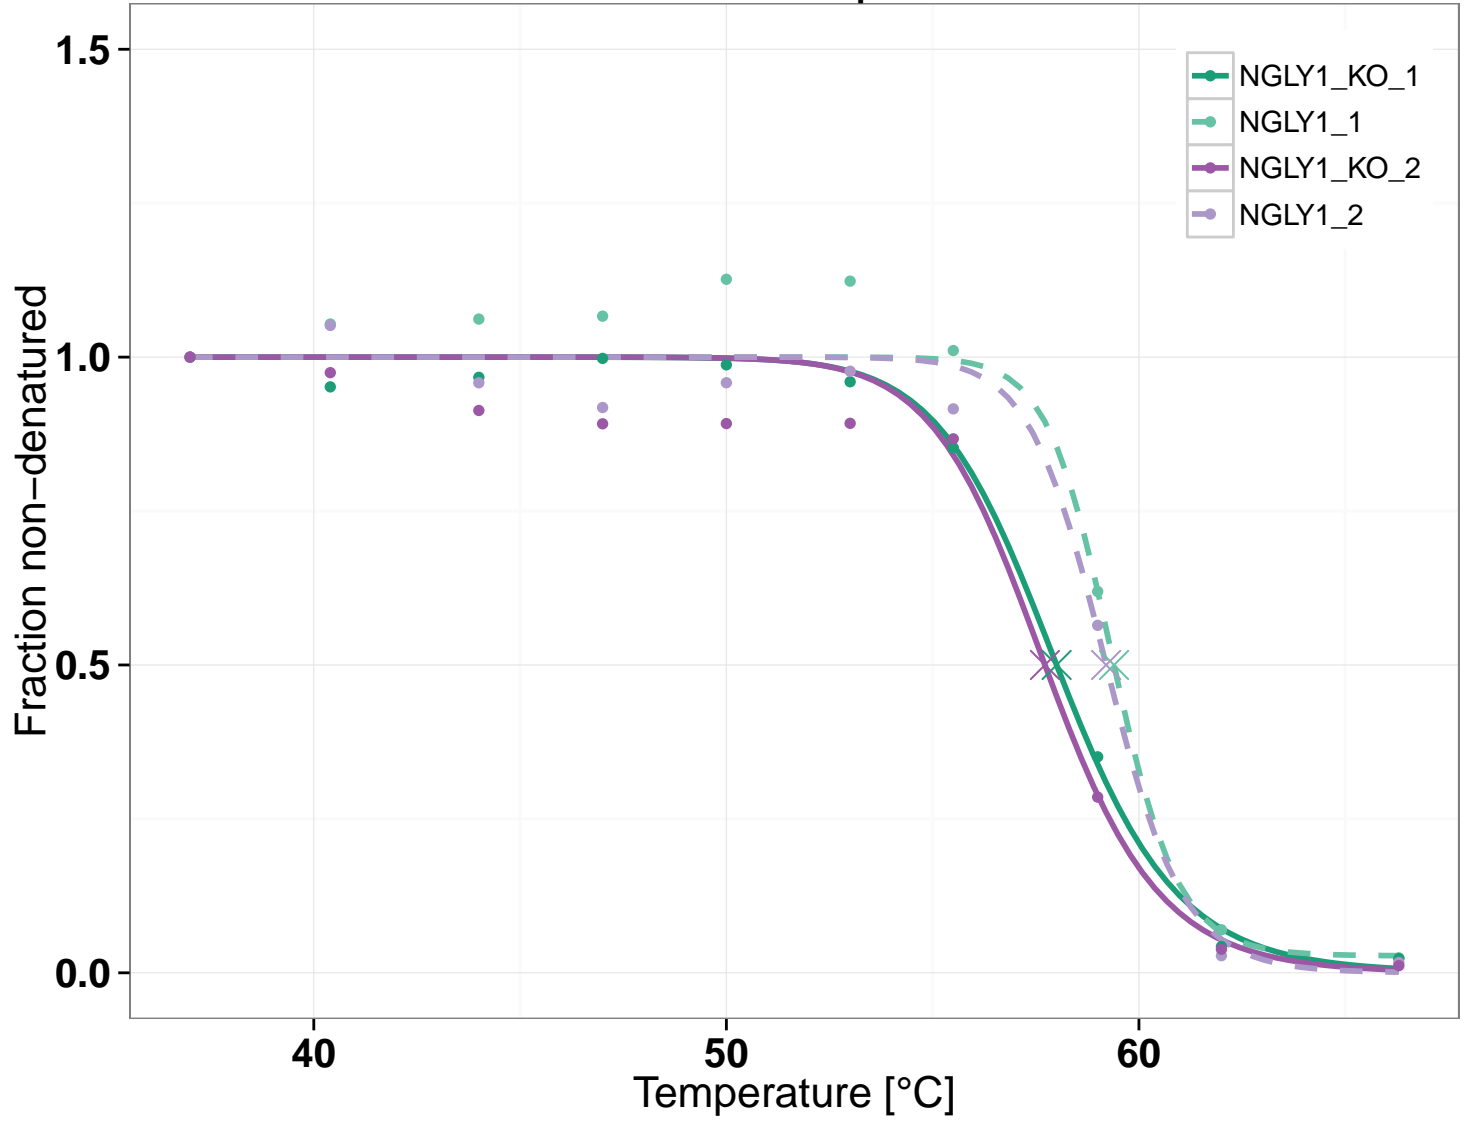

|            | meltPoint | slope | plateau | R2   |
|------------|-----------|-------|---------|------|
| NGLY1_KO_1 | 58        | -0.17 | 0       | 1    |
| NGLY1_1    | 59.4      | -0.31 | 0.03    | 0.97 |
| NGLY1_KO_2 | 57.72     | -0.18 | 0       | 0.97 |
| NGLY1_2    | 59.21     | -0.27 | 0       | 0.99 |

Supplement: Supplementary file 3548 [file 1]

IPI00789740.1|GEMIN4

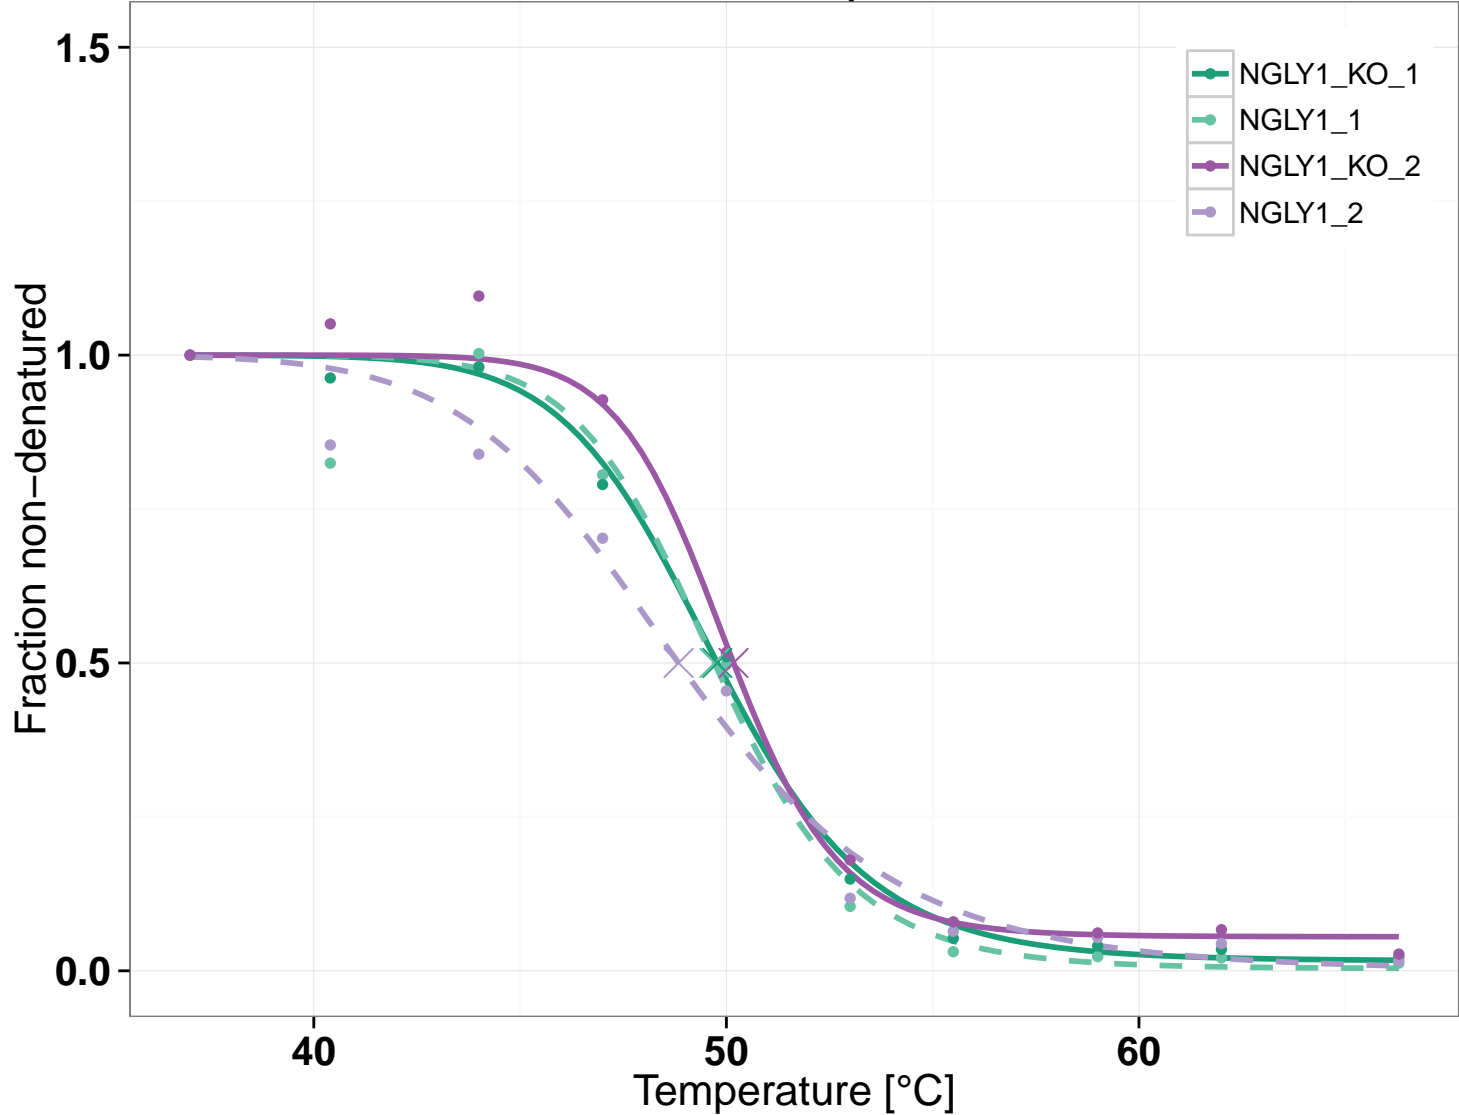

|            | meltPoint | slope  | plateau | R2   |
|------------|-----------|--------|---------|------|
| NGLY1_KO_1 | 49.78     | -0.13  | 0.02    | 1    |
| NGLY1_1    | 49.71     | -0.15  | 0       | 0.98 |
| NGLY1_KO_2 | 50.17     | -0.18  | 0.06    | 0.99 |
| NGLY1_2    | 48.84     | -0.095 | 0       | 0.98 |

Supplement: Supplementary file 3549 [file 1]

# IPI00001883.1|SNX9

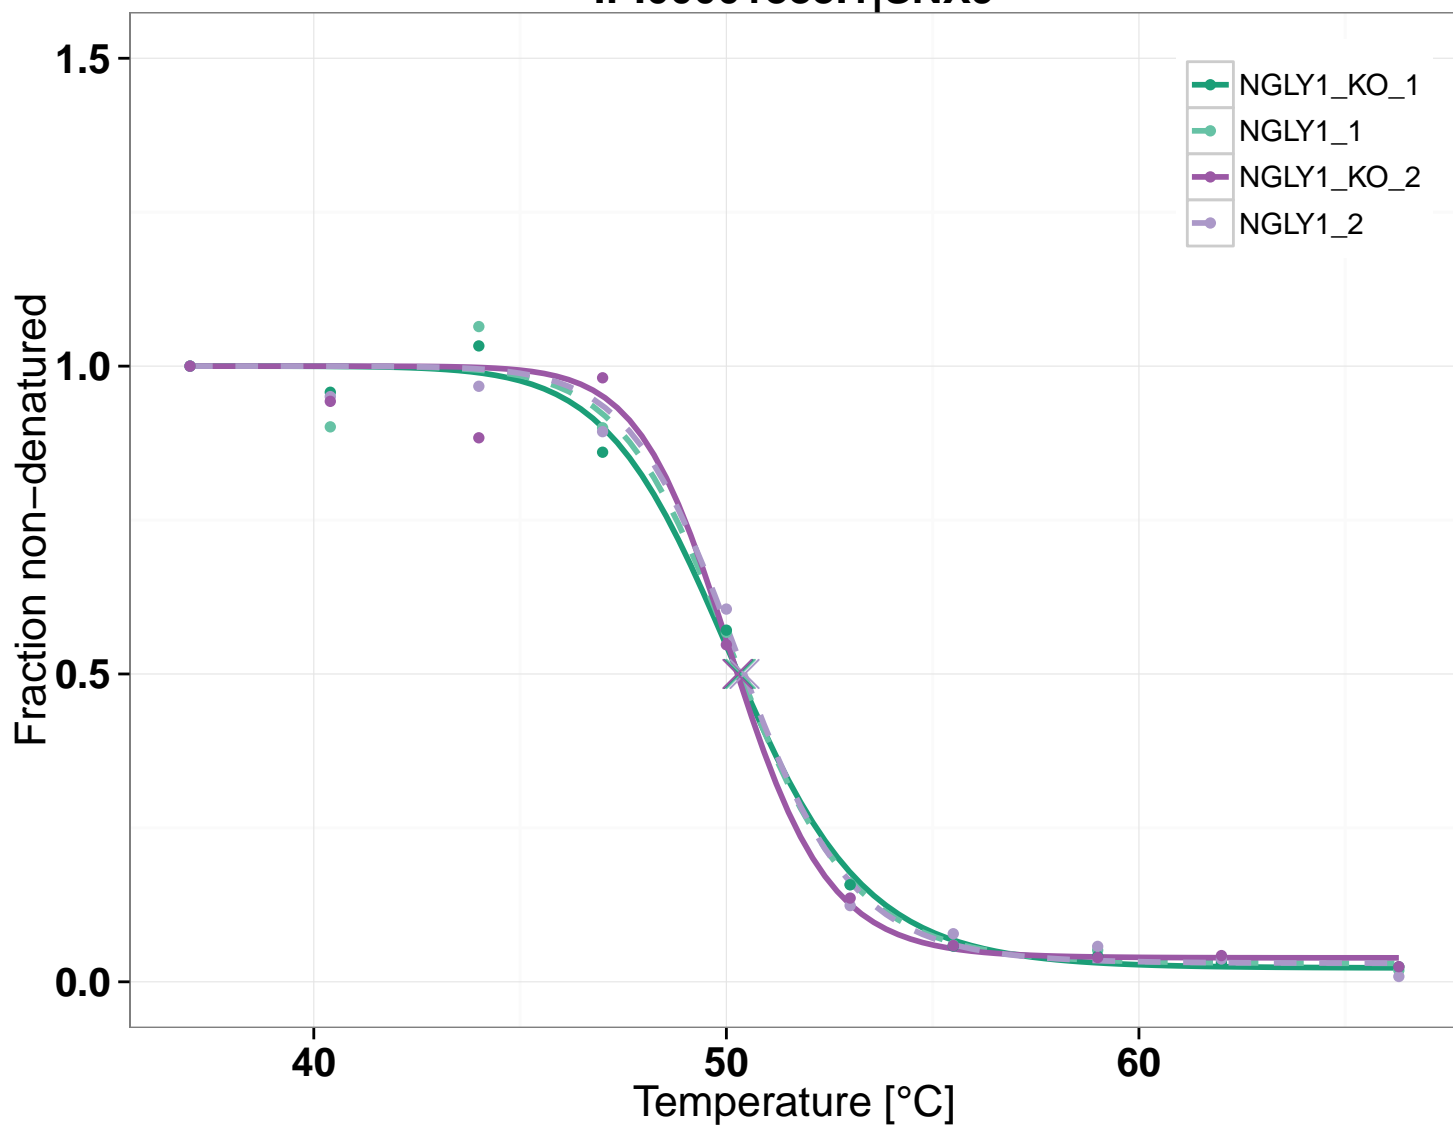

|            | meltPoint | slope | plateau | R2   |
|------------|-----------|-------|---------|------|
| NGLY1_KO_1 | 50.3      | -0.16 | 0.02    | 1    |
| NGLY1_1    | 50.35     | -0.17 | 0.03    | 0.99 |
| NGLY1_KO_2 | 50.27     | -0.21 | 0.04    | 0.99 |
| NGLY1_2    | 50.44     | -0.18 | 0.03    | 1    |

Supplement: Supplementary file 3550 [file 1]

IPI00412440.3|GLTPP1

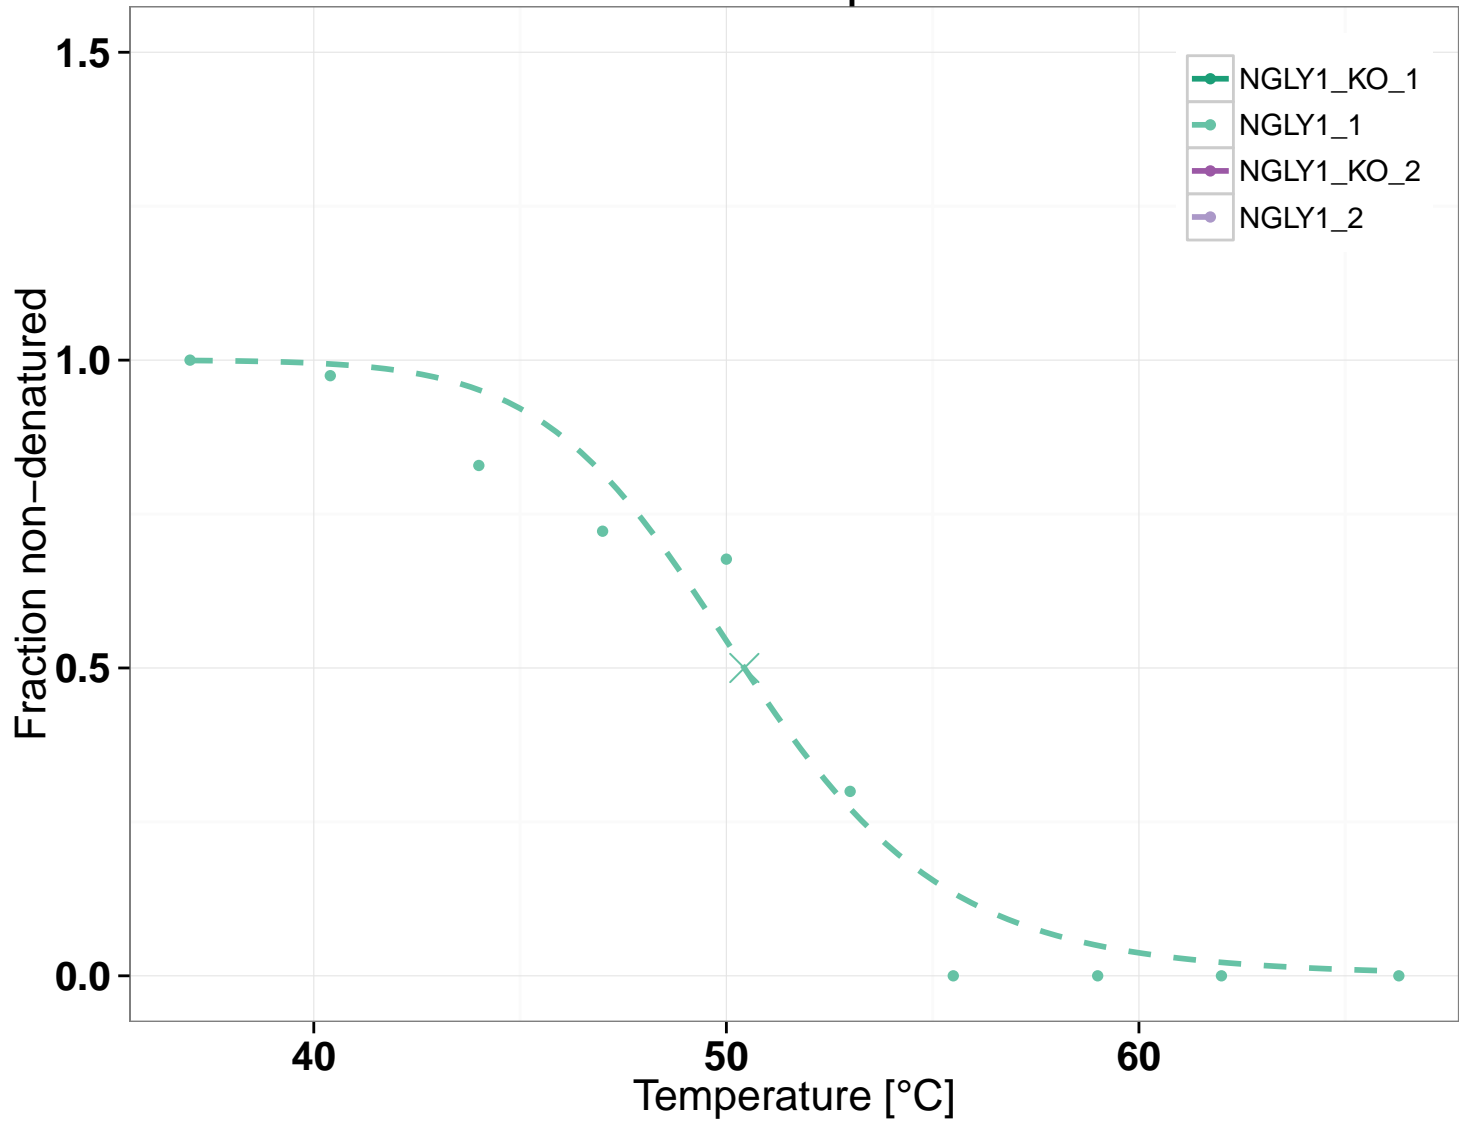

|            | meltPoint | slope | plateau | R2   |
|------------|-----------|-------|---------|------|
| NGLY1_KO_1 | –         | –     | –       | –    |
| NGLY1_1    | 50.44     | –0.1  | 0       | 0.96 |
| NGLY1_KO_2 | –         | –     | –       | –    |
| NGLY1_2    | –         | –     | –       | –    |

Supplement: Supplementary file 3551 [file 1]

IPI00074893.1|ZNF512B

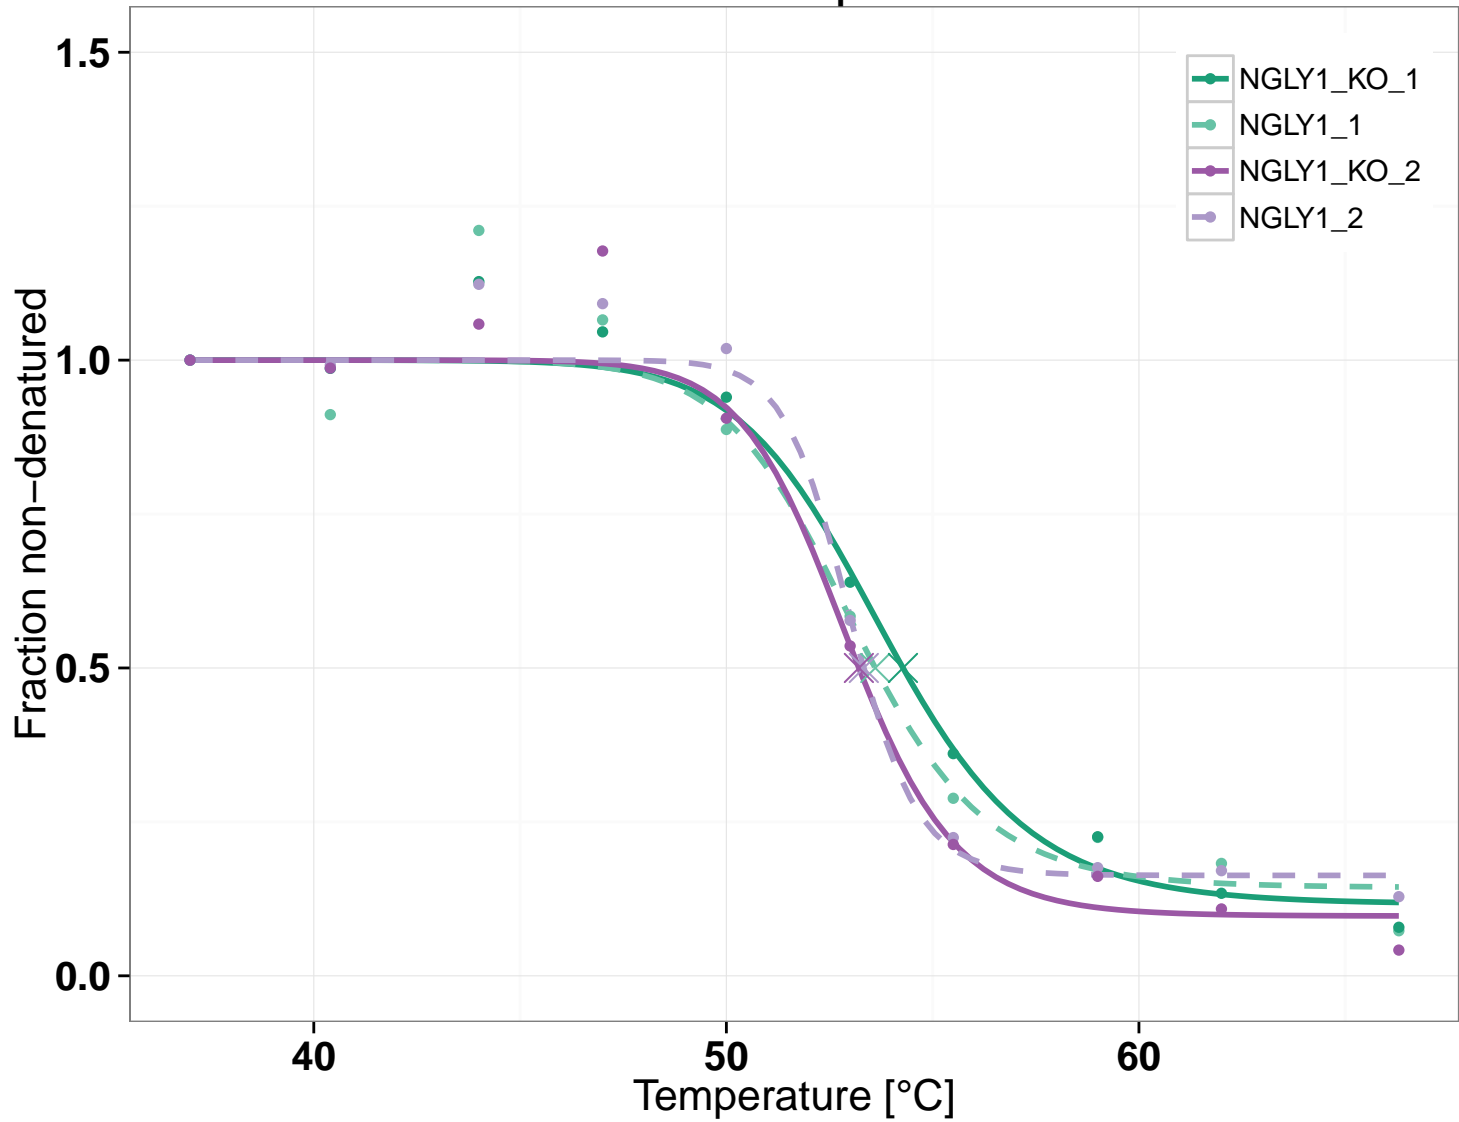

|            | meltPoint | slope | plateau | R2   |
|------------|-----------|-------|---------|------|
| NGLY1_KO_1 | 54.28     | -0.12 | 0.12    | 0.98 |
| NGLY1_1    | 53.61     | -0.14 | 0.14    | 0.96 |
| NGLY1_KO_2 | 53.21     | -0.17 | 0.1     | 0.98 |
| NGLY1_2    | 53.33     | -0.26 | 0.16    | 0.98 |

Supplement: Supplementary file 3552 [file 1]

# IPI00002946.1|GJC1

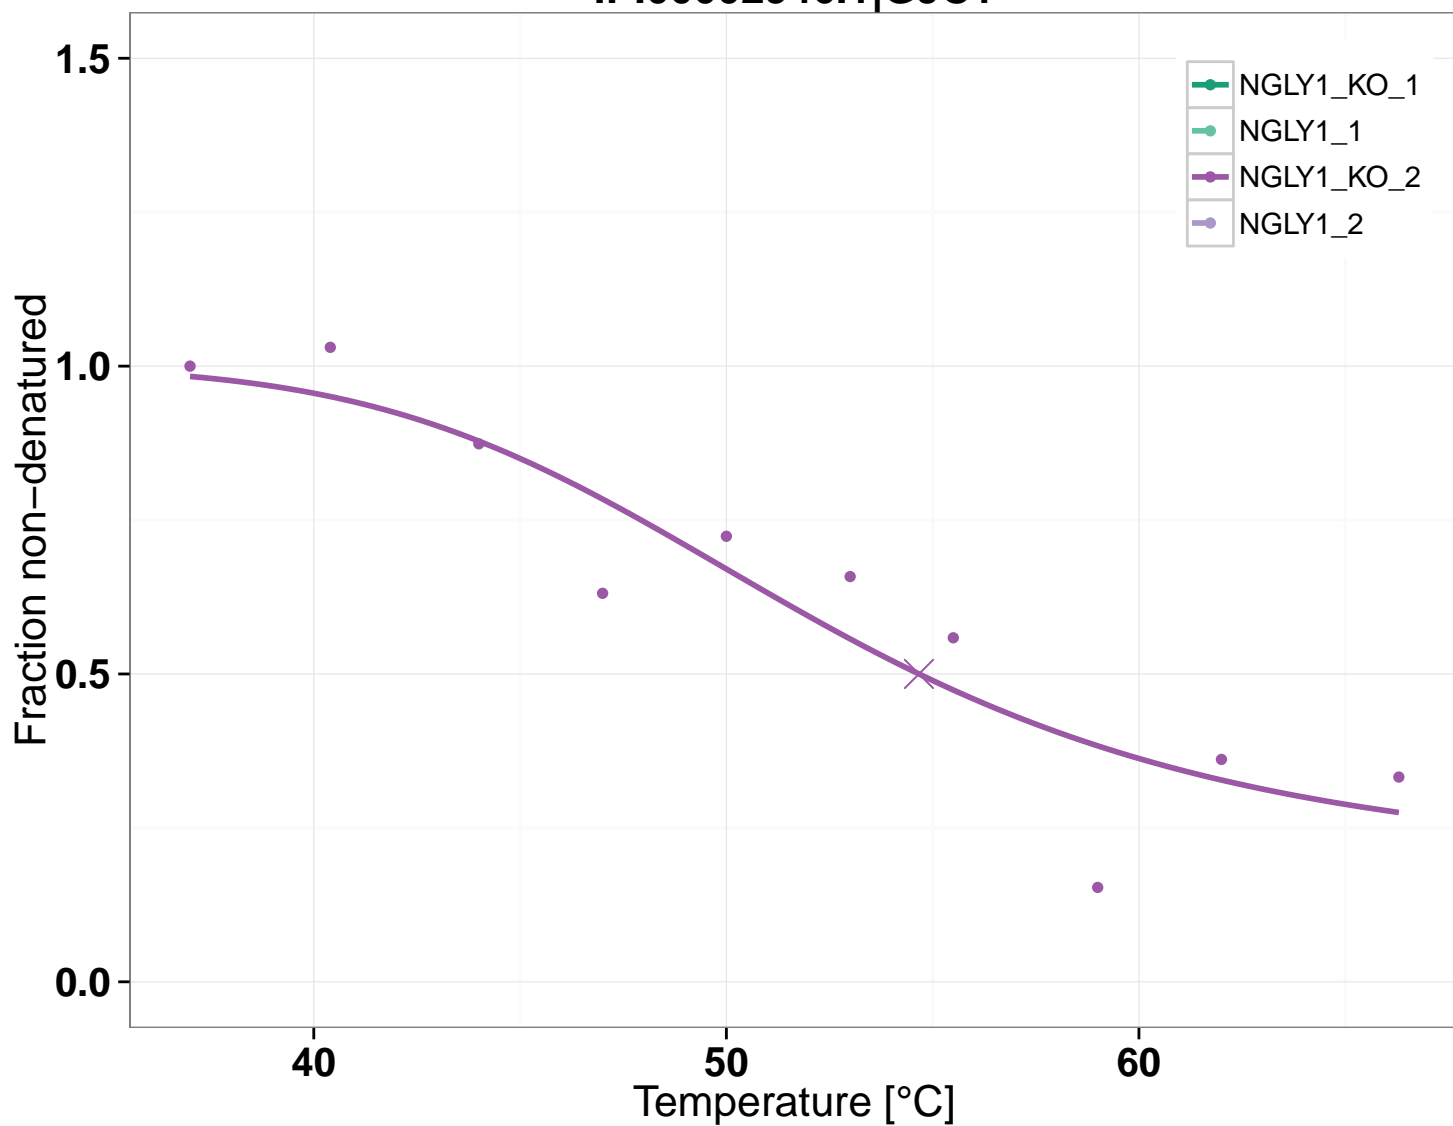

|            | meltPoint | slope  | plateau | R2   |
|------------|-----------|--------|---------|------|
| NGLY1_KO_1 | —         | —      | —       | —    |
| NGLY1_1    | —         | —      | —       | —    |
| NGLY1_KO_2 | 54.67     | −0.039 | 0.18    | 0.86 |
| NGLY1_2    | —         | —      | —       | —    |

Supplement: Supplementary file 3553 [file 1]

IPI00396627.1|ELAC2

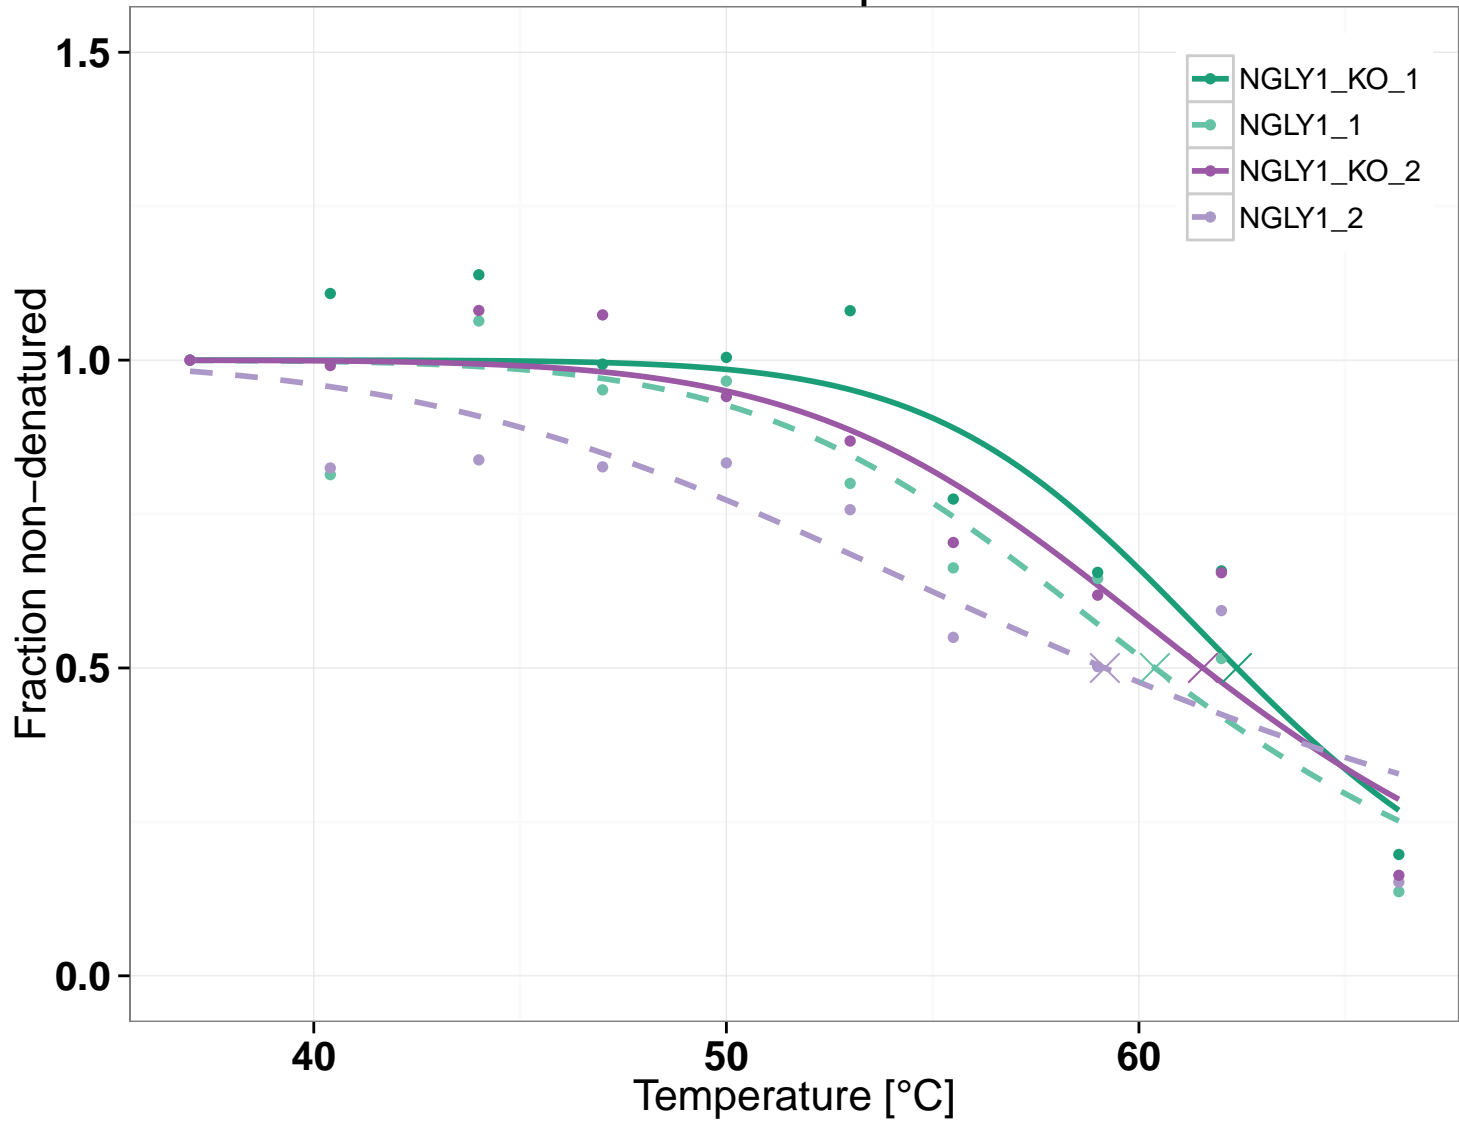

|            | meltPoint | slope  | plateau | R2   |
|------------|-----------|--------|---------|------|
| NGLY1_KO_1 | 62.37     | -0.069 | 0       | 0.89 |
| NGLY1_1    | 60.39     | -0.052 | 0       | 0.89 |
| NGLY1_KO_2 | 61.55     | -0.053 | 0       | 0.9  |
| NGLY1_2    | 59.17     | -0.031 | 0       | 0.82 |

Supplement: Supplementary file 3554 [file 1]

IPI00549408.1|TMEM208

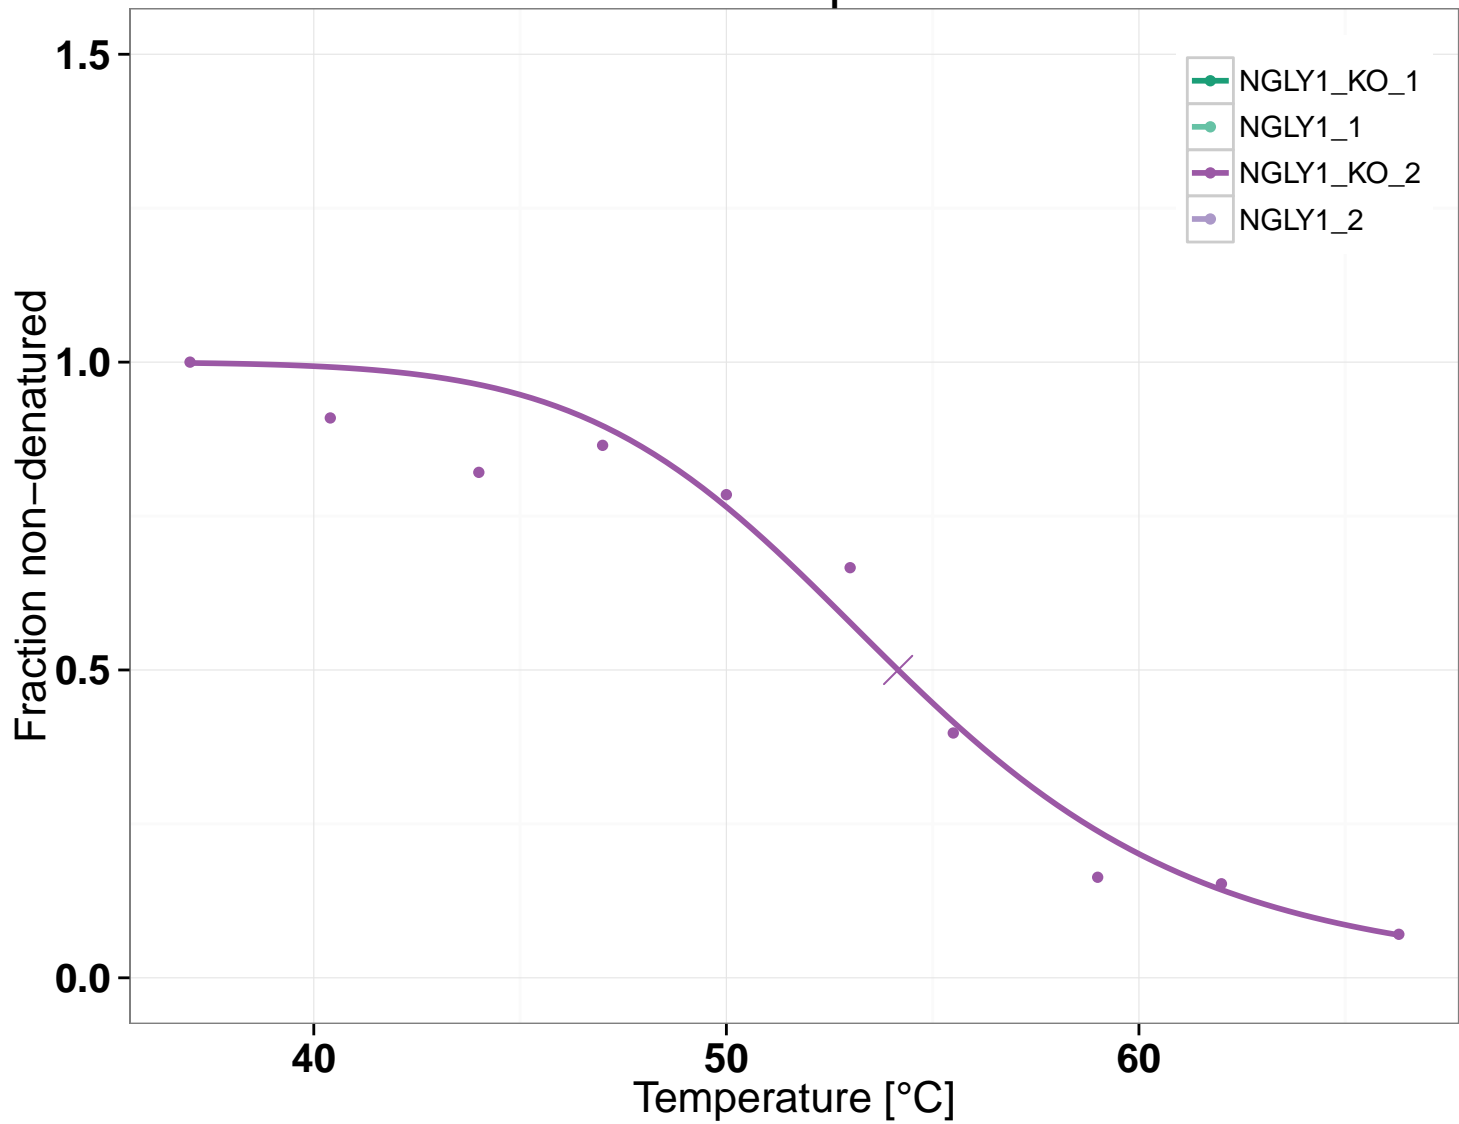

|            | meltPoint | slope  | plateau | R2   |
|------------|-----------|--------|---------|------|
| NGLY1_KO_1 | —         | —      | —       | —    |
| NGLY1_1    | —         | —      | —       | —    |
| NGLY1_KO_2 | 54.16     | −0.067 | 0       | 0.96 |
| NGLY1_2    | —         | —      | —       | —    |

Supplement: Supplementary file 3555 [file 1]

IPI00607618.2|C1ORF43

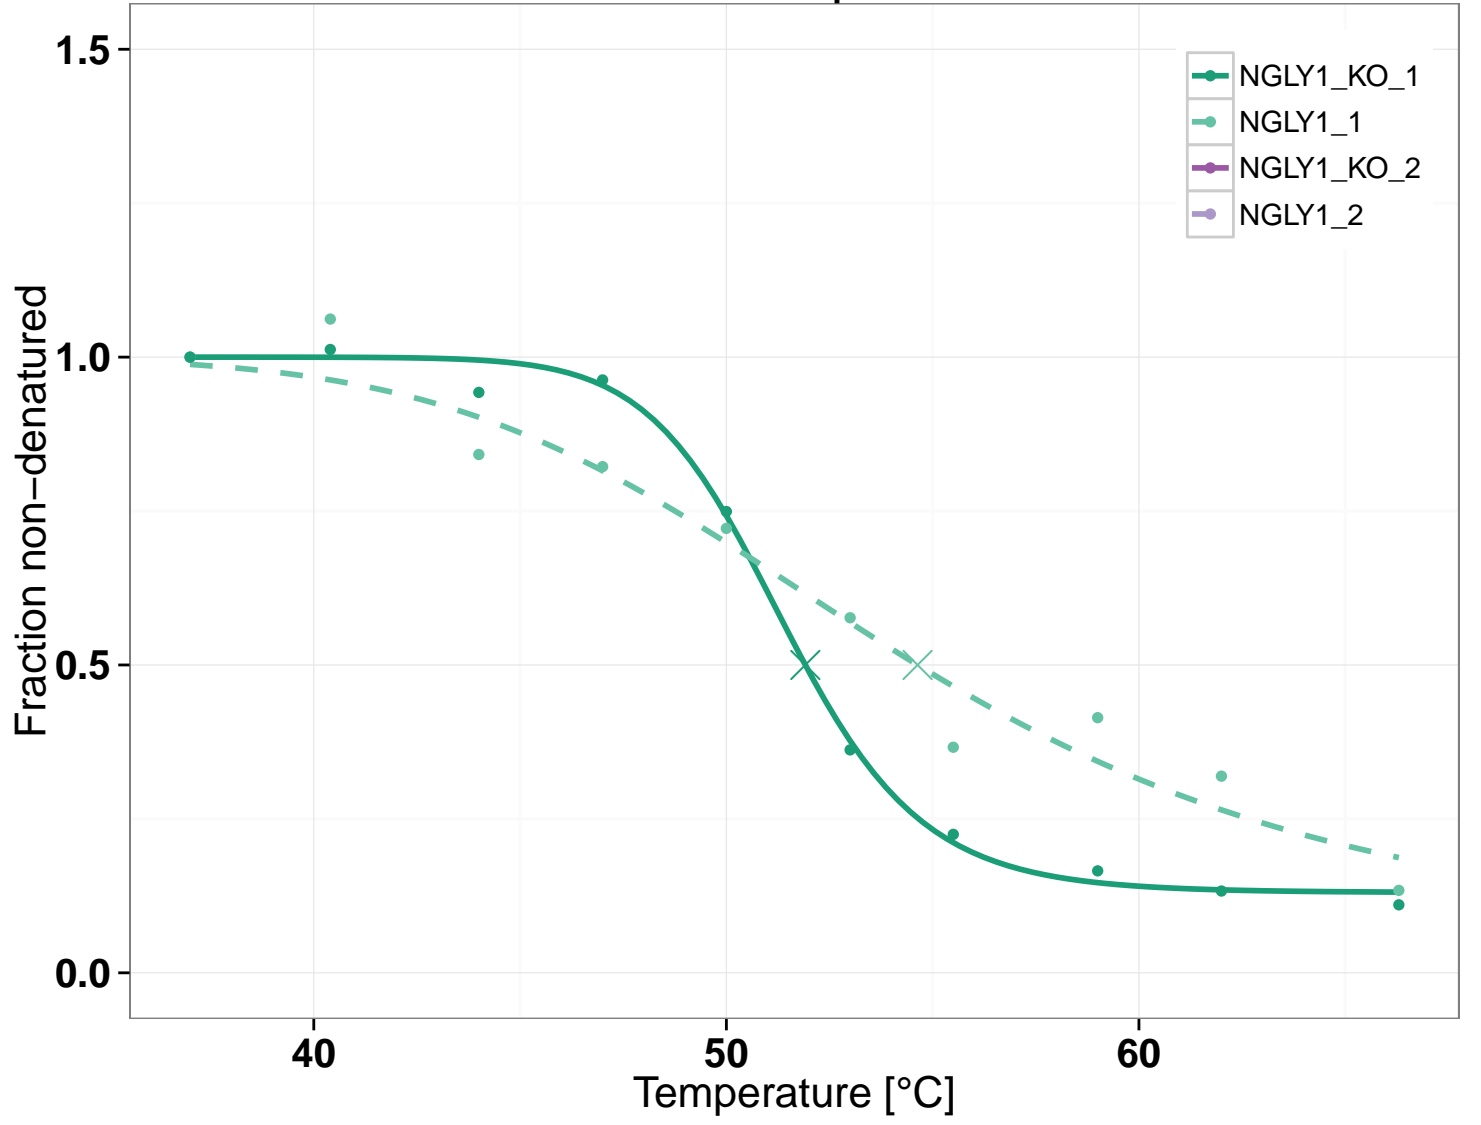

|            | meltPoint | slope  | plateau | R2   |
|------------|-----------|--------|---------|------|
| NGLY1_KO_1 | 51.91     | -0.13  | 0.13    | 1    |
| NGLY1_1    | 54.63     | -0.044 | 0.05    | 0.96 |
| NGLY1_KO_2 | -         | -      | -       | -    |
| NGLY1_2    | -         | -      | -       | -    |

Supplement: Supplementary file 3556 [file 1]

IPI00218962.3|C20ORF43

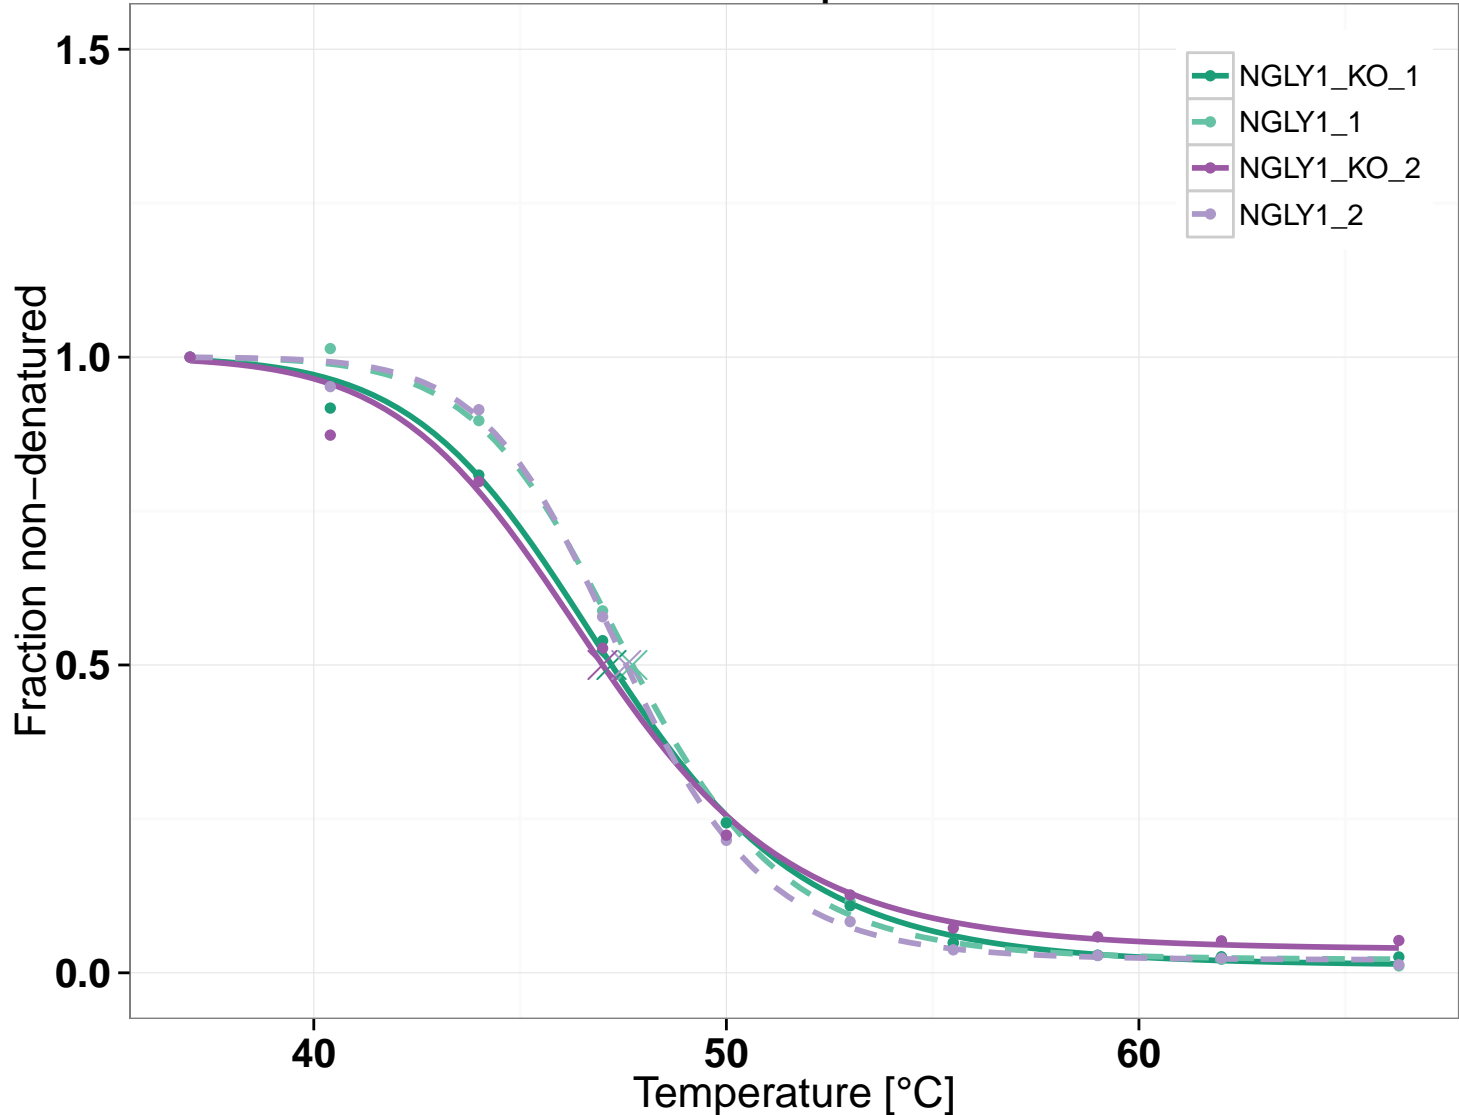

|            | meltPoint | slope | plateau | R2   |
|------------|-----------|-------|---------|------|
| NGLY1_KO_1 | 47.22     | -0.1  | 0.01    | 1    |
| NGLY1_1    | 47.72     | -0.13 | 0.02    | 1    |
| NGLY1_KO_2 | 47        | -0.1  | 0.04    | 0.99 |
| NGLY1_2    | 47.57     | -0.14 | 0.02    | 1    |

Supplement: Supplementary file 3557 [file 1]

IPI00306043.1|YTHDF2

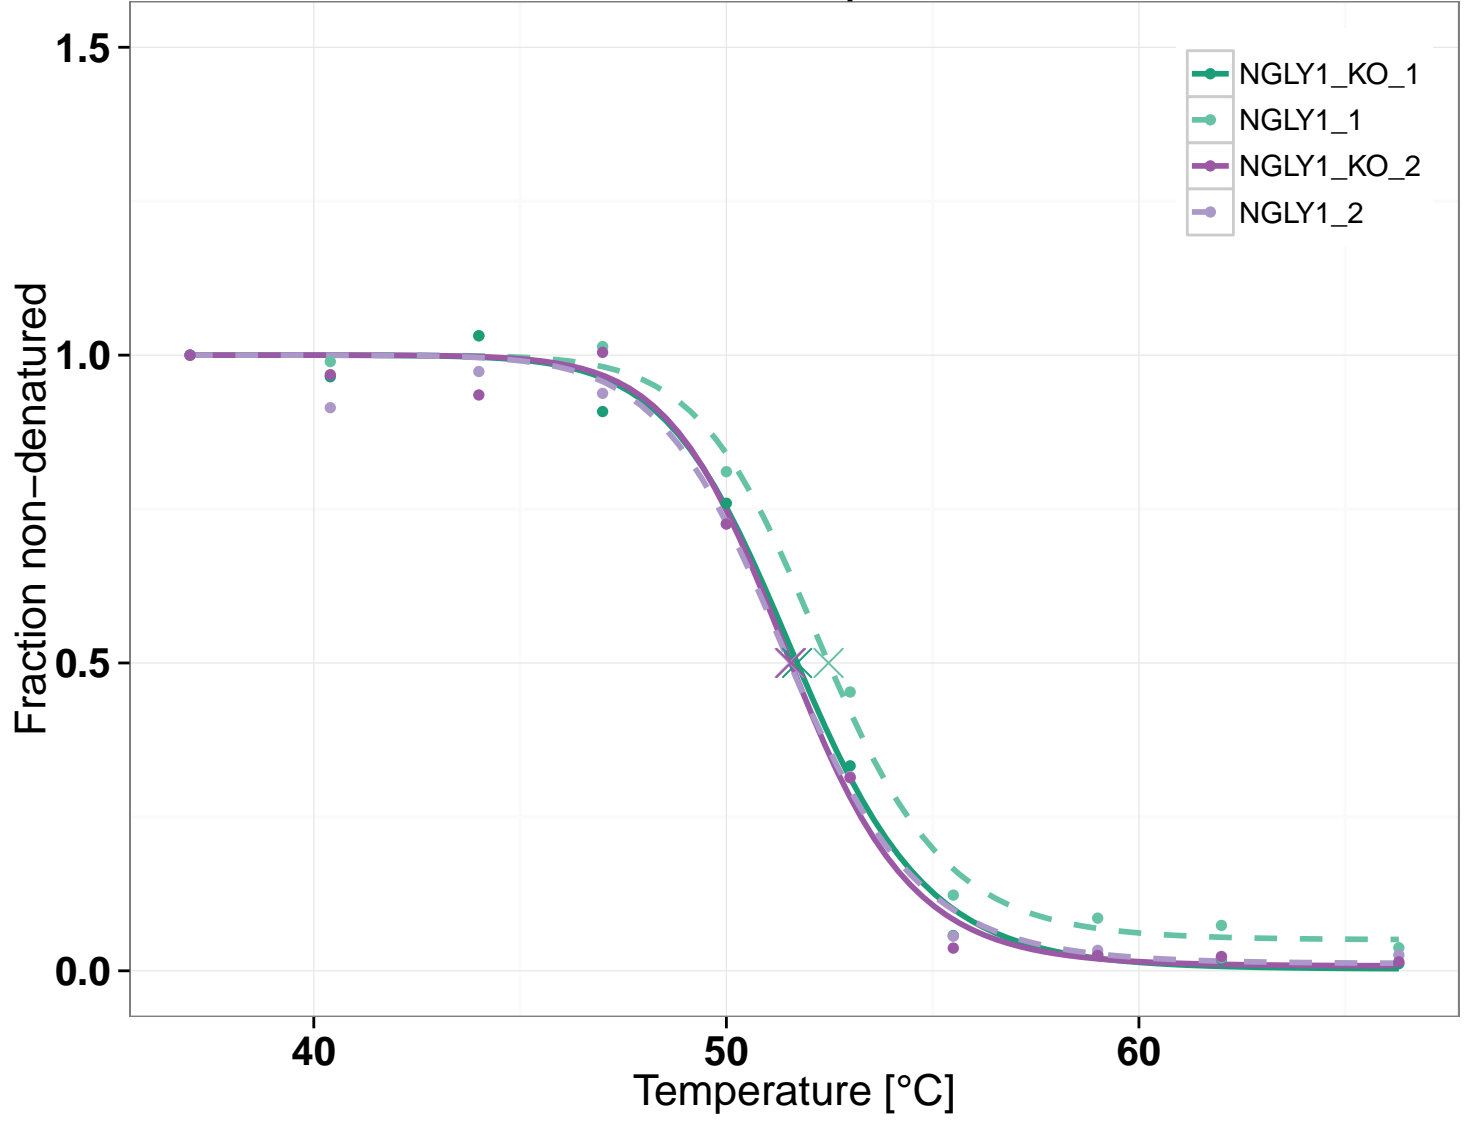

|            | meltPoint | slope | plateau | R2   |
|------------|-----------|-------|---------|------|
| NGLY1_KO_1 | 51.72     | -0.16 | 0       | 1    |
| NGLY1_1    | 52.48     | -0.16 | 0.05    | 1    |
| NGLY1_KO_2 | 51.56     | -0.17 | 0.01    | 0.99 |
| NGLY1_2    | 51.53     | -0.16 | 0.01    | 0.99 |

Supplement: Supplementary file 3558 [file 1]

IPI00012687.3|C1ORF83

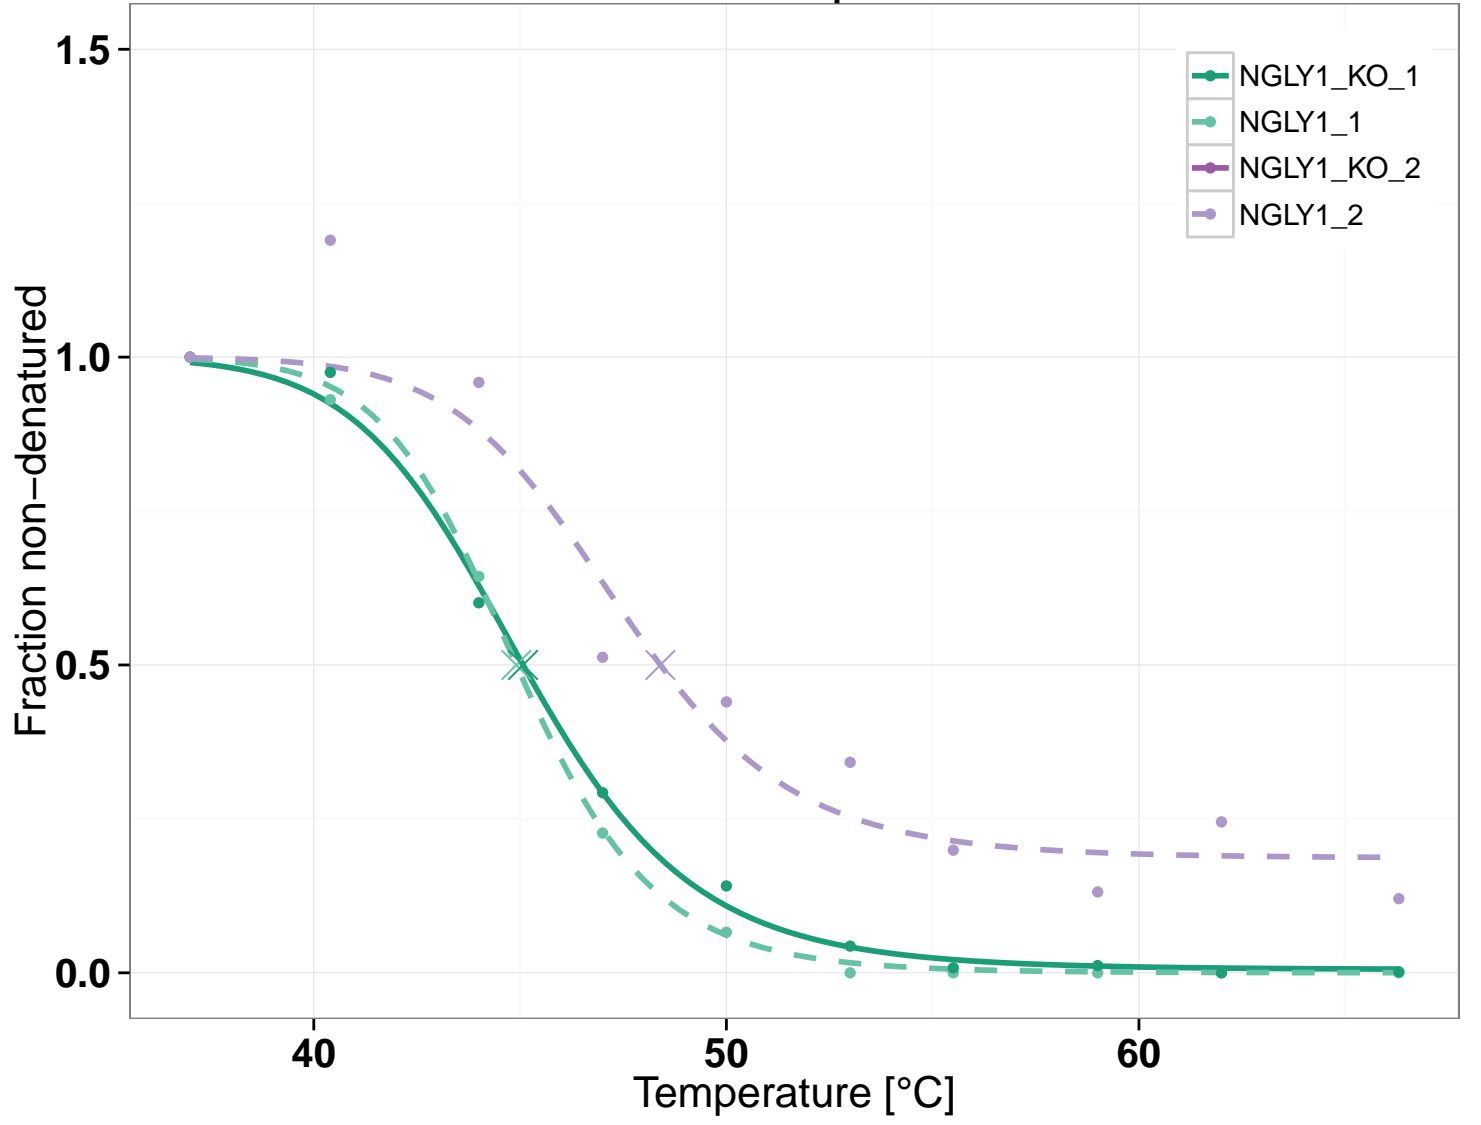

|            | meltPoint | slope  | plateau | R2   |
|------------|-----------|--------|---------|------|
| NGLY1_KO_1 | 45.07     | -0.12  | 0.01    | 1    |
| NGLY1_1    | 44.91     | -0.15  | 0       | 1    |
| NGLY1_KO_2 | -         | -      | -       | -    |
| NGLY1_2    | 48.4      | -0.099 | 0.19    | 0.94 |

Supplement: Supplementary file 3559 [file 1]

IPI00012855.1|TMEM11

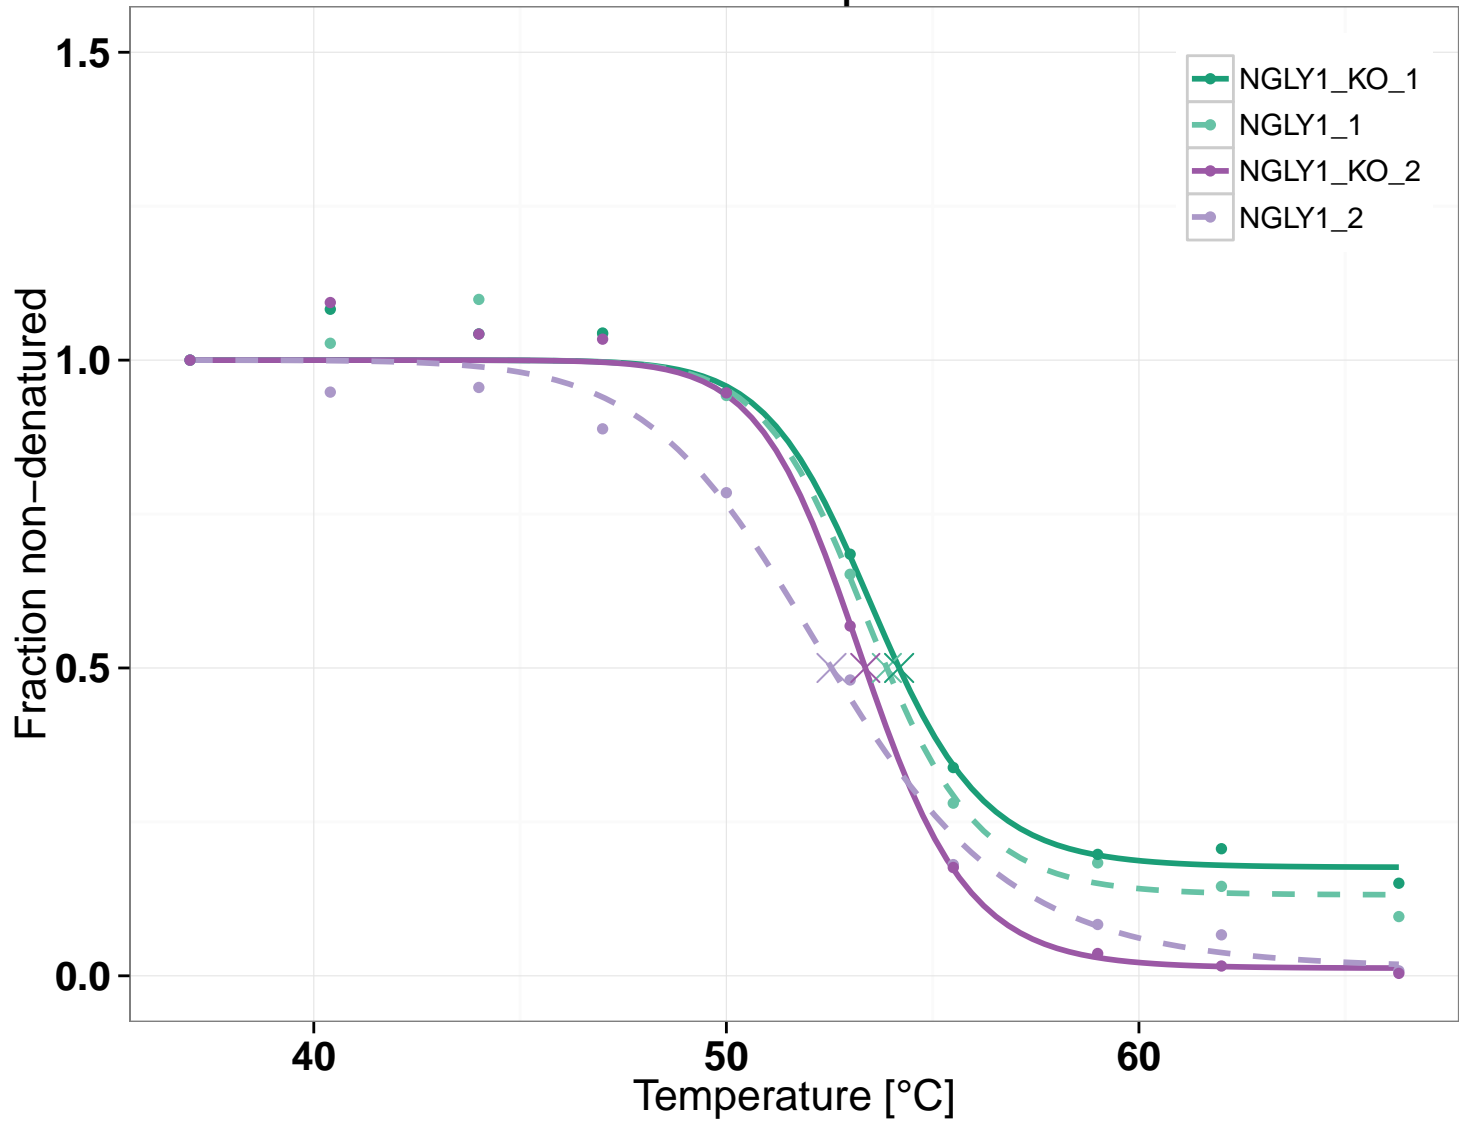

|            | meltPoint | slope | plateau | R2   |
|------------|-----------|-------|---------|------|
| NGLY1_KO_1 | 54.19     | -0.16 | 0.18    | 0.99 |
| NGLY1_1    | 53.89     | -0.17 | 0.13    | 0.99 |
| NGLY1_KO_2 | 53.37     | -0.19 | 0.01    | 0.99 |
| NGLY1_2    | 52.55     | -0.11 | 0.01    | 0.99 |

Supplement: Supplementary file 3560 [file 1]

IPI00444046.3|SRCAP

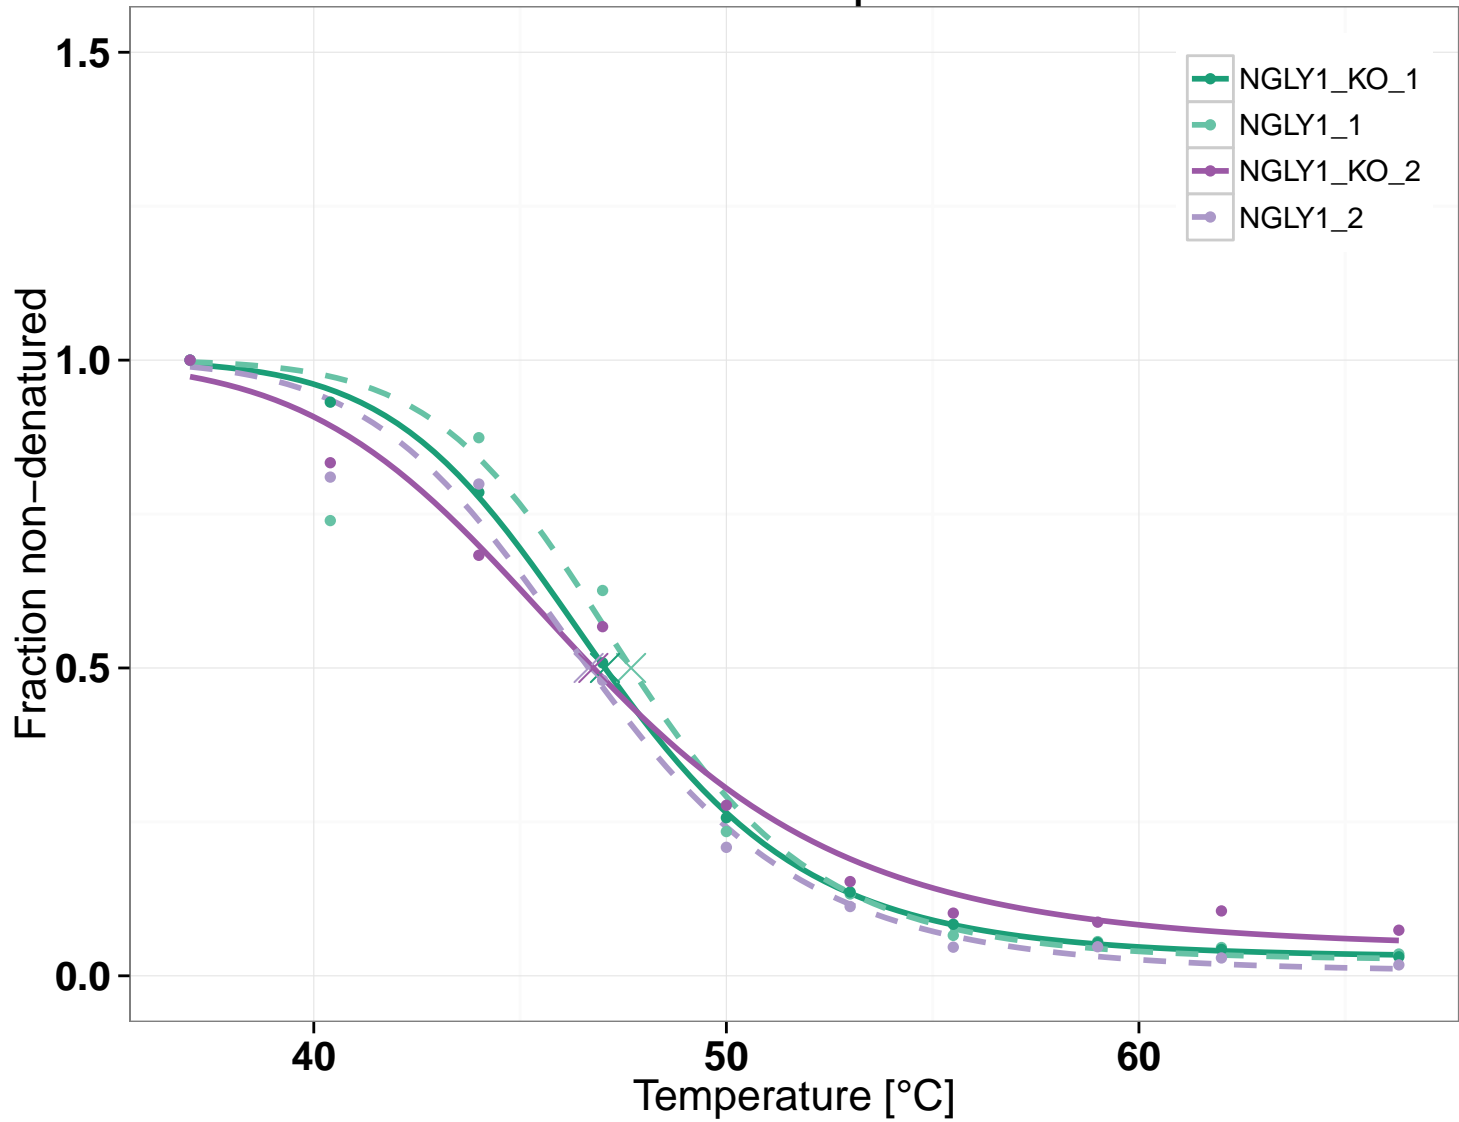

|            | meltPoint | slope  | plateau | R2   |
|------------|-----------|--------|---------|------|
| NGLY1_KO_1 | 47.06     | -0.096 | 0.03    | 1    |
| NGLY1_1    | 47.69     | -0.1   | 0.02    | 0.95 |
| NGLY1_KO_2 | 46.78     | -0.073 | 0.04    | 0.99 |
| NGLY1_2    | 46.66     | -0.093 | 0.01    | 0.98 |

Supplement: Supplementary file 3561 [file 1]

# IPI00014149.3|TTC35

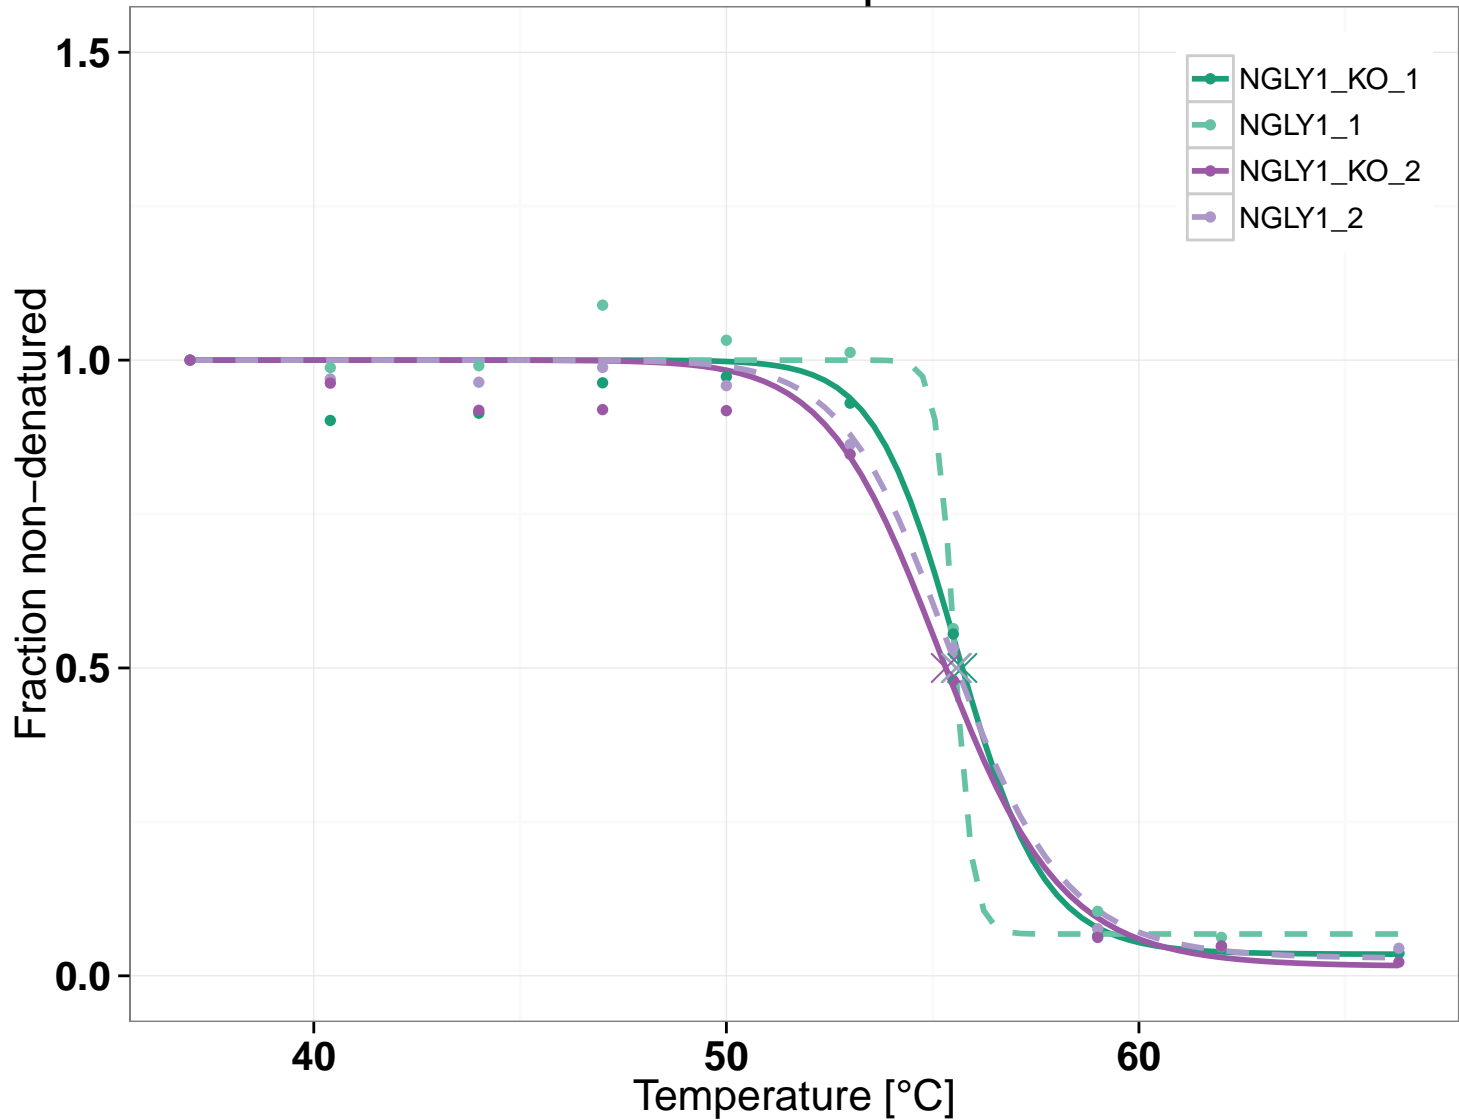

|            | meltPoint | slope | plateau | R2   |
|------------|-----------|-------|---------|------|
| NGLY1_KO_1 | 55.72     | -0.23 | 0.04    | 0.99 |
| NGLY1_1    | 55.56     | -1    | 0.07    | 0.99 |
| NGLY1_KO_2 | 55.32     | -0.17 | 0.02    | 0.99 |
| NGLY1_2    | 55.59     | -0.18 | 0.03    | 1    |

Supplement: Supplementary file 3562 [file 1]

IPI00514222.1|CASP7

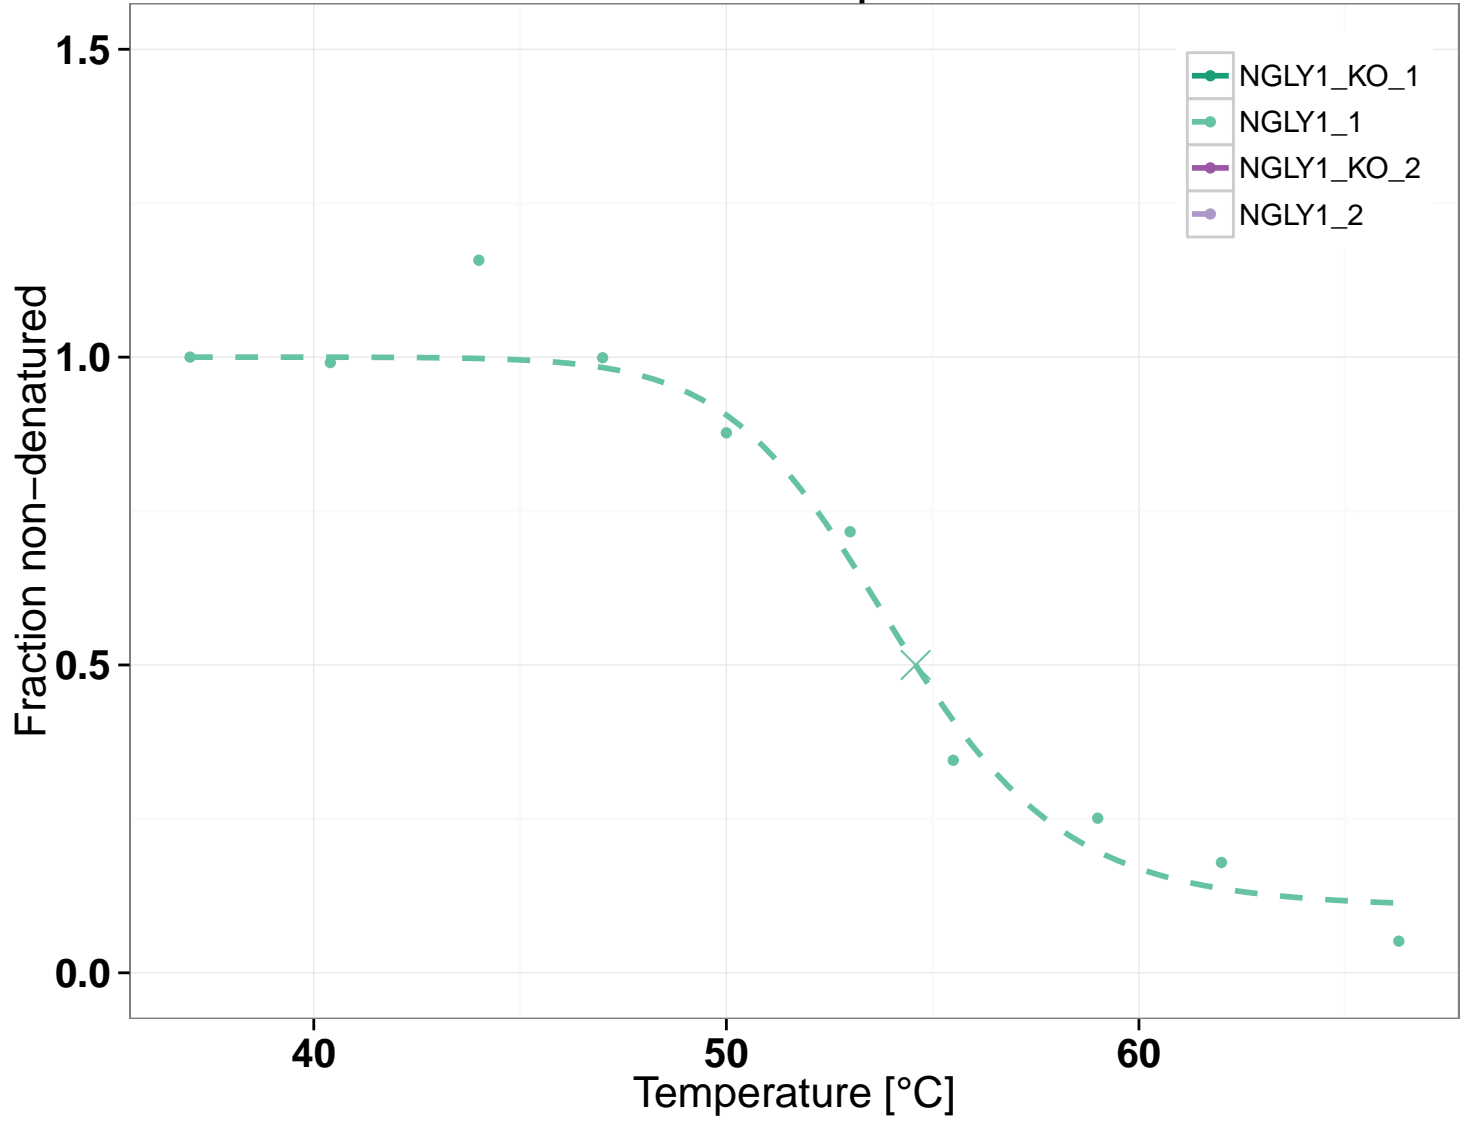

|            | meltPoint | slope | plateau | R2   |
|------------|-----------|-------|---------|------|
| NGLY1_KO_1 | -         | -     | -       | -    |
| NGLY1_1    | 54.59     | -0.11 | 0.11    | 0.97 |
| NGLY1_KO_2 | -         | -     | -       | -    |
| NGLY1_2    | -         | -     | -       | -    |

Supplement: Supplementary file 3563 [file 1]

# IPI00015105.1|CKS2

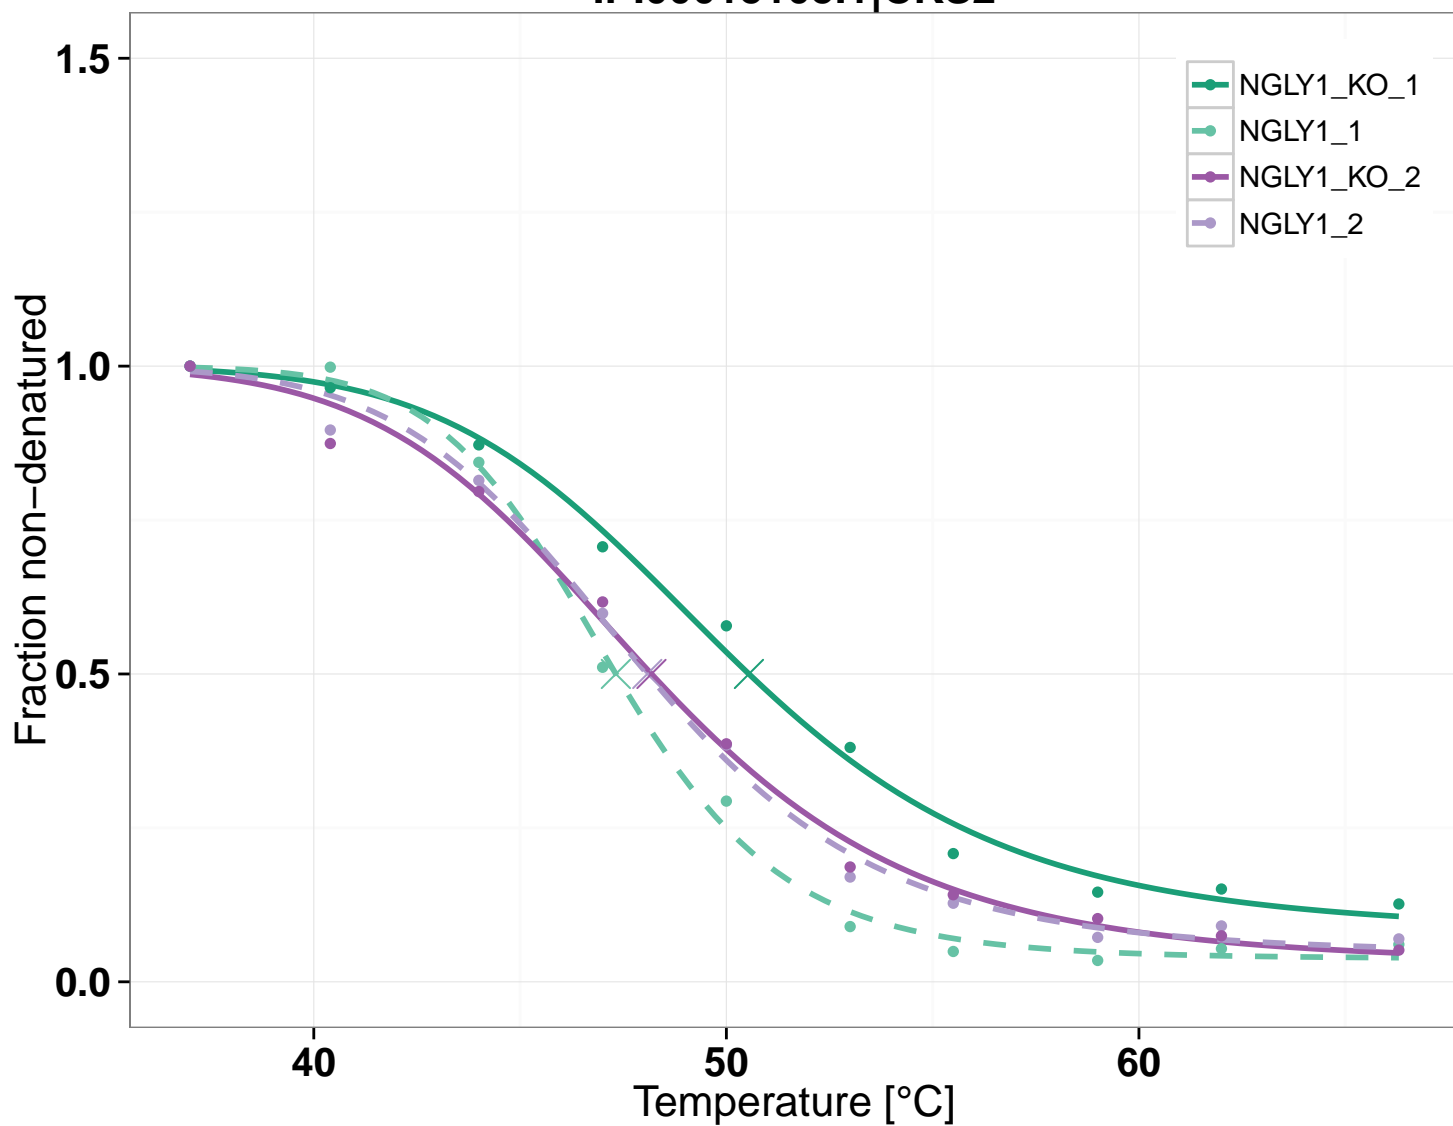

|            | meltPoint | slope  | plateau | R2   |
|------------|-----------|--------|---------|------|
| NGLY1_KO_1 | 50.55     | -0.067 | 0.08    | 0.99 |
| NGLY1_1    | 47.32     | -0.11  | 0.04    | 1    |
| NGLY1_KO_2 | 48.18     | -0.074 | 0.03    | 0.99 |
| NGLY1_2    | 48.08     | -0.082 | 0.05    | 0.99 |

Supplement: Supplementary file 3564 [file 1]

IPI00167074.4|ARL6IP6

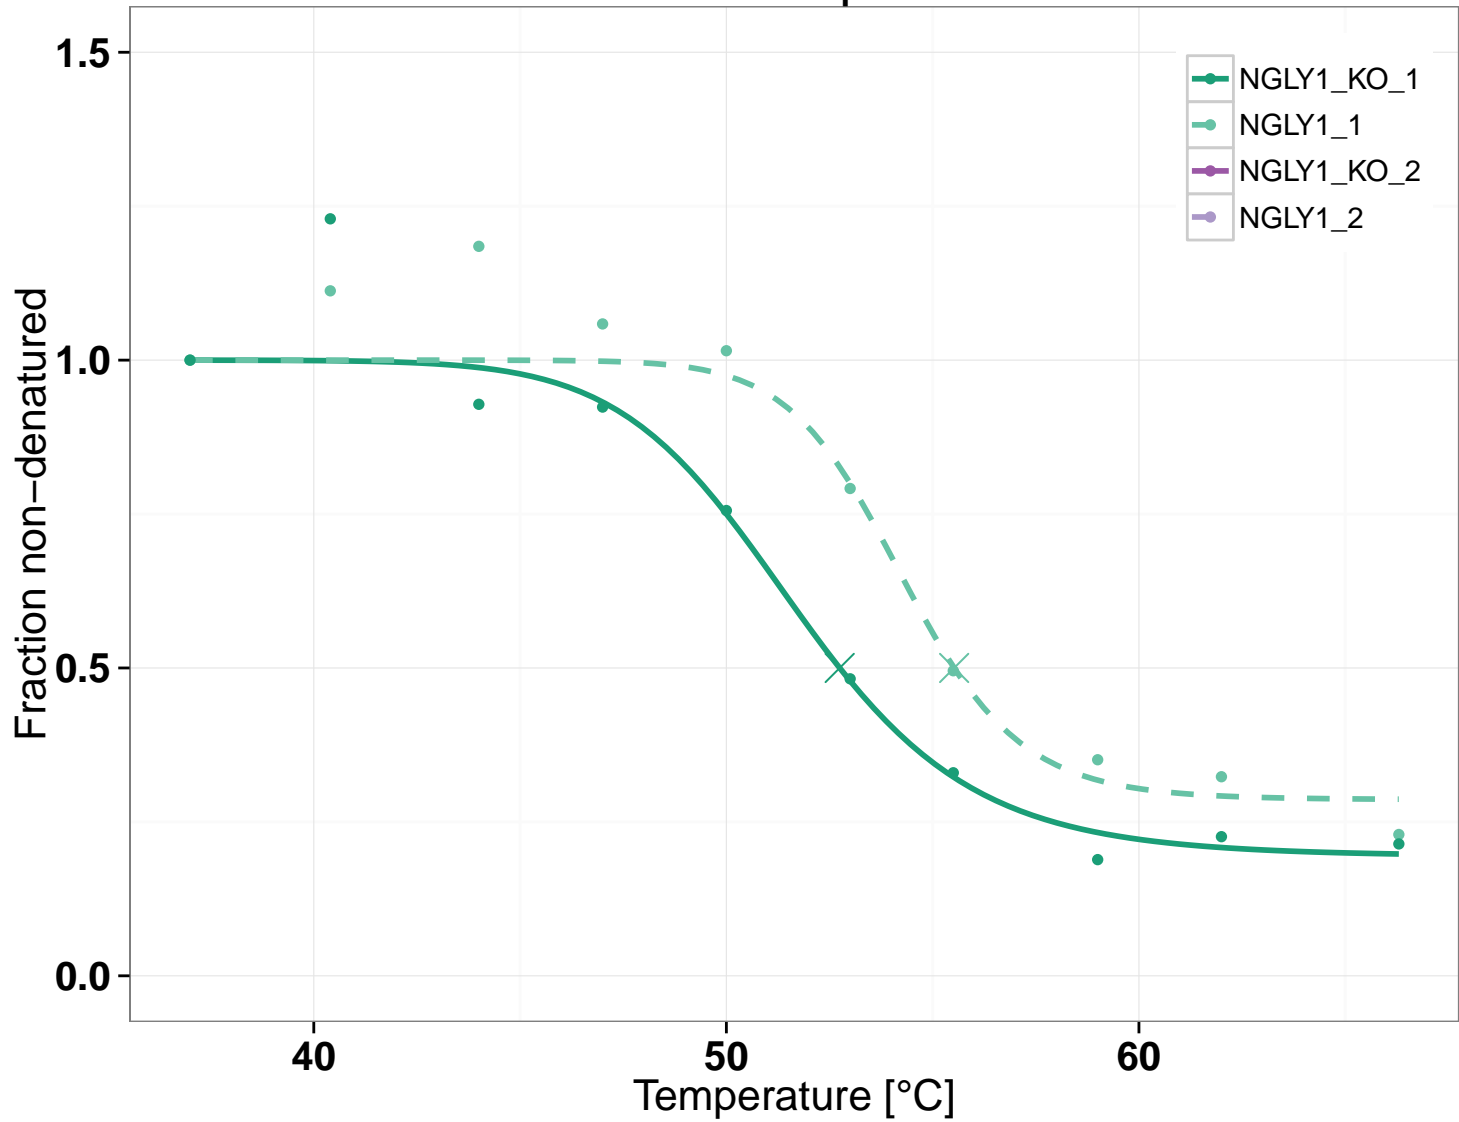

|            | meltPoint | slope  | plateau | R2   |
|------------|-----------|--------|---------|------|
| NGLY1_KO_1 | 52.75     | -0.094 | 0.19    | 0.96 |
| NGLY1_1    | 55.52     | -0.13  | 0.29    | 0.95 |
| NGLY1_KO_2 | -         | -      | -       | -    |
| NGLY1_2    | -         | -      | -       | -    |

Supplement: Supplementary file 3565 [file 1]

# IPI00444945.2|BAX

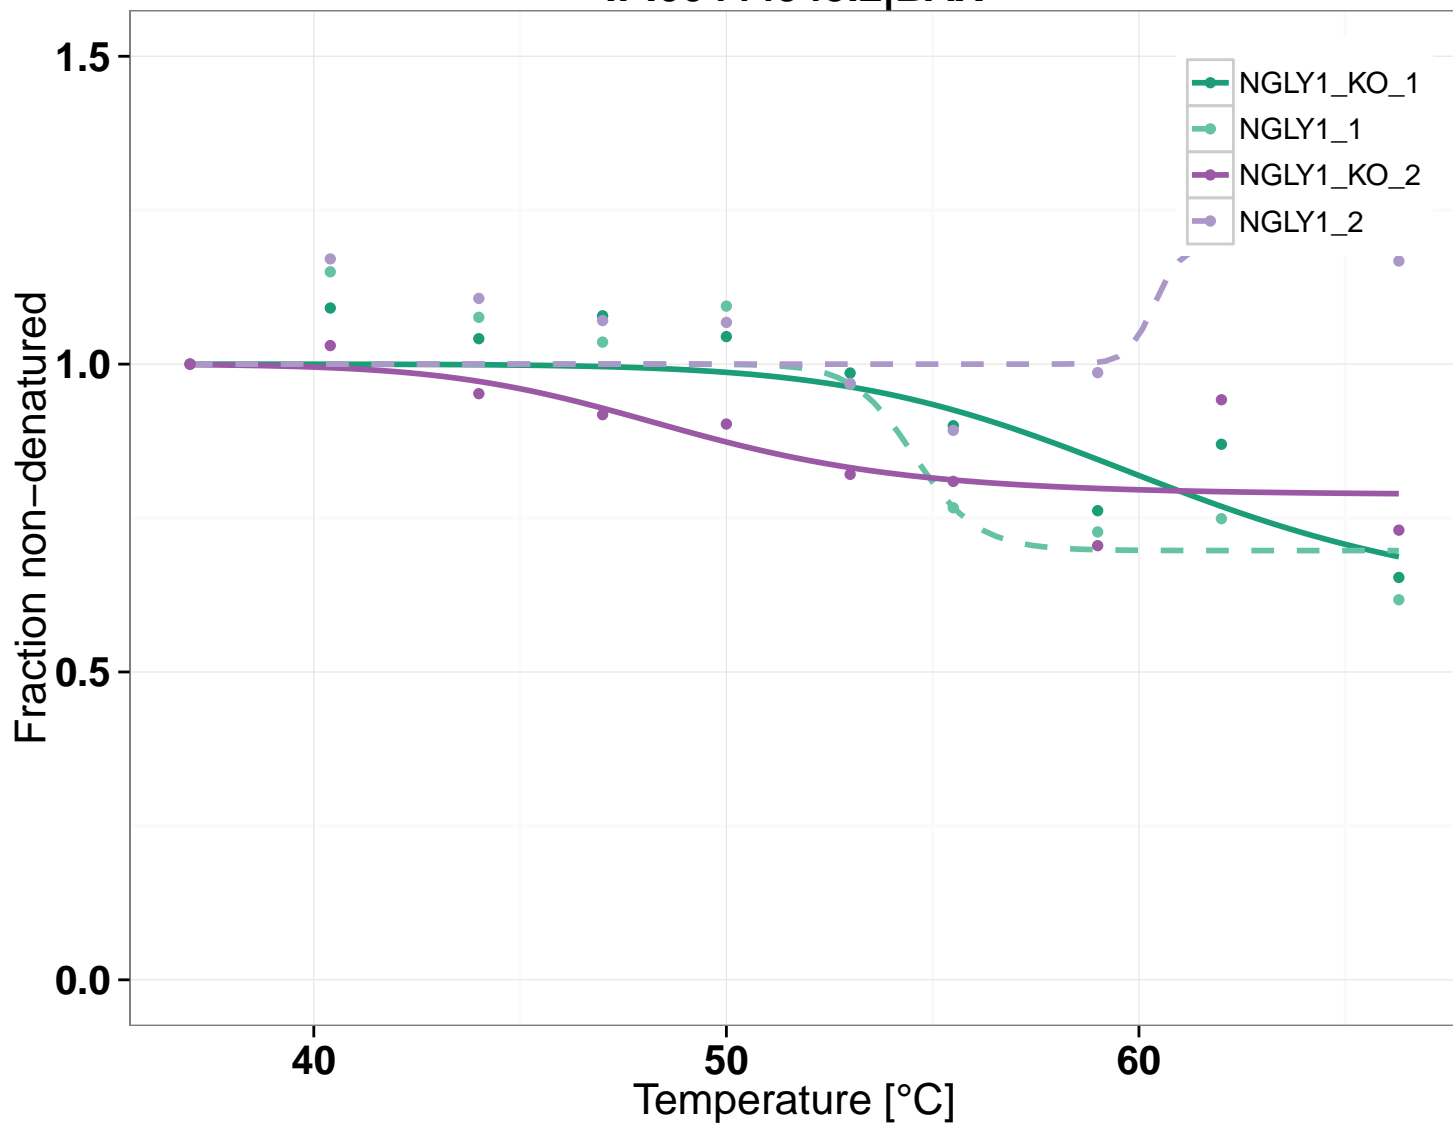

|            | meltPoint | slope  | plateau | R2   |
|------------|-----------|--------|---------|------|
| NGLY1_KO_1 | –         | –0.026 | 0.61    | 0.79 |
| NGLY1_1    | –         | –0.1   | 0.7     | 0.84 |
| NGLY1_KO_2 | –         | –0.019 | 0.79    | 0.66 |
| NGLY1_2    | –         | 0.15   | 1.2     | 0.34 |

Supplement: Supplementary file 3566 [file 1]

# IPI00216719.1|ERC1

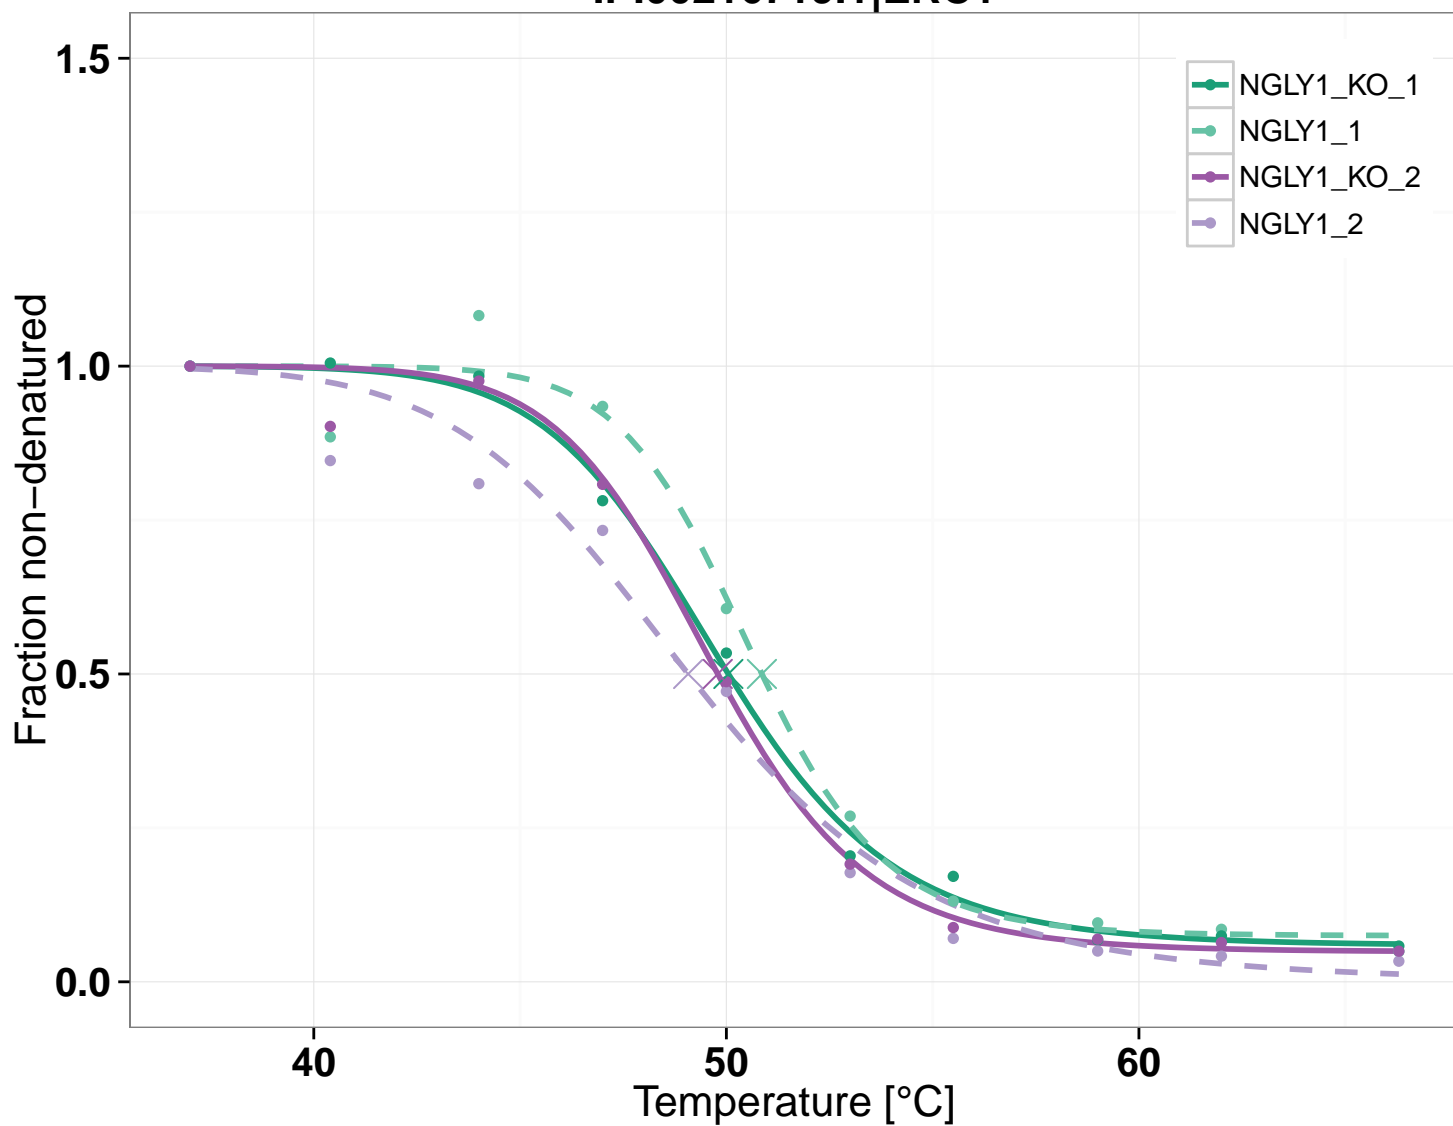

|            | meltPoint | slope  | plateau | R2   |
|------------|-----------|--------|---------|------|
| NGLY1_KO_1 | 50.05     | -0.11  | 0.06    | 1    |
| NGLY1_1    | 50.86     | -0.14  | 0.07    | 0.99 |
| NGLY1_KO_2 | 49.79     | -0.13  | 0.05    | 0.99 |
| NGLY1_2    | 49.07     | -0.087 | 0       | 0.98 |

Supplement: Supplementary file 3567 [file 1]

IPI00477050.4|CEP152

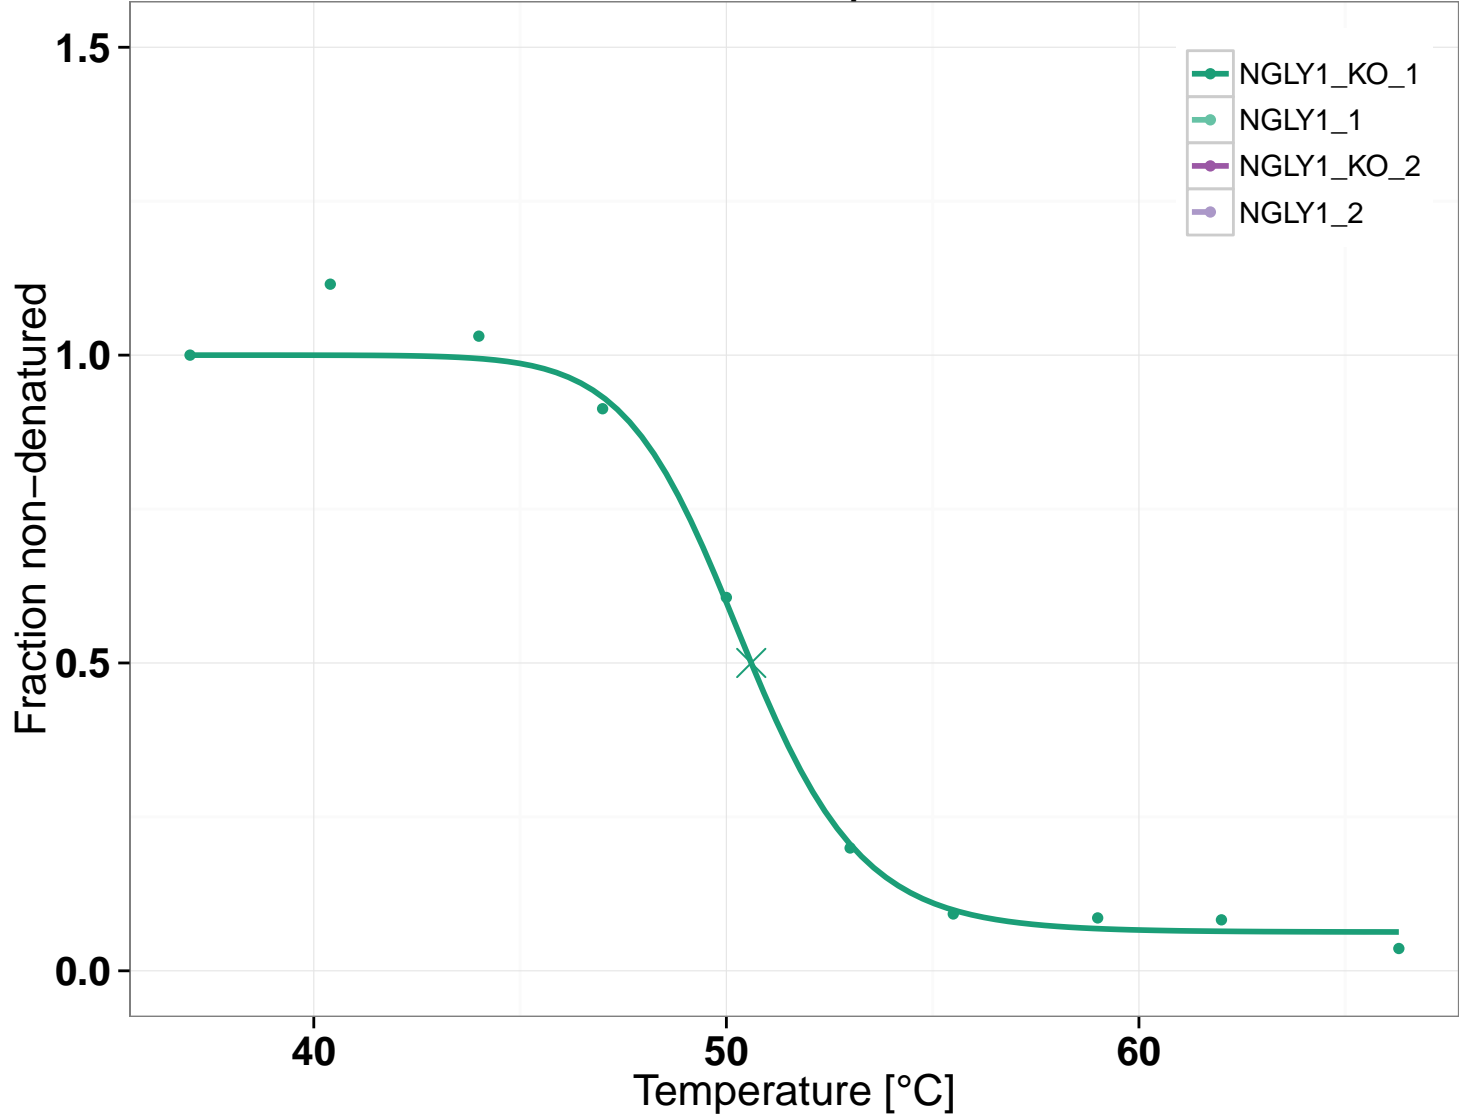

|            | meltPoint | slope | plateau | R2   |
|------------|-----------|-------|---------|------|
| NGLY1_KO_1 | 50.6      | -0.16 | 0.06    | 0.99 |
| NGLY1_1    | -         | -     | -       | -    |
| NGLY1_KO_2 | -         | -     | -       | -    |
| NGLY1_2    | -         | -     | -       | -    |

Supplement: Supplementary file 3568 [file 1]

IPI00171118.3|ZNF668

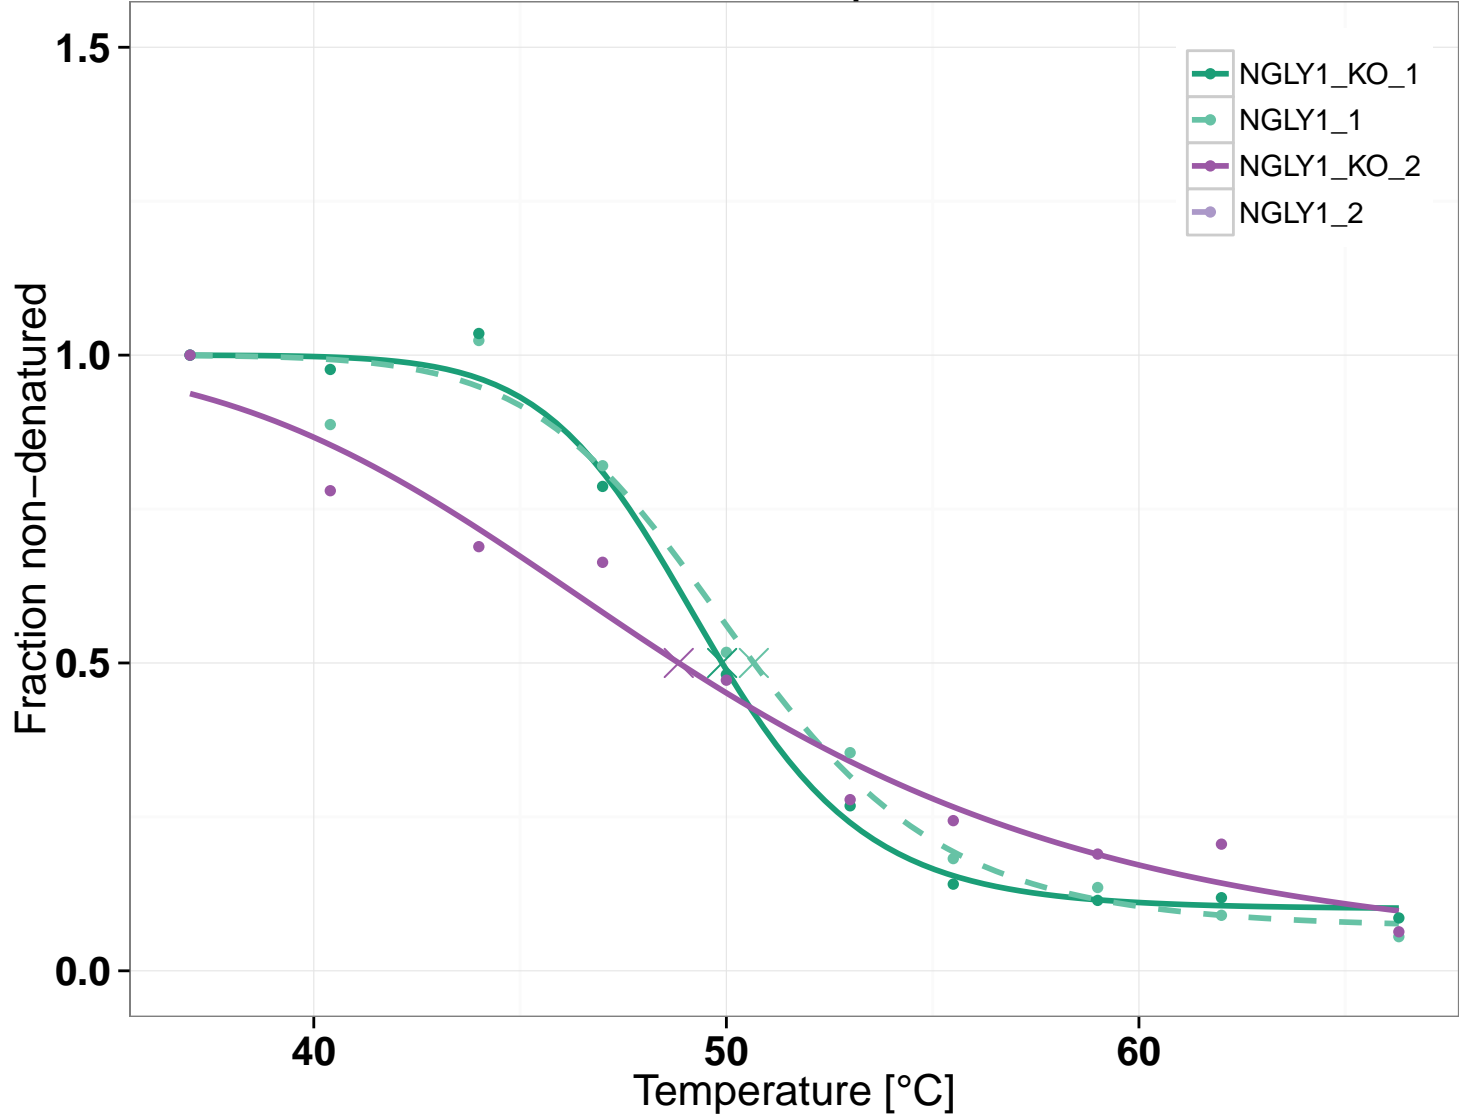

|            | meltPoint | slope  | plateau | R2   |
|------------|-----------|--------|---------|------|
| NGLY1_KO_1 | 49.9      | -0.12  | 0.1     | 0.99 |
| NGLY1_1    | 50.67     | -0.093 | 0.07    | 0.98 |
| NGLY1_KO_2 | 48.85     | -0.046 | 0       | 0.97 |
| NGLY1_2    | -         | -      | -       | -    |

Supplement: Supplementary file 3569 [file 1]

IPI00005794.2|PGCP

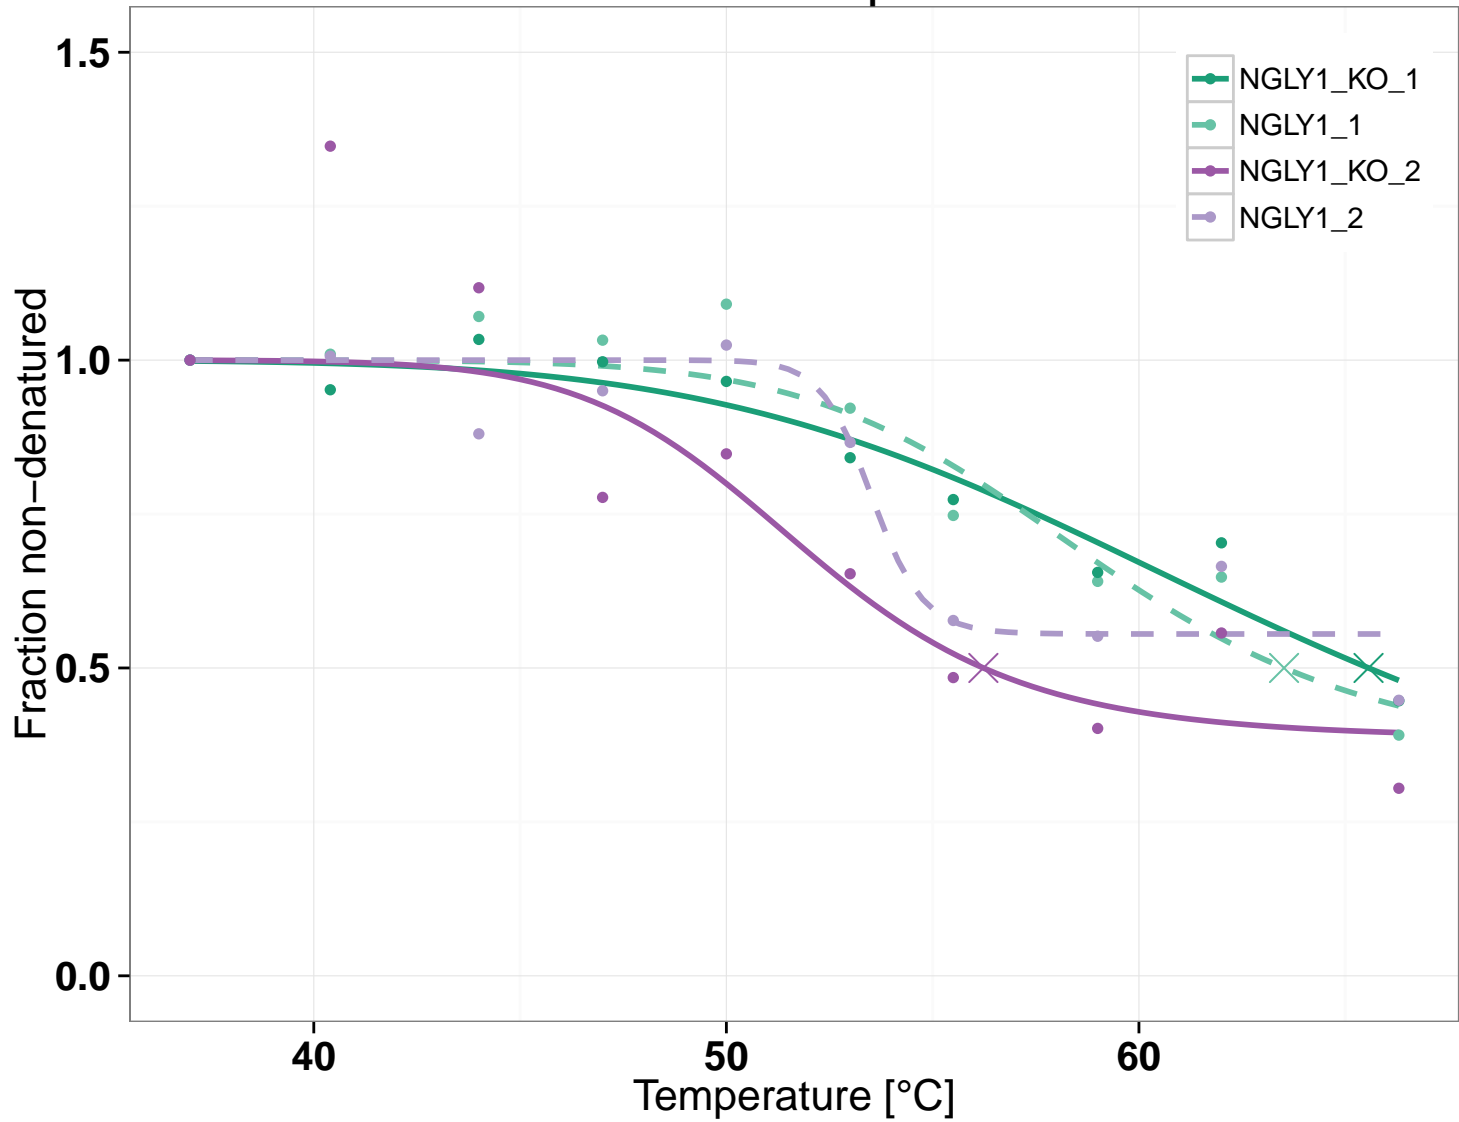

|            | meltPoint | slope  | plateau | R2   |
|------------|-----------|--------|---------|------|
| NGLY1_KO_1 | 65.57     | -0.032 | 0.13    | 0.93 |
| NGLY1_1    | 63.52     | -0.047 | 0.35    | 0.92 |
| NGLY1_KO_2 | 56.23     | -0.057 | 0.39    | 0.8  |
| NGLY1_2    | -         | -0.18  | 0.56    | 0.9  |

Supplement: Supplementary file 3570 [file 1]

IPI00017979.2|FAM54A

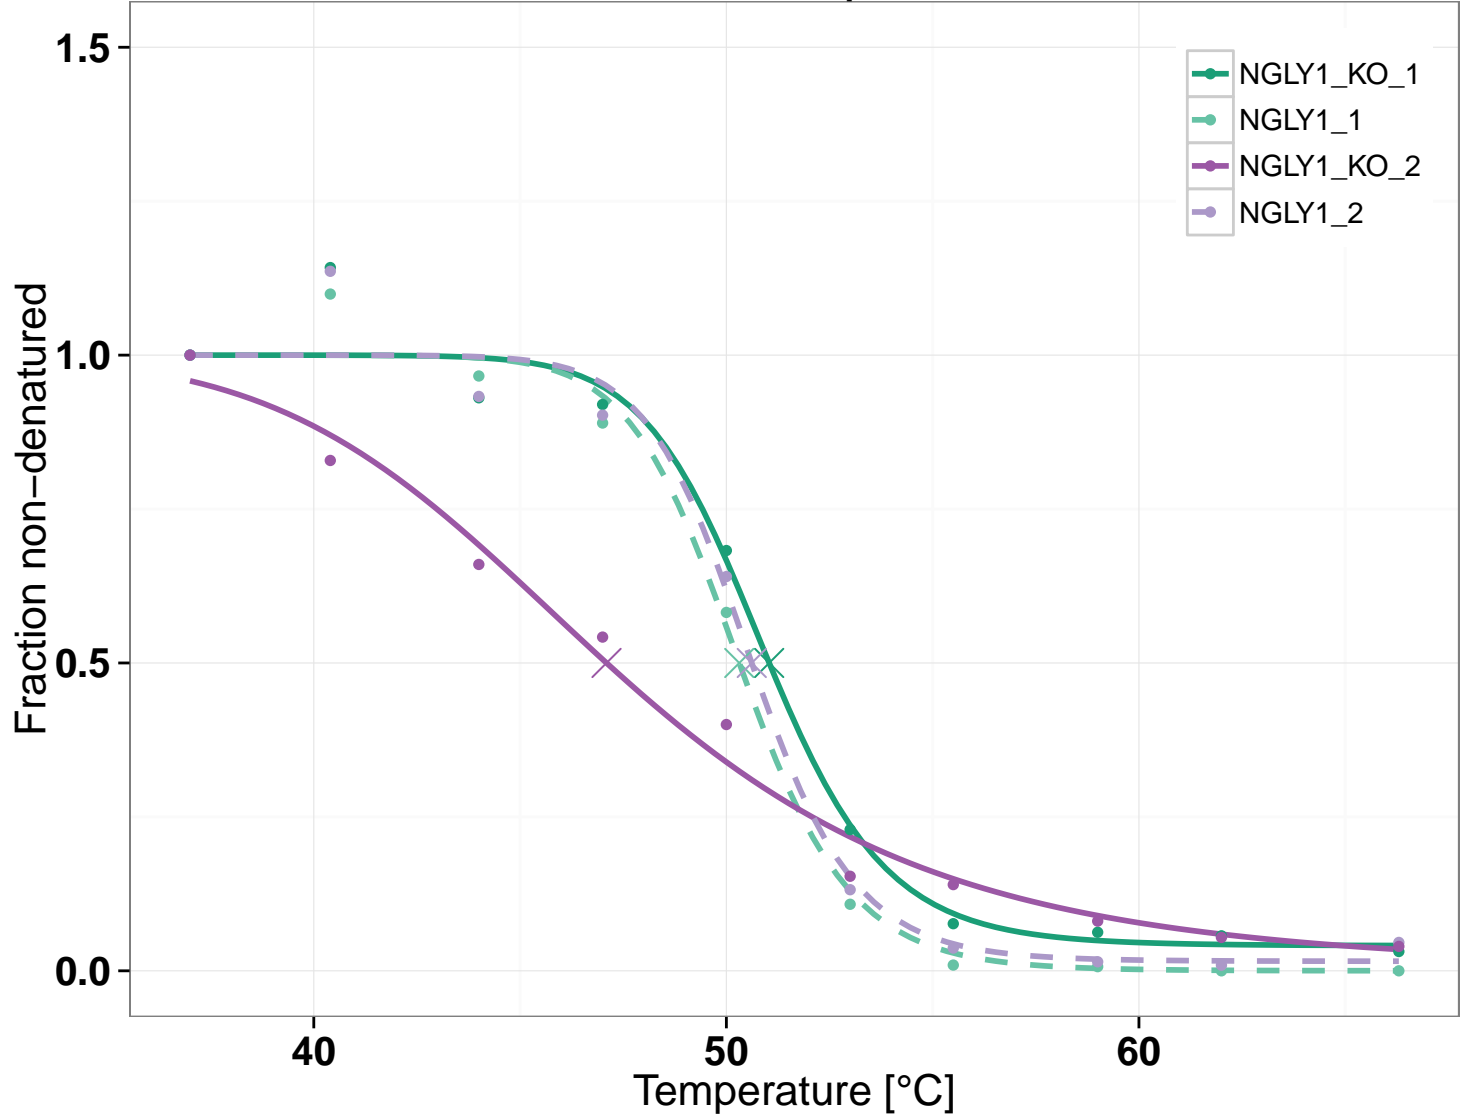

|            | meltPoint | slope  | plateau | R2   |
|------------|-----------|--------|---------|------|
| NGLY1_KO_1 | 51.04     | -0.16  | 0.04    | 0.99 |
| NGLY1_1    | 50.31     | -0.19  | 0       | 0.99 |
| NGLY1_KO_2 | 47.1      | -0.063 | 0       | 0.99 |
| NGLY1_2    | 50.62     | -0.19  | 0.02    | 0.99 |

Supplement: Supplementary file 3571 [file 1]

IPI00514311.1|CTTNBP2NL

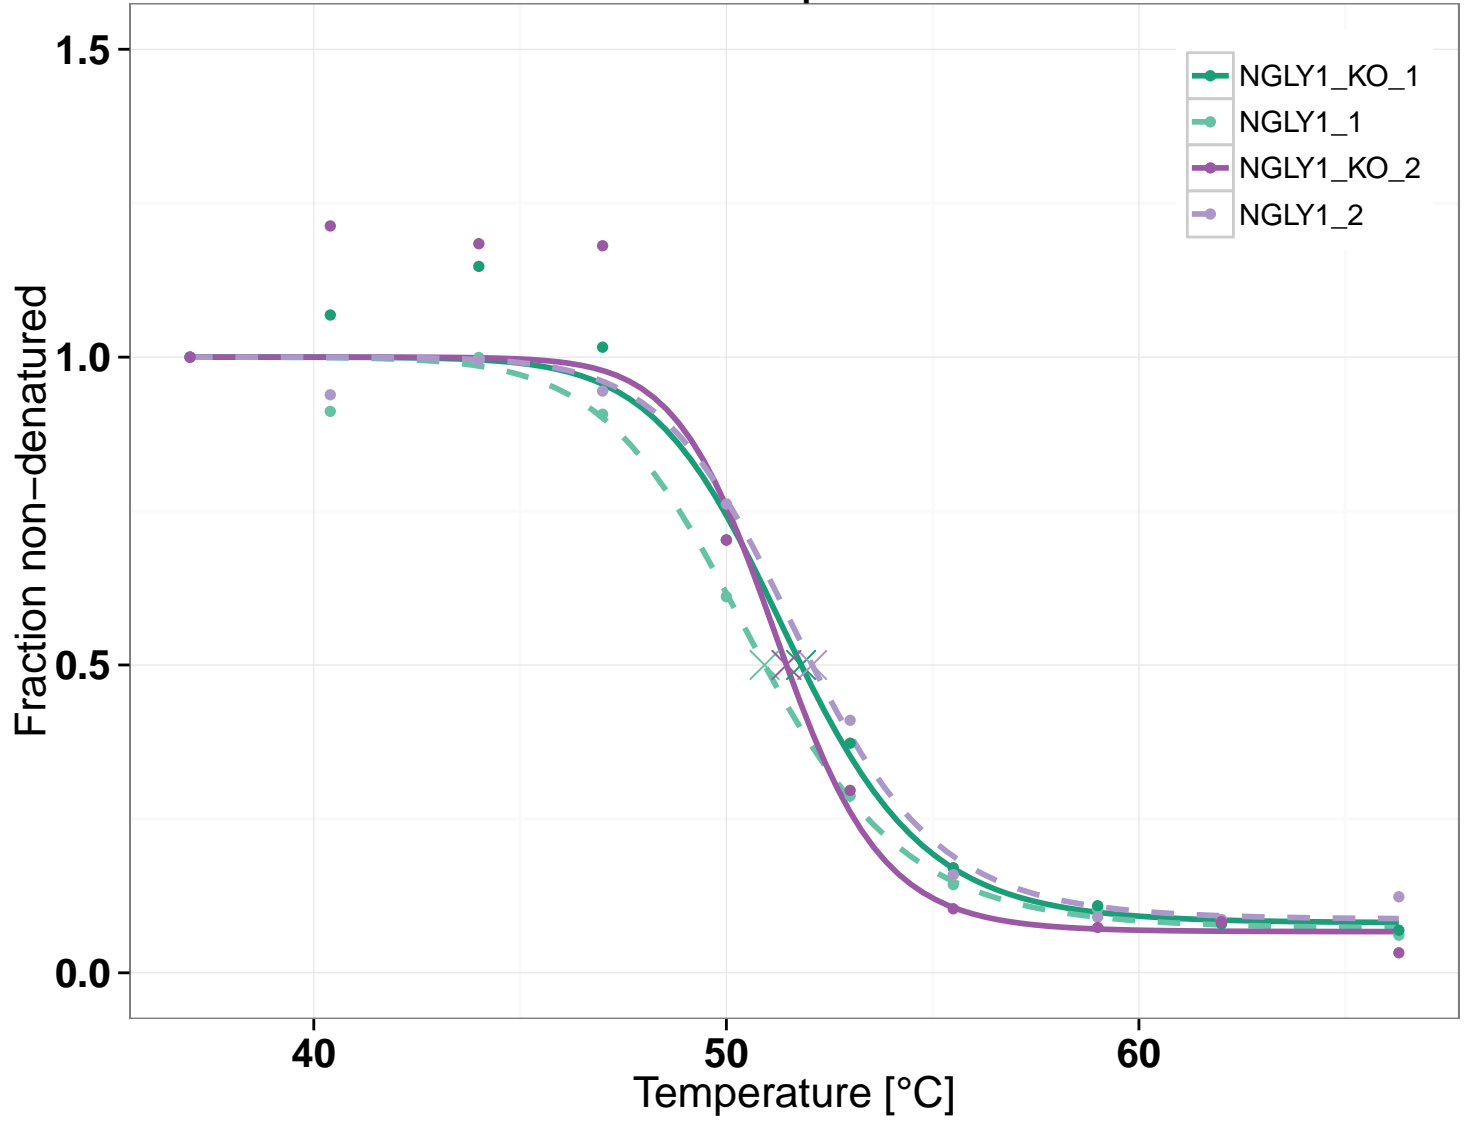

|            | meltPoint | slope | plateau | R2   |
|------------|-----------|-------|---------|------|
| NGLY1_KO_1 | 51.81     | -0.14 | 0.08    | 0.98 |
| NGLY1_1    | 50.93     | -0.13 | 0.07    | 0.99 |
| NGLY1_KO_2 | 51.46     | -0.19 | 0.07    | 0.95 |
| NGLY1_2    | 52.08     | -0.14 | 0.09    | 1    |

Supplement: Supplementary file 3572 [file 1]

IPI00456620.1|BRPF1

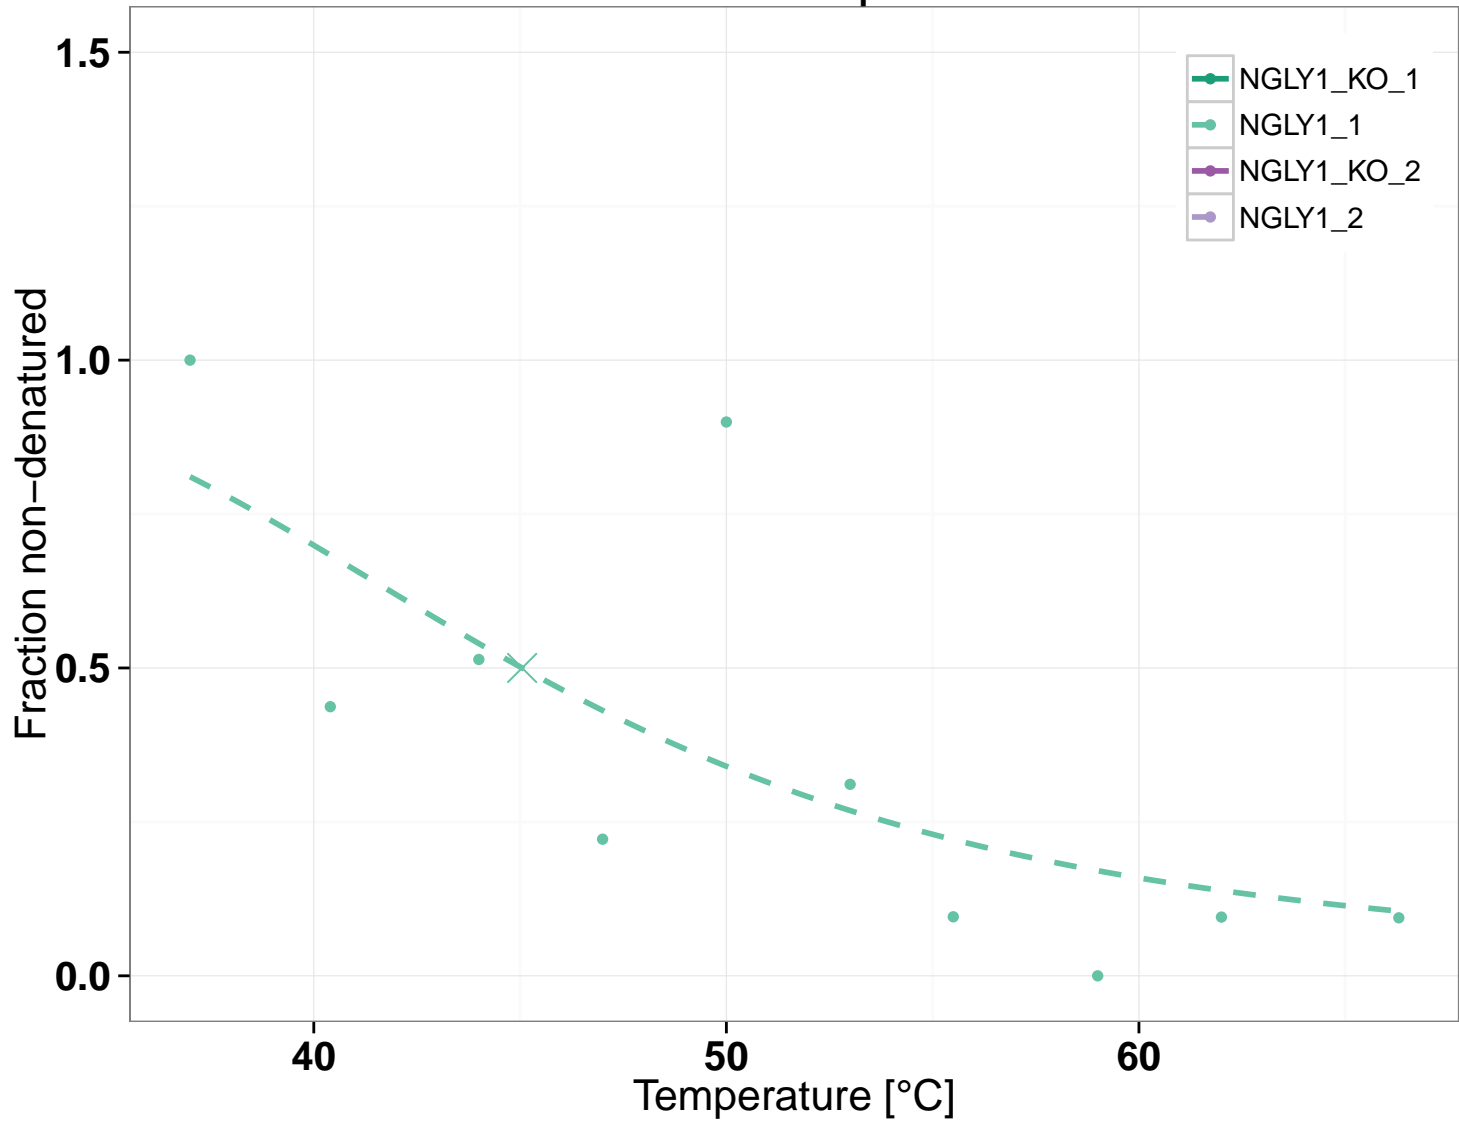

|            | meltPoint | slope | plateau | R2   |
|------------|-----------|-------|---------|------|
| NGLY1_KO_1 | -         | -     | -       | -    |
| NGLY1_1    | 45.05     | -0.04 | 0       | 0.54 |
| NGLY1_KO_2 | -         | -     | -       | -    |
| NGLY1_2    | -         | -     | -       | -    |

Supplement: Supplementary file 3573 [file 1]

# IPI00016095.1|MTERF

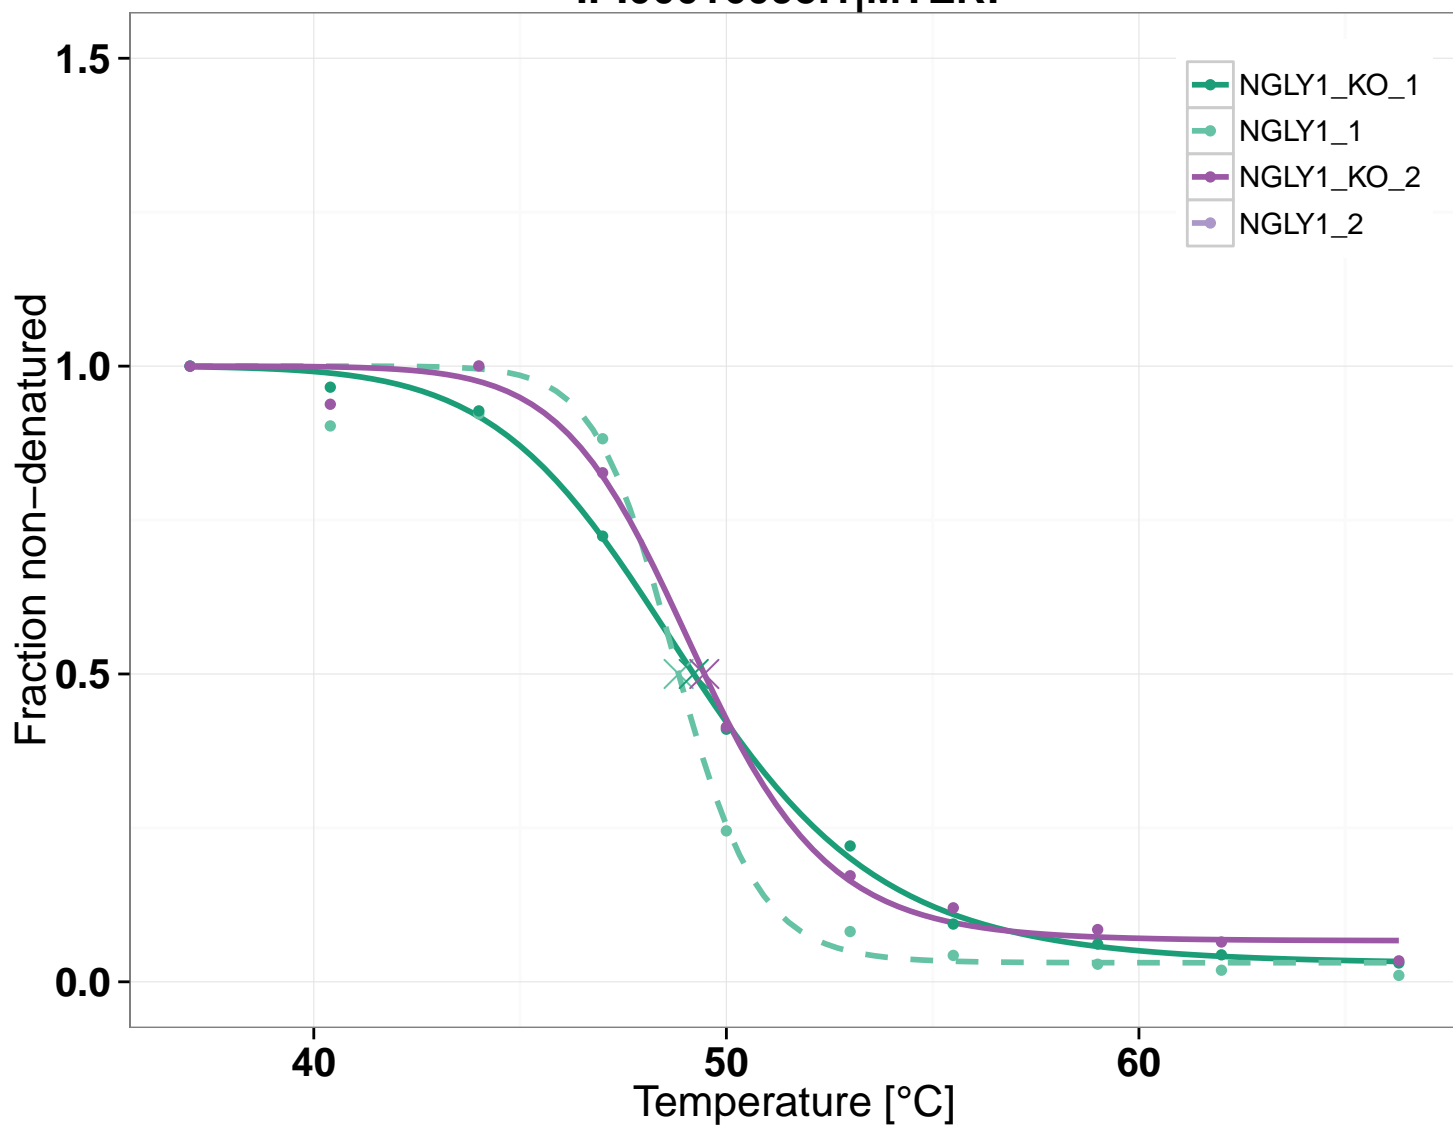

|            | meltPoint | slope | plateau | R2   |
|------------|-----------|-------|---------|------|
| NGLY1_KO_1 | 49.21     | -0.1  | 0.03    | 1    |
| NGLY1_1    | 48.84     | -0.25 | 0.03    | 0.99 |
| NGLY1_KO_2 | 49.47     | -0.14 | 0.07    | 1    |
| NGLY1_2    | -         | -     | -       | -    |

Supplement: Supplementary file 3574 [file 1]

IPI00000184.3|SCOC

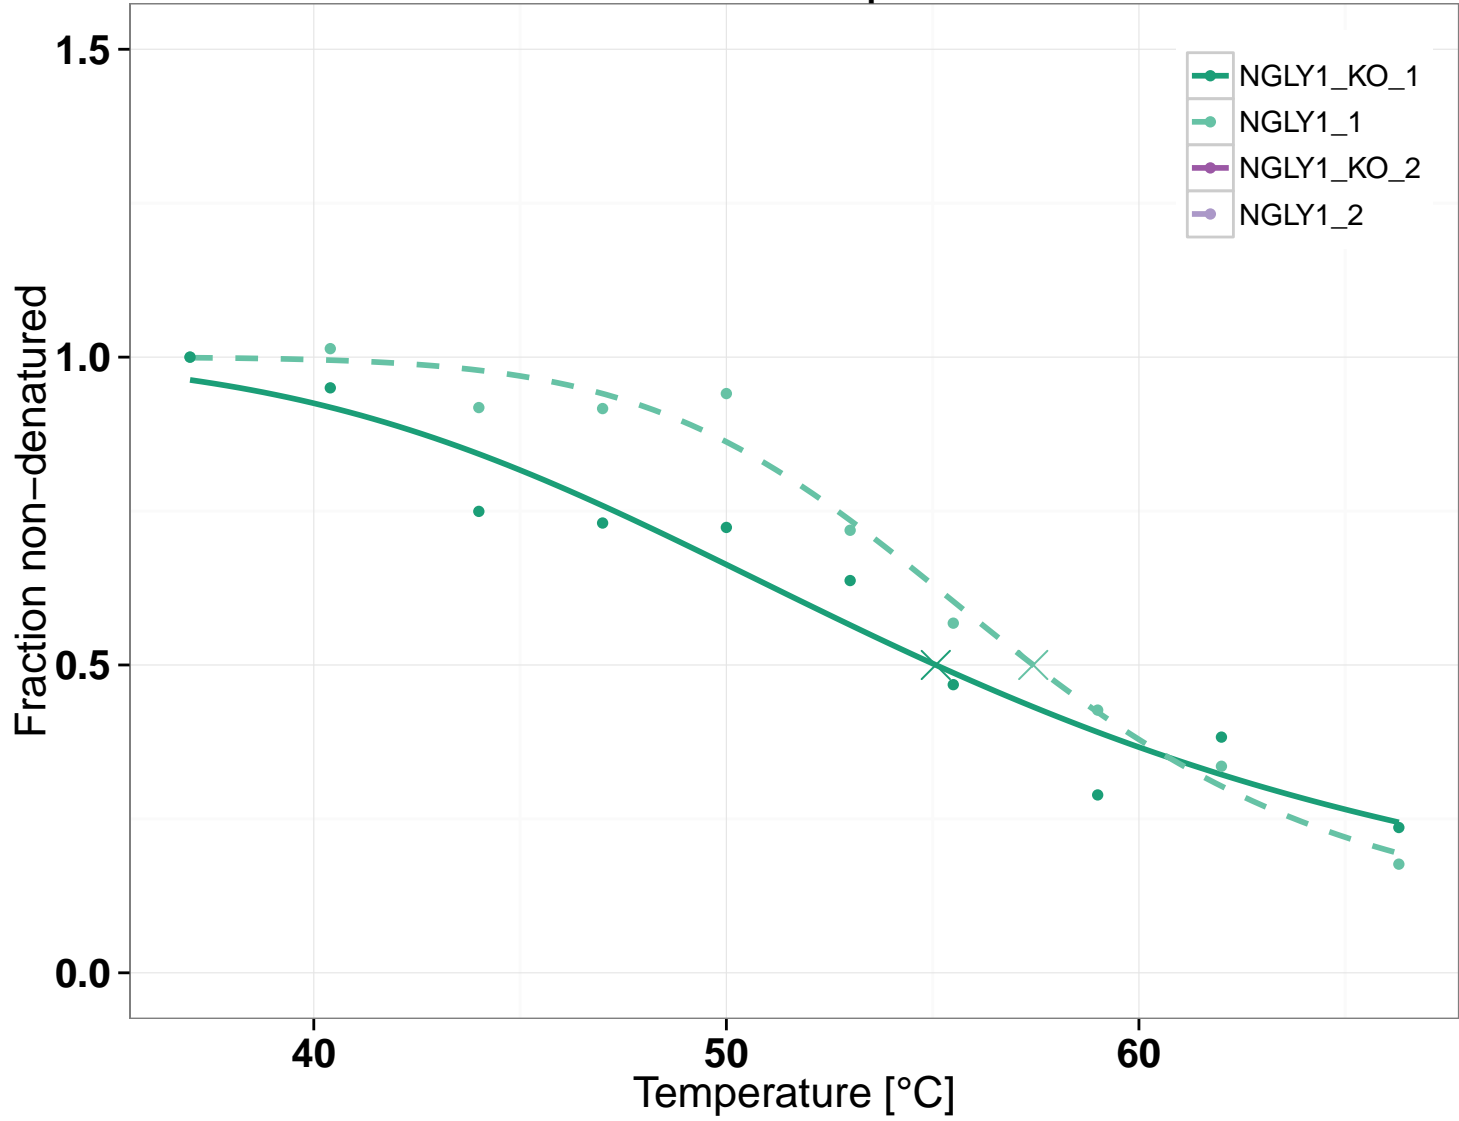

|            | meltPoint | slope  | plateau | R2   |
|------------|-----------|--------|---------|------|
| NGLY1_KO_1 | 55.08     | -0.033 | 0       | 0.94 |
| NGLY1_1    | 57.44     | -0.054 | 0.07    | 0.98 |
| NGLY1_KO_2 | -         | -      | -       | -    |
| NGLY1_2    | -         | -      | -       | -    |

Supplement: Supplementary file 3575 [file 1]

IPI00014825.8|KCTD9

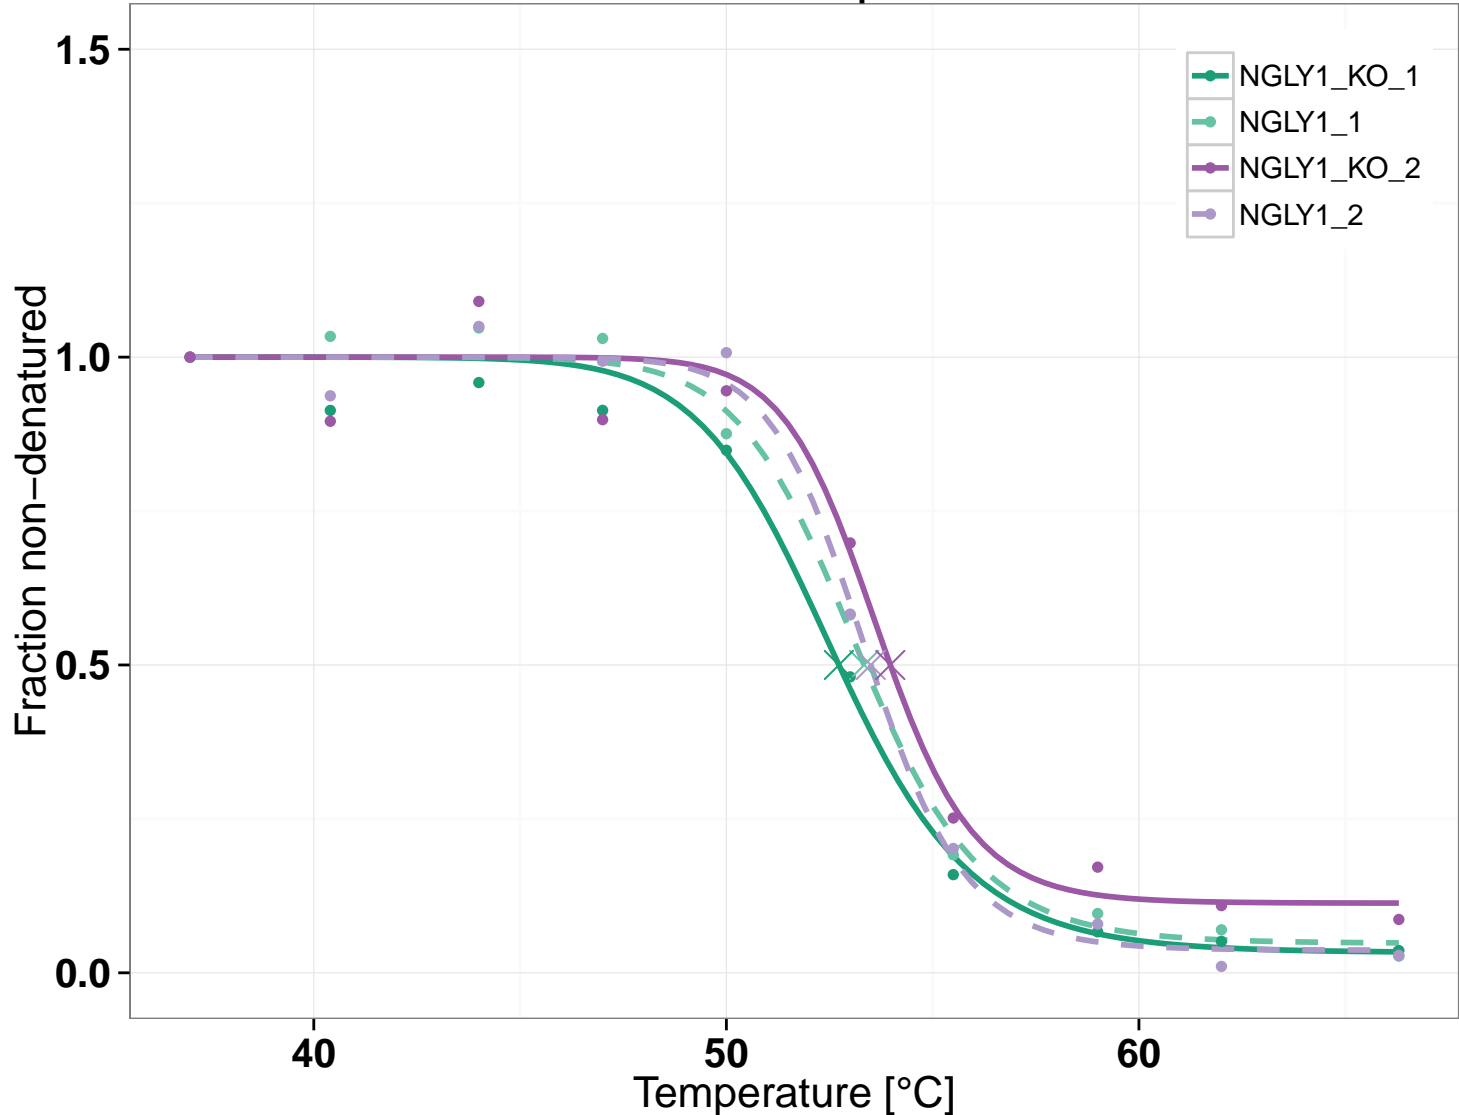

|            | meltPoint | slope | plateau | R2   |
|------------|-----------|-------|---------|------|
| NGLY1_KO_1 | 52.73     | -0.15 | 0.03    | 0.99 |
| NGLY1_1    | 53.34     | -0.16 | 0.05    | 1    |
| NGLY1_KO_2 | 53.97     | -0.19 | 0.11    | 0.98 |
| NGLY1_2    | 53.5      | -0.2  | 0.04    | 0.99 |

Supplement: Supplementary file 3576 [file 1]

# IPI00909420.1|B4DNQ6\_HUMAN

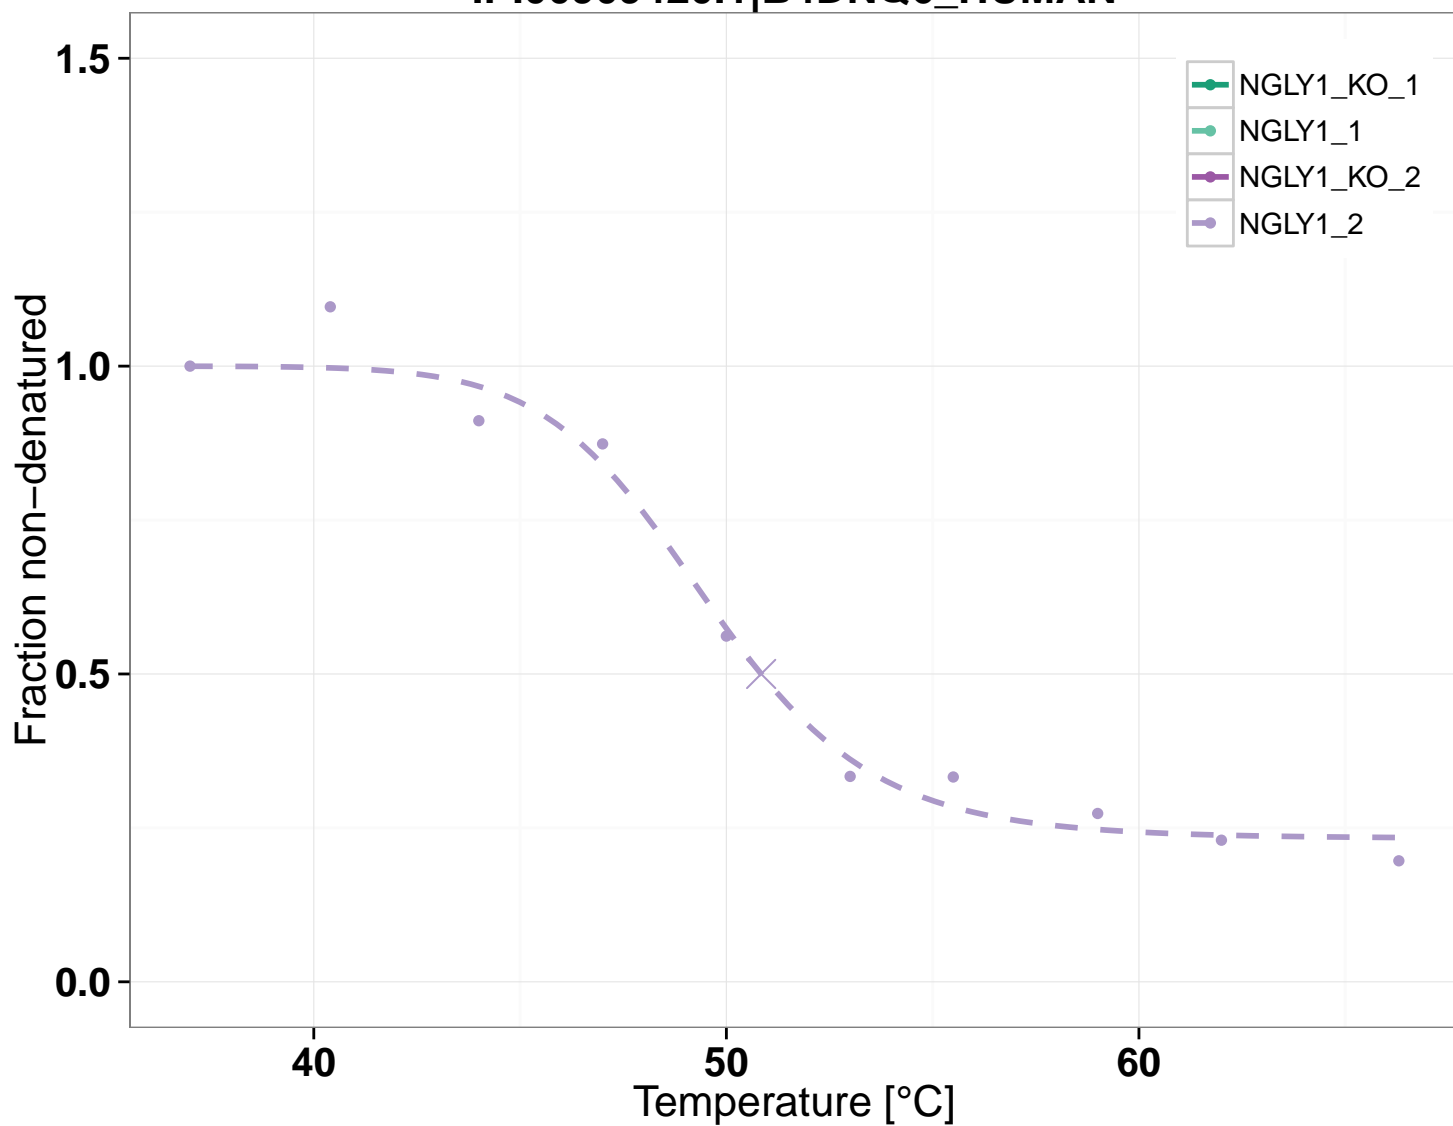

|            | meltPoint | slope  | plateau | R2   |
|------------|-----------|--------|---------|------|
| NGLY1_KO_1 | —         | —      | —       | —    |
| NGLY1_1    | —         | —      | —       | —    |
| NGLY1_KO_2 | —         | —      | —       | —    |
| NGLY1_2    | 50.84     | −0.096 | 0.23    | 0.98 |

Supplement: Supplementary file 3577 [file 1]

# IPI00250153.8|YBX2

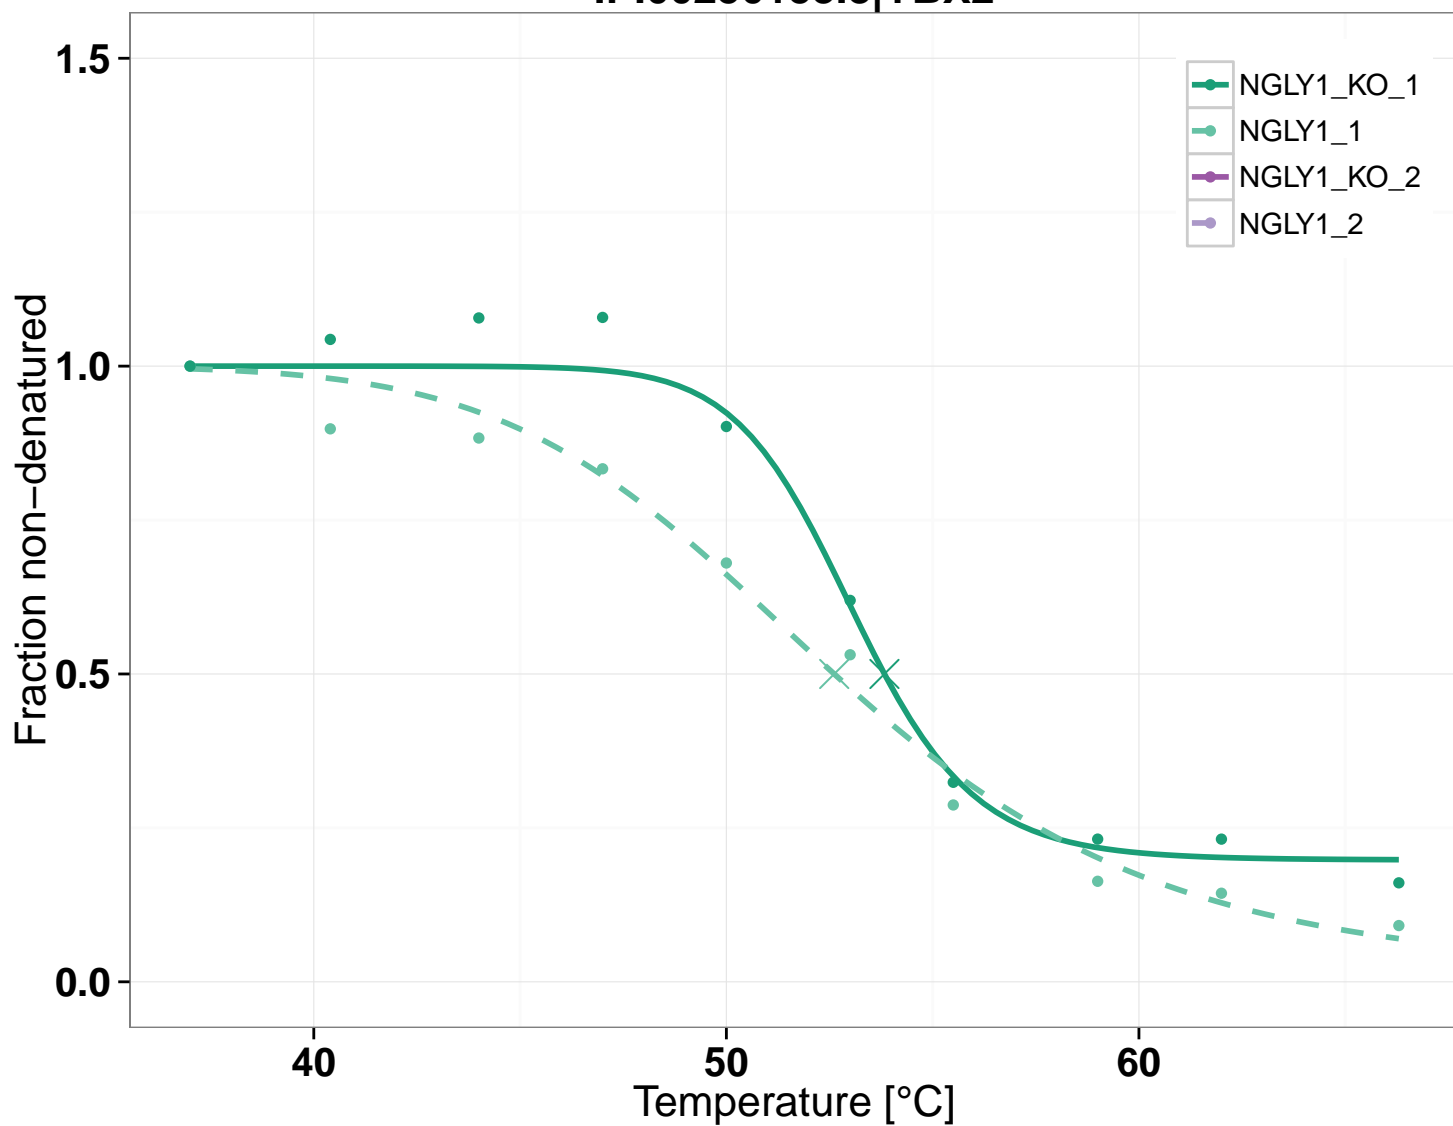

|            | meltPoint | slope  | plateau | R2   |
|------------|-----------|--------|---------|------|
| NGLY1_KO_1 | 53.83     | -0.14  | 0.2     | 0.99 |
| NGLY1_1    | 52.61     | -0.062 | 0.01    | 0.99 |
| NGLY1_KO_2 | -         | -      | -       | -    |
| NGLY1_2    | -         | -      | -       | -    |

Supplement: Supplementary file 3578 [file 1]

IPI00006084.4|CNNM2

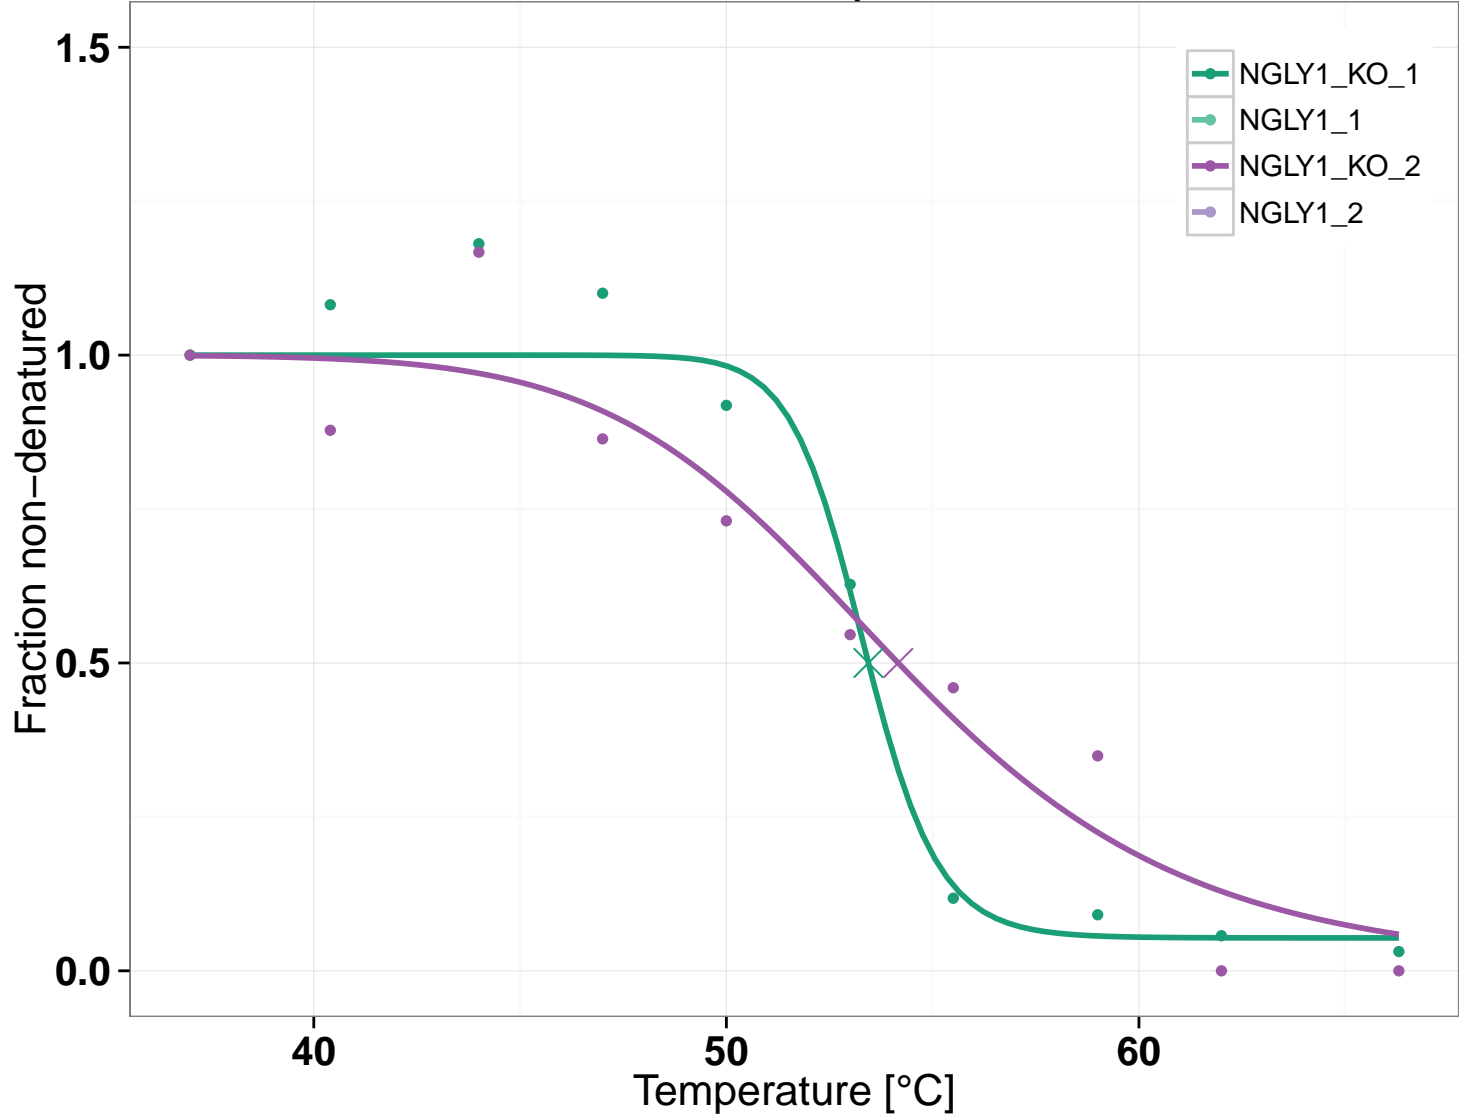

|            | meltPoint | slope  | plateau | R2   |
|------------|-----------|--------|---------|------|
| NGLY1_KO_1 | 53.44     | -0.26  | 0.05    | 0.97 |
| NGLY1_1    | -         | -      | -       | -    |
| NGLY1_KO_2 | 54.17     | -0.071 | 0       | 0.93 |
| NGLY1_2    | -         | -      | -       | -    |

Supplement: Supplementary file 3579 [file 1]

# IPI00217561.2|ITGB1

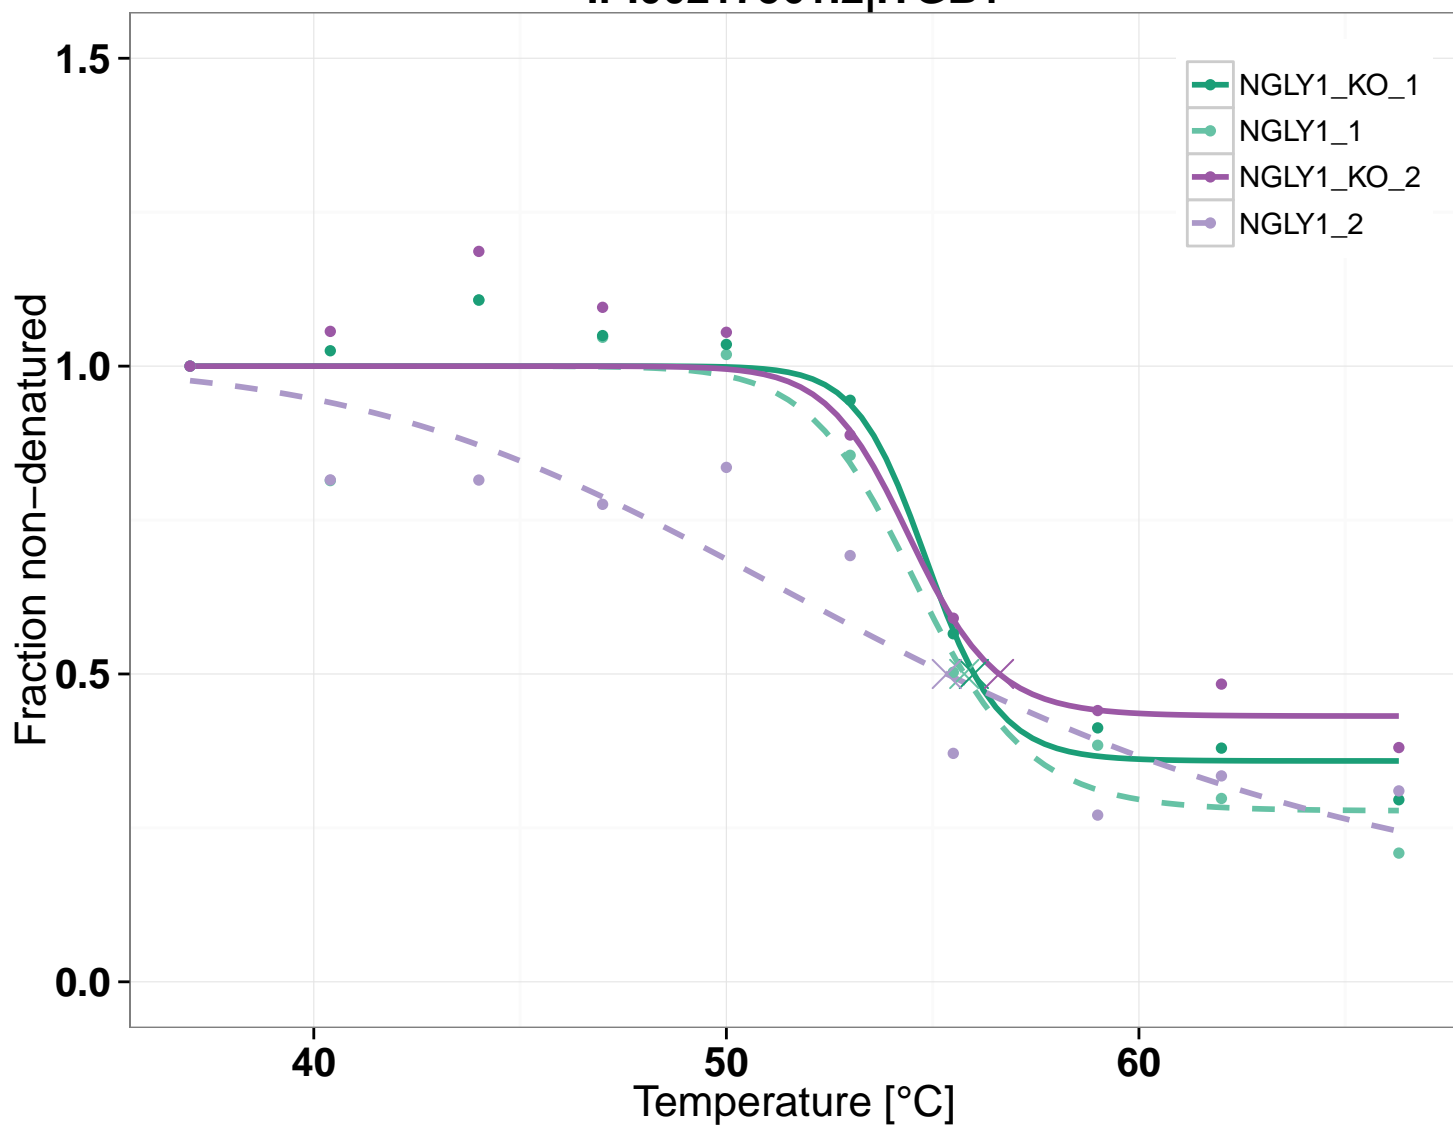

|            | meltPoint | slope  | plateau | R2   |
|------------|-----------|--------|---------|------|
| NGLY1_KO_1 | 56        | -0.18  | 0.36    | 0.98 |
| NGLY1_1    | 55.77     | -0.14  | 0.28    | 0.94 |
| NGLY1_KO_2 | 56.61     | -0.14  | 0.43    | 0.94 |
| NGLY1_2    | 55.34     | -0.036 | 0.05    | 0.86 |

Supplement: Supplementary file 3580 [file 1]

# IPI00027009.2|PACSIN2

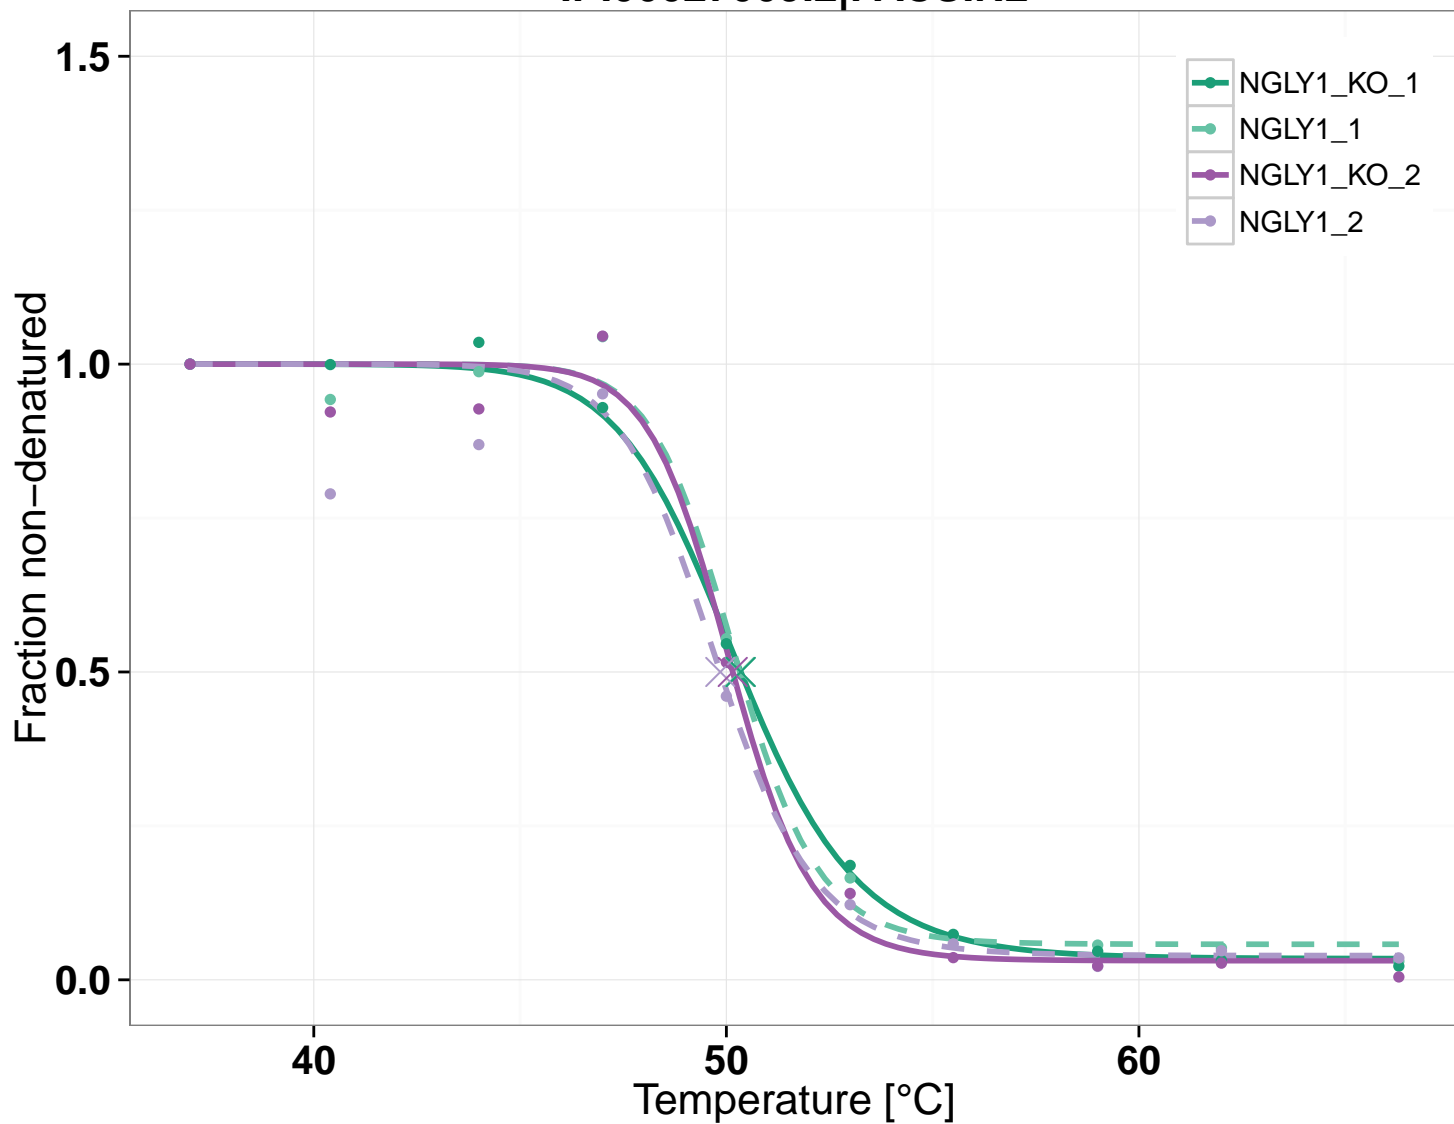

|            | meltPoint | slope | plateau | R2   |
|------------|-----------|-------|---------|------|
| NGLY1_KO_1 | 50.35     | -0.17 | 0.03    | 1    |
| NGLY1_1    | 50.33     | -0.23 | 0.06    | 0.99 |
| NGLY1_KO_2 | 50.15     | -0.24 | 0.03    | 0.99 |
| NGLY1_2    | 49.85     | -0.2  | 0.04    | 0.96 |

Supplement: Supplementary file 3581 [file 1]

IPI00064219.3|KIAA1787

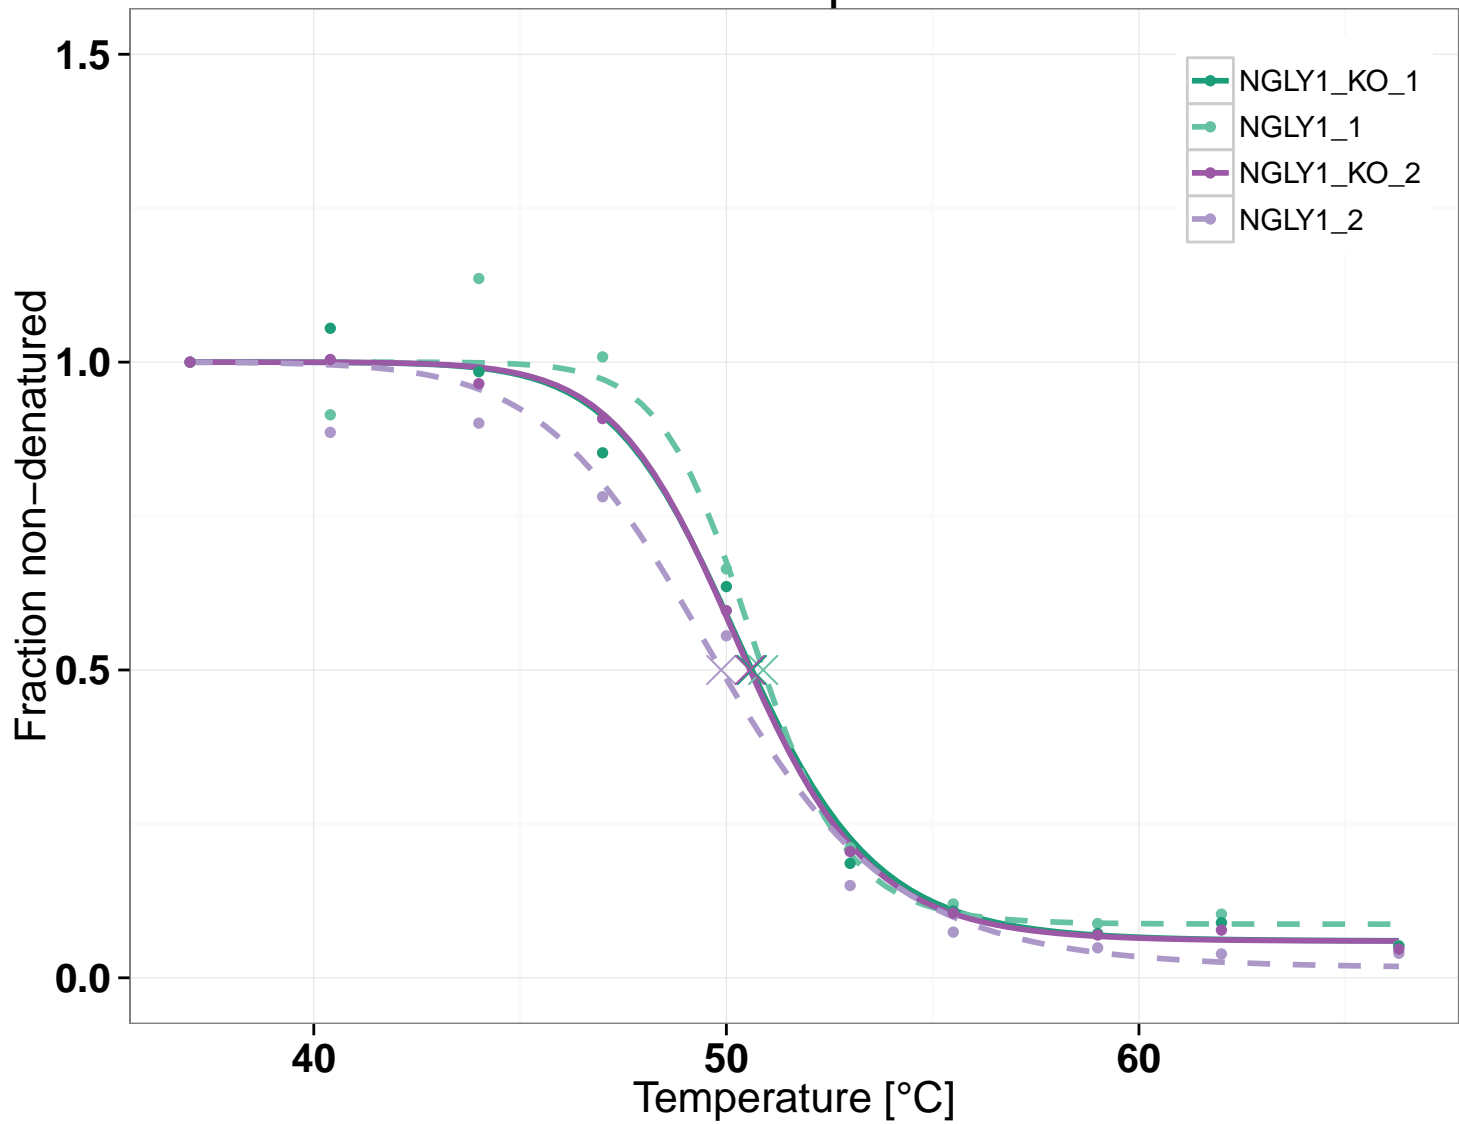

|            | meltPoint | slope | plateau | R2   |
|------------|-----------|-------|---------|------|
| NGLY1_KO_1 | 50.62     | -0.15 | 0.06    | 0.99 |
| NGLY1_1    | 50.89     | -0.2  | 0.09    | 0.98 |
| NGLY1_KO_2 | 50.57     | -0.15 | 0.06    | 1    |
| NGLY1_2    | 49.87     | -0.12 | 0.02    | 0.98 |

Supplement: Supplementary file 3582 [file 1]

# IPI00031595.1|ZNF268

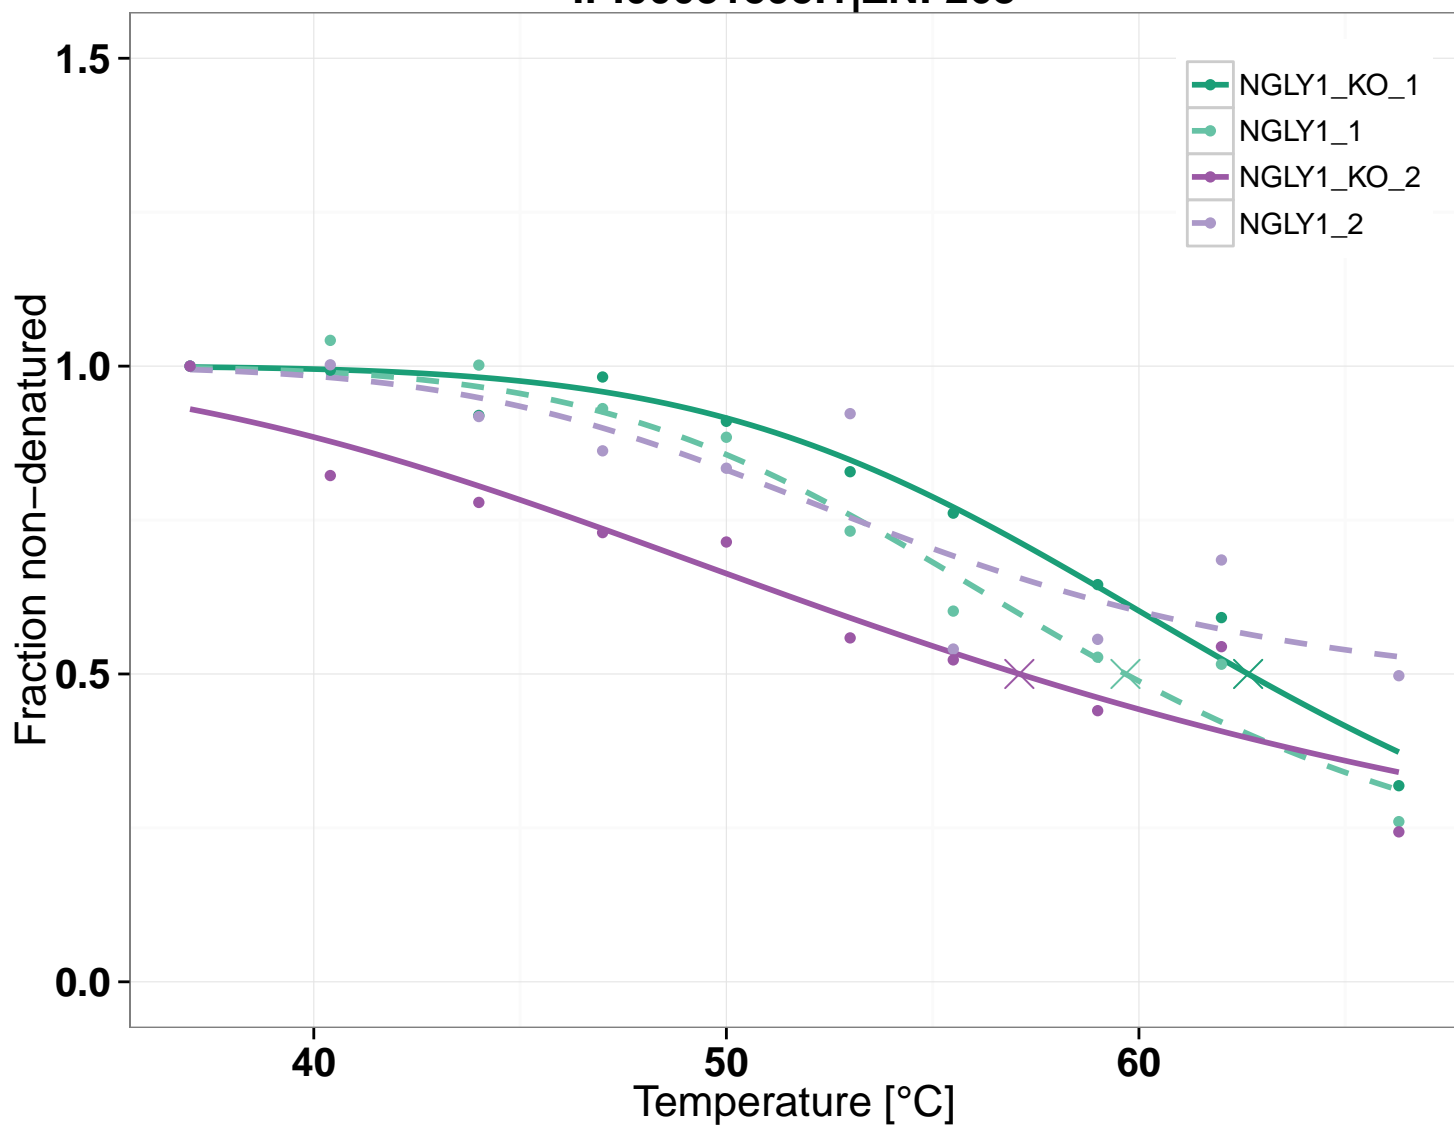

|            | meltPoint | slope  | plateau | R2   |
|------------|-----------|--------|---------|------|
| NGLY1_KO_1 | 62.65     | -0.039 | 0       | 0.97 |
| NGLY1_1    | 59.67     | -0.04  | 0.11    | 0.97 |
| NGLY1_KO_2 | 57.1      | -0.024 | 0       | 0.9  |
| NGLY1_2    | -         | -0.026 | 0.45    | 0.79 |

Supplement: Supplementary file 3583 [file 1]

# IPI00784216.2|PFKL

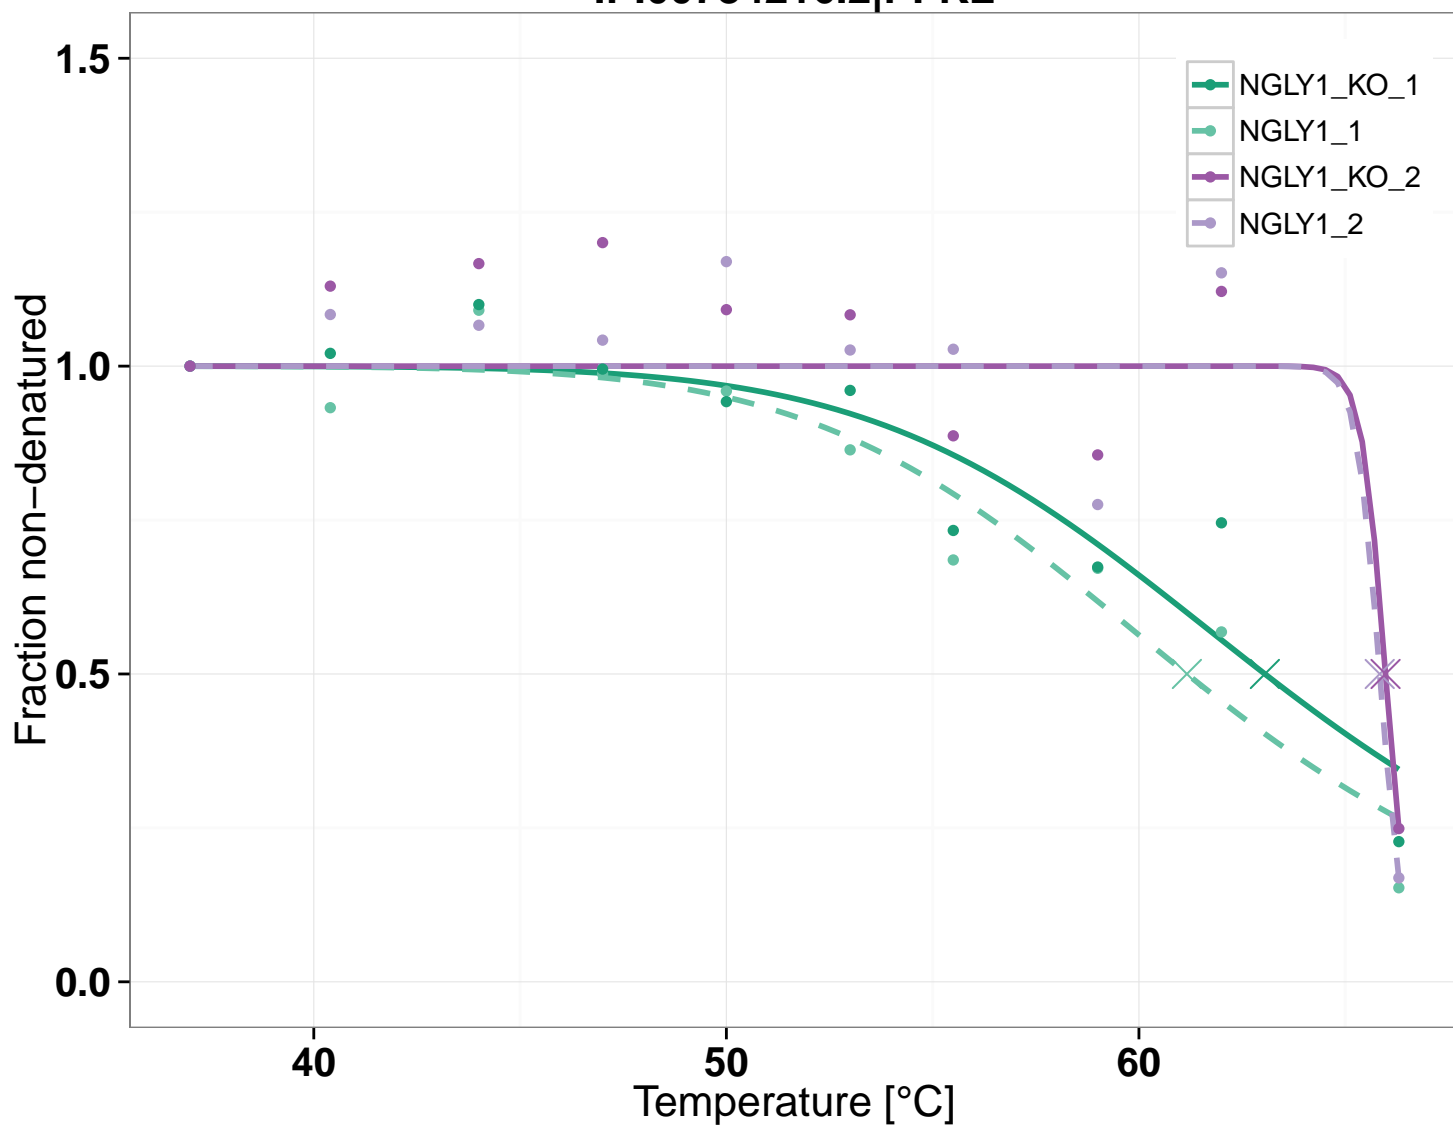

|            | meltPoint | slope  | plateau | R2   |
|------------|-----------|--------|---------|------|
| NGLY1_KO_1 | 63.05     | -0.053 | 0       | 0.87 |
| NGLY1_1    | 61.16     | -0.055 | 0       | 0.92 |
| NGLY1_KO_2 | 65.98     | -0.86  | 0       | 0.79 |
| NGLY1_2    | 65.84     | -0.87  | 0       | 0.85 |

Supplement: Supplementary file 3584 [file 1]

IPI00337556.1|MDP-1

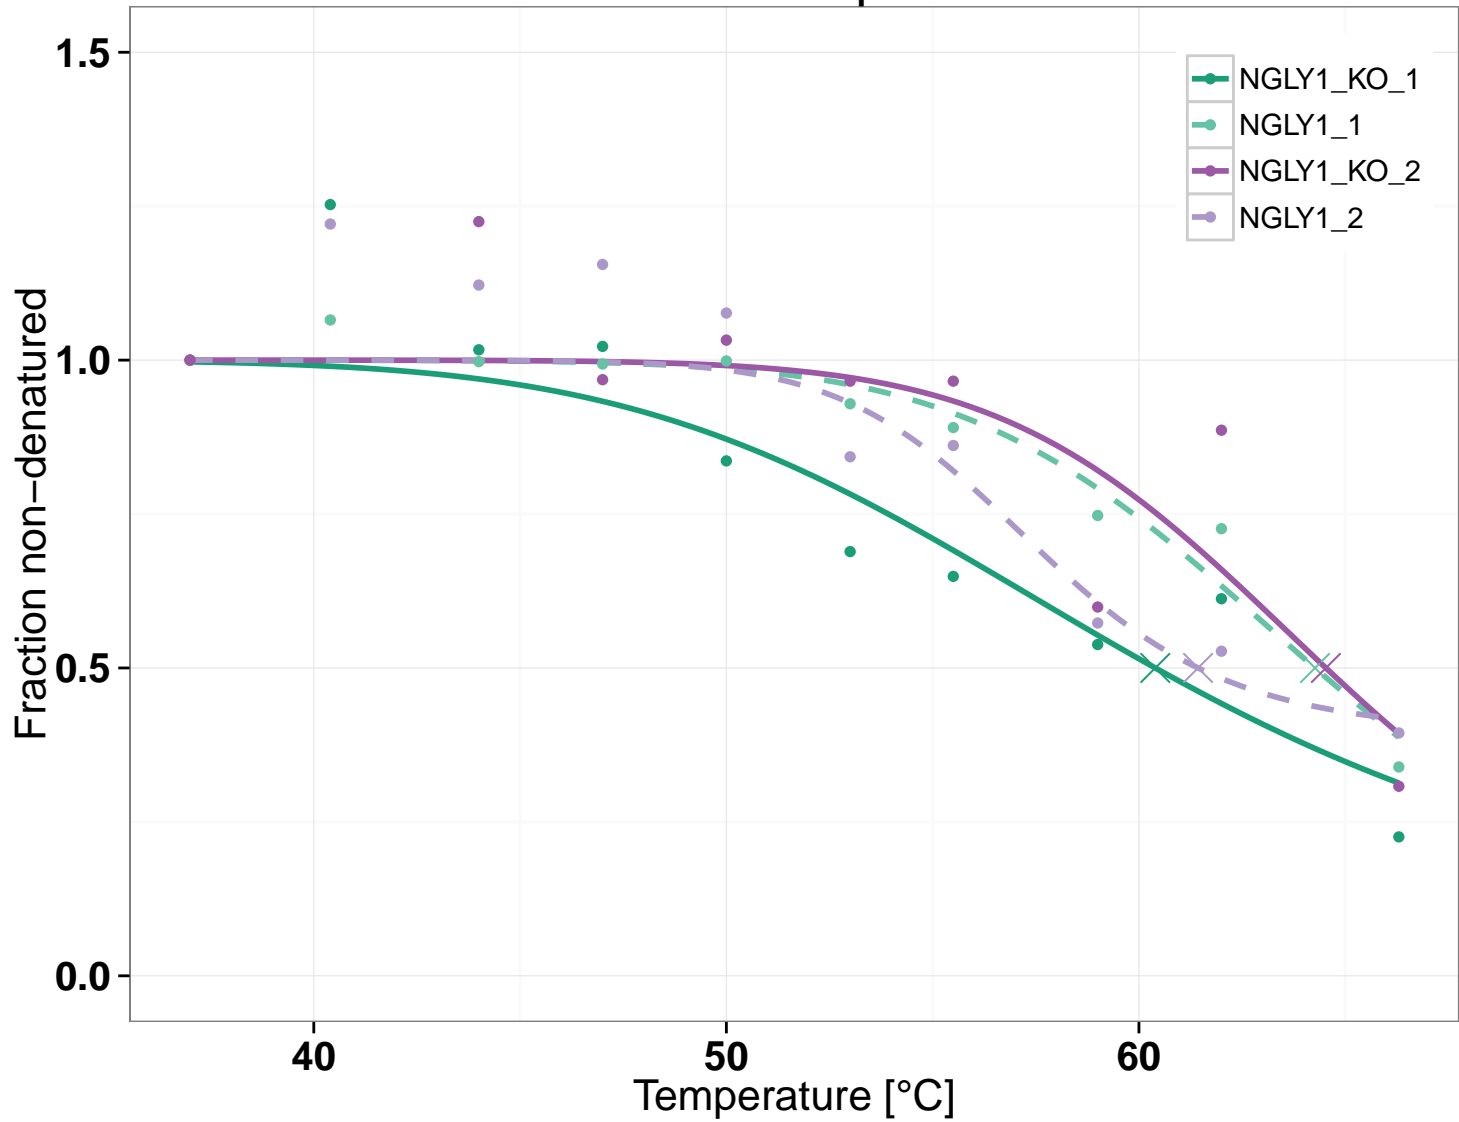

|            | meltPoint | slope  | plateau | R2   |
|------------|-----------|--------|---------|------|
| NGLY1_KO_1 | 60.4      | -0.04  | 0.04    | 0.84 |
| NGLY1_1    | 64.27     | -0.059 | 0       | 0.96 |
| NGLY1_KO_2 | 64.53     | -0.064 | 0       | 0.55 |
| NGLY1_2    | 61.43     | -0.064 | 0.39    | 0.85 |

Supplement: Supplementary file 3585 [file 1]

IPI00011702.4|KIAA0406

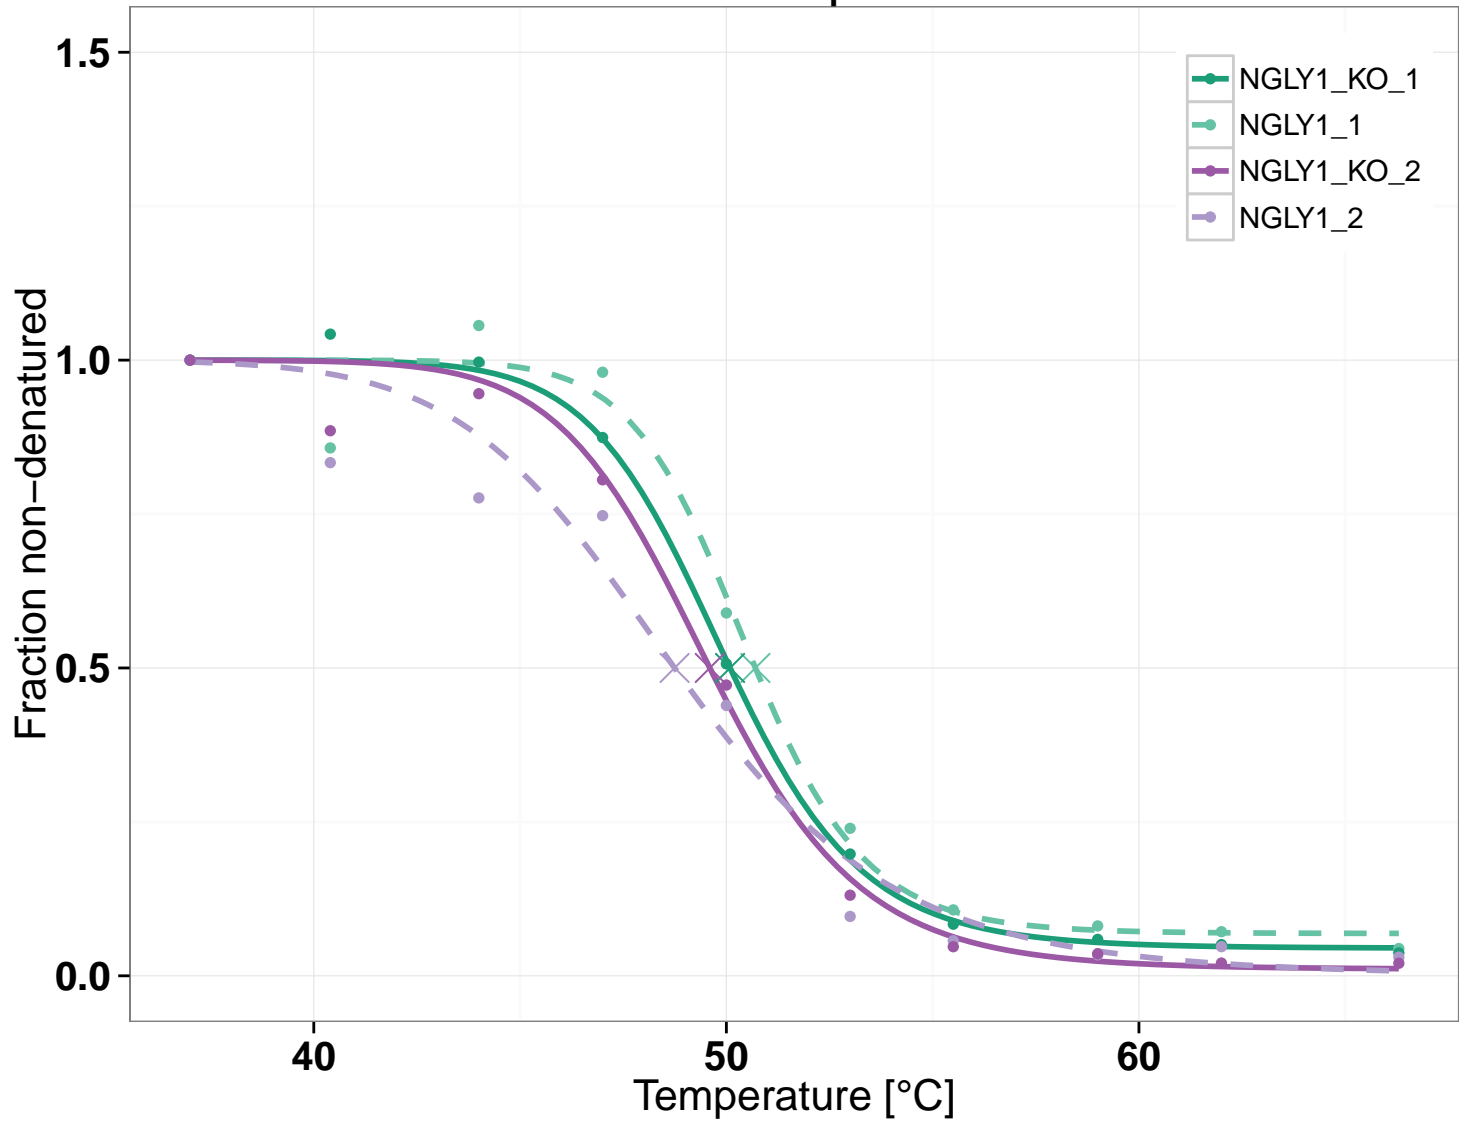

|            | meltPoint | slope  | plateau | R2   |
|------------|-----------|--------|---------|------|
| NGLY1_KO_1 | 50.09     | -0.14  | 0.04    | 1    |
| NGLY1_1    | 50.7      | -0.16  | 0.07    | 0.98 |
| NGLY1_KO_2 | 49.6      | -0.13  | 0.01    | 0.99 |
| NGLY1_2    | 48.74     | -0.095 | 0       | 0.96 |

Supplement: Supplementary file 3586 [file 1]

# IPI00029422.1|KIF20A

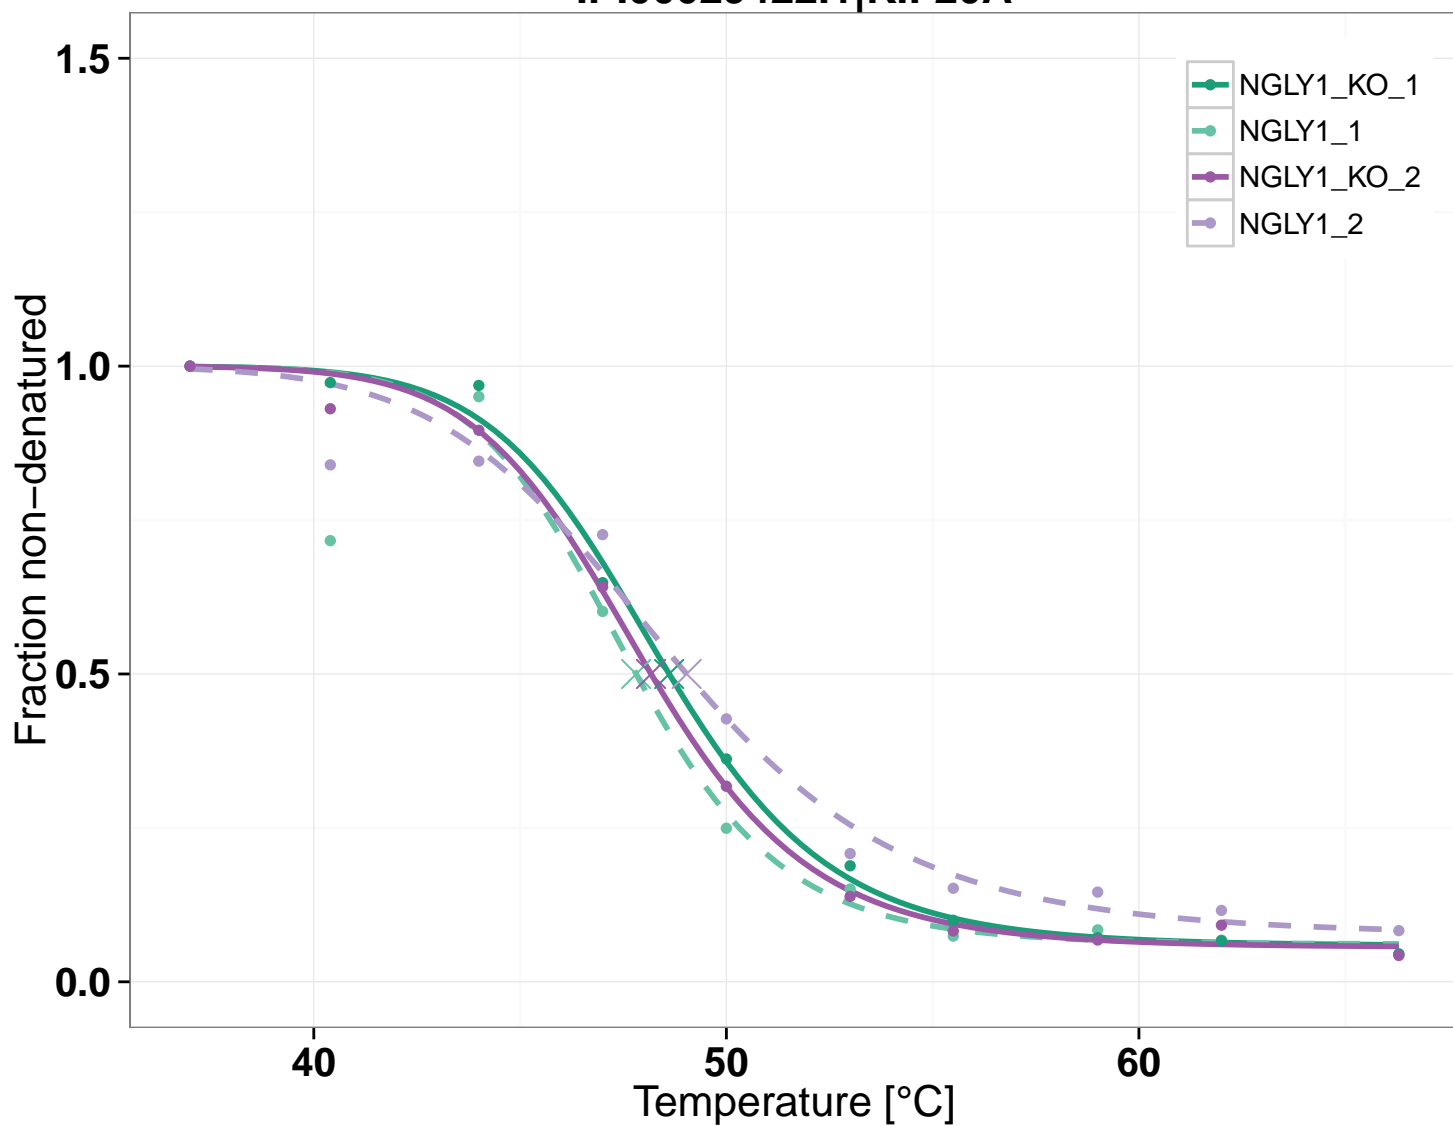

|            | meltPoint | slope  | plateau | R2   |
|------------|-----------|--------|---------|------|
| NGLY1_KO_1 | 48.61     | -0.11  | 0.06    | 1    |
| NGLY1_1    | 47.81     | -0.13  | 0.06    | 0.94 |
| NGLY1_KO_2 | 48.18     | -0.12  | 0.06    | 1    |
| NGLY1_2    | 49.04     | -0.082 | 0.07    | 0.98 |

Supplement: Supplementary file 3587 [file 1]

**IPI00642329.2|MFN2**

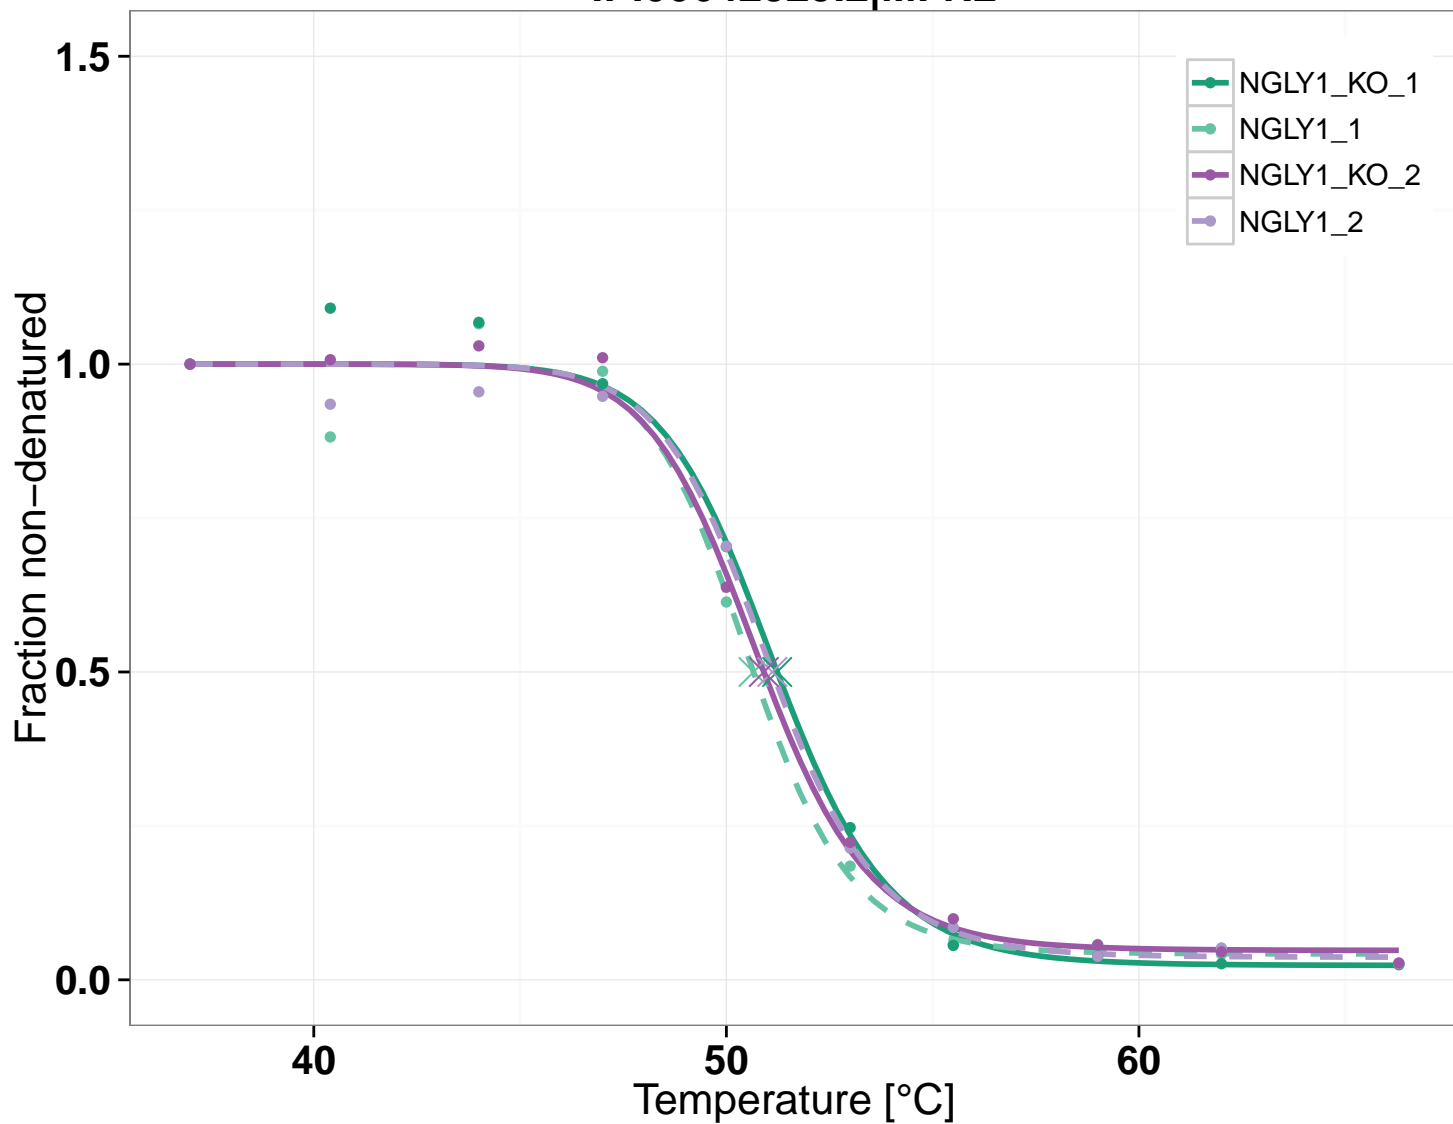

|            | meltPoint | slope | plateau | R2   |
|------------|-----------|-------|---------|------|
| NGLY1_KO_1 | 51.23     | −0.18 | 0.02    | 0.99 |
| NGLY1_1    | 50.66     | −0.19 | 0.04    | 0.99 |
| NGLY1_KO_2 | 50.91     | −0.18 | 0.05    | 1    |
| NGLY1_2    | 51.12     | −0.18 | 0.04    | 1    |

Supplement: Supplementary file 3588 [file 1]

IPI00645887.1|ITGAM

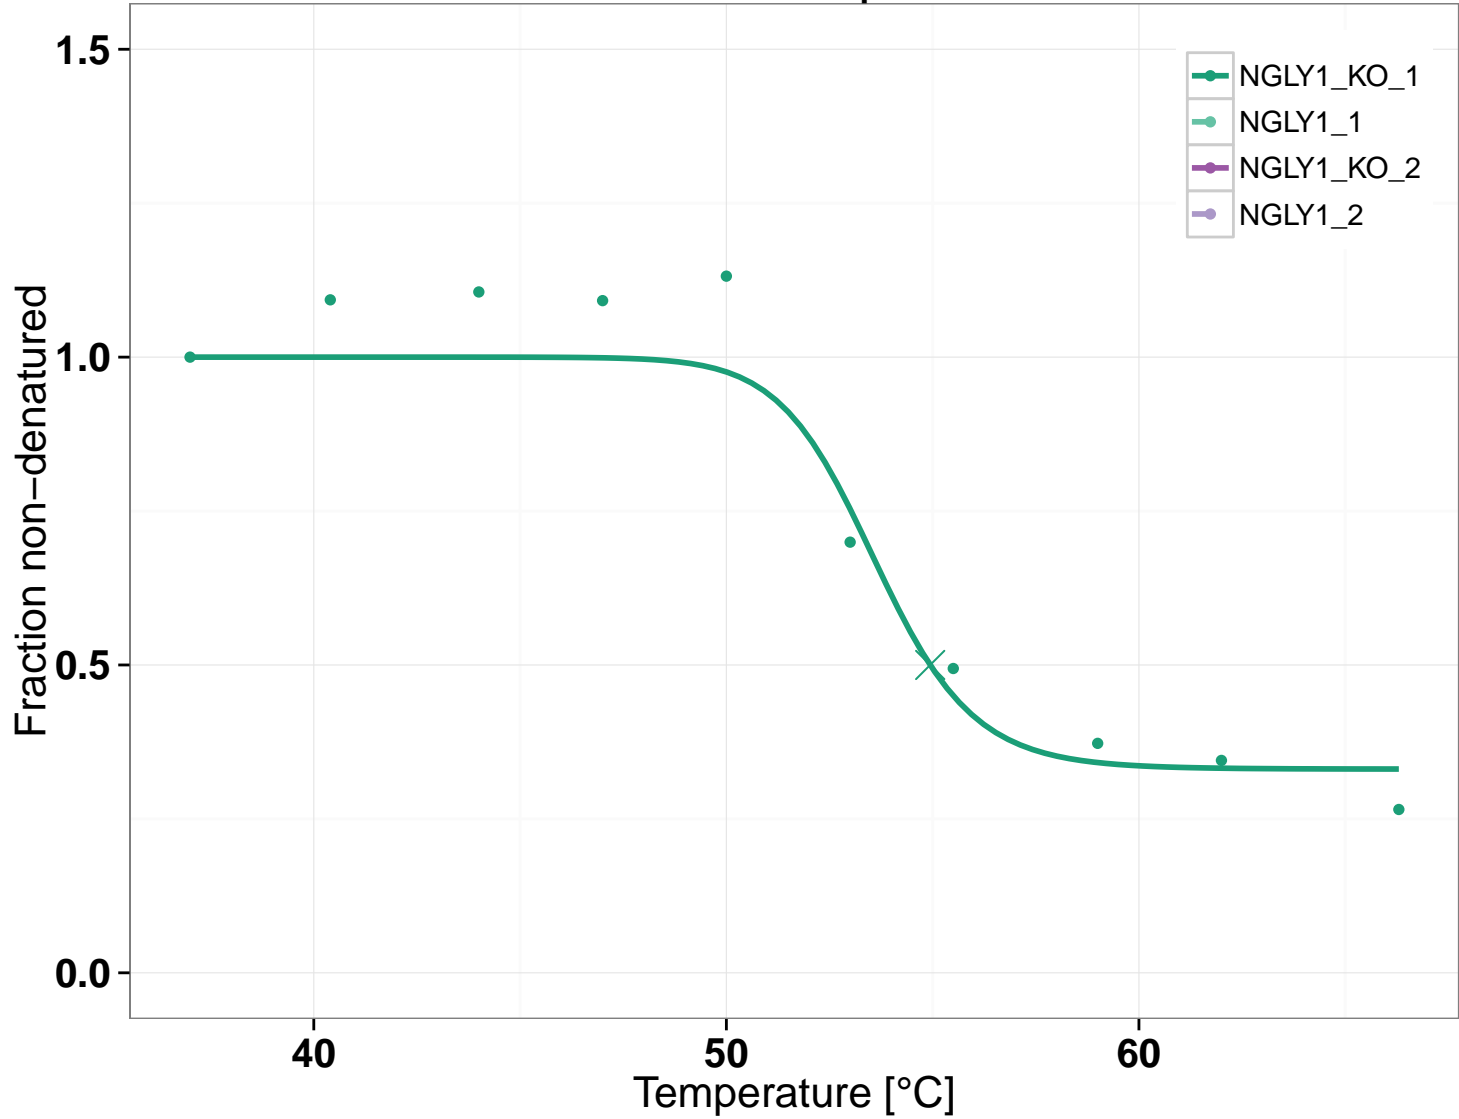

|            | meltPoint | slope | plateau | R2   |
|------------|-----------|-------|---------|------|
| NGLY1_KO_1 | 54.94     | -0.14 | 0.33    | 0.95 |
| NGLY1_1    | -         | -     | -       | -    |
| NGLY1_KO_2 | -         | -     | -       | -    |
| NGLY1_2    | -         | -     | -       | -    |

Supplement: Supplementary file 3589 [file 1]

IPI00031661.1|NOC4L

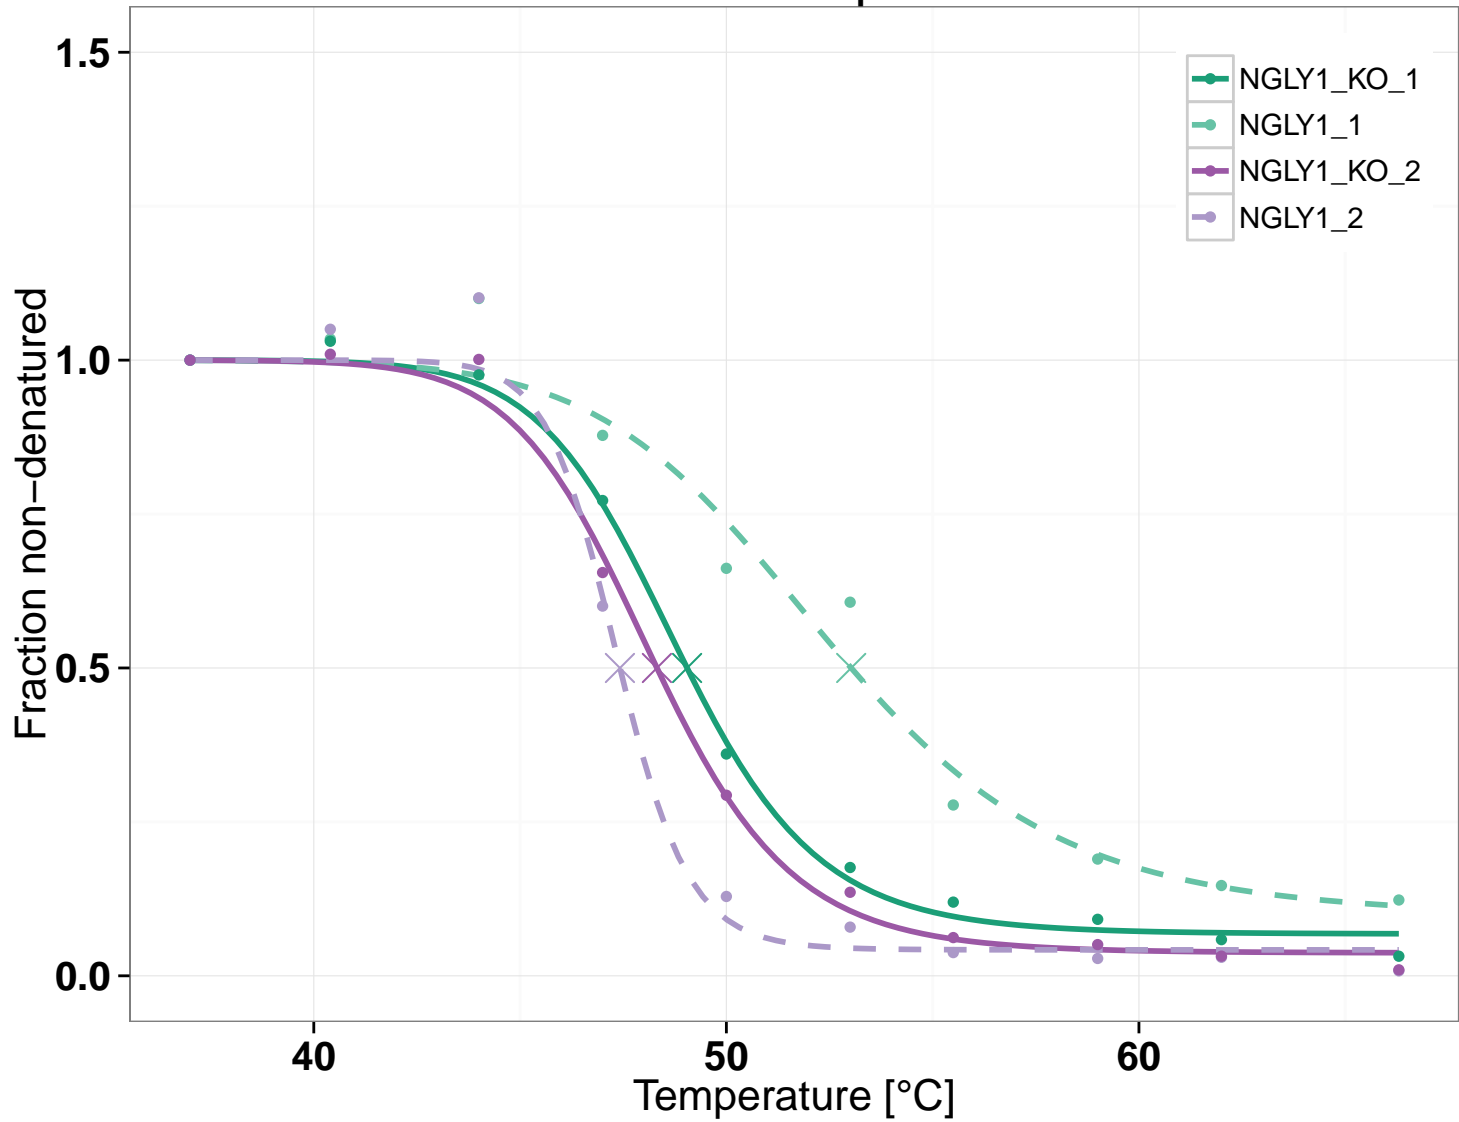

|            | meltPoint | slope  | plateau | R2   |
|------------|-----------|--------|---------|------|
| NGLY1_KO_1 | 49.05     | -0.14  | 0.07    | 1    |
| NGLY1_1    | 53.03     | -0.081 | 0.1     | 0.97 |
| NGLY1_KO_2 | 48.32     | -0.14  | 0.04    | 1    |
| NGLY1_2    | 47.42     | -0.28  | 0.04    | 0.99 |

Supplement: Supplementary file 3590 [file 1]

IPI00783999.3|NFKBIL2

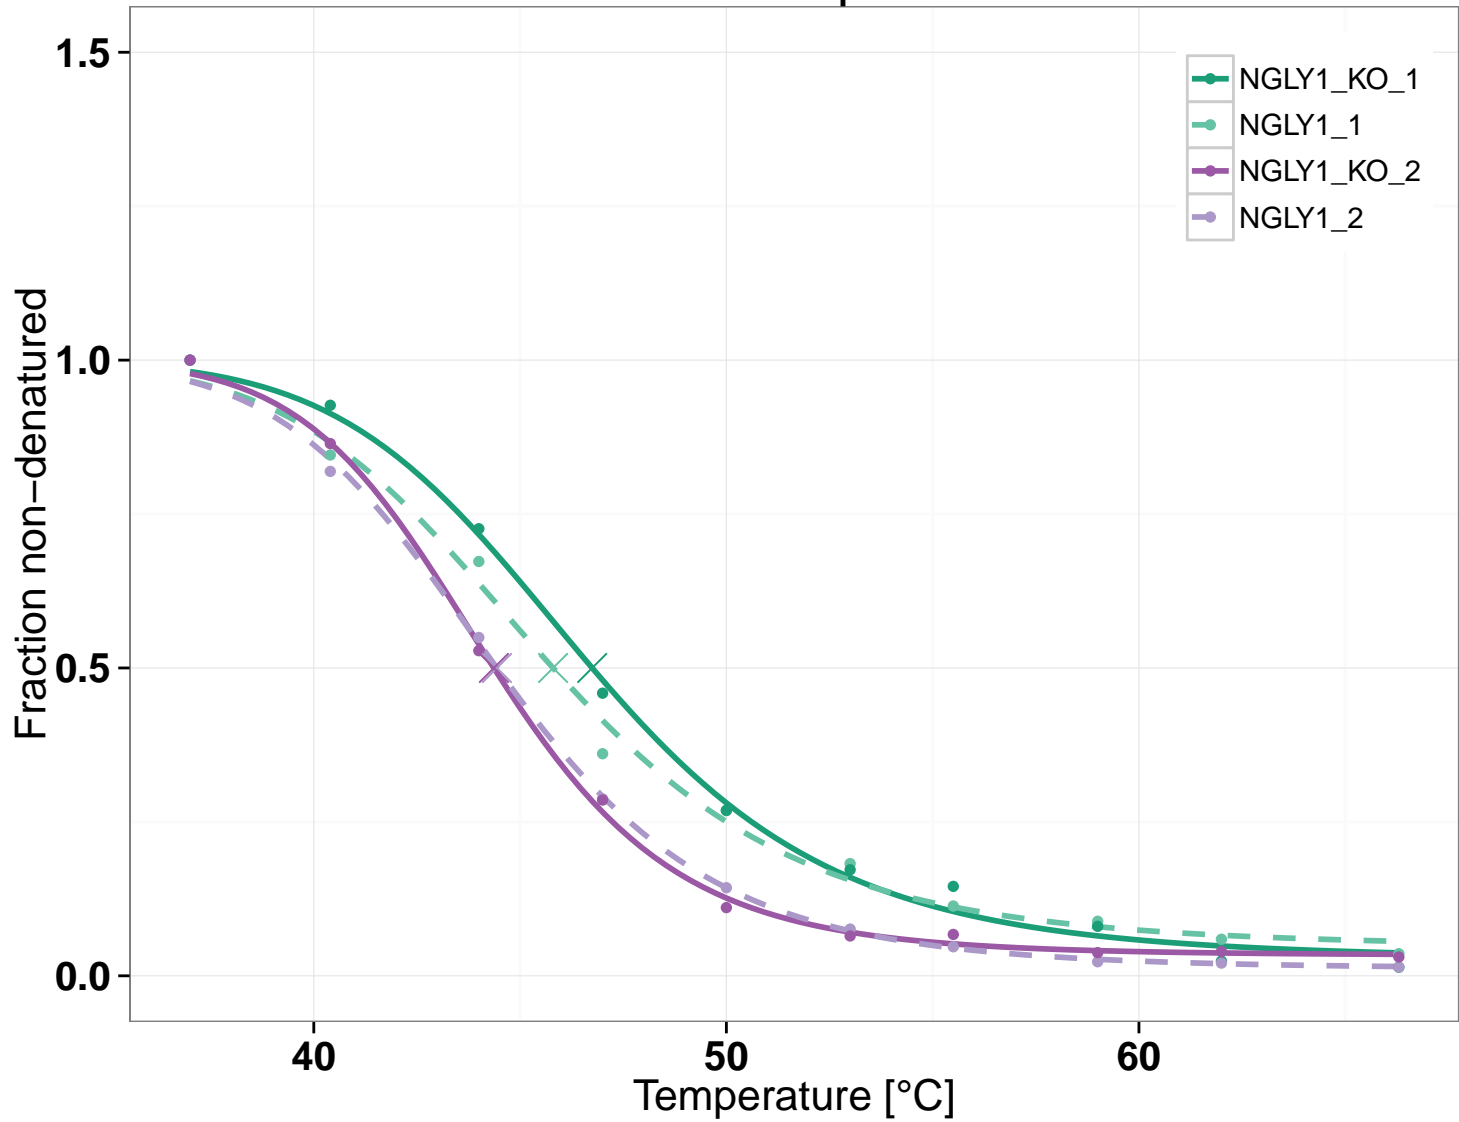

|            | meltPoint | slope  | plateau | R2   |
|------------|-----------|--------|---------|------|
| NGLY1_KO_1 | 46.75     | -0.081 | 0.03    | 1    |
| NGLY1_1    | 45.8      | -0.077 | 0.05    | 0.99 |
| NGLY1_KO_2 | 44.36     | -0.11  | 0.03    | 1    |
| NGLY1_2    | 44.44     | -0.094 | 0.01    | 1    |

Supplement: Supplementary file 3591 [file 1]

IPI00453473.6|HIST1H4A

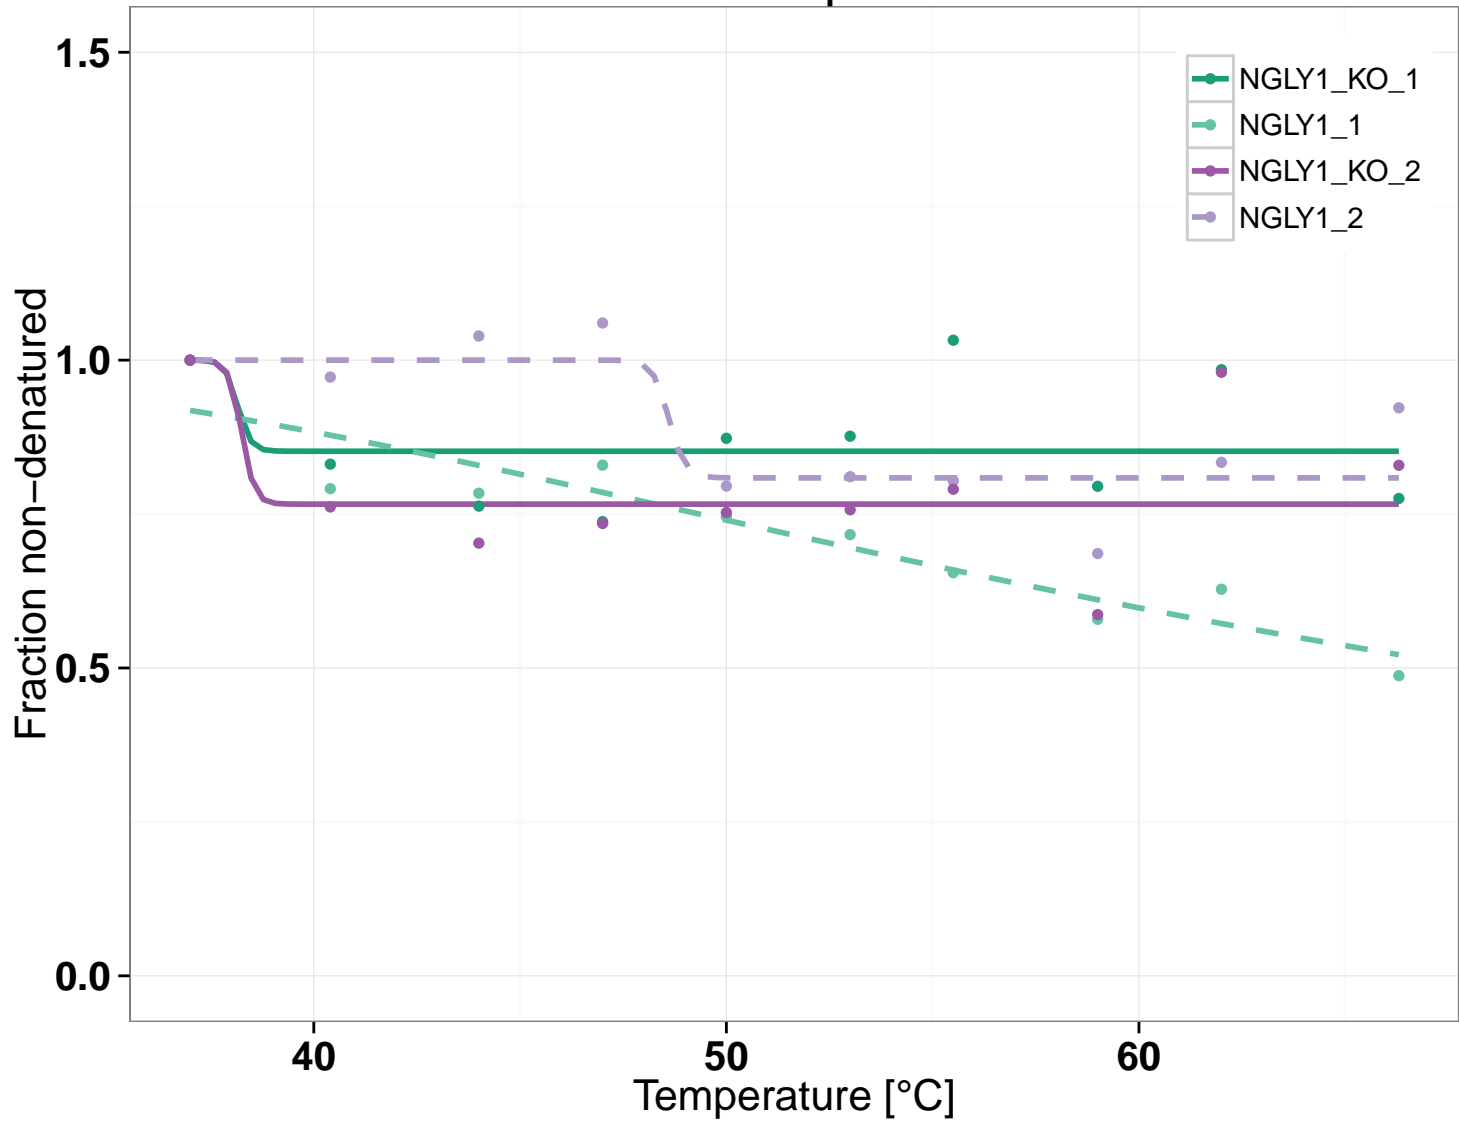

|            | meltPoint | slope  | plateau | R2   |
|------------|-----------|--------|---------|------|
| NGLY1_KO_1 | —         | -0.24  | 0.85    | 0.19 |
| NGLY1_1    | —         | -0.015 | 0       | 0.87 |
| NGLY1_KO_2 | —         | -0.38  | 0.77    | 0.36 |
| NGLY1_2    | —         | -0.25  | 0.81    | 0.75 |

Supplement: Supplementary file 3592 [file 1]

IPI00020060.2|SLC9A1

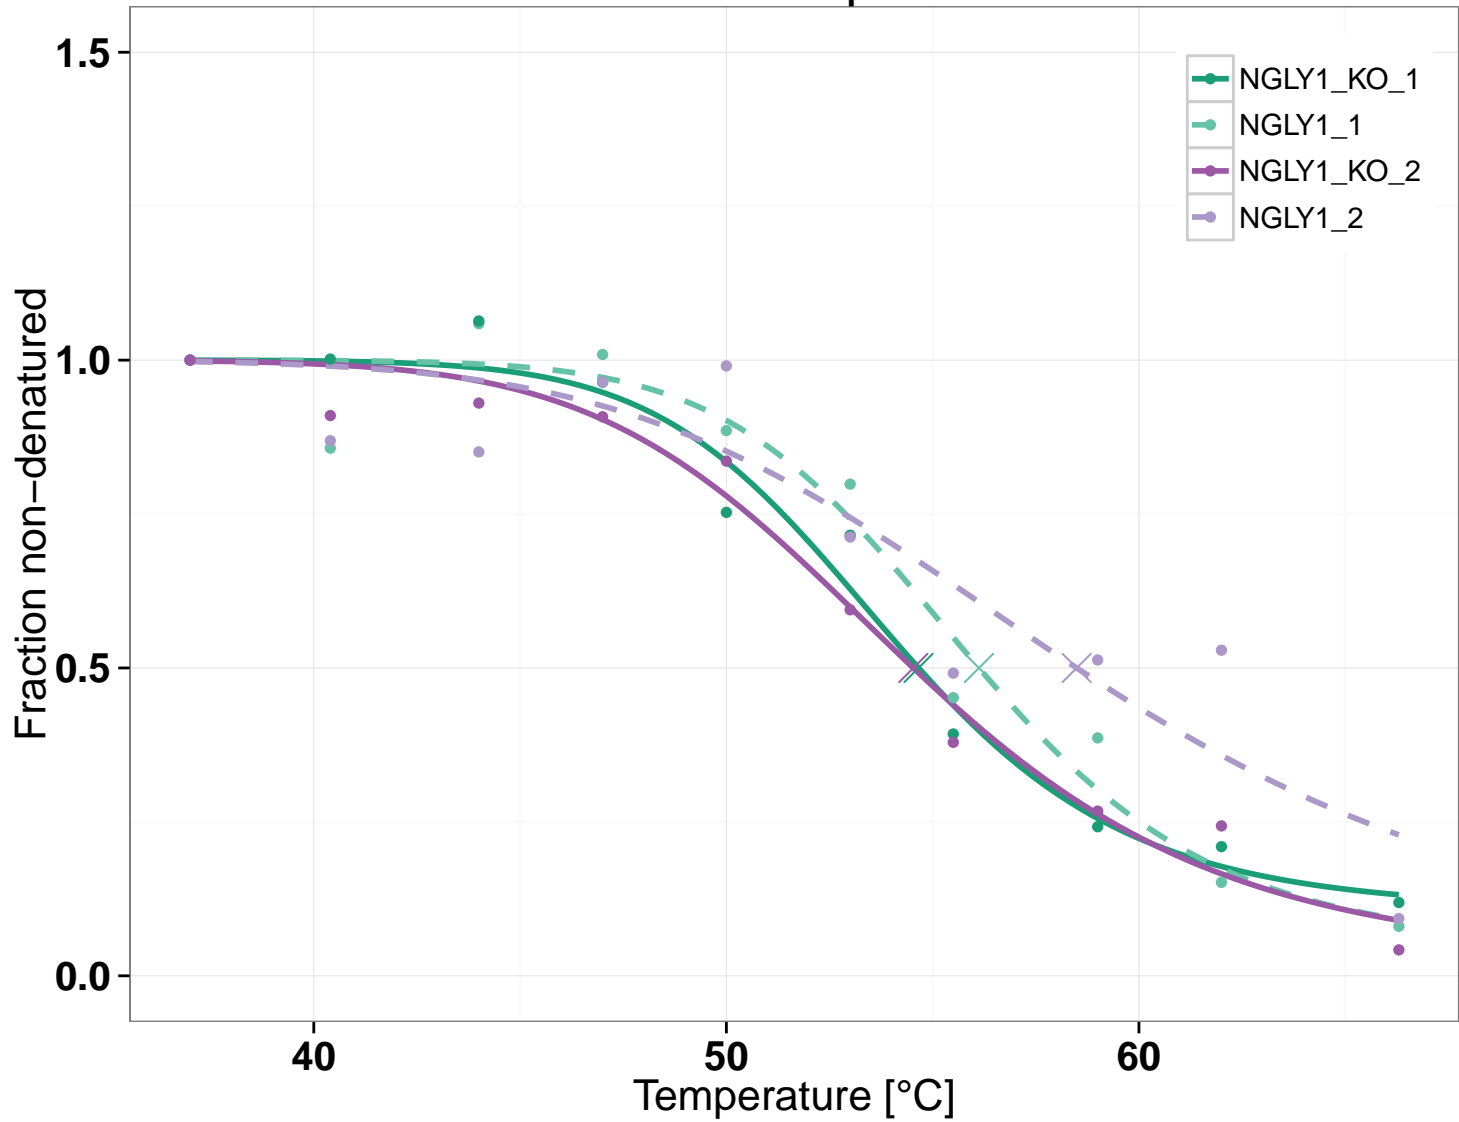

|            | meltPoint | slope  | plateau | R2   |
|------------|-----------|--------|---------|------|
| NGLY1_KO_1 | 54.66     | -0.079 | 0.1     | 0.98 |
| NGLY1_1    | 56.12     | -0.08  | 0.04    | 0.96 |
| NGLY1_KO_2 | 54.53     | -0.065 | 0.02    | 0.98 |
| NGLY1_2    | 58.49     | -0.046 | 0       | 0.85 |

Supplement: Supplementary file 3593 [file 1]

IPI00015618.2|CCDC49

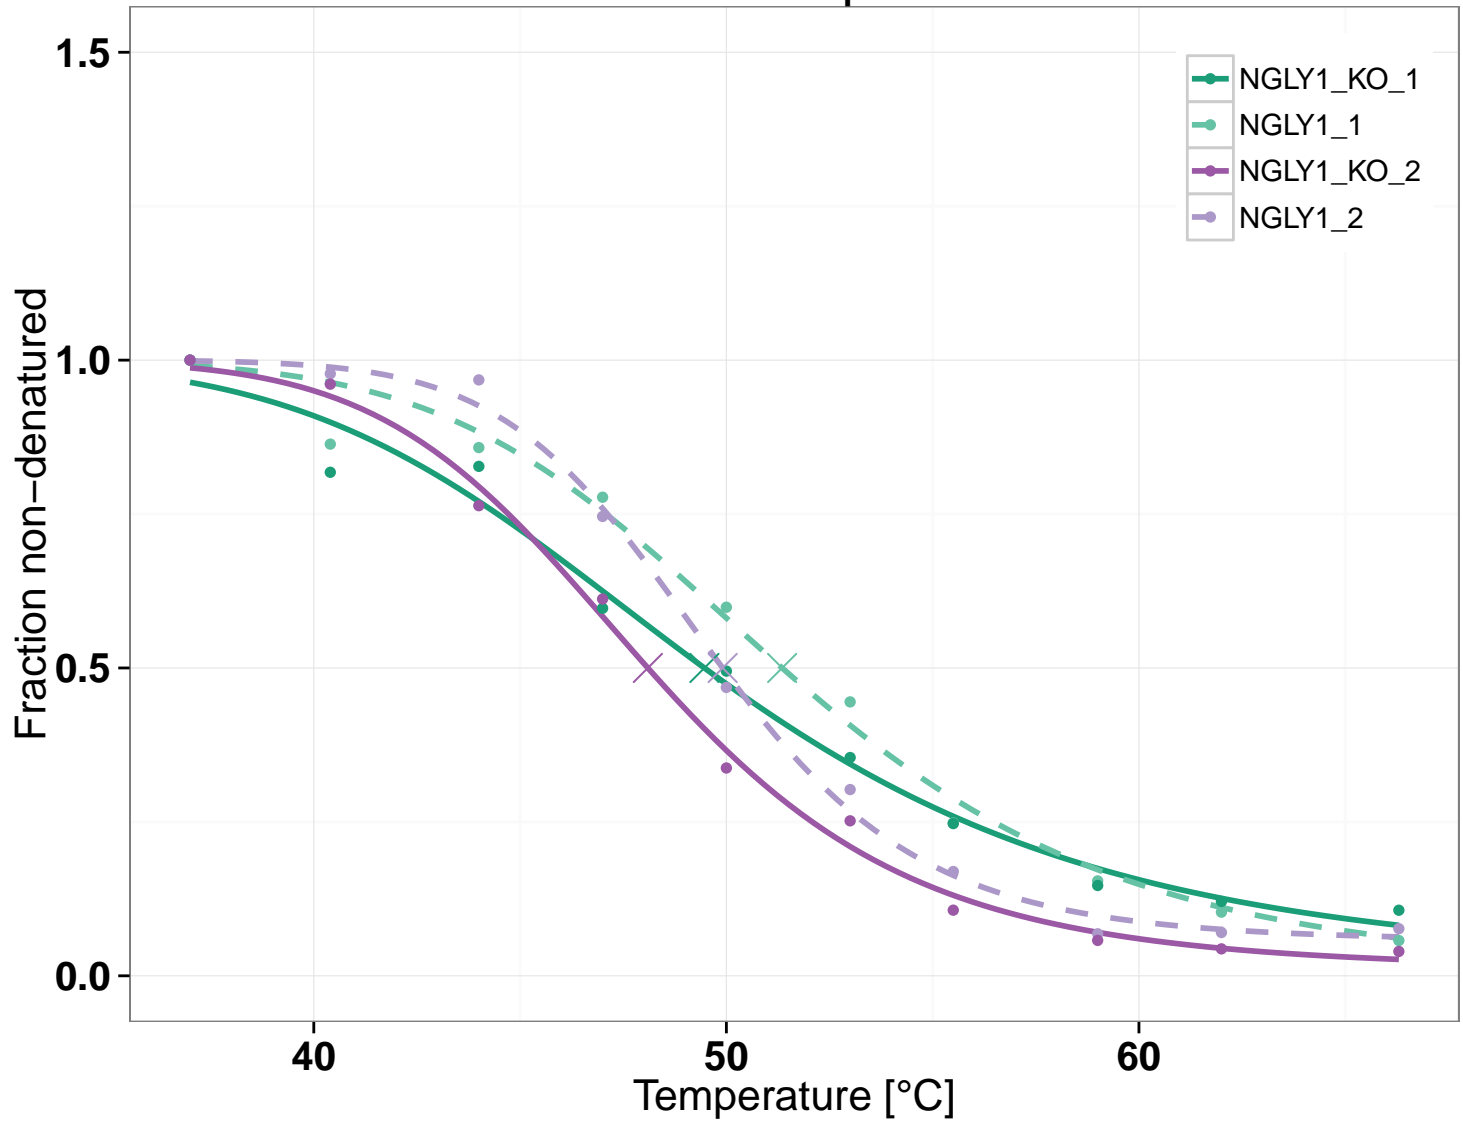

|            | meltPoint | slope  | plateau | R2   |
|------------|-----------|--------|---------|------|
| NGLY1_KO_1 | 49.47     | -0.051 | 0.01    | 0.99 |
| NGLY1_1    | 51.35     | -0.061 | 0       | 0.99 |
| NGLY1_KO_2 | 48.1      | -0.077 | 0.01    | 1    |
| NGLY1_2    | 49.91     | -0.093 | 0.06    | 1    |

Supplement: Supplementary file 3594 [file 1]

# IPI00016669.1|RHEB

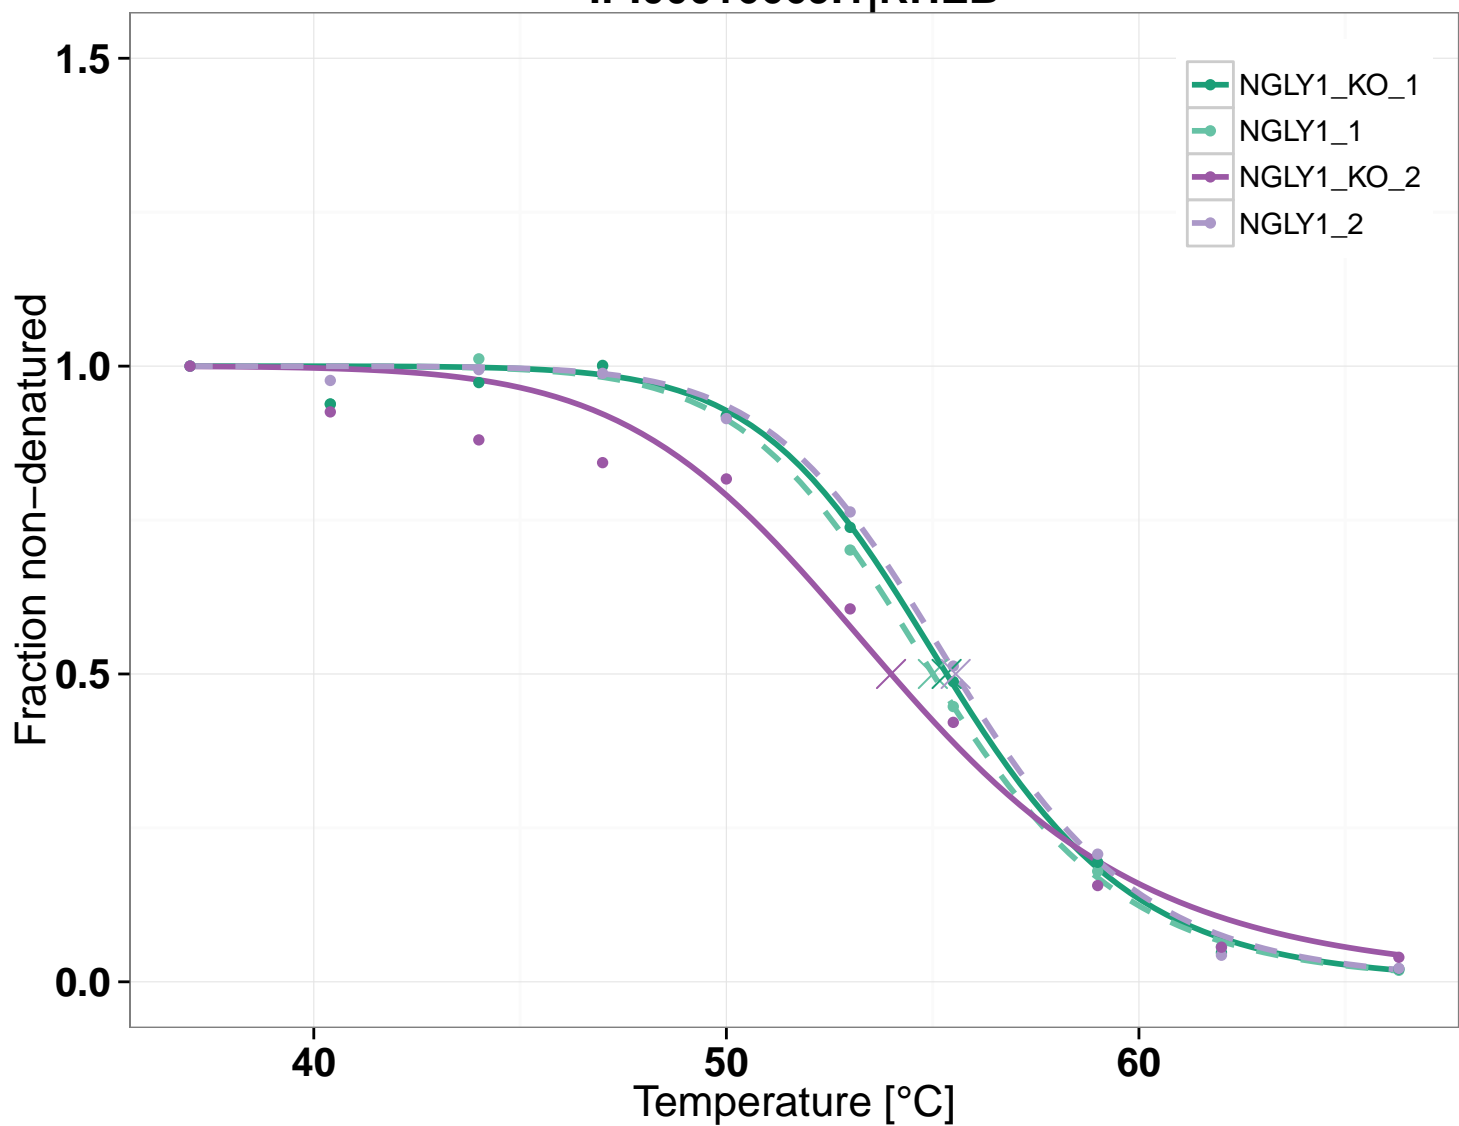

|            | meltPoint | slope  | plateau | R2   |
|------------|-----------|--------|---------|------|
| NGLY1_KO_1 | 55.34     | -0.11  | 0       | 1    |
| NGLY1_1    | 55.01     | -0.11  | 0       | 1    |
| NGLY1_KO_2 | 53.99     | -0.078 | 0       | 0.98 |
| NGLY1_2    | 55.56     | -0.11  | 0       | 1    |

Supplement: Supplementary file 3595 [file 1]

# IPI00000980.1|TOMM7

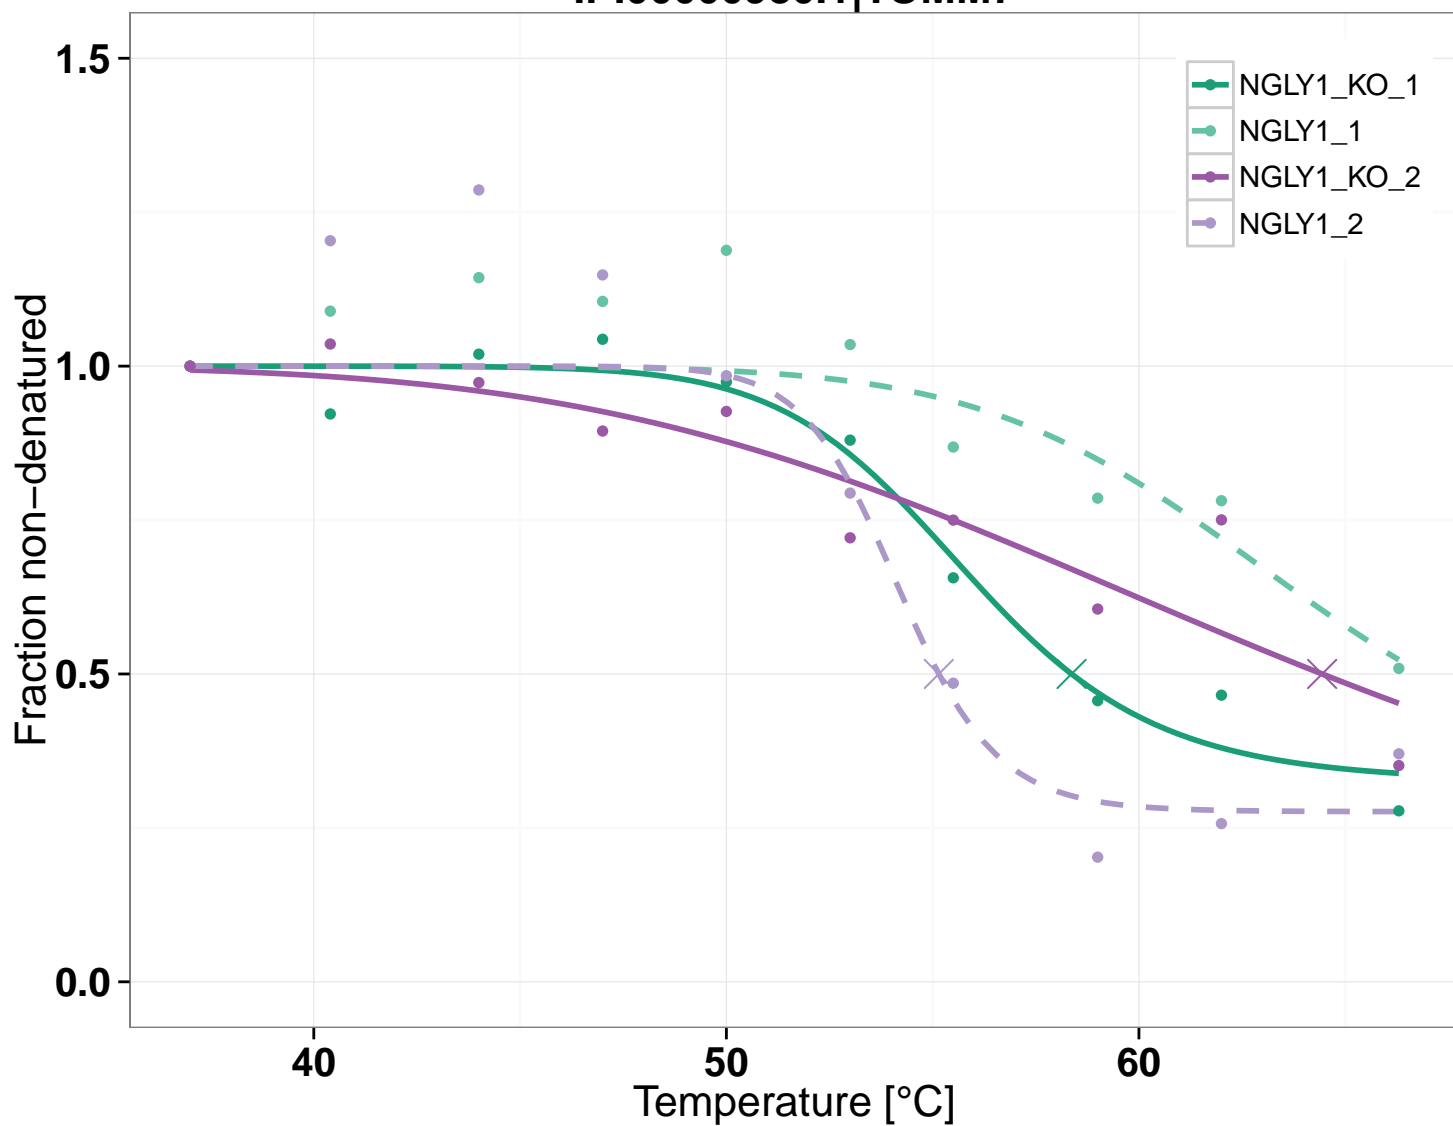

|            | meltPoint | slope  | plateau | R2   |
|------------|-----------|--------|---------|------|
| NGLY1_KO_1 | 58.37     | -0.074 | 0.32    | 0.97 |
| NGLY1_1    | -         | -0.048 | 0.27    | 0.76 |
| NGLY1_KO_2 | 64.44     | -0.029 | 0       | 0.85 |
| NGLY1_2    | 55.15     | -0.15  | 0.28    | 0.89 |

Supplement: Supplementary file 3596 [file 1]

IPI00010689.3|SERF1A

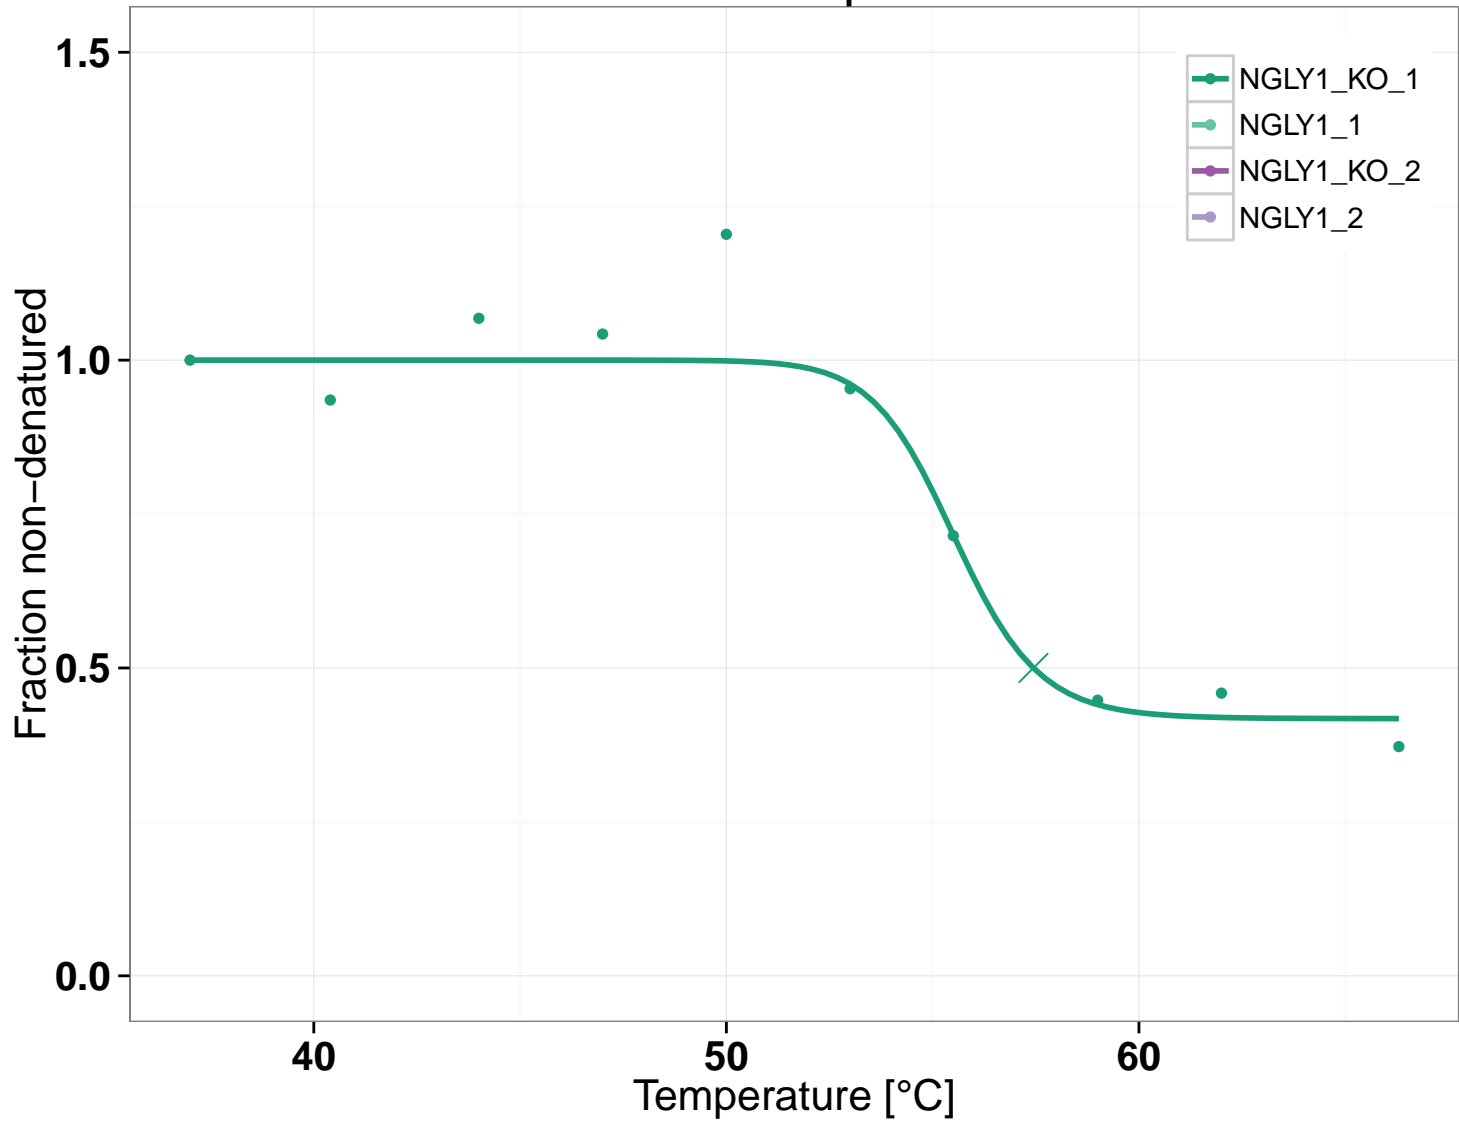

|            | meltPoint | slope | plateau | R2   |
|------------|-----------|-------|---------|------|
| NGLY1_KO_1 | 57.44     | -0.14 | 0.42    | 0.93 |
| NGLY1_1    | -         | -     | -       | -    |
| NGLY1_KO_2 | -         | -     | -       | -    |
| NGLY1_2    | -         | -     | -       | -    |

Supplement: Supplementary file 3597 [file 1]

IPI00019018.3|TM7SF2

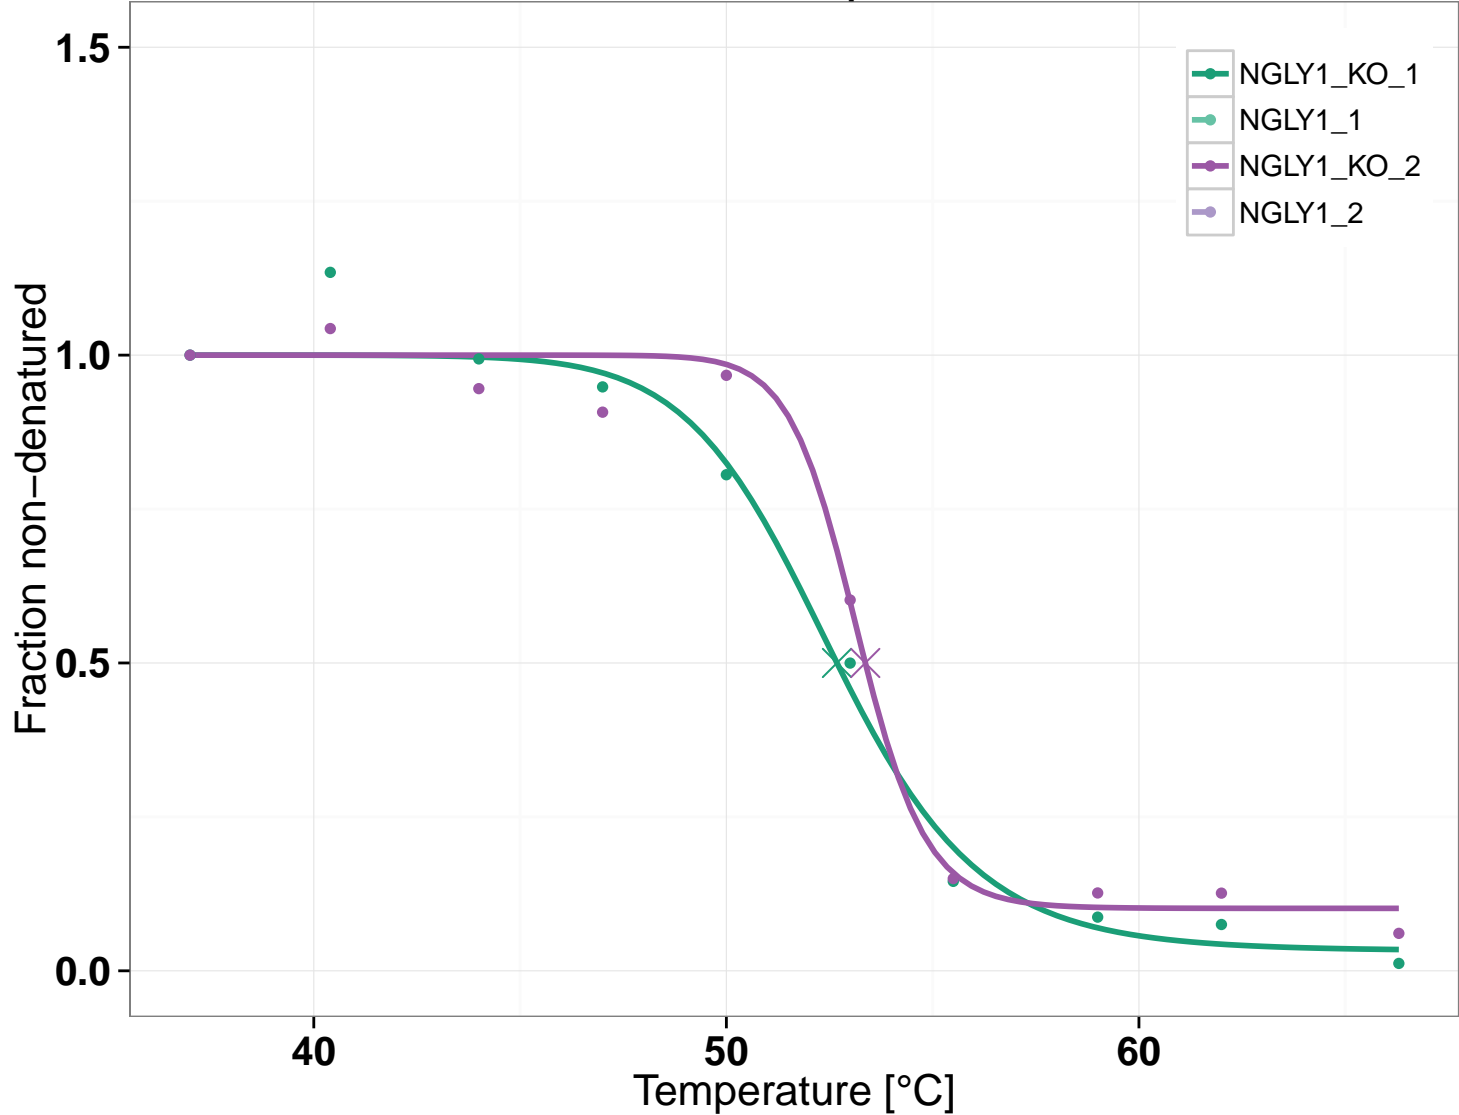

|            | meltPoint | slope | plateau | R2   |
|------------|-----------|-------|---------|------|
| NGLY1_KO_1 | 52.68     | -0.14 | 0.03    | 0.99 |
| NGLY1_1    | -         | -     | -       | -    |
| NGLY1_KO_2 | 53.37     | -0.27 | 0.1     | 0.99 |
| NGLY1_2    | -         | -     | -       | -    |

Supplement: Supplementary file 3598 [file 1]

IPI00003927.5|PPID

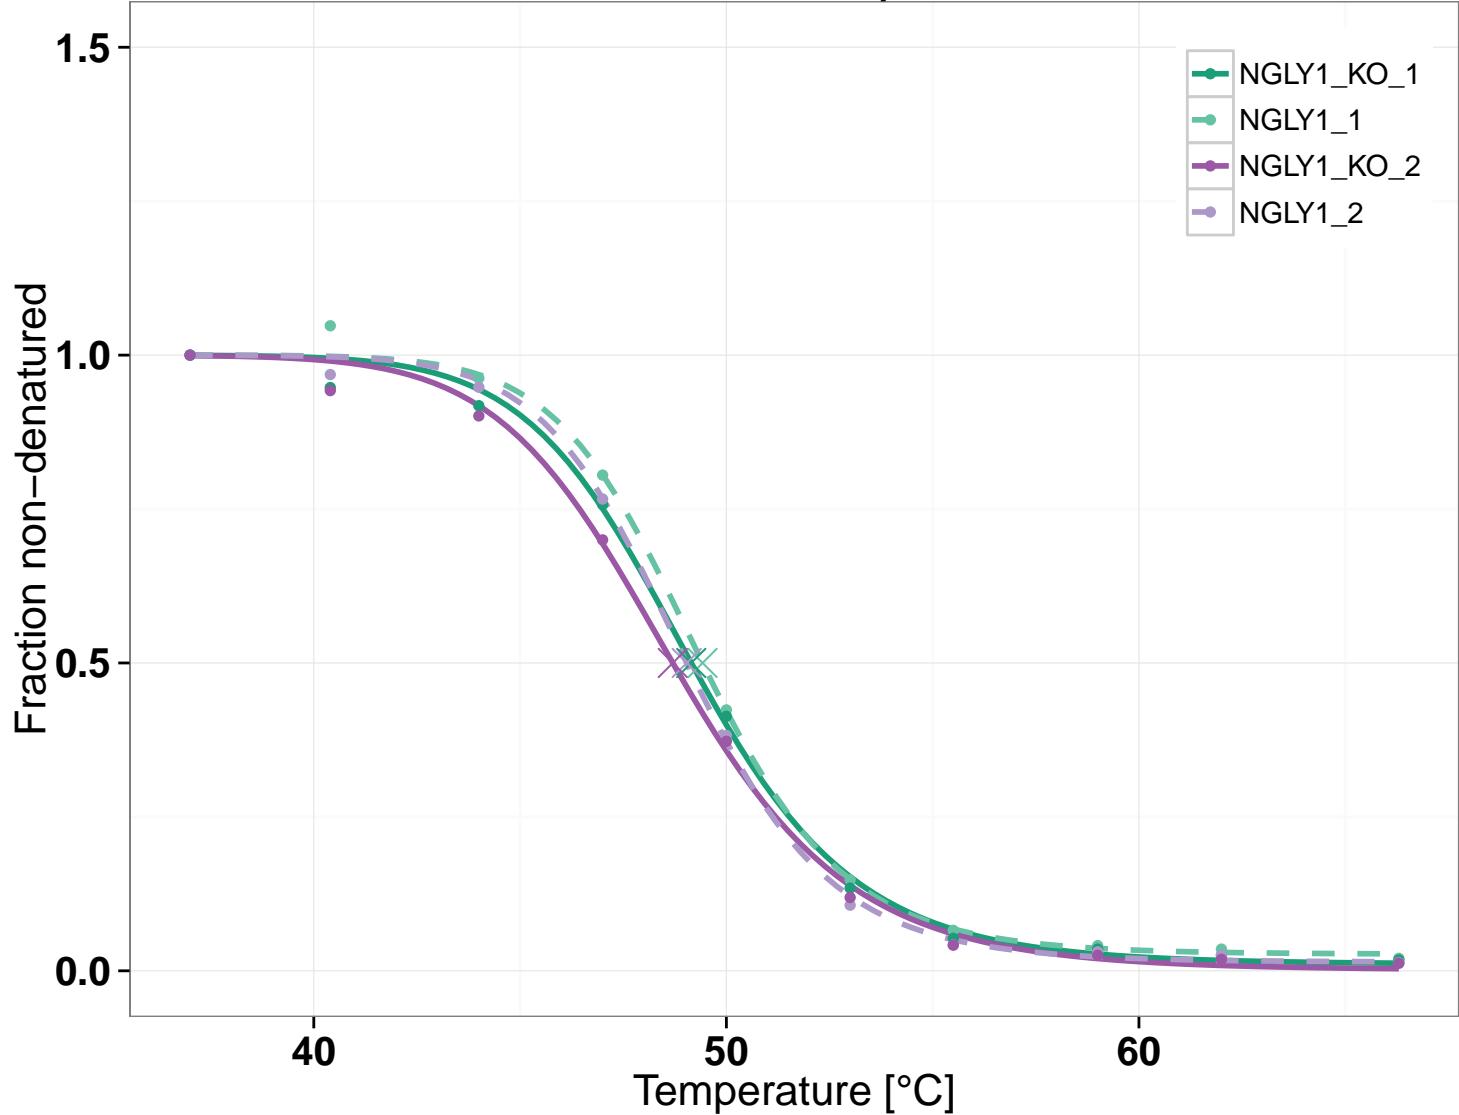

|            | meltPoint | slope | plateau | R2 |
|------------|-----------|-------|---------|----|
| NGLY1_KO_1 | 49.15     | -0.12 | 0.01    | 1  |
| NGLY1_1    | 49.42     | -0.14 | 0.03    | 1  |
| NGLY1_KO_2 | 48.7      | -0.12 | 0       | 1  |
| NGLY1_2    | 49.04     | -0.14 | 0.01    | 1  |

Supplement: Supplementary file 3599 [file 1]

# IPI00009374.4|C14ORF129

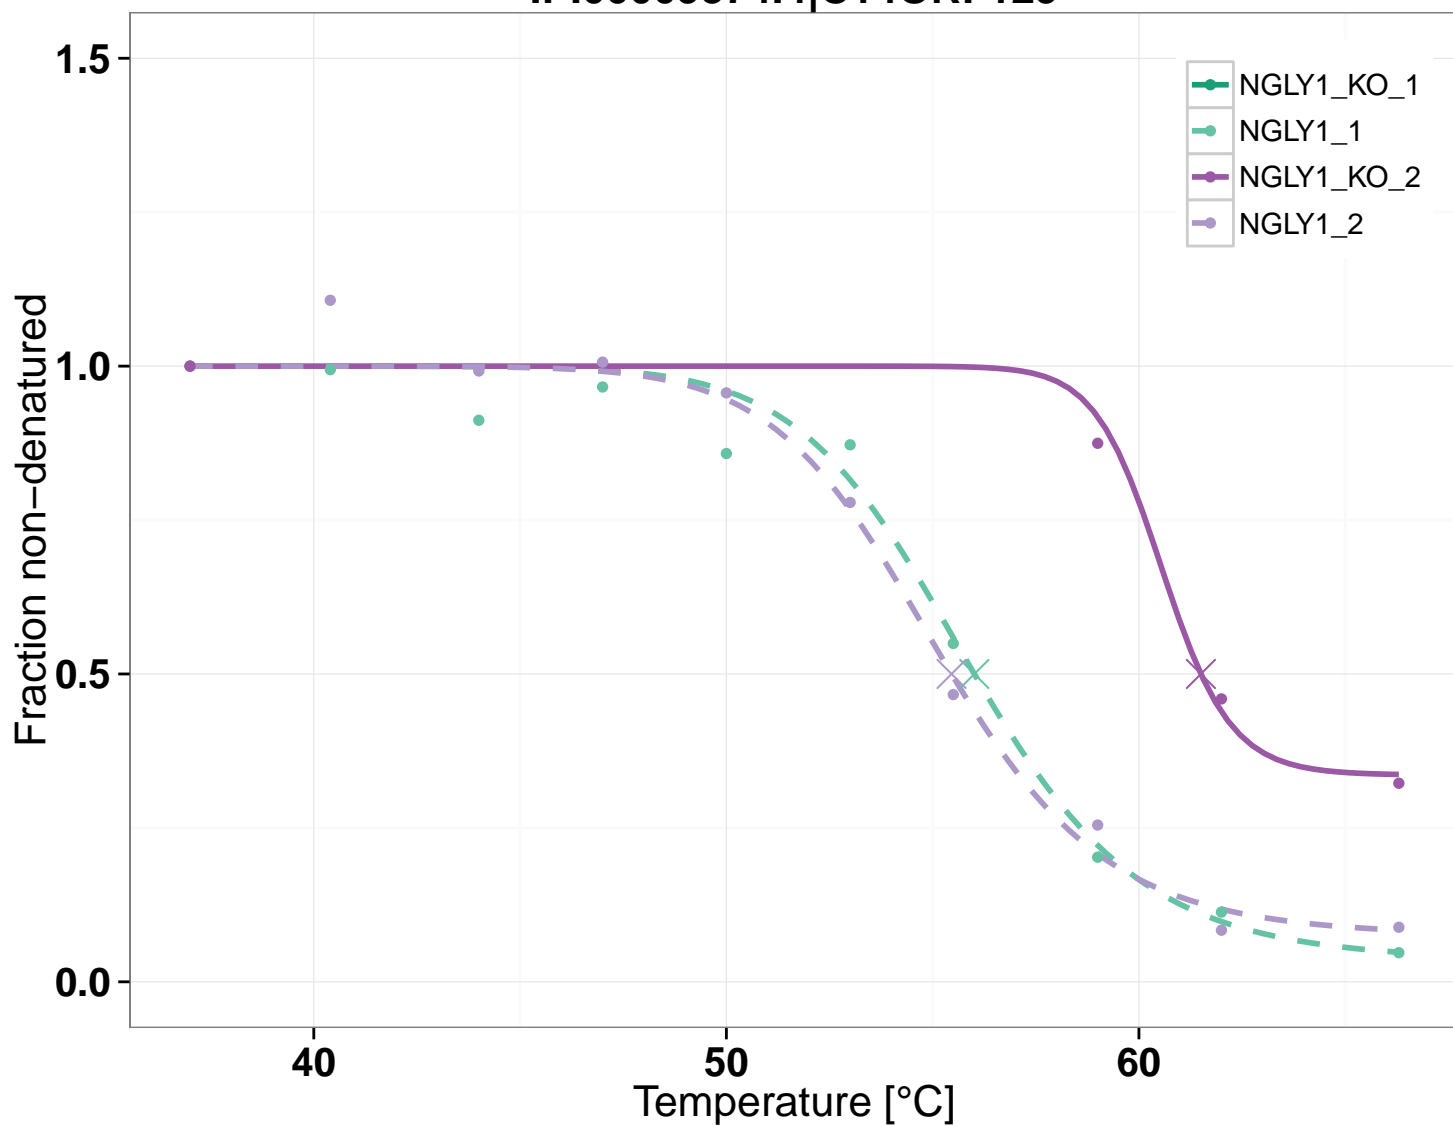

|            | meltPoint | slope | plateau | R2    |
|------------|-----------|-------|---------|-------|
| NGLY1_KO_1 | —         | —     | —       | —     |
| NGLY1_1    | 56.01     | -0.12 | 0.03    | 0.98  |
| NGLY1_KO_2 | 61.5      | -0.2  | 0.34    | -0.92 |
| NGLY1_2    | 55.46     | -0.11 | 0.07    | 0.99  |

Supplement: Supplementary file 3600 [file 1]

IPI00027175.1|SRI

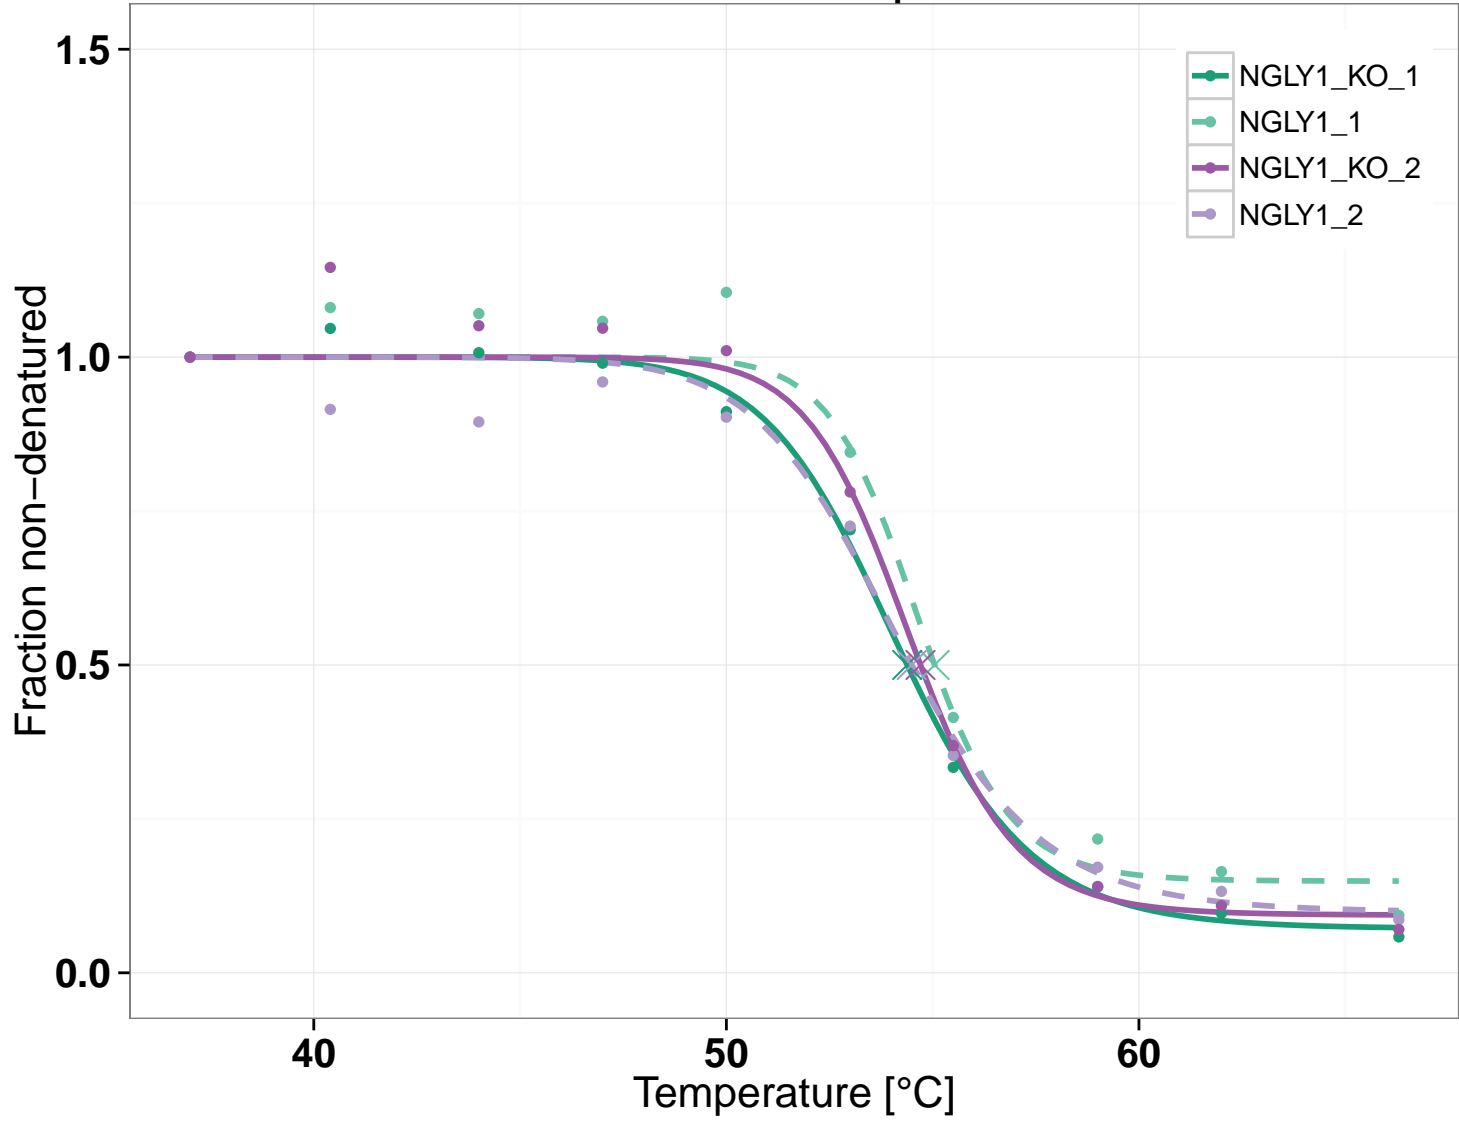

|            | meltPoint | slope | plateau | R2   |
|------------|-----------|-------|---------|------|
| NGLY1_KO_1 | 54.38     | -0.14 | 0.07    | 1    |
| NGLY1_1    | 55.05     | -0.2  | 0.15    | 0.98 |
| NGLY1_KO_2 | 54.71     | -0.18 | 0.09    | 0.98 |
| NGLY1_2    | 54.49     | -0.13 | 0.1     | 0.98 |

Supplement: Supplementary file 3601 [file 1]

# IPI00554777.2|ASNS

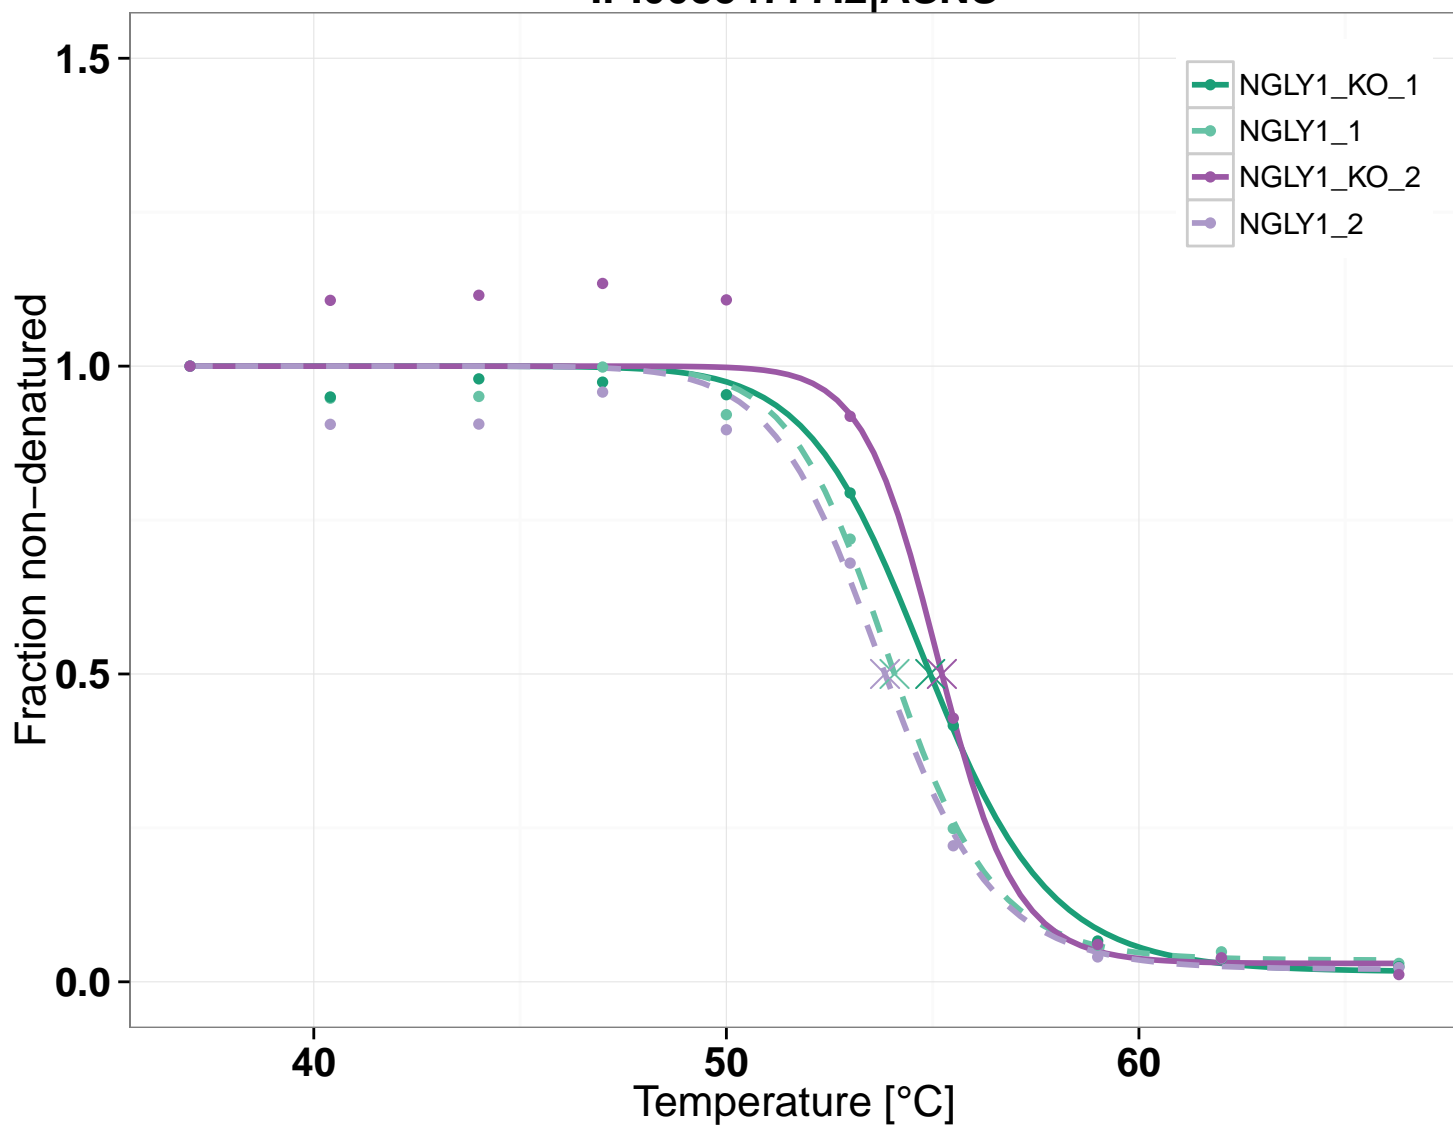

|            | meltPoint | slope | plateau | R2   |
|------------|-----------|-------|---------|------|
| NGLY1_KO_1 | 54.94     | -0.17 | 0.02    | 1    |
| NGLY1_1    | 54.08     | -0.19 | 0.04    | 1    |
| NGLY1_KO_2 | 55.22     | -0.26 | 0.03    | 0.98 |
| NGLY1_2    | 53.85     | -0.18 | 0.02    | 0.99 |

Supplement: Supplementary file 3602 [file 1]

# IPI00028931.2|DSG2

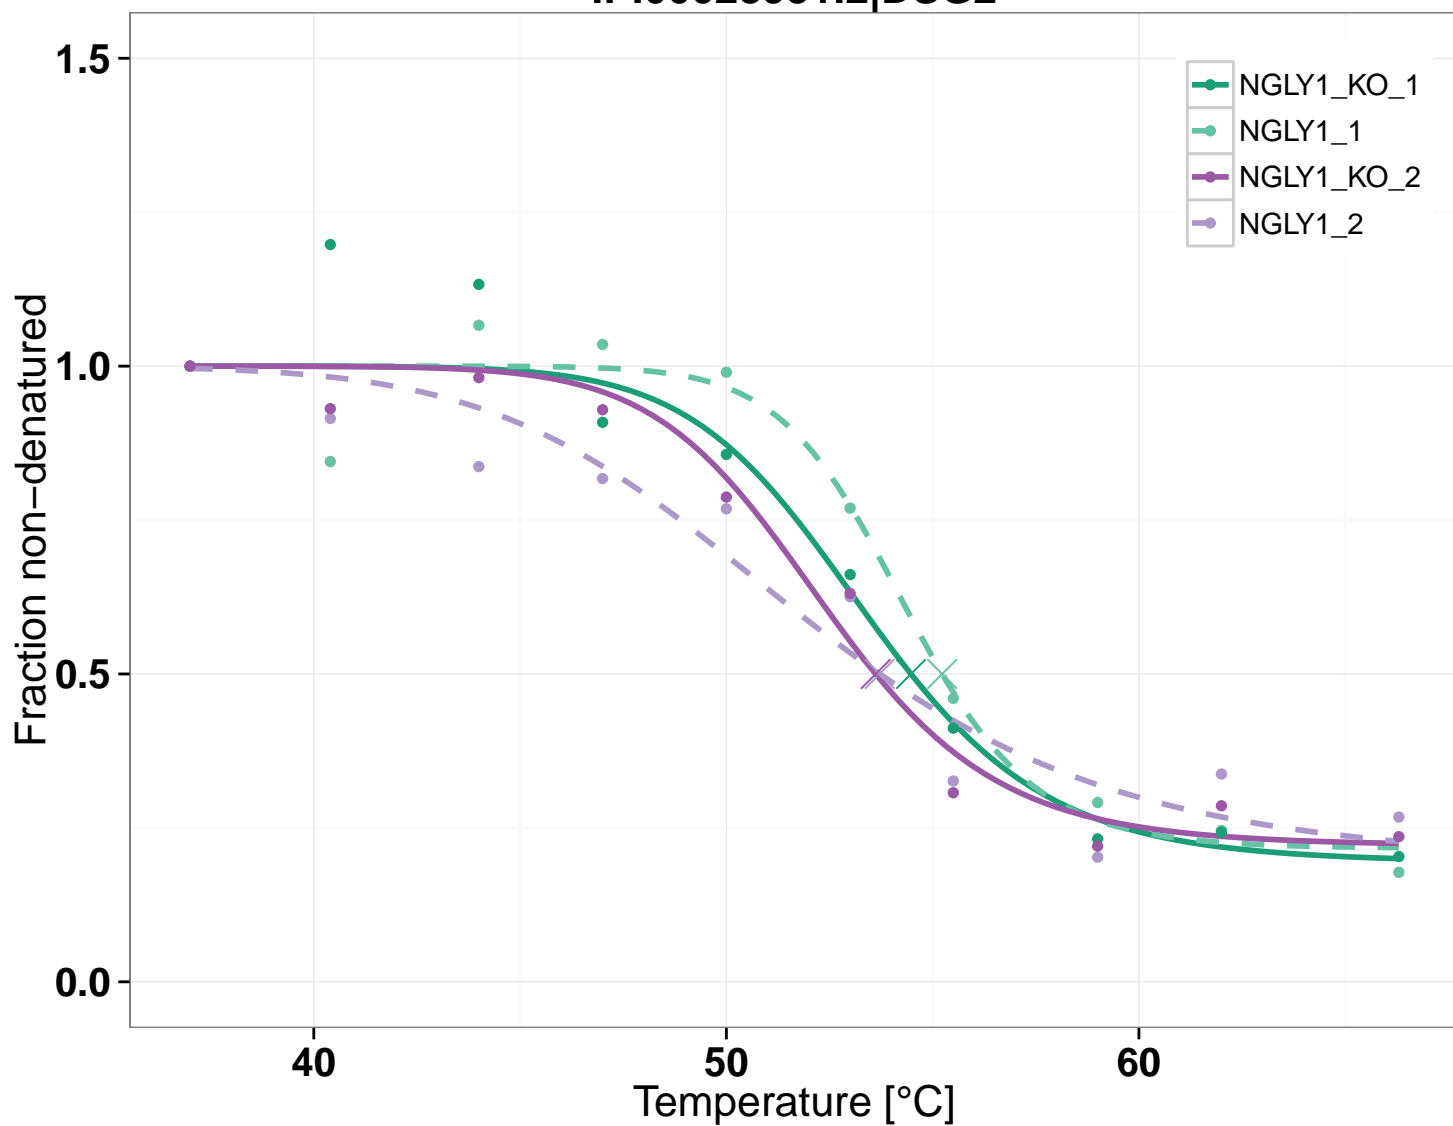

|            | meltPoint | slope  | plateau | R2   |
|------------|-----------|--------|---------|------|
| NGLY1_KO_1 | 54.47     | -0.094 | 0.19    | 0.95 |
| NGLY1_1    | 55.23     | -0.13  | 0.22    | 0.97 |
| NGLY1_KO_2 | 53.62     | -0.094 | 0.22    | 0.98 |
| NGLY1_2    | 53.72     | -0.054 | 0.19    | 0.93 |

Supplement: Supplementary file 3603 [file 1]

# IPI00011107.2|IDH2

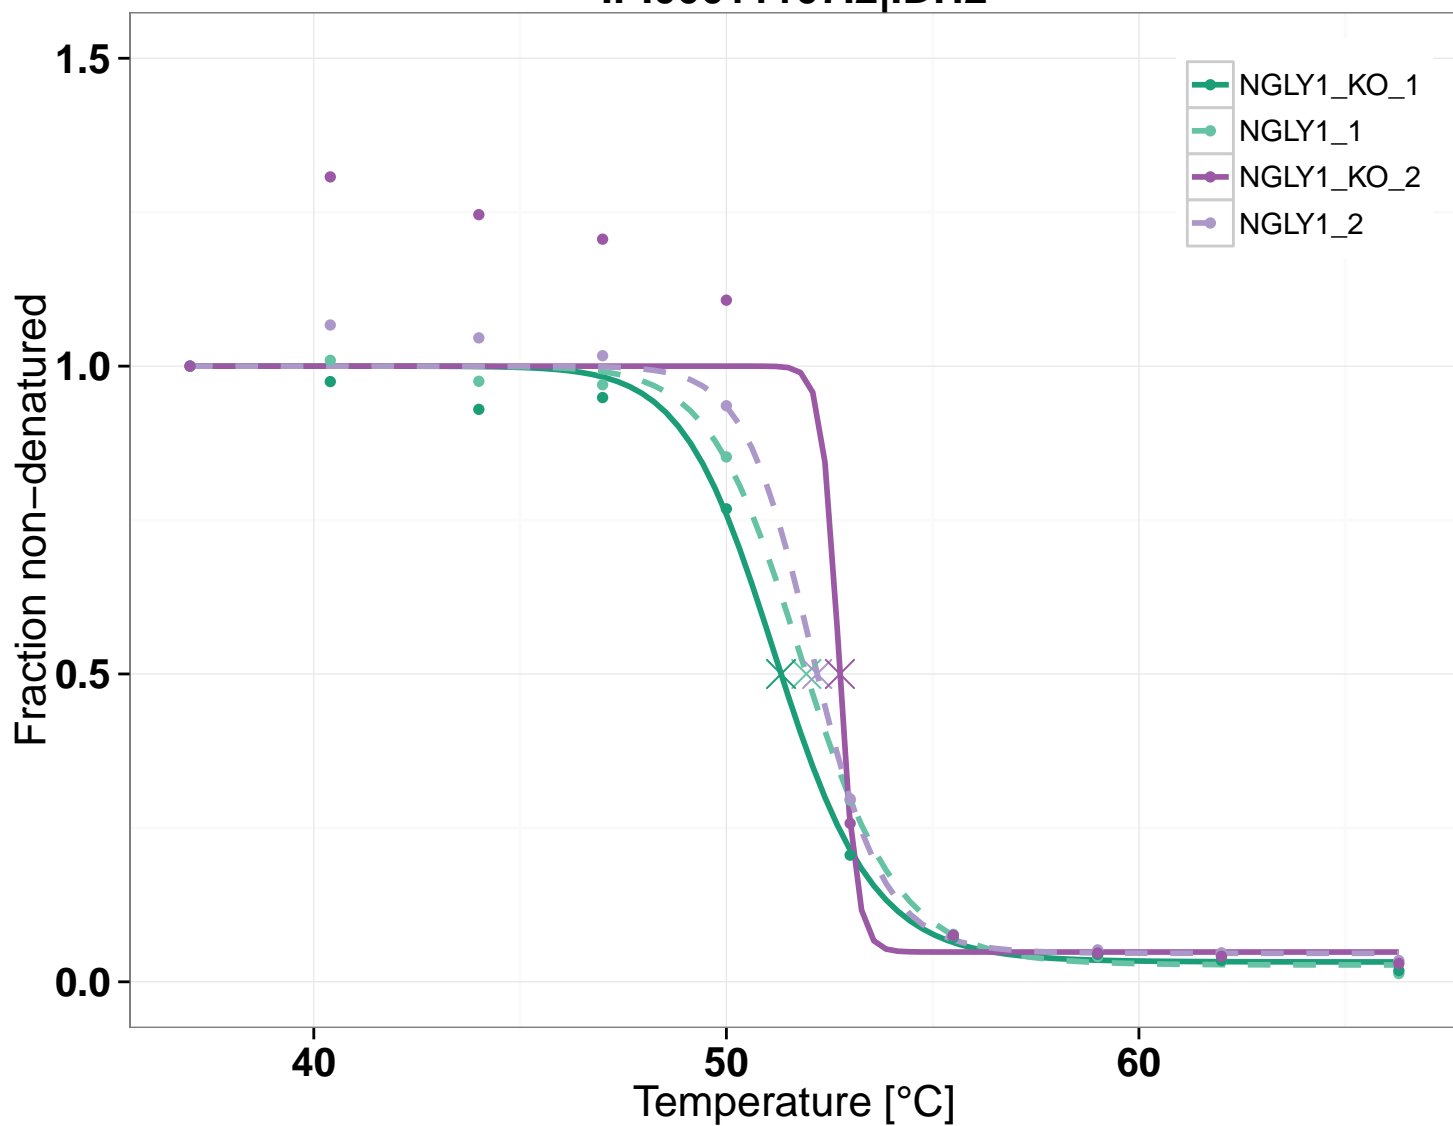

|            | meltPoint | slope | plateau | R2   |
|------------|-----------|-------|---------|------|
| NGLY1_KO_1 | 51.33     | -0.21 | 0.03    | 1    |
| NGLY1_1    | 51.94     | -0.21 | 0.03    | 1    |
| NGLY1_KO_2 | 52.75     | -1.1  | 0.05    | 0.93 |
| NGLY1_2    | 52.2      | -0.28 | 0.05    | 1    |

Supplement: Supplementary file 3604 [file 1]

# IPI00018823.1|EPC1

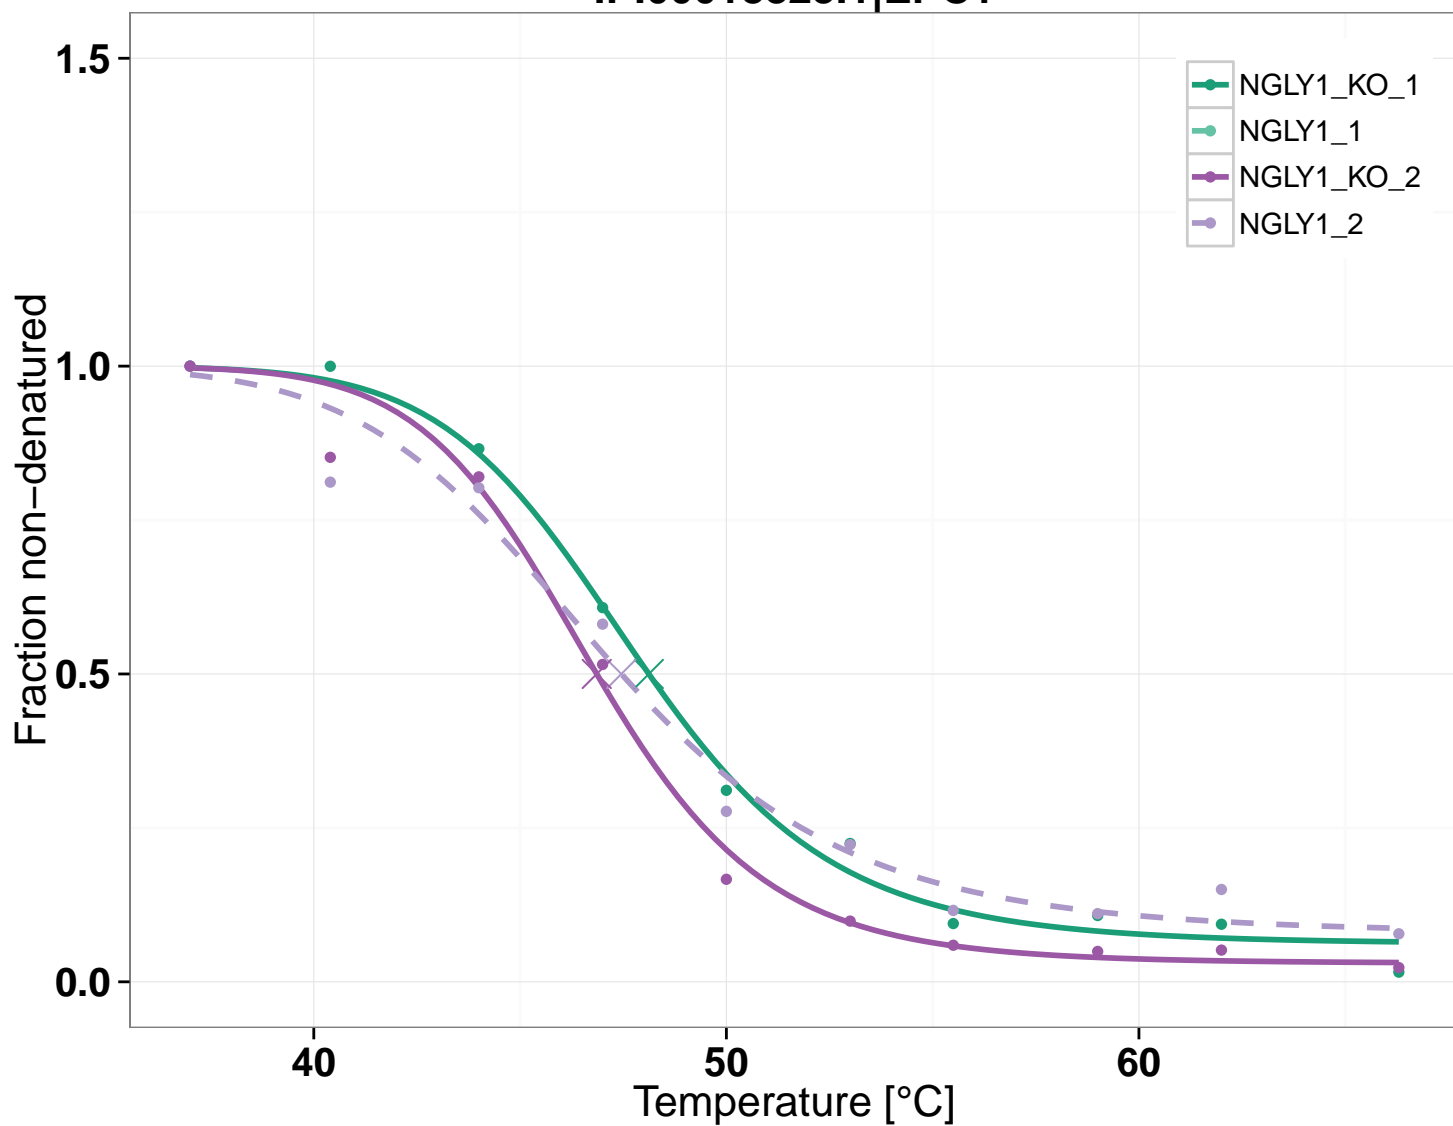

|            | meltPoint | slope  | plateau | R2   |
|------------|-----------|--------|---------|------|
| NGLY1_KO_1 | 48.12     | -0.099 | 0.06    | 0.99 |
| NGLY1_1    | -         | -      | -       | -    |
| NGLY1_KO_2 | 46.86     | -0.12  | 0.03    | 0.99 |
| NGLY1_2    | 47.45     | -0.078 | 0.08    | 0.98 |

Supplement: Supplementary file 3605 [file 1]

IPI00478608.3|CYTH1

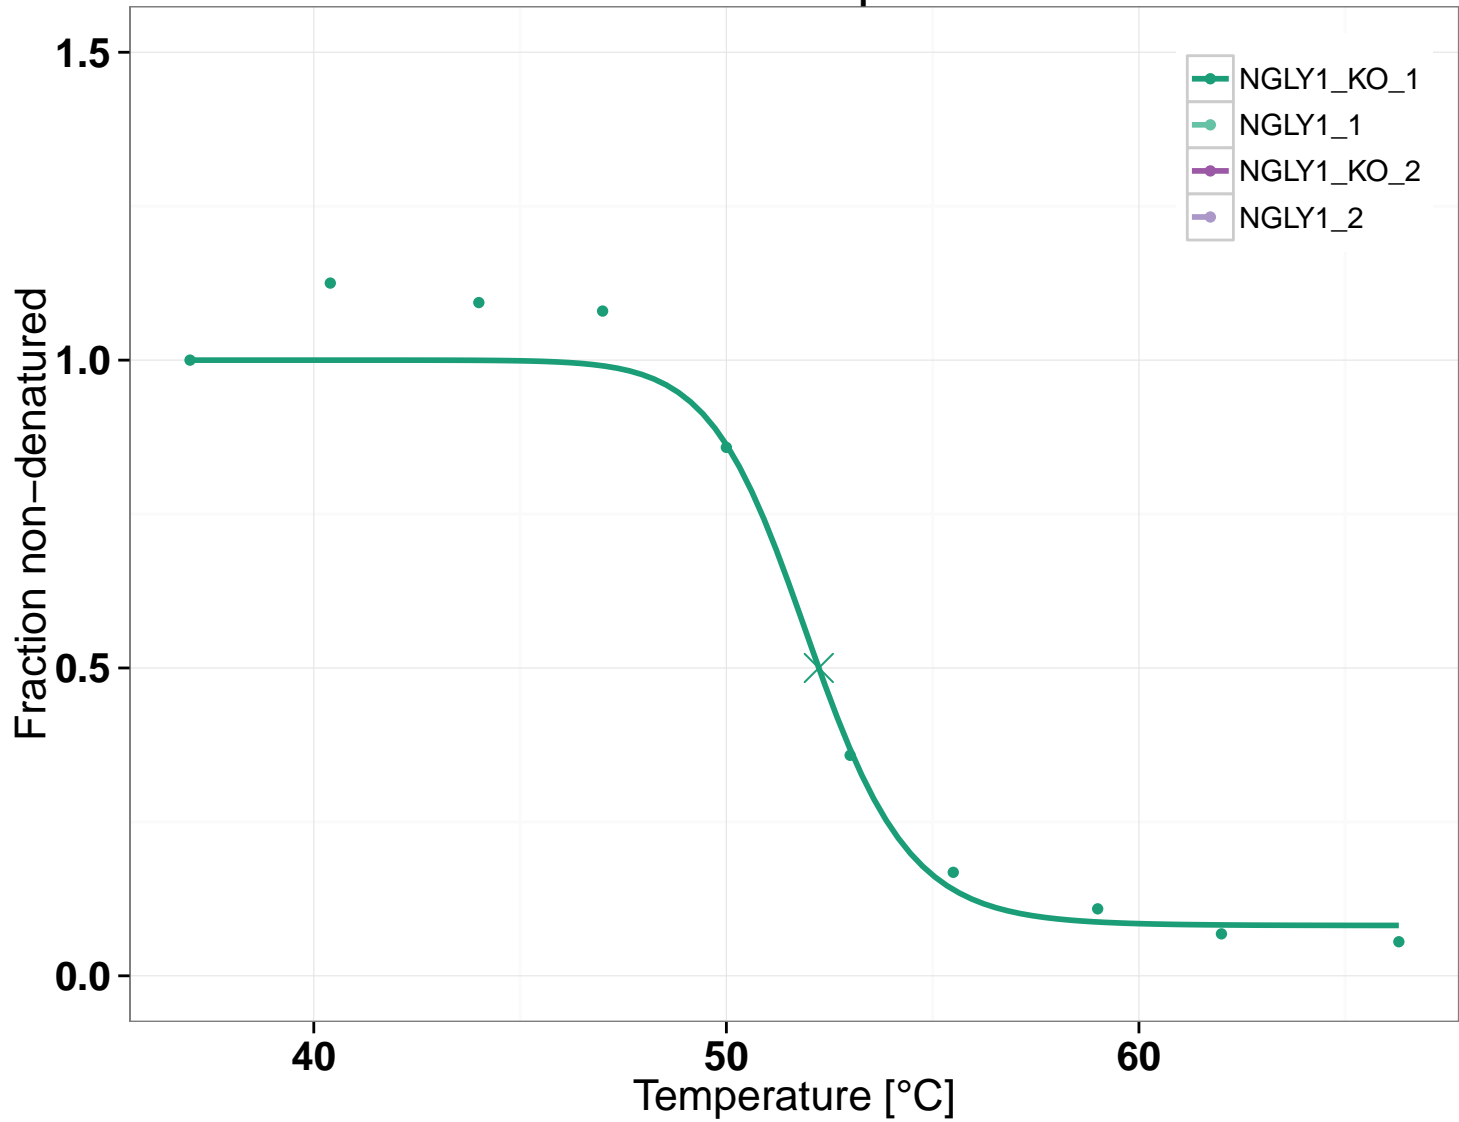

|            | meltPoint | slope | plateau | R2   |
|------------|-----------|-------|---------|------|
| NGLY1_KO_1 | 52.24     | -0.19 | 0.08    | 0.98 |
| NGLY1_1    | -         | -     | -       | -    |
| NGLY1_KO_2 | -         | -     | -       | -    |
| NGLY1_2    | -         | -     | -       | -    |

Supplement: Supplementary file 3606 [file 1]

IPI00306642.3|WDSOF1

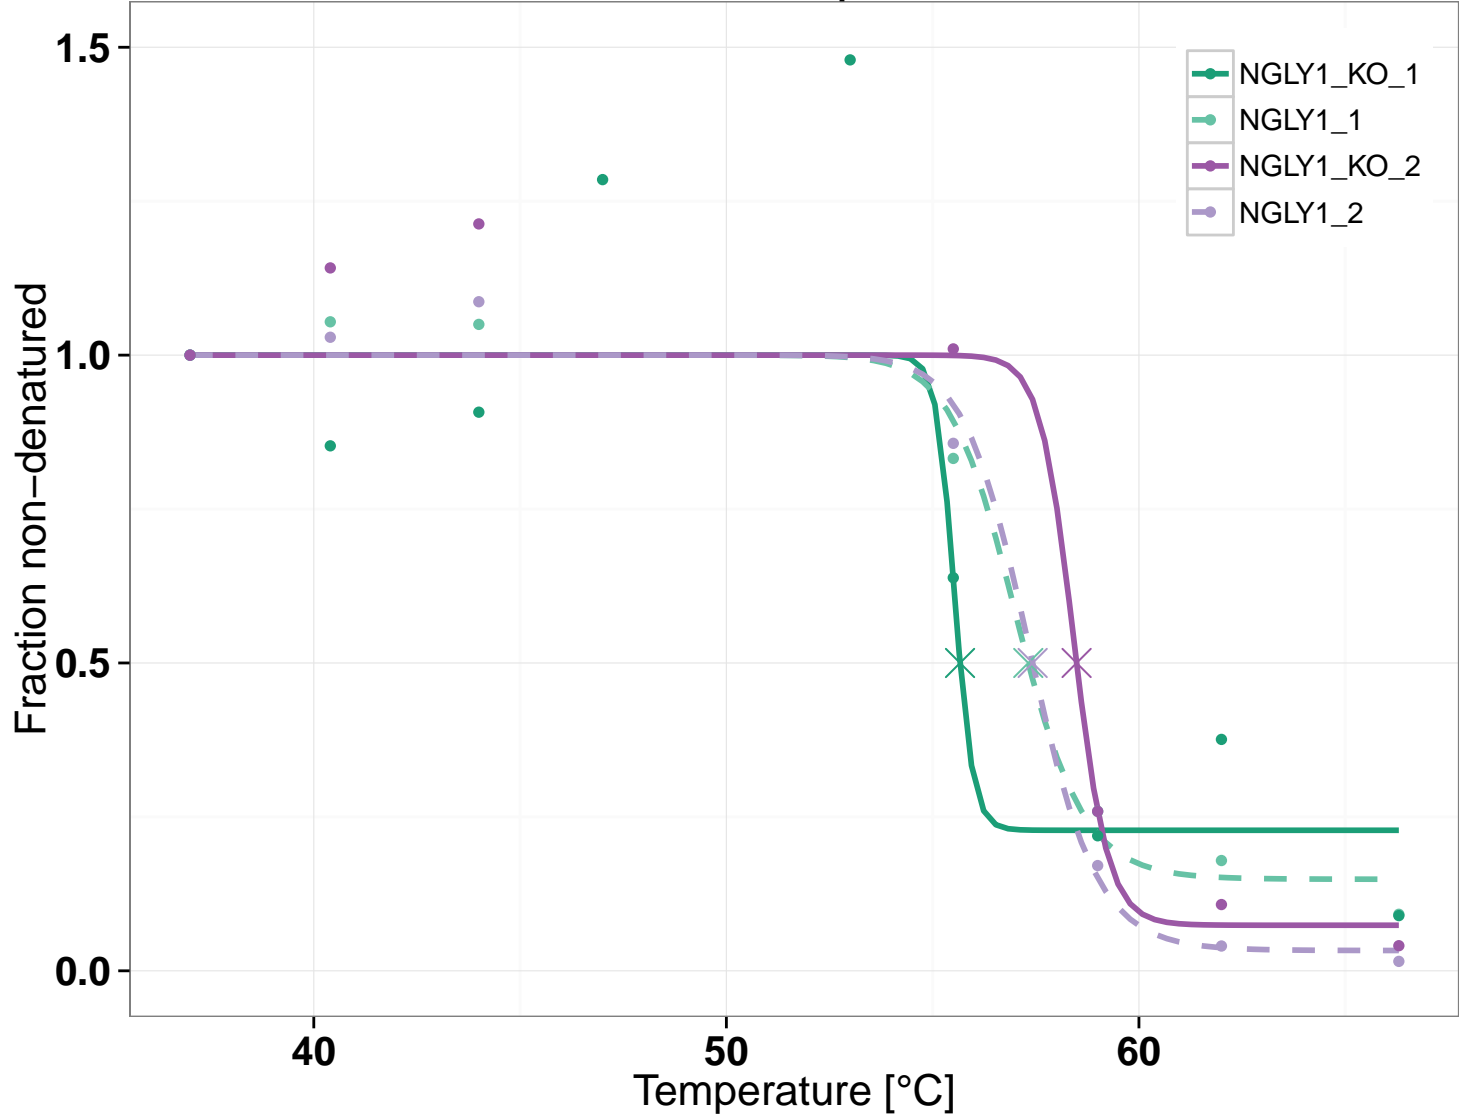

|            | meltPoint | slope | plateau | R2   |
|------------|-----------|-------|---------|------|
| NGLY1_KO_1 | 55.66     | -0.87 | 0.23    | 0.53 |
| NGLY1_1    | 57.32     | -0.26 | 0.15    | 0.35 |
| NGLY1_KO_2 | 58.49     | -0.56 | 0.07    | 0.2  |
| NGLY1_2    | 57.42     | -0.3  | 0.03    | 0.32 |

Supplement: Supplementary file 3607 [file 1]

# IPI00027235.1|ATRN

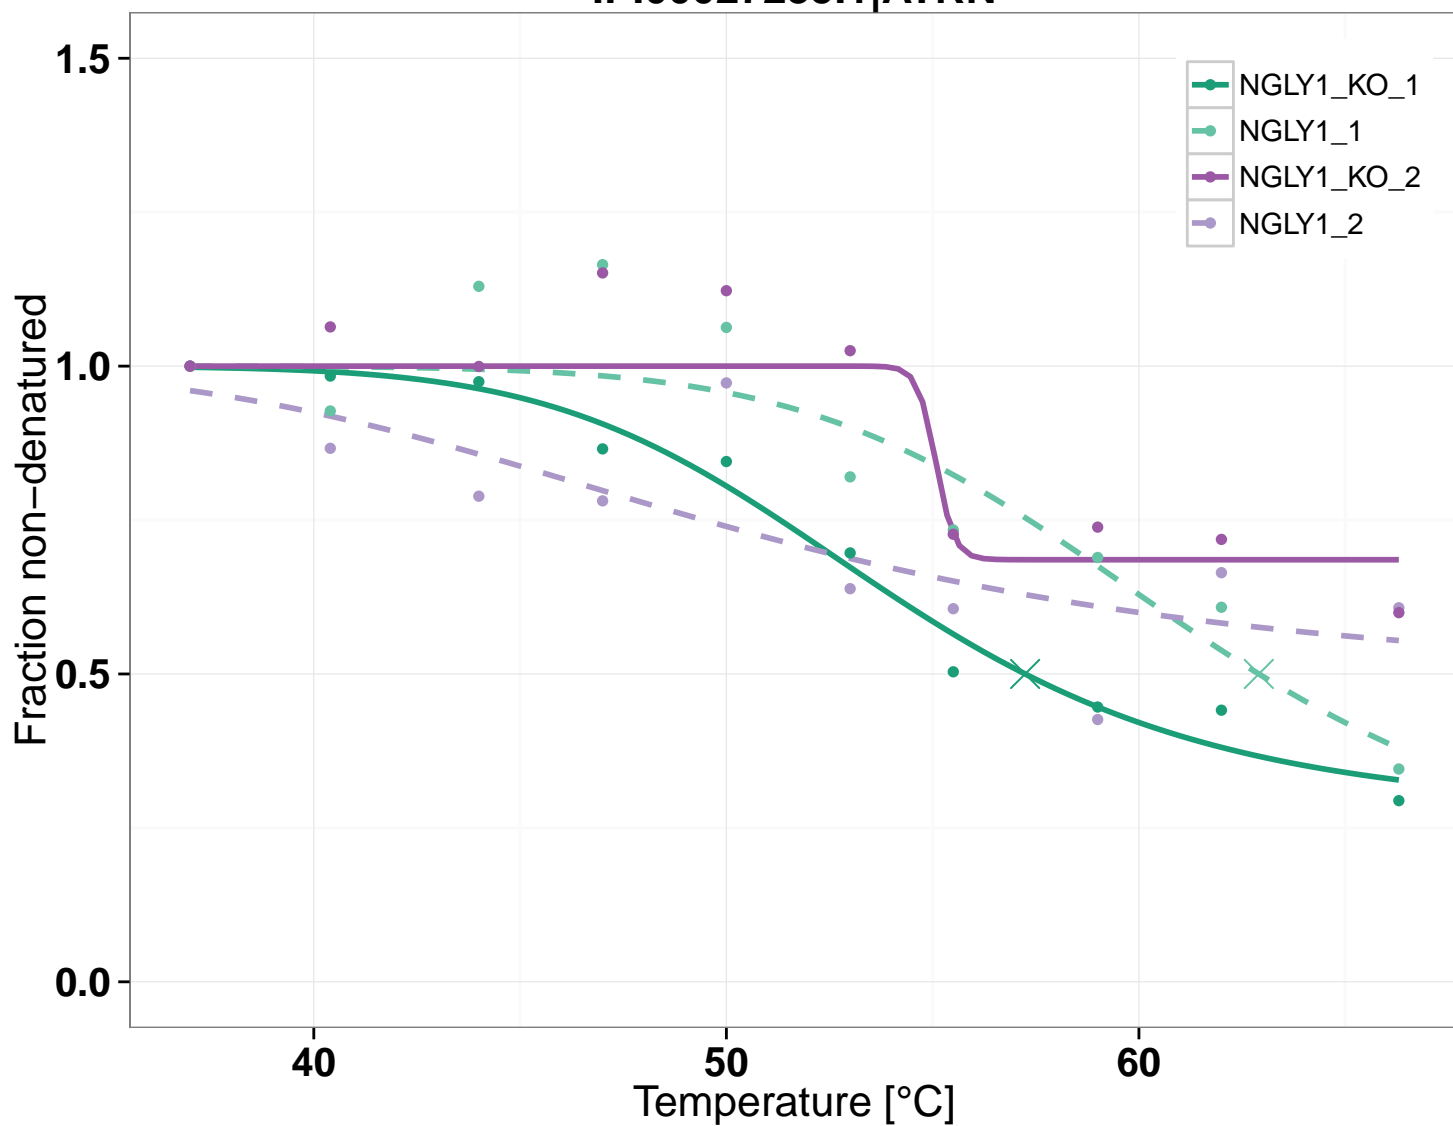

|            | meltPoint | slope  | plateau | R2   |
|------------|-----------|--------|---------|------|
| NGLY1_KO_1 | 57.24     | -0.046 | 0.27    | 0.98 |
| NGLY1_1    | 62.91     | -0.046 | 0.16    | 0.85 |
| NGLY1_KO_2 | –         | -0.36  | 0.69    | 0.85 |
| NGLY1_2    | –         | -0.02  | 0.47    | 0.62 |

Supplement: Supplementary file 3608 [file 1]

IPI00411705.2|C13ORF1

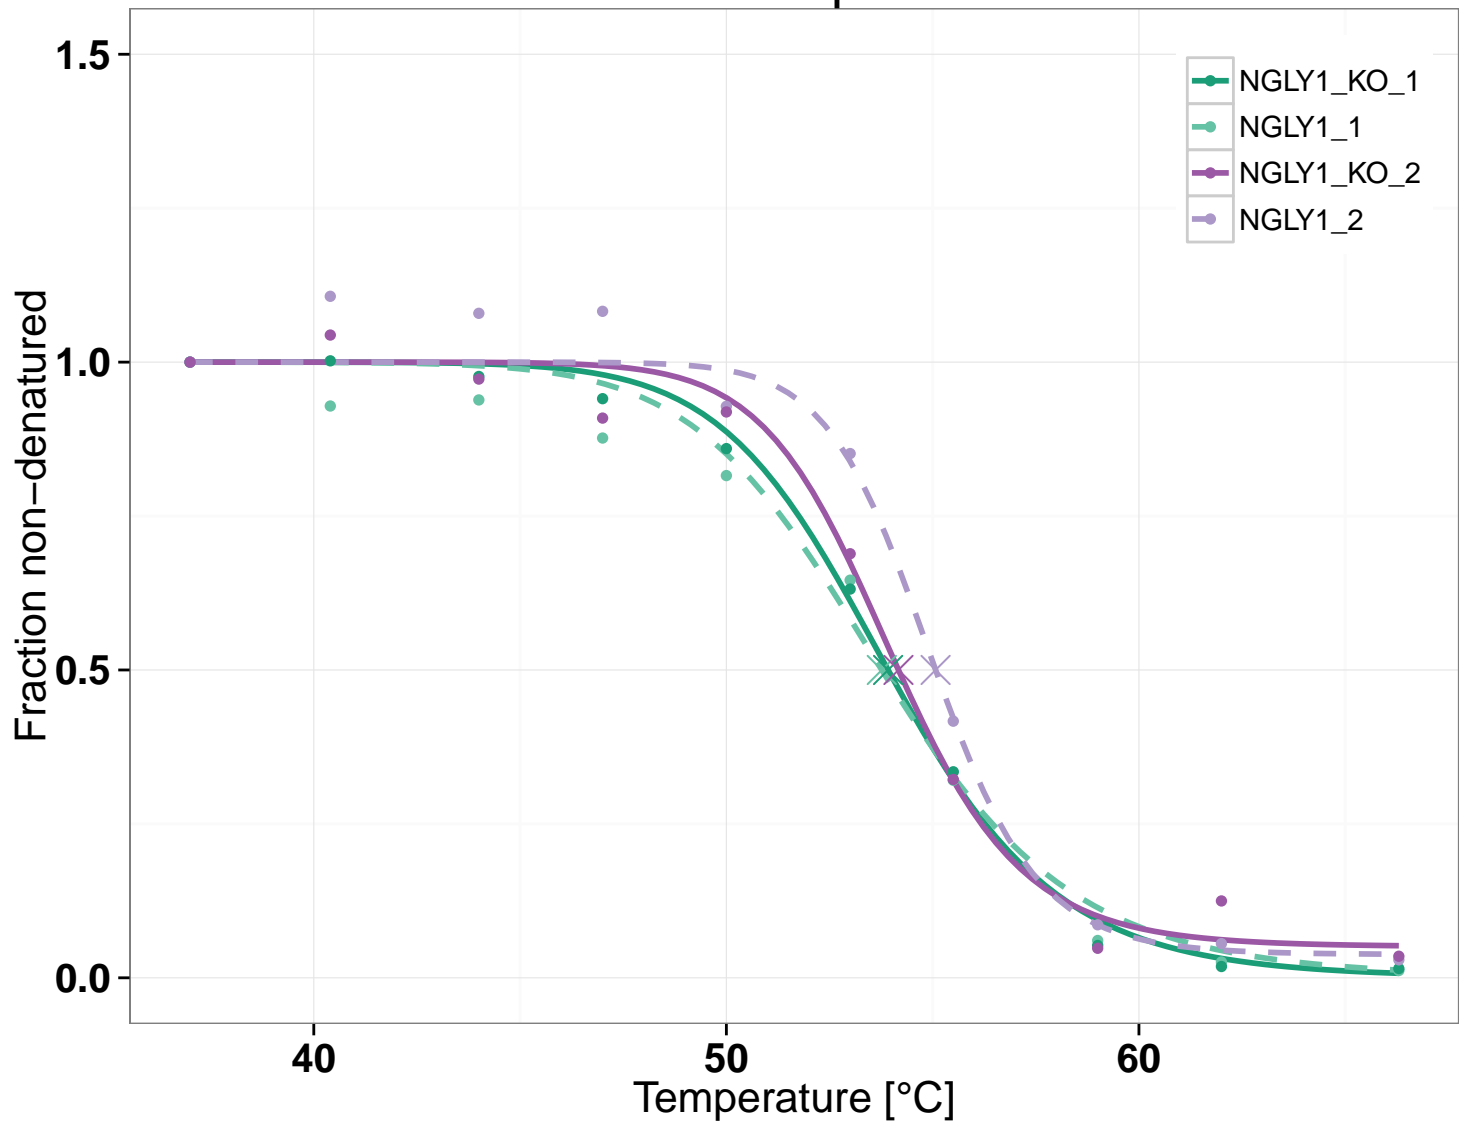

|            | meltPoint | slope | plateau | R2   |
|------------|-----------|-------|---------|------|
| NGLY1_KO_1 | 53.92     | -0.12 | 0       | 1    |
| NGLY1_1    | 53.77     | -0.11 | 0       | 0.98 |
| NGLY1_KO_2 | 54.17     | -0.15 | 0.05    | 0.99 |
| NGLY1_2    | 55.07     | -0.19 | 0.04    | 0.99 |

Supplement: Supplementary file 3609 [file 1]

# IPI00303099.2|CDCA8

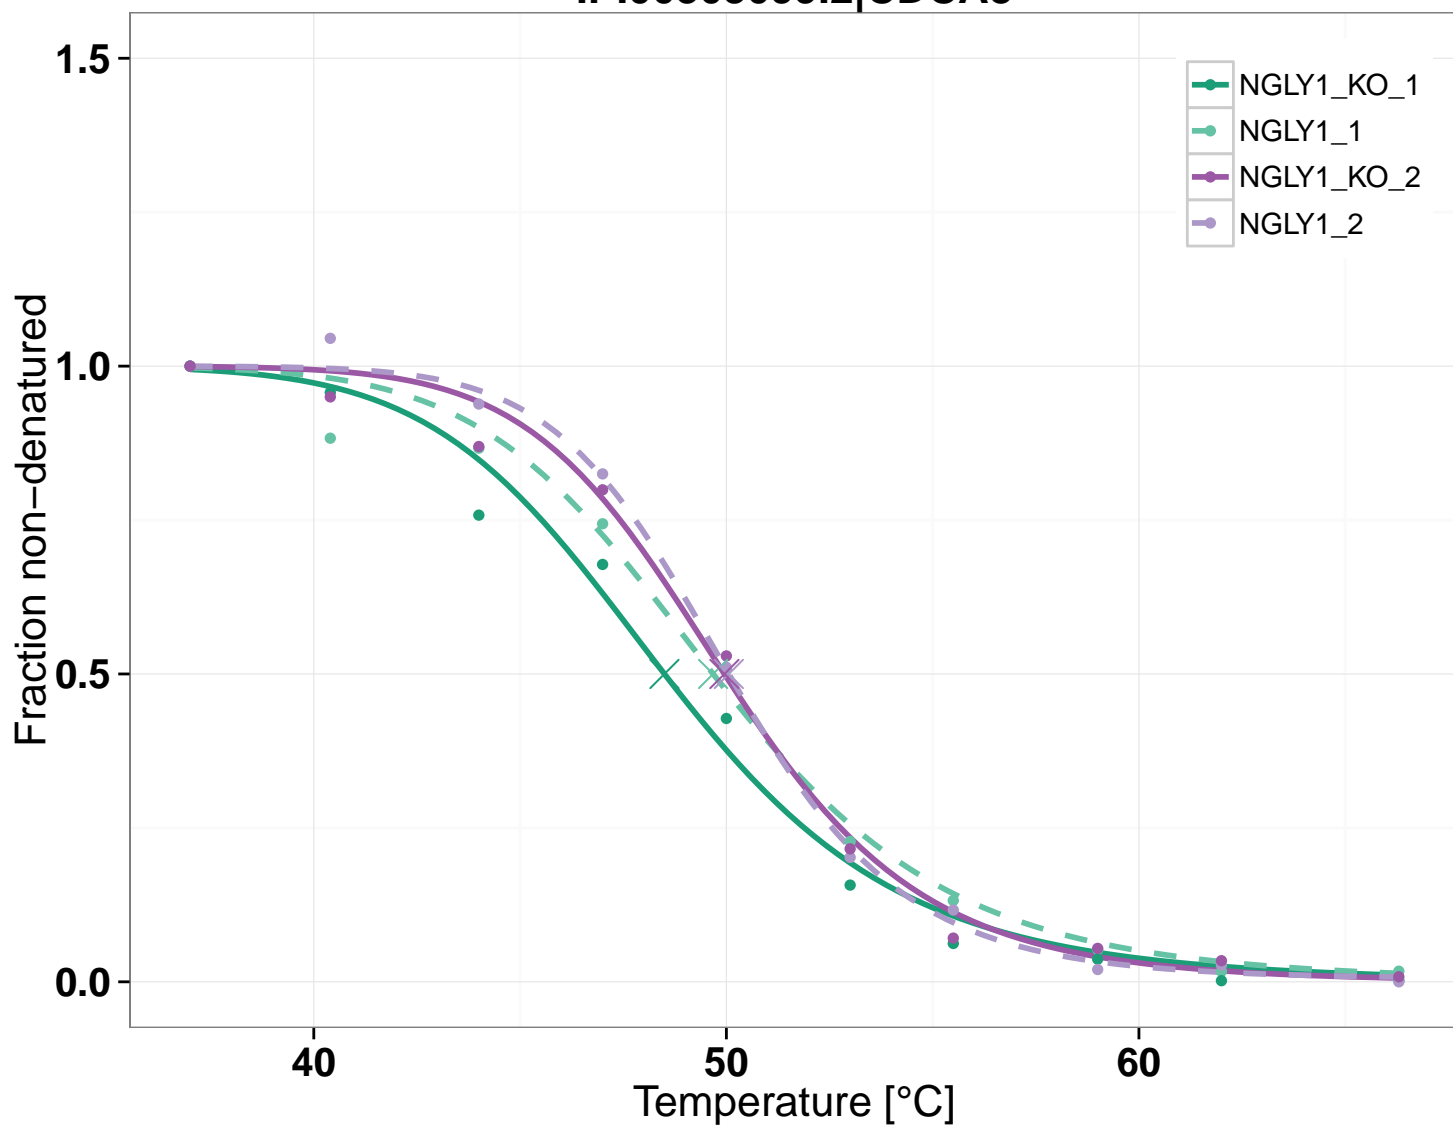

|            | meltPoint | slope  | plateau | R2   |
|------------|-----------|--------|---------|------|
| NGLY1_KO_1 | 48.5      | -0.088 | 0       | 0.99 |
| NGLY1_1    | 49.68     | -0.087 | 0       | 0.99 |
| NGLY1_KO_2 | 49.95     | -0.1   | 0       | 0.99 |
| NGLY1_2    | 50.06     | -0.12  | 0       | 1    |

Supplement: Supplementary file 3610 [file 1]

# IPI00794805.1|PTTG1IP

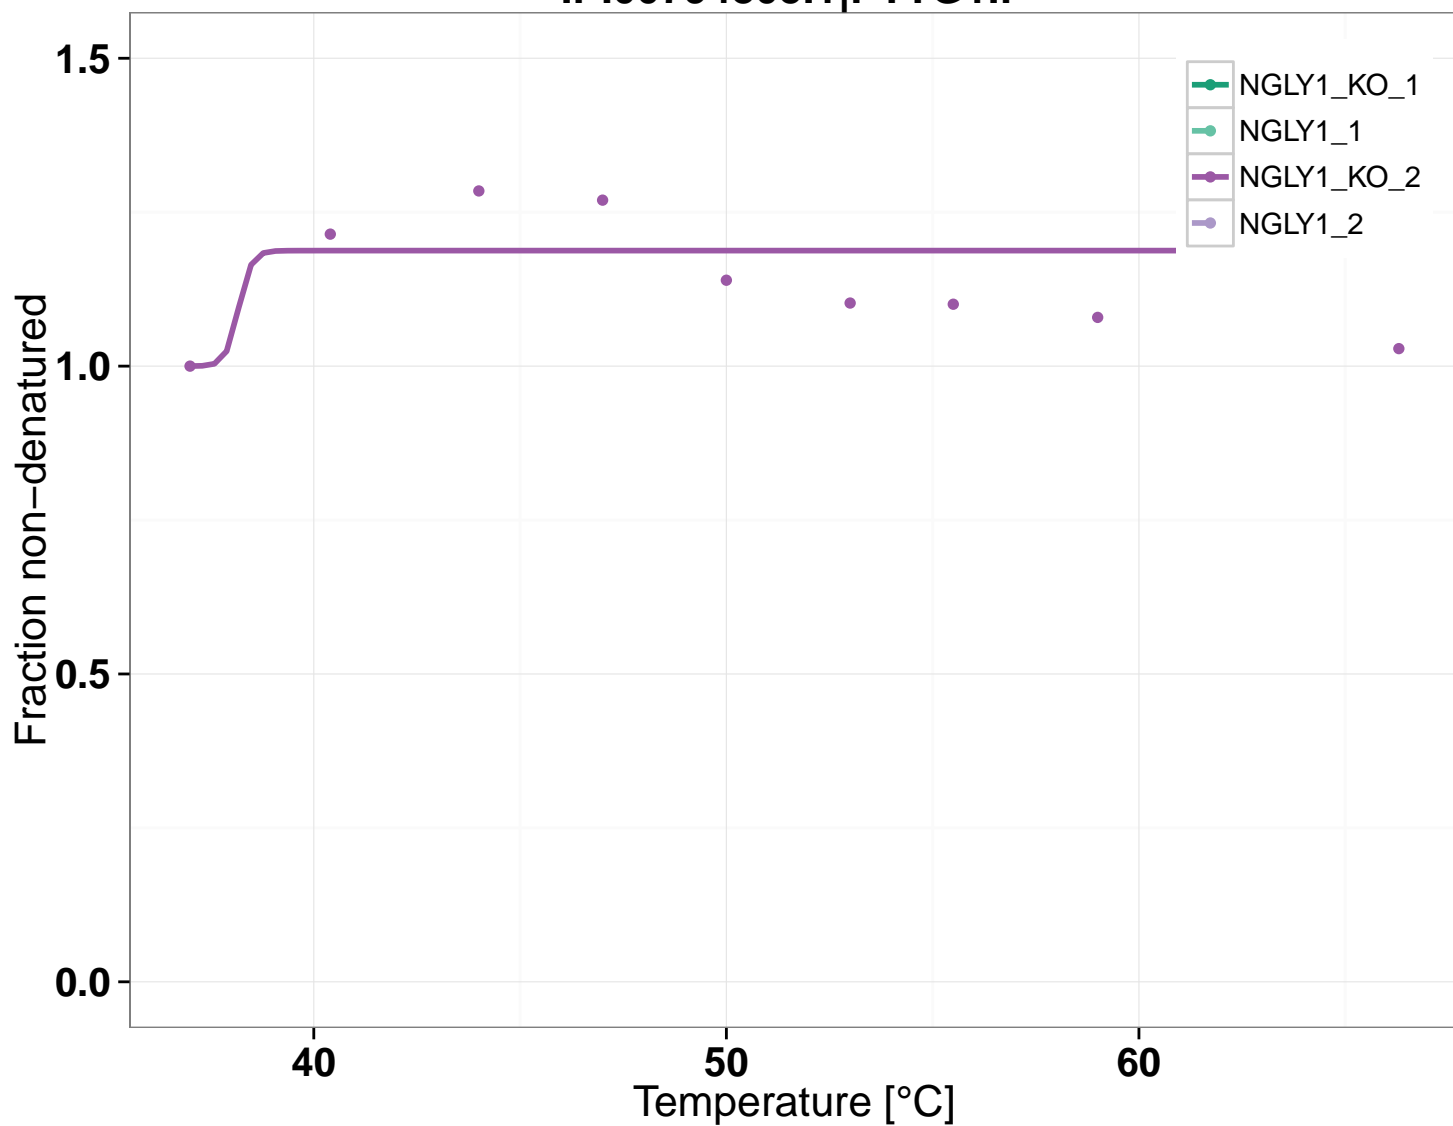

|            | meltPoint | slope | plateau | R2   |
|------------|-----------|-------|---------|------|
| NGLY1_KO_1 | —         | —     | —       | —    |
| NGLY1_1    | —         | —     | —       | —    |
| NGLY1_KO_2 | —         | 0.31  | 1.19    | 0.17 |
| NGLY1_2    | —         | —     | —       | —    |

Supplement: Supplementary file 3611 [file 1]

IPI00300567.1|DCI

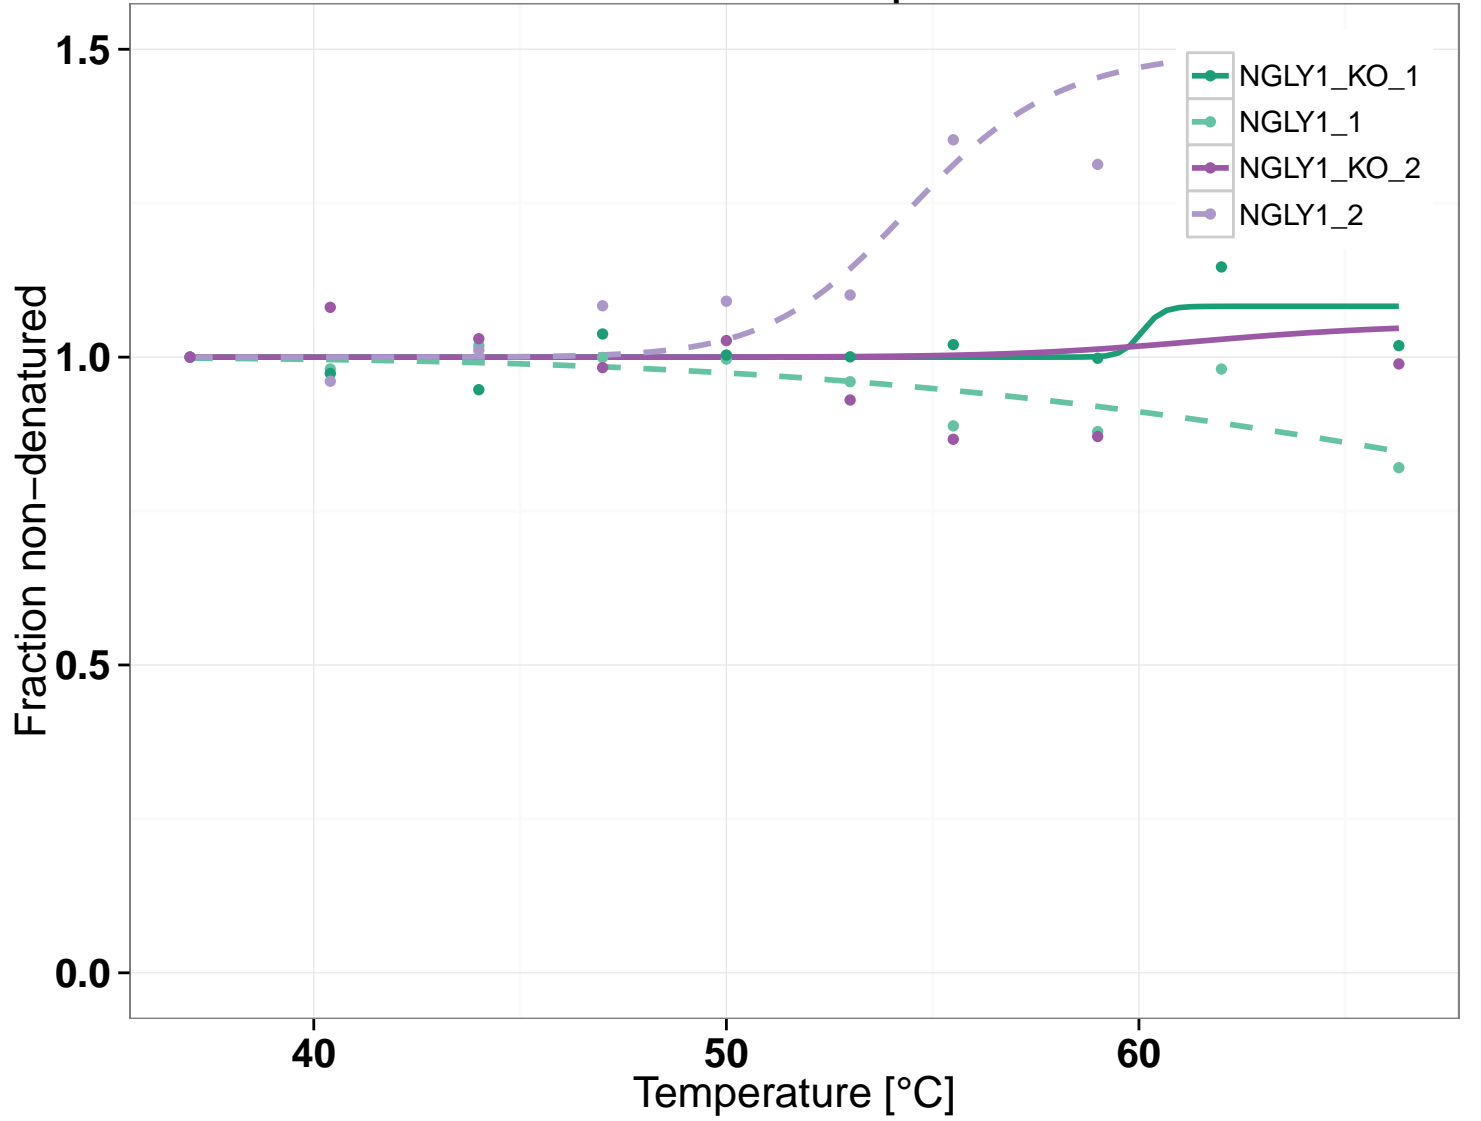

|            | meltPoint | slope  | plateau | R2   |
|------------|-----------|--------|---------|------|
| NGLY1_KO_1 | —         | 0.086  | 1.08    | 0.46 |
| NGLY1_1    | —         | —      | 0       | 0.62 |
| NGLY1_KO_2 | —         | 0.0057 | 1.06    | 0.04 |
| NGLY1_2    | —         | 0.07   | 1.5     | 0.82 |

Supplement: Supplementary file 3612 [file 1]

# IPI00298800.1|GYPA

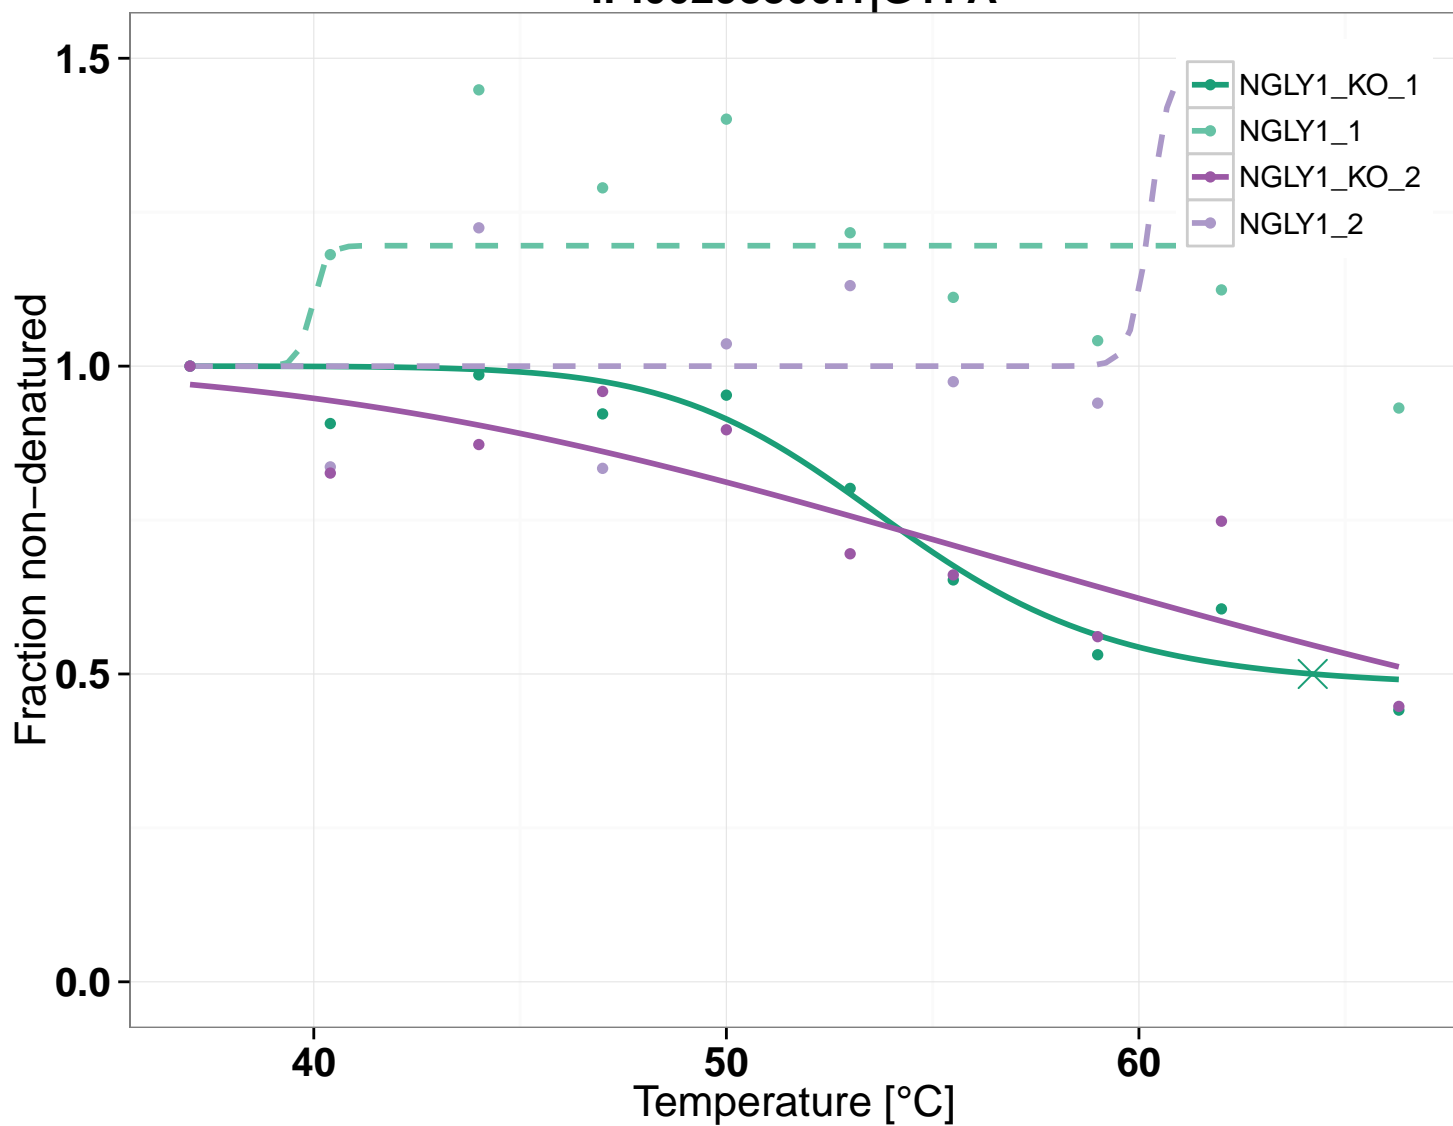

|            | meltPoint | slope  | plateau | R2   |
|------------|-----------|--------|---------|------|
| NGLY1_KO_1 | 64.21     | -0.048 | 0.48    | 0.93 |
| NGLY1_1    | -         | 0.29   | 1.2     | 0.13 |
| NGLY1_KO_2 | -         | -0.019 | 0       | 0.73 |
| NGLY1_2    | -         | 0.52   | 1.5     | 0.65 |

Supplement: Supplementary file 3613 [file 1]

# IPI00000104.1|RNGTT

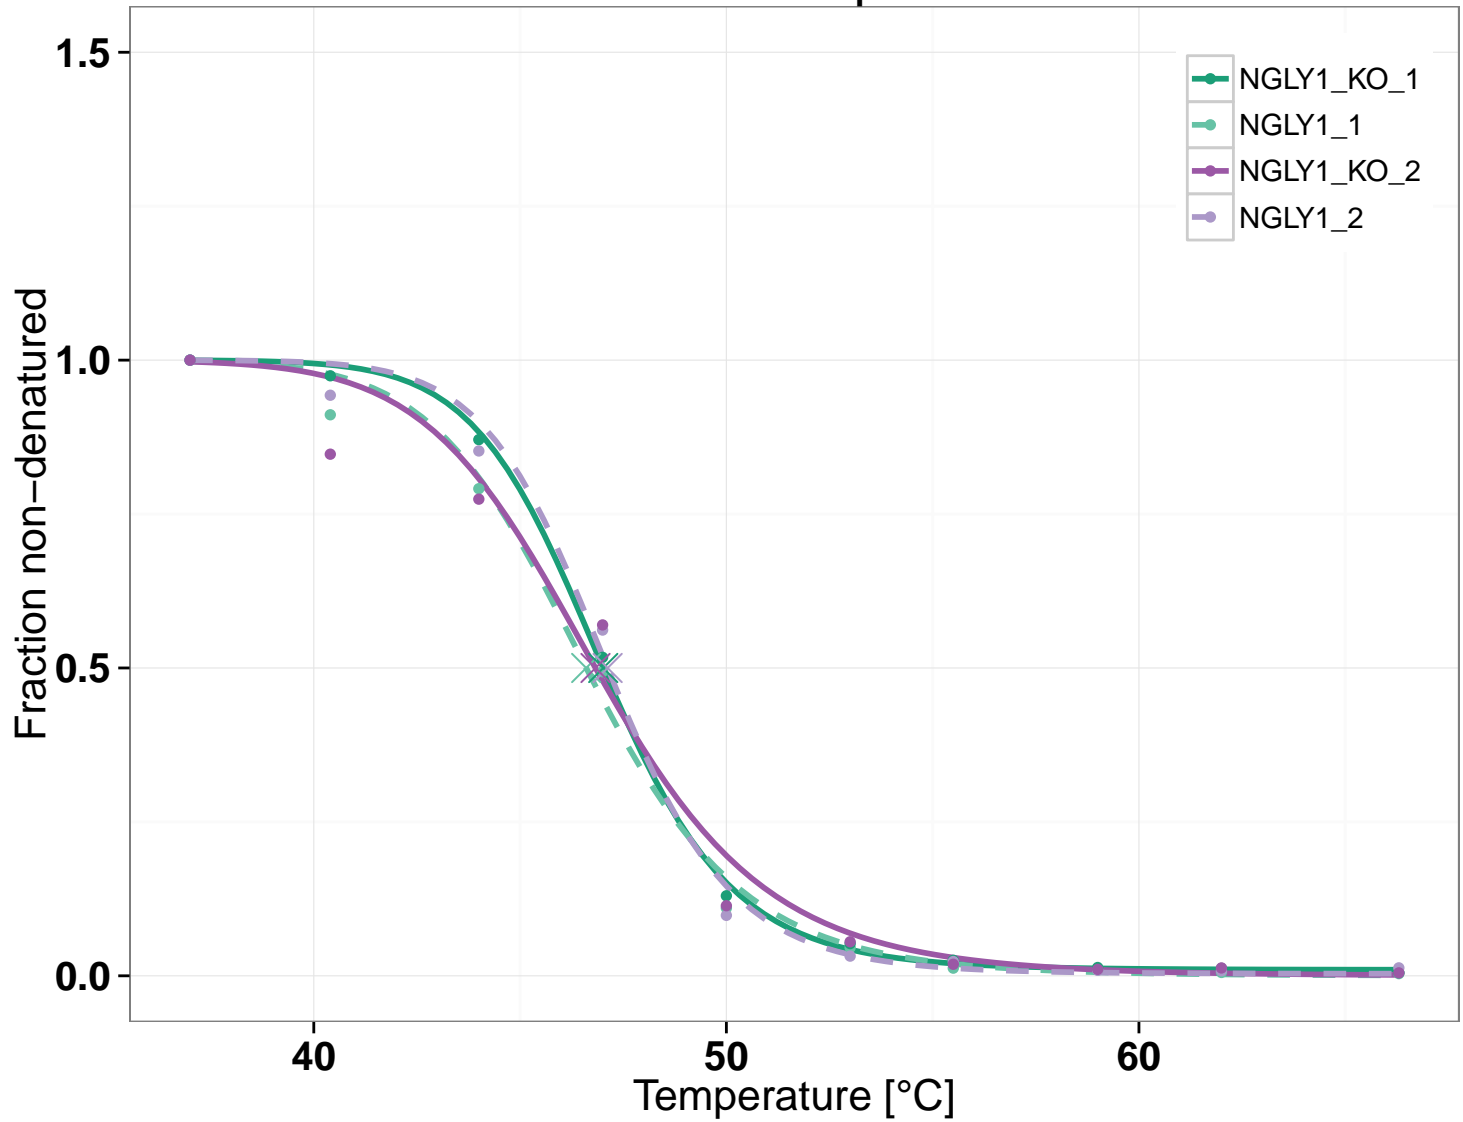

|            | meltPoint | slope | plateau | R2   |
|------------|-----------|-------|---------|------|
| NGLY1_KO_1 | 47.02     | -0.16 | 0.01    | 1    |
| NGLY1_1    | 46.6      | -0.13 | 0       | 0.99 |
| NGLY1_KO_2 | 46.83     | -0.12 | 0       | 0.98 |
| NGLY1_2    | 47.12     | -0.16 | 0       | 0.99 |

Supplement: Supplementary file 3614 [file 1]

# IPI00220477.3|MCRS1

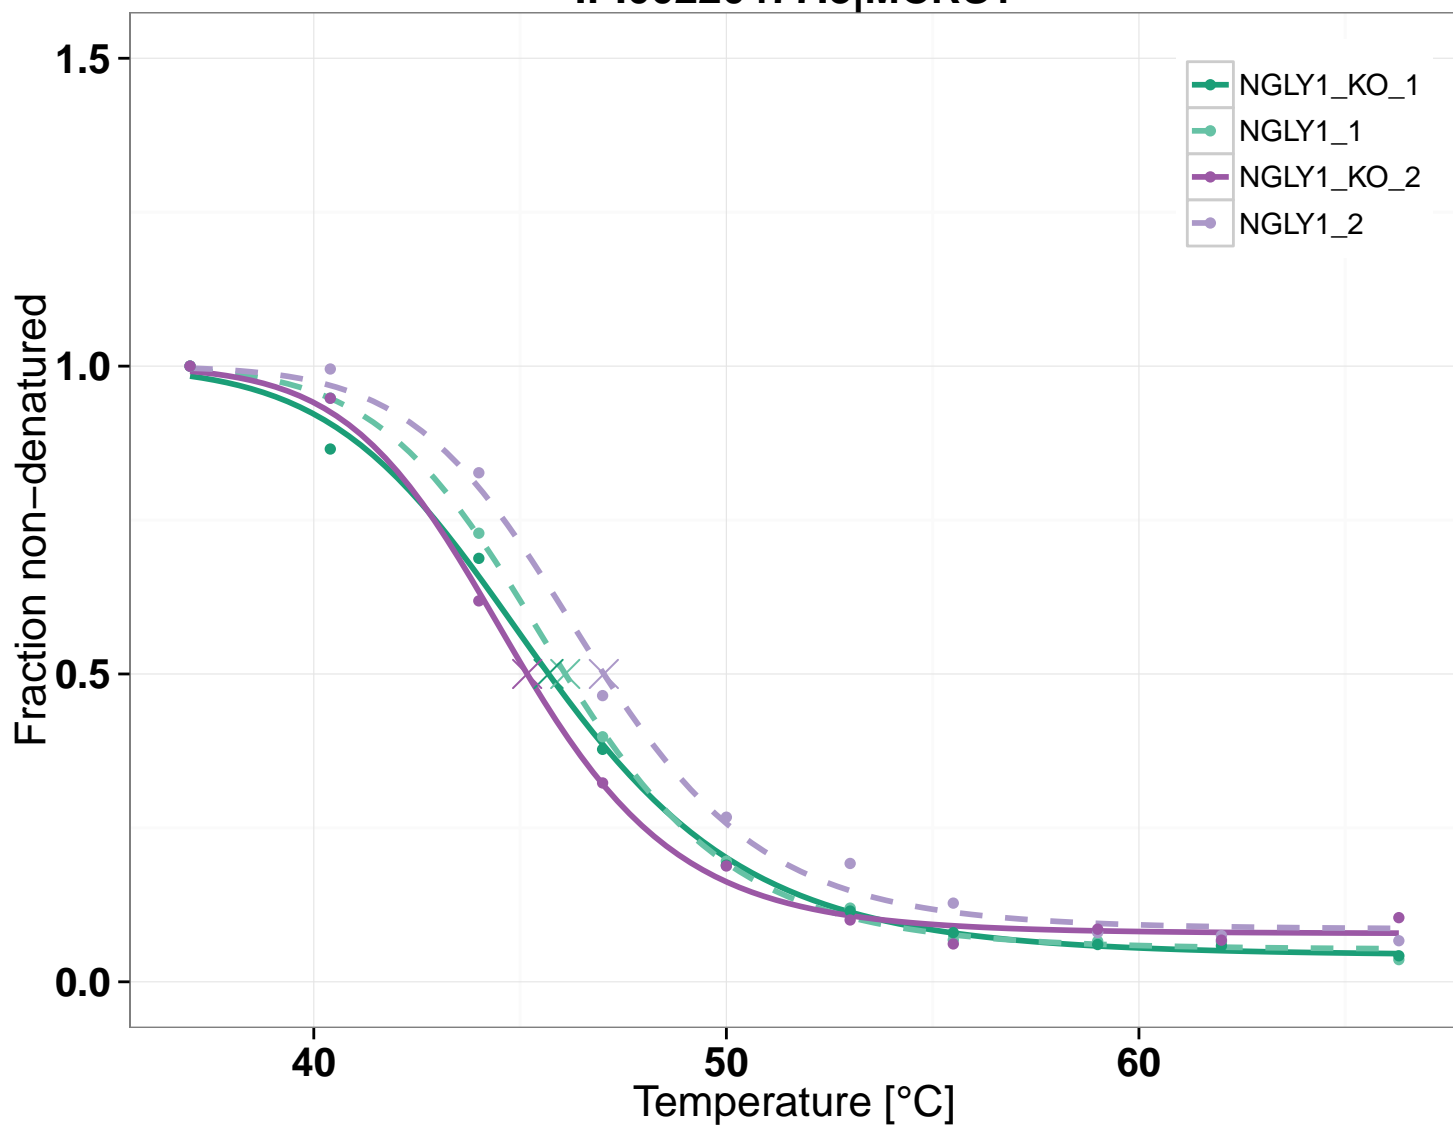

|            | meltPoint | slope  | plateau | R2 |
|------------|-----------|--------|---------|----|
| NGLY1_KO_1 | 45.69     | -0.095 | 0.04    | 1  |
| NGLY1_1    | 46.09     | -0.11  | 0.05    | 1  |
| NGLY1_KO_2 | 45.17     | -0.12  | 0.08    | 1  |
| NGLY1_2    | 47.03     | -0.11  | 0.09    | 1  |

Supplement: Supplementary file 3615 [file 1]
