# Supplementary material (part 37 of 85)
Source: publisher figshare collection journal article supplement (https://gsajournals.figshare.com/articles/dataset/_/12014913)

# IPI00171117.5|COMMD1

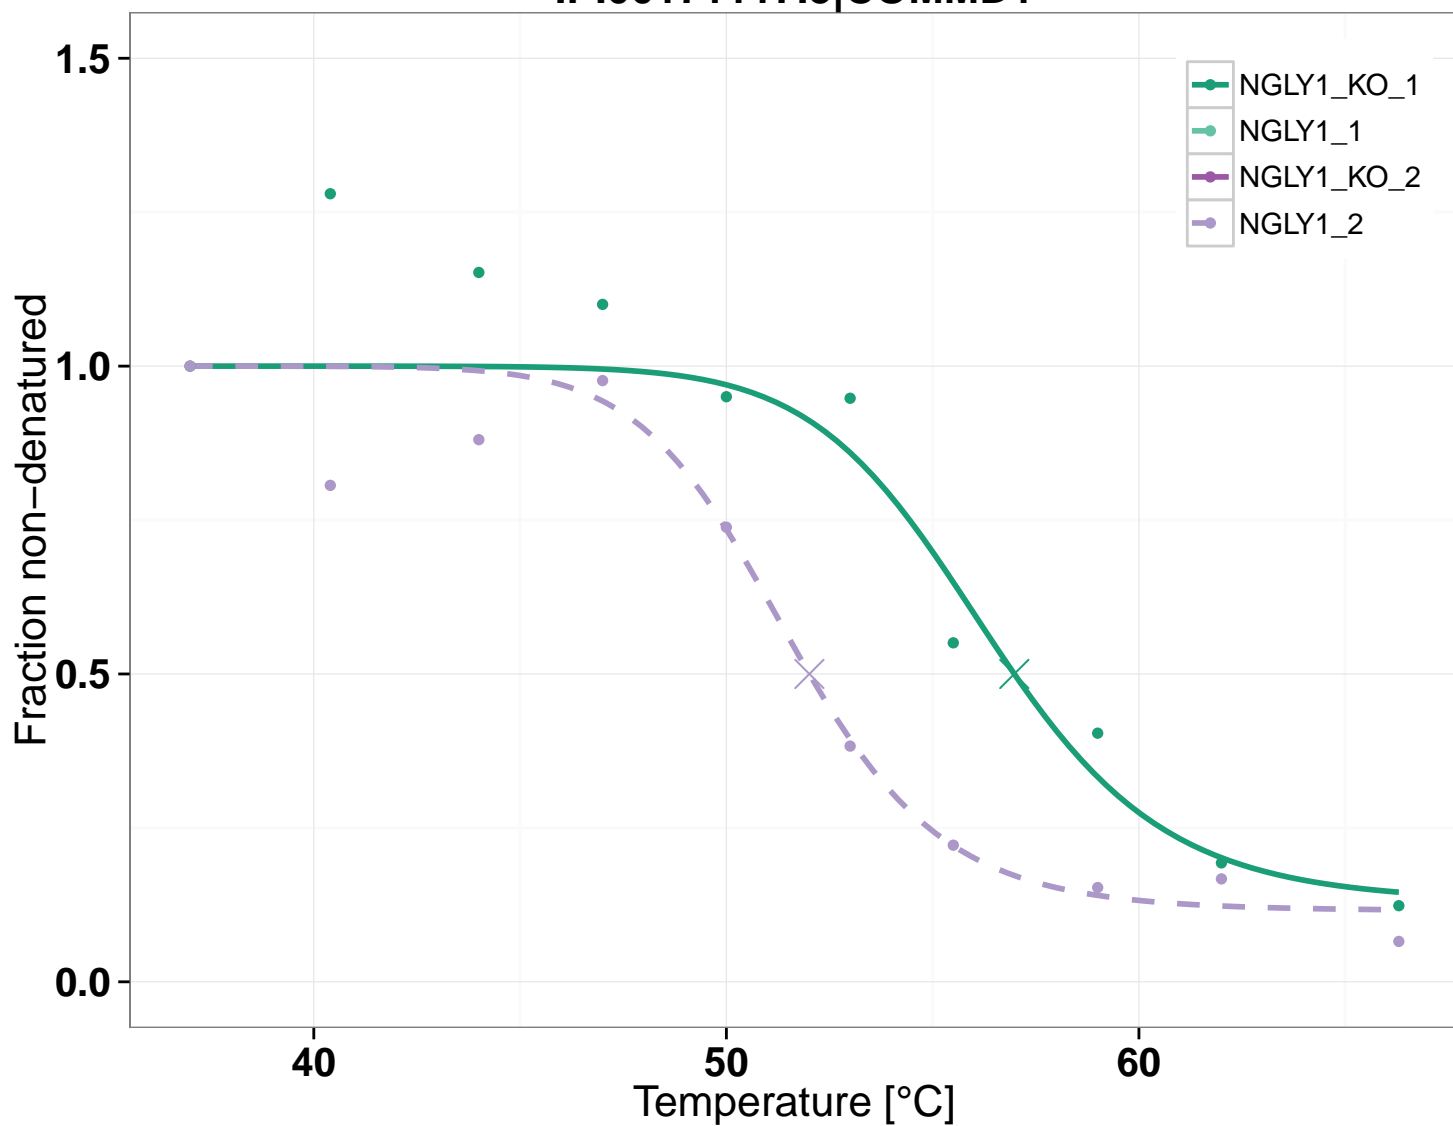

|            | meltPoint | slope | plateau | R2   |
|------------|-----------|-------|---------|------|
| NGLY1_KO_1 | 56.98     | -0.1  | 0.13    | 0.91 |
| NGLY1_1    | -         | -     | -       | -    |
| NGLY1_KO_2 | -         | -     | -       | -    |
| NGLY1_2    | 52.01     | -0.12 | 0.12    | 0.96 |

Supplement: Supplementary file 3616 [file 1]

IPI00179019.2|MRPL35

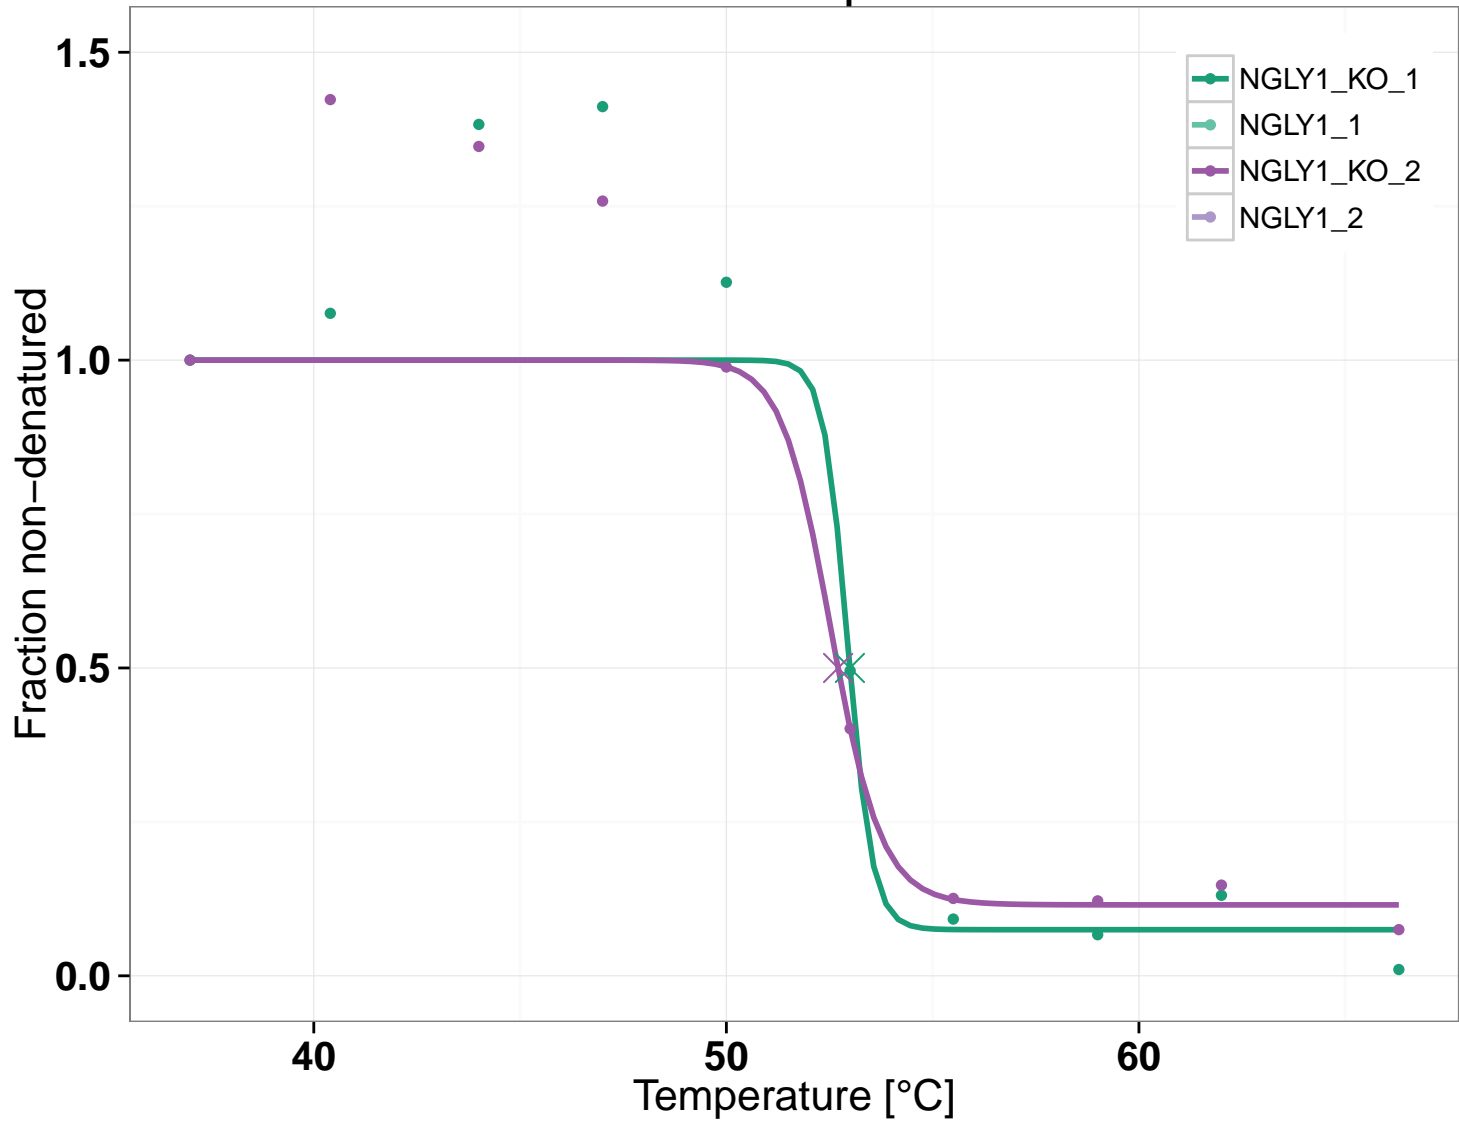

|            | meltPoint | slope | plateau | R2   |
|------------|-----------|-------|---------|------|
| NGLY1_KO_1 | 52.99     | -0.78 | 0.07    | 0.88 |
| NGLY1_1    | -         | -     | -       | -    |
| NGLY1_KO_2 | 52.71     | -0.36 | 0.12    | 0.87 |
| NGLY1_2    | -         | -     | -       | -    |

Supplement: Supplementary file 3617 [file 1]

IPI00216583.1|C6ORF25

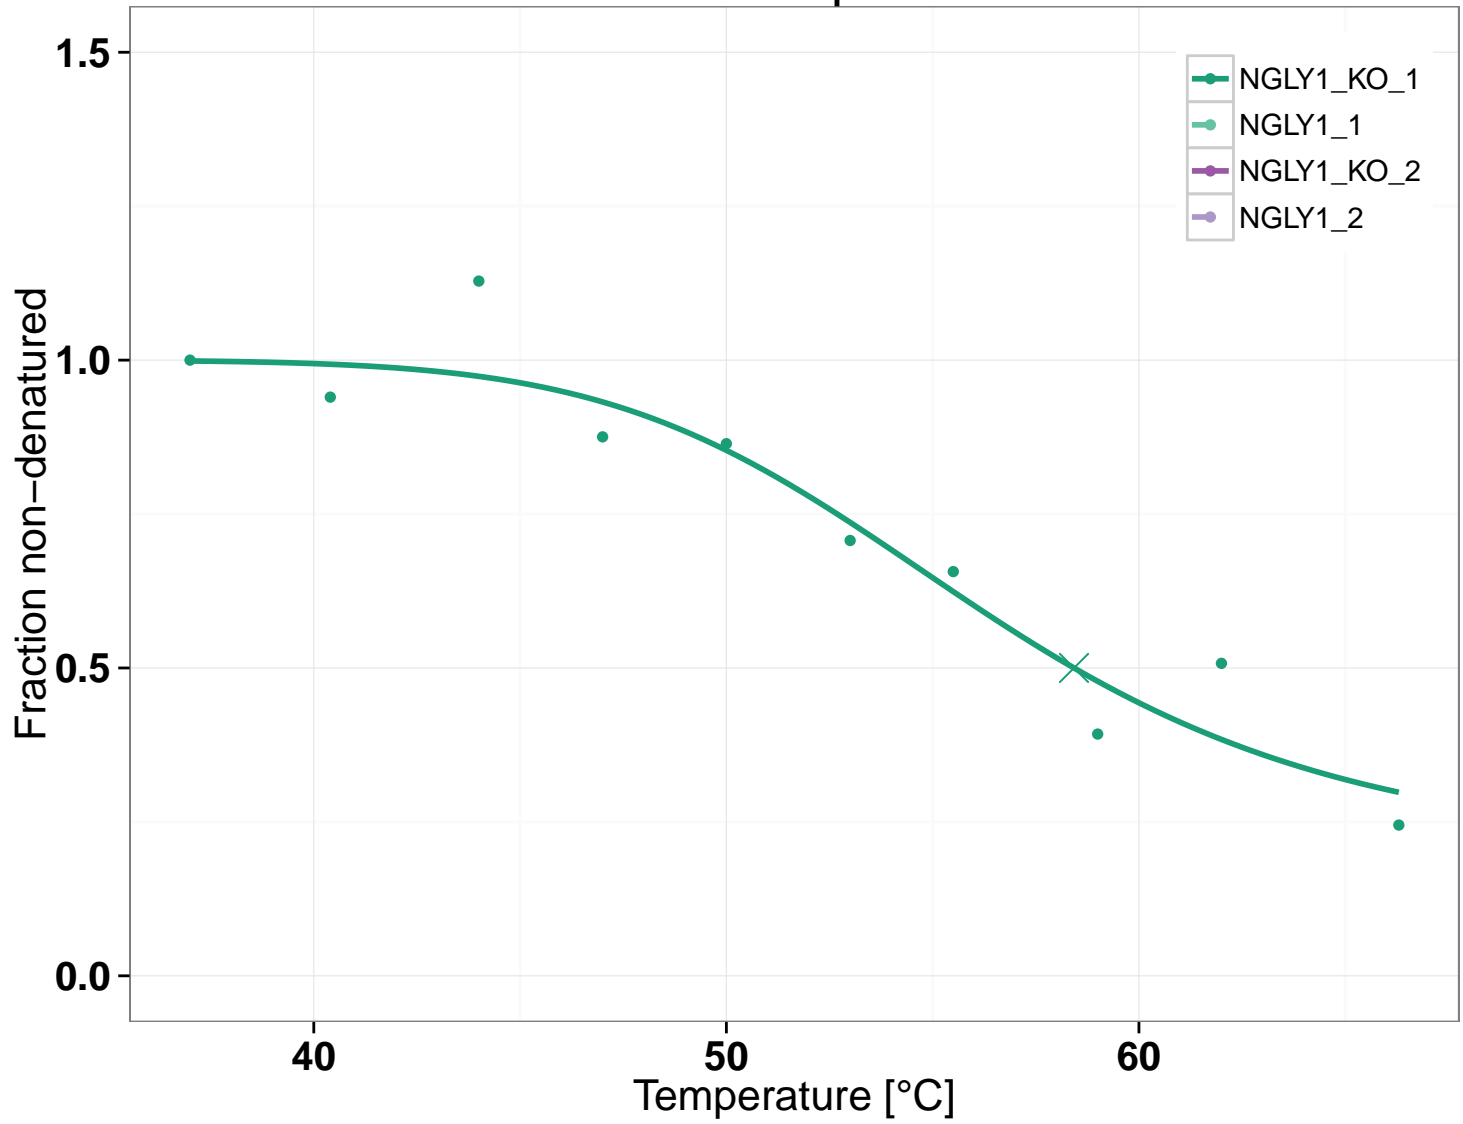

|            | meltPoint | slope  | plateau | R2   |
|------------|-----------|--------|---------|------|
| NGLY1_KO_1 | 58.43     | -0.045 | 0.19    | 0.92 |
| NGLY1_1    | -         | -      | -       | -    |
| NGLY1_KO_2 | -         | -      | -       | -    |
| NGLY1_2    | -         | -      | -       | -    |

Supplement: Supplementary file 3618 [file 1]

IPI00219156.7|RPL30

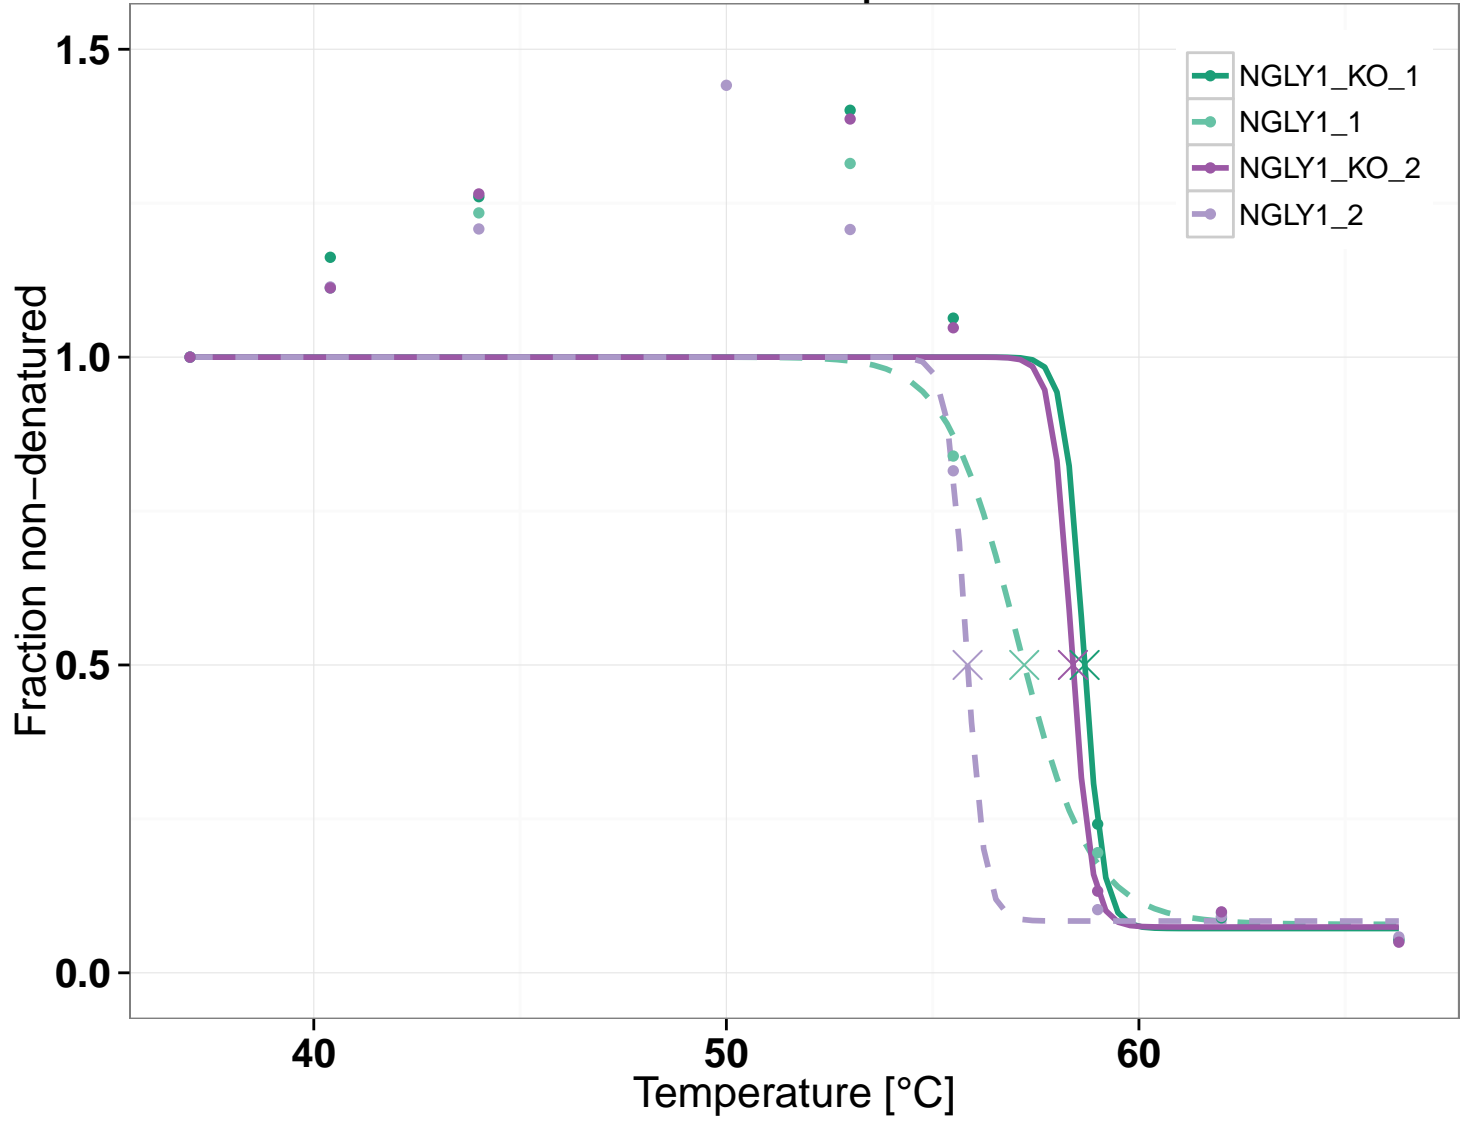

|            | meltPoint | slope | plateau | R2   |
|------------|-----------|-------|---------|------|
| NGLY1_KO_1 | 58.68     | -0.99 | 0.07    | 0.68 |
| NGLY1_1    | 57.22     | -0.26 | 0.08    | 0.71 |
| NGLY1_KO_2 | 58.4      | -0.99 | 0.07    | 0.63 |
| NGLY1_2    | 55.85     | -1    | 0.08    | 0.79 |

Supplement: Supplementary file 3619 [file 1]

# IPI00878190.1|PRR5

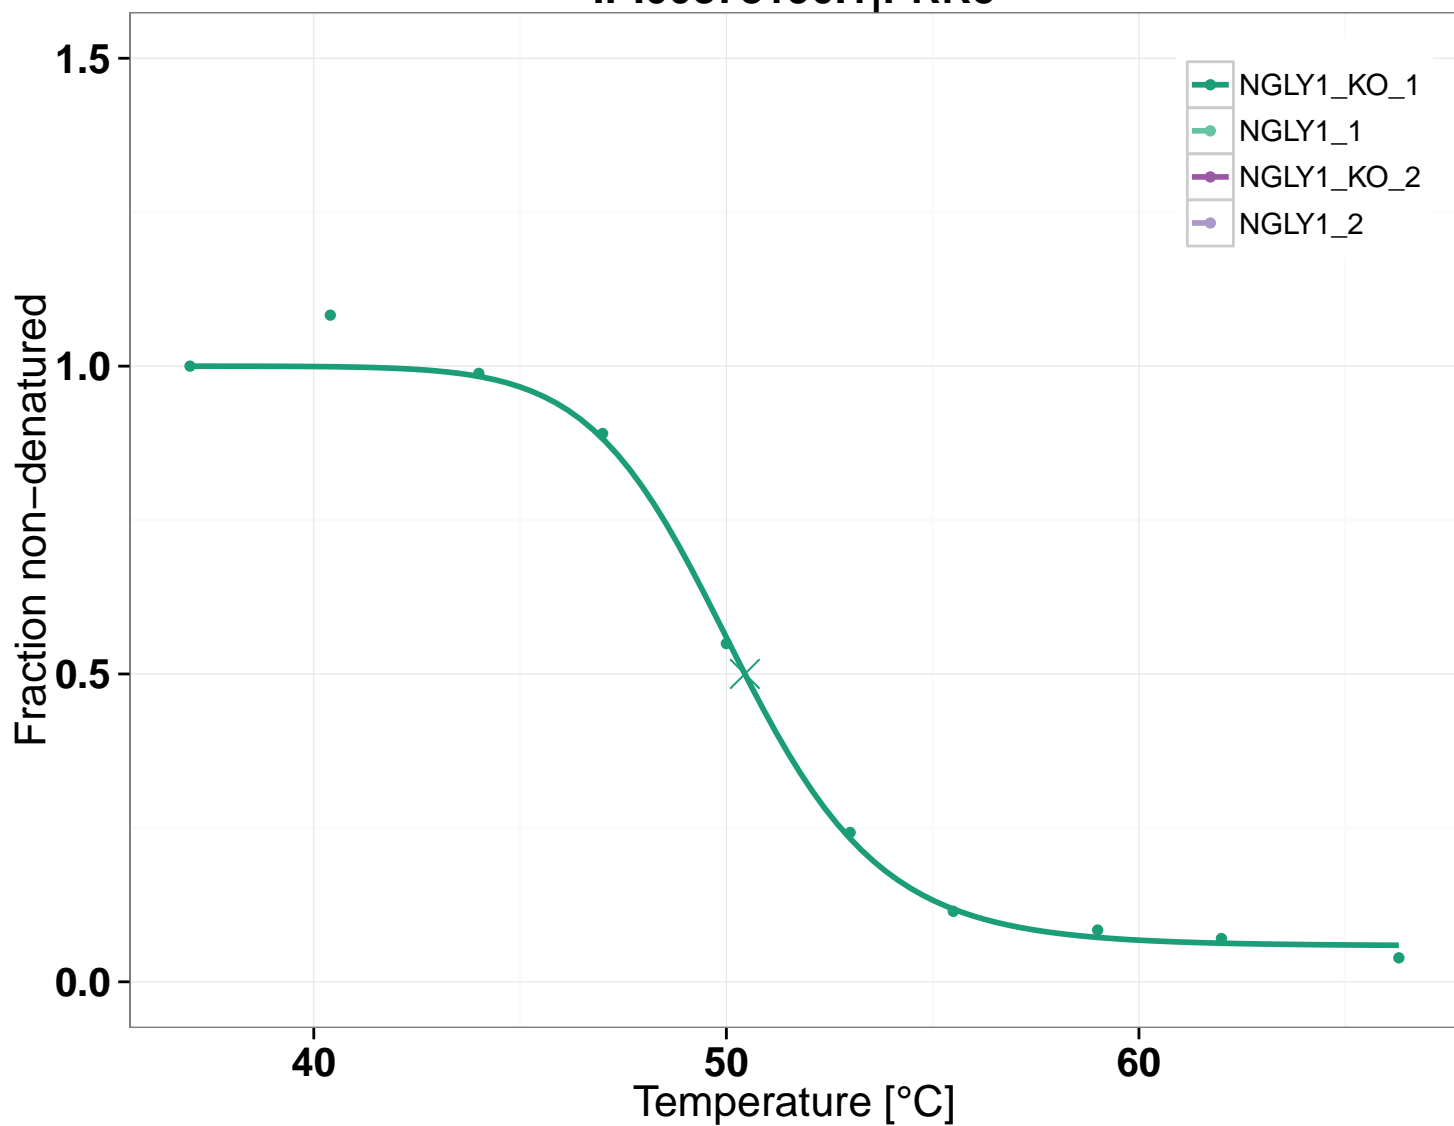

|            | meltPoint | slope | plateau | R2 |
|------------|-----------|-------|---------|----|
| NGLY1_KO_1 | 50.45     | -0.13 | 0.06    | 1  |
| NGLY1_1    | -         | -     | -       | -  |
| NGLY1_KO_2 | -         | -     | -       | -  |
| NGLY1_2    | -         | -     | -       | -  |

Supplement: Supplementary file 3620 [file 1]

# IPI00855940.1|XPO7

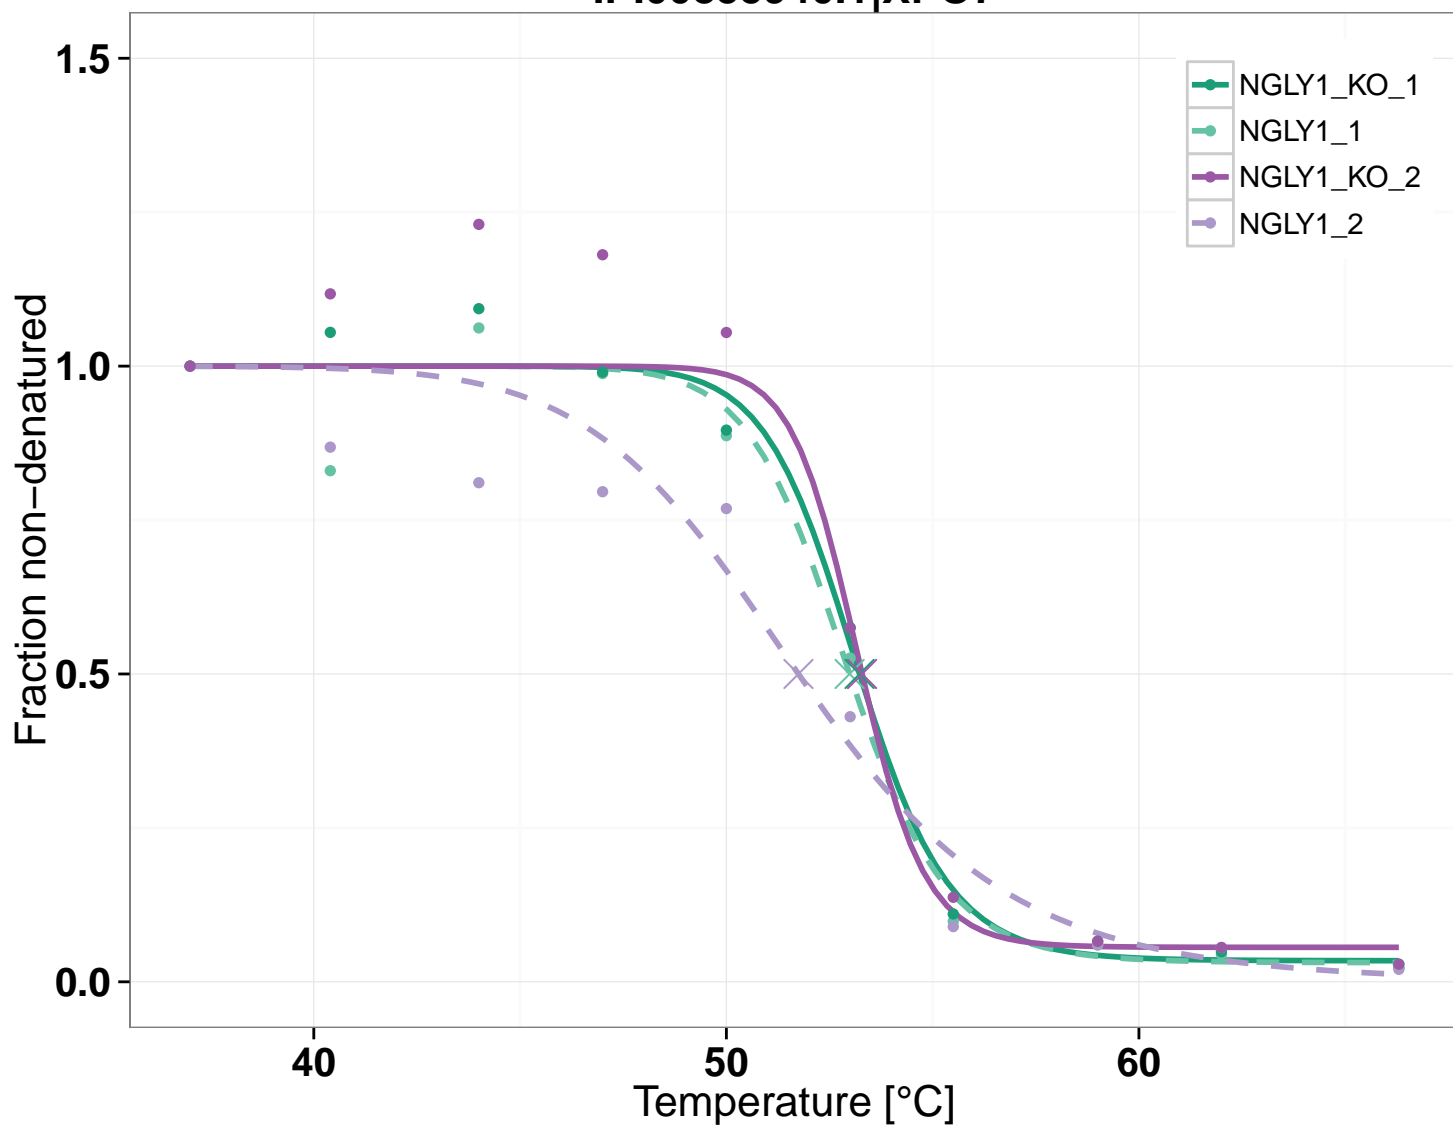

|            | meltPoint | slope  | plateau | R2   |
|------------|-----------|--------|---------|------|
| NGLY1_KO_1 | 53.23     | -0.22  | 0.03    | 0.99 |
| NGLY1_1    | 52.99     | -0.2   | 0.03    | 0.98 |
| NGLY1_KO_2 | 53.29     | -0.29  | 0.06    | 0.96 |
| NGLY1_2    | 51.75     | -0.098 | 0       | 0.95 |

Supplement: Supplementary file 3621 [file 1]

IPI00018002.4|ZC3H12A

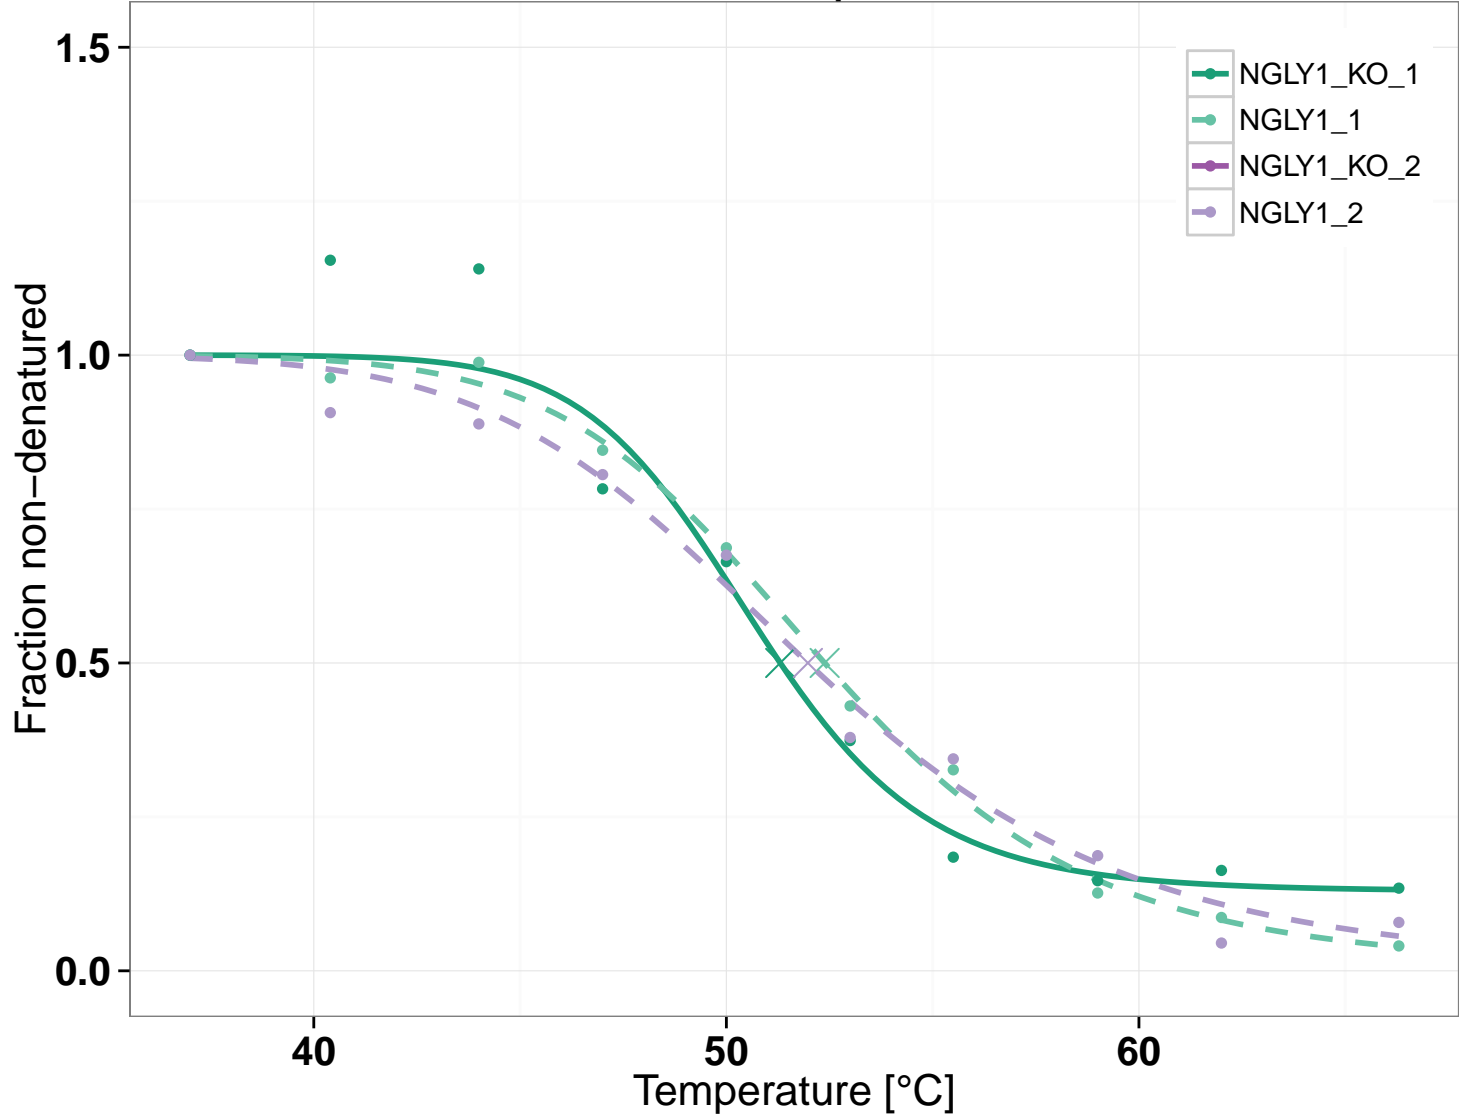

|            | meltPoint | slope  | plateau | R2   |
|------------|-----------|--------|---------|------|
| NGLY1_KO_1 | 51.31     | -0.1   | 0.13    | 0.96 |
| NGLY1_1    | 52.38     | -0.077 | 0.01    | 1    |
| NGLY1_KO_2 | -         | -      | -       | -    |
| NGLY1_2    | 51.98     | -0.064 | 0       | 0.99 |

Supplement: Supplementary file 3622 [file 1]

IPI00444592.1|TRAK1

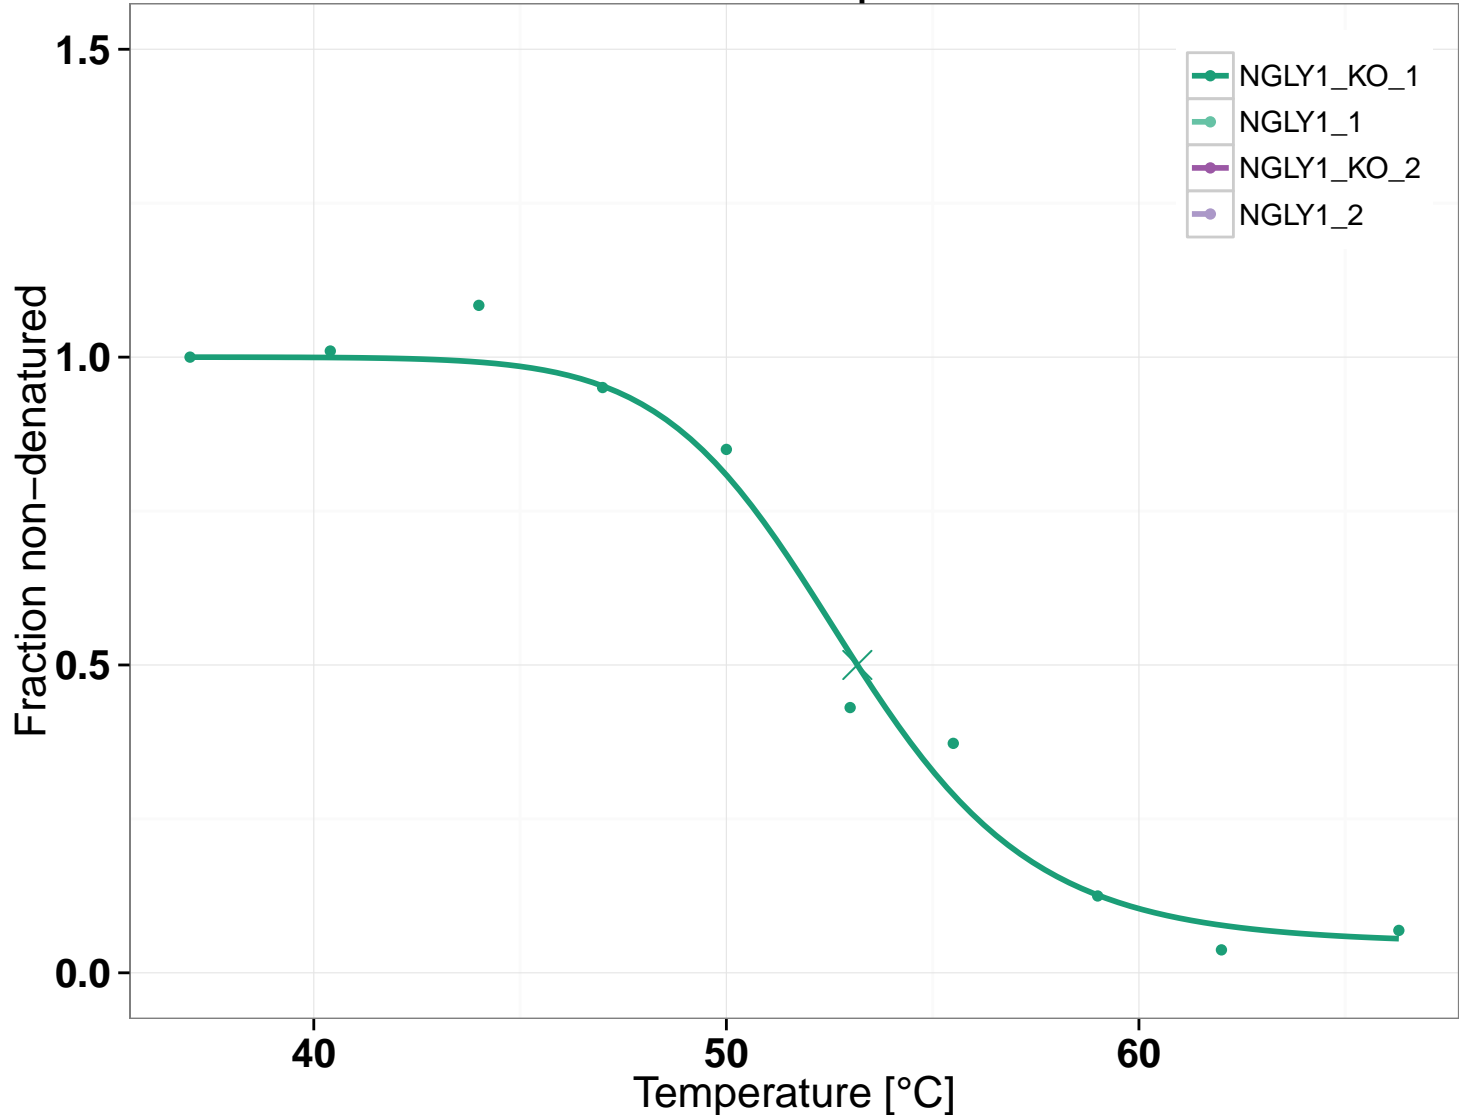

|            | meltPoint | slope | plateau | R2   |
|------------|-----------|-------|---------|------|
| NGLY1_KO_1 | 53.17     | -0.11 | 0.05    | 0.98 |
| NGLY1_1    | -         | -     | -       | -    |
| NGLY1_KO_2 | -         | -     | -       | -    |
| NGLY1_2    | -         | -     | -       | -    |

Supplement: Supplementary file 3623 [file 1]

# IPI00399164.2|ARID5B

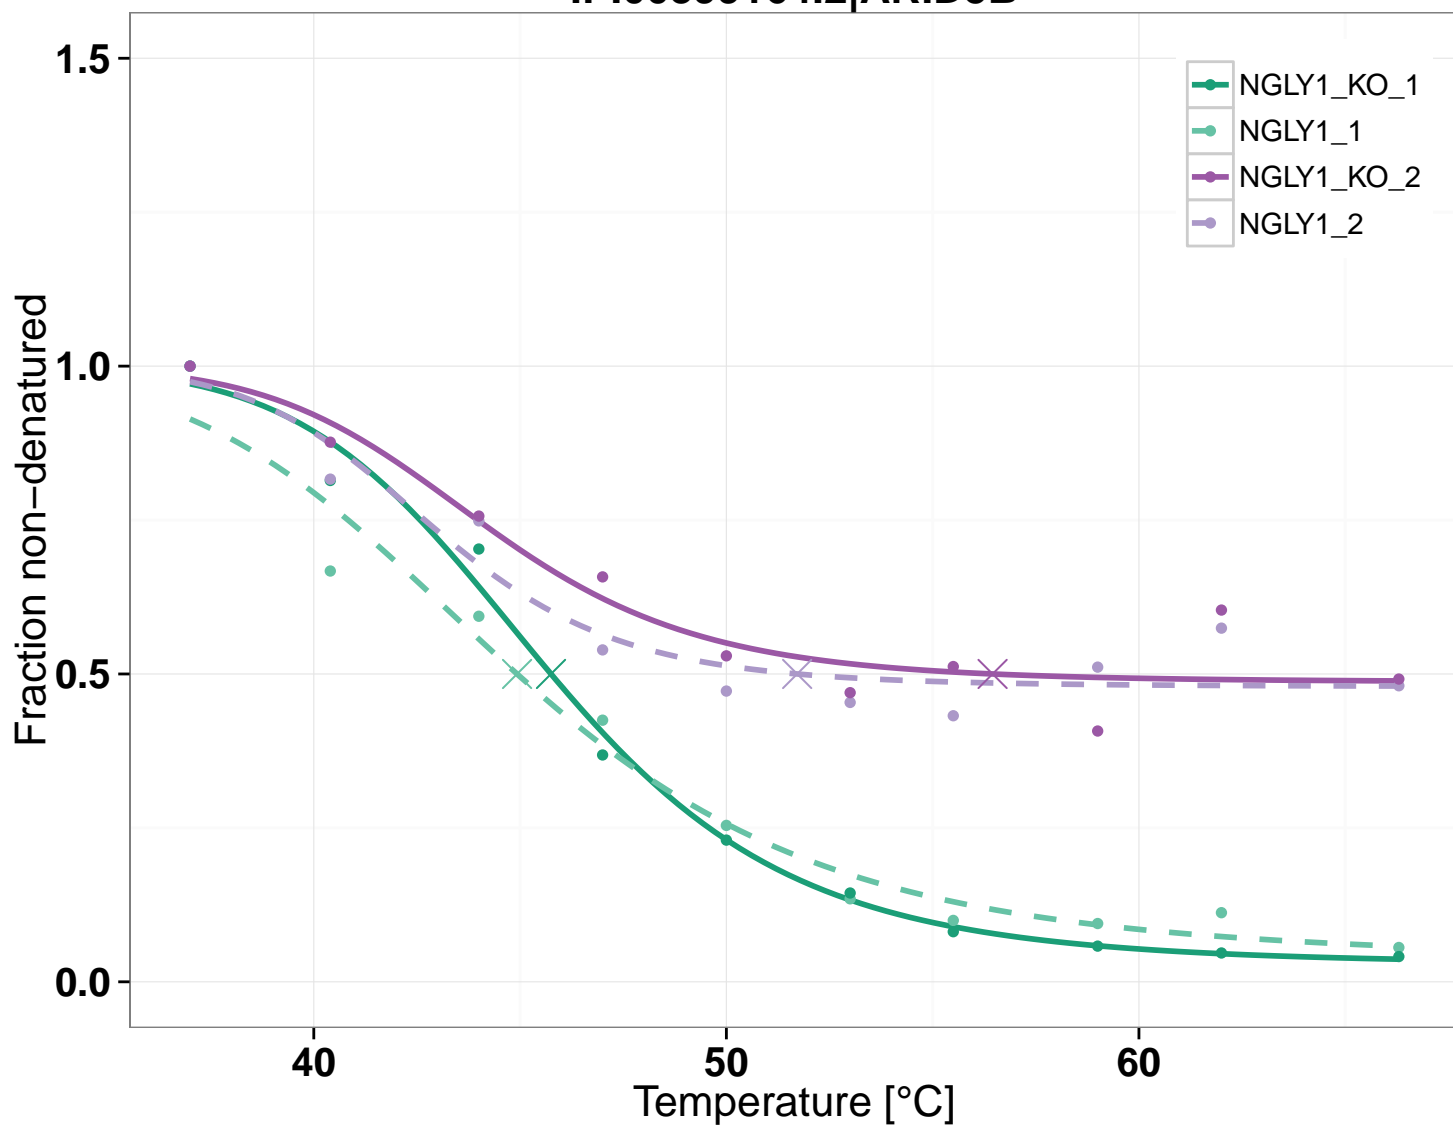

|            | meltPoint | slope  | plateau | R2   |
|------------|-----------|--------|---------|------|
| NGLY1_KO_1 | 45.75     | -0.082 | 0.03    | 0.99 |
| NGLY1_1    | 44.93     | -0.063 | 0.03    | 0.97 |
| NGLY1_KO_2 | 56.45     | -0.049 | 0.49    | 0.92 |
| NGLY1_2    | 51.72     | -0.057 | 0.48    | 0.92 |

Supplement: Supplementary file 3624 [file 1]

# IPI00019400.1|TPMT

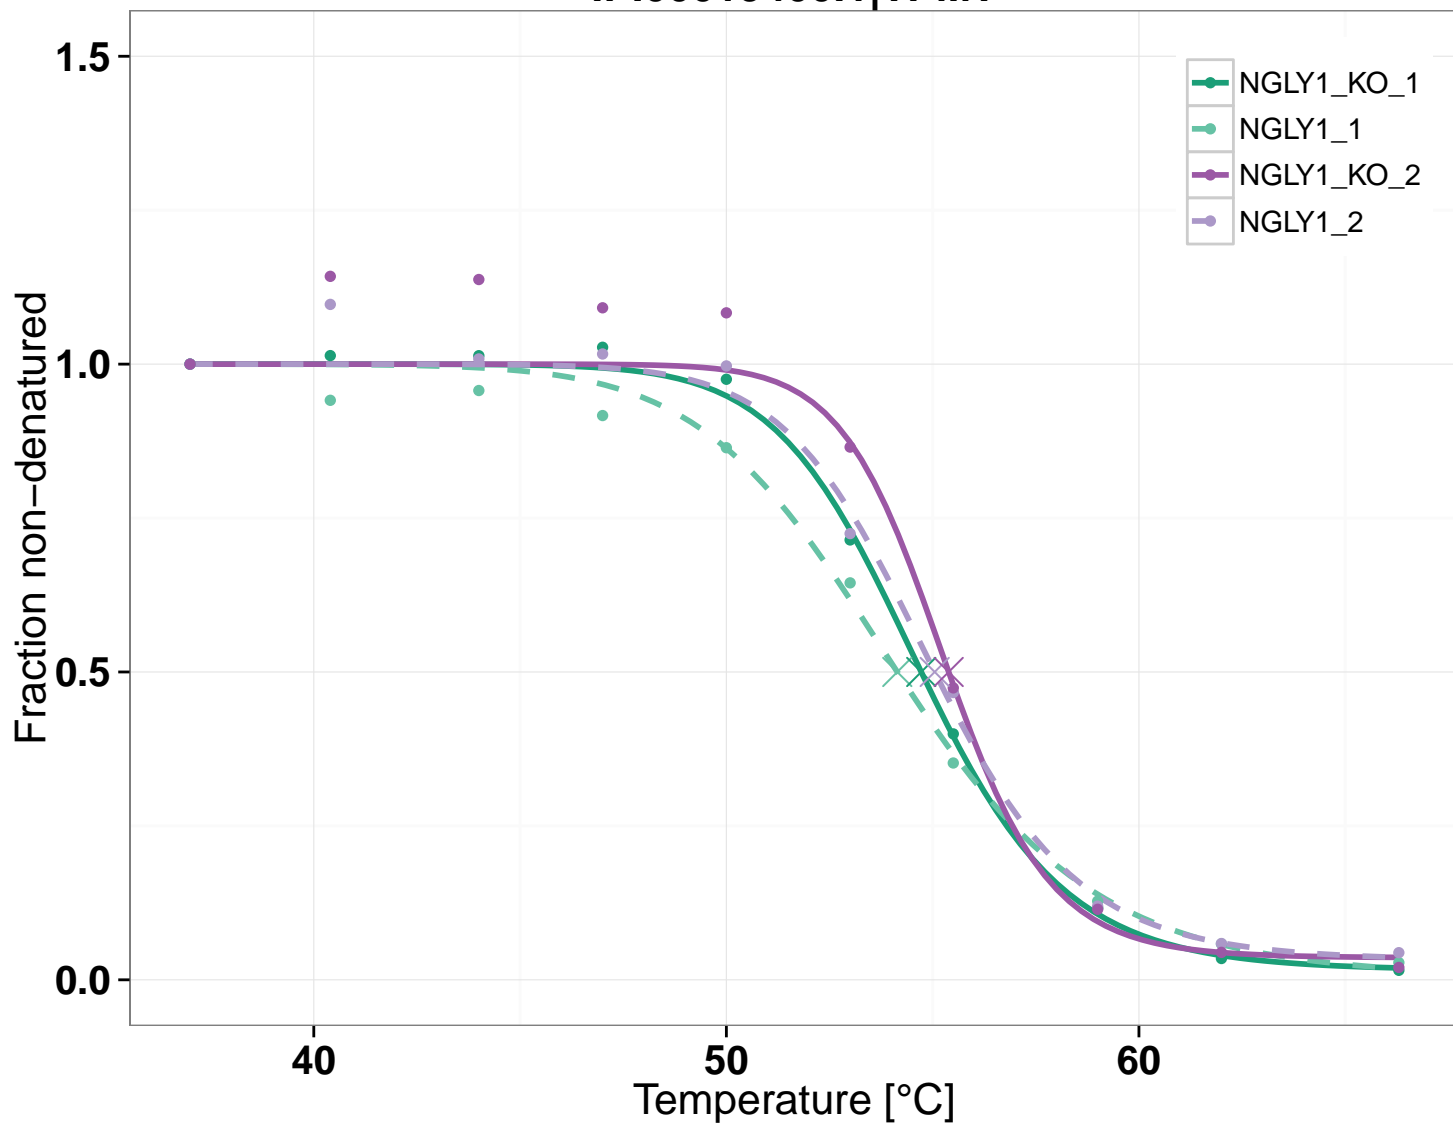

|            | meltPoint | slope | plateau | R2   |
|------------|-----------|-------|---------|------|
| NGLY1_KO_1 | 54.72     | -0.14 | 0.02    | 1    |
| NGLY1_1    | 54.14     | -0.1  | 0       | 0.99 |
| NGLY1_KO_2 | 55.39     | -0.19 | 0.04    | 0.97 |
| NGLY1_2    | 55.05     | -0.14 | 0.03    | 0.99 |

Supplement: Supplementary file 3625 [file 1]

IPI00871134.1|YI028\_HUMAN

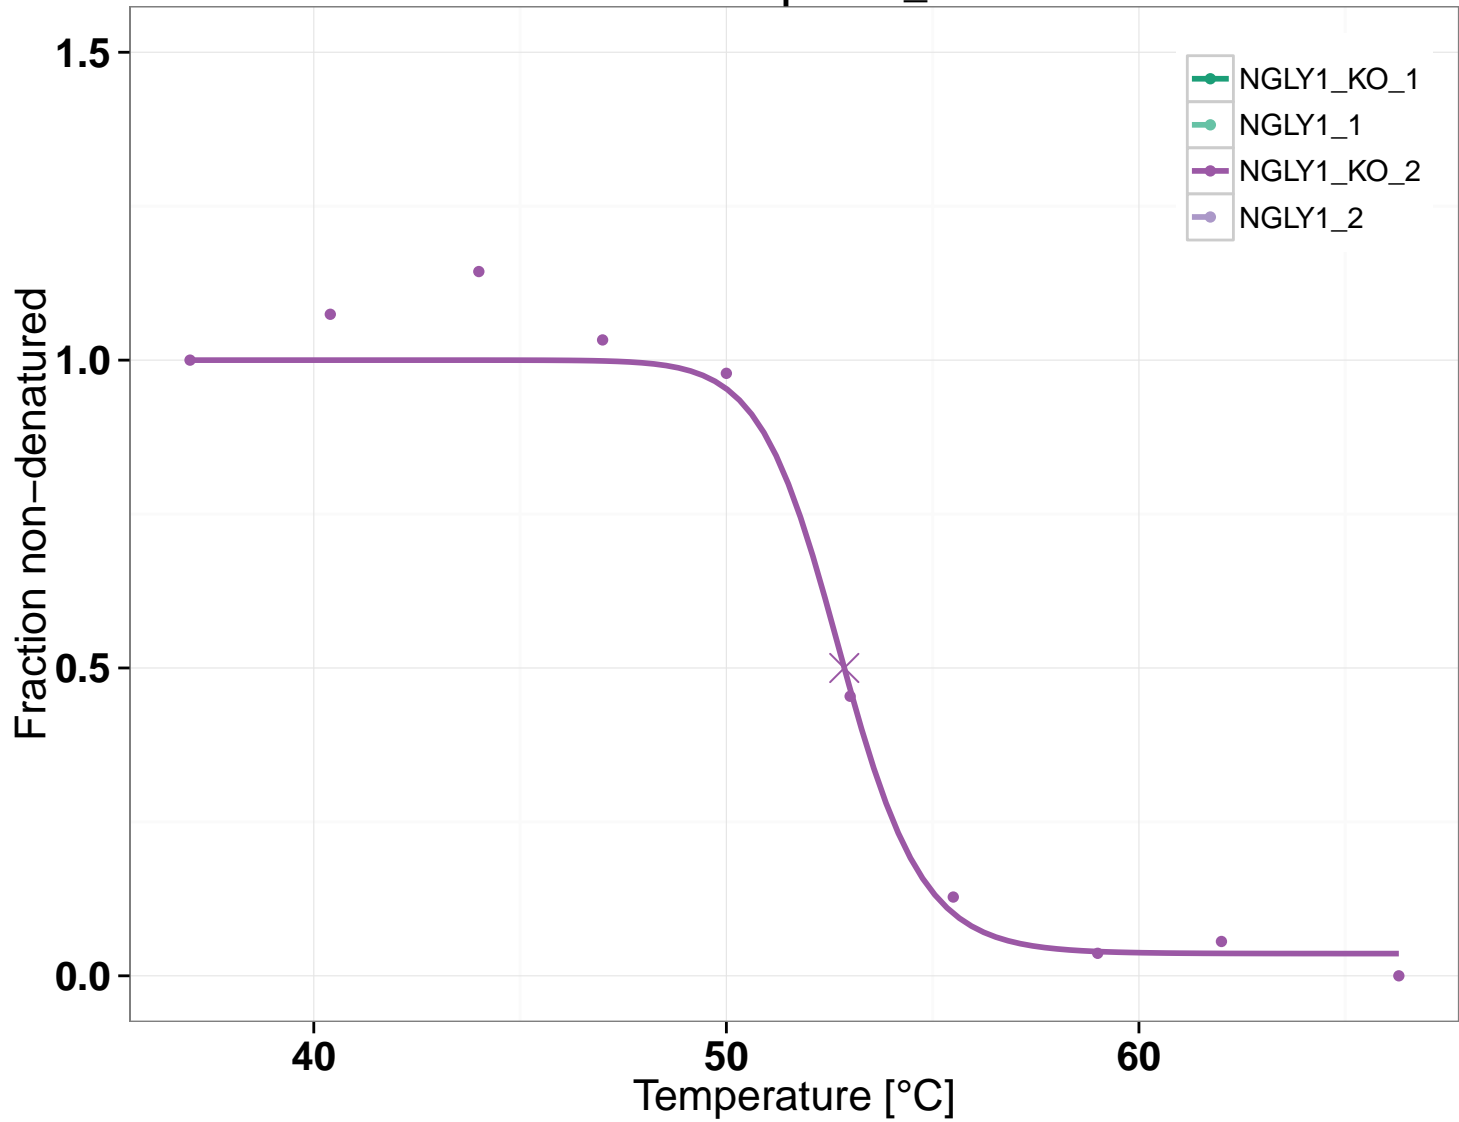

|            | meltPoint | slope | plateau | R2   |
|------------|-----------|-------|---------|------|
| NGLY1_KO_1 | -         | -     | -       | -    |
| NGLY1_1    | -         | -     | -       | -    |
| NGLY1_KO_2 | 52.86     | -0.24 | 0.04    | 0.99 |
| NGLY1_2    | -         | -     | -       | -    |

Supplement: Supplementary file 3626 [file 1]

IPI00657938.1|SNX18

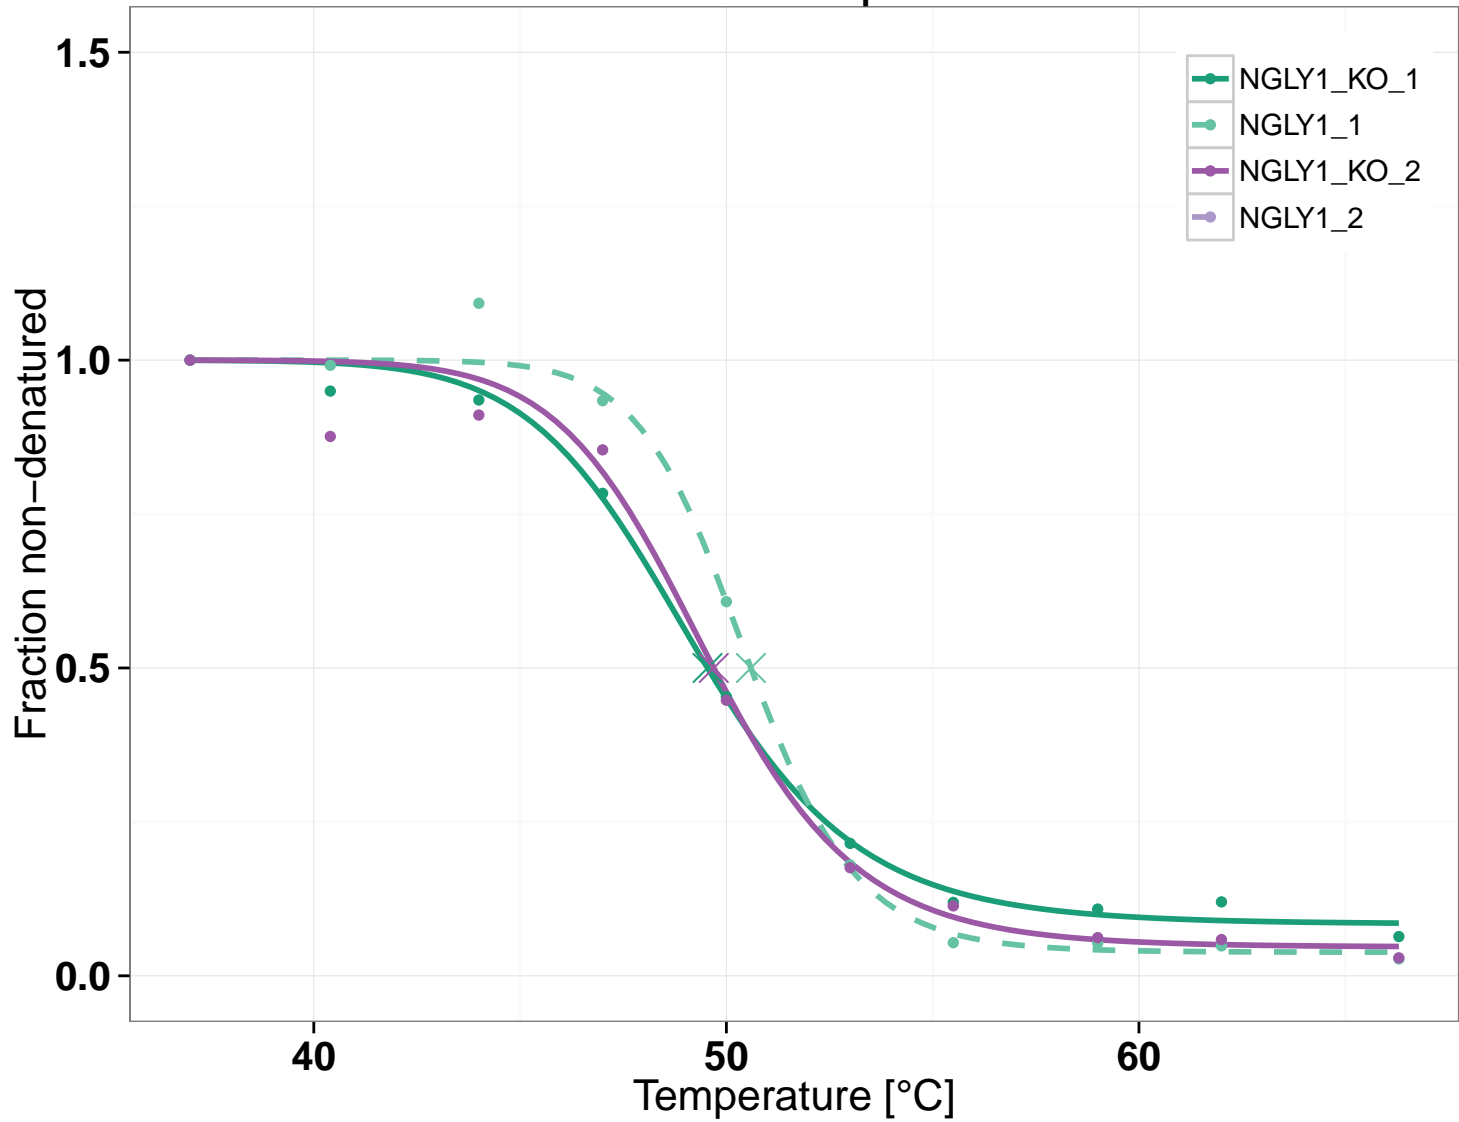

|            | meltPoint | slope | plateau | R2   |
|------------|-----------|-------|---------|------|
| NGLY1_KO_1 | 49.54     | -0.11 | 0.08    | 1    |
| NGLY1_1    | 50.6      | -0.18 | 0.04    | 0.99 |
| NGLY1_KO_2 | 49.69     | -0.13 | 0.05    | 0.99 |
| NGLY1_2    | -         | -     | -       | -    |

Supplement: Supplementary file 3627 [file 1]

# IPI00645780.1|FANCB

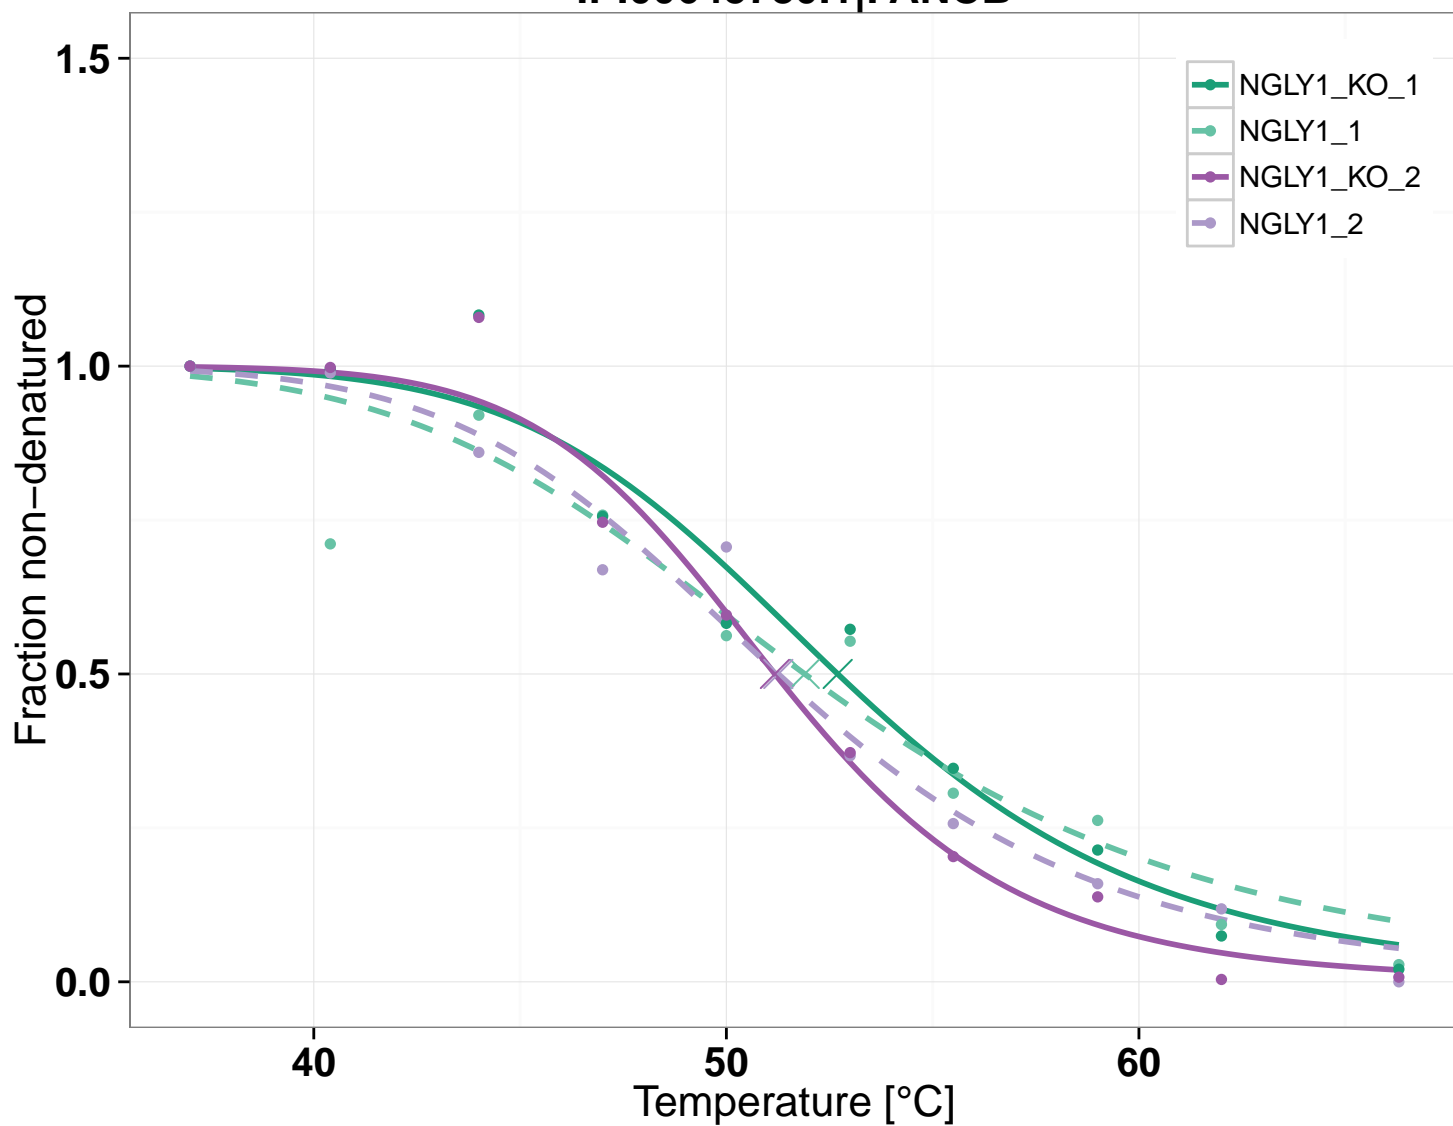

|            | meltPoint | slope  | plateau | R2   |
|------------|-----------|--------|---------|------|
| NGLY1_KO_1 | 52.7      | -0.065 | 0       | 0.96 |
| NGLY1_1    | 51.9      | -0.051 | 0       | 0.92 |
| NGLY1_KO_2 | 51.18     | -0.085 | 0       | 0.98 |
| NGLY1_2    | 51.26     | -0.063 | 0       | 0.98 |

Supplement: Supplementary file 3628 [file 1]

# IPI00302829.5|RB1

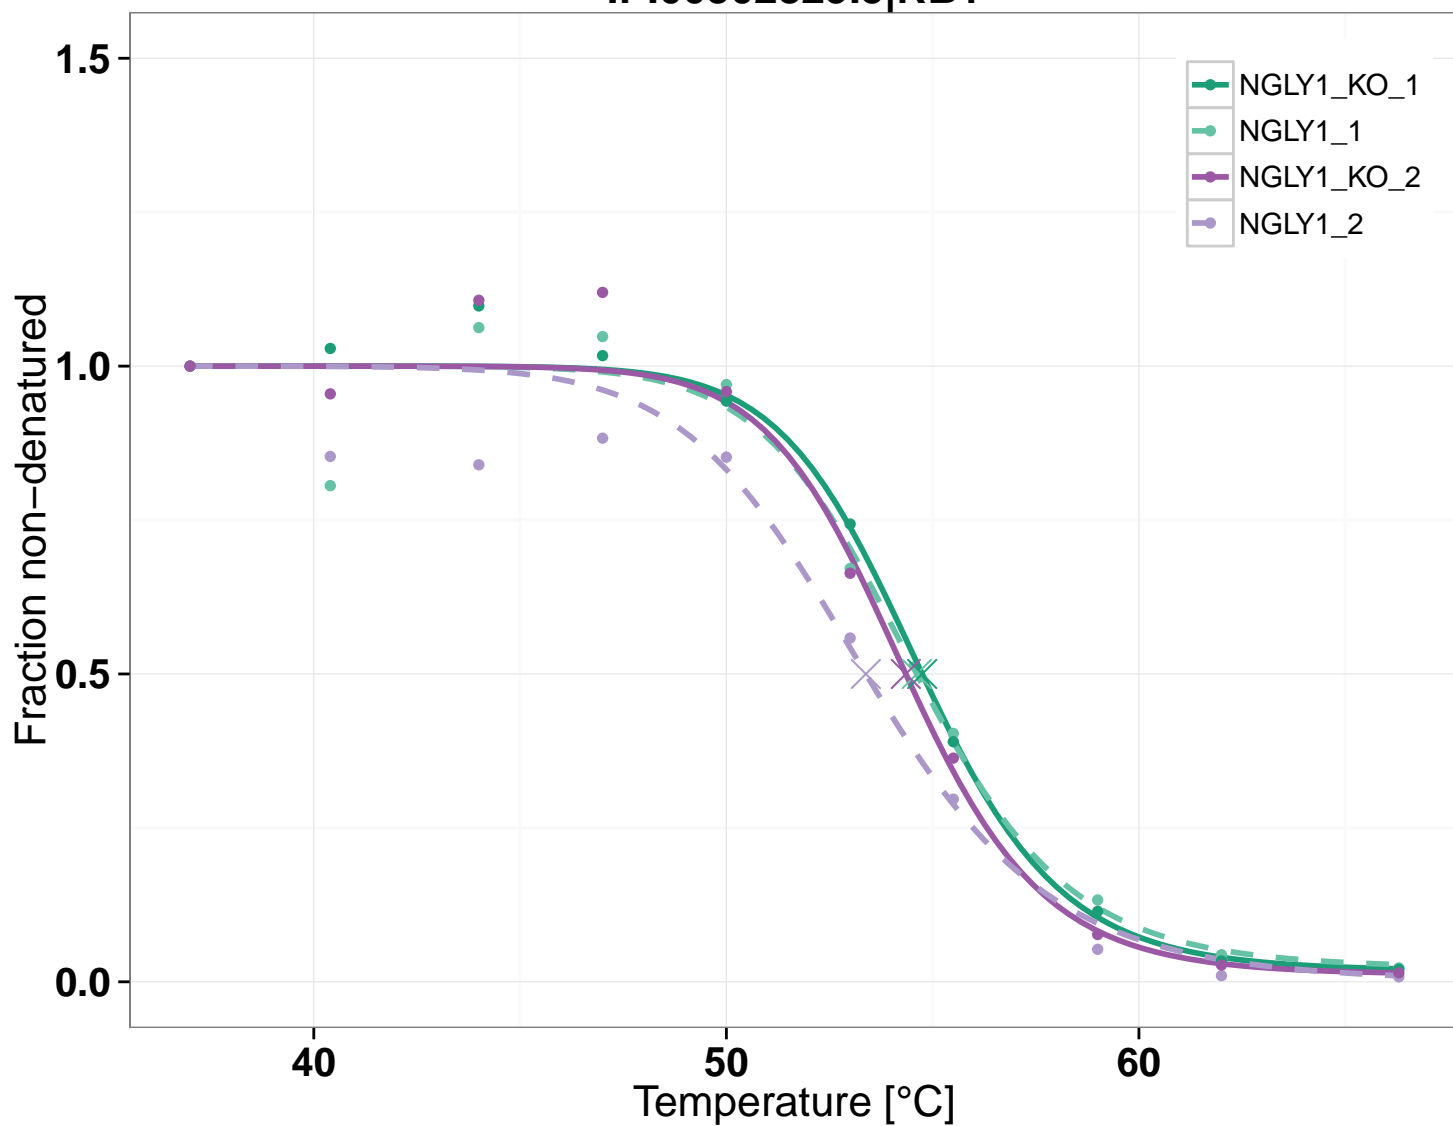

|            | meltPoint | slope | plateau | R2   |
|------------|-----------|-------|---------|------|
| NGLY1_KO_1 | 54.75     | -0.14 | 0.02    | 0.99 |
| NGLY1_1    | 54.62     | -0.13 | 0.02    | 0.97 |
| NGLY1_KO_2 | 54.35     | -0.15 | 0.01    | 0.98 |
| NGLY1_2    | 53.38     | -0.11 | 0       | 0.96 |

Supplement: Supplementary file 3630 [file 1]

IPI00002926.4|VPS37B

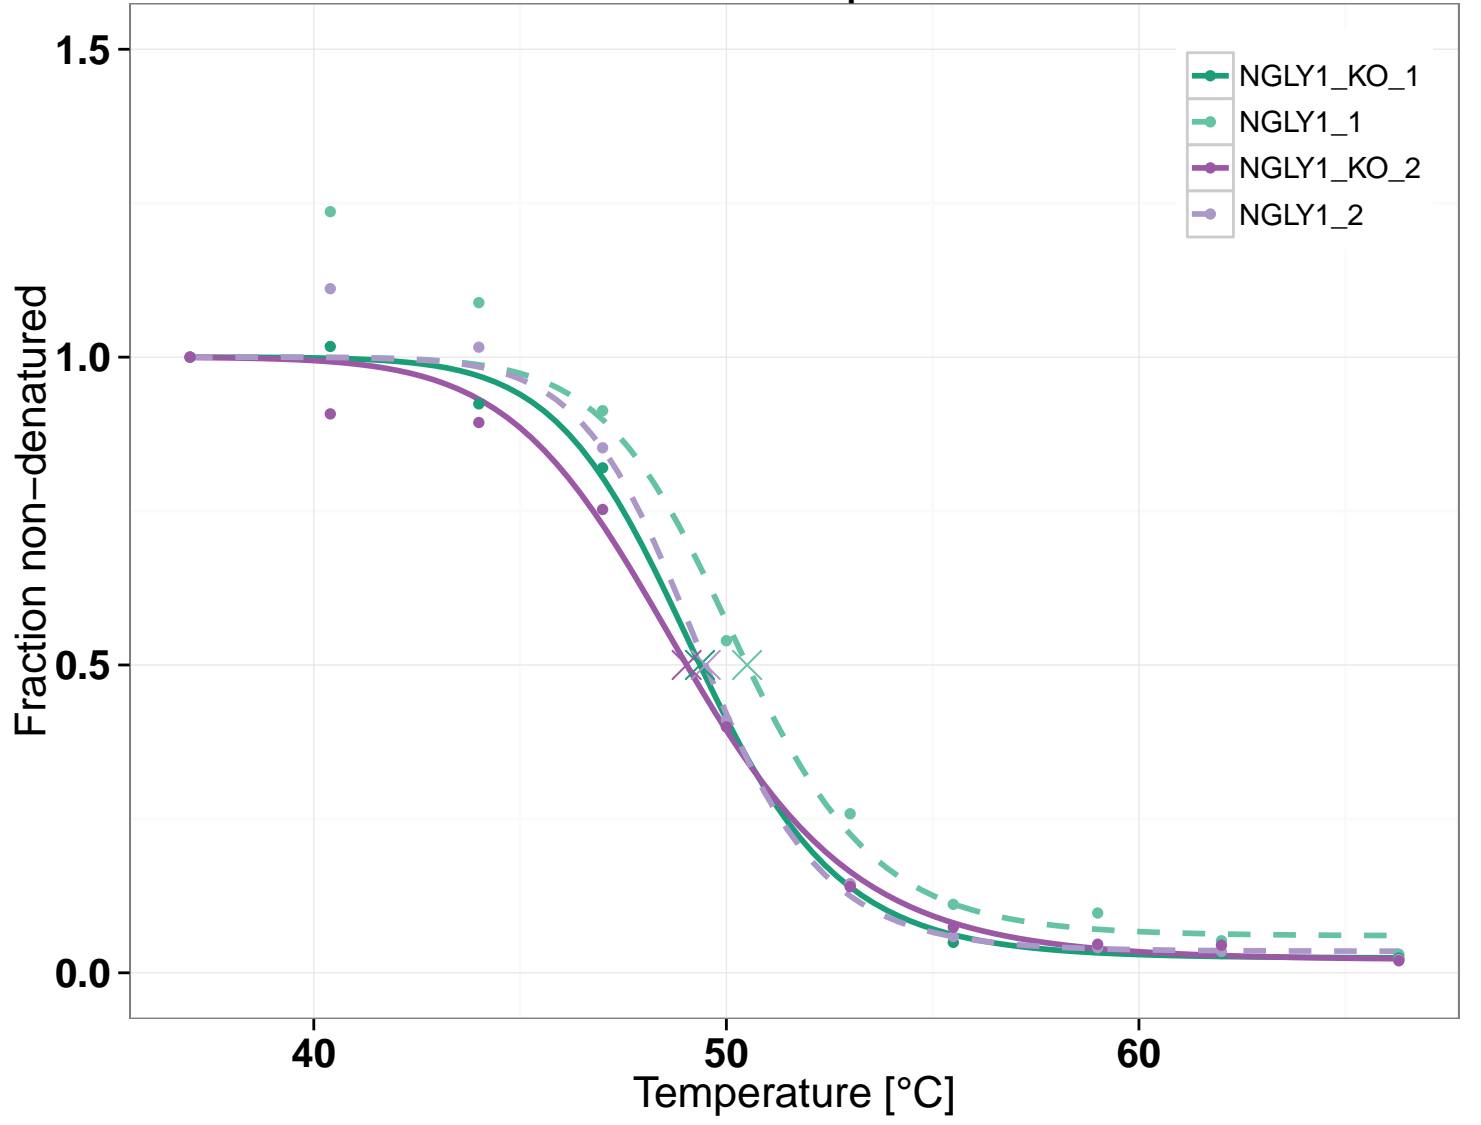

|            | meltPoint | slope | plateau | R2   |
|------------|-----------|-------|---------|------|
| NGLY1_KO_1 | 49.36     | -0.14 | 0.02    | 1    |
| NGLY1_1    | 50.5      | -0.14 | 0.06    | 0.97 |
| NGLY1_KO_2 | 49.04     | -0.12 | 0.02    | 0.99 |
| NGLY1_2    | 49.5      | -0.16 | 0.03    | 0.99 |

Supplement: Supplementary file 3631 [file 1]

IPI00790248.1|VAMP2

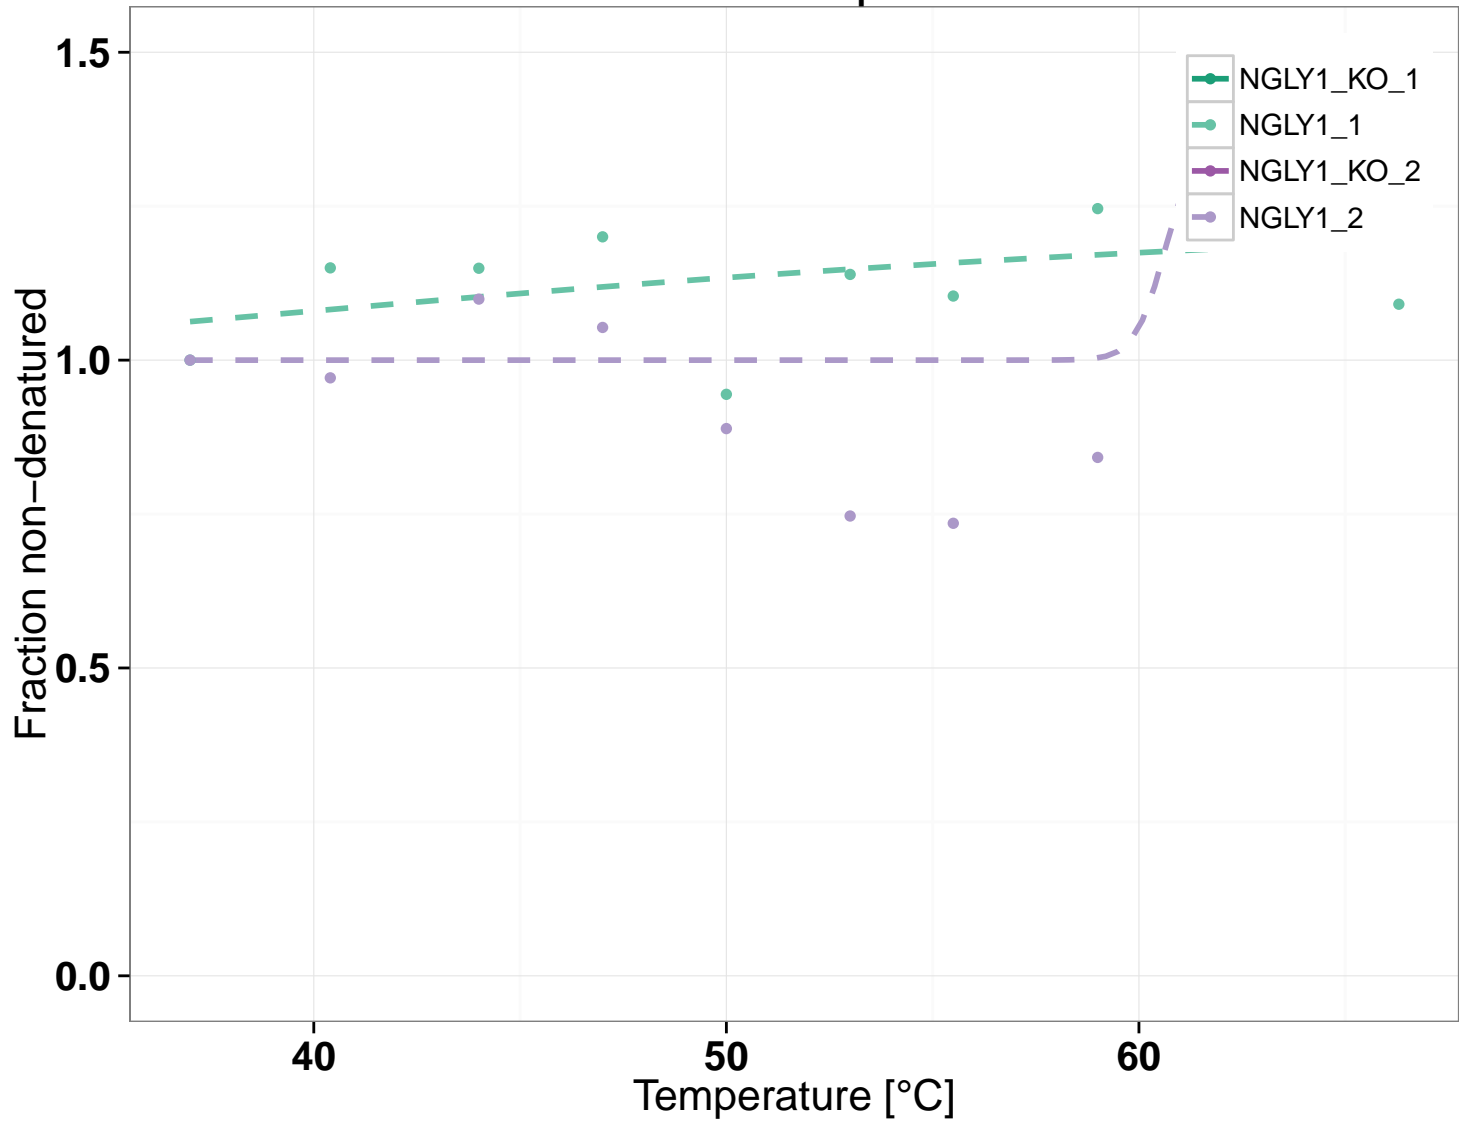

|            | meltPoint | slope  | plateau | R2   |
|------------|-----------|--------|---------|------|
| NGLY1_KO_1 | -         | -      | -       | -    |
| NGLY1_1    | -         | 0.0058 | 1.31    | 0.16 |
| NGLY1_KO_2 | -         | -      | -       | -    |
| NGLY1_2    | -         | 0.24   | 1.35    | 0.56 |

Supplement: Supplementary file 3633 [file 1]

IPI00219034.3|NDUFA8

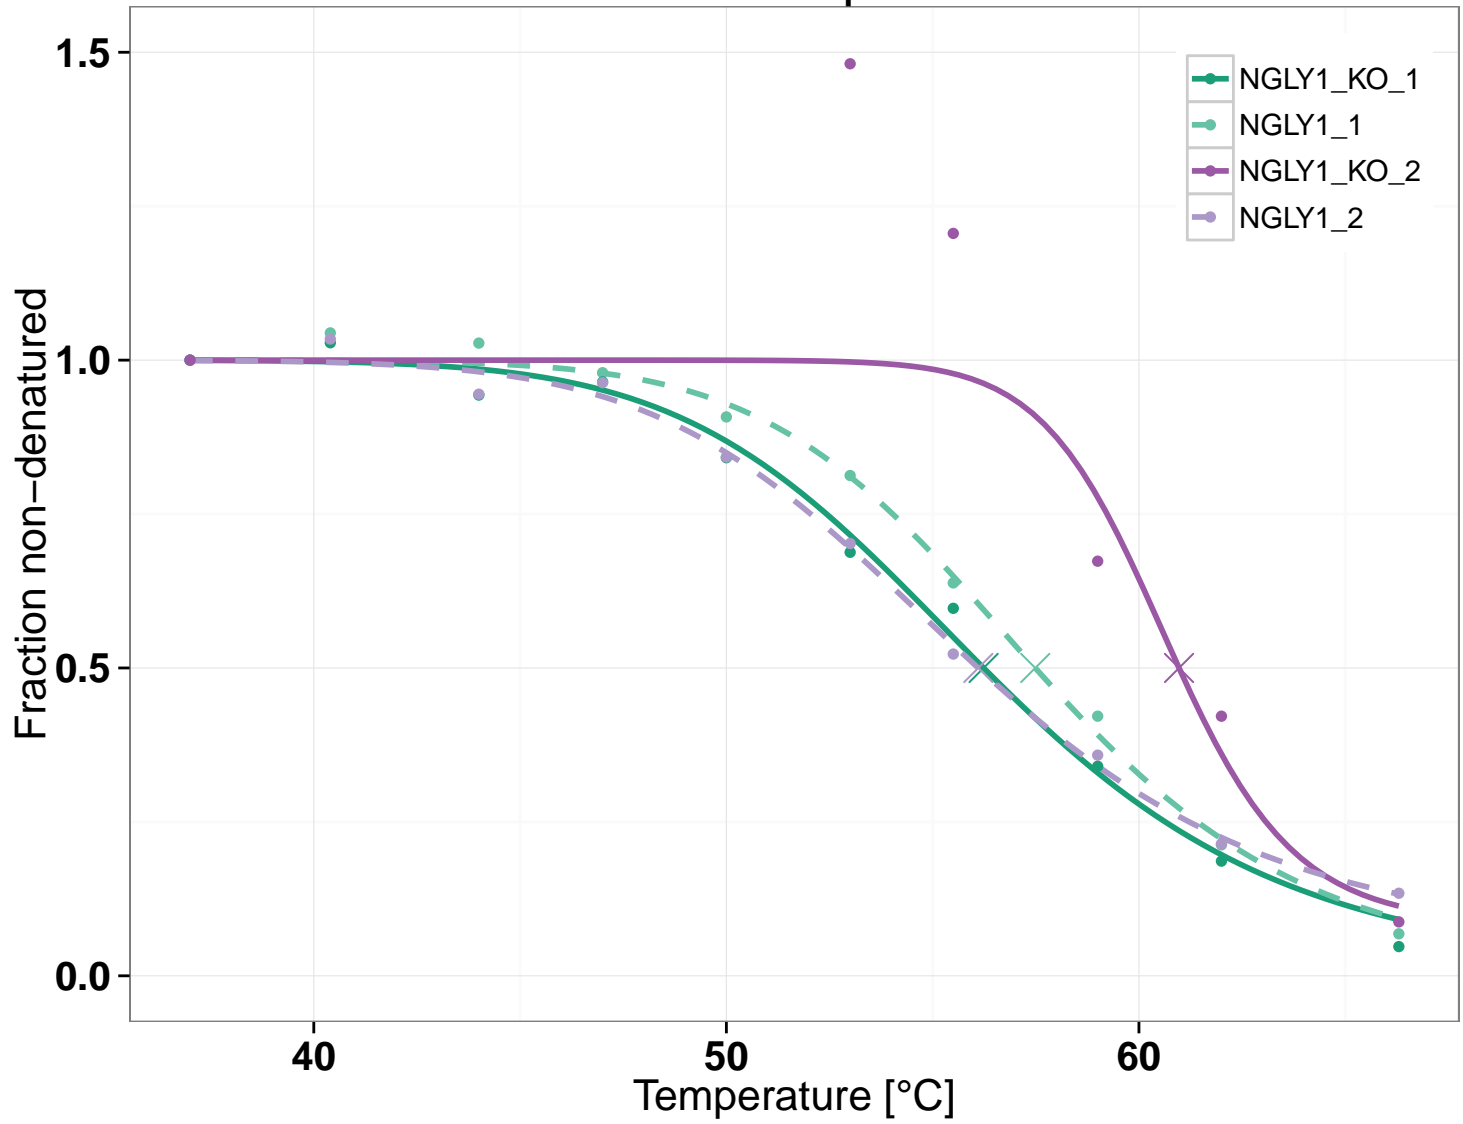

|            | meltPoint | slope  | plateau | R2   |
|------------|-----------|--------|---------|------|
| NGLY1_KO_1 | 56.24     | -0.068 | 0       | 0.99 |
| NGLY1_1    | 57.49     | -0.076 | 0       | 1    |
| NGLY1_KO_2 | 60.97     | -0.15  | 0.08    | 0.11 |
| NGLY1_2    | 56.11     | -0.064 | 0.05    | 1    |

Supplement: Supplementary file 3634 [file 1]

# IPI00004416.1|CHMP2A

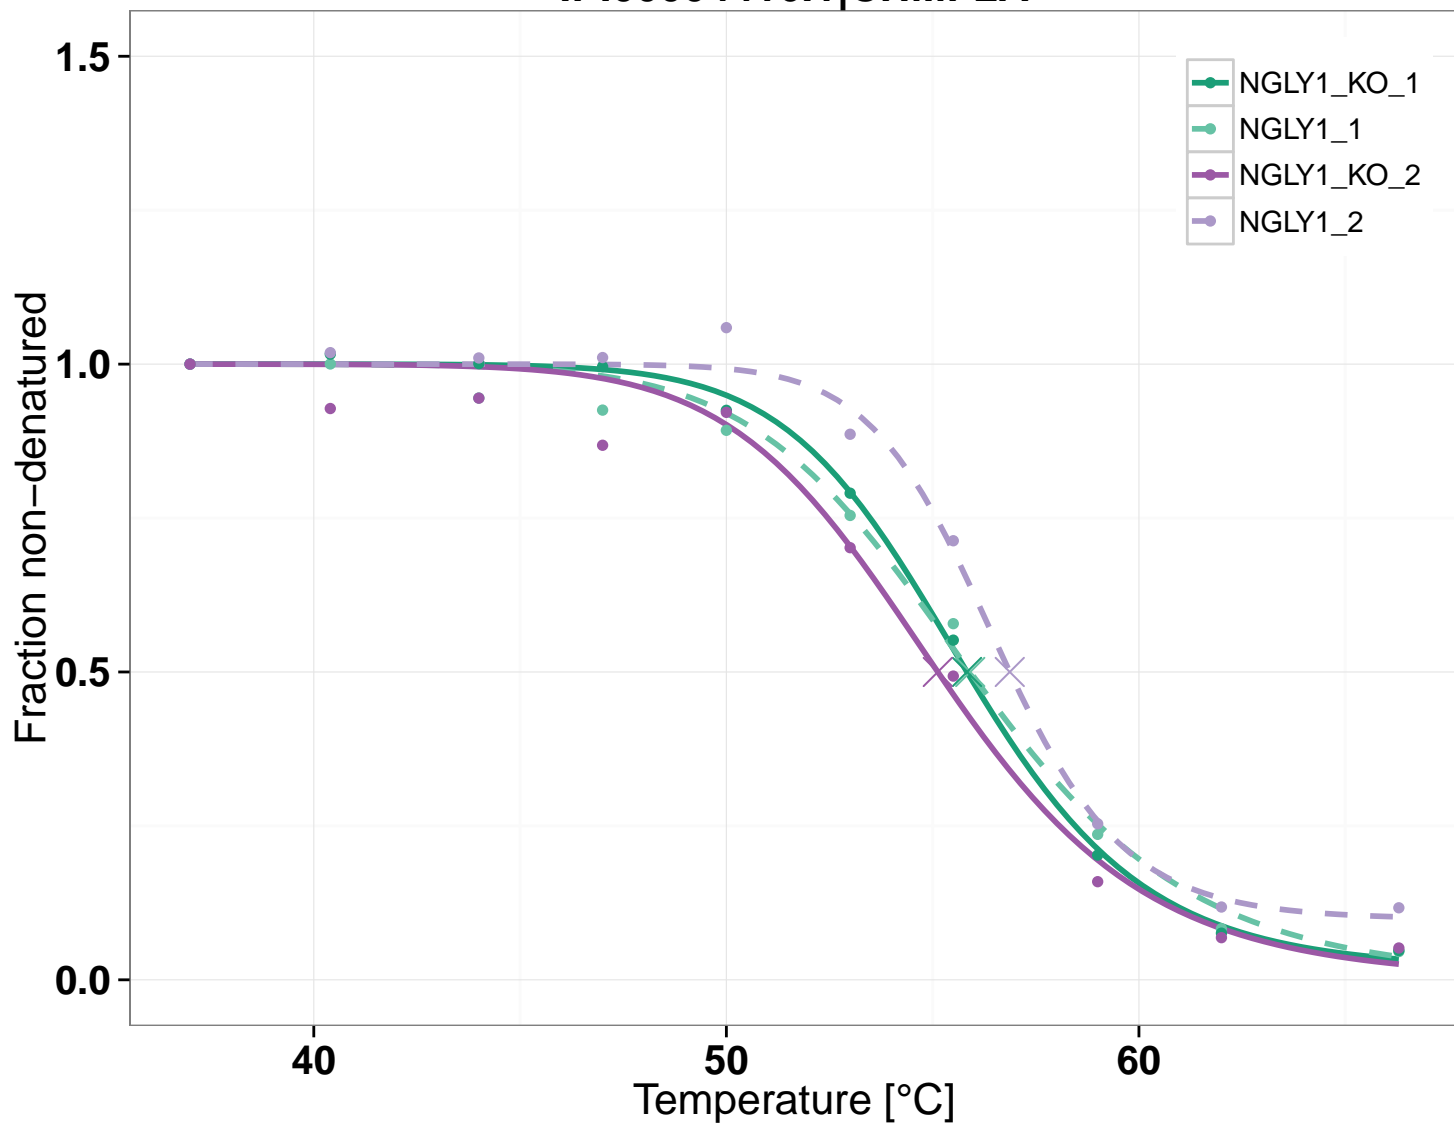

|            | meltPoint | slope  | plateau | R2   |
|------------|-----------|--------|---------|------|
| NGLY1_KO_1 | 55.83     | -0.11  | 0.02    | 1    |
| NGLY1_1    | 55.91     | -0.093 | 0       | 0.99 |
| NGLY1_KO_2 | 55.12     | -0.099 | 0       | 0.98 |
| NGLY1_2    | 56.87     | -0.15  | 0.1     | 0.99 |

Supplement: Supplementary file 3635 [file 1]

# IPI00657689.1|GBL

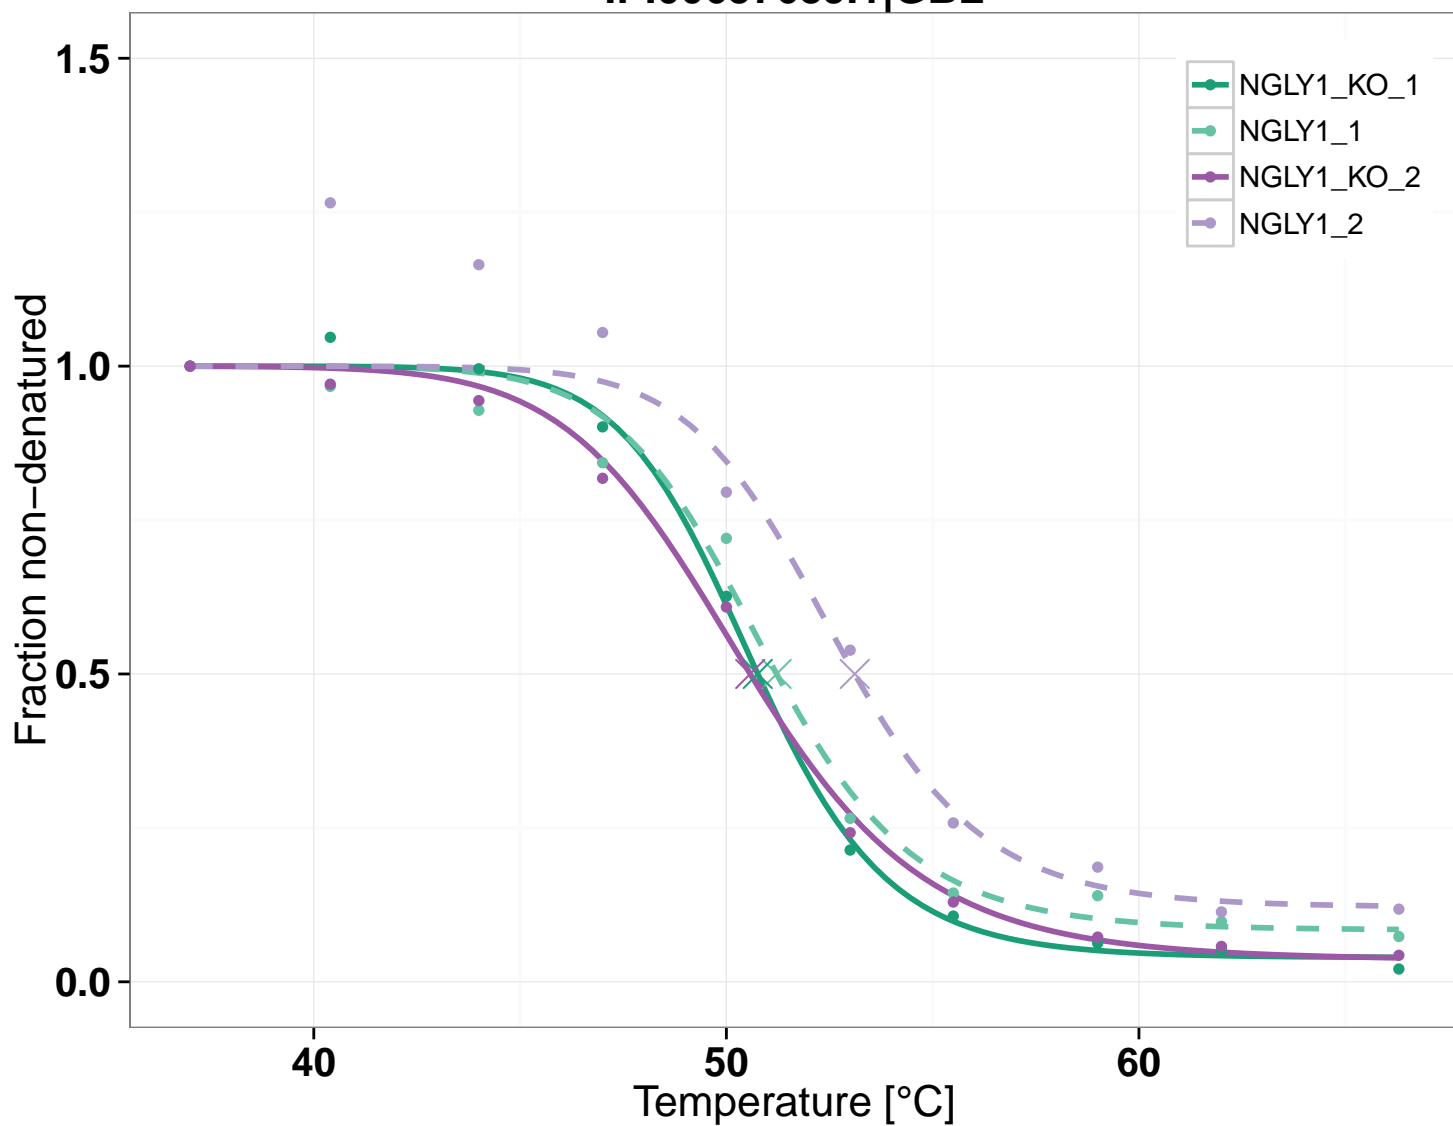

|            | meltPoint | slope | plateau | R2   |
|------------|-----------|-------|---------|------|
| NGLY1_KO_1 | 50.76     | -0.15 | 0.04    | 1    |
| NGLY1_1    | 51.22     | -0.13 | 0.08    | 0.99 |
| NGLY1_KO_2 | 50.58     | -0.11 | 0.04    | 1    |
| NGLY1_2    | 53.11     | -0.12 | 0.12    | 0.94 |

Supplement: Supplementary file 3636 [file 1]

IPI00171821.4|SETMAR

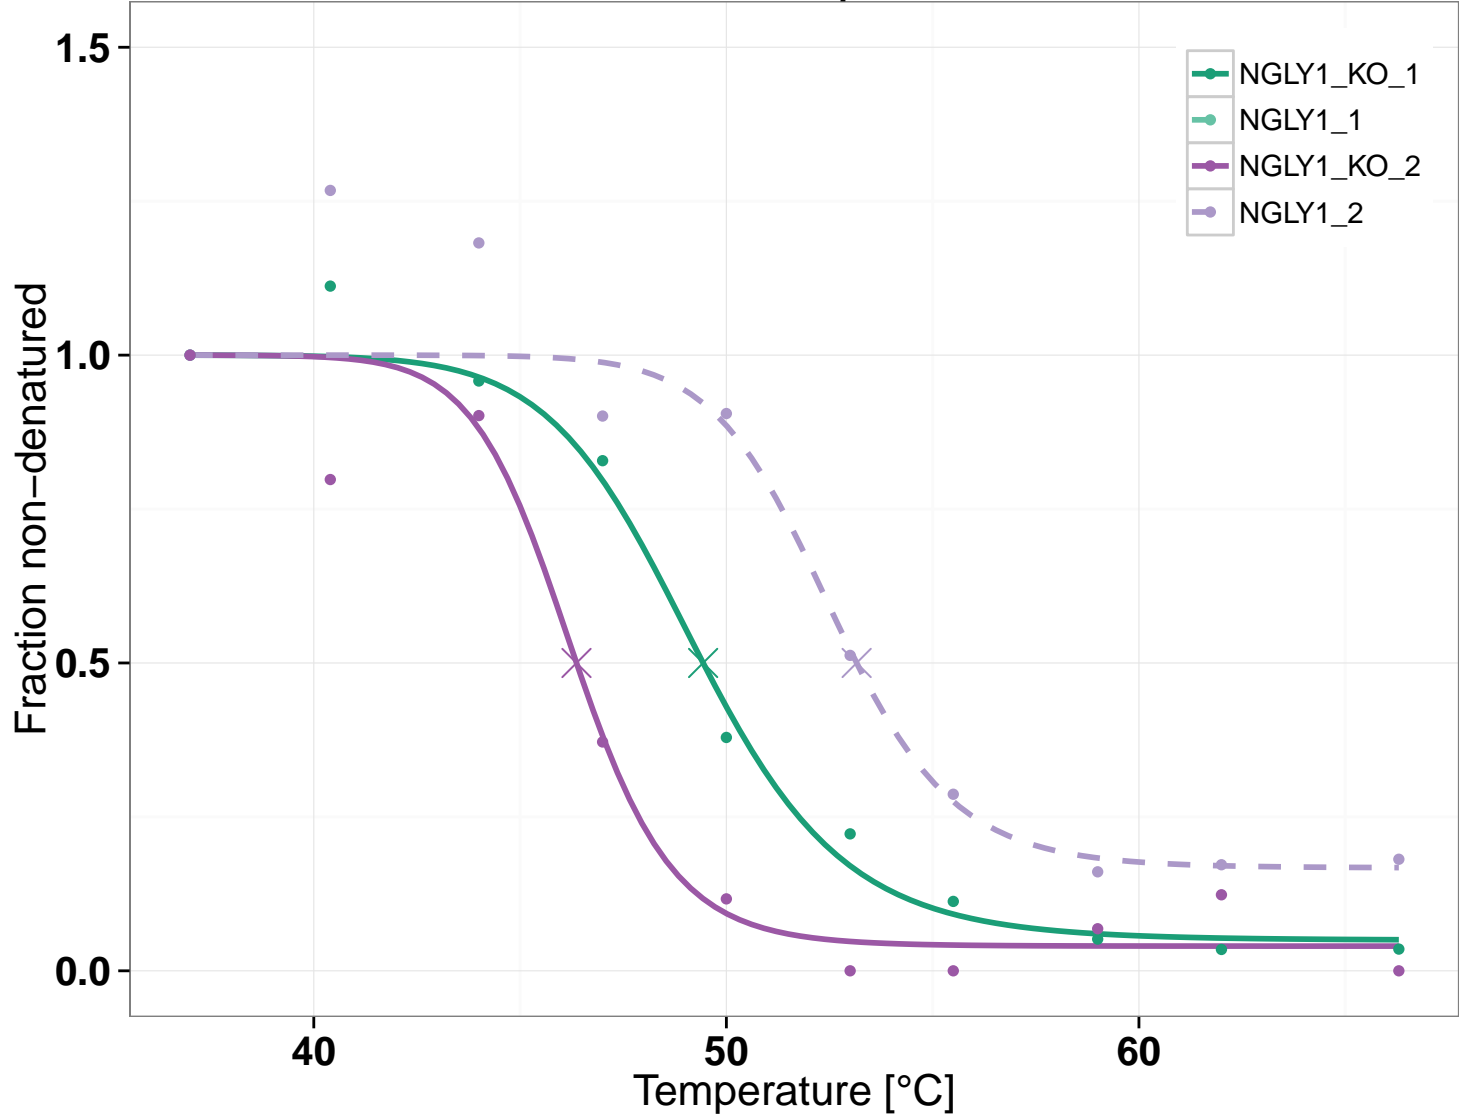

|            | meltPoint | slope | plateau | R2   |
|------------|-----------|-------|---------|------|
| NGLY1_KO_1 | 49.44     | -0.13 | 0.05    | 0.99 |
| NGLY1_1    | -         | -     | -       | -    |
| NGLY1_KO_2 | 46.37     | -0.2  | 0.04    | 0.96 |
| NGLY1_2    | 53.16     | -0.14 | 0.17    | 0.93 |

Supplement: Supplementary file 3637 [file 1]

IPI00154283.4|KIAA1524

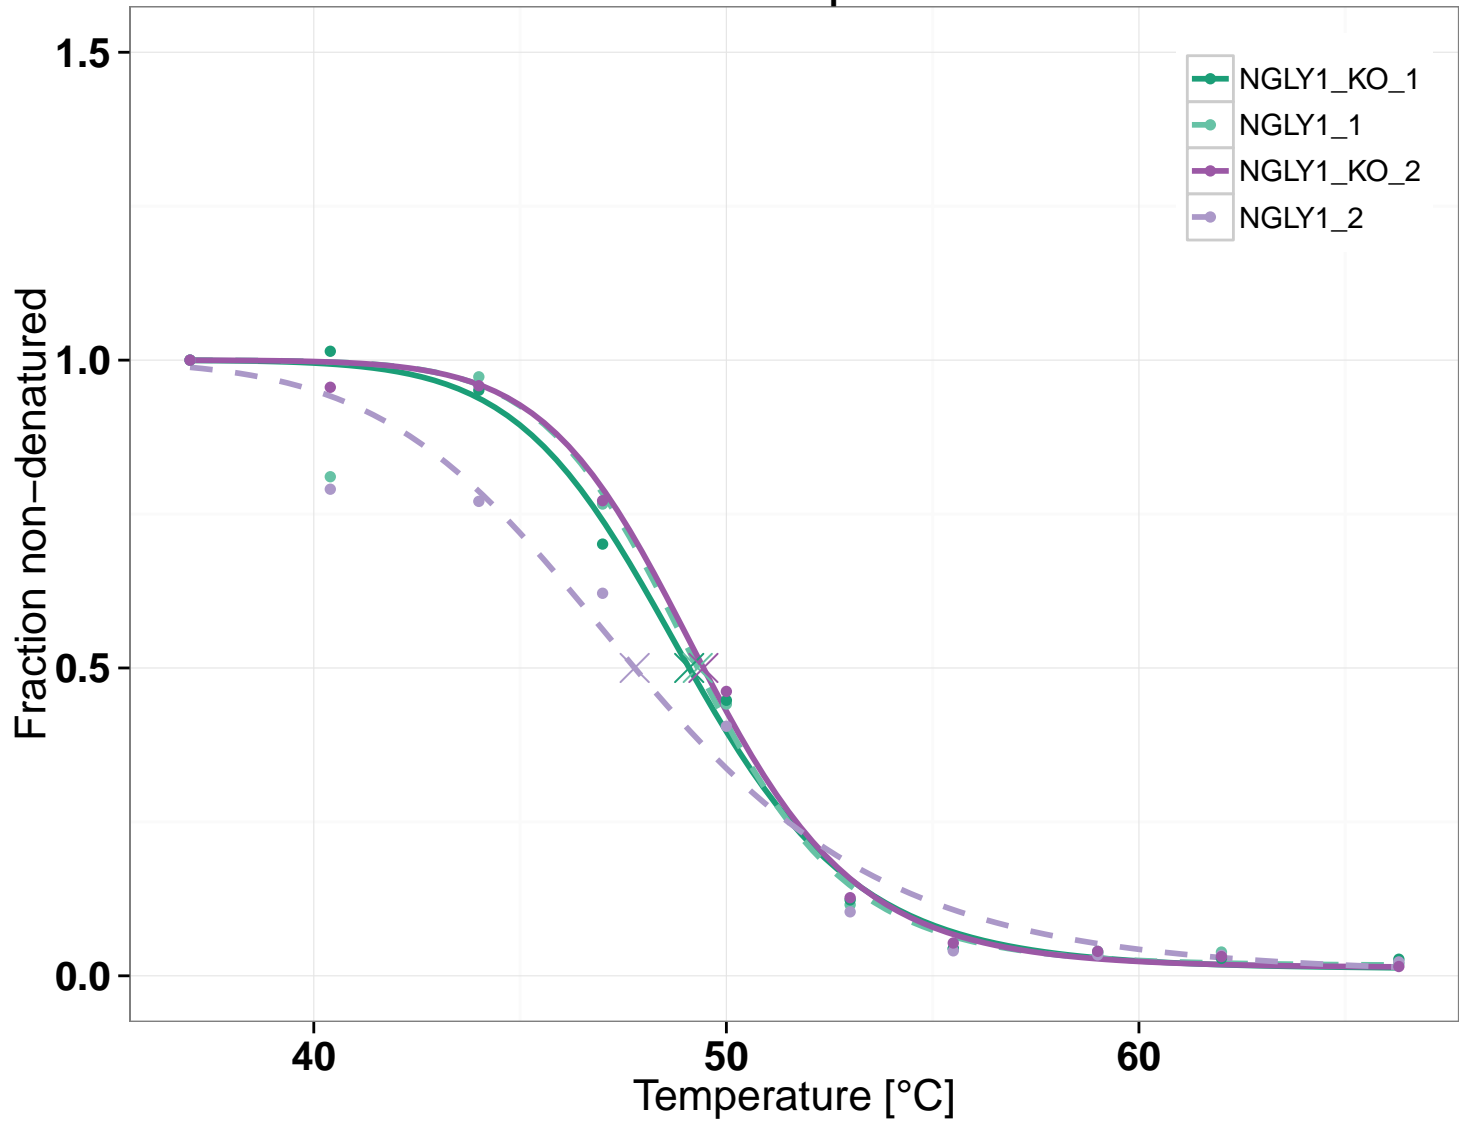

|            | meltPoint | slope  | plateau | R2   |
|------------|-----------|--------|---------|------|
| NGLY1_KO_1 | 49.1      | -0.12  | 0.01    | 1    |
| NGLY1_1    | 49.31     | -0.13  | 0.02    | 0.98 |
| NGLY1_KO_2 | 49.44     | -0.13  | 0.01    | 1    |
| NGLY1_2    | 47.78     | -0.081 | 0       | 0.97 |

Supplement: Supplementary file 3638 [file 1]

IPI00023330.3|KIAA1468

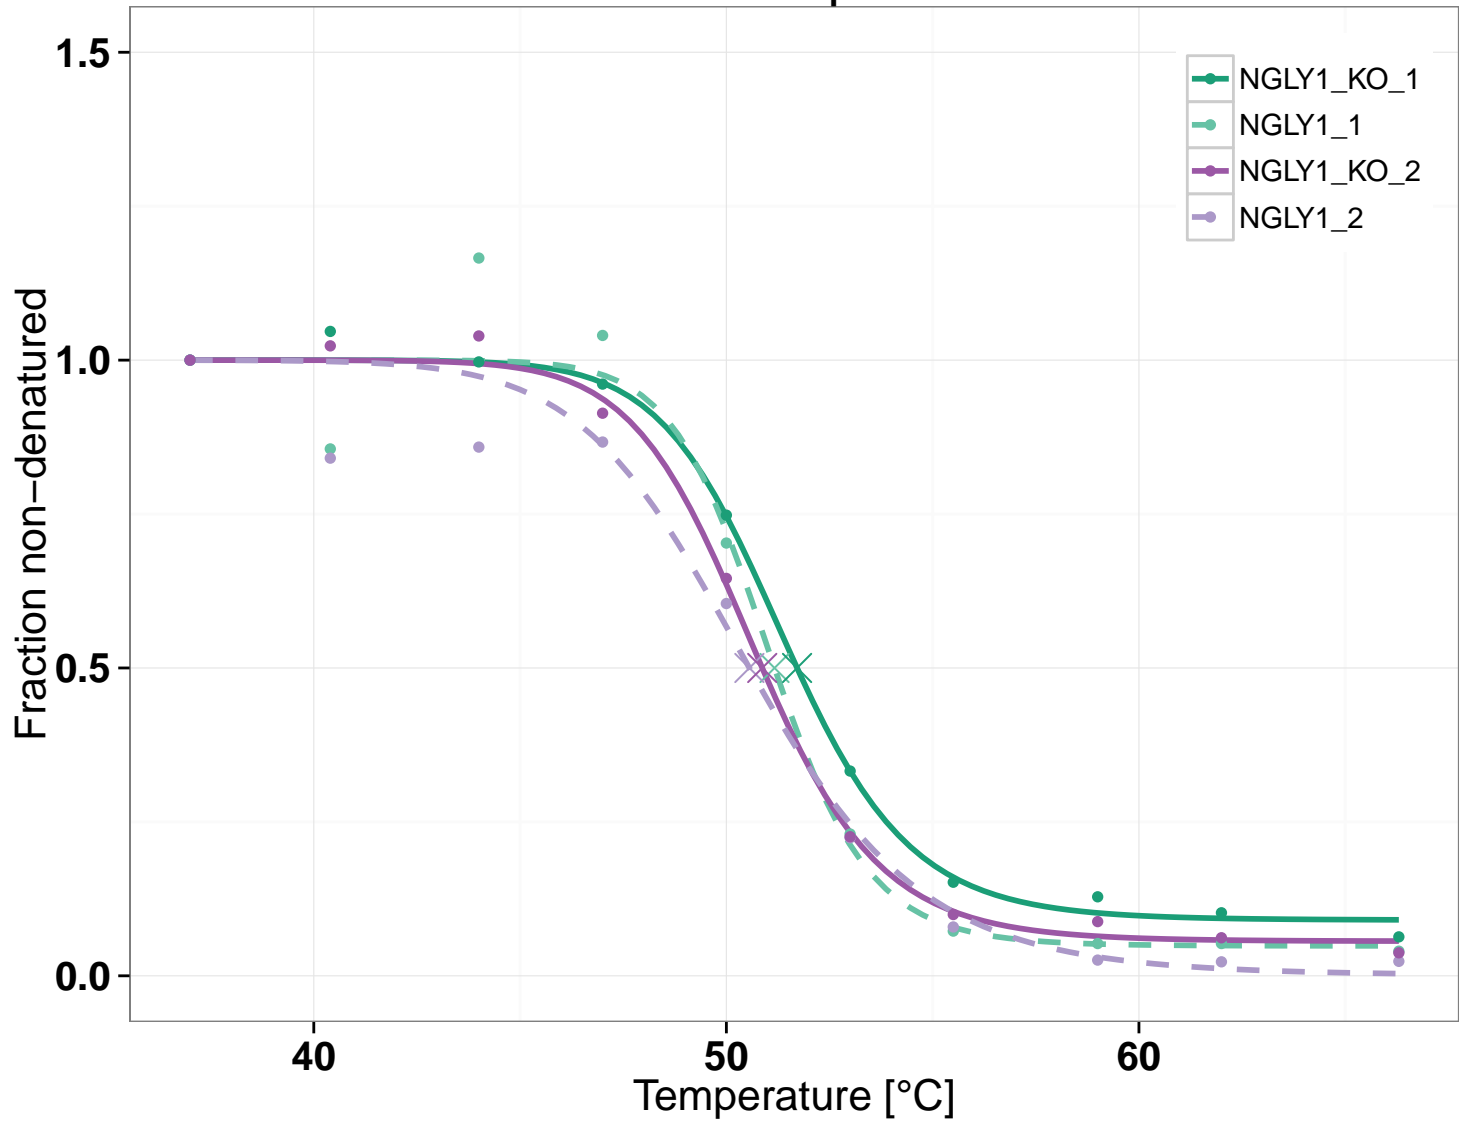

|            | meltPoint | slope | plateau | R2   |
|------------|-----------|-------|---------|------|
| NGLY1_KO_1 | 51.71     | -0.15 | 0.09    | 1    |
| NGLY1_1    | 51.17     | -0.2  | 0.05    | 0.97 |
| NGLY1_KO_2 | 50.87     | -0.16 | 0.06    | 1    |
| NGLY1_2    | 50.56     | -0.12 | 0       | 0.97 |

Supplement: Supplementary file 3639 [file 1]

# IPI00152432.2|GPT2

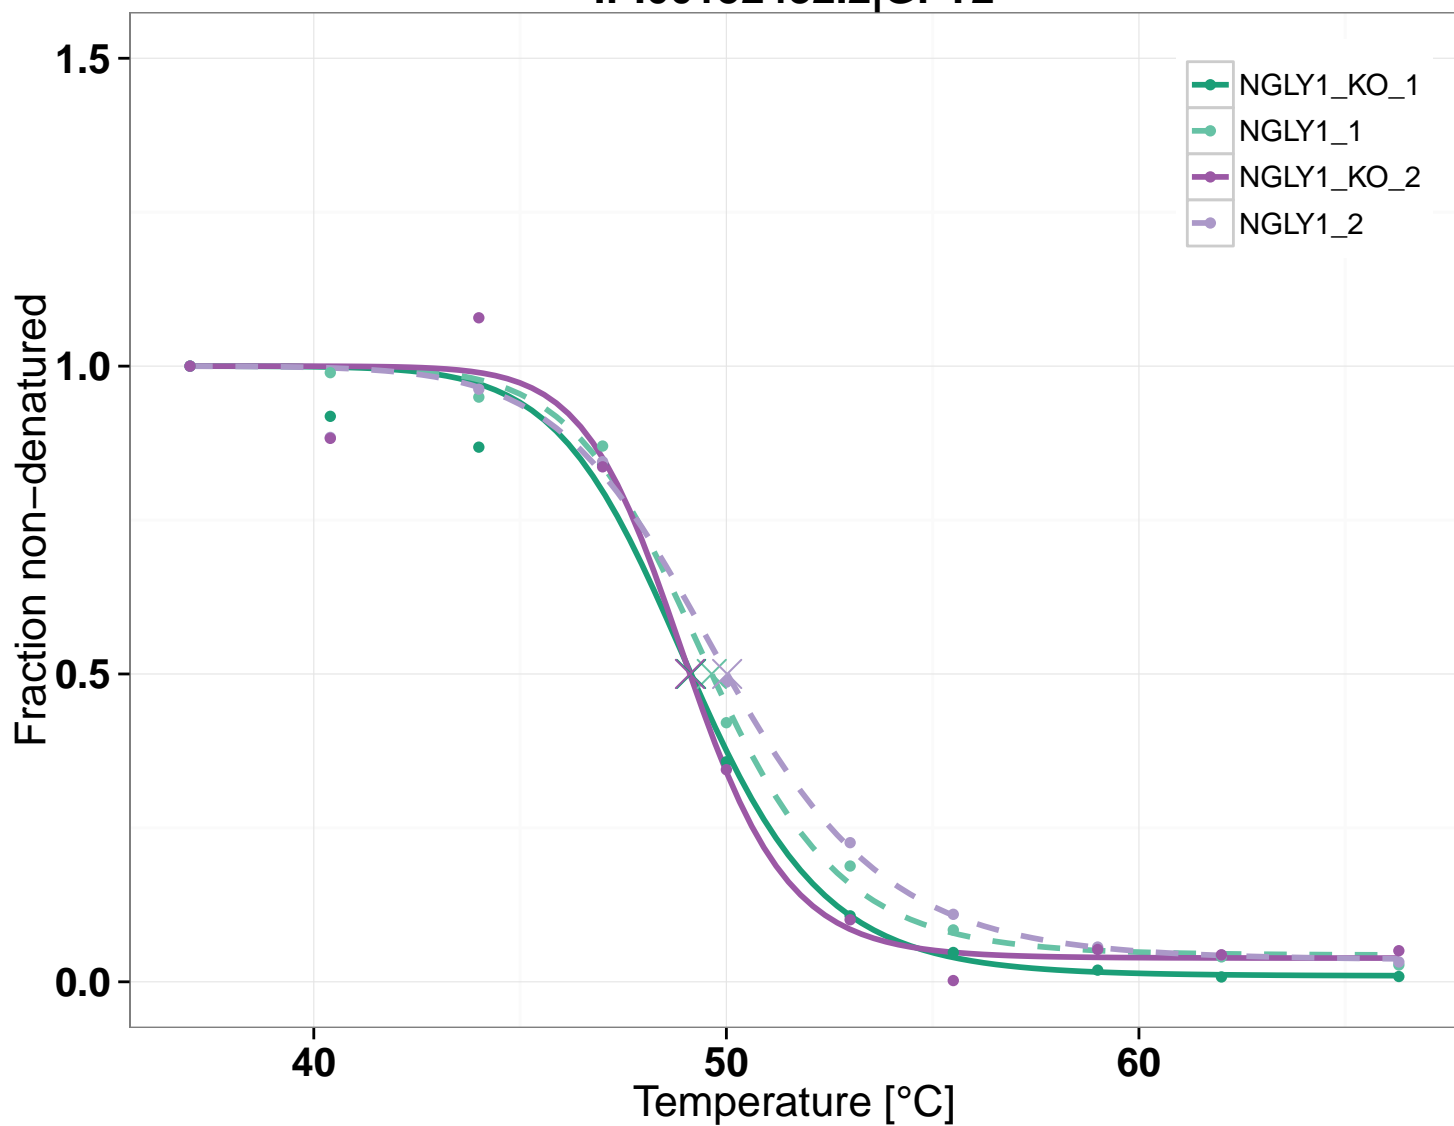

|            | meltPoint | slope | plateau | R2   |
|------------|-----------|-------|---------|------|
| NGLY1_KO_1 | 49.15     | -0.15 | 0.01    | 0.99 |
| NGLY1_1    | 49.65     | -0.15 | 0.04    | 1    |
| NGLY1_KO_2 | 49.12     | -0.19 | 0.04    | 0.99 |
| NGLY1_2    | 50.02     | -0.12 | 0.04    | 0.99 |

Supplement: Supplementary file 3640 [file 1]

IPI00795917.1|ALG13

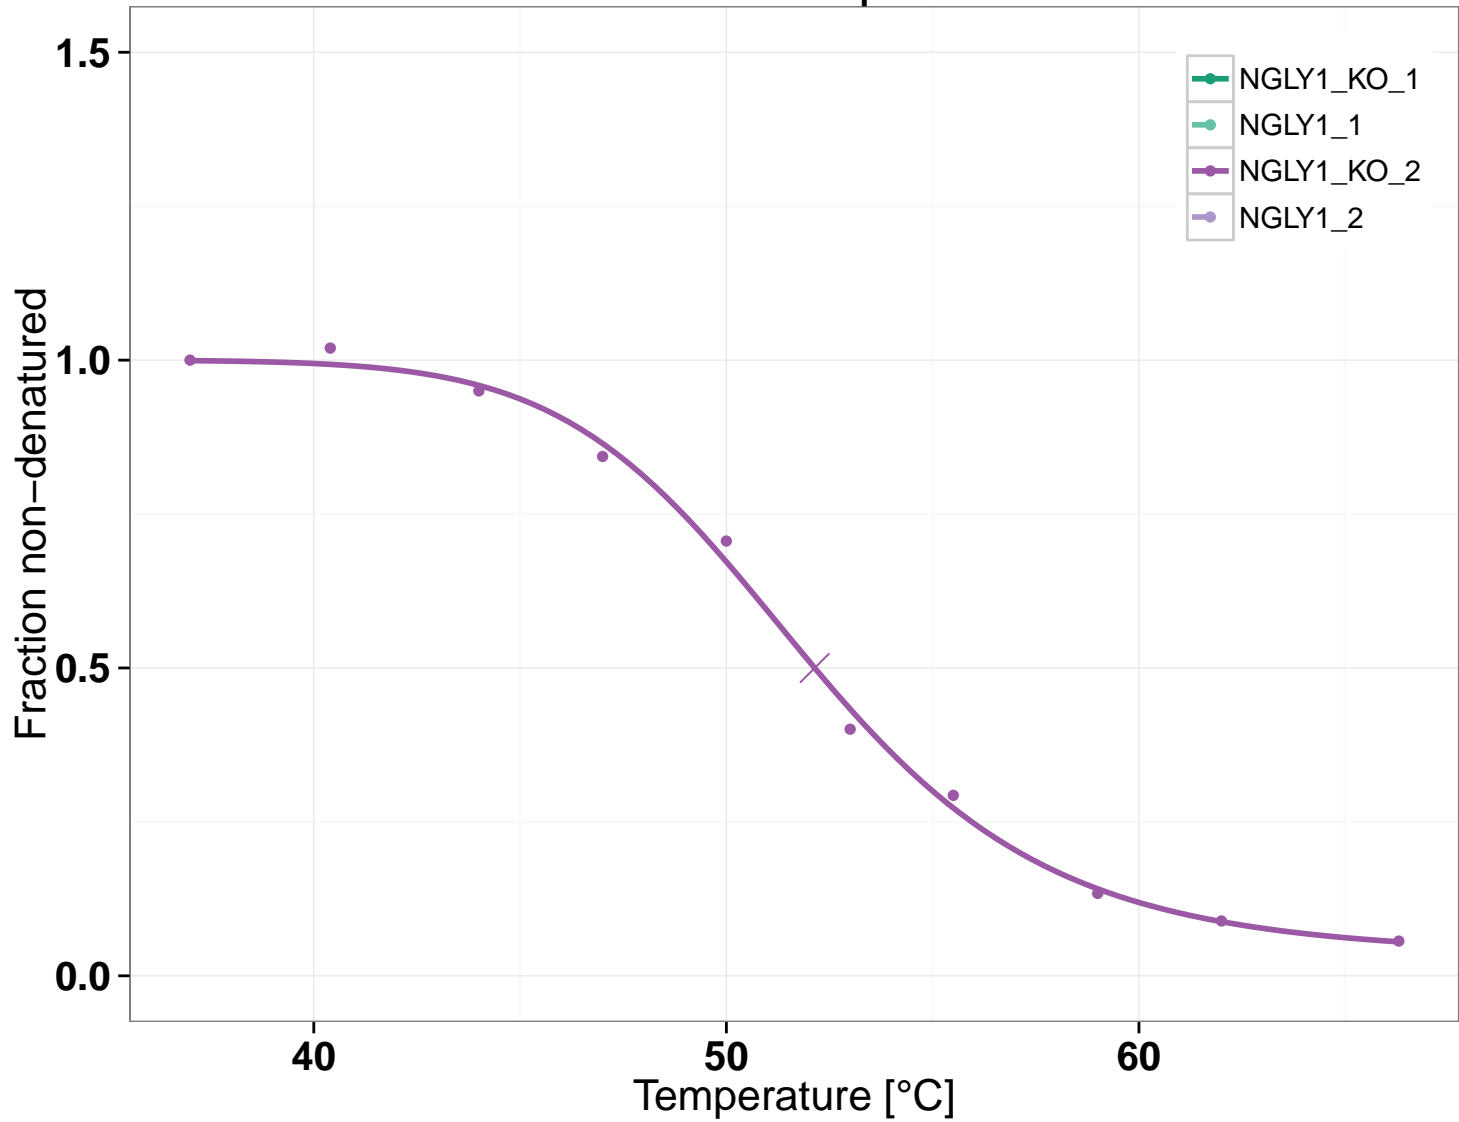

|            | meltPoint | slope  | plateau | R2 |
|------------|-----------|--------|---------|----|
| NGLY1_KO_1 | —         | —      | —       | —  |
| NGLY1_1    | —         | —      | —       | —  |
| NGLY1_KO_2 | 52.14     | -0.082 | 0.03    | 1  |
| NGLY1_2    | —         | —      | —       | —  |

Supplement: Supplementary file 3641 [file 1]

IPI00017704.3|COTL1

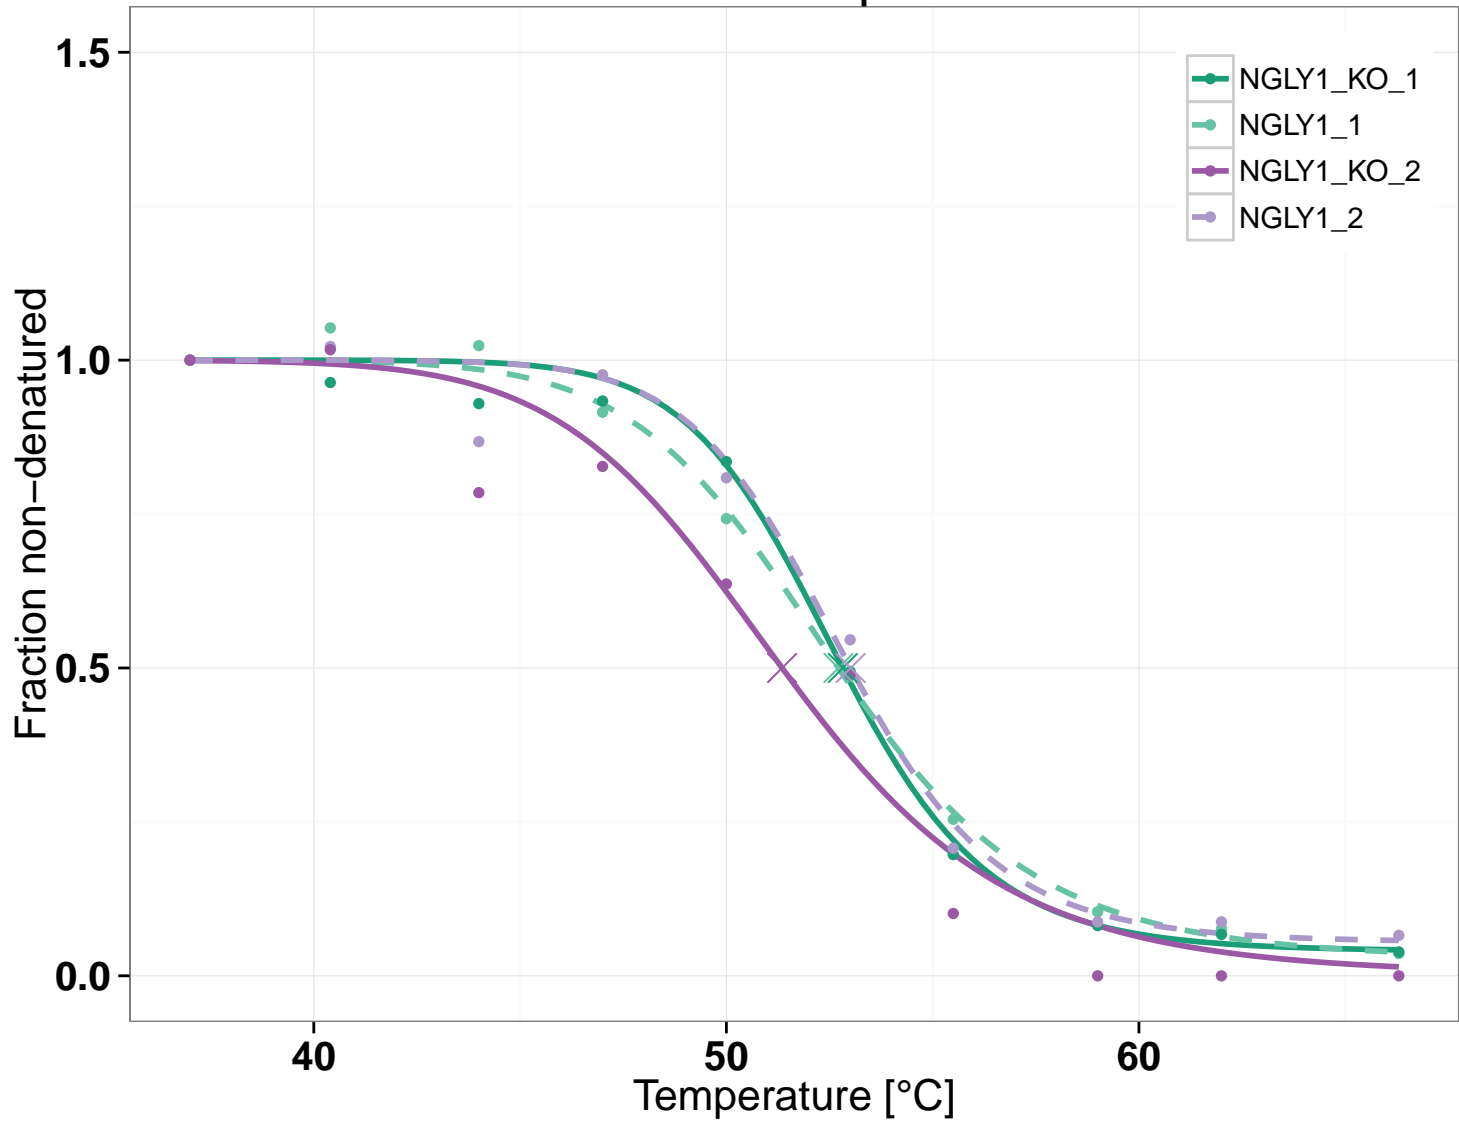

|            | meltPoint | slope  | plateau | R2   |
|------------|-----------|--------|---------|------|
| NGLY1_KO_1 | 52.82     | -0.13  | 0.04    | 0.99 |
| NGLY1_1    | 52.72     | -0.099 | 0.03    | 1    |
| NGLY1_KO_2 | 51.35     | -0.092 | 0       | 0.96 |
| NGLY1_2    | 53.01     | -0.13  | 0.05    | 0.99 |

Supplement: Supplementary file 3642 [file 1]

# IPI00023101.1|RQCD1

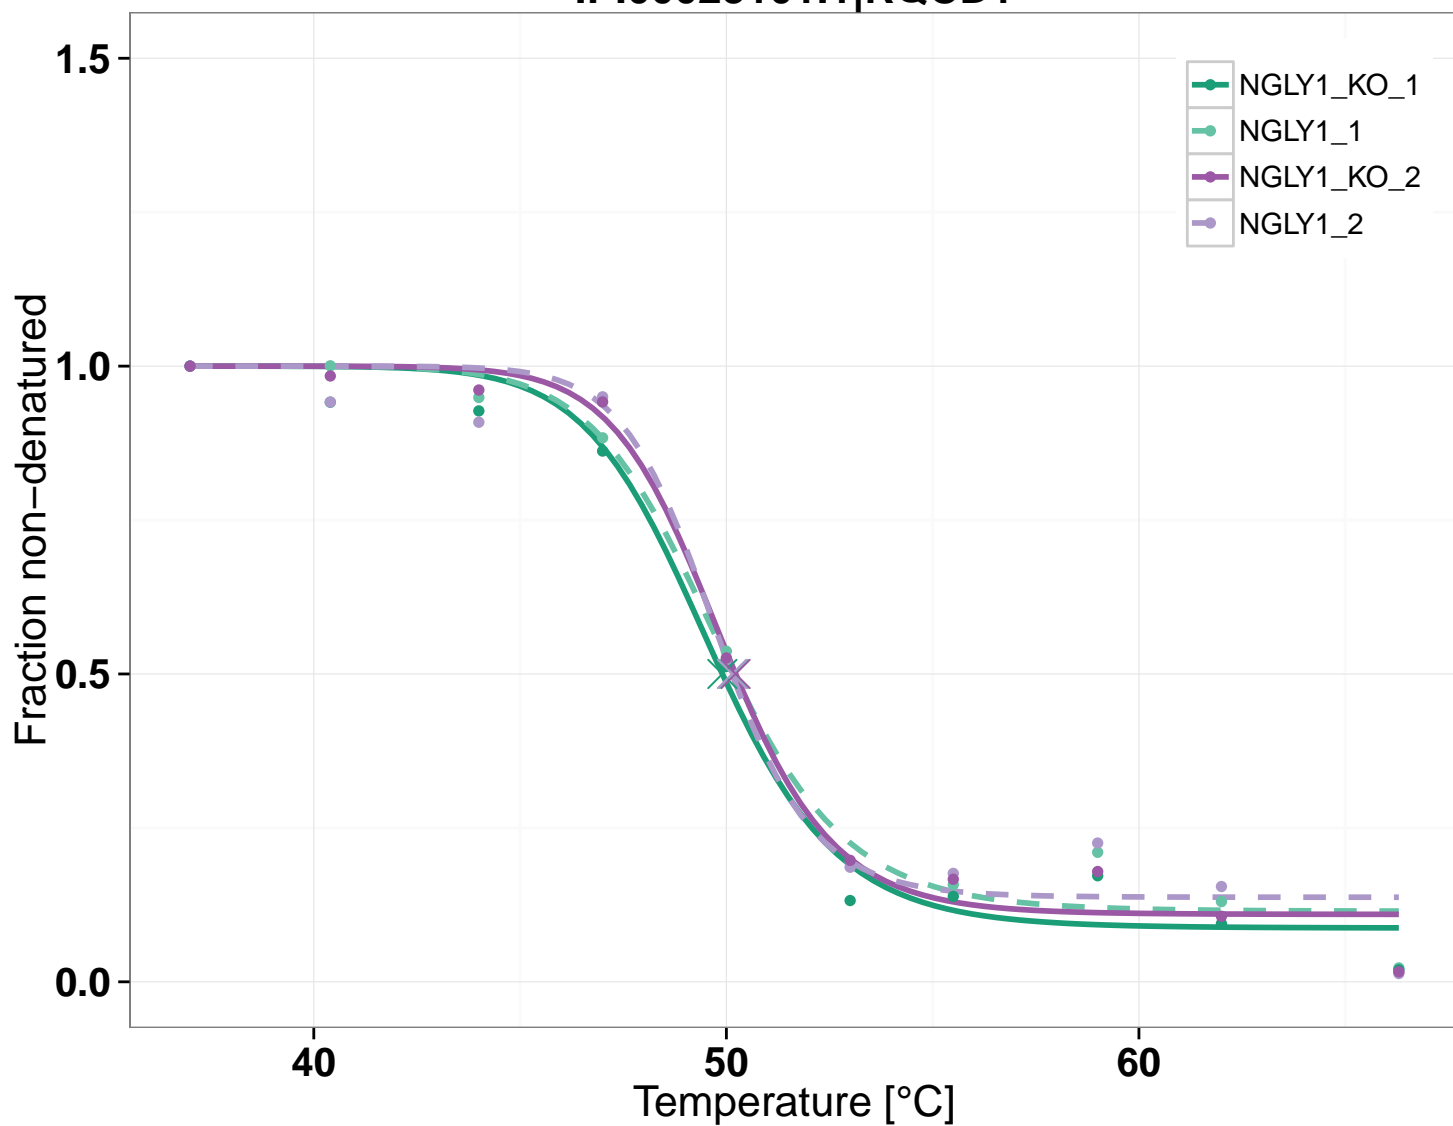

|            | meltPoint | slope | plateau | R2   |
|------------|-----------|-------|---------|------|
| NGLY1_KO_1 | 49.9      | -0.15 | 0.09    | 0.99 |
| NGLY1_1    | 50.18     | -0.14 | 0.11    | 0.99 |
| NGLY1_KO_2 | 50.22     | -0.17 | 0.11    | 0.99 |
| NGLY1_2    | 50.14     | -0.19 | 0.14    | 0.98 |

Supplement: Supplementary file 3643 [file 1]

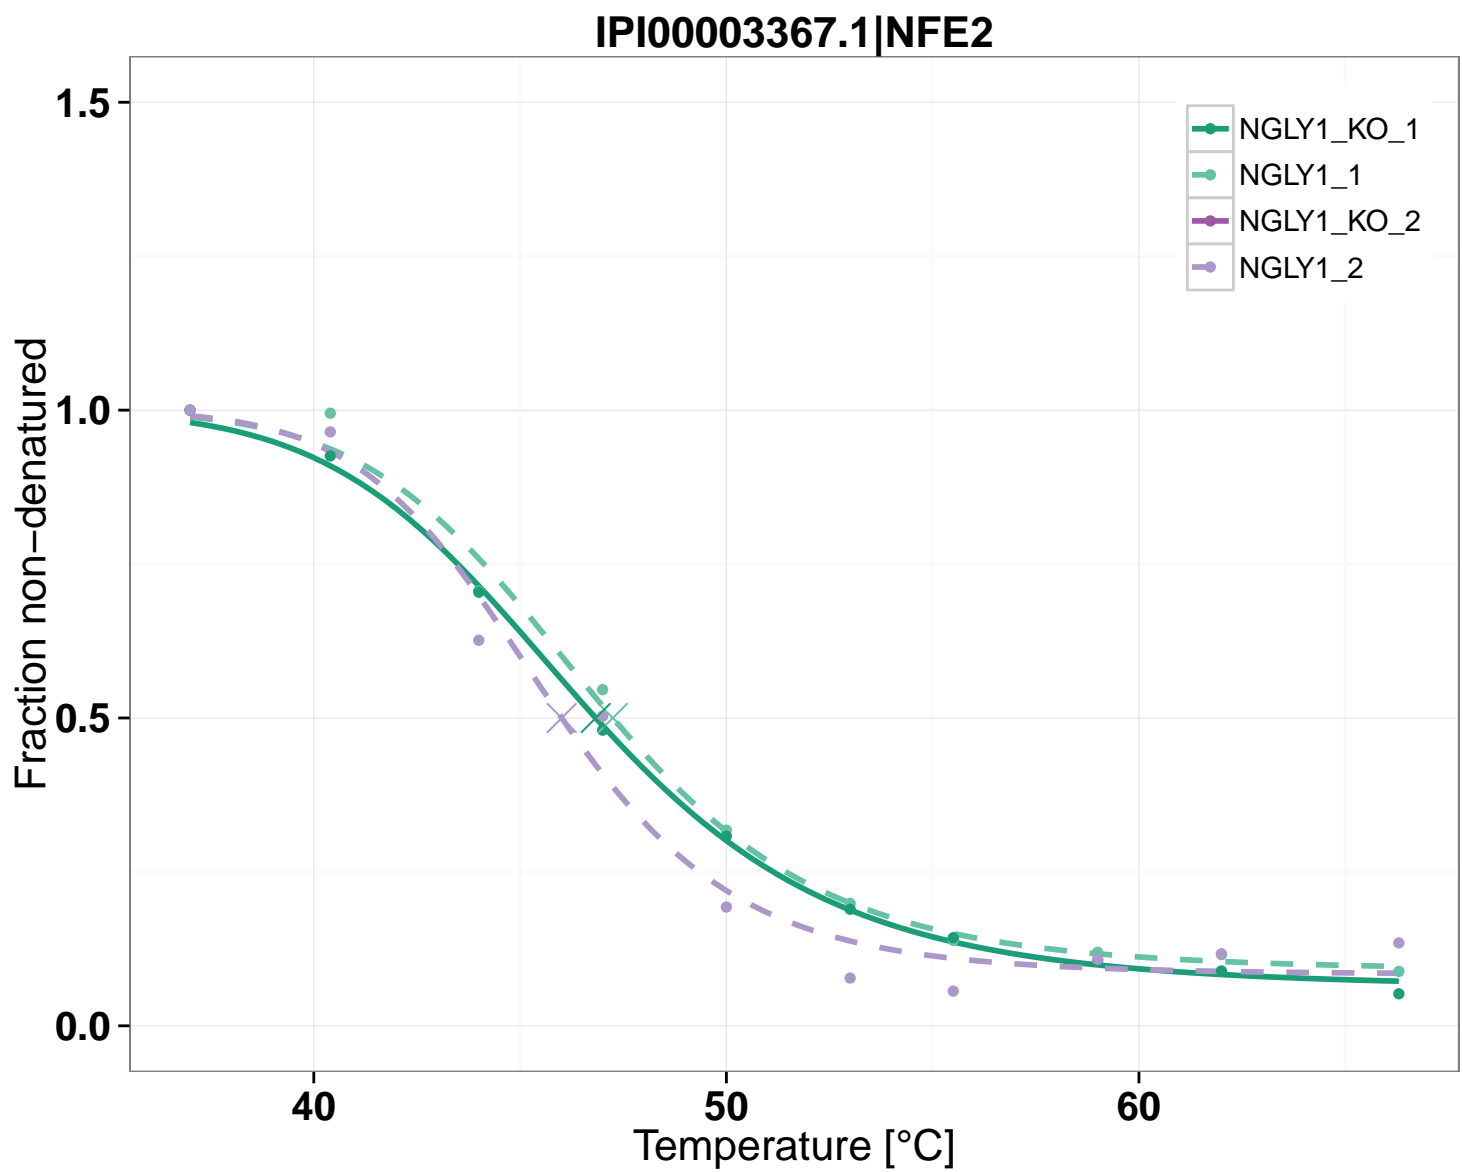

|            | meltPoint | slope  | plateau | R2   |
|------------|-----------|--------|---------|------|
| NGLY1_KO_1 | 46.83     | -0.077 | 0.06    | 1    |
| NGLY1_1    | 47.25     | -0.083 | 0.09    | 0.99 |
| NGLY1_KO_2 | -         | -      | -       | -    |
| NGLY1_2    | 46.01     | -0.1   | 0.08    | 0.98 |

Supplement: Supplementary file 3644 [file 1]

IPI00220628.1|AKAP9

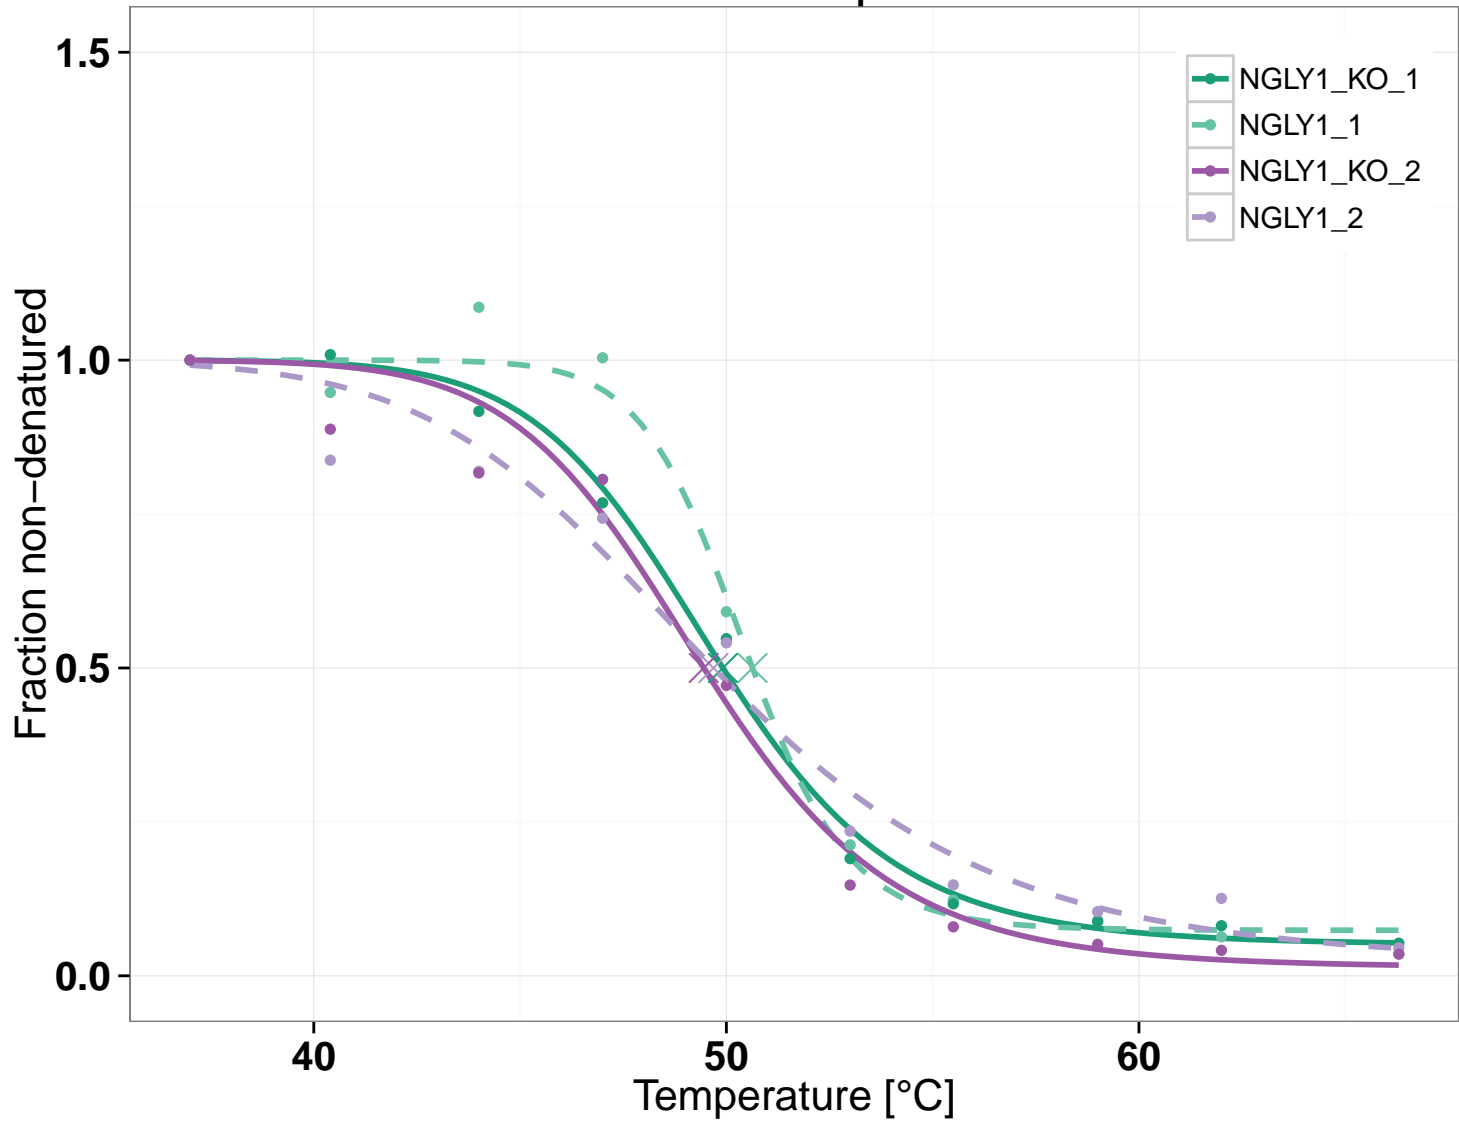

|            | meltPoint | slope  | plateau | R2   |
|------------|-----------|--------|---------|------|
| NGLY1_KO_1 | 49.92     | -0.11  | 0.05    | 0.99 |
| NGLY1_1    | 50.63     | -0.18  | 0.07    | 0.99 |
| NGLY1_KO_2 | 49.45     | -0.11  | 0.01    | 0.98 |
| NGLY1_2    | 49.69     | -0.071 | 0.02    | 0.97 |

Supplement: Supplementary file 3645 [file 1]

IPI00031117.3|POLR3GL

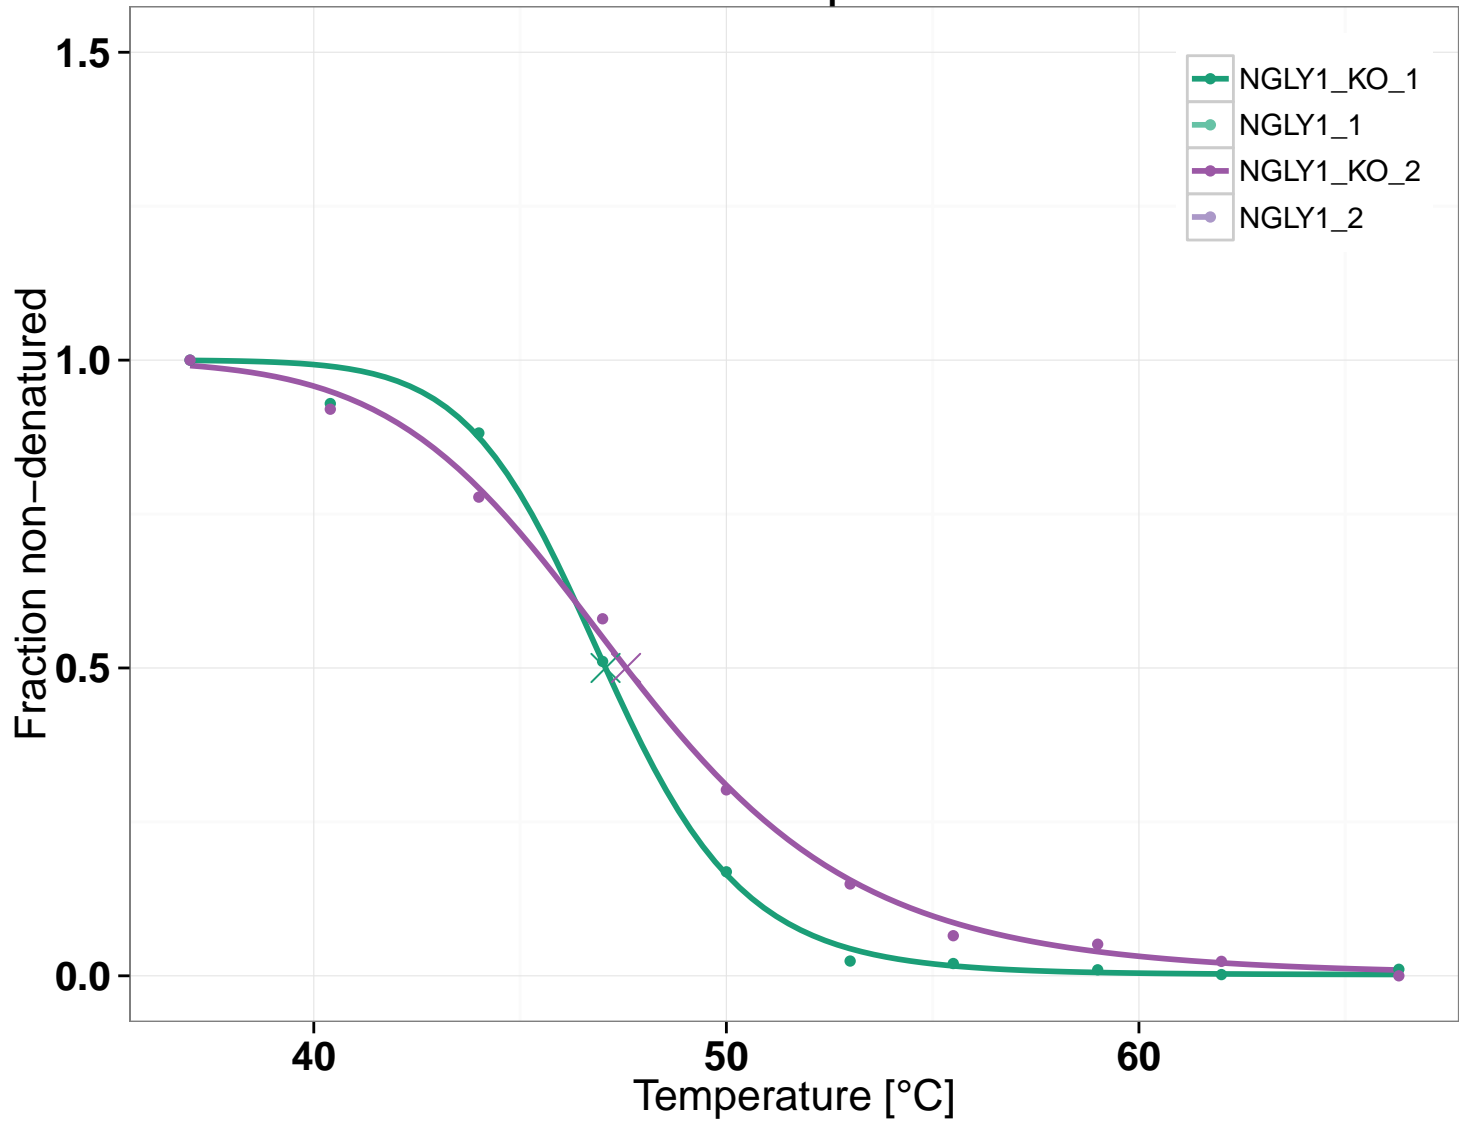

|            | meltPoint | slope  | plateau | R2 |
|------------|-----------|--------|---------|----|
| NGLY1_KO_1 | 47.07     | -0.15  | 0       | 1  |
| NGLY1_1    | -         | -      | -       | -  |
| NGLY1_KO_2 | 47.57     | -0.088 | 0       | 1  |
| NGLY1_2    | -         | -      | -       | -  |

Supplement: Supplementary file 3646 [file 1]

IPI00183642.2|ZNF280C

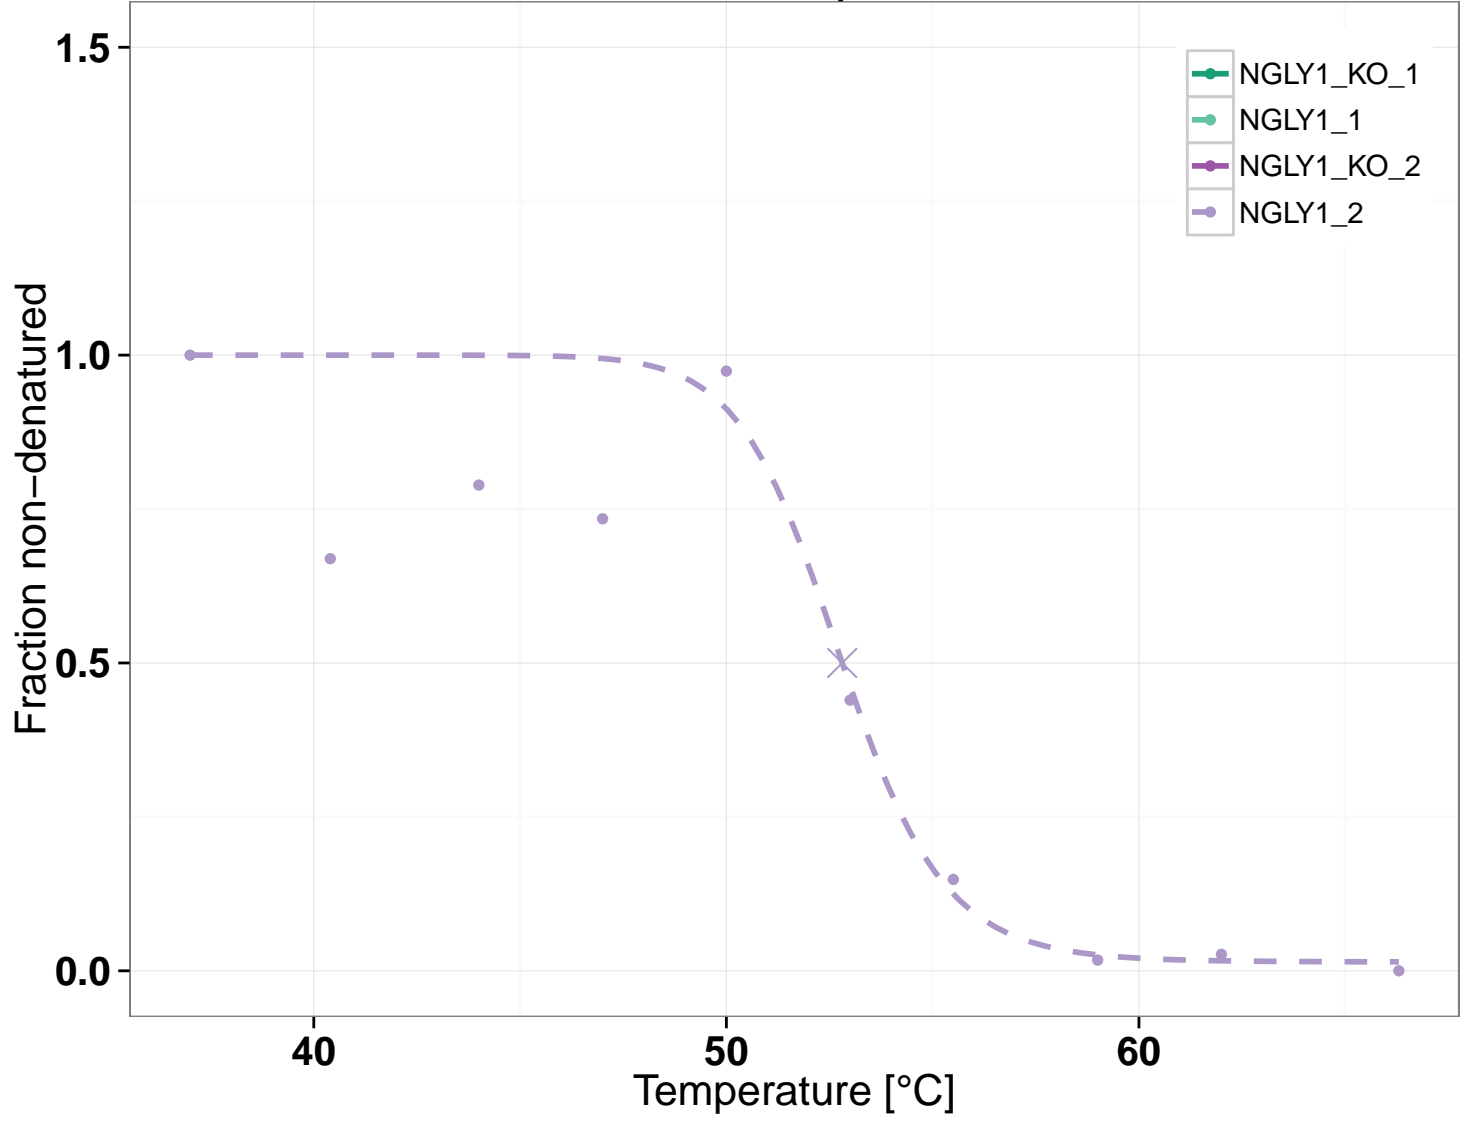

|            | meltPoint | slope | plateau | R2   |
|------------|-----------|-------|---------|------|
| NGLY1_KO_1 | -         | -     | -       | -    |
| NGLY1_1    | -         | -     | -       | -    |
| NGLY1_KO_2 | -         | -     | -       | -    |
| NGLY1_2    | 52.81     | -0.2  | 0.01    | 0.85 |

Supplement: Supplementary file 3647 [file 1]

# IPI00894498.1|ACTB

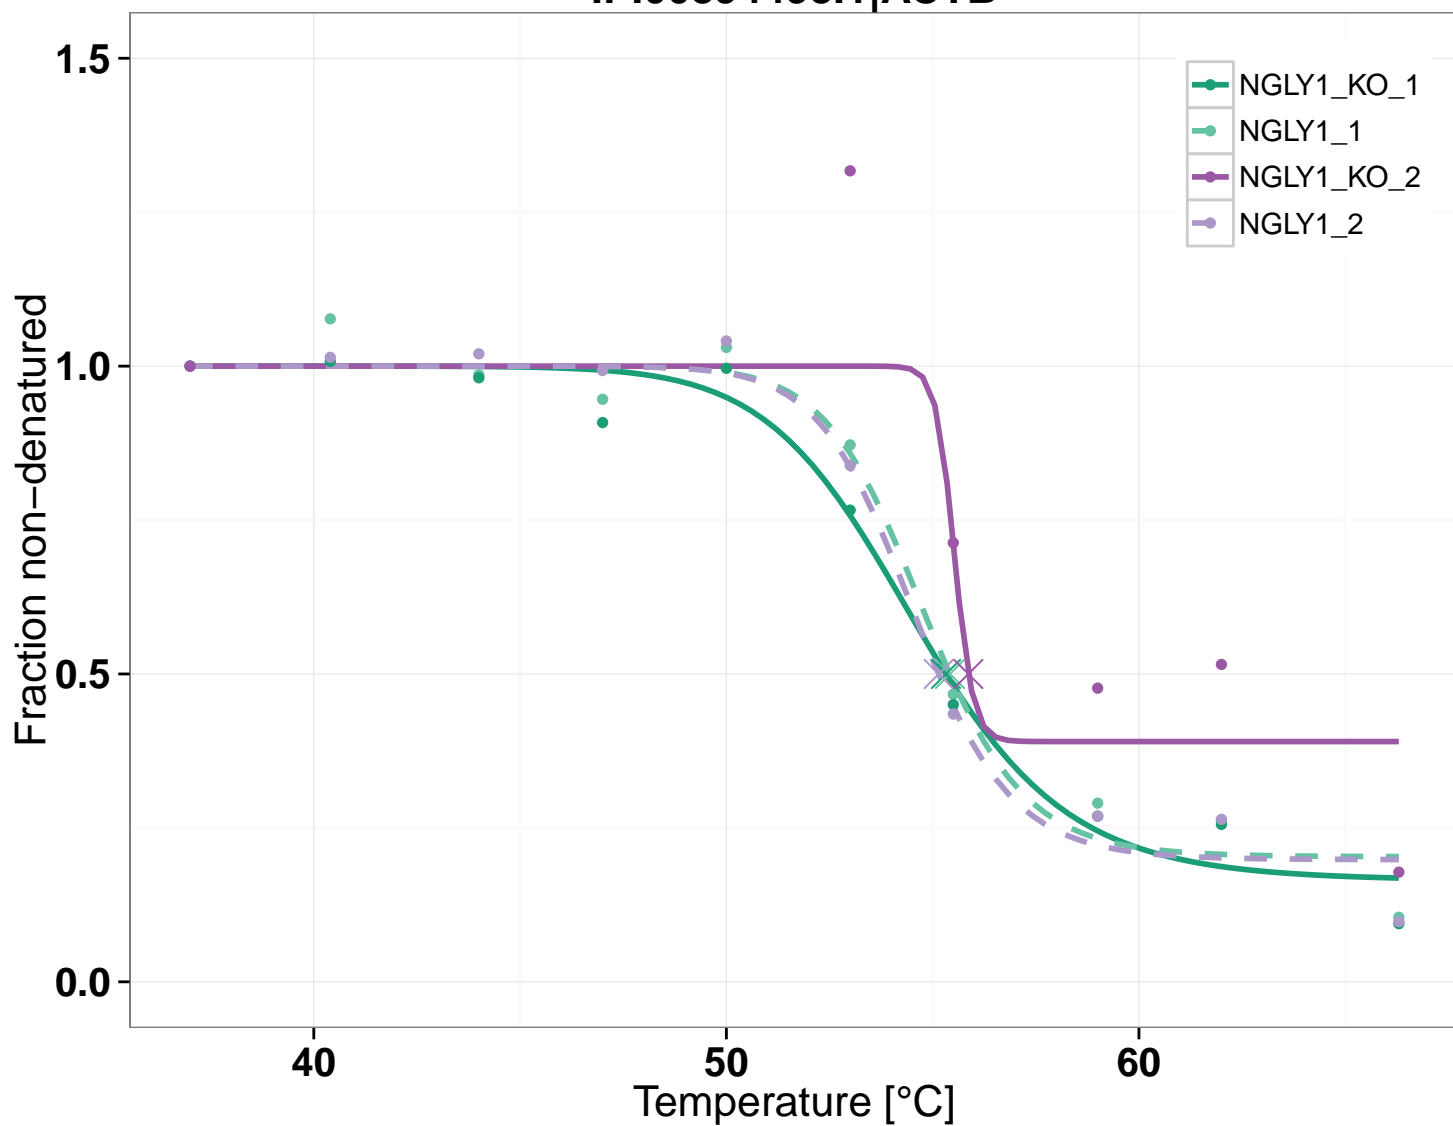

|            | meltPoint | slope | plateau | R2   |
|------------|-----------|-------|---------|------|
| NGLY1_KO_1 | 55.32     | -0.11 | 0.16    | 0.98 |
| NGLY1_1    | 55.42     | -0.17 | 0.2     | 0.98 |
| NGLY1_KO_2 | 55.87     | -0.69 | 0.39    | 0.35 |
| NGLY1_2    | 55.15     | -0.17 | 0.2     | 0.98 |

Supplement: Supplementary file 3648 [file 1]

IPI00103104.3|N6AMT2

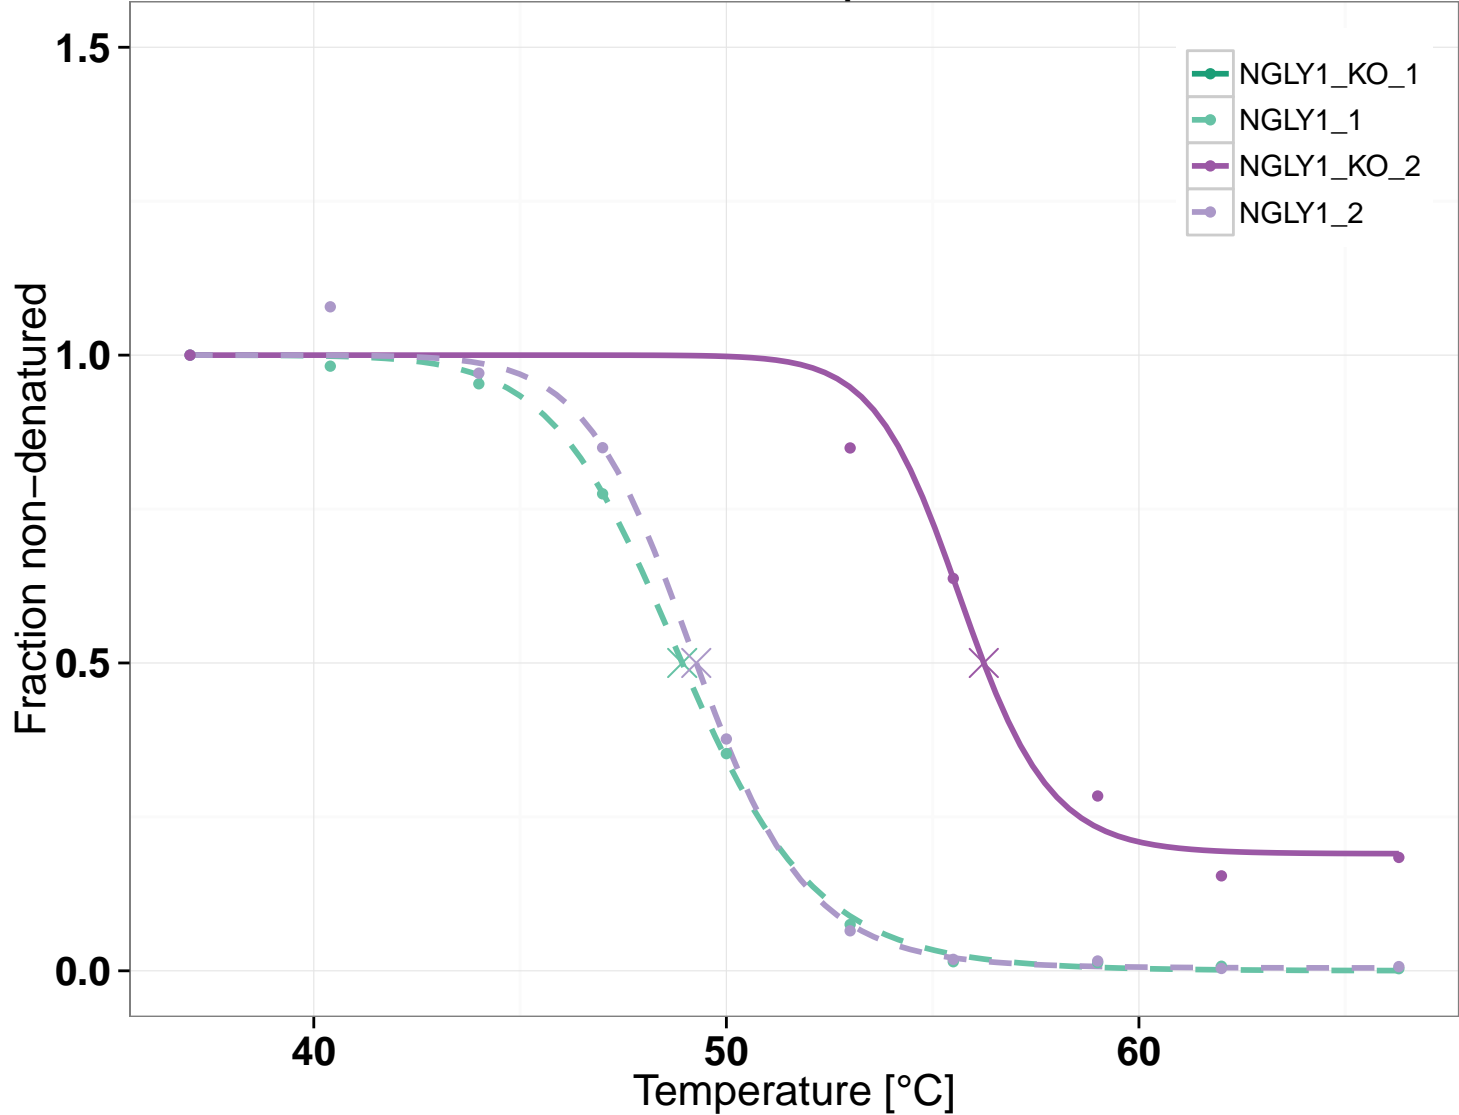

|            | meltPoint | slope | plateau | R2   |
|------------|-----------|-------|---------|------|
| NGLY1_KO_1 | -         | -     | -       | -    |
| NGLY1_1    | 48.93     | -0.16 | 0       | 1    |
| NGLY1_KO_2 | 56.24     | -0.19 | 0.19    | -0.2 |
| NGLY1_2    | 49.27     | -0.18 | 0       | 1    |

Supplement: Supplementary file 3649 [file 1]

# IPI00166858.3|ARRDC1

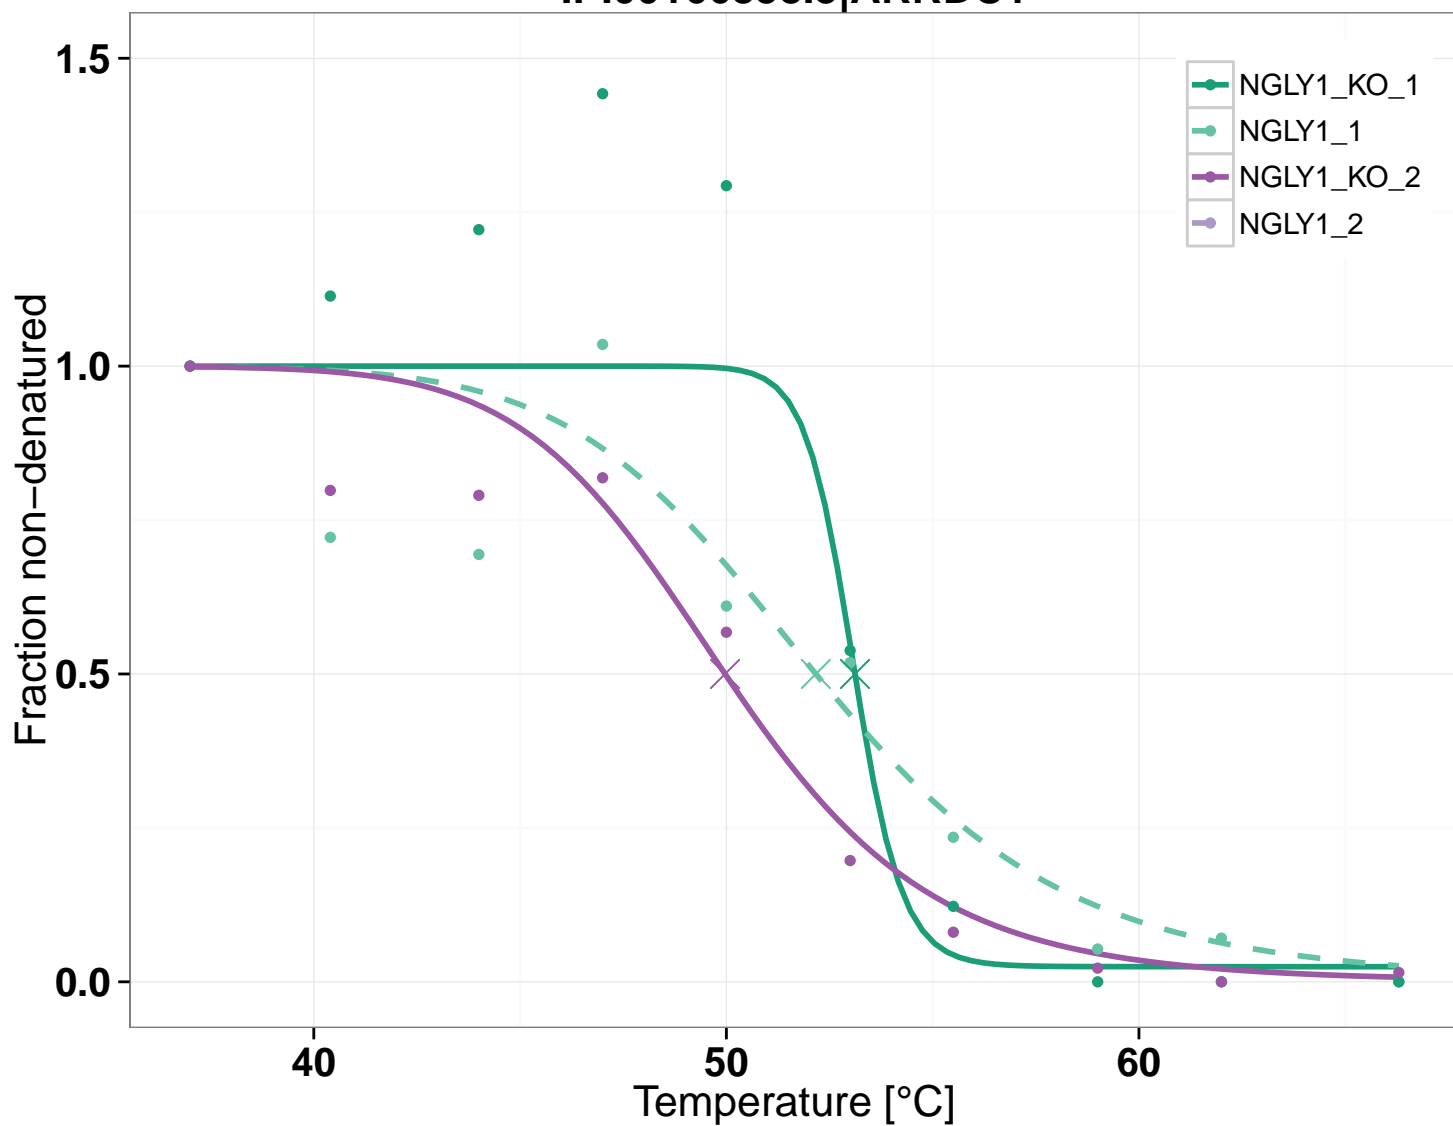

|            | meltPoint | slope  | plateau | R2   |
|------------|-----------|--------|---------|------|
| NGLY1_KO_1 | 53.12     | -0.42  | 0.02    | 0.89 |
| NGLY1_1    | 52.17     | -0.083 | 0       | 0.86 |
| NGLY1_KO_2 | 49.97     | -0.1   | 0       | 0.95 |
| NGLY1_2    | -         | -      | -       | -    |

Supplement: Supplementary file 3650 [file 1]

IPI00746655.1|FAM62A

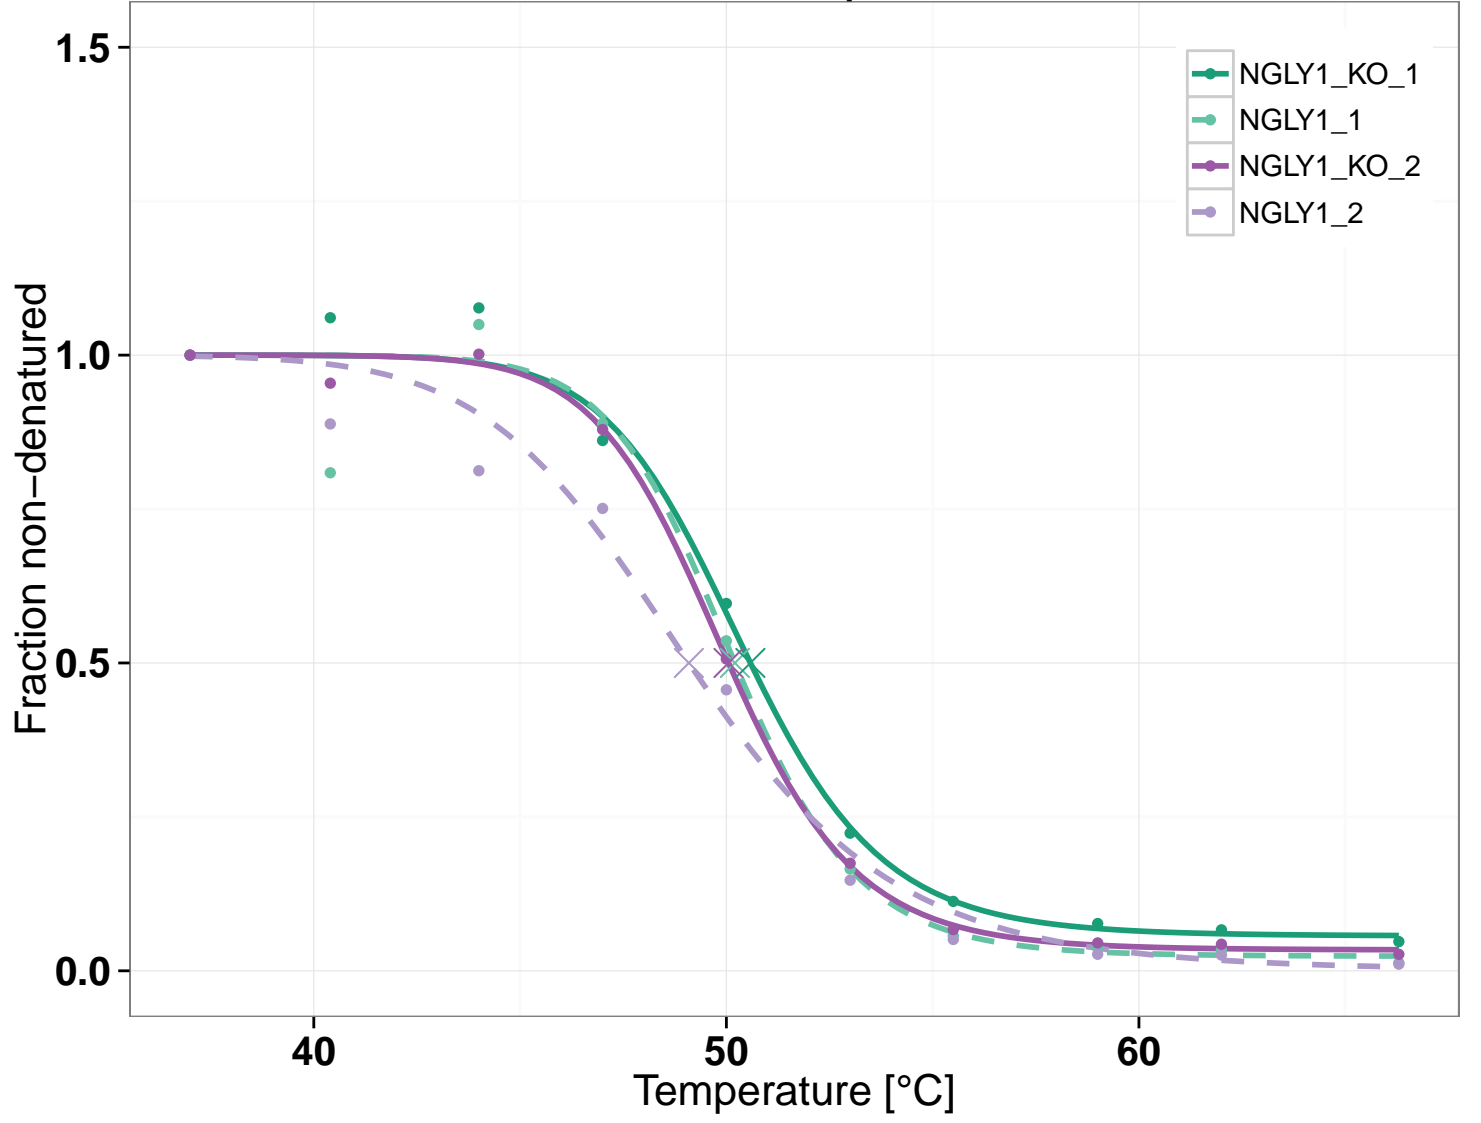

|            | meltPoint | slope | plateau | R2   |
|------------|-----------|-------|---------|------|
| NGLY1_KO_1 | 50.58     | -0.14 | 0.06    | 0.99 |
| NGLY1_1    | 50.21     | -0.16 | 0.02    | 0.98 |
| NGLY1_KO_2 | 50.05     | -0.15 | 0.03    | 1    |
| NGLY1_2    | 49.09     | -0.1  | 0       | 0.98 |

Supplement: Supplementary file 3651 [file 1]

IPI00005084.4|ASNSD1

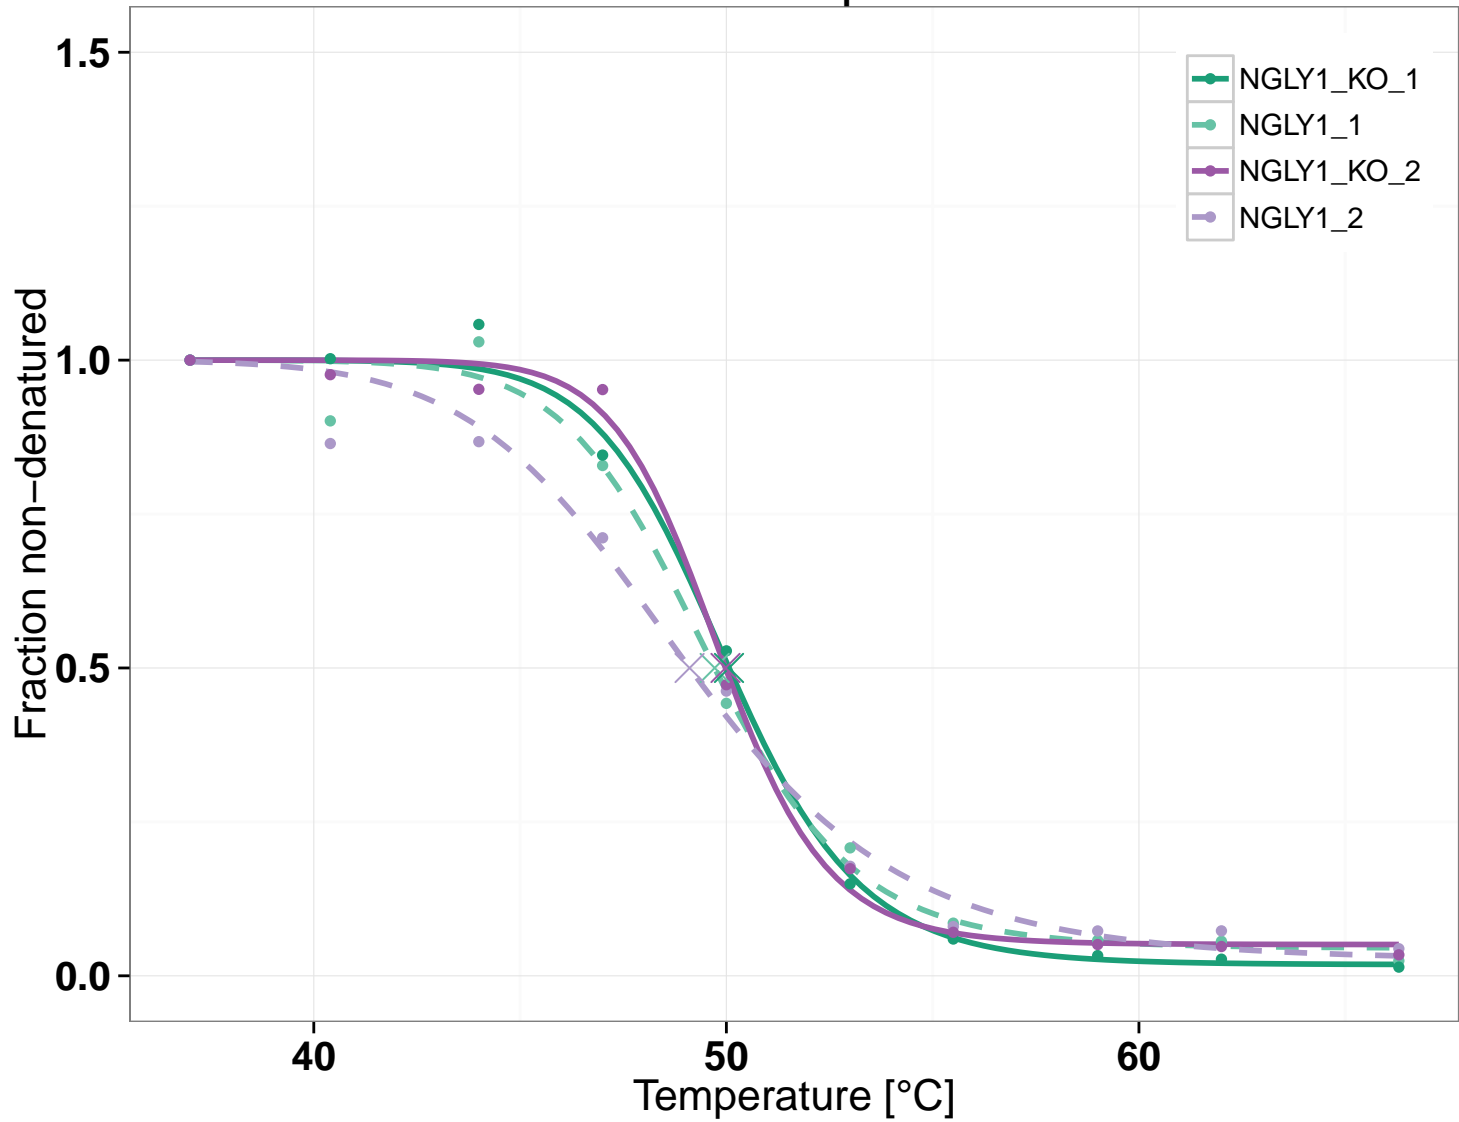

|            | meltPoint | slope  | plateau | R2   |
|------------|-----------|--------|---------|------|
| NGLY1_KO_1 | 50.06     | -0.15  | 0.02    | 1    |
| NGLY1_1    | 49.72     | -0.14  | 0.04    | 0.99 |
| NGLY1_KO_2 | 49.98     | -0.18  | 0.05    | 1    |
| NGLY1_2    | 49.11     | -0.093 | 0.02    | 0.98 |

Supplement: Supplementary file 3652 [file 1]

IPI00171385.3|C3ORF39

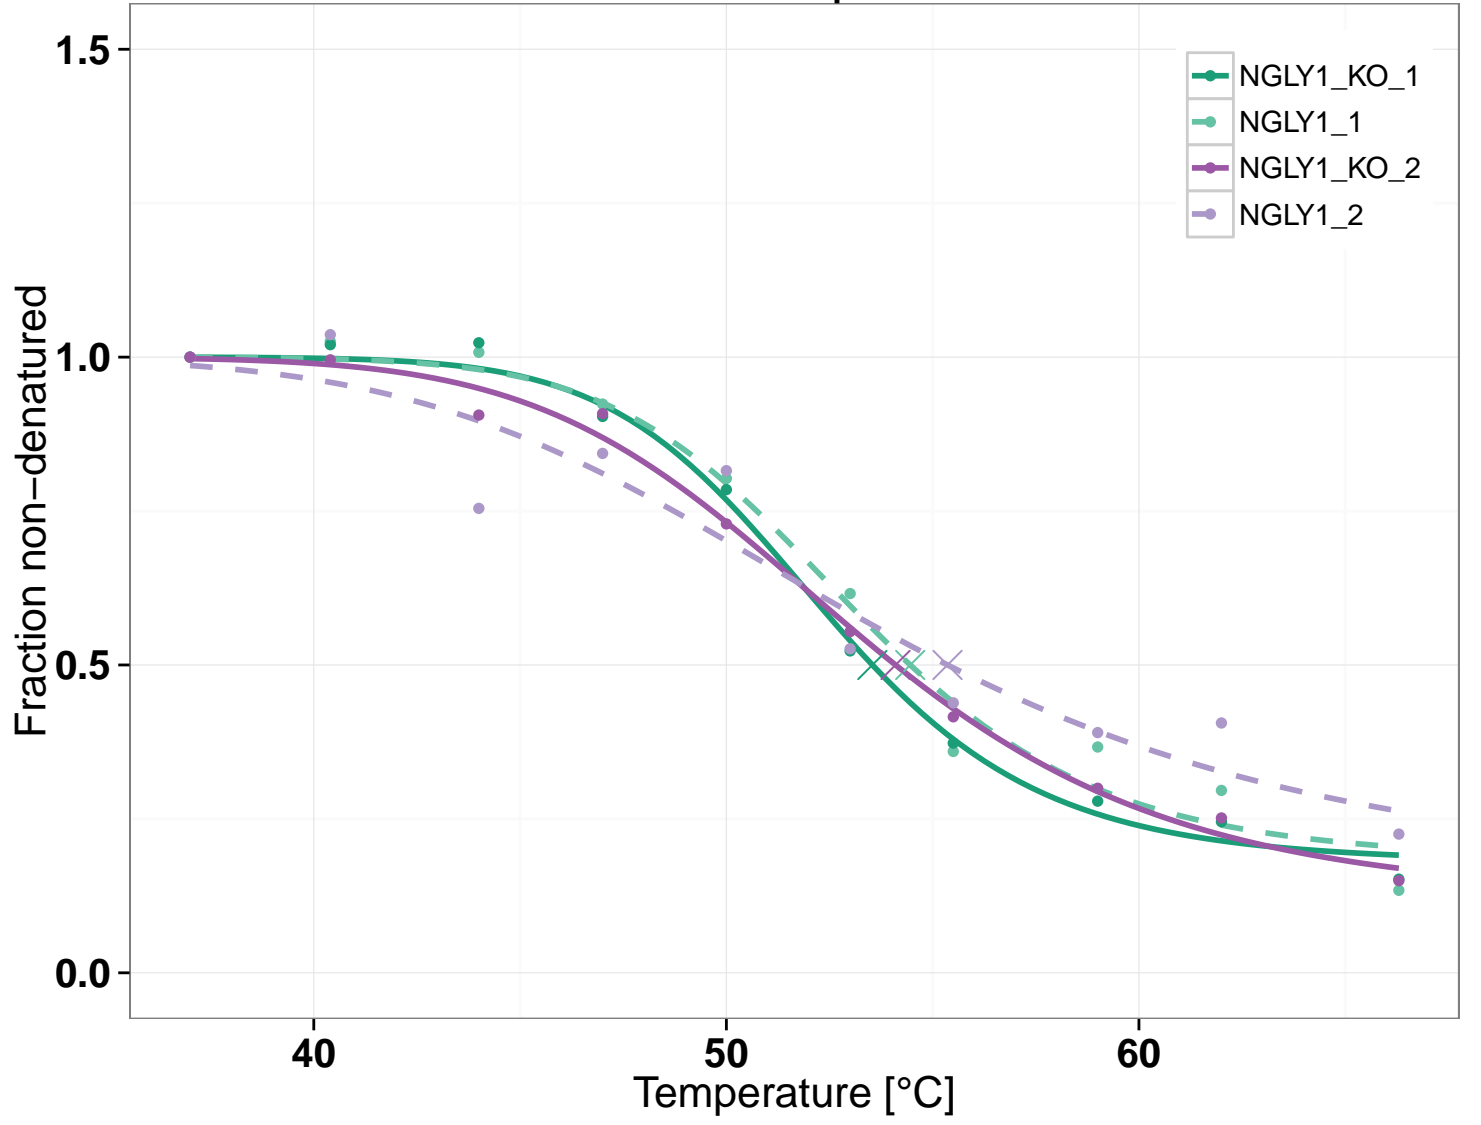

|            | meltPoint | slope  | plateau | R2   |
|------------|-----------|--------|---------|------|
| NGLY1_KO_1 | 53.54     | -0.079 | 0.18    | 0.99 |
| NGLY1_1    | 54.46     | -0.07  | 0.18    | 0.98 |
| NGLY1_KO_2 | 54.1      | -0.058 | 0.11    | 0.99 |
| NGLY1_2    | 55.36     | -0.039 | 0.14    | 0.92 |

Supplement: Supplementary file 3653 [file 1]

IPI00472119.2|RPS3A

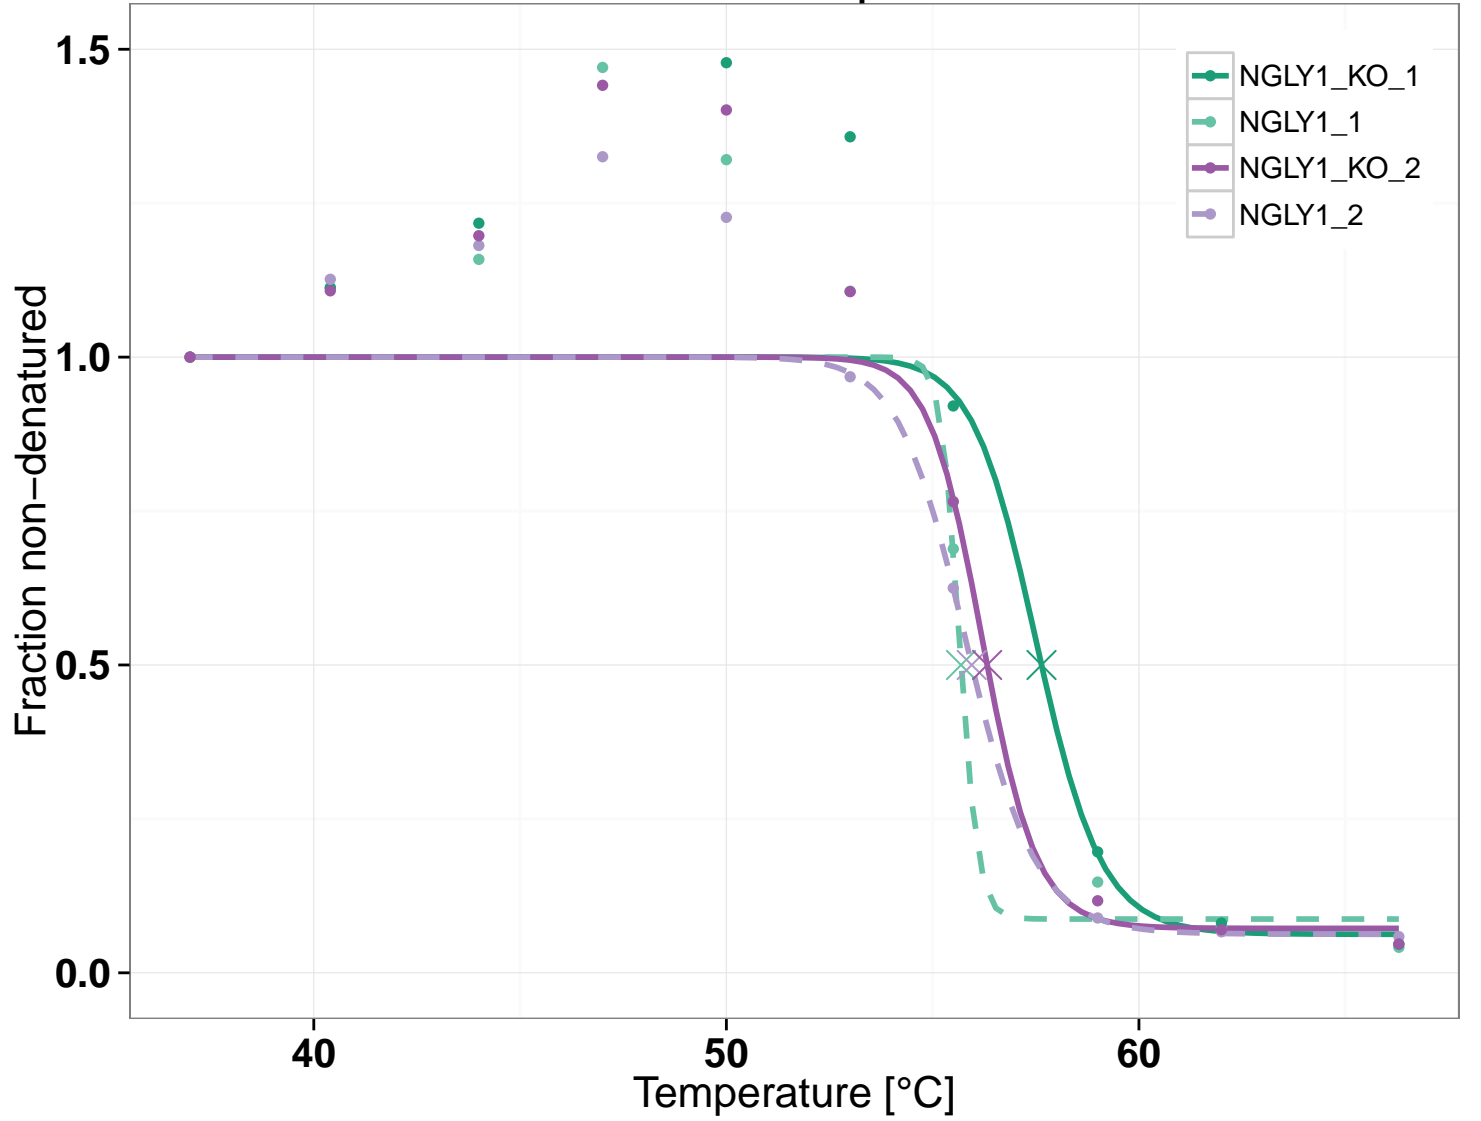

|            | meltPoint | slope | plateau | R2   |
|------------|-----------|-------|---------|------|
| NGLY1_KO_1 | 57.64     | -0.3  | 0.06    | 0.74 |
| NGLY1_1    | 55.69     | -1    | 0.09    | 0.86 |
| NGLY1_KO_2 | 56.32     | -0.36 | 0.07    | 0.85 |
| NGLY1_2    | 55.95     | -0.28 | 0.06    | 0.91 |

Supplement: Supplementary file 3654 [file 1]

IPI00888100.1|LOC390956

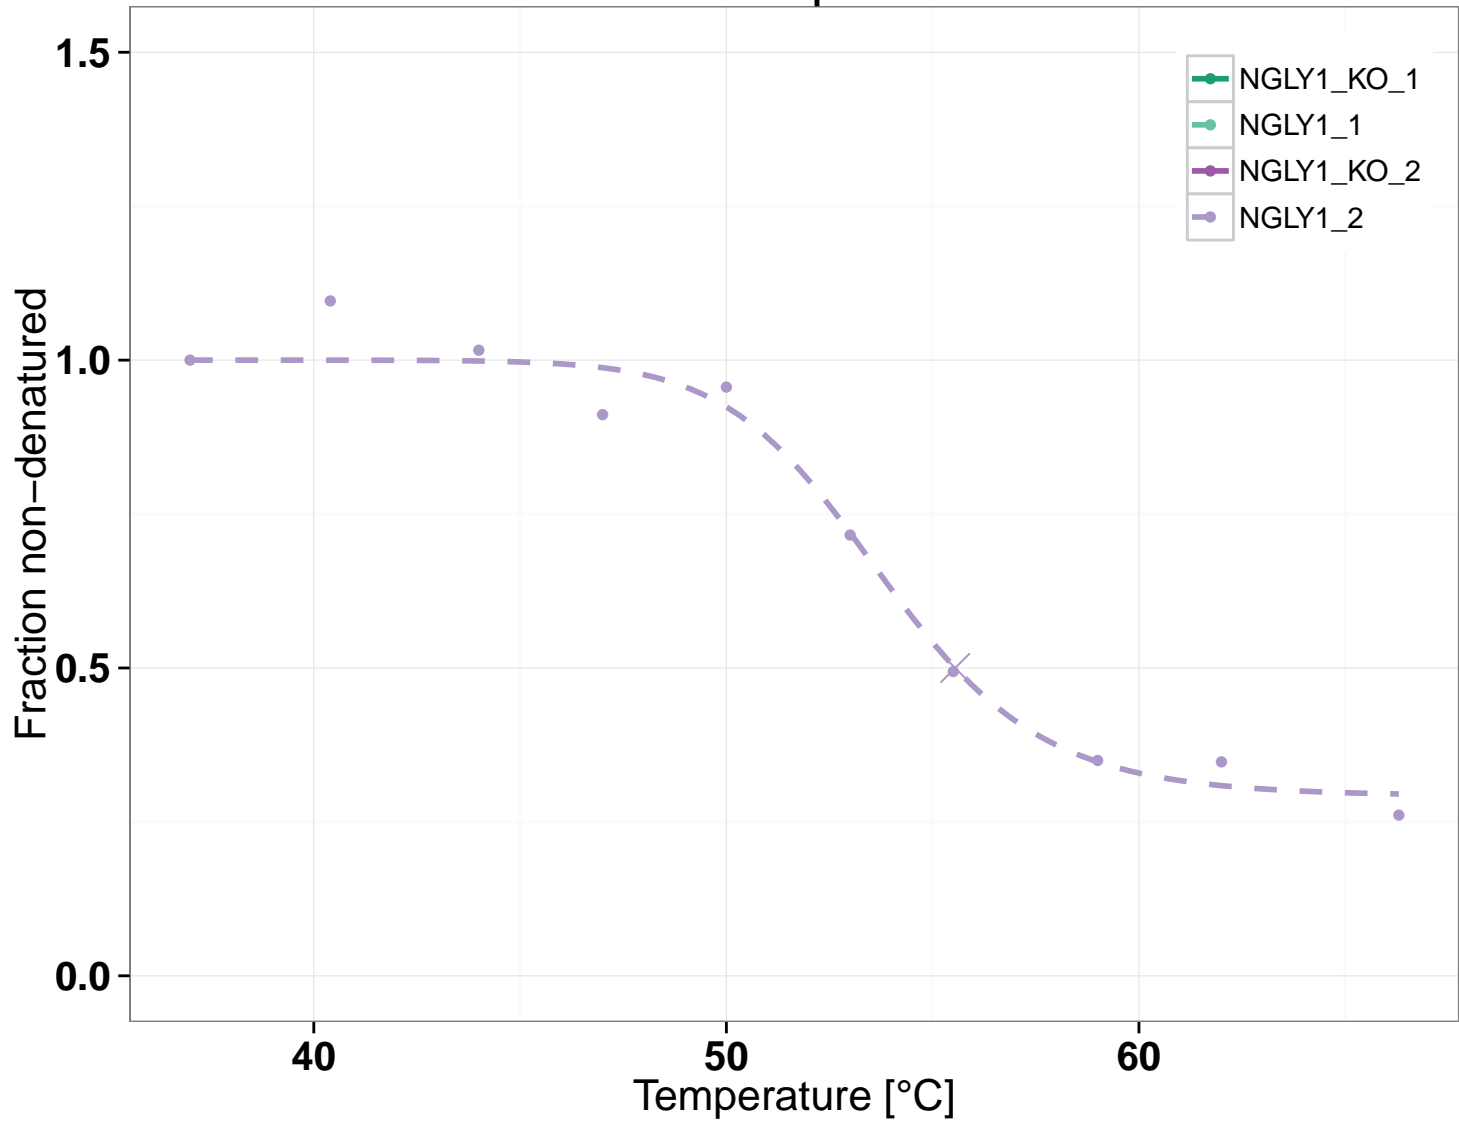

|            | meltPoint | slope  | plateau | R2   |
|------------|-----------|--------|---------|------|
| NGLY1_KO_1 | -         | -      | -       | -    |
| NGLY1_1    | -         | -      | -       | -    |
| NGLY1_KO_2 | -         | -      | -       | -    |
| NGLY1_2    | 55.55     | -0.092 | 0.29    | 0.98 |

Supplement: Supplementary file 3655 [file 1]

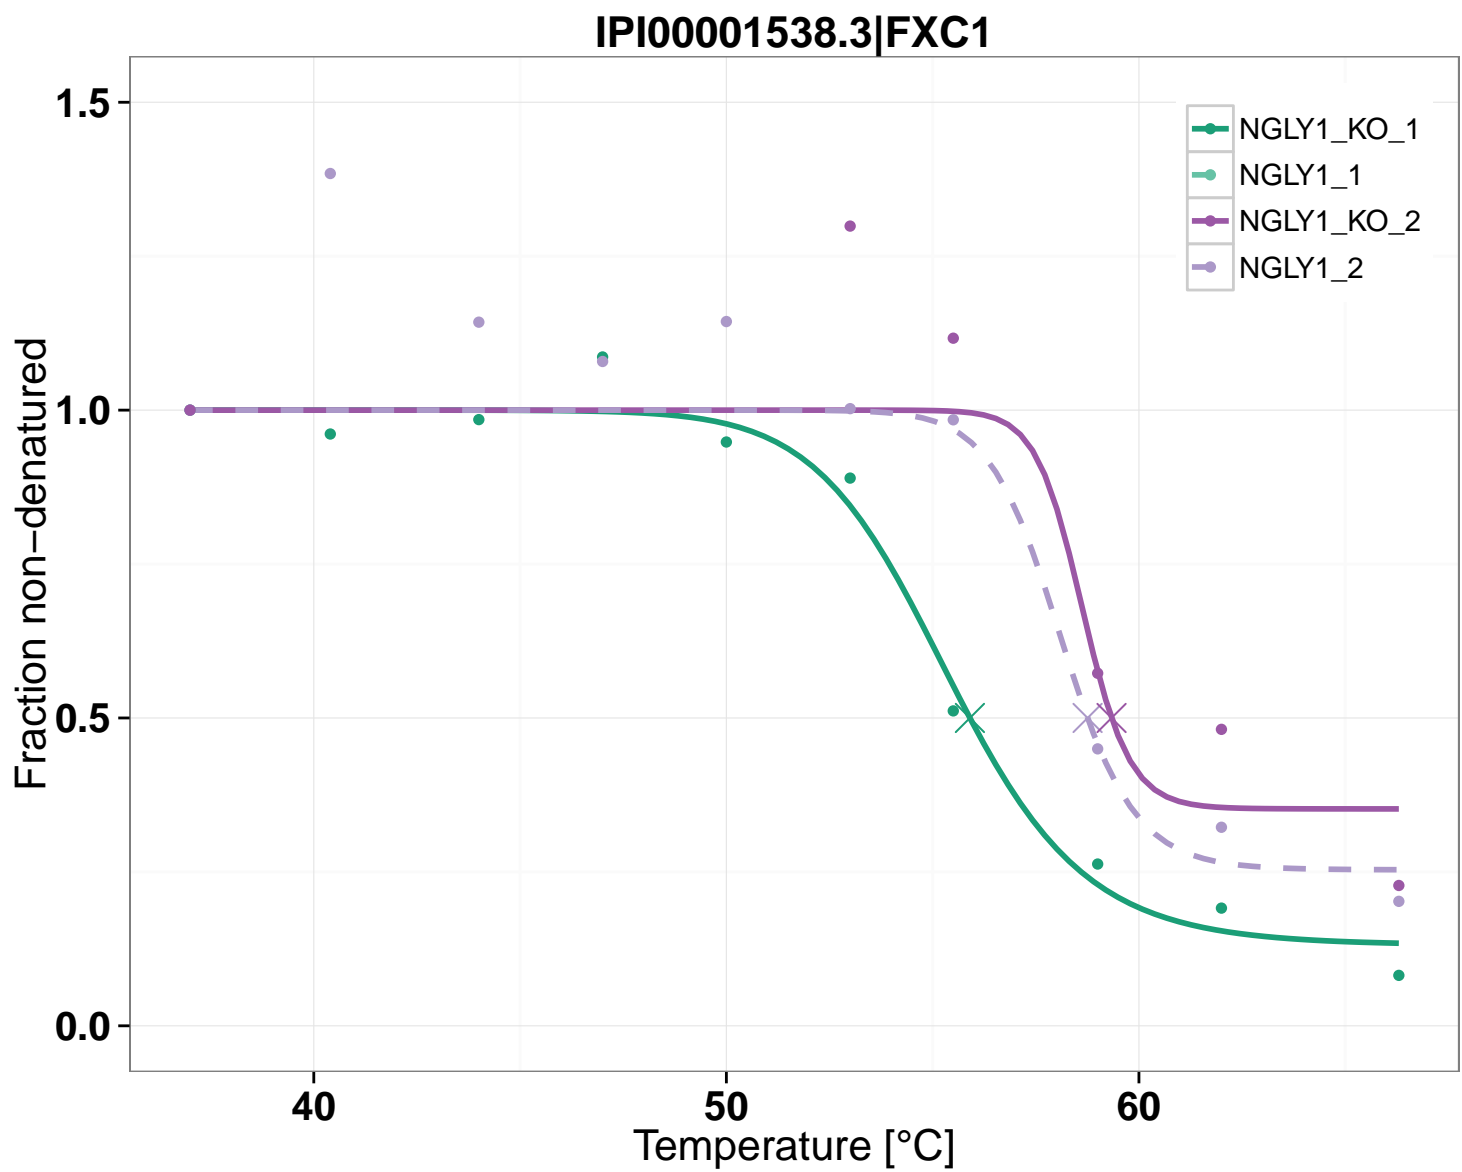

|            | meltPoint | slope | plateau | R2   |
|------------|-----------|-------|---------|------|
| NGLY1_KO_1 | 55.9      | -0.13 | 0.13    | 0.99 |
| NGLY1_1    | -         | -     | -       | -    |
| NGLY1_KO_2 | 59.34     | -0.29 | 0.35    | 0.28 |
| NGLY1_2    | 58.76     | -0.21 | 0.25    | 0.86 |

Supplement: Supplementary file 3656 [file 1]

IPI00045360.4|CIC

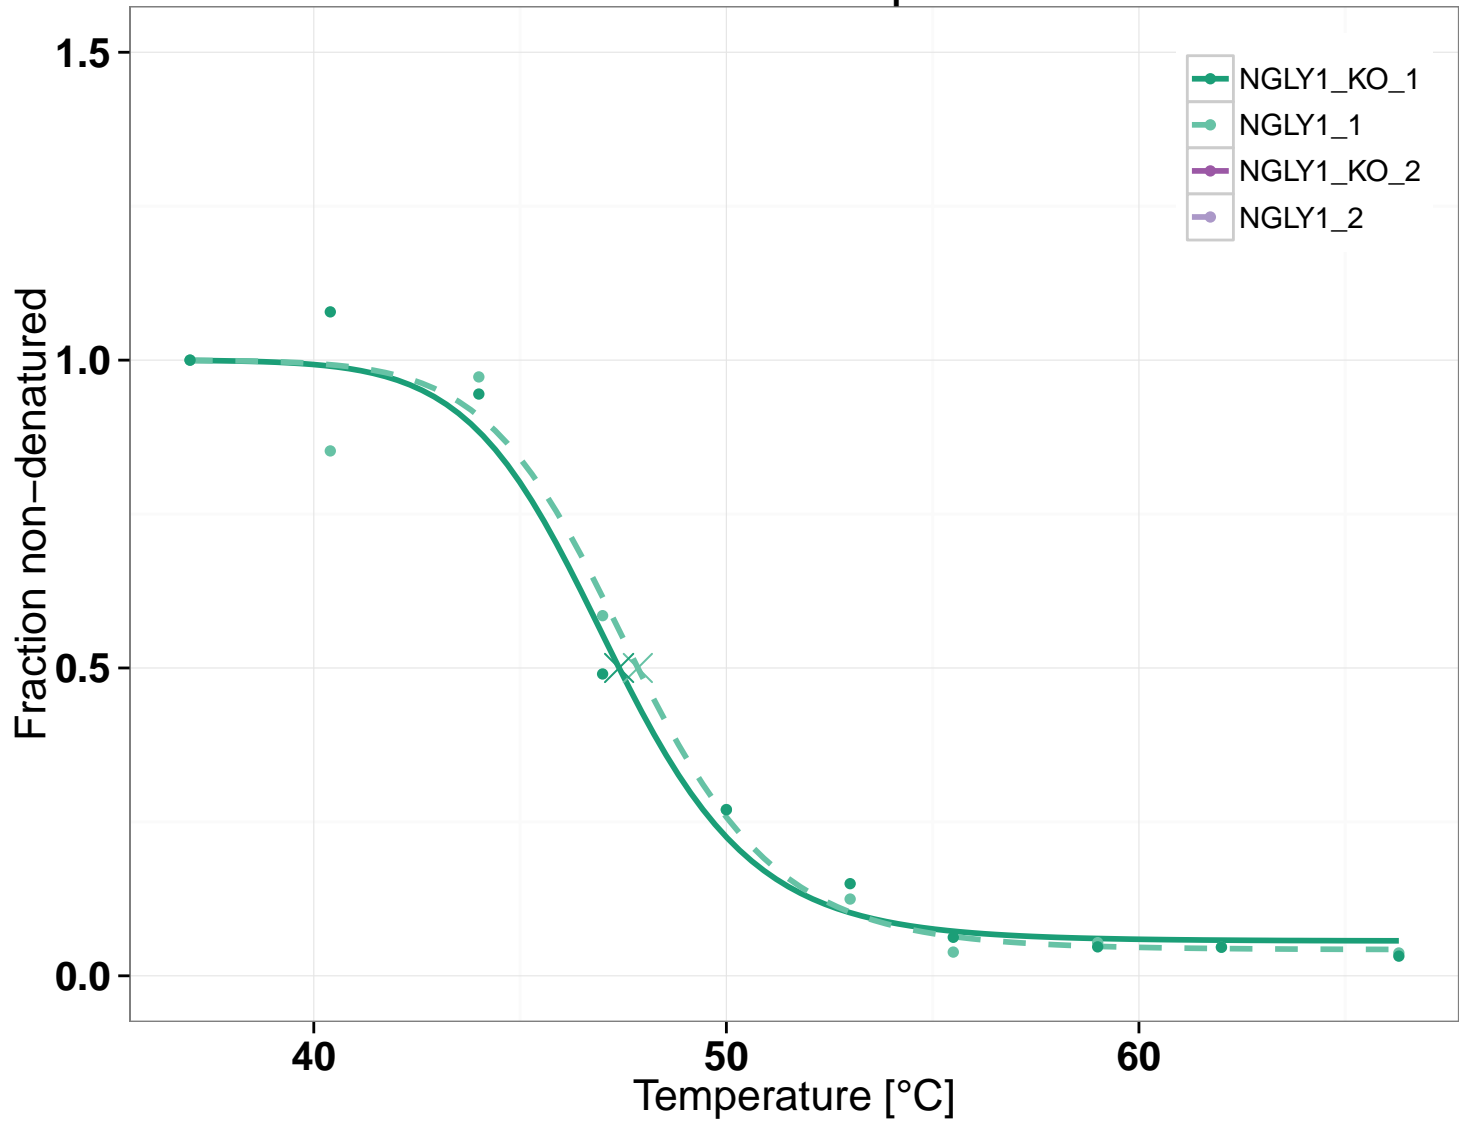

|            | meltPoint | slope | plateau | R2   |
|------------|-----------|-------|---------|------|
| NGLY1_KO_1 | 47.4      | -0.14 | 0.06    | 0.99 |
| NGLY1_1    | 47.85     | -0.14 | 0.04    | 0.98 |
| NGLY1_KO_2 | -         | -     | -       | -    |
| NGLY1_2    | -         | -     | -       | -    |

Supplement: Supplementary file 3657 [file 1]

IPI00002557.1|COPG2

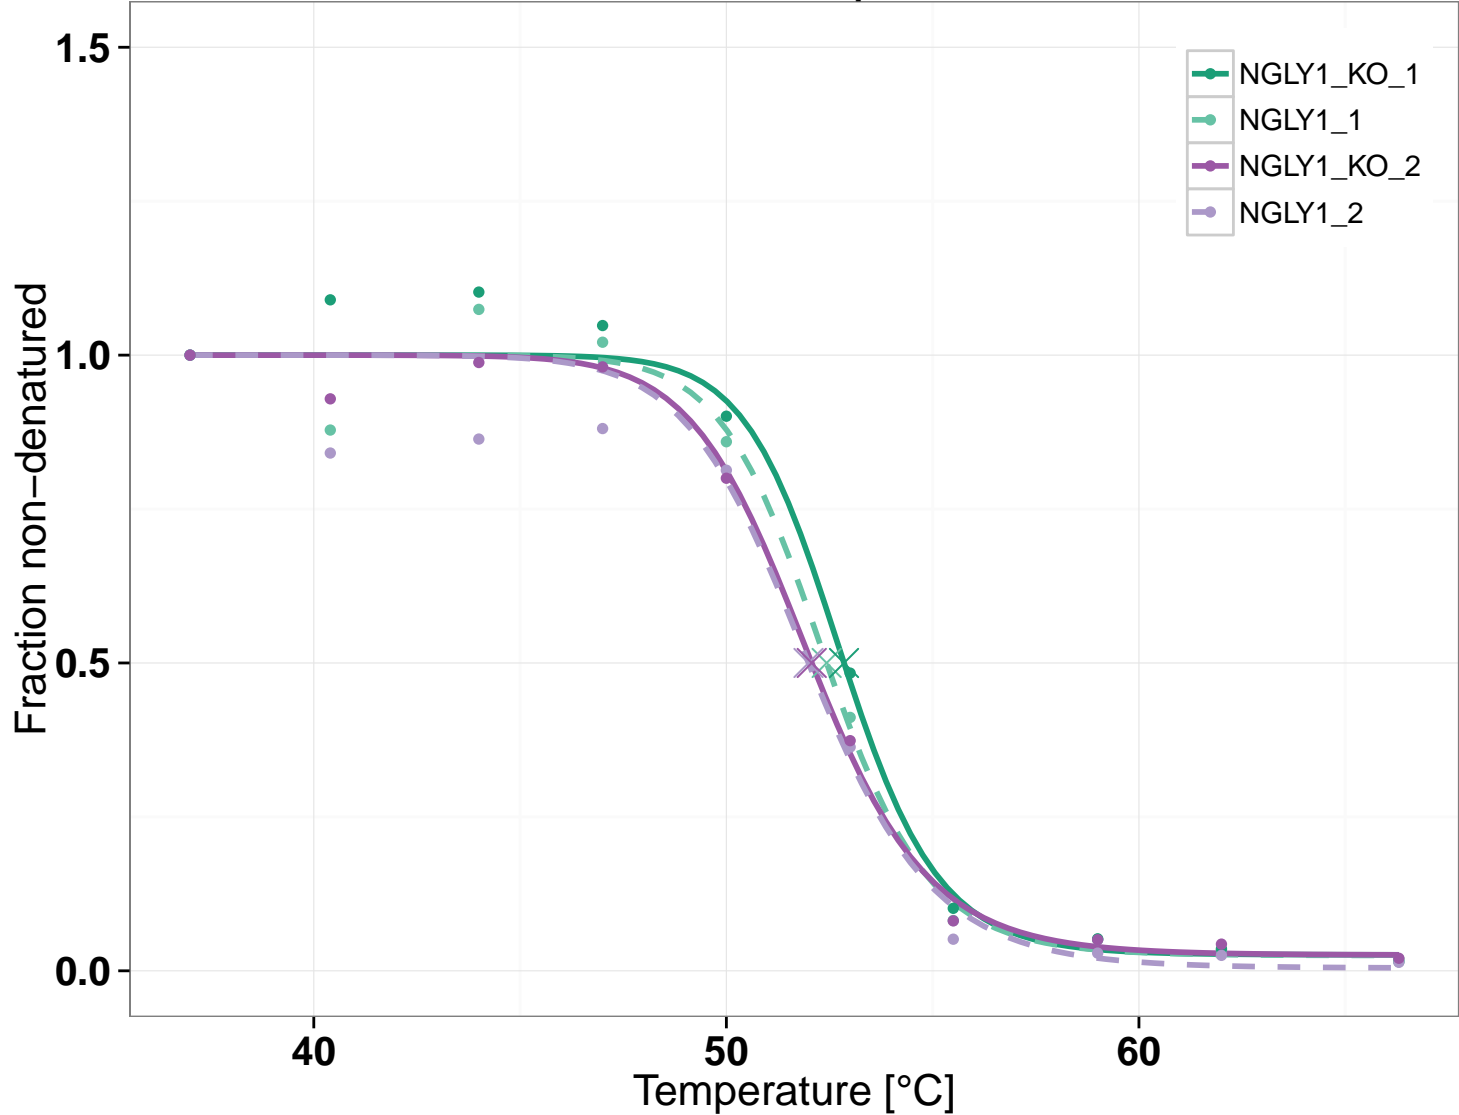

|            | meltPoint | slope | plateau | R2   |
|------------|-----------|-------|---------|------|
| NGLY1_KO_1 | 52.85     | -0.21 | 0.03    | 0.99 |
| NGLY1_1    | 52.43     | -0.19 | 0.02    | 0.99 |
| NGLY1_KO_2 | 52.07     | -0.17 | 0.03    | 1    |
| NGLY1_2    | 51.99     | -0.17 | 0       | 0.97 |

Supplement: Supplementary file 3658 [file 1]

IPI00028077.1|PSEN1

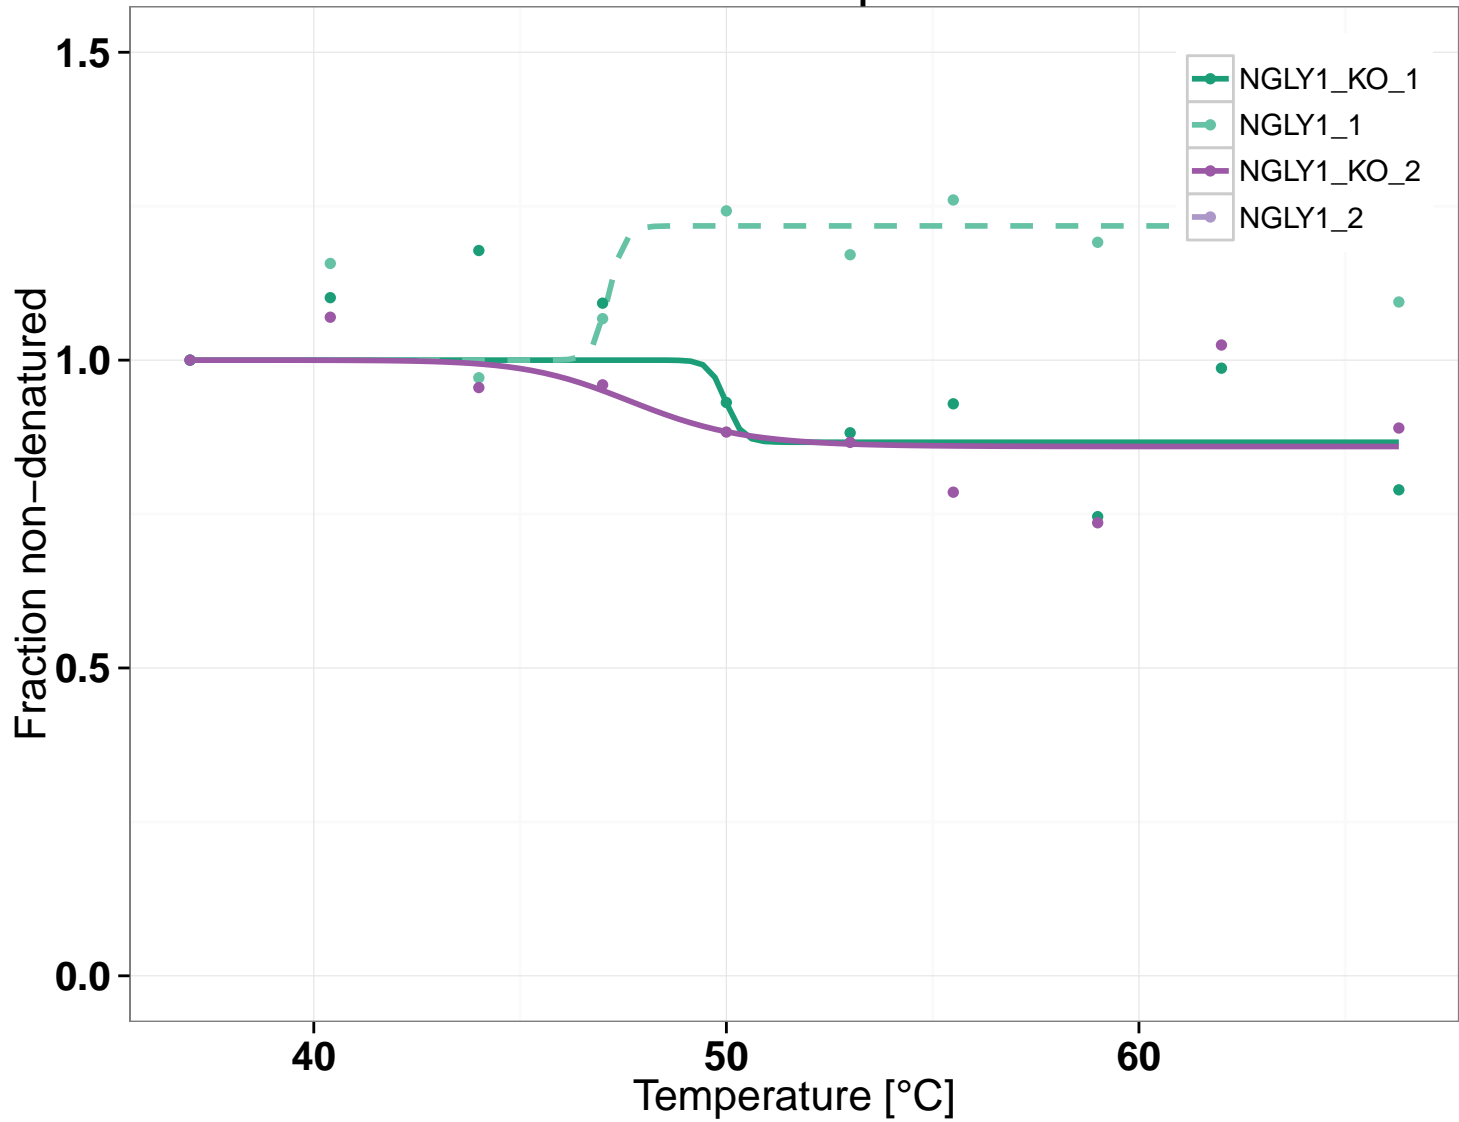

|            | meltPoint | slope  | plateau | R2   |
|------------|-----------|--------|---------|------|
| NGLY1_KO_1 | -         | -0.17  | 0.87    | 0.47 |
| NGLY1_1    | -         | 0.29   | 1.22    | 0.5  |
| NGLY1_KO_2 | -         | -0.026 | 0.86    | 0.44 |
| NGLY1_2    | -         | -      | -       | -    |

Supplement: Supplementary file 3659 [file 1]

# IPI00916332.1|MLL3

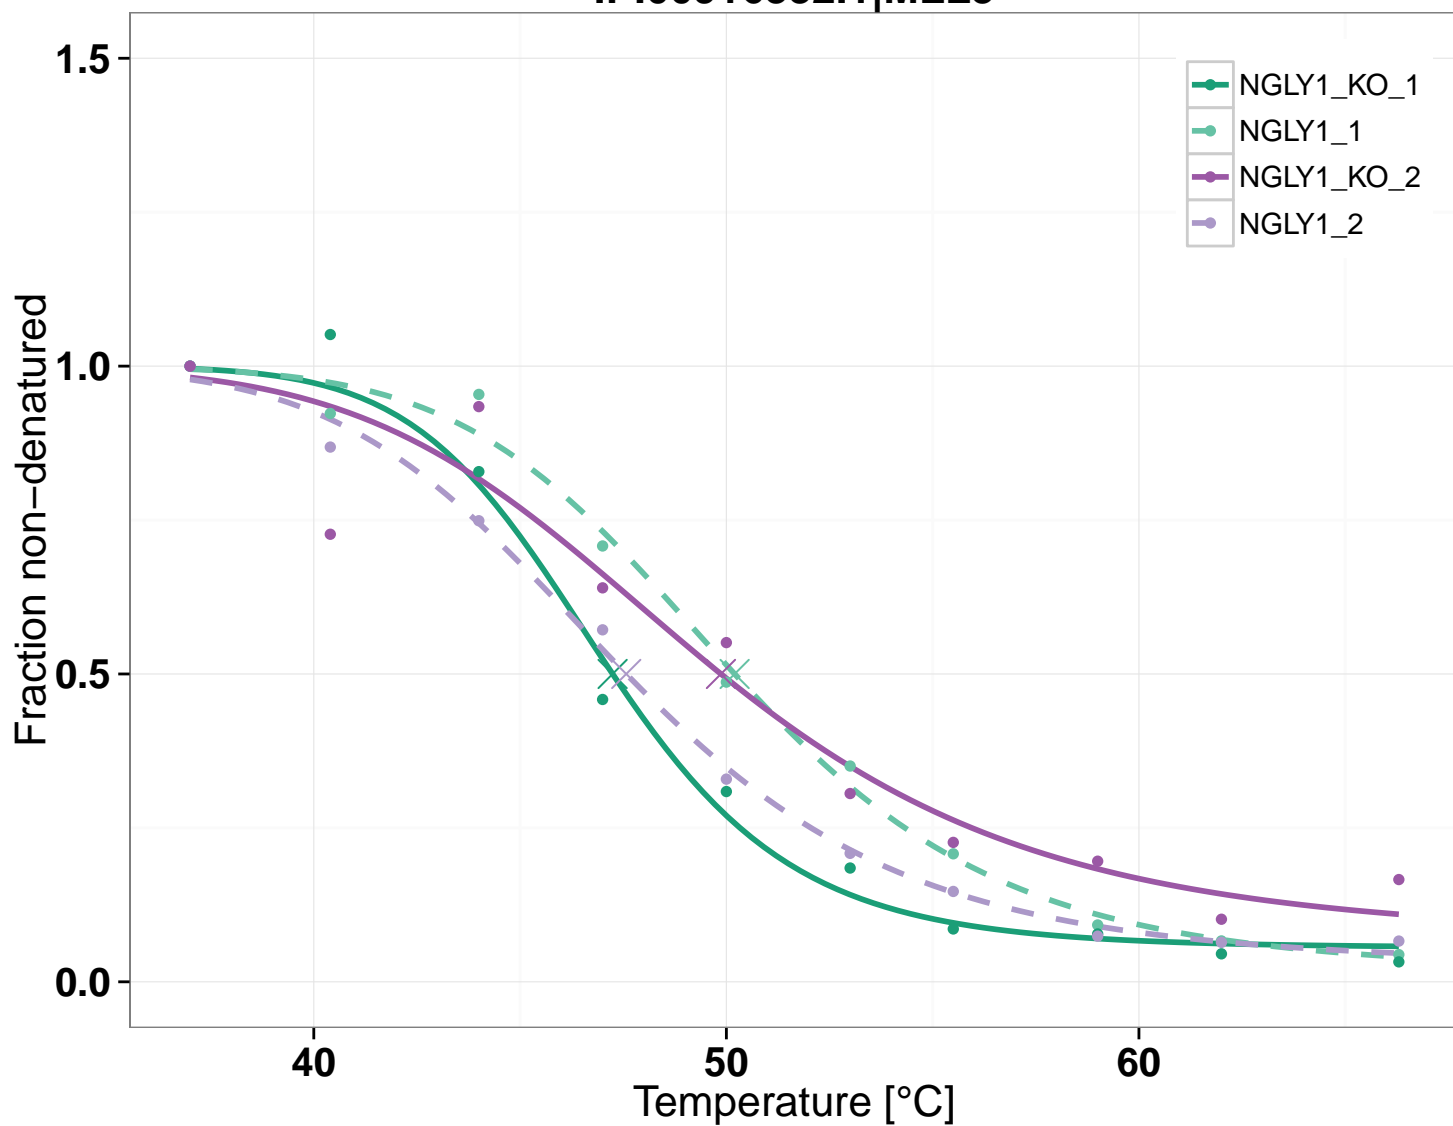

|            | meltPoint | slope  | plateau | R2   |
|------------|-----------|--------|---------|------|
| NGLY1_KO_1 | 47.24     | -0.1   | 0.06    | 0.99 |
| NGLY1_1    | 50.2      | -0.075 | 0.02    | 0.99 |
| NGLY1_KO_2 | 49.87     | -0.057 | 0.07    | 0.93 |
| NGLY1_2    | 47.57     | -0.071 | 0.03    | 1    |

Supplement: Supplementary file 3660 [file 1]

IPI00032635.1|LSM14B

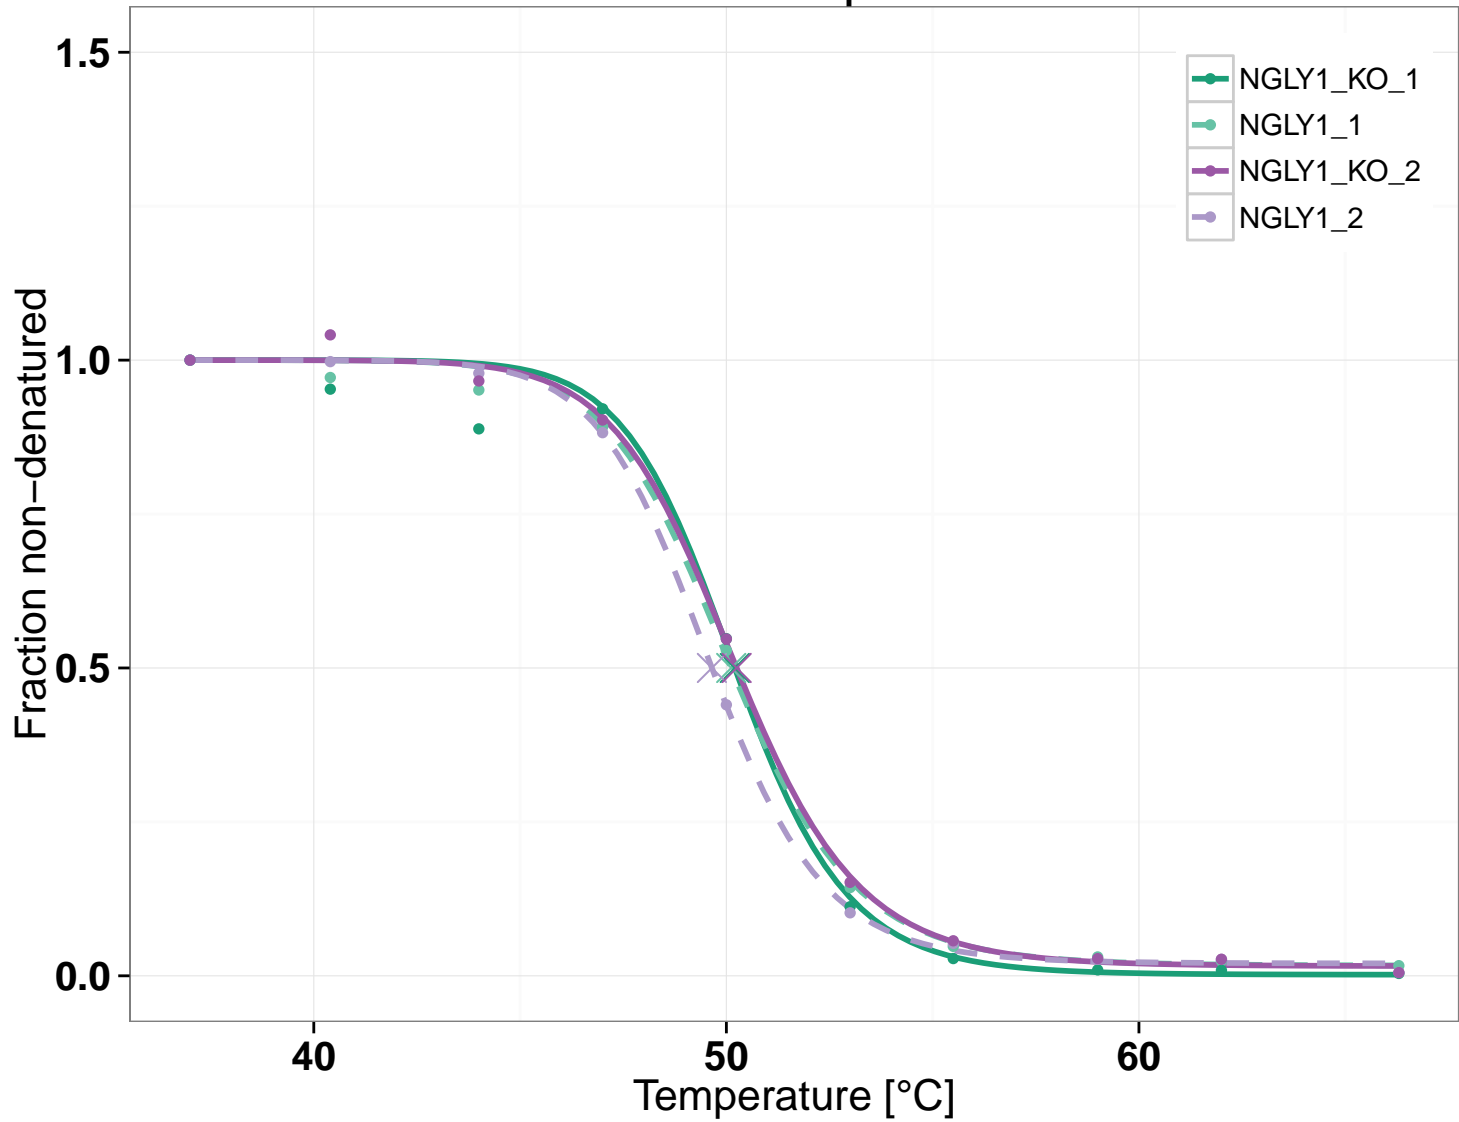

|            | meltPoint | slope | plateau | R2   |
|------------|-----------|-------|---------|------|
| NGLY1_KO_1 | 50.2      | -0.18 | 0       | 0.99 |
| NGLY1_1    | 50.12     | -0.16 | 0.02    | 1    |
| NGLY1_KO_2 | 50.25     | -0.16 | 0.02    | 1    |
| NGLY1_2    | 49.65     | -0.18 | 0.02    | 1    |

Supplement: Supplementary file 3661 [file 1]

IPI00329301.3|NDUFA11

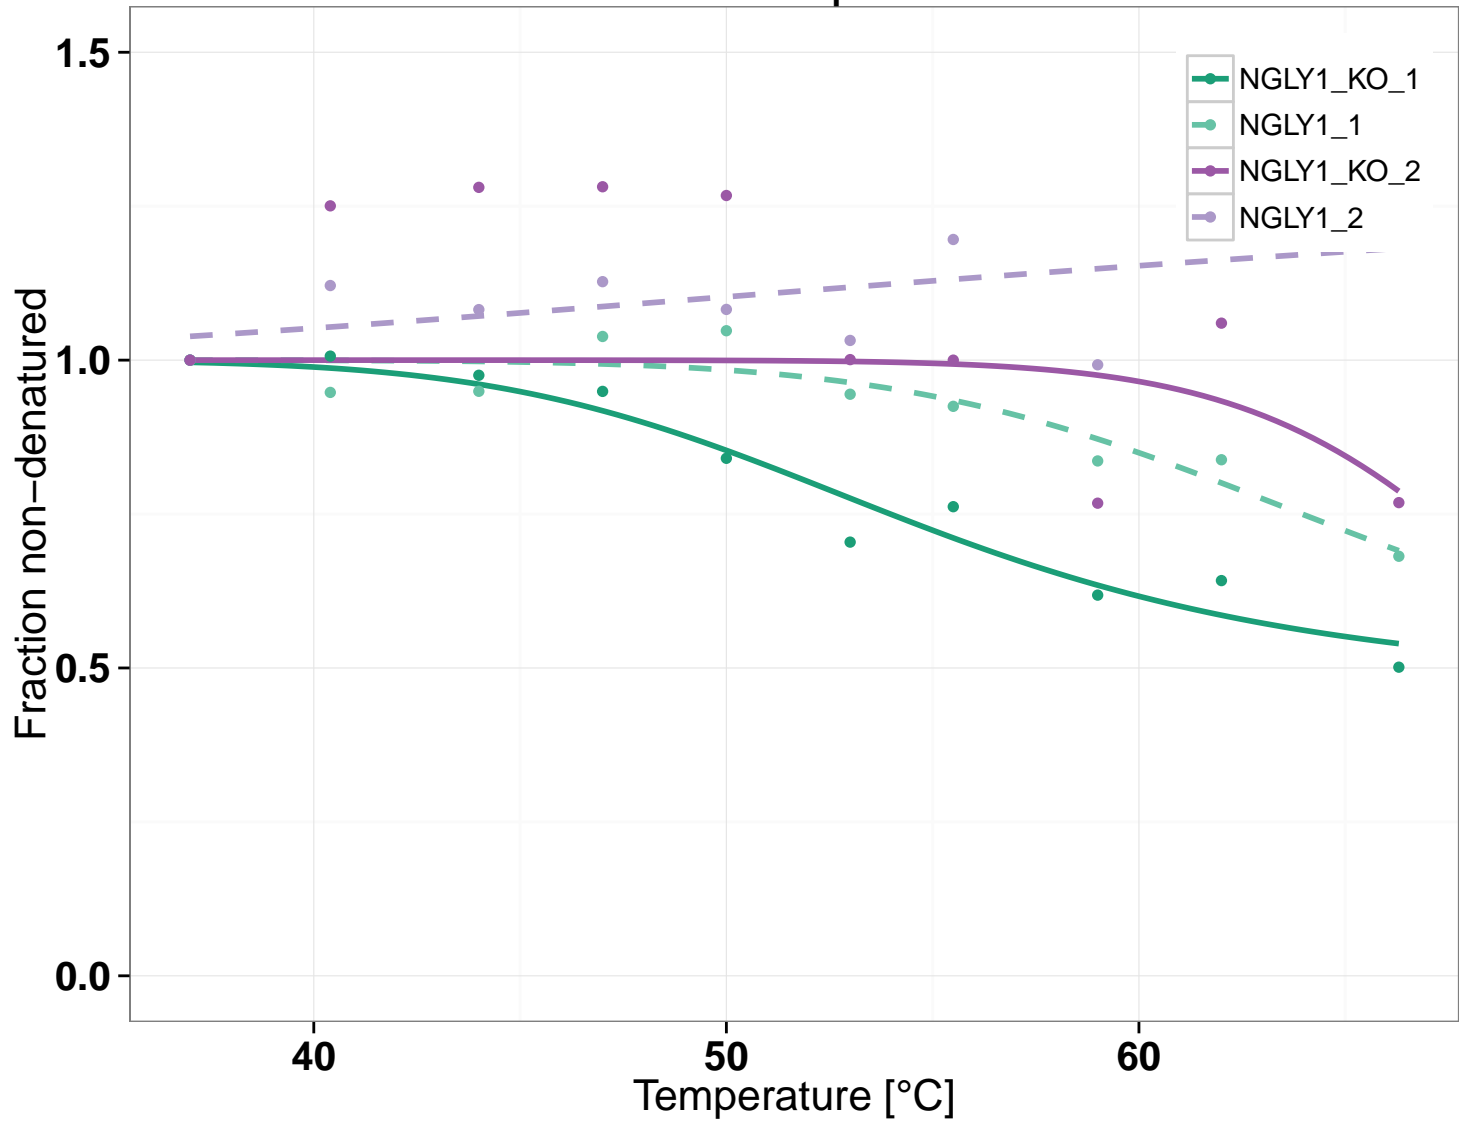

|            | meltPoint | slope  | plateau | R2   |
|------------|-----------|--------|---------|------|
| NGLY1_KO_1 | -         | -0.027 | 0.47    | 0.95 |
| NGLY1_1    | -         | -0.026 | 0.43    | 0.87 |
| NGLY1_KO_2 | -         | -      | 0       | 0.01 |
| NGLY1_2    | -         | 0.0053 | 1.5     | 0.26 |

Supplement: Supplementary file 3662 [file 1]

# IPI00303722.5|FAM136A

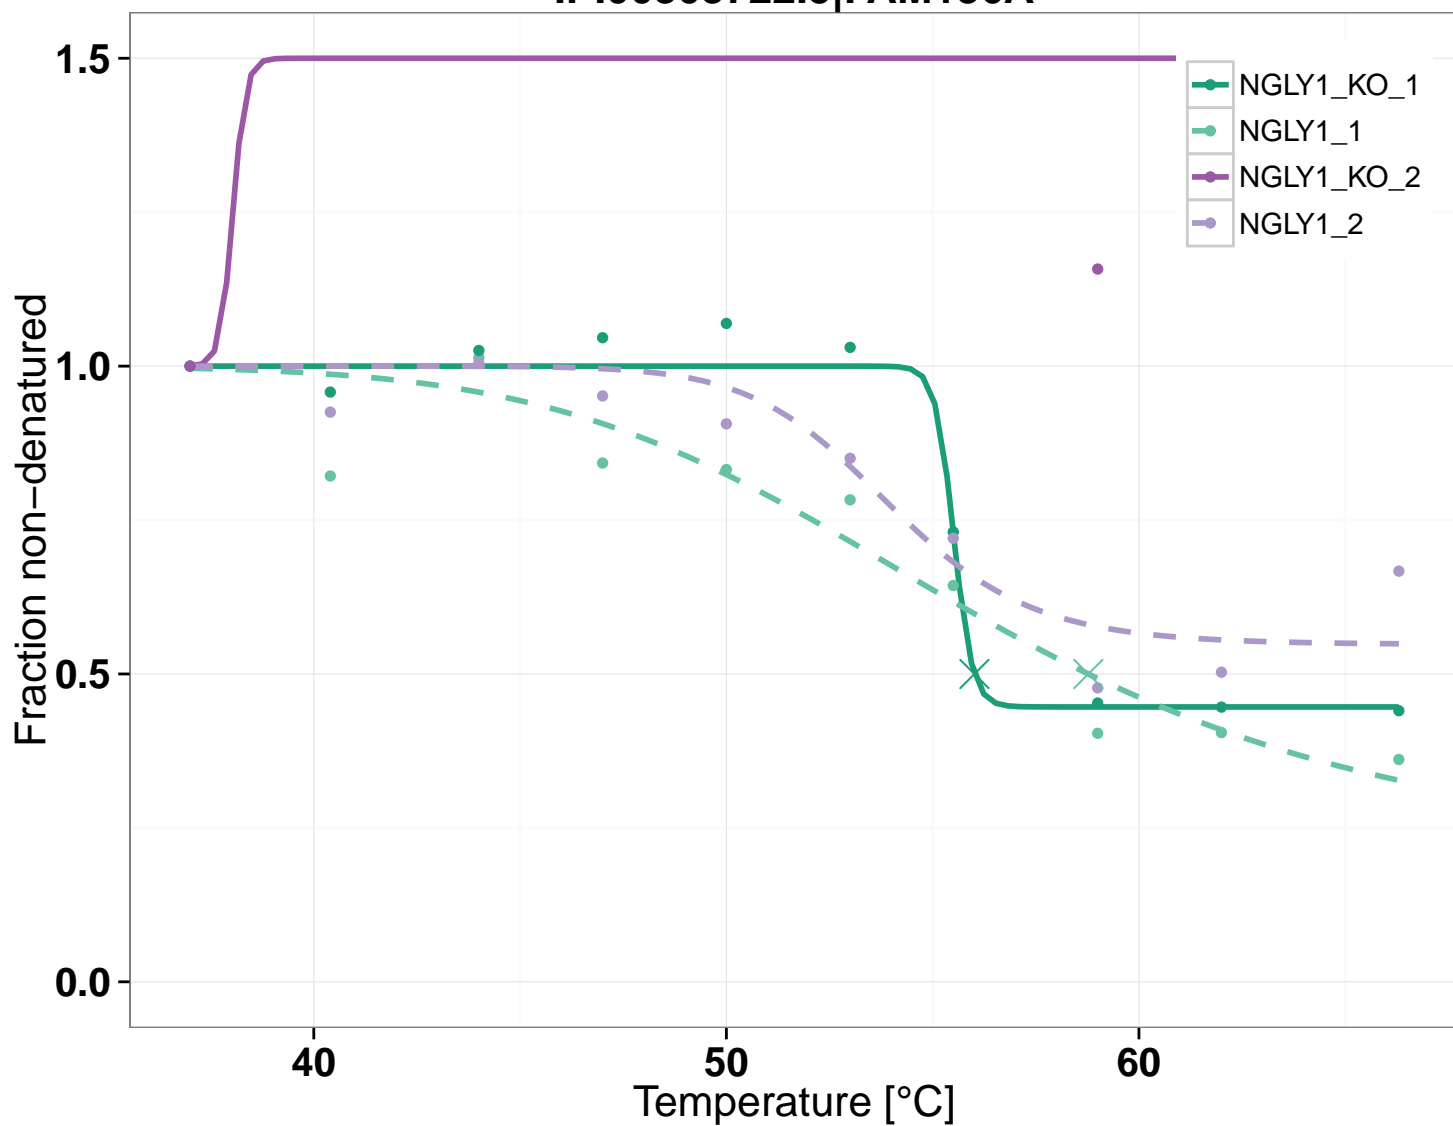

|            | meltPoint | slope  | plateau | R2    |
|------------|-----------|--------|---------|-------|
| NGLY1_KO_1 | 56.01     | -0.62  | 0.45    | 0.98  |
| NGLY1_1    | 58.77     | -0.039 | 0.2     | 0.91  |
| NGLY1_KO_2 | -         | 0.82   | 1.5     | -0.46 |
| NGLY1_2    | -         | -0.066 | 0.55    | 0.89  |

Supplement: Supplementary file 3663 [file 1]

IPI00412792.2|BTF3L4

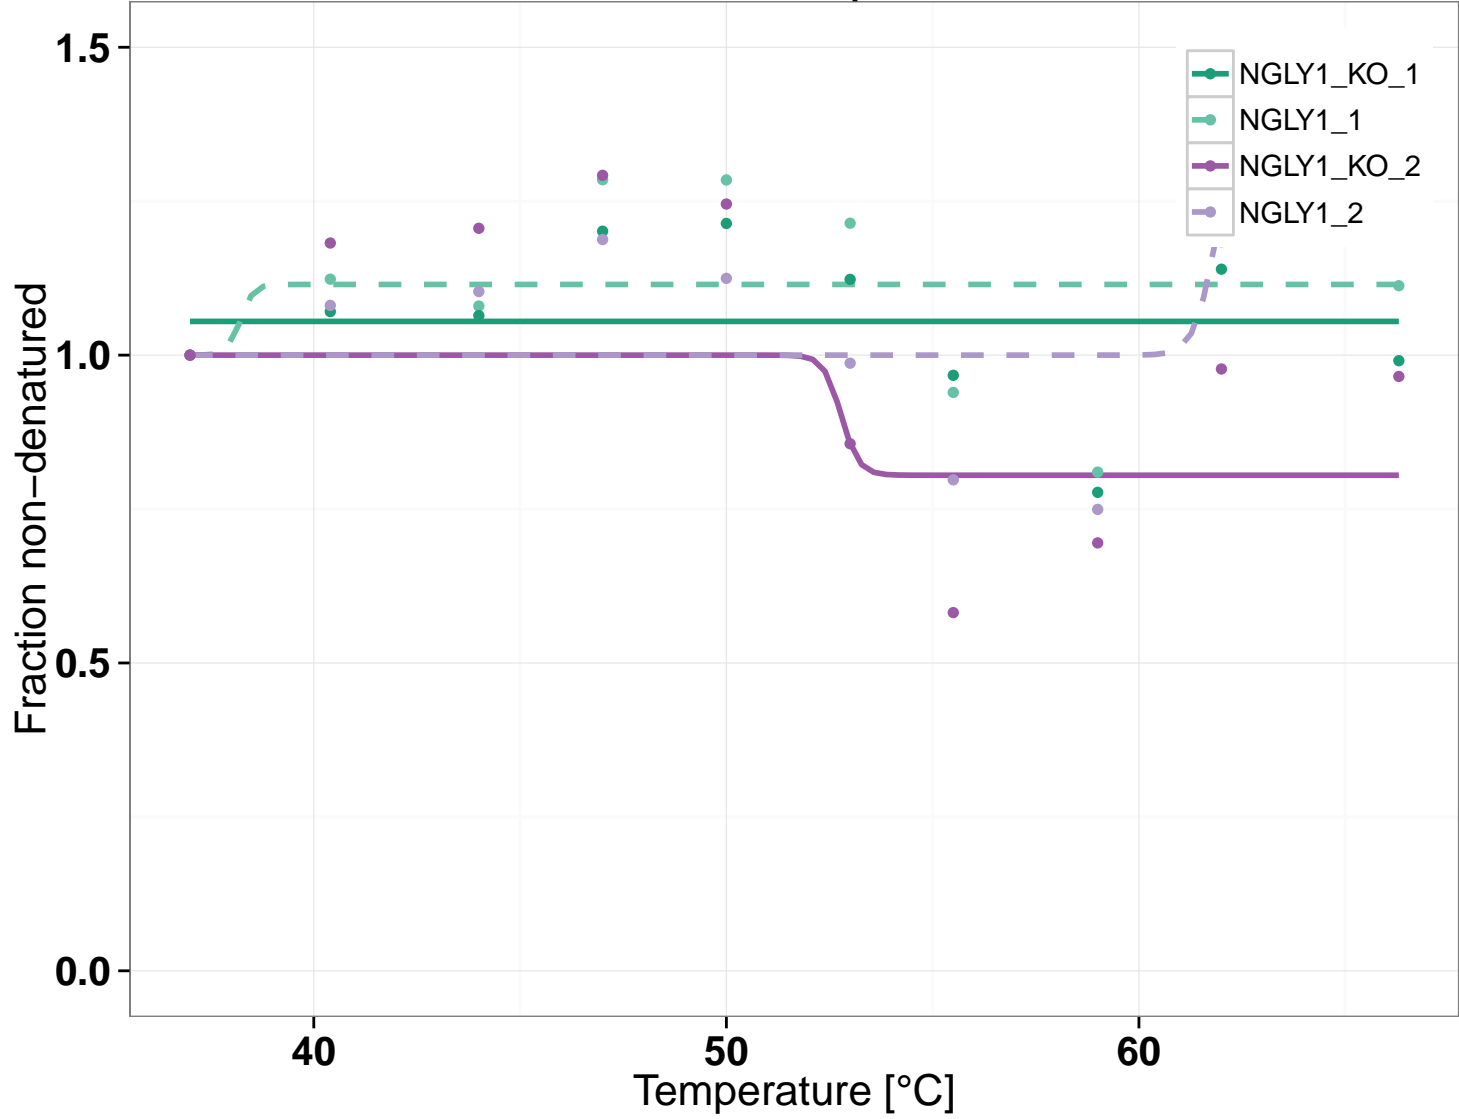

|            | meltPoint | slope | plateau | R2   |
|------------|-----------|-------|---------|------|
| NGLY1_KO_1 | -         | -     | 1.05    | 0    |
| NGLY1_1    | -         | 0.19  | 1.11    | 0.06 |
| NGLY1_KO_2 | -         | -0.23 | 0.8     | 0.34 |
| NGLY1_2    | -         | 0.34  | 1.34    | 0.44 |

Supplement: Supplementary file 3664 [file 1]

IPI00012345.2|SFRS6

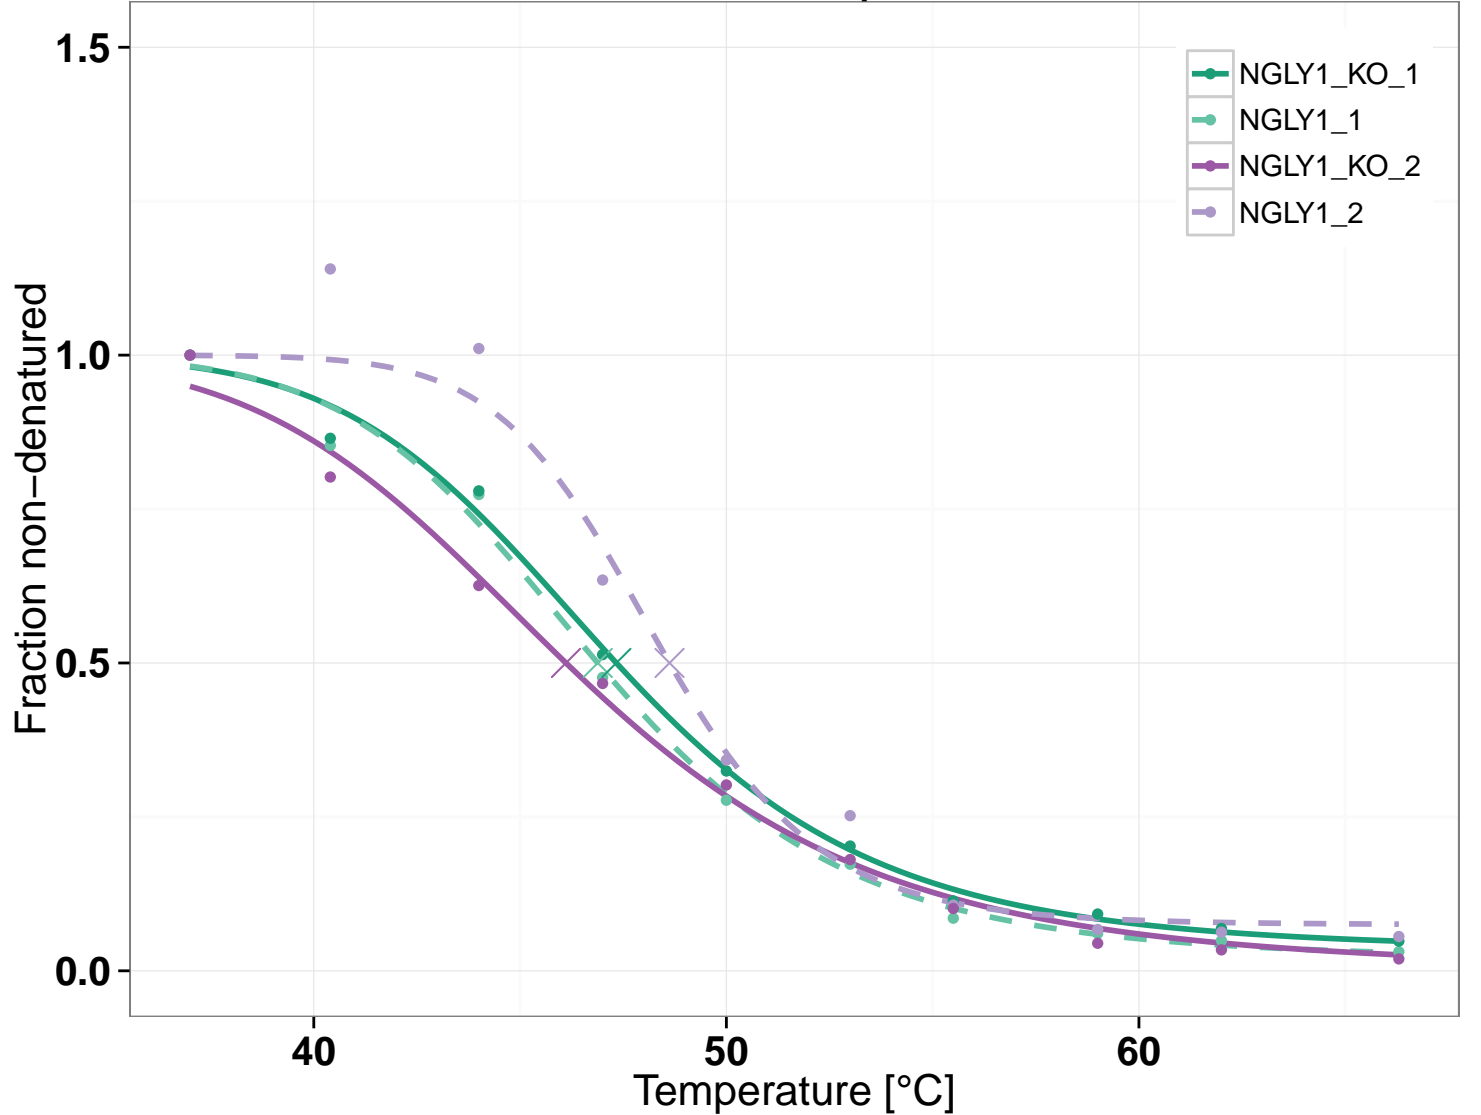

|            | meltPoint | slope  | plateau | R2   |
|------------|-----------|--------|---------|------|
| NGLY1_KO_1 | 47.33     | -0.075 | 0.03    | 1    |
| NGLY1_1    | 46.88     | -0.081 | 0.02    | 0.99 |
| NGLY1_KO_2 | 46.11     | -0.066 | 0       | 0.99 |
| NGLY1_2    | 48.62     | -0.12  | 0.07    | 0.98 |

Supplement: Supplementary file 3665 [file 1]

# IPI00411614.1|WDHD1

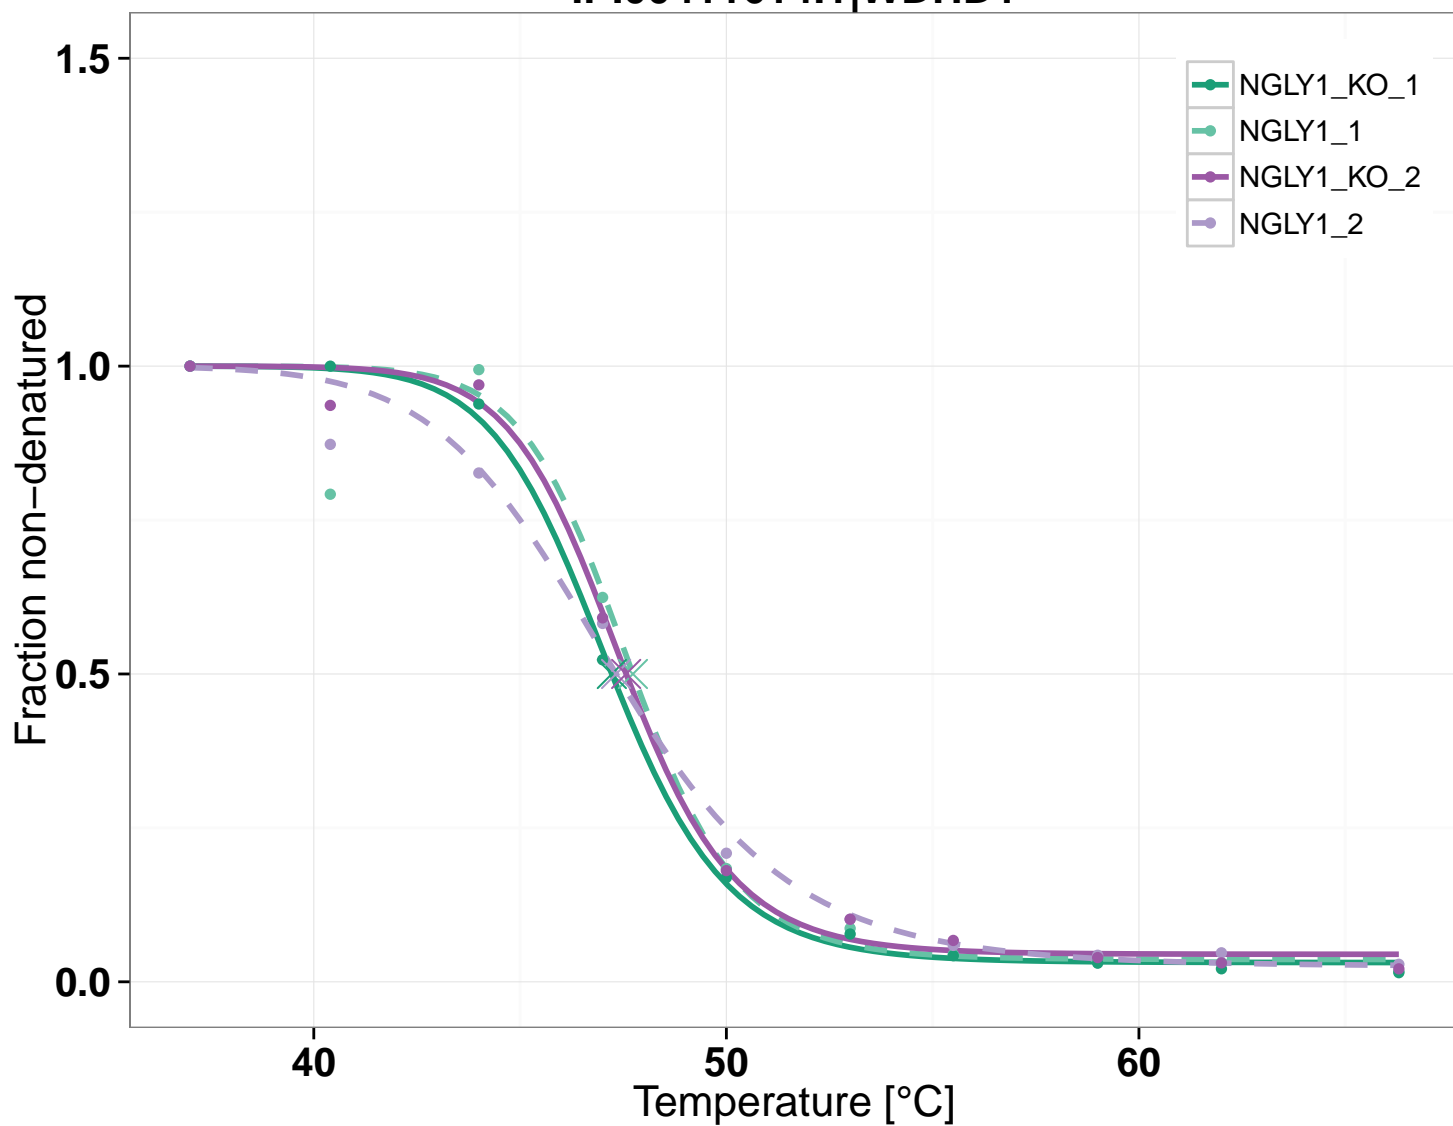

|            | meltPoint | slope | plateau | R2   |
|------------|-----------|-------|---------|------|
| NGLY1_KO_1 | 47.22     | -0.17 | 0.03    | 1    |
| NGLY1_1    | 47.73     | -0.18 | 0.04    | 0.97 |
| NGLY1_KO_2 | 47.57     | -0.18 | 0.04    | 1    |
| NGLY1_2    | 47.33     | -0.11 | 0.02    | 0.99 |

Supplement: Supplementary file 3666 [file 1]

IPI00301204.2|RDH13

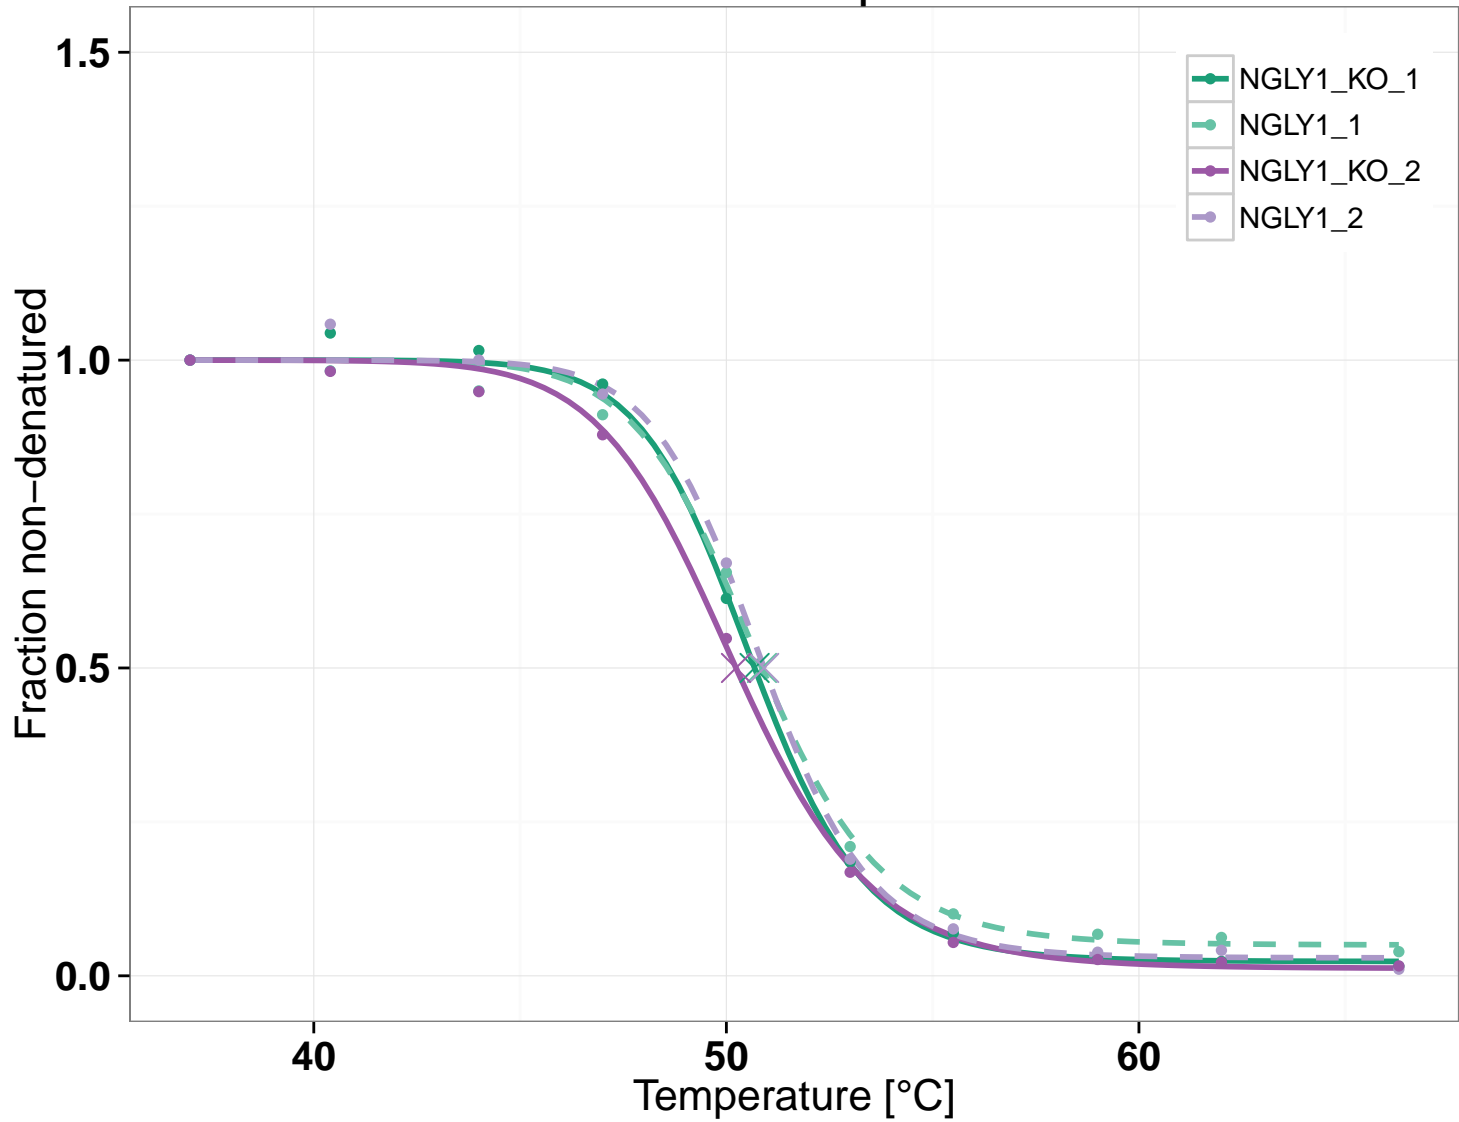

|            | meltPoint | slope | plateau | R2 |
|------------|-----------|-------|---------|----|
| NGLY1_KO_1 | 50.68     | -0.18 | 0.02    | 1  |
| NGLY1_1    | 50.86     | -0.16 | 0.05    | 1  |
| NGLY1_KO_2 | 50.23     | -0.15 | 0.01    | 1  |
| NGLY1_2    | 50.92     | -0.18 | 0.03    | 1  |

Supplement: Supplementary file 3667 [file 1]

# IPI00382432.1|GNPTAB

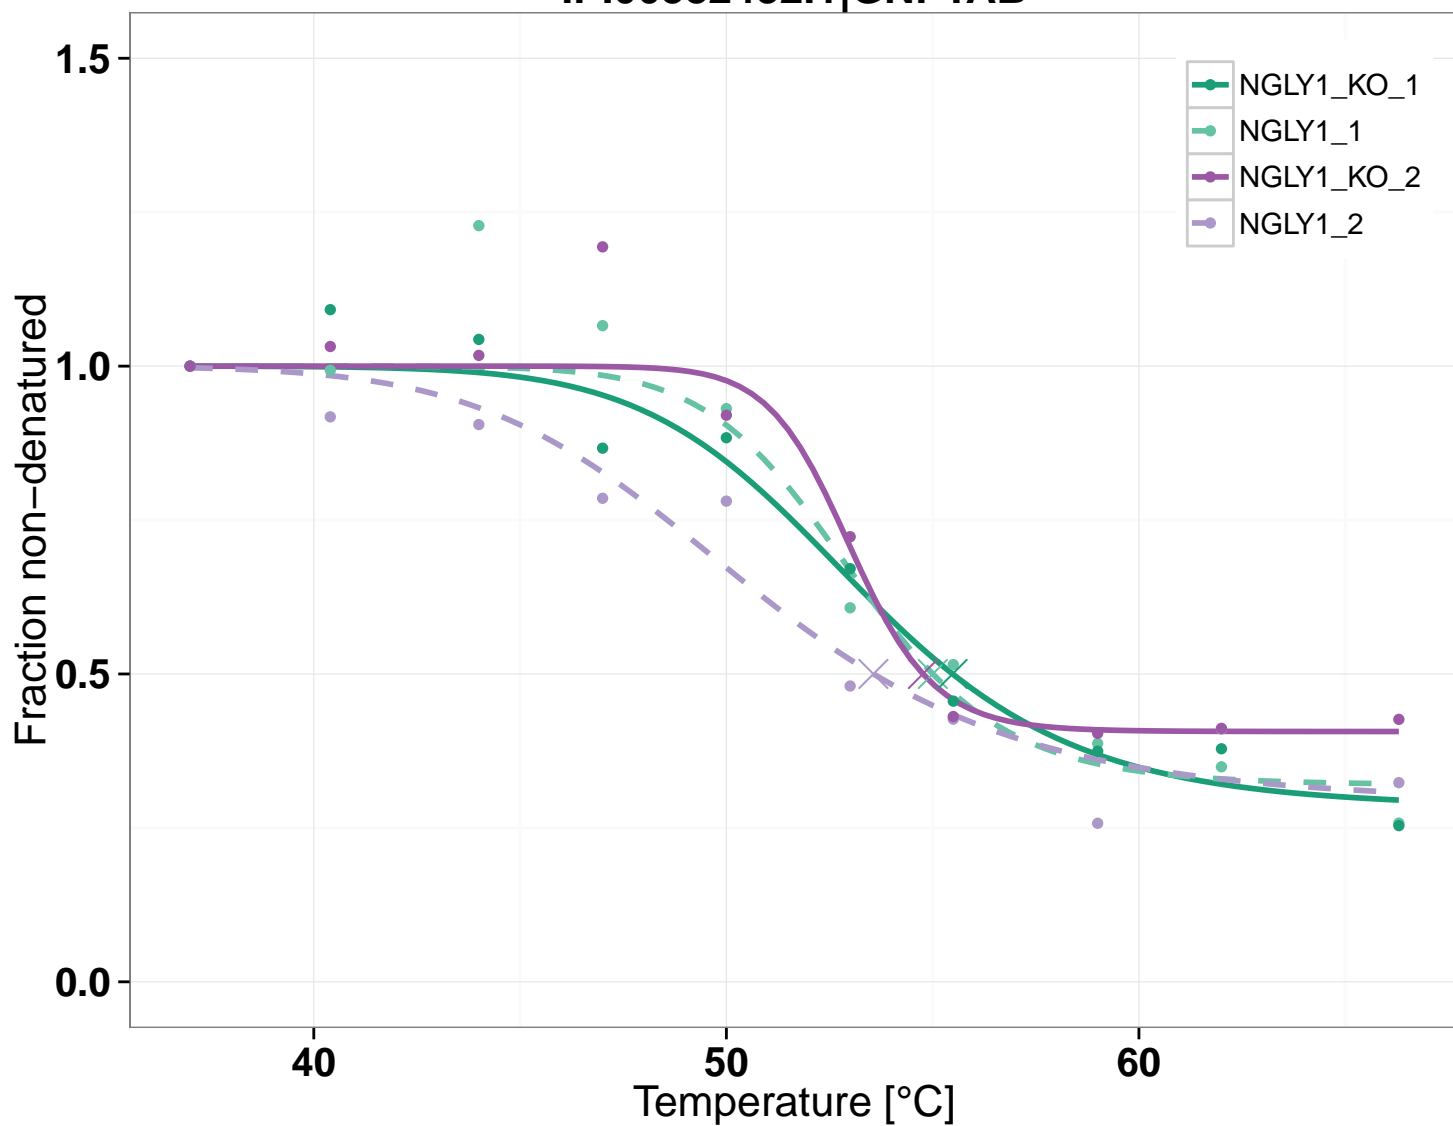

|            | meltPoint | slope  | plateau | R2   |
|------------|-----------|--------|---------|------|
| NGLY1_KO_1 | 55.48     | -0.069 | 0.28    | 0.97 |
| NGLY1_1    | 55        | -0.094 | 0.32    | 0.93 |
| NGLY1_KO_2 | 54.76     | -0.15  | 0.41    | 0.95 |
| NGLY1_2    | 53.56     | -0.054 | 0.29    | 0.94 |

Supplement: Supplementary file 3668 [file 1]

IPI00152083.3|C7ORF11

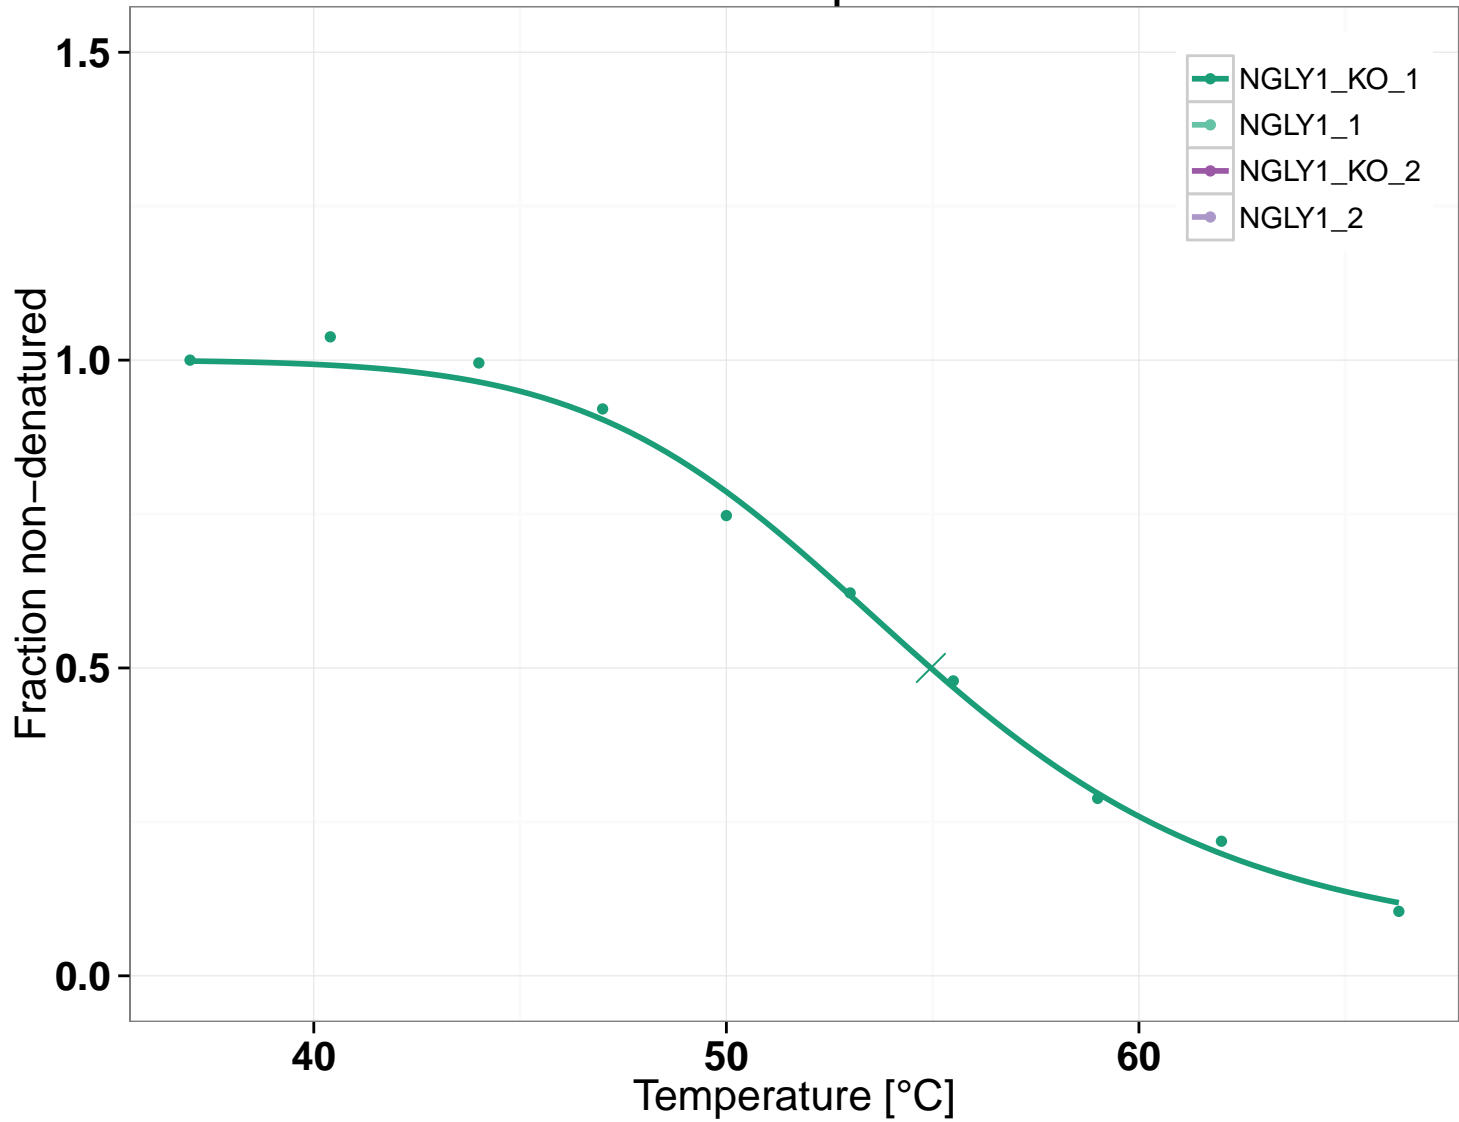

|            | meltPoint | slope  | plateau | R2   |
|------------|-----------|--------|---------|------|
| NGLY1_KO_1 | 54.96     | -0.061 | 0.04    | 0.99 |
| NGLY1_1    | —         | —      | —       | —    |
| NGLY1_KO_2 | —         | —      | —       | —    |
| NGLY1_2    | —         | —      | —       | —    |

Supplement: Supplementary file 3669 [file 1]

IPI00413900.5|RTEL1

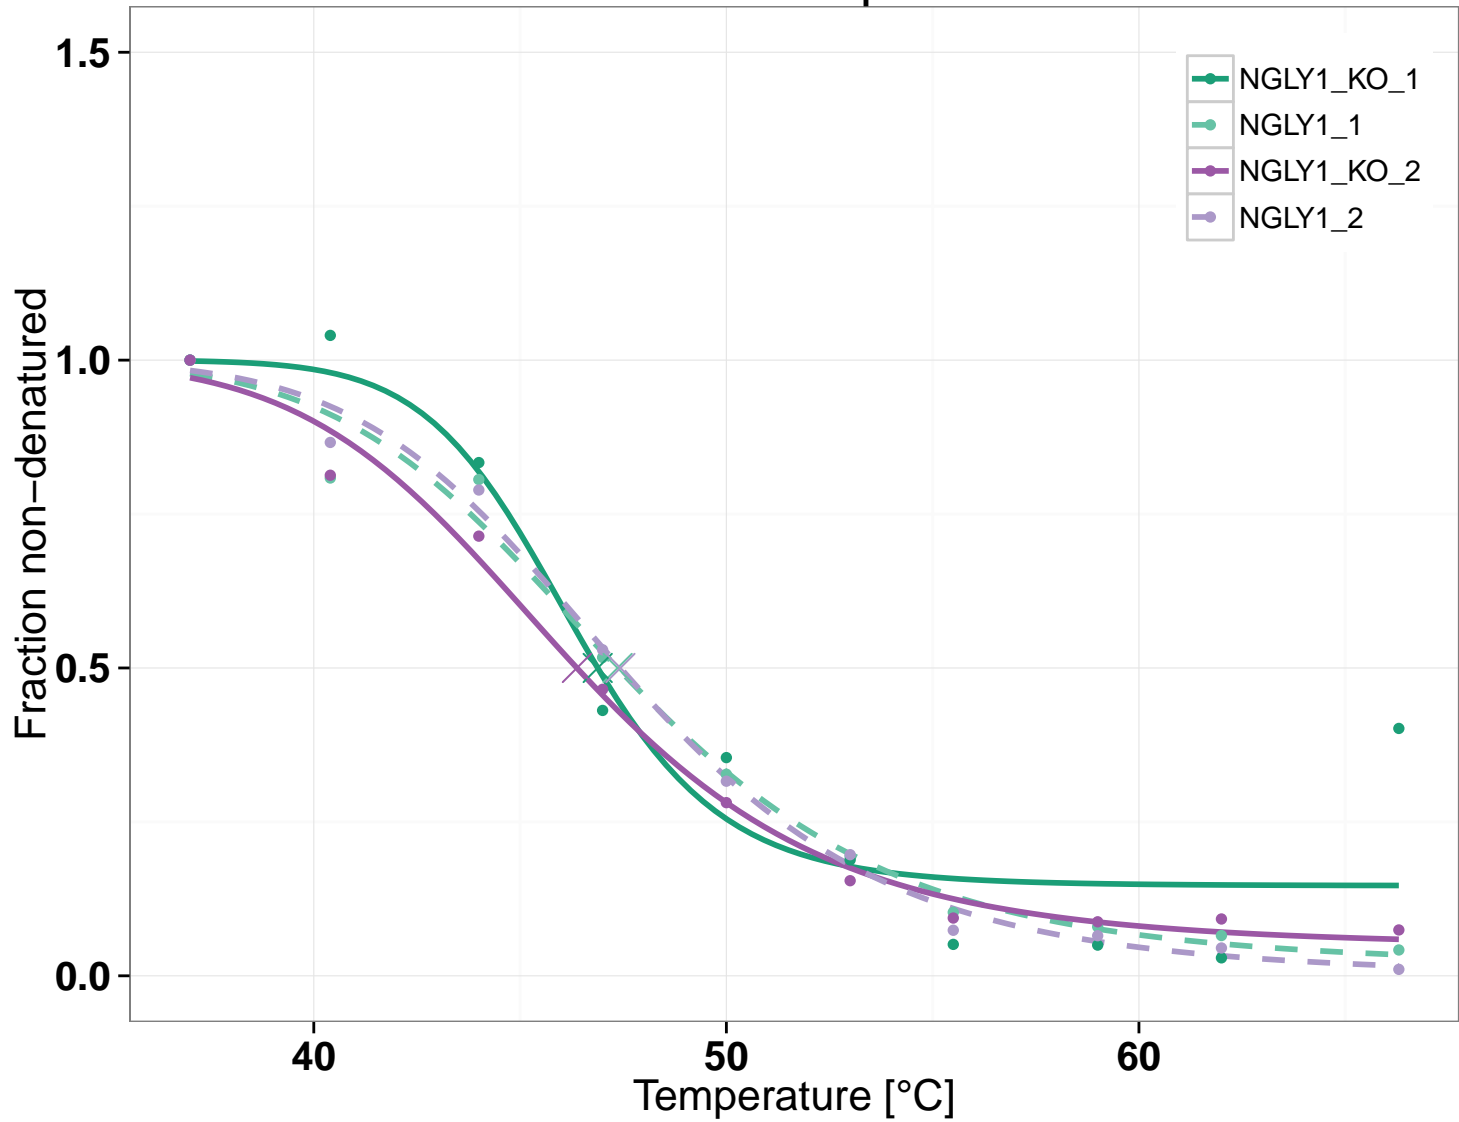

|            | meltPoint | slope  | plateau | R2   |
|------------|-----------|--------|---------|------|
| NGLY1_KO_1 | 46.88     | -0.12  | 0.15    | 0.91 |
| NGLY1_1    | 47.36     | -0.073 | 0.02    | 0.99 |
| NGLY1_KO_2 | 46.38     | -0.075 | 0.05    | 0.99 |
| NGLY1_2    | 47.43     | -0.078 | 0       | 0.99 |

Supplement: Supplementary file 3670 [file 1]

IPI00016621.7|AP2A2

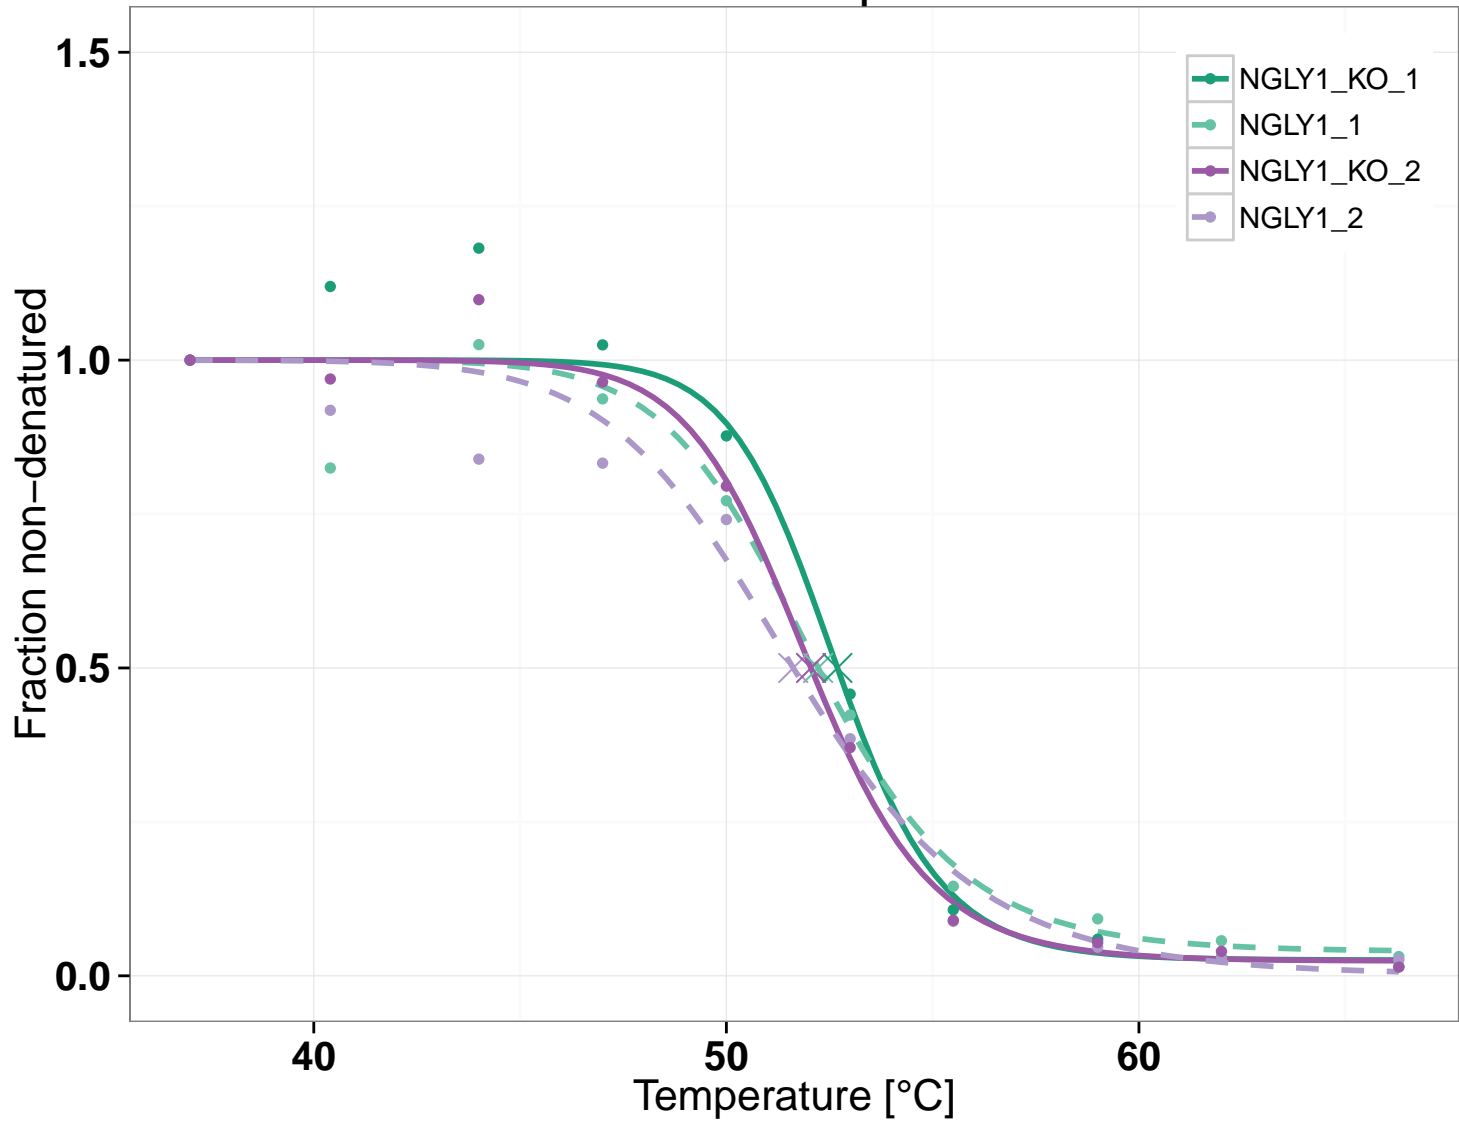

|            | meltPoint | slope | plateau | R2   |
|------------|-----------|-------|---------|------|
| NGLY1_KO_1 | 52.69     | -0.19 | 0.03    | 0.98 |
| NGLY1_1    | 52.23     | -0.13 | 0.04    | 0.98 |
| NGLY1_KO_2 | 52.05     | -0.16 | 0.02    | 0.99 |
| NGLY1_2    | 51.62     | -0.11 | 0       | 0.97 |

Supplement: Supplementary file 3671 [file 1]

IPI00005191.2|ZKSCAN4

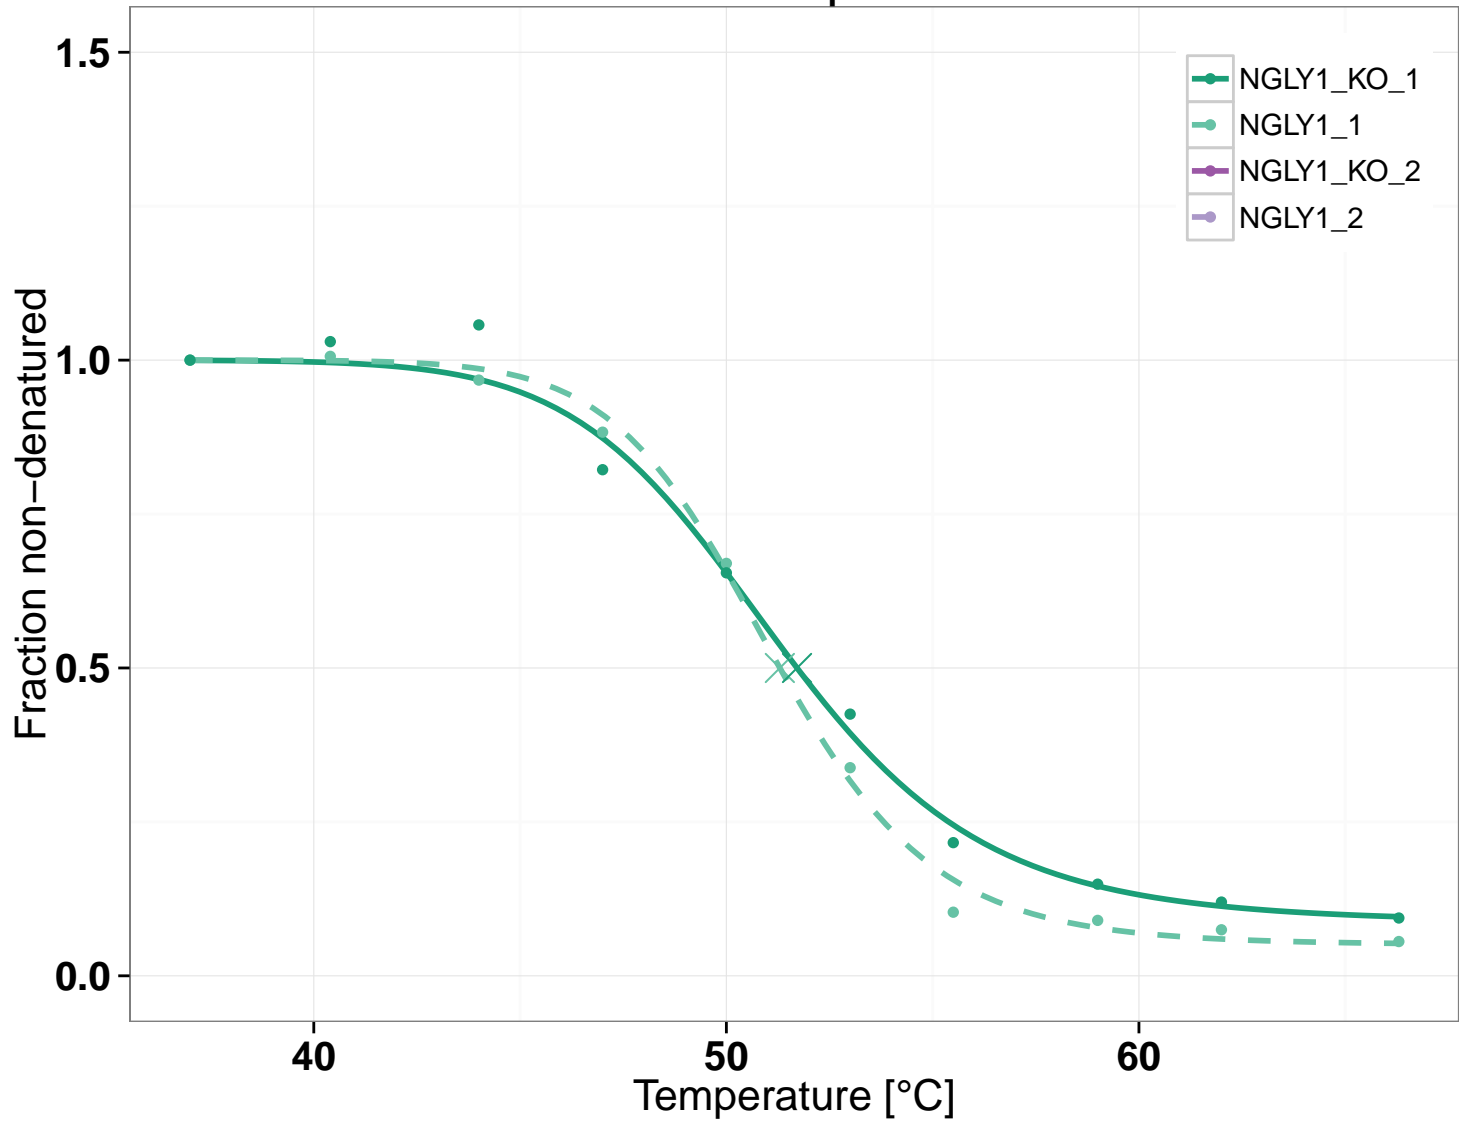

|            | meltPoint | slope  | plateau | R2   |
|------------|-----------|--------|---------|------|
| NGLY1_KO_1 | 51.71     | -0.091 | 0.09    | 0.99 |
| NGLY1_1    | 51.3      | -0.12  | 0.05    | 1    |
| NGLY1_KO_2 | -         | -      | -       | -    |
| NGLY1_2    | -         | -      | -       | -    |

Supplement: Supplementary file 3672 [file 1]

IPI00853369.1|PLXNB2

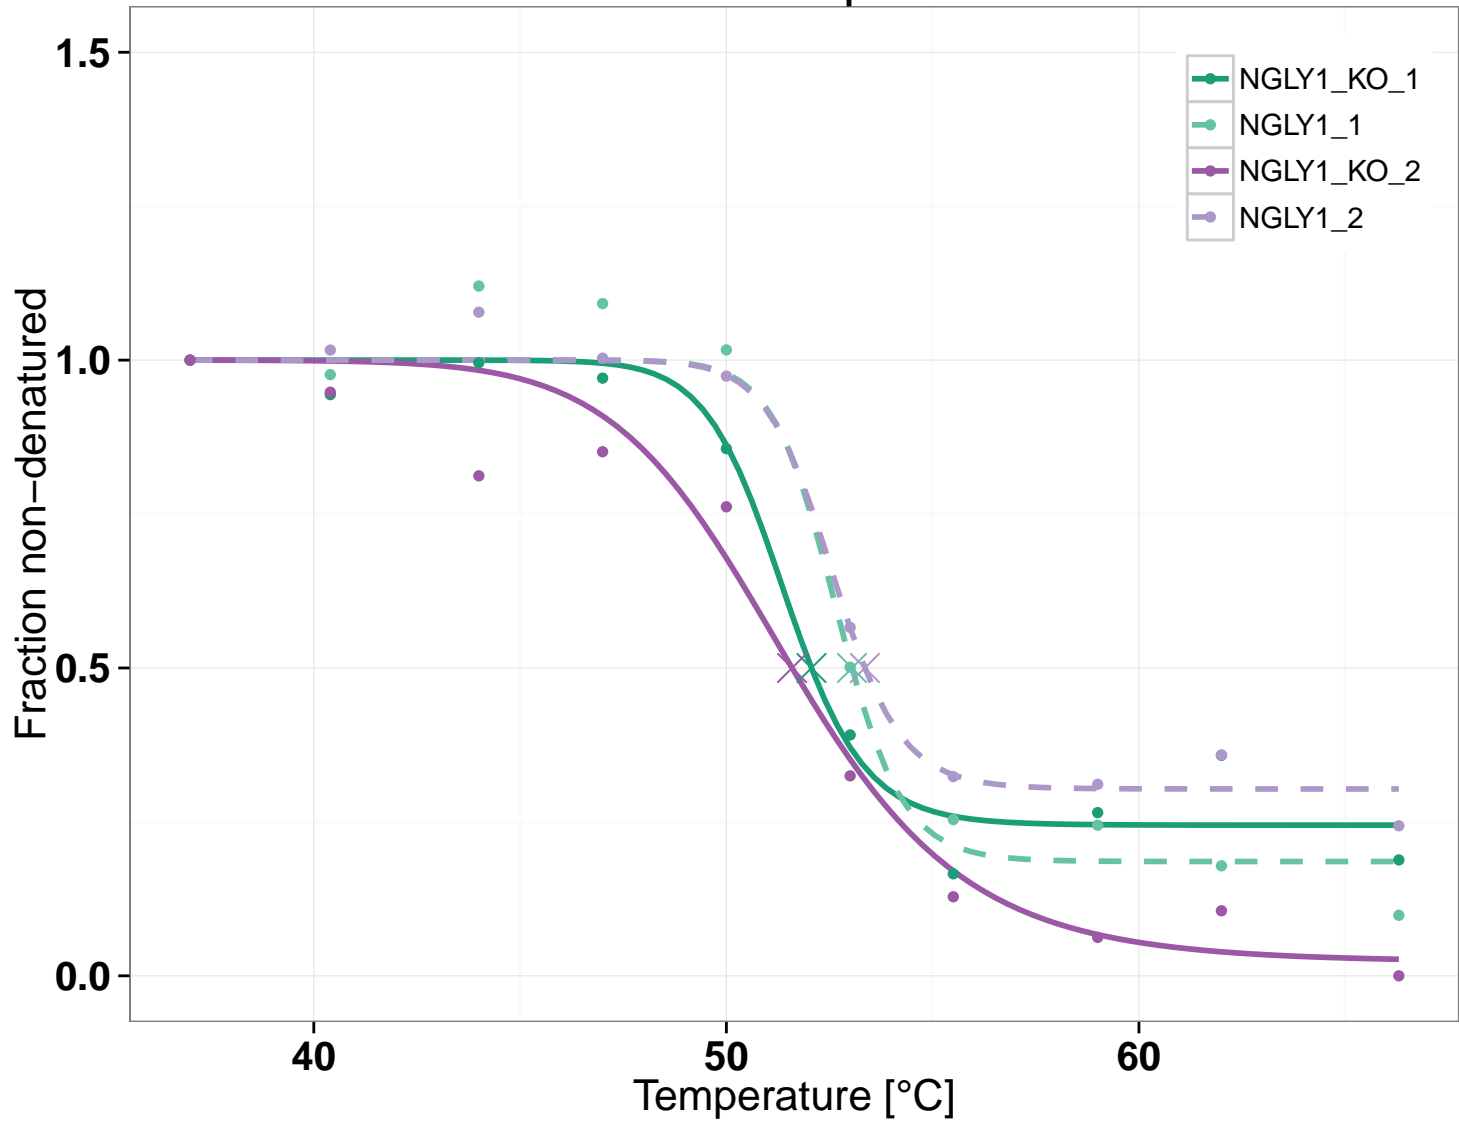

|            | meltPoint | slope | plateau | R2   |
|------------|-----------|-------|---------|------|
| NGLY1_KO_1 | 52.06     | -0.2  | 0.24    | 0.98 |
| NGLY1_1    | 53.04     | -0.26 | 0.19    | 0.98 |
| NGLY1_KO_2 | 51.59     | -0.11 | 0.02    | 0.97 |
| NGLY1_2    | 53.36     | -0.21 | 0.3     | 0.99 |

Supplement: Supplementary file 3673 [file 1]

IPI00784107.1|DUS3L

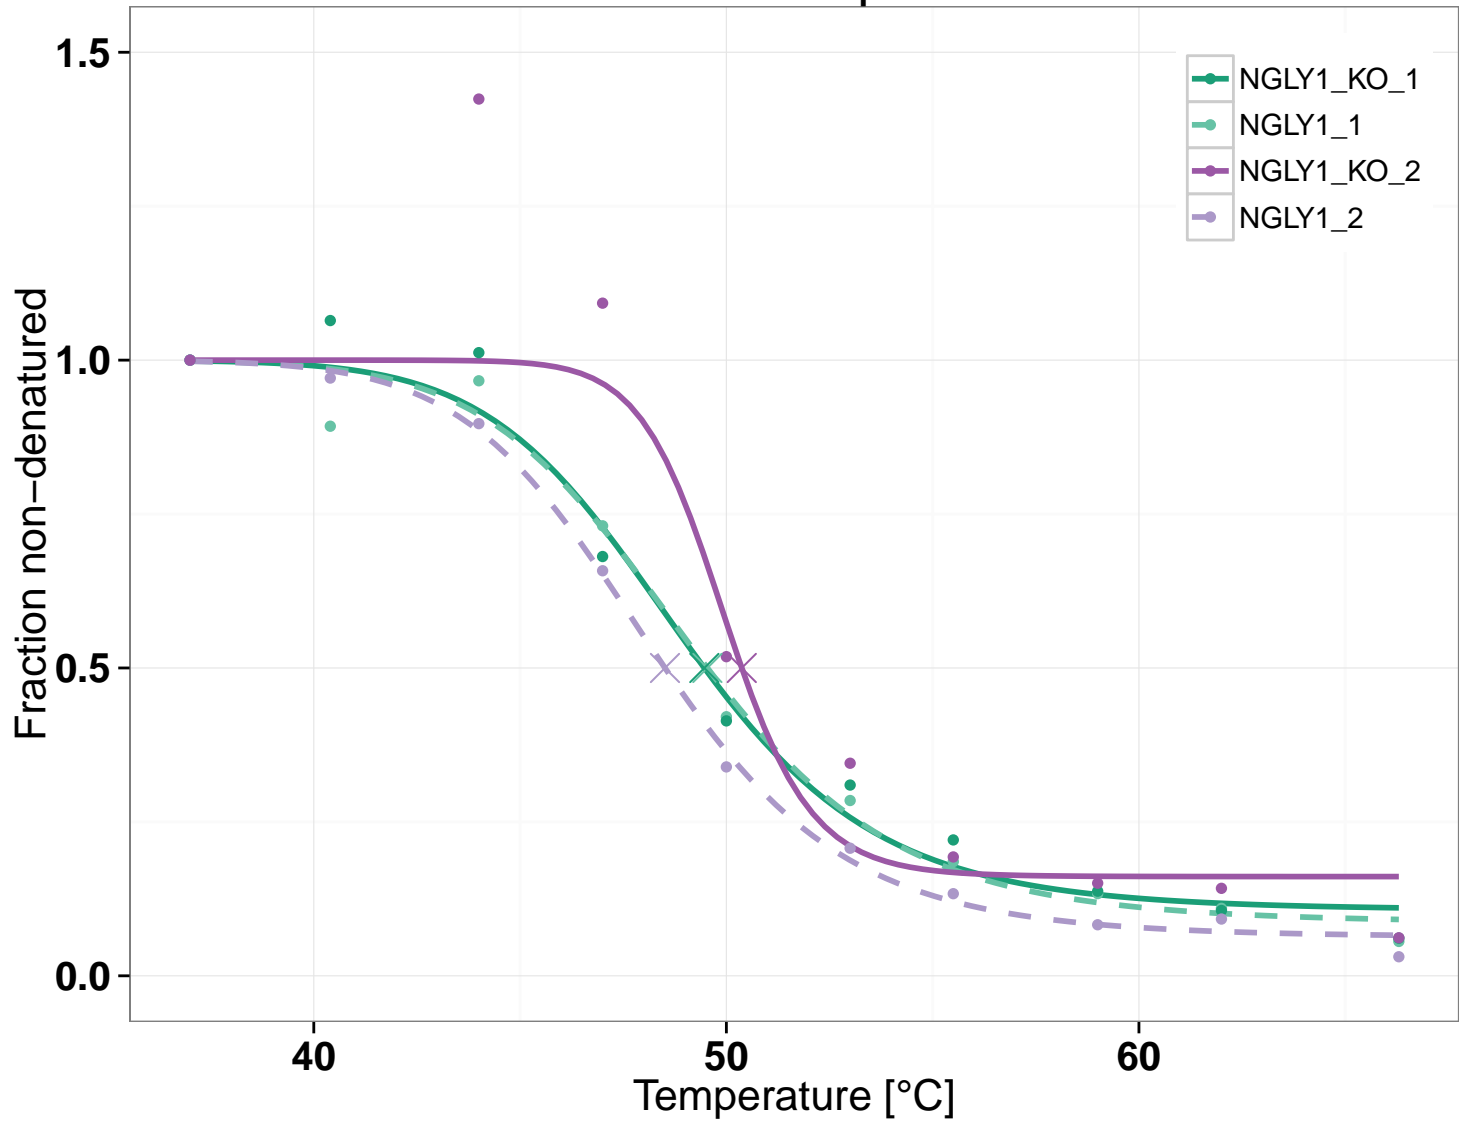

|            | meltPoint | slope  | plateau | R2   |
|------------|-----------|--------|---------|------|
| NGLY1_KO_1 | 49.47     | -0.095 | 0.11    | 0.98 |
| NGLY1_1    | 49.54     | -0.092 | 0.09    | 0.99 |
| NGLY1_KO_2 | 50.37     | -0.2   | 0.16    | 0.82 |
| NGLY1_2    | 48.51     | -0.1   | 0.06    | 1    |

Supplement: Supplementary file 3674 [file 1]

IPI00295457.6|MPRIP

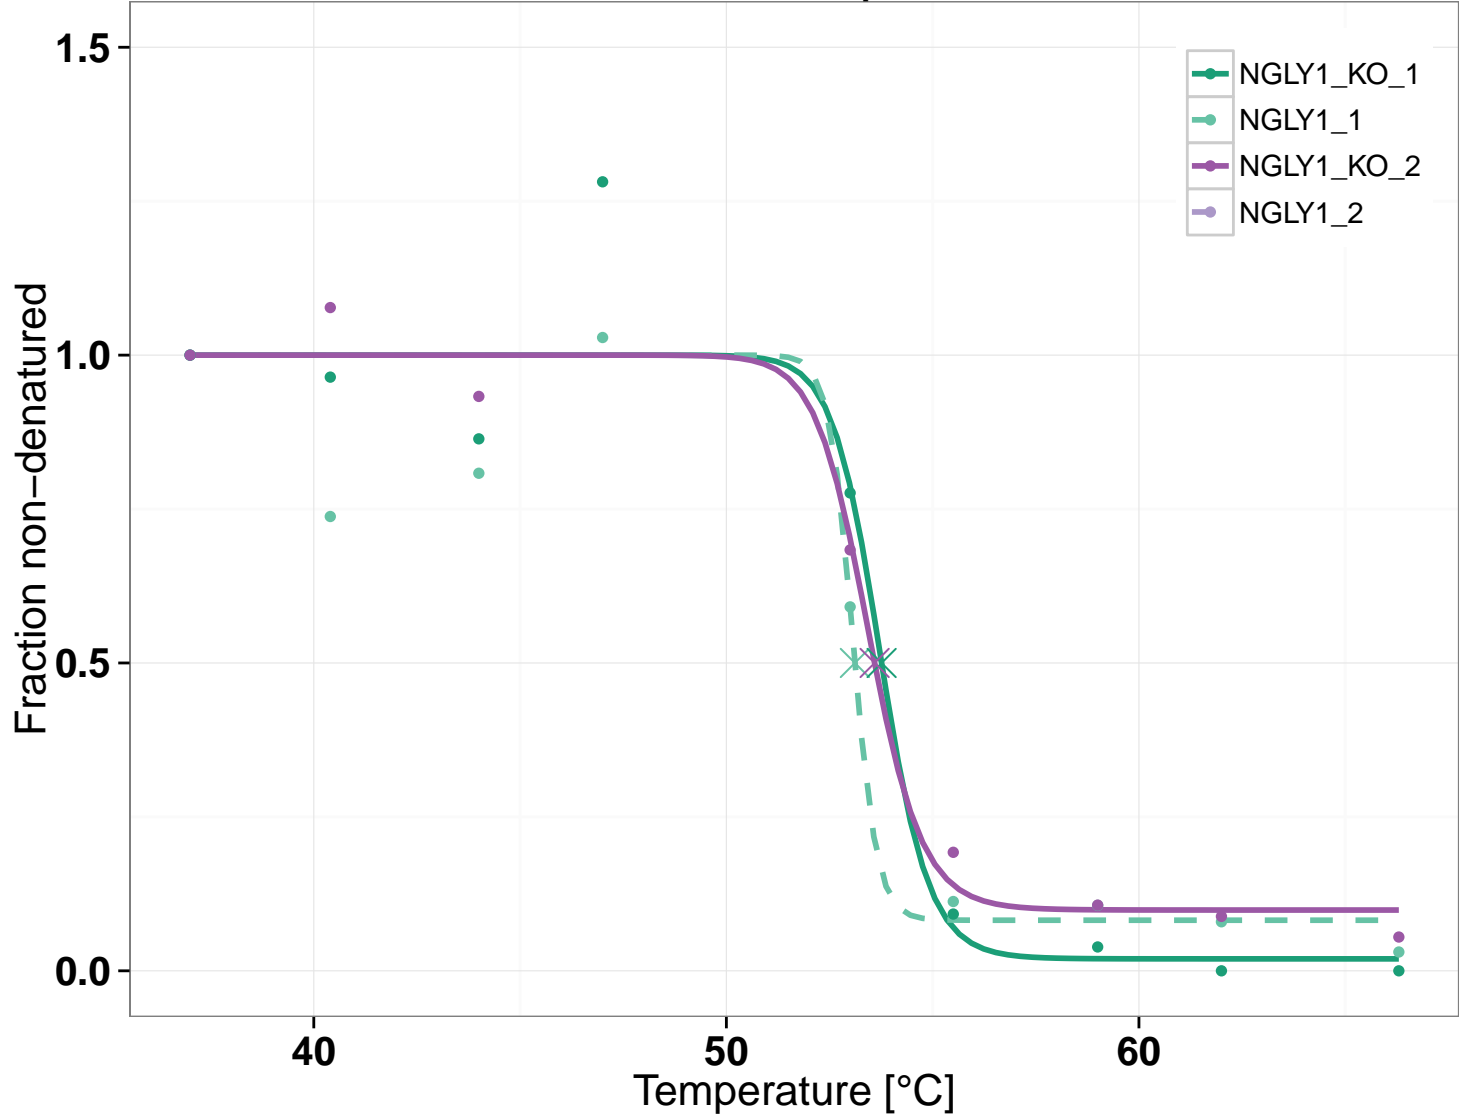

|            | meltPoint | slope | plateau | R2   |
|------------|-----------|-------|---------|------|
| NGLY1_KO_1 | 53.76     | -0.42 | 0.02    | 0.78 |
| NGLY1_1    | 53.12     | -0.8  | 0.08    | 0.83 |
| NGLY1_KO_2 | 53.59     | -0.35 | 0.1     | 0.81 |
| NGLY1_2    | -         | -     | -       | -    |

Supplement: Supplementary file 3675 [file 1]

IPI00654780.2|FAM160B2

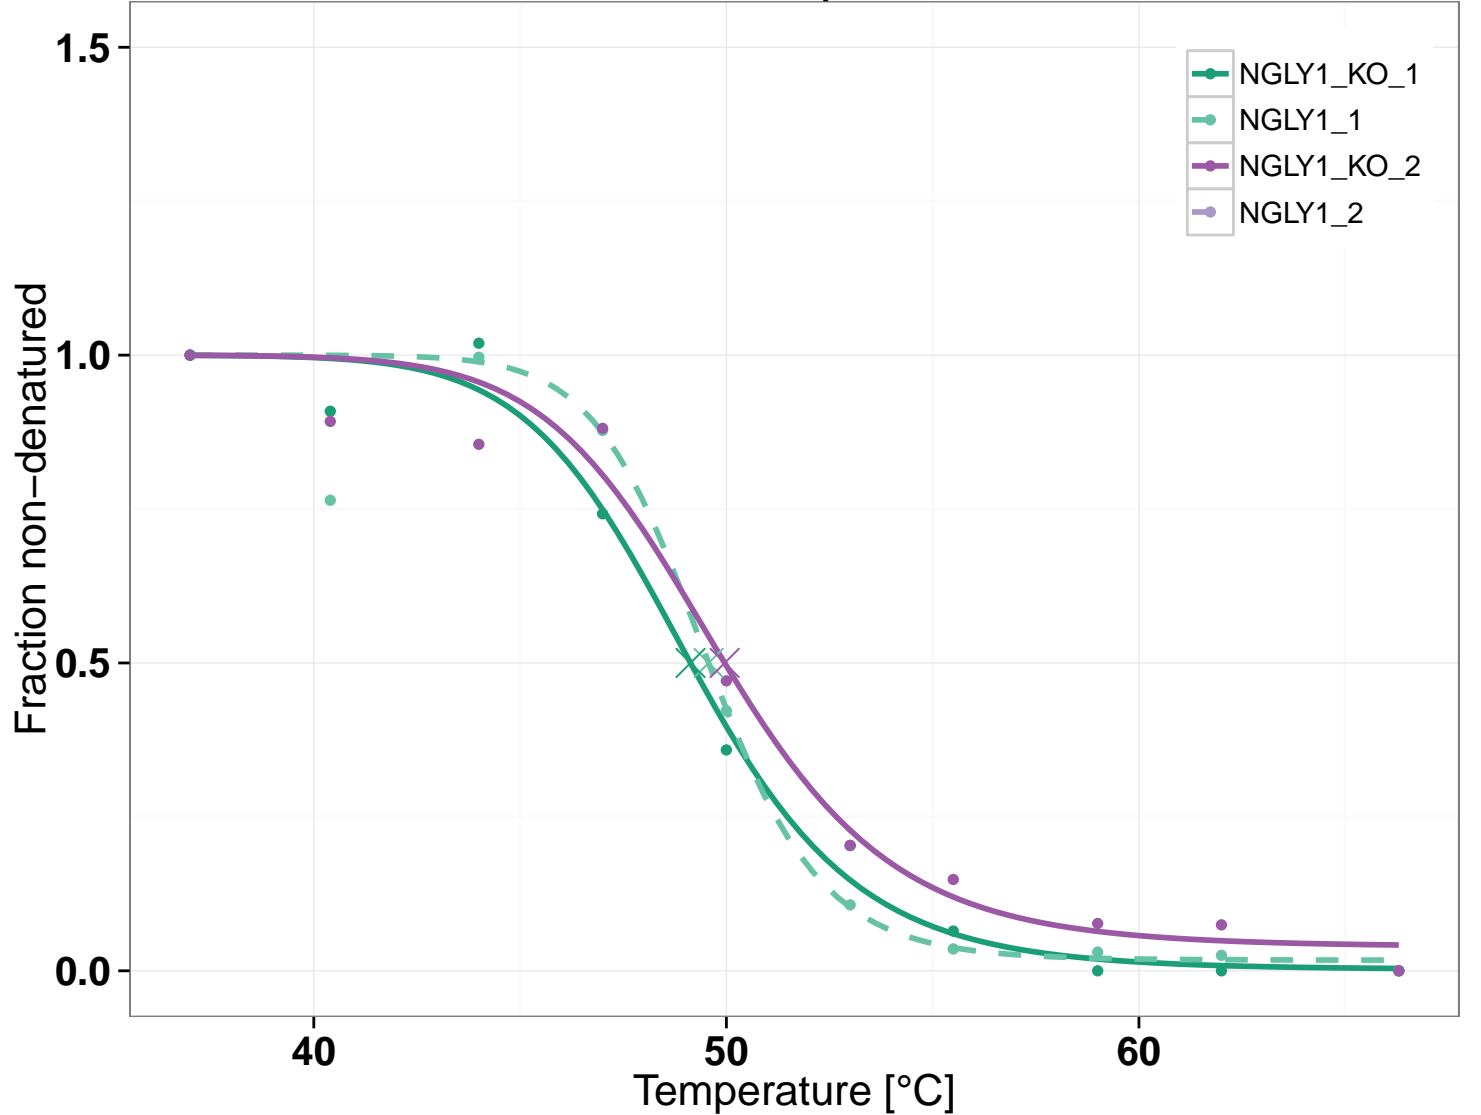

|            | meltPoint | slope | plateau | R2   |
|------------|-----------|-------|---------|------|
| NGLY1_KO_1 | 49.13     | -0.12 | 0       | 0.99 |
| NGLY1_1    | 49.57     | -0.18 | 0.02    | 0.97 |
| NGLY1_KO_2 | 49.96     | -0.11 | 0.04    | 0.98 |
| NGLY1_2    | -         | -     | -       | -    |

Supplement: Supplementary file 3676 [file 1]

IPI00291200.2|NUP133

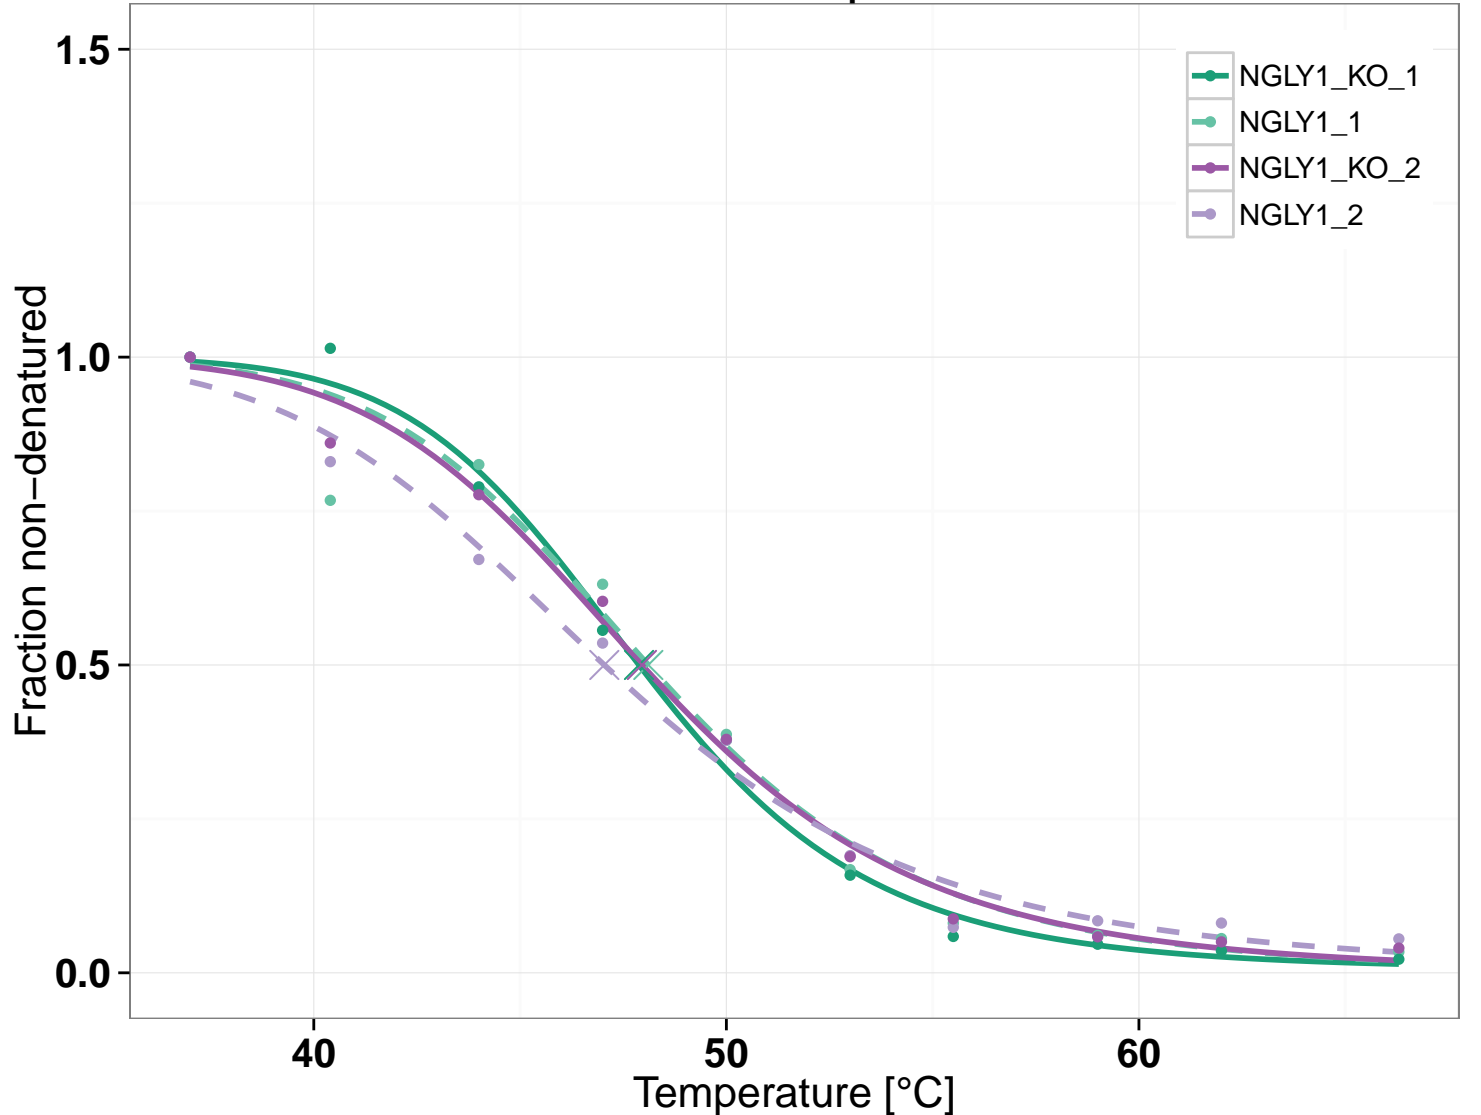

|            | meltPoint | slope  | plateau | R2   |
|------------|-----------|--------|---------|------|
| NGLY1_KO_1 | 47.88     | -0.089 | 0.01    | 0.99 |
| NGLY1_1    | 48.11     | -0.076 | 0       | 0.97 |
| NGLY1_KO_2 | 47.95     | -0.075 | 0       | 0.99 |
| NGLY1_2    | 47.04     | -0.064 | 0       | 0.99 |

Supplement: Supplementary file 3677 [file 1]

IPI00236901.6|USP33

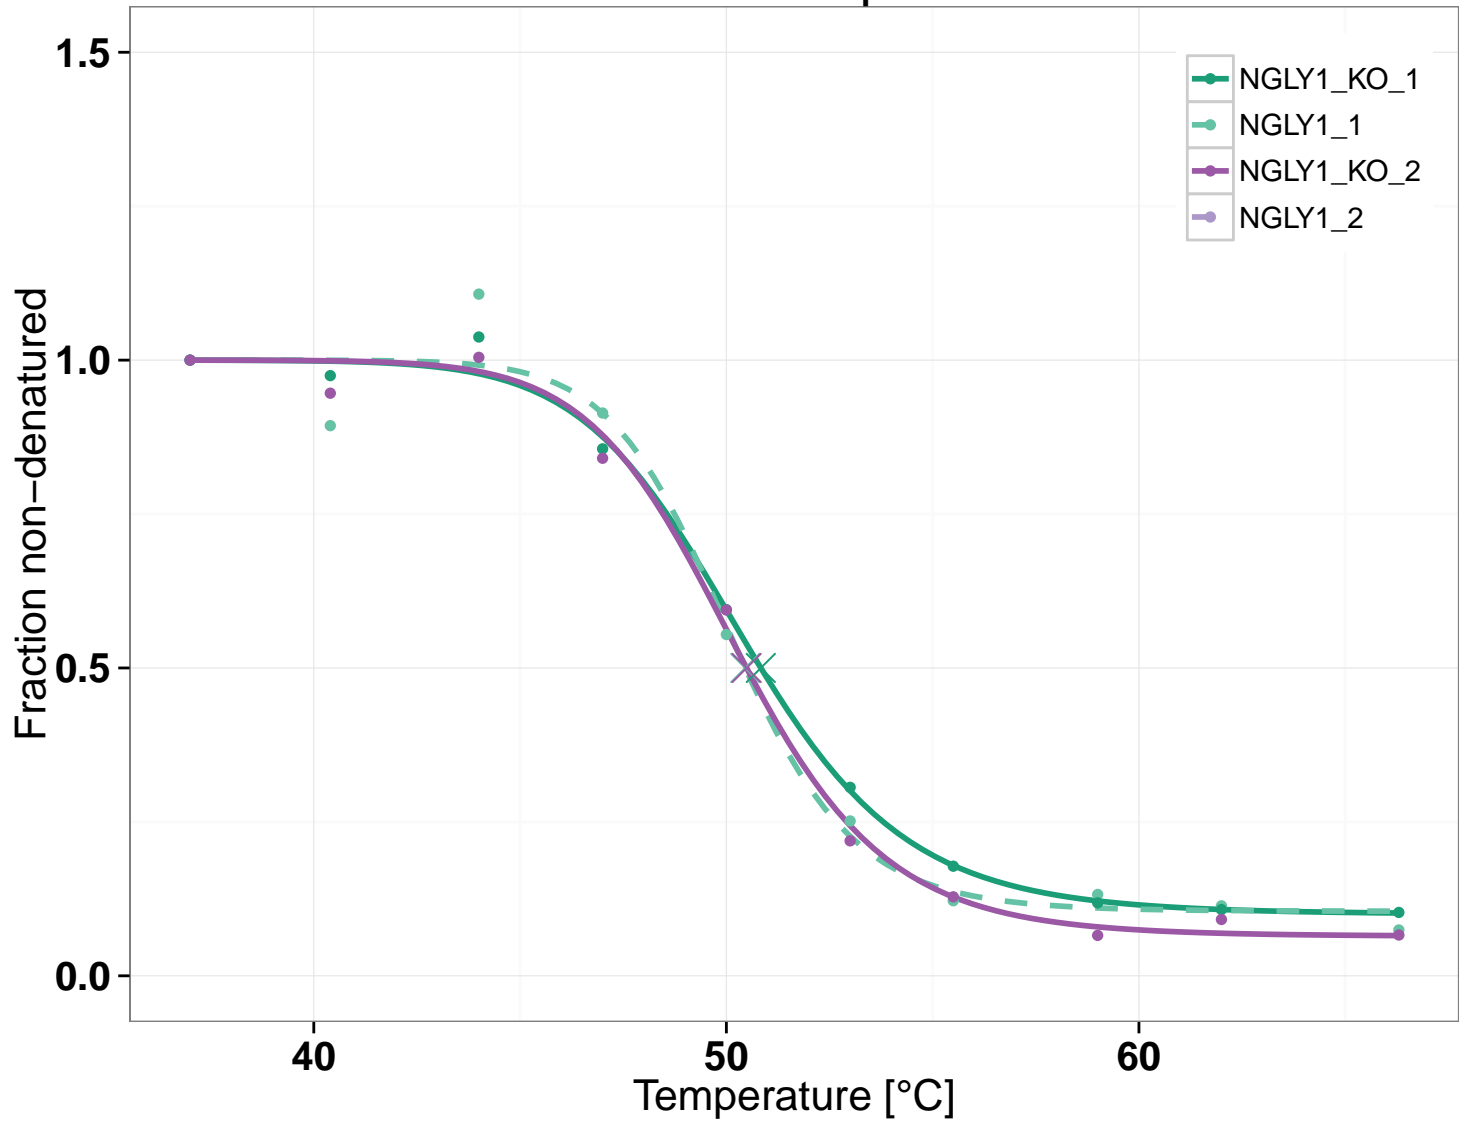

|            | meltPoint | slope | plateau | R2   |
|------------|-----------|-------|---------|------|
| NGLY1_KO_1 | 50.84     | -0.11 | 0.1     | 1    |
| NGLY1_1    | 50.46     | -0.15 | 0.1     | 0.98 |
| NGLY1_KO_2 | 50.49     | -0.13 | 0.06    | 1    |
| NGLY1_2    | -         | -     | -       | -    |

Supplement: Supplementary file 3678 [file 1]

IPI00896553.1|LOC728138

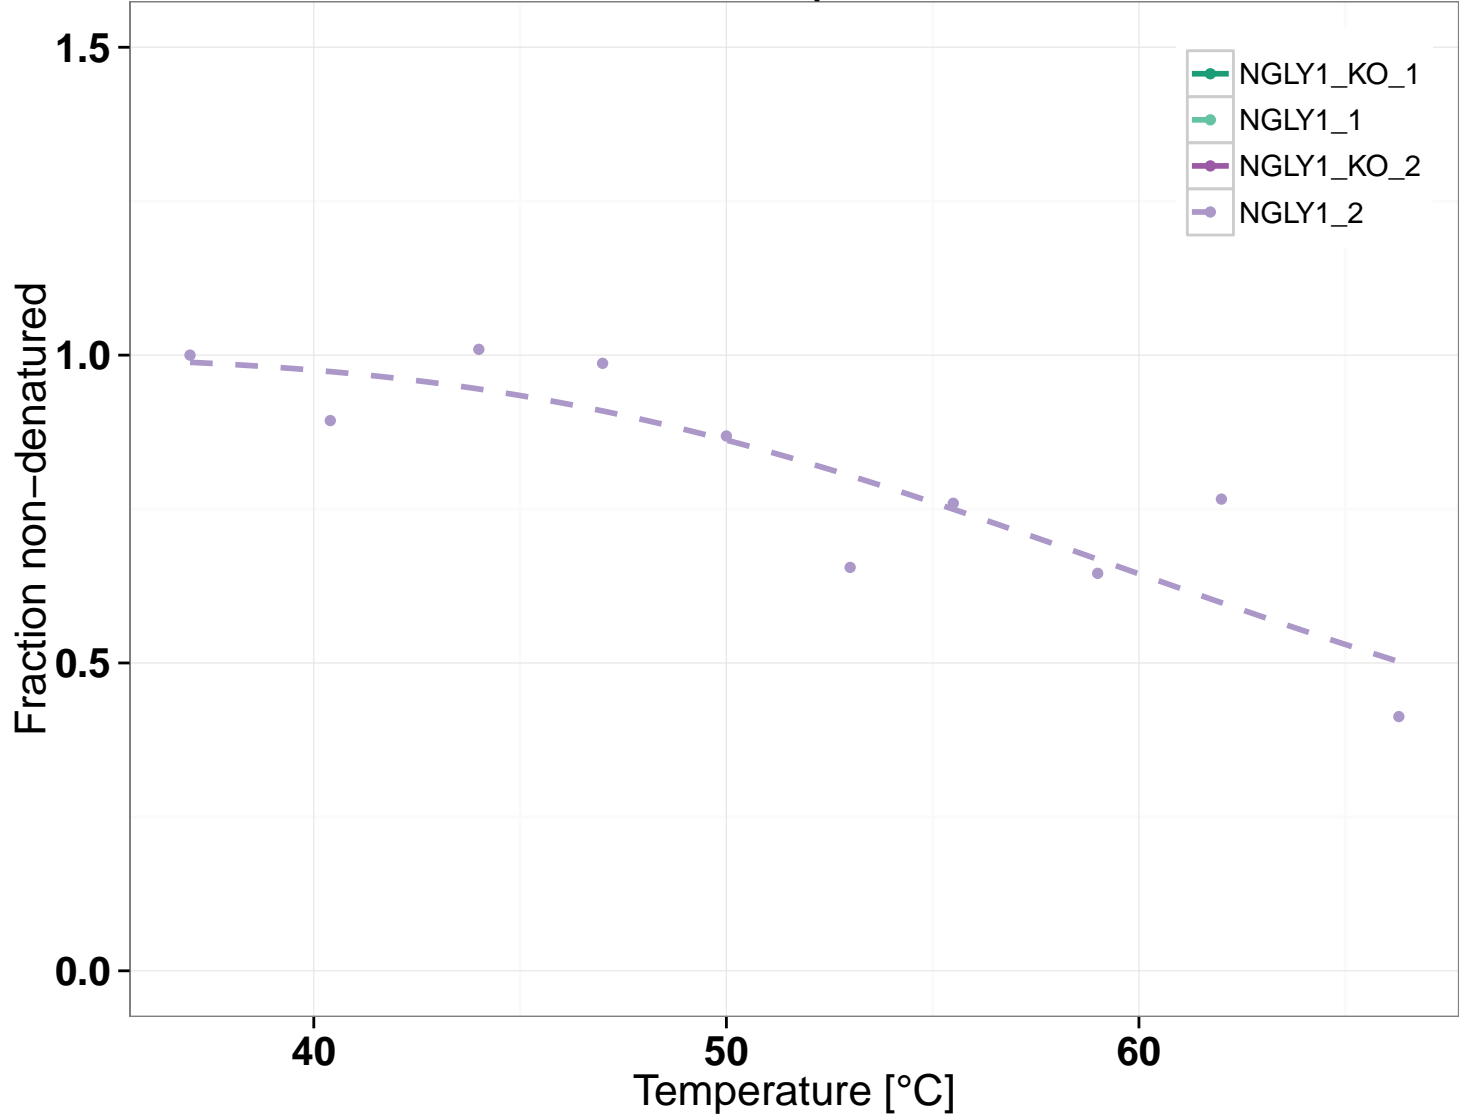

|            | meltPoint | slope  | plateau | R2   |
|------------|-----------|--------|---------|------|
| NGLY1_KO_1 | -         | -      | -       | -    |
| NGLY1_1    | -         | -      | -       | -    |
| NGLY1_KO_2 | -         | -      | -       | -    |
| NGLY1_2    | -         | -0.024 | 0       | 0.77 |

Supplement: Supplementary file 3679 [file 1]

# IPI00328149.3|EIF2AK1

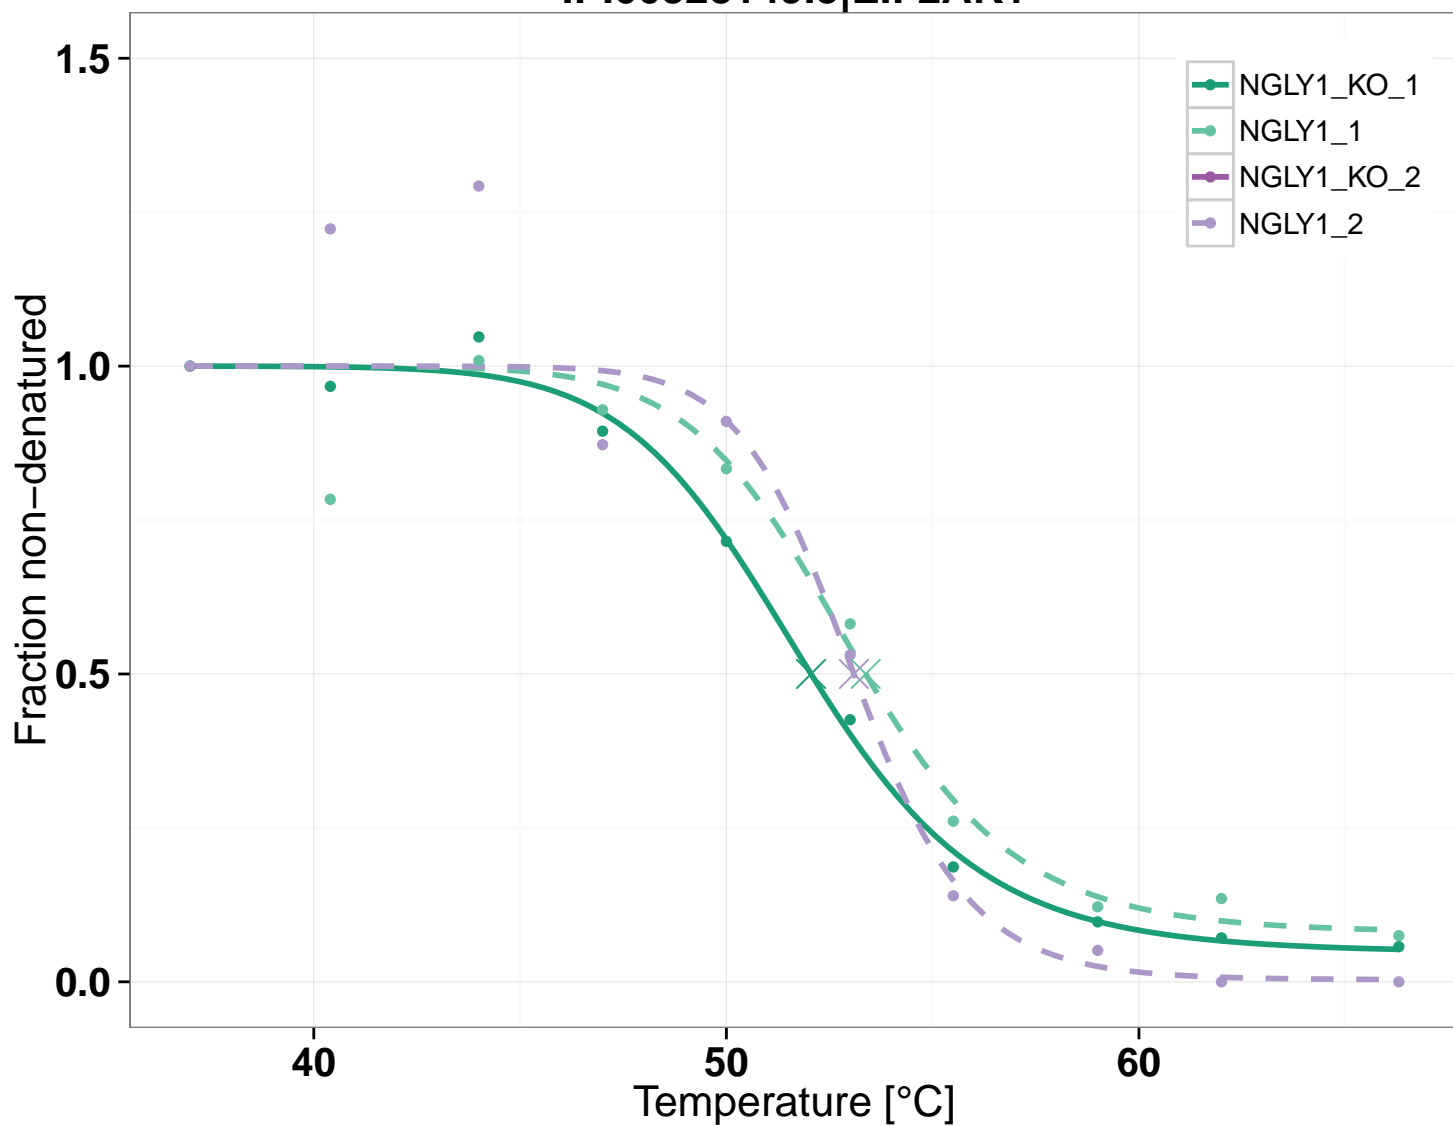

|            | meltPoint | slope | plateau | R2   |
|------------|-----------|-------|---------|------|
| NGLY1_KO_1 | 52.05     | -0.11 | 0.05    | 1    |
| NGLY1_1    | 53.38     | -0.12 | 0.08    | 0.96 |
| NGLY1_KO_2 | -         | -     | -       | -    |
| NGLY1_2    | 53.09     | -0.18 | 0       | 0.94 |

Supplement: Supplementary file 3680 [file 1]

IPI00917298.1|RPL31

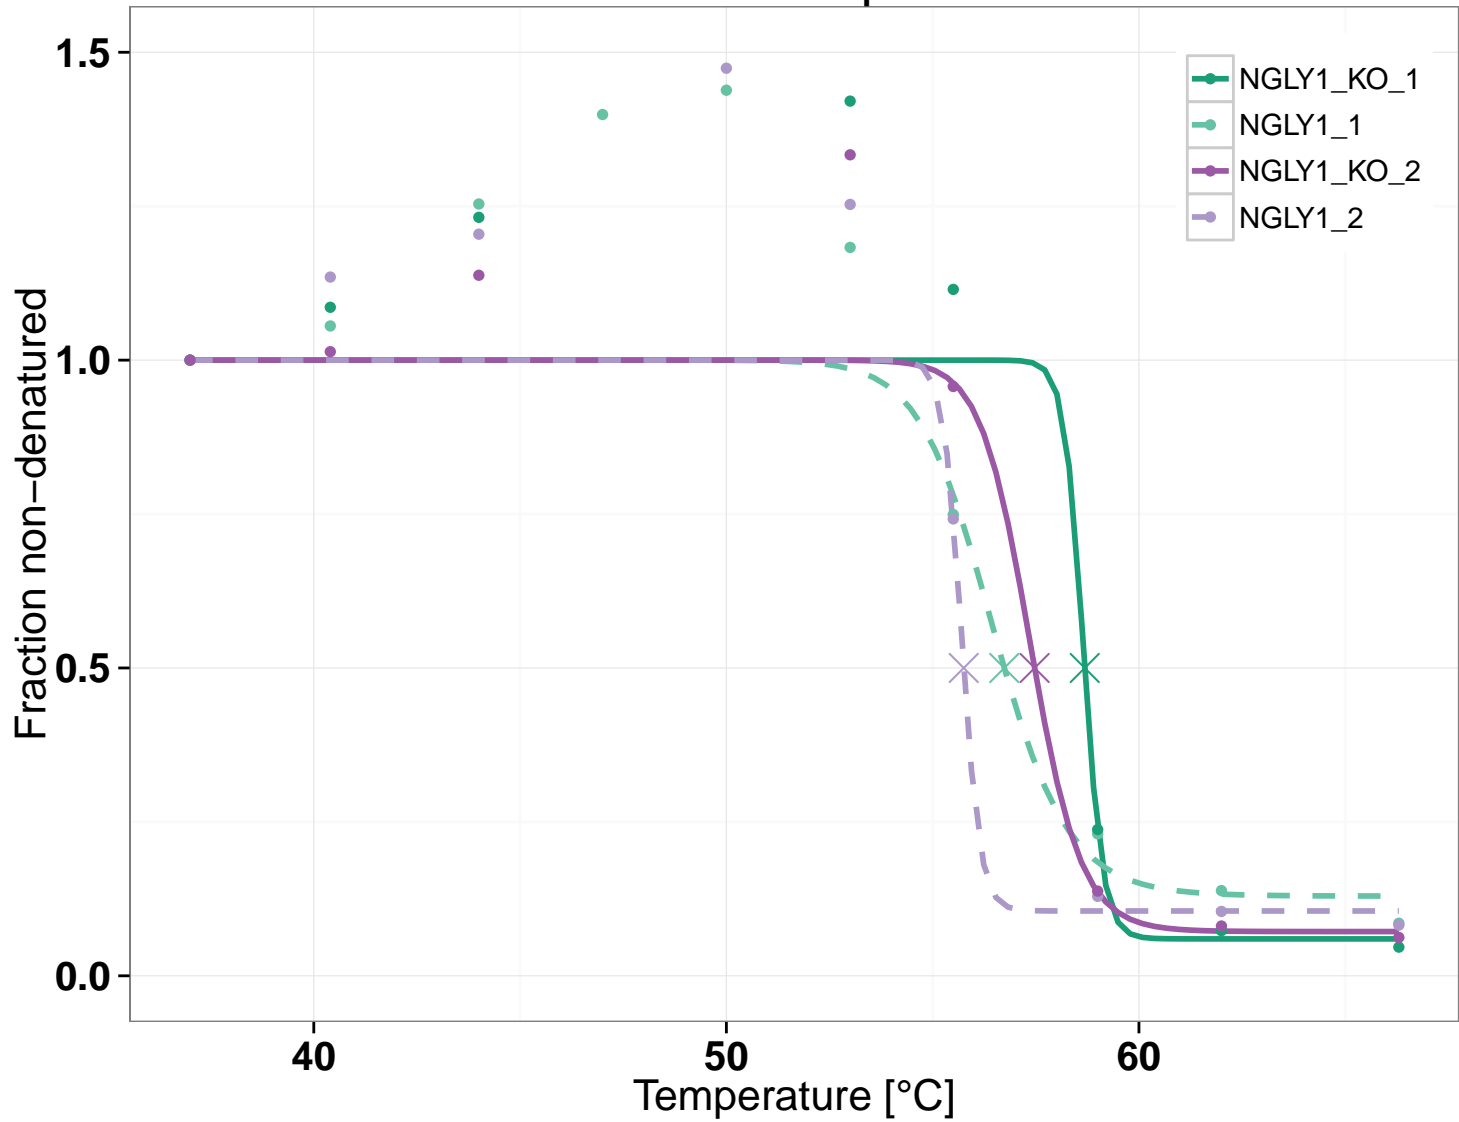

|            | meltPoint | slope | plateau | R2   |
|------------|-----------|-------|---------|------|
| NGLY1_KO_1 | 58.69     | -1    | 0.06    | 0.68 |
| NGLY1_1    | 56.74     | -0.24 | 0.13    | 0.81 |
| NGLY1_KO_2 | 57.47     | -0.38 | 0.07    | 0.72 |
| NGLY1_2    | 55.75     | -1    | 0.11    | 0.79 |

Supplement: Supplementary file 3681 [file 1]

IPI00016461.5|PLCD1

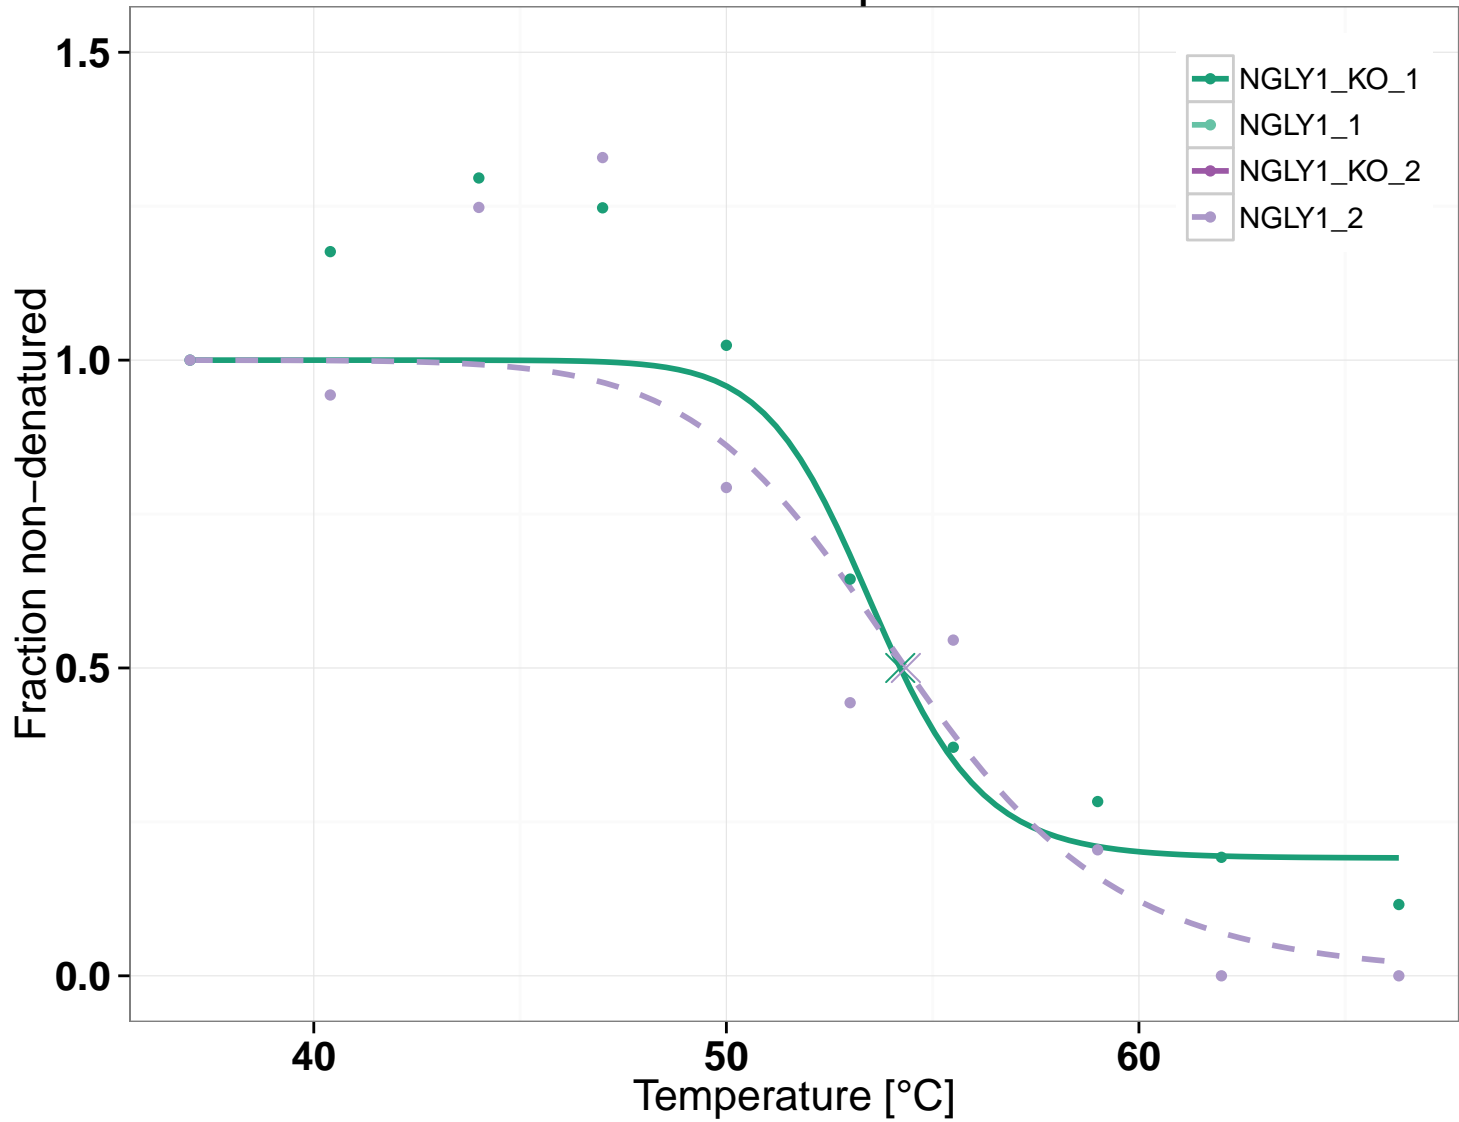

|            | meltPoint | slope  | plateau | R2   |
|------------|-----------|--------|---------|------|
| NGLY1_KO_1 | 54.21     | -0.15  | 0.19    | 0.9  |
| NGLY1_1    | -         | -      | -       | -    |
| NGLY1_KO_2 | -         | -      | -       | -    |
| NGLY1_2    | 54.35     | -0.097 | 0       | 0.87 |

Supplement: Supplementary file 3682 [file 1]

IPI00293143.2|PHOX2B

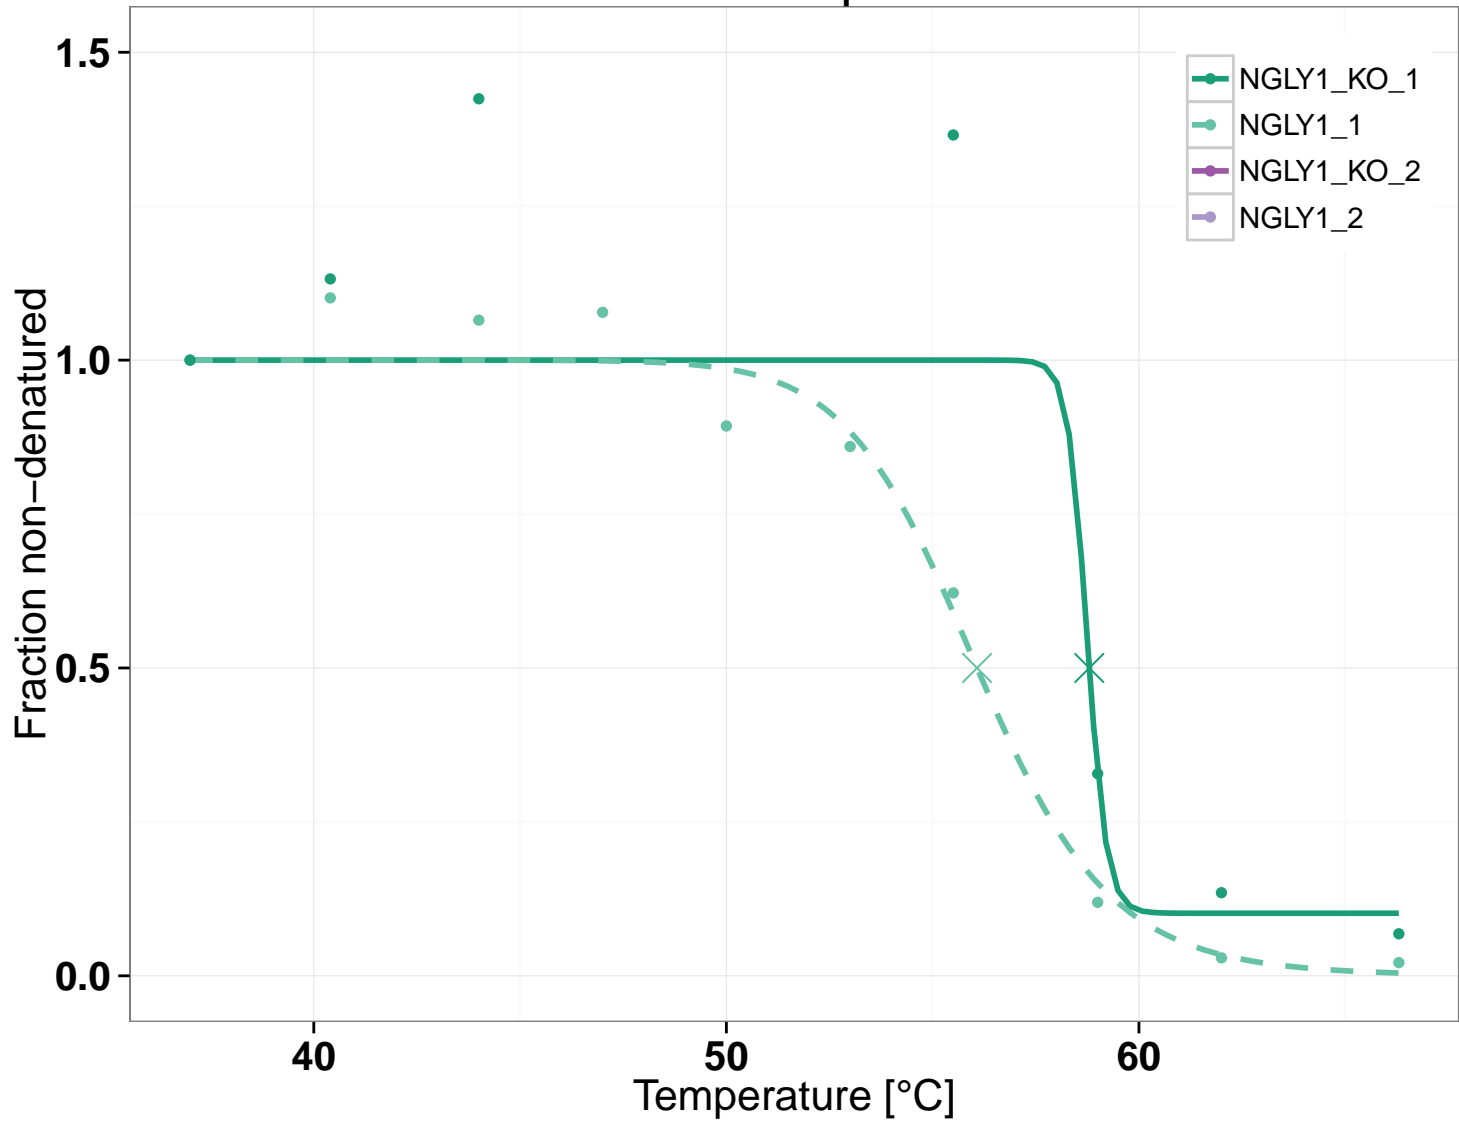

|            | meltPoint | slope | plateau | R2   |
|------------|-----------|-------|---------|------|
| NGLY1_KO_1 | 58.8      | -0.96 | 0.1     | 0.44 |
| NGLY1_1    | 56.08     | -0.16 | 0       | 0.98 |
| NGLY1_KO_2 | -         | -     | -       | -    |
| NGLY1_2    | -         | -     | -       | -    |

Supplement: Supplementary file 3683 [file 1]

IPI00025174.2|SDCCAG10

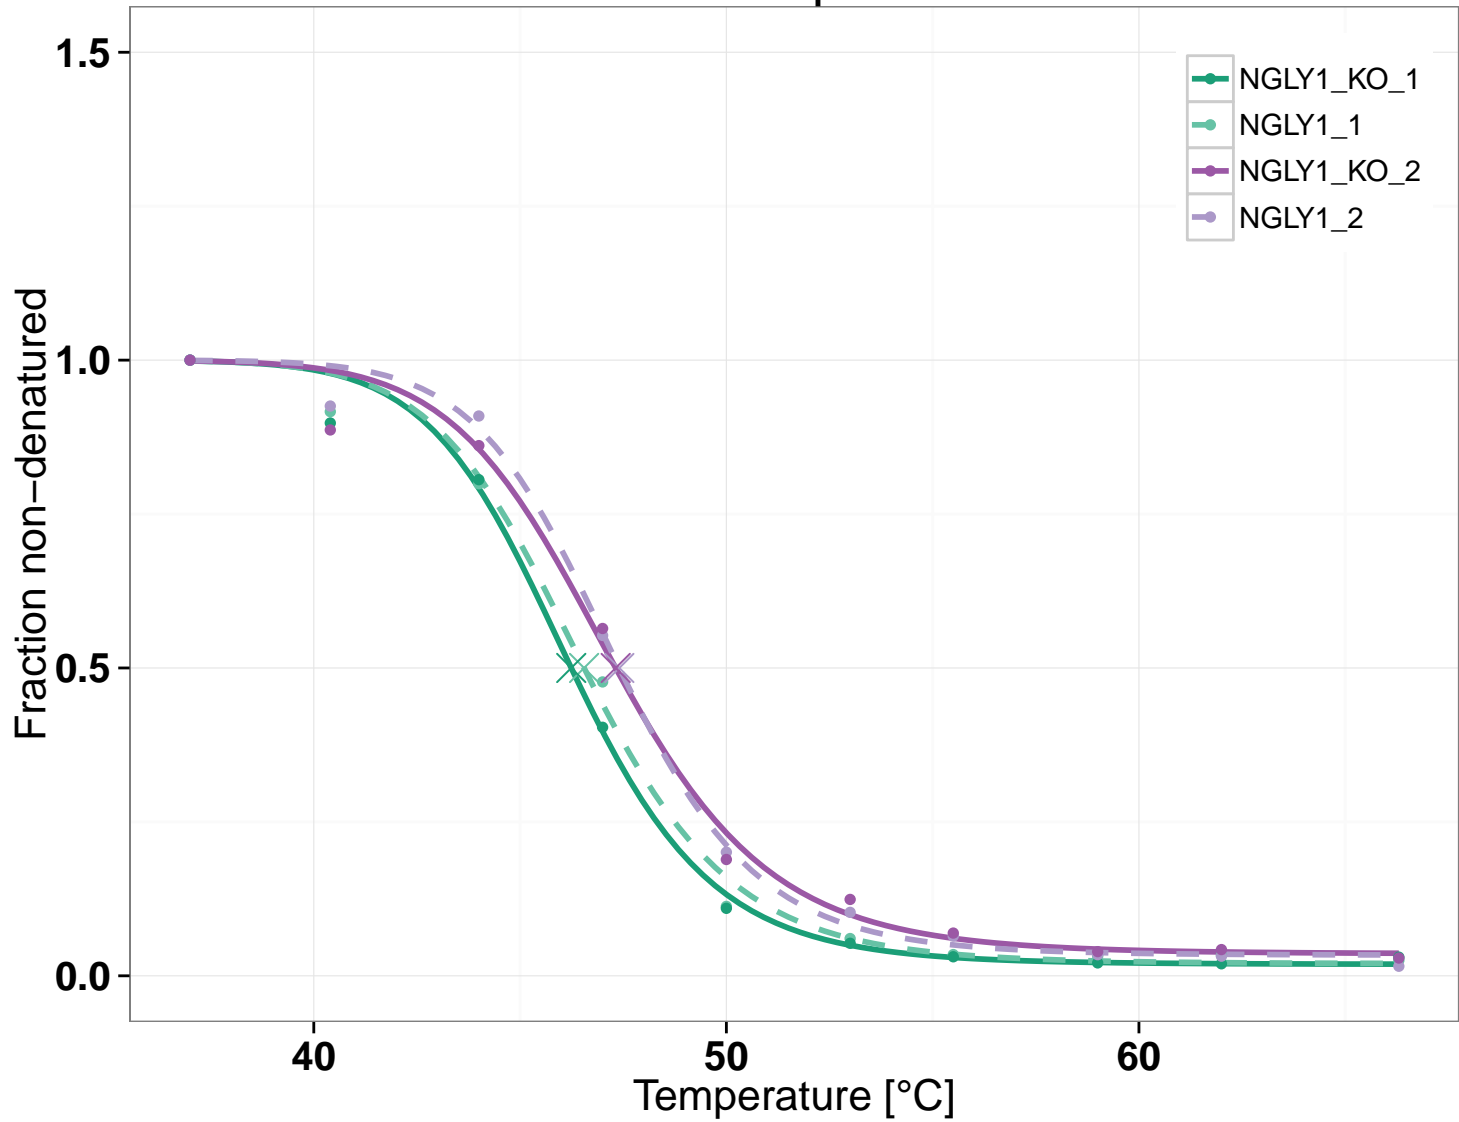

|            | meltPoint | slope | plateau | R2   |
|------------|-----------|-------|---------|------|
| NGLY1_KO_1 | 46.24     | -0.14 | 0.02    | 1    |
| NGLY1_1    | 46.55     | -0.13 | 0.02    | 0.99 |
| NGLY1_KO_2 | 47.32     | -0.12 | 0.04    | 0.99 |
| NGLY1_2    | 47.41     | -0.14 | 0.03    | 1    |

Supplement: Supplementary file 3684 [file 1]

# IPI00034181.1|RBBP9

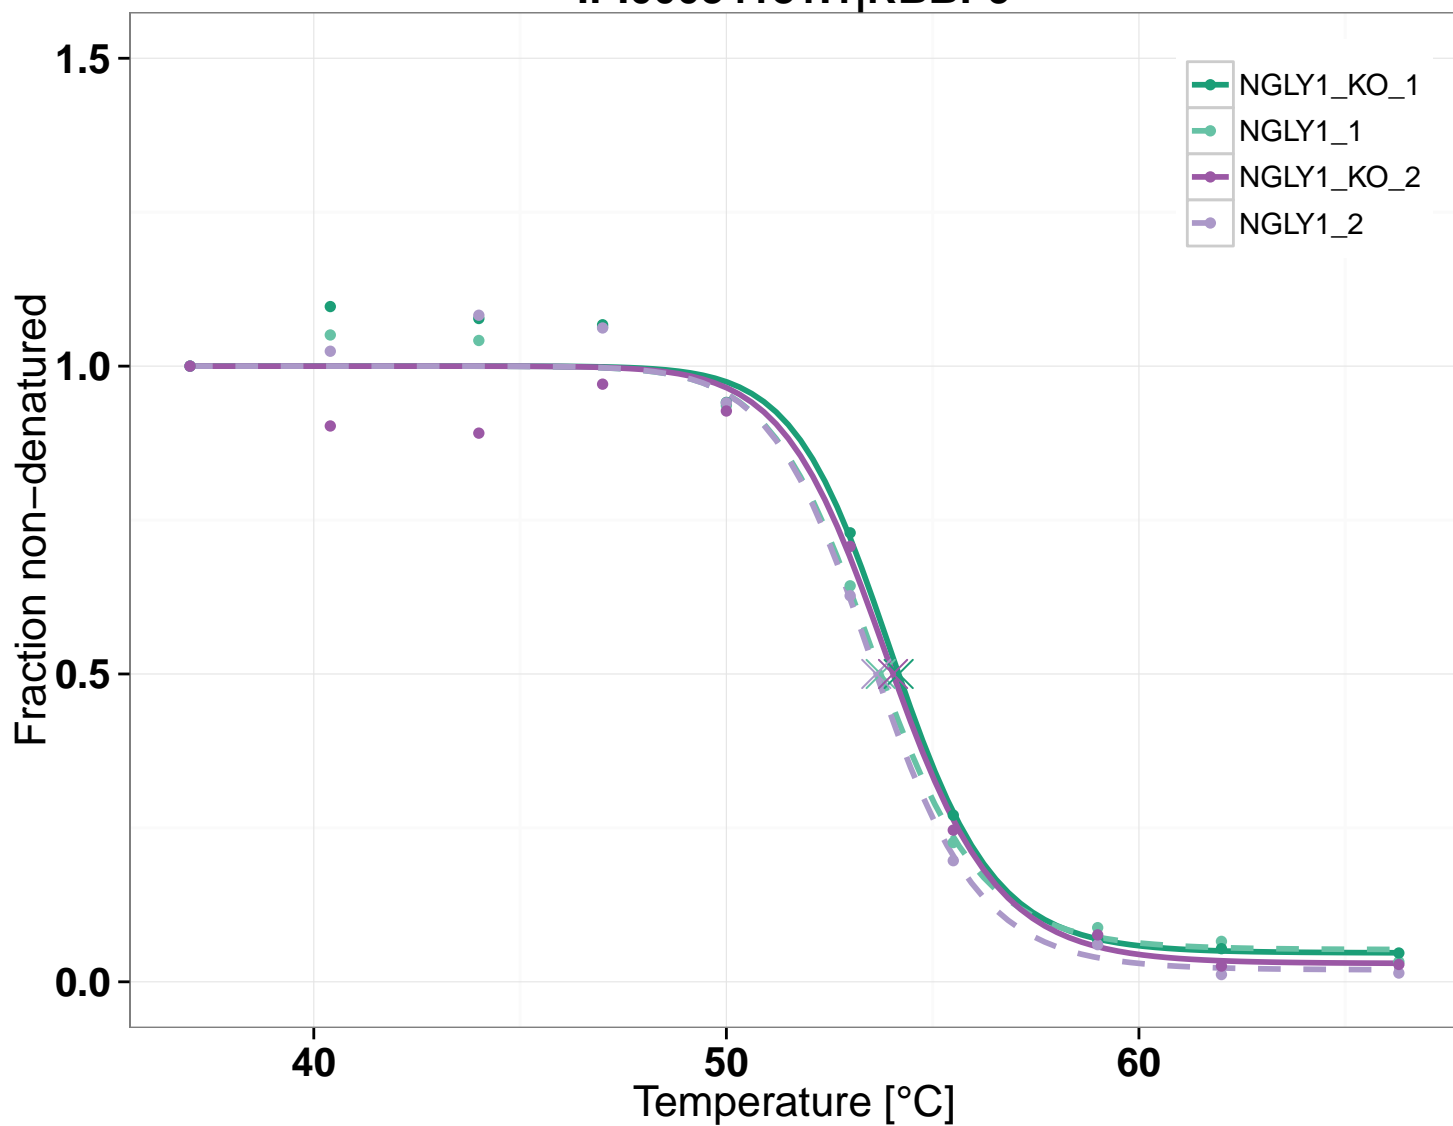

|            | meltPoint | slope | plateau | R2   |
|------------|-----------|-------|---------|------|
| NGLY1_KO_1 | 54.18     | -0.2  | 0.05    | 0.99 |
| NGLY1_1    | 53.74     | -0.19 | 0.05    | 0.99 |
| NGLY1_KO_2 | 54.04     | -0.19 | 0.03    | 0.99 |
| NGLY1_2    | 53.63     | -0.19 | 0.02    | 0.99 |

Supplement: Supplementary file 3685 [file 1]

IPI00400922.5|PDCD11

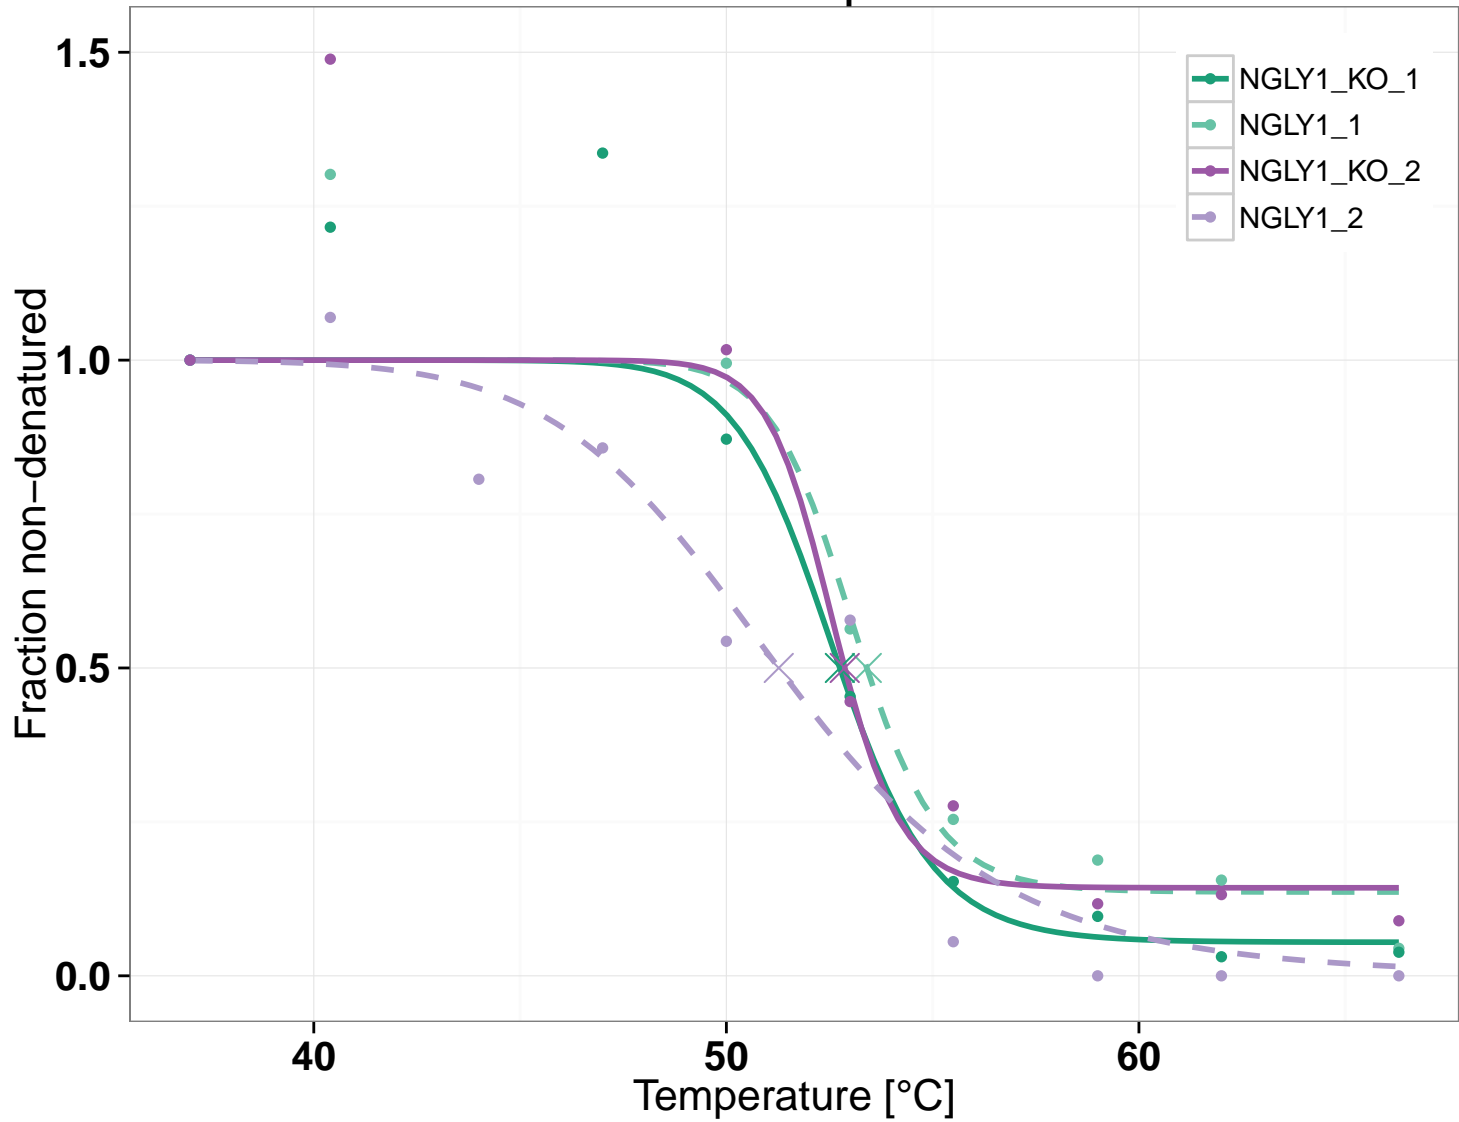

|            | meltPoint | slope  | plateau | R2   |
|------------|-----------|--------|---------|------|
| NGLY1_KO_1 | 52.75     | -0.2   | 0.05    | 0.83 |
| NGLY1_1    | 53.4      | -0.21  | 0.14    | 0.69 |
| NGLY1_KO_2 | 52.87     | -0.27  | 0.14    | 0.54 |
| NGLY1_2    | 51.27     | -0.091 | 0       | 0.94 |

Supplement: Supplementary file 3686 [file 1]

IPI00009444.3|MRPL27

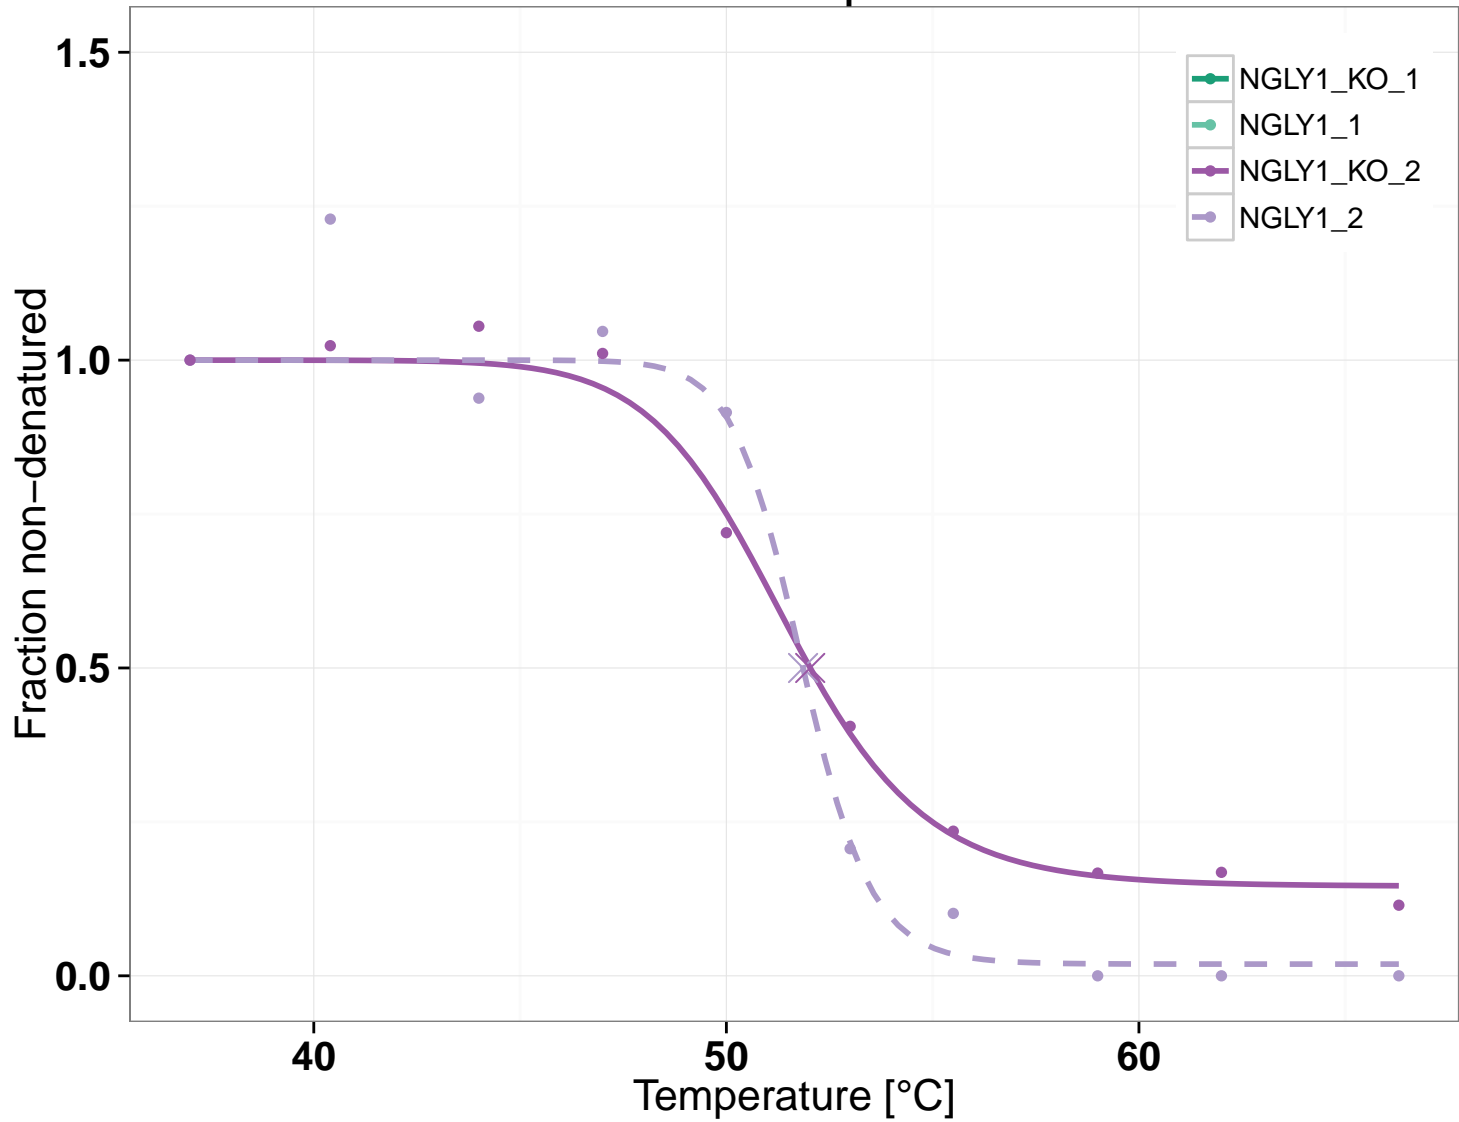

|            | meltPoint | slope | plateau | R2   |
|------------|-----------|-------|---------|------|
| NGLY1_KO_1 | —         | —     | —       | —    |
| NGLY1_1    | —         | —     | —       | —    |
| NGLY1_KO_2 | 52.03     | -0.13 | 0.15    | 0.99 |
| NGLY1_2    | 51.86     | -0.29 | 0.02    | 0.97 |

Supplement: Supplementary file 3687 [file 1]

# IPI00216470.1|PIP4K2B

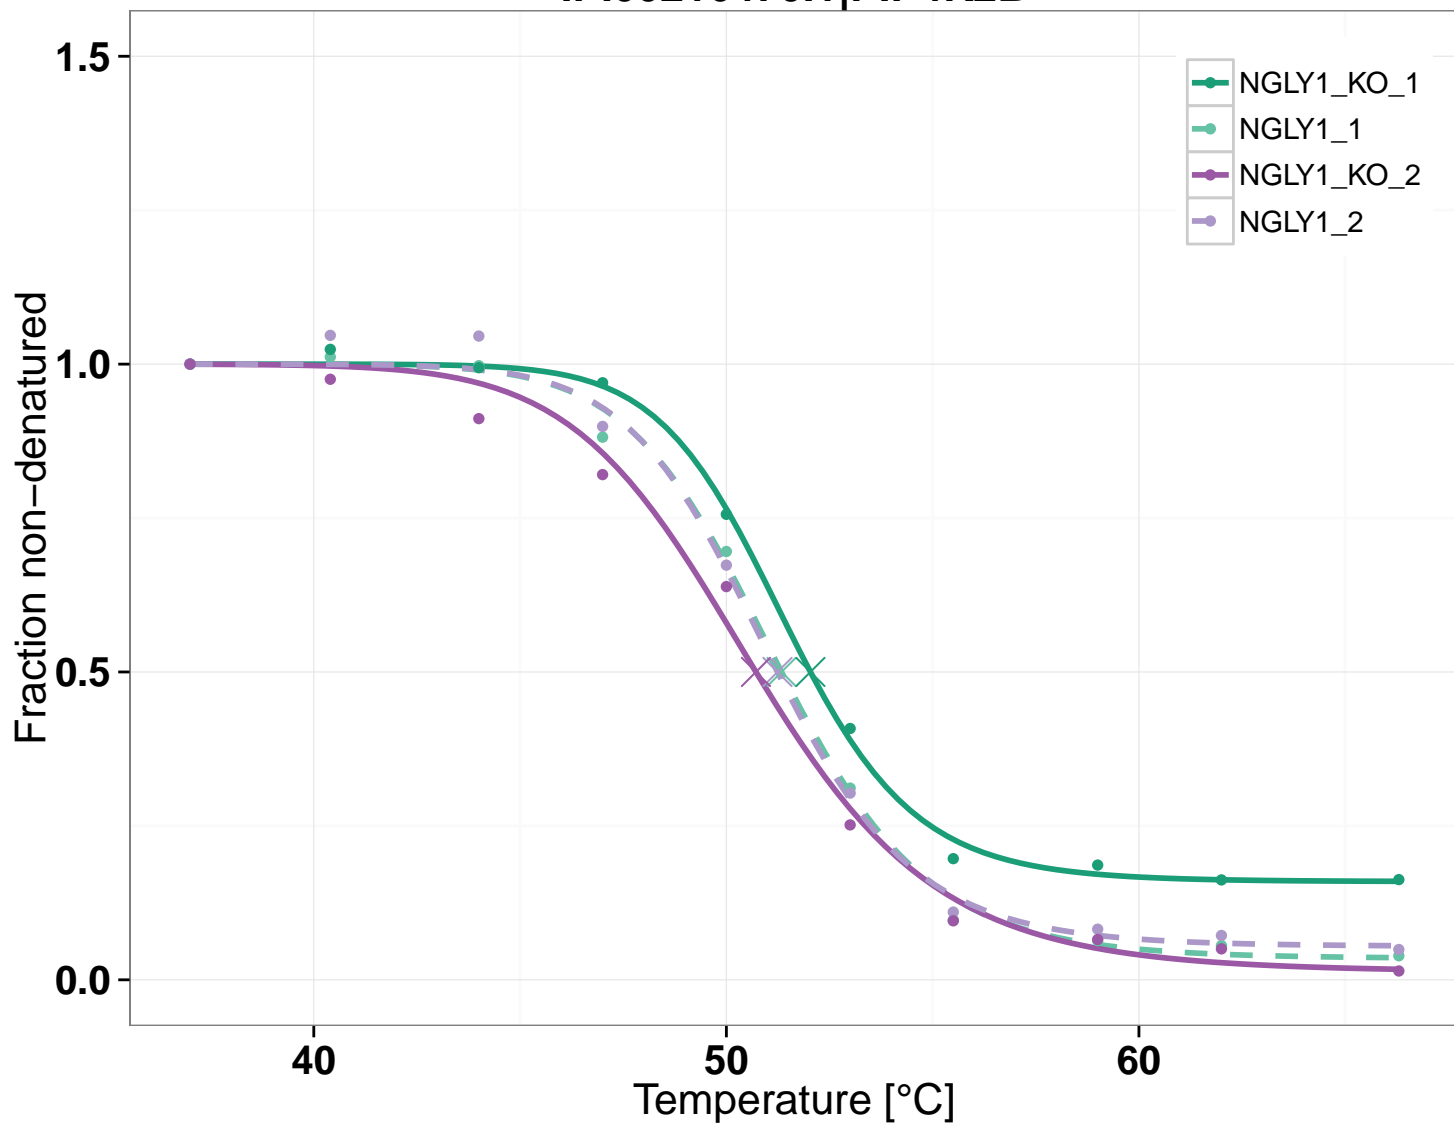

|            | meltPoint | slope | plateau | R2   |
|------------|-----------|-------|---------|------|
| NGLY1_KO_1 | 52.04     | -0.14 | 0.16    | 1    |
| NGLY1_1    | 51.34     | -0.13 | 0.03    | 1    |
| NGLY1_KO_2 | 50.72     | -0.11 | 0.01    | 0.99 |
| NGLY1_2    | 51.24     | -0.14 | 0.05    | 1    |

Supplement: Supplementary file 3688 [file 1]

IPI00784351.4|FLJ37078

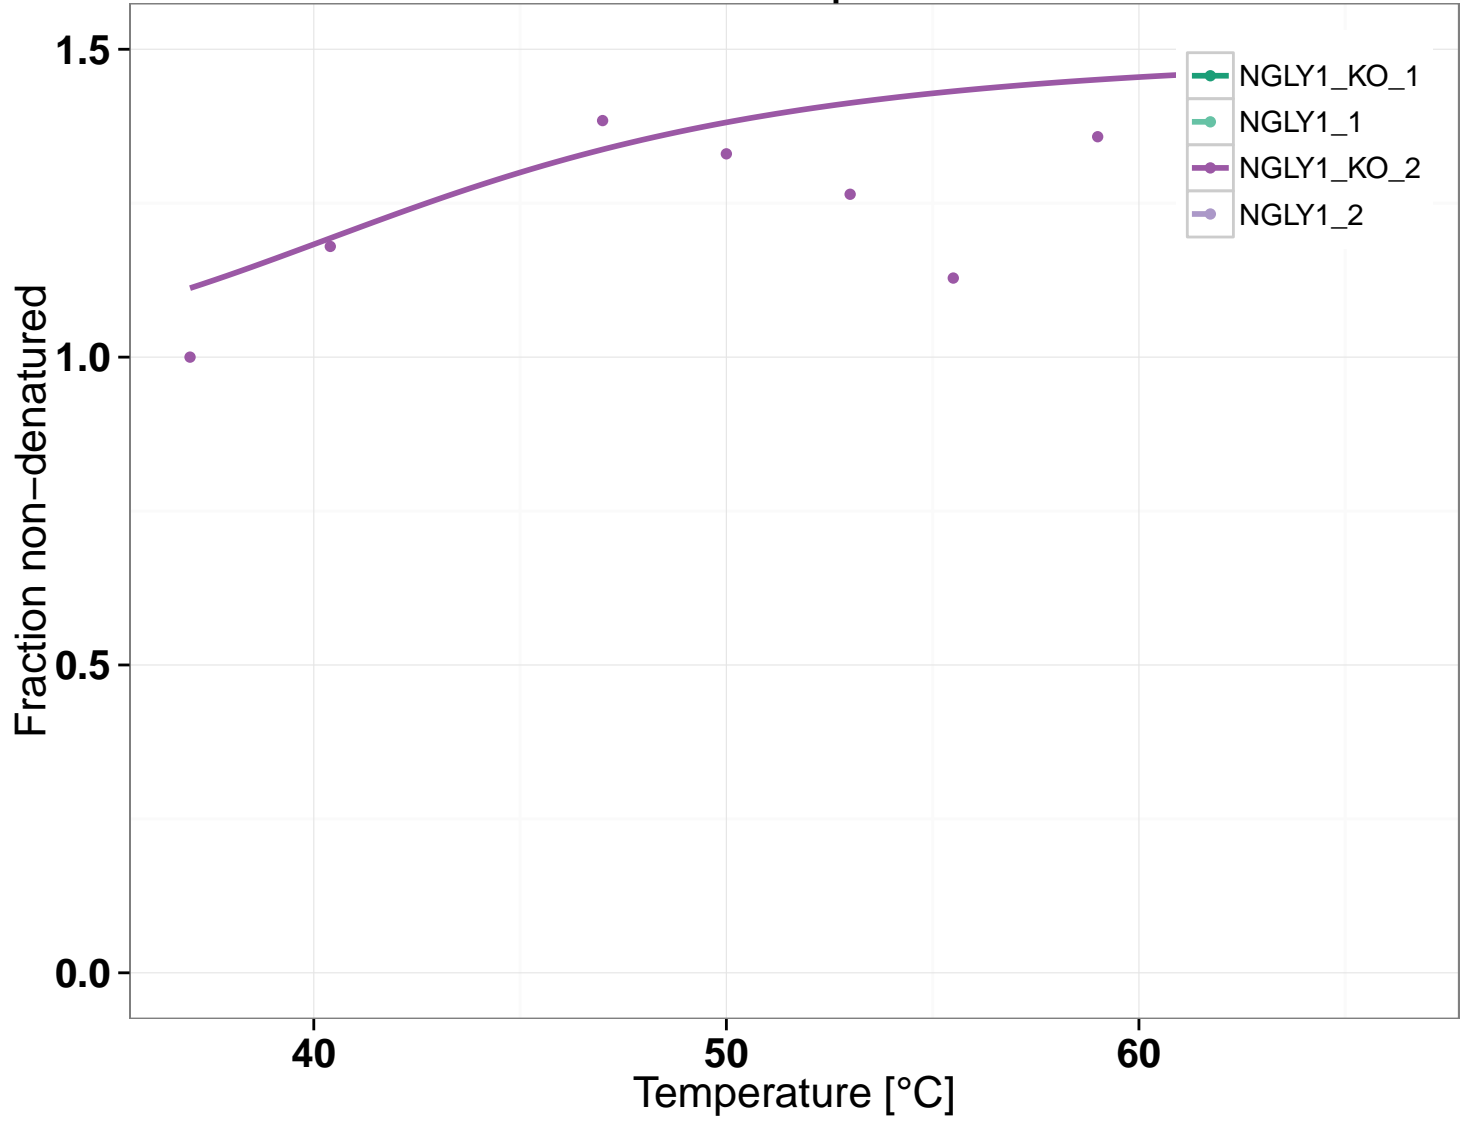

|            | meltPoint | slope | plateau | R2   |
|------------|-----------|-------|---------|------|
| NGLY1_KO_1 | -         | -     | -       | -    |
| NGLY1_1    | -         | -     | -       | -    |
| NGLY1_KO_2 | -         | 0.025 | 1.5     | 0.29 |
| NGLY1_2    | -         | -     | -       | -    |

Supplement: Supplementary file 3689 [file 1]

IPI00152708.3|UTP15

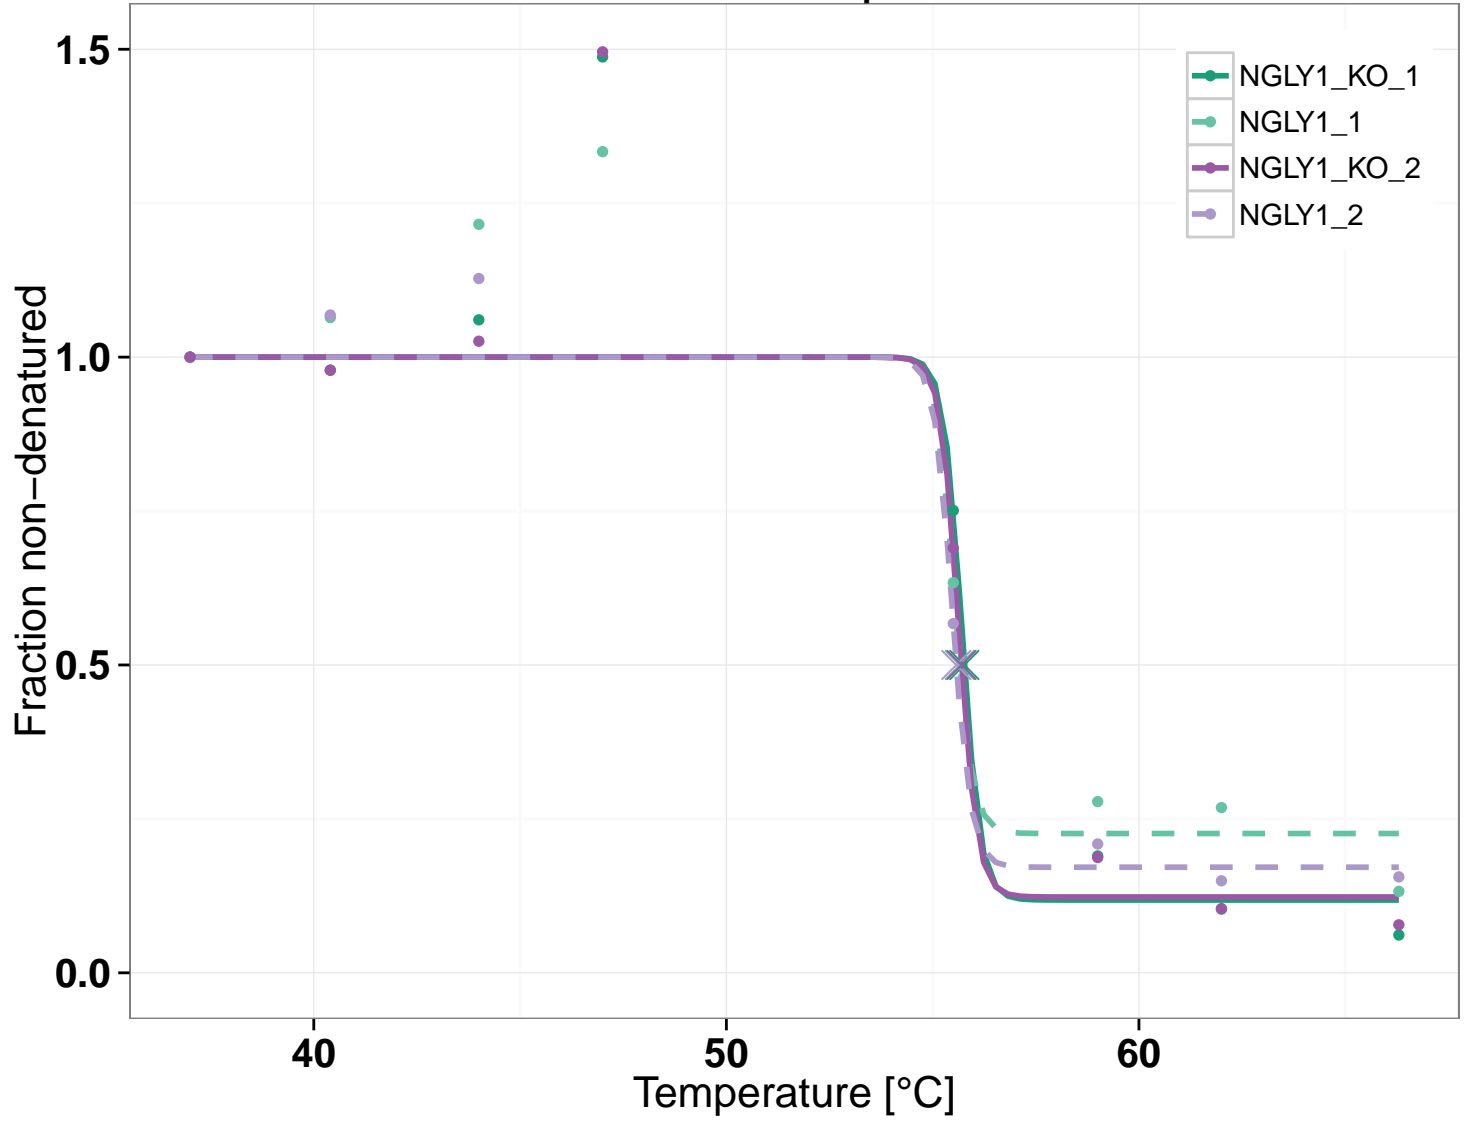

|            | meltPoint | slope | plateau | R2   |
|------------|-----------|-------|---------|------|
| NGLY1_KO_1 | 55.77     | -0.99 | 0.12    | 0.47 |
| NGLY1_1    | 55.66     | -0.87 | 0.23    | 0.56 |
| NGLY1_KO_2 | 55.7      | -0.99 | 0.12    | 0.45 |
| NGLY1_2    | 55.57     | -0.93 | 0.17    | 0.51 |

Supplement: Supplementary file 3690 [file 1]

IPI00908666.1|INO80B

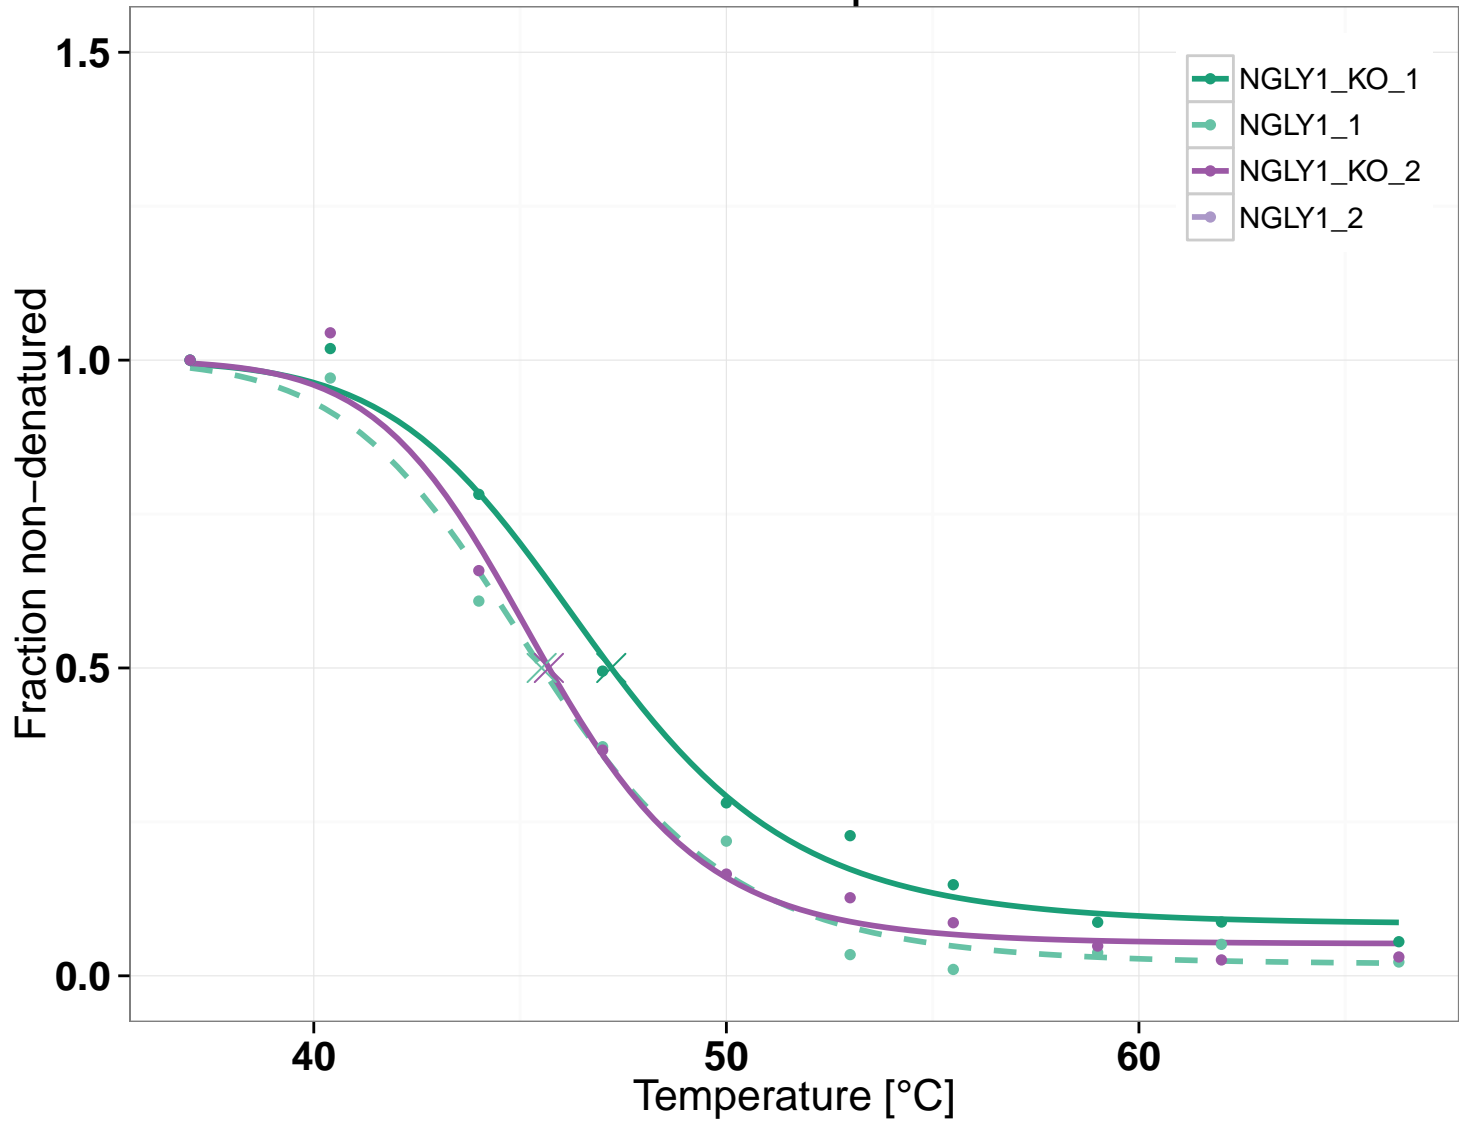

|            | meltPoint | slope  | plateau | R2   |
|------------|-----------|--------|---------|------|
| NGLY1_KO_1 | 47.21     | -0.093 | 0.08    | 0.99 |
| NGLY1_1    | 45.52     | -0.1   | 0.02    | 0.99 |
| NGLY1_KO_2 | 45.7      | -0.12  | 0.05    | 0.99 |
| NGLY1_2    | -         | -      | -       | -    |

Supplement: Supplementary file 3691 [file 1]

# IPI00024975.2|KIF15

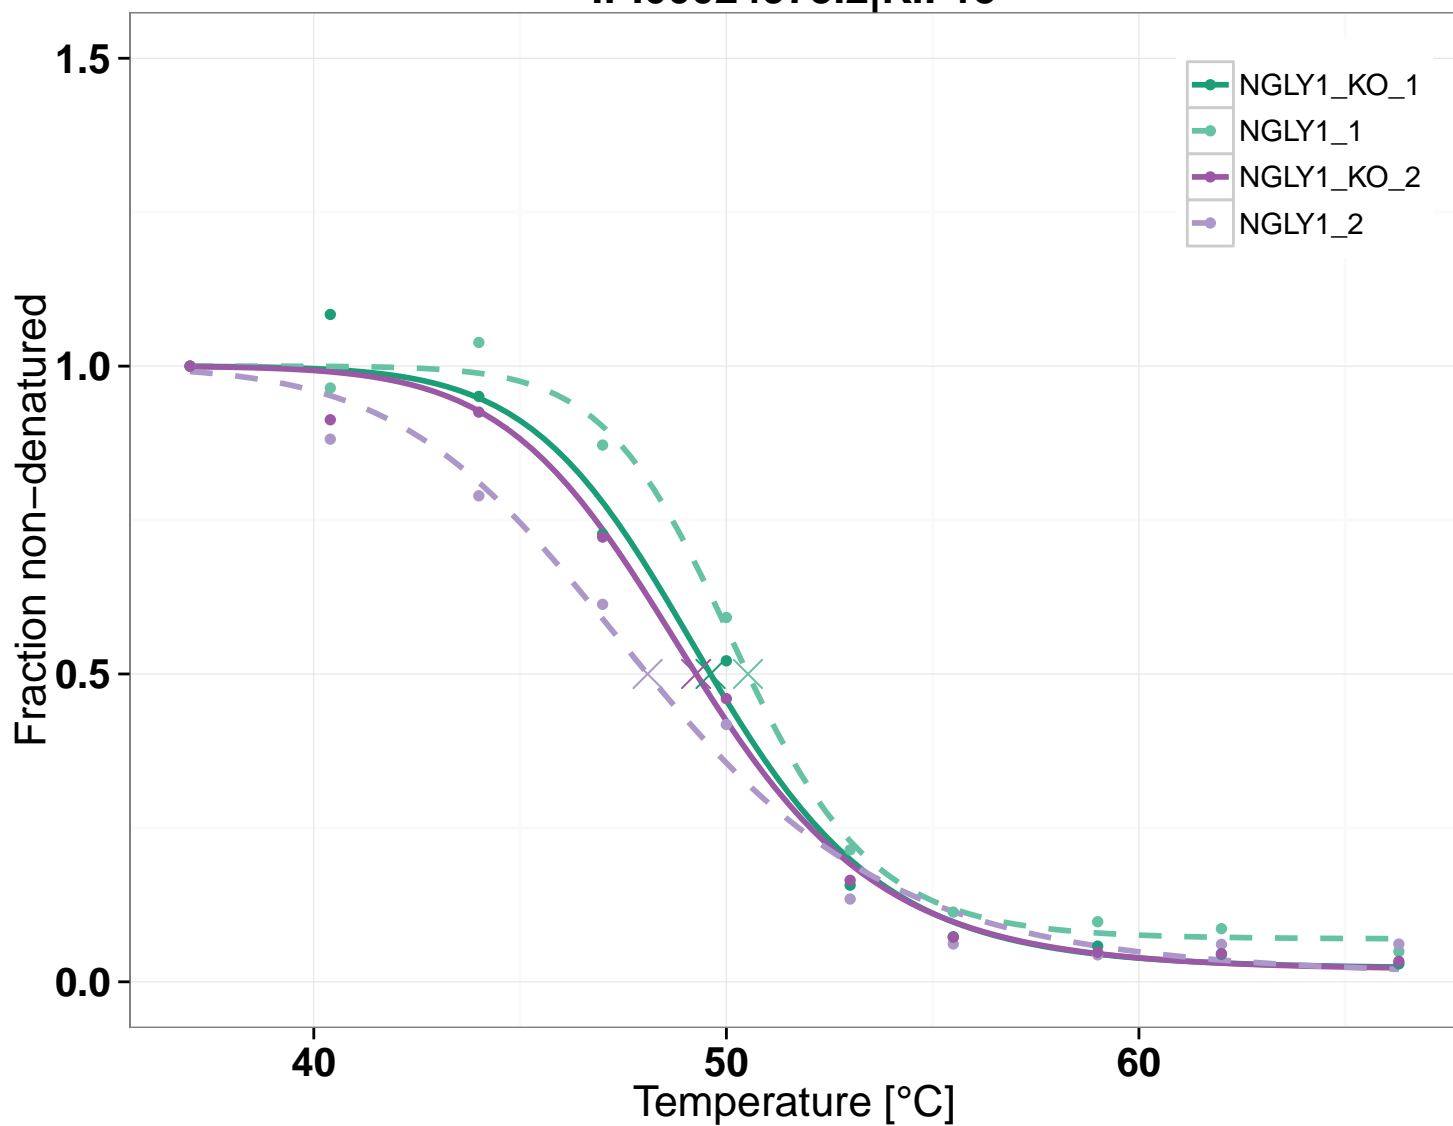

|            | meltPoint | slope  | plateau | R2   |
|------------|-----------|--------|---------|------|
| NGLY1_KO_1 | 49.62     | -0.11  | 0.02    | 0.99 |
| NGLY1_1    | 50.52     | -0.14  | 0.07    | 1    |
| NGLY1_KO_2 | 49.27     | -0.11  | 0.02    | 0.99 |
| NGLY1_2    | 48.09     | -0.083 | 0.01    | 0.99 |

Supplement: Supplementary file 3692 [file 1]

IPI00032259.1|MAN2A2

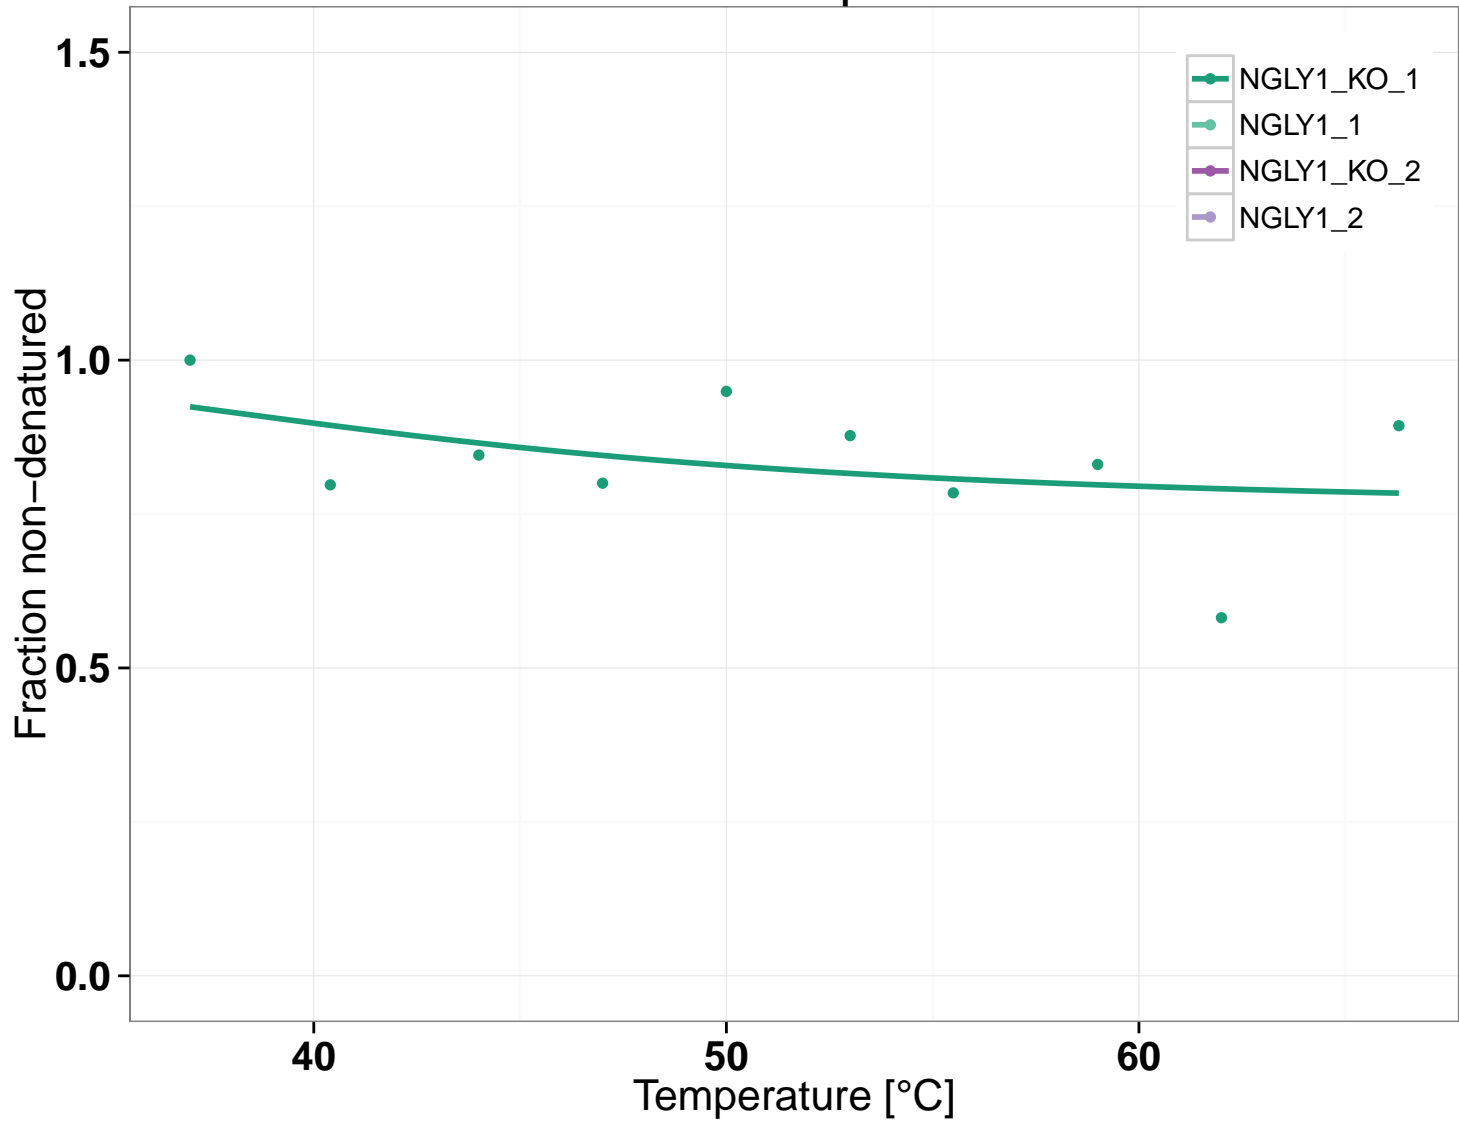

|            | meltPoint | slope   | plateau | R2   |
|------------|-----------|---------|---------|------|
| NGLY1_KO_1 | —         | −0.0089 | 0.75    | 0.19 |
| NGLY1_1    | —         | —       | —       | —    |
| NGLY1_KO_2 | —         | —       | —       | —    |
| NGLY1_2    | —         | —       | —       | —    |

Supplement: Supplementary file 3693 [file 1]

# IPI00893715.1|EPCAM

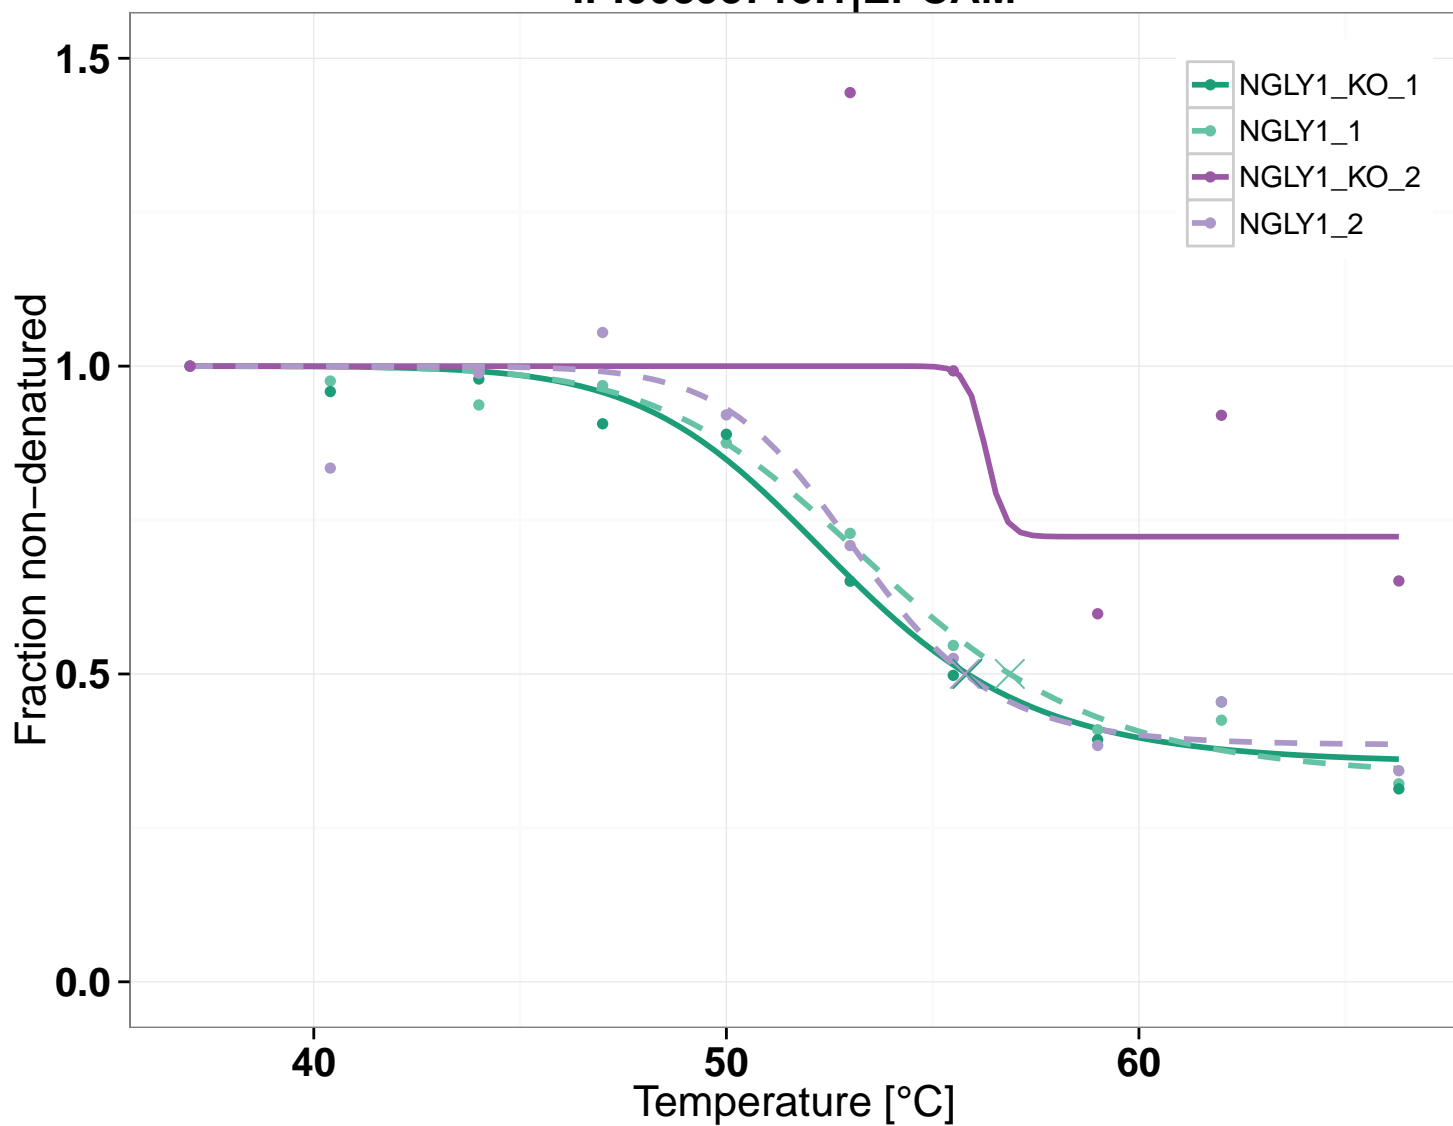

|            | meltPoint | slope  | plateau | R2    |
|------------|-----------|--------|---------|-------|
| NGLY1_KO_1 | 55.84     | -0.068 | 0.35    | 0.98  |
| NGLY1_1    | 56.87     | -0.062 | 0.33    | 0.99  |
| NGLY1_KO_2 | -         | -0.31  | 0.72    | -0.41 |
| NGLY1_2    | 55.78     | -0.093 | 0.38    | 0.94  |

Supplement: Supplementary file 3694 [file 1]

IPI00179016.8|SETD1A

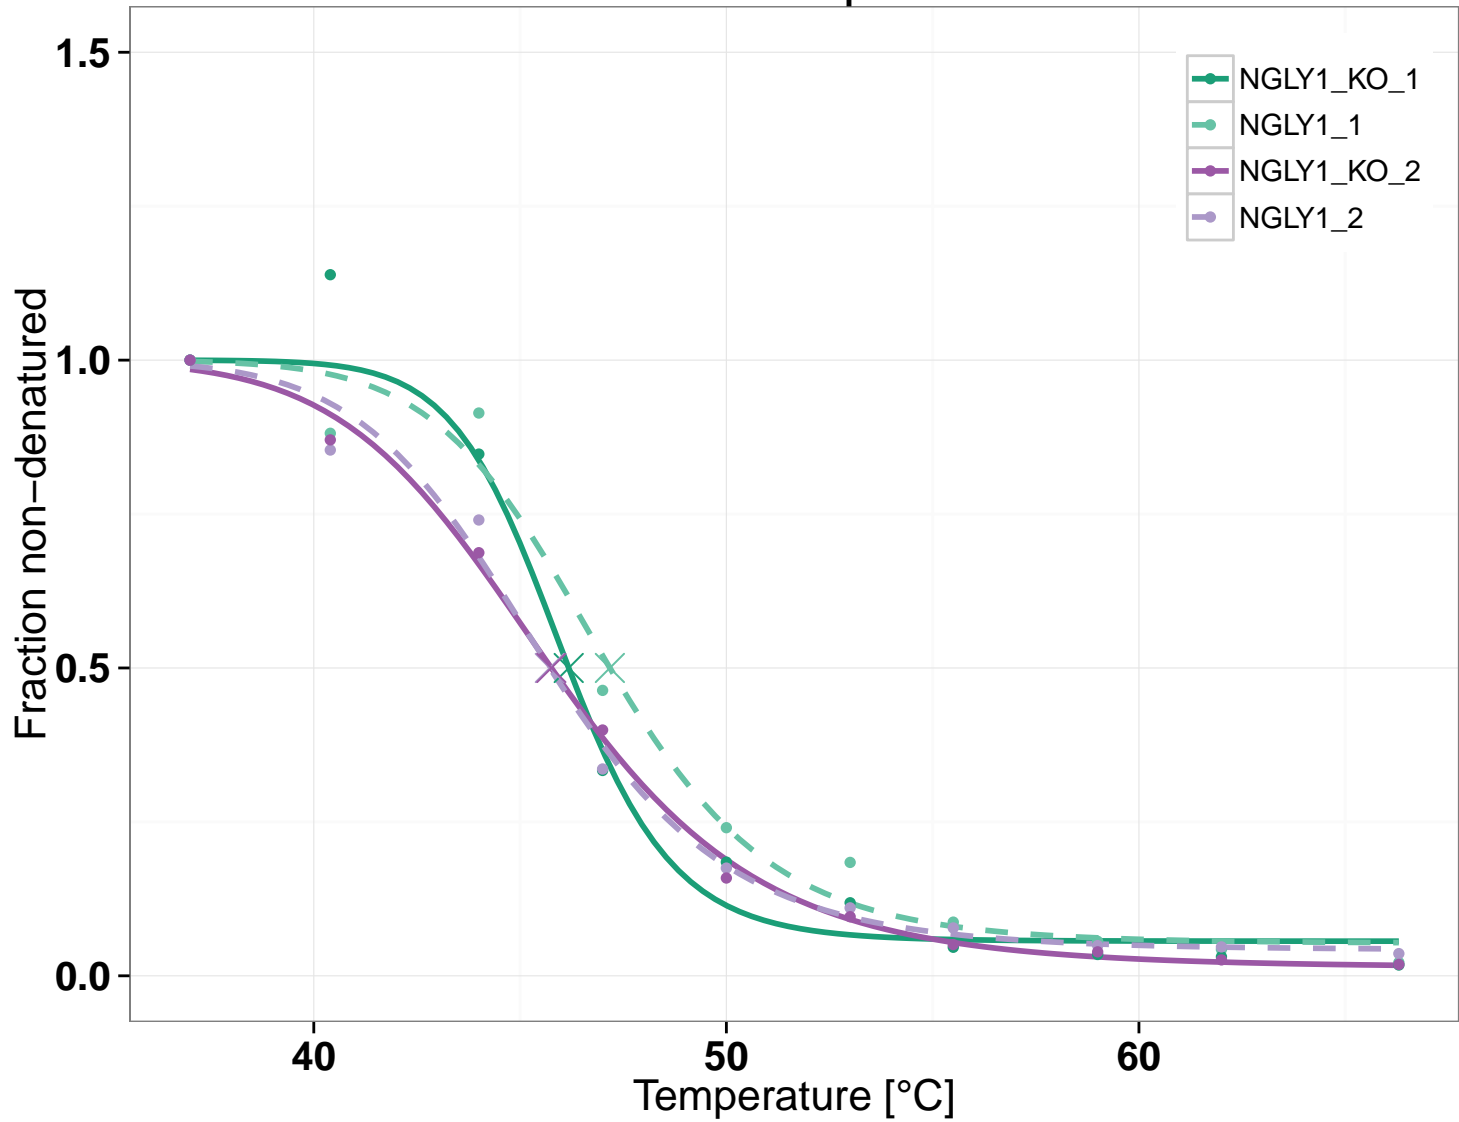

|            | meltPoint | slope  | plateau | R2   |
|------------|-----------|--------|---------|------|
| NGLY1_KO_1 | 46.18     | -0.18  | 0.06    | 0.98 |
| NGLY1_1    | 47.18     | -0.12  | 0.05    | 0.98 |
| NGLY1_KO_2 | 45.76     | -0.097 | 0.01    | 1    |
| NGLY1_2    | 45.72     | -0.11  | 0.04    | 0.99 |

Supplement: Supplementary file 3695 [file 1]

# IPI00178150.5|KIF4A

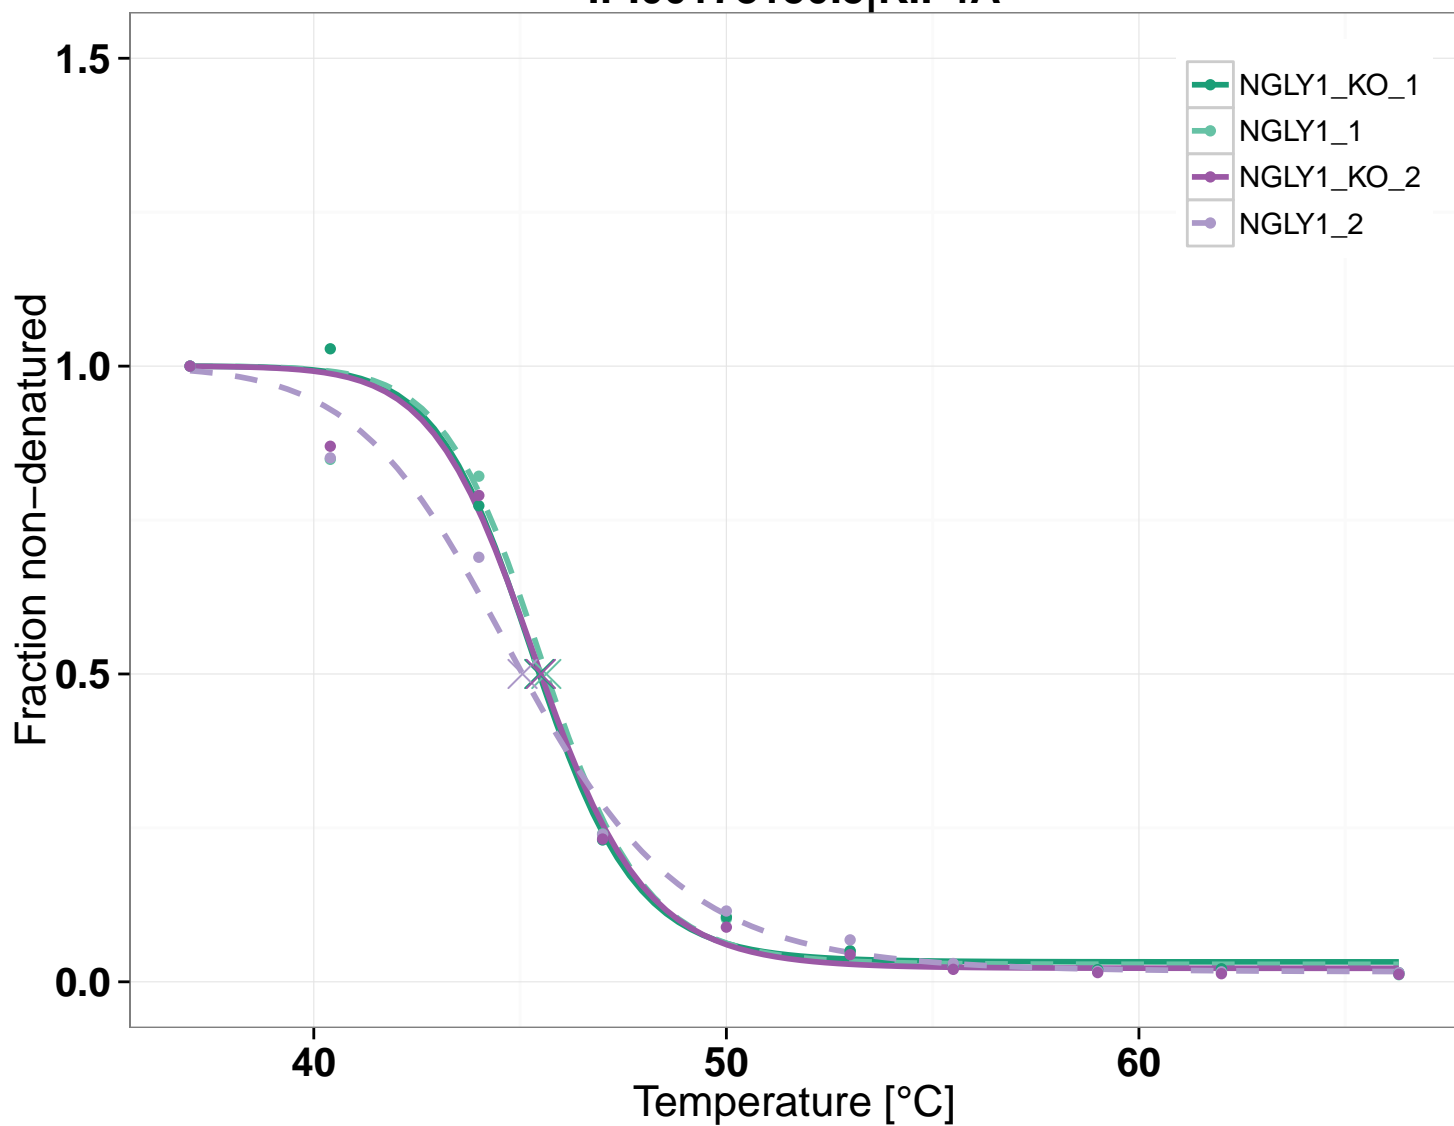

|            | meltPoint | slope | plateau | R2   |
|------------|-----------|-------|---------|------|
| NGLY1_KO_1 | 45.47     | -0.2  | 0.03    | 1    |
| NGLY1_1    | 45.64     | -0.2  | 0.03    | 0.98 |
| NGLY1_KO_2 | 45.5      | -0.19 | 0.02    | 0.99 |
| NGLY1_2    | 45.06     | -0.12 | 0.02    | 0.99 |

Supplement: Supplementary file 3696 [file 1]

IPI00102660.1|C10ORF2

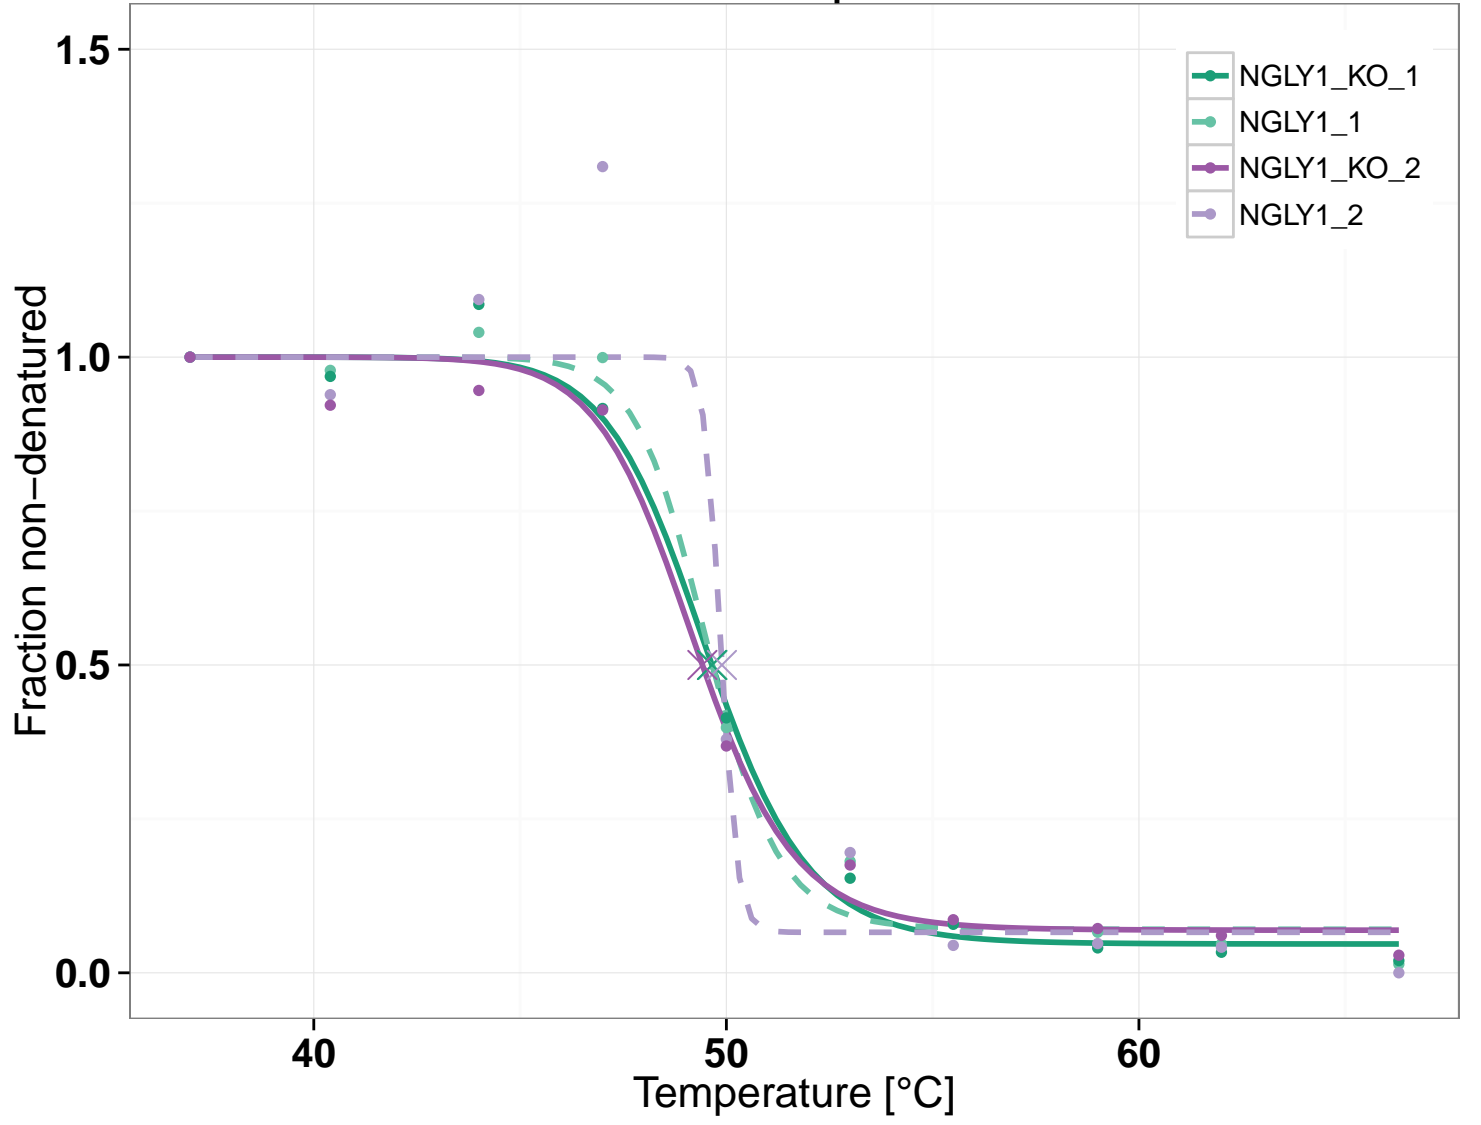

|            | meltPoint | slope | plateau | R2   |
|------------|-----------|-------|---------|------|
| NGLY1_KO_1 | 49.65     | -0.19 | 0.05    | 0.99 |
| NGLY1_1    | 49.67     | -0.27 | 0.07    | 0.99 |
| NGLY1_KO_2 | 49.42     | -0.19 | 0.07    | 0.99 |
| NGLY1_2    | 49.89     | -1.2  | 0.07    | 0.95 |

Supplement: Supplementary file 3697 [file 1]

# IPI00873758.1|PIK3C3

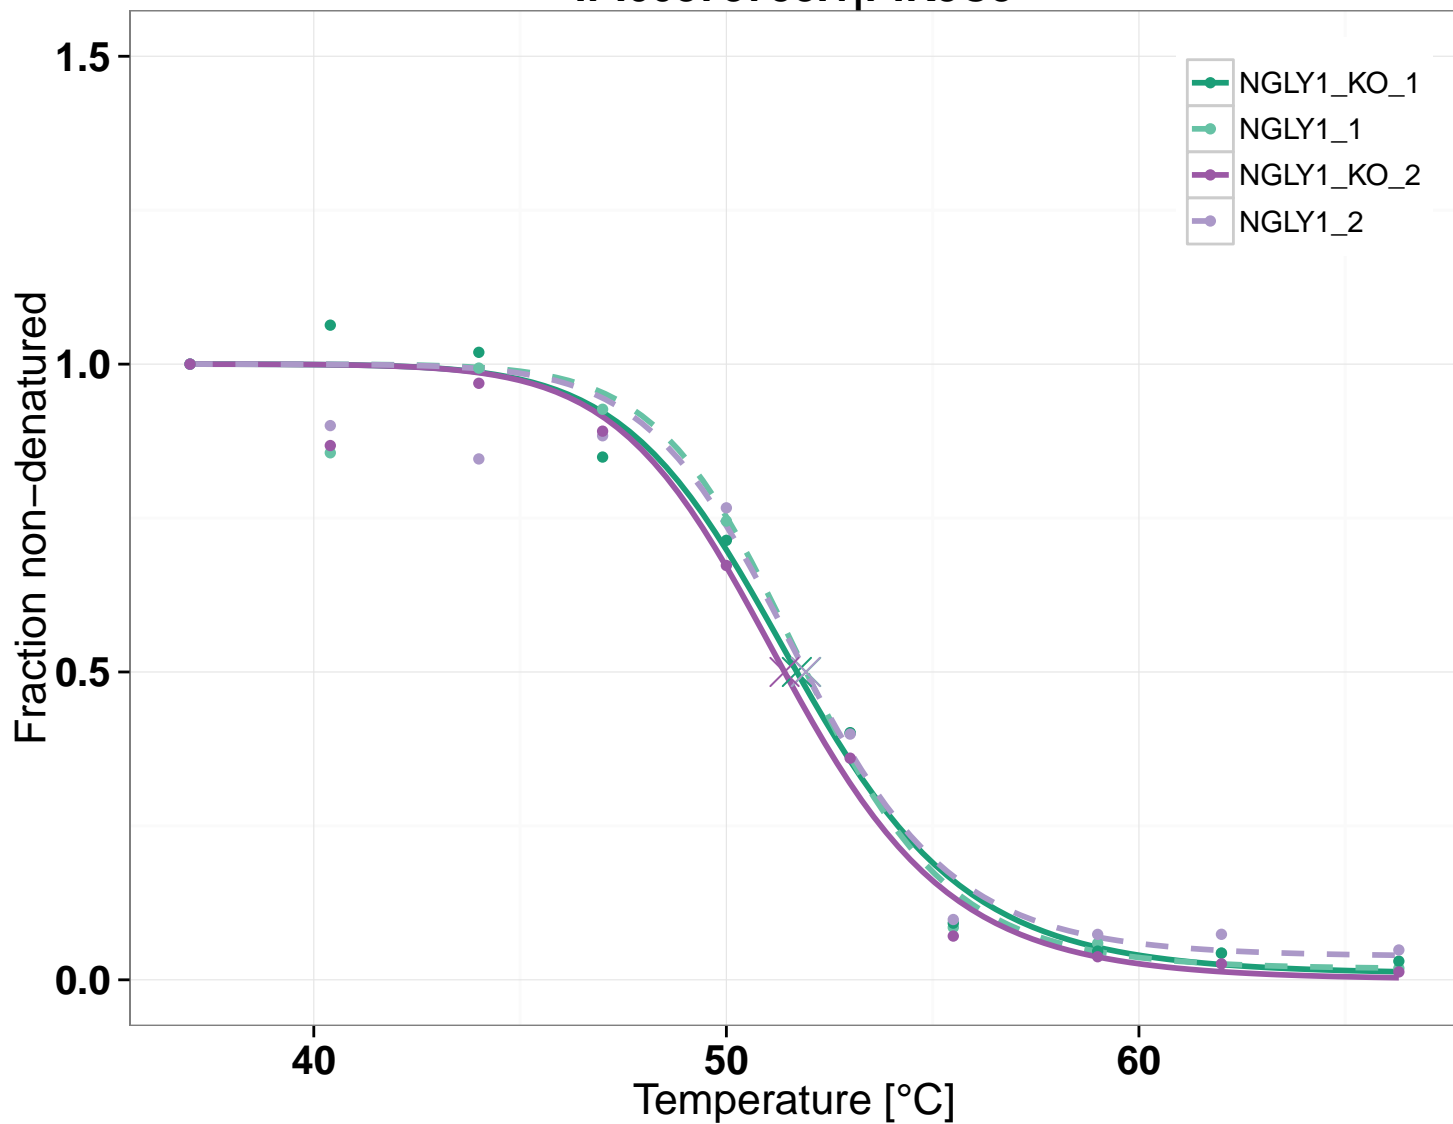

|            | meltPoint | slope | plateau | R2   |
|------------|-----------|-------|---------|------|
| NGLY1_KO_1 | 51.71     | -0.12 | 0.01    | 0.99 |
| NGLY1_1    | 51.93     | -0.14 | 0.02    | 0.98 |
| NGLY1_KO_2 | 51.41     | -0.12 | 0       | 0.99 |
| NGLY1_2    | 51.92     | -0.13 | 0.04    | 0.97 |

Supplement: Supplementary file 3698 [file 1]

IPI00020058.2|ATP7B

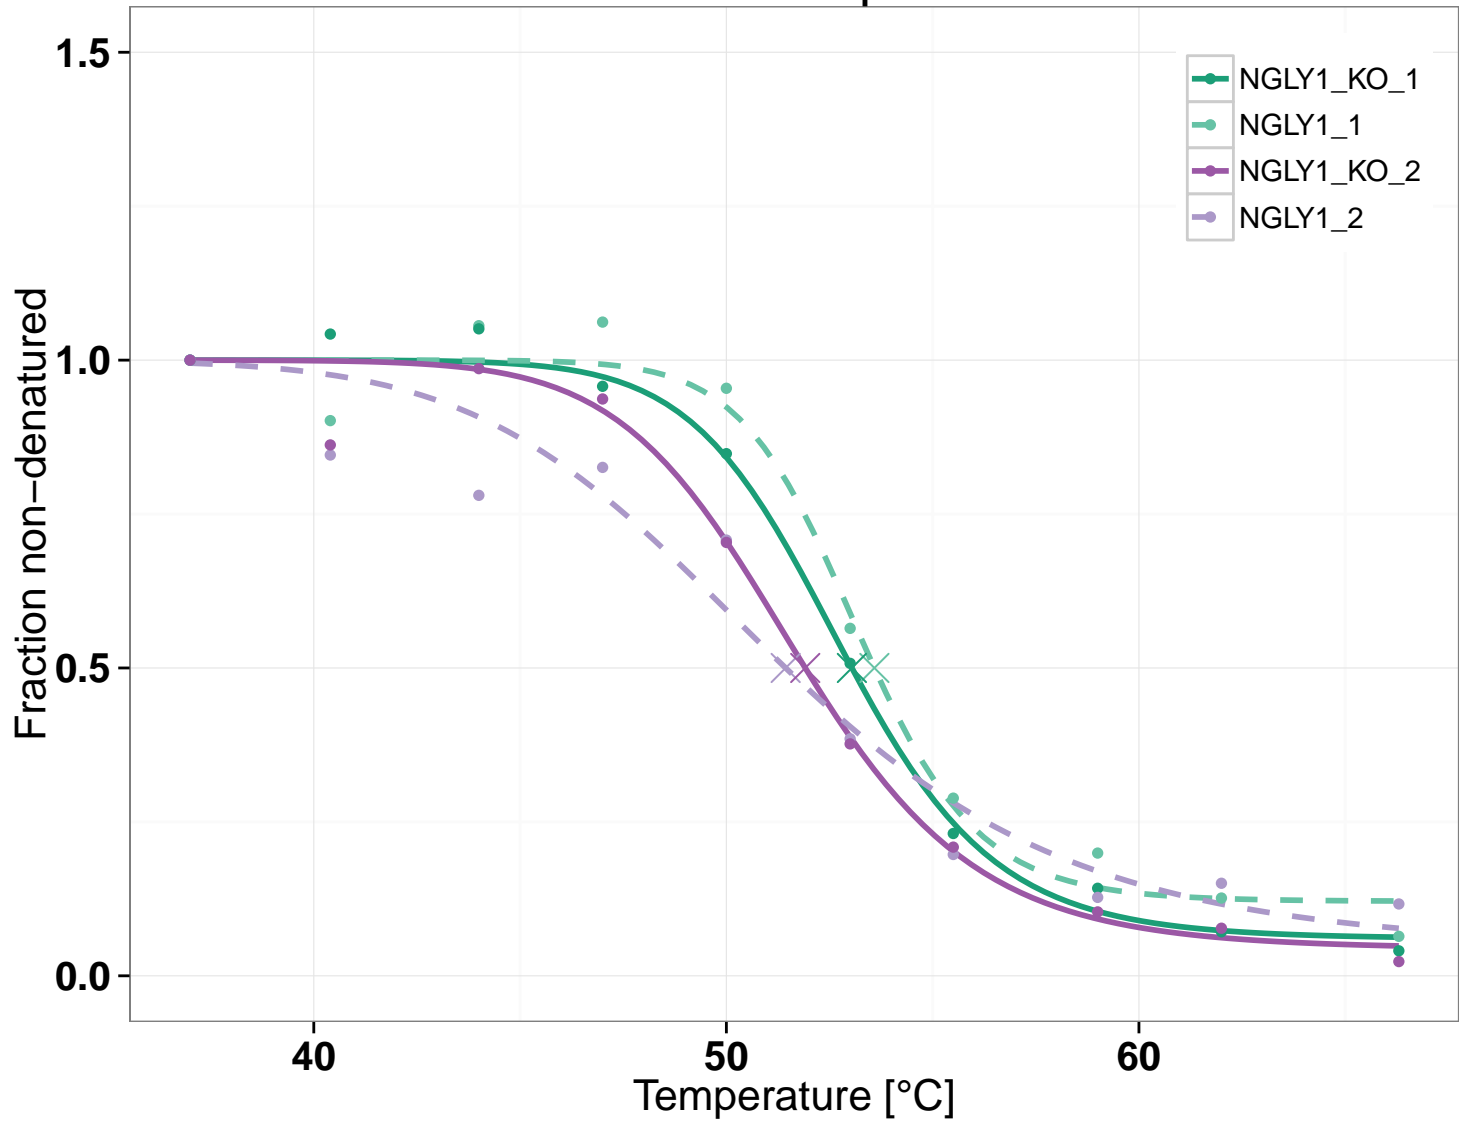

|            | meltPoint | slope  | plateau | R2   |
|------------|-----------|--------|---------|------|
| NGLY1_KO_1 | 53.04     | -0.13  | 0.06    | 1    |
| NGLY1_1    | 53.59     | -0.15  | 0.12    | 0.98 |
| NGLY1_KO_2 | 51.91     | -0.11  | 0.04    | 0.99 |
| NGLY1_2    | 51.44     | -0.066 | 0.04    | 0.95 |

Supplement: Supplementary file 3699 [file 1]

# IPI00397860.3|CYB5A

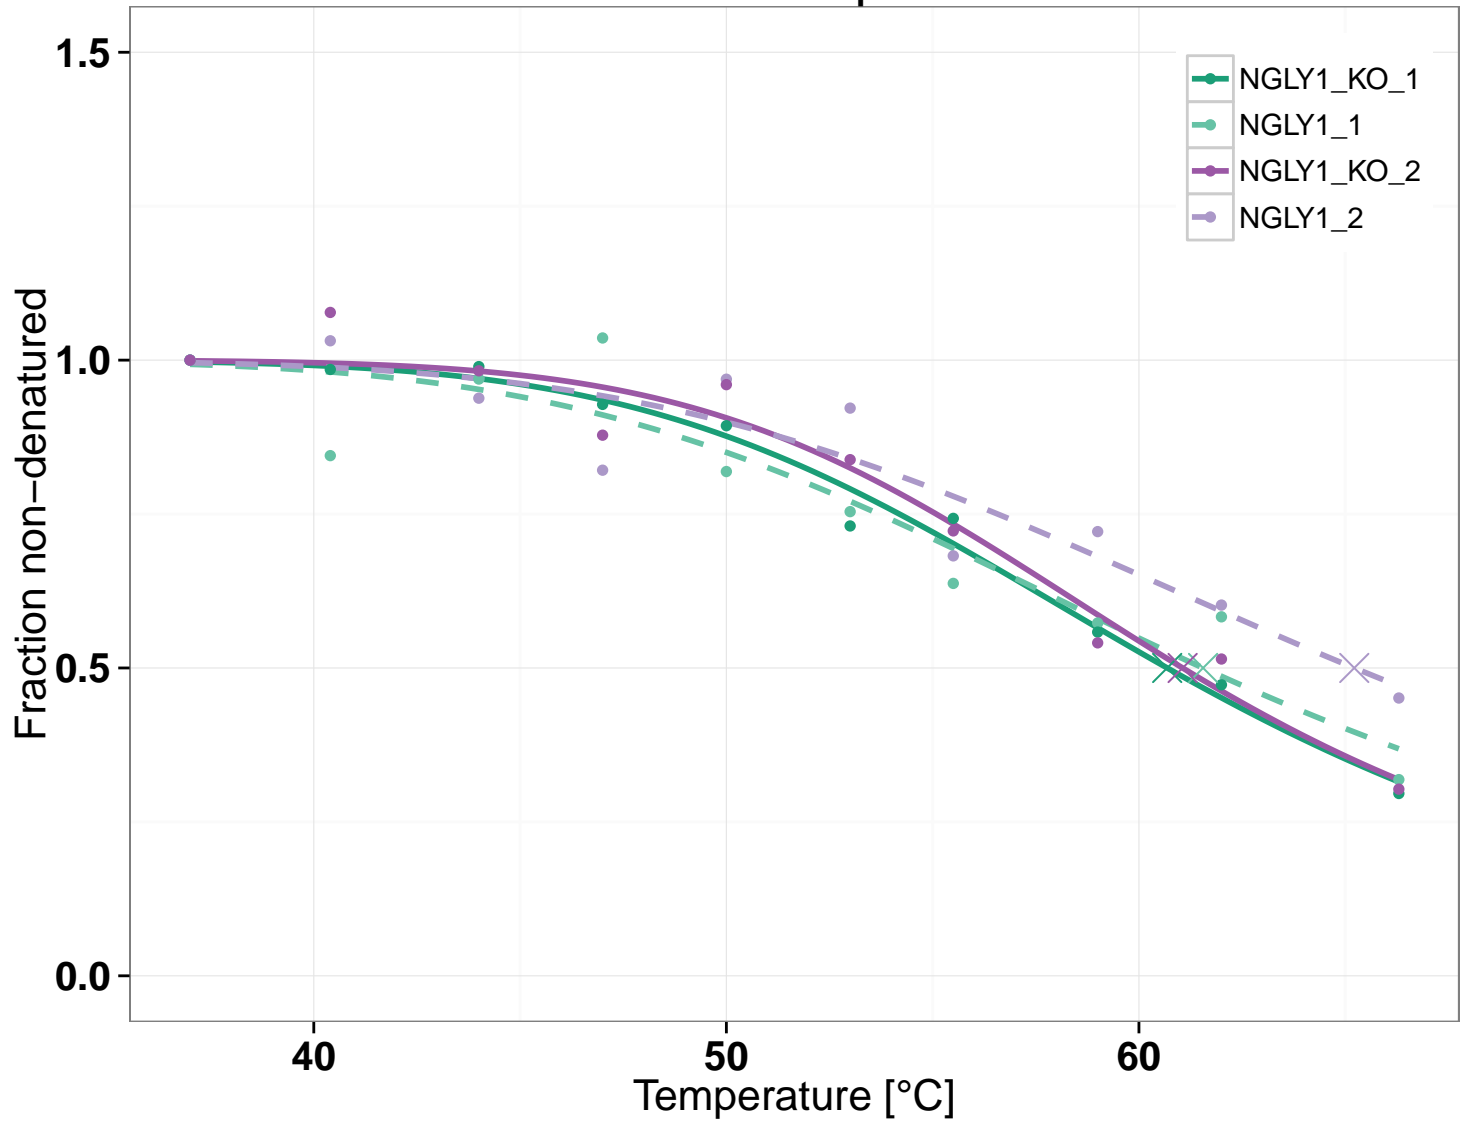

|            | meltPoint | slope  | plateau | R2   |
|------------|-----------|--------|---------|------|
| NGLY1_KO_1 | 60.69     | -0.04  | 0       | 0.99 |
| NGLY1_1    | 61.55     | -0.033 | 0       | 0.89 |
| NGLY1_KO_2 | 61.06     | -0.043 | 0.05    | 0.96 |
| NGLY1_2    | 65.22     | -0.03  | 0       | 0.88 |

Supplement: Supplementary file 3700 [file 1]

# IPI00005487.1|RBKS

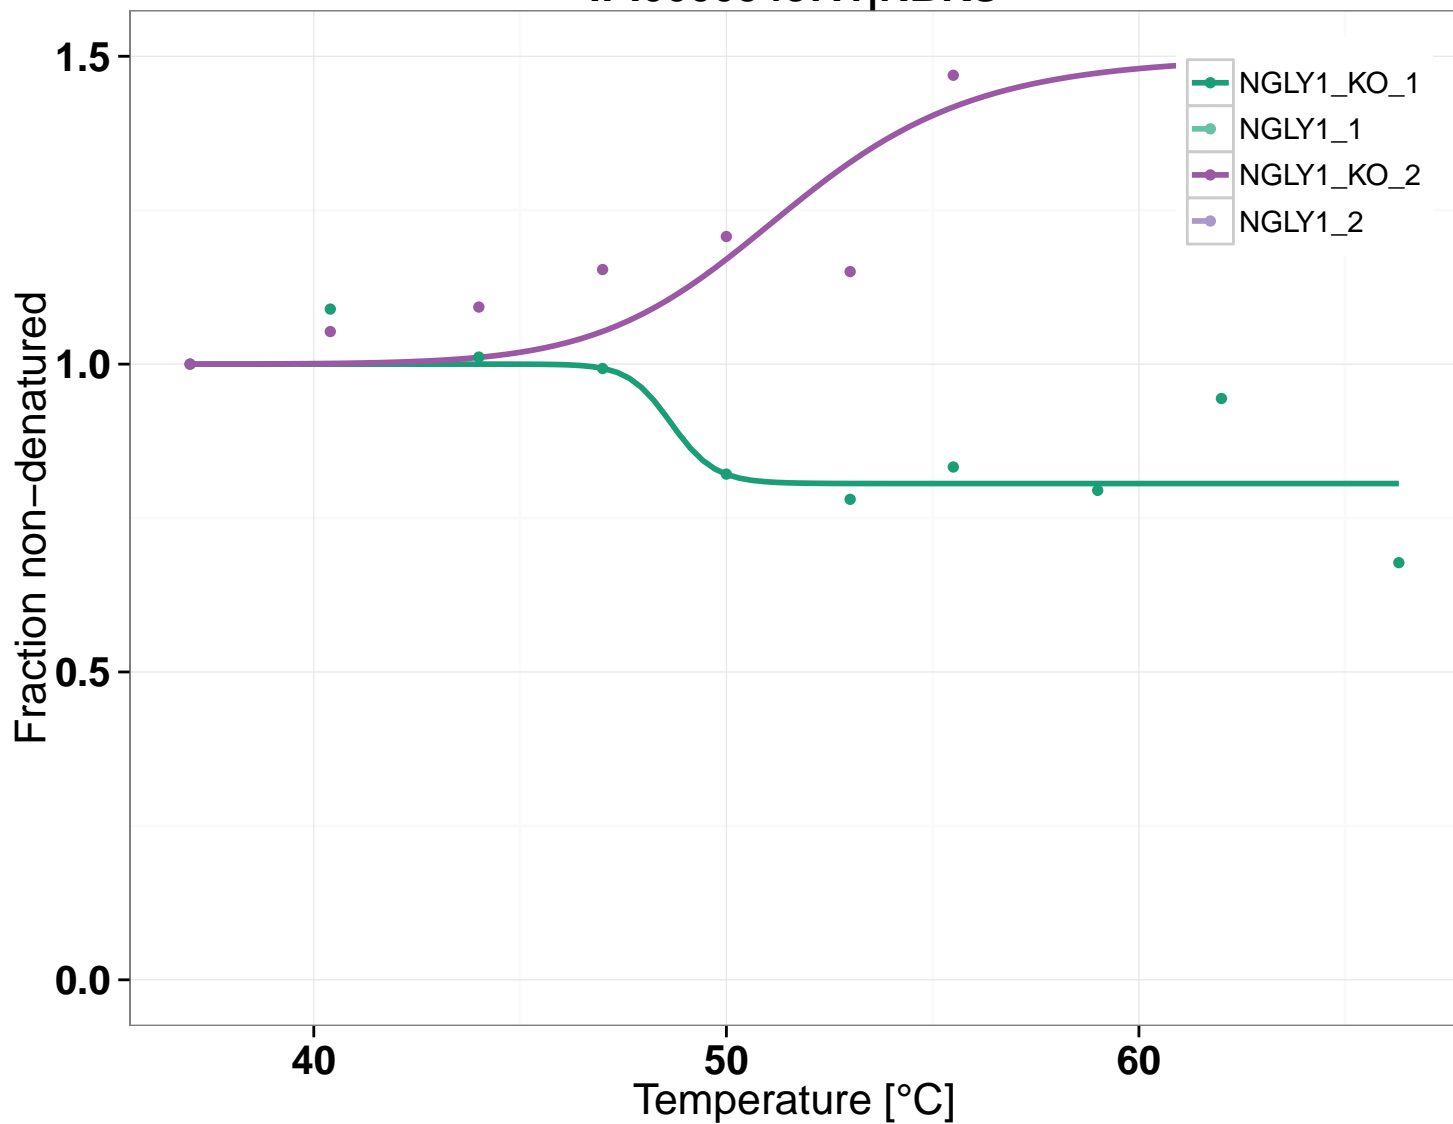

|            | meltPoint | slope  | plateau | R2   |
|------------|-----------|--------|---------|------|
| NGLY1_KO_1 | —         | −0.093 | 0.81    | 0.71 |
| NGLY1_1    | —         | —      | —       | —    |
| NGLY1_KO_2 | —         | 0.055  | 1.5     | 0.56 |
| NGLY1_2    | —         | —      | —       | —    |

Supplement: Supplementary file 3701 [file 1]

IPI00783879.2|HIVEP1

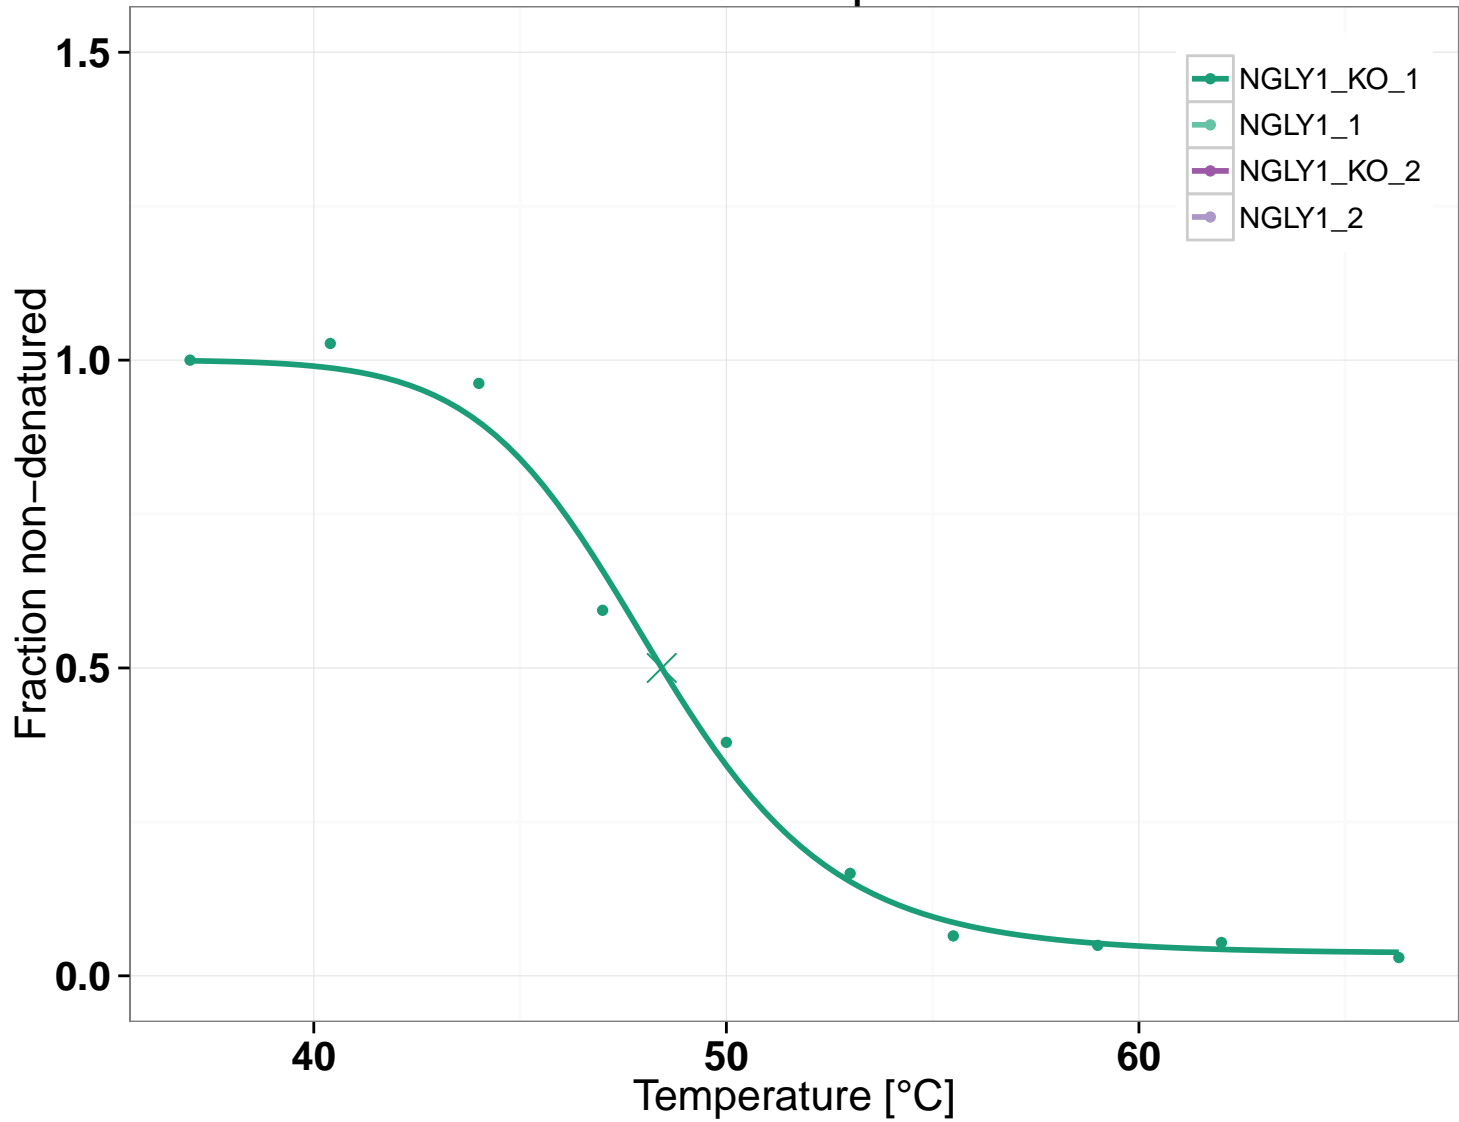

|            | meltPoint | slope | plateau | R2   |
|------------|-----------|-------|---------|------|
| NGLY1_KO_1 | 48.43     | -0.11 | 0.04    | 0.99 |
| NGLY1_1    | -         | -     | -       | -    |
| NGLY1_KO_2 | -         | -     | -       | -    |
| NGLY1_2    | -         | -     | -       | -    |

Supplement: Supplementary file 3702 [file 1]

# IPI00022831.1|TBP

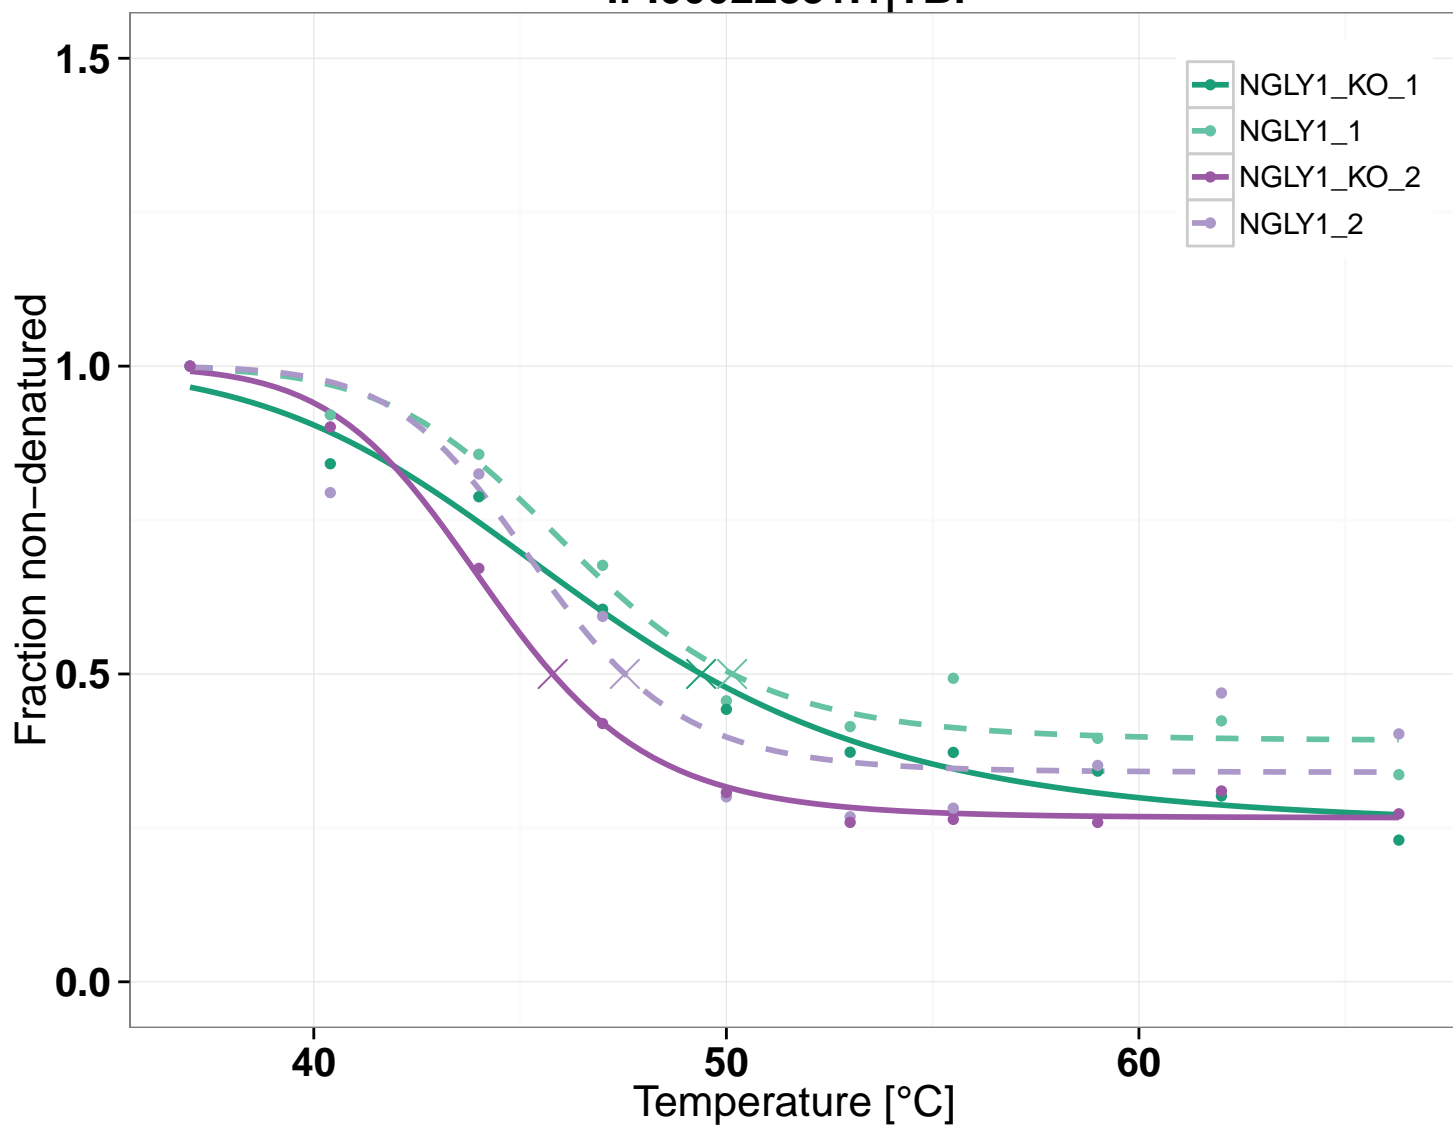

|            | meltPoint | slope  | plateau | R2   |
|------------|-----------|--------|---------|------|
| NGLY1_KO_1 | 49.39     | -0.049 | 0.25    | 0.98 |
| NGLY1_1    | 50.14     | -0.067 | 0.39    | 0.97 |
| NGLY1_KO_2 | 45.79     | -0.095 | 0.27    | 1    |
| NGLY1_2    | 47.54     | -0.094 | 0.34    | 0.87 |

Supplement: Supplementary file 3703 [file 1]

IPI00018140.3|SYNCRIP

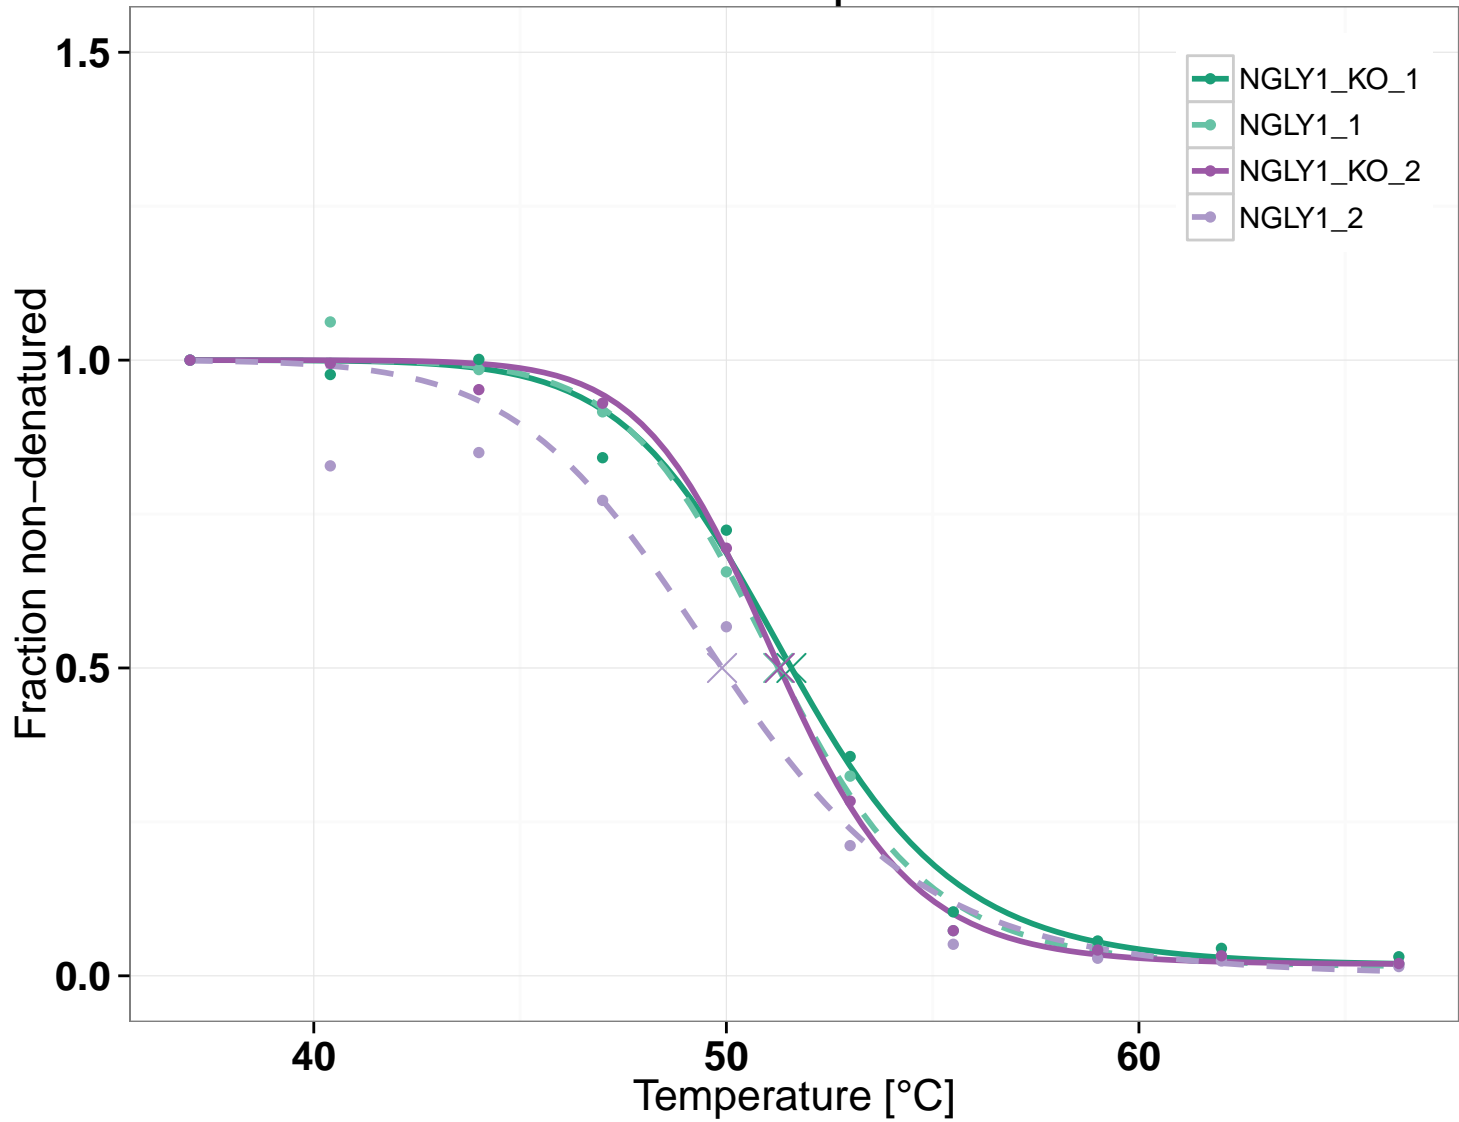

|            | meltPoint | slope | plateau | R2   |
|------------|-----------|-------|---------|------|
| NGLY1_KO_1 | 51.58     | -0.12 | 0.02    | 0.99 |
| NGLY1_1    | 51.26     | -0.13 | 0.01    | 1    |
| NGLY1_KO_2 | 51.29     | -0.15 | 0.02    | 1    |
| NGLY1_2    | 49.9      | -0.1  | 0       | 0.97 |

Supplement: Supplementary file 3704 [file 1]

# IPI00796051.1|MGST1

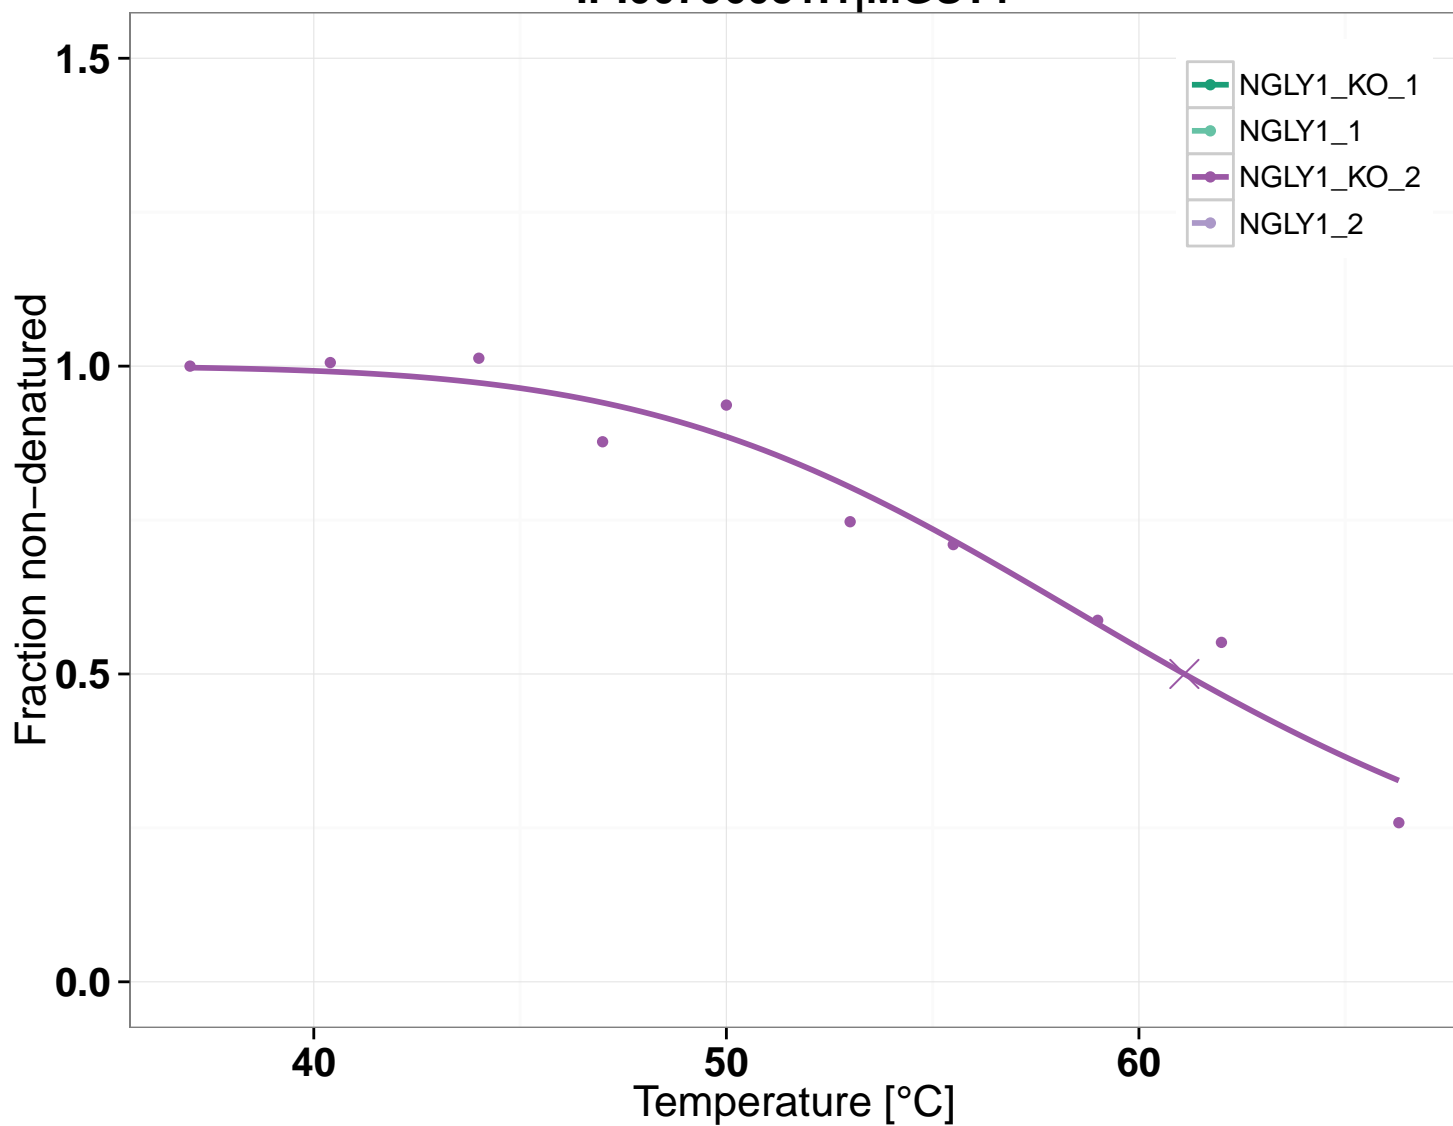

|            | meltPoint | slope  | plateau | R2   |
|------------|-----------|--------|---------|------|
| NGLY1_KO_1 | —         | —      | —       | —    |
| NGLY1_1    | —         | —      | —       | —    |
| NGLY1_KO_2 | 61.1      | -0.039 | 0       | 0.96 |
| NGLY1_2    | —         | —      | —       | —    |

Supplement: Supplementary file 3705 [file 1]

IPI00796519.1|TEX264

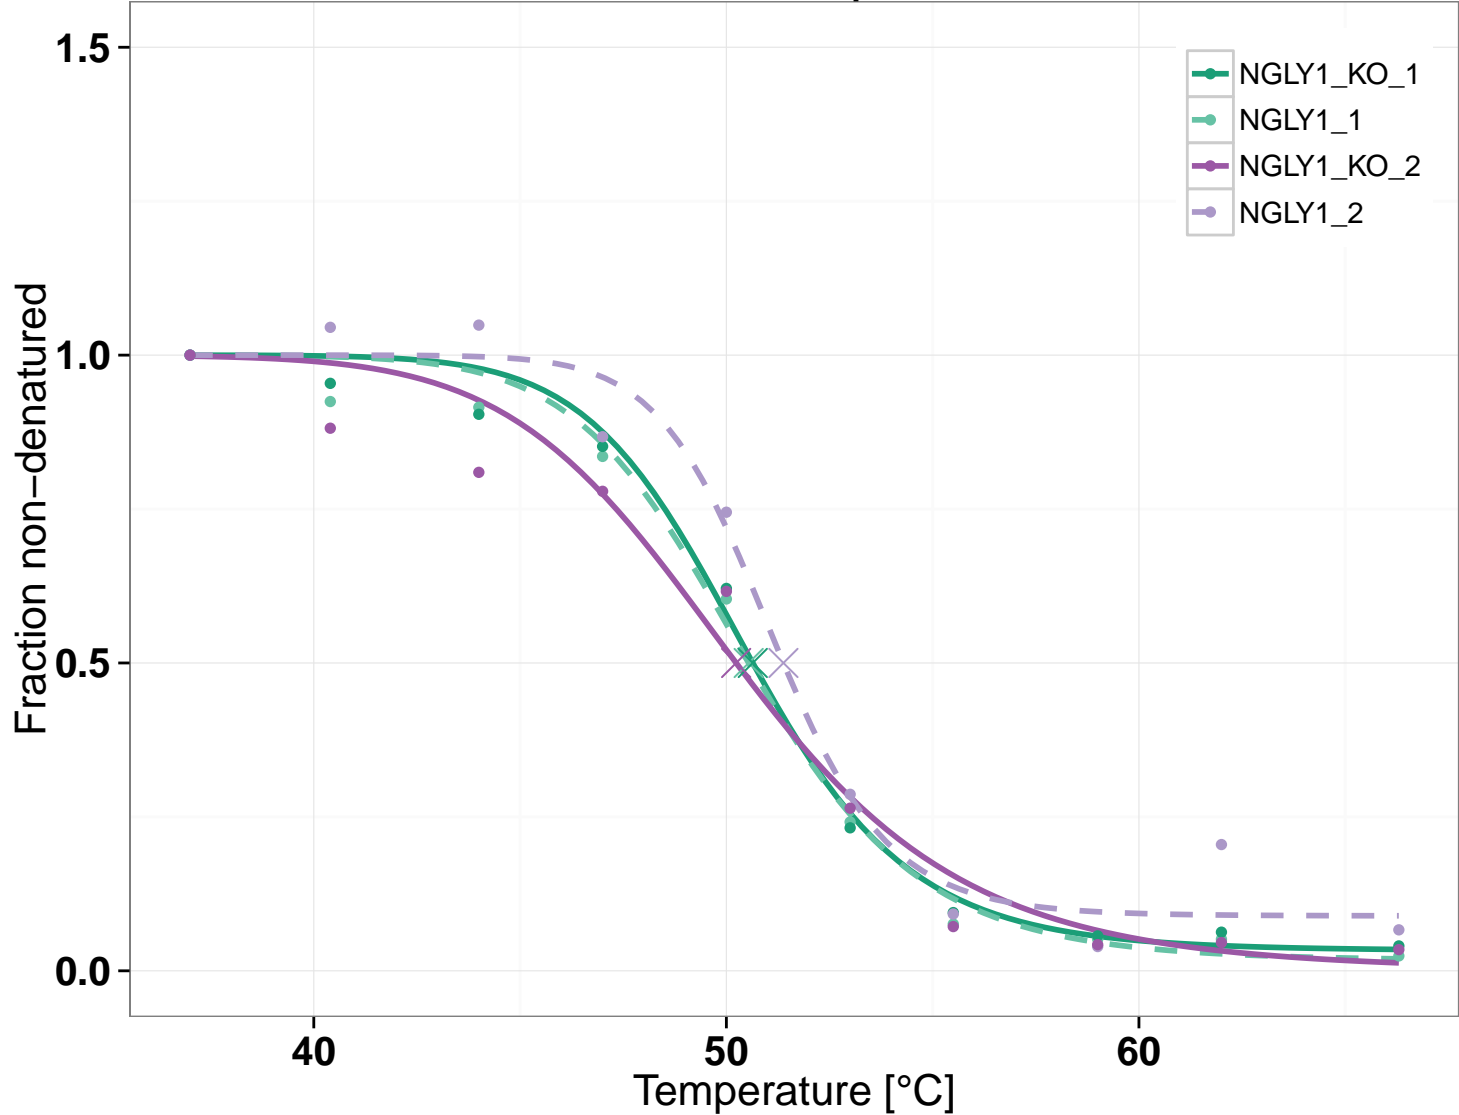

|            | meltPoint | slope | plateau | R2   |
|------------|-----------|-------|---------|------|
| NGLY1_KO_1 | 50.64     | -0.12 | 0.03    | 0.99 |
| NGLY1_1    | 50.54     | -0.12 | 0.02    | 0.99 |
| NGLY1_KO_2 | 50.24     | -0.09 | 0       | 0.97 |
| NGLY1_2    | 51.38     | -0.16 | 0.09    | 0.98 |

Supplement: Supplementary file 3706 [file 1]

# IPI00017450.2|GTF2F1

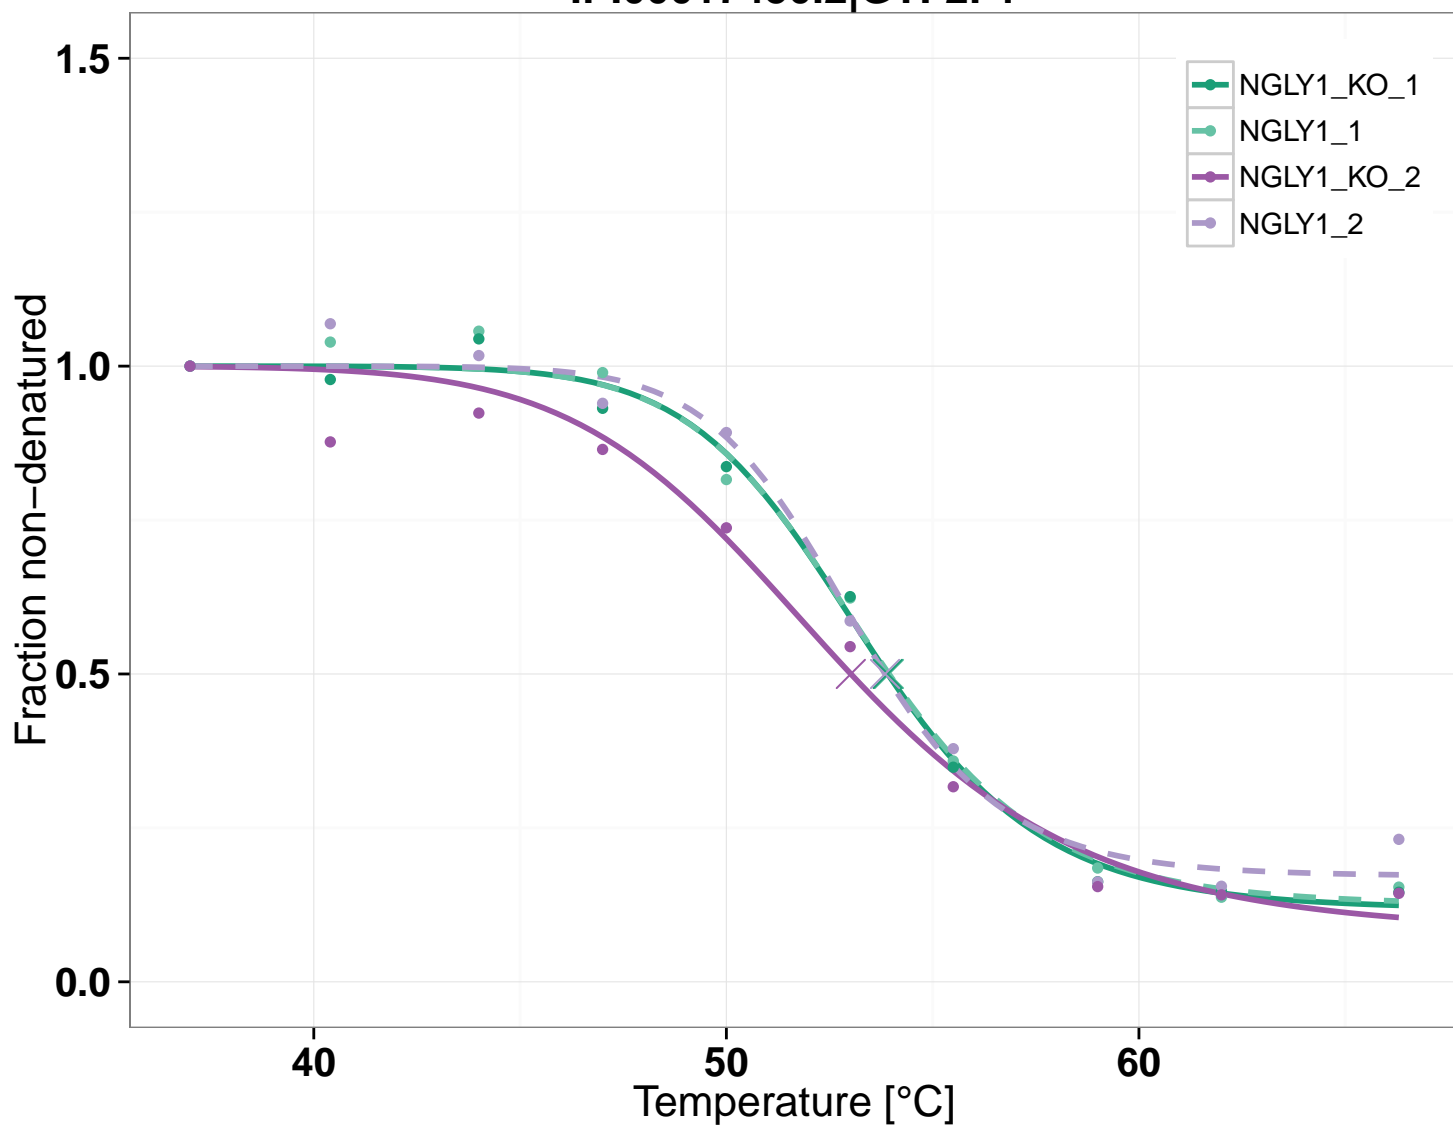

|            | meltPoint | slope  | plateau | R2   |
|------------|-----------|--------|---------|------|
| NGLY1_KO_1 | 53.91     | -0.1   | 0.12    | 0.99 |
| NGLY1_1    | 53.94     | -0.1   | 0.12    | 0.99 |
| NGLY1_KO_2 | 53.02     | -0.074 | 0.08    | 0.98 |
| NGLY1_2    | 53.85     | -0.12  | 0.17    | 0.99 |

Supplement: Supplementary file 3707 [file 1]

IPI00641950.4|GNB2L1

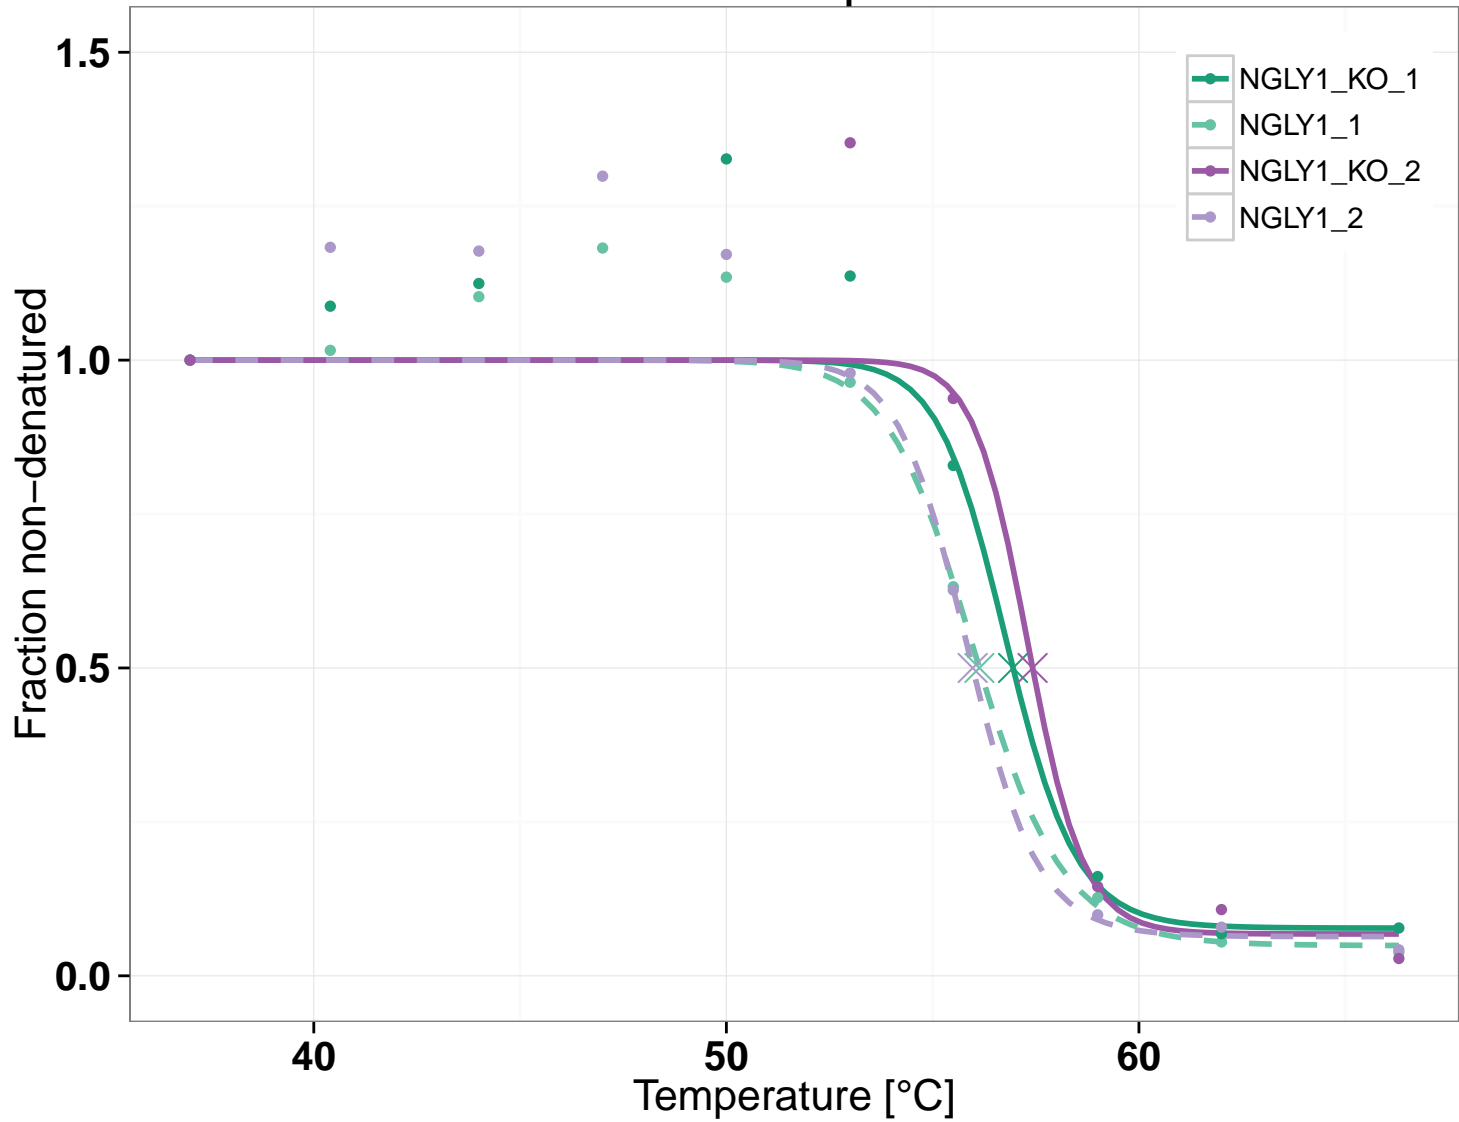

|            | meltPoint | slope | plateau | R2   |
|------------|-----------|-------|---------|------|
| NGLY1_KO_1 | 56.95     | -0.27 | 0.08    | 0.83 |
| NGLY1_1    | 56.13     | -0.22 | 0.05    | 0.97 |
| NGLY1_KO_2 | 57.42     | -0.35 | 0.07    | 0.54 |
| NGLY1_2    | 55.97     | -0.28 | 0.06    | 0.92 |

Supplement: Supplementary file 3708 [file 1]

# IPI00641812.2|INPP4A

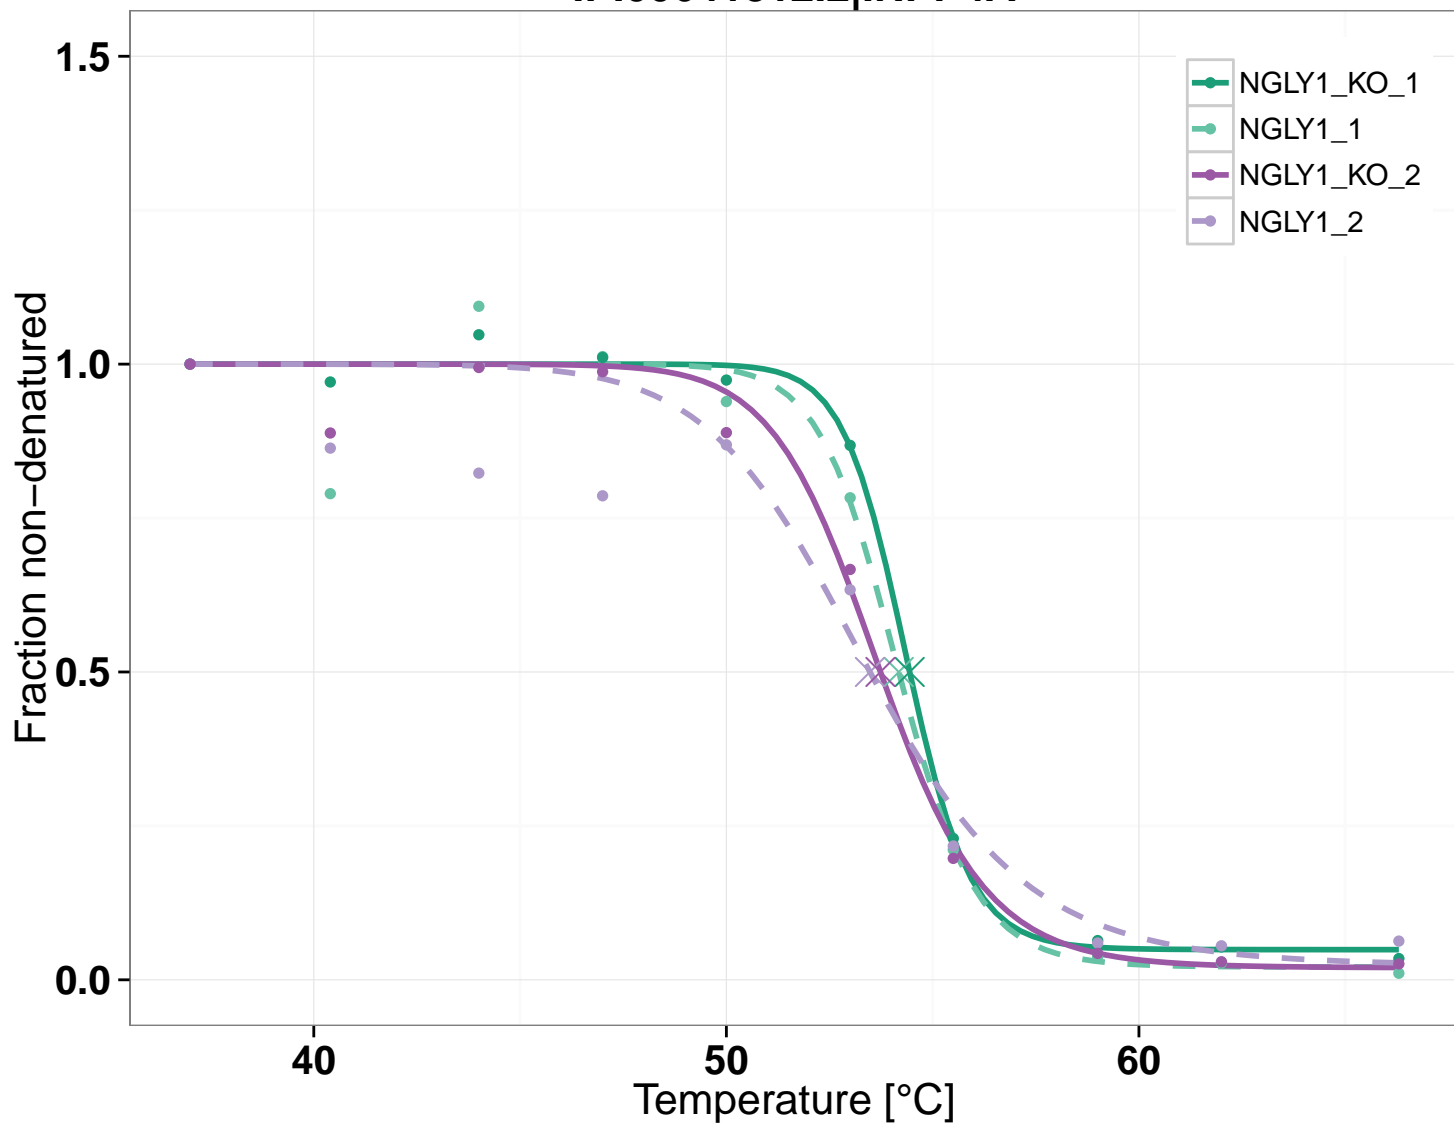

|            | meltPoint | slope | plateau | R2   |
|------------|-----------|-------|---------|------|
| NGLY1_KO_1 | 54.44     | -0.31 | 0.05    | 1    |
| NGLY1_1    | 54.18     | -0.26 | 0.02    | 0.97 |
| NGLY1_KO_2 | 53.73     | -0.19 | 0.02    | 0.99 |
| NGLY1_2    | 53.48     | -0.13 | 0.02    | 0.93 |

Supplement: Supplementary file 3709 [file 1]

IPI00219162.9|RPL39

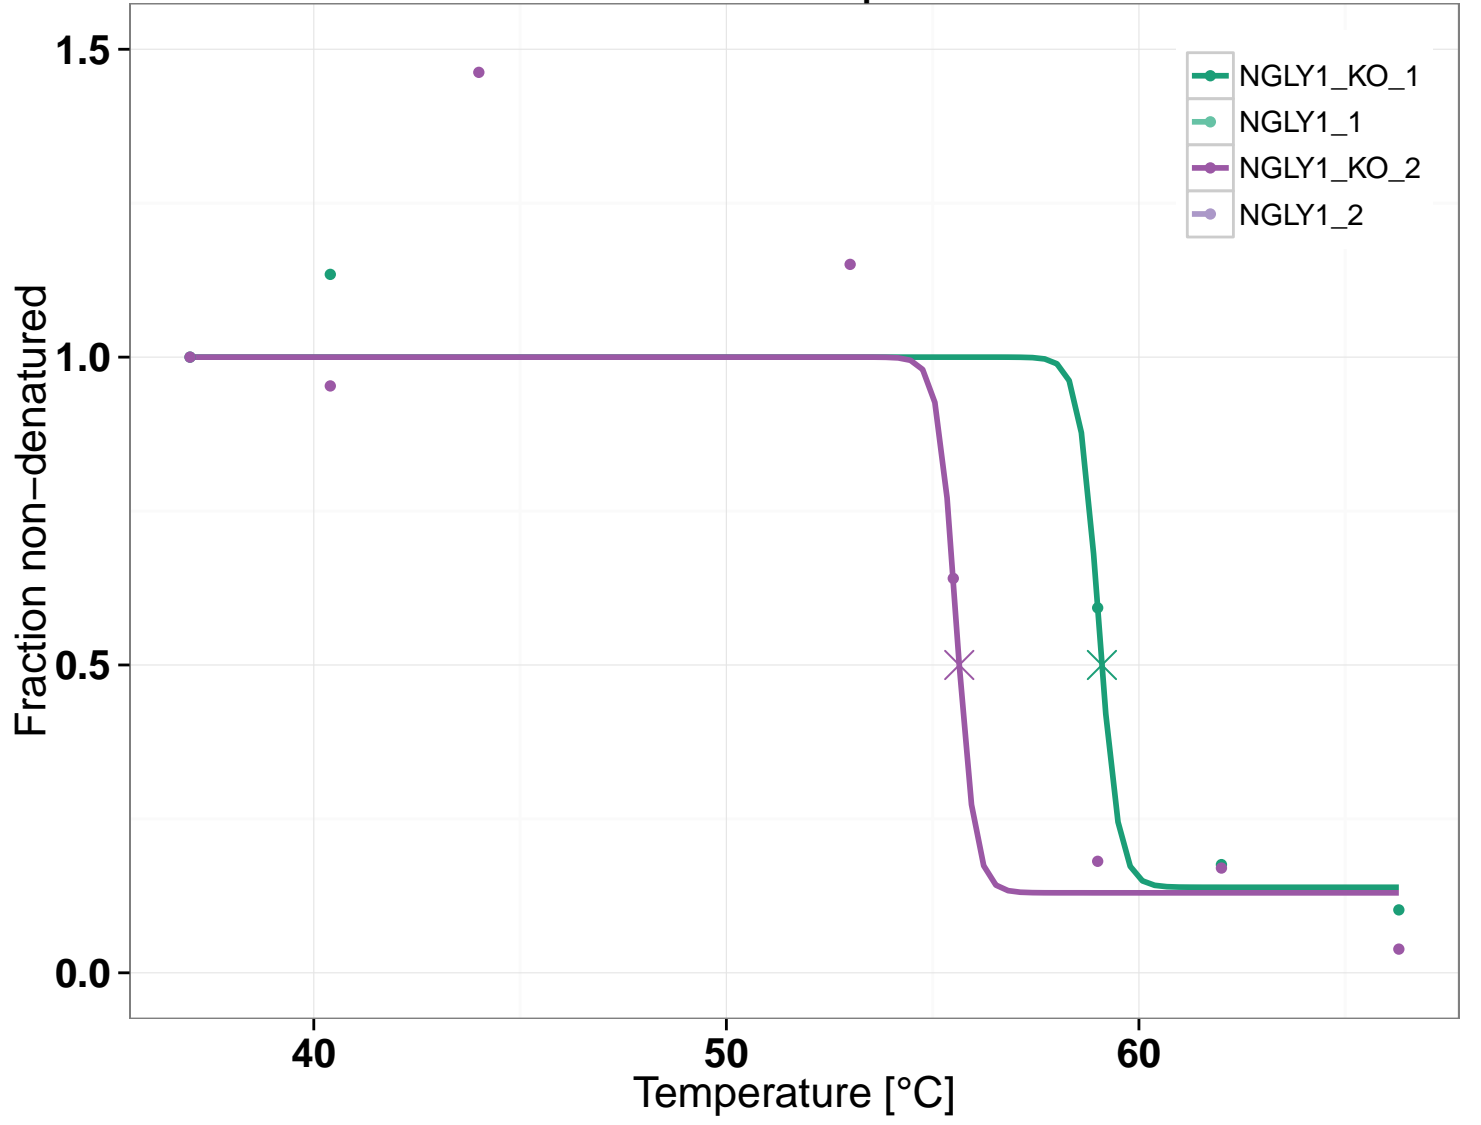

|            | meltPoint | slope | plateau | R2   |
|------------|-----------|-------|---------|------|
| NGLY1_KO_1 | 59.1      | -0.91 | 0.14    | -0.1 |
| NGLY1_1    | -         | -     | -       | -    |
| NGLY1_KO_2 | 55.64     | -0.98 | 0.13    | 0.69 |
| NGLY1_2    | -         | -     | -       | -    |

Supplement: Supplementary file 3710 [file 1]

IPI00014137.3|OSBPL2

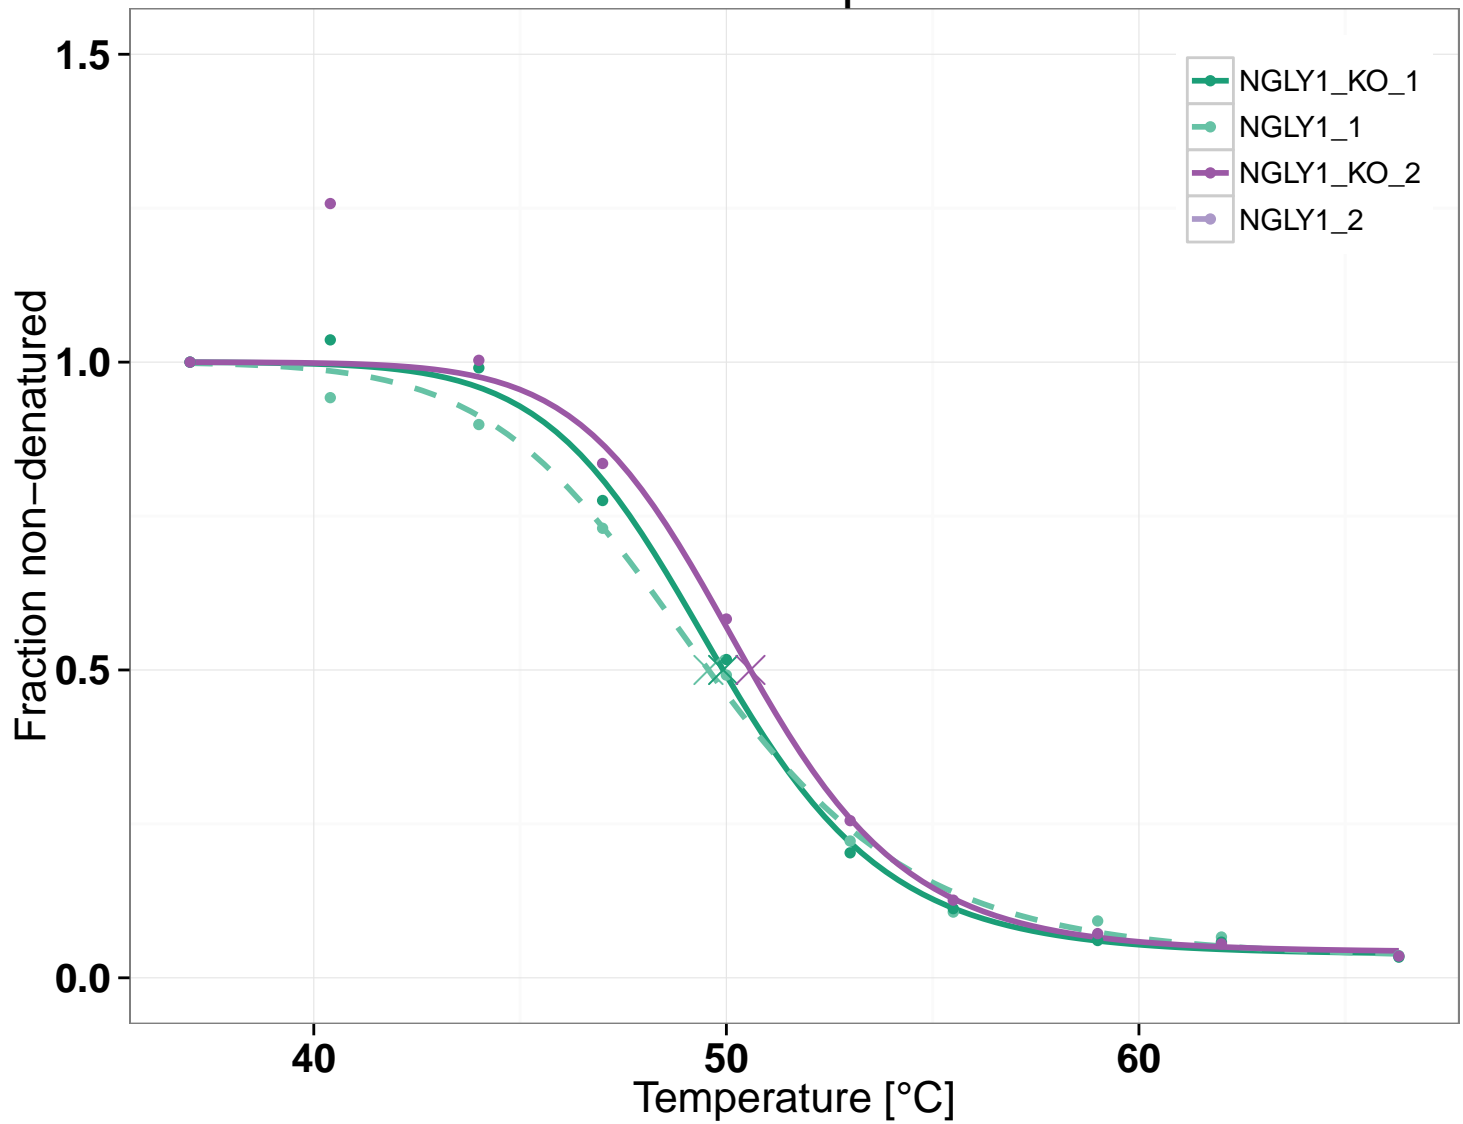

|            | meltPoint | slope  | plateau | R2   |
|------------|-----------|--------|---------|------|
| NGLY1_KO_1 | 49.92     | -0.12  | 0.04    | 1    |
| NGLY1_1    | 49.57     | -0.094 | 0.03    | 1    |
| NGLY1_KO_2 | 50.58     | -0.12  | 0.04    | 0.97 |
| NGLY1_2    | -         | -      | -       | -    |

Supplement: Supplementary file 3711 [file 1]

IPI00025081.2|RANGRF

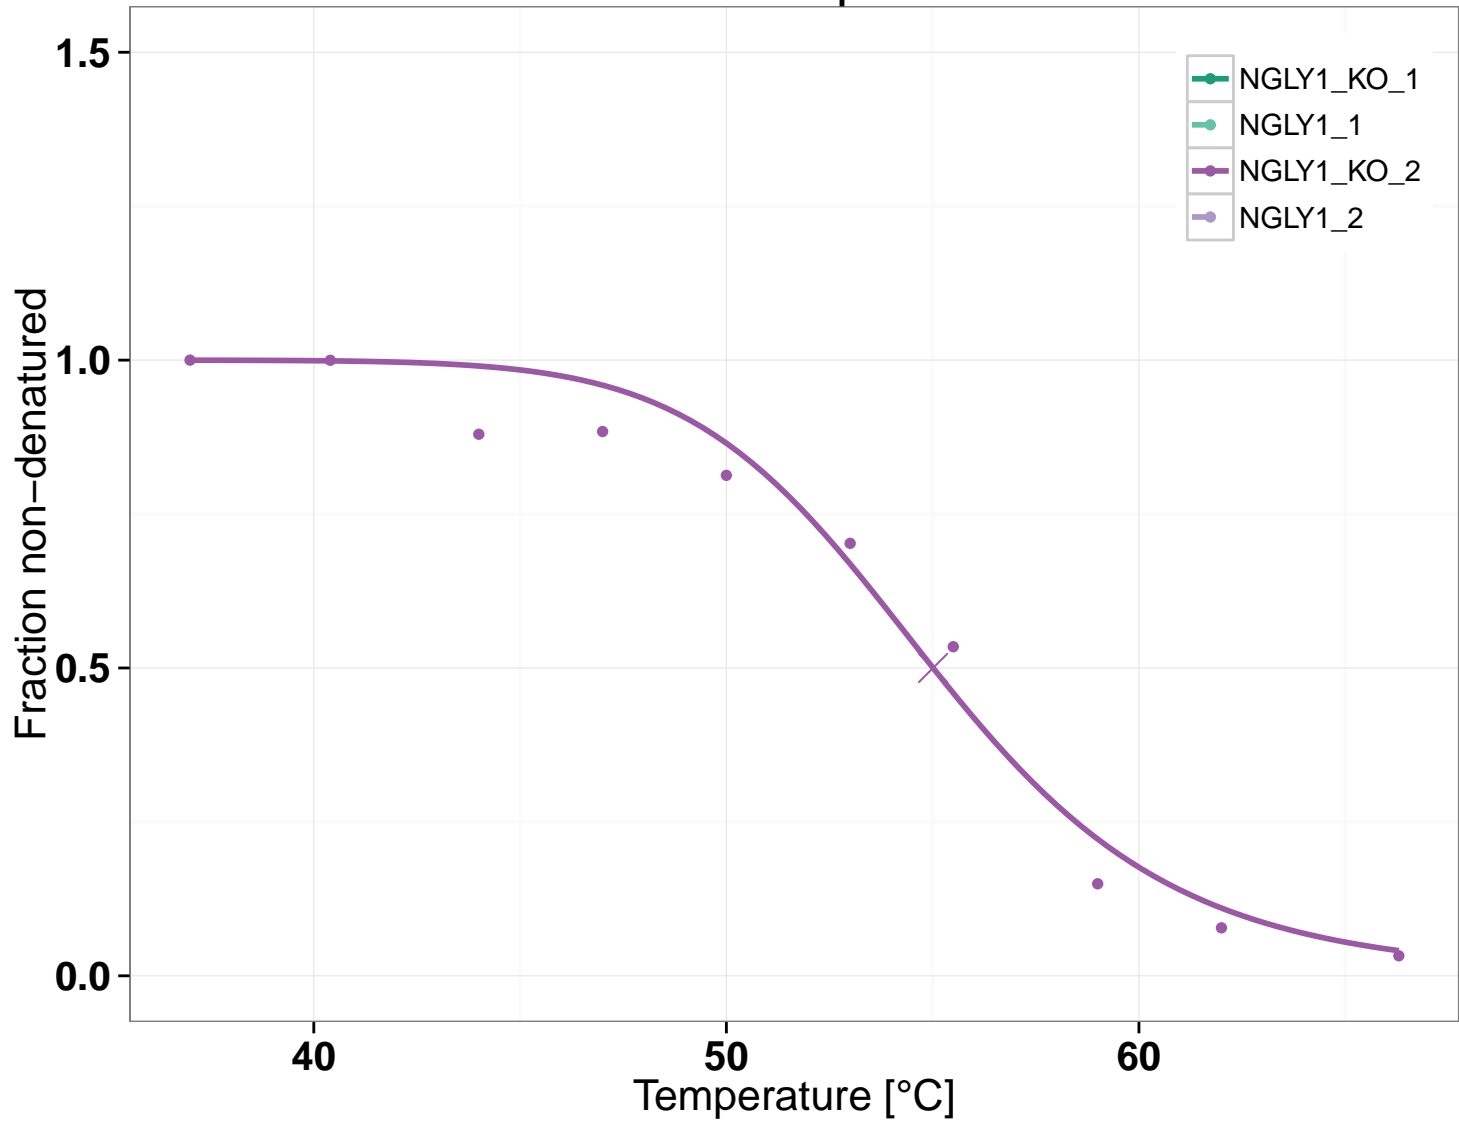

|            | meltPoint | slope  | plateau | R2   |
|------------|-----------|--------|---------|------|
| NGLY1_KO_1 | -         | -      | -       | -    |
| NGLY1_1    | -         | -      | -       | -    |
| NGLY1_KO_2 | 55.01     | -0.085 | 0       | 0.97 |
| NGLY1_2    | -         | -      | -       | -    |

Supplement: Supplementary file 3712 [file 1]

IPI00027803.2|PARP9

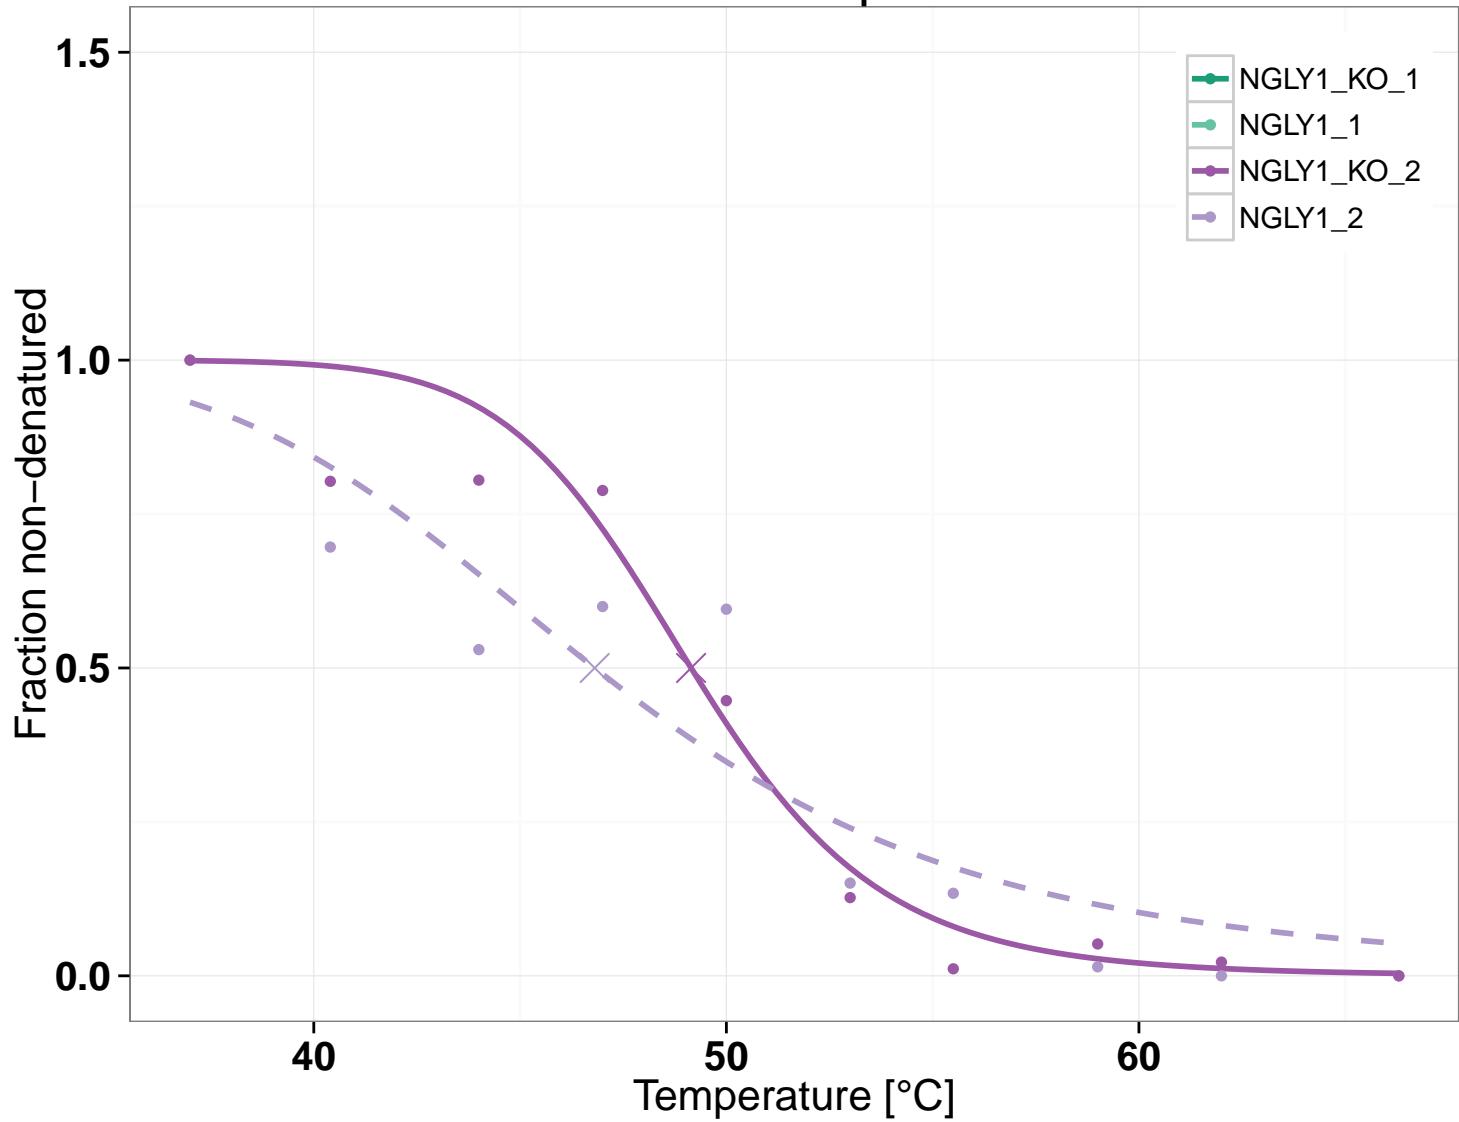

|            | meltPoint | slope  | plateau | R2   |
|------------|-----------|--------|---------|------|
| NGLY1_KO_1 | -         | -      | -       | -    |
| NGLY1_1    | -         | -      | -       | -    |
| NGLY1_KO_2 | 49.15     | -0.11  | 0       | 0.96 |
| NGLY1_2    | 46.81     | -0.055 | 0       | 0.88 |

Supplement: Supplementary file 3713 [file 1]

# IPI00760962.1|KANK2

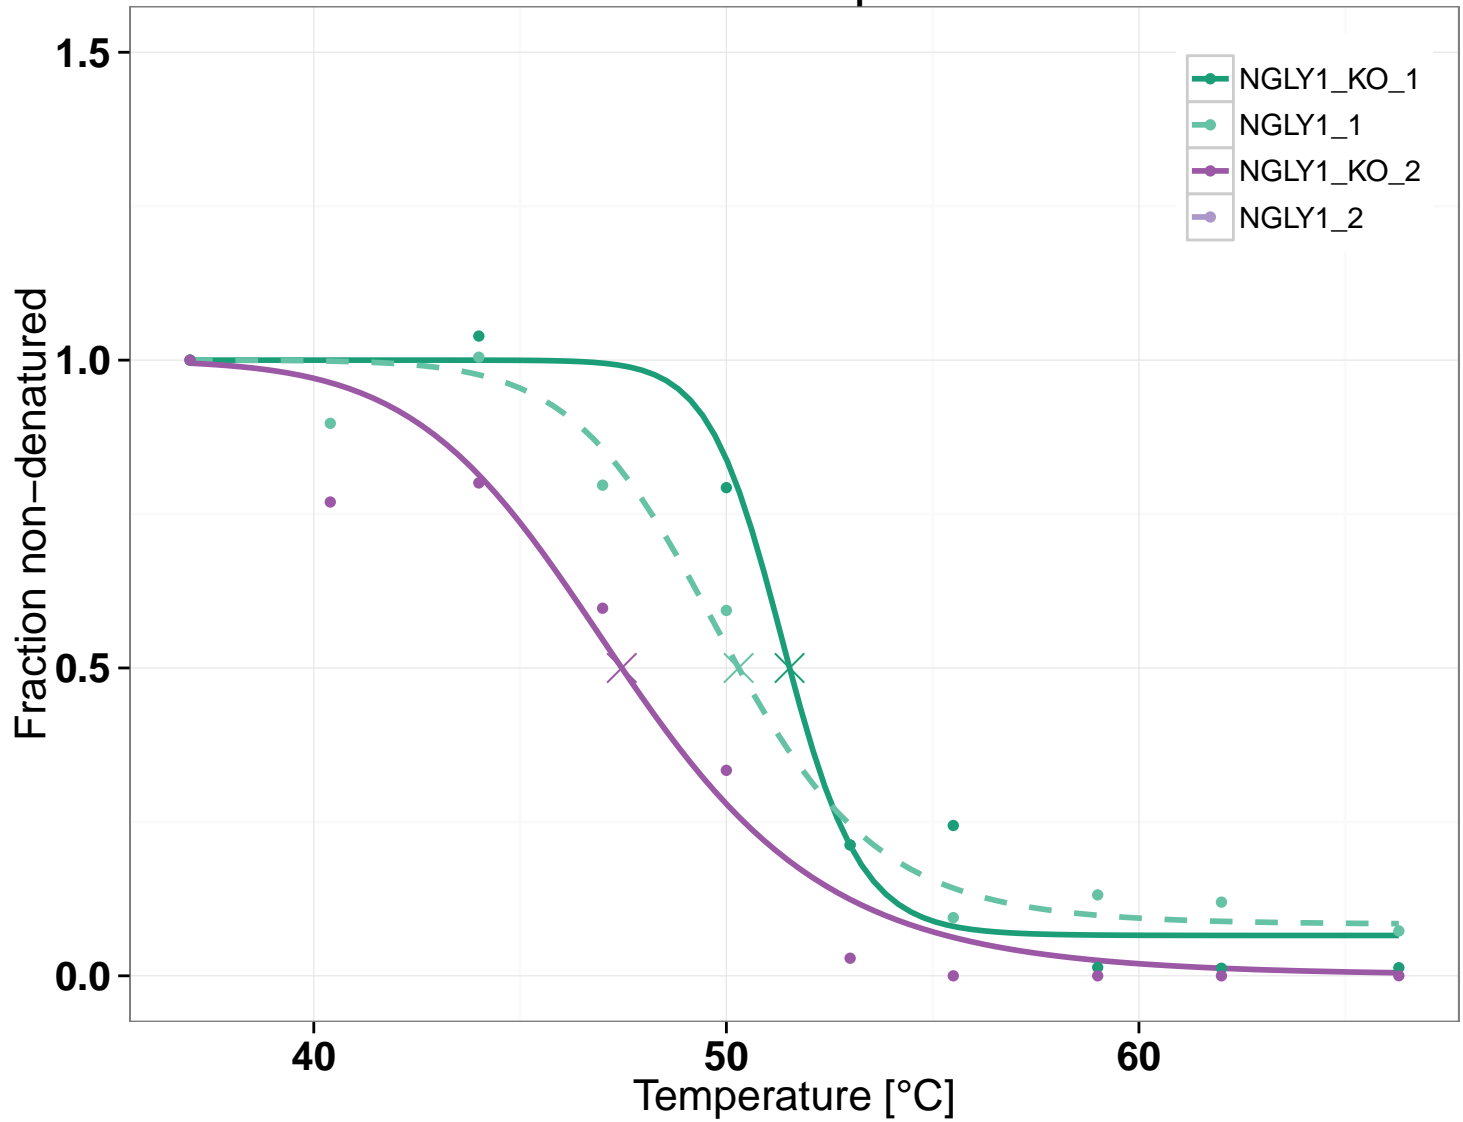

|            | meltPoint | slope | plateau | R2   |
|------------|-----------|-------|---------|------|
| NGLY1_KO_1 | 51.53     | -0.25 | 0.07    | 0.66 |
| NGLY1_1    | 50.3      | -0.12 | 0.08    | 0.98 |
| NGLY1_KO_2 | 47.46     | -0.1  | 0       | 0.96 |
| NGLY1_2    | -         | -     | -       | -    |

Supplement: Supplementary file 3714 [file 1]

IPI00479761.1|ANKRD30A

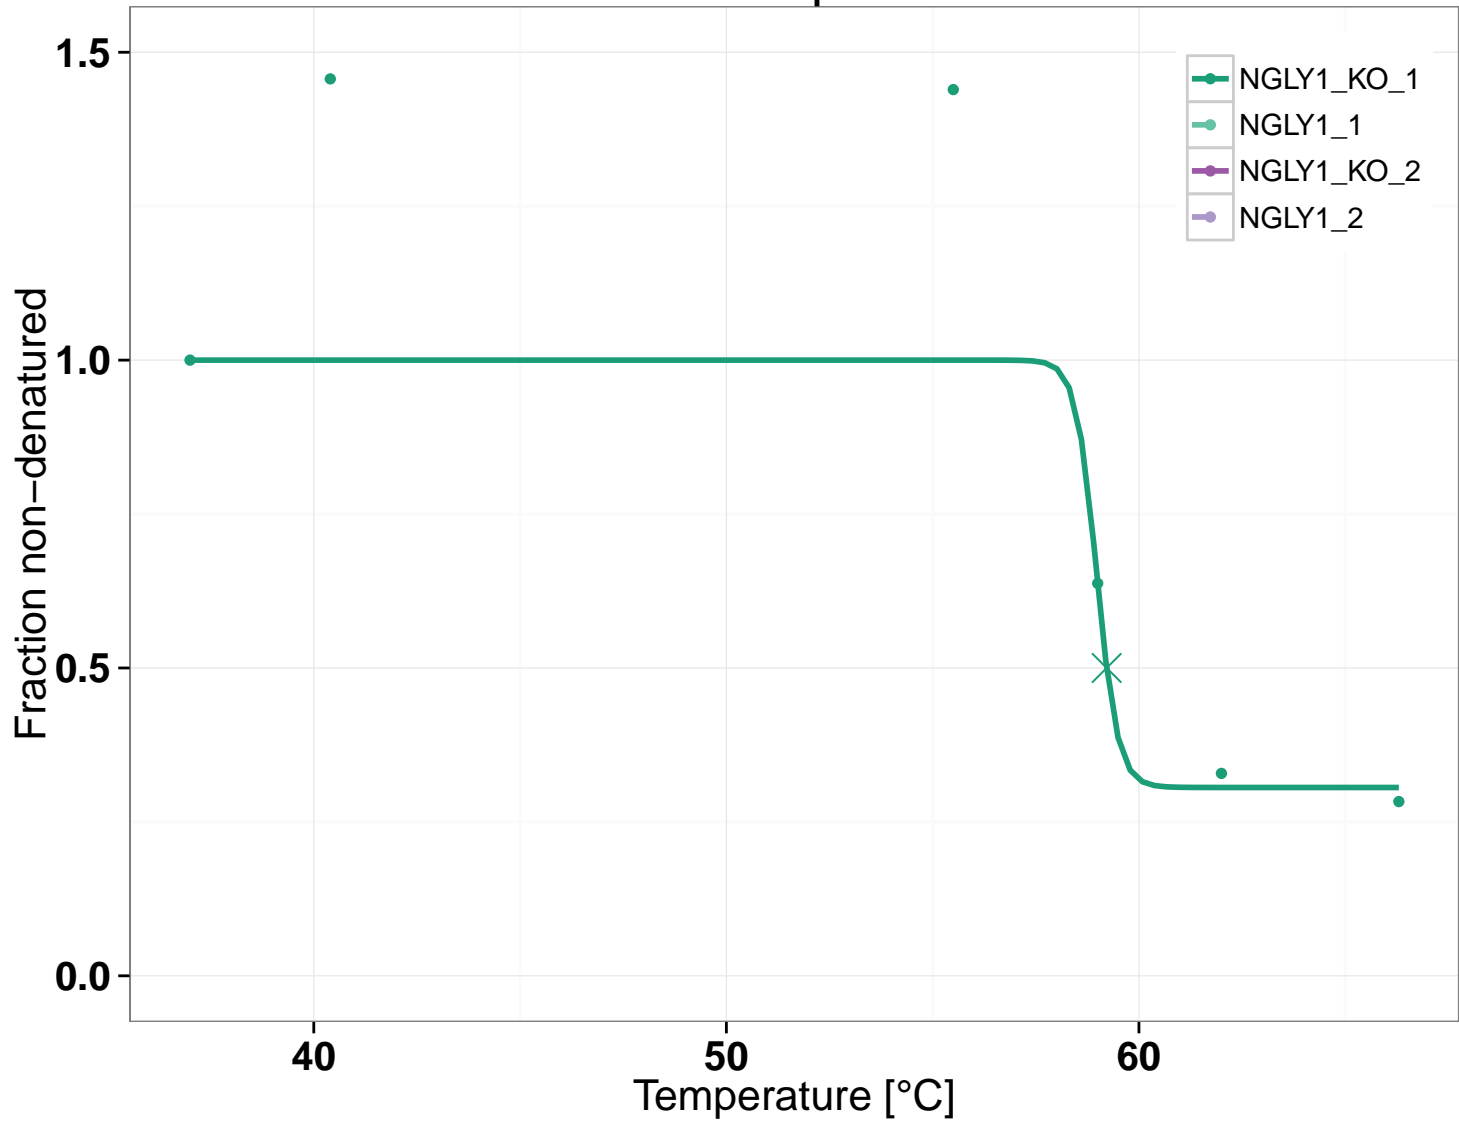

|            | meltPoint | slope | plateau | R2   |
|------------|-----------|-------|---------|------|
| NGLY1_KO_1 | 59.22     | -0.69 | 0.31    | 0.05 |
| NGLY1_1    | -         | -     | -       | -    |
| NGLY1_KO_2 | -         | -     | -       | -    |
| NGLY1_2    | -         | -     | -       | -    |

Supplement: Supplementary file 3715 [file 1]

IPI00034309.4|INVS

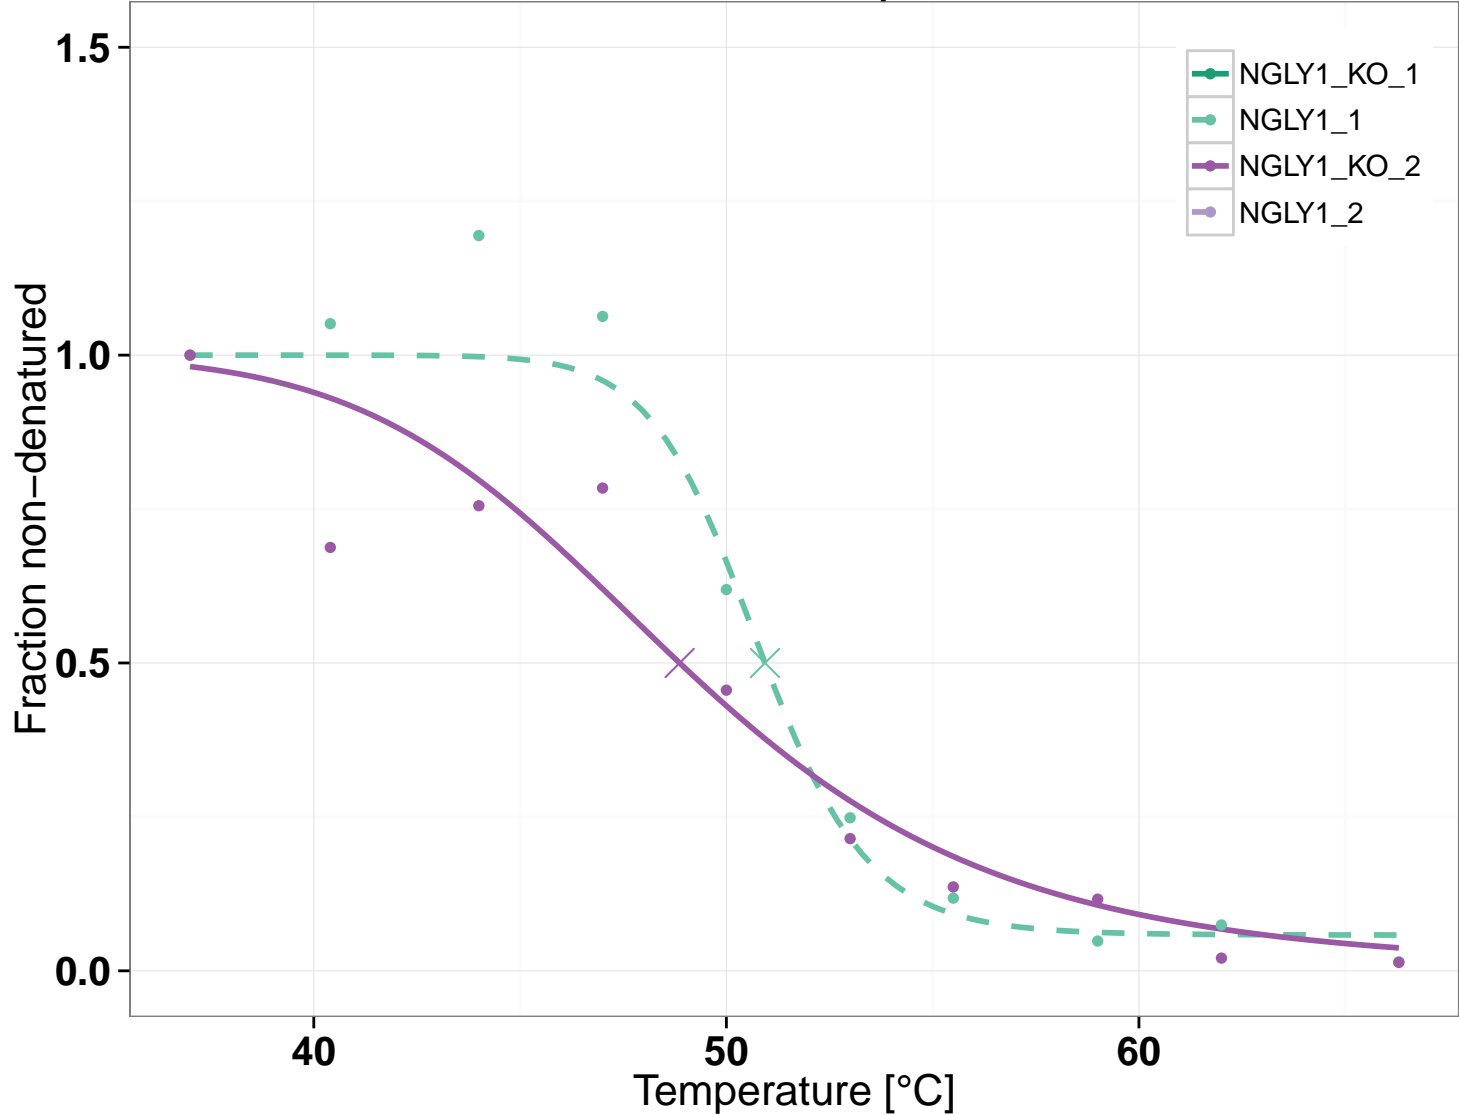

|            | meltPoint | slope  | plateau | R2   |
|------------|-----------|--------|---------|------|
| NGLY1_KO_1 | -         | -      | -       | -    |
| NGLY1_1    | 50.94     | -0.18  | 0.06    | 0.97 |
| NGLY1_KO_2 | 48.87     | -0.065 | 0       | 0.92 |
| NGLY1_2    | -         | -      | -       | -    |

Supplement: Supplementary file 3716 [file 1]

# IPI00221222.7|SUB1

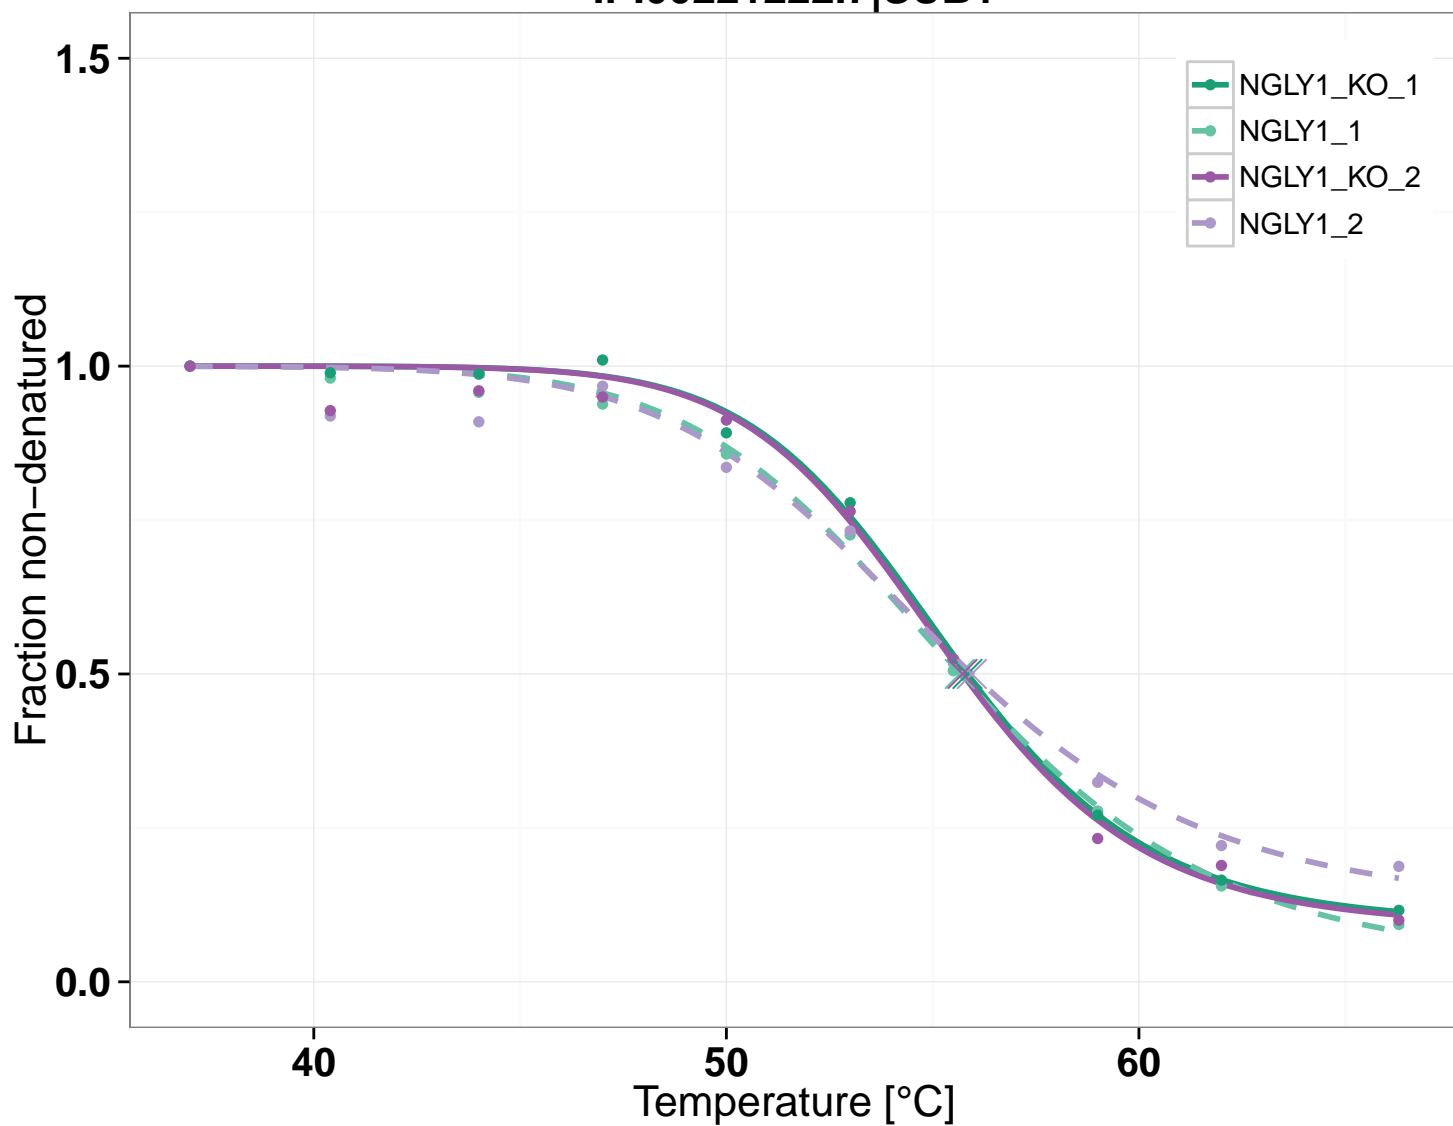

|            | meltPoint | slope  | plateau | R2   |
|------------|-----------|--------|---------|------|
| NGLY1_KO_1 | 55.84     | -0.094 | 0.09    | 1    |
| NGLY1_1    | 55.66     | -0.076 | 0.02    | 1    |
| NGLY1_KO_2 | 55.72     | -0.094 | 0.09    | 0.99 |
| NGLY1_2    | 55.95     | -0.067 | 0.12    | 0.98 |

Supplement: Supplementary file 3717 [file 1]
