# Supplementary material (part 38 of 85)
Source: publisher figshare collection journal article supplement (https://gsajournals.figshare.com/articles/dataset/_/12014913)

# IPI00470649.3|NCLN

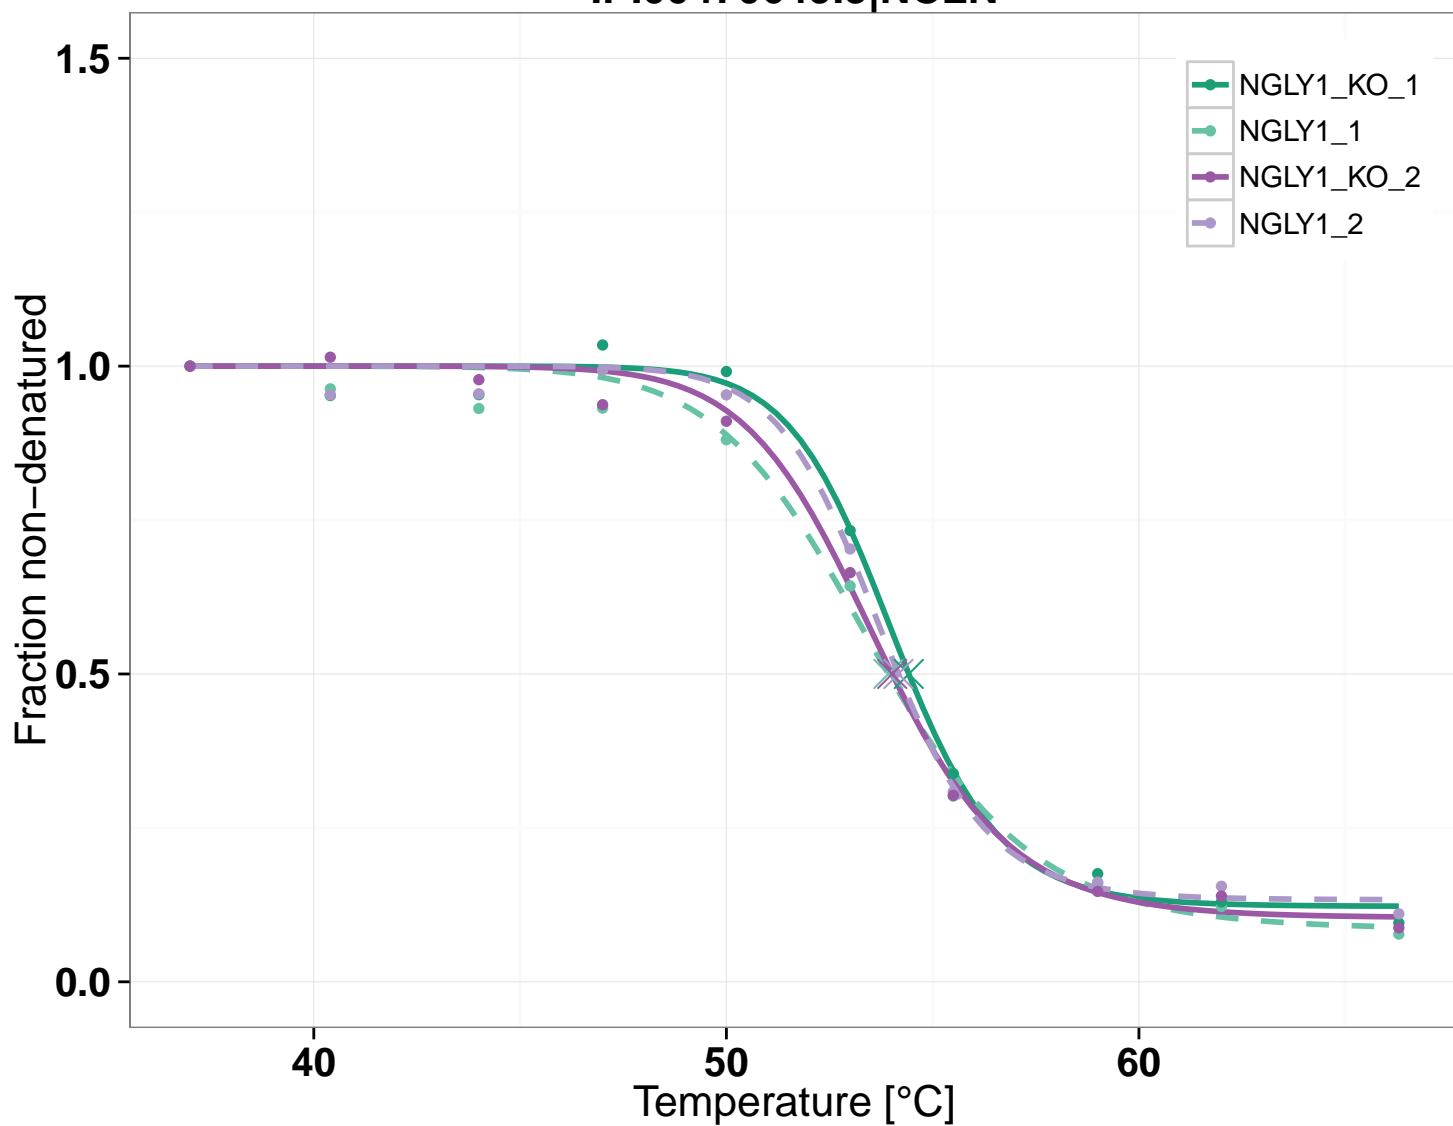

|            | meltPoint | slope | plateau | R2   |
|------------|-----------|-------|---------|------|
| NGLY1_KO_1 | 54.42     | -0.17 | 0.12    | 0.99 |
| NGLY1_1    | 53.93     | -0.12 | 0.08    | 0.99 |
| NGLY1_KO_2 | 54.02     | -0.14 | 0.1     | 1    |
| NGLY1_2    | 54.17     | -0.17 | 0.13    | 1    |

Supplement: Supplementary file 3718 [file 1]

IPI000000006.1|HRAS

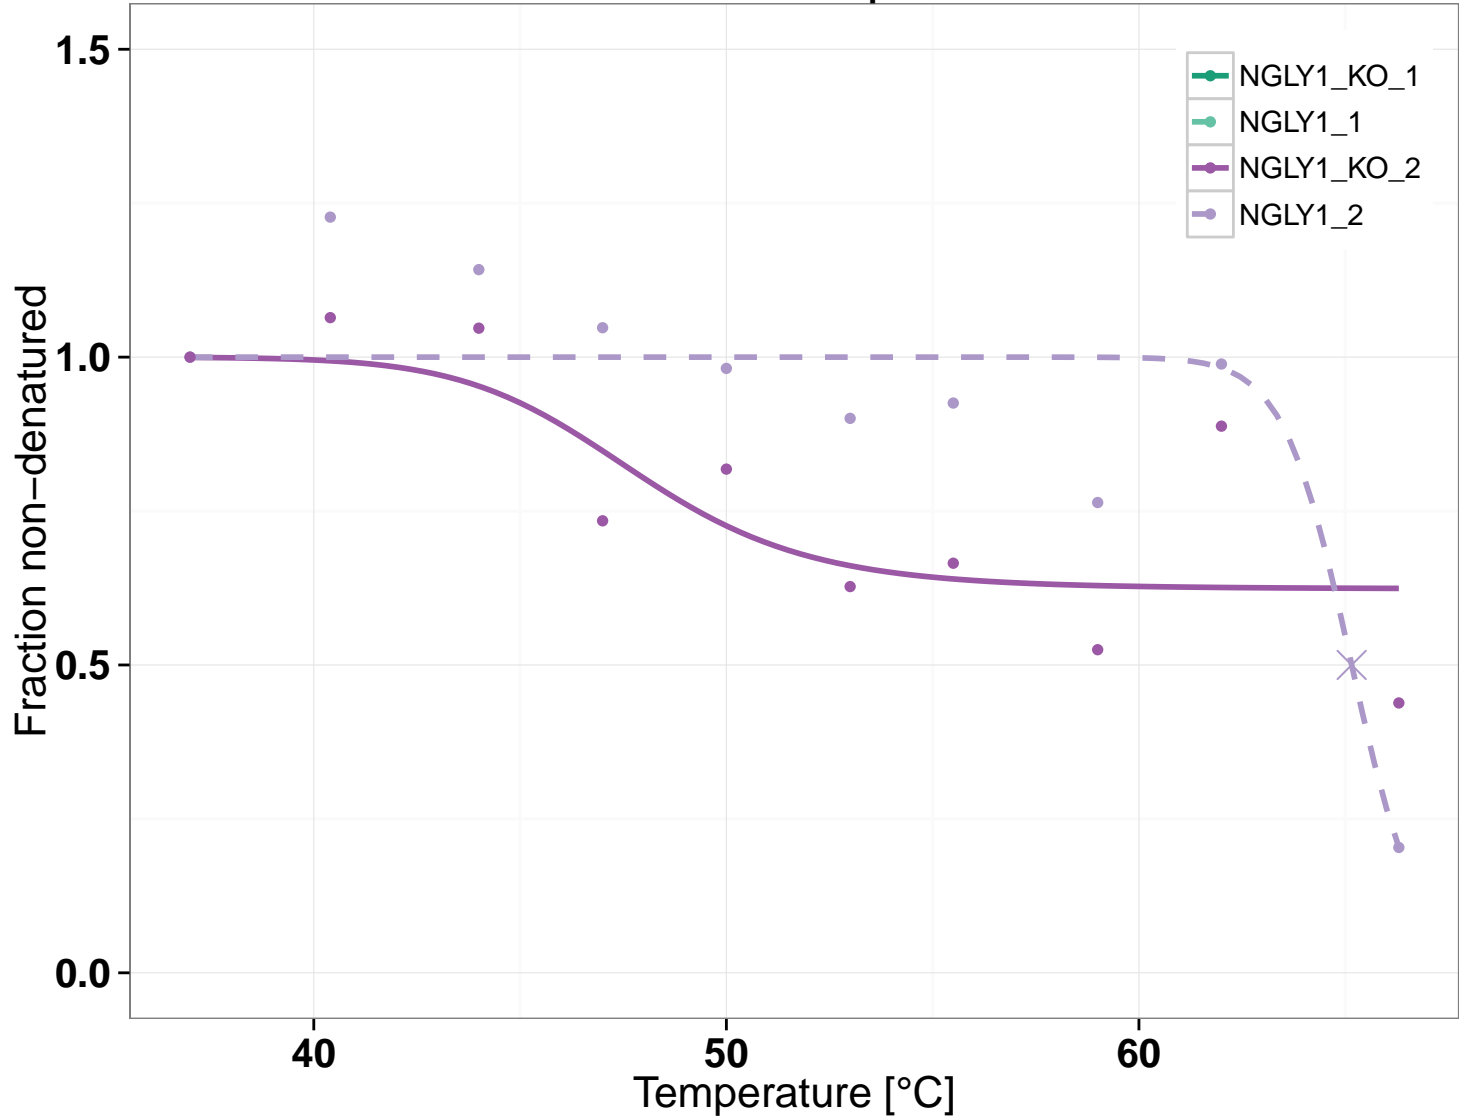

|            | meltPoint | slope  | plateau | R2   |
|------------|-----------|--------|---------|------|
| NGLY1_KO_1 | -         | -      | -       | -    |
| NGLY1_1    | -         | -      | -       | -    |
| NGLY1_KO_2 | -         | -0.045 | 0.62    | 0.65 |
| NGLY1_2    | 65.16     | -0.3   | 0       | 0.8  |

Supplement: Supplementary file 3719 [file 1]

# IPI00018855.1|ATP6V0C

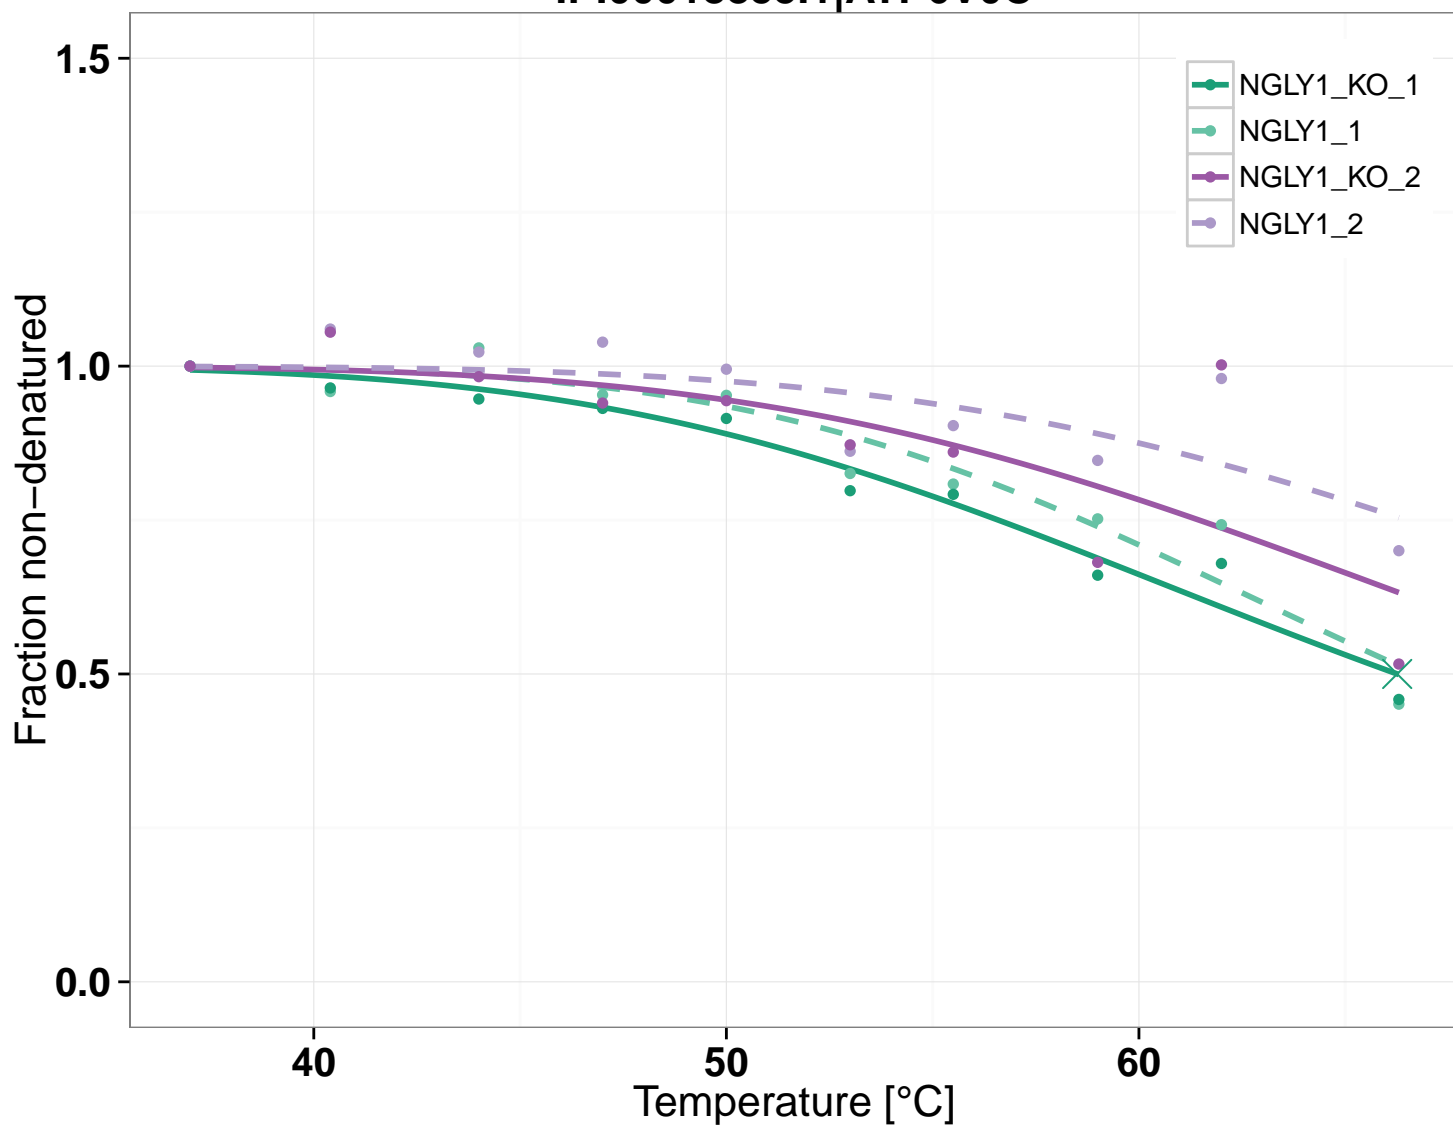

|            | meltPoint | slope  | plateau | R2   |
|------------|-----------|--------|---------|------|
| NGLY1_KO_1 | 66.26     | -0.027 | 0       | 0.96 |
| NGLY1_1    | -         | -0.032 | 0       | 0.92 |
| NGLY1_KO_2 | -         | -0.025 | 0       | 0.58 |
| NGLY1_2    | -         | -      | 0       | 0.63 |

Supplement: Supplementary file 3720 [file 1]

IPI00008579.3|FARS2

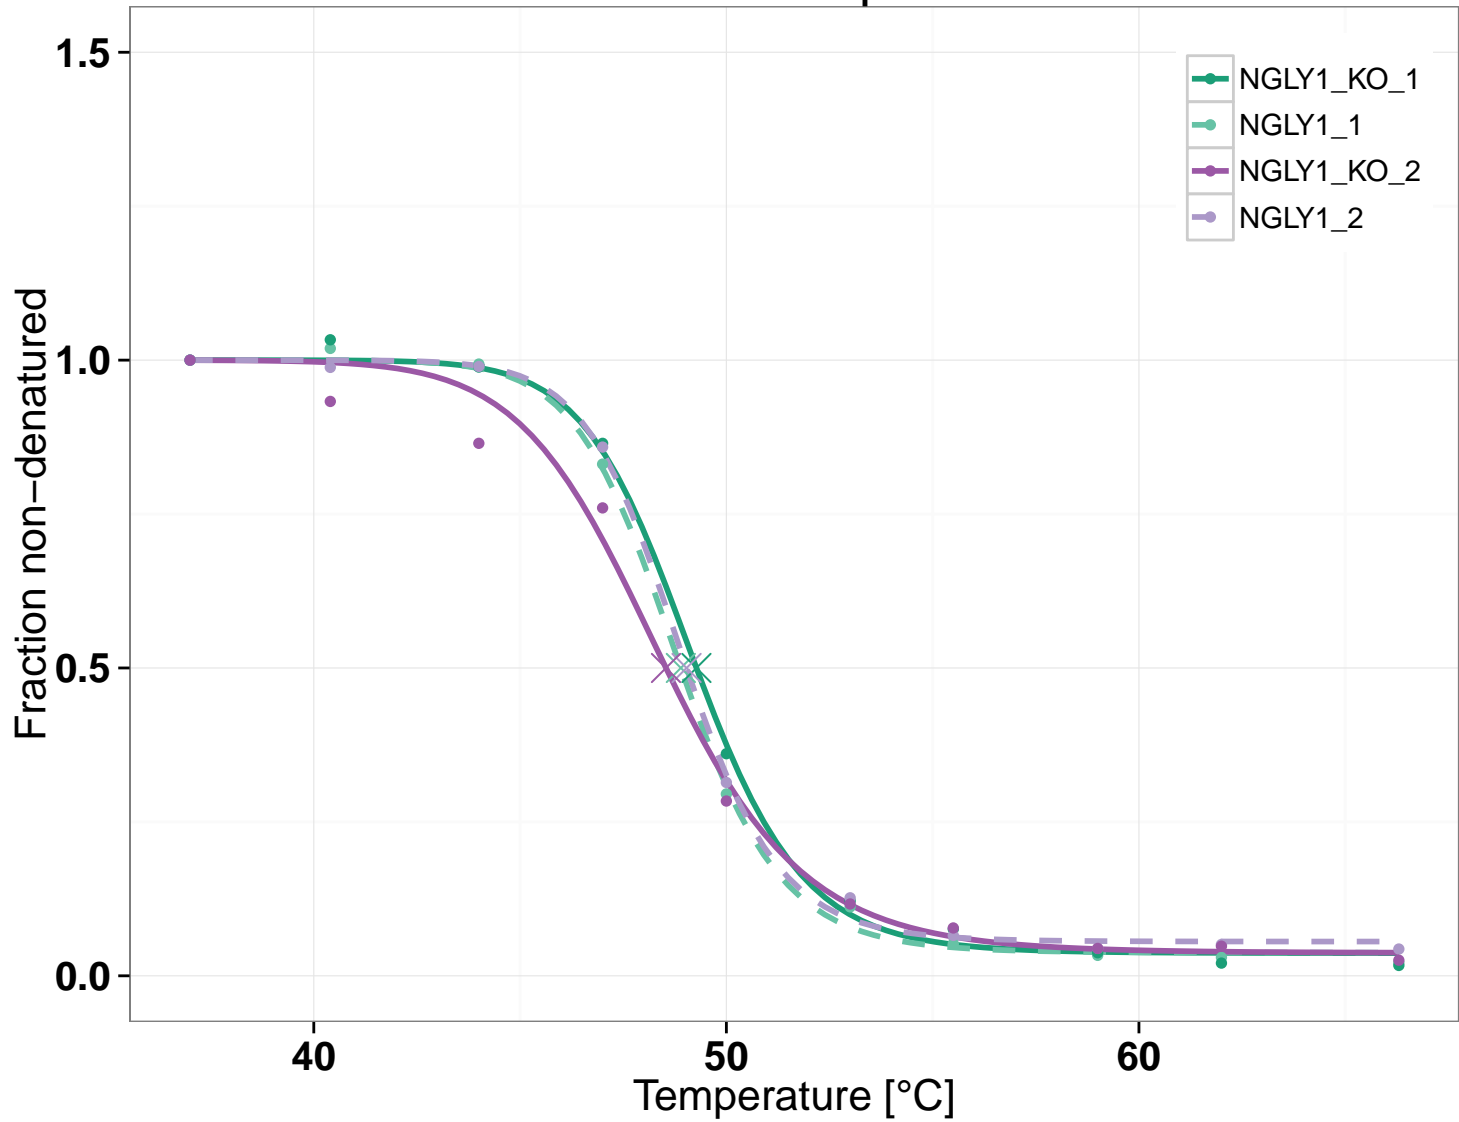

|            | meltPoint | slope | plateau | R2   |
|------------|-----------|-------|---------|------|
| NGLY1_KO_1 | 49.27     | -0.18 | 0.04    | 1    |
| NGLY1_1    | 48.9      | -0.19 | 0.04    | 1    |
| NGLY1_KO_2 | 48.54     | -0.14 | 0.04    | 0.99 |
| NGLY1_2    | 49.04     | -0.2  | 0.06    | 1    |

Supplement: Supplementary file 3721 [file 1]

IPI00018087.5|C17ORF68

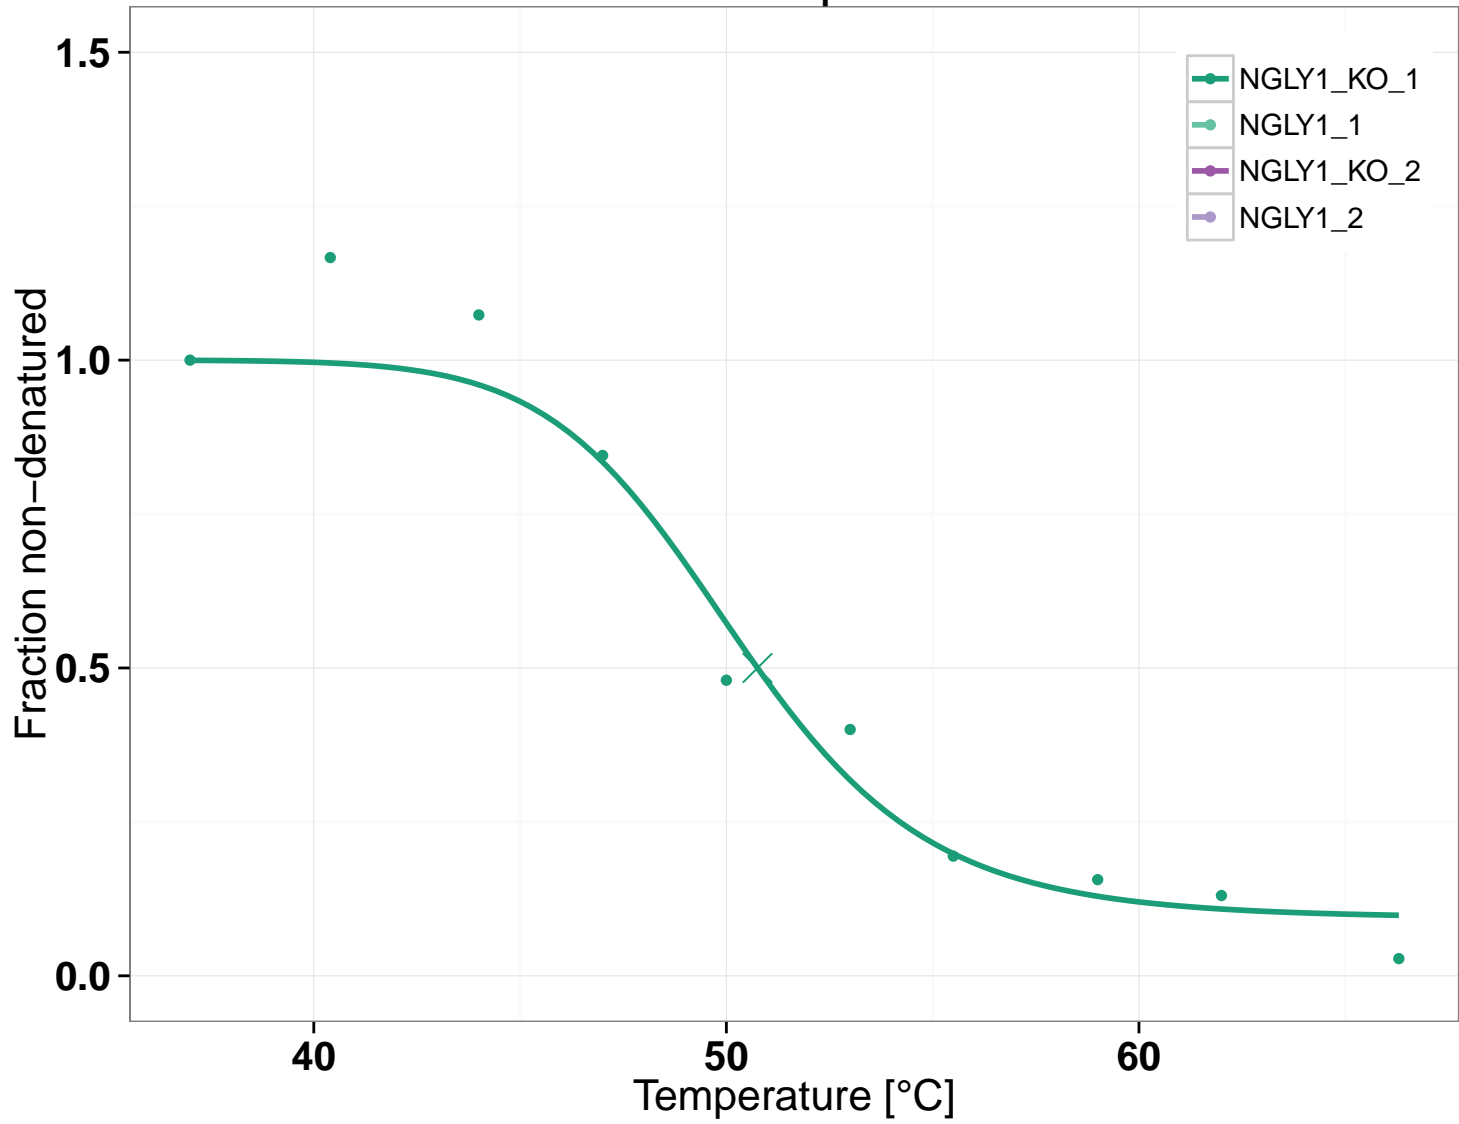

|            | meltPoint | slope  | plateau | R2   |
|------------|-----------|--------|---------|------|
| NGLY1_KO_1 | 50.76     | -0.098 | 0.09    | 0.96 |
| NGLY1_1    | -         | -      | -       | -    |
| NGLY1_KO_2 | -         | -      | -       | -    |
| NGLY1_2    | -         | -      | -       | -    |

Supplement: Supplementary file 3722 [file 1]

IPI00291827.4|GANC

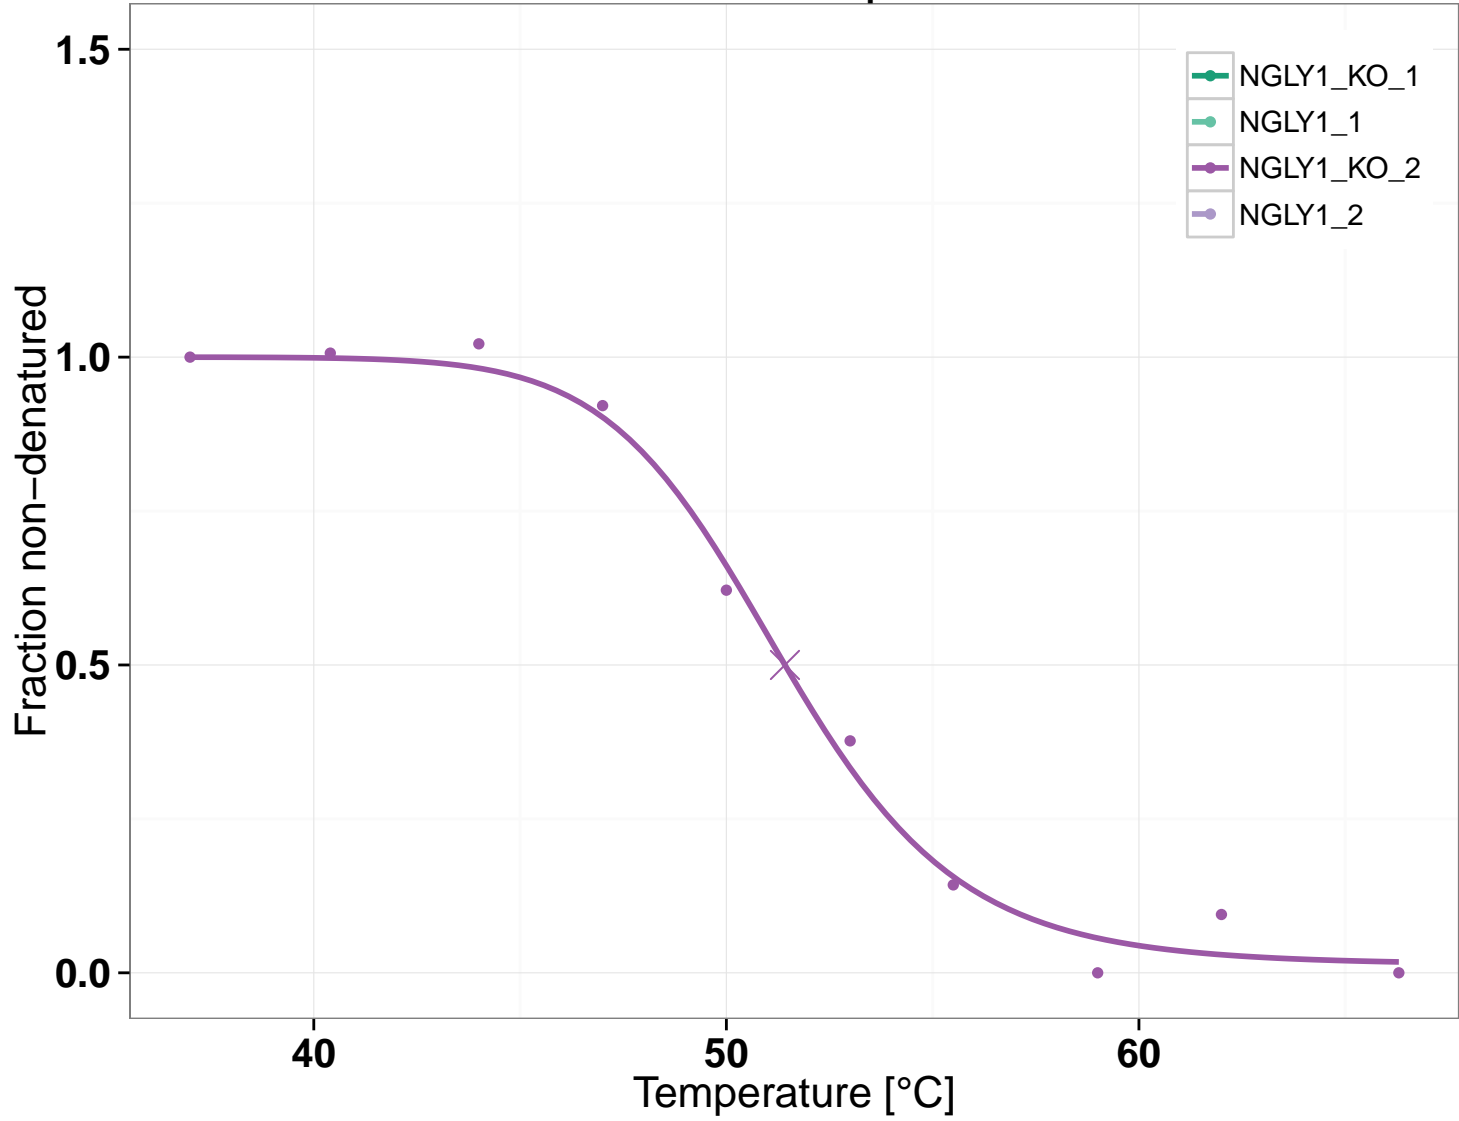

|            | meltPoint | slope | plateau | R2   |
|------------|-----------|-------|---------|------|
| NGLY1_KO_1 | -         | -     | -       | -    |
| NGLY1_1    | -         | -     | -       | -    |
| NGLY1_KO_2 | 51.42     | -0.12 | 0.01    | 0.99 |
| NGLY1_2    | -         | -     | -       | -    |

Supplement: Supplementary file 3723 [file 1]

IPI00156005.3|NOVA2

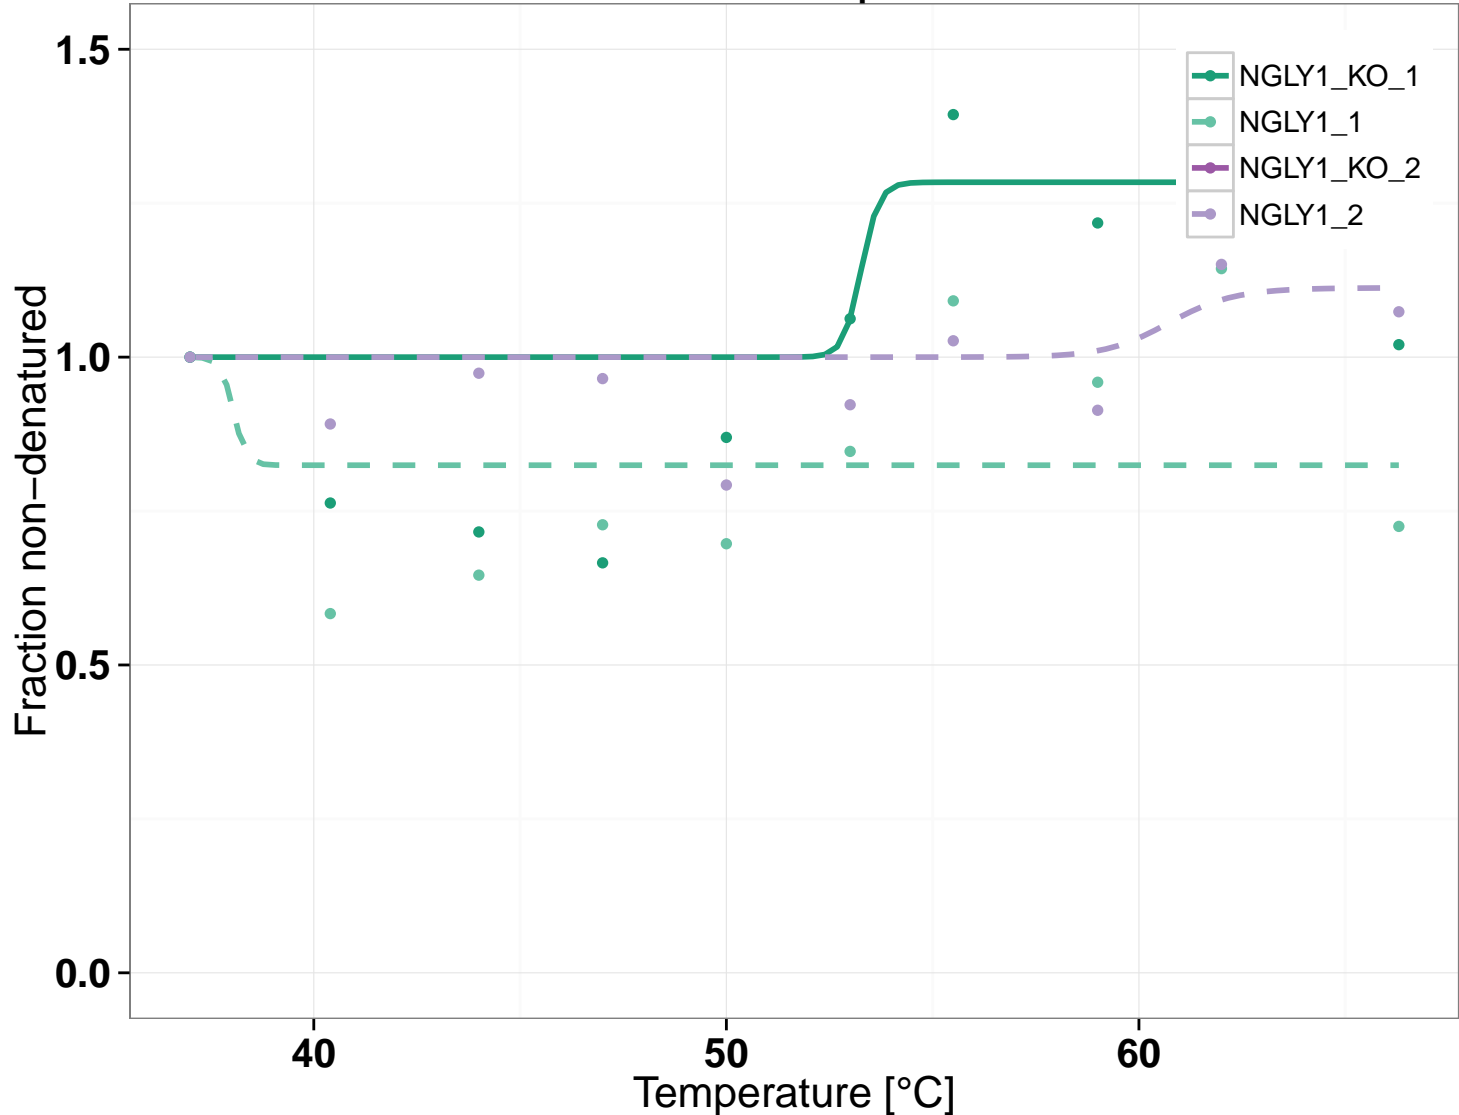

|            | meltPoint | slope | plateau | R2   |
|------------|-----------|-------|---------|------|
| NGLY1_KO_1 | —         | 0.33  | 1.28    | 0.45 |
| NGLY1_1    | —         | -0.29 | 0.82    | 0.08 |
| NGLY1_KO_2 | —         | —     | —       | —    |
| NGLY1_2    | —         | 0.036 | 1.11    | 0.14 |

Supplement: Supplementary file 3724 [file 1]

IPI00642105.1|TAF9B

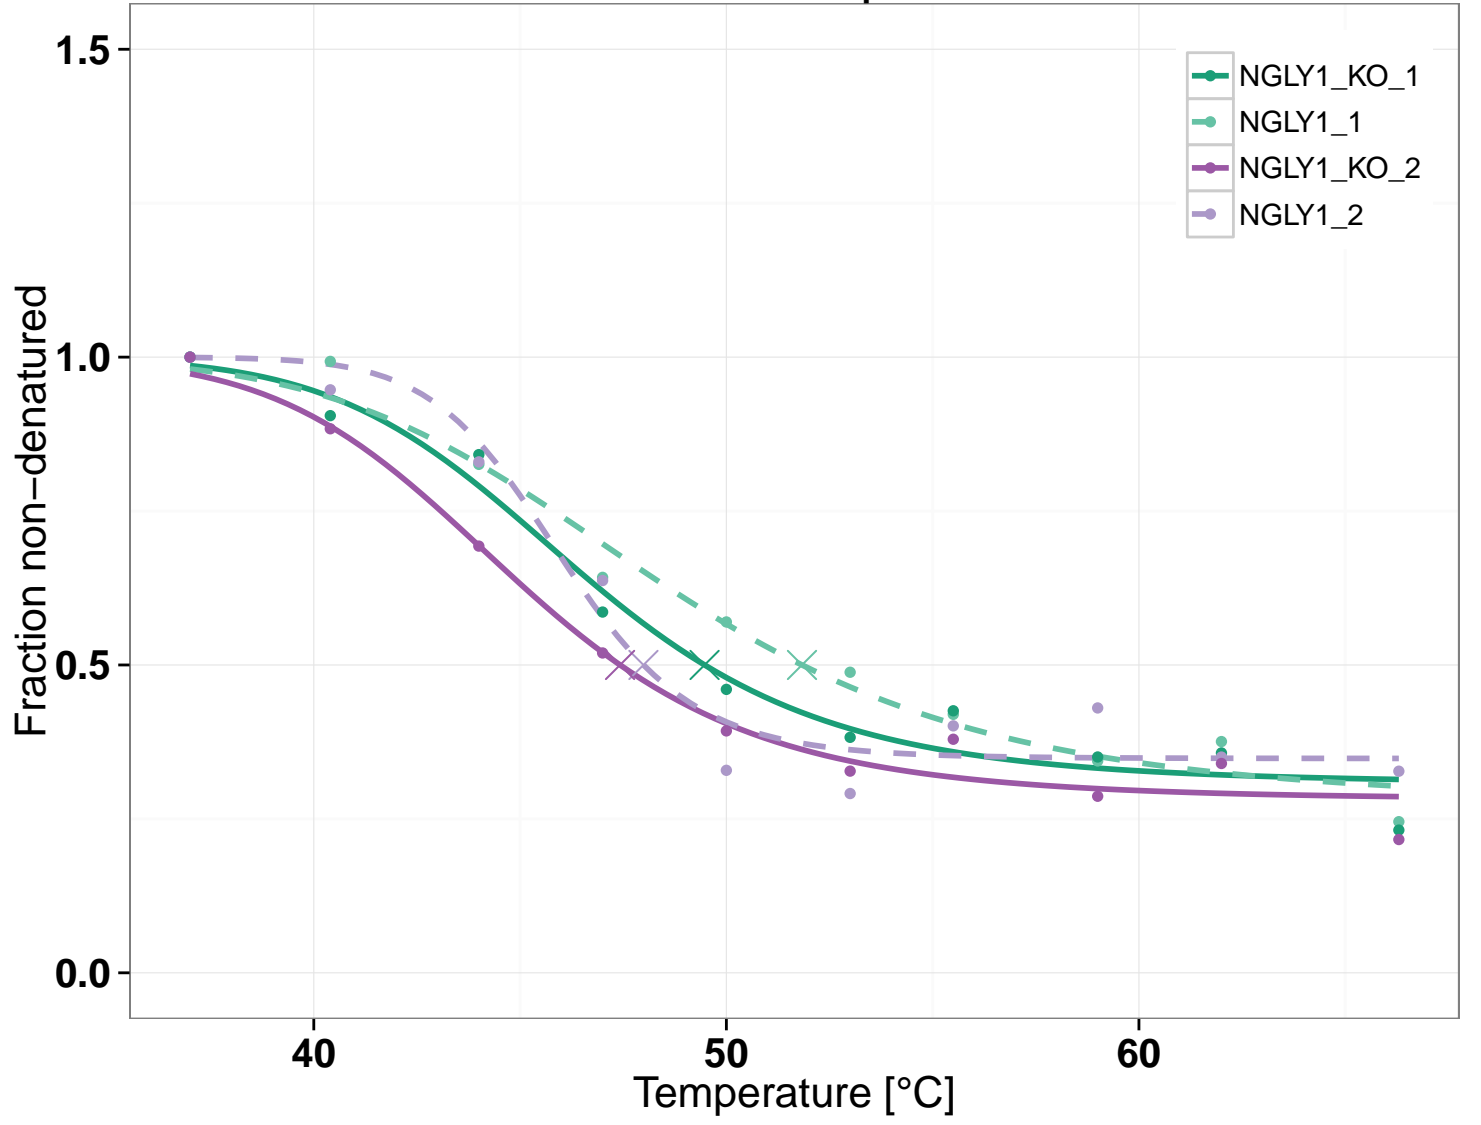

|            | meltPoint | slope  | plateau | R2   |
|------------|-----------|--------|---------|------|
| NGLY1_KO_1 | 49.47     | -0.058 | 0.31    | 0.97 |
| NGLY1_1    | 51.83     | -0.045 | 0.27    | 0.98 |
| NGLY1_KO_2 | 47.42     | -0.062 | 0.28    | 0.98 |
| NGLY1_2    | 47.99     | -0.1   | 0.35    | 0.96 |

Supplement: Supplementary file 3725 [file 1]

# IPI00791509.1|NEDD1

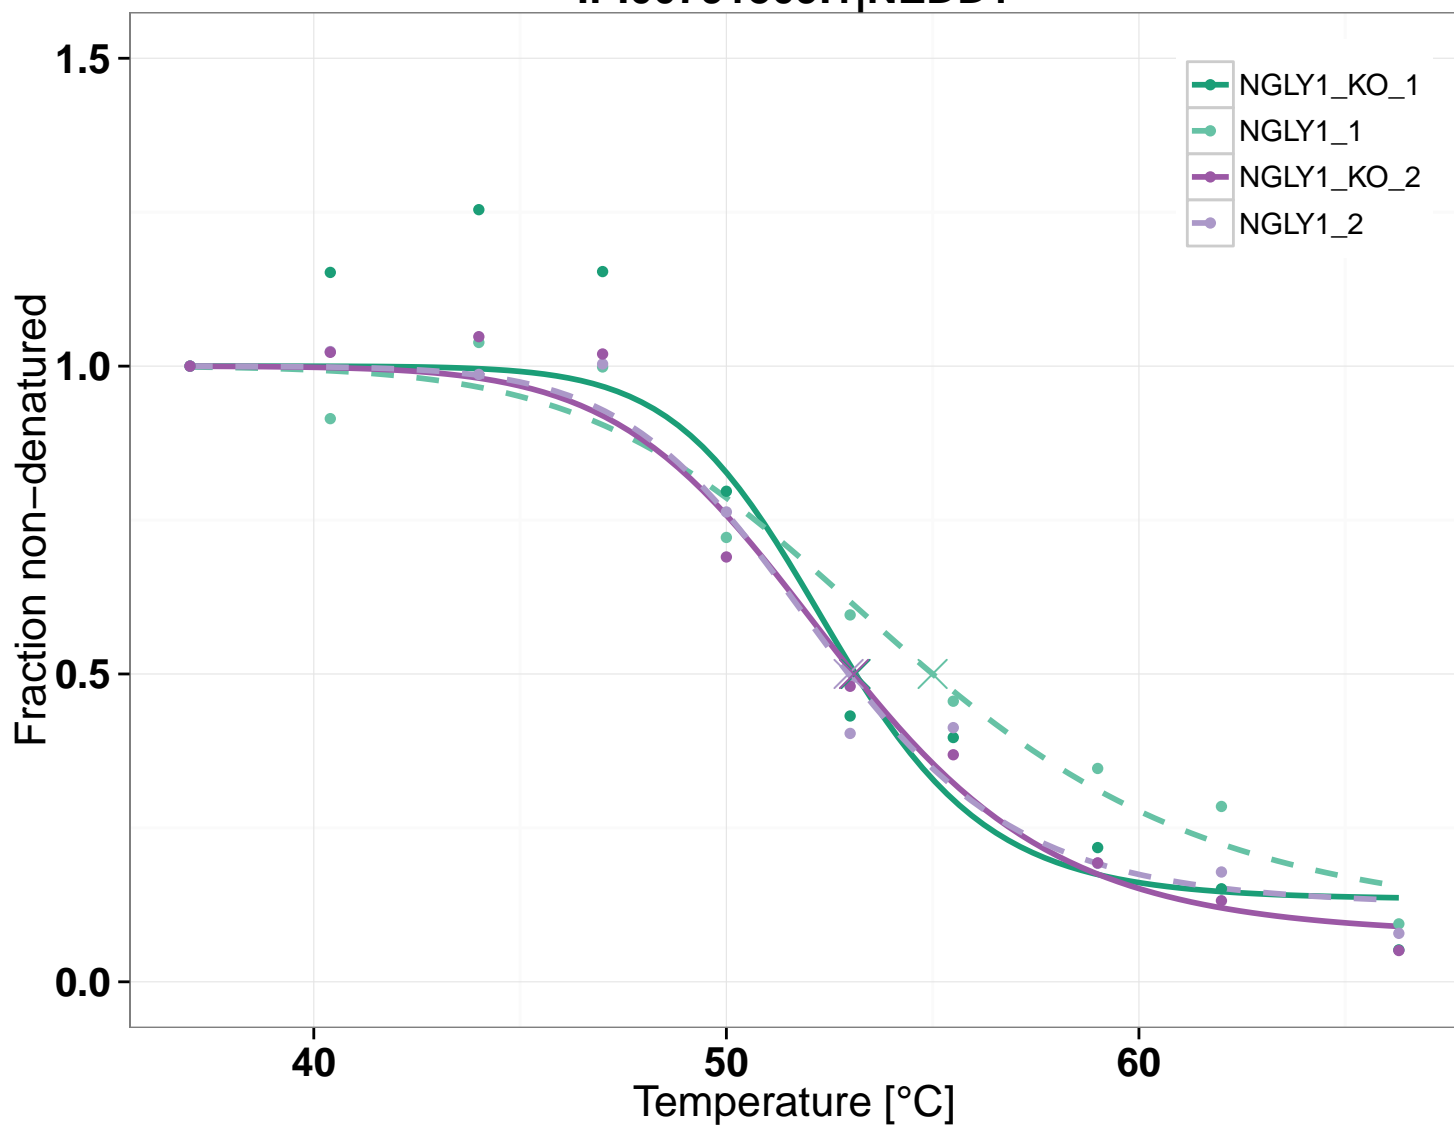

|            | meltPoint | slope  | plateau | R2   |
|------------|-----------|--------|---------|------|
| NGLY1_KO_1 | 53.13     | -0.11  | 0.13    | 0.92 |
| NGLY1_1    | 55        | -0.06  | 0.09    | 0.97 |
| NGLY1_KO_2 | 53.09     | -0.087 | 0.07    | 0.98 |
| NGLY1_2    | 52.96     | -0.091 | 0.12    | 0.98 |

Supplement: Supplementary file 3726 [file 1]

# IPI00746451.2|UBE2A

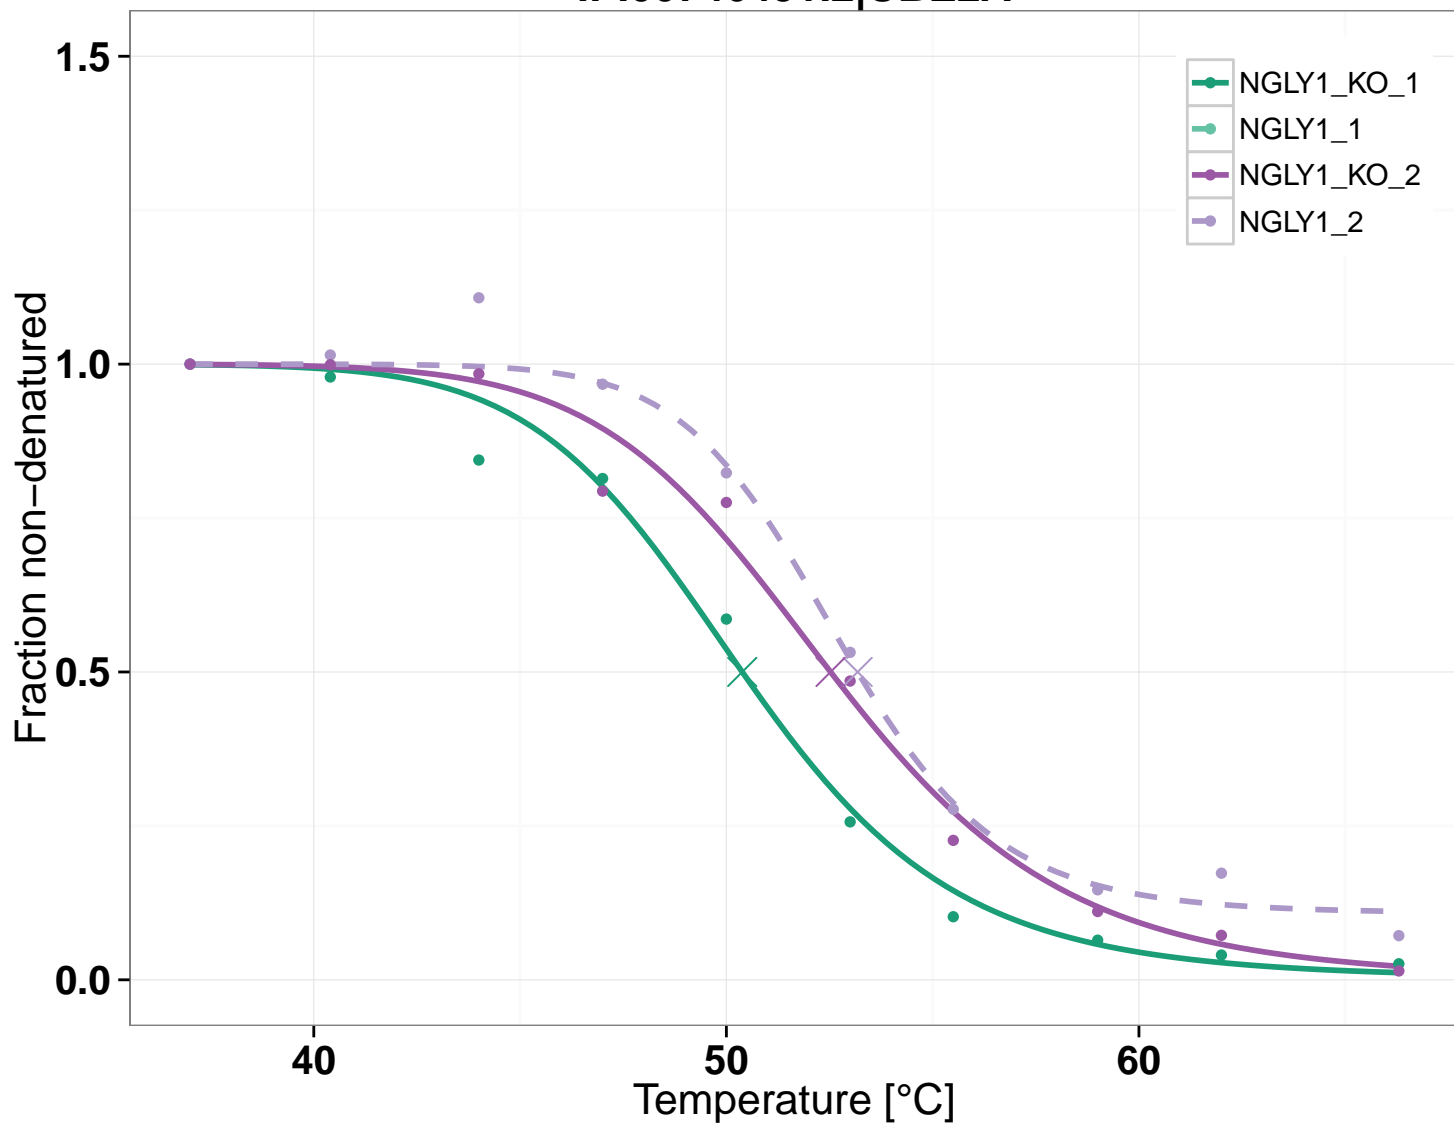

|            | meltPoint | slope  | plateau | R2   |
|------------|-----------|--------|---------|------|
| NGLY1_KO_1 | 50.38     | -0.097 | 0       | 0.99 |
| NGLY1_1    | -         | -      | -       | -    |
| NGLY1_KO_2 | 52.53     | -0.088 | 0       | 0.99 |
| NGLY1_2    | 53.18     | -0.12  | 0.11    | 0.99 |

Supplement: Supplementary file 3727 [file 1]

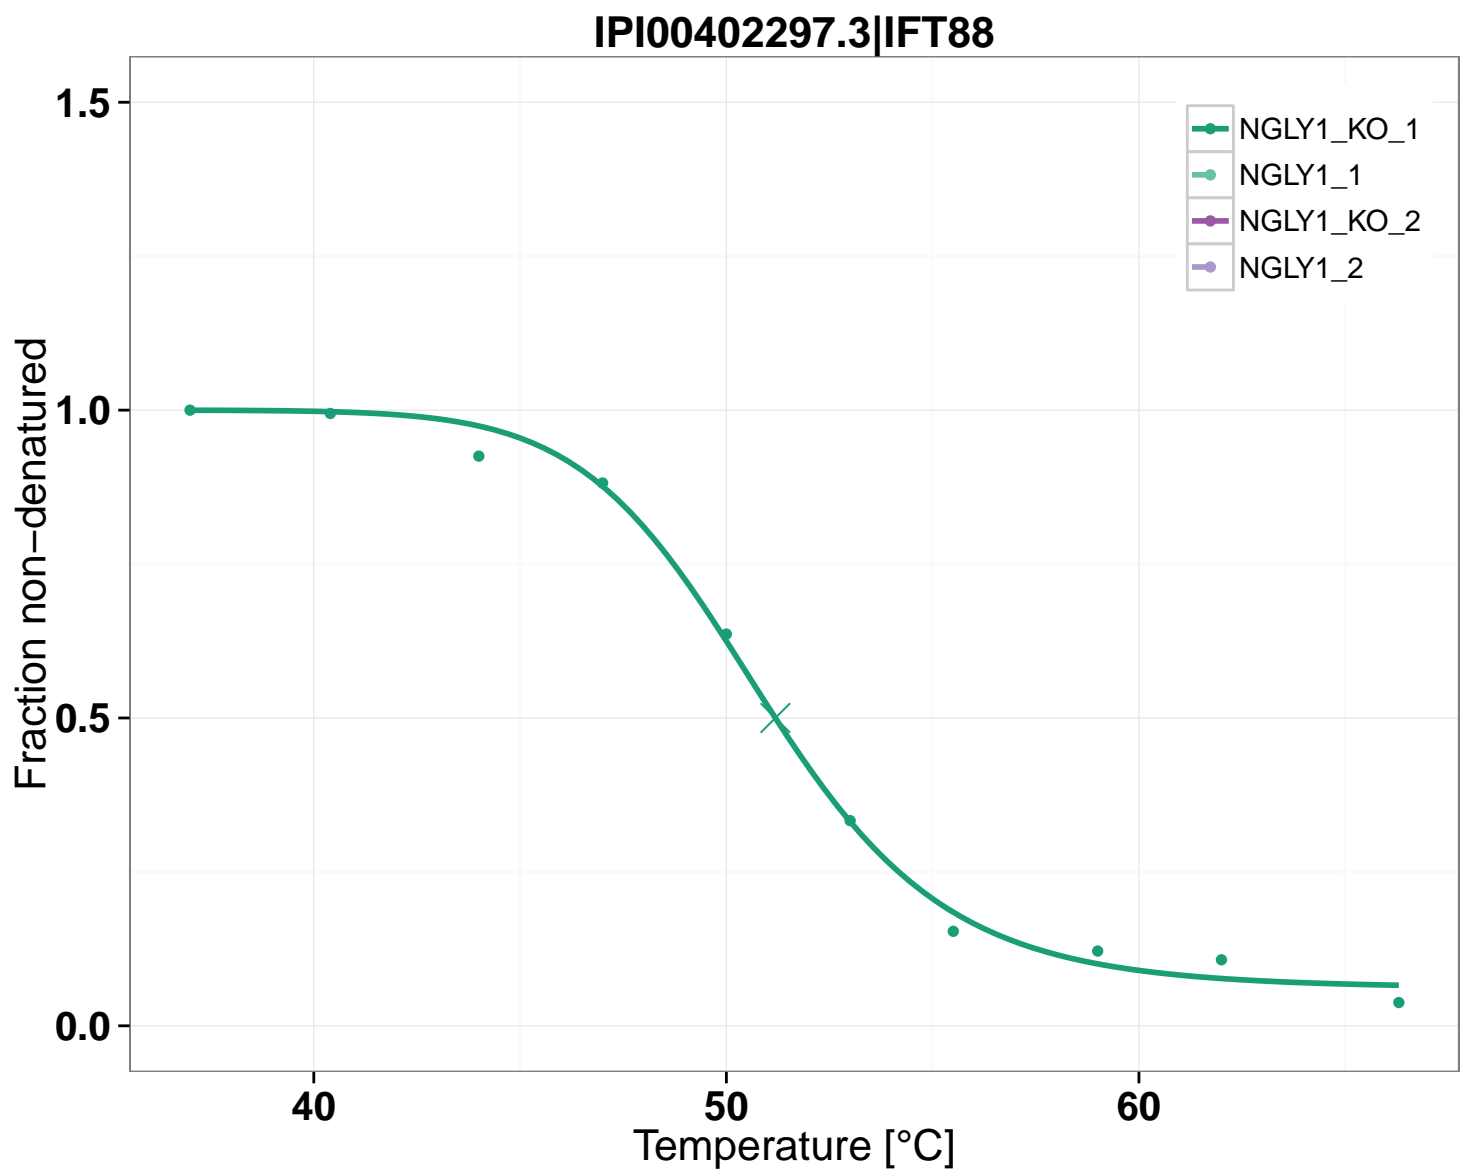

|            | meltPoint | slope | plateau | R2 |
|------------|-----------|-------|---------|----|
| NGLY1_KO_1 | 51.19     | -0.11 | 0.06    | 1  |
| NGLY1_1    | -         | -     | -       | -  |
| NGLY1_KO_2 | -         | -     | -       | -  |
| NGLY1_2    | -         | -     | -       | -  |

Supplement: Supplementary file 3728 [file 1]

# IPI00027770.1|SYP

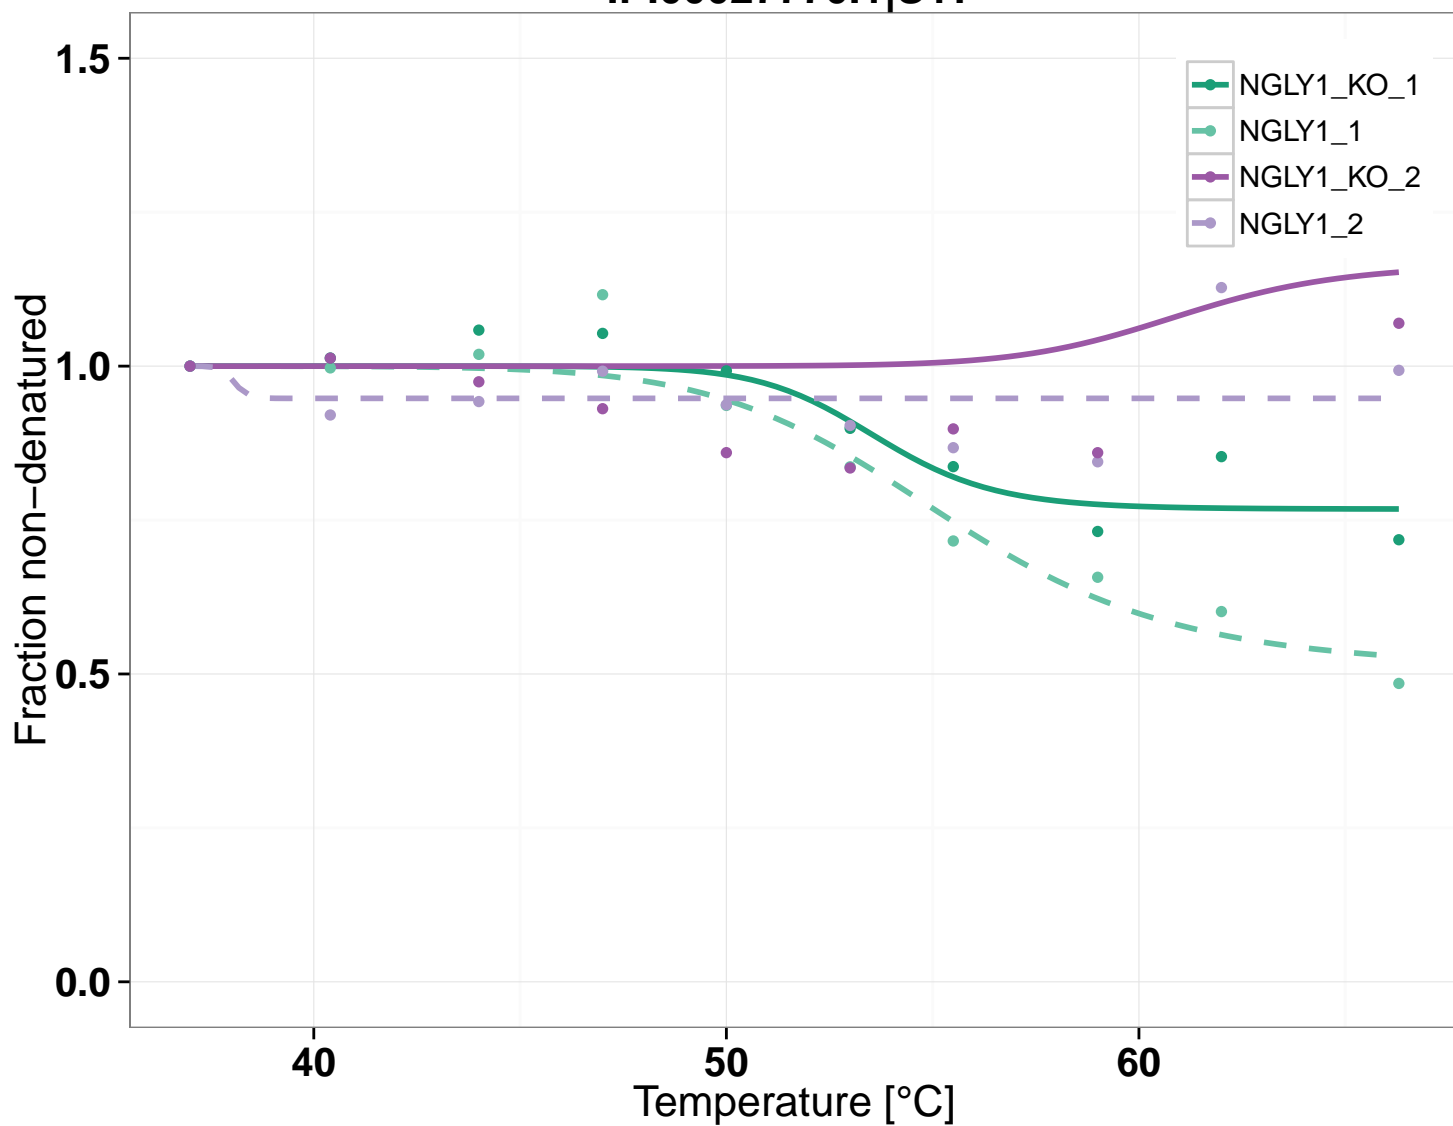

|            | meltPoint | slope  | plateau | R2   |
|------------|-----------|--------|---------|------|
| NGLY1_KO_1 | –         | –0.041 | 0.77    | 0.87 |
| NGLY1_1    | –         | –0.043 | 0.51    | 0.94 |
| NGLY1_KO_2 | –         | 0.021  | 1.17    | 0.17 |
| NGLY1_2    | –         | –0.086 | 0.95    | 0.04 |

Supplement: Supplementary file 3729 [file 1]

# IPI00643920.3|TKT

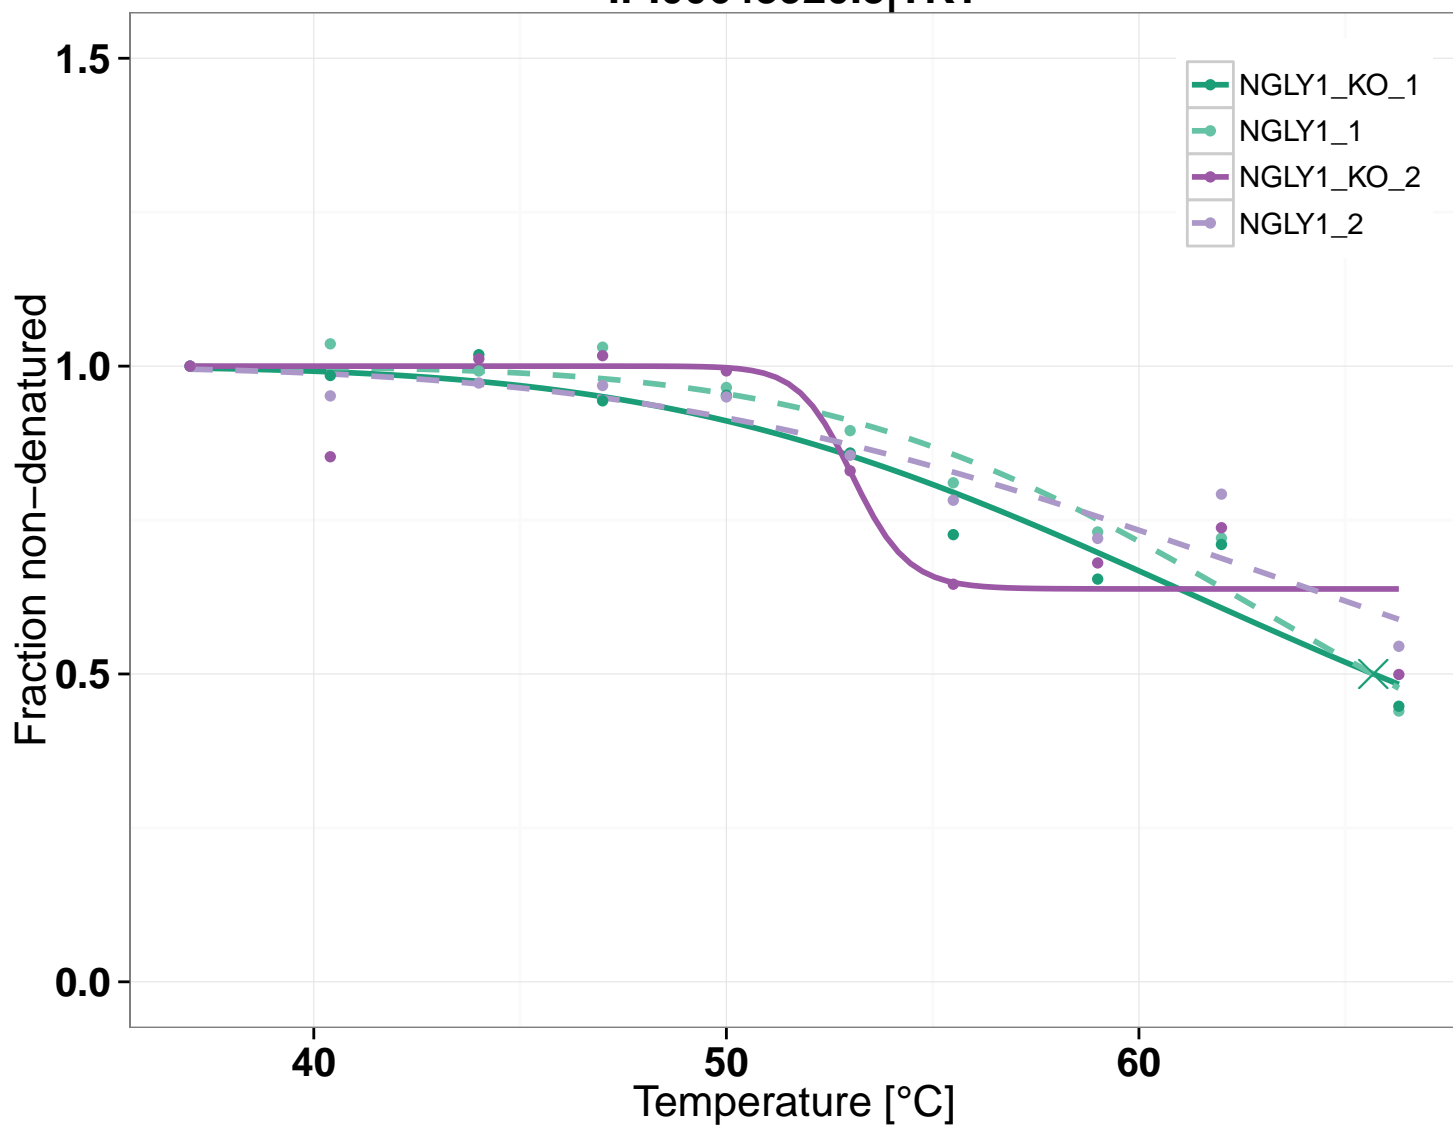

|            | meltPoint | slope  | plateau | R2   |
|------------|-----------|--------|---------|------|
| NGLY1_KO_1 | 65.69     | -0.03  | 0.03    | 0.93 |
| NGLY1_1    | 65.67     | -0.039 | 0       | 0.95 |
| NGLY1_KO_2 | -         | -0.14  | 0.64    | 0.82 |
| NGLY1_2    | -         | -0.023 | 0       | 0.9  |

Supplement: Supplementary file 3730 [file 1]

IPI00307200.9|SWAP70

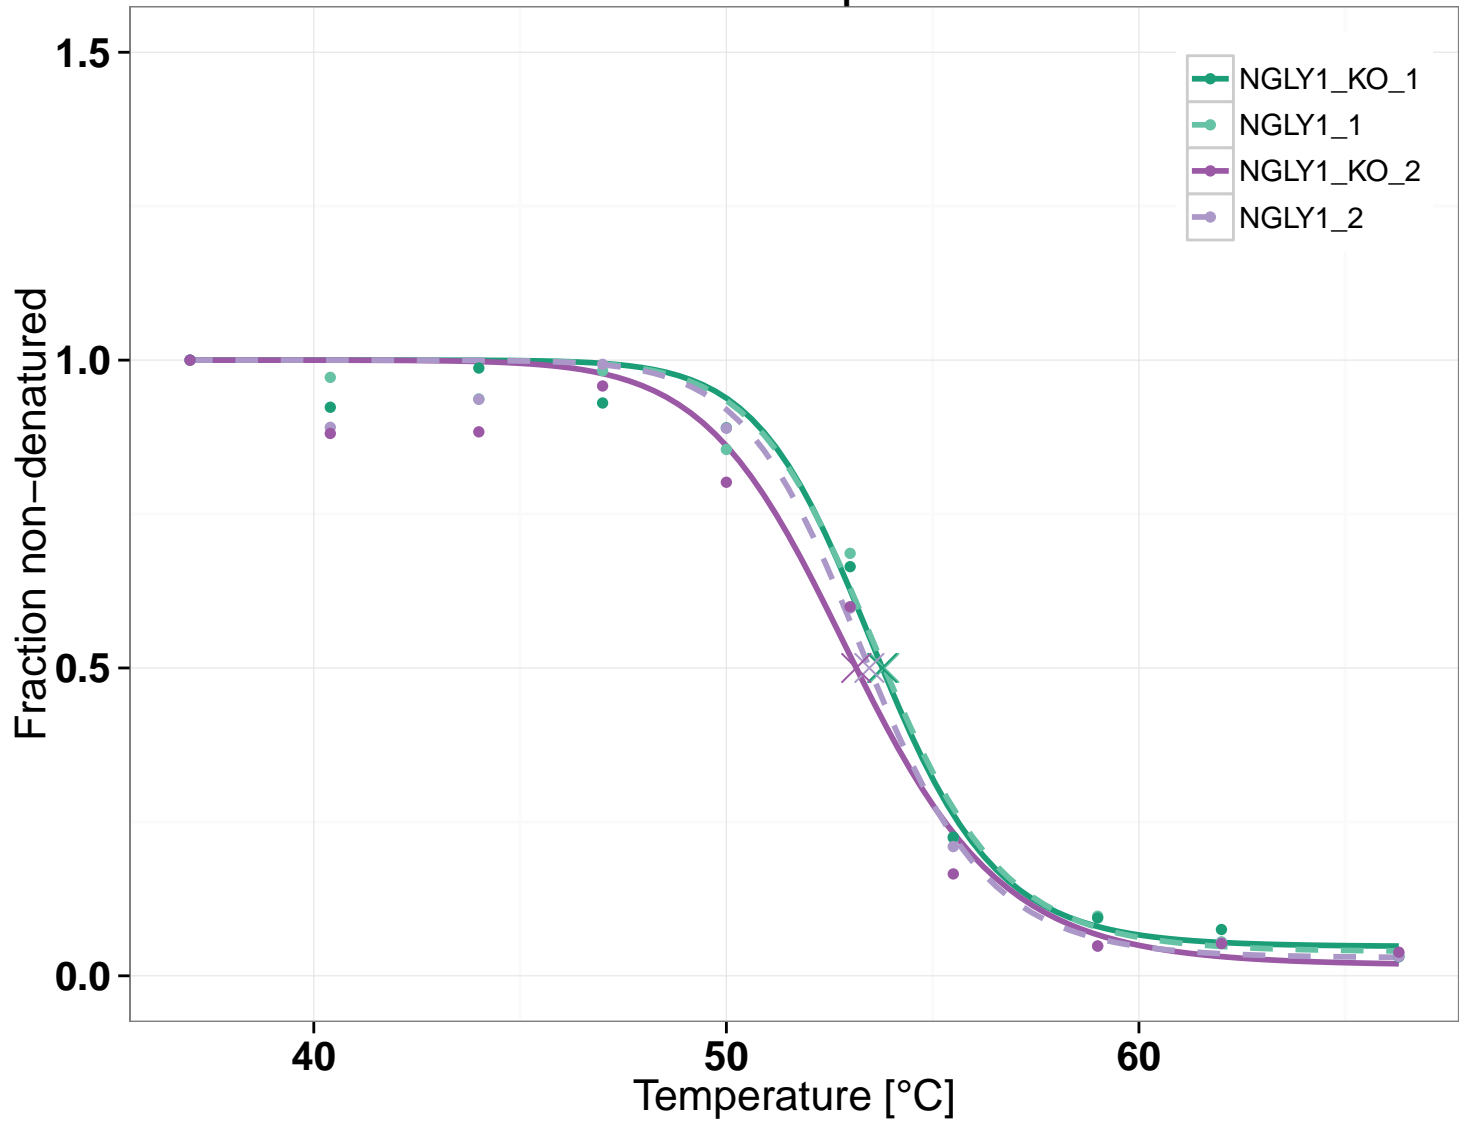

|            | meltPoint | slope | plateau | R2   |
|------------|-----------|-------|---------|------|
| NGLY1_KO_1 | 53.78     | -0.16 | 0.05    | 0.99 |
| NGLY1_1    | 53.83     | -0.16 | 0.04    | 0.99 |
| NGLY1_KO_2 | 53.15     | -0.14 | 0.02    | 0.97 |
| NGLY1_2    | 53.47     | -0.16 | 0.03    | 0.99 |

Supplement: Supplementary file 3731 [file 1]

IPI00024650.1|SLC16A1

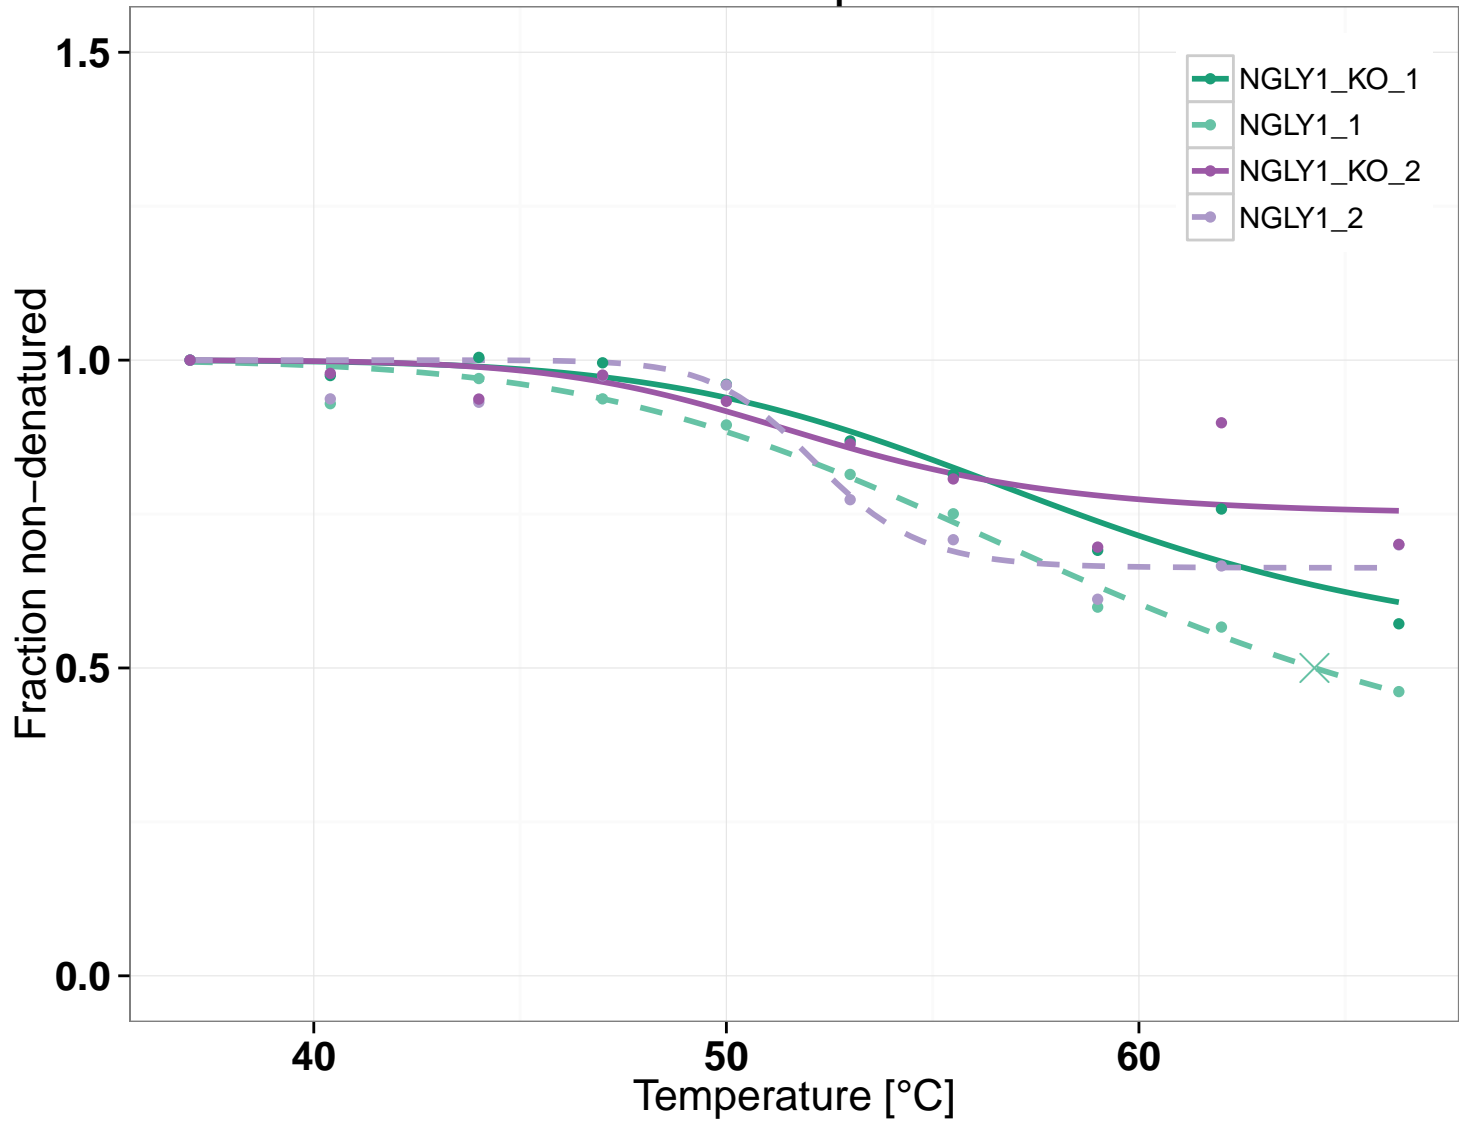

|            | meltPoint | slope  | plateau | R2   |
|------------|-----------|--------|---------|------|
| NGLY1_KO_1 | –         | –0.025 | 0.51    | 0.94 |
| NGLY1_1    | 64.25     | –0.03  | 0.27    | 0.98 |
| NGLY1_KO_2 | –         | –0.02  | 0.75    | 0.72 |
| NGLY1_2    | –         | –0.067 | 0.66    | 0.93 |

Supplement: Supplementary file 3732 [file 1]

IPI00328714.2|PNKD

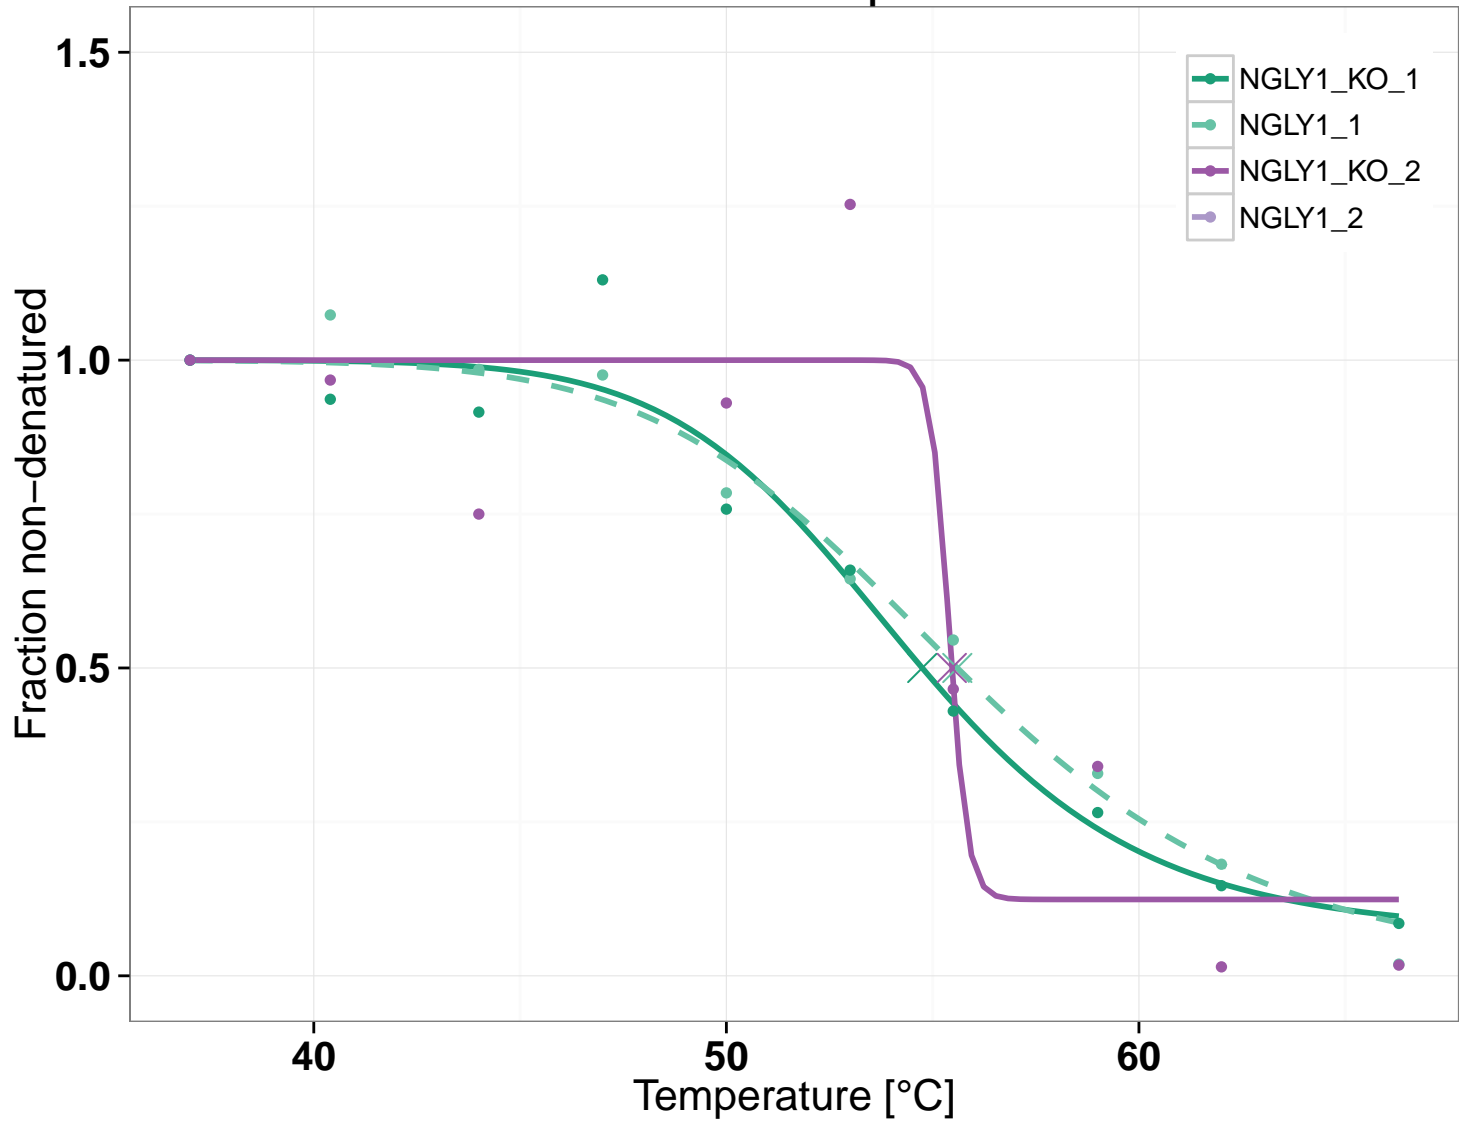

|            | meltPoint | slope  | plateau | R2   |
|------------|-----------|--------|---------|------|
| NGLY1_KO_1 | 54.75     | -0.082 | 0.07    | 0.96 |
| NGLY1_1    | 55.6      | -0.067 | 0       | 0.99 |
| NGLY1_KO_2 | 55.46     | -0.99  | 0.12    | 0.59 |
| NGLY1_2    | -         | -      | -       | -    |

Supplement: Supplementary file 3733 [file 1]

# IPI00419791.3|RSRC2

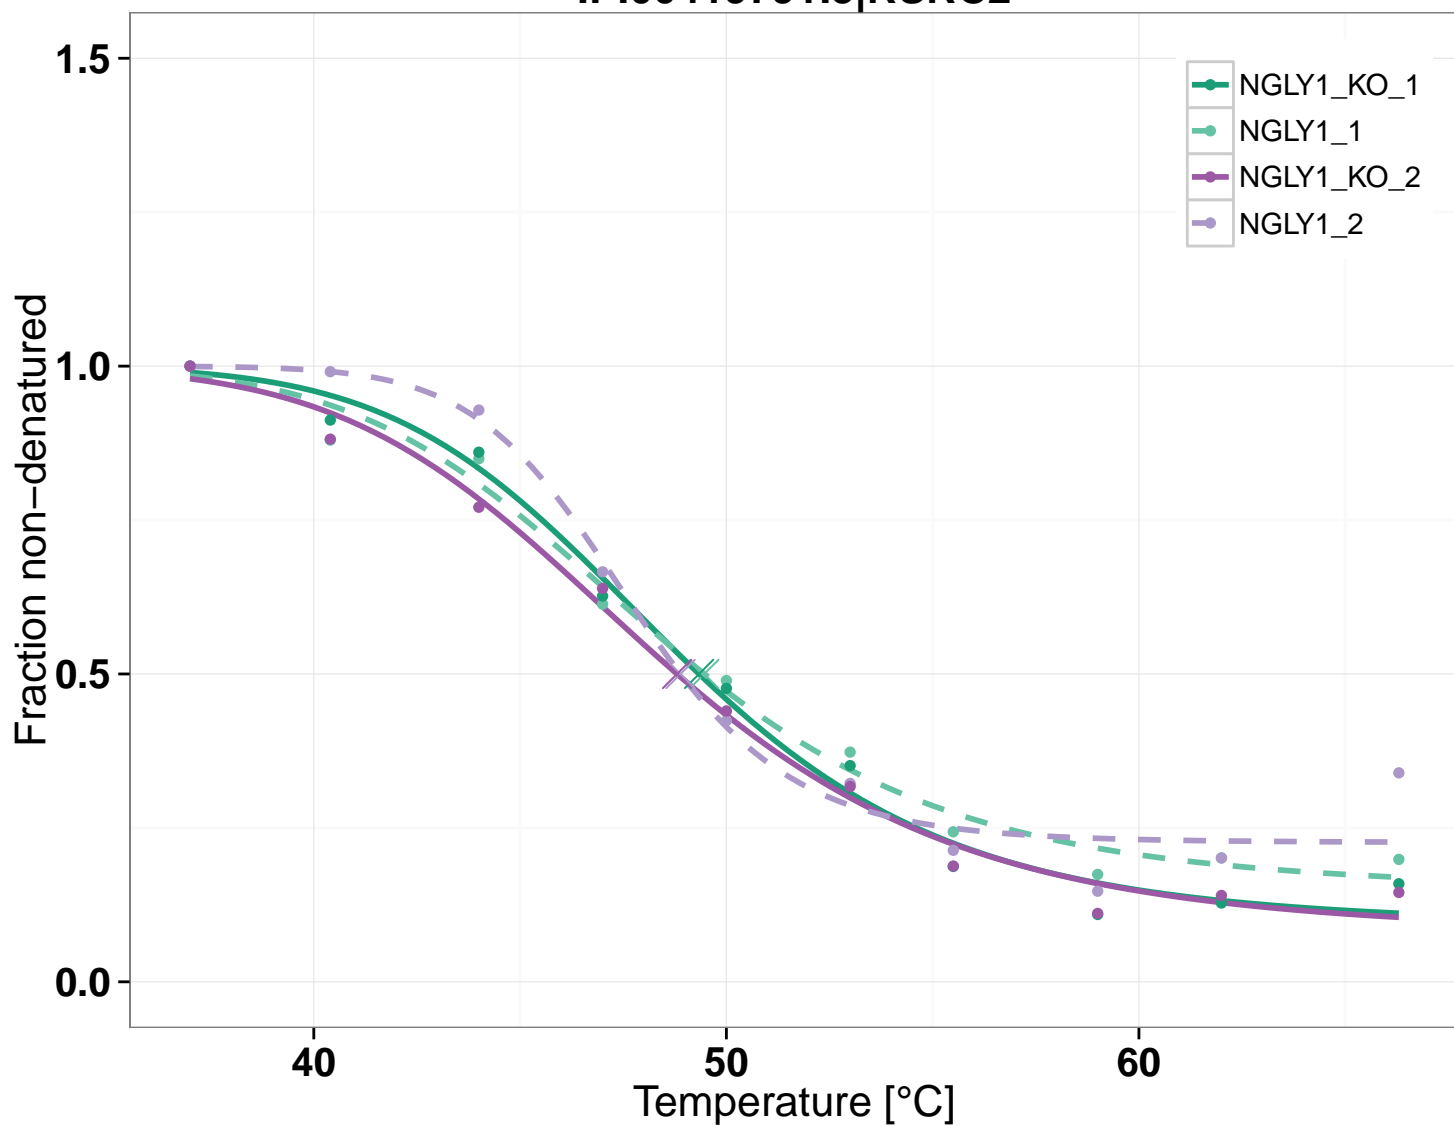

|            | meltPoint | slope  | plateau | R2   |
|------------|-----------|--------|---------|------|
| NGLY1_KO_1 | 49.34     | -0.068 | 0.09    | 0.99 |
| NGLY1_1    | 49.46     | -0.06  | 0.15    | 0.99 |
| NGLY1_KO_2 | 48.81     | -0.062 | 0.08    | 0.99 |
| NGLY1_2    | 48.89     | -0.1   | 0.23    | 0.98 |

Supplement: Supplementary file 3734 [file 1]

IPI00411733.4|DHX30

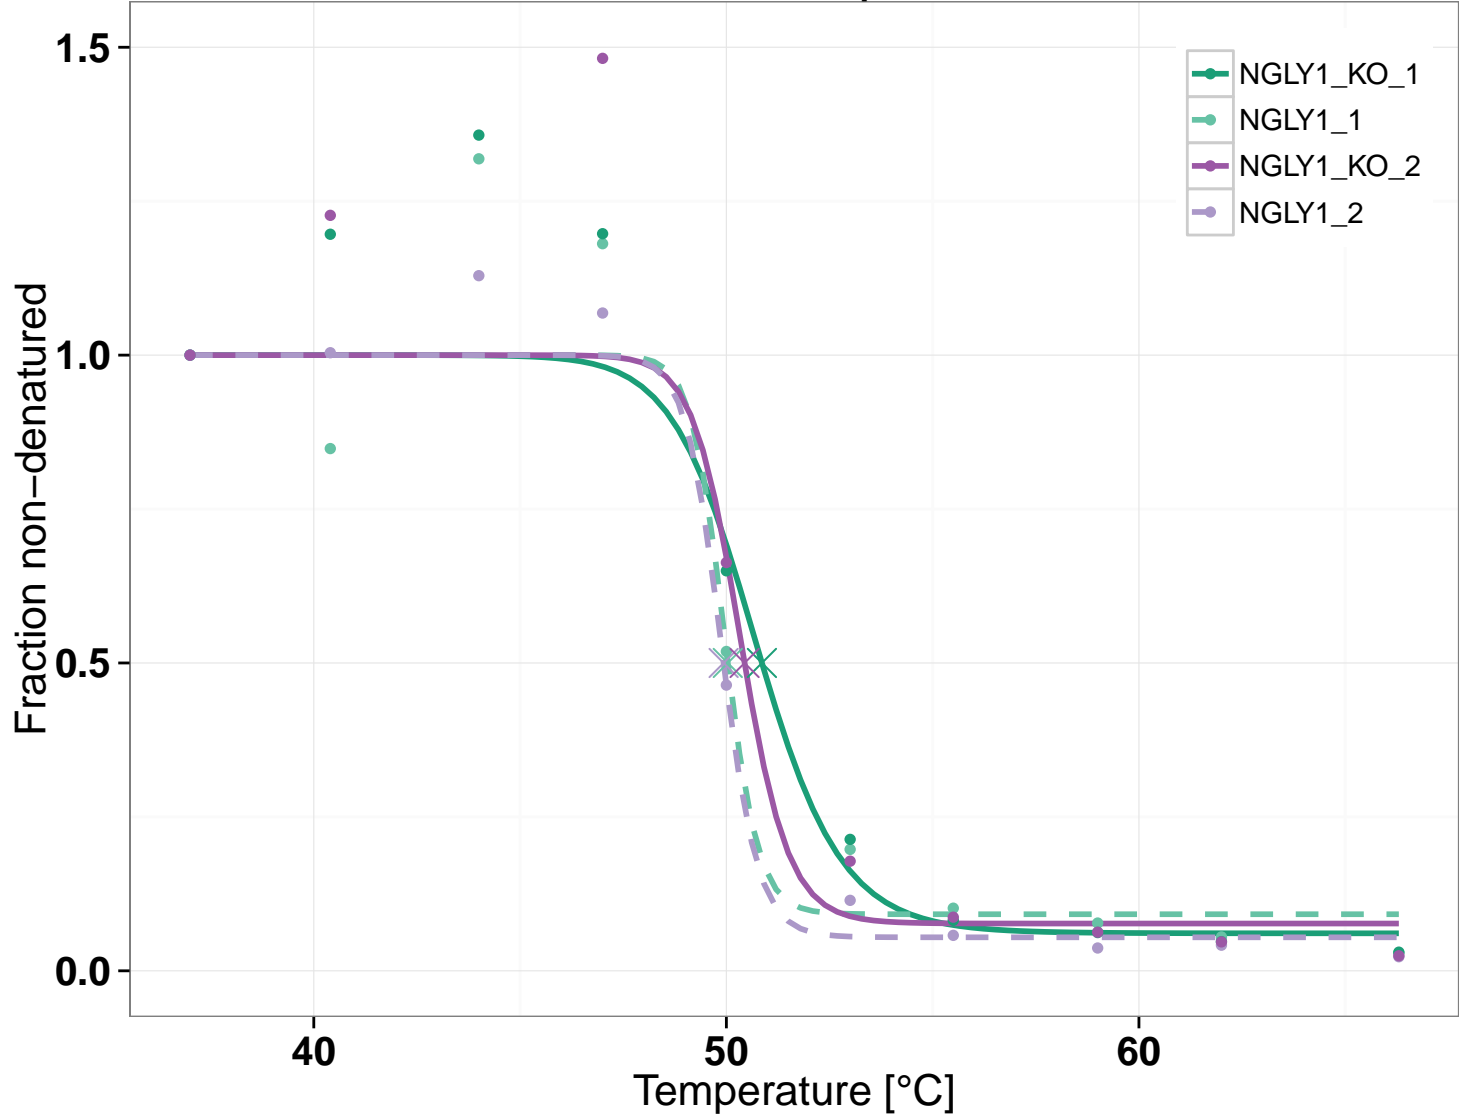

|            | meltPoint | slope | plateau | R2   |
|------------|-----------|-------|---------|------|
| NGLY1_KO_1 | 50.86     | -0.23 | 0.06    | 0.92 |
| NGLY1_1    | 50.03     | -0.57 | 0.09    | 0.93 |
| NGLY1_KO_2 | 50.44     | -0.4  | 0.08    | 0.84 |
| NGLY1_2    | 49.93     | -0.54 | 0.05    | 0.99 |

Supplement: Supplementary file 3735 [file 1]

IPI00025344.1|NDUFS6

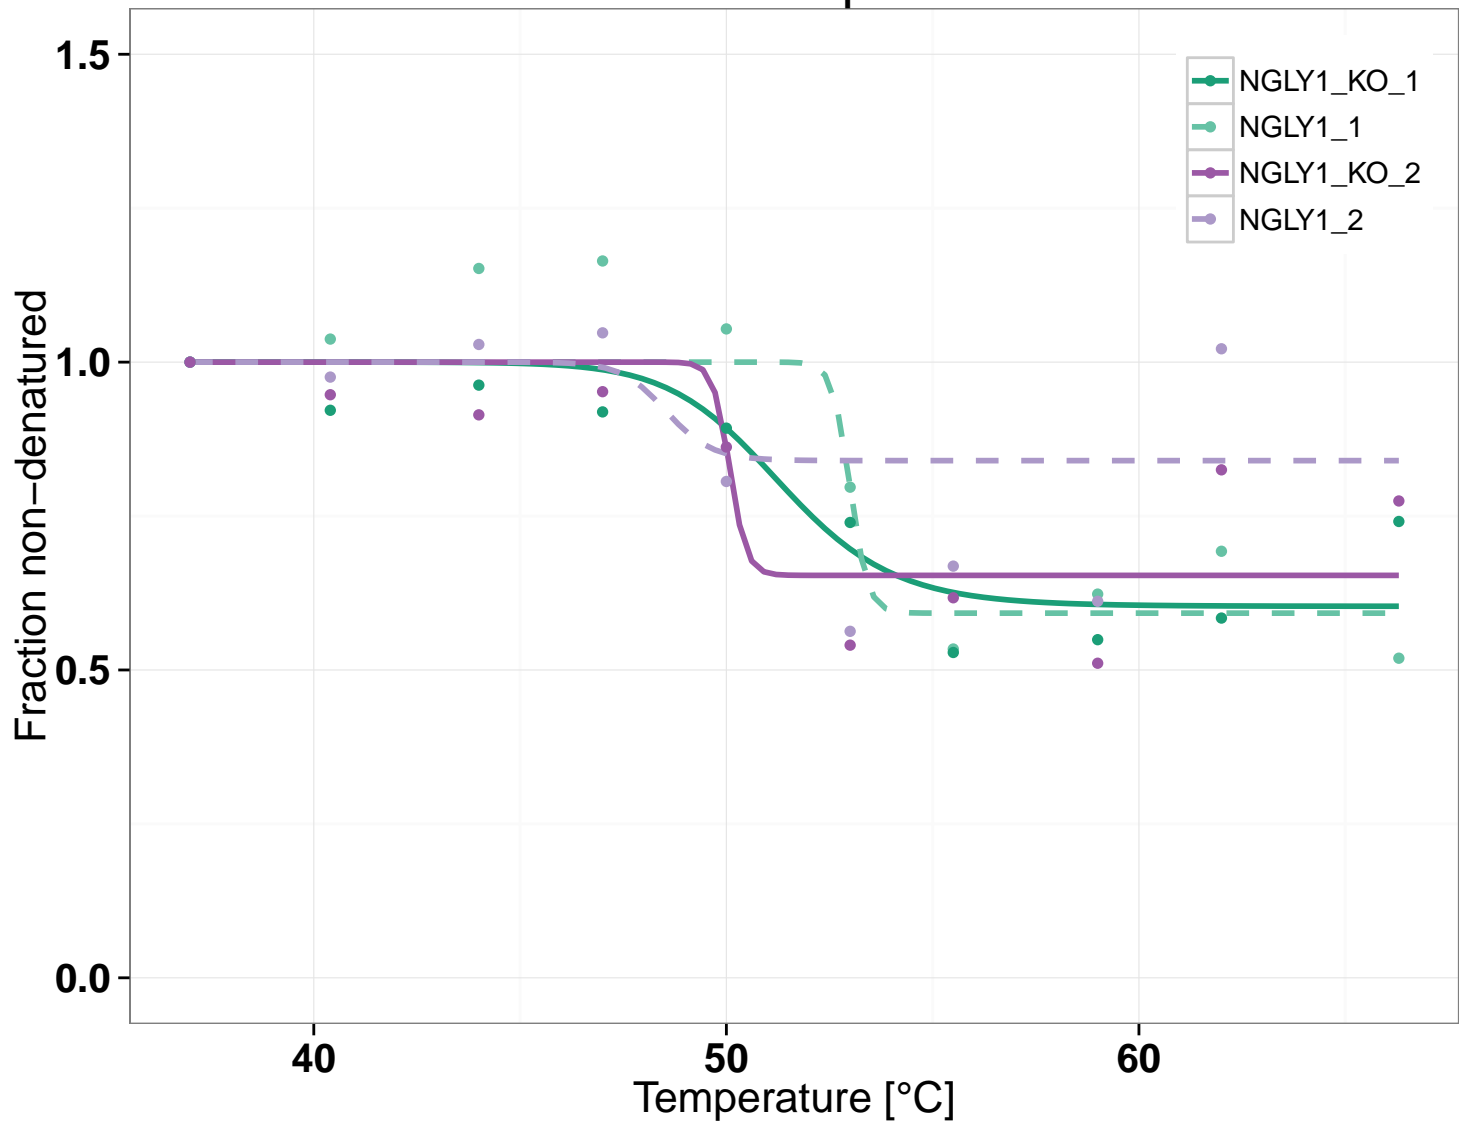

|            | meltPoint | slope  | plateau | R2   |
|------------|-----------|--------|---------|------|
| NGLY1_KO_1 | —         | -0.072 | 0.6     | 0.84 |
| NGLY1_1    | —         | -0.48  | 0.59    | 0.87 |
| NGLY1_KO_2 | —         | -0.43  | 0.65    | 0.68 |
| NGLY1_2    | —         | -0.073 | 0.84    | 0.12 |

Supplement: Supplementary file 3736 [file 1]

IPI00007393.5|APPBP2

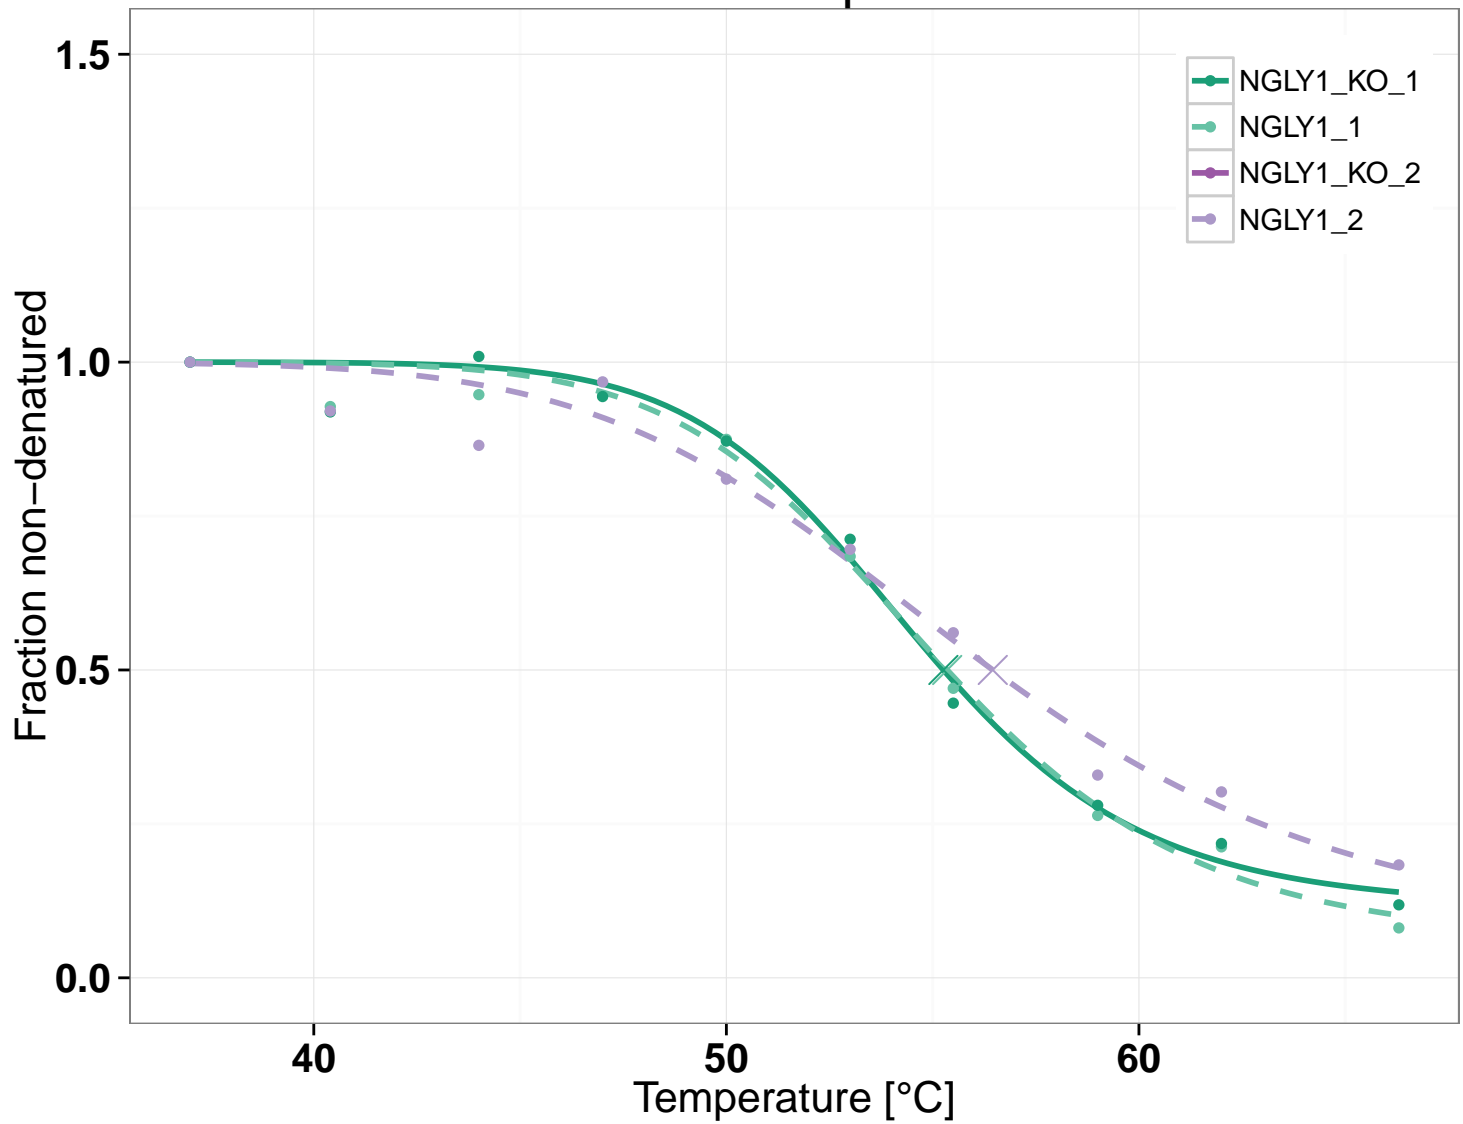

|            | meltPoint | slope  | plateau | R2   |
|------------|-----------|--------|---------|------|
| NGLY1_KO_1 | 55.26     | -0.081 | 0.11    | 0.99 |
| NGLY1_1    | 55.35     | -0.075 | 0.05    | 0.99 |
| NGLY1_KO_2 | -         | -      | -       | -    |
| NGLY1_2    | 56.46     | -0.052 | 0.05    | 0.97 |

Supplement: Supplementary file 3737 [file 1]

# IPI00011102.2|CSNK1D

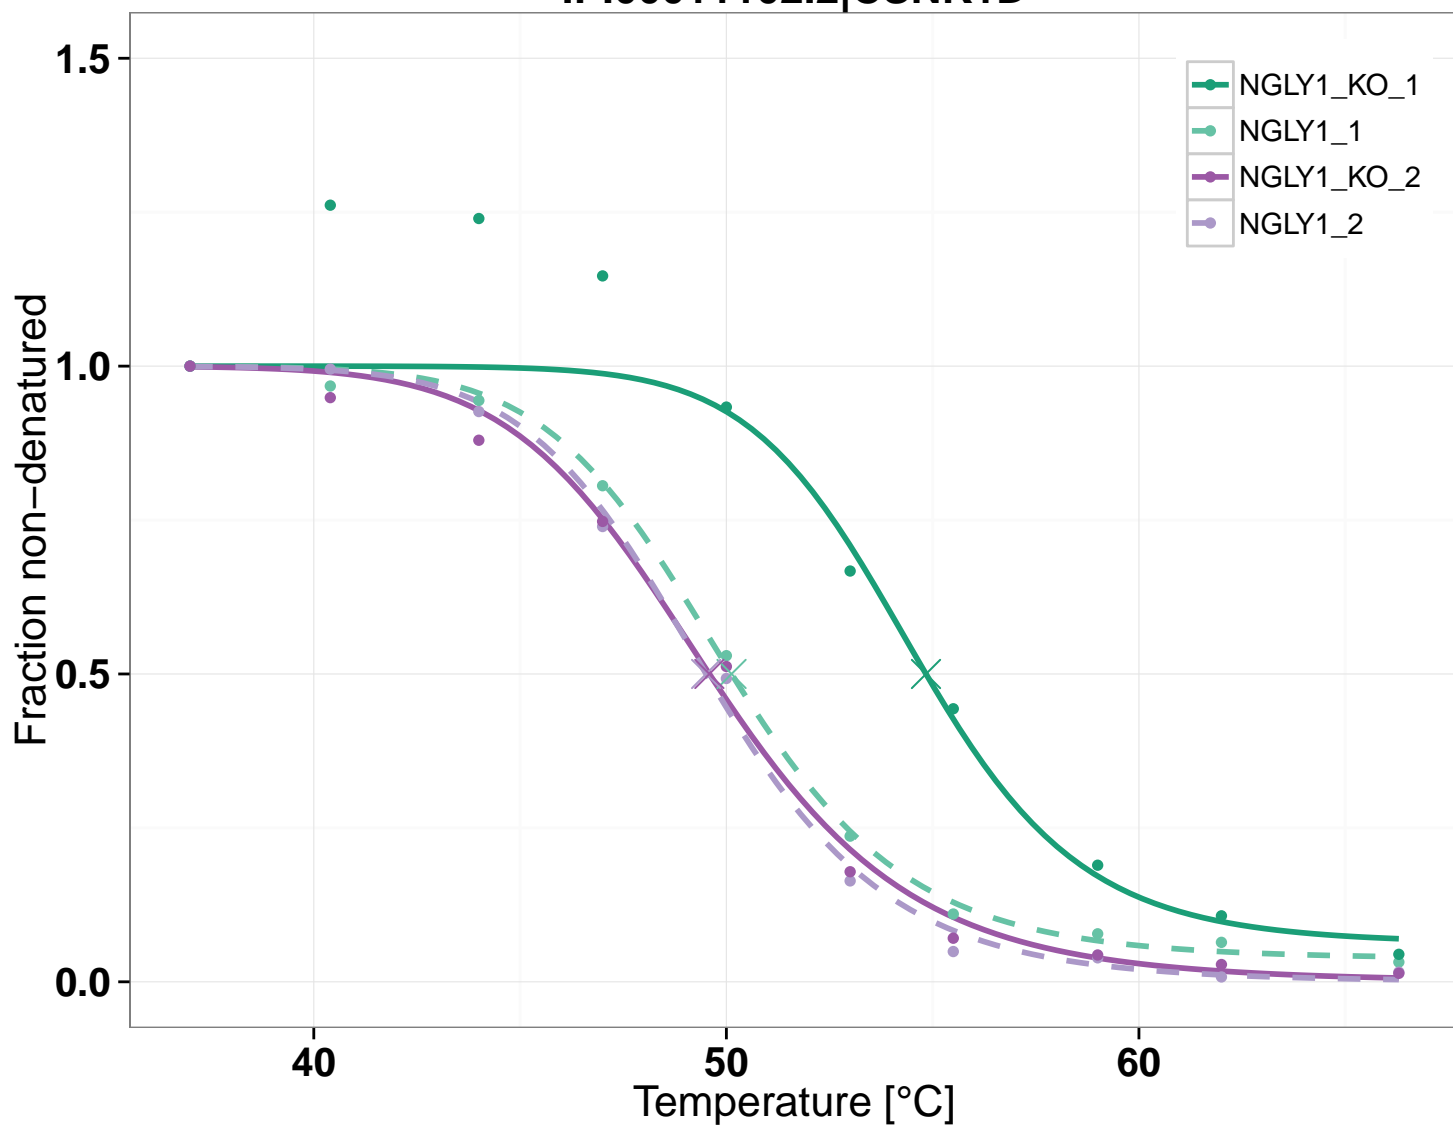

|            | meltPoint | slope | plateau | R2   |
|------------|-----------|-------|---------|------|
| NGLY1_KO_1 | 54.84     | -0.12 | 0.06    | 0.92 |
| NGLY1_1    | 50.13     | -0.11 | 0.04    | 1    |
| NGLY1_KO_2 | 49.59     | -0.1  | 0       | 0.99 |
| NGLY1_2    | 49.51     | -0.11 | 0       | 1    |

Supplement: Supplementary file 3738 [file 1]

IPI00031597.2|TMEM106C

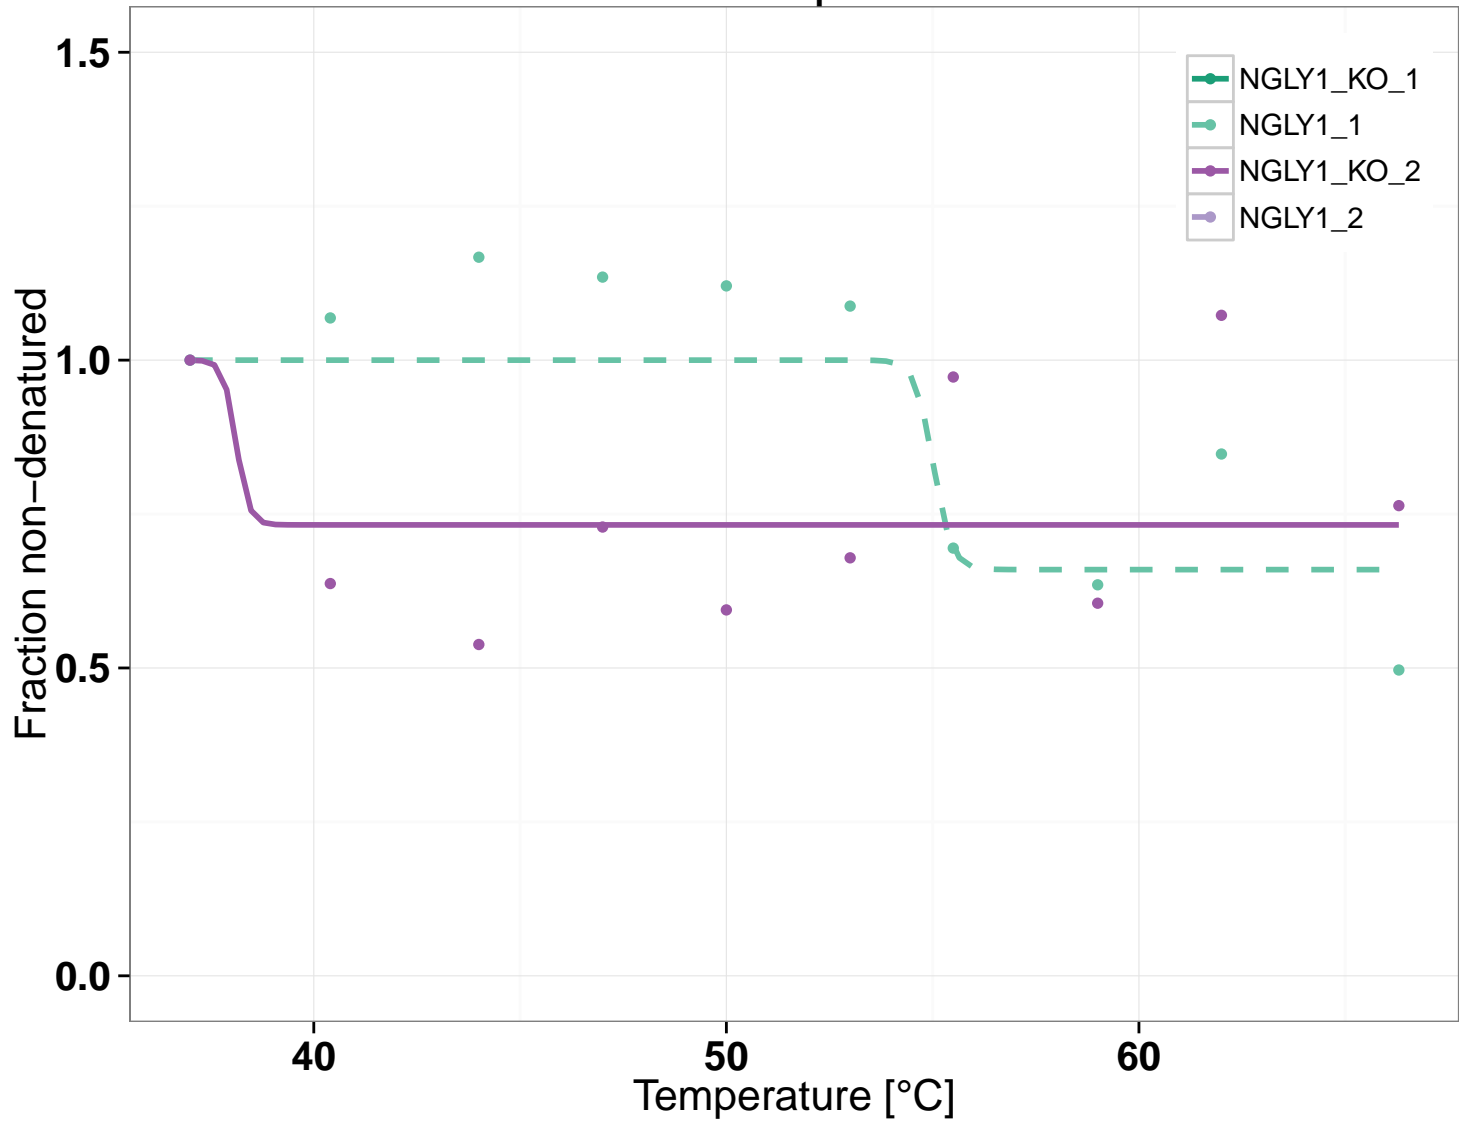

|            | meltPoint | slope | plateau | R2   |
|------------|-----------|-------|---------|------|
| NGLY1_KO_1 | -         | -     | -       | -    |
| NGLY1_1    | -         | -0.39 | 0.66    | 0.74 |
| NGLY1_KO_2 | -         | -0.44 | 0.73    | 0.2  |
| NGLY1_2    | -         | -     | -       | -    |

Supplement: Supplementary file 3739 [file 1]

# IPI00646857.3|MTX3

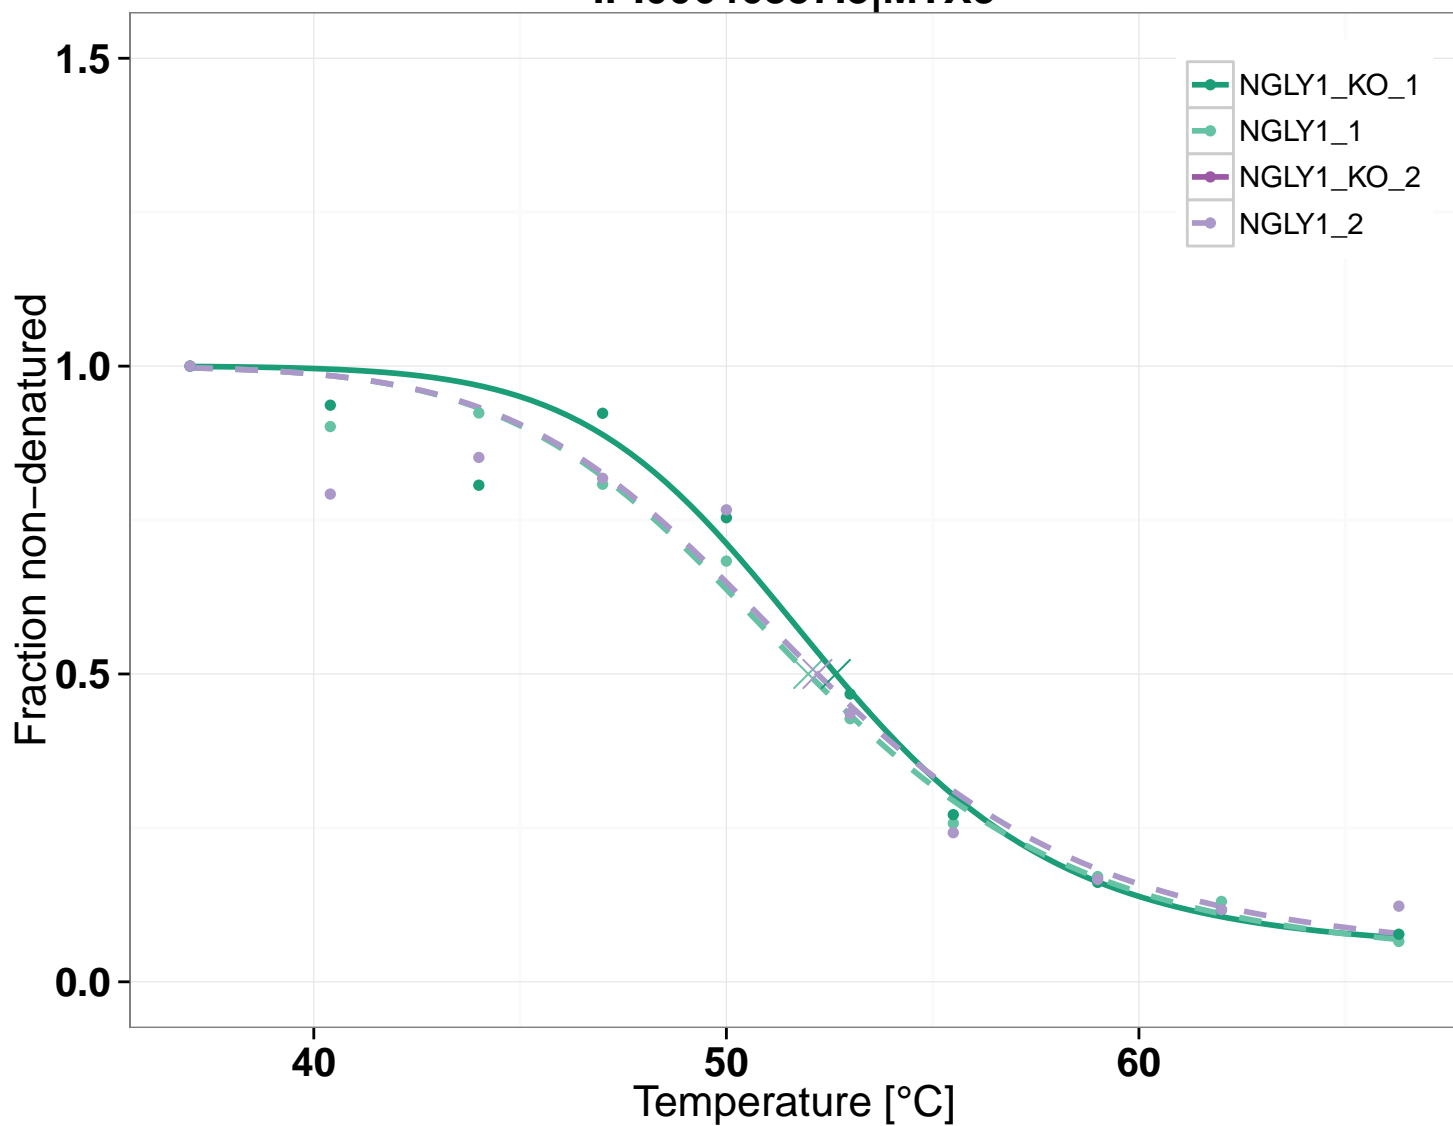

|            | meltPoint | slope  | plateau | R2   |
|------------|-----------|--------|---------|------|
| NGLY1_KO_1 | 52.65     | -0.082 | 0.05    | 0.97 |
| NGLY1_1    | 51.99     | -0.07  | 0.03    | 0.99 |
| NGLY1_KO_2 | -         | -      | -       | -    |
| NGLY1_2    | 52.21     | -0.068 | 0.04    | 0.94 |

Supplement: Supplementary file 3740 [file 1]

# IPI00916258.1|WDR47

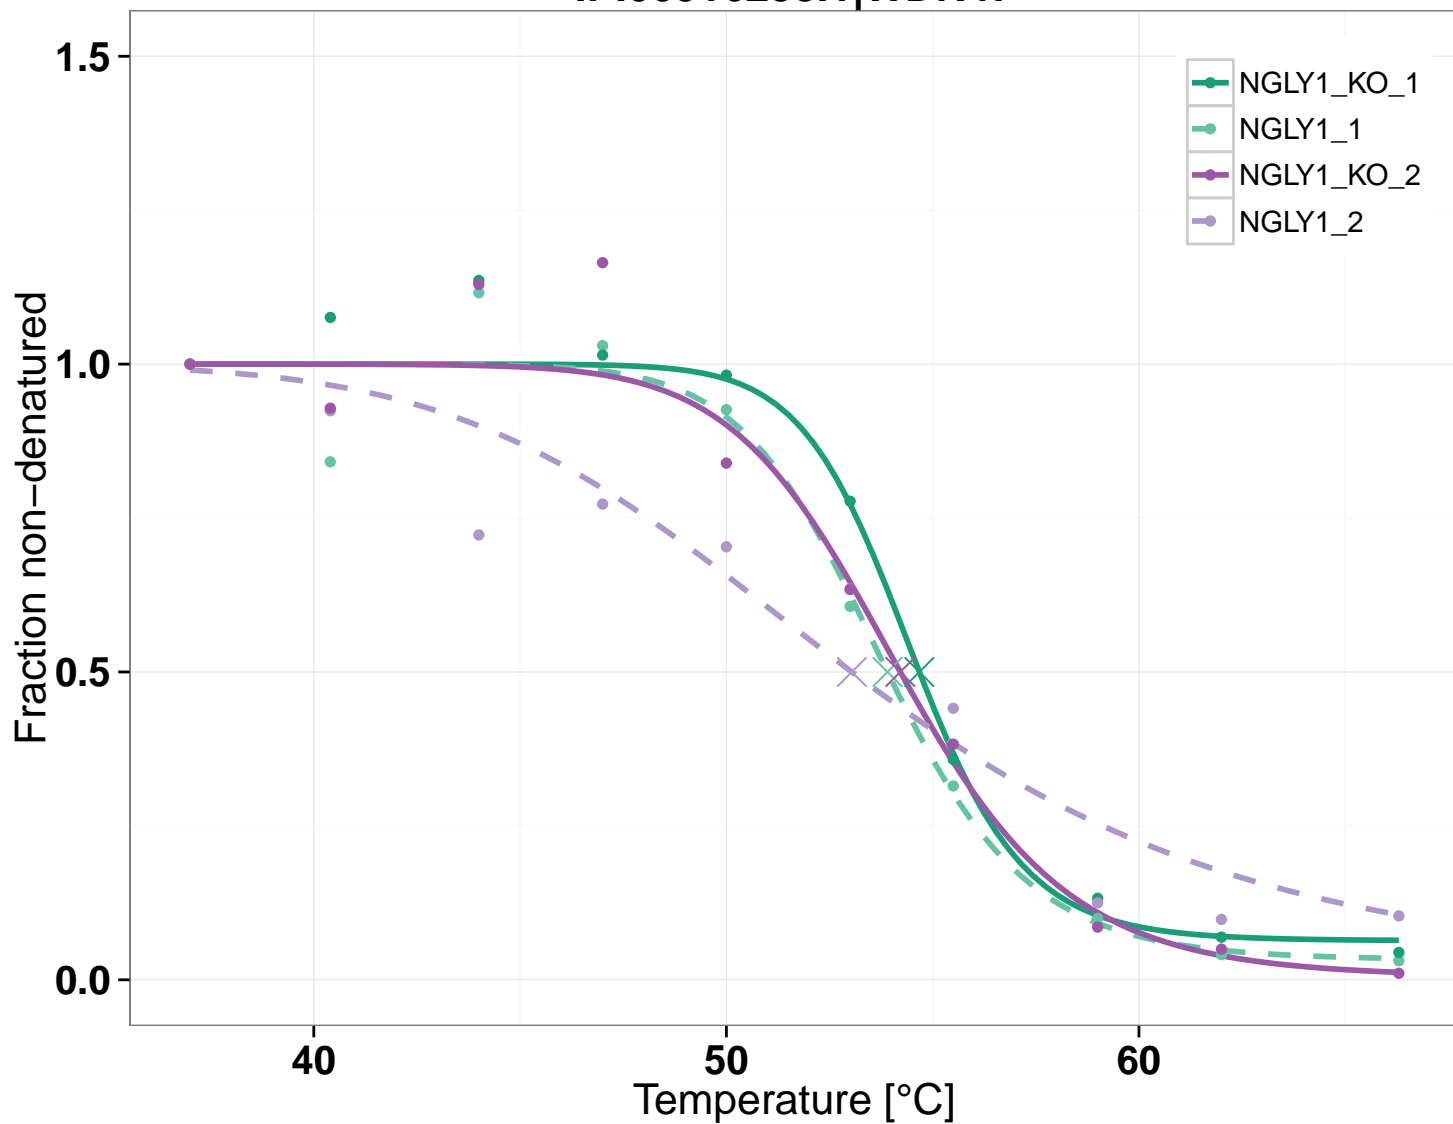

|            | meltPoint | slope  | plateau | R2   |
|------------|-----------|--------|---------|------|
| NGLY1_KO_1 | 54.68     | -0.17  | 0.06    | 0.99 |
| NGLY1_1    | 53.91     | -0.14  | 0.03    | 0.98 |
| NGLY1_KO_2 | 54.22     | -0.12  | 0       | 0.97 |
| NGLY1_2    | 53.04     | -0.052 | 0       | 0.92 |

Supplement: Supplementary file 3741 [file 1]

# IPI00217151.3|C17ORF39

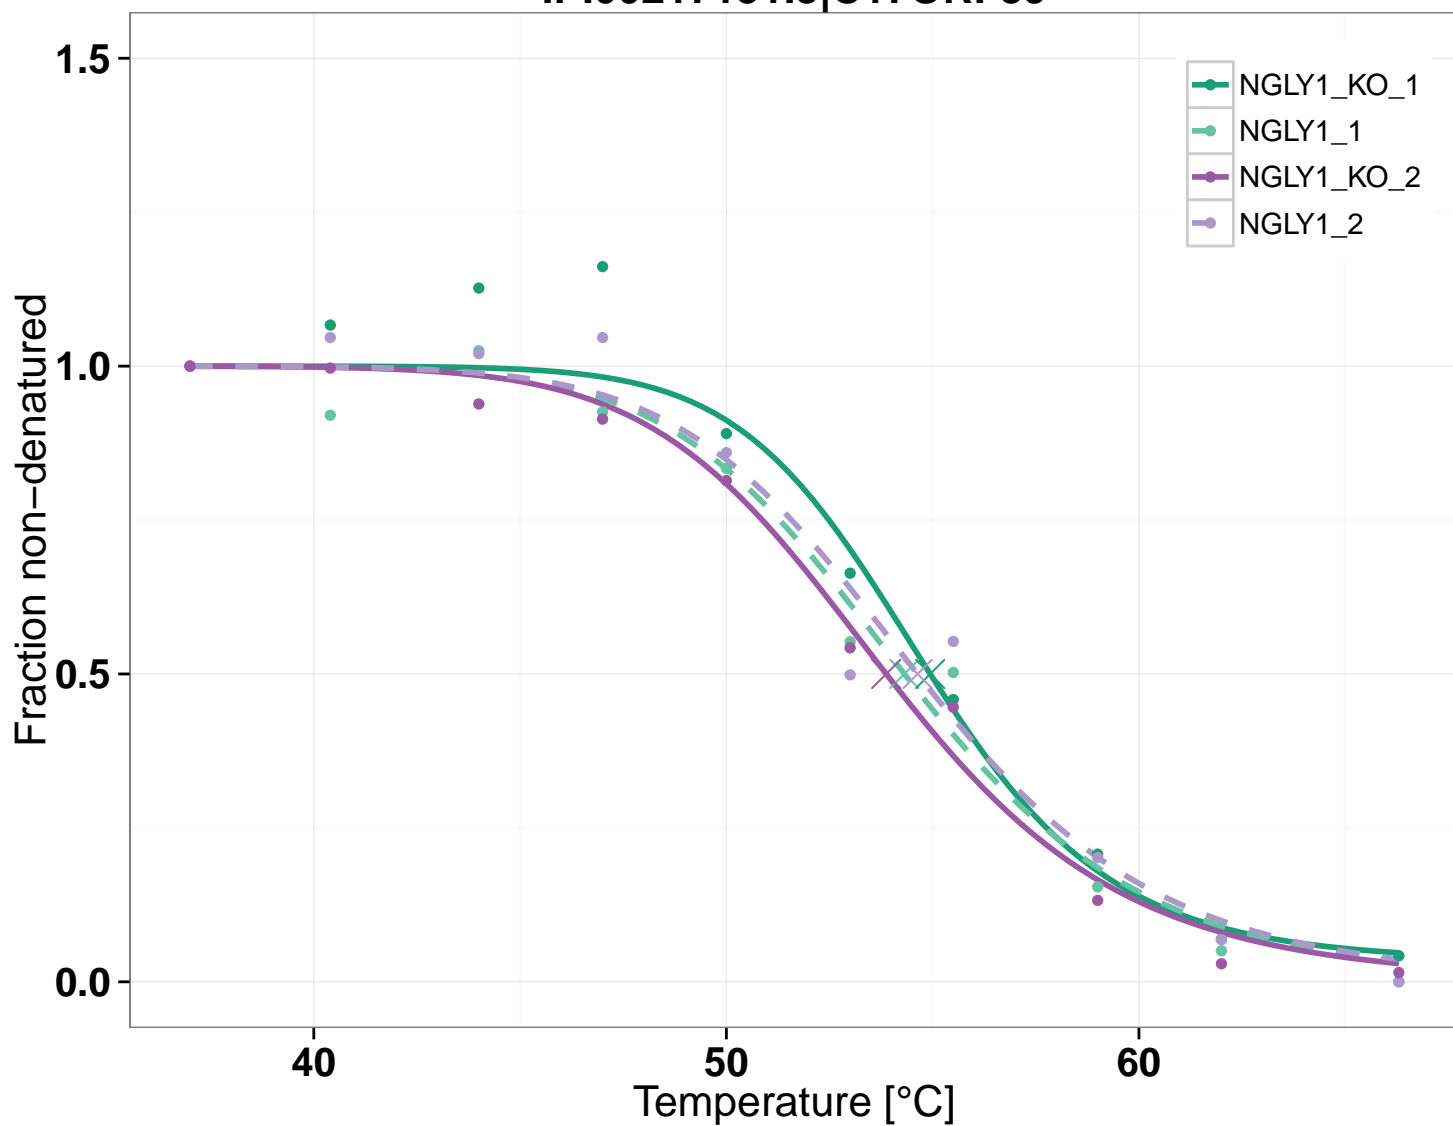

|            | meltPoint | slope  | plateau | R2   |
|------------|-----------|--------|---------|------|
| NGLY1_KO_1 | 54.94     | -0.11  | 0.03    | 0.97 |
| NGLY1_1    | 54.31     | -0.087 | 0       | 0.98 |
| NGLY1_KO_2 | 53.87     | -0.087 | 0       | 0.99 |
| NGLY1_2    | 54.63     | -0.086 | 0       | 0.97 |

Supplement: Supplementary file 3742 [file 1]

IPI00791699.1|TMCO6

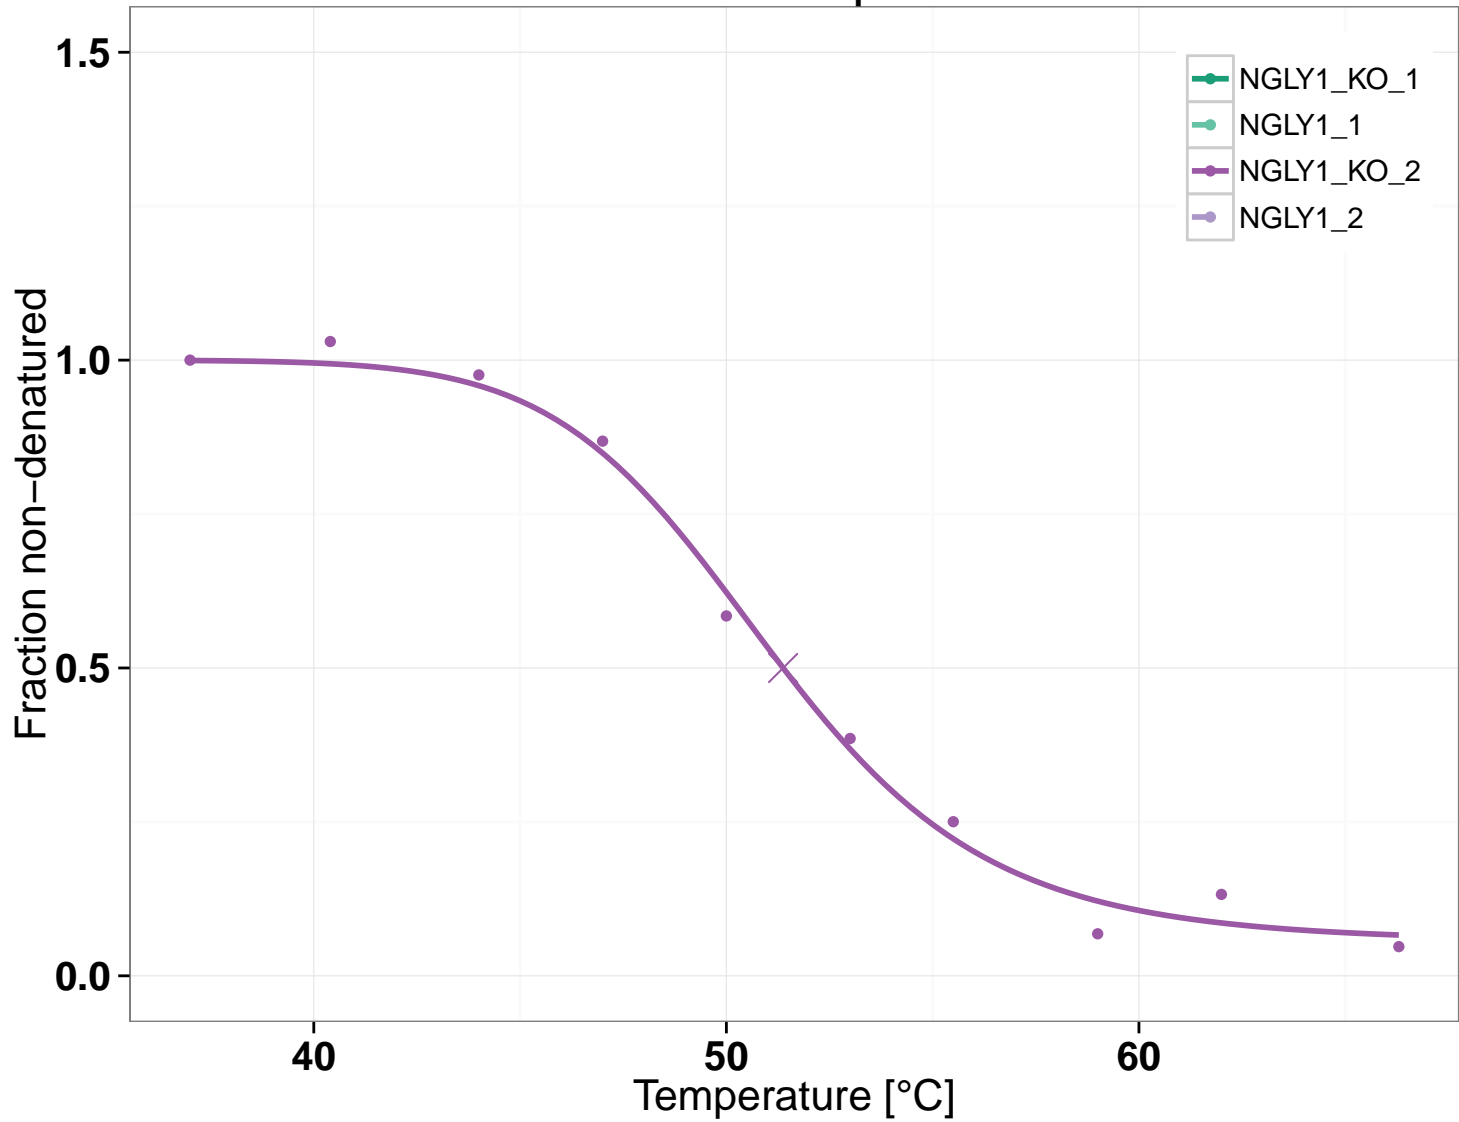

|            | meltPoint | slope | plateau | R2   |
|------------|-----------|-------|---------|------|
| NGLY1_KO_1 | —         | —     | —       | —    |
| NGLY1_1    | —         | —     | —       | —    |
| NGLY1_KO_2 | 51.38     | -0.09 | 0.05    | 0.99 |
| NGLY1_2    | —         | —     | —       | —    |

Supplement: Supplementary file 3743 [file 1]

IPI00910443.1|GLTSCR2

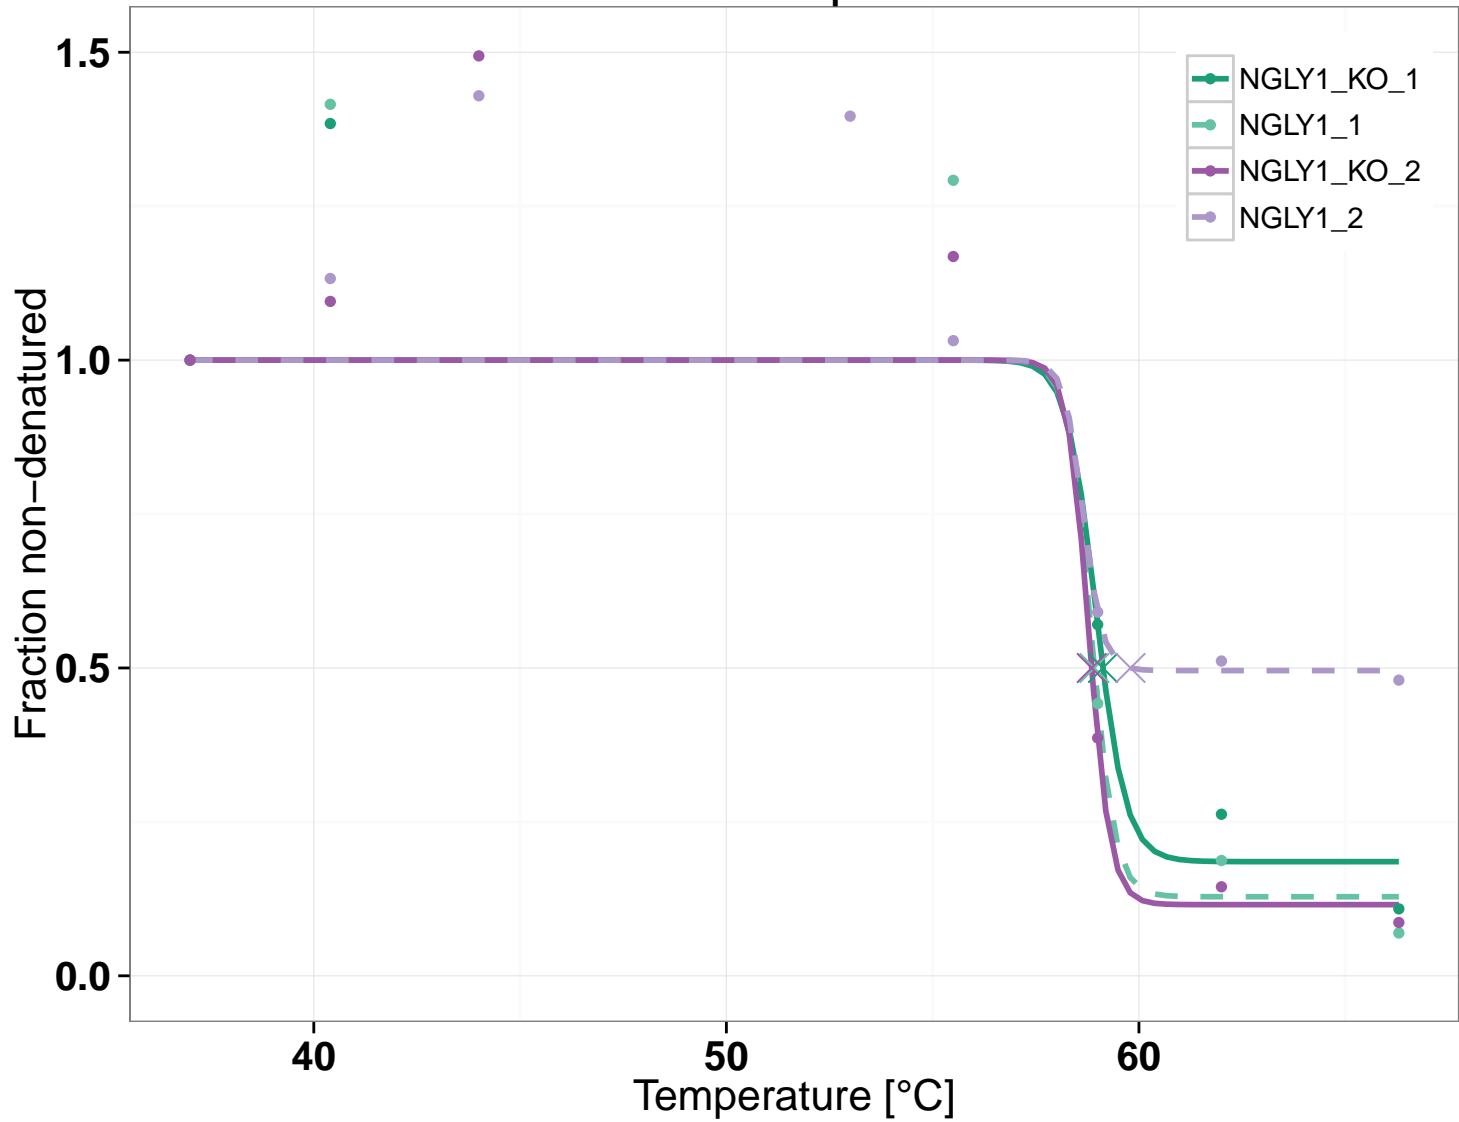

|            | meltPoint | slope | plateau | R2    |
|------------|-----------|-------|---------|-------|
| NGLY1_KO_1 | 59.13     | -0.57 | 0.19    | -0.18 |
| NGLY1_1    | 58.92     | -0.76 | 0.13    | -0.03 |
| NGLY1_KO_2 | 58.86     | -0.85 | 0.12    | 0.14  |
| NGLY1_2    | 59.8      | -0.54 | 0.5     | 0.22  |

Supplement: Supplementary file 3744 [file 1]

IPI00007001.1|MRPL11

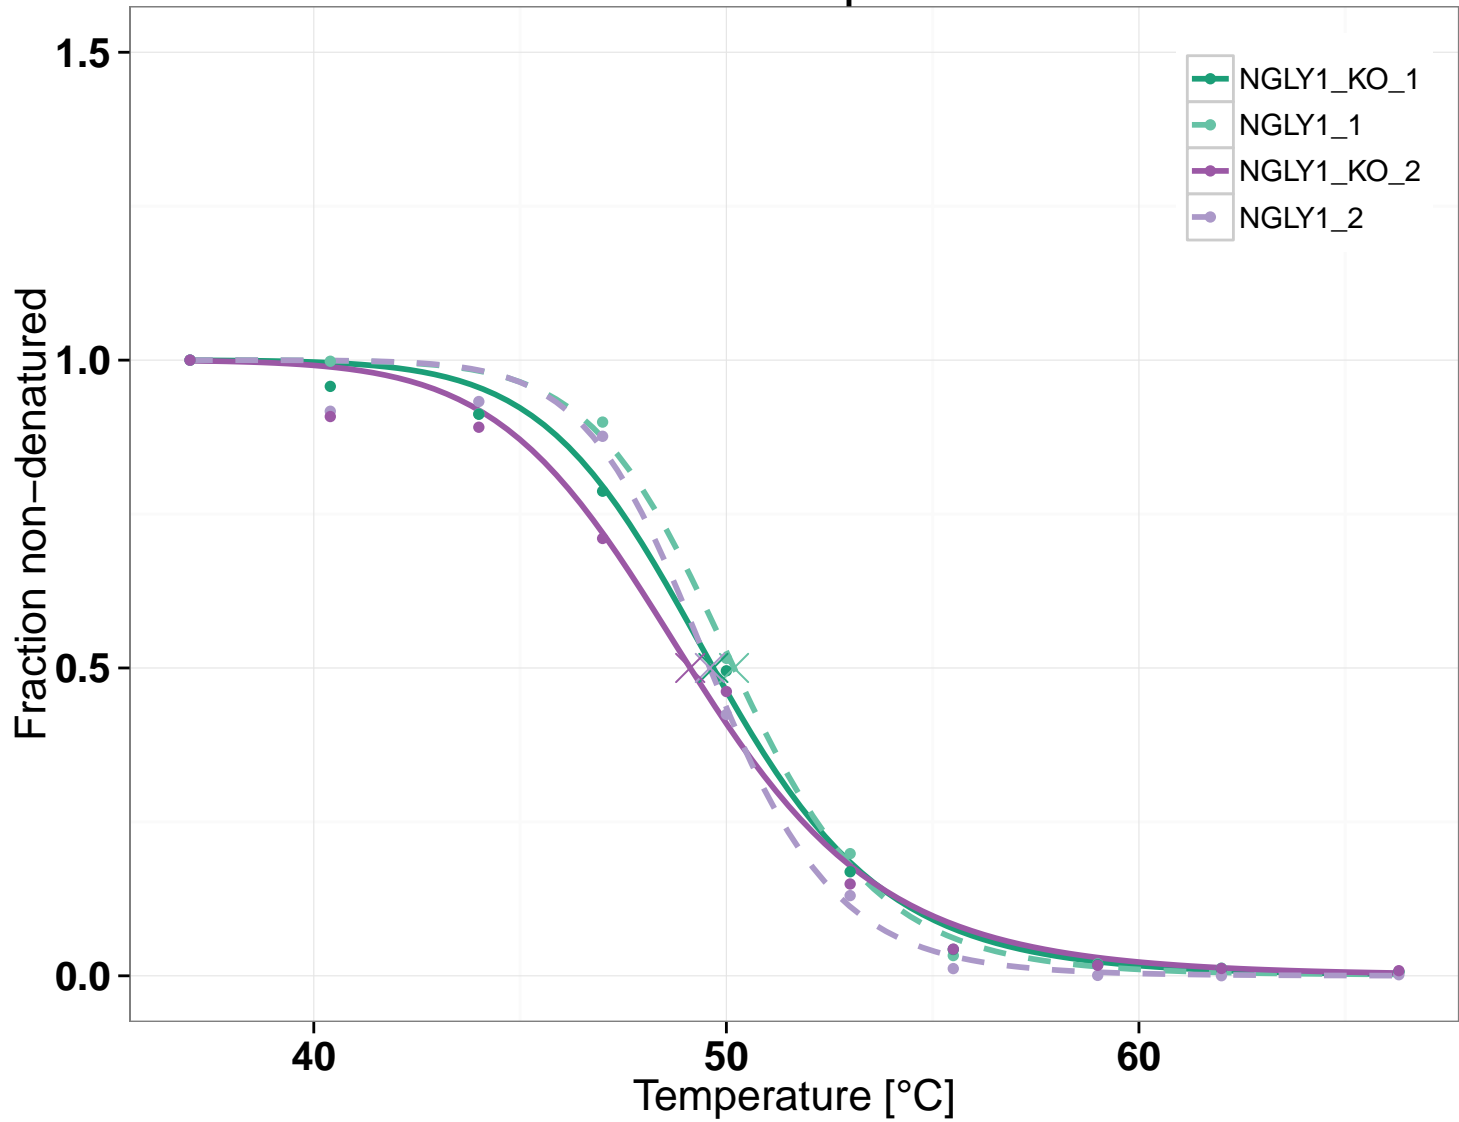

|            | meltPoint | slope | plateau | R2   |
|------------|-----------|-------|---------|------|
| NGLY1_KO_1 | 49.68     | -0.12 | 0       | 1    |
| NGLY1_1    | 50.19     | -0.14 | 0       | 1    |
| NGLY1_KO_2 | 49.12     | -0.11 | 0       | 0.99 |
| NGLY1_2    | 49.6      | -0.16 | 0       | 0.99 |

Supplement: Supplementary file 3745 [file 1]

IPI00002538.1|PDPK1

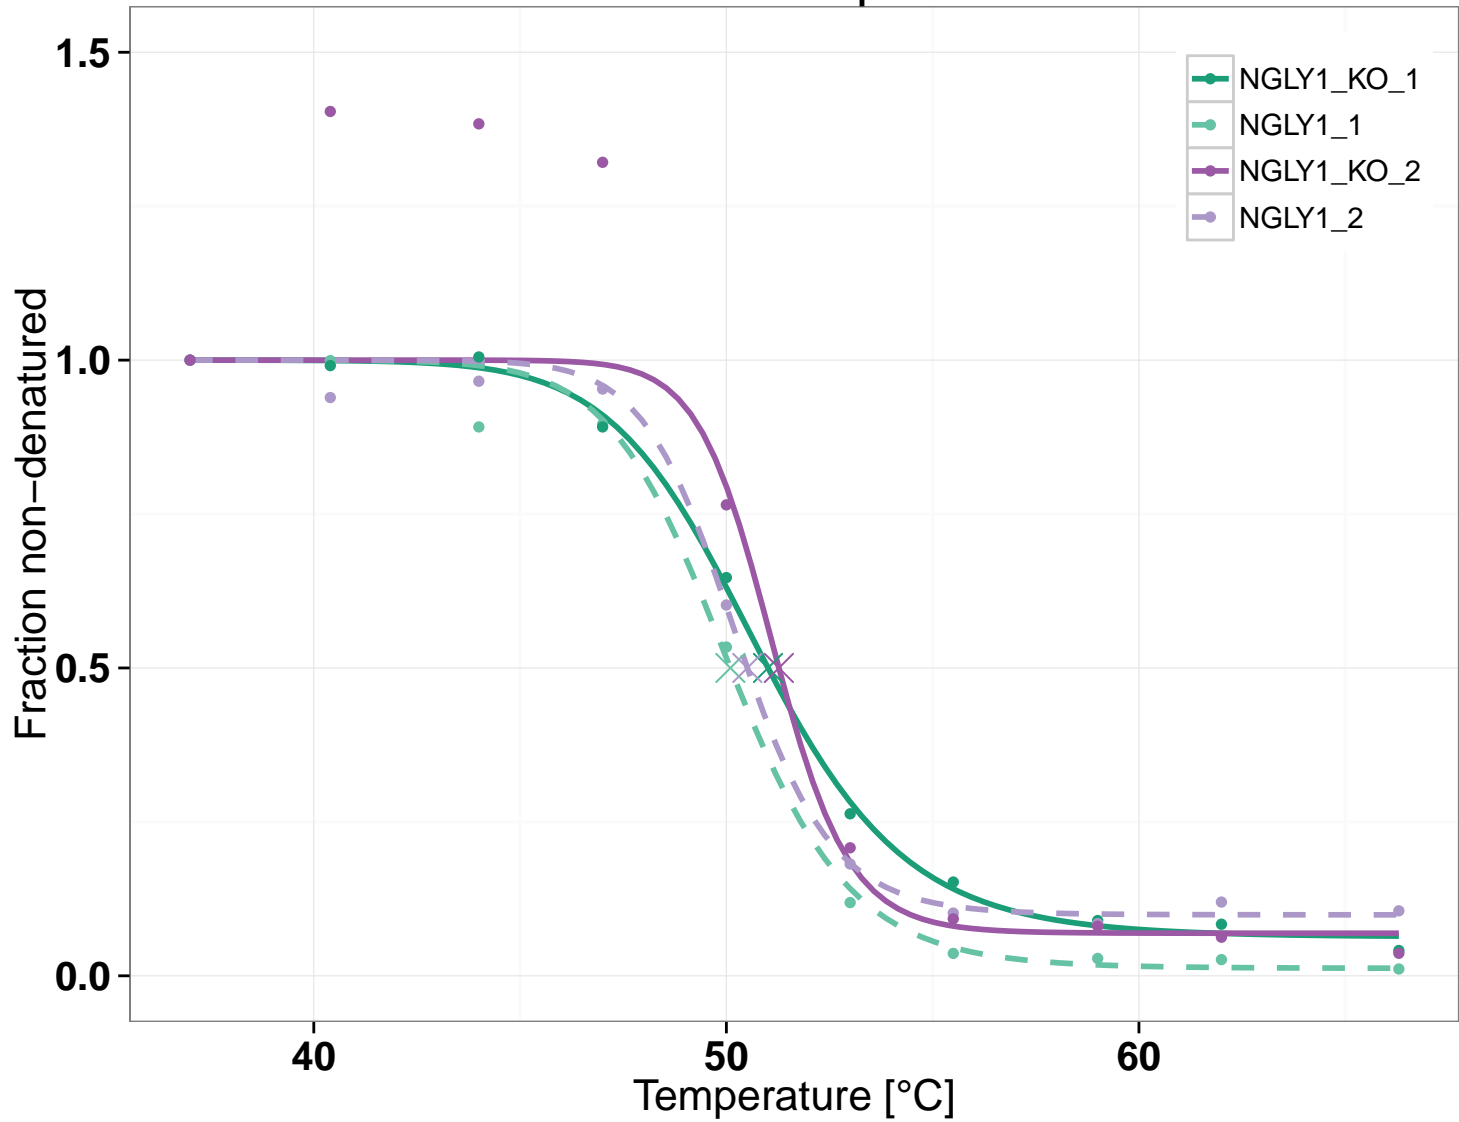

|            | meltPoint | slope | plateau | R2   |
|------------|-----------|-------|---------|------|
| NGLY1_KO_1 | 51.01     | -0.13 | 0.06    | 1    |
| NGLY1_1    | 50.1      | -0.17 | 0.01    | 0.99 |
| NGLY1_KO_2 | 51.27     | -0.25 | 0.07    | 0.87 |
| NGLY1_2    | 50.51     | -0.2  | 0.1     | 1    |

Supplement: Supplementary file 3746 [file 1]

IPI00167267.2|FLJ40473

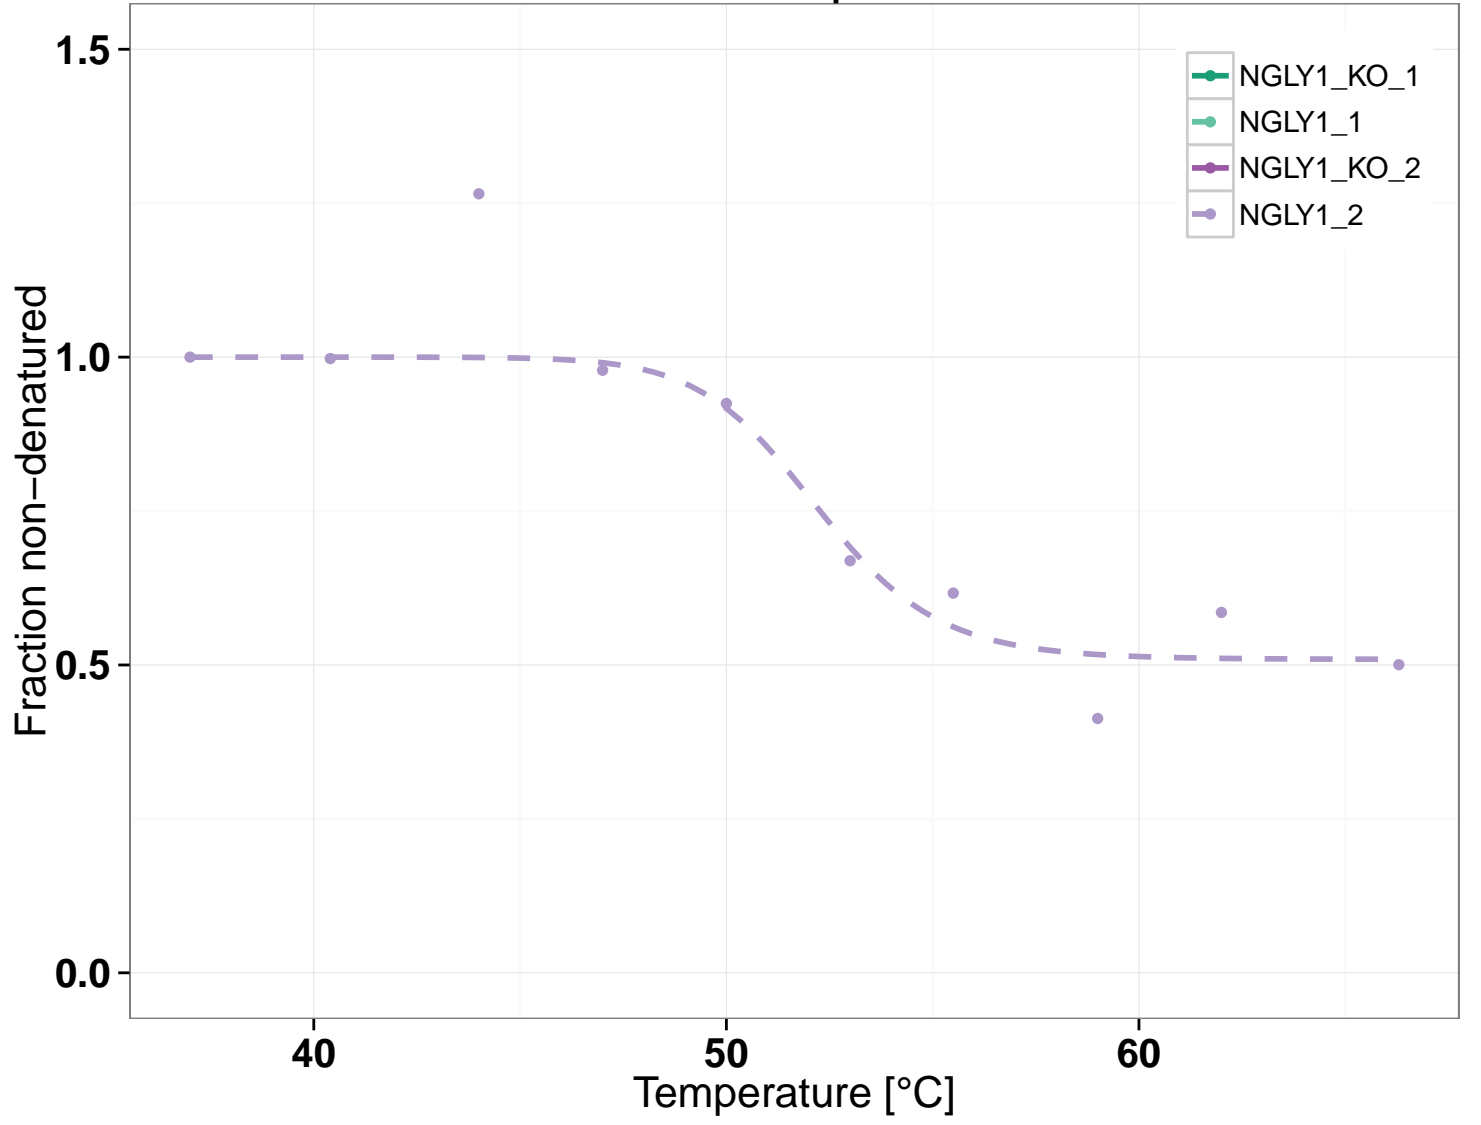

|            | meltPoint | slope  | plateau | R2   |
|------------|-----------|--------|---------|------|
| NGLY1_KO_1 | -         | -      | -       | -    |
| NGLY1_1    | -         | -      | -       | -    |
| NGLY1_KO_2 | -         | -      | -       | -    |
| NGLY1_2    | -         | -0.084 | 0.51    | 0.87 |

Supplement: Supplementary file 3747 [file 1]

# IPI00234857.6|ALG9

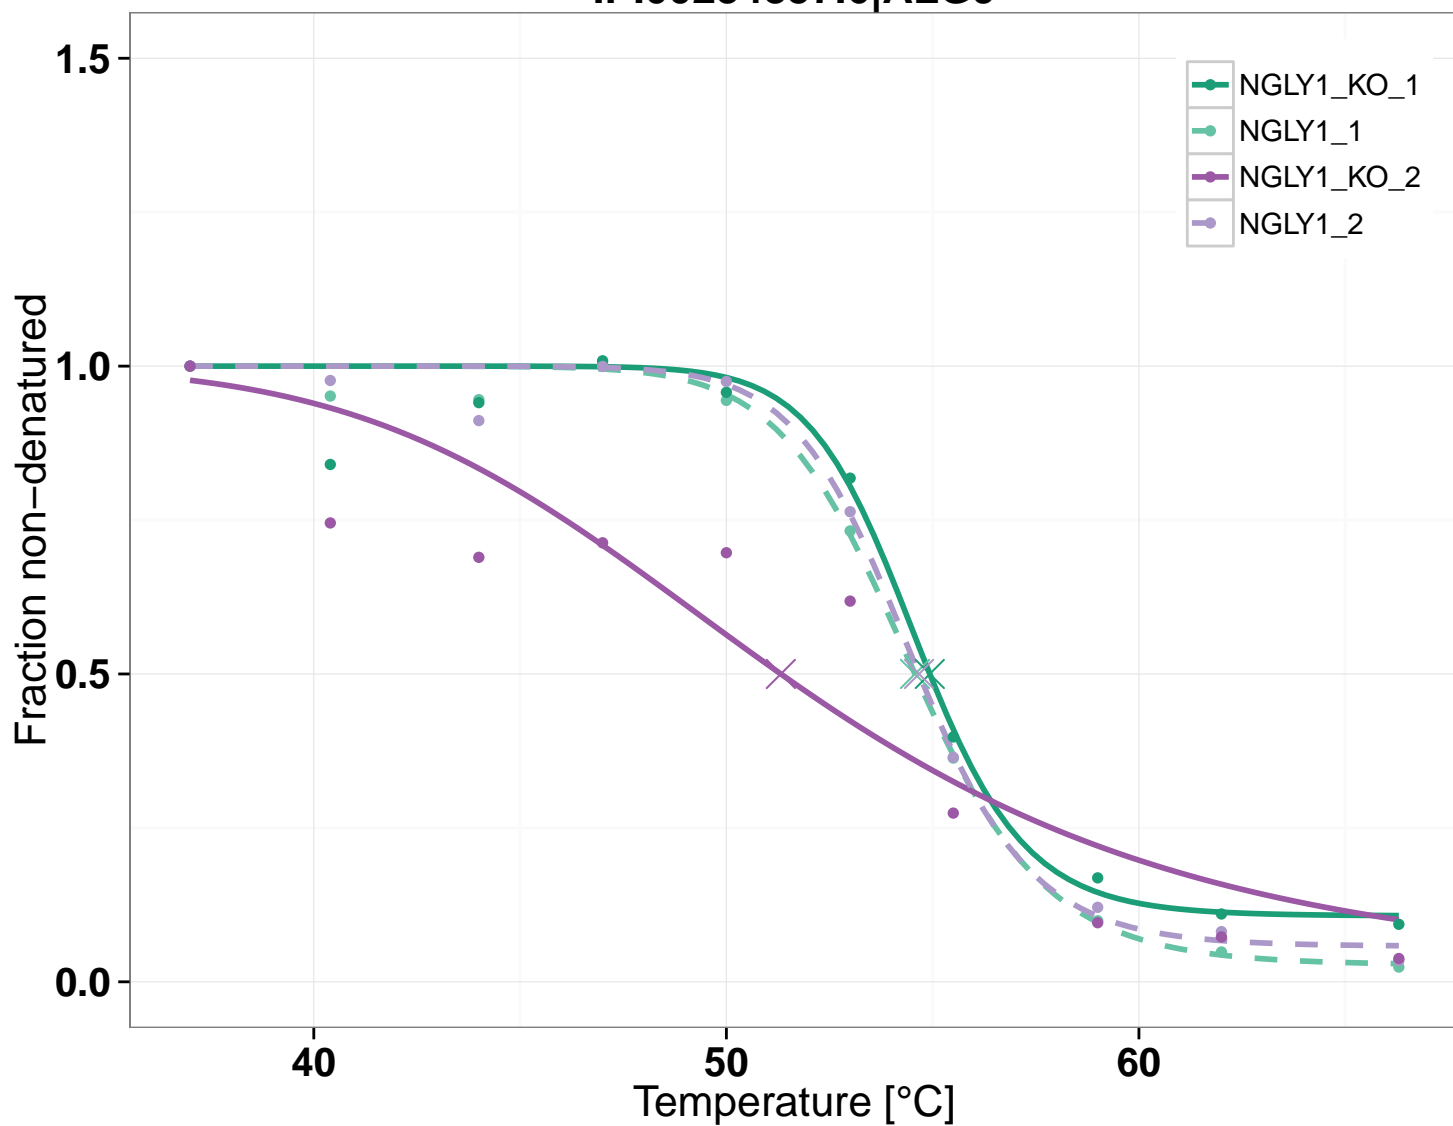

|            | meltPoint | slope  | plateau | R2   |
|------------|-----------|--------|---------|------|
| NGLY1_KO_1 | 54.93     | -0.17  | 0.11    | 0.98 |
| NGLY1_1    | 54.57     | -0.15  | 0.03    | 1    |
| NGLY1_KO_2 | 51.32     | -0.049 | 0       | 0.87 |
| NGLY1_2    | 54.67     | -0.16  | 0.06    | 0.99 |

Supplement: Supplementary file 3748 [file 1]

IPI00005711.4|HDAC6

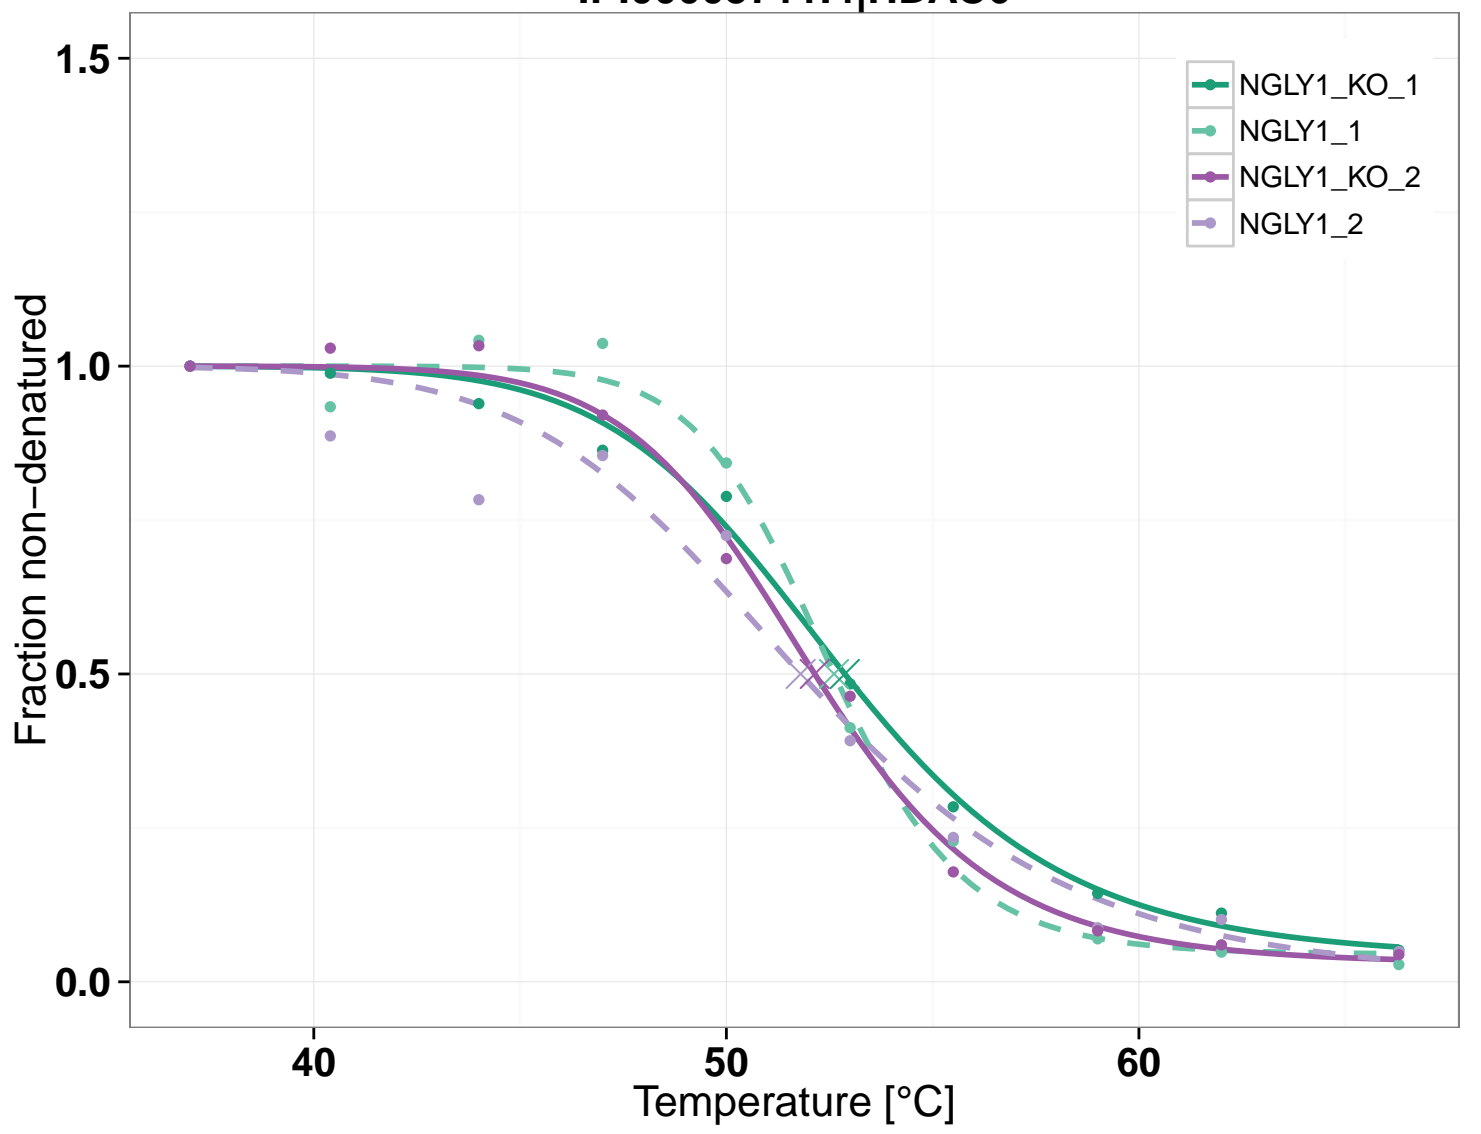

|            | meltPoint | slope  | plateau | R2   |
|------------|-----------|--------|---------|------|
| NGLY1_KO_1 | 52.87     | -0.086 | 0.04    | 1    |
| NGLY1_1    | 52.61     | -0.15  | 0.04    | 0.99 |
| NGLY1_KO_2 | 52.14     | -0.11  | 0.03    | 0.99 |
| NGLY1_2    | 51.8      | -0.075 | 0       | 0.96 |

Supplement: Supplementary file 3749 [file 1]

IPI00747877.3|ZNF768

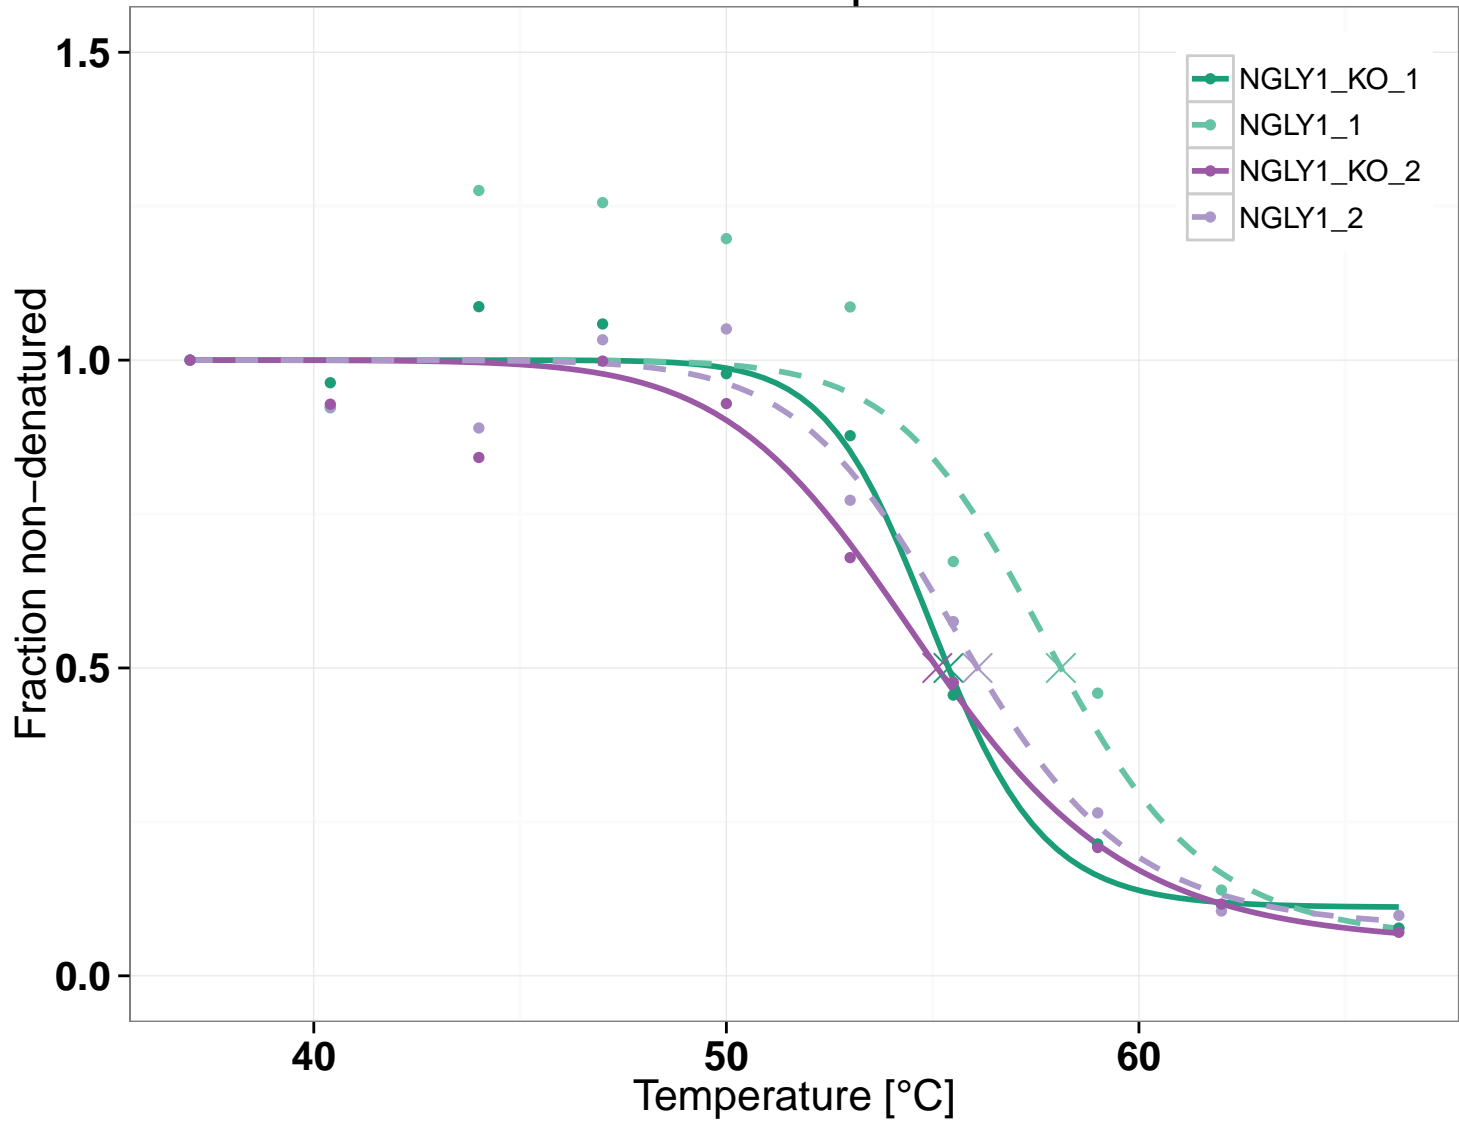

|            | meltPoint | slope  | plateau | R2   |
|------------|-----------|--------|---------|------|
| NGLY1_KO_1 | 55.38     | -0.17  | 0.11    | 0.99 |
| NGLY1_1    | 58.11     | -0.12  | 0.06    | 0.87 |
| NGLY1_KO_2 | 55.11     | -0.097 | 0.05    | 0.98 |
| NGLY1_2    | 56.09     | -0.11  | 0.08    | 0.98 |

Supplement: Supplementary file 3750 [file 1]

# IPI00465179.3|PFKM

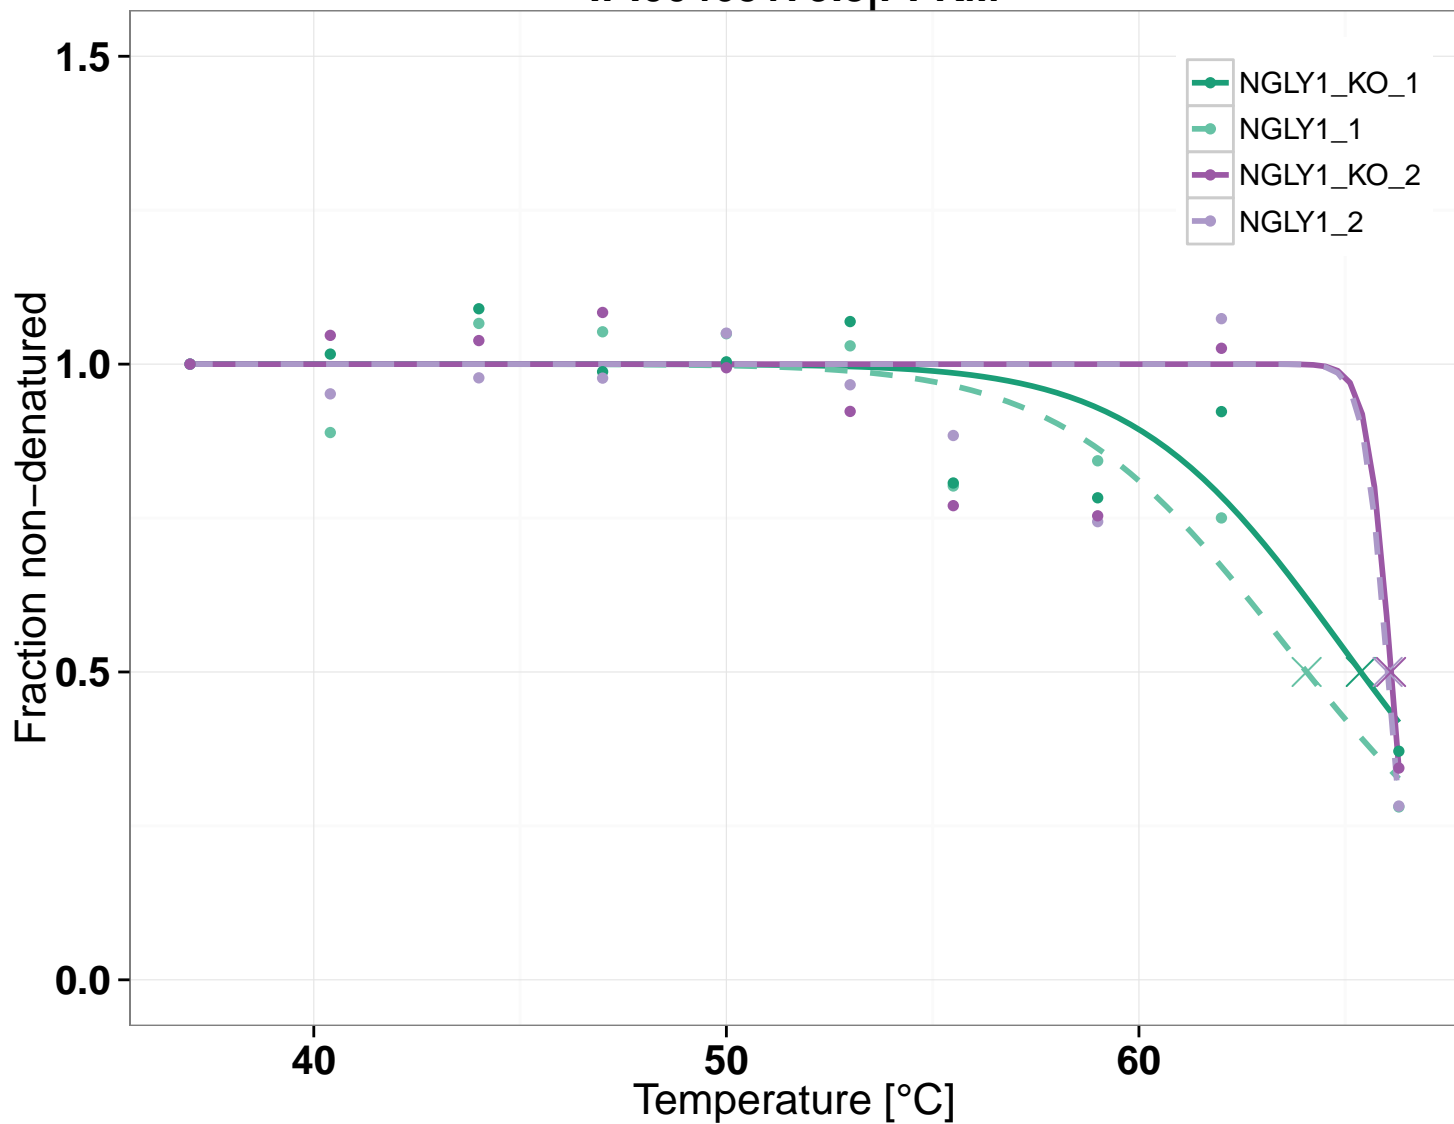

|            | meltPoint | slope  | plateau | R2   |
|------------|-----------|--------|---------|------|
| NGLY1_KO_1 | 65.38     | -0.092 | 0       | 0.78 |
| NGLY1_1    | 64.06     | -0.084 | 0       | 0.88 |
| NGLY1_KO_2 | 66.11     | -0.86  | 0       | 0.71 |
| NGLY1_2    | 66.03     | -0.86  | 0       | 0.81 |

Supplement: Supplementary file 3751 [file 1]

IPI00046057.1|STXBP1

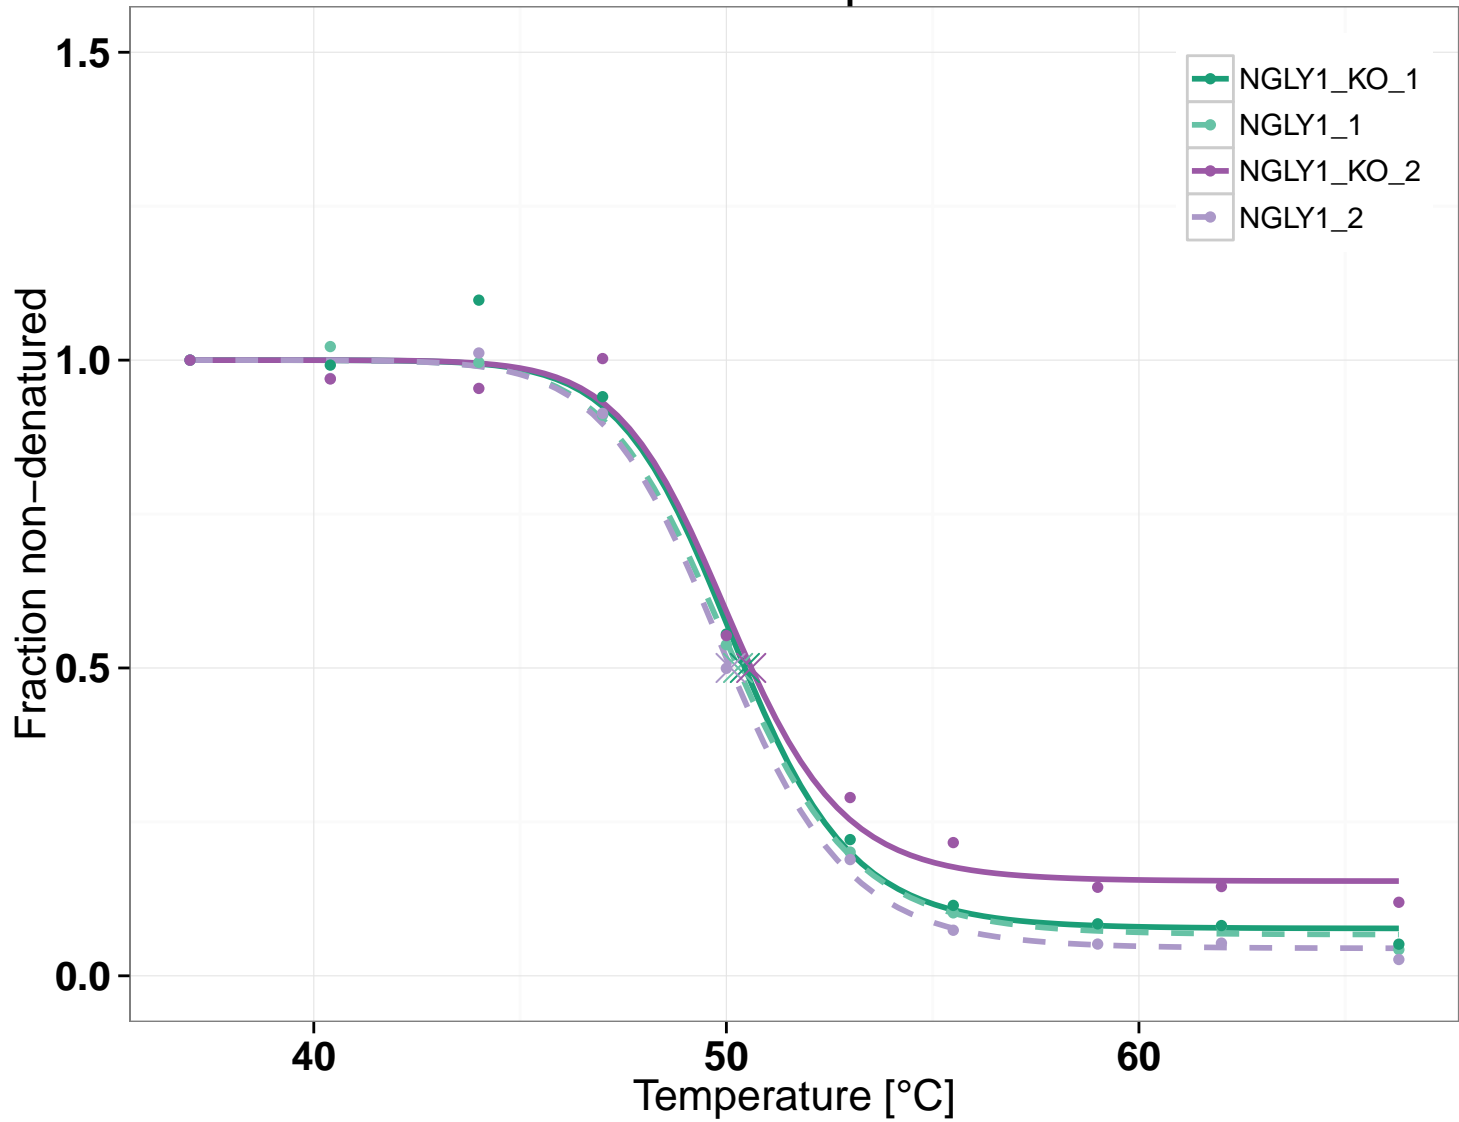

|            | meltPoint | slope | plateau | R2   |
|------------|-----------|-------|---------|------|
| NGLY1_KO_1 | 50.45     | -0.16 | 0.08    | 0.99 |
| NGLY1_1    | 50.28     | -0.15 | 0.07    | 1    |
| NGLY1_KO_2 | 50.6      | -0.16 | 0.15    | 0.99 |
| NGLY1_2    | 50.1      | -0.16 | 0.04    | 1    |

Supplement: Supplementary file 3752 [file 1]

# IPI00056324.1|HPS3

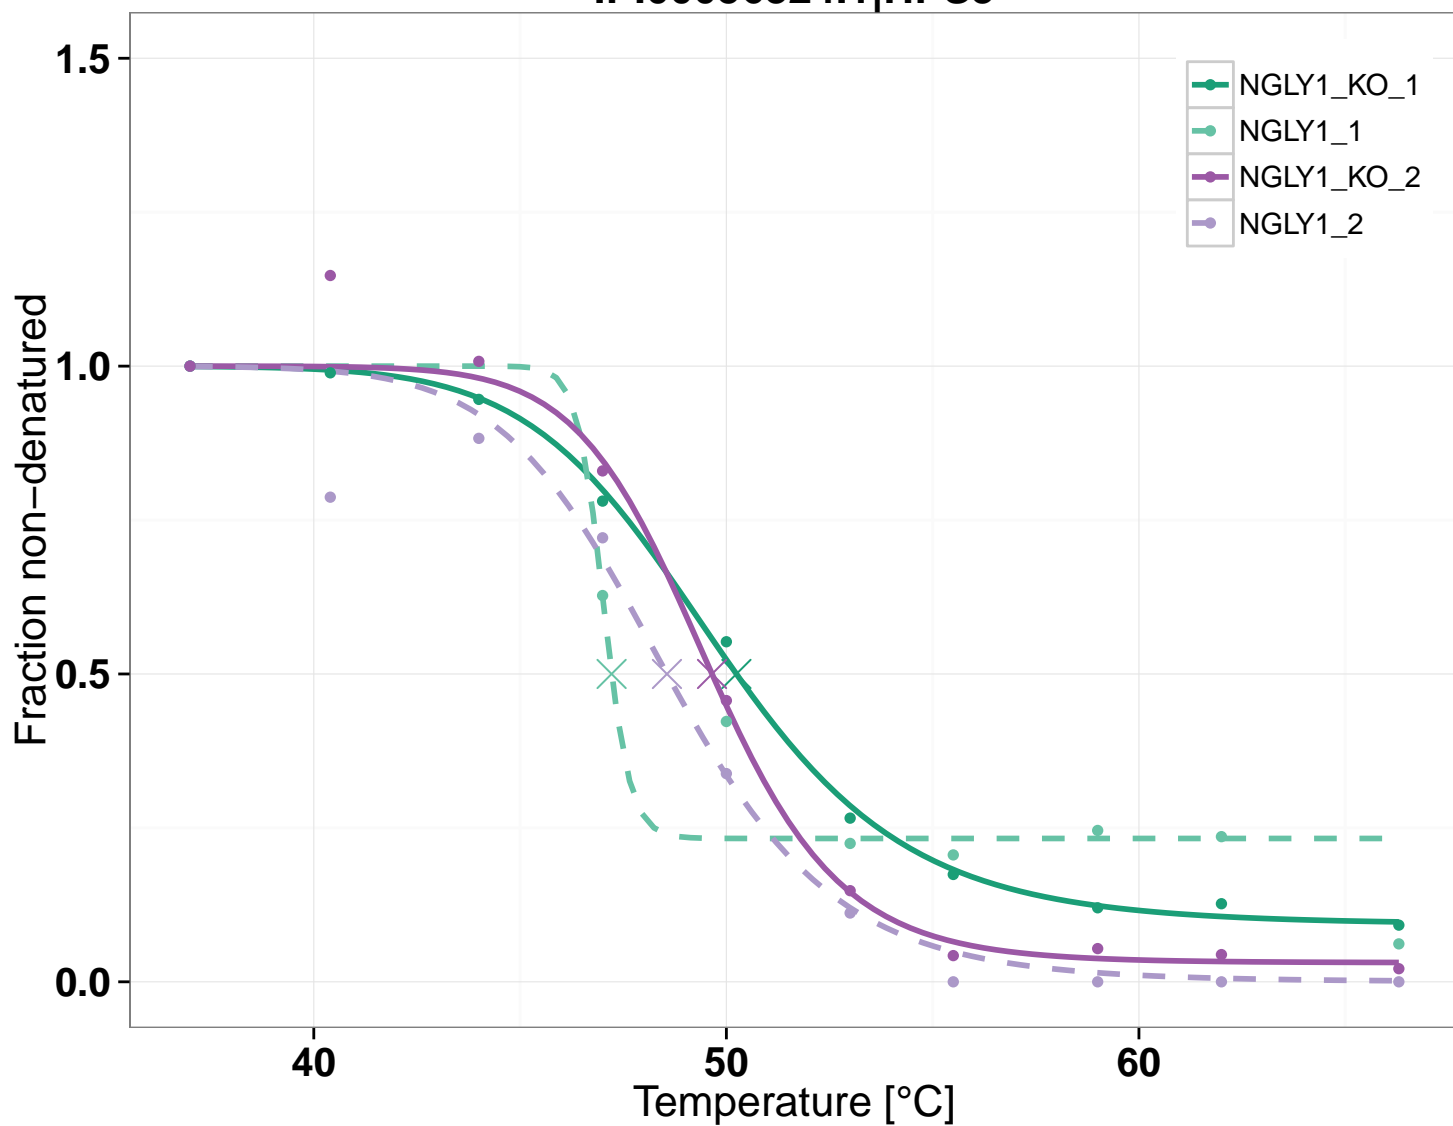

|            | meltPoint | slope  | plateau | R2   |
|------------|-----------|--------|---------|------|
| NGLY1_KO_1 | 50.24     | -0.098 | 0.09    | 1    |
| NGLY1_1    | 47.22     | -0.6   | 0.23    | 0.65 |
| NGLY1_KO_2 | 49.65     | -0.15  | 0.03    | 0.99 |
| NGLY1_2    | 48.56     | -0.12  | 0       | 0.97 |

Supplement: Supplementary file 3753 [file 1]

IPI00644950.1|KIAA1328

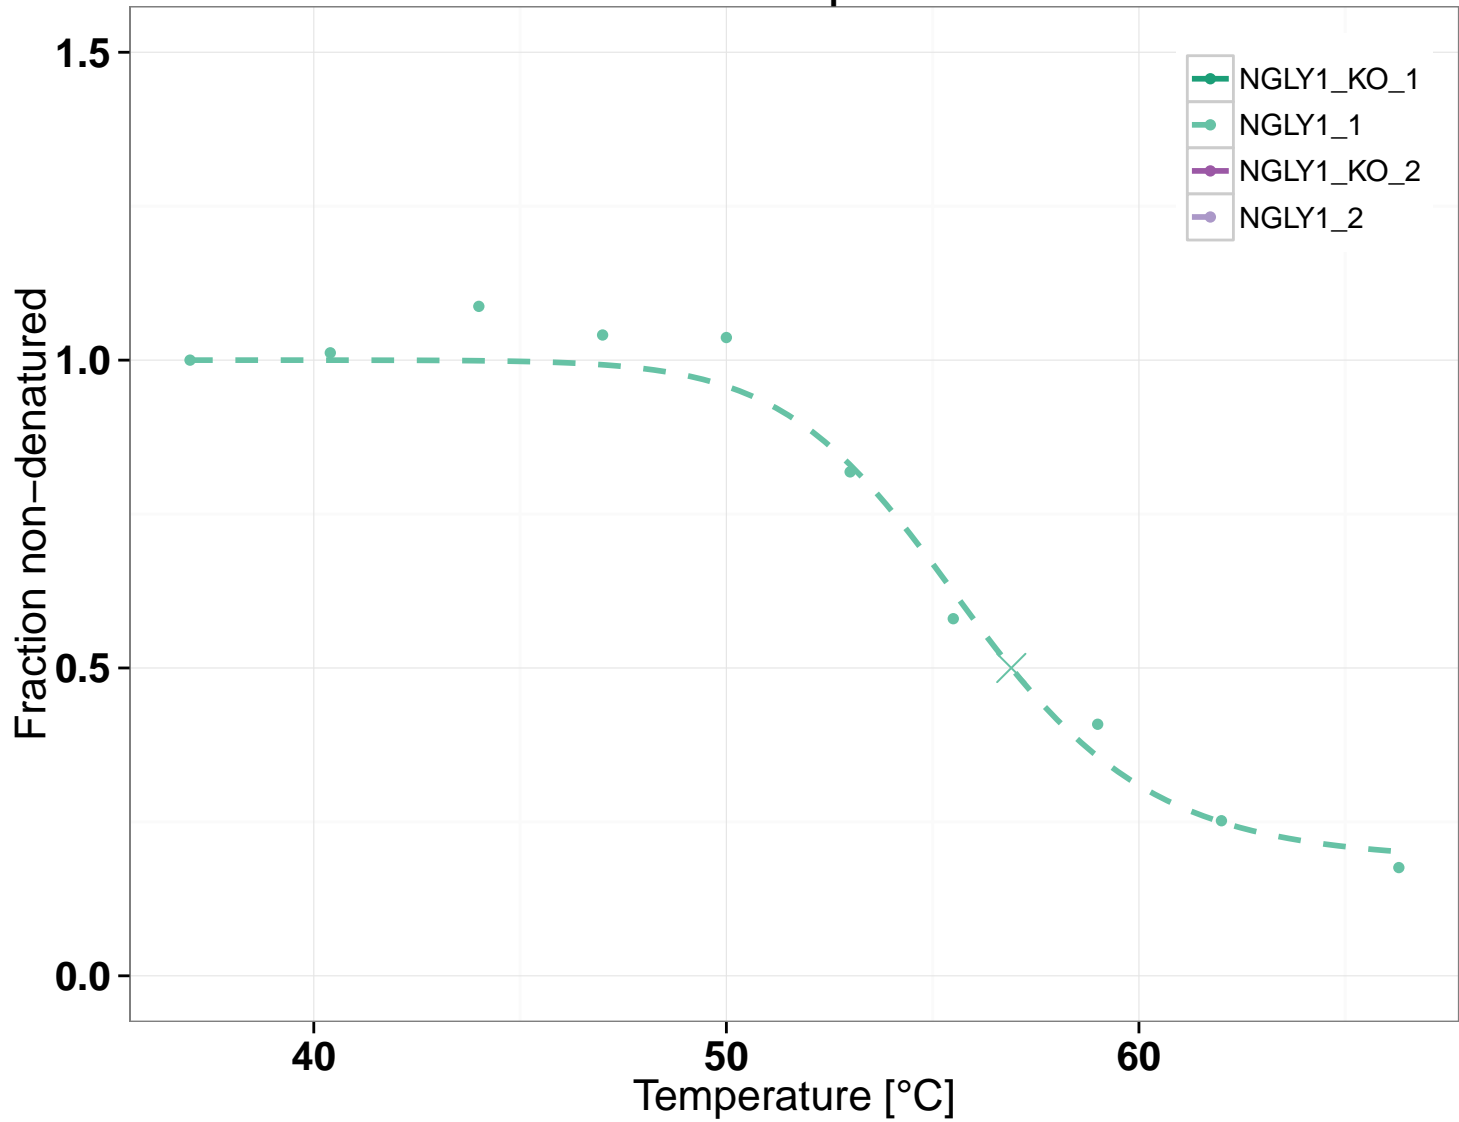

|            | meltPoint | slope  | plateau | R2   |
|------------|-----------|--------|---------|------|
| NGLY1_KO_1 | -         | -      | -       | -    |
| NGLY1_1    | 56.91     | -0.091 | 0.19    | 0.98 |
| NGLY1_KO_2 | -         | -      | -       | -    |
| NGLY1_2    | -         | -      | -       | -    |

Supplement: Supplementary file 3754 [file 1]

IPI00061777.4|CCDC97

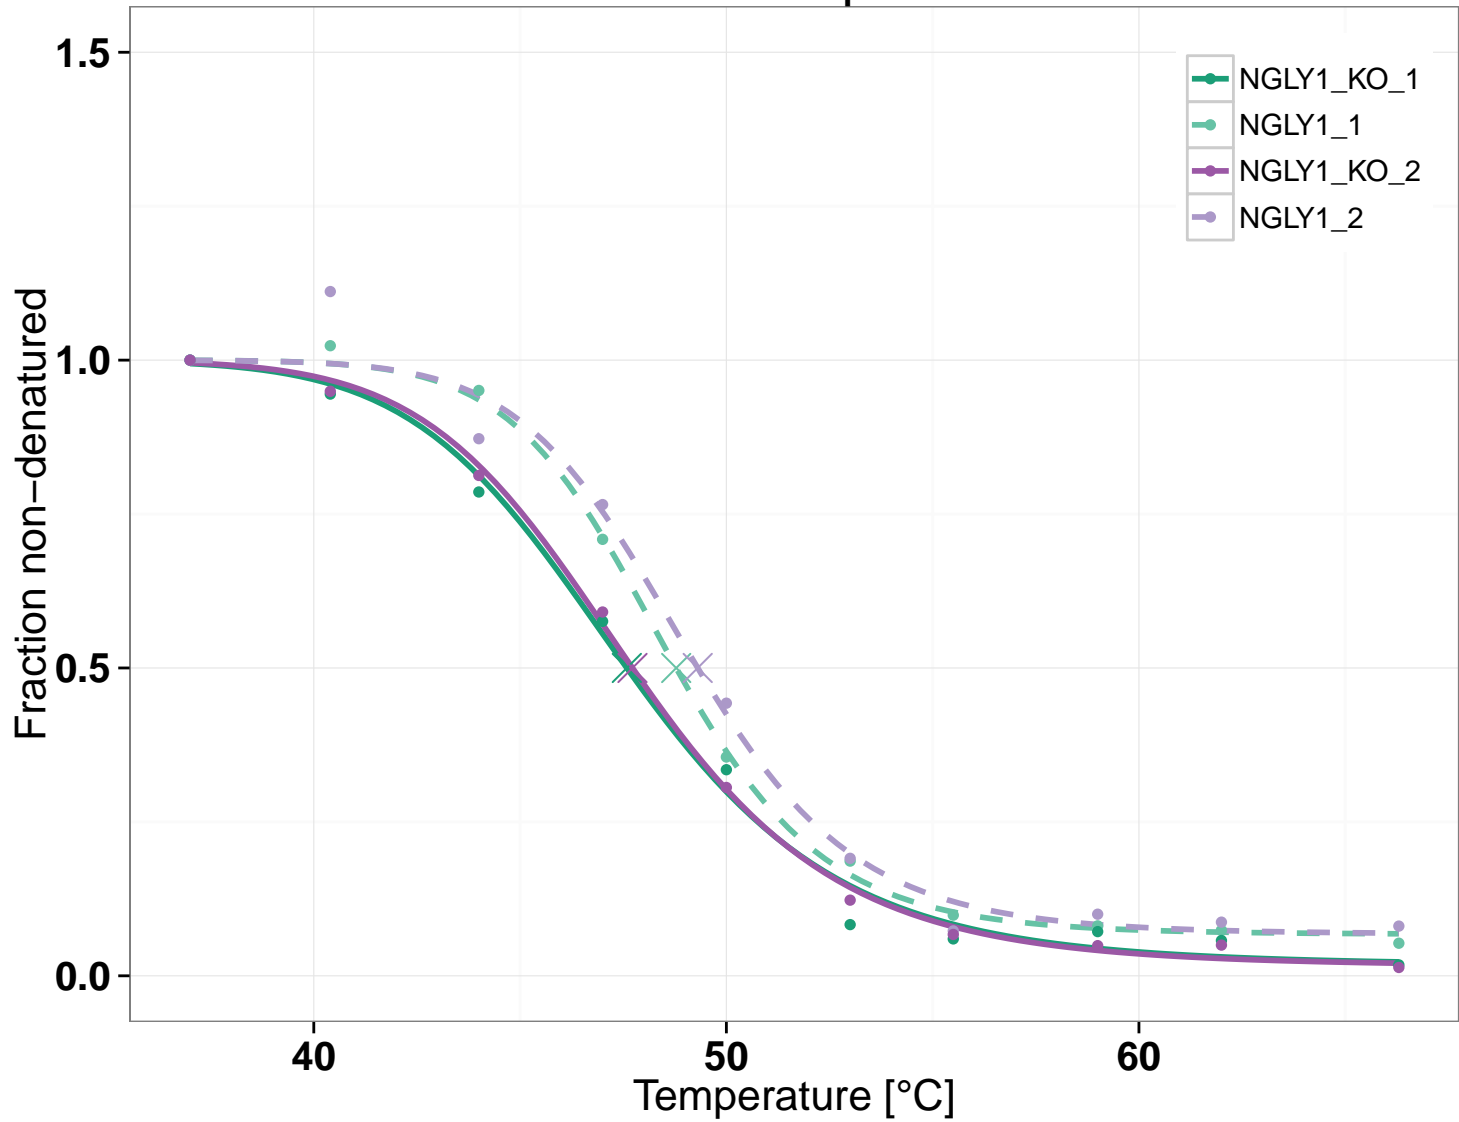

|            | meltPoint | slope  | plateau | R2   |
|------------|-----------|--------|---------|------|
| NGLY1_KO_1 | 47.59     | -0.095 | 0.02    | 0.99 |
| NGLY1_1    | 48.78     | -0.12  | 0.07    | 1    |
| NGLY1_KO_2 | 47.72     | -0.098 | 0.02    | 1    |
| NGLY1_2    | 49.31     | -0.11  | 0.07    | 0.99 |

Supplement: Supplementary file 3755 [file 1]

# IPI00029046.1|MLEC

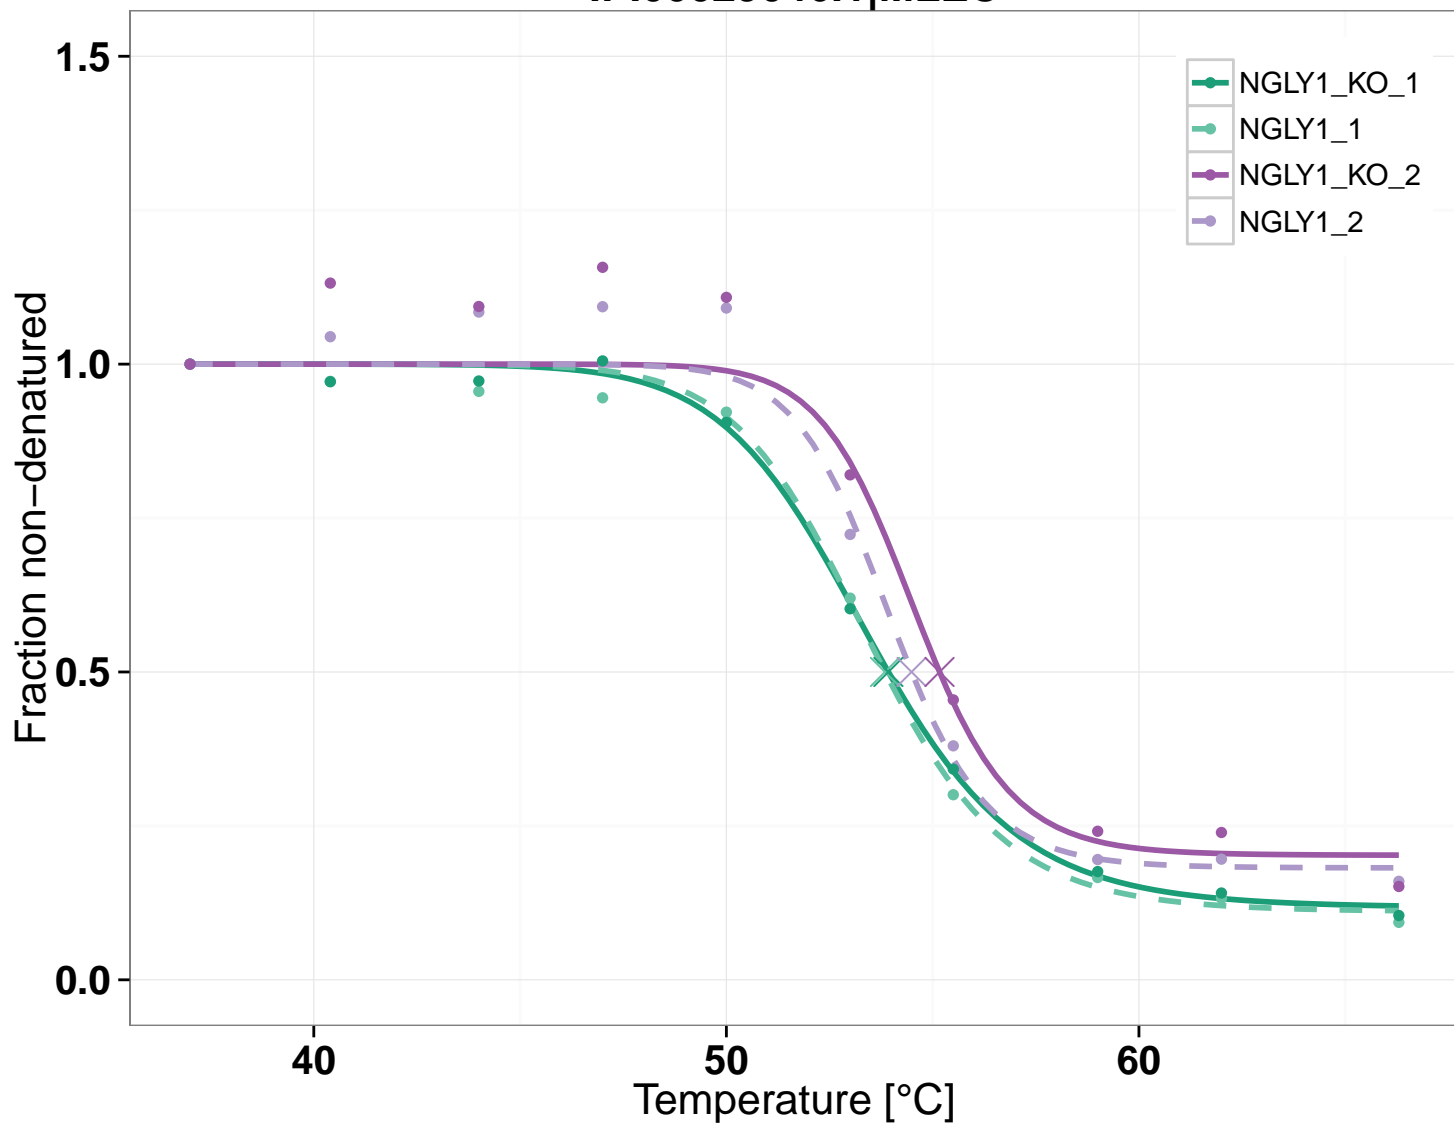

|            | meltPoint | slope | plateau | R2   |
|------------|-----------|-------|---------|------|
| NGLY1_KO_1 | 53.93     | -0.12 | 0.12    | 1    |
| NGLY1_1    | 53.84     | -0.14 | 0.11    | 1    |
| NGLY1_KO_2 | 55.17     | -0.17 | 0.2     | 0.96 |
| NGLY1_2    | 54.49     | -0.18 | 0.18    | 0.98 |

Supplement: Supplementary file 3756 [file 1]

IPI00220044.3|PHTF1

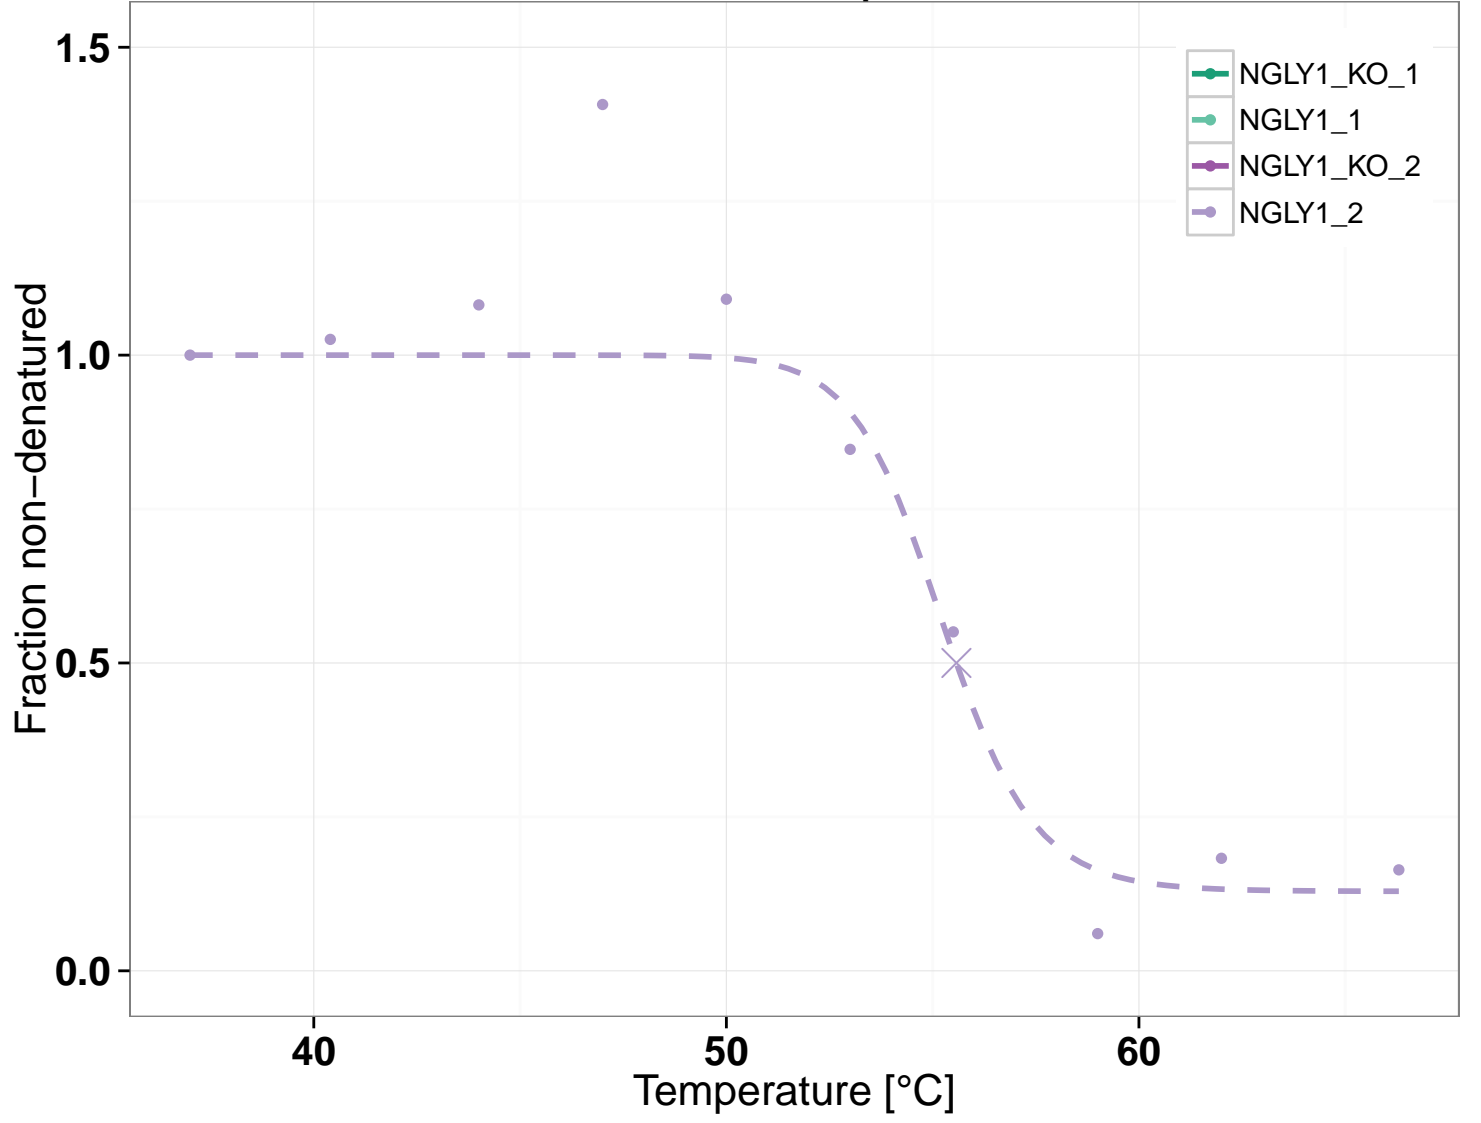

|            | meltPoint | slope | plateau | R2  |
|------------|-----------|-------|---------|-----|
| NGLY1_KO_1 | -         | -     | -       | -   |
| NGLY1_1    | -         | -     | -       | -   |
| NGLY1_KO_2 | -         | -     | -       | -   |
| NGLY1_2    | 55.58     | -0.2  | 0.13    | 0.9 |

Supplement: Supplementary file 3757 [file 1]

IPI00021405.3|LMNA

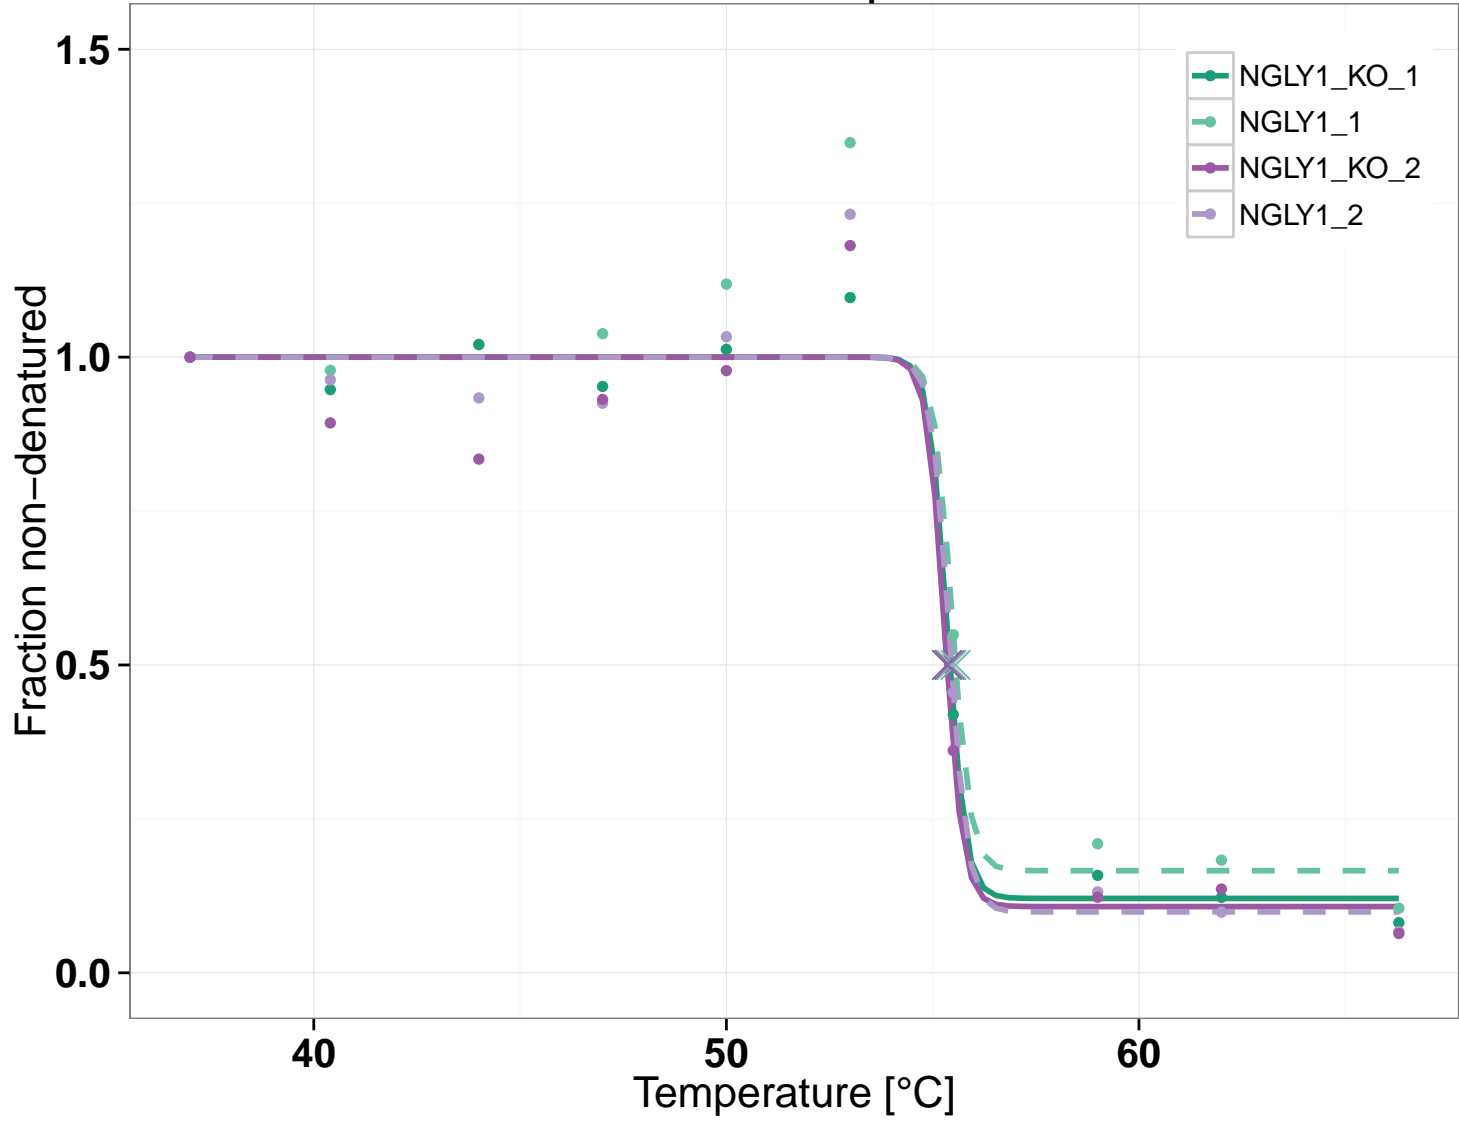

|            | meltPoint | slope | plateau | R2   |
|------------|-----------|-------|---------|------|
| NGLY1_KO_1 | 55.41     | -0.99 | 0.12    | 0.99 |
| NGLY1_1    | 55.55     | -0.94 | 0.17    | 0.92 |
| NGLY1_KO_2 | 55.35     | -1    | 0.11    | 0.95 |
| NGLY1_2    | 55.45     | -1    | 0.1     | 0.96 |

Supplement: Supplementary file 3758 [file 1]

IPI00033419.2|FEM1B

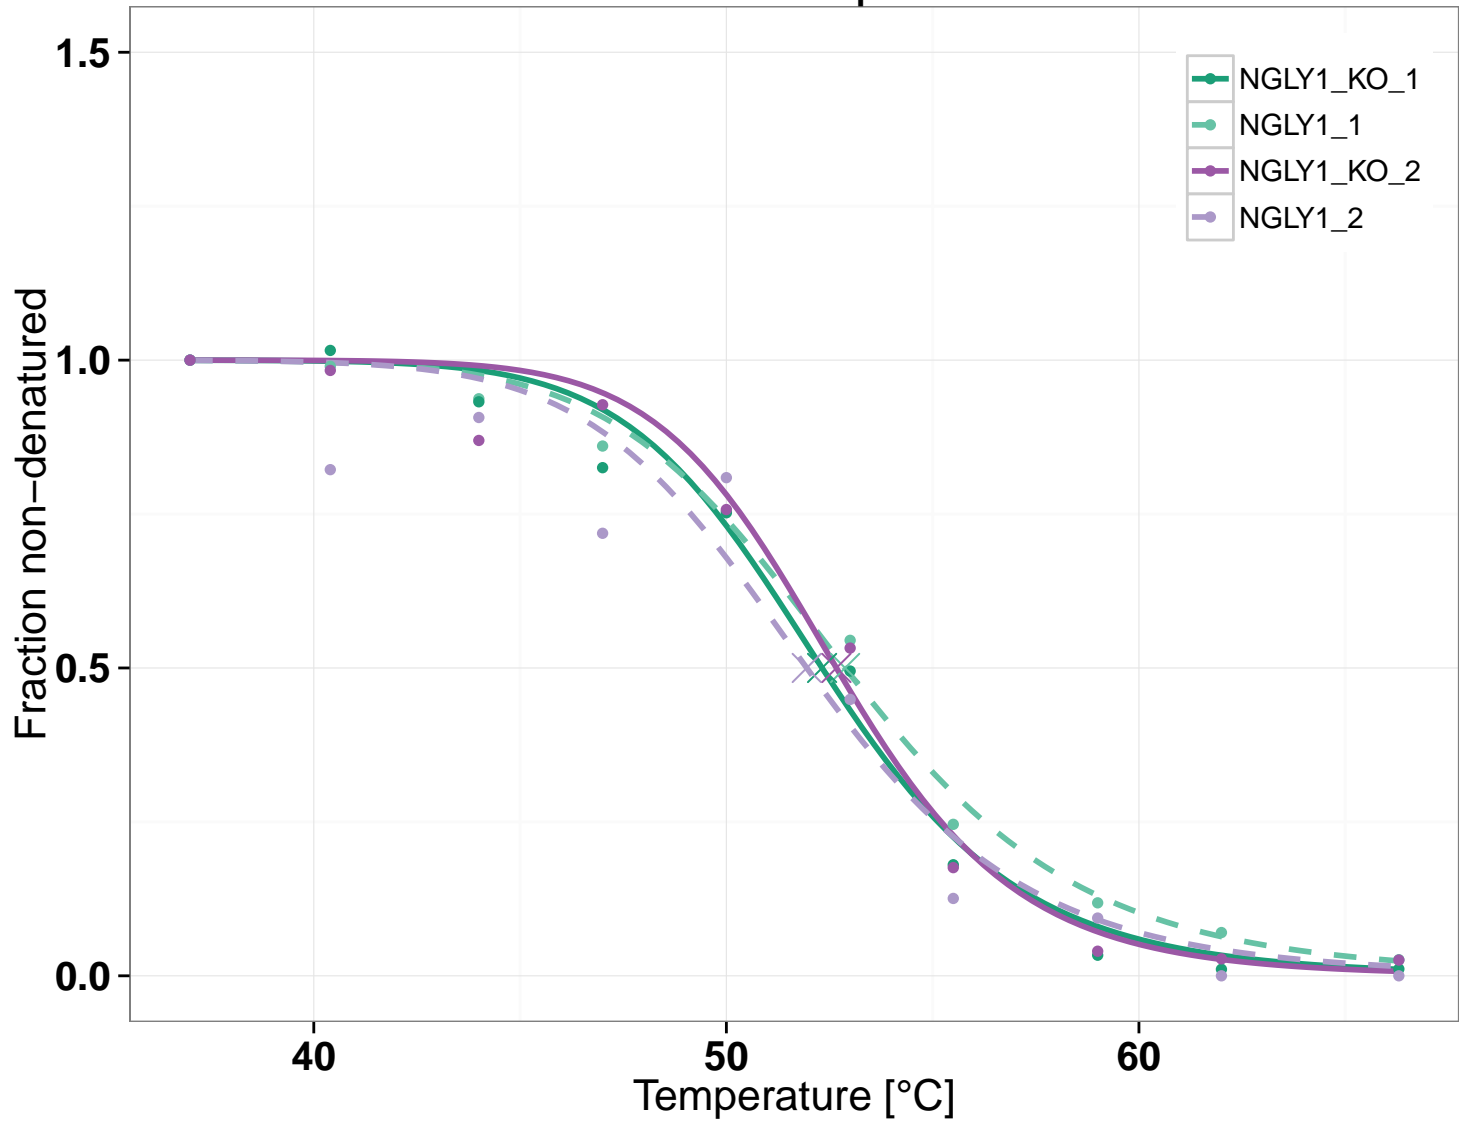

|            | meltPoint | slope  | plateau | R2   |
|------------|-----------|--------|---------|------|
| NGLY1_KO_1 | 52.32     | -0.1   | 0       | 0.99 |
| NGLY1_1    | 52.88     | -0.087 | 0       | 0.99 |
| NGLY1_KO_2 | 52.67     | -0.11  | 0       | 0.98 |
| NGLY1_2    | 51.95     | -0.094 | 0       | 0.94 |

Supplement: Supplementary file 3759 [file 1]

IPI00743594.1|ANLN

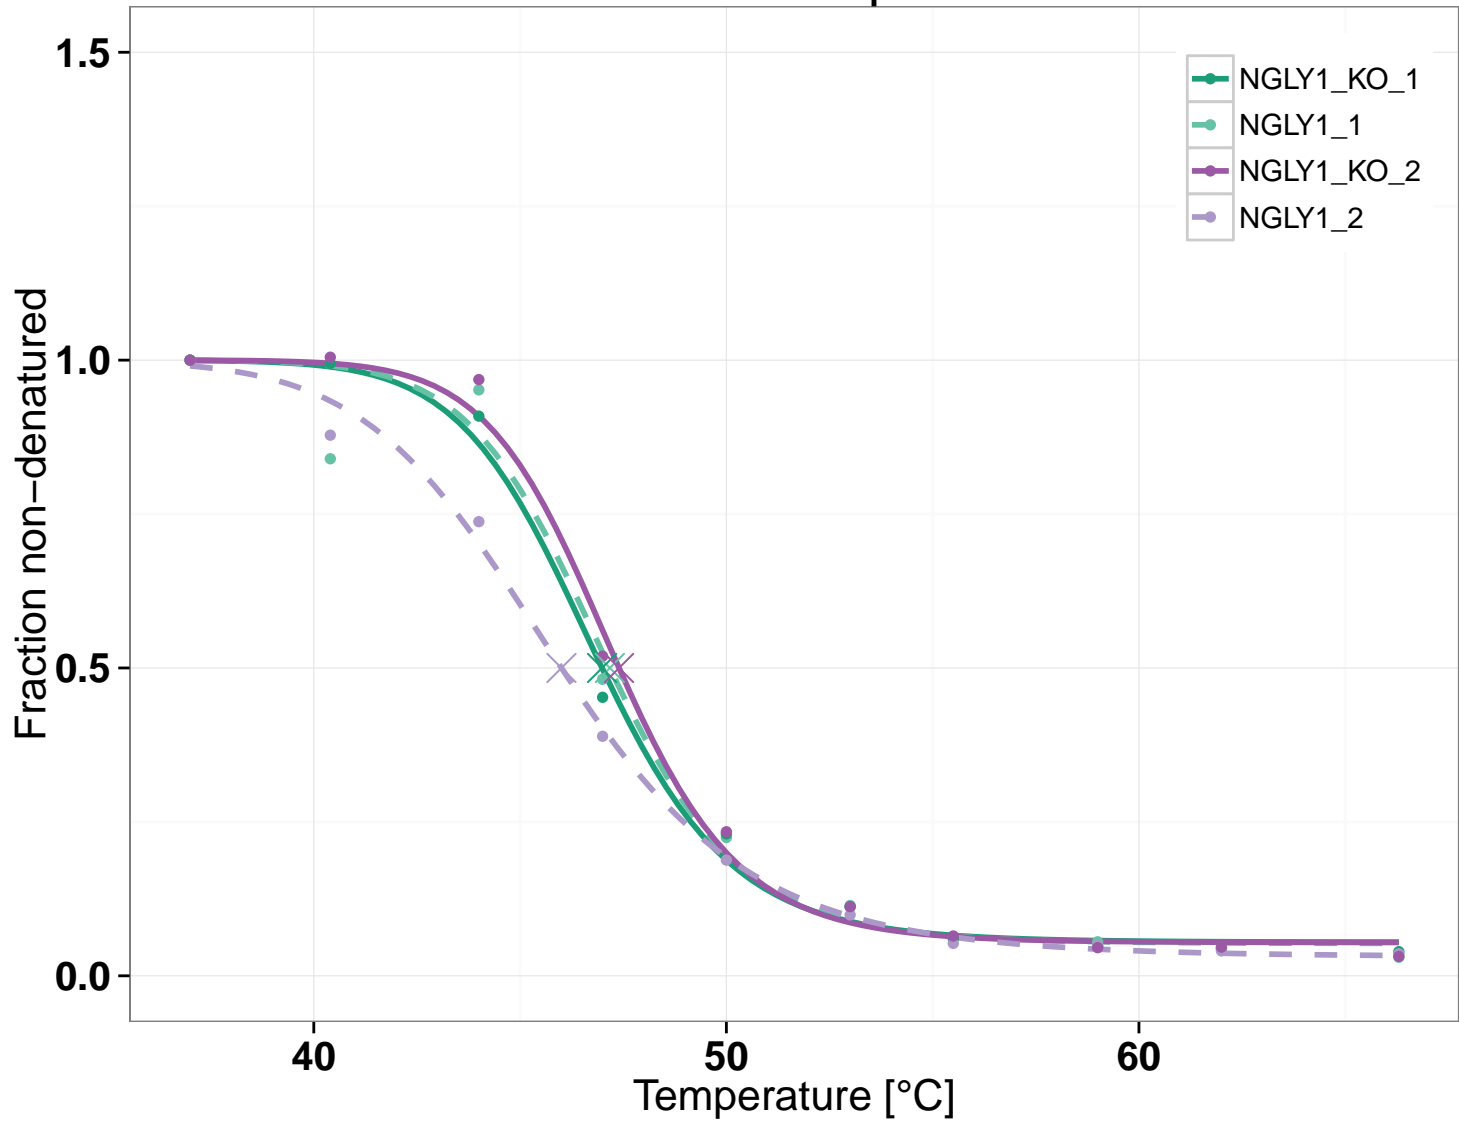

|            | meltPoint | slope | plateau | R2   |
|------------|-----------|-------|---------|------|
| NGLY1_KO_1 | 46.99     | -0.14 | 0.05    | 1    |
| NGLY1_1    | 47.18     | -0.14 | 0.05    | 0.98 |
| NGLY1_KO_2 | 47.4      | -0.15 | 0.05    | 1    |
| NGLY1_2    | 46        | -0.1  | 0.03    | 1    |

Supplement: Supplementary file 3760 [file 1]

IPI00795277.1|PRR13

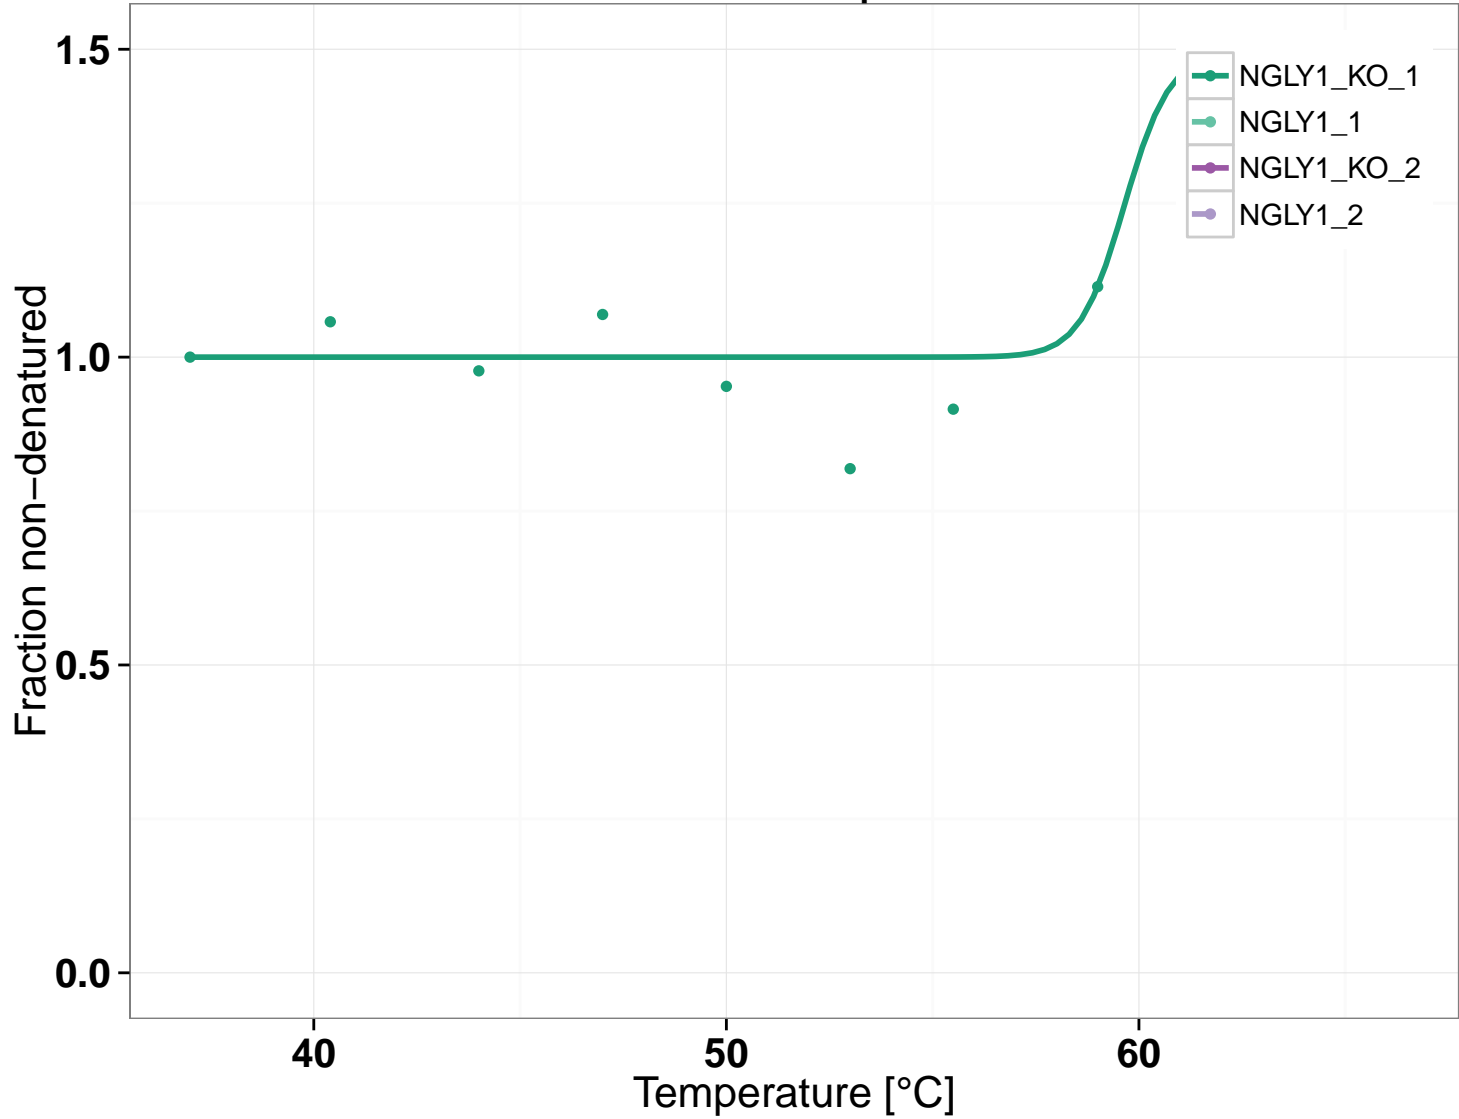

|            | meltPoint | slope | plateau | R2   |
|------------|-----------|-------|---------|------|
| NGLY1_KO_1 | —         | 0.23  | 1.5     | 0.61 |
| NGLY1_1    | —         | —     | —       | —    |
| NGLY1_KO_2 | —         | —     | —       | —    |
| NGLY1_2    | —         | —     | —       | —    |

Supplement: Supplementary file 3761 [file 1]

IPI00018914.2|PTPN14

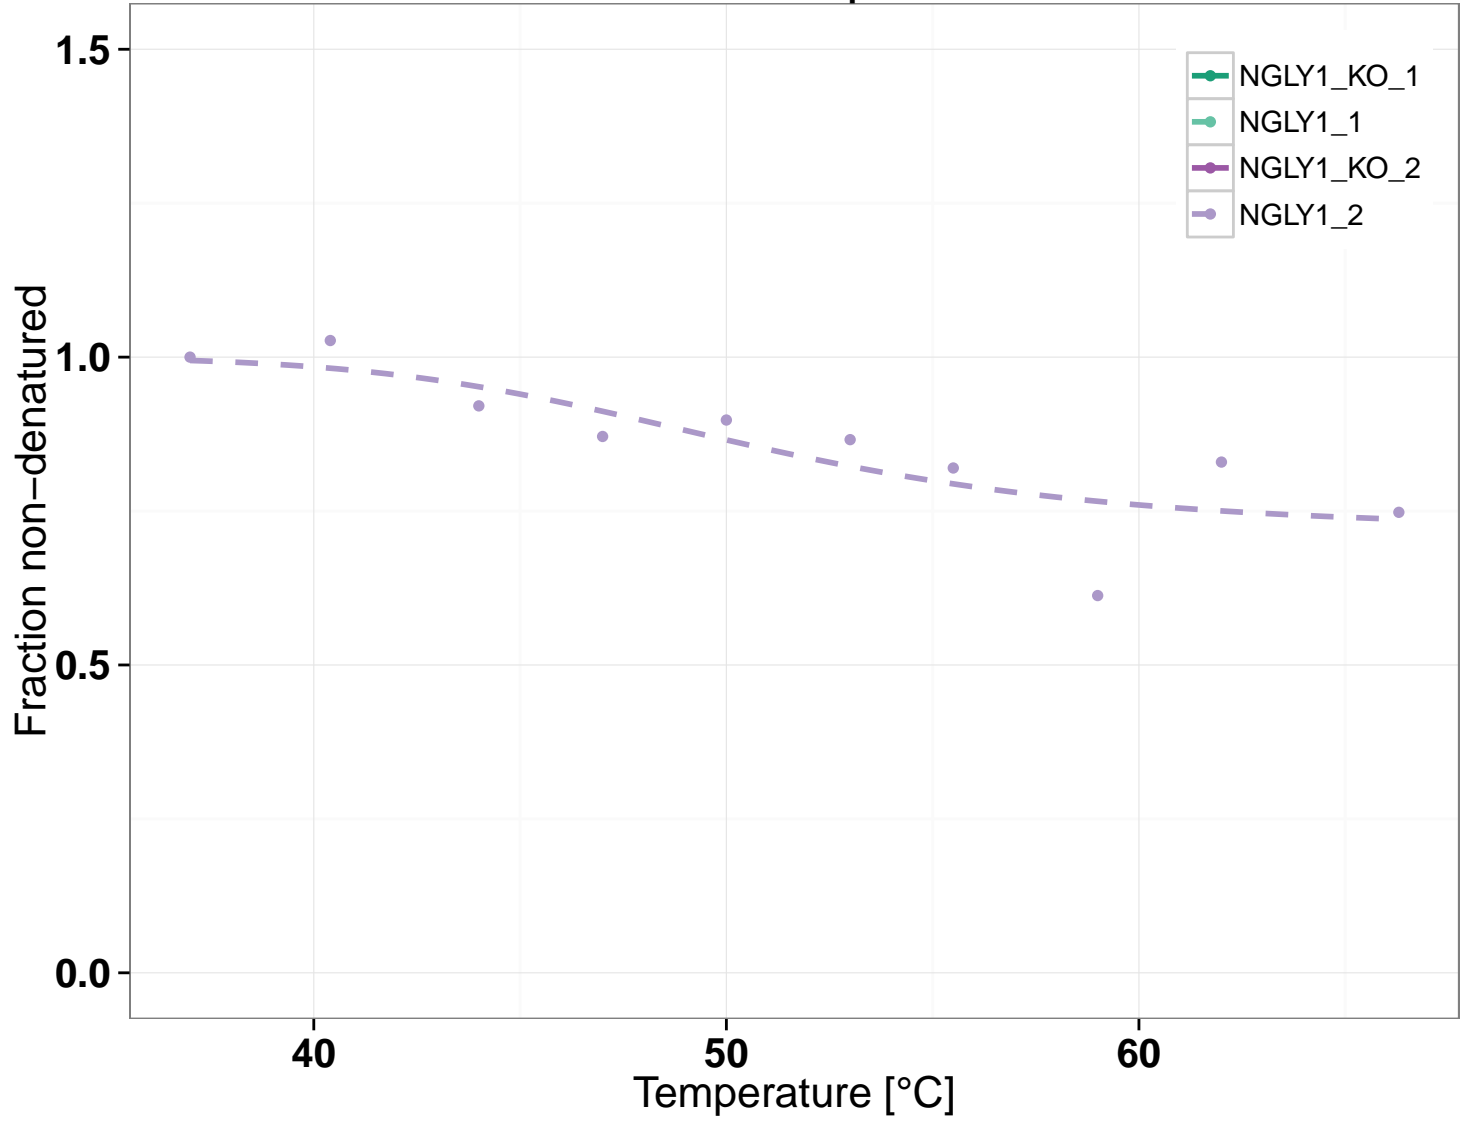

|            | meltPoint | slope  | plateau | R2  |
|------------|-----------|--------|---------|-----|
| NGLY1_KO_1 | —         | —      | —       | —   |
| NGLY1_1    | —         | —      | —       | —   |
| NGLY1_KO_2 | —         | —      | —       | —   |
| NGLY1_2    | —         | -0.016 | 0.72    | 0.7 |

Supplement: Supplementary file 3762 [file 1]

# IPI00028493.3|TSC2

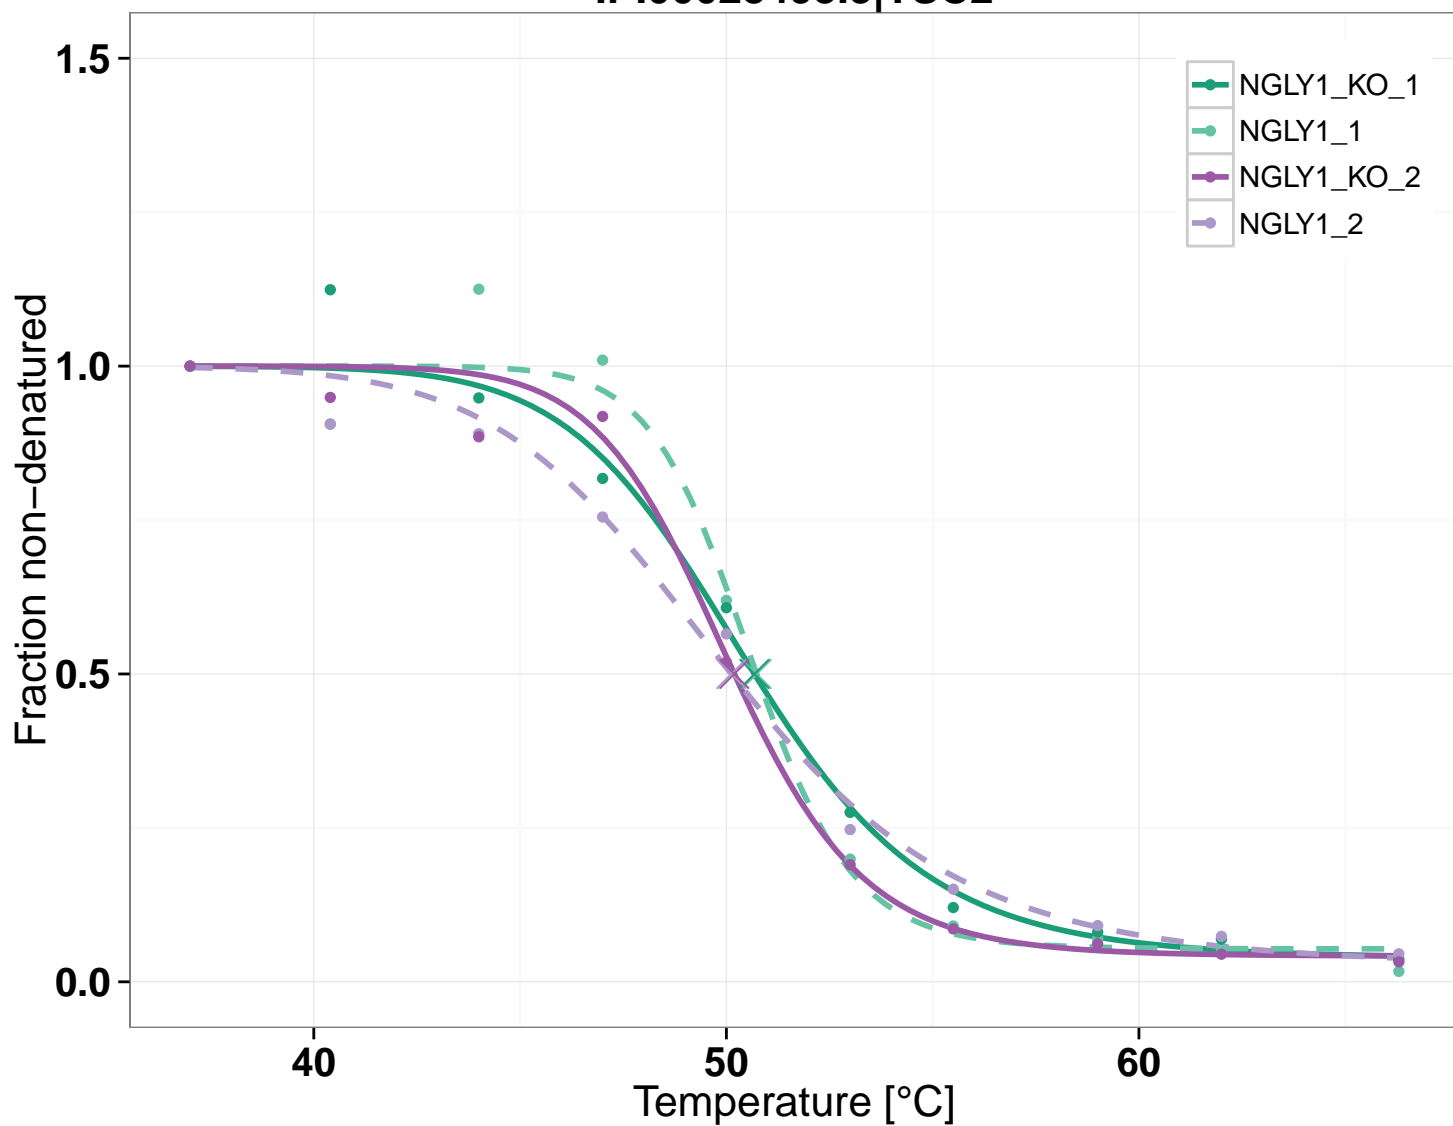

|            | meltPoint | slope  | plateau | R2   |
|------------|-----------|--------|---------|------|
| NGLY1_KO_1 | 50.68     | -0.11  | 0.04    | 0.99 |
| NGLY1_1    | 50.73     | -0.19  | 0.05    | 0.98 |
| NGLY1_KO_2 | 50.19     | -0.15  | 0.04    | 0.99 |
| NGLY1_2    | 50.12     | -0.086 | 0.03    | 0.99 |

Supplement: Supplementary file 3763 [file 1]

IPI00413853.7|C19ORF66

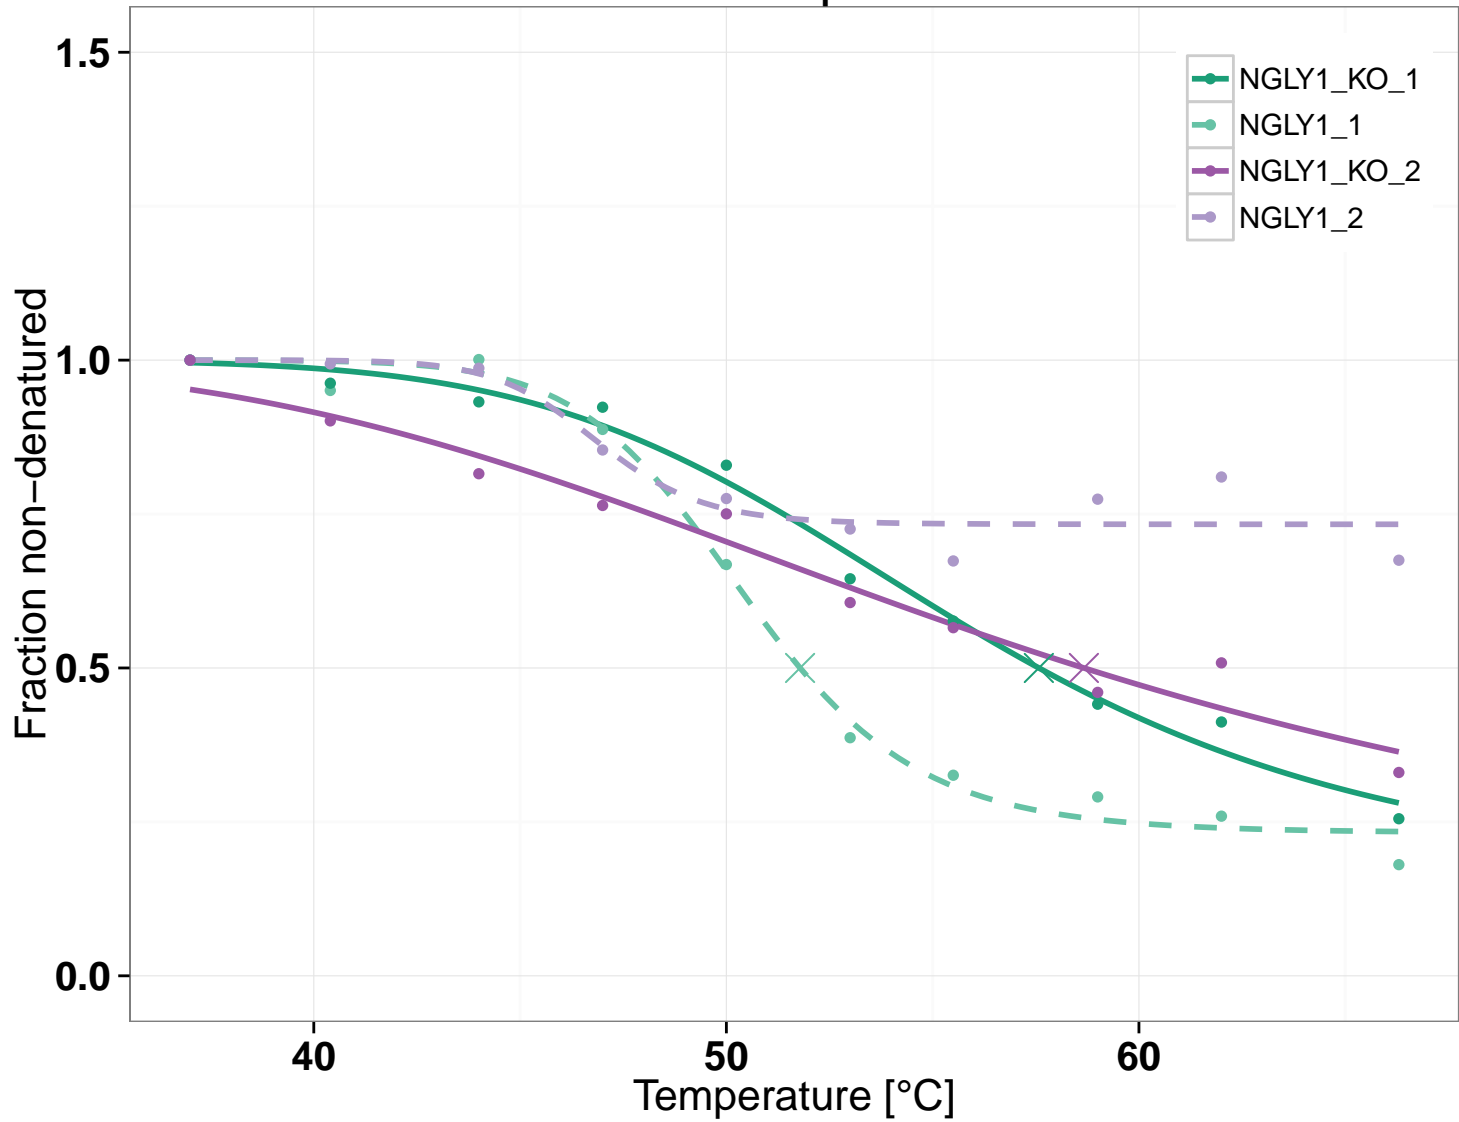

|            | meltPoint | slope  | plateau | R2   |
|------------|-----------|--------|---------|------|
| NGLY1_KO_1 | 57.57     | -0.042 | 0.15    | 0.99 |
| NGLY1_1    | 51.79     | -0.093 | 0.23    | 0.99 |
| NGLY1_KO_2 | 58.67     | -0.025 | 0.05    | 0.97 |
| NGLY1_2    | -         | -0.052 | 0.73    | 0.9  |

Supplement: Supplementary file 3764 [file 1]

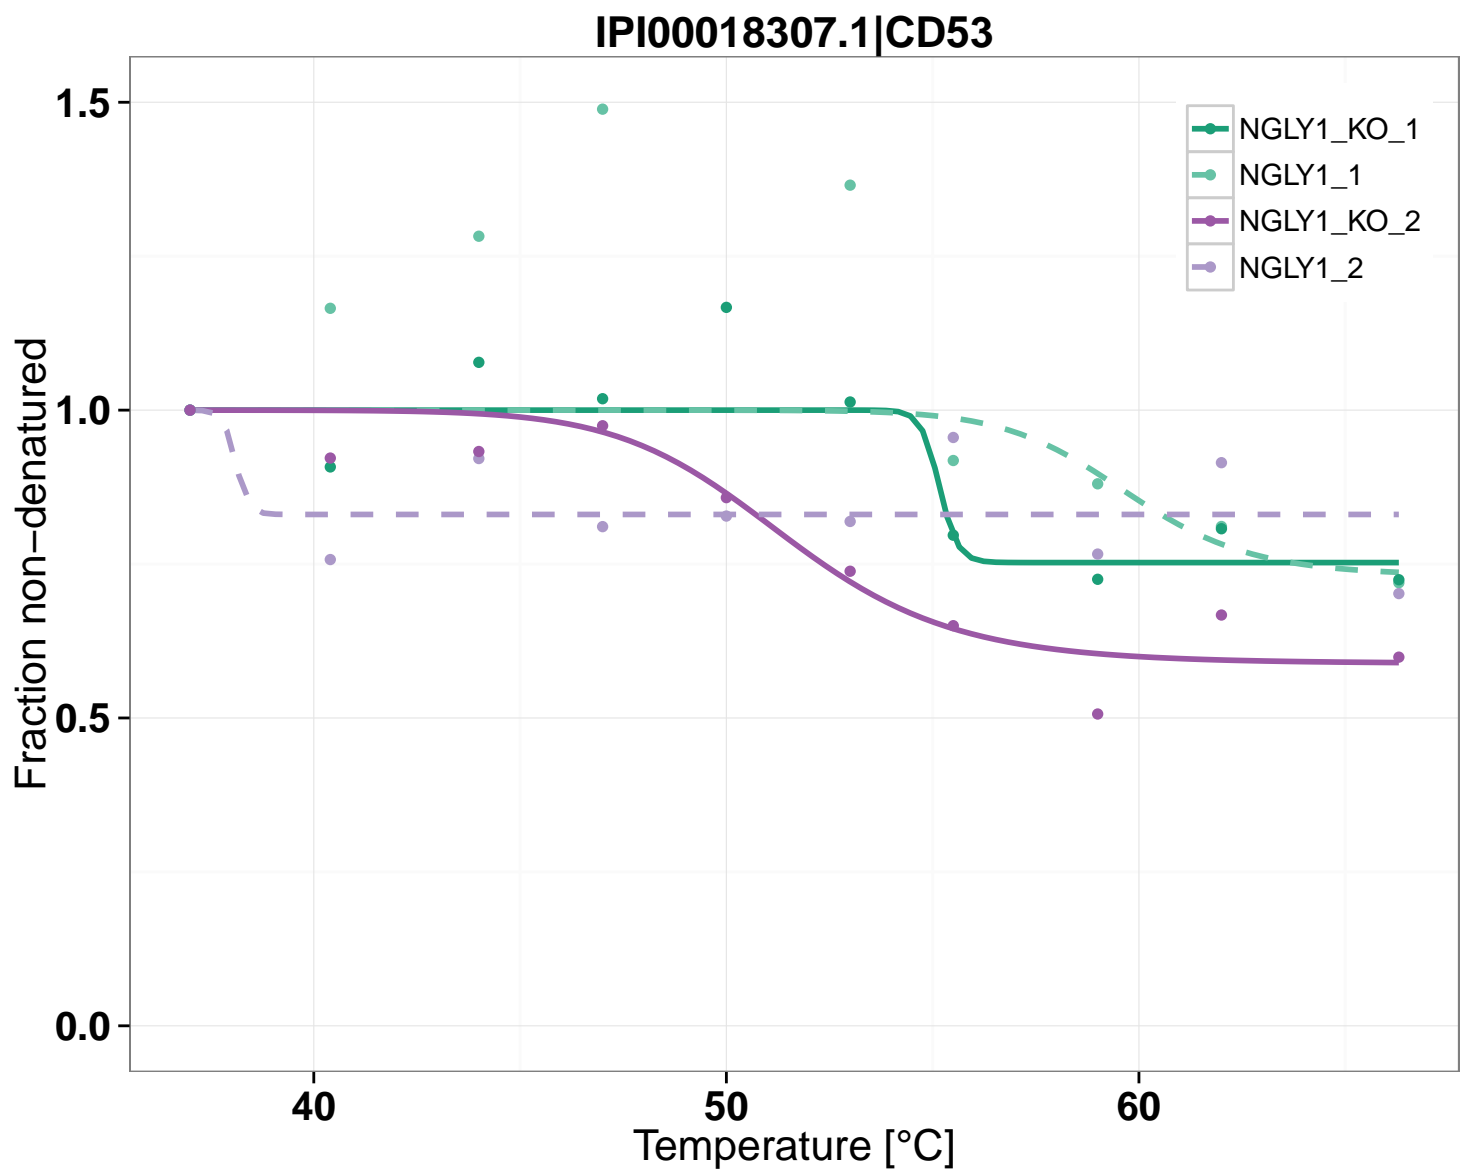

|            | meltPoint | slope  | plateau | R2    |
|------------|-----------|--------|---------|-------|
| NGLY1_KO_1 | —         | −0.28  | 0.75    | 0.78  |
| NGLY1_1    | —         | −0.044 | 0.73    | −0.11 |
| NGLY1_KO_2 | —         | −0.05  | 0.59    | 0.91  |
| NGLY1_2    | —         | −0.28  | 0.83    | 0.31  |

Supplement: Supplementary file 3765 [file 1]

# IPI00179034.4|SLC25A30

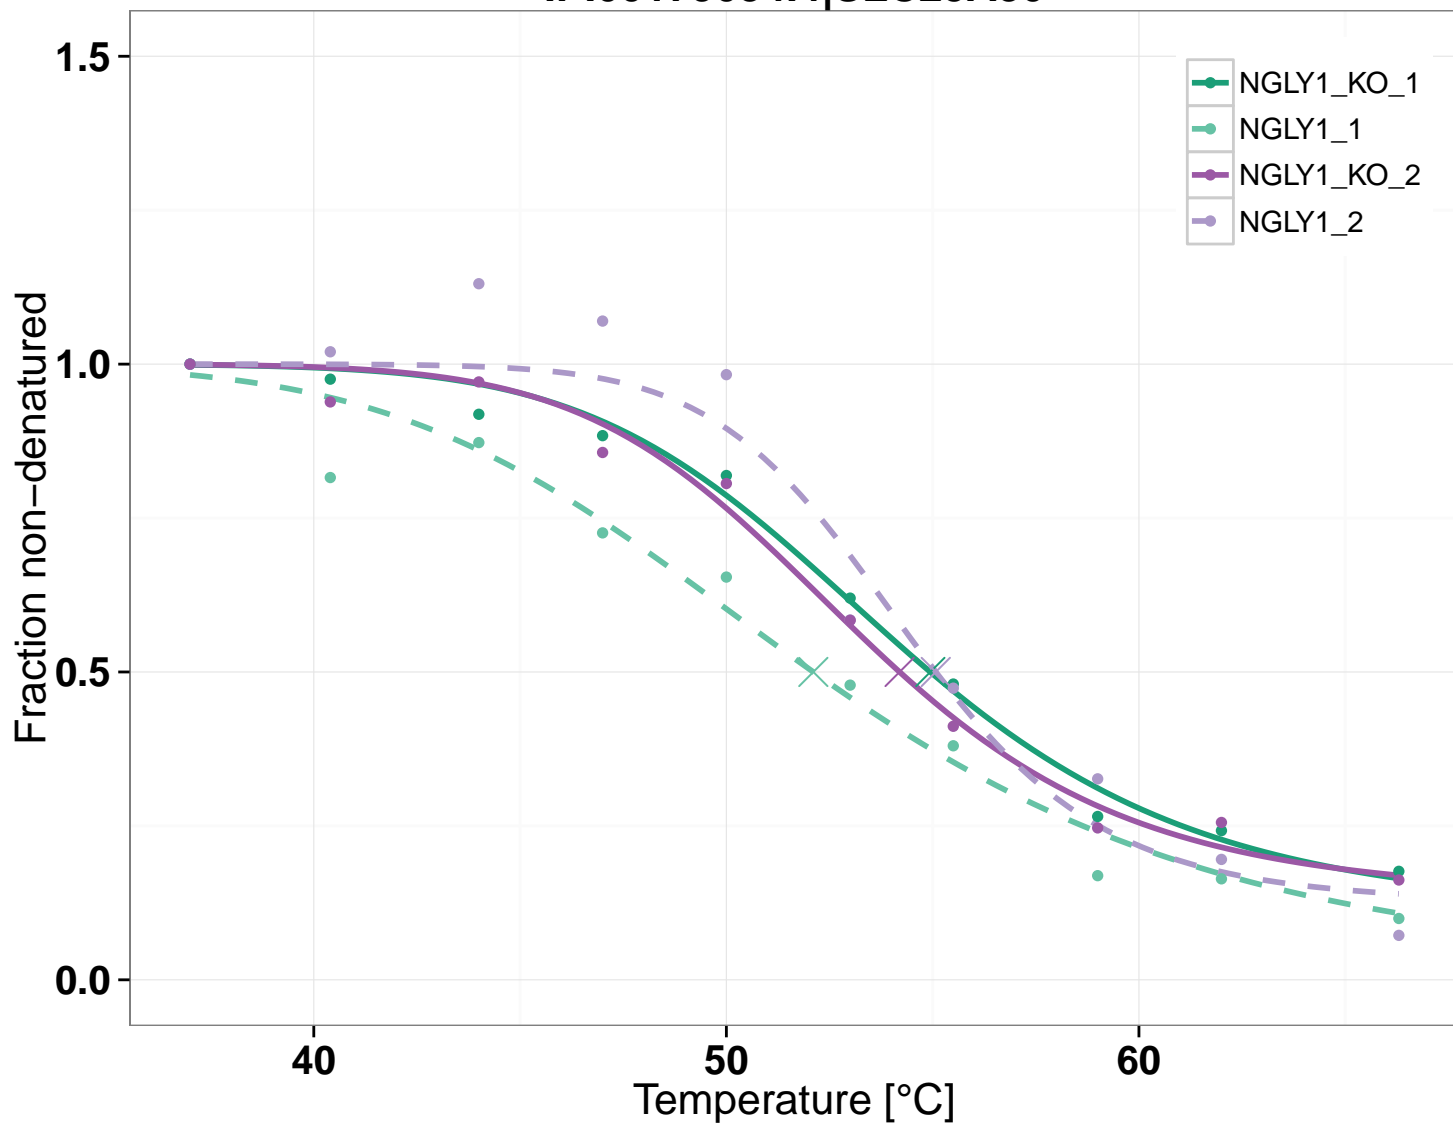

|            | meltPoint | slope  | plateau | R2   |
|------------|-----------|--------|---------|------|
| NGLY1_KO_1 | 54.94     | -0.061 | 0.11    | 0.99 |
| NGLY1_1    | 52.11     | -0.049 | 0       | 0.97 |
| NGLY1_KO_2 | 54.2      | -0.066 | 0.13    | 0.99 |
| NGLY1_2    | 55.08     | -0.092 | 0.13    | 0.96 |

Supplement: Supplementary file 3766 [file 1]

# IPI00026957.1|WBP4

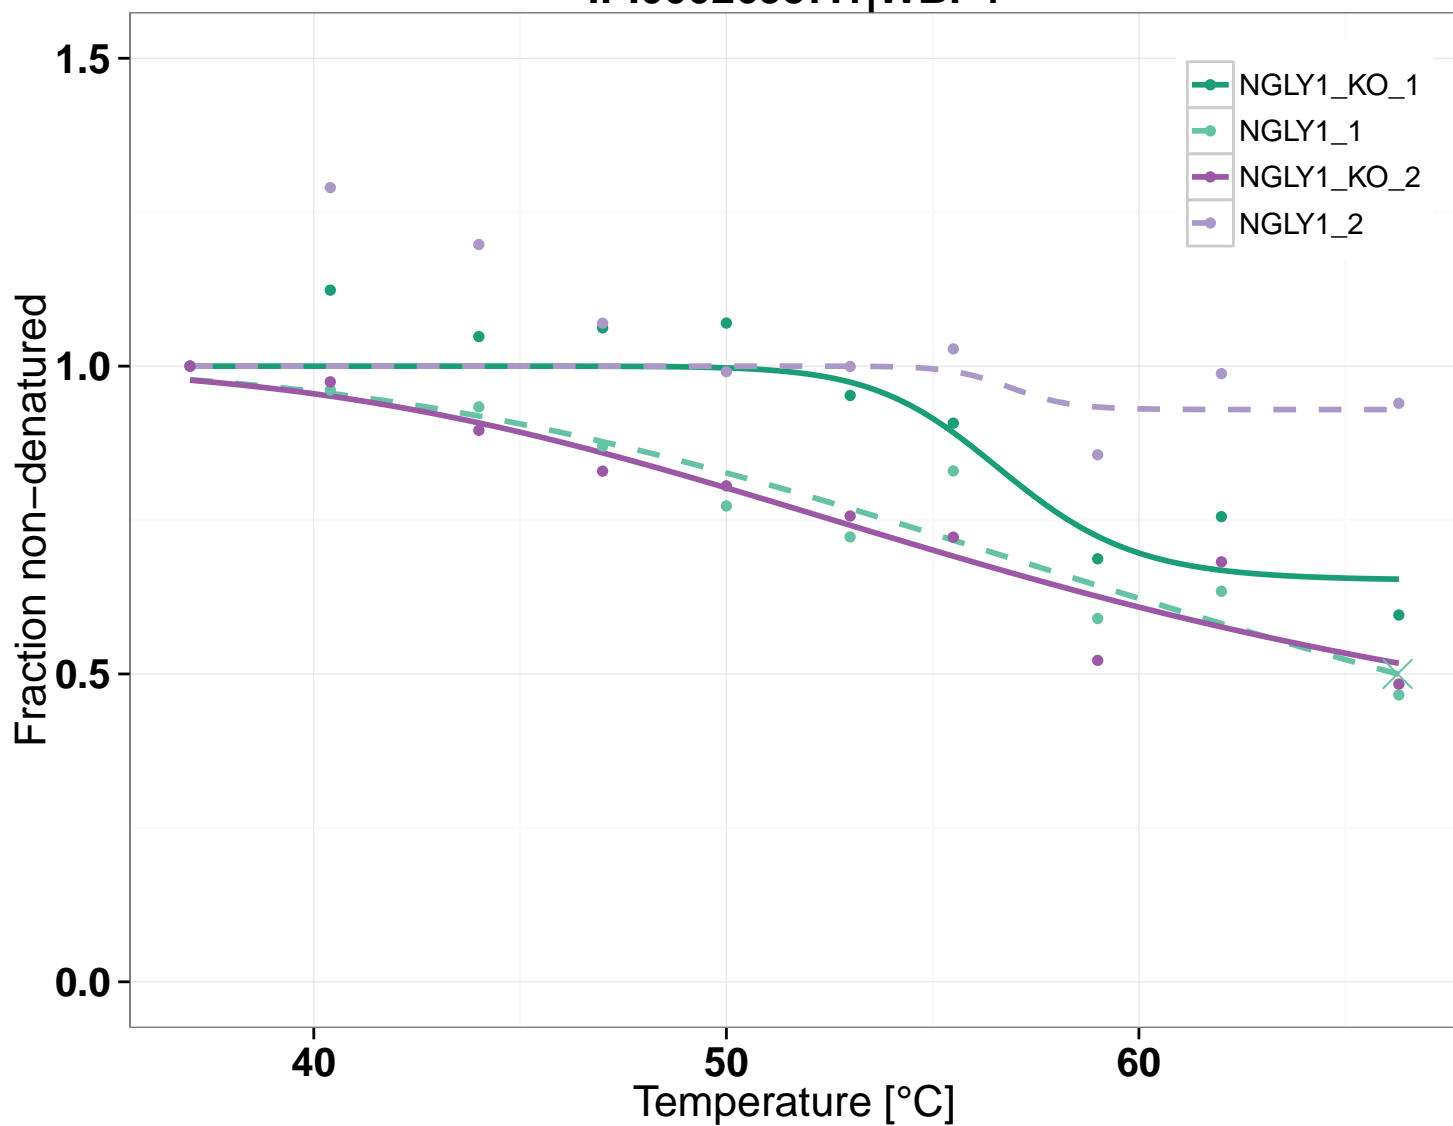

|            | meltPoint | slope  | plateau | R2   |
|------------|-----------|--------|---------|------|
| NGLY1_KO_1 | -         | -0.055 | 0.65    | 0.87 |
| NGLY1_1    | 66.27     | -0.021 | 0       | 0.91 |
| NGLY1_KO_2 | -         | -0.02  | 0.29    | 0.9  |
| NGLY1_2    | -         | -0.024 | 0.93    | 0.01 |

Supplement: Supplementary file 3767 [file 1]

IPI00305068.5|PRPF6

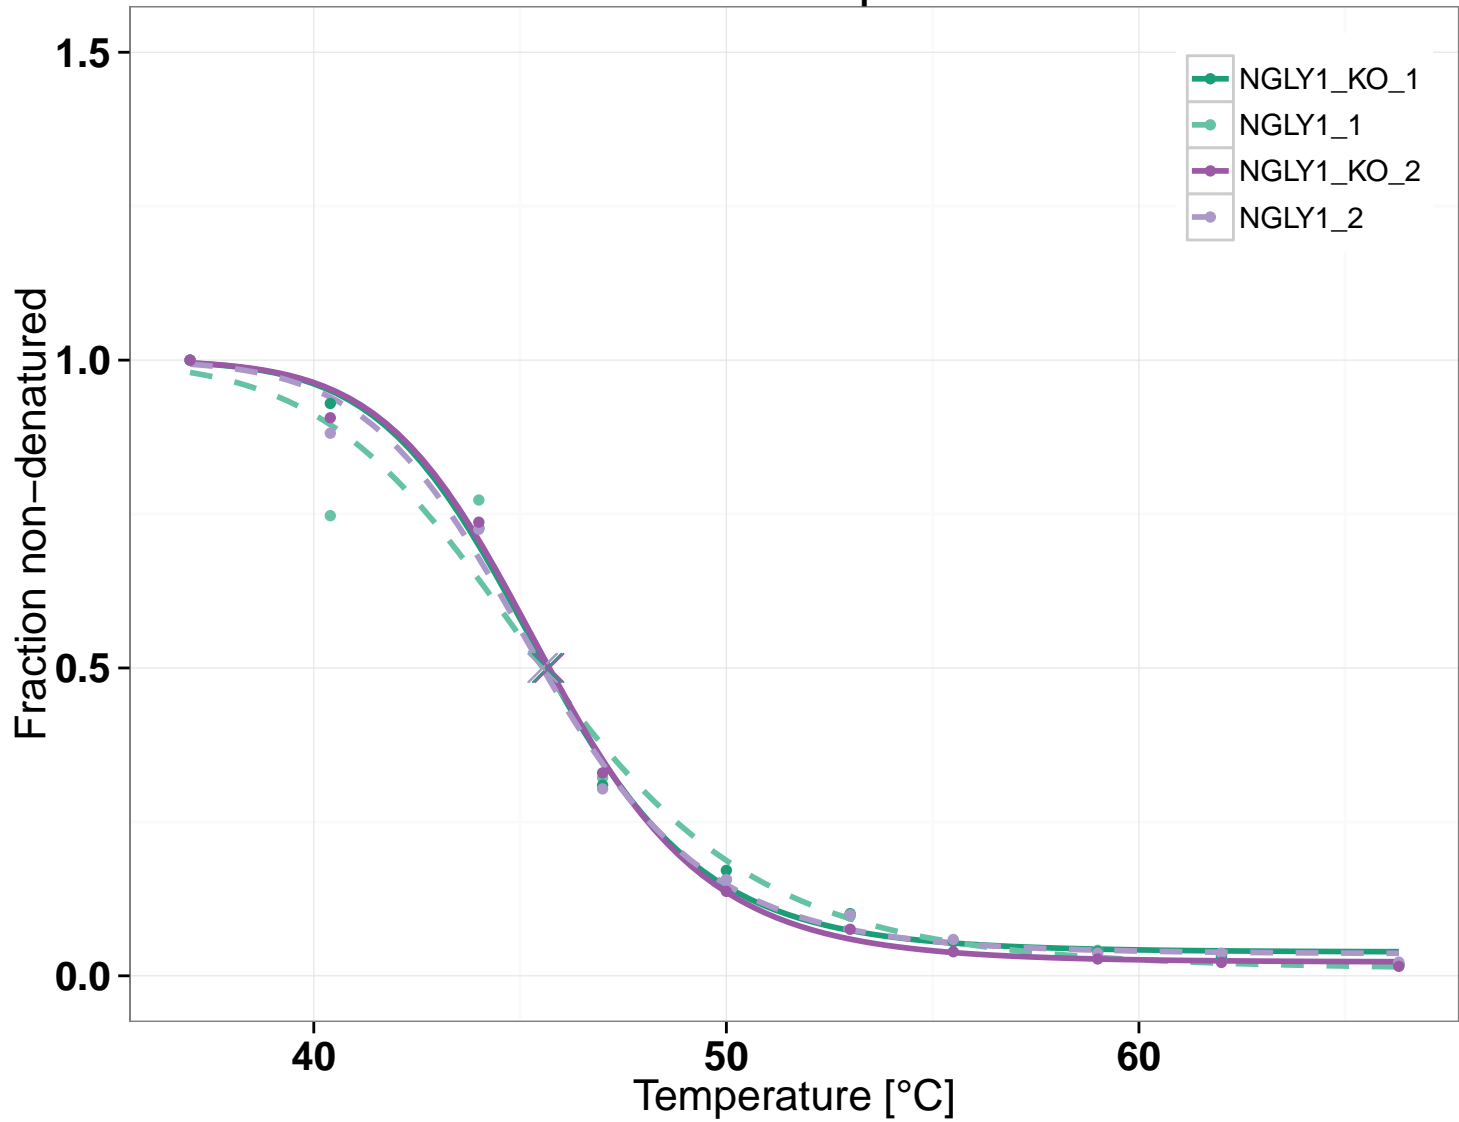

|            | meltPoint | slope  | plateau | R2   |
|------------|-----------|--------|---------|------|
| NGLY1_KO_1 | 45.65     | -0.12  | 0.04    | 1    |
| NGLY1_1    | 45.55     | -0.093 | 0.01    | 0.97 |
| NGLY1_KO_2 | 45.71     | -0.12  | 0.02    | 1    |
| NGLY1_2    | 45.54     | -0.12  | 0.04    | 0.99 |

Supplement: Supplementary file 3768 [file 1]

# IPI00020897.2|PPARG

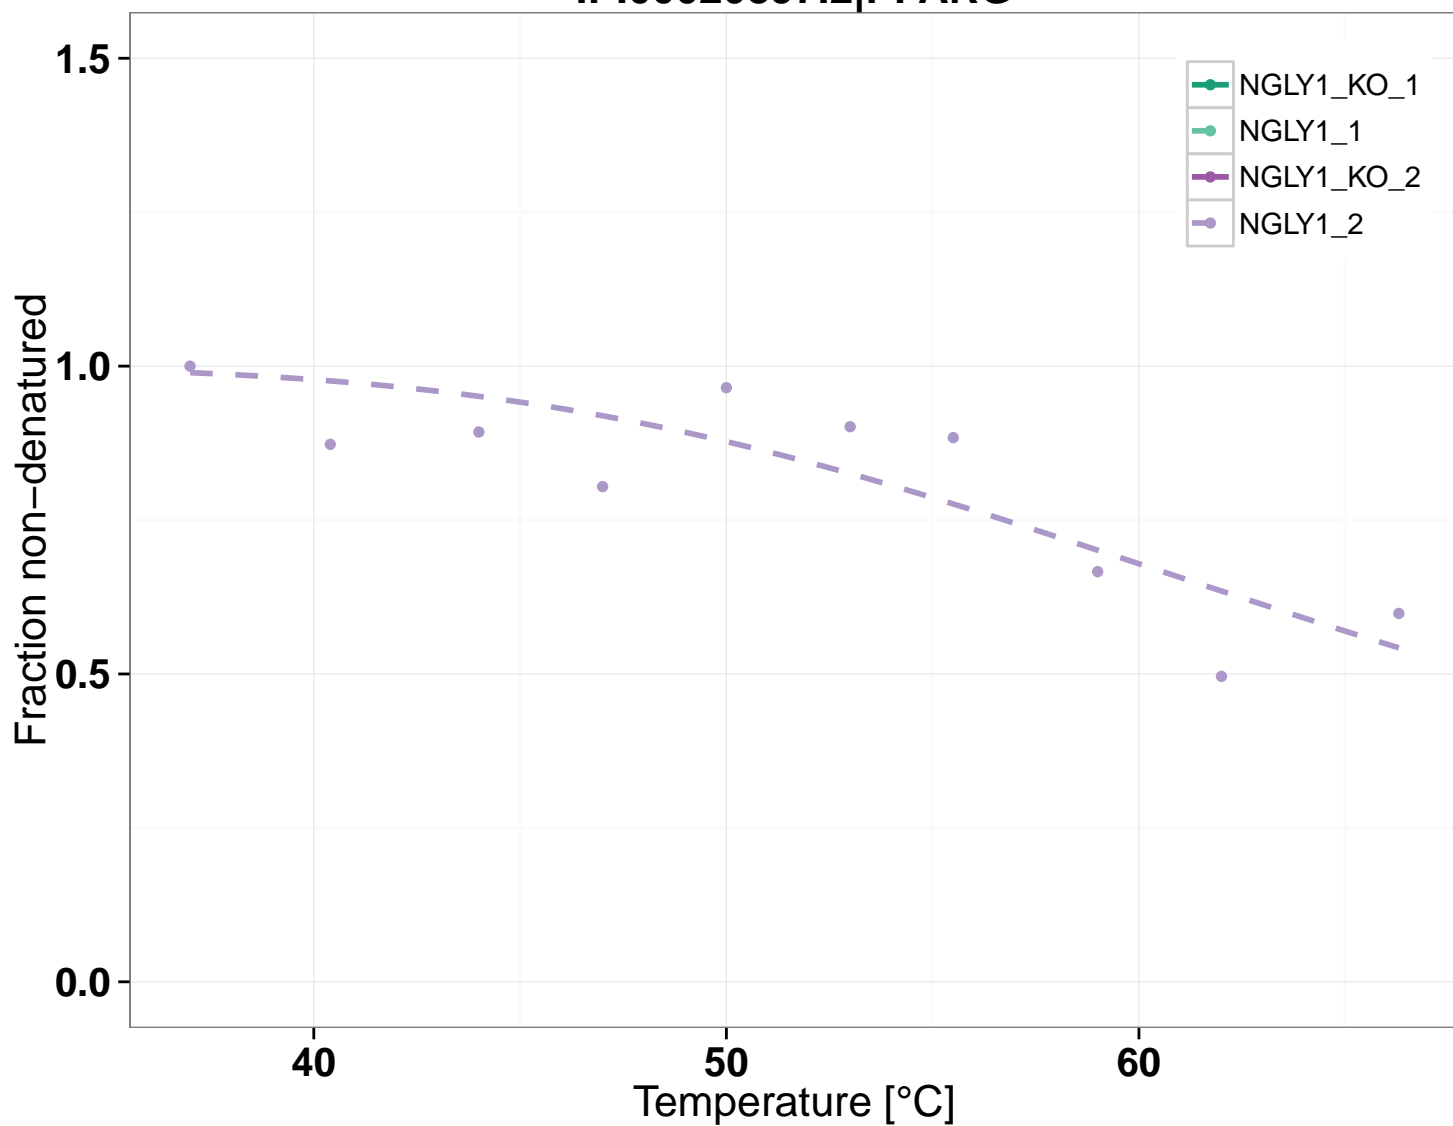

|            | meltPoint | slope  | plateau | R2   |
|------------|-----------|--------|---------|------|
| NGLY1_KO_1 | —         | —      | —       | —    |
| NGLY1_1    | —         | —      | —       | —    |
| NGLY1_KO_2 | —         | —      | —       | —    |
| NGLY1_2    | —         | −0.022 | 0       | 0.69 |

Supplement: Supplementary file 3769 [file 1]

IPI00173589.2|LOC284064

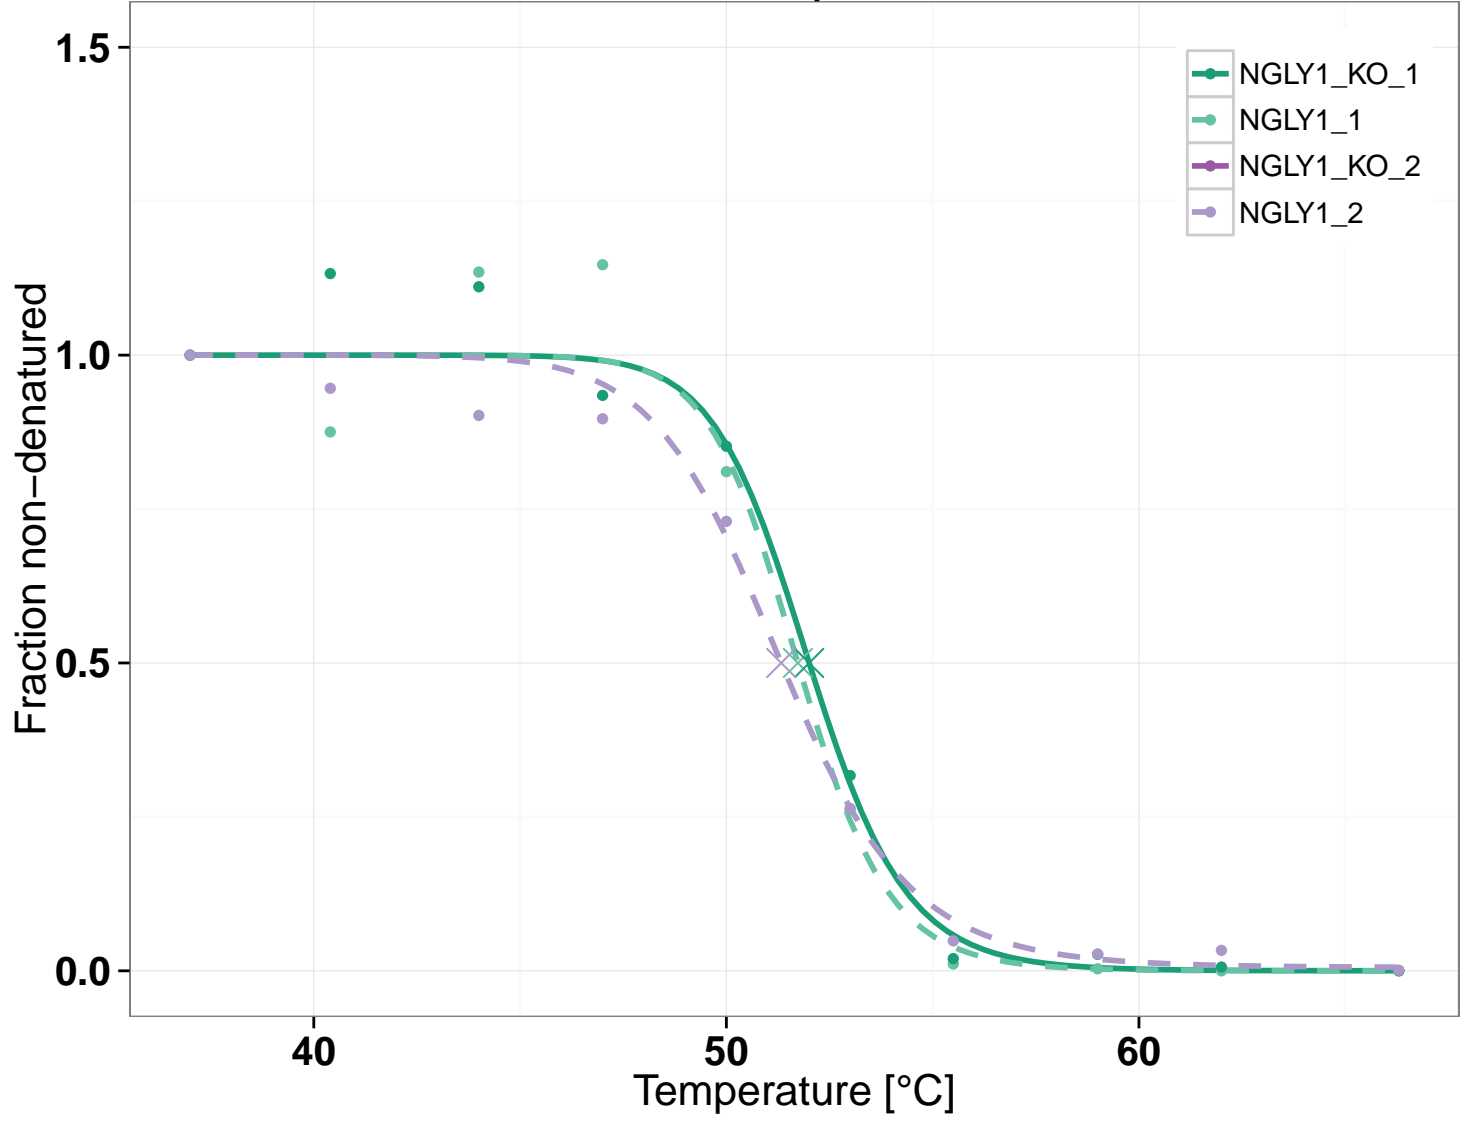

|            | meltPoint | slope | plateau | R2   |
|------------|-----------|-------|---------|------|
| NGLY1_KO_1 | 52.01     | -0.21 | 0       | 0.98 |
| NGLY1_1    | 51.73     | -0.23 | 0       | 0.97 |
| NGLY1_KO_2 | -         | -     | -       | -    |
| NGLY1_2    | 51.33     | -0.16 | 0.01    | 0.99 |

Supplement: Supplementary file 3770 [file 1]

IPI00022156.3|LOC730066

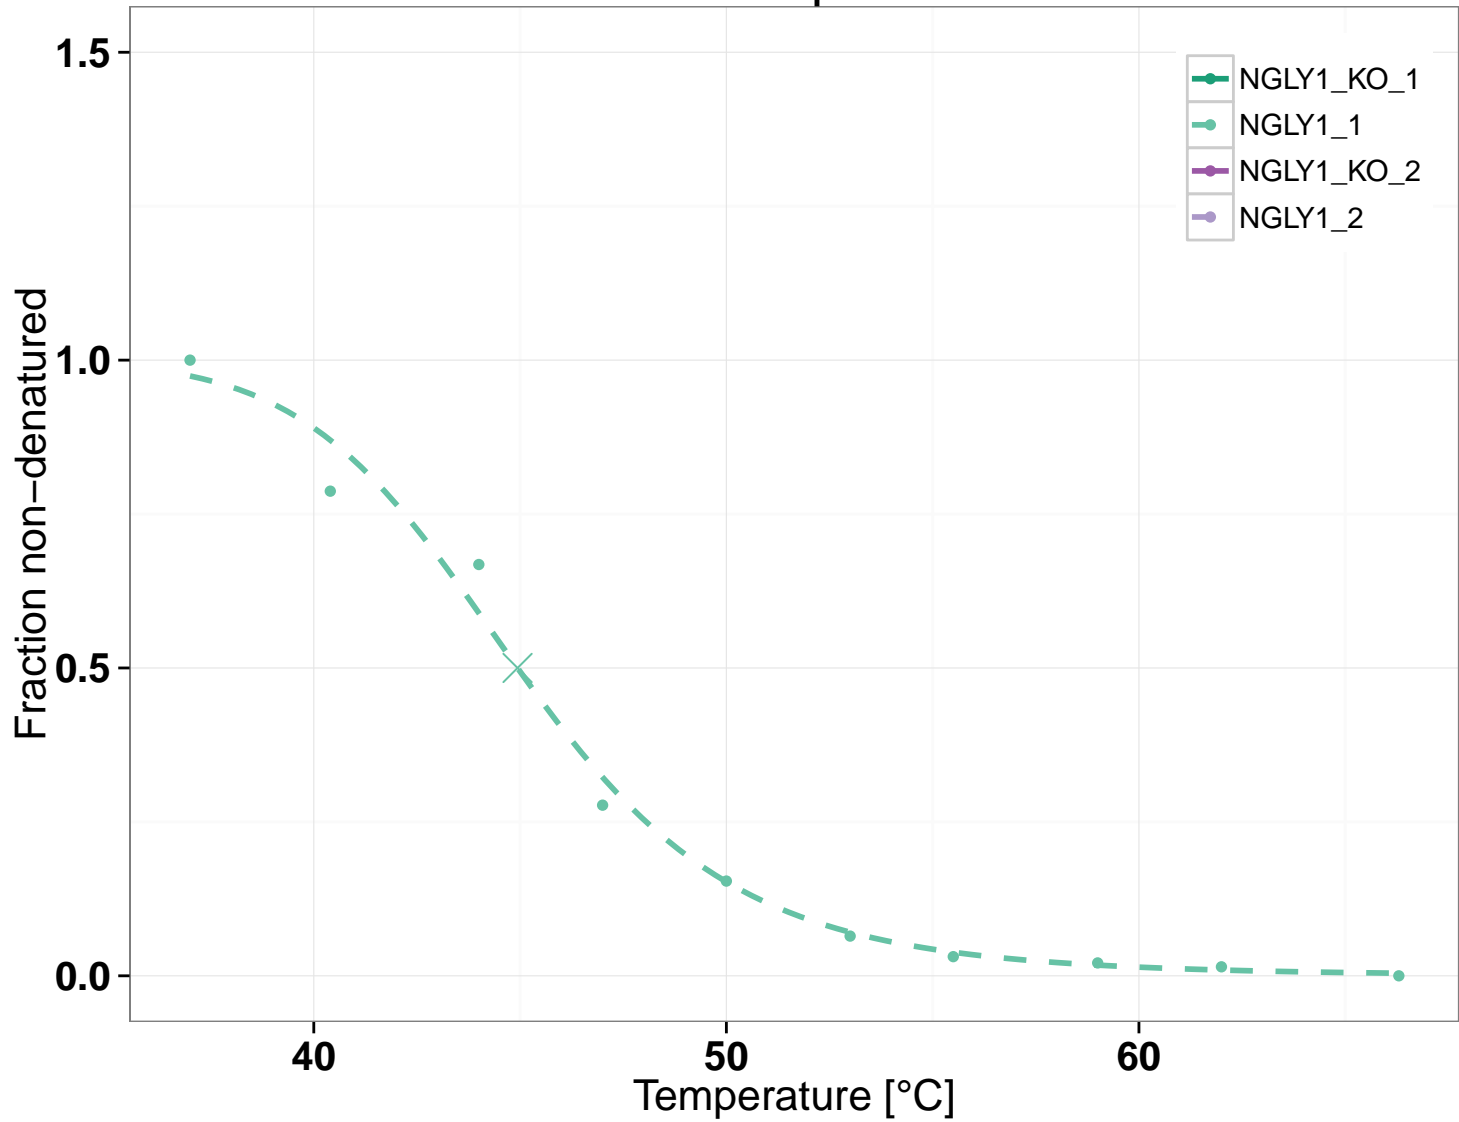

|            | meltPoint | slope  | plateau | R2   |
|------------|-----------|--------|---------|------|
| NGLY1_KO_1 | -         | -      | -       | -    |
| NGLY1_1    | 44.94     | -0.095 | 0       | 0.99 |
| NGLY1_KO_2 | -         | -      | -       | -    |
| NGLY1_2    | -         | -      | -       | -    |

Supplement: Supplementary file 3771 [file 1]

IPI00795288.1|PEBP1

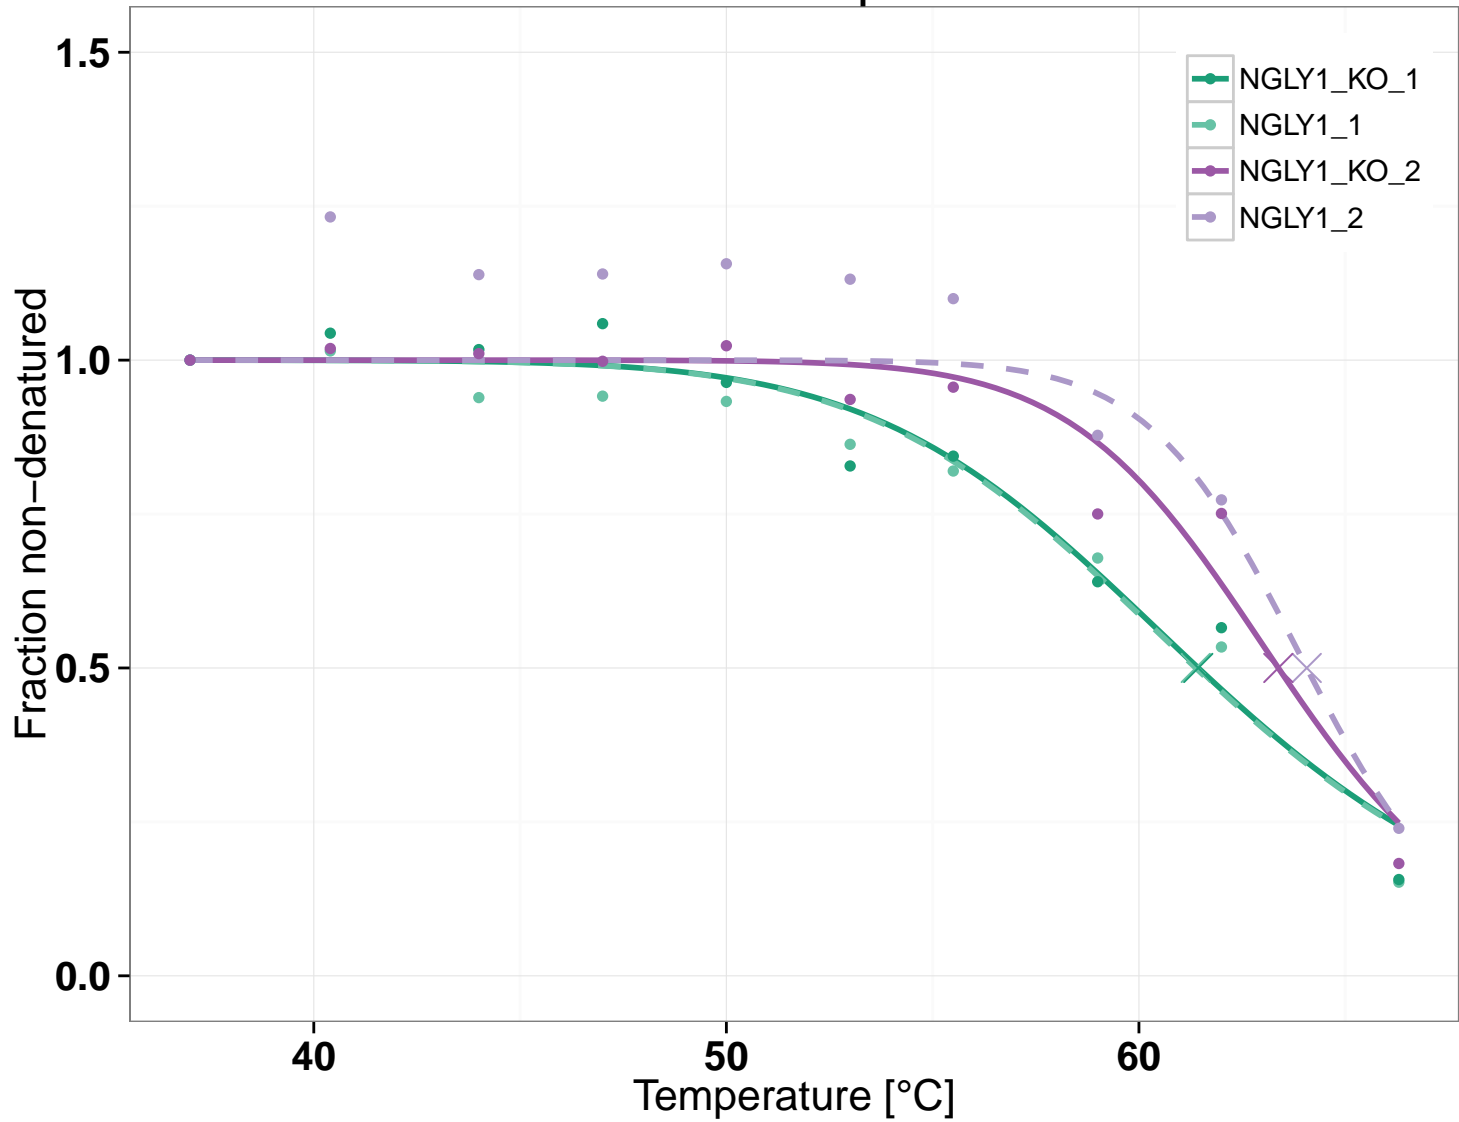

|            | meltPoint | slope  | plateau | R2   |
|------------|-----------|--------|---------|------|
| NGLY1_KO_1 | 61.44     | -0.064 | 0       | 0.95 |
| NGLY1_1    | 61.38     | -0.064 | 0       | 0.96 |
| NGLY1_KO_2 | 63.38     | -0.1   | 0       | 0.94 |
| NGLY1_2    | 64.07     | -0.13  | 0       | 0.81 |

Supplement: Supplementary file 3772 [file 1]

IPI00386516.4|KIAA0174

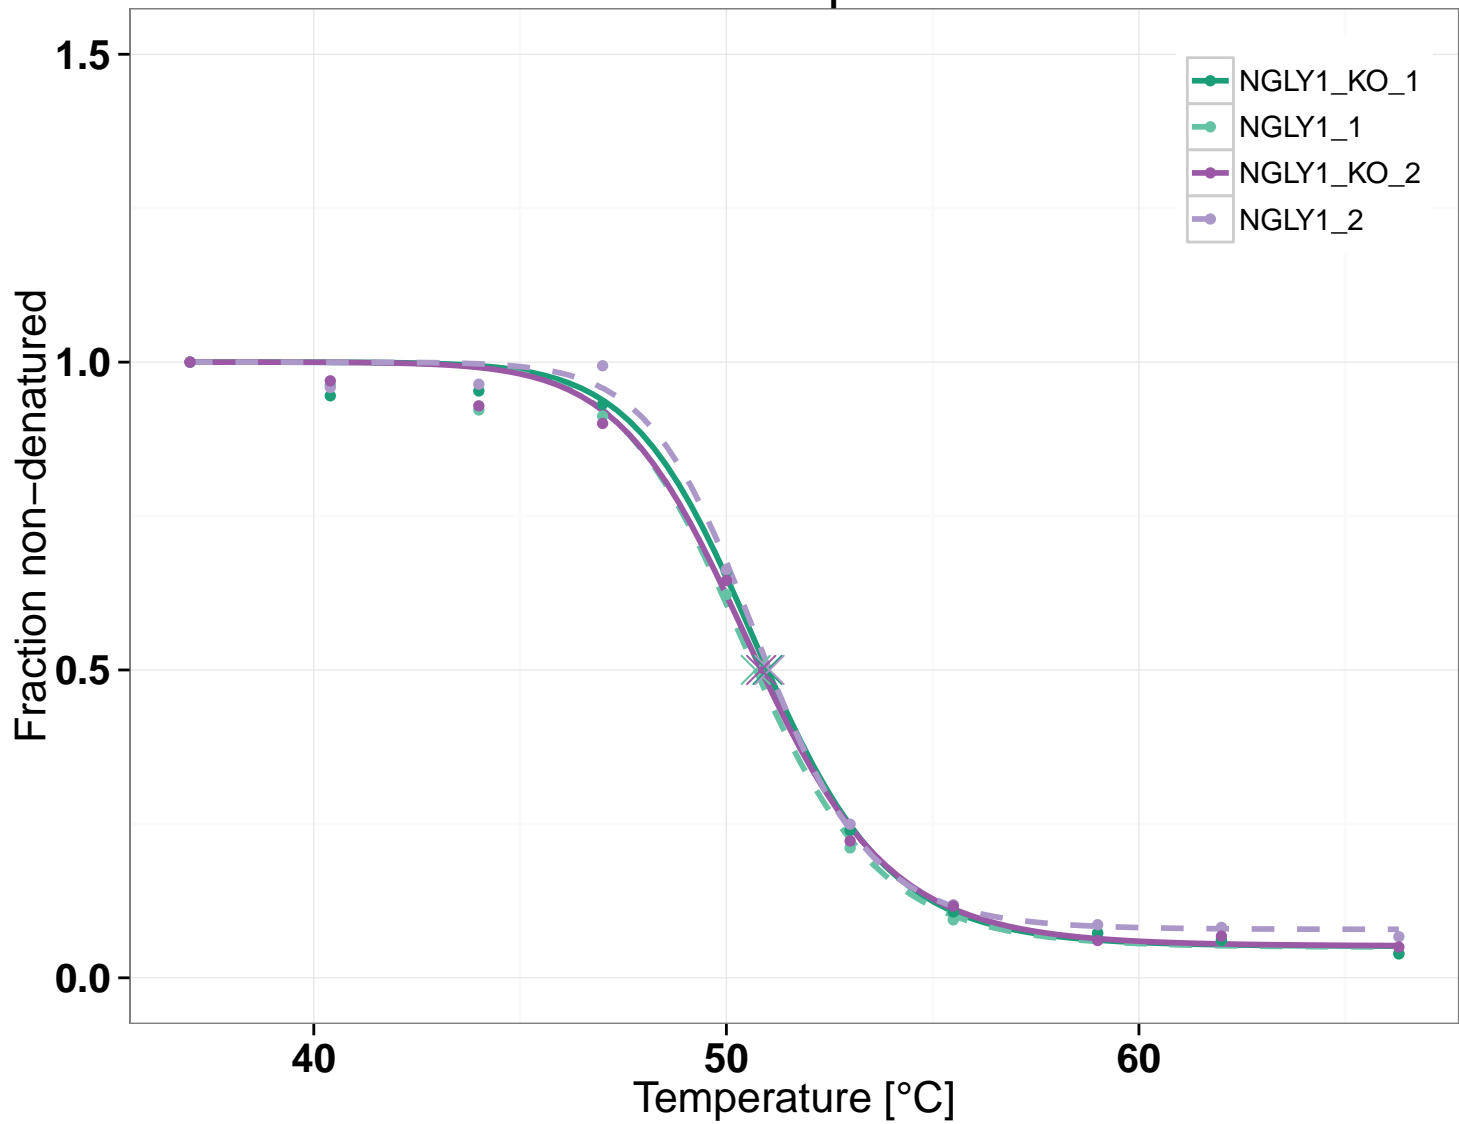

|            | meltPoint | slope | plateau | R2 |
|------------|-----------|-------|---------|----|
| NGLY1_KO_1 | 51        | -0.15 | 0.05    | 1  |
| NGLY1_1    | 50.71     | -0.15 | 0.05    | 1  |
| NGLY1_KO_2 | 50.84     | -0.15 | 0.05    | 1  |
| NGLY1_2    | 51.05     | -0.17 | 0.08    | 1  |

Supplement: Supplementary file 3773 [file 1]

IPI00556316.2|FLJ22167

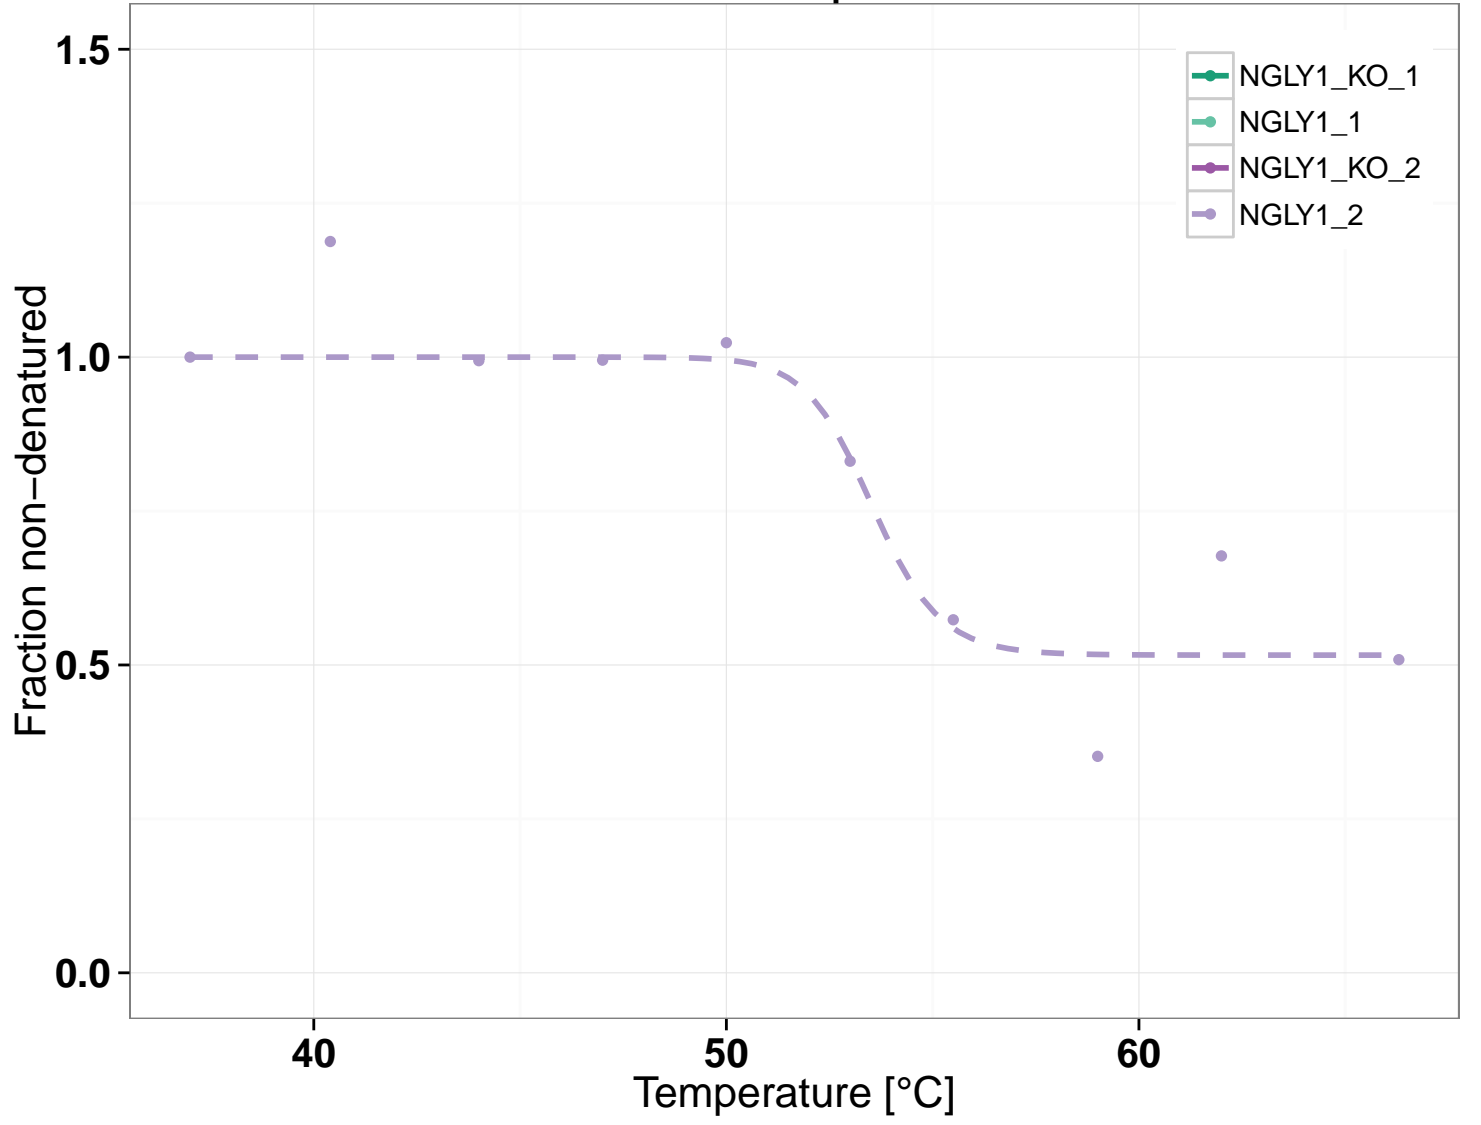

|            | meltPoint | slope | plateau | R2   |
|------------|-----------|-------|---------|------|
| NGLY1_KO_1 | -         | -     | -       | -    |
| NGLY1_1    | -         | -     | -       | -    |
| NGLY1_KO_2 | -         | -     | -       | -    |
| NGLY1_2    | -         | -0.15 | 0.52    | 0.87 |

Supplement: Supplementary file 3774 [file 1]

IPI00386862.5|ZFYVE19

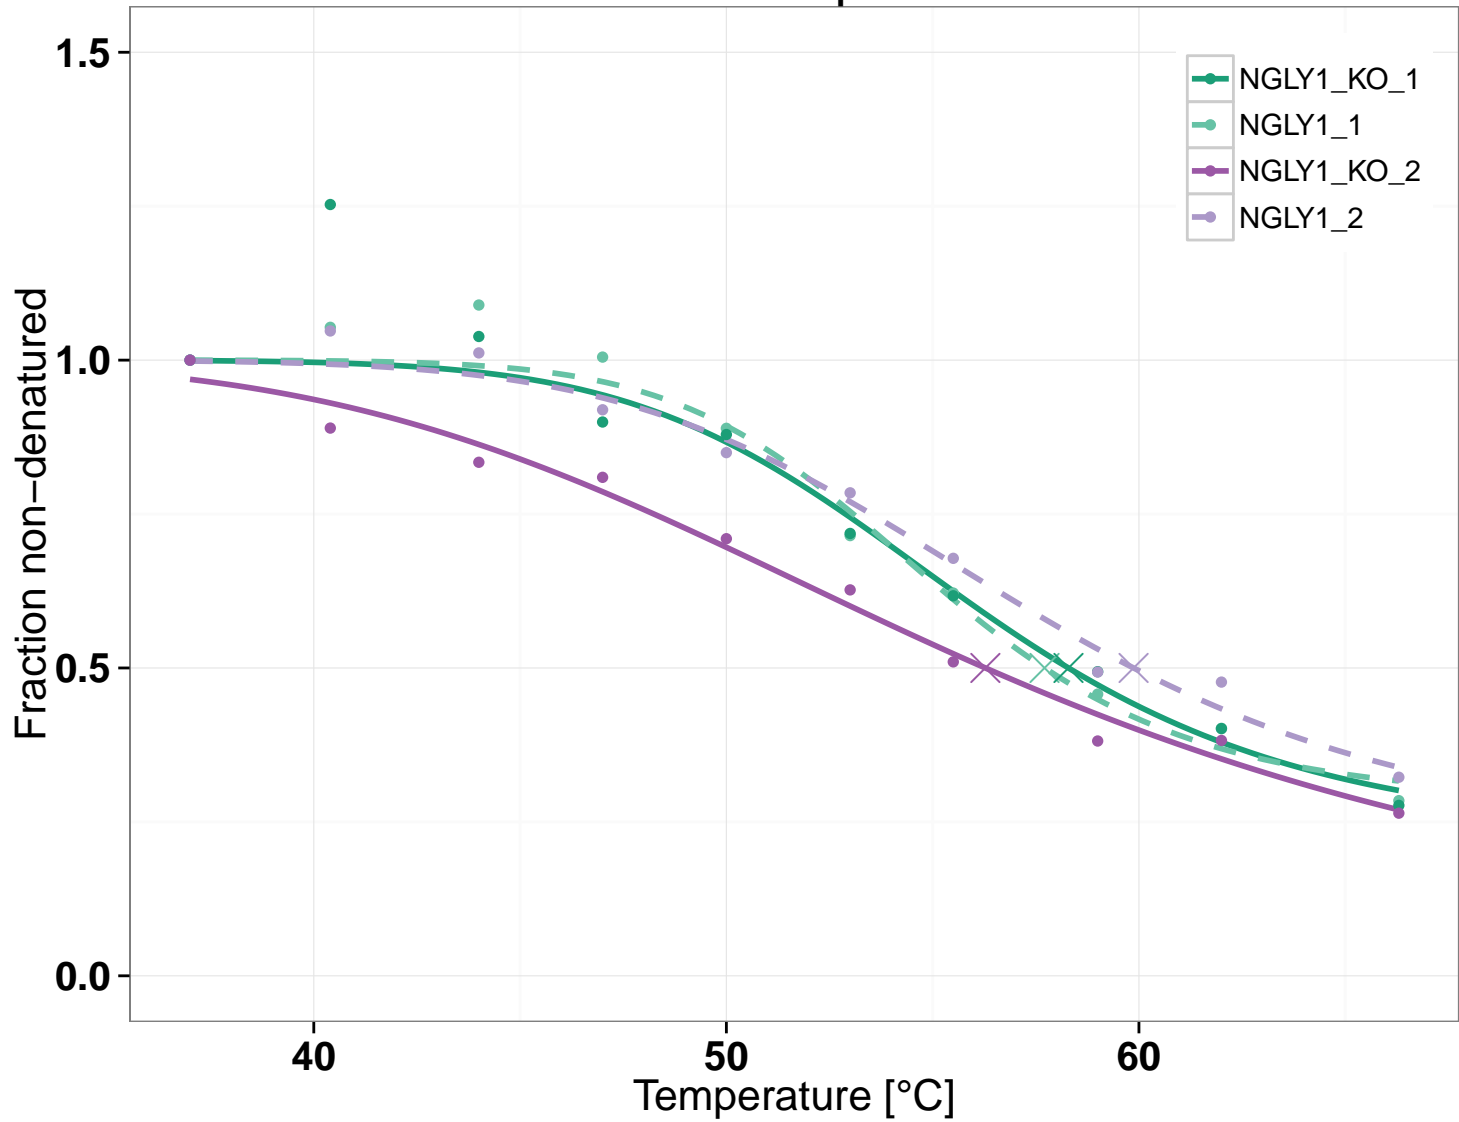

|            | meltPoint | slope  | plateau | R2   |
|------------|-----------|--------|---------|------|
| NGLY1_KO_1 | 58.29     | -0.049 | 0.22    | 0.91 |
| NGLY1_1    | 57.71     | -0.058 | 0.28    | 0.98 |
| NGLY1_KO_2 | 56.28     | -0.032 | 0       | 0.99 |
| NGLY1_2    | 59.87     | -0.041 | 0.2     | 0.98 |

Supplement: Supplementary file 3775 [file 1]

IPI00304198.7|SLC7A6OS

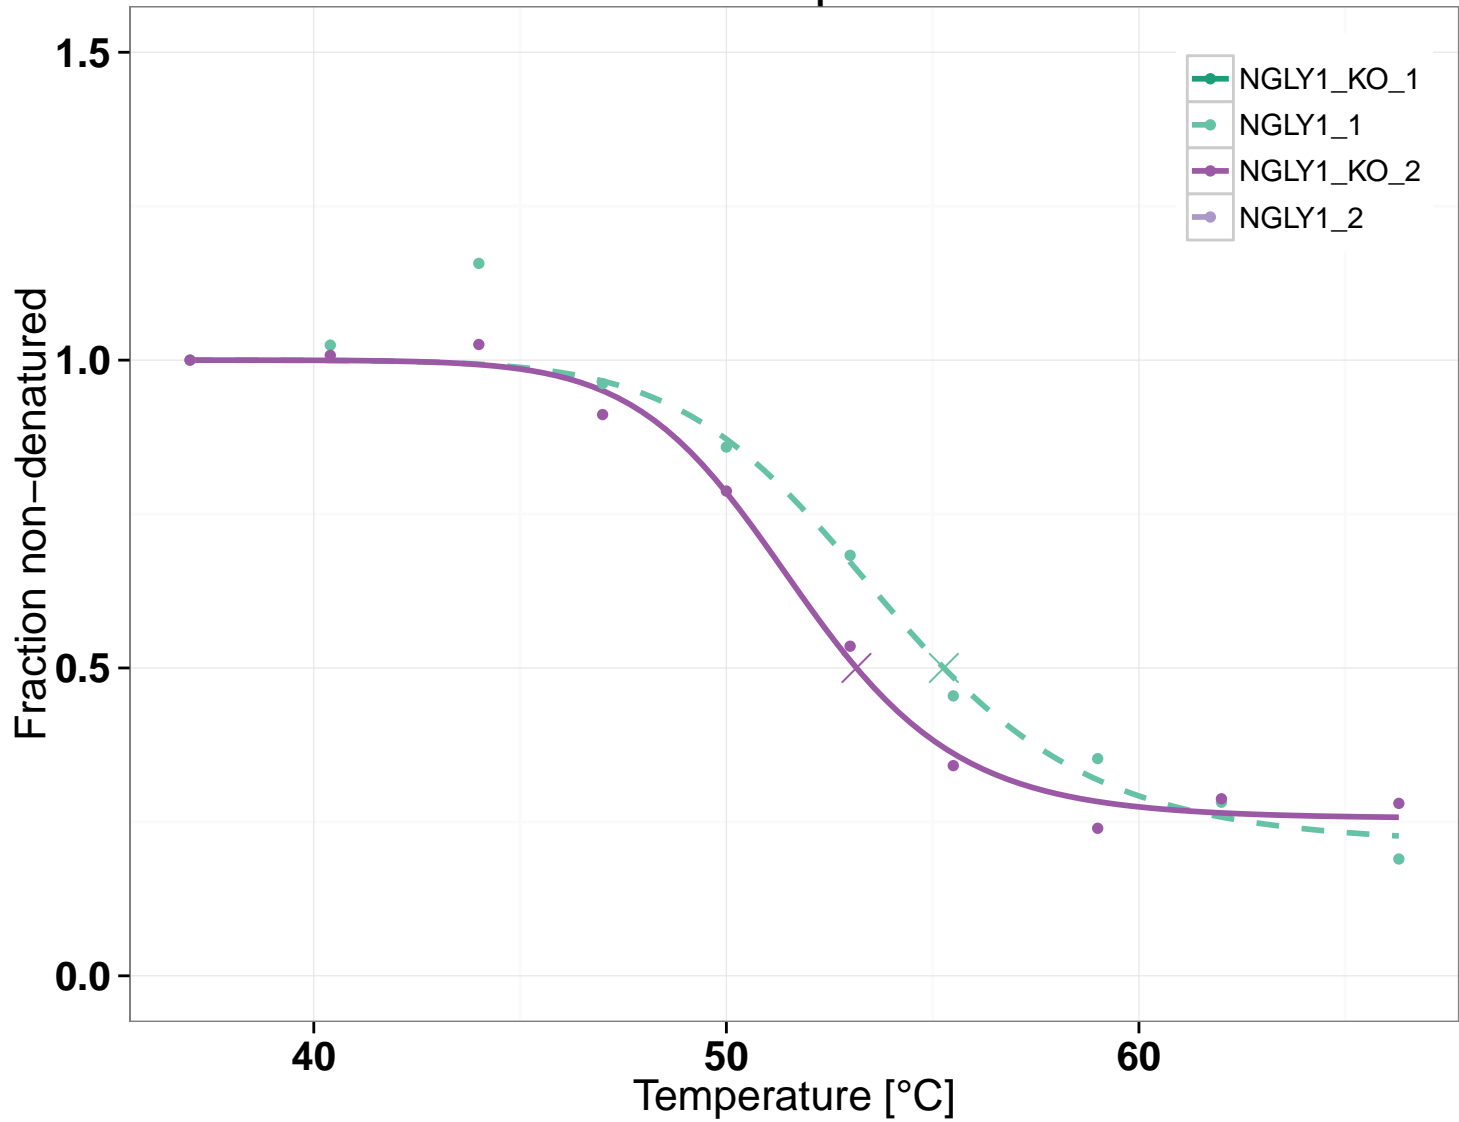

|            | meltPoint | slope  | plateau | R2   |
|------------|-----------|--------|---------|------|
| NGLY1_KO_1 | -         | -      | -       | -    |
| NGLY1_1    | 55.27     | -0.079 | 0.21    | 0.97 |
| NGLY1_KO_2 | 53.15     | -0.095 | 0.26    | 0.99 |
| NGLY1_2    | -         | -      | -       | -    |

Supplement: Supplementary file 3776 [file 1]

IPI00015809.1|OSGEP

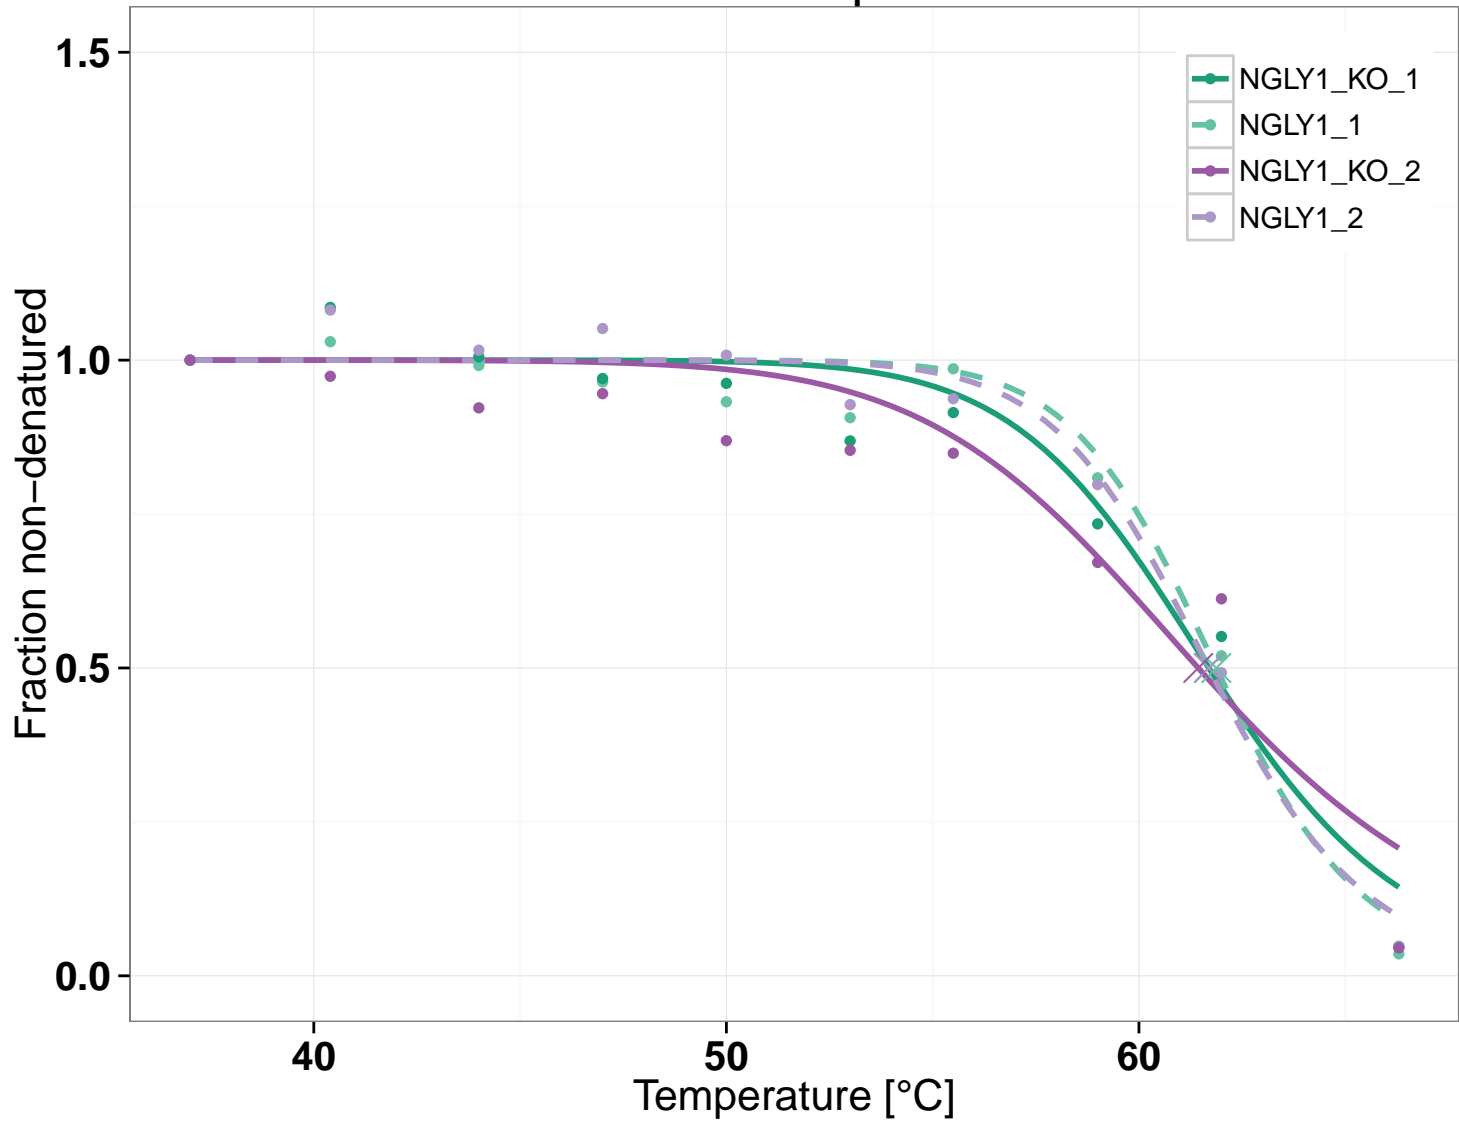

|            | meltPoint | slope  | plateau | R2   |
|------------|-----------|--------|---------|------|
| NGLY1_KO_1 | 61.7      | -0.1   | 0       | 0.95 |
| NGLY1_1    | 61.88     | -0.14  | 0       | 0.98 |
| NGLY1_KO_2 | 61.44     | -0.075 | 0       | 0.89 |
| NGLY1_2    | 61.7      | -0.13  | 0       | 0.98 |

Supplement: Supplementary file 3777 [file 1]

IPI00446998.2|TAZ

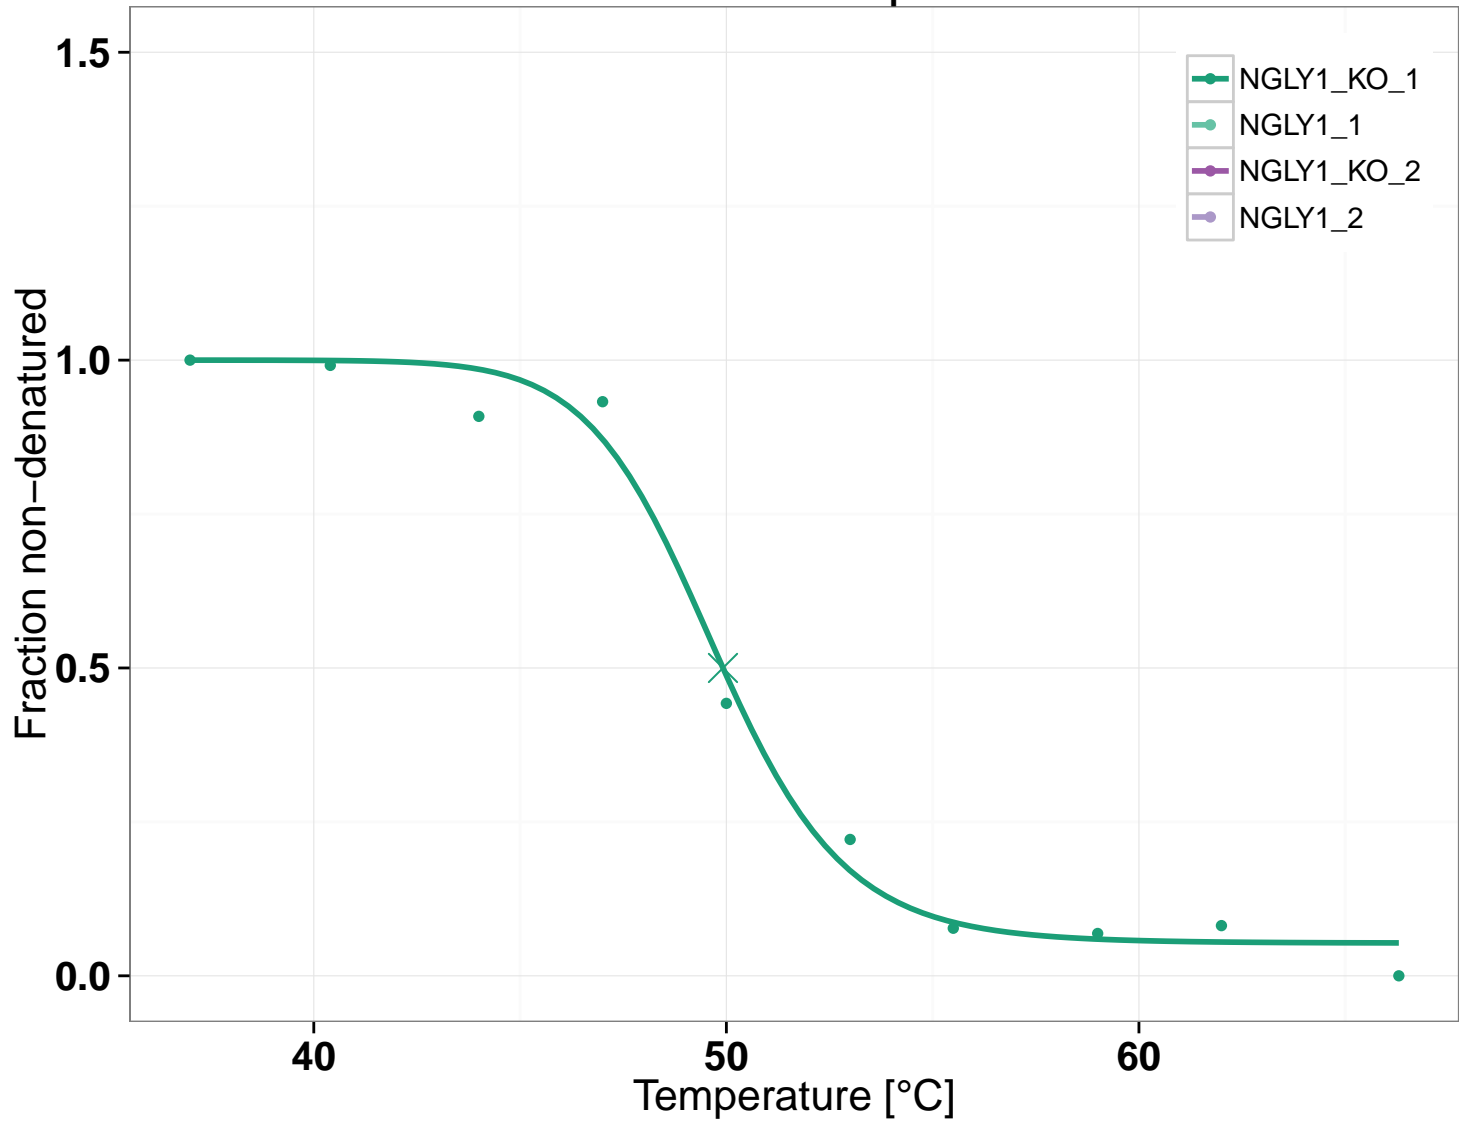

|            | meltPoint | slope | plateau | R2   |
|------------|-----------|-------|---------|------|
| NGLY1_KO_1 | 49.92     | -0.15 | 0.05    | 0.99 |
| NGLY1_1    | -         | -     | -       | -    |
| NGLY1_KO_2 | -         | -     | -       | -    |
| NGLY1_2    | -         | -     | -       | -    |

Supplement: Supplementary file 3778 [file 1]

IPI00004069.2|TATDN2

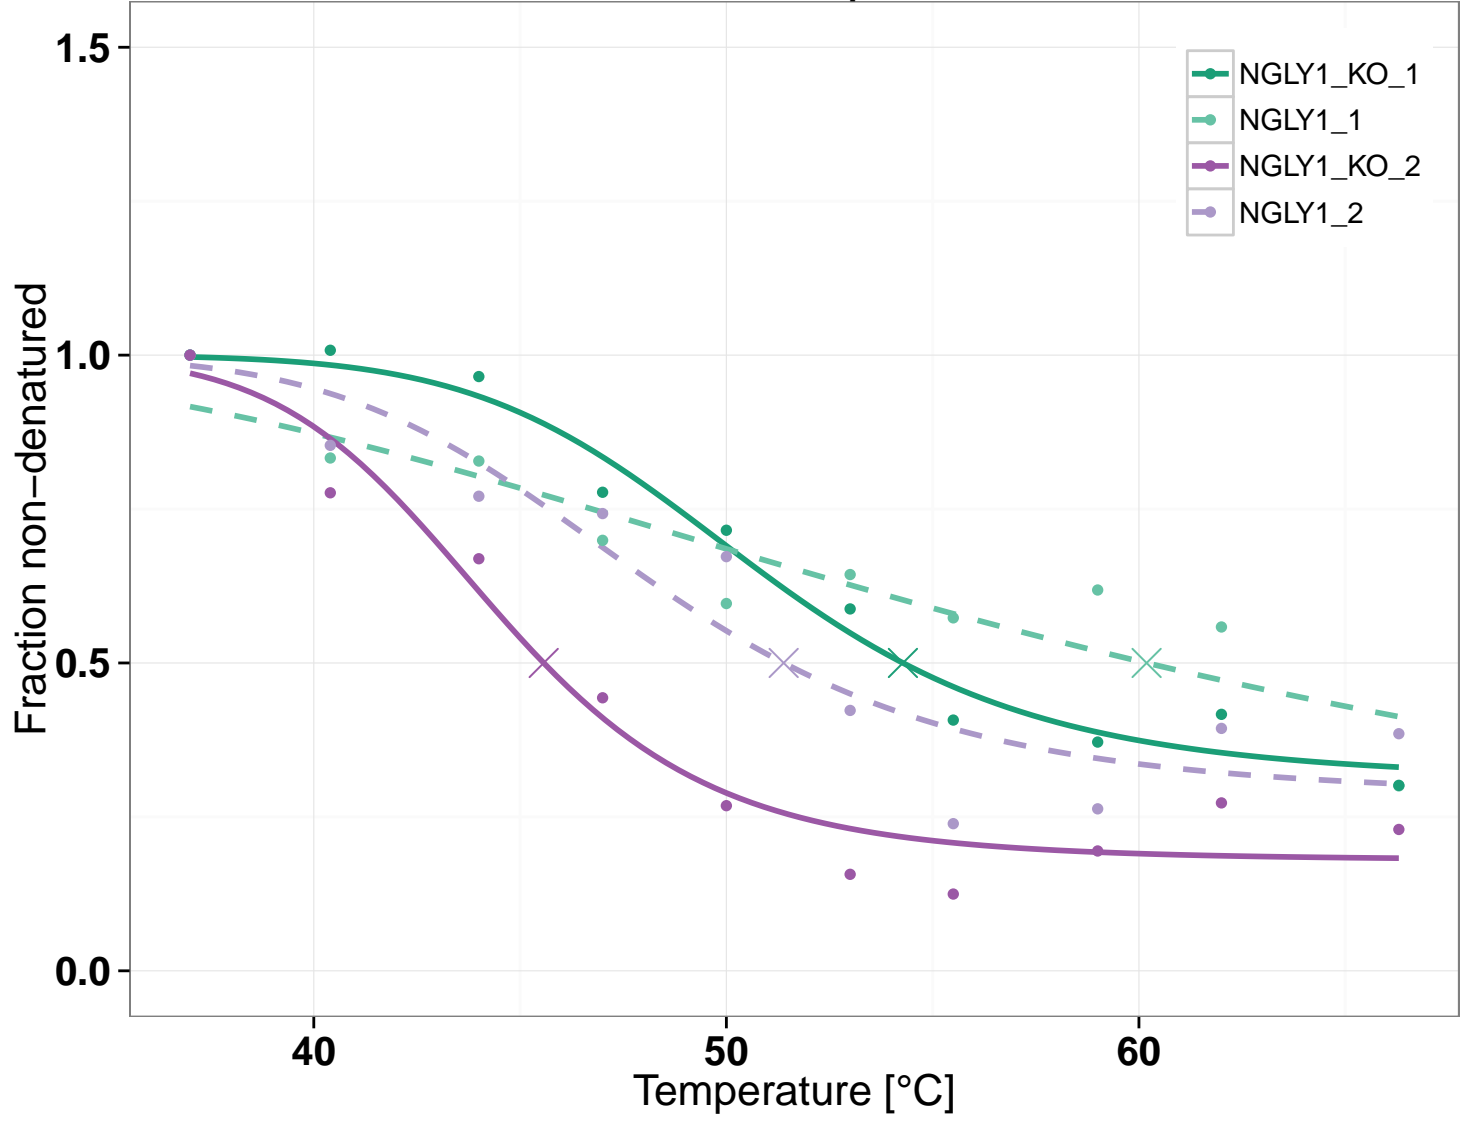

|            | meltPoint | slope  | plateau | R2   |
|------------|-----------|--------|---------|------|
| NGLY1_KO_1 | 54.28     | -0.051 | 0.31    | 0.98 |
| NGLY1_1    | 60.19     | -0.02  | 0       | 0.85 |
| NGLY1_KO_2 | 45.57     | -0.078 | 0.18    | 0.96 |
| NGLY1_2    | 51.39     | -0.048 | 0.28    | 0.89 |

Supplement: Supplementary file 3779 [file 1]

# IPI00418316.5|ZMYND8

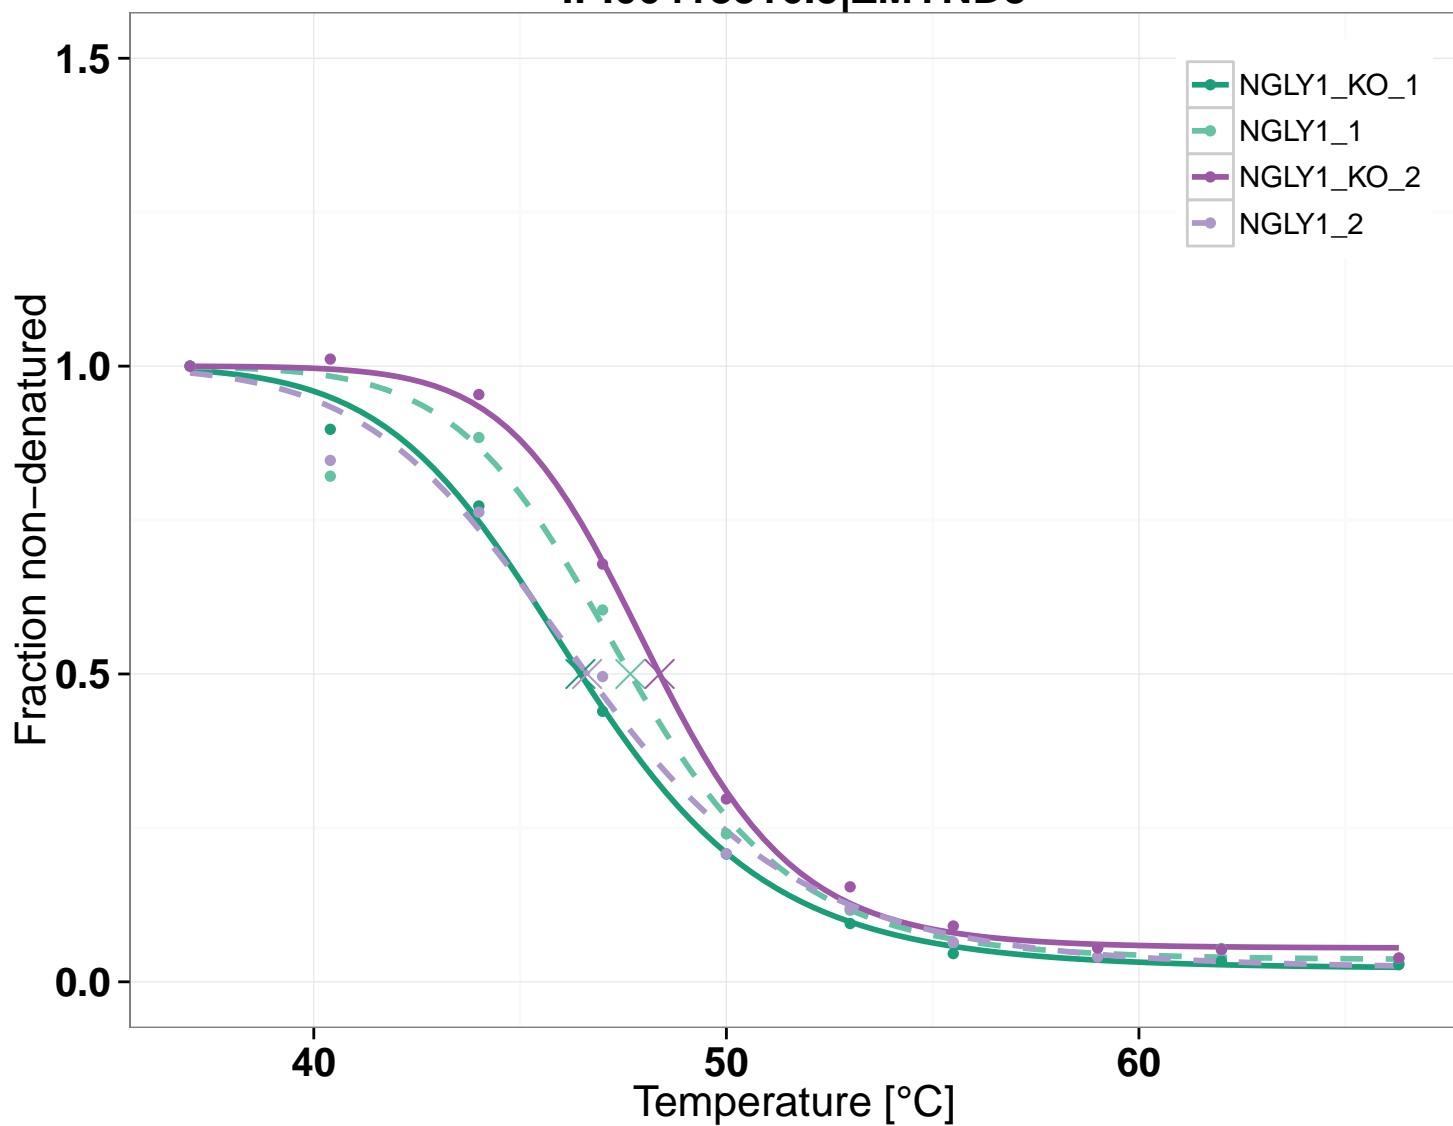

|            | meltPoint | slope  | plateau | R2   |
|------------|-----------|--------|---------|------|
| NGLY1_KO_1 | 46.46     | -0.11  | 0.02    | 1    |
| NGLY1_1    | 47.67     | -0.12  | 0.04    | 0.98 |
| NGLY1_KO_2 | 48.38     | -0.13  | 0.05    | 1    |
| NGLY1_2    | 46.62     | -0.093 | 0.02    | 0.99 |

Supplement: Supplementary file 3780 [file 1]

IPI00745300.2|NAT11

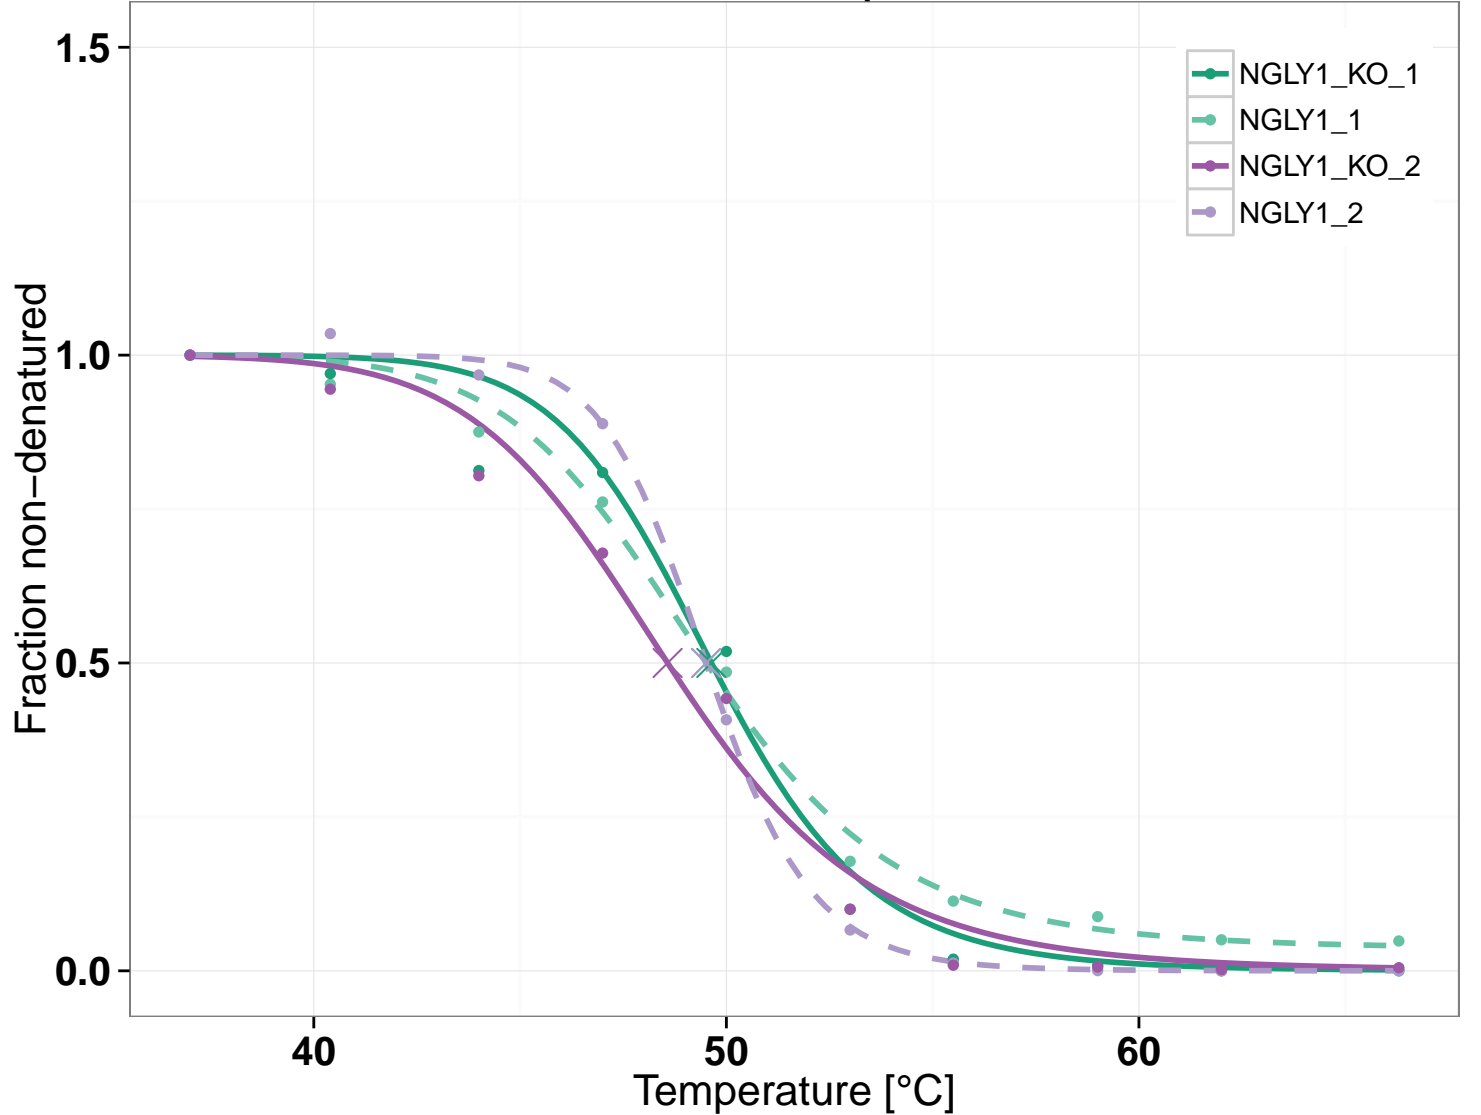

|            | meltPoint | slope | plateau | R2   |
|------------|-----------|-------|---------|------|
| NGLY1_KO_1 | 49.64     | -0.13 | 0       | 0.98 |
| NGLY1_1    | 49.51     | -0.1  | 0.04    | 0.99 |
| NGLY1_KO_2 | 48.58     | -0.1  | 0       | 0.99 |
| NGLY1_2    | 49.51     | -0.2  | 0       | 1    |

Supplement: Supplementary file 3781 [file 1]

# IPI00072377.1|SET

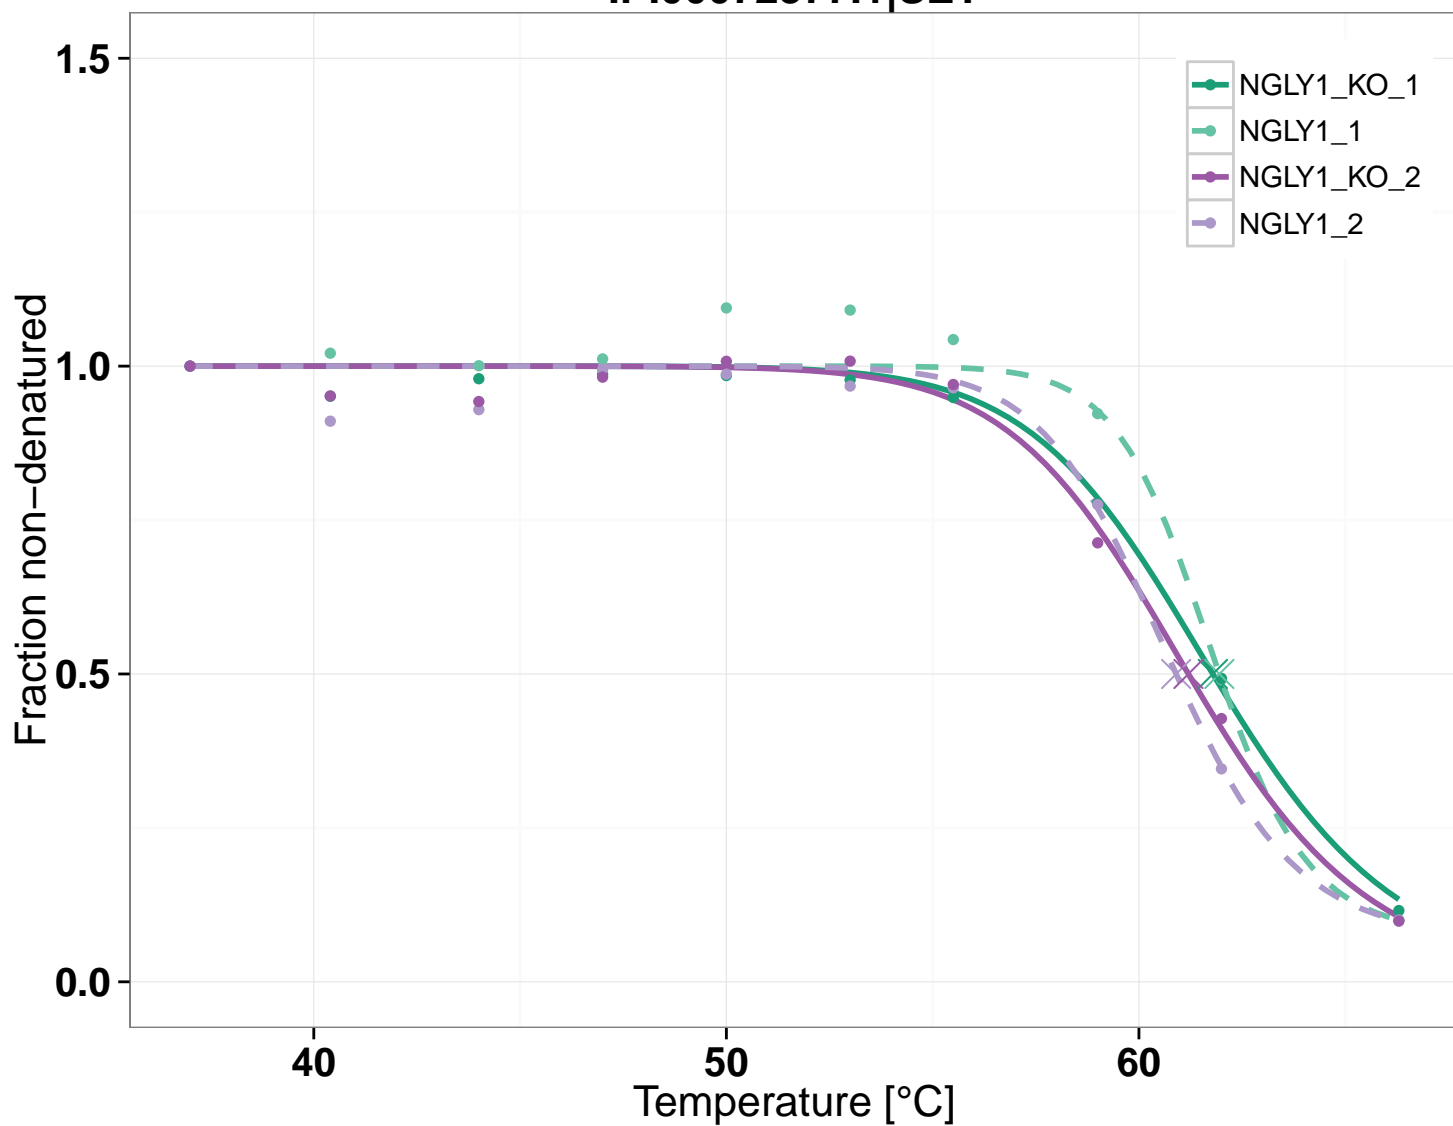

|            | meltPoint | slope | plateau | R2   |
|------------|-----------|-------|---------|------|
| NGLY1_KO_1 | 61.79     | -0.11 | 0       | 0.99 |
| NGLY1_1    | 61.95     | -0.2  | 0.08    | 0.98 |
| NGLY1_KO_2 | 61.2      | -0.11 | 0       | 0.99 |
| NGLY1_2    | 60.9      | -0.15 | 0.07    | 0.98 |

Supplement: Supplementary file 3782 [file 1]

IPI00218187.1|PPP1CC

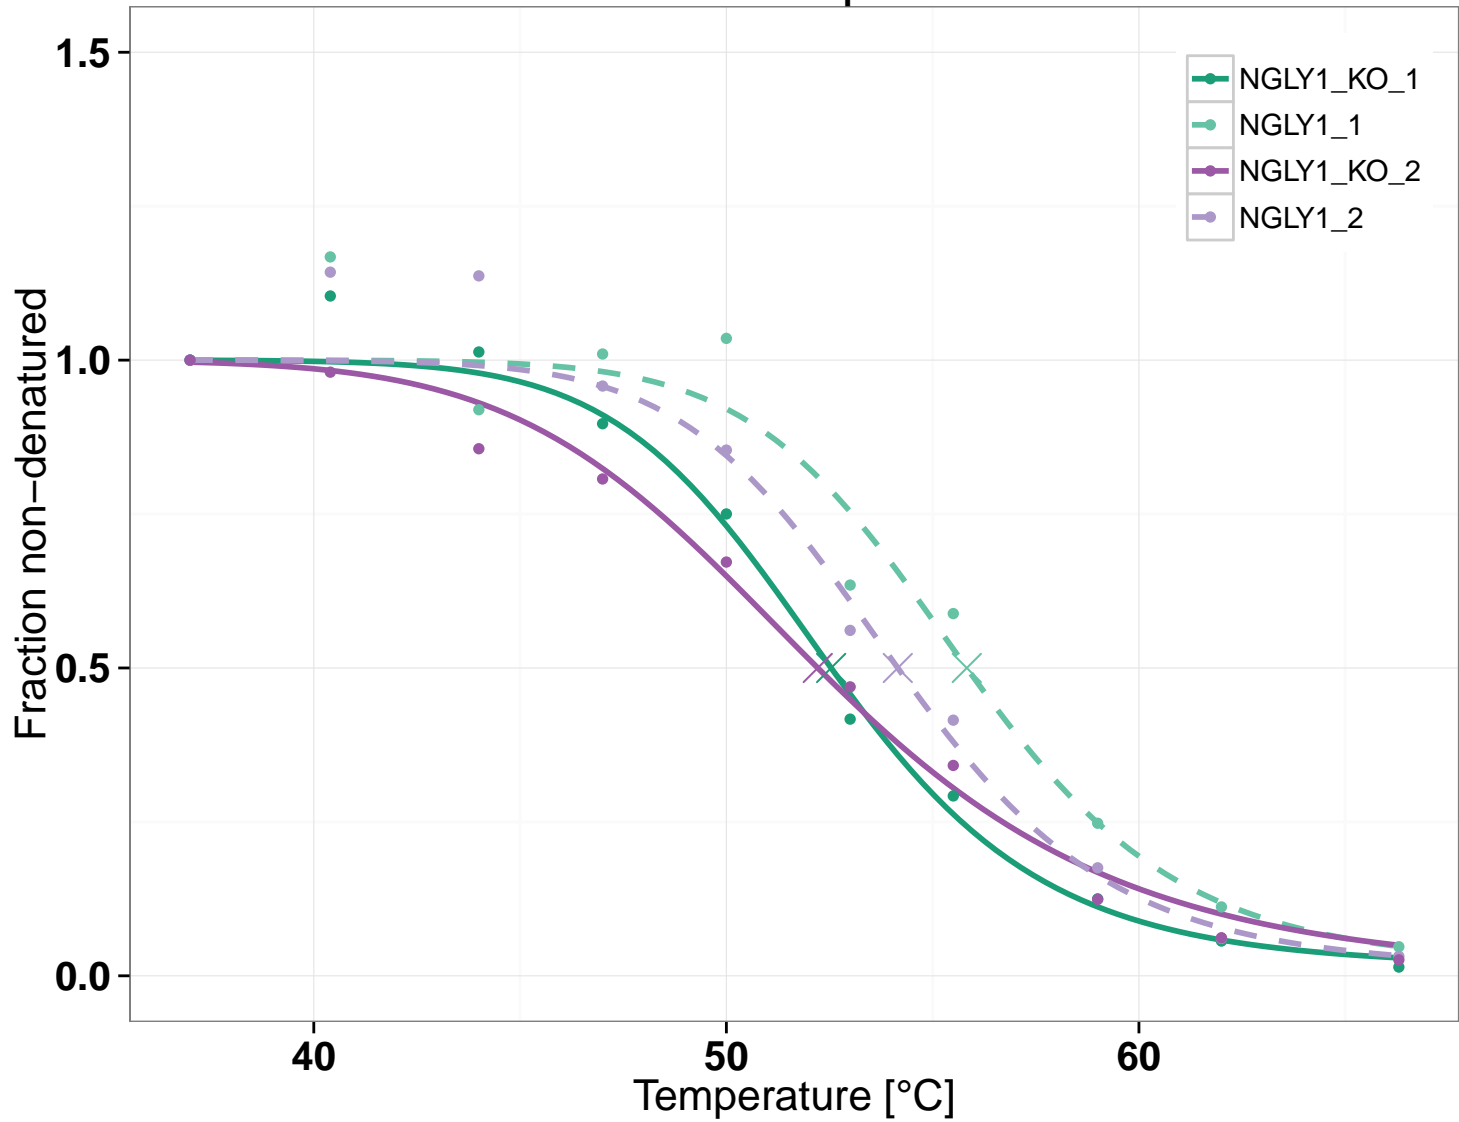

|            | meltPoint | slope  | plateau | R2   |
|------------|-----------|--------|---------|------|
| NGLY1_KO_1 | 52.54     | -0.094 | 0.01    | 0.99 |
| NGLY1_1    | 55.83     | -0.095 | 0.02    | 0.96 |
| NGLY1_KO_2 | 52.22     | -0.068 | 0       | 0.99 |
| NGLY1_2    | 54.15     | -0.095 | 0.01    | 0.97 |

Supplement: Supplementary file 3783 [file 1]

IPI00456649.2|KIAA1161

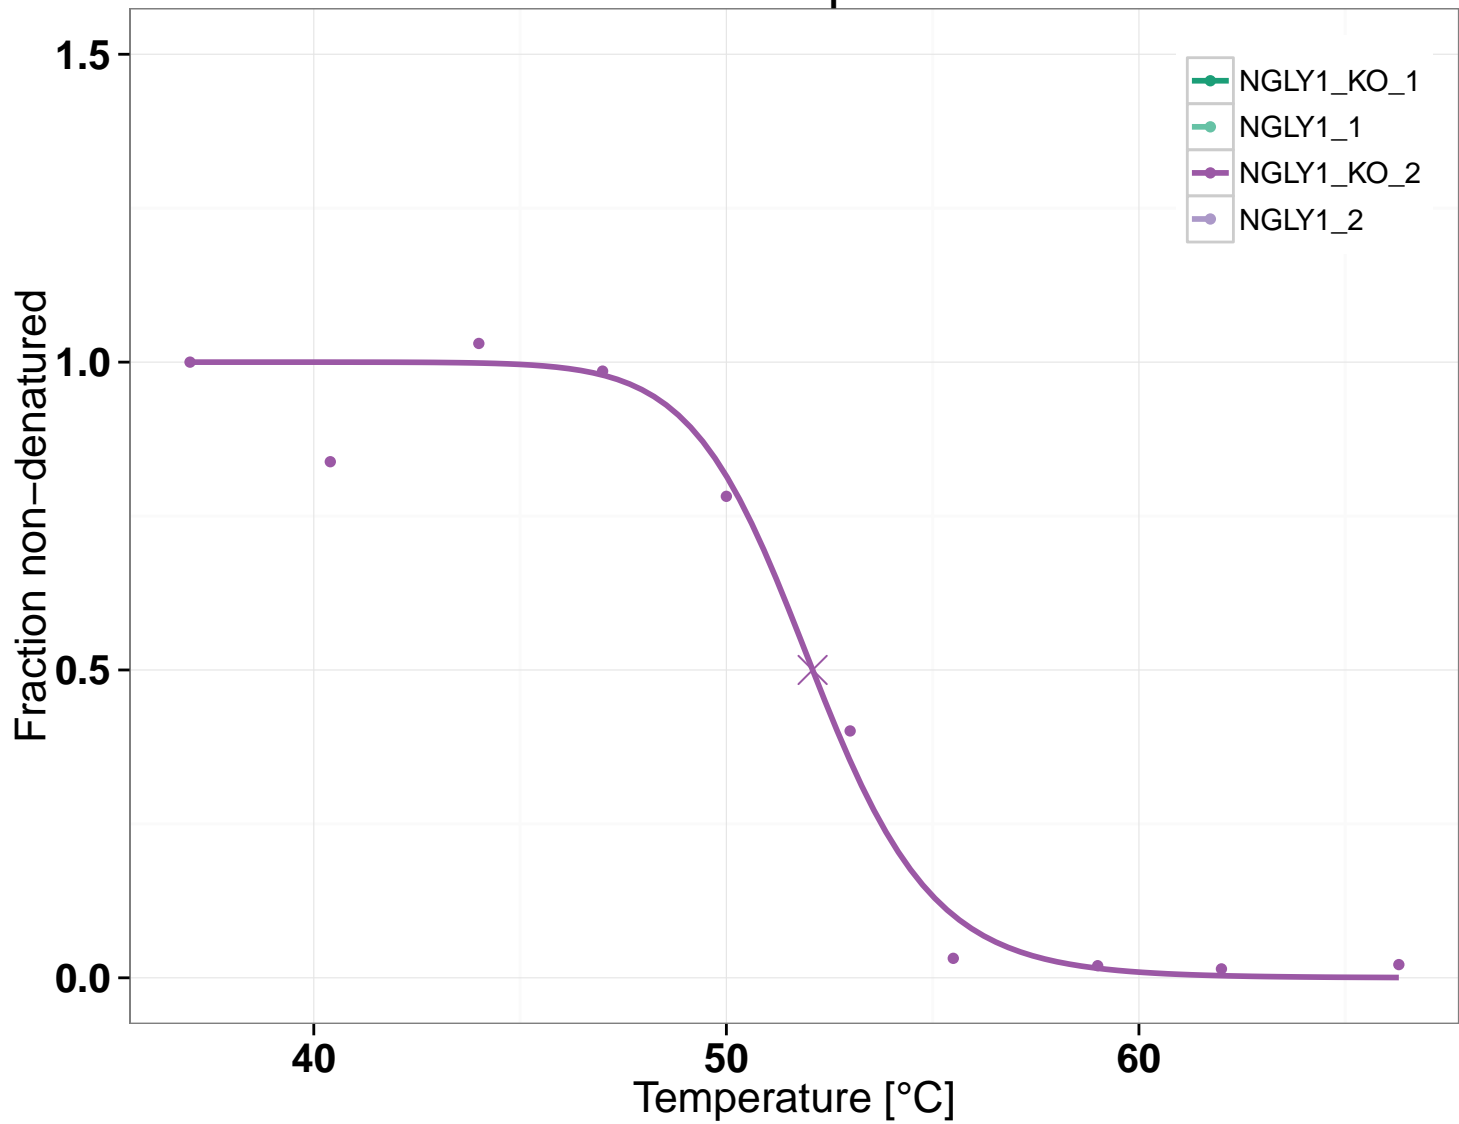

|            | meltPoint | slope | plateau | R2   |
|------------|-----------|-------|---------|------|
| NGLY1_KO_1 | -         | -     | -       | -    |
| NGLY1_1    | -         | -     | -       | -    |
| NGLY1_KO_2 | 52.09     | -0.17 | 0       | 0.98 |
| NGLY1_2    | -         | -     | -       | -    |

Supplement: Supplementary file 3784 [file 1]

# IPI00099986.5|FN3KRP

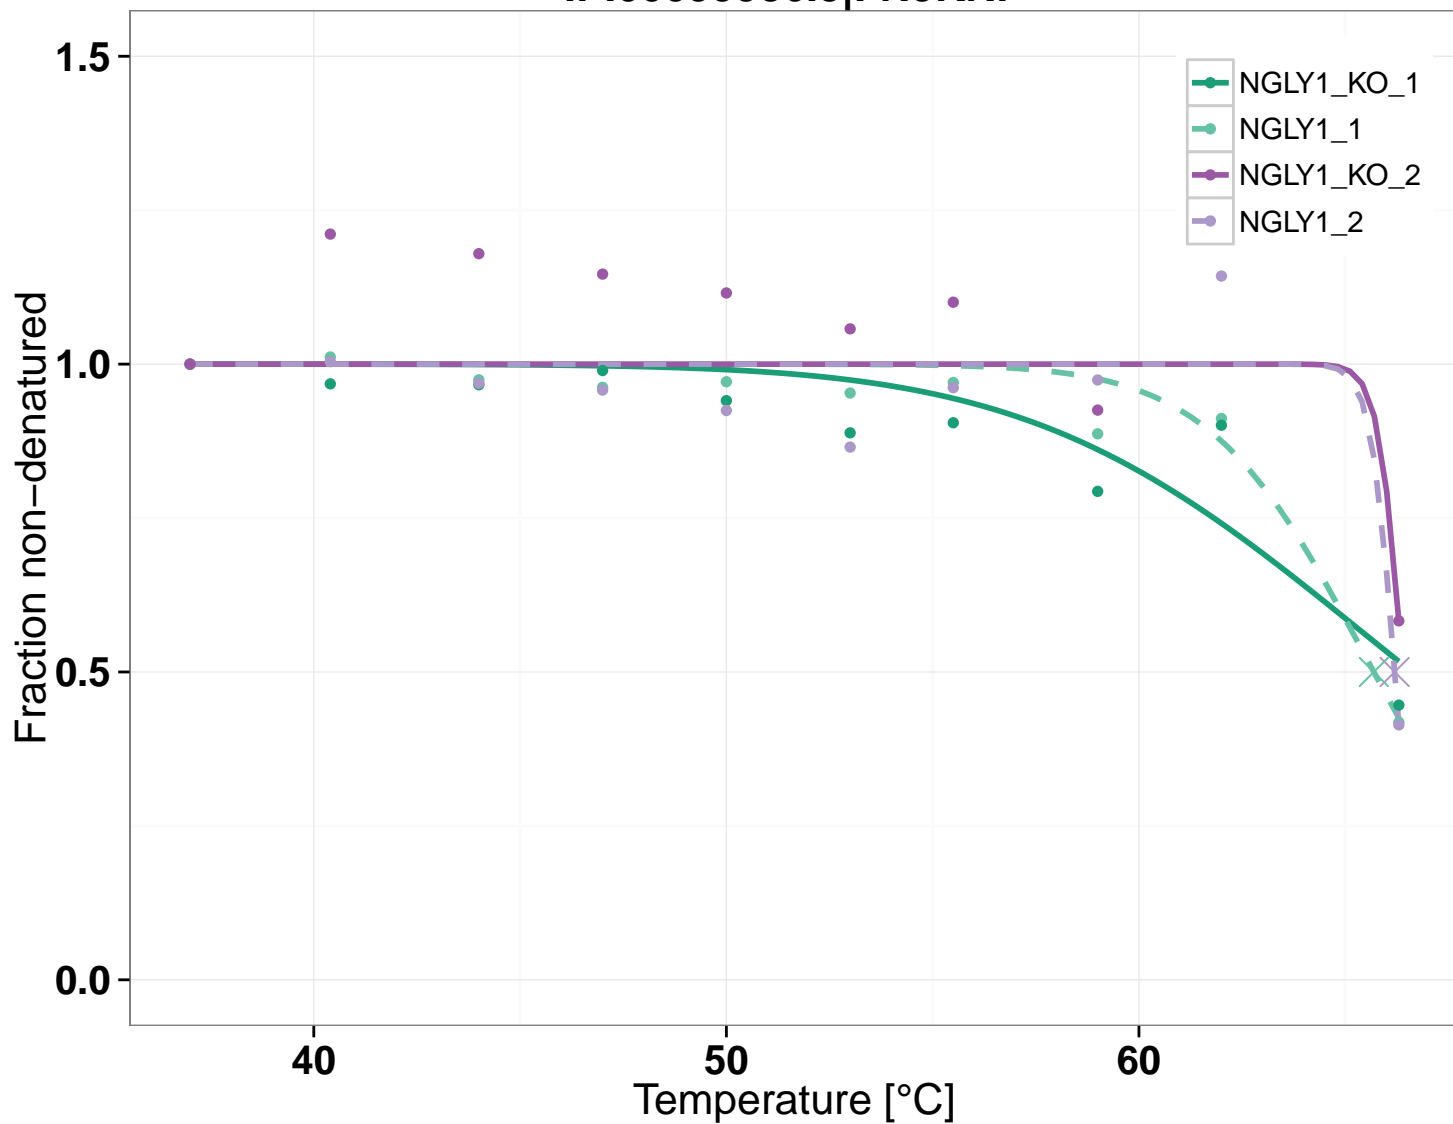

|            | meltPoint | slope  | plateau | R2   |
|------------|-----------|--------|---------|------|
| NGLY1_KO_1 | -         | -0.054 | 0       | 0.8  |
| NGLY1_1    | 65.69     | -0.12  | 0       | 0.94 |
| NGLY1_KO_2 | -         | -      | 0       | 0.35 |
| NGLY1_2    | 66.2      | -0.86  | 0       | 0.85 |

Supplement: Supplementary file 3785 [file 1]

IPI00410549.6|FLJ44048

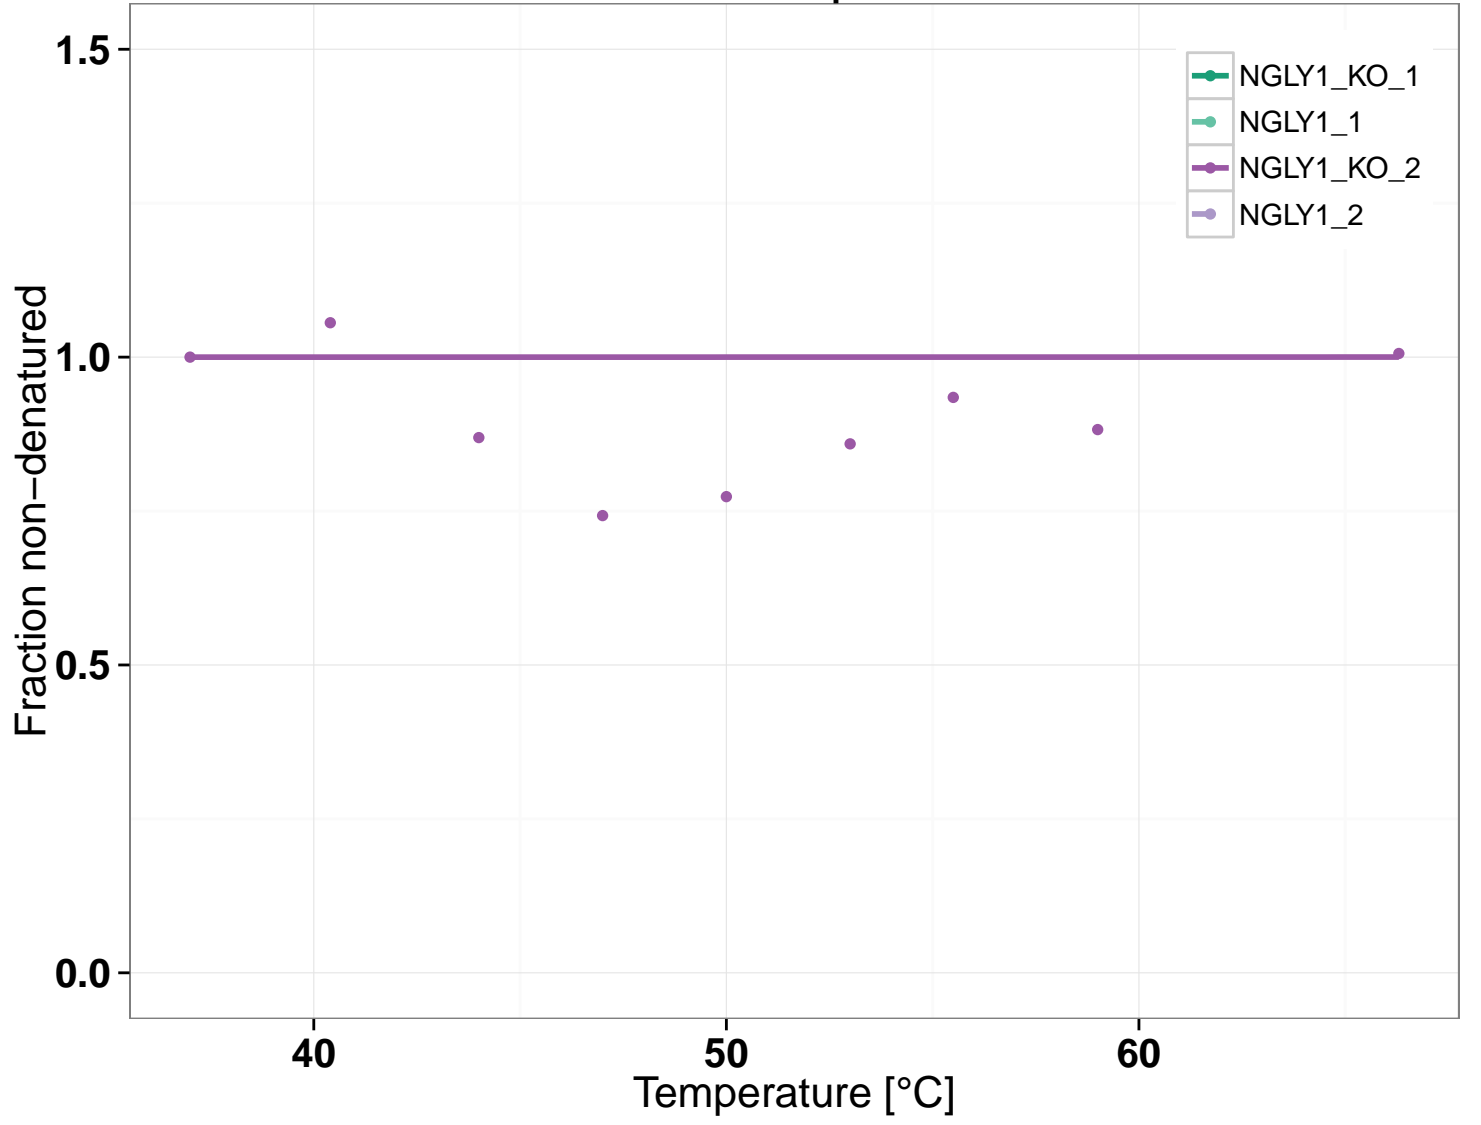

|            | meltPoint | slope | plateau | R2    |
|------------|-----------|-------|---------|-------|
| NGLY1_KO_1 | -         | -     | -       | -     |
| NGLY1_1    | -         | -     | -       | -     |
| NGLY1_KO_2 | -         | -     | 1.5     | -0.29 |
| NGLY1_2    | -         | -     | -       | -     |

Supplement: Supplementary file 3786 [file 1]

# IPI00021147.1|DEGS1

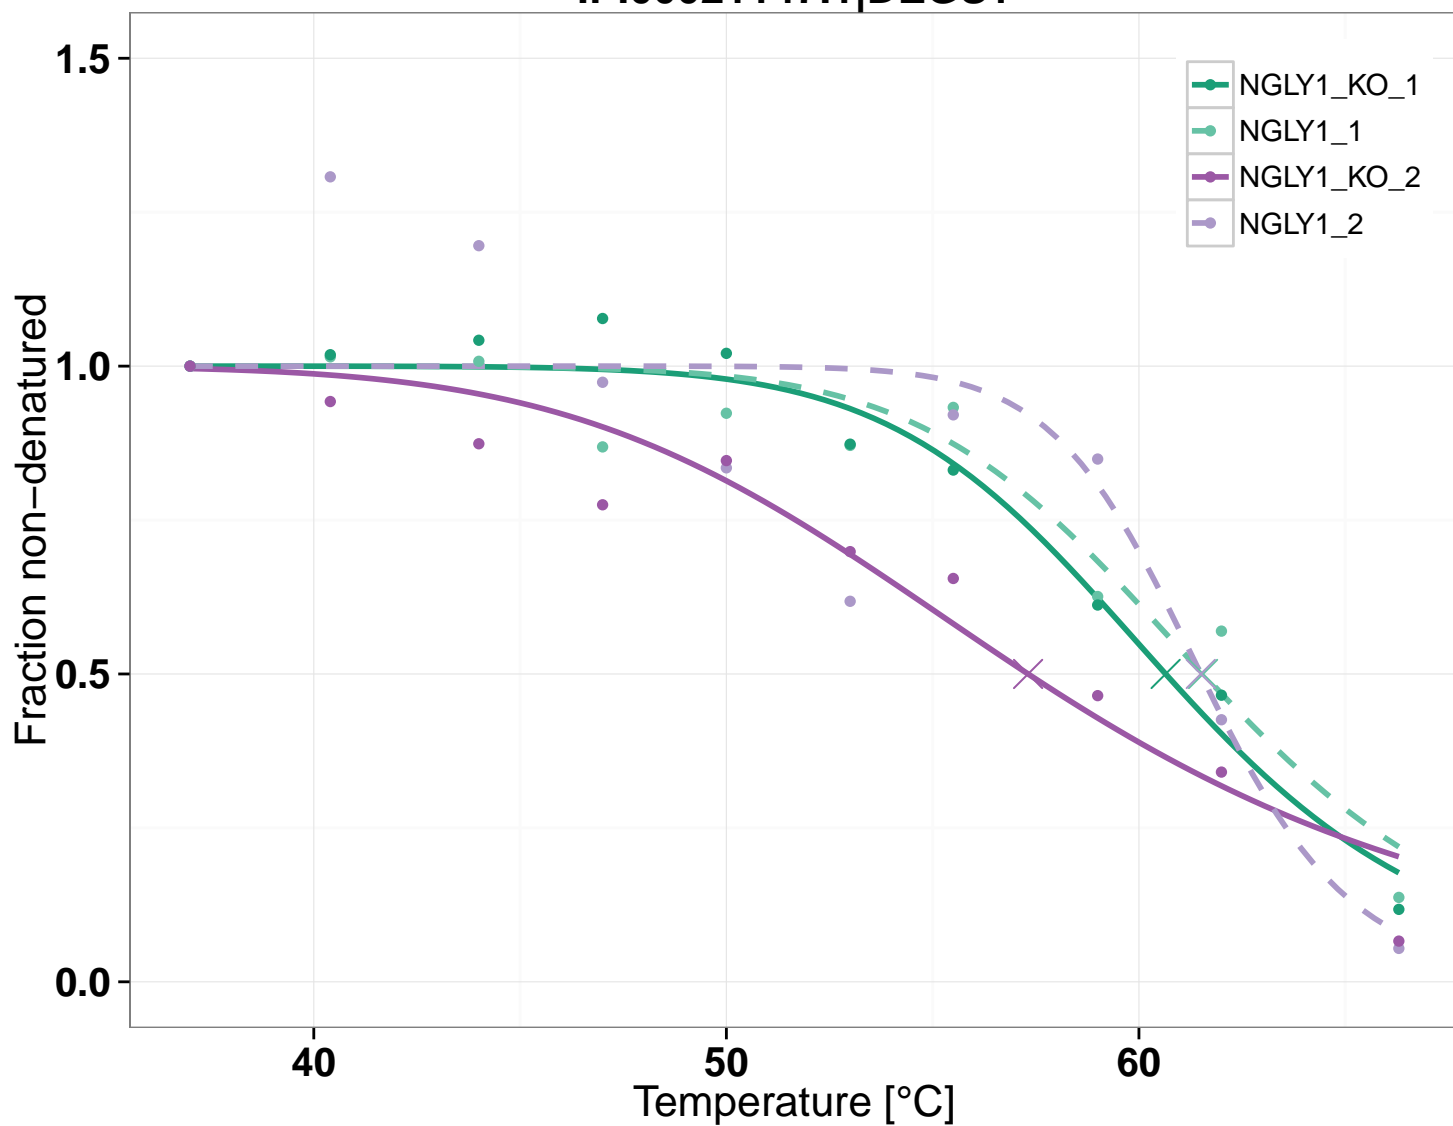

|            | meltPoint | slope  | plateau | R2   |
|------------|-----------|--------|---------|------|
| NGLY1_KO_1 | 60.65     | -0.075 | 0       | 0.98 |
| NGLY1_1    | 61.55     | -0.073 | 0       | 0.93 |
| NGLY1_KO_2 | 57.31     | -0.046 | 0       | 0.93 |
| NGLY1_2    | 61.5      | -0.14  | 0       | 0.75 |

Supplement: Supplementary file 3787 [file 1]

IPI00643435.1|ATAD3A

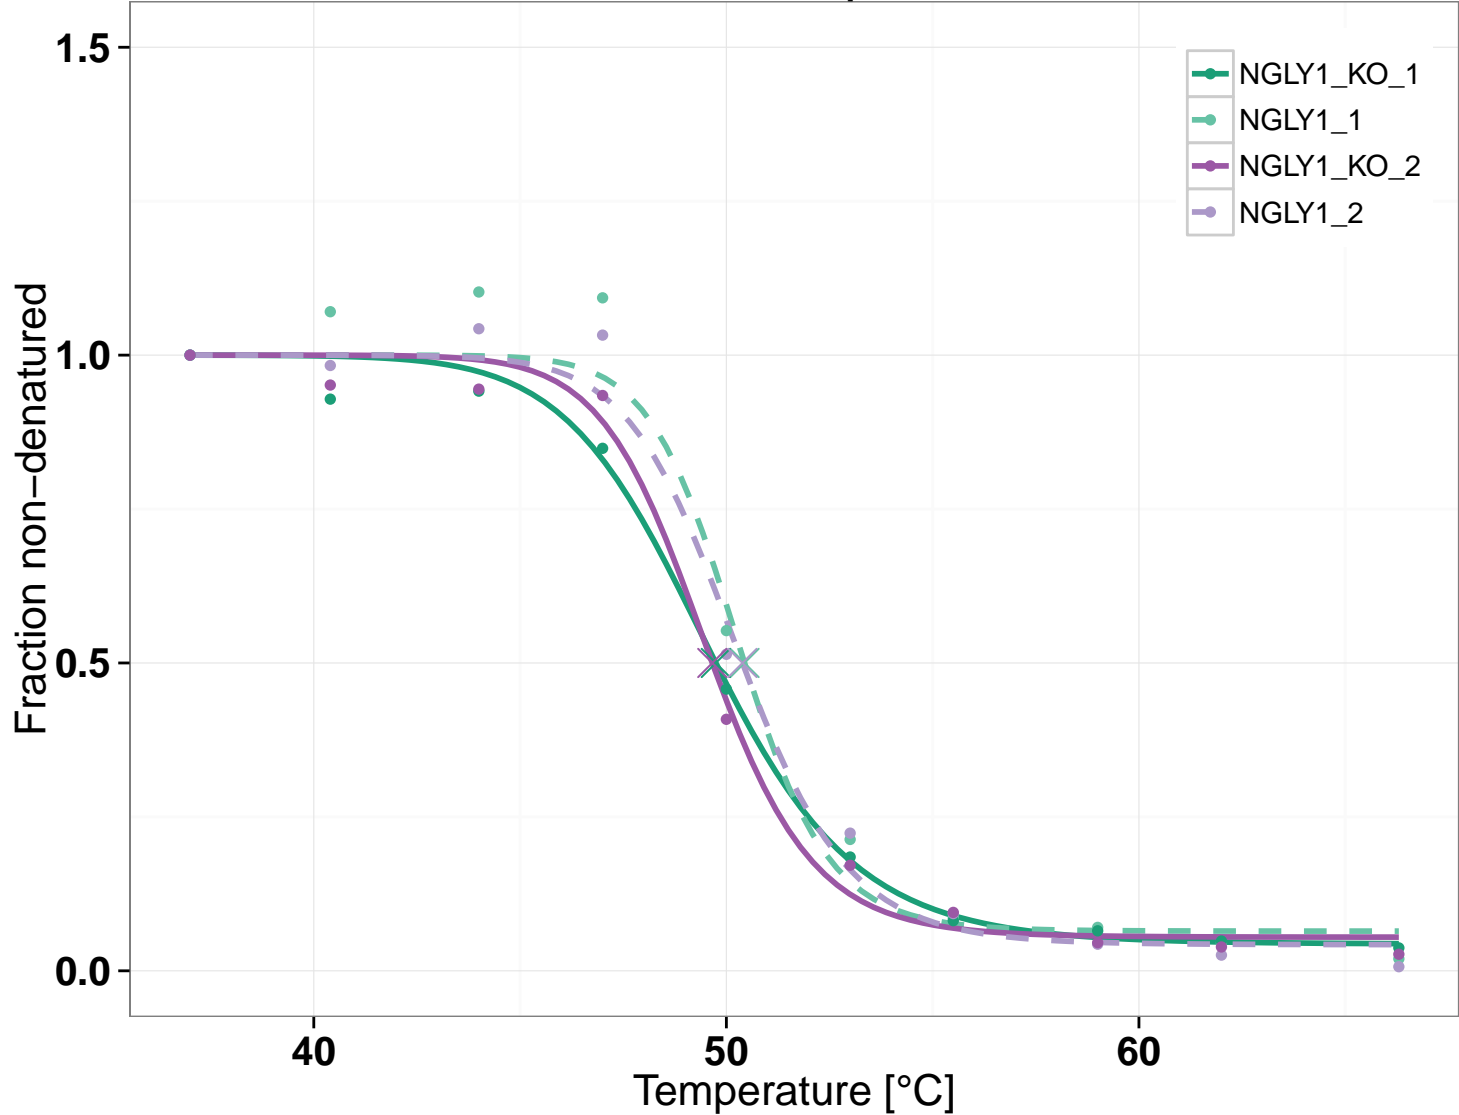

|            | meltpoint | slope | plateau | R2   |
|------------|-----------|-------|---------|------|
| NGLY1_KO_1 | 49.74     | -0.14 | 0.04    | 1    |
| NGLY1_1    | 50.44     | -0.22 | 0.06    | 0.98 |
| NGLY1_KO_2 | 49.66     | -0.18 | 0.05    | 0.99 |
| NGLY1_2    | 50.39     | -0.18 | 0.04    | 0.99 |

Supplement: Supplementary file 3788 [file 1]

IPI00645153.1|PFKFB3

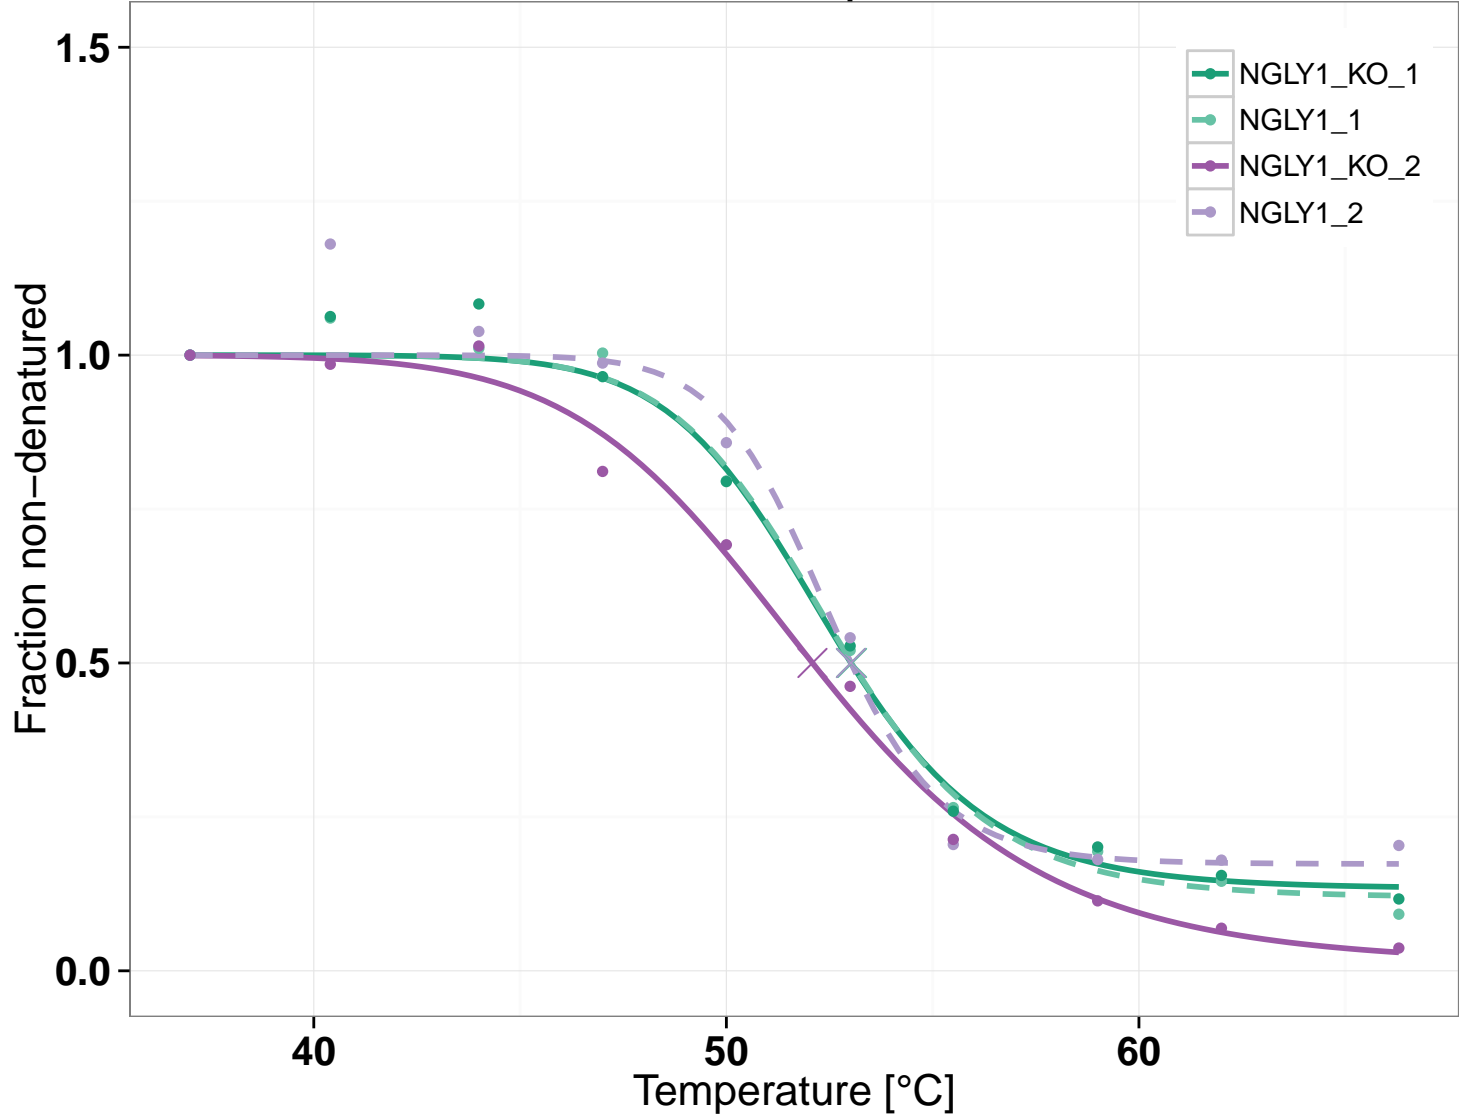

|            | meltPoint | slope  | plateau | R2   |
|------------|-----------|--------|---------|------|
| NGLY1_KO_1 | 53.02     | -0.11  | 0.13    | 0.99 |
| NGLY1_1    | 53.05     | -0.11  | 0.12    | 0.99 |
| NGLY1_KO_2 | 52.09     | -0.086 | 0.01    | 0.99 |
| NGLY1_2    | 53.02     | -0.15  | 0.17    | 0.97 |

Supplement: Supplementary file 3789 [file 1]

IPI00216890.2|RELL1

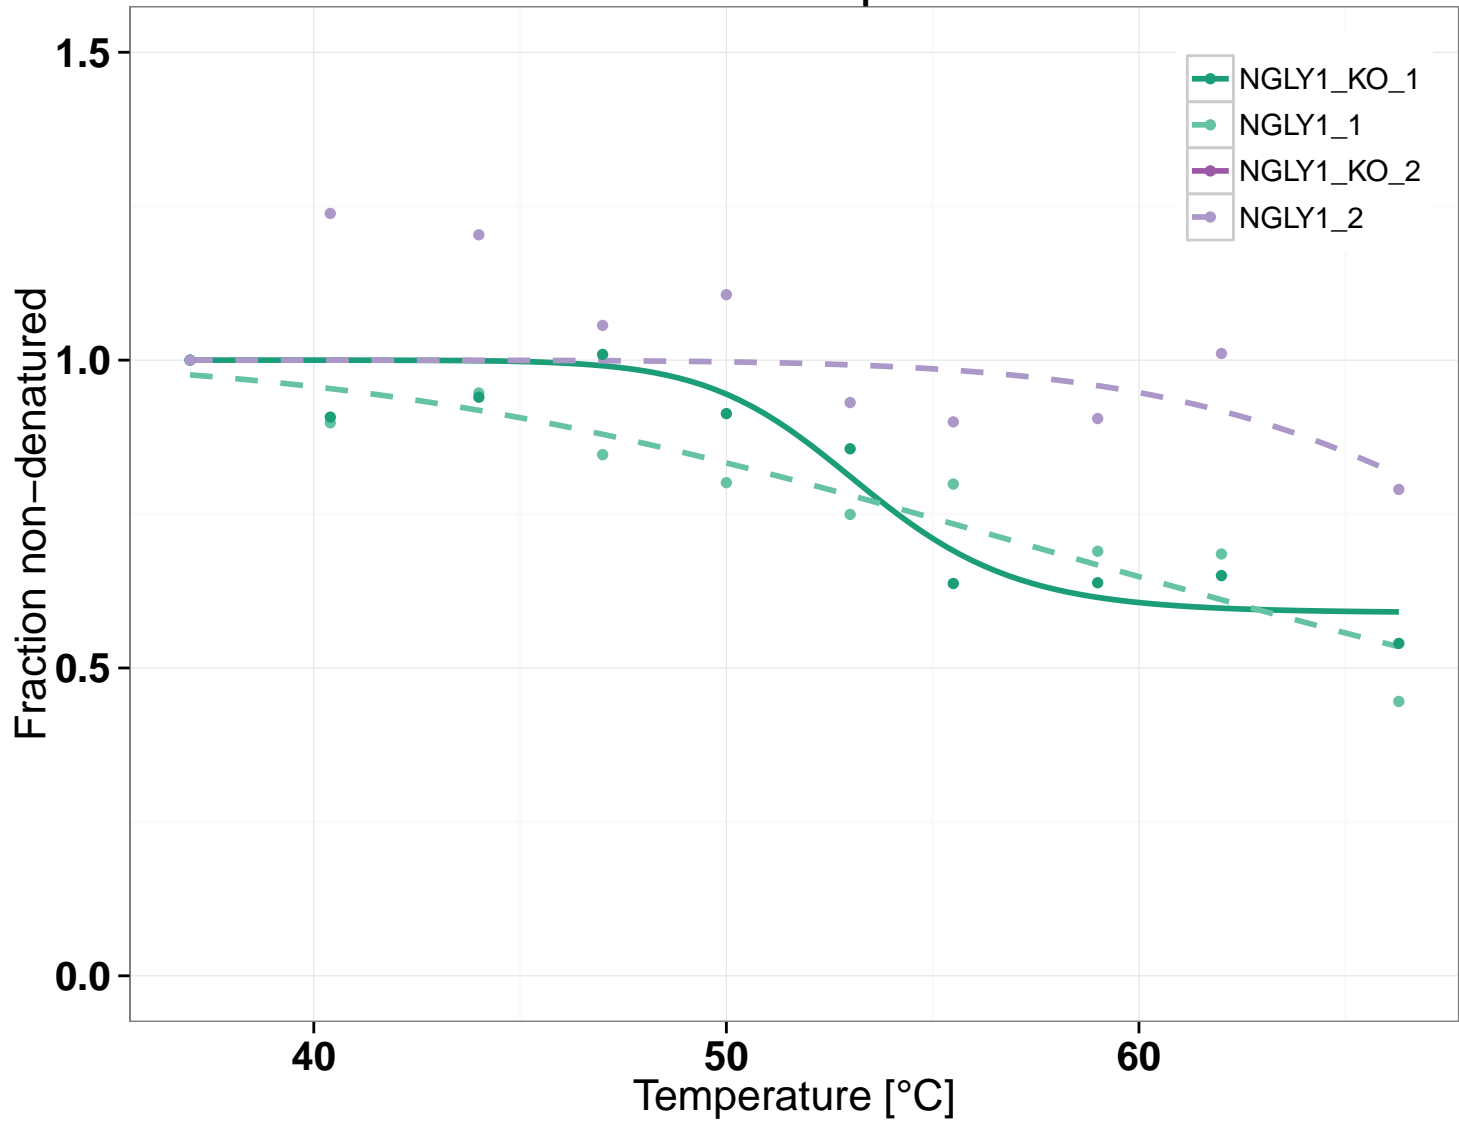

|            | meltPoint | slope  | plateau | R2   |
|------------|-----------|--------|---------|------|
| NGLY1_KO_1 | -         | -0.055 | 0.59    | 0.91 |
| NGLY1_1    | -         | -0.019 | 0       | 0.89 |
| NGLY1_KO_2 | -         | -      | -       | -    |
| NGLY1_2    | -         | -      | 0       | 0.24 |

Supplement: Supplementary file 3790 [file 1]

IPI00604599.2|TMED3

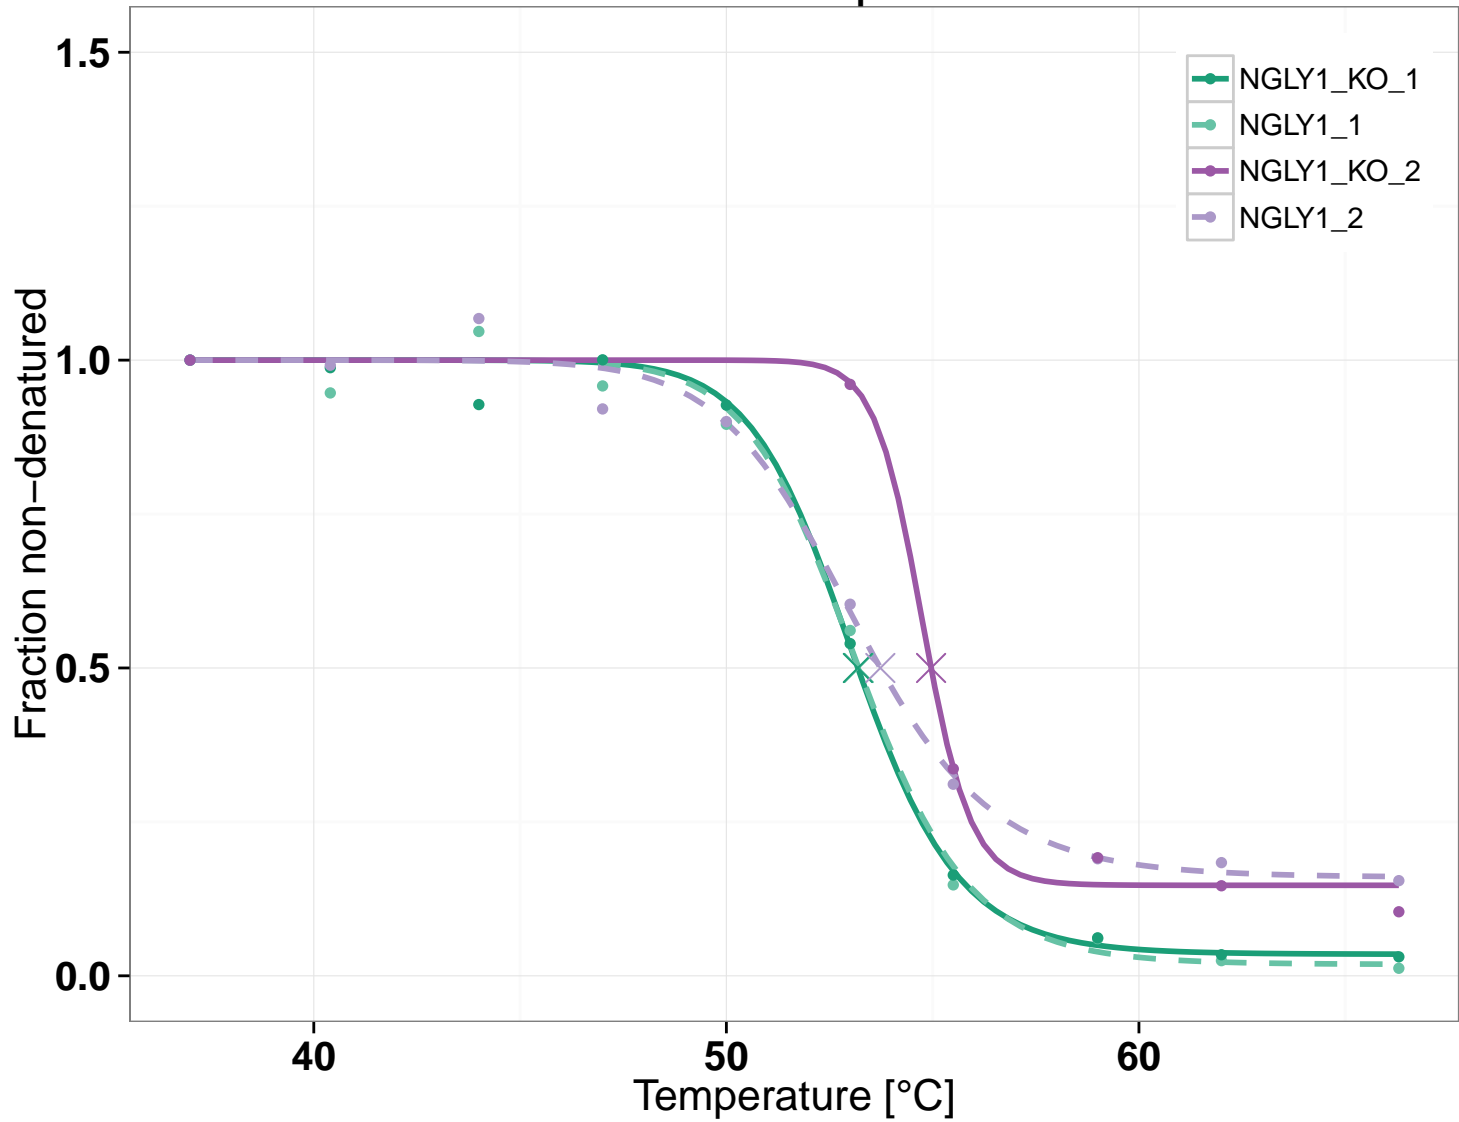

|            | meltPoint | slope | plateau | R2   |
|------------|-----------|-------|---------|------|
| NGLY1_KO_1 | 53.19     | -0.19 | 0.04    | 1    |
| NGLY1_1    | 53.21     | -0.18 | 0.02    | 1    |
| NGLY1_KO_2 | 54.96     | -0.37 | 0.15    | 0.6  |
| NGLY1_2    | 53.73     | -0.13 | 0.16    | 0.99 |

Supplement: Supplementary file 3791 [file 1]

# IPI00001117.1|IPP

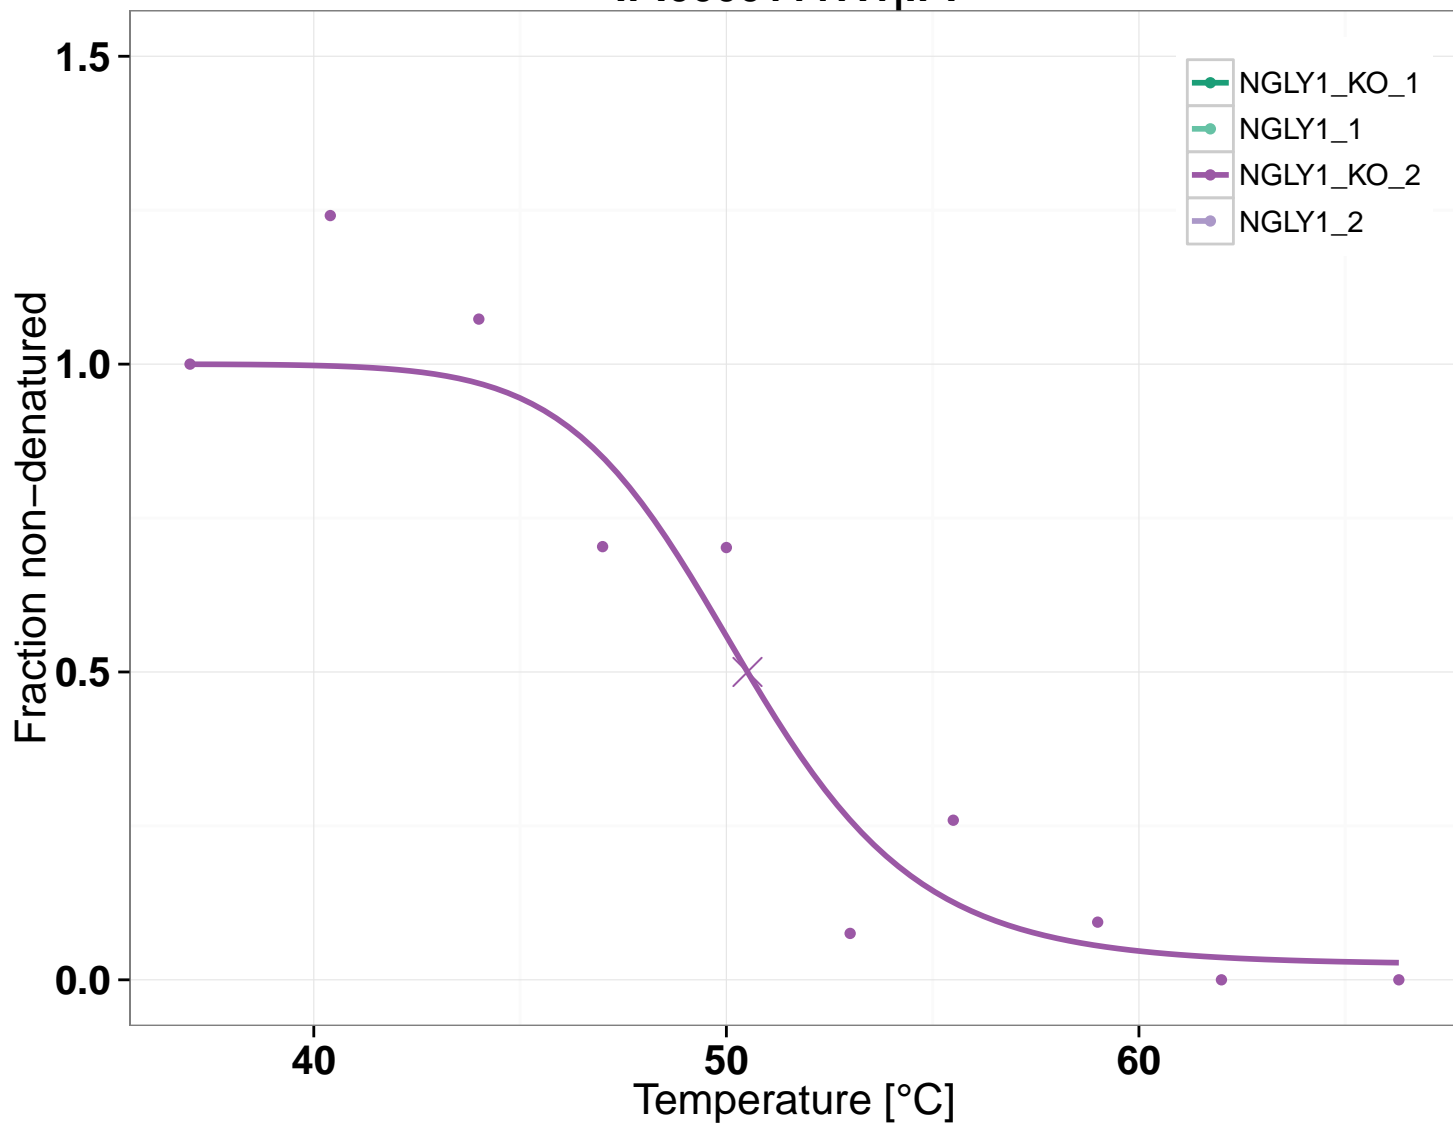

|            | meltPoint | slope | plateau | R2   |
|------------|-----------|-------|---------|------|
| NGLY1_KO_1 | —         | —     | —       | —    |
| NGLY1_1    | —         | —     | —       | —    |
| NGLY1_KO_2 | 50.51     | -0.11 | 0.02    | 0.92 |
| NGLY1_2    | —         | —     | —       | —    |

Supplement: Supplementary file 3792 [file 1]

IPI00166955.3|LOC255374

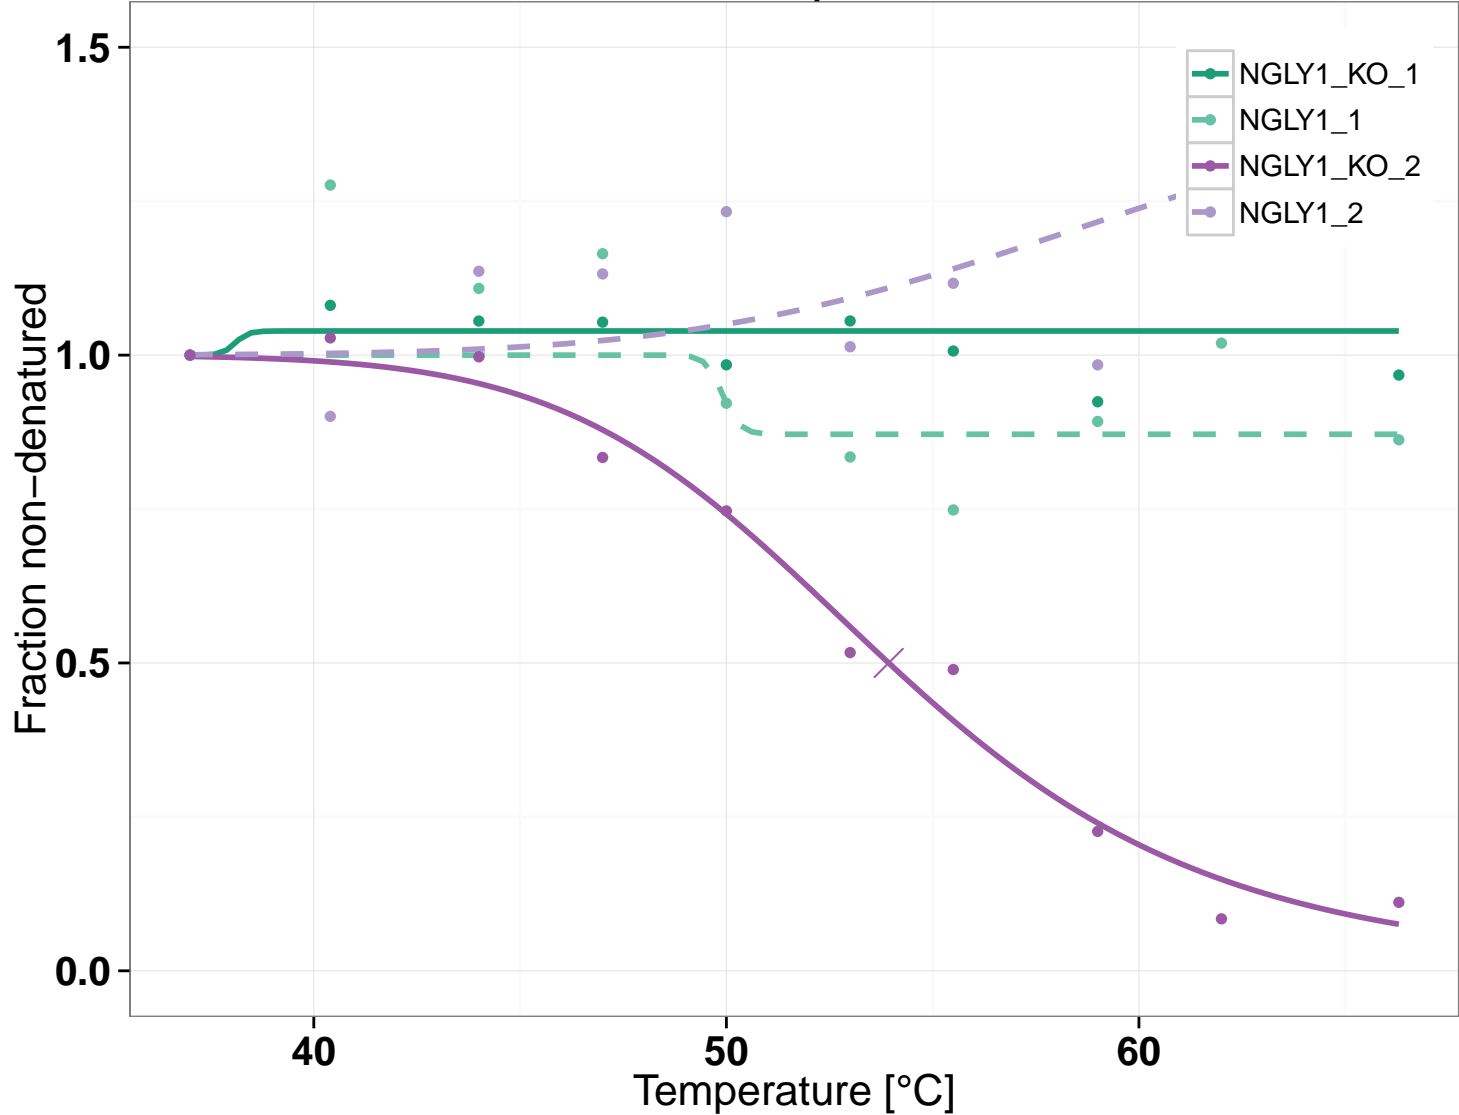

|            | meltPoint | slope  | plateau | R2   |
|------------|-----------|--------|---------|------|
| NGLY1_KO_1 | -         | 0.064  | 1.04    | 0.02 |
| NGLY1_1    | -         | -0.16  | 0.87    | 0.36 |
| NGLY1_KO_2 | 53.93     | -0.064 | 0       | 0.98 |
| NGLY1_2    | -         | 0.022  | 1.5     | 0.45 |

Supplement: Supplementary file 3793 [file 1]

IPI00031666.6|RP3-402G11 5

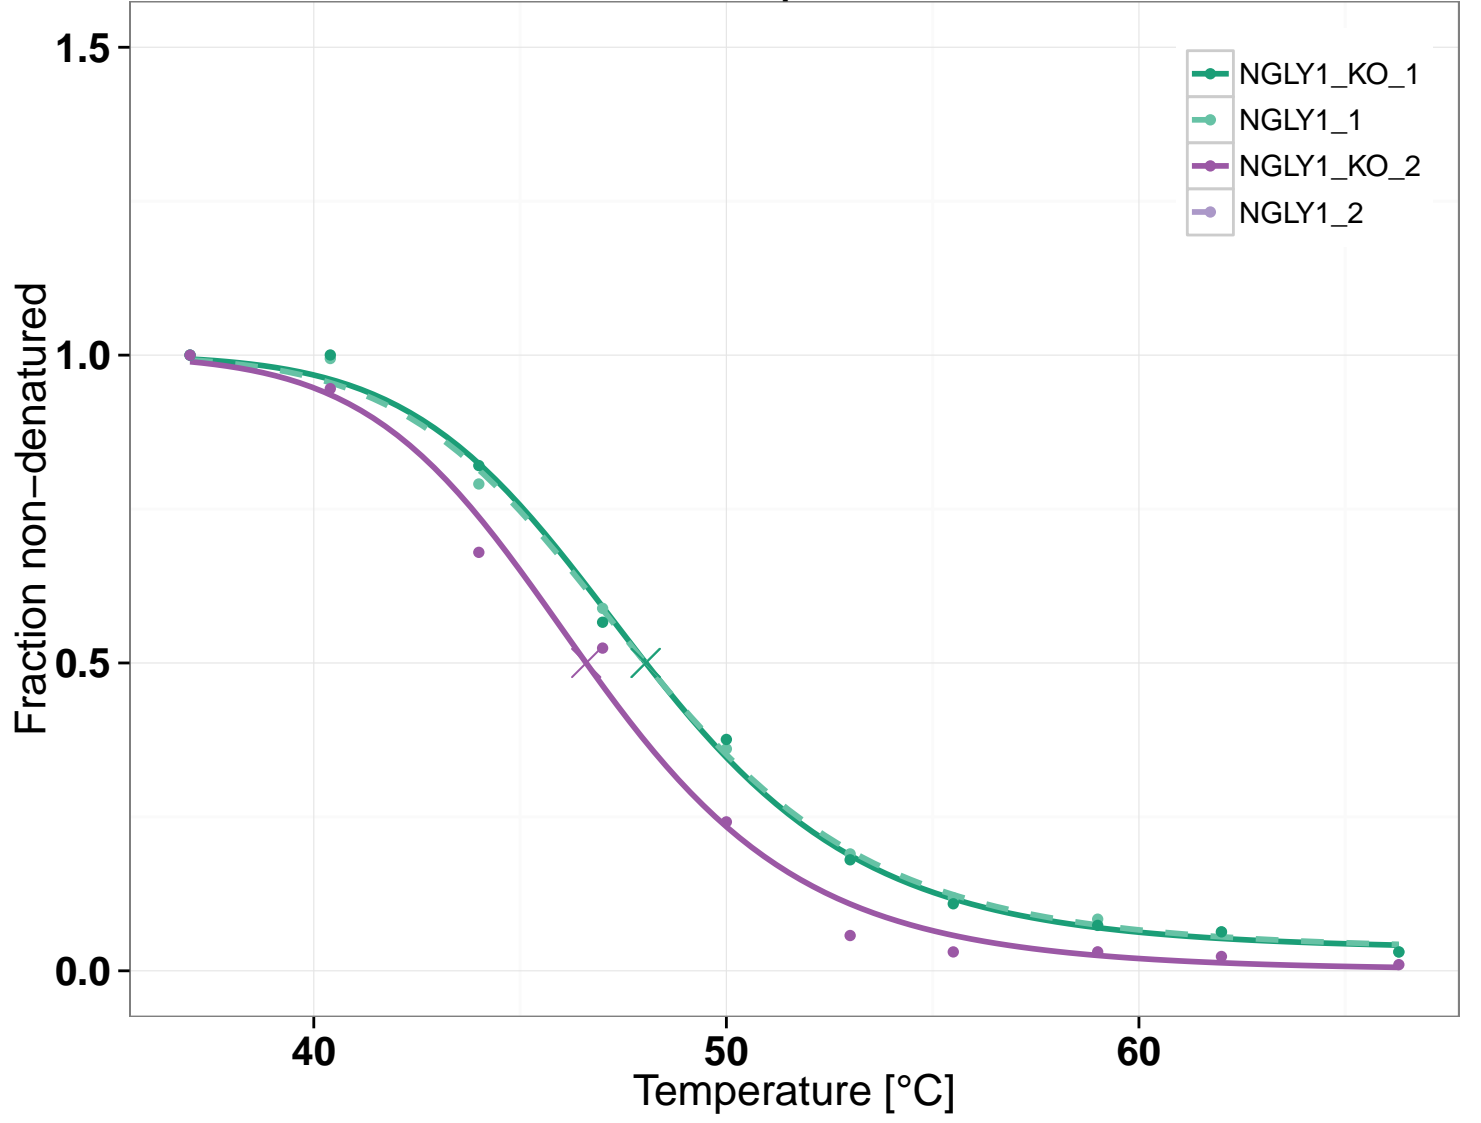

|            | meltPoint | slope  | plateau | R2   |
|------------|-----------|--------|---------|------|
| NGLY1_KO_1 | 48.05     | -0.088 | 0.03    | 1    |
| NGLY1_1    | 48.03     | -0.084 | 0.03    | 1    |
| NGLY1_KO_2 | 46.6      | -0.095 | 0       | 0.99 |
| NGLY1_2    | -         | -      | -       | -    |

Supplement: Supplementary file 3794 [file 1]

# IPI00006170.2|FANCA

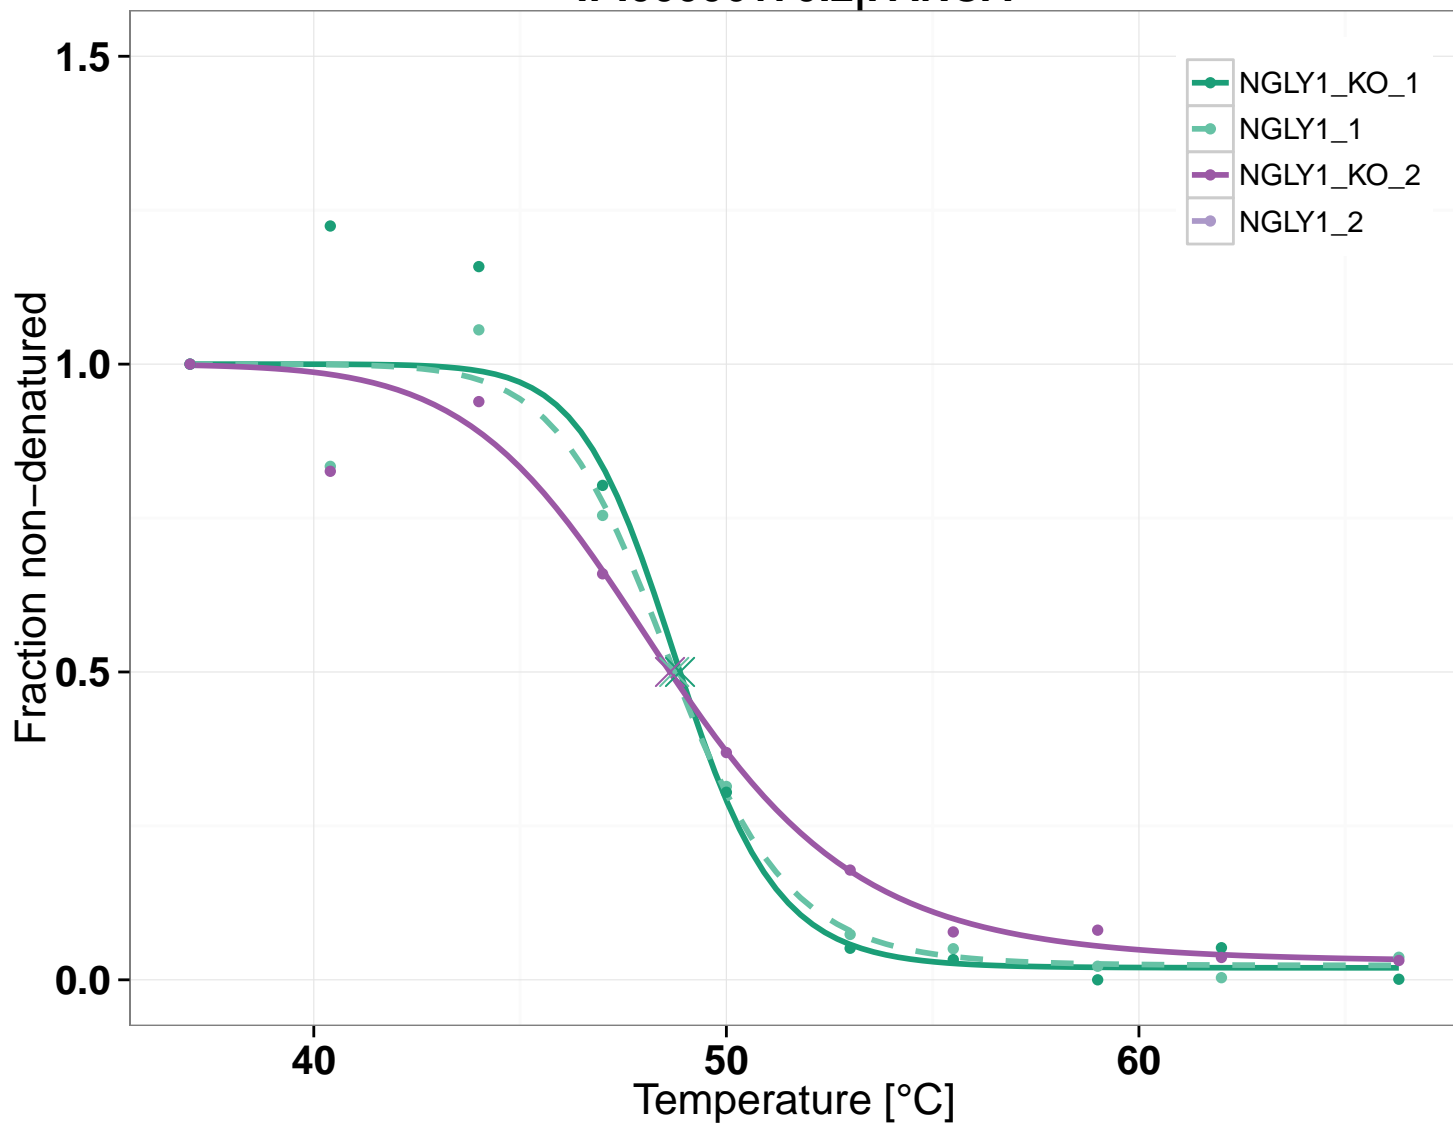

|            | meltPoint | slope | plateau | R2   |
|------------|-----------|-------|---------|------|
| NGLY1_KO_1 | 48.88     | -0.21 | 0.02    | 0.97 |
| NGLY1_1    | 48.74     | -0.17 | 0.02    | 0.98 |
| NGLY1_KO_2 | 48.63     | -0.1  | 0.03    | 0.98 |
| NGLY1_2    | -         | -     | -       | -    |

Supplement: Supplementary file 3795 [file 1]

IPI00063408.7|DHTKD1

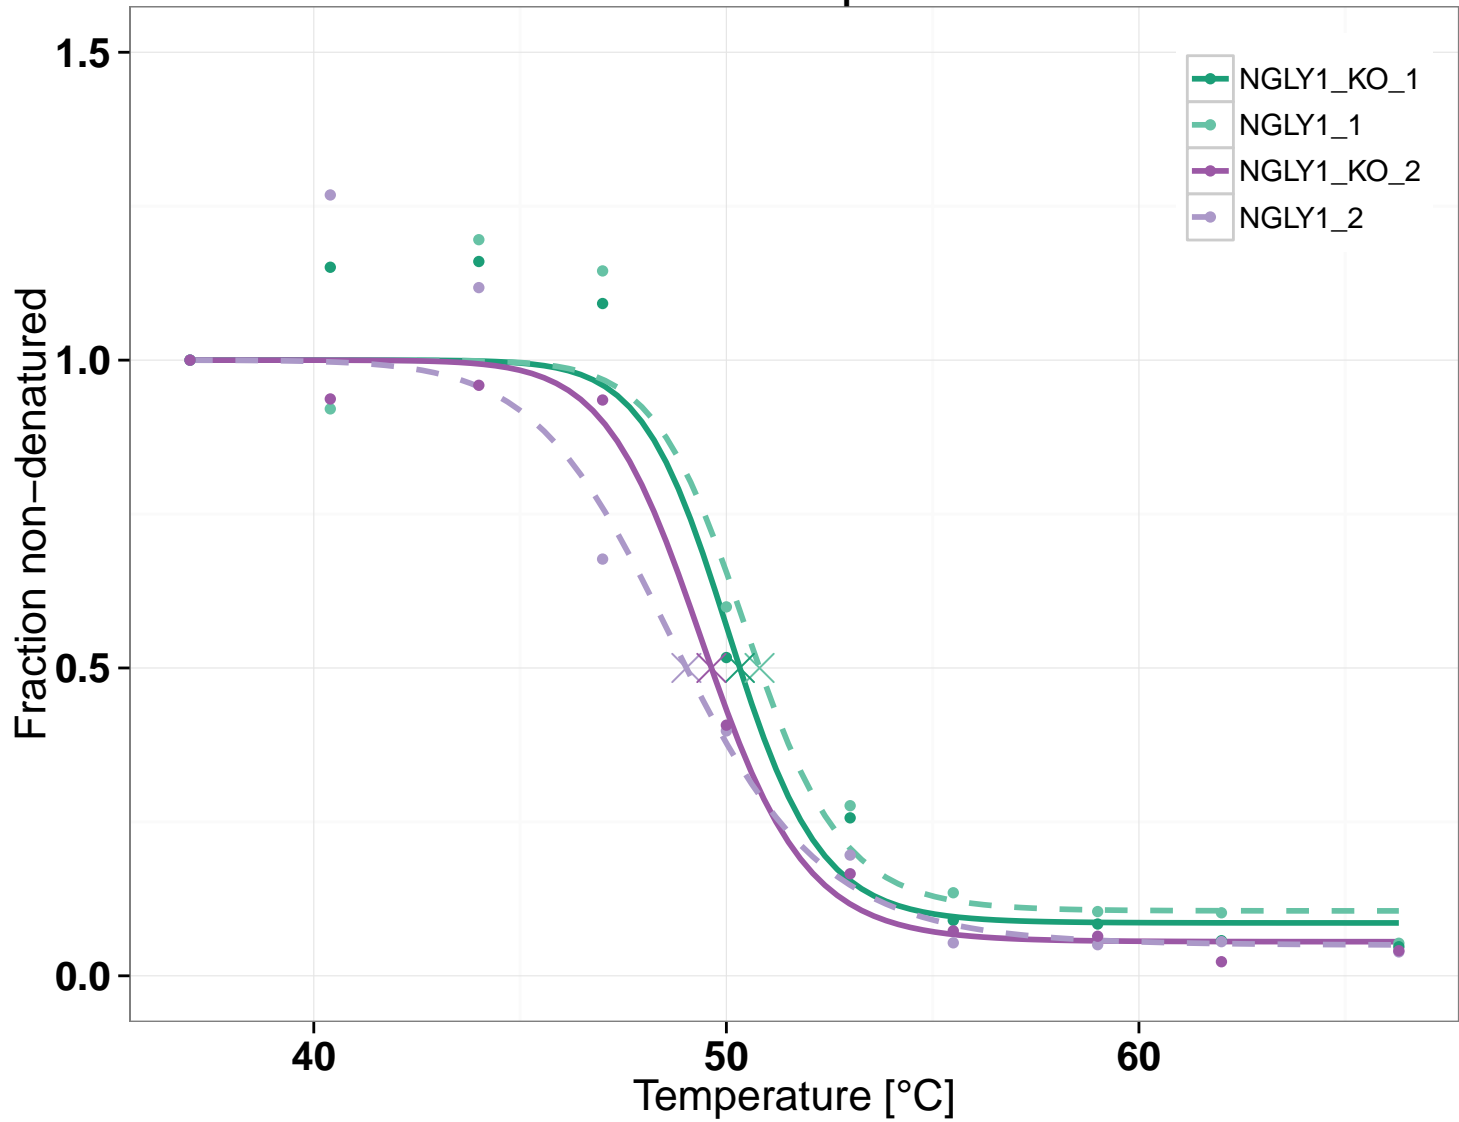

|            | meltPoint | slope | plateau | R2   |
|------------|-----------|-------|---------|------|
| NGLY1_KO_1 | 50.33     | -0.21 | 0.09    | 0.96 |
| NGLY1_1    | 50.8      | -0.2  | 0.11    | 0.96 |
| NGLY1_KO_2 | 49.64     | -0.19 | 0.06    | 0.99 |
| NGLY1_2    | 49.03     | -0.14 | 0.05    | 0.95 |

Supplement: Supplementary file 3796 [file 1]

IPI00383220.2|FBXO17

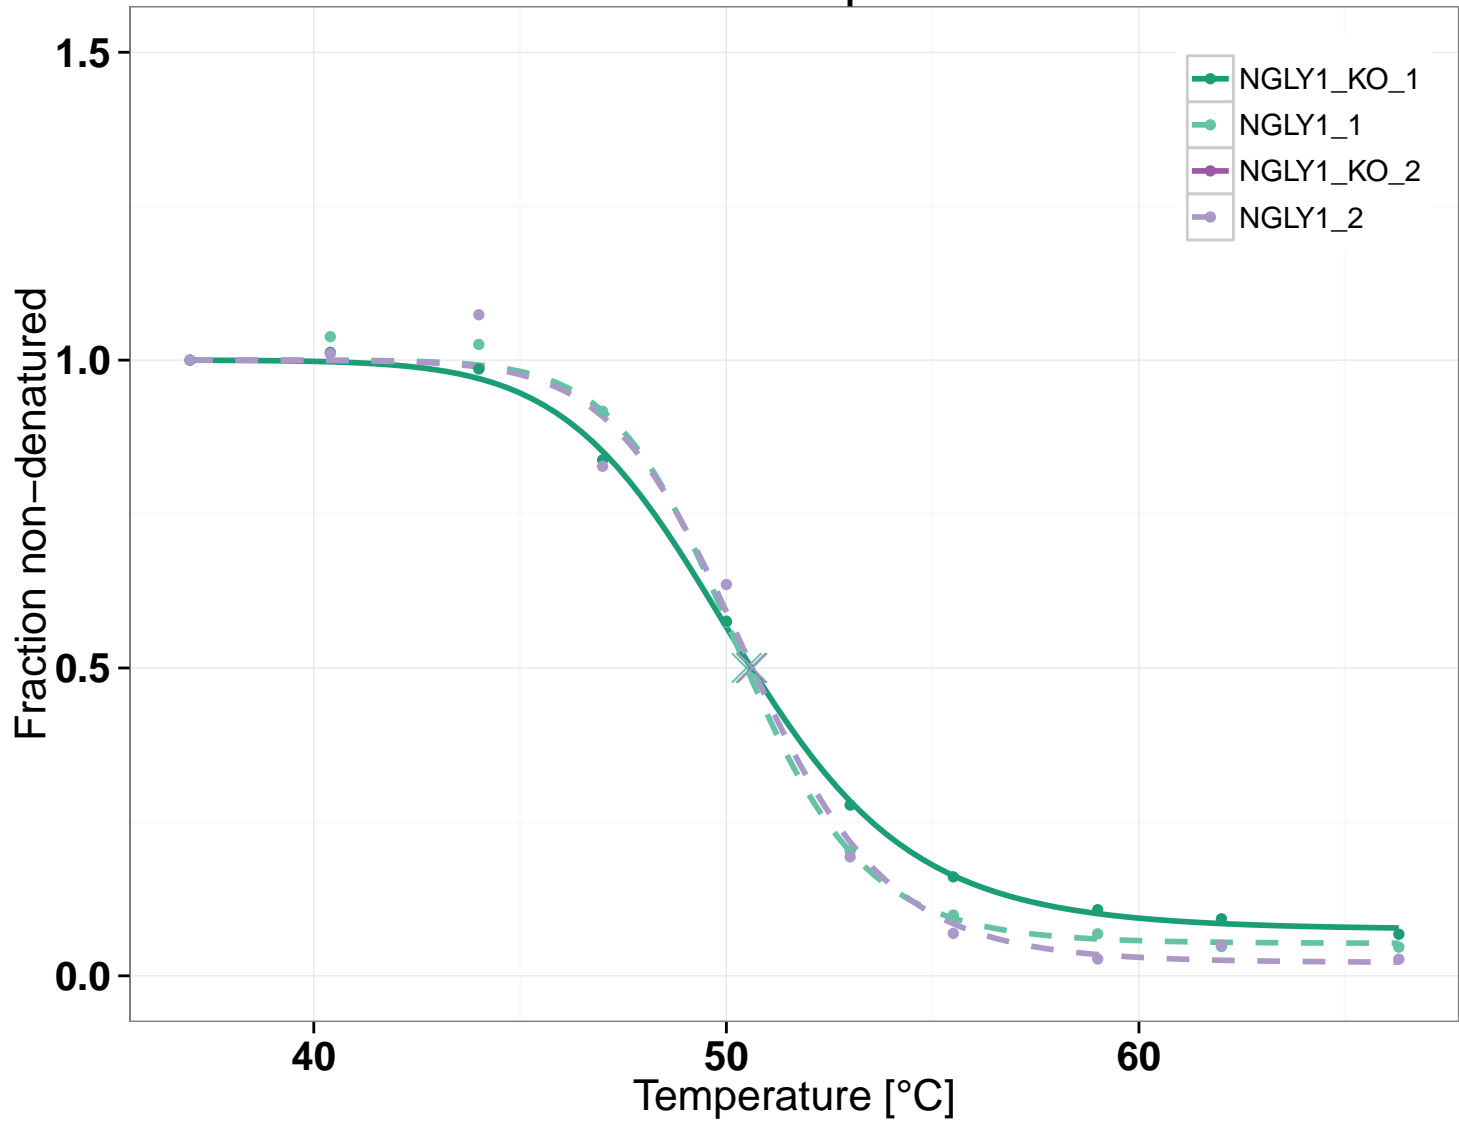

|            | meltPoint | slope | plateau | R2   |
|------------|-----------|-------|---------|------|
| NGLY1_KO_1 | 50.61     | -0.11 | 0.07    | 1    |
| NGLY1_1    | 50.49     | -0.16 | 0.05    | 1    |
| NGLY1_KO_2 | -         | -     | -       | -    |
| NGLY1_2    | 50.63     | -0.15 | 0.02    | 0.99 |

Supplement: Supplementary file 3797 [file 1]

IPI00878252.1|GTF3C2

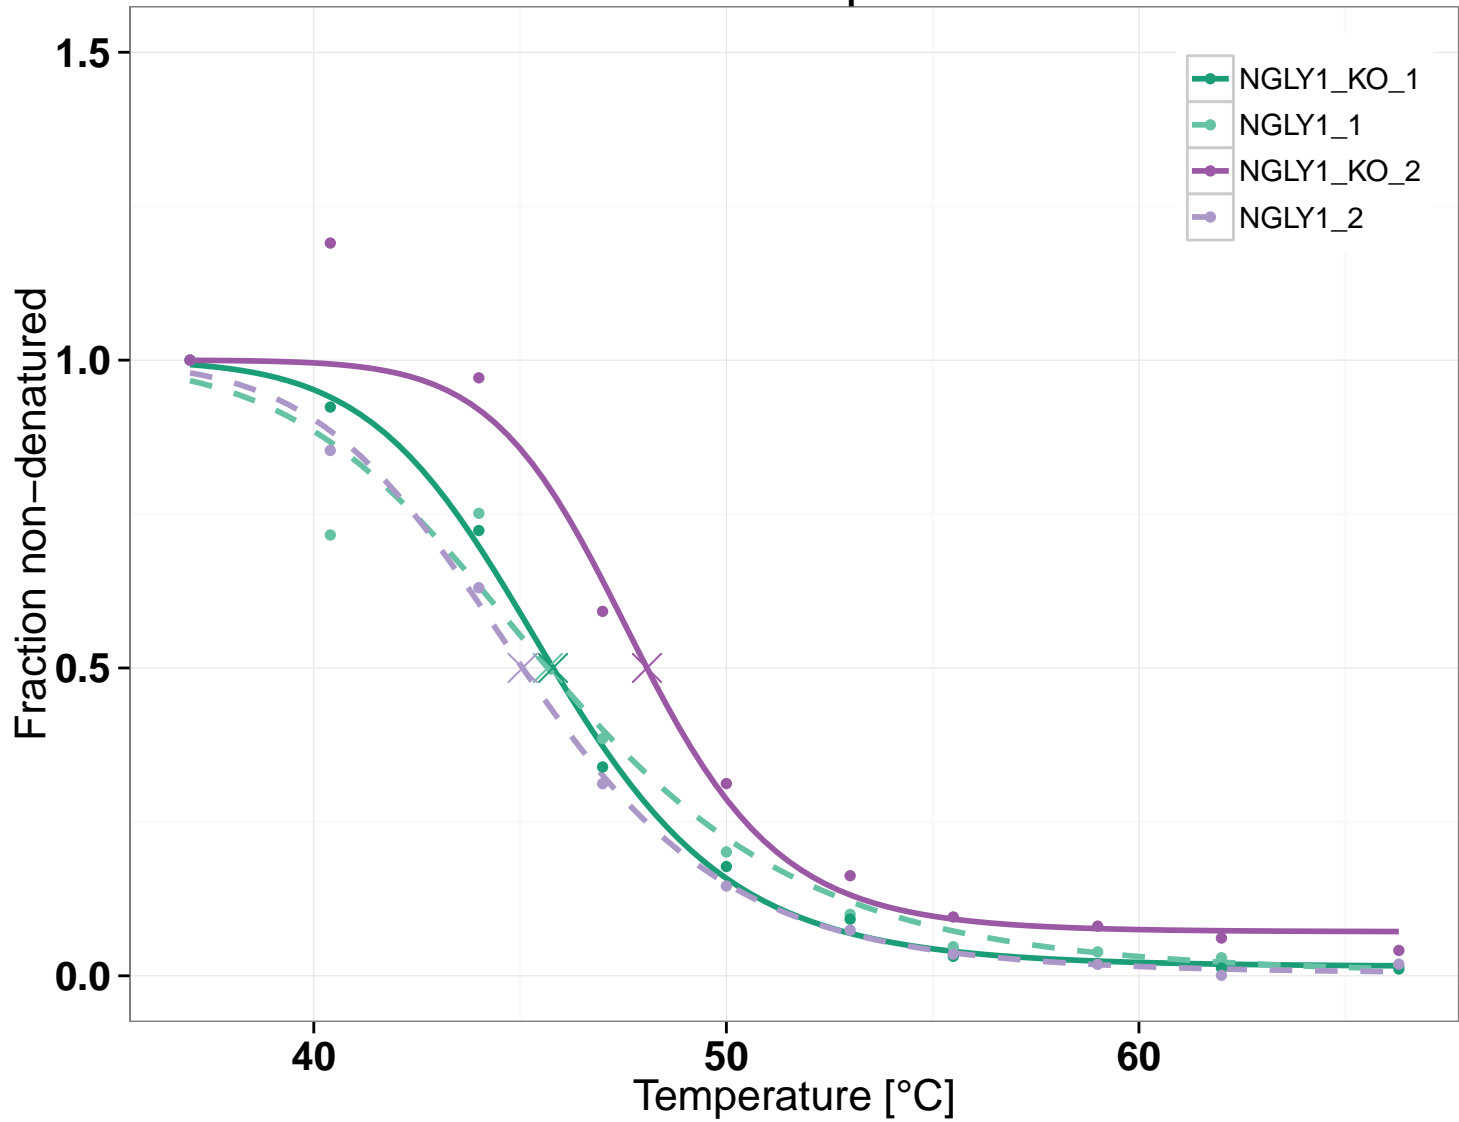

|            | meltPoint | slope  | plateau | R2   |
|------------|-----------|--------|---------|------|
| NGLY1_KO_1 | 45.8      | -0.11  | 0.01    | 1    |
| NGLY1_1    | 45.67     | -0.08  | 0       | 0.97 |
| NGLY1_KO_2 | 48.08     | -0.13  | 0.07    | 0.97 |
| NGLY1_2    | 45.06     | -0.099 | 0       | 1    |

Supplement: Supplementary file 3798 [file 1]

# IPI00018331.3|SNAPIN

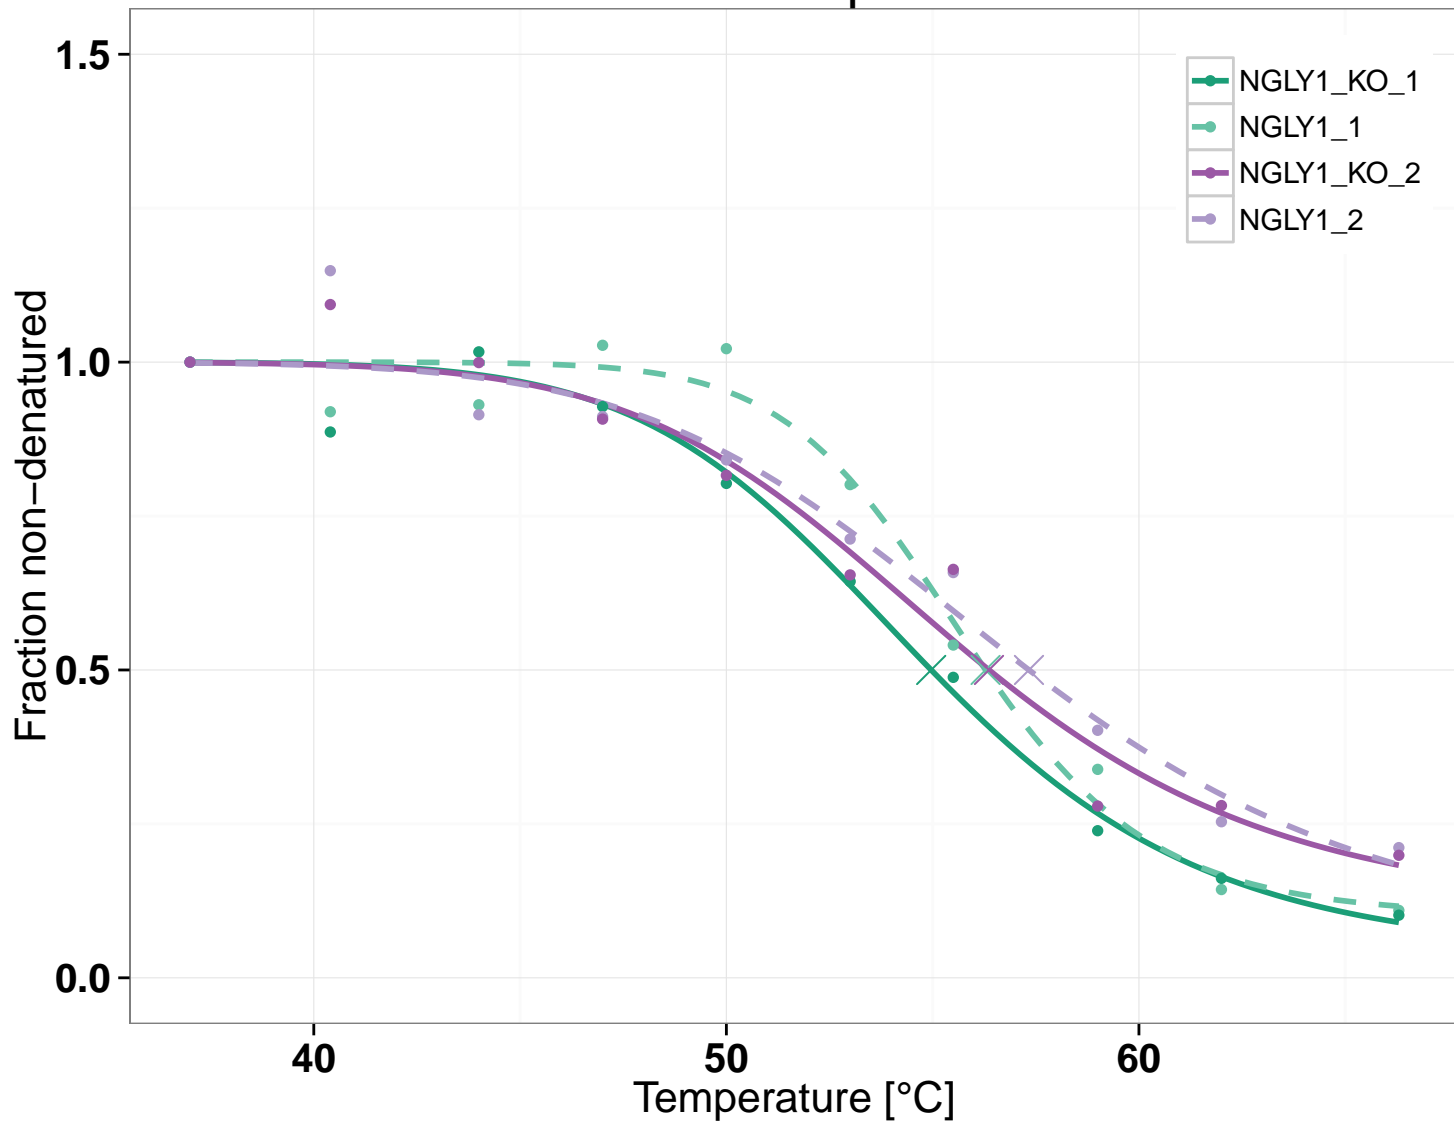

|            | meltPoint | slope  | plateau | R2   |
|------------|-----------|--------|---------|------|
| NGLY1_KO_1 | 54.96     | -0.07  | 0.03    | 0.99 |
| NGLY1_1    | 56.28     | -0.1   | 0.1     | 0.98 |
| NGLY1_KO_2 | 56.37     | -0.058 | 0.1     | 0.96 |
| NGLY1_2    | 57.33     | -0.053 | 0.04    | 0.96 |

Supplement: Supplementary file 3799 [file 1]

IPI00154614.4|ZCRB1

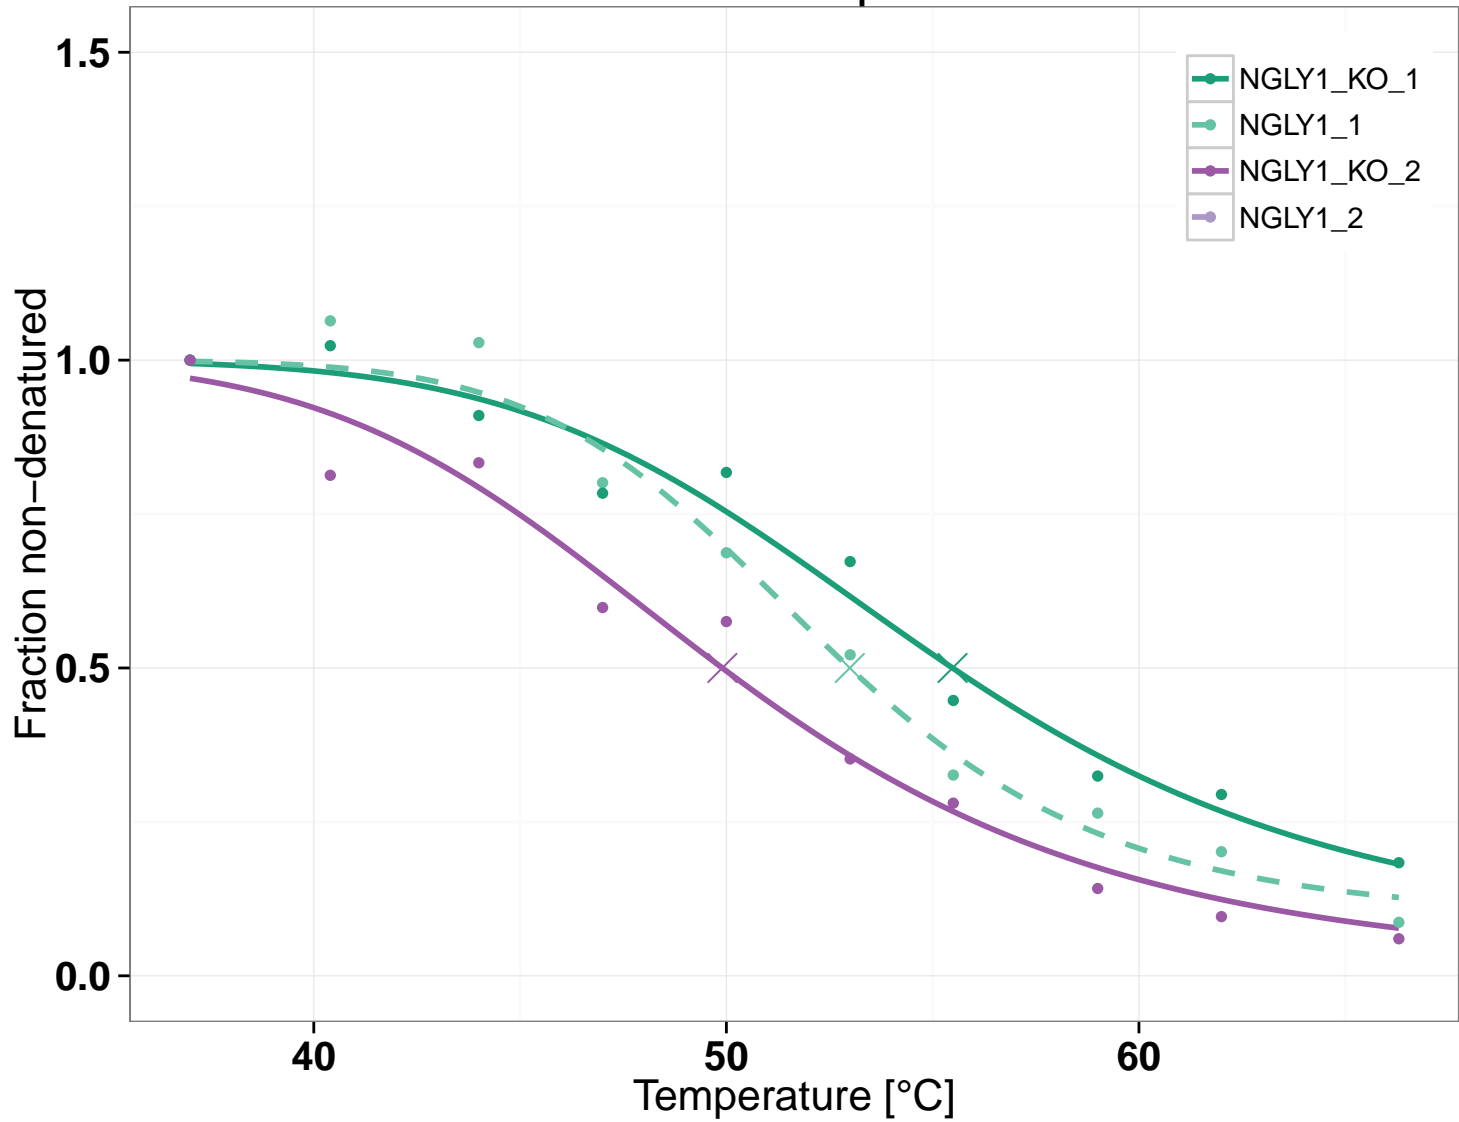

|            | meltPoint | slope  | plateau | R2   |
|------------|-----------|--------|---------|------|
| NGLY1_KO_1 | 55.48     | -0.048 | 0.05    | 0.98 |
| NGLY1_1    | 52.99     | -0.066 | 0.09    | 0.98 |
| NGLY1_KO_2 | 49.9      | -0.052 | 0       | 0.98 |
| NGLY1_2    | -         | -      | -       | -    |

Supplement: Supplementary file 3800 [file 1]

IPI00872486.1|SEPT6

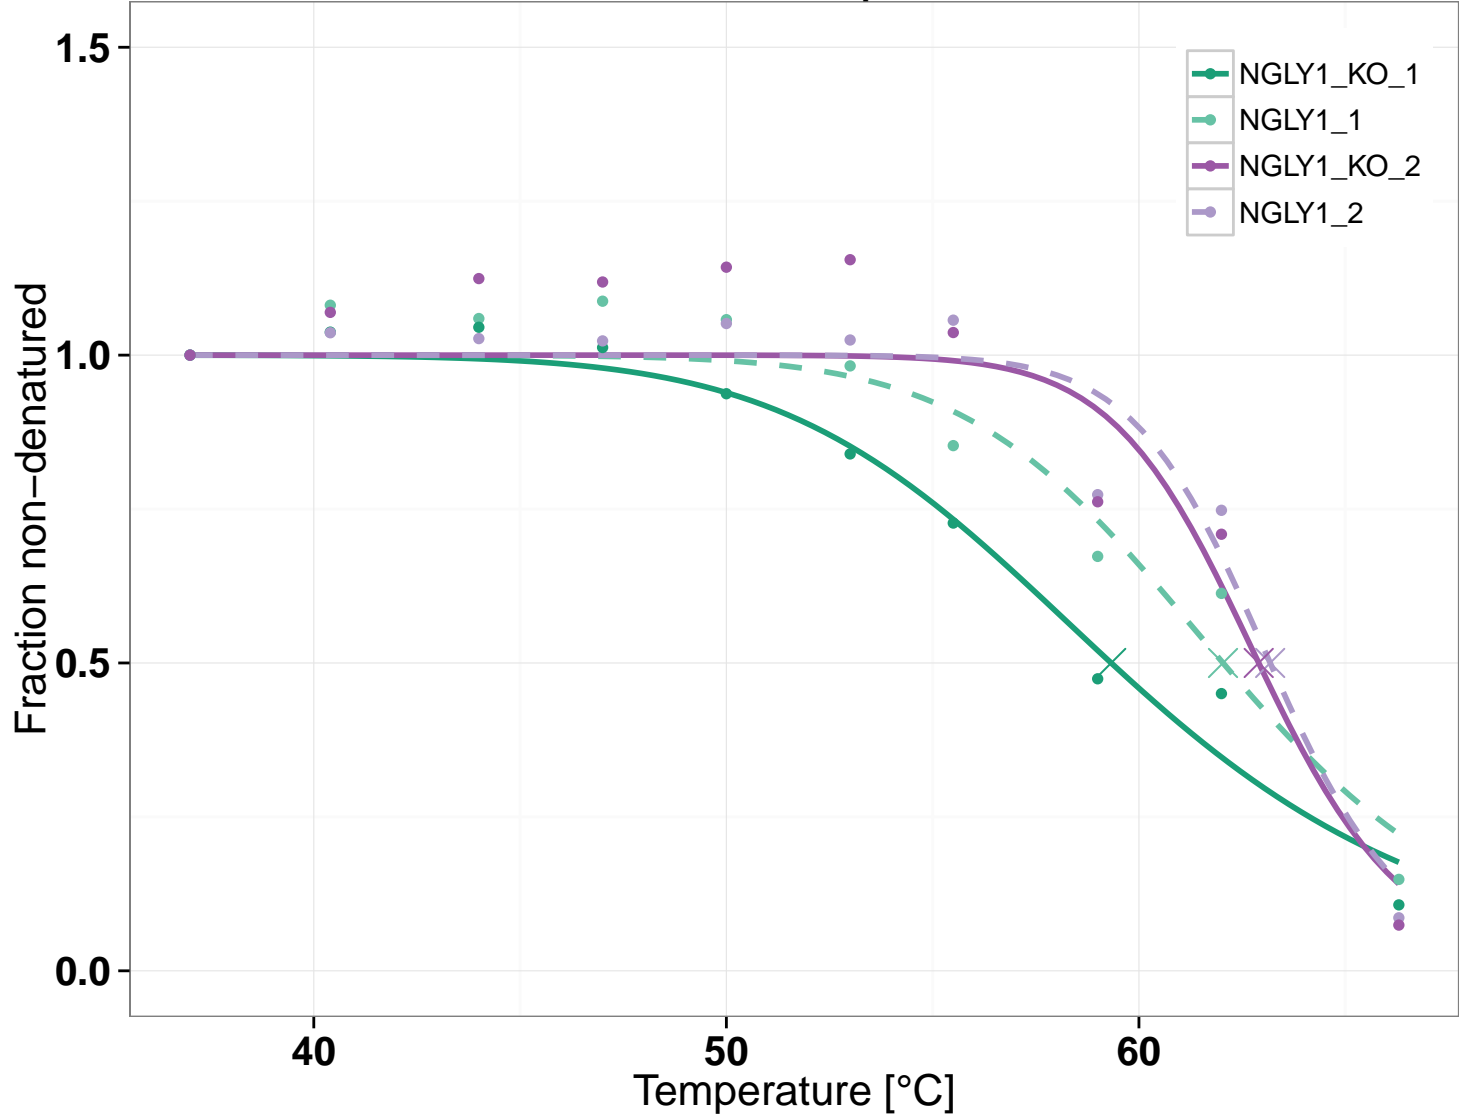

|            | meltPoint | slope  | plateau | R2   |
|------------|-----------|--------|---------|------|
| NGLY1_KO_1 | 59.33     | -0.063 | 0       | 0.98 |
| NGLY1_1    | 62.04     | -0.079 | 0       | 0.94 |
| NGLY1_KO_2 | 62.9      | -0.14  | 0       | 0.89 |
| NGLY1_2    | 63.18     | -0.15  | 0       | 0.95 |

Supplement: Supplementary file 3801 [file 1]

# IPI00216142.5|DNA2

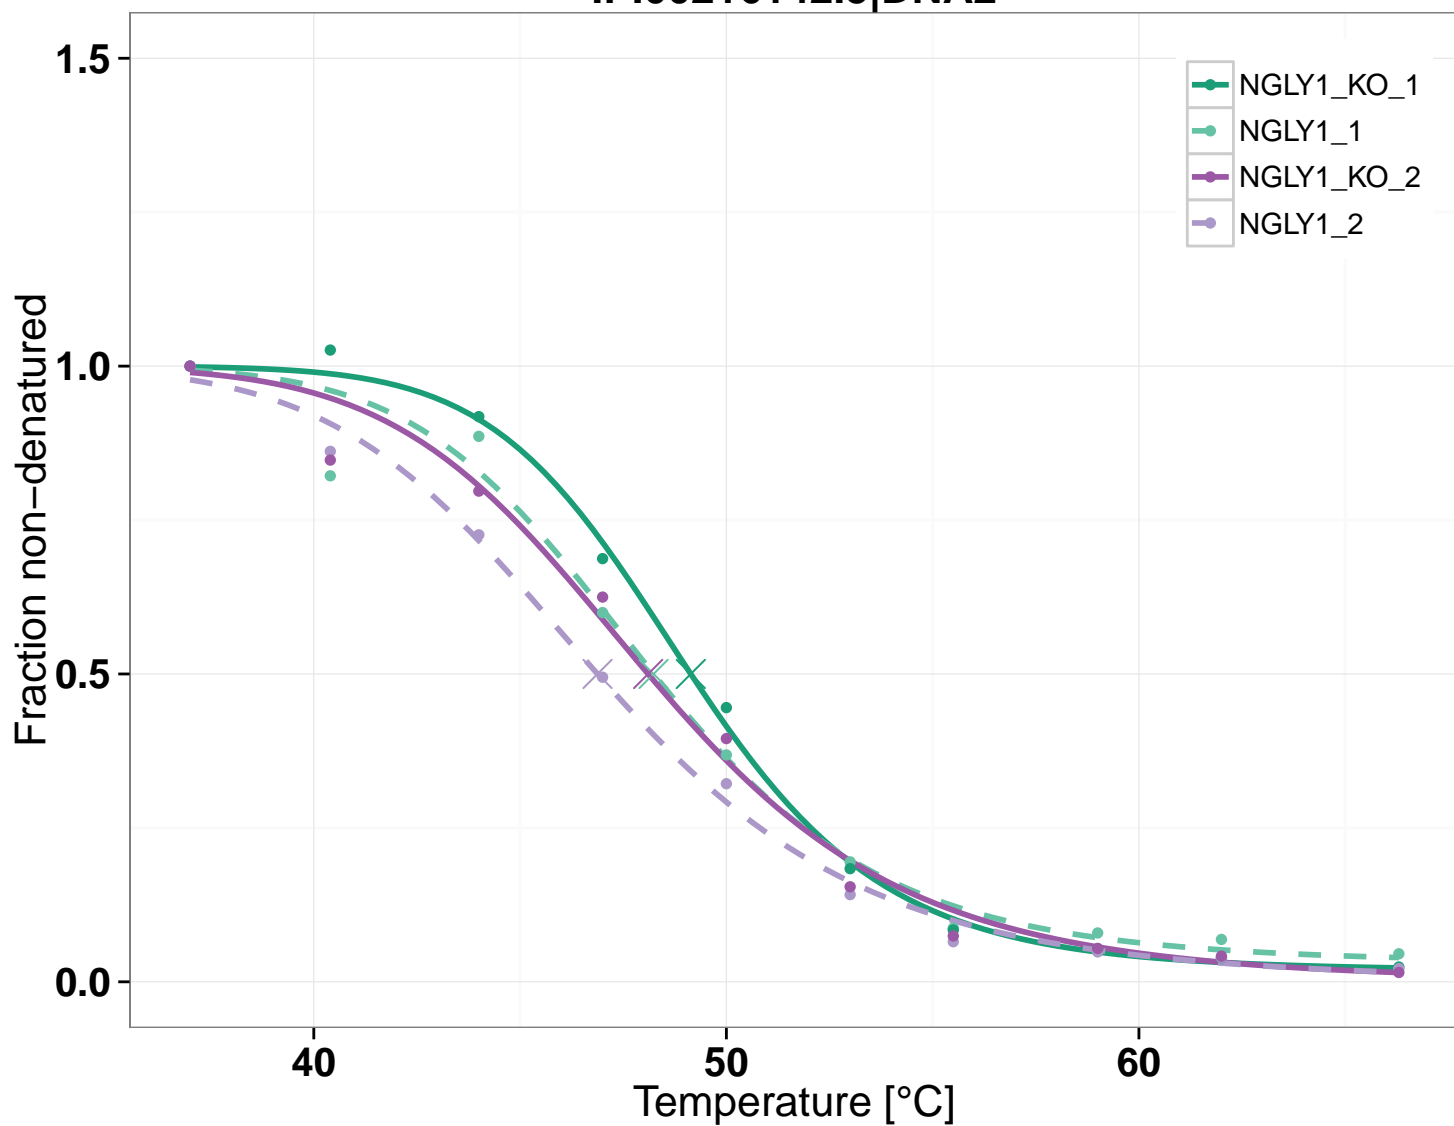

|            | meltPoint | slope  | plateau | R2   |
|------------|-----------|--------|---------|------|
| NGLY1_KO_1 | 49.14     | -0.1   | 0.02    | 1    |
| NGLY1_1    | 48.24     | -0.085 | 0.03    | 0.98 |
| NGLY1_KO_2 | 48.1      | -0.081 | 0       | 0.99 |
| NGLY1_2    | 46.88     | -0.077 | 0       | 1    |

Supplement: Supplementary file 3802 [file 1]

# IPI00295741.4|CTSB

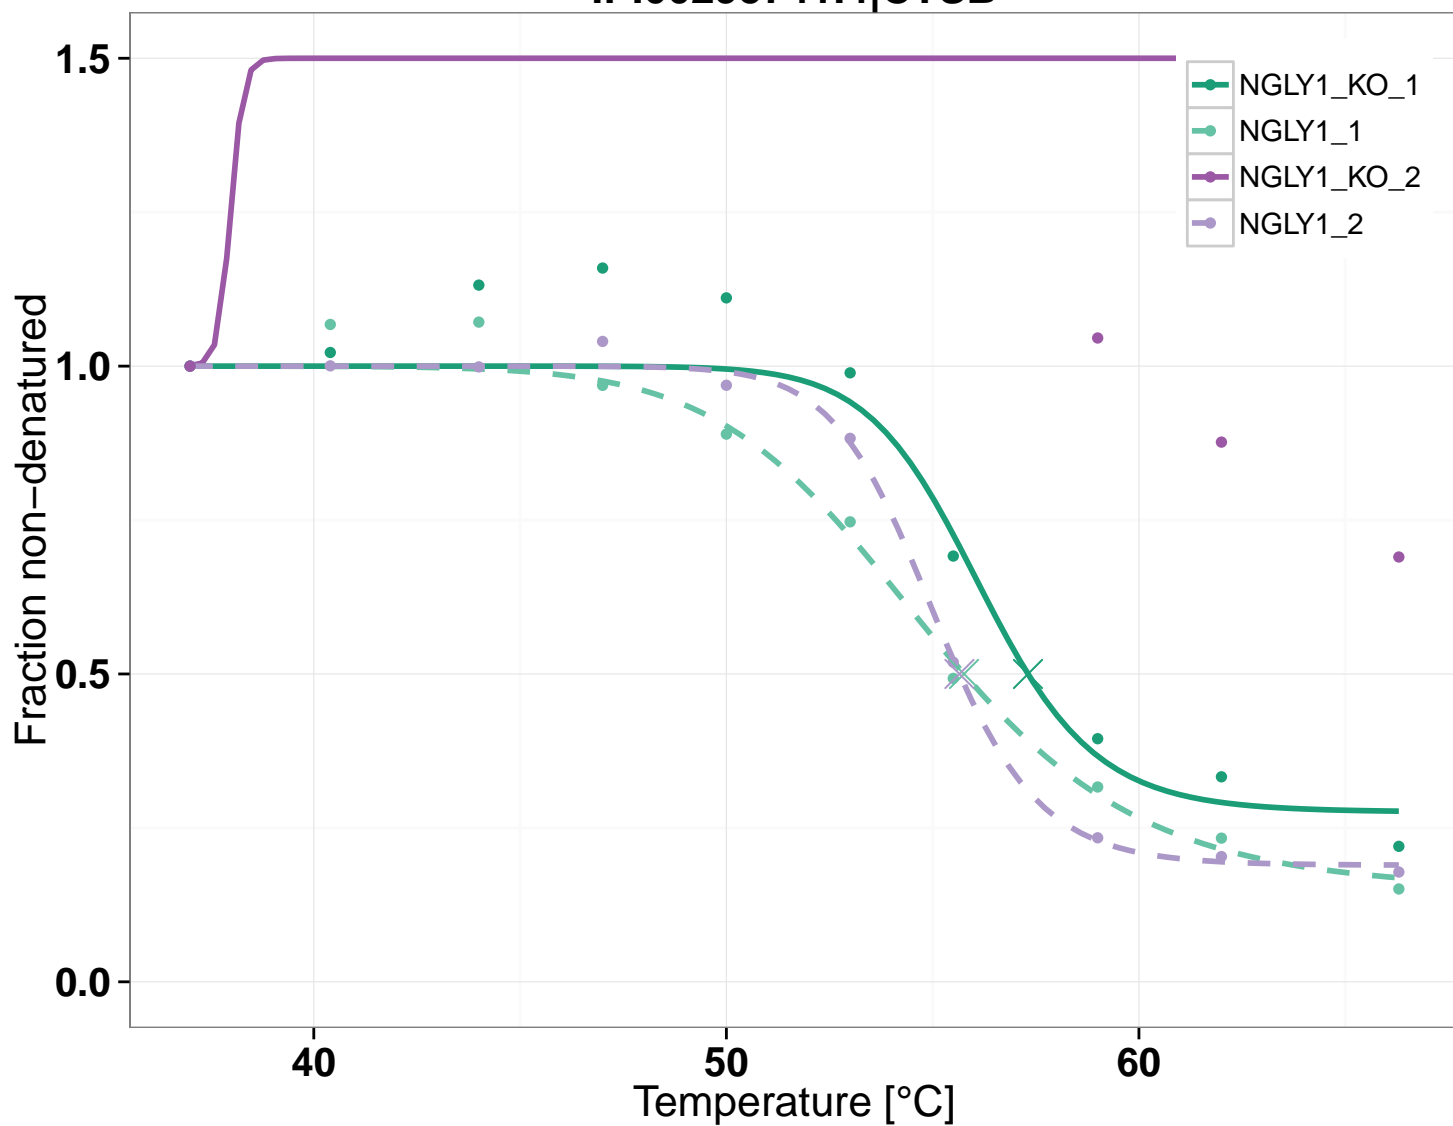

|            | meltPoint | slope  | plateau | R2   |
|------------|-----------|--------|---------|------|
| NGLY1_KO_1 | 57.31     | -0.13  | 0.28    | 0.94 |
| NGLY1_1    | 55.76     | -0.083 | 0.15    | 0.99 |
| NGLY1_KO_2 | -         | 0.82   | 1.5     | -0.5 |
| NGLY1_2    | 55.65     | -0.16  | 0.19    | 1    |

Supplement: Supplementary file 3803 [file 1]

IPI00641523.1|PDZD11

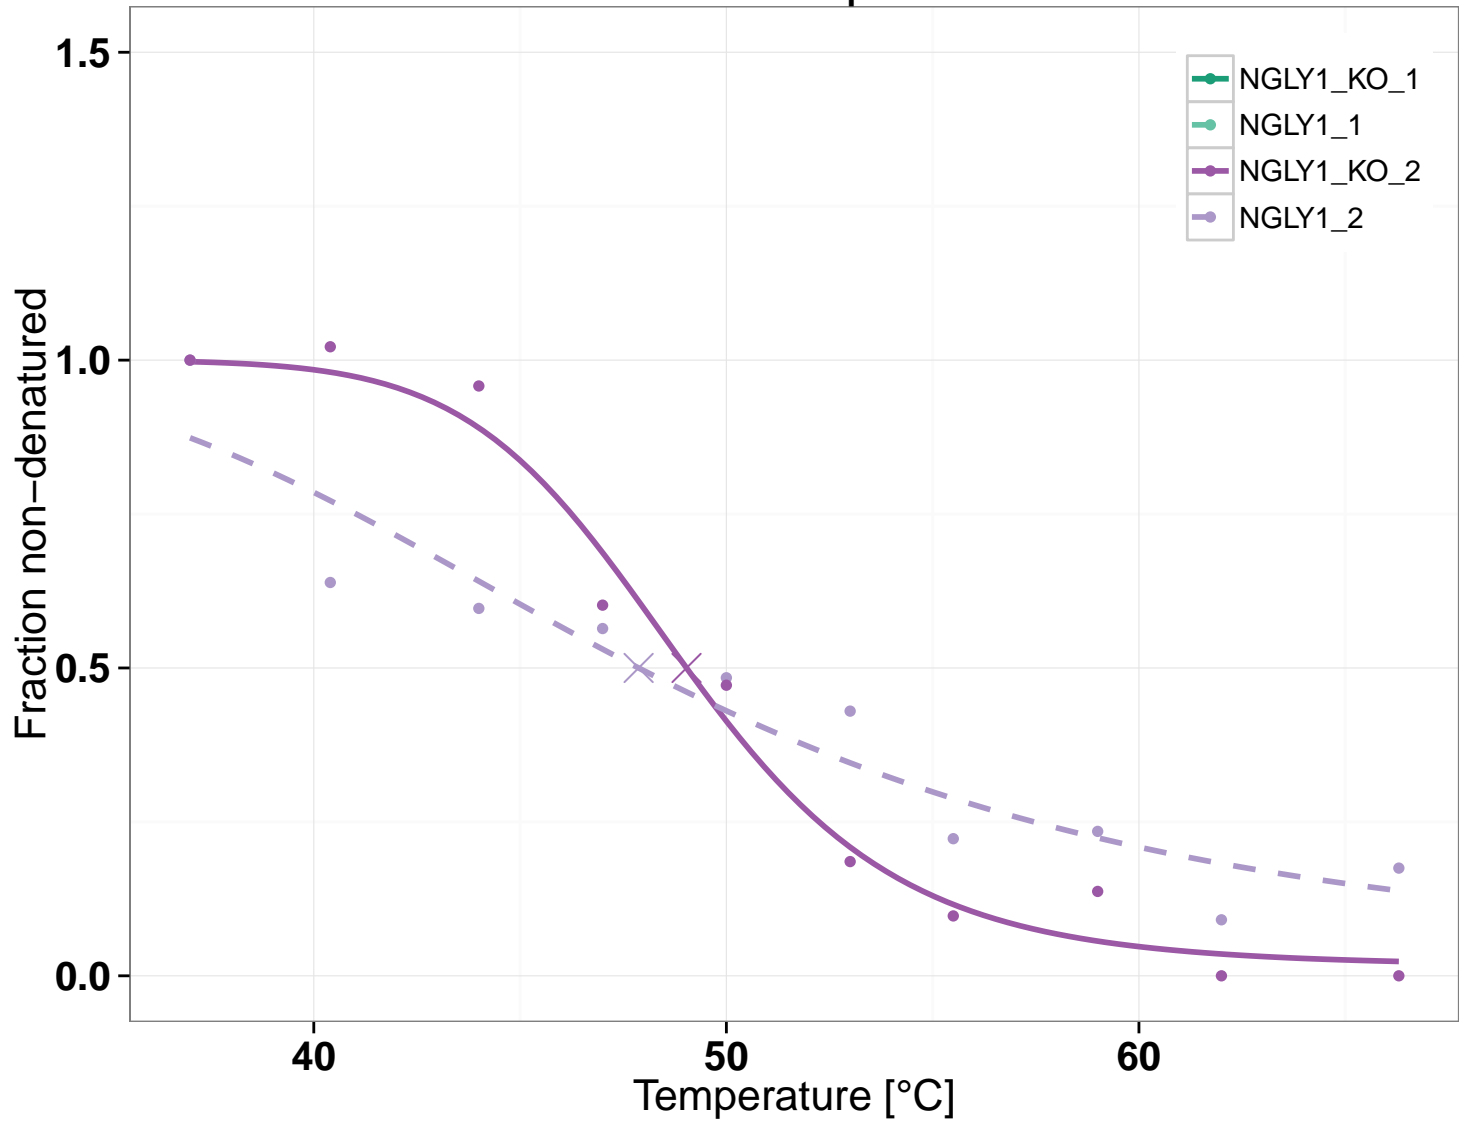

|            | meltPoint | slope  | plateau | R2   |
|------------|-----------|--------|---------|------|
| NGLY1_KO_1 | —         | —      | —       | —    |
| NGLY1_1    | —         | —      | —       | —    |
| NGLY1_KO_2 | 49.03     | -0.094 | 0.02    | 0.98 |
| NGLY1_2    | 47.87     | -0.037 | 0       | 0.91 |

Supplement: Supplementary file 3804 [file 1]

IPI00012199.1|CCDC86

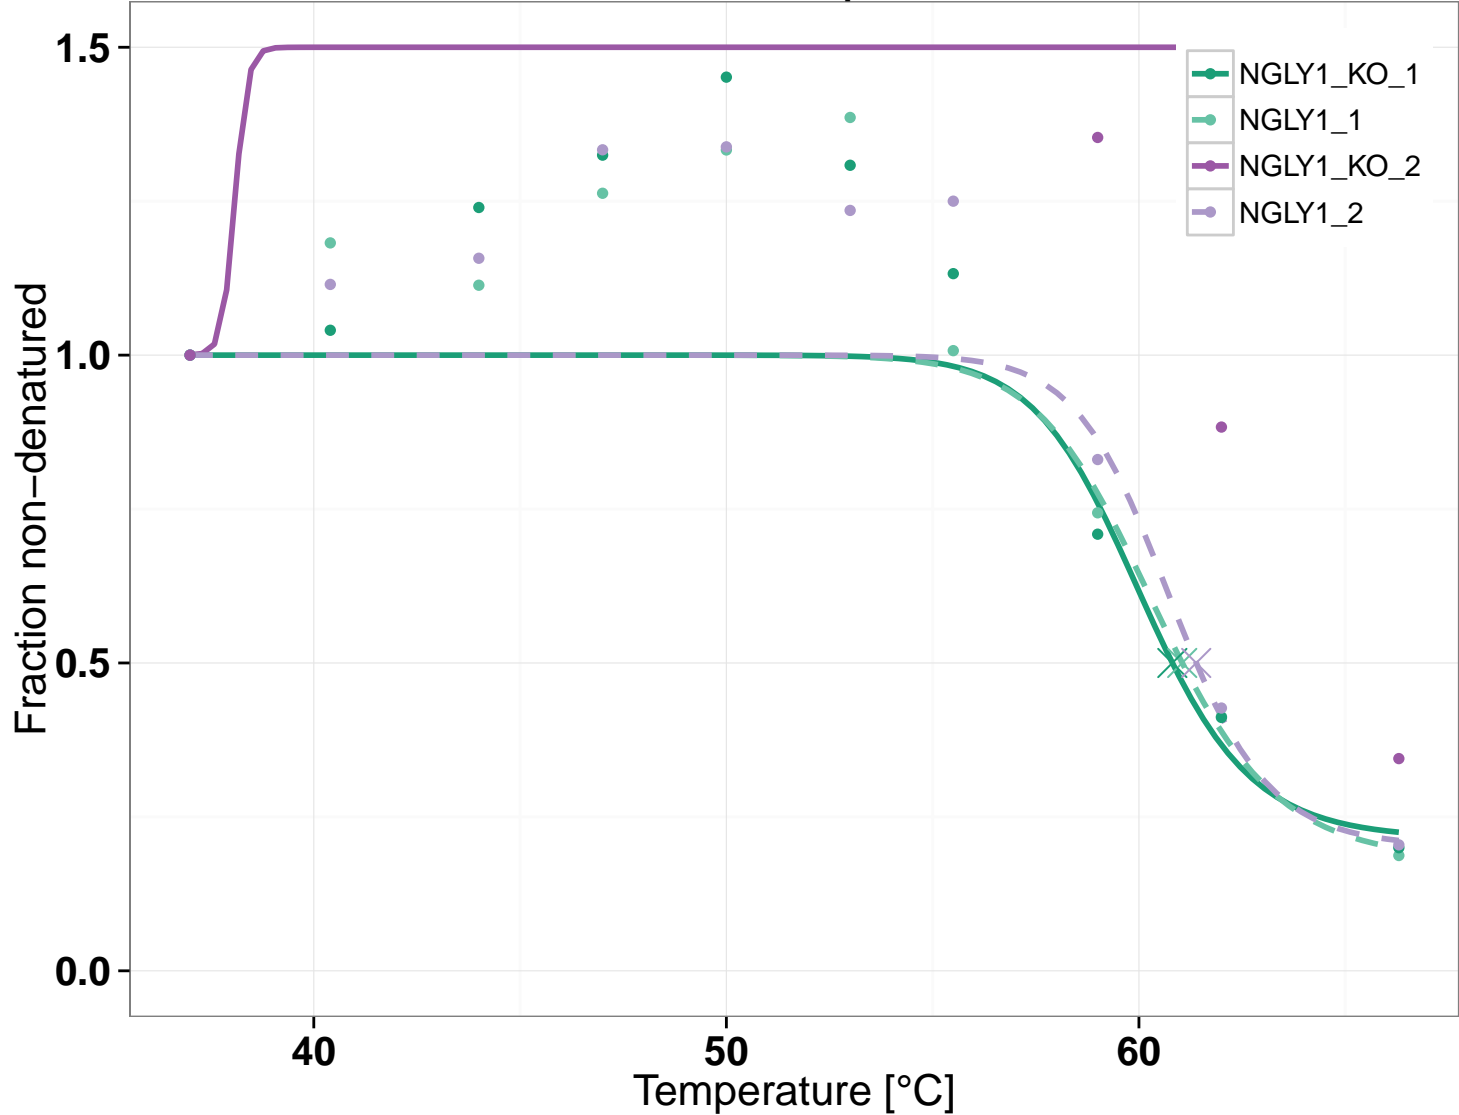

|            | meltPoint | slope | plateau | R2    |
|------------|-----------|-------|---------|-------|
| NGLY1_KO_1 | 60.81     | -0.15 | 0.21    | 0.68  |
| NGLY1_1    | 61.05     | -0.14 | 0.18    | 0.73  |
| NGLY1_KO_2 | -         | 0.82  | 1.5     | -0.04 |
| NGLY1_2    | 61.39     | -0.17 | 0.2     | 0.72  |

Supplement: Supplementary file 3805 [file 1]

# IPI00019432.1|NAB2

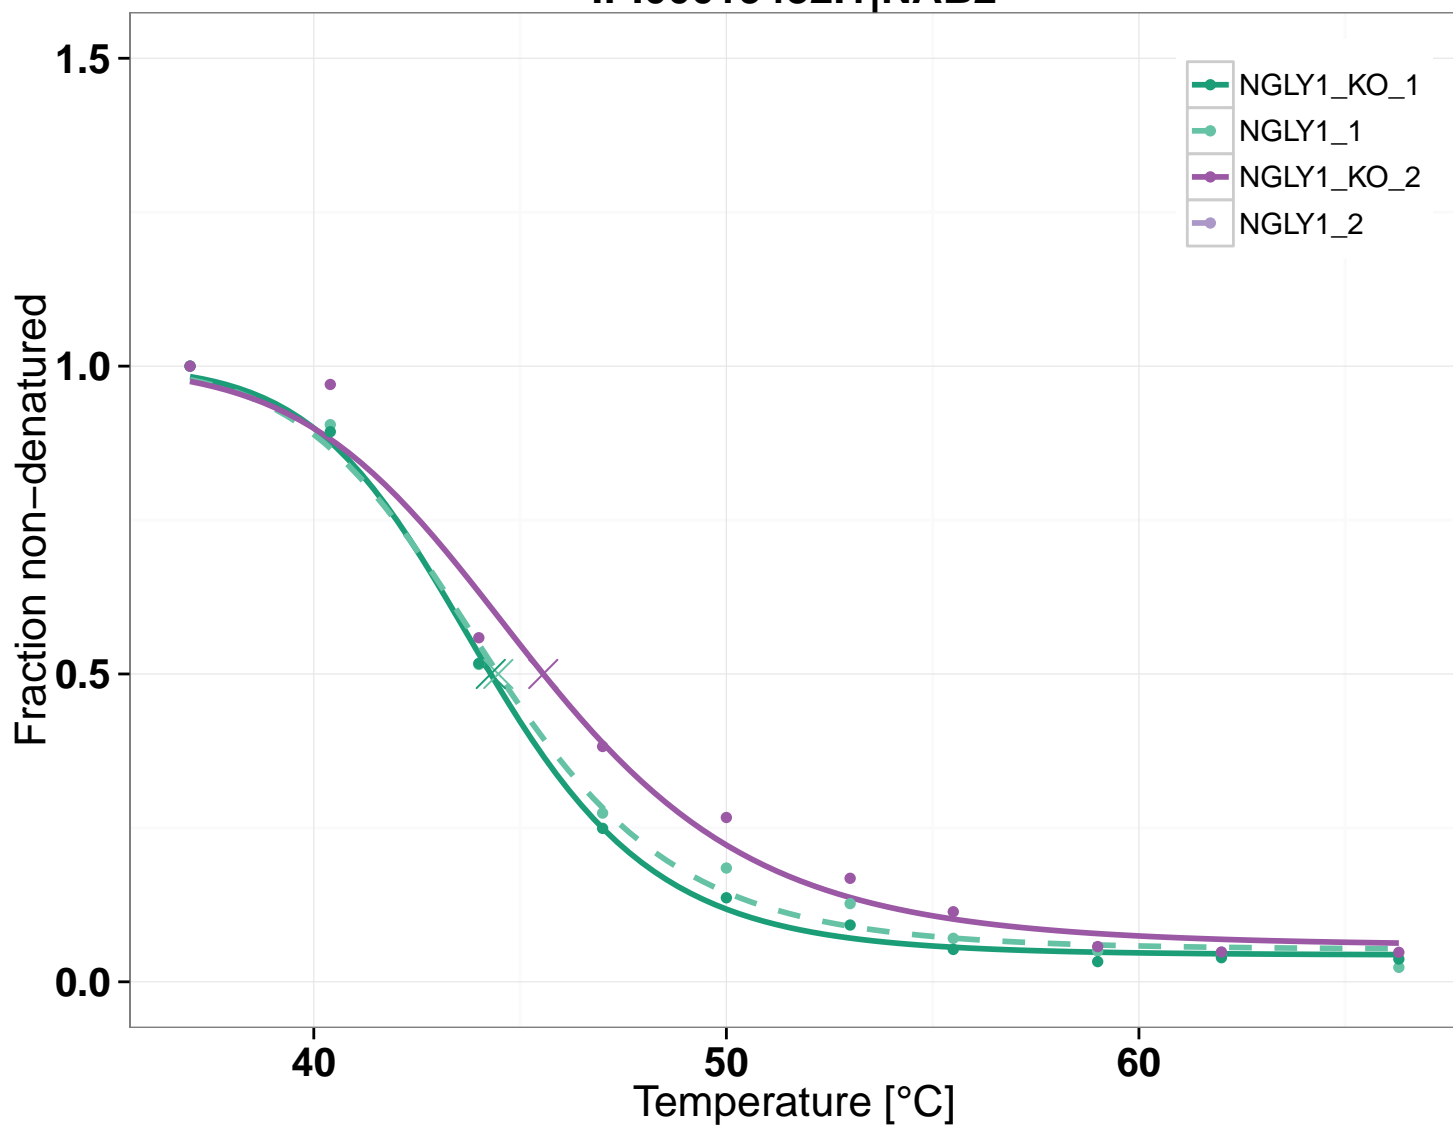

|            | meltPoint | slope  | plateau | R2   |
|------------|-----------|--------|---------|------|
| NGLY1_KO_1 | 44.29     | -0.11  | 0.04    | 1    |
| NGLY1_1    | 44.47     | -0.1   | 0.05    | 0.99 |
| NGLY1_KO_2 | 45.56     | -0.086 | 0.06    | 0.98 |
| NGLY1_2    | -         | -      | -       | -    |

Supplement: Supplementary file 3806 [file 1]

IPI00301421.5|ZC3HC1

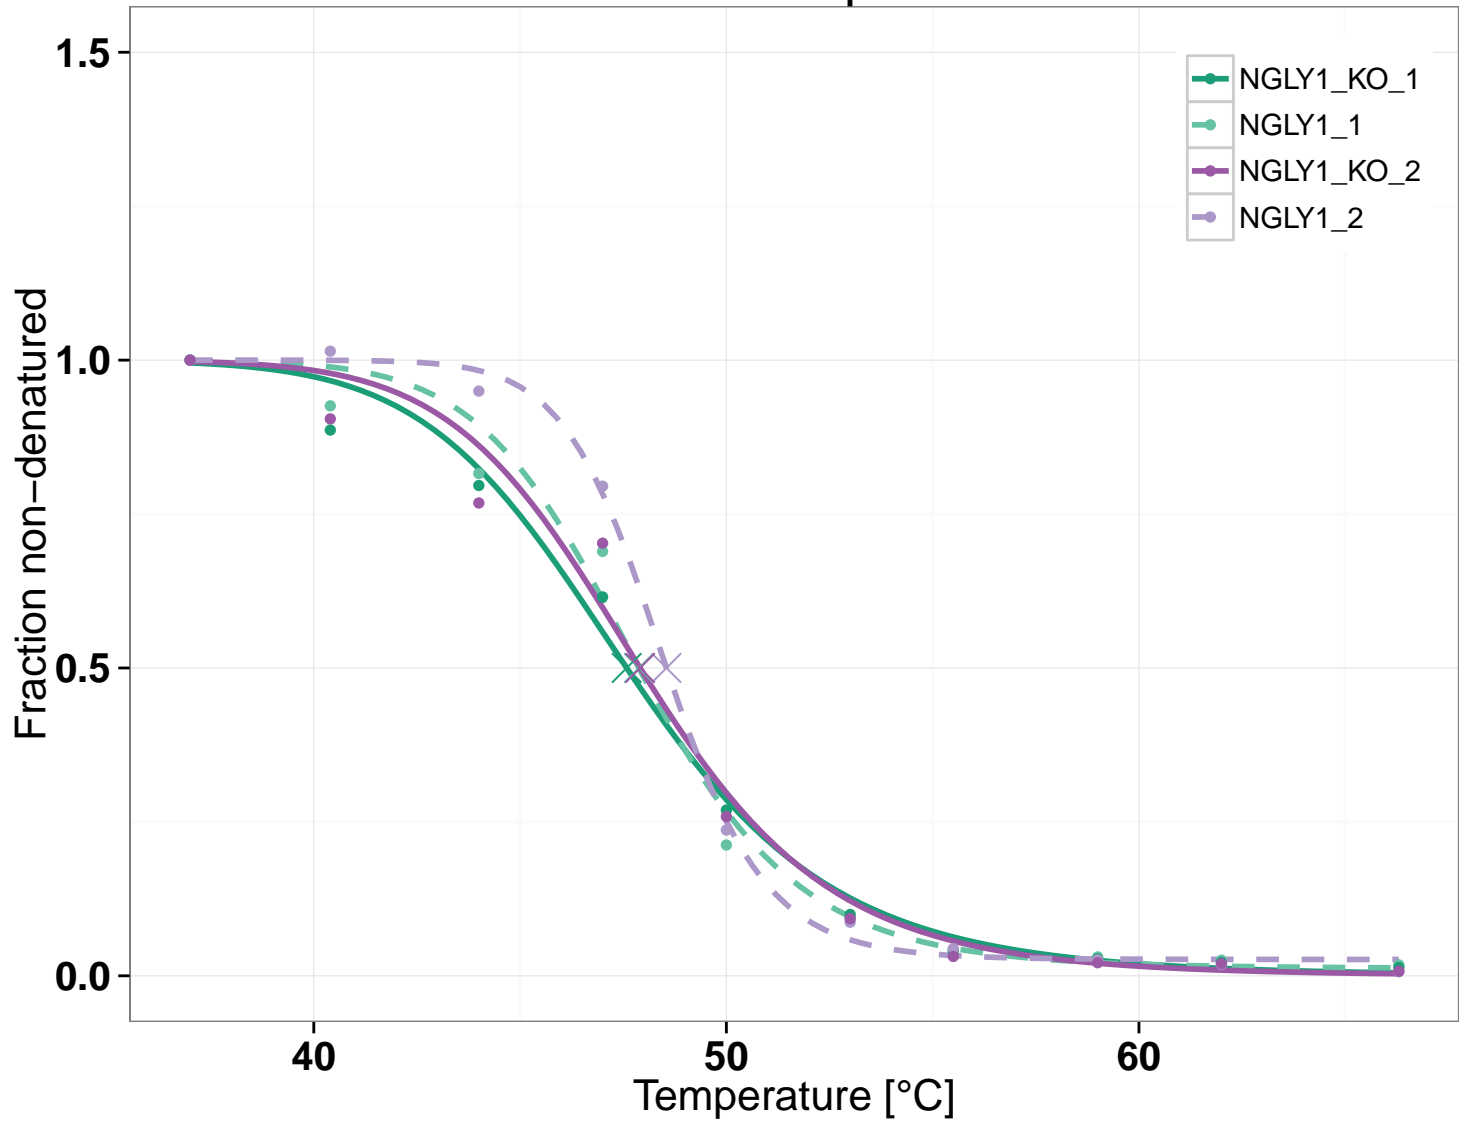

|            | meltPoint | slope | plateau | R2   |
|------------|-----------|-------|---------|------|
| NGLY1_KO_1 | 47.58     | -0.1  | 0       | 0.99 |
| NGLY1_1    | 47.88     | -0.13 | 0.01    | 0.99 |
| NGLY1_KO_2 | 47.91     | -0.11 | 0       | 0.98 |
| NGLY1_2    | 48.55     | -0.2  | 0.03    | 1    |

Supplement: Supplementary file 3807 [file 1]

IPI00304214.5|FAM118A

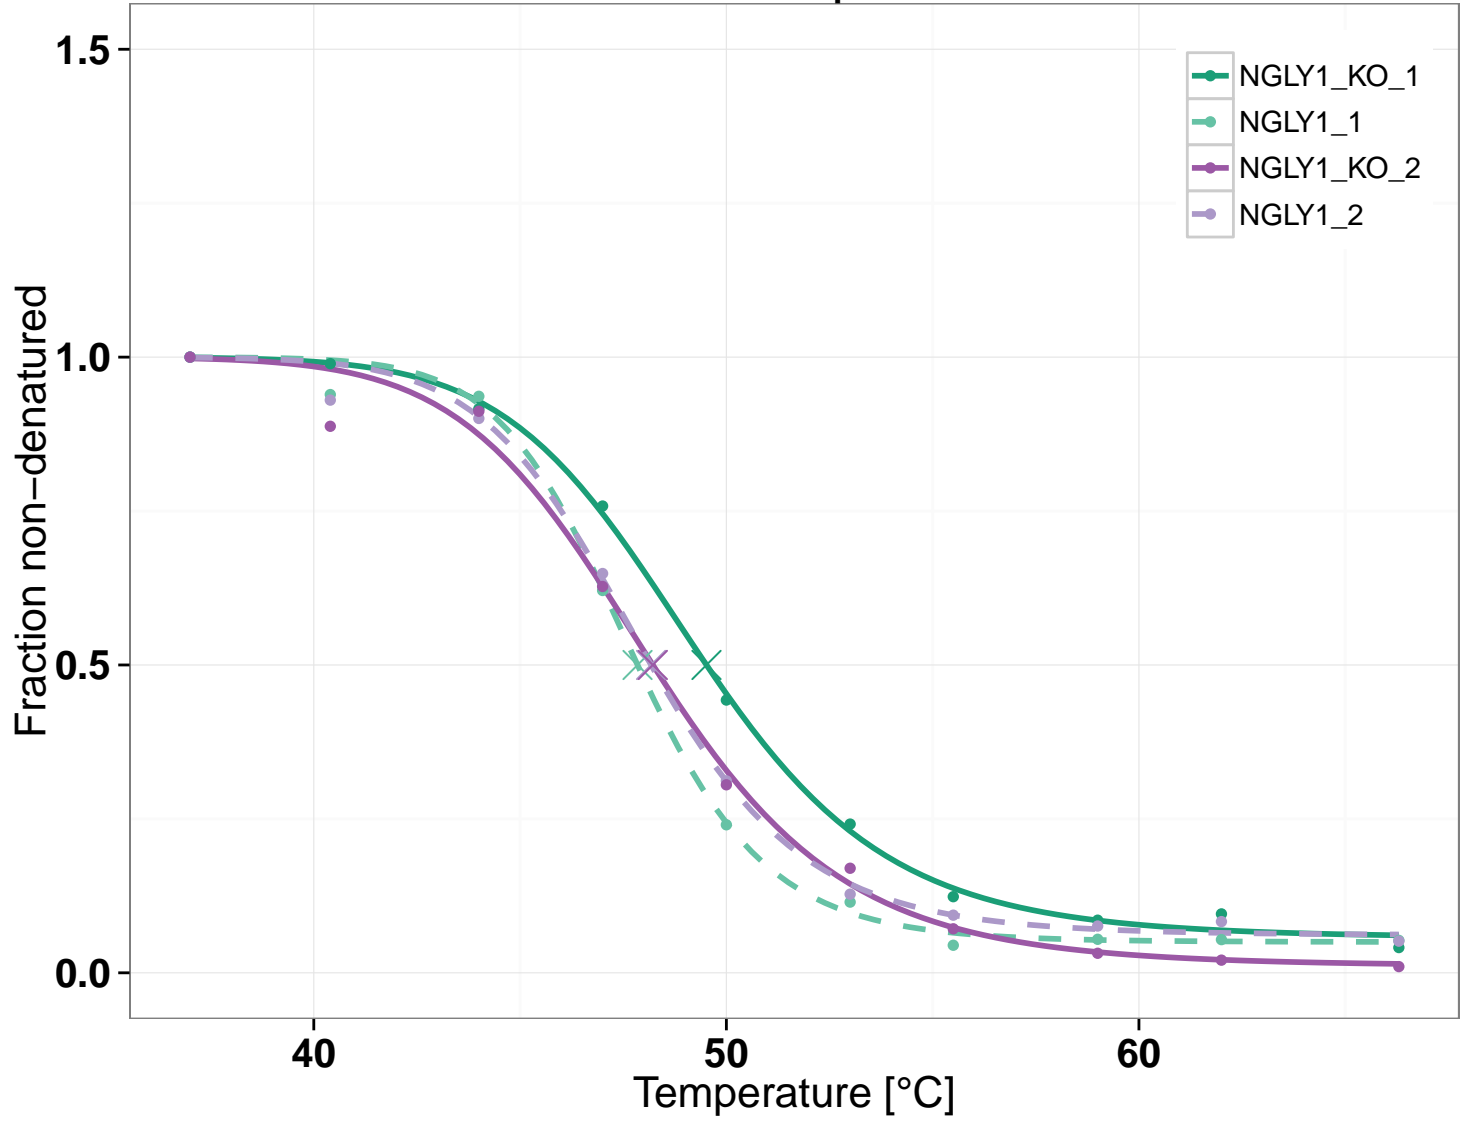

|            | meltPoint | slope | plateau | R2   |
|------------|-----------|-------|---------|------|
| NGLY1_KO_1 | 49.52     | -0.1  | 0.06    | 1    |
| NGLY1_1    | 47.85     | -0.15 | 0.05    | 1    |
| NGLY1_KO_2 | 48.22     | -0.11 | 0.01    | 0.99 |
| NGLY1_2    | 48.18     | -0.12 | 0.06    | 1    |

Supplement: Supplementary file 3808 [file 1]

# IPI00024083.3|NAAA

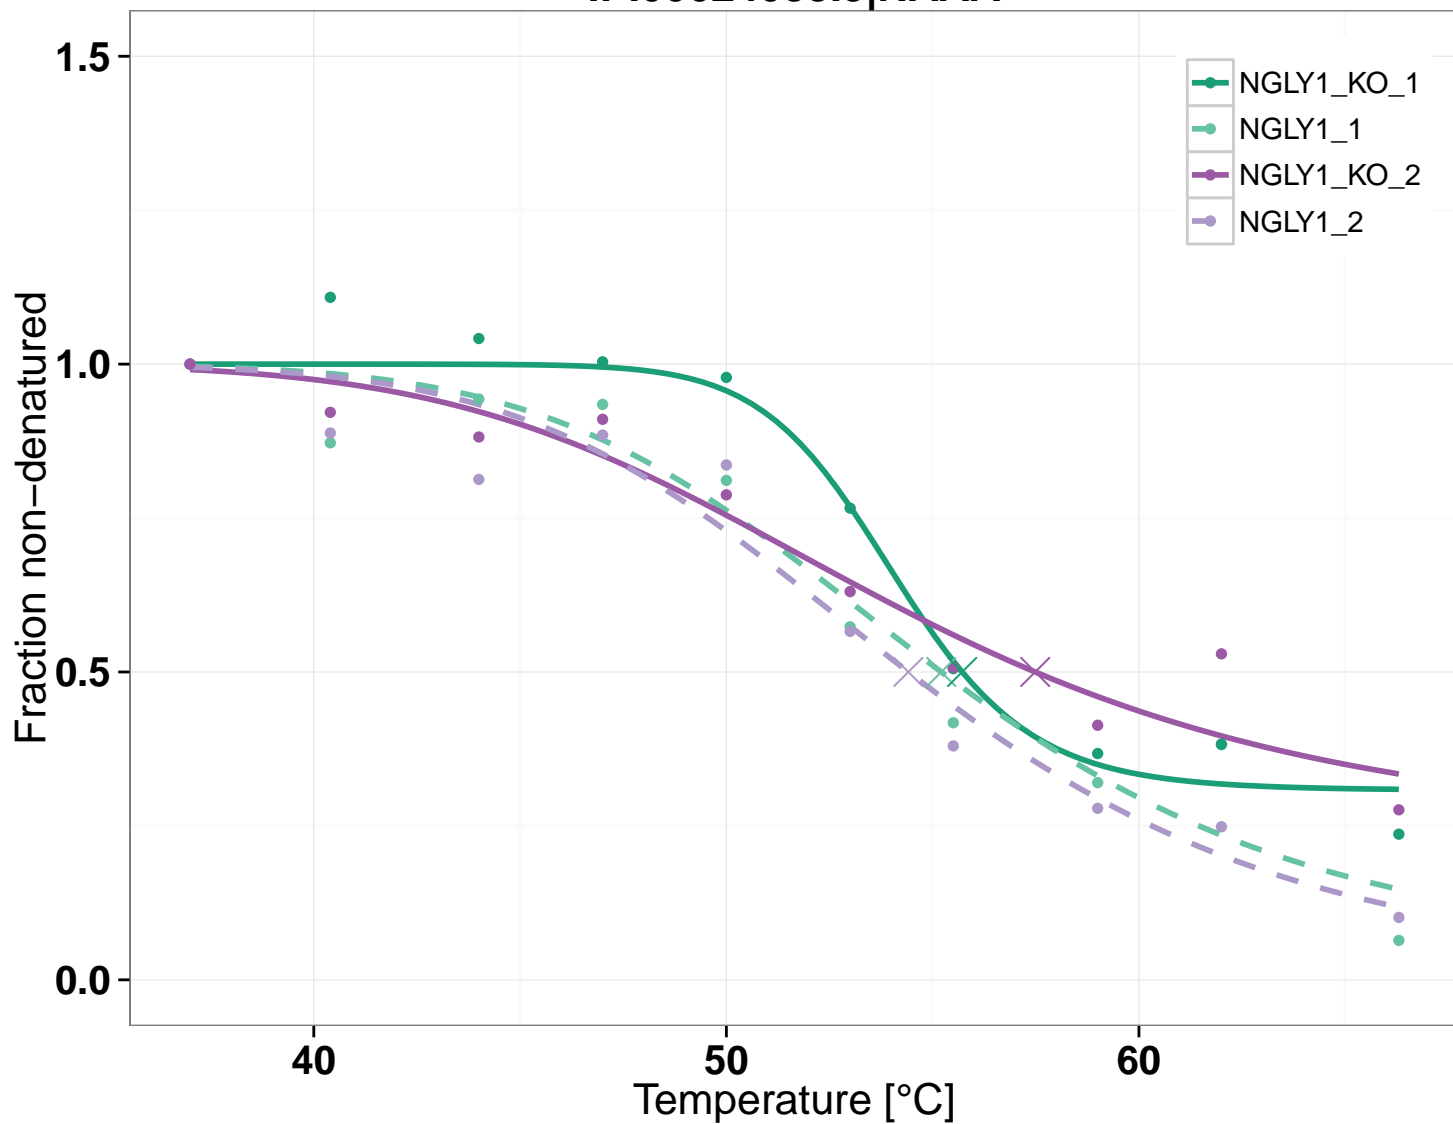

|            | meltPoint | slope  | plateau | R2   |
|------------|-----------|--------|---------|------|
| NGLY1_KO_1 | 55.72     | -0.11  | 0.31    | 0.98 |
| NGLY1_1    | 55.21     | -0.052 | 0.03    | 0.94 |
| NGLY1_KO_2 | 57.49     | -0.036 | 0.23    | 0.94 |
| NGLY1_2    | 54.41     | -0.053 | 0       | 0.96 |

Supplement: Supplementary file 3809 [file 1]

IPI00900336.1|ATXN1L

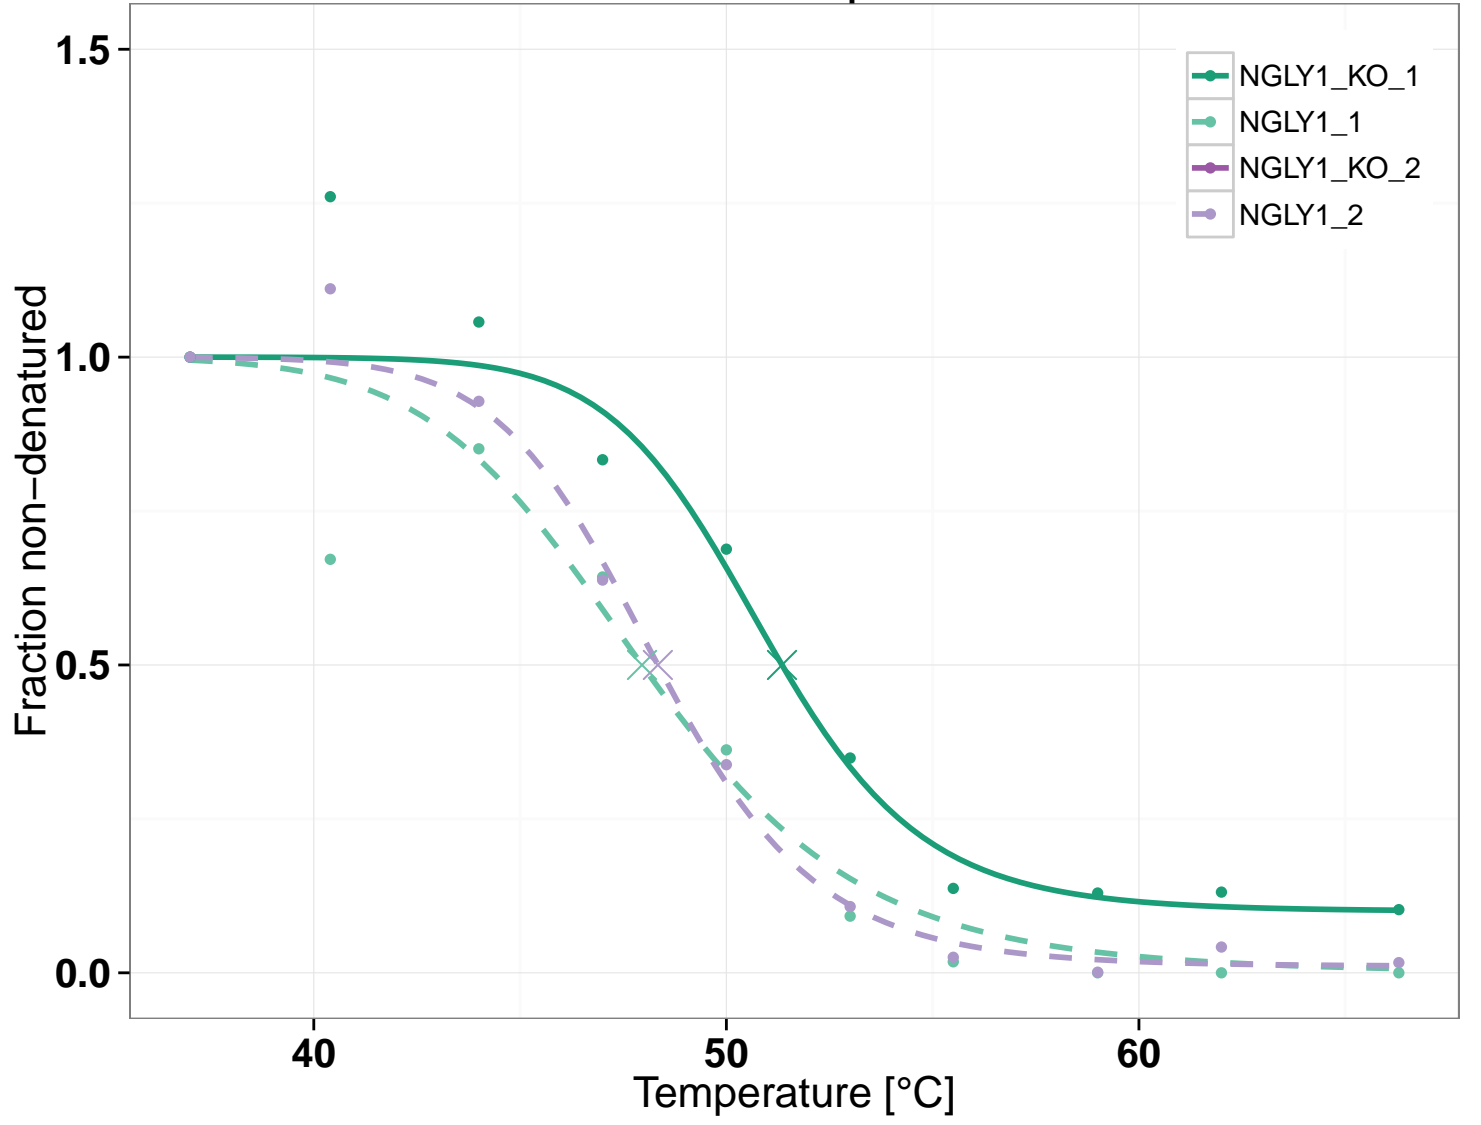

|            | meltPoint | slope  | plateau | R2   |
|------------|-----------|--------|---------|------|
| NGLY1_KO_1 | 51.35     | -0.12  | 0.1     | 0.95 |
| NGLY1_1    | 47.95     | -0.095 | 0       | 0.93 |
| NGLY1_KO_2 | -         | -      | -       | -    |
| NGLY1_2    | 48.34     | -0.13  | 0.01    | 0.99 |

Supplement: Supplementary file 3810 [file 1]

IPI00760846.1|MYO18A

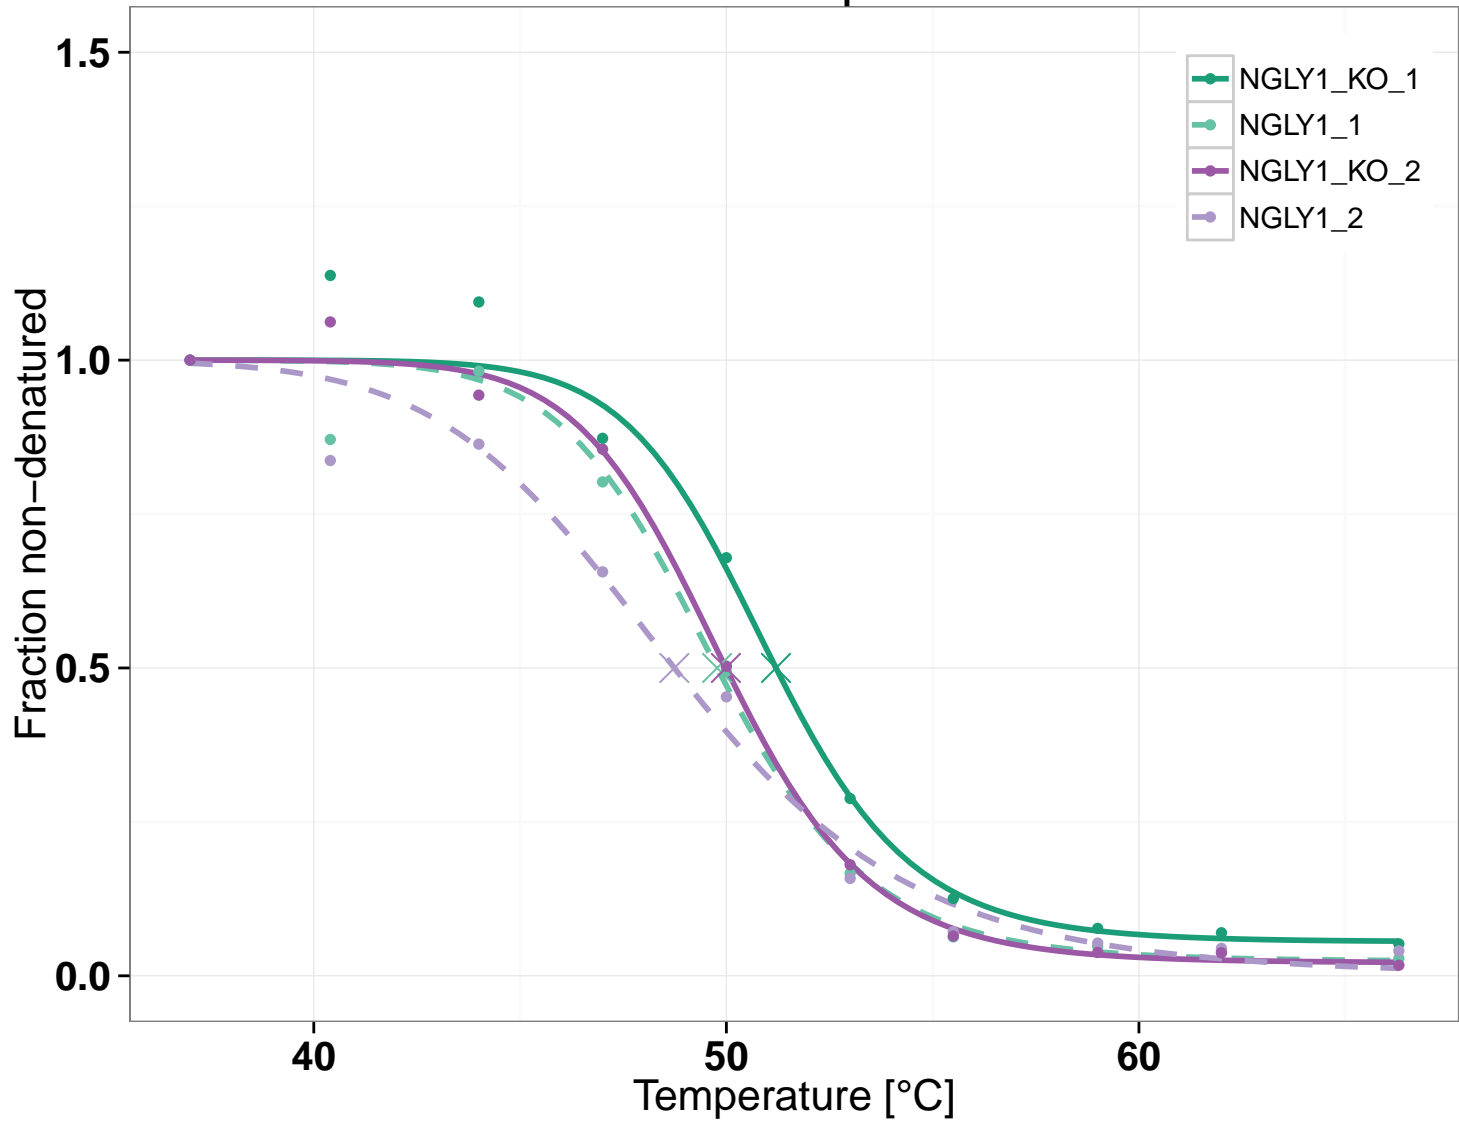

|            | meltPoint | slope  | plateau | R2   |
|------------|-----------|--------|---------|------|
| NGLY1_KO_1 | 51.2      | -0.14  | 0.06    | 0.98 |
| NGLY1_1    | 49.78     | -0.13  | 0.02    | 0.99 |
| NGLY1_KO_2 | 49.99     | -0.14  | 0.02    | 1    |
| NGLY1_2    | 48.74     | -0.087 | 0       | 0.98 |

Supplement: Supplementary file 3811 [file 1]

# IPI00010188.2|MRS2

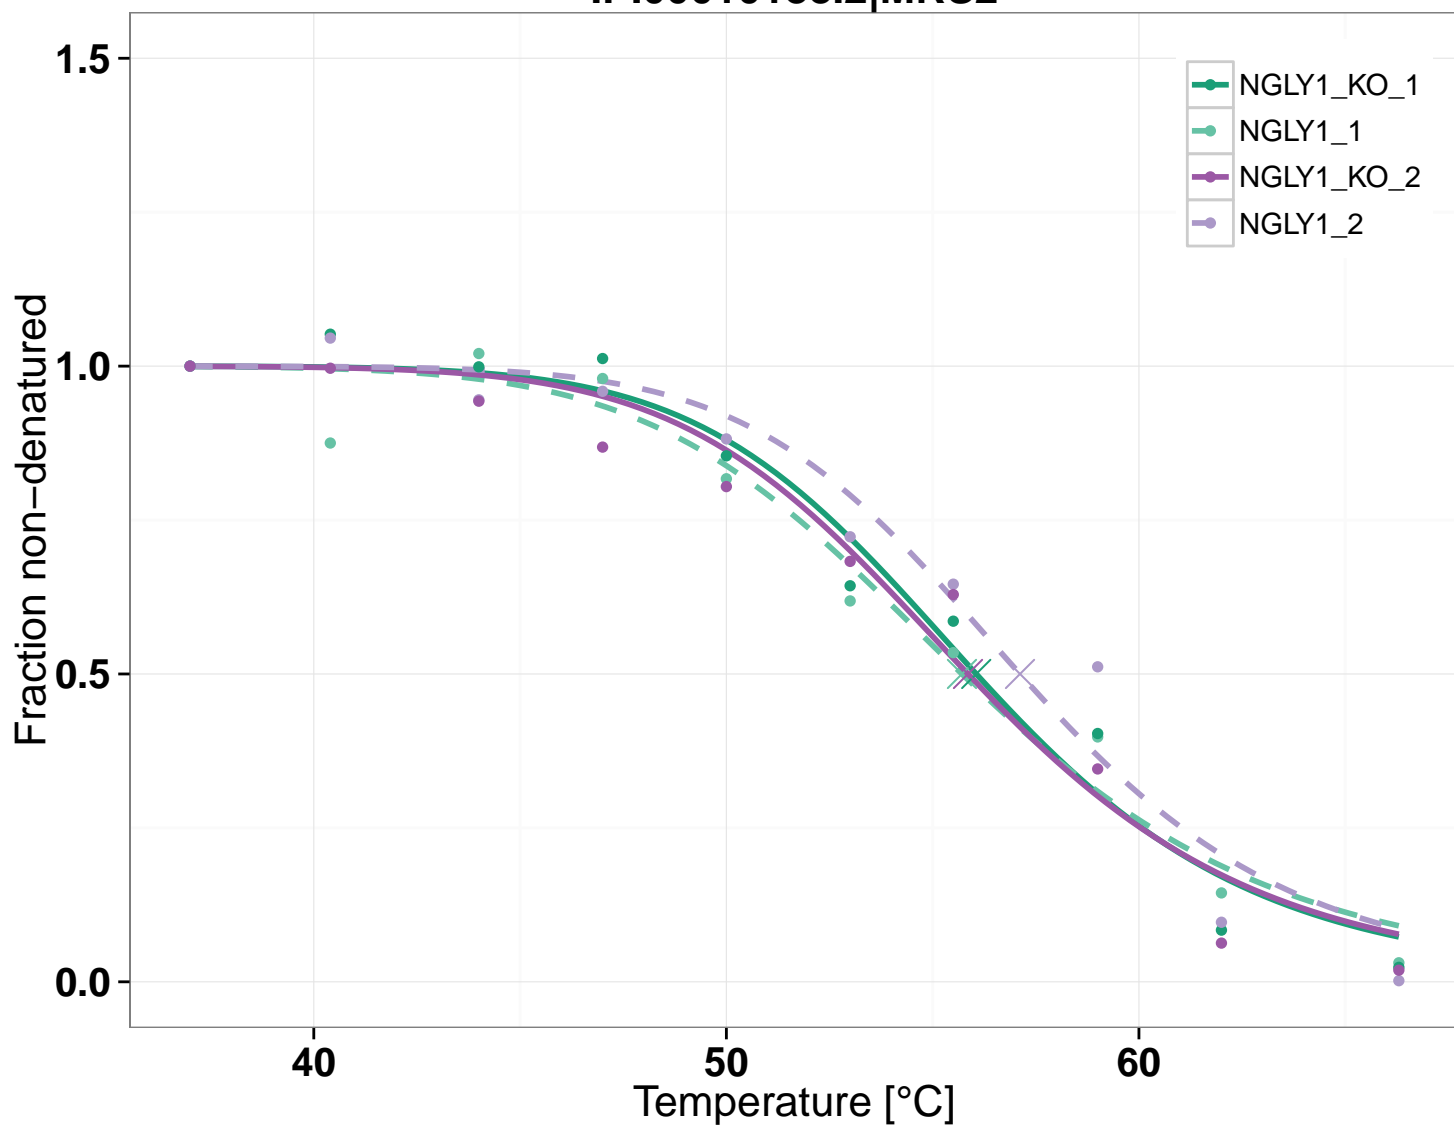

|            | meltPoint | slope  | plateau | R2   |
|------------|-----------|--------|---------|------|
| NGLY1_KO_1 | 56.06     | -0.074 | 0       | 0.97 |
| NGLY1_1    | 55.71     | -0.066 | 0       | 0.97 |
| NGLY1_KO_2 | 55.86     | -0.072 | 0       | 0.97 |
| NGLY1_2    | 57.12     | -0.076 | 0       | 0.96 |

Supplement: Supplementary file 3812 [file 1]

# IPI00059964.3|APH1A

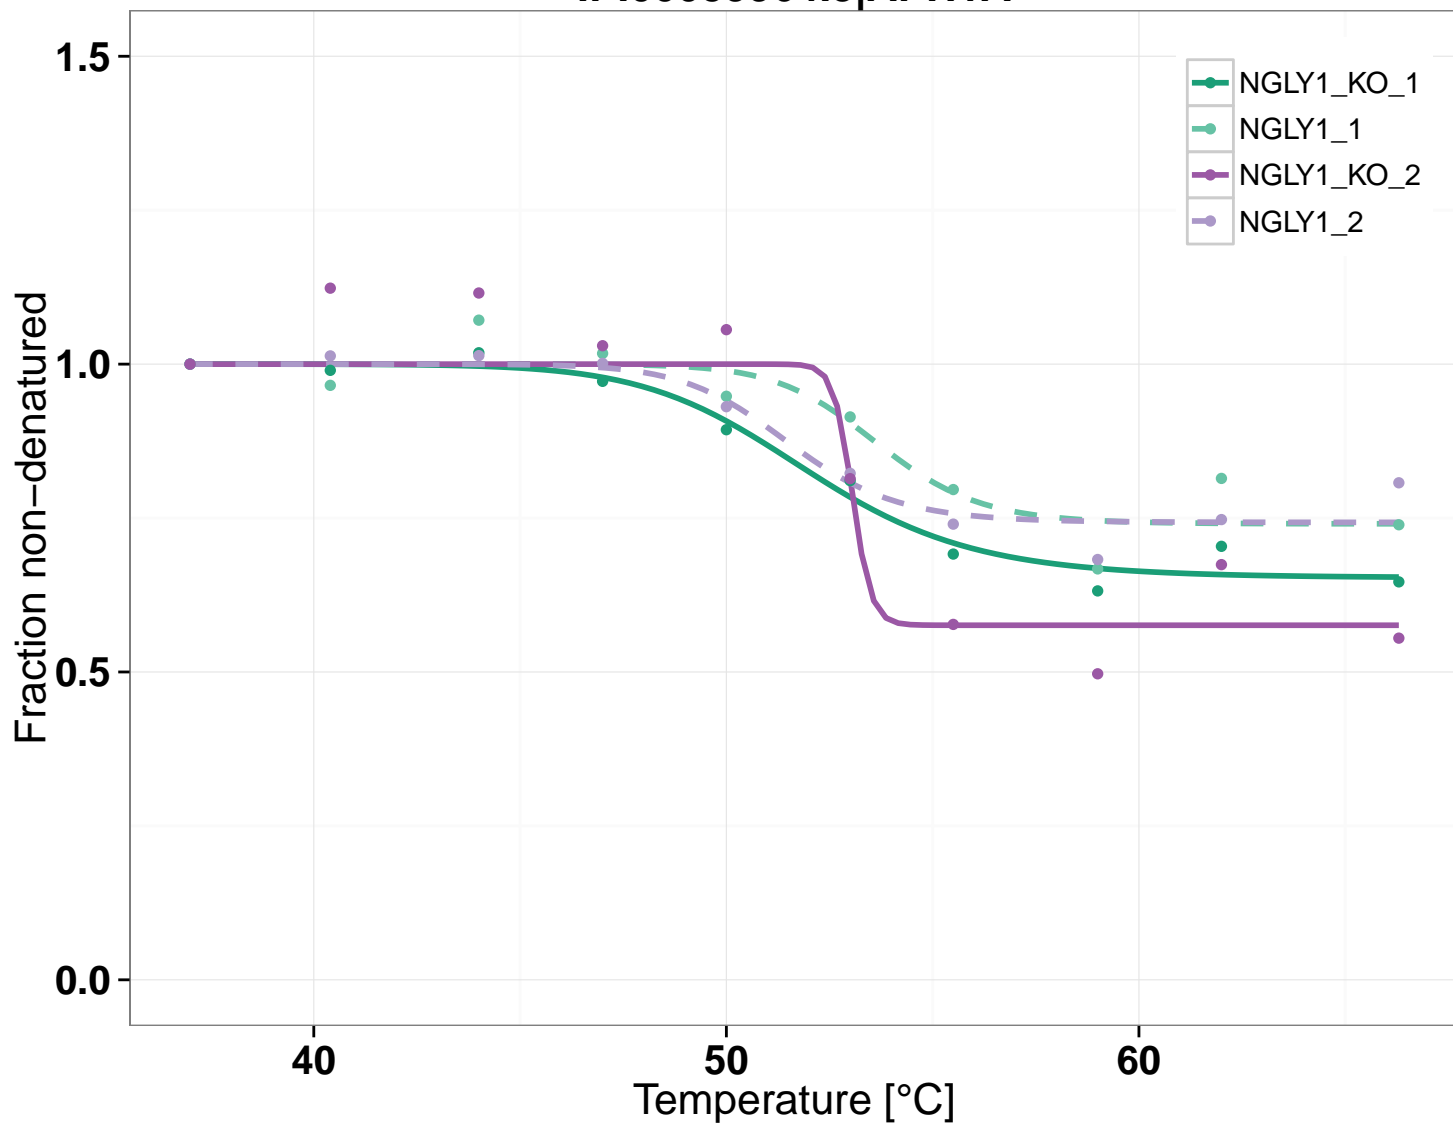

|            | meltPoint | slope  | plateau | R2   |
|------------|-----------|--------|---------|------|
| NGLY1_KO_1 | —         | −0.043 | 0.65    | 0.98 |
| NGLY1_1    | —         | −0.052 | 0.74    | 0.87 |
| NGLY1_KO_2 | —         | −0.47  | 0.58    | 0.91 |
| NGLY1_2    | —         | −0.049 | 0.74    | 0.94 |

Supplement: Supplementary file 3813 [file 1]

IPI00215874.7|TMEM194A

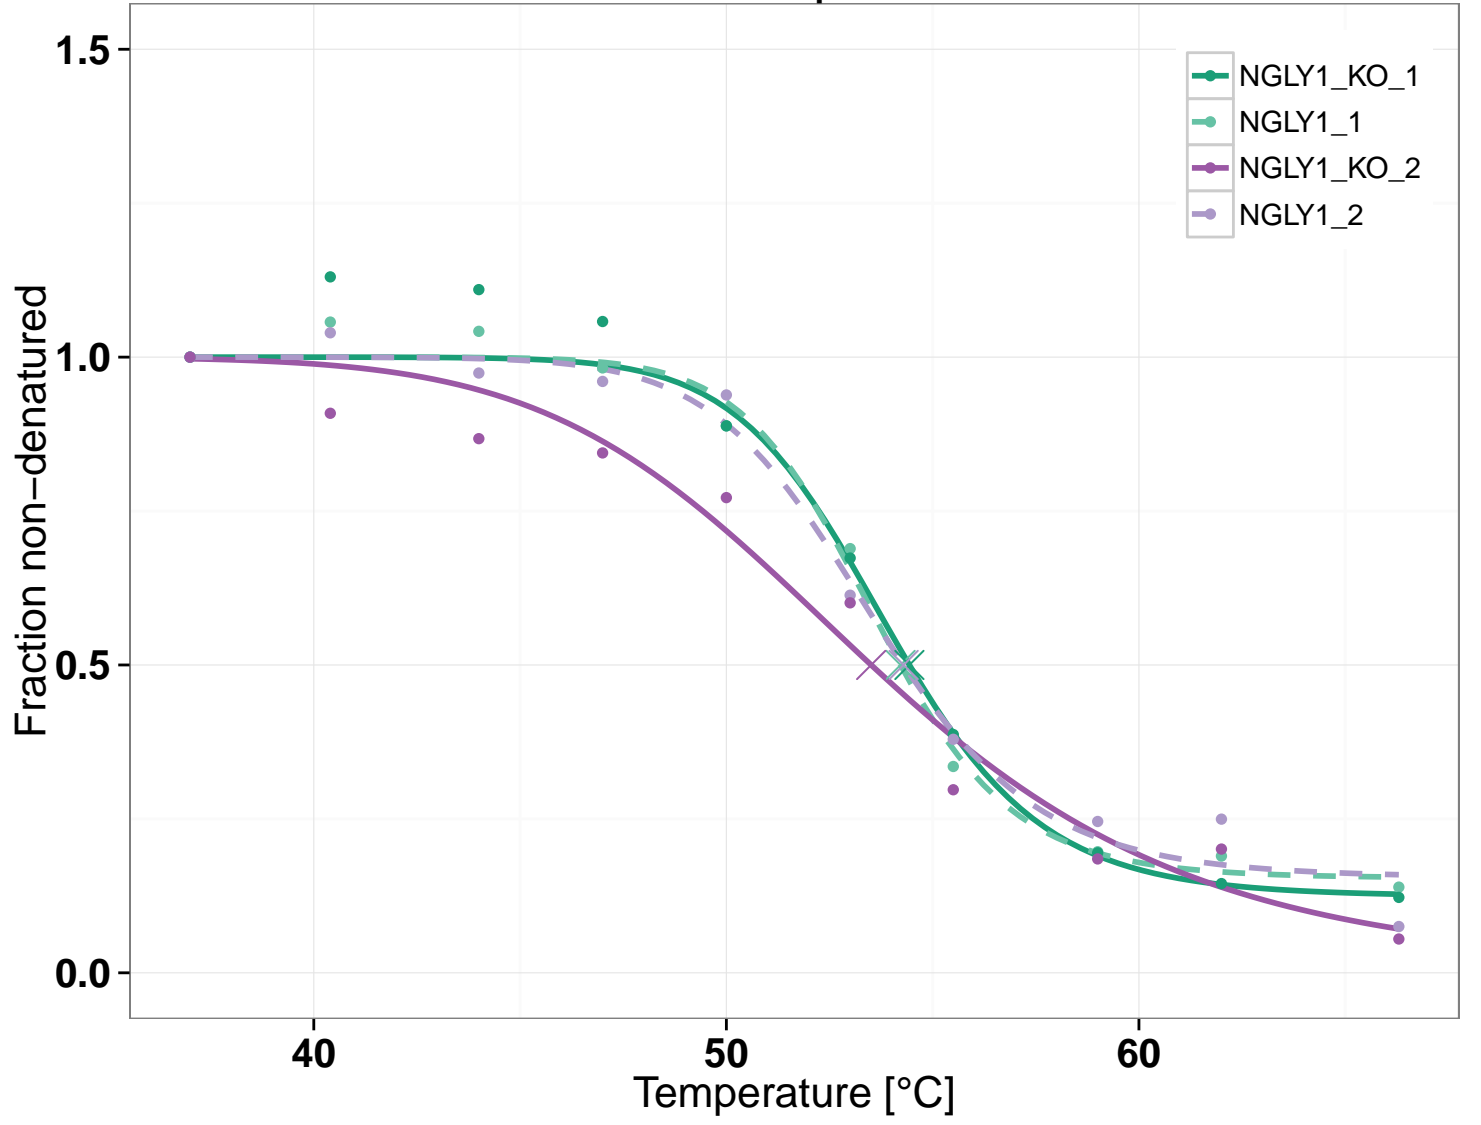

|            | meltPoint | slope  | plateau | R2   |
|------------|-----------|--------|---------|------|
| NGLY1_KO_1 | 54.44     | -0.12  | 0.12    | 0.98 |
| NGLY1_1    | 54.22     | -0.13  | 0.15    | 0.99 |
| NGLY1_KO_2 | 53.51     | -0.064 | 0       | 0.97 |
| NGLY1_2    | 54.3      | -0.11  | 0.15    | 0.99 |

Supplement: Supplementary file 3814 [file 1]

IPI00045864.1|ZNF587

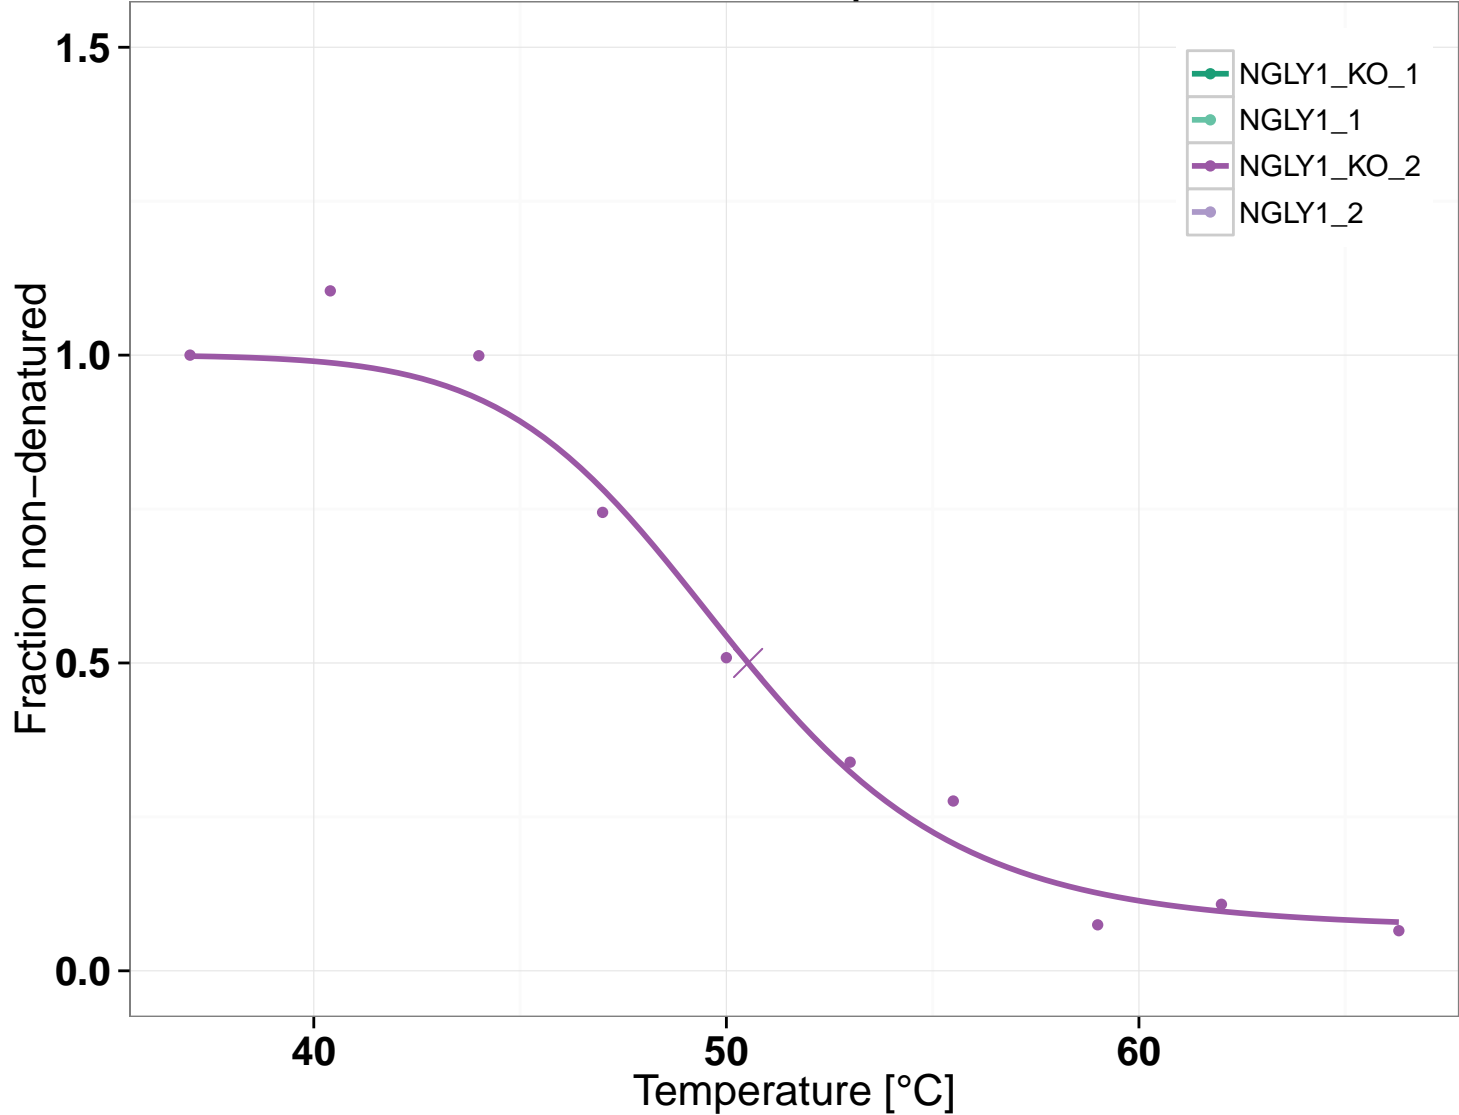

|            | meltPoint | slope  | plateau | R2   |
|------------|-----------|--------|---------|------|
| NGLY1_KO_1 | —         | —      | —       | —    |
| NGLY1_1    | —         | —      | —       | —    |
| NGLY1_KO_2 | 50.53     | -0.084 | 0.07    | 0.98 |
| NGLY1_2    | —         | —      | —       | —    |

Supplement: Supplementary file 3815 [file 1]

# IPI00642211.3|RNPEP

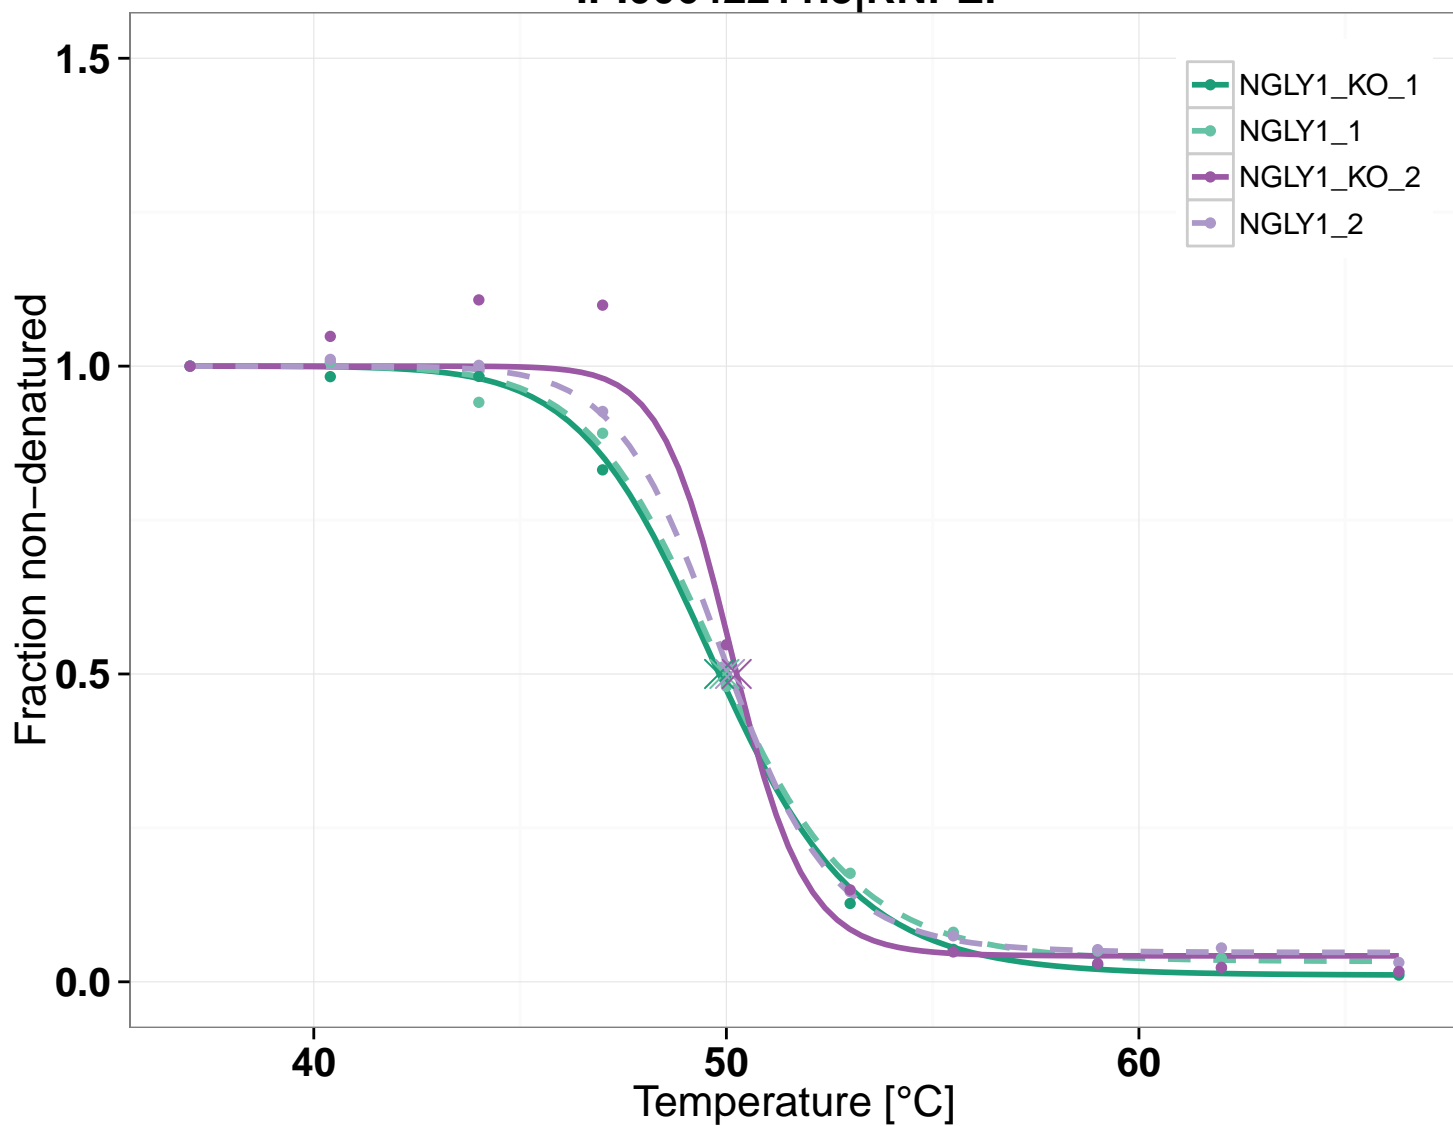

|            | meltPoint | slope | plateau | R2   |
|------------|-----------|-------|---------|------|
| NGLY1_KO_1 | 49.82     | -0.15 | 0.01    | 1    |
| NGLY1_1    | 49.95     | -0.15 | 0.03    | 1    |
| NGLY1_KO_2 | 50.25     | -0.27 | 0.04    | 0.99 |
| NGLY1_2    | 50.09     | -0.18 | 0.05    | 1    |

Supplement: Supplementary file 3816 [file 1]

# IPI00218258.6|LYL1

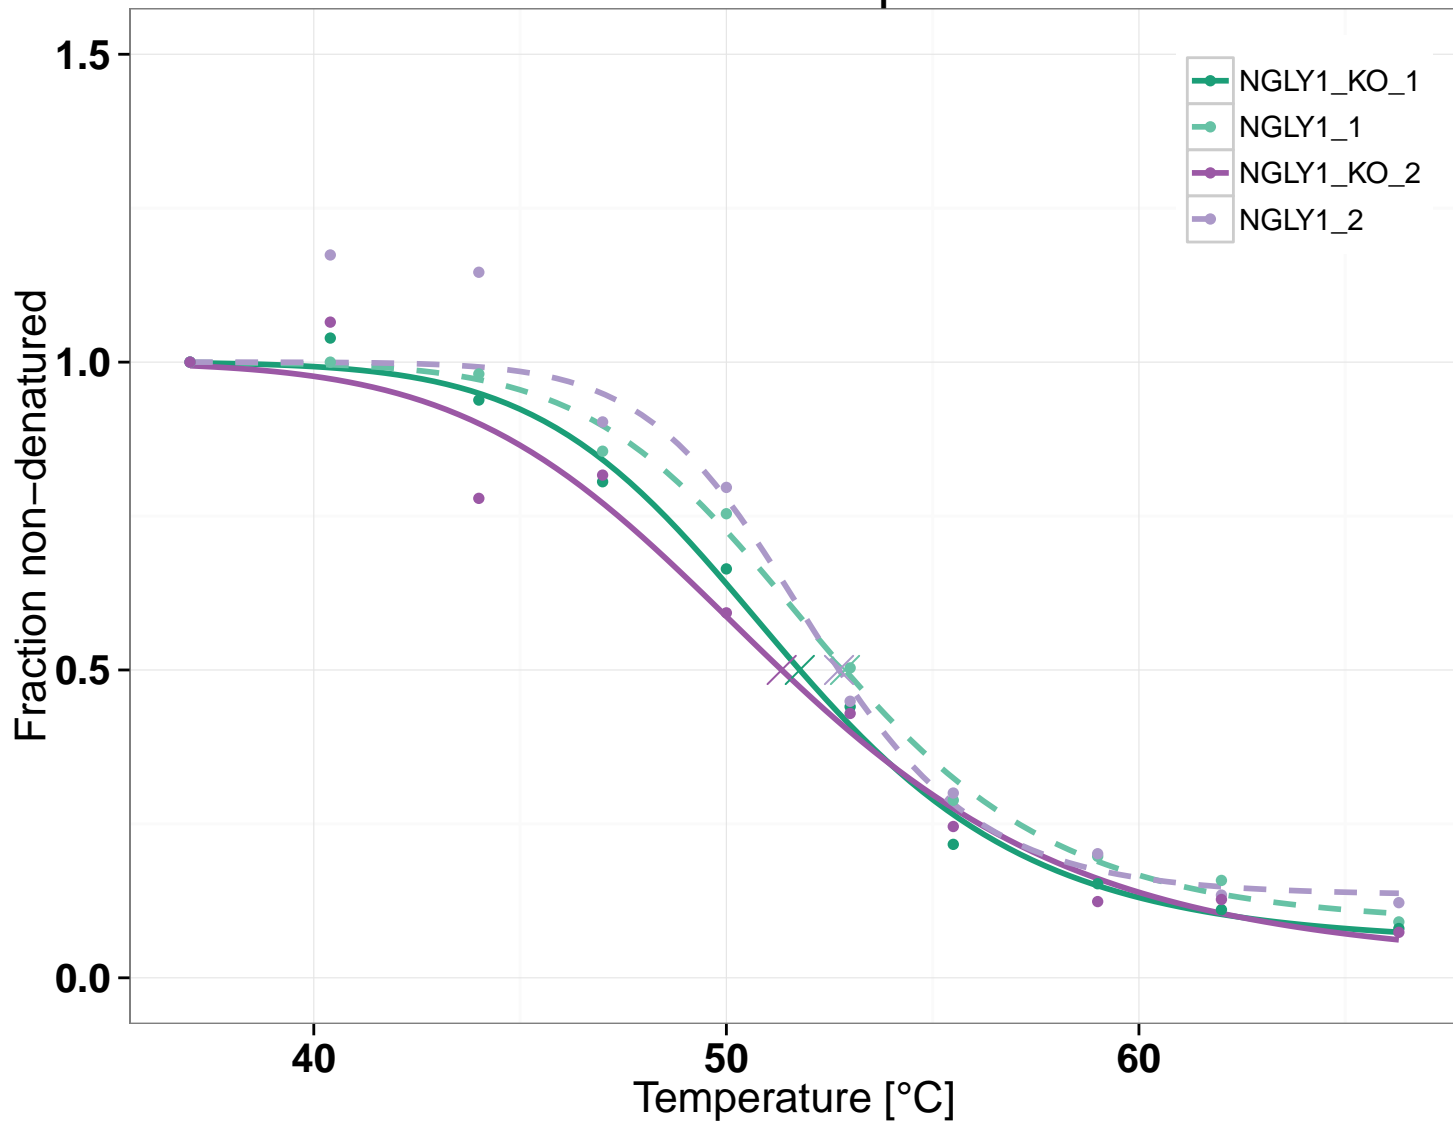

|            | meltPoint | slope  | plateau | R2   |
|------------|-----------|--------|---------|------|
| NGLY1_KO_1 | 51.78     | -0.079 | 0.05    | 0.99 |
| NGLY1_1    | 52.88     | -0.08  | 0.08    | 1    |
| NGLY1_KO_2 | 51.34     | -0.065 | 0.02    | 0.98 |
| NGLY1_2    | 52.73     | -0.11  | 0.13    | 0.96 |

Supplement: Supplementary file 3817 [file 1]
