# Supplementary material (part 39 of 85)
Source: publisher figshare collection journal article supplement (https://gsajournals.figshare.com/articles/dataset/_/12014913)

IPI00878754.1|PRPF39

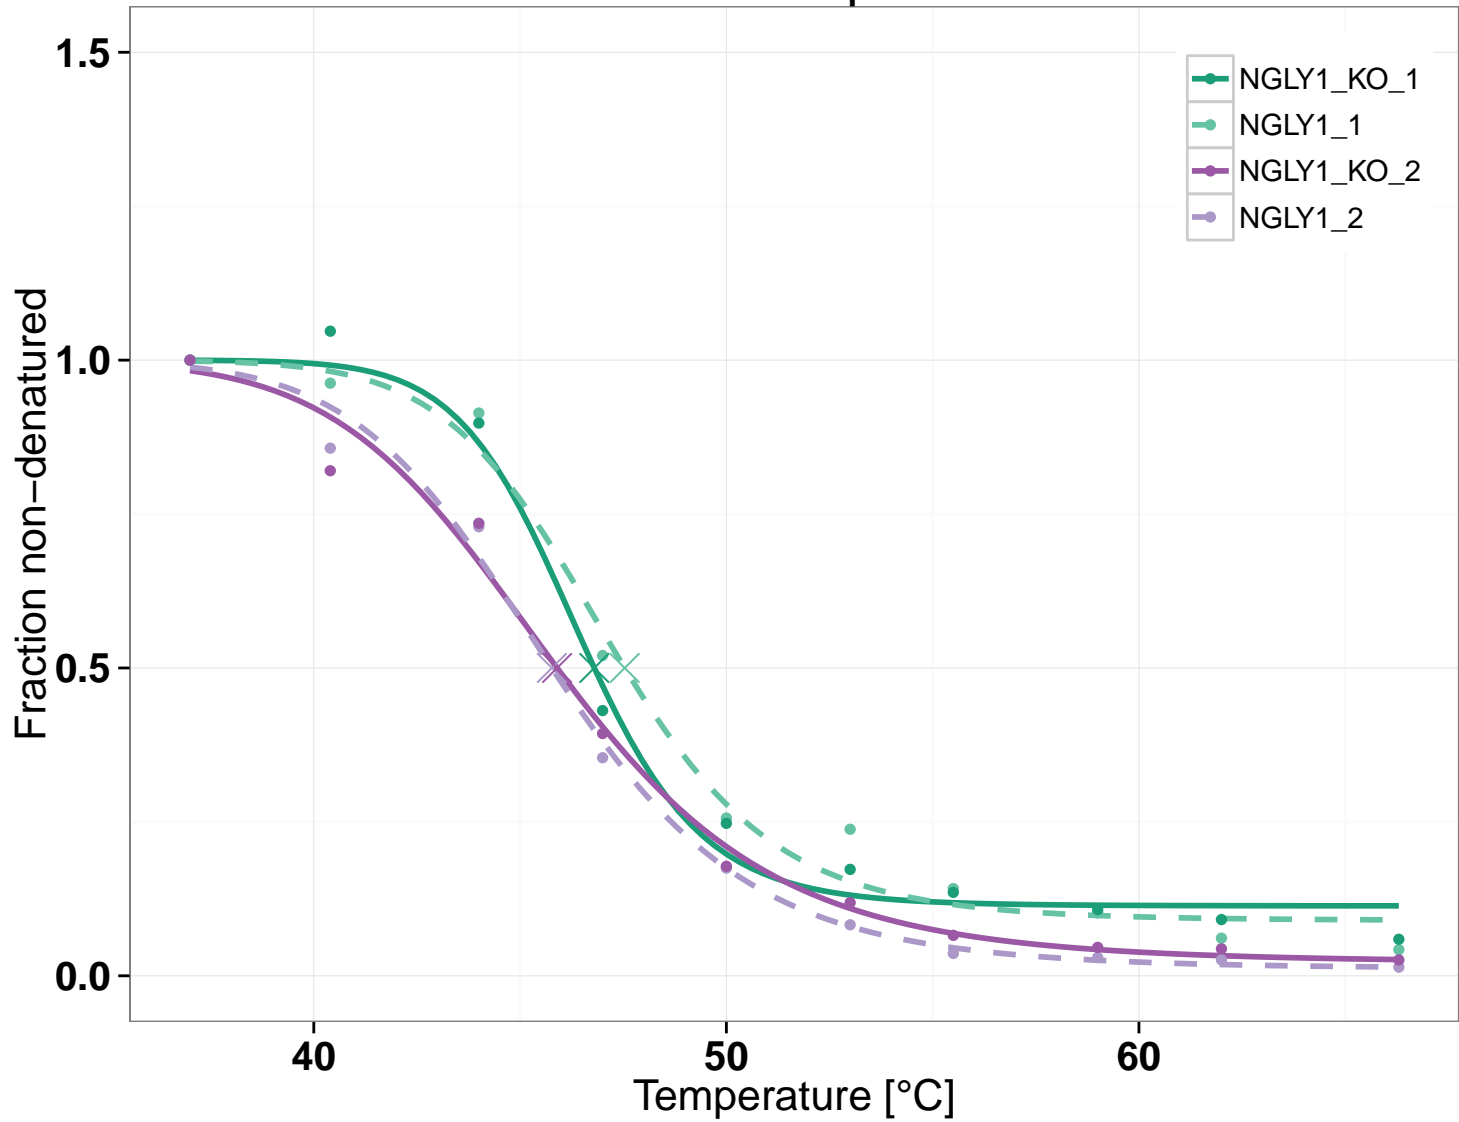

|            | meltPoint | slope  | plateau | R2   |
|------------|-----------|--------|---------|------|
| NGLY1_KO_1 | 46.8      | -0.15  | 0.11    | 0.99 |
| NGLY1_1    | 47.54     | -0.11  | 0.09    | 0.99 |
| NGLY1_KO_2 | 45.9      | -0.092 | 0.02    | 0.99 |
| NGLY1_2    | 45.77     | -0.1   | 0.01    | 0.99 |

Supplement: Supplementary file 3818 [file 1]

# IPI00549248.4|NPM1

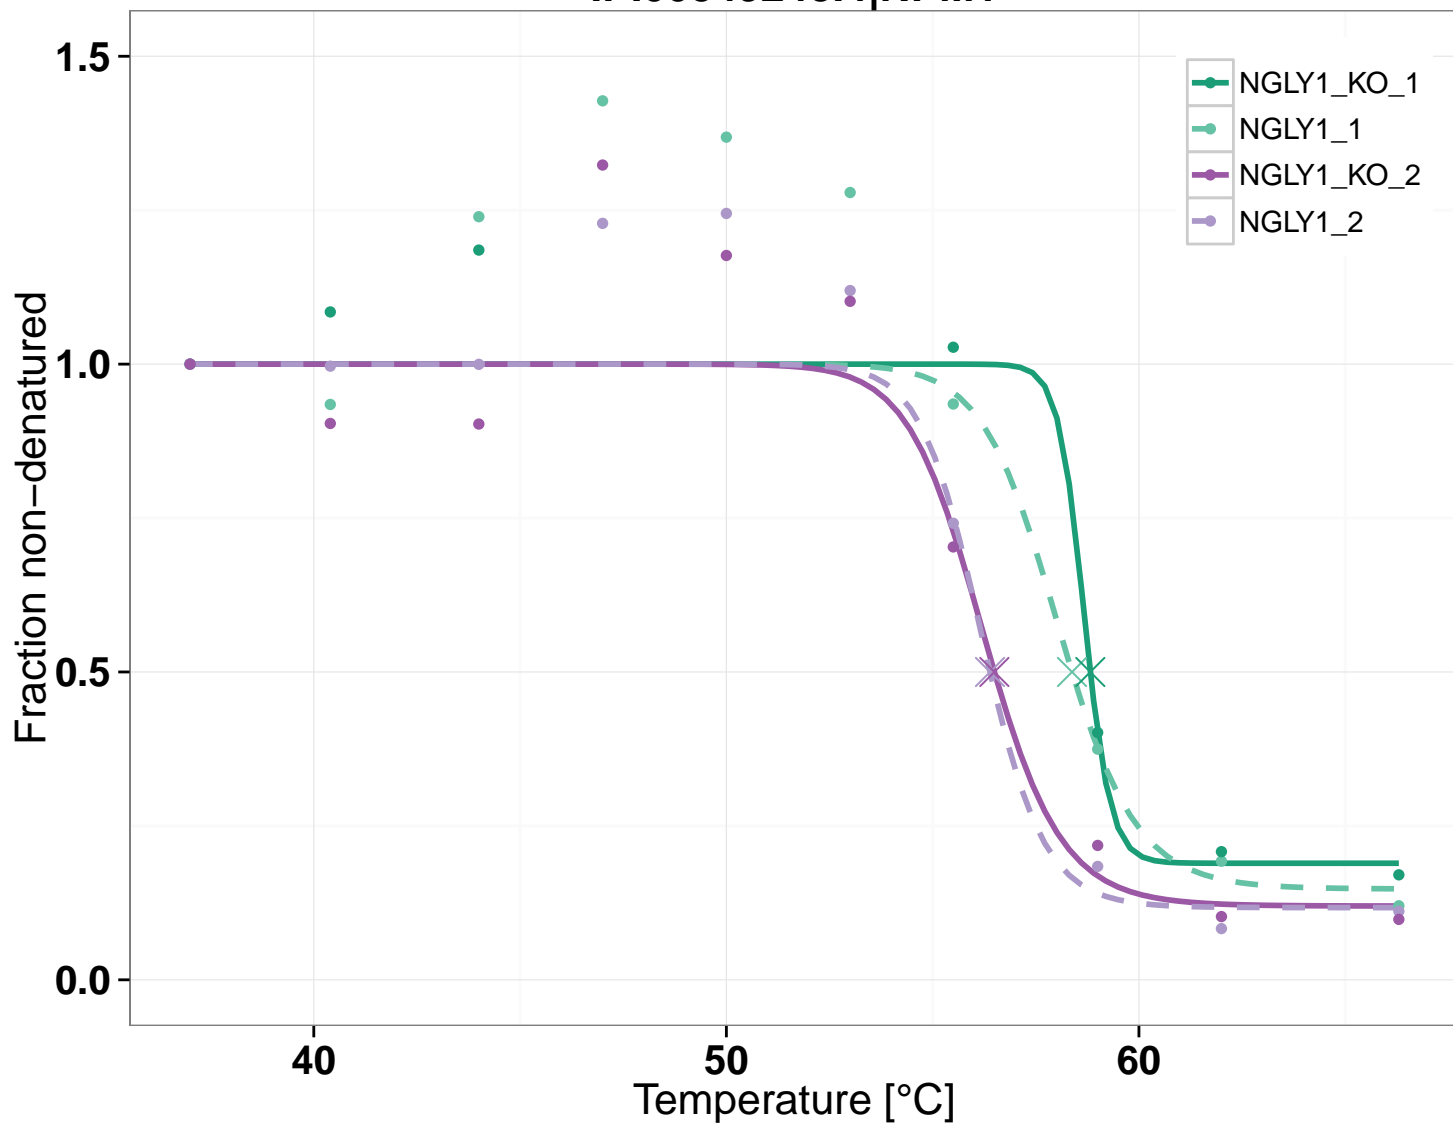

|            | meltPoint | slope | plateau | R2   |
|------------|-----------|-------|---------|------|
| NGLY1_KO_1 | 58.82     | -0.64 | 0.19    | 0.63 |
| NGLY1_1    | 58.38     | -0.23 | 0.15    | 0.79 |
| NGLY1_KO_2 | 56.5      | -0.24 | 0.12    | 0.91 |
| NGLY1_2    | 56.39     | -0.3  | 0.12    | 0.93 |

Supplement: Supplementary file 3819 [file 1]

IPI00410211.2|DPY19L3

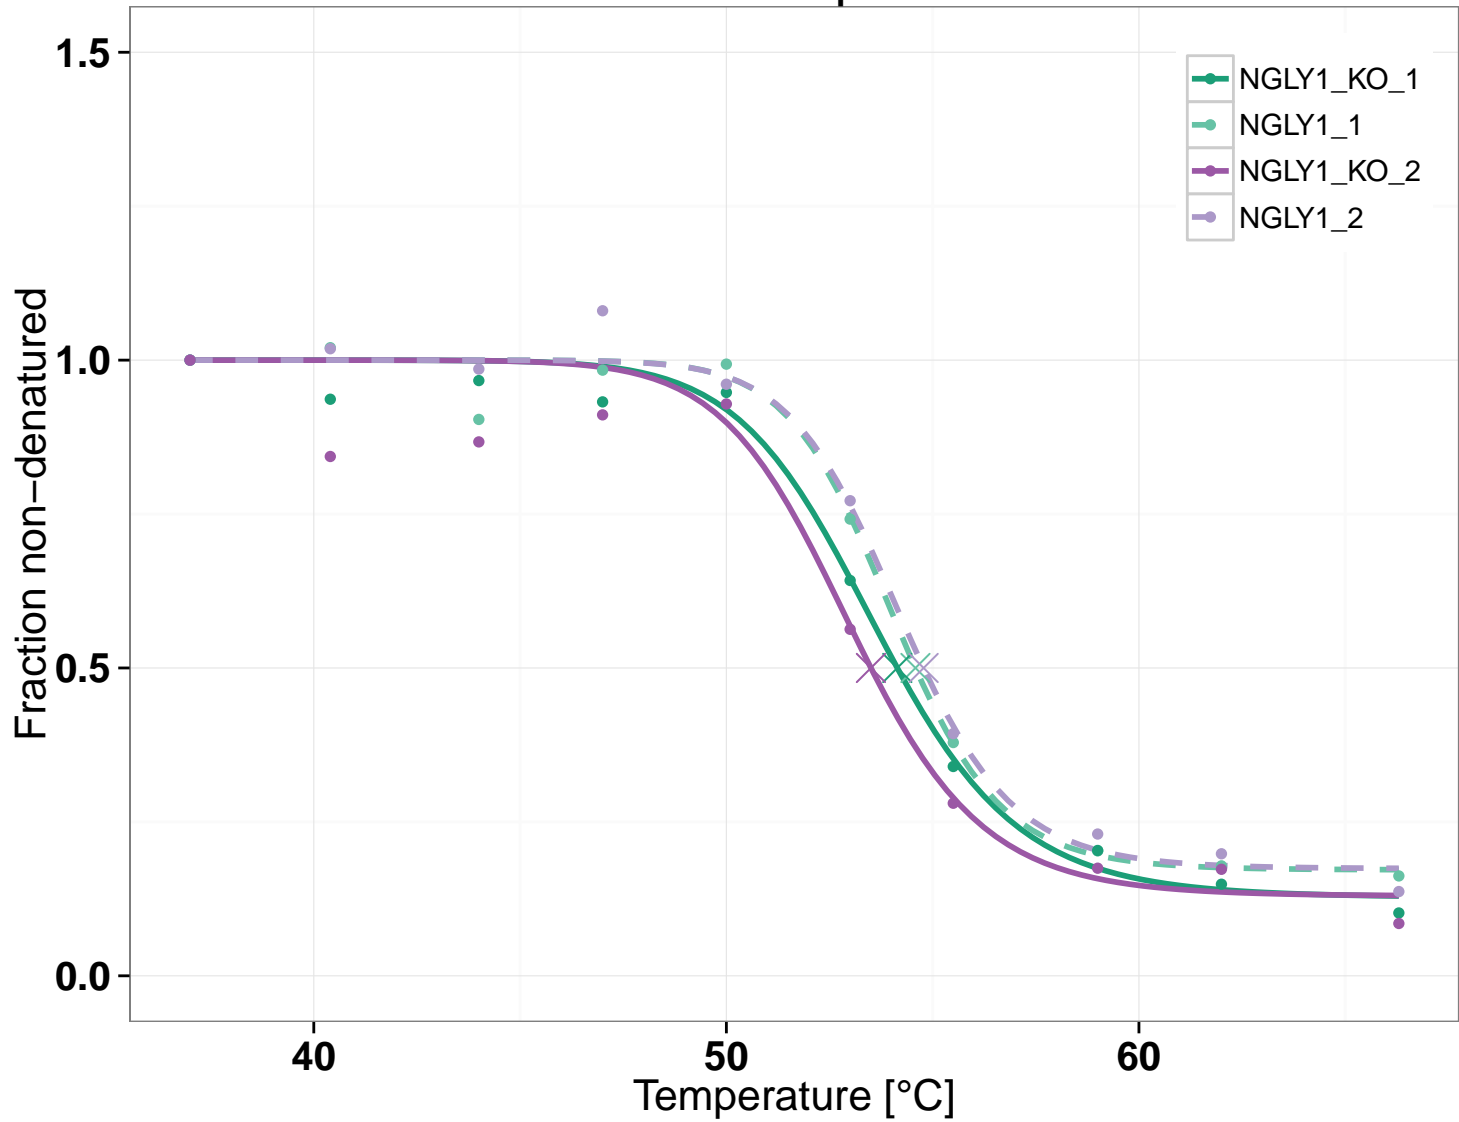

|            | meltPoint | slope | plateau | R2   |
|------------|-----------|-------|---------|------|
| NGLY1_KO_1 | 54.14     | -0.13 | 0.13    | 0.99 |
| NGLY1_1    | 54.58     | -0.16 | 0.17    | 0.99 |
| NGLY1_KO_2 | 53.5      | -0.14 | 0.13    | 0.96 |
| NGLY1_2    | 54.78     | -0.15 | 0.17    | 0.99 |

Supplement: Supplementary file 3820 [file 1]

IPI00646709.1|IRF3

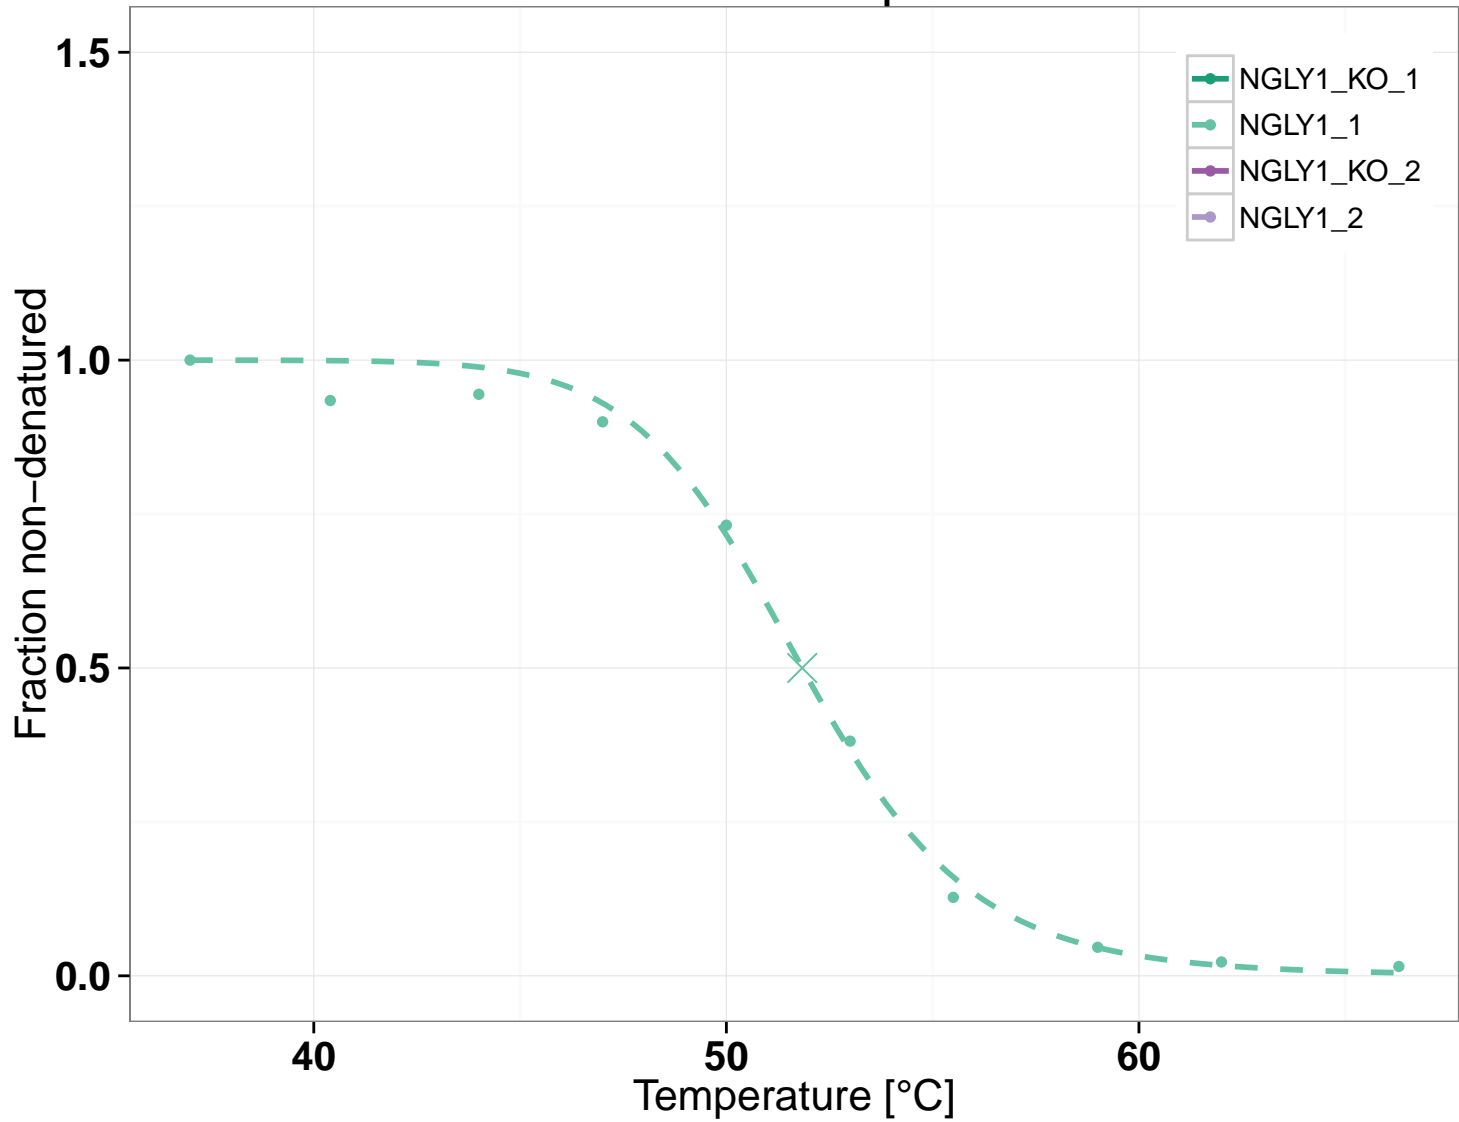

|            | meltPoint | slope | plateau | R2   |
|------------|-----------|-------|---------|------|
| NGLY1_KO_1 | -         | -     | -       | -    |
| NGLY1_1    | 51.84     | -0.12 | 0       | 0.99 |
| NGLY1_KO_2 | -         | -     | -       | -    |
| NGLY1_2    | -         | -     | -       | -    |

Supplement: Supplementary file 3821 [file 1]

# IPI00746934.2|UBR4

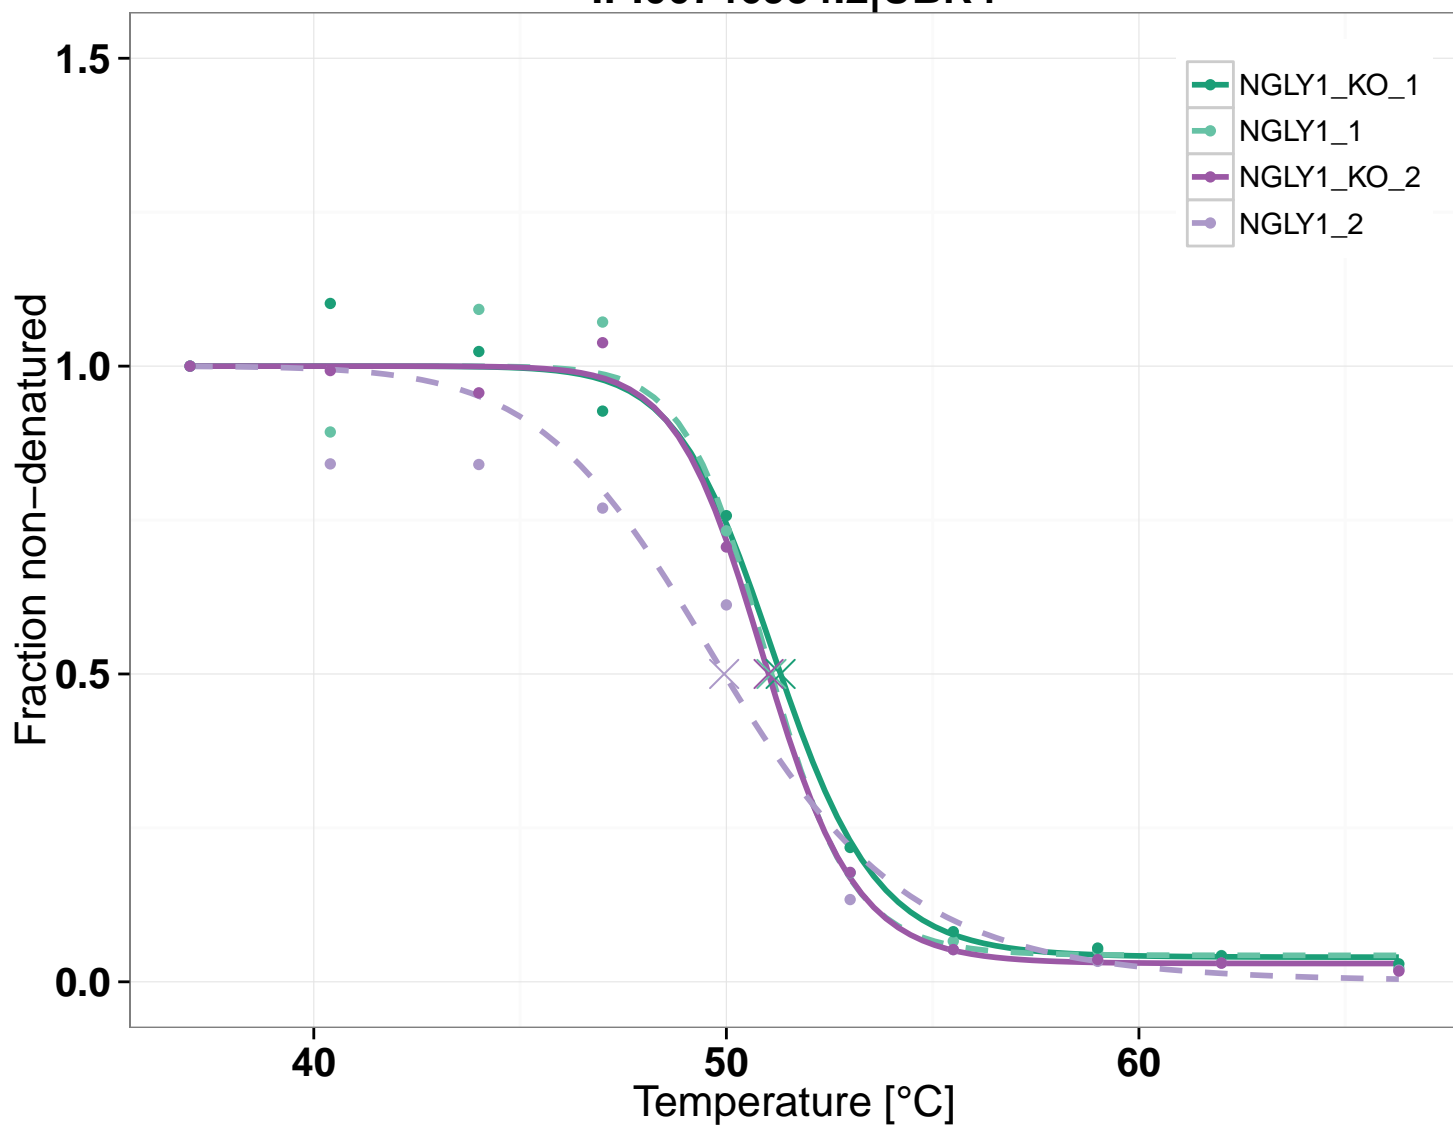

|            | meltPoint | slope | plateau | R2   |
|------------|-----------|-------|---------|------|
| NGLY1_KO_1 | 51.31     | -0.2  | 0.04    | 0.99 |
| NGLY1_1    | 51.09     | -0.24 | 0.04    | 0.99 |
| NGLY1_KO_2 | 51.02     | -0.22 | 0.03    | 1    |
| NGLY1_2    | 49.95     | -0.11 | 0       | 0.96 |

Supplement: Supplementary file 3822 [file 1]

IPI00145726.5|C4ORF46

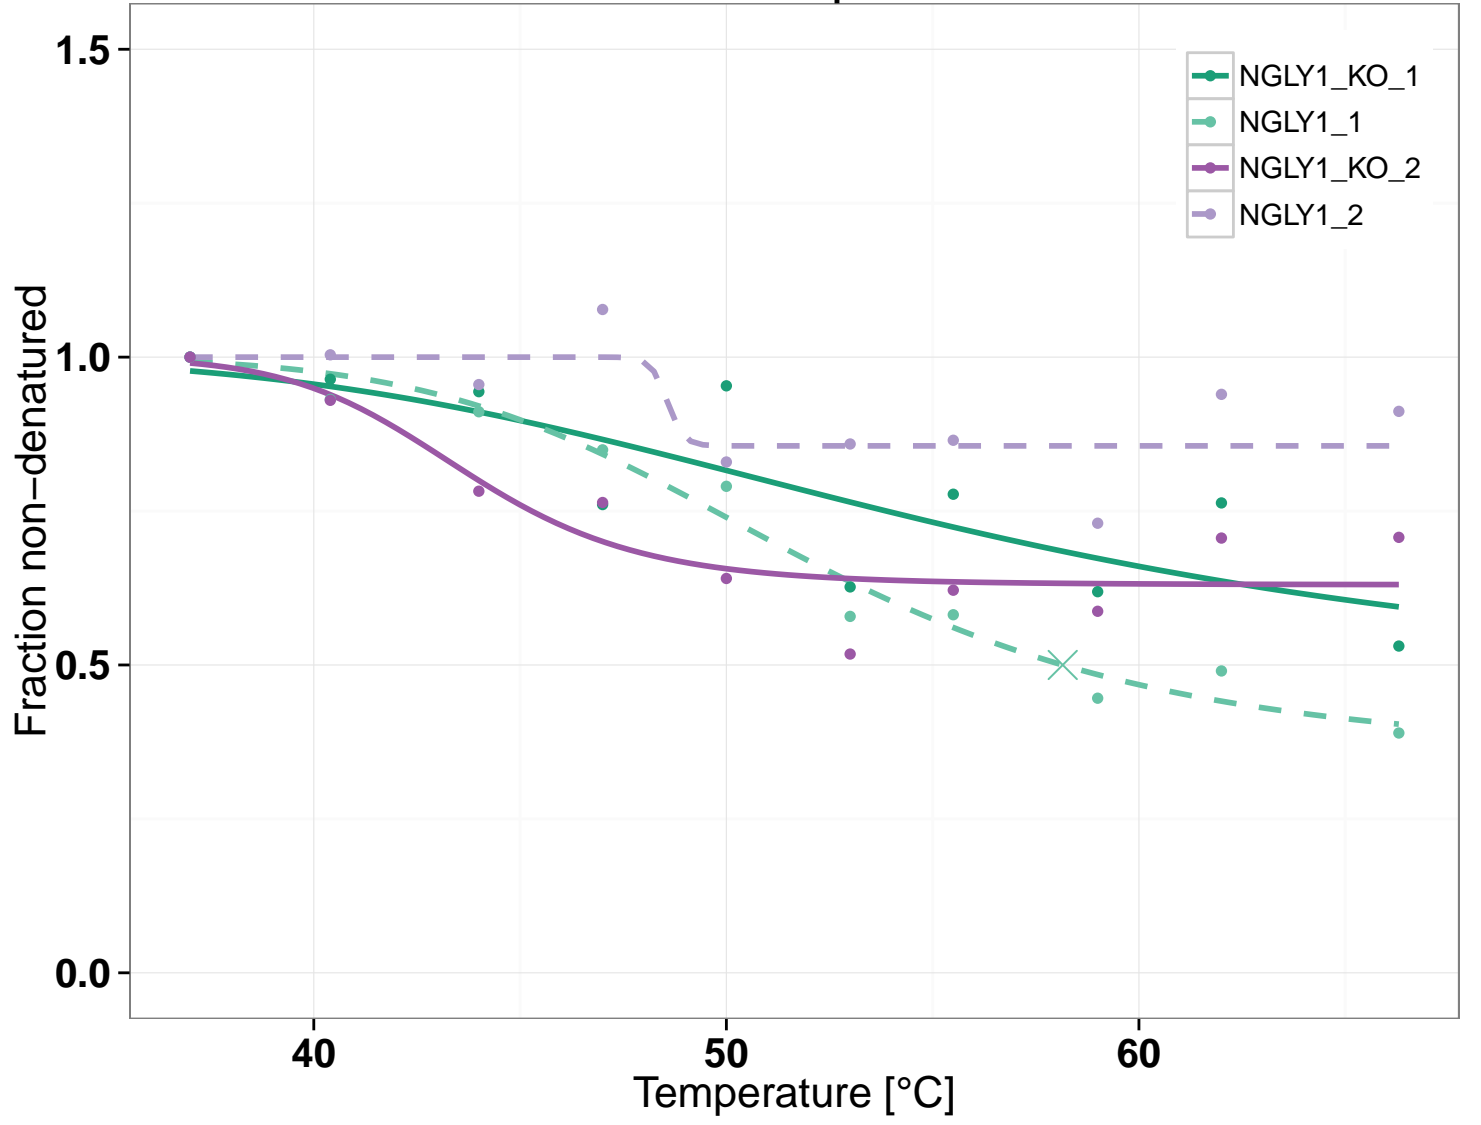

|            | meltPoint | slope  | plateau | R2   |
|------------|-----------|--------|---------|------|
| NGLY1_KO_1 | –         | –0.017 | 0.45    | 0.69 |
| NGLY1_1    | 58.15     | –0.036 | 0.35    | 0.97 |
| NGLY1_KO_2 | –         | –0.043 | 0.63    | 0.84 |
| NGLY1_2    | –         | –0.19  | 0.86    | 0.62 |

Supplement: Supplementary file 3823 [file 1]

IPI00645577.1|ROGDI

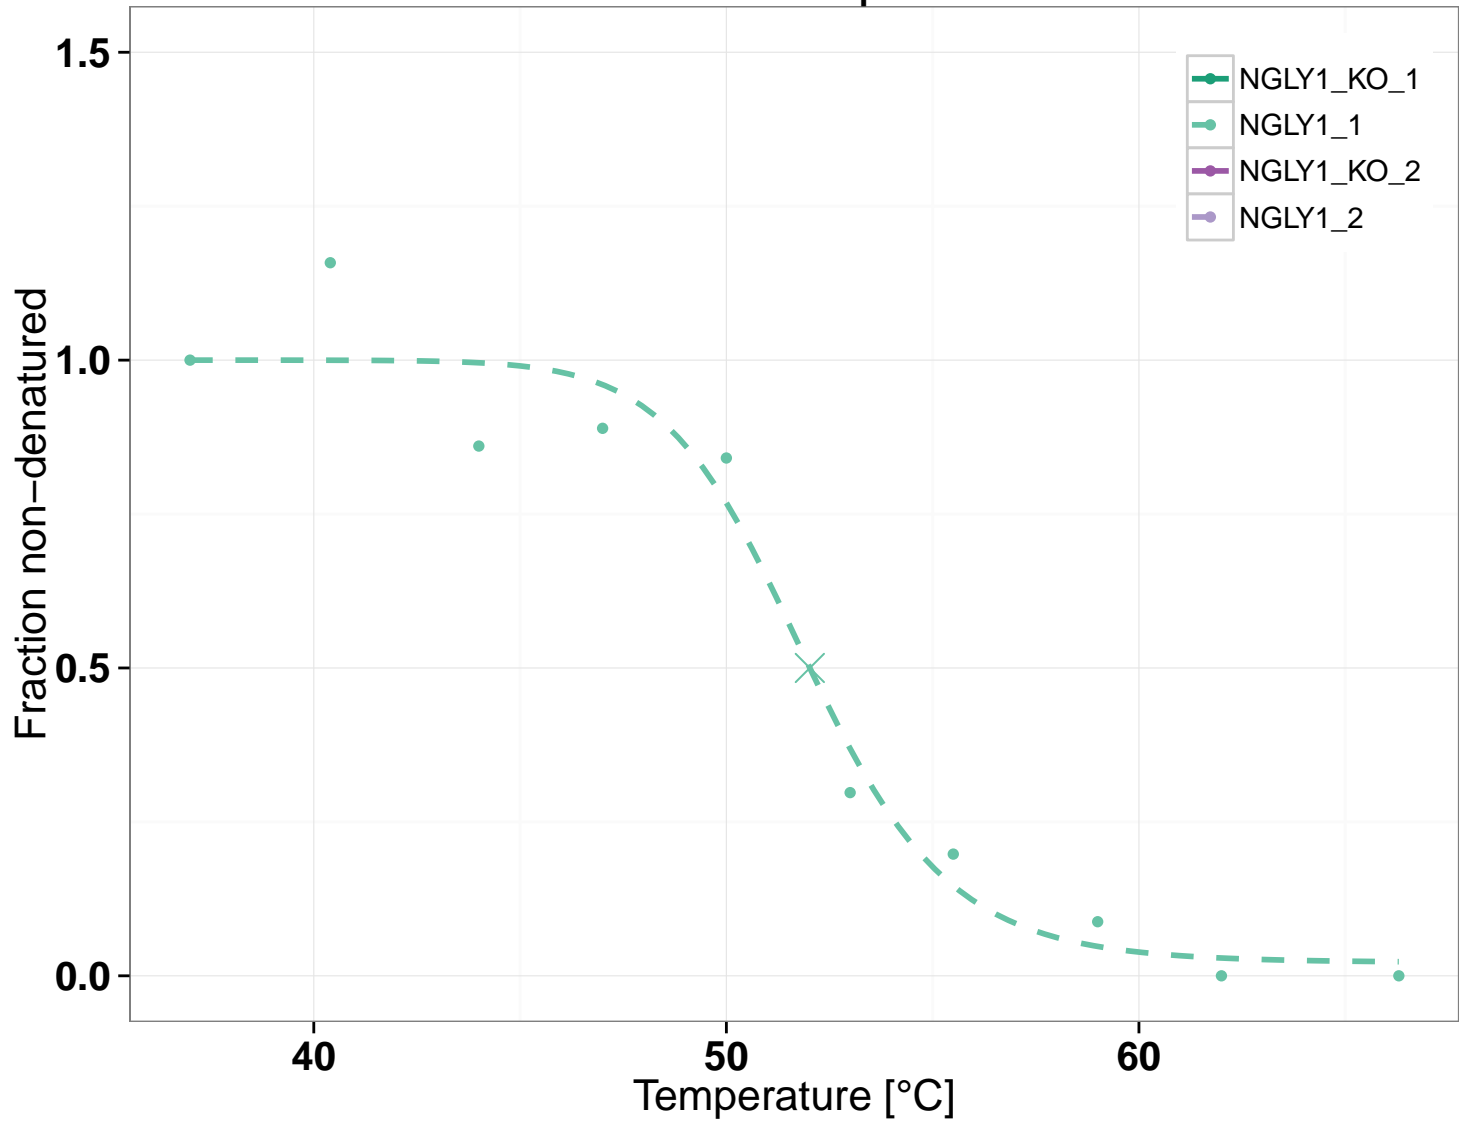

|            | meltPoint | slope | plateau | R2   |
|------------|-----------|-------|---------|------|
| NGLY1_KO_1 | -         | -     | -       | -    |
| NGLY1_1    | 52.02     | -0.14 | 0.02    | 0.97 |
| NGLY1_KO_2 | -         | -     | -       | -    |
| NGLY1_2    | -         | -     | -       | -    |

Supplement: Supplementary file 3824 [file 1]

# IPI00291579.7|KIF23

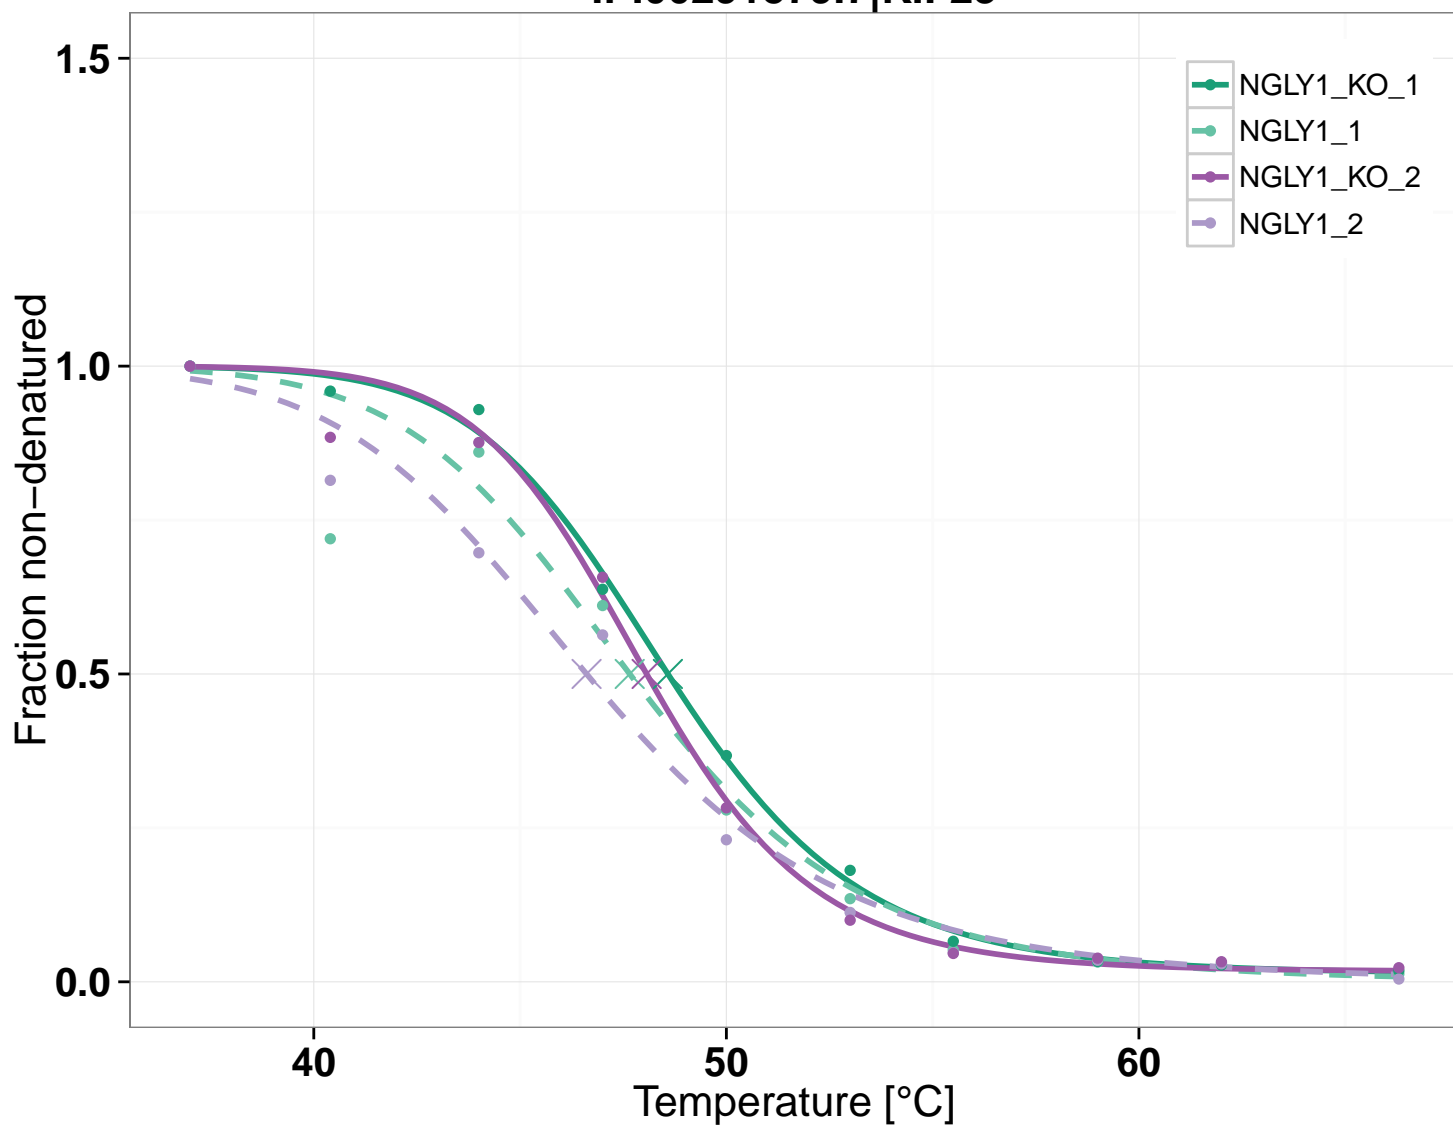

|            | meltPoint | slope  | plateau | R2   |
|------------|-----------|--------|---------|------|
| NGLY1_KO_1 | 48.58     | -0.1   | 0.01    | 1    |
| NGLY1_1    | 47.66     | -0.09  | 0       | 0.95 |
| NGLY1_KO_2 | 48.07     | -0.12  | 0.02    | 0.99 |
| NGLY1_2    | 46.61     | -0.081 | 0       | 0.98 |

Supplement: Supplementary file 3825 [file 1]

IPI00301841.6|TMEM161A

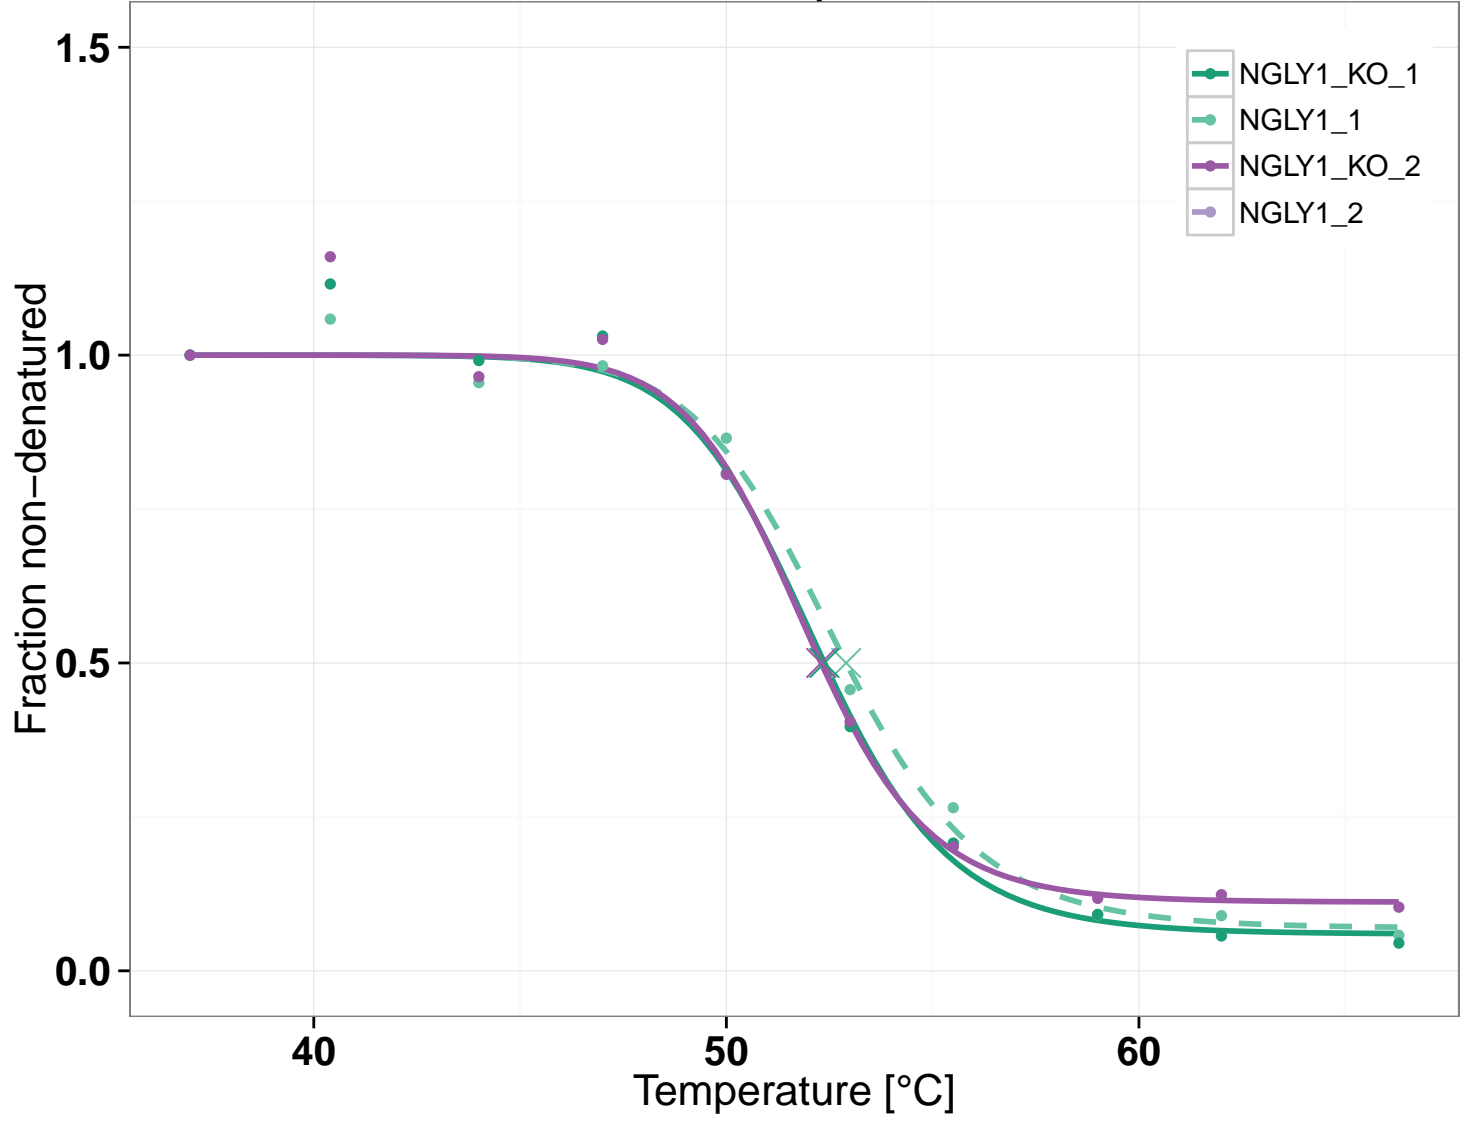

|            | meltPoint | slope | plateau | R2   |
|------------|-----------|-------|---------|------|
| NGLY1_KO_1 | 52.38     | -0.15 | 0.06    | 0.99 |
| NGLY1_1    | 52.9      | -0.13 | 0.07    | 1    |
| NGLY1_KO_2 | 52.3      | -0.15 | 0.11    | 0.98 |
| NGLY1_2    | -         | -     | -       | -    |

Supplement: Supplementary file 3826 [file 1]

# IPI00017412.1|RFC2

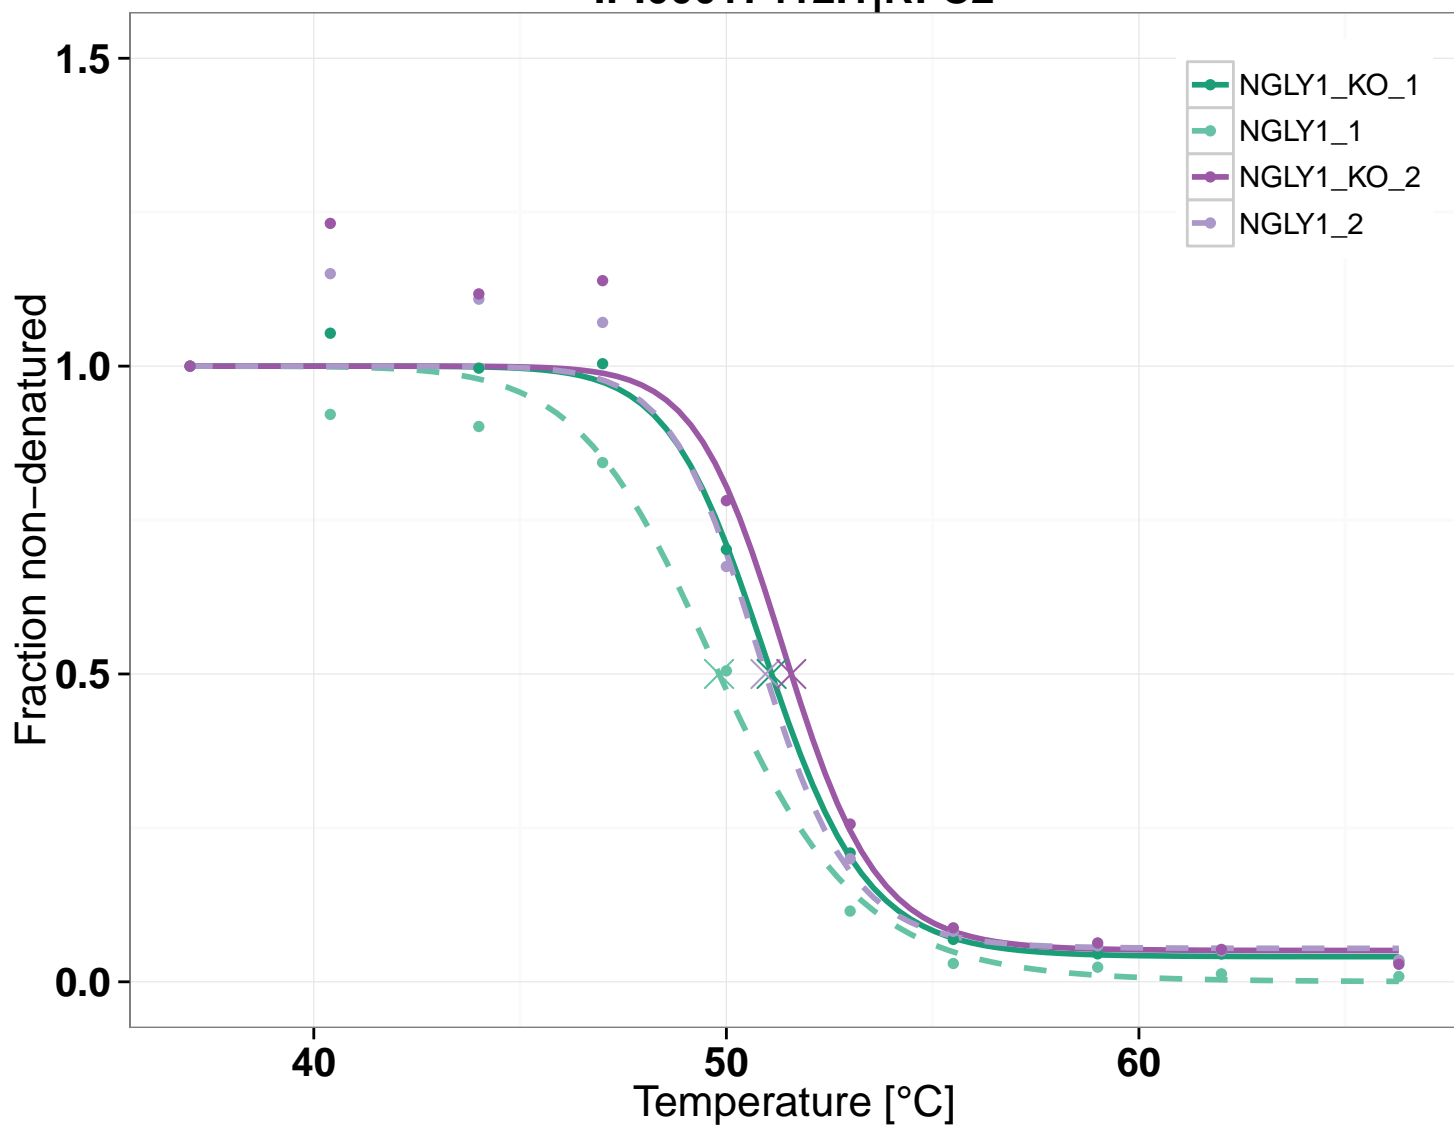

|            | meltPoint | slope | plateau | R2   |
|------------|-----------|-------|---------|------|
| NGLY1_KO_1 | 51.1      | -0.2  | 0.04    | 1    |
| NGLY1_1    | 49.82     | -0.15 | 0       | 0.99 |
| NGLY1_KO_2 | 51.57     | -0.21 | 0.05    | 0.96 |
| NGLY1_2    | 50.95     | -0.21 | 0.05    | 0.98 |

Supplement: Supplementary file 3827 [file 1]

IPI00853598.1|SEC13

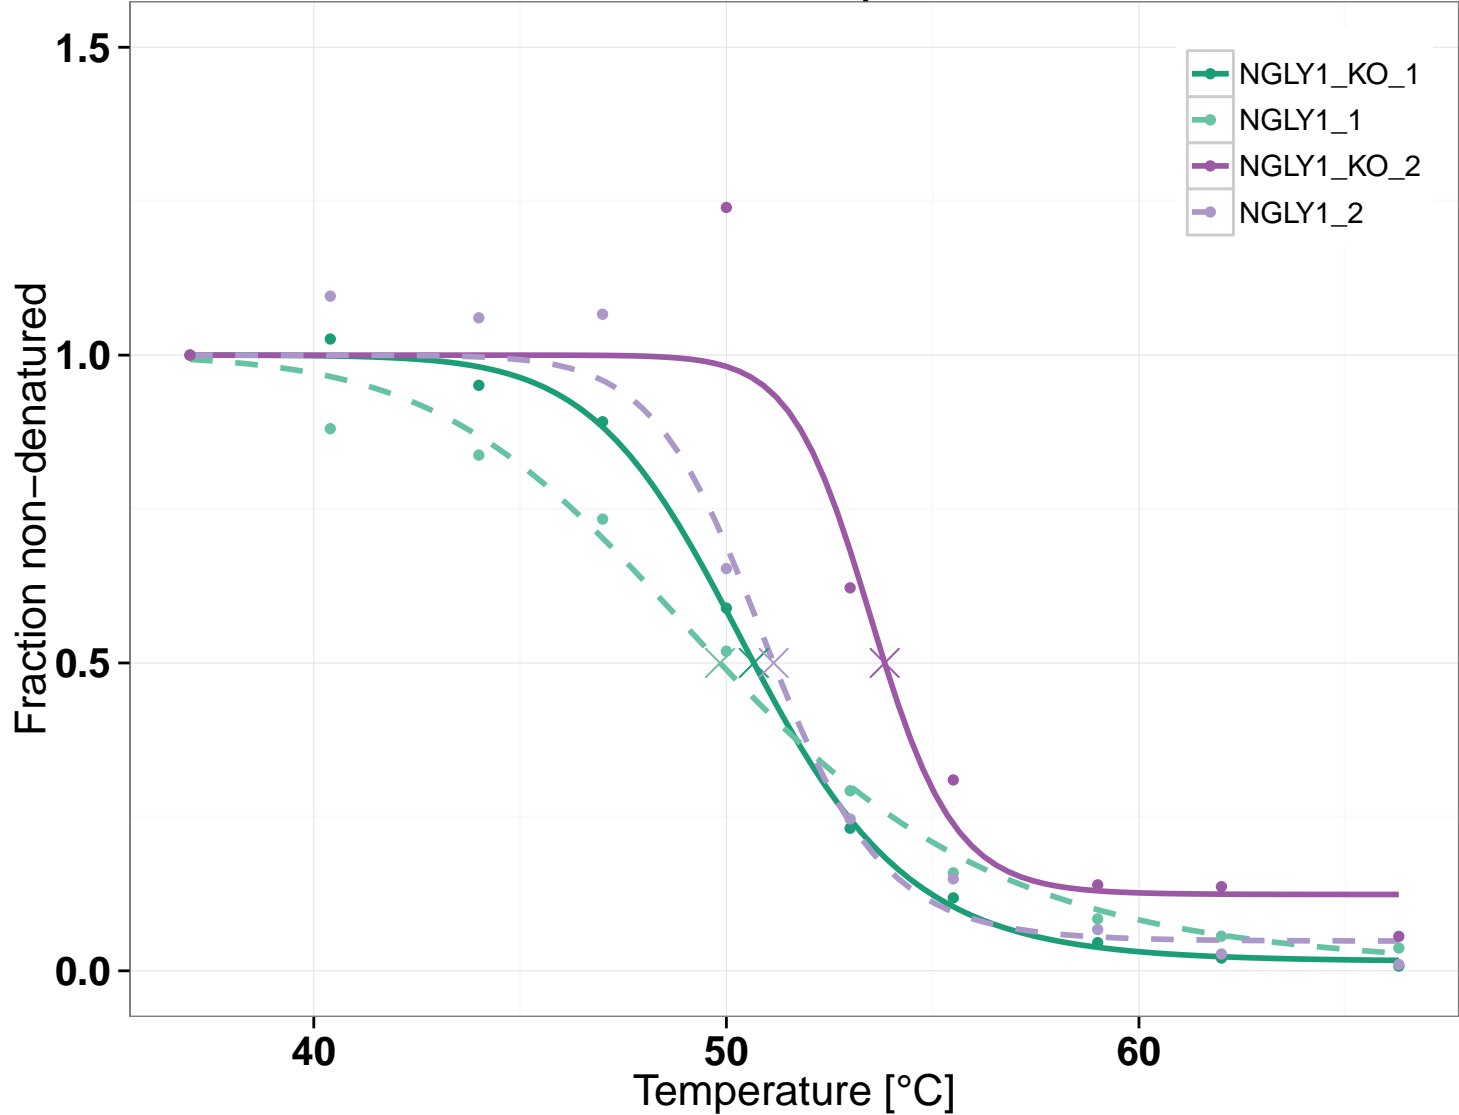

|            | meltPoint | slope  | plateau | R2   |
|------------|-----------|--------|---------|------|
| NGLY1_KO_1 | 50.67     | -0.13  | 0.01    | 1    |
| NGLY1_1    | 49.85     | -0.073 | 0       | 0.99 |
| NGLY1_KO_2 | 53.84     | -0.22  | 0.12    | 0.56 |
| NGLY1_2    | 51.15     | -0.17  | 0.05    | 0.99 |

Supplement: Supplementary file 3828 [file 1]

IPI00218821.1|SLCO4A1

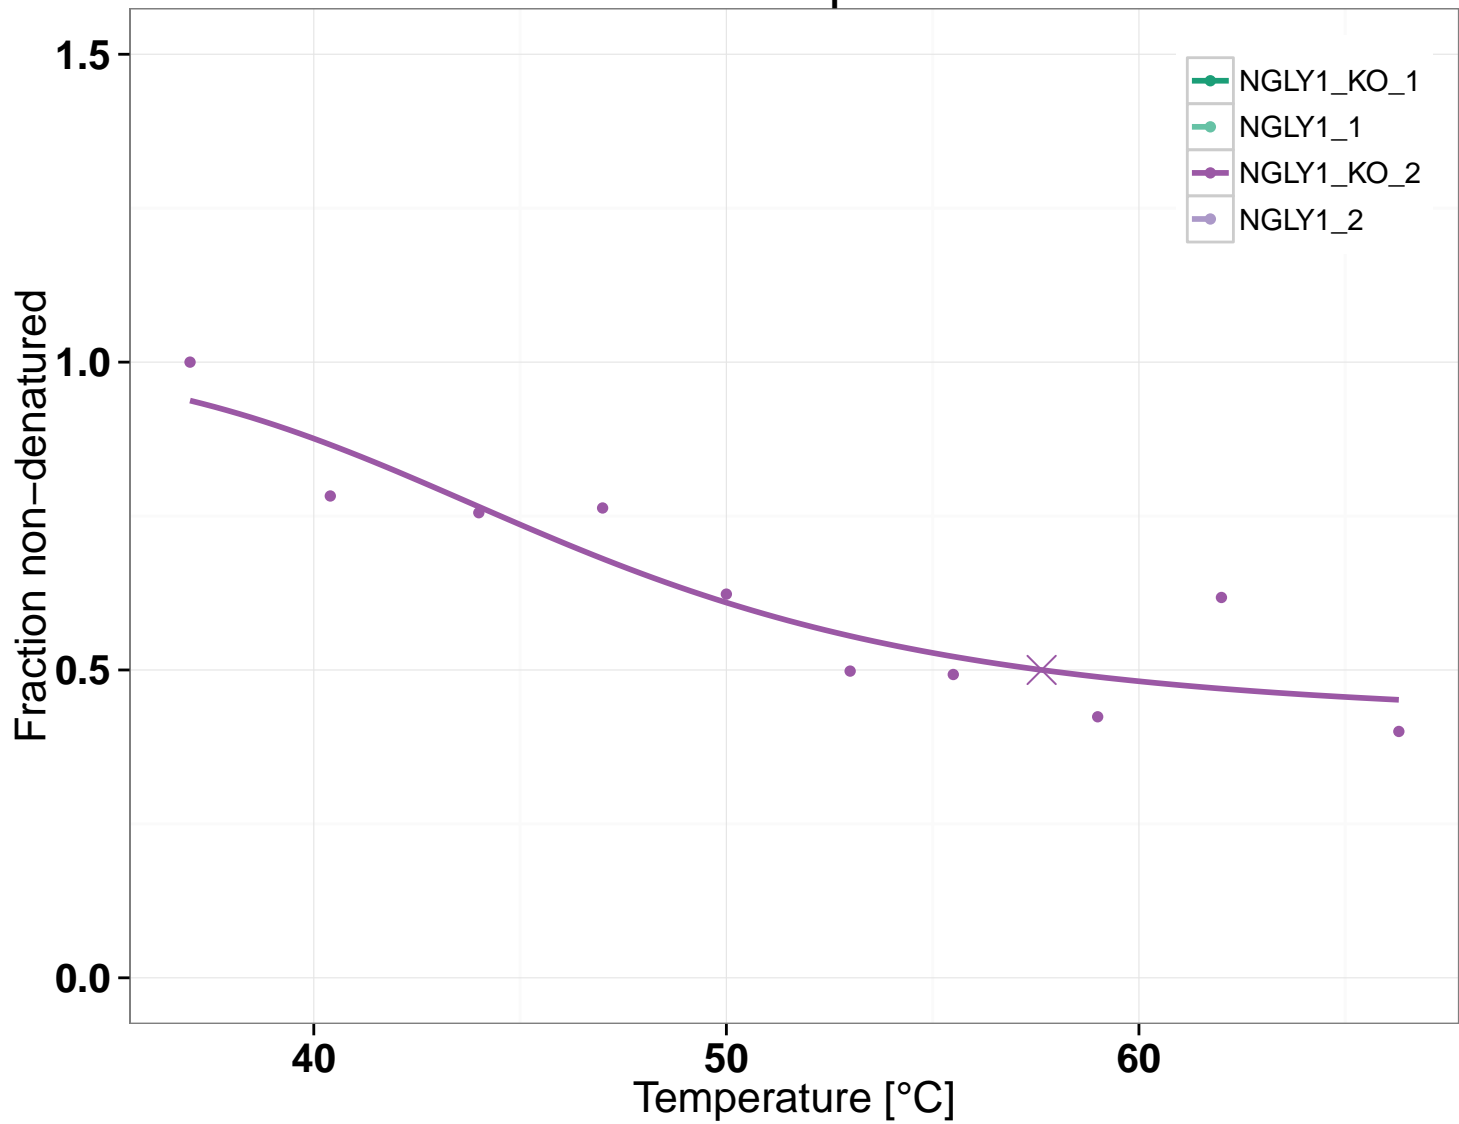

|            | meltPoint | slope  | plateau | R2   |
|------------|-----------|--------|---------|------|
| NGLY1_KO_1 | —         | —      | —       | —    |
| NGLY1_1    | —         | —      | —       | —    |
| NGLY1_KO_2 | 57.64     | -0.029 | 0.41    | 0.84 |
| NGLY1_2    | —         | —      | —       | —    |

Supplement: Supplementary file 3829 [file 1]

IPI00025707.1|UBASH3A

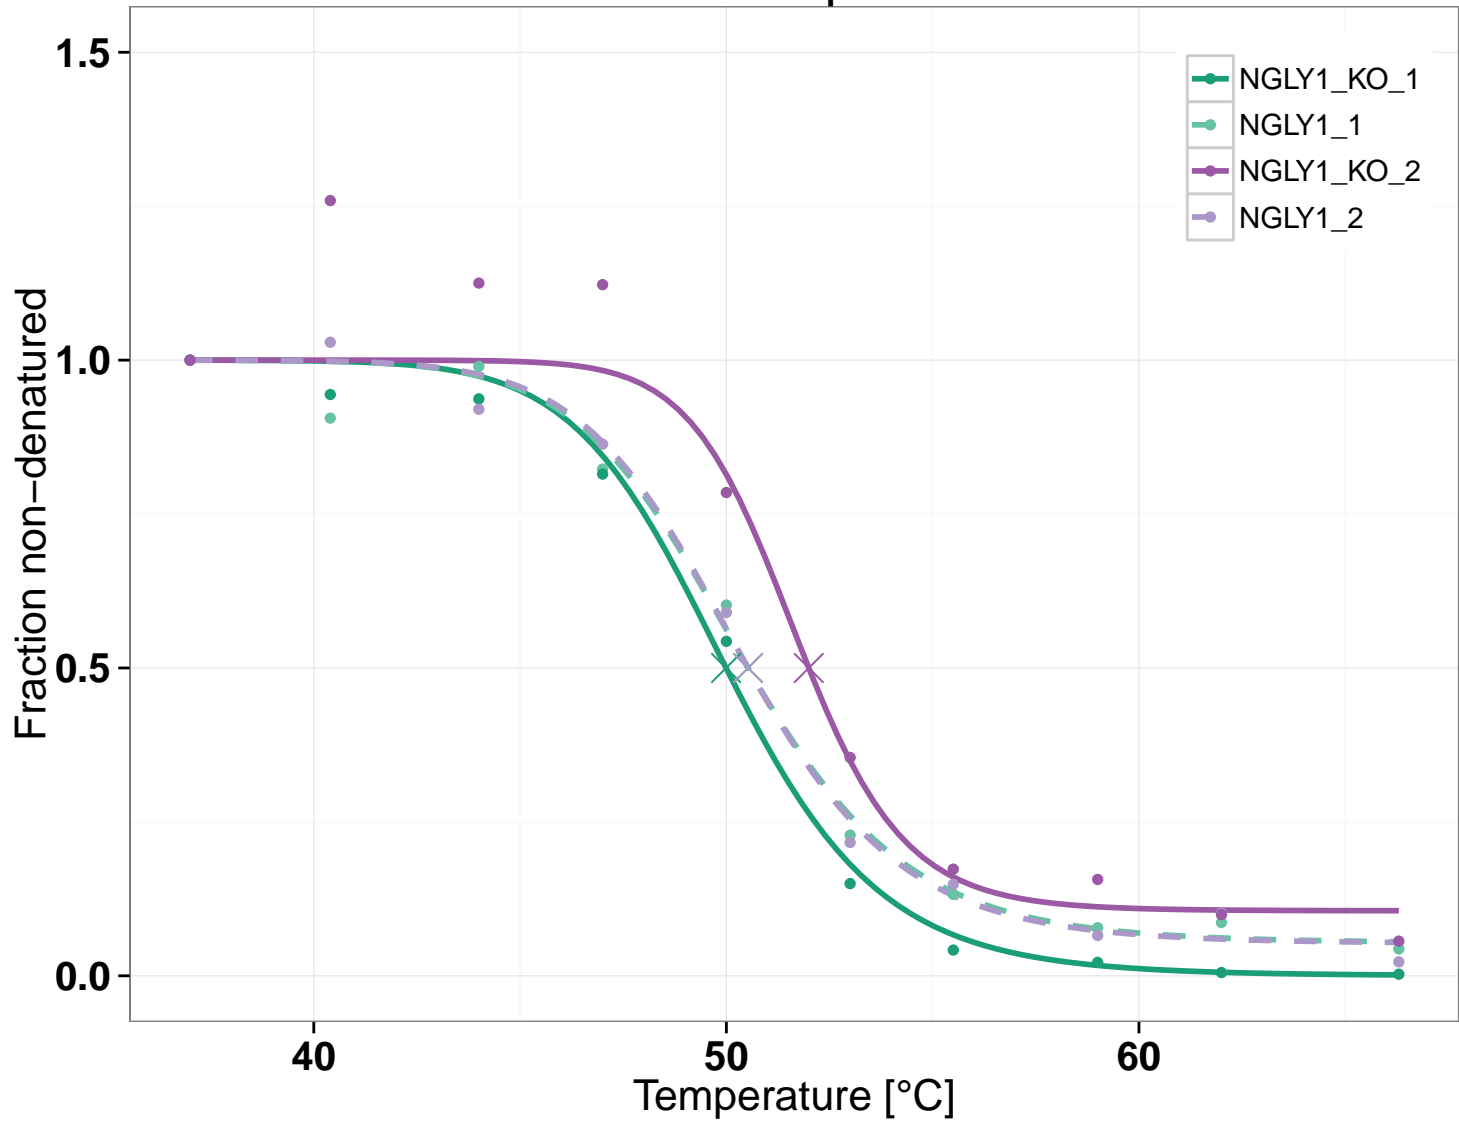

|            | meltPoint | slope | plateau | R2   |
|------------|-----------|-------|---------|------|
| NGLY1_KO_1 | 49.99     | -0.13 | 0       | 1    |
| NGLY1_1    | 50.53     | -0.12 | 0.05    | 0.99 |
| NGLY1_KO_2 | 52        | -0.17 | 0.11    | 0.95 |
| NGLY1_2    | 50.53     | -0.12 | 0.05    | 0.99 |

Supplement: Supplementary file 3830 [file 1]

# IPI00446579.4|DNM1L

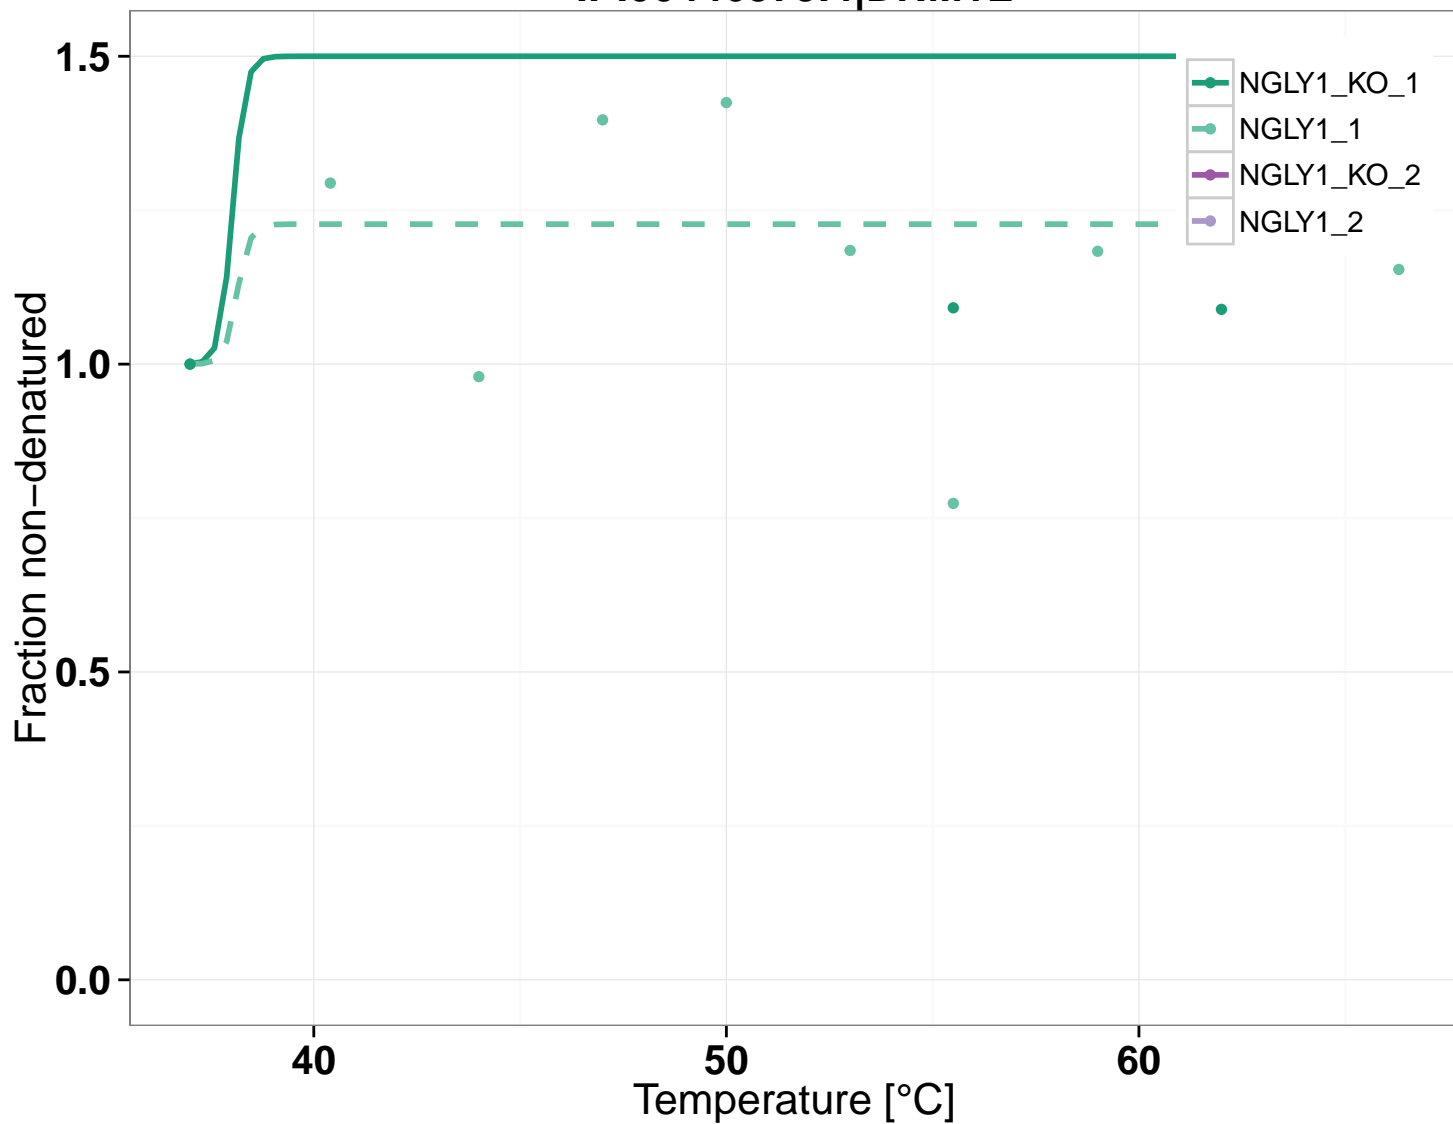

|            | meltPoint | slope | plateau | R2    |
|------------|-----------|-------|---------|-------|
| NGLY1_KO_1 | —         | 0.82  | 1.5     | -0.72 |
| NGLY1_1    | —         | 0.37  | 1.23    | 0.08  |
| NGLY1_KO_2 | —         | —     | —       | —     |
| NGLY1_2    | —         | —     | —       | —     |

Supplement: Supplementary file 3831 [file 1]

# IPI00171771.3|RFWD2

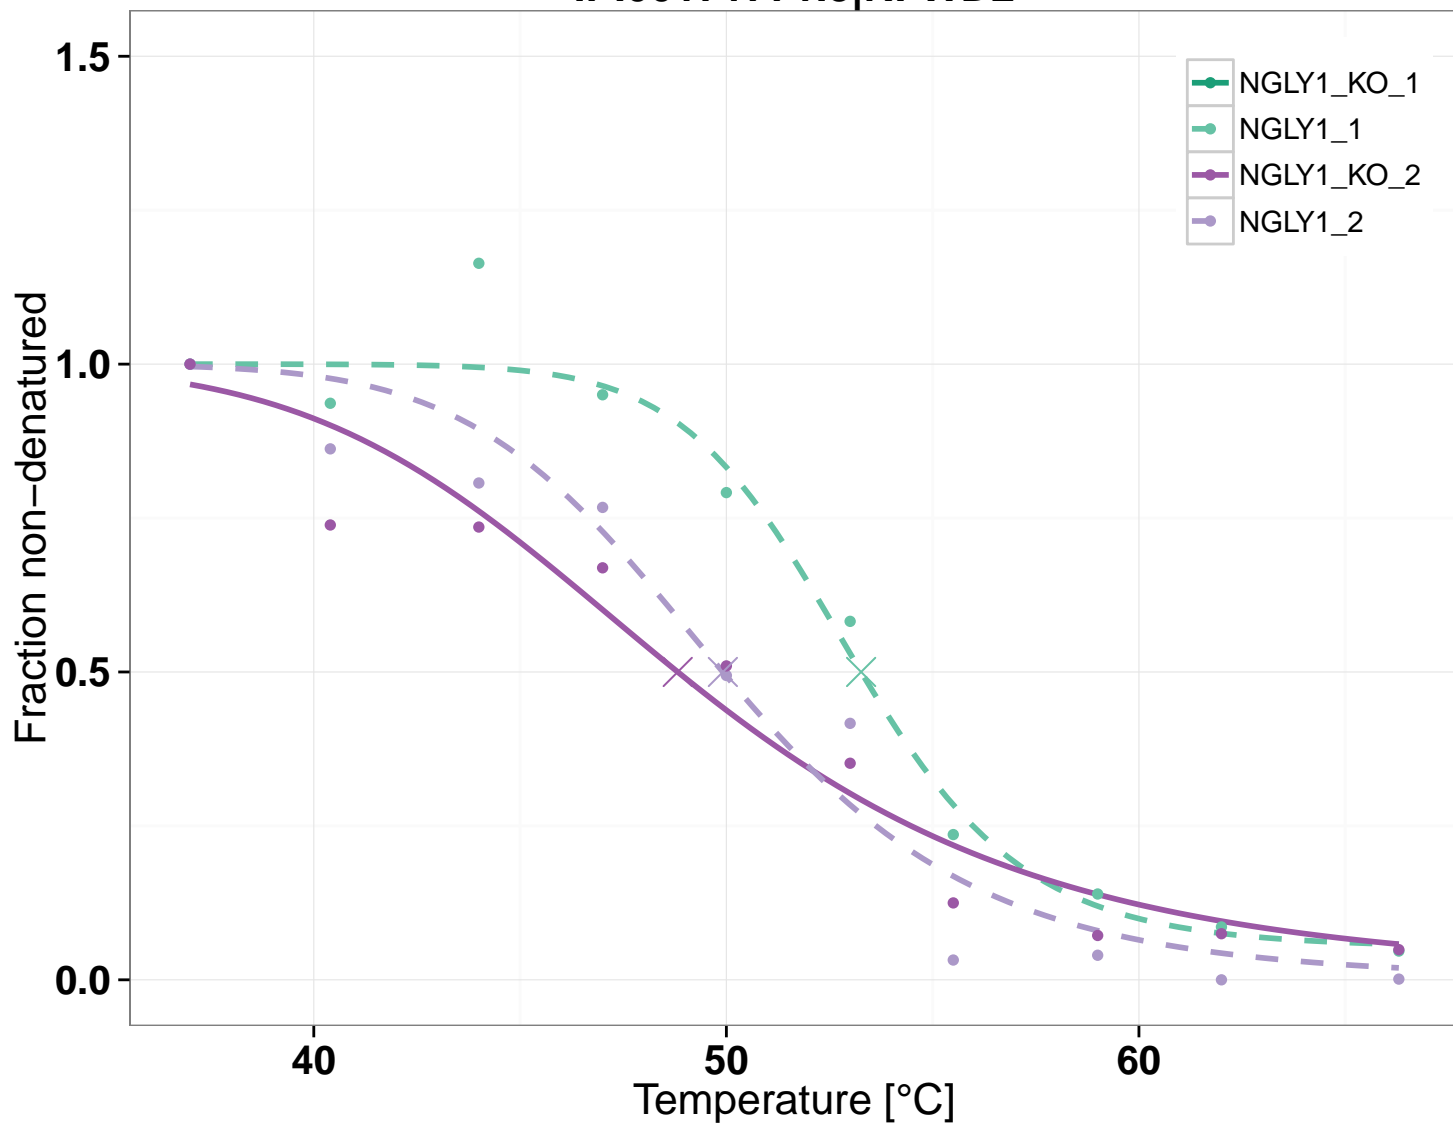

|            | meltPoint | slope  | plateau | R2   |
|------------|-----------|--------|---------|------|
| NGLY1_KO_1 | —         | —      | —       | —    |
| NGLY1_1    | 53.27     | -0.11  | 0.05    | 0.98 |
| NGLY1_KO_2 | 48.82     | -0.056 | 0       | 0.95 |
| NGLY1_2    | 49.92     | -0.081 | 0       | 0.96 |

Supplement: Supplementary file 3832 [file 1]

# IPI00719073.1|CHD8

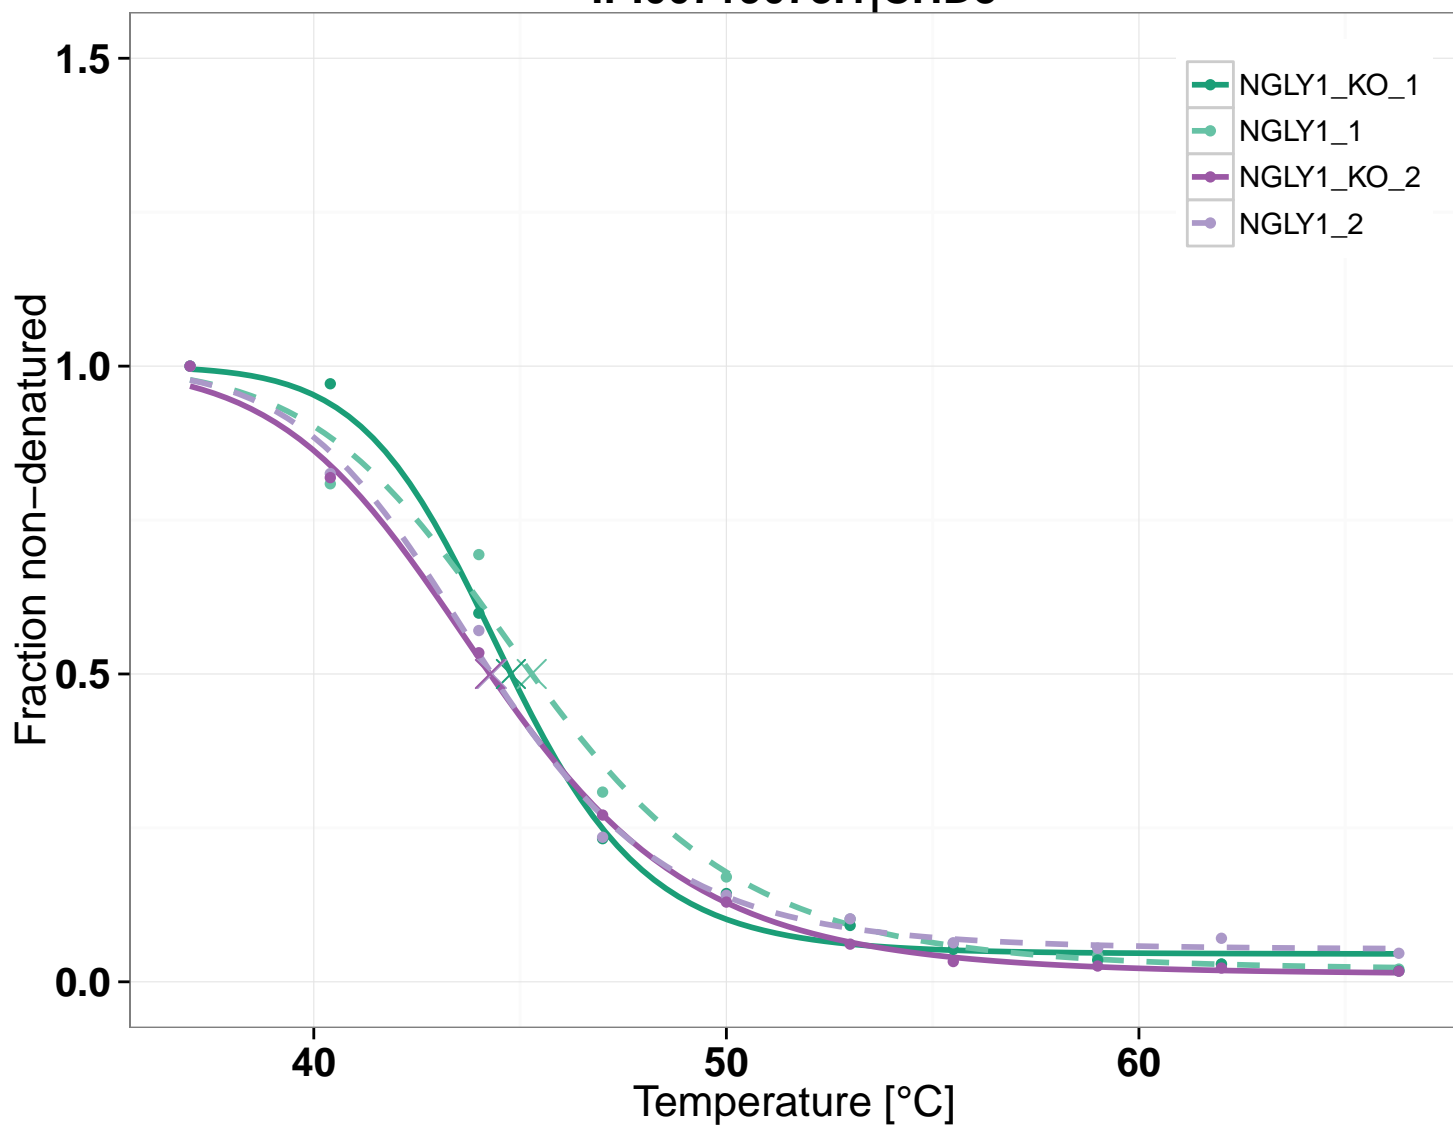

|            | meltPoint | slope  | plateau | R2   |
|------------|-----------|--------|---------|------|
| NGLY1_KO_1 | 44.78     | -0.14  | 0.05    | 1    |
| NGLY1_1    | 45.28     | -0.094 | 0.02    | 0.99 |
| NGLY1_KO_2 | 44.27     | -0.098 | 0.01    | 1    |
| NGLY1_2    | 44.32     | -0.11  | 0.05    | 1    |

Supplement: Supplementary file 3833 [file 1]

IPI00032406.1|DNAJA2

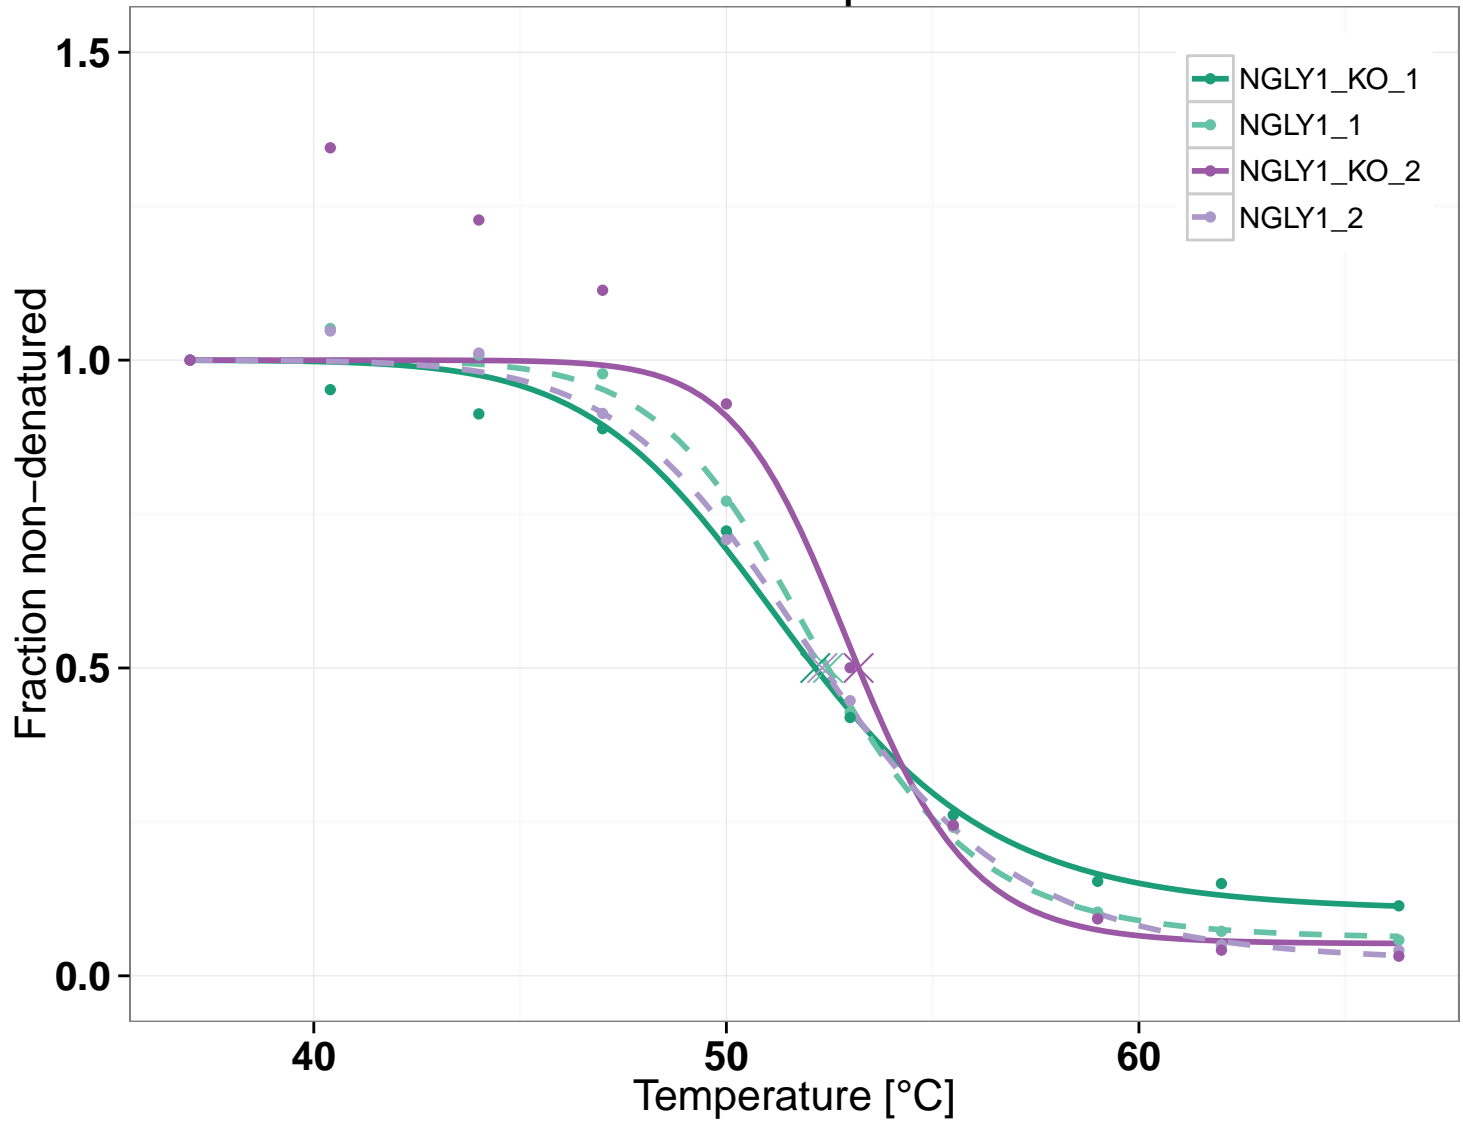

|            | meltPoint | slope  | plateau | R2   |
|------------|-----------|--------|---------|------|
| NGLY1_KO_1 | 52.16     | -0.091 | 0.1     | 0.99 |
| NGLY1_1    | 52.47     | -0.12  | 0.06    | 1    |
| NGLY1_KO_2 | 53.2      | -0.17  | 0.05    | 0.92 |
| NGLY1_2    | 52.33     | -0.1   | 0.02    | 1    |

Supplement: Supplementary file 3835 [file 1]

IPI00296421.2|EHBP1L1

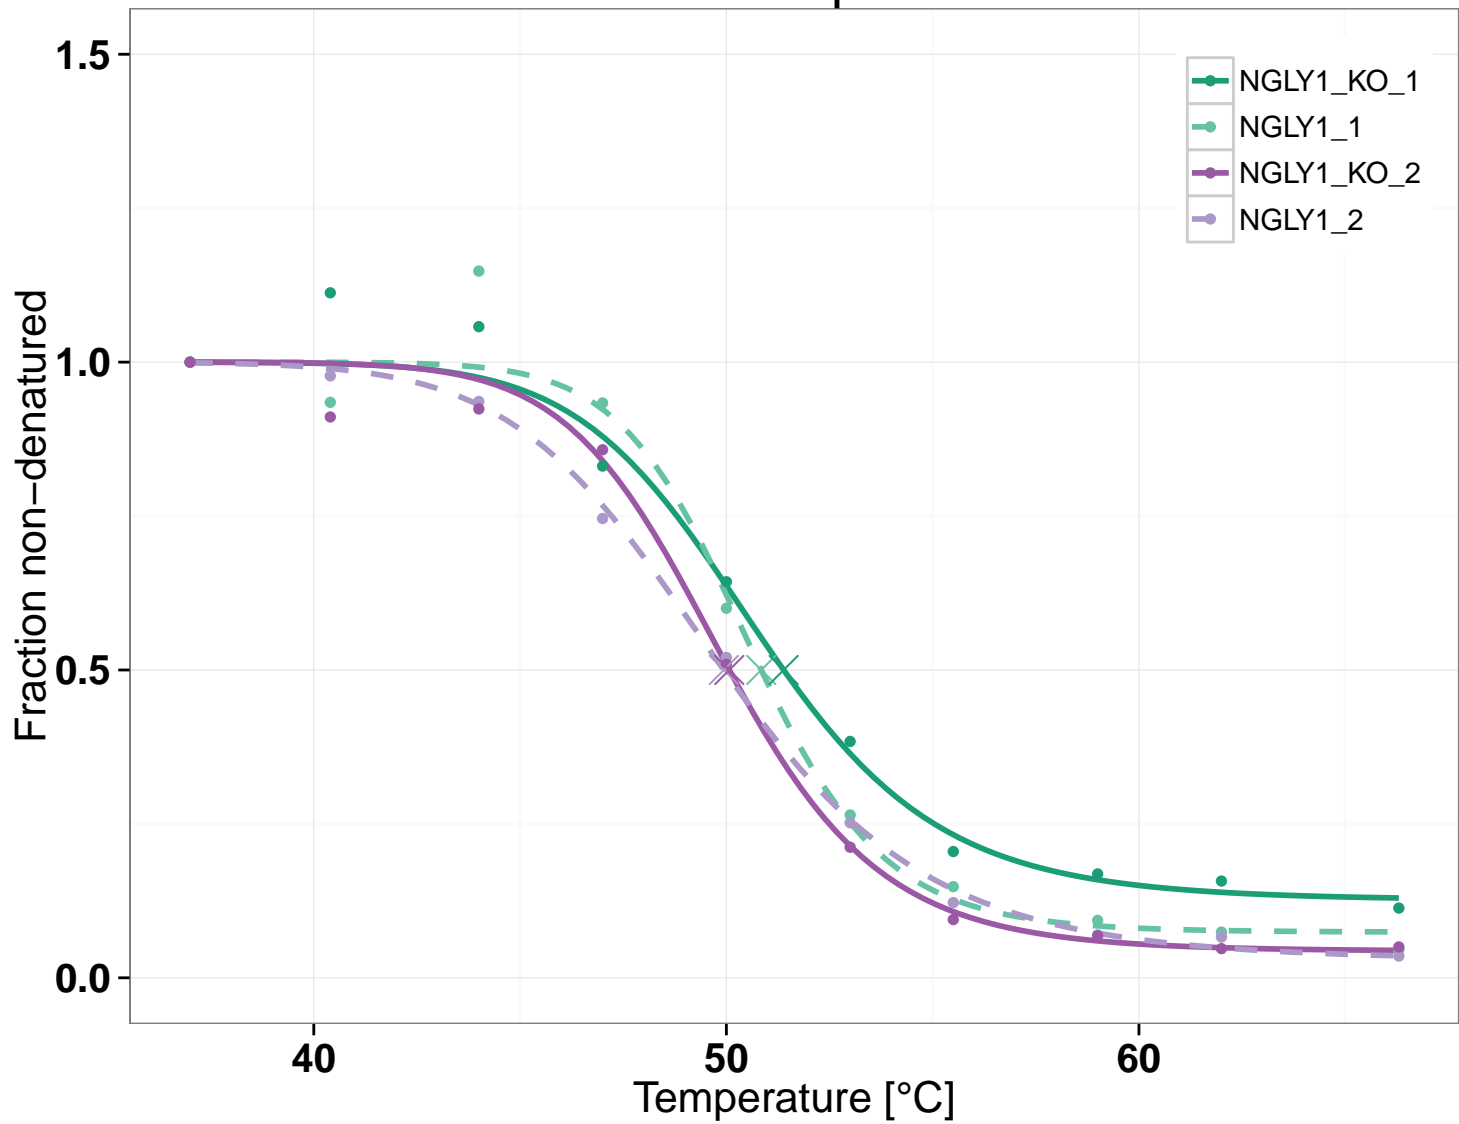

|            | meltPoint | slope  | plateau | R2   |
|------------|-----------|--------|---------|------|
| NGLY1_KO_1 | 51.39     | -0.1   | 0.13    | 0.98 |
| NGLY1_1    | 50.85     | -0.14  | 0.07    | 0.98 |
| NGLY1_KO_2 | 50.07     | -0.13  | 0.04    | 0.99 |
| NGLY1_2    | 49.94     | -0.096 | 0.03    | 1    |

Supplement: Supplementary file 3836 [file 1]

# IPI00479669.1|UHRF1BP1L

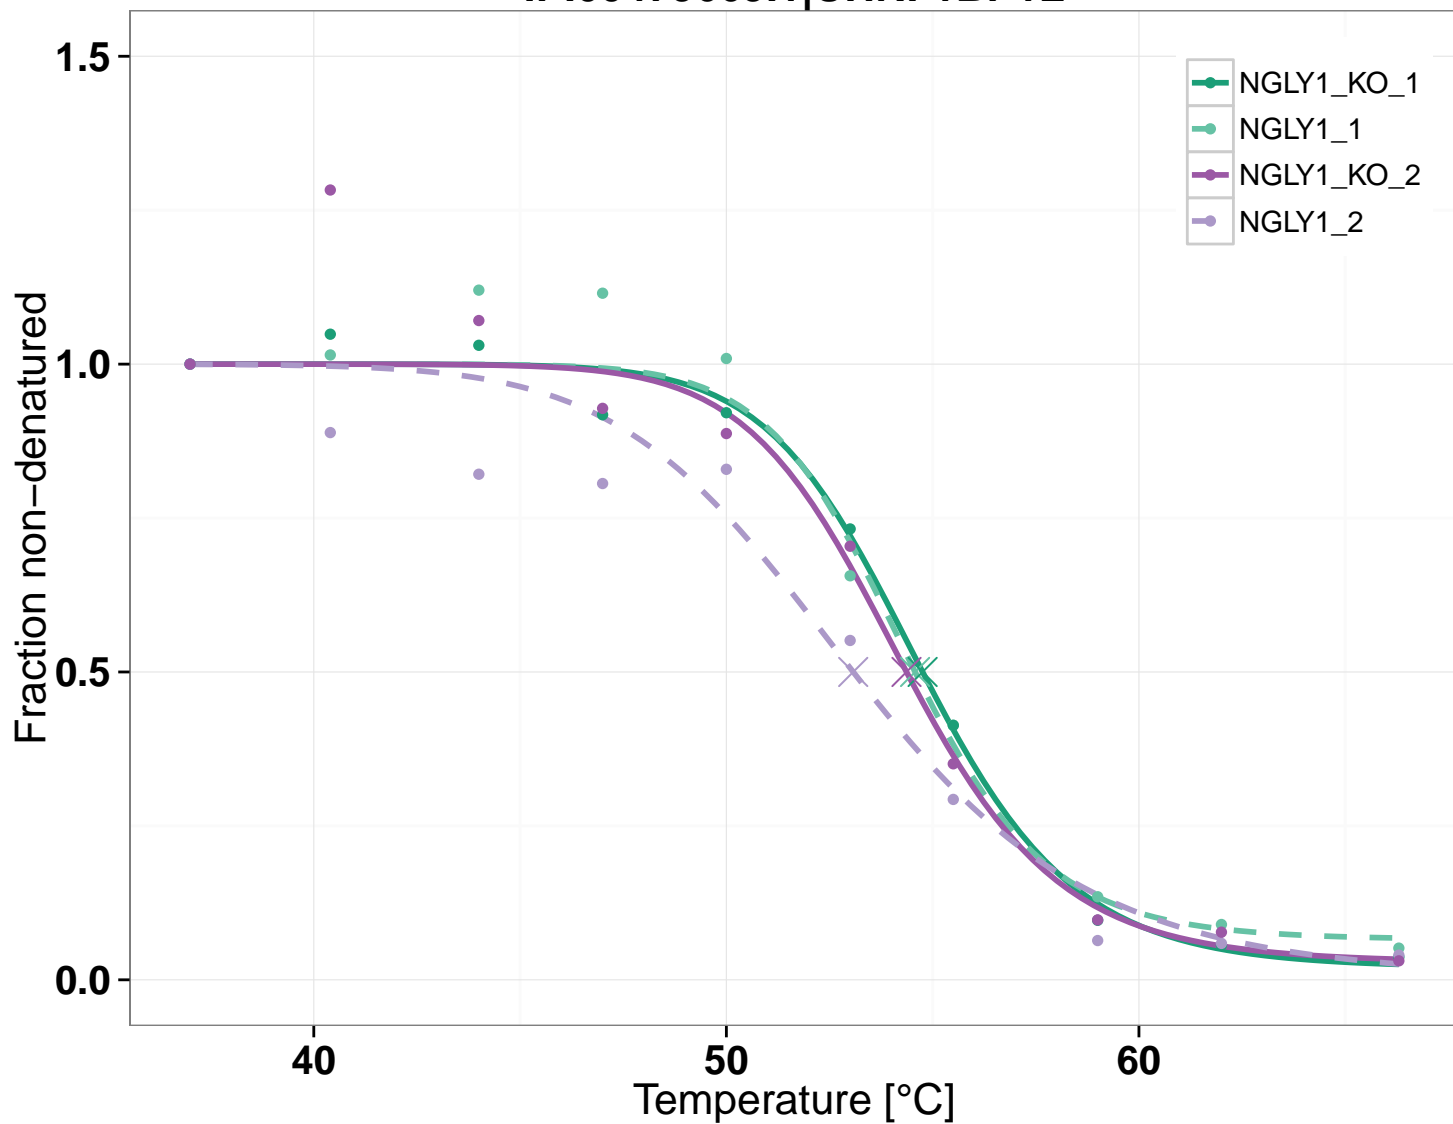

|            | meltPoint | slope  | plateau | R2   |
|------------|-----------|--------|---------|------|
| NGLY1_KO_1 | 54.76     | -0.13  | 0.02    | 0.99 |
| NGLY1_1    | 54.57     | -0.14  | 0.06    | 0.98 |
| NGLY1_KO_2 | 54.37     | -0.13  | 0.03    | 0.95 |
| NGLY1_2    | 53.07     | -0.087 | 0       | 0.95 |

Supplement: Supplementary file 3837 [file 1]

IPI00025415.1|SEMG2

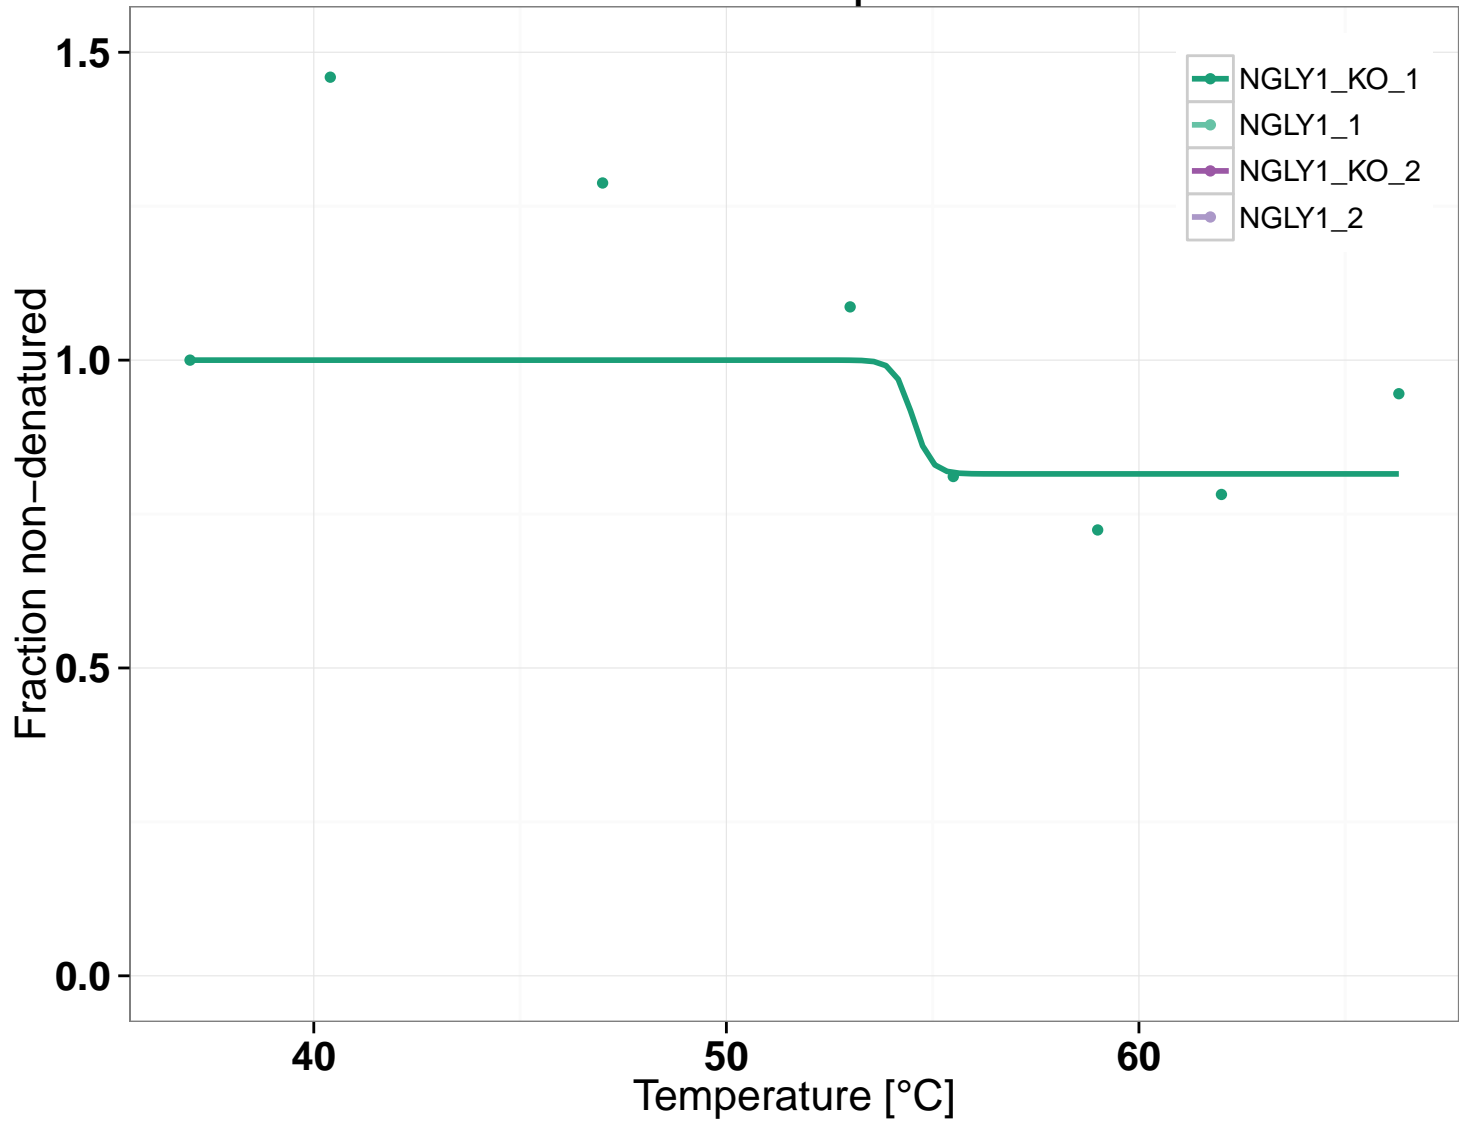

|            | meltPoint | slope | plateau | R2    |
|------------|-----------|-------|---------|-------|
| NGLY1_KO_1 | —         | -0.21 | 0.82    | -0.05 |
| NGLY1_1    | —         | —     | —       | —     |
| NGLY1_KO_2 | —         | —     | —       | —     |
| NGLY1_2    | —         | —     | —       | —     |

Supplement: Supplementary file 3838 [file 1]

IPI00107155.2|C3ORF75

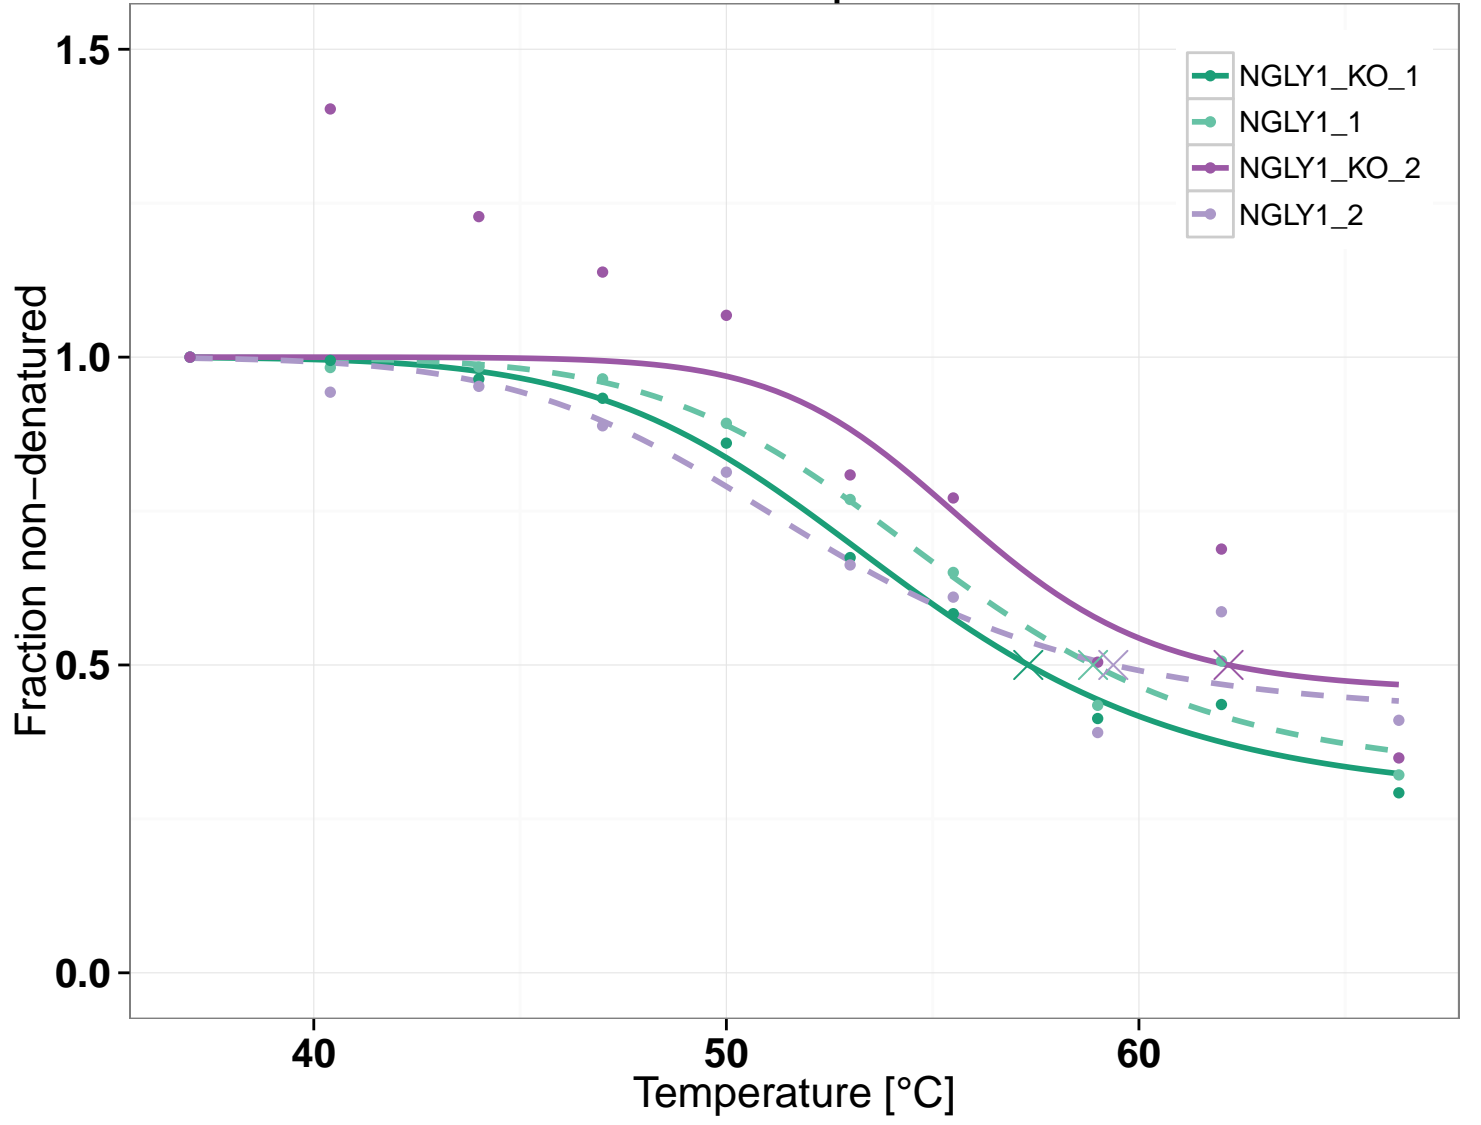

|            | meltPoint | slope  | plateau | R2   |
|------------|-----------|--------|---------|------|
| NGLY1_KO_1 | 57.32     | -0.05  | 0.28    | 0.99 |
| NGLY1_1    | 58.89     | -0.05  | 0.31    | 0.98 |
| NGLY1_KO_2 | 62.17     | -0.059 | 0.46    | 0.69 |
| NGLY1_2    | 59.38     | -0.041 | 0.42    | 0.93 |

Supplement: Supplementary file 3839 [file 1]

IPI00639811.2|RABEPK

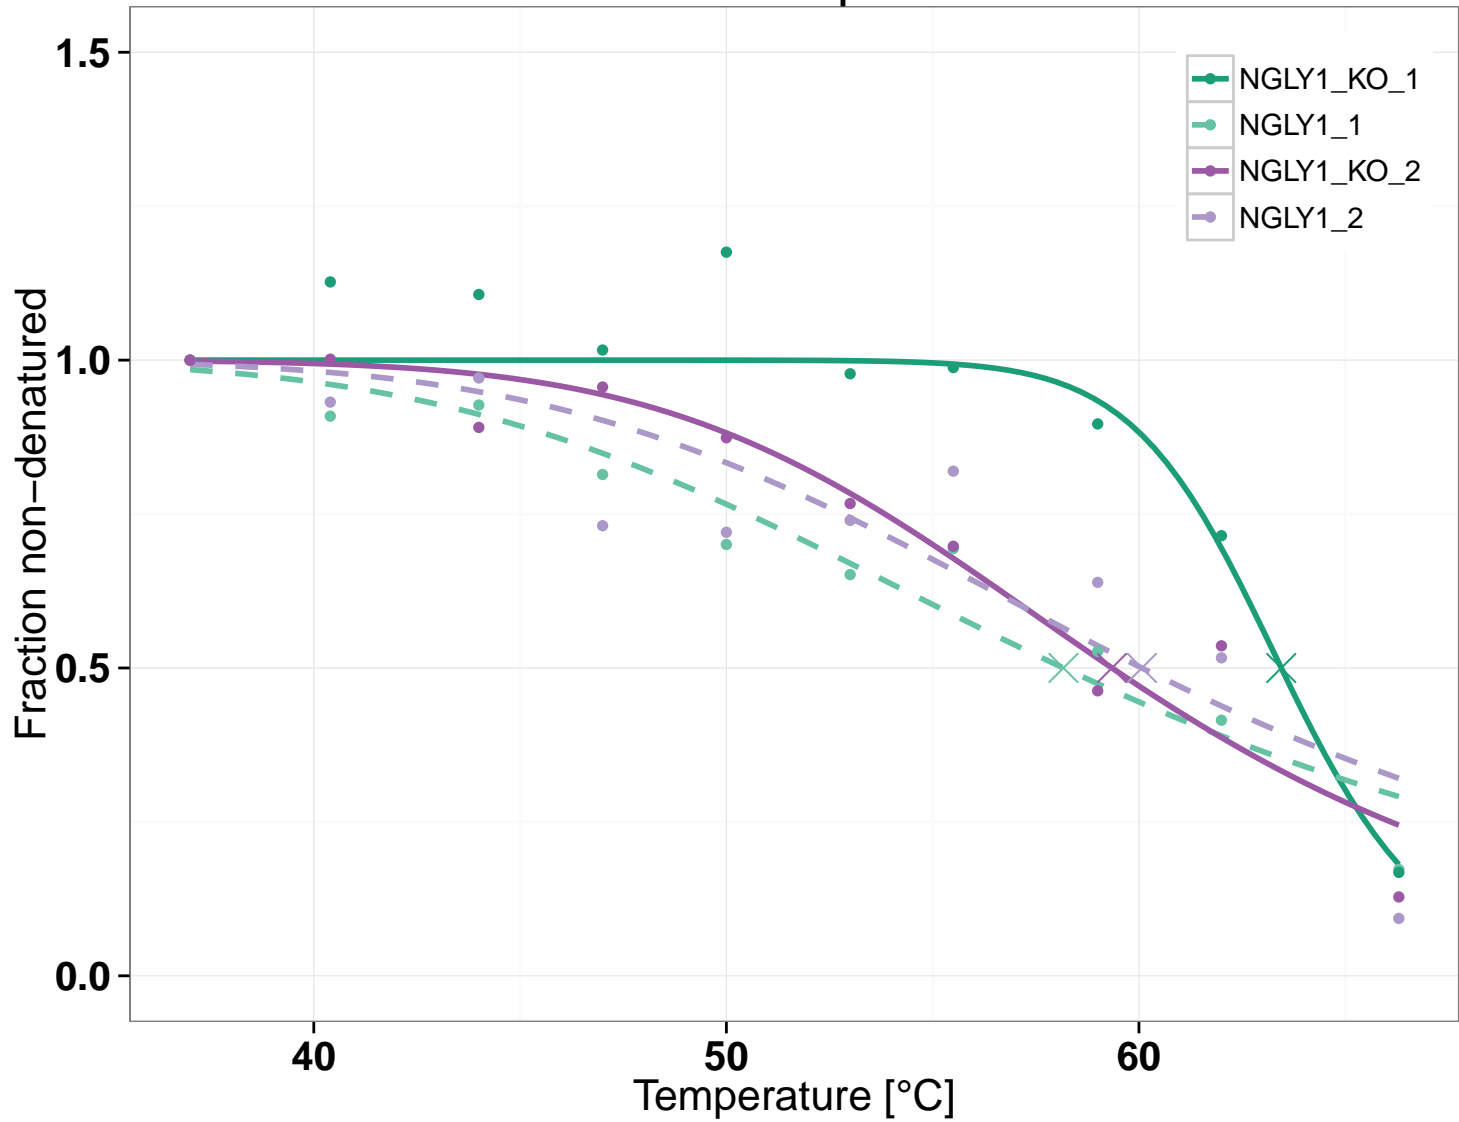

|            | meltPoint | slope  | plateau | R2   |
|------------|-----------|--------|---------|------|
| NGLY1_KO_1 | 63.45     | -0.14  | 0       | 0.92 |
| NGLY1_1    | 58.17     | -0.033 | 0       | 0.94 |
| NGLY1_KO_2 | 59.35     | -0.047 | 0       | 0.93 |
| NGLY1_2    | 60.07     | -0.035 | 0       | 0.78 |

Supplement: Supplementary file 3840 [file 1]

IPI00023087.1|UBE2T

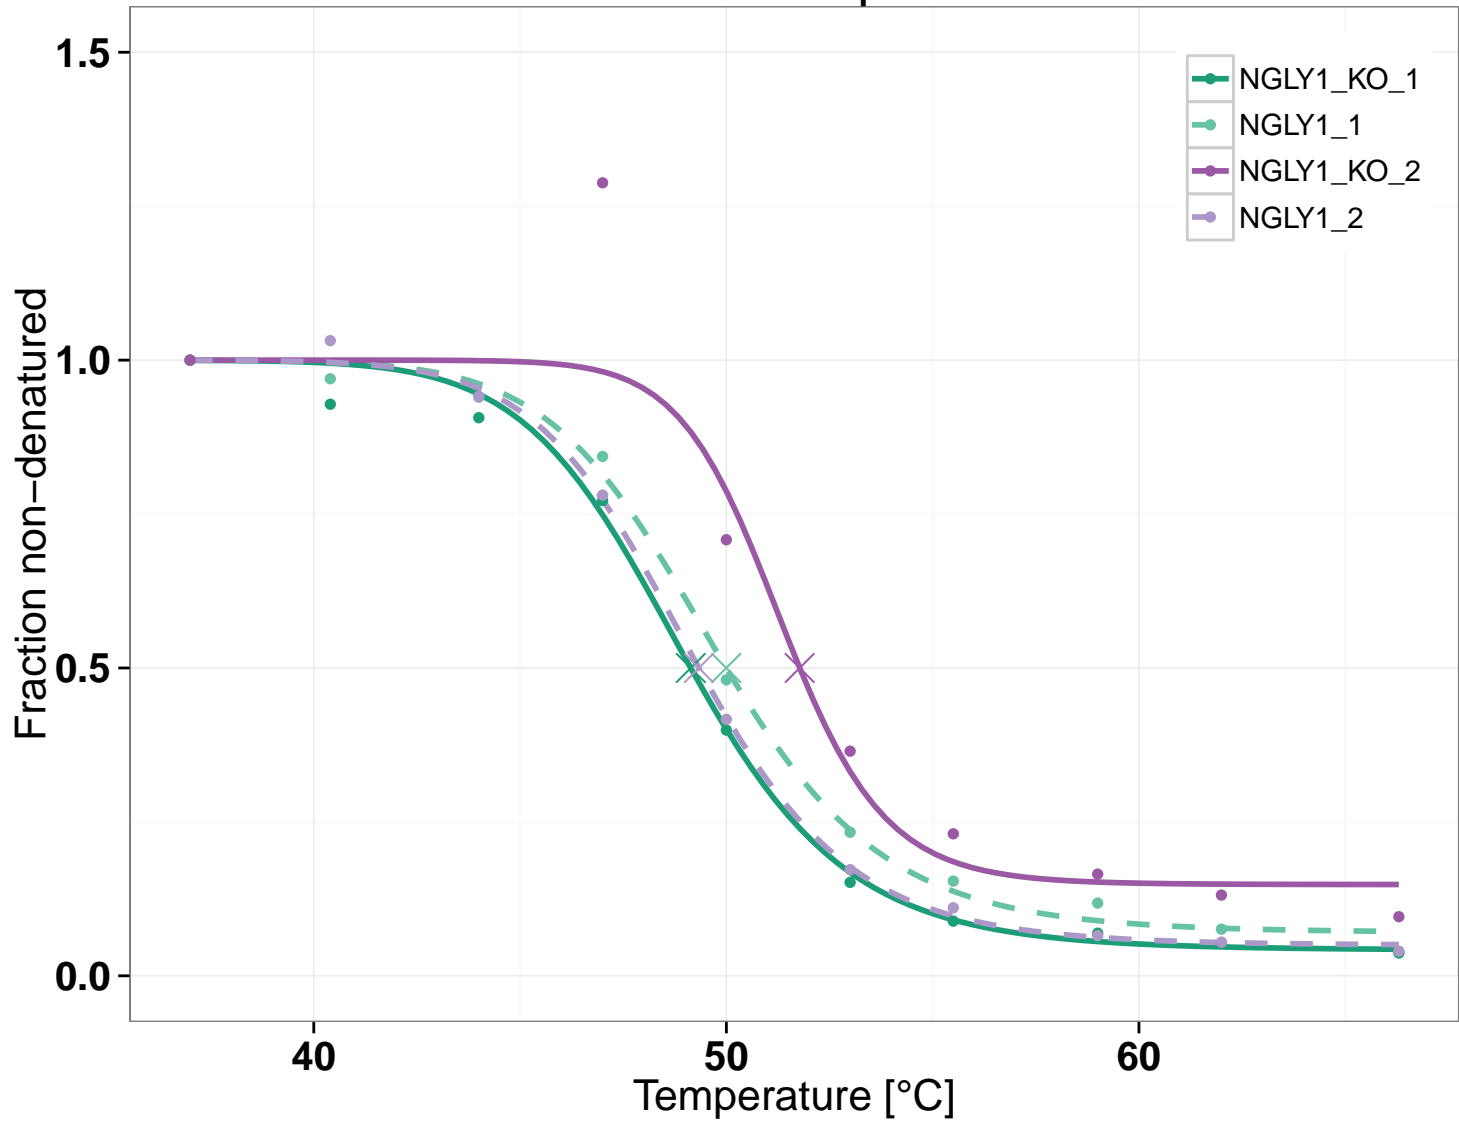

|            | meltPoint | slope | plateau | R2   |
|------------|-----------|-------|---------|------|
| NGLY1_KO_1 | 49.14     | -0.12 | 0.04    | 1    |
| NGLY1_1    | 50        | -0.11 | 0.07    | 1    |
| NGLY1_KO_2 | 51.78     | -0.17 | 0.15    | 0.72 |
| NGLY1_2    | 49.33     | -0.12 | 0.05    | 1    |

Supplement: Supplementary file 3841 [file 1]

# IPI00306290.5|XPOT

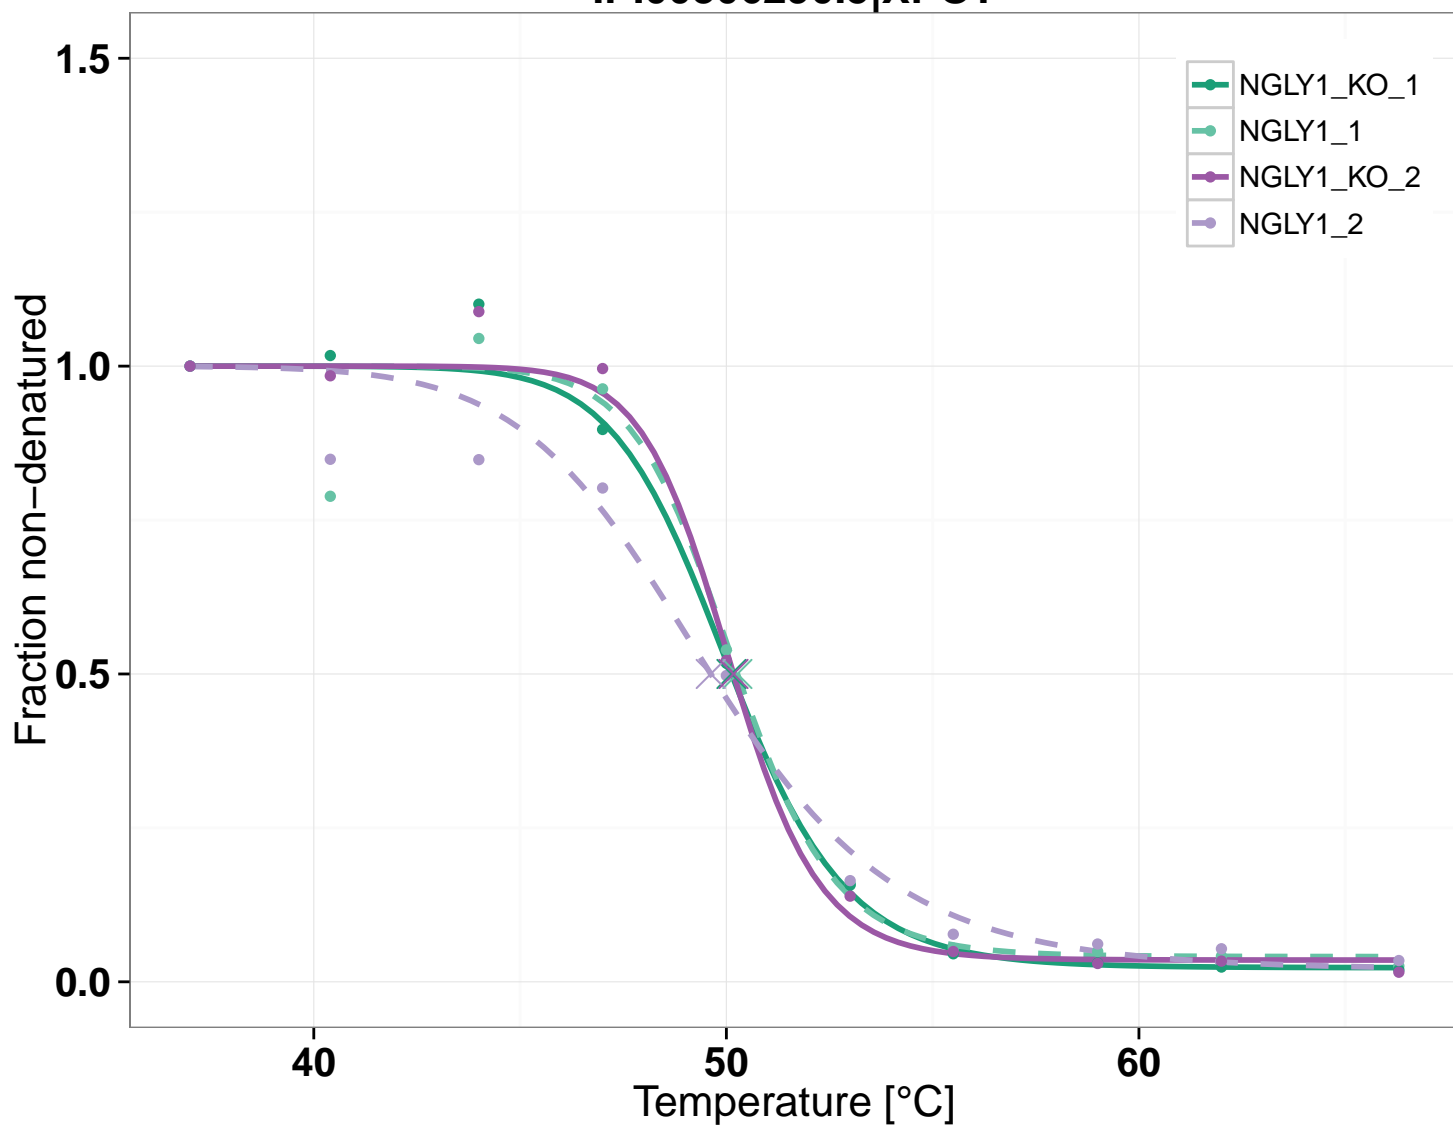

|            | meltPoint | slope | plateau | R2   |
|------------|-----------|-------|---------|------|
| NGLY1_KO_1 | 50.12     | -0.17 | 0.02    | 0.99 |
| NGLY1_1    | 50.27     | -0.19 | 0.04    | 0.97 |
| NGLY1_KO_2 | 50.17     | -0.22 | 0.04    | 0.99 |
| NGLY1_2    | 49.62     | -0.11 | 0.02    | 0.98 |

Supplement: Supplementary file 3842 [file 1]

# IPI00016708.2|AMD1

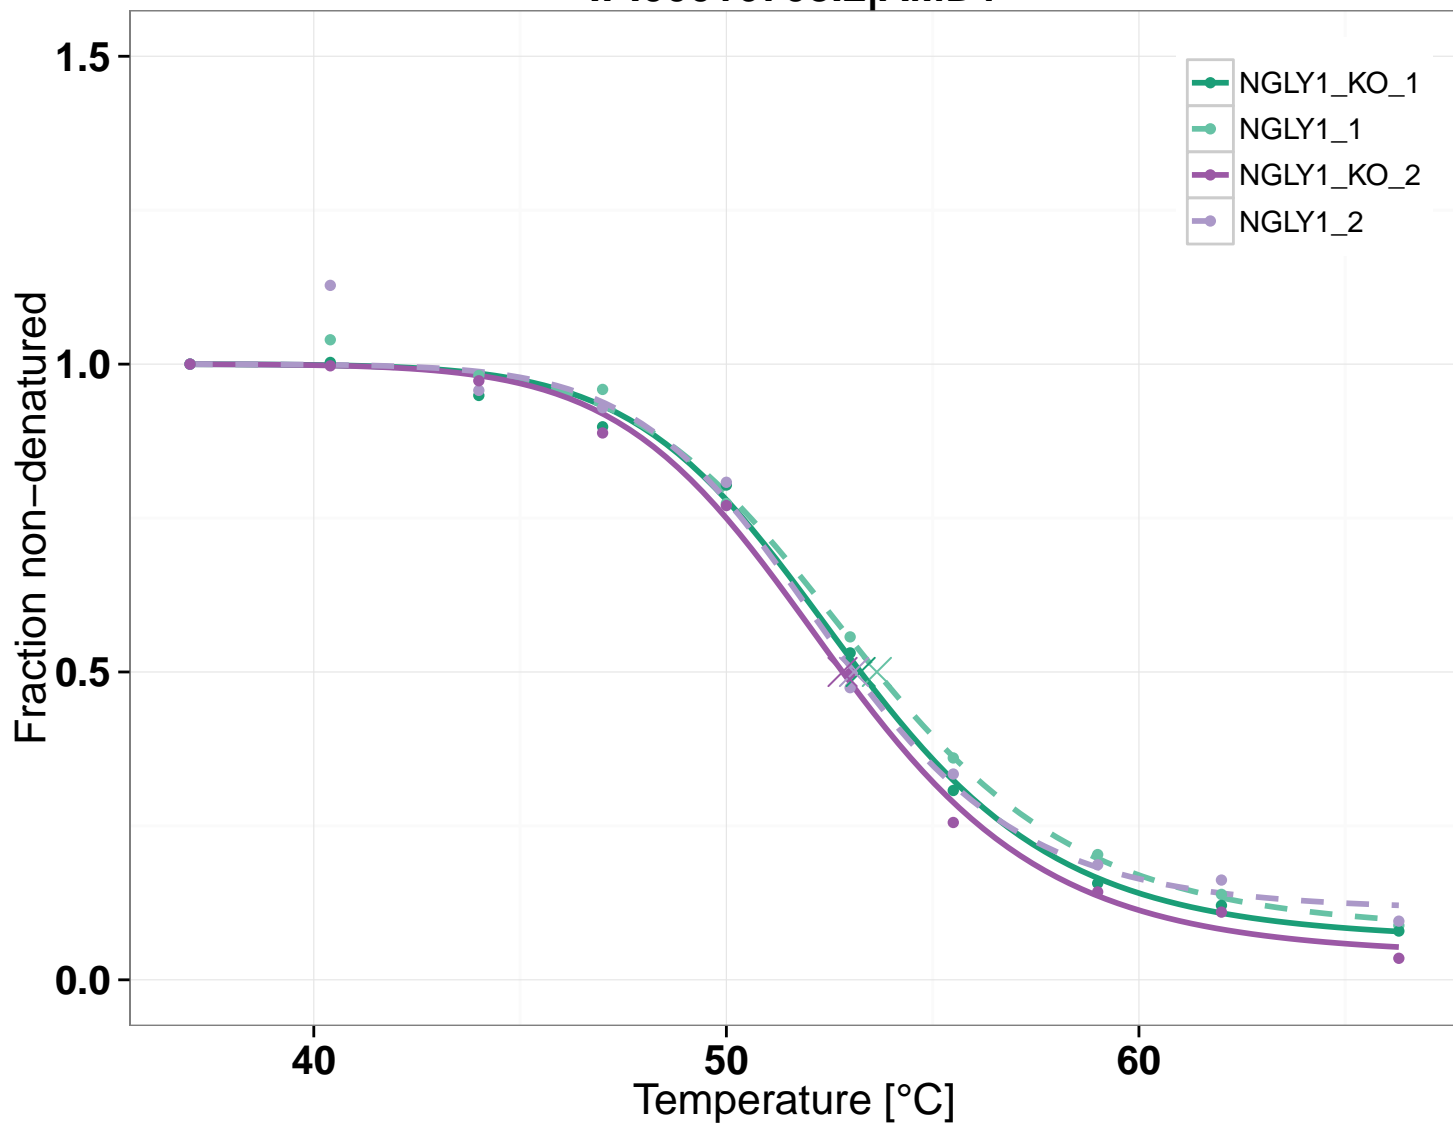

|            | meltPoint | slope  | plateau | R2   |
|------------|-----------|--------|---------|------|
| NGLY1_KO_1 | 53.25     | -0.091 | 0.06    | 1    |
| NGLY1_1    | 53.65     | -0.085 | 0.08    | 1    |
| NGLY1_KO_2 | 52.82     | -0.093 | 0.04    | 1    |
| NGLY1_2    | 53.09     | -0.095 | 0.11    | 0.99 |

Supplement: Supplementary file 3843 [file 1]

IPI00018146.1|YWHAQ

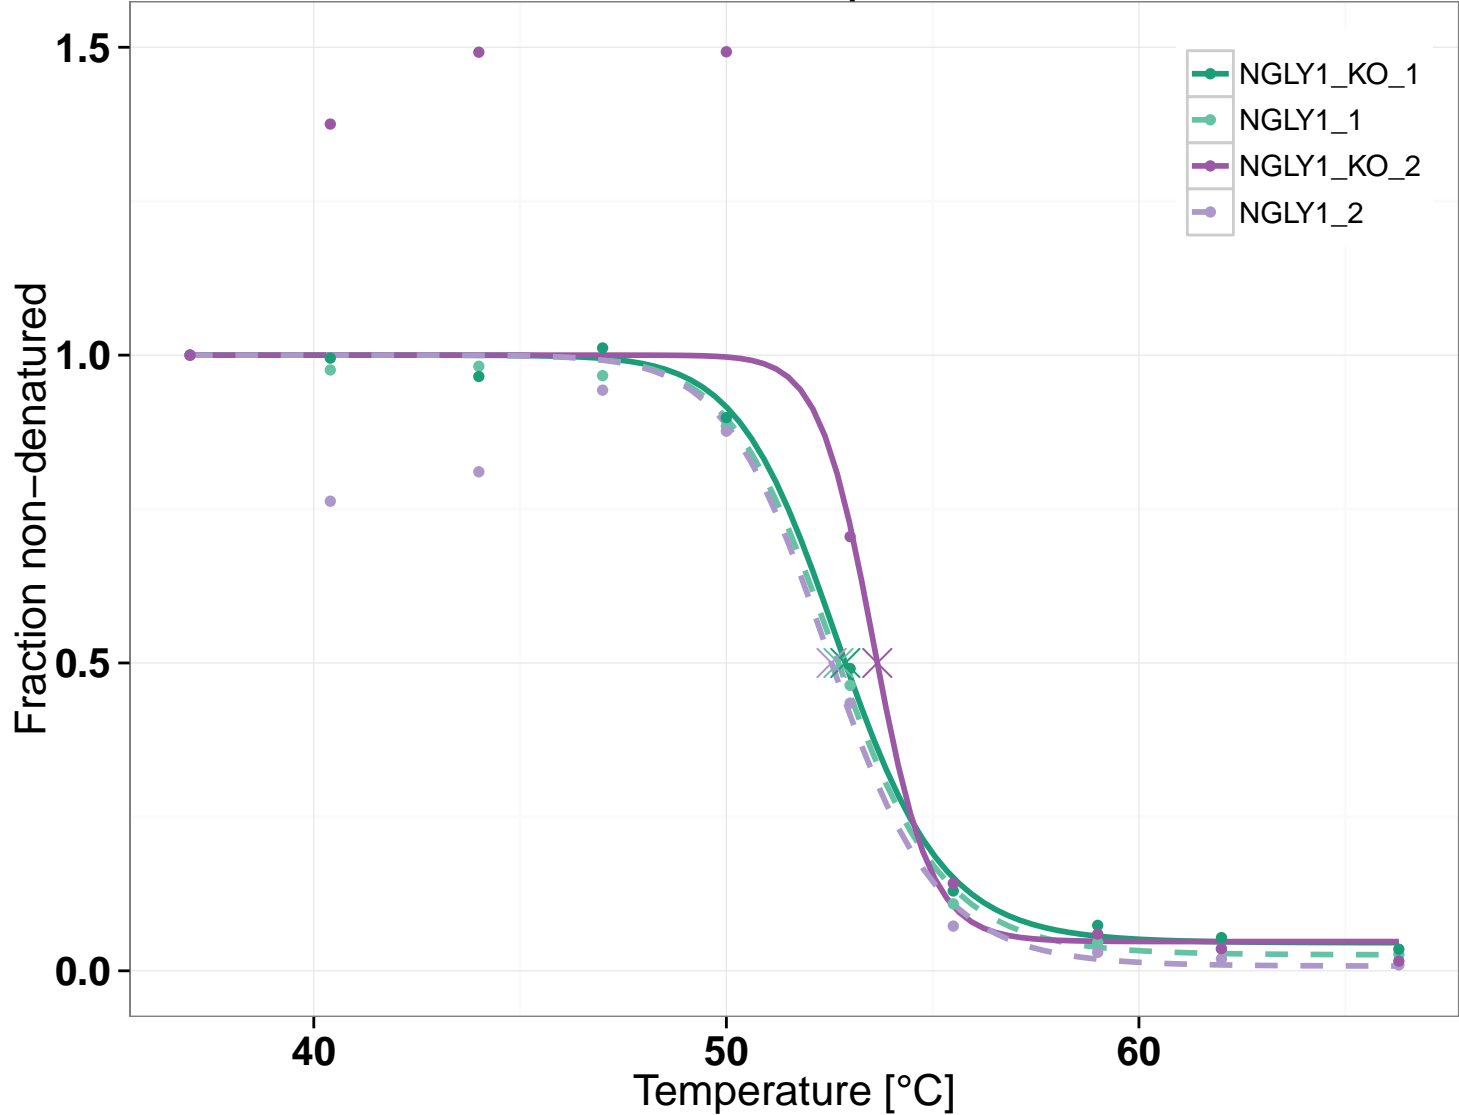

|            | meltPoint | slope | plateau | R2   |
|------------|-----------|-------|---------|------|
| NGLY1_KO_1 | 52.88     | -0.19 | 0.05    | 1    |
| NGLY1_1    | 52.72     | -0.19 | 0.03    | 1    |
| NGLY1_KO_2 | 53.66     | -0.36 | 0.05    | 0.77 |
| NGLY1_2    | 52.55     | -0.19 | 0.01    | 0.94 |

Supplement: Supplementary file 3844 [file 1]

# IPI00008964.3|RAB1B

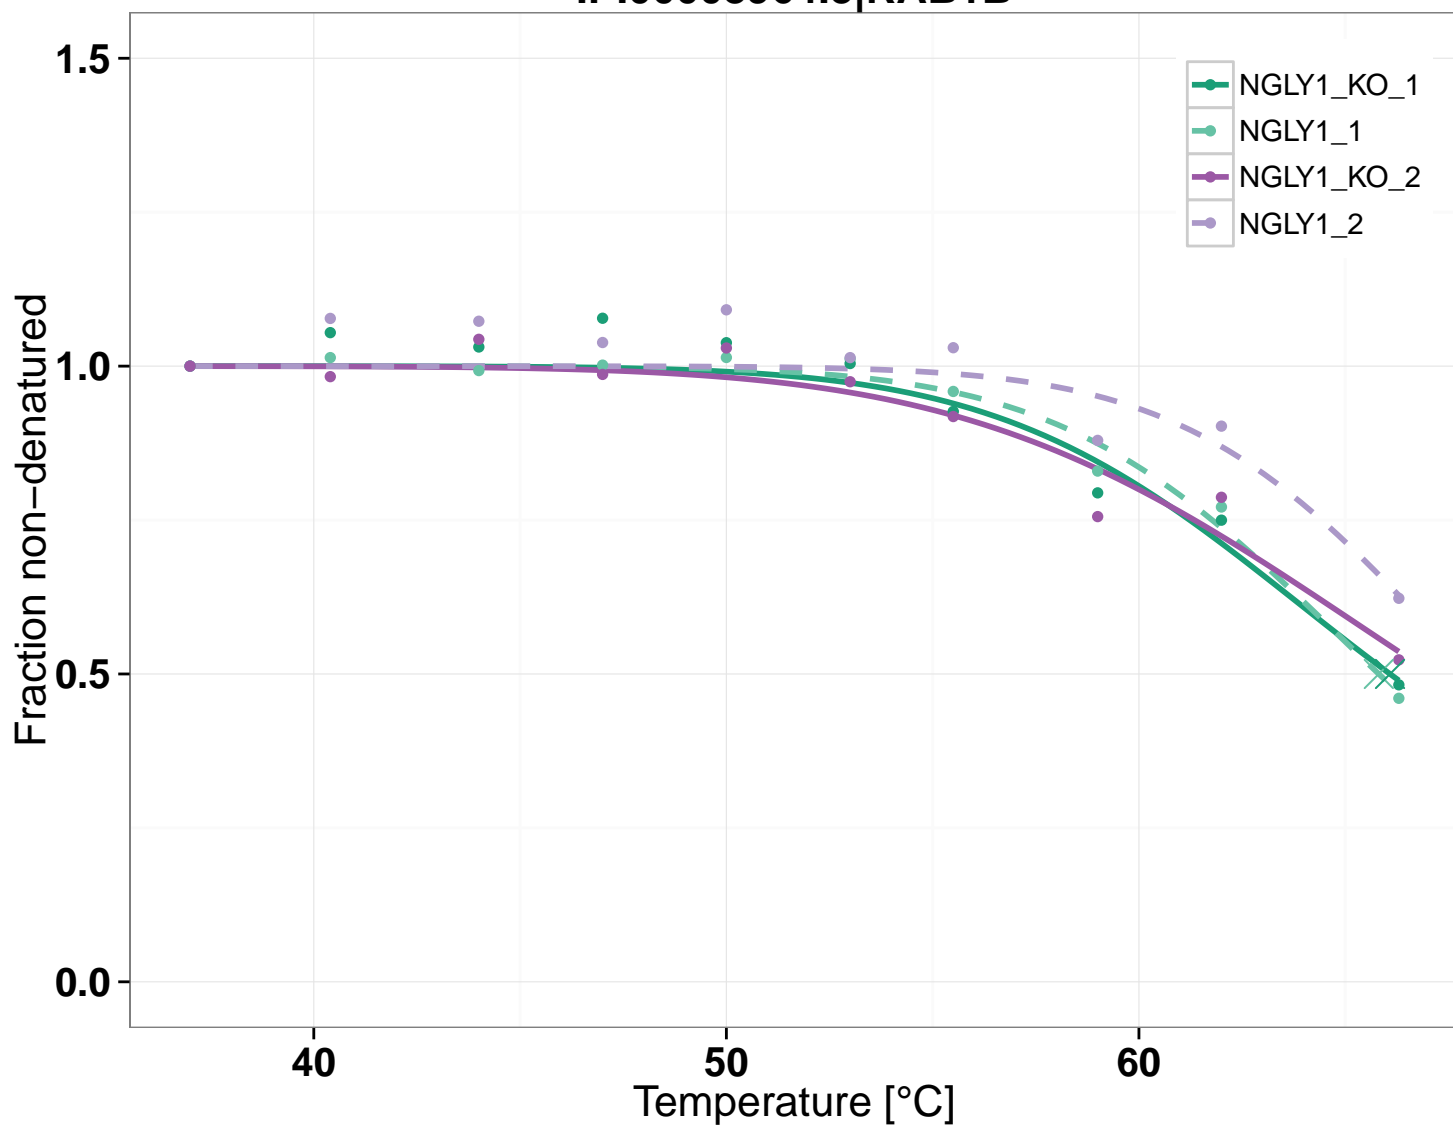

|            | meltPoint | slope  | plateau | R2   |
|------------|-----------|--------|---------|------|
| NGLY1_KO_1 | 66.09     | -0.053 | 0.12    | 0.94 |
| NGLY1_1    | 65.81     | -0.065 | 0       | 0.98 |
| NGLY1_KO_2 | -         | -0.045 | 0       | 0.94 |
| NGLY1_2    | -         | -      | 0       | 0.84 |

Supplement: Supplementary file 3845 [file 1]

IPI00382412.4|BCAT1

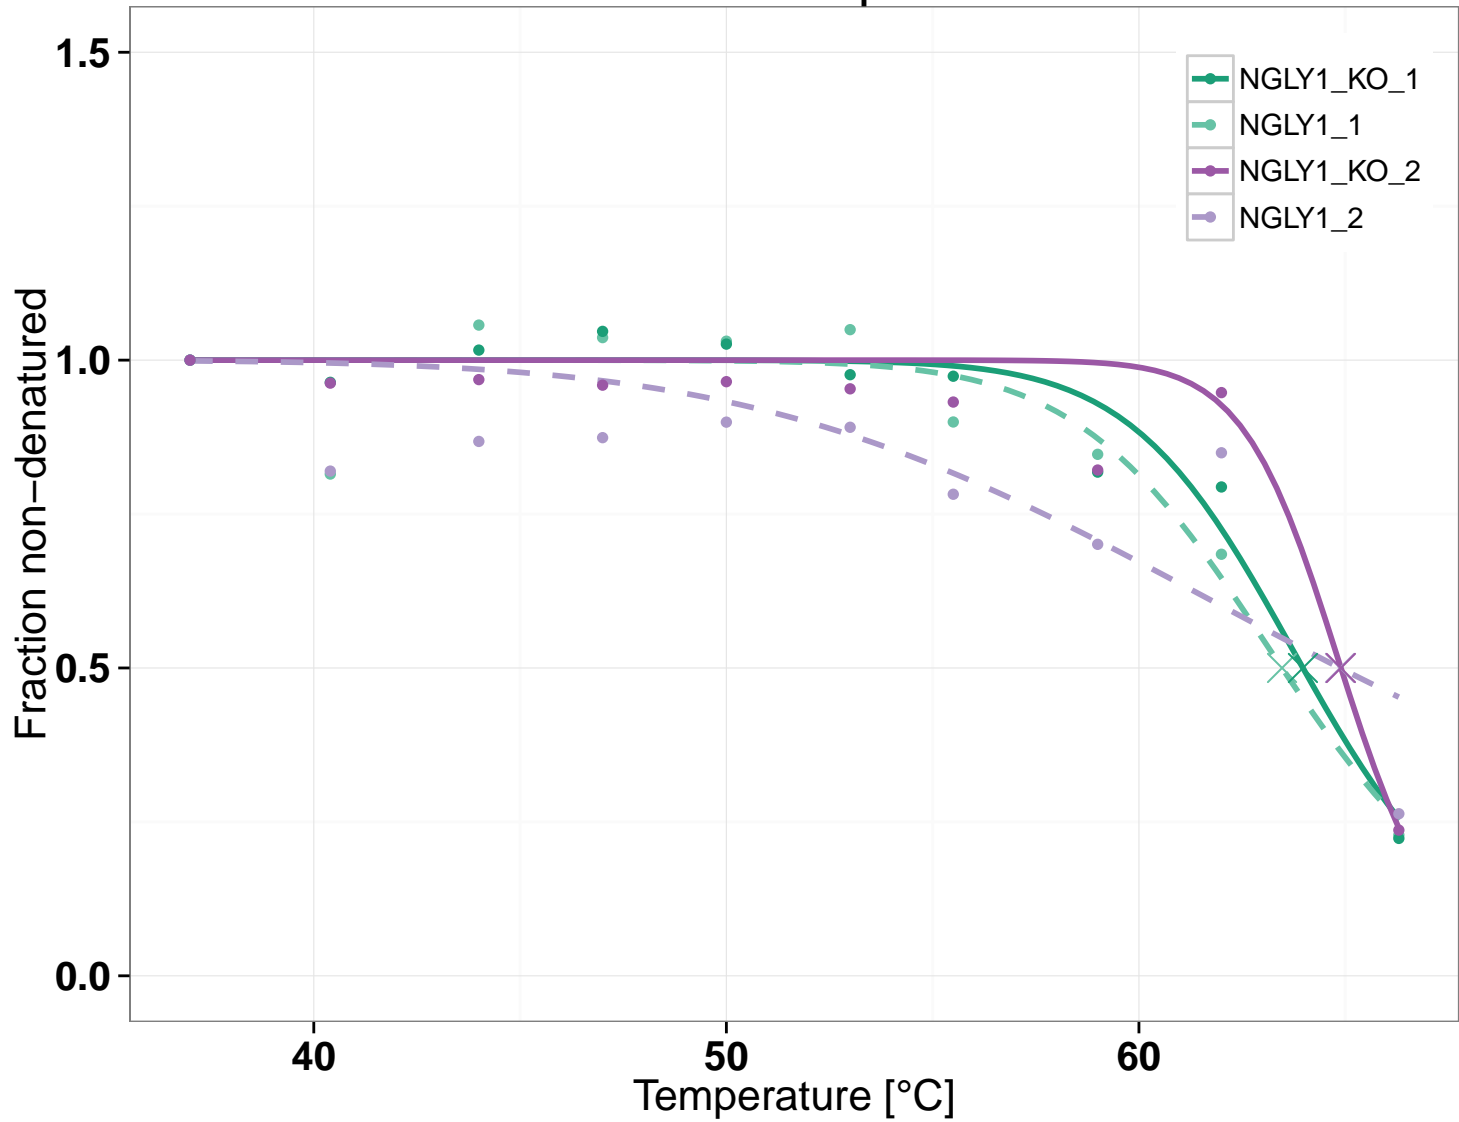

|            | meltPoint | slope  | plateau | R2   |
|------------|-----------|--------|---------|------|
| NGLY1_KO_1 | 63.98     | -0.12  | 0       | 0.96 |
| NGLY1_1    | 63.47     | -0.1   | 0       | 0.91 |
| NGLY1_KO_2 | 64.9      | -0.21  | 0       | 0.91 |
| NGLY1_2    | 64.87     | -0.036 | 0       | 0.58 |

Supplement: Supplementary file 3846 [file 1]

IPI00644671.1|CC2D1B

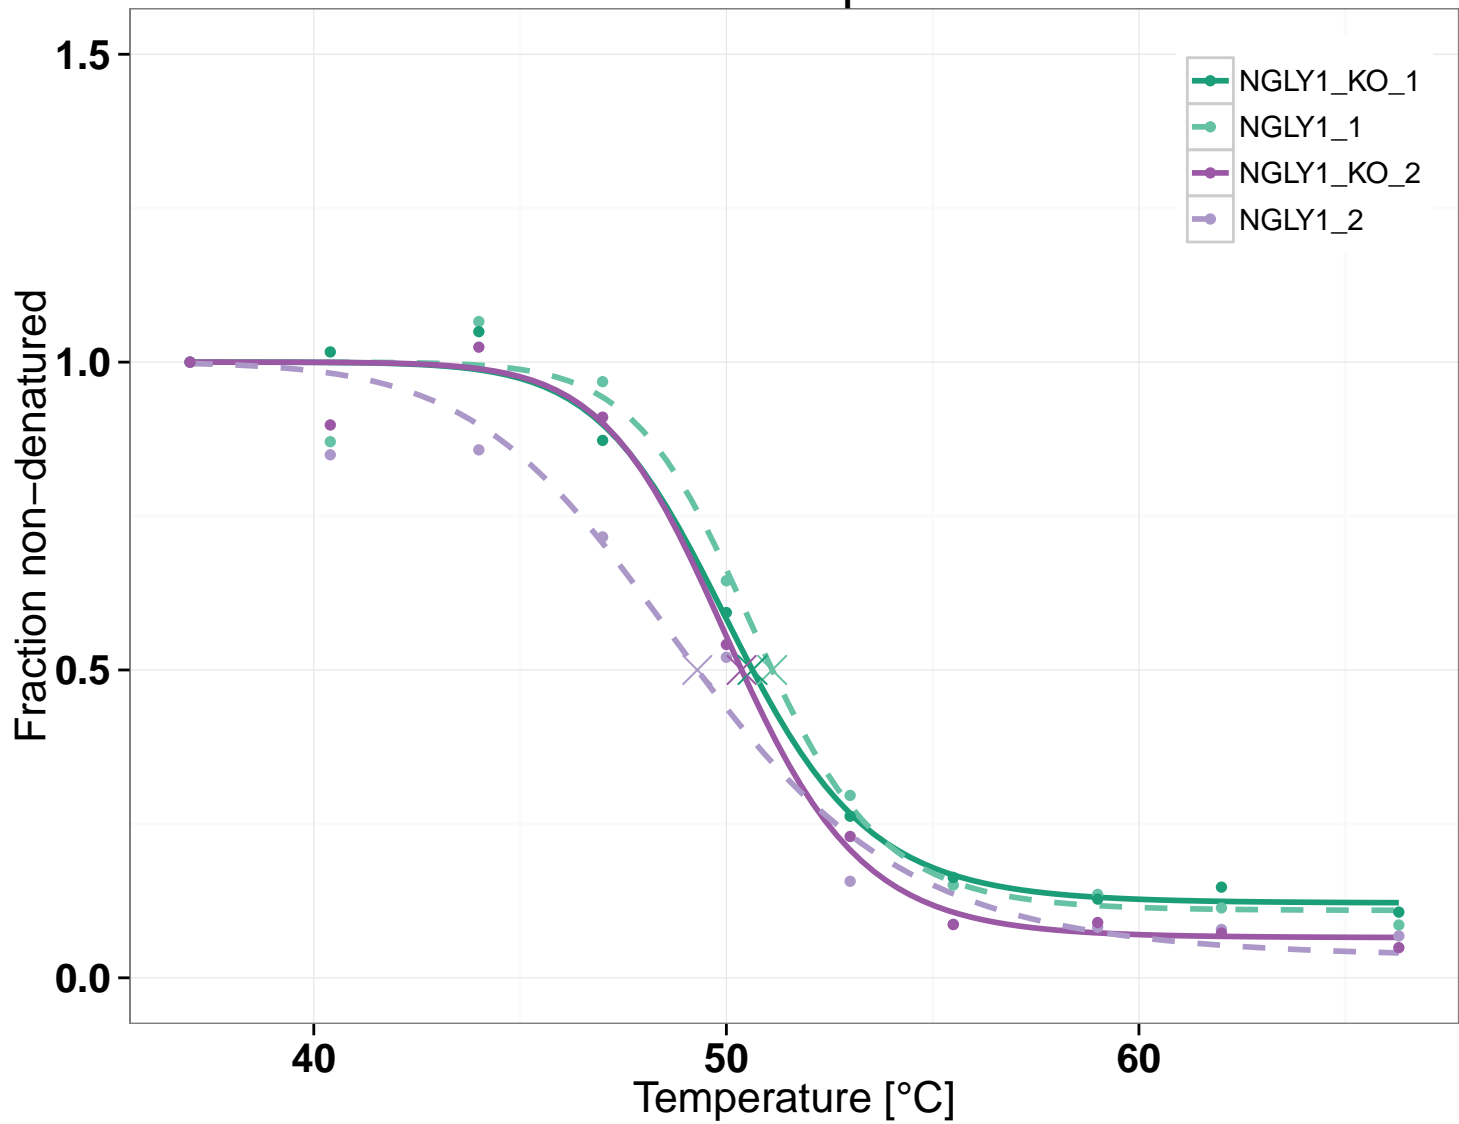

|            | meltPoint | slope  | plateau | R2   |
|------------|-----------|--------|---------|------|
| NGLY1_KO_1 | 50.63     | -0.13  | 0.12    | 1    |
| NGLY1_1    | 51.11     | -0.15  | 0.11    | 0.98 |
| NGLY1_KO_2 | 50.37     | -0.15  | 0.07    | 0.99 |
| NGLY1_2    | 49.3      | -0.092 | 0.03    | 0.97 |

Supplement: Supplementary file 3847 [file 1]

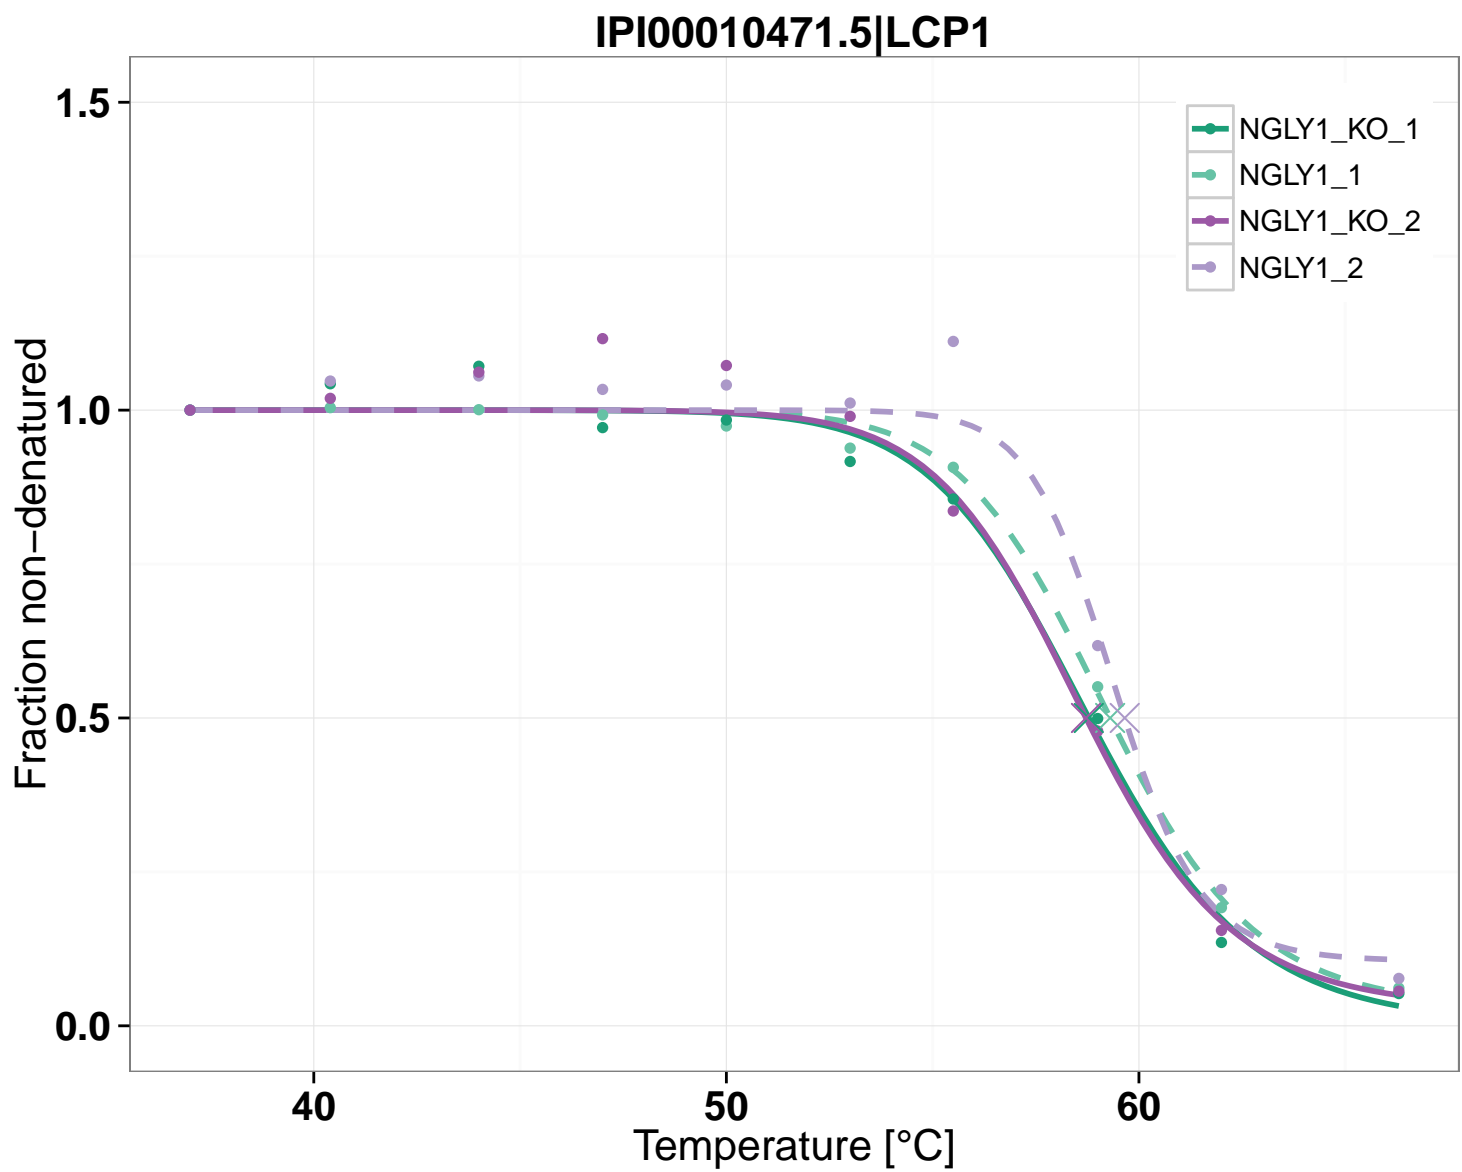

|            | meltPoint | slope | plateau | R2   |
|------------|-----------|-------|---------|------|
| NGLY1_KO_1 | 58.78     | -0.13 | 0       | 0.99 |
| NGLY1_1    | 59.3      | -0.14 | 0.03    | 1    |
| NGLY1_KO_2 | 58.72     | -0.13 | 0.03    | 0.98 |
| NGLY1_2    | 59.66     | -0.21 | 0.11    | 0.98 |

Supplement: Supplementary file 3848 [file 1]

# IPI00002468.6|UBIAD1

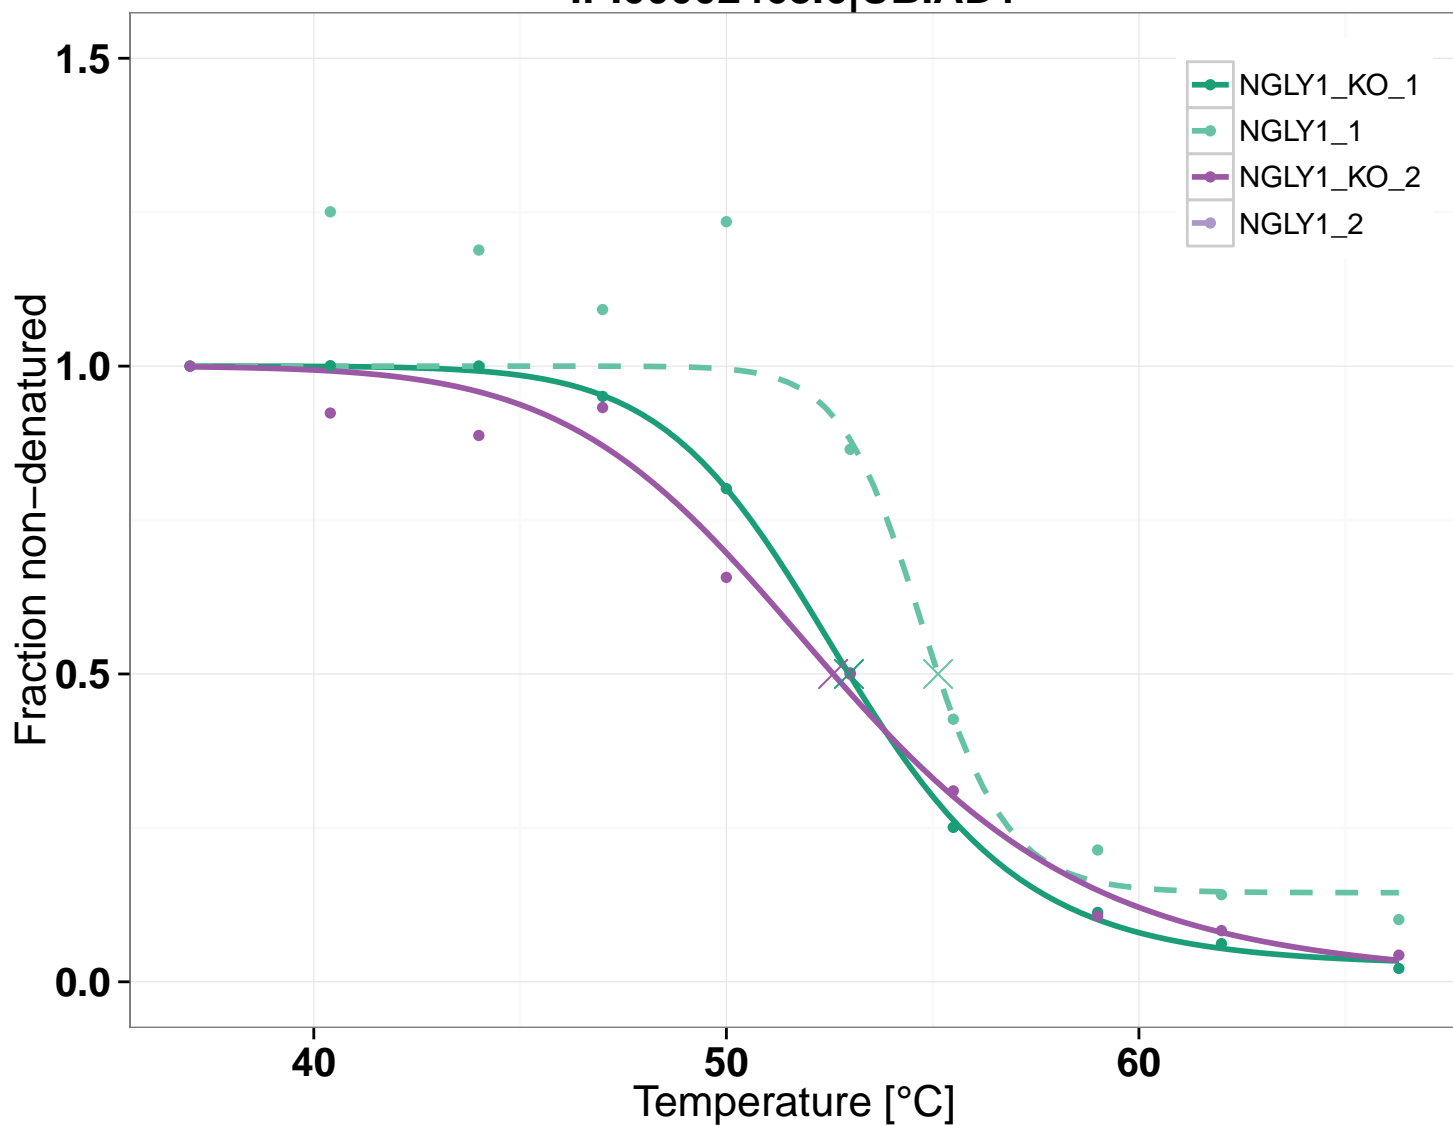

|            | meltPoint | slope  | plateau | R2   |
|------------|-----------|--------|---------|------|
| NGLY1_KO_1 | 52.97     | -0.11  | 0.03    | 1    |
| NGLY1_1    | 55.13     | -0.21  | 0.14    | 0.92 |
| NGLY1_KO_2 | 52.59     | -0.078 | 0       | 0.99 |
| NGLY1_2    | -         | -      | -       | -    |

Supplement: Supplementary file 3849 [file 1]

IPI00013262.1|UNC119

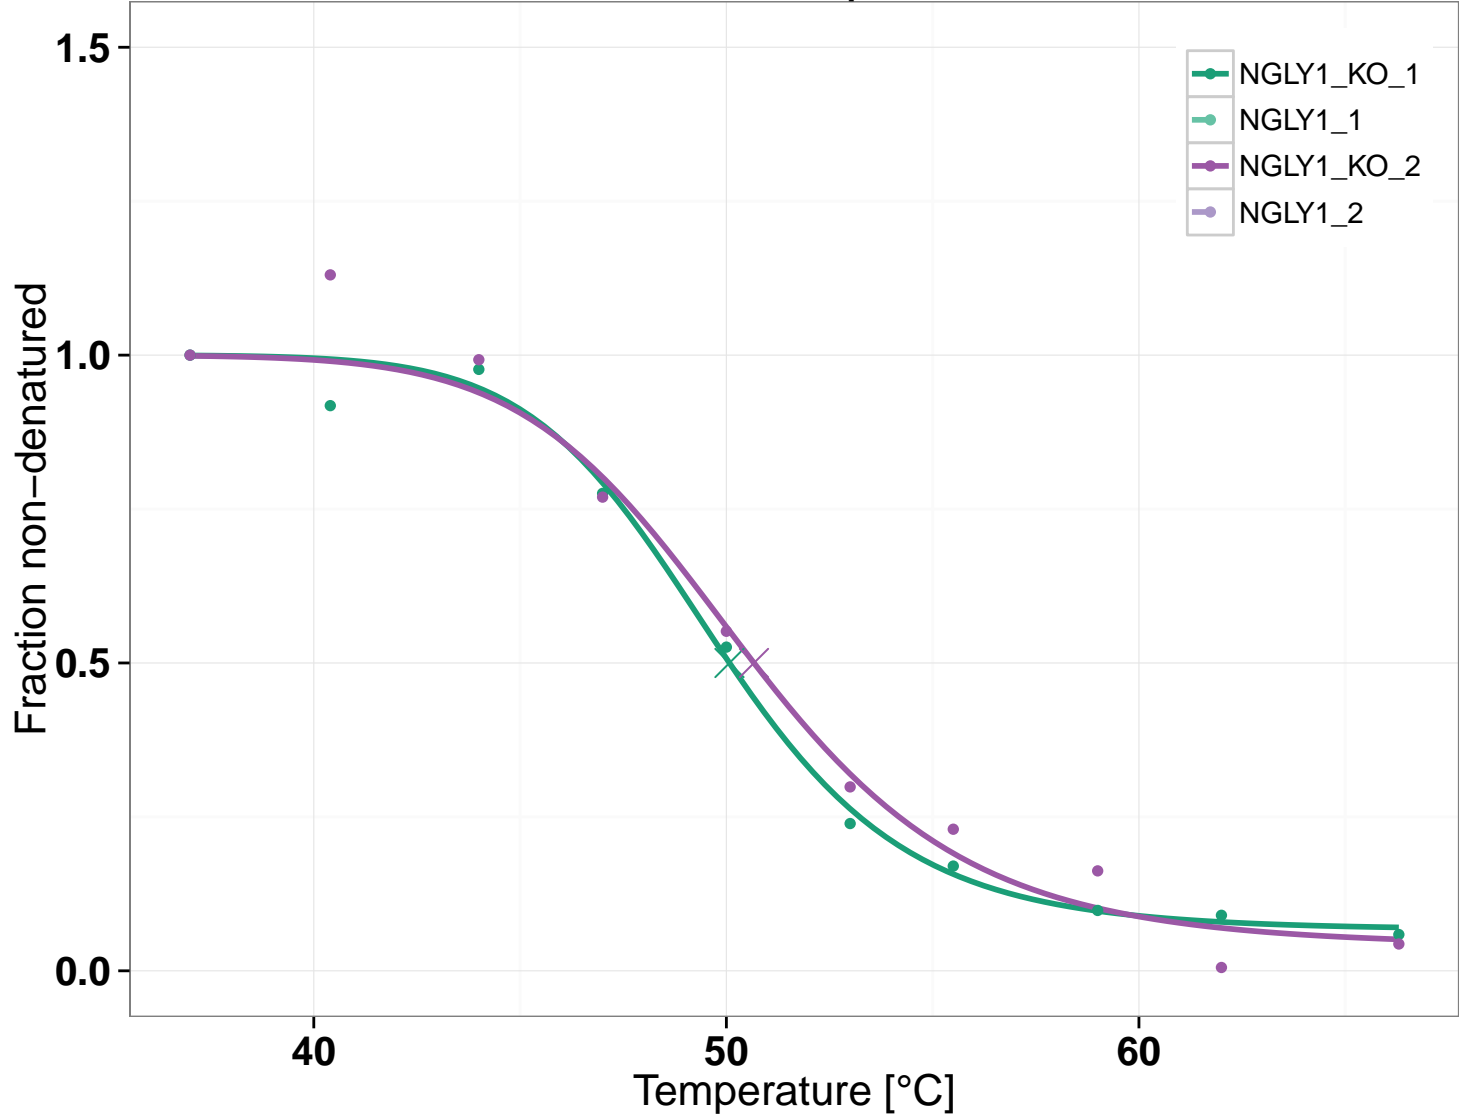

|            | meltPoint | slope  | plateau | R2   |
|------------|-----------|--------|---------|------|
| NGLY1_KO_1 | 50.07     | -0.1   | 0.07    | 0.99 |
| NGLY1_1    | -         | -      | -       | -    |
| NGLY1_KO_2 | 50.67     | -0.089 | 0.04    | 0.98 |
| NGLY1_2    | -         | -      | -       | -    |

Supplement: Supplementary file 3850 [file 1]

# IPI00014266.1|BRD3

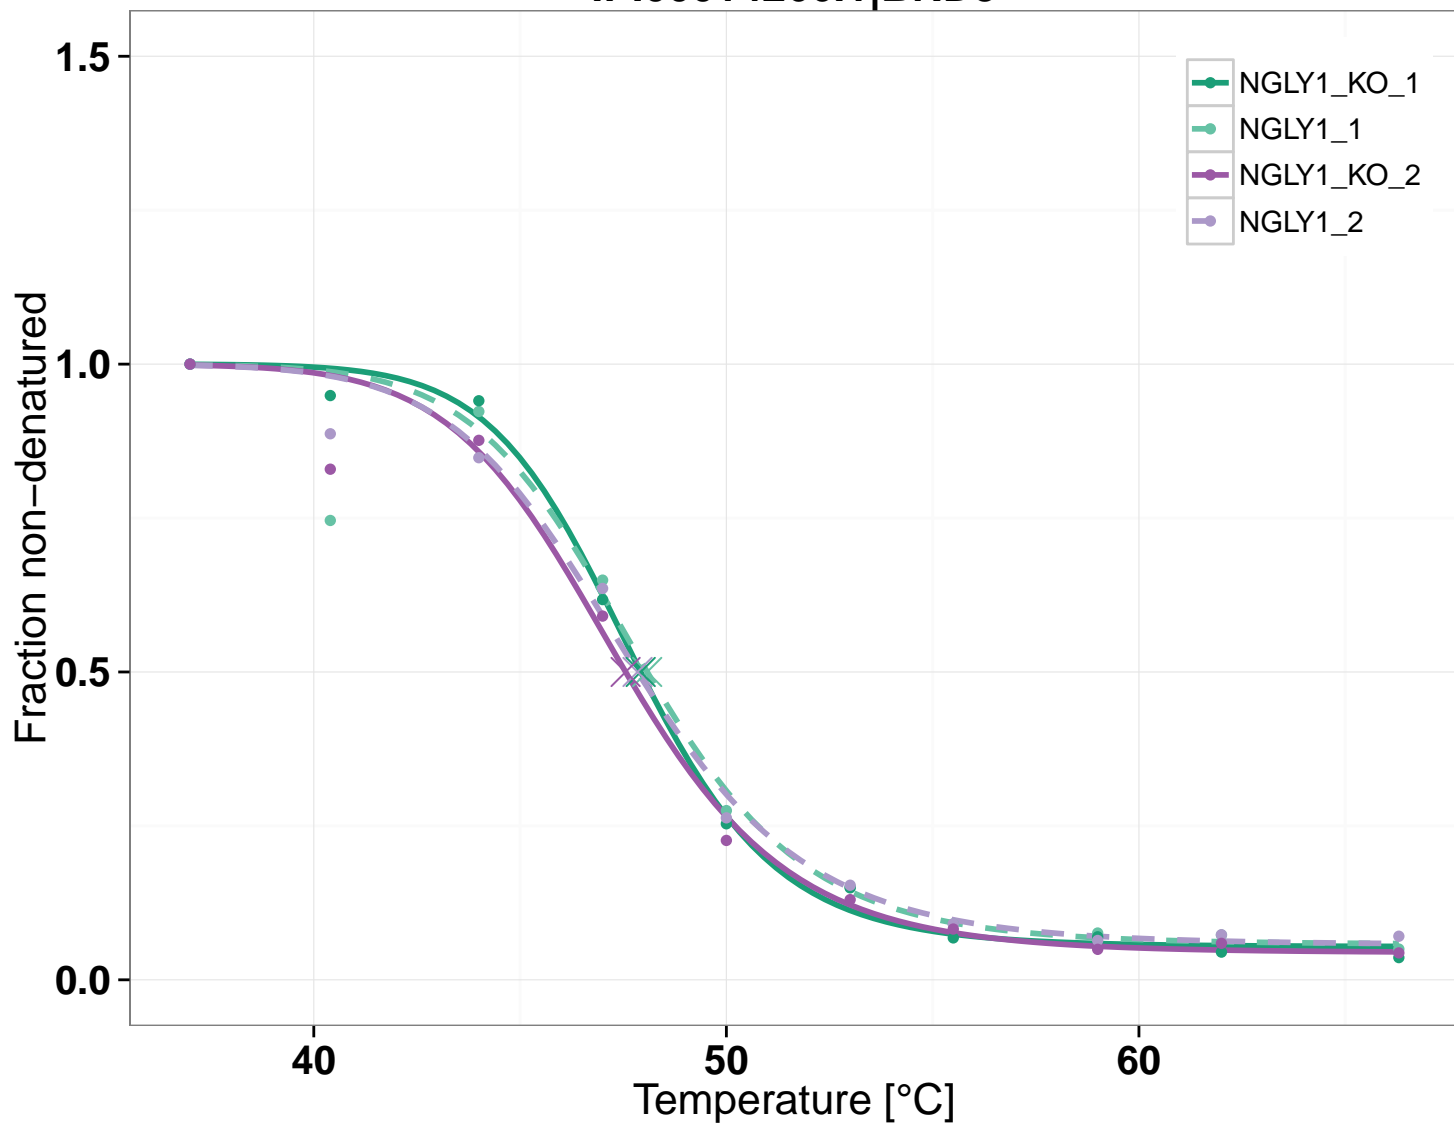

|            | meltPoint | slope | plateau | R2   |
|------------|-----------|-------|---------|------|
| NGLY1_KO_1 | 47.92     | -0.14 | 0.05    | 1    |
| NGLY1_1    | 48.08     | -0.12 | 0.06    | 0.95 |
| NGLY1_KO_2 | 47.56     | -0.12 | 0.04    | 0.98 |
| NGLY1_2    | 47.85     | -0.11 | 0.06    | 0.99 |

Supplement: Supplementary file 3851 [file 1]

IPI00879931.1|SERPING1

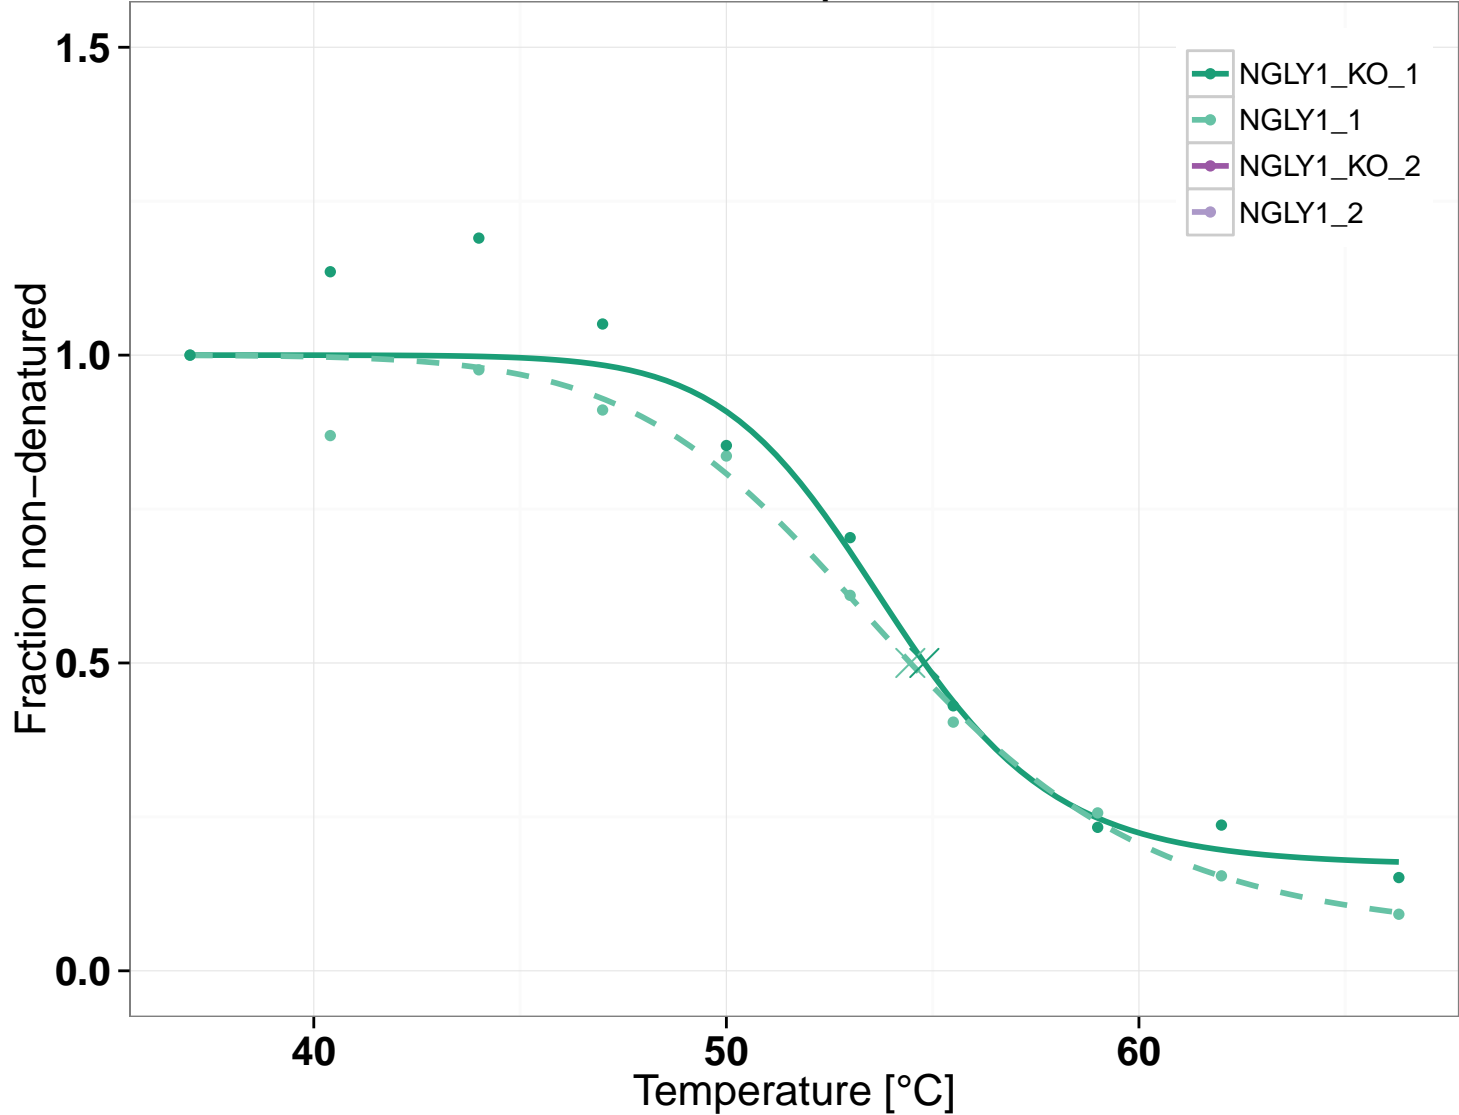

|            | meltPoint | slope  | plateau | R2   |
|------------|-----------|--------|---------|------|
| NGLY1_KO_1 | 54.8      | -0.1   | 0.17    | 0.96 |
| NGLY1_1    | 54.46     | -0.074 | 0.05    | 0.98 |
| NGLY1_KO_2 | -         | -      | -       | -    |
| NGLY1_2    | -         | -      | -       | -    |

Supplement: Supplementary file 3852 [file 1]

# IPI00719079.1|PDDC1

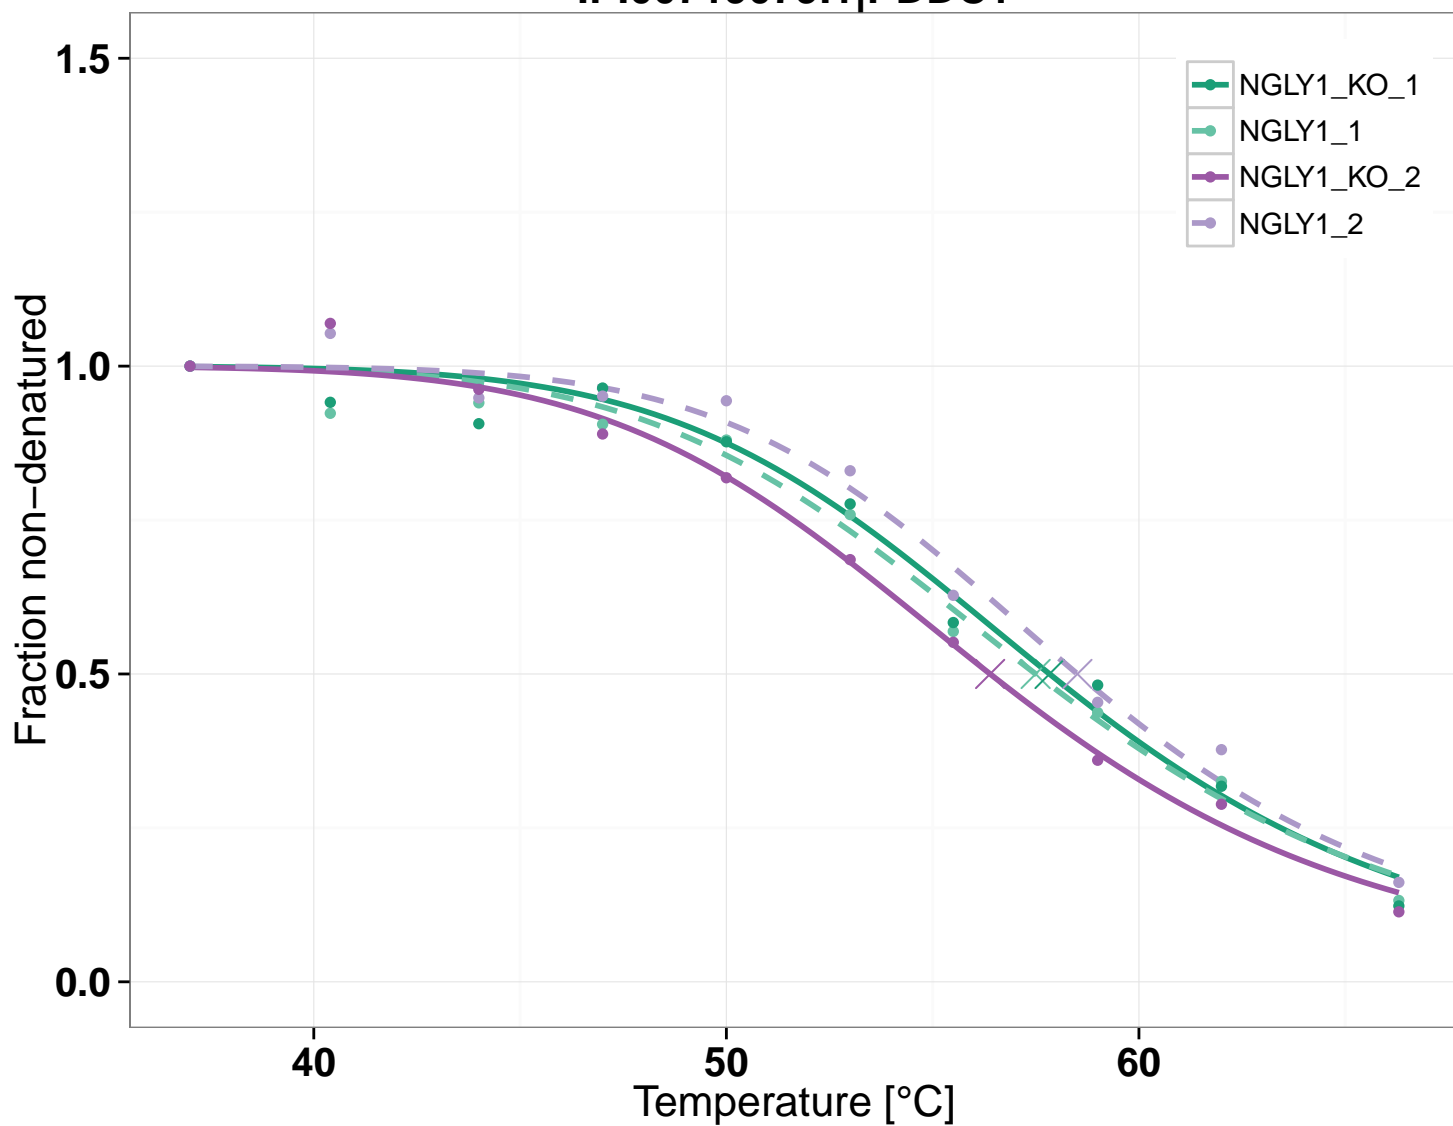

|            | meltPoint | slope  | plateau | R2   |
|------------|-----------|--------|---------|------|
| NGLY1_KO_1 | 57.83     | -0.055 | 0       | 0.98 |
| NGLY1_1    | 57.5      | -0.053 | 0       | 0.99 |
| NGLY1_KO_2 | 56.39     | -0.054 | 0       | 0.99 |
| NGLY1_2    | 58.51     | -0.058 | 0.03    | 0.99 |

Supplement: Supplementary file 3853 [file 1]

IPI00034006.1|PTPN23

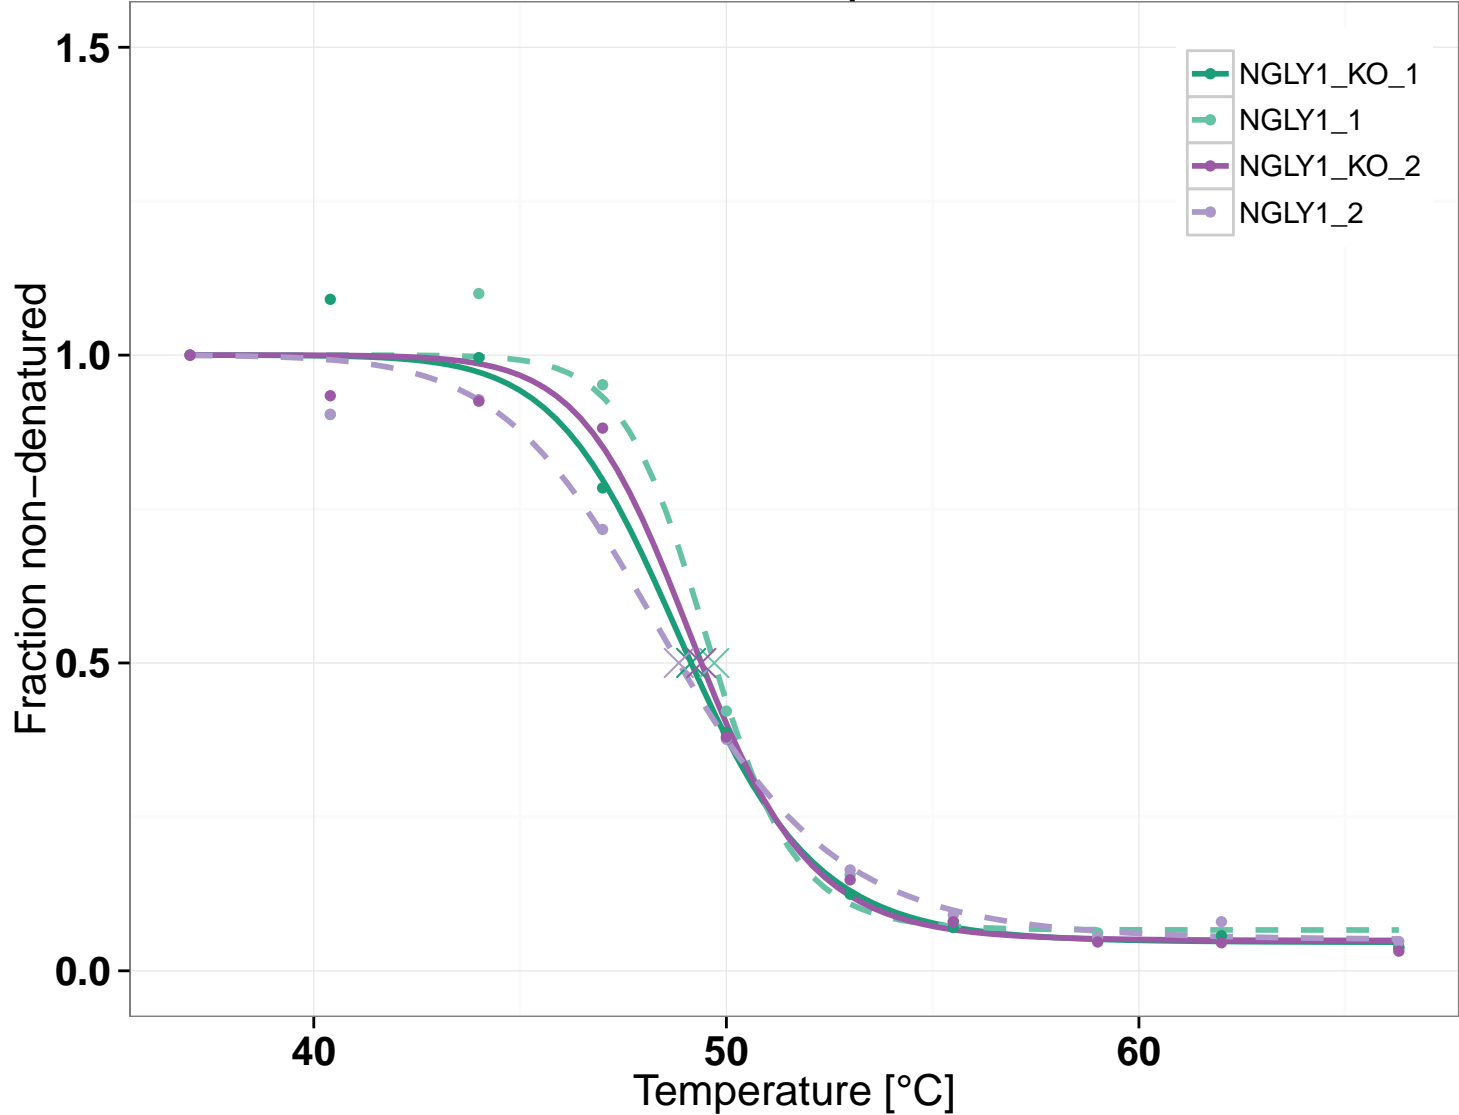

|            | meltPoint | slope | plateau | R2   |
|------------|-----------|-------|---------|------|
| NGLY1_KO_1 | 49.15     | -0.15 | 0.05    | 0.99 |
| NGLY1_1    | 49.71     | -0.22 | 0.07    | 0.99 |
| NGLY1_KO_2 | 49.39     | -0.17 | 0.05    | 0.99 |
| NGLY1_2    | 48.85     | -0.12 | 0.05    | 0.99 |

Supplement: Supplementary file 3854 [file 1]

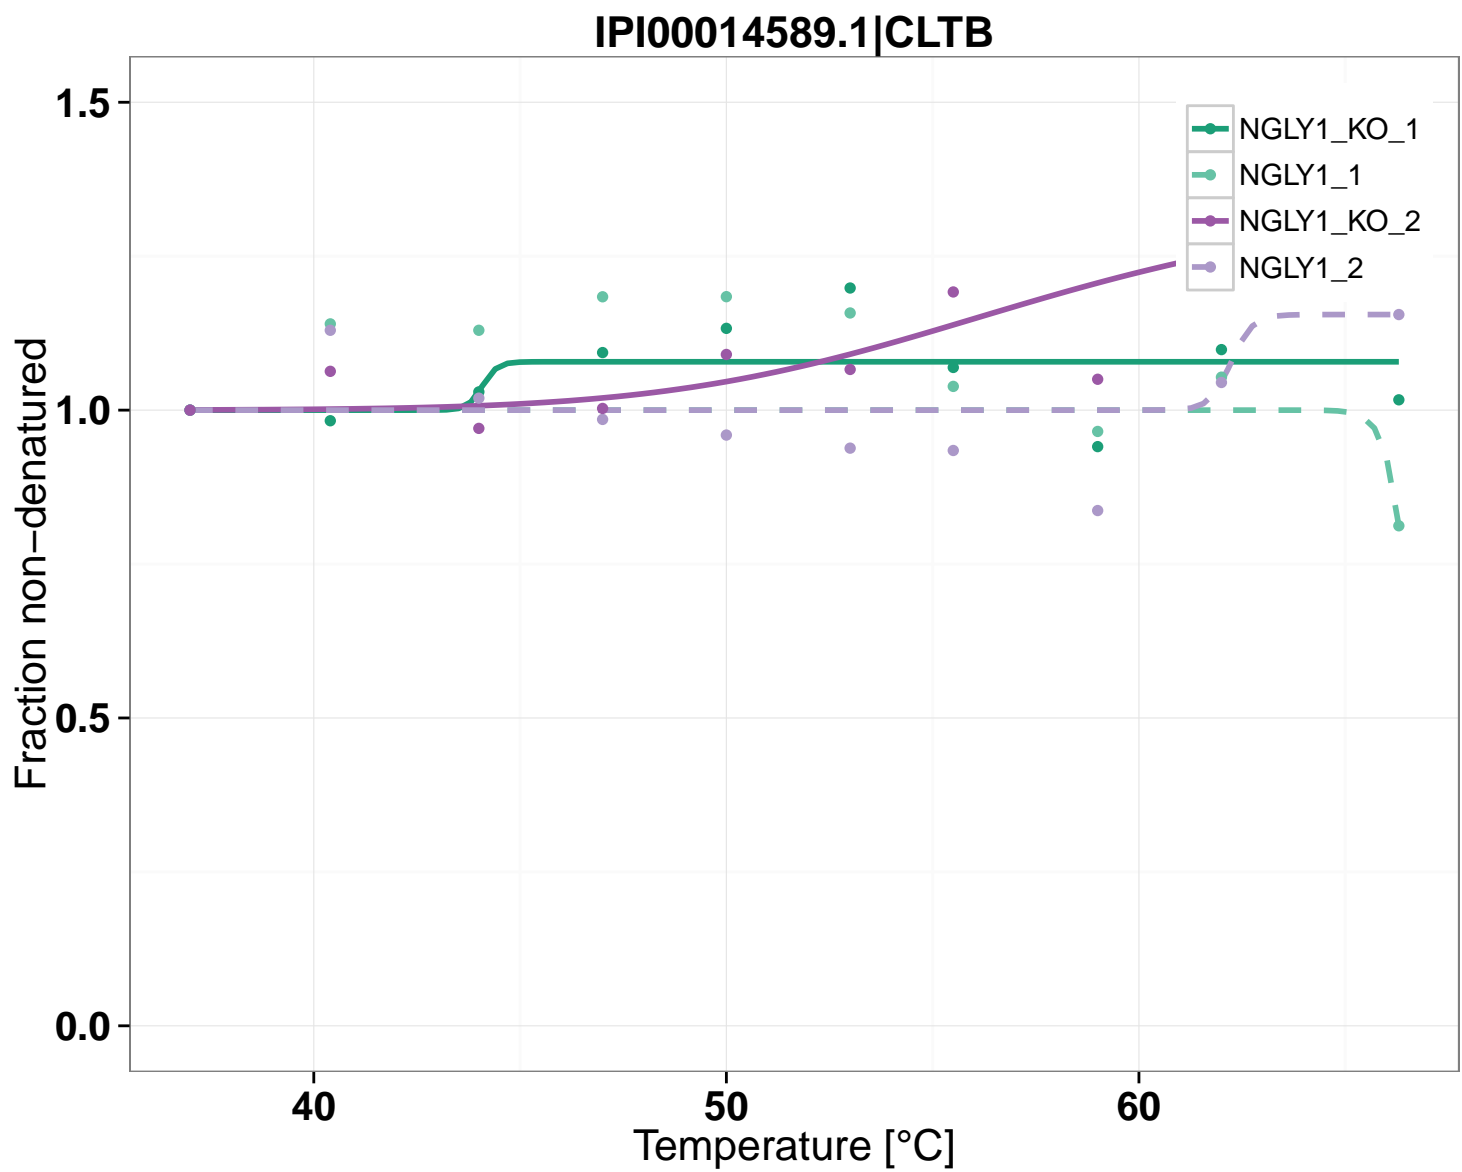

|            | meltPoint | slope | plateau | R2    |
|------------|-----------|-------|---------|-------|
| NGLY1_KO_1 | –         | 0.11  | 1.08    | 0.23  |
| NGLY1_1    | –         | –     | 0       | –0.07 |
| NGLY1_KO_2 | –         | 0.02  | 1.35    | 0.62  |
| NGLY1_2    | –         | 0.15  | 1.16    | 0.33  |

Supplement: Supplementary file 3855 [file 1]

# IPI00902843.1|CDIPT

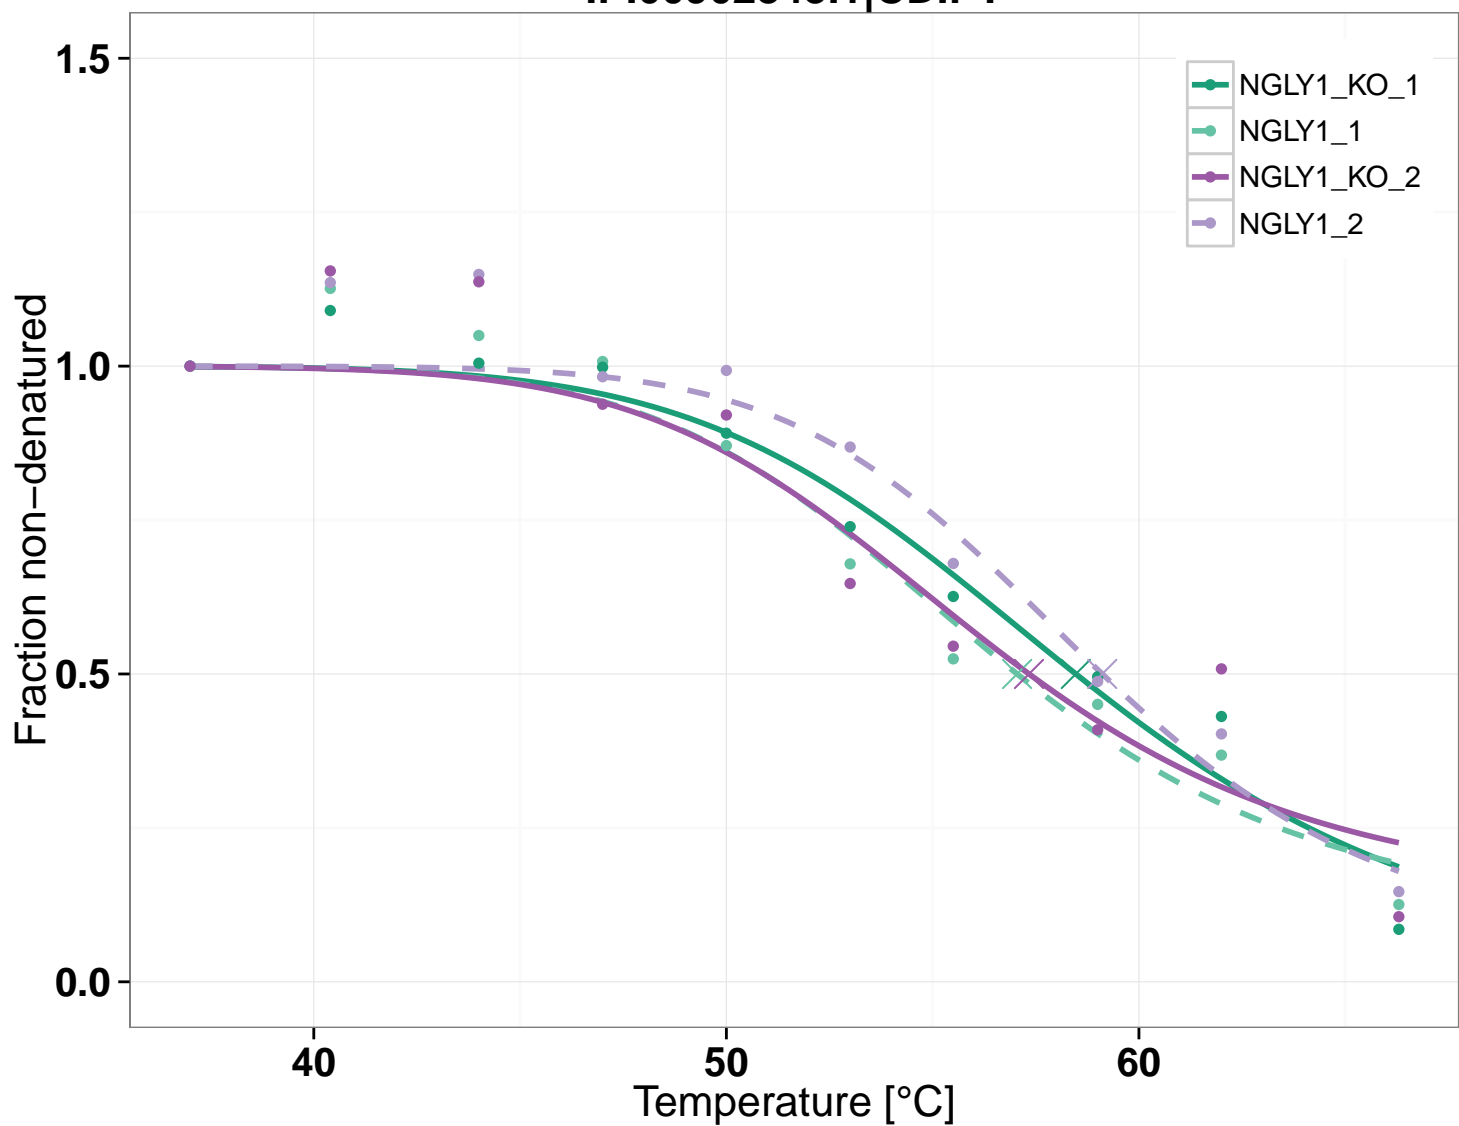

|            | meltPoint | slope  | plateau | R2   |
|------------|-----------|--------|---------|------|
| NGLY1_KO_1 | 58.47     | -0.055 | 0       | 0.96 |
| NGLY1_1    | 57.05     | -0.057 | 0.09    | 0.96 |
| NGLY1_KO_2 | 57.34     | -0.054 | 0.13    | 0.89 |
| NGLY1_2    | 59.11     | -0.066 | 0.05    | 0.95 |

Supplement: Supplementary file 3856 [file 1]

IPI00178386.4|TTC21B

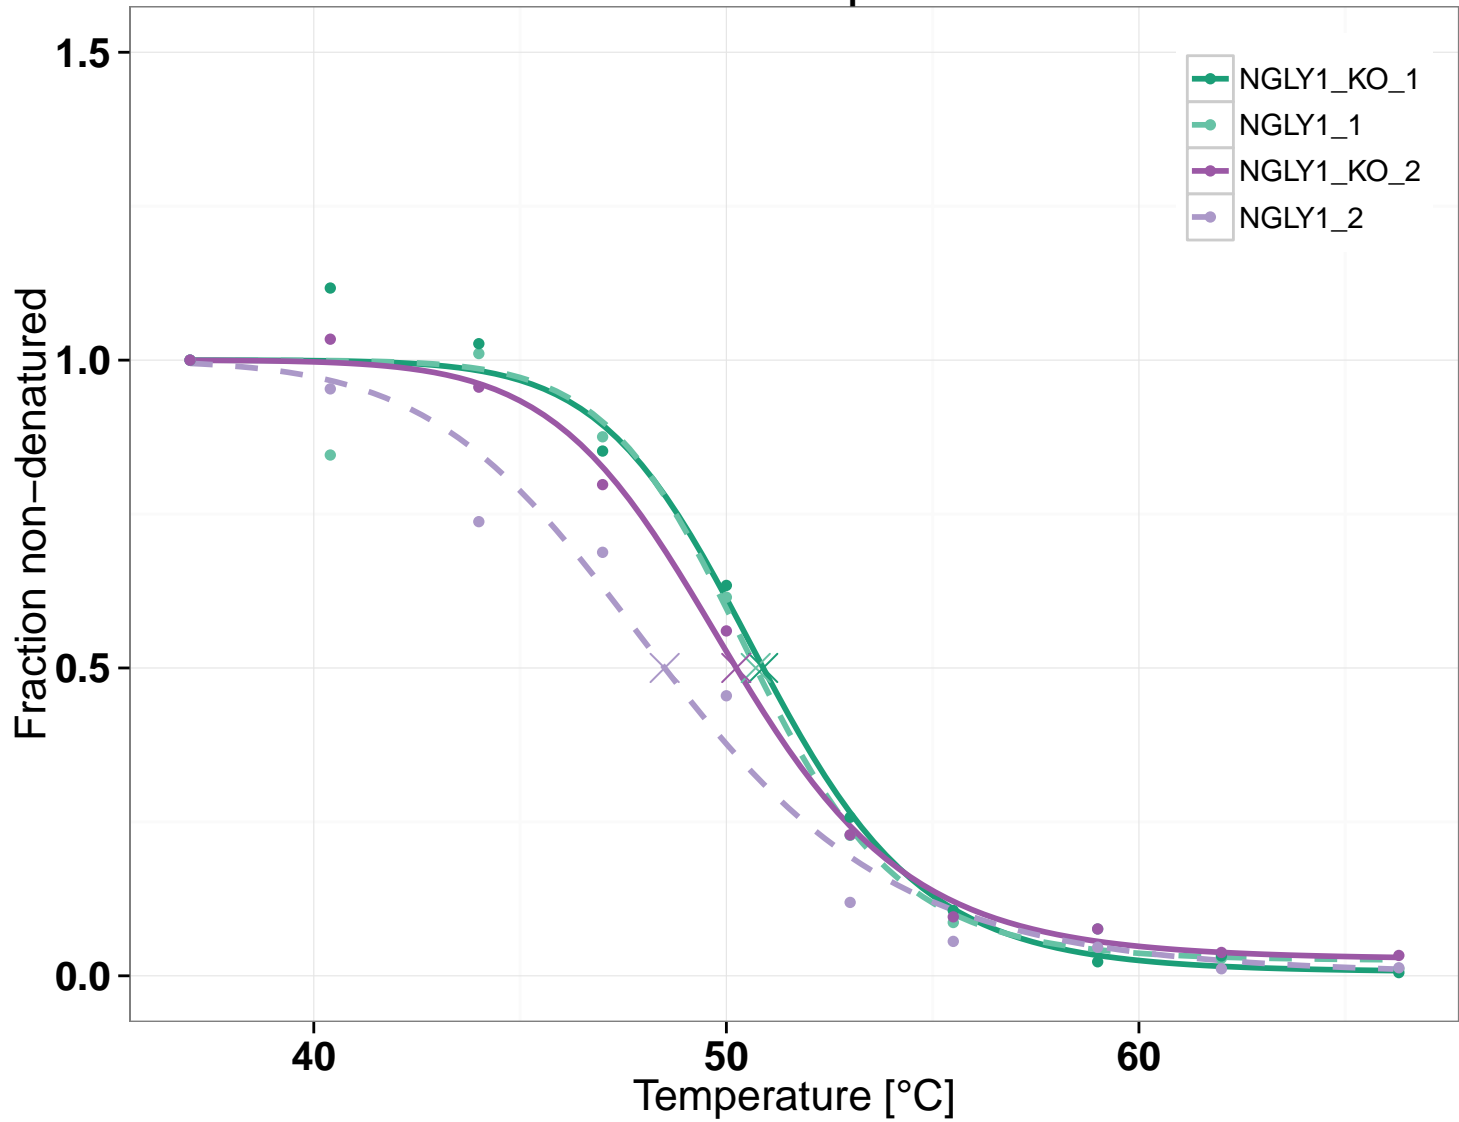

|            | meltPoint | slope  | plateau | R2   |
|------------|-----------|--------|---------|------|
| NGLY1_KO_1 | 50.89     | -0.13  | 0.01    | 0.99 |
| NGLY1_1    | 50.71     | -0.14  | 0.02    | 0.98 |
| NGLY1_KO_2 | 50.24     | -0.11  | 0.03    | 1    |
| NGLY1_2    | 48.5      | -0.088 | 0       | 0.98 |

Supplement: Supplementary file 3857 [file 1]

# IPI00021926.3|PSMC6

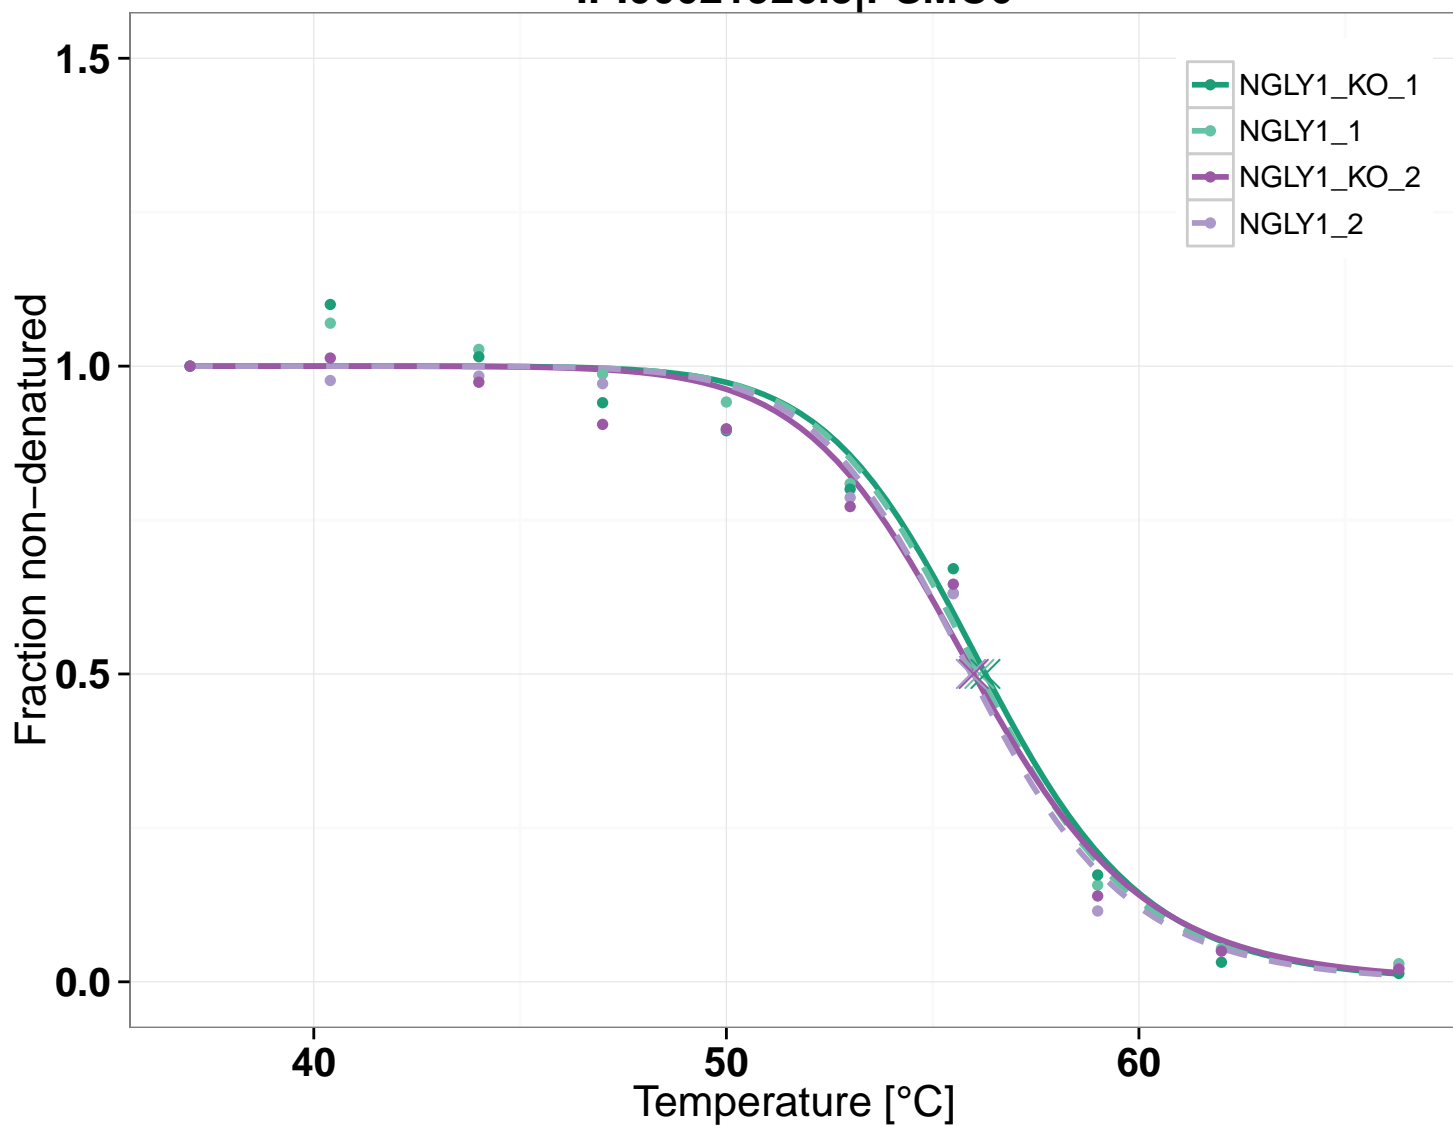

|            | meltPoint | slope | plateau | R2   |
|------------|-----------|-------|---------|------|
| NGLY1_KO_1 | 56.28     | -0.13 | 0       | 0.98 |
| NGLY1_1    | 56.13     | -0.13 | 0       | 0.99 |
| NGLY1_KO_2 | 55.99     | -0.12 | 0       | 0.98 |
| NGLY1_2    | 55.93     | -0.13 | 0       | 0.99 |

Supplement: Supplementary file 3858 [file 1]

# IPI00480159.1|INPP5F

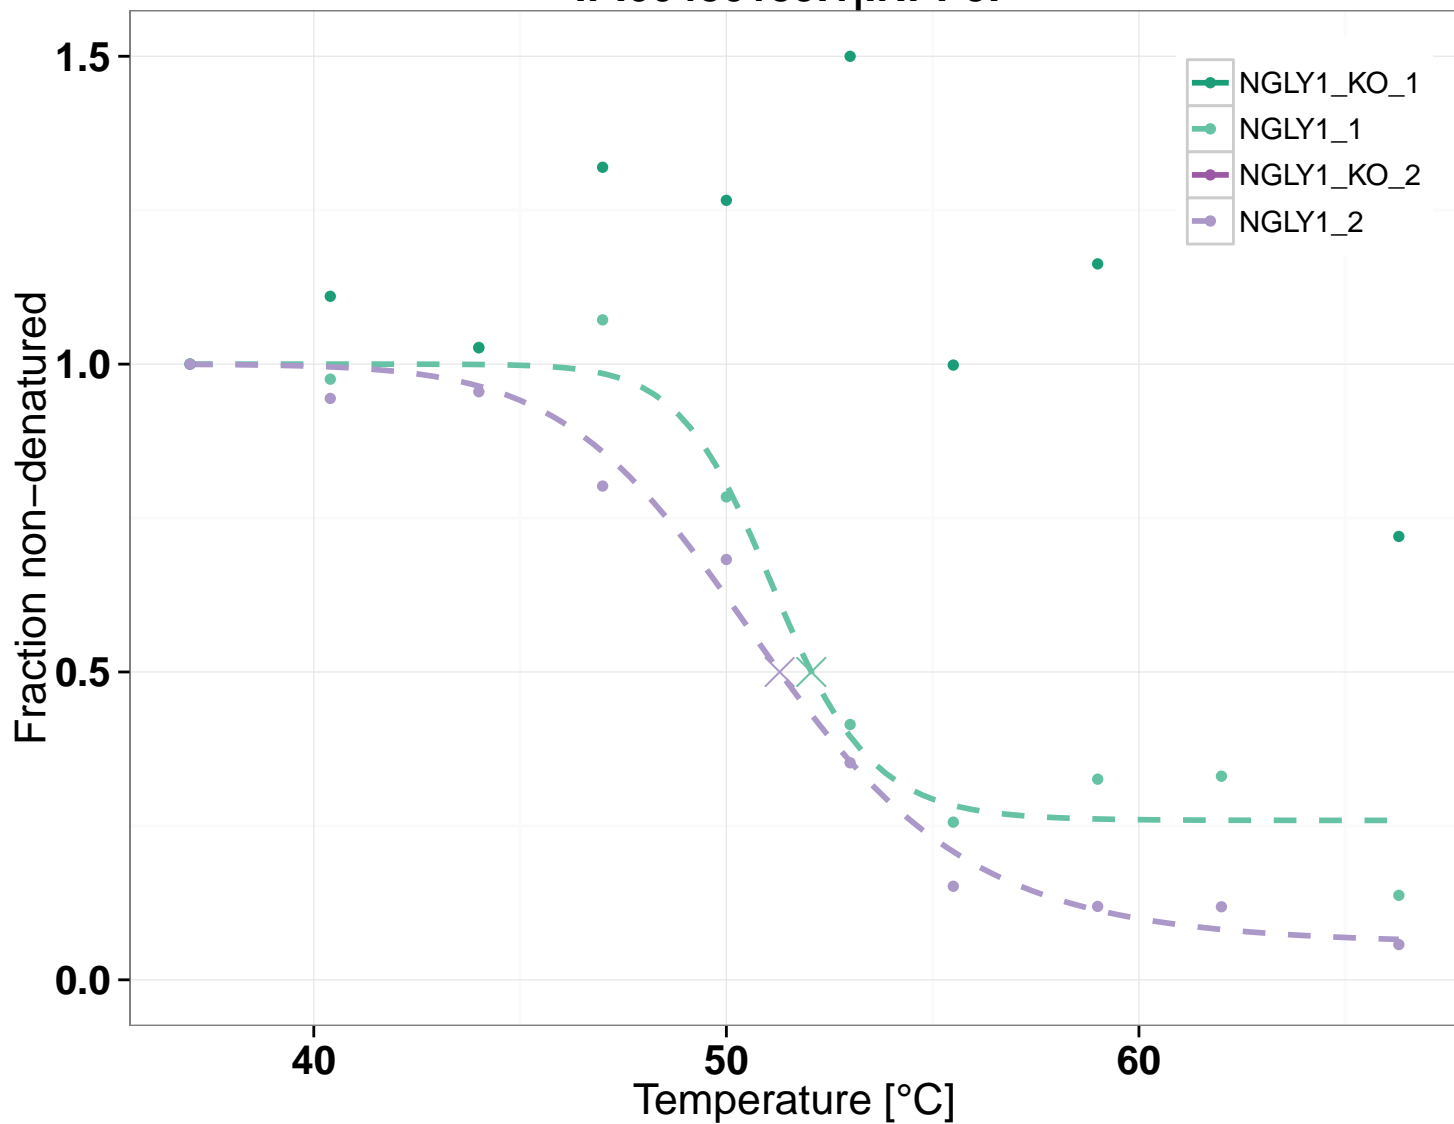

|            | meltPoint | slope  | plateau | R2   |
|------------|-----------|--------|---------|------|
| NGLY1_KO_1 | —         | —      | —       | —    |
| NGLY1_1    | 52.06     | -0.16  | 0.26    | 0.97 |
| NGLY1_KO_2 | —         | —      | —       | —    |
| NGLY1_2    | 51.29     | -0.095 | 0.06    | 0.99 |

Supplement: Supplementary file 3859 [file 1]

IPI00477505.3|ANKRD28

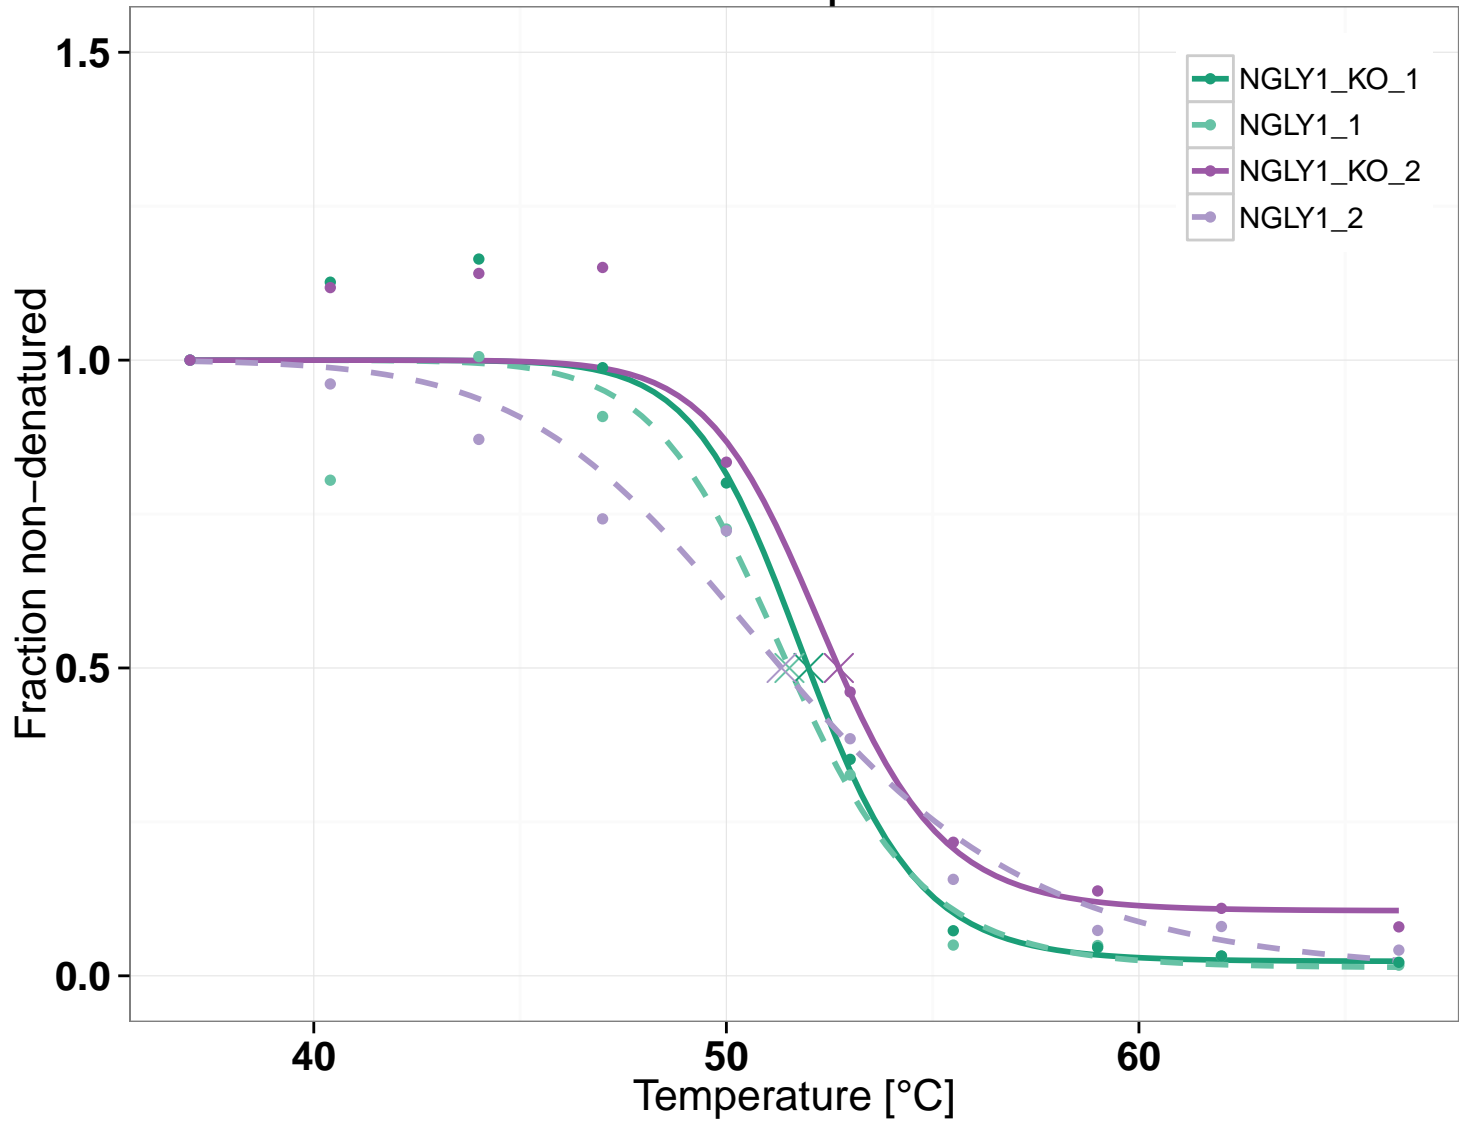

|            | meltPoint | slope | plateau | R2   |
|------------|-----------|-------|---------|------|
| NGLY1_KO_1 | 51.99     | -0.18 | 0.02    | 0.98 |
| NGLY1_1    | 51.53     | -0.15 | 0.01    | 0.97 |
| NGLY1_KO_2 | 52.73     | -0.16 | 0.11    | 0.97 |
| NGLY1_2    | 51.34     | -0.08 | 0       | 0.98 |

Supplement: Supplementary file 3860 [file 1]

IPI00002469.1|HCFC2

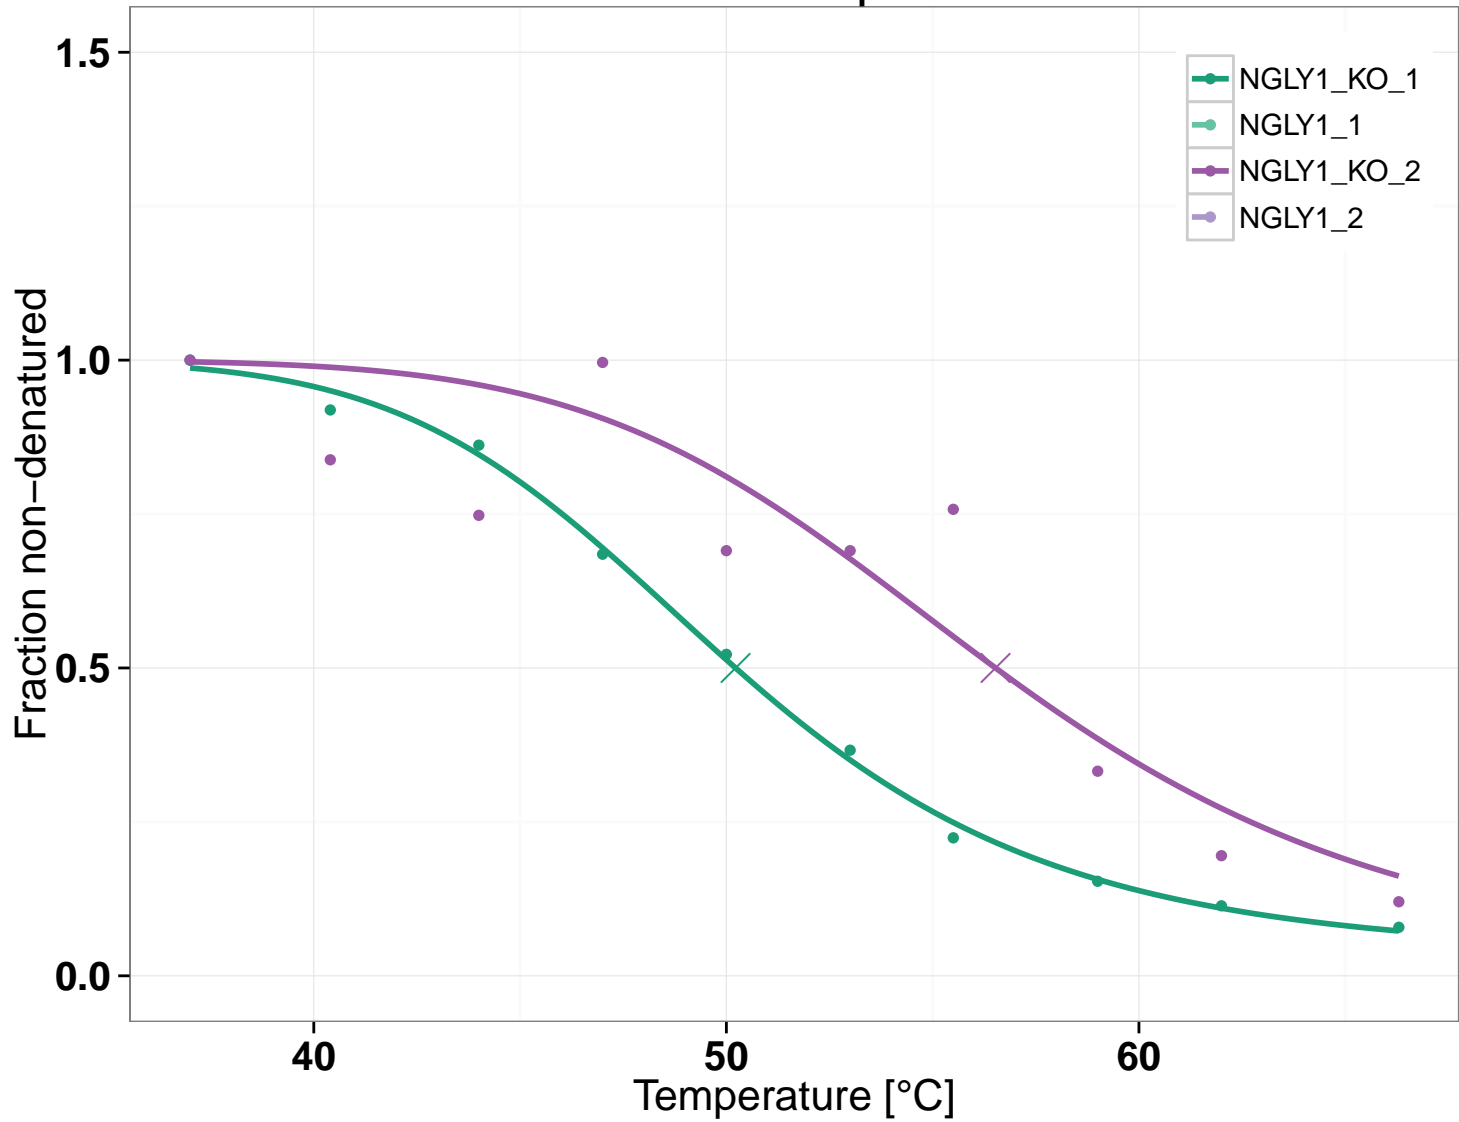

|            | meltPoint | slope  | plateau | R2   |
|------------|-----------|--------|---------|------|
| NGLY1_KO_1 | 50.22     | -0.061 | 0.03    | 1    |
| NGLY1_1    | -         | -      | -       | -    |
| NGLY1_KO_2 | 56.52     | -0.051 | 0       | 0.84 |
| NGLY1_2    | -         | -      | -       | -    |

Supplement: Supplementary file 3861 [file 1]

IPI00032995.1|LANCL2

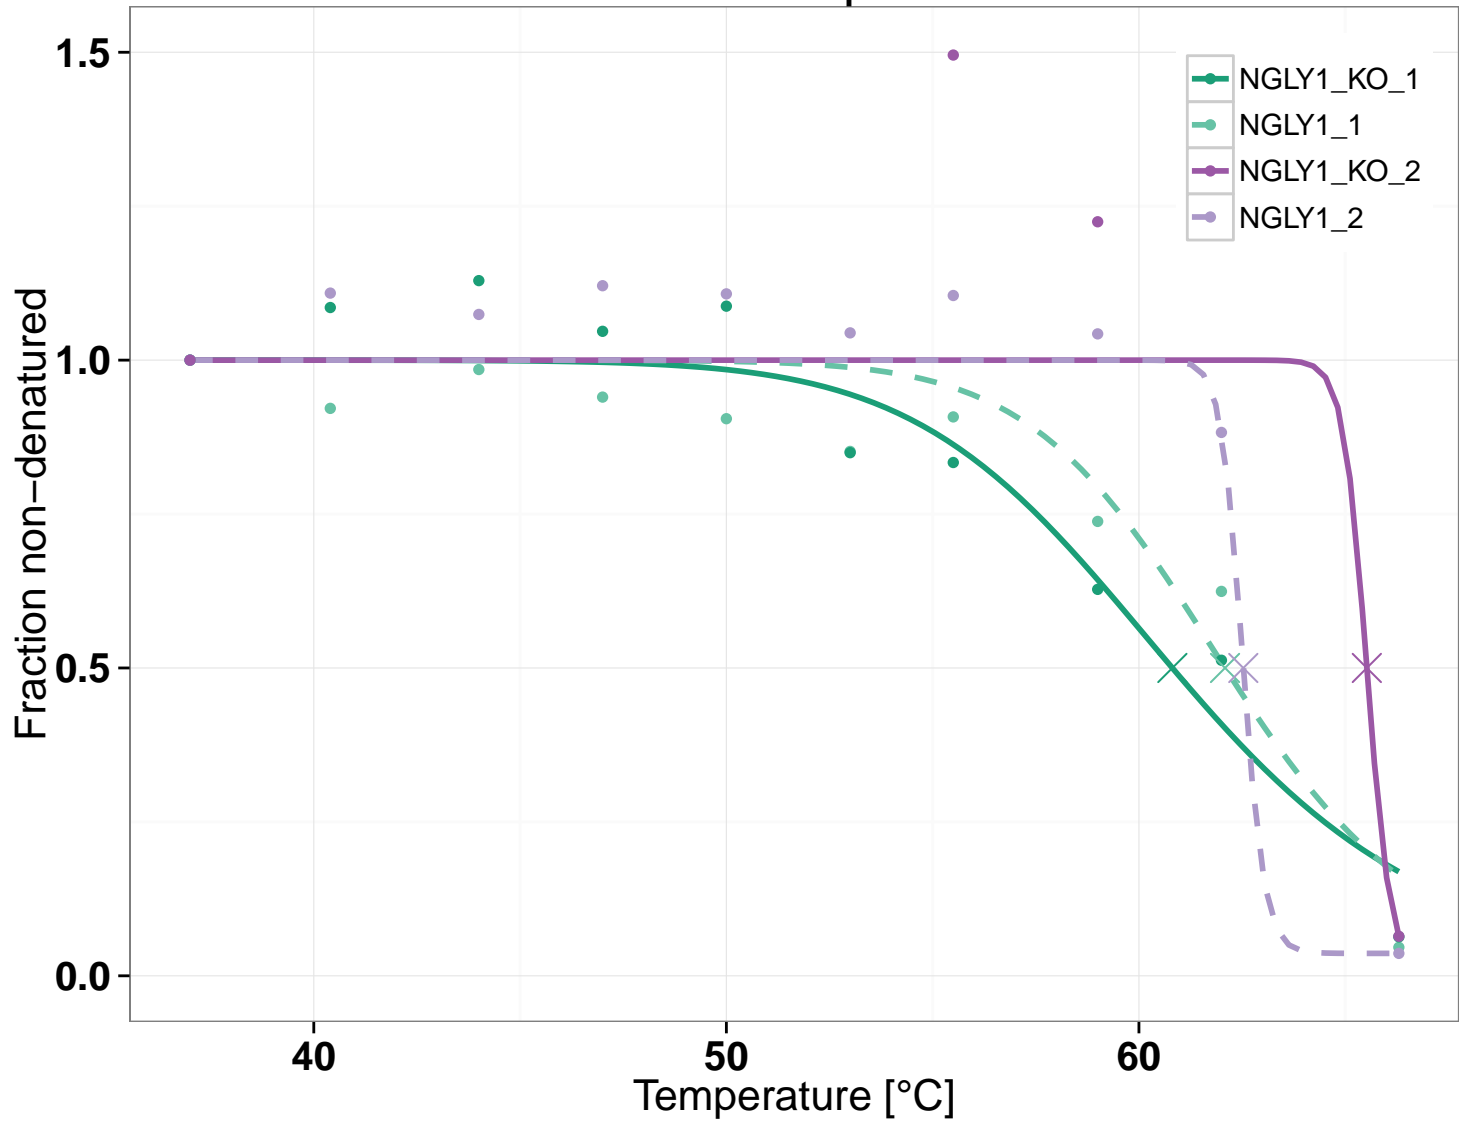

|            | meltPoint | slope | plateau | R2    |
|------------|-----------|-------|---------|-------|
| NGLY1_KO_1 | 60.81     | -0.08 | 0       | 0.93  |
| NGLY1_1    | 62.09     | -0.1  | 0       | 0.91  |
| NGLY1_KO_2 | 65.52     | -0.87 | 0       | -0.18 |
| NGLY1_2    | 62.53     | -0.92 | 0.04    | 0.94  |

Supplement: Supplementary file 3862 [file 1]

IPI00465288.2|RREB1

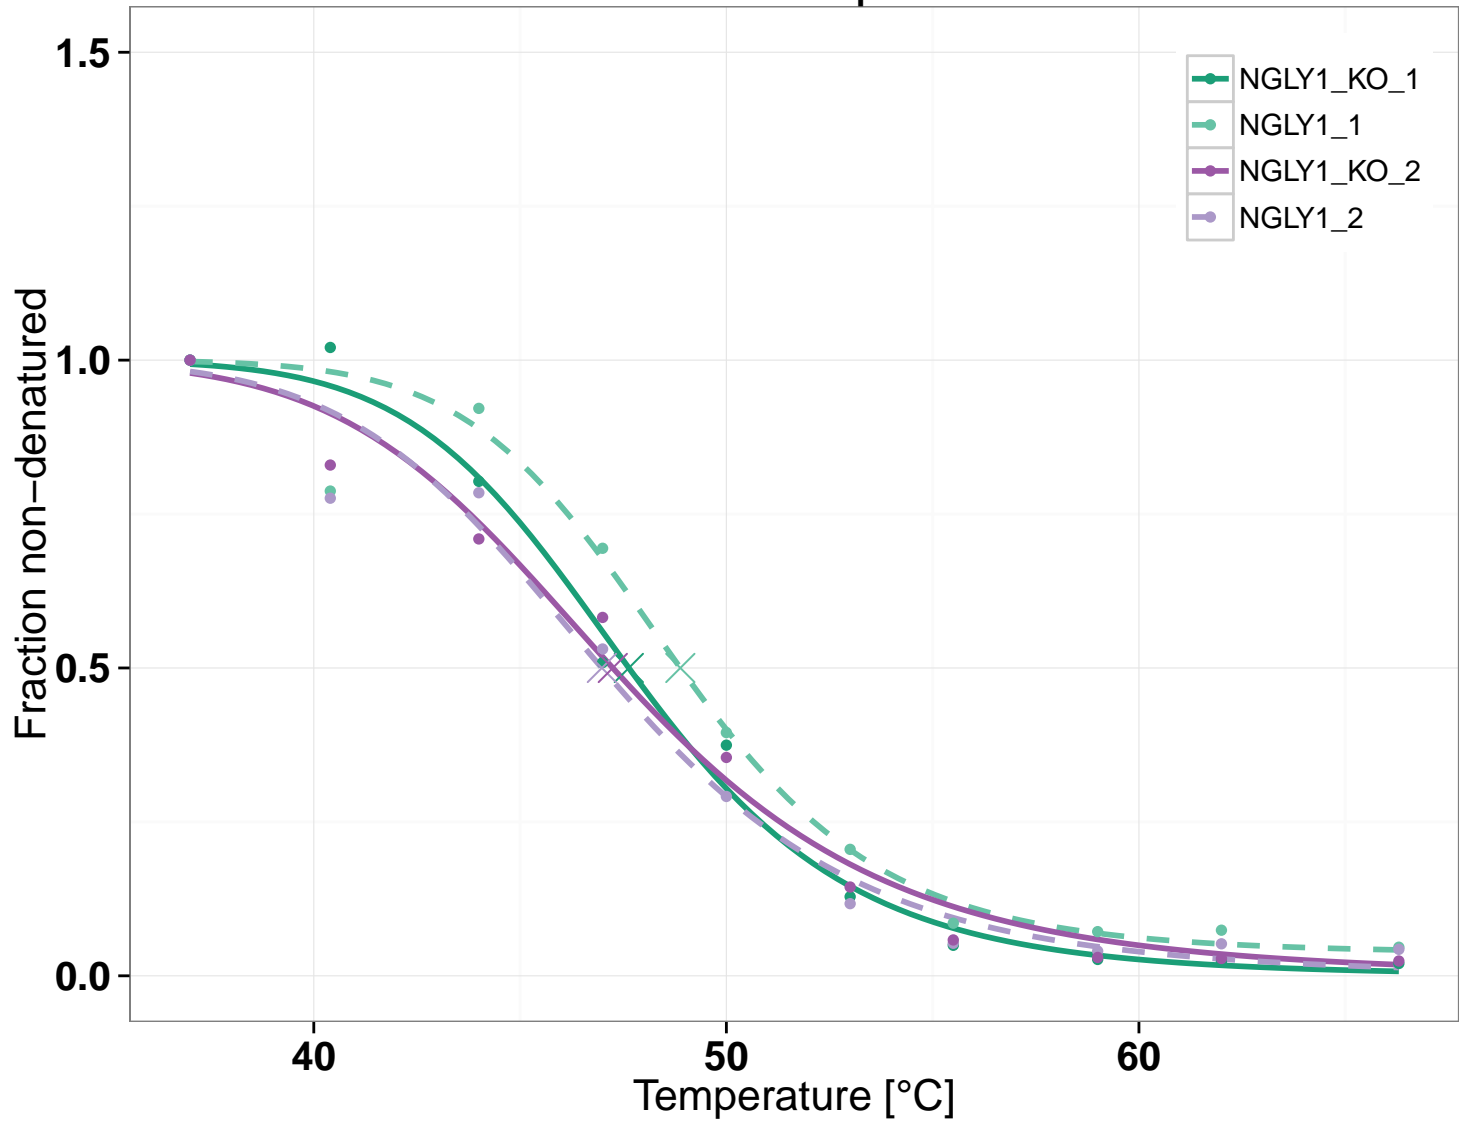

|            | meltPoint | slope  | plateau | R2   |
|------------|-----------|--------|---------|------|
| NGLY1_KO_1 | 47.64     | -0.093 | 0       | 0.99 |
| NGLY1_1    | 48.88     | -0.096 | 0.04    | 0.97 |
| NGLY1_KO_2 | 47.25     | -0.075 | 0       | 0.99 |
| NGLY1_2    | 46.98     | -0.08  | 0       | 0.98 |

Supplement: Supplementary file 3863 [file 1]

# IPI00216565.1|YDJC

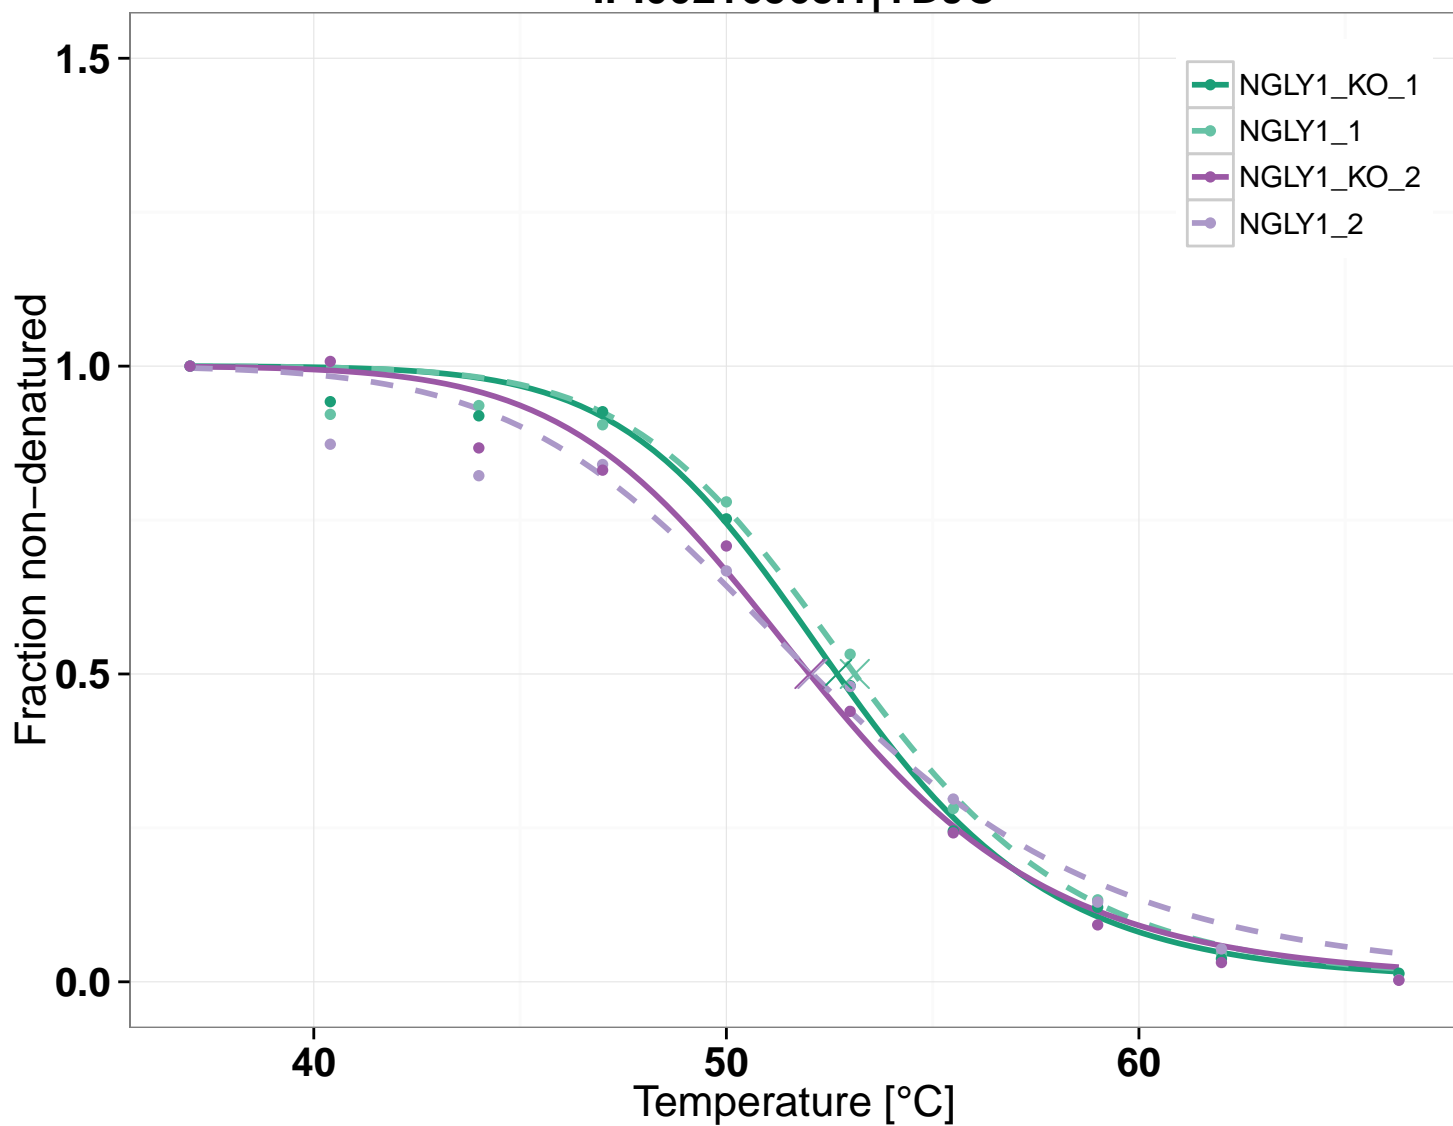

|            | meltPoint | slope  | plateau | R2   |
|------------|-----------|--------|---------|------|
| NGLY1_KO_1 | 52.69     | -0.096 | 0       | 0.99 |
| NGLY1_1    | 53.11     | -0.092 | 0       | 0.99 |
| NGLY1_KO_2 | 52.01     | -0.084 | 0       | 0.99 |
| NGLY1_2    | 52.09     | -0.069 | 0       | 0.98 |

Supplement: Supplementary file 3864 [file 1]

# IPI00289159.3|GLS

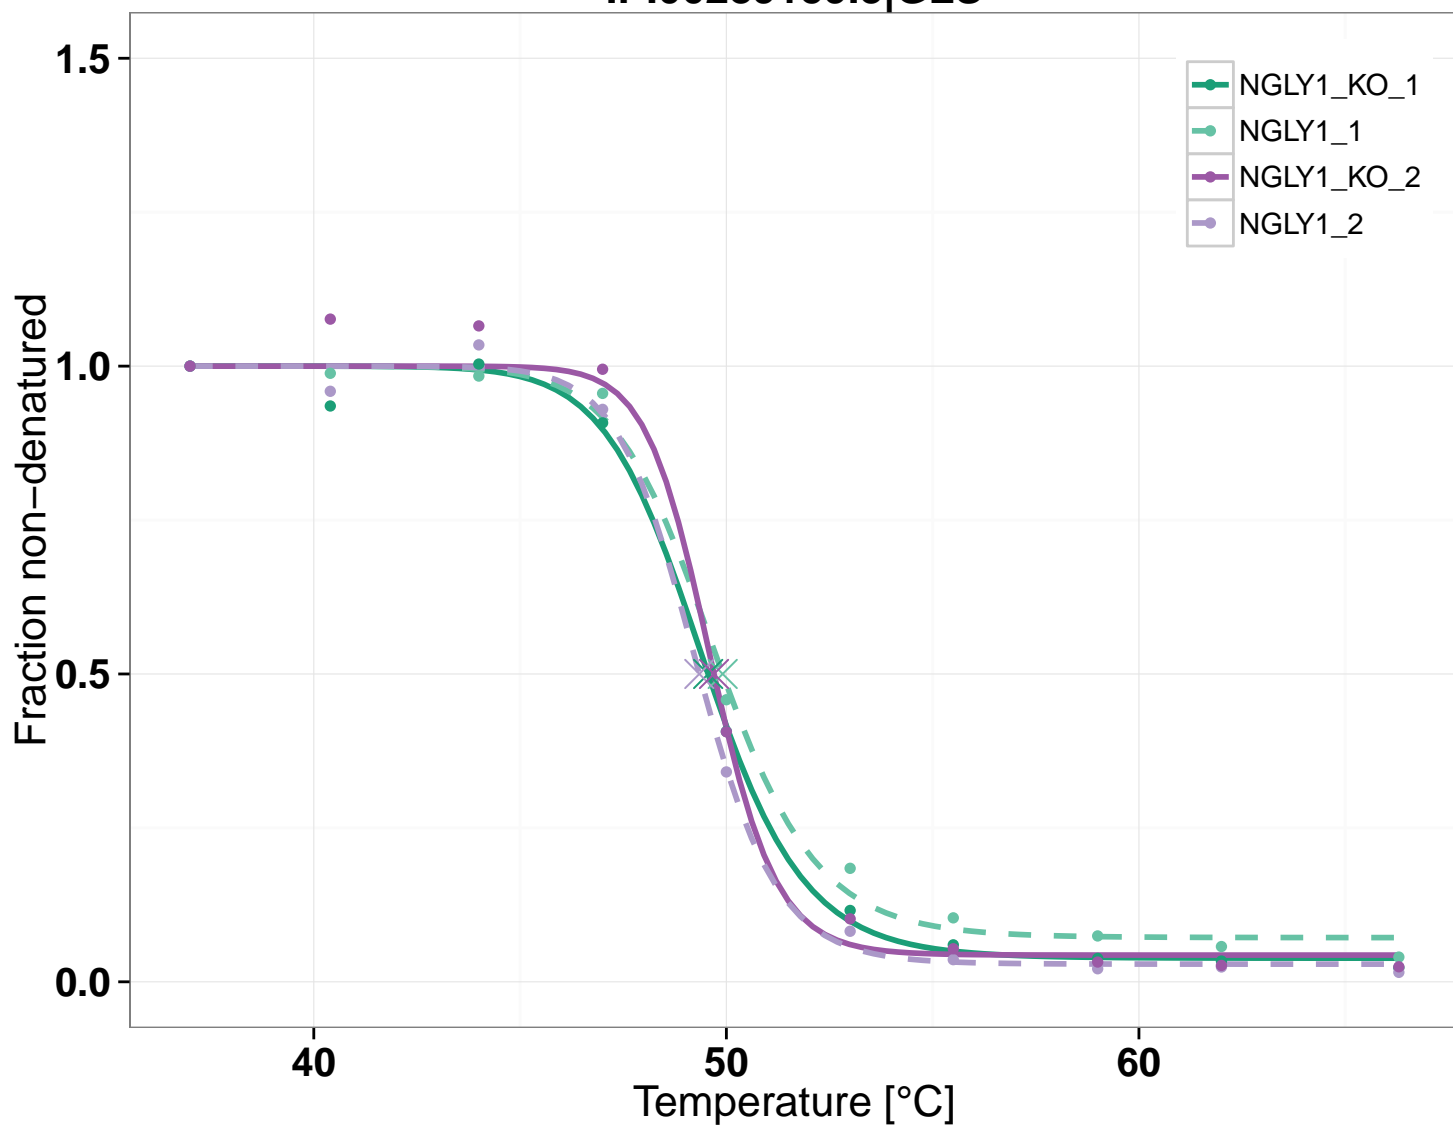

|            | meltPoint | slope | plateau | R2   |
|------------|-----------|-------|---------|------|
| NGLY1_KO_1 | 49.56     | -0.2  | 0.04    | 1    |
| NGLY1_1    | 49.91     | -0.19 | 0.07    | 1    |
| NGLY1_KO_2 | 49.7      | -0.3  | 0.04    | 0.99 |
| NGLY1_2    | 49.34     | -0.25 | 0.03    | 1    |

Supplement: Supplementary file 3865 [file 1]

# IPI00102896.1|RAB2B

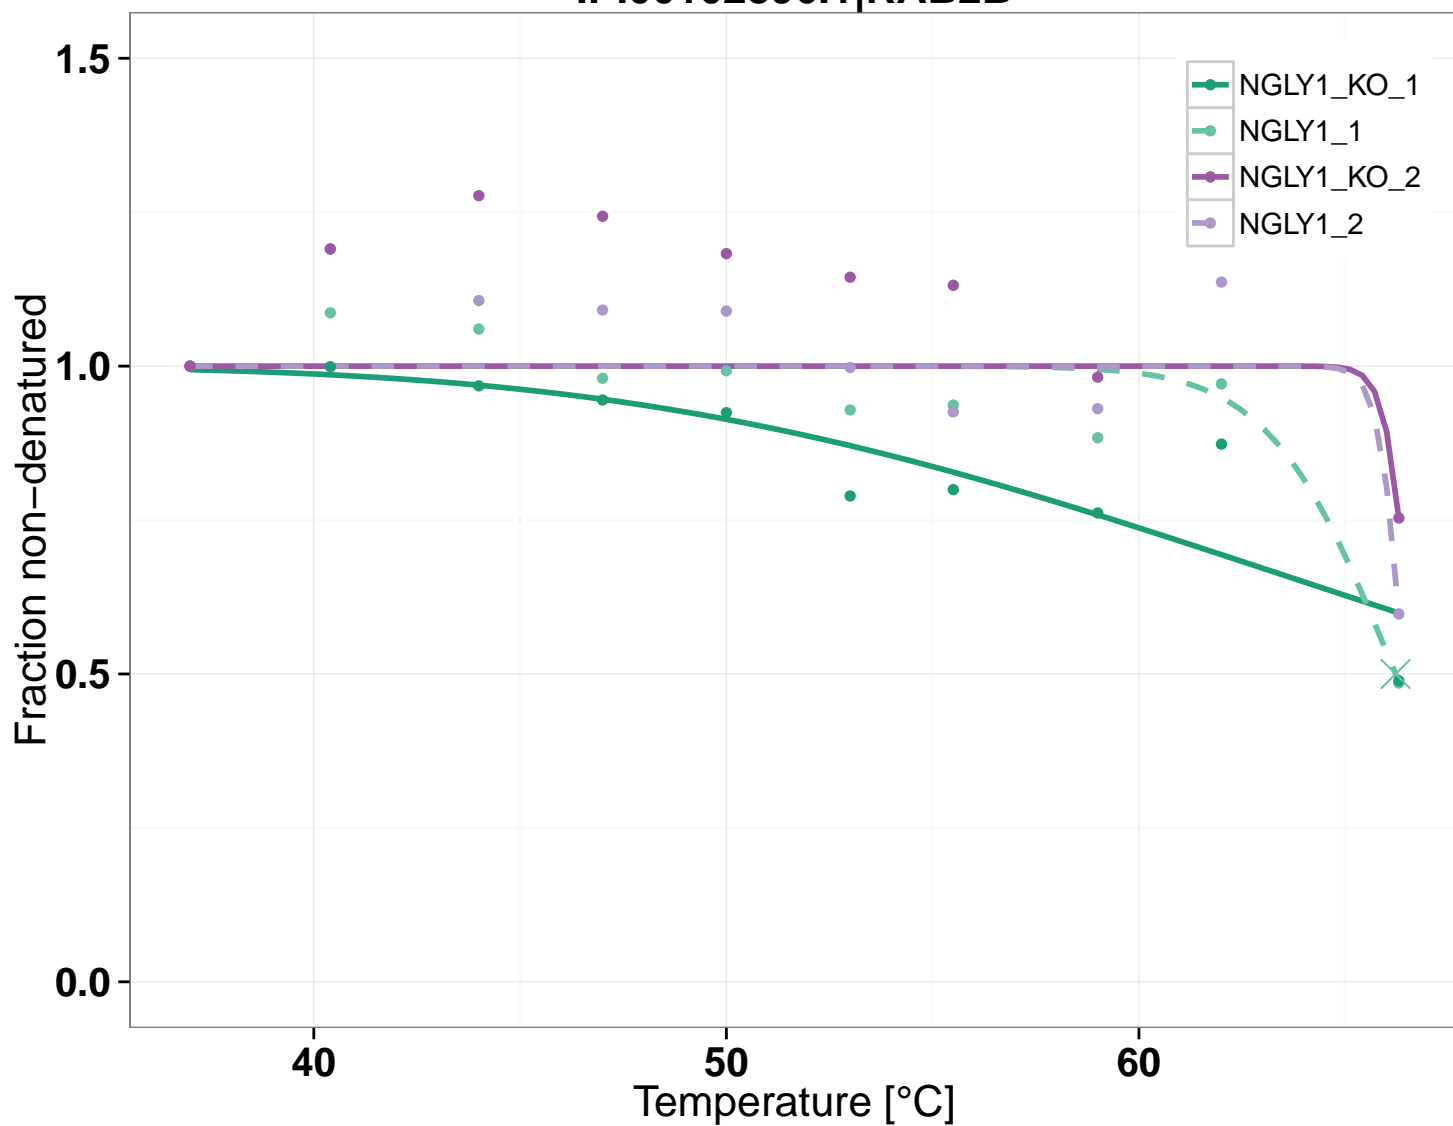

|            | meltPoint | slope  | plateau | R2    |
|------------|-----------|--------|---------|-------|
| NGLY1_KO_1 | -         | -0.022 | 0       | 0.76  |
| NGLY1_1    | 66.22     | -0.16  | 0       | 0.87  |
| NGLY1_KO_2 | -         | -      | 0       | -0.38 |
| NGLY1_2    | -         | -      | 0       | 0.64  |

Supplement: Supplementary file 3866 [file 1]

# IPI00218214.4|NME6

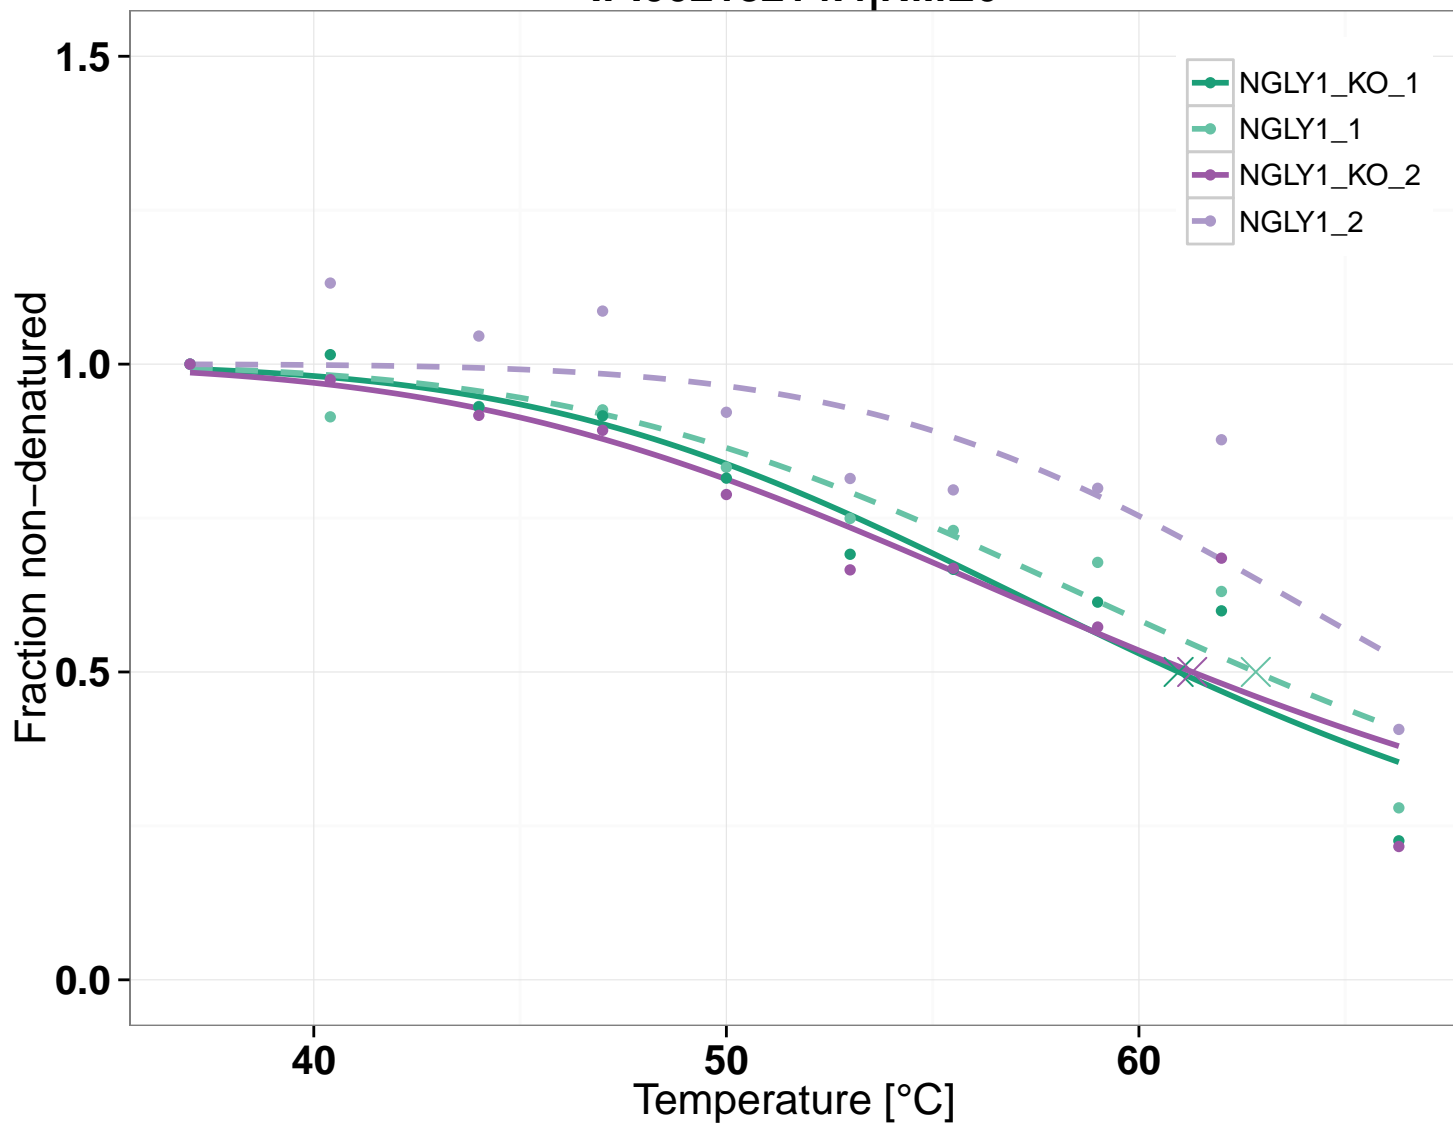

|            | meltPoint | slope  | plateau | R2   |
|------------|-----------|--------|---------|------|
| NGLY1_KO_1 | 60.96     | -0.033 | 0       | 0.92 |
| NGLY1_1    | 62.83     | -0.031 | 0       | 0.9  |
| NGLY1_KO_2 | 61.29     | -0.029 | 0       | 0.85 |
| NGLY1_2    | -         | -0.038 | 0       | 0.73 |

Supplement: Supplementary file 3867 [file 1]

IPI00030255.1|PLOD3

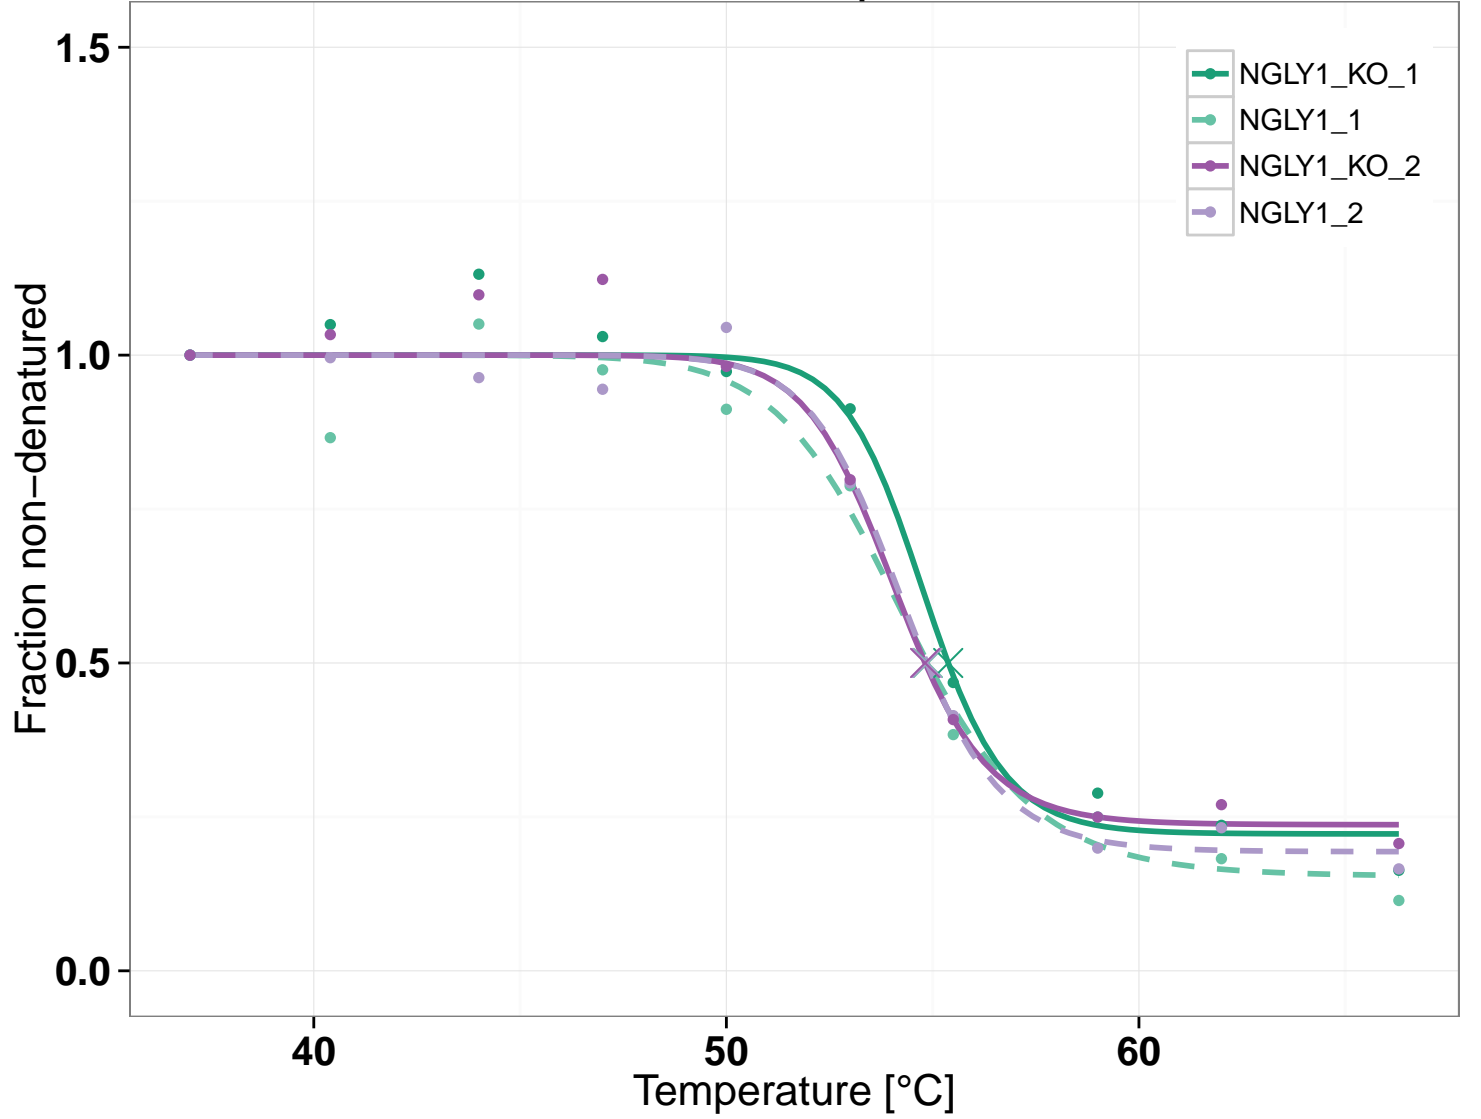

|            | meltPoint | slope | plateau | R2   |
|------------|-----------|-------|---------|------|
| NGLY1_KO_1 | 55.38     | -0.2  | 0.22    | 0.98 |
| NGLY1_1    | 54.89     | -0.13 | 0.15    | 0.98 |
| NGLY1_KO_2 | 54.82     | -0.17 | 0.24    | 0.98 |
| NGLY1_2    | 54.86     | -0.17 | 0.19    | 0.99 |

Supplement: Supplementary file 3868 [file 1]

IPI00298925.2|TAF5

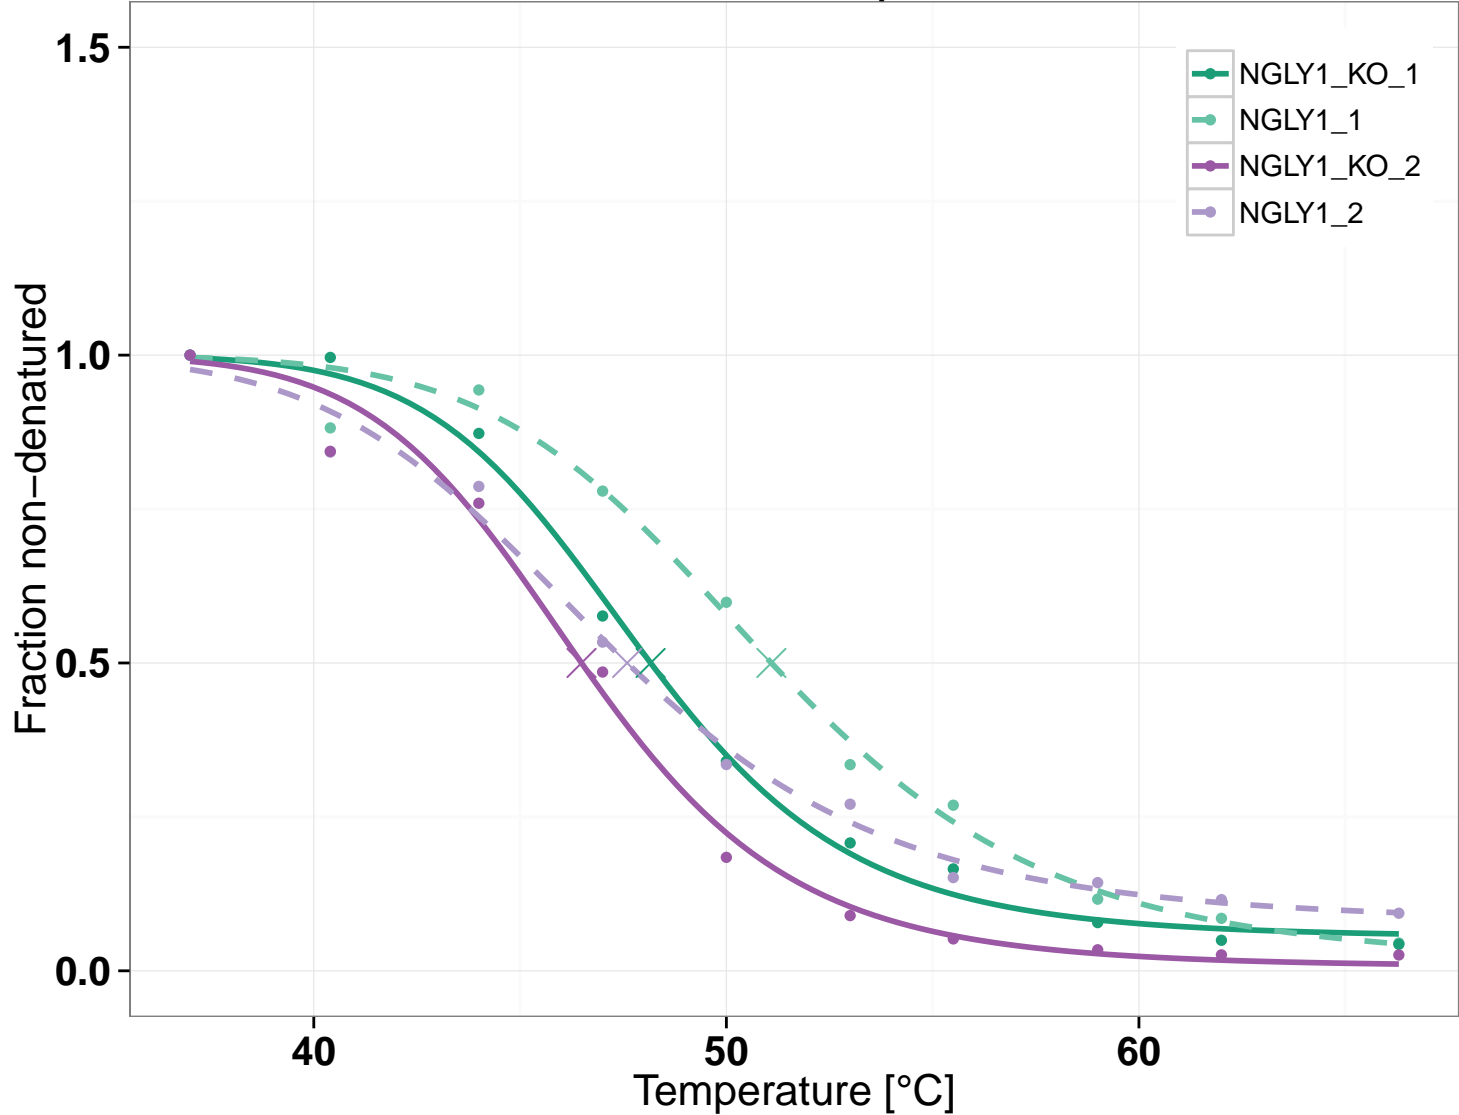

|            | meltPoint | slope  | plateau | R2   |
|------------|-----------|--------|---------|------|
| NGLY1_KO_1 | 48.16     | -0.092 | 0.05    | 1    |
| NGLY1_1    | 51.09     | -0.073 | 0.01    | 0.99 |
| NGLY1_KO_2 | 46.49     | -0.097 | 0.01    | 0.99 |
| NGLY1_2    | 47.6      | -0.068 | 0.08    | 0.99 |

Supplement: Supplementary file 3869 [file 1]

# IPI00005685.2|PNMA1

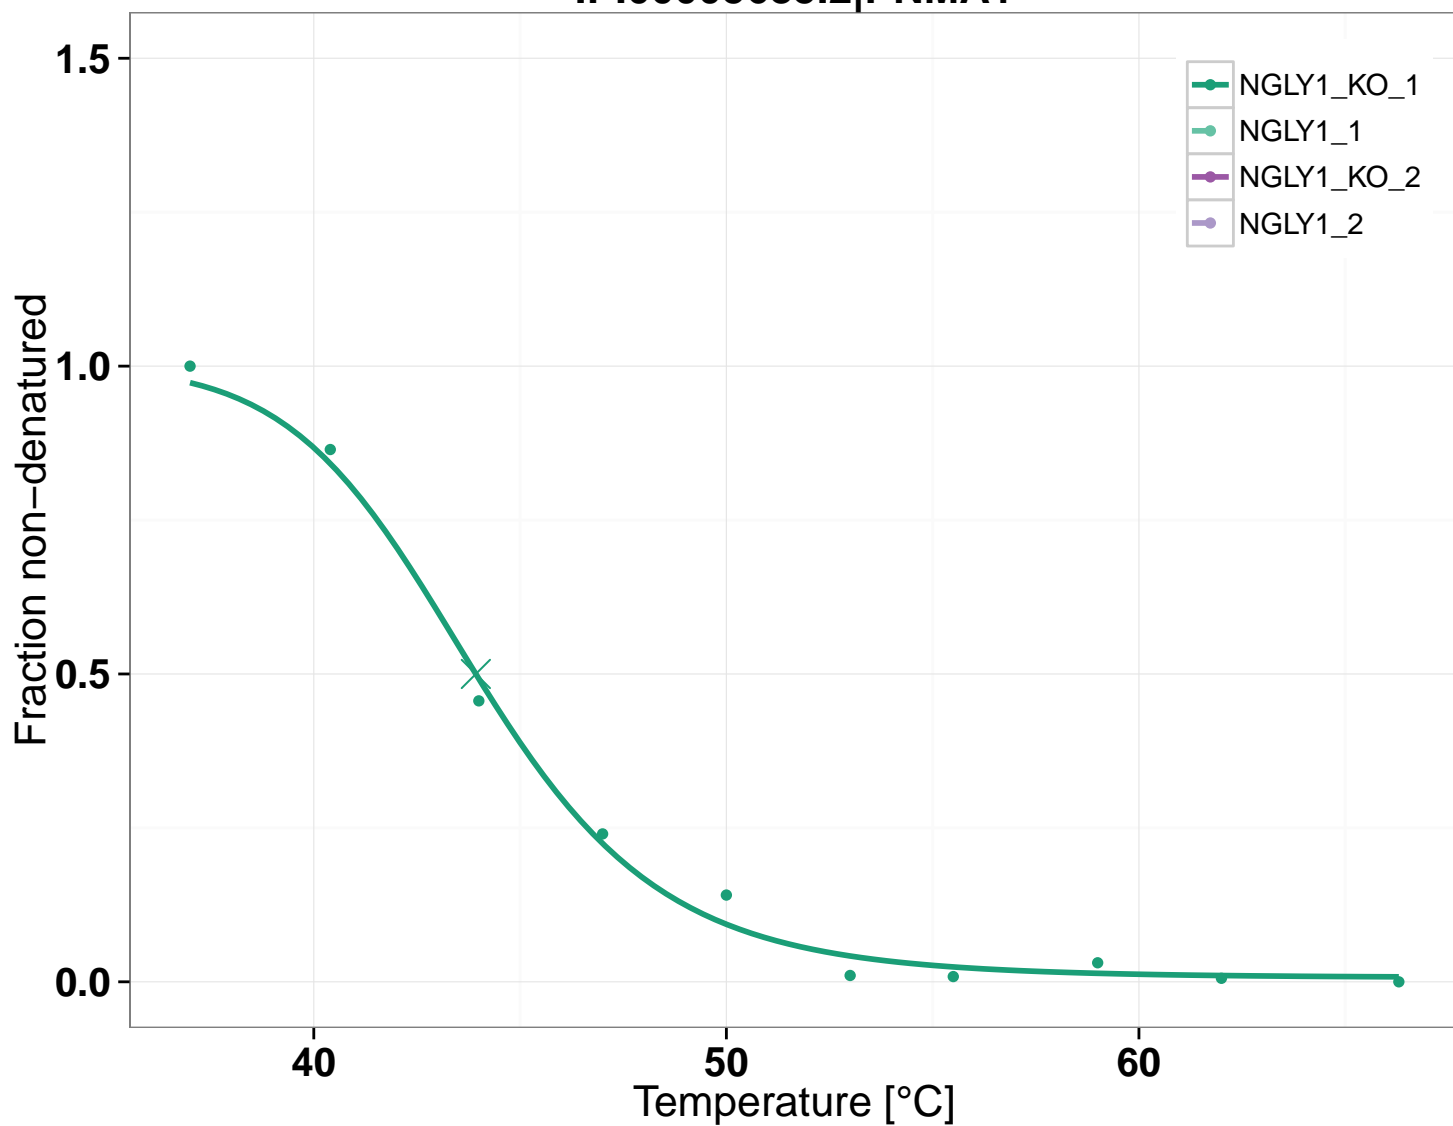

|            | meltPoint | slope | plateau | R2   |
|------------|-----------|-------|---------|------|
| NGLY1_KO_1 | 43.93     | -0.11 | 0.01    | 0.99 |
| NGLY1_1    | -         | -     | -       | -    |
| NGLY1_KO_2 | -         | -     | -       | -    |
| NGLY1_2    | -         | -     | -       | -    |

Supplement: Supplementary file 3870 [file 1]

# IPI00896469.1|PSMG4

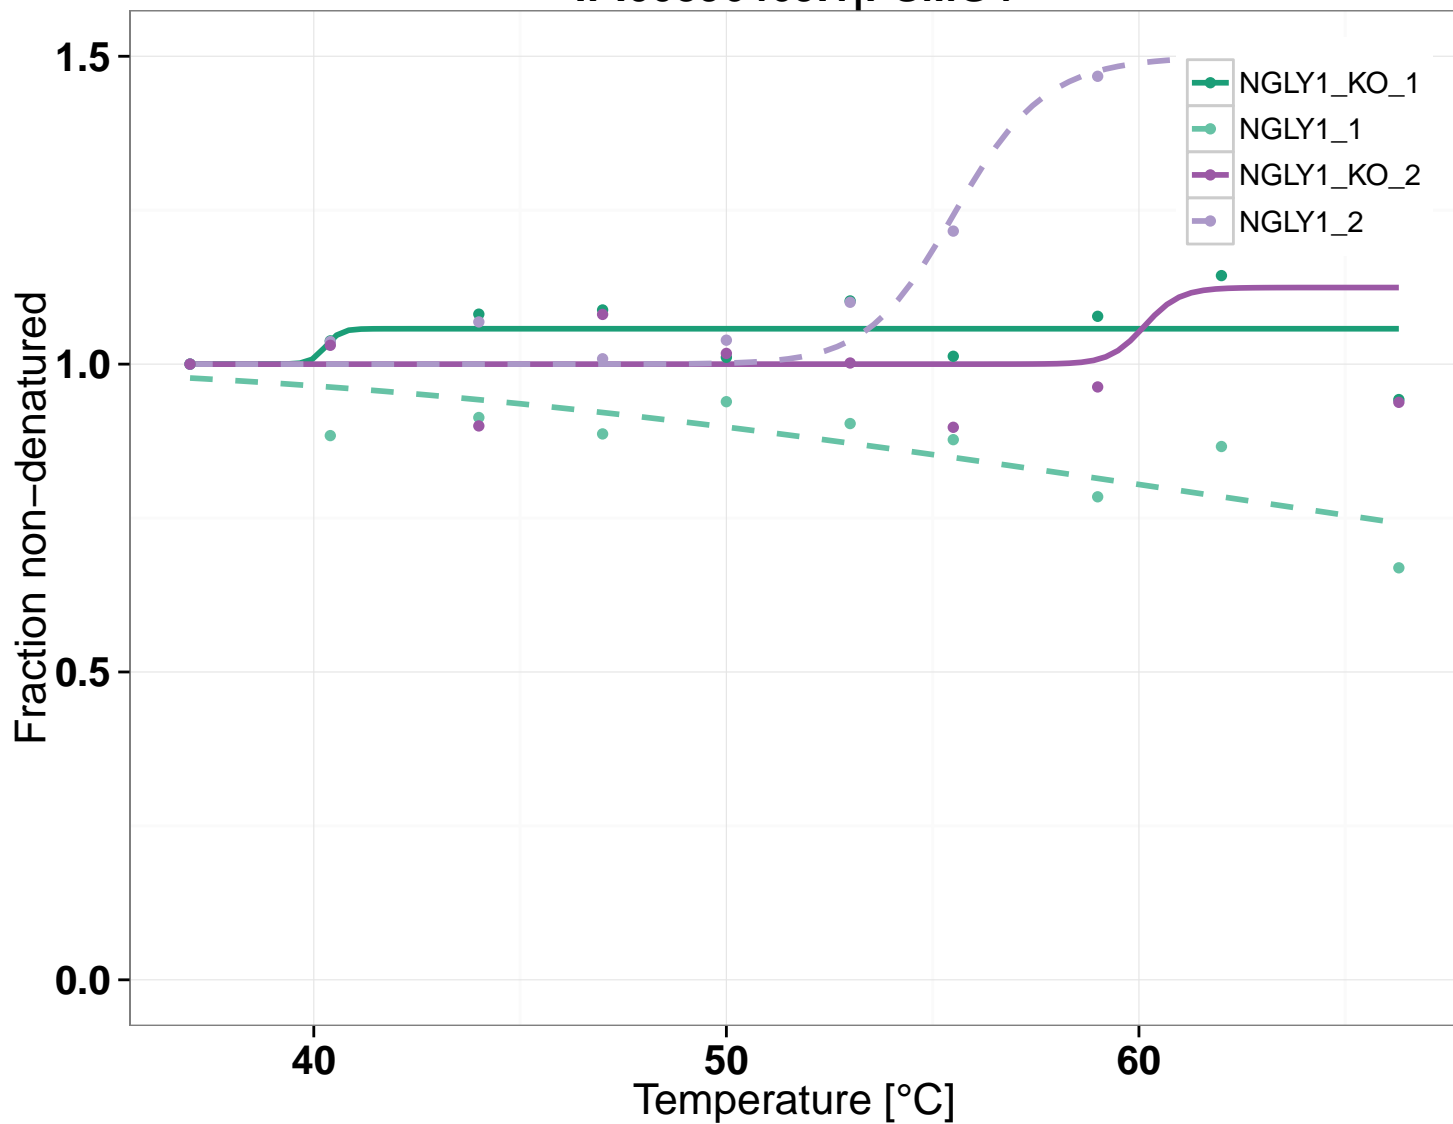

|            | meltPoint | slope | plateau | R2   |
|------------|-----------|-------|---------|------|
| NGLY1_KO_1 | –         | 0.081 | 1.06    | 0.1  |
| NGLY1_1    | –         | –0.01 | 0       | 0.65 |
| NGLY1_KO_2 | –         | 0.073 | 1.12    | 0.22 |
| NGLY1_2    | –         | 0.12  | 1.5     | 0.73 |

Supplement: Supplementary file 3871 [file 1]

IPI00152440.1|UNQ1887

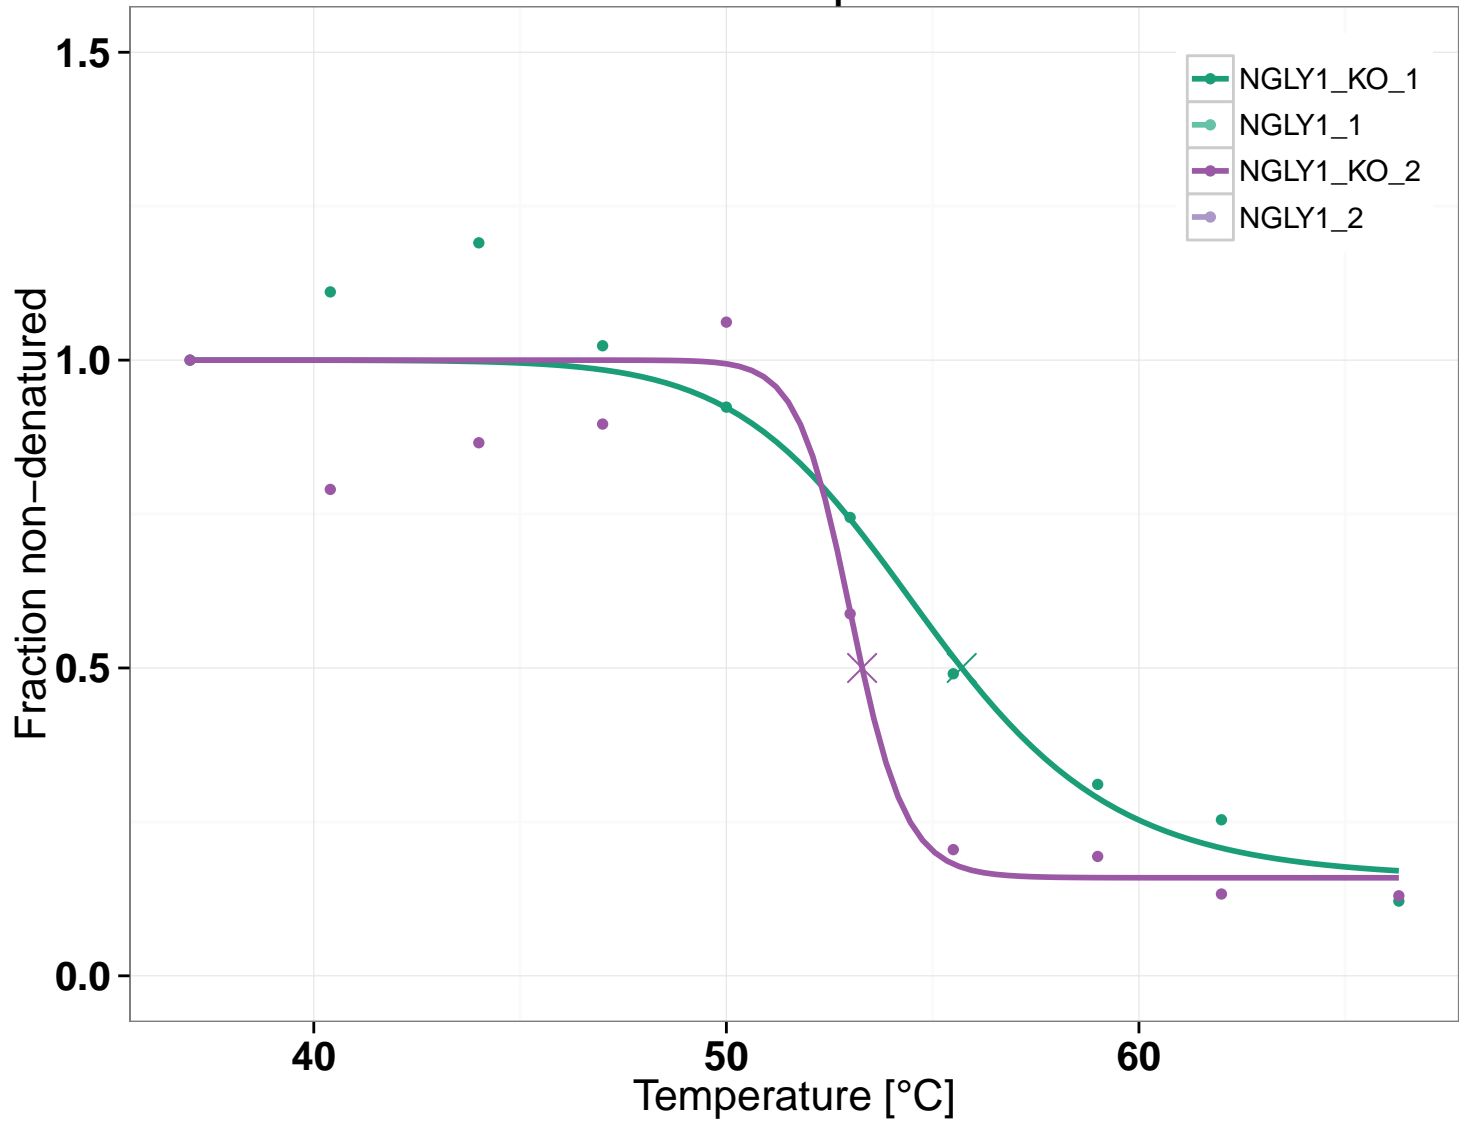

|            | meltPoint | slope  | plateau | R2   |
|------------|-----------|--------|---------|------|
| NGLY1_KO_1 | 55.7      | -0.092 | 0.16    | 0.96 |
| NGLY1_1    | -         | -      | -       | -    |
| NGLY1_KO_2 | 53.29     | -0.32  | 0.16    | 0.94 |
| NGLY1_2    | -         | -      | -       | -    |

Supplement: Supplementary file 3872 [file 1]

IPI00002355.1|CABIN1

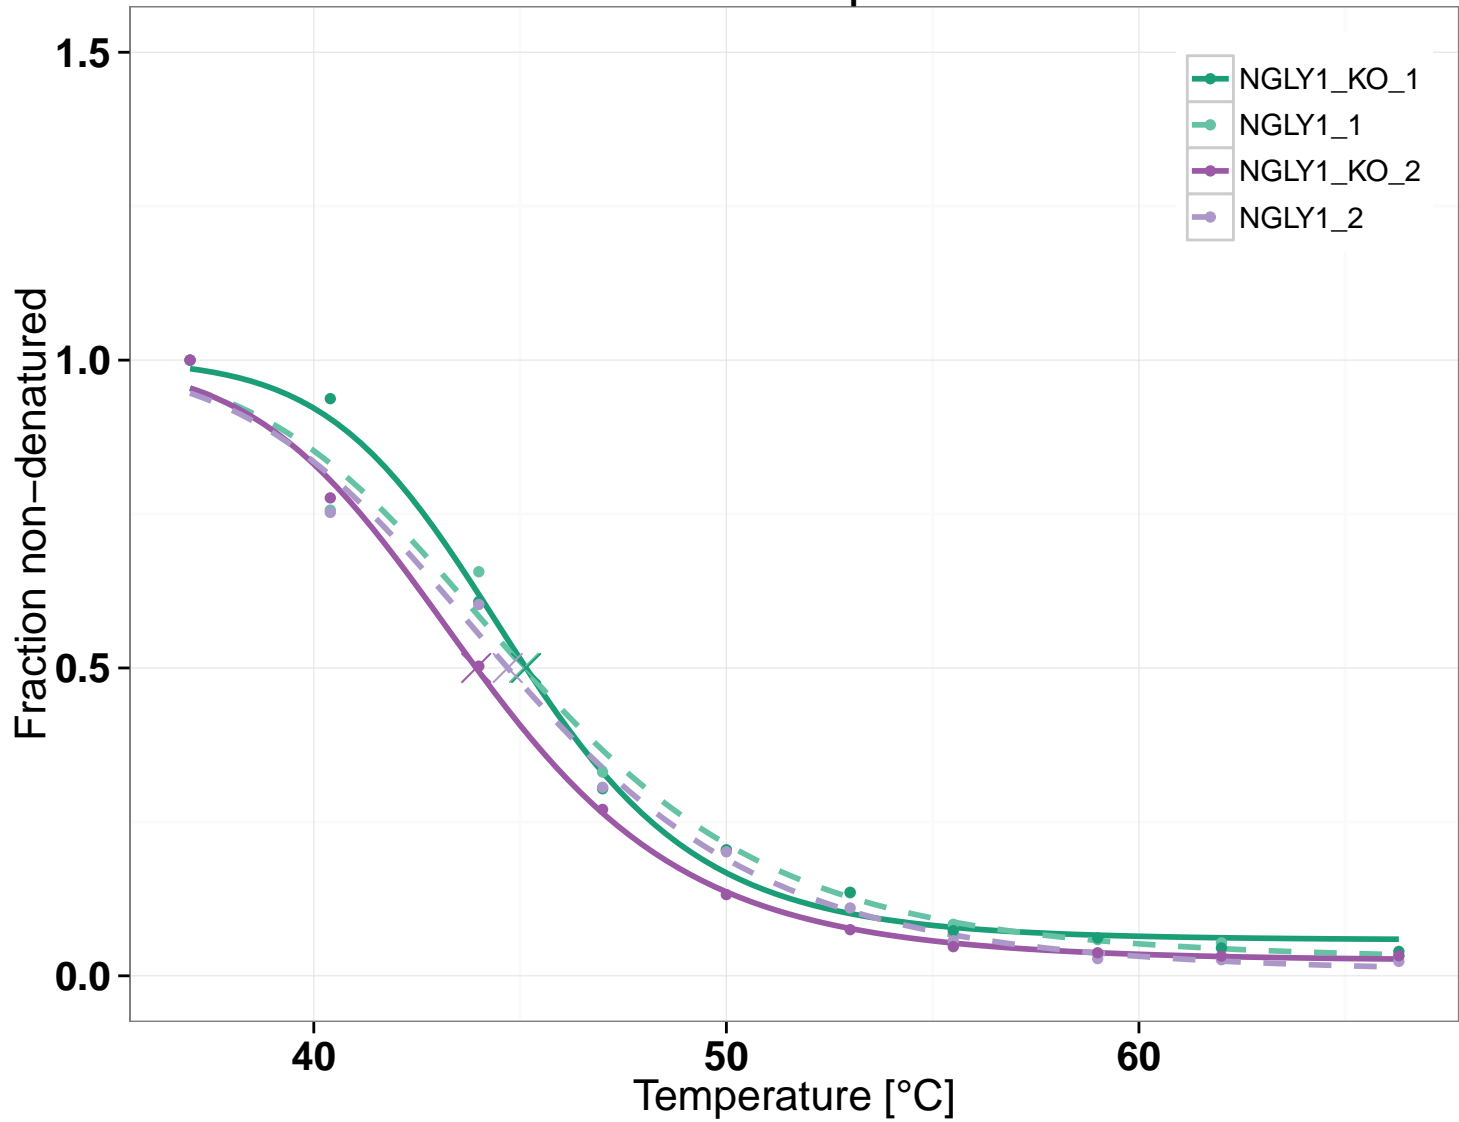

|            | meltPoint | slope  | plateau | R2   |
|------------|-----------|--------|---------|------|
| NGLY1_KO_1 | 45.15     | -0.1   | 0.06    | 1    |
| NGLY1_1    | 45.09     | -0.078 | 0.02    | 0.99 |
| NGLY1_KO_2 | 43.94     | -0.093 | 0.02    | 1    |
| NGLY1_2    | 44.7      | -0.079 | 0       | 0.99 |

Supplement: Supplementary file 3873 [file 1]

IPI00151990.3|TXNDC15

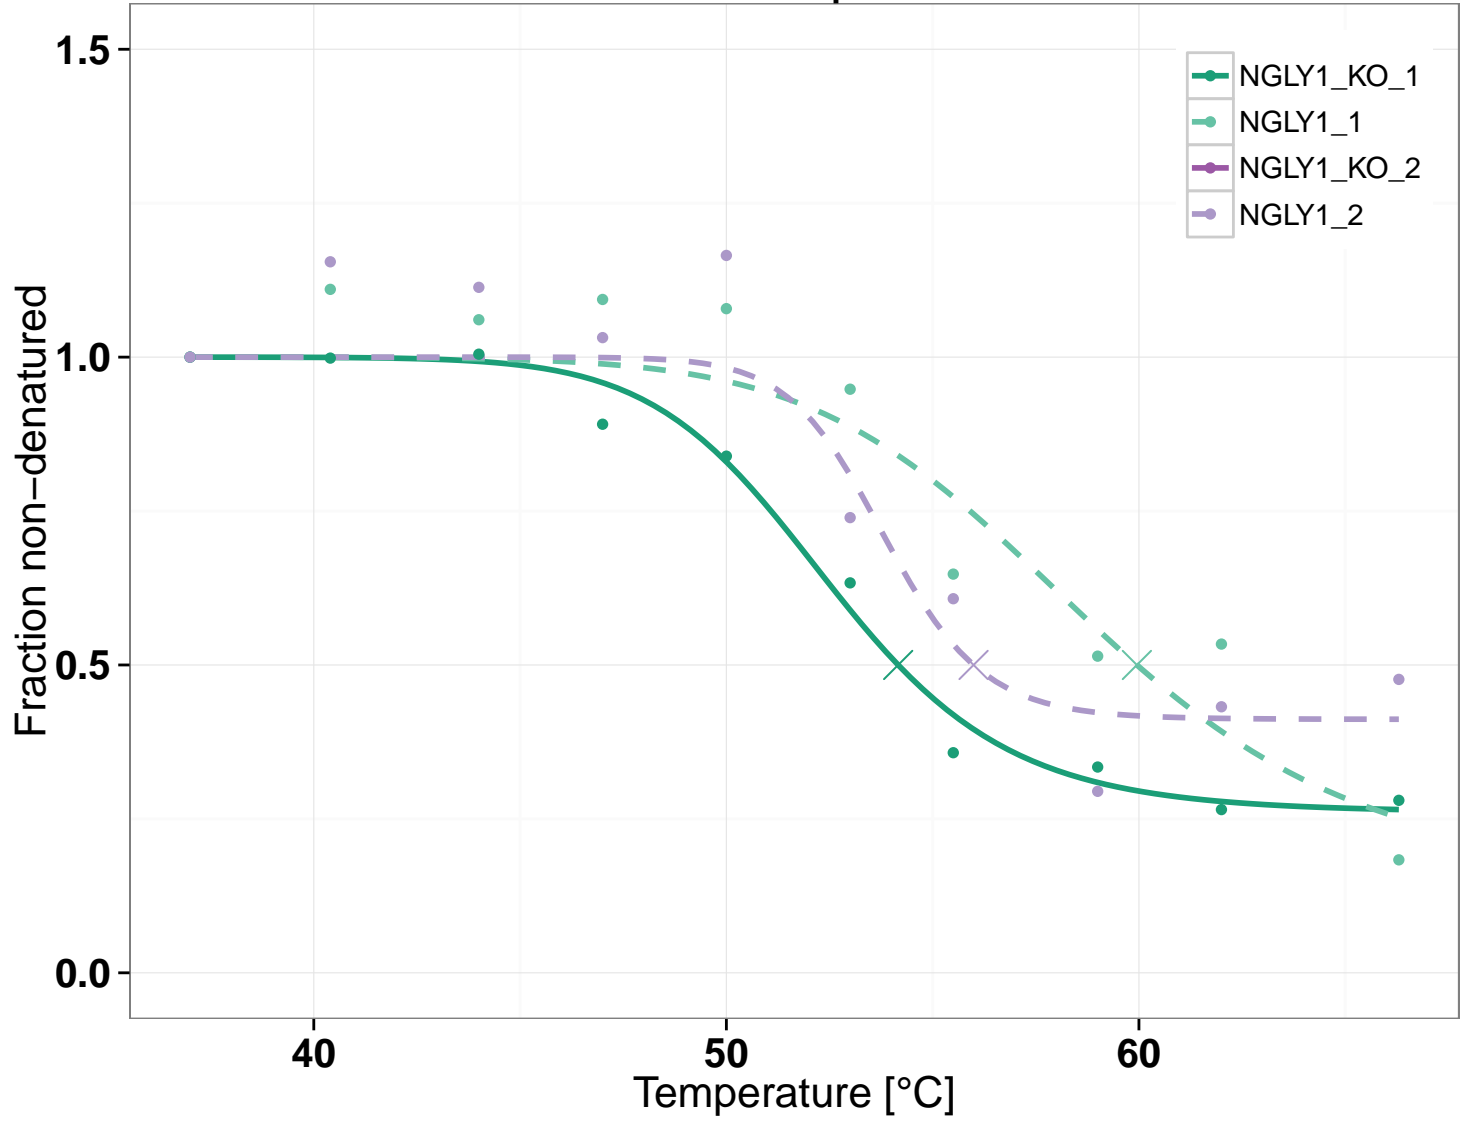

|            | meltPoint | slope  | plateau | R2   |
|------------|-----------|--------|---------|------|
| NGLY1_KO_1 | 54.16     | -0.085 | 0.26    | 0.99 |
| NGLY1_1    | 59.95     | -0.064 | 0.15    | 0.91 |
| NGLY1_KO_2 | -         | -      | -       | -    |
| NGLY1_2    | 55.99     | -0.12  | 0.41    | 0.9  |

Supplement: Supplementary file 3874 [file 1]

IPI00001849.5|KIAA1530

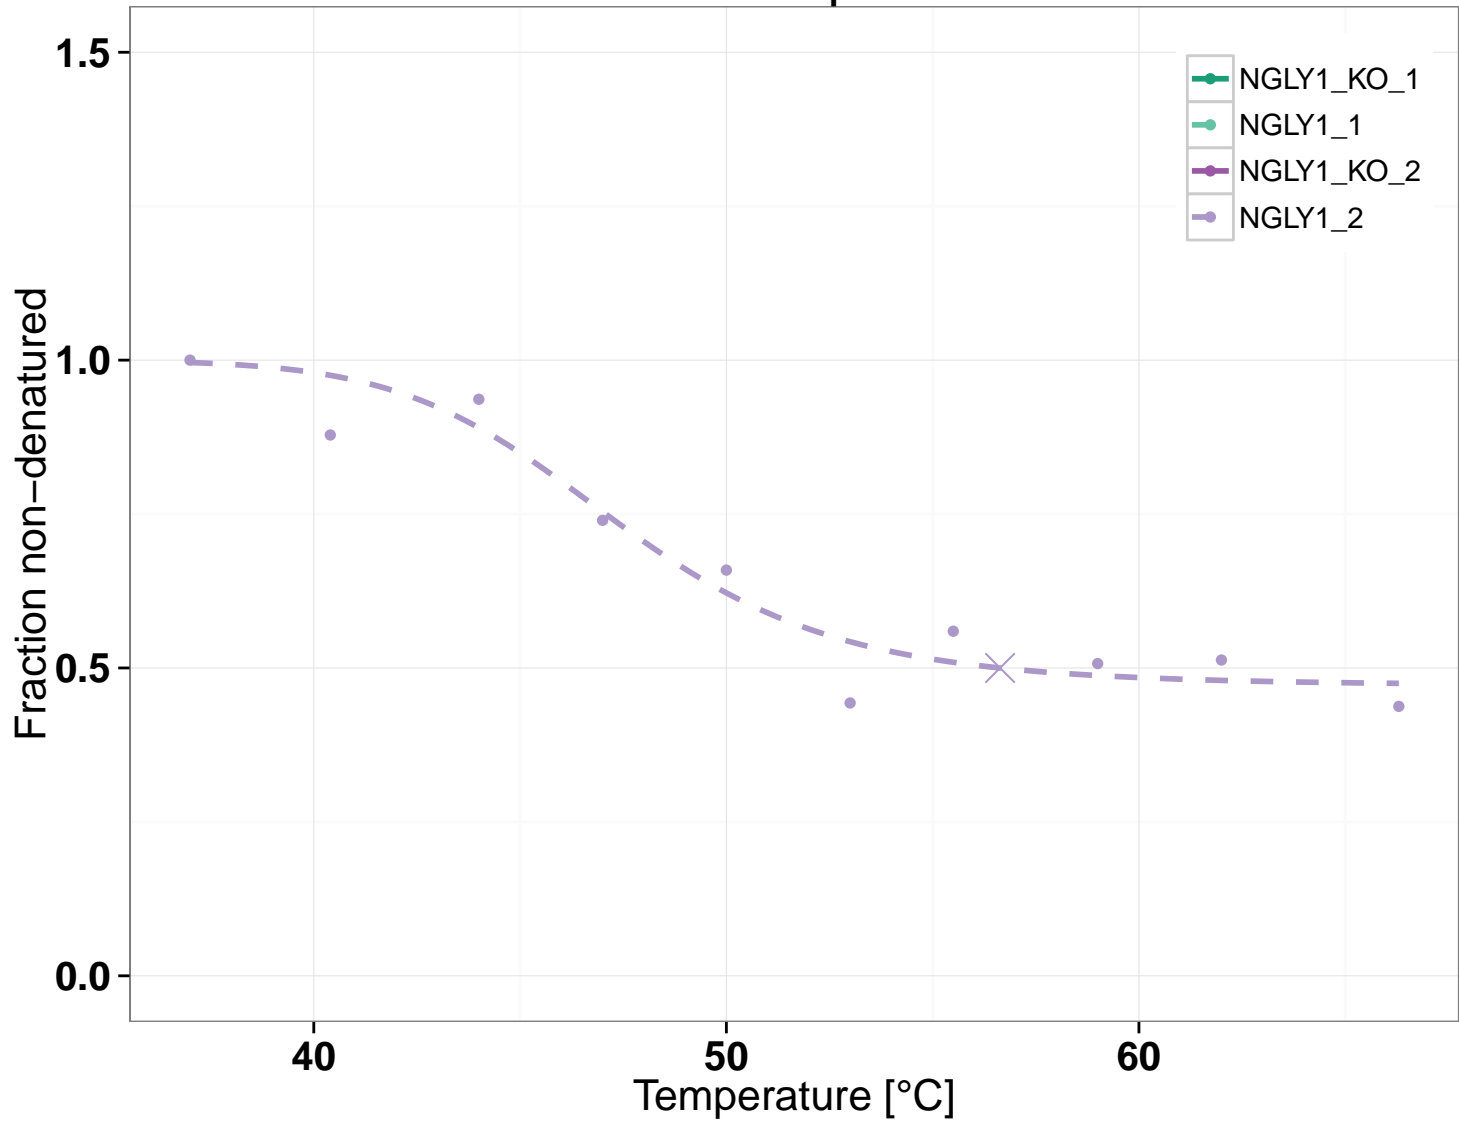

|            | meltPoint | slope  | plateau | R2   |
|------------|-----------|--------|---------|------|
| NGLY1_KO_1 | —         | —      | —       | —    |
| NGLY1_1    | —         | —      | —       | —    |
| NGLY1_KO_2 | —         | —      | —       | —    |
| NGLY1_2    | 56.63     | −0.049 | 0.47    | 0.93 |

Supplement: Supplementary file 3875 [file 1]

IPI00027443.5|CARS

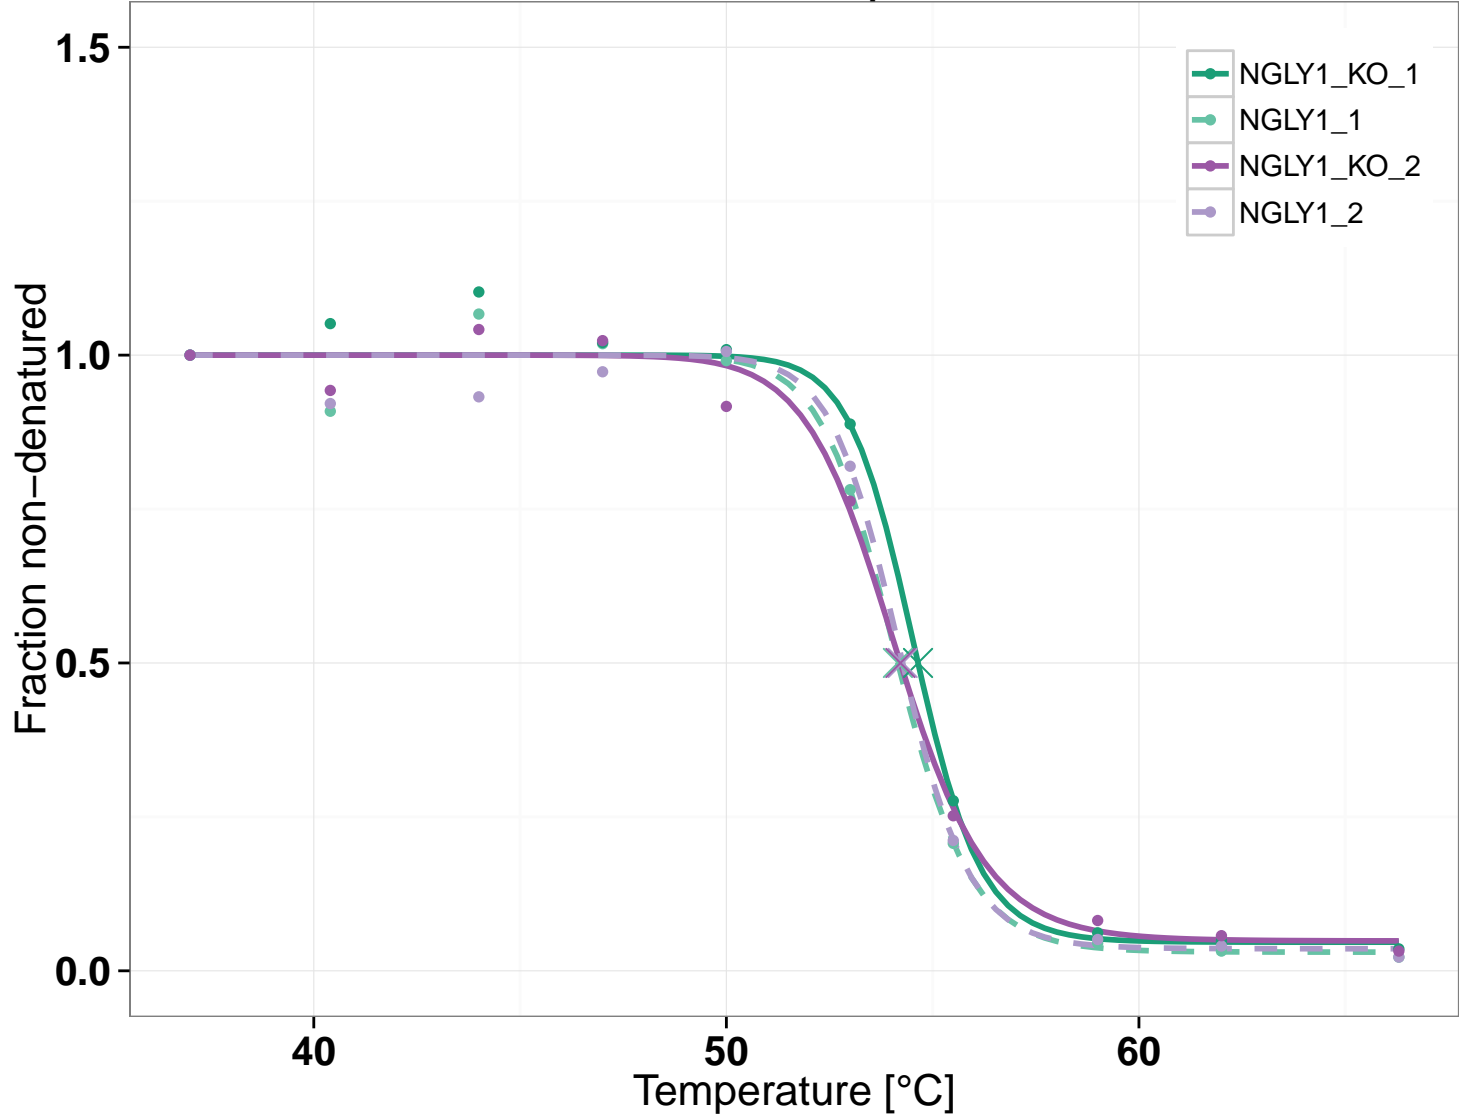

|            | meltPoint | slope | plateau | R2   |
|------------|-----------|-------|---------|------|
| NGLY1_KO_1 | 54.65     | -0.3  | 0.05    | 0.99 |
| NGLY1_1    | 54.16     | -0.27 | 0.03    | 0.99 |
| NGLY1_KO_2 | 54.22     | -0.21 | 0.05    | 0.99 |
| NGLY1_2    | 54.27     | -0.29 | 0.04    | 0.99 |

Supplement: Supplementary file 3876 [file 1]

IPI00917072.1|RABL2A

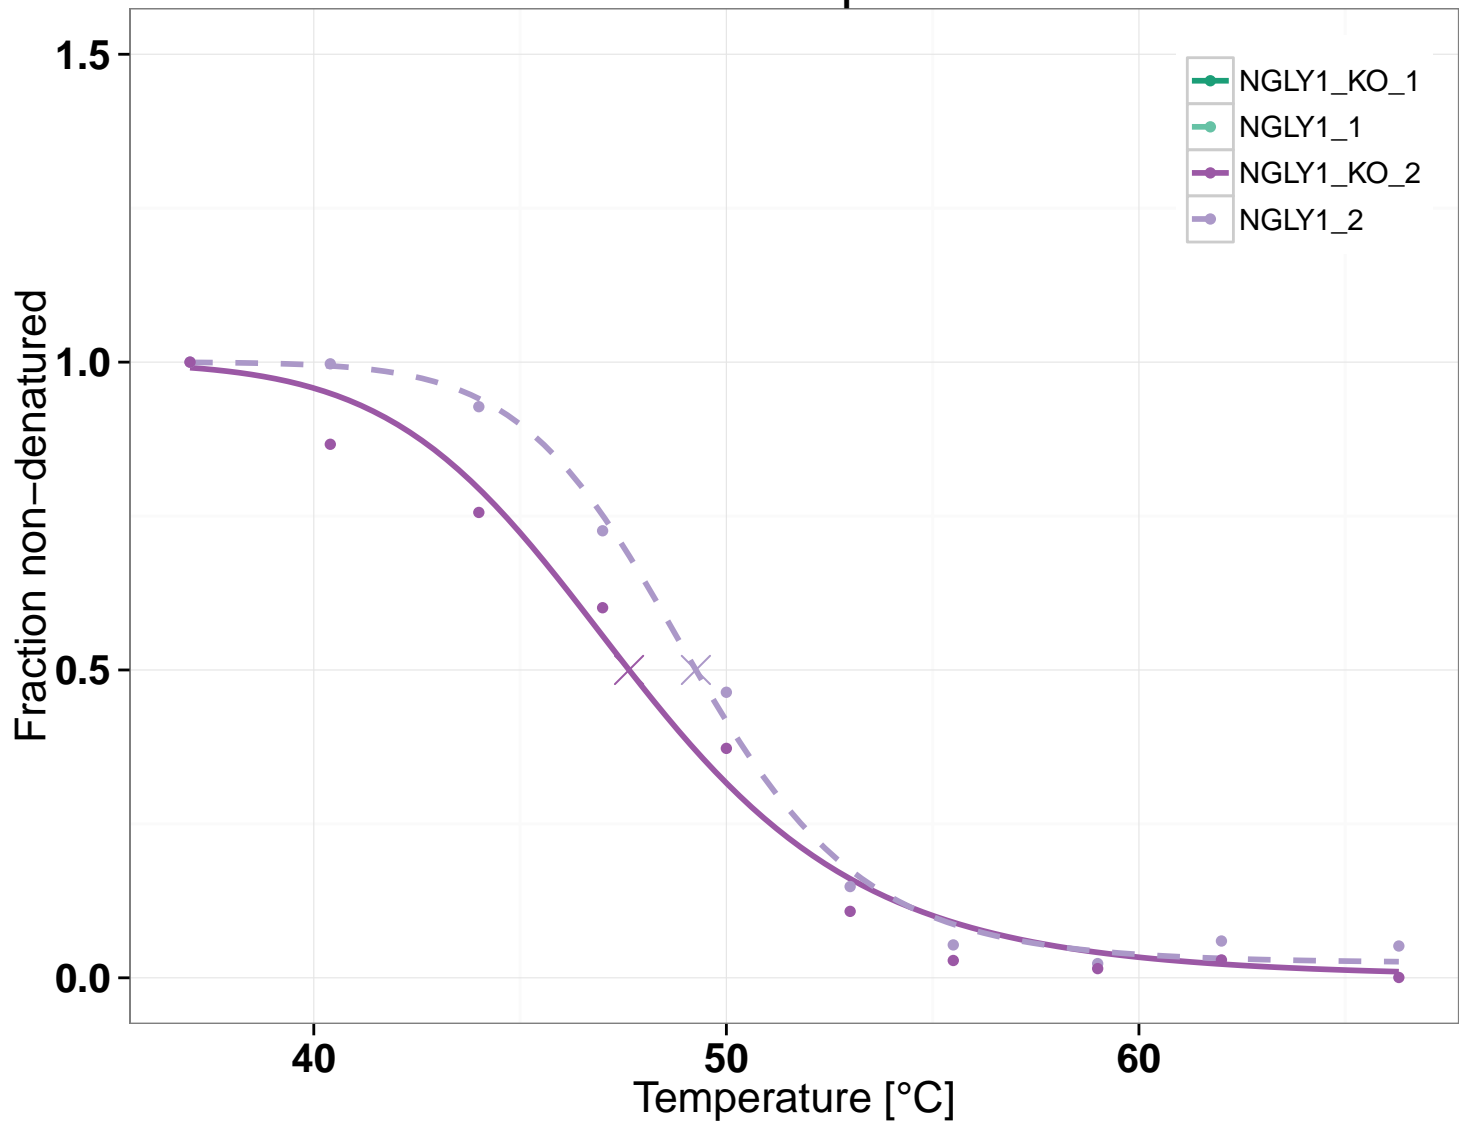

|            | meltPoint | slope  | plateau | R2   |
|------------|-----------|--------|---------|------|
| NGLY1_KO_1 | -         | -      | -       | -    |
| NGLY1_1    | -         | -      | -       | -    |
| NGLY1_KO_2 | 47.64     | -0.087 | 0       | 0.99 |
| NGLY1_2    | 49.26     | -0.12  | 0.02    | 1    |

Supplement: Supplementary file 3877 [file 1]

IPI00020898.1|RPS6KA3

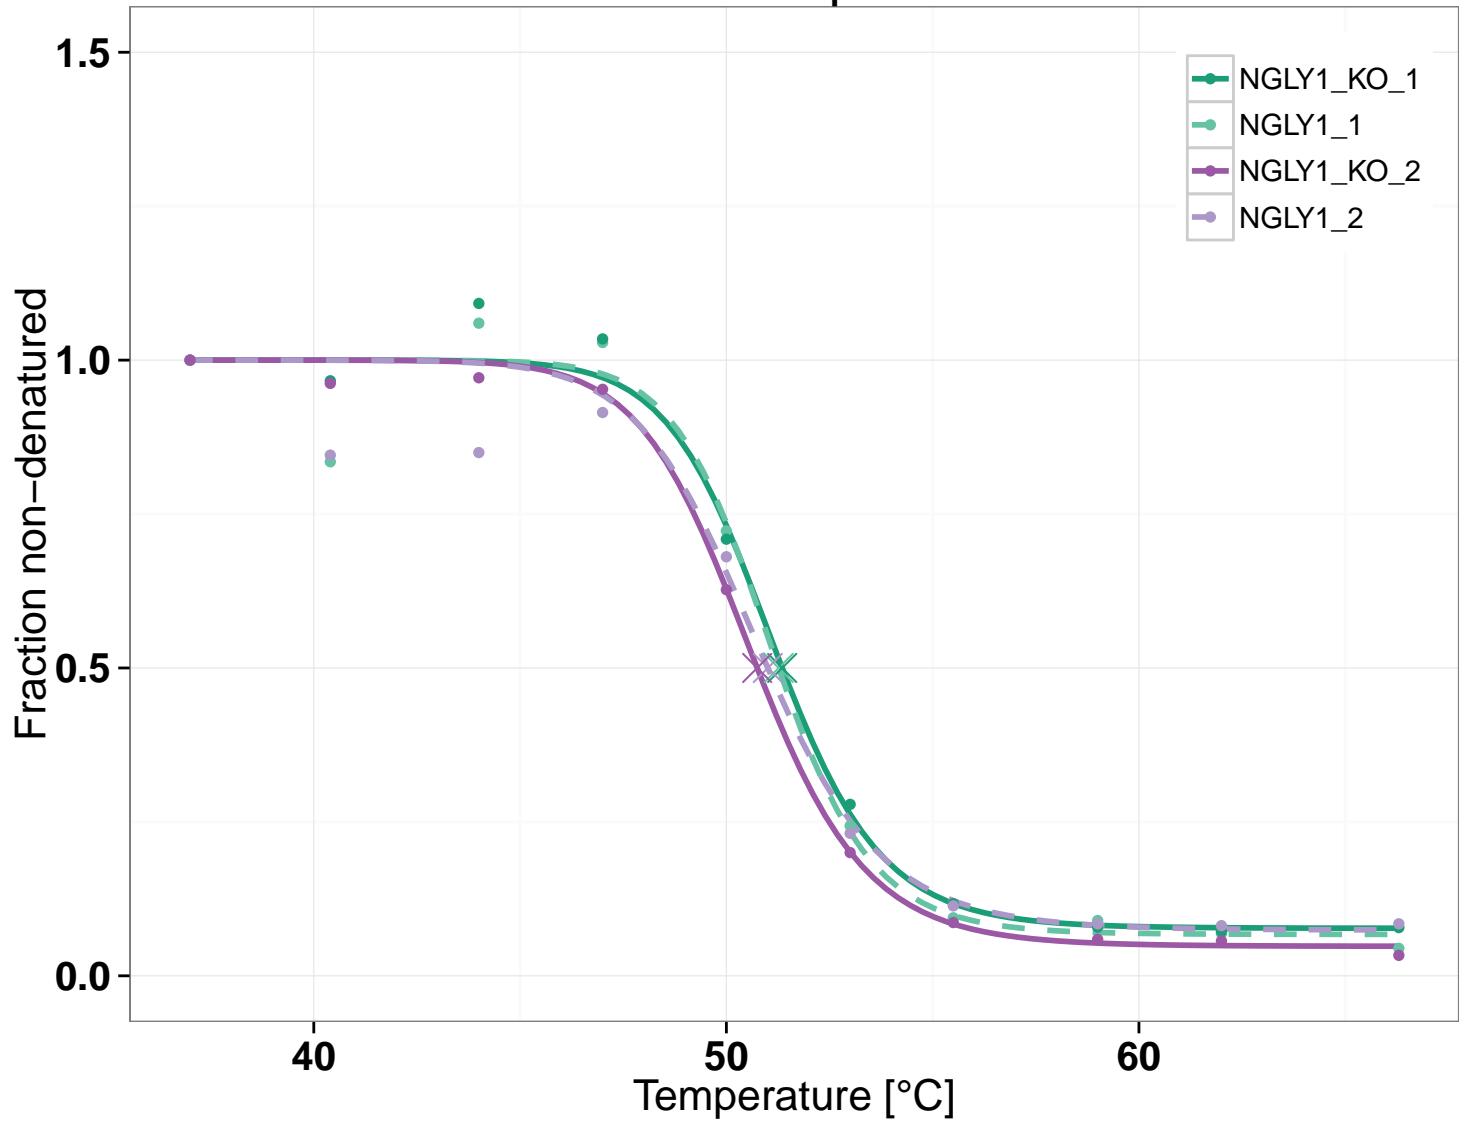

|            | meltPoint | slope | plateau | R2   |
|------------|-----------|-------|---------|------|
| NGLY1_KO_1 | 51.35     | -0.18 | 0.08    | 0.99 |
| NGLY1_1    | 51.27     | -0.19 | 0.07    | 0.98 |
| NGLY1_KO_2 | 50.75     | -0.17 | 0.05    | 1    |
| NGLY1_2    | 51        | -0.16 | 0.07    | 0.97 |

Supplement: Supplementary file 3878 [file 1]

# IPI00296594.2|RYBP

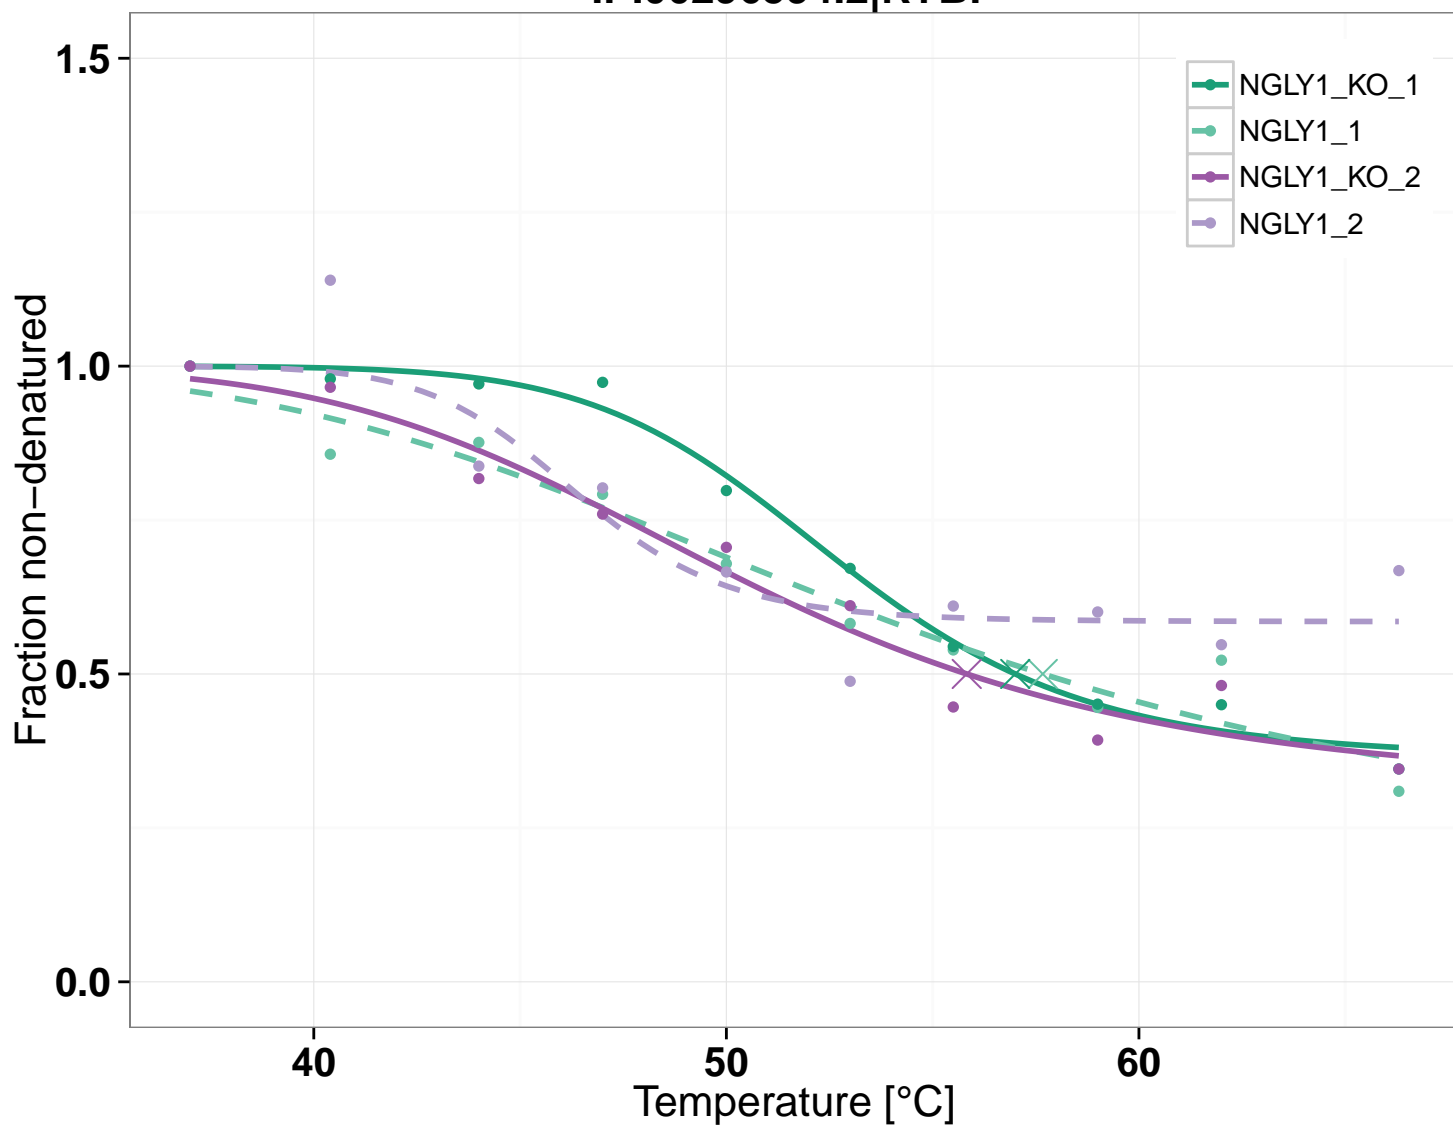

|            | meltPoint | slope  | plateau | R2   |
|------------|-----------|--------|---------|------|
| NGLY1_KO_1 | 57        | -0.053 | 0.36    | 0.99 |
| NGLY1_1    | 57.67     | -0.027 | 0.17    | 0.95 |
| NGLY1_KO_2 | 55.83     | -0.035 | 0.3     | 0.96 |
| NGLY1_2    | -         | -0.057 | 0.58    | 0.86 |

Supplement: Supplementary file 3879 [file 1]

# IPI00219025.3|GLRX

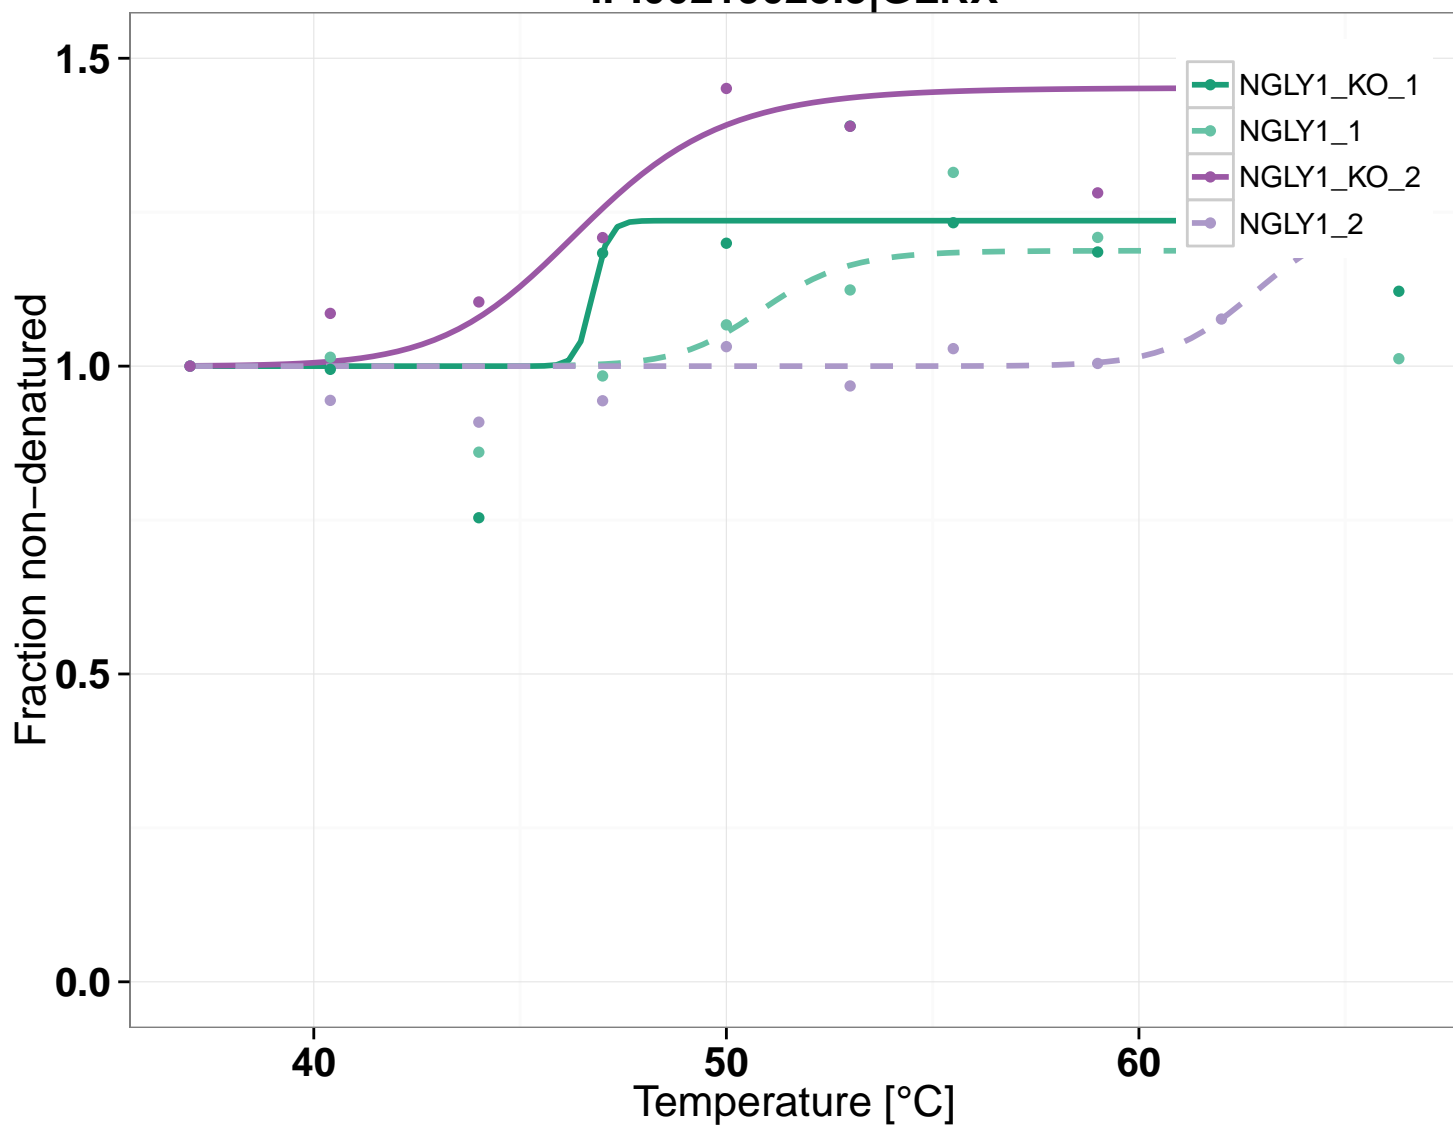

|            | meltPoint | slope | plateau | R2   |
|------------|-----------|-------|---------|------|
| NGLY1_KO_1 | —         | 0.32  | 1.24    | 0.64 |
| NGLY1_1    | —         | 0.045 | 1.19    | 0.58 |
| NGLY1_KO_2 | —         | 0.066 | 1.45    | 0.64 |
| NGLY1_2    | —         | 0.056 | 1.25    | 0.77 |

Supplement: Supplementary file 3880 [file 1]

IPI00290785.3|SETD6

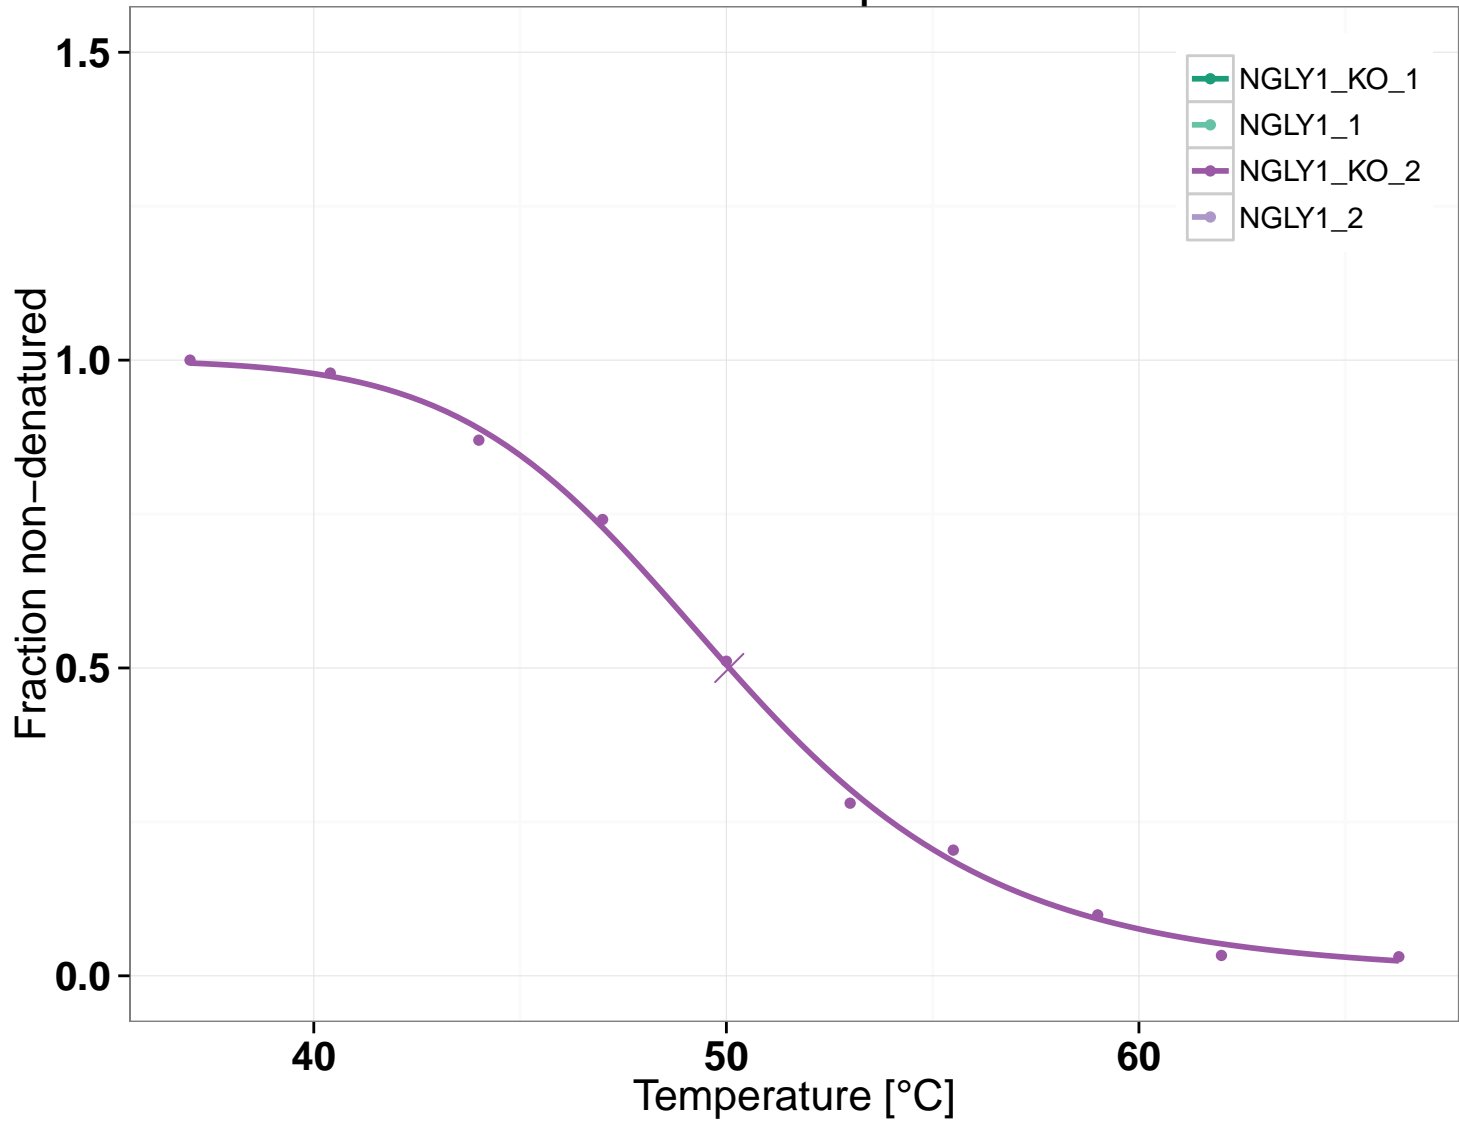

|            | meltPoint | slope  | plateau | R2 |
|------------|-----------|--------|---------|----|
| NGLY1_KO_1 | -         | -      | -       | -  |
| NGLY1_1    | -         | -      | -       | -  |
| NGLY1_KO_2 | 50.07     | -0.077 | 0       | 1  |
| NGLY1_2    | -         | -      | -       | -  |

Supplement: Supplementary file 3881 [file 1]

IPI00062599.3|SMARCD1

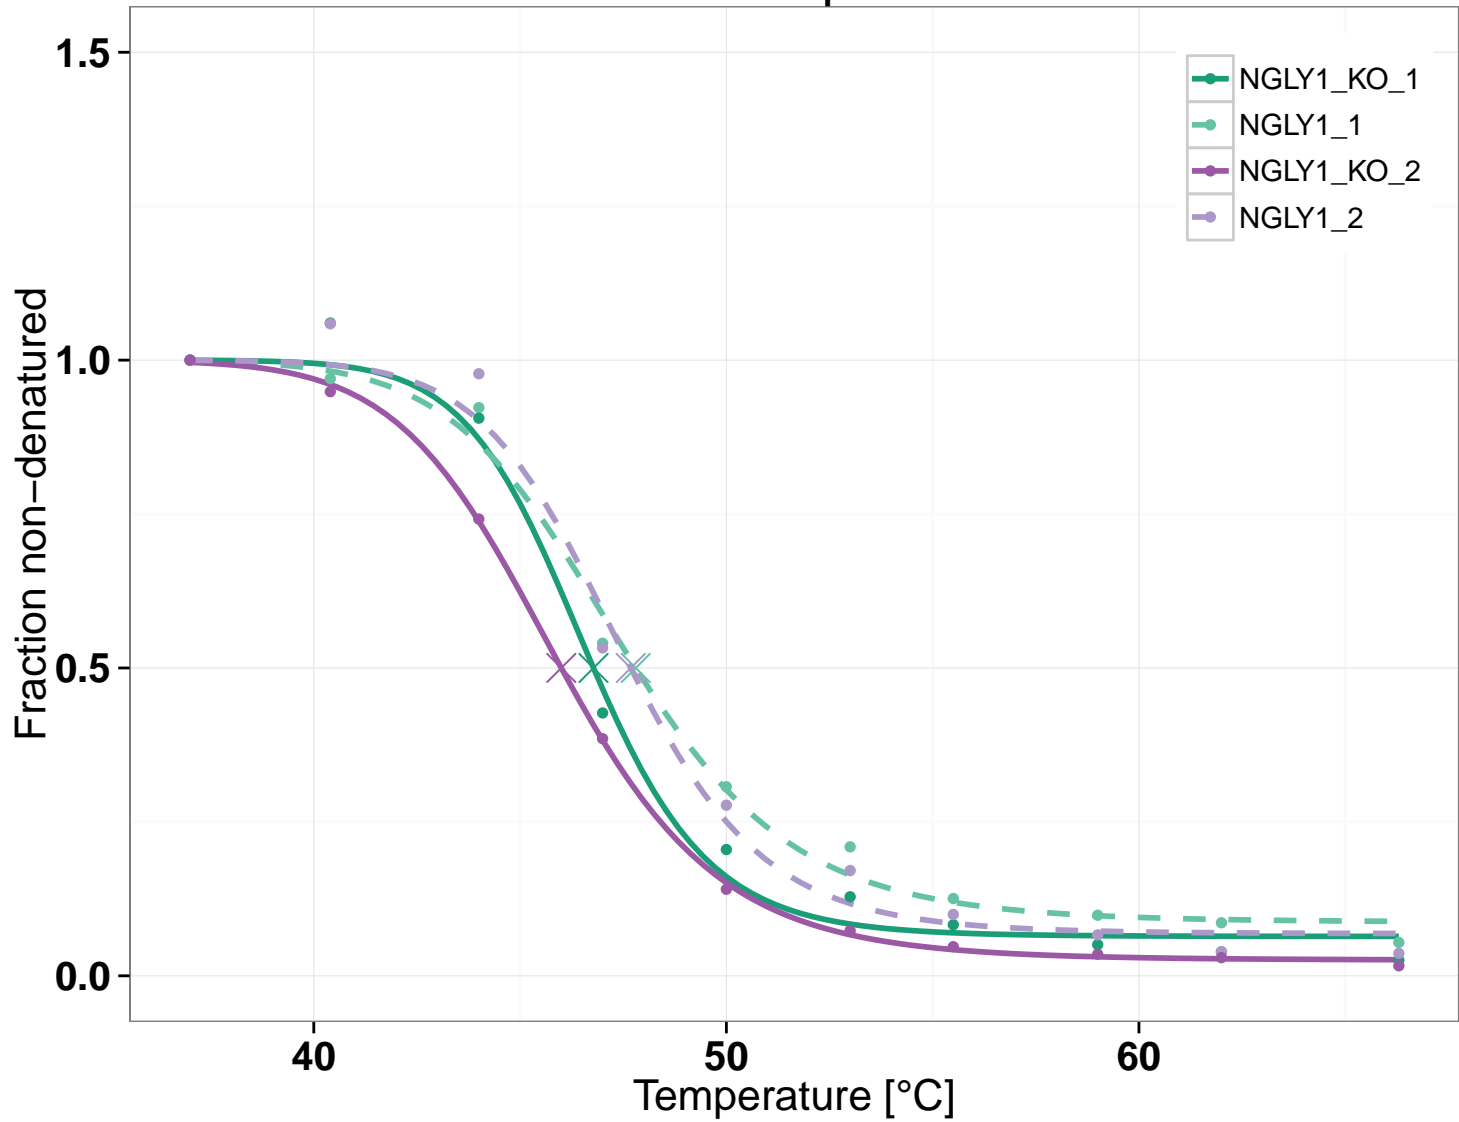

|            | meltPoint | slope | plateau | R2   |
|------------|-----------|-------|---------|------|
| NGLY1_KO_1 | 46.78     | -0.16 | 0.06    | 0.99 |
| NGLY1_1    | 47.8      | -0.11 | 0.09    | 0.99 |
| NGLY1_KO_2 | 46        | -0.12 | 0.03    | 1    |
| NGLY1_2    | 47.68     | -0.14 | 0.07    | 0.99 |

Supplement: Supplementary file 3882 [file 1]

IPI00016150.1|SERPINI1

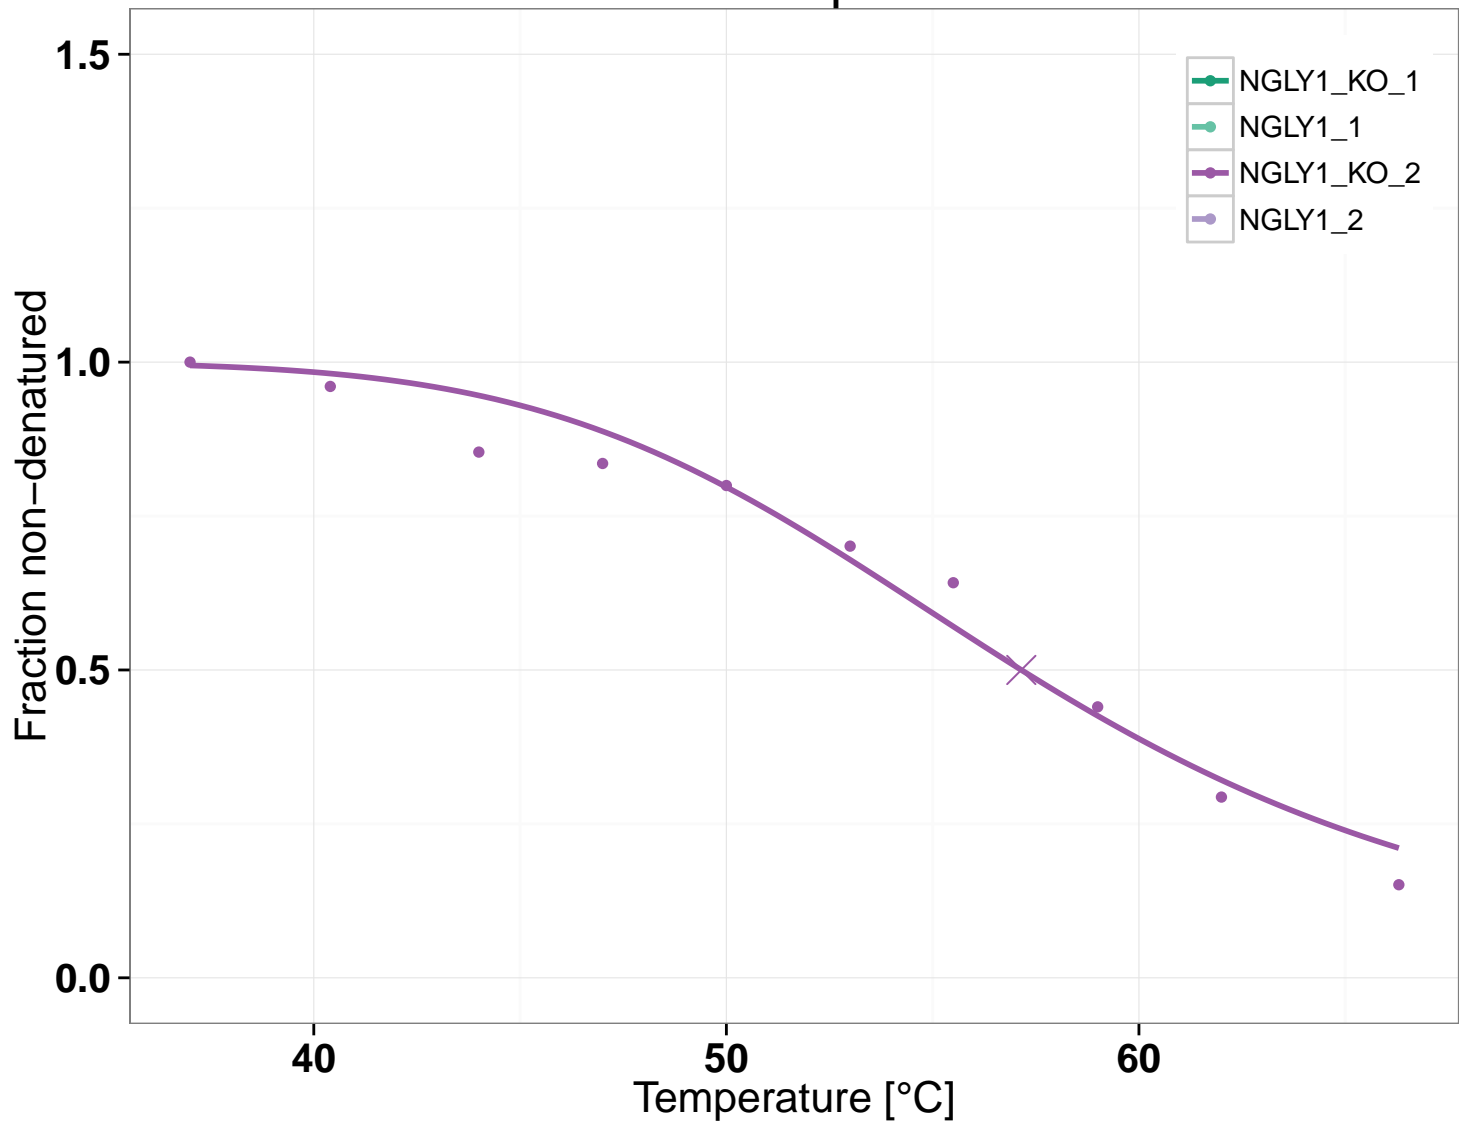

|            | meltPoint | slope  | plateau | R2   |
|------------|-----------|--------|---------|------|
| NGLY1_KO_1 | —         | —      | —       | —    |
| NGLY1_1    | —         | —      | —       | —    |
| NGLY1_KO_2 | 57.15     | −0.044 | 0       | 0.97 |
| NGLY1_2    | —         | —      | —       | —    |

Supplement: Supplementary file 3883 [file 1]

IPI00902512.1|PPP1CA

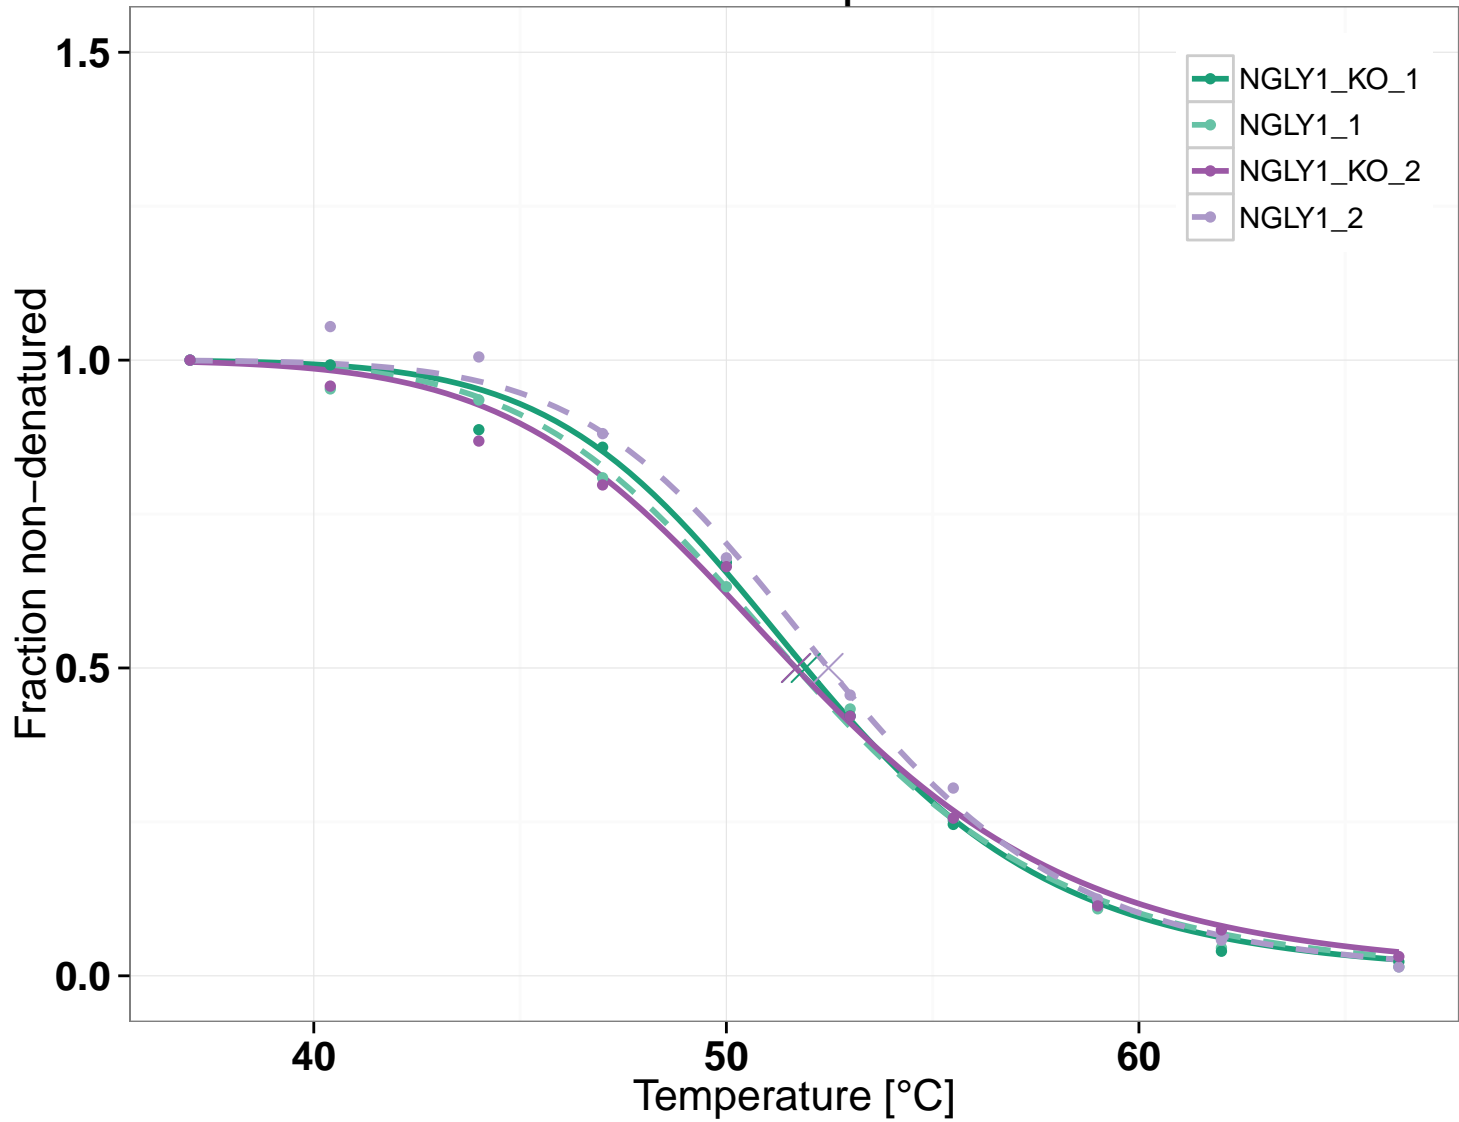

|            | meltPoint | slope  | plateau | R2   |
|------------|-----------|--------|---------|------|
| NGLY1_KO_1 | 51.92     | -0.082 | 0       | 1    |
| NGLY1_1    | 51.69     | -0.077 | 0       | 1    |
| NGLY1_KO_2 | 51.69     | -0.072 | 0       | 0.99 |
| NGLY1_2    | 52.48     | -0.084 | 0       | 1    |

Supplement: Supplementary file 3884 [file 1]

# IPI00056880.7|ZNF787

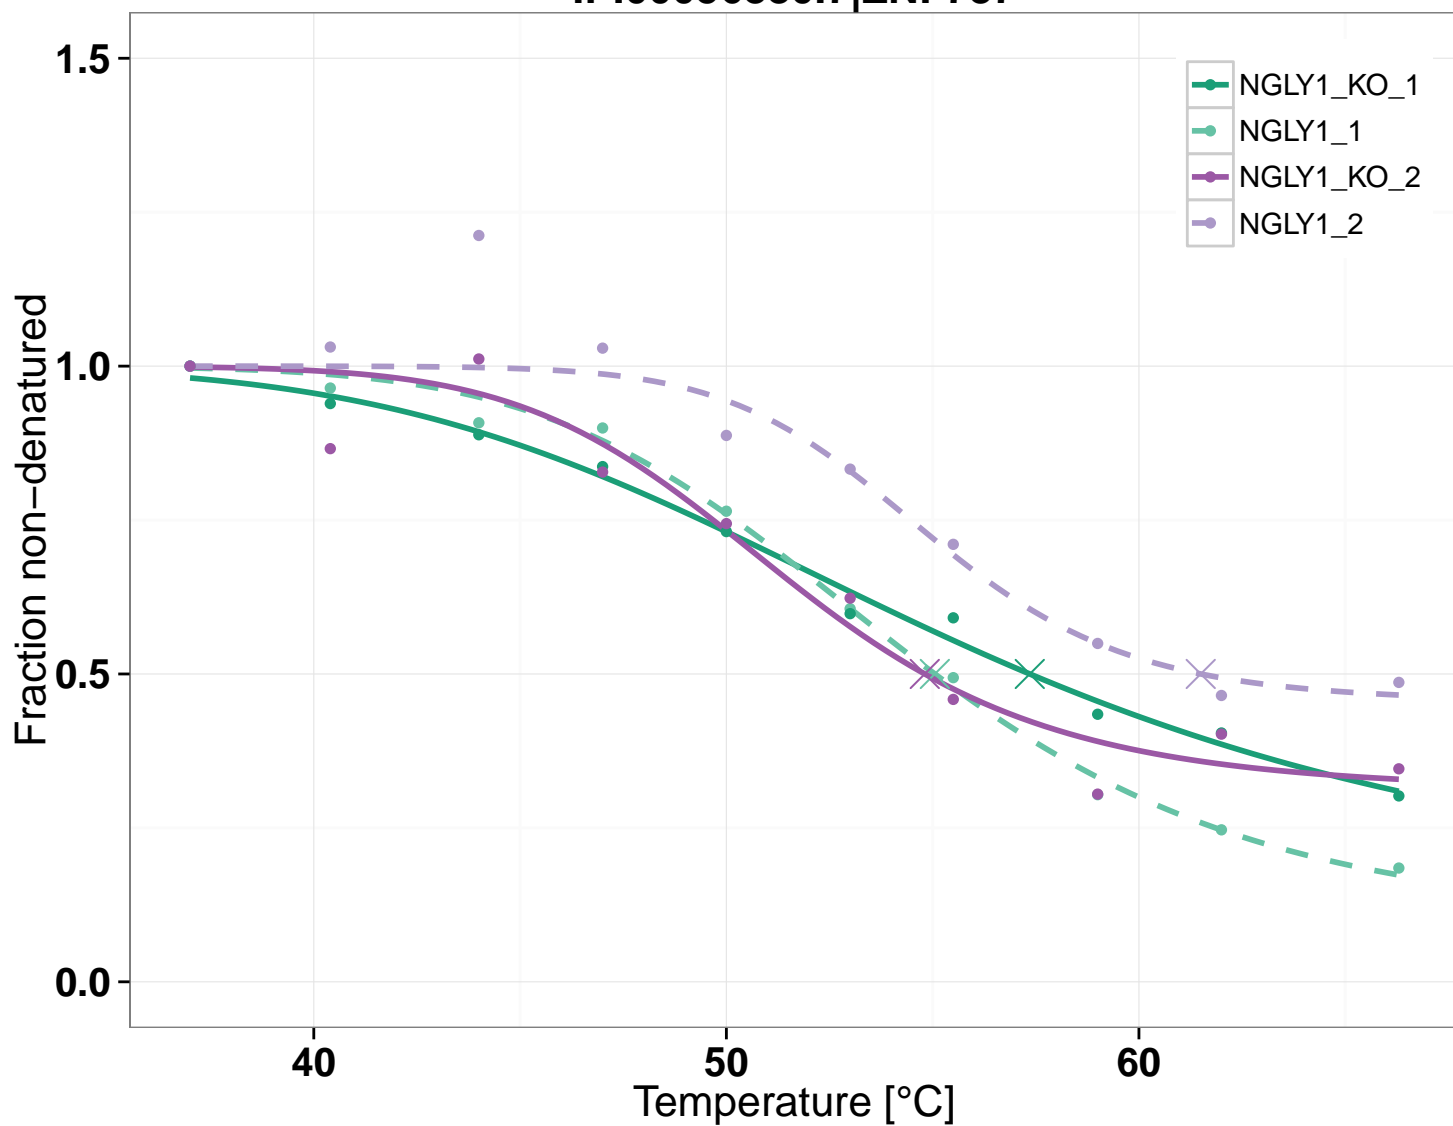

|            | meltPoint | slope  | plateau | R2   |
|------------|-----------|--------|---------|------|
| NGLY1_KO_1 | 57.35     | -0.033 | 0.11    | 0.99 |
| NGLY1_1    | 55.05     | -0.053 | 0.08    | 1    |
| NGLY1_KO_2 | 54.81     | -0.054 | 0.31    | 0.95 |
| NGLY1_2    | 61.5      | -0.056 | 0.45    | 0.91 |

Supplement: Supplementary file 3885 [file 1]

IPI00789341.2|KLHL18

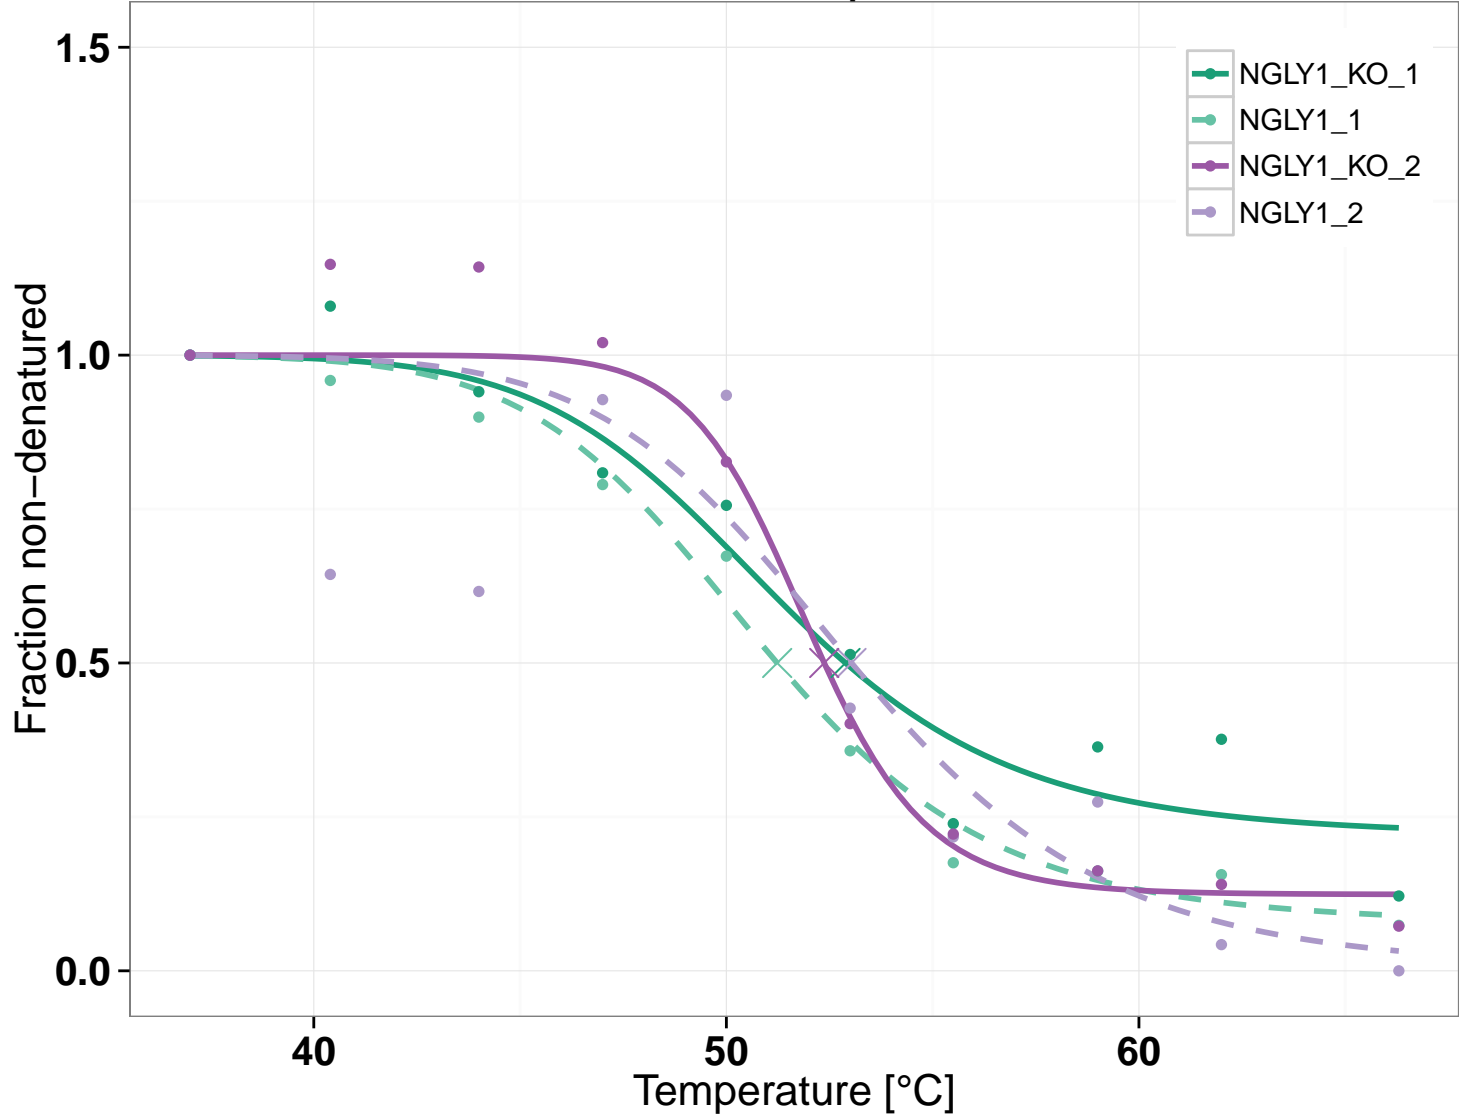

|            | meltPoint | slope  | plateau | R2   |
|------------|-----------|--------|---------|------|
| NGLY1_KO_1 | 52.89     | -0.068 | 0.22    | 0.93 |
| NGLY1_1    | 51.23     | -0.082 | 0.08    | 0.99 |
| NGLY1_KO_2 | 52.37     | -0.15  | 0.12    | 0.97 |
| NGLY1_2    | 53.03     | -0.081 | 0       | 0.74 |

Supplement: Supplementary file 3886 [file 1]

IPI00646762.1|NUDT5

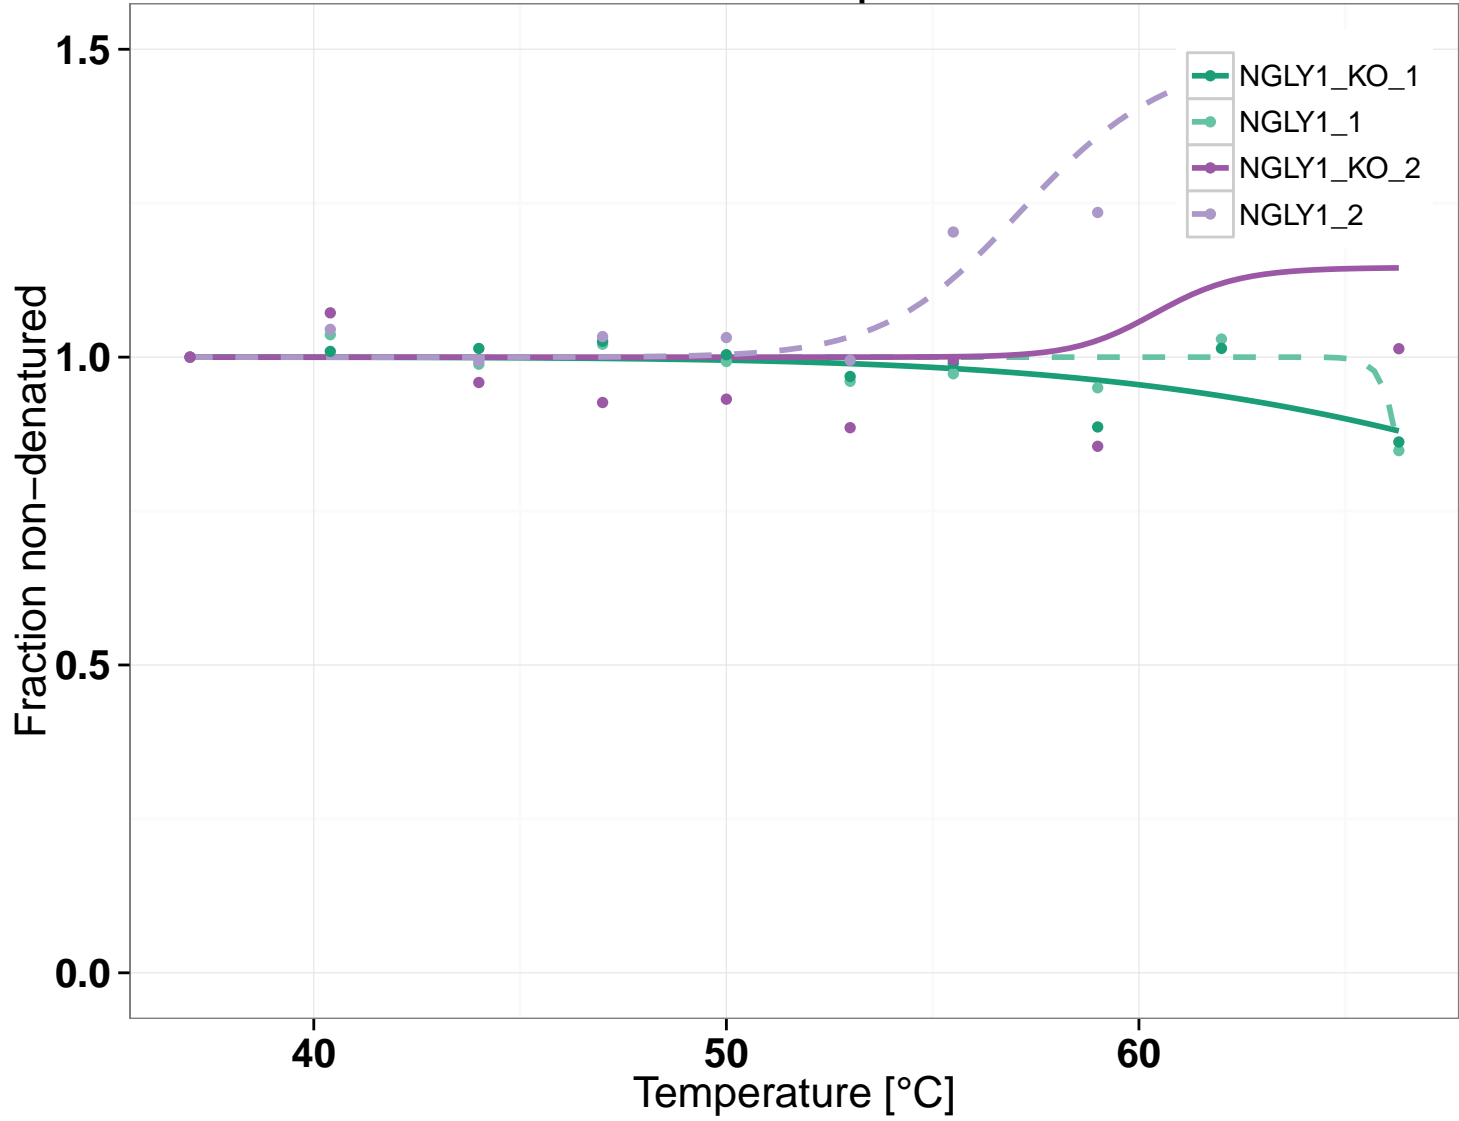

|            | meltPoint | slope | plateau | R2   |
|------------|-----------|-------|---------|------|
| NGLY1_KO_1 | -         | -     | 0       | 0.53 |
| NGLY1_1    | -         | -     | 0       | 0.72 |
| NGLY1_KO_2 | -         | 0.037 | 1.15    | 0.23 |
| NGLY1_2    | -         | 0.071 | 1.5     | 0.89 |

Supplement: Supplementary file 3887 [file 1]

IPI00438229.2|TRIM28

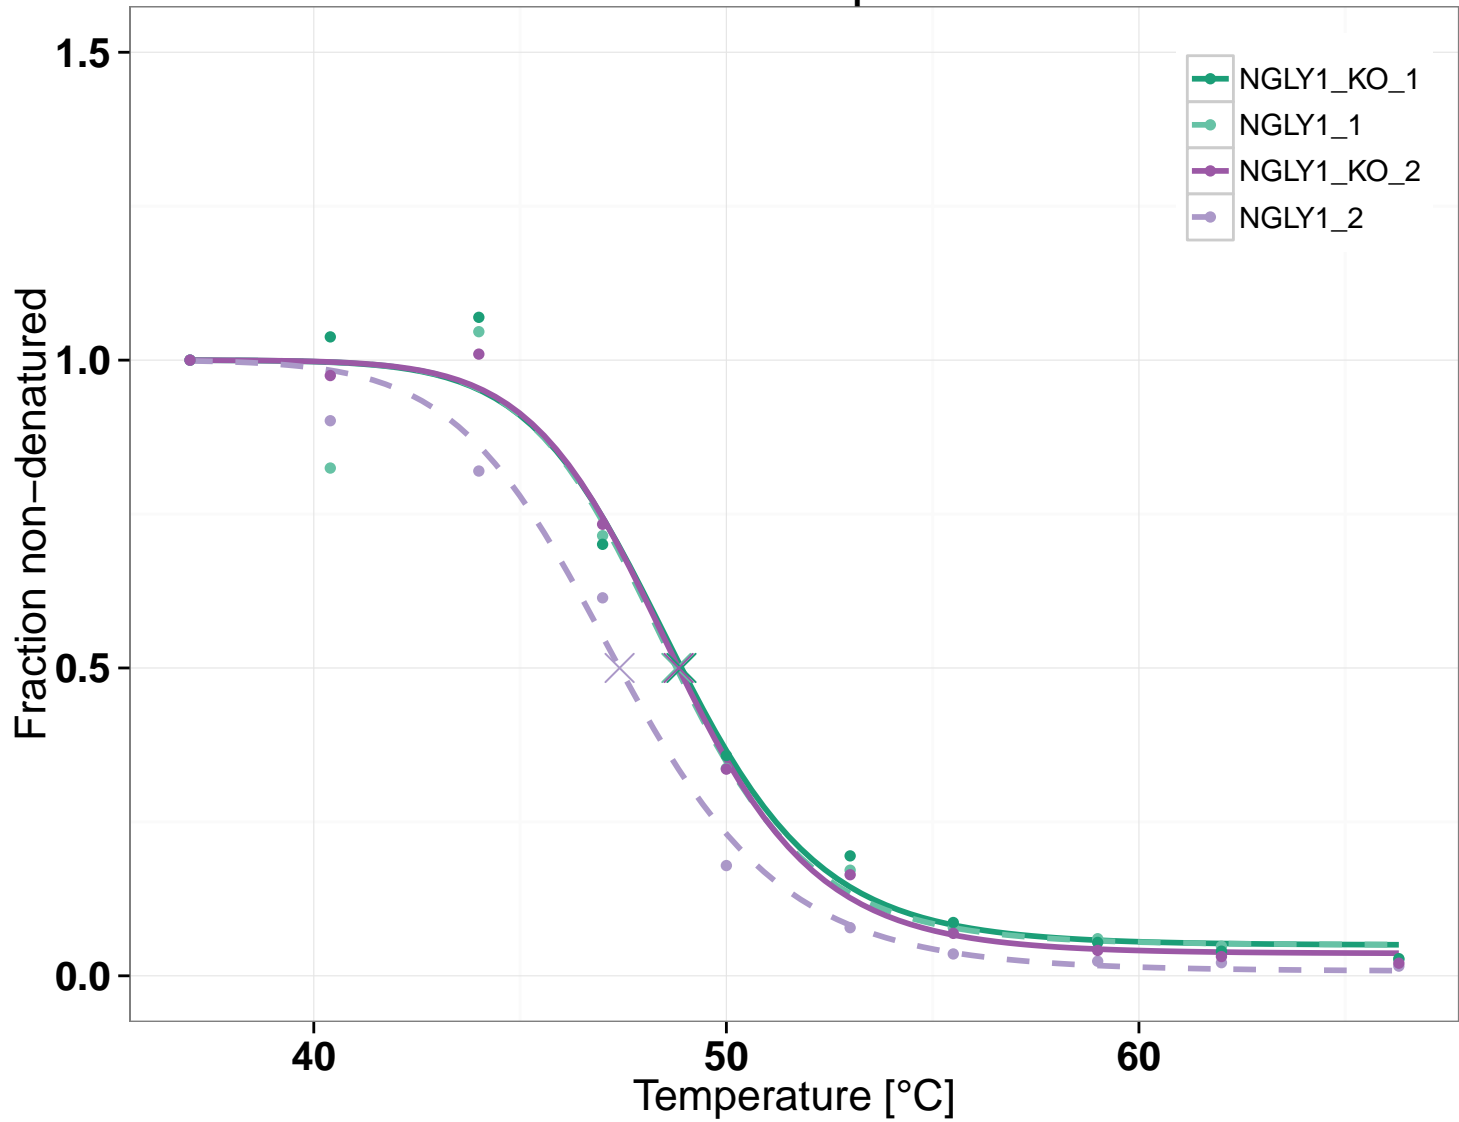

|            | meltPoint | slope | plateau | R2   |
|------------|-----------|-------|---------|------|
| NGLY1_KO_1 | 48.91     | -0.13 | 0.05    | 0.99 |
| NGLY1_1    | 48.79     | -0.14 | 0.05    | 0.97 |
| NGLY1_KO_2 | 48.84     | -0.14 | 0.04    | 1    |
| NGLY1_2    | 47.41     | -0.12 | 0.01    | 0.99 |

Supplement: Supplementary file 3889 [file 1]

IPI00549766.2|FAM40A

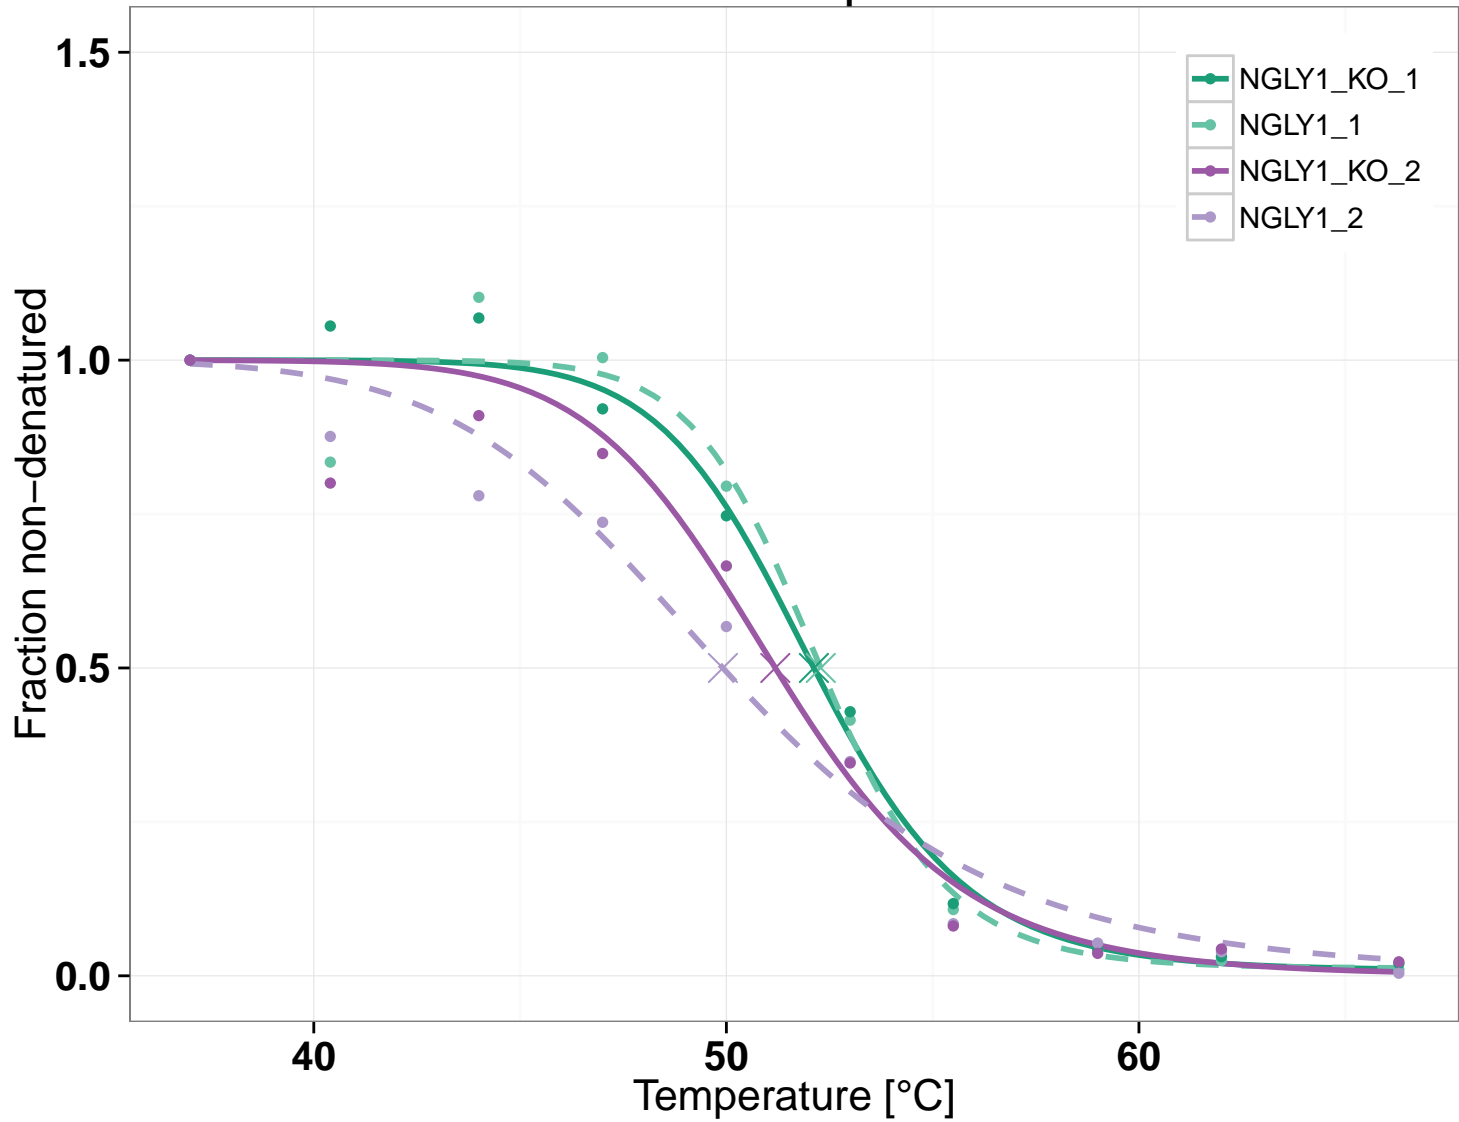

|            | meltPoint | slope  | plateau | R2   |
|------------|-----------|--------|---------|------|
| NGLY1_KO_1 | 52.12     | -0.13  | 0.01    | 0.99 |
| NGLY1_1    | 52.29     | -0.16  | 0.01    | 0.98 |
| NGLY1_KO_2 | 51.19     | -0.11  | 0       | 0.97 |
| NGLY1_2    | 49.92     | -0.075 | 0       | 0.97 |

Supplement: Supplementary file 3890 [file 1]

IPI00852747.1|C1ORF174

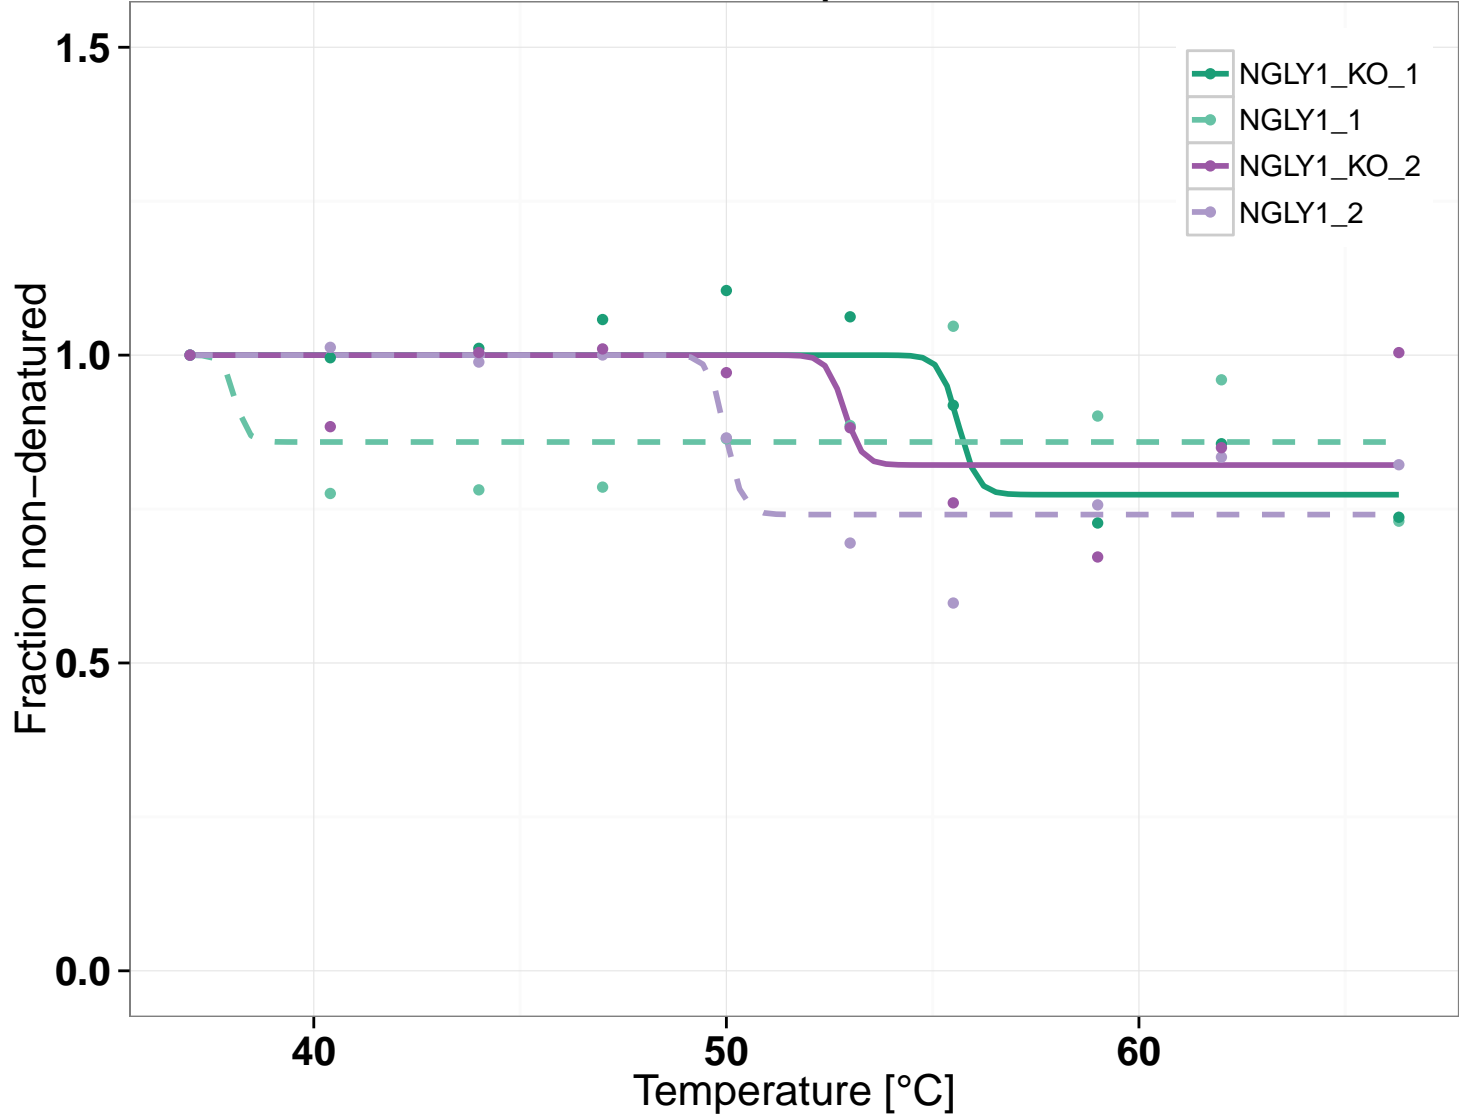

|            | meltPoint | slope | plateau | R2   |
|------------|-----------|-------|---------|------|
| NGLY1_KO_1 | —         | −0.25 | 0.77    | 0.82 |
| NGLY1_1    | —         | −0.23 | 0.86    | 0.18 |
| NGLY1_KO_2 | —         | −0.21 | 0.82    | 0.4  |
| NGLY1_2    | —         | −0.32 | 0.74    | 0.79 |

Supplement: Supplementary file 3891 [file 1]

# IPI00783214.2|CCNK

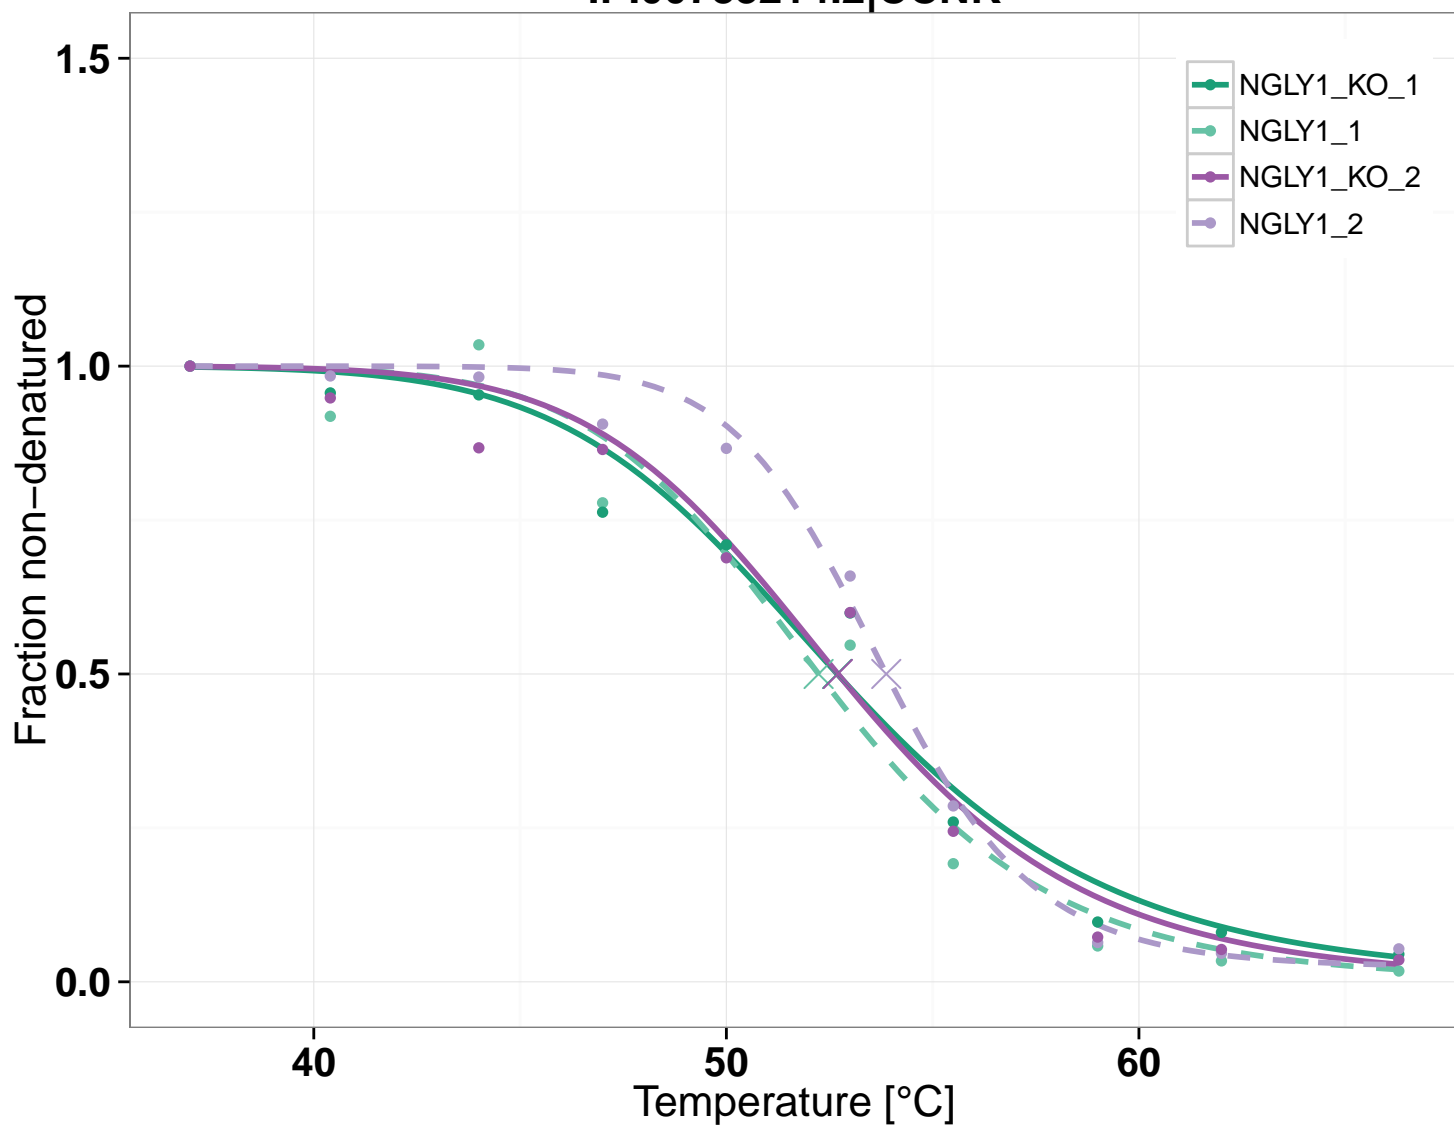

|            | meltPoint | slope  | plateau | R2   |
|------------|-----------|--------|---------|------|
| NGLY1_KO_1 | 52.69     | -0.075 | 0       | 0.98 |
| NGLY1_1    | 52.24     | -0.089 | 0       | 0.97 |
| NGLY1_KO_2 | 52.7      | -0.083 | 0       | 0.97 |
| NGLY1_2    | 53.88     | -0.13  | 0.02    | 0.99 |

Supplement: Supplementary file 3892 [file 1]

IPI00654605.1|MAP7D1

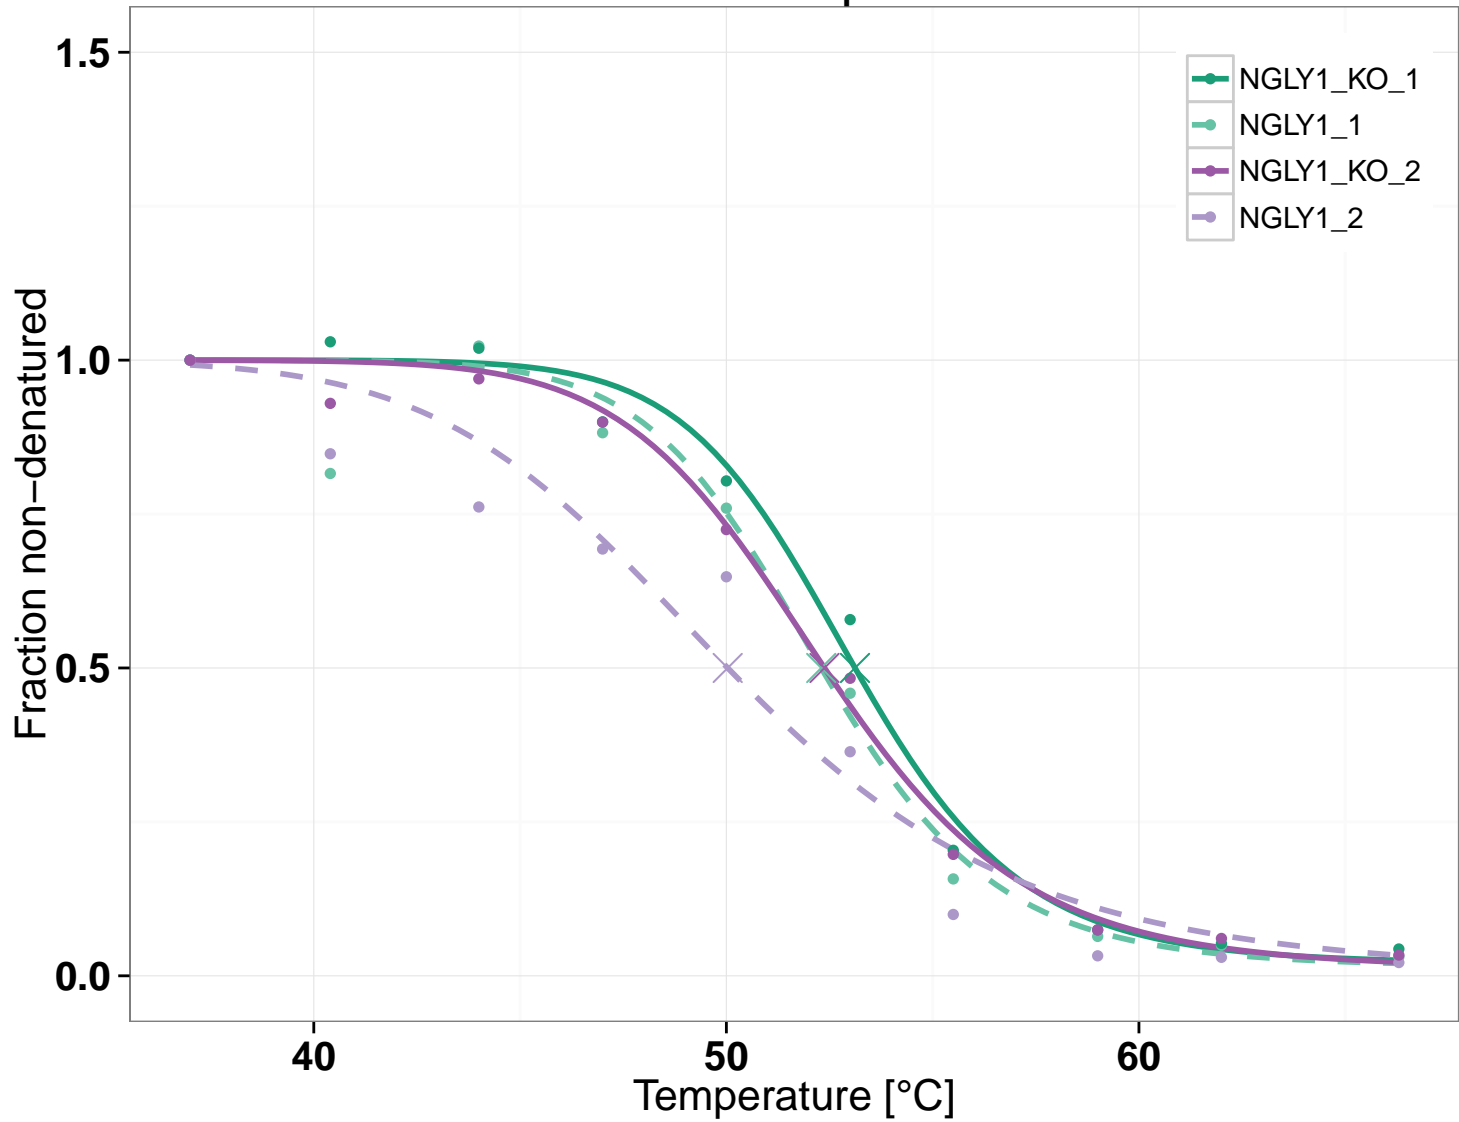

|            | meltPoint | slope | plateau | R2   |
|------------|-----------|-------|---------|------|
| NGLY1_KO_1 | 53.12     | -0.12 | 0.02    | 0.99 |
| NGLY1_1    | 52.3      | -0.12 | 0.01    | 0.97 |
| NGLY1_KO_2 | 52.38     | -0.1  | 0.01    | 0.99 |
| NGLY1_2    | 50.03     | -0.07 | 0       | 0.95 |

Supplement: Supplementary file 3893 [file 1]

IPI00217283.5|PLEKHM2

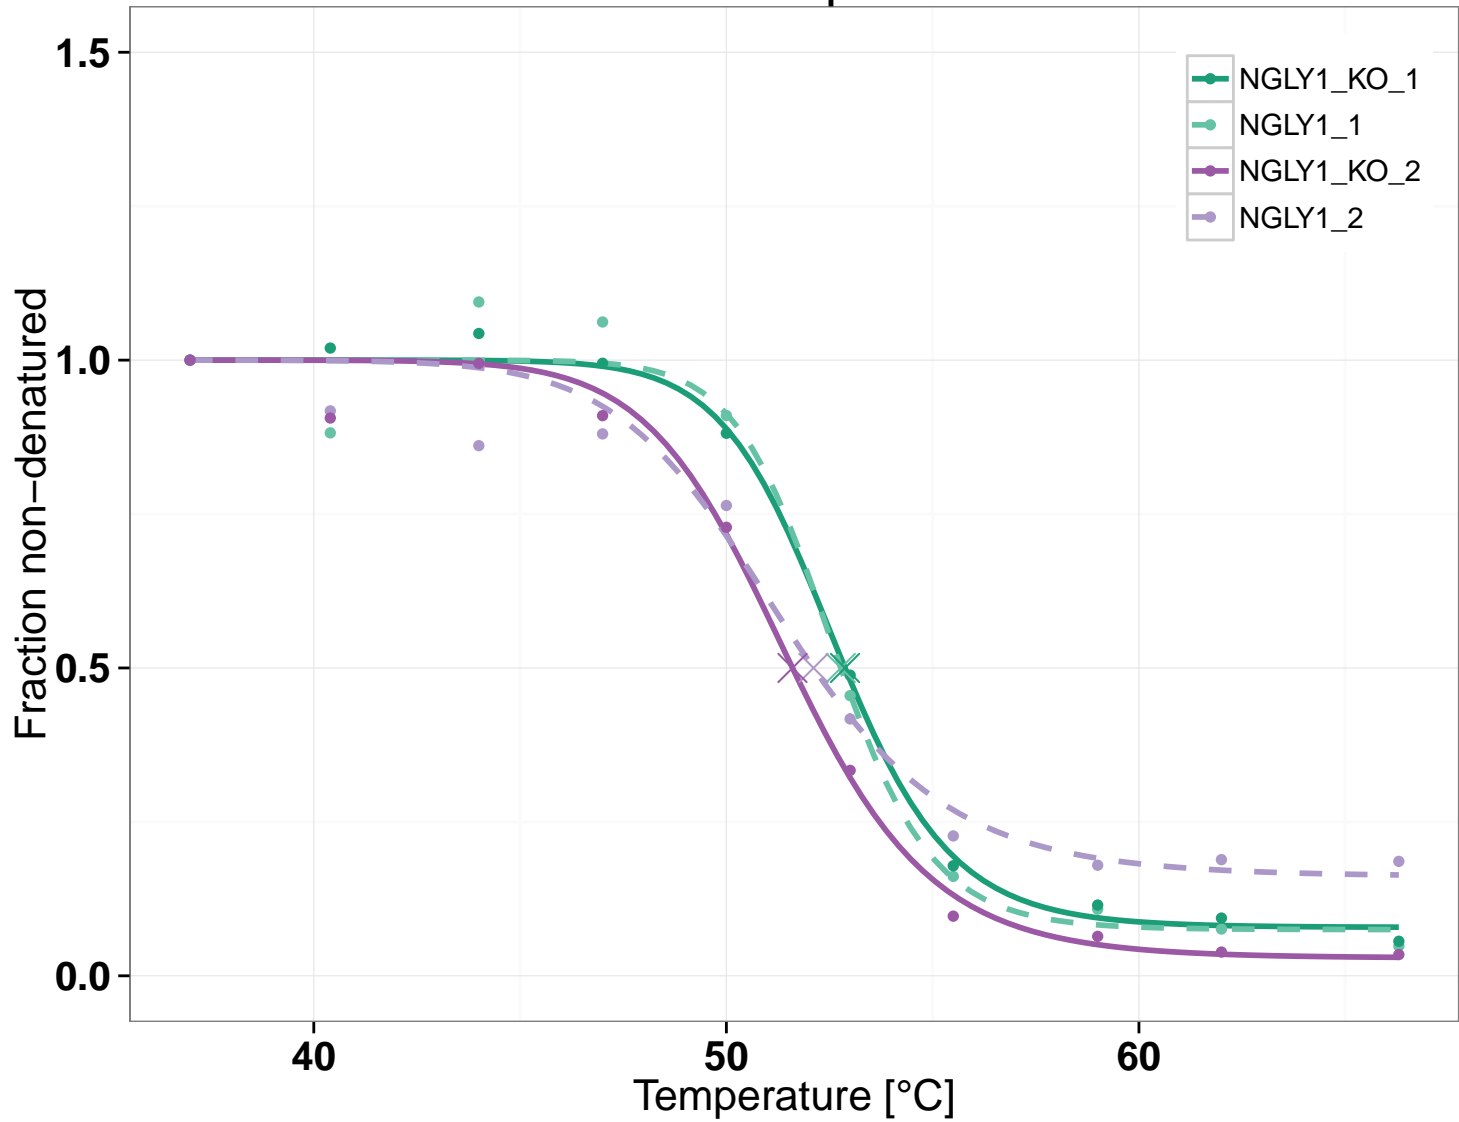

|            | meltPoint | slope | plateau | R2   |
|------------|-----------|-------|---------|------|
| NGLY1_KO_1 | 52.88     | -0.17 | 0.08    | 1    |
| NGLY1_1    | 52.77     | -0.19 | 0.08    | 0.98 |
| NGLY1_KO_2 | 51.6      | -0.14 | 0.03    | 0.99 |
| NGLY1_2    | 52.11     | -0.1  | 0.16    | 0.97 |

Supplement: Supplementary file 3894 [file 1]

IPI00877923.1|NDUFB1

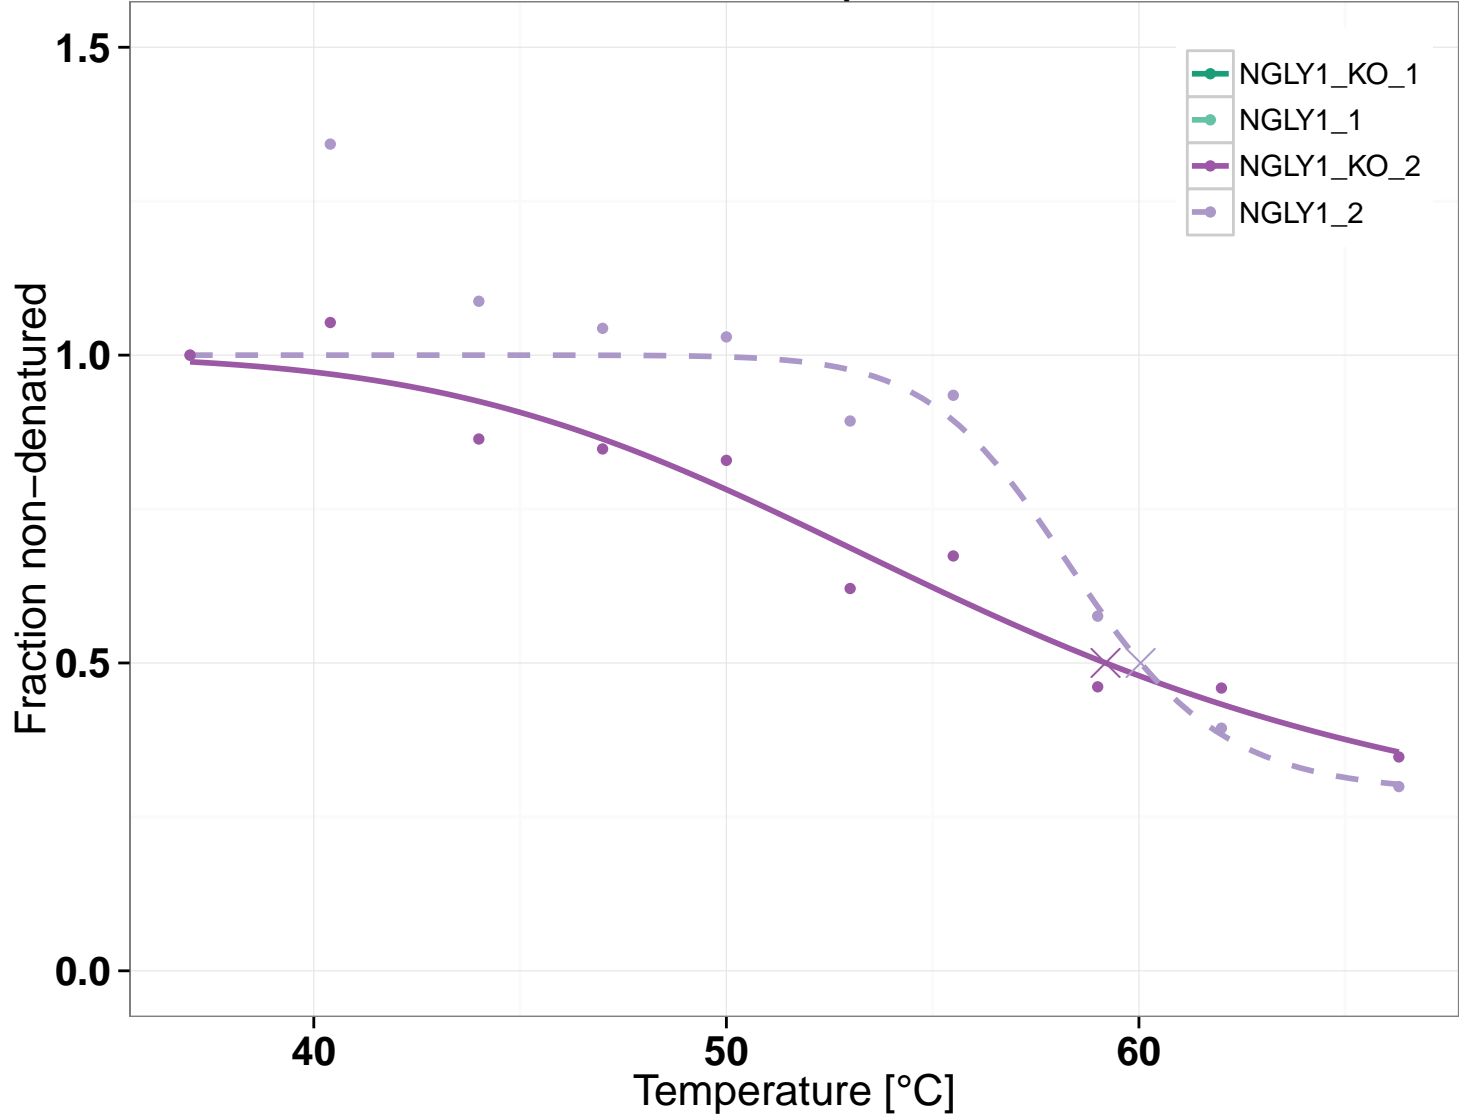

|            | meltPoint | slope  | plateau | R2   |
|------------|-----------|--------|---------|------|
| NGLY1_KO_1 | —         | —      | —       | —    |
| NGLY1_1    | —         | —      | —       | —    |
| NGLY1_KO_2 | 59.19     | -0.032 | 0.18    | 0.95 |
| NGLY1_2    | 60.04     | -0.1   | 0.29    | 0.86 |

Supplement: Supplementary file 3895 [file 1]

# IPI00056478.1|IGSF8

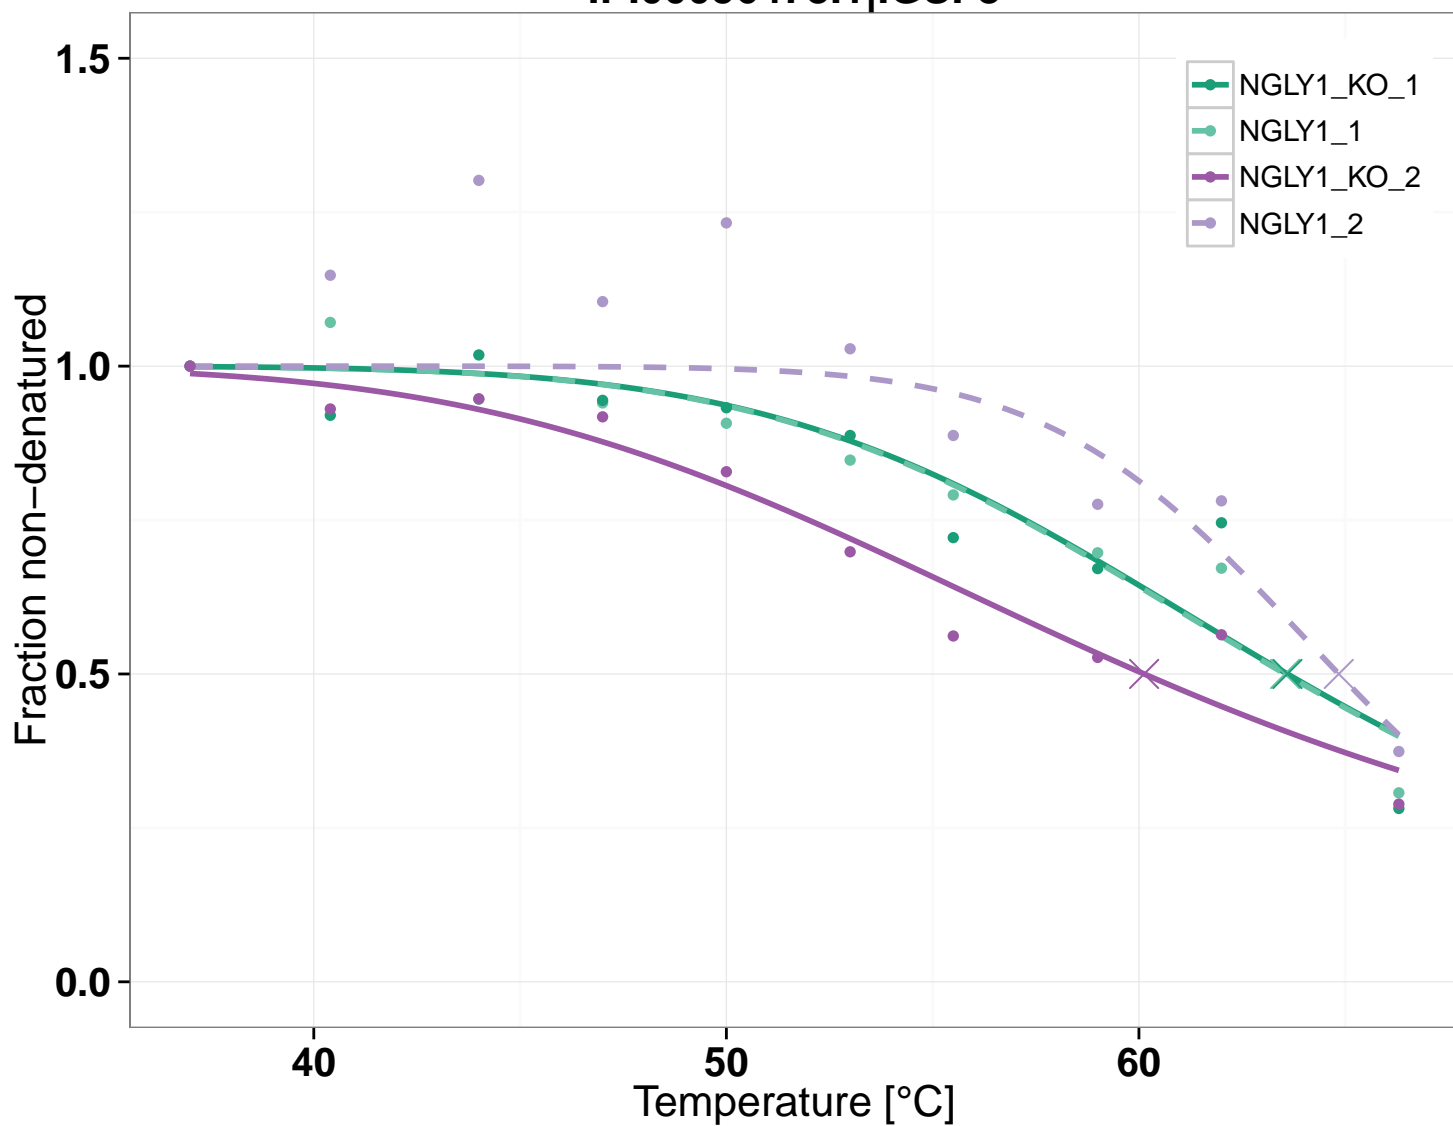

|            | meltPoint | slope  | plateau | R2   |
|------------|-----------|--------|---------|------|
| NGLY1_KO_1 | 63.6      | -0.04  | 0       | 0.86 |
| NGLY1_1    | 63.54     | -0.04  | 0       | 0.93 |
| NGLY1_KO_2 | 60.13     | -0.032 | 0.01    | 0.94 |
| NGLY1_2    | 64.84     | -0.071 | 0       | 0.7  |

Supplement: Supplementary file 3896 [file 1]

IPI00014361.1|TSTA3

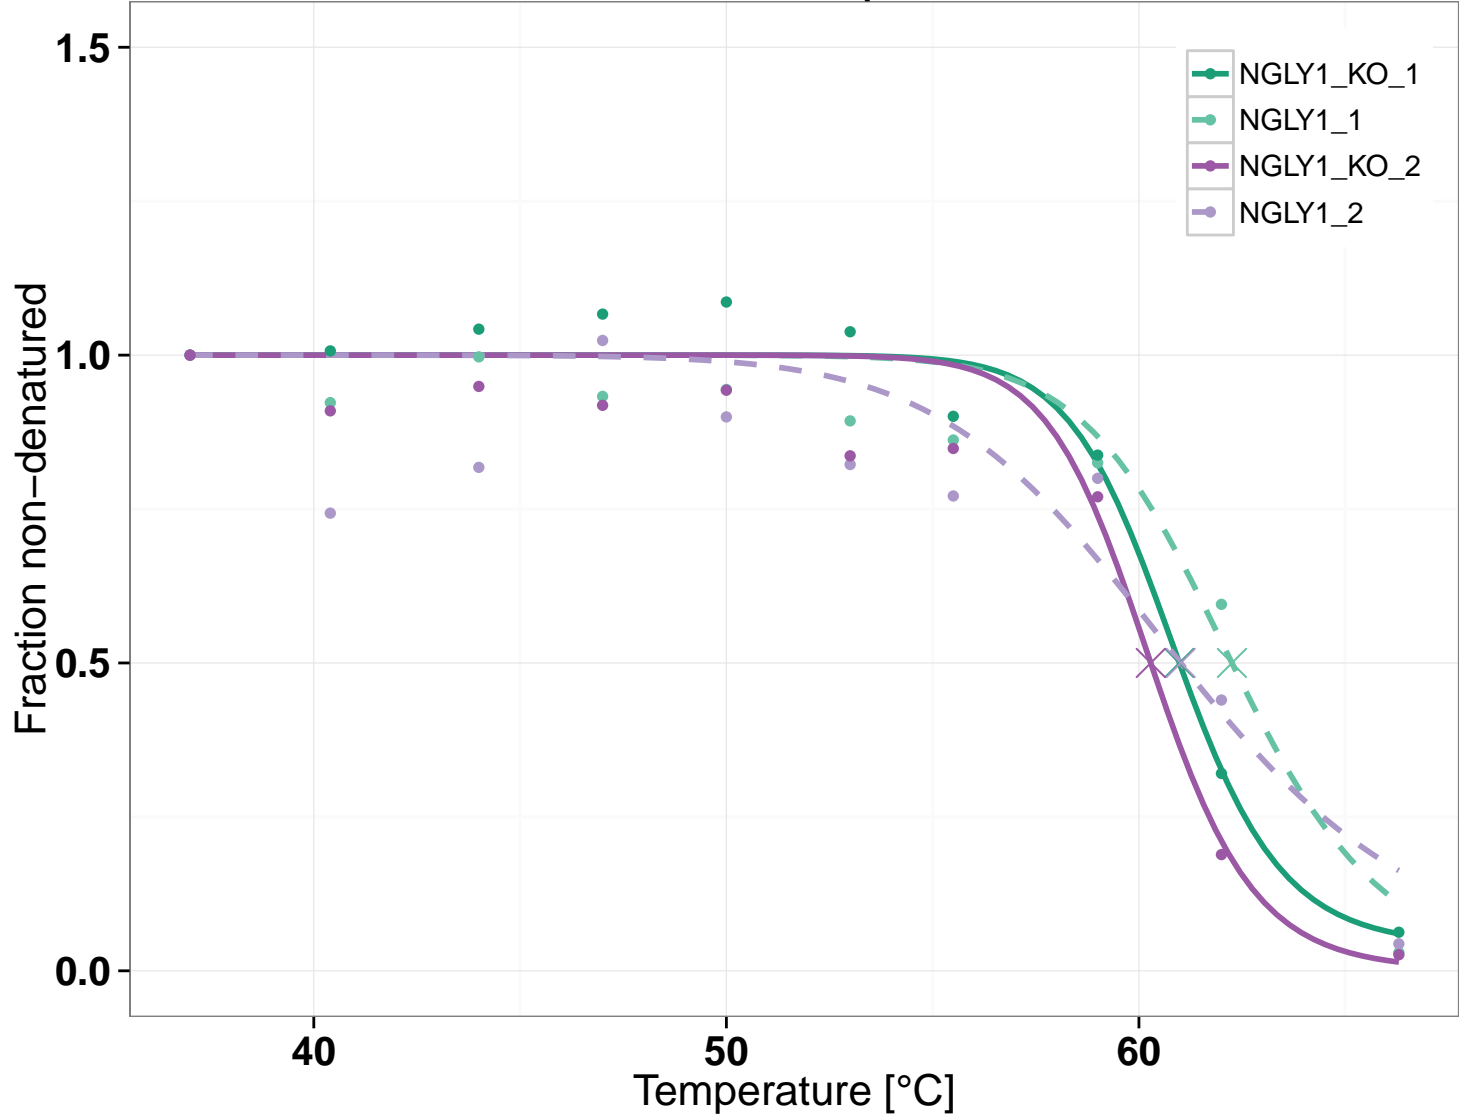

|            | meltPoint | slope  | plateau | R2   |
|------------|-----------|--------|---------|------|
| NGLY1_KO_1 | 60.98     | -0.19  | 0.04    | 0.98 |
| NGLY1_1    | 62.25     | -0.14  | 0       | 0.93 |
| NGLY1_KO_2 | 60.29     | -0.2   | 0       | 0.94 |
| NGLY1_2    | 61.01     | -0.085 | 0       | 0.78 |

Supplement: Supplementary file 3897 [file 1]

# IPI00218823.4|MLL4

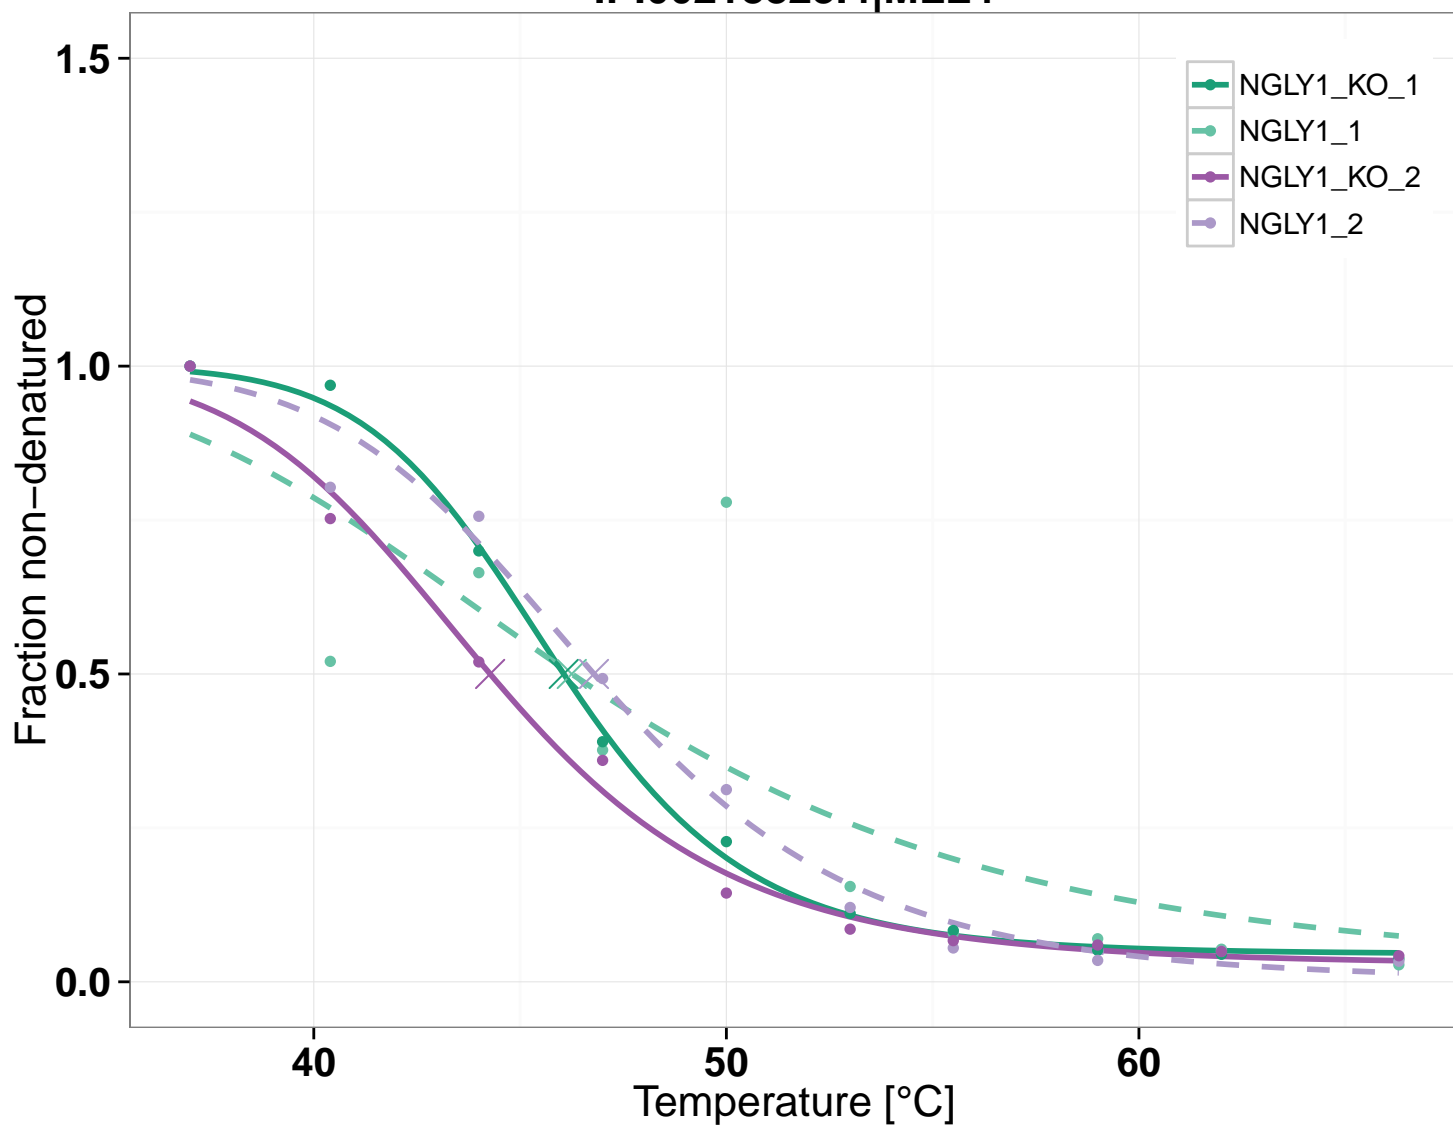

|            | meltPoint | slope  | plateau | R2   |
|------------|-----------|--------|---------|------|
| NGLY1_KO_1 | 46.06     | -0.1   | 0.04    | 1    |
| NGLY1_1    | 46.25     | -0.048 | 0       | 0.72 |
| NGLY1_KO_2 | 44.27     | -0.081 | 0.03    | 0.99 |
| NGLY1_2    | 46.79     | -0.078 | 0       | 0.99 |

Supplement: Supplementary file 3898 [file 1]

IPI00307688.2|GIPC3

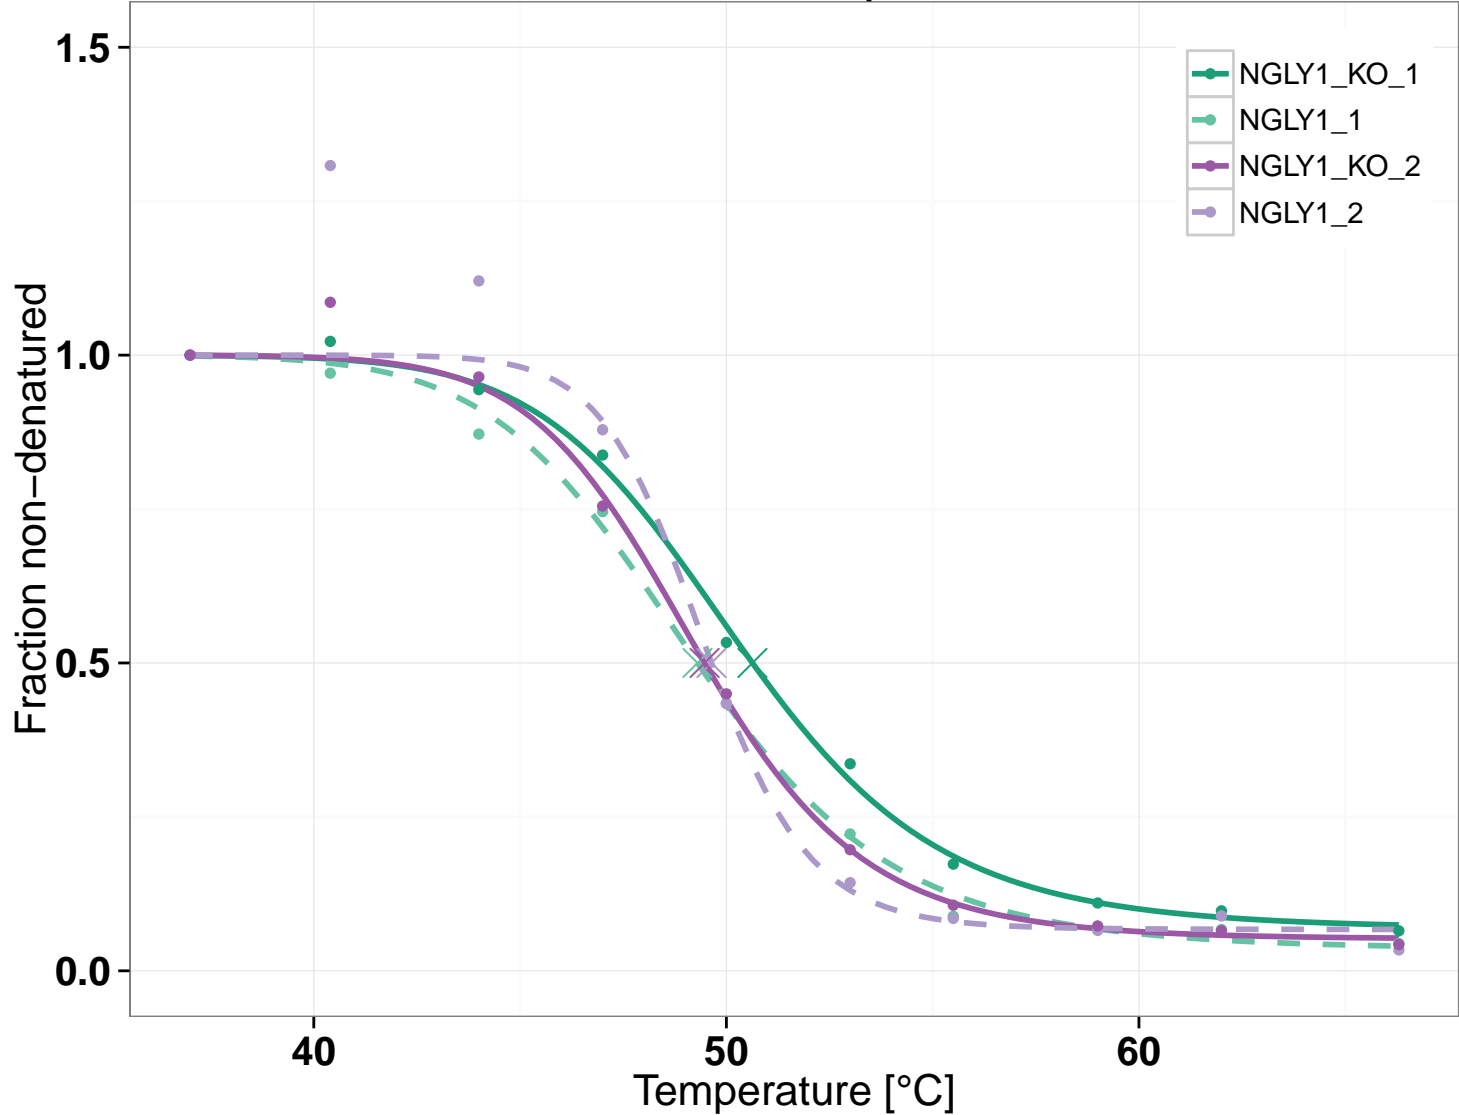

|            | meltPoint | slope  | plateau | R2   |
|------------|-----------|--------|---------|------|
| NGLY1_KO_1 | 50.63     | -0.096 | 0.07    | 1    |
| NGLY1_1    | 49.3      | -0.099 | 0.03    | 1    |
| NGLY1_KO_2 | 49.47     | -0.12  | 0.05    | 0.99 |
| NGLY1_2    | 49.64     | -0.19  | 0.07    | 0.95 |

Supplement: Supplementary file 3899 [file 1]

# IPI00221171.4|ABL1

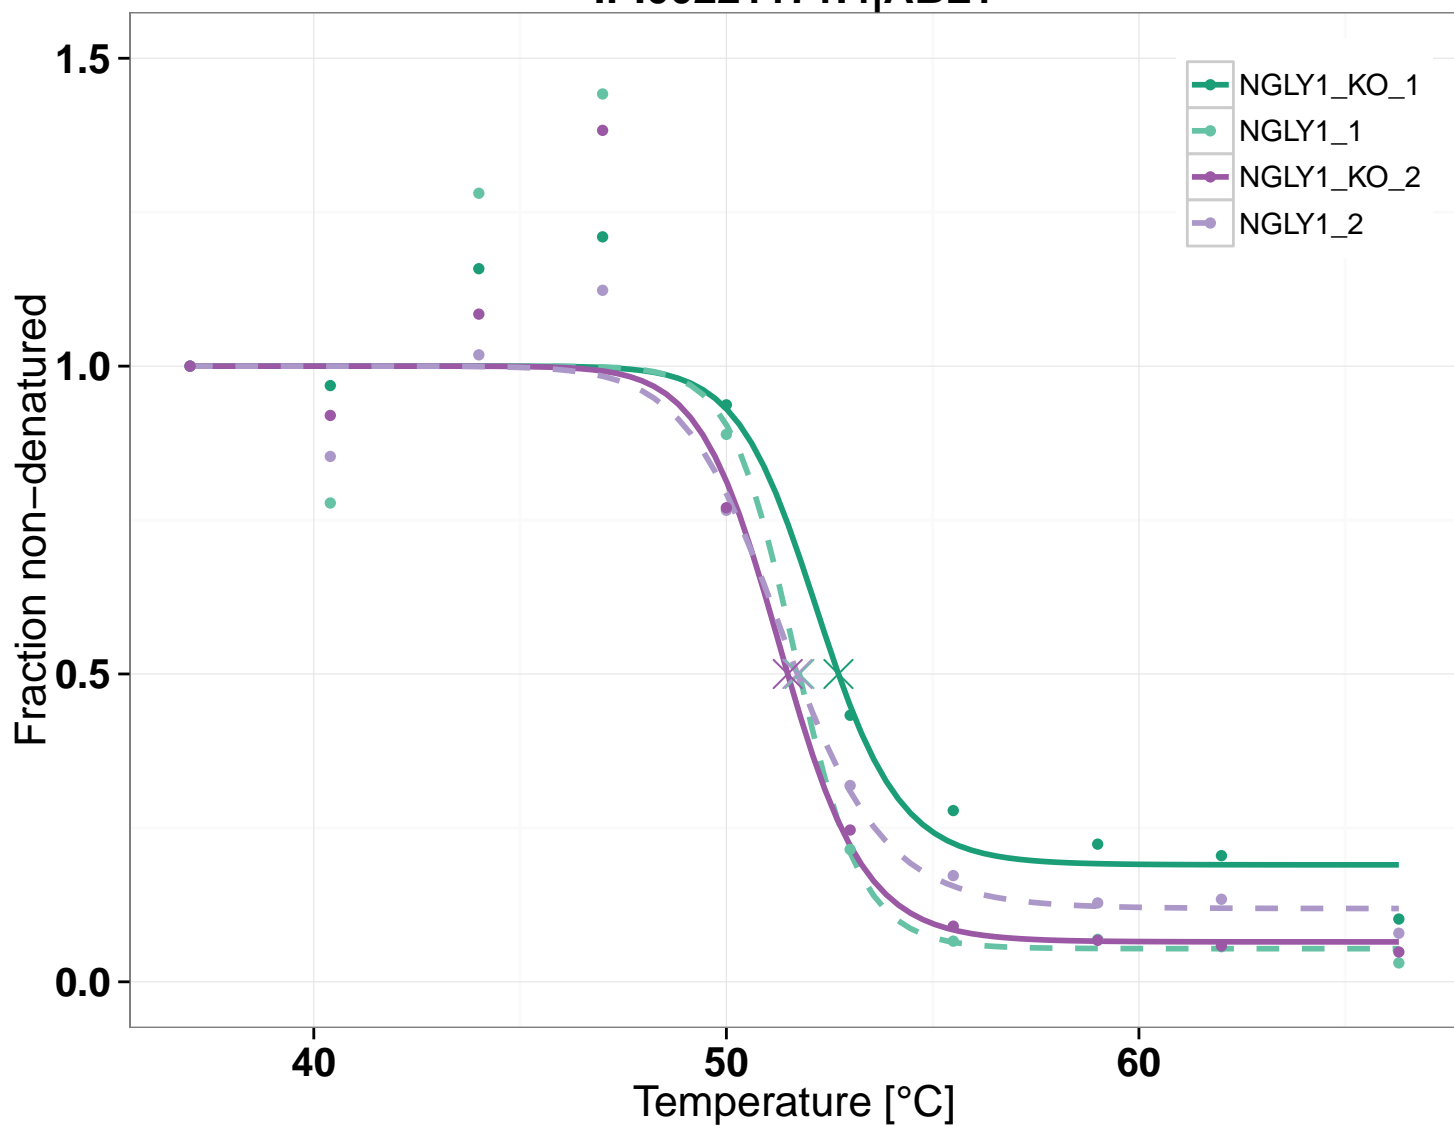

|            | meltPoint | slope | plateau | R2   |
|------------|-----------|-------|---------|------|
| NGLY1_KO_1 | 52.72     | -0.21 | 0.19    | 0.95 |
| NGLY1_1    | 51.77     | -0.3  | 0.05    | 0.88 |
| NGLY1_KO_2 | 51.49     | -0.23 | 0.06    | 0.93 |
| NGLY1_2    | 51.72     | -0.18 | 0.12    | 0.97 |

Supplement: Supplementary file 3900 [file 1]

IPI00185219.1|GAS2L3

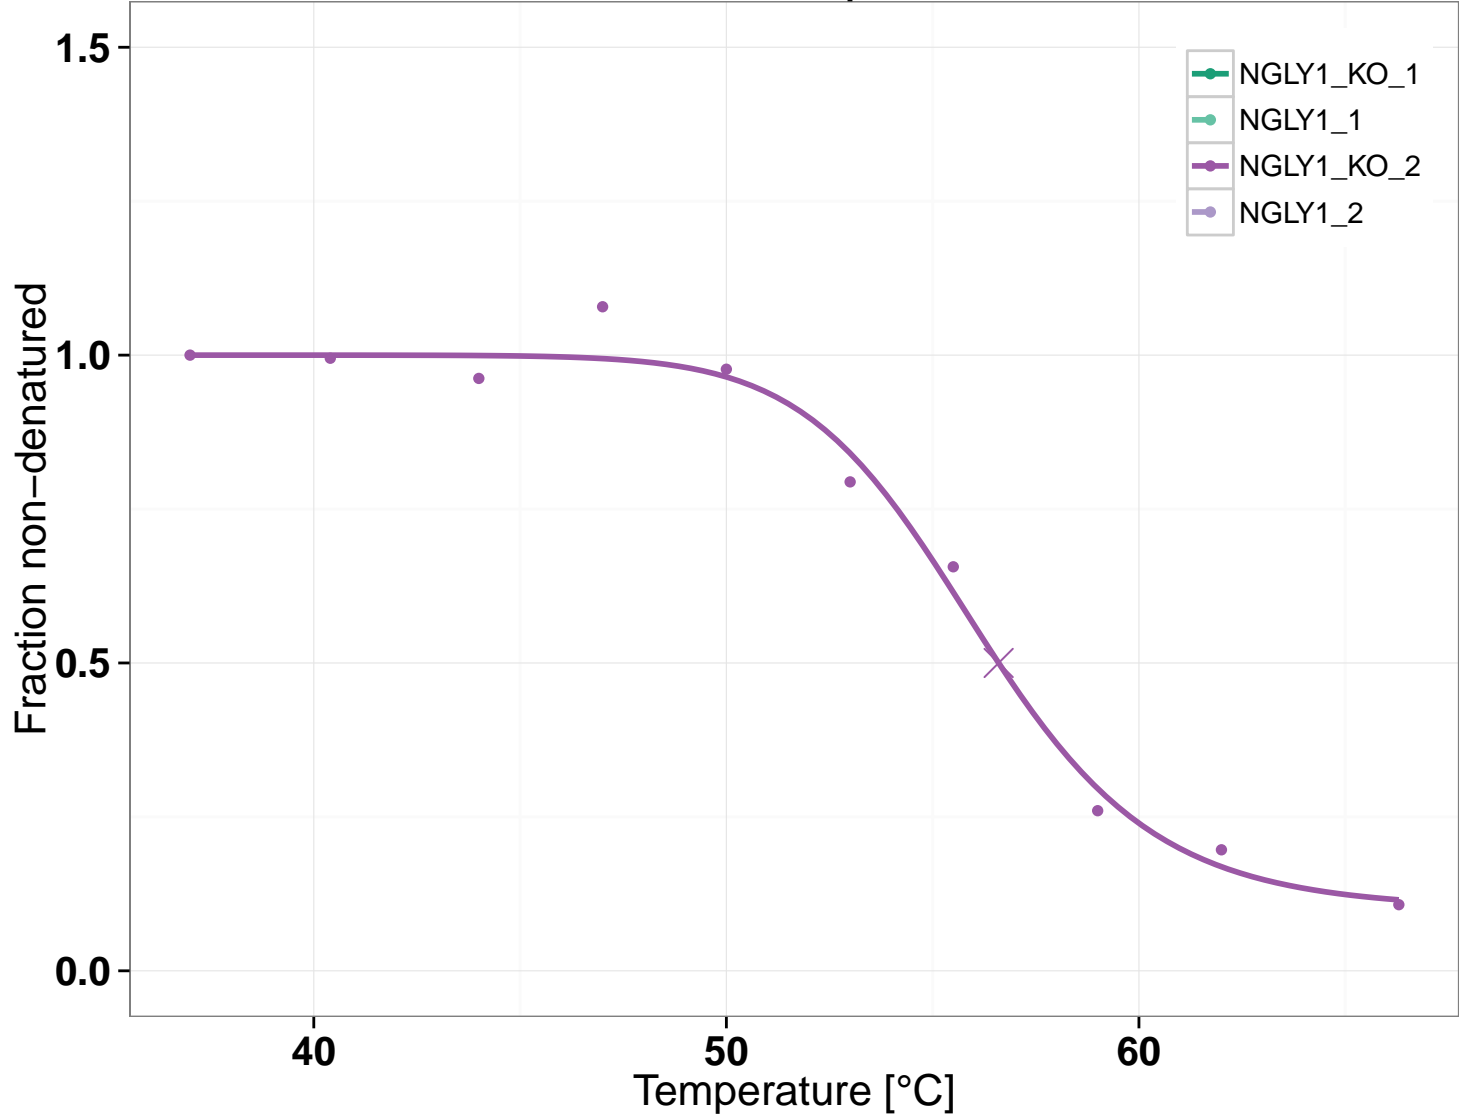

|            | meltPoint | slope | plateau | R2   |
|------------|-----------|-------|---------|------|
| NGLY1_KO_1 | -         | -     | -       | -    |
| NGLY1_1    | -         | -     | -       | -    |
| NGLY1_KO_2 | 56.6      | -0.11 | 0.1     | 0.99 |
| NGLY1_2    | -         | -     | -       | -    |

Supplement: Supplementary file 3901 [file 1]

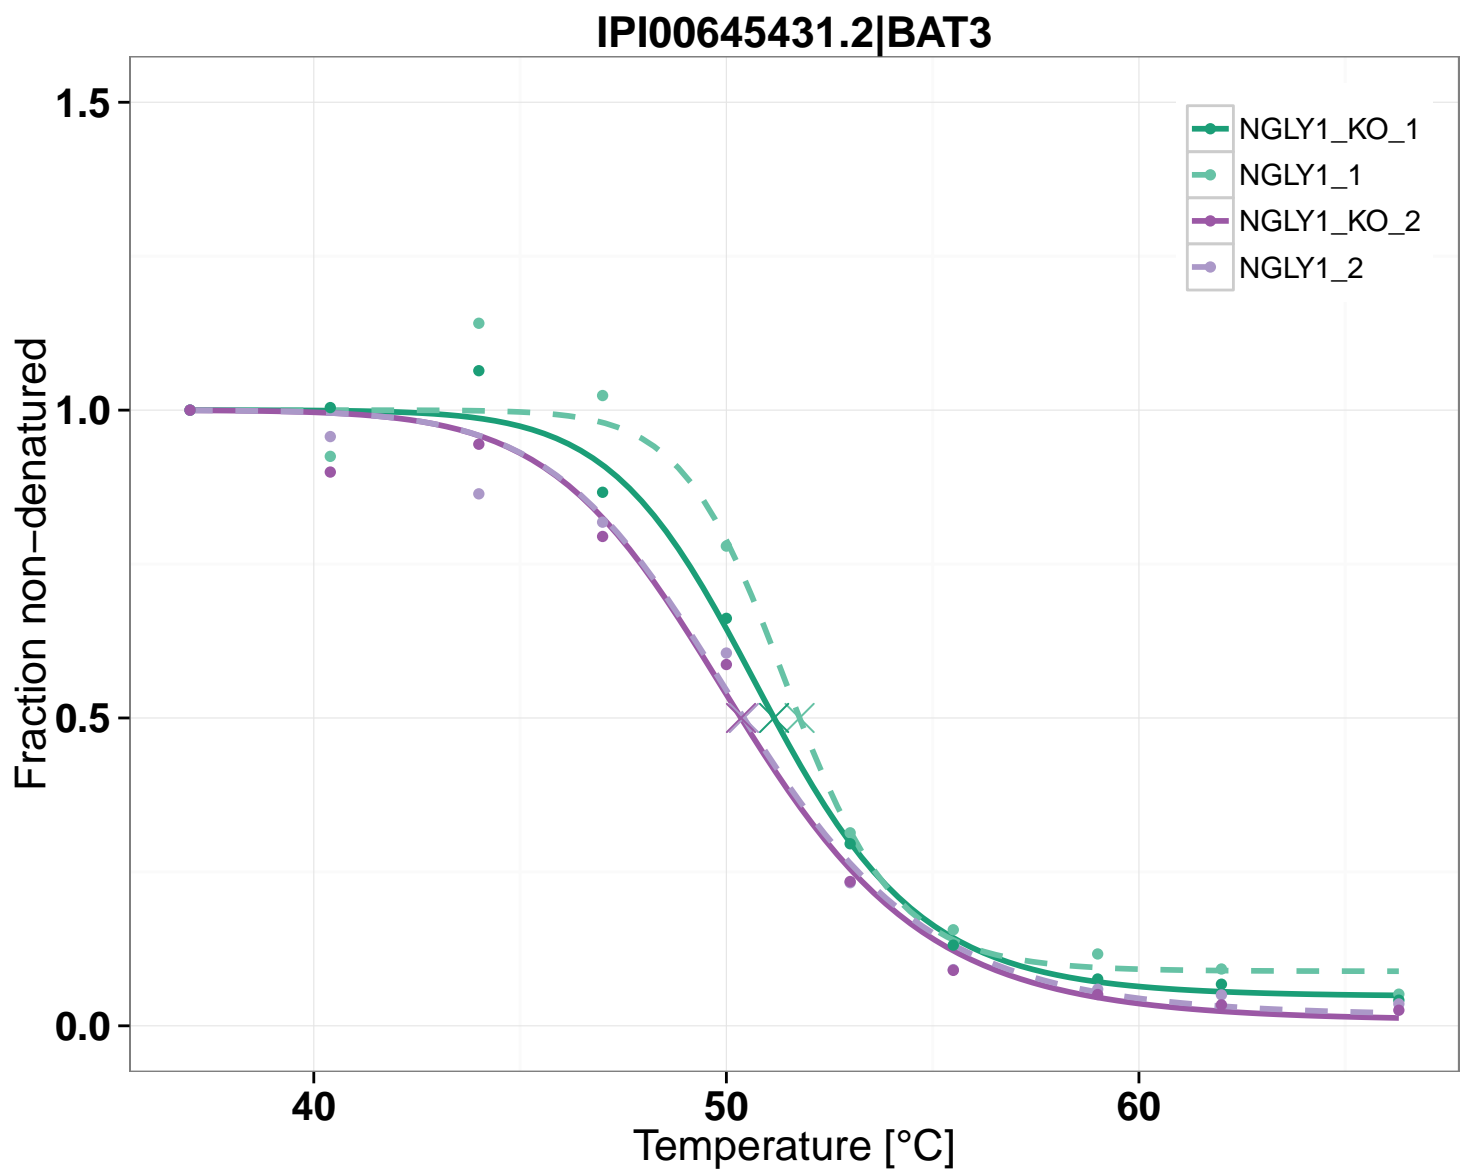

|            | meltPoint | slope | plateau | R2   |
|------------|-----------|-------|---------|------|
| NGLY1_KO_1 | 51.16     | -0.13 | 0.05    | 1    |
| NGLY1_1    | 51.77     | -0.17 | 0.09    | 0.98 |
| NGLY1_KO_2 | 50.35     | -0.11 | 0.01    | 0.99 |
| NGLY1_2    | 50.43     | -0.11 | 0.02    | 0.99 |

Supplement: Supplementary file 3902 [file 1]

IPI00639887.2|FAM60A

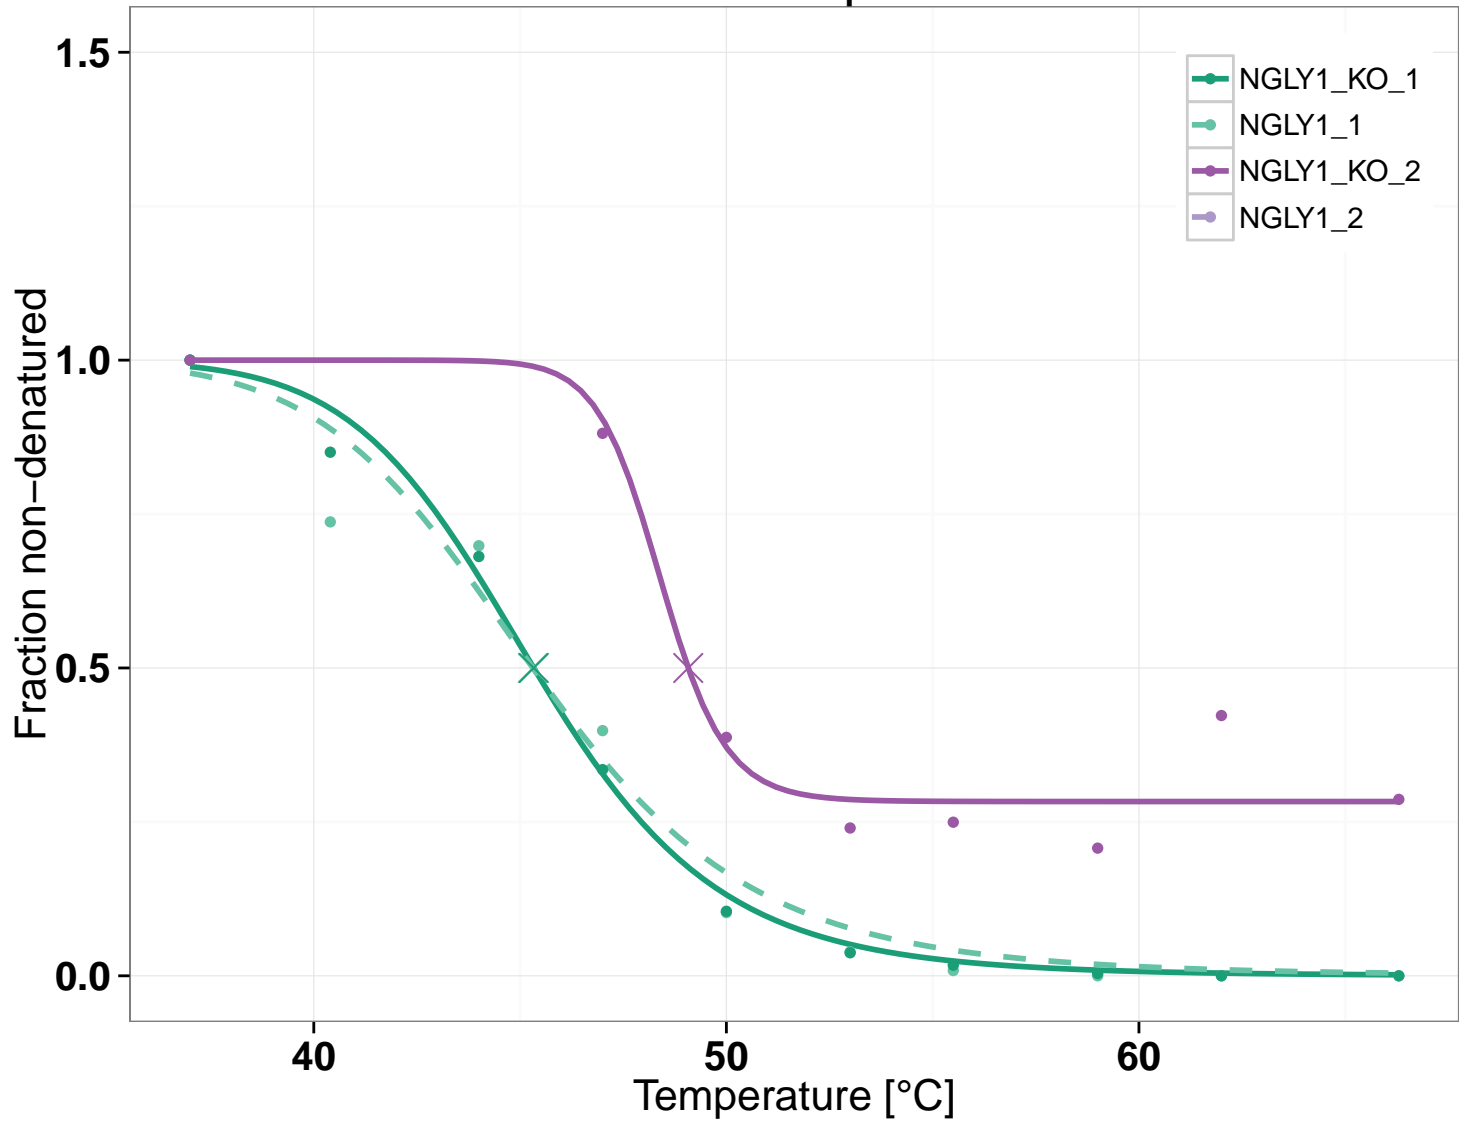

|            | meltPoint | slope  | plateau | R2   |
|------------|-----------|--------|---------|------|
| NGLY1_KO_1 | 45.33     | -0.11  | 0       | 0.99 |
| NGLY1_1    | 45.31     | -0.096 | 0       | 0.97 |
| NGLY1_KO_2 | 49.08     | -0.23  | 0.28    | 0.52 |
| NGLY1_2    | -         | -      | -       | -    |

Supplement: Supplementary file 3903 [file 1]

IPI00022793.5|HADHB

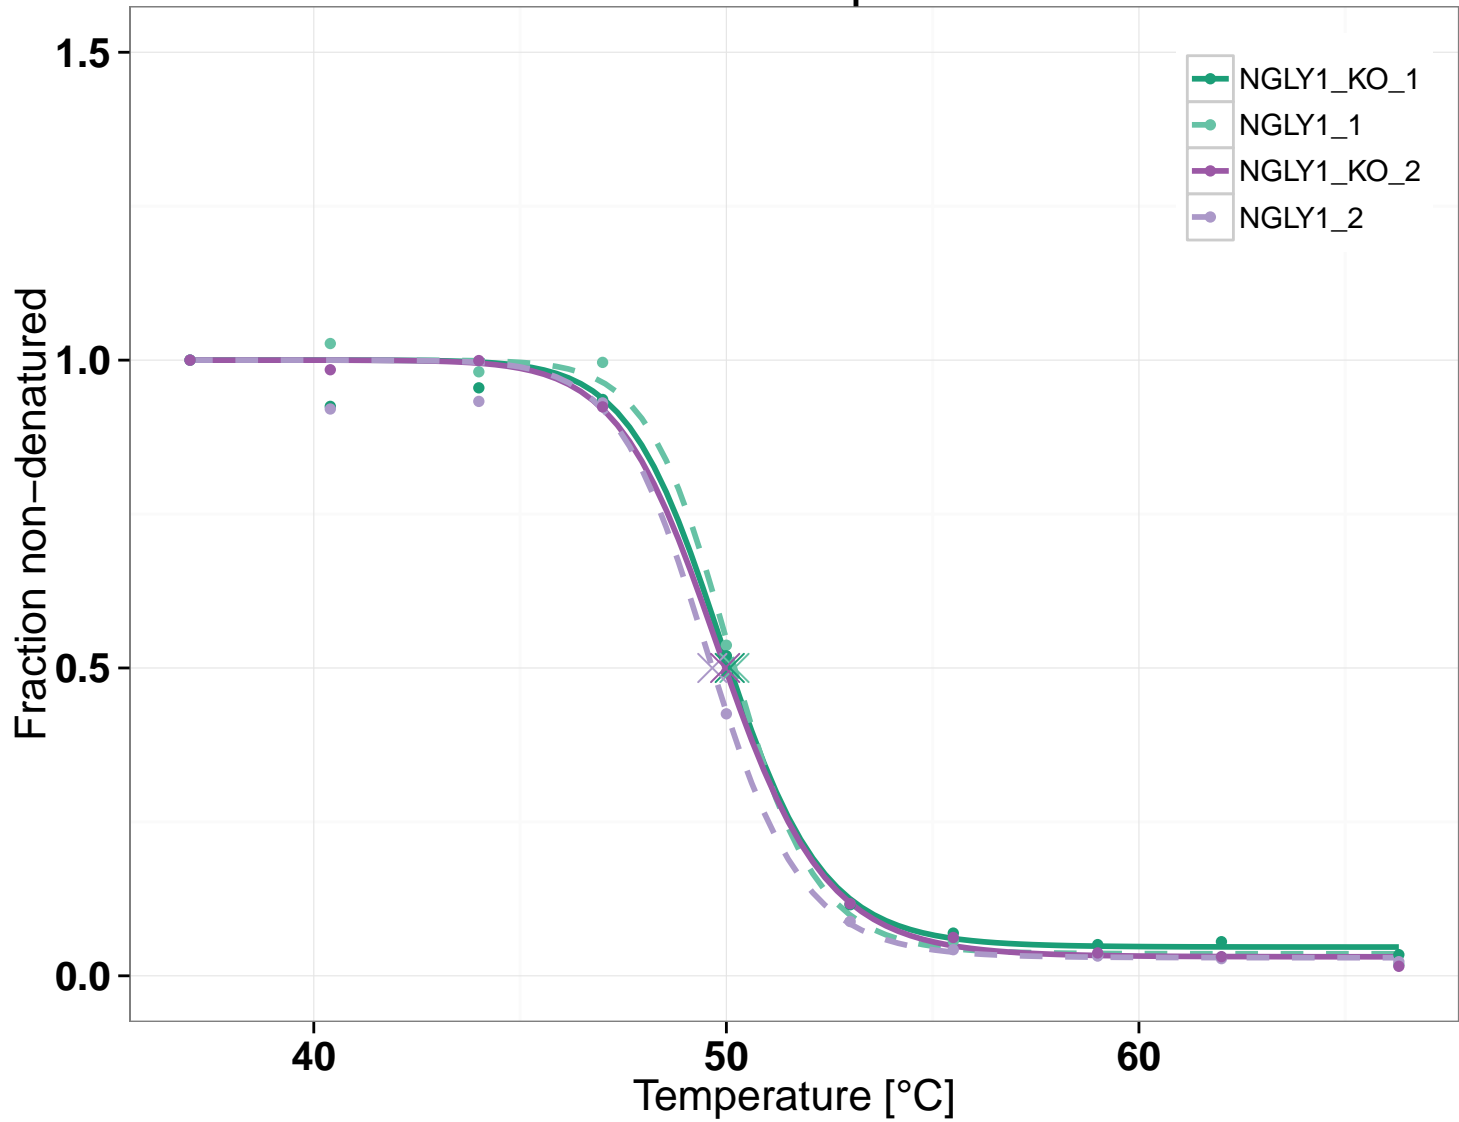

|            | meltPoint | slope | plateau | R2   |
|------------|-----------|-------|---------|------|
| NGLY1_KO_1 | 50.08     | -0.2  | 0.05    | 1    |
| NGLY1_1    | 50.2      | -0.24 | 0.04    | 1    |
| NGLY1_KO_2 | 49.97     | -0.19 | 0.03    | 1    |
| NGLY1_2    | 49.66     | -0.21 | 0.03    | 0.99 |

Supplement: Supplementary file 3904 [file 1]

# IPI00012301.1|GPS2

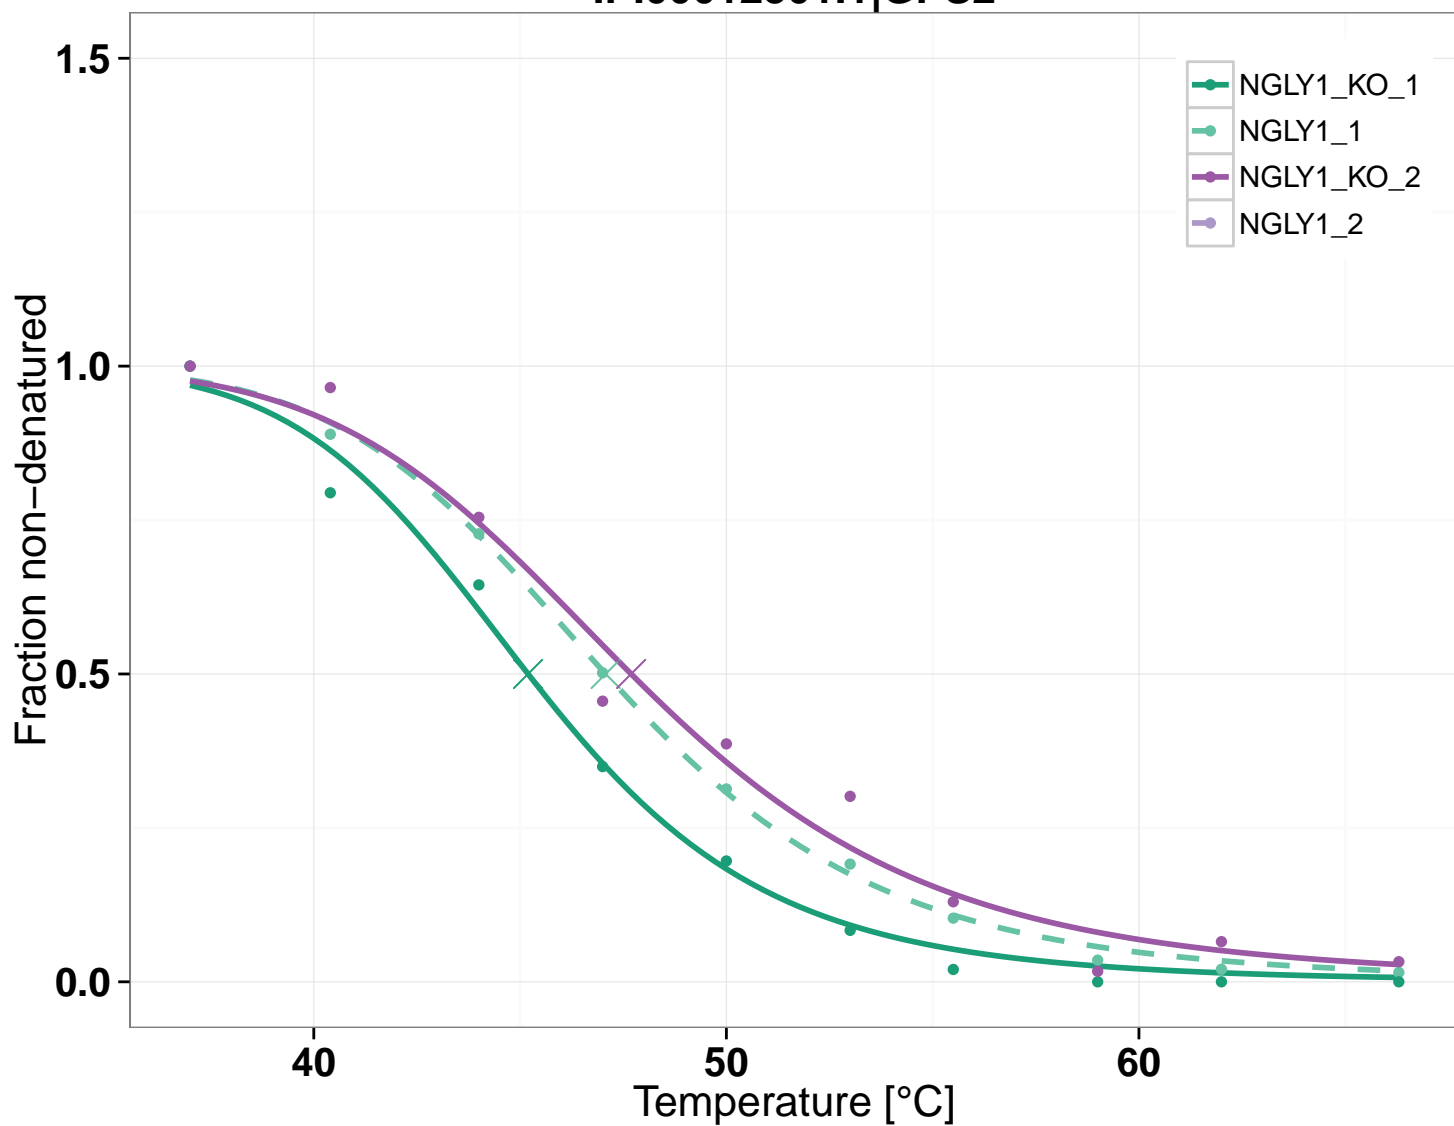

|            | meltPoint | slope  | plateau | R2   |
|------------|-----------|--------|---------|------|
| NGLY1_KO_1 | 45.19     | -0.087 | 0       | 0.99 |
| NGLY1_1    | 47.07     | -0.075 | 0       | 1    |
| NGLY1_KO_2 | 47.69     | -0.069 | 0       | 0.98 |
| NGLY1_2    | -         | -      | -       | -    |

Supplement: Supplementary file 3905 [file 1]

IPI00304069.3|RPUSD4

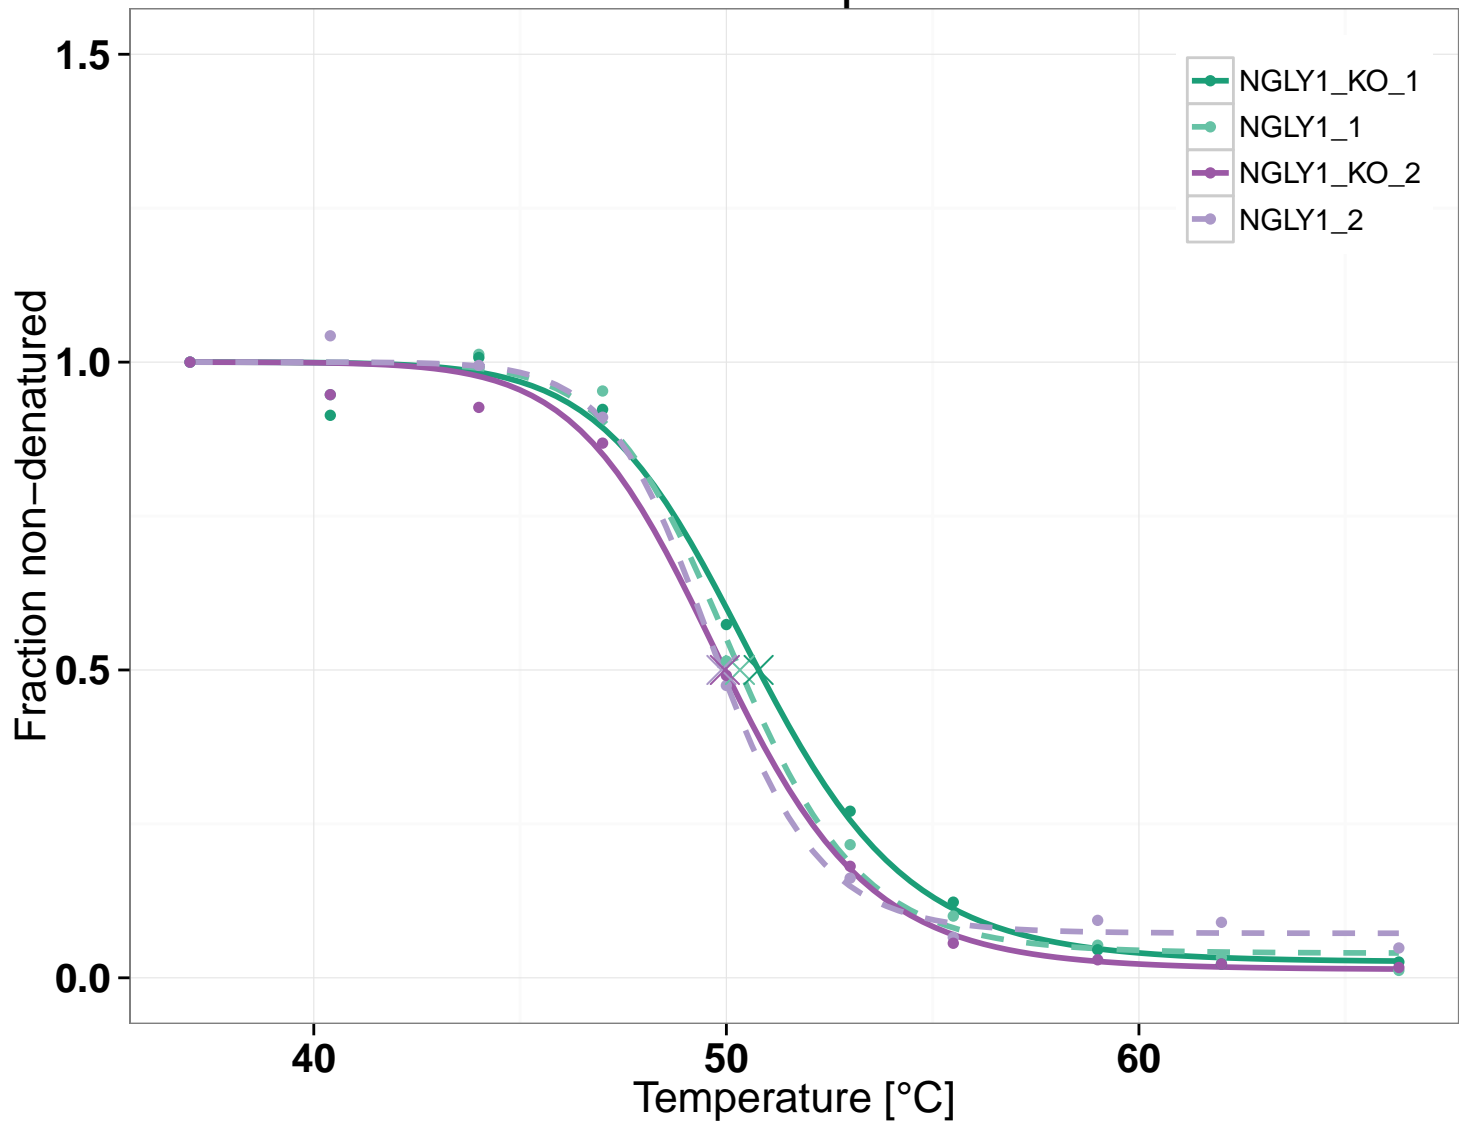

|            | meltPoint | slope | plateau | R2   |
|------------|-----------|-------|---------|------|
| NGLY1_KO_1 | 50.78     | -0.13 | 0.03    | 0.99 |
| NGLY1_1    | 50.33     | -0.16 | 0.04    | 0.99 |
| NGLY1_KO_2 | 49.96     | -0.14 | 0.01    | 1    |
| NGLY1_2    | 49.88     | -0.18 | 0.07    | 1    |

Supplement: Supplementary file 3906 [file 1]

IPI00019488.1|IMP3

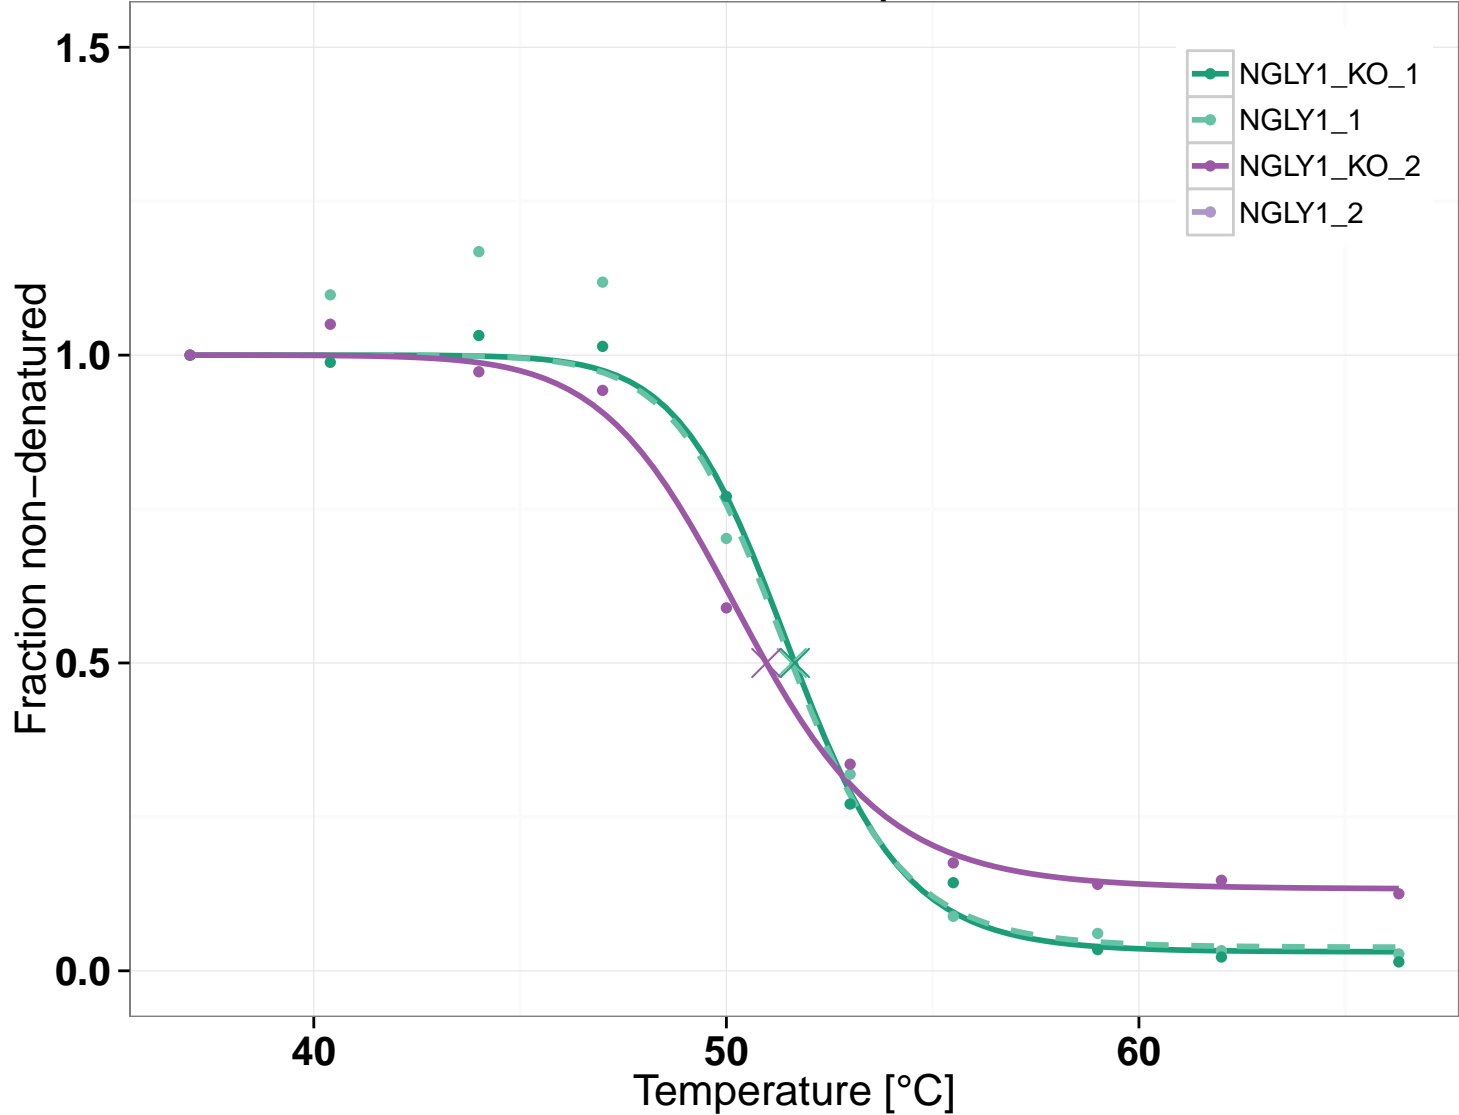

|            | meltPoint | slope | plateau | R2   |
|------------|-----------|-------|---------|------|
| NGLY1_KO_1 | 51.66     | -0.18 | 0.03    | 1    |
| NGLY1_1    | 51.58     | -0.17 | 0.04    | 0.97 |
| NGLY1_KO_2 | 50.97     | -0.13 | 0.13    | 1    |
| NGLY1_2    | -         | -     | -       | -    |

Supplement: Supplementary file 3907 [file 1]

IPI00168635.3|ABCC10

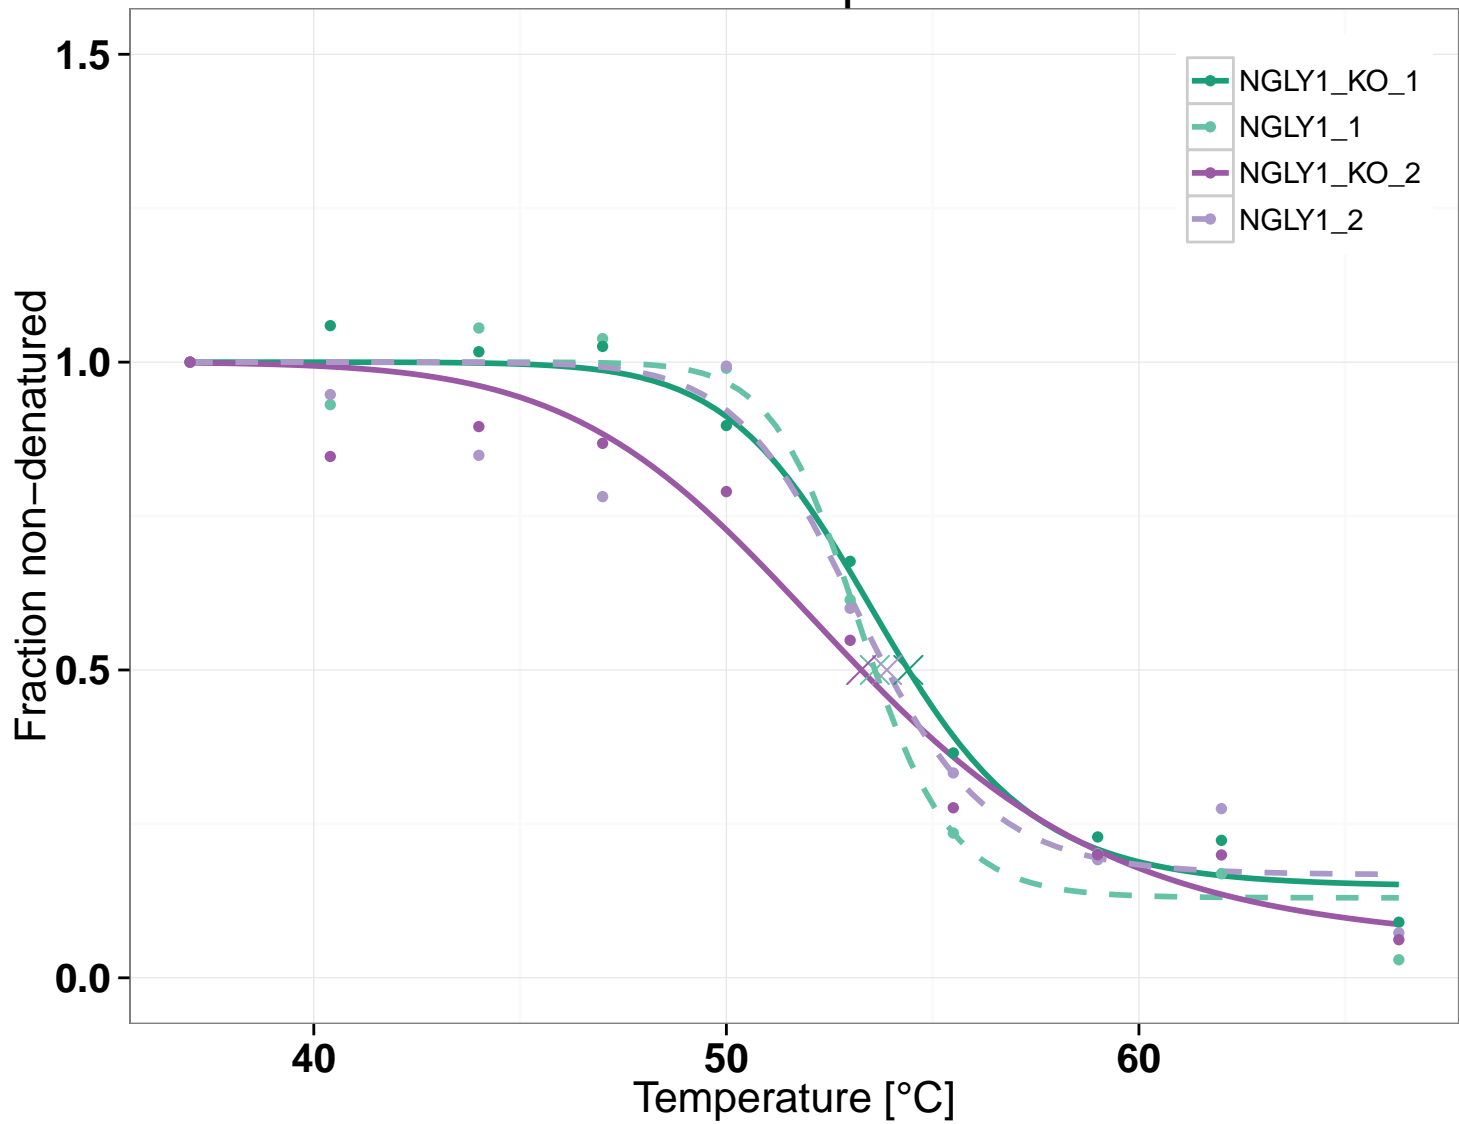

|            | meltPoint | slope  | plateau | R2   |
|------------|-----------|--------|---------|------|
| NGLY1_KO_1 | 54.41     | -0.11  | 0.15    | 0.99 |
| NGLY1_1    | 53.6      | -0.2   | 0.13    | 0.98 |
| NGLY1_KO_2 | 53.27     | -0.071 | 0.05    | 0.96 |
| NGLY1_2    | 53.89     | -0.14  | 0.17    | 0.92 |

Supplement: Supplementary file 3908 [file 1]

# IPI00783874.2|HDHD2

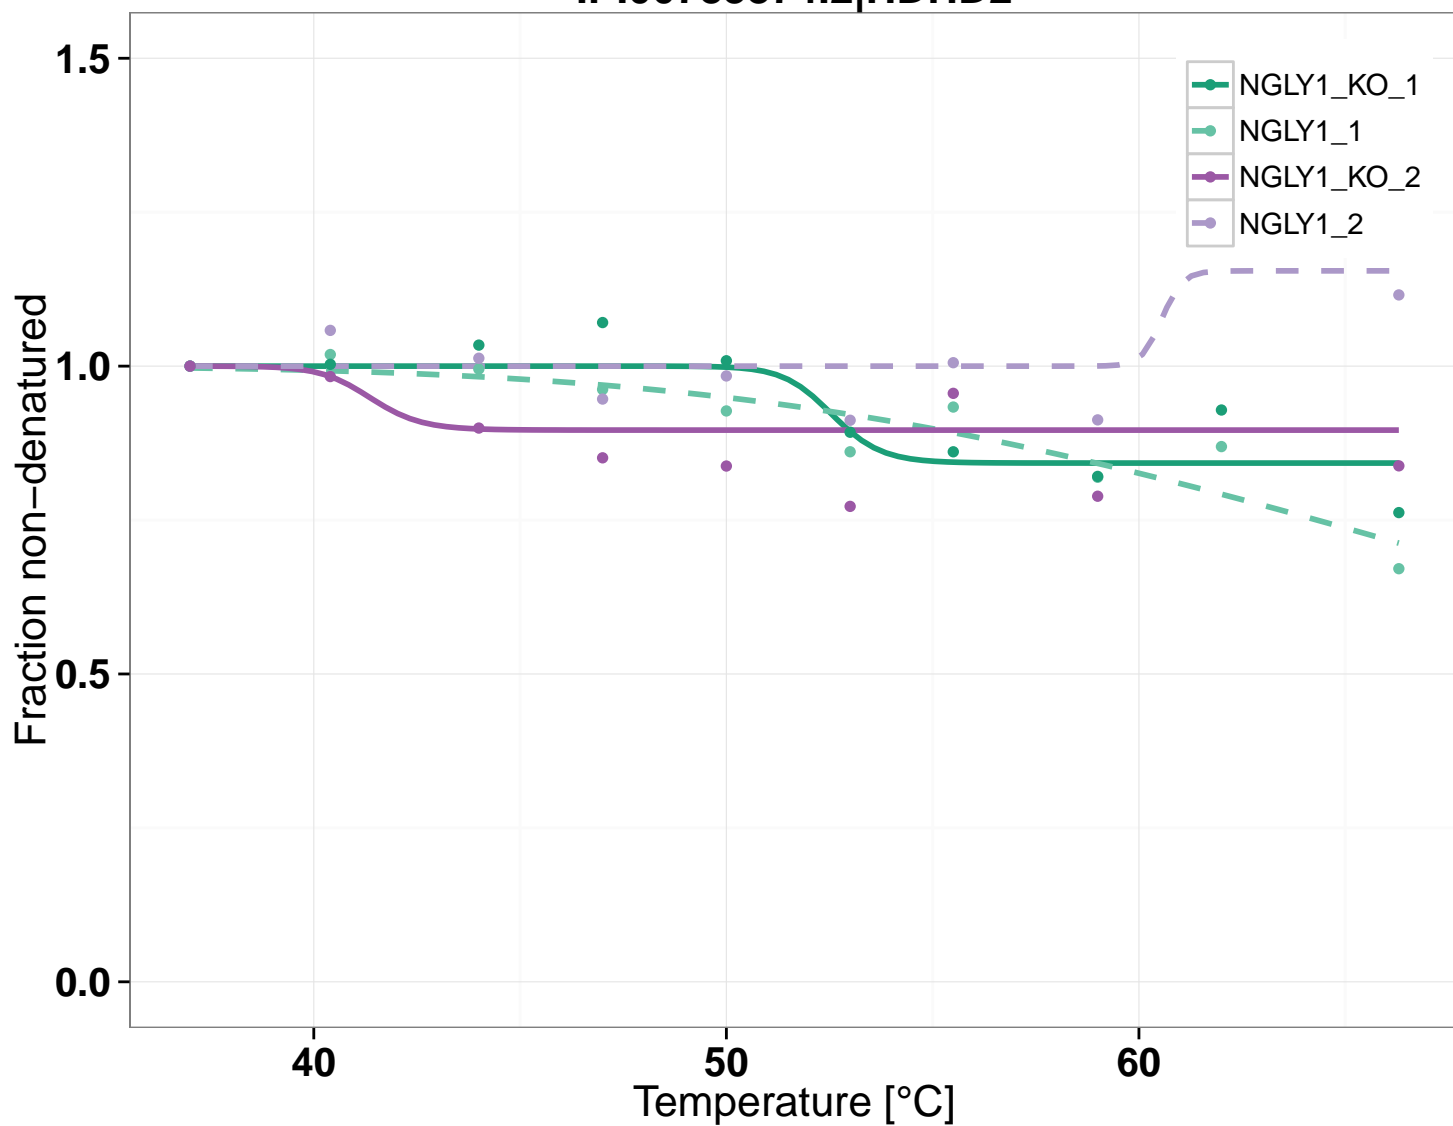

|            | meltPoint | slope  | plateau | R2   |
|------------|-----------|--------|---------|------|
| NGLY1_KO_1 | –         | –0.066 | 0.84    | 0.77 |
| NGLY1_1    | –         | –      | 0       | 0.85 |
| NGLY1_KO_2 | –         | –0.042 | 0.9     | 0.09 |
| NGLY1_2    | –         | 0.16   | 1.15    | 0.65 |

Supplement: Supplementary file 3909 [file 1]

IPI00024670.5|REEP5

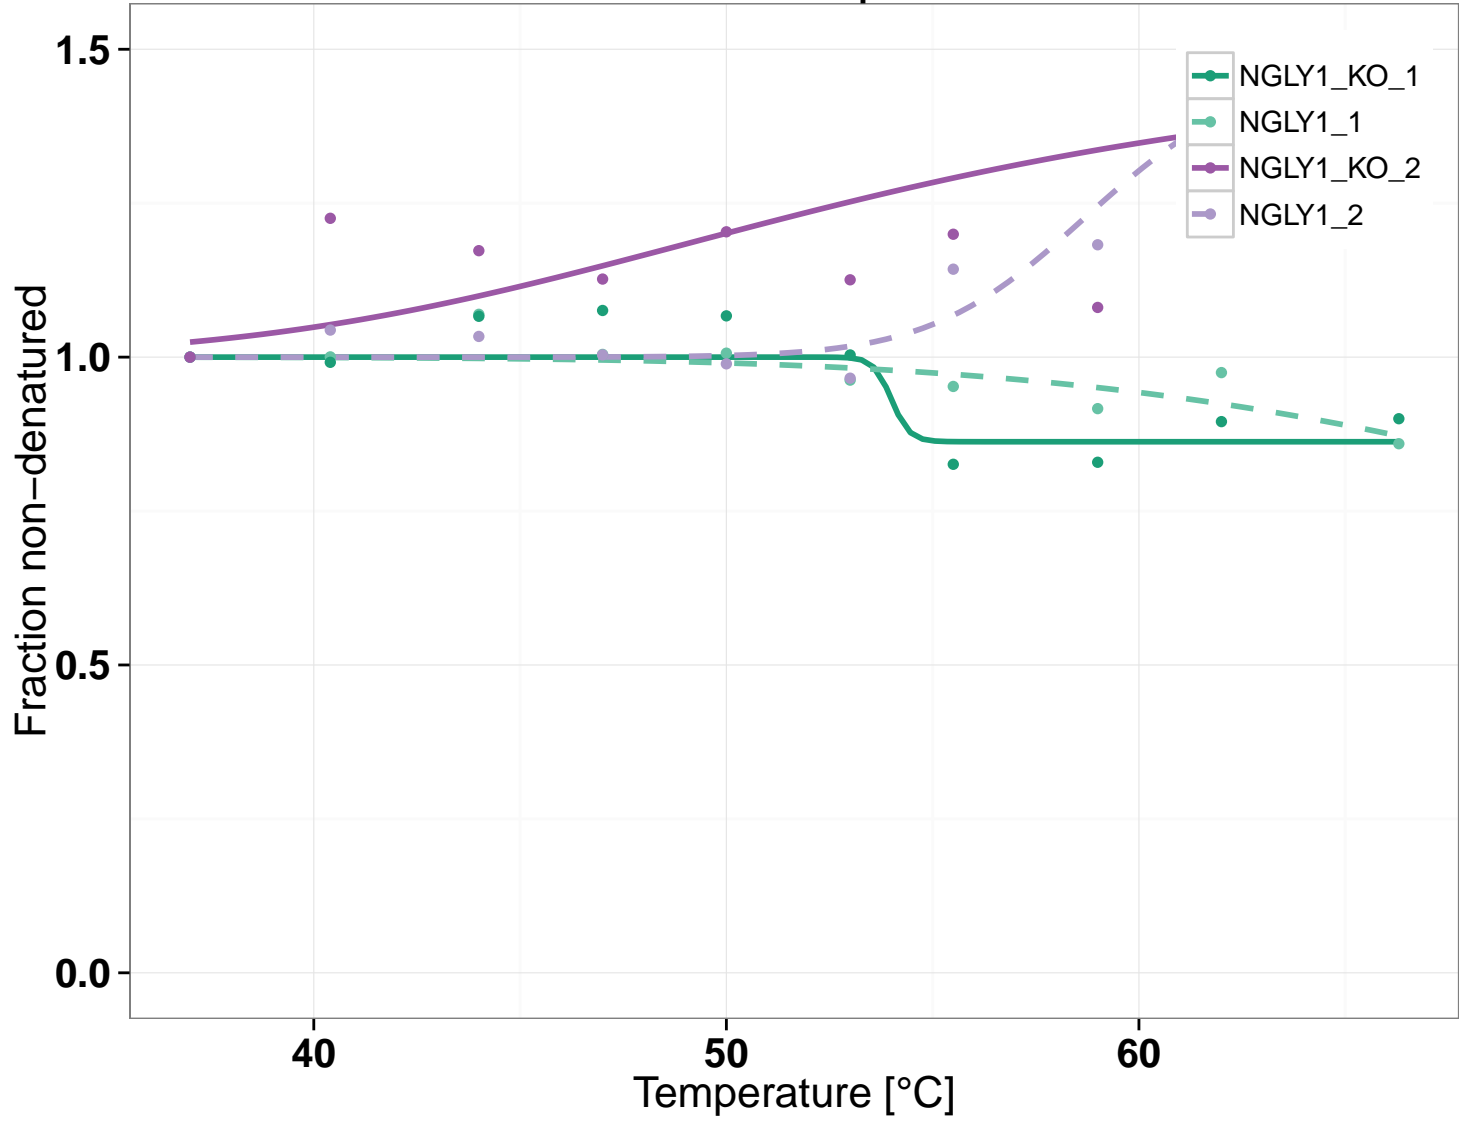

|            | meltPoint | slope | plateau | R2   |
|------------|-----------|-------|---------|------|
| NGLY1_KO_1 | -         | -0.16 | 0.86    | 0.76 |
| NGLY1_1    | -         | -     | 0       | 0.66 |
| NGLY1_KO_2 | -         | 0.018 | 1.5     | 0.35 |
| NGLY1_2    | -         | 0.06  | 1.49    | 0.93 |

Supplement: Supplementary file 3910 [file 1]

IPI00300026.6|SULT1A1

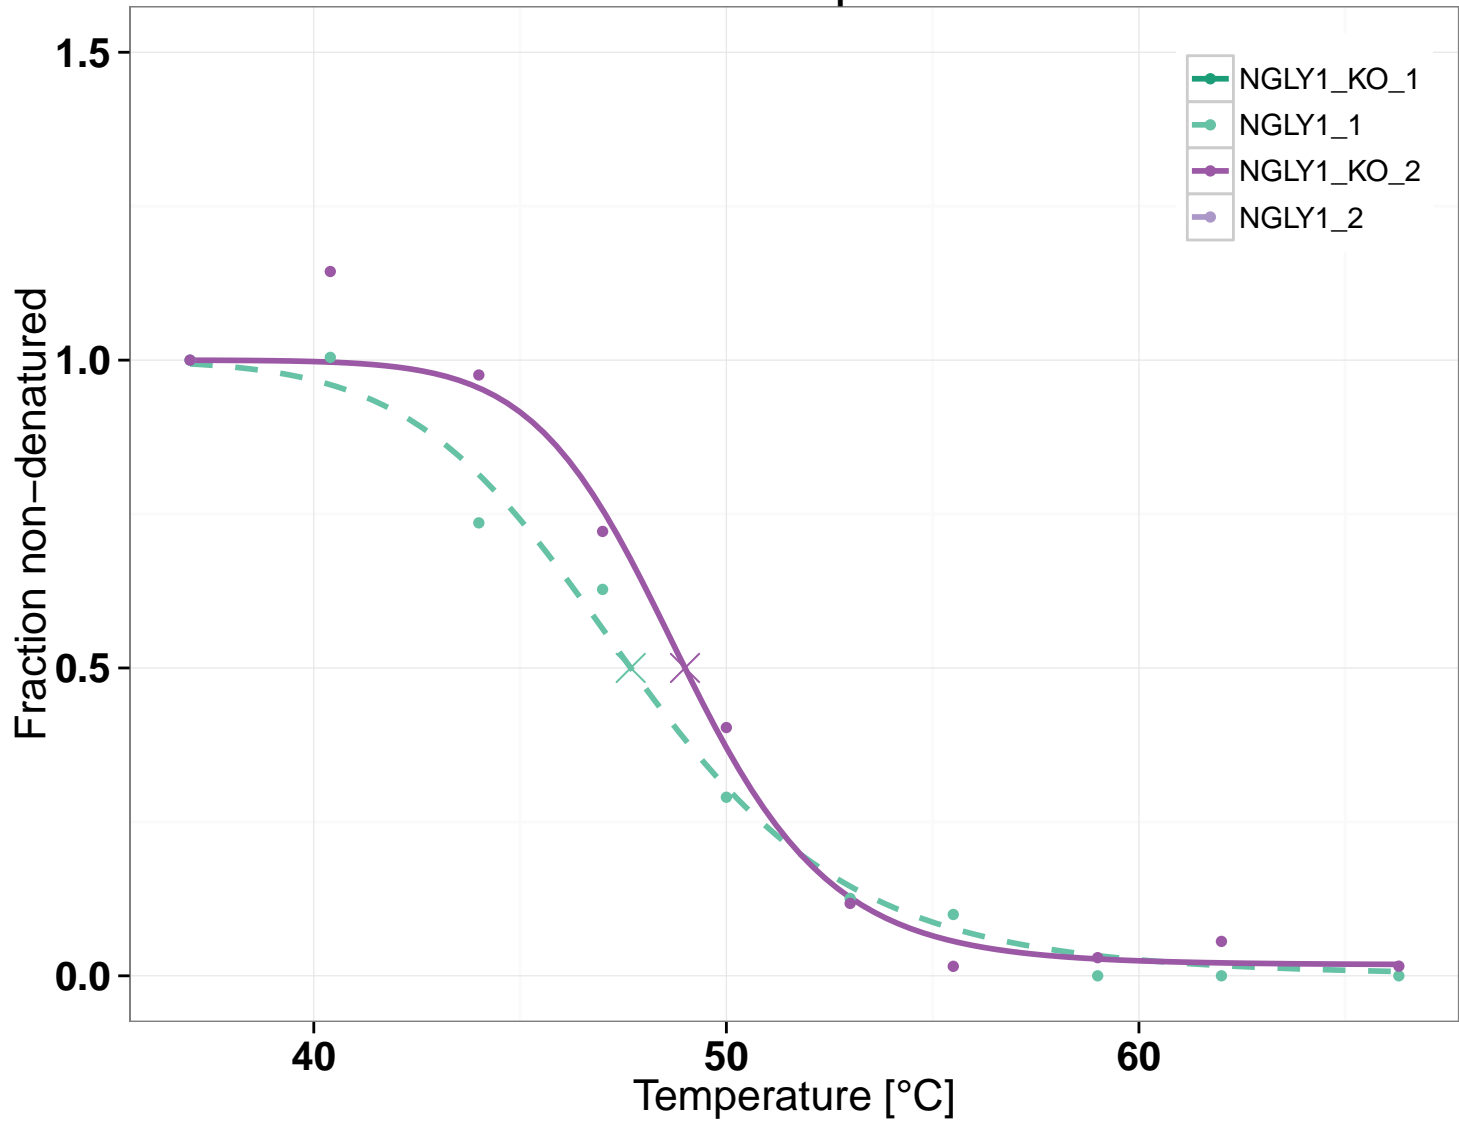

|            | meltPoint | slope  | plateau | R2   |
|------------|-----------|--------|---------|------|
| NGLY1_KO_1 | -         | -      | -       | -    |
| NGLY1_1    | 47.68     | -0.094 | 0       | 0.99 |
| NGLY1_KO_2 | 49        | -0.14  | 0.02    | 0.99 |
| NGLY1_2    | -         | -      | -       | -    |

Supplement: Supplementary file 3911 [file 1]

IPI00410485.2|TAOK3

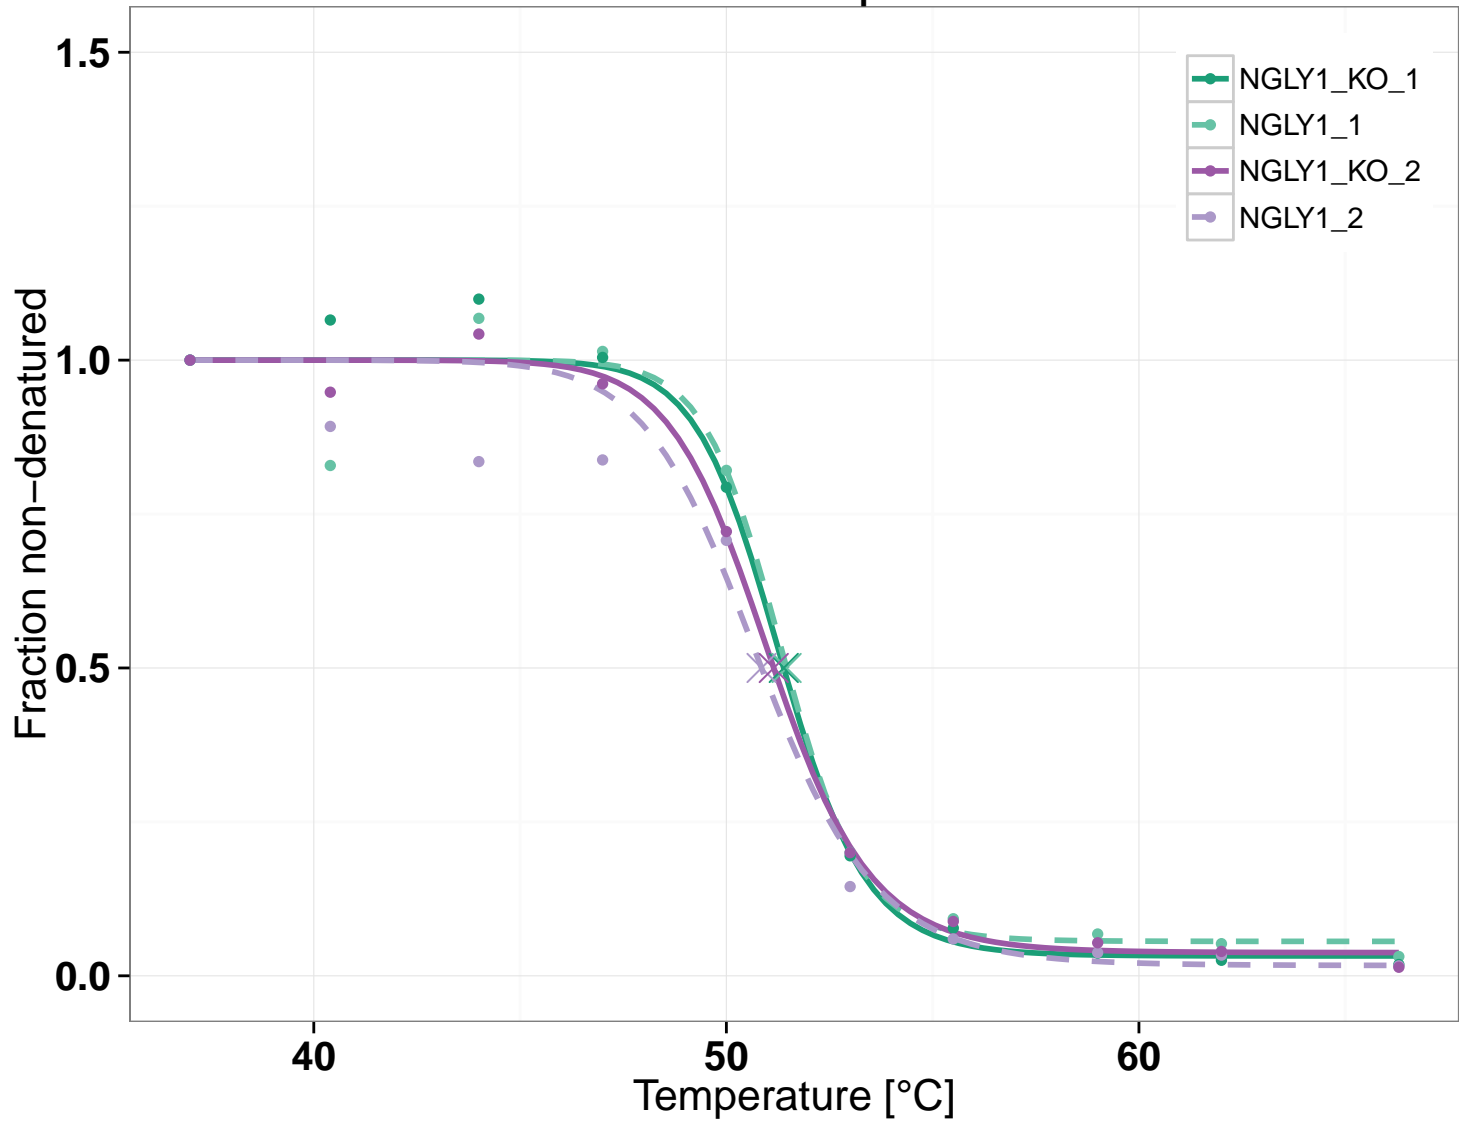

|            | meltPoint | slope | plateau | R2   |
|------------|-----------|-------|---------|------|
| NGLY1_KO_1 | 51.39     | -0.23 | 0.03    | 0.99 |
| NGLY1_1    | 51.46     | -0.25 | 0.06    | 0.98 |
| NGLY1_KO_2 | 51.15     | -0.2  | 0.04    | 1    |
| NGLY1_2    | 50.85     | -0.17 | 0.02    | 0.97 |

Supplement: Supplementary file 3912 [file 1]

IPI00915342.1|LMO2

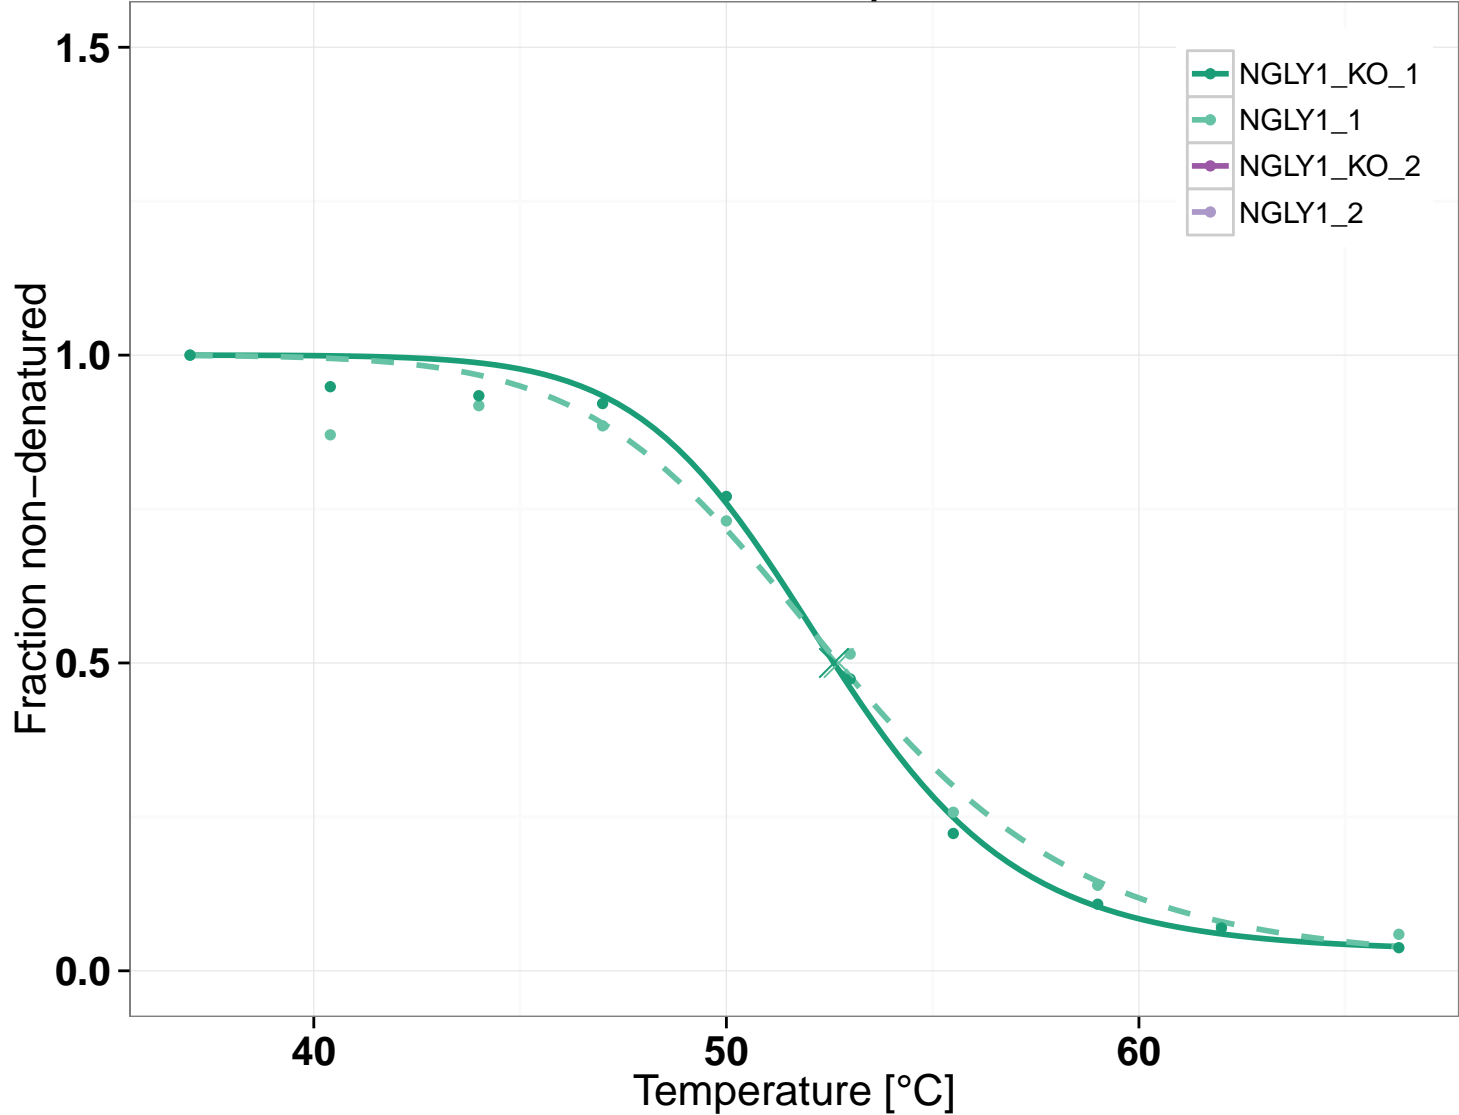

|            | meltPoint | slope  | plateau | R2   |
|------------|-----------|--------|---------|------|
| NGLY1_KO_1 | 52.61     | -0.1   | 0.03    | 1    |
| NGLY1_1    | 52.72     | -0.082 | 0.01    | 0.98 |
| NGLY1_KO_2 | -         | -      | -       | -    |
| NGLY1_2    | -         | -      | -       | -    |

Supplement: Supplementary file 3913 [file 1]

IPI00219179.6|ERCC4

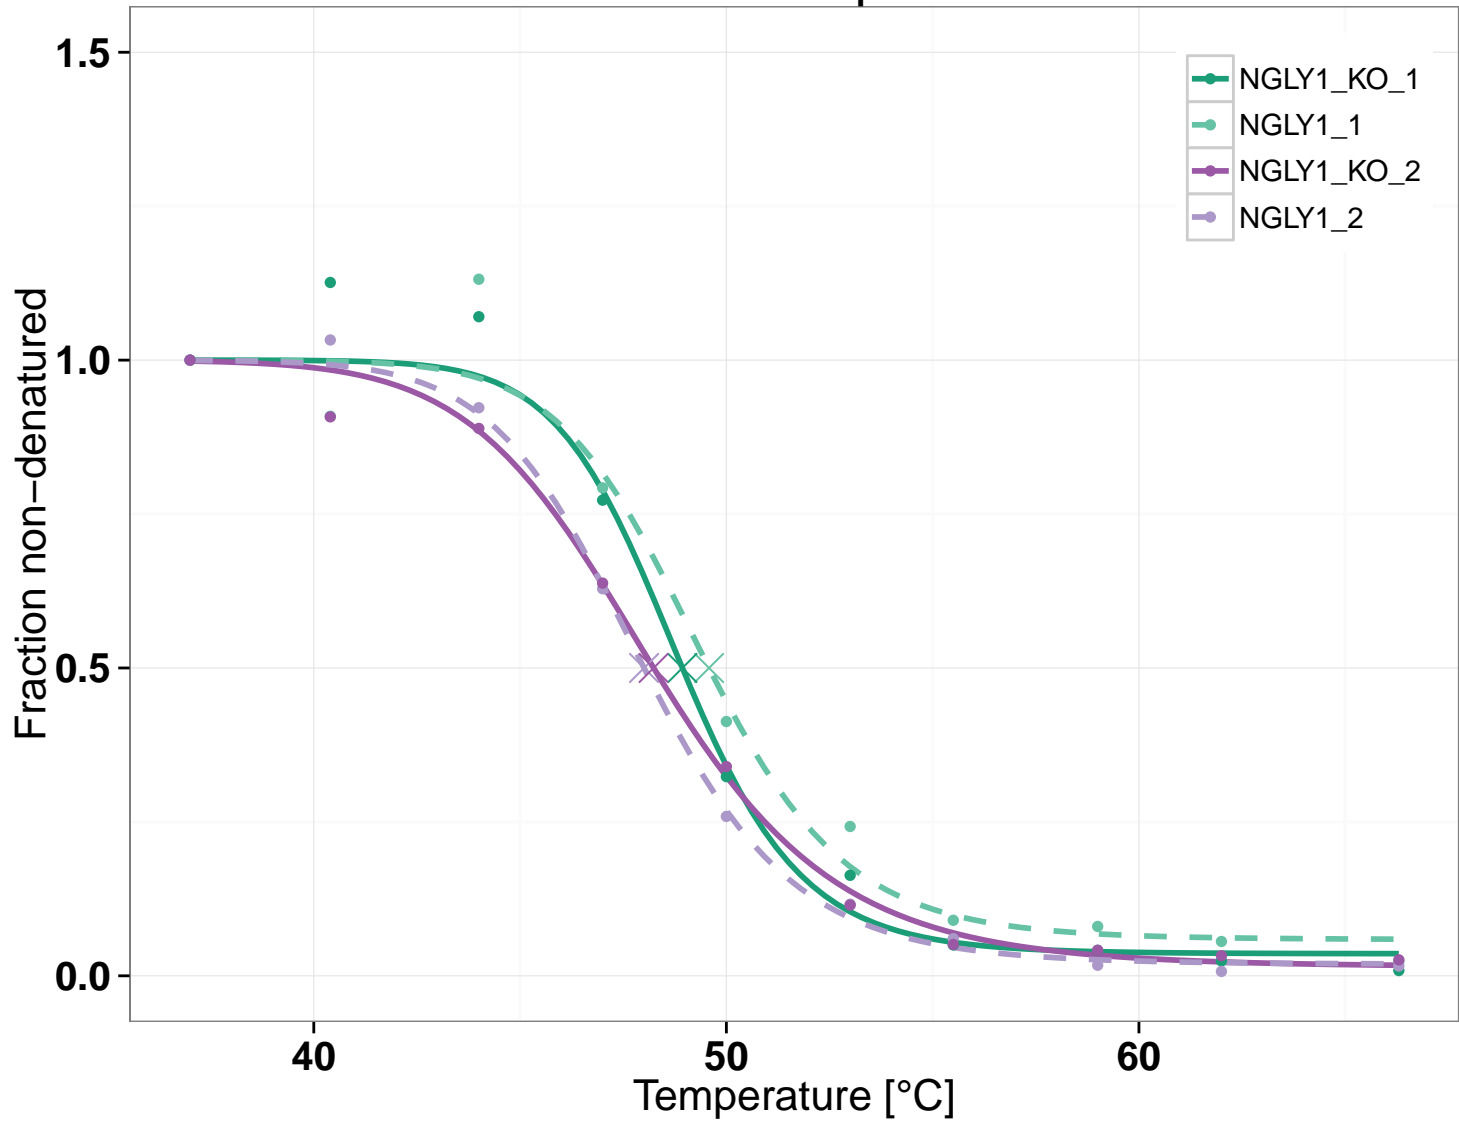

|            | meltPoint | slope | plateau | R2   |
|------------|-----------|-------|---------|------|
| NGLY1_KO_1 | 48.93     | -0.16 | 0.04    | 0.99 |
| NGLY1_1    | 49.58     | -0.14 | 0.06    | 0.98 |
| NGLY1_KO_2 | 48.24     | -0.11 | 0.01    | 1    |
| NGLY1_2    | 48.01     | -0.13 | 0.02    | 1    |

Supplement: Supplementary file 3914 [file 1]

IPI00003519.1|EFTUD2

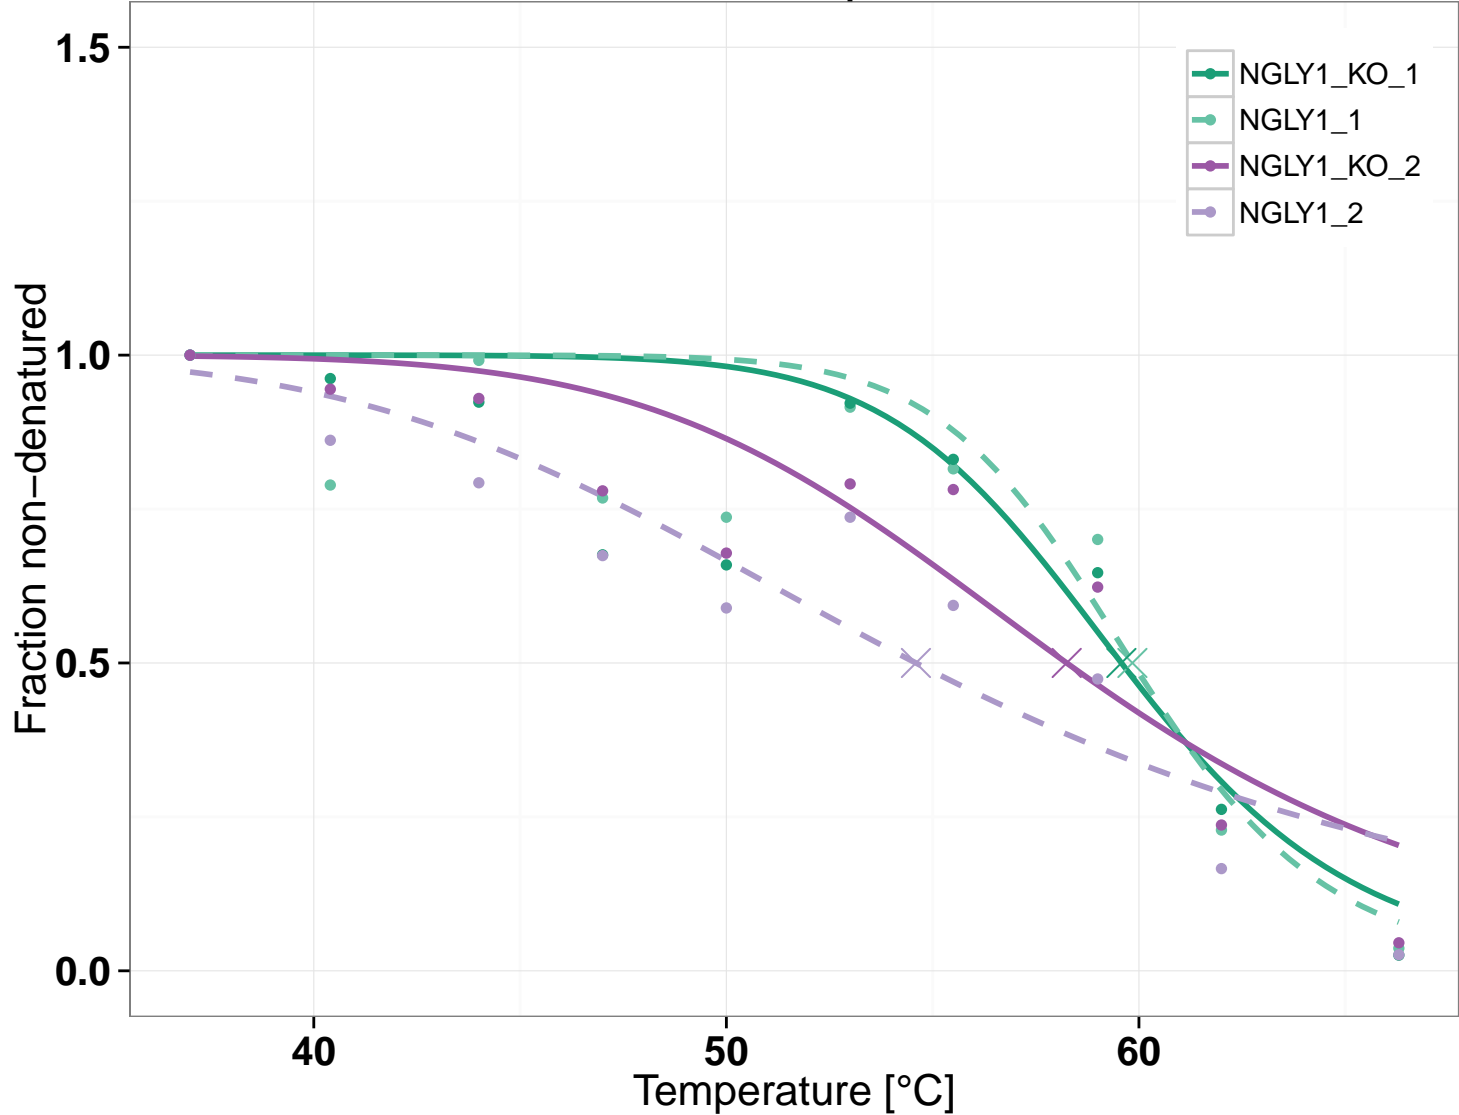

|            | meltPoint | slope  | plateau | R2   |
|------------|-----------|--------|---------|------|
| NGLY1_KO_1 | 59.58     | -0.088 | 0       | 0.75 |
| NGLY1_1    | 59.84     | -0.11  | 0       | 0.79 |
| NGLY1_KO_2 | 58.25     | -0.05  | 0       | 0.83 |
| NGLY1_2    | 54.59     | -0.037 | 0       | 0.84 |

Supplement: Supplementary file 3915 [file 1]

IPI00301346.3|POLR3B

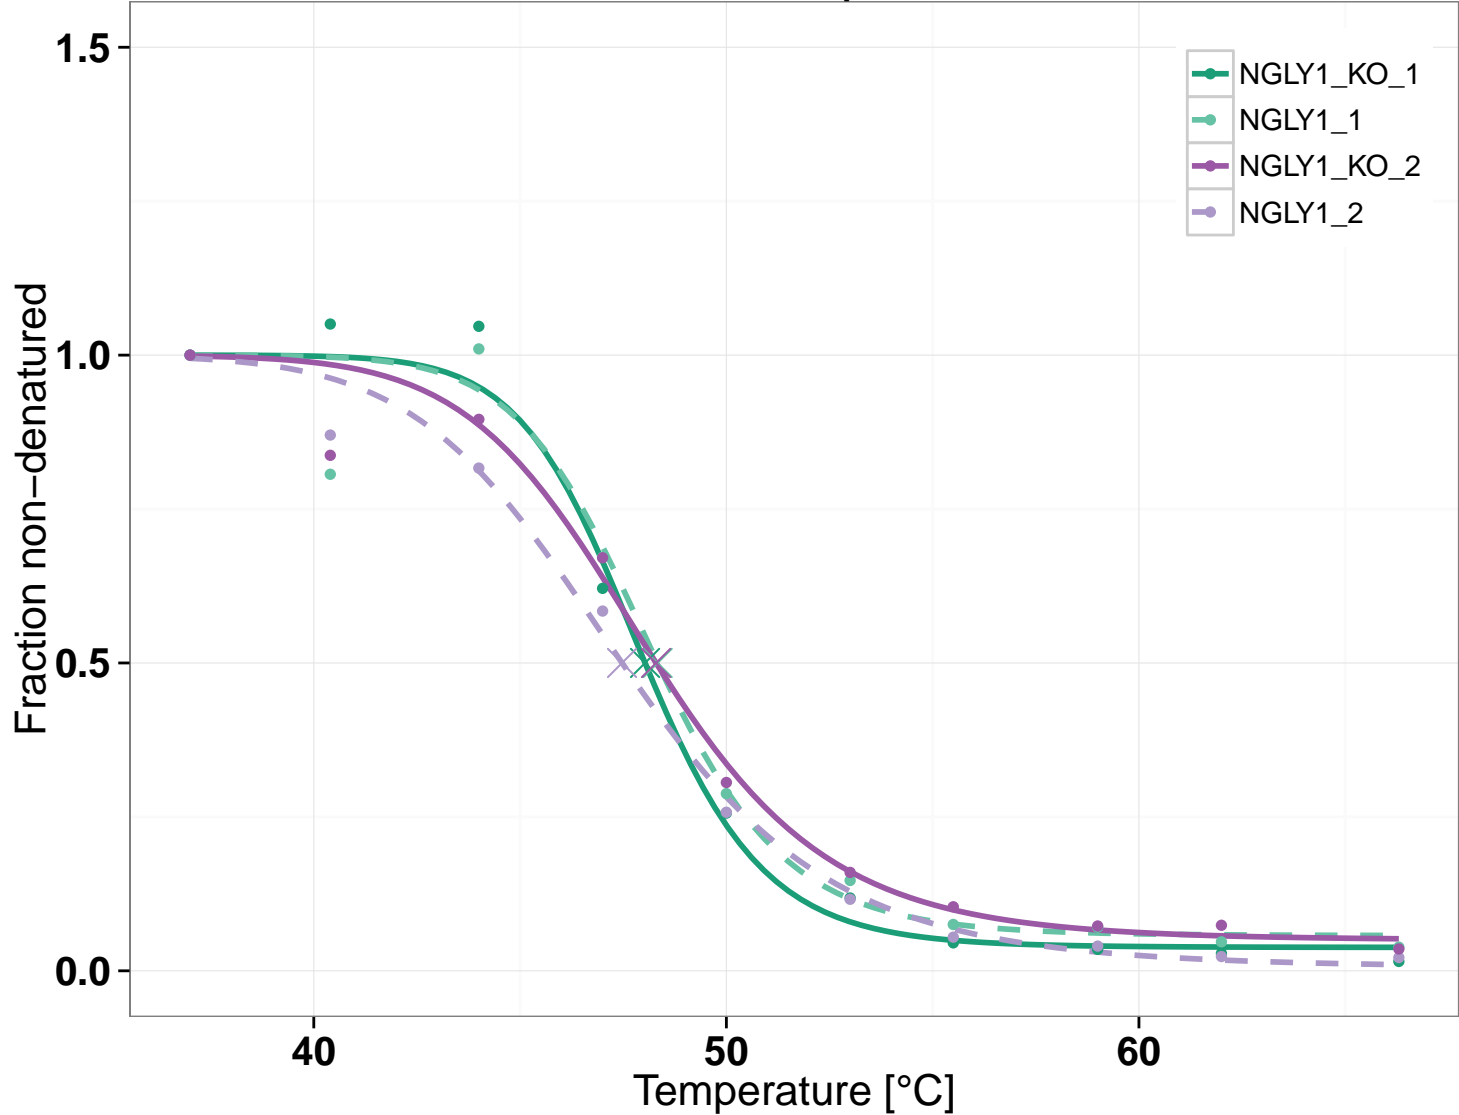

|            | meltPoint | slope  | plateau | R2   |
|------------|-----------|--------|---------|------|
| NGLY1_KO_1 | 48.03     | -0.16  | 0.04    | 0.99 |
| NGLY1_1    | 48.33     | -0.14  | 0.06    | 0.97 |
| NGLY1_KO_2 | 48.3      | -0.11  | 0.05    | 0.98 |
| NGLY1_2    | 47.47     | -0.099 | 0.01    | 0.99 |

Supplement: Supplementary file 3916 [file 1]

IPI00029372.2|C4ORF15

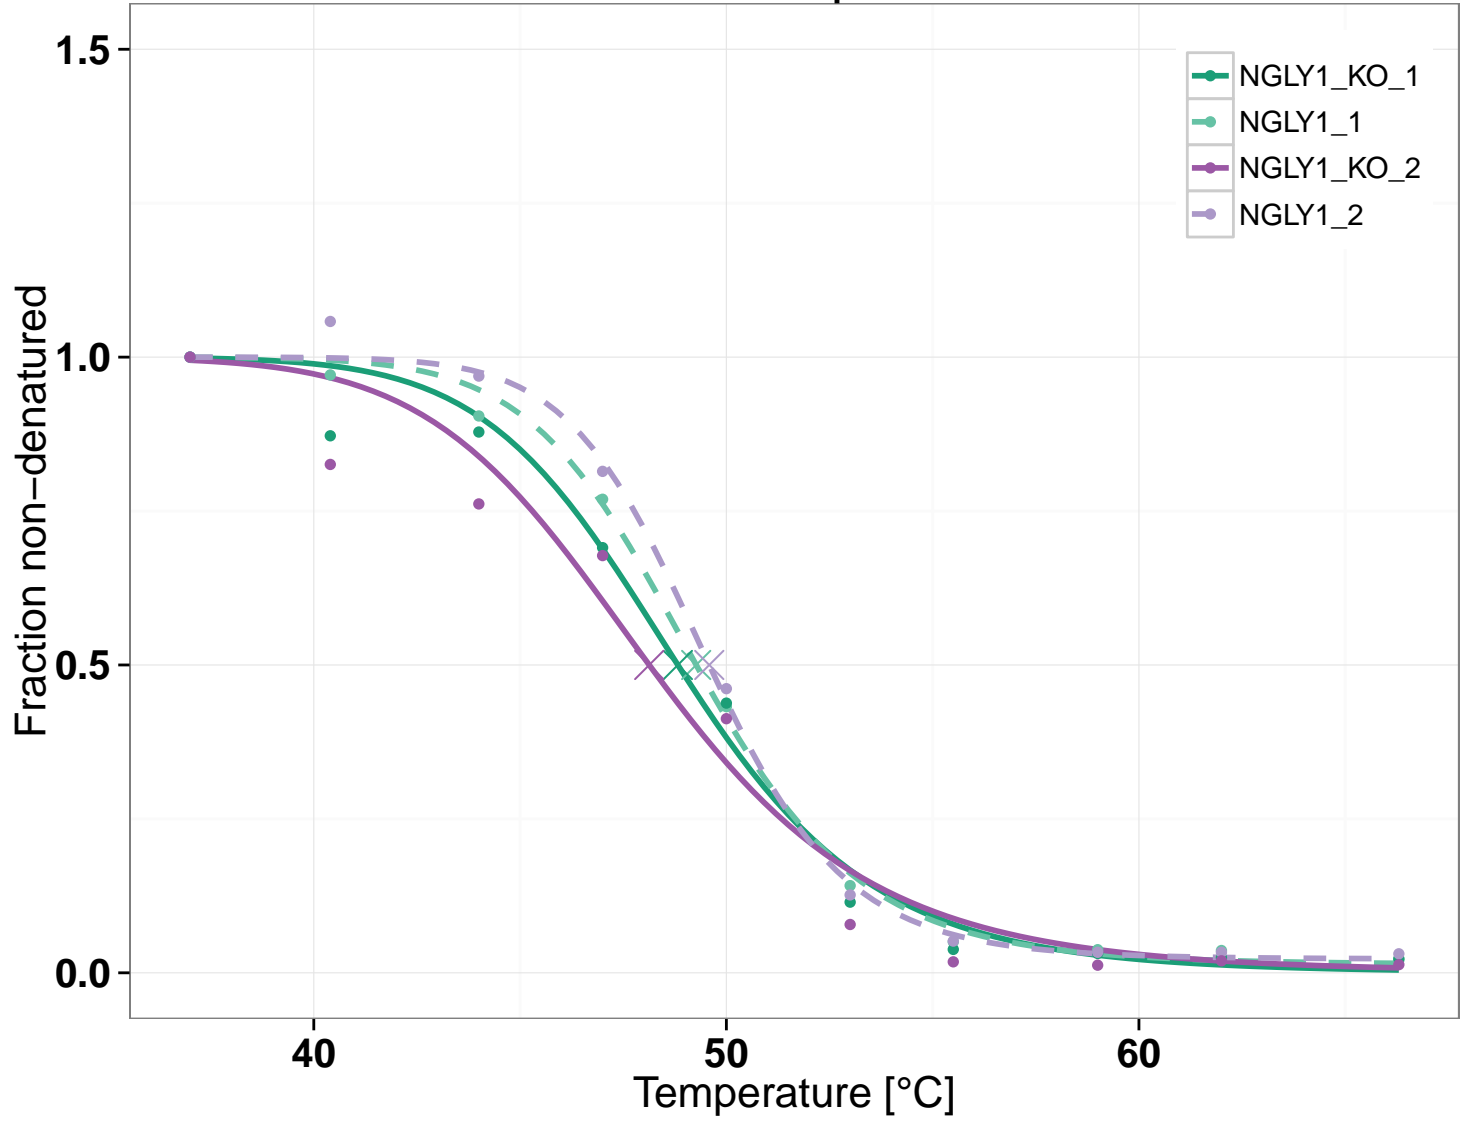

|            | meltPoint | slope  | plateau | R2   |
|------------|-----------|--------|---------|------|
| NGLY1_KO_1 | 48.82     | -0.11  | 0       | 0.99 |
| NGLY1_1    | 49.27     | -0.12  | 0.01    | 1    |
| NGLY1_KO_2 | 48.13     | -0.092 | 0       | 0.97 |
| NGLY1_2    | 49.59     | -0.15  | 0.02    | 1    |

Supplement: Supplementary file 3917 [file 1]

IPI00061171.1|ZMYND19

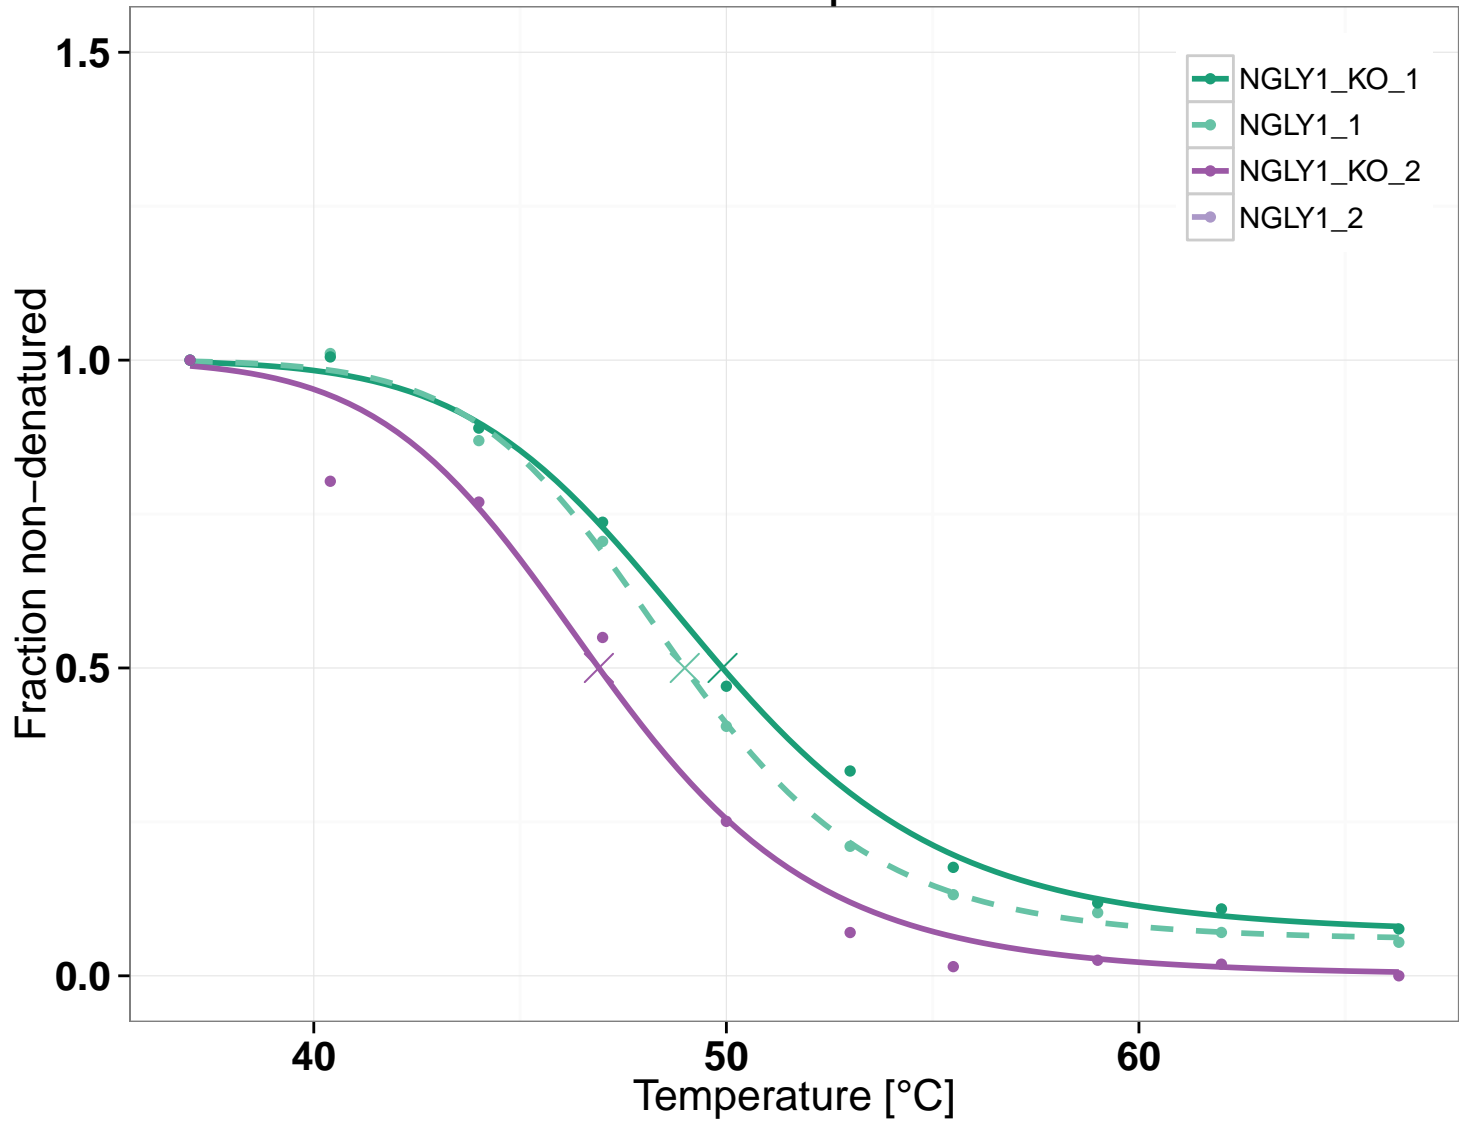

|            | meltPoint | slope  | plateau | R2   |
|------------|-----------|--------|---------|------|
| NGLY1_KO_1 | 49.91     | -0.081 | 0.07    | 1    |
| NGLY1_1    | 48.99     | -0.096 | 0.06    | 1    |
| NGLY1_KO_2 | 46.91     | -0.094 | 0       | 0.98 |
| NGLY1_2    | -         | -      | -       | -    |

Supplement: Supplementary file 3918 [file 1]

IPI00292487.3|TRIM68

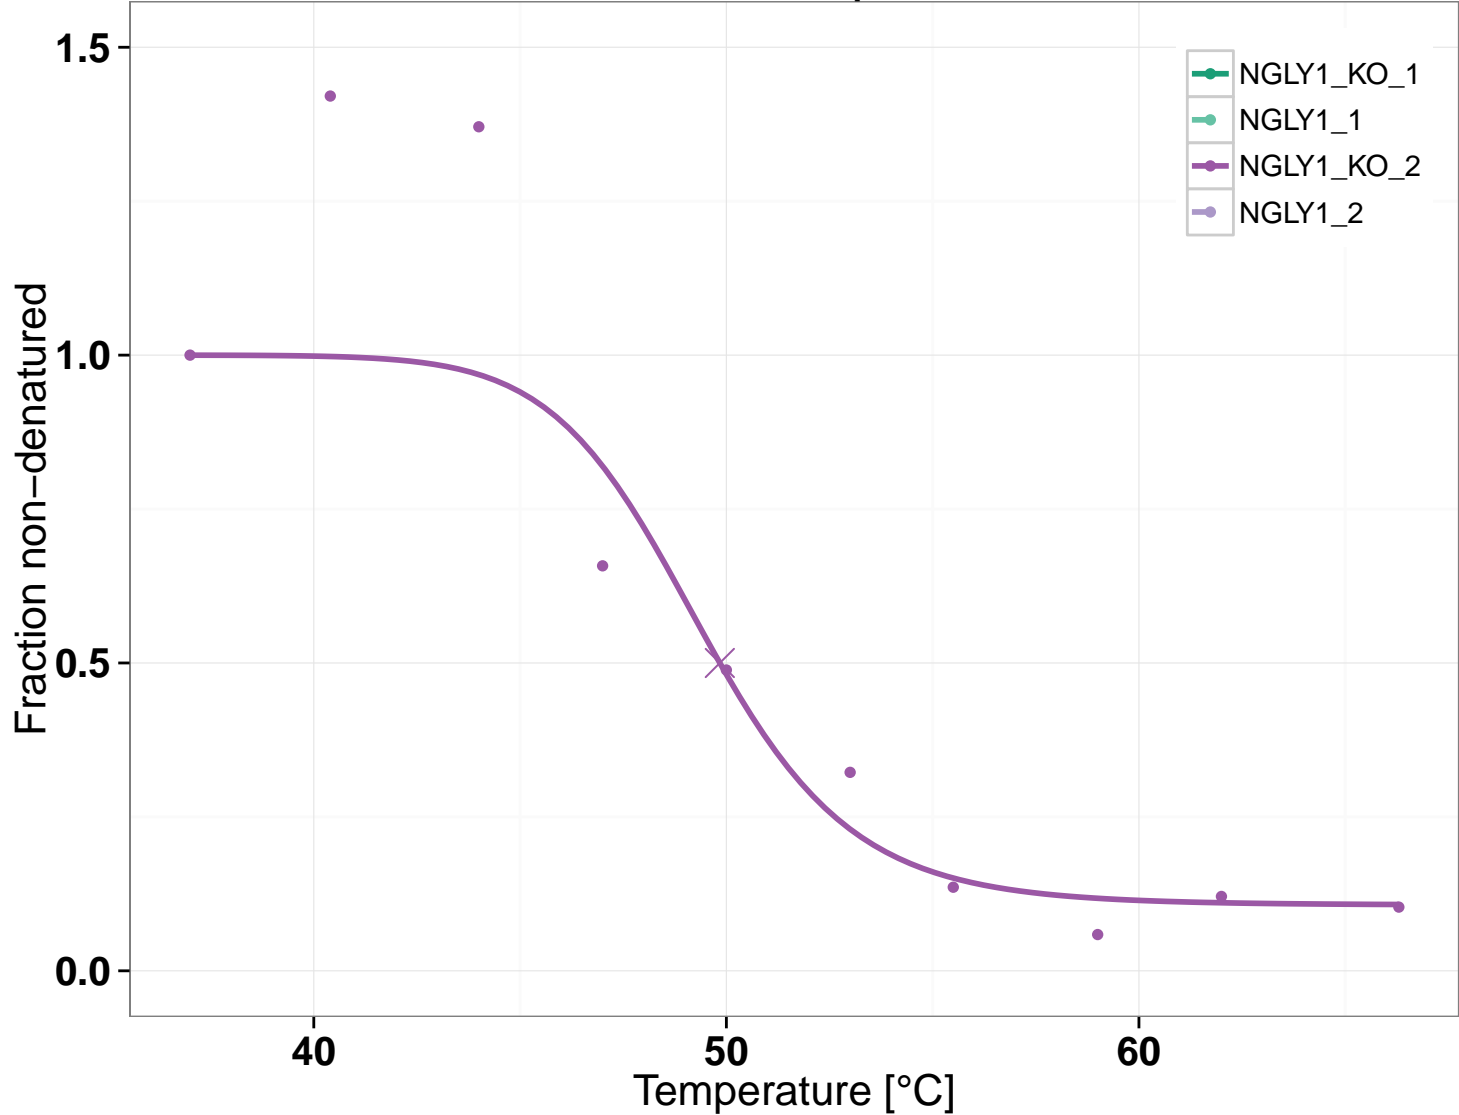

|            | meltPoint | slope | plateau | R2   |
|------------|-----------|-------|---------|------|
| NGLY1_KO_1 | —         | —     | —       | —    |
| NGLY1_1    | —         | —     | —       | —    |
| NGLY1_KO_2 | 49.84     | -0.12 | 0.11    | 0.85 |
| NGLY1_2    | —         | —     | —       | —    |

Supplement: Supplementary file 3919 [file 1]
