# Supplementary material (part 40 of 85)
Source: publisher figshare collection journal article supplement (https://gsajournals.figshare.com/articles/dataset/_/12014913)

# IPI00425404.2|KIF21A

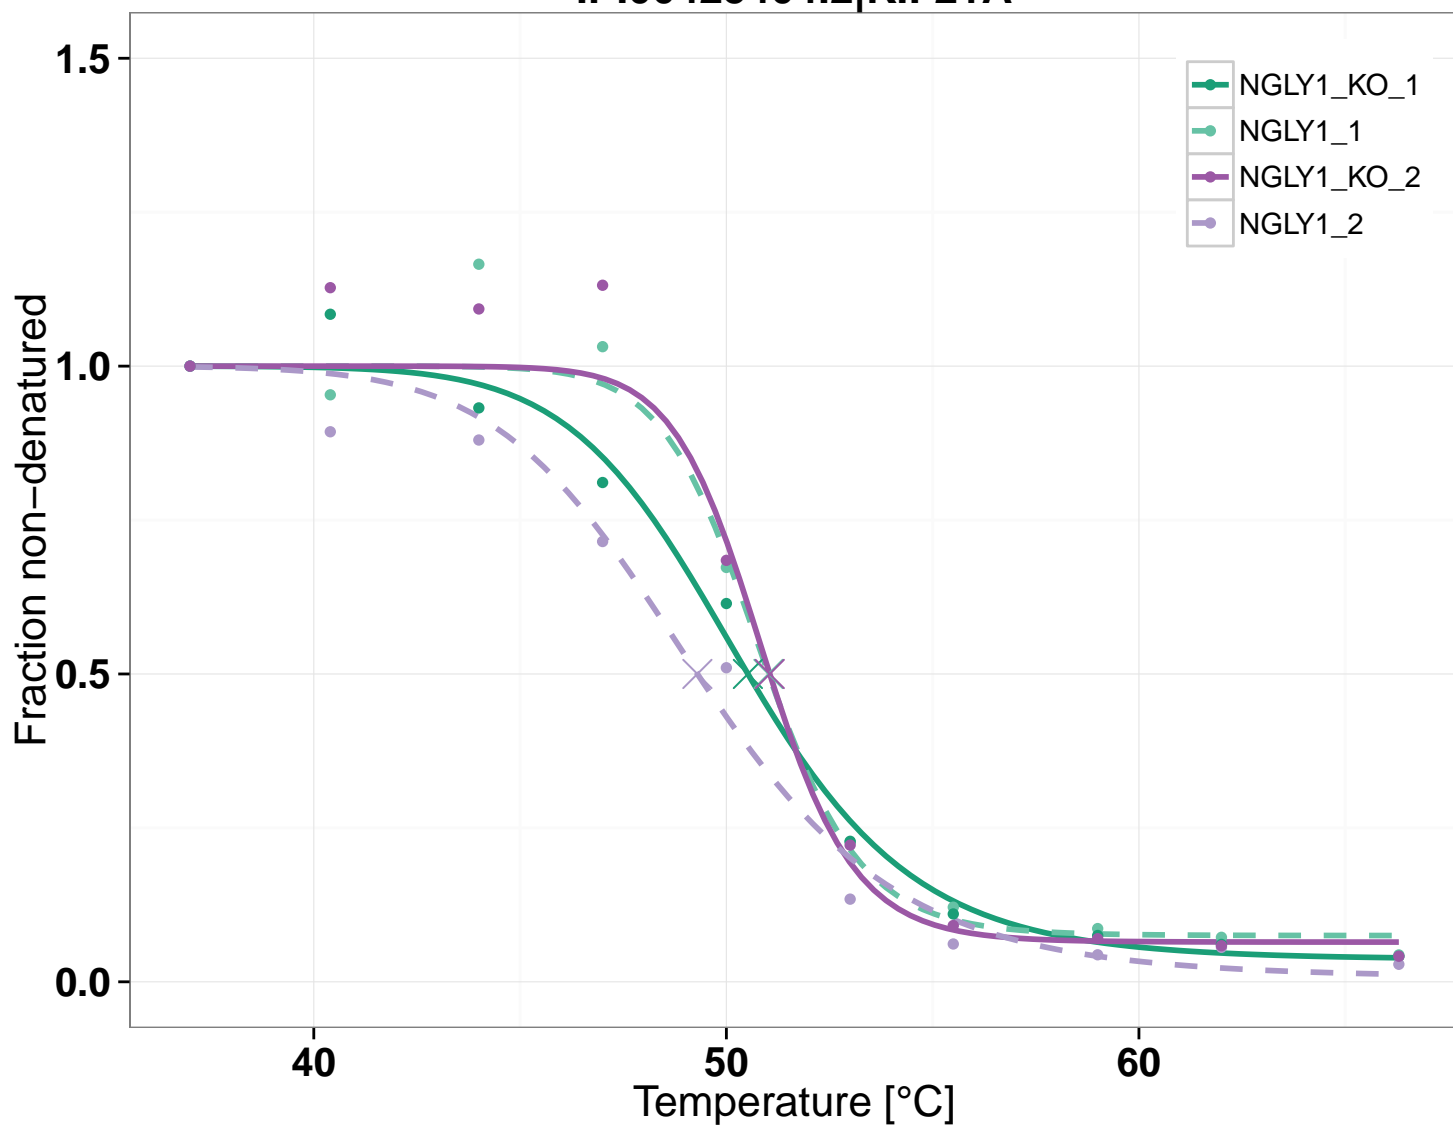

|            | meltPoint | slope | plateau | R2   |
|------------|-----------|-------|---------|------|
| NGLY1_KO_1 | 50.52     | -0.12 | 0.04    | 0.99 |
| NGLY1_1    | 51.02     | -0.19 | 0.08    | 0.98 |
| NGLY1_KO_2 | 51.05     | -0.21 | 0.06    | 0.98 |
| NGLY1_2    | 49.3      | -0.1  | 0.01    | 0.98 |

Supplement: Supplementary file 3920 [file 1]

IPI00644438.1|TMEM201

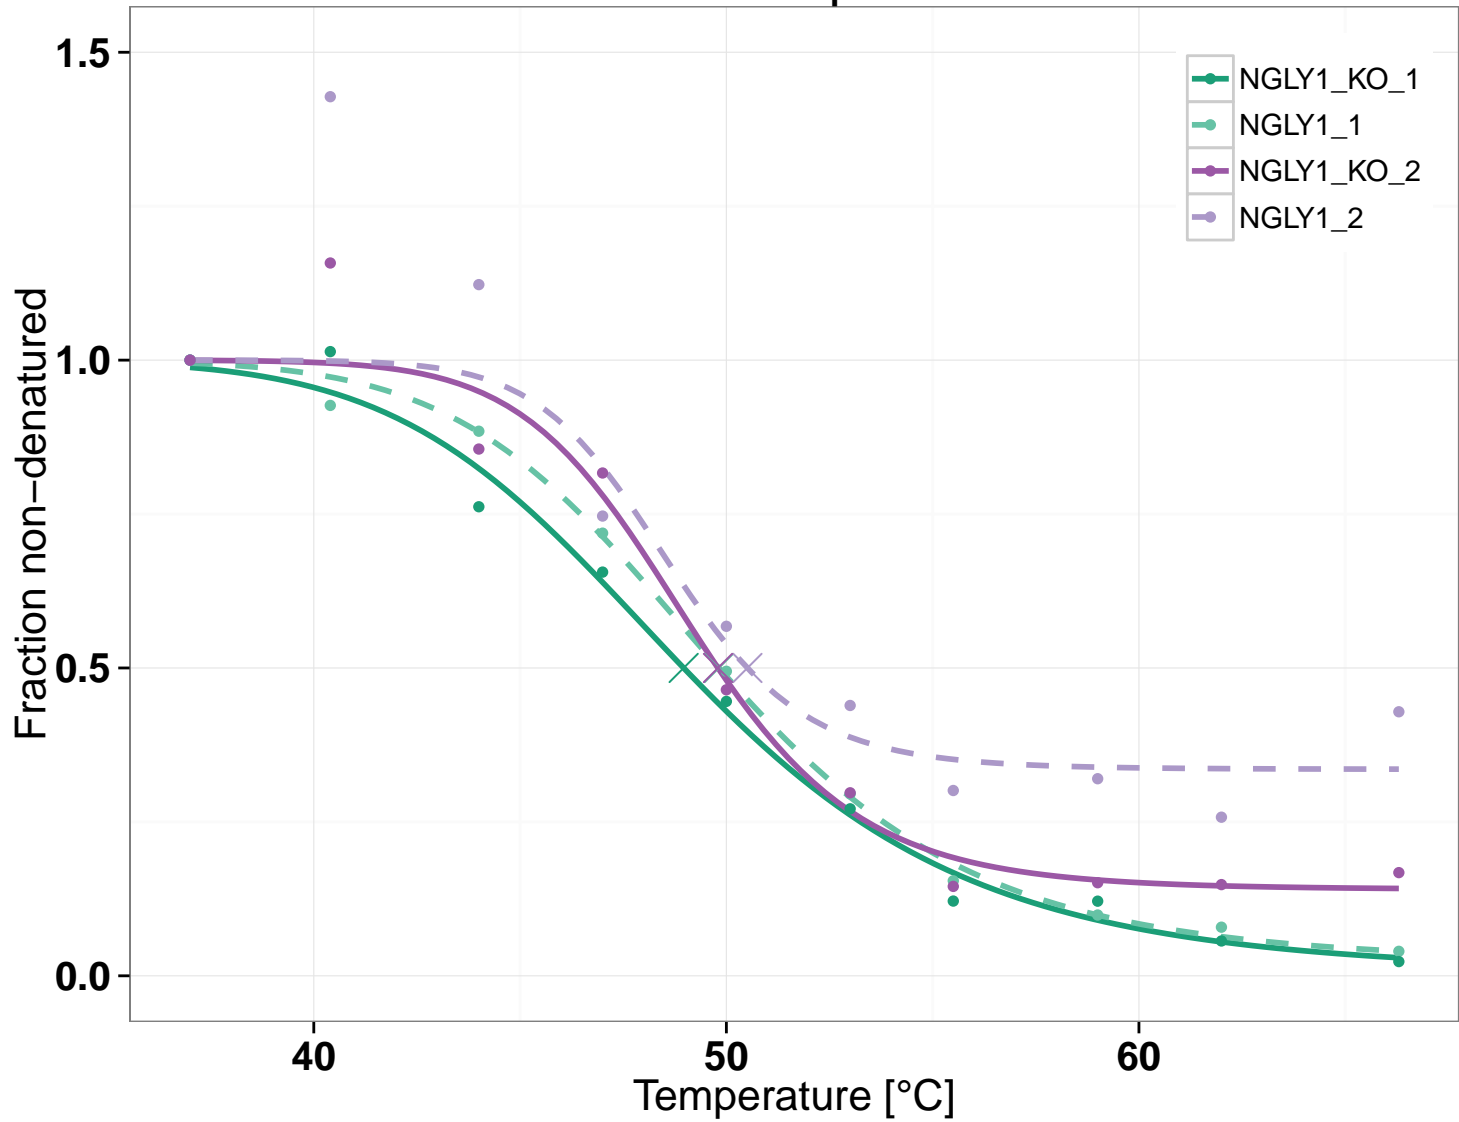

|            | meltPoint | slope  | plateau | R2   |
|------------|-----------|--------|---------|------|
| NGLY1_KO_1 | 48.96     | -0.071 | 0       | 0.99 |
| NGLY1_1    | 49.82     | -0.077 | 0.02    | 1    |
| NGLY1_KO_2 | 49.8      | -0.11  | 0.14    | 0.97 |
| NGLY1_2    | 50.51     | -0.1   | 0.34    | 0.84 |

Supplement: Supplementary file 3921 [file 1]

IPI00337439.2|TK2

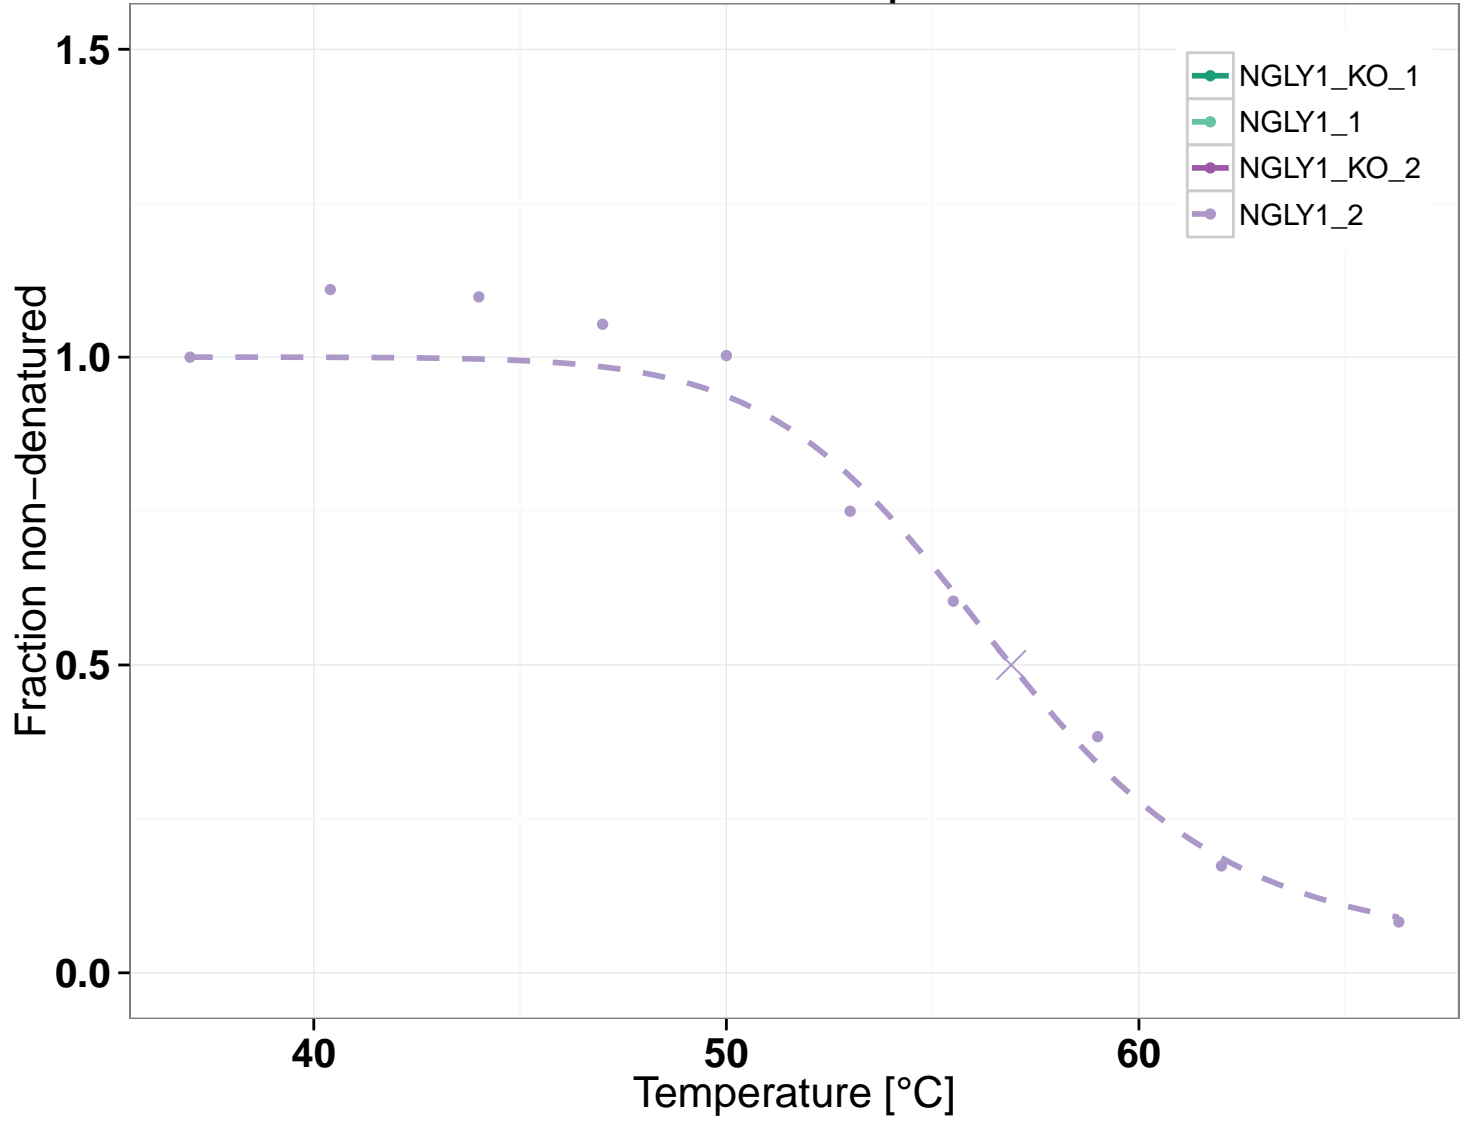

|            | meltPoint | slope  | plateau | R2   |
|------------|-----------|--------|---------|------|
| NGLY1_KO_1 | -         | -      | -       | -    |
| NGLY1_1    | -         | -      | -       | -    |
| NGLY1_KO_2 | -         | -      | -       | -    |
| NGLY1_2    | 56.9      | -0.085 | 0.04    | 0.97 |

Supplement: Supplementary file 3922 [file 1]

# IPI00016801.1|GLUD1

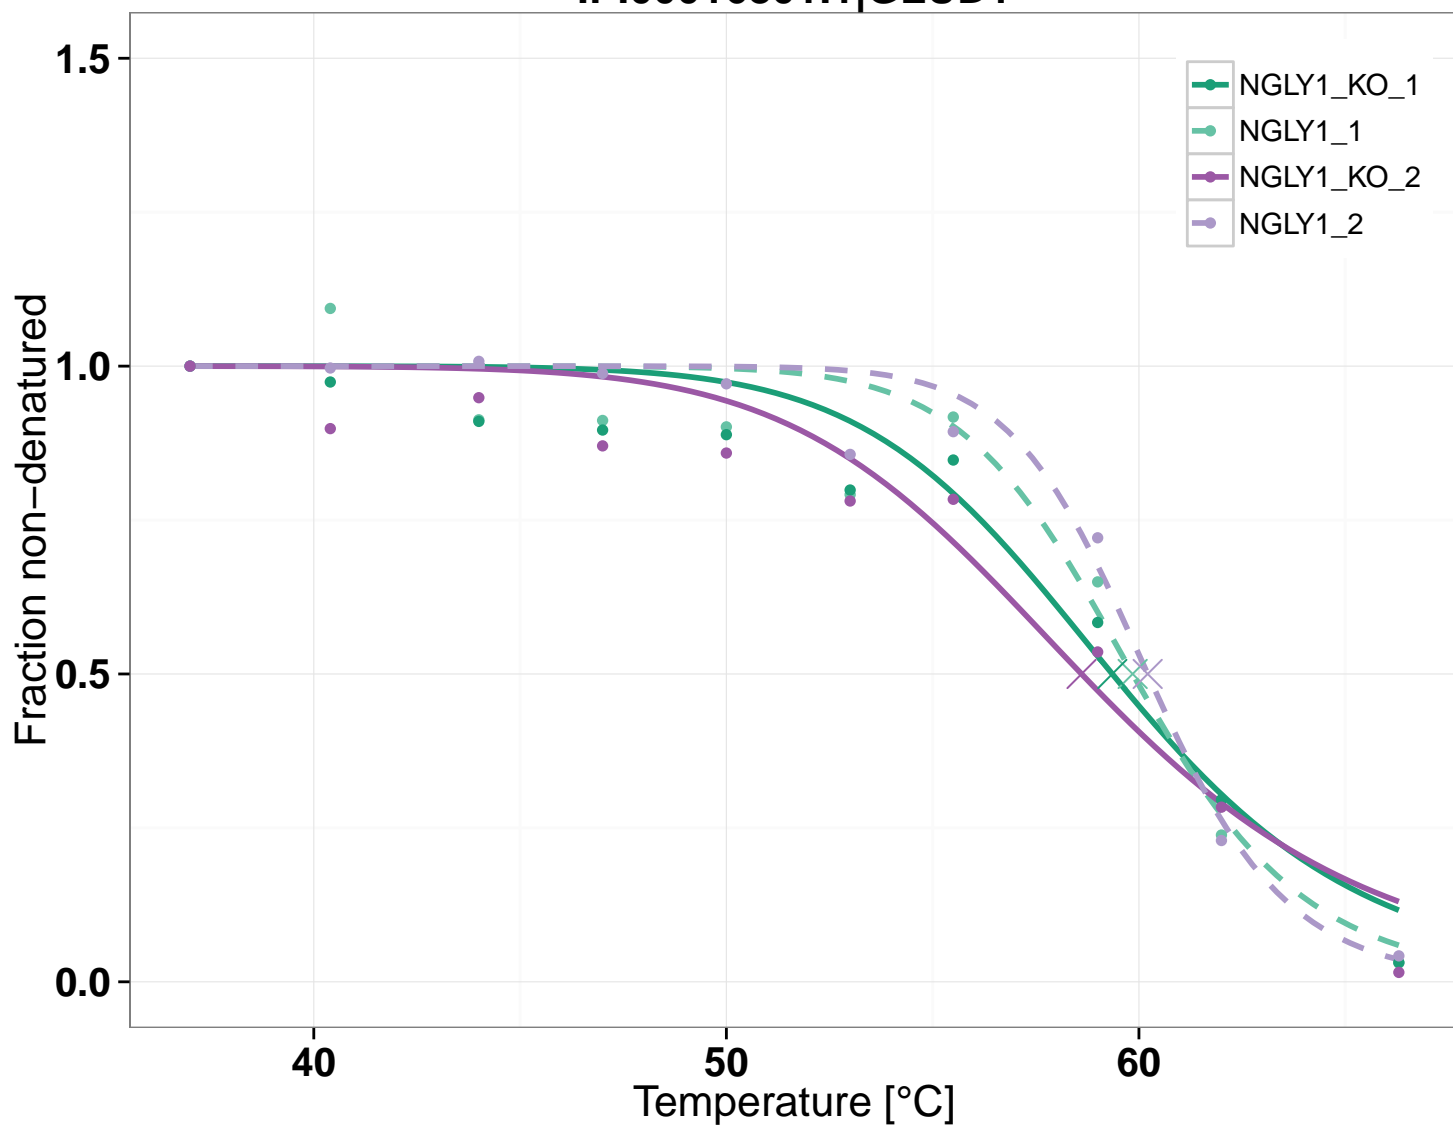

|            | meltPoint | slope  | plateau | R2   |
|------------|-----------|--------|---------|------|
| NGLY1_KO_1 | 59.35     | -0.082 | 0       | 0.95 |
| NGLY1_1    | 59.85     | -0.12  | 0       | 0.93 |
| NGLY1_KO_2 | 58.61     | -0.071 | 0       | 0.94 |
| NGLY1_2    | 60.21     | -0.15  | 0       | 0.98 |

Supplement: Supplementary file 3923 [file 1]

IPI00399254.3|OTUD4

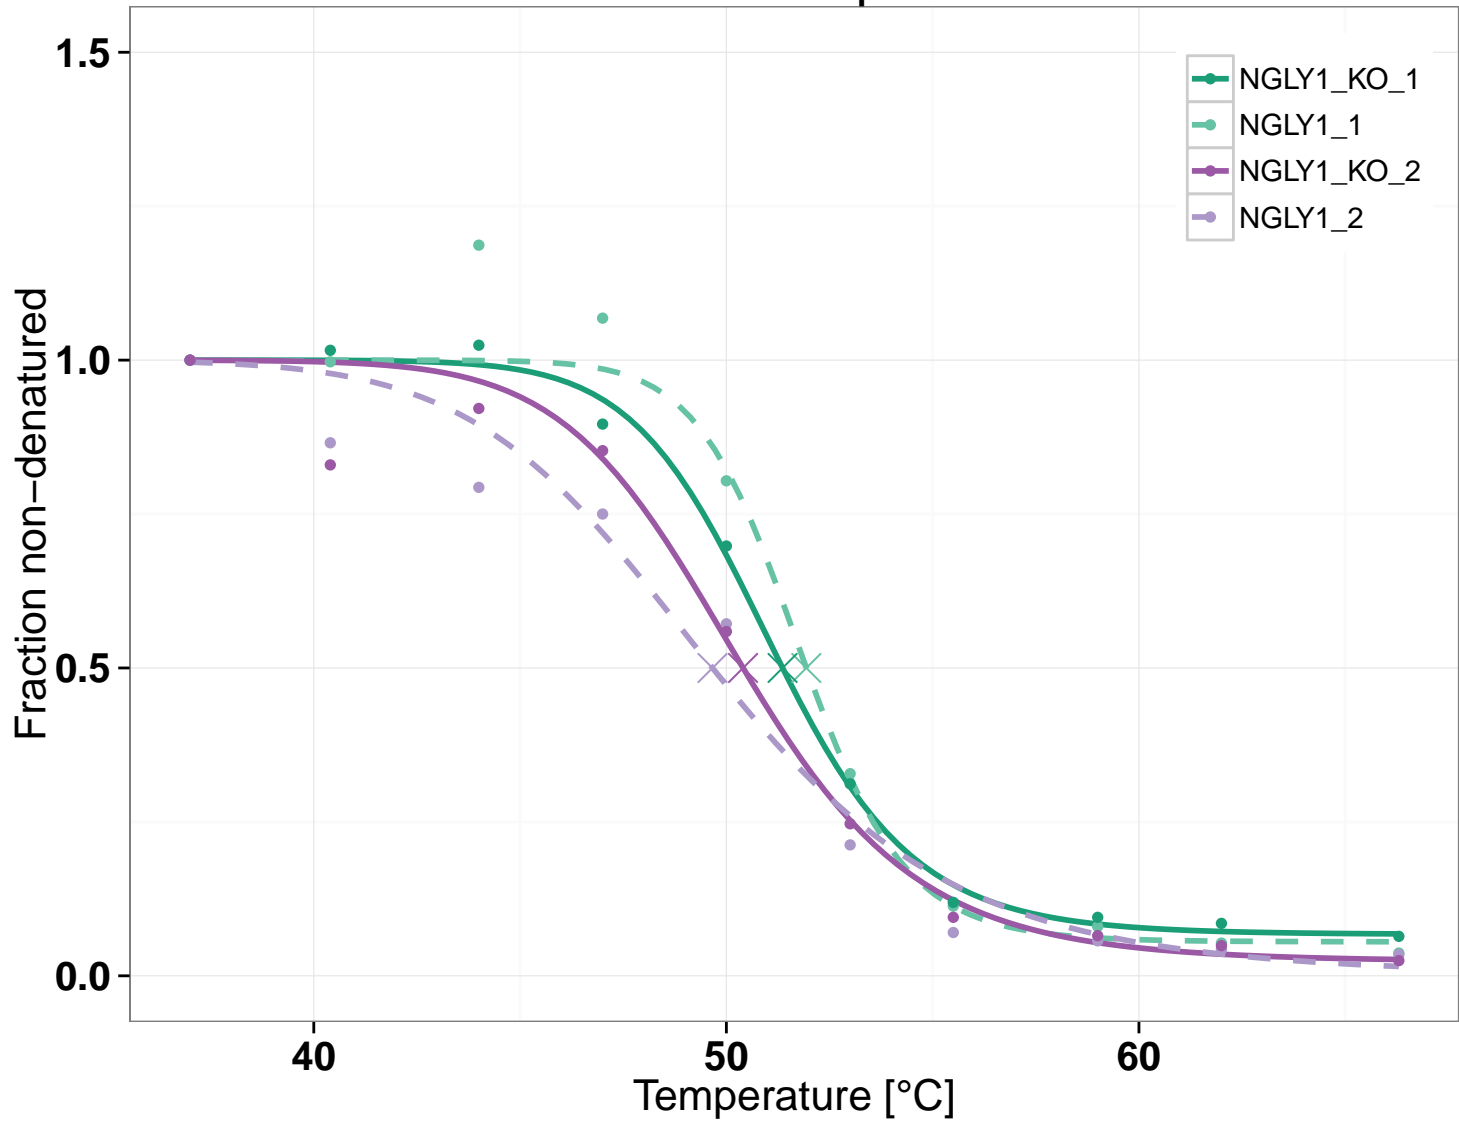

|            | meltPoint | slope  | plateau | R2   |
|------------|-----------|--------|---------|------|
| NGLY1_KO_1 | 51.36     | -0.14  | 0.07    | 1    |
| NGLY1_1    | 51.94     | -0.19  | 0.06    | 0.98 |
| NGLY1_KO_2 | 50.41     | -0.11  | 0.02    | 0.98 |
| NGLY1_2    | 49.66     | -0.085 | 0       | 0.97 |

Supplement: Supplementary file 3924 [file 1]

# IPI00554824.1|SGOL1

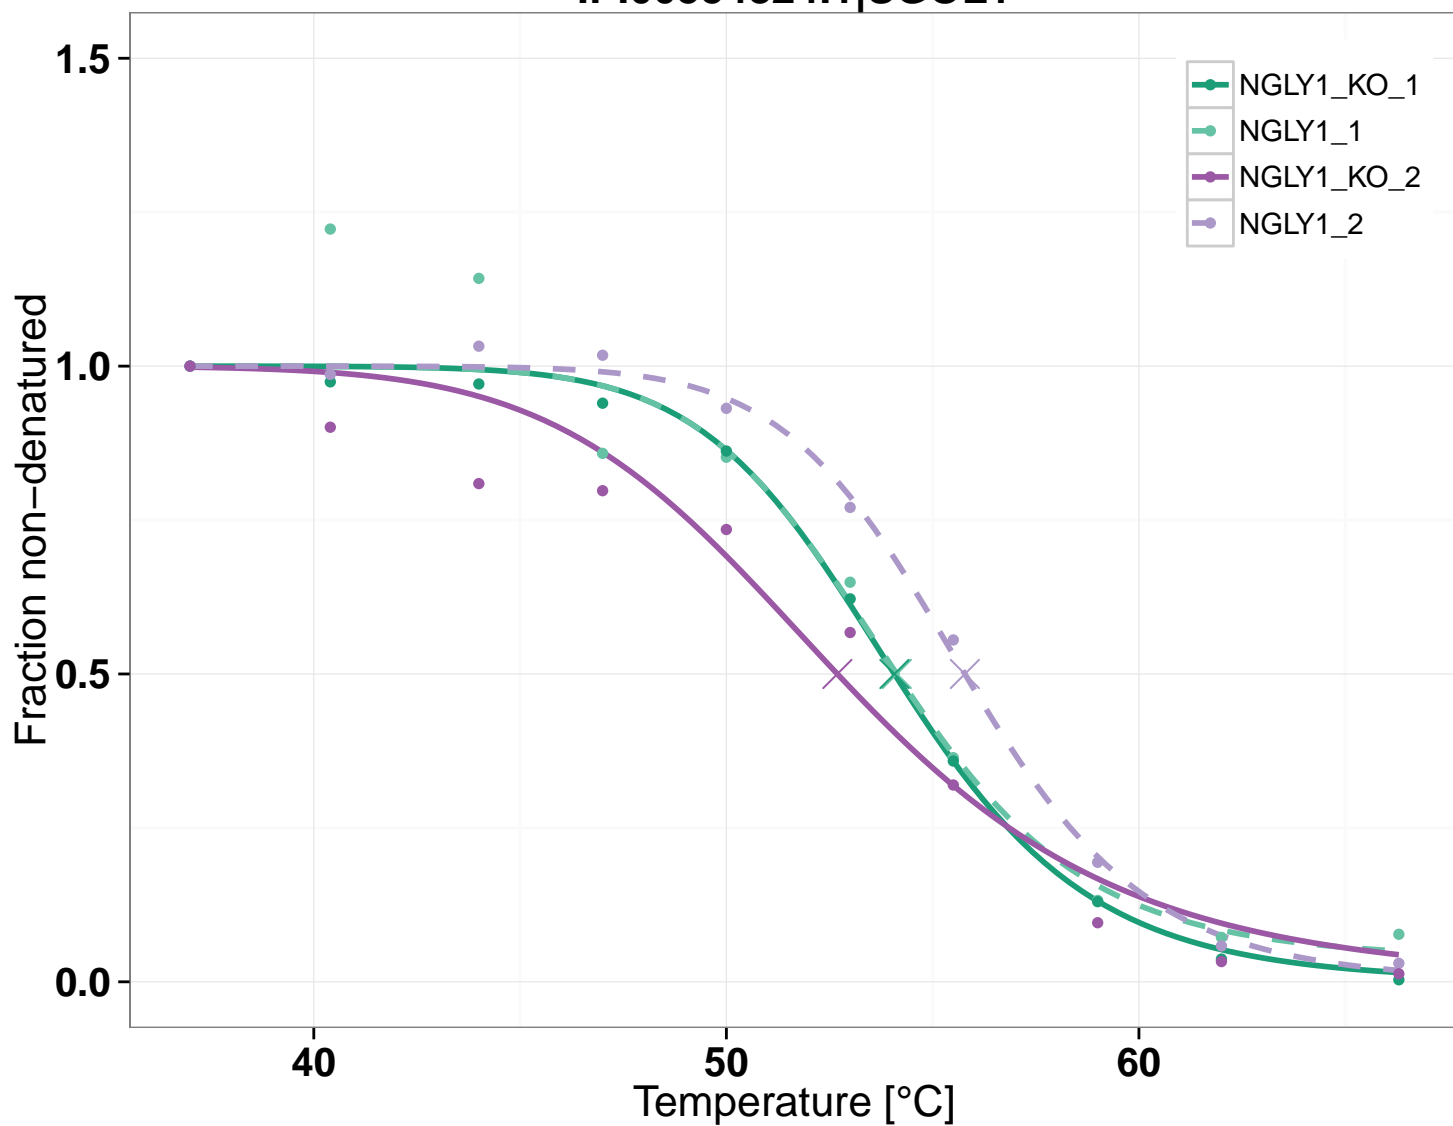

|            | meltPoint | slope  | plateau | R2   |
|------------|-----------|--------|---------|------|
| NGLY1_KO_1 | 54.07     | -0.11  | 0       | 1    |
| NGLY1_1    | 54.13     | -0.1   | 0.04    | 0.95 |
| NGLY1_KO_2 | 52.69     | -0.072 | 0       | 0.96 |
| NGLY1_2    | 55.78     | -0.11  | 0       | 1    |

Supplement: Supplementary file 3925 [file 1]

# IPI00328987.3|BYSL

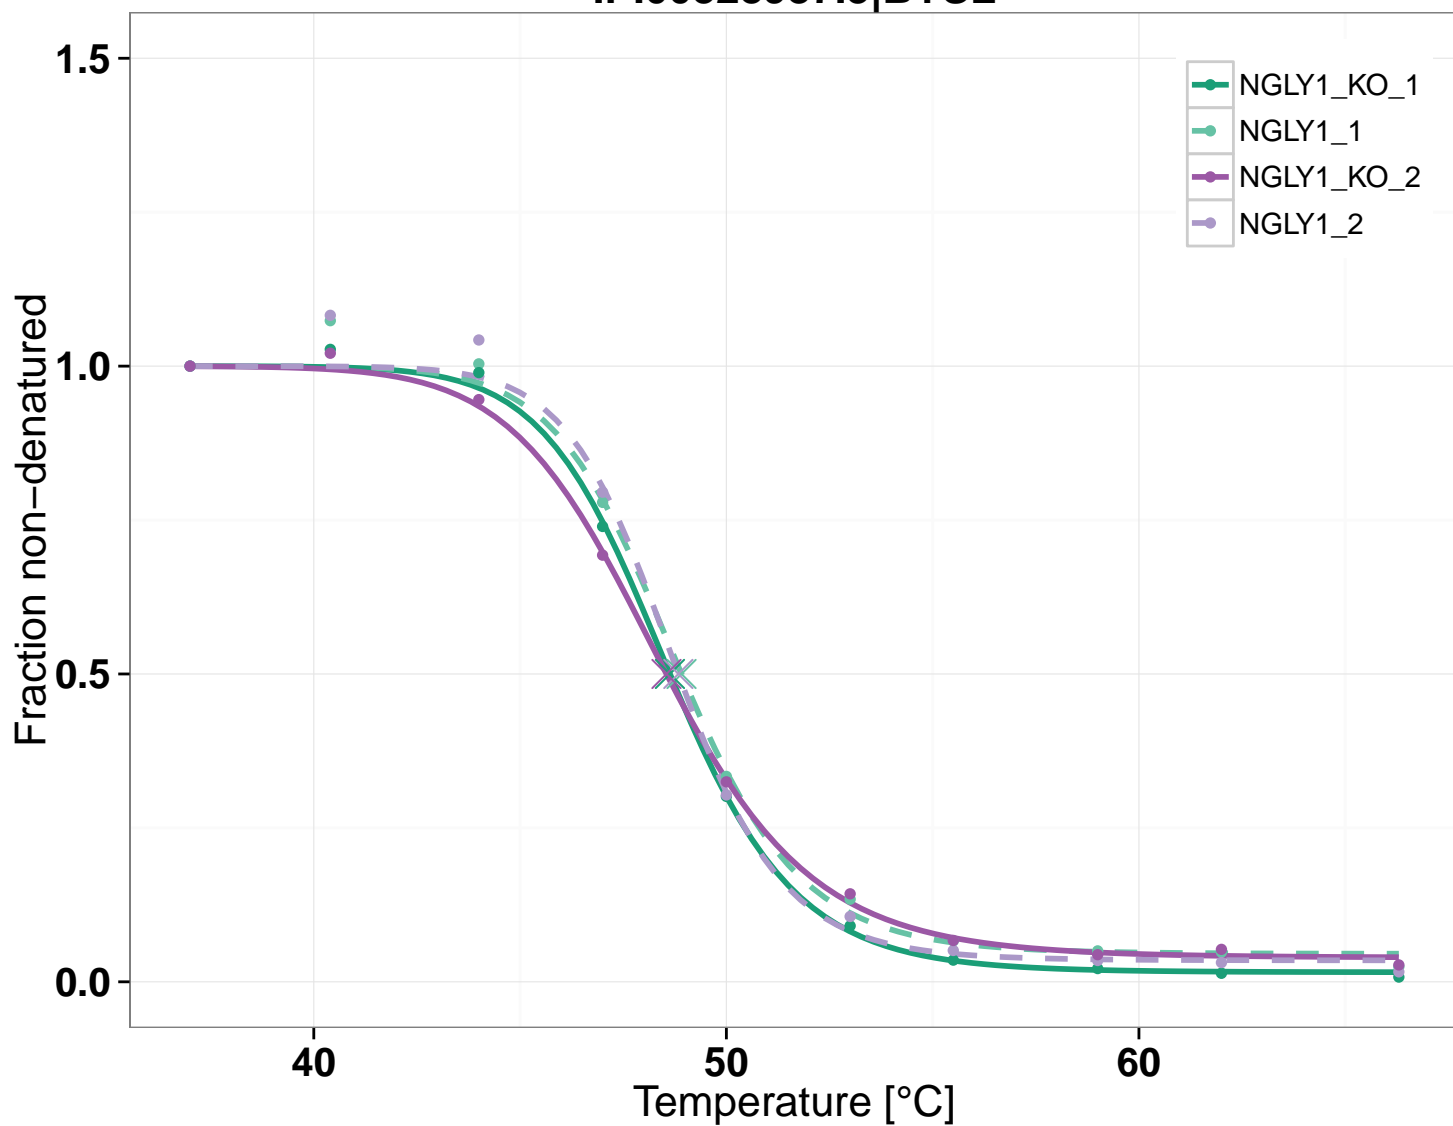

|            | meltPoint | slope | plateau | R2   |
|------------|-----------|-------|---------|------|
| NGLY1_KO_1 | 48.63     | -0.16 | 0.02    | 1    |
| NGLY1_1    | 48.91     | -0.16 | 0.05    | 1    |
| NGLY1_KO_2 | 48.55     | -0.13 | 0.04    | 1    |
| NGLY1_2    | 48.84     | -0.18 | 0.03    | 0.99 |

Supplement: Supplementary file 3926 [file 1]

IPI00298940.3|AURKA

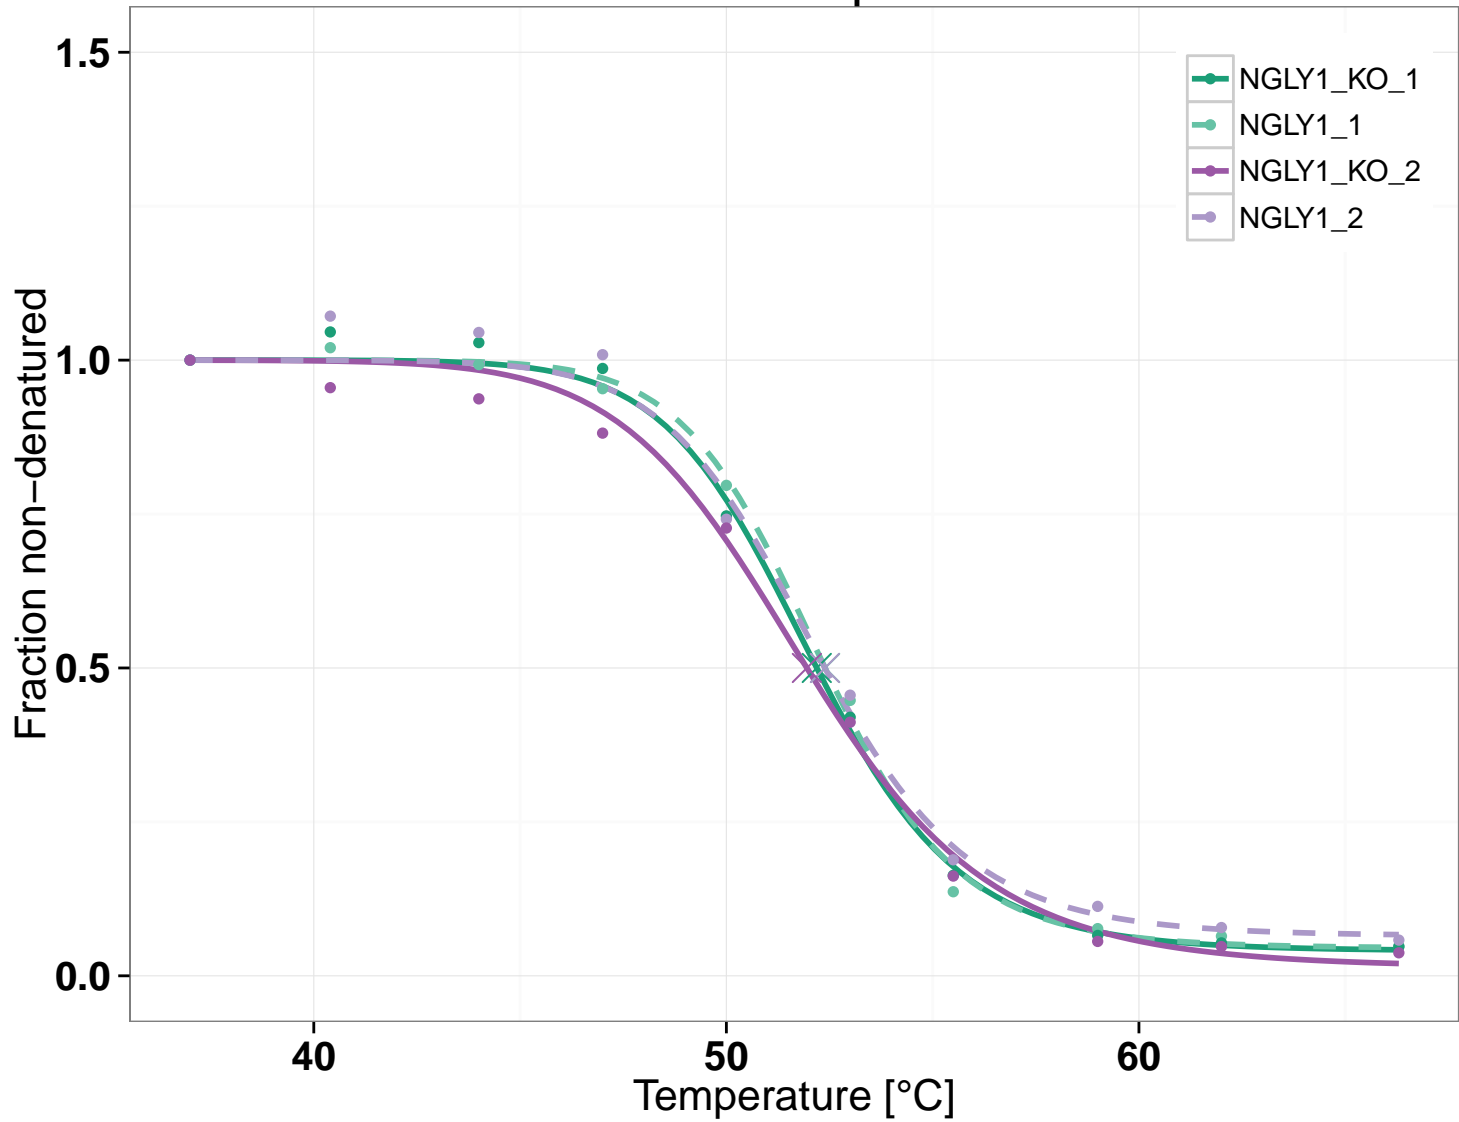

|            | meltPoint | slope | plateau | R2   |
|------------|-----------|-------|---------|------|
| NGLY1_KO_1 | 52.19     | -0.13 | 0.04    | 1    |
| NGLY1_1    | 52.39     | -0.14 | 0.04    | 1    |
| NGLY1_KO_2 | 51.95     | -0.11 | 0.01    | 0.99 |
| NGLY1_2    | 52.39     | -0.13 | 0.06    | 0.99 |

Supplement: Supplementary file 3927 [file 1]

# IPI00442307.1|KCNAB2

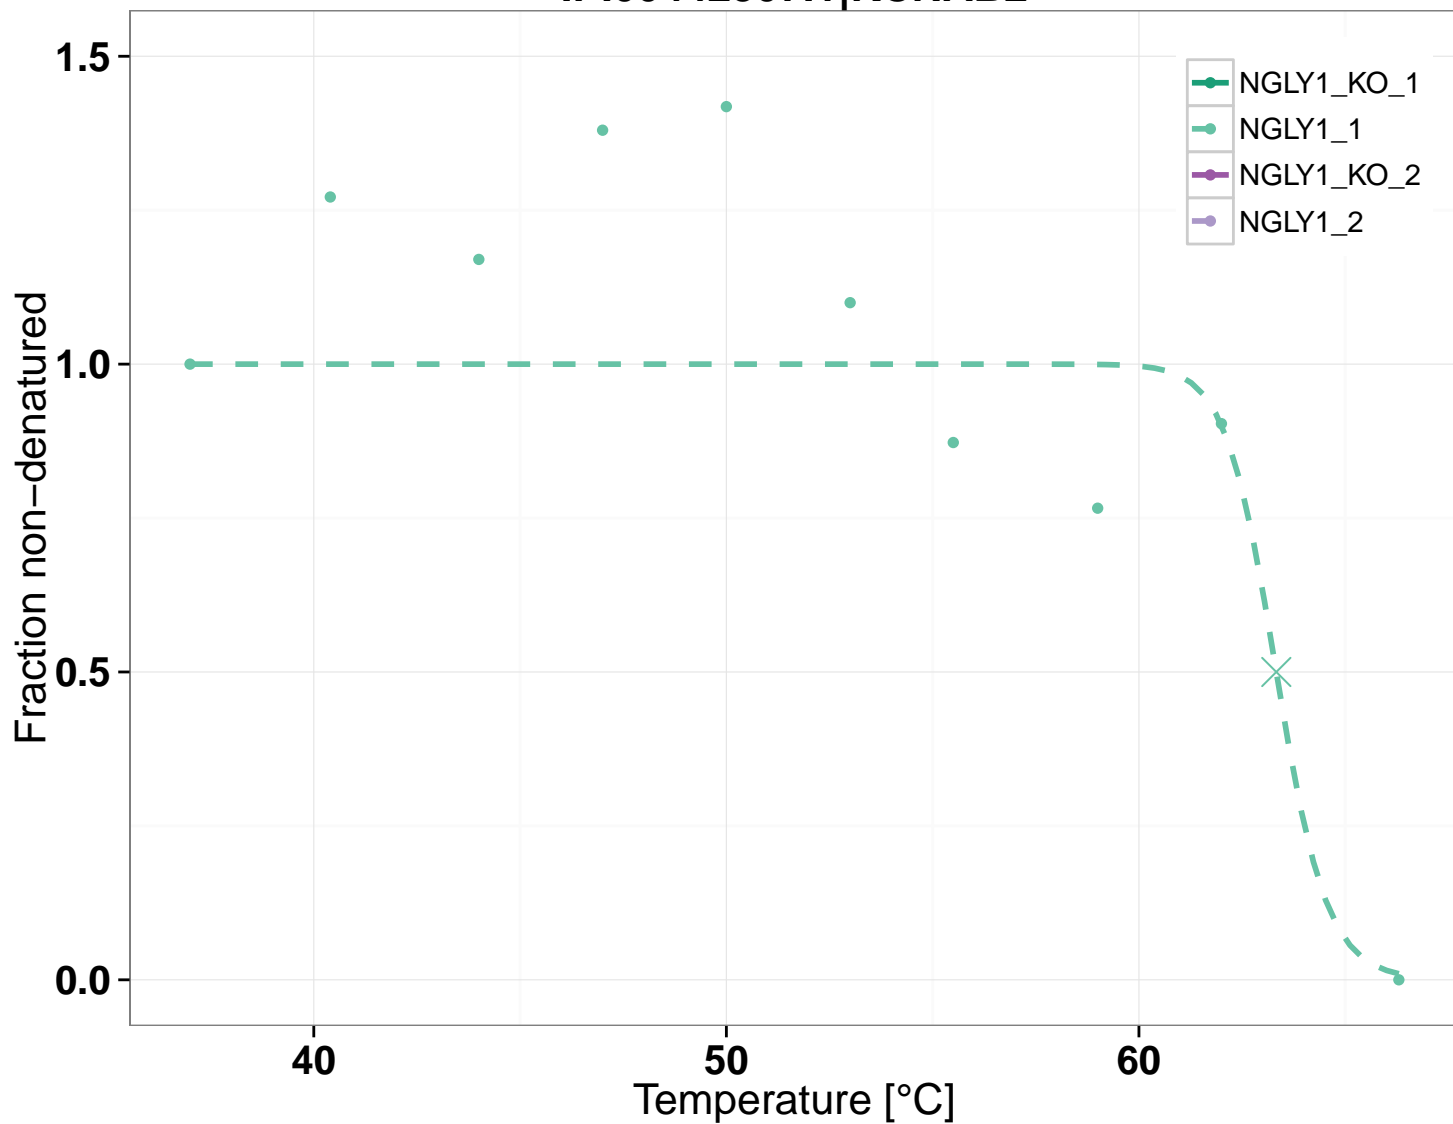

|            | meltPoint | slope | plateau | R2   |
|------------|-----------|-------|---------|------|
| NGLY1_KO_1 | —         | —     | —       | —    |
| NGLY1_1    | 63.33     | -0.41 | 0       | 0.67 |
| NGLY1_KO_2 | —         | —     | —       | —    |
| NGLY1_2    | —         | —     | —       | —    |

Supplement: Supplementary file 3928 [file 1]

# IPI00024641.4|SMYD2

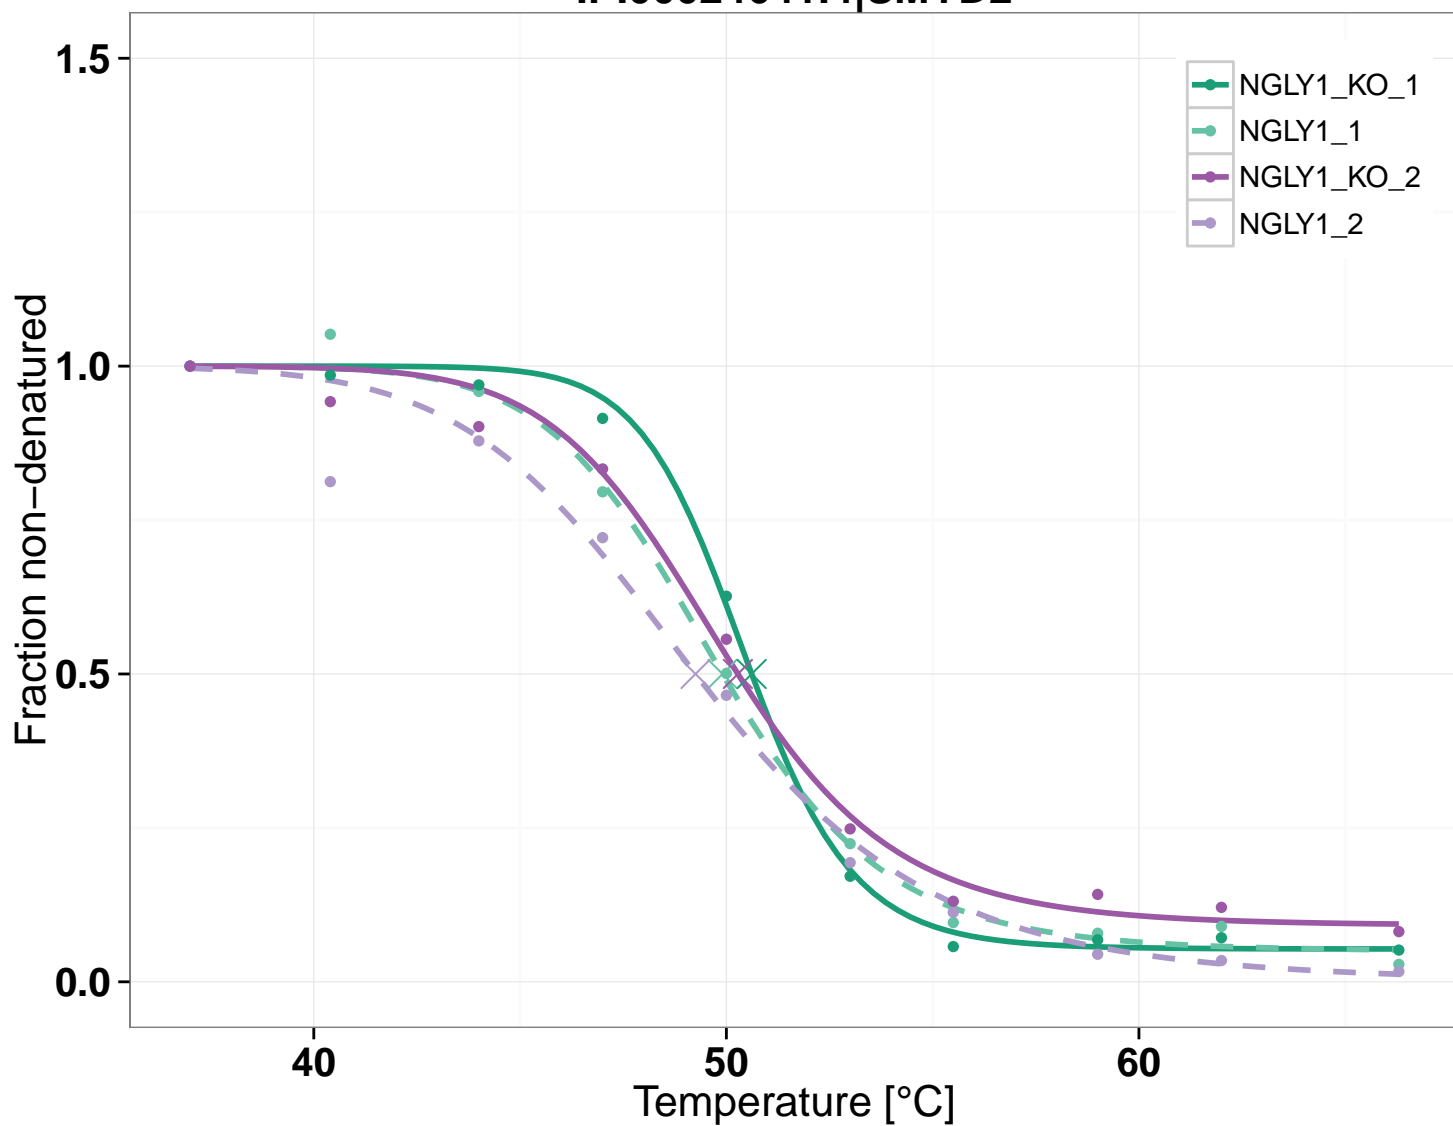

Supplement: Supplementary file 3929 [file 1]

# IPI00306369.3|NSUN2

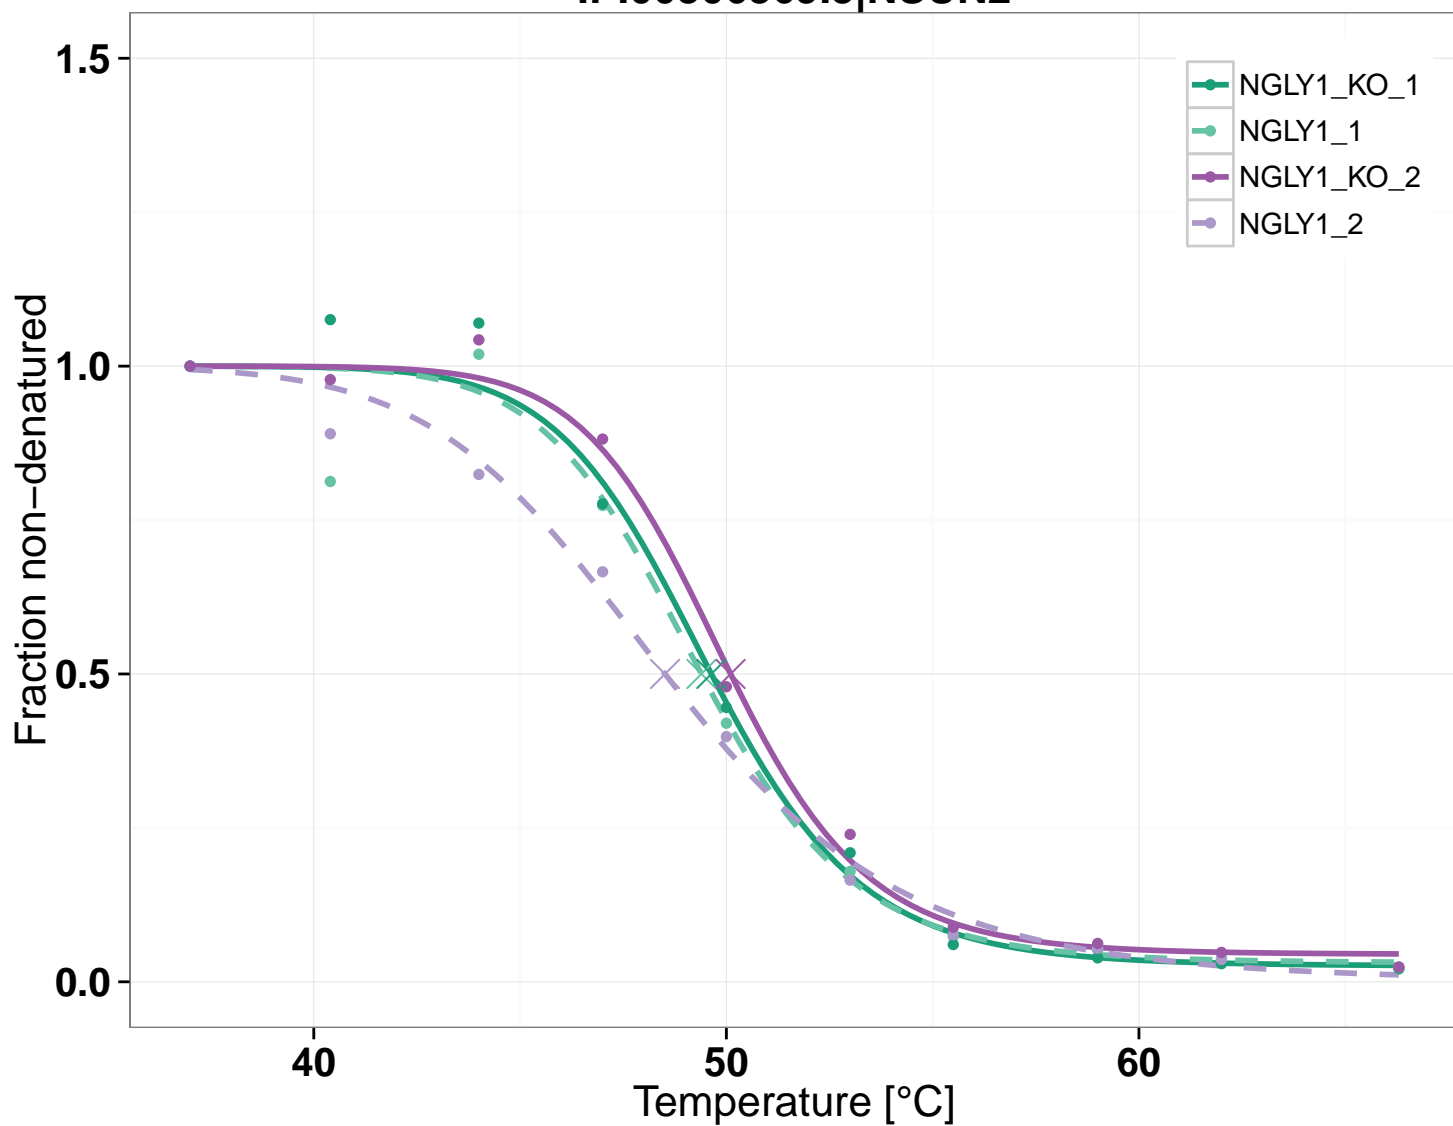

|            | meltPoint | slope  | plateau | R2   |
|------------|-----------|--------|---------|------|
| NGLY1_KO_1 | 49.64     | -0.13  | 0.03    | 0.99 |
| NGLY1_1    | 49.4      | -0.13  | 0.03    | 0.98 |
| NGLY1_KO_2 | 50.1      | -0.14  | 0.04    | 1    |
| NGLY1_2    | 48.51     | -0.087 | 0       | 0.99 |

Supplement: Supplementary file 3930 [file 1]

IPI00027251.1|STK38

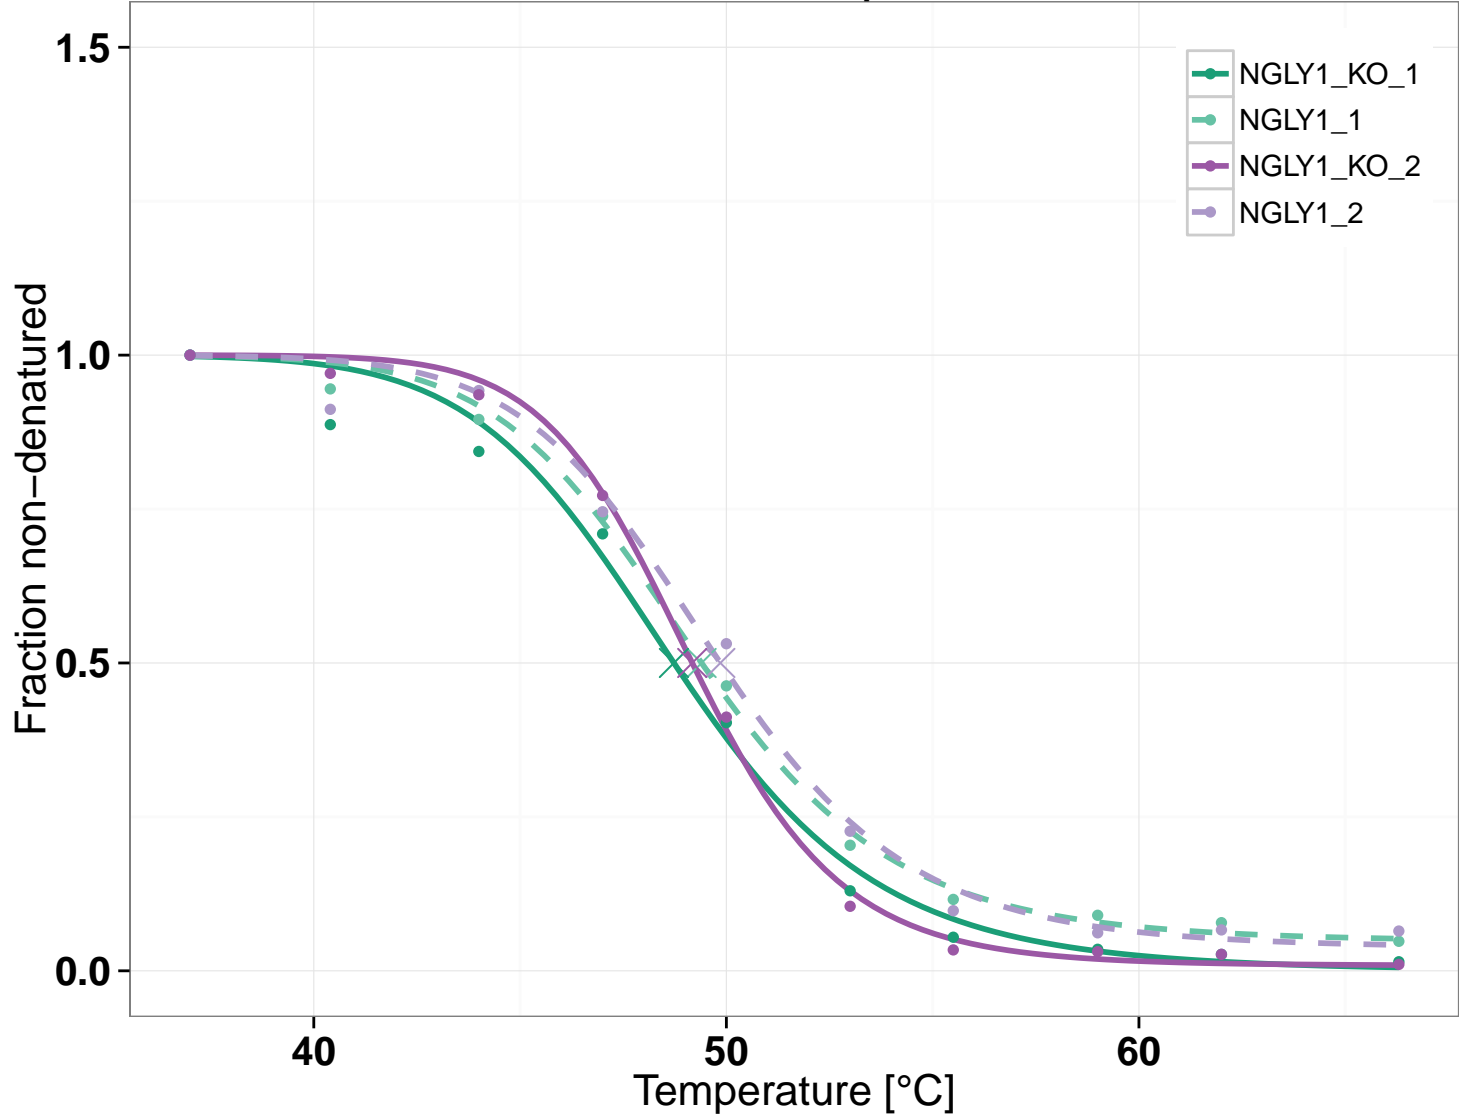

|            | meltPoint | slope  | plateau | R2   |
|------------|-----------|--------|---------|------|
| NGLY1_KO_1 | 48.73     | -0.1   | 0       | 0.99 |
| NGLY1_1    | 49.4      | -0.099 | 0.05    | 1    |
| NGLY1_KO_2 | 49.17     | -0.14  | 0.01    | 1    |
| NGLY1_2    | 49.85     | -0.1   | 0.04    | 0.99 |

Supplement: Supplementary file 3931 [file 1]

IPI00301610.9|TSC22D1

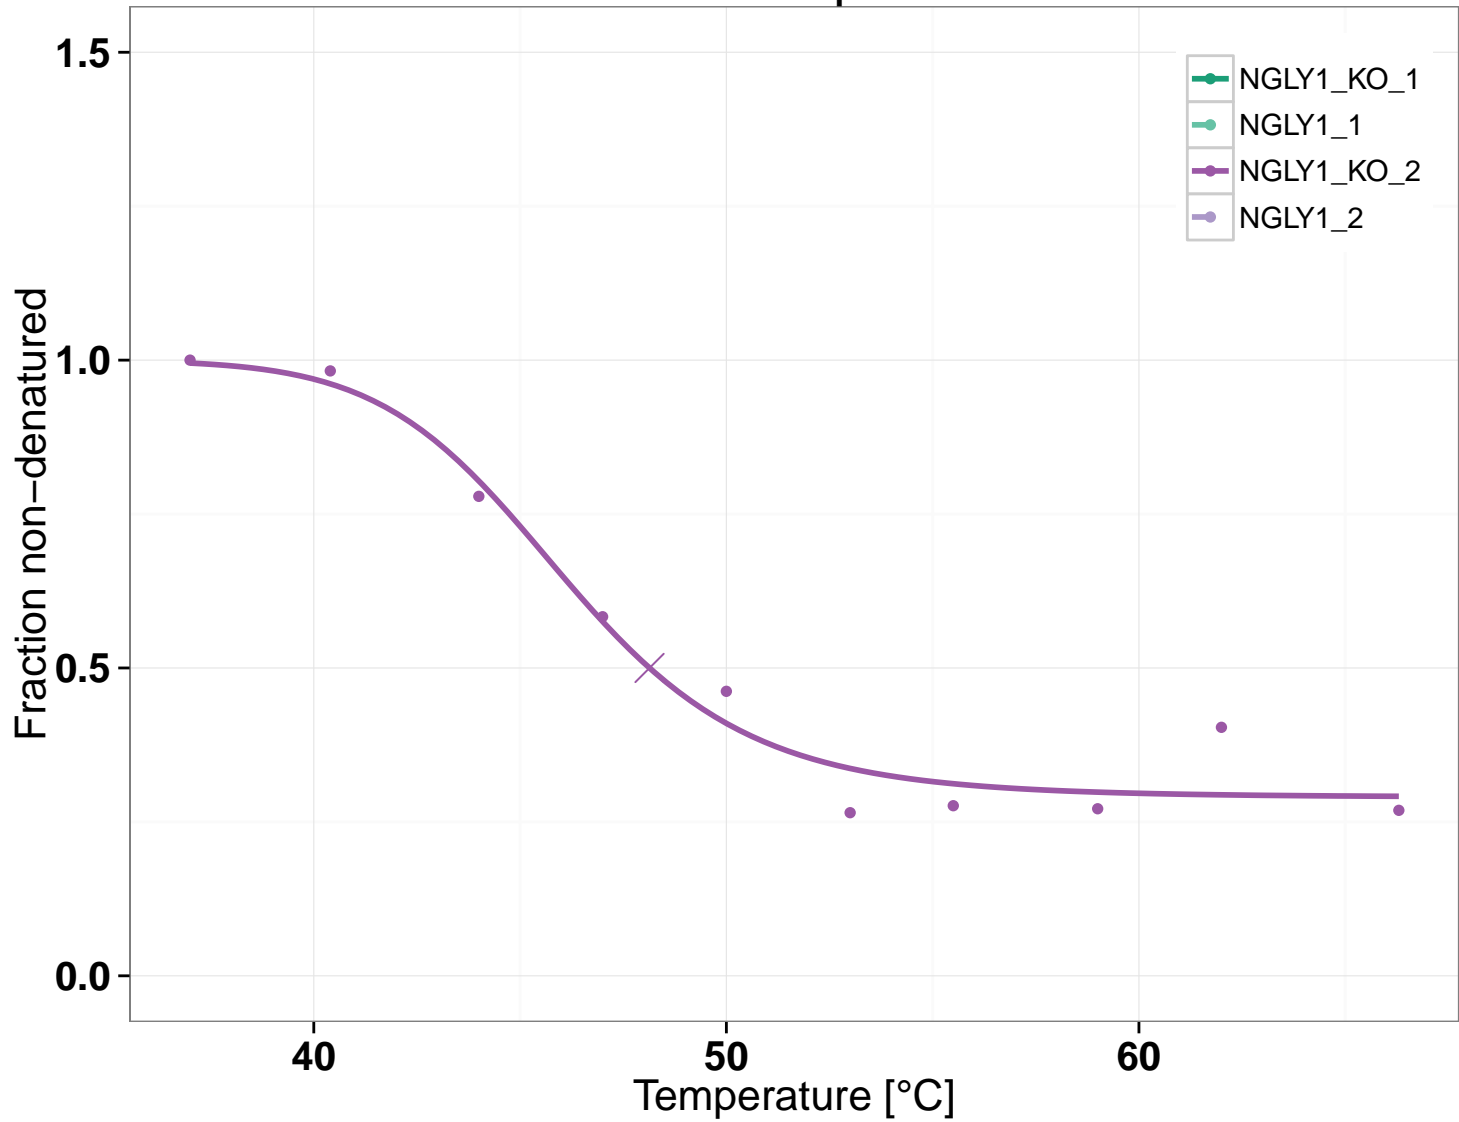

|            | meltPoint | slope  | plateau | R2   |
|------------|-----------|--------|---------|------|
| NGLY1_KO_1 | —         | —      | —       | —    |
| NGLY1_1    | —         | —      | —       | —    |
| NGLY1_KO_2 | 48.14     | -0.079 | 0.29    | 0.97 |
| NGLY1_2    | —         | —      | —       | —    |

Supplement: Supplementary file 3932 [file 1]

# IPI00219568.4|PGK2

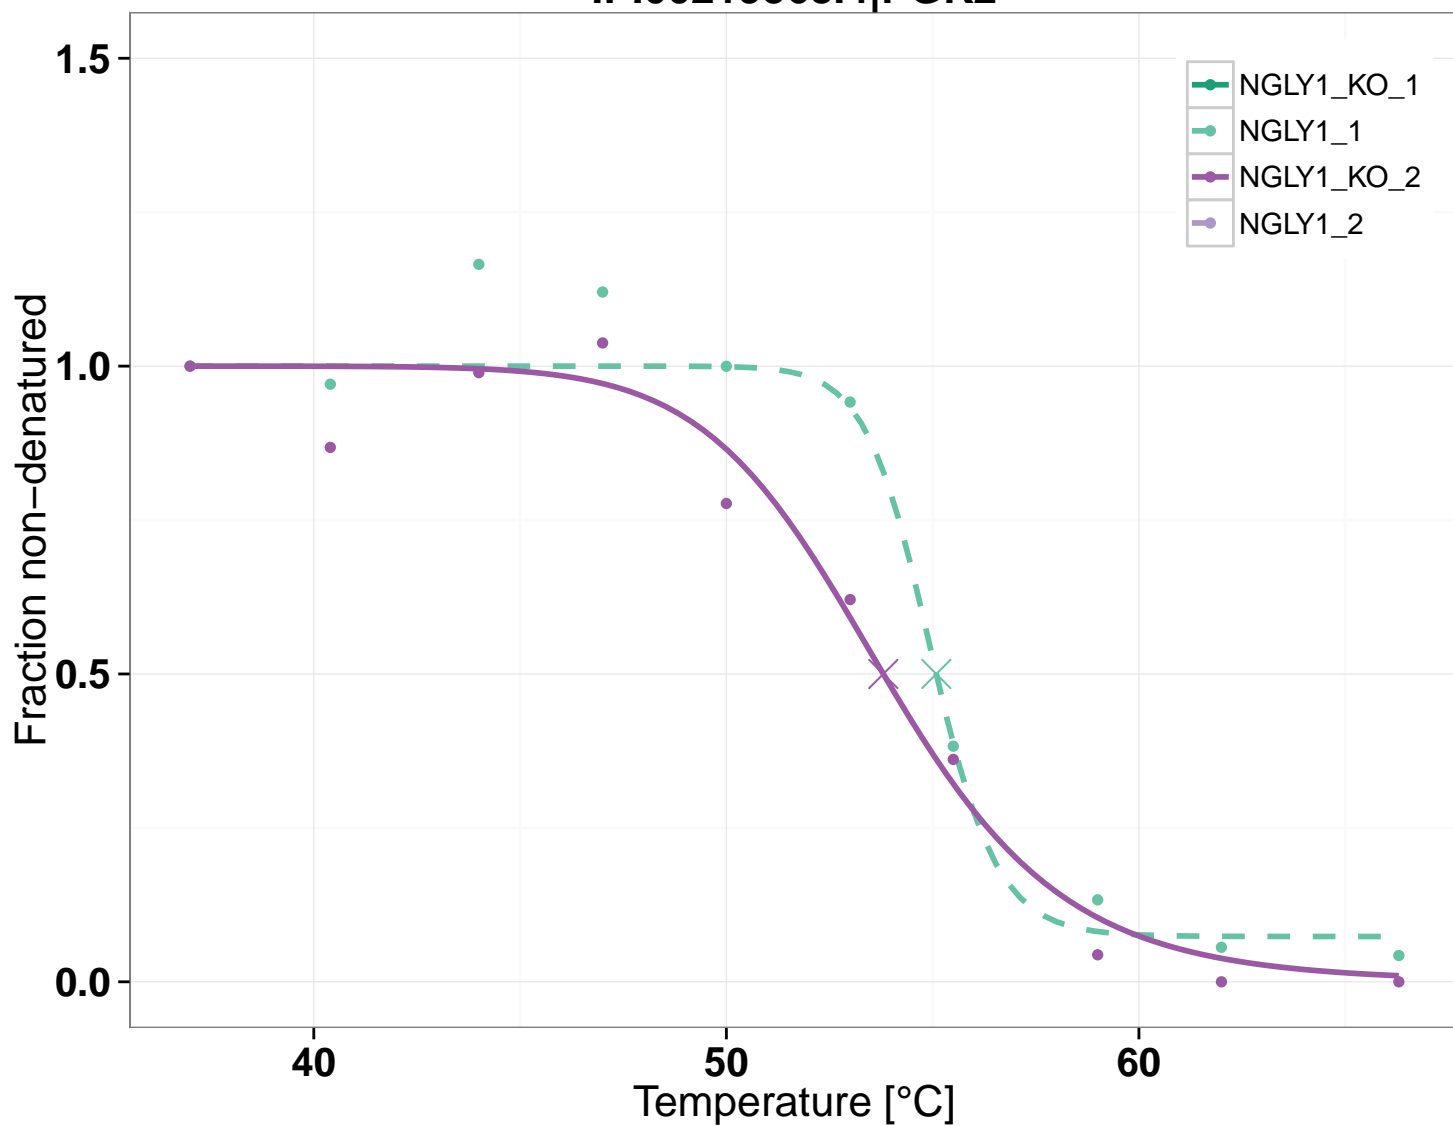

|            | meltPoint | slope | plateau | R2   |
|------------|-----------|-------|---------|------|
| NGLY1_KO_1 | –         | –     | –       | –    |
| NGLY1_1    | 55.09     | –0.29 | 0.07    | 0.98 |
| NGLY1_KO_2 | 53.8      | –0.11 | 0       | 0.98 |
| NGLY1_2    | –         | –     | –       | –    |

Supplement: Supplementary file 3933 [file 1]

IPI00303423.8|METTL8

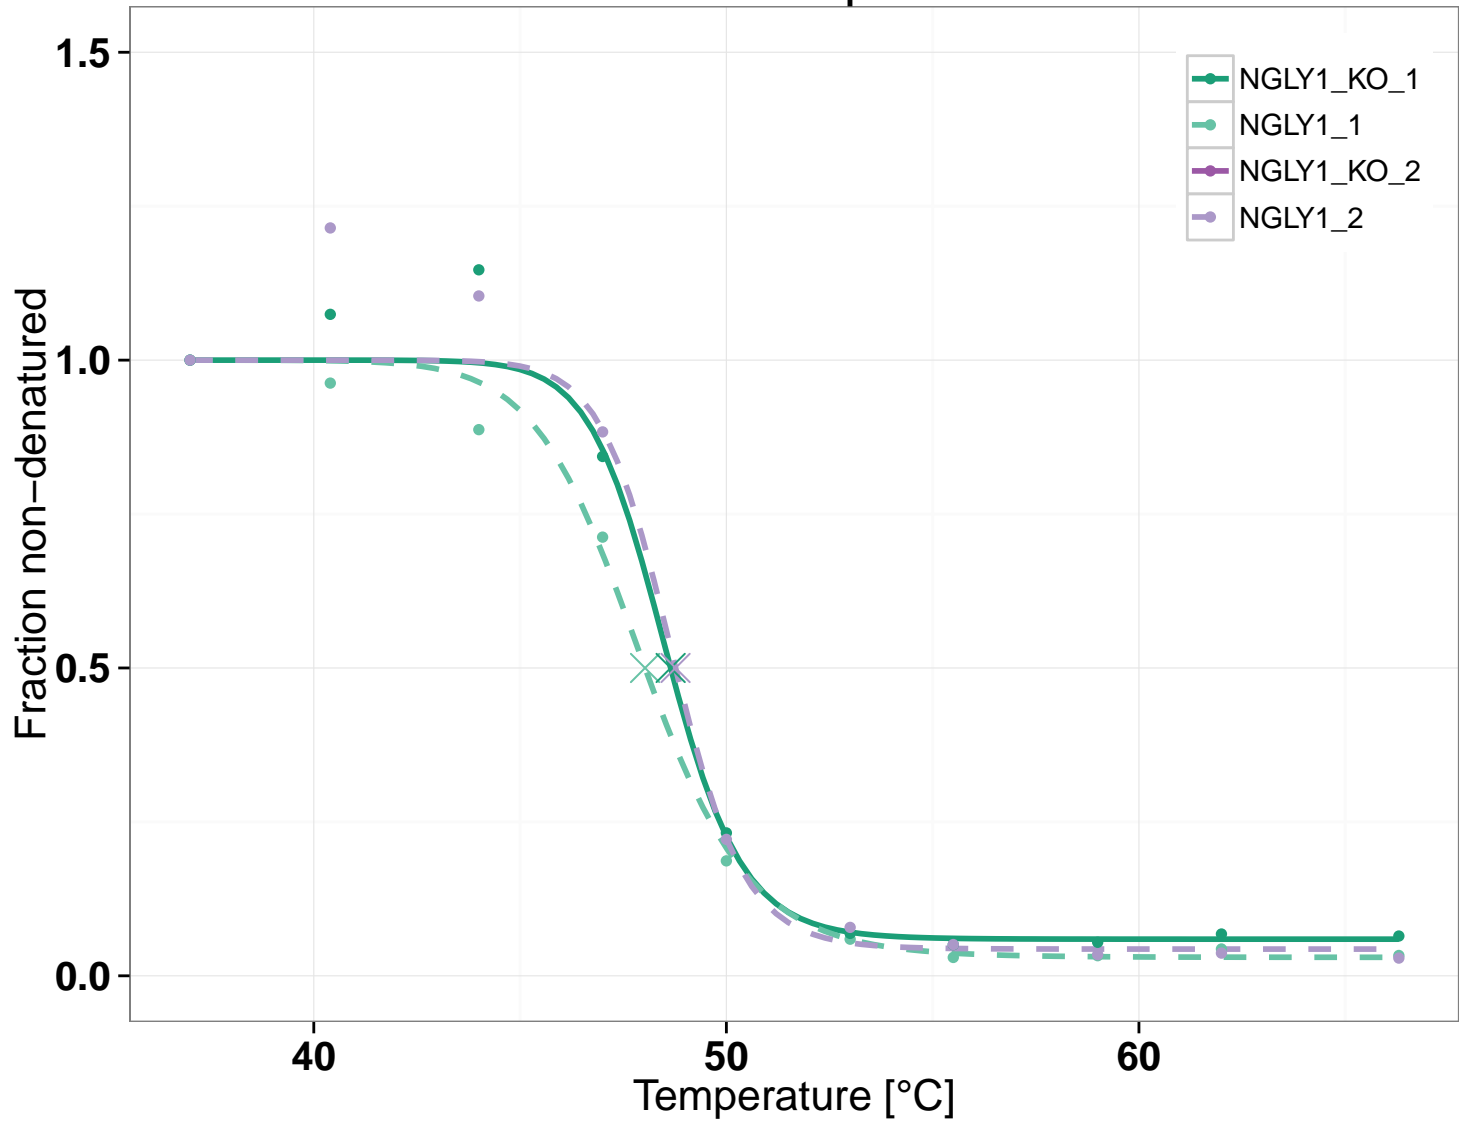

|            | meltPoint | slope | plateau | R2   |
|------------|-----------|-------|---------|------|
| NGLY1_KO_1 | 48.65     | -0.25 | 0.06    | 0.99 |
| NGLY1_1    | 48.03     | -0.18 | 0.03    | 0.99 |
| NGLY1_KO_2 | -         | -     | -       | -    |
| NGLY1_2    | 48.77     | -0.27 | 0.04    | 0.98 |

Supplement: Supplementary file 3934 [file 1]

IPI00549673.2|ARMCX5

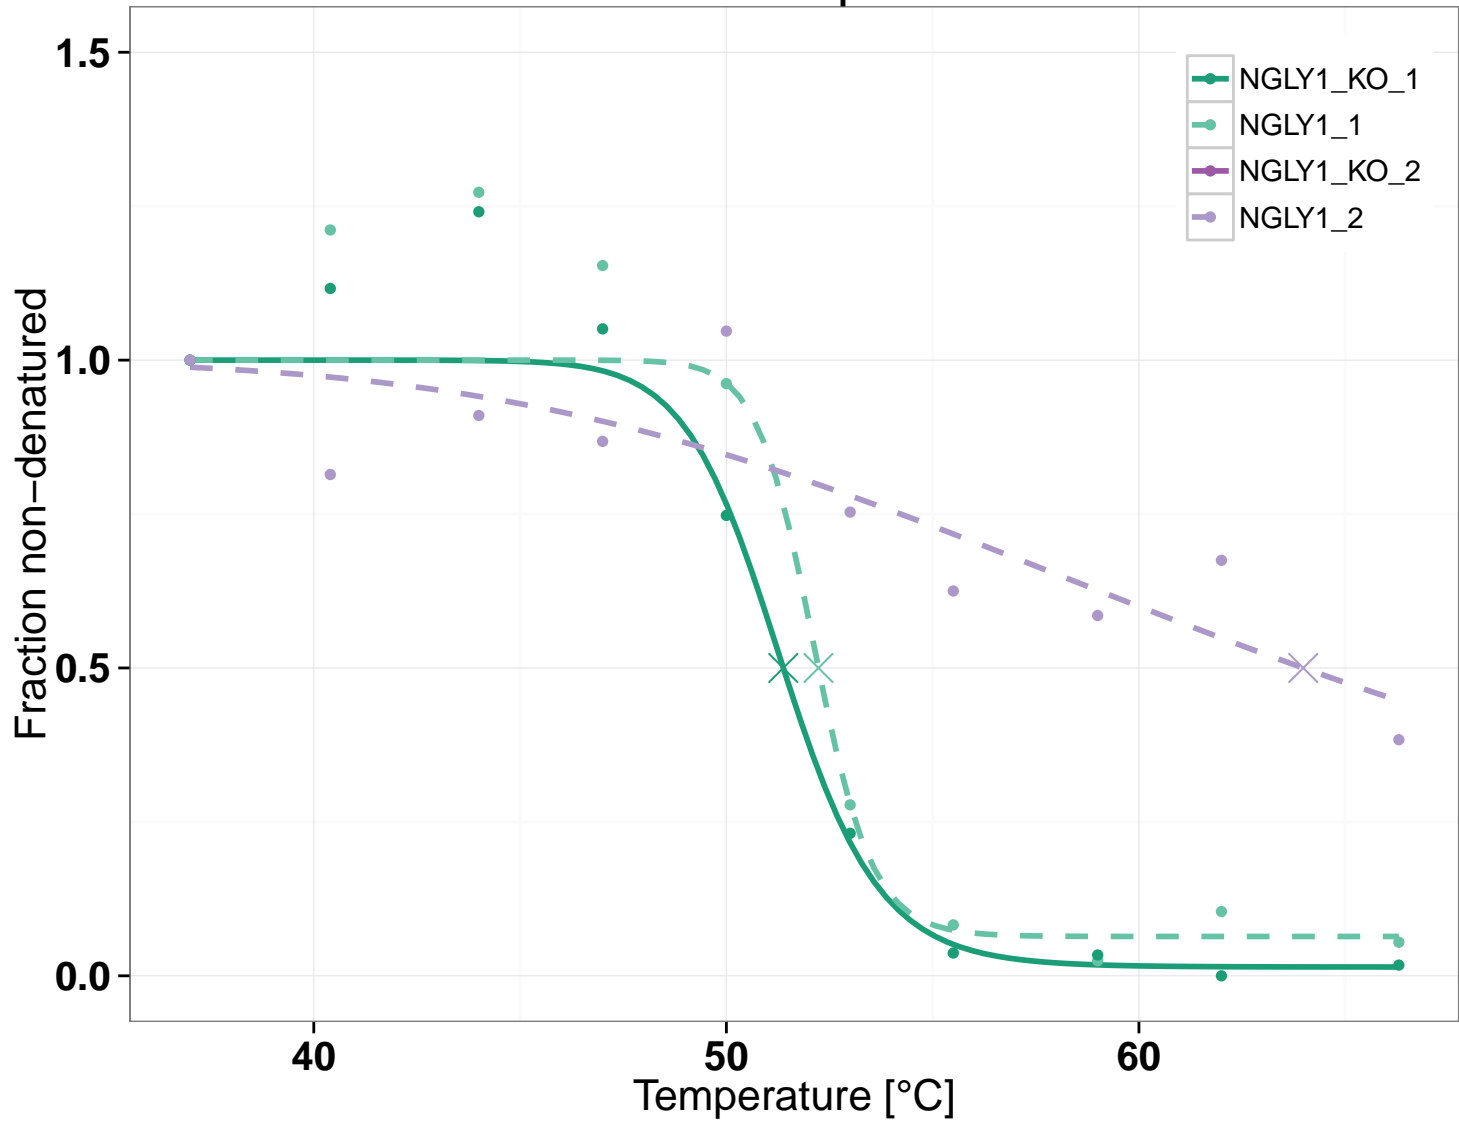

|            | meltPoint | slope  | plateau | R2   |
|------------|-----------|--------|---------|------|
| NGLY1_KO_1 | 51.38     | -0.21  | 0.01    | 0.97 |
| NGLY1_1    | 52.23     | -0.33  | 0.06    | 0.95 |
| NGLY1_KO_2 | -         | -      | -       | -    |
| NGLY1_2    | 63.98     | -0.026 | 0       | 0.74 |

Supplement: Supplementary file 3935 [file 1]

IPI00477962.3|UAP1L1

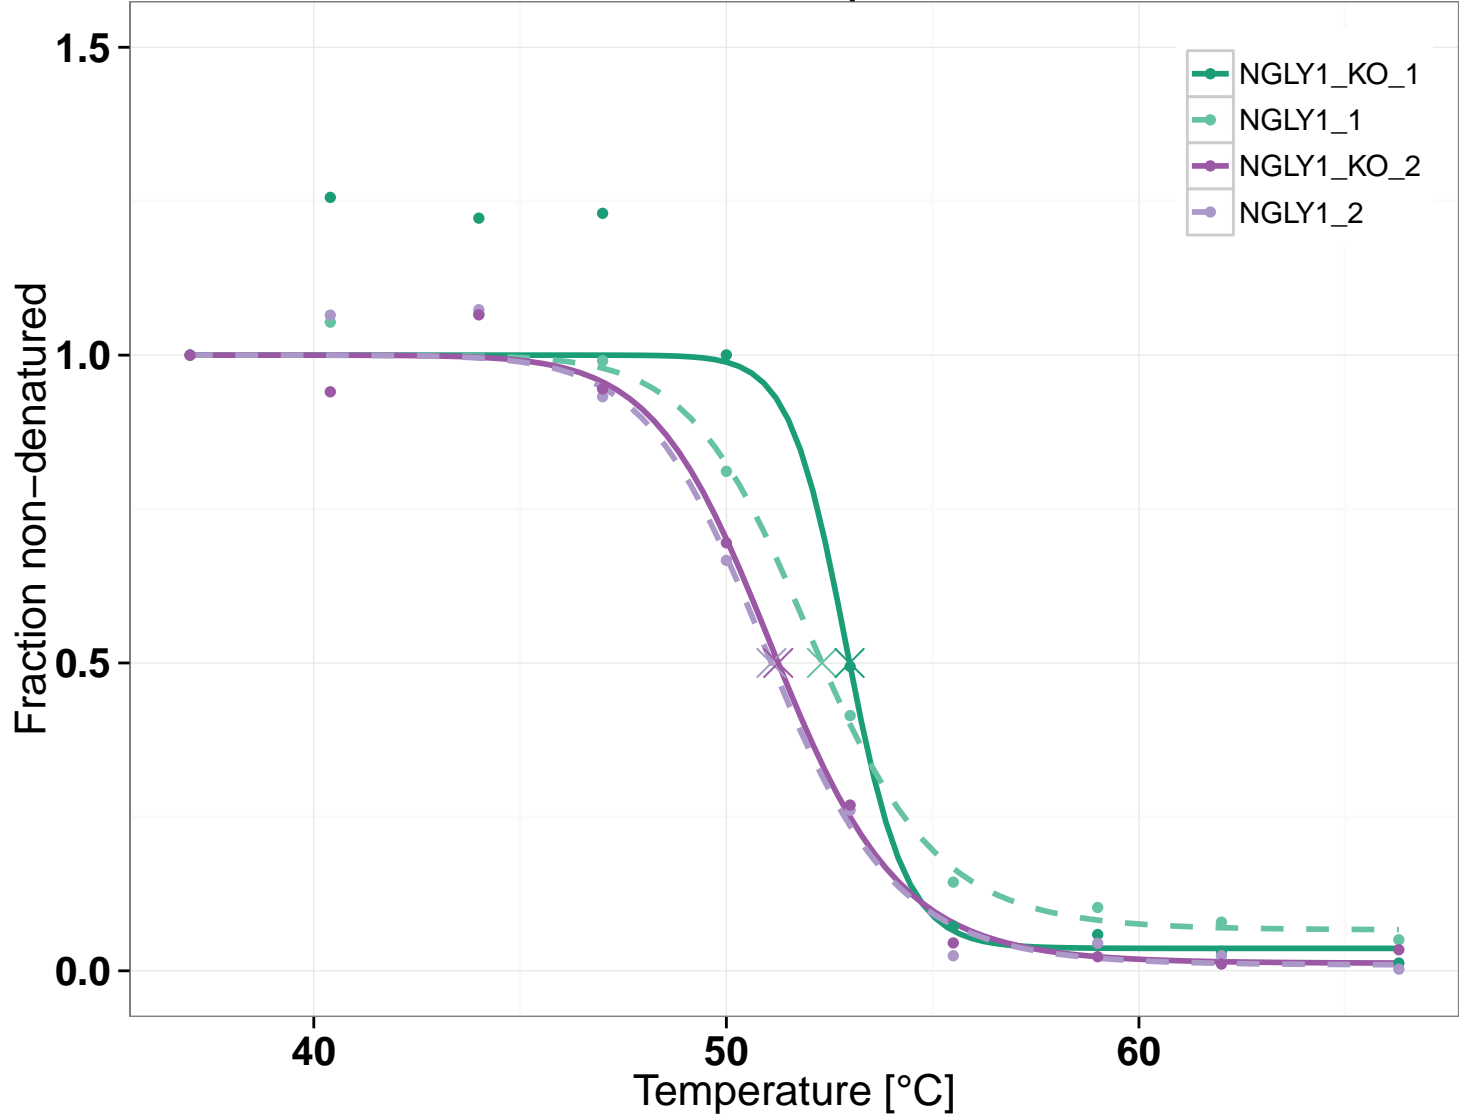

|            | meltPoint | slope | plateau | R2   |
|------------|-----------|-------|---------|------|
| NGLY1_KO_1 | 52.99     | -0.34 | 0.04    | 0.94 |
| NGLY1_1    | 52.32     | -0.16 | 0.07    | 0.99 |
| NGLY1_KO_2 | 51.26     | -0.17 | 0.01    | 0.99 |
| NGLY1_2    | 51.09     | -0.16 | 0.01    | 0.99 |

Supplement: Supplementary file 3936 [file 1]

IPI00465457.4|CCNY

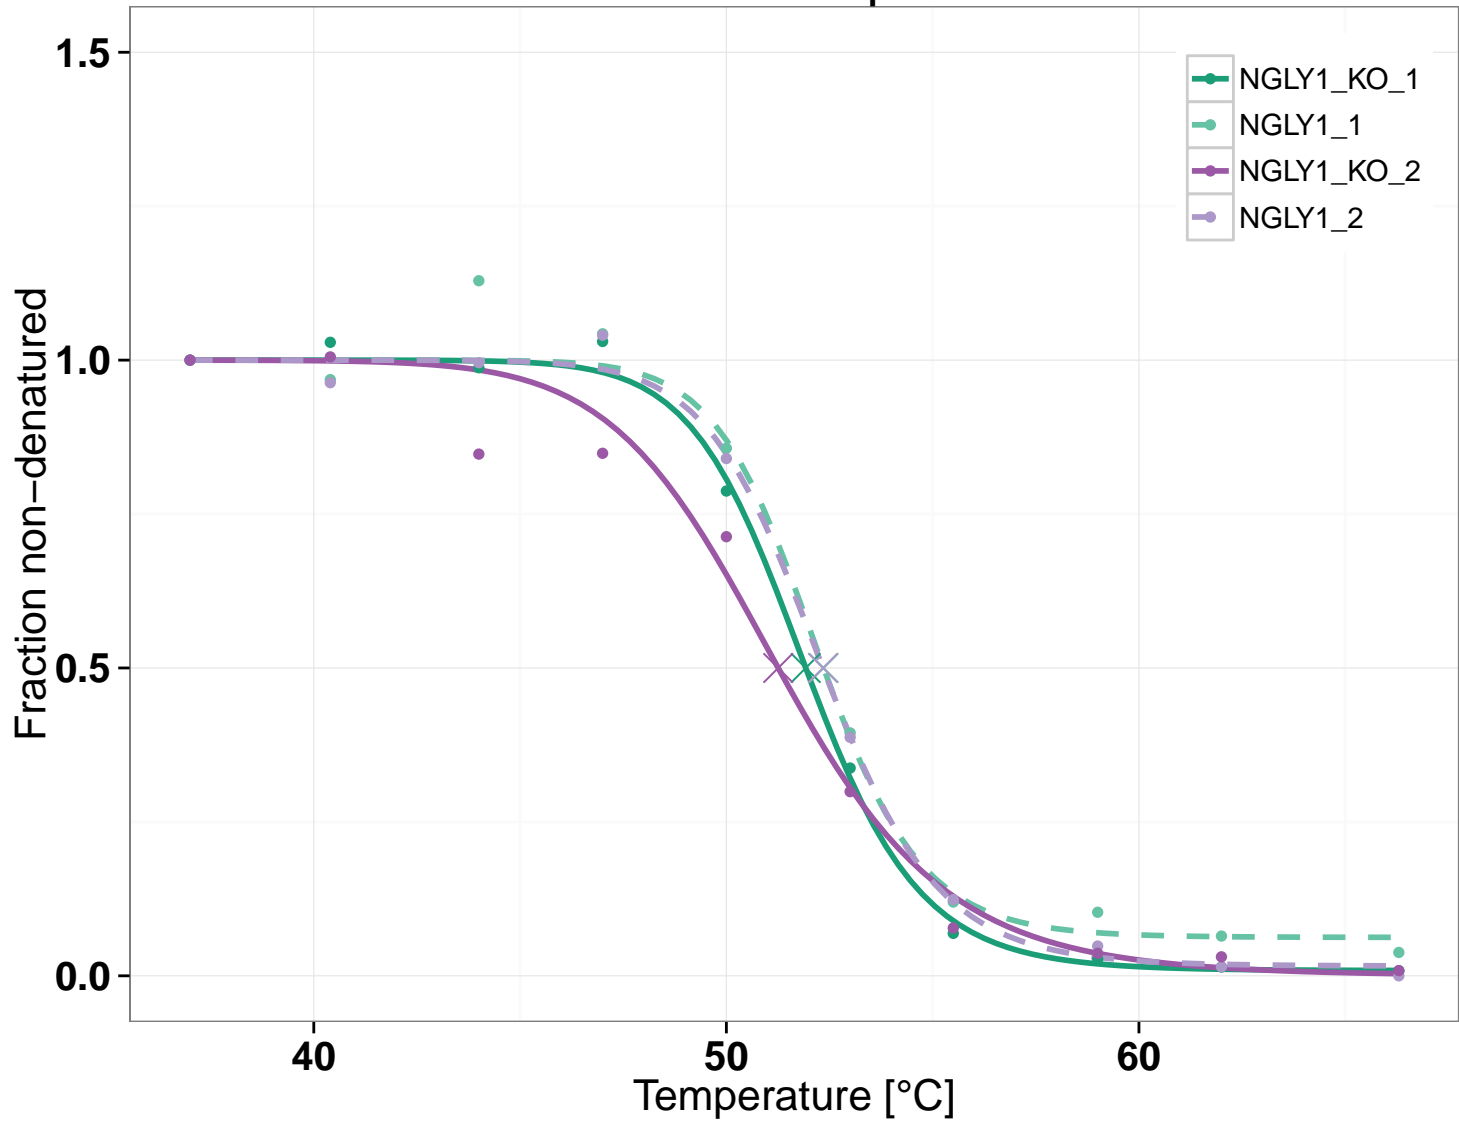

|            | meltPoint | slope | plateau | R2   |
|------------|-----------|-------|---------|------|
| NGLY1_KO_1 | 51.92     | -0.18 | 0.01    | 1    |
| NGLY1_1    | 52.36     | -0.19 | 0.06    | 0.99 |
| NGLY1_KO_2 | 51.26     | -0.12 | 0       | 0.98 |
| NGLY1_2    | 52.34     | -0.17 | 0.02    | 1    |

Supplement: Supplementary file 3937 [file 1]

# IPI00025086.4|COX5A

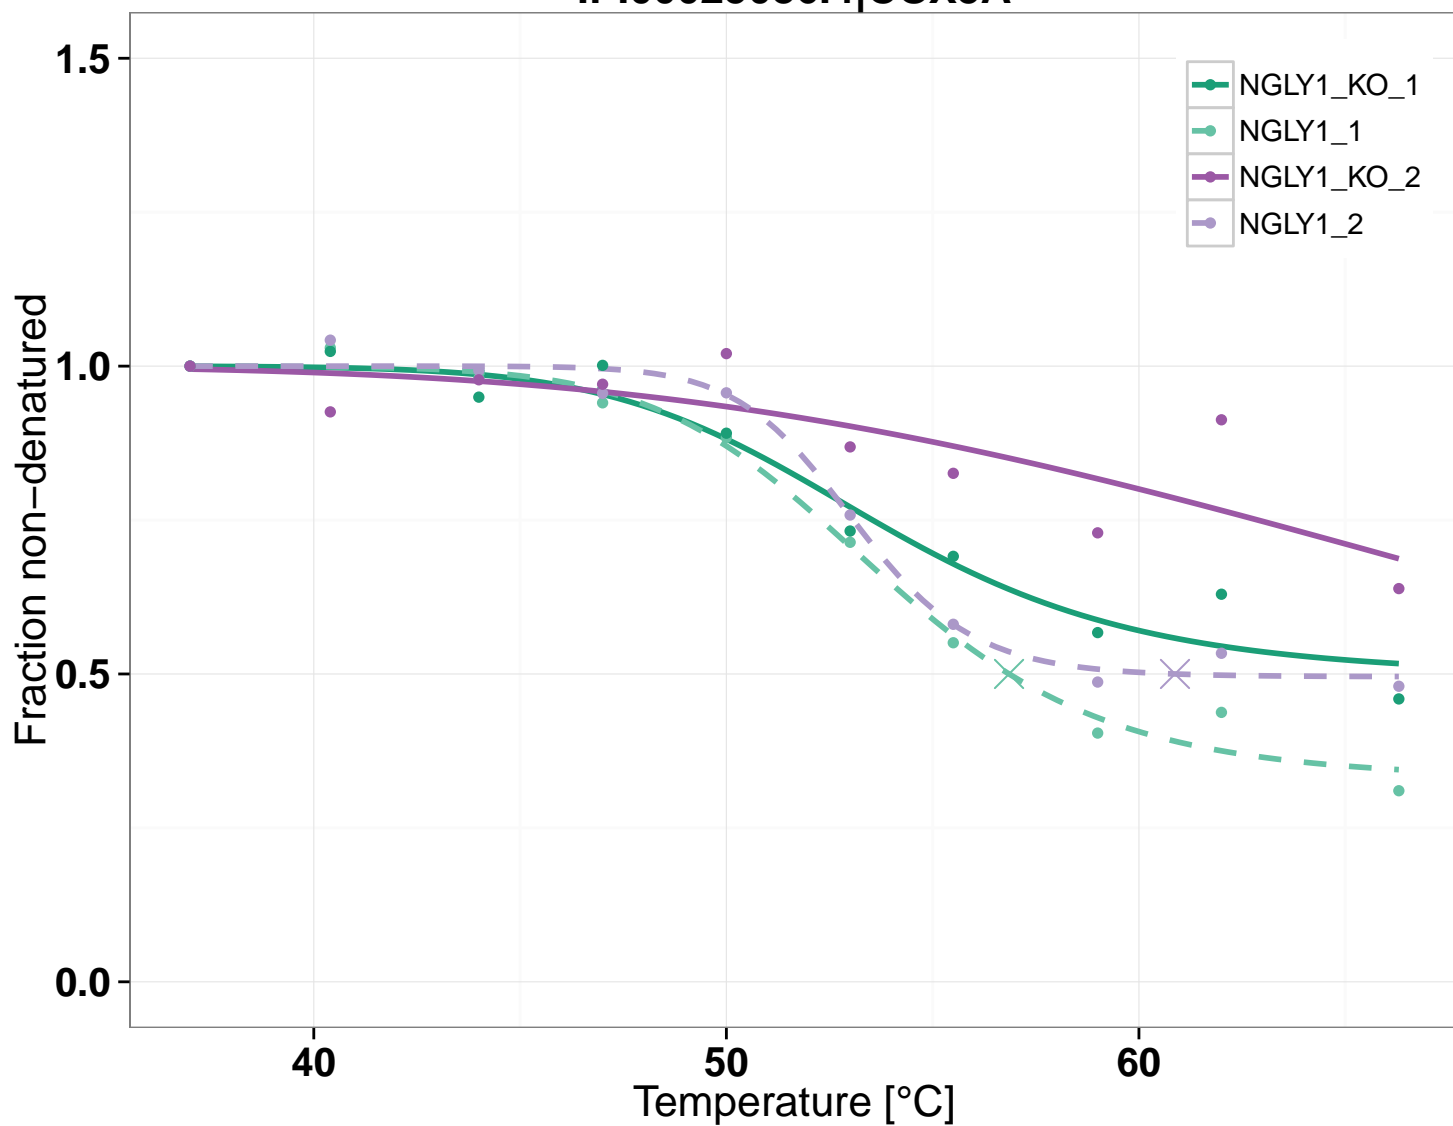

|            | meltPoint | slope  | plateau | R2   |
|------------|-----------|--------|---------|------|
| NGLY1_KO_1 | –         | –0.039 | 0.5     | 0.96 |
| NGLY1_1    | 56.85     | –0.061 | 0.33    | 0.99 |
| NGLY1_KO_2 | –         | –      | 0       | 0.67 |
| NGLY1_2    | 60.87     | –0.088 | 0.5     | 0.99 |

Supplement: Supplementary file 3938 [file 1]

# IPI00301907.3|HLCS

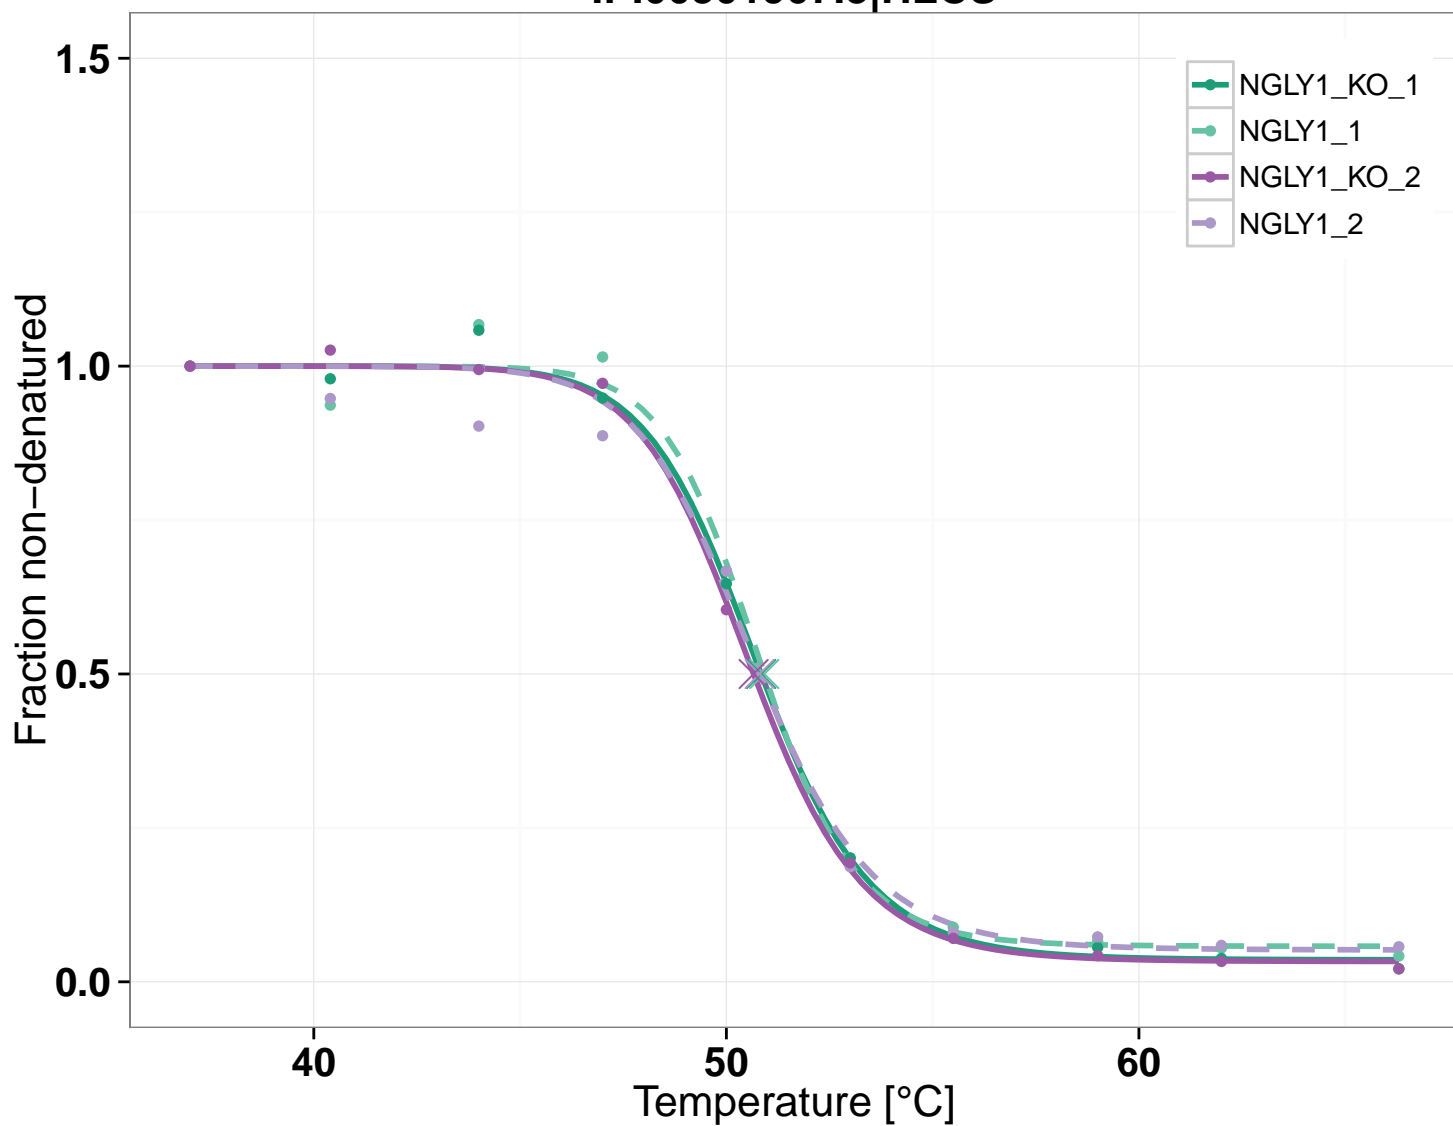

|            | meltPoint | slope | plateau | R2   |
|------------|-----------|-------|---------|------|
| NGLY1_KO_1 | 50.84     | -0.18 | 0.04    | 1    |
| NGLY1_1    | 50.92     | -0.2  | 0.06    | 0.99 |
| NGLY1_KO_2 | 50.66     | -0.18 | 0.03    | 1    |
| NGLY1_2    | 50.81     | -0.17 | 0.05    | 0.99 |

Supplement: Supplementary file 3939 [file 1]

IPI00219219.3|LGALS1

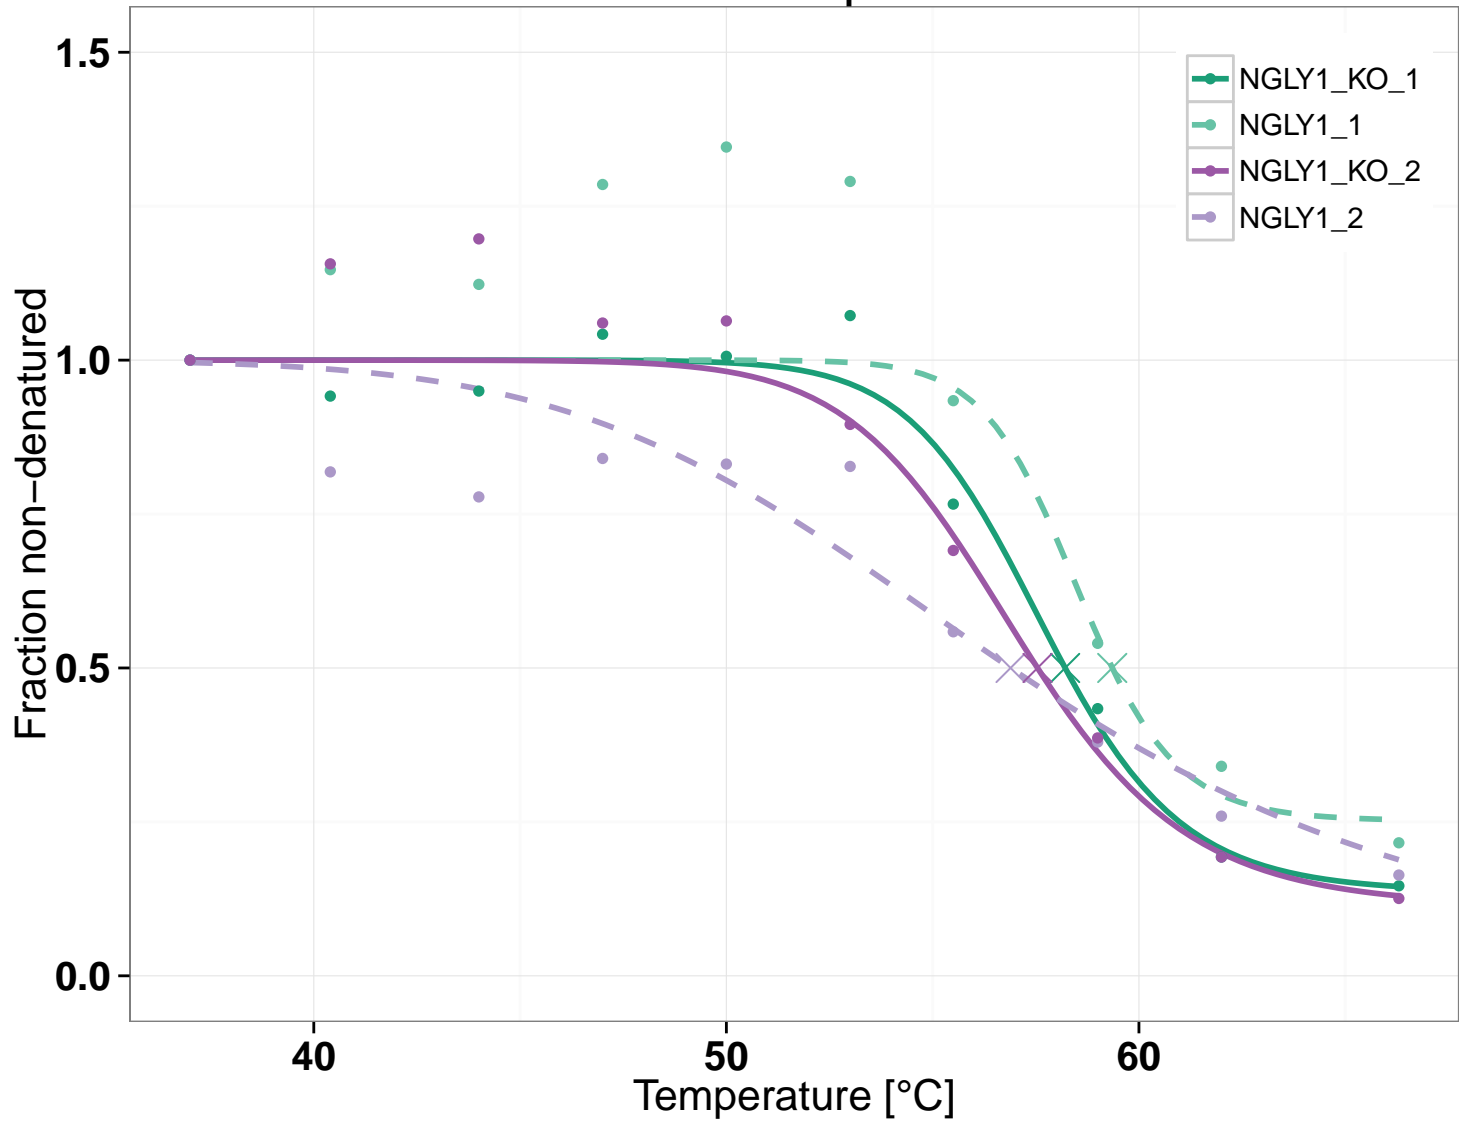

|            | meltPoint | slope  | plateau | R2   |
|------------|-----------|--------|---------|------|
| NGLY1_KO_1 | 58.21     | -0.13  | 0.14    | 0.98 |
| NGLY1_1    | 59.35     | -0.16  | 0.25    | 0.78 |
| NGLY1_KO_2 | 57.54     | -0.11  | 0.11    | 0.95 |
| NGLY1_2    | 56.89     | -0.047 | 0       | 0.88 |

Supplement: Supplementary file 3940 [file 1]

# IPI00641251.1|CD320

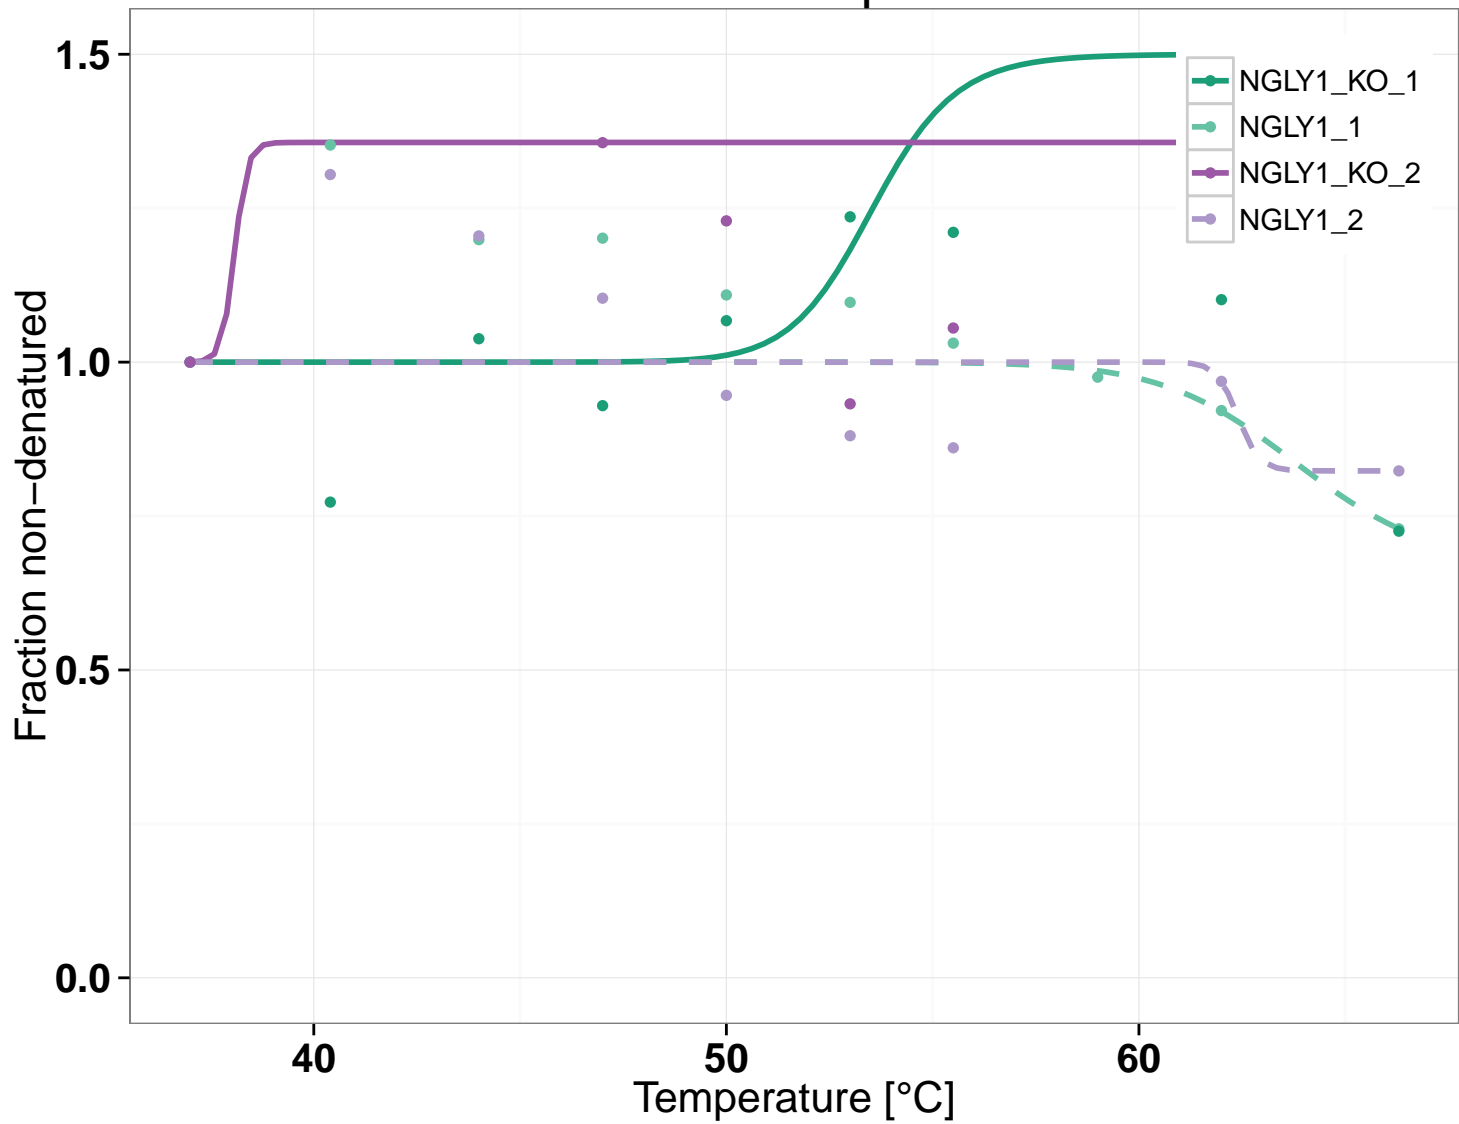

|            | meltPoint | slope | plateau | R2    |
|------------|-----------|-------|---------|-------|
| NGLY1_KO_1 | –         | 0.12  | 1.5     | 0.17  |
| NGLY1_1    | –         | −0.05 | 0.66    | 0.16  |
| NGLY1_KO_2 | –         | 0.59  | 1.36    | 0.15  |
| NGLY1_2    | –         | −0.17 | 0.82    | −0.01 |

Supplement: Supplementary file 3941 [file 1]

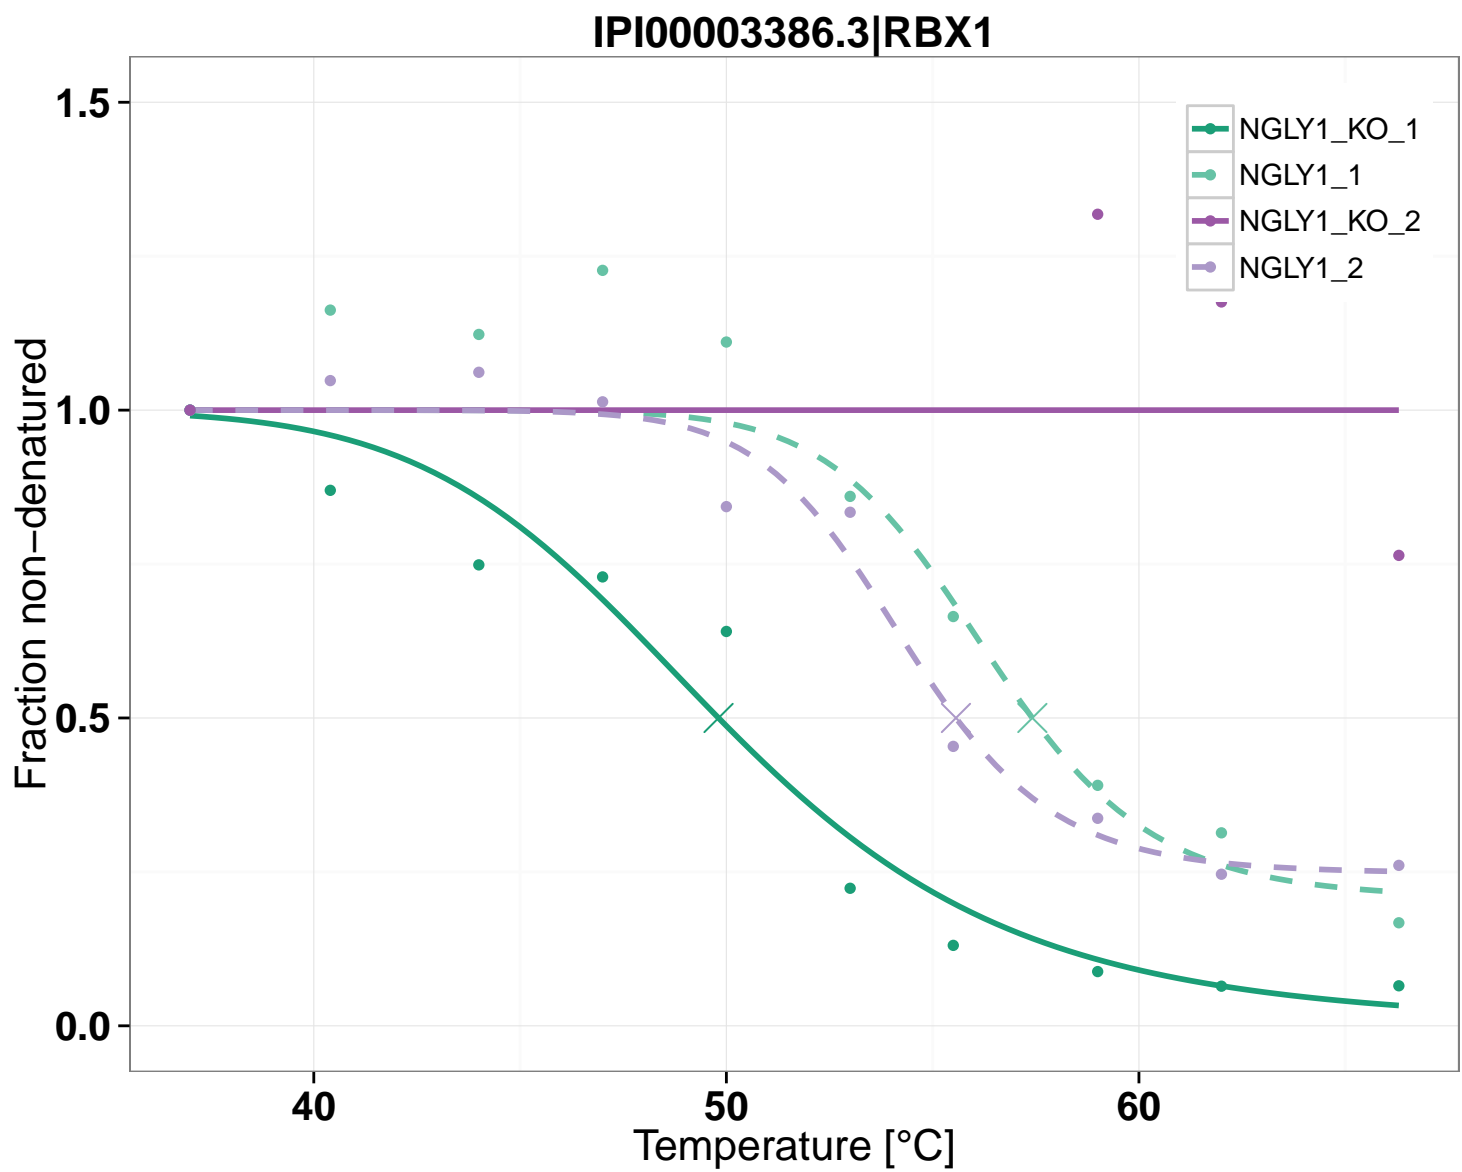

|            | meltPoint | slope | plateau | R2    |
|------------|-----------|-------|---------|-------|
| NGLY1_KO_1 | 49.81     | -0.07 | 0       | 0.95  |
| NGLY1_1    | 57.42     | -0.1  | 0.21    | 0.91  |
| NGLY1_KO_2 | -         | -     | 1.5     | -1.26 |
| NGLY1_2    | 55.56     | -0.11 | 0.25    | 0.97  |

Supplement: Supplementary file 3942 [file 1]

IPI00043564.2|SFXN2

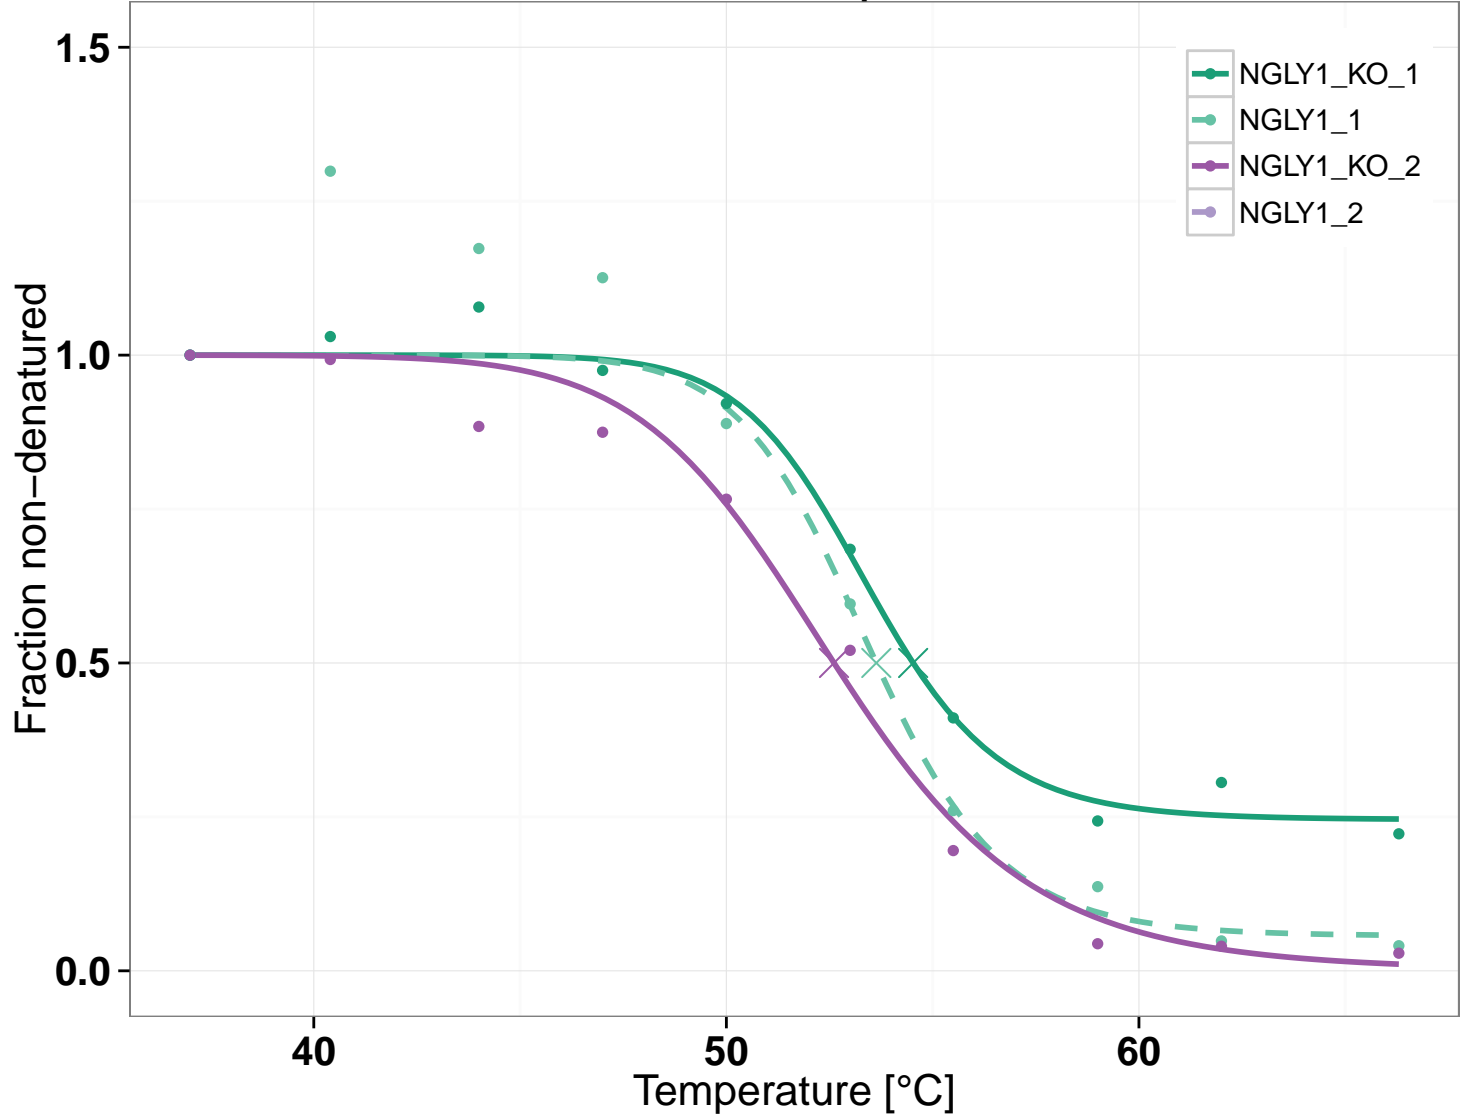

|            | meltPoint | slope | plateau | R2   |
|------------|-----------|-------|---------|------|
| NGLY1_KO_1 | 54.53     | -0.12 | 0.25    | 0.99 |
| NGLY1_1    | 53.63     | -0.15 | 0.06    | 0.94 |
| NGLY1_KO_2 | 52.61     | -0.1  | 0       | 0.99 |
| NGLY1_2    | -         | -     | -       | -    |

Supplement: Supplementary file 3943 [file 1]

IPI00893925.1|MPZL1

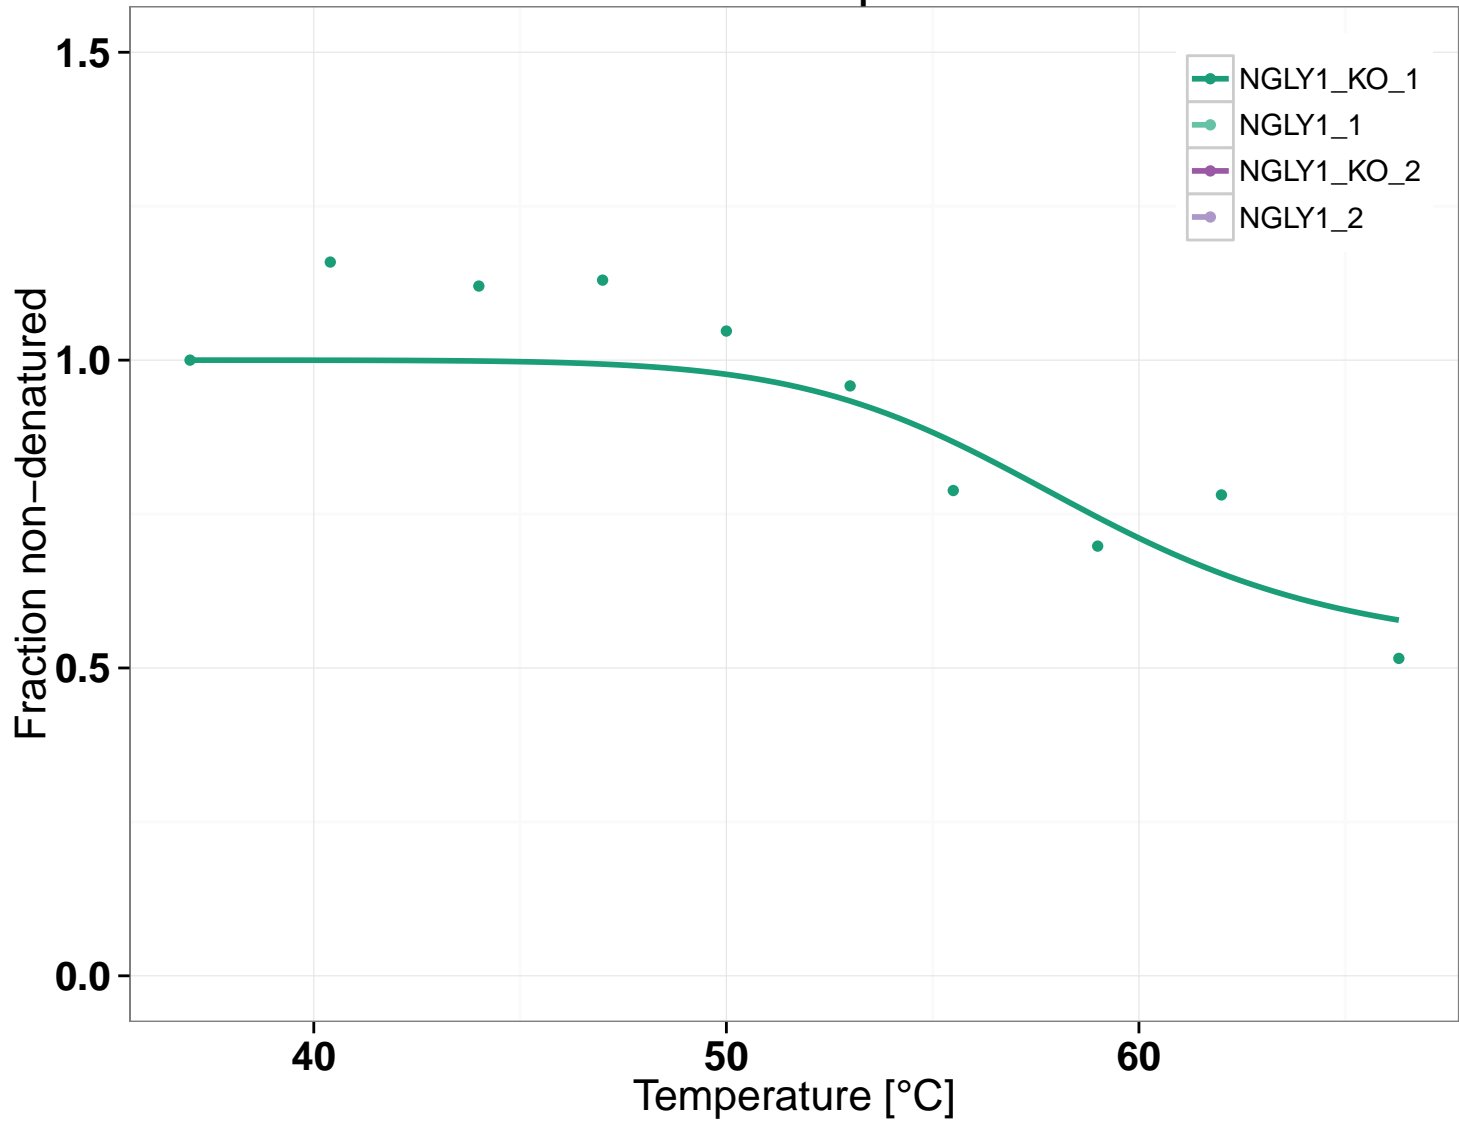

|            | meltPoint | slope  | plateau | R2   |
|------------|-----------|--------|---------|------|
| NGLY1_KO_1 | —         | −0.036 | 0.52    | 0.78 |
| NGLY1_1    | —         | —      | —       | —    |
| NGLY1_KO_2 | —         | —      | —       | —    |
| NGLY1_2    | —         | —      | —       | —    |

Supplement: Supplementary file 3944 [file 1]

IPI00000334.2|C6ORF35

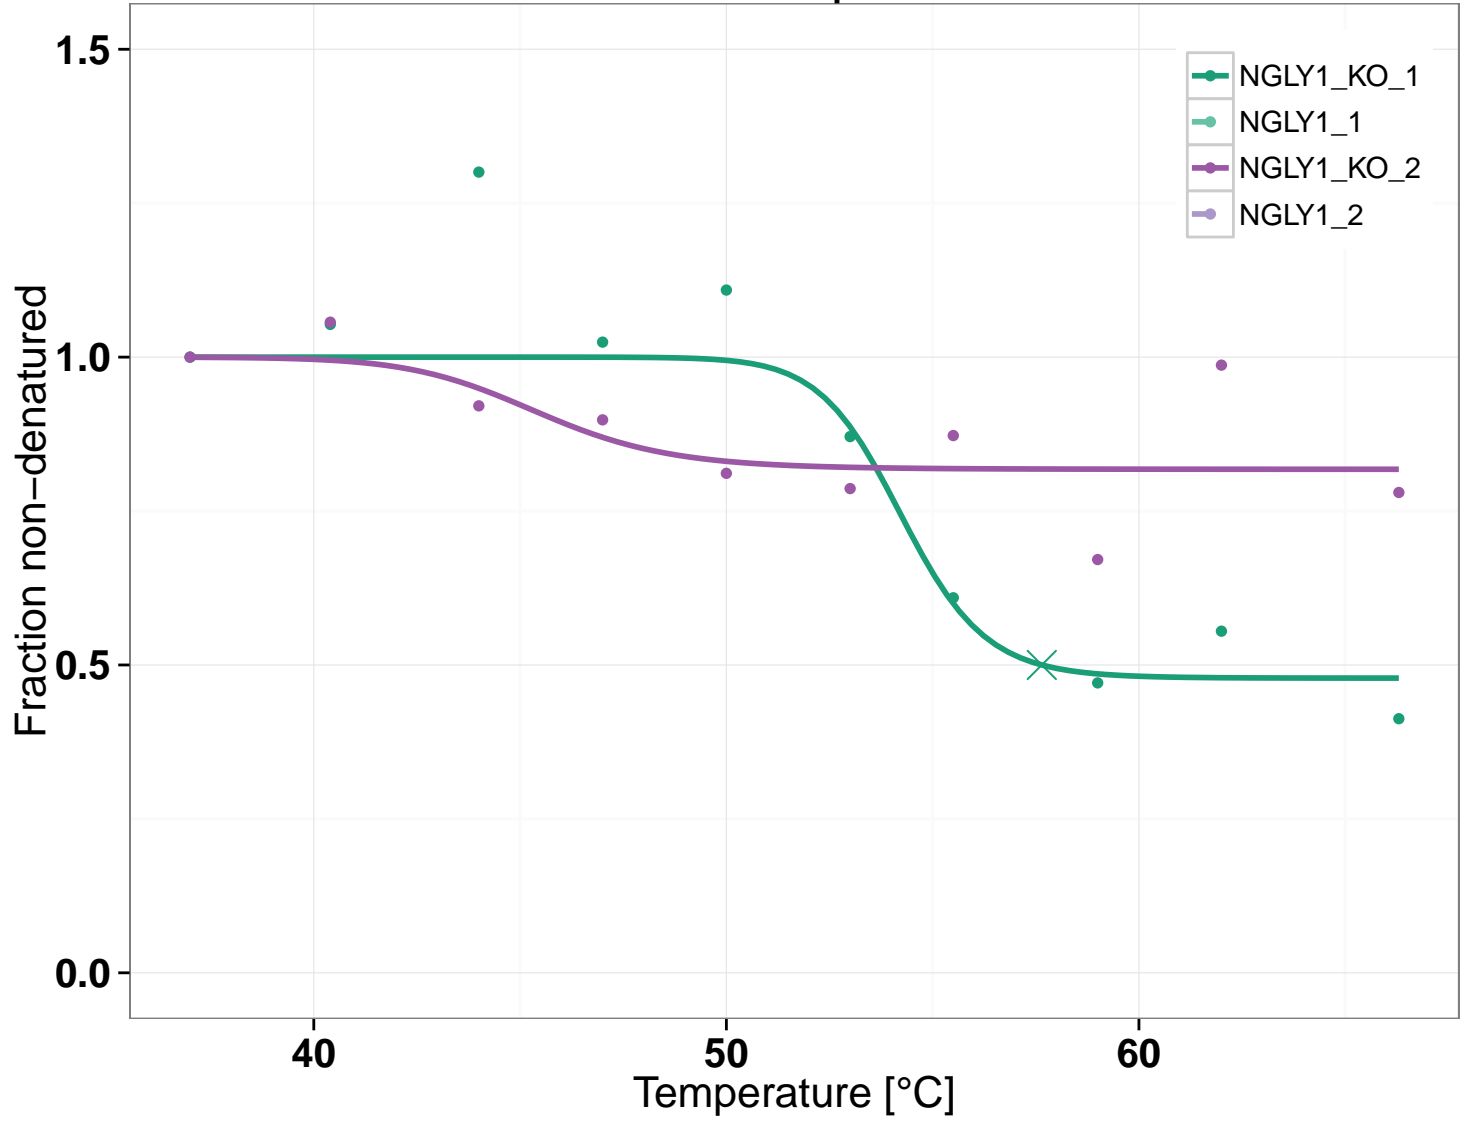

|            | meltPoint | slope  | plateau | R2   |
|------------|-----------|--------|---------|------|
| NGLY1_KO_1 | 57.65     | -0.13  | 0.48    | 0.86 |
| NGLY1_1    | -         | -      | -       | -    |
| NGLY1_KO_2 | -         | -0.029 | 0.82    | 0.51 |
| NGLY1_2    | -         | -      | -       | -    |

Supplement: Supplementary file 3945 [file 1]

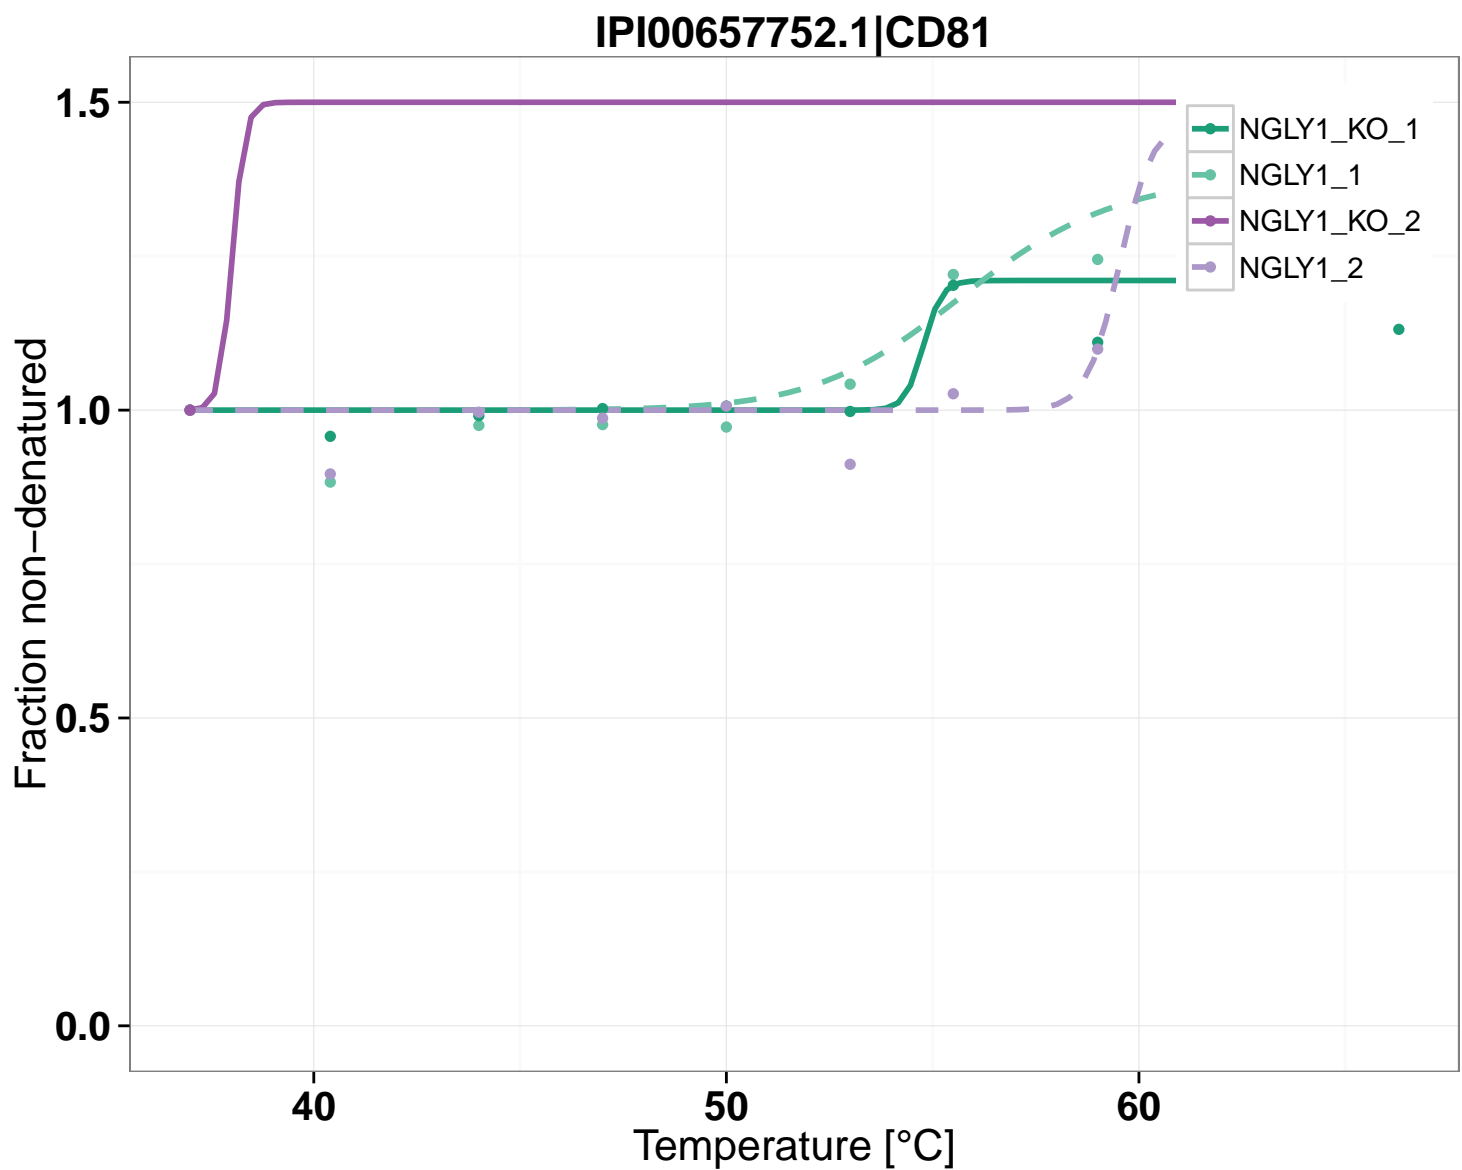

|            | meltPoint | slope | plateau | R2    |
|------------|-----------|-------|---------|-------|
| NGLY1_KO_1 | —         | 0.24  | 1.21    | 0.69  |
| NGLY1_1    | —         | 0.052 | 1.39    | 0.9   |
| NGLY1_KO_2 | —         | 0.82  | 1.5     | -3.08 |
| NGLY1_2    | —         | 0.3   | 1.47    | 0.95  |

Supplement: Supplementary file 3946 [file 1]

IPI00217104.4|NDNL2

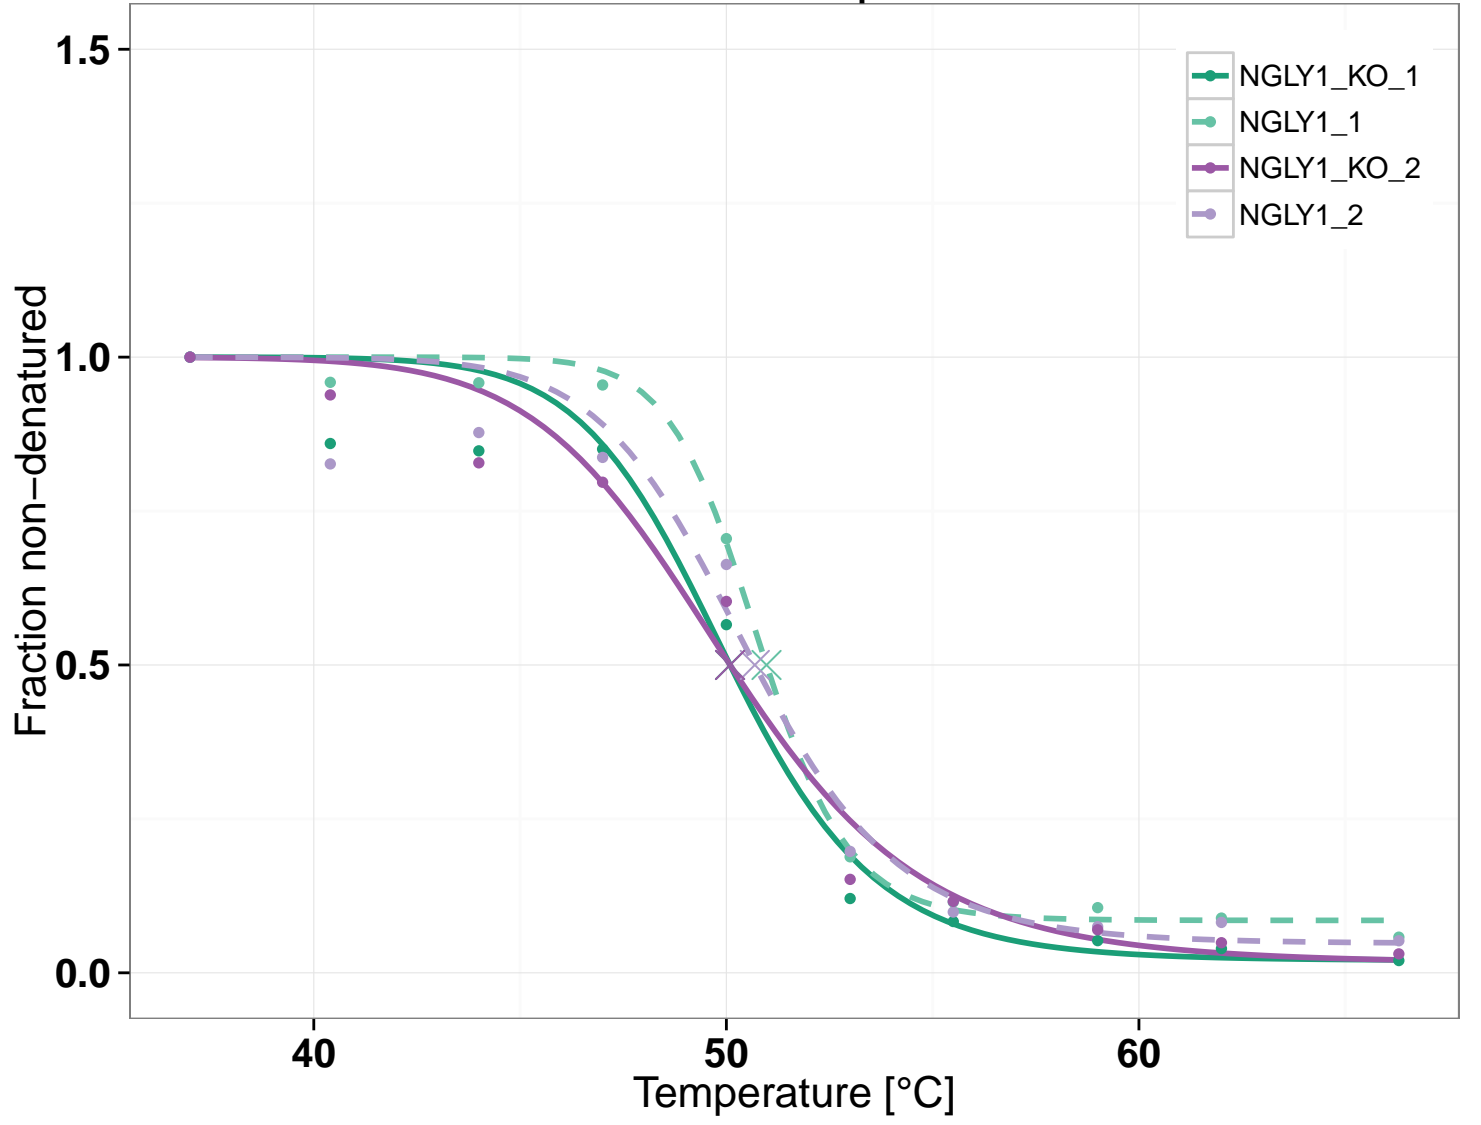

|            | meltPoint | slope | plateau | R2   |
|------------|-----------|-------|---------|------|
| NGLY1_KO_1 | 50.09     | -0.14 | 0.02    | 0.97 |
| NGLY1_1    | 50.97     | -0.21 | 0.09    | 1    |
| NGLY1_KO_2 | 50.09     | -0.1  | 0.02    | 0.98 |
| NGLY1_2    | 50.69     | -0.13 | 0.05    | 0.96 |

Supplement: Supplementary file 3947 [file 1]

IPI00910782.1|MTFR1

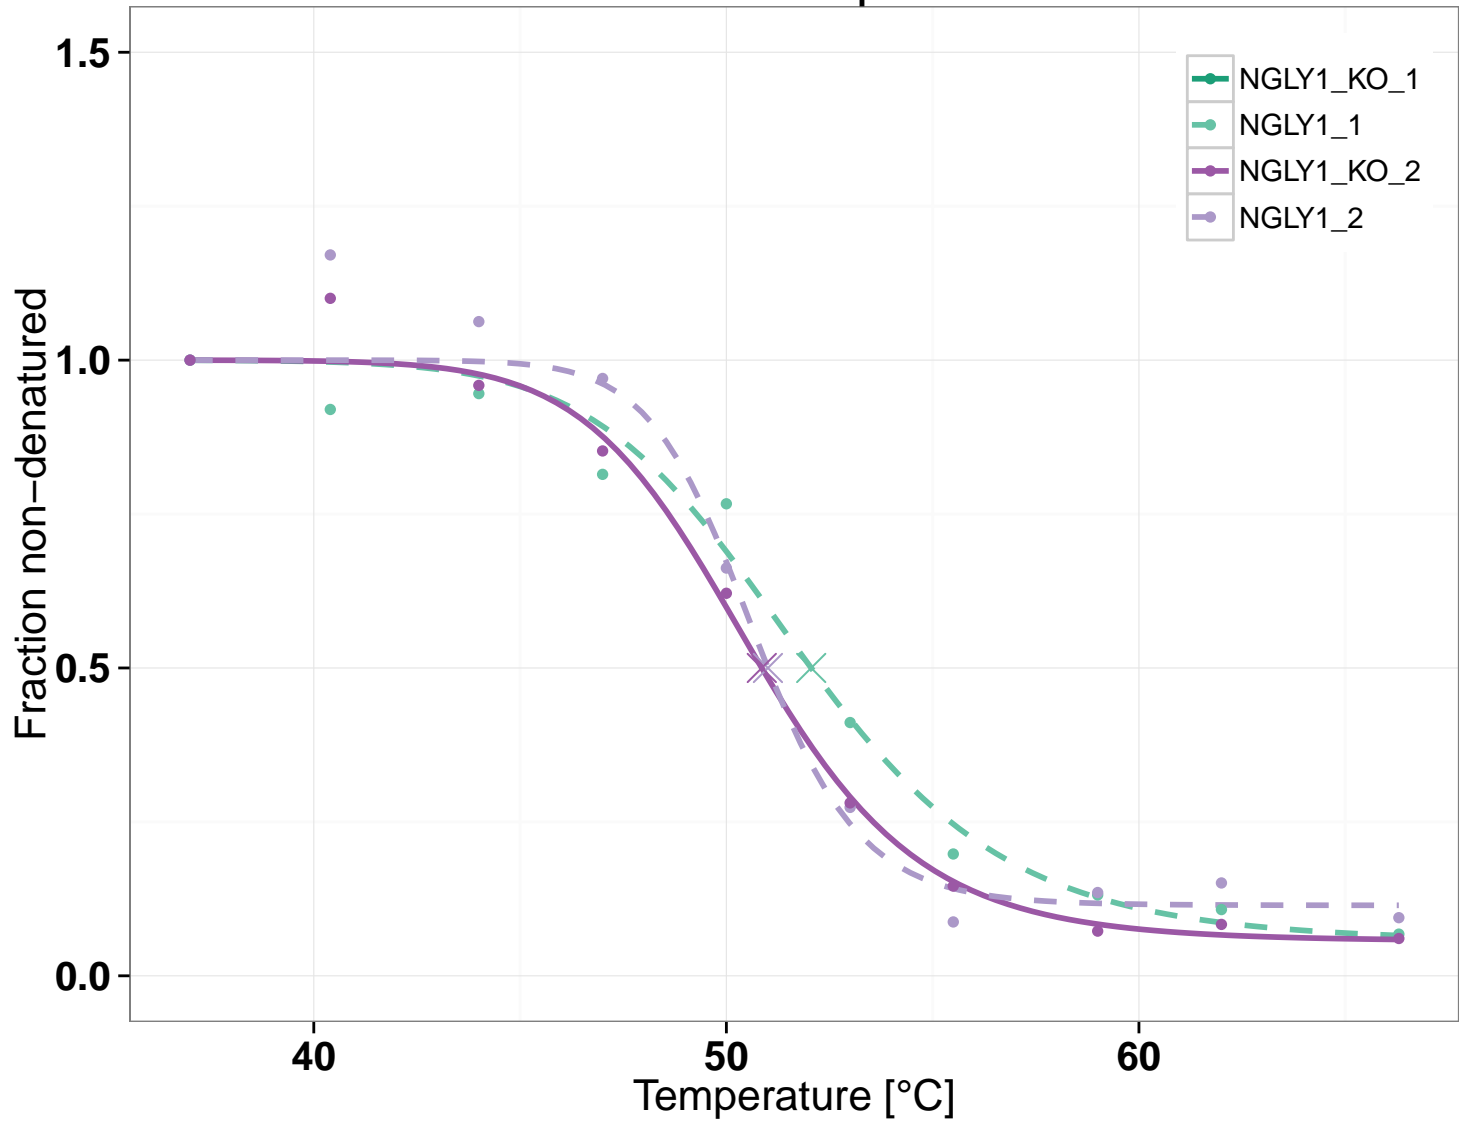

Supplement: Supplementary file 3948 [file 1]

# IPI00006006.3|TMEM63A

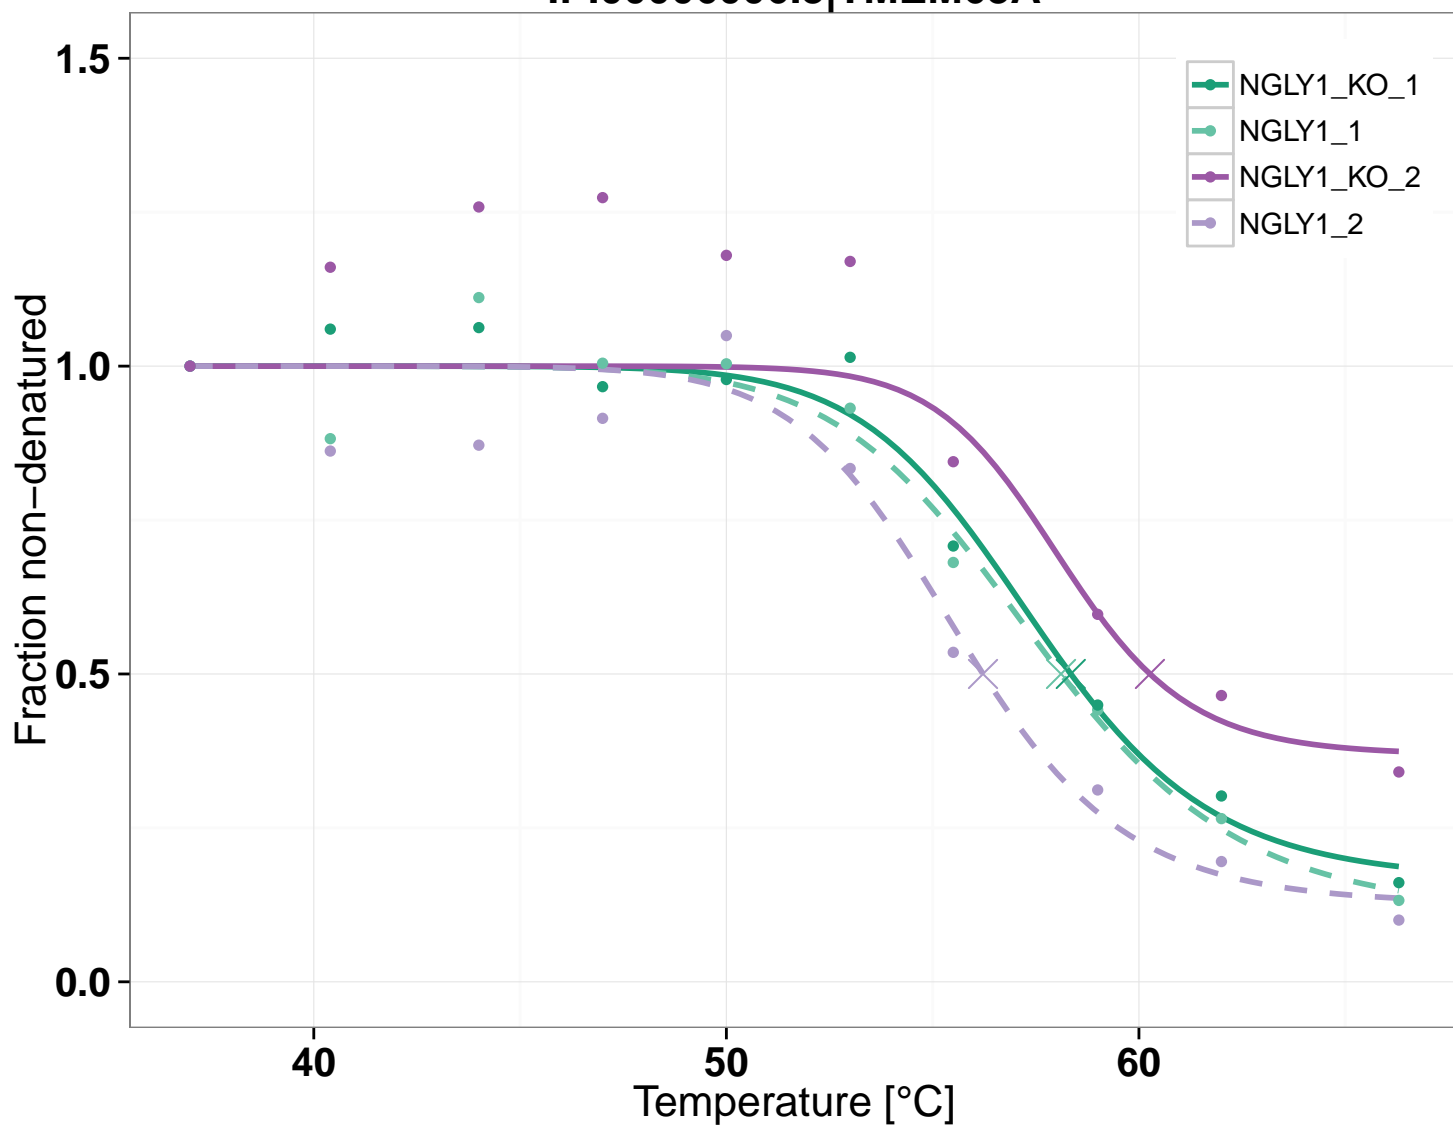

|            | meltPoint | slope  | plateau | R2   |
|------------|-----------|--------|---------|------|
| NGLY1_KO_1 | 58.35     | -0.098 | 0.16    | 0.98 |
| NGLY1_1    | 58.11     | -0.091 | 0.11    | 0.97 |
| NGLY1_KO_2 | 60.27     | -0.1   | 0.37    | 0.78 |
| NGLY1_2    | 56.22     | -0.11  | 0.13    | 0.95 |

Supplement: Supplementary file 3949 [file 1]

# IPI00432226.1|Q6UWH2\_HUMAN

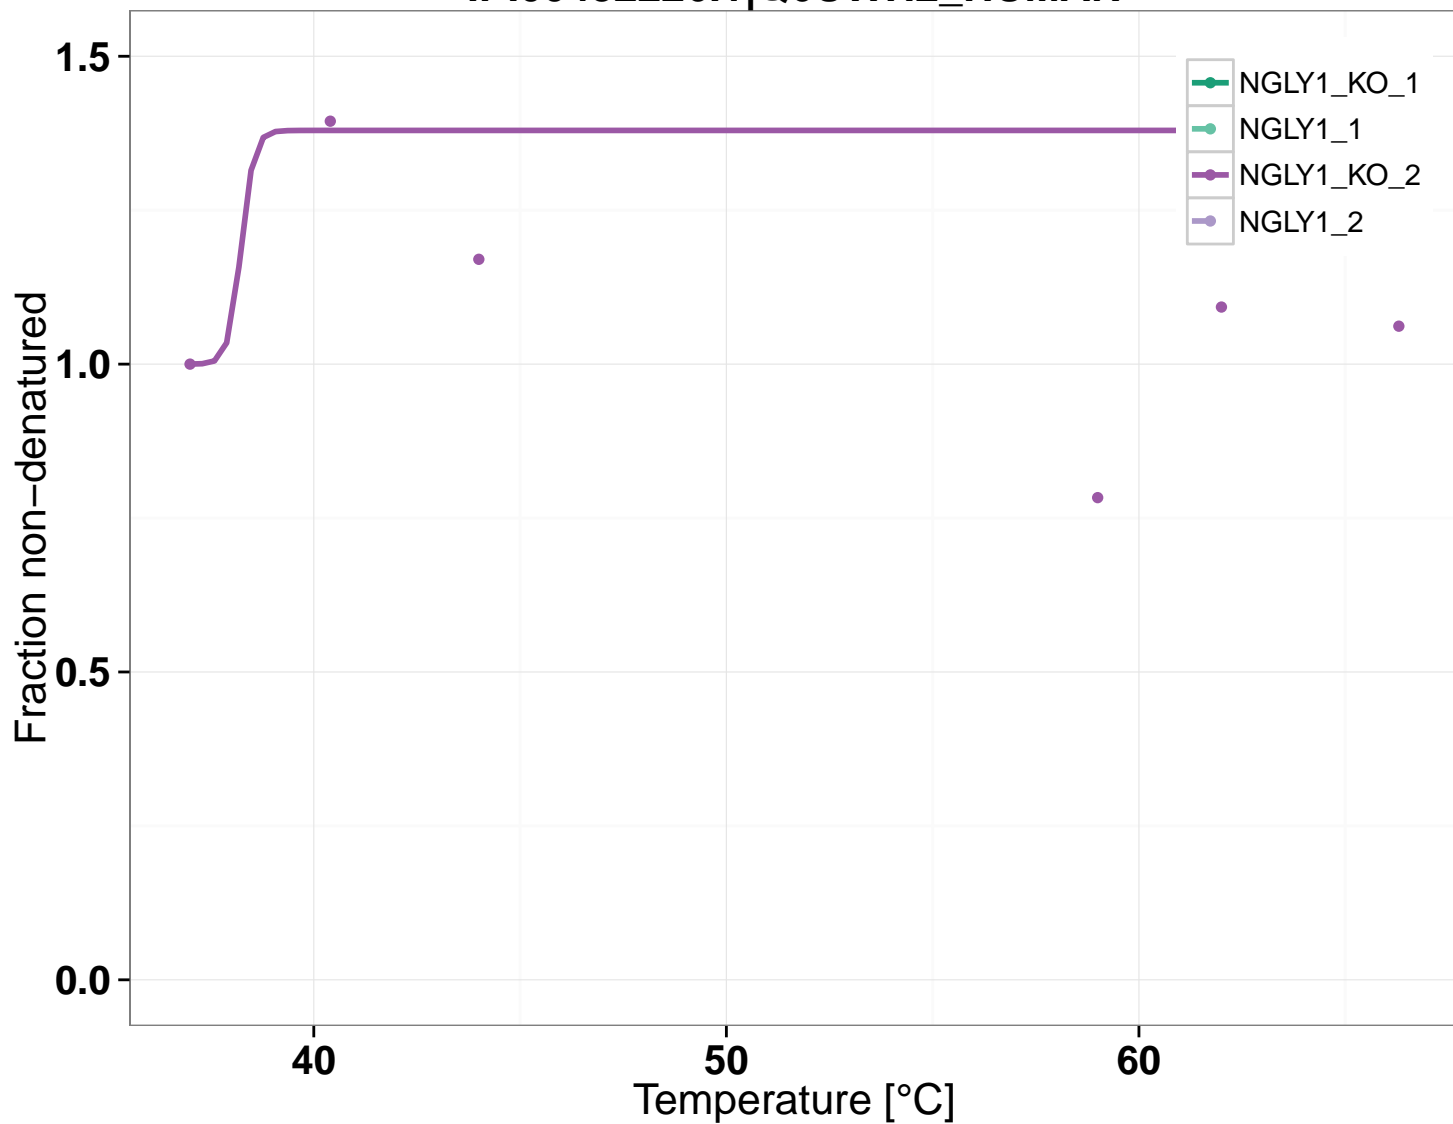

|            | meltPoint | slope | plateau | R2  |
|------------|-----------|-------|---------|-----|
| NGLY1_KO_1 | —         | —     | —       | —   |
| NGLY1_1    | —         | —     | —       | —   |
| NGLY1_KO_2 | —         | 0.62  | 1.38    | 0.1 |
| NGLY1_2    | —         | —     | —       | —   |

Supplement: Supplementary file 3950 [file 1]

# IPI00009868.4|MBIP

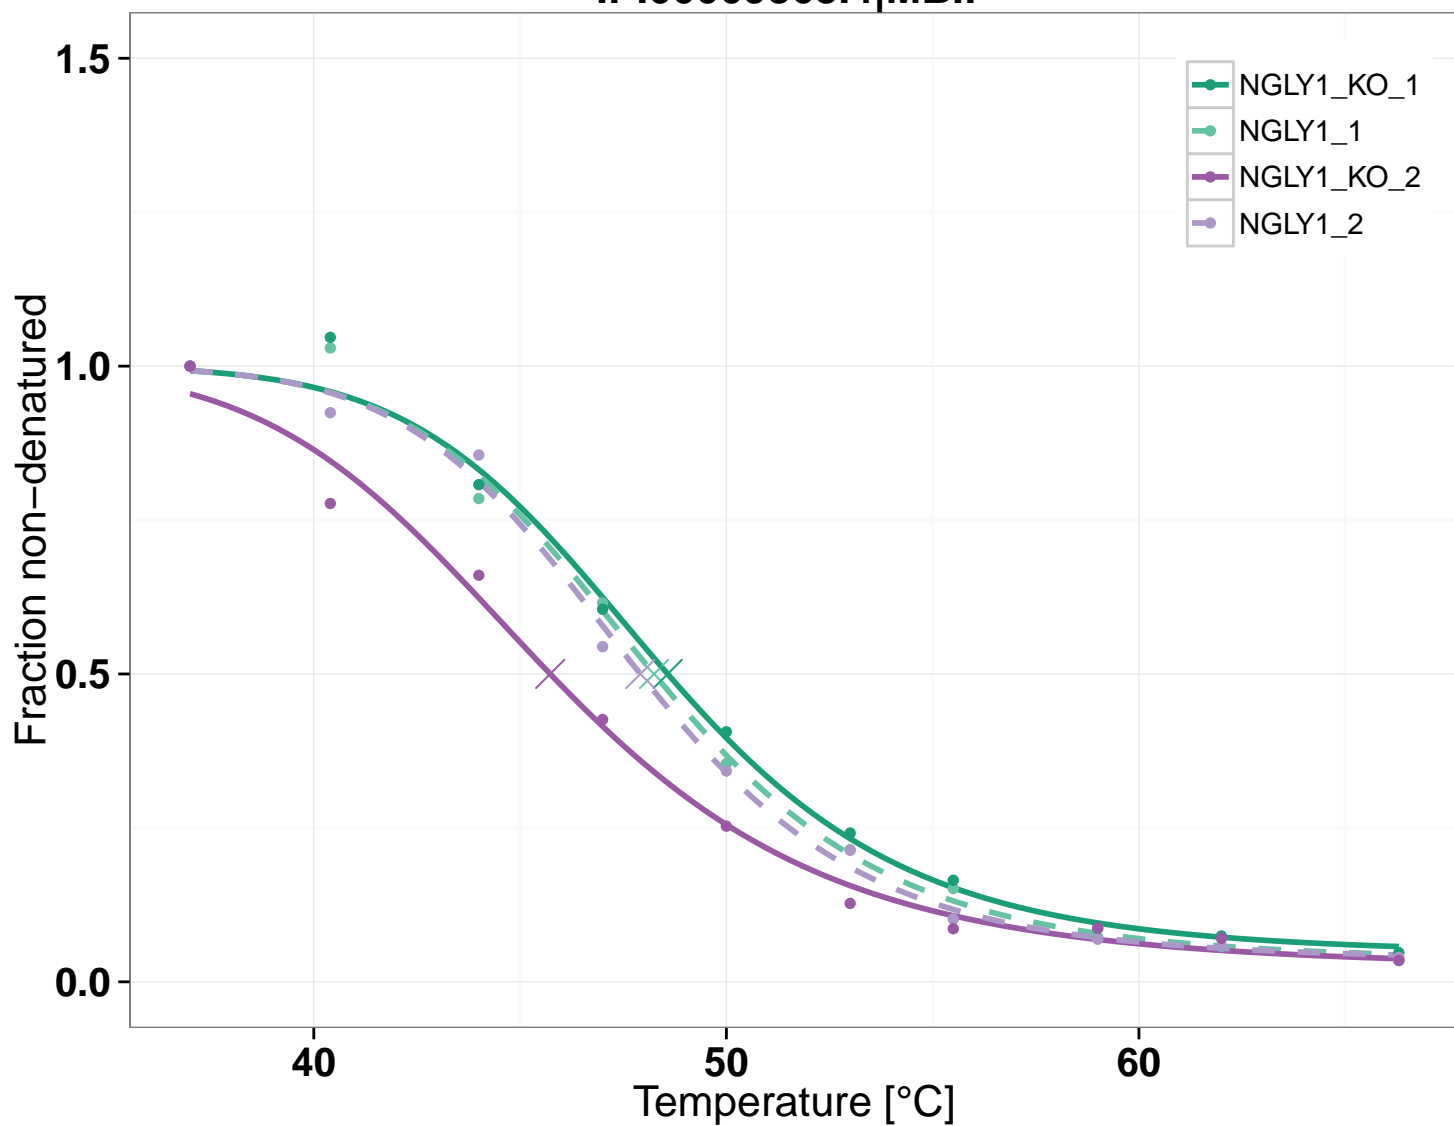

|            | meltPoint | slope  | plateau | R2   |
|------------|-----------|--------|---------|------|
| NGLY1_KO_1 | 48.58     | -0.08  | 0.04    | 0.99 |
| NGLY1_1    | 48.25     | -0.083 | 0.03    | 0.99 |
| NGLY1_KO_2 | 45.73     | -0.072 | 0.02    | 0.99 |
| NGLY1_2    | 47.91     | -0.087 | 0.04    | 1    |

Supplement: Supplementary file 3951 [file 1]

# IPI00178352.5|FLNC

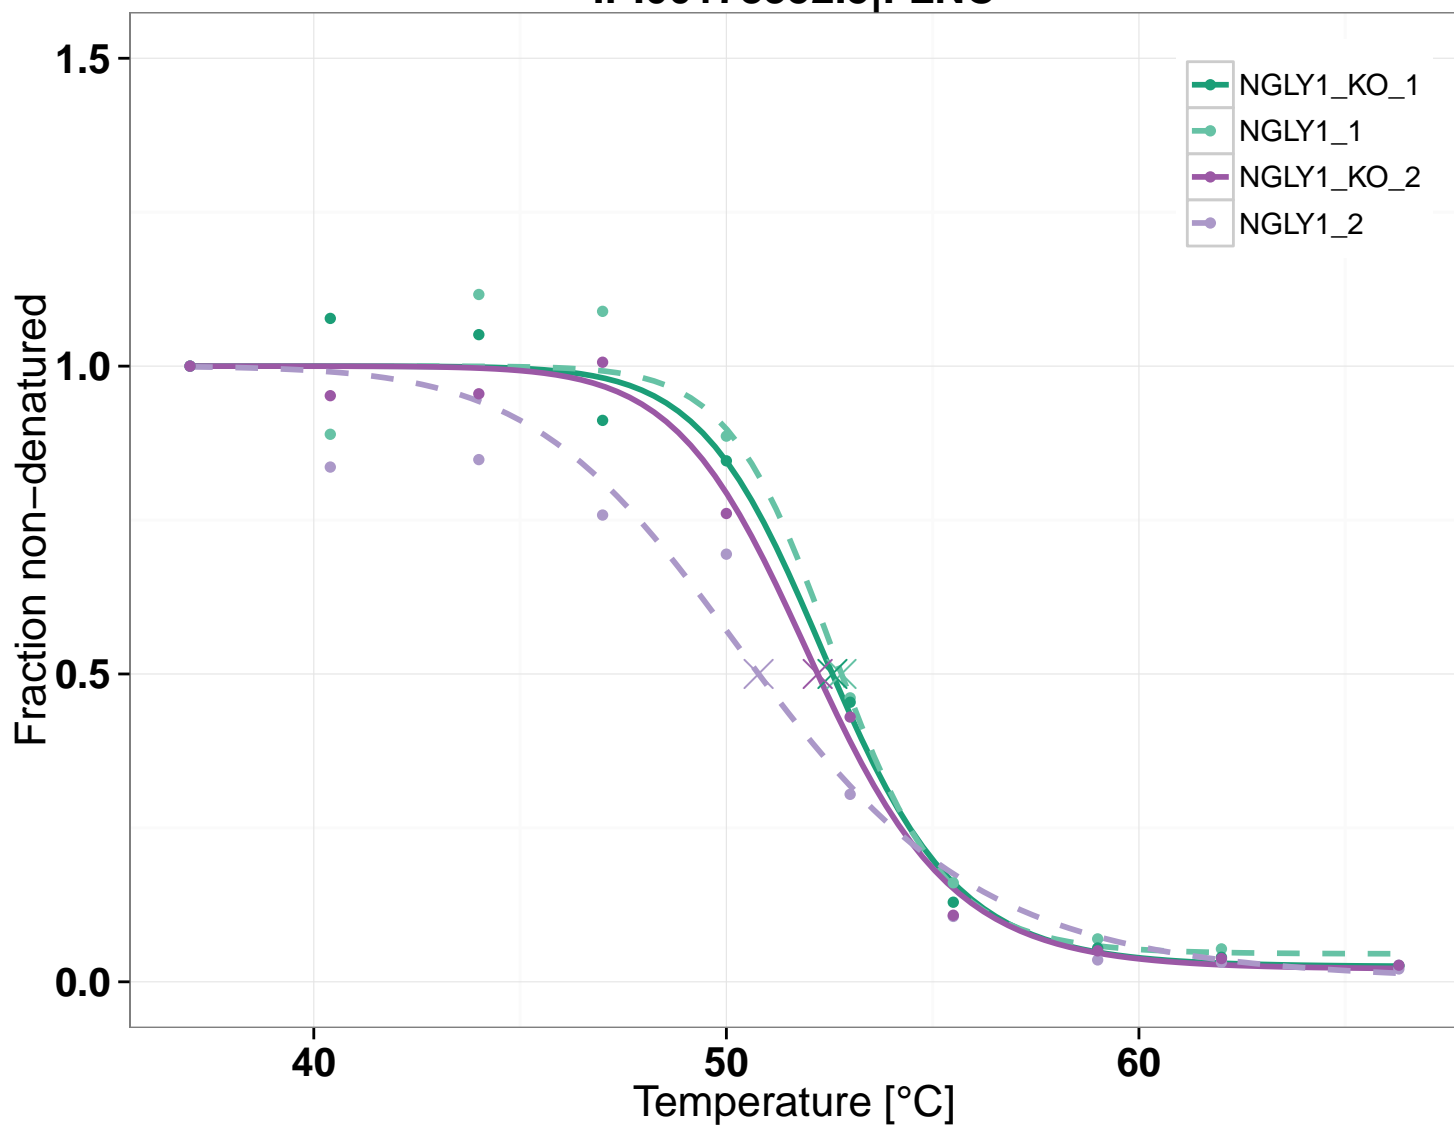

|            | meltPoint | slope  | plateau | R2   |
|------------|-----------|--------|---------|------|
| NGLY1_KO_1 | 52.57     | -0.16  | 0.02    | 0.99 |
| NGLY1_1    | 52.79     | -0.18  | 0.05    | 0.98 |
| NGLY1_KO_2 | 52.21     | -0.15  | 0.02    | 0.99 |
| NGLY1_2    | 50.78     | -0.091 | 0       | 0.96 |

Supplement: Supplementary file 3952 [file 1]

# IPI00335543.9|NCRNA00153

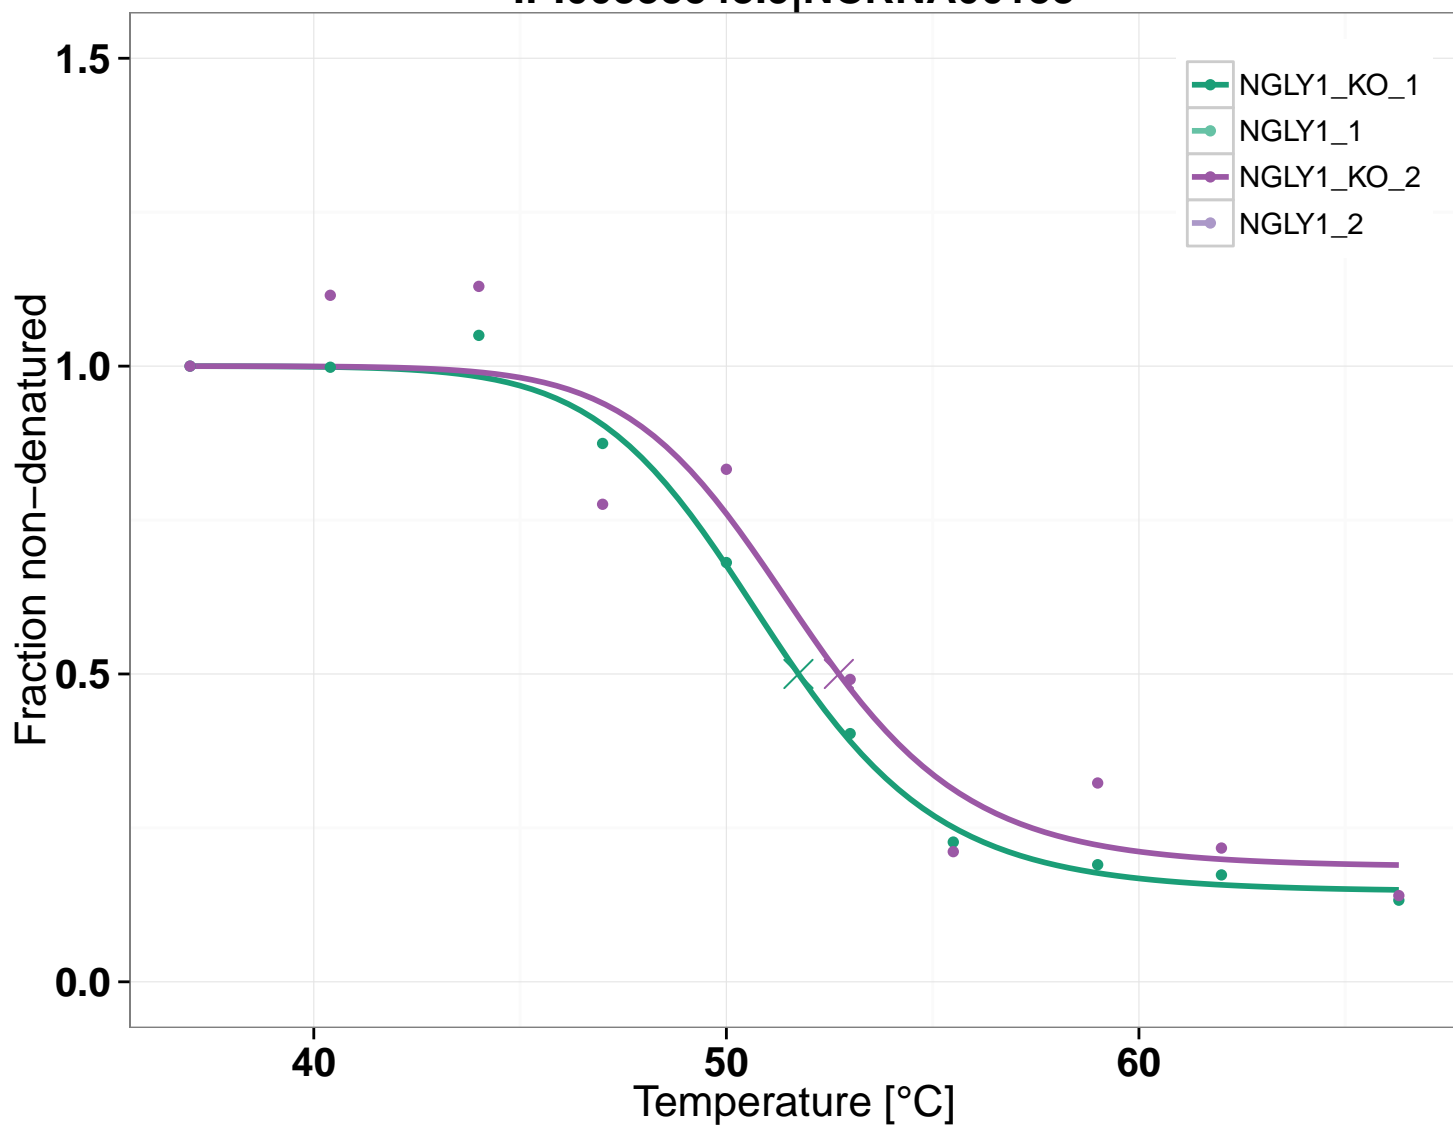

|            | meltPoint | slope  | plateau | R2   |
|------------|-----------|--------|---------|------|
| NGLY1_KO_1 | 51.75     | -0.1   | 0.15    | 0.99 |
| NGLY1_1    | -         | -      | -       | -    |
| NGLY1_KO_2 | 52.73     | -0.099 | 0.19    | 0.94 |
| NGLY1_2    | -         | -      | -       | -    |

Supplement: Supplementary file 3953 [file 1]

IPI00302674.3|CCDC134

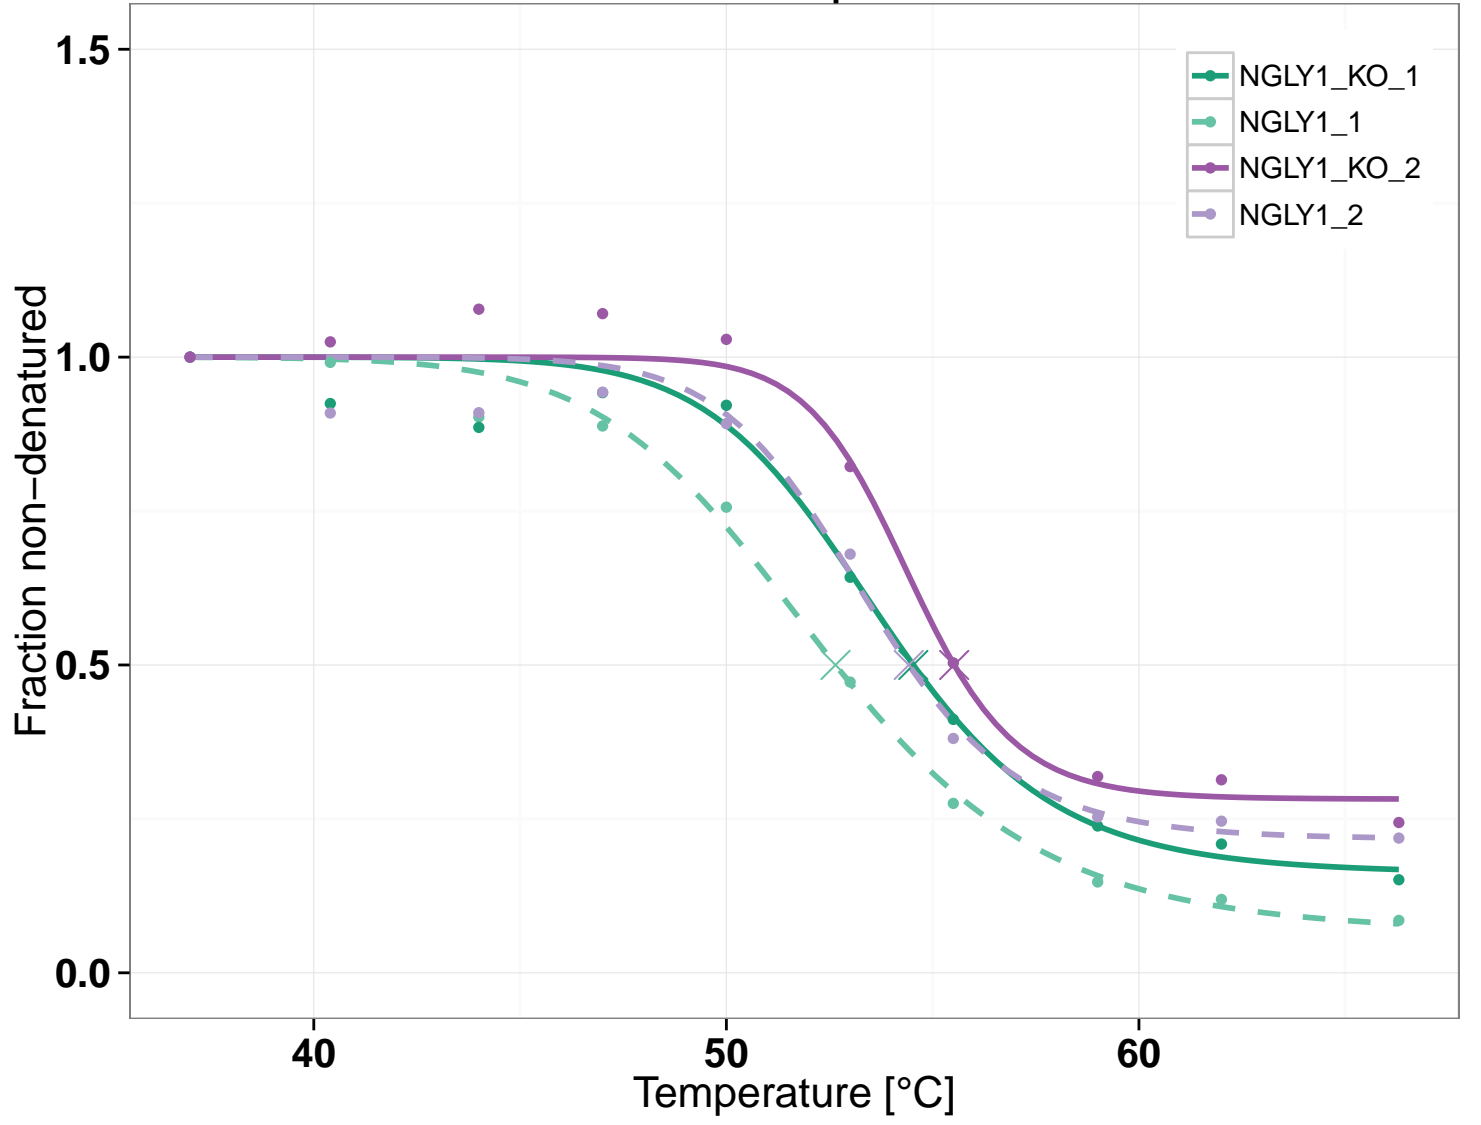

|            | meltPoint | slope  | plateau | R2   |
|------------|-----------|--------|---------|------|
| NGLY1_KO_1 | 54.53     | -0.1   | 0.16    | 0.98 |
| NGLY1_1    | 52.65     | -0.087 | 0.06    | 0.99 |
| NGLY1_KO_2 | 55.52     | -0.14  | 0.28    | 0.99 |
| NGLY1_2    | 54.42     | -0.11  | 0.22    | 0.98 |

Supplement: Supplementary file 3954 [file 1]

IPI00796934.2|RPL29

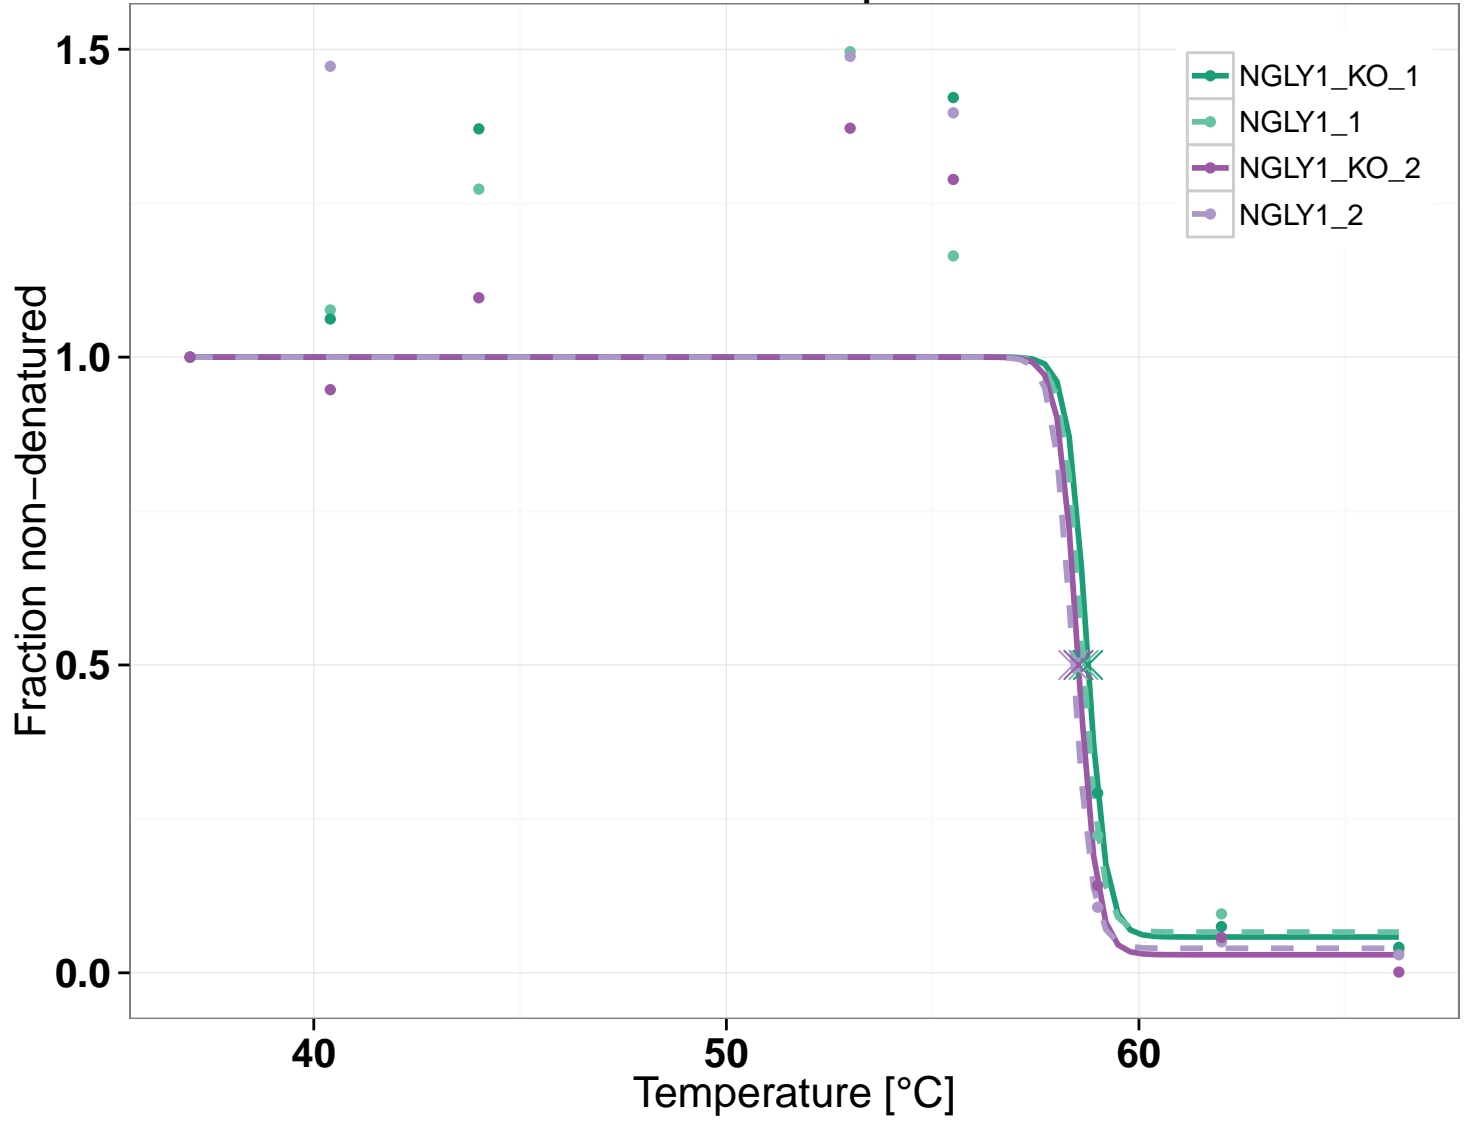

|            | meltPoint | slope | plateau | R2   |
|------------|-----------|-------|---------|------|
| NGLY1_KO_1 | 58.77     | -1    | 0.06    | 0.54 |
| NGLY1_1    | 58.66     | -1    | 0.07    | 0.64 |
| NGLY1_KO_2 | 58.53     | -1    | 0.03    | 0.69 |
| NGLY1_2    | 58.41     | -1    | 0.04    | 0.56 |

Supplement: Supplementary file 3955 [file 1]

# IPI00880117.1|APOBEC3B

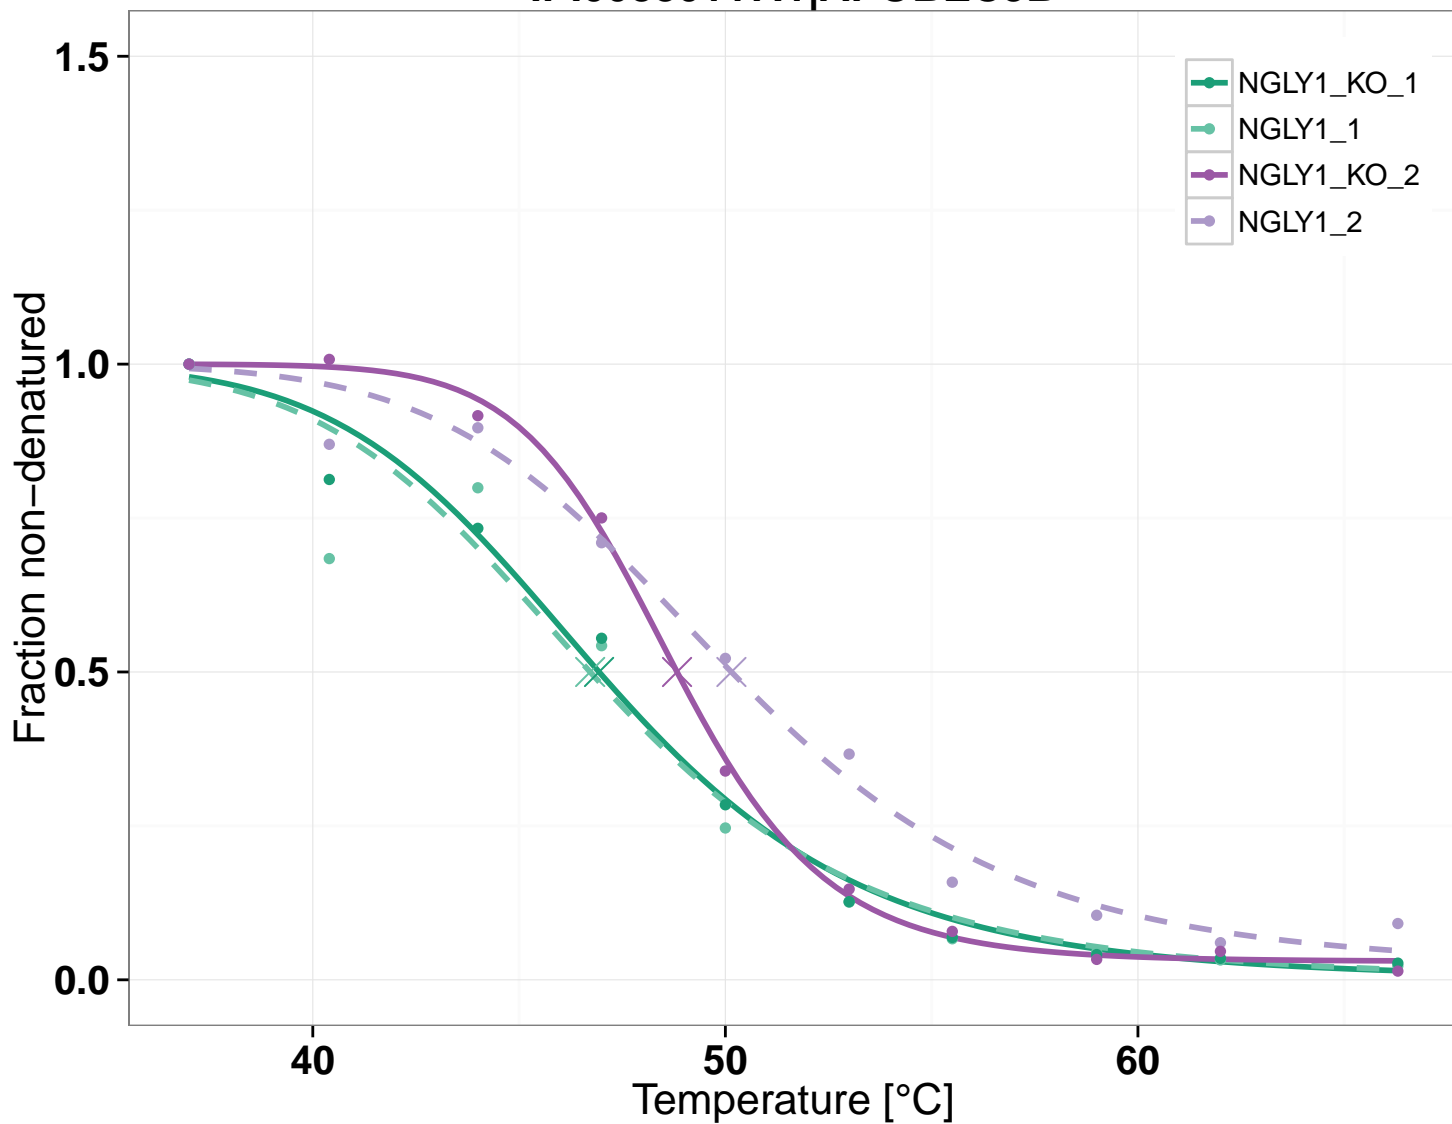

|            | meltPoint | slope  | plateau | R2   |
|------------|-----------|--------|---------|------|
| NGLY1_KO_1 | 46.94     | -0.078 | 0       | 0.99 |
| NGLY1_1    | 46.72     | -0.075 | 0       | 0.95 |
| NGLY1_KO_2 | 48.83     | -0.13  | 0.03    | 1    |
| NGLY1_2    | 50.15     | -0.07  | 0.02    | 0.99 |

Supplement: Supplementary file 3956 [file 1]

IPI00375577.1|TMEM65

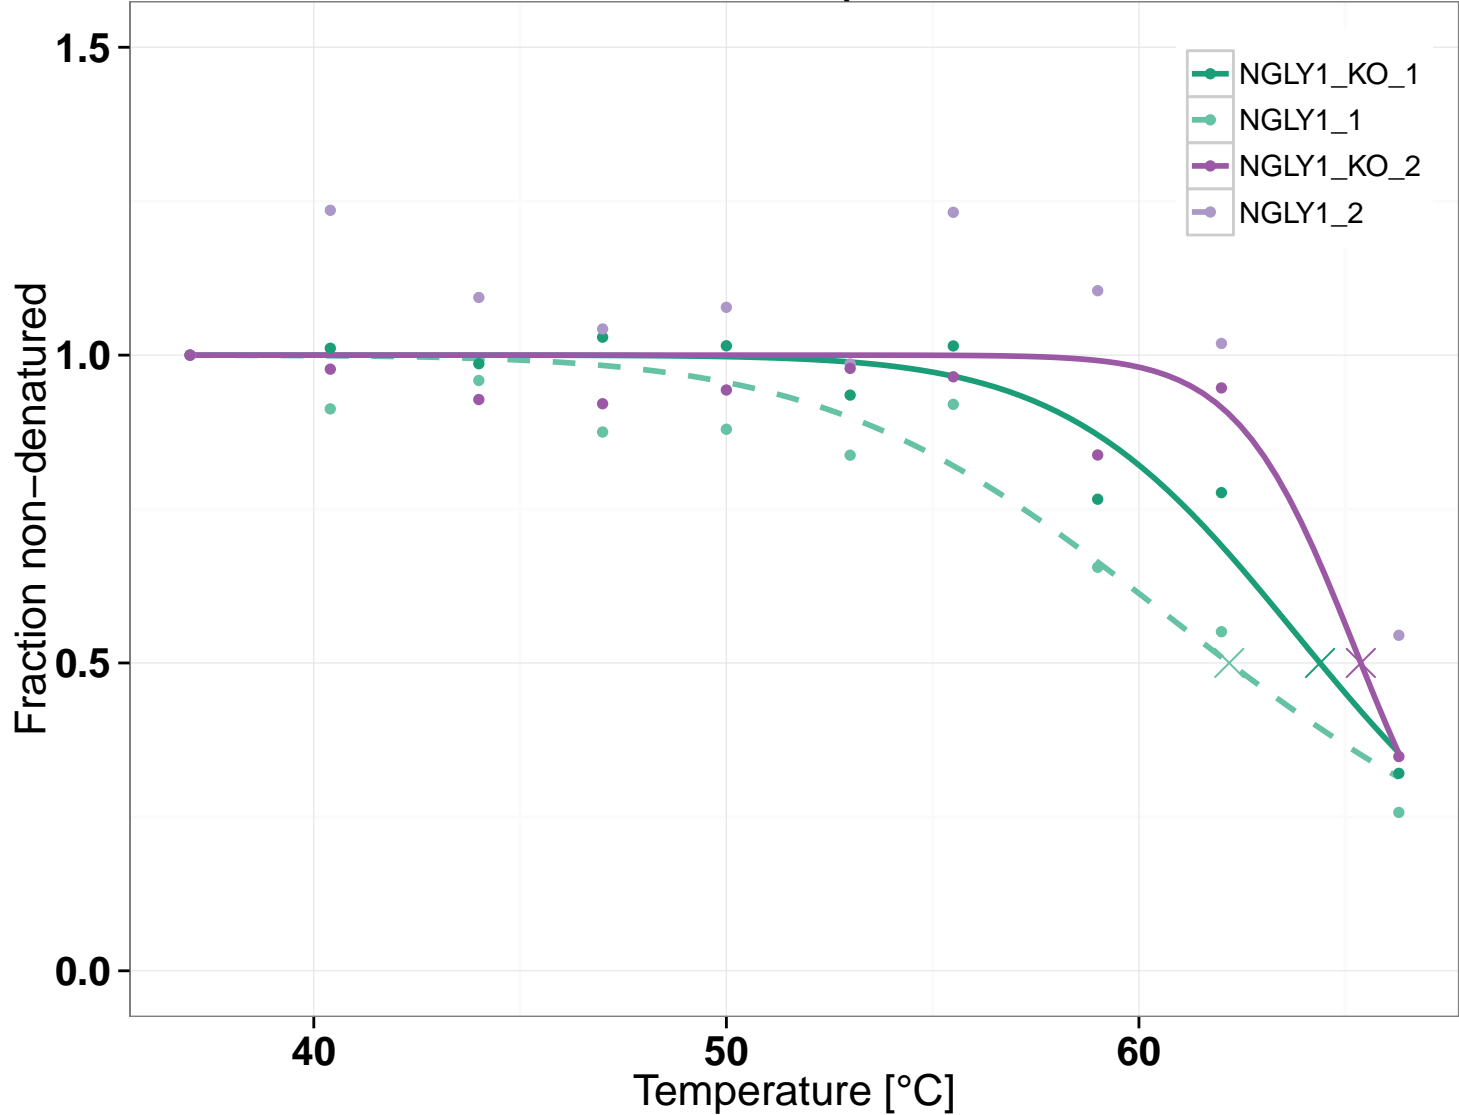

|            | meltPoint | slope  | plateau | R2   |
|------------|-----------|--------|---------|------|
| NGLY1_KO_1 | 64.39     | -0.082 | 0       | 0.94 |
| NGLY1_1    | 62.19     | -0.052 | 0       | 0.91 |
| NGLY1_KO_2 | 65.38     | -0.17  | 0       | 0.88 |
| NGLY1_2    | -         | -      | -       | -    |

Supplement: Supplementary file 3957 [file 1]

# IPI00552756.4|MTIF3

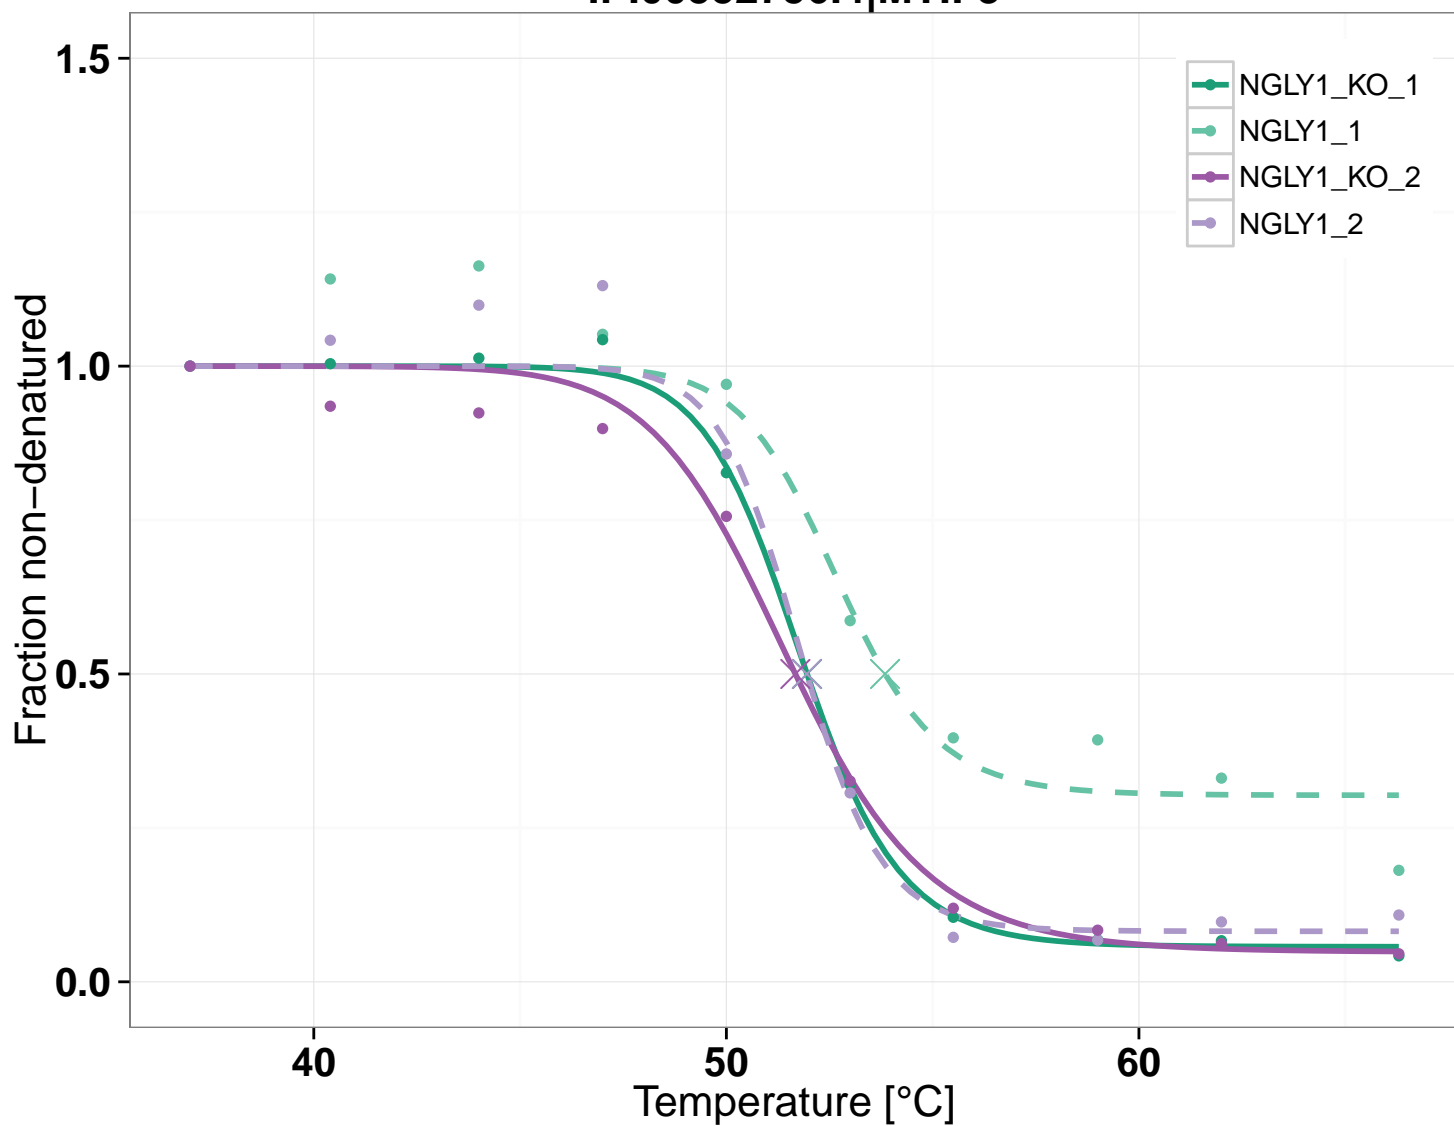

|            | meltPoint | slope | plateau | R2   |
|------------|-----------|-------|---------|------|
| NGLY1_KO_1 | 51.96     | -0.2  | 0.06    | 1    |
| NGLY1_1    | 53.85     | -0.15 | 0.3     | 0.94 |
| NGLY1_KO_2 | 51.67     | -0.14 | 0.05    | 0.99 |
| NGLY1_2    | 51.95     | -0.23 | 0.08    | 0.98 |

Supplement: Supplementary file 3958 [file 1]

IPI00043327.5|C17ORF56

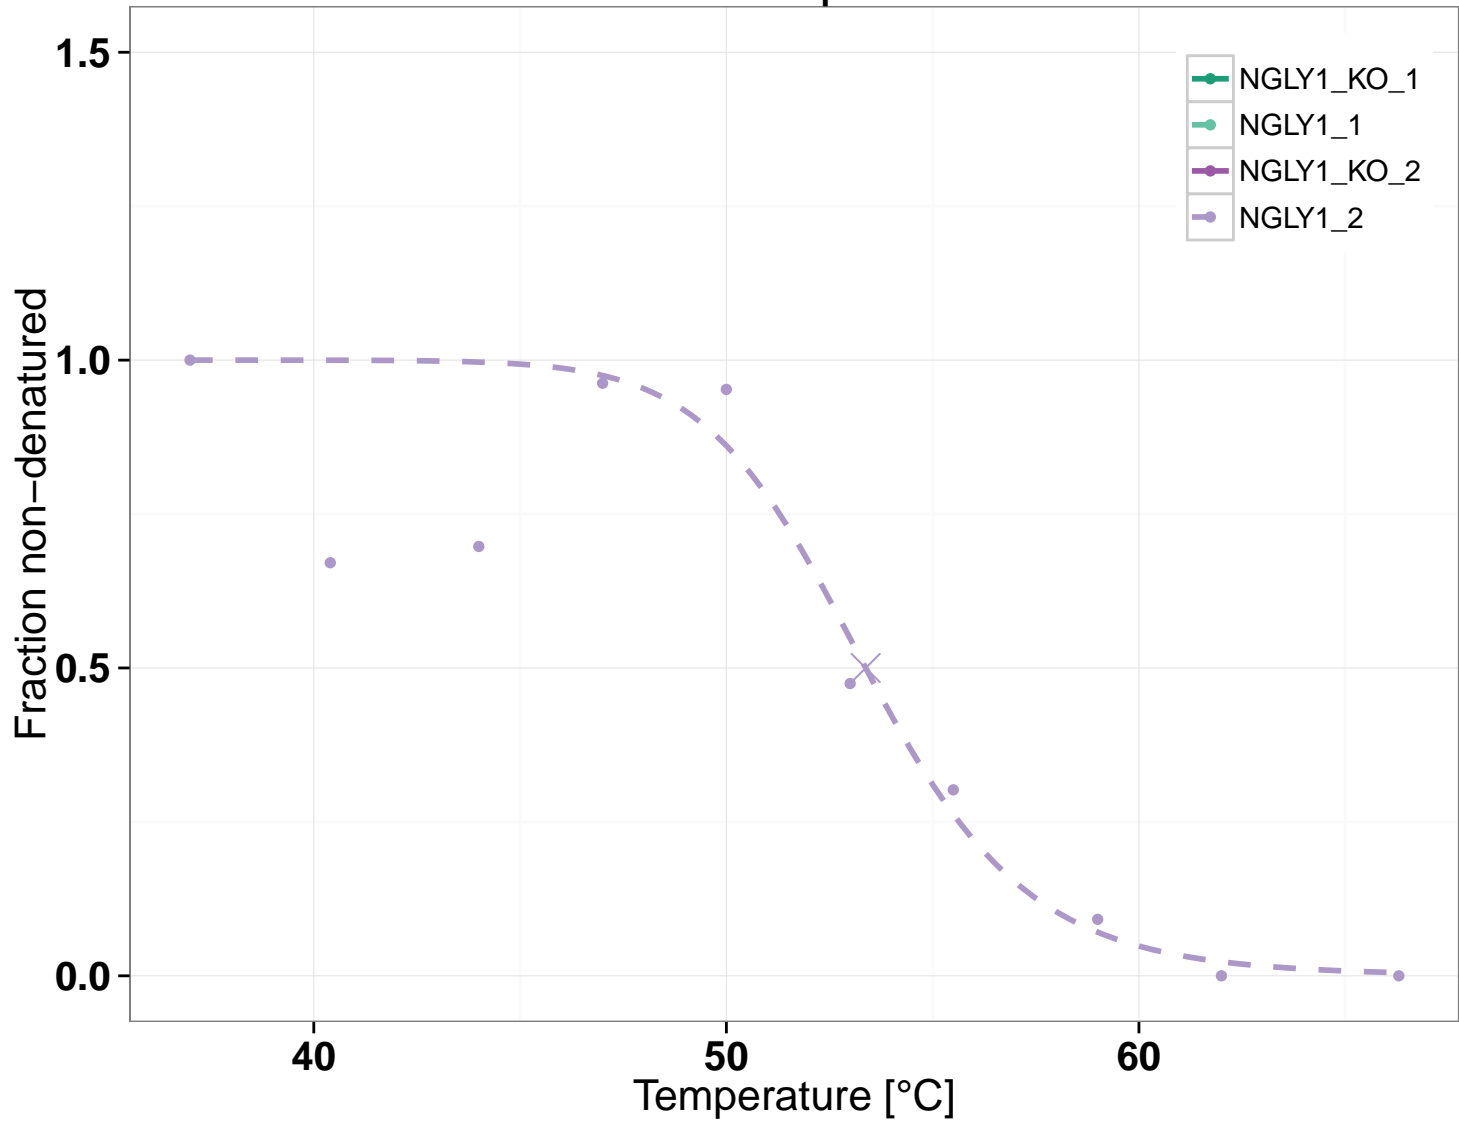

|            | meltPoint | slope | plateau | R2   |
|------------|-----------|-------|---------|------|
| NGLY1_KO_1 | -         | -     | -       | -    |
| NGLY1_1    | -         | -     | -       | -    |
| NGLY1_KO_2 | -         | -     | -       | -    |
| NGLY1_2    | 53.38     | -0.13 | 0       | 0.85 |

Supplement: Supplementary file 3959 [file 1]

IPI00074605.2|NGLY1

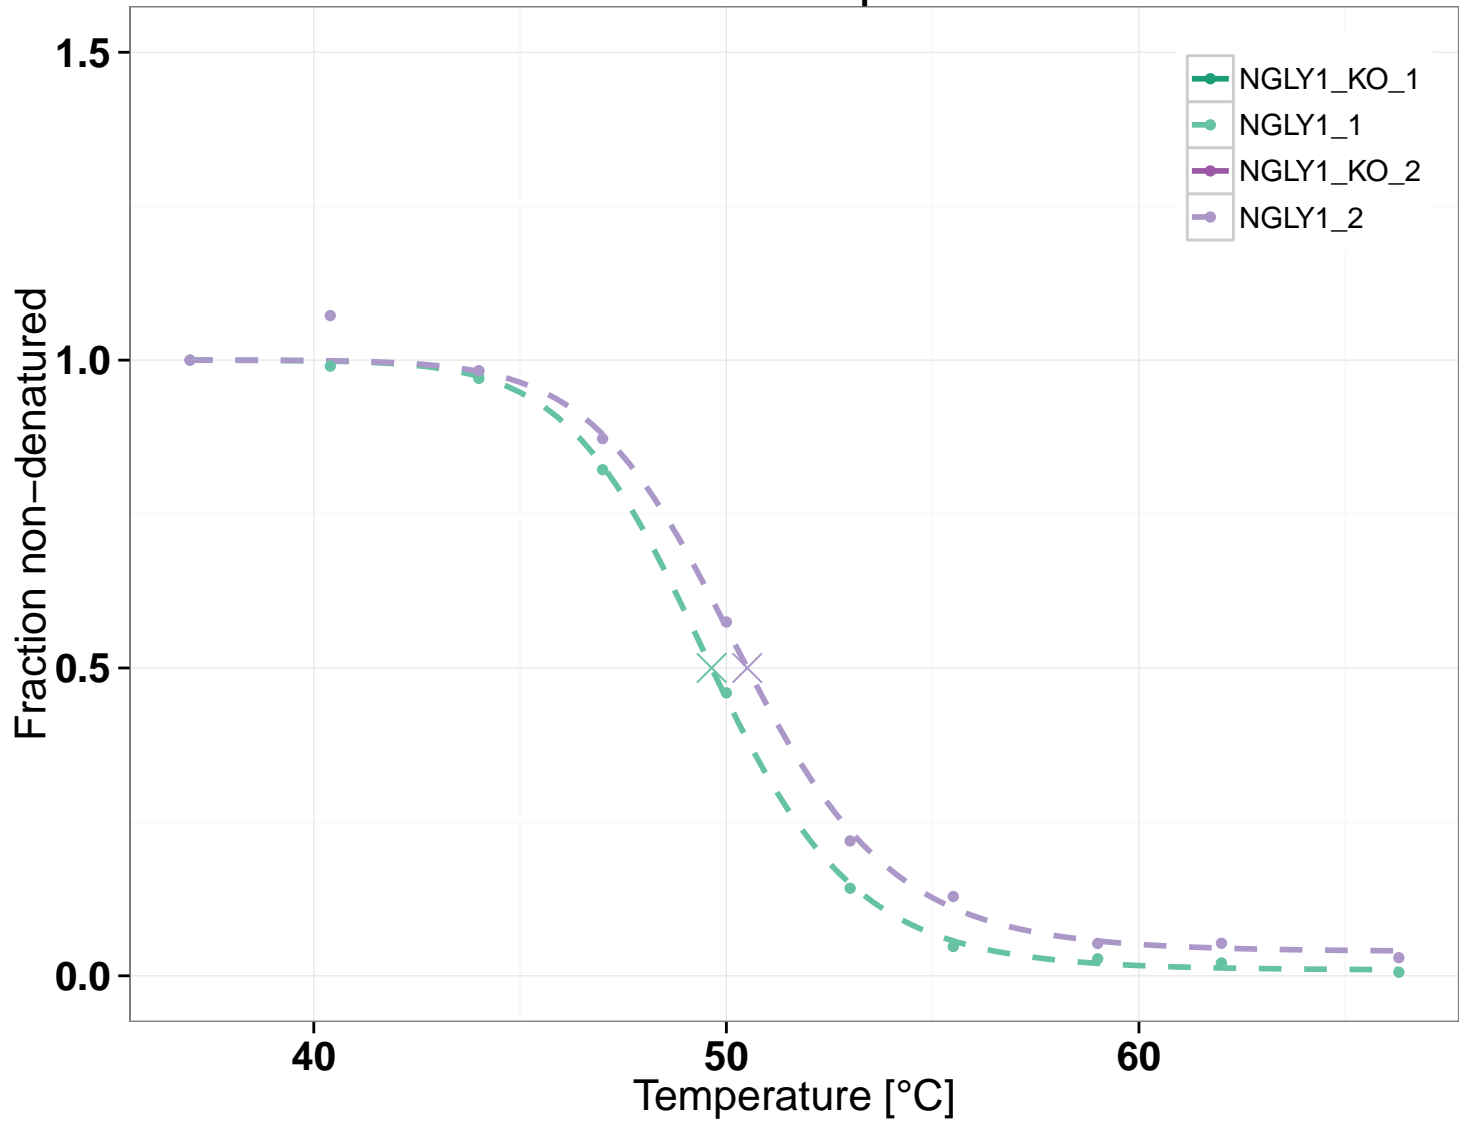

|            | meltPoint | slope | plateau | R2 |
|------------|-----------|-------|---------|----|
| NGLY1_KO_1 | -         | -     | -       | -  |
| NGLY1_1    | 49.64     | -0.14 | 0.01    | 1  |
| NGLY1_KO_2 | -         | -     | -       | -  |
| NGLY1_2    | 50.51     | -0.13 | 0.04    | 1  |

Supplement: Supplementary file 3960 [file 1]

IPI00152453.1|TUBB3

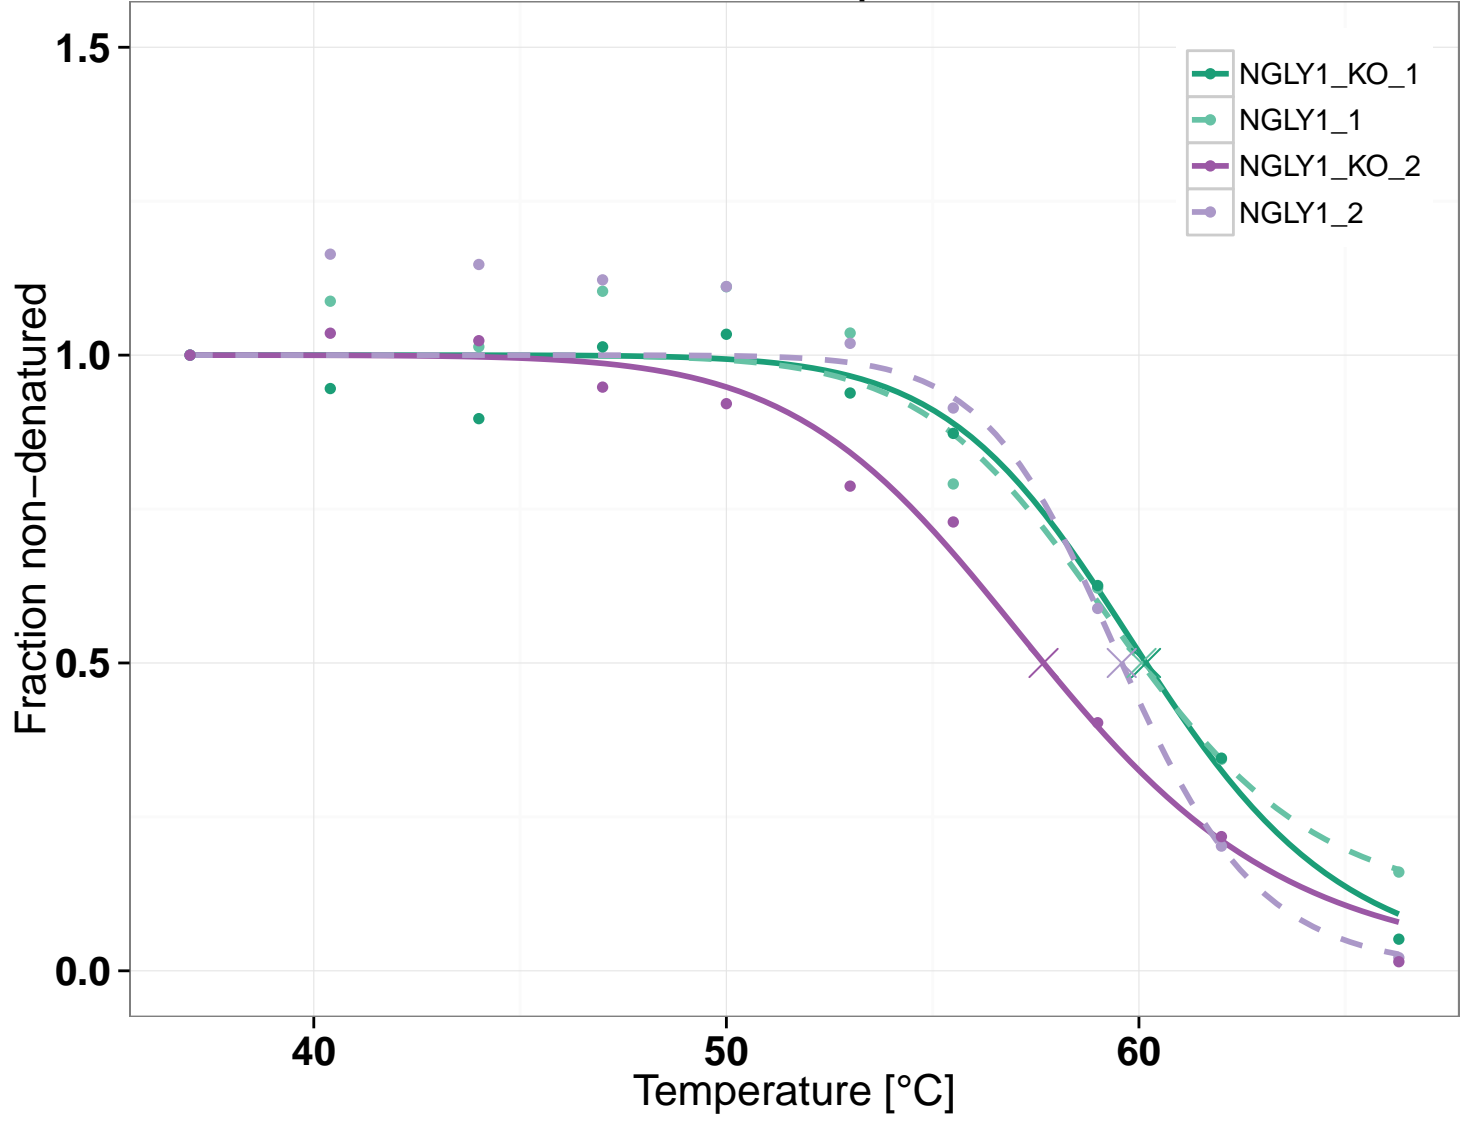

|            | meltPoint | slope  | plateau | R2   |
|------------|-----------|--------|---------|------|
| NGLY1_KO_1 | 60.17     | -0.1   | 0       | 0.98 |
| NGLY1_1    | 60.06     | -0.094 | 0.1     | 0.96 |
| NGLY1_KO_2 | 57.69     | -0.083 | 0       | 0.99 |
| NGLY1_2    | 59.58     | -0.15  | 0       | 0.95 |

Supplement: Supplementary file 3961 [file 1]

# IPI00296141.4|DPP7

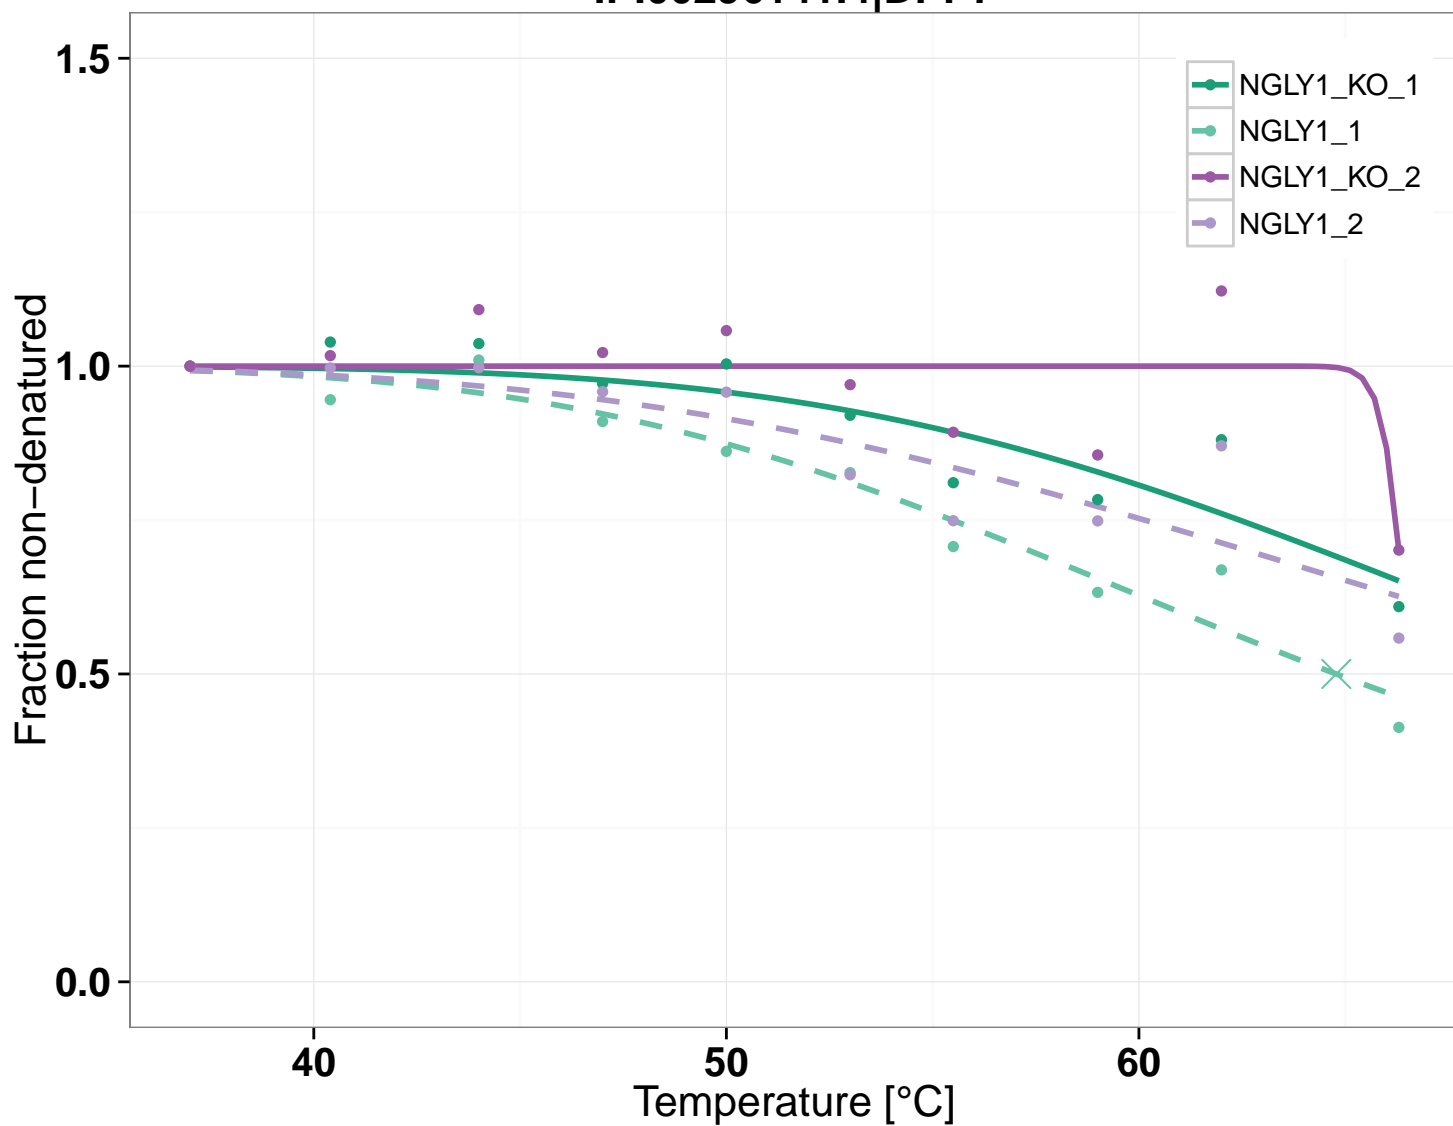

|            | meltPoint | slope  | plateau | R2   |
|------------|-----------|--------|---------|------|
| NGLY1_KO_1 | —         | —      | 0       | 0.82 |
| NGLY1_1    | 64.78     | -0.028 | 0       | 0.94 |
| NGLY1_KO_2 | —         | —      | 0       | 0.57 |
| NGLY1_2    | —         | -0.02  | 0       | 0.78 |

Supplement: Supplementary file 3962 [file 1]

IPI00783436.1|C19ORF28

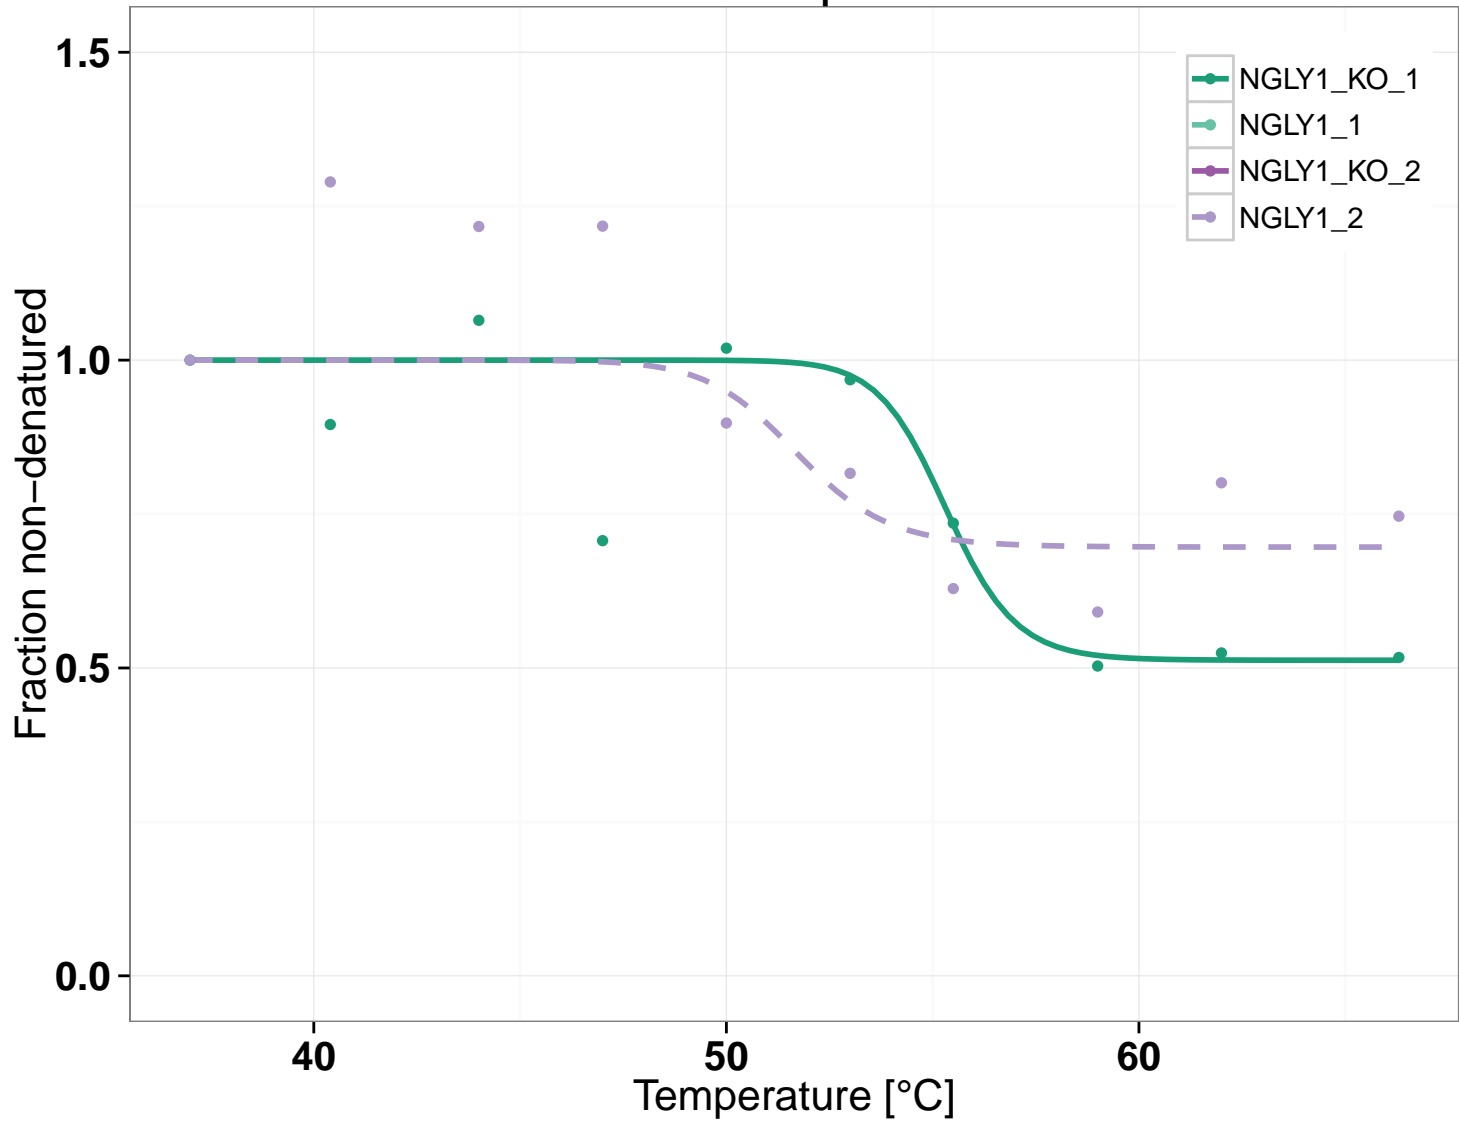

|            | meltPoint | slope  | plateau | R2   |
|------------|-----------|--------|---------|------|
| NGLY1_KO_1 | —         | -0.15  | 0.51    | 0.77 |
| NGLY1_1    | —         | —      | —       | —    |
| NGLY1_KO_2 | —         | —      | —       | —    |
| NGLY1_2    | —         | -0.069 | 0.7     | 0.62 |

Supplement: Supplementary file 3963 [file 1]

IPI00643286.3|SDR39U1

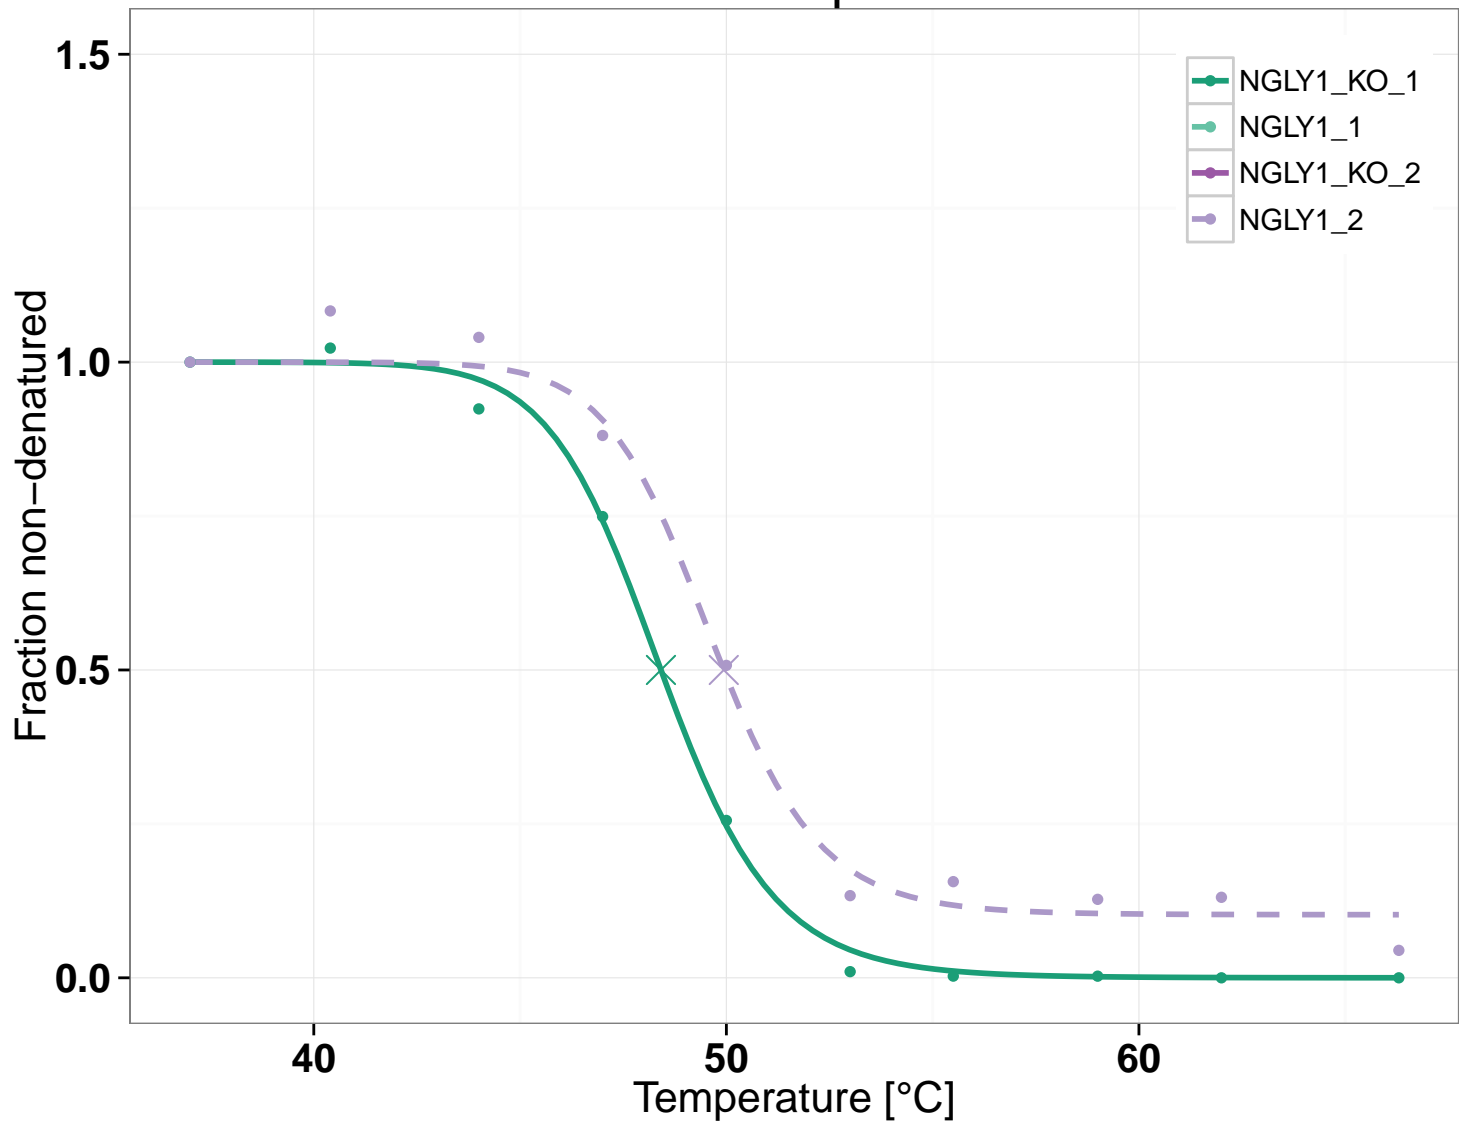

|            | meltPoint | slope | plateau | R2   |
|------------|-----------|-------|---------|------|
| NGLY1_KO_1 | 48.41     | -0.18 | 0       | 1    |
| NGLY1_1    | —         | —     | —       | —    |
| NGLY1_KO_2 | —         | —     | —       | —    |
| NGLY1_2    | 49.94     | -0.17 | 0.1     | 0.99 |

Supplement: Supplementary file 3964 [file 1]

IPI00399252.2|PHF17

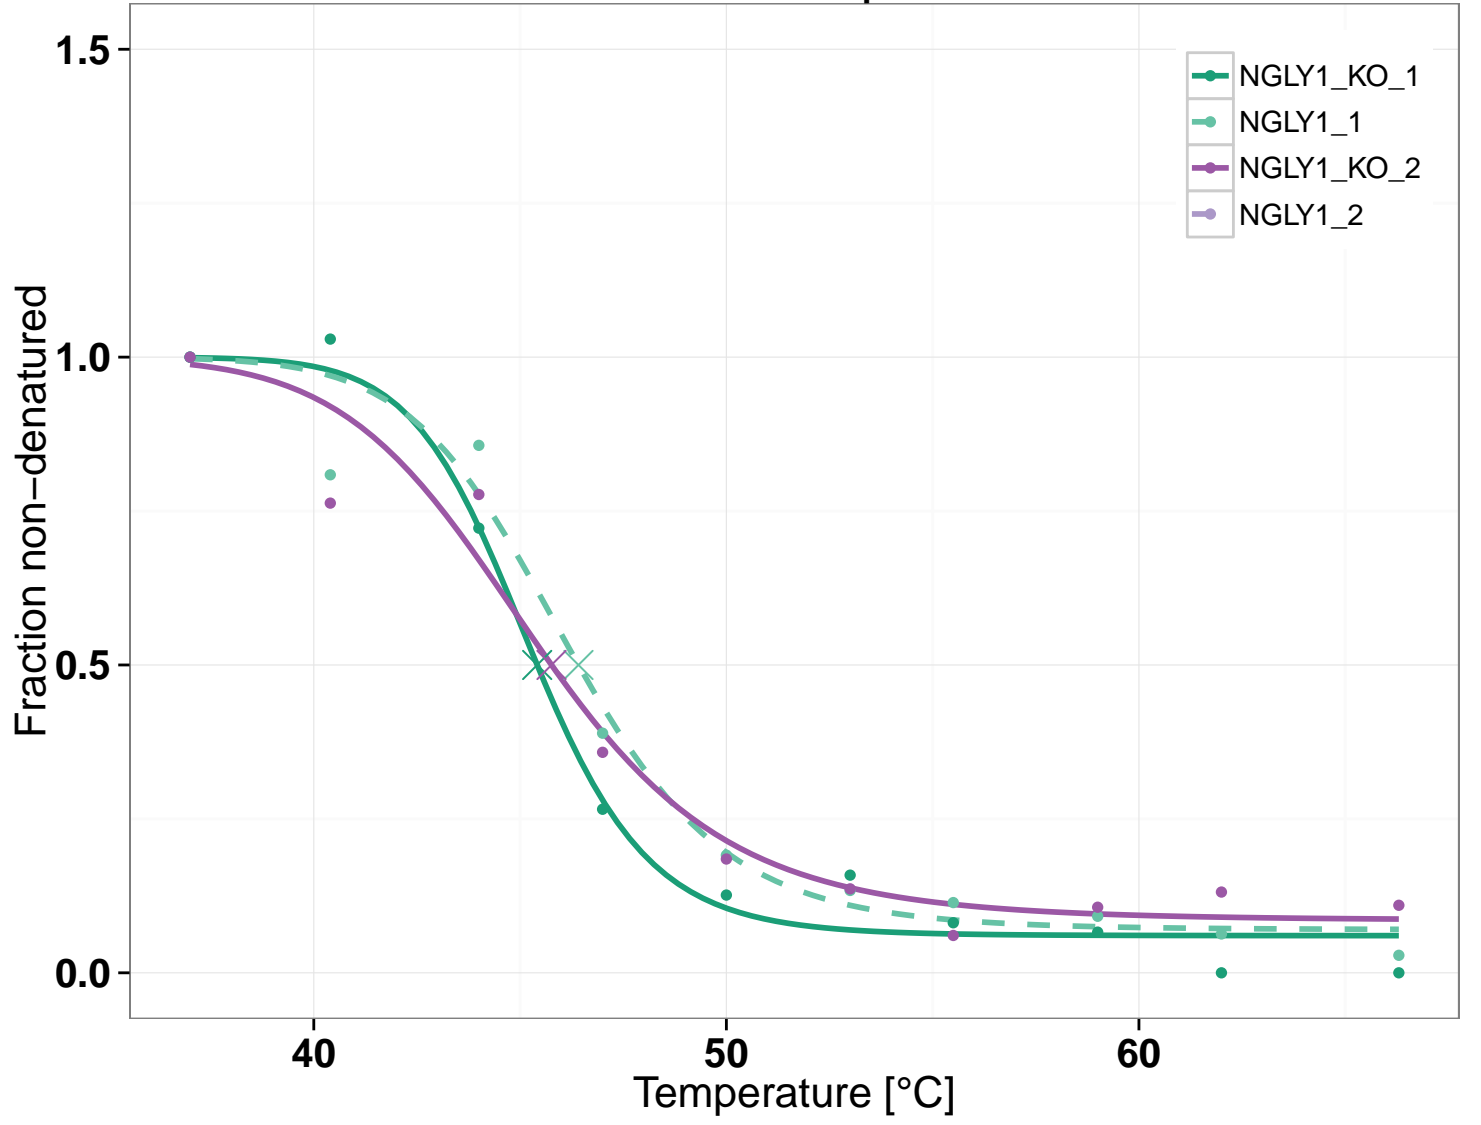

|            | meltPoint | slope  | plateau | R2   |
|------------|-----------|--------|---------|------|
| NGLY1_KO_1 | 45.41     | -0.16  | 0.06    | 0.99 |
| NGLY1_1    | 46.42     | -0.12  | 0.07    | 0.97 |
| NGLY1_KO_2 | 45.76     | -0.098 | 0.09    | 0.96 |
| NGLY1_2    | -         | -      | -       | -    |

Supplement: Supplementary file 3965 [file 1]

# IPI00238209.3|NUDCD3

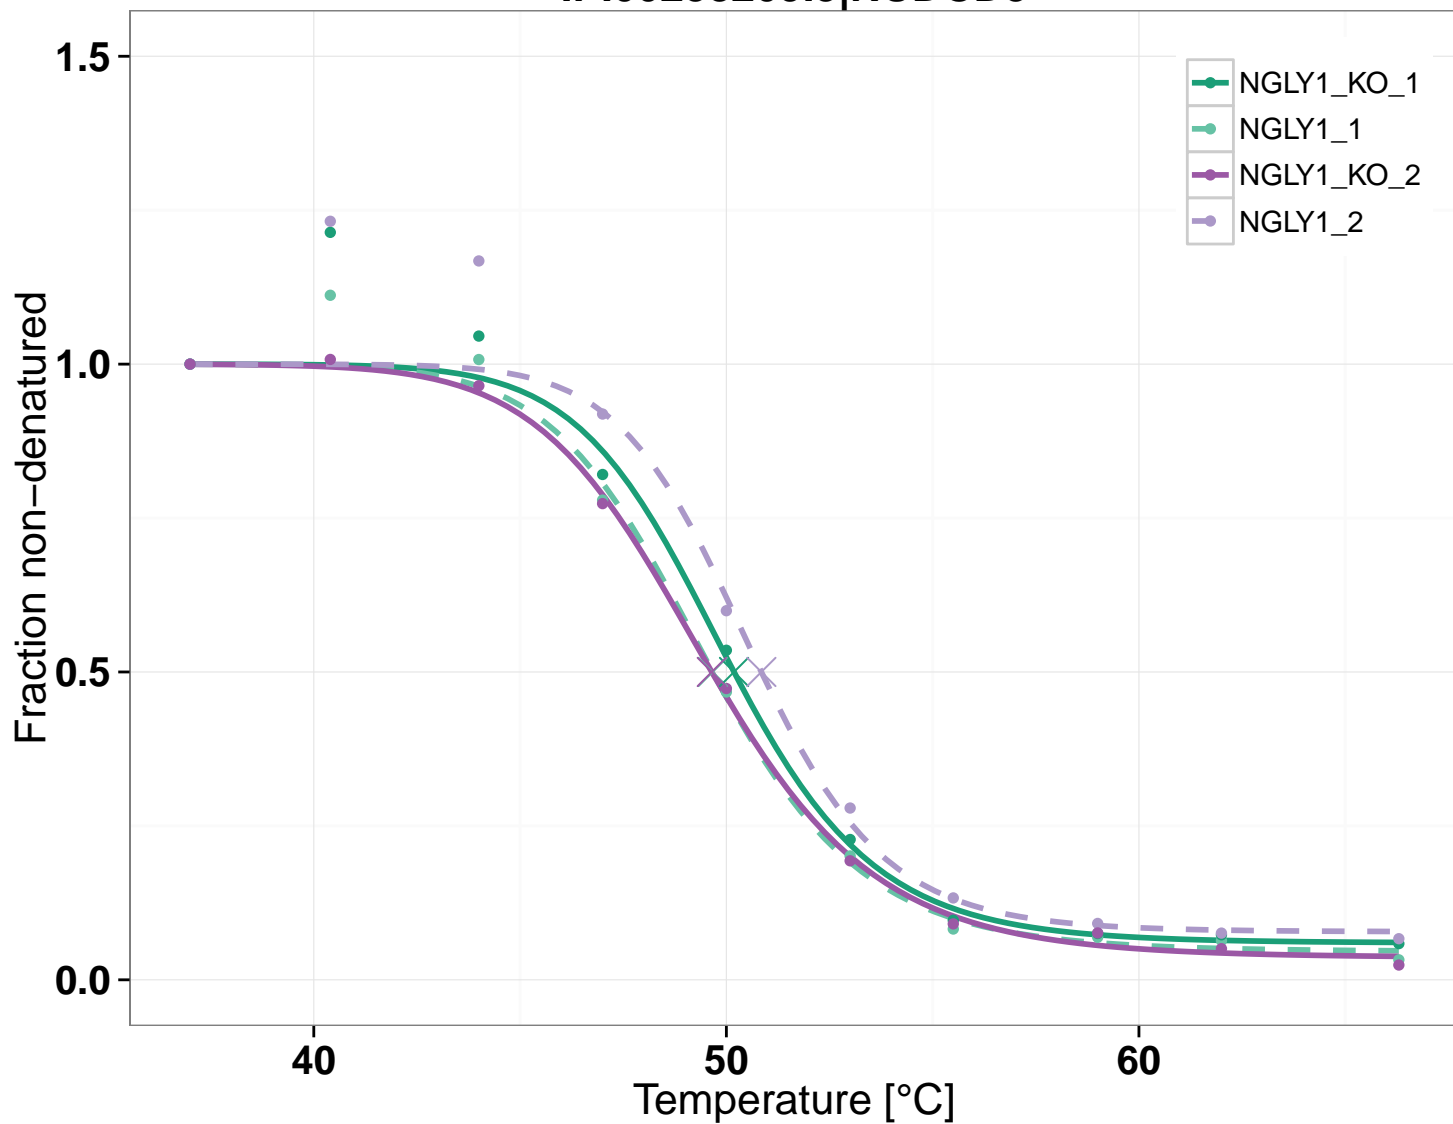

|            | meltPoint | slope | plateau | R2   |
|------------|-----------|-------|---------|------|
| NGLY1_KO_1 | 50.19     | -0.13 | 0.06    | 0.97 |
| NGLY1_1    | 49.67     | -0.13 | 0.05    | 0.99 |
| NGLY1_KO_2 | 49.65     | -0.12 | 0.04    | 1    |
| NGLY1_2    | 50.85     | -0.14 | 0.08    | 0.96 |

Supplement: Supplementary file 3966 [file 1]

# IPI00791537.1|CAND2

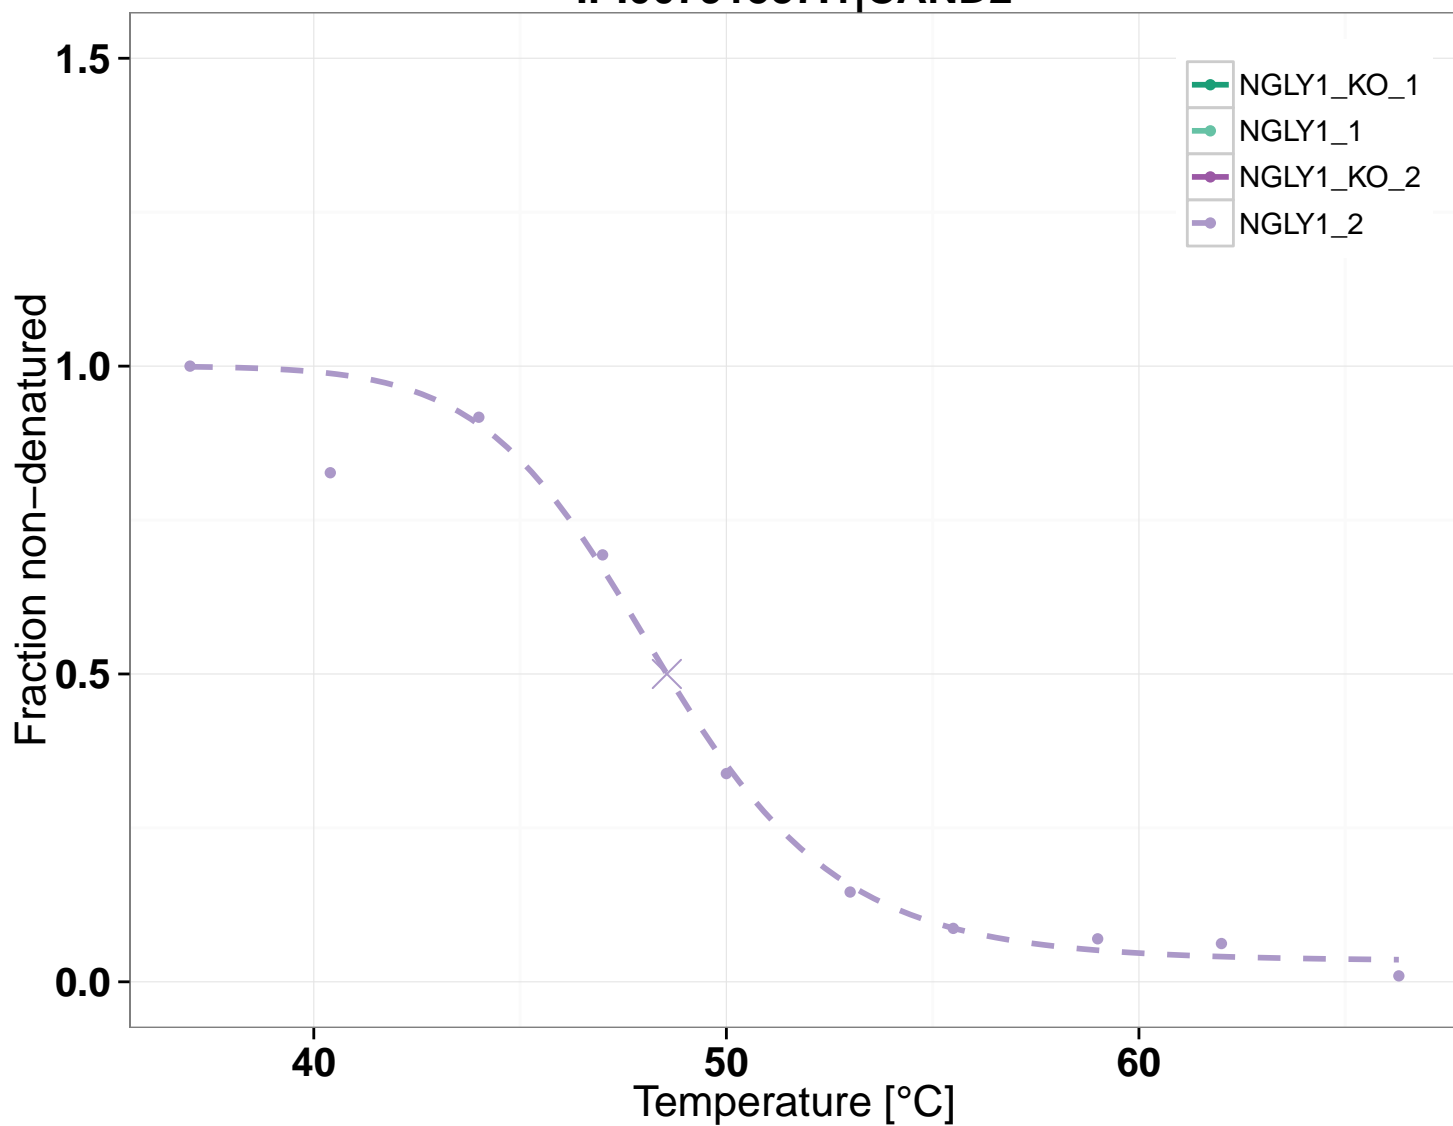

|            | meltPoint | slope | plateau | R2   |
|------------|-----------|-------|---------|------|
| NGLY1_KO_1 | —         | —     | —       | —    |
| NGLY1_1    | —         | —     | —       | —    |
| NGLY1_KO_2 | —         | —     | —       | —    |
| NGLY1_2    | 48.56     | -0.11 | 0.03    | 0.98 |

Supplement: Supplementary file 3967 [file 1]

IPI00007045.2|GLRX2

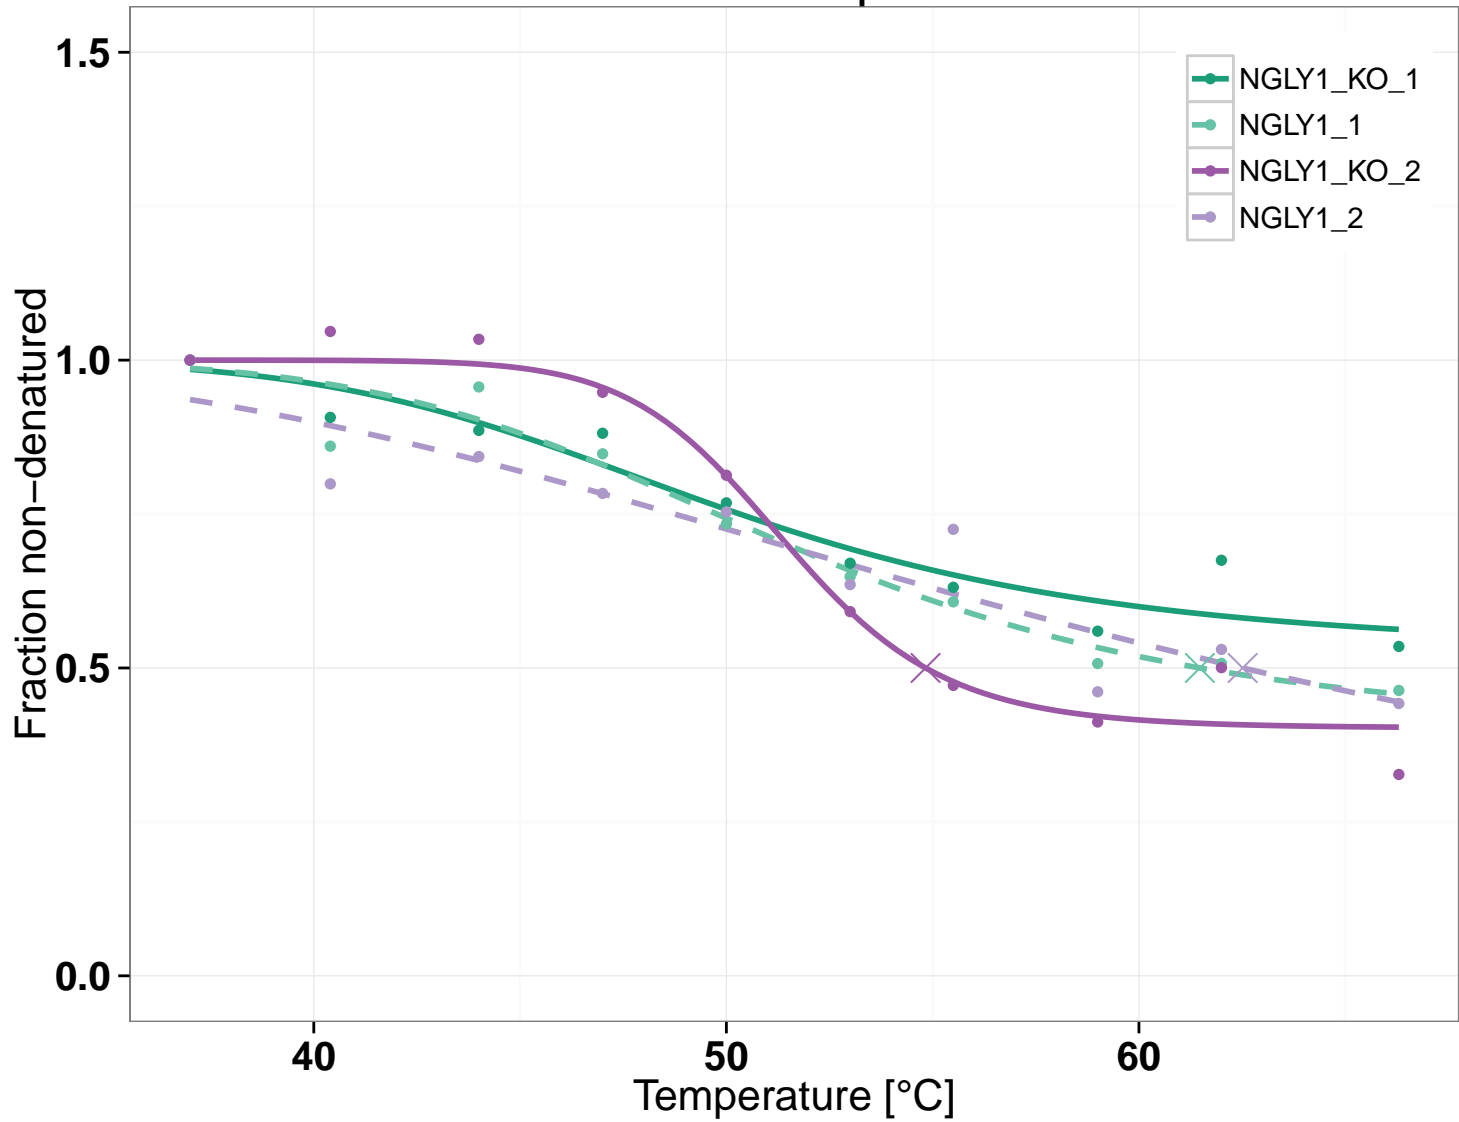

|            | meltPoint | slope  | plateau | R2   |
|------------|-----------|--------|---------|------|
| NGLY1_KO_1 | –         | –0.025 | 0.53    | 0.92 |
| NGLY1_1    | 61.48     | –0.029 | 0.39    | 0.96 |
| NGLY1_KO_2 | 54.83     | –0.078 | 0.4     | 0.97 |
| NGLY1_2    | 62.51     | –0.019 | 0       | 0.88 |

Supplement: Supplementary file 3968 [file 1]

IPI00607818.2|MYH14

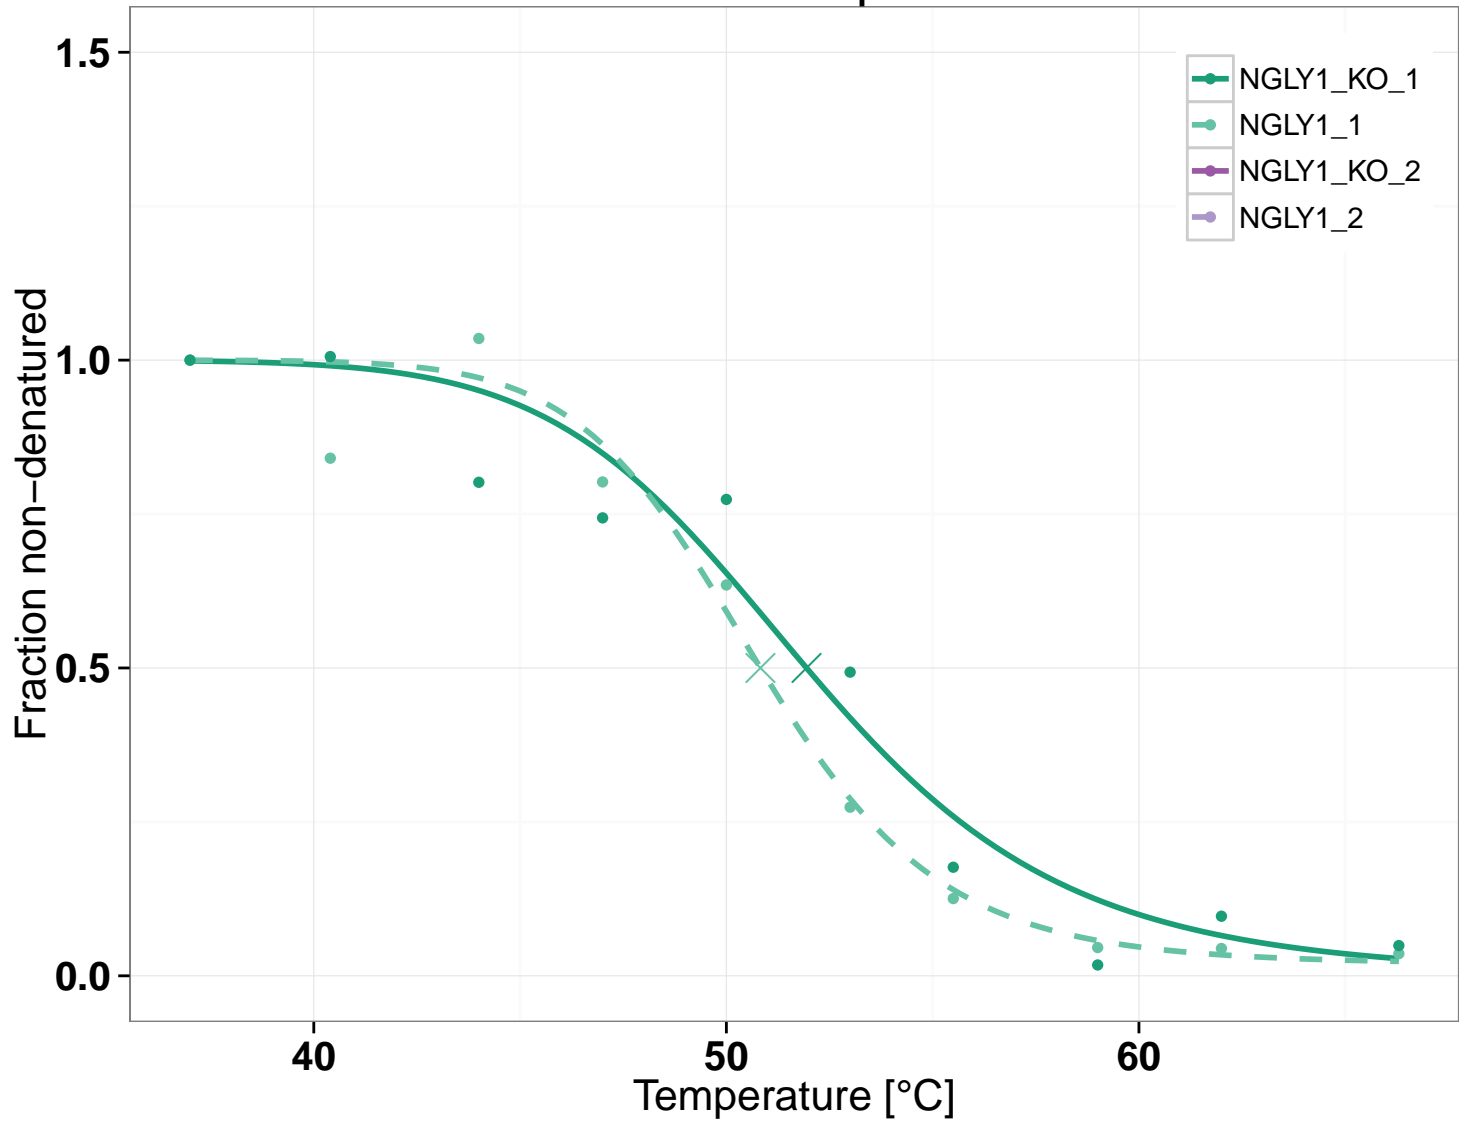

|            | meltPoint | slope | plateau | R2   |
|------------|-----------|-------|---------|------|
| NGLY1_KO_1 | 51.94     | -0.08 | 0       | 0.95 |
| NGLY1_1    | 50.83     | -0.11 | 0.02    | 0.98 |
| NGLY1_KO_2 | -         | -     | -       | -    |
| NGLY1_2    | -         | -     | -       | -    |

Supplement: Supplementary file 3969 [file 1]

IPI00045473.1|JMJD8

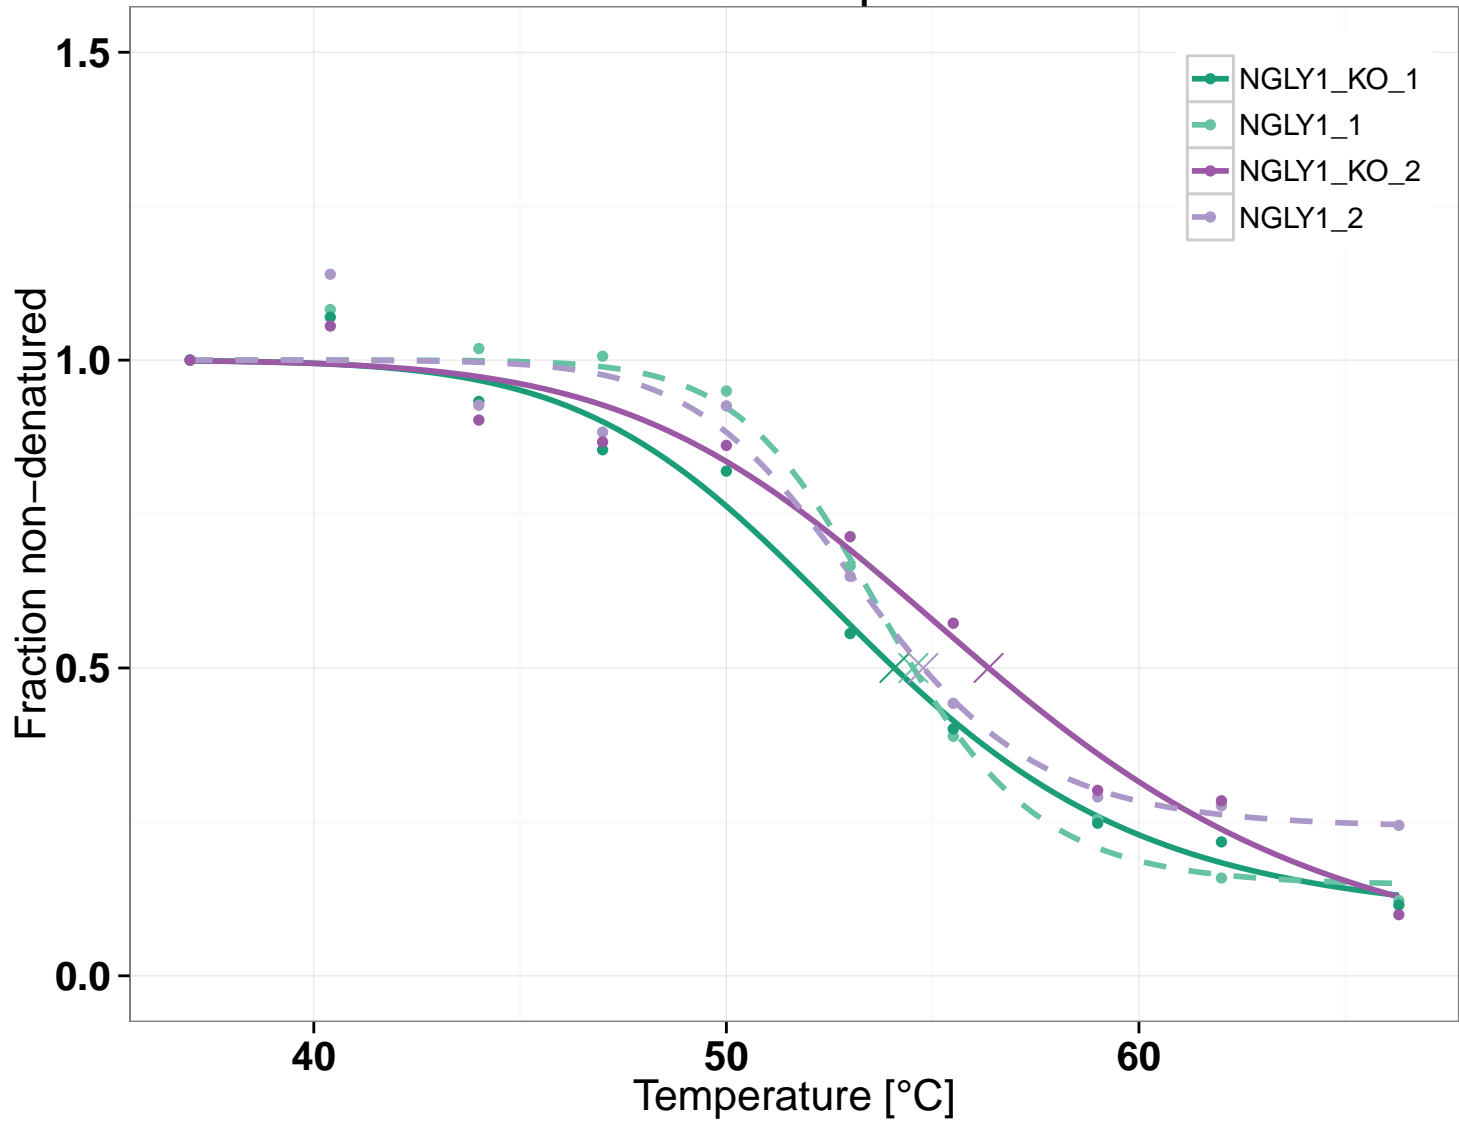

|            | meltPoint | slope  | plateau | R2   |
|------------|-----------|--------|---------|------|
| NGLY1_KO_1 | 54.07     | -0.067 | 0.09    | 0.99 |
| NGLY1_1    | 54.53     | -0.12  | 0.15    | 0.99 |
| NGLY1_KO_2 | 56.35     | -0.058 | 0       | 0.98 |
| NGLY1_2    | 54.77     | -0.091 | 0.24    | 0.97 |

Supplement: Supplementary file 3970 [file 1]

# IPI00420029.1|APT<sub>X</sub>

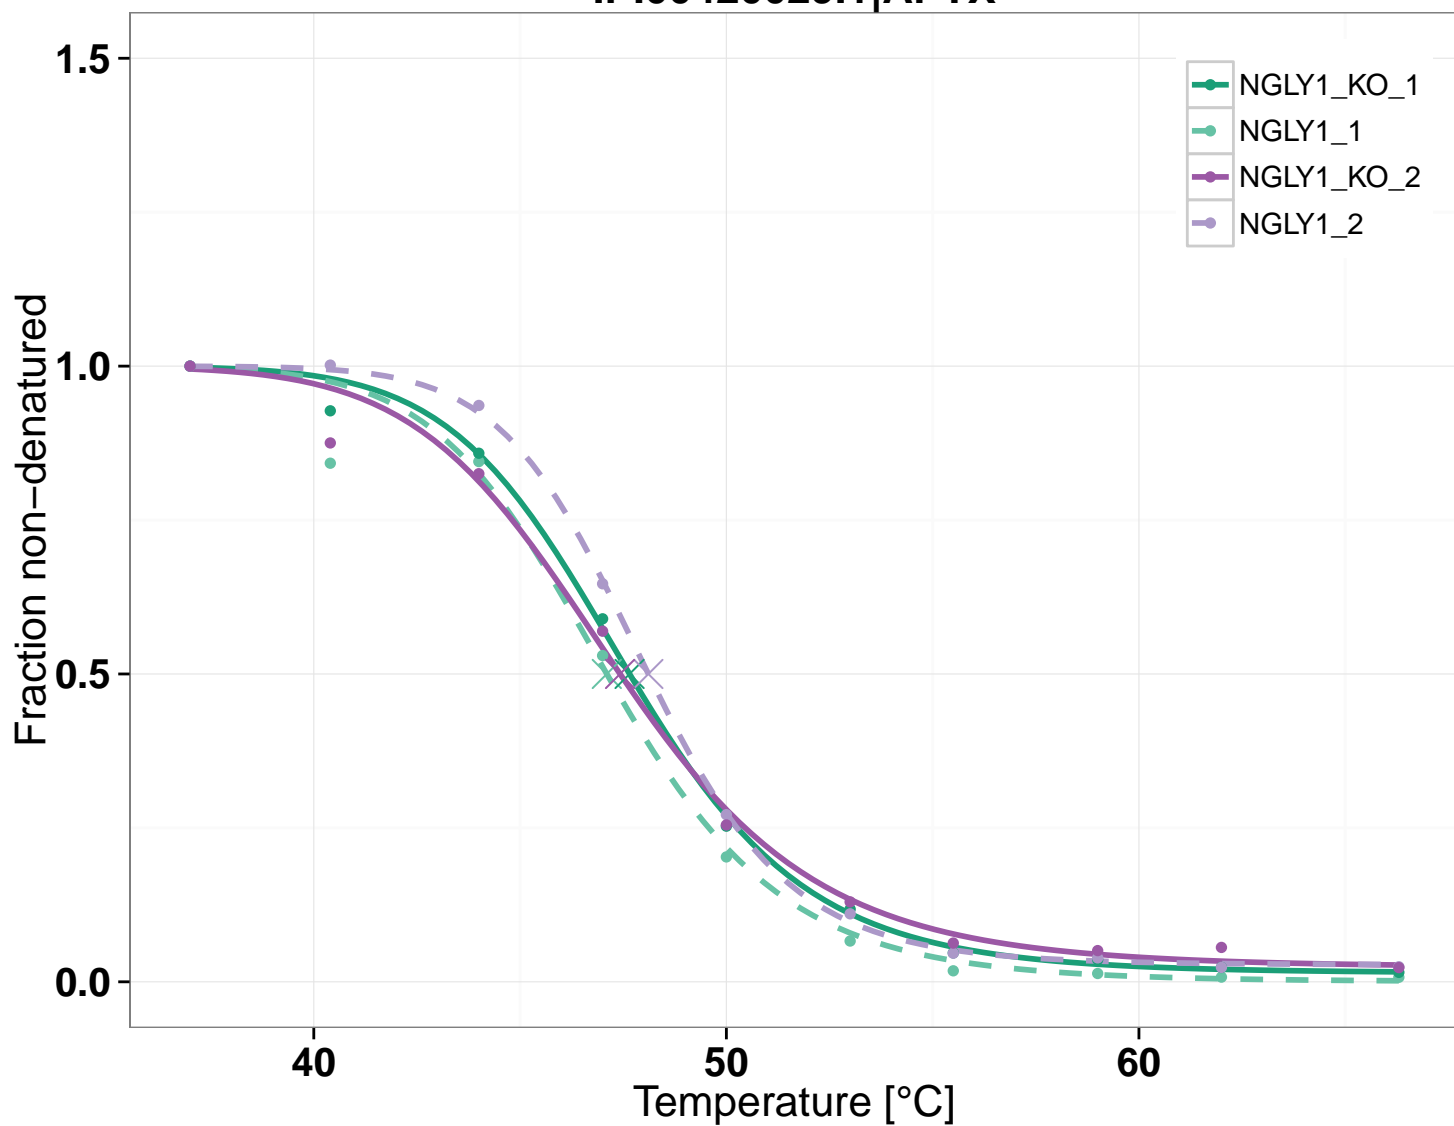

|            | meltPoint | slope | plateau | R2   |
|------------|-----------|-------|---------|------|
| NGLY1_KO_1 | 47.65     | -0.11 | 0.01    | 1    |
| NGLY1_1    | 47.1      | -0.12 | 0       | 0.99 |
| NGLY1_KO_2 | 47.42     | -0.1  | 0.02    | 0.99 |
| NGLY1_2    | 48.11     | -0.14 | 0.03    | 1    |

Supplement: Supplementary file 3971 [file 1]

# IPI00783665.3|LAMA5

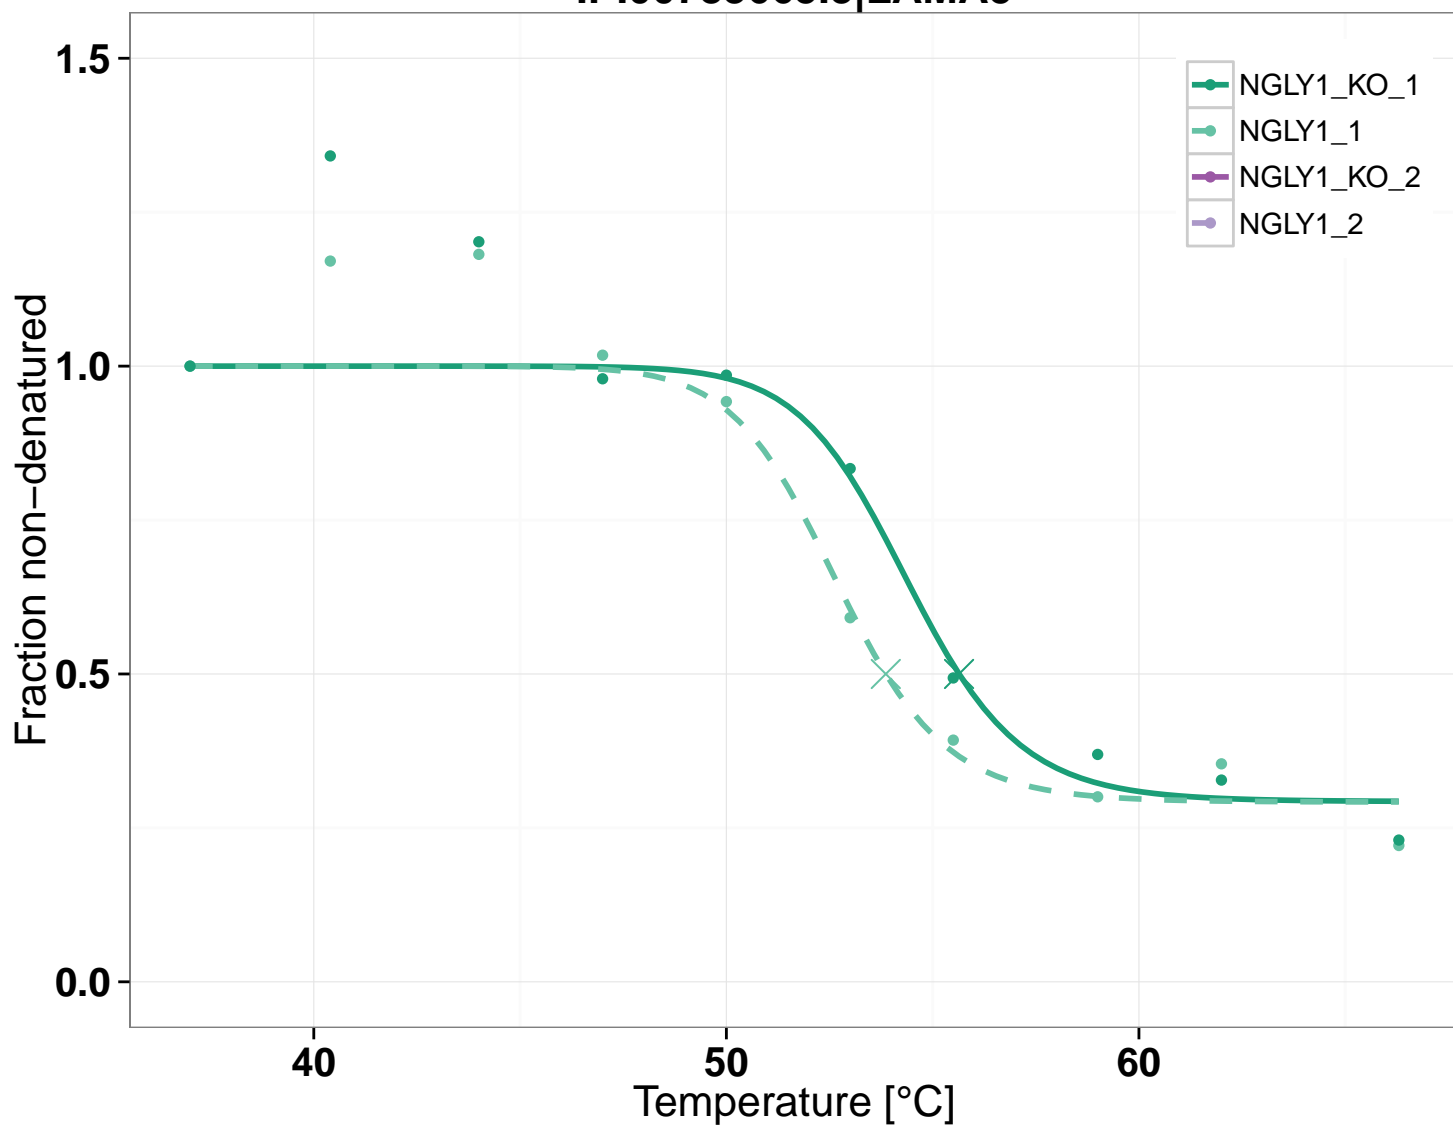

|            | meltPoint | slope | plateau | R2   |
|------------|-----------|-------|---------|------|
| NGLY1_KO_1 | 55.64     | -0.13 | 0.29    | 0.88 |
| NGLY1_1    | 53.86     | -0.14 | 0.29    | 0.95 |
| NGLY1_KO_2 | -         | -     | -       | -    |
| NGLY1_2    | -         | -     | -       | -    |

Supplement: Supplementary file 3972 [file 1]

# IPI00151170.4|TTK

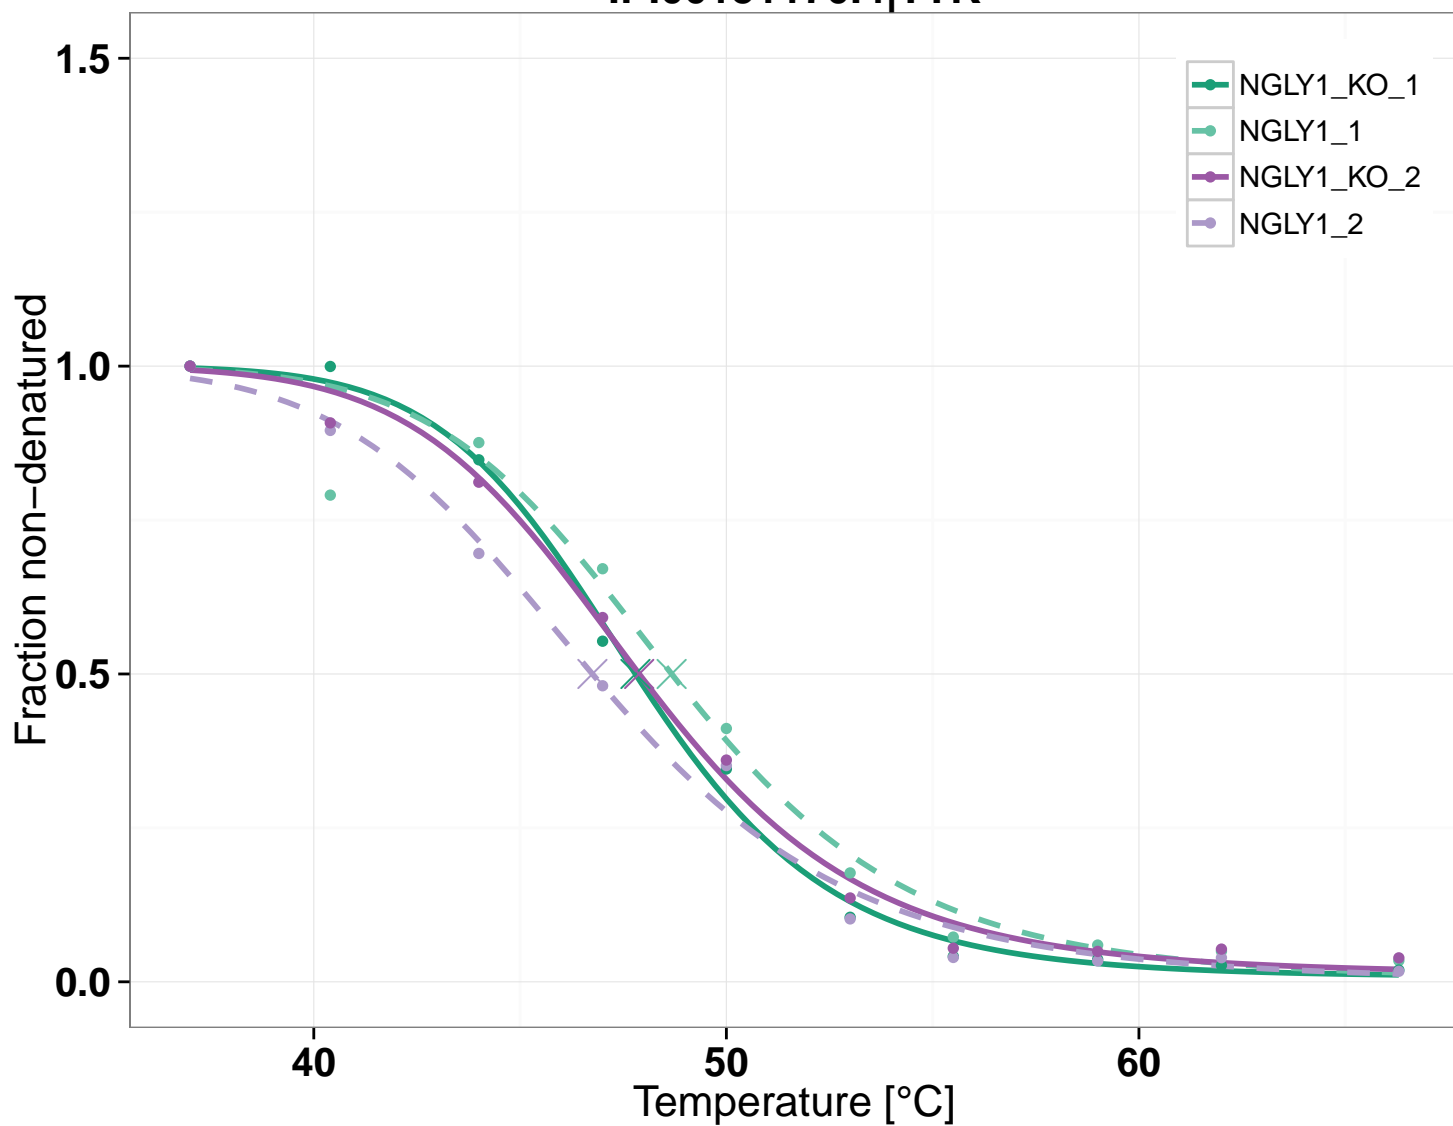

|            | meltPoint | slope  | plateau | R2   |
|------------|-----------|--------|---------|------|
| NGLY1_KO_1 | 47.8      | -0.1   | 0.01    | 1    |
| NGLY1_1    | 48.67     | -0.086 | 0       | 0.97 |
| NGLY1_KO_2 | 47.89     | -0.09  | 0.01    | 0.99 |
| NGLY1_2    | 46.75     | -0.08  | 0       | 0.99 |

Supplement: Supplementary file 3973 [file 1]

IPI00183445.1|LPHN1

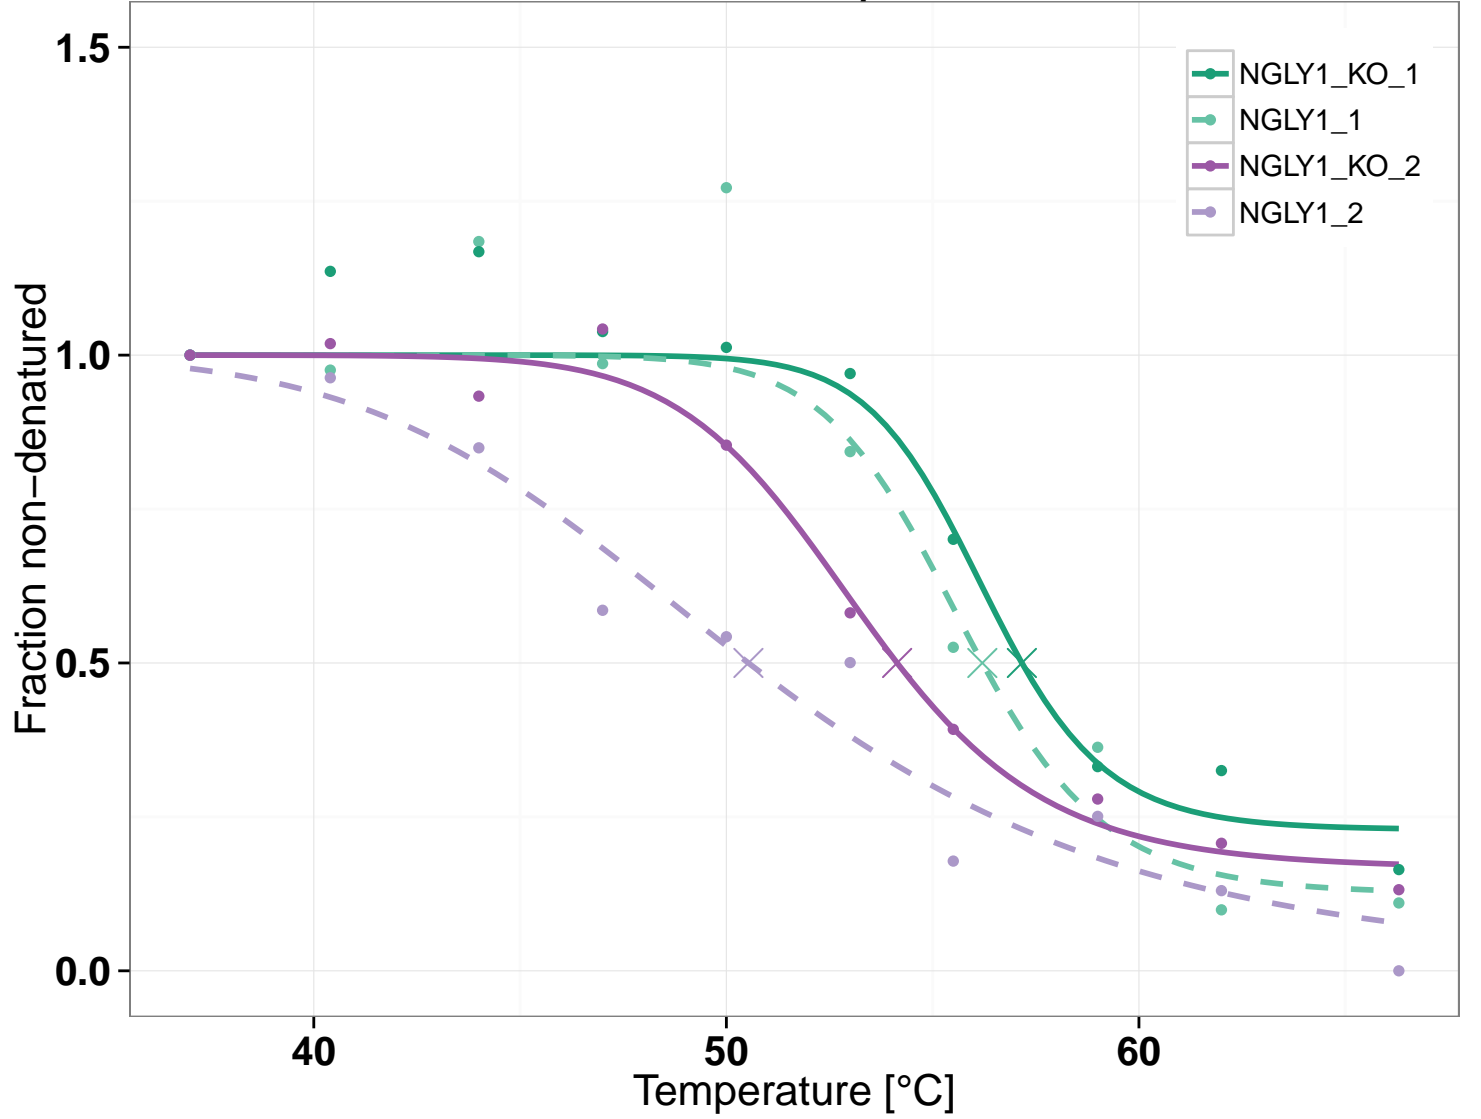

|            | meltPoint | slope  | plateau | R2   |
|------------|-----------|--------|---------|------|
| NGLY1_KO_1 | 57.16     | -0.13  | 0.23    | 0.95 |
| NGLY1_1    | 56.2      | -0.13  | 0.13    | 0.92 |
| NGLY1_KO_2 | 54.14     | -0.094 | 0.17    | 0.99 |
| NGLY1_2    | 50.53     | -0.053 | 0       | 0.96 |

Supplement: Supplementary file 3974 [file 1]

IPI00910746.1|B4E0K3\_HUMAN

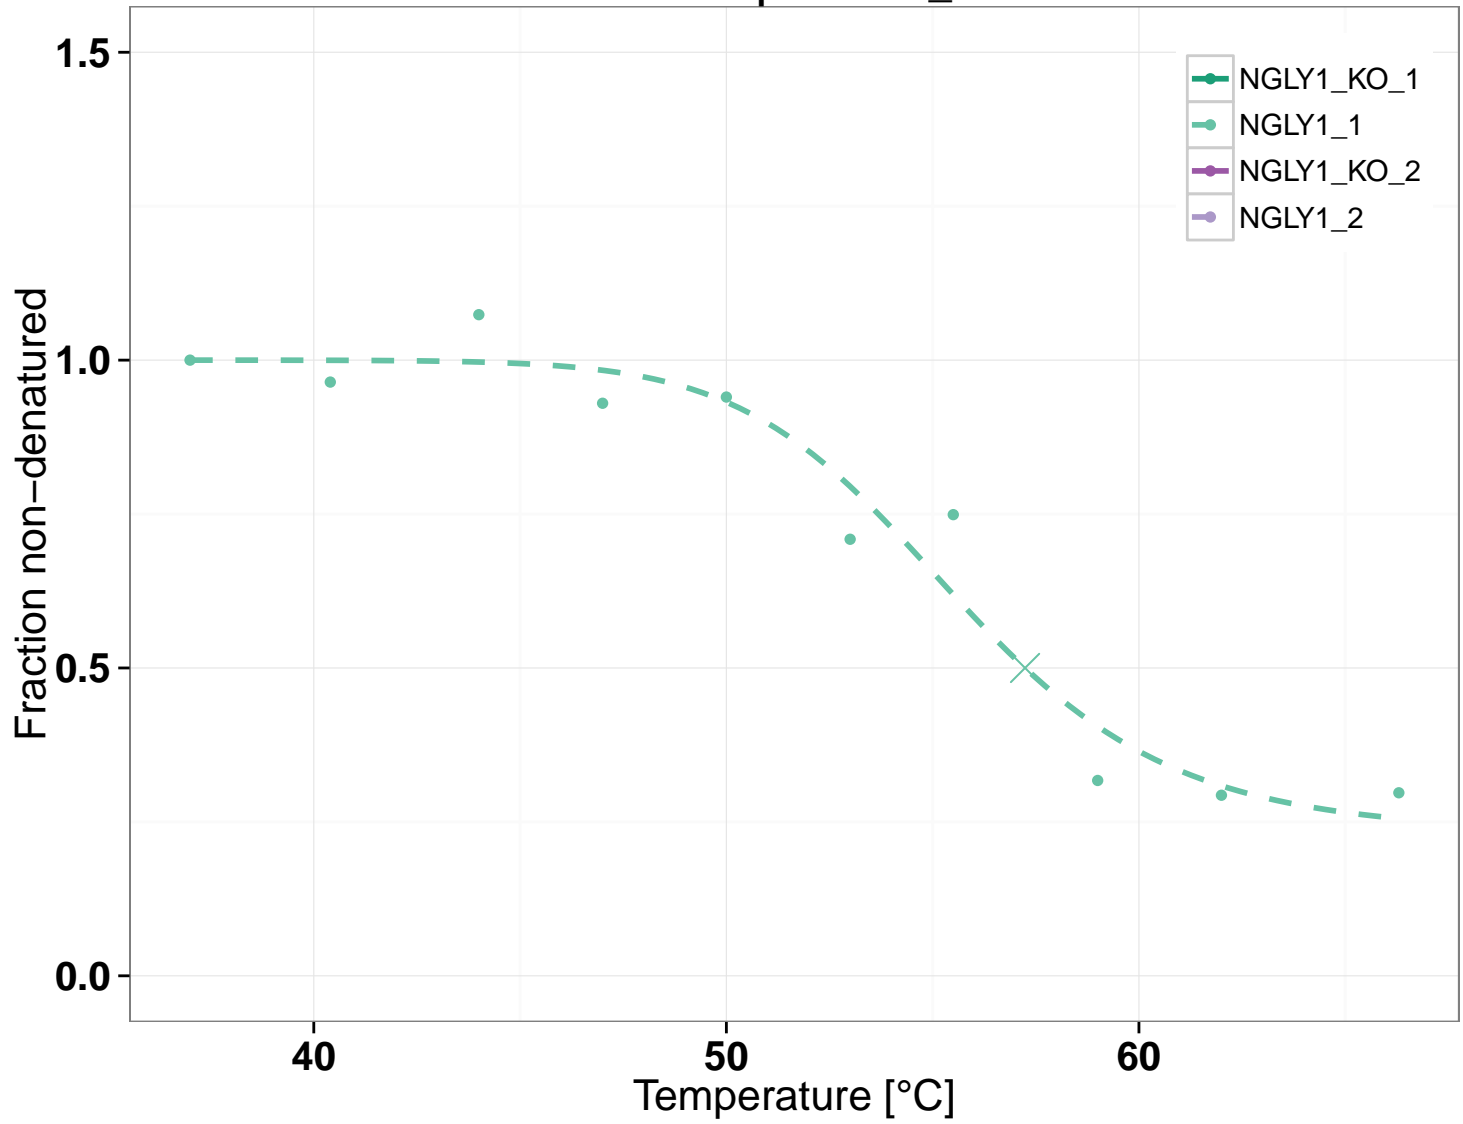

|            | meltPoint | slope  | plateau | R2   |
|------------|-----------|--------|---------|------|
| NGLY1_KO_1 | –         | –      | –       | –    |
| NGLY1_1    | 57.24     | –0.073 | 0.23    | 0.95 |
| NGLY1_KO_2 | –         | –      | –       | –    |
| NGLY1_2    | –         | –      | –       | –    |

Supplement: Supplementary file 3975 [file 1]

IPI00169326.2|PPTC7

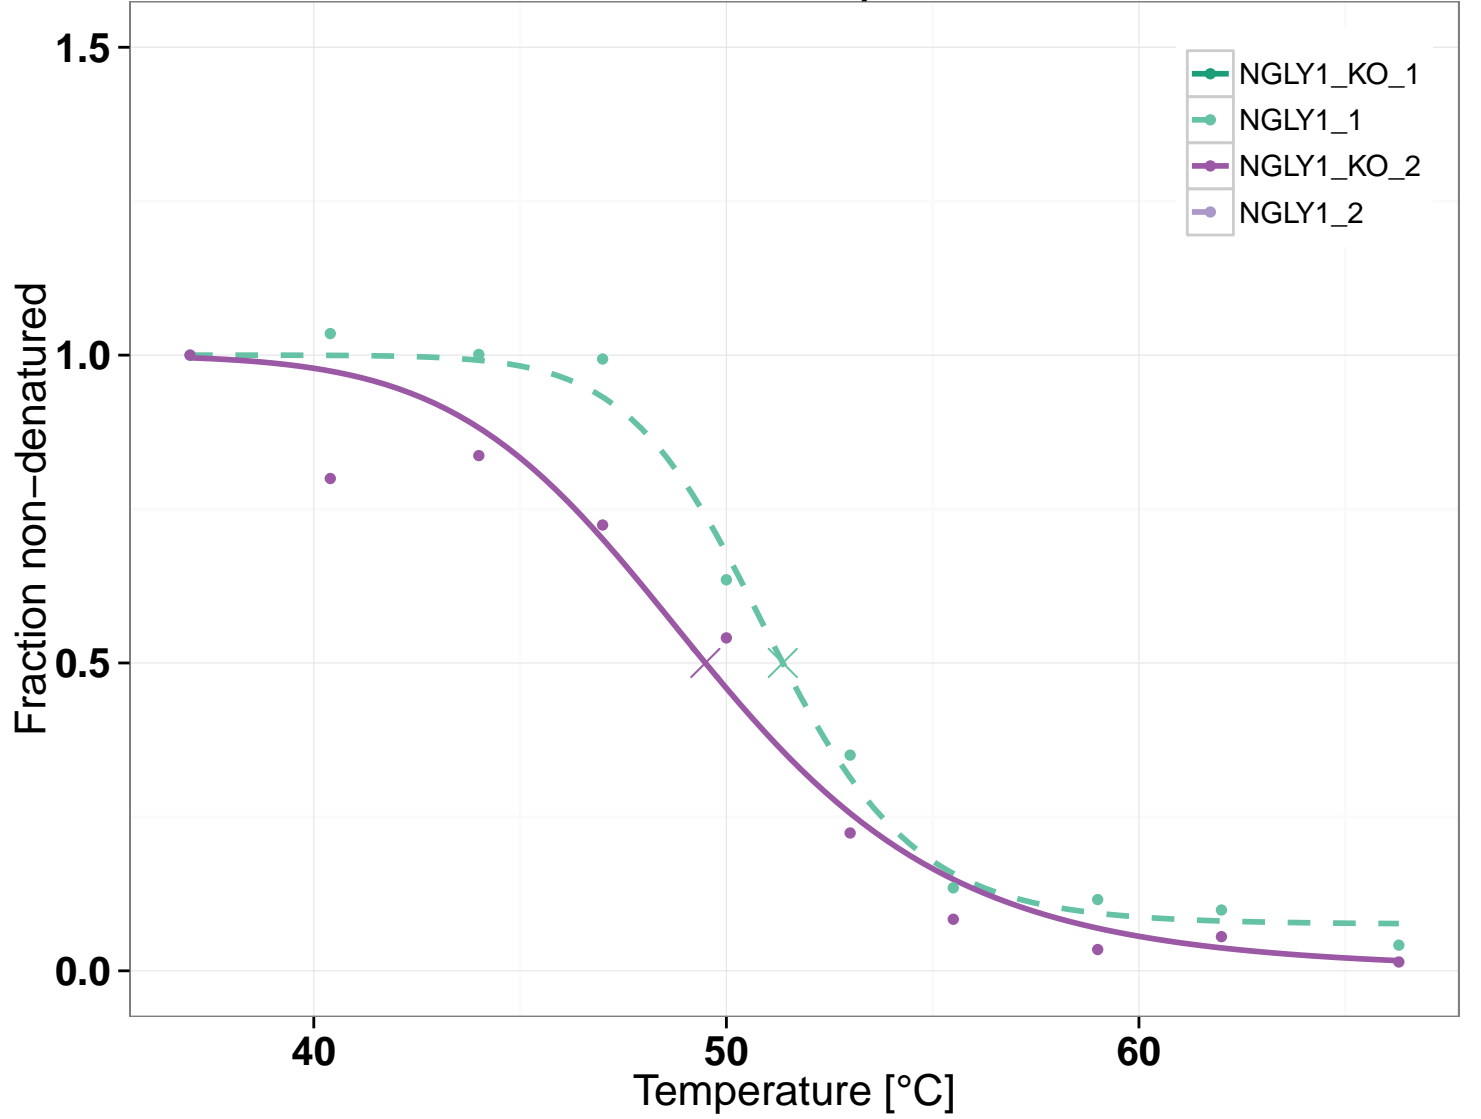

|            | meltPoint | slope  | plateau | R2   |
|------------|-----------|--------|---------|------|
| NGLY1_KO_1 | -         | -      | -       | -    |
| NGLY1_1    | 51.37     | -0.13  | 0.08    | 0.99 |
| NGLY1_KO_2 | 49.49     | -0.083 | 0       | 0.97 |
| NGLY1_2    | -         | -      | -       | -    |

Supplement: Supplementary file 3976 [file 1]

# IPI00306130.6|WDR34

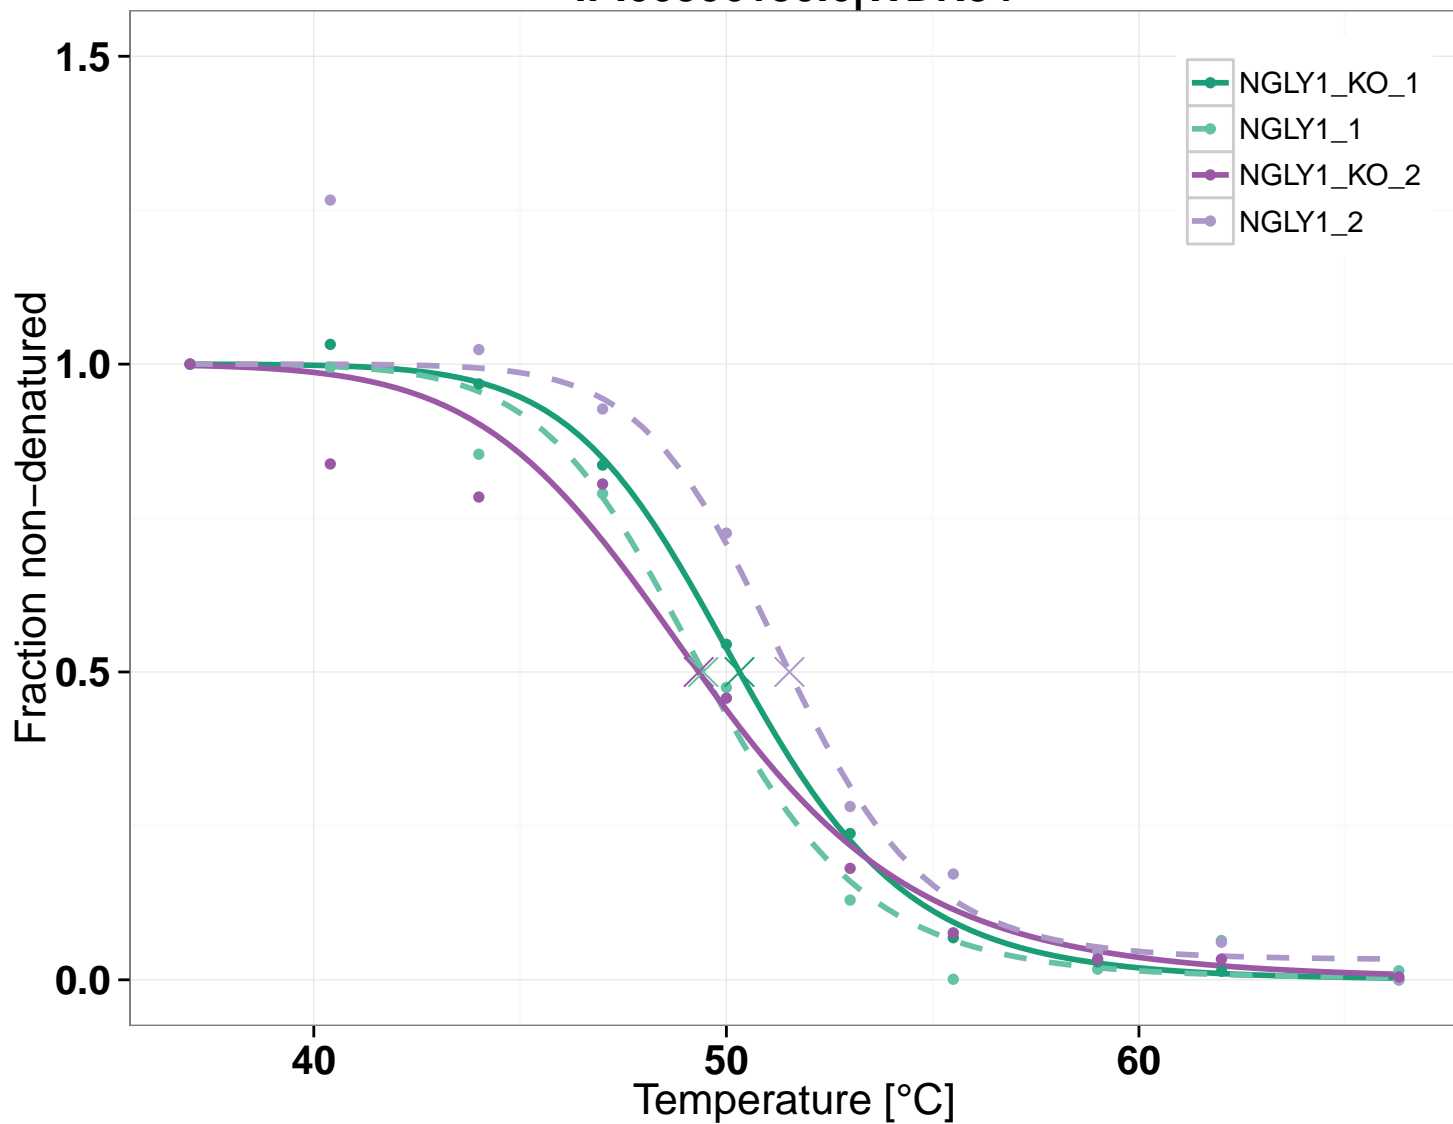

|            | meltPoint | slope  | plateau | R2   |
|------------|-----------|--------|---------|------|
| NGLY1_KO_1 | 50.32     | -0.12  | 0       | 1    |
| NGLY1_1    | 49.44     | -0.13  | 0       | 0.99 |
| NGLY1_KO_2 | 49.33     | -0.094 | 0       | 0.97 |
| NGLY1_2    | 51.53     | -0.14  | 0.03    | 0.96 |

Supplement: Supplementary file 3977 [file 1]

# IPI00643351.1|YBX1

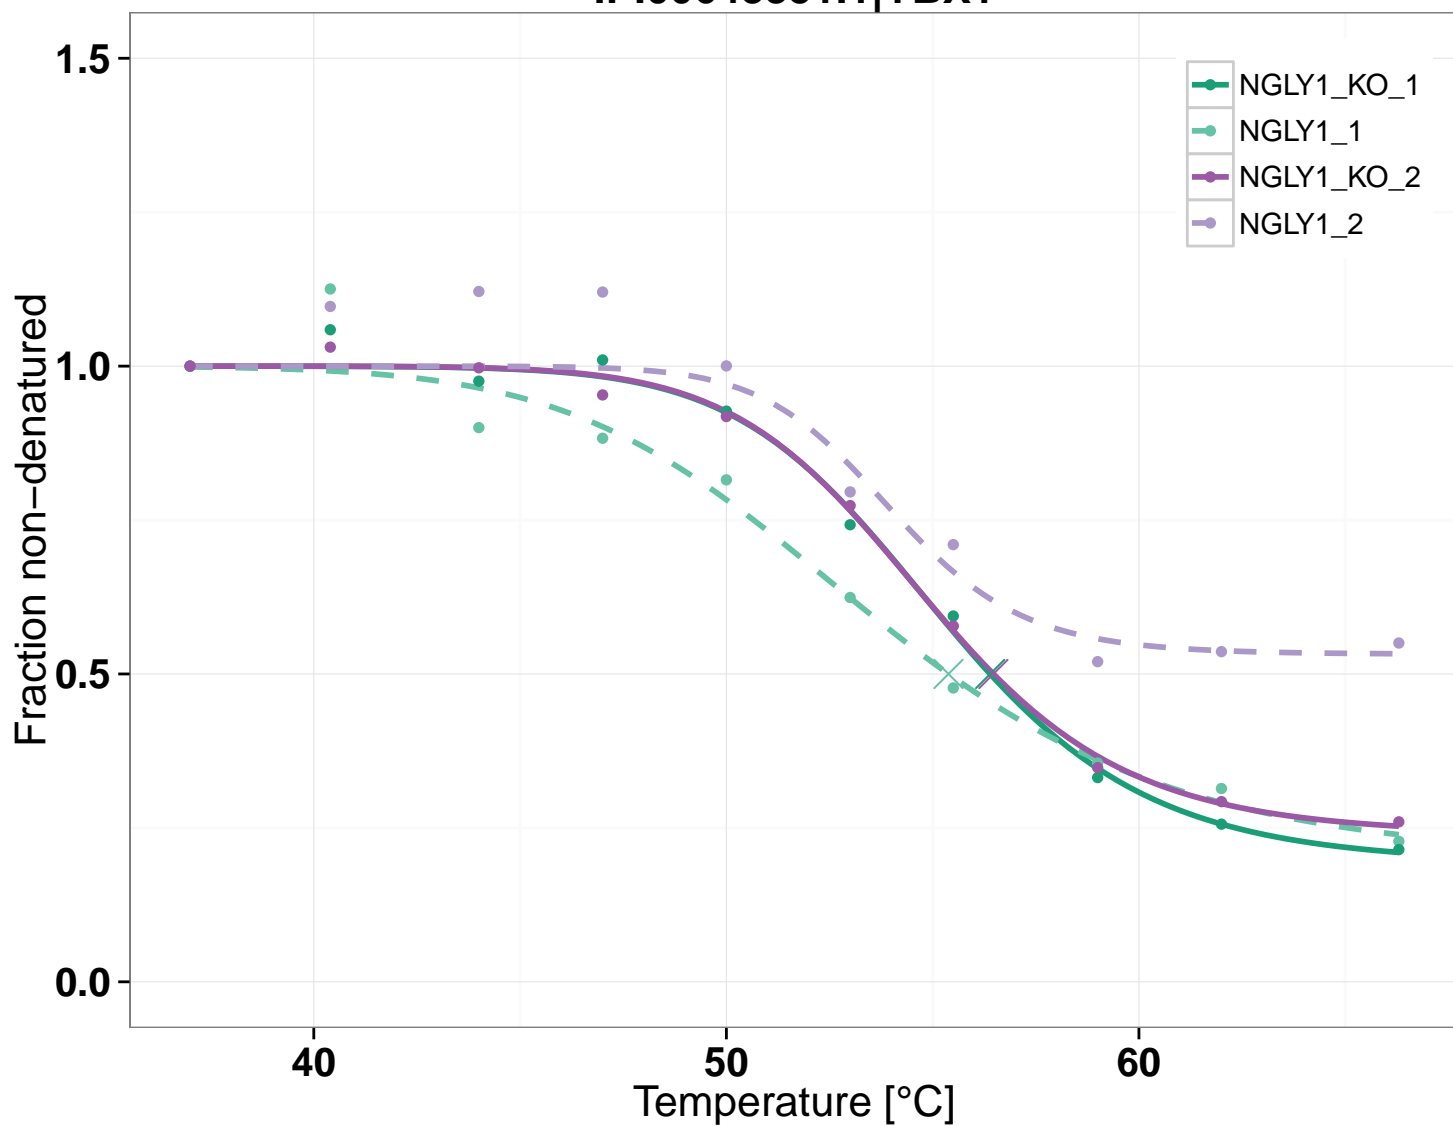

|            | meltPoint | slope  | plateau | R2   |
|------------|-----------|--------|---------|------|
| NGLY1_KO_1 | 56.39     | -0.081 | 0.19    | 0.99 |
| NGLY1_1    | 55.38     | -0.055 | 0.19    | 0.97 |
| NGLY1_KO_2 | 56.47     | -0.08  | 0.24    | 1    |
| NGLY1_2    | -         | -0.074 | 0.53    | 0.92 |

Supplement: Supplementary file 3978 [file 1]

# IPI00290979.3|ABHD5

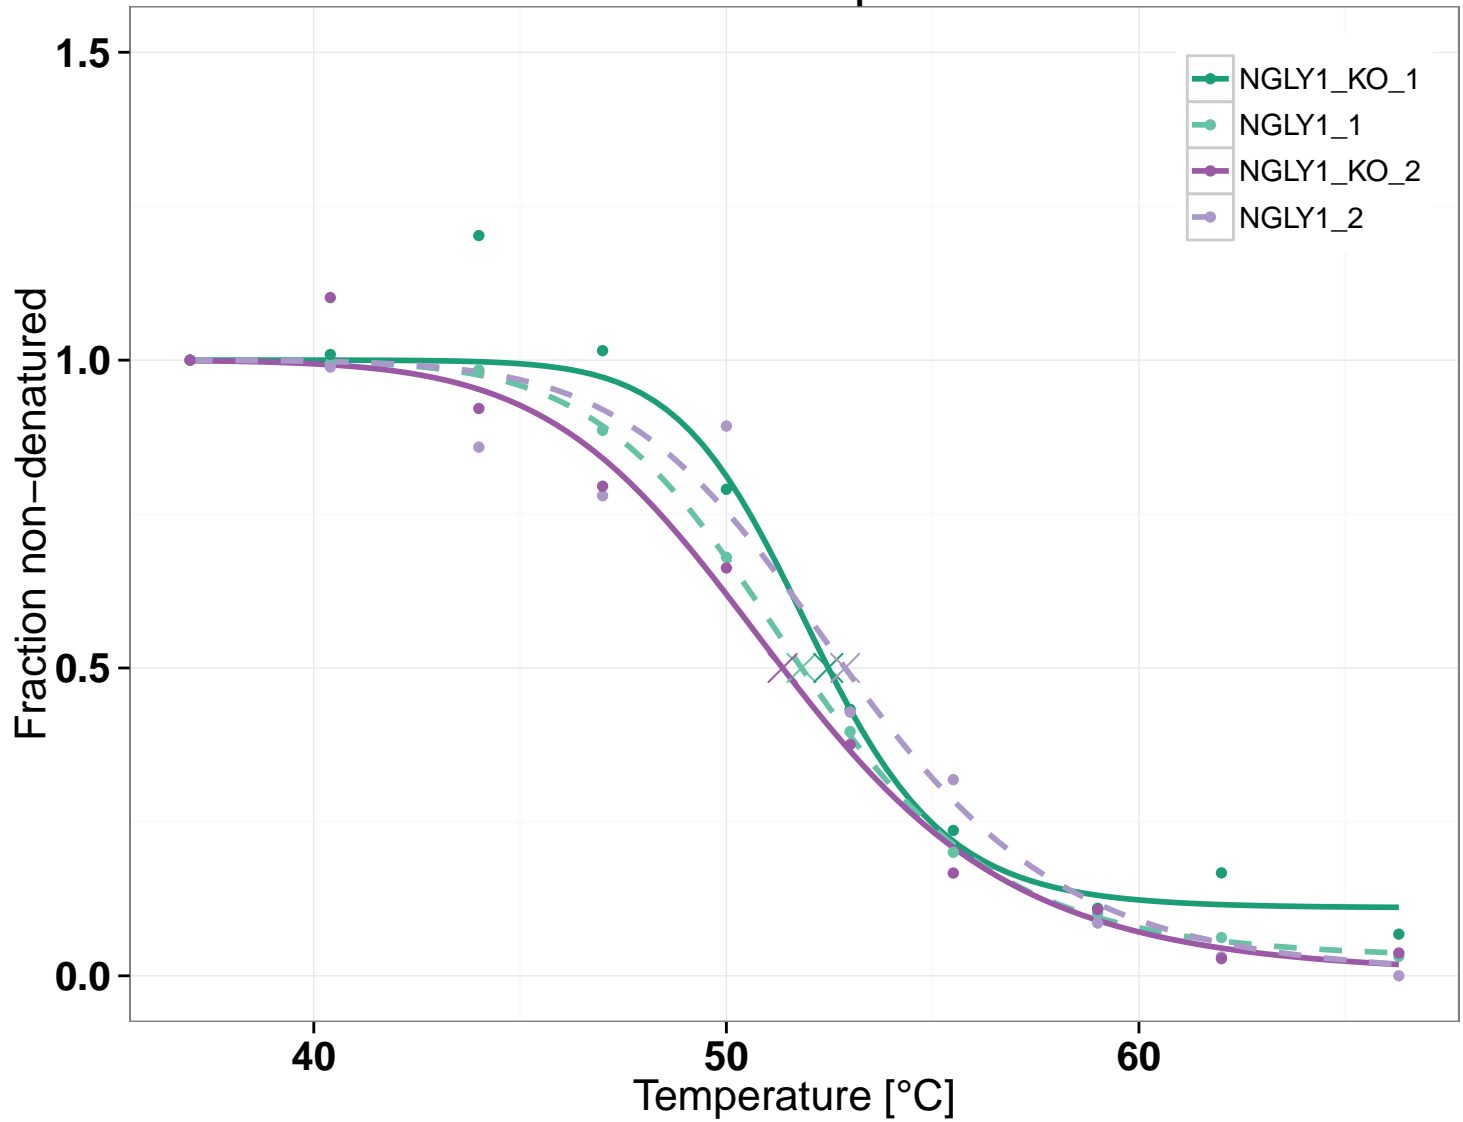

|            | meltPoint | slope  | plateau | R2   |
|------------|-----------|--------|---------|------|
| NGLY1_KO_1 | 52.47     | -0.14  | 0.11    | 0.97 |
| NGLY1_1    | 51.82     | -0.1   | 0.03    | 1    |
| NGLY1_KO_2 | 51.36     | -0.088 | 0       | 0.99 |
| NGLY1_2    | 52.88     | -0.093 | 0       | 0.96 |

Supplement: Supplementary file 3979 [file 1]

IPI00030247.1|CCNT1

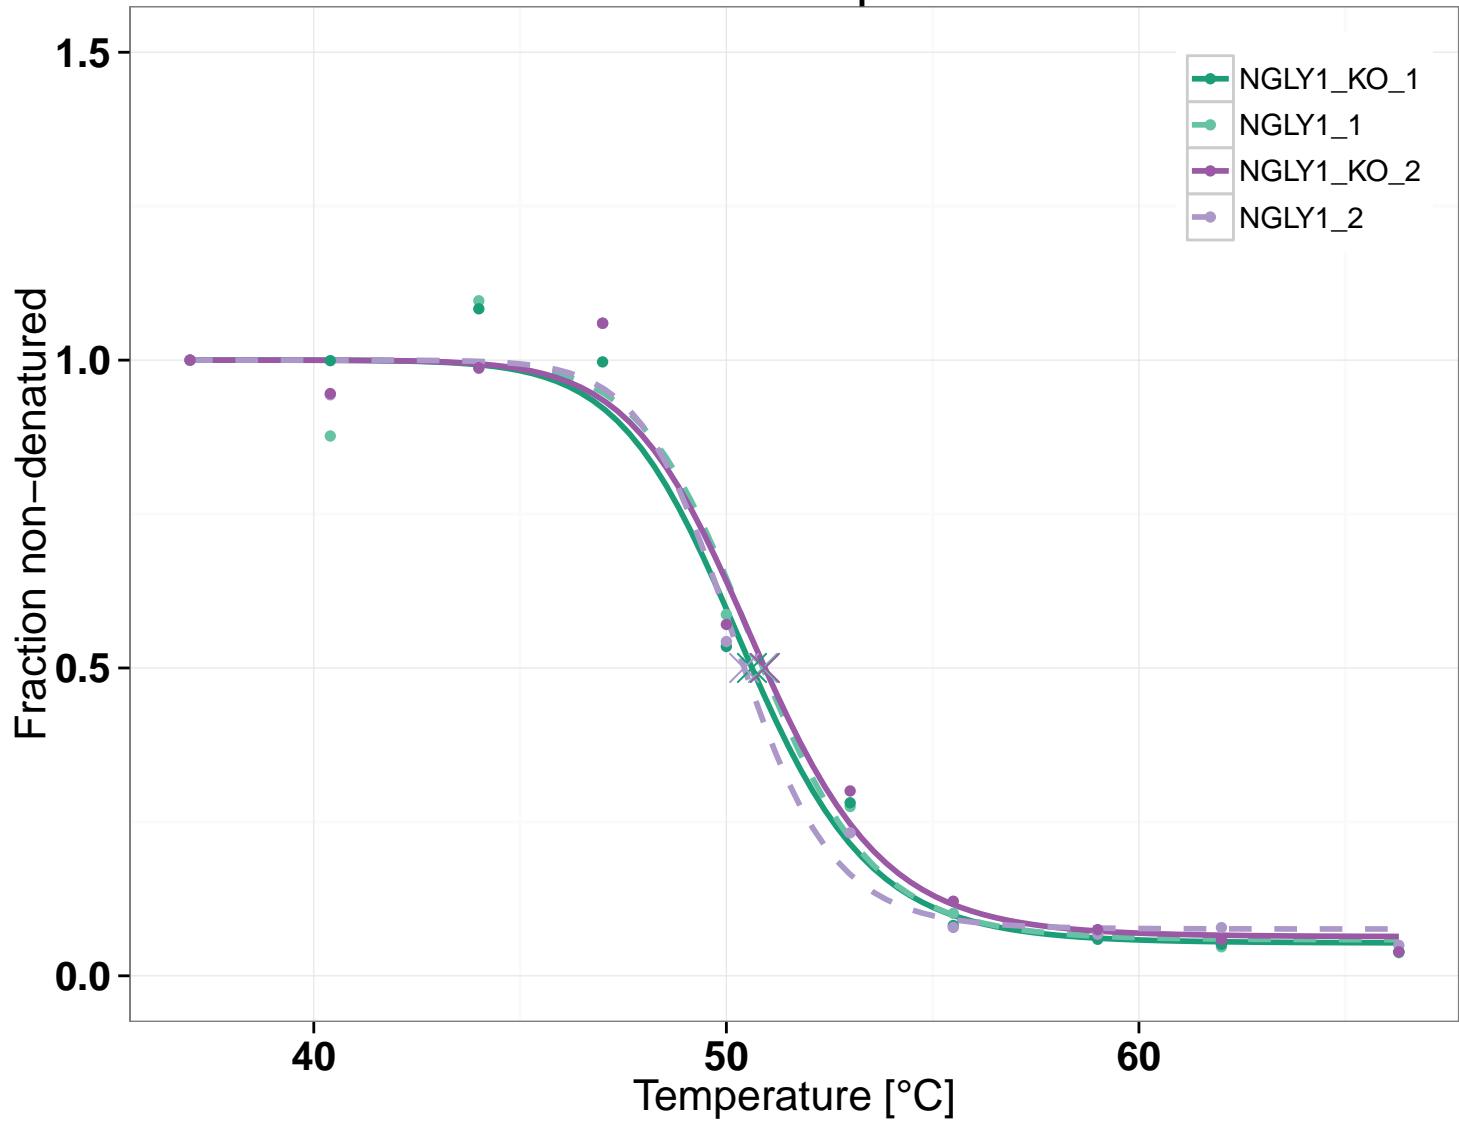

|            | meltPoint | slope | plateau | R2   |
|------------|-----------|-------|---------|------|
| NGLY1_KO_1 | 50.62     | -0.16 | 0.05    | 0.99 |
| NGLY1_1    | 50.88     | -0.17 | 0.06    | 0.98 |
| NGLY1_KO_2 | 50.93     | -0.15 | 0.06    | 0.98 |
| NGLY1_2    | 50.43     | -0.2  | 0.08    | 0.99 |

Supplement: Supplementary file 3980 [file 1]

IPI00304809.7|KIAA0774

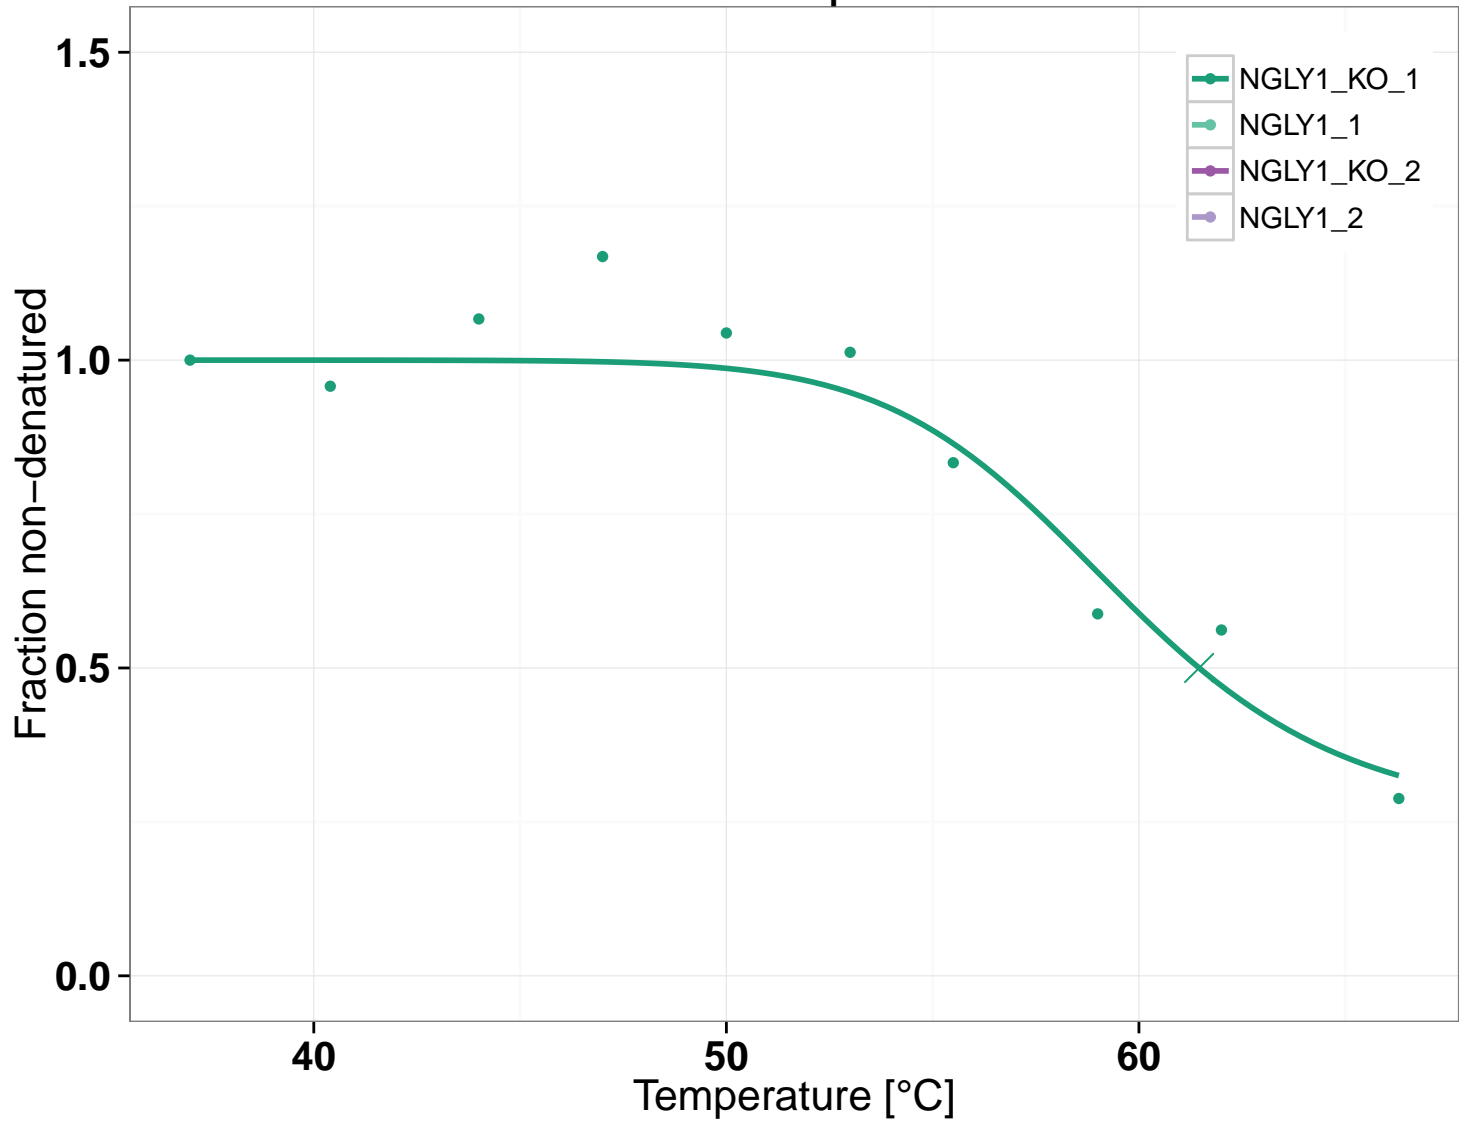

|            | meltPoint | slope  | plateau | R2   |
|------------|-----------|--------|---------|------|
| NGLY1_KO_1 | 61.46     | -0.068 | 0.25    | 0.92 |
| NGLY1_1    | -         | -      | -       | -    |
| NGLY1_KO_2 | -         | -      | -       | -    |
| NGLY1_2    | -         | -      | -       | -    |

Supplement: Supplementary file 3981 [file 1]

IPI00019600.3|UBE2V2

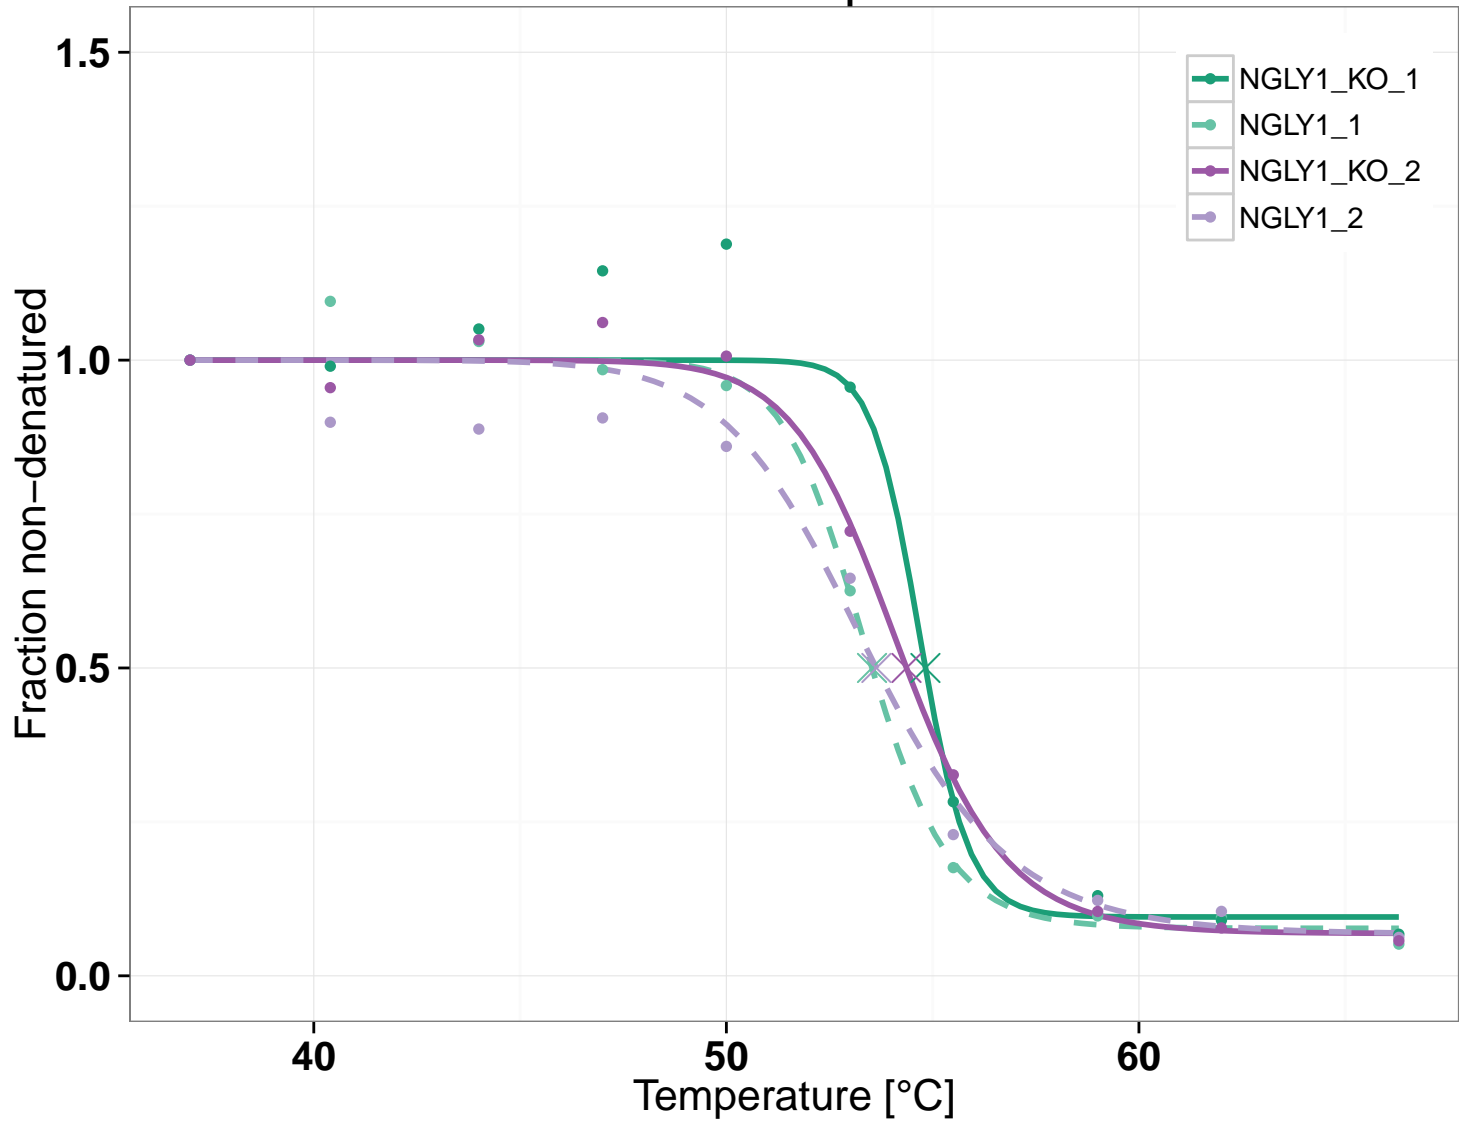

|            | meltPoint | slope | plateau | R2   |
|------------|-----------|-------|---------|------|
| NGLY1_KO_1 | 54.83     | -0.39 | 0.1     | 0.97 |
| NGLY1_1    | 53.53     | -0.23 | 0.08    | 0.99 |
| NGLY1_KO_2 | 54.37     | -0.18 | 0.07    | 1    |
| NGLY1_2    | 53.64     | -0.13 | 0.07    | 0.97 |

Supplement: Supplementary file 3982 [file 1]

IPI00797341.1|LEPROTL1

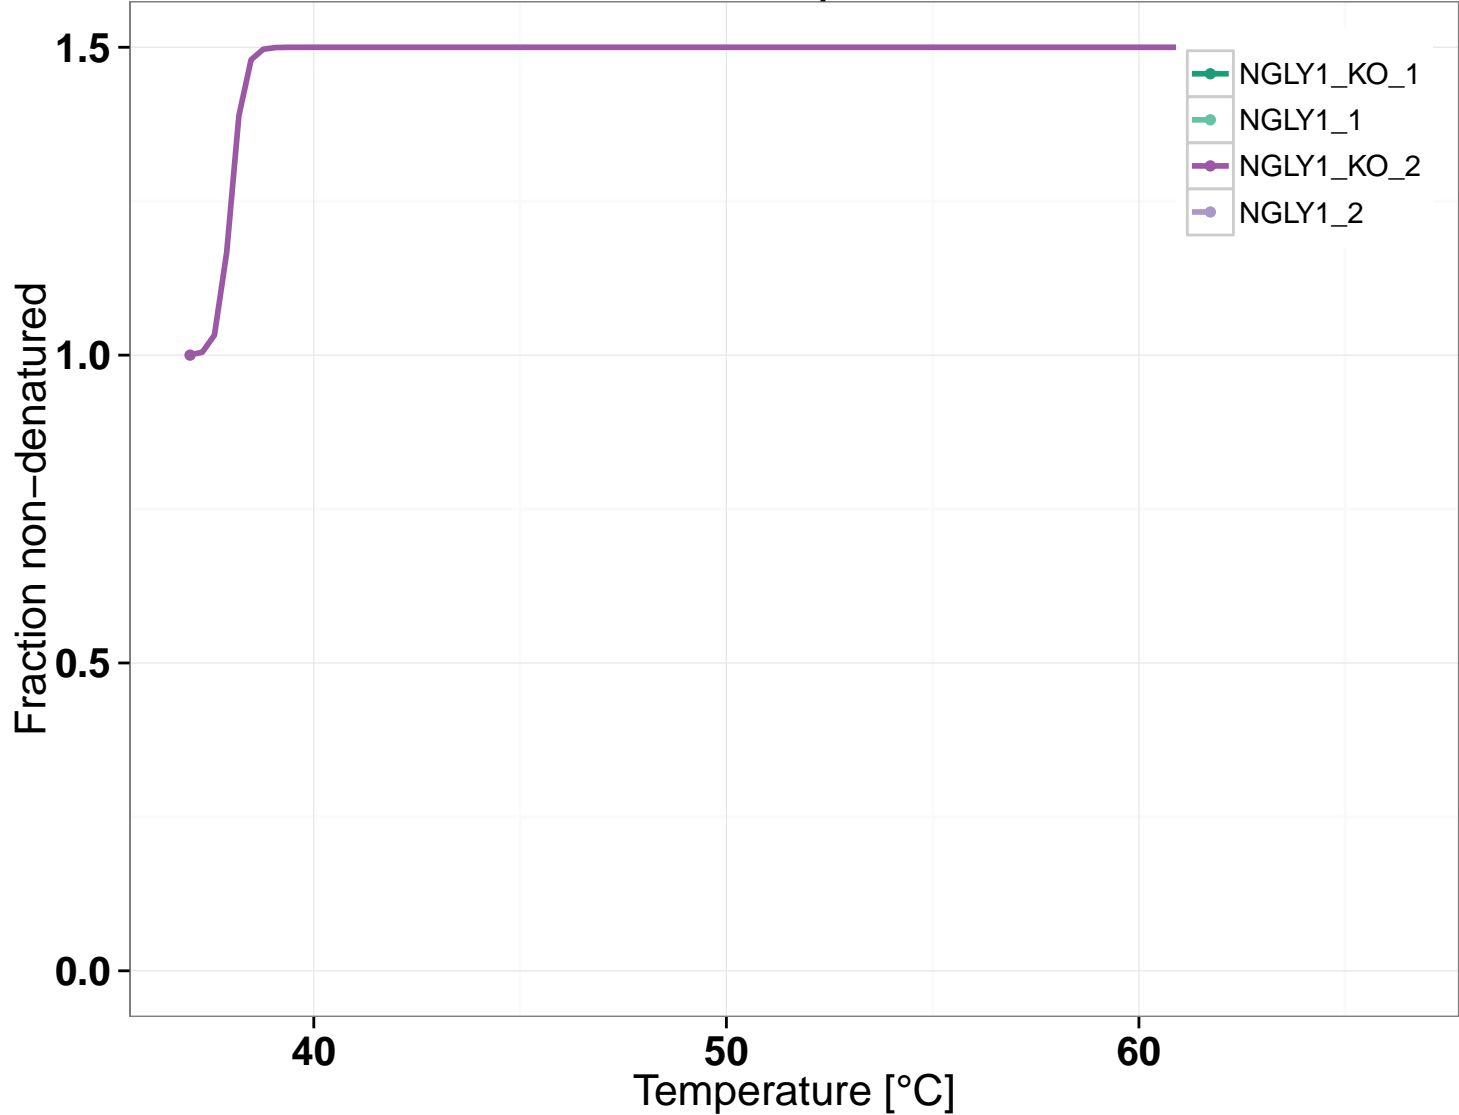

|            | meltPoint | slope | plateau | R2    |
|------------|-----------|-------|---------|-------|
| NGLY1_KO_1 | -         | -     | -       | -     |
| NGLY1_1    | -         | -     | -       | -     |
| NGLY1_KO_2 | -         | 0.82  | 1.5     | -4.08 |
| NGLY1_2    | -         | -     | -       | -     |

Supplement: Supplementary file 3983 [file 1]

# IPI00006774.3|IL27RA

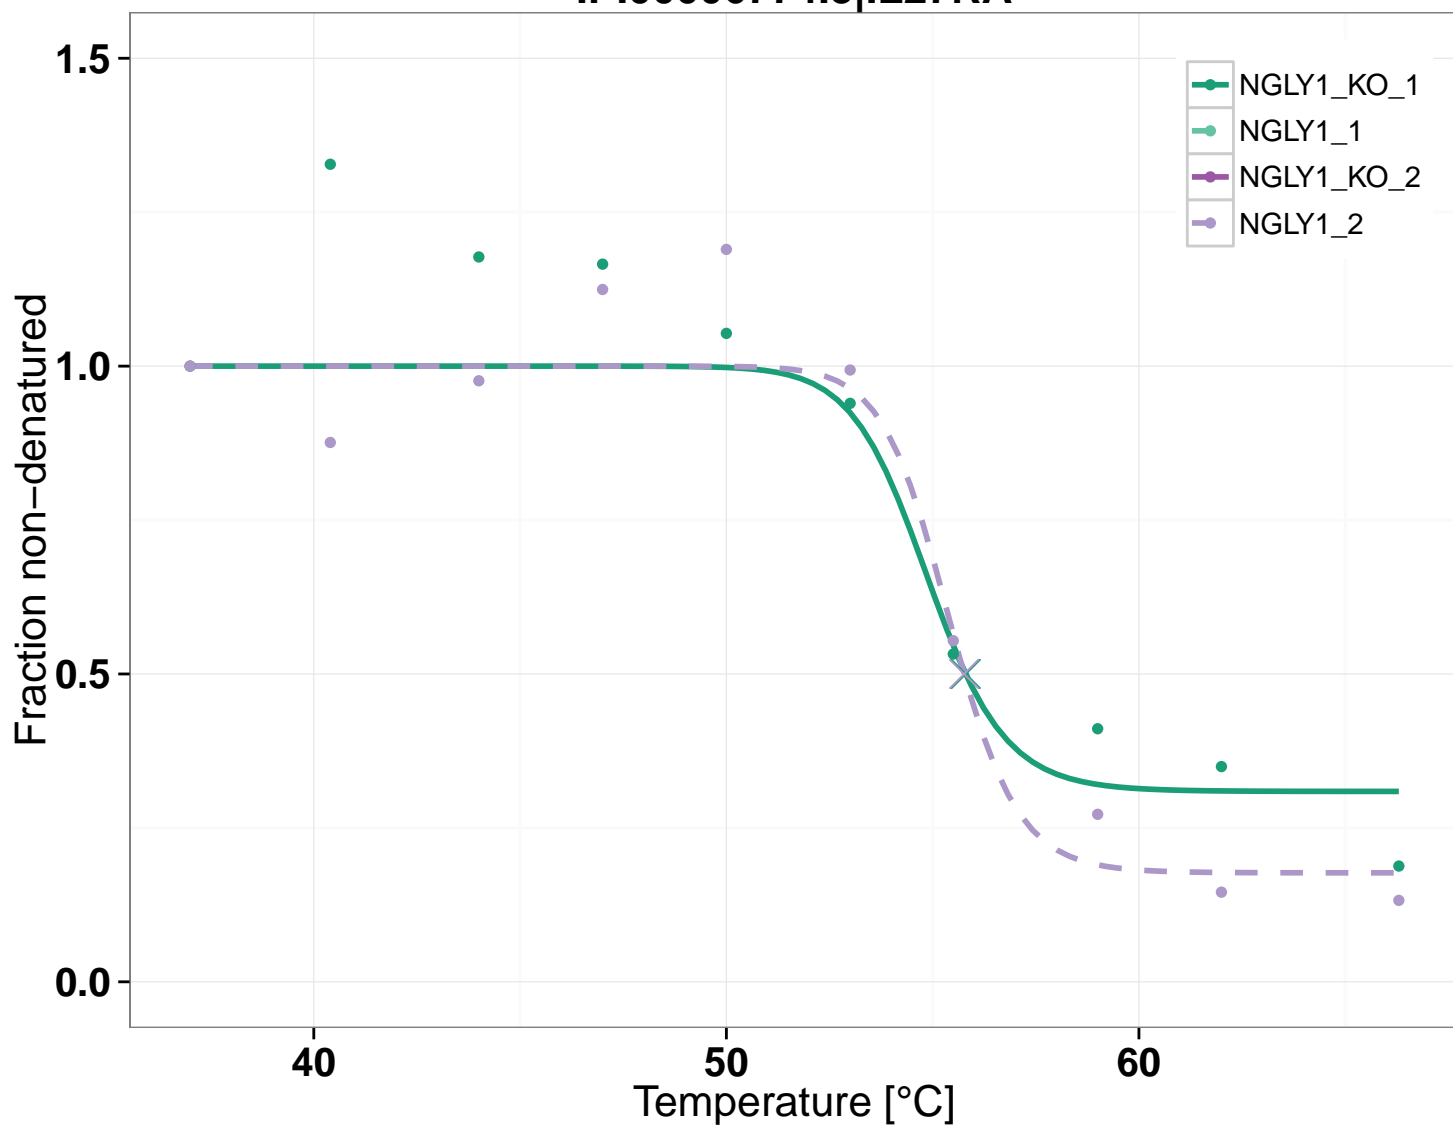

|            | meltPoint | slope | plateau | R2   |
|------------|-----------|-------|---------|------|
| NGLY1_KO_1 | 55.8      | -0.19 | 0.31    | 0.87 |
| NGLY1_1    | -         | -     | -       | -    |
| NGLY1_KO_2 | -         | -     | -       | -    |
| NGLY1_2    | 55.76     | -0.25 | 0.18    | 0.95 |

Supplement: Supplementary file 3984 [file 1]

IPI00015361.1|PFDN5

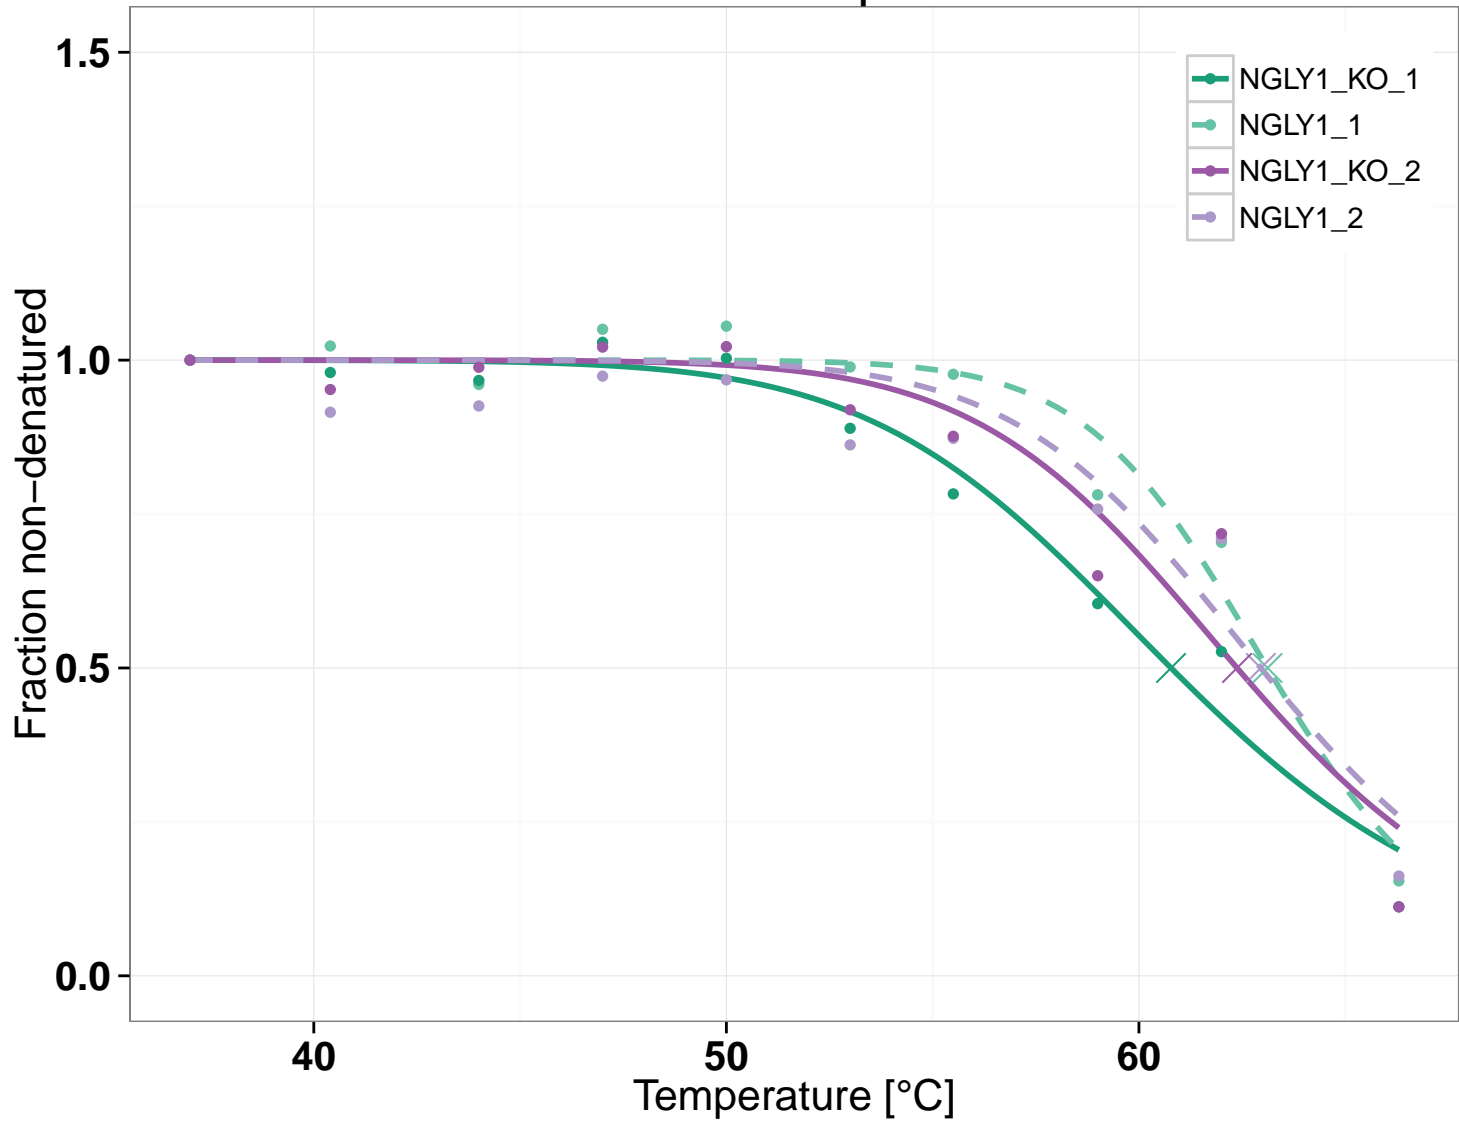

|            | meltPoint | slope  | plateau | R2   |
|------------|-----------|--------|---------|------|
| NGLY1_KO_1 | 60.78     | -0.068 | 0       | 0.97 |
| NGLY1_1    | 63.12     | -0.11  | 0       | 0.96 |
| NGLY1_KO_2 | 62.38     | -0.079 | 0       | 0.9  |
| NGLY1_2    | 62.95     | -0.083 | 0       | 0.89 |

Supplement: Supplementary file 3985 [file 1]

# IPI00440502.3|BRD2

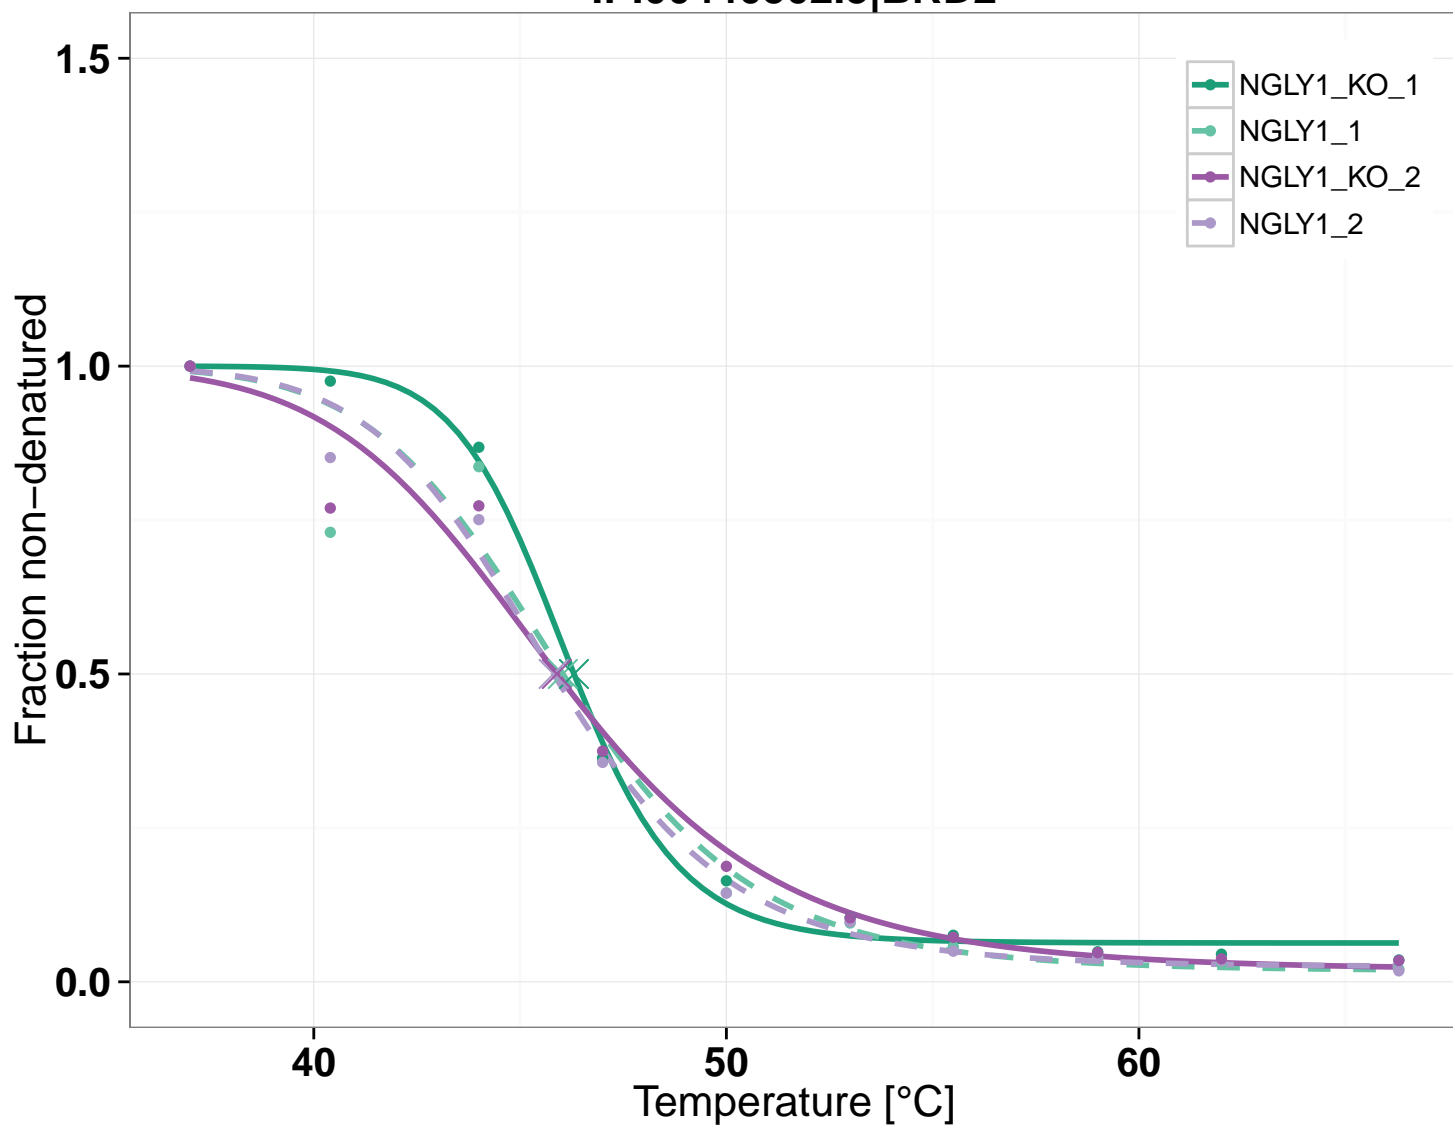

|            | meltPoint | slope | plateau | R2   |
|------------|-----------|-------|---------|------|
| NGLY1_KO_1 | 46.31     | -0.17 | 0.06    | 1    |
| NGLY1_1    | 46.04     | -0.11 | 0.02    | 0.95 |
| NGLY1_KO_2 | 45.89     | -0.09 | 0.02    | 0.97 |
| NGLY1_2    | 45.81     | -0.11 | 0.02    | 0.99 |

Supplement: Supplementary file 3986 [file 1]

# IPI00063962.5|RP11-529|10 4

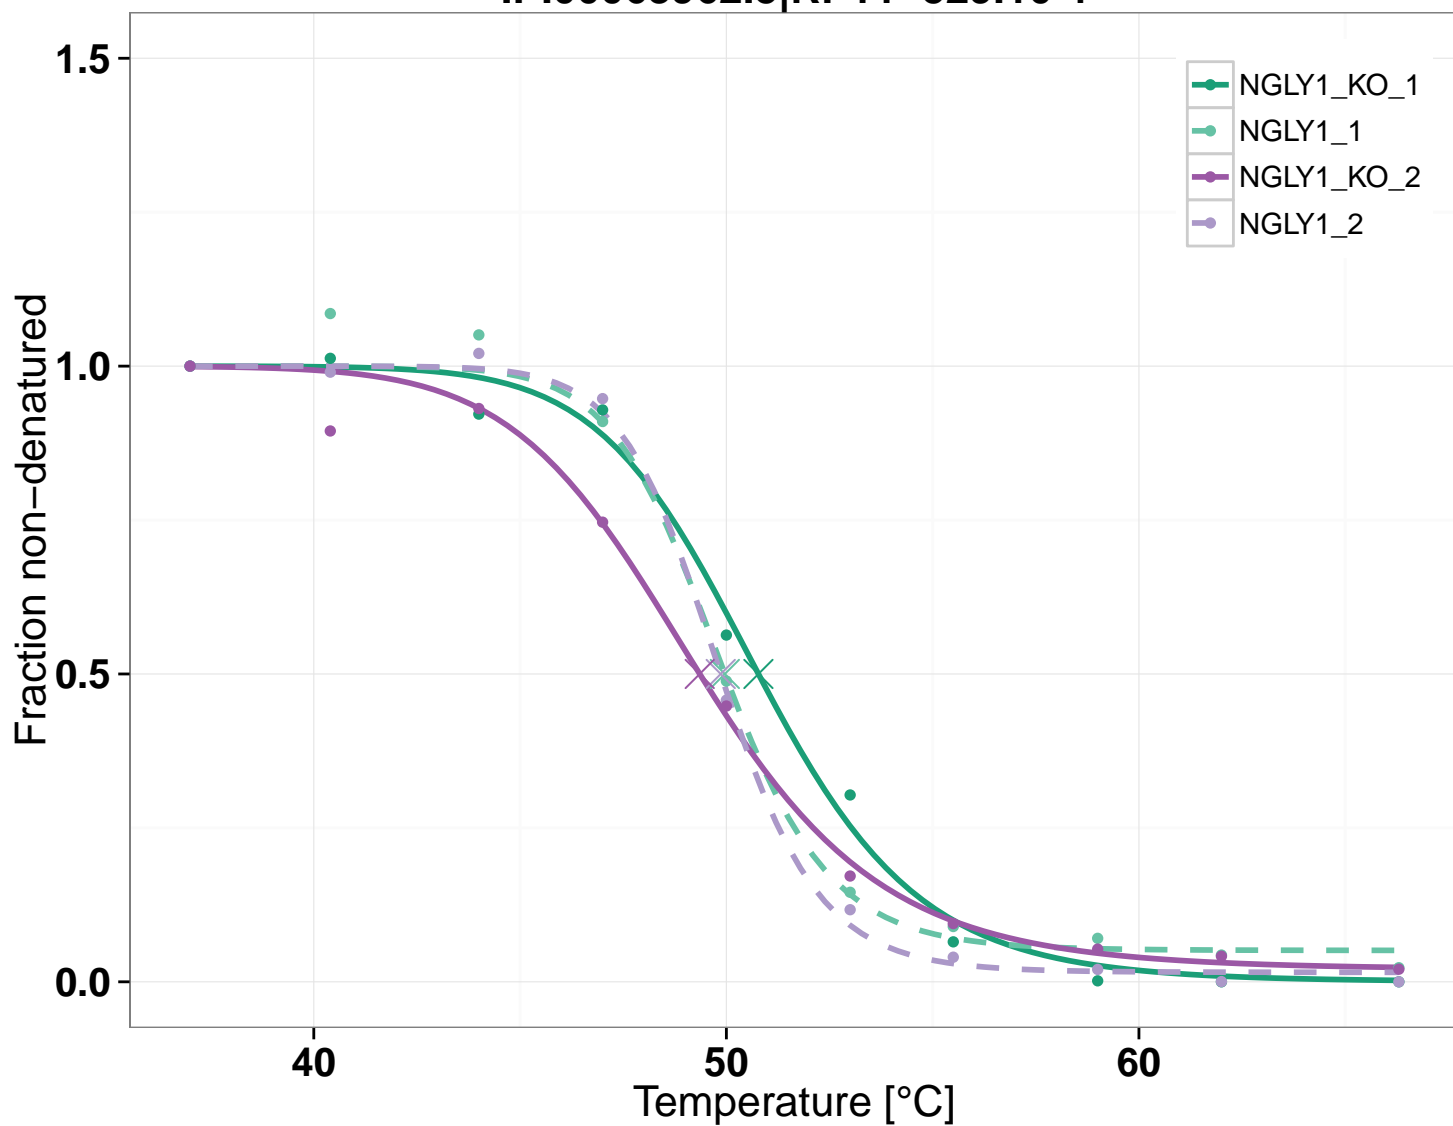

|            | meltPoint | slope | plateau | R2   |
|------------|-----------|-------|---------|------|
| NGLY1_KO_1 | 50.78     | -0.13 | 0       | 0.99 |
| NGLY1_1    | 49.96     | -0.18 | 0.05    | 0.99 |
| NGLY1_KO_2 | 49.35     | -0.11 | 0.02    | 0.99 |
| NGLY1_2    | 49.86     | -0.2  | 0.02    | 1    |

Supplement: Supplementary file 3987 [file 1]

IPI00020512.1|ALG13

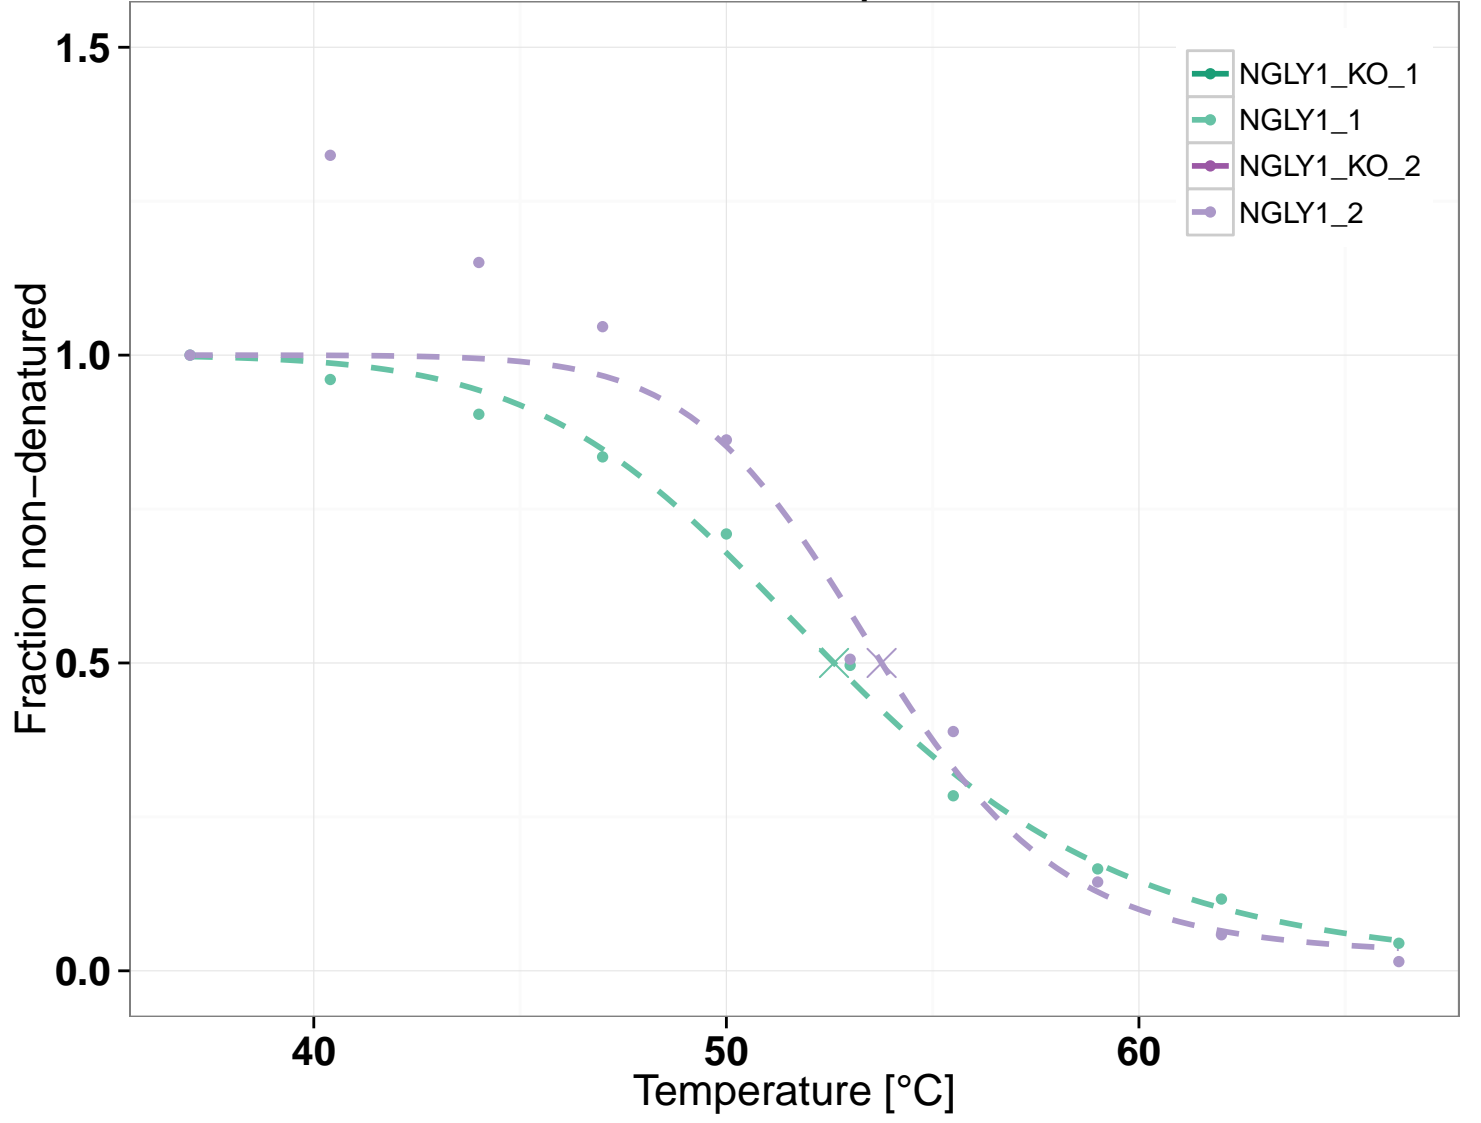

|            | meltPoint | slope | plateau | R2   |
|------------|-----------|-------|---------|------|
| NGLY1_KO_1 | -         | -     | -       | -    |
| NGLY1_1    | 52.61     | -0.07 | 0       | 1    |
| NGLY1_KO_2 | -         | -     | -       | -    |
| NGLY1_2    | 53.76     | -0.11 | 0.03    | 0.93 |

Supplement: Supplementary file 3988 [file 1]

IPI00300127.3|NAT10

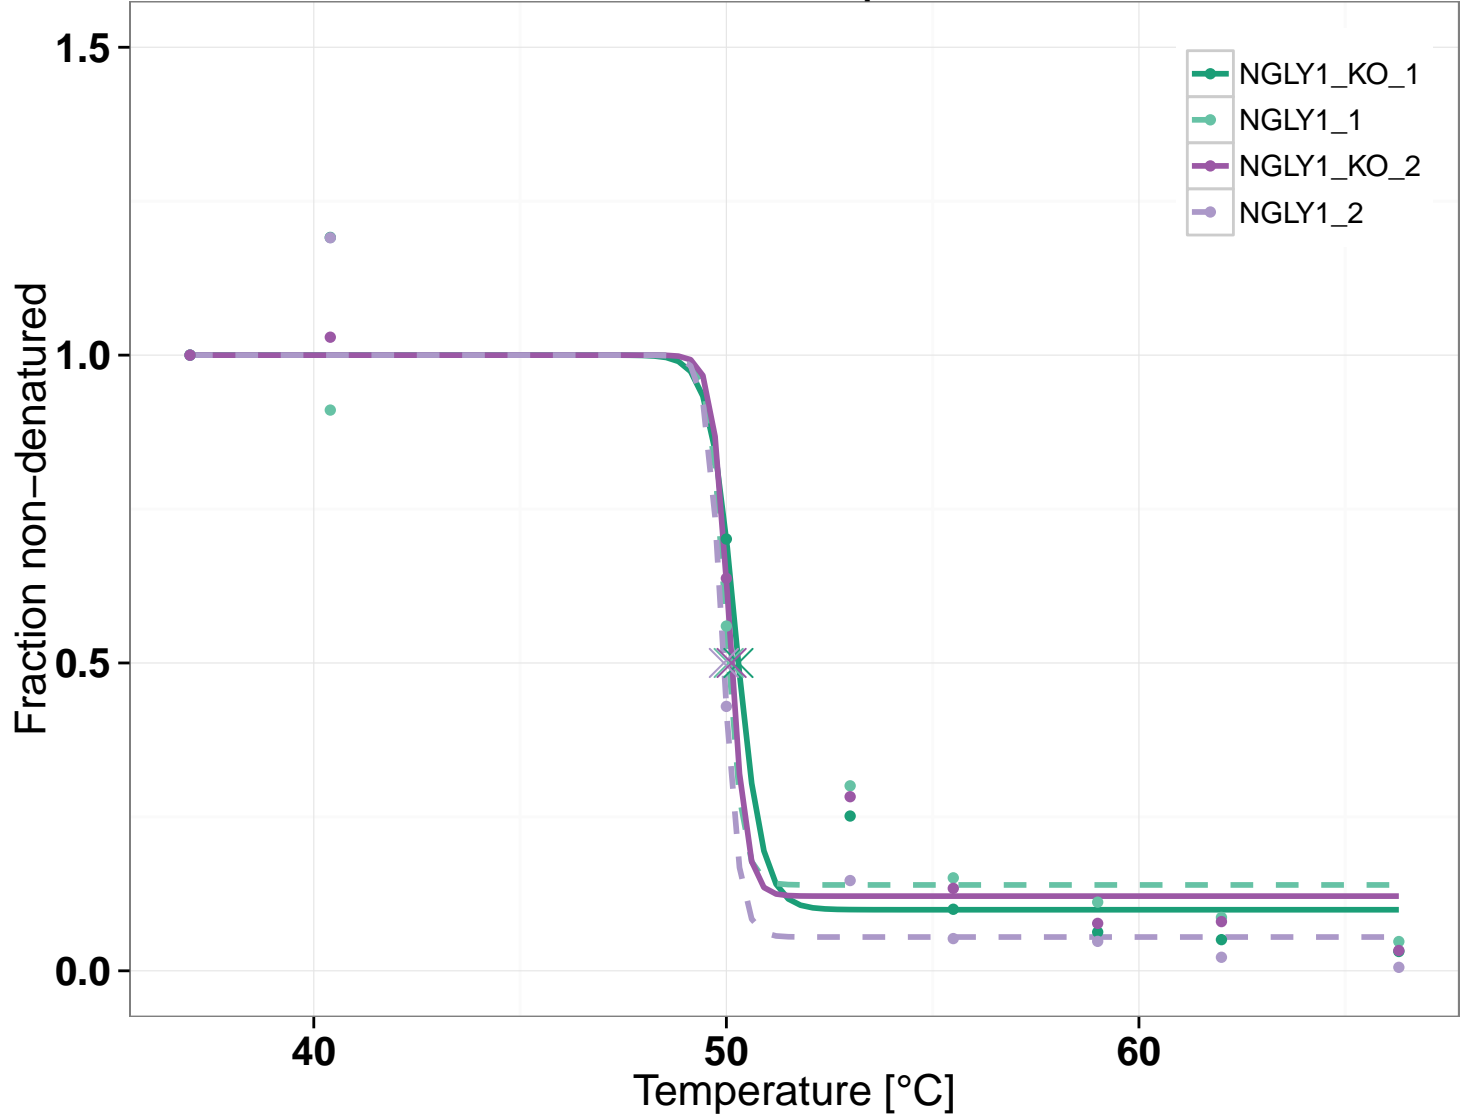

|            | meltPoint | slope | plateau | R2   |
|------------|-----------|-------|---------|------|
| NGLY1_KO_1 | 50.29     | -0.71 | 0.1     | 0.5  |
| NGLY1_1    | 50.06     | -1.1  | 0.14    | 0.62 |
| NGLY1_KO_2 | 50.13     | -1.1  | 0.12    | 0.42 |
| NGLY1_2    | 49.94     | -1.2  | 0.05    | 0.61 |

Supplement: Supplementary file 3989 [file 1]

# IPI00028122.1|PSIP1

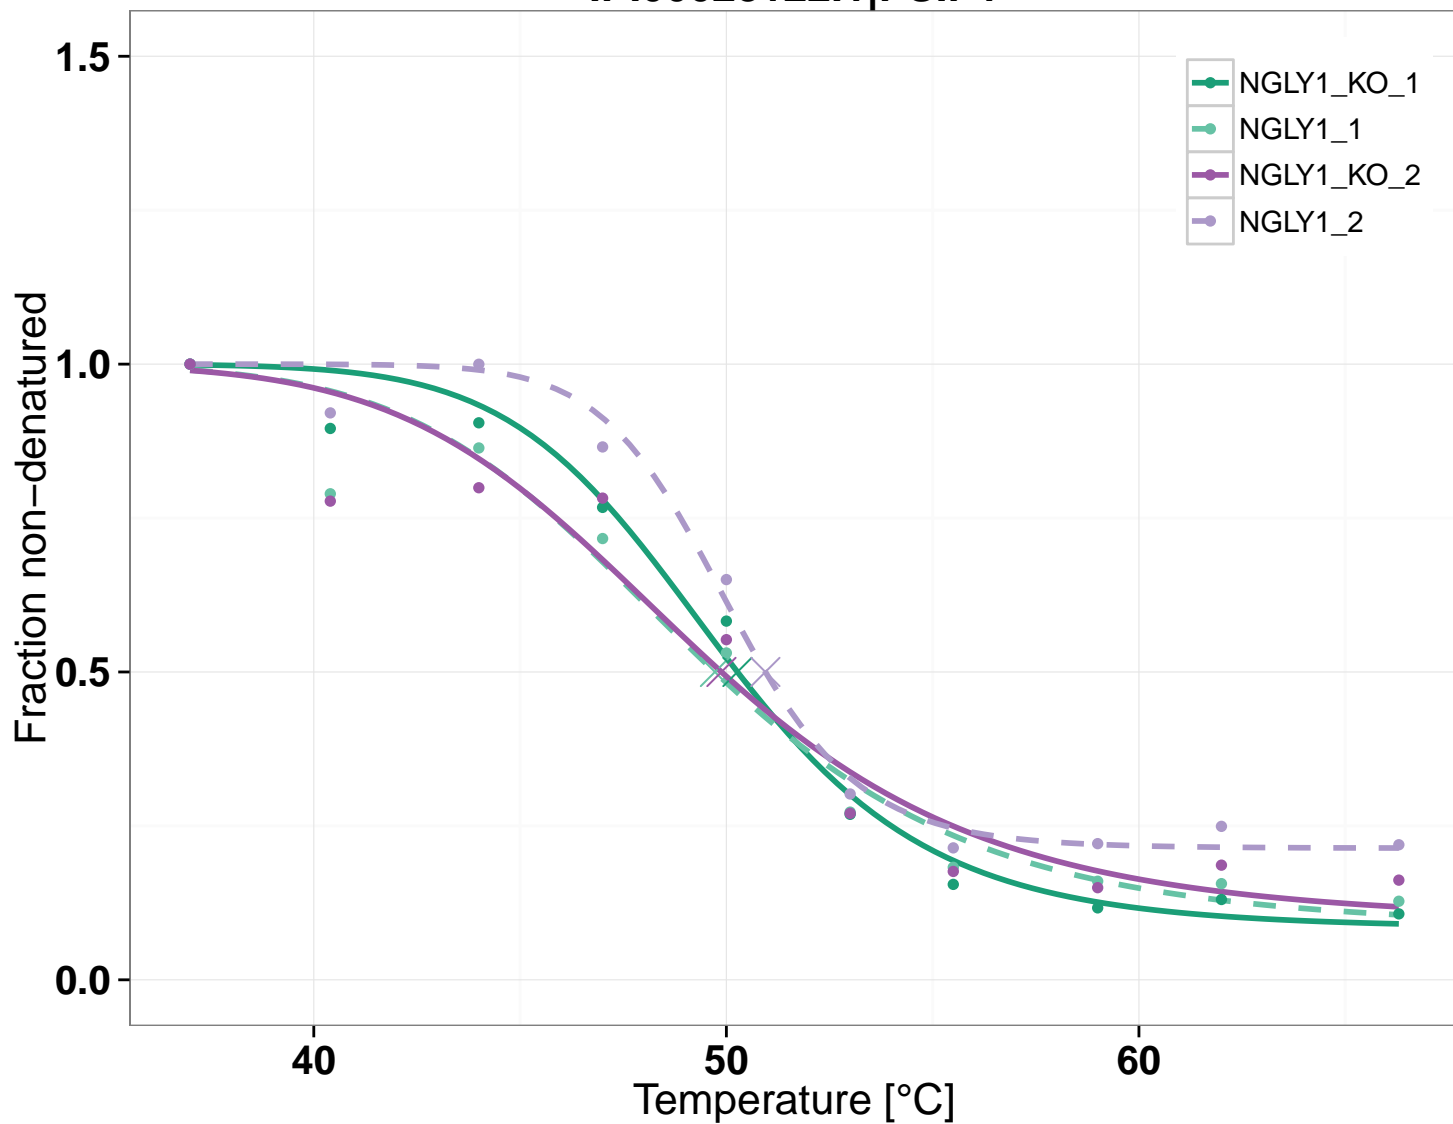

|            | meltPoint | slope  | plateau | R2   |
|------------|-----------|--------|---------|------|
| NGLY1_KO_1 | 50.27     | -0.09  | 0.08    | 0.99 |
| NGLY1_1    | 49.72     | -0.067 | 0.08    | 0.96 |
| NGLY1_KO_2 | 49.88     | -0.064 | 0.09    | 0.94 |
| NGLY1_2    | 50.95     | -0.13  | 0.21    | 0.99 |

Supplement: Supplementary file 3990 [file 1]

# IPI00025809.2|MGAT2

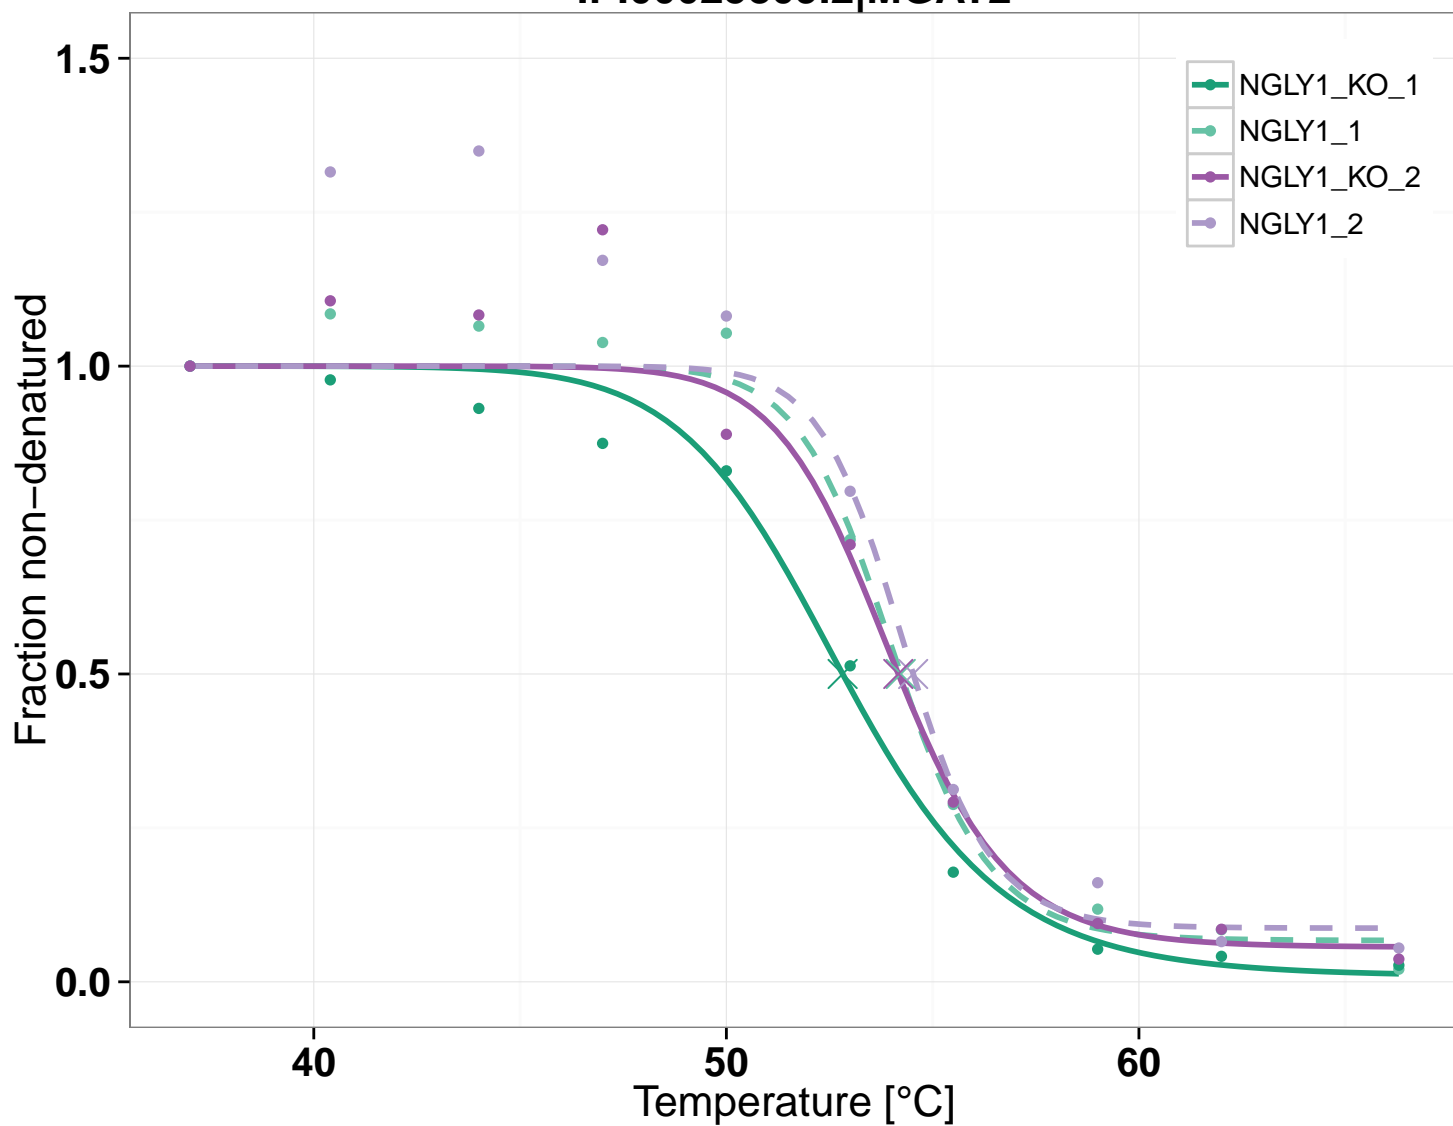

|            | meltPoint | slope | plateau | R2   |
|------------|-----------|-------|---------|------|
| NGLY1_KO_1 | 52.82     | -0.13 | 0.01    | 0.99 |
| NGLY1_1    | 54.23     | -0.2  | 0.07    | 0.99 |
| NGLY1_KO_2 | 54.17     | -0.17 | 0.06    | 0.96 |
| NGLY1_2    | 54.53     | -0.22 | 0.09    | 0.89 |

Supplement: Supplementary file 3991 [file 1]

# IPI00006377.4|POMP

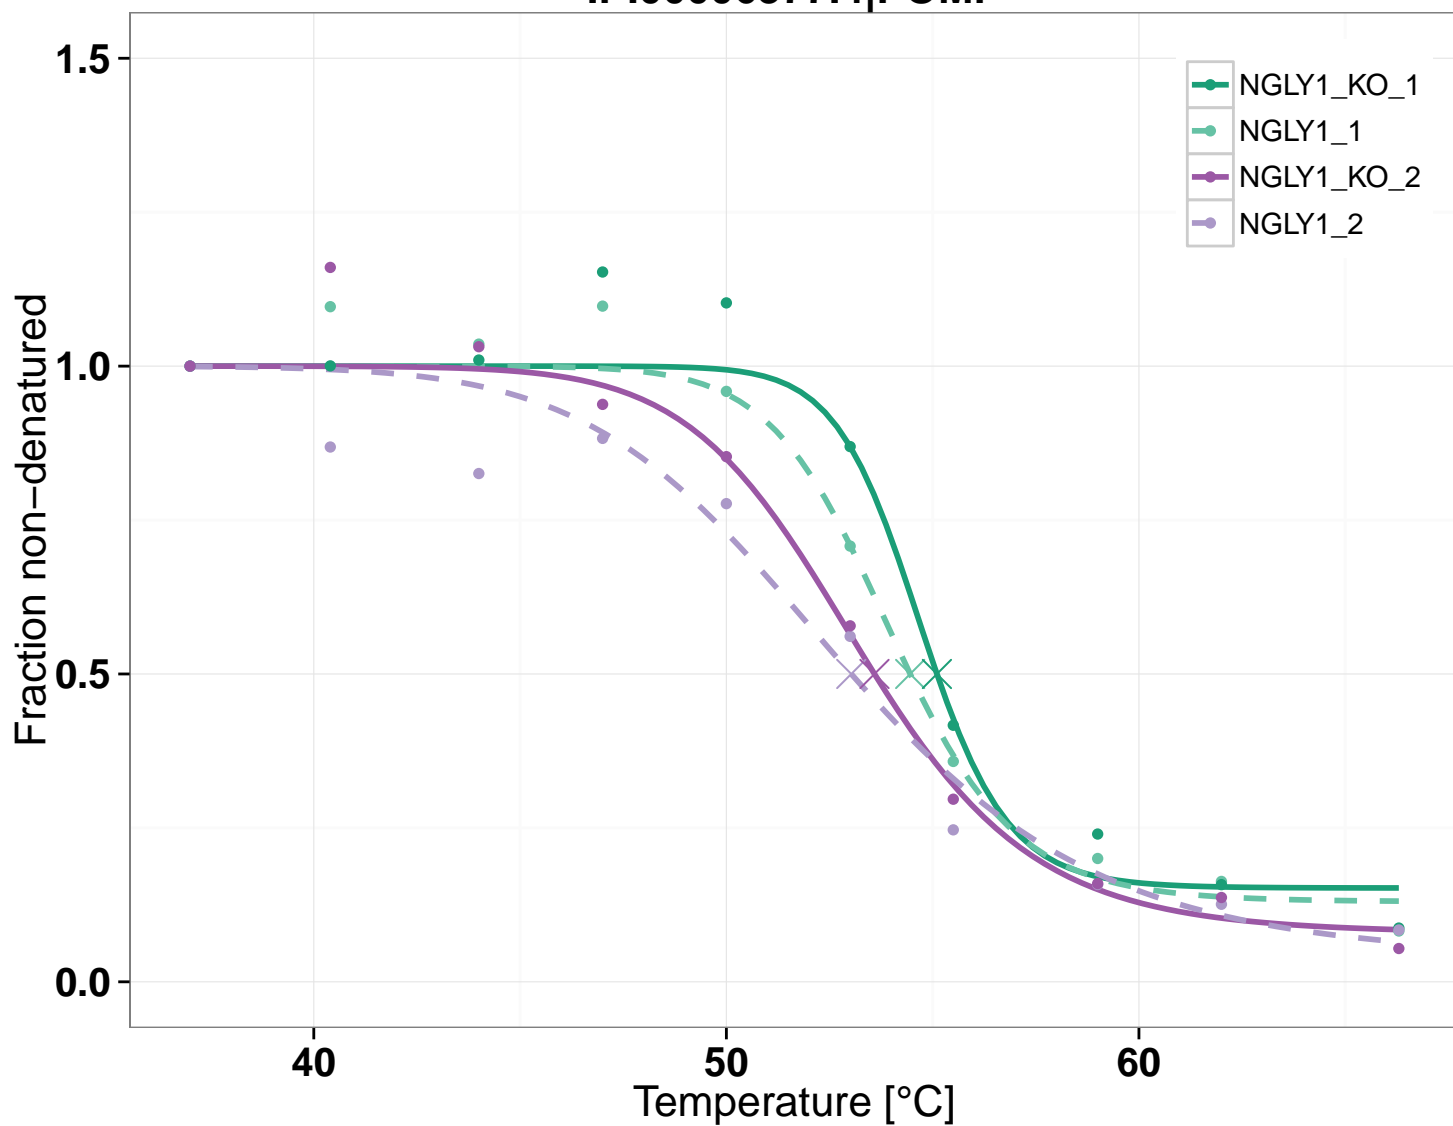

|            | meltPoint | slope  | plateau | R2   |
|------------|-----------|--------|---------|------|
| NGLY1_KO_1 | 55.1      | -0.2   | 0.15    | 0.97 |
| NGLY1_1    | 54.46     | -0.15  | 0.13    | 0.98 |
| NGLY1_KO_2 | 53.59     | -0.11  | 0.08    | 0.98 |
| NGLY1_2    | 53.03     | -0.078 | 0.03    | 0.96 |

Supplement: Supplementary file 3992 [file 1]

# IPI00013678.2|MTX1

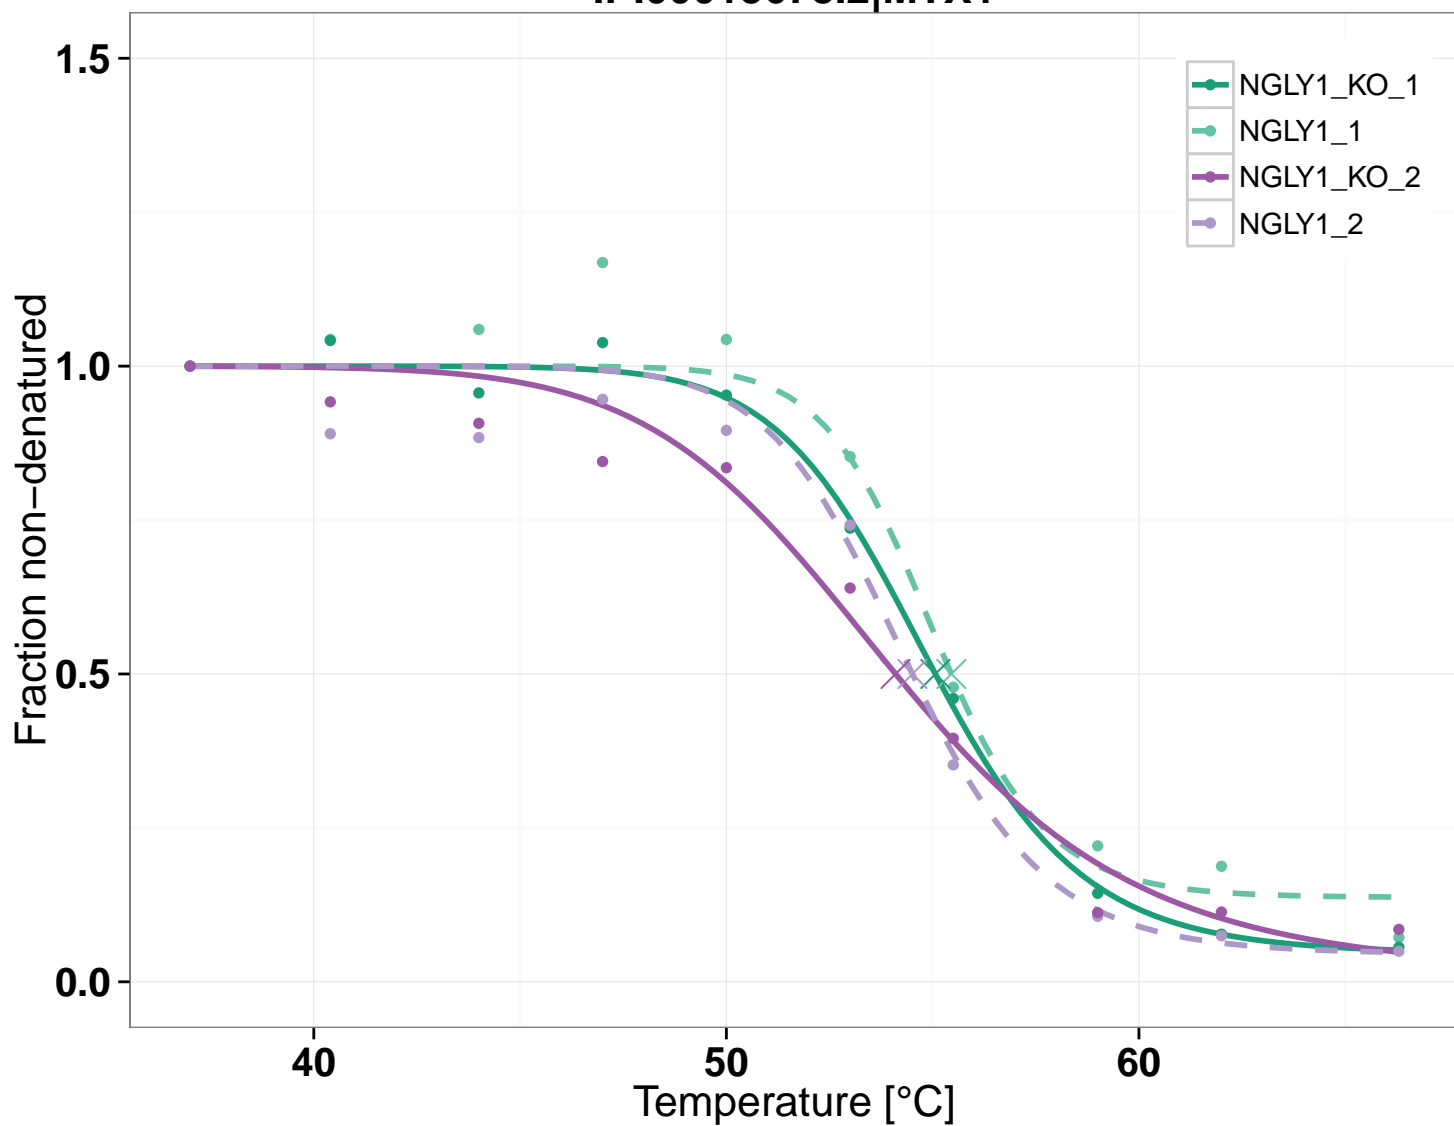

|            | meltPoint | slope  | plateau | R2   |
|------------|-----------|--------|---------|------|
| NGLY1_KO_1 | 55.07     | -0.13  | 0.05    | 1    |
| NGLY1_1    | 55.45     | -0.16  | 0.14    | 0.97 |
| NGLY1_KO_2 | 54.1      | -0.083 | 0.01    | 0.98 |
| NGLY1_2    | 54.51     | -0.14  | 0.04    | 0.98 |

Supplement: Supplementary file 3993 [file 1]

# IPI00015897.2|CHORDC1

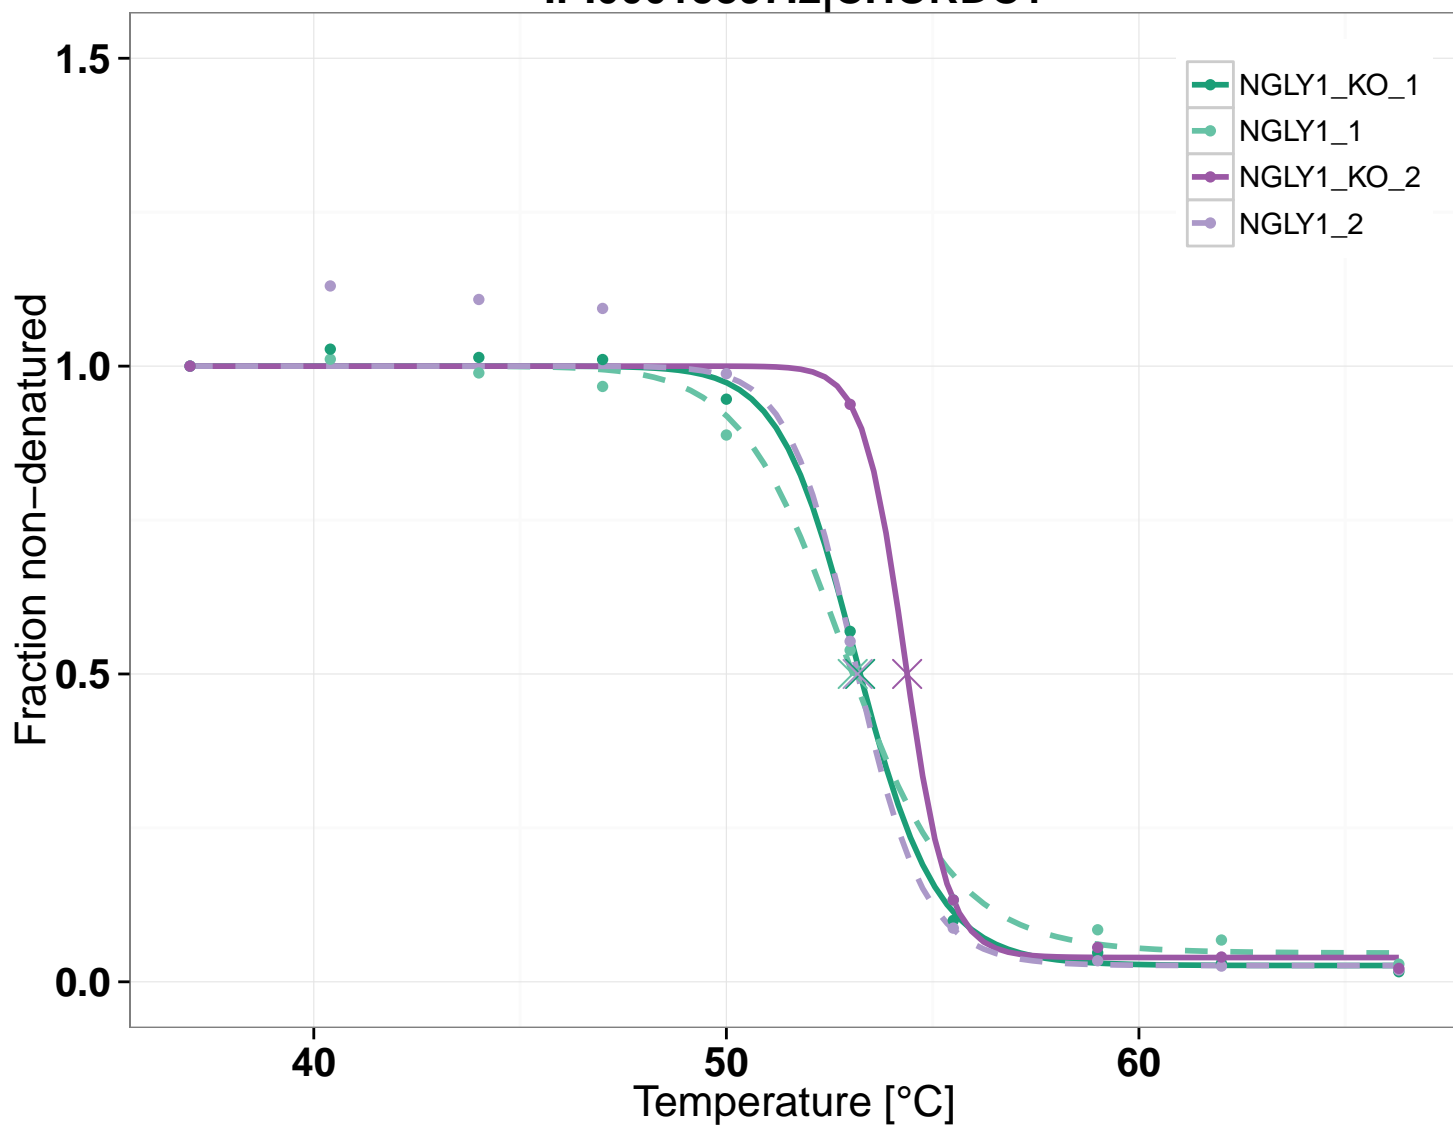

|            | meltPoint | slope | plateau | R2   |
|------------|-----------|-------|---------|------|
| NGLY1_KO_1 | 53.24     | -0.26 | 0.03    | 1    |
| NGLY1_1    | 53.06     | -0.18 | 0.05    | 1    |
| NGLY1_KO_2 | 54.38     | -0.47 | 0.04    | 0.69 |
| NGLY1_2    | 53.18     | -0.3  | 0.03    | 0.98 |

Supplement: Supplementary file 3994 [file 1]

IPI00165506.4|POLDIP2

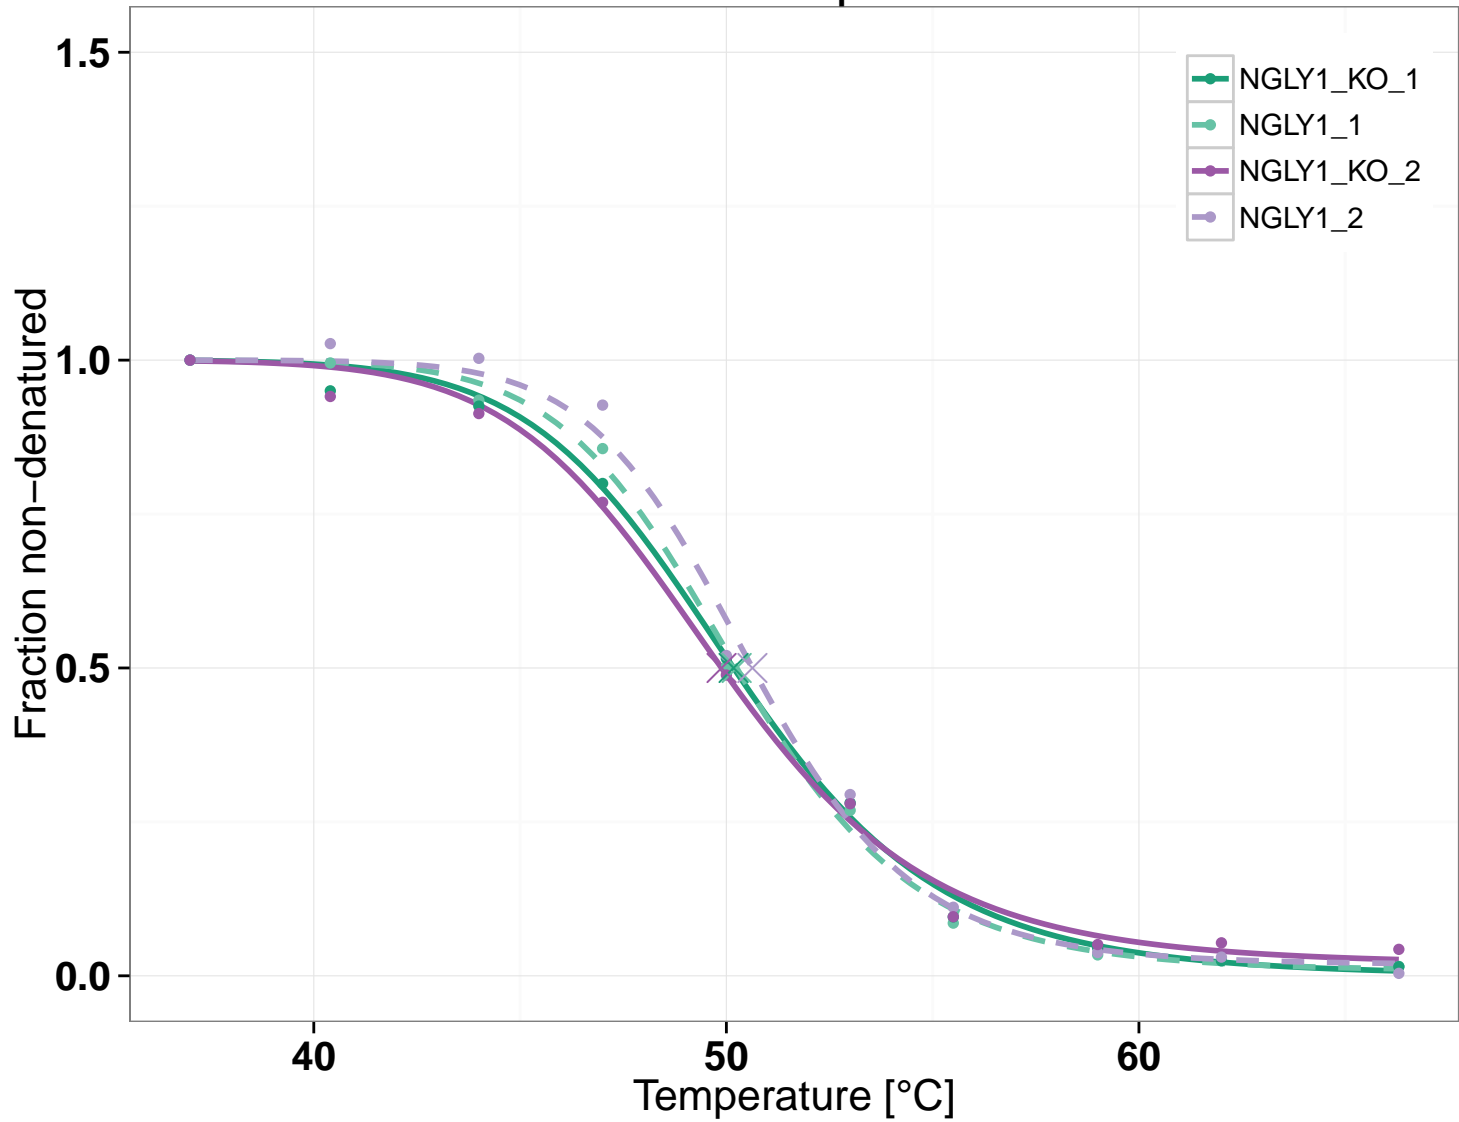

|            | meltPoint | slope  | plateau | R2   |
|------------|-----------|--------|---------|------|
| NGLY1_KO_1 | 50.18     | -0.1   | 0       | 1    |
| NGLY1_1    | 50.25     | -0.11  | 0.01    | 1    |
| NGLY1_KO_2 | 49.88     | -0.096 | 0.02    | 1    |
| NGLY1_2    | 50.63     | -0.12  | 0.02    | 0.99 |

Supplement: Supplementary file 3995 [file 1]

# IPI00063784.3|VTI1B

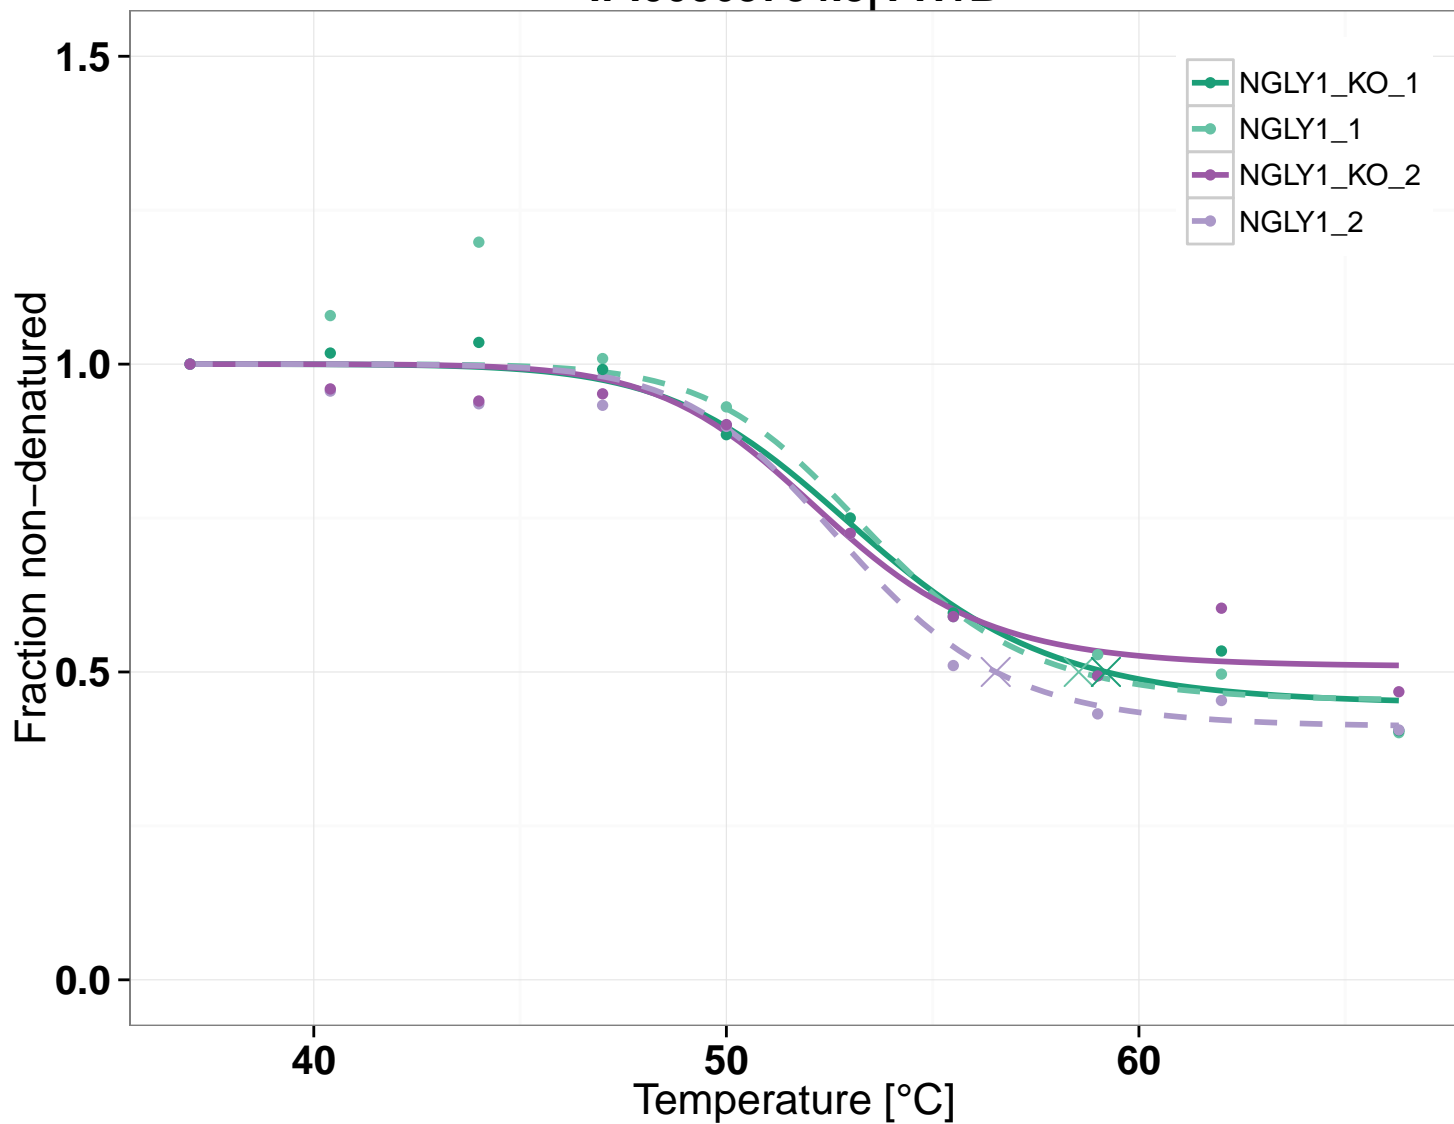

|            | meltPoint | slope  | plateau | R2   |
|------------|-----------|--------|---------|------|
| NGLY1_KO_1 | 59.2      | -0.059 | 0.45    | 0.98 |
| NGLY1_1    | 58.54     | -0.07  | 0.45    | 0.93 |
| NGLY1_KO_2 | -         | -0.061 | 0.51    | 0.96 |
| NGLY1_2    | 56.53     | -0.075 | 0.41    | 0.98 |

Supplement: Supplementary file 3996 [file 1]

# IPI00655852.1|SGK3

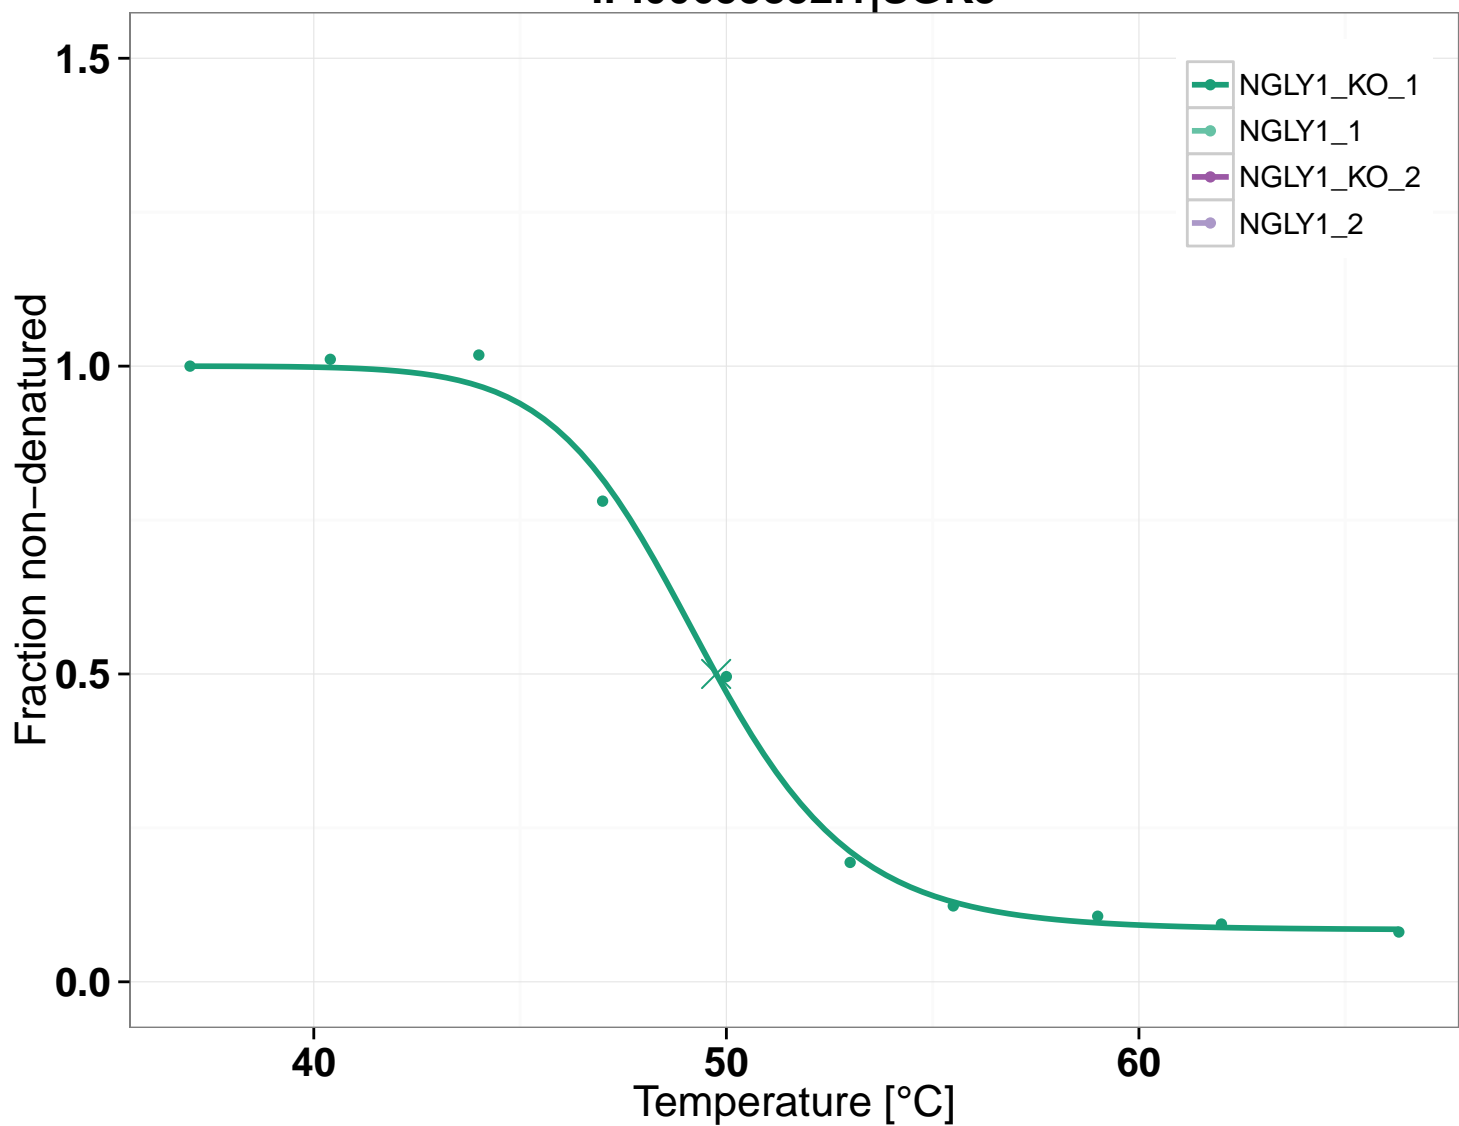

|            | meltPoint | slope | plateau | R2 |
|------------|-----------|-------|---------|----|
| NGLY1_KO_1 | 49.75     | -0.13 | 0.08    | 1  |
| NGLY1_1    | -         | -     | -       | -  |
| NGLY1_KO_2 | -         | -     | -       | -  |
| NGLY1_2    | -         | -     | -       | -  |

Supplement: Supplementary file 3997 [file 1]

# IPI00026791.1|CDK8

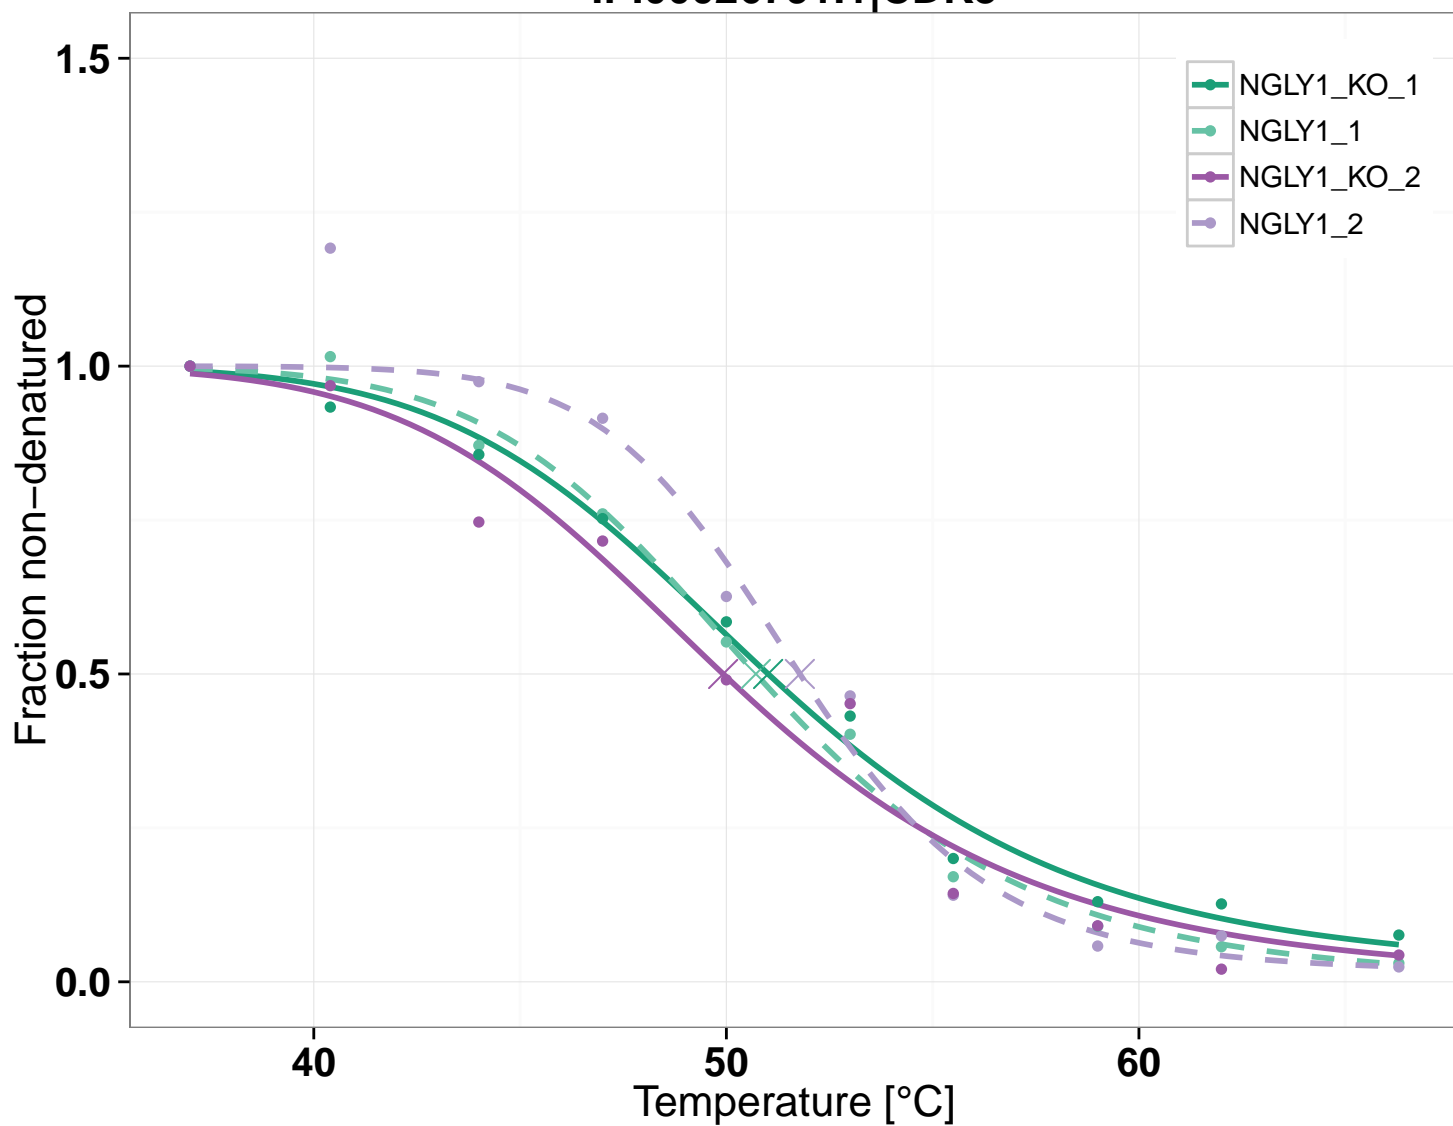

|            | meltPoint | slope  | plateau | R2   |
|------------|-----------|--------|---------|------|
| NGLY1_KO_1 | 51.01     | -0.064 | 0.01    | 0.99 |
| NGLY1_1    | 50.71     | -0.075 | 0       | 0.99 |
| NGLY1_KO_2 | 49.92     | -0.065 | 0       | 0.97 |
| NGLY1_2    | 51.78     | -0.1   | 0.02    | 0.97 |

Supplement: Supplementary file 3998 [file 1]

IPI00877069.2|USP54

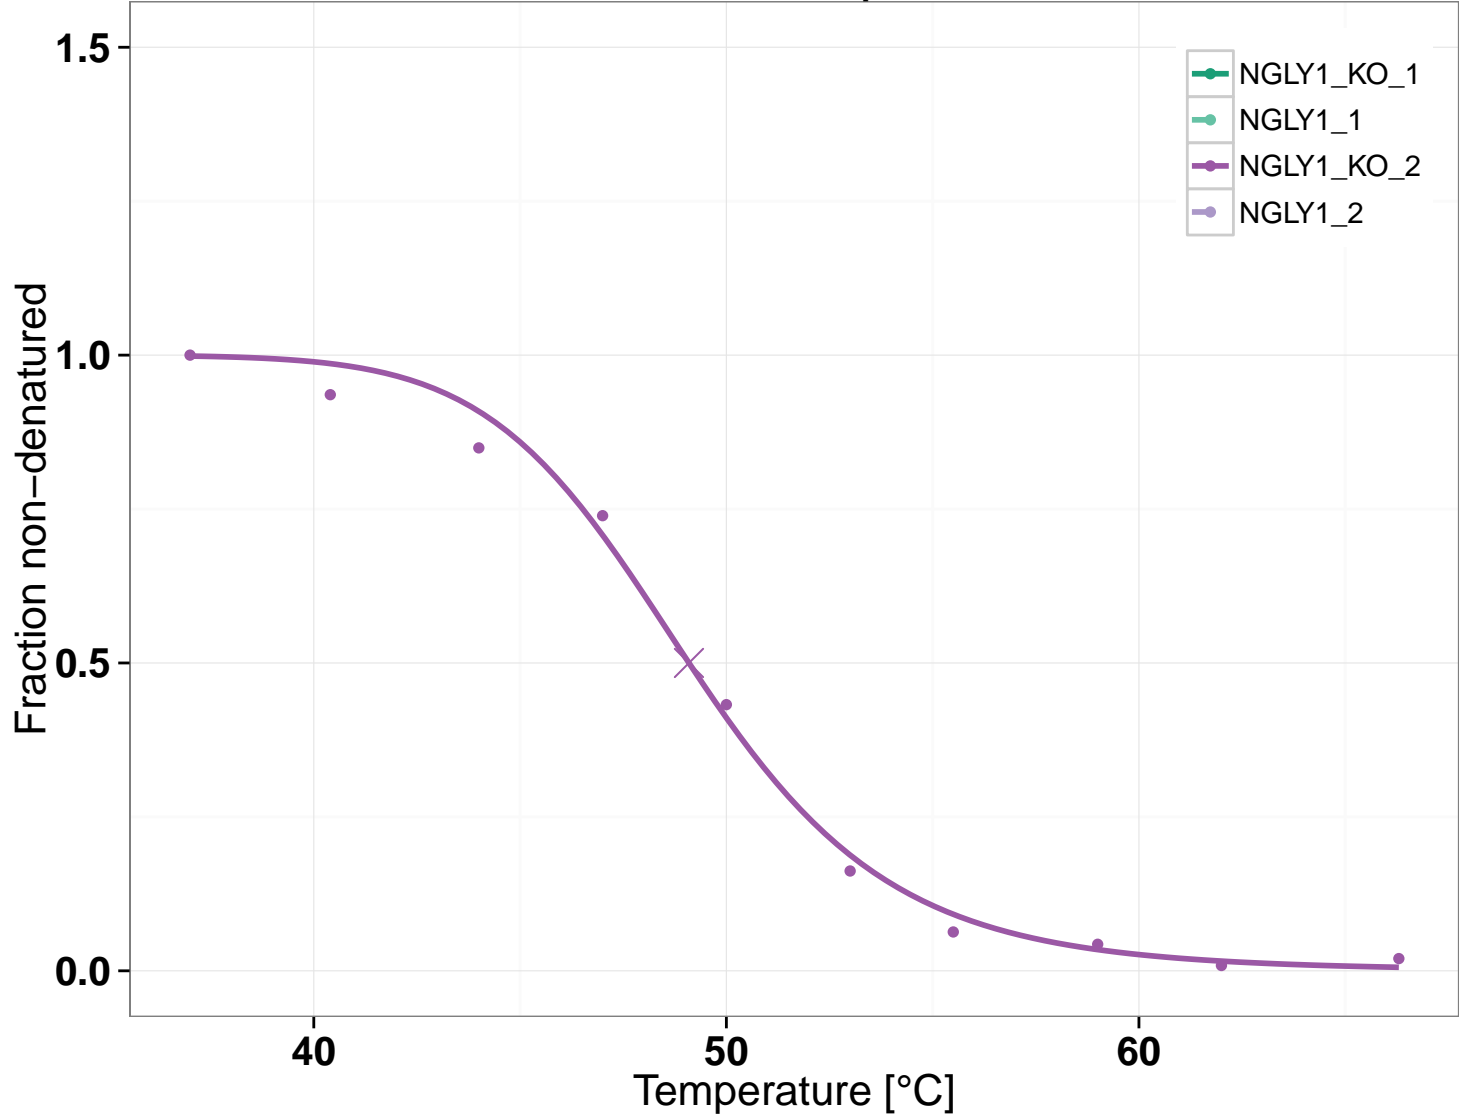

|            | meltPoint | slope | plateau | R2   |
|------------|-----------|-------|---------|------|
| NGLY1_KO_1 | -         | -     | -       | -    |
| NGLY1_1    | -         | -     | -       | -    |
| NGLY1_KO_2 | 49.09     | -0.1  | 0       | 0.99 |
| NGLY1_2    | -         | -     | -       | -    |

Supplement: Supplementary file 3999 [file 1]

IPI00455518.5|MORC2

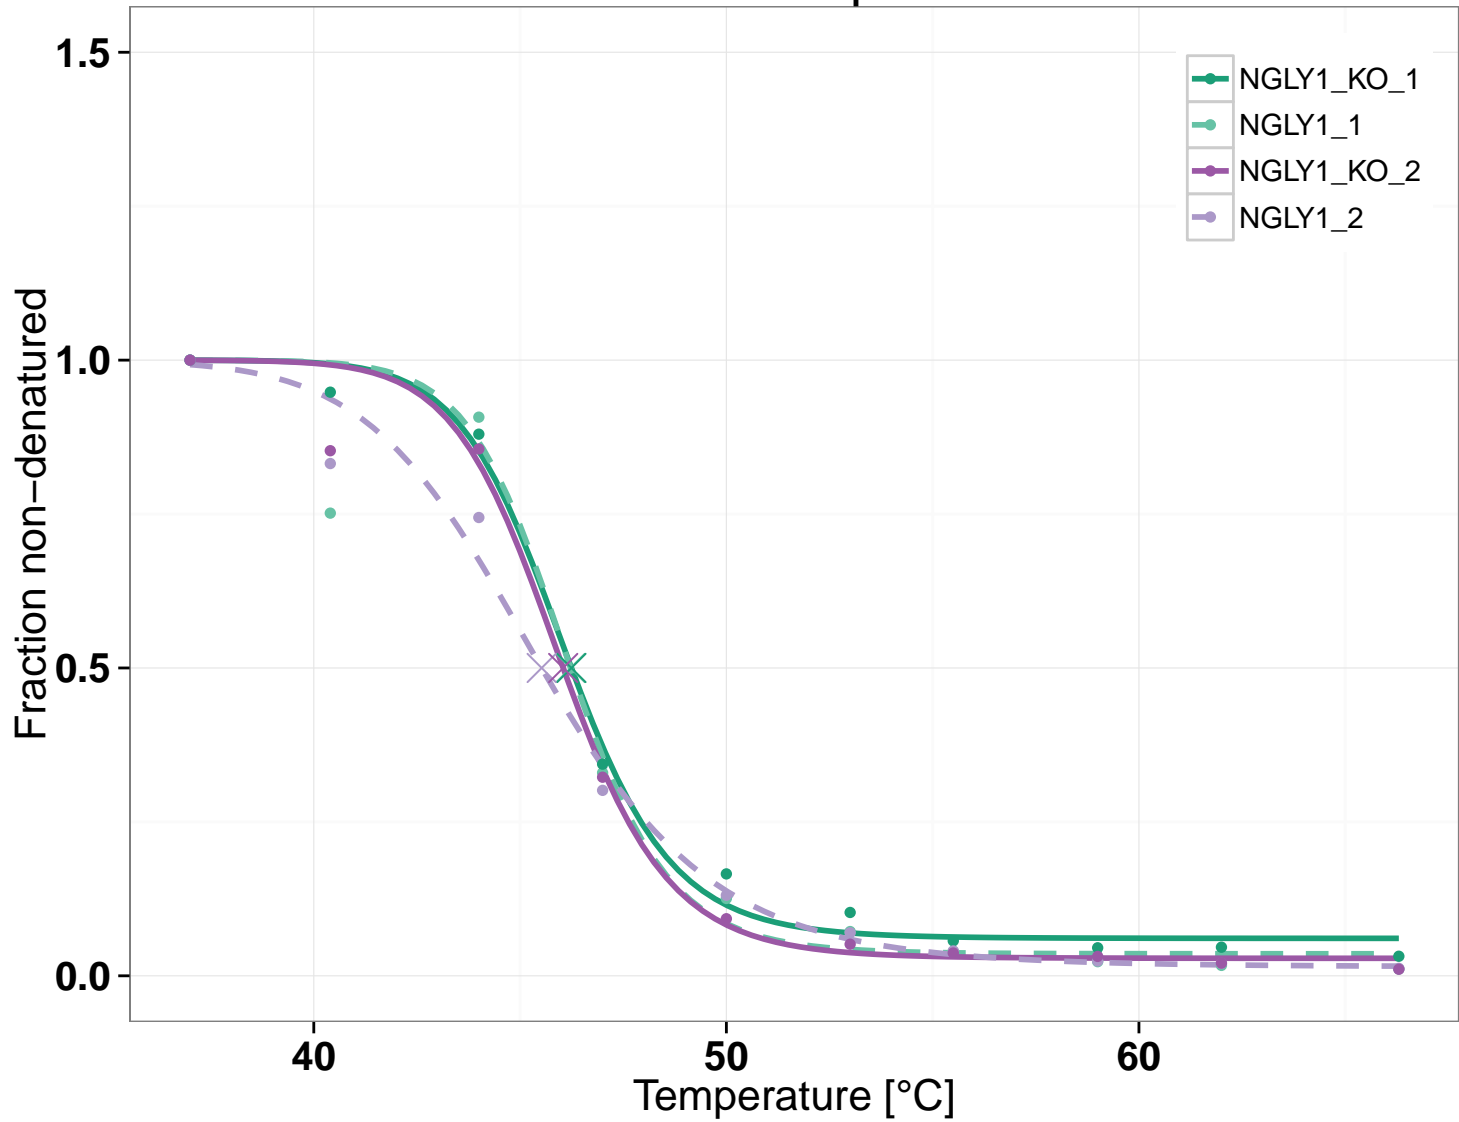

|            | meltPoint | slope | plateau | R2   |
|------------|-----------|-------|---------|------|
| NGLY1_KO_1 | 46.24     | -0.18 | 0.06    | 0.99 |
| NGLY1_1    | 46.22     | -0.2  | 0.04    | 0.95 |
| NGLY1_KO_2 | 46.04     | -0.19 | 0.03    | 0.99 |
| NGLY1_2    | 45.52     | -0.12 | 0.01    | 0.99 |

Supplement: Supplementary file 4000 [file 1]

IPI00004363.1|STK39

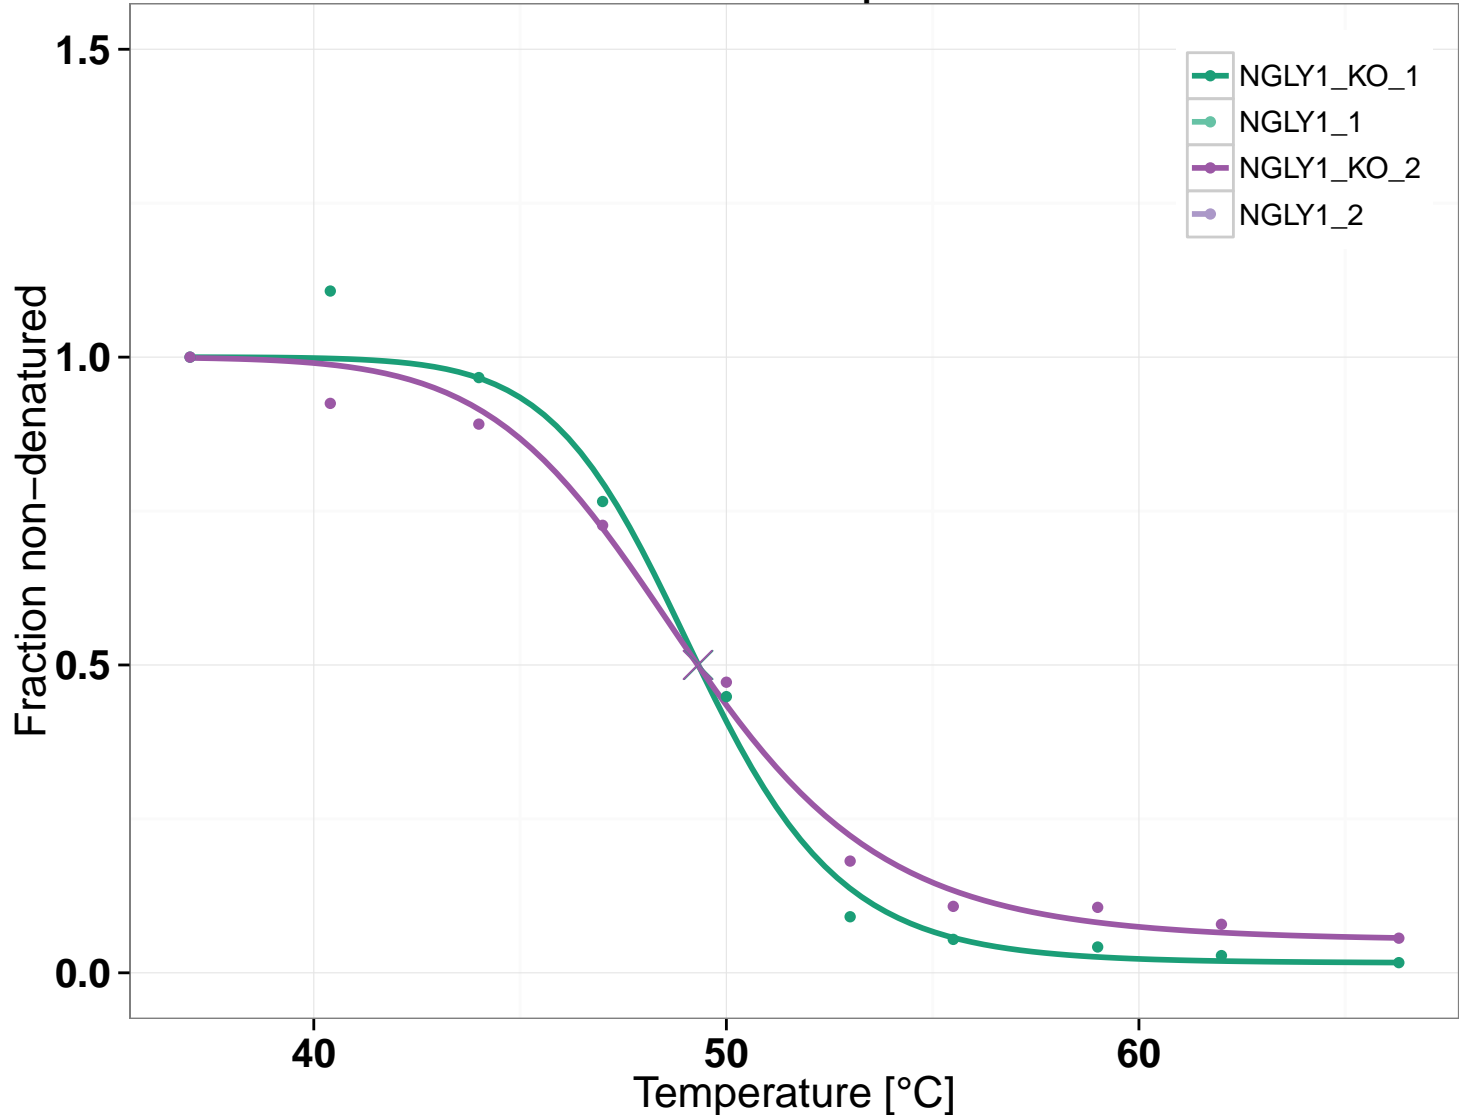

|            | meltPoint | slope  | plateau | R2   |
|------------|-----------|--------|---------|------|
| NGLY1_KO_1 | 49.32     | -0.14  | 0.02    | 0.99 |
| NGLY1_1    | -         | -      | -       | -    |
| NGLY1_KO_2 | 49.31     | -0.099 | 0.05    | 0.99 |
| NGLY1_2    | -         | -      | -       | -    |

Supplement: Supplementary file 4001 [file 1]

# IPI00002374.2|MCPH1

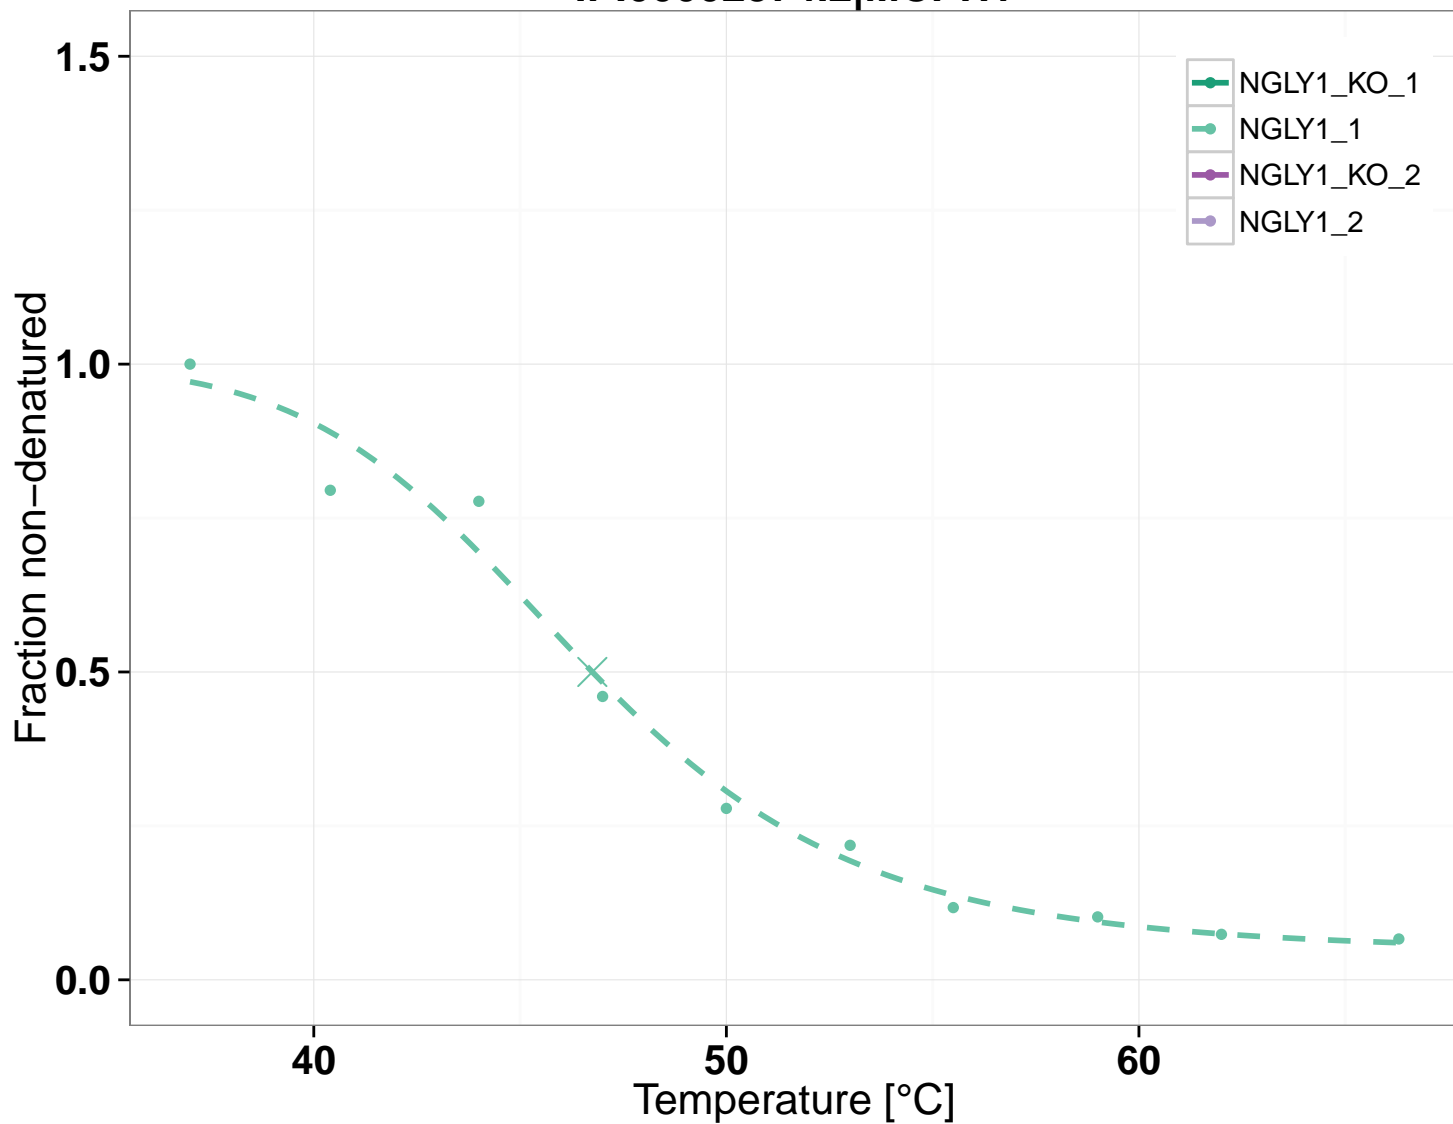

|            | meltPoint | slope  | plateau | R2   |
|------------|-----------|--------|---------|------|
| NGLY1_KO_1 | —         | —      | —       | —    |
| NGLY1_1    | 46.75     | -0.072 | 0.04    | 0.98 |
| NGLY1_KO_2 | —         | —      | —       | —    |
| NGLY1_2    | —         | —      | —       | —    |

Supplement: Supplementary file 4002 [file 1]

IPI00159770.1|GMEB2

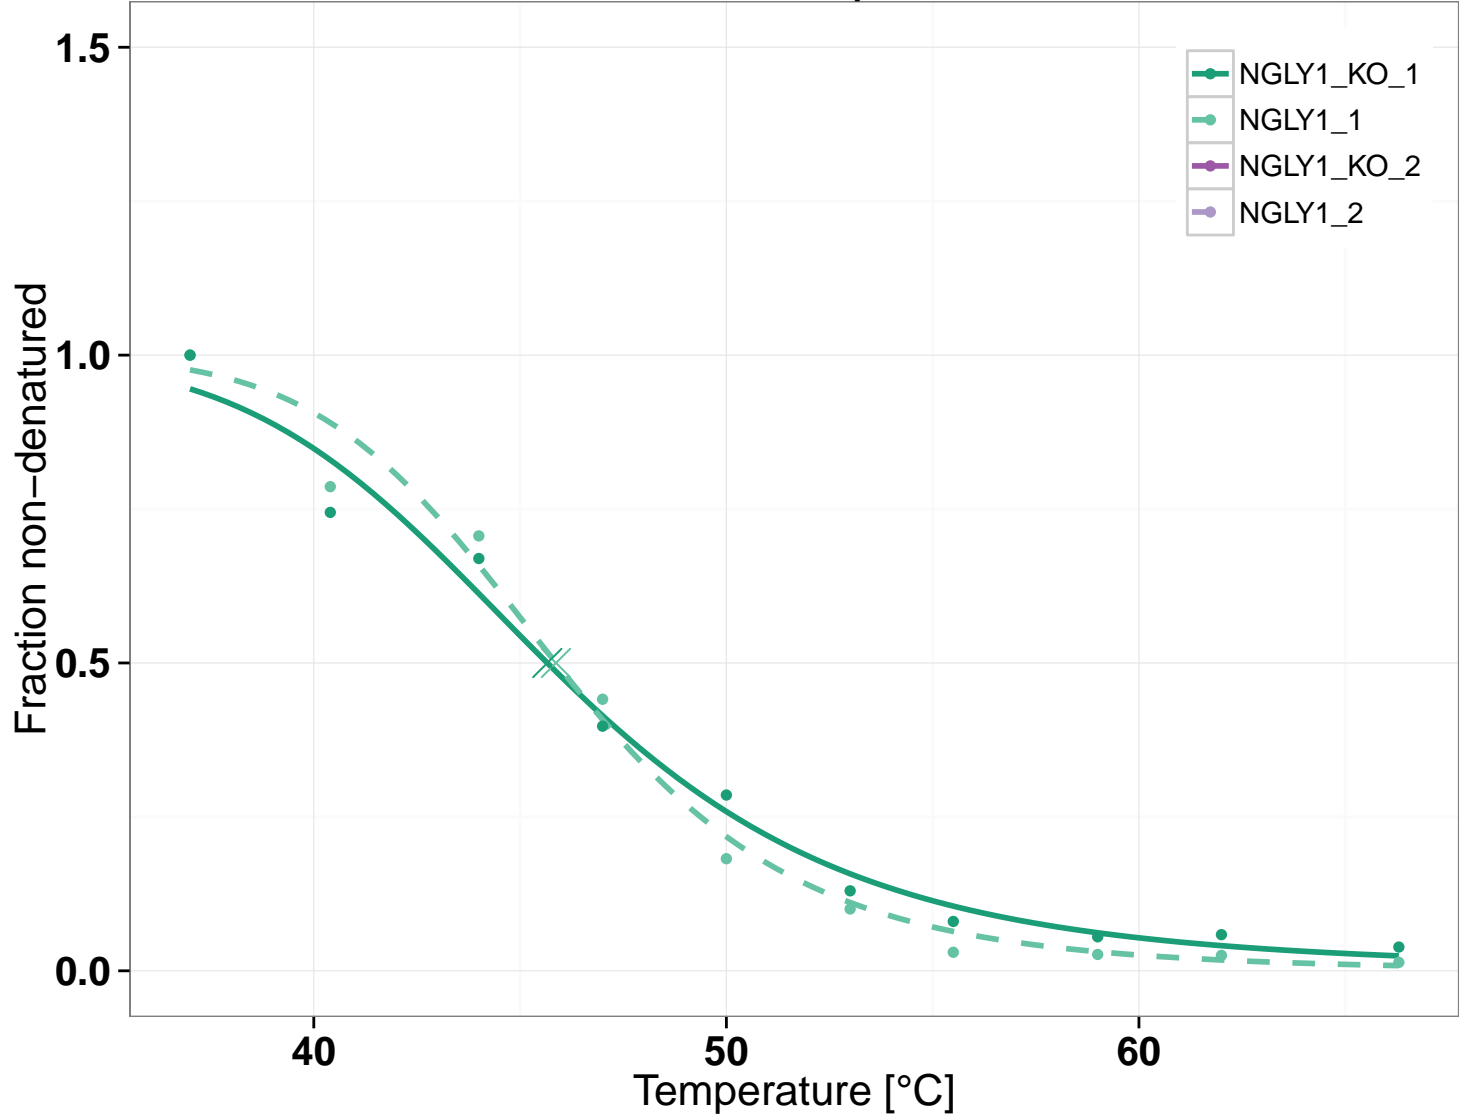

|            | meltPoint | slope  | plateau | R2   |
|------------|-----------|--------|---------|------|
| NGLY1_KO_1 | 45.66     | -0.068 | 0       | 0.98 |
| NGLY1_1    | 45.87     | -0.086 | 0       | 0.99 |
| NGLY1_KO_2 | -         | -      | -       | -    |
| NGLY1_2    | -         | -      | -       | -    |

Supplement: Supplementary file 4003 [file 1]

# IPI00744503.1|HBG1

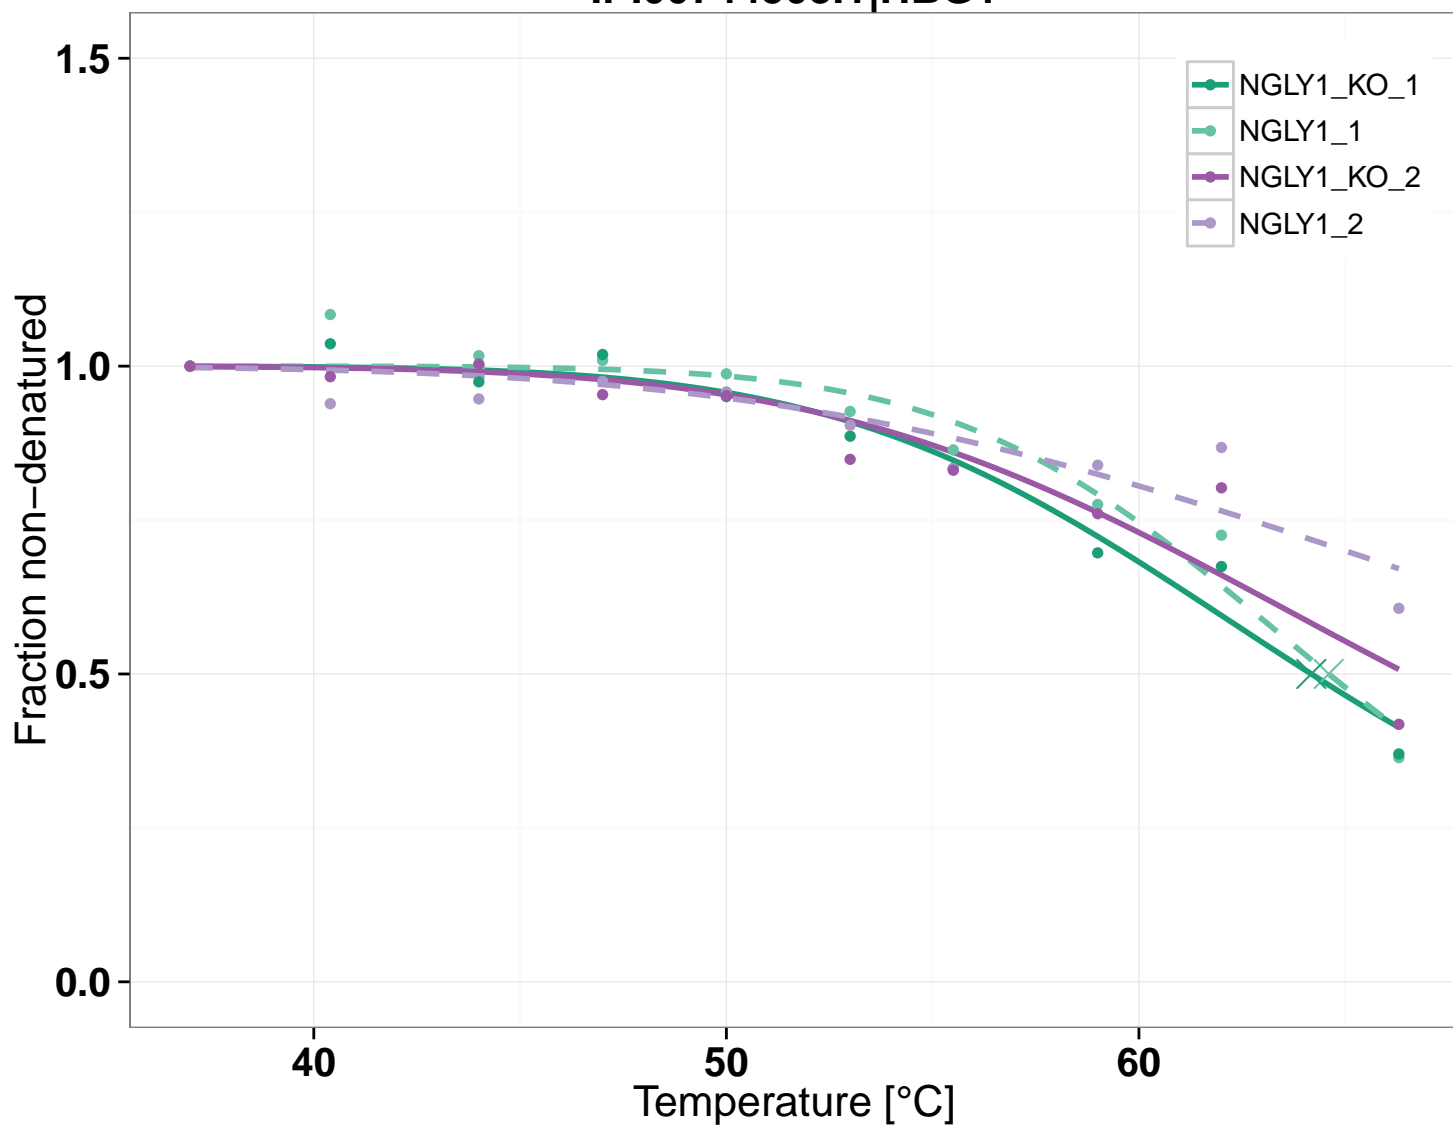

|            | meltPoint | slope  | plateau | R2   |
|------------|-----------|--------|---------|------|
| NGLY1_KO_1 | 64.18     | -0.044 | 0       | 0.97 |
| NGLY1_1    | 64.6      | -0.056 | 0       | 0.95 |
| NGLY1_KO_2 | -         | -0.036 | 0       | 0.88 |
| NGLY1_2    | -         | -      | 0       | 0.81 |

Supplement: Supplementary file 4004 [file 1]

IPI00293028.8|GLB1L2

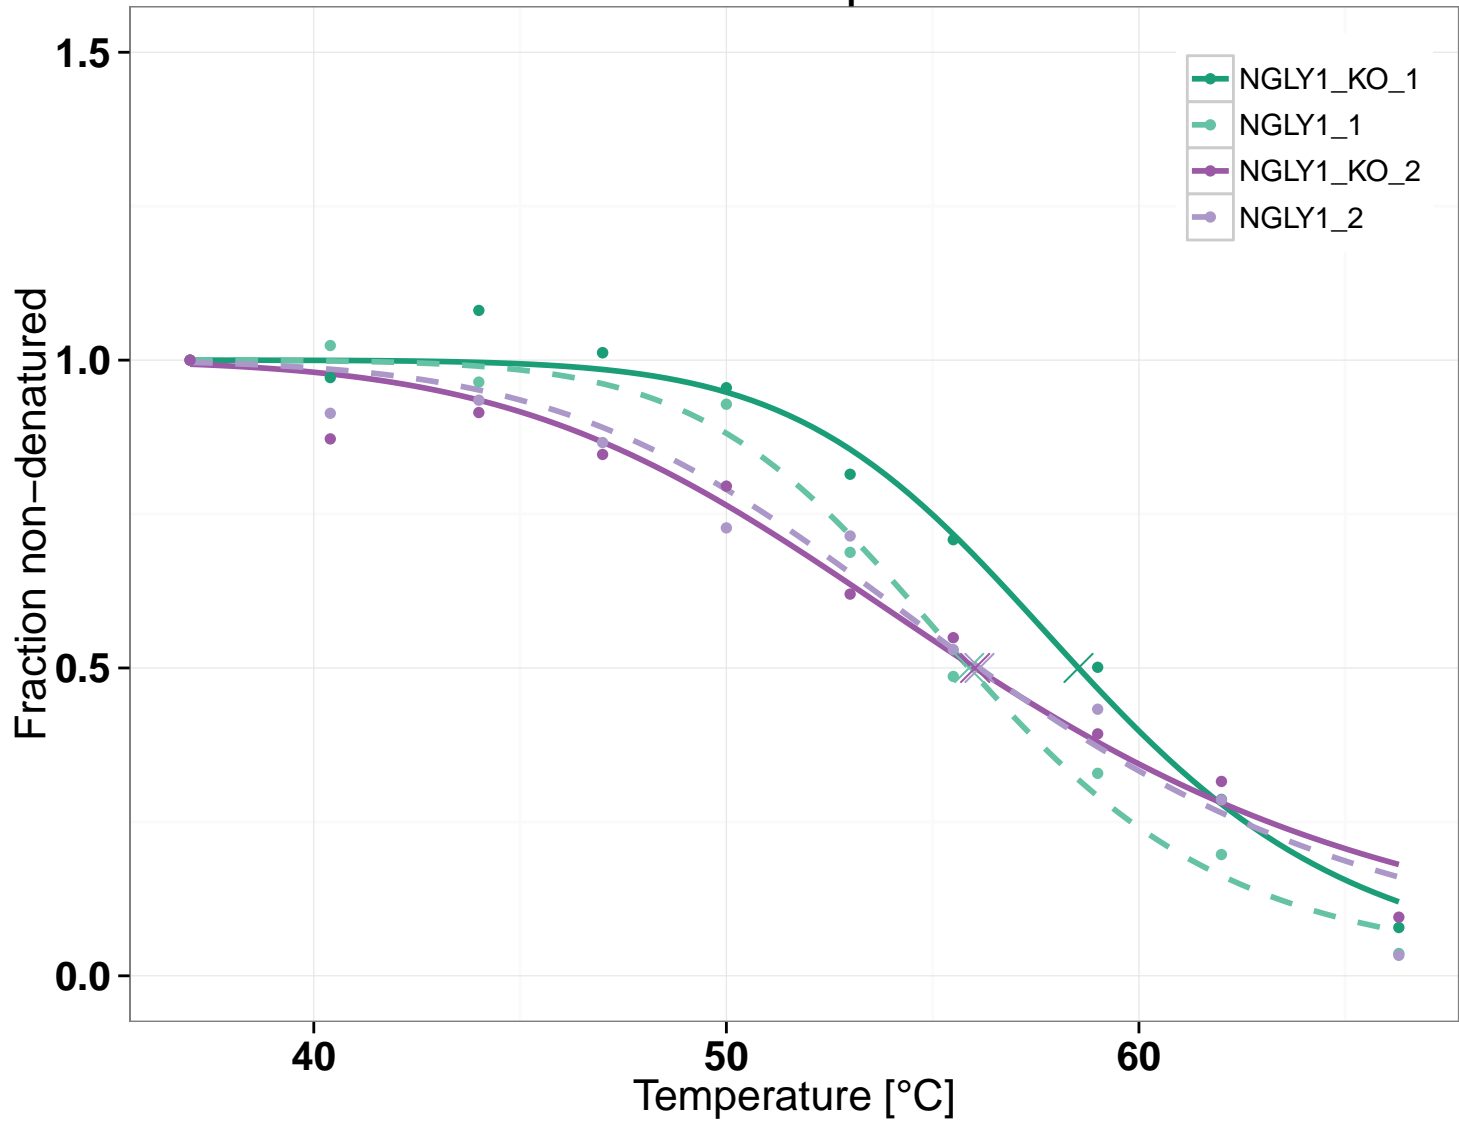

|            | meltPoint | slope  | plateau | R2   |
|------------|-----------|--------|---------|------|
| NGLY1_KO_1 | 58.54     | -0.074 | 0       | 0.99 |
| NGLY1_1    | 55.88     | -0.077 | 0.01    | 0.99 |
| NGLY1_KO_2 | 56.03     | -0.045 | 0       | 0.97 |
| NGLY1_2    | 56.14     | -0.05  | 0       | 0.96 |

Supplement: Supplementary file 4005 [file 1]

# IPI00032150.3|CDS2

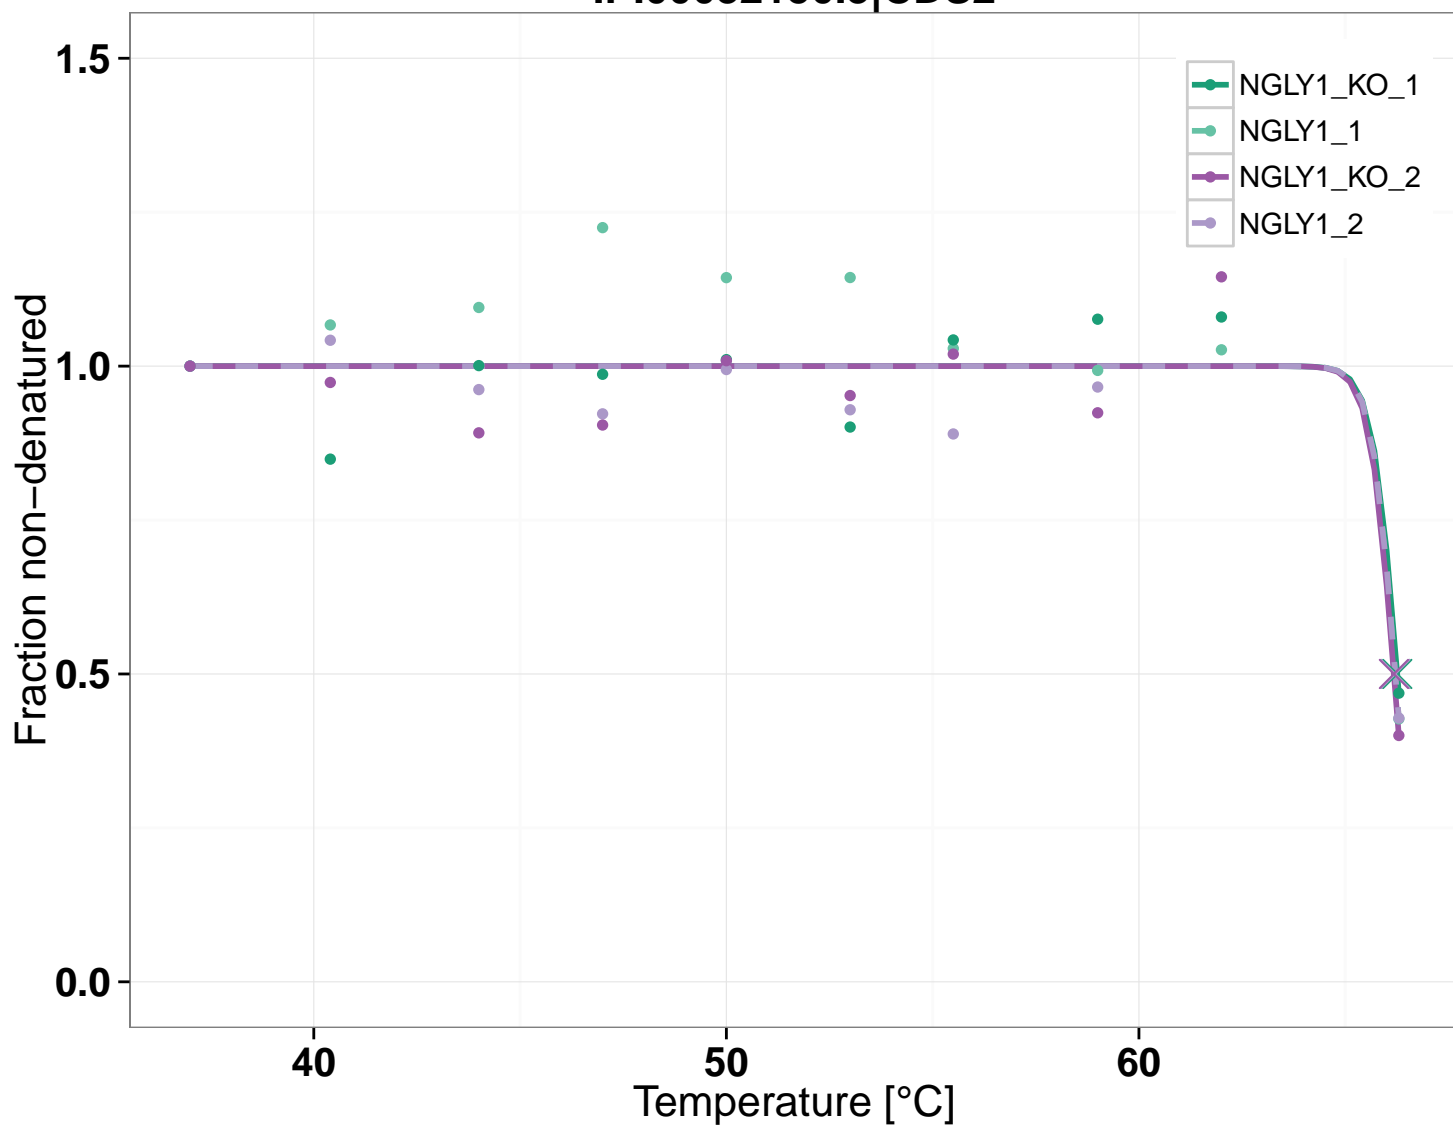

|            | meltPoint | slope | plateau | R2   |
|------------|-----------|-------|---------|------|
| NGLY1_KO_1 | 66.26     | -0.82 | 0       | 0.84 |
| NGLY1_1    | 66.21     | -0.86 | 0       | 0.75 |
| NGLY1_KO_2 | 66.18     | -0.84 | 0       | 0.85 |
| NGLY1_2    | 66.22     | -0.86 | 0       | 0.8  |

Supplement: Supplementary file 4006 [file 1]

# IPI00023530.7|CDK5

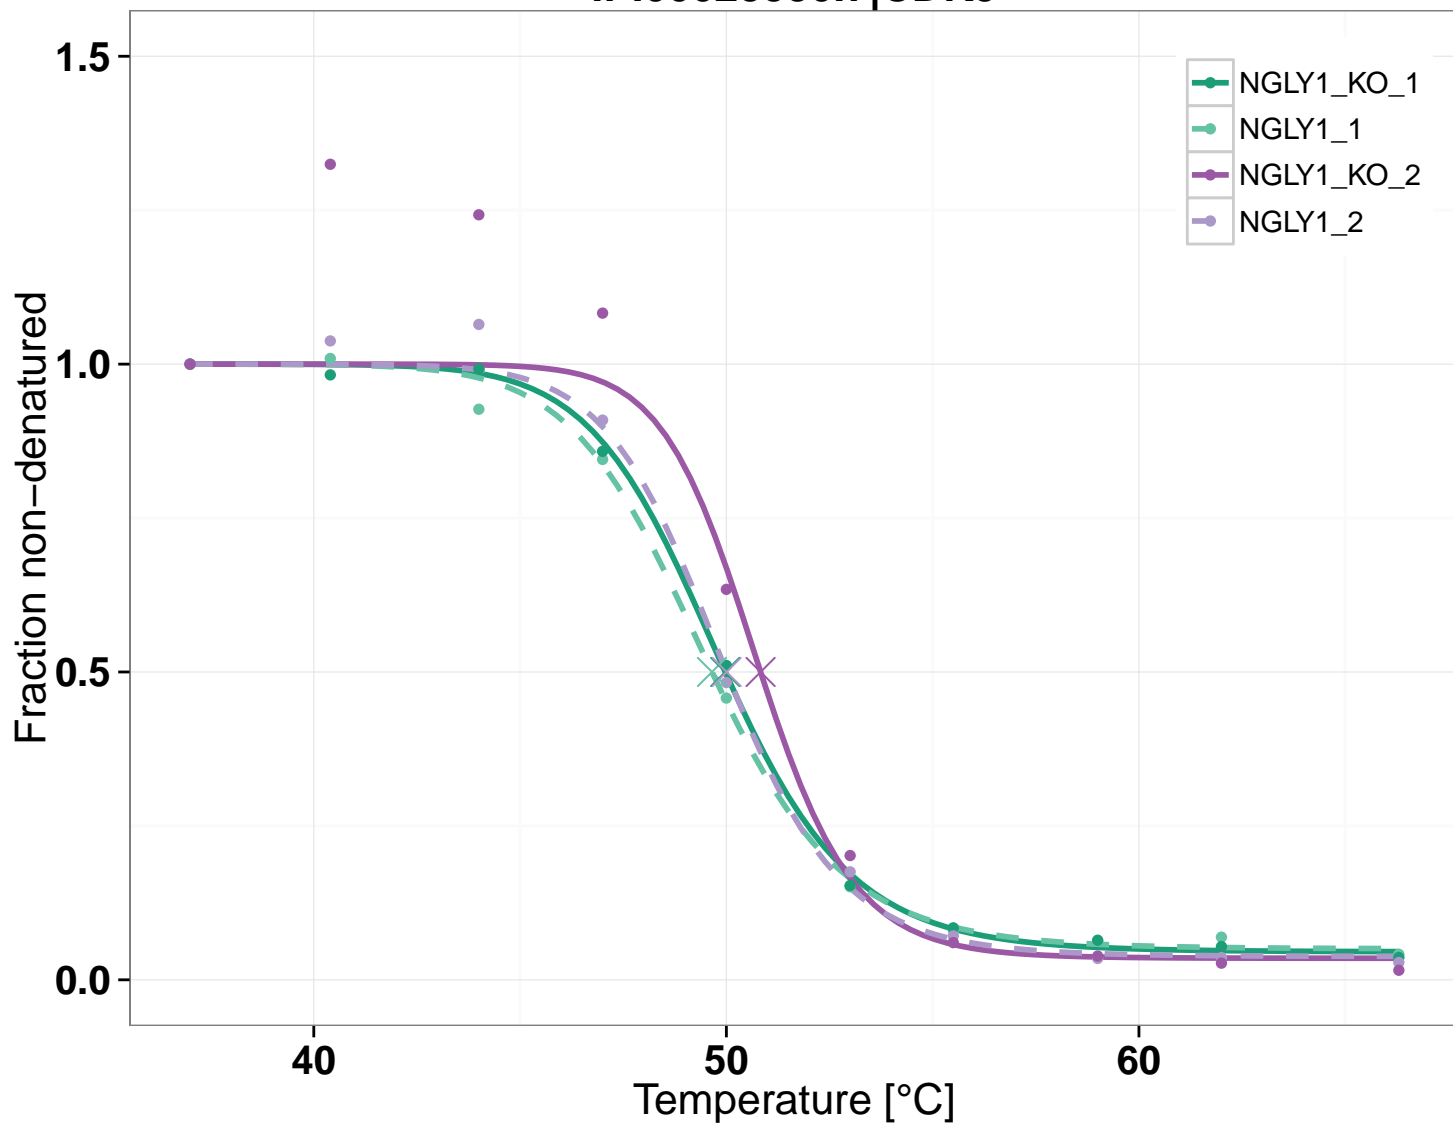

|            | meltPoint | slope | plateau | R2   |
|------------|-----------|-------|---------|------|
| NGLY1_KO_1 | 49.97     | -0.15 | 0.05    | 1    |
| NGLY1_1    | 49.65     | -0.14 | 0.05    | 1    |
| NGLY1_KO_2 | 50.83     | -0.21 | 0.04    | 0.93 |
| NGLY1_2    | 50.01     | -0.17 | 0.04    | 1    |

Supplement: Supplementary file 4007 [file 1]

IPI00910882.1|TBC1D5

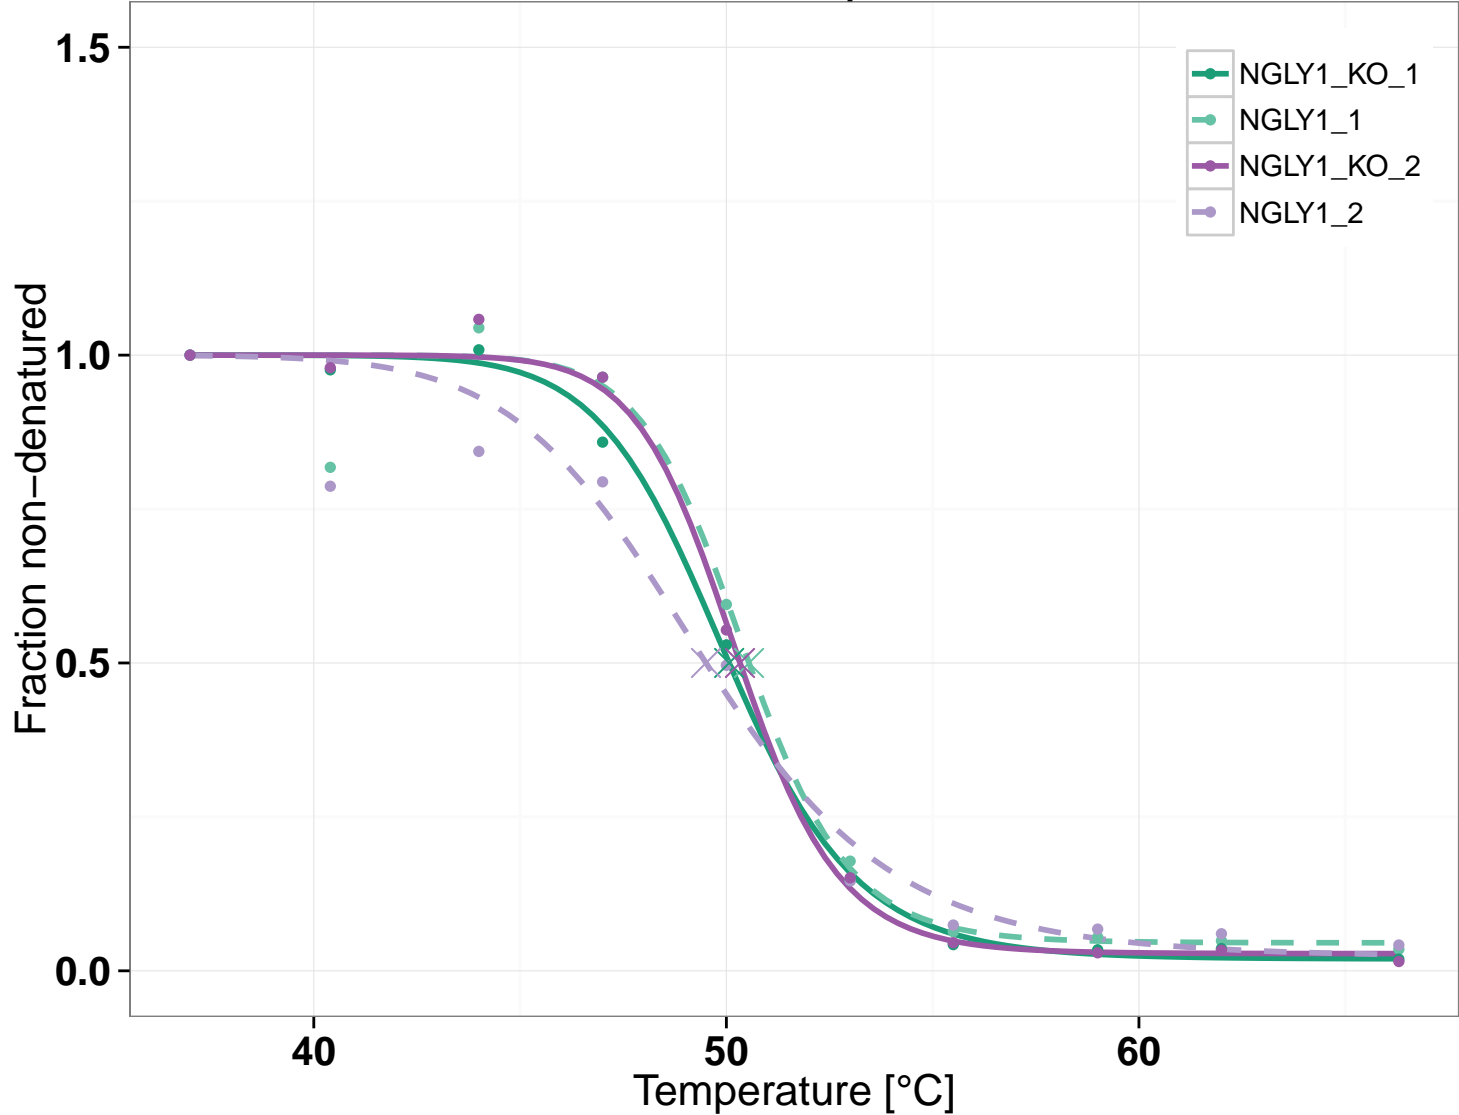

|            | meltPoint | slope | plateau | R2   |
|------------|-----------|-------|---------|------|
| NGLY1_KO_1 | 50.07     | -0.16 | 0.02    | 1    |
| NGLY1_1    | 50.55     | -0.19 | 0.05    | 0.98 |
| NGLY1_KO_2 | 50.33     | -0.2  | 0.03    | 1    |
| NGLY1_2    | 49.51     | -0.11 | 0.02    | 0.96 |

Supplement: Supplementary file 4008 [file 1]

# IPI00022373.2|NOB1

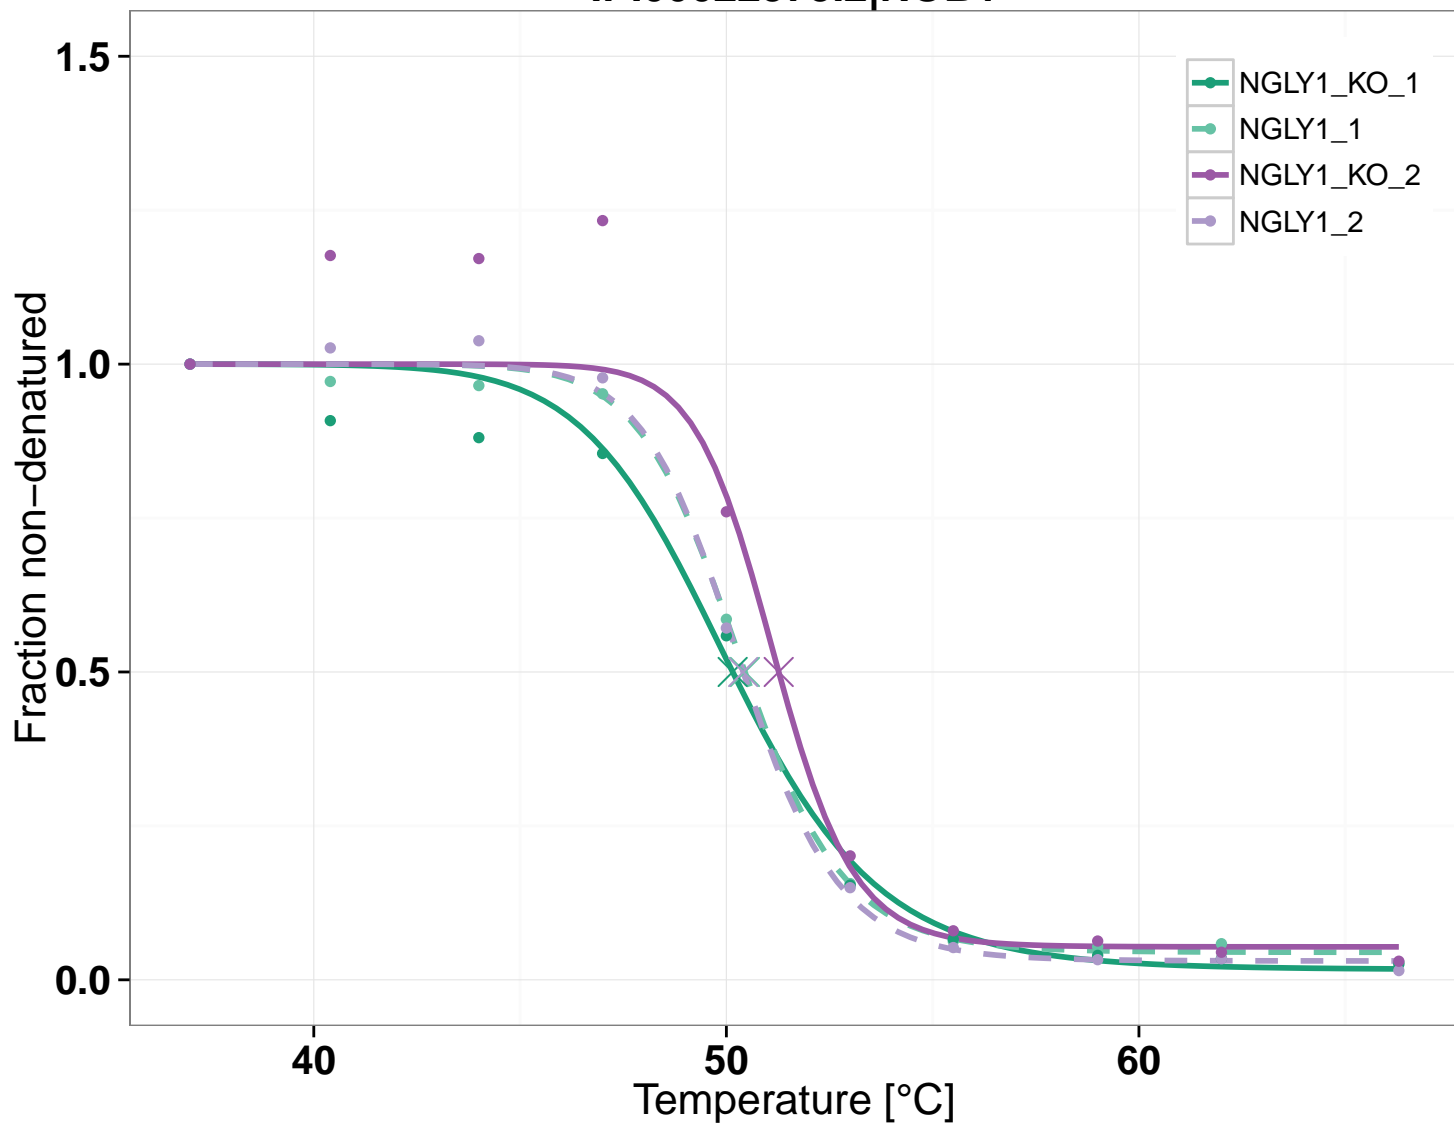

|            | meltPoint | slope | plateau | R2   |
|------------|-----------|-------|---------|------|
| NGLY1_KO_1 | 50.15     | -0.14 | 0.02    | 0.99 |
| NGLY1_1    | 50.45     | -0.19 | 0.04    | 1    |
| NGLY1_KO_2 | 51.27     | -0.25 | 0.05    | 0.95 |
| NGLY1_2    | 50.41     | -0.2  | 0.03    | 1    |

Supplement: Supplementary file 4009 [file 1]

# IPI00220581.2|DLGAP4

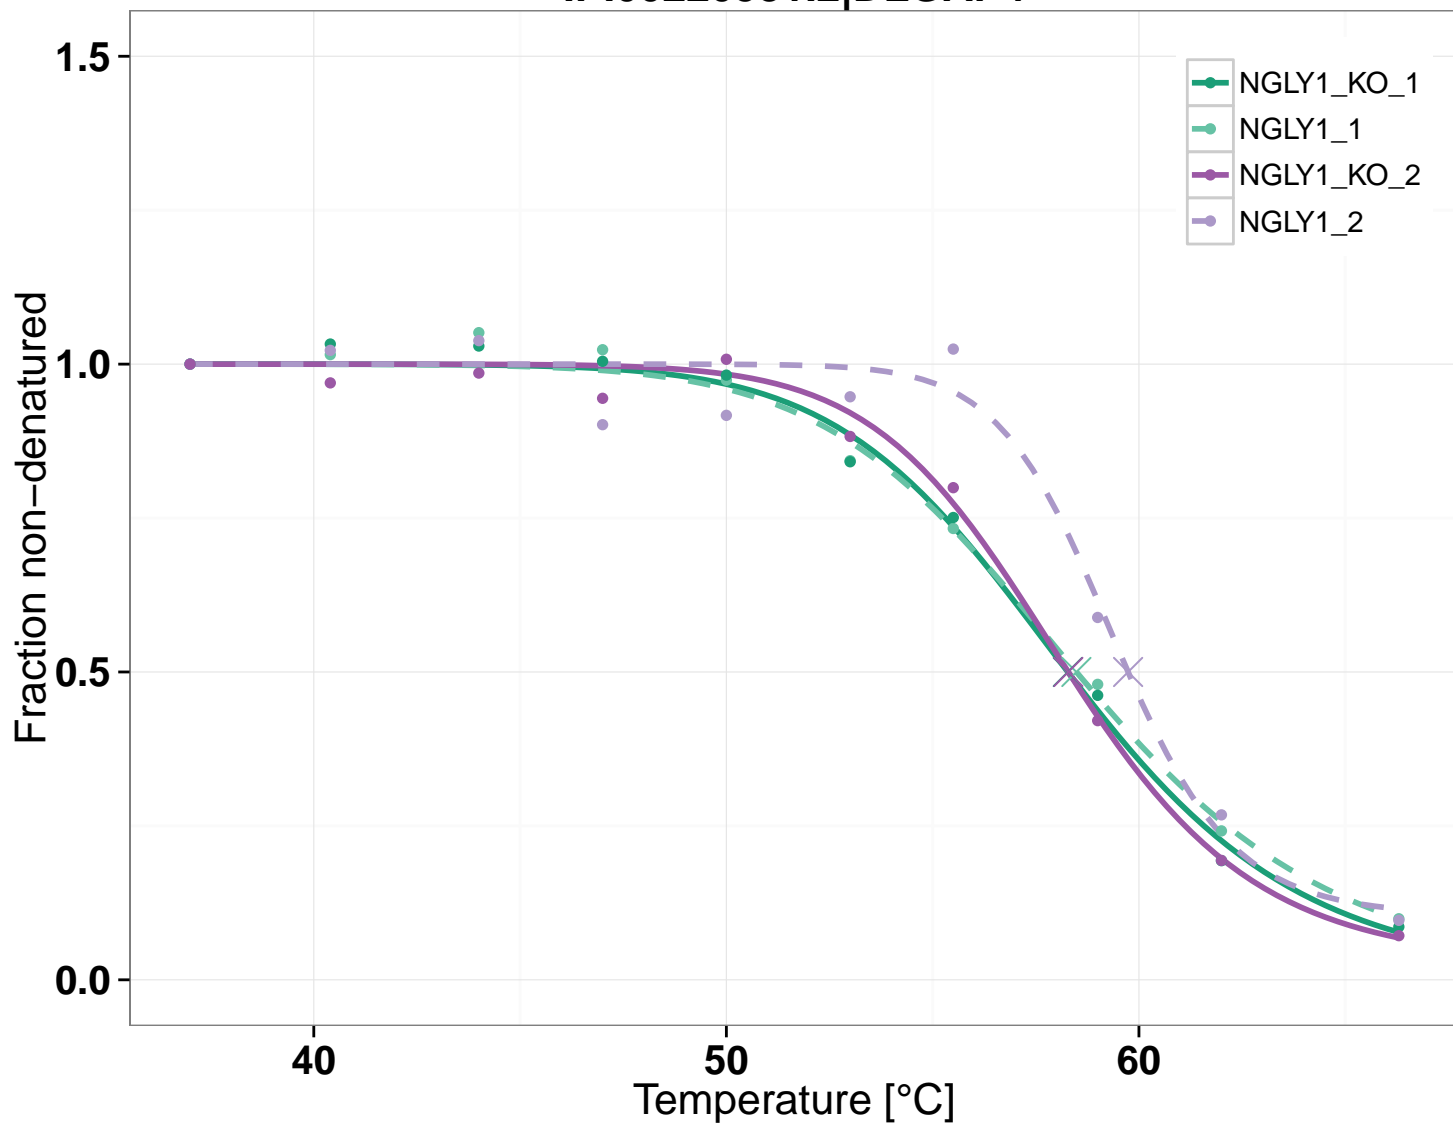

|            | meltPoint | slope  | plateau | R2   |
|------------|-----------|--------|---------|------|
| NGLY1_KO_1 | 58.28     | -0.089 | 0       | 0.99 |
| NGLY1_1    | 58.48     | -0.081 | 0       | 0.99 |
| NGLY1_KO_2 | 58.29     | -0.11  | 0.02    | 0.99 |
| NGLY1_2    | 59.74     | -0.16  | 0.1     | 0.97 |

Supplement: Supplementary file 4010 [file 1]

# IPI00337541.3|NNT

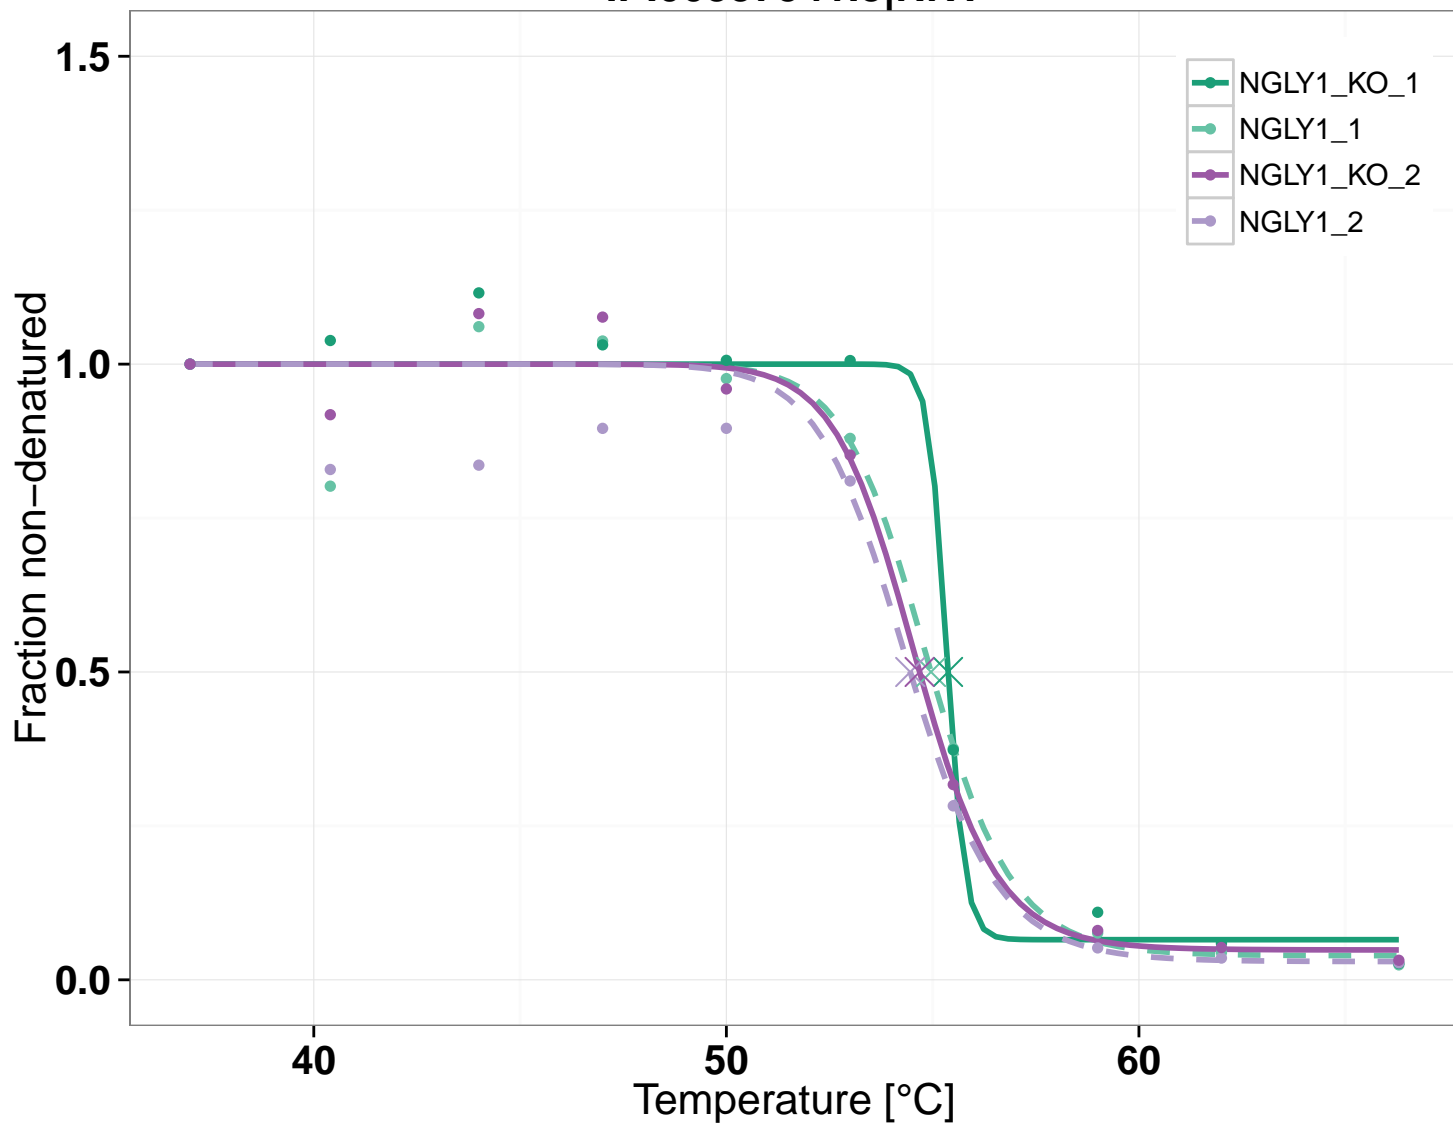

|            | meltPoint | slope | plateau | R2   |
|------------|-----------|-------|---------|------|
| NGLY1_KO_1 | 55.37     | -1.1  | 0.07    | 0.99 |
| NGLY1_1    | 54.96     | -0.23 | 0.04    | 0.97 |
| NGLY1_KO_2 | 54.68     | -0.24 | 0.05    | 0.99 |
| NGLY1_2    | 54.46     | -0.22 | 0.03    | 0.95 |

Supplement: Supplementary file 4011 [file 1]

# IPI00894296.1|PAXIP1

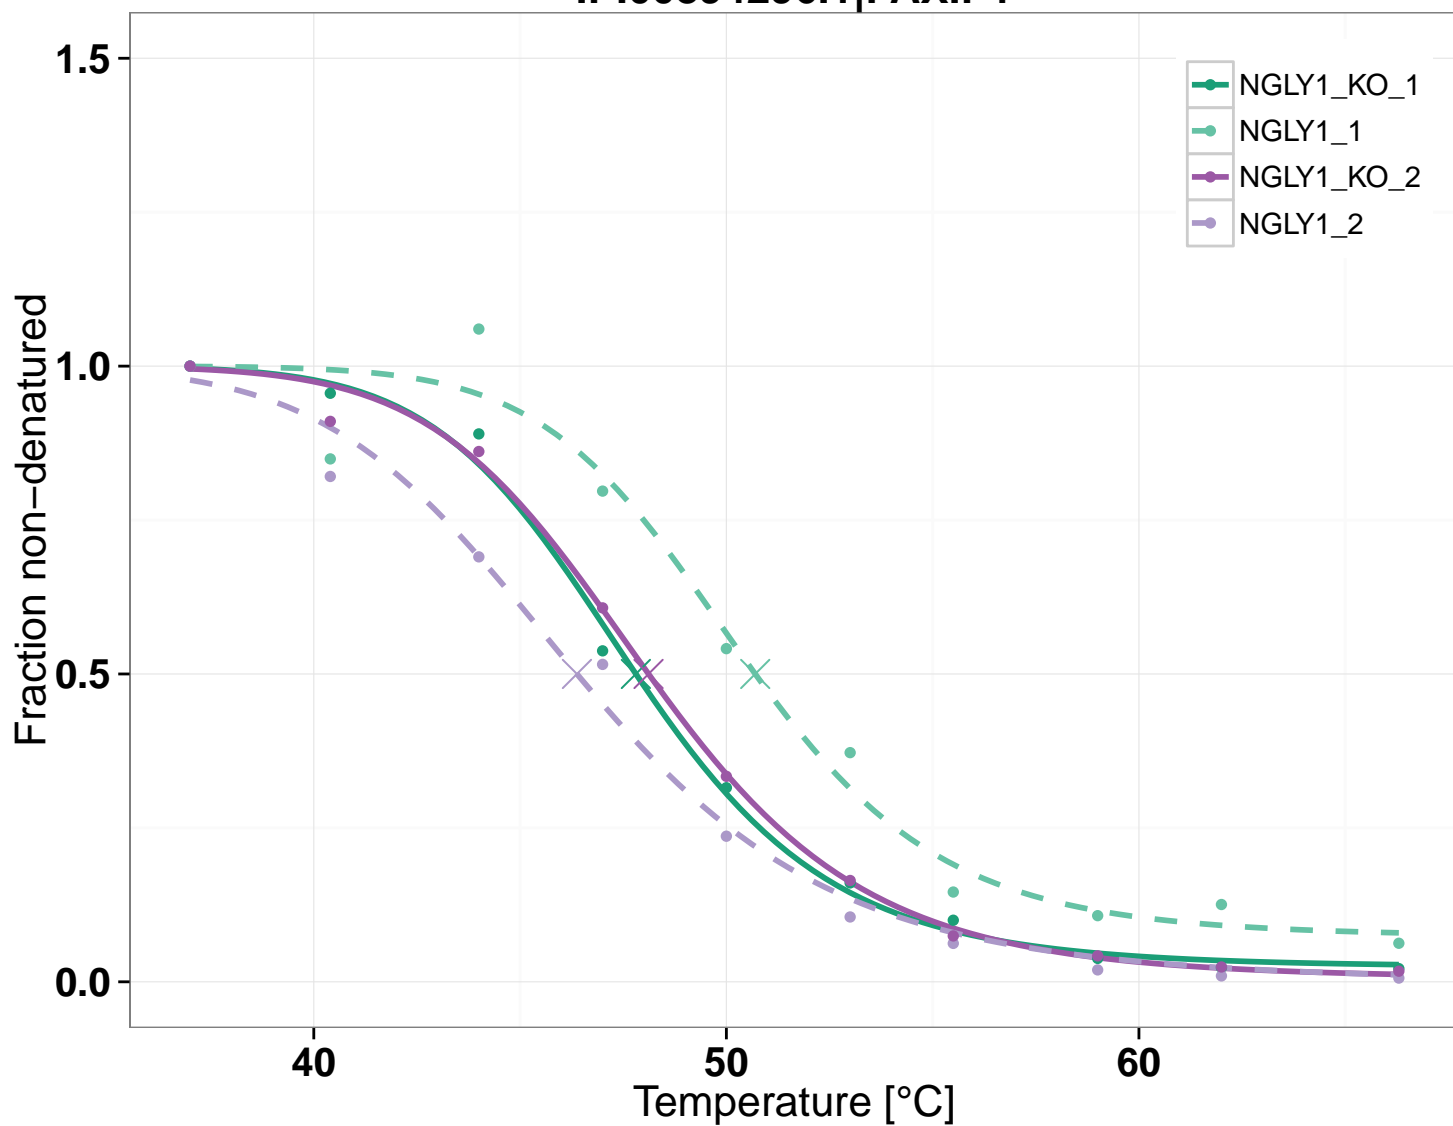

|            | meltPoint | slope  | plateau | R2   |
|------------|-----------|--------|---------|------|
| NGLY1_KO_1 | 47.81     | -0.1   | 0.02    | 1    |
| NGLY1_1    | 50.7      | -0.096 | 0.07    | 0.97 |
| NGLY1_KO_2 | 48.11     | -0.094 | 0.01    | 1    |
| NGLY1_2    | 46.38     | -0.082 | 0       | 0.99 |

Supplement: Supplementary file 4012 [file 1]

IPI00008091.2|INO80

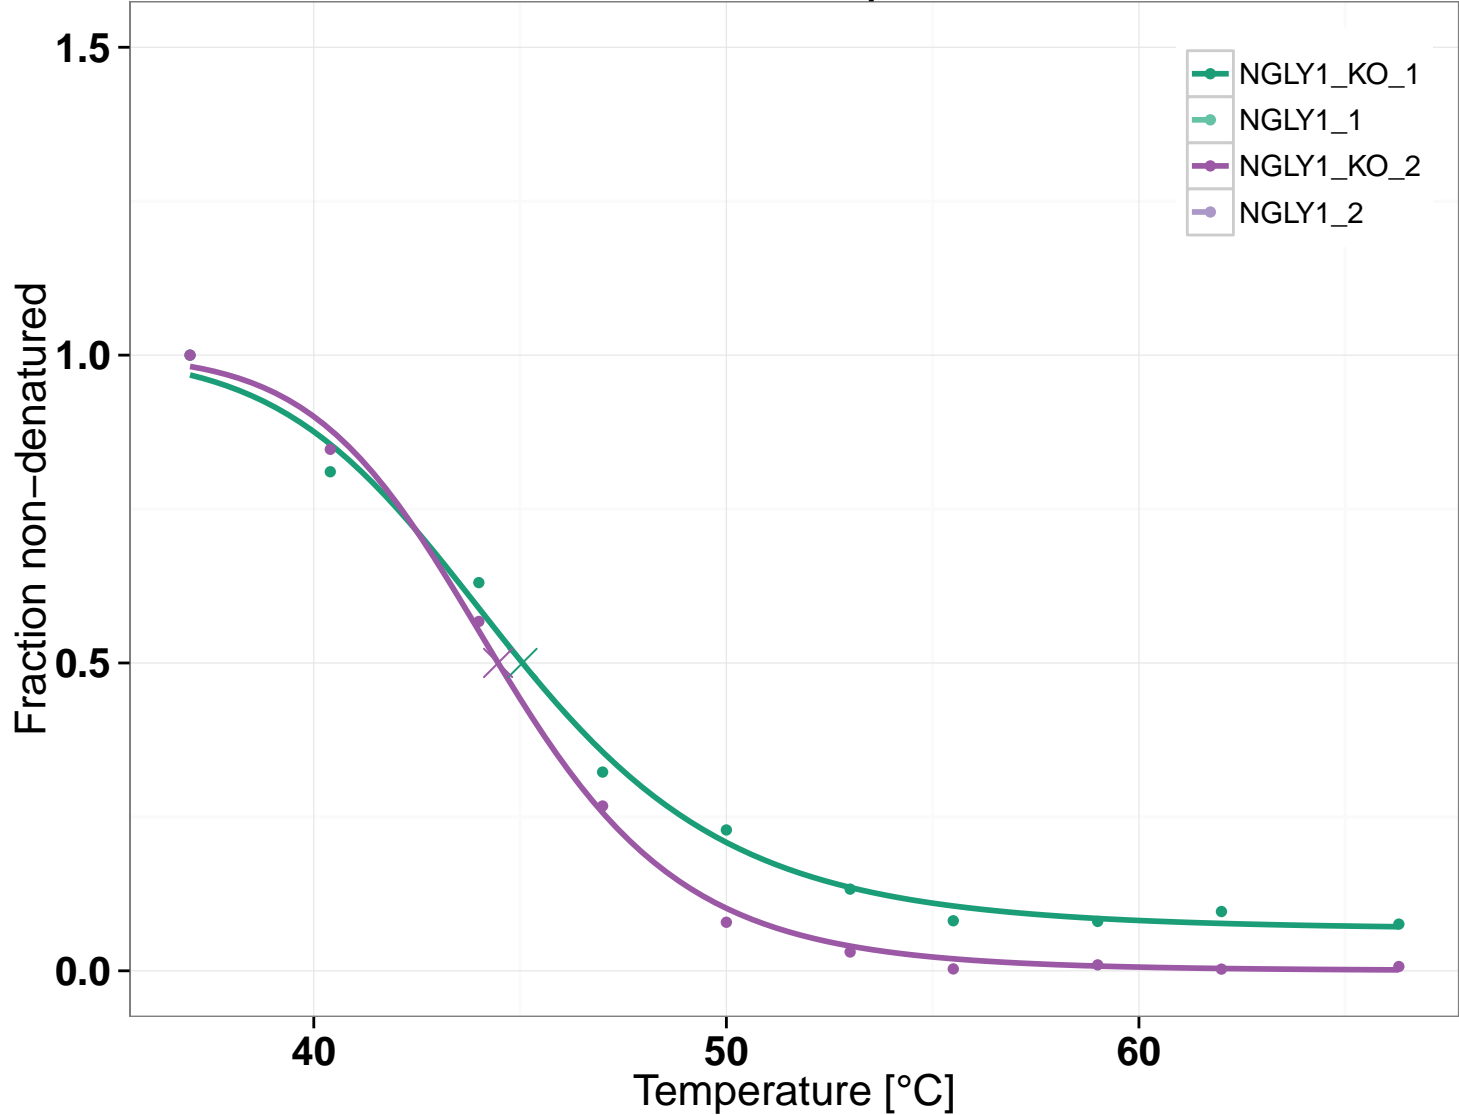

|            | meltPoint | slope  | plateau | R2   |
|------------|-----------|--------|---------|------|
| NGLY1_KO_1 | 45.06     | -0.085 | 0.07    | 0.99 |
| NGLY1_1    | -         | -      | -       | -    |
| NGLY1_KO_2 | 44.47     | -0.11  | 0       | 1    |
| NGLY1_2    | -         | -      | -       | -    |

Supplement: Supplementary file 4013 [file 1]

IPI00031030.1|APLP2

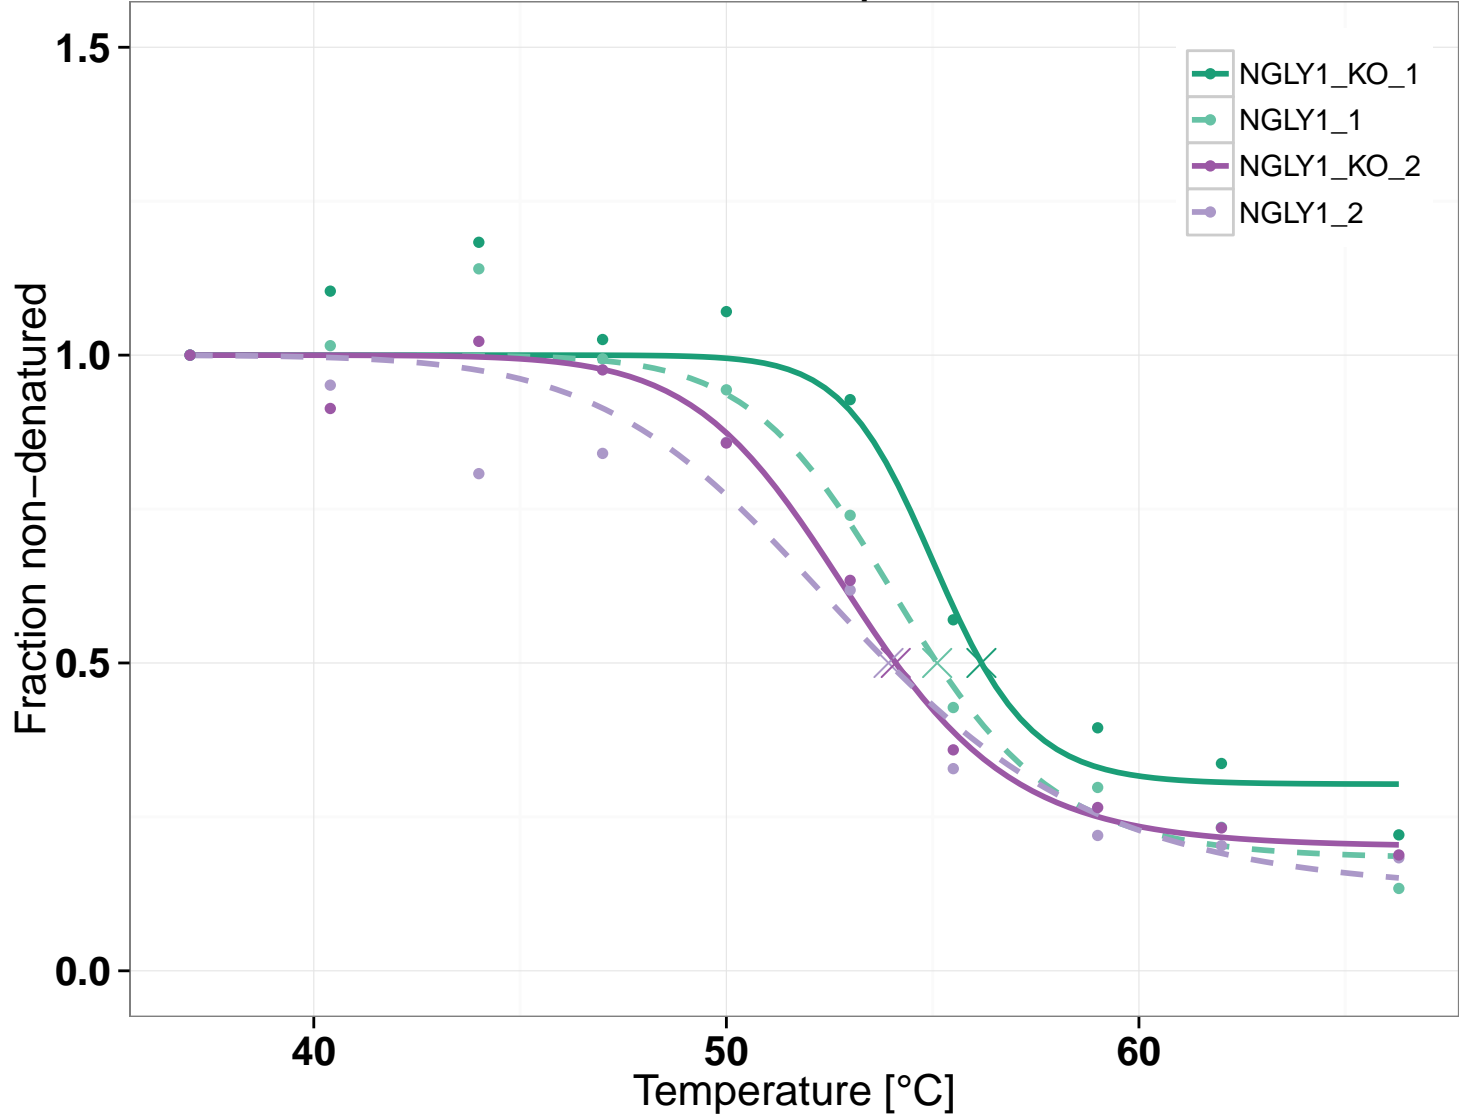

|            | meltPoint | slope  | plateau | R2   |
|------------|-----------|--------|---------|------|
| NGLY1_KO_1 | 56.18     | -0.15  | 0.3     | 0.95 |
| NGLY1_1    | 55.11     | -0.11  | 0.18    | 0.98 |
| NGLY1_KO_2 | 54.11     | -0.1   | 0.2     | 0.99 |
| NGLY1_2    | 53.93     | -0.072 | 0.12    | 0.95 |

Supplement: Supplementary file 4014 [file 1]

# IPI00010353.1|UBXN8

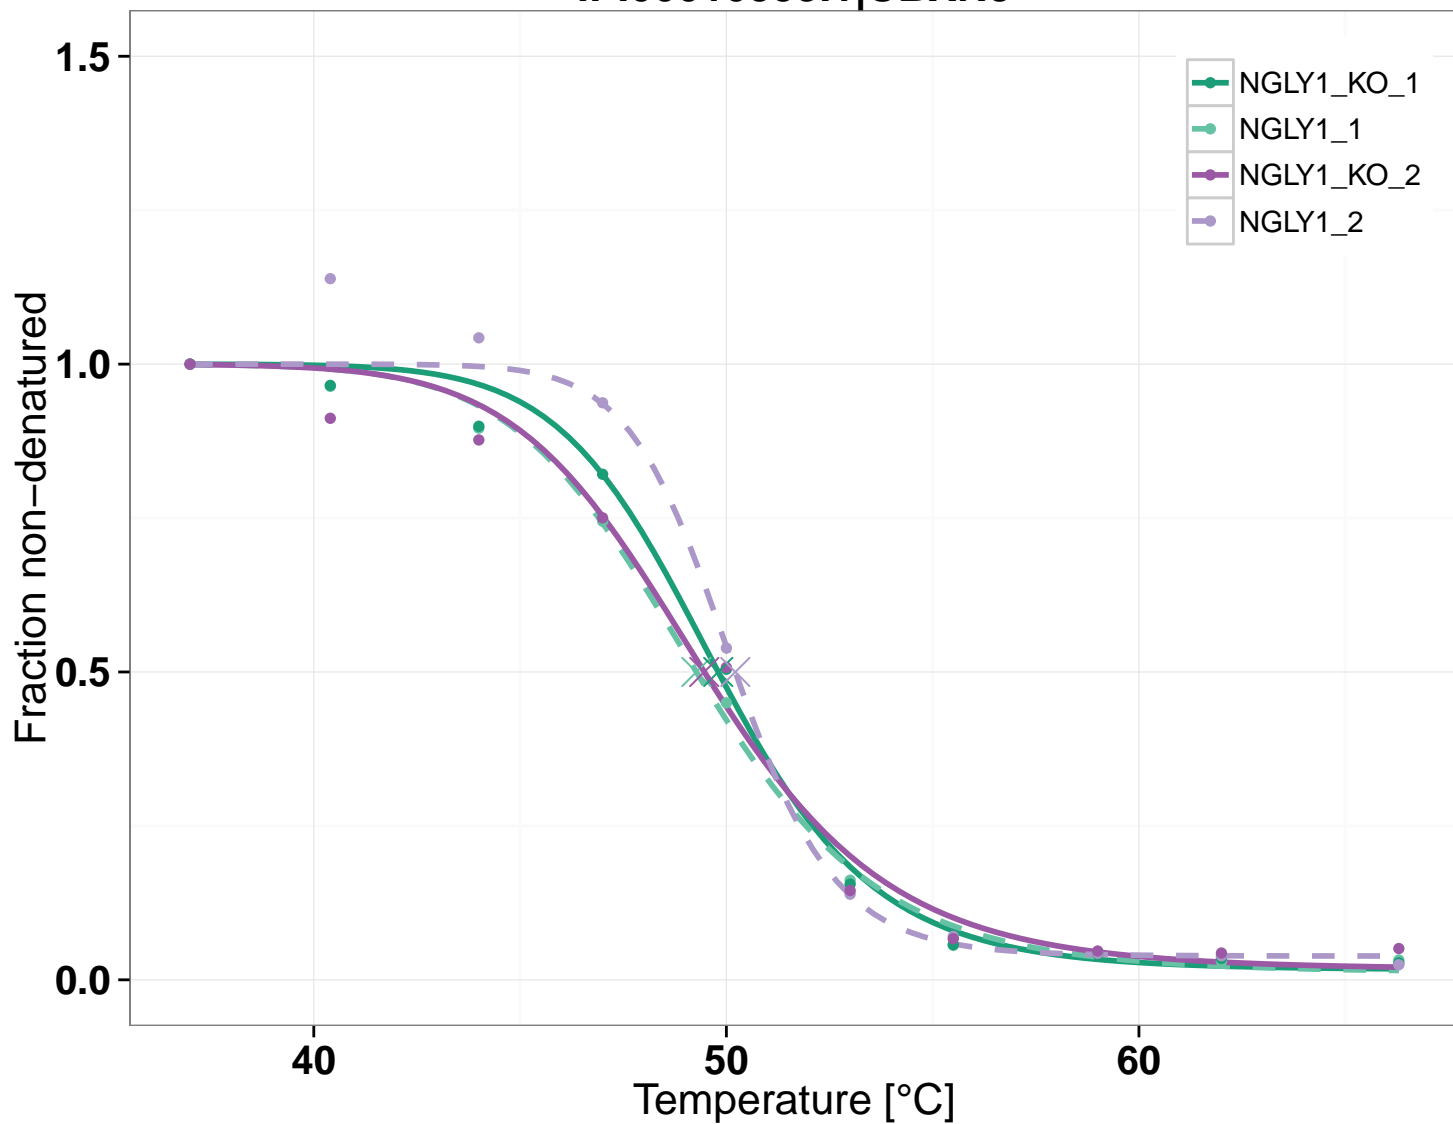

|            | meltPoint | slope | plateau | R2   |
|------------|-----------|-------|---------|------|
| NGLY1_KO_1 | 49.8      | -0.13 | 0.02    | 1    |
| NGLY1_1    | 49.27     | -0.11 | 0.01    | 1    |
| NGLY1_KO_2 | 49.47     | -0.11 | 0.02    | 0.99 |
| NGLY1_2    | 50.22     | -0.19 | 0.04    | 0.99 |

Supplement: Supplementary file 4015 [file 1]

# IPI00749276.1|GAB2

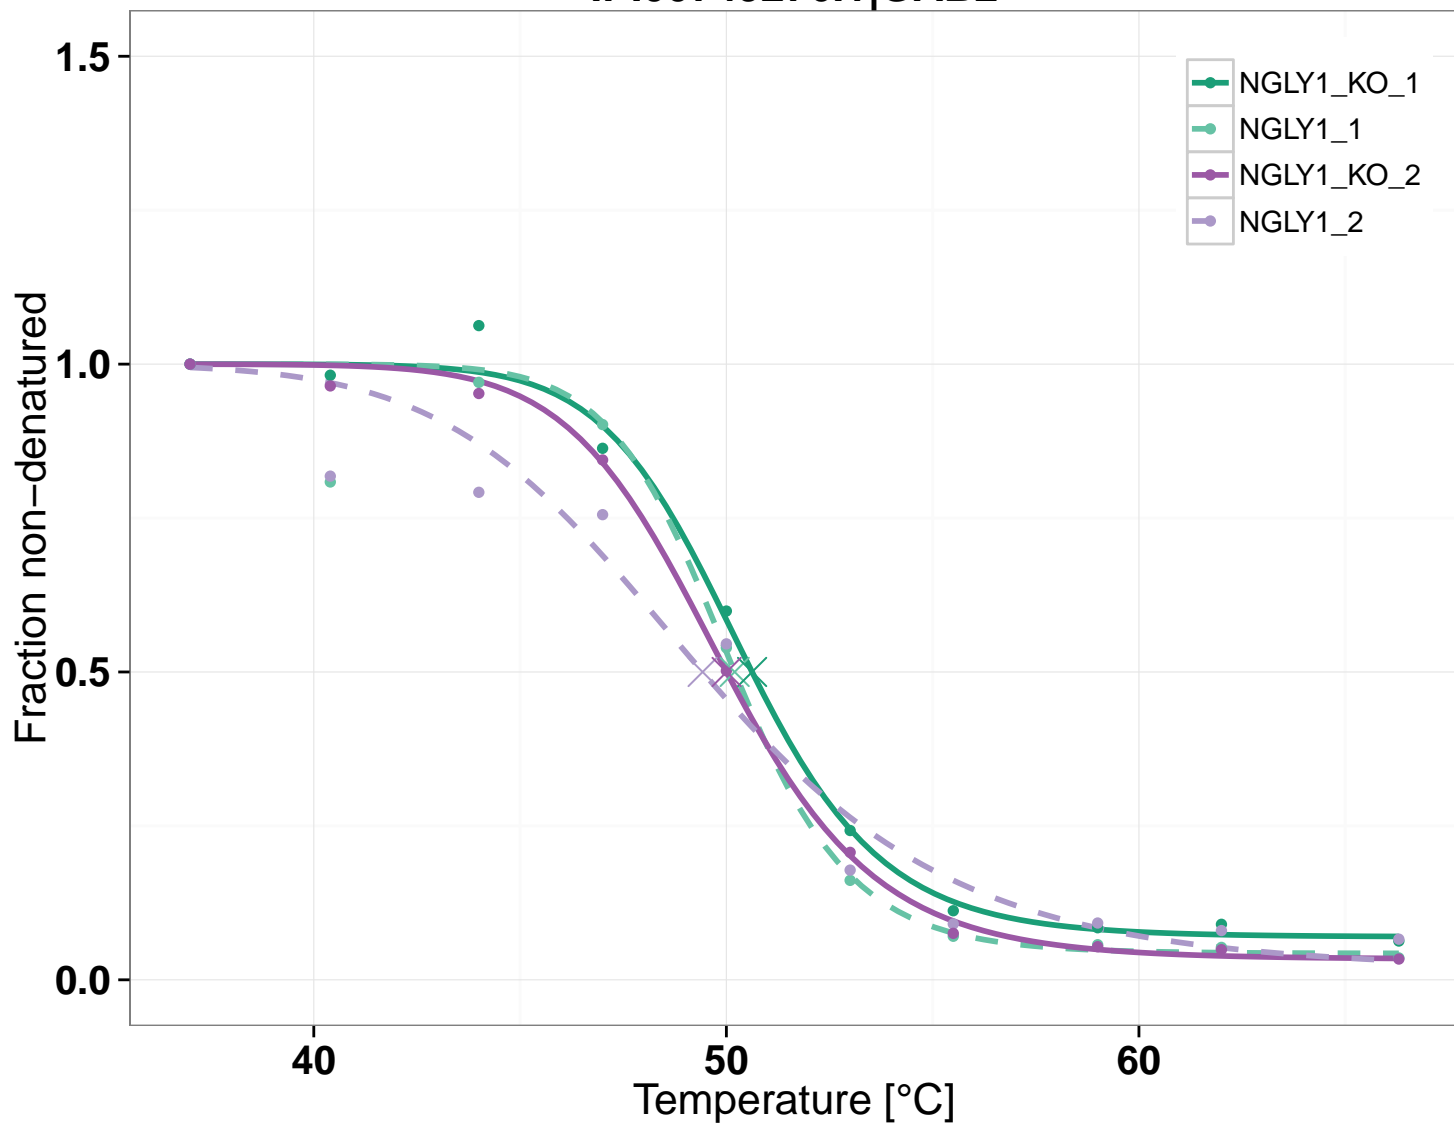

|            | meltPoint | slope  | plateau | R2   |
|------------|-----------|--------|---------|------|
| NGLY1_KO_1 | 50.62     | -0.14  | 0.07    | 1    |
| NGLY1_1    | 50.2      | -0.16  | 0.04    | 0.98 |
| NGLY1_KO_2 | 50.01     | -0.13  | 0.03    | 1    |
| NGLY1_2    | 49.42     | -0.079 | 0.01    | 0.96 |

Supplement: Supplementary file 4016 [file 1]

# IPI00217954.5|LGR4

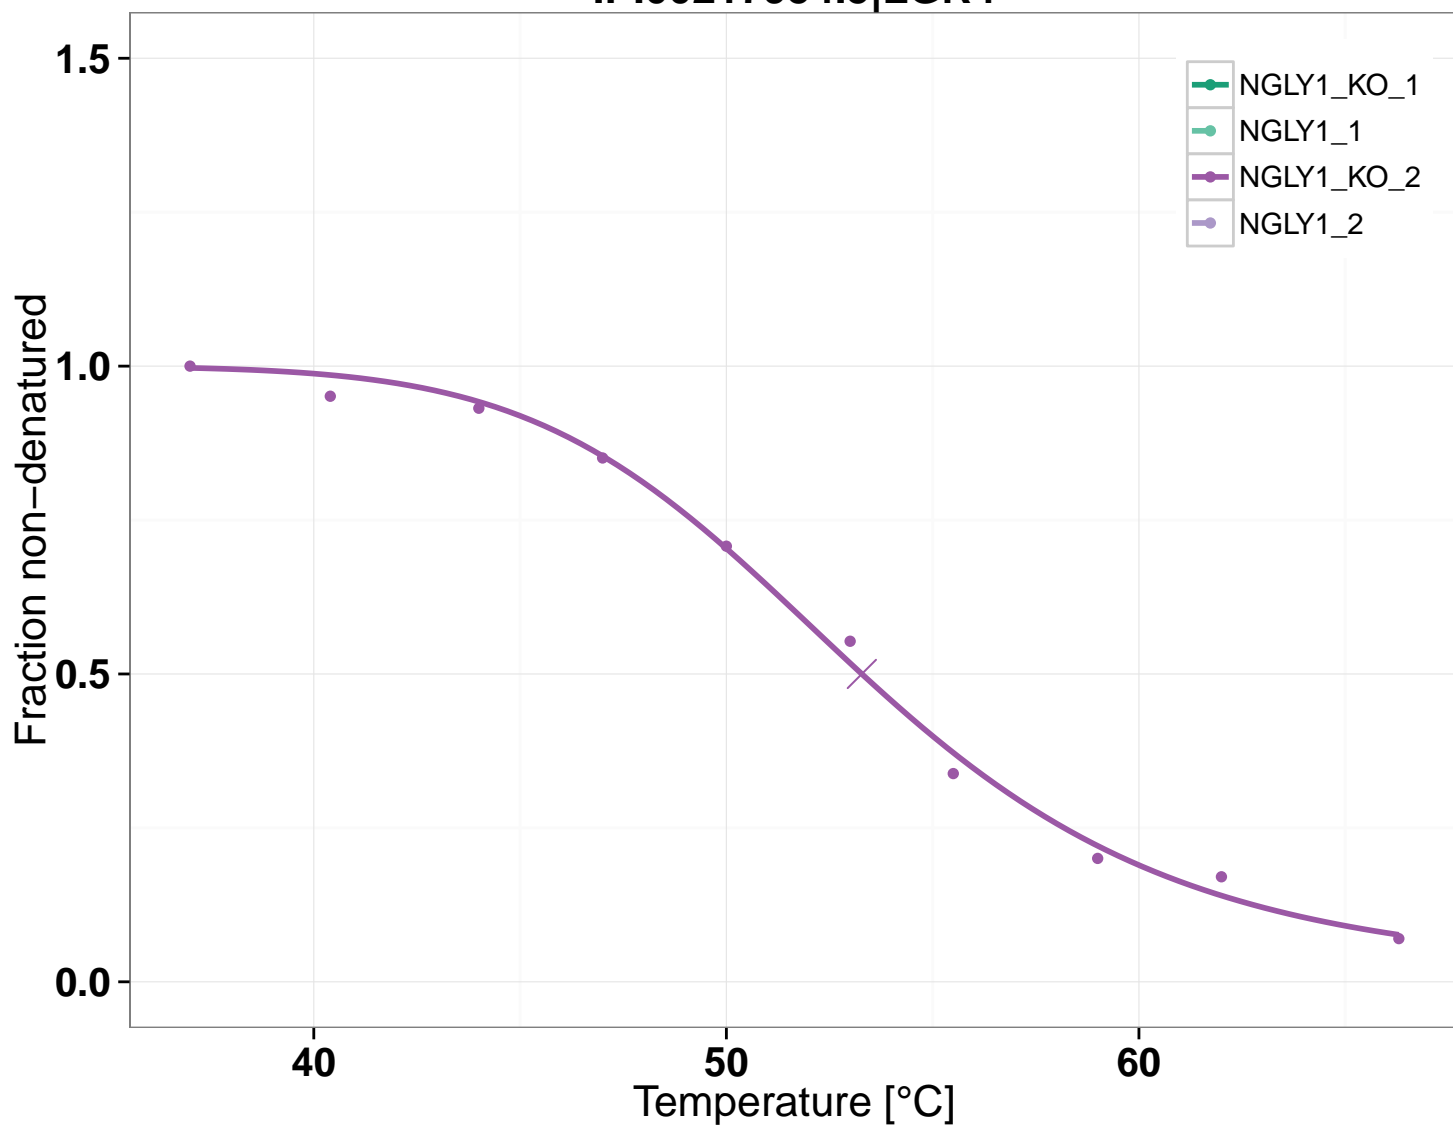

|            | meltPoint | slope  | plateau | R2 |
|------------|-----------|--------|---------|----|
| NGLY1_KO_1 | —         | —      | —       | —  |
| NGLY1_1    | —         | —      | —       | —  |
| NGLY1_KO_2 | 53.28     | -0.063 | 0.01    | 1  |
| NGLY1_2    | —         | —      | —       | —  |

Supplement: Supplementary file 4017 [file 1]

# IPI00011631.6|ZW10

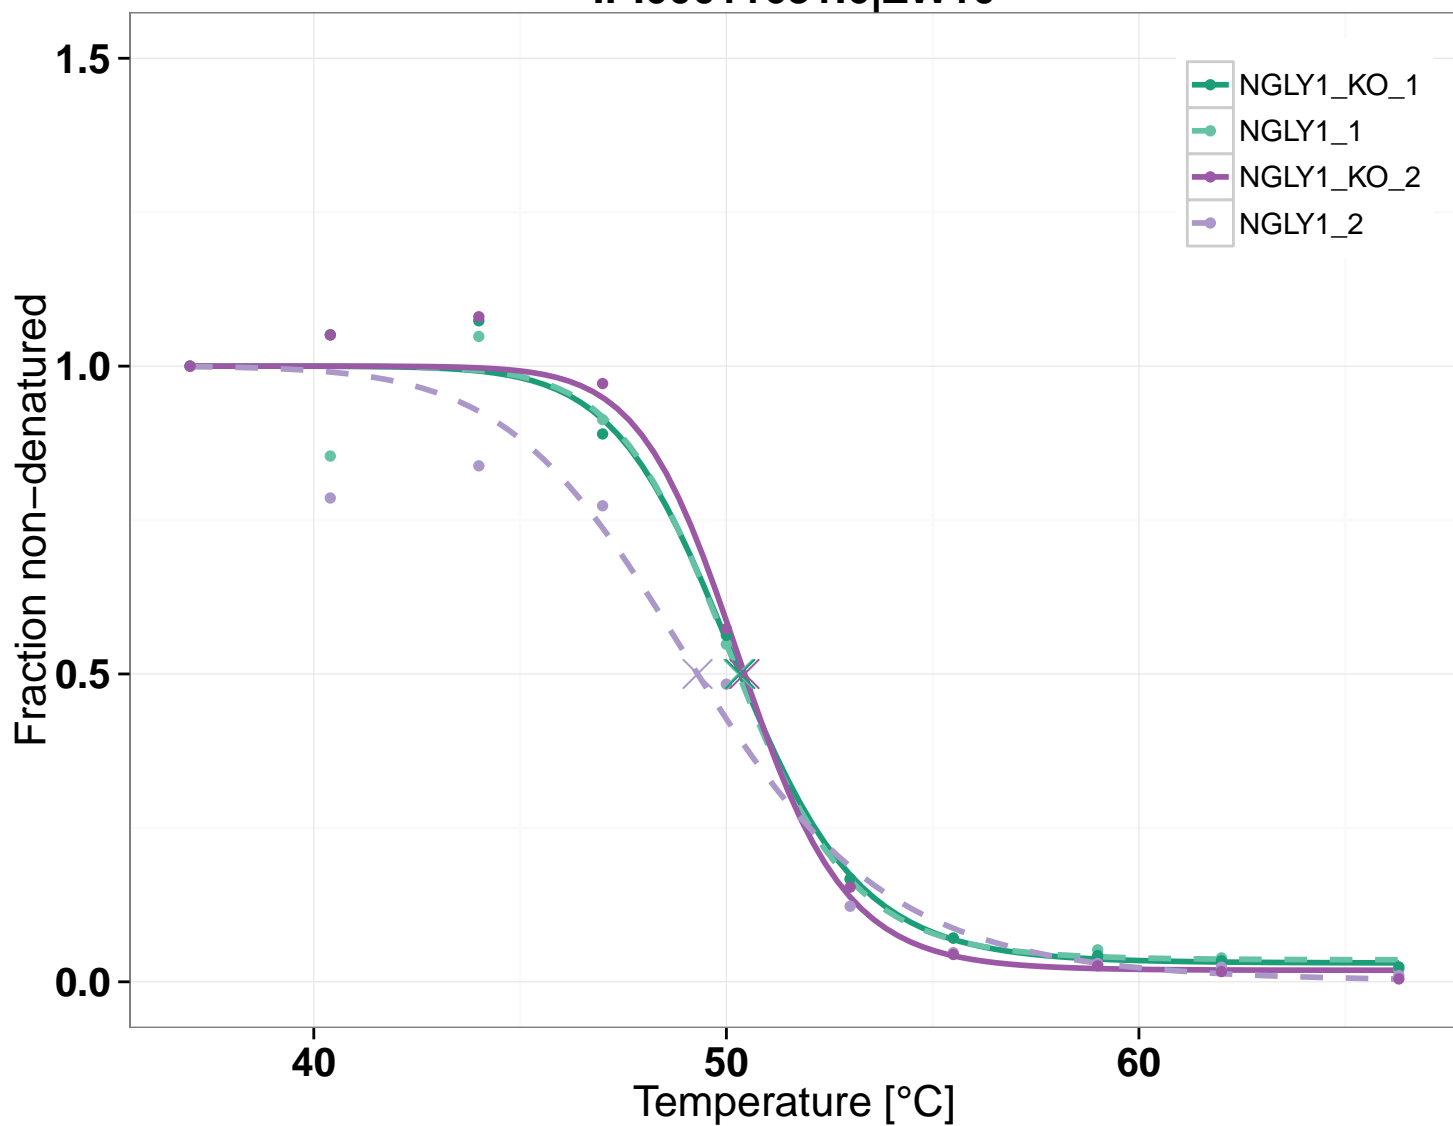

|            | meltPoint | slope | plateau | R2   |
|------------|-----------|-------|---------|------|
| NGLY1_KO_1 | 50.34     | -0.16 | 0.03    | 0.99 |
| NGLY1_1    | 50.29     | -0.17 | 0.04    | 0.99 |
| NGLY1_KO_2 | 50.44     | -0.2  | 0.02    | 1    |
| NGLY1_2    | 49.3      | -0.11 | 0       | 0.96 |

Supplement: Supplementary file 4018 [file 1]

IPI00873810.1|FKBP1A

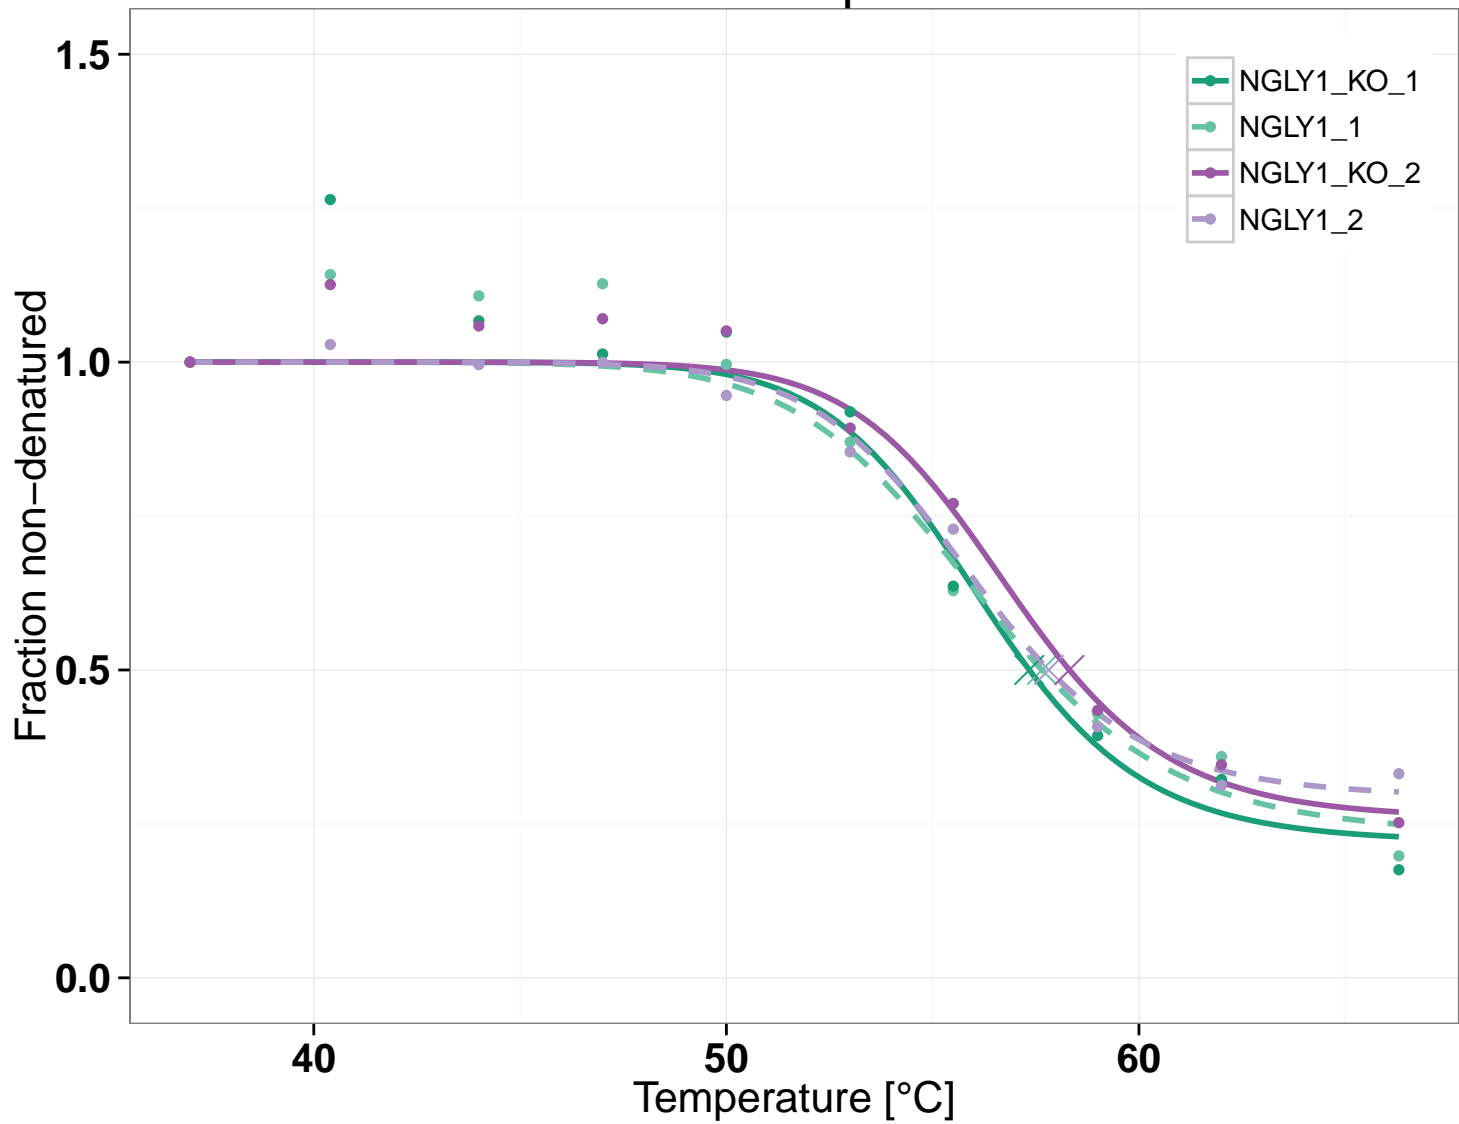

|            | meltPoint | slope  | plateau | R2   |
|------------|-----------|--------|---------|------|
| NGLY1_KO_1 | 57.34     | -0.1   | 0.22    | 0.93 |
| NGLY1_1    | 57.65     | -0.084 | 0.23    | 0.95 |
| NGLY1_KO_2 | 58.31     | -0.097 | 0.26    | 0.97 |
| NGLY1_2    | 57.81     | -0.089 | 0.29    | 0.99 |

Supplement: Supplementary file 4019 [file 1]
