# Supplementary material (part 41 of 85)
Source: publisher figshare collection journal article supplement (https://gsajournals.figshare.com/articles/dataset/_/12014913)

IPI00152089.3|CXORF38

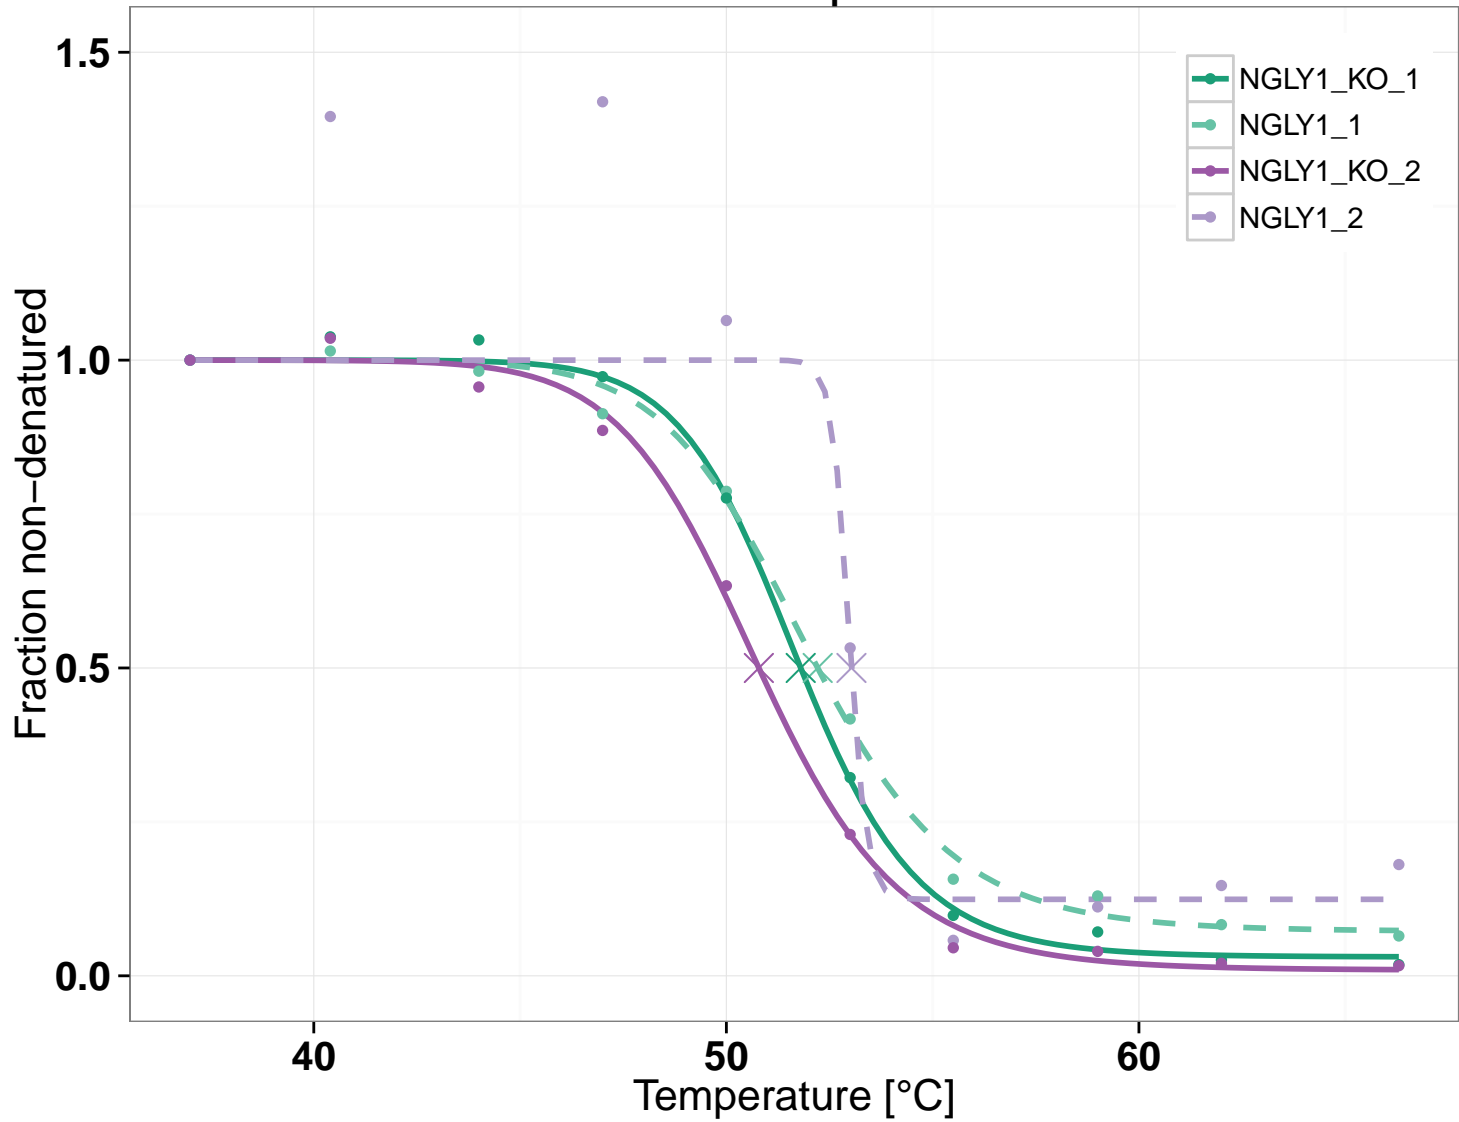

|            | meltPoint | slope | plateau | R2   |
|------------|-----------|-------|---------|------|
| NGLY1_KO_1 | 51.8      | -0.17 | 0.03    | 1    |
| NGLY1_1    | 52.21     | -0.13 | 0.07    | 1    |
| NGLY1_KO_2 | 50.79     | -0.15 | 0.01    | 1    |
| NGLY1_2    | 53.03     | -1    | 0.12    | 0.78 |

Supplement: Supplementary file 4020 [file 1]

IPI00065415.2|CCDC138

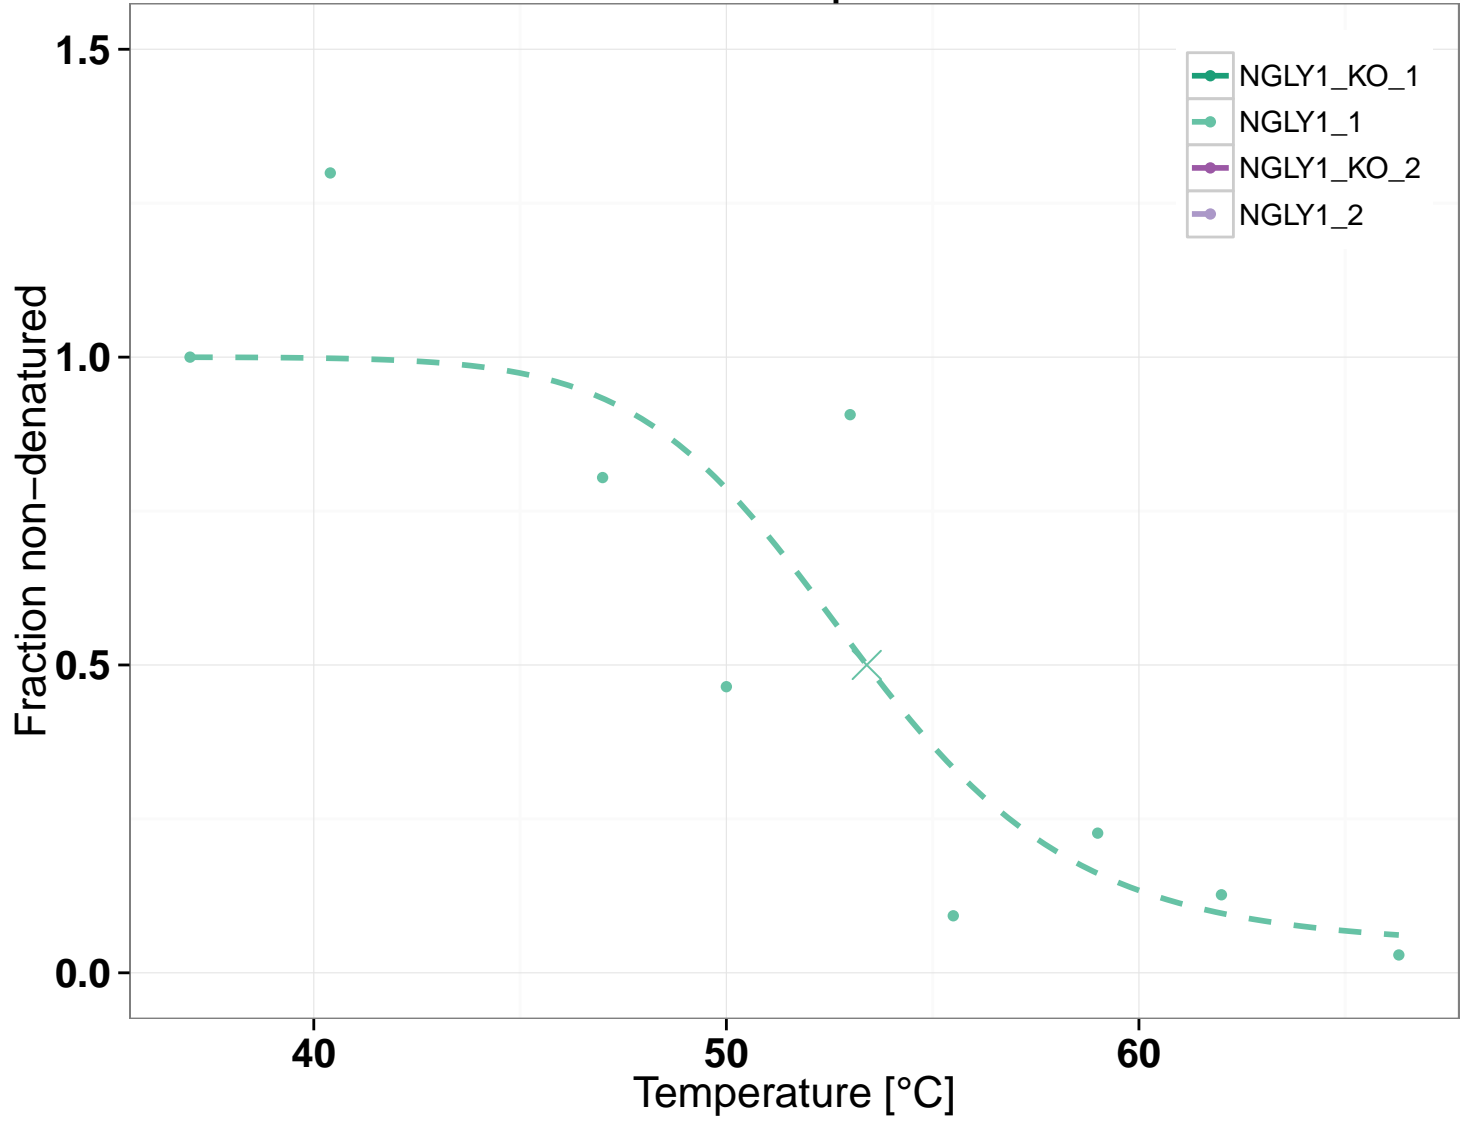

|            | meltPoint | slope | plateau | R2   |
|------------|-----------|-------|---------|------|
| NGLY1_KO_1 | -         | -     | -       | -    |
| NGLY1_1    | 53.4      | -0.09 | 0.04    | 0.64 |
| NGLY1_KO_2 | -         | -     | -       | -    |
| NGLY1_2    | -         | -     | -       | -    |

Supplement: Supplementary file 4021 [file 1]

IPI00908639.1|HISPPD1

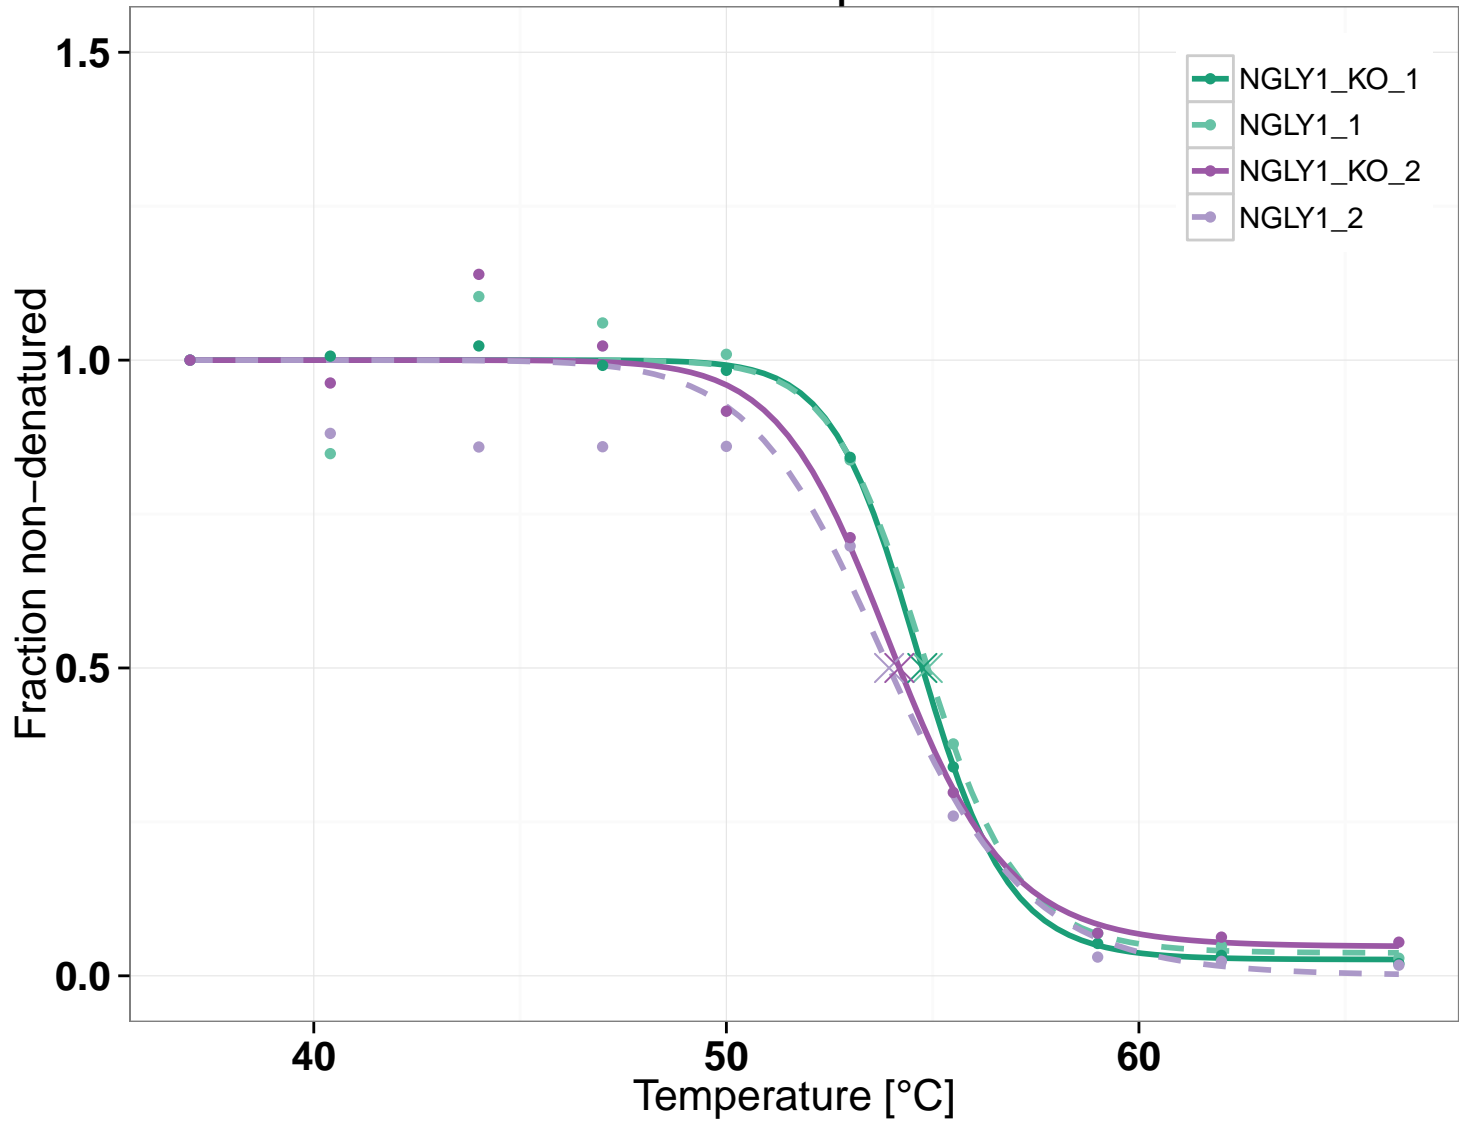

|            | meltPoint | slope | plateau | R2   |
|------------|-----------|-------|---------|------|
| NGLY1_KO_1 | 54.75     | -0.23 | 0.03    | 1    |
| NGLY1_1    | 54.88     | -0.21 | 0.04    | 0.98 |
| NGLY1_KO_2 | 54.19     | -0.17 | 0.05    | 0.99 |
| NGLY1_2    | 53.94     | -0.15 | 0       | 0.96 |

Supplement: Supplementary file 4022 [file 1]

IPI00783034.4|C17ORF70

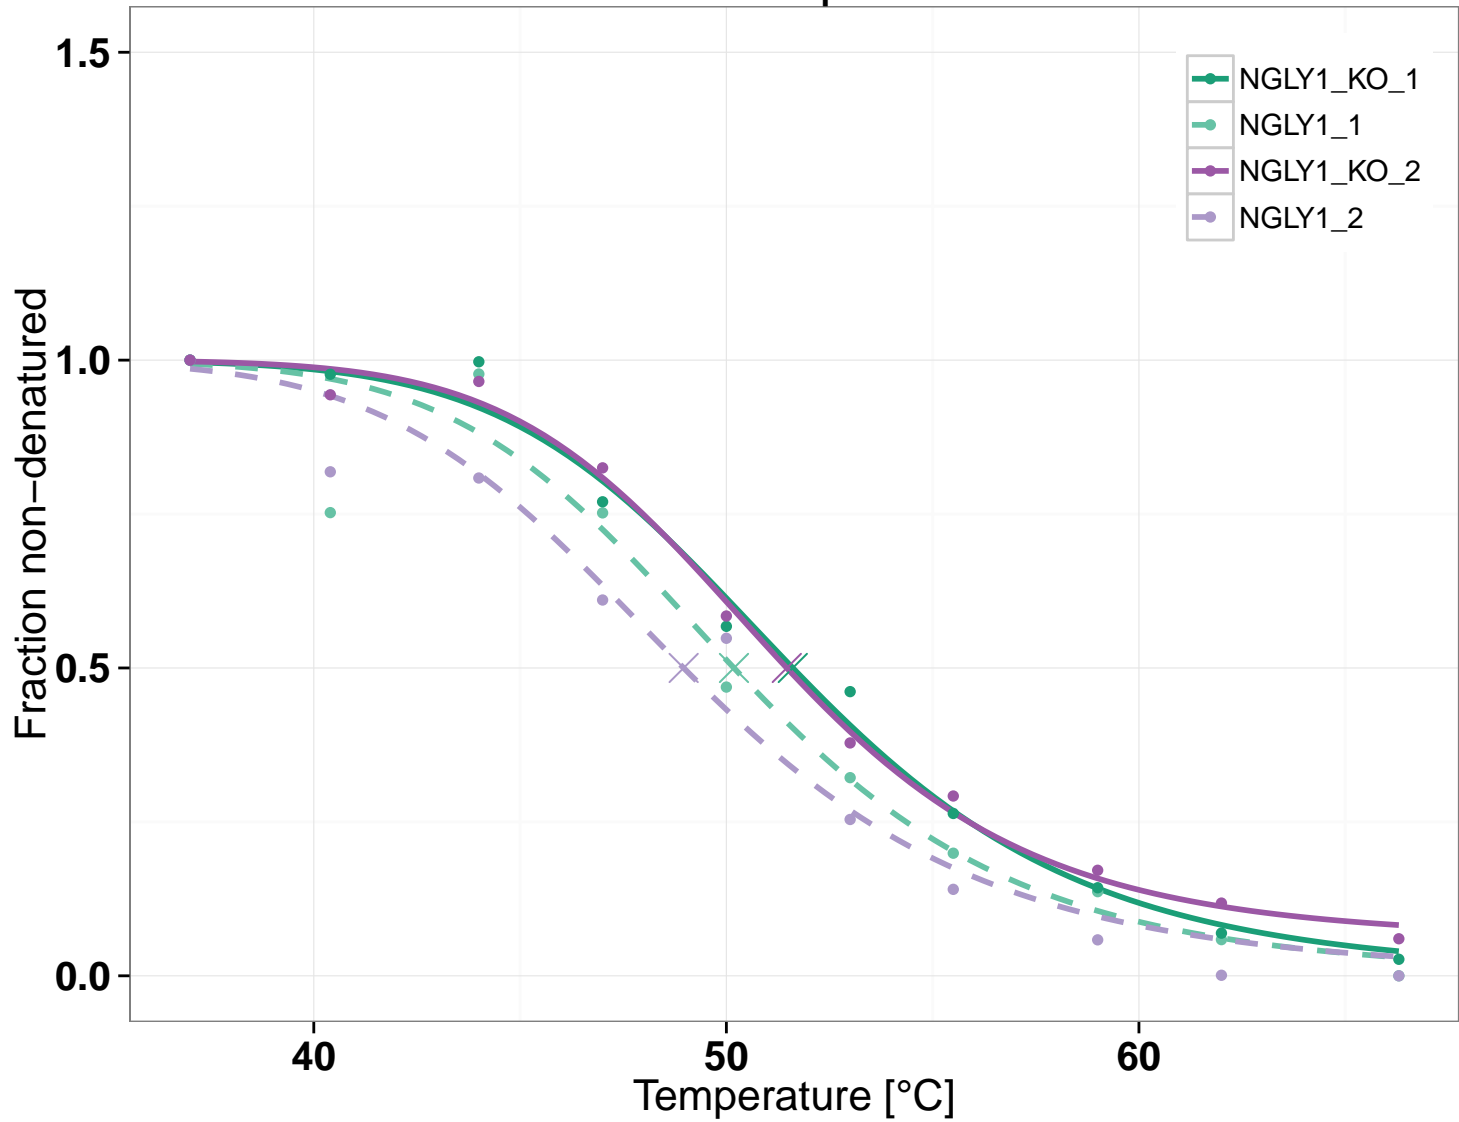

|            | meltPoint | slope  | plateau | R2   |
|------------|-----------|--------|---------|------|
| NGLY1_KO_1 | 51.61     | -0.071 | 0       | 0.99 |
| NGLY1_1    | 50.18     | -0.073 | 0       | 0.95 |
| NGLY1_KO_2 | 51.46     | -0.074 | 0.06    | 1    |
| NGLY1_2    | 48.96     | -0.069 | 0       | 0.97 |

Supplement: Supplementary file 4023 [file 1]

# IPI00022449.6|DOCK2

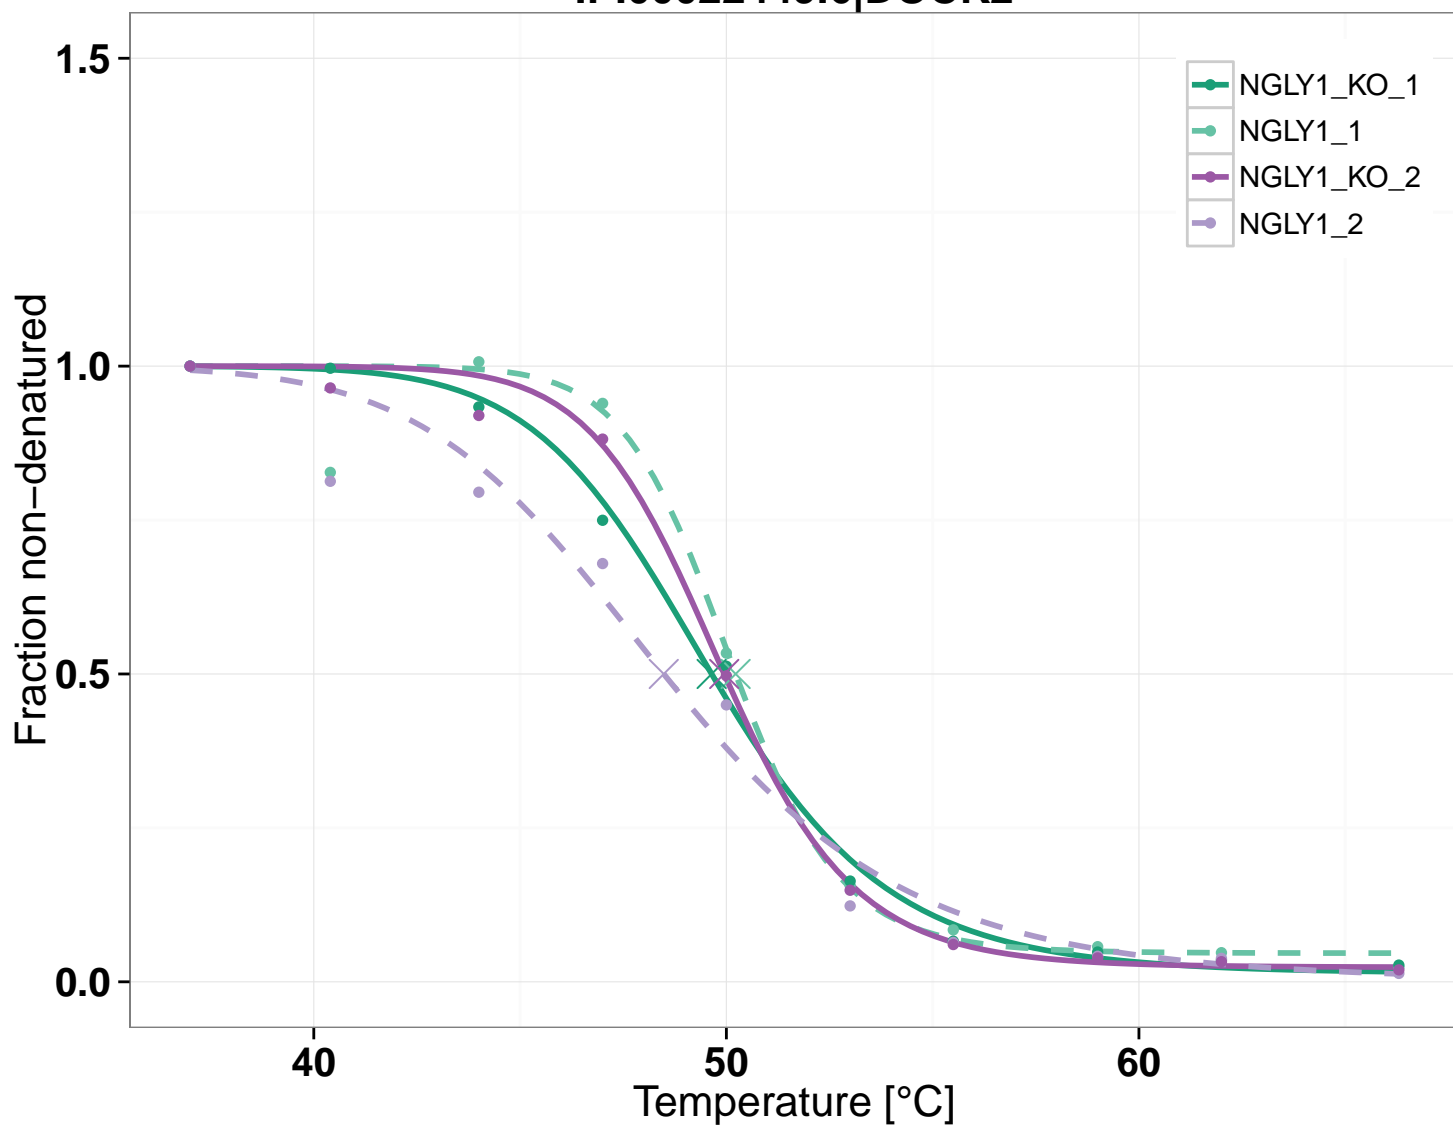

|            | meltPoint | slope  | plateau | R2   |
|------------|-----------|--------|---------|------|
| NGLY1_KO_1 | 49.64     | -0.11  | 0.01    | 1    |
| NGLY1_1    | 50.22     | -0.18  | 0.05    | 0.98 |
| NGLY1_KO_2 | 49.95     | -0.15  | 0.02    | 1    |
| NGLY1_2    | 48.48     | -0.085 | 0       | 0.97 |

Supplement: Supplementary file 4024 [file 1]

# IPI00291608.4|PCNP

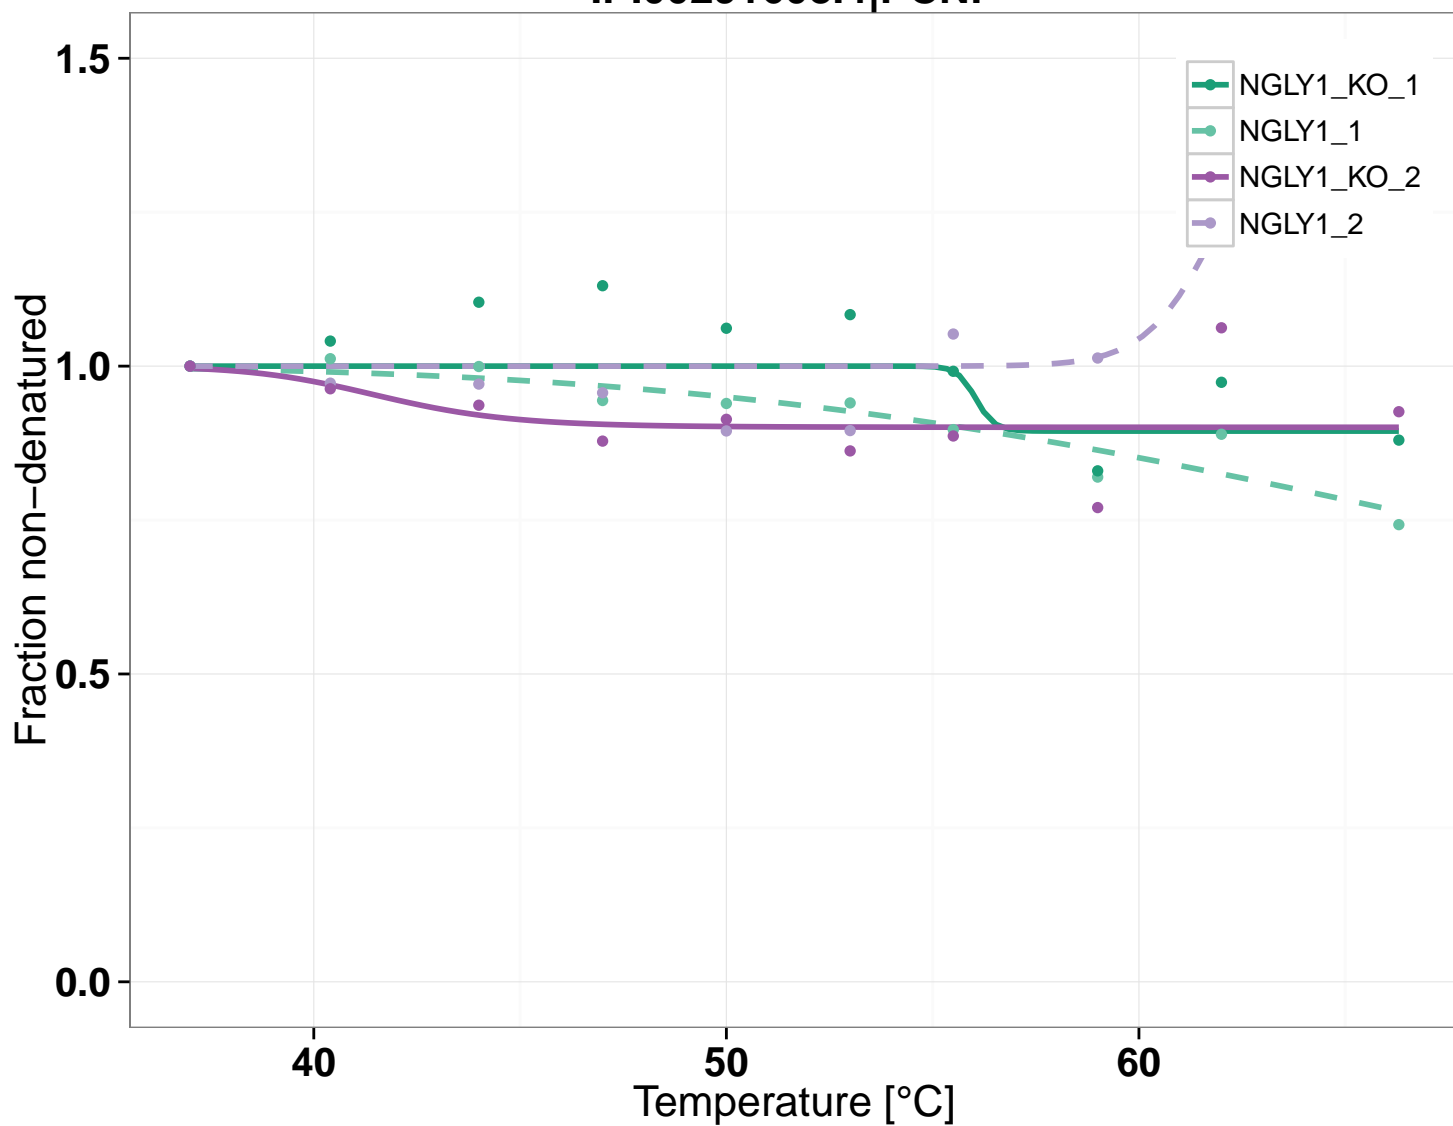

|            | meltPoint | slope  | plateau | R2   |
|------------|-----------|--------|---------|------|
| NGLY1_KO_1 | -         | -0.12  | 0.89    | 0.39 |
| NGLY1_1    | -         | -      | 0       | 0.87 |
| NGLY1_KO_2 | -         | -0.016 | 0.9     | 0.19 |
| NGLY1_2    | -         | 0.14   | 1.5     | 0.91 |

Supplement: Supplementary file 4025 [file 1]

# IPI00152542.1|DMXL2

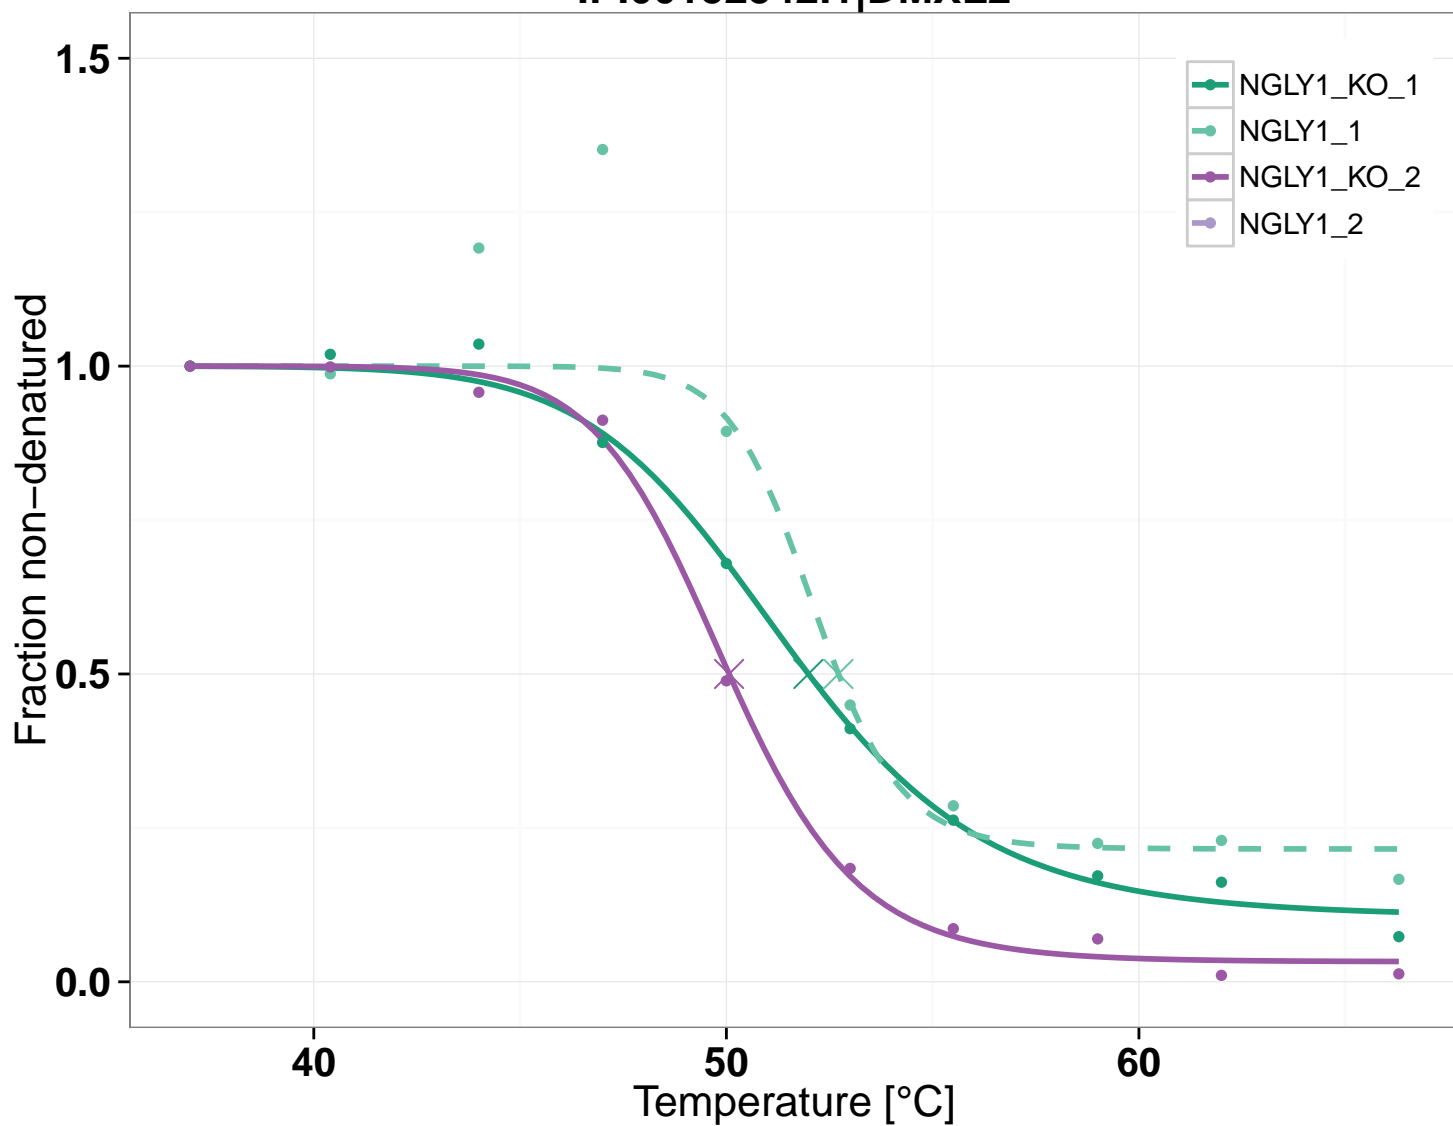

|            | meltPoint | slope  | plateau | R2   |
|------------|-----------|--------|---------|------|
| NGLY1_KO_1 | 51.99     | -0.093 | 0.11    | 0.99 |
| NGLY1_1    | 52.72     | -0.19  | 0.22    | 0.91 |
| NGLY1_KO_2 | 50.07     | -0.15  | 0.03    | 1    |
| NGLY1_2    | -         | -      | -       | -    |

Supplement: Supplementary file 4026 [file 1]

# IPI00792065.3|TOR1AIP1

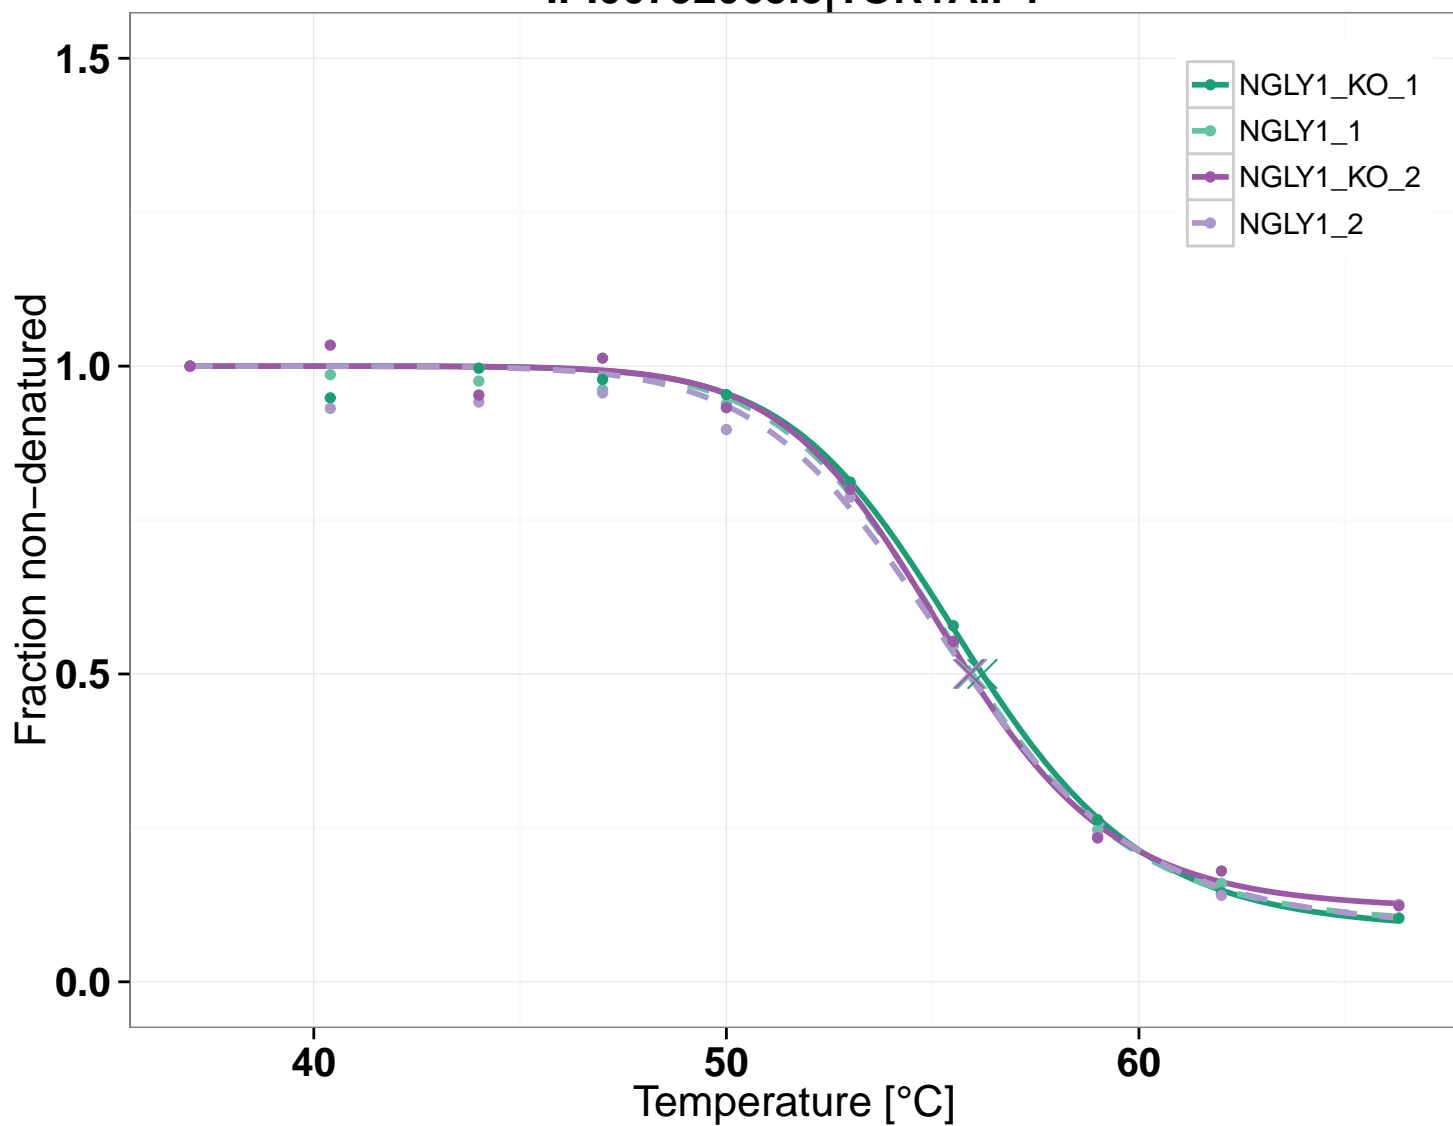

|            | meltPoint | slope  | plateau | R2   |
|------------|-----------|--------|---------|------|
| NGLY1_KO_1 | 56.21     | -0.11  | 0.08    | 1    |
| NGLY1_1    | 55.96     | -0.11  | 0.09    | 1    |
| NGLY1_KO_2 | 55.9      | -0.11  | 0.12    | 1    |
| NGLY1_2    | 55.85     | -0.099 | 0.09    | 0.99 |

Supplement: Supplementary file 4027 [file 1]

# IPI00396387.3|GNL1

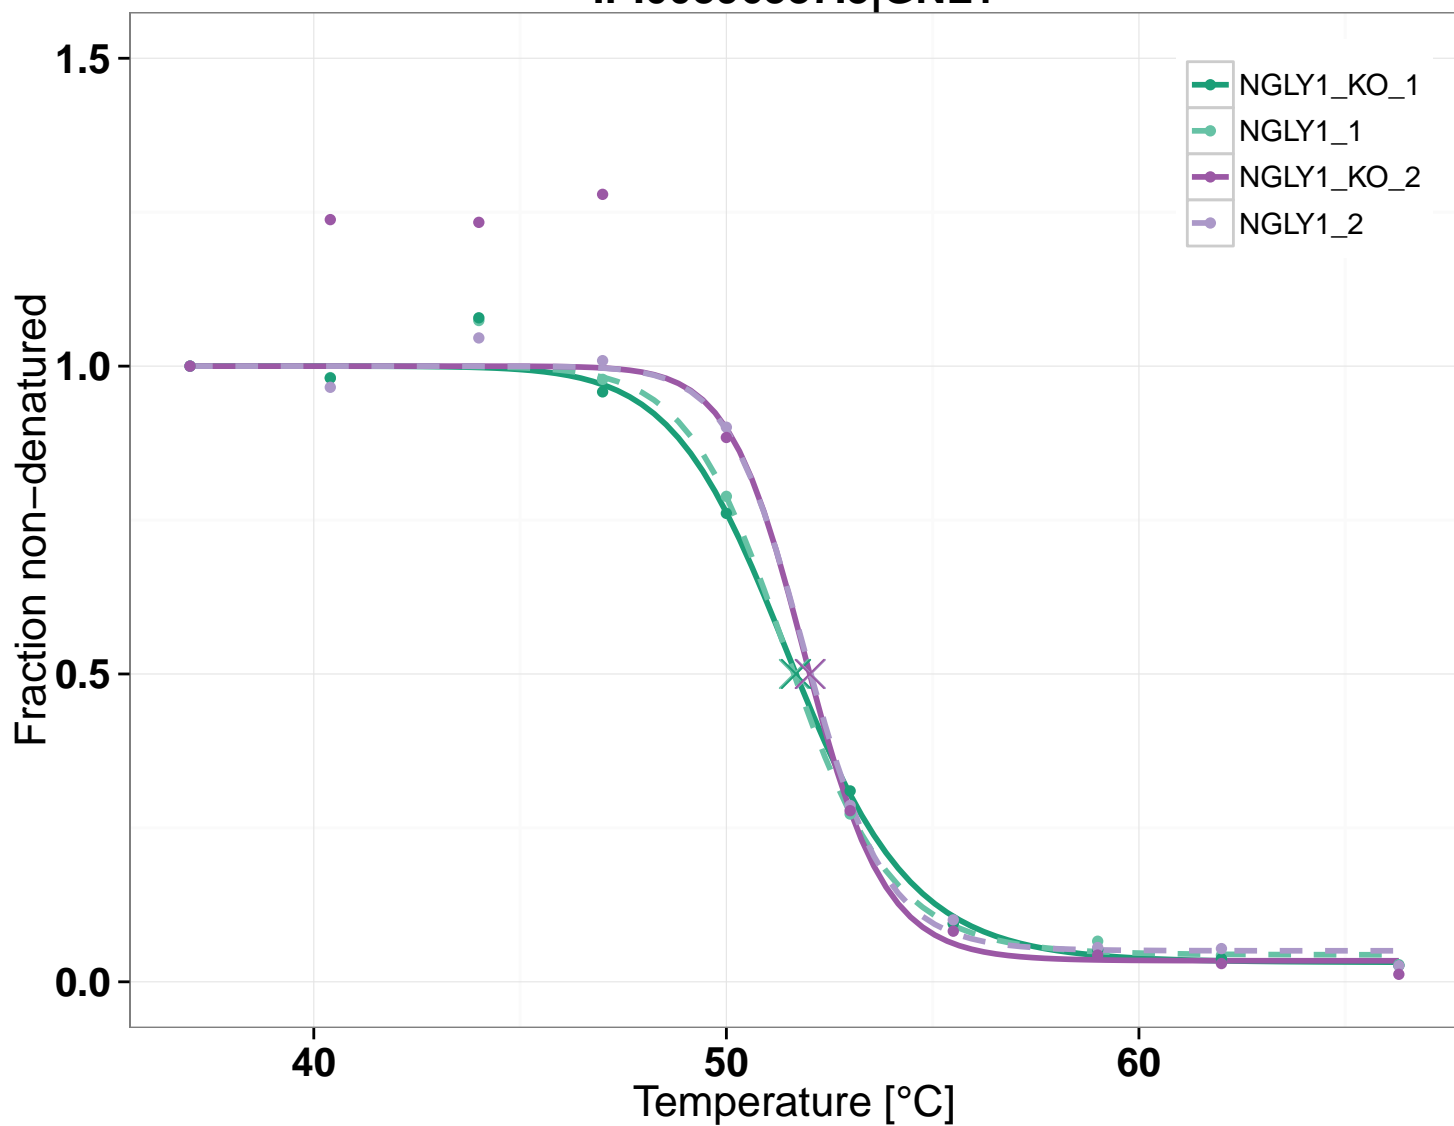

|            | meltPoint | slope | plateau | R2   |
|------------|-----------|-------|---------|------|
| NGLY1_KO_1 | 51.69     | -0.17 | 0.03    | 1    |
| NGLY1_1    | 51.64     | -0.19 | 0.04    | 1    |
| NGLY1_KO_2 | 52.02     | -0.26 | 0.03    | 0.93 |
| NGLY1_2    | 52.05     | -0.25 | 0.05    | 1    |

Supplement: Supplementary file 4028 [file 1]

# IPI00064209.3|ZNF333

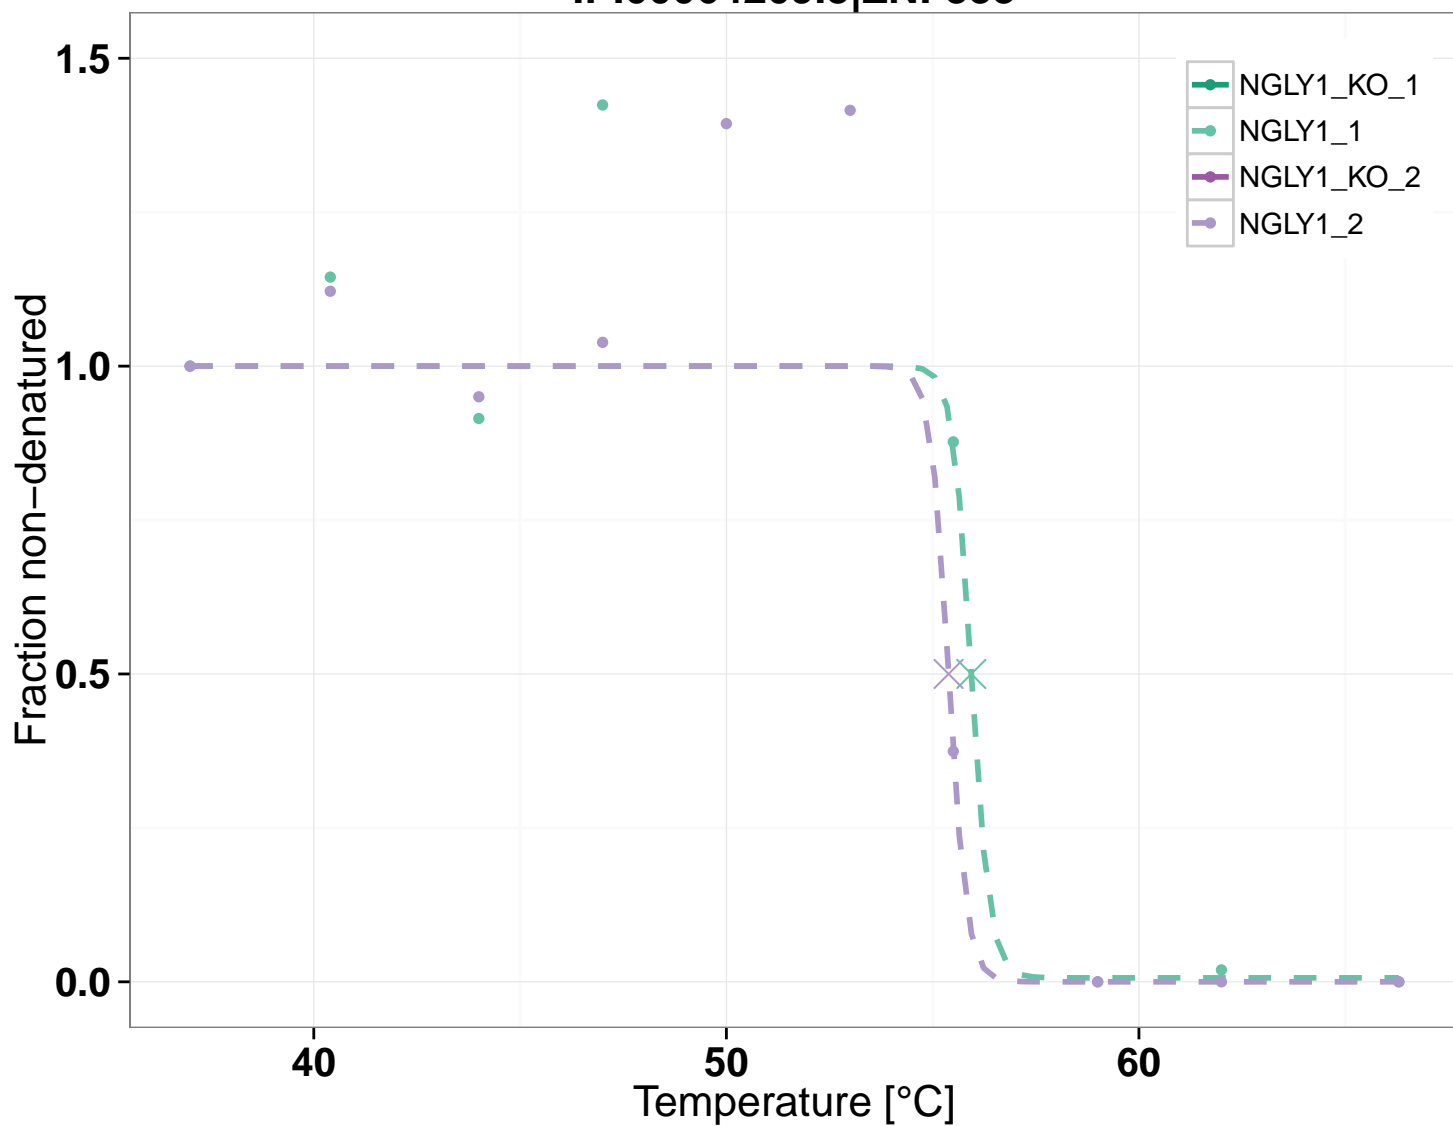

|            | meltPoint | slope | plateau | R2   |
|------------|-----------|-------|---------|------|
| NGLY1_KO_1 | -         | -     | -       | -    |
| NGLY1_1    | 55.94     | -1.1  | 0.01    | 0.71 |
| NGLY1_KO_2 | -         | -     | -       | -    |
| NGLY1_2    | 55.39     | -1.1  | 0       | 0.88 |

Supplement: Supplementary file 4029 [file 1]

IPI00641912.1|RTN4IP1

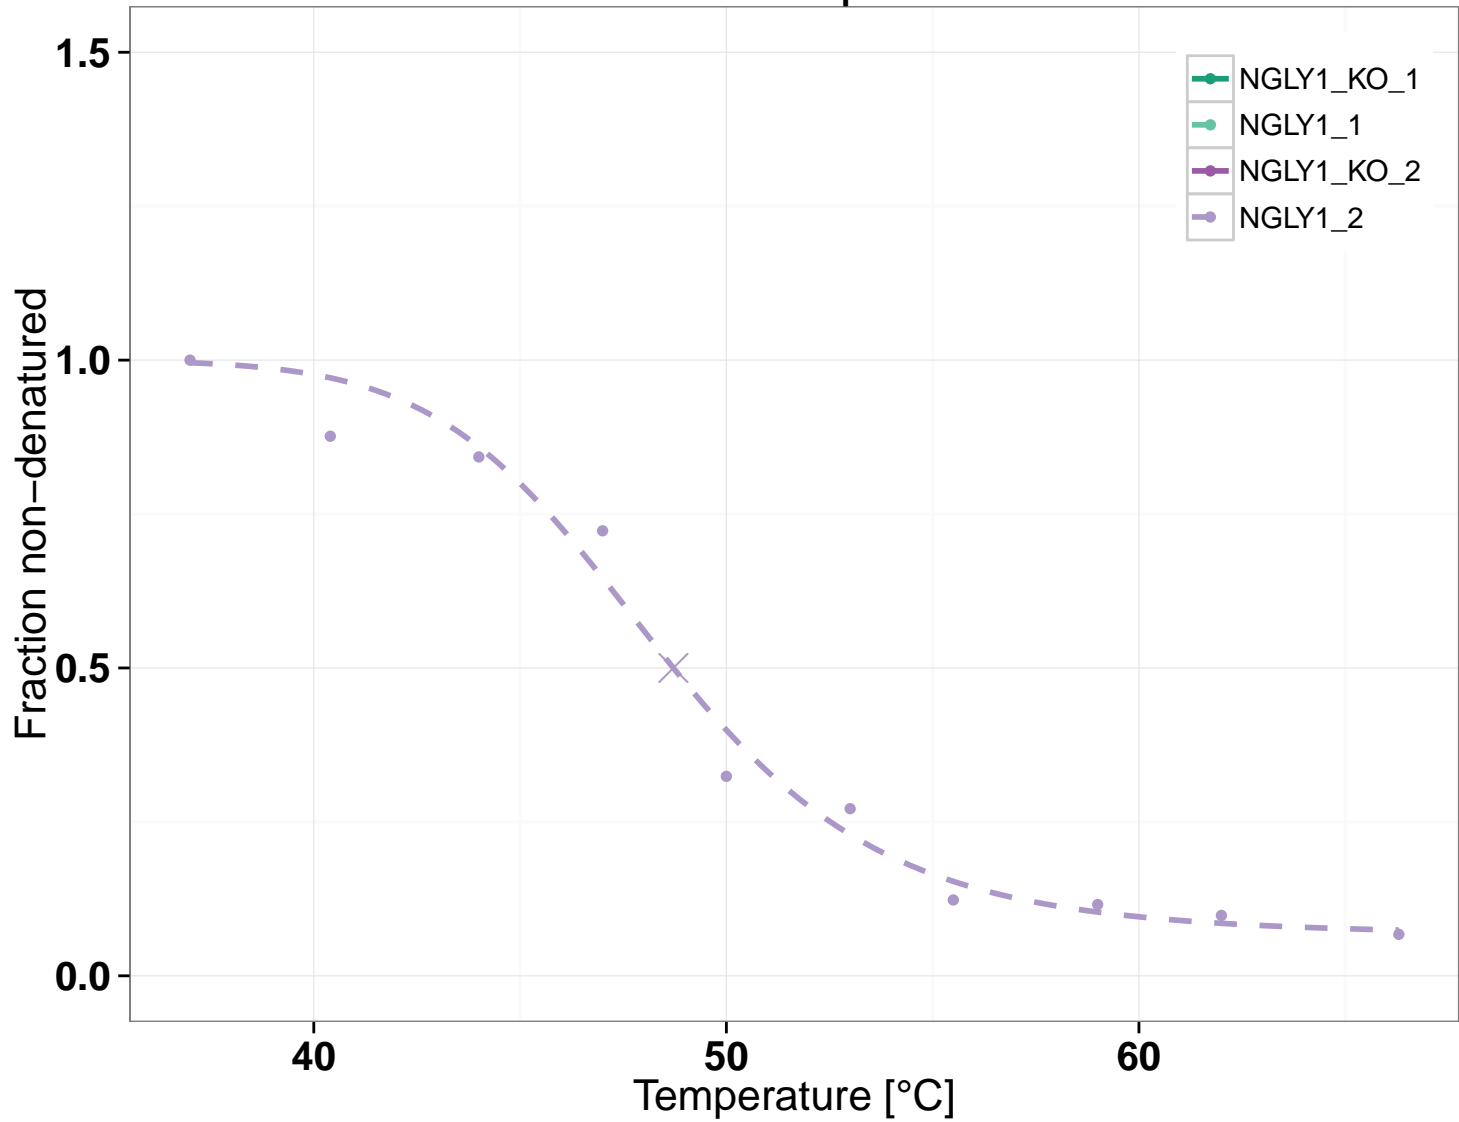

|            | meltPoint | slope  | plateau | R2   |
|------------|-----------|--------|---------|------|
| NGLY1_KO_1 | —         | —      | —       | —    |
| NGLY1_1    | —         | —      | —       | —    |
| NGLY1_KO_2 | —         | —      | —       | —    |
| NGLY1_2    | 48.72     | -0.086 | 0.07    | 0.98 |

Supplement: Supplementary file 4030 [file 1]

# IPI00044761.4|PUS7

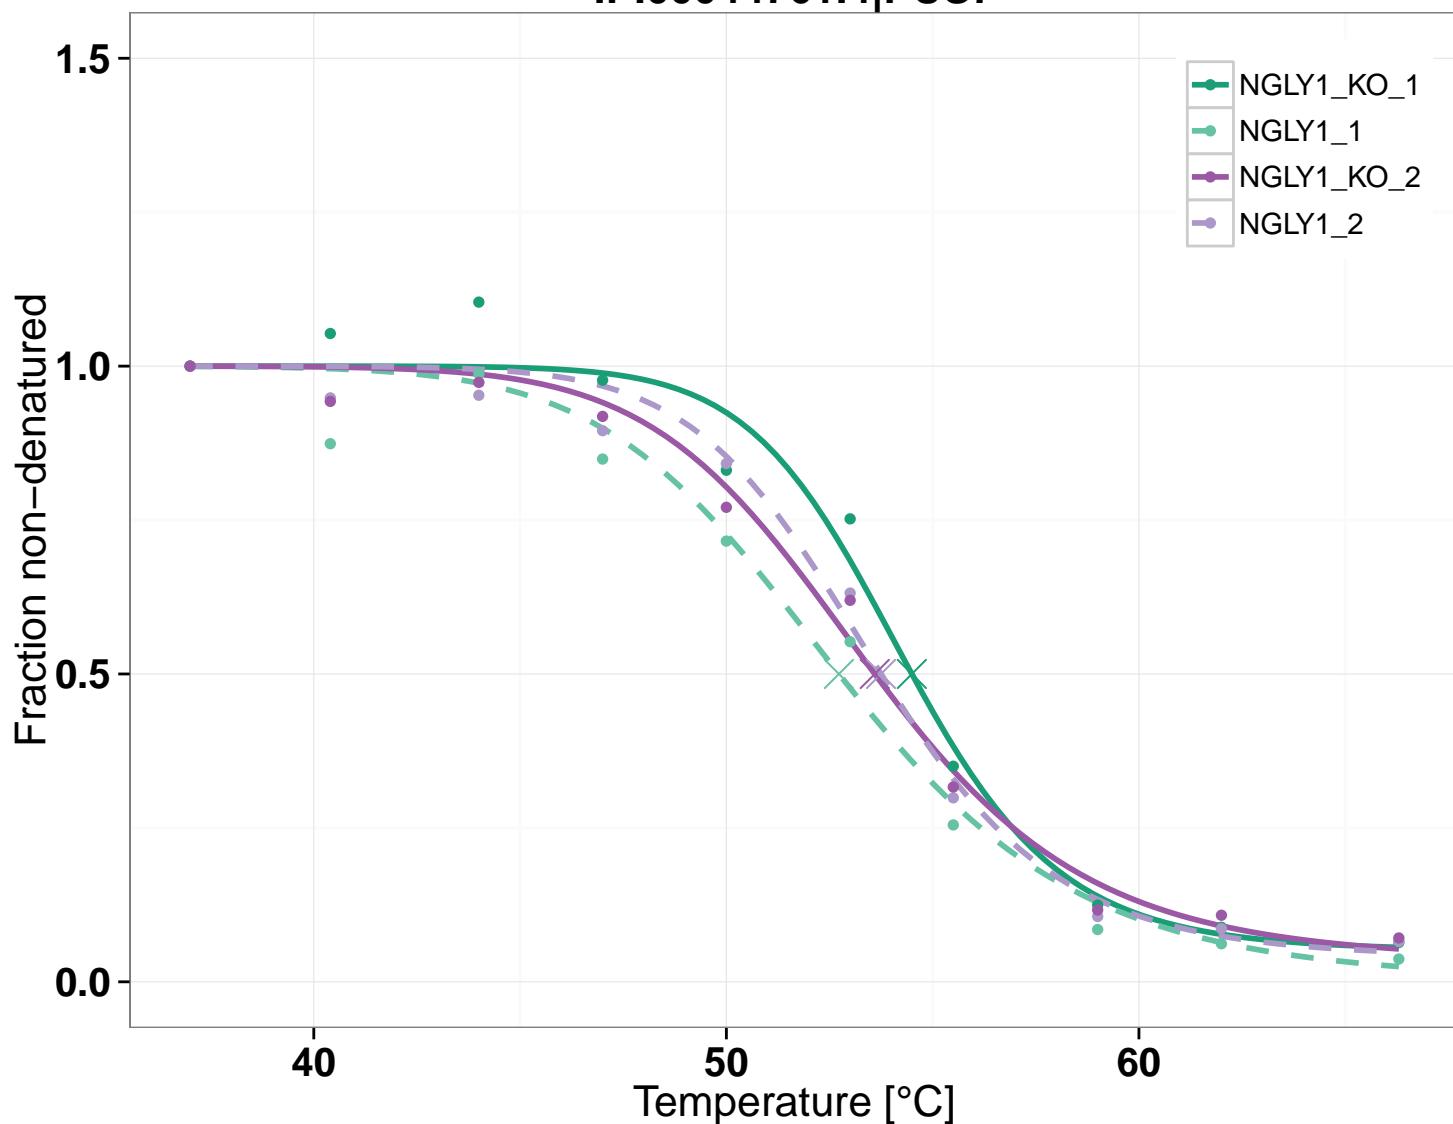

|            | meltPoint | slope  | plateau | R2   |
|------------|-----------|--------|---------|------|
| NGLY1_KO_1 | 54.5      | -0.13  | 0.05    | 0.98 |
| NGLY1_1    | 52.73     | -0.086 | 0       | 0.98 |
| NGLY1_KO_2 | 53.6      | -0.091 | 0.03    | 0.99 |
| NGLY1_2    | 53.75     | -0.11  | 0.04    | 0.99 |

Supplement: Supplementary file 4031 [file 1]

IPI00220770.2|DCTN6

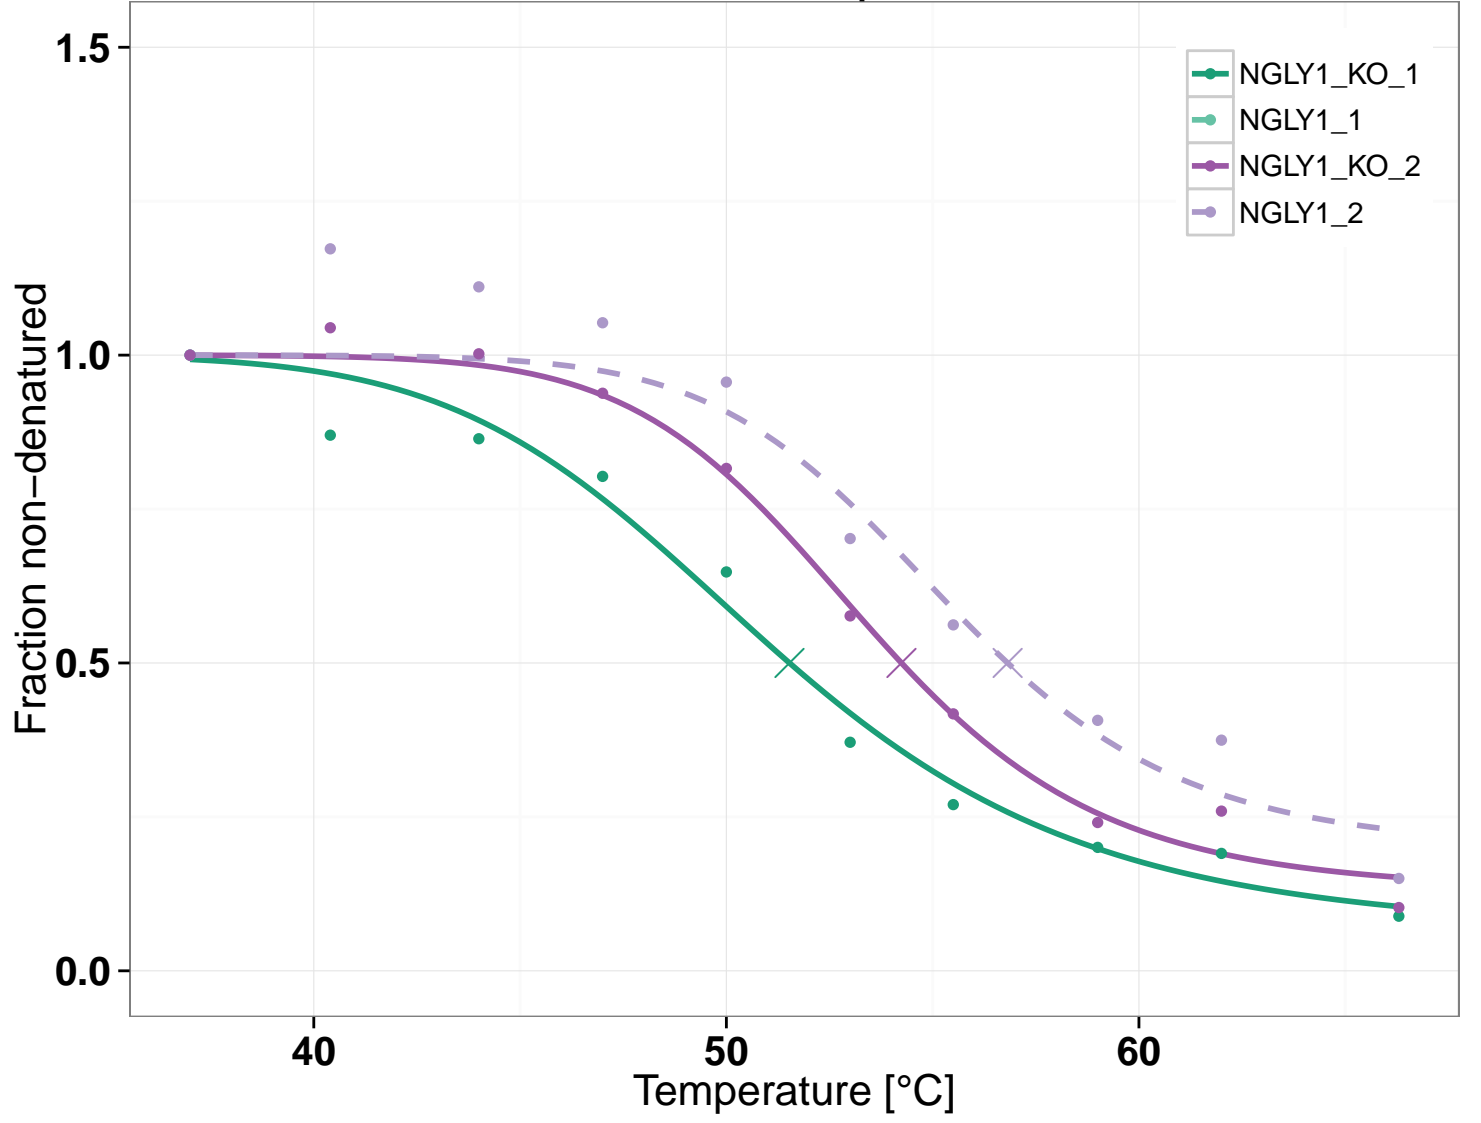

|            | meltPoint | slope  | plateau | R2   |
|------------|-----------|--------|---------|------|
| NGLY1_KO_1 | 51.53     | -0.061 | 0.06    | 0.98 |
| NGLY1_1    | -         | -      | -       | -    |
| NGLY1_KO_2 | 54.24     | -0.077 | 0.13    | 0.99 |
| NGLY1_2    | 56.82     | -0.07  | 0.2     | 0.94 |

Supplement: Supplementary file 4032 [file 1]

IPI00031522.2|HADHA

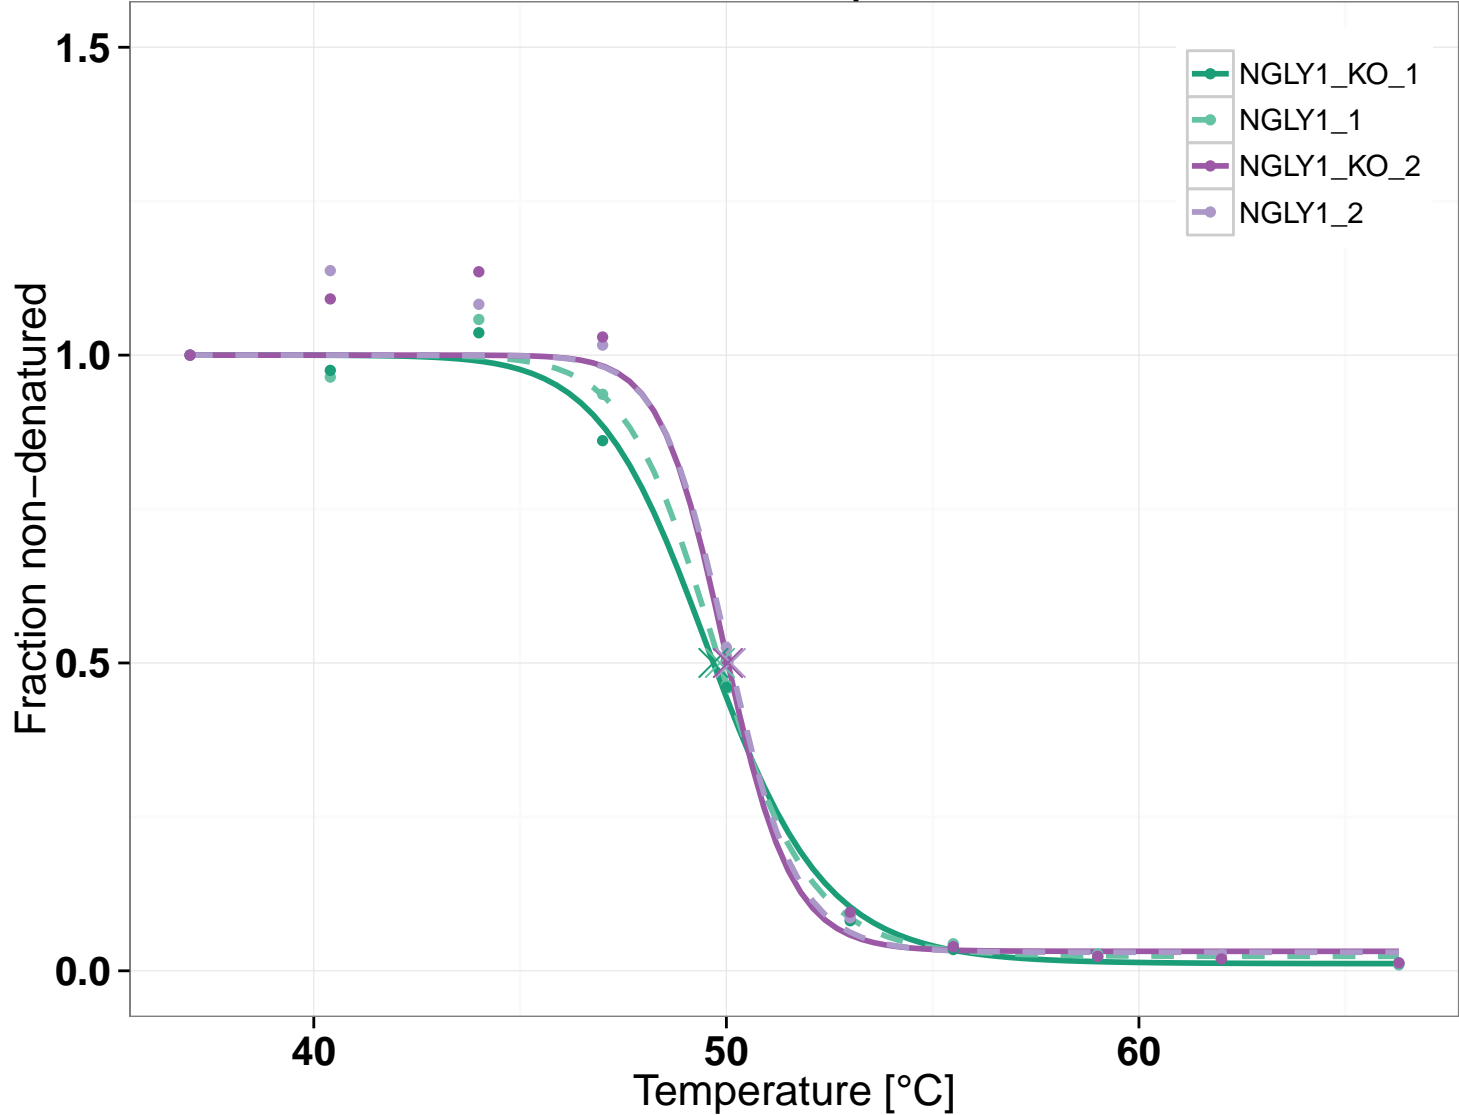

|            | meltPoint | slope | plateau | R2   |
|------------|-----------|-------|---------|------|
| NGLY1_KO_1 | 49.69     | -0.18 | 0.01    | 1    |
| NGLY1_1    | 49.85     | -0.22 | 0.02    | 1    |
| NGLY1_KO_2 | 50.04     | -0.31 | 0.03    | 0.99 |
| NGLY1_2    | 50.11     | -0.29 | 0.03    | 0.99 |

Supplement: Supplementary file 4033 [file 1]

# IPI00000858.2|RDBP

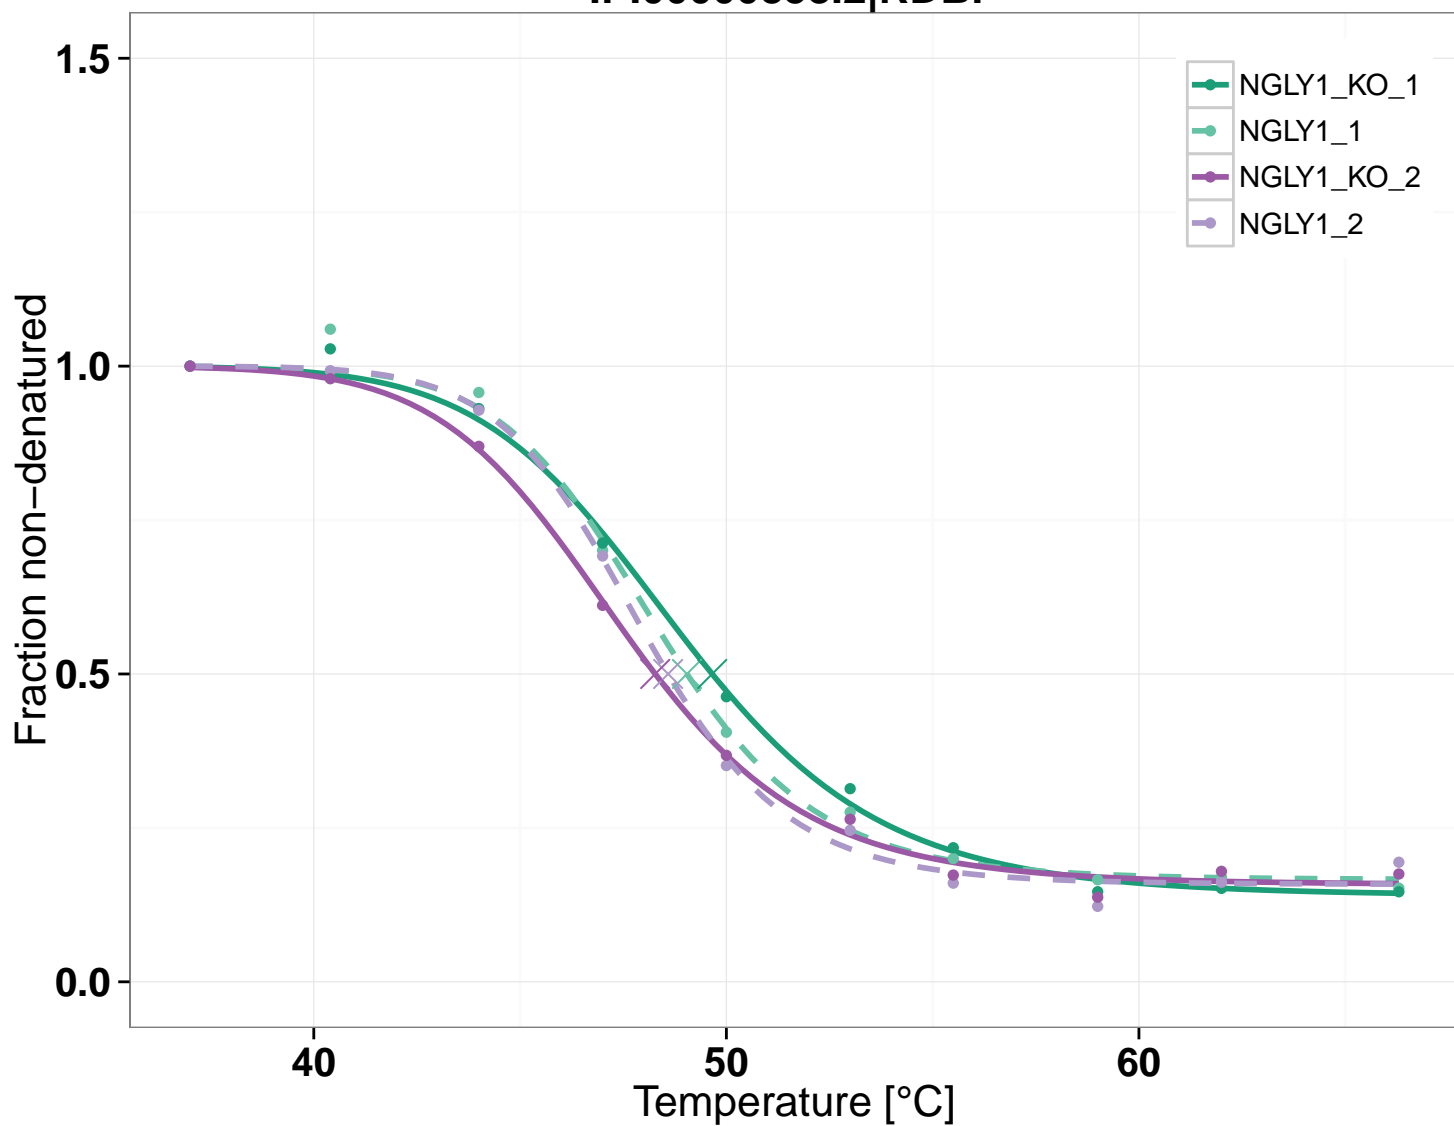

|            | meltPoint | slope  | plateau | R2   |
|------------|-----------|--------|---------|------|
| NGLY1_KO_1 | 49.66     | -0.088 | 0.14    | 1    |
| NGLY1_1    | 49.04     | -0.11  | 0.17    | 0.99 |
| NGLY1_KO_2 | 48.28     | -0.095 | 0.16    | 1    |
| NGLY1_2    | 48.59     | -0.12  | 0.16    | 1    |

Supplement: Supplementary file 4034 [file 1]

IPI00306845.4|CBFA2T3

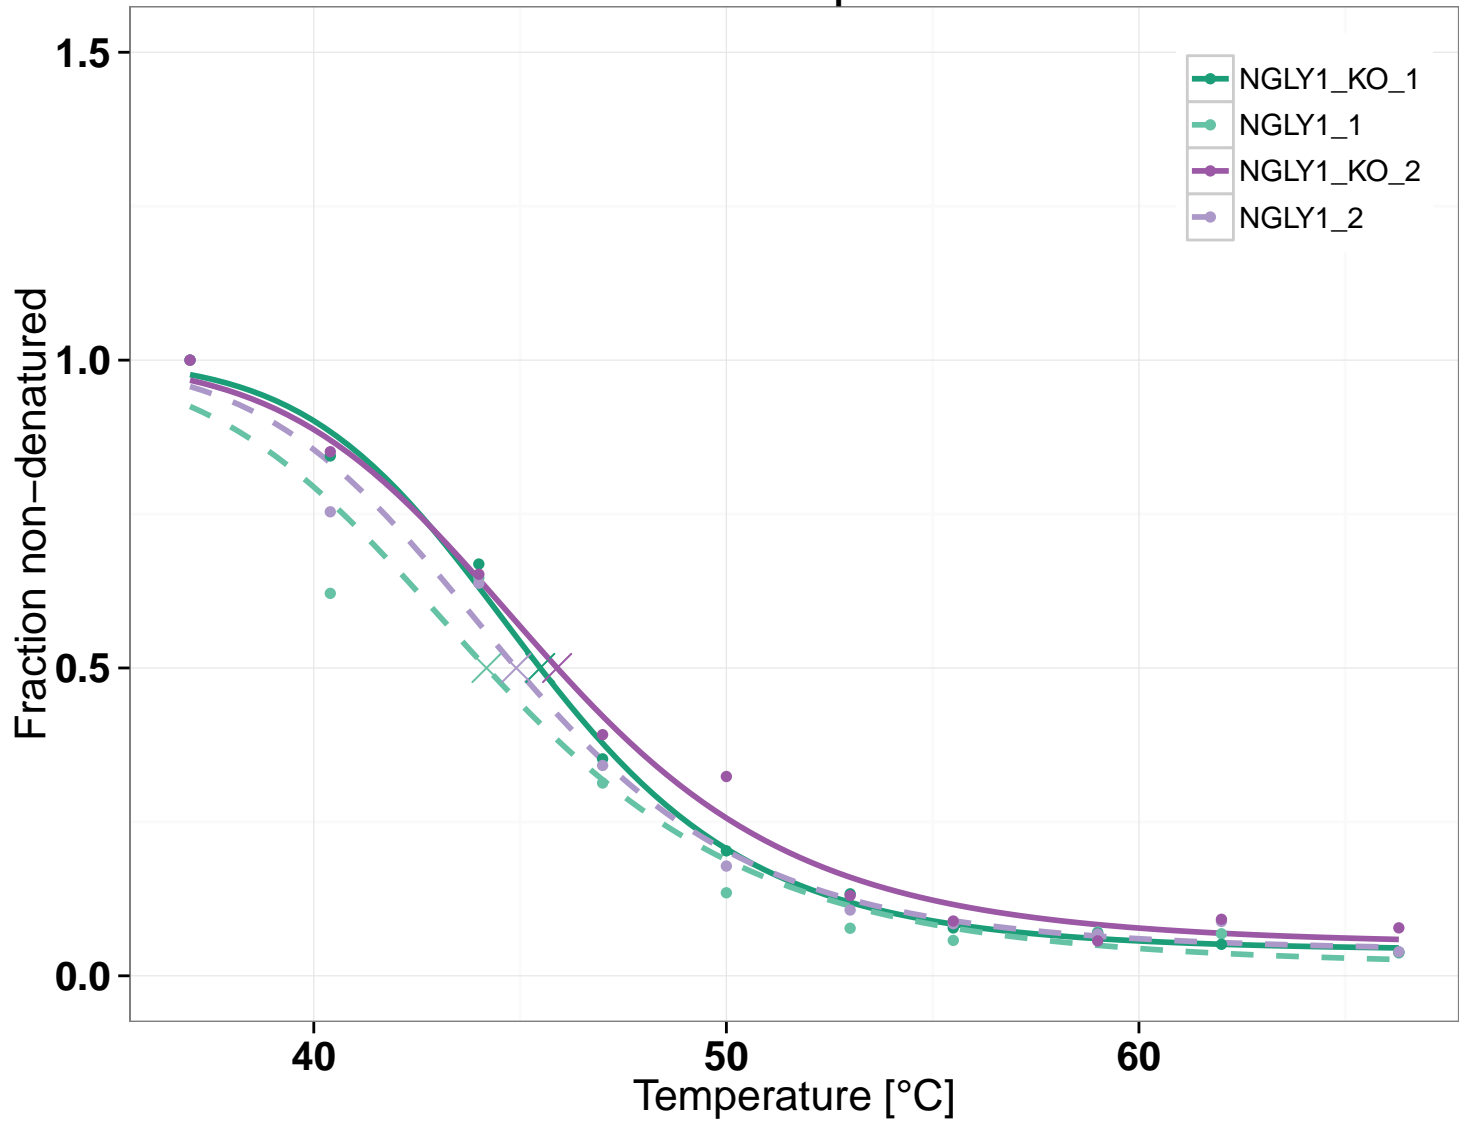

|            | meltPoint | slope  | plateau | R2   |
|------------|-----------|--------|---------|------|
| NGLY1_KO_1 | 45.49     | -0.089 | 0.04    | 1    |
| NGLY1_1    | 44.19     | -0.074 | 0.01    | 0.95 |
| NGLY1_KO_2 | 45.9      | -0.077 | 0.05    | 0.99 |
| NGLY1_2    | 44.91     | -0.081 | 0.04    | 0.99 |

Supplement: Supplementary file 4035 [file 1]

IPI00329650.1|NUP35

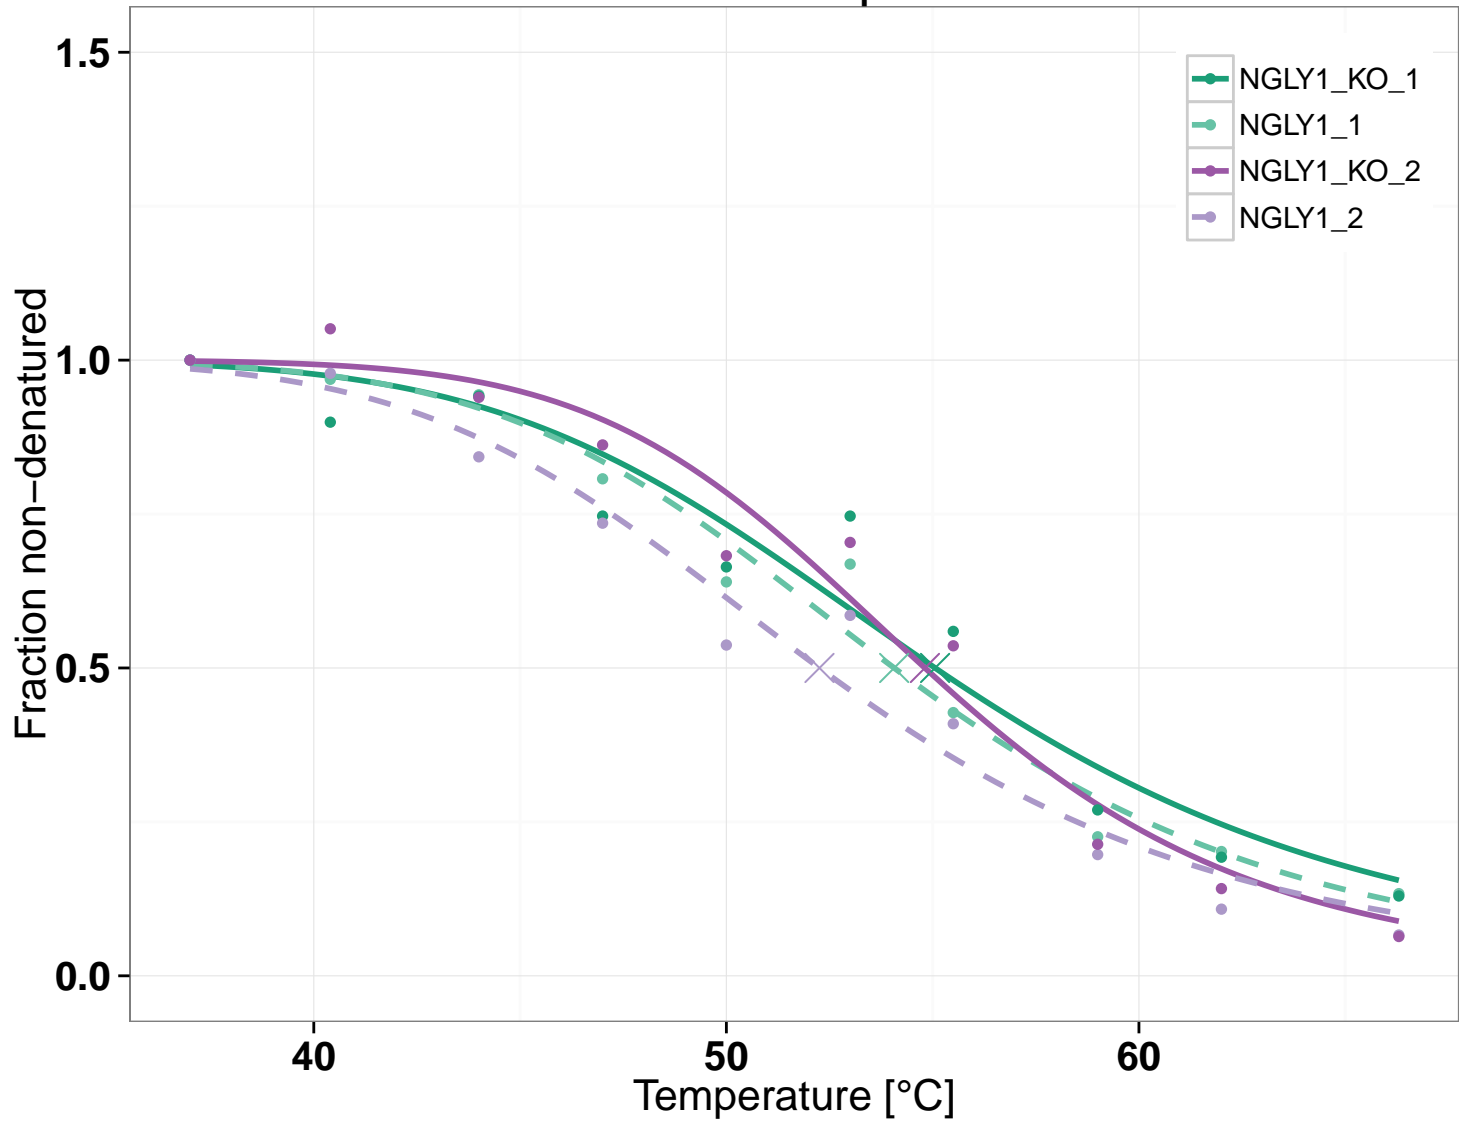

|            | meltPoint | slope  | plateau | R2   |
|------------|-----------|--------|---------|------|
| NGLY1_KO_1 | 55.06     | -0.047 | 0       | 0.94 |
| NGLY1_1    | 54.07     | -0.052 | 0       | 0.98 |
| NGLY1_KO_2 | 54.81     | -0.063 | 0       | 0.97 |
| NGLY1_2    | 52.26     | -0.051 | 0       | 0.97 |

Supplement: Supplementary file 4036 [file 1]

# IPI00641770.1|PI4KB

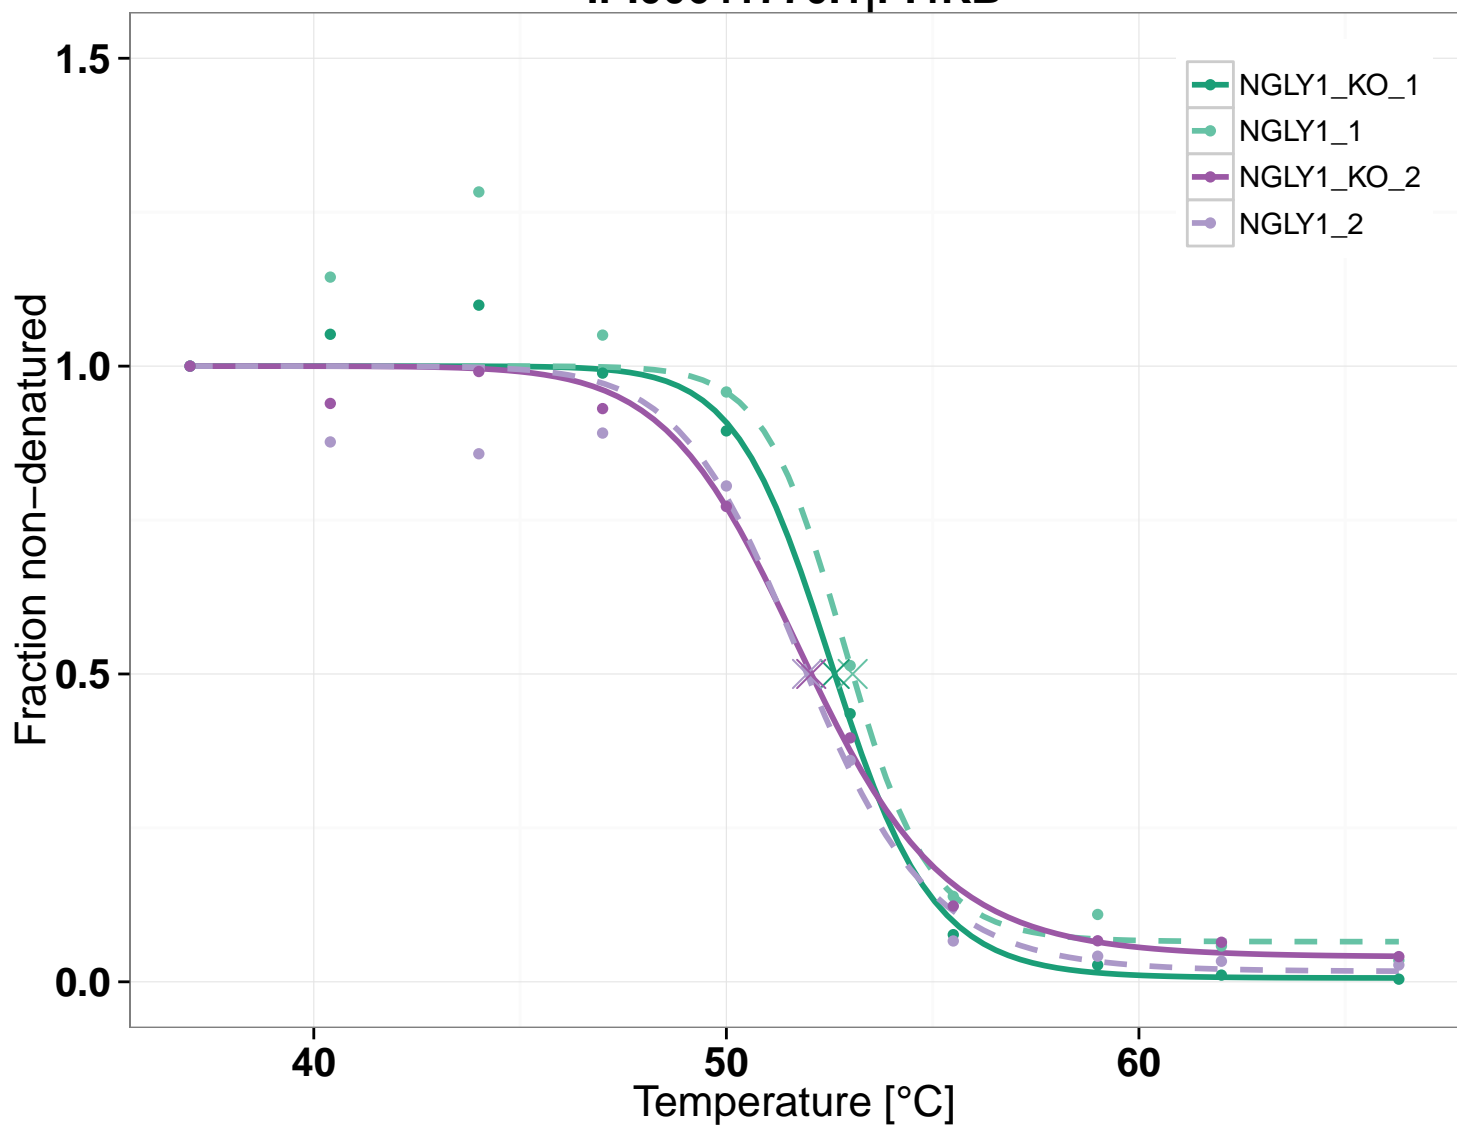

|            | meltPoint | slope | plateau | R2   |
|------------|-----------|-------|---------|------|
| NGLY1_KO_1 | 52.63     | -0.21 | 0.01    | 0.99 |
| NGLY1_1    | 53.06     | -0.23 | 0.07    | 0.95 |
| NGLY1_KO_2 | 52.06     | -0.14 | 0.04    | 1    |
| NGLY1_2    | 51.96     | -0.16 | 0.02    | 0.97 |

Supplement: Supplementary file 4037 [file 1]

IPI00549736.3|ASCC2

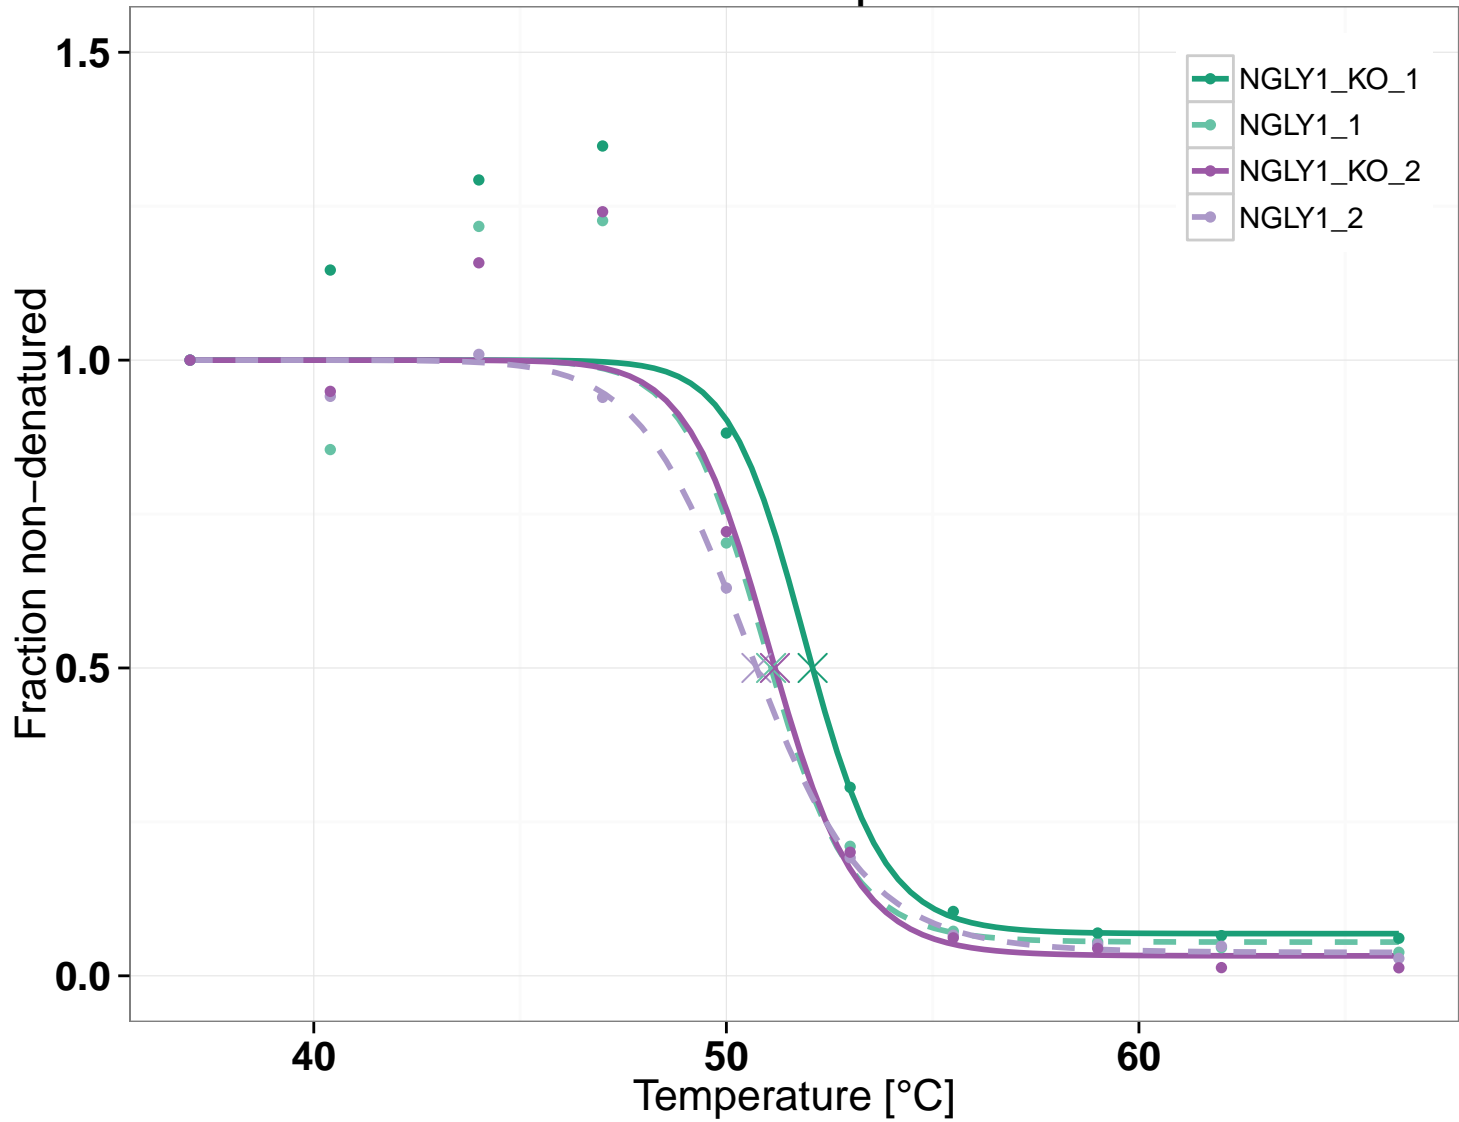

|            | meltPoint | slope | plateau | R2   |
|------------|-----------|-------|---------|------|
| NGLY1_KO_1 | 52.09     | -0.25 | 0.07    | 0.92 |
| NGLY1_1    | 51.08     | -0.23 | 0.05    | 0.94 |
| NGLY1_KO_2 | 51.18     | -0.23 | 0.03    | 0.96 |
| NGLY1_2    | 50.73     | -0.18 | 0.04    | 1    |

Supplement: Supplementary file 4038 [file 1]

# IPI00020530.1|THEM2

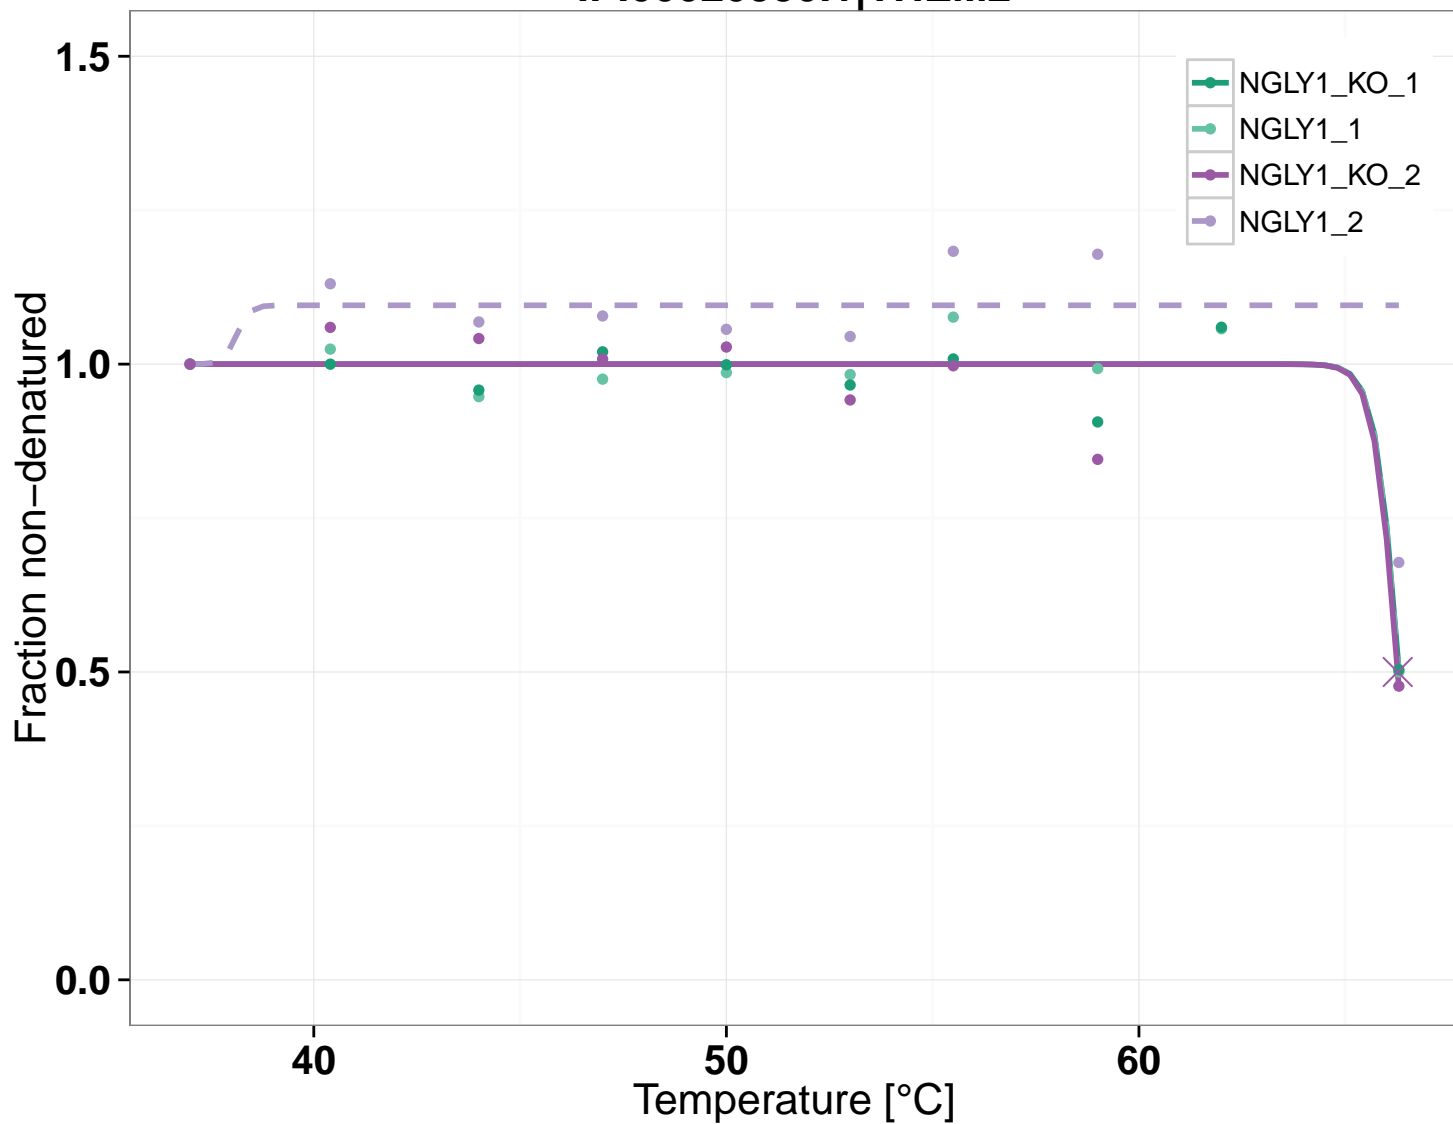

|            | meltPoint | slope | plateau | R2   |
|------------|-----------|-------|---------|------|
| NGLY1_KO_1 | -         | -0.85 | 0       | 0.93 |
| NGLY1_1    | -         | -0.85 | 0       | 0.94 |
| NGLY1_KO_2 | 66.27     | -0.85 | 0       | 0.72 |
| NGLY1_2    | -         | 0.16  | 1.1     | 0.03 |

Supplement: Supplementary file 4039 [file 1]

IPI00465141.2|TOP1MT

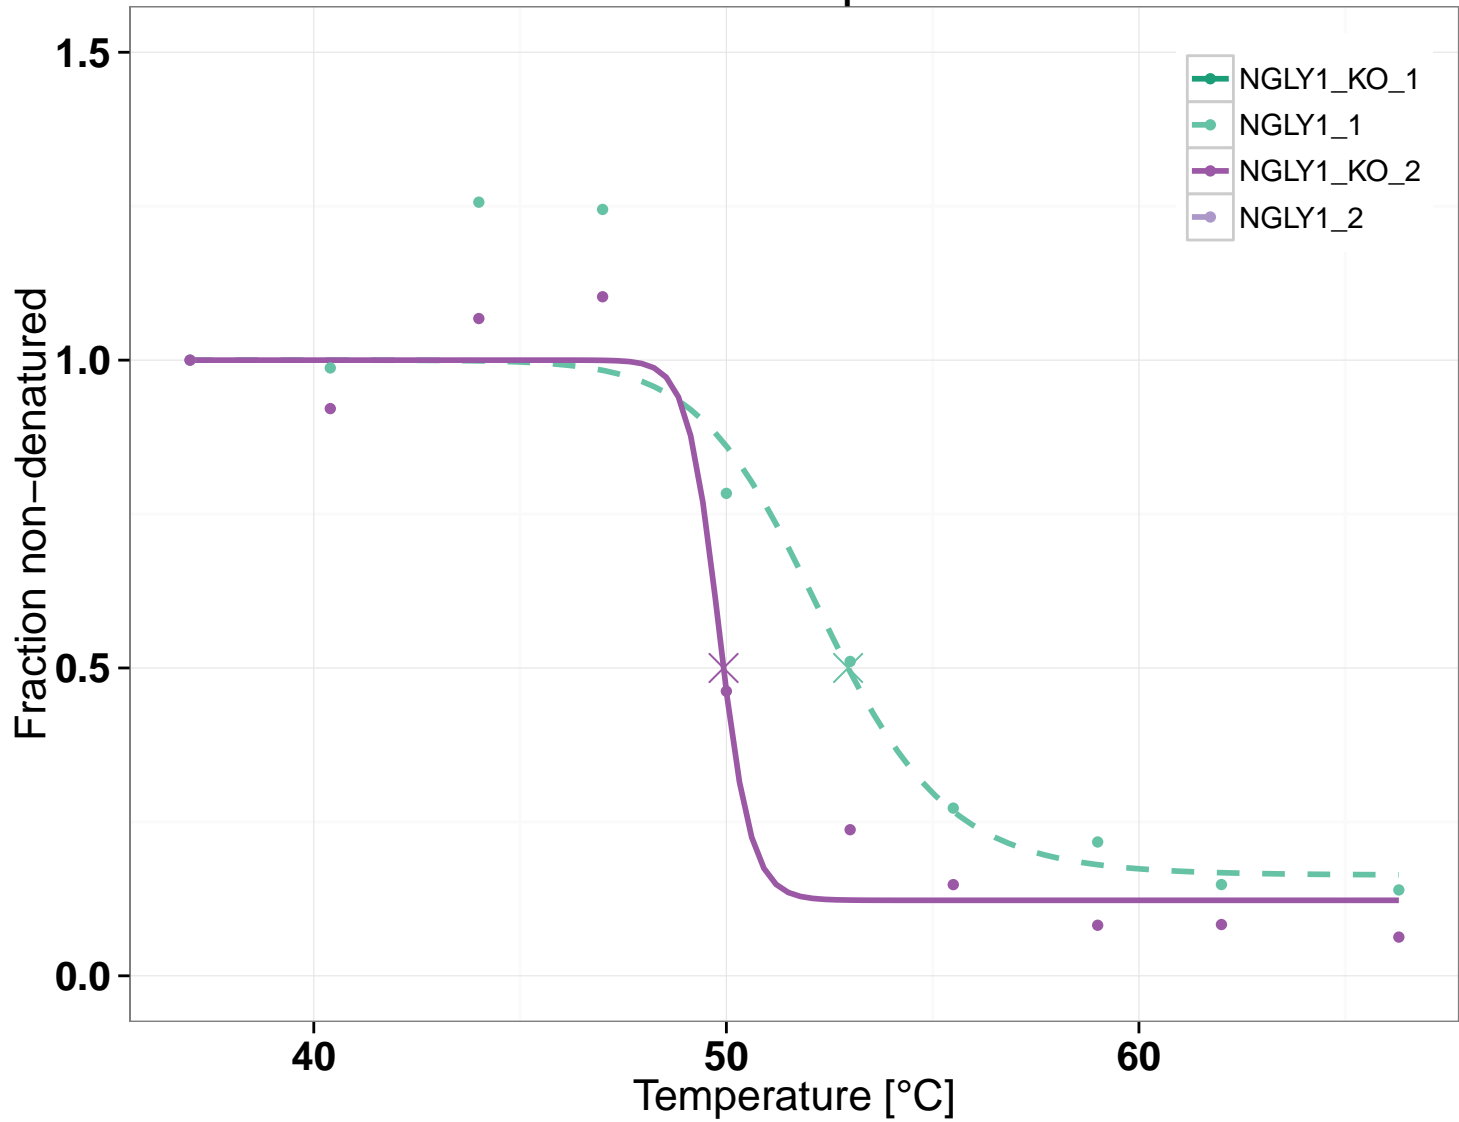

|            | meltPoint | slope | plateau | R2   |
|------------|-----------|-------|---------|------|
| NGLY1_KO_1 | -         | -     | -       | -    |
| NGLY1_1    | 52.95     | -0.14 | 0.16    | 0.92 |
| NGLY1_KO_2 | 49.93     | -0.57 | 0.12    | 0.98 |
| NGLY1_2    | -         | -     | -       | -    |

Supplement: Supplementary file 4040 [file 1]

# IPI00011200.5|PHGDH

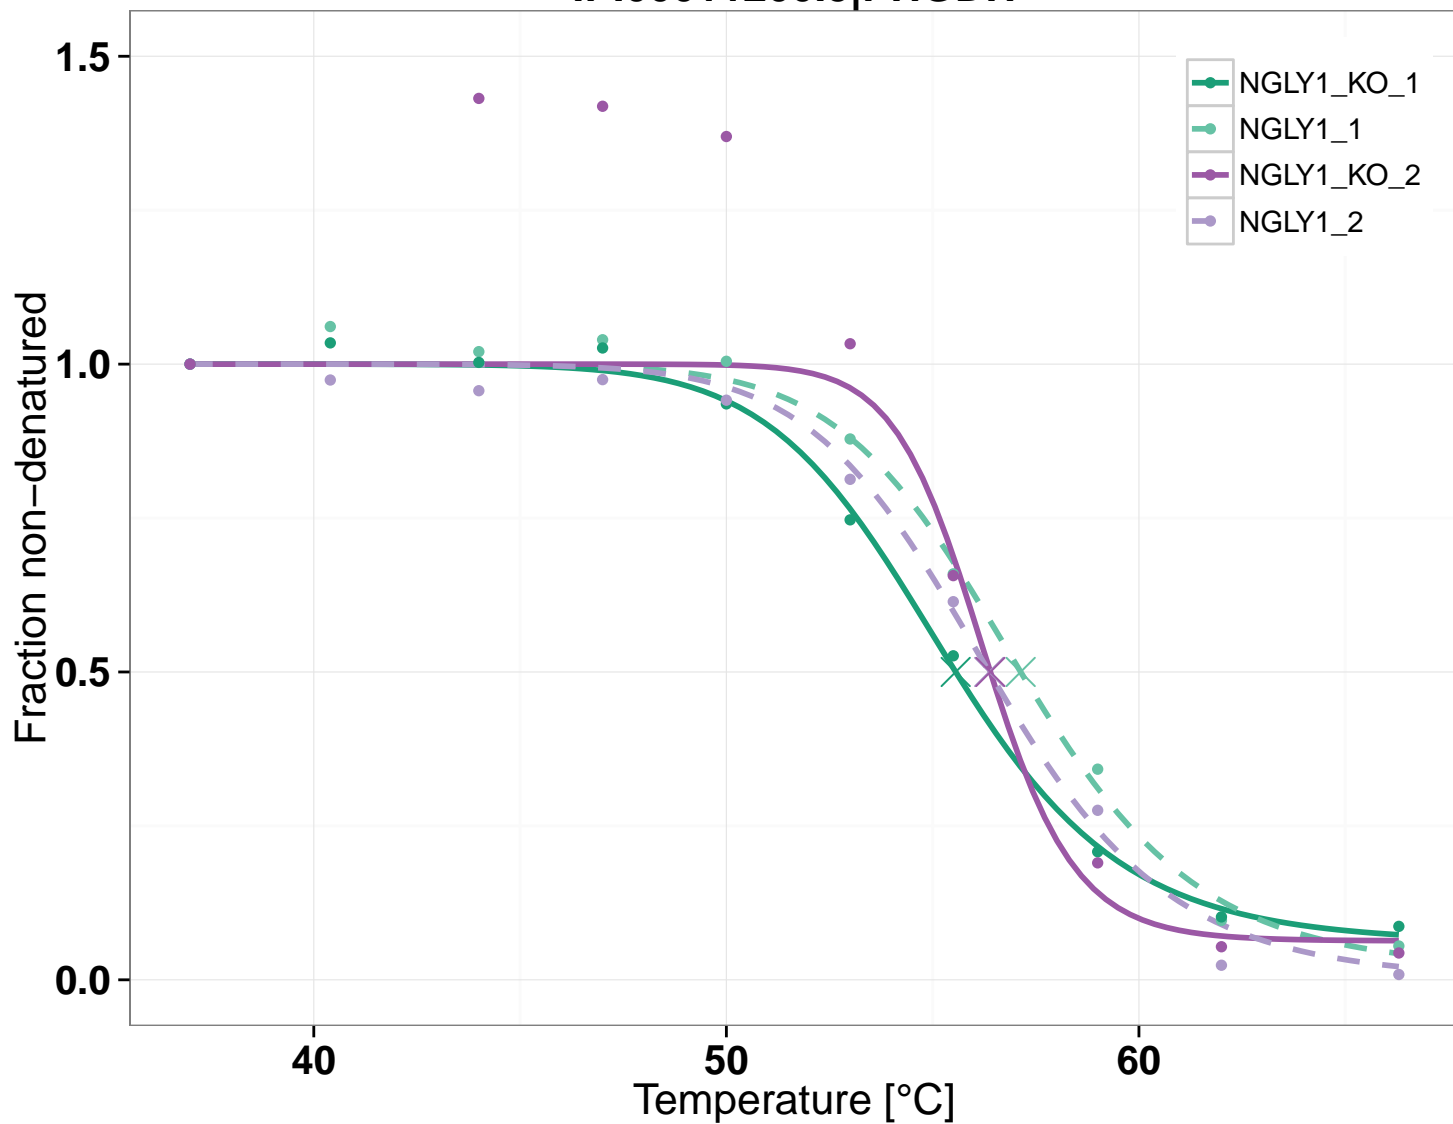

|            | meltPoint | slope | plateau | R2   |
|------------|-----------|-------|---------|------|
| NGLY1_KO_1 | 55.56     | -0.11 | 0.06    | 1    |
| NGLY1_1    | 57.13     | -0.11 | 0.02    | 0.99 |
| NGLY1_KO_2 | 56.4      | -0.21 | 0.06    | 0.75 |
| NGLY1_2    | 56.37     | -0.11 | 0       | 0.99 |

Supplement: Supplementary file 4041 [file 1]

IPI00339297.1|GALNT4

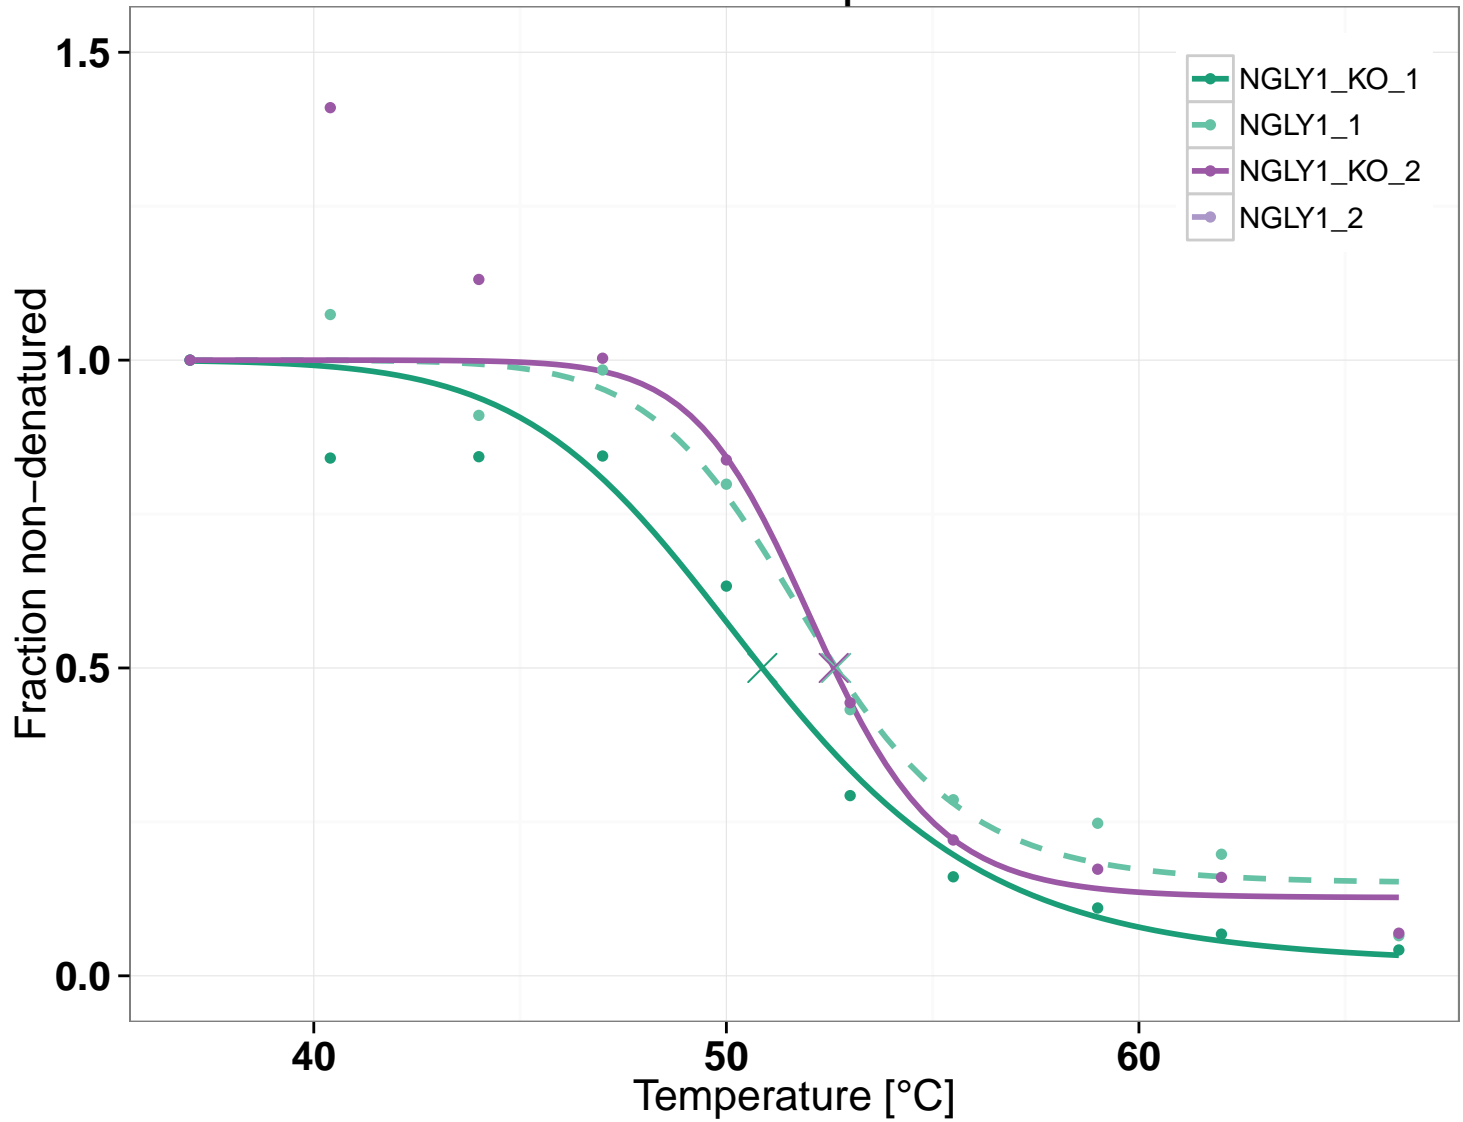

|            | meltPoint | slope  | plateau | R2   |
|------------|-----------|--------|---------|------|
| NGLY1_KO_1 | 50.87     | -0.086 | 0.02    | 0.97 |
| NGLY1_1    | 52.66     | -0.11  | 0.15    | 0.98 |
| NGLY1_KO_2 | 52.6      | -0.15  | 0.13    | 0.91 |
| NGLY1_2    | -         | -      | -       | -    |

Supplement: Supplementary file 4042 [file 1]

IPI00019373.2|TMEM184C

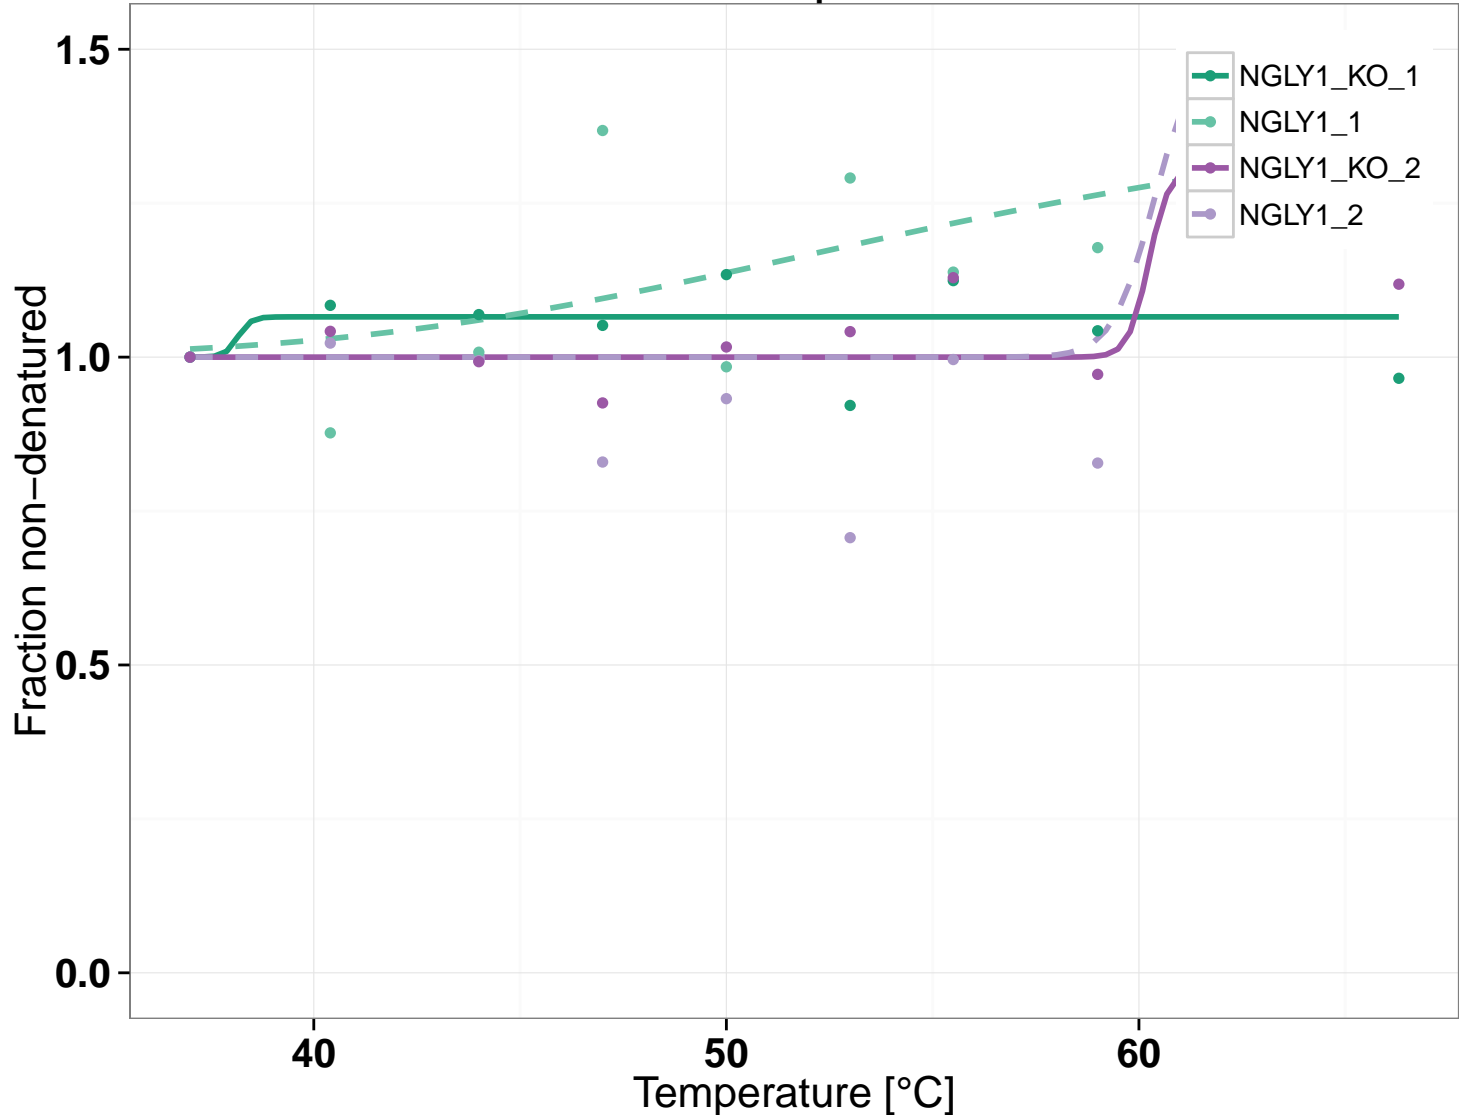

|            | meltPoint | slope | plateau | R2   |
|------------|-----------|-------|---------|------|
| NGLY1_KO_1 | —         | 0.11  | 1.07    | 0.06 |
| NGLY1_1    | —         | 0.015 | 1.46    | 0.48 |
| NGLY1_KO_2 | —         | 0.32  | 1.31    | 0.58 |
| NGLY1_2    | —         | 0.25  | 1.5     | 0.72 |

Supplement: Supplementary file 4043 [file 1]

# IPI00013439.3|JUNB

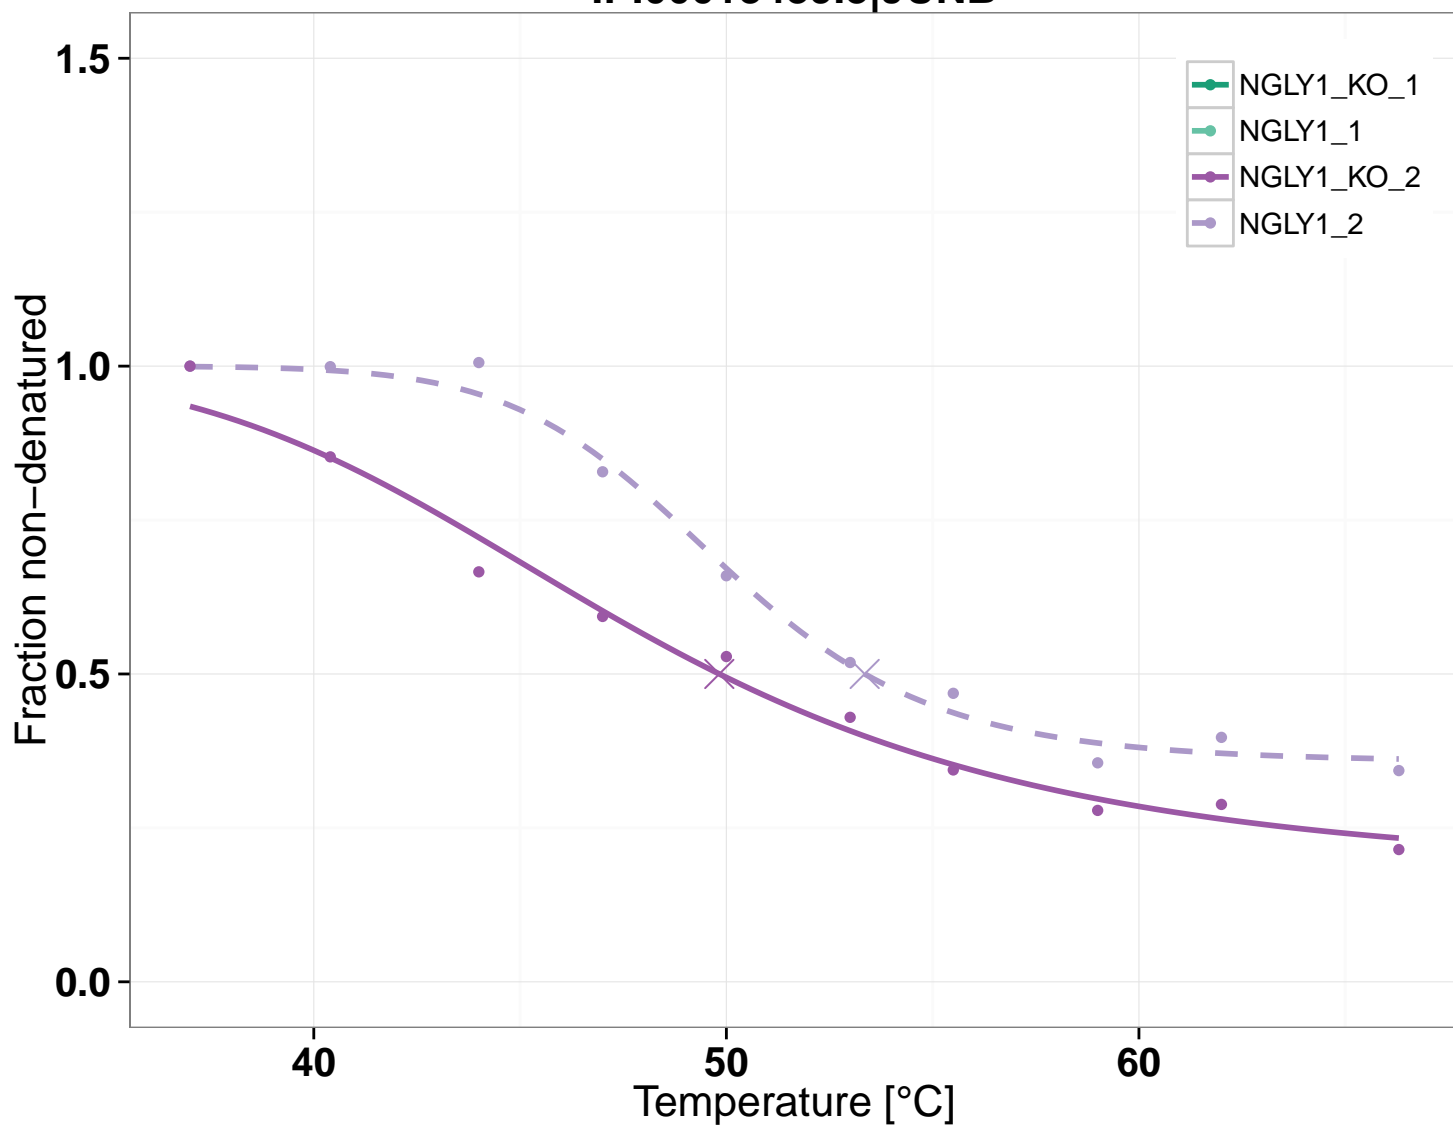

|            | meltPoint | slope  | plateau | R2   |
|------------|-----------|--------|---------|------|
| NGLY1_KO_1 | —         | —      | —       | —    |
| NGLY1_1    | —         | —      | —       | —    |
| NGLY1_KO_2 | 49.83     | -0.04  | 0.17    | 0.98 |
| NGLY1_2    | 53.35     | -0.063 | 0.36    | 0.99 |

Supplement: Supplementary file 4044 [file 1]

# IPI00554705.1|DCTD

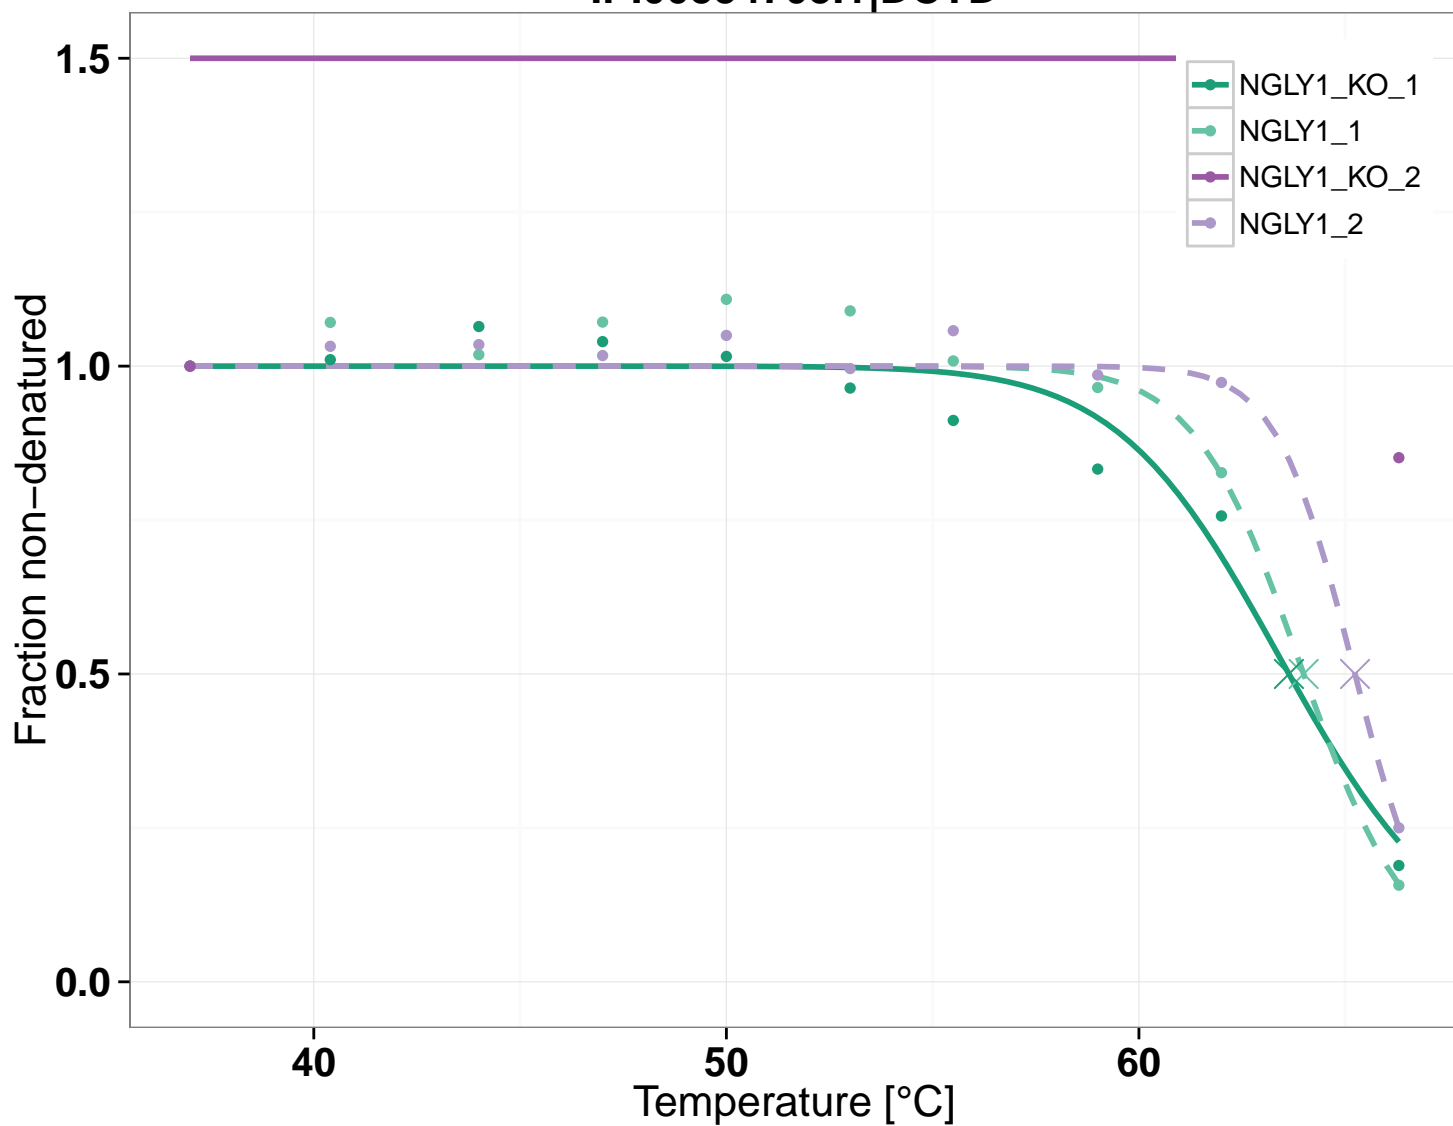

|            | meltPoint | slope | plateau | R2    |
|------------|-----------|-------|---------|-------|
| NGLY1_KO_1 | 63.64     | -0.12 | 0       | 0.96  |
| NGLY1_1    | 63.99     | -0.19 | 0       | 0.96  |
| NGLY1_KO_2 | -         | -     | 1.5     | -2.27 |
| NGLY1_2    | 65.24     | -0.26 | 0       | 0.98  |

Supplement: Supplementary file 4045 [file 1]

IPI00031523.4|HSP90AA2

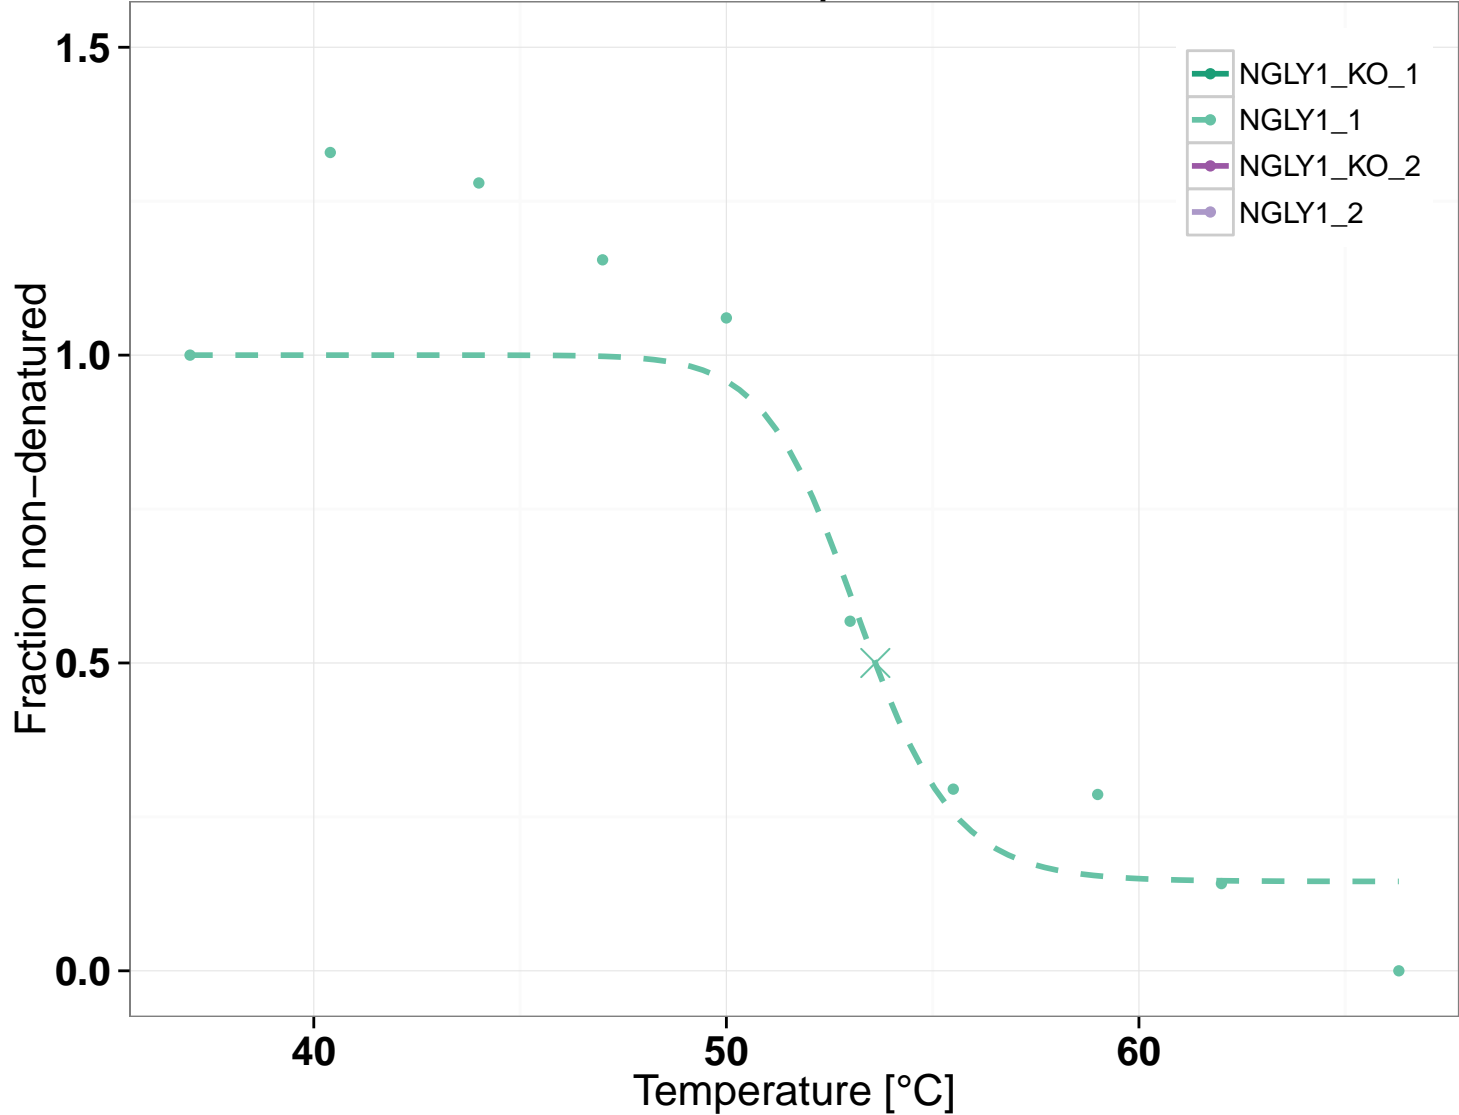

|            | meltPoint | slope | plateau | R2   |
|------------|-----------|-------|---------|------|
| NGLY1_KO_1 | -         | -     | -       | -    |
| NGLY1_1    | 53.61     | -0.19 | 0.15    | 0.89 |
| NGLY1_KO_2 | -         | -     | -       | -    |
| NGLY1_2    | -         | -     | -       | -    |

Supplement: Supplementary file 4046 [file 1]

IPI00183979.6|ZDHHC18

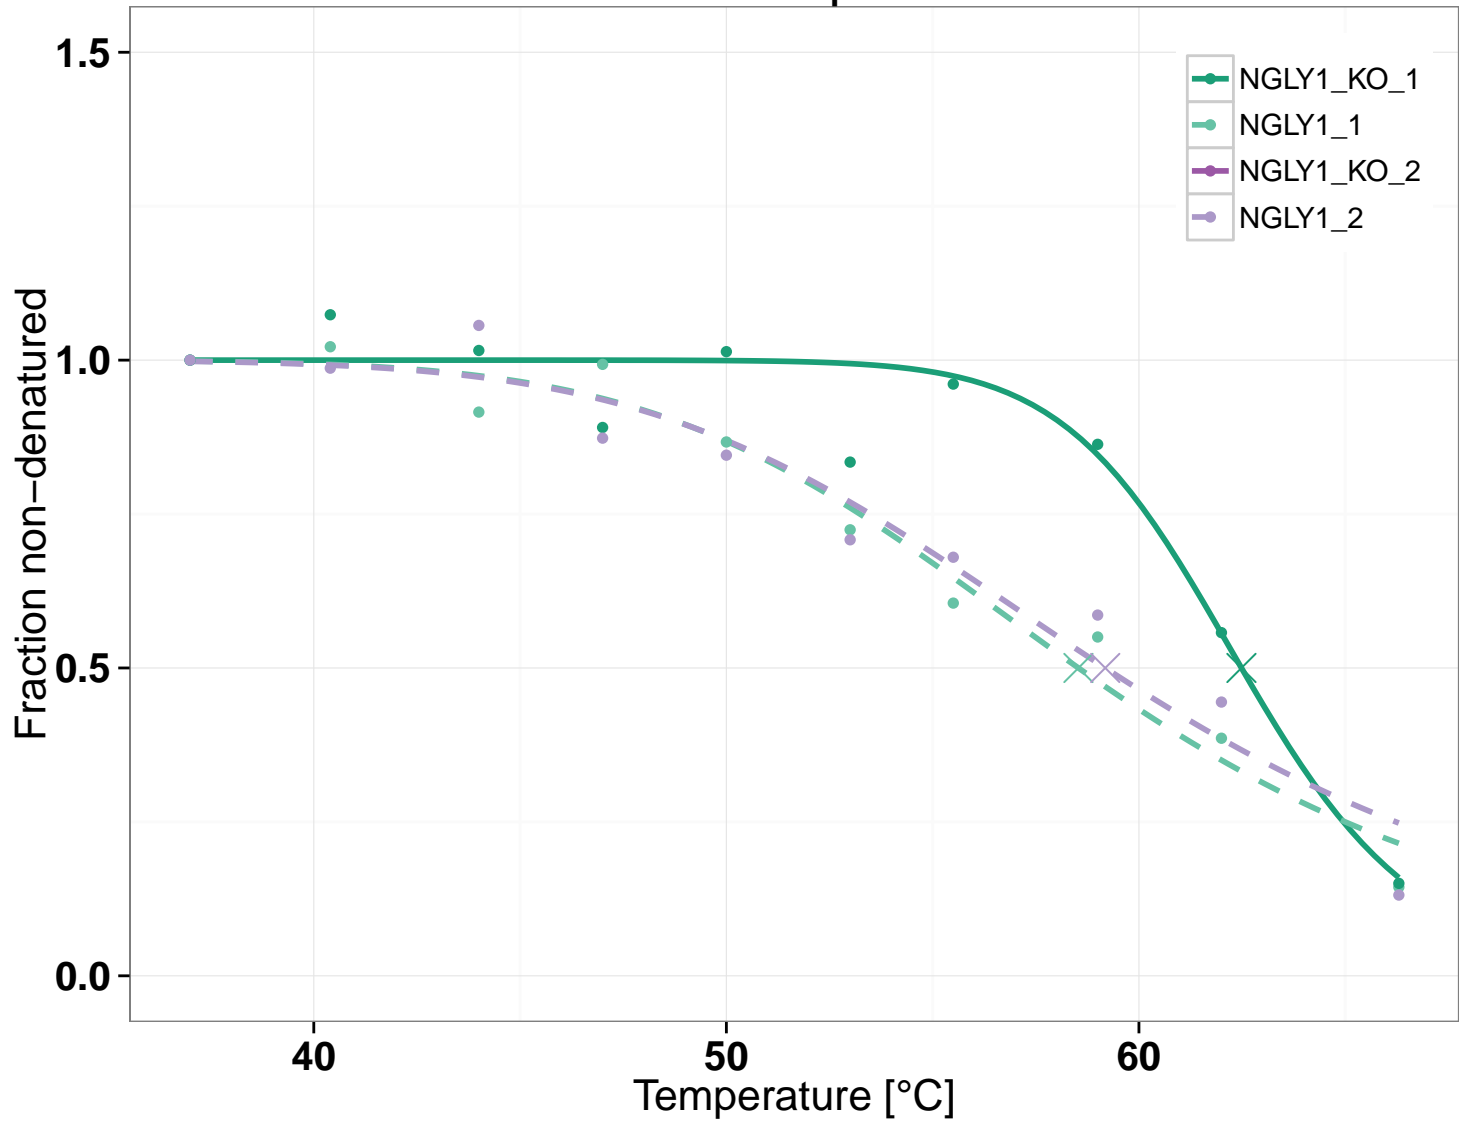

|            | meltPoint | slope  | plateau | R2   |
|------------|-----------|--------|---------|------|
| NGLY1_KO_1 | 62.48     | -0.12  | 0       | 0.94 |
| NGLY1_1    | 58.53     | -0.049 | 0       | 0.97 |
| NGLY1_KO_2 | -         | -      | -       | -    |
| NGLY1_2    | 59.18     | -0.045 | 0       | 0.95 |

Supplement: Supplementary file 4047 [file 1]

# IPI00005635.2|TTLL4

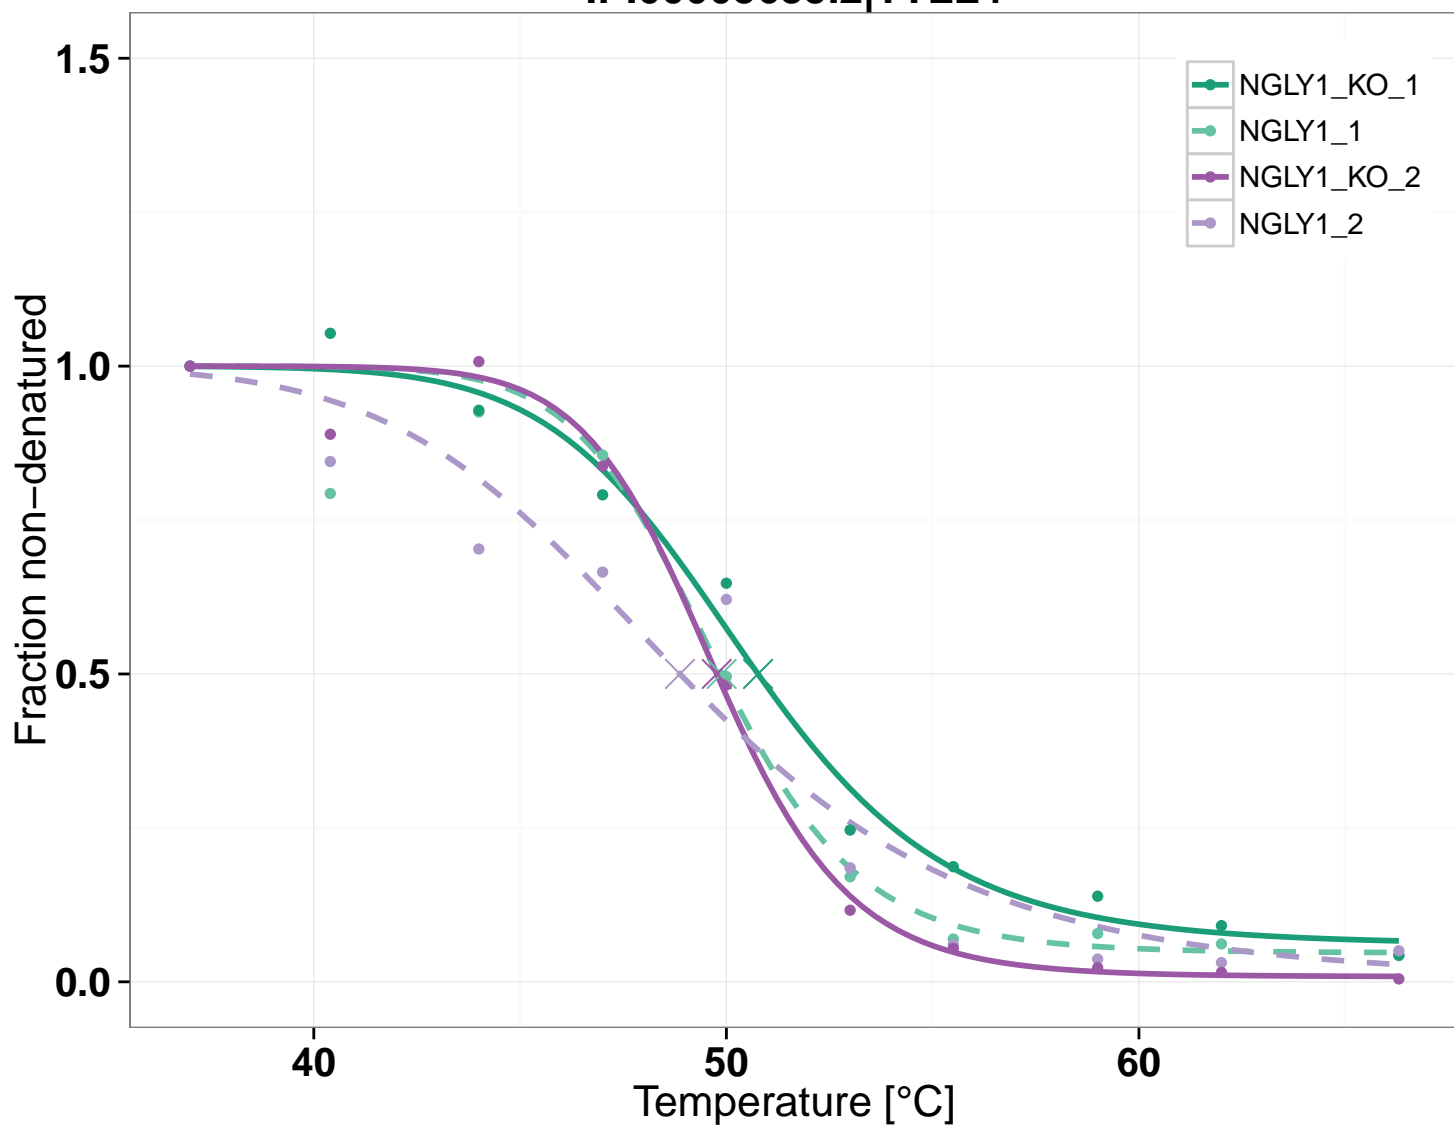

|            | meltPoint | slope  | plateau | R2   |
|------------|-----------|--------|---------|------|
| NGLY1_KO_1 | 50.77     | -0.097 | 0.06    | 0.99 |
| NGLY1_1    | 49.88     | -0.14  | 0.05    | 0.97 |
| NGLY1_KO_2 | 49.77     | -0.15  | 0.01    | 0.99 |
| NGLY1_2    | 48.88     | -0.071 | 0       | 0.94 |

Supplement: Supplementary file 4048 [file 1]

IPI00219436.3|SEC11C

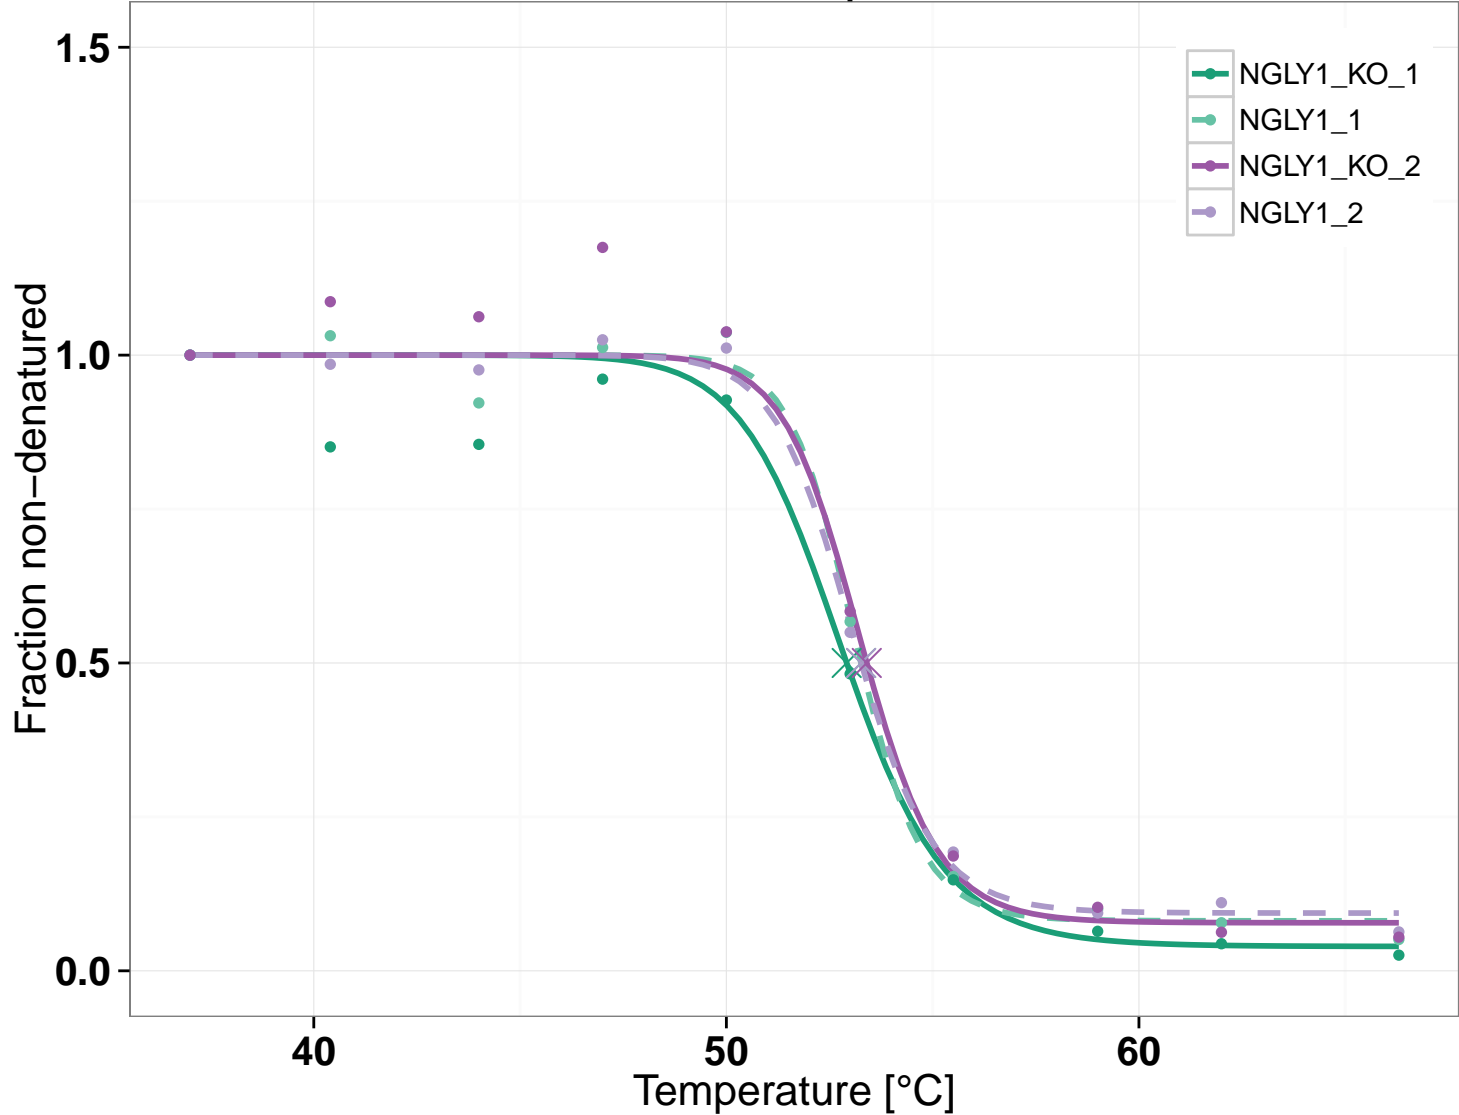

|            | meltPoint | slope | plateau | R2   |
|------------|-----------|-------|---------|------|
| NGLY1_KO_1 | 52.92     | -0.19 | 0.04    | 0.97 |
| NGLY1_1    | 53.26     | -0.28 | 0.08    | 0.99 |
| NGLY1_KO_2 | 53.4      | -0.25 | 0.08    | 0.98 |
| NGLY1_2    | 53.27     | -0.23 | 0.09    | 1    |

Supplement: Supplementary file 4049 [file 1]

IPI00218465.10|PLAA

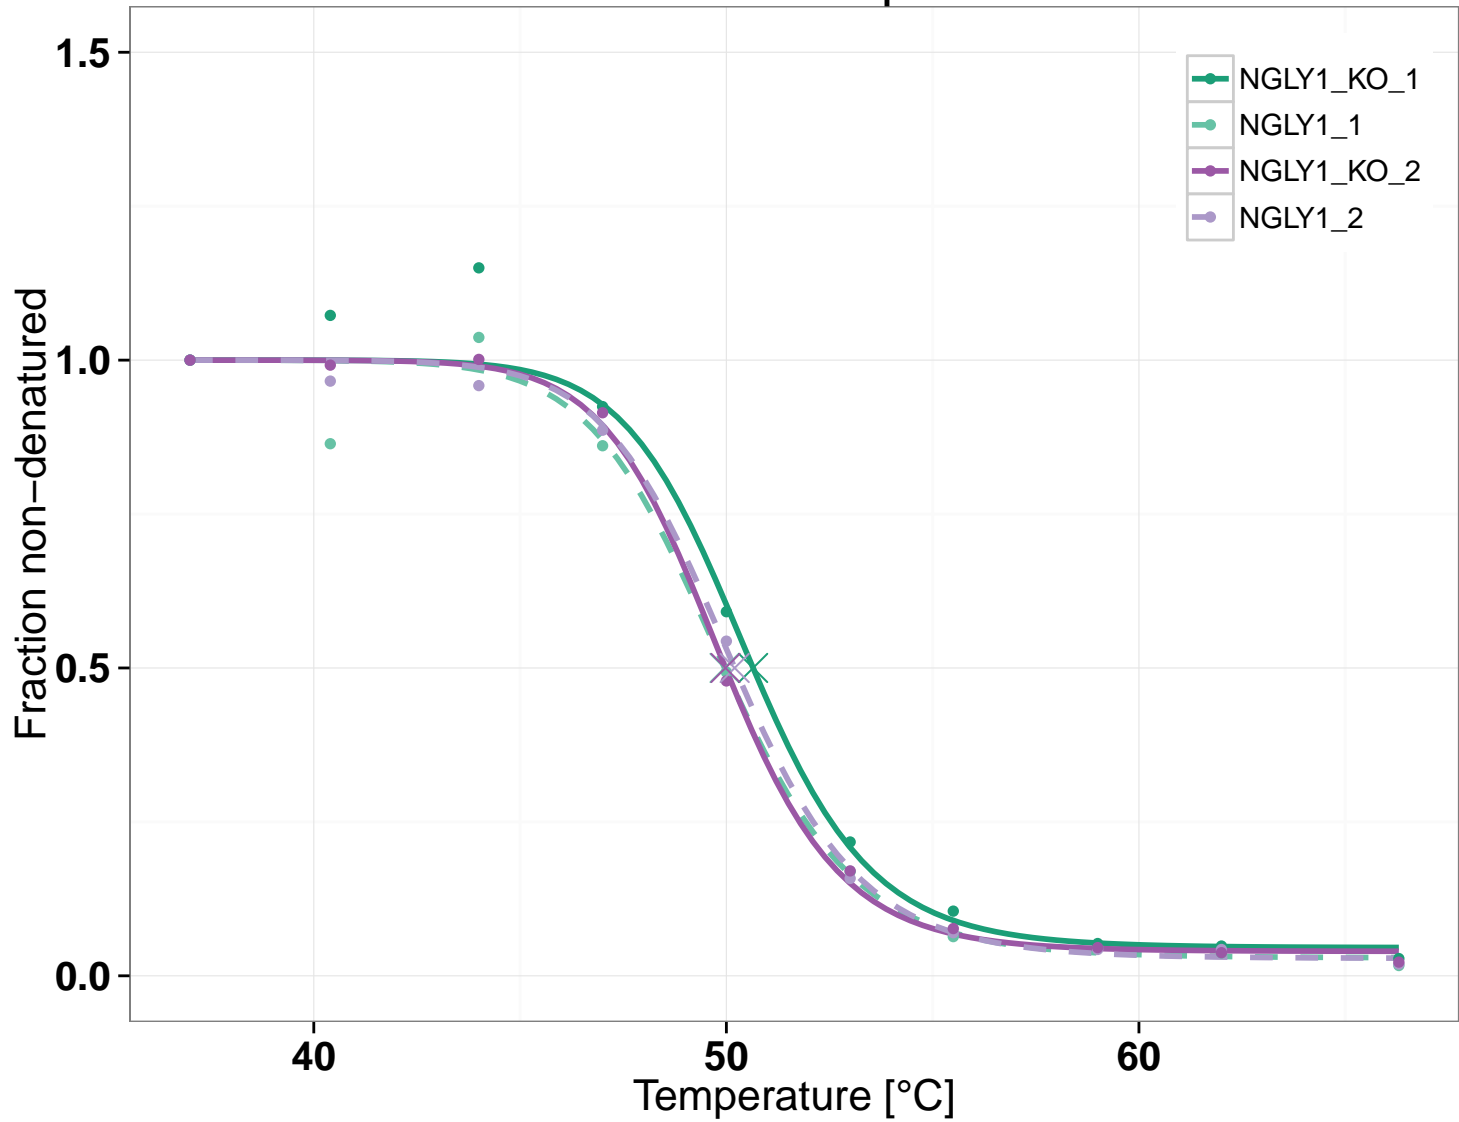

|            | meltPoint | slope | plateau | R2   |
|------------|-----------|-------|---------|------|
| NGLY1_KO_1 | 50.65     | -0.16 | 0.05    | 0.99 |
| NGLY1_1    | 49.96     | -0.15 | 0.03    | 0.99 |
| NGLY1_KO_2 | 49.98     | -0.17 | 0.04    | 1    |
| NGLY1_2    | 50.2      | -0.15 | 0.03    | 1    |

Supplement: Supplementary file 4050 [file 1]

IPI00014481.4|AAMP

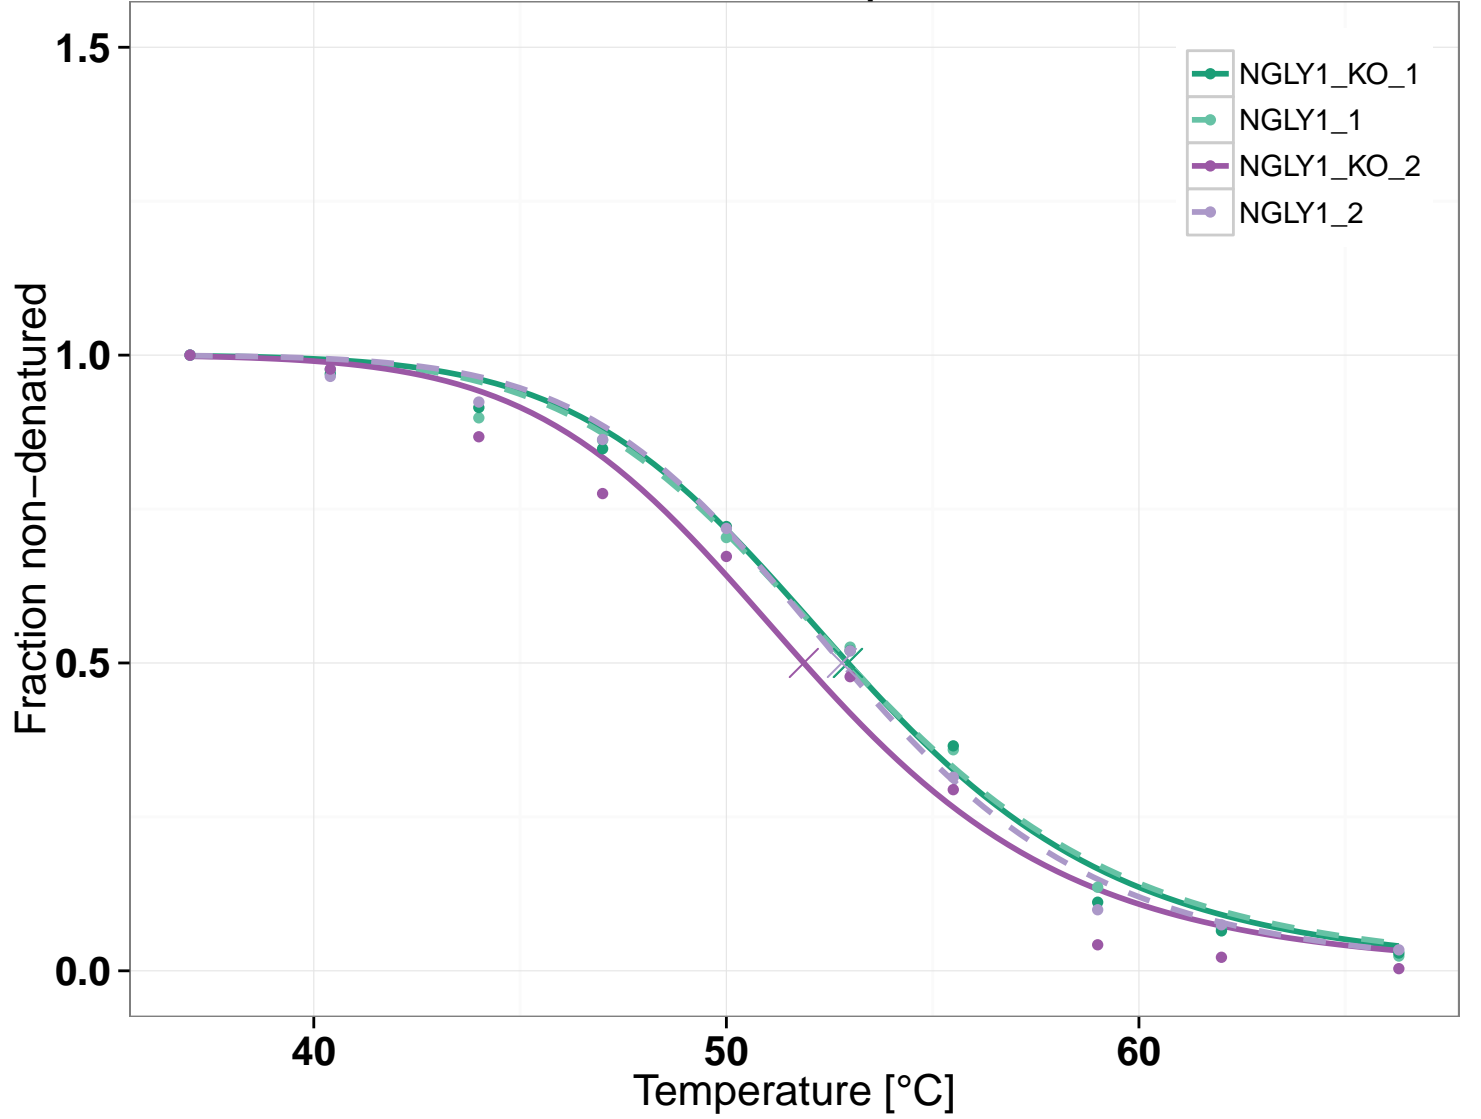

|            | meltPoint | slope  | plateau | R2   |
|------------|-----------|--------|---------|------|
| NGLY1_KO_1 | 52.95     | -0.076 | 0       | 0.99 |
| NGLY1_1    | 52.94     | -0.073 | 0       | 0.99 |
| NGLY1_KO_2 | 51.88     | -0.076 | 0       | 0.98 |
| NGLY1_2    | 52.8      | -0.08  | 0       | 1    |

Supplement: Supplementary file 4051 [file 1]

IPI00170517.1|TMEM115

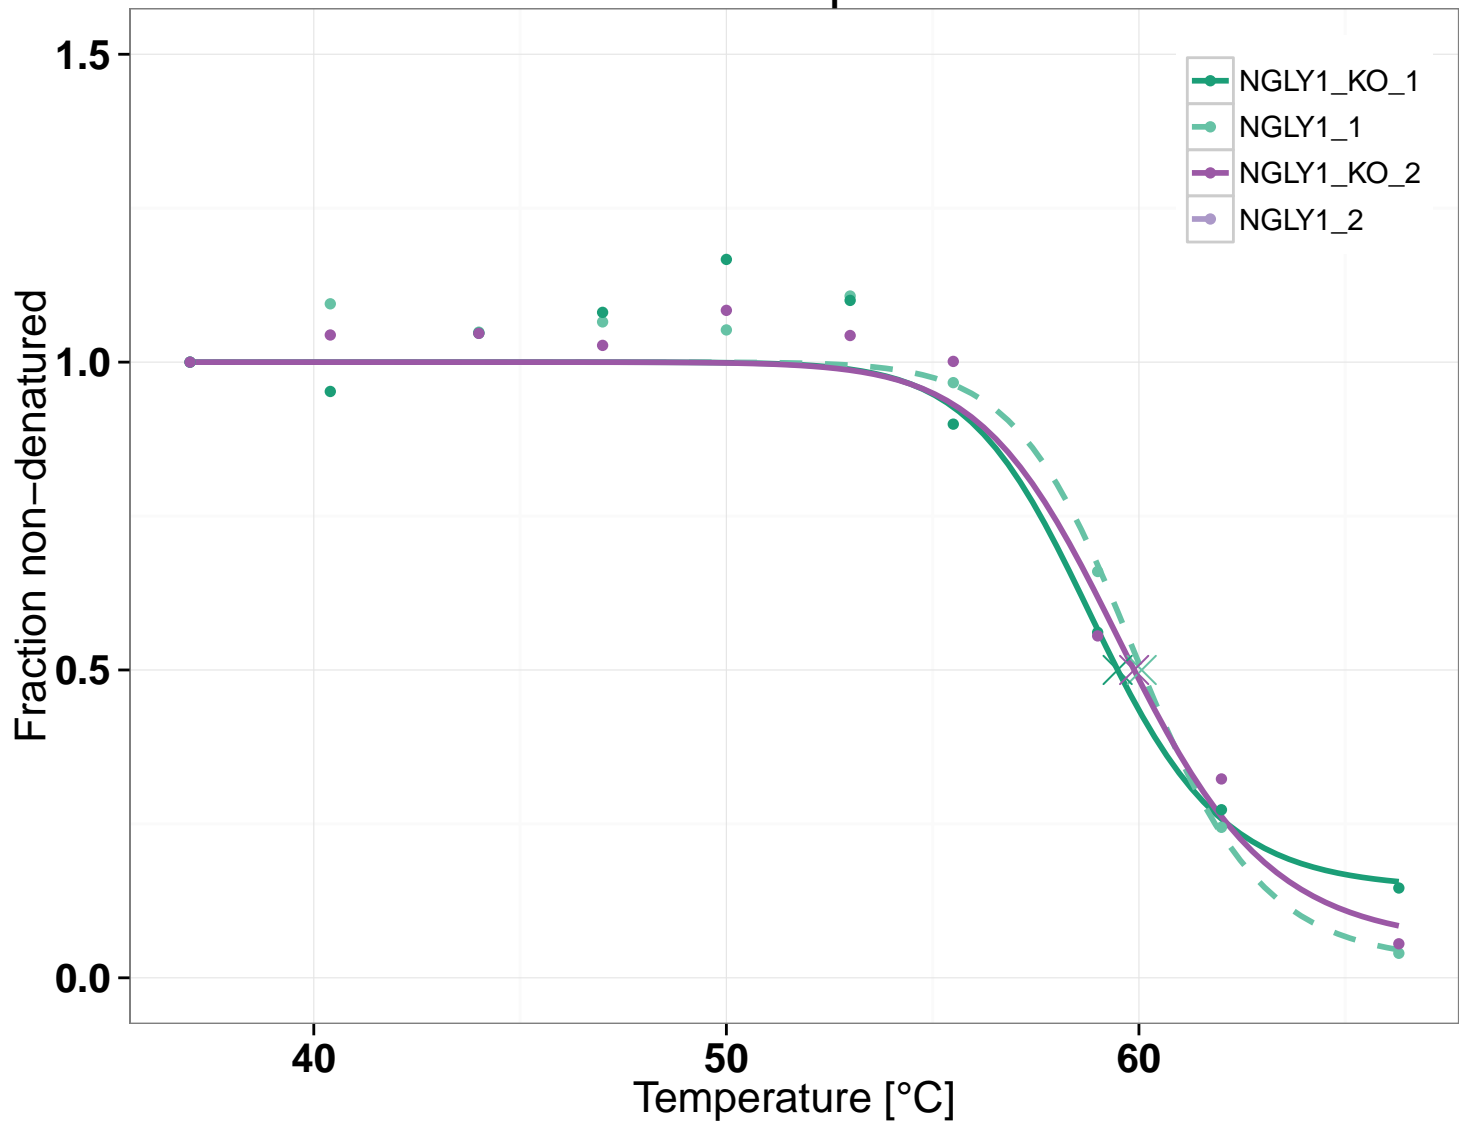

|            | meltPoint | slope | plateau | R2   |
|------------|-----------|-------|---------|------|
| NGLY1_KO_1 | 59.48     | -0.14 | 0.14    | 0.96 |
| NGLY1_1    | 60.07     | -0.16 | 0.02    | 0.98 |
| NGLY1_KO_2 | 59.88     | -0.13 | 0.05    | 0.98 |
| NGLY1_2    | -         | -     | -       | -    |

Supplement: Supplementary file 4052 [file 1]

IPI00002901.5|TEAD1

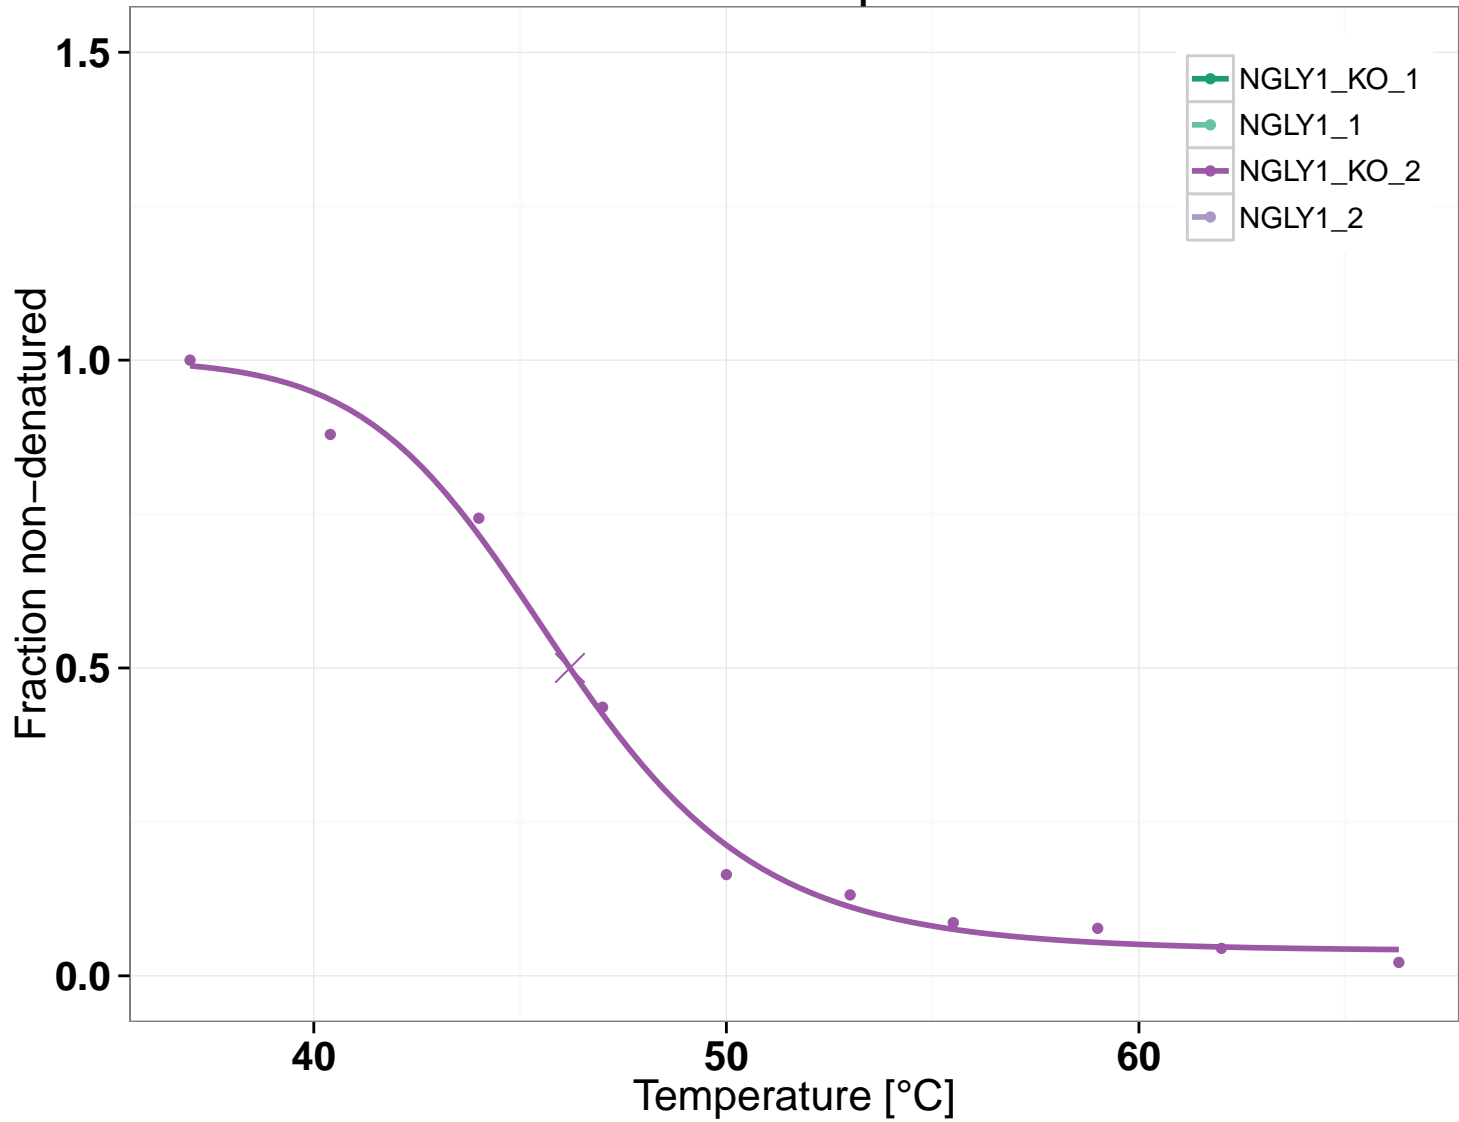

|            | meltPoint | slope | plateau | R2   |
|------------|-----------|-------|---------|------|
| NGLY1_KO_1 | -         | -     | -       | -    |
| NGLY1_1    | -         | -     | -       | -    |
| NGLY1_KO_2 | 46.21     | -0.1  | 0.04    | 0.99 |
| NGLY1_2    | -         | -     | -       | -    |

Supplement: Supplementary file 4053 [file 1]

IPI00289301.4|TSGA10

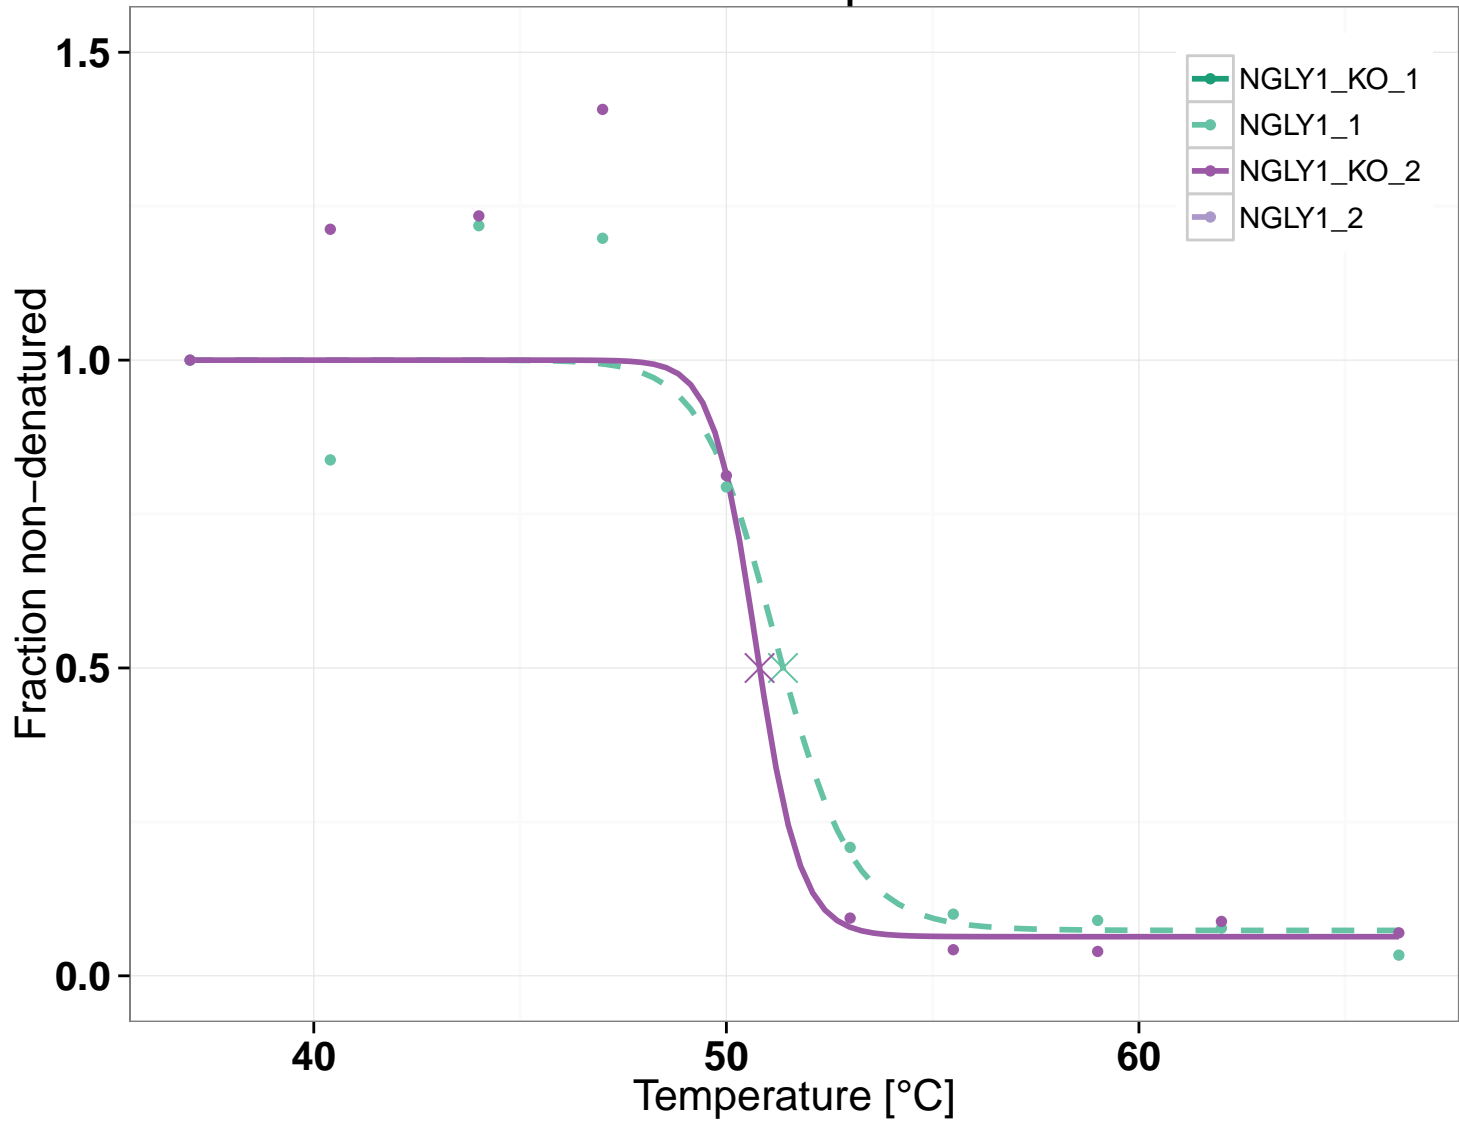

|            | meltPoint | slope | plateau | R2   |
|------------|-----------|-------|---------|------|
| NGLY1_KO_1 | -         | -     | -       | -    |
| NGLY1_1    | 51.37     | -0.25 | 0.07    | 0.95 |
| NGLY1_KO_2 | 50.81     | -0.44 | 0.06    | 0.91 |
| NGLY1_2    | -         | -     | -       | -    |

Supplement: Supplementary file 4054 [file 1]

IPI00019169.3|SH3GL1

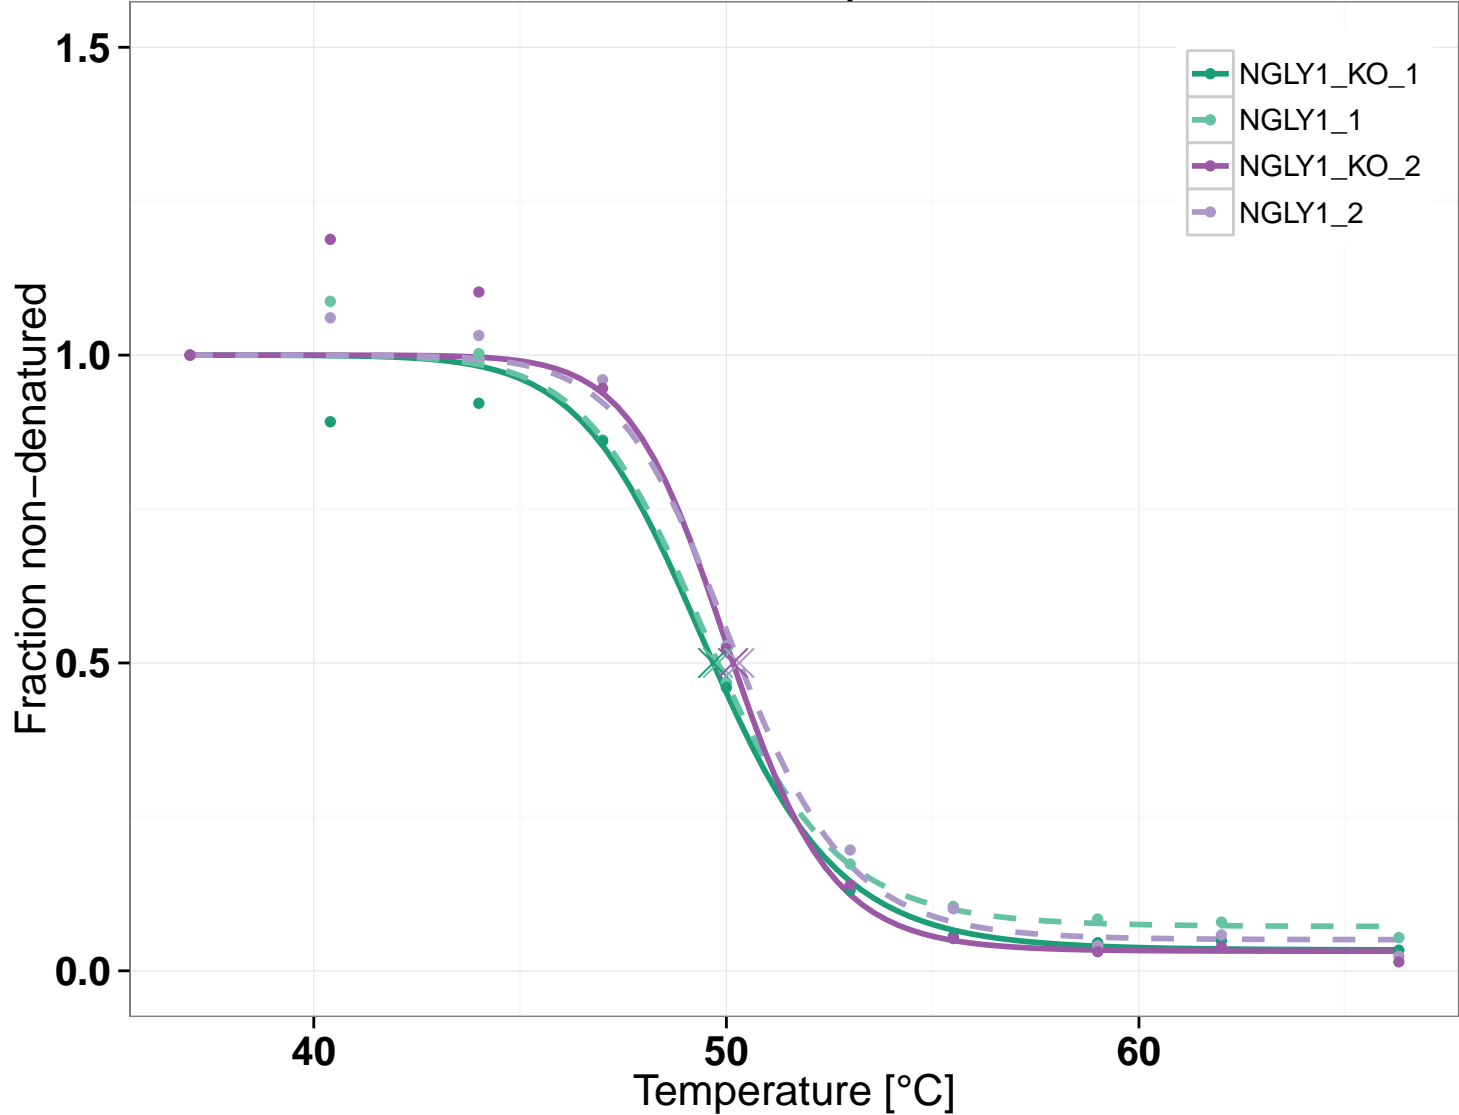

|            | meltPoint | slope | plateau | R2   |
|------------|-----------|-------|---------|------|
| NGLY1_KO_1 | 49.68     | -0.15 | 0.03    | 0.99 |
| NGLY1_1    | 49.8      | -0.15 | 0.07    | 1    |
| NGLY1_KO_2 | 50.16     | -0.2  | 0.03    | 0.98 |
| NGLY1_2    | 50.31     | -0.17 | 0.05    | 1    |

Supplement: Supplementary file 4055 [file 1]

IPI00552142.1|CENPI

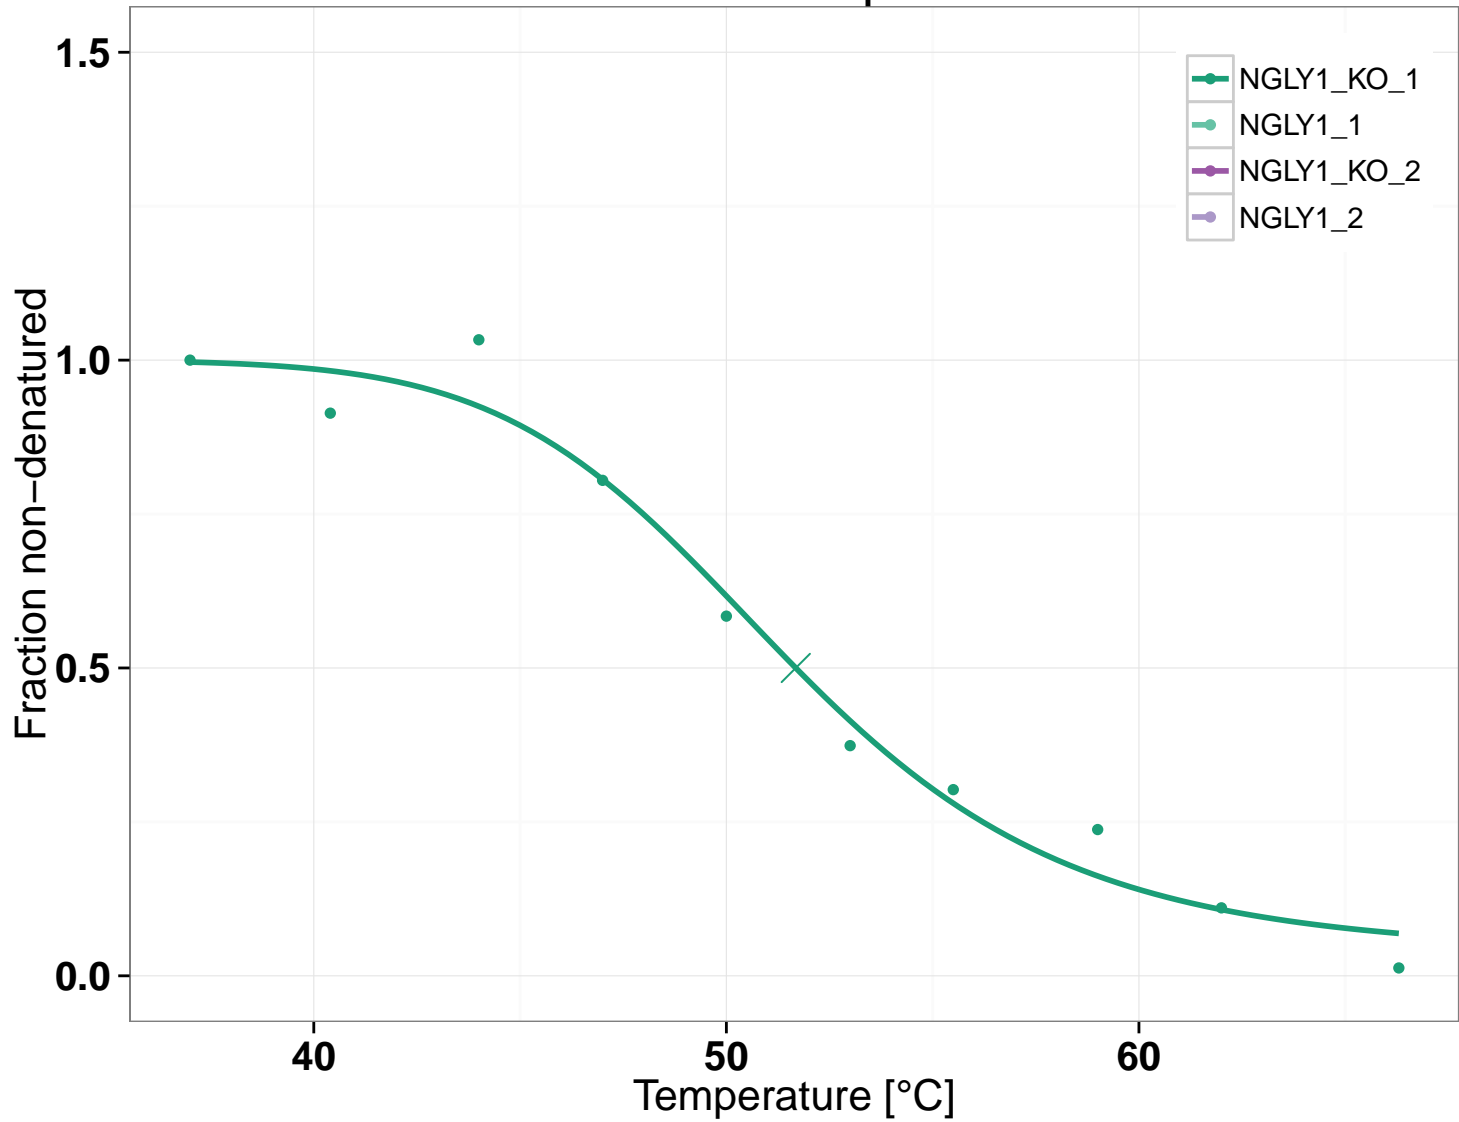

|            | meltPoint | slope | plateau | R2   |
|------------|-----------|-------|---------|------|
| NGLY1_KO_1 | 51.68     | -0.07 | 0.03    | 0.98 |
| NGLY1_1    | -         | -     | -       | -    |
| NGLY1_KO_2 | -         | -     | -       | -    |
| NGLY1_2    | -         | -     | -       | -    |

Supplement: Supplementary file 4056 [file 1]

# IPI00442038.3|IL16

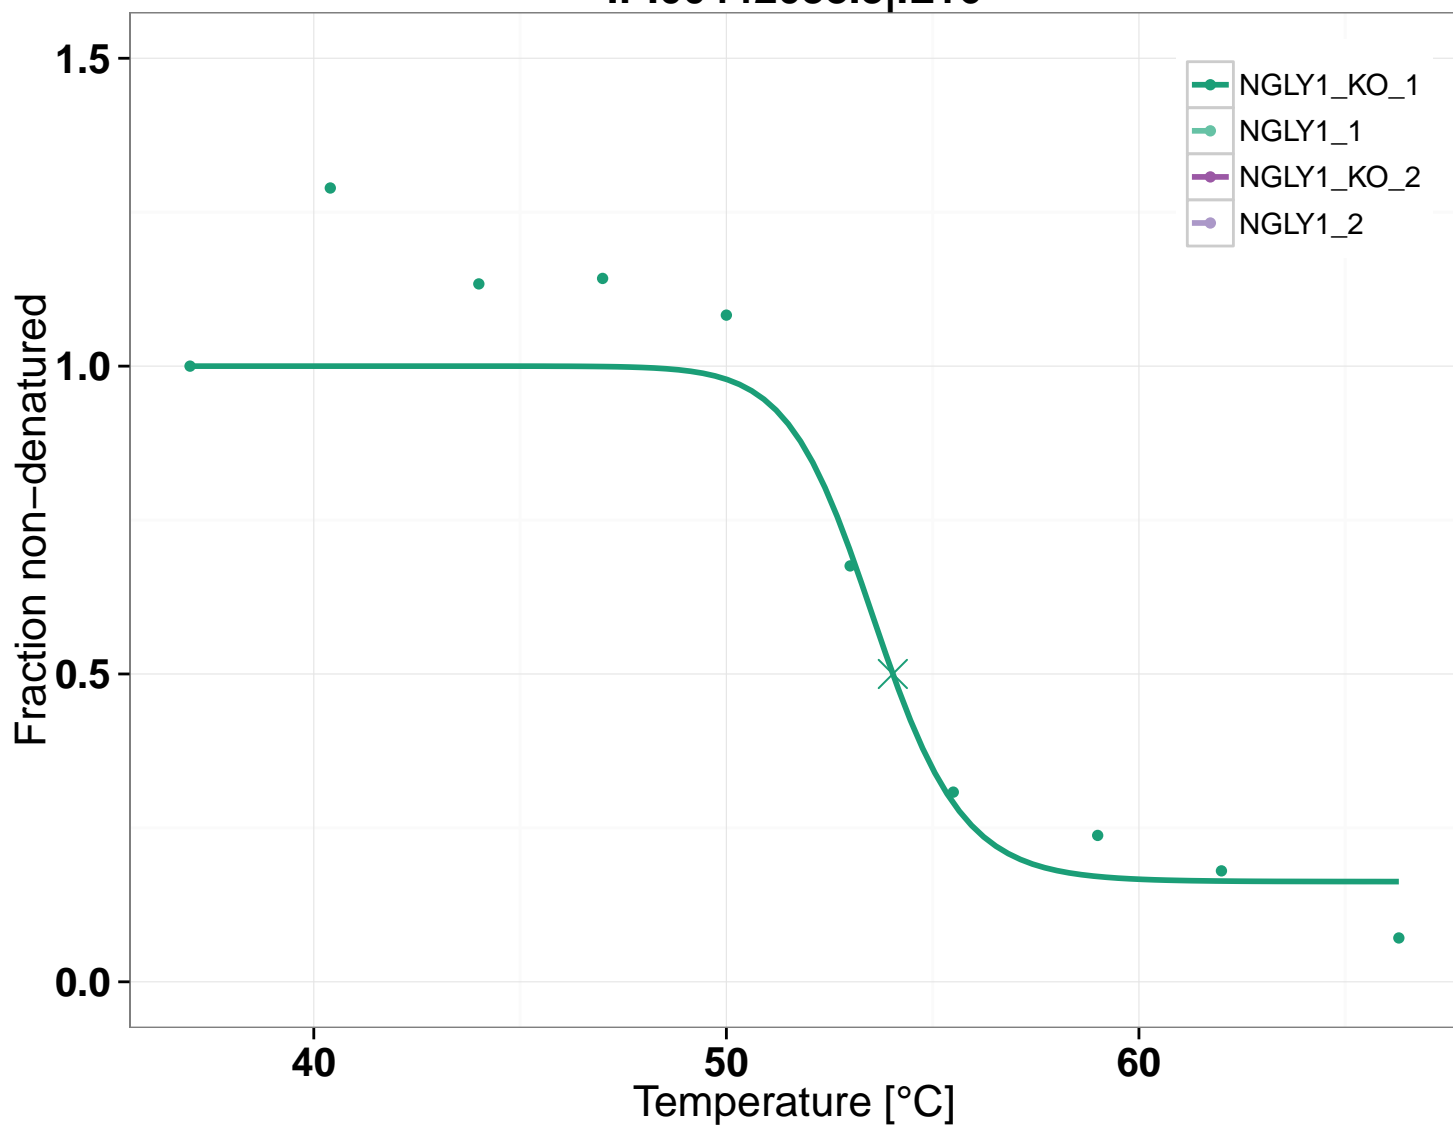

|            | meltPoint | slope | plateau | R2   |
|------------|-----------|-------|---------|------|
| NGLY1_KO_1 | 54.03     | -0.2  | 0.16    | 0.93 |
| NGLY1_1    | -         | -     | -       | -    |
| NGLY1_KO_2 | -         | -     | -       | -    |
| NGLY1_2    | -         | -     | -       | -    |

Supplement: Supplementary file 4057 [file 1]

IPI00412811.4|COMMD10

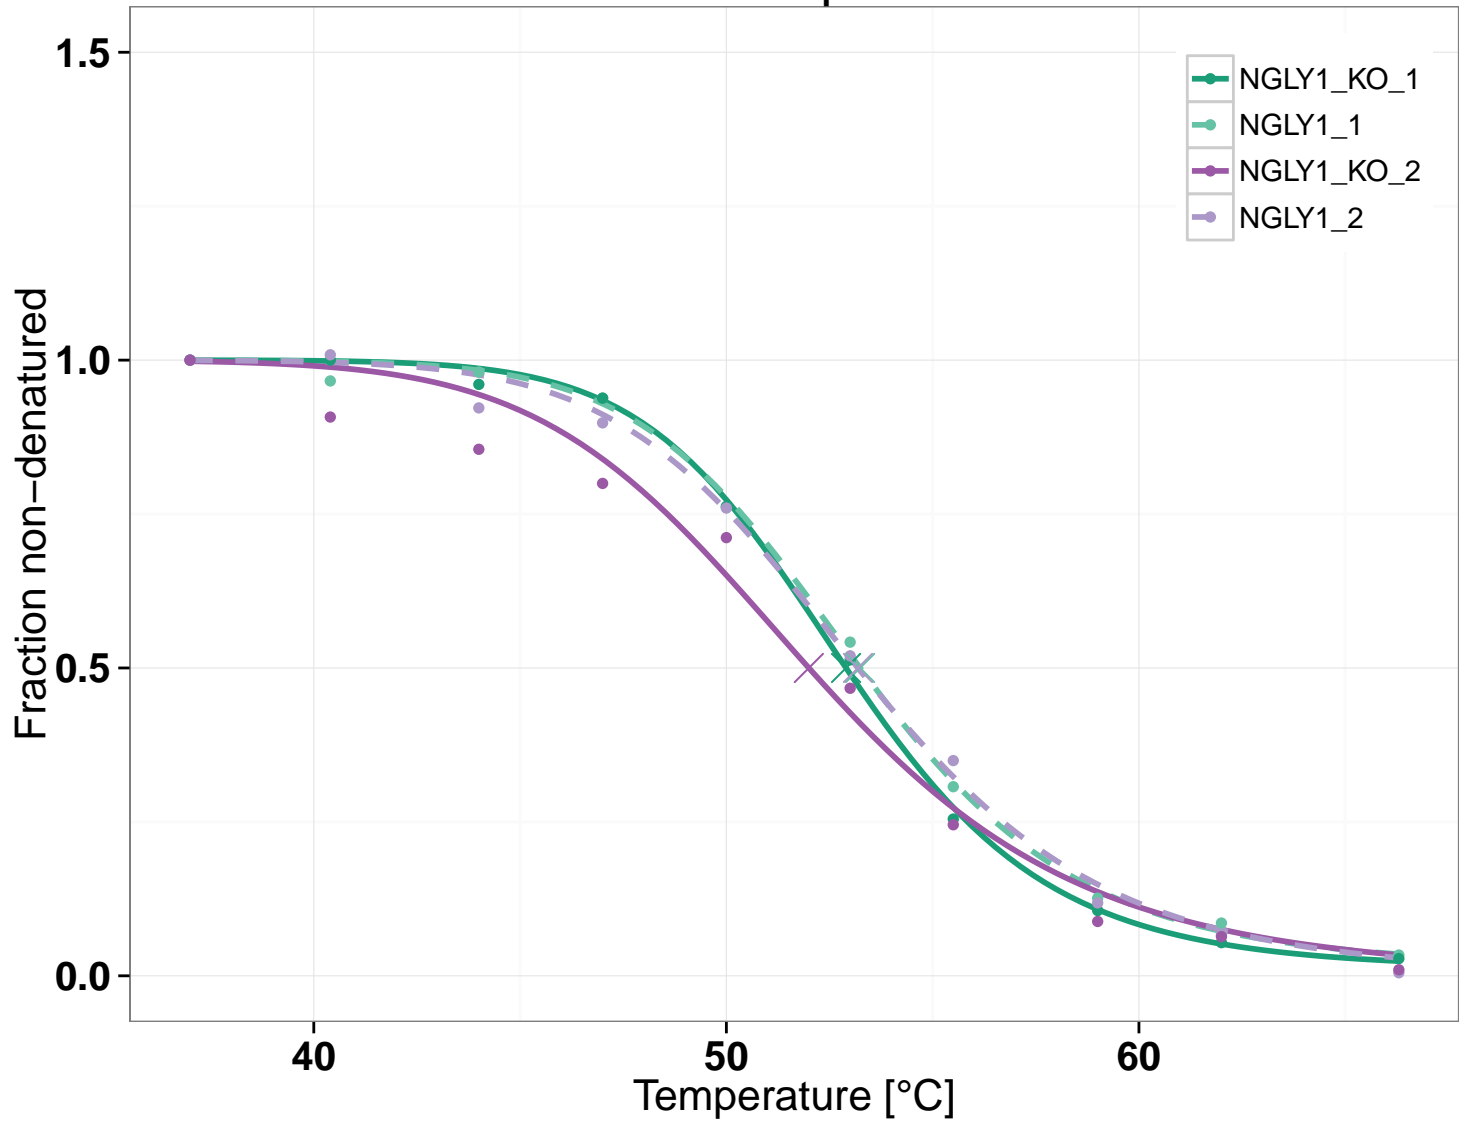

|            | meltPoint | slope  | plateau | R2   |
|------------|-----------|--------|---------|------|
| NGLY1_KO_1 | 52.9      | -0.1   | 0.01    | 1    |
| NGLY1_1    | 53.24     | -0.091 | 0.02    | 1    |
| NGLY1_KO_2 | 52        | -0.076 | 0       | 0.98 |
| NGLY1_2    | 53.19     | -0.084 | 0       | 1    |

Supplement: Supplementary file 4058 [file 1]

IPI00013218.3|PNPLA4

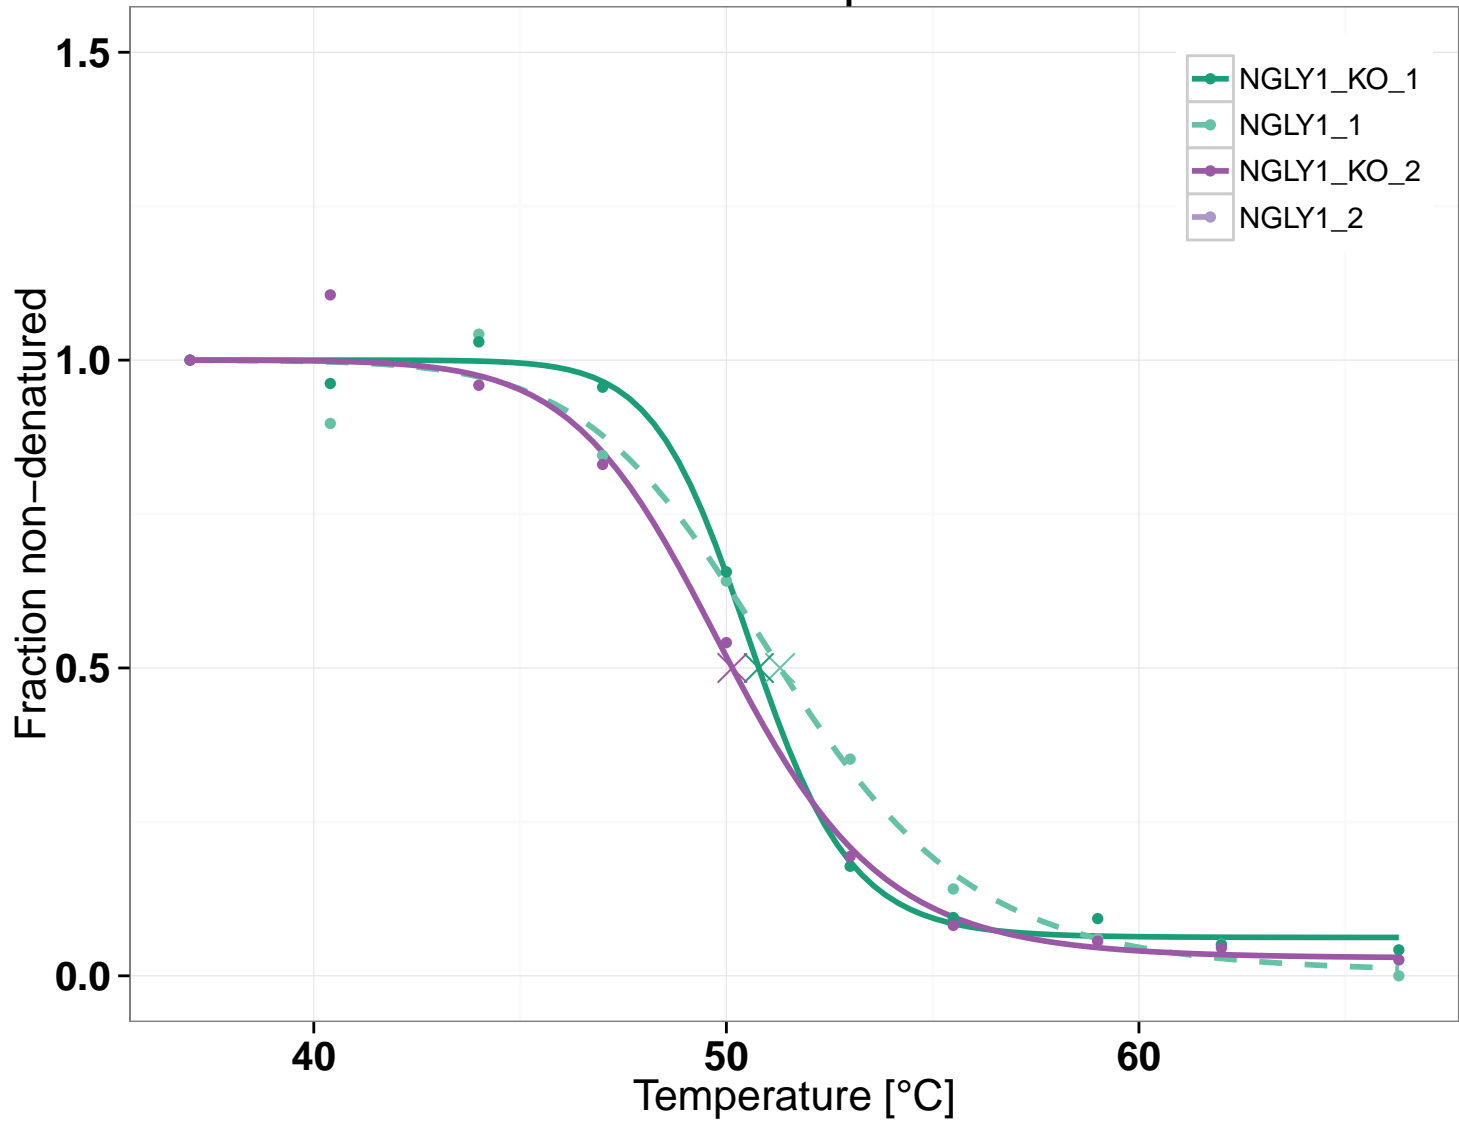

|            | meltPoint | slope | plateau | R2   |
|------------|-----------|-------|---------|------|
| NGLY1_KO_1 | 50.79     | -0.2  | 0.06    | 1    |
| NGLY1_1    | 51.3      | -0.11 | 0.01    | 0.99 |
| NGLY1_KO_2 | 50.14     | -0.13 | 0.03    | 0.99 |
| NGLY1_2    | -         | -     | -       | -    |

Supplement: Supplementary file 4059 [file 1]

# IPI00103142.1|NUDCD2

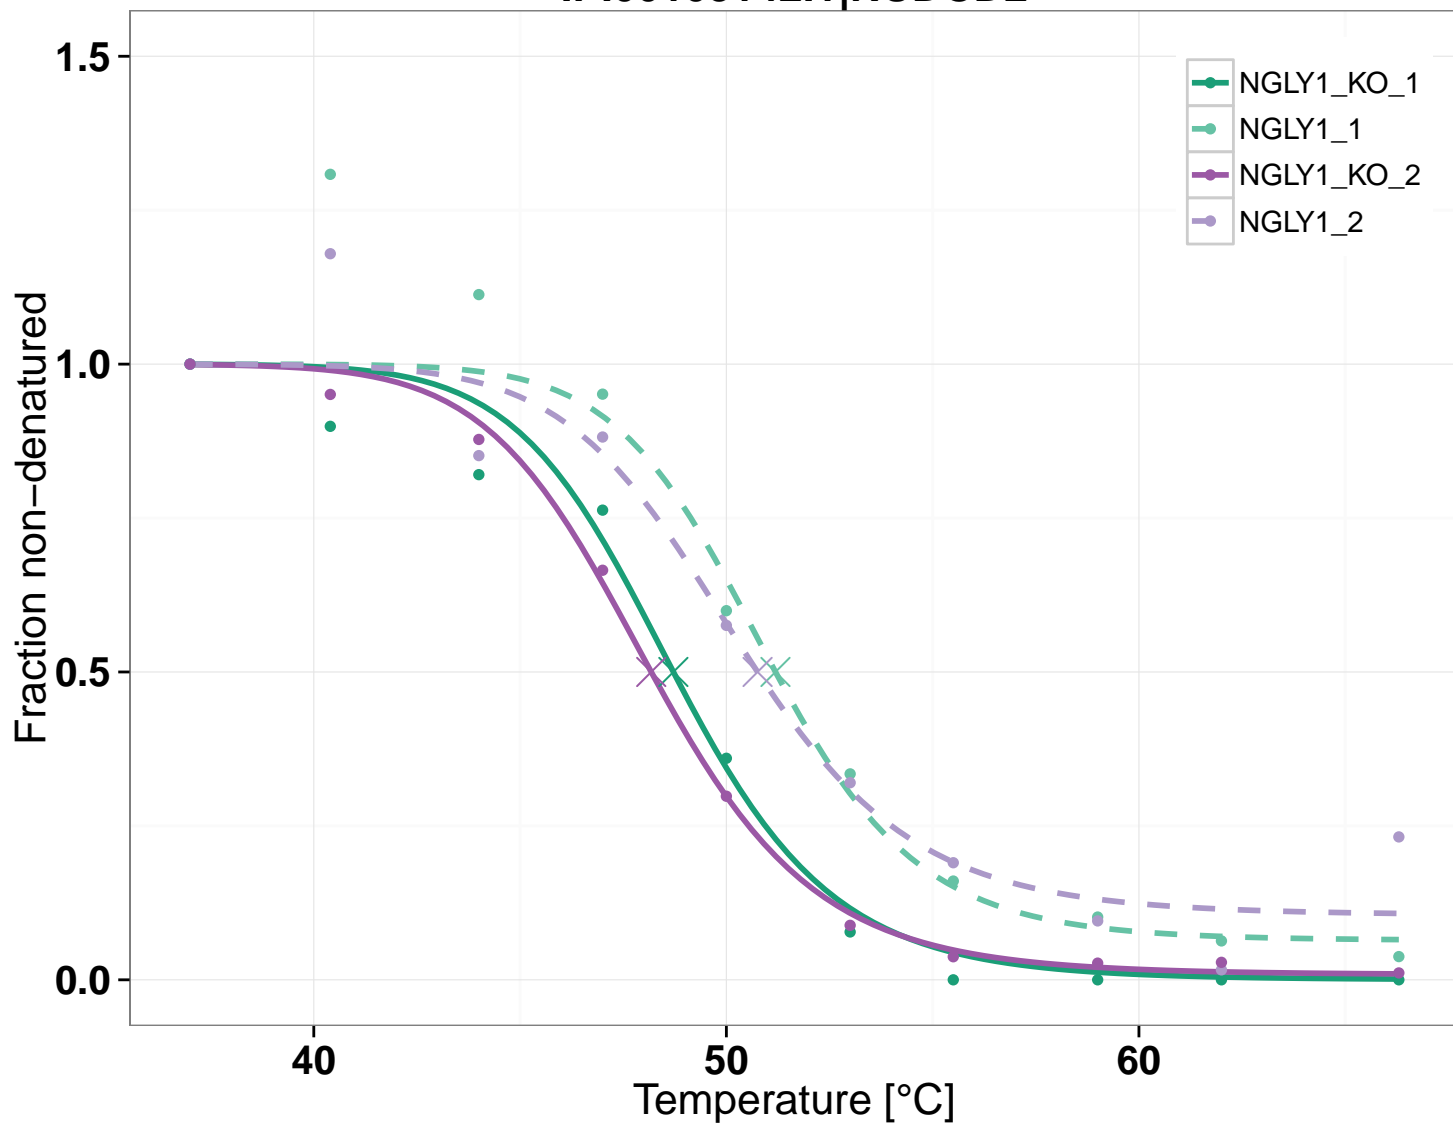

|            | meltPoint | slope | plateau | R2   |
|------------|-----------|-------|---------|------|
| NGLY1_KO_1 | 48.72     | -0.13 | 0       | 0.98 |
| NGLY1_1    | 51.19     | -0.13 | 0.06    | 0.95 |
| NGLY1_KO_2 | 48.18     | -0.12 | 0.01    | 1    |
| NGLY1_2    | 50.76     | -0.11 | 0.1     | 0.95 |

Supplement: Supplementary file 4060 [file 1]

# IPI00021331.1|NEK2

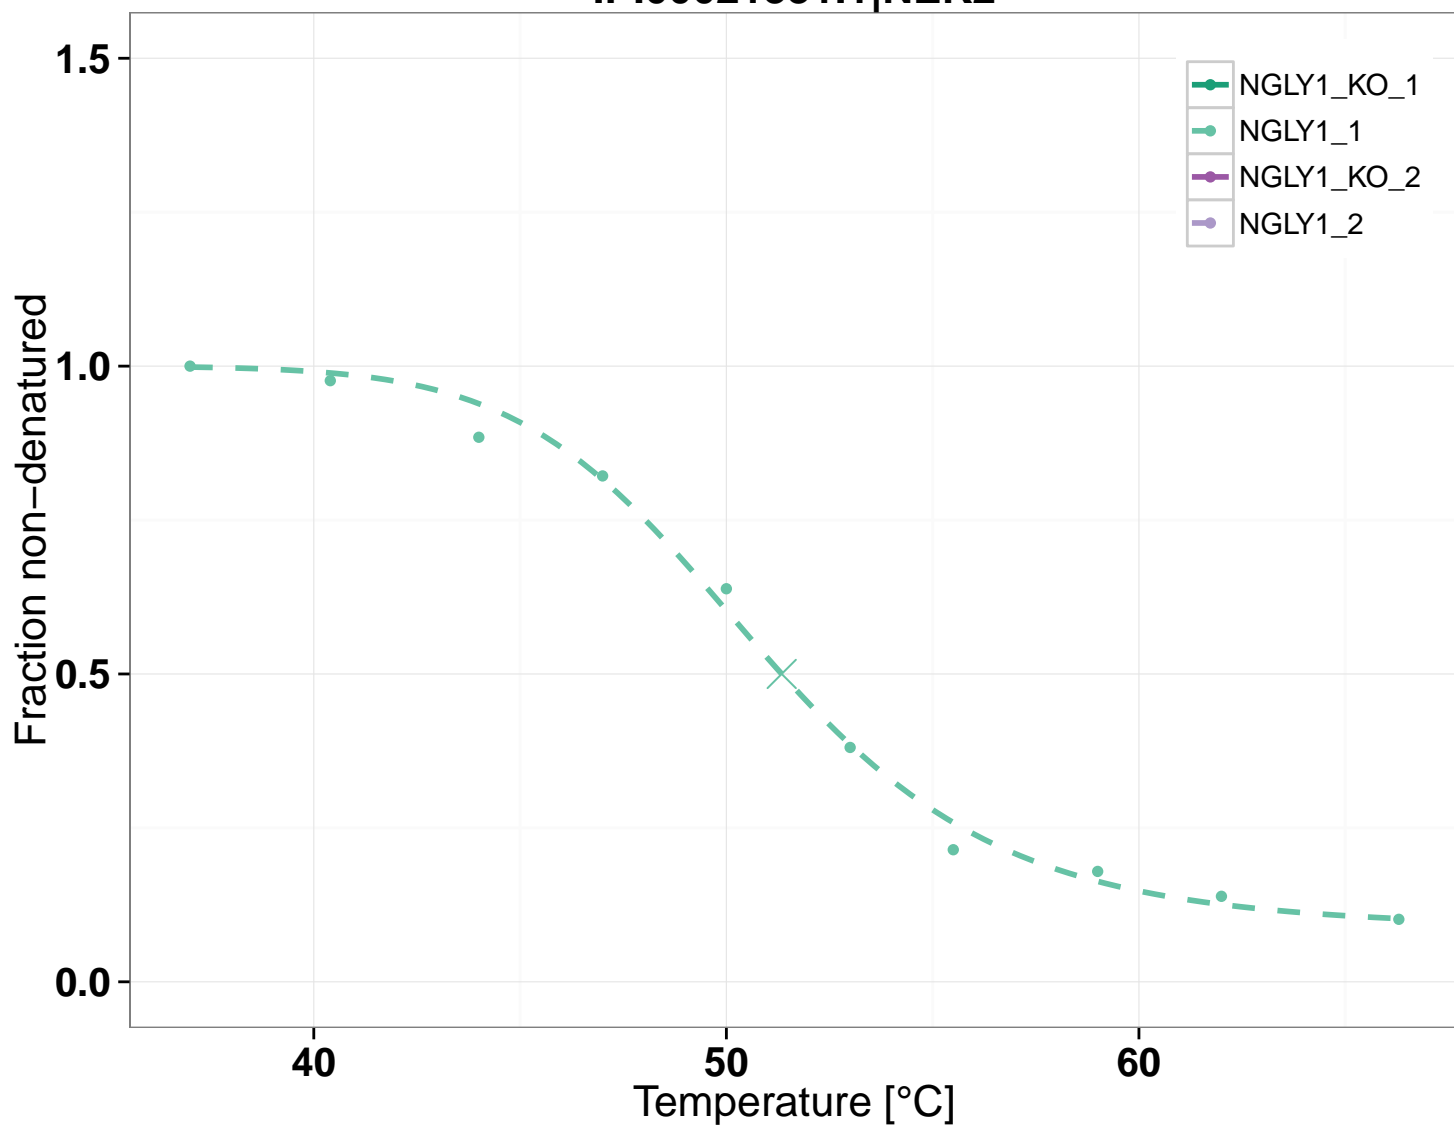

|            | meltPoint | slope  | plateau | R2   |
|------------|-----------|--------|---------|------|
| NGLY1_KO_1 | —         | —      | —       | —    |
| NGLY1_1    | 51.34     | -0.078 | 0.09    | 0.99 |
| NGLY1_KO_2 | —         | —      | —       | —    |
| NGLY1_2    | —         | —      | —       | —    |

Supplement: Supplementary file 4061 [file 1]

IPI00386043.6|C1ORF27

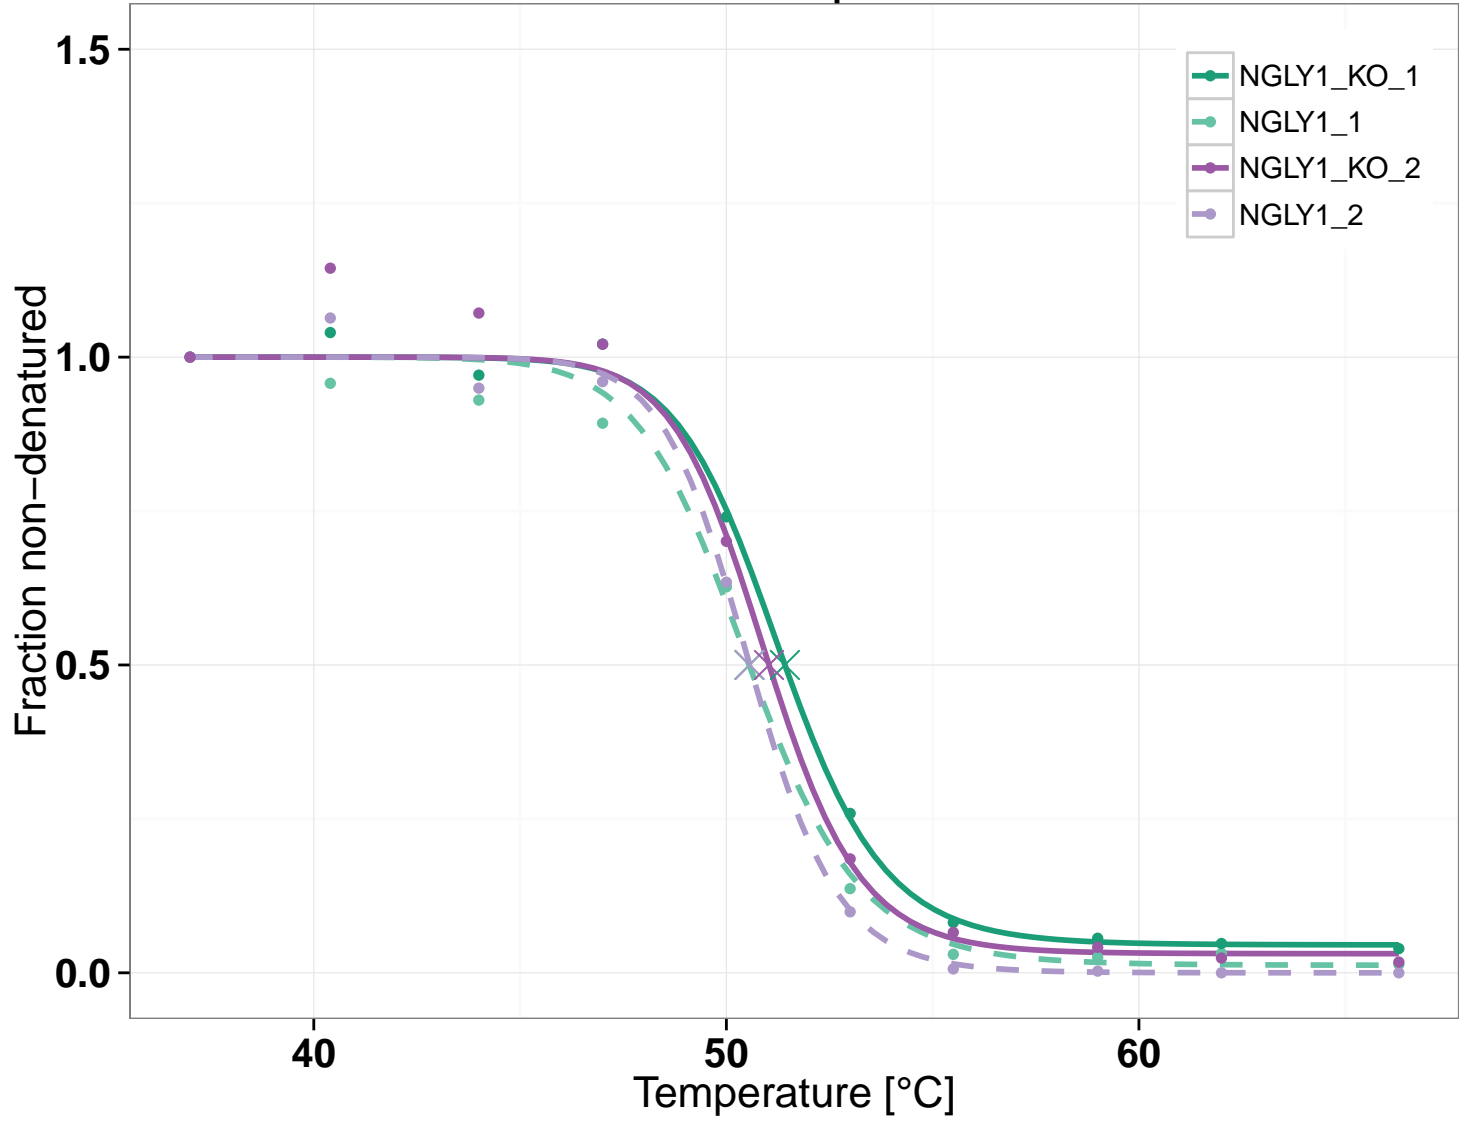

|            | meltPoint | slope | plateau | R2   |
|------------|-----------|-------|---------|------|
| NGLY1_KO_1 | 51.42     | -0.19 | 0.05    | 1    |
| NGLY1_1    | 50.55     | -0.18 | 0.01    | 0.99 |
| NGLY1_KO_2 | 51.03     | -0.21 | 0.03    | 0.99 |
| NGLY1_2    | 50.57     | -0.23 | 0       | 1    |

Supplement: Supplementary file 4062 [file 1]

# IPI00306446.2|ZNF24

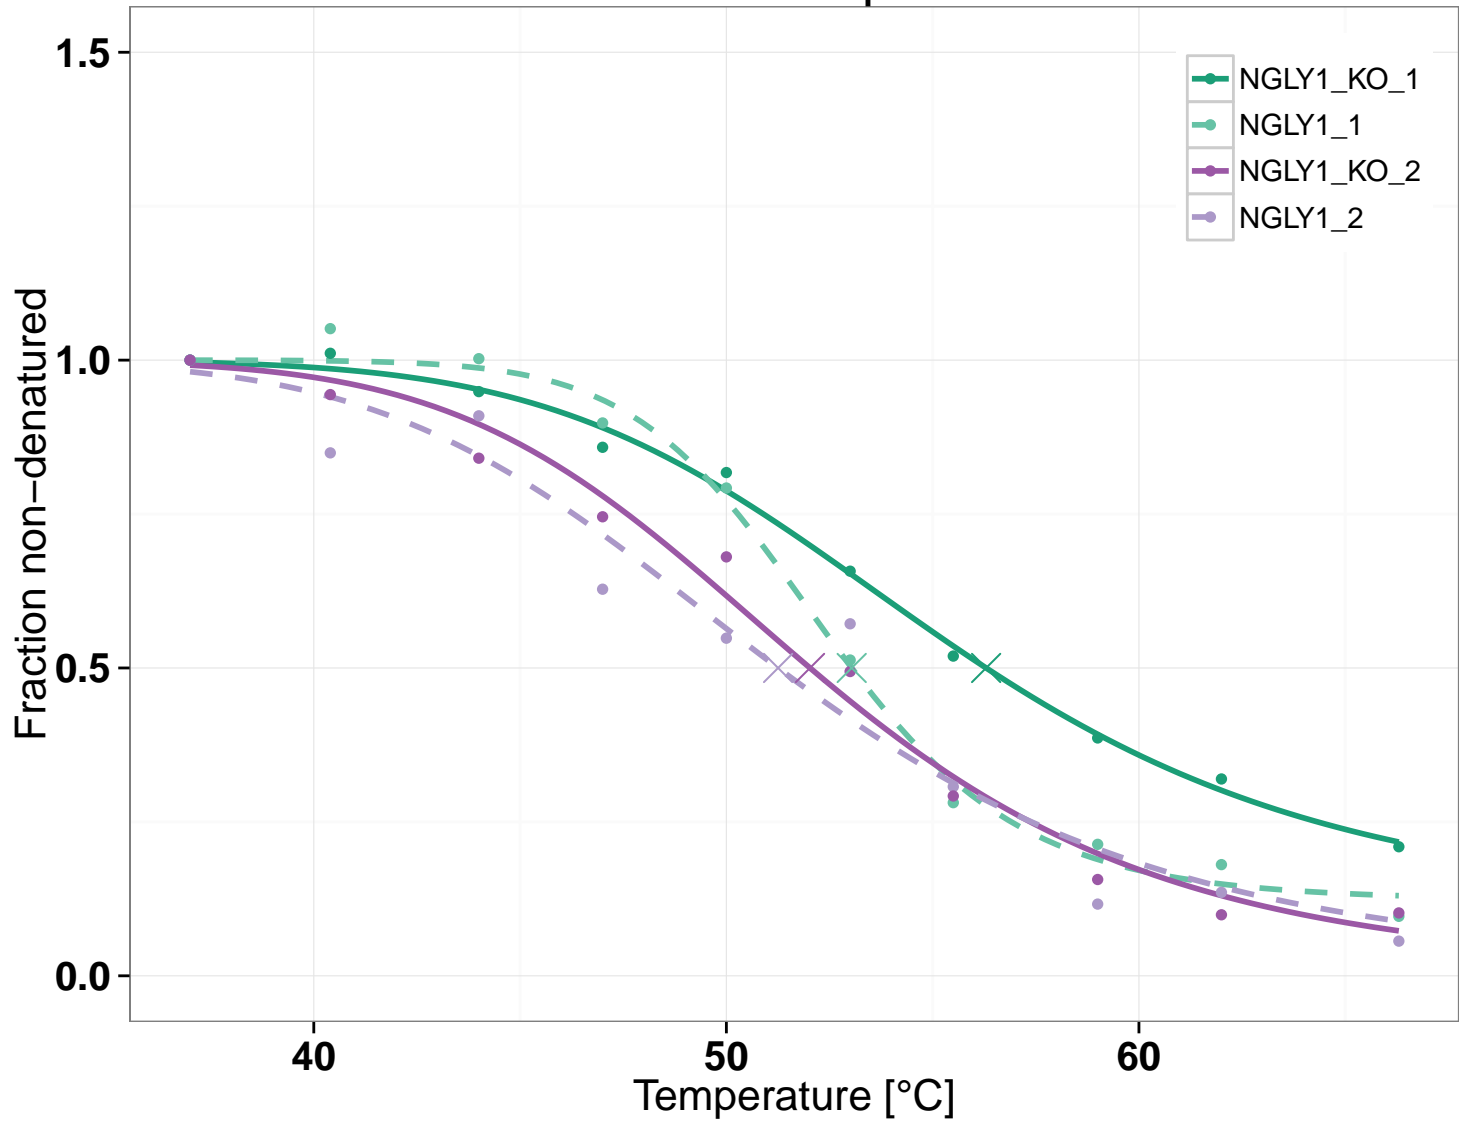

|            | meltPoint | slope  | plateau | R2   |
|------------|-----------|--------|---------|------|
| NGLY1_KO_1 | 56.3      | -0.048 | 0.1     | 1    |
| NGLY1_1    | 53.04     | -0.094 | 0.12    | 0.99 |
| NGLY1_KO_2 | 52.03     | -0.058 | 0       | 0.99 |
| NGLY1_2    | 51.25     | -0.052 | 0       | 0.95 |

Supplement: Supplementary file 4063 [file 1]

# IPI00299088.3|BAIAP2

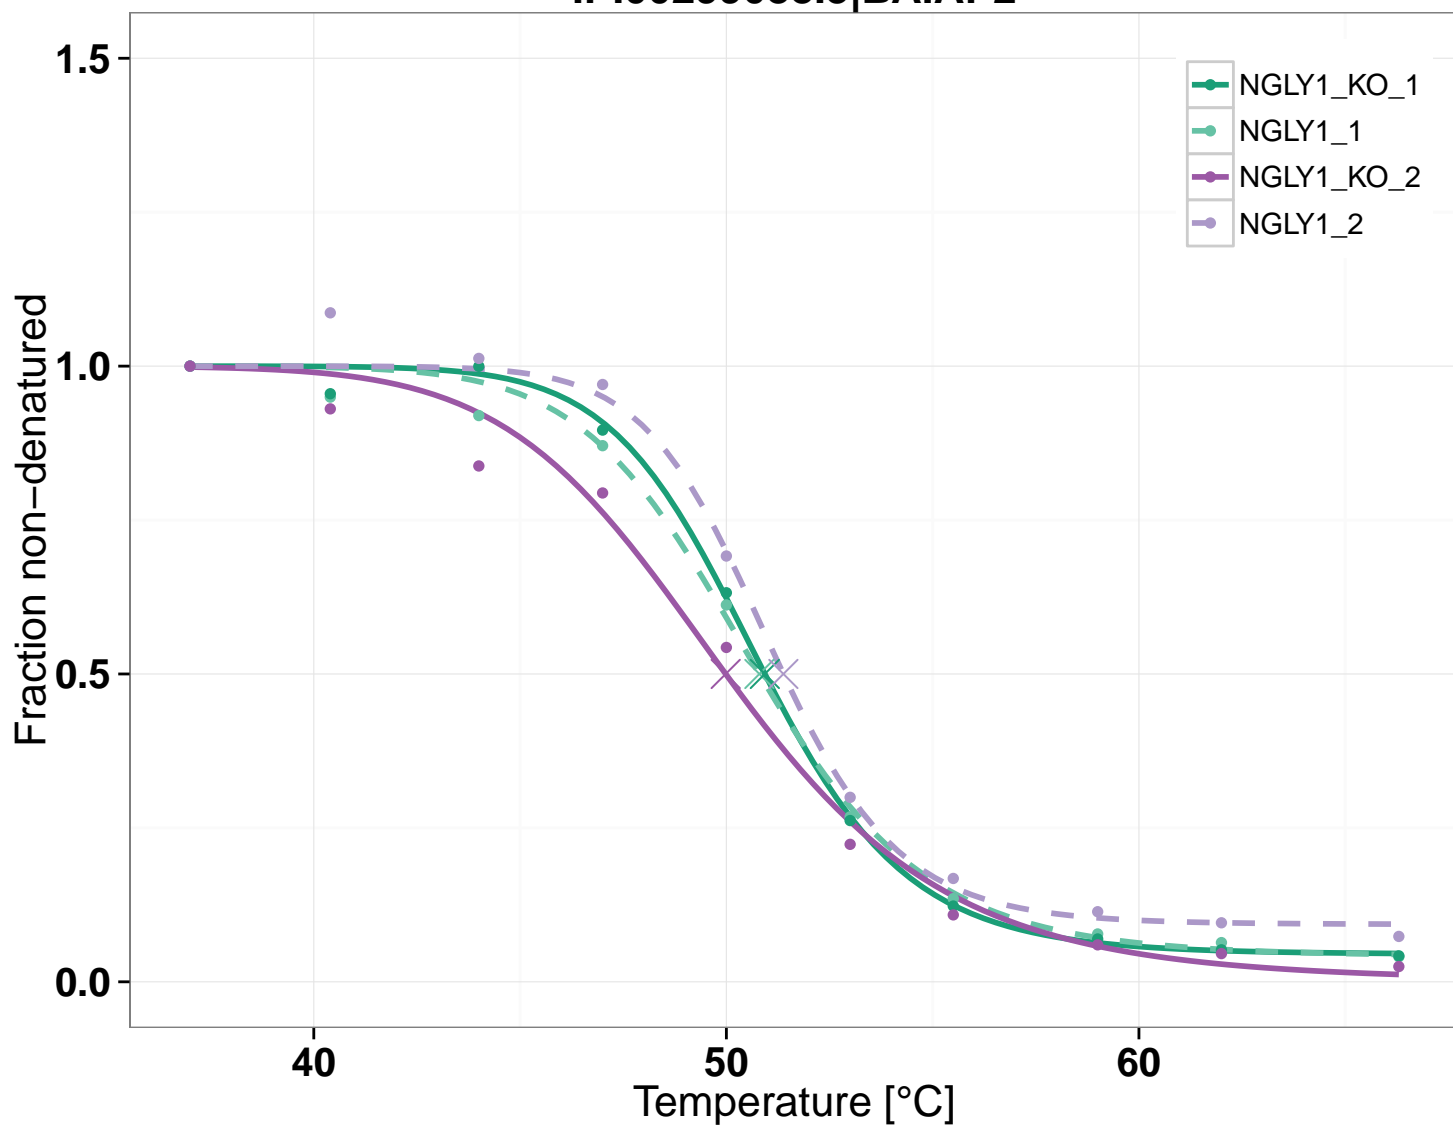

|            | meltPoint | slope  | plateau | R2   |
|------------|-----------|--------|---------|------|
| NGLY1_KO_1 | 50.93     | -0.13  | 0.04    | 1    |
| NGLY1_1    | 50.8      | -0.11  | 0.04    | 1    |
| NGLY1_KO_2 | 49.98     | -0.093 | 0       | 0.99 |
| NGLY1_2    | 51.38     | -0.15  | 0.09    | 0.99 |

Supplement: Supplementary file 4064 [file 1]

IPI00028296.1|CAMK1

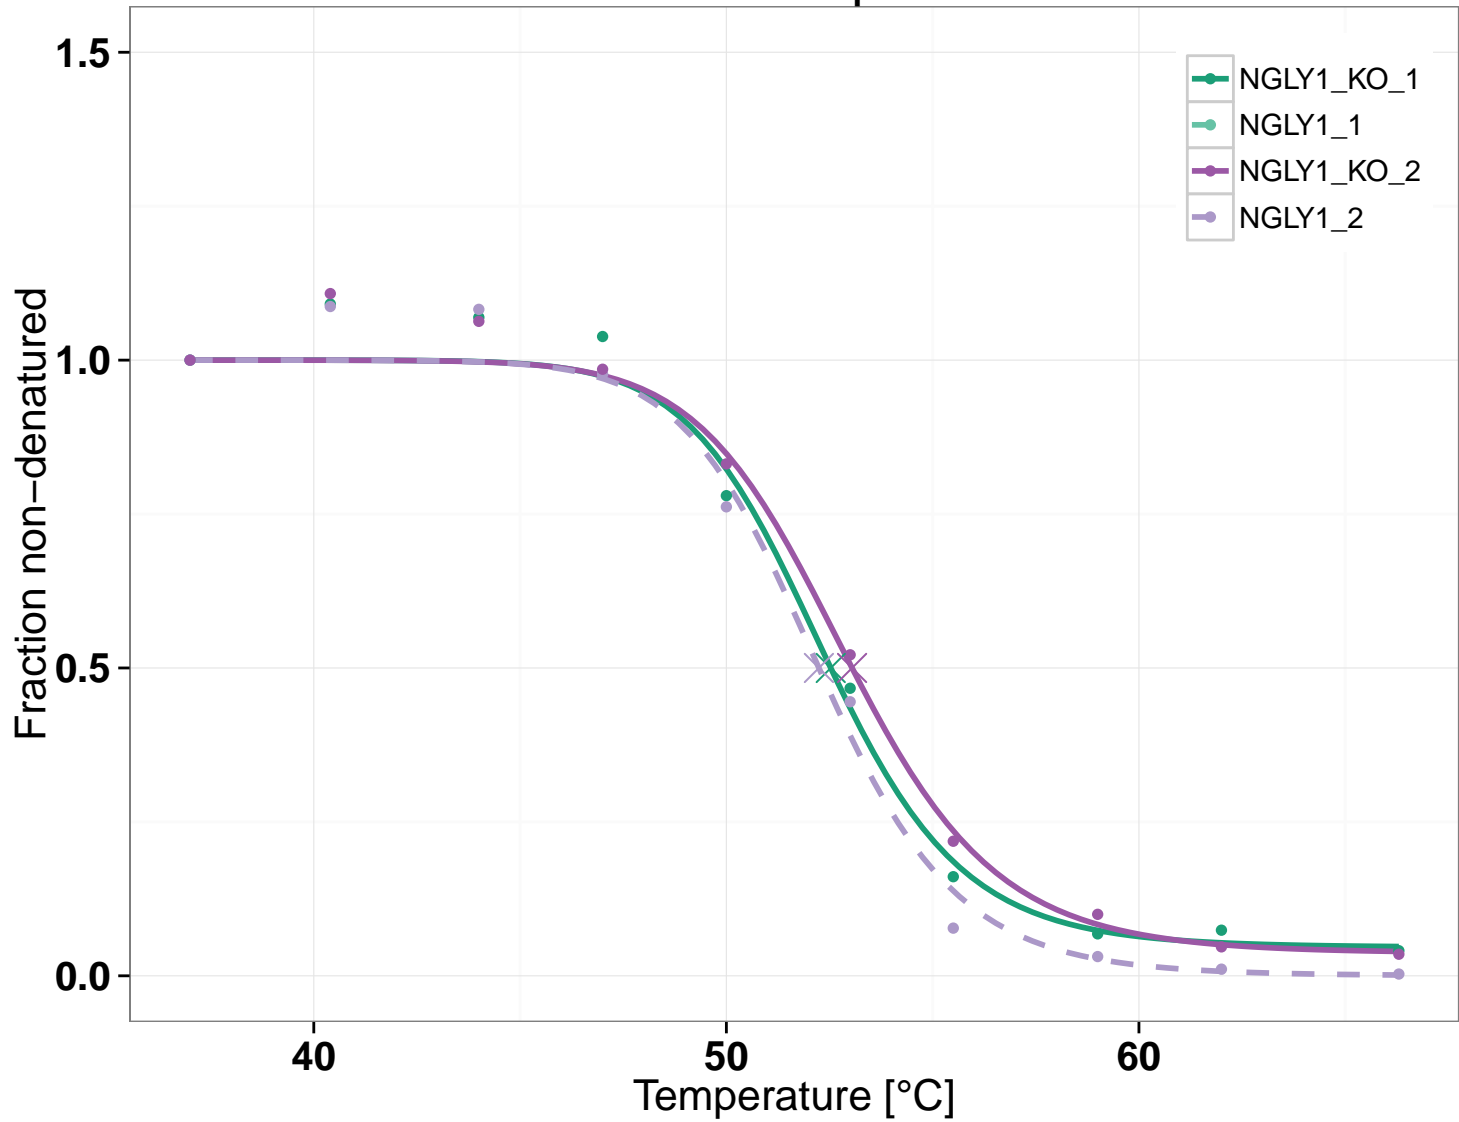

|            | meltPoint | slope | plateau | R2   |
|------------|-----------|-------|---------|------|
| NGLY1_KO_1 | 52.53     | -0.14 | 0.05    | 0.99 |
| NGLY1_1    | -         | -     | -       | -    |
| NGLY1_KO_2 | 53.05     | -0.13 | 0.04    | 0.99 |
| NGLY1_2    | 52.24     | -0.15 | 0       | 0.99 |

Supplement: Supplementary file 4065 [file 1]

# IPI00008868.3|MAP1B

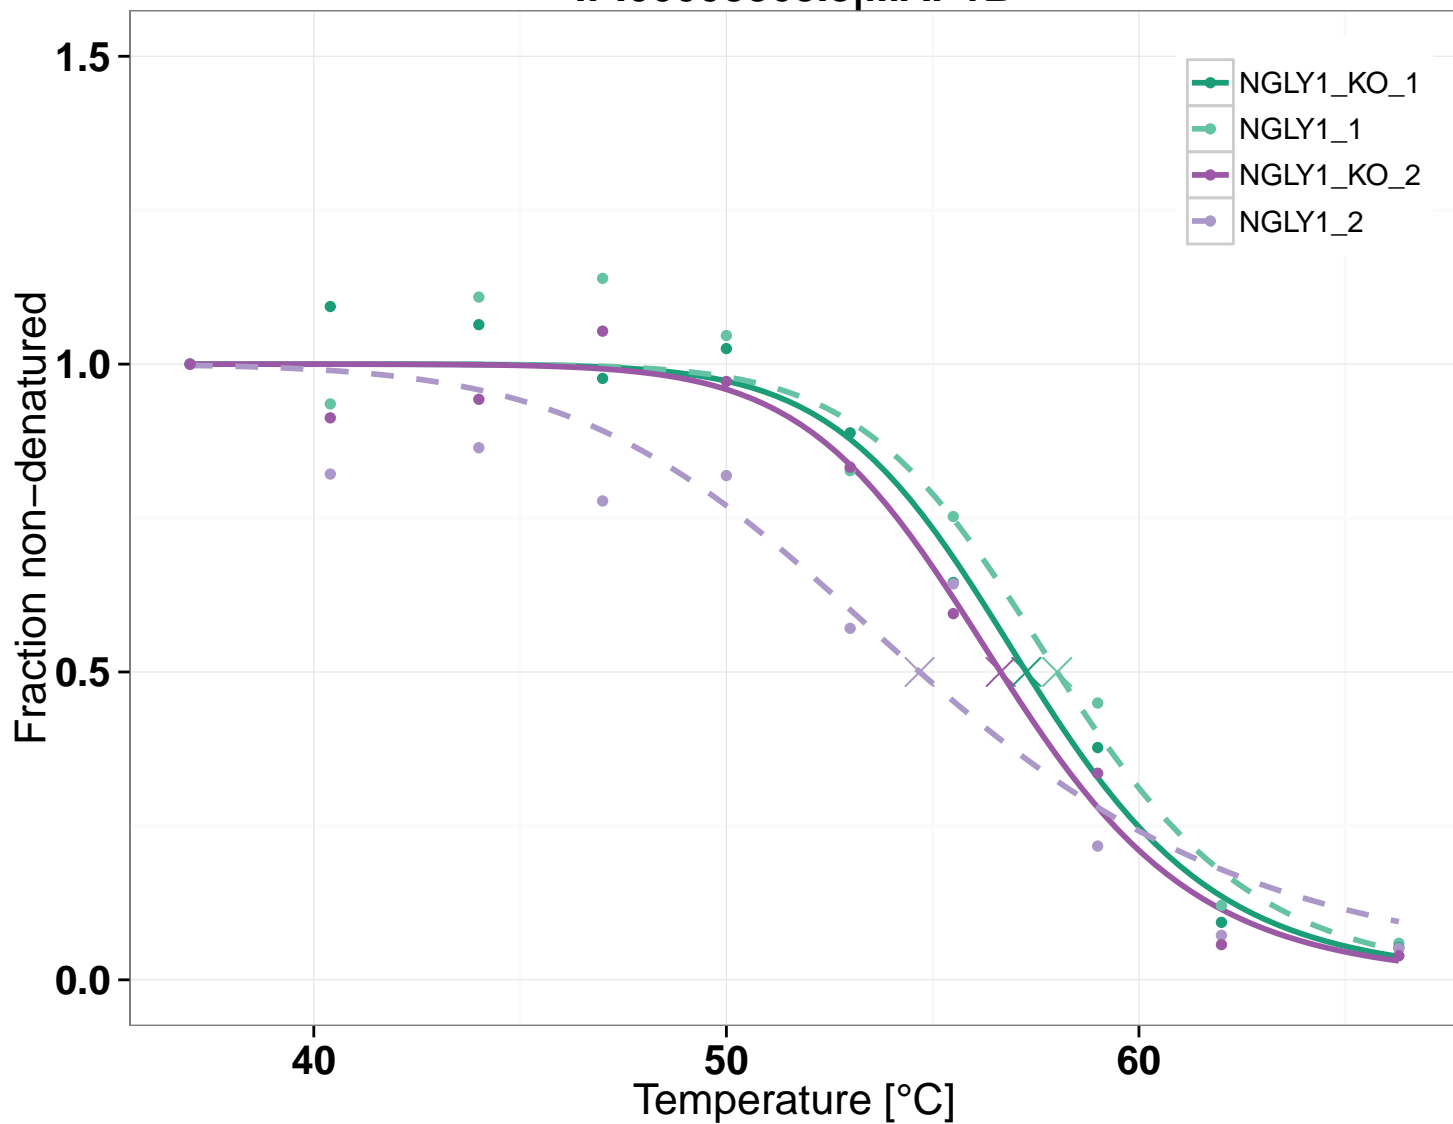

|            | meltPoint | slope | plateau | R2   |
|------------|-----------|-------|---------|------|
| NGLY1_KO_1 | 57.27     | -0.11 | 0       | 0.99 |
| NGLY1_1    | 58.02     | -0.1  | 0       | 0.96 |
| NGLY1_KO_2 | 56.65     | -0.11 | 0       | 0.98 |
| NGLY1_2    | 54.68     | -0.06 | 0       | 0.9  |

Supplement: Supplementary file 4066 [file 1]

# IPI00021277.1|NUBP1

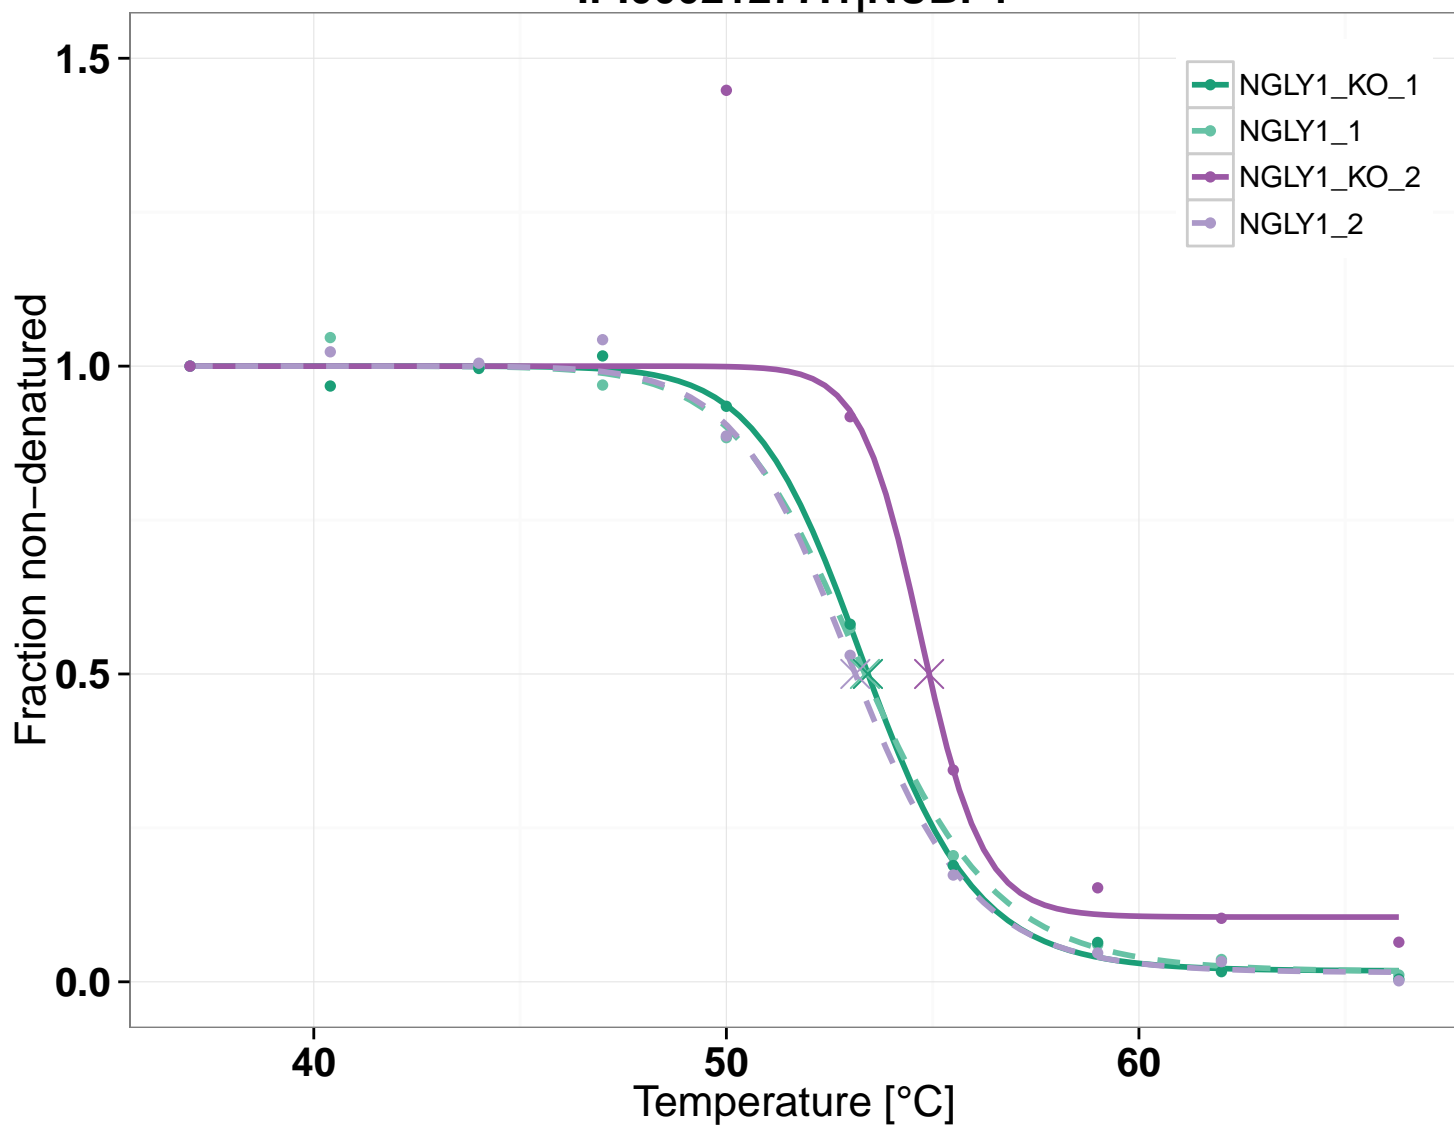

|            | meltPoint | slope | plateau | R2   |
|------------|-----------|-------|---------|------|
| NGLY1_KO_1 | 53.43     | -0.18 | 0.02    | 1    |
| NGLY1_1    | 53.36     | -0.15 | 0.02    | 1    |
| NGLY1_KO_2 | 54.91     | -0.3  | 0.11    | 0.67 |
| NGLY1_2    | 53.13     | -0.17 | 0.01    | 1    |

Supplement: Supplementary file 4067 [file 1]

IPI00022460.2|ZNF592

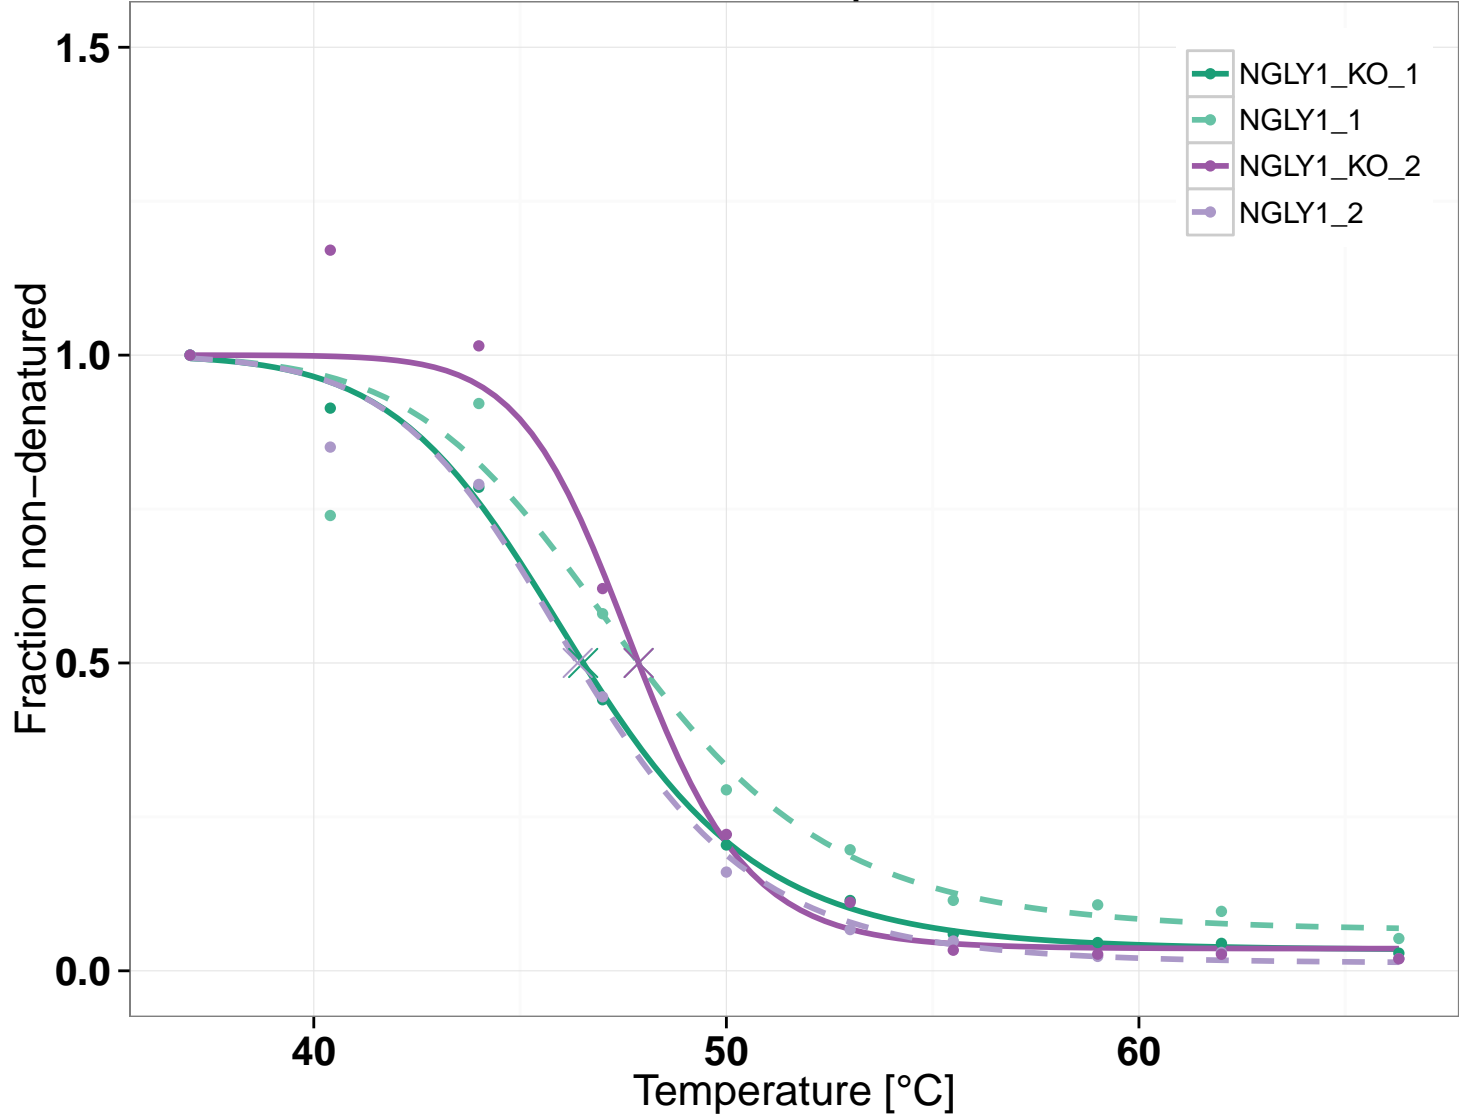

|            | meltPoint | slope  | plateau | R2   |
|------------|-----------|--------|---------|------|
| NGLY1_KO_1 | 46.53     | -0.11  | 0.03    | 1    |
| NGLY1_1    | 47.87     | -0.091 | 0.06    | 0.95 |
| NGLY1_KO_2 | 47.87     | -0.17  | 0.04    | 0.98 |
| NGLY1_2    | 46.4      | -0.11  | 0.01    | 0.99 |

Supplement: Supplementary file 4068 [file 1]

# IPI00166394.1|ARMC10

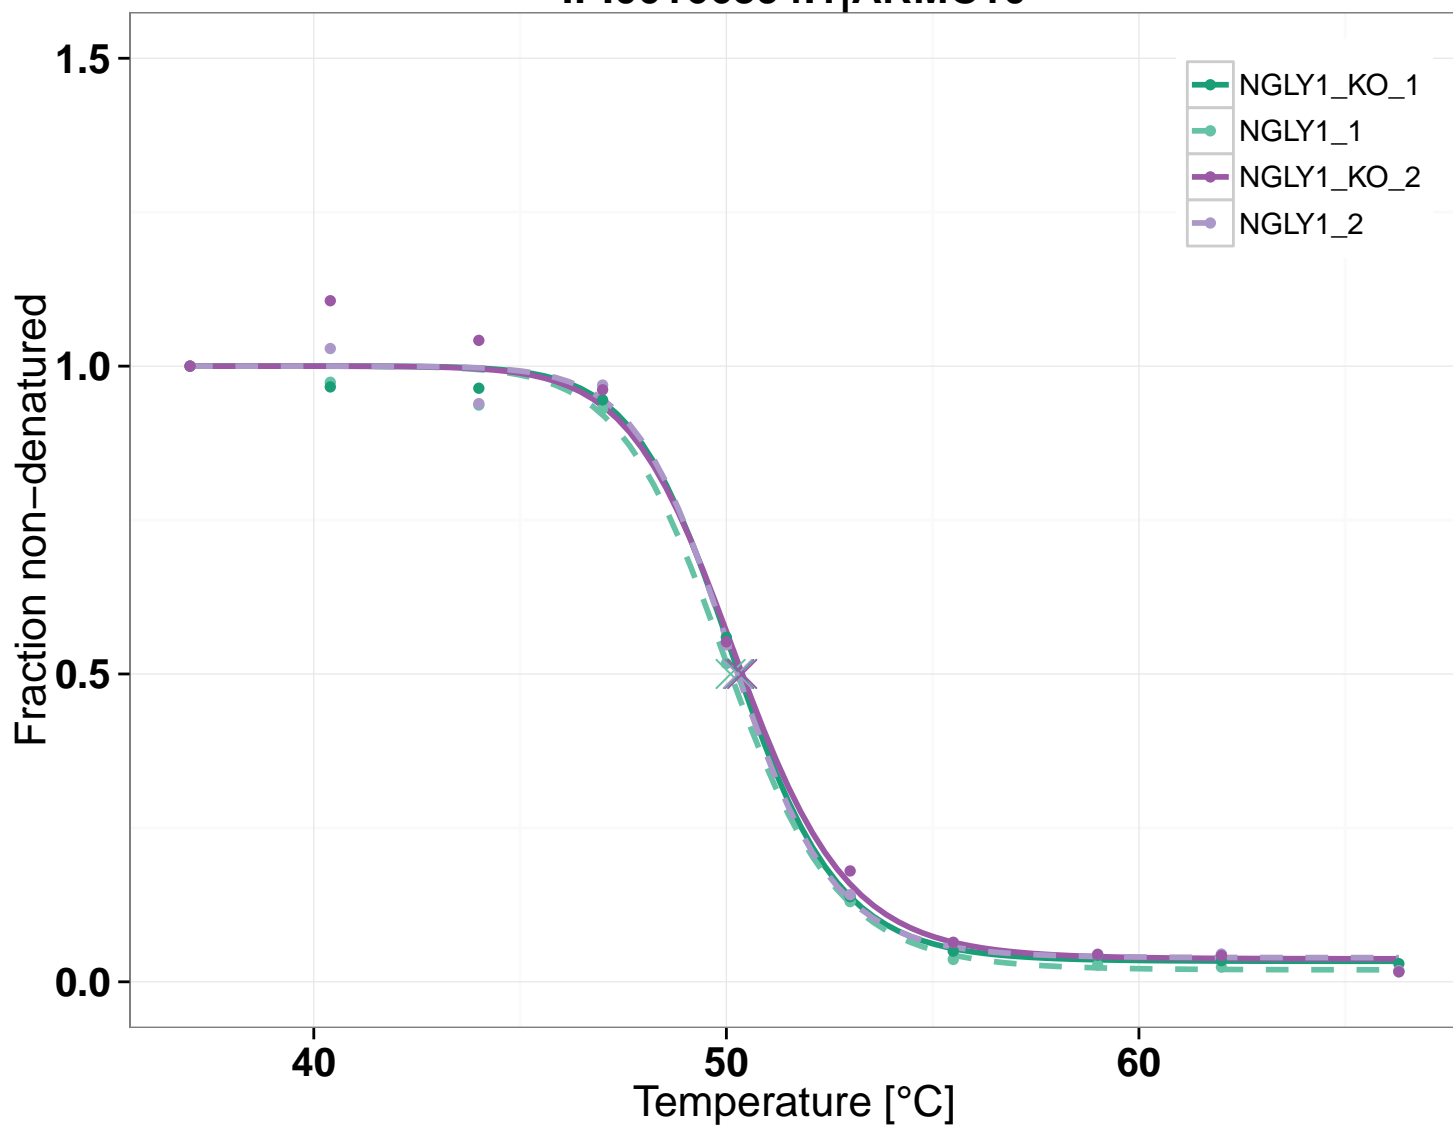

|            | meltPoint | slope | plateau | R2   |
|------------|-----------|-------|---------|------|
| NGLY1_KO_1 | 50.31     | -0.19 | 0.03    | 1    |
| NGLY1_1    | 50.1      | -0.18 | 0.02    | 1    |
| NGLY1_KO_2 | 50.38     | -0.18 | 0.04    | 0.99 |
| NGLY1_2    | 50.28     | -0.2  | 0.04    | 1    |

Supplement: Supplementary file 4069 [file 1]

# IPI00334514.2|SUMF2

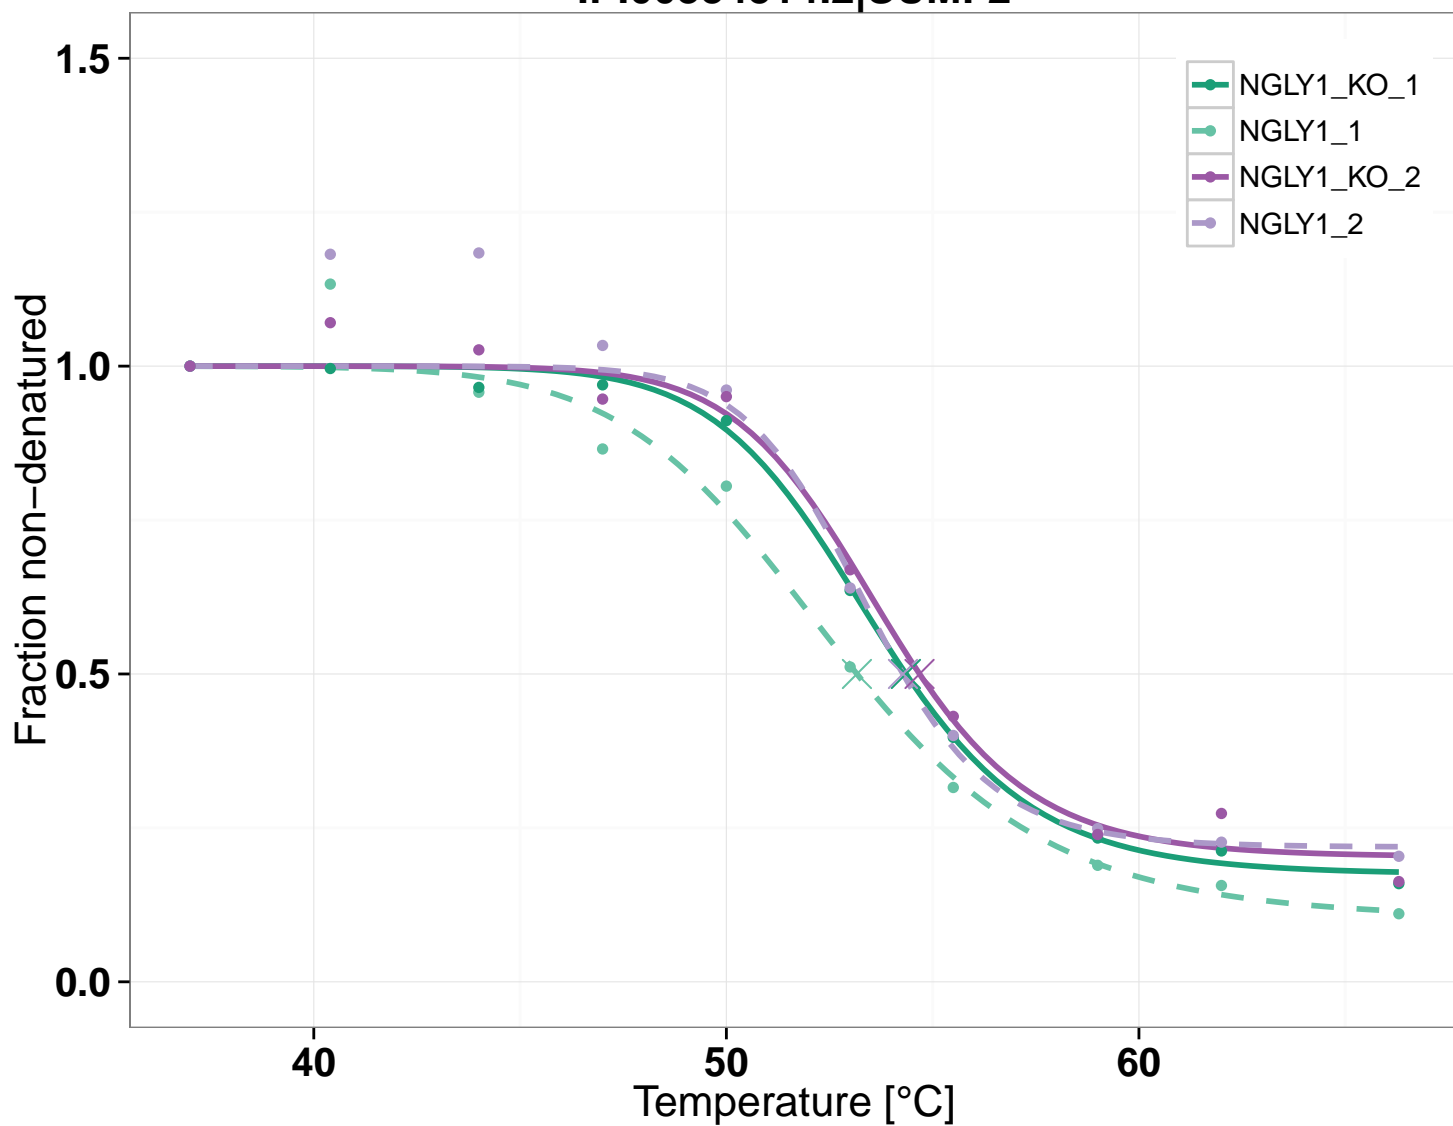

|            | meltPoint | slope  | plateau | R2   |
|------------|-----------|--------|---------|------|
| NGLY1_KO_1 | 54.35     | -0.11  | 0.17    | 1    |
| NGLY1_1    | 53.16     | -0.087 | 0.1     | 0.98 |
| NGLY1_KO_2 | 54.68     | -0.11  | 0.2     | 0.99 |
| NGLY1_2    | 54.28     | -0.13  | 0.22    | 0.95 |

Supplement: Supplementary file 4070 [file 1]

IPI00024775.1|RAB7L1

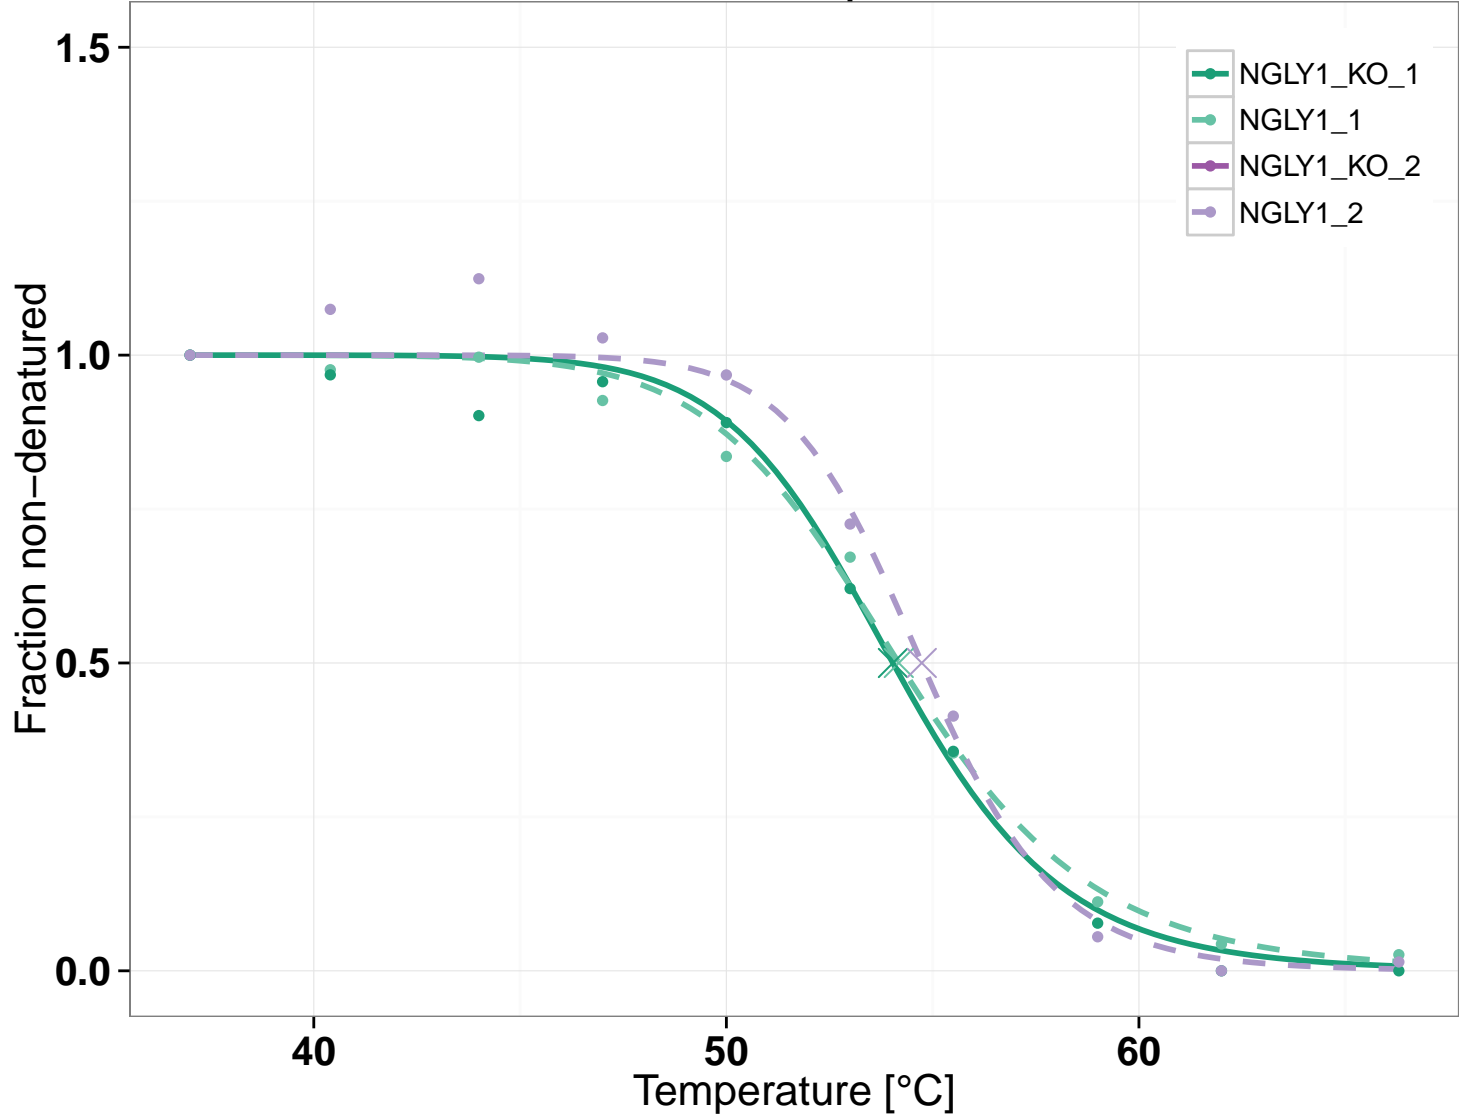

|            | meltPoint | slope | plateau | R2   |
|------------|-----------|-------|---------|------|
| NGLY1_KO_1 | 54.04     | -0.12 | 0       | 0.99 |
| NGLY1_1    | 54.18     | -0.11 | 0       | 1    |
| NGLY1_KO_2 | -         | -     | -       | -    |
| NGLY1_2    | 54.74     | -0.15 | 0       | 0.99 |

Supplement: Supplementary file 4071 [file 1]

IPI00024299.4|SNUPN

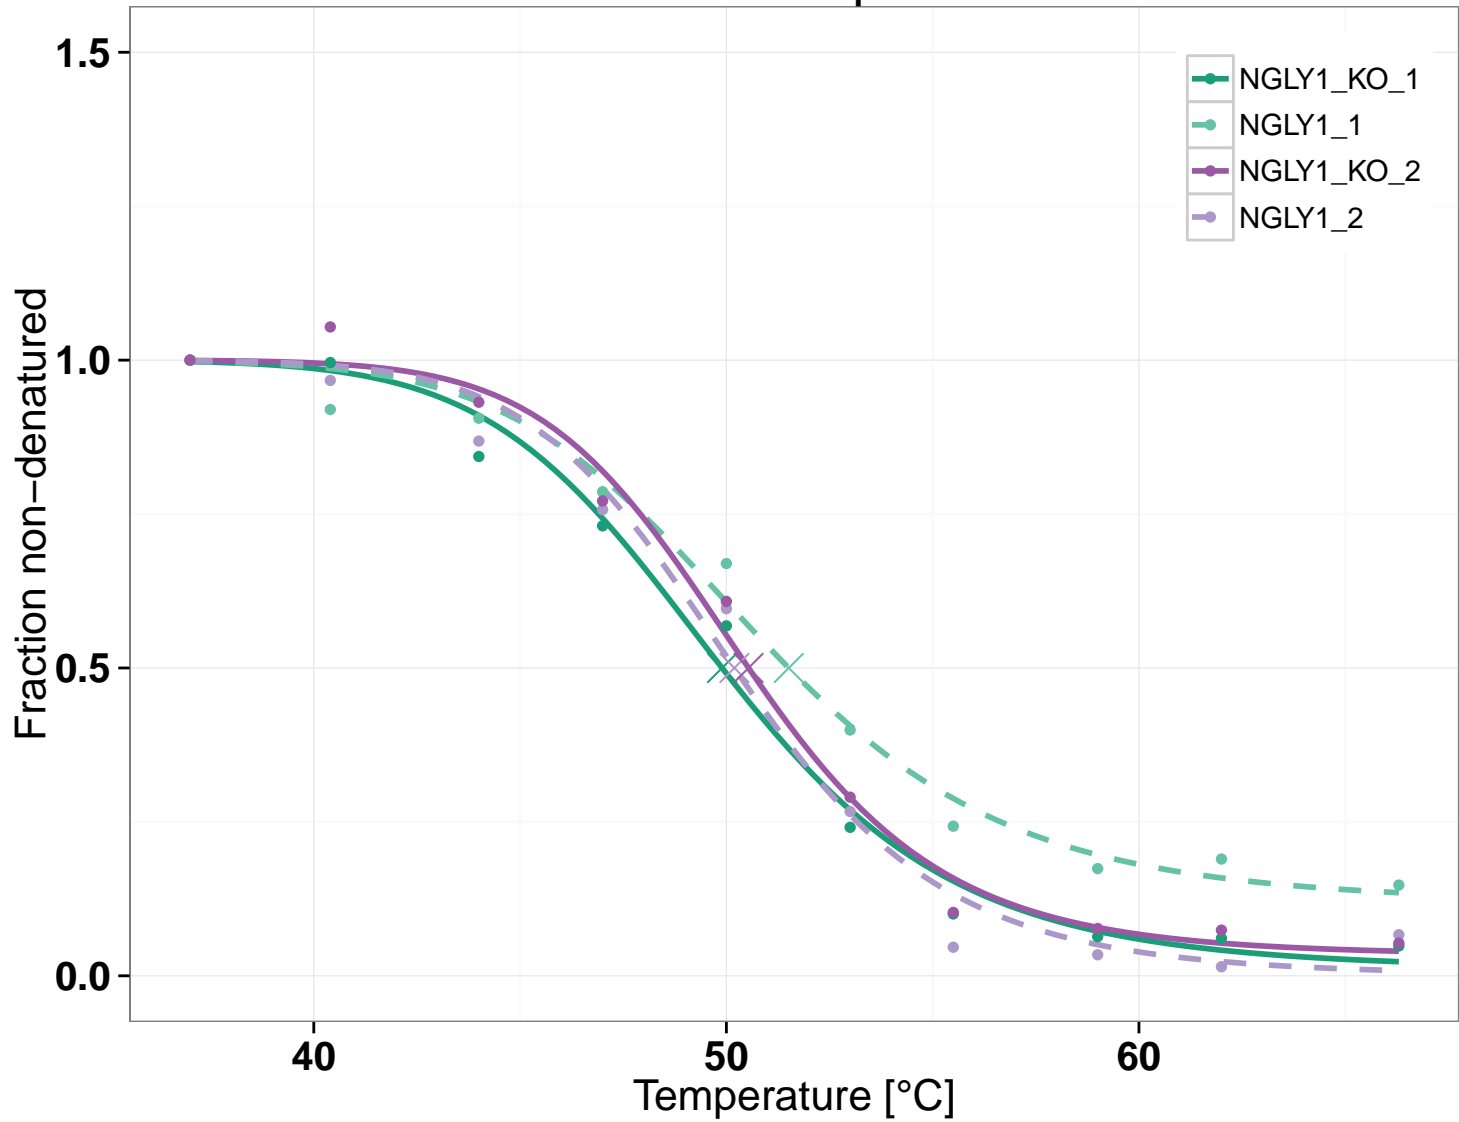

|            | meltPoint | slope  | plateau | R2   |
|------------|-----------|--------|---------|------|
| NGLY1_KO_1 | 49.9      | -0.087 | 0.01    | 0.99 |
| NGLY1_1    | 51.51     | -0.072 | 0.12    | 0.99 |
| NGLY1_KO_2 | 50.54     | -0.1   | 0.03    | 0.99 |
| NGLY1_2    | 50.2      | -0.099 | 0       | 0.98 |

Supplement: Supplementary file 4072 [file 1]

IPI00171123.4|GATAD1

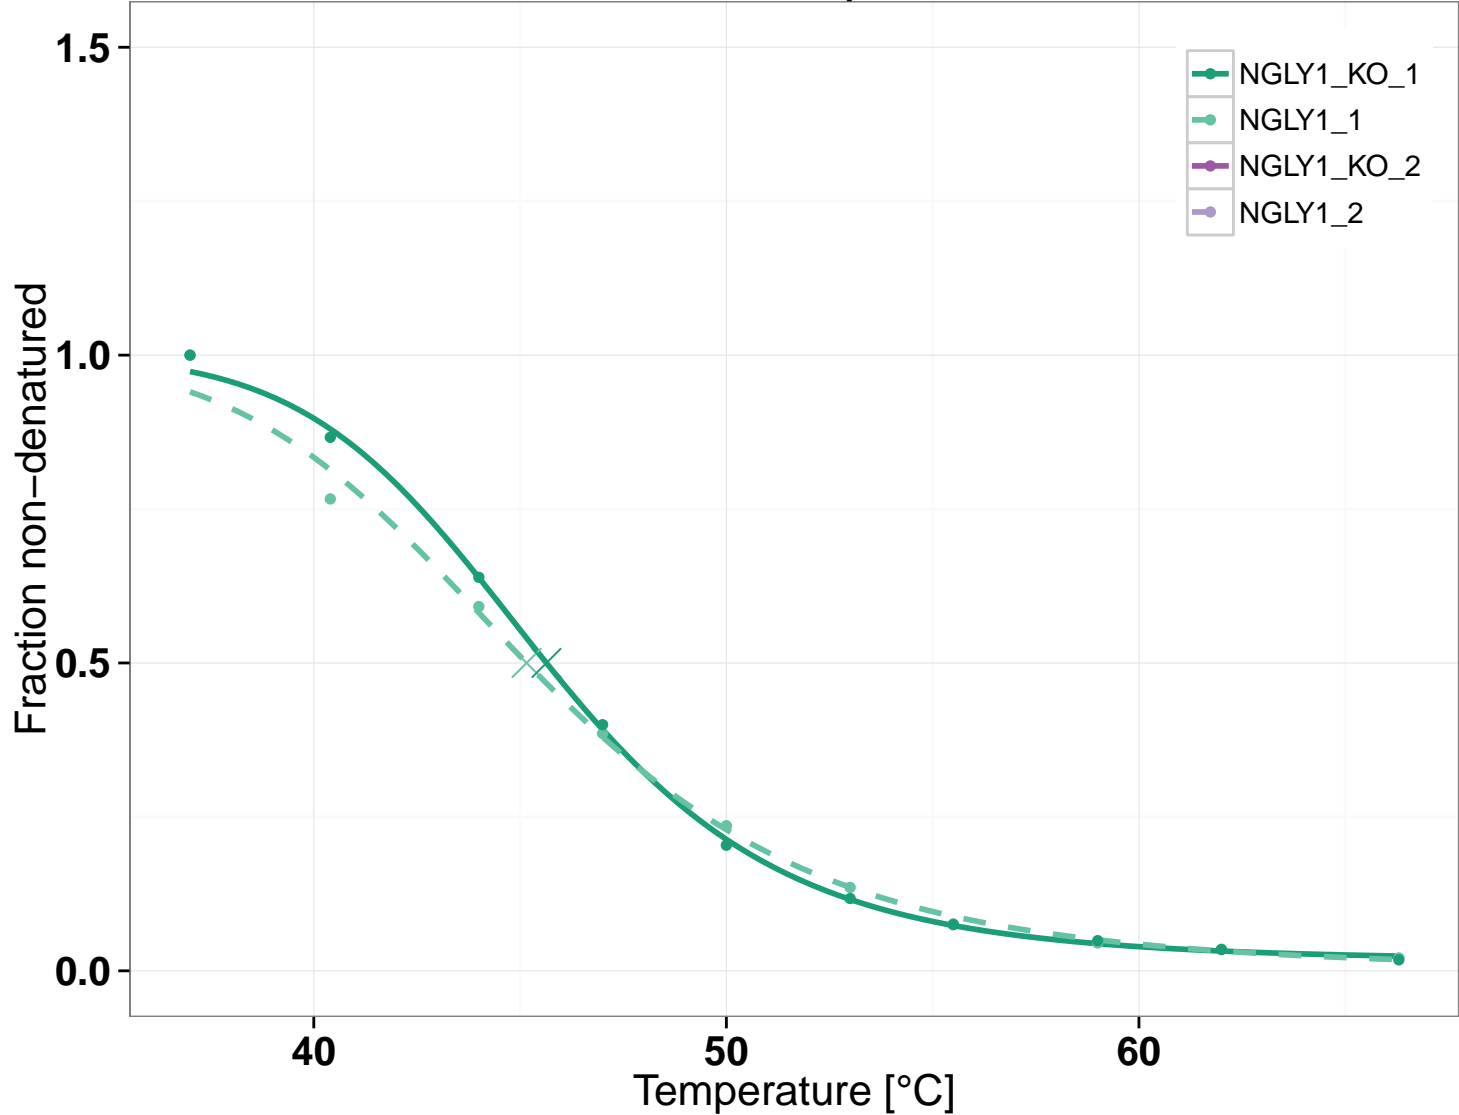

|            | meltPoint | slope  | plateau | R2   |
|------------|-----------|--------|---------|------|
| NGLY1_KO_1 | 45.64     | -0.085 | 0.02    | 1    |
| NGLY1_1    | 45.16     | -0.071 | 0       | 0.99 |
| NGLY1_KO_2 | -         | -      | -       | -    |
| NGLY1_2    | -         | -      | -       | -    |

Supplement: Supplementary file 4073 [file 1]

IPI00015476.1|SLC1A4

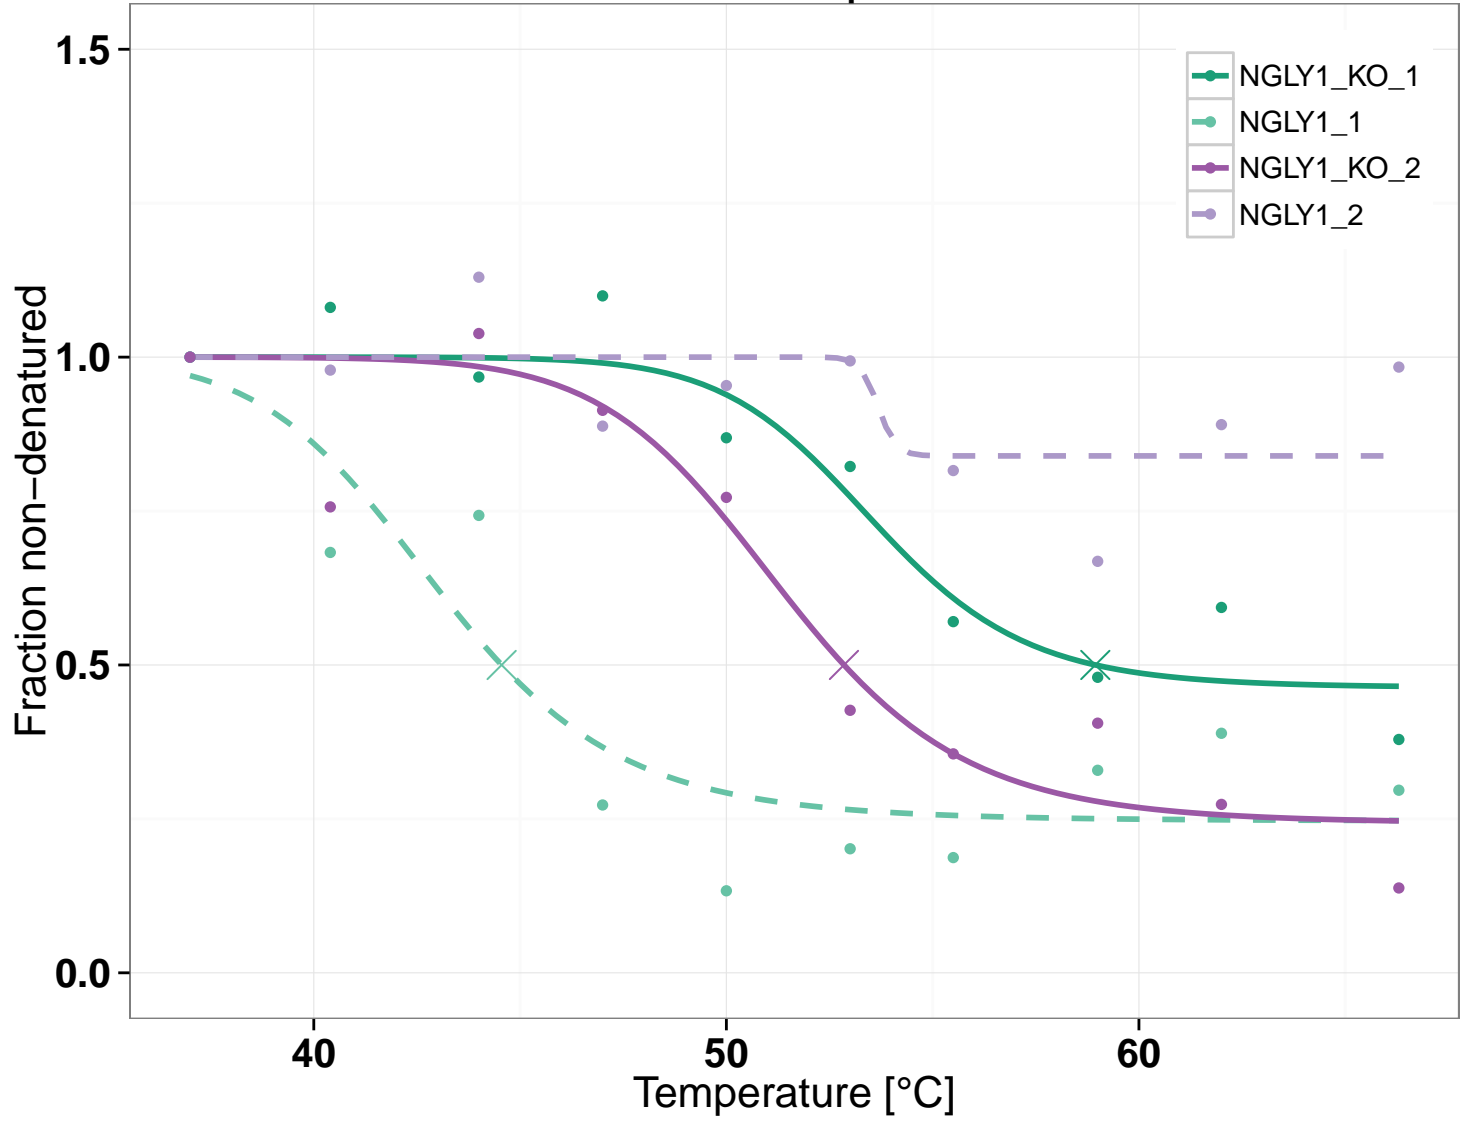

|            | meltPoint | slope  | plateau | R2   |
|------------|-----------|--------|---------|------|
| NGLY1_KO_1 | 58.94     | -0.072 | 0.46    | 0.92 |
| NGLY1_1    | 44.55     | -0.087 | 0.25    | 0.82 |
| NGLY1_KO_2 | 52.85     | -0.086 | 0.24    | 0.9  |
| NGLY1_2    | -         | -0.19  | 0.84    | 0.39 |

Supplement: Supplementary file 4074 [file 1]

IPI00374290.5|C5ORF25

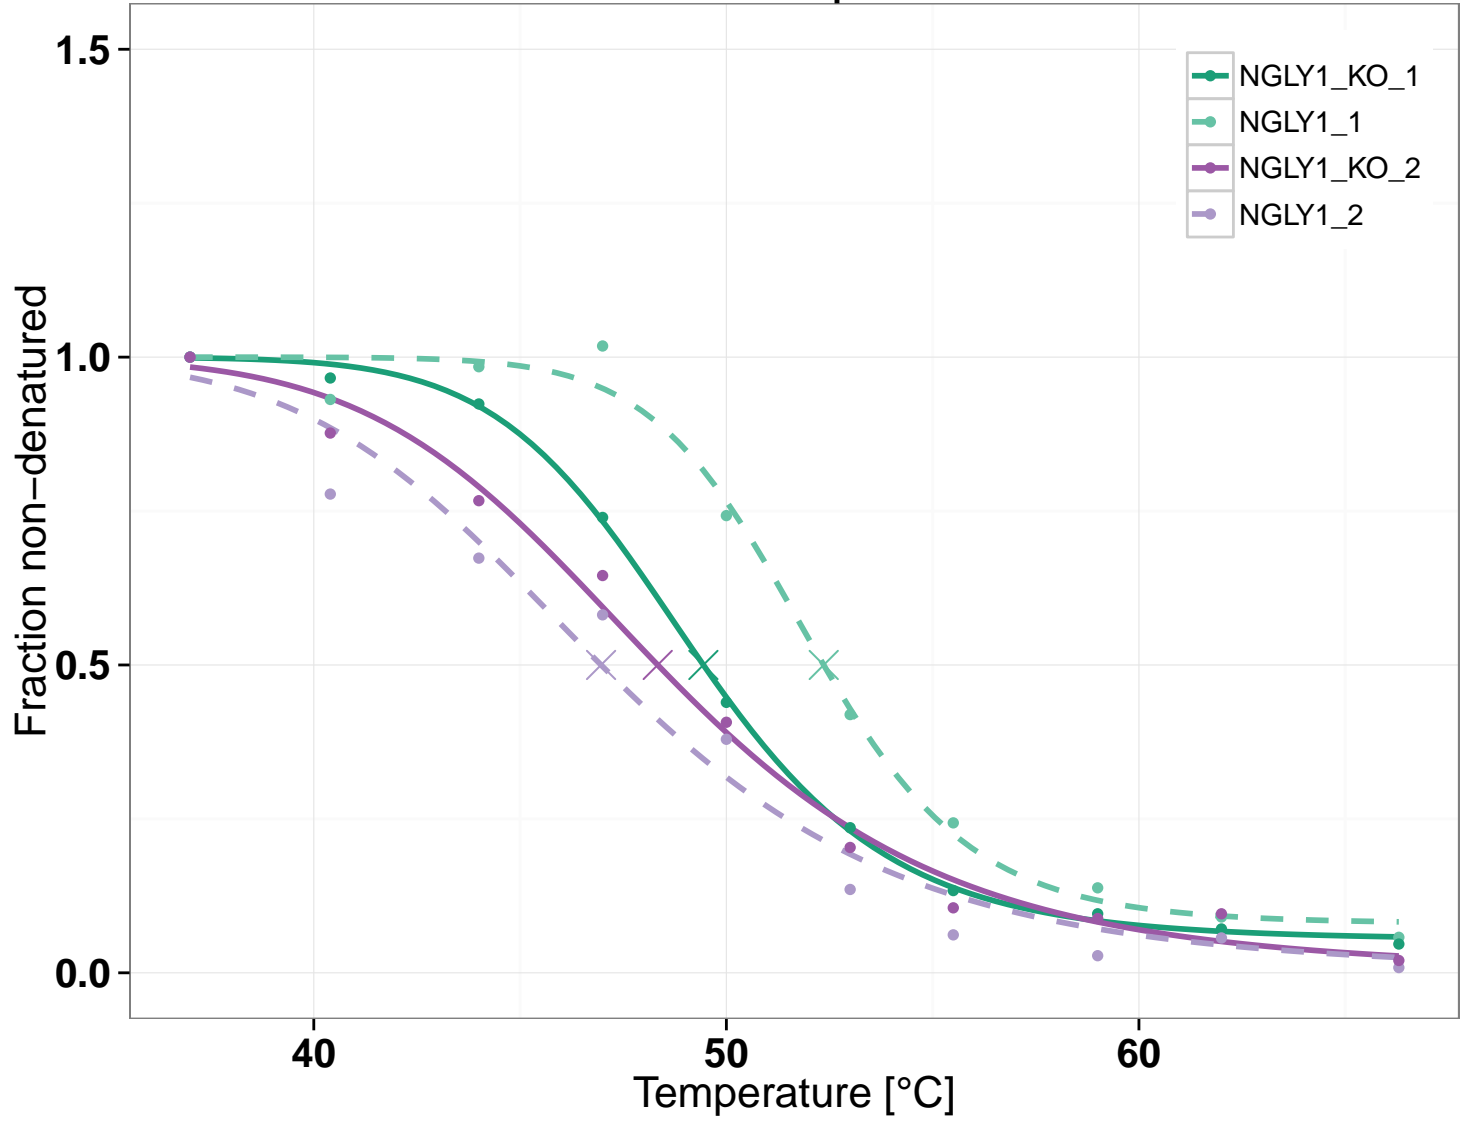

|            | meltPoint | slope  | plateau | R2   |
|------------|-----------|--------|---------|------|
| NGLY1_KO_1 | 49.44     | -0.099 | 0.05    | 1    |
| NGLY1_1    | 52.36     | -0.12  | 0.08    | 0.99 |
| NGLY1_KO_2 | 48.34     | -0.071 | 0       | 0.99 |
| NGLY1_2    | 46.96     | -0.069 | 0       | 0.97 |

Supplement: Supplementary file 4075 [file 1]

IPI00748151.2|C2ORF30

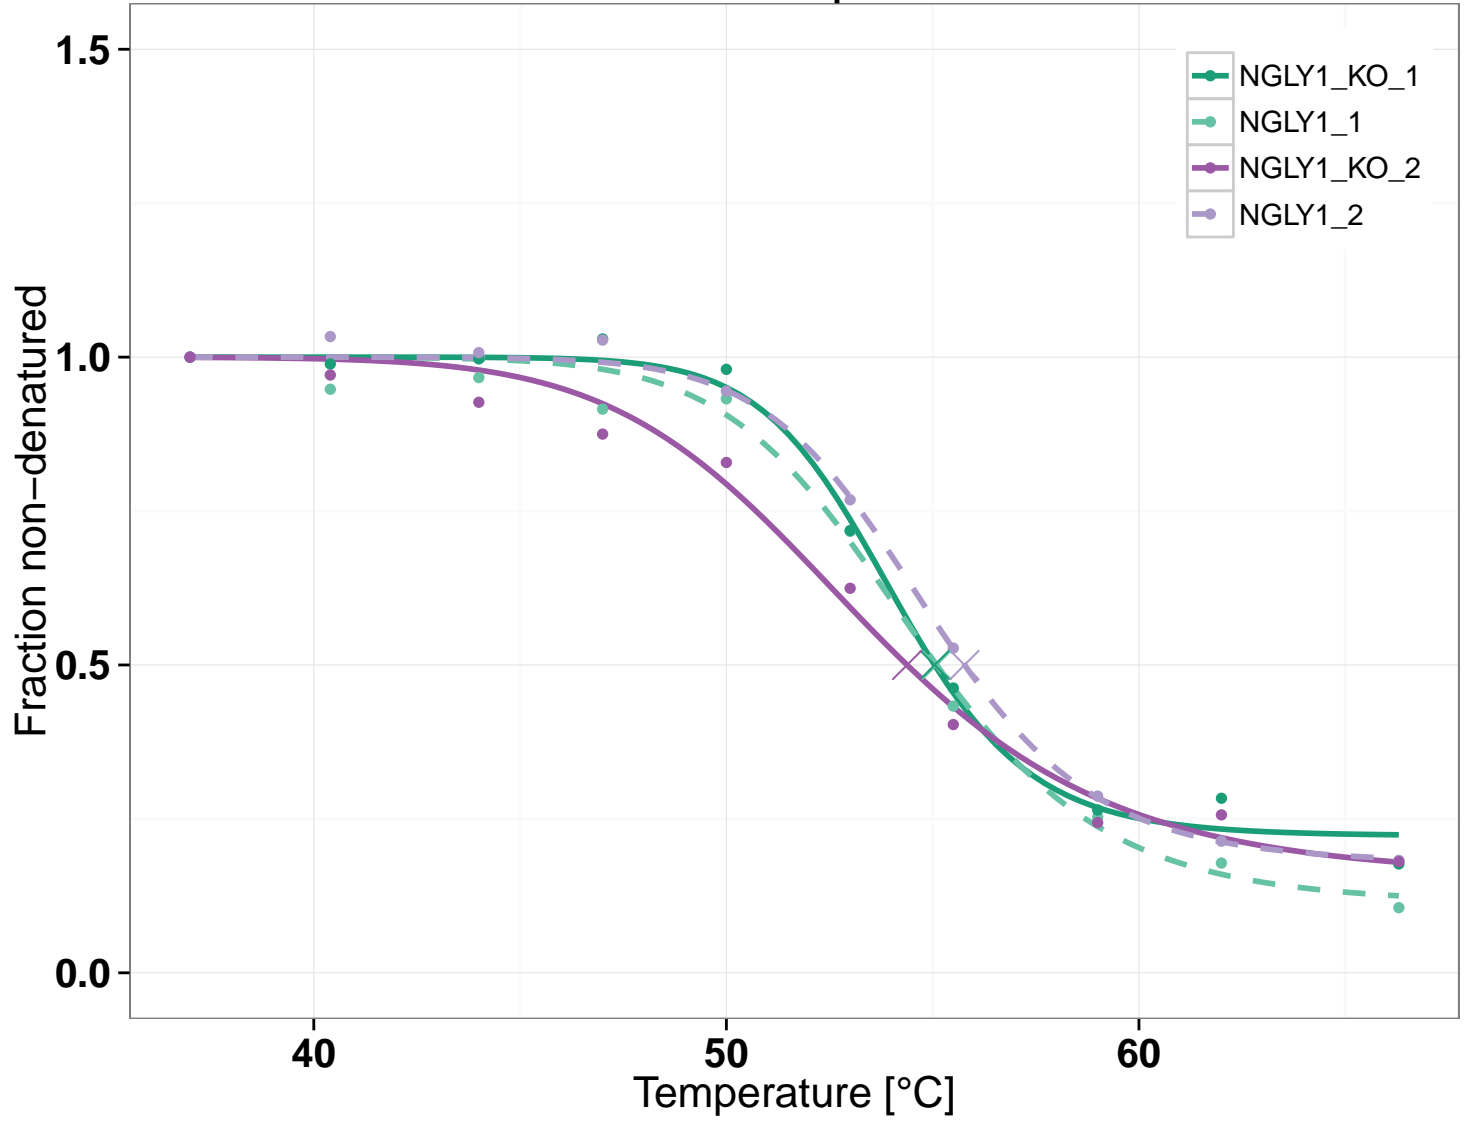

|            | meltPoint | slope  | plateau | R2   |
|------------|-----------|--------|---------|------|
| NGLY1_KO_1 | 55.05     | -0.12  | 0.22    | 0.99 |
| NGLY1_1    | 55.1      | -0.097 | 0.11    | 0.99 |
| NGLY1_KO_2 | 54.38     | -0.07  | 0.15    | 0.99 |
| NGLY1_2    | 55.77     | -0.1   | 0.18    | 1    |

Supplement: Supplementary file 4076 [file 1]

# IPI00106646.1|SDF4

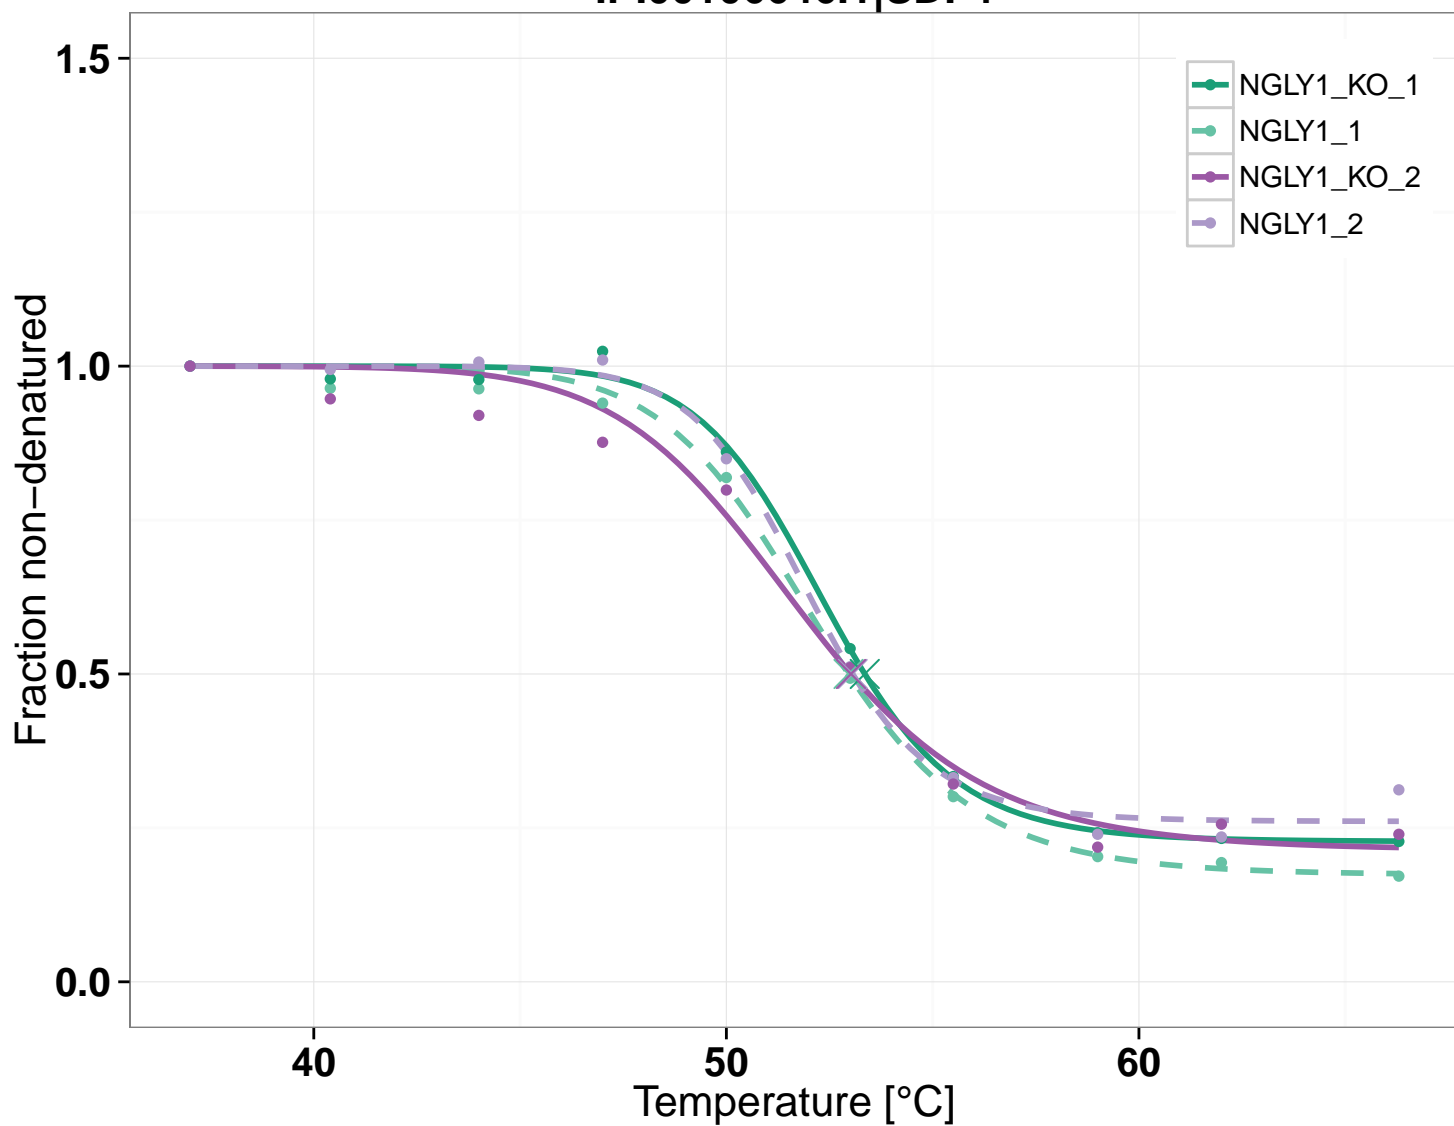

|            | meltPoint | slope  | plateau | R2   |
|------------|-----------|--------|---------|------|
| NGLY1_KO_1 | 53.35     | -0.12  | 0.23    | 1    |
| NGLY1_1    | 52.96     | -0.11  | 0.17    | 1    |
| NGLY1_KO_2 | 53.02     | -0.089 | 0.21    | 0.98 |
| NGLY1_2    | 53.06     | -0.13  | 0.26    | 1    |

Supplement: Supplementary file 4077 [file 1]

IPI00556430.1|NPEPL1

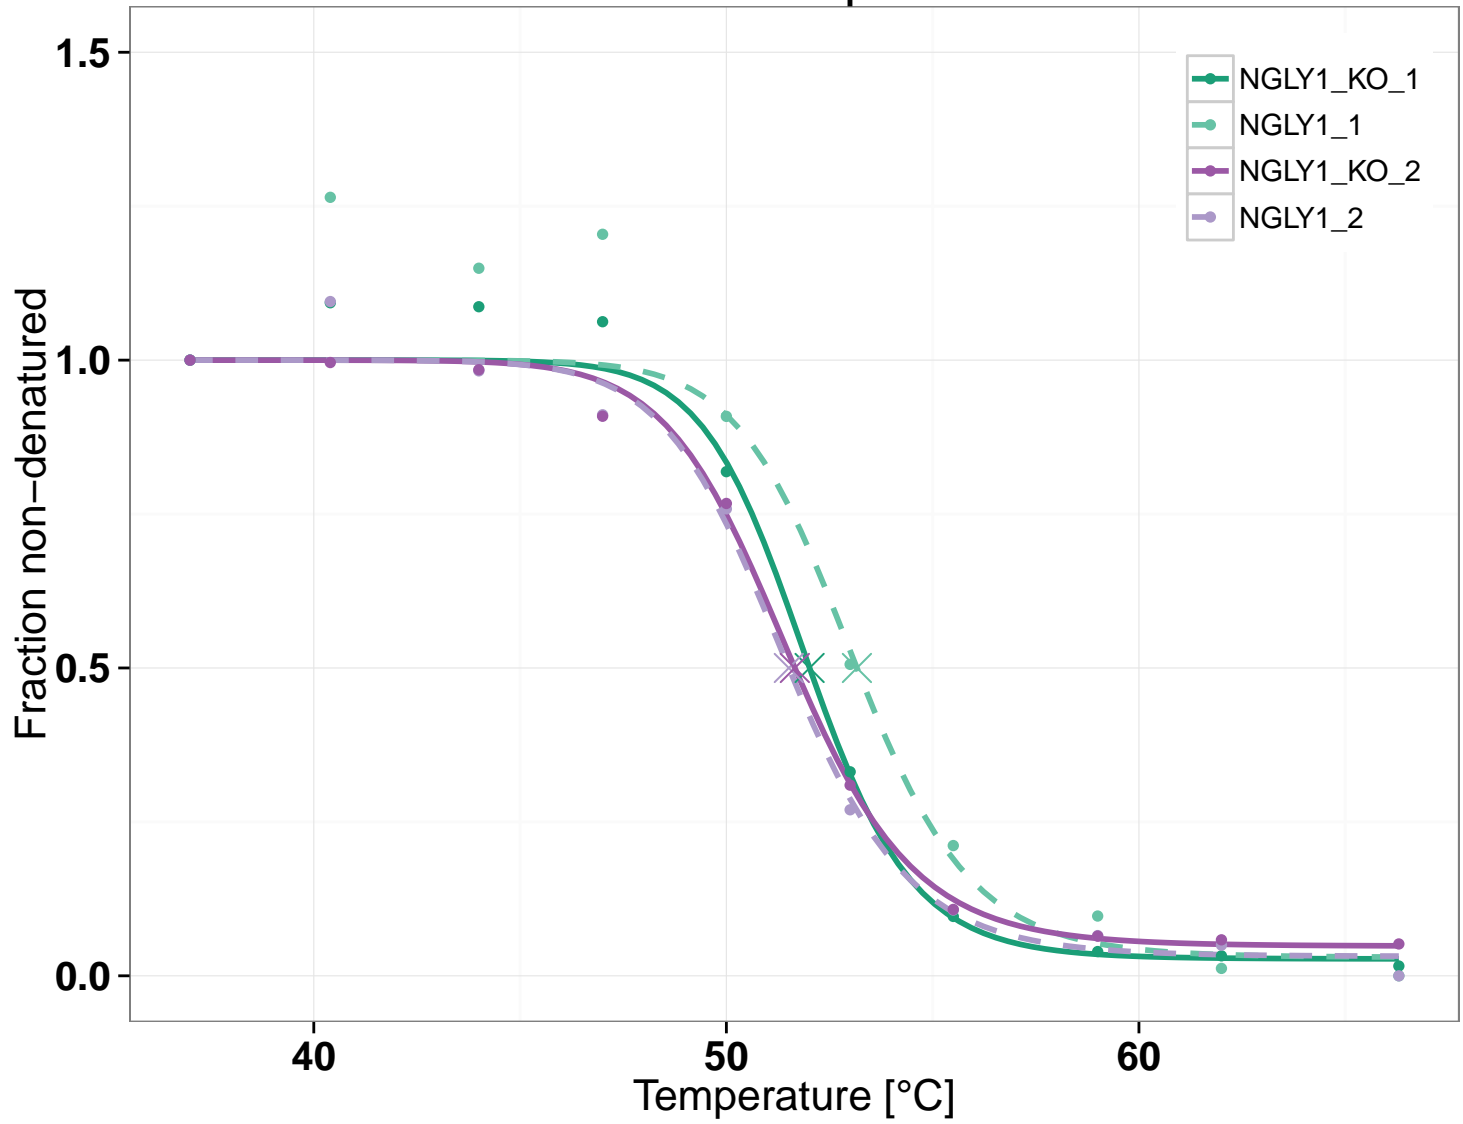

|            | meltPoint | slope | plateau | R2   |
|------------|-----------|-------|---------|------|
| NGLY1_KO_1 | 52.02     | -0.19 | 0.03    | 0.99 |
| NGLY1_1    | 53.16     | -0.17 | 0.03    | 0.94 |
| NGLY1_KO_2 | 51.66     | -0.16 | 0.05    | 1    |
| NGLY1_2    | 51.51     | -0.16 | 0.03    | 0.99 |

Supplement: Supplementary file 4078 [file 1]

IPI00024568.2|GLTSCR1

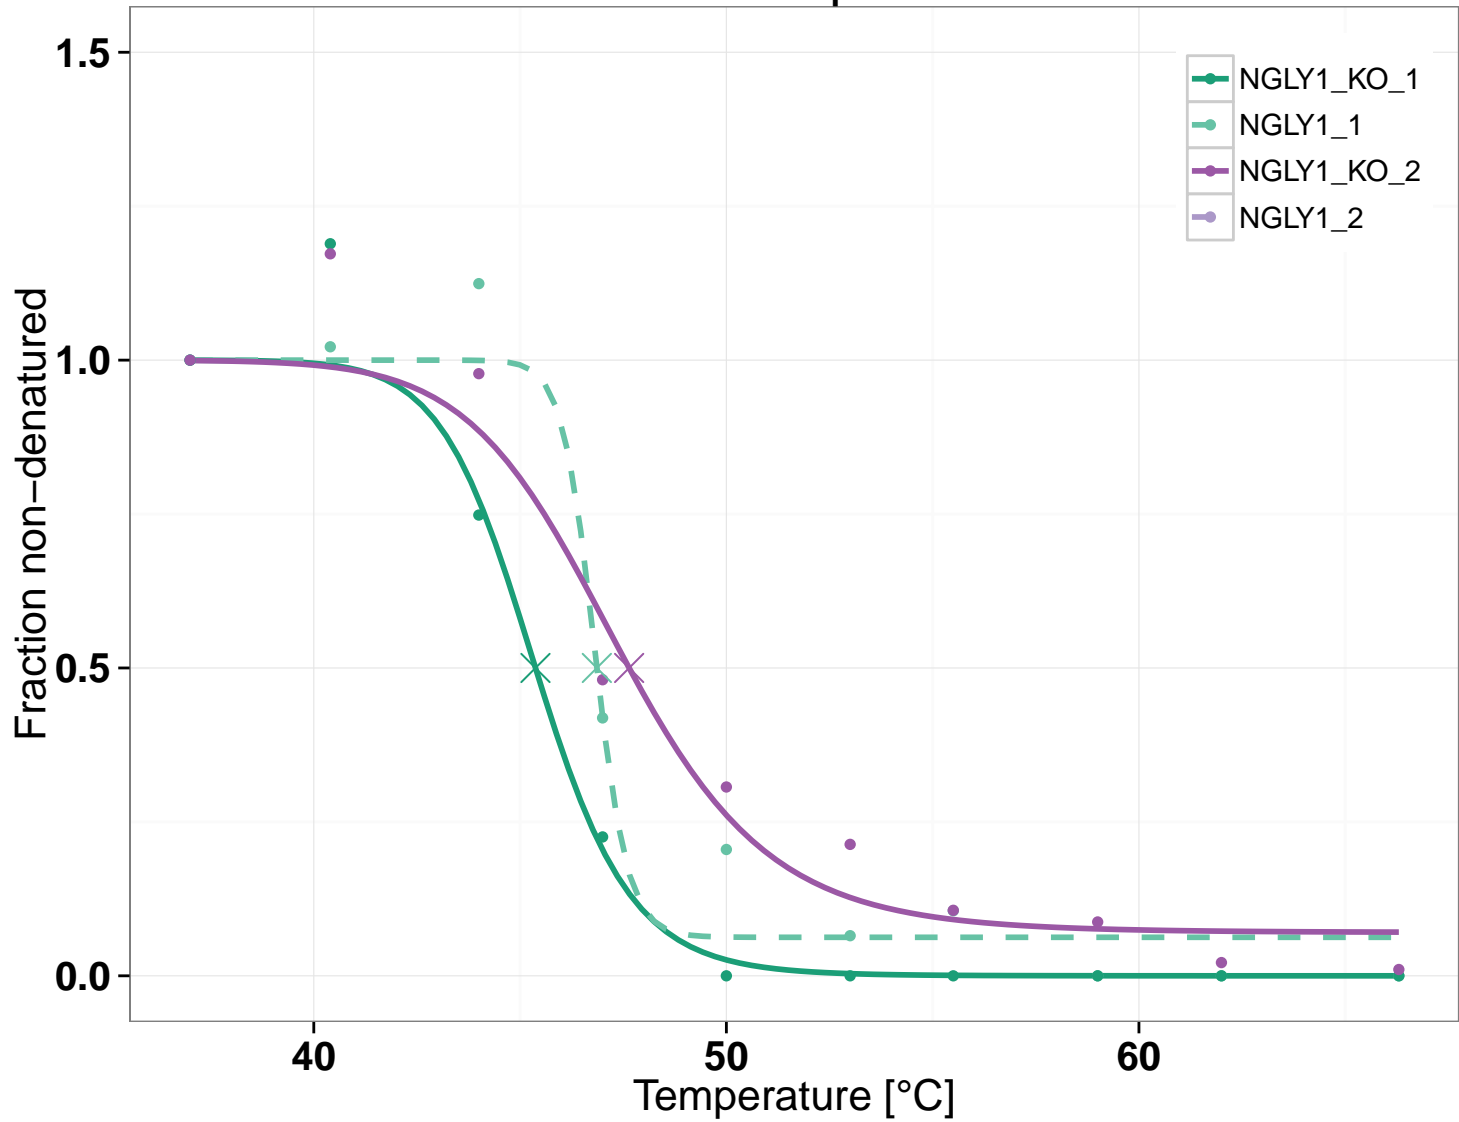

|            | meltPoint | slope | plateau | R2   |
|------------|-----------|-------|---------|------|
| NGLY1_KO_1 | 45.37     | -0.22 | 0       | 0.98 |
| NGLY1_1    | 46.86     | -0.6  | 0.06    | 0.97 |
| NGLY1_KO_2 | 47.64     | -0.13 | 0.07    | 0.96 |
| NGLY1_2    | -         | -     | -       | -    |

Supplement: Supplementary file 4079 [file 1]

IPI00888836.1|LOC729148

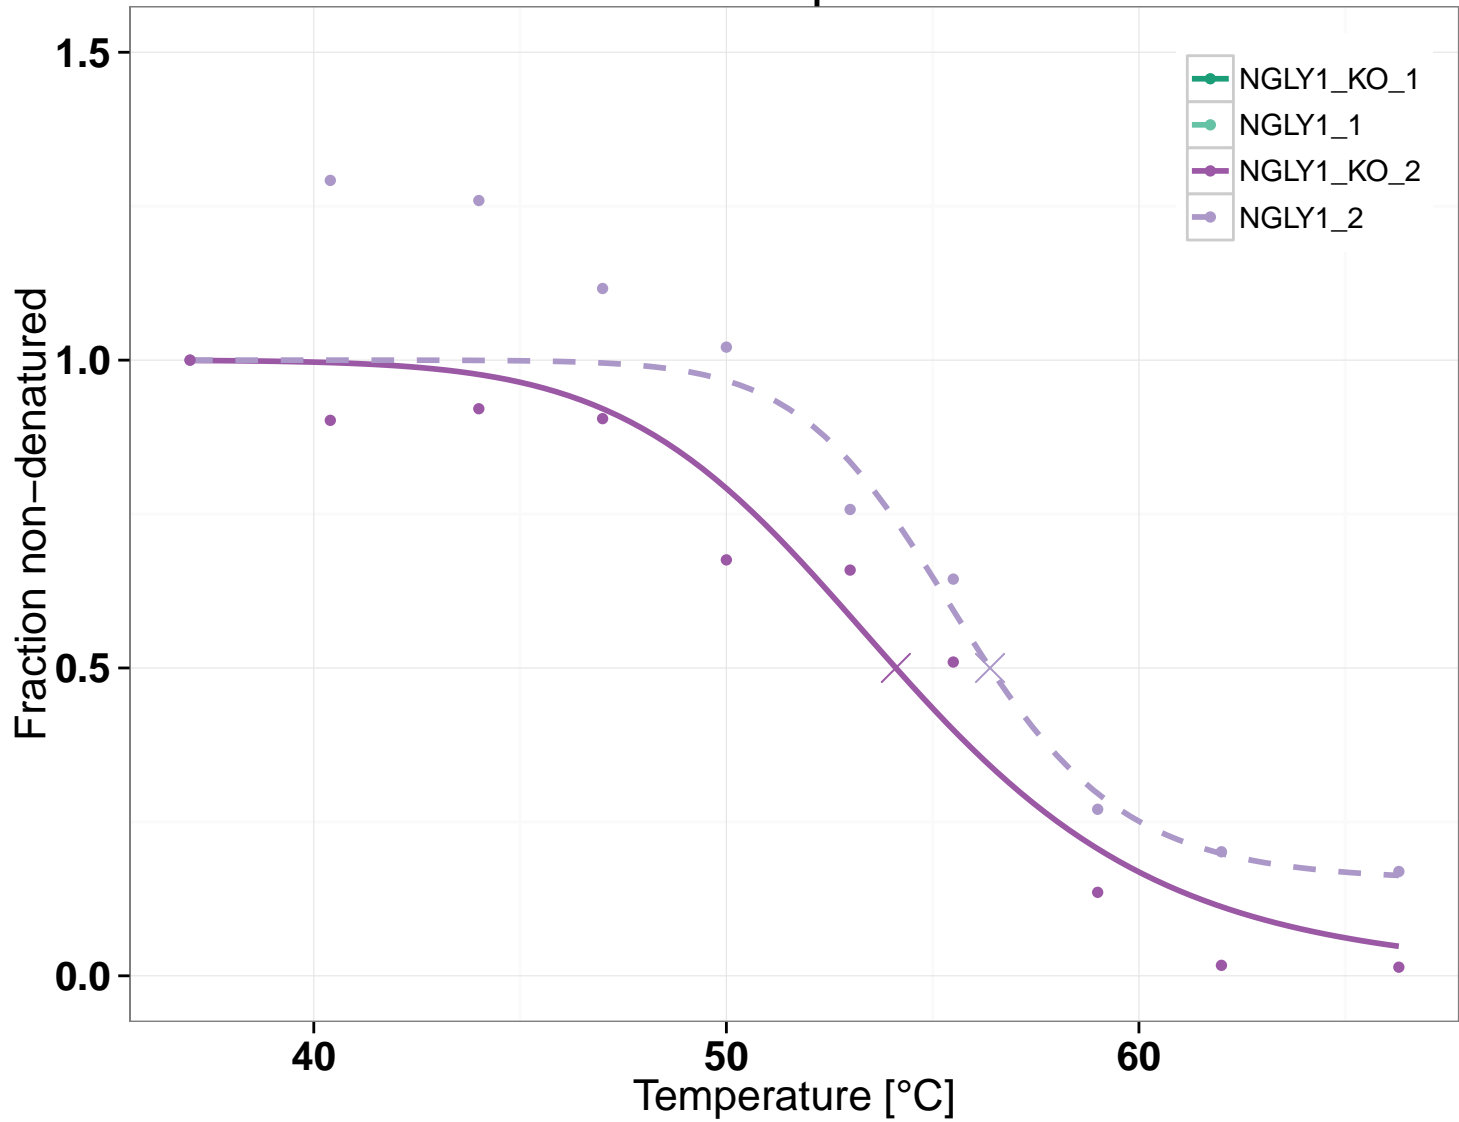

|            | meltPoint | slope  | plateau | R2   |
|------------|-----------|--------|---------|------|
| NGLY1_KO_1 | —         | —      | —       | —    |
| NGLY1_1    | —         | —      | —       | —    |
| NGLY1_KO_2 | 54.11     | -0.076 | 0       | 0.96 |
| NGLY1_2    | 56.39     | -0.11  | 0.15    | 0.89 |

Supplement: Supplementary file 4080 [file 1]

# IPI00020131.1|SOS1

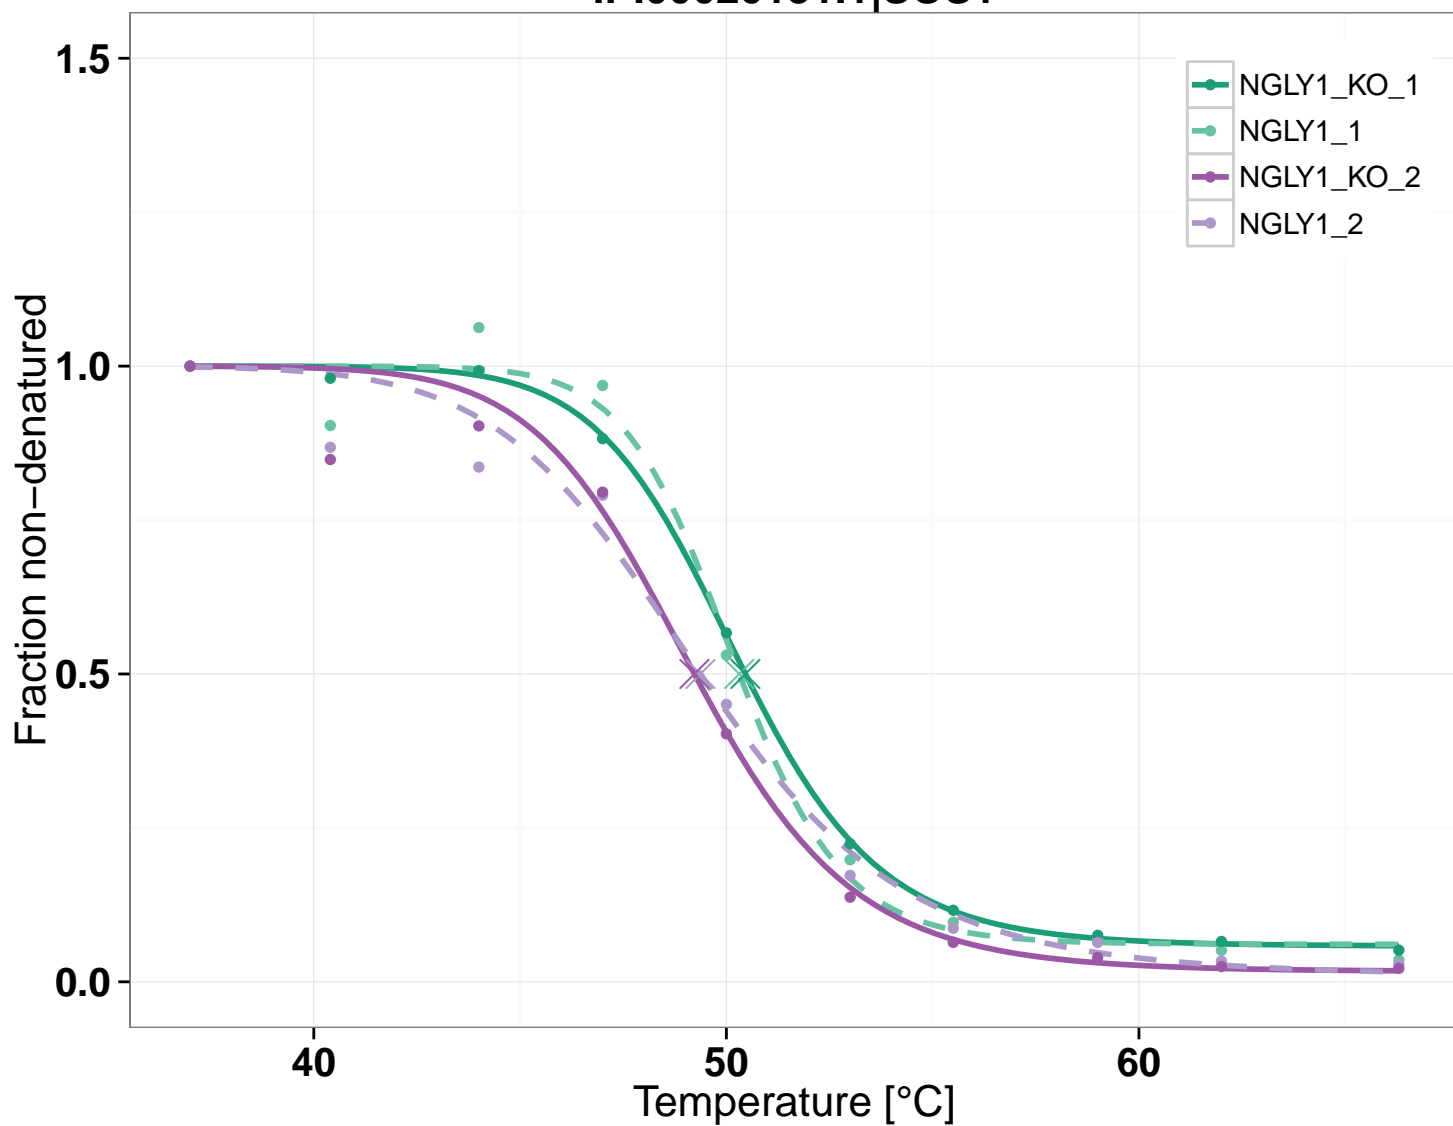

|            | meltPoint | slope | plateau | R2   |
|------------|-----------|-------|---------|------|
| NGLY1_KO_1 | 50.46     | -0.14 | 0.06    | 1    |
| NGLY1_1    | 50.31     | -0.18 | 0.06    | 0.99 |
| NGLY1_KO_2 | 49.23     | -0.13 | 0.02    | 0.98 |
| NGLY1_2    | 49.37     | -0.1  | 0.01    | 0.98 |

Supplement: Supplementary file 4081 [file 1]

# IPI00014230.1|C1QBP

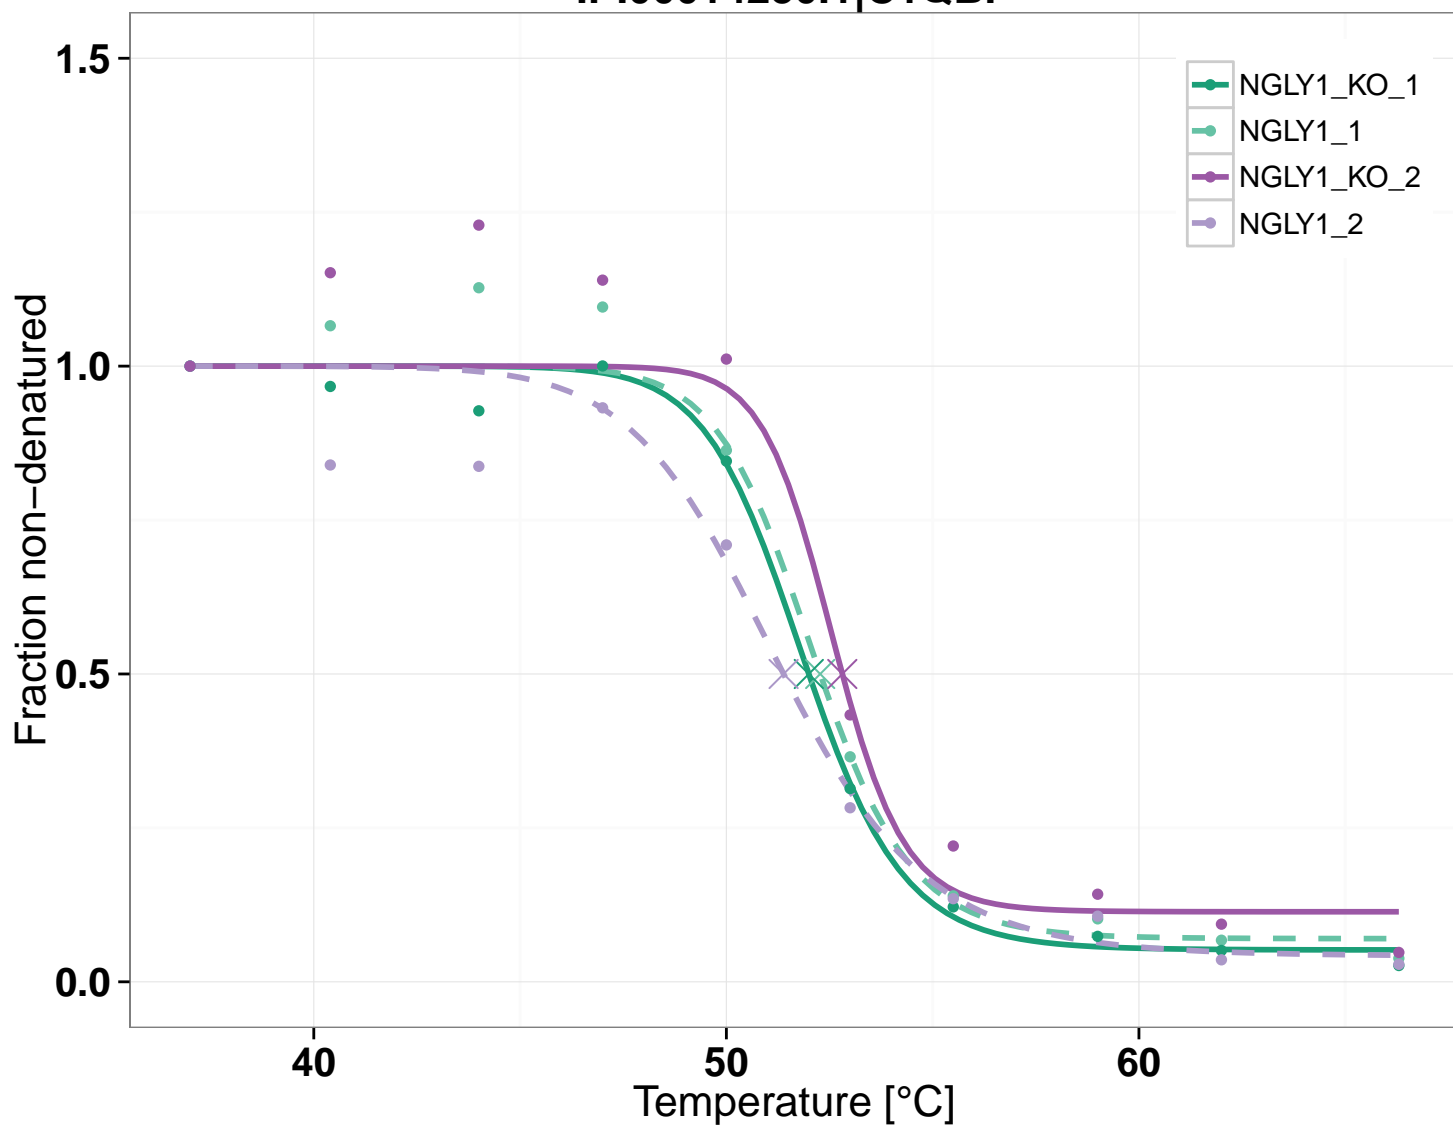

|            | meltPoint | slope | plateau | R2   |
|------------|-----------|-------|---------|------|
| NGLY1_KO_1 | 52        | -0.2  | 0.05    | 1    |
| NGLY1_1    | 52.27     | -0.2  | 0.07    | 0.98 |
| NGLY1_KO_2 | 52.81     | -0.26 | 0.11    | 0.95 |
| NGLY1_2    | 51.39     | -0.13 | 0.04    | 0.96 |

Supplement: Supplementary file 4082 [file 1]

# IPI00013880.2|SEMA5A

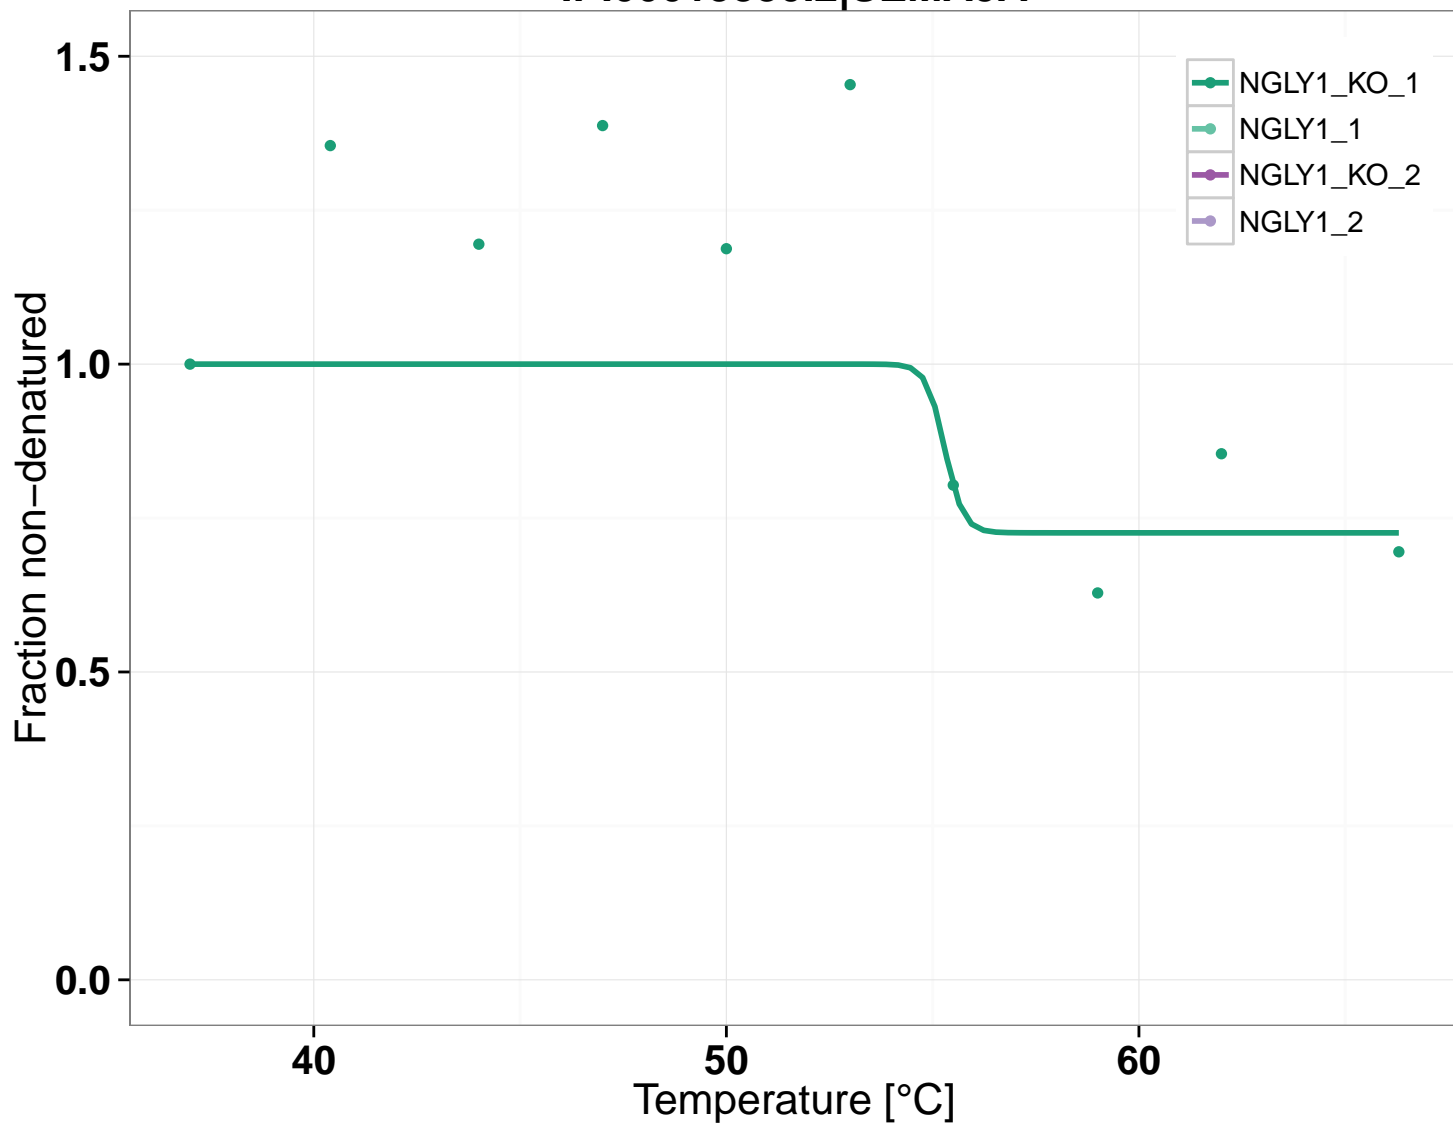

|            | meltPoint | slope | plateau | R2   |
|------------|-----------|-------|---------|------|
| NGLY1_KO_1 | —         | -0.31 | 0.73    | 0.29 |
| NGLY1_1    | —         | —     | —       | —    |
| NGLY1_KO_2 | —         | —     | —       | —    |
| NGLY1_2    | —         | —     | —       | —    |

Supplement: Supplementary file 4083 [file 1]

IPI00640514.3|C6ORF134

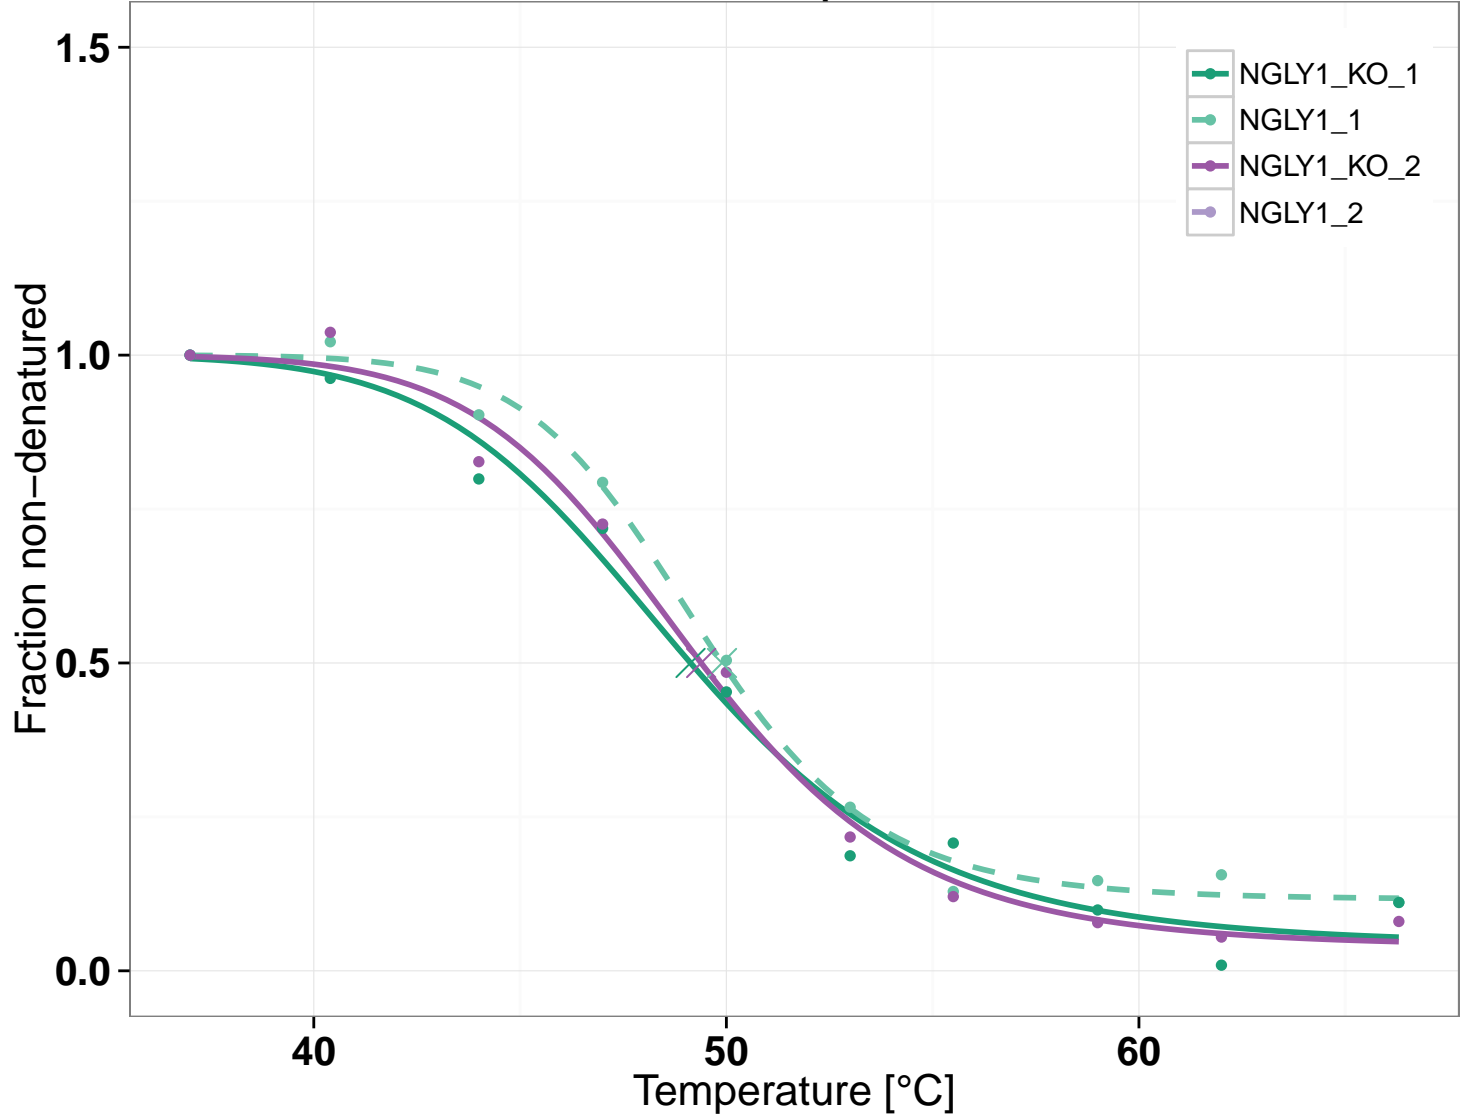

|            | meltPoint | slope | plateau | R2   |
|------------|-----------|-------|---------|------|
| NGLY1_KO_1 | 49.13     | -0.08 | 0.04    | 0.98 |
| NGLY1_1    | 49.89     | -0.1  | 0.12    | 0.99 |
| NGLY1_KO_2 | 49.39     | -0.09 | 0.04    | 0.99 |
| NGLY1_2    | -         | -     | -       | -    |

Supplement: Supplementary file 4084 [file 1]

# IPI00017672.4|NP

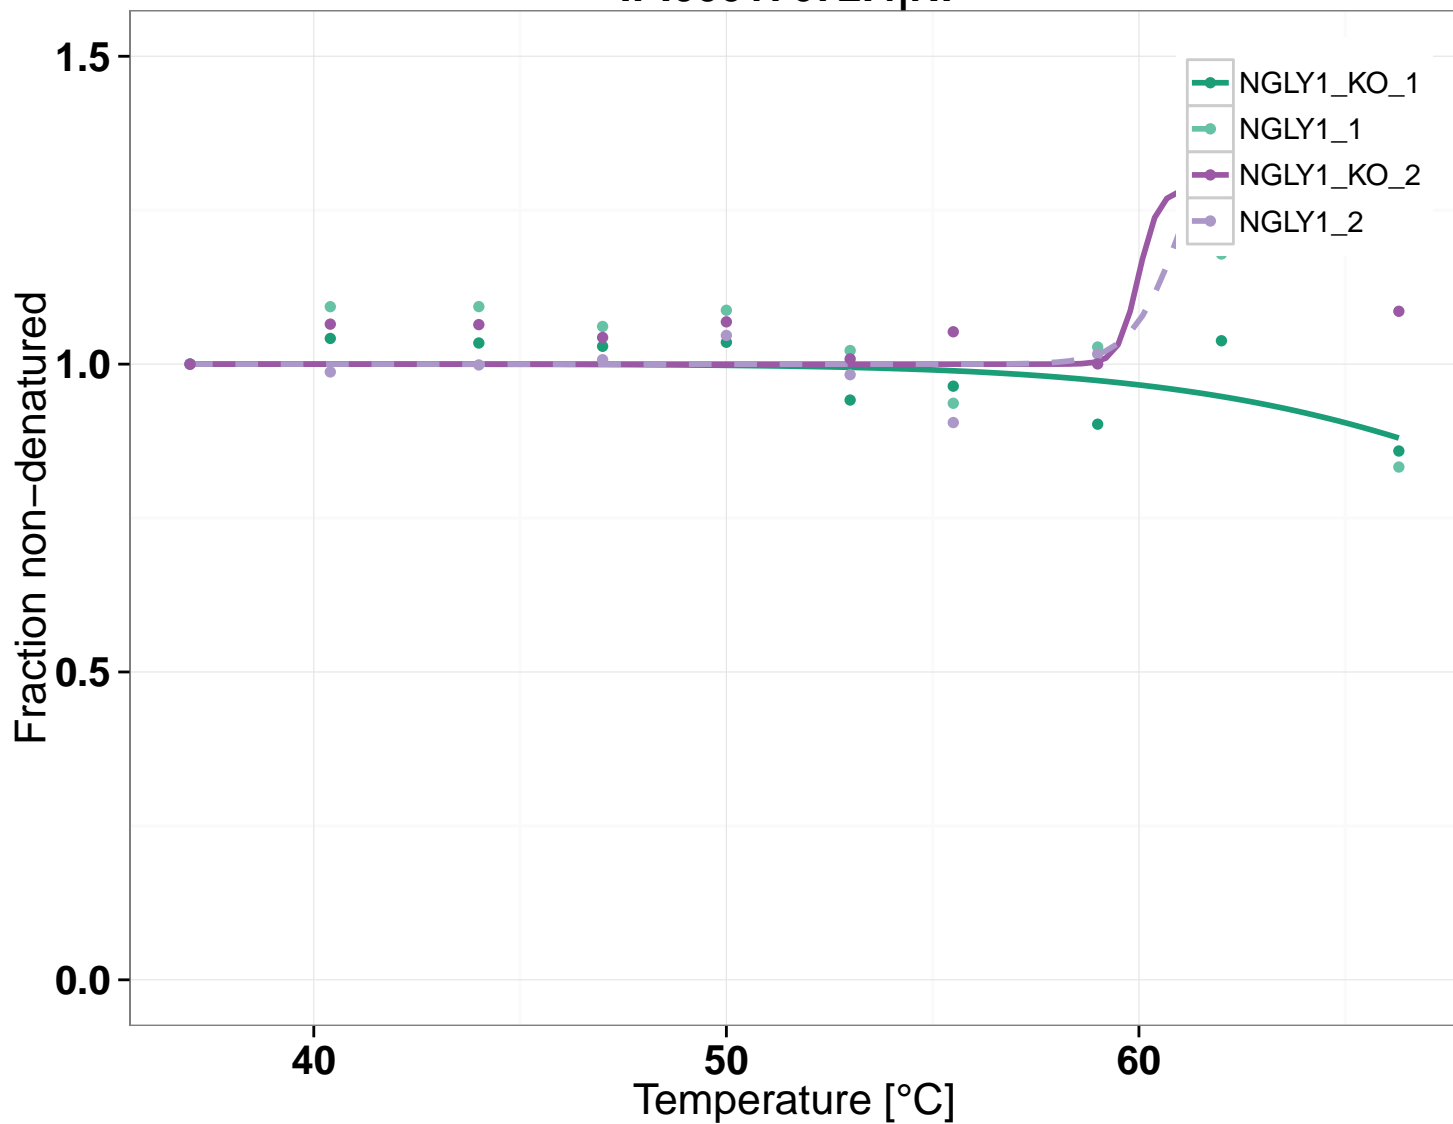

|            | meltPoint | slope | plateau | R2   |
|------------|-----------|-------|---------|------|
| NGLY1_KO_1 | —         | —     | 0       | 0.42 |
| NGLY1_1    | —         | —     | —       | —    |
| NGLY1_KO_2 | —         | 0.3   | 1.28    | 0.47 |
| NGLY1_2    | —         | 0.19  | 1.5     | 0.97 |

Supplement: Supplementary file 4085 [file 1]

# IPI00896504.1|GNE

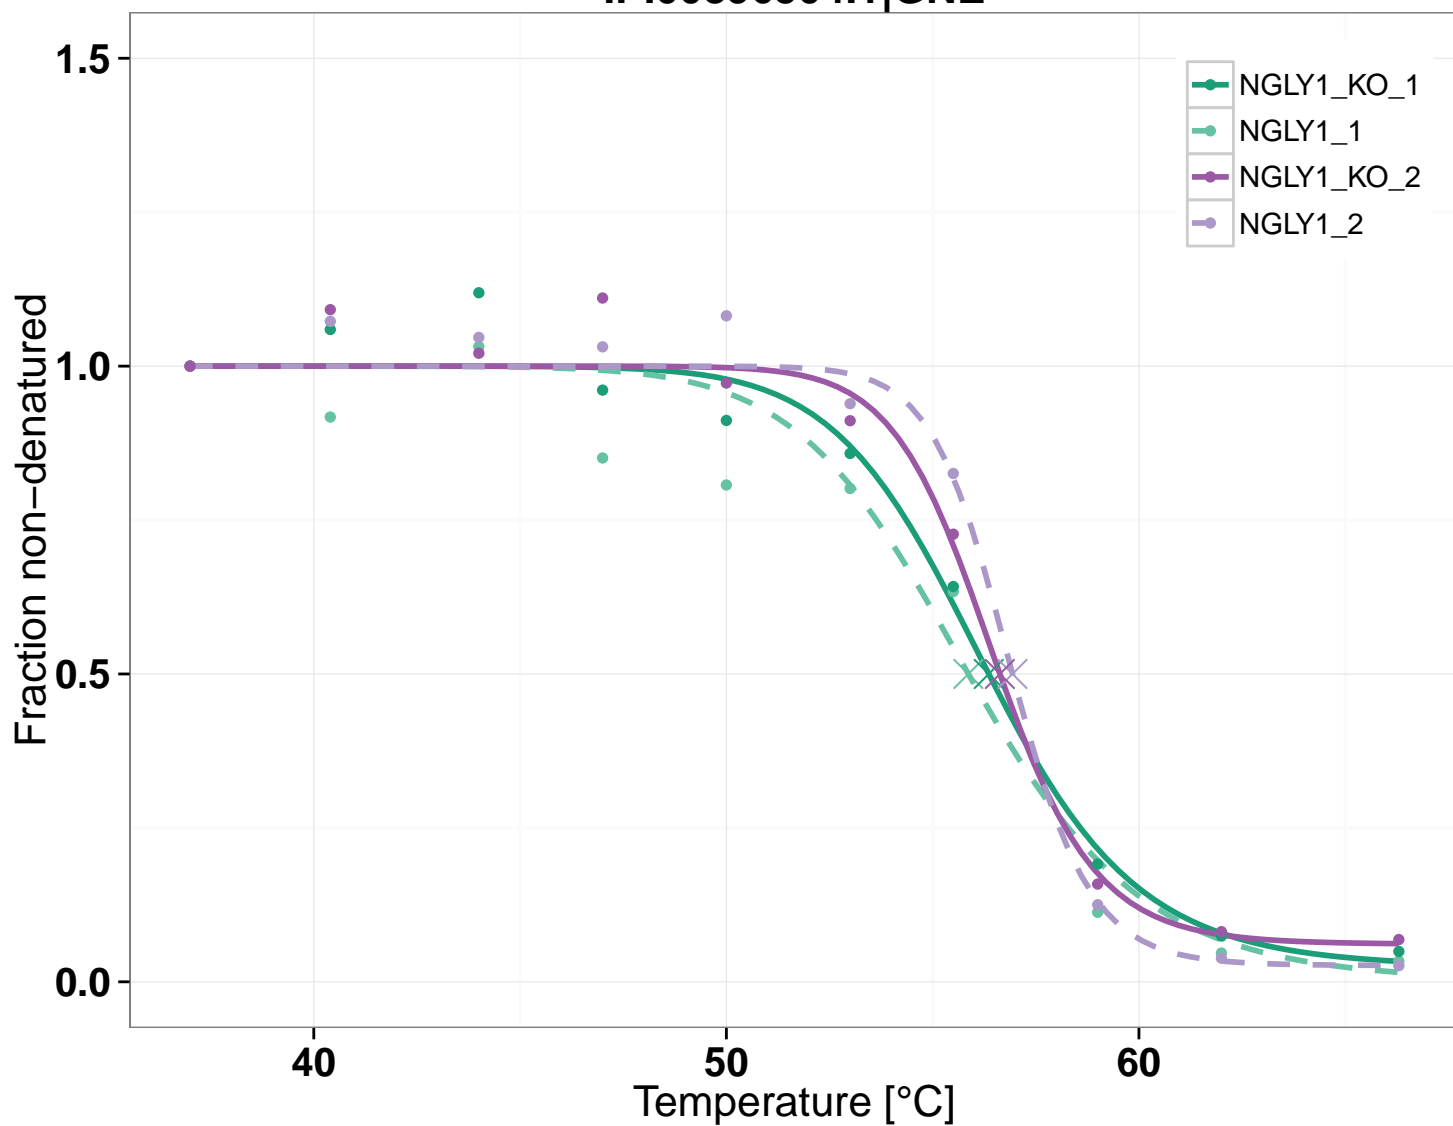

|            | meltPoint | slope | plateau | R2   |
|------------|-----------|-------|---------|------|
| NGLY1_KO_1 | 56.36     | -0.13 | 0.02    | 0.98 |
| NGLY1_1    | 55.87     | -0.12 | 0       | 0.95 |
| NGLY1_KO_2 | 56.63     | -0.19 | 0.06    | 0.99 |
| NGLY1_2    | 56.93     | -0.25 | 0.03    | 0.99 |

Supplement: Supplementary file 4086 [file 1]

IPI00019981.1|GTF2E2

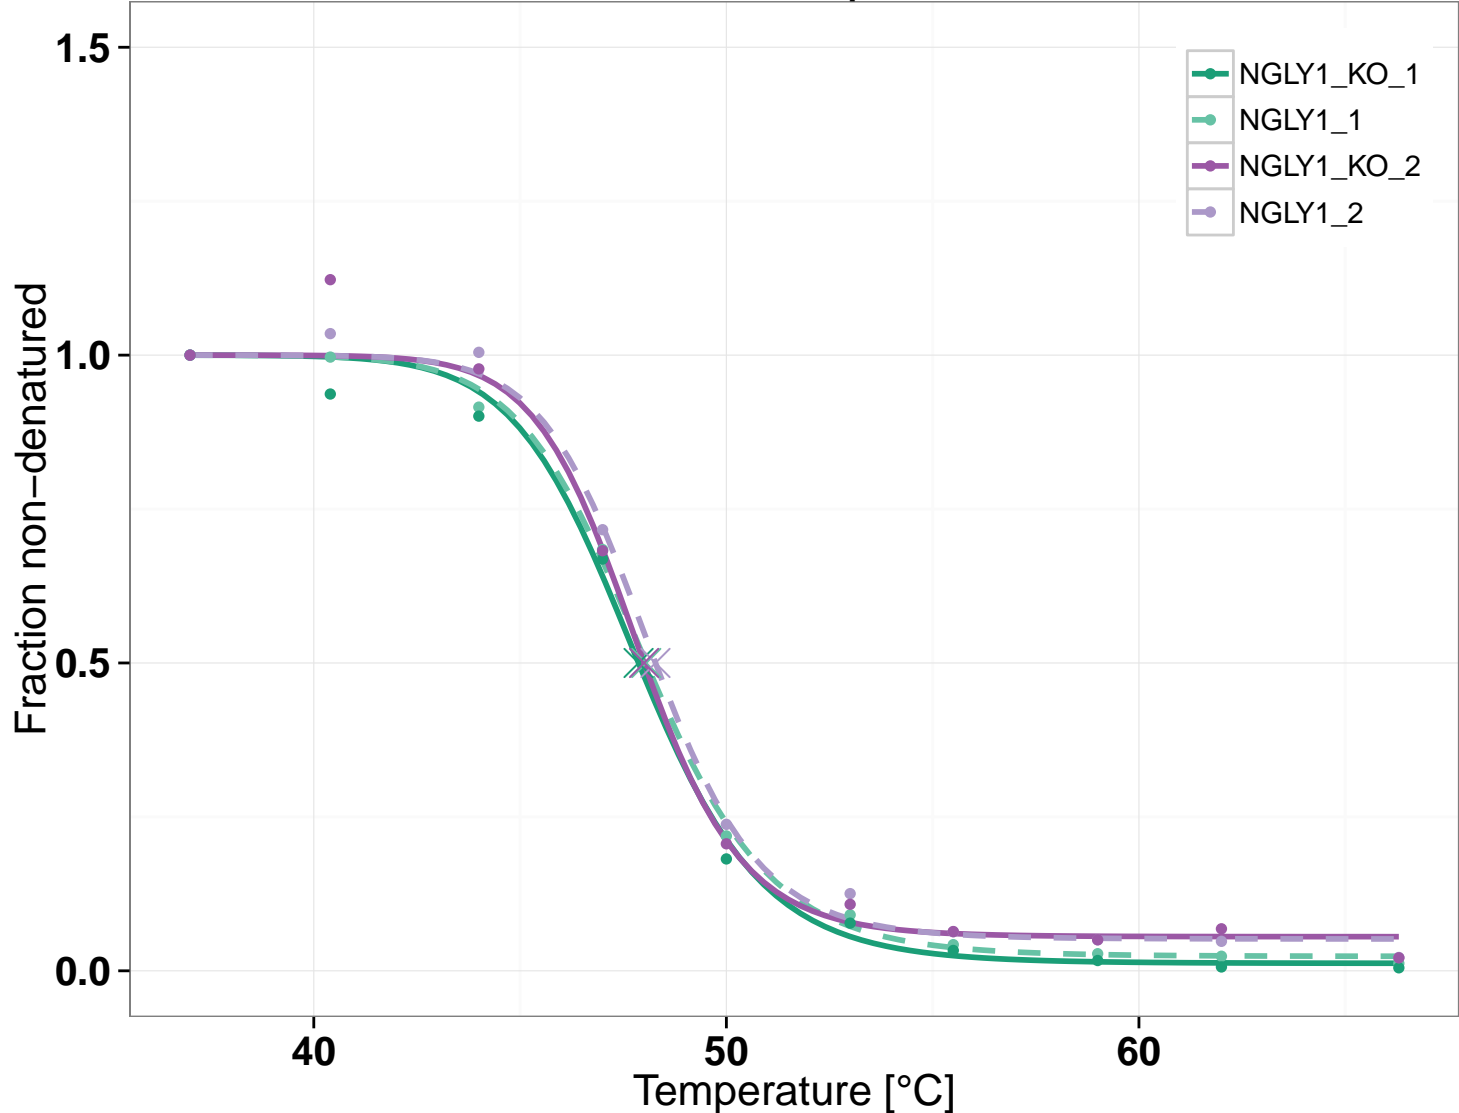

|            | meltPoint | slope | plateau | R2   |
|------------|-----------|-------|---------|------|
| NGLY1_KO_1 | 47.87     | -0.16 | 0.01    | 1    |
| NGLY1_1    | 48.06     | -0.16 | 0.02    | 1    |
| NGLY1_KO_2 | 48.01     | -0.19 | 0.06    | 0.99 |
| NGLY1_2    | 48.28     | -0.18 | 0.05    | 1    |

Supplement: Supplementary file 4087 [file 1]

IPI00883896.1|LIMA1

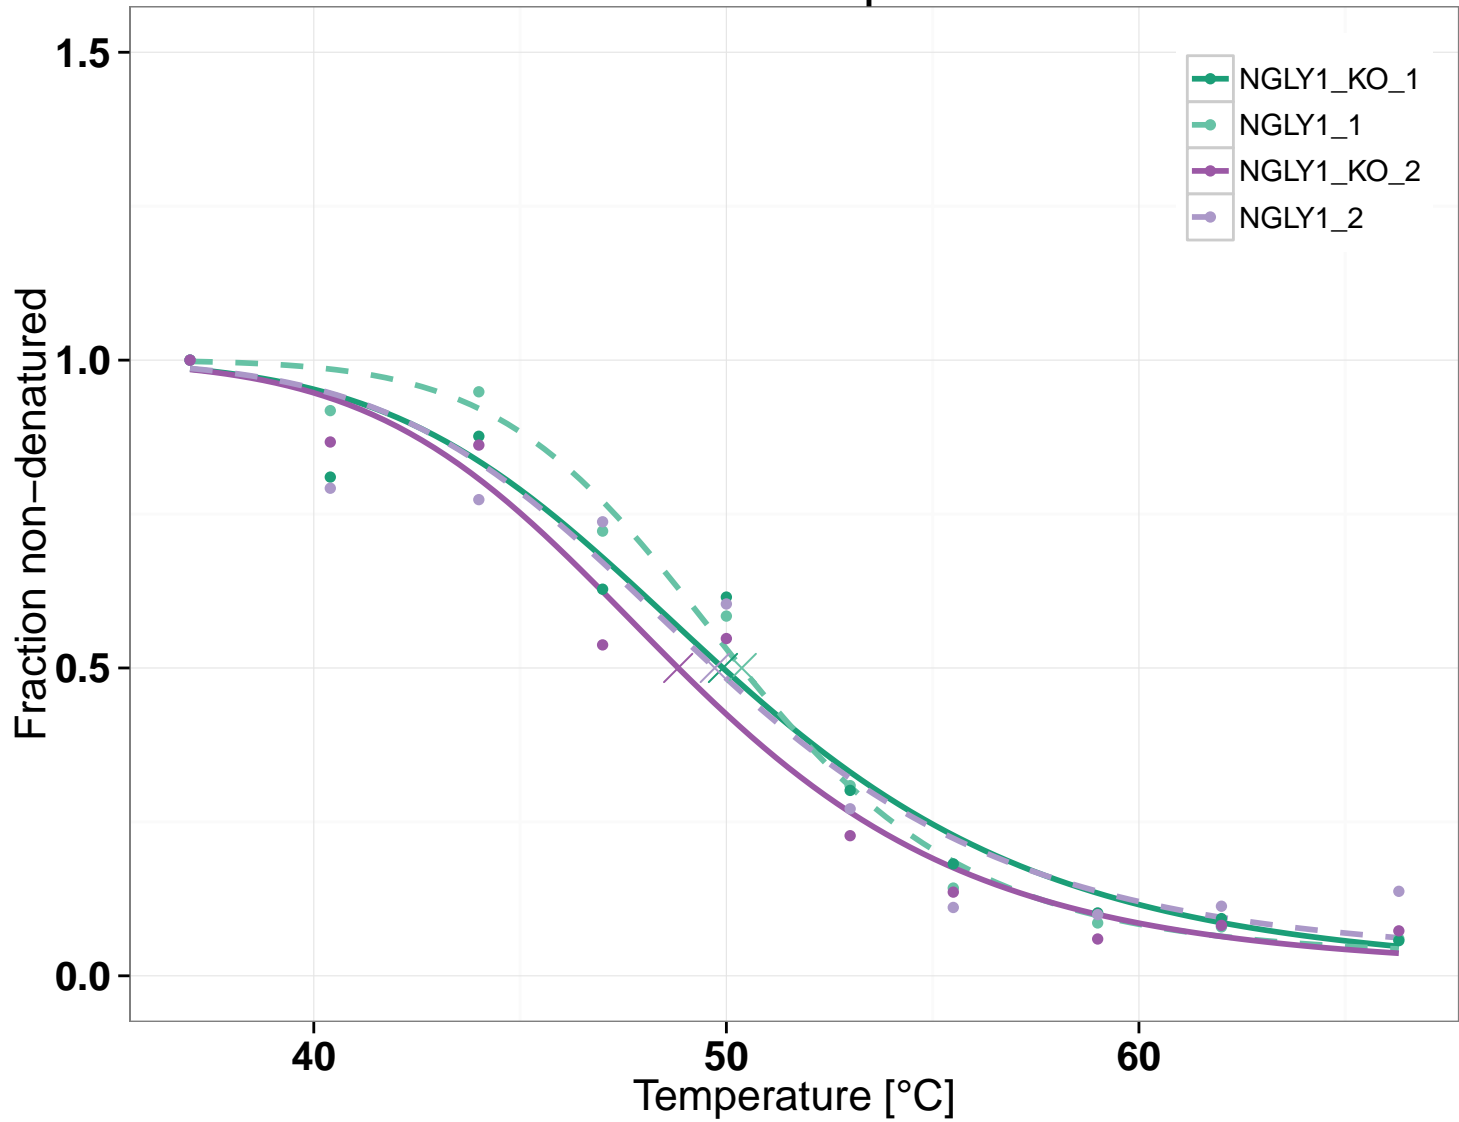

|            | meltPoint | slope  | plateau | R2   |
|------------|-----------|--------|---------|------|
| NGLY1_KO_1 | 49.92     | -0.062 | 0       | 0.96 |
| NGLY1_1    | 50.37     | -0.085 | 0.03    | 0.99 |
| NGLY1_KO_2 | 48.83     | -0.068 | 0.01    | 0.97 |
| NGLY1_2    | 49.72     | -0.064 | 0.02    | 0.94 |

Supplement: Supplementary file 4088 [file 1]

# IPI00100668.2|GBA2

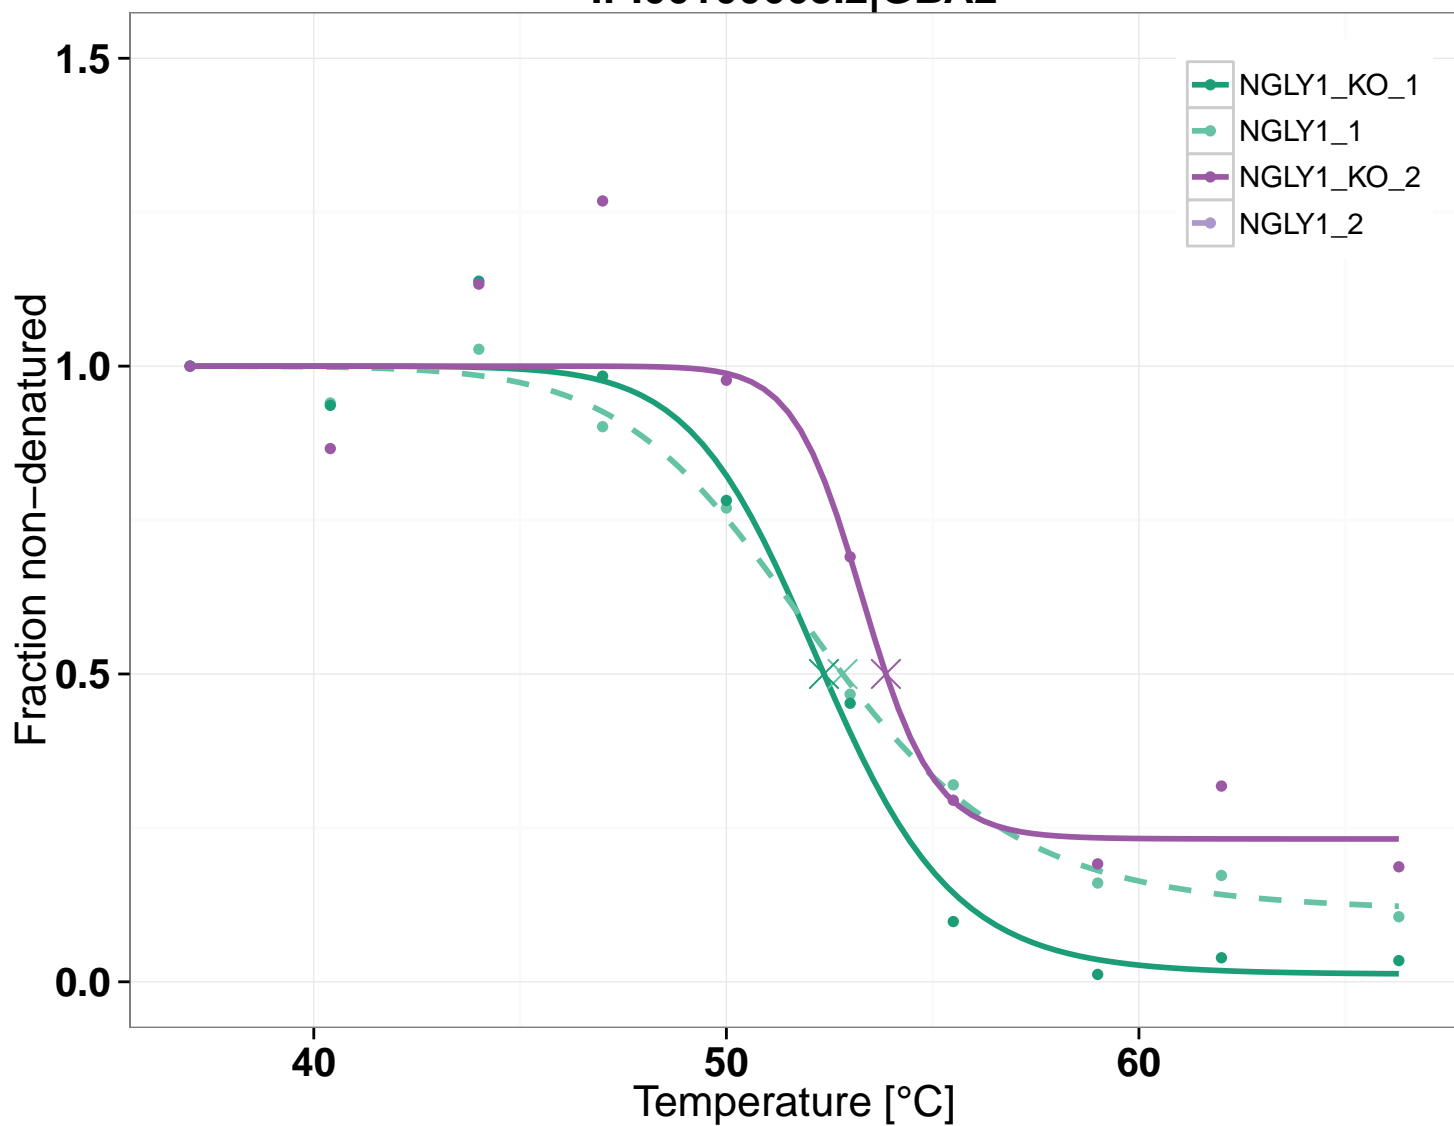

|            | meltPoint | slope  | plateau | R2   |
|------------|-----------|--------|---------|------|
| NGLY1_KO_1 | 52.37     | -0.15  | 0.01    | 0.98 |
| NGLY1_1    | 52.82     | -0.093 | 0.11    | 0.99 |
| NGLY1_KO_2 | 53.87     | -0.23  | 0.23    | 0.92 |
| NGLY1_2    | -         | -      | -       | -    |

Supplement: Supplementary file 4089 [file 1]

IPI00171410.1|C3ORF21

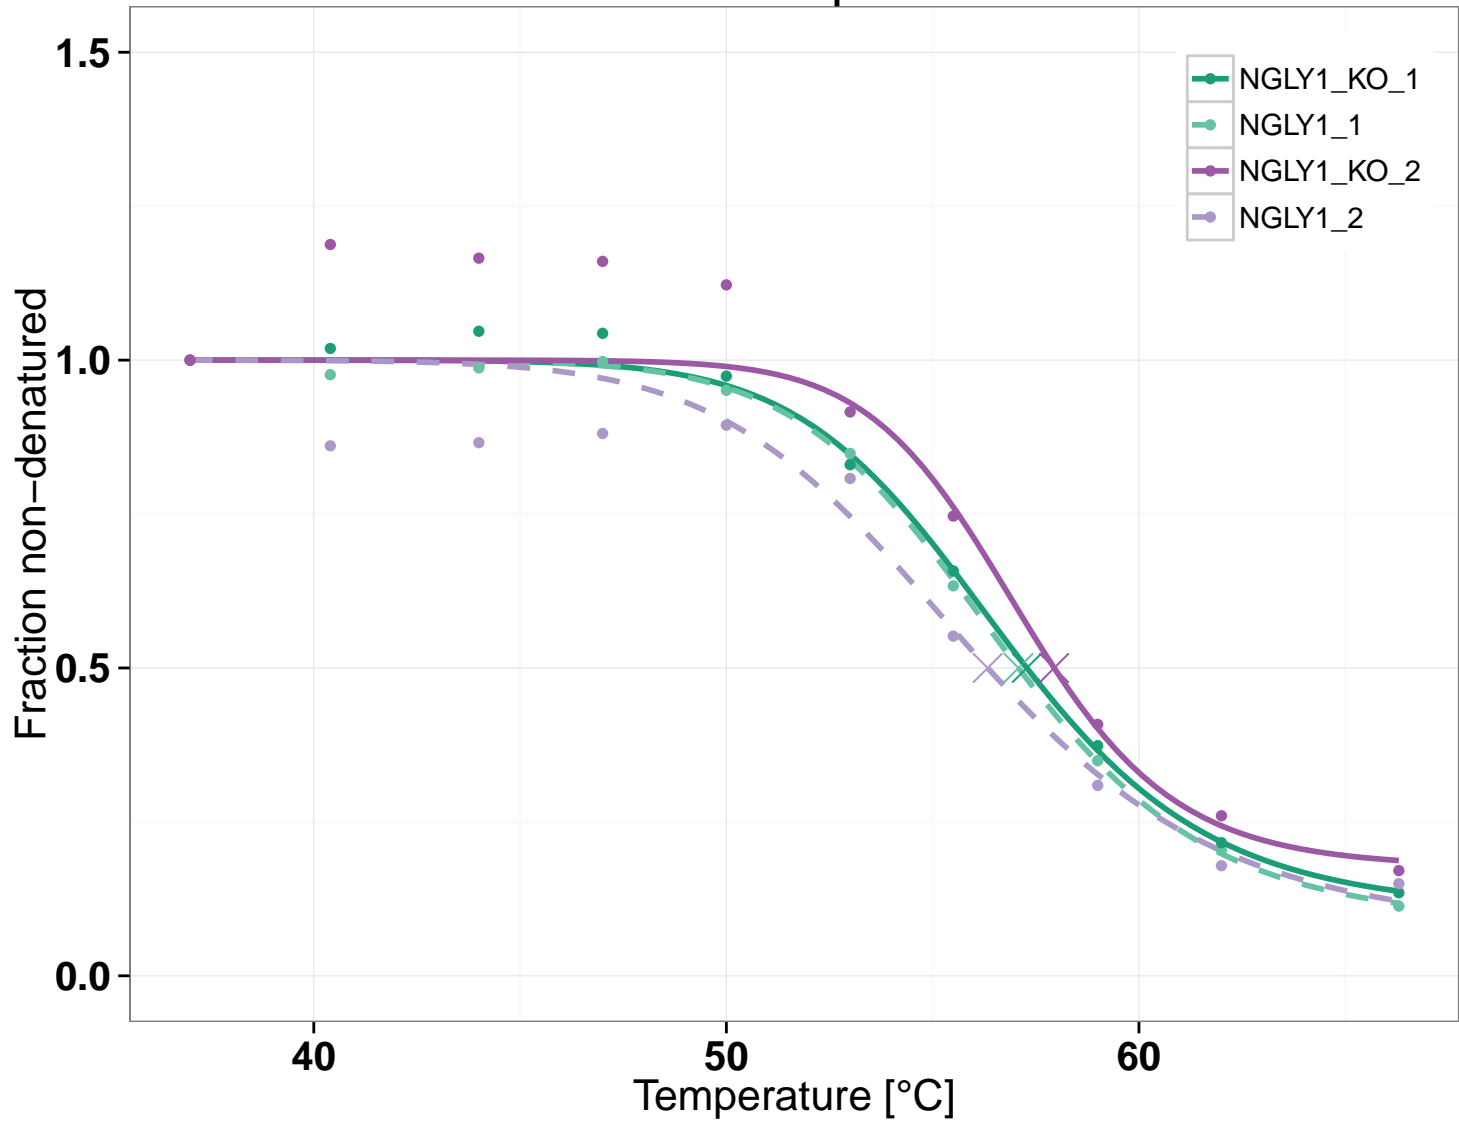

|            | meltPoint | slope  | plateau | R2   |
|------------|-----------|--------|---------|------|
| NGLY1_KO_1 | 57.28     | −0.09  | 0.11    | 0.99 |
| NGLY1_1    | 57.08     | −0.092 | 0.08    | 1    |
| NGLY1_KO_2 | 57.95     | −0.11  | 0.18    | 0.92 |
| NGLY1_2    | 56.33     | −0.076 | 0.07    | 0.95 |

Supplement: Supplementary file 4090 [file 1]

# IPI00887274.1|PI4KA

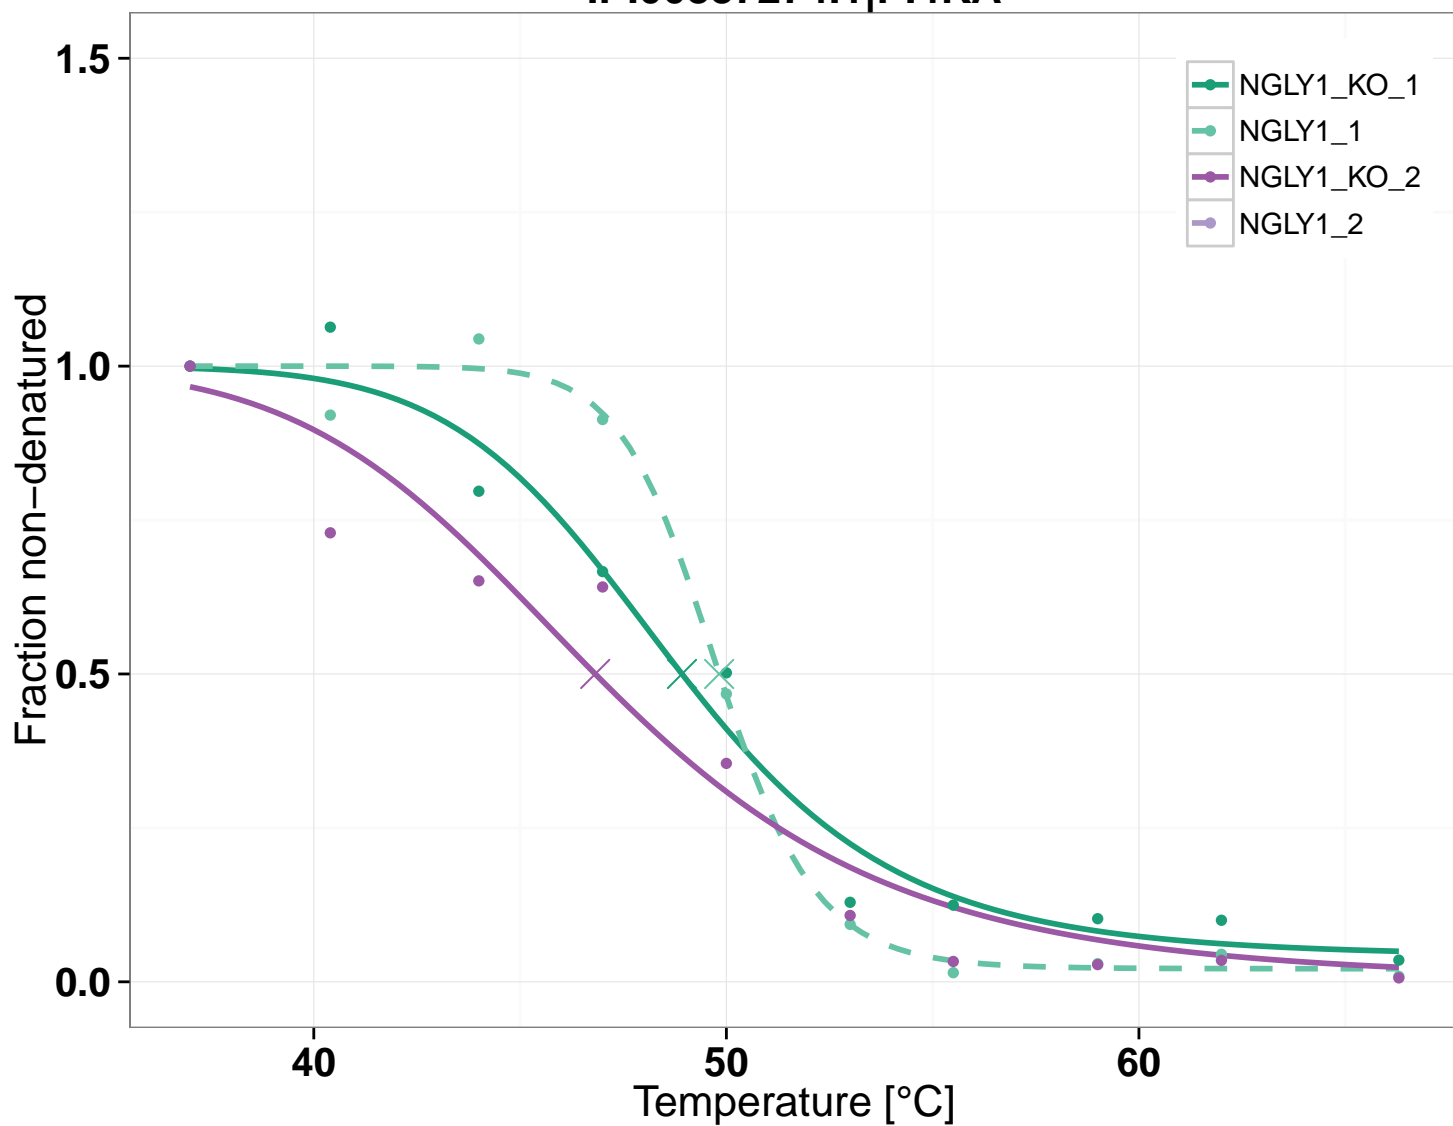

|            | meltPoint | slope  | plateau | R2   |
|------------|-----------|--------|---------|------|
| NGLY1_KO_1 | 48.92     | -0.088 | 0.04    | 0.98 |
| NGLY1_1    | 49.83     | -0.21  | 0.02    | 0.99 |
| NGLY1_KO_2 | 46.82     | -0.069 | 0       | 0.94 |
| NGLY1_2    | -         | -      | -       | -    |

Supplement: Supplementary file 4091 [file 1]

# IPI00002525.3|NENF

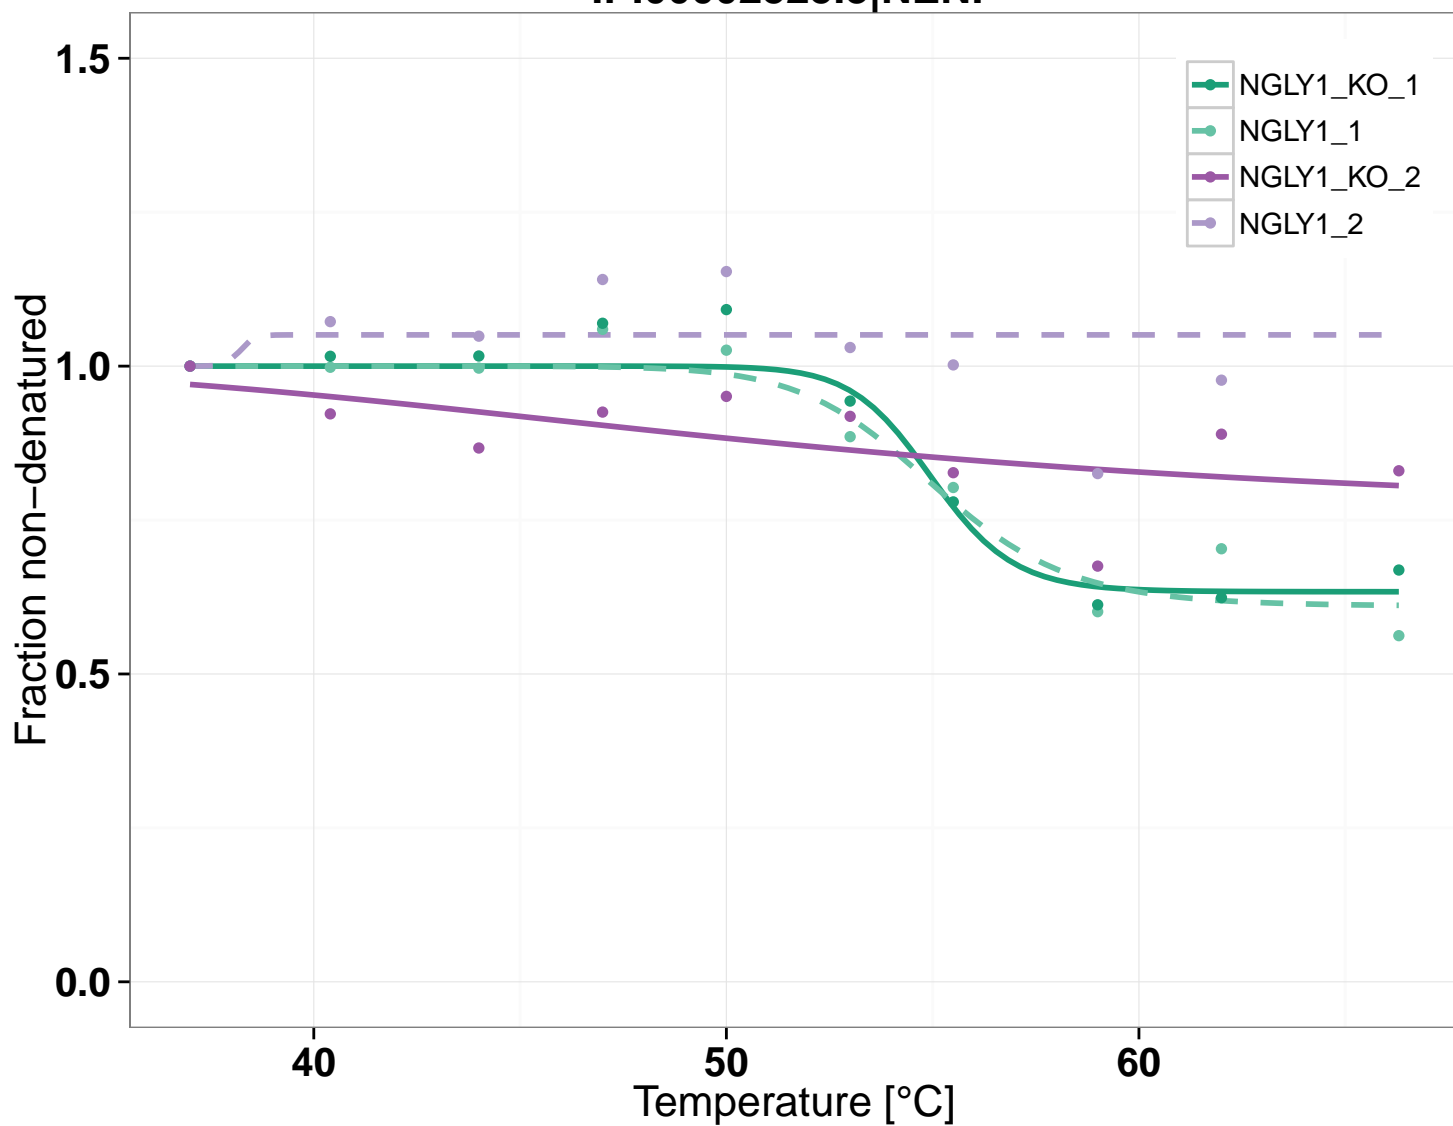

|            | meltPoint | slope   | plateau | R2   |
|------------|-----------|---------|---------|------|
| NGLY1_KO_1 | –         | –0.093  | 0.63    | 0.95 |
| NGLY1_1    | –         | –0.059  | 0.61    | 0.94 |
| NGLY1_KO_2 | –         | –0.0073 | 0.74    | 0.39 |
| NGLY1_2    | –         | 0.083   | 1.05    | 0.02 |

Supplement: Supplementary file 4092 [file 1]

# IPI00024742.7|UQCRQ

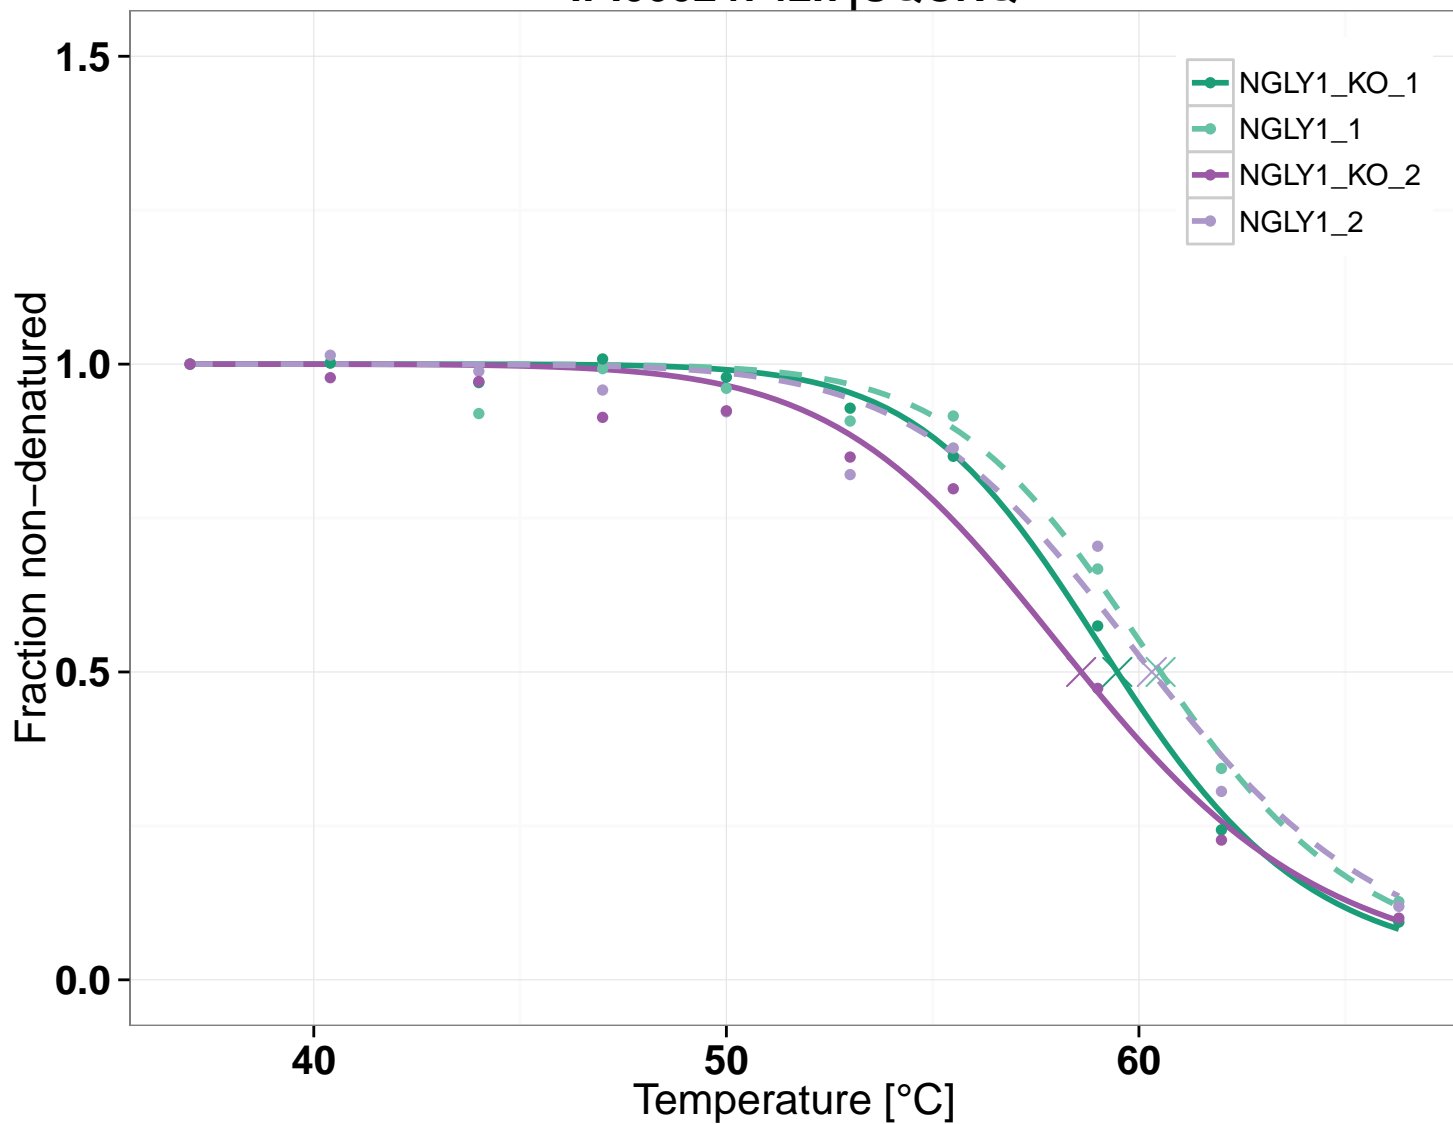

|            | meltPoint | slope  | plateau | R2   |
|------------|-----------|--------|---------|------|
| NGLY1_KO_1 | 59.48     | -0.1   | 0.01    | 1    |
| NGLY1_1    | 60.53     | -0.099 | 0.01    | 0.99 |
| NGLY1_KO_2 | 58.6      | -0.083 | 0       | 0.99 |
| NGLY1_2    | 60.31     | -0.086 | 0       | 0.96 |

Supplement: Supplementary file 4093 [file 1]

IPI00168769.7|EXPH5

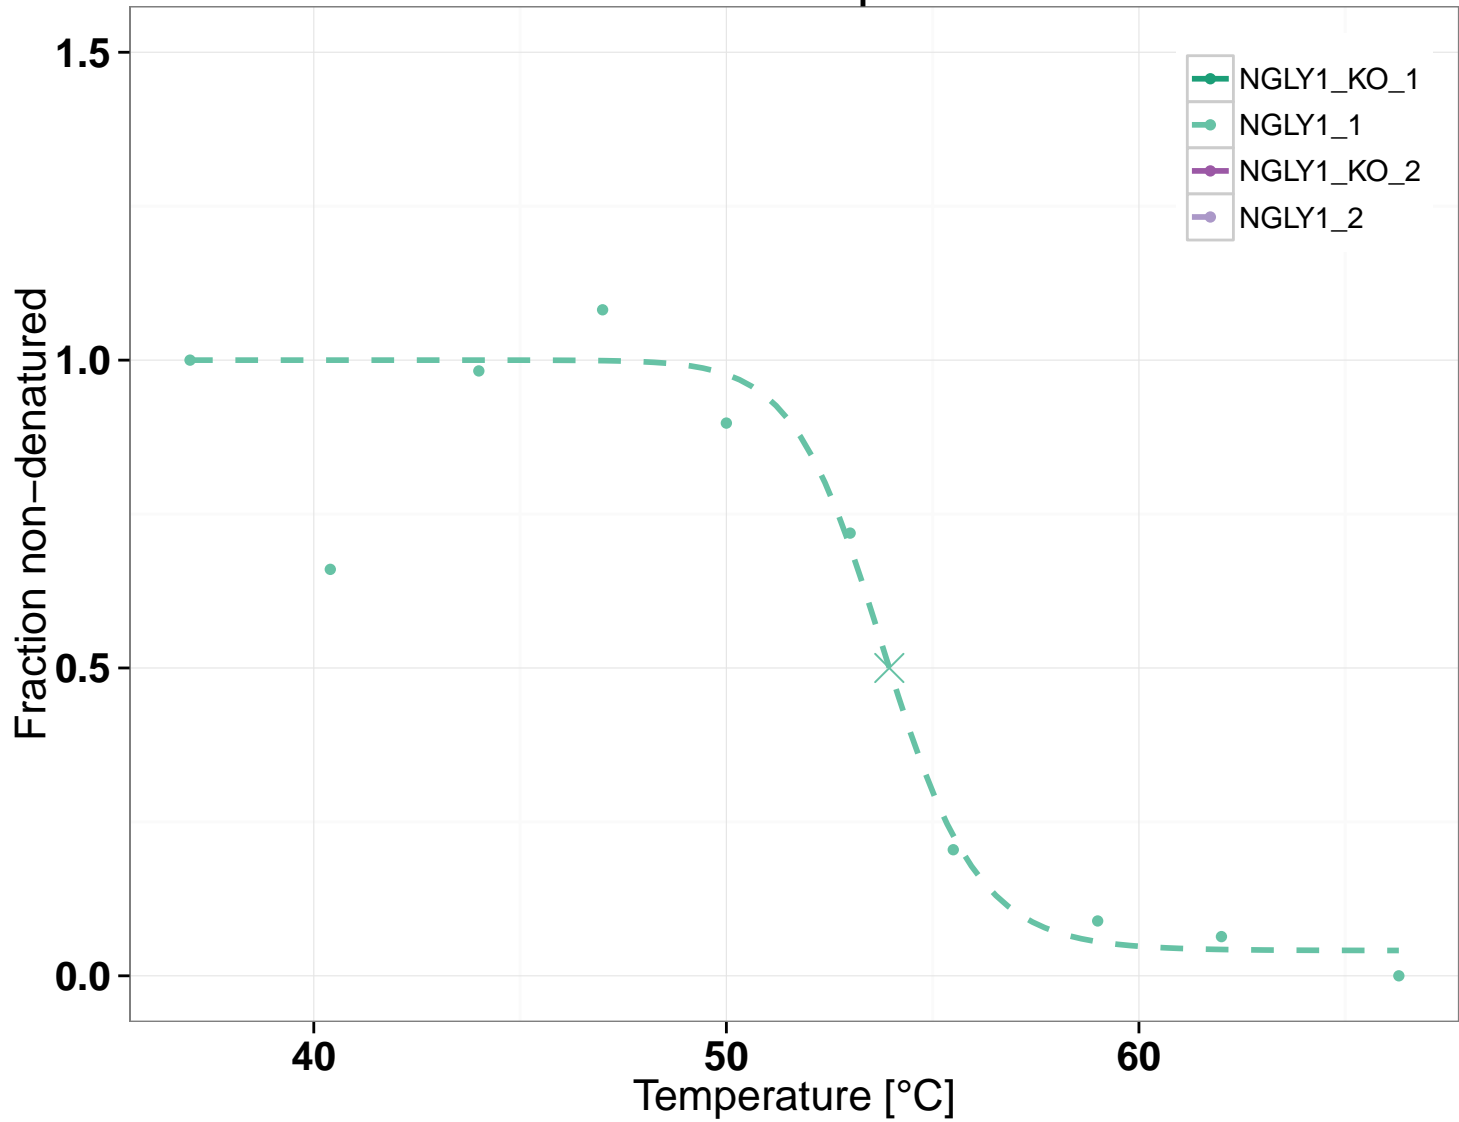

|            | meltPoint | slope | plateau | R2   |
|------------|-----------|-------|---------|------|
| NGLY1_KO_1 | -         | -     | -       | -    |
| NGLY1_1    | 53.95     | -0.21 | 0.04    | 0.92 |
| NGLY1_KO_2 | -         | -     | -       | -    |
| NGLY1_2    | -         | -     | -       | -    |

Supplement: Supplementary file 4094 [file 1]

# IPI00293088.5|GAA

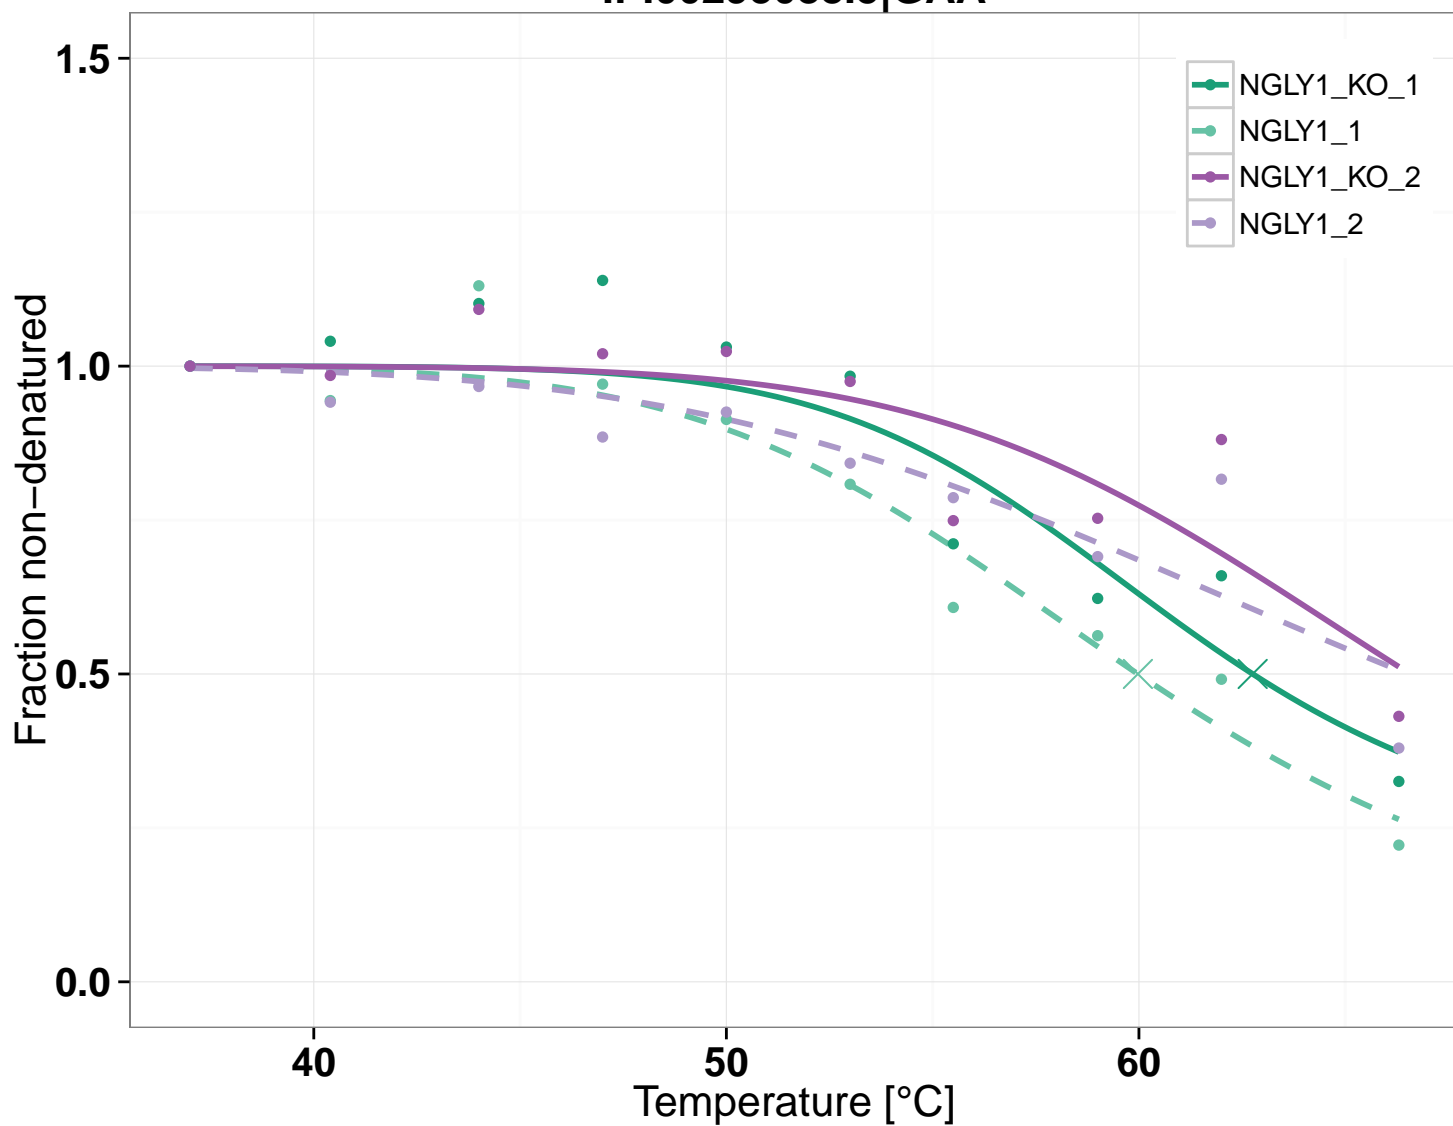

|            | meltPoint | slope  | plateau | R2   |
|------------|-----------|--------|---------|------|
| NGLY1_KO_1 | 62.76     | -0.05  | 0.19    | 0.87 |
| NGLY1_1    | 59.97     | -0.047 | 0.01    | 0.94 |
| NGLY1_KO_2 | -         | -0.043 | 0       | 0.77 |
| NGLY1_2    | -         | -0.029 | 0       | 0.8  |

Supplement: Supplementary file 4095 [file 1]

# IPI00301190.5|BRF2

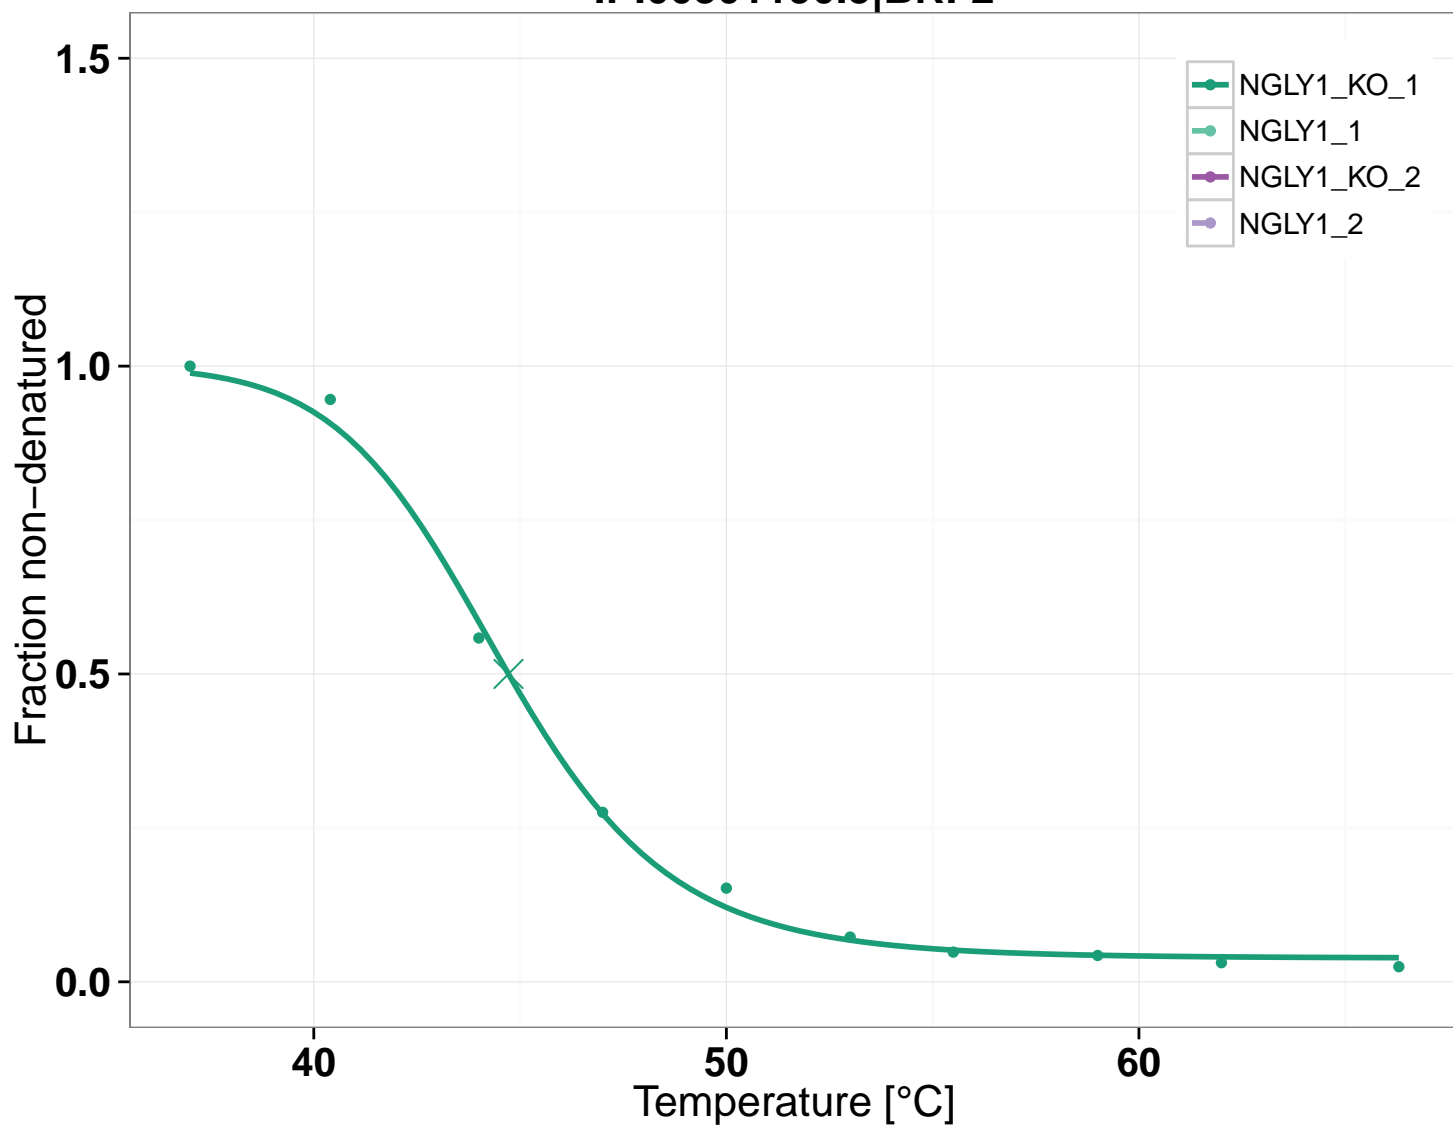

|            | meltPoint | slope | plateau | R2 |
|------------|-----------|-------|---------|----|
| NGLY1_KO_1 | 44.72     | -0.12 | 0.04    | 1  |
| NGLY1_1    | -         | -     | -       | -  |
| NGLY1_KO_2 | -         | -     | -       | -  |
| NGLY1_2    | -         | -     | -       | -  |

Supplement: Supplementary file 4096 [file 1]

IPI00015104.1|CKS1B

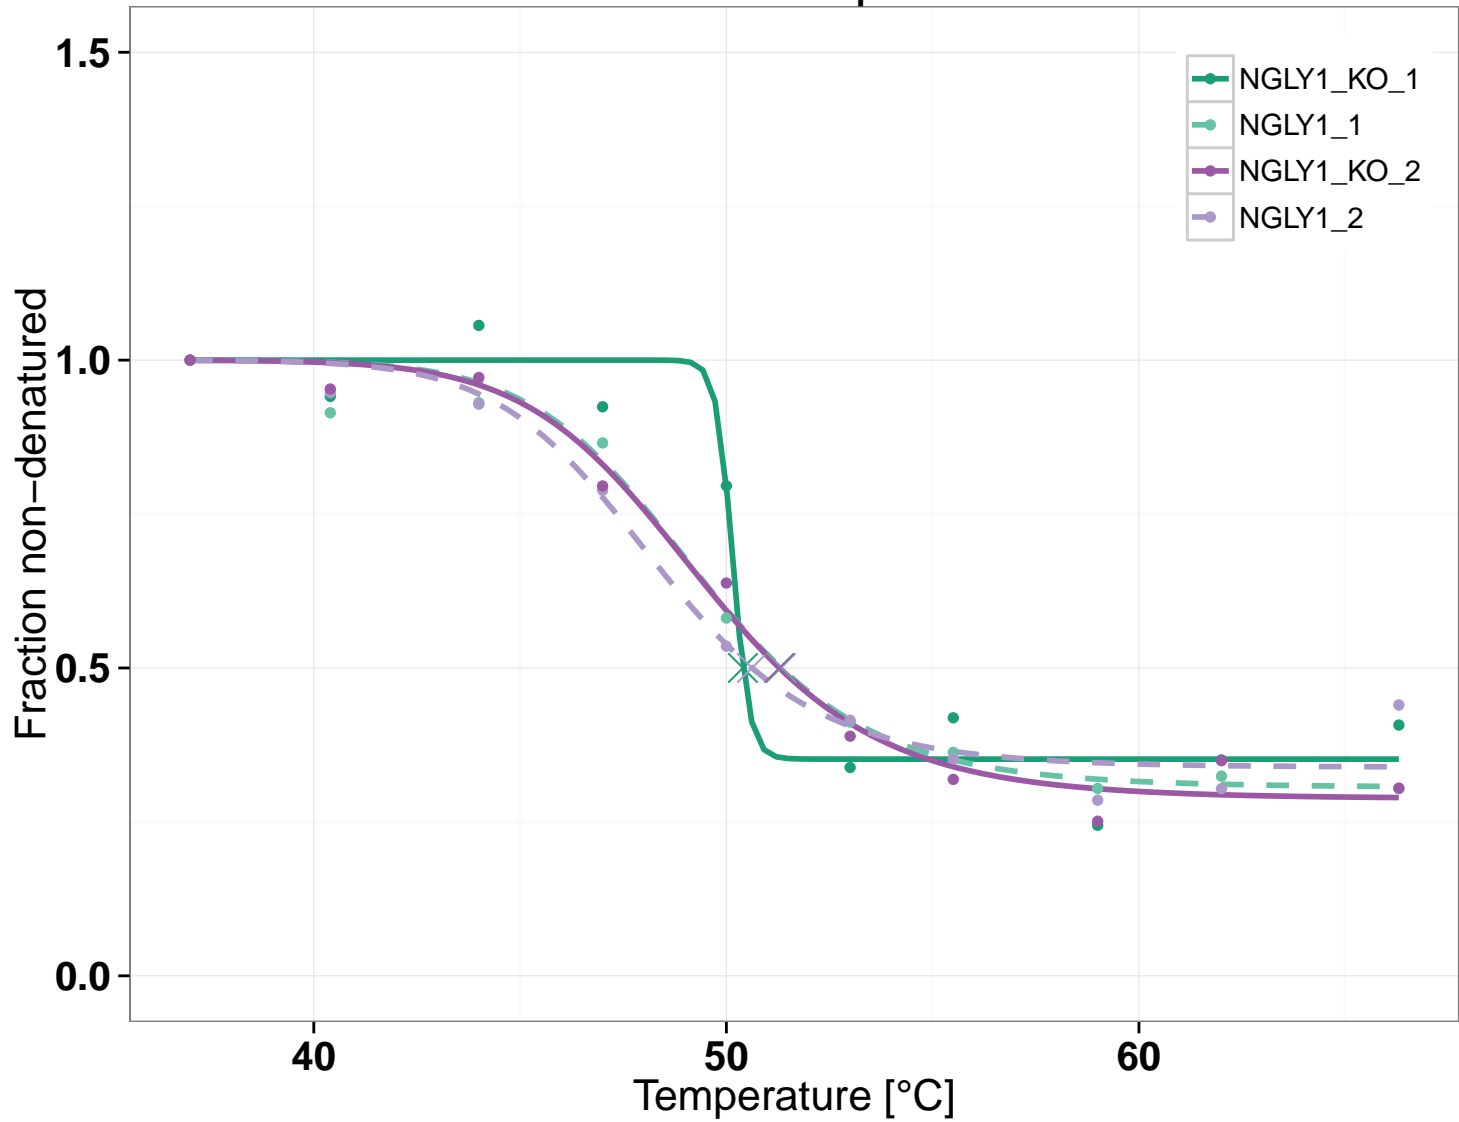

|            | meltPoint | slope  | plateau | R2   |
|------------|-----------|--------|---------|------|
| NGLY1_KO_1 | 50.4      | -0.81  | 0.35    | 0.97 |
| NGLY1_1    | 51.33     | -0.085 | 0.31    | 0.99 |
| NGLY1_KO_2 | 51.29     | -0.084 | 0.29    | 0.99 |
| NGLY1_2    | 50.62     | -0.085 | 0.34    | 0.98 |

Supplement: Supplementary file 4097 [file 1]

IPI00783656.1|MRPL38

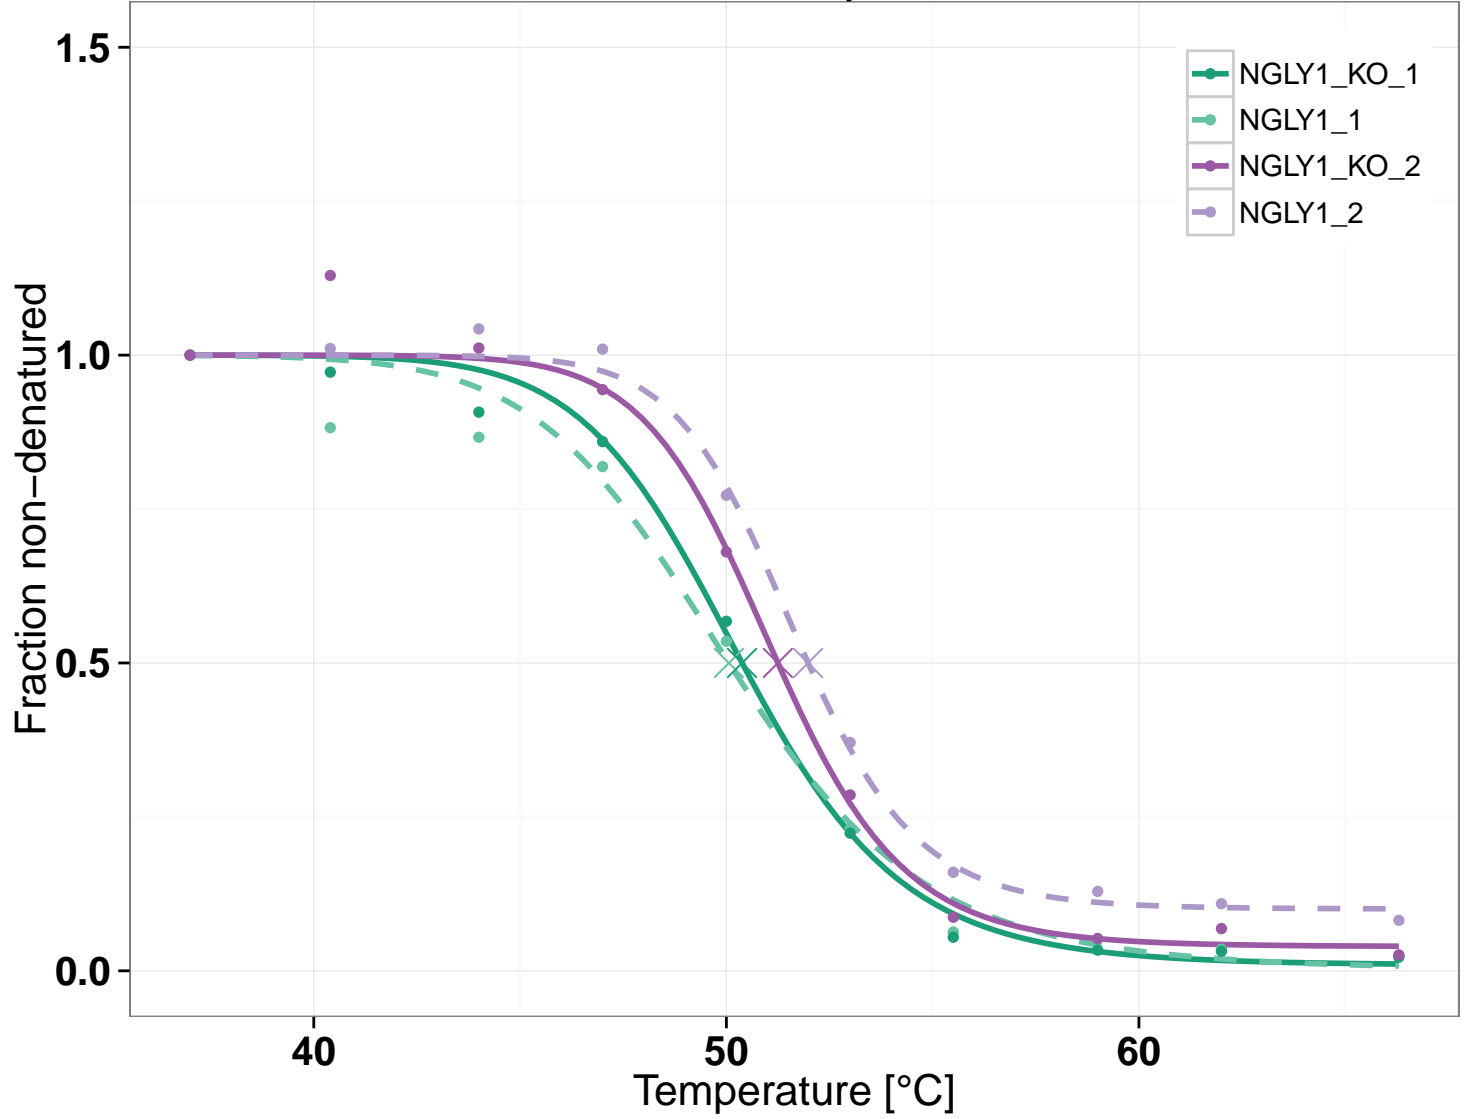

|            | meltPoint | slope | plateau | R2   |
|------------|-----------|-------|---------|------|
| NGLY1_KO_1 | 50.38     | -0.13 | 0.01    | 1    |
| NGLY1_1    | 50.06     | -0.11 | 0       | 0.98 |
| NGLY1_KO_2 | 51.25     | -0.15 | 0.04    | 0.99 |
| NGLY1_2    | 51.98     | -0.15 | 0.1     | 1    |

Supplement: Supplementary file 4098 [file 1]

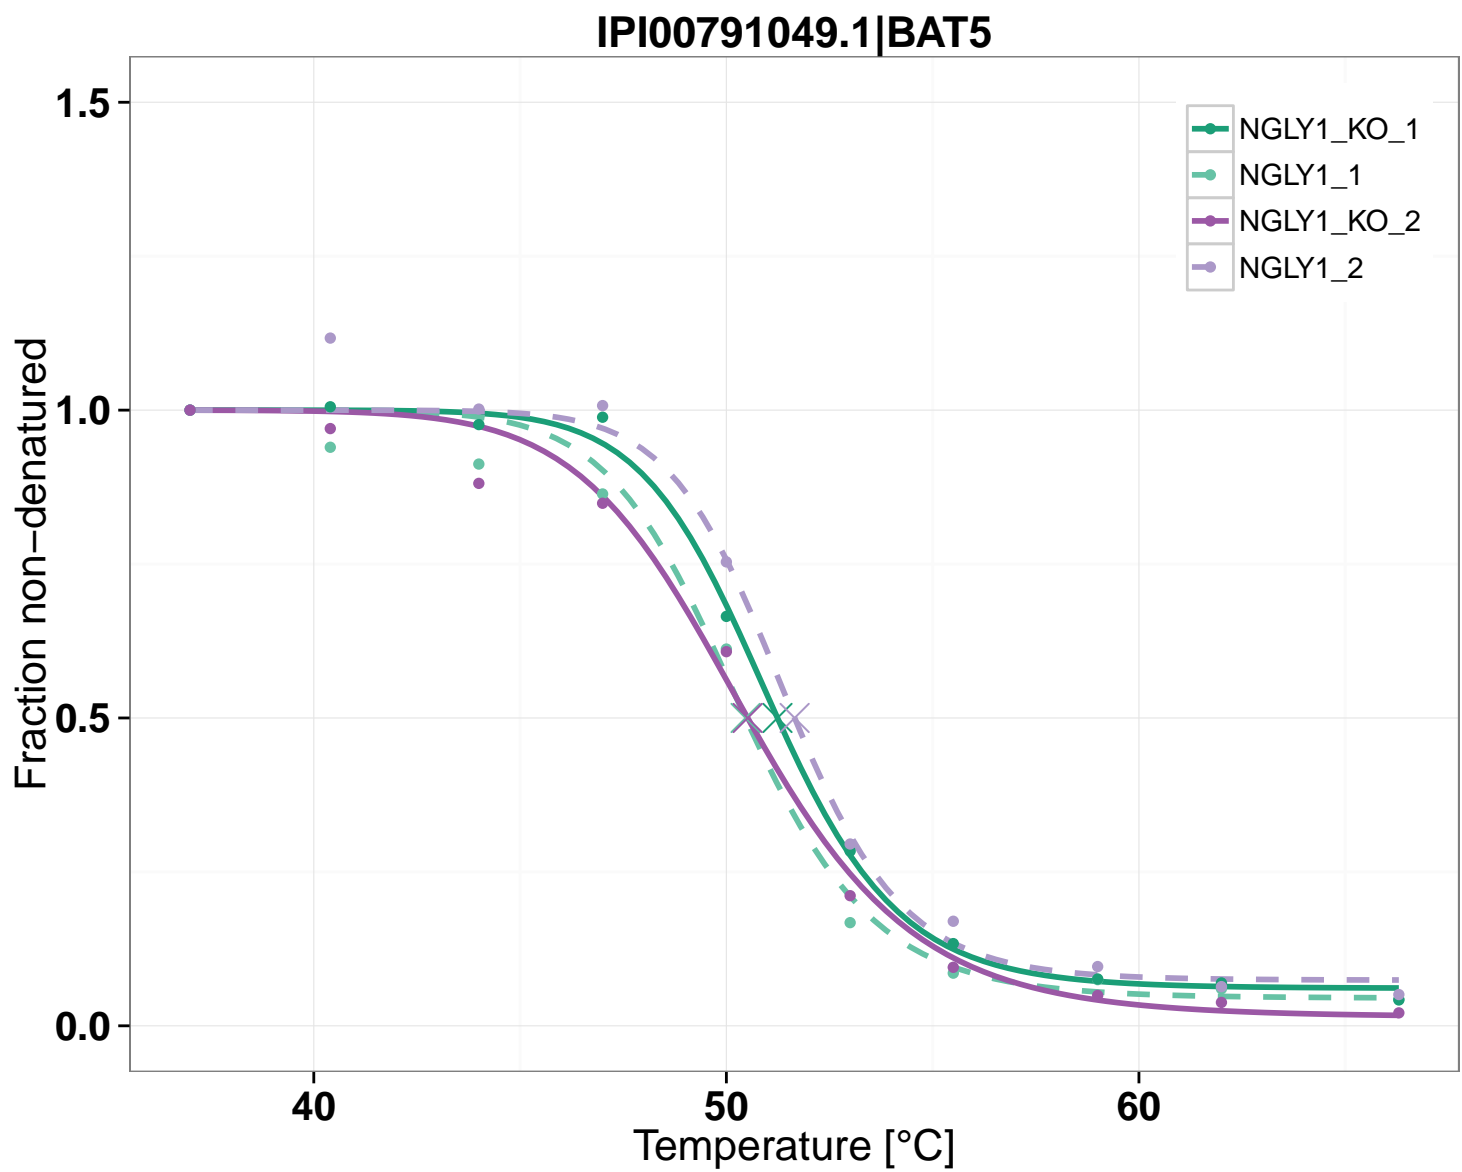

|            | meltPoint | slope | plateau | R2   |
|------------|-----------|-------|---------|------|
| NGLY1_KO_1 | 51.24     | -0.15 | 0.06    | 1    |
| NGLY1_1    | 50.47     | -0.15 | 0.04    | 0.99 |
| NGLY1_KO_2 | 50.52     | -0.12 | 0.01    | 0.99 |
| NGLY1_2    | 51.65     | -0.16 | 0.07    | 0.99 |

Supplement: Supplementary file 4099 [file 1]

IPI00554681.2|NDUFA5

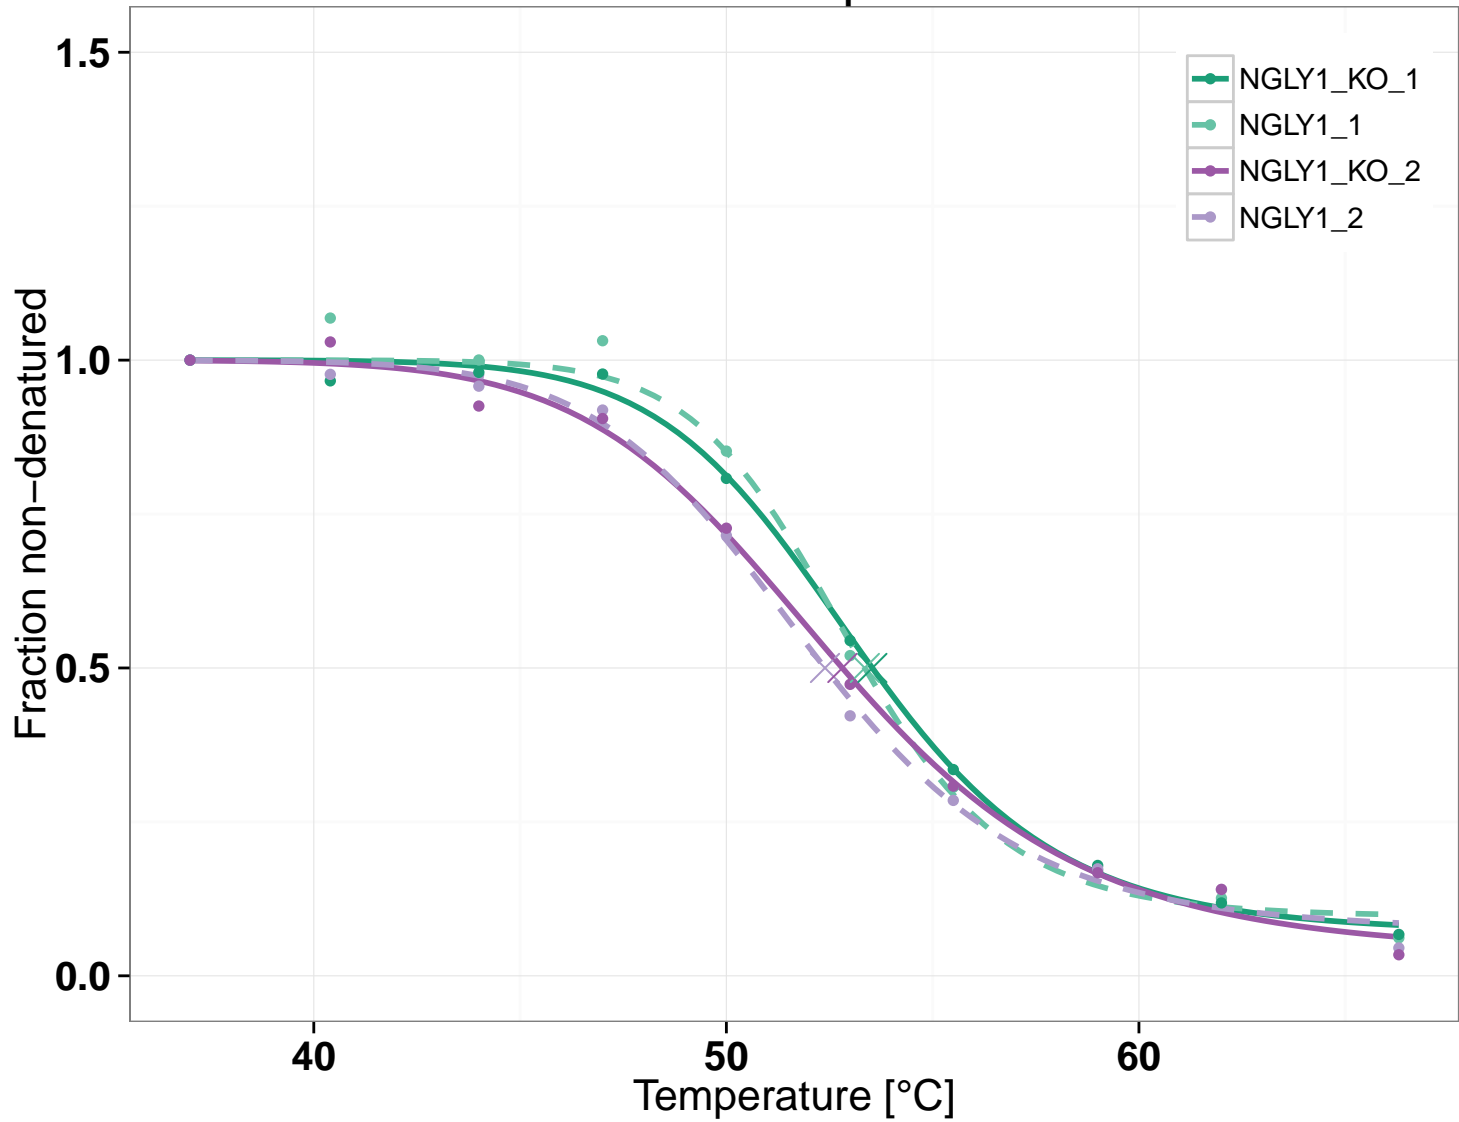

|            | meltPoint | slope  | plateau | R2   |
|------------|-----------|--------|---------|------|
| NGLY1_KO_1 | 53.54     | -0.096 | 0.07    | 1    |
| NGLY1_1    | 53.36     | -0.12  | 0.1     | 0.99 |
| NGLY1_KO_2 | 52.81     | -0.079 | 0.04    | 1    |
| NGLY1_2    | 52.39     | -0.089 | 0.07    | 1    |

Supplement: Supplementary file 4100 [file 1]

IPI00916049.1|SPRED2

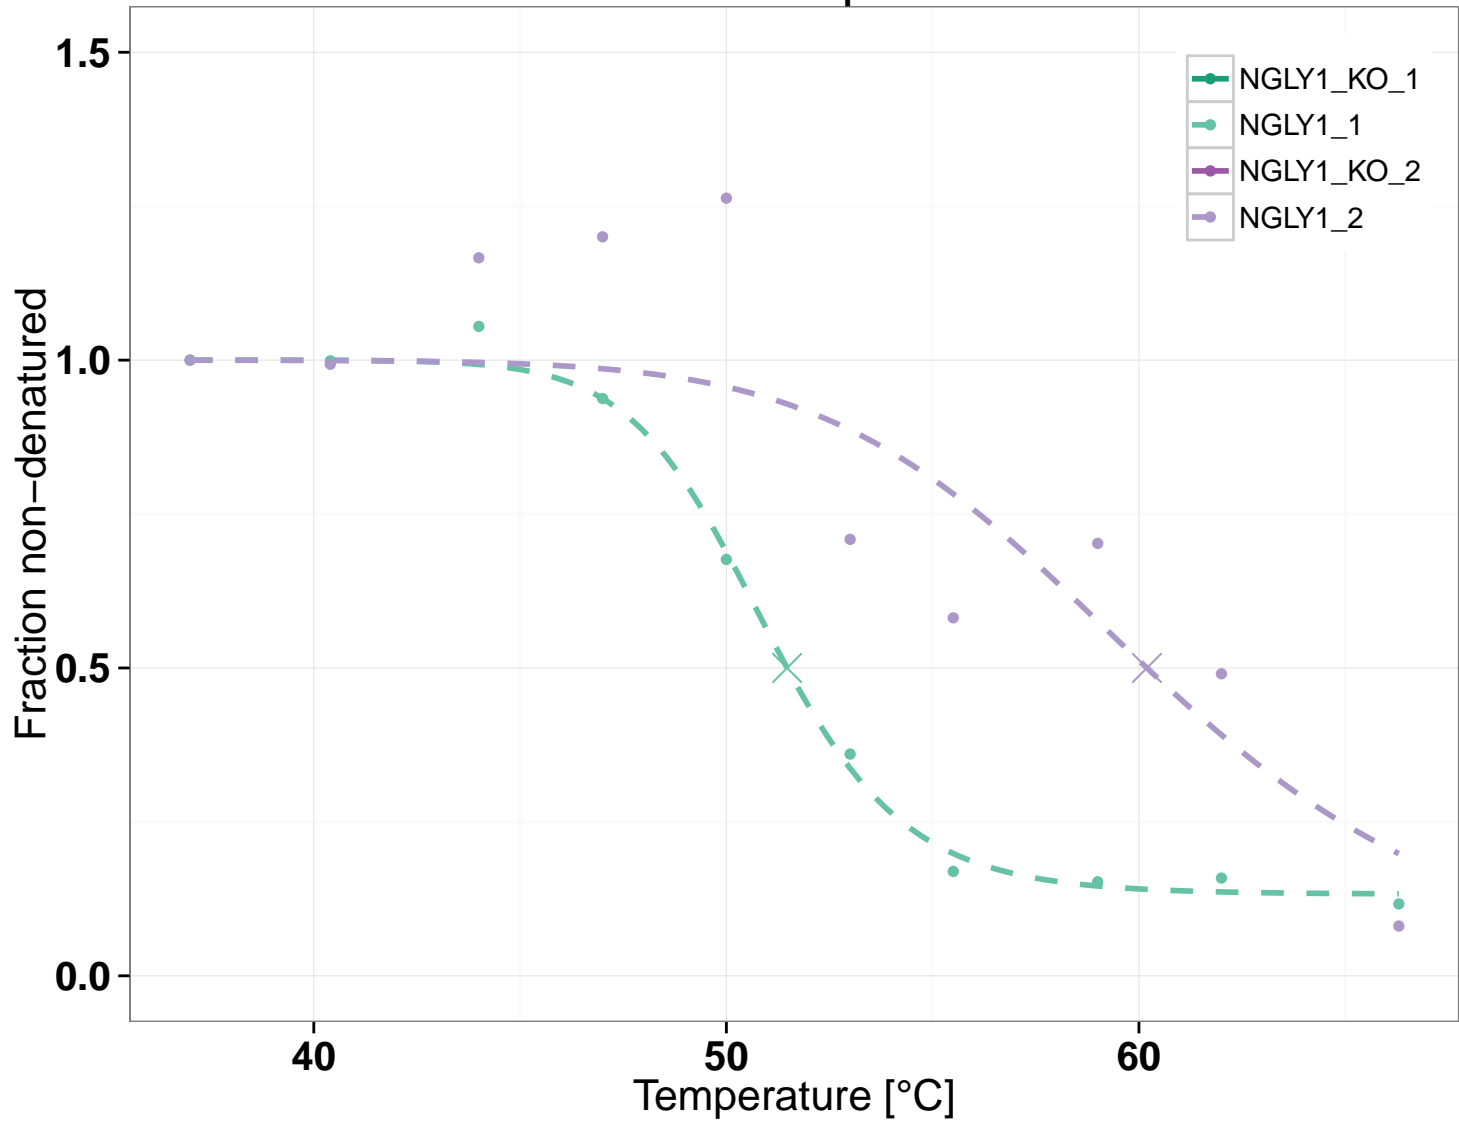

|            | meltPoint | slope  | plateau | R2   |
|------------|-----------|--------|---------|------|
| NGLY1_KO_1 | -         | -      | -       | -    |
| NGLY1_1    | 51.47     | -0.13  | 0.13    | 1    |
| NGLY1_KO_2 | -         | -      | -       | -    |
| NGLY1_2    | 60.19     | -0.064 | 0       | 0.78 |

Supplement: Supplementary file 4101 [file 1]

IPI00099463.2|SGPL1

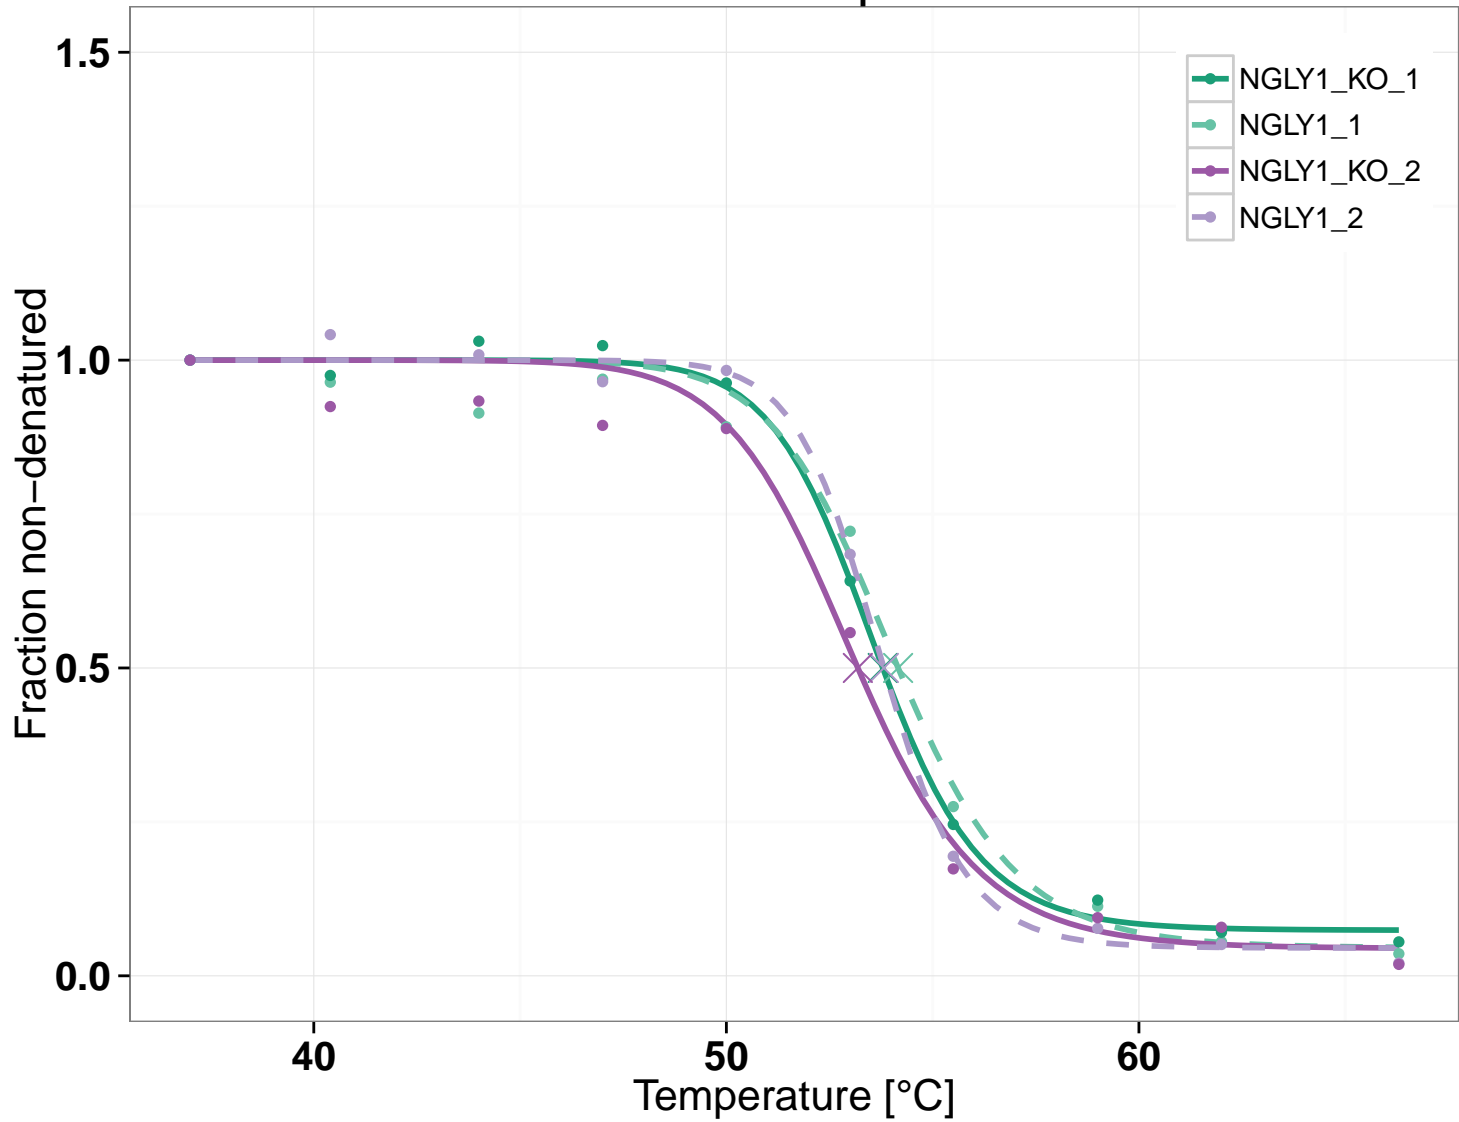

|            | meltPoint | slope | plateau | R2   |
|------------|-----------|-------|---------|------|
| NGLY1_KO_1 | 53.79     | -0.18 | 0.07    | 1    |
| NGLY1_1    | 54.16     | -0.16 | 0.05    | 0.99 |
| NGLY1_KO_2 | 53.19     | -0.16 | 0.04    | 0.99 |
| NGLY1_2    | 53.82     | -0.23 | 0.05    | 1    |

Supplement: Supplementary file 4102 [file 1]

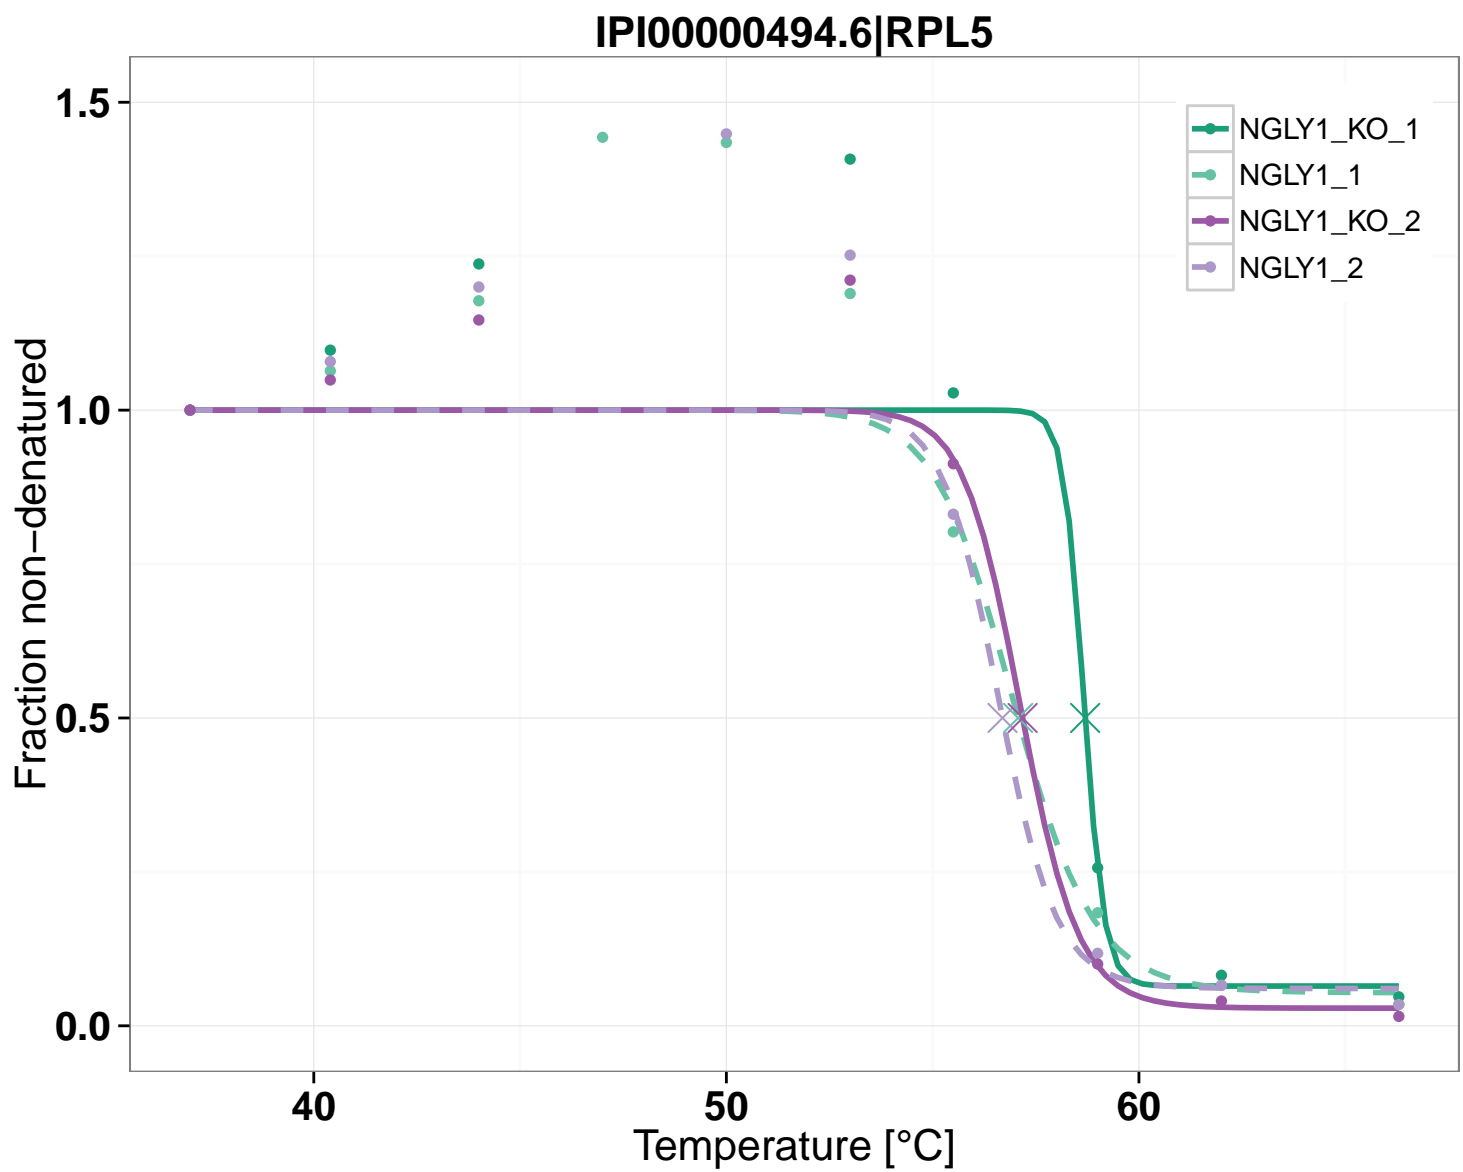

|            | meltPoint | slope | plateau | R2   |
|------------|-----------|-------|---------|------|
| NGLY1_KO_1 | 58.7      | -0.94 | 0.06    | 0.7  |
| NGLY1_1    | 57.07     | -0.24 | 0.05    | 0.83 |
| NGLY1_KO_2 | 57.18     | -0.35 | 0.03    | 0.8  |
| NGLY1_2    | 56.69     | -0.34 | 0.06    | 0.8  |

Supplement: Supplementary file 4103 [file 1]

# IPI00103023.1|FBXW2

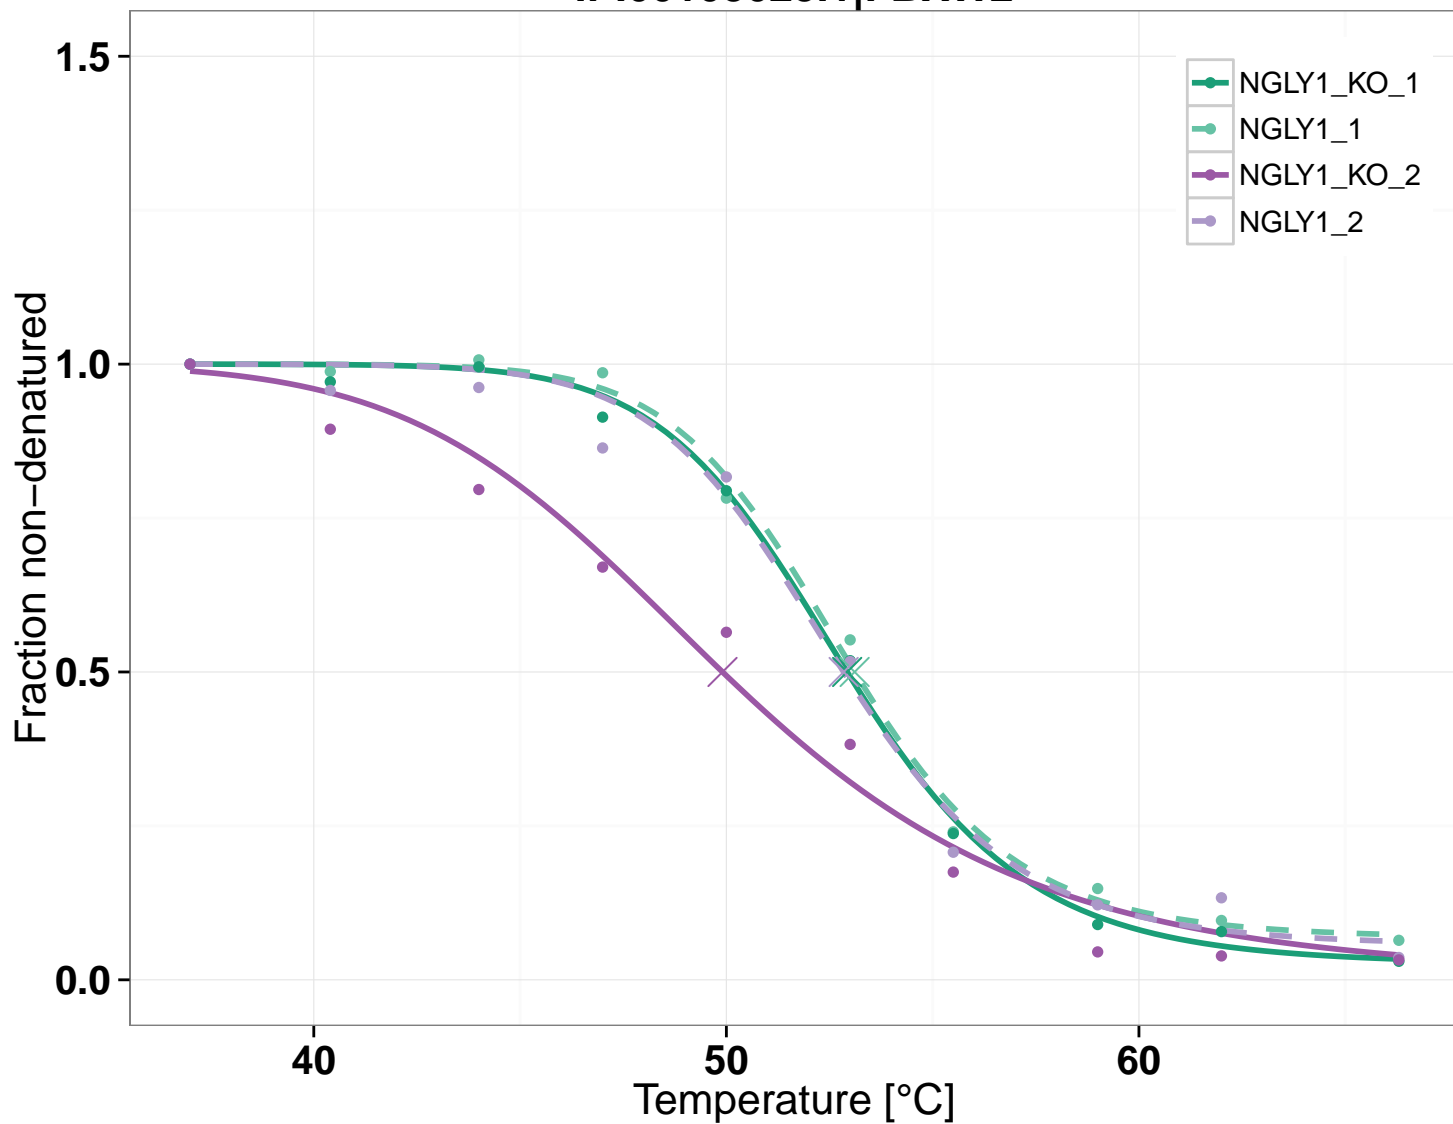

|            | meltPoint | slope  | plateau | R2   |
|------------|-----------|--------|---------|------|
| NGLY1_KO_1 | 52.93     | -0.11  | 0.03    | 1    |
| NGLY1_1    | 53.11     | -0.11  | 0.07    | 1    |
| NGLY1_KO_2 | 49.91     | -0.066 | 0       | 0.98 |
| NGLY1_2    | 52.84     | -0.11  | 0.06    | 0.99 |

Supplement: Supplementary file 4104 [file 1]

IPI00027909.1|DNAJC25

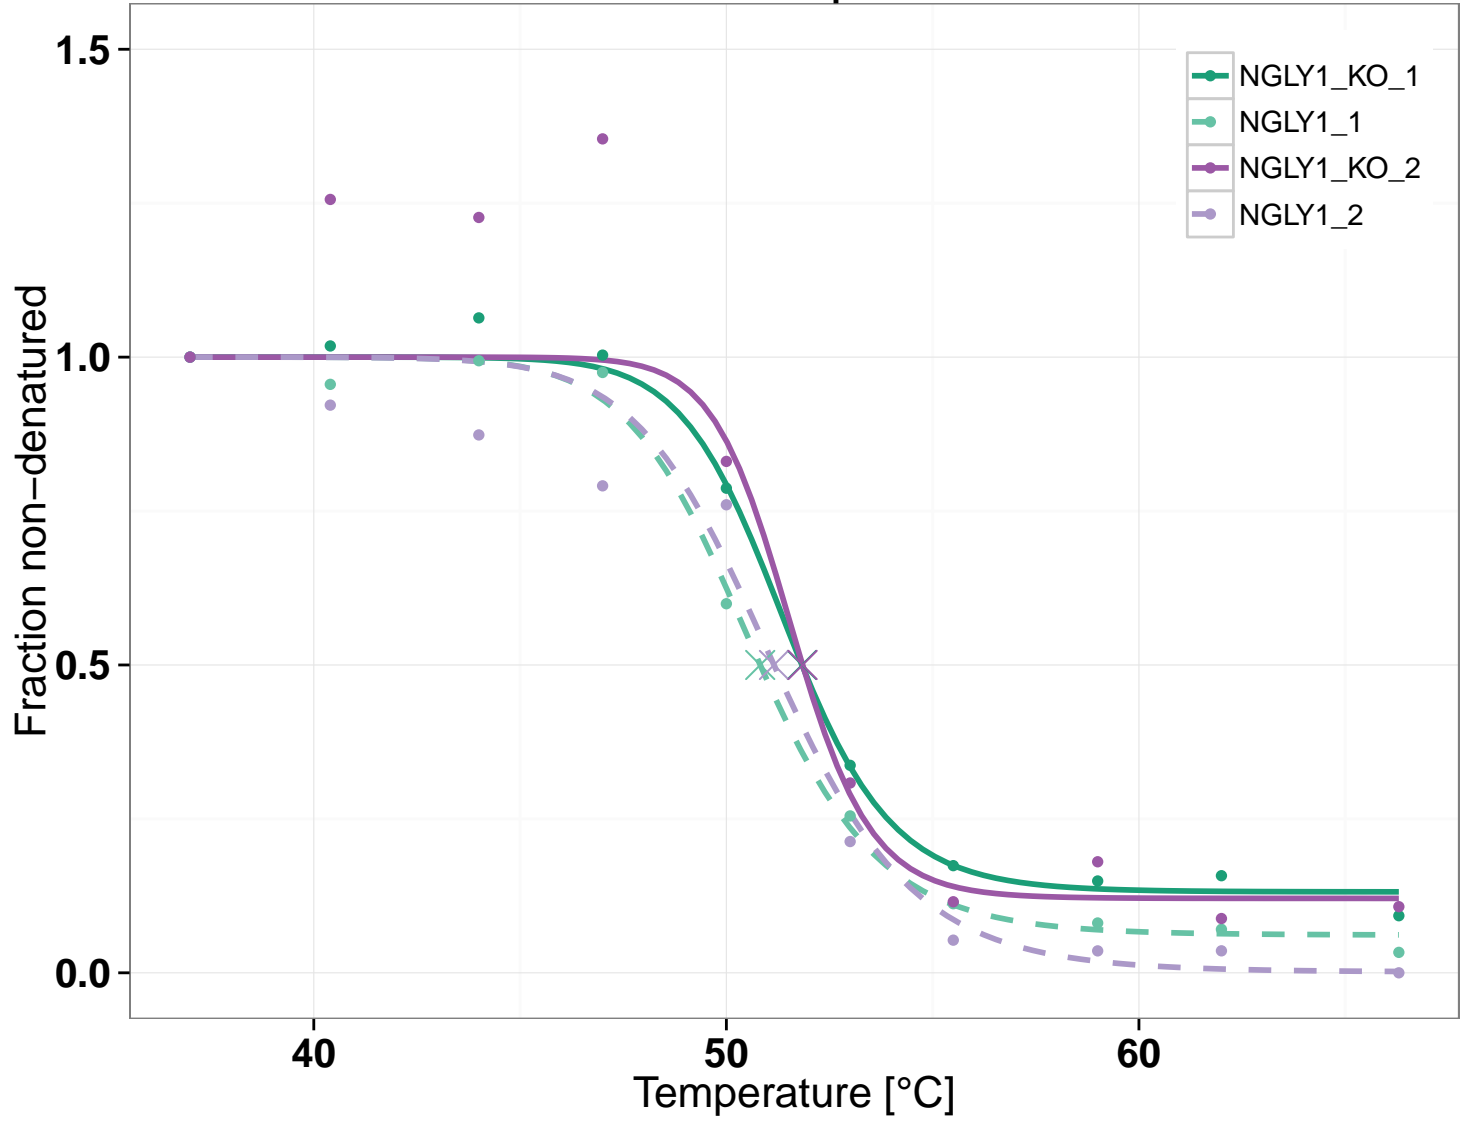

|            | meltPoint | slope | plateau | R2   |
|------------|-----------|-------|---------|------|
| NGLY1_KO_1 | 51.83     | -0.17 | 0.13    | 1    |
| NGLY1_1    | 50.82     | -0.15 | 0.06    | 1    |
| NGLY1_KO_2 | 51.85     | -0.23 | 0.12    | 0.9  |
| NGLY1_2    | 51.15     | -0.15 | 0       | 0.97 |

Supplement: Supplementary file 4105 [file 1]

IPI00888474.1|LOC100130562

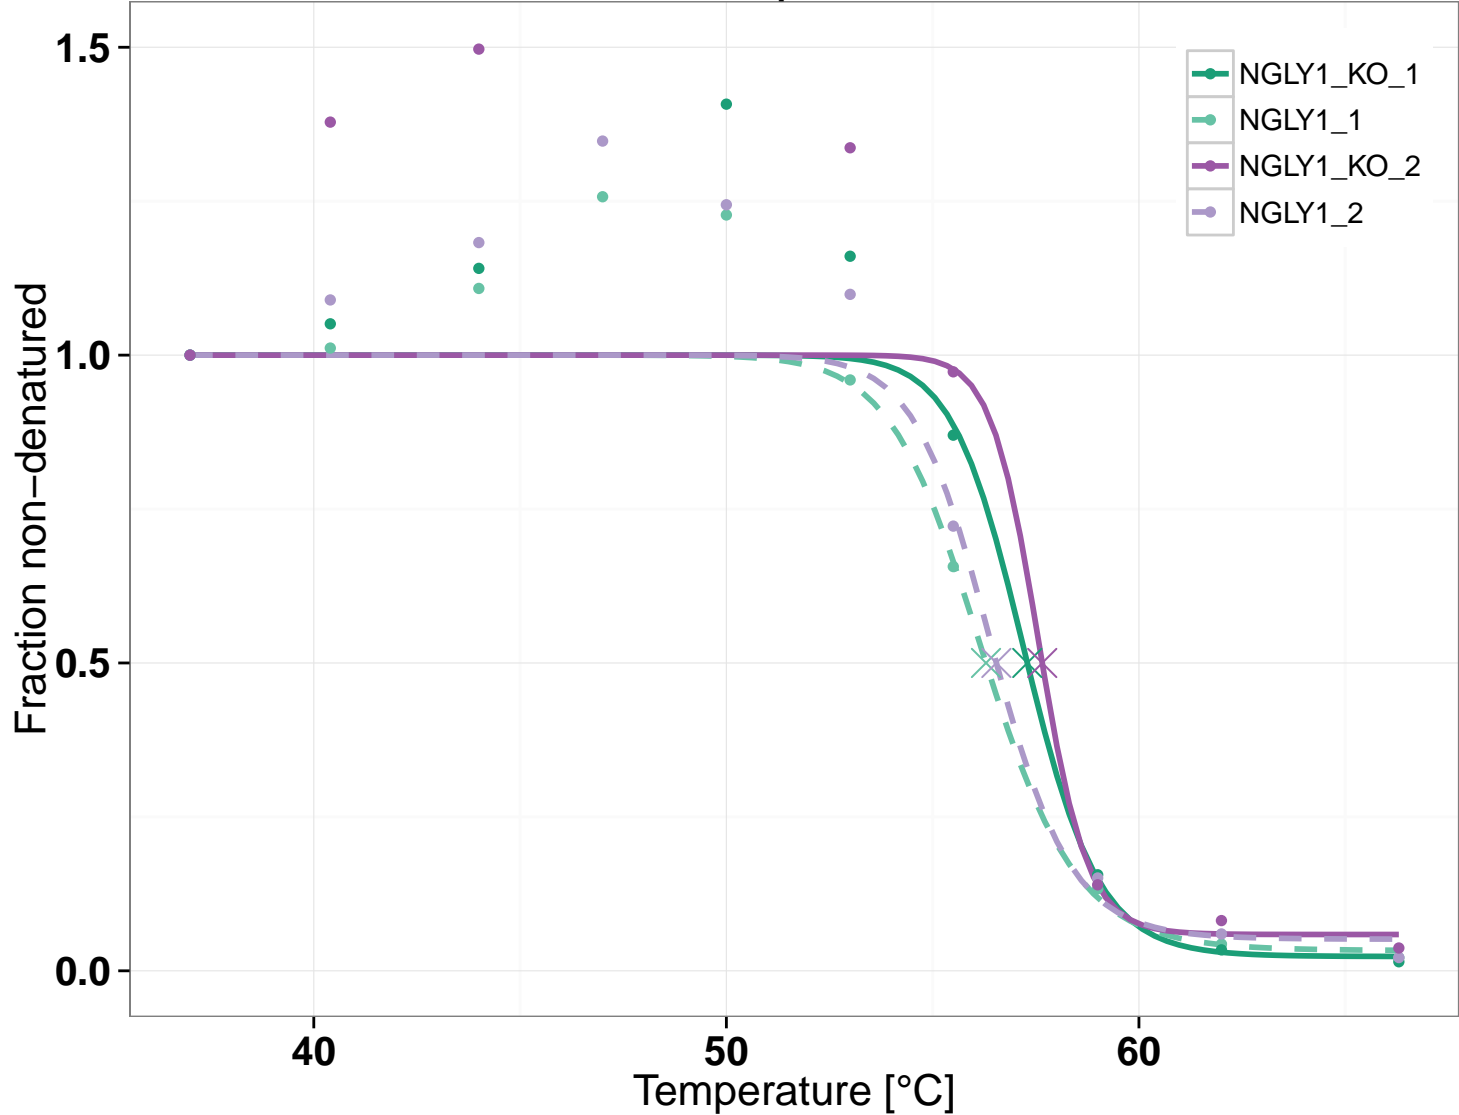

|            | meltPoint | slope | plateau | R2   |
|------------|-----------|-------|---------|------|
| NGLY1_KO_1 | 57.29     | -0.28 | 0.02    | 0.82 |
| NGLY1_1    | 56.29     | -0.21 | 0.03    | 0.94 |
| NGLY1_KO_2 | 57.66     | -0.4  | 0.06    | 0.57 |
| NGLY1_2    | 56.54     | -0.25 | 0.05    | 0.9  |

Supplement: Supplementary file 4106 [file 1]

# IPI00413720.3|LMBR1

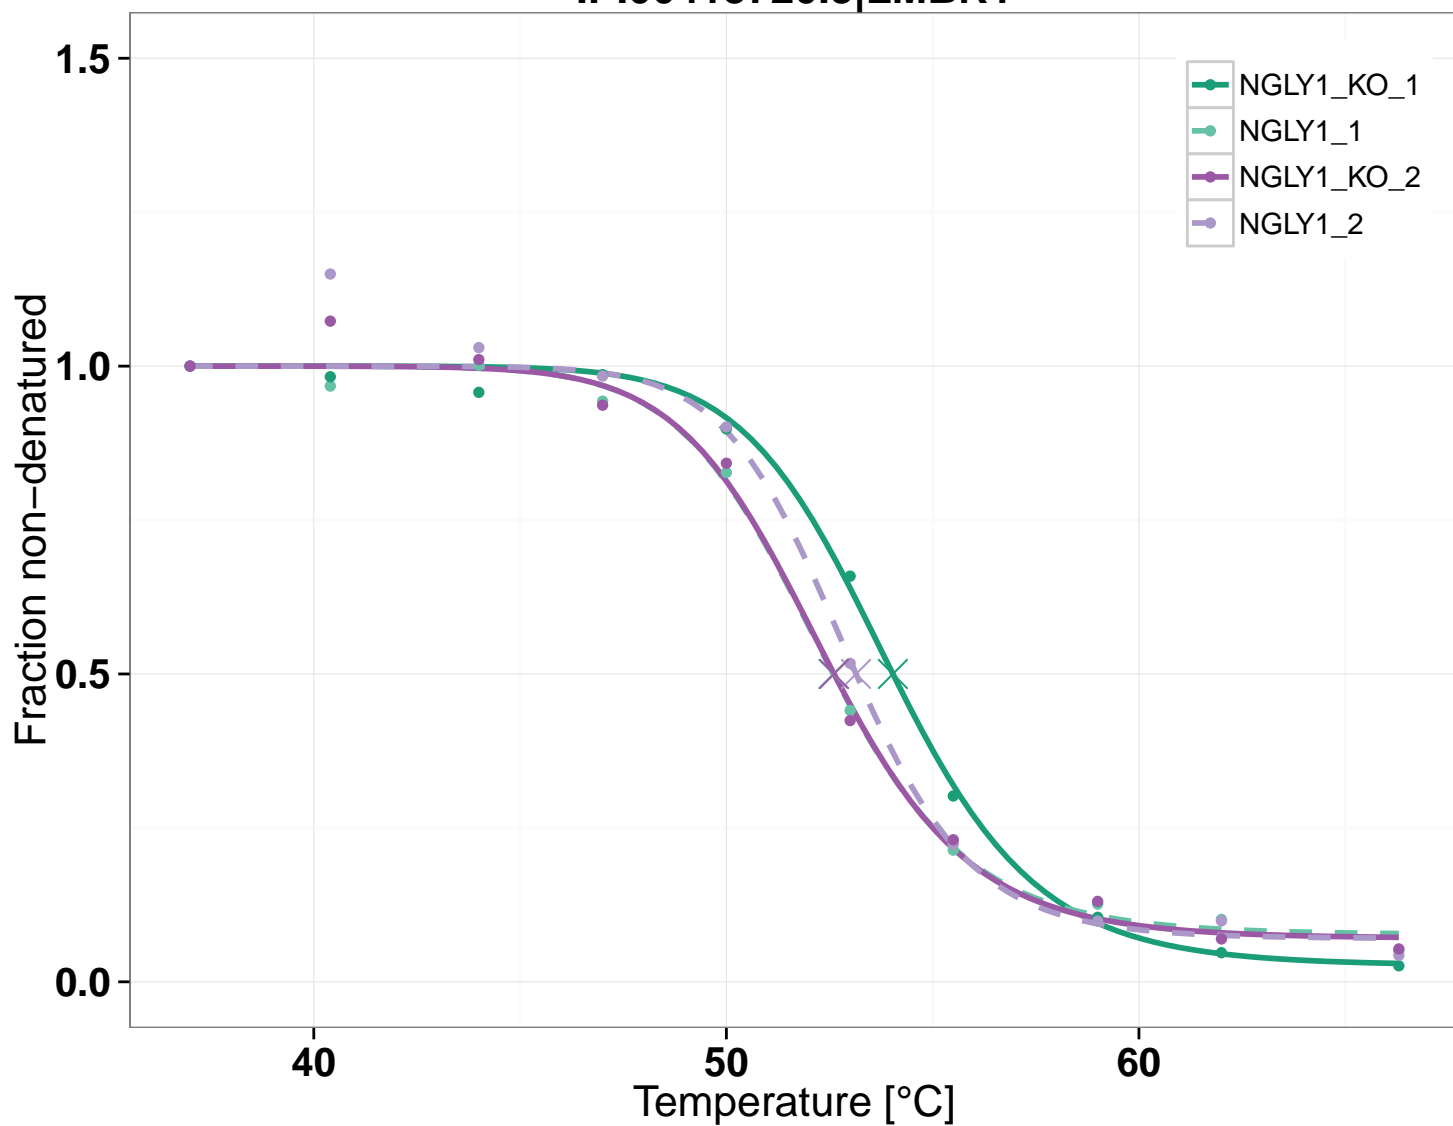

|            | meltPoint | slope | plateau | R2   |
|------------|-----------|-------|---------|------|
| NGLY1_KO_1 | 54.04     | -0.14 | 0.03    | 1    |
| NGLY1_1    | 52.59     | -0.13 | 0.08    | 1    |
| NGLY1_KO_2 | 52.61     | -0.13 | 0.07    | 0.99 |
| NGLY1_2    | 53.14     | -0.16 | 0.07    | 0.99 |

Supplement: Supplementary file 4107 [file 1]

# IPI00015287.1|DOK1

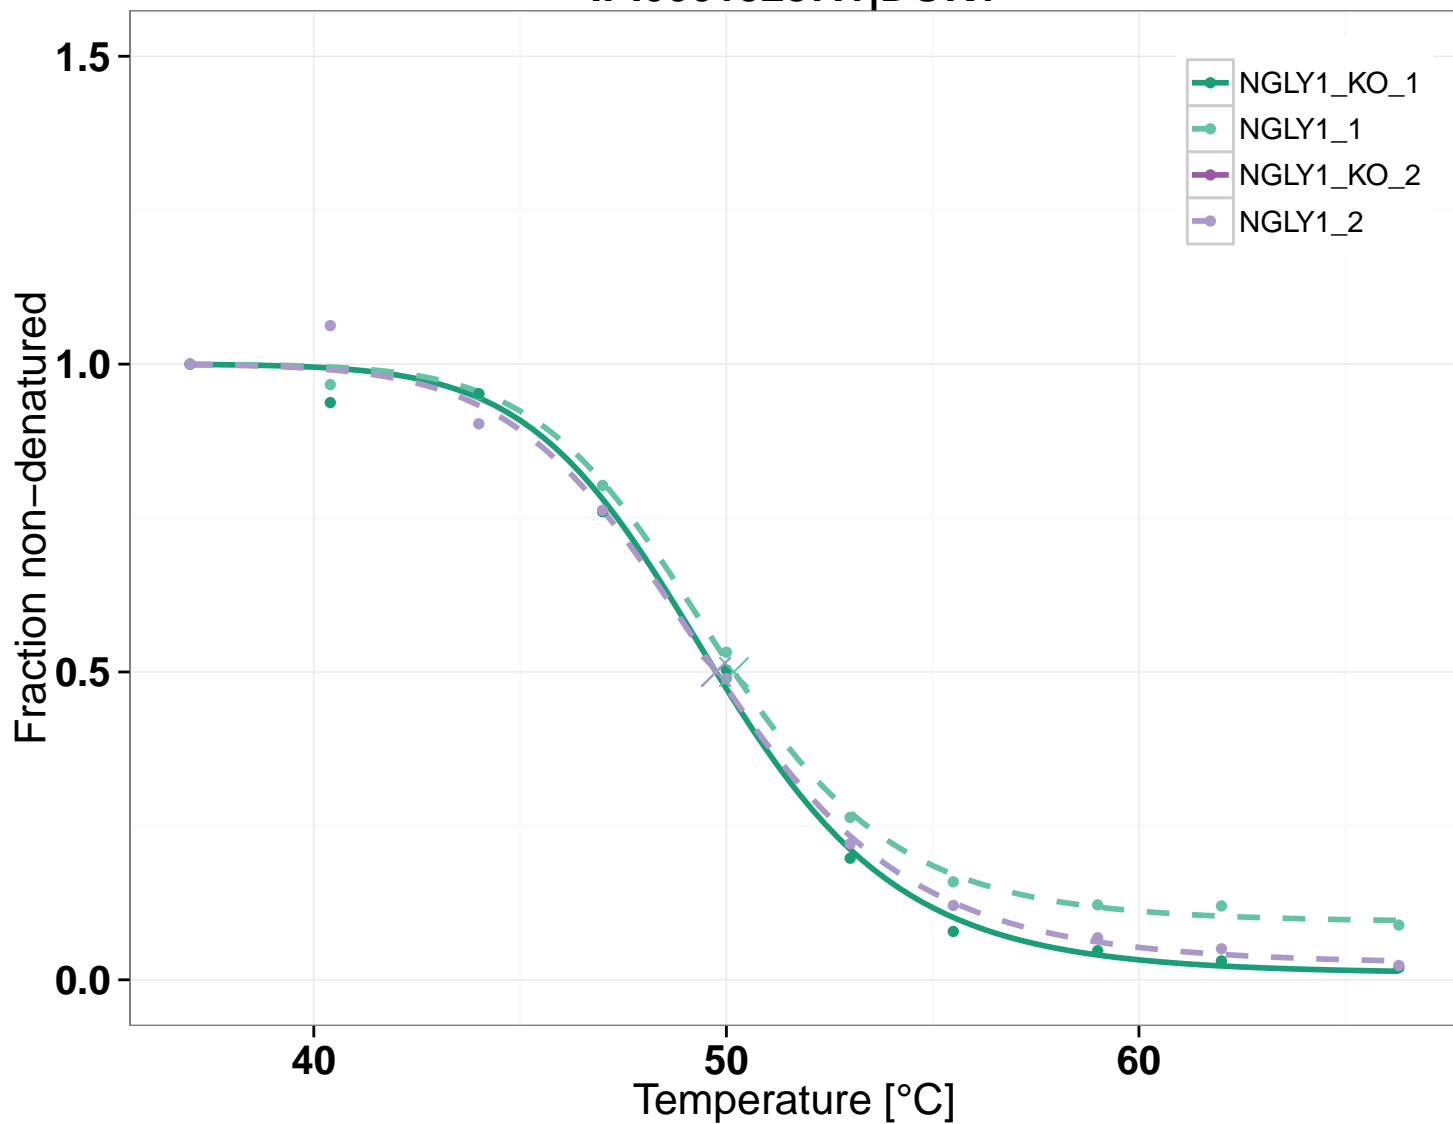

|            | meltPoint | slope | plateau | R2 |
|------------|-----------|-------|---------|----|
| NGLY1_KO_1 | 49.75     | -0.11 | 0.01    | 1  |
| NGLY1_1    | 50.18     | -0.1  | 0.09    | 1  |
| NGLY1_KO_2 | -         | -     | -       | -  |
| NGLY1_2    | 49.75     | -0.1  | 0.02    | 1  |

Supplement: Supplementary file 4108 [file 1]

# IPI00021264.1|CNN1

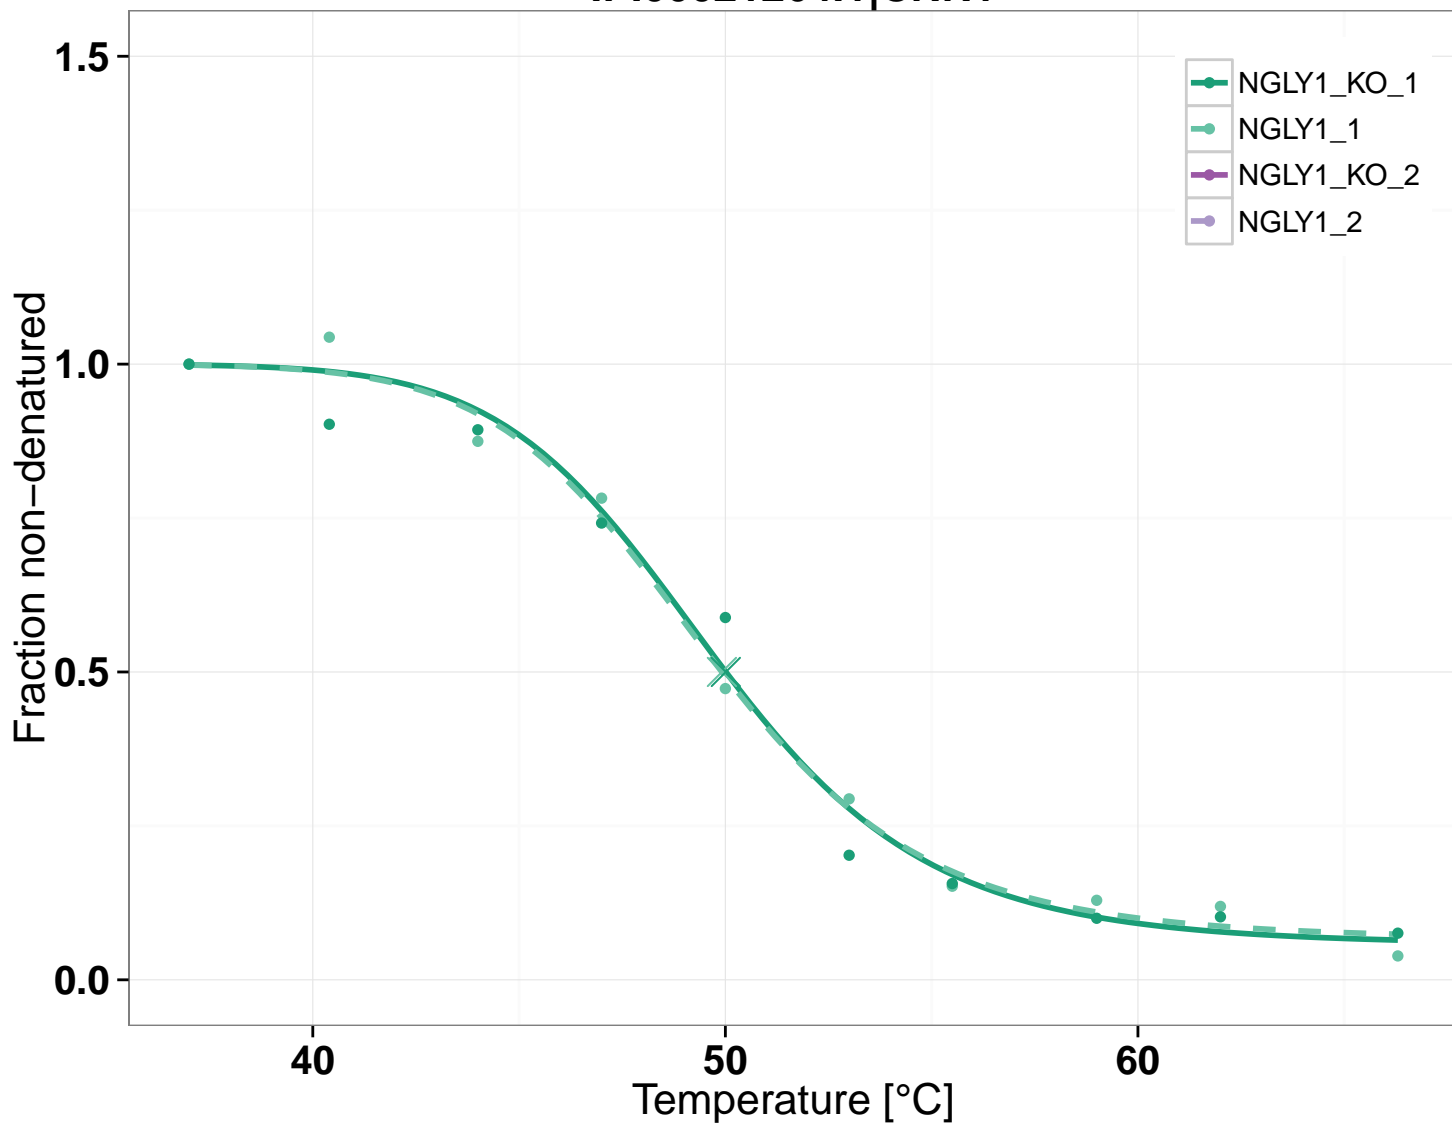

|            | meltPoint | slope  | plateau | R2   |
|------------|-----------|--------|---------|------|
| NGLY1_KO_1 | 50.01     | -0.091 | 0.06    | 0.98 |
| NGLY1_1    | 49.92     | -0.089 | 0.07    | 0.99 |
| NGLY1_KO_2 | -         | -      | -       | -    |
| NGLY1_2    | -         | -      | -       | -    |

Supplement: Supplementary file 4109 [file 1]

IPI00334715.4|GRLF1

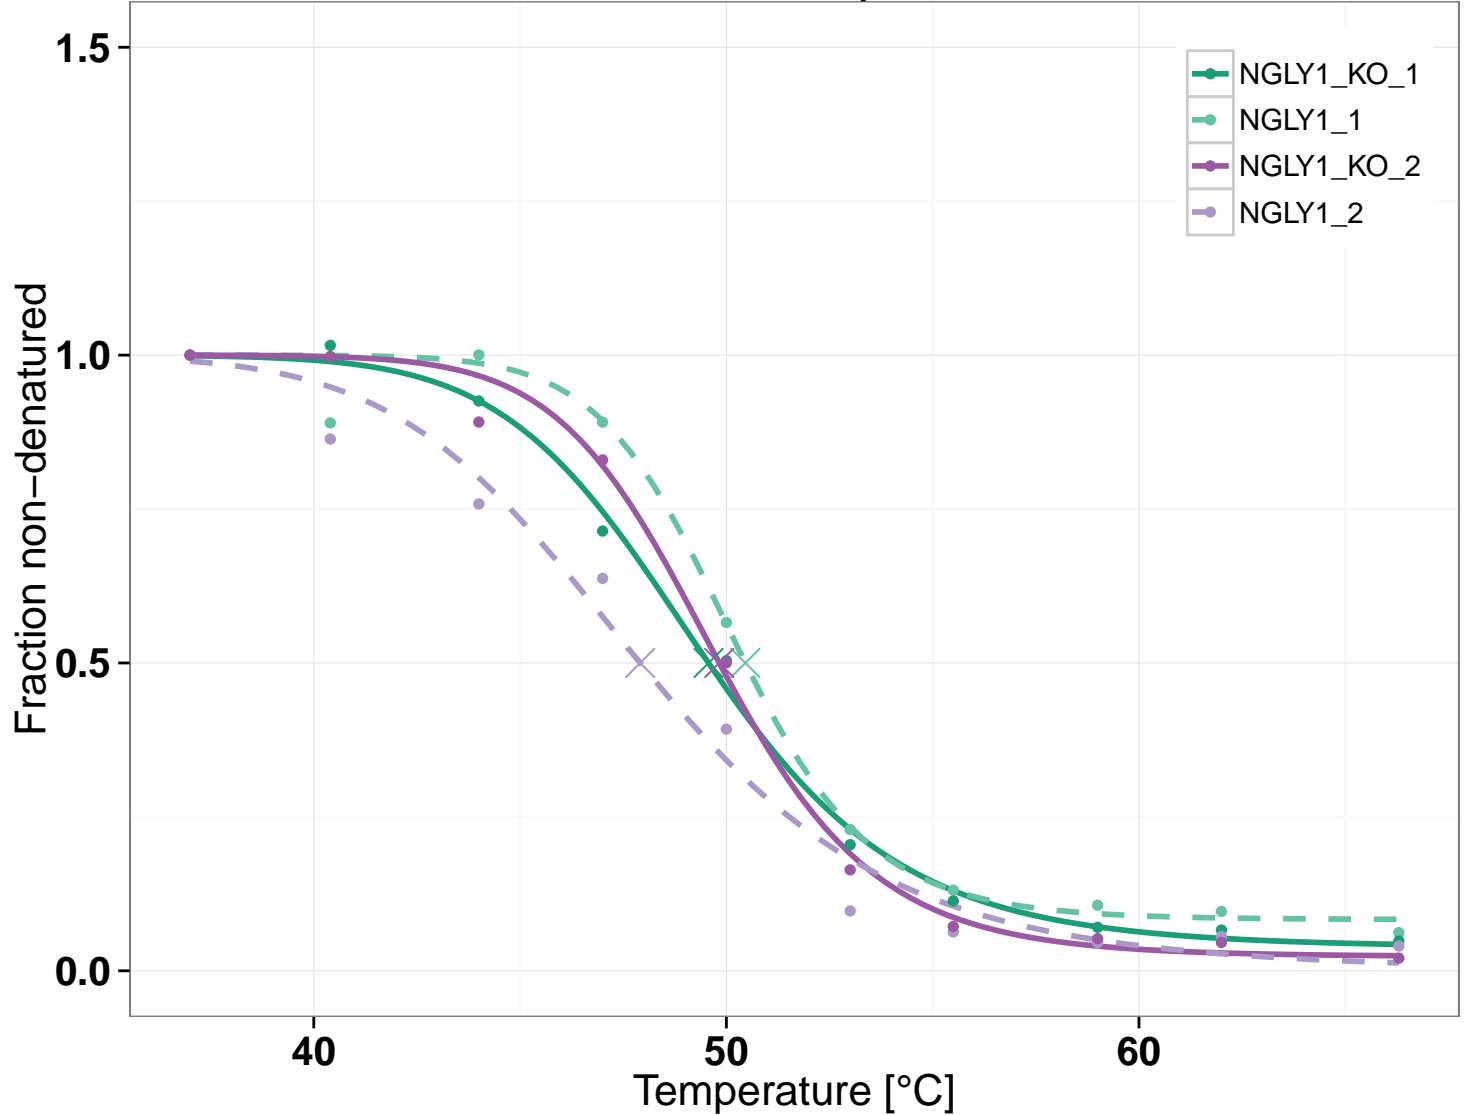

|            | meltPoint | slope  | plateau | R2   |
|------------|-----------|--------|---------|------|
| NGLY1_KO_1 | 49.57     | -0.1   | 0.04    | 1    |
| NGLY1_1    | 50.46     | -0.14  | 0.08    | 0.99 |
| NGLY1_KO_2 | 49.83     | -0.13  | 0.02    | 1    |
| NGLY1_2    | 47.91     | -0.083 | 0       | 0.98 |

Supplement: Supplementary file 4110 [file 1]

# IPI00418313.3|ILF3

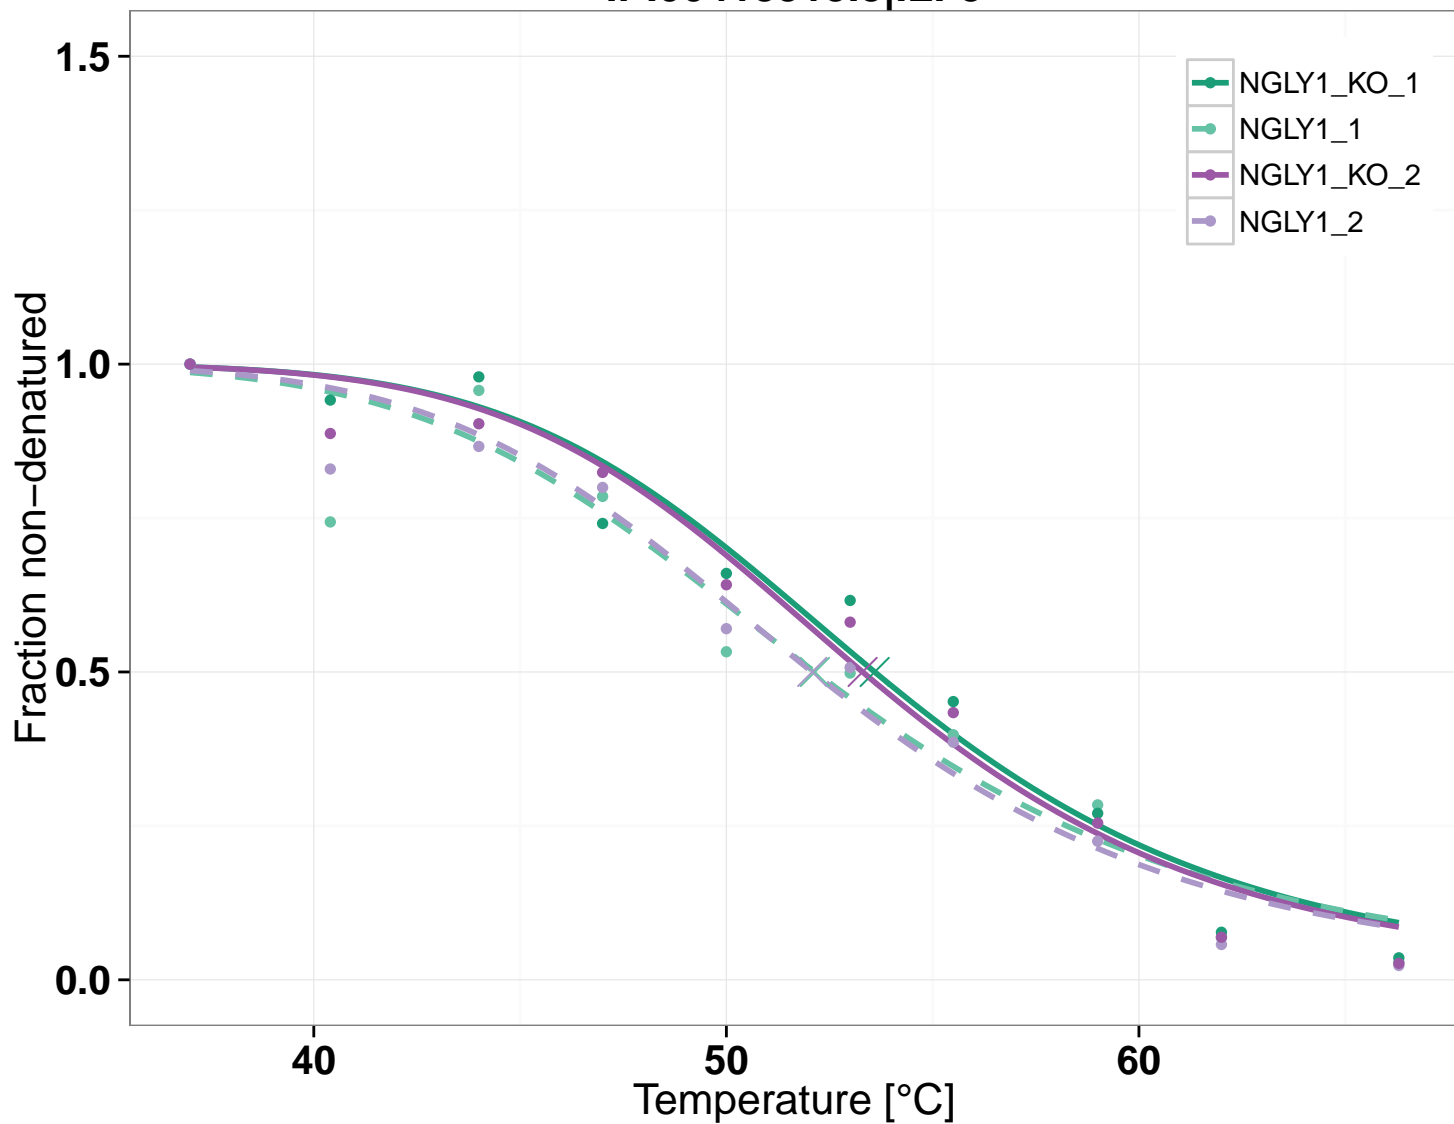

|            | meltPoint | slope  | plateau | R2   |
|------------|-----------|--------|---------|------|
| NGLY1_KO_1 | 53.59     | -0.057 | 0       | 0.97 |
| NGLY1_1    | 52.14     | -0.052 | 0       | 0.93 |
| NGLY1_KO_2 | 53.3      | -0.058 | 0       | 0.97 |
| NGLY1_2    | 52.08     | -0.055 | 0       | 0.97 |

Supplement: Supplementary file 4111 [file 1]

IPI00030106.1|TPST1

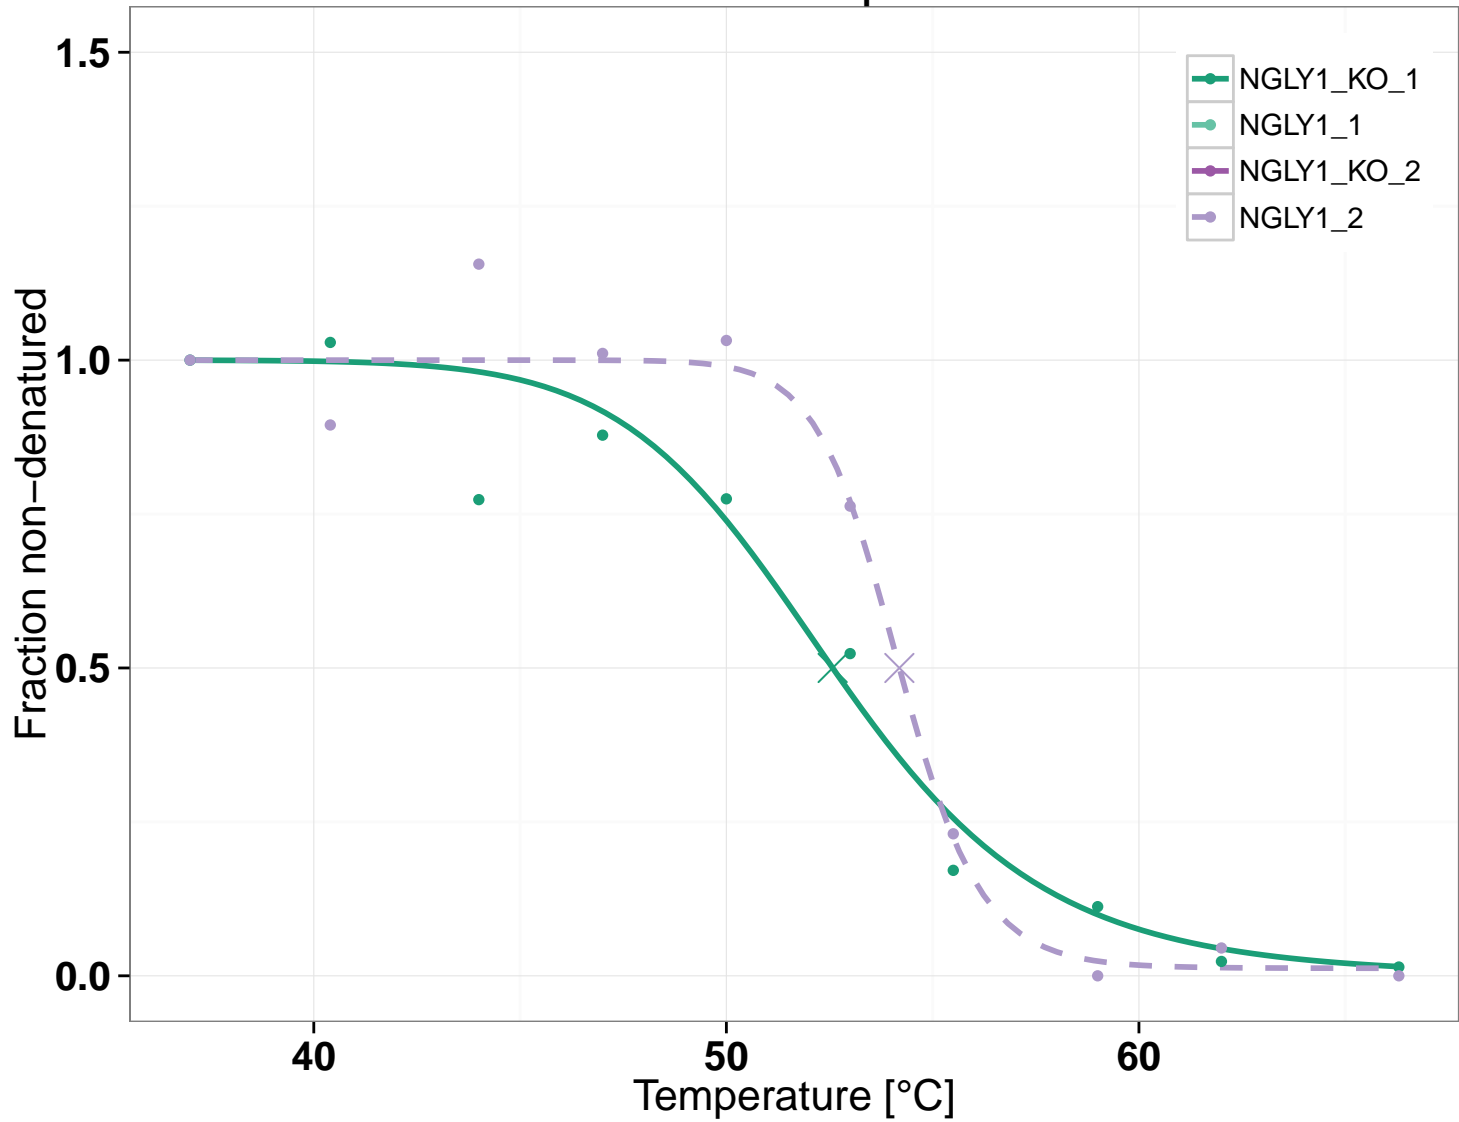

|            | meltPoint | slope  | plateau | R2   |
|------------|-----------|--------|---------|------|
| NGLY1_KO_1 | 52.58     | -0.097 | 0       | 0.96 |
| NGLY1_1    | -         | -      | -       | -    |
| NGLY1_KO_2 | -         | -      | -       | -    |
| NGLY1_2    | 54.19     | -0.25  | 0.01    | 0.98 |

Supplement: Supplementary file 4112 [file 1]

IPI00395938.5|C16ORF73

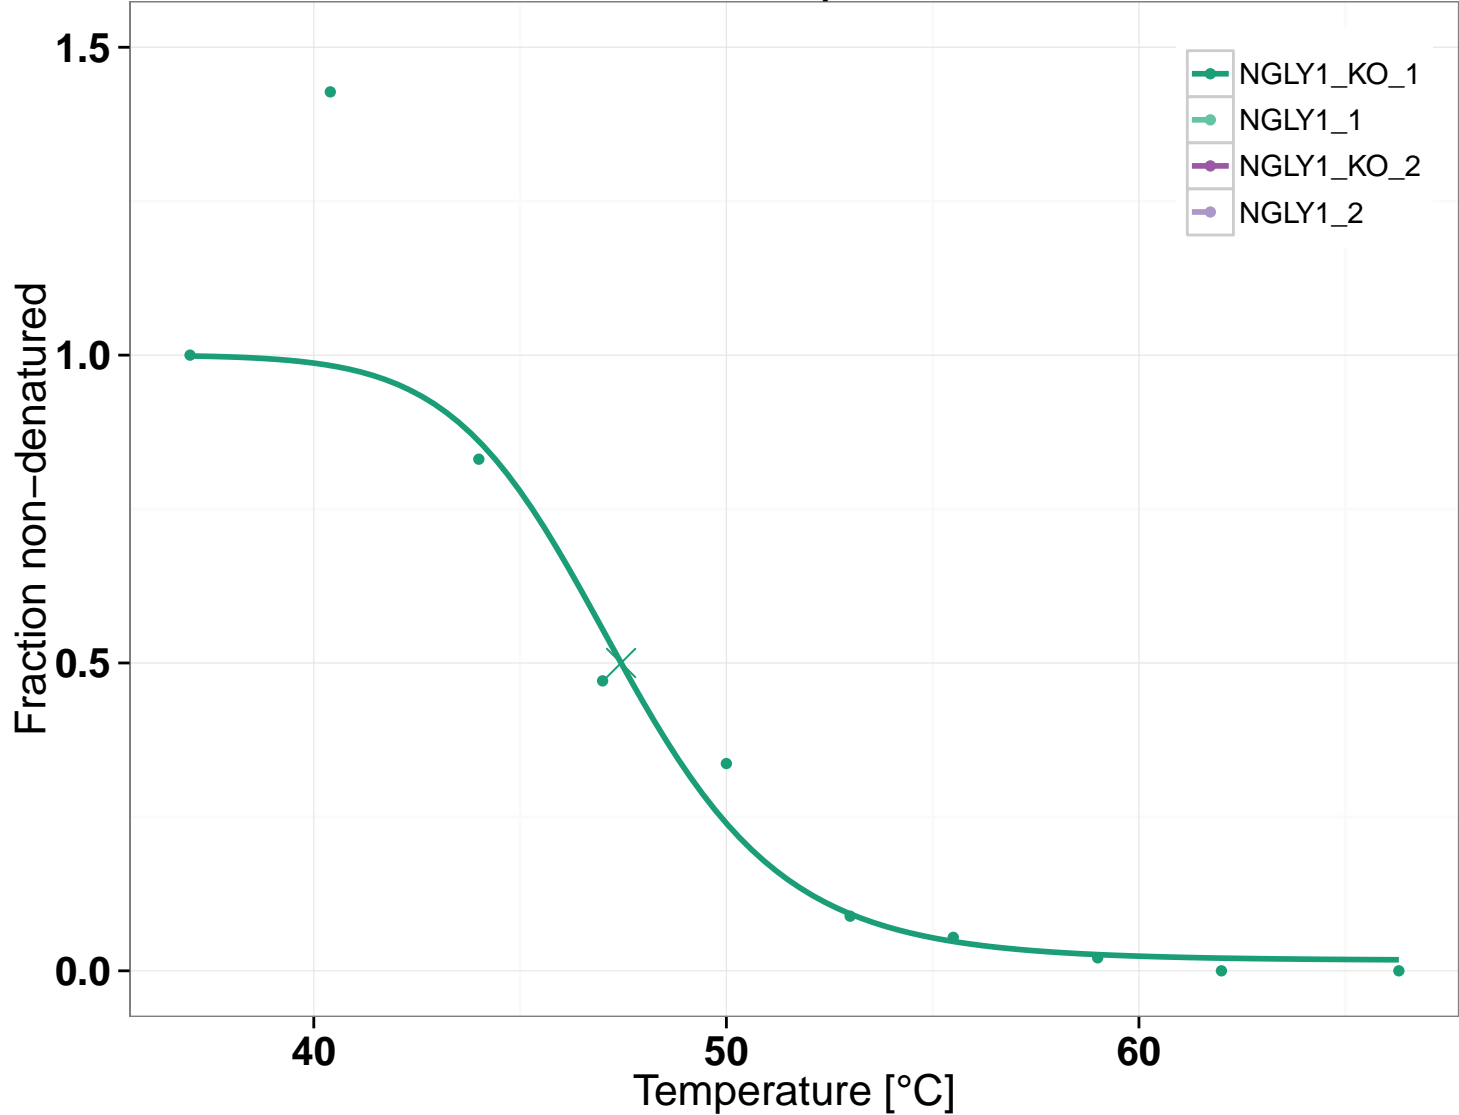

|            | meltPoint | slope | plateau | R2   |
|------------|-----------|-------|---------|------|
| NGLY1_KO_1 | 47.45     | -0.12 | 0.02    | 0.91 |
| NGLY1_1    | -         | -     | -       | -    |
| NGLY1_KO_2 | -         | -     | -       | -    |
| NGLY1_2    | -         | -     | -       | -    |

Supplement: Supplementary file 4113 [file 1]

# IPI00913938.1|IPO11

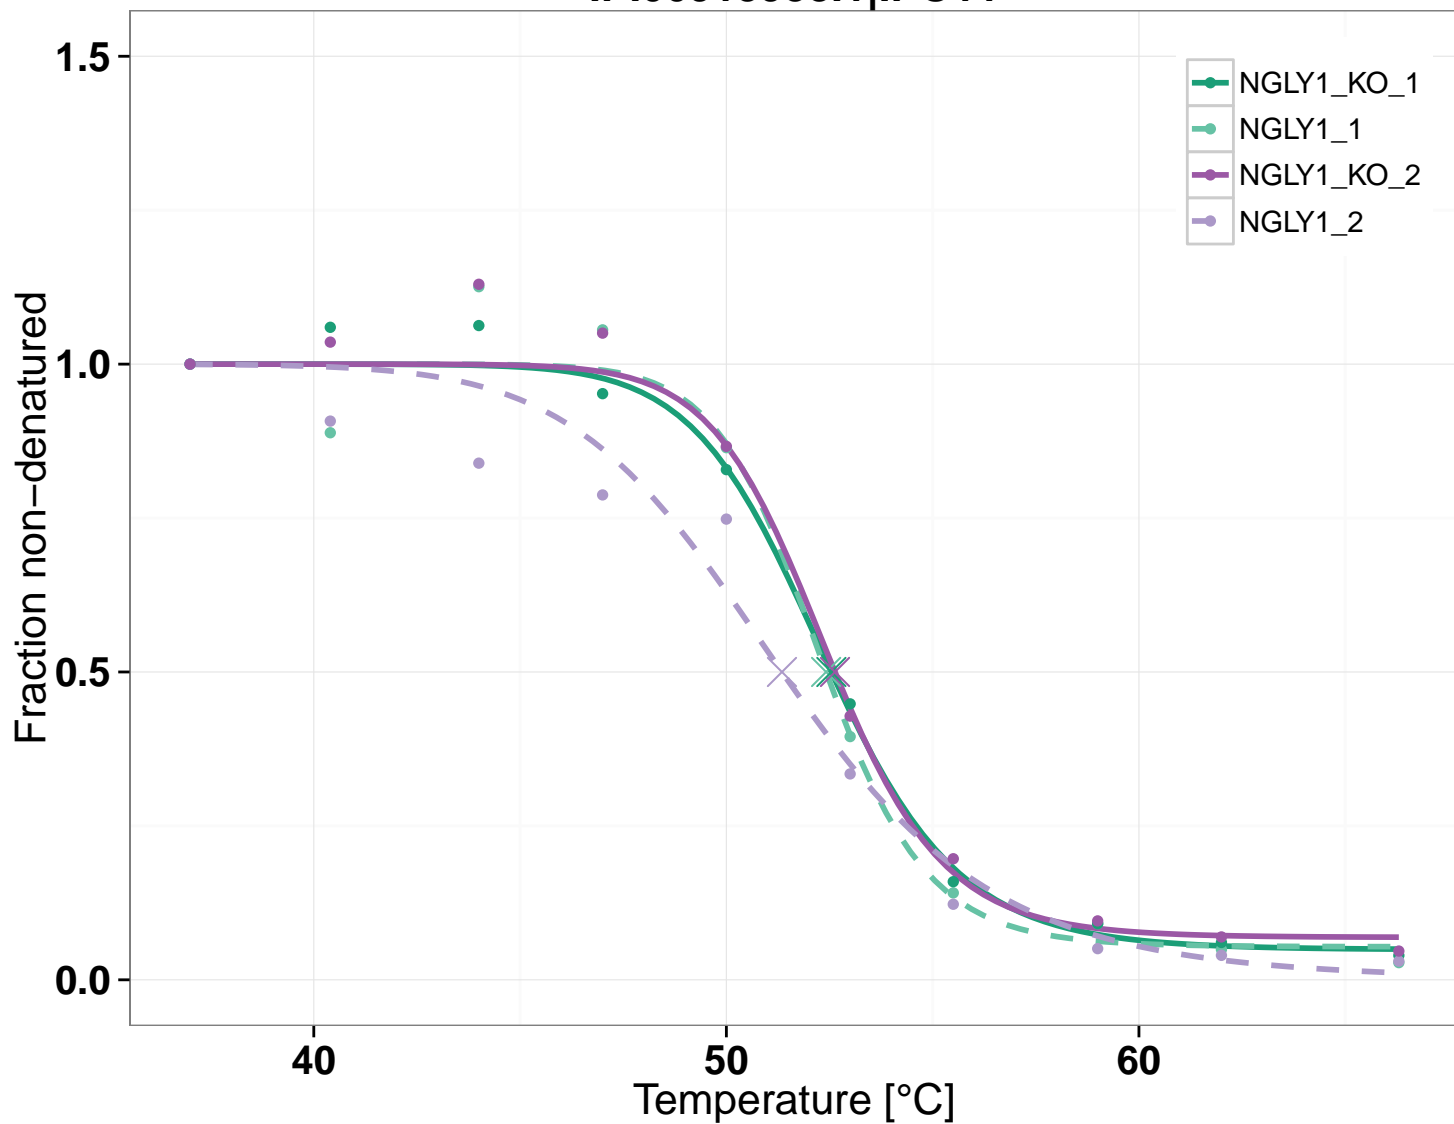

|            | meltPoint | slope  | plateau | R2   |
|------------|-----------|--------|---------|------|
| NGLY1_KO_1 | 52.55     | -0.15  | 0.05    | 0.99 |
| NGLY1_1    | 52.42     | -0.18  | 0.05    | 0.98 |
| NGLY1_KO_2 | 52.63     | -0.17  | 0.07    | 0.99 |
| NGLY1_2    | 51.35     | -0.097 | 0       | 0.97 |

Supplement: Supplementary file 4114 [file 1]

IPI00010163.1|ZNF286A

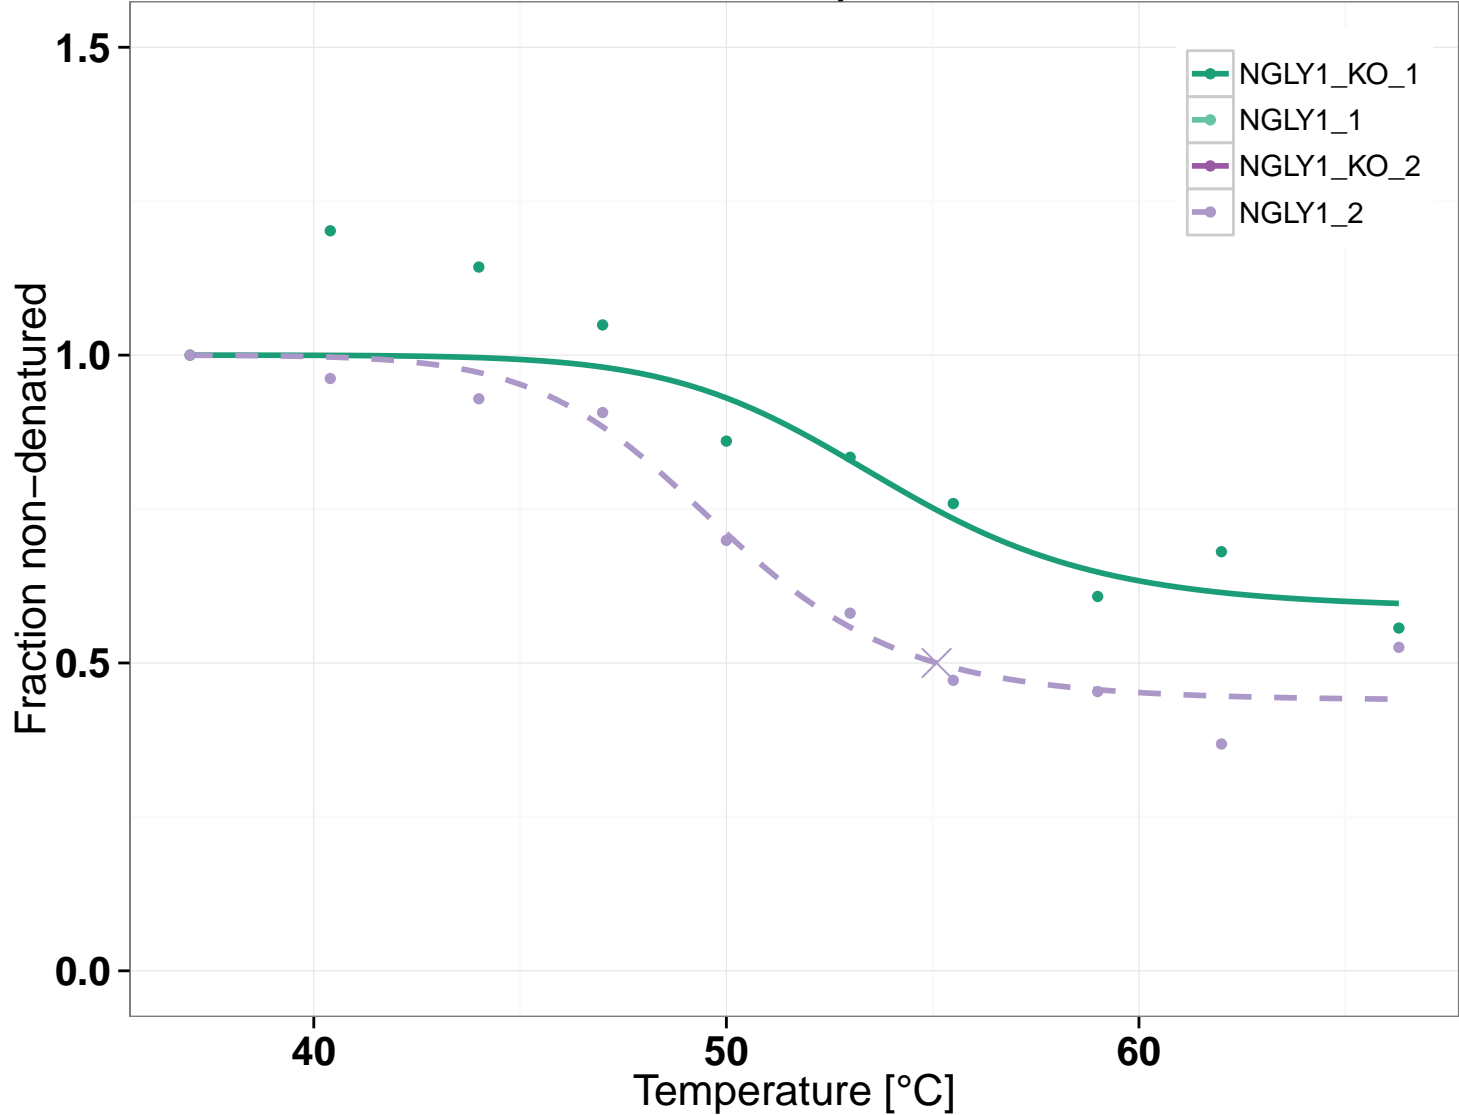

|            | meltPoint | slope  | plateau | R2   |
|------------|-----------|--------|---------|------|
| NGLY1_KO_1 | —         | −0.04  | 0.59    | 0.82 |
| NGLY1_1    | —         | —      | —       | —    |
| NGLY1_KO_2 | —         | —      | —       | —    |
| NGLY1_2    | 55.1      | −0.063 | 0.44    | 0.97 |

Supplement: Supplementary file 4115 [file 1]

IPI00910716.1|GABARAPL1

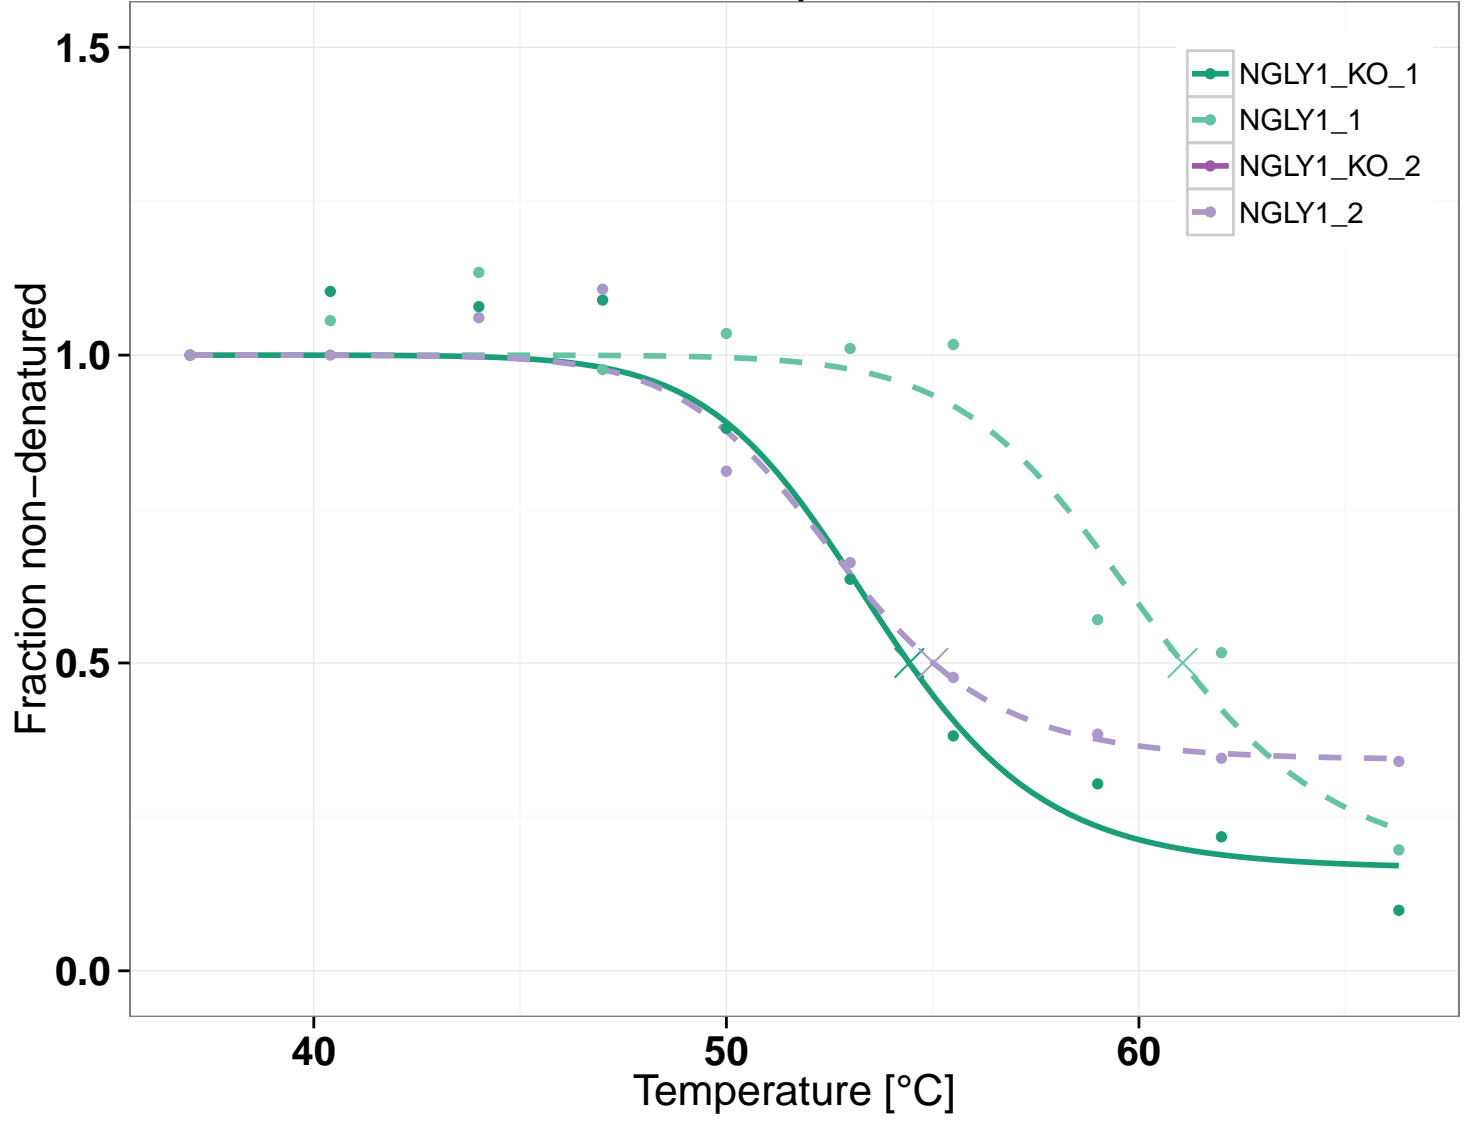

|            | meltPoint | slope  | plateau | R2   |
|------------|-----------|--------|---------|------|
| NGLY1_KO_1 | 54.43     | -0.1   | 0.17    | 0.97 |
| NGLY1_1    | 61.06     | -0.093 | 0.16    | 0.93 |
| NGLY1_KO_2 | -         | -      | -       | -    |
| NGLY1_2    | 55.02     | -0.086 | 0.34    | 0.97 |

Supplement: Supplementary file 4116 [file 1]

# IPI00293564.5|HMGCL

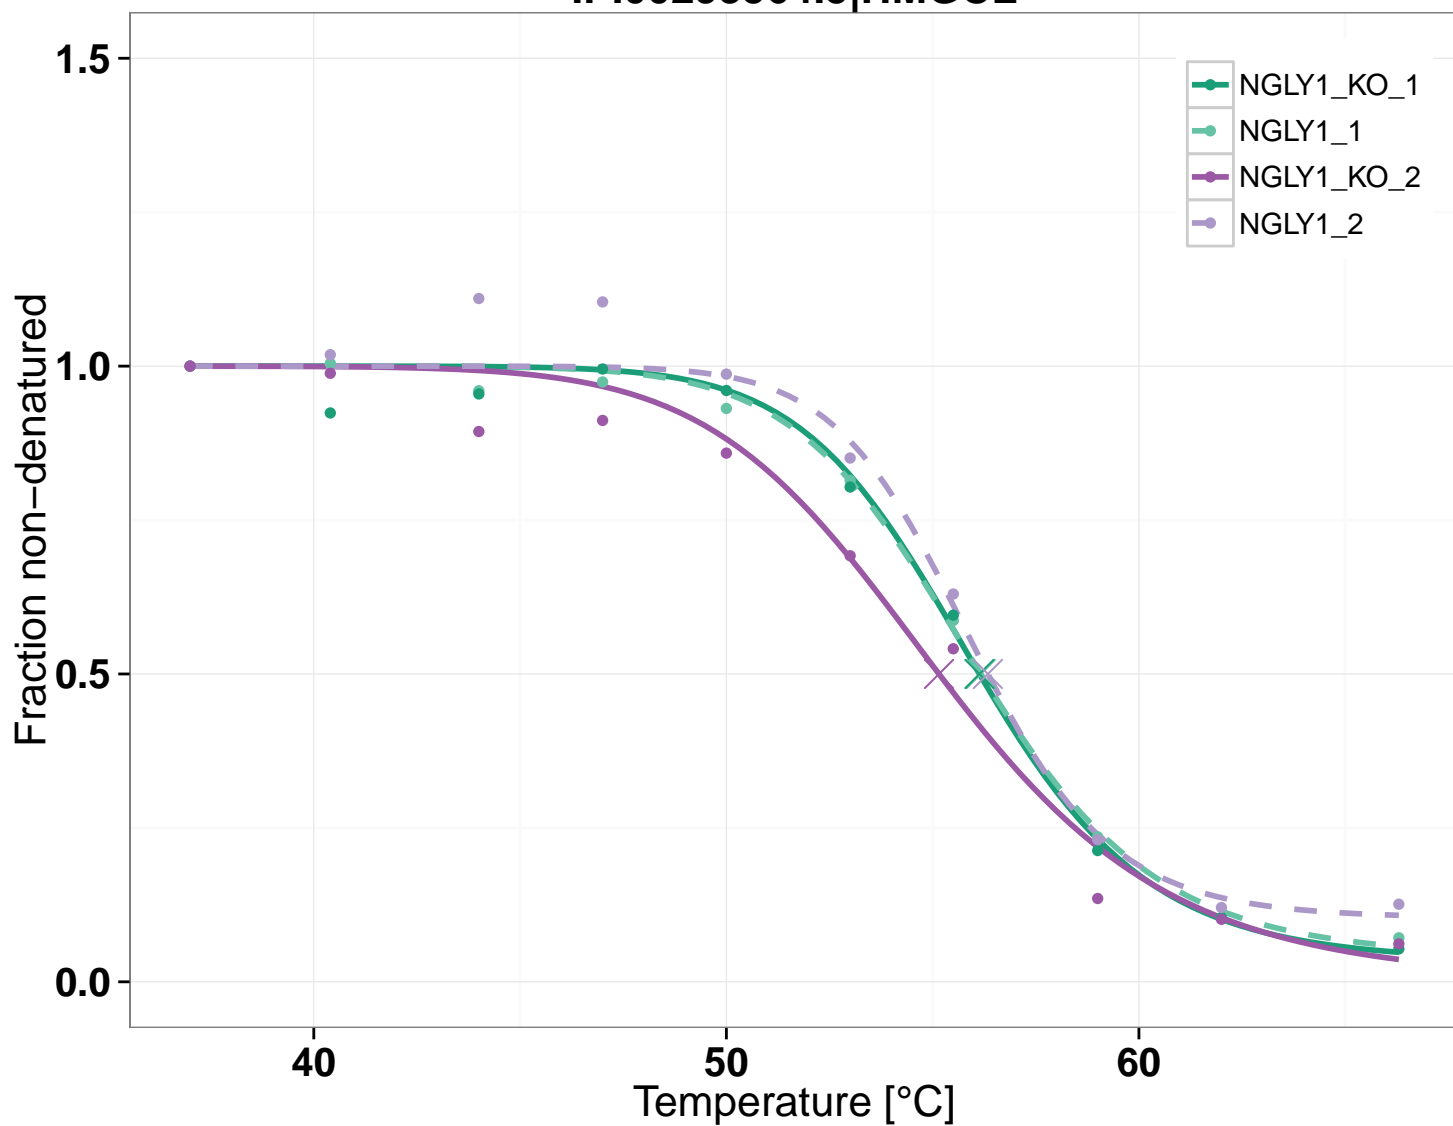

|            | meltPoint | slope  | plateau | R2   |
|------------|-----------|--------|---------|------|
| NGLY1_KO_1 | 56.13     | -0.12  | 0.03    | 0.99 |
| NGLY1_1    | 56.17     | -0.11  | 0.04    | 1    |
| NGLY1_KO_2 | 55.15     | -0.089 | 0       | 0.98 |
| NGLY1_2    | 56.34     | -0.13  | 0.1     | 0.98 |

Supplement: Supplementary file 4117 [file 1]

IPI00008207.7|MAN1B1

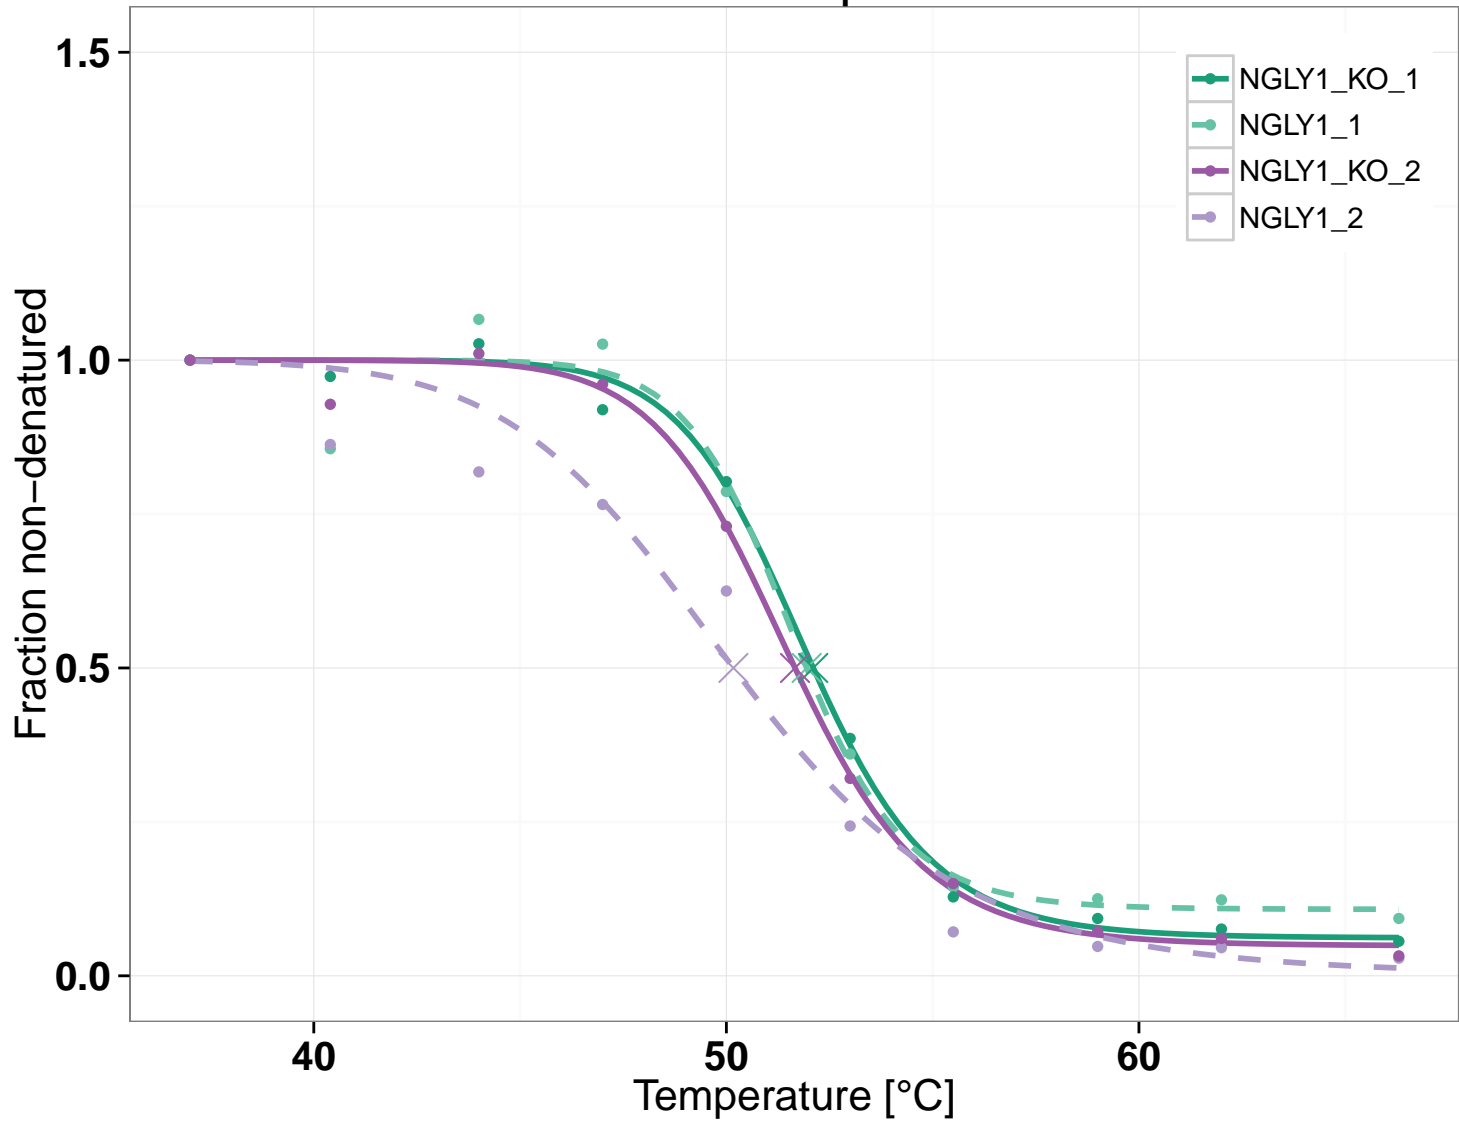

|            | meltPoint | slope | plateau | R2   |
|------------|-----------|-------|---------|------|
| NGLY1_KO_1 | 52.11     | -0.15 | 0.06    | 1    |
| NGLY1_1    | 51.95     | -0.17 | 0.11    | 0.98 |
| NGLY1_KO_2 | 51.66     | -0.14 | 0.05    | 1    |
| NGLY1_2    | 50.17     | -0.09 | 0       | 0.97 |

Supplement: Supplementary file 4118 [file 1]

IPI00303568.3|PTGES2

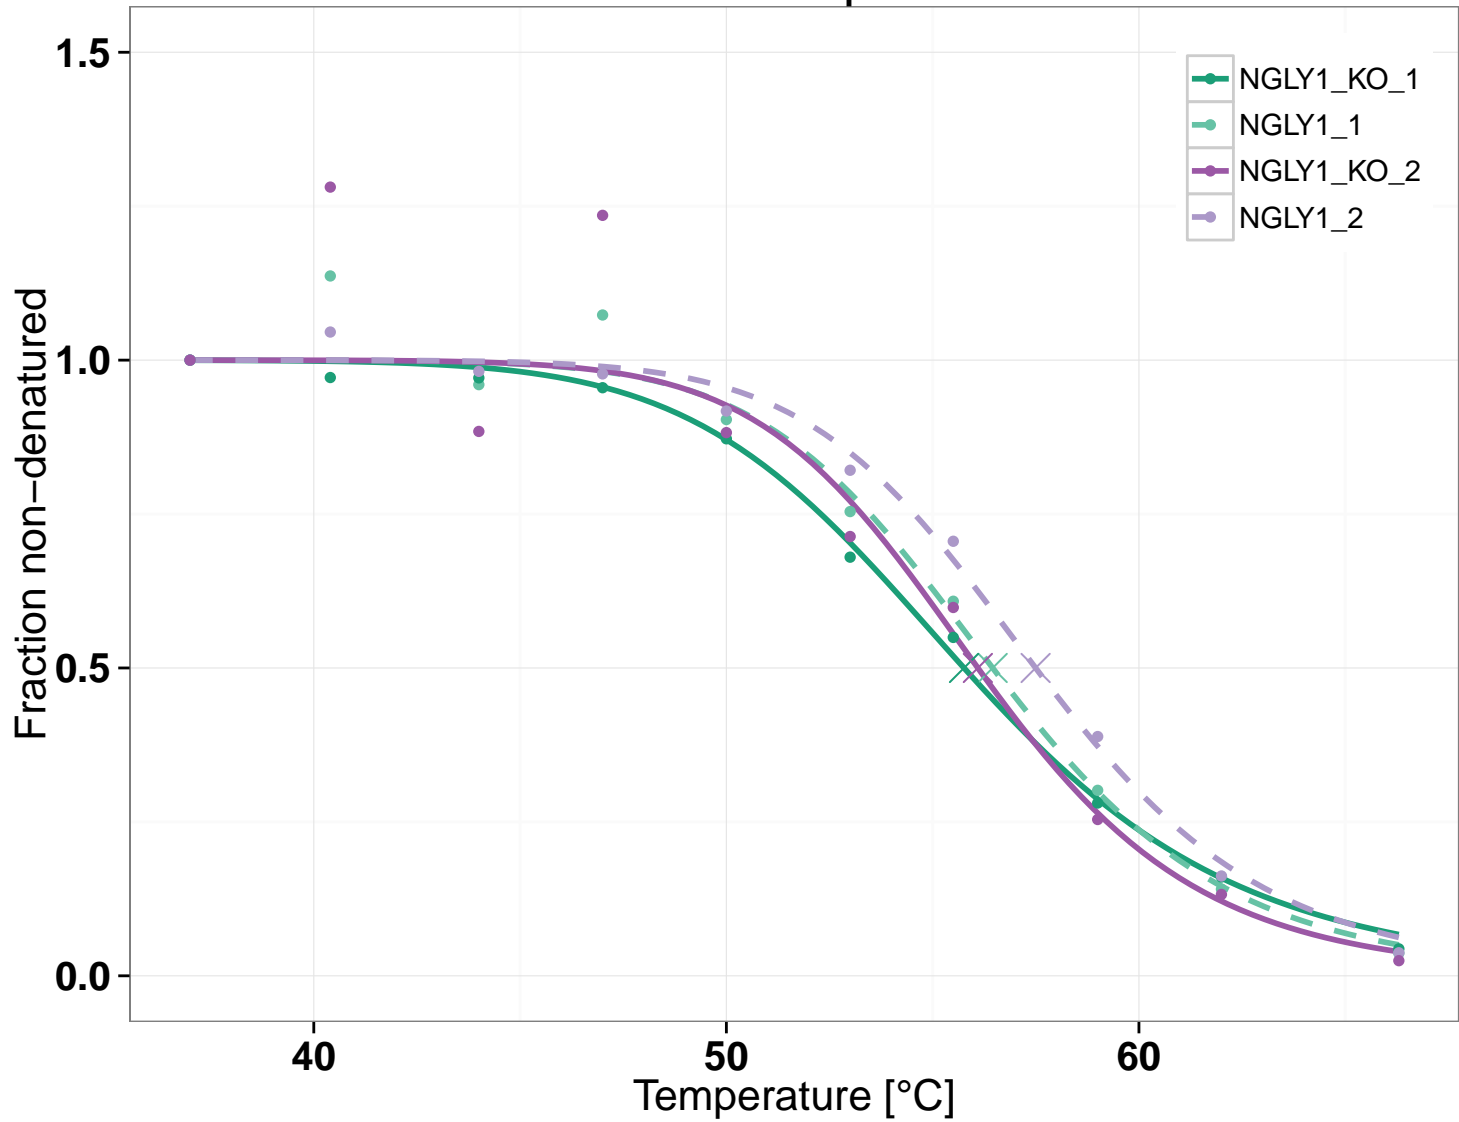

|            | meltPoint | slope  | plateau | R2   |
|------------|-----------|--------|---------|------|
| NGLY1_KO_1 | 55.76     | -0.075 | 0       | 1    |
| NGLY1_1    | 56.45     | -0.089 | 0       | 0.98 |
| NGLY1_KO_2 | 56.1      | -0.094 | 0       | 0.91 |
| NGLY1_2    | 57.5      | -0.09  | 0       | 0.99 |

Supplement: Supplementary file 4119 [file 1]
