# Supplementary material (part 42 of 85)
Source: publisher figshare collection journal article supplement (https://gsajournals.figshare.com/articles/dataset/_/12014913)

IPI00140301.5|AGPAT9

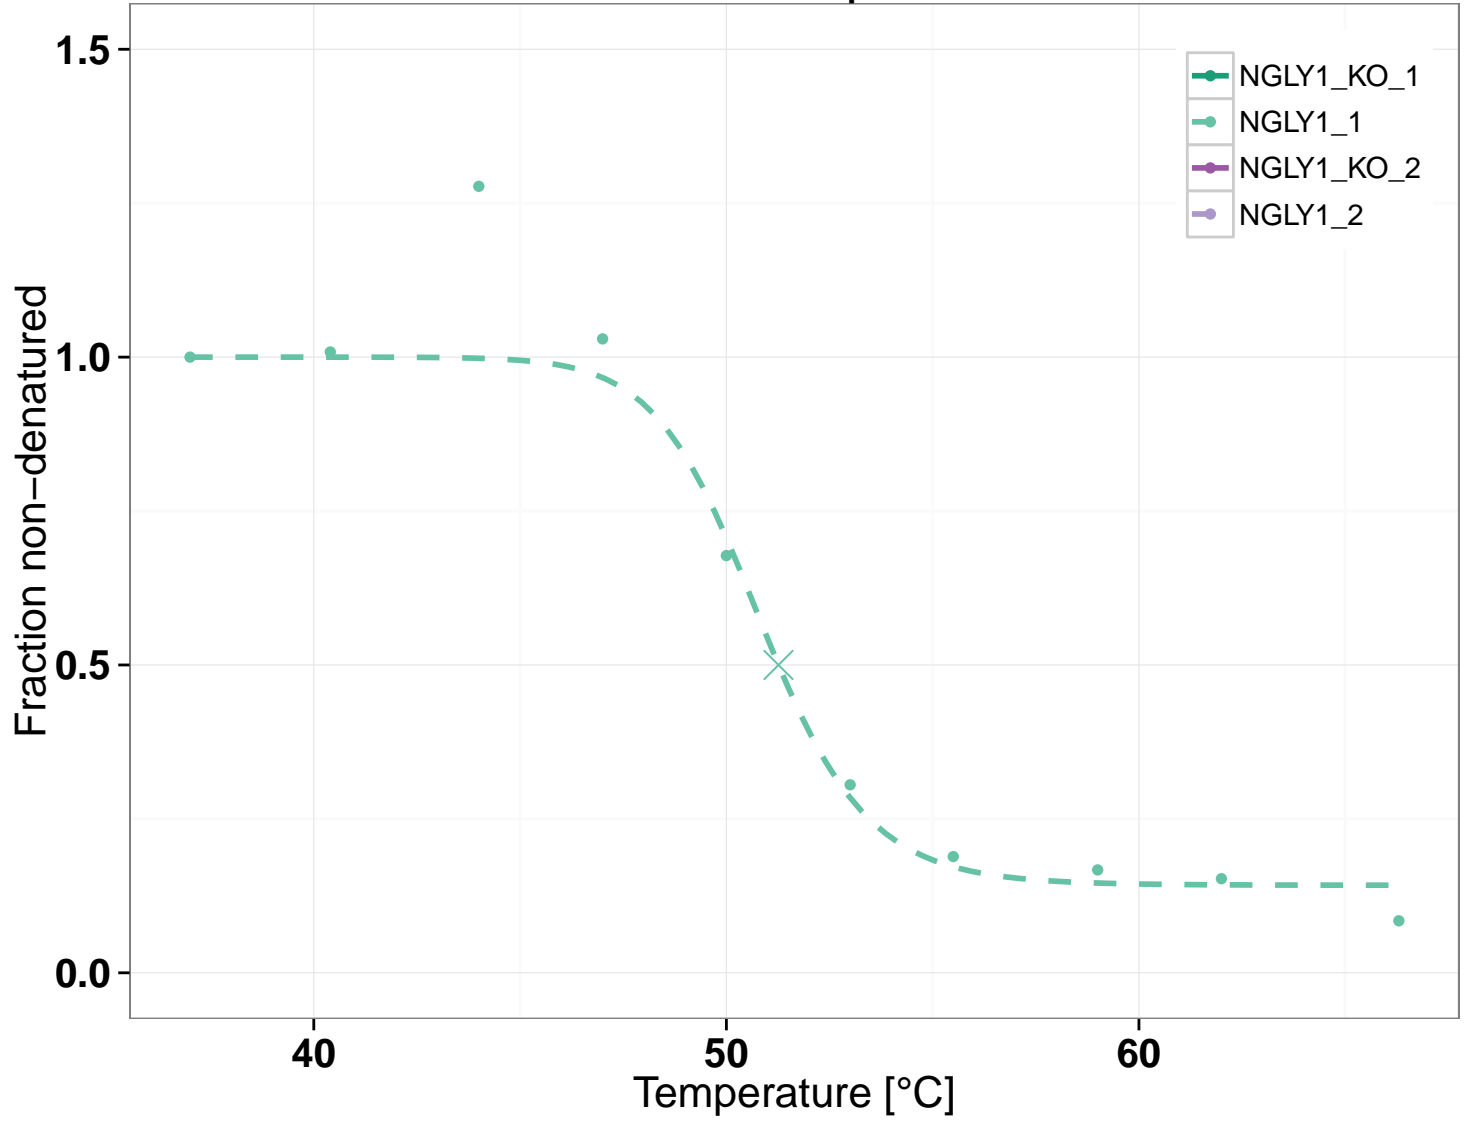

|            | meltPoint | slope | plateau | R2   |
|------------|-----------|-------|---------|------|
| NGLY1_KO_1 | -         | -     | -       | -    |
| NGLY1_1    | 51.26     | -0.17 | 0.14    | 0.95 |
| NGLY1_KO_2 | -         | -     | -       | -    |
| NGLY1_2    | -         | -     | -       | -    |

Supplement: Supplementary file 4120 [file 1]

IPI00239406.2|SYNE2

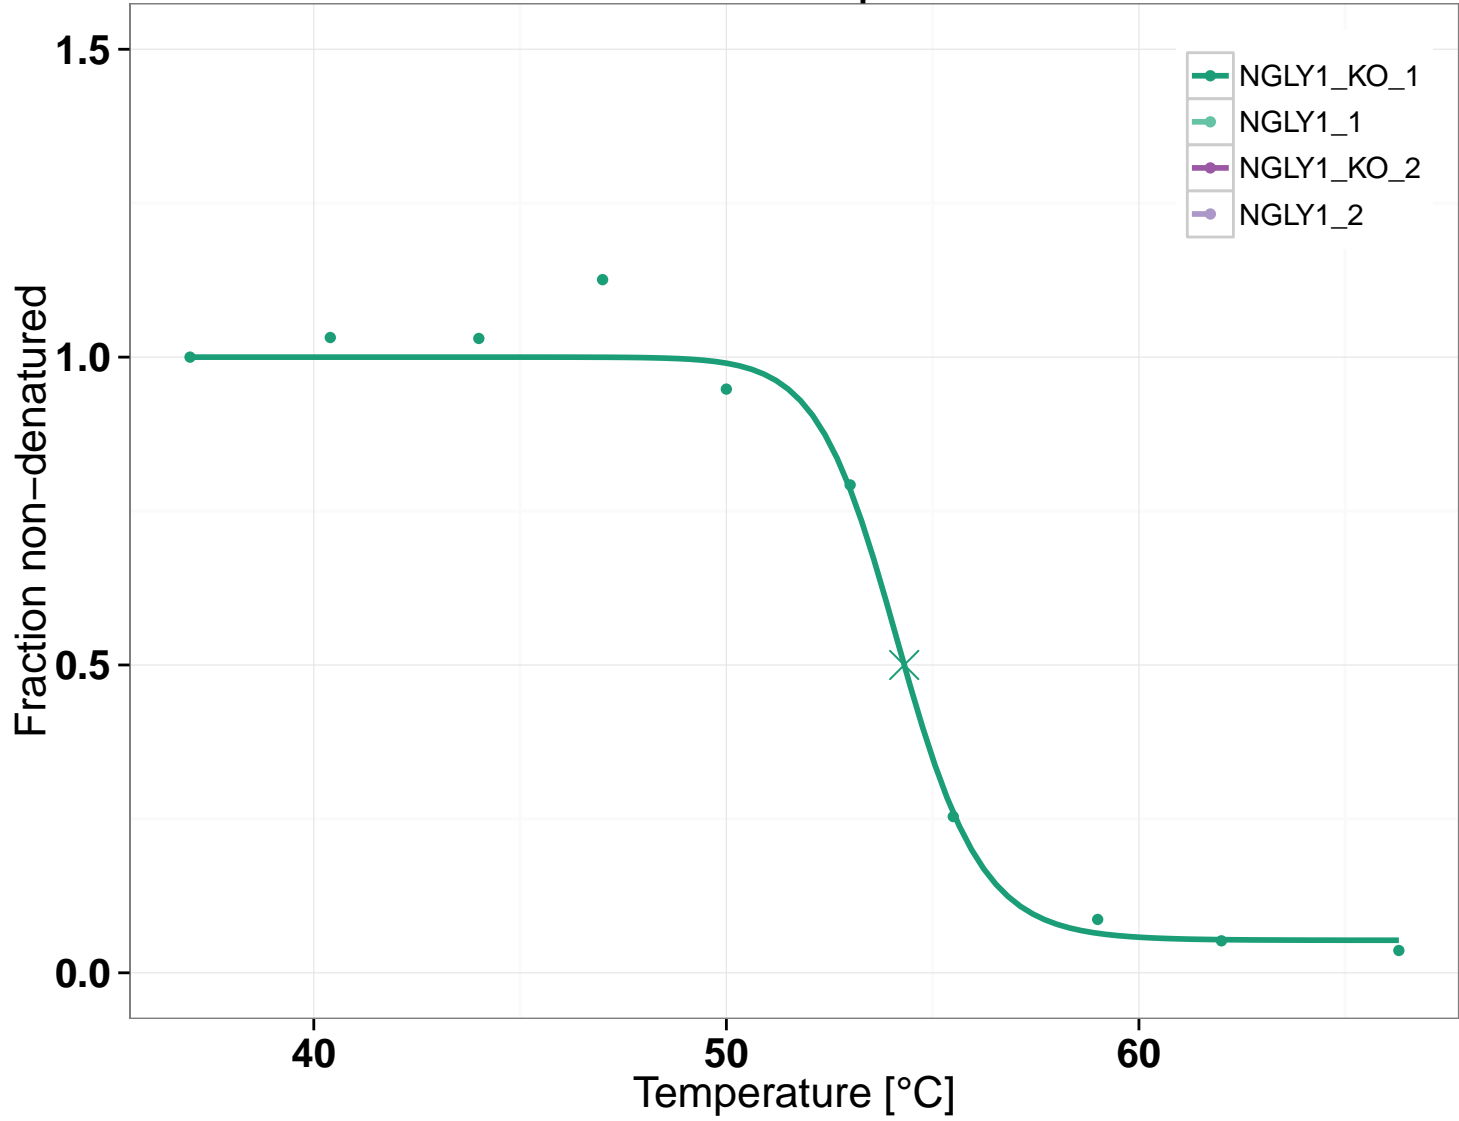

|            | meltPoint | slope | plateau | R2   |
|------------|-----------|-------|---------|------|
| NGLY1_KO_1 | 54.31     | -0.24 | 0.05    | 0.99 |
| NGLY1_1    | -         | -     | -       | -    |
| NGLY1_KO_2 | -         | -     | -       | -    |
| NGLY1_2    | -         | -     | -       | -    |

Supplement: Supplementary file 4121 [file 1]

IPI00002957.1|TBC1D17

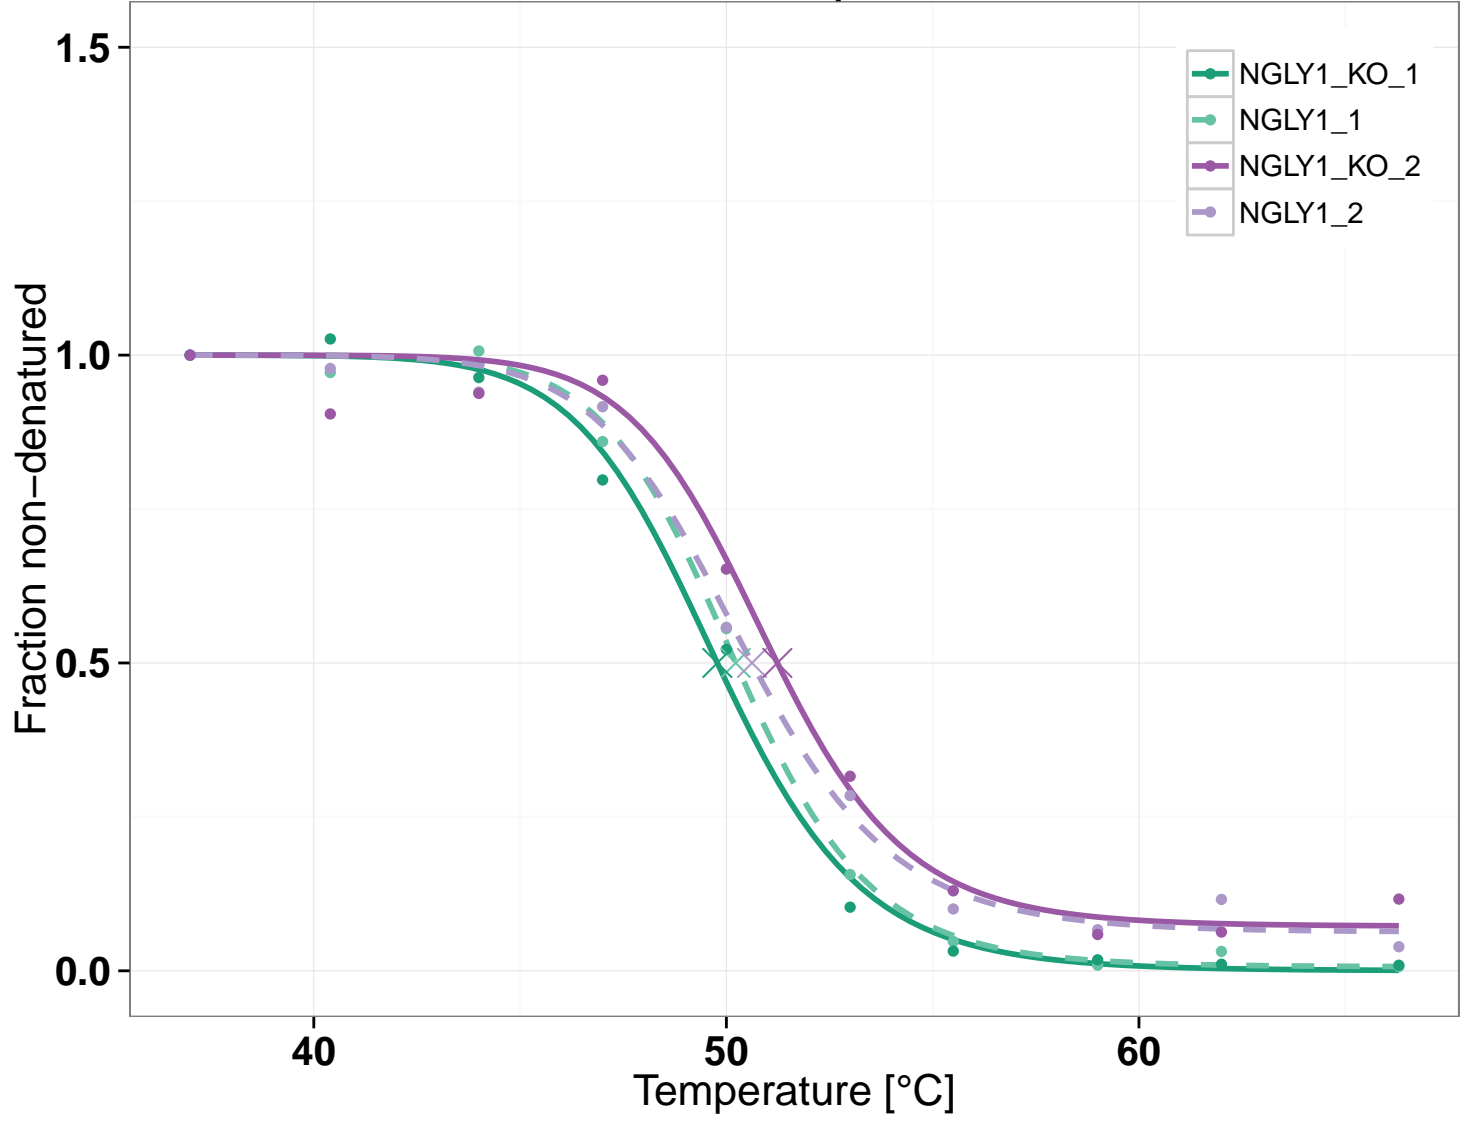

|            | meltPoint | slope | plateau | R2   |
|------------|-----------|-------|---------|------|
| NGLY1_KO_1 | 49.78     | -0.14 | 0       | 1    |
| NGLY1_1    | 50.23     | -0.15 | 0.01    | 1    |
| NGLY1_KO_2 | 51.24     | -0.14 | 0.07    | 0.99 |
| NGLY1_2    | 50.62     | -0.13 | 0.06    | 0.99 |

Supplement: Supplementary file 4122 [file 1]

IPI00479156.1|TMEM164

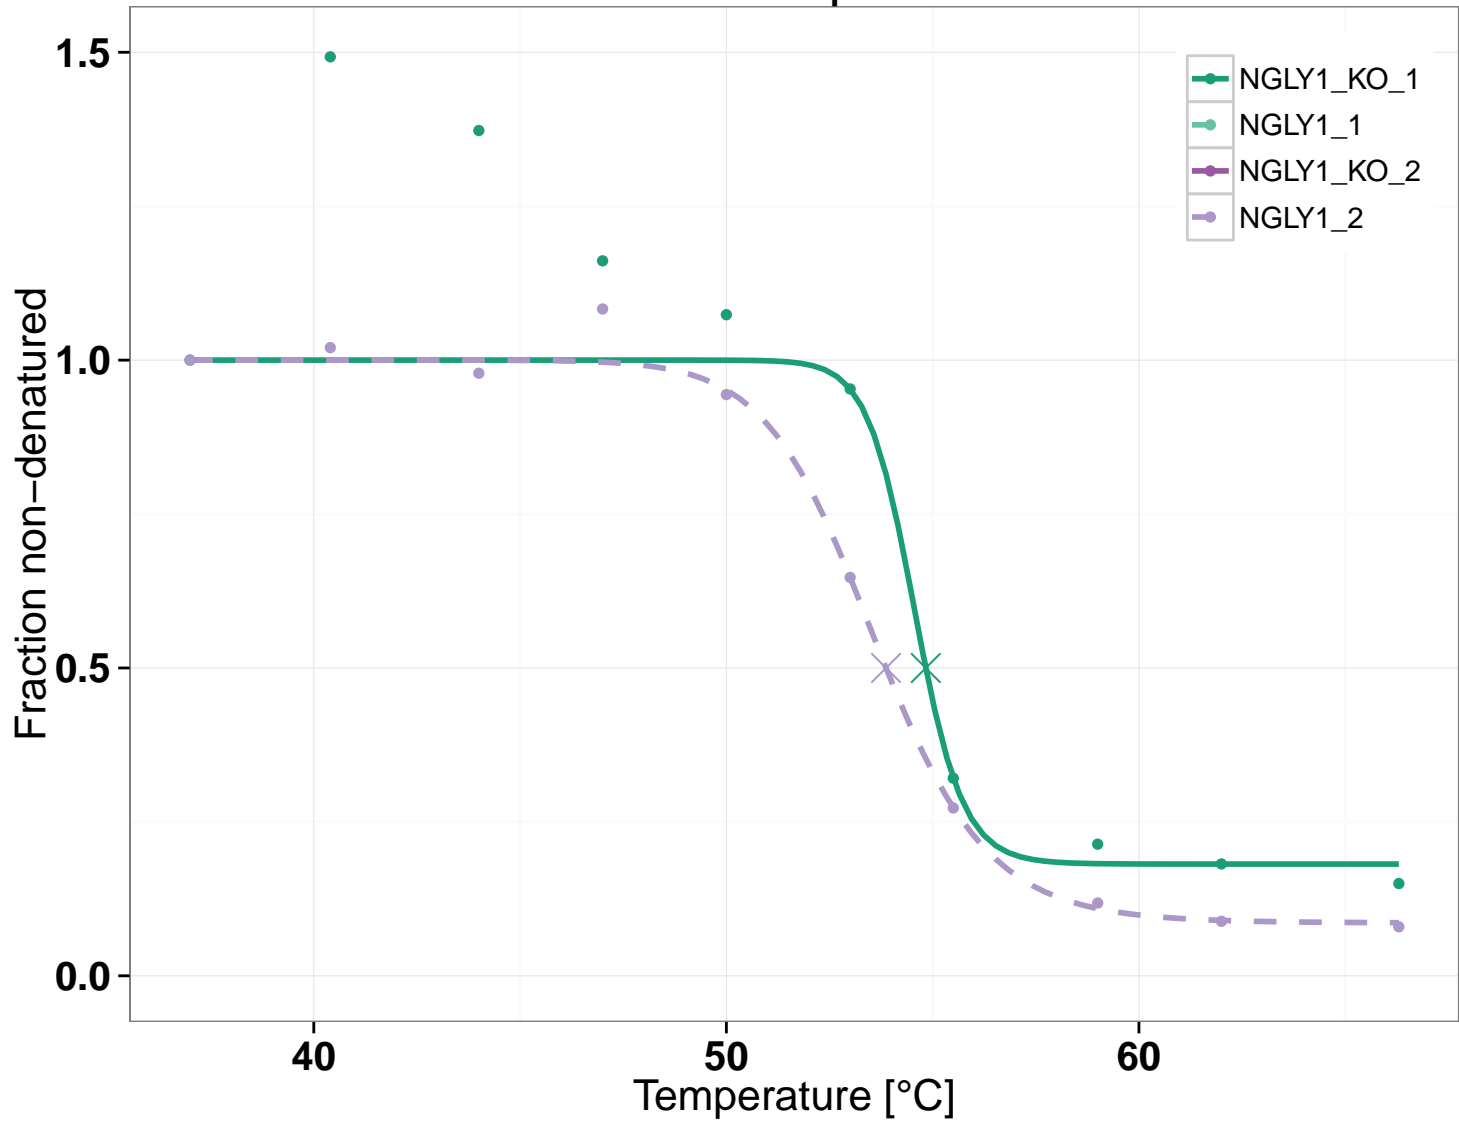

|            | meltPoint | slope | plateau | R2   |
|------------|-----------|-------|---------|------|
| NGLY1_KO_1 | 54.83     | -0.35 | 0.18    | 0.83 |
| NGLY1_1    | -         | -     | -       | -    |
| NGLY1_KO_2 | -         | -     | -       | -    |
| NGLY1_2    | 53.87     | -0.17 | 0.09    | 1    |

Supplement: Supplementary file 4123 [file 1]

# IPI00293425.1|FXN

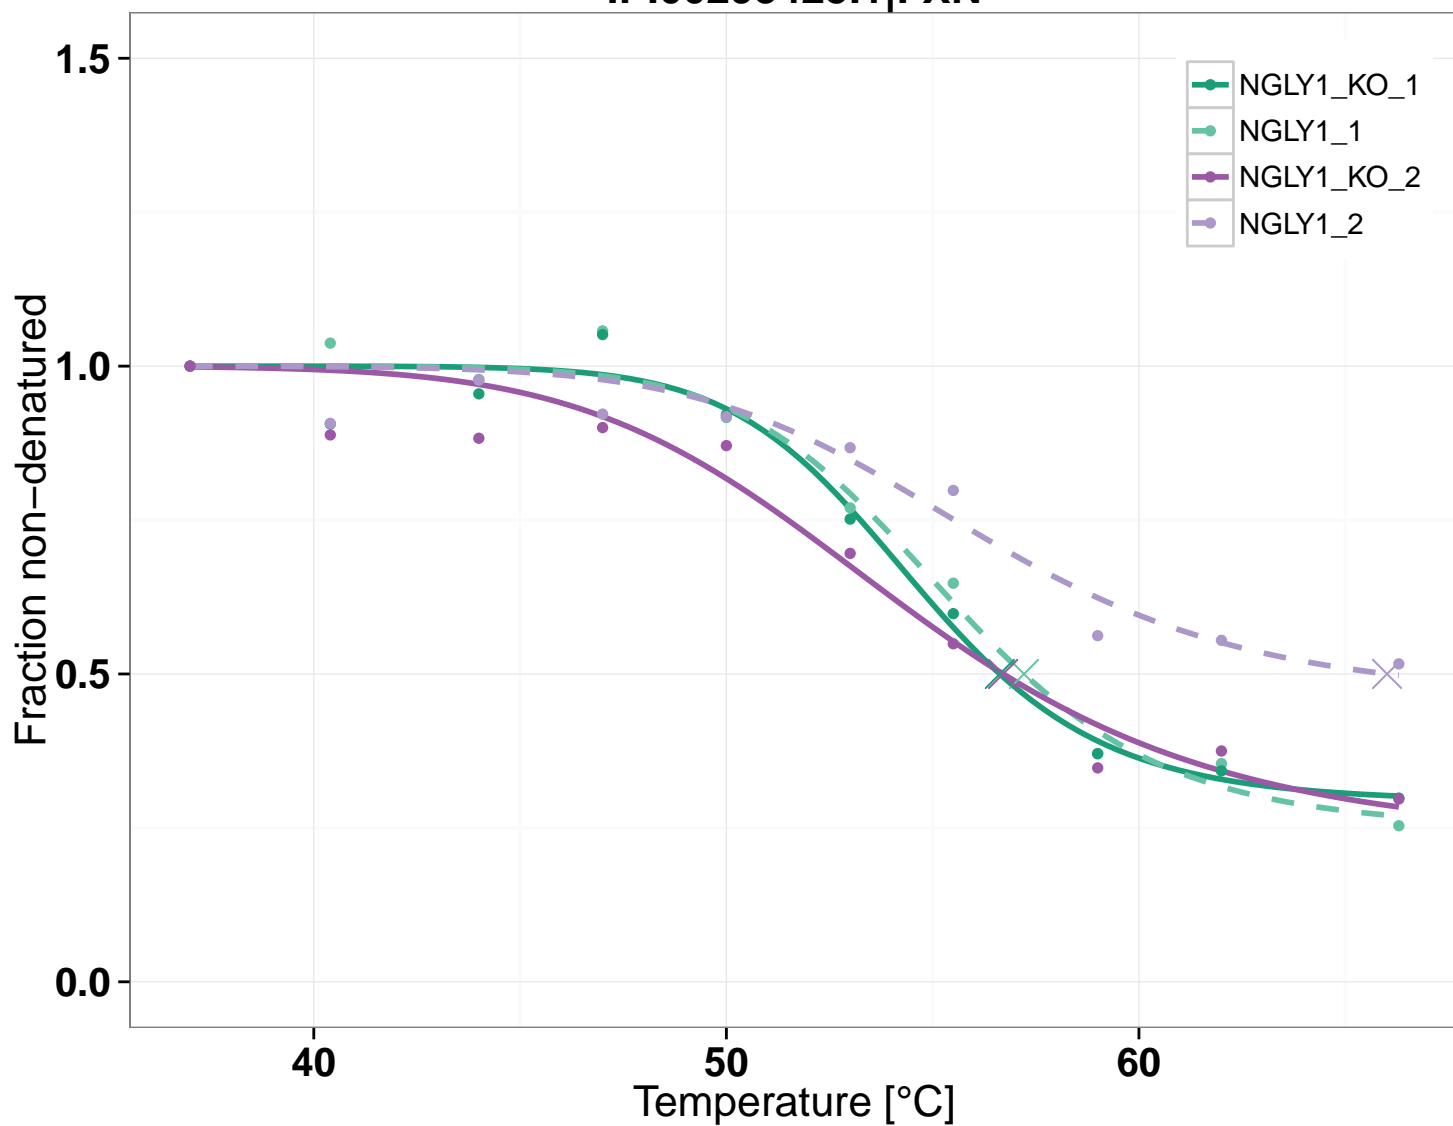

|            | meltPoint | slope  | plateau | R2   |
|------------|-----------|--------|---------|------|
| NGLY1_KO_1 | 56.63     | -0.079 | 0.29    | 0.98 |
| NGLY1_1    | 57.21     | -0.074 | 0.25    | 0.99 |
| NGLY1_KO_2 | 56.71     | -0.05  | 0.23    | 0.96 |
| NGLY1_2    | 66.01     | -0.04  | 0.46    | 0.94 |

Supplement: Supplementary file 4124 [file 1]

IPI00009633.1|CTDSP1

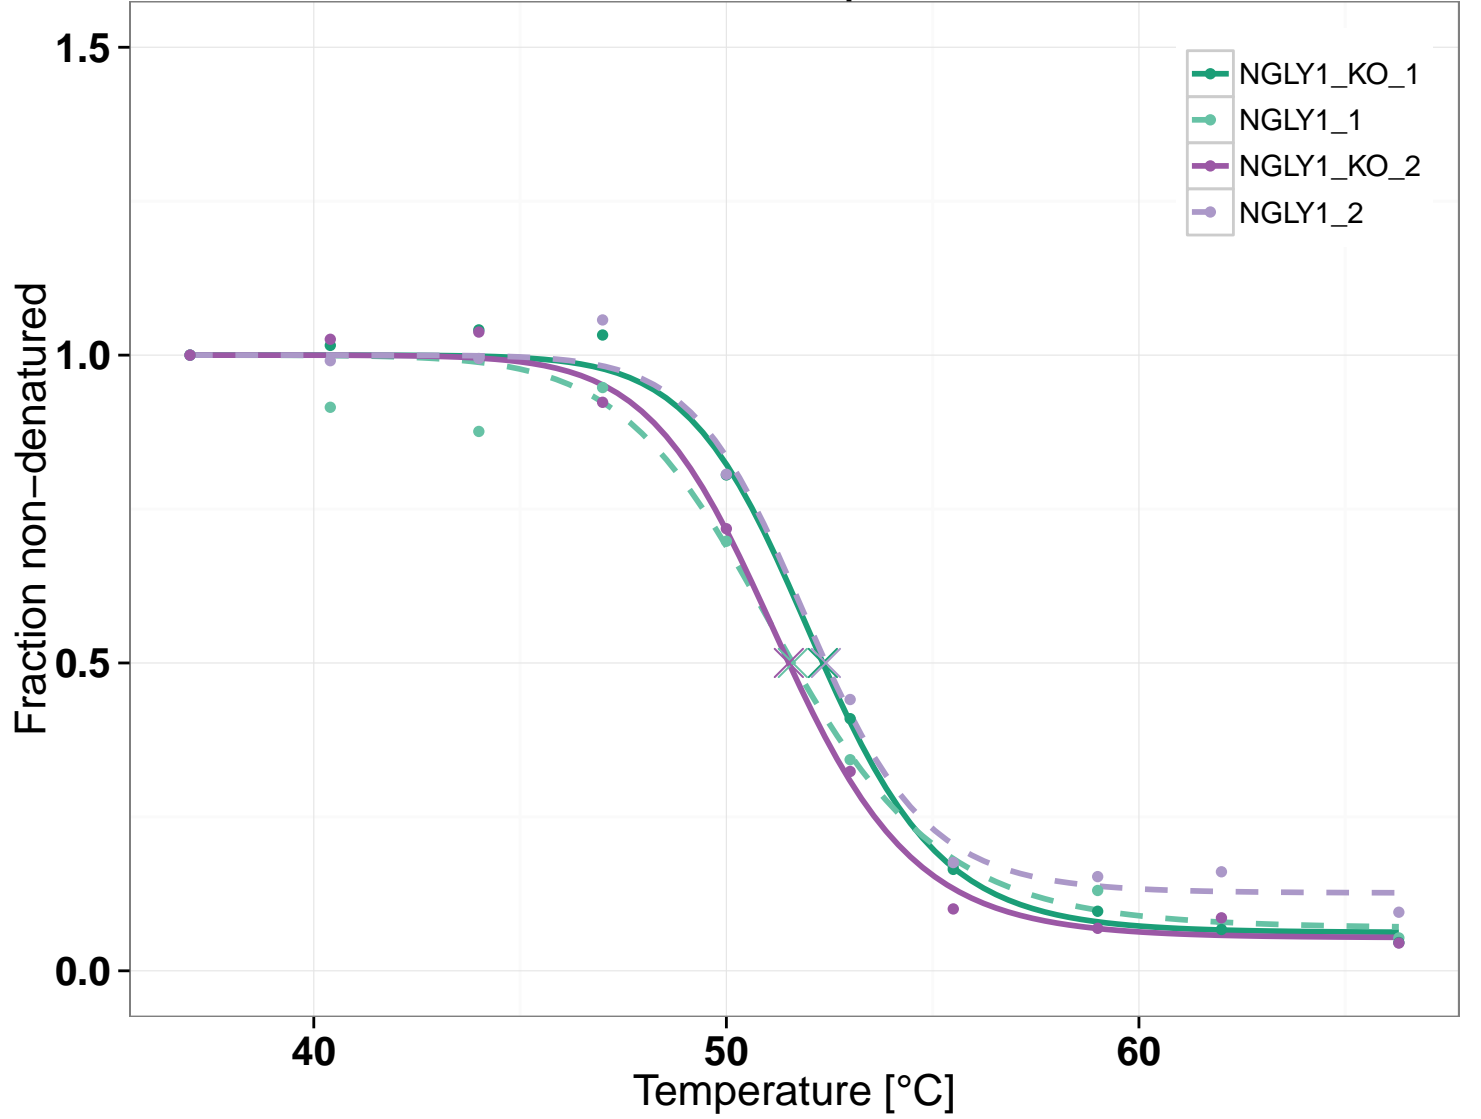

|            | meltPoint | slope | plateau | R2   |
|------------|-----------|-------|---------|------|
| NGLY1_KO_1 | 52.34     | -0.15 | 0.06    | 1    |
| NGLY1_1    | 51.61     | -0.12 | 0.07    | 0.98 |
| NGLY1_KO_2 | 51.51     | -0.15 | 0.05    | 1    |
| NGLY1_2    | 52.41     | -0.15 | 0.13    | 0.99 |

Supplement: Supplementary file 4125 [file 1]

IPI00289454.3|MUS81

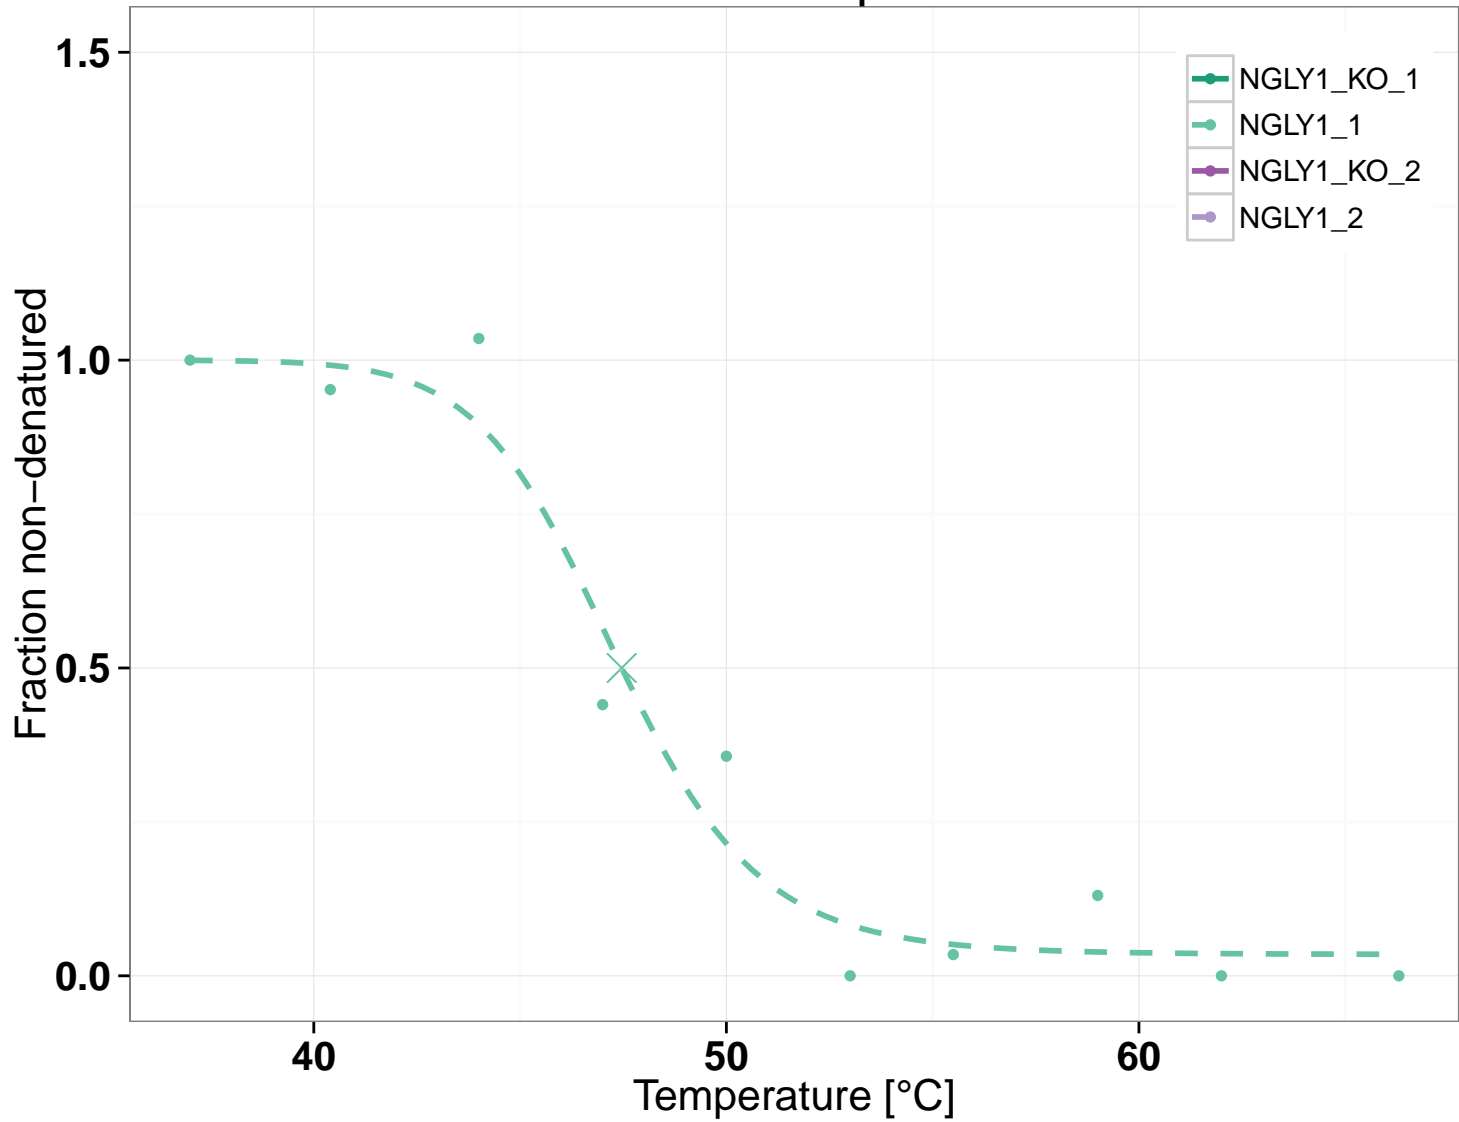

|            | meltPoint | slope | plateau | R2   |
|------------|-----------|-------|---------|------|
| NGLY1_KO_1 | -         | -     | -       | -    |
| NGLY1_1    | 47.46     | -0.14 | 0.03    | 0.96 |
| NGLY1_KO_2 | -         | -     | -       | -    |
| NGLY1_2    | -         | -     | -       | -    |

Supplement: Supplementary file 4126 [file 1]

IPI00073602.1|EXOSC6

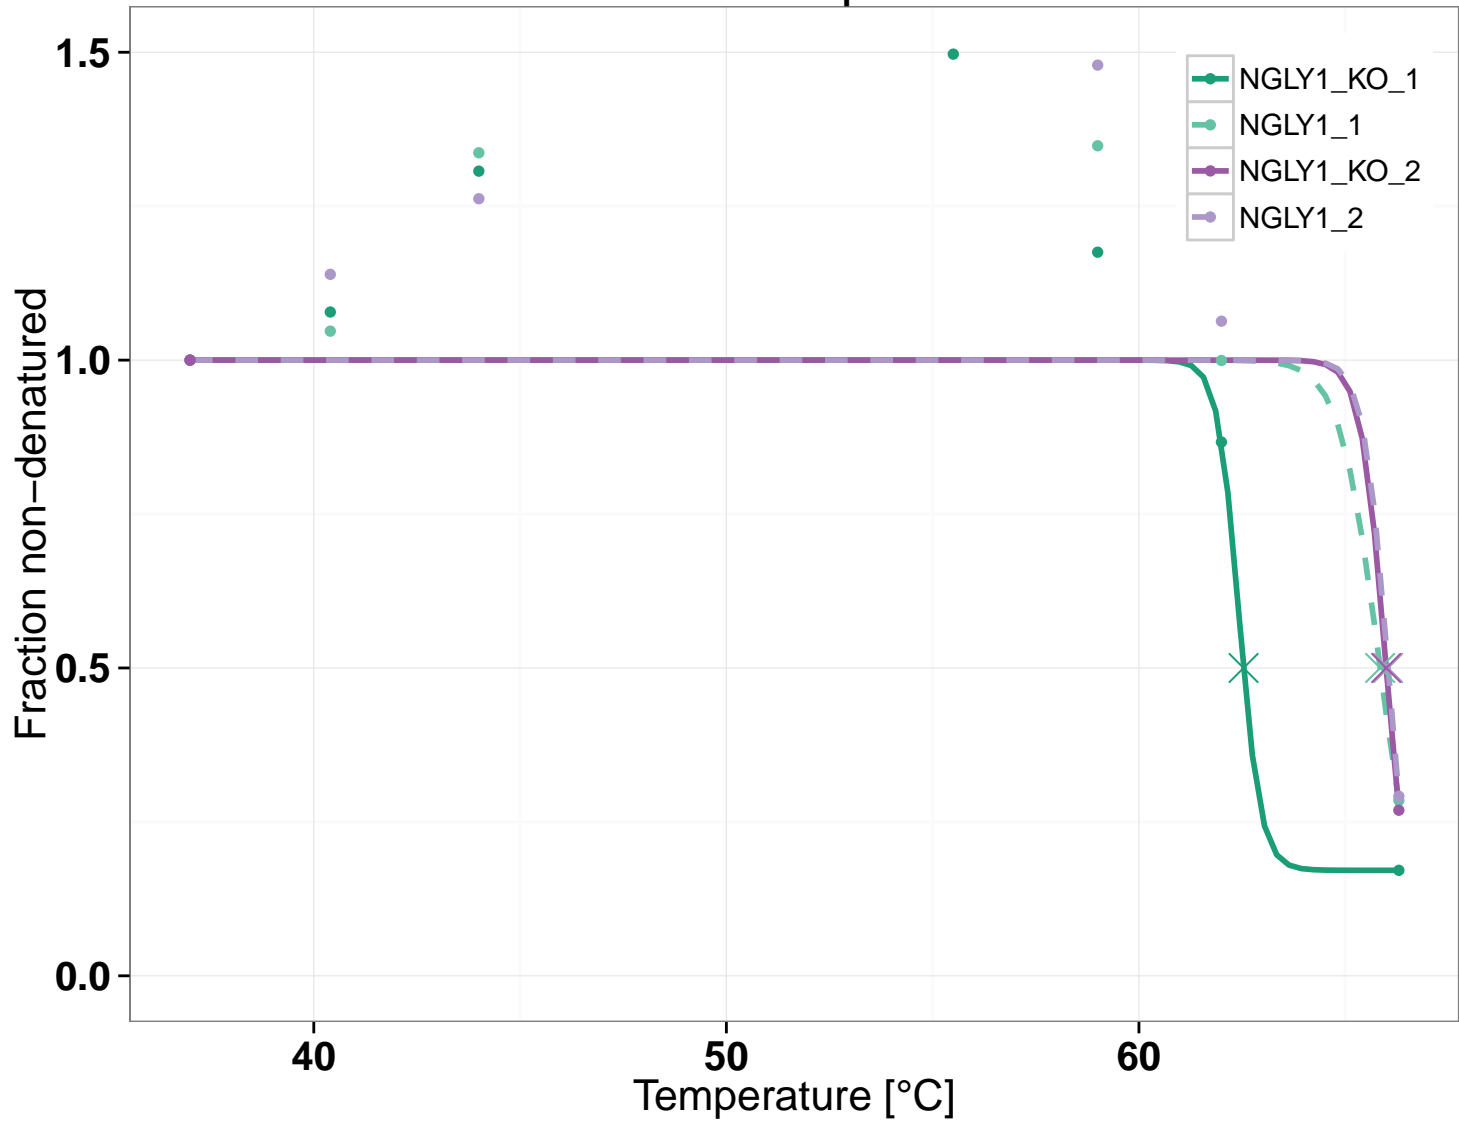

|            | meltPoint | slope | plateau | R2    |
|------------|-----------|-------|---------|-------|
| NGLY1_KO_1 | 62.54     | -0.8  | 0.17    | 0.18  |
| NGLY1_1    | 65.85     | -0.51 | 0       | -0.01 |
| NGLY1_KO_2 | 65.99     | -0.82 | 0       | -0.87 |
| NGLY1_2    | 66.04     | -0.85 | 0       | -0.1  |

Supplement: Supplementary file 4127 [file 1]

IPI00024523.2|DNAJB6

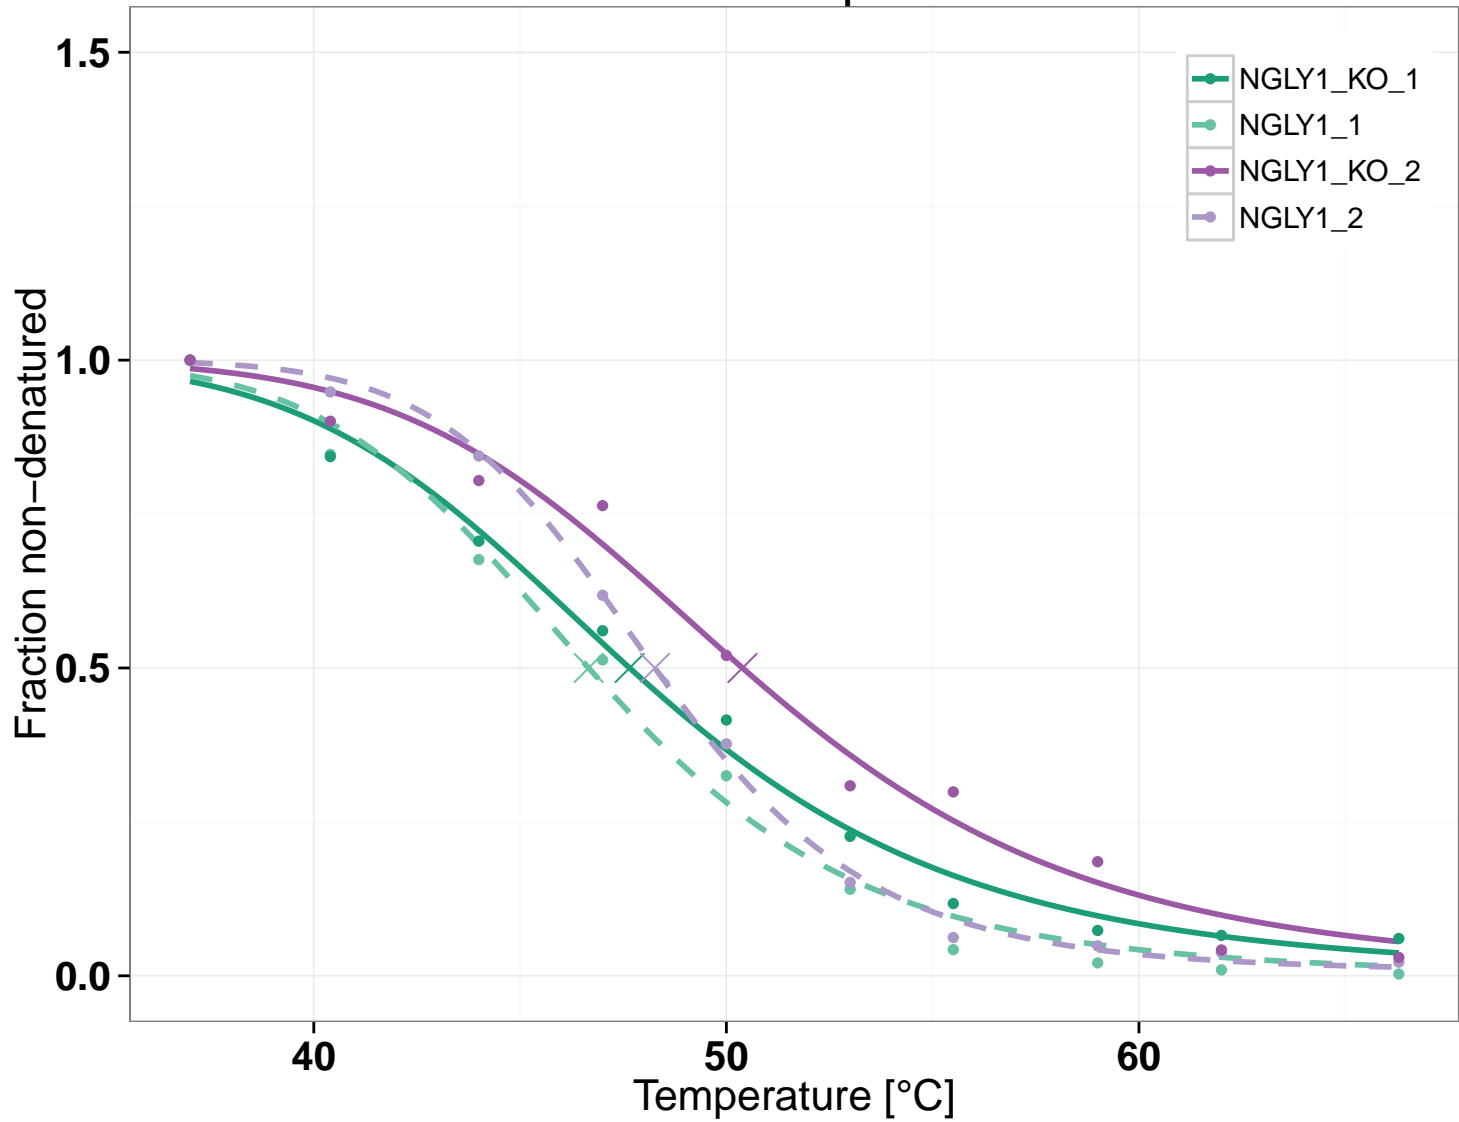

|            | meltPoint | slope  | plateau | R2   |
|------------|-----------|--------|---------|------|
| NGLY1_KO_1 | 47.65     | -0.063 | 0       | 0.99 |
| NGLY1_1    | 46.66     | -0.077 | 0       | 0.99 |
| NGLY1_KO_2 | 50.39     | -0.06  | 0       | 0.98 |
| NGLY1_2    | 48.27     | -0.094 | 0.01    | 1    |

Supplement: Supplementary file 4128 [file 1]

IPI00748472.2|KIAA0196

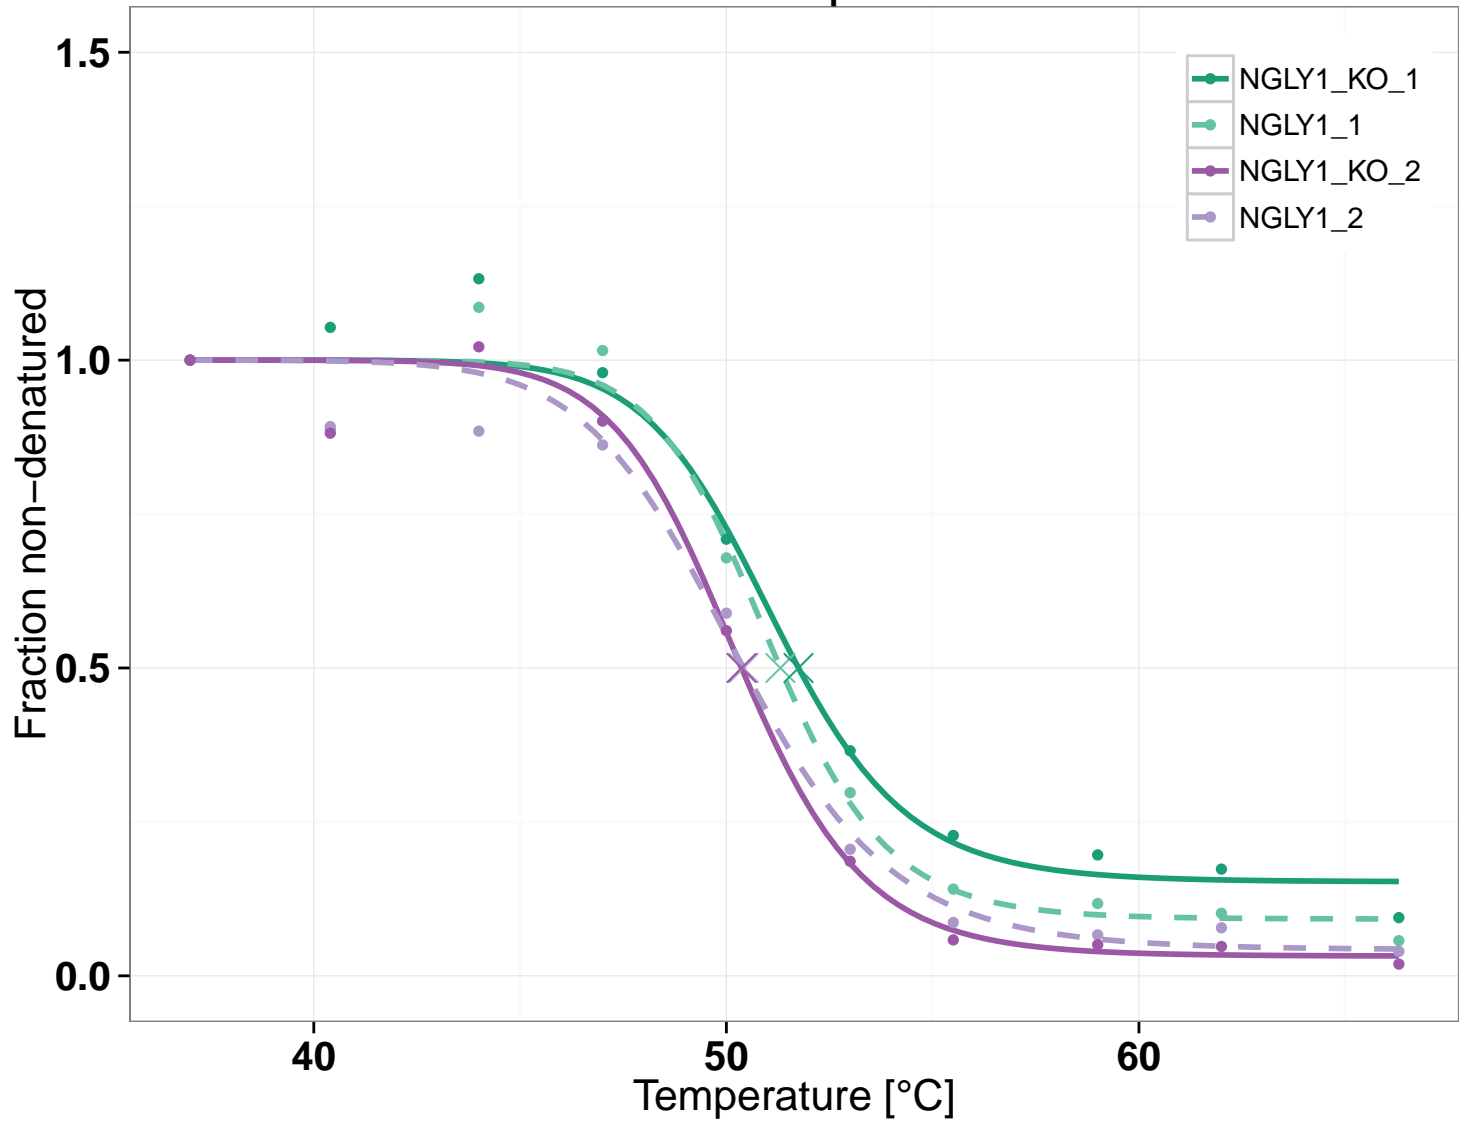

|            | meltPoint | slope | plateau | R2   |
|------------|-----------|-------|---------|------|
| NGLY1_KO_1 | 51.75     | -0.13 | 0.15    | 0.98 |
| NGLY1_1    | 51.31     | -0.16 | 0.09    | 0.98 |
| NGLY1_KO_2 | 50.37     | -0.16 | 0.03    | 0.99 |
| NGLY1_2    | 50.42     | -0.13 | 0.04    | 0.98 |

Supplement: Supplementary file 4129 [file 1]

IPI00016639.7|PRKCI

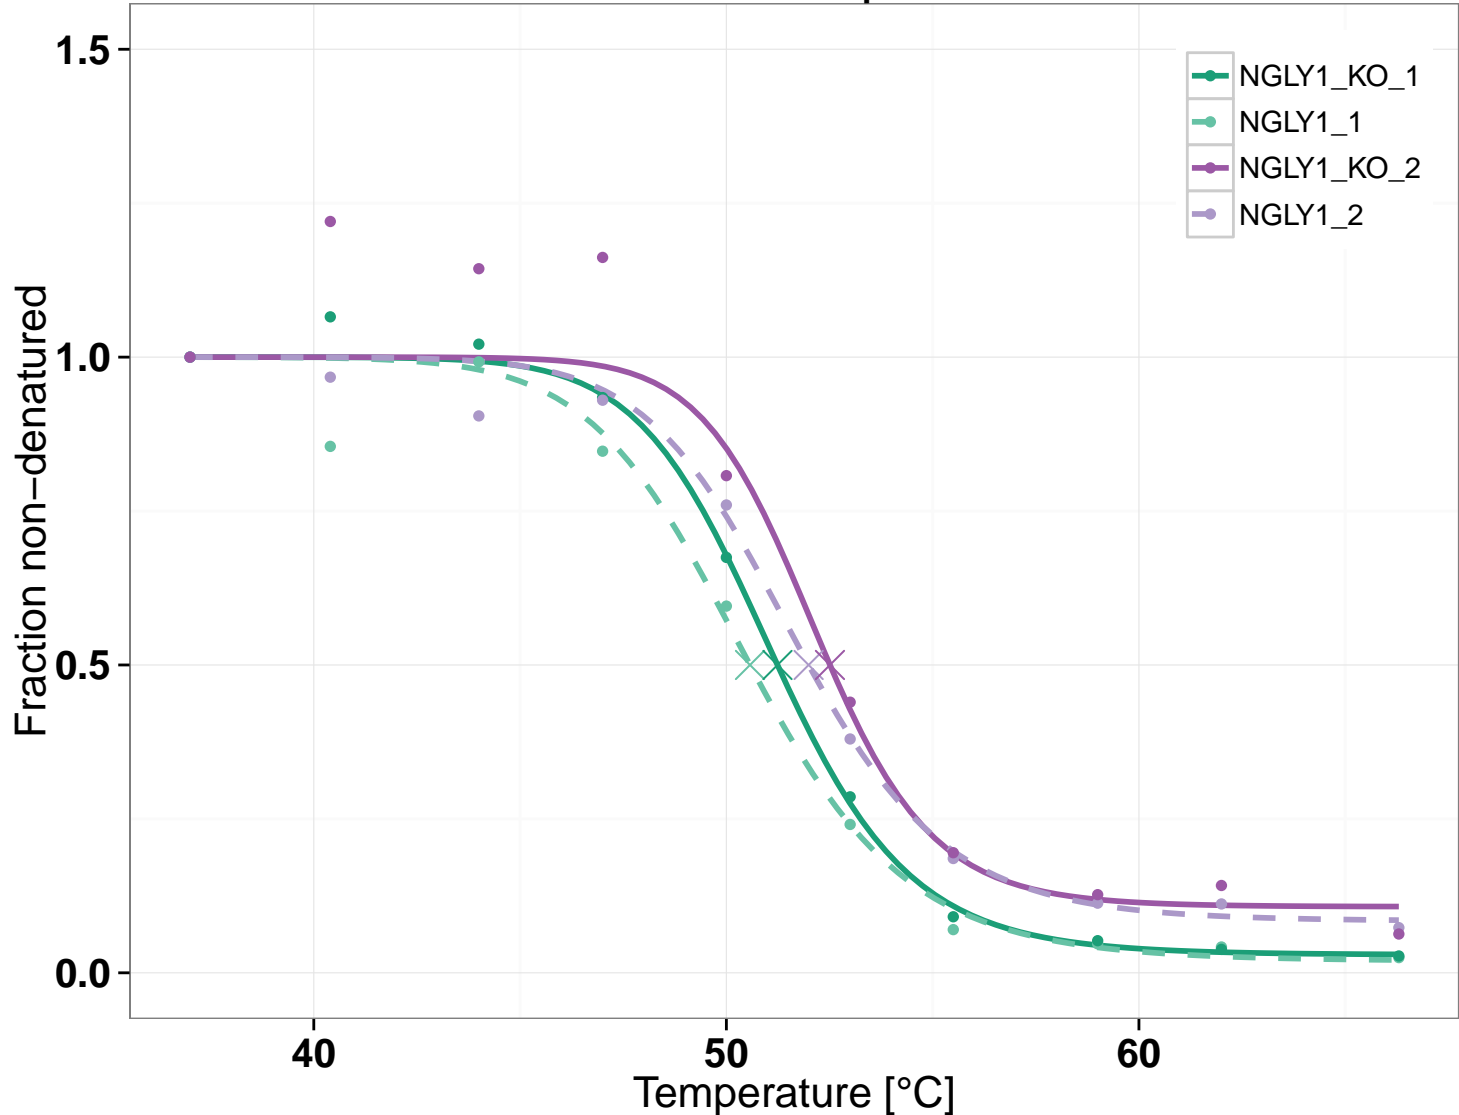

|            | meltPoint | slope | plateau | R2   |
|------------|-----------|-------|---------|------|
| NGLY1_KO_1 | 51.24     | -0.15 | 0.03    | 1    |
| NGLY1_1    | 50.57     | -0.13 | 0.02    | 0.99 |
| NGLY1_KO_2 | 52.51     | -0.16 | 0.11    | 0.95 |
| NGLY1_2    | 51.99     | -0.13 | 0.08    | 0.99 |

Supplement: Supplementary file 4130 [file 1]

IPI00094740.1|RNF31

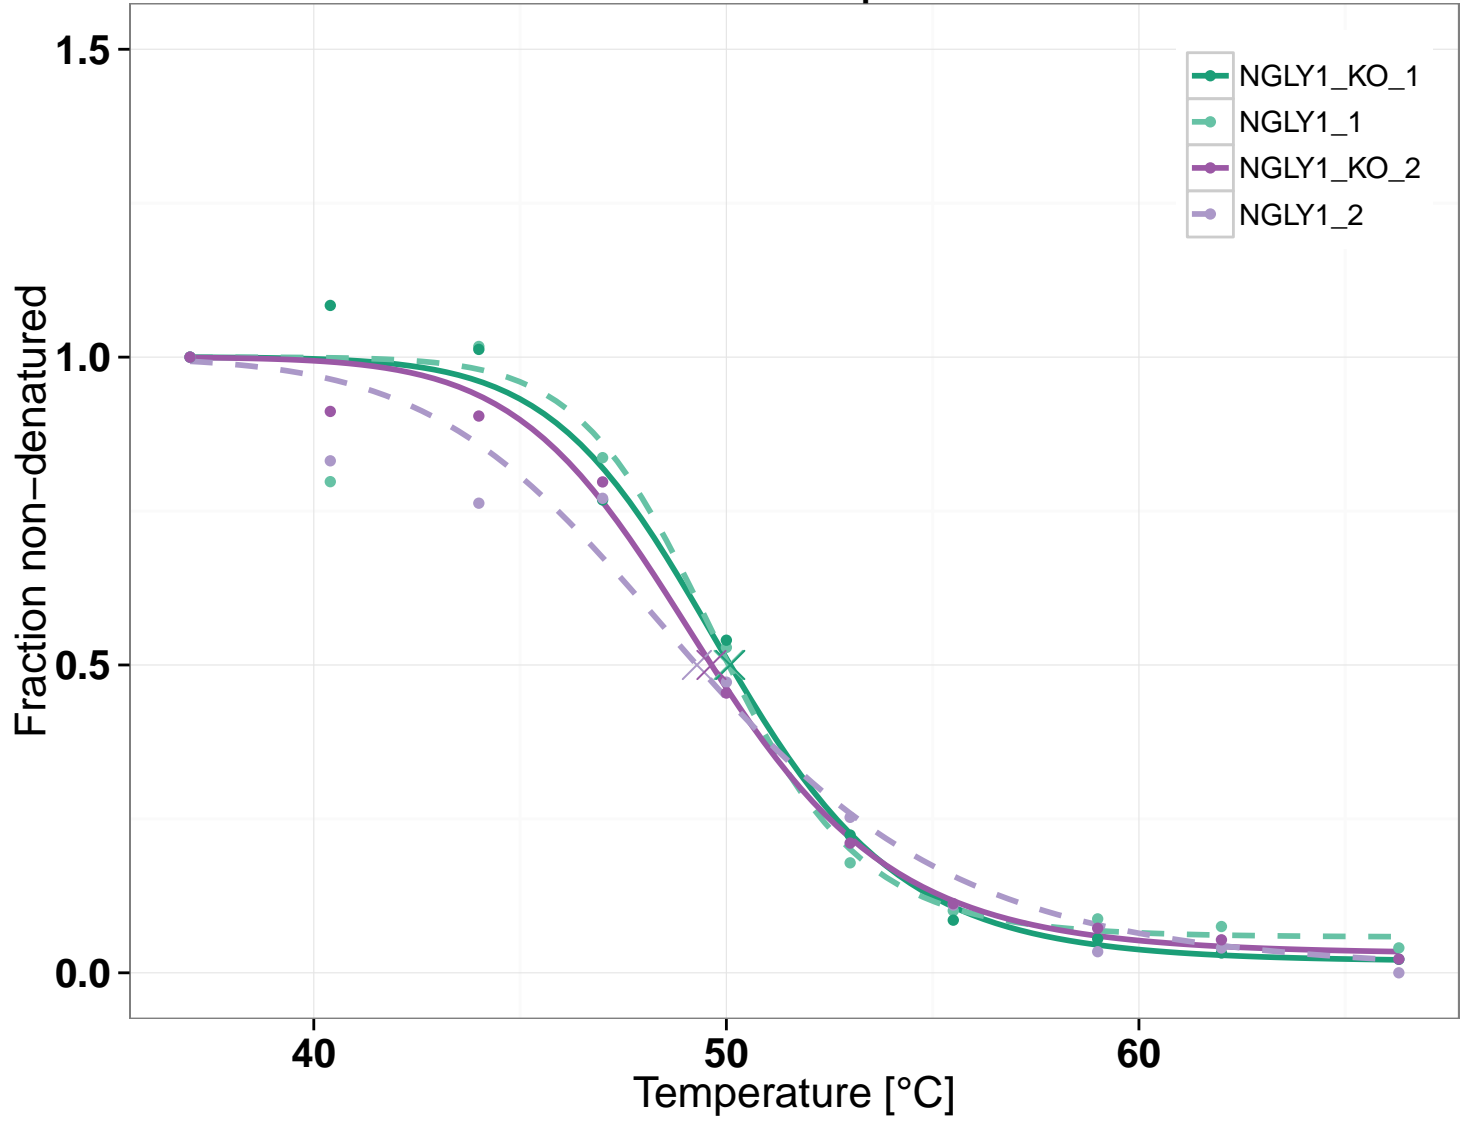

|            | meltPoint | slope  | plateau | R2   |
|------------|-----------|--------|---------|------|
| NGLY1_KO_1 | 50.09     | -0.12  | 0.02    | 0.99 |
| NGLY1_1    | 50.06     | -0.14  | 0.06    | 0.97 |
| NGLY1_KO_2 | 49.64     | -0.11  | 0.03    | 0.99 |
| NGLY1_2    | 49.29     | -0.077 | 0       | 0.97 |

Supplement: Supplementary file 4131 [file 1]

IPI00006026.1|FTSJ2

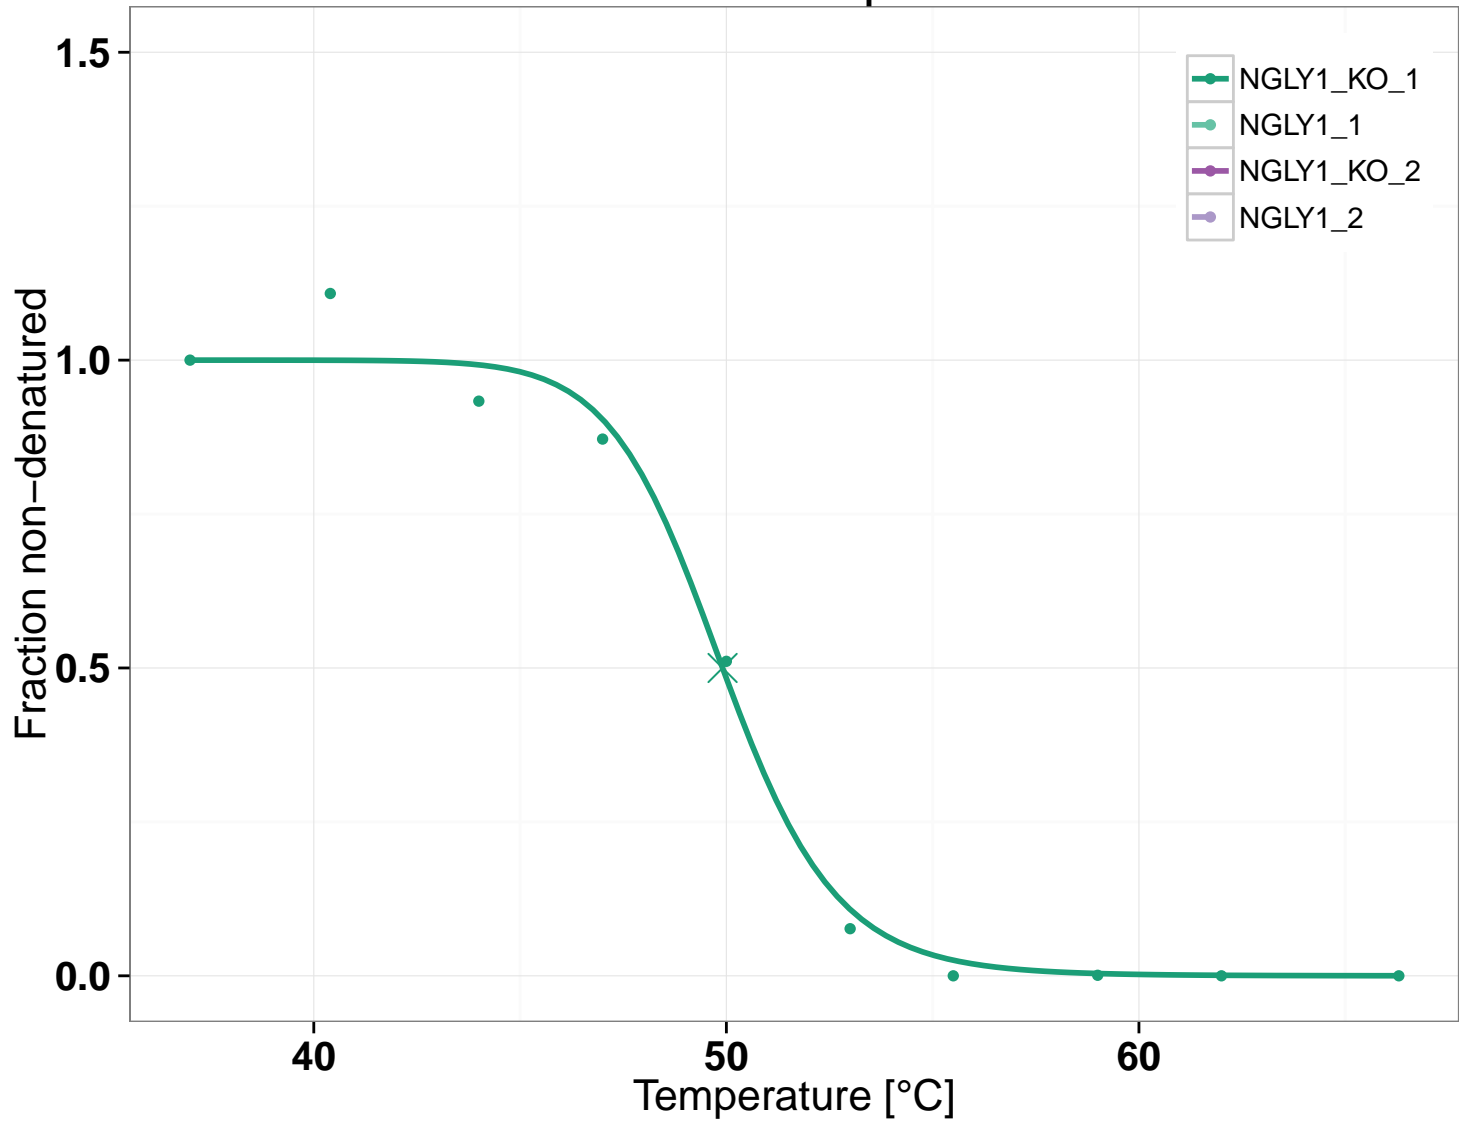

|            | meltPoint | slope | plateau | R2   |
|------------|-----------|-------|---------|------|
| NGLY1_KO_1 | 49.91     | -0.18 | 0       | 0.99 |
| NGLY1_1    | -         | -     | -       | -    |
| NGLY1_KO_2 | -         | -     | -       | -    |
| NGLY1_2    | -         | -     | -       | -    |

Supplement: Supplementary file 4132 [file 1]

IPI00010333.1|MDK

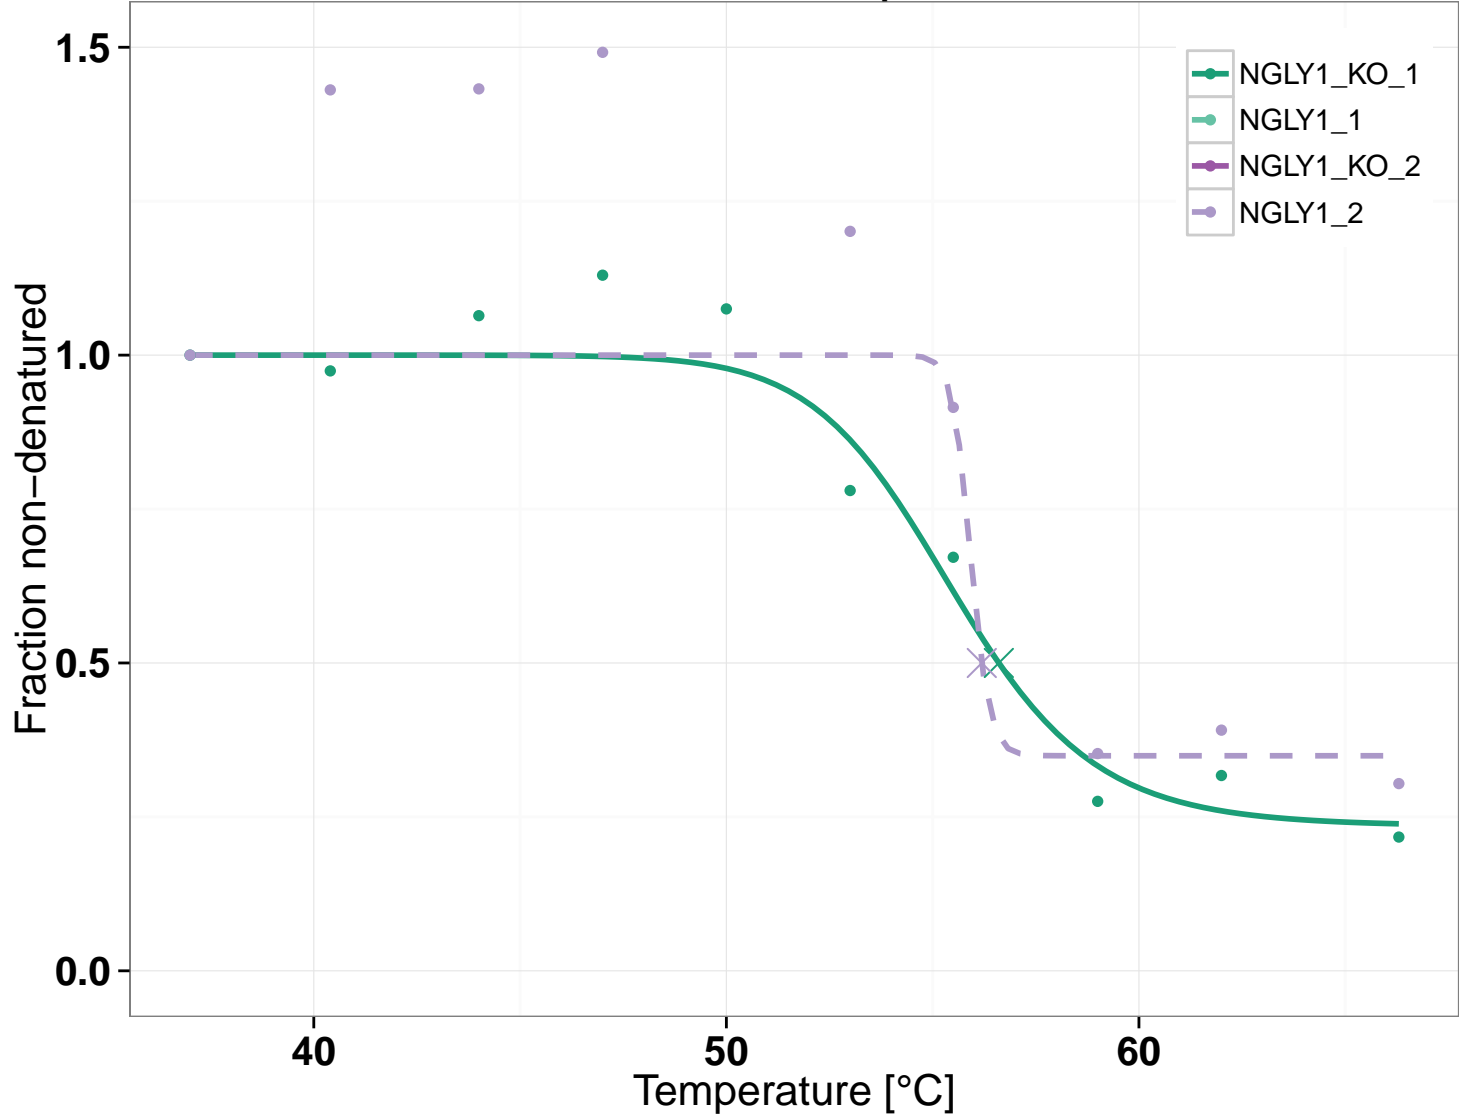

|            | meltPoint | slope | plateau | R2   |
|------------|-----------|-------|---------|------|
| NGLY1_KO_1 | 56.6      | -0.11 | 0.23    | 0.96 |
| NGLY1_1    | -         | -     | -       | -    |
| NGLY1_KO_2 | -         | -     | -       | -    |
| NGLY1_2    | 56.19     | -0.73 | 0.35    | 0.58 |

Supplement: Supplementary file 4133 [file 1]

IPI00335437.7|ANKZF1

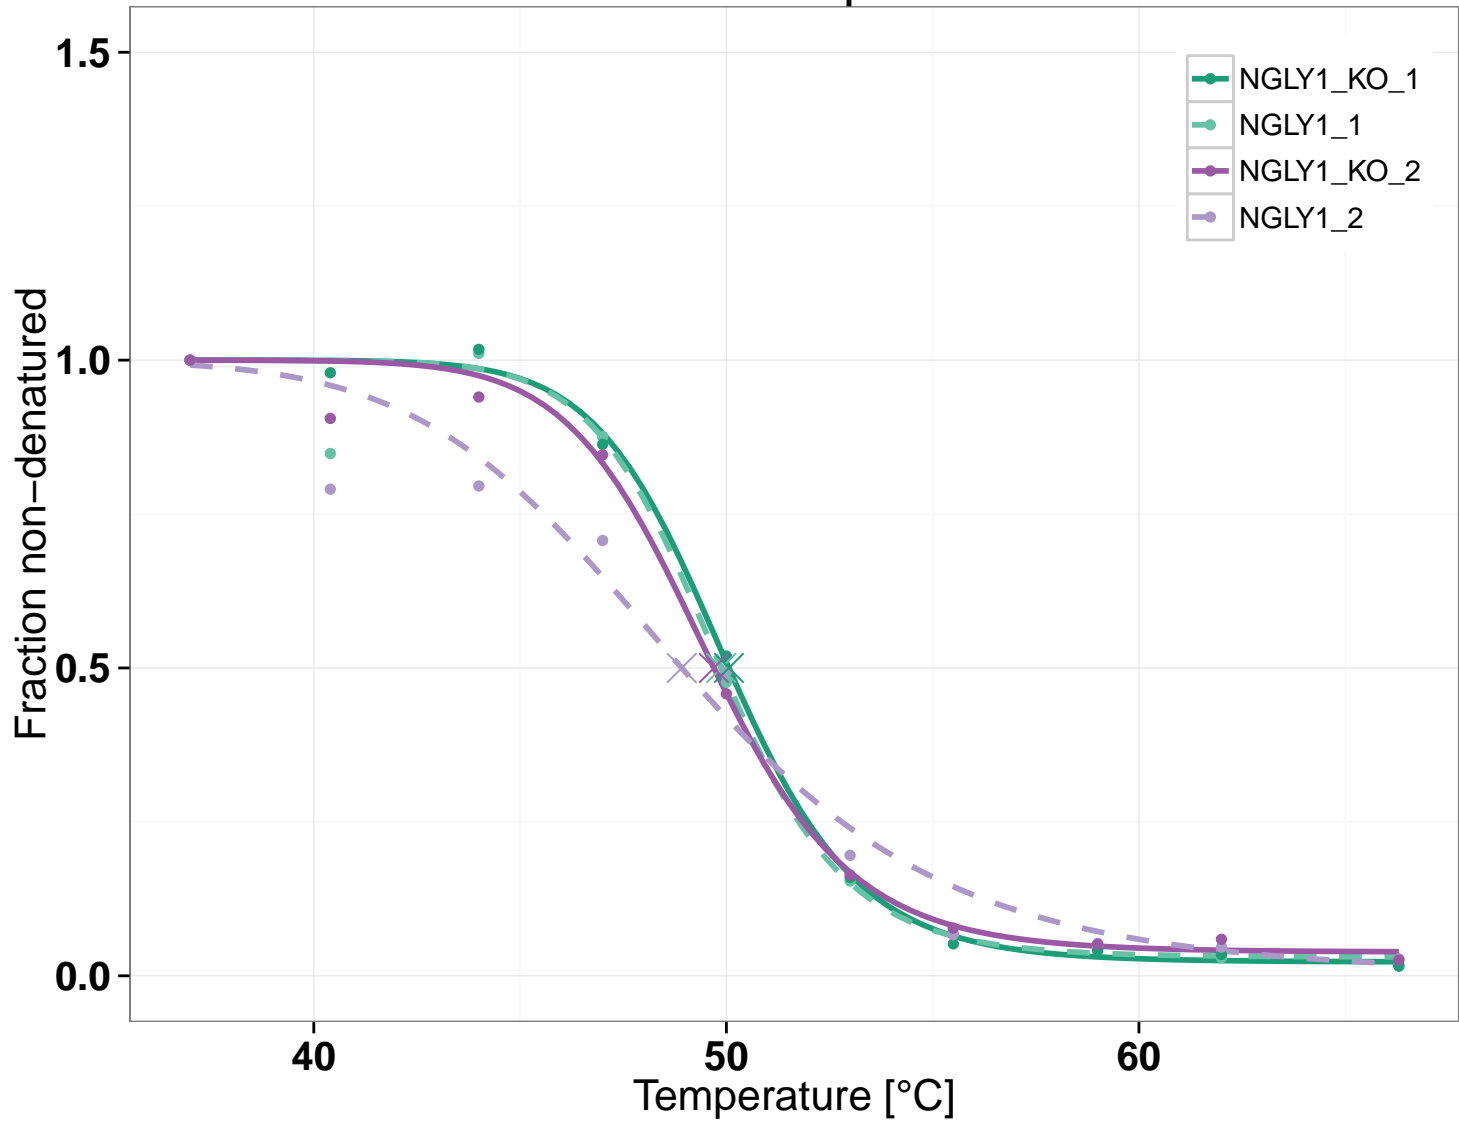

|            | meltPoint | slope  | plateau | R2   |
|------------|-----------|--------|---------|------|
| NGLY1_KO_1 | 50.06     | -0.15  | 0.02    | 1    |
| NGLY1_1    | 49.88     | -0.16  | 0.03    | 0.99 |
| NGLY1_KO_2 | 49.7      | -0.14  | 0.04    | 0.99 |
| NGLY1_2    | 48.92     | -0.078 | 0       | 0.96 |

Supplement: Supplementary file 4134 [file 1]

# IPI00783166.3|FAM171A2

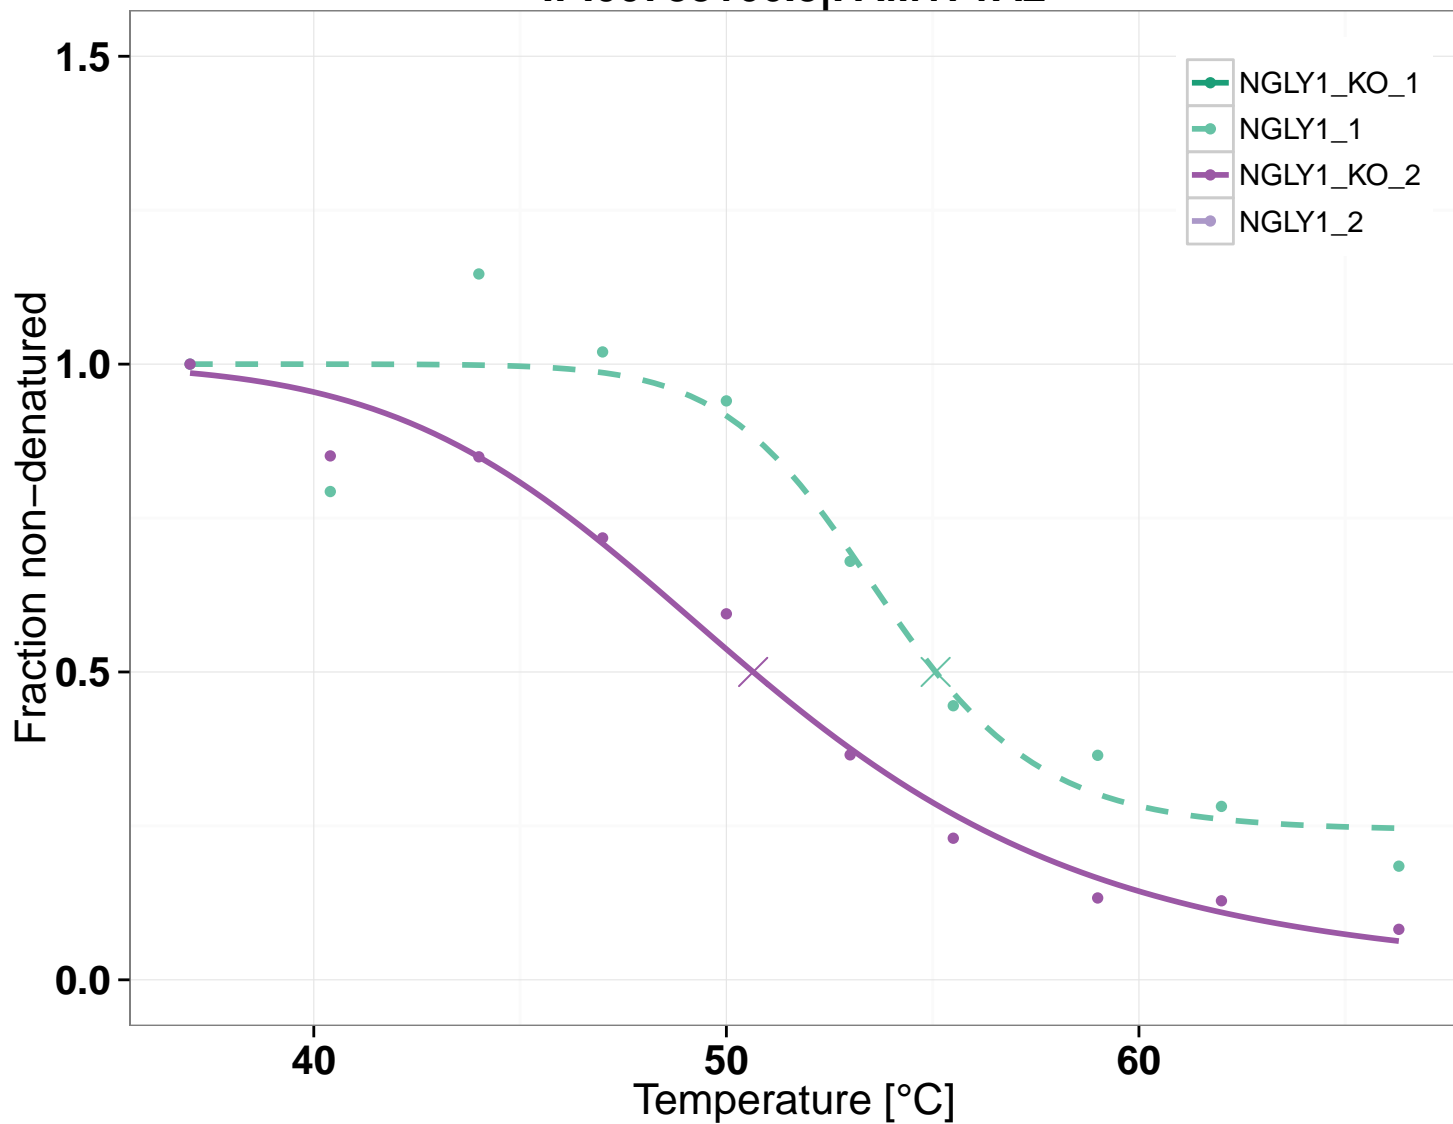

|            | meltPoint | slope  | plateau | R2   |
|------------|-----------|--------|---------|------|
| NGLY1_KO_1 | —         | —      | —       | —    |
| NGLY1_1    | 55.07     | -0.098 | 0.24    | 0.93 |
| NGLY1_KO_2 | 50.65     | -0.058 | 0       | 0.98 |
| NGLY1_2    | —         | —      | —       | —    |

Supplement: Supplementary file 4135 [file 1]

# IPI00005914.4|SHPK

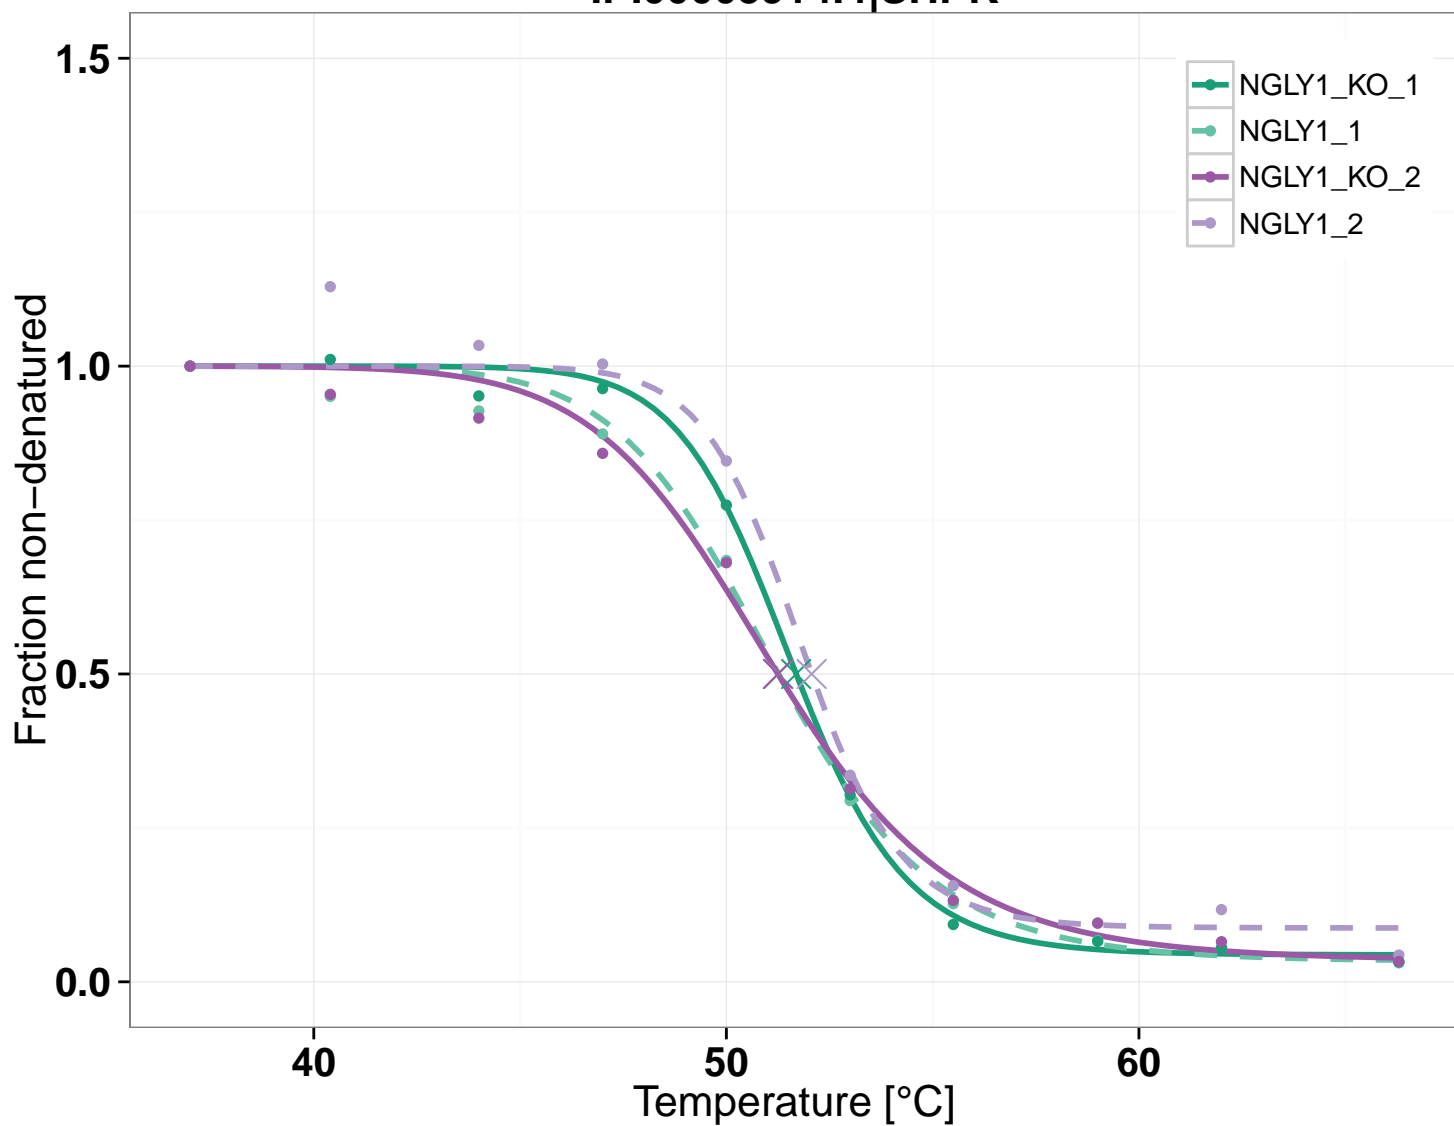

|            | meltPoint | slope | plateau | R2   |
|------------|-----------|-------|---------|------|
| NGLY1_KO_1 | 51.69     | -0.17 | 0.04    | 1    |
| NGLY1_1    | 51.26     | -0.12 | 0.03    | 1    |
| NGLY1_KO_2 | 51.25     | -0.11 | 0.03    | 0.99 |
| NGLY1_2    | 52.07     | -0.19 | 0.09    | 0.99 |

Supplement: Supplementary file 4136 [file 1]

# IPI00220150.4|IDH3G

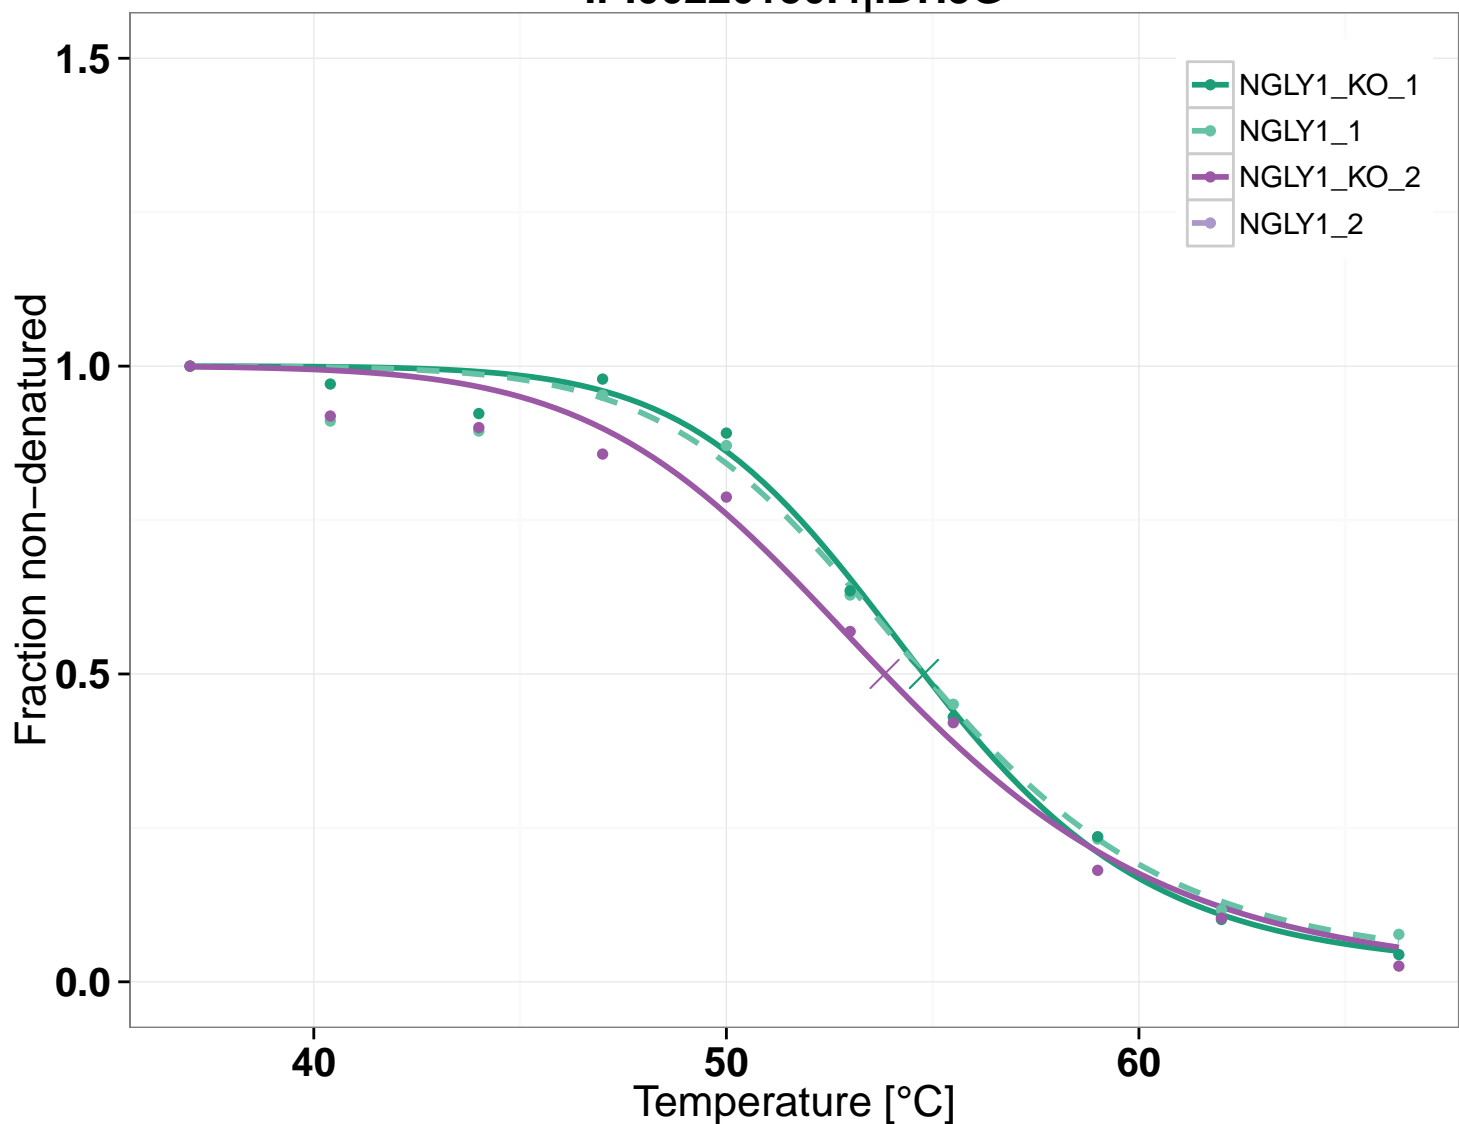

|            | meltPoint | slope  | plateau | R2   |
|------------|-----------|--------|---------|------|
| NGLY1_KO_1 | 54.79     | -0.088 | 0.02    | 0.99 |
| NGLY1_1    | 54.79     | -0.08  | 0.02    | 0.99 |
| NGLY1_KO_2 | 53.83     | -0.071 | 0       | 0.99 |
| NGLY1_2    | -         | -      | -       | -    |

Supplement: Supplementary file 4137 [file 1]

IPI00099871.1|MRPL40

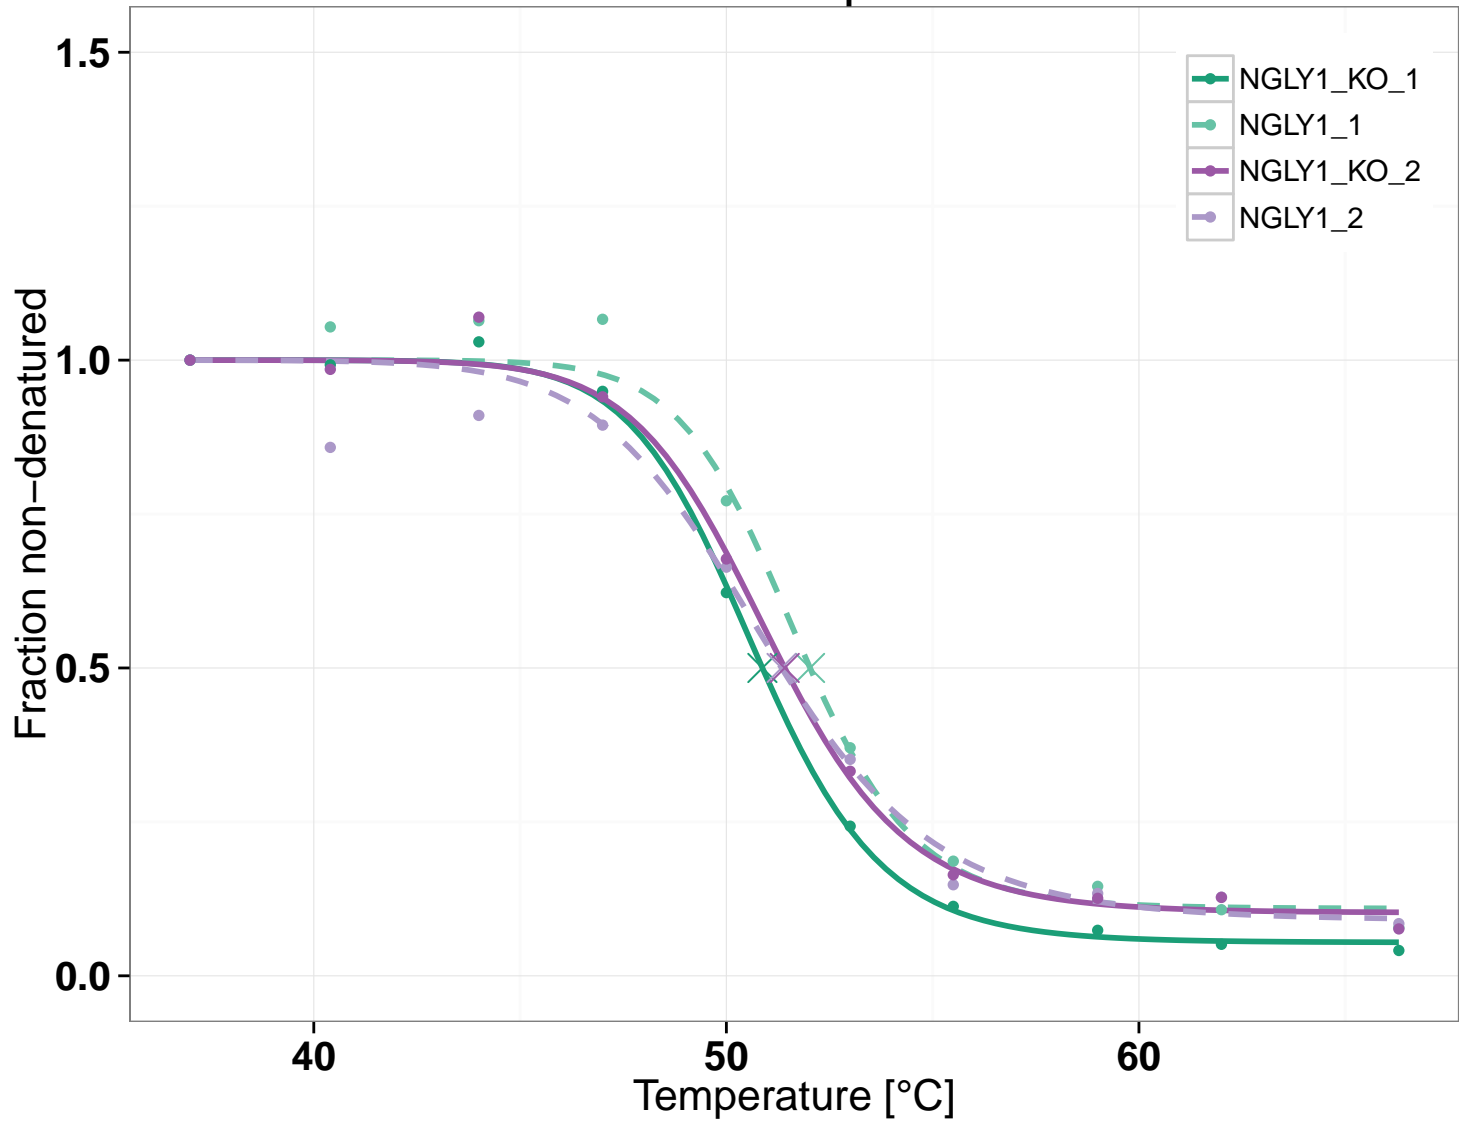

|            | meltPoint | slope | plateau | R2   |
|------------|-----------|-------|---------|------|
| NGLY1_KO_1 | 50.87     | -0.15 | 0.05    | 1    |
| NGLY1_1    | 52.03     | -0.16 | 0.11    | 0.99 |
| NGLY1_KO_2 | 51.41     | -0.13 | 0.1     | 1    |
| NGLY1_2    | 51.34     | -0.11 | 0.09    | 0.98 |

Supplement: Supplementary file 4138 [file 1]

# IPI00220578.3|GNAI3

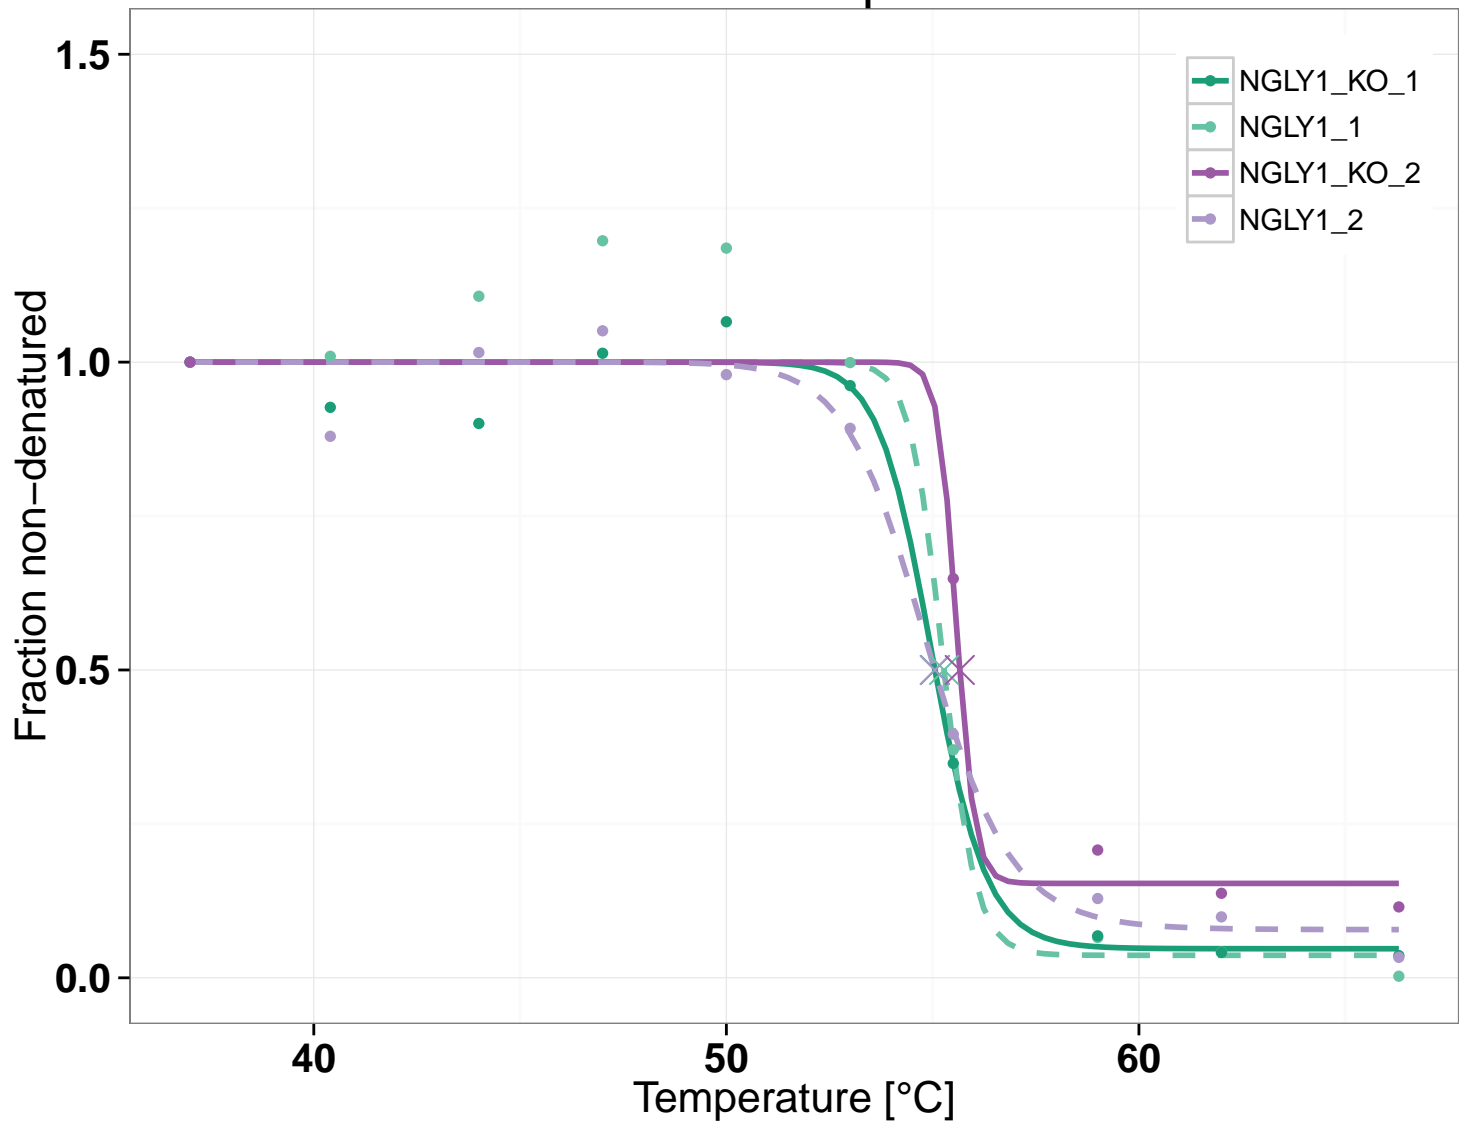

|            | meltPoint | slope | plateau | R2   |
|------------|-----------|-------|---------|------|
| NGLY1_KO_1 | 55.06     | −0.36 | 0.05    | 0.99 |
| NGLY1_1    | 55.28     | −0.61 | 0.04    | 0.96 |
| NGLY1_KO_2 | 55.66     | −0.95 | 0.15    | 0.31 |
| NGLY1_2    | 55.05     | −0.23 | 0.08    | 0.99 |

Supplement: Supplementary file 4139 [file 1]

# IPI00651642.1|CBX2

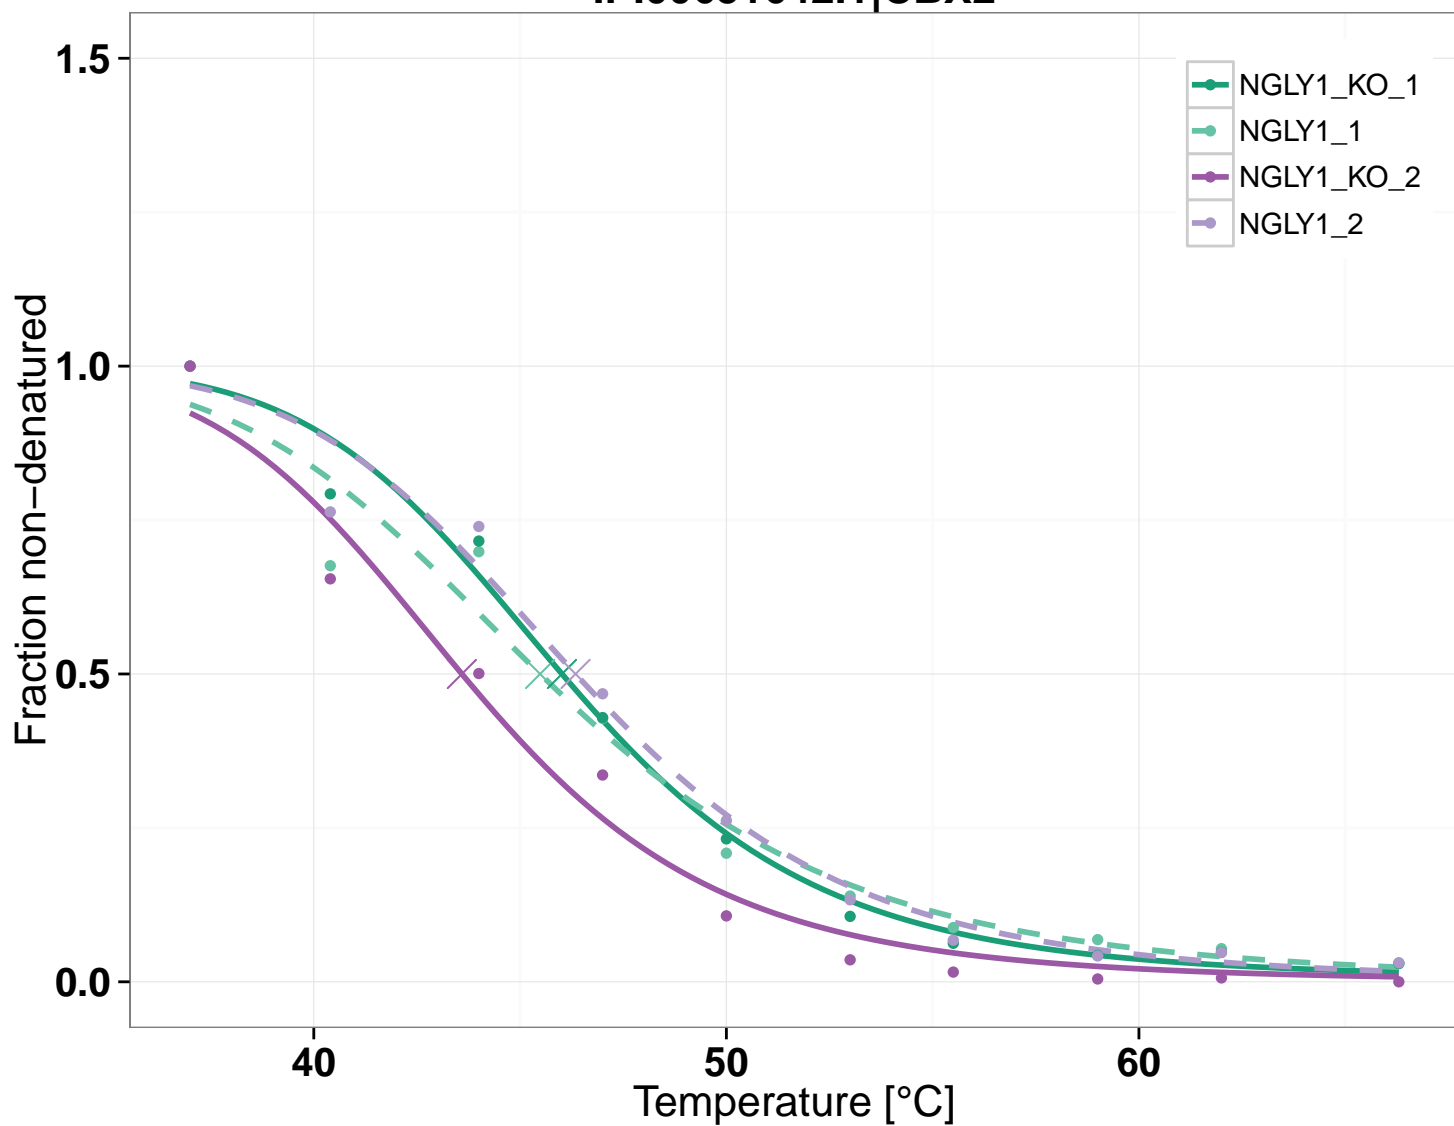

|            | meltPoint | slope  | plateau | R2   |
|------------|-----------|--------|---------|------|
| NGLY1_KO_1 | 46.02     | -0.08  | 0       | 0.99 |
| NGLY1_1    | 45.49     | -0.067 | 0       | 0.96 |
| NGLY1_KO_2 | 43.59     | -0.082 | 0       | 0.98 |
| NGLY1_2    | 46.34     | -0.075 | 0       | 0.98 |

Supplement: Supplementary file 4140 [file 1]

IPI00647226.1|MGC57346

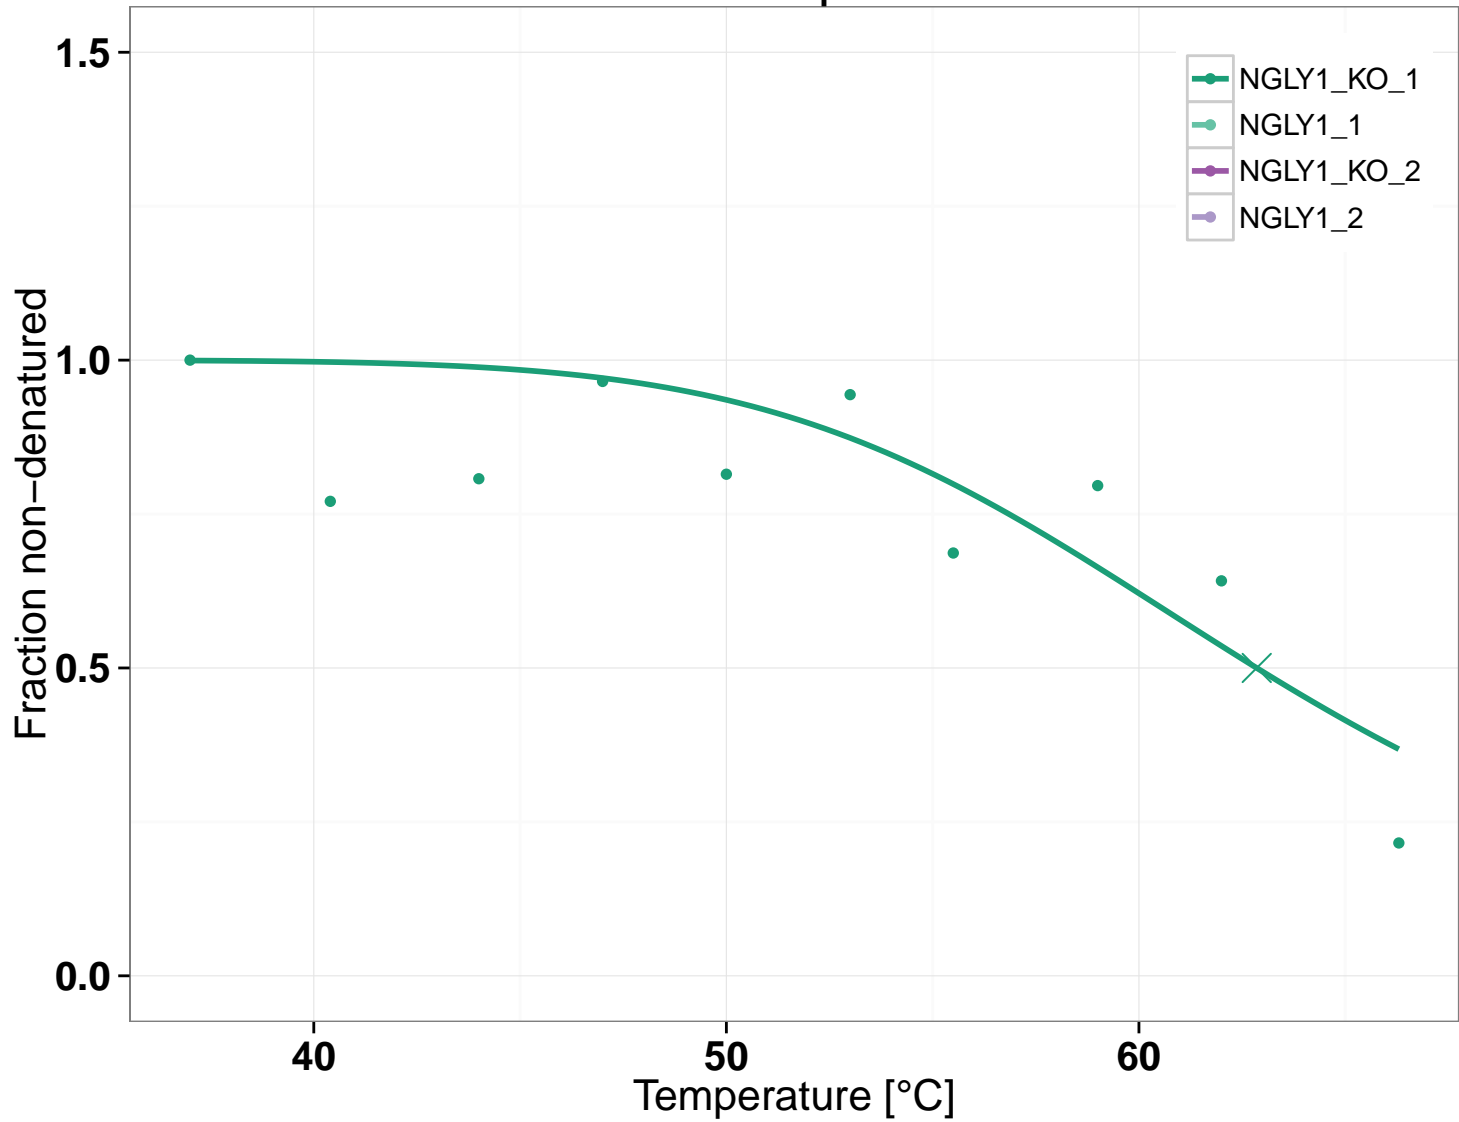

|            | meltPoint | slope  | plateau | R2   |
|------------|-----------|--------|---------|------|
| NGLY1_KO_1 | 62.86     | -0.043 | 0       | 0.63 |
| NGLY1_1    | -         | -      | -       | -    |
| NGLY1_KO_2 | -         | -      | -       | -    |
| NGLY1_2    | -         | -      | -       | -    |

Supplement: Supplementary file 4141 [file 1]

# IPI00871909.1|NME7

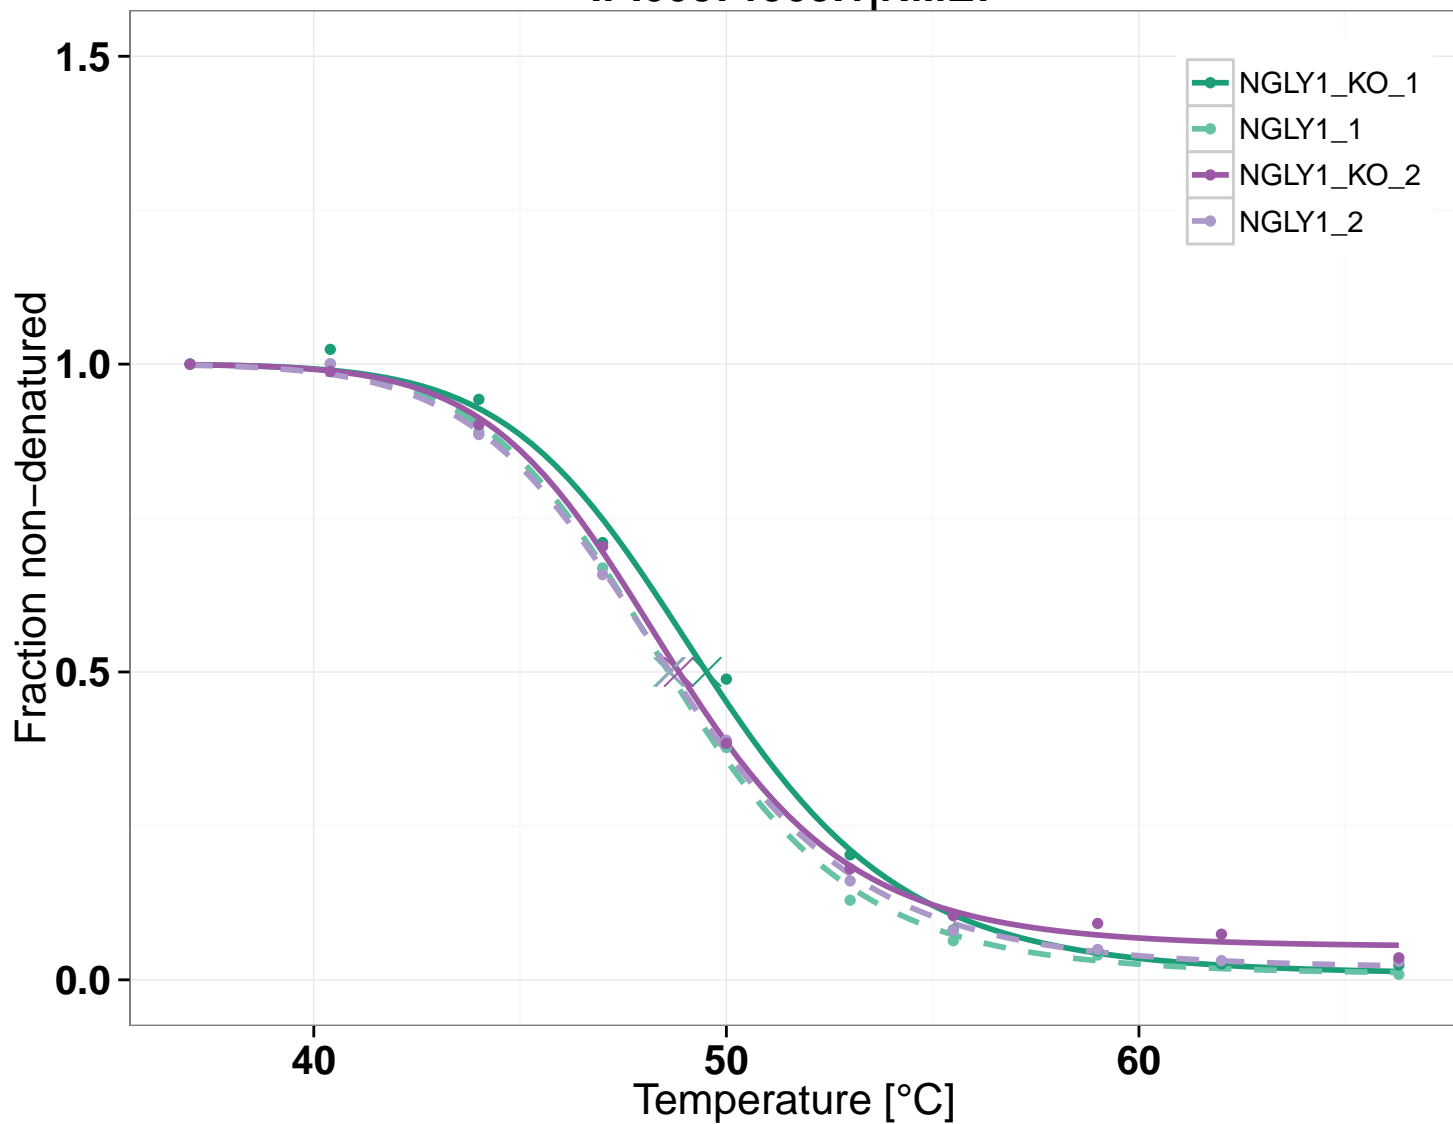

|            | meltPoint | slope | plateau | R2 |
|------------|-----------|-------|---------|----|
| NGLY1_KO_1 | 49.52     | -0.1  | 0.01    | 1  |
| NGLY1_1    | 48.6      | -0.11 | 0.01    | 1  |
| NGLY1_KO_2 | 48.85     | -0.11 | 0.05    | 1  |
| NGLY1_2    | 48.65     | -0.1  | 0.02    | 1  |

Supplement: Supplementary file 4142 [file 1]

# IPI00019385.3|SSR4

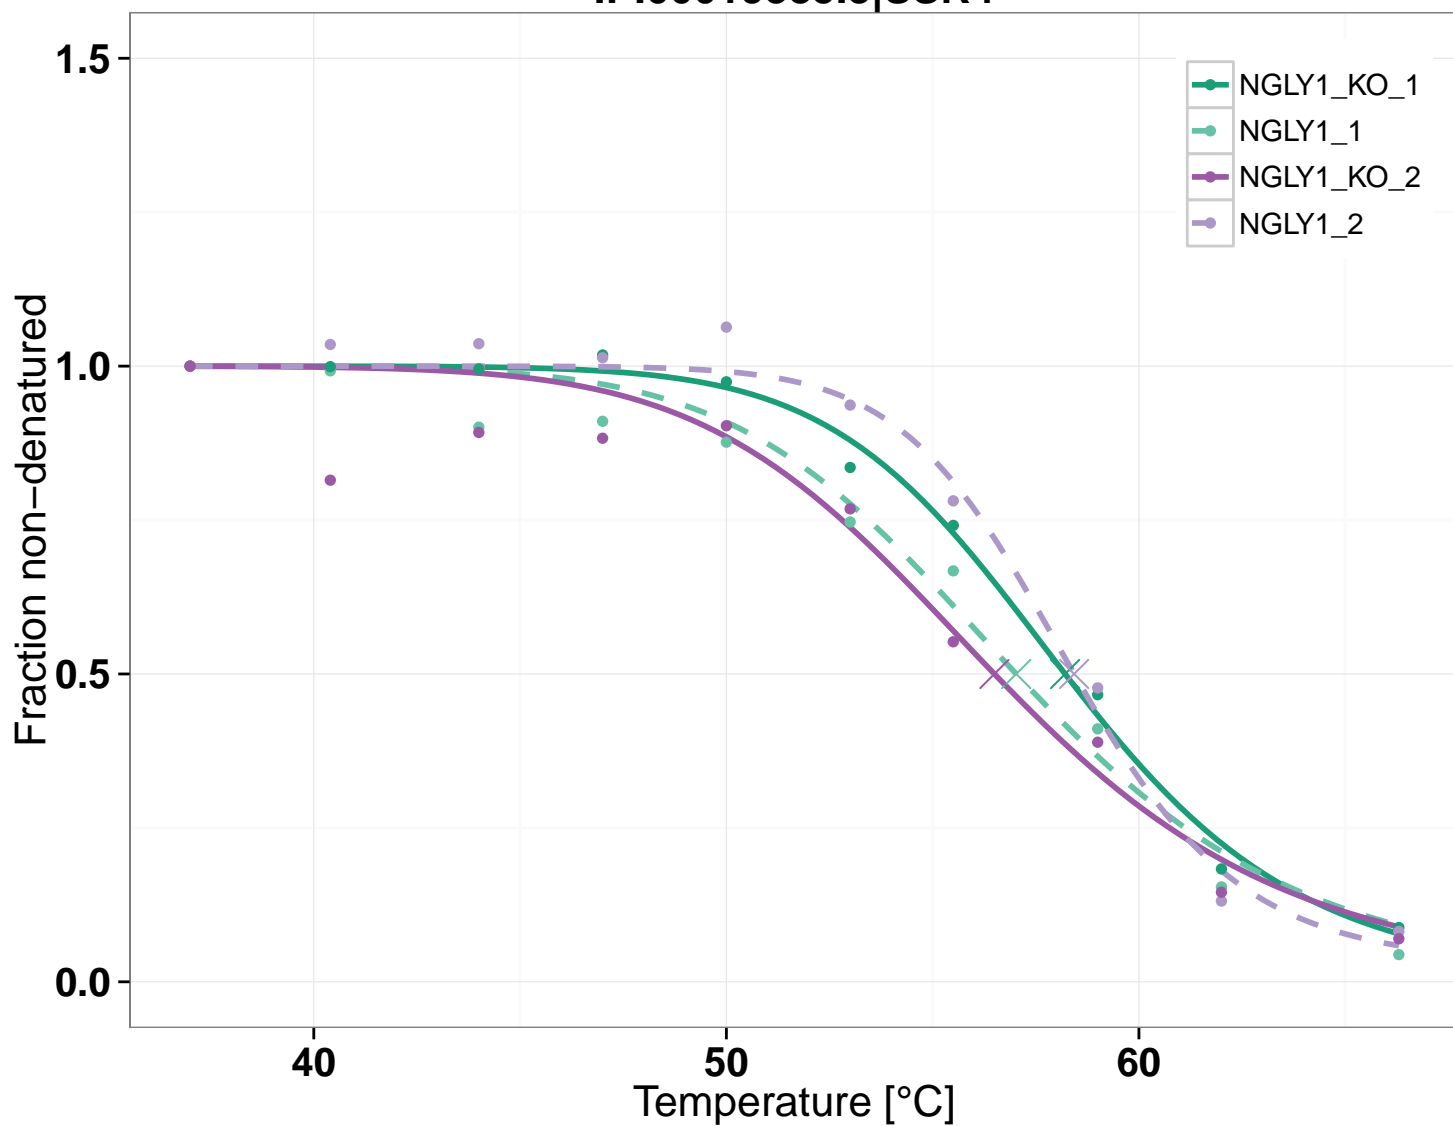

|            | meltPoint | slope  | plateau | R2   |
|------------|-----------|--------|---------|------|
| NGLY1_KO_1 | 58.21     | -0.088 | 0       | 0.99 |
| NGLY1_1    | 57.03     | -0.073 | 0       | 0.98 |
| NGLY1_KO_2 | 56.5      | -0.071 | 0       | 0.94 |
| NGLY1_2    | 58.43     | -0.12  | 0.03    | 0.99 |

Supplement: Supplementary file 4143 [file 1]

# IPI00916570.1|SCAMP4

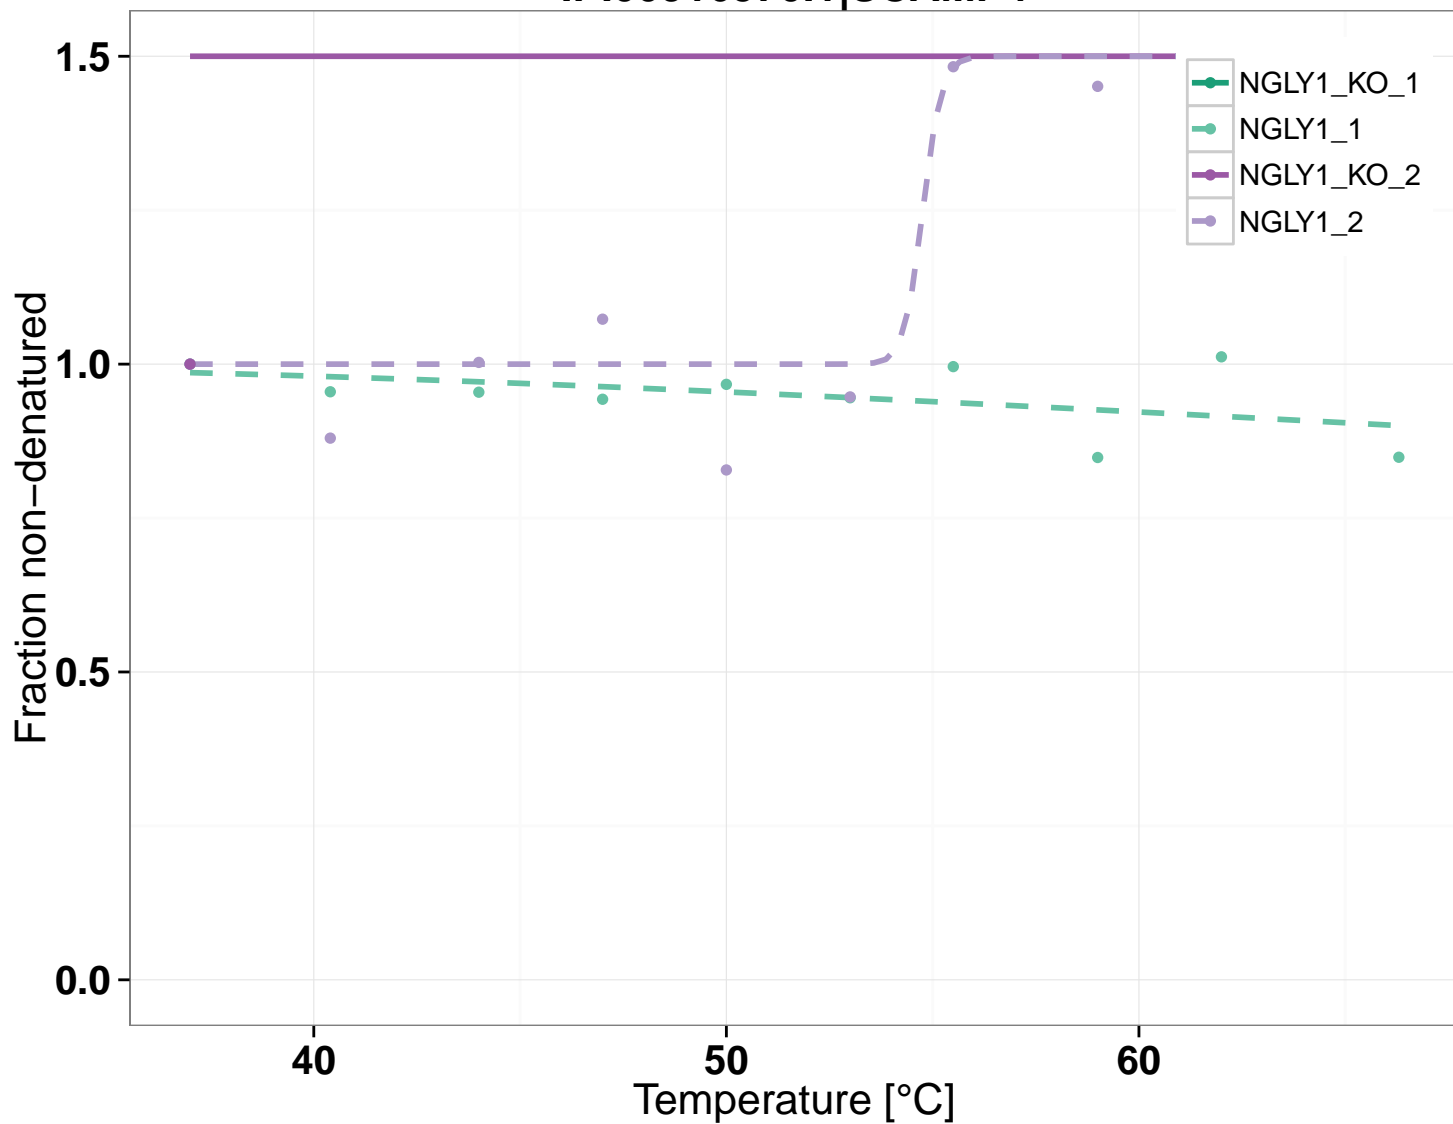

|            | meltPoint | slope | plateau | R2    |
|------------|-----------|-------|---------|-------|
| NGLY1_KO_1 | -         | -     | -       | -     |
| NGLY1_1    | -         | -     | 0       | 0.22  |
| NGLY1_KO_2 | -         | -     | 1.5     | -1.69 |
| NGLY1_2    | -         | 0.57  | 1.5     | 0.8   |

Supplement: Supplementary file 4144 [file 1]

IPI00002458.3|OGFOD2

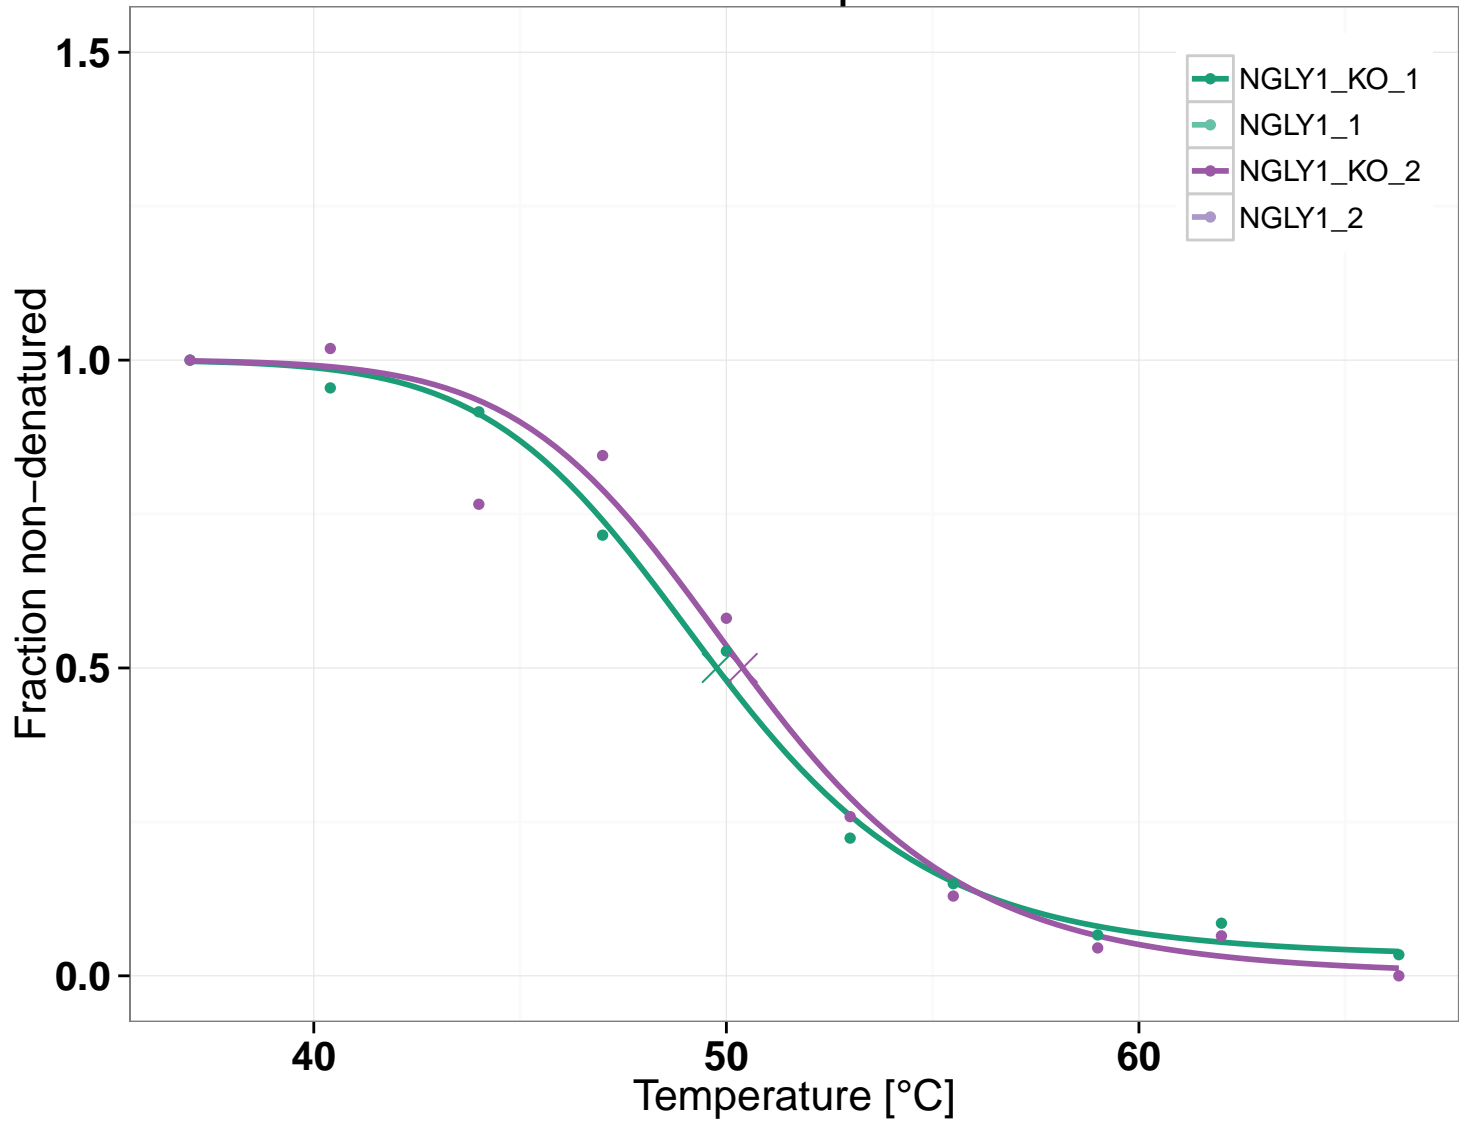

|            | meltPoint | slope  | plateau | R2   |
|------------|-----------|--------|---------|------|
| NGLY1_KO_1 | 49.77     | -0.09  | 0.03    | 1    |
| NGLY1_1    | -         | -      | -       | -    |
| NGLY1_KO_2 | 50.4      | -0.092 | 0       | 0.98 |
| NGLY1_2    | -         | -      | -       | -    |

Supplement: Supplementary file 4145 [file 1]

IPI00008231.2|C1ORF9

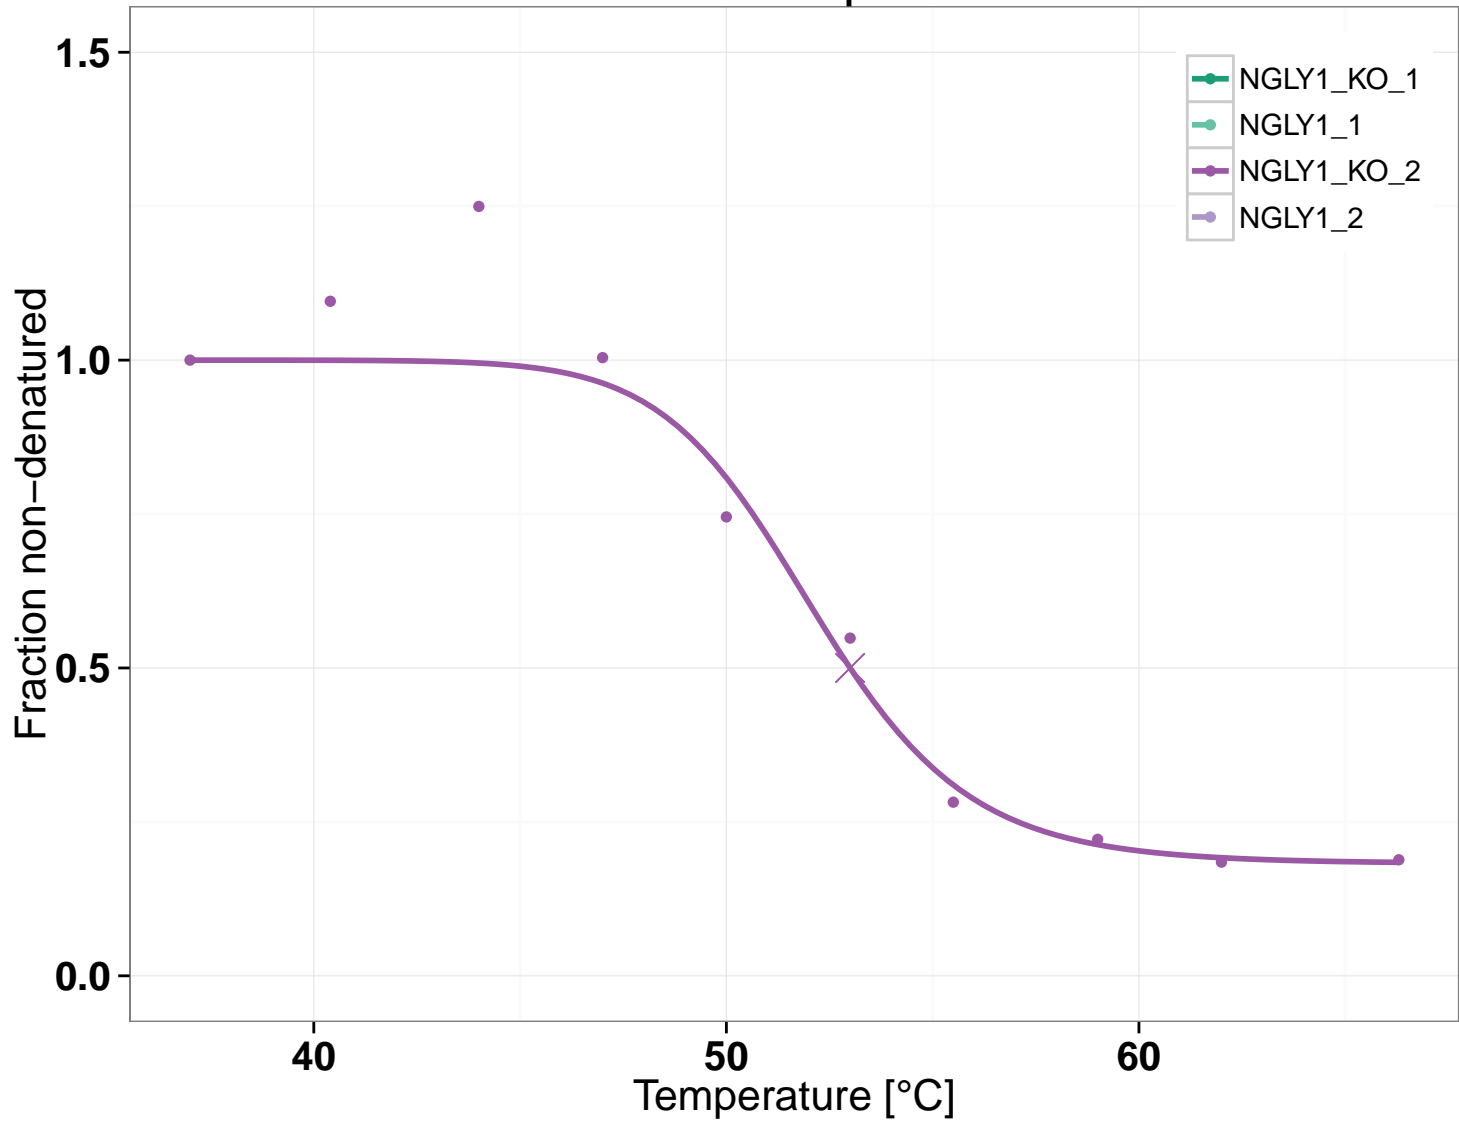

|            | meltPoint | slope | plateau | R2   |
|------------|-----------|-------|---------|------|
| NGLY1_KO_1 | —         | —     | —       | —    |
| NGLY1_1    | —         | —     | —       | —    |
| NGLY1_KO_2 | 53        | -0.11 | 0.18    | 0.95 |
| NGLY1_2    | —         | —     | —       | —    |

Supplement: Supplementary file 4146 [file 1]

IPI00016287.5|THNSL1

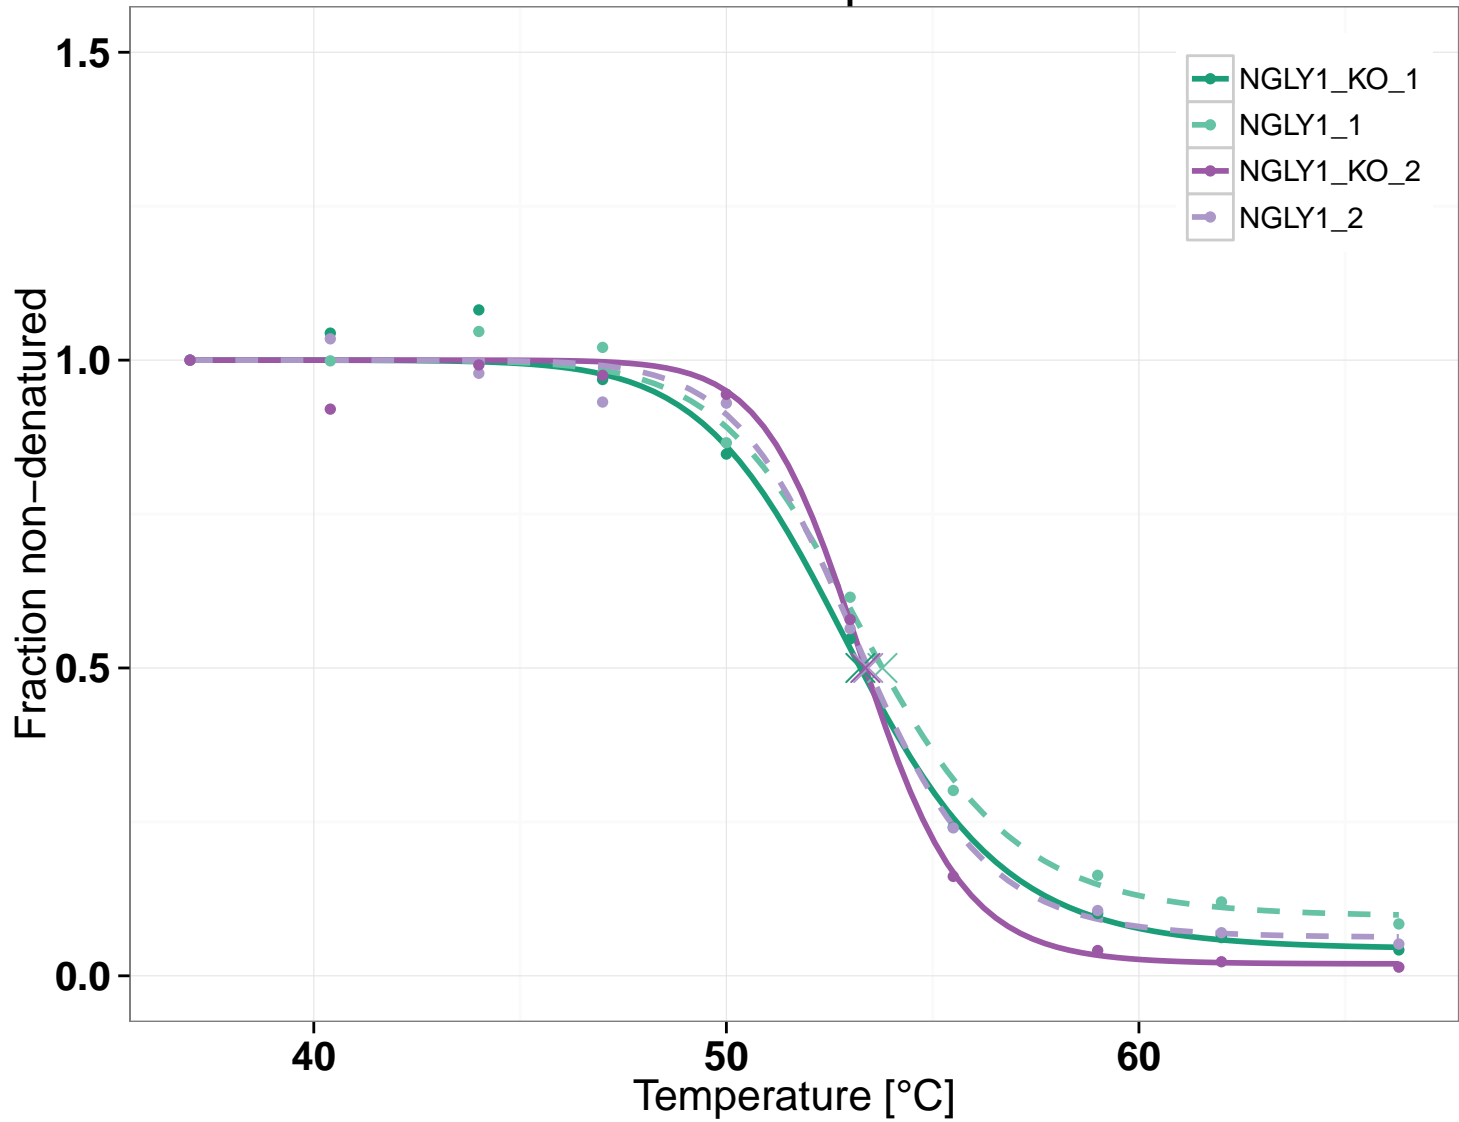

|            | meltPoint | slope | plateau | R2   |
|------------|-----------|-------|---------|------|
| NGLY1_KO_1 | 53.25     | -0.13 | 0.04    | 0.99 |
| NGLY1_1    | 53.78     | -0.12 | 0.1     | 1    |
| NGLY1_KO_2 | 53.37     | -0.2  | 0.02    | 1    |
| NGLY1_2    | 53.44     | -0.15 | 0.06    | 1    |

Supplement: Supplementary file 4147 [file 1]

IPI00033025.8|SEPT7

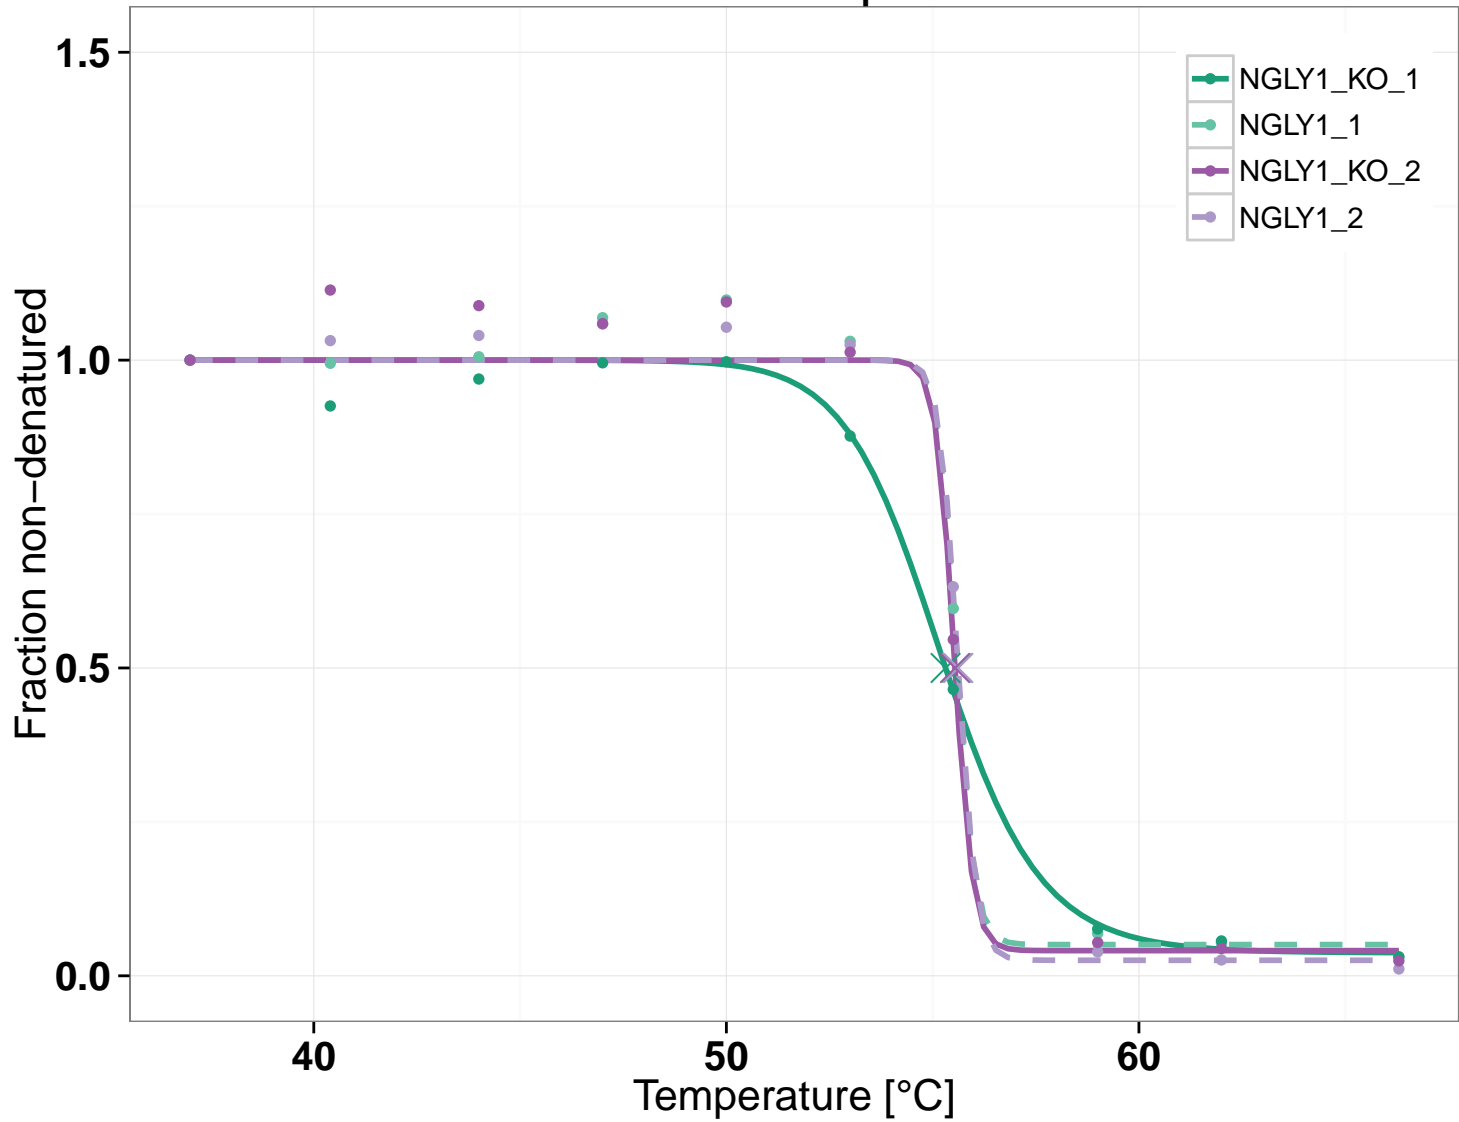

|            | meltPoint | slope | plateau | R2   |
|------------|-----------|-------|---------|------|
| NGLY1_KO_1 | 55.31     | -0.2  | 0.04    | 1    |
| NGLY1_1    | 55.59     | -1.1  | 0.05    | 0.99 |
| NGLY1_KO_2 | 55.54     | -1.1  | 0.04    | 0.98 |
| NGLY1_2    | 55.62     | -1.1  | 0.03    | 1    |

Supplement: Supplementary file 4148 [file 1]

# IPI00020037.1|USF2

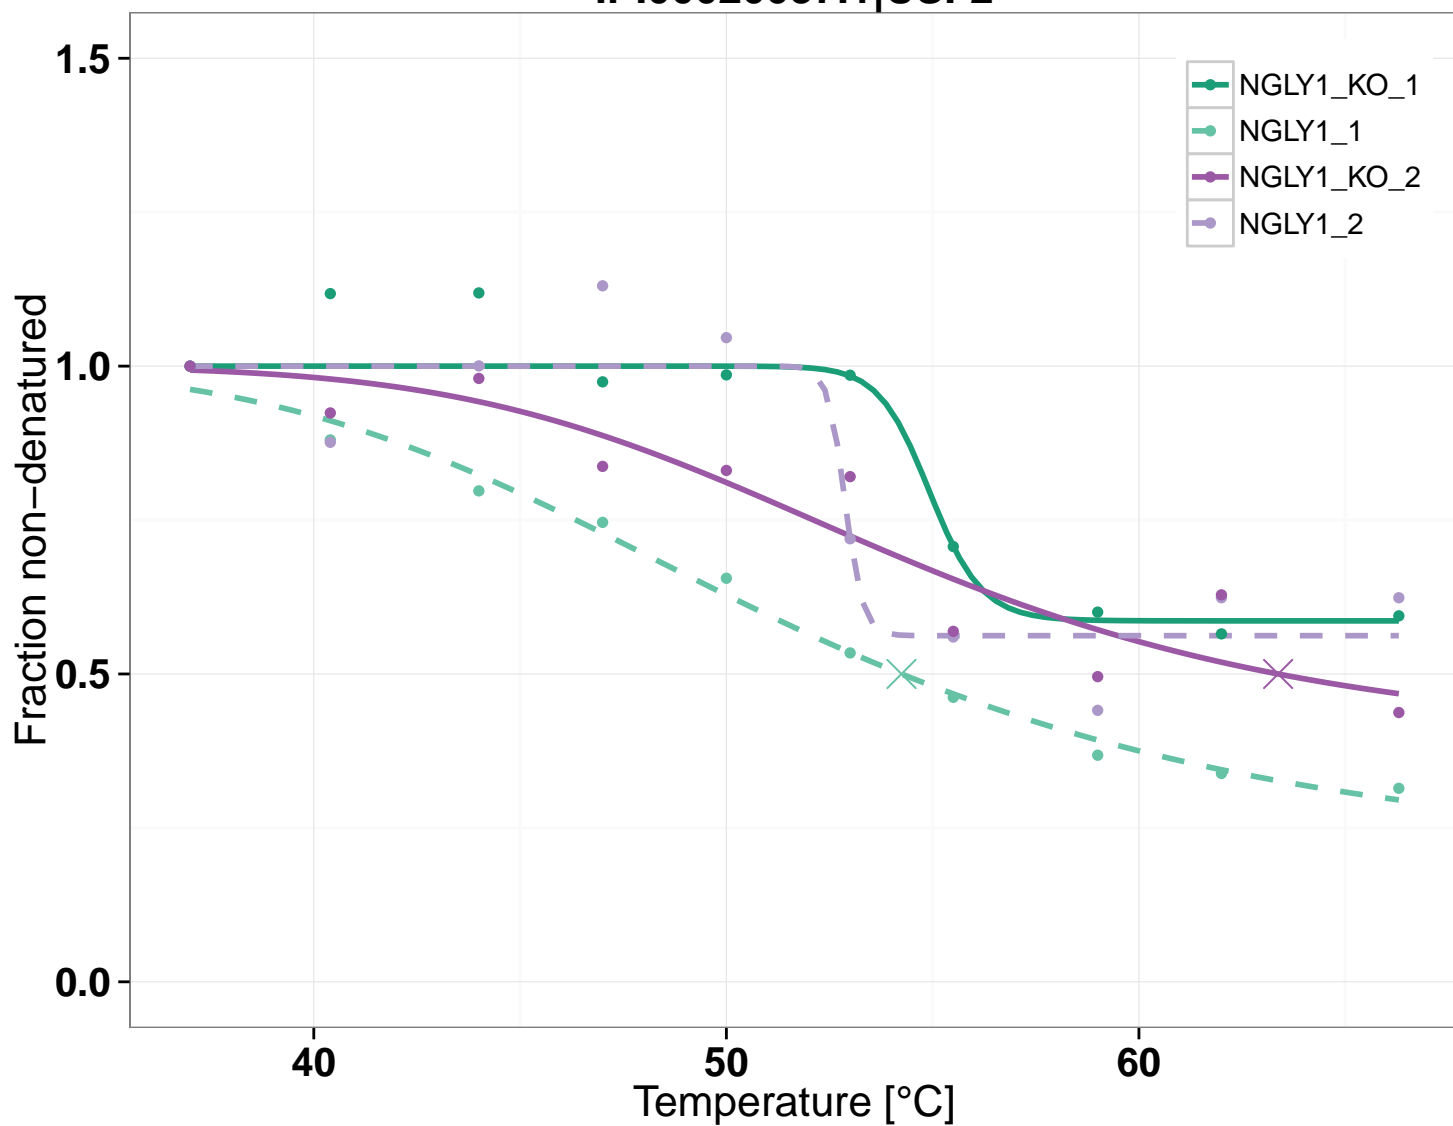

|            | meltPoint | slope  | plateau | R2   |
|------------|-----------|--------|---------|------|
| NGLY1_KO_1 | –         | –0.17  | 0.59    | 0.93 |
| NGLY1_1    | 54.24     | –0.034 | 0.18    | 0.99 |
| NGLY1_KO_2 | 63.37     | –0.029 | 0.38    | 0.89 |
| NGLY1_2    | –         | –0.52  | 0.56    | 0.89 |

Supplement: Supplementary file 4149 [file 1]

# IPI00020928.1|TFAM

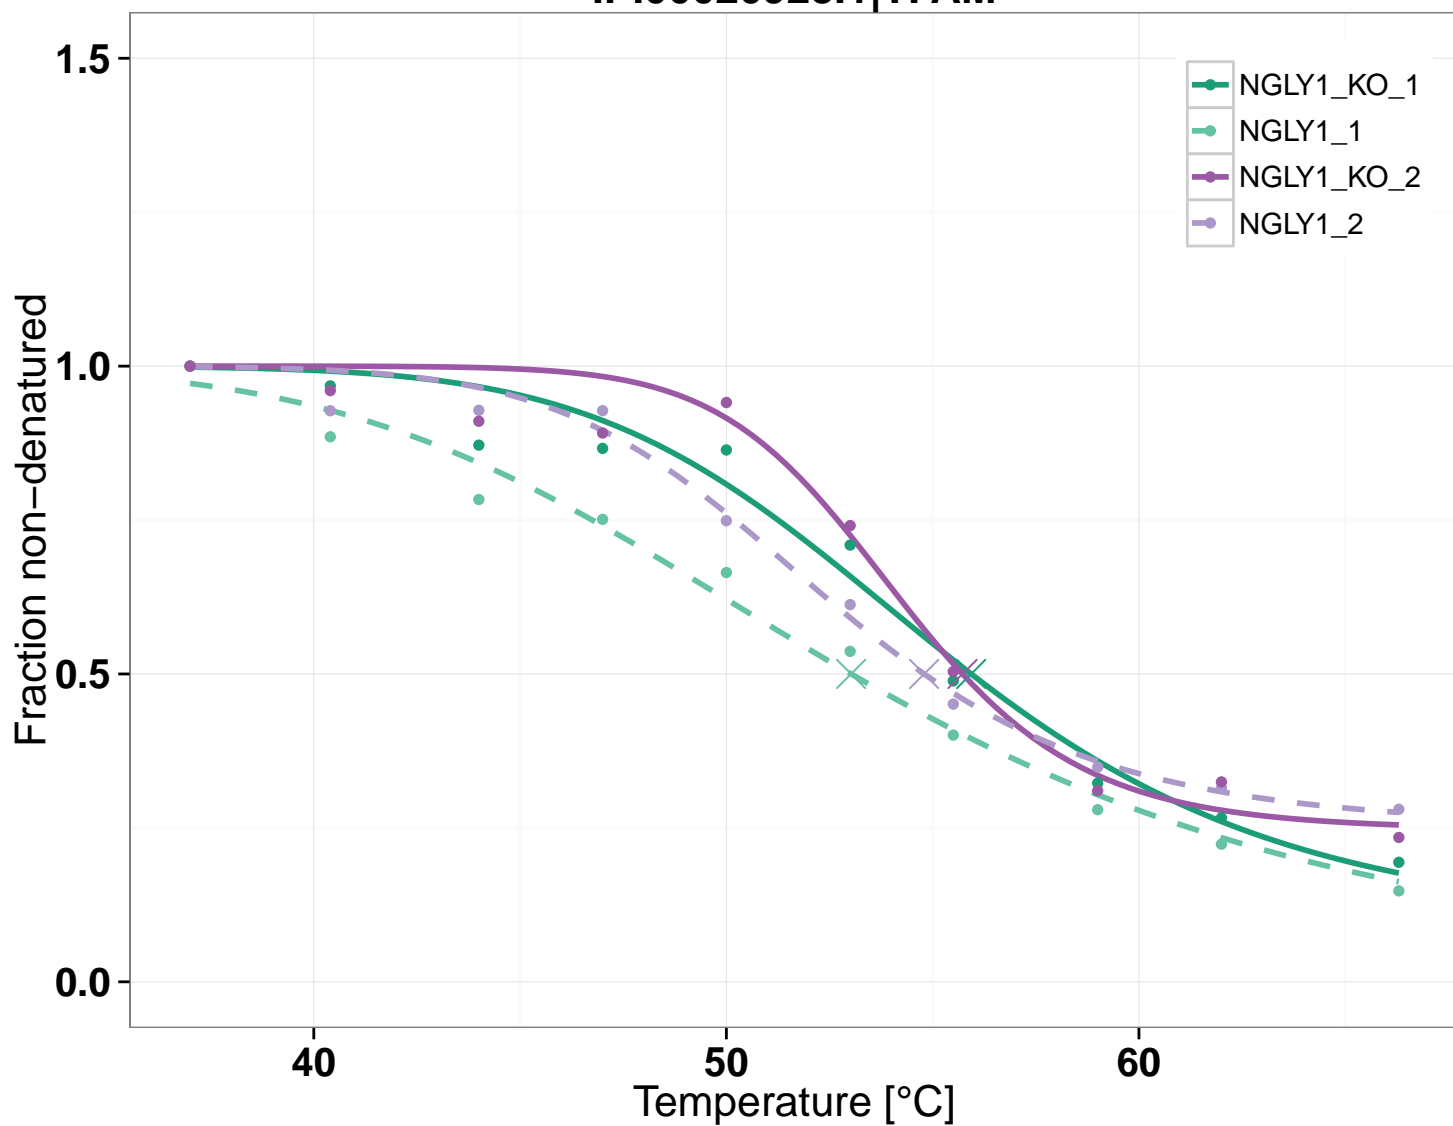

|            | meltPoint | slope  | plateau | R2   |
|------------|-----------|--------|---------|------|
| NGLY1_KO_1 | 55.93     | -0.055 | 0.08    | 0.98 |
| NGLY1_1    | 53.02     | -0.041 | 0       | 0.99 |
| NGLY1_KO_2 | 55.72     | -0.086 | 0.25    | 0.97 |
| NGLY1_2    | 54.79     | -0.058 | 0.25    | 0.99 |

Supplement: Supplementary file 4150 [file 1]

IPI00168404.5|ZBTB34

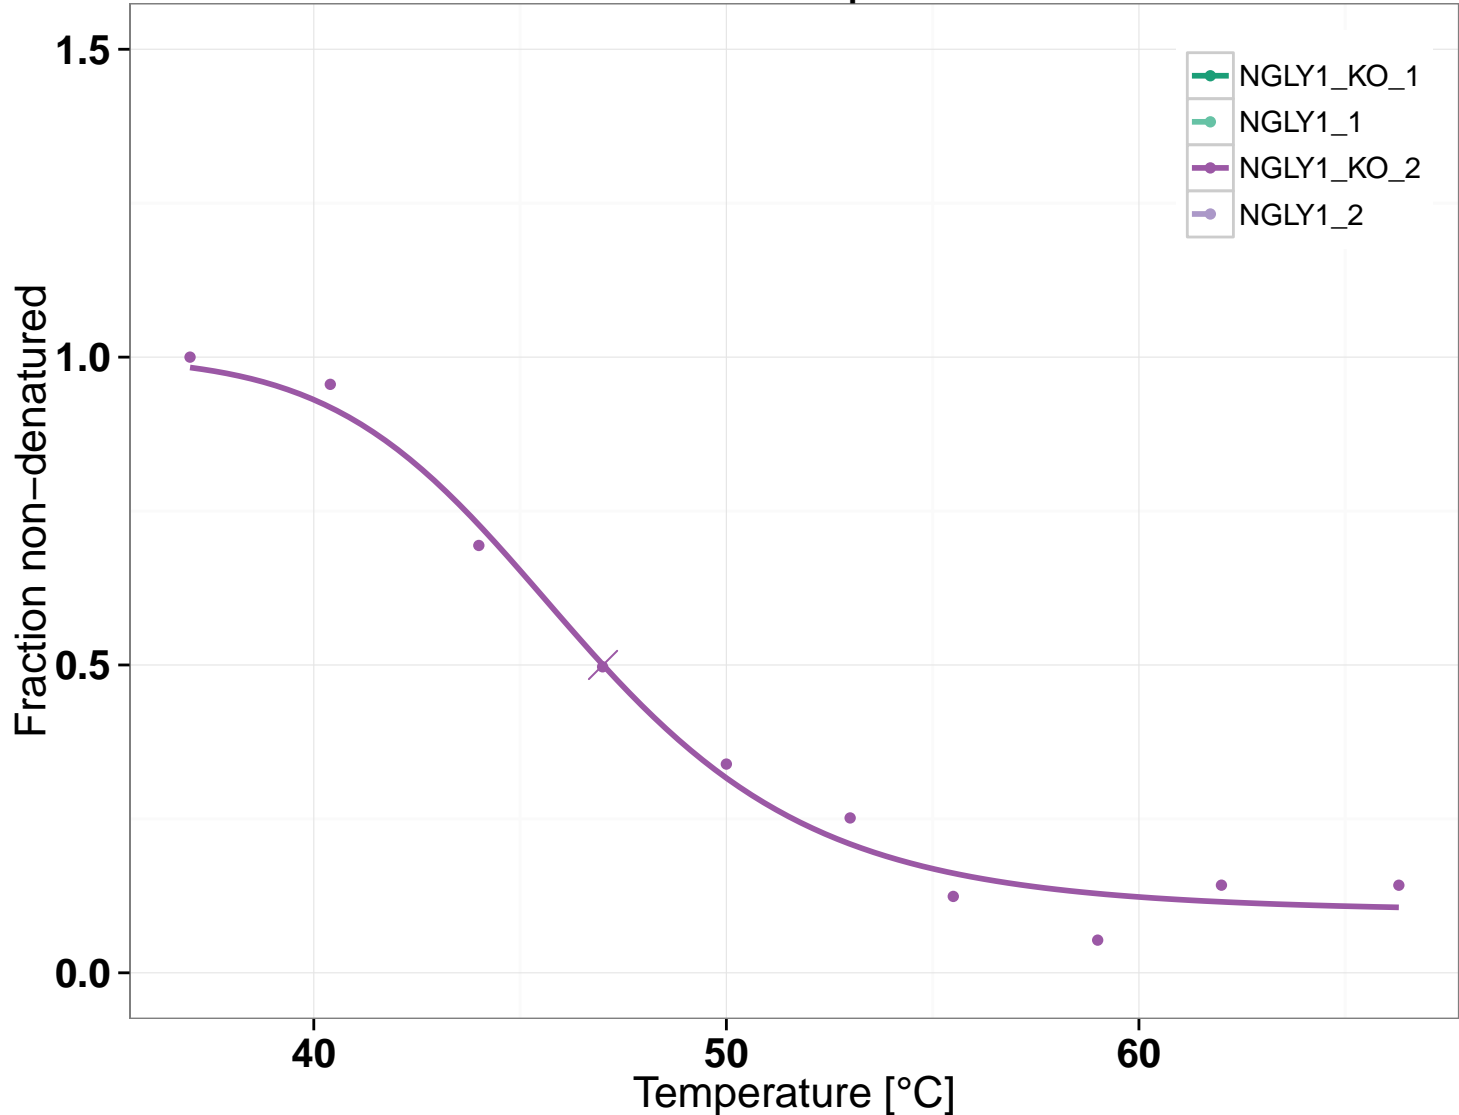

|            | meltPoint | slope  | plateau | R2   |
|------------|-----------|--------|---------|------|
| NGLY1_KO_1 | -         | -      | -       | -    |
| NGLY1_1    | -         | -      | -       | -    |
| NGLY1_KO_2 | 47.01     | -0.077 | 0.1     | 0.99 |
| NGLY1_2    | -         | -      | -       | -    |

Supplement: Supplementary file 4151 [file 1]

IPI00737174.1|PHF21A

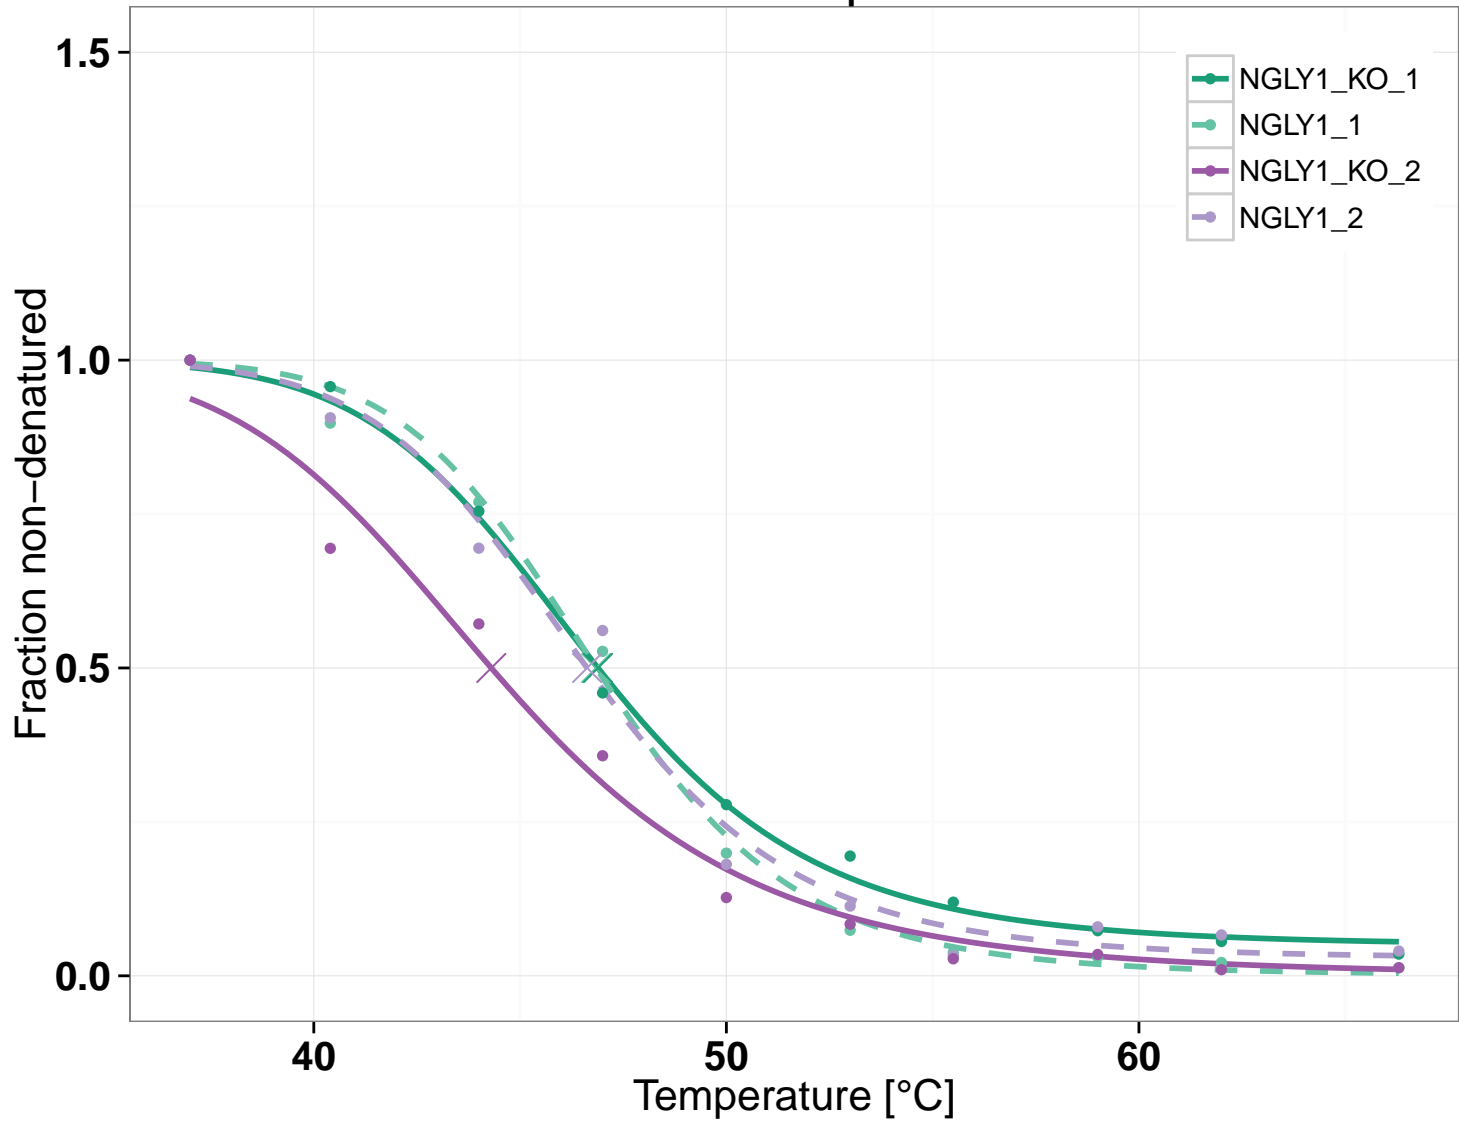

|            | meltPoint | slope  | plateau | R2   |
|------------|-----------|--------|---------|------|
| NGLY1_KO_1 | 46.89     | -0.087 | 0.05    | 1    |
| NGLY1_1    | 46.85     | -0.1   | 0       | 1    |
| NGLY1_KO_2 | 44.3      | -0.079 | 0       | 0.98 |
| NGLY1_2    | 46.63     | -0.095 | 0.03    | 0.98 |

Supplement: Supplementary file 4152 [file 1]

# IPI00019640.1|VRK1

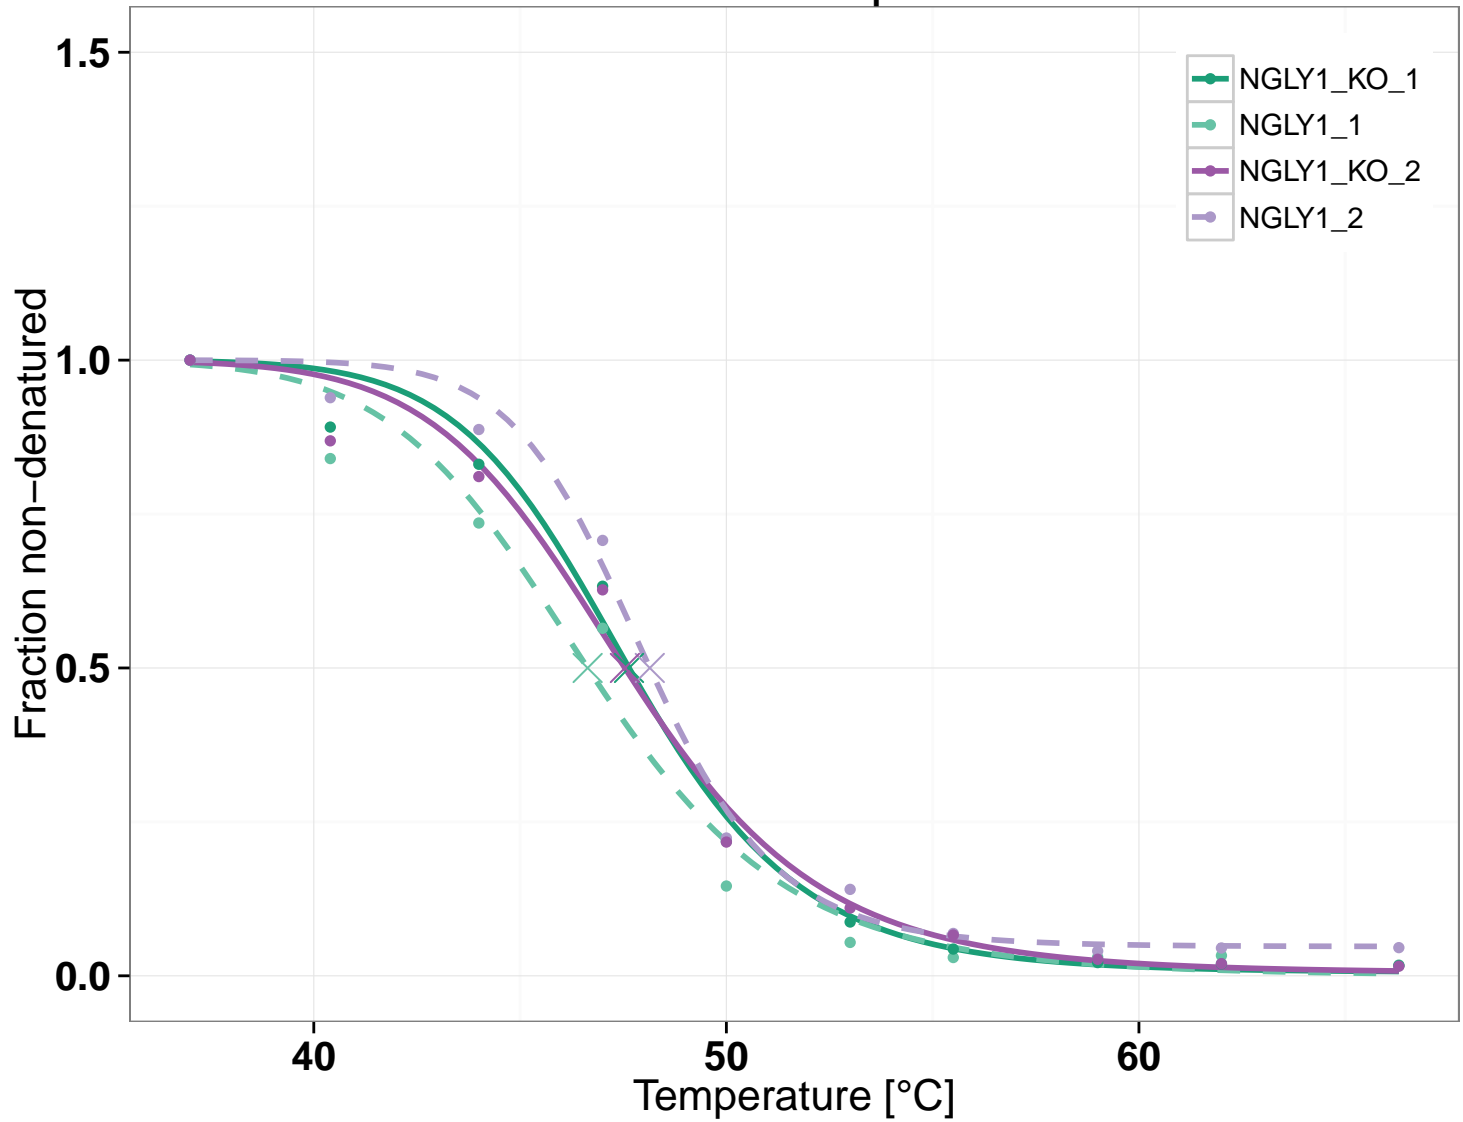

|            | meltPoint | slope | plateau | R2   |
|------------|-----------|-------|---------|------|
| NGLY1_KO_1 | 47.64     | -0.12 | 0.01    | 0.99 |
| NGLY1_1    | 46.64     | -0.1  | 0       | 0.98 |
| NGLY1_KO_2 | 47.54     | -0.11 | 0       | 0.99 |
| NGLY1_2    | 48.14     | -0.15 | 0.05    | 0.99 |

Supplement: Supplementary file 4153 [file 1]

# IPI00299149.1|SUMO2

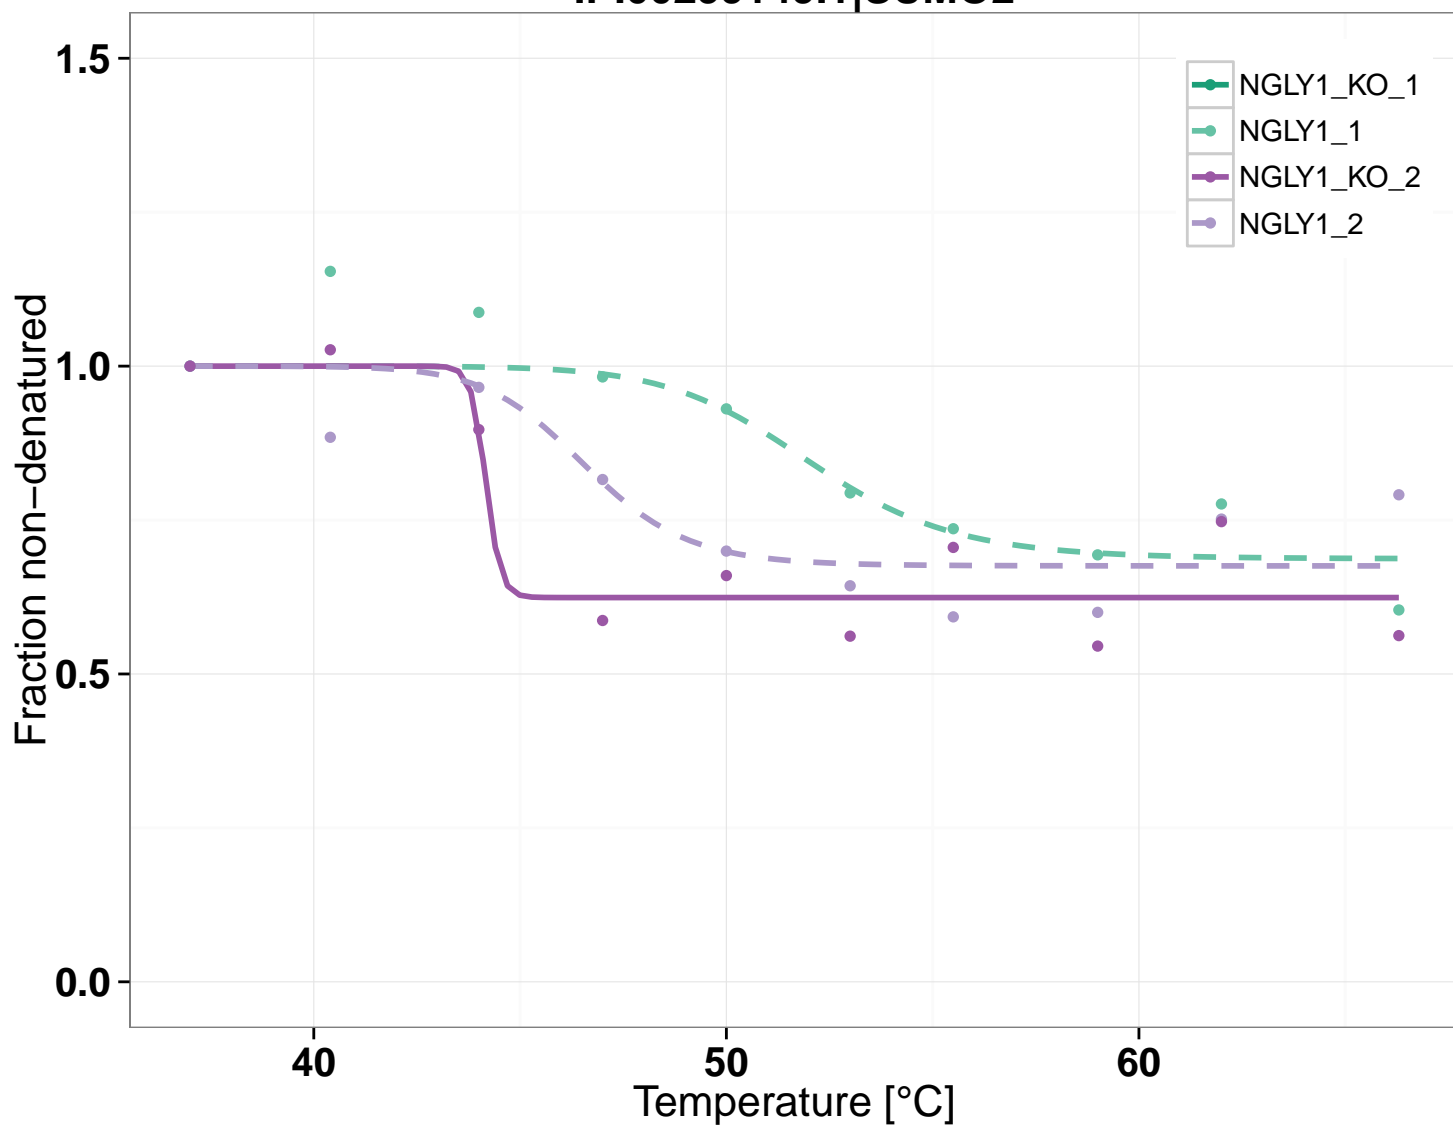

|            | meltPoint | slope  | plateau | R2   |
|------------|-----------|--------|---------|------|
| NGLY1_KO_1 | —         | —      | —       | —    |
| NGLY1_1    | —         | -0.044 | 0.69    | 0.84 |
| NGLY1_KO_2 | —         | -0.53  | 0.62    | 0.87 |
| NGLY1_2    | —         | -0.065 | 0.68    | 0.75 |

Supplement: Supplementary file 4154 [file 1]

IPI00292671.1|TOP3B

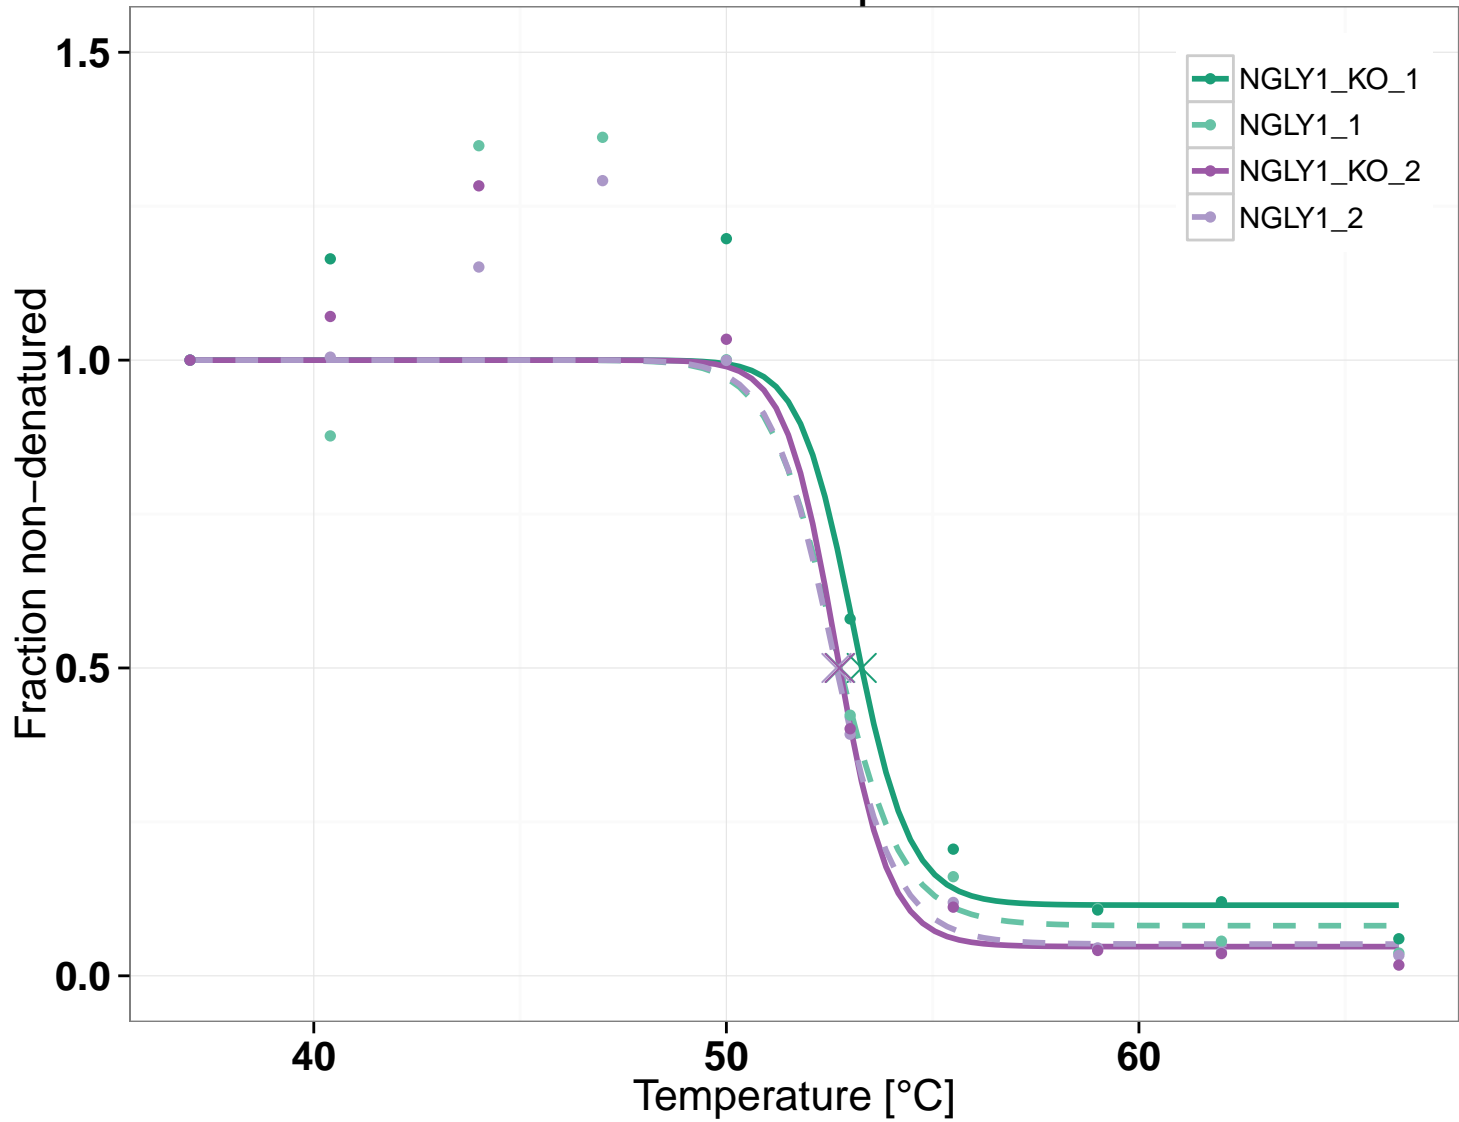

|            | meltPoint | slope | plateau | R2   |
|------------|-----------|-------|---------|------|
| NGLY1_KO_1 | 53.28     | -0.33 | 0.11    | 0.81 |
| NGLY1_1    | 52.76     | -0.29 | 0.08    | 0.89 |
| NGLY1_KO_2 | 52.74     | -0.38 | 0.05    | 0.89 |
| NGLY1_2    | 52.67     | -0.31 | 0.05    | 0.96 |

Supplement: Supplementary file 4155 [file 1]

# IPI00855980.1|NME4

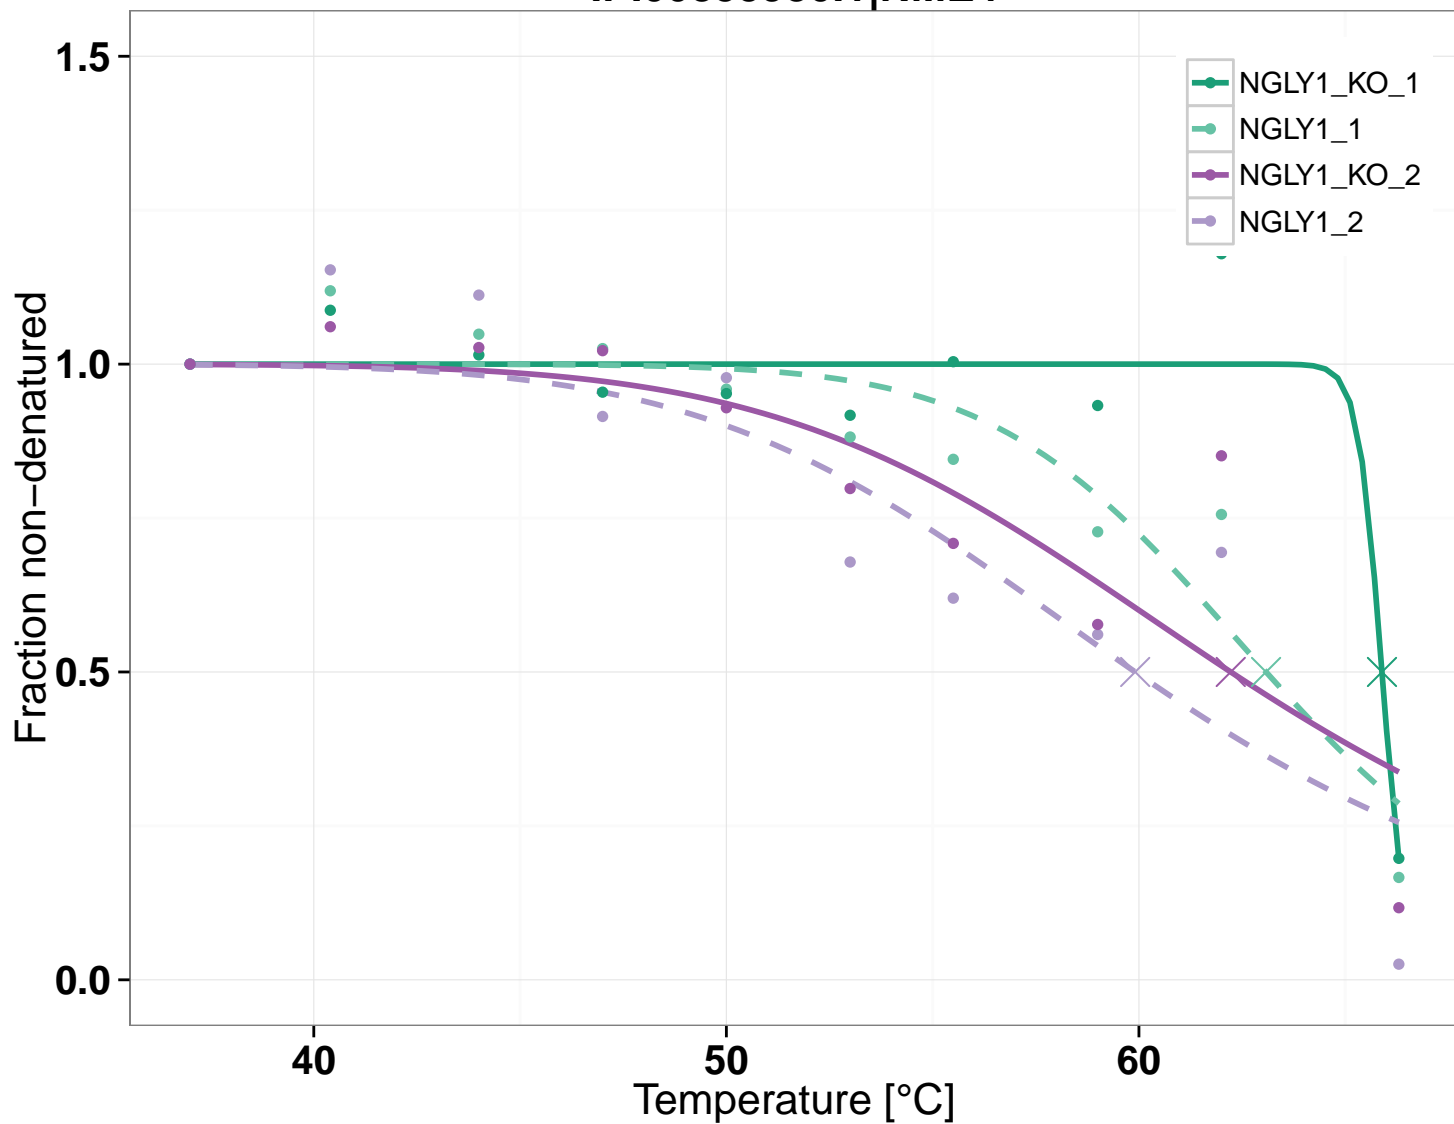

|            | meltPoint | slope  | plateau | R2   |
|------------|-----------|--------|---------|------|
| NGLY1_KO_1 | 65.89     | -0.86  | 0       | 0.91 |
| NGLY1_1    | 63.08     | -0.075 | 0       | 0.88 |
| NGLY1_KO_2 | 62.23     | -0.046 | 0       | 0.75 |
| NGLY1_2    | 59.91     | -0.048 | 0       | 0.79 |

Supplement: Supplementary file 4156 [file 1]

# IPI00305374.5|THOC1

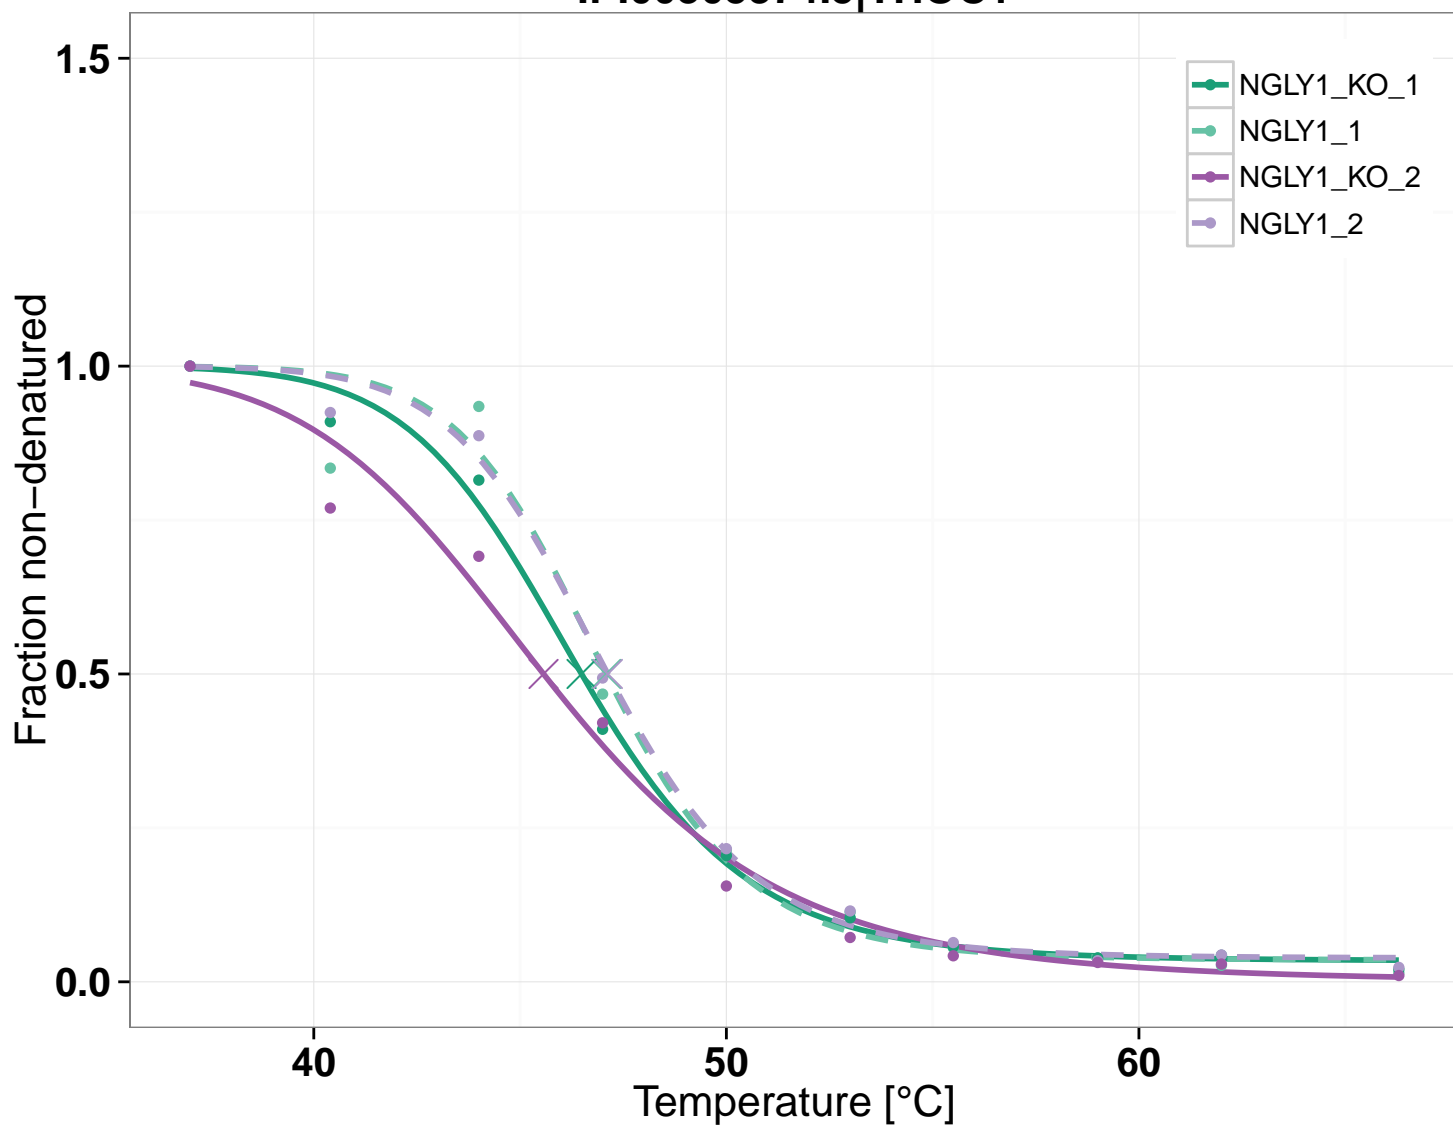

|            | meltPoint | slope  | plateau | R2   |
|------------|-----------|--------|---------|------|
| NGLY1_KO_1 | 46.49     | -0.12  | 0.03    | 1    |
| NGLY1_1    | 47.09     | -0.14  | 0.04    | 0.98 |
| NGLY1_KO_2 | 45.57     | -0.087 | 0       | 0.98 |
| NGLY1_2    | 47.13     | -0.13  | 0.04    | 1    |

Supplement: Supplementary file 4157 [file 1]

IPI00337386.3|PRPF40A

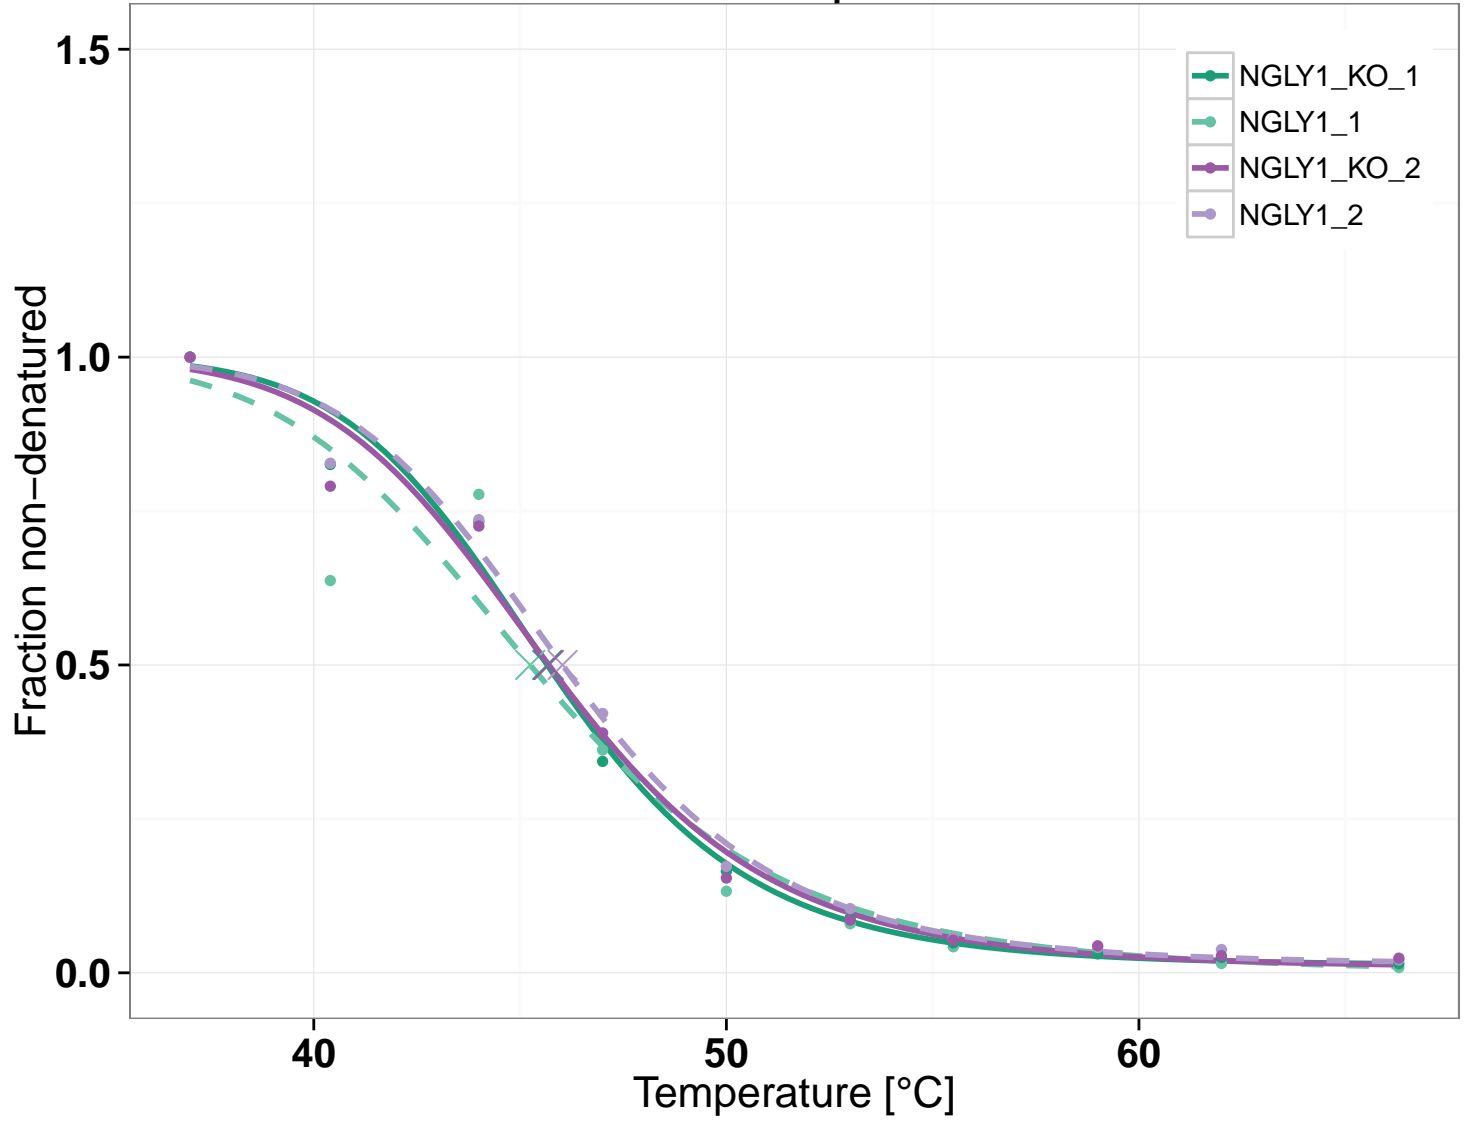

|            | meltPoint | slope  | plateau | R2   |
|------------|-----------|--------|---------|------|
| NGLY1_KO_1 | 45.66     | -0.1   | 0.01    | 0.99 |
| NGLY1_1    | 45.25     | -0.082 | 0       | 0.93 |
| NGLY1_KO_2 | 45.7      | -0.092 | 0.01    | 0.98 |
| NGLY1_2    | 46.03     | -0.093 | 0.01    | 0.99 |

Supplement: Supplementary file 4158 [file 1]

# IPI00237011.5|STK38L

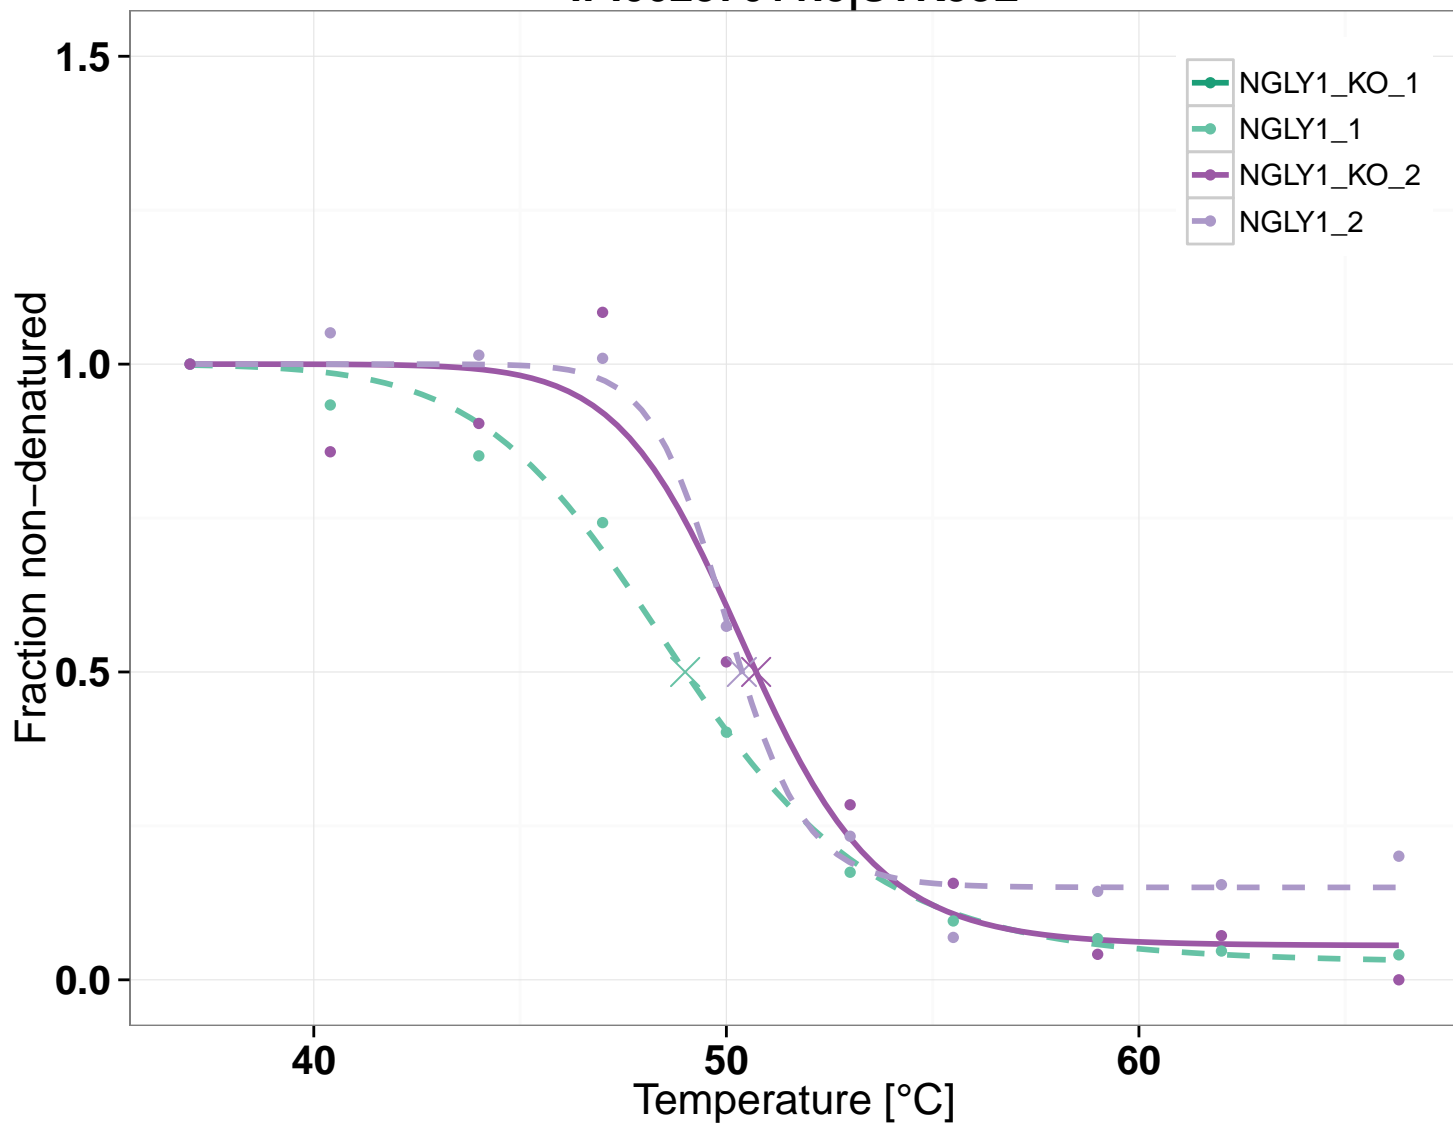

|            | meltPoint | slope | plateau | R2   |
|------------|-----------|-------|---------|------|
| NGLY1_KO_1 | 49        | -0.1  | 0.03    | 0.99 |
| NGLY1_1    | 49        | -0.1  | 0.03    | 0.99 |
| NGLY1_KO_2 | 50.72     | -0.15 | 0.06    | 0.96 |
| NGLY1_2    | 50.38     | -0.23 | 0.15    | 0.99 |

Supplement: Supplementary file 4159 [file 1]

# IPI00012269.3|MMRN1

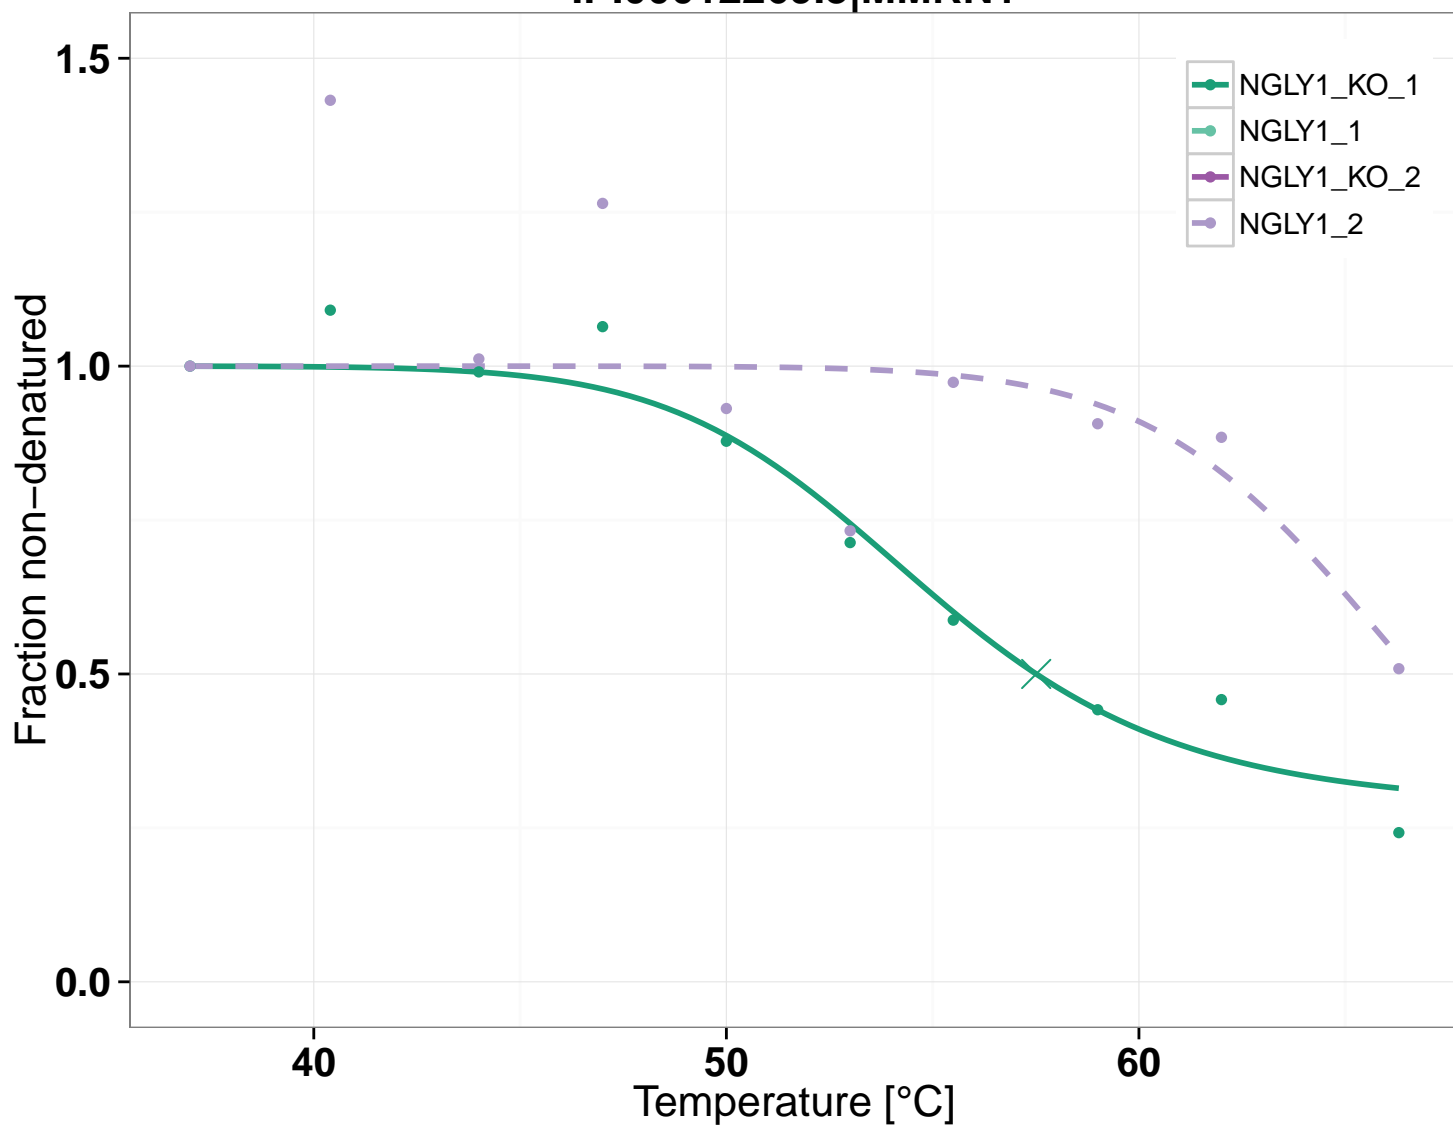

Supplement: Supplementary file 4160 [file 1]

# IPI00022542.1|ROCK1

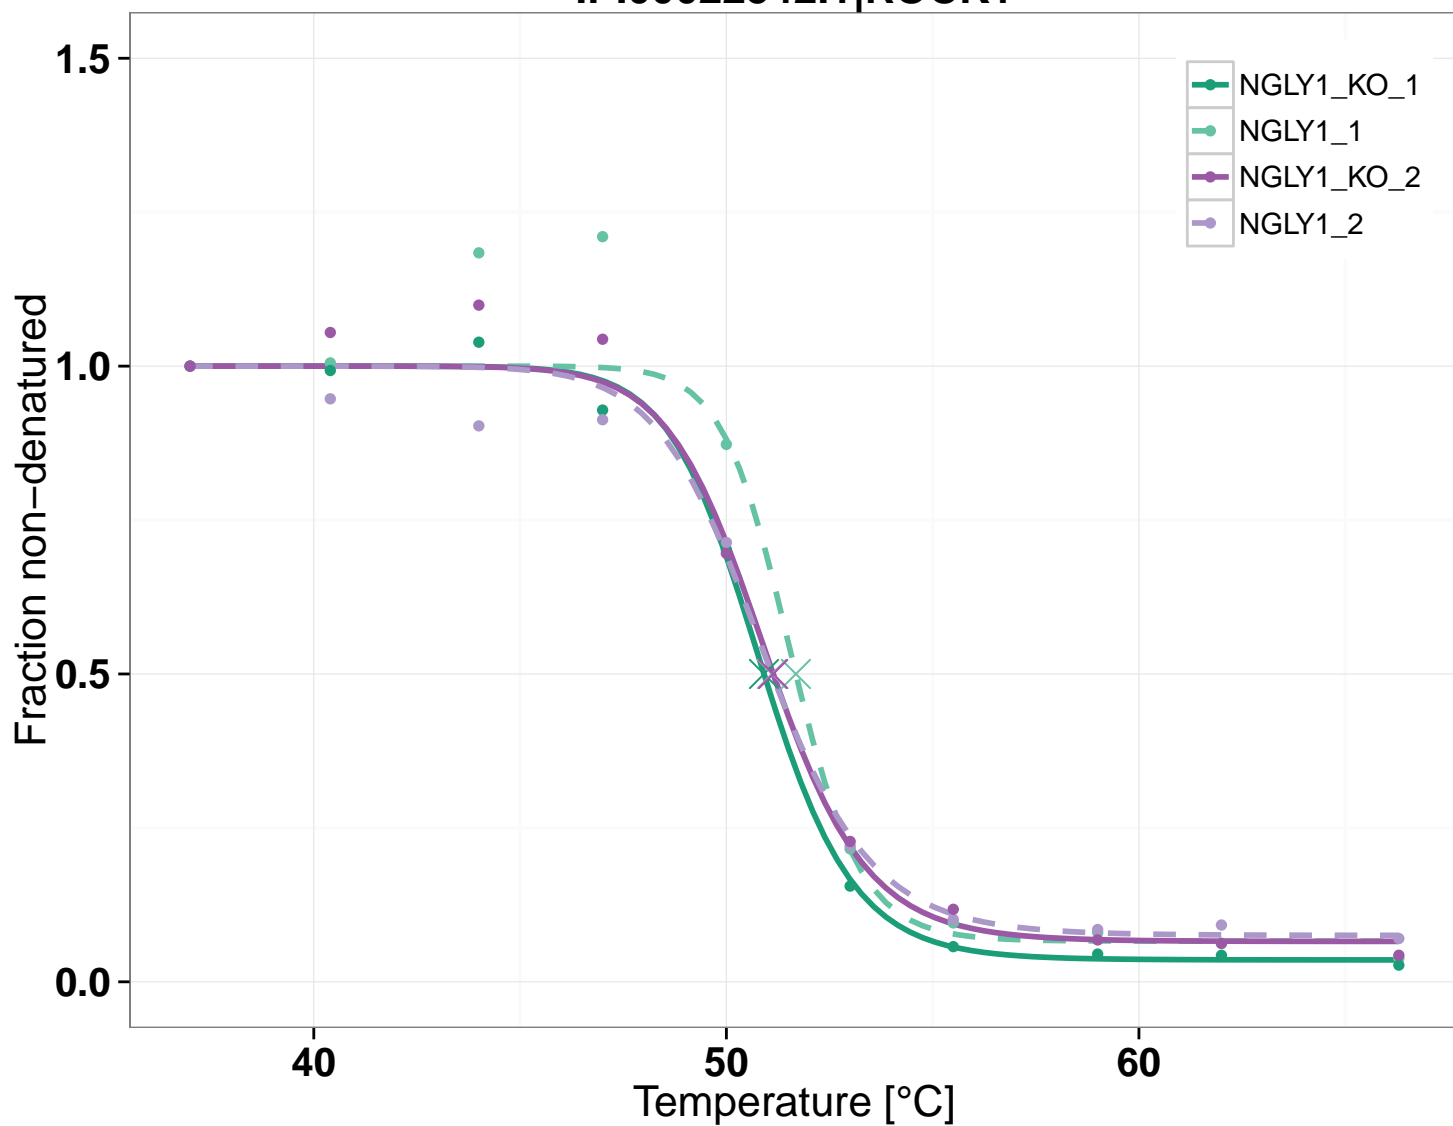

|            | meltPoint | slope | plateau | R2   |
|------------|-----------|-------|---------|------|
| NGLY1_KO_1 | 50.91     | -0.22 | 0.04    | 1    |
| NGLY1_1    | 51.69     | -0.28 | 0.07    | 0.97 |
| NGLY1_KO_2 | 51.14     | -0.19 | 0.07    | 0.99 |
| NGLY1_2    | 51.1      | -0.18 | 0.08    | 0.99 |

Supplement: Supplementary file 4161 [file 1]

IPI00059169.3|CCDC102A

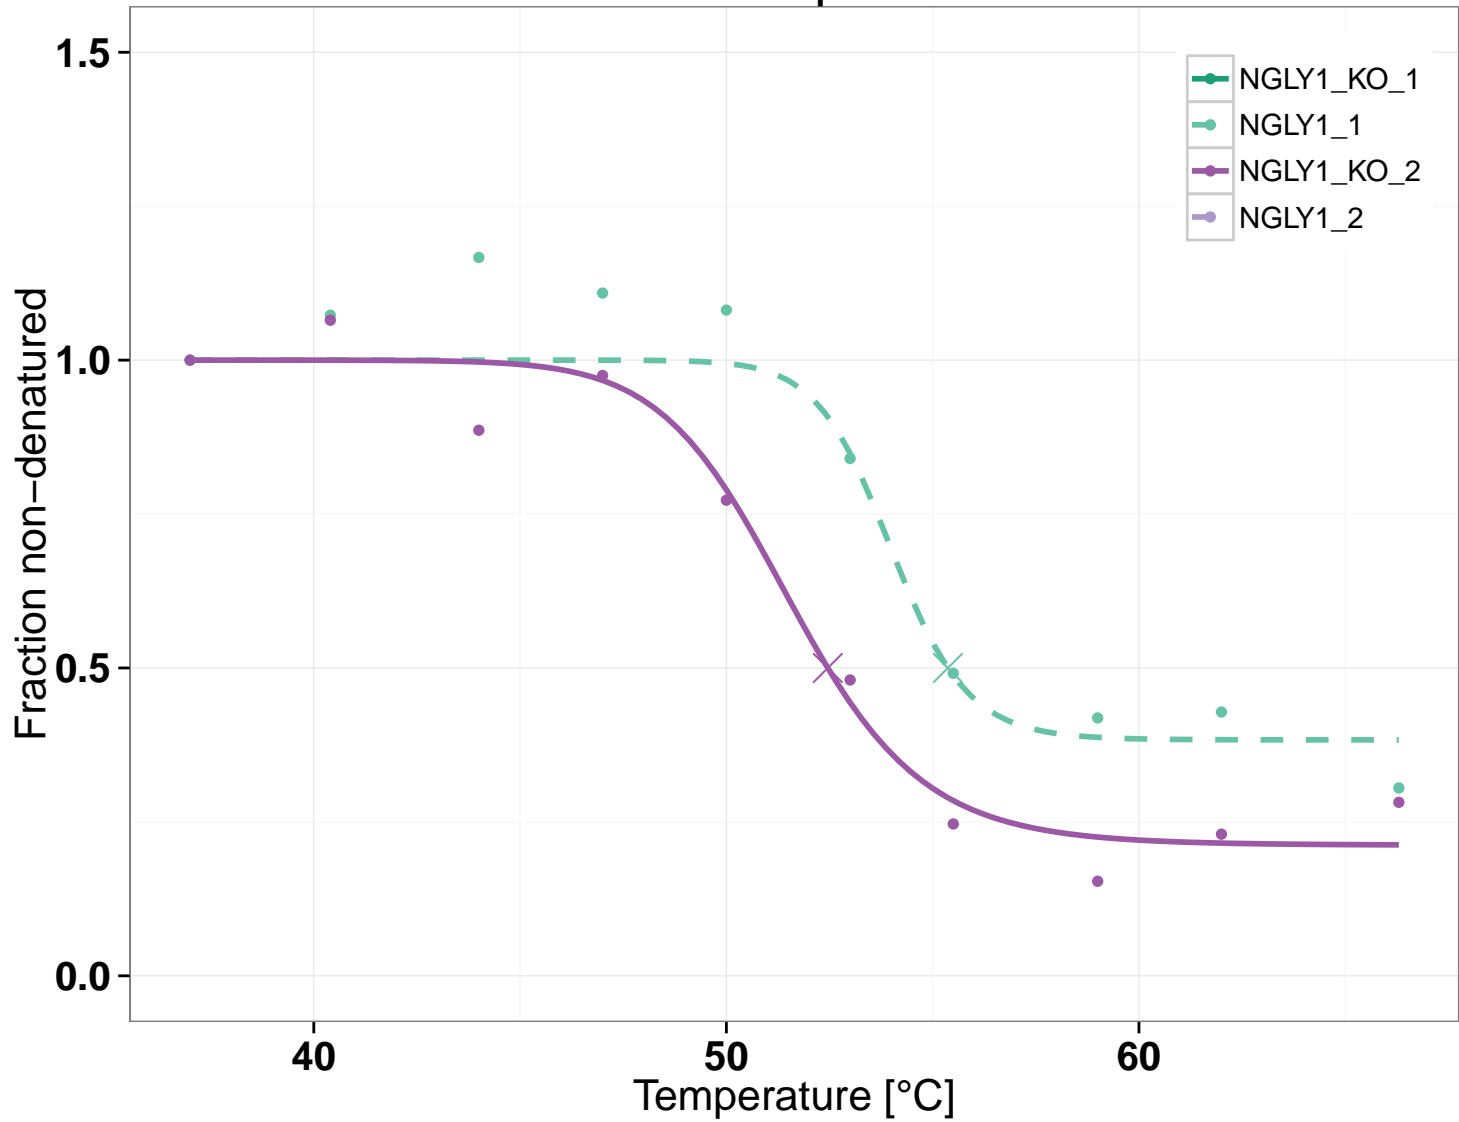

|            | meltPoint | slope | plateau | R2   |
|------------|-----------|-------|---------|------|
| NGLY1_KO_1 | –         | –     | –       | –    |
| NGLY1_1    | 55.37     | –0.17 | 0.38    | 0.94 |
| NGLY1_KO_2 | 52.46     | –0.12 | 0.21    | 0.98 |
| NGLY1_2    | –         | –     | –       | –    |

Supplement: Supplementary file 4162 [file 1]

IPI00031109.4|NDUFAF2

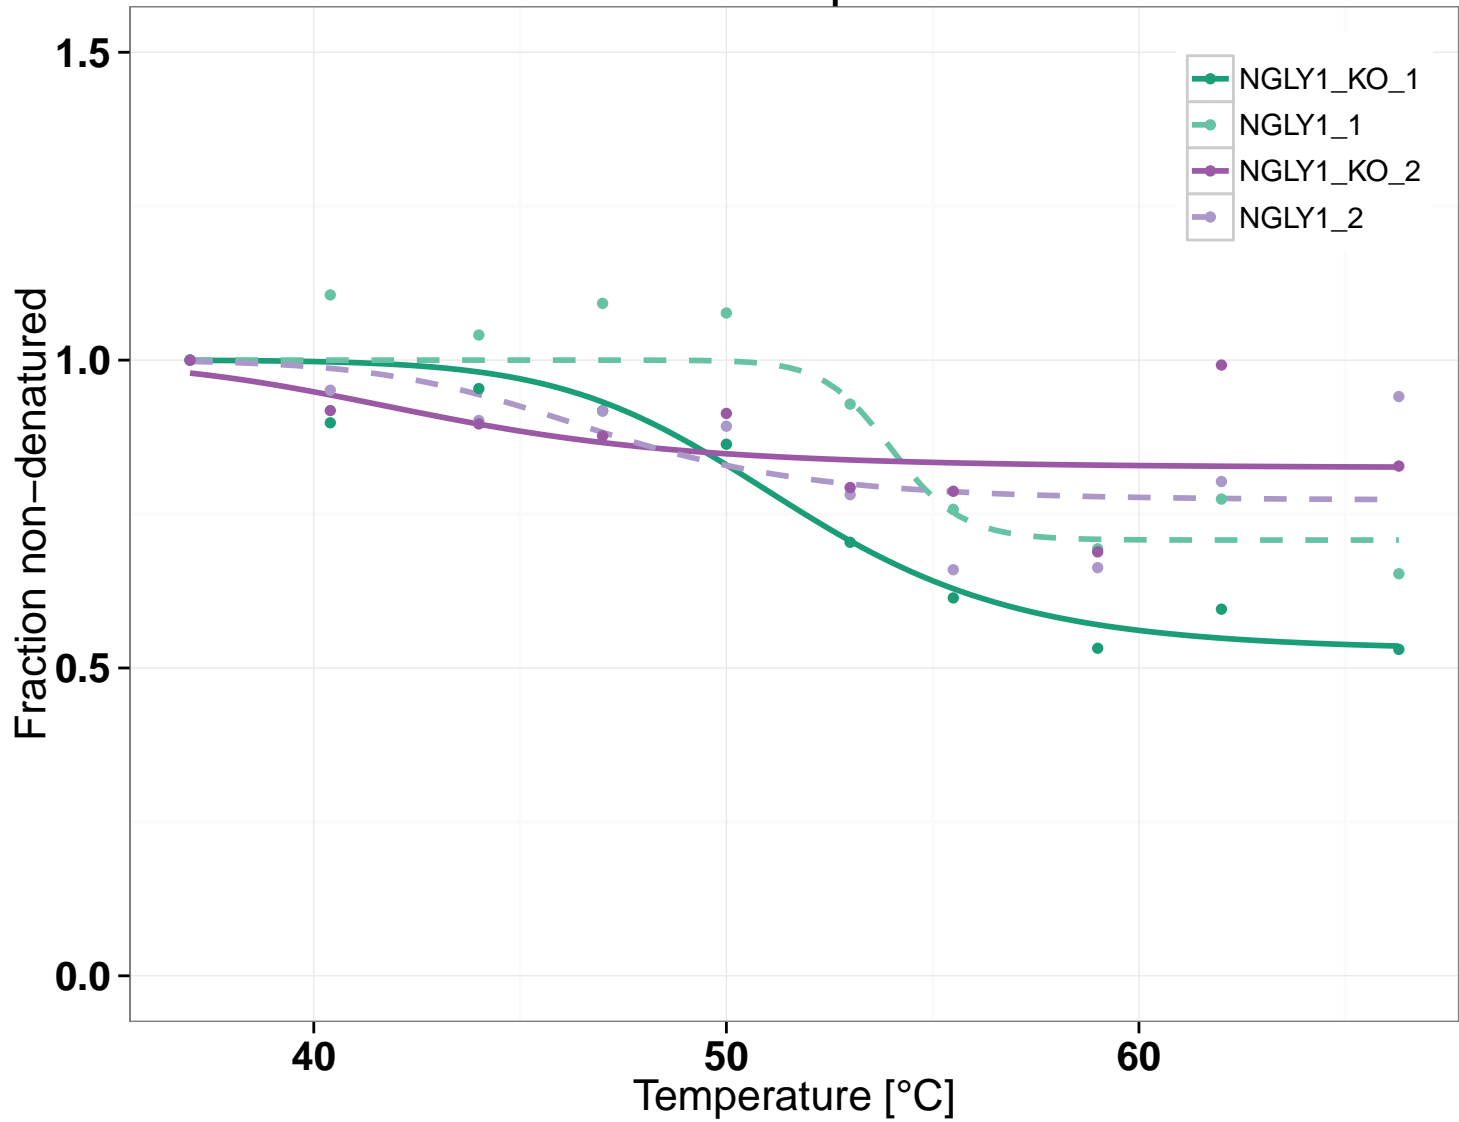

|            | meltPoint | slope  | plateau | R2   |
|------------|-----------|--------|---------|------|
| NGLY1_KO_1 | -         | -0.043 | 0.53    | 0.95 |
| NGLY1_1    | -         | -0.087 | 0.71    | 0.87 |
| NGLY1_KO_2 | -         | -0.014 | 0.82    | 0.33 |
| NGLY1_2    | -         | -0.021 | 0.77    | 0.48 |

Supplement: Supplementary file 4163 [file 1]

# IPI00059215.4|RNF166

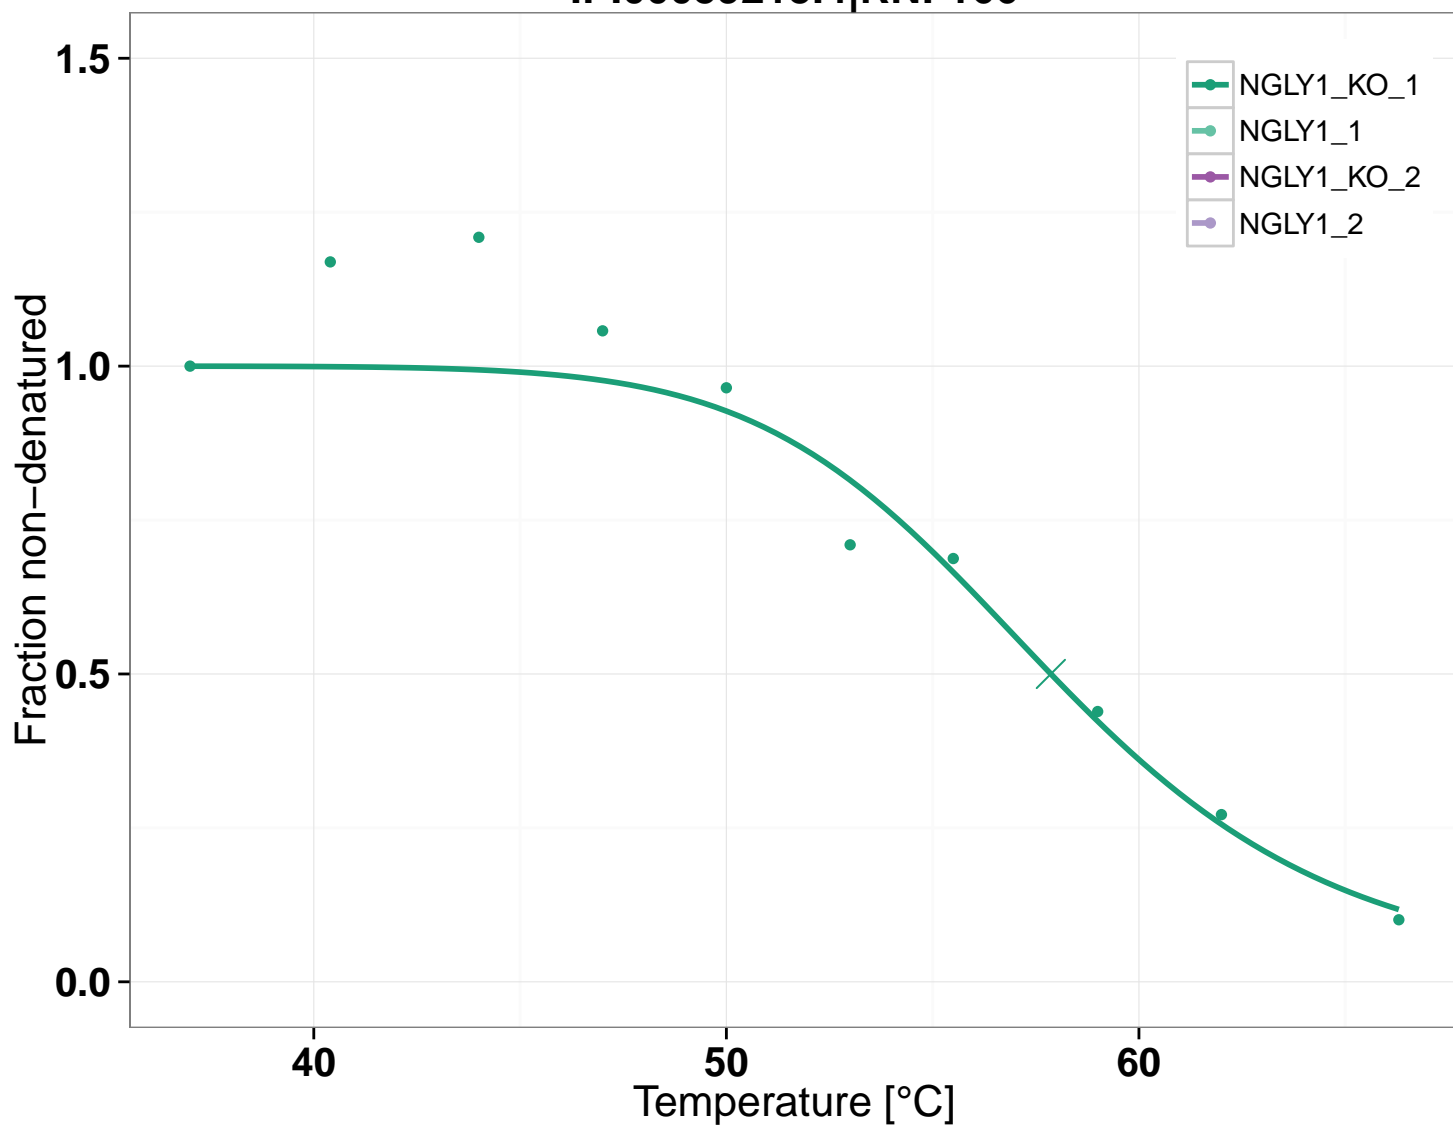

|            | meltPoint | slope  | plateau | R2   |
|------------|-----------|--------|---------|------|
| NGLY1_KO_1 | 57.87     | -0.071 | 0.01    | 0.93 |
| NGLY1_1    | -         | -      | -       | -    |
| NGLY1_KO_2 | -         | -      | -       | -    |
| NGLY1_2    | -         | -      | -       | -    |

Supplement: Supplementary file 4164 [file 1]

IPI00173346.3|PGM2L1

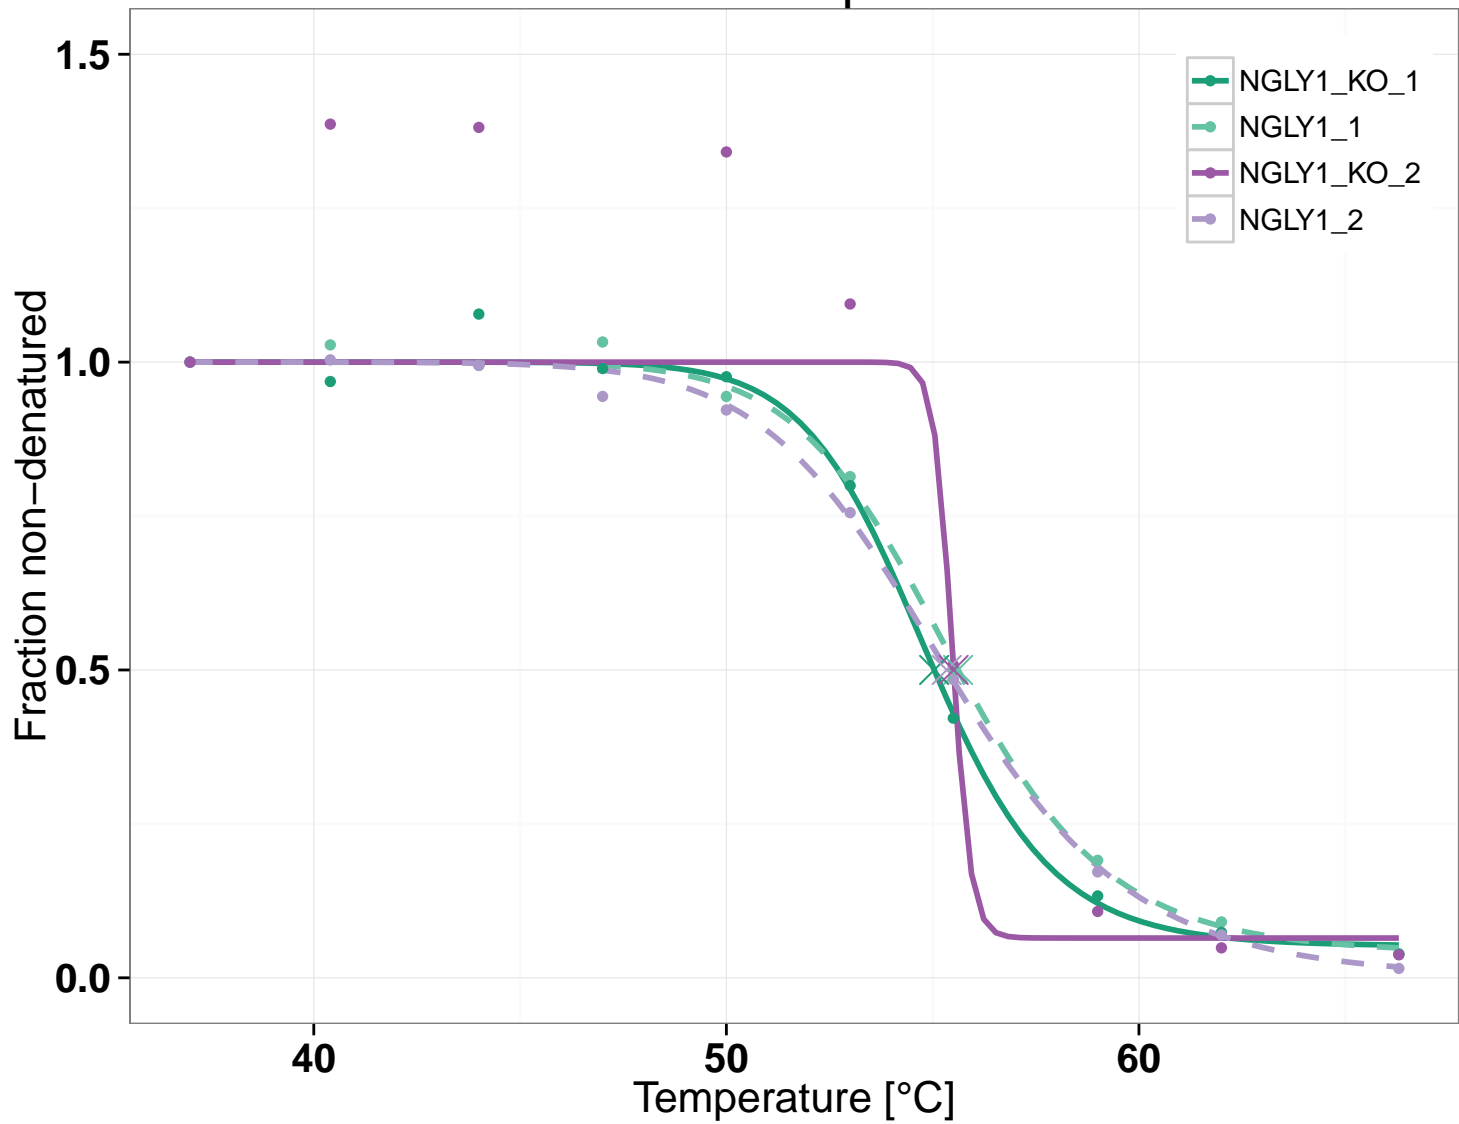

|            | meltPoint | slope | plateau | R2   |
|------------|-----------|-------|---------|------|
| NGLY1_KO_1 | 55.04     | -0.16 | 0.05    | 1    |
| NGLY1_1    | 55.62     | -0.13 | 0.04    | 1    |
| NGLY1_KO_2 | 55.51     | -1.1  | 0.06    | 0.79 |
| NGLY1_2    | 55.34     | -0.11 | 0       | 1    |

Supplement: Supplementary file 4165 [file 1]

IPI00002186.5|ARFGEF2

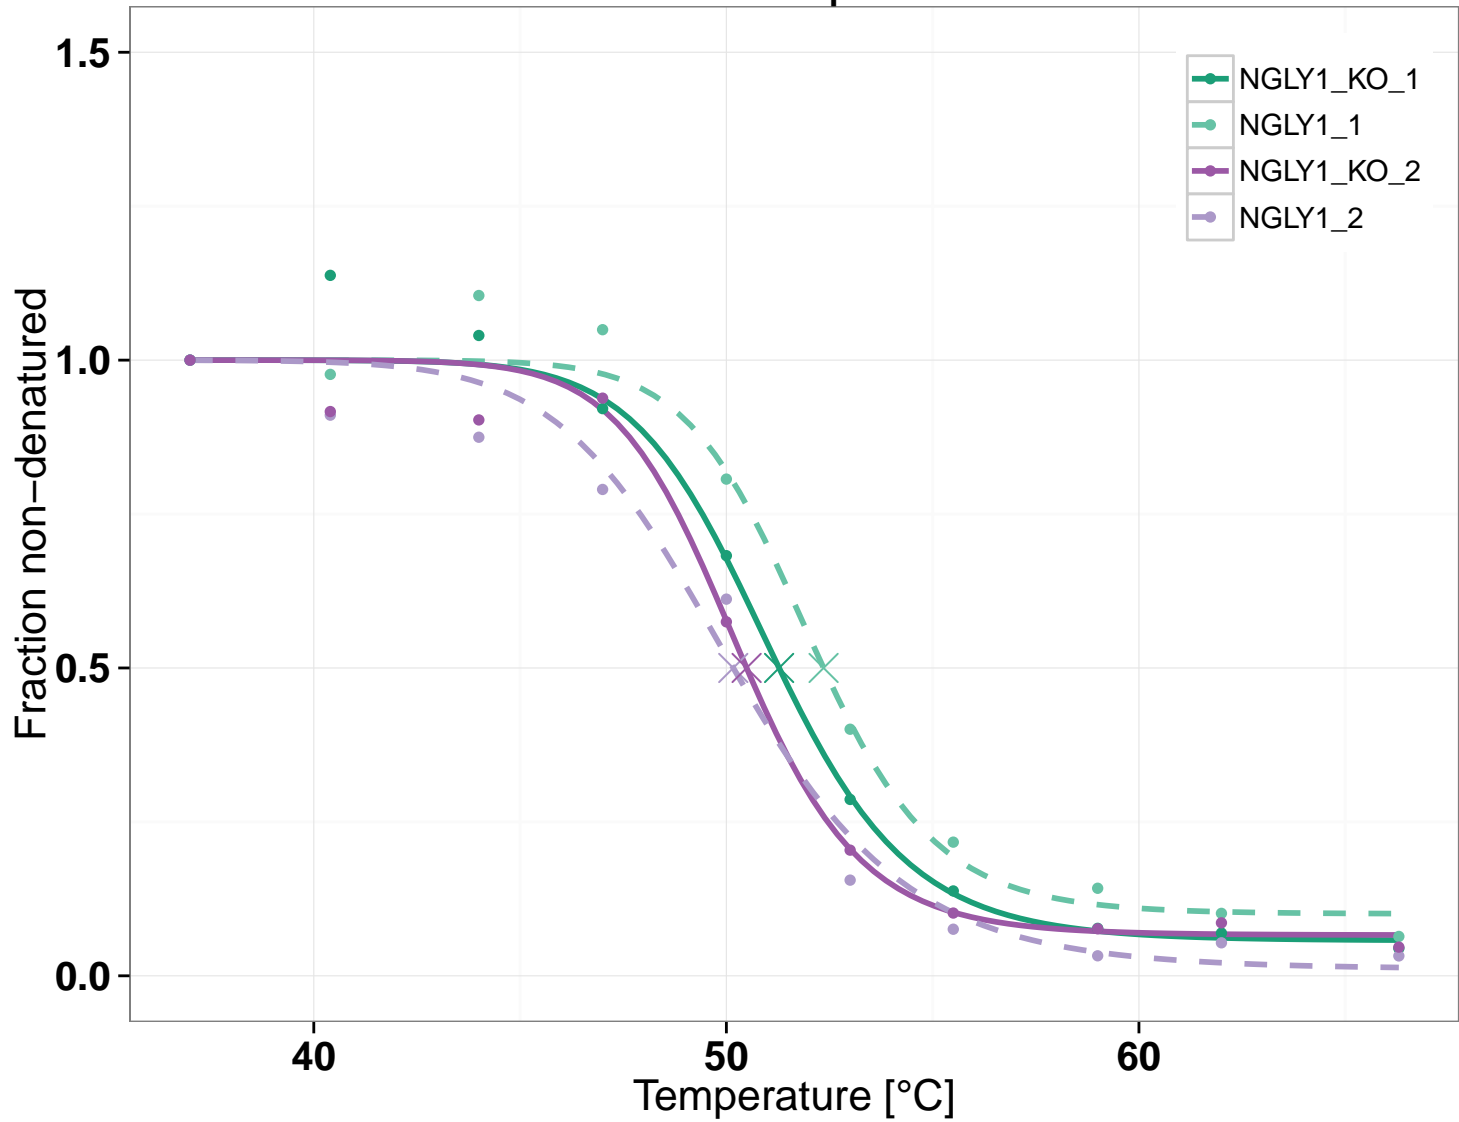

|            | meltPoint | slope | plateau | R2   |
|------------|-----------|-------|---------|------|
| NGLY1_KO_1 | 51.28     | -0.14 | 0.06    | 0.99 |
| NGLY1_1    | 52.36     | -0.15 | 0.1     | 0.99 |
| NGLY1_KO_2 | 50.49     | -0.16 | 0.07    | 0.99 |
| NGLY1_2    | 50.17     | -0.12 | 0.01    | 0.98 |

Supplement: Supplementary file 4166 [file 1]

IPI00740516.3|LOC644937

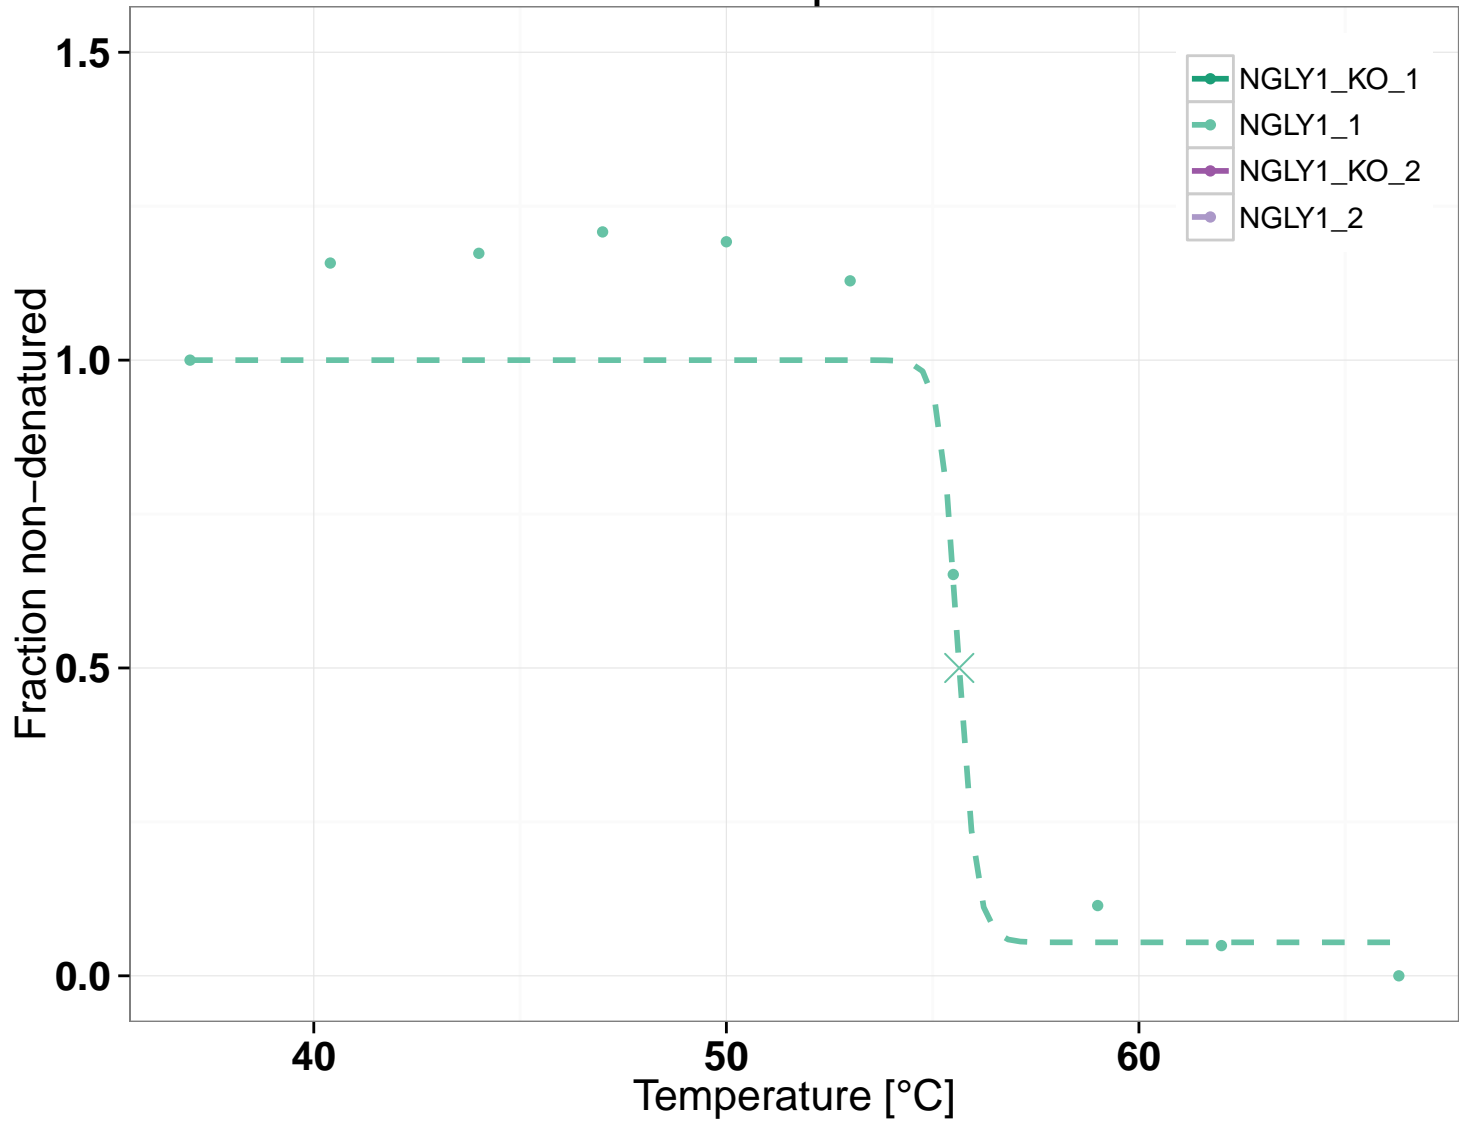

|            | meltPoint | slope | plateau | R2   |
|------------|-----------|-------|---------|------|
| NGLY1_KO_1 | -         | -     | -       | -    |
| NGLY1_1    | 55.65     | -1.1  | 0.05    | 0.93 |
| NGLY1_KO_2 | -         | -     | -       | -    |
| NGLY1_2    | -         | -     | -       | -    |

Supplement: Supplementary file 4167 [file 1]

IPI00514538.2|TMEM63B

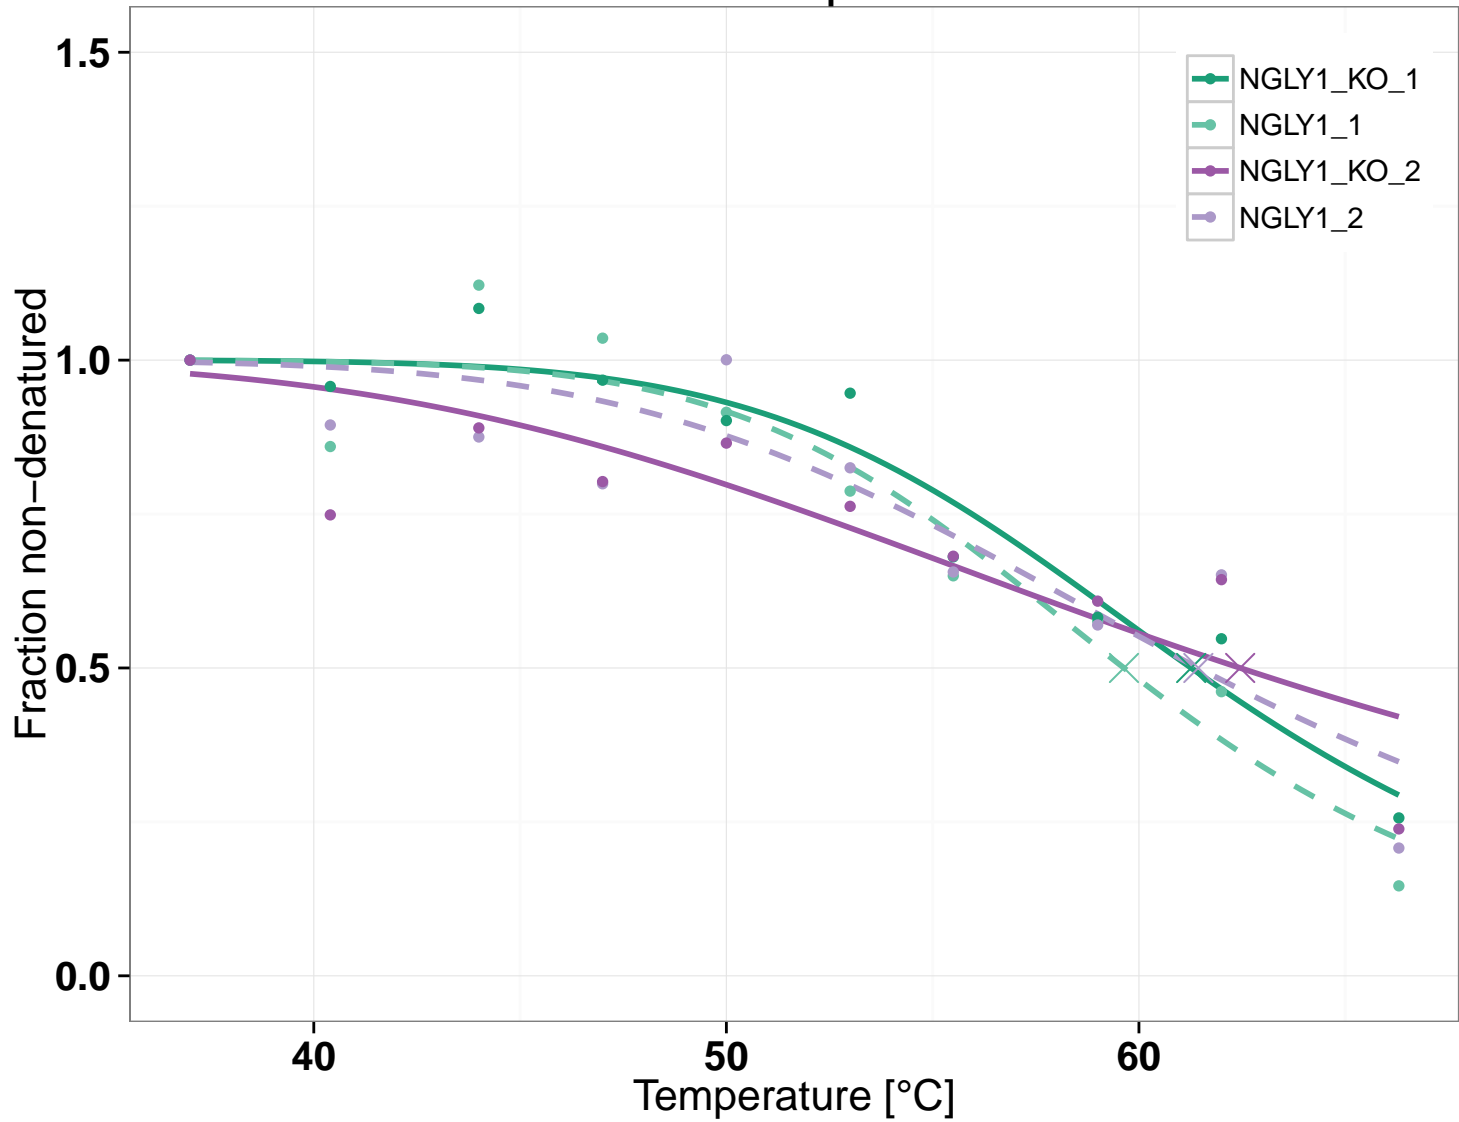

|            | meltPoint | slope  | plateau | R2   |
|------------|-----------|--------|---------|------|
| NGLY1_KO_1 | 61.27     | -0.049 | 0       | 0.94 |
| NGLY1_1    | 59.64     | -0.054 | 0       | 0.92 |
| NGLY1_KO_2 | 62.45     | -0.025 | 0       | 0.73 |
| NGLY1_2    | 61.44     | -0.037 | 0       | 0.8  |

Supplement: Supplementary file 4168 [file 1]

# IPI00295022.6|NKTR

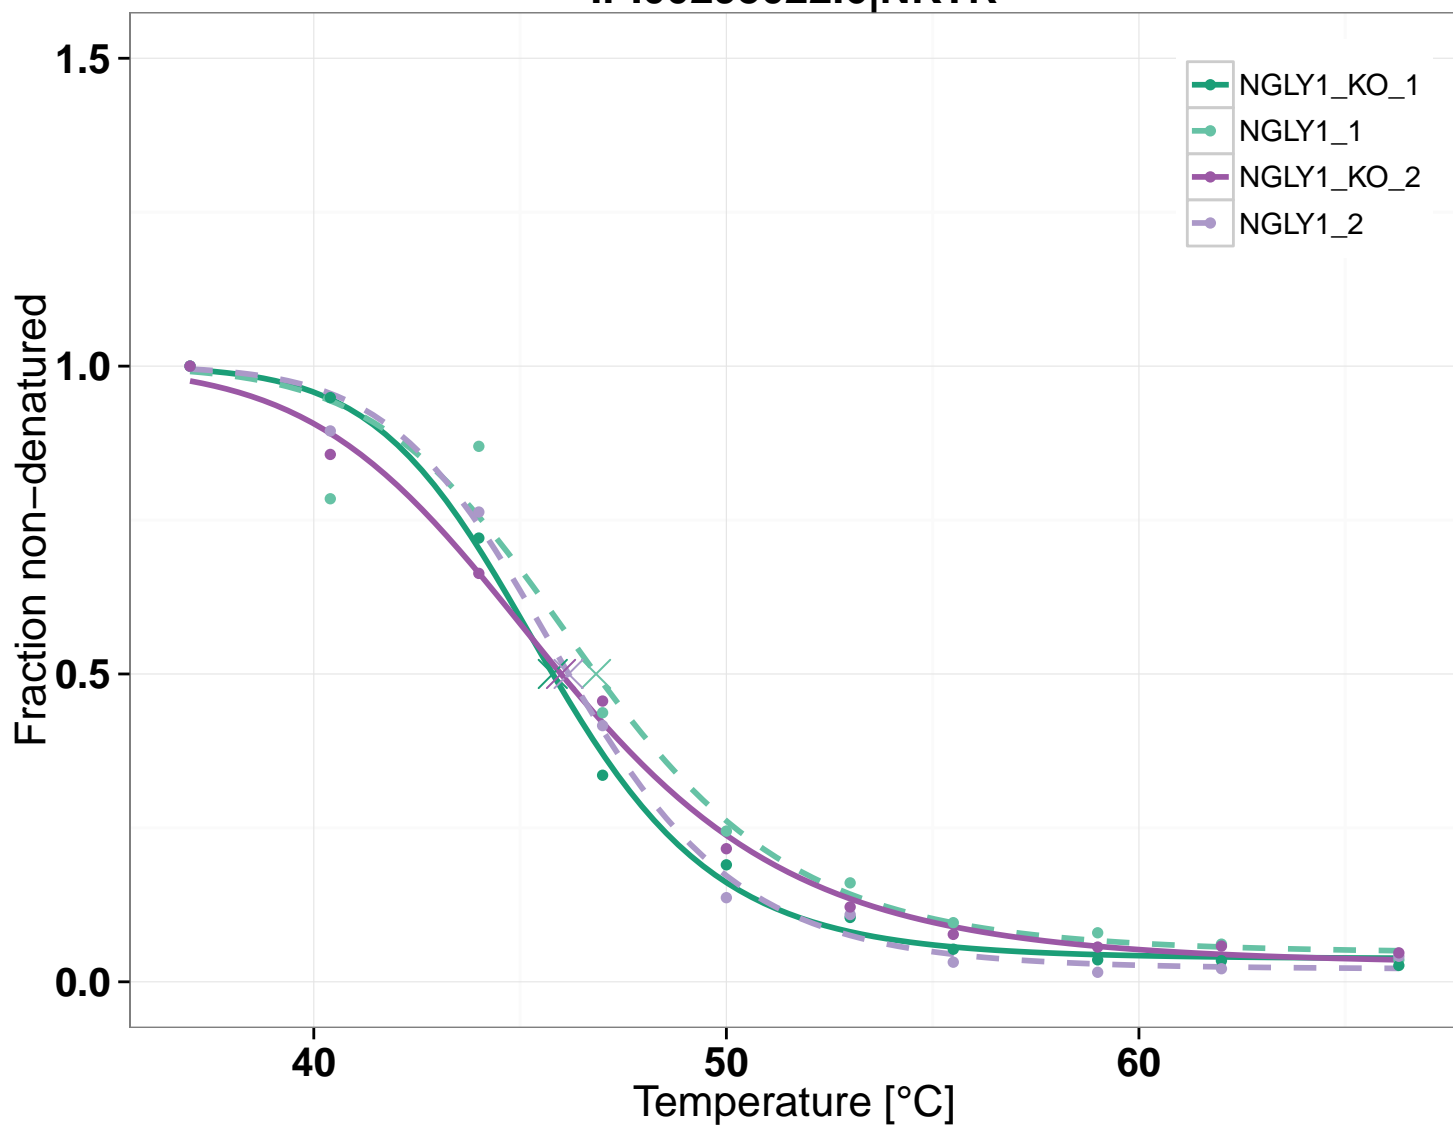

|            | meltPoint | slope  | plateau | R2   |
|------------|-----------|--------|---------|------|
| NGLY1_KO_1 | 45.79     | -0.12  | 0.04    | 1    |
| NGLY1_1    | 46.84     | -0.094 | 0.05    | 0.97 |
| NGLY1_KO_2 | 45.99     | -0.083 | 0.03    | 1    |
| NGLY1_2    | 46.18     | -0.12  | 0.02    | 0.99 |

Supplement: Supplementary file 4169 [file 1]

# IPI00034159.1|ATP6V0D1

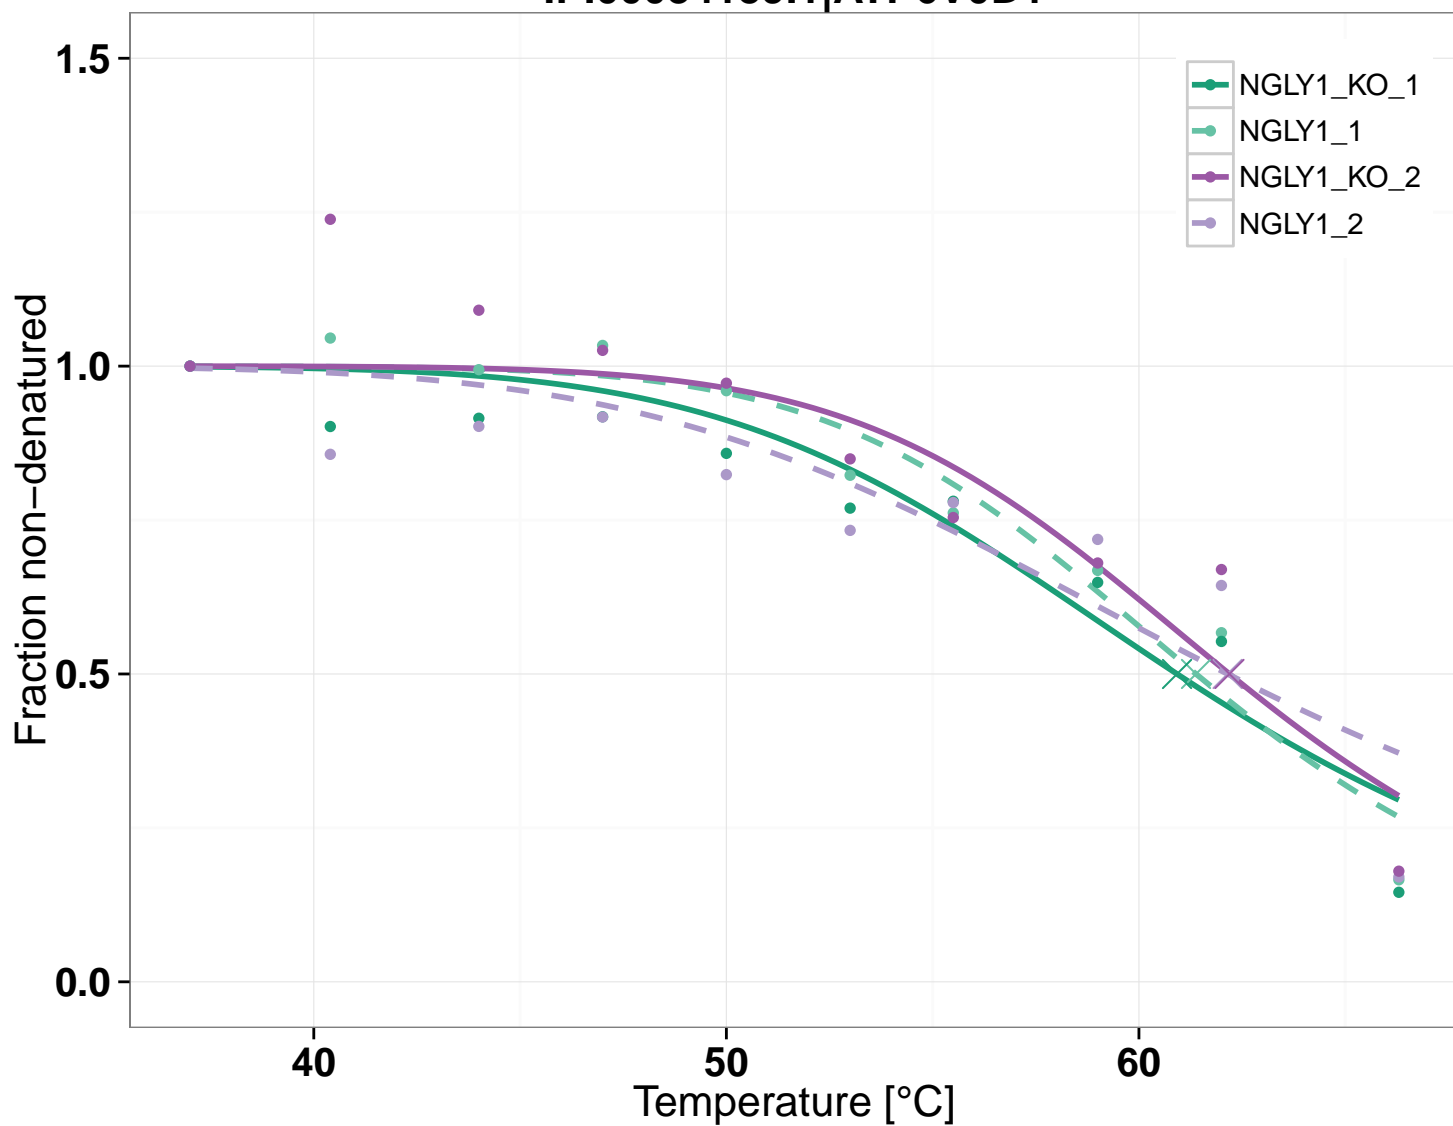

|            | meltPoint | slope  | plateau | R2   |
|------------|-----------|--------|---------|------|
| NGLY1_KO_1 | 60.92     | -0.045 | 0       | 0.89 |
| NGLY1_1    | 61.38     | -0.056 | 0       | 0.95 |
| NGLY1_KO_2 | 62.19     | -0.056 | 0       | 0.85 |
| NGLY1_2    | 62.15     | -0.036 | 0       | 0.78 |

Supplement: Supplementary file 4170 [file 1]

# IPI00026781.2|FASN

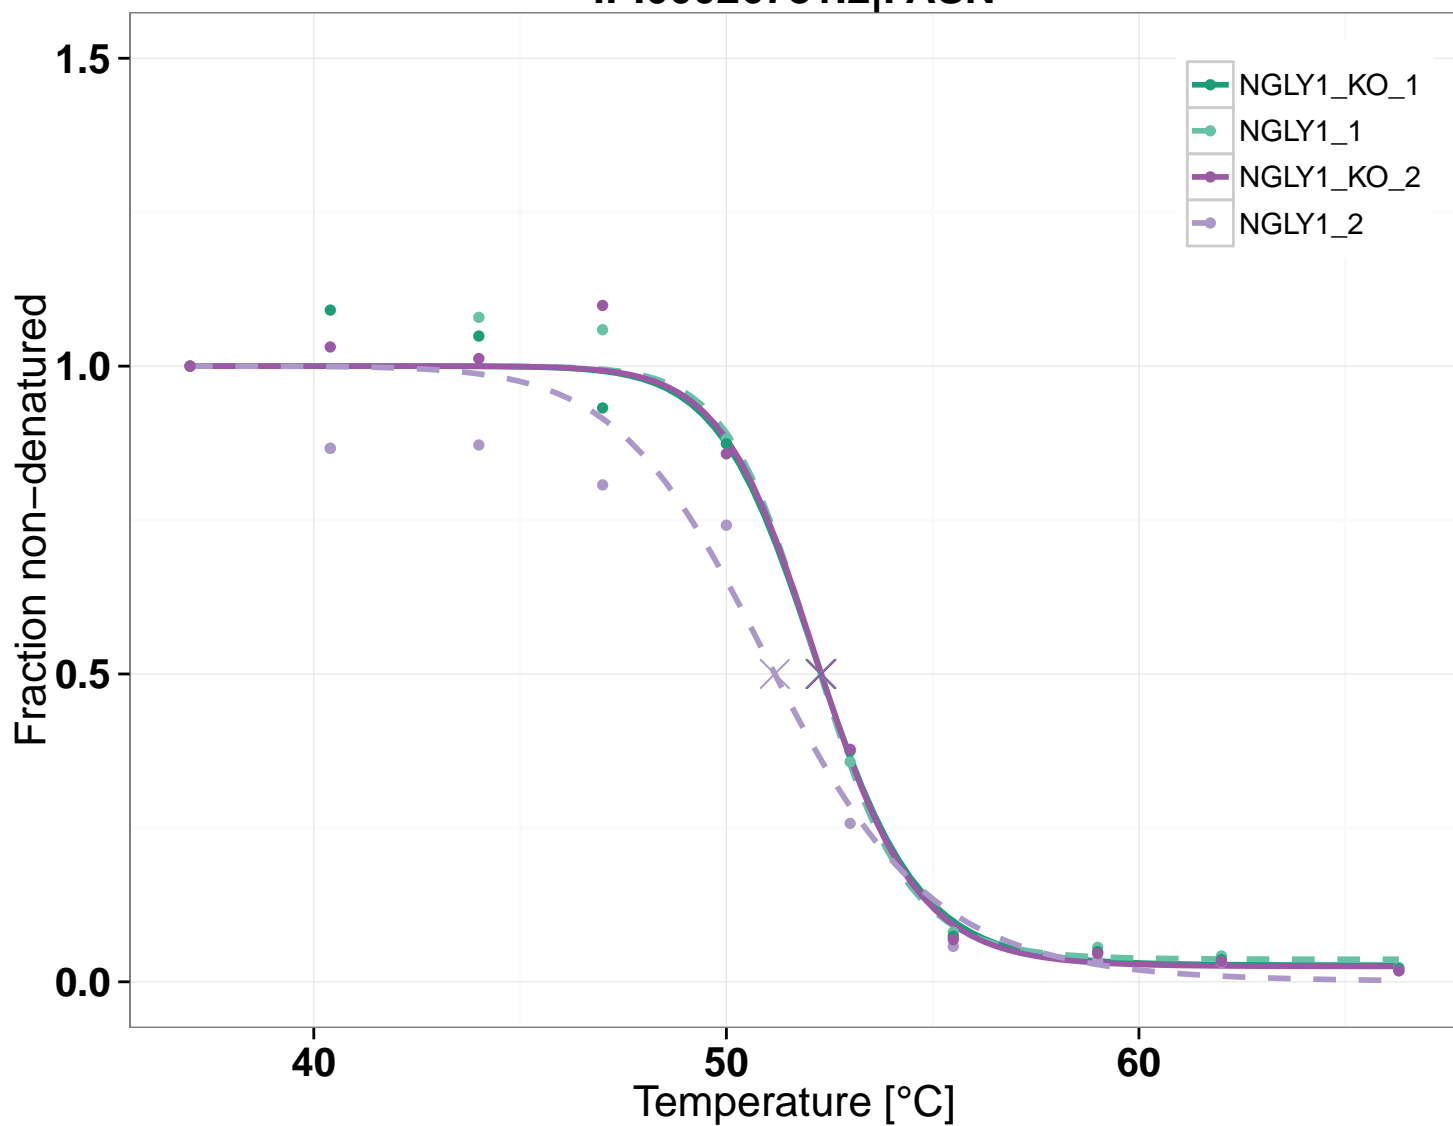

|            | meltPoint | slope | plateau | R2   |
|------------|-----------|-------|---------|------|
| NGLY1_KO_1 | 52.29     | -0.2  | 0.03    | 0.99 |
| NGLY1_1    | 52.28     | -0.22 | 0.04    | 0.99 |
| NGLY1_KO_2 | 52.3      | -0.21 | 0.02    | 0.99 |
| NGLY1_2    | 51.17     | -0.13 | 0       | 0.97 |

Supplement: Supplementary file 4171 [file 1]

IPI00031140.3|MGC13057

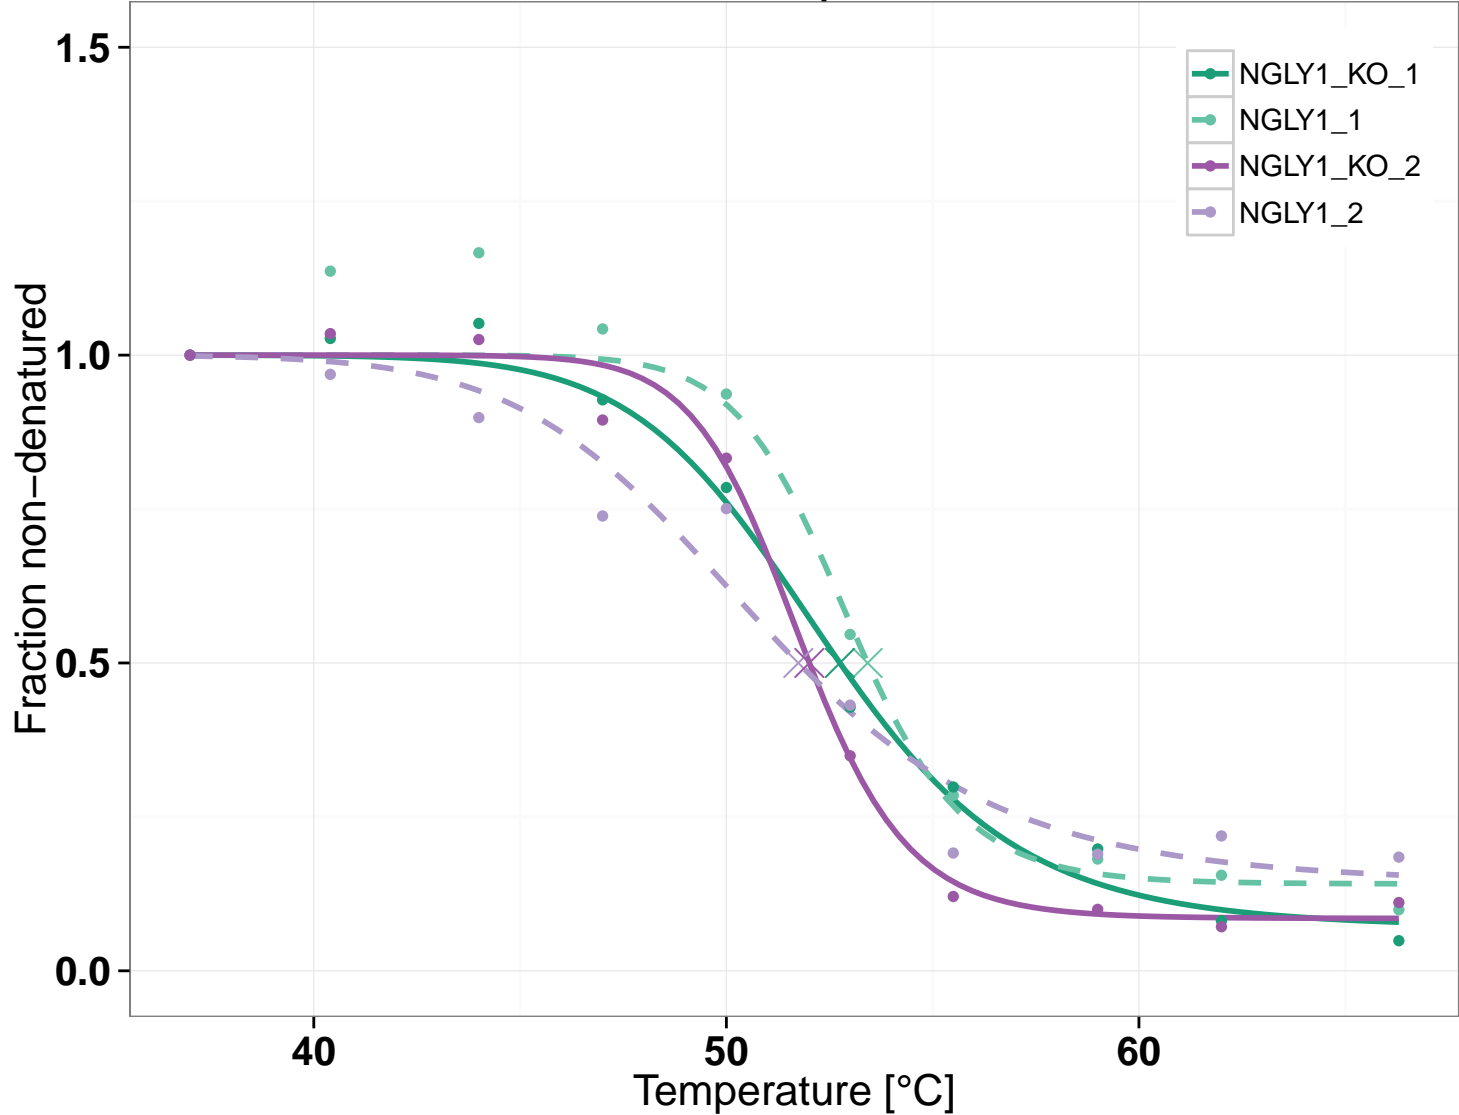

|            | meltPoint | slope  | plateau | R2   |
|------------|-----------|--------|---------|------|
| NGLY1_KO_1 | 52.75     | -0.099 | 0.07    | 0.99 |
| NGLY1_1    | 53.42     | -0.16  | 0.14    | 0.97 |
| NGLY1_KO_2 | 52.01     | -0.18  | 0.09    | 0.99 |
| NGLY1_2    | 51.74     | -0.074 | 0.14    | 0.96 |

Supplement: Supplementary file 4172 [file 1]

IPI00009371.3|IPPK

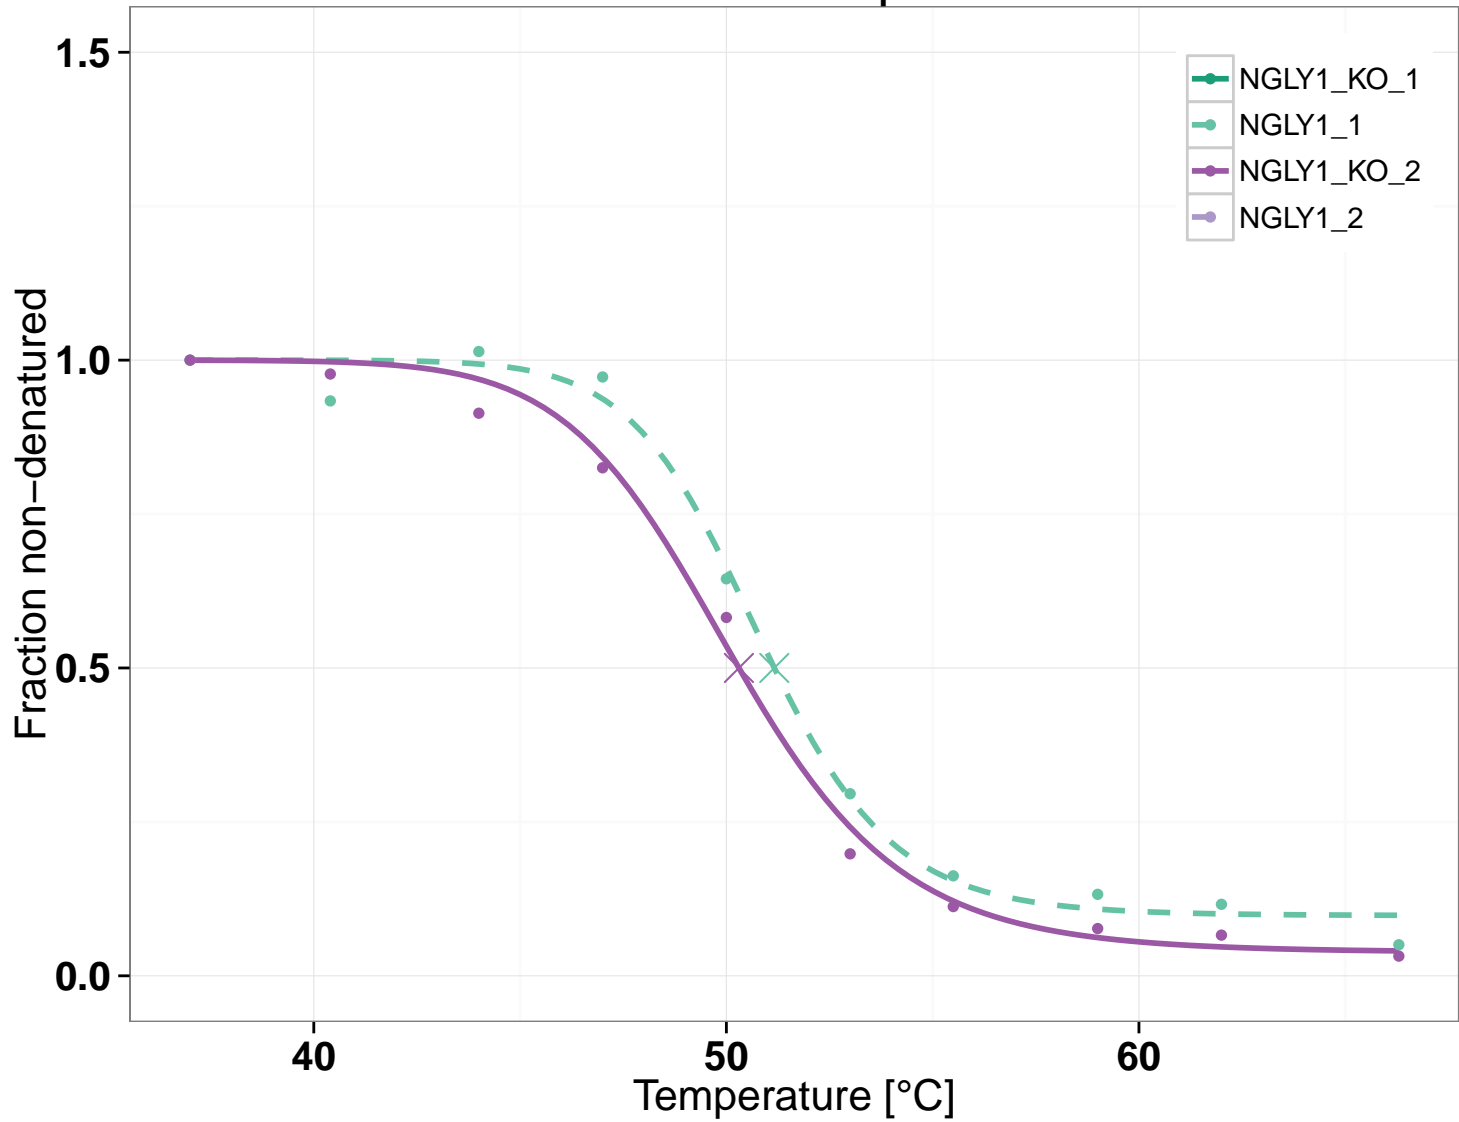

|            | meltPoint | slope | plateau | R2   |
|------------|-----------|-------|---------|------|
| NGLY1_KO_1 | -         | -     | -       | -    |
| NGLY1_1    | 51.16     | -0.14 | 0.1     | 0.99 |
| NGLY1_KO_2 | 50.3      | -0.12 | 0.04    | 0.99 |
| NGLY1_2    | -         | -     | -       | -    |

Supplement: Supplementary file 4173 [file 1]

IPI00013174.2|RBM14

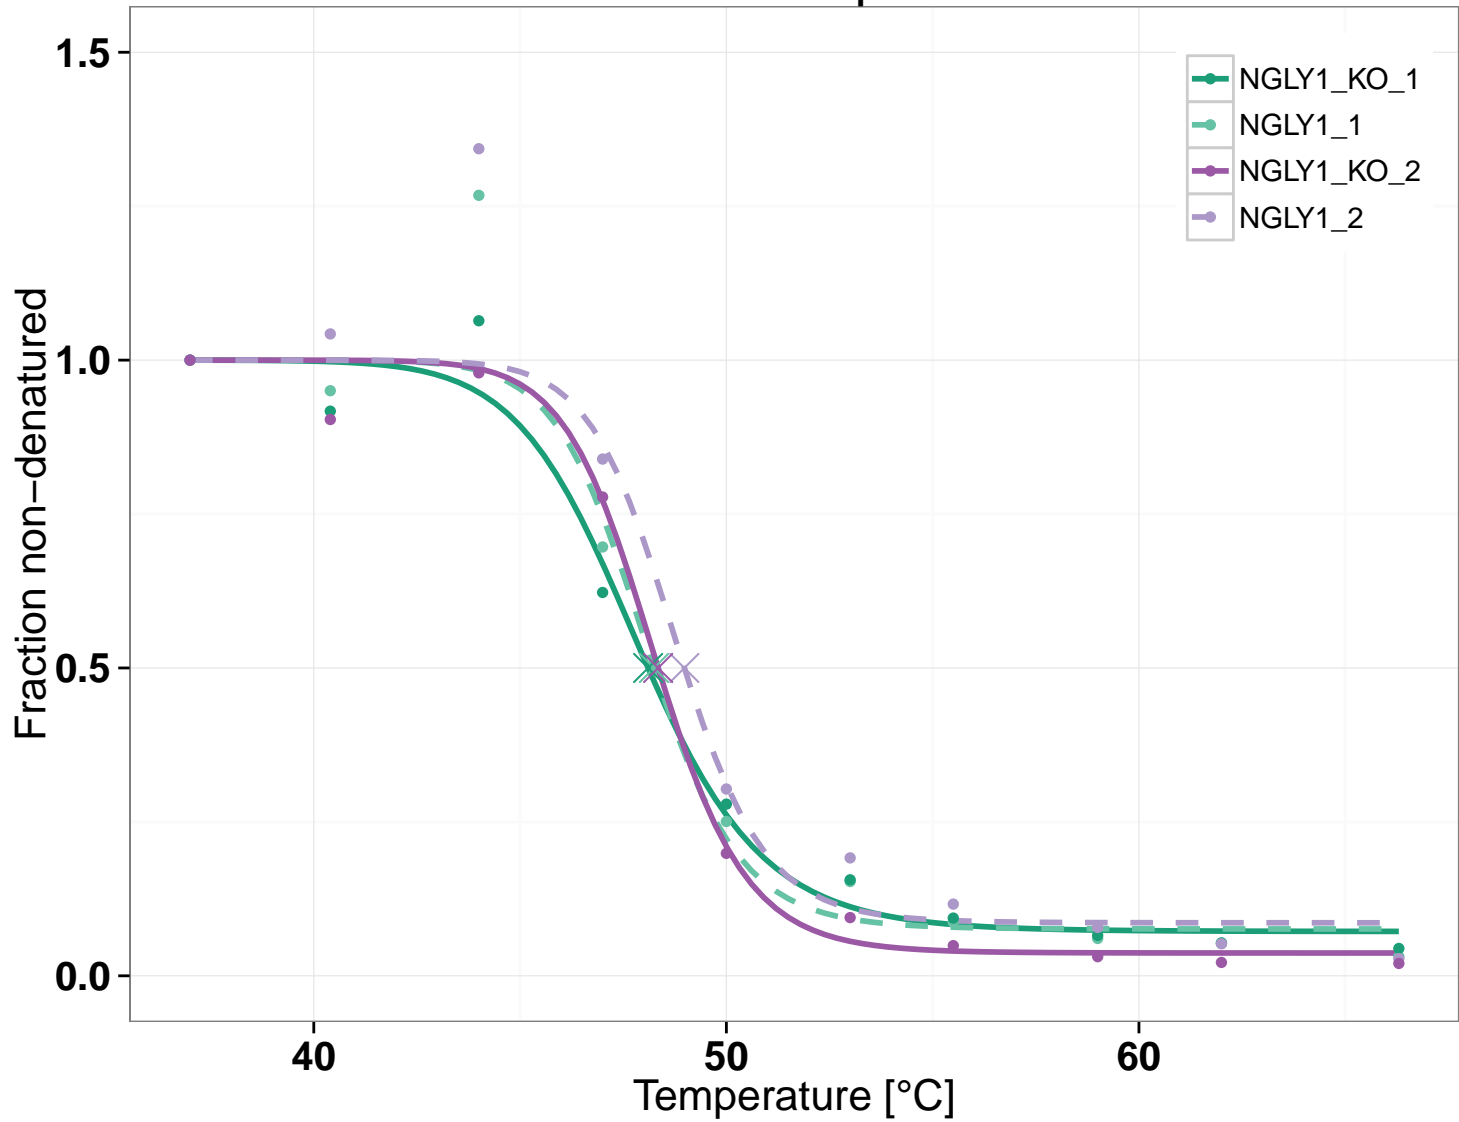

|            | meltPoint | slope | plateau | R2   |
|------------|-----------|-------|---------|------|
| NGLY1_KO_1 | 48.1      | -0.16 | 0.07    | 0.98 |
| NGLY1_1    | 48.25     | -0.21 | 0.08    | 0.95 |
| NGLY1_KO_2 | 48.35     | -0.22 | 0.04    | 0.99 |
| NGLY1_2    | 48.98     | -0.22 | 0.09    | 0.94 |

Supplement: Supplementary file 4174 [file 1]

# IPI00908949.1|TARS

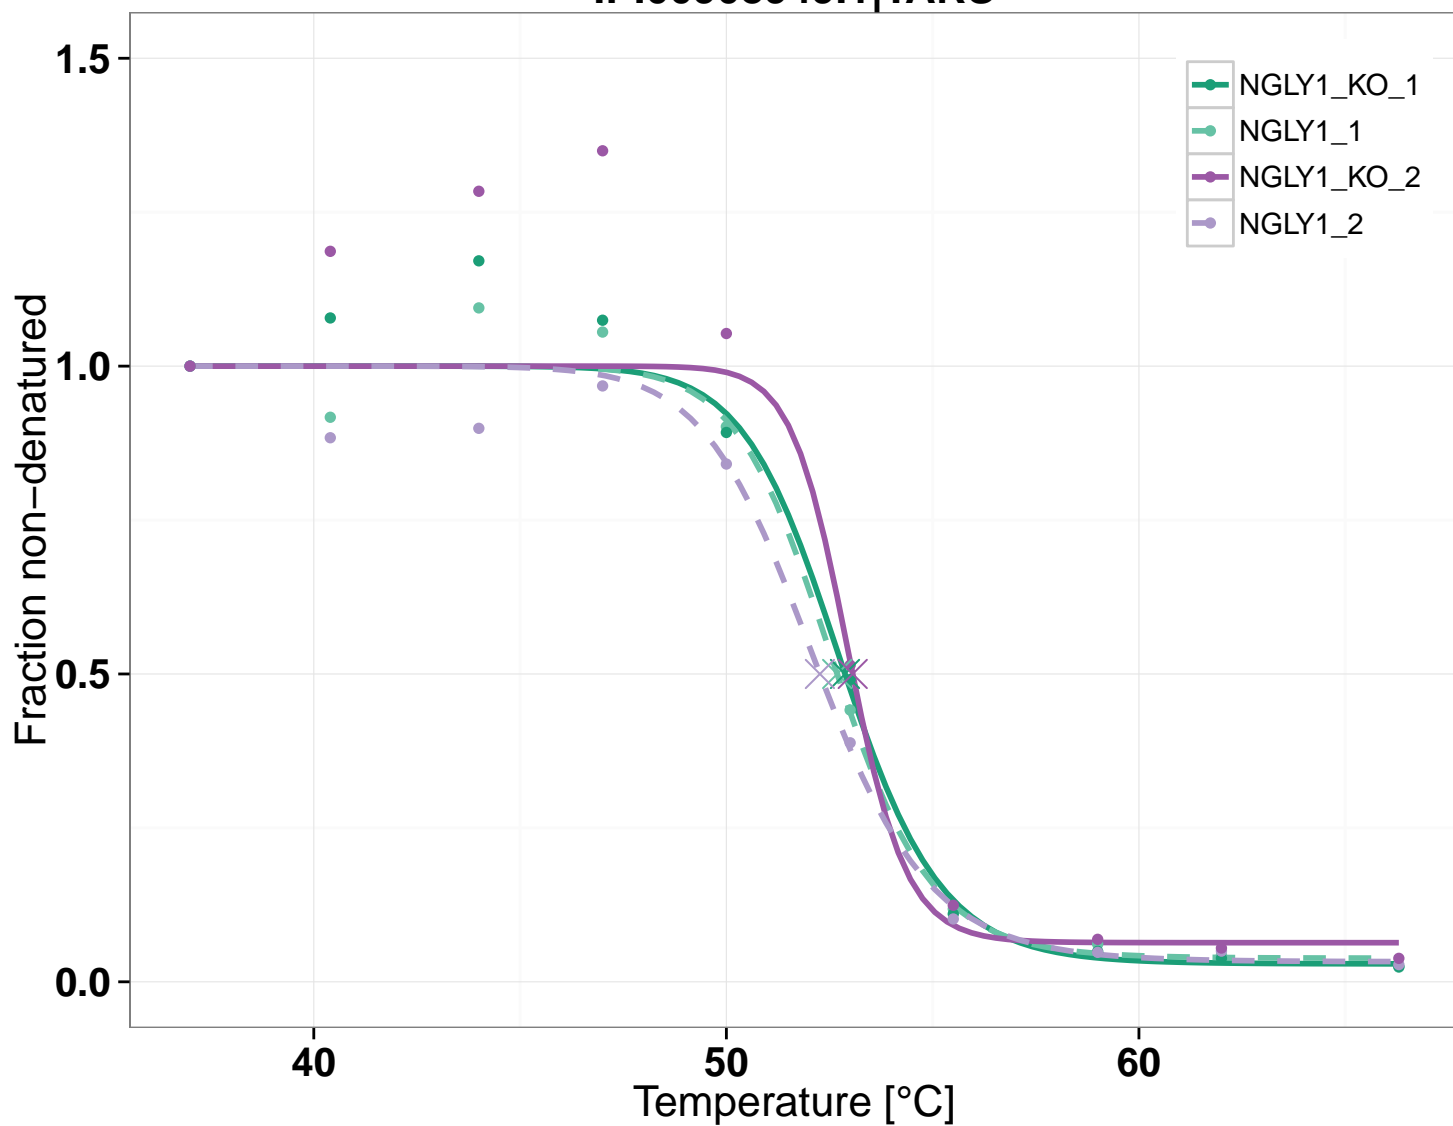

|            | meltPoint | slope | plateau | R2   |
|------------|-----------|-------|---------|------|
| NGLY1_KO_1 | 52.88     | -0.2  | 0.03    | 0.98 |
| NGLY1_1    | 52.69     | -0.2  | 0.04    | 0.99 |
| NGLY1_KO_2 | 53.06     | -0.34 | 0.06    | 0.91 |
| NGLY1_2    | 52.27     | -0.18 | 0.03    | 0.99 |

Supplement: Supplementary file 4175 [file 1]

IPI00329723.5|TRMT12

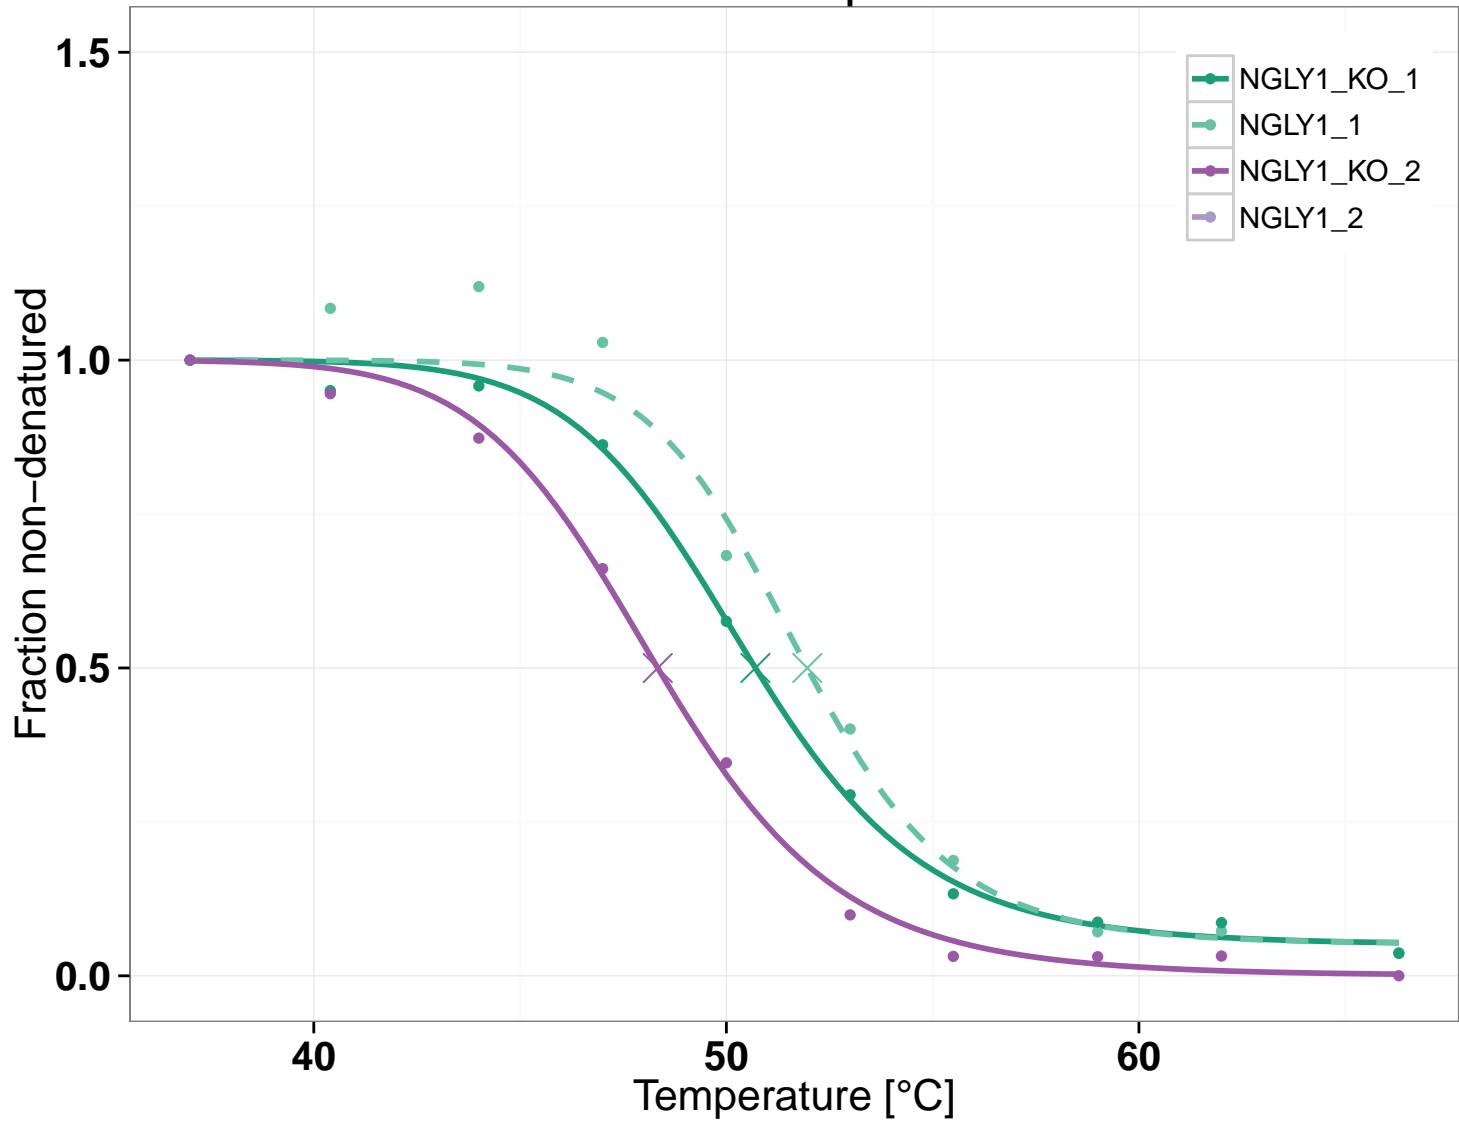

|            | meltPoint | slope | plateau | R2   |
|------------|-----------|-------|---------|------|
| NGLY1_KO_1 | 50.7      | -0.11 | 0.05    | 1    |
| NGLY1_1    | 51.96     | -0.13 | 0.05    | 0.98 |
| NGLY1_KO_2 | 48.34     | -0.11 | 0       | 1    |
| NGLY1_2    | -         | -     | -       | -    |

Supplement: Supplementary file 4176 [file 1]

# IPI00784023.1|MBTD1

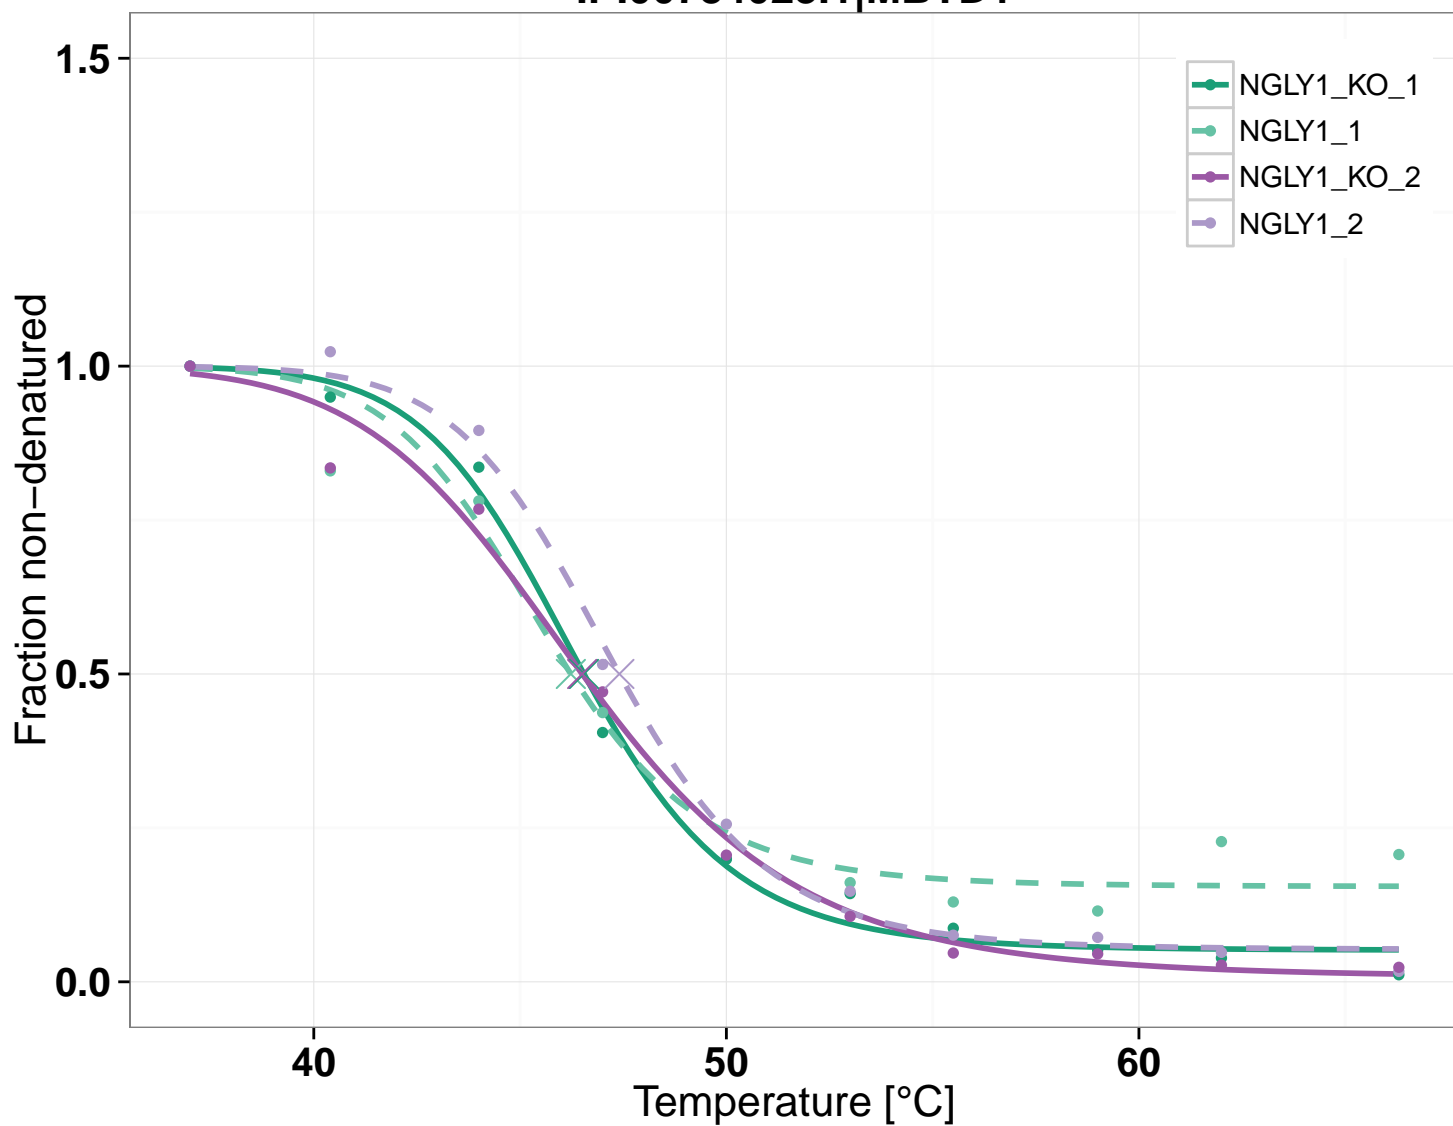

|            | meltPoint | slope  | plateau | R2   |
|------------|-----------|--------|---------|------|
| NGLY1_KO_1 | 46.55     | -0.13  | 0.05    | 0.99 |
| NGLY1_1    | 46.23     | -0.11  | 0.15    | 0.97 |
| NGLY1_KO_2 | 46.51     | -0.093 | 0.01    | 0.99 |
| NGLY1_2    | 47.41     | -0.12  | 0.05    | 1    |

Supplement: Supplementary file 4177 [file 1]

# IPI00847168.2|RSU1

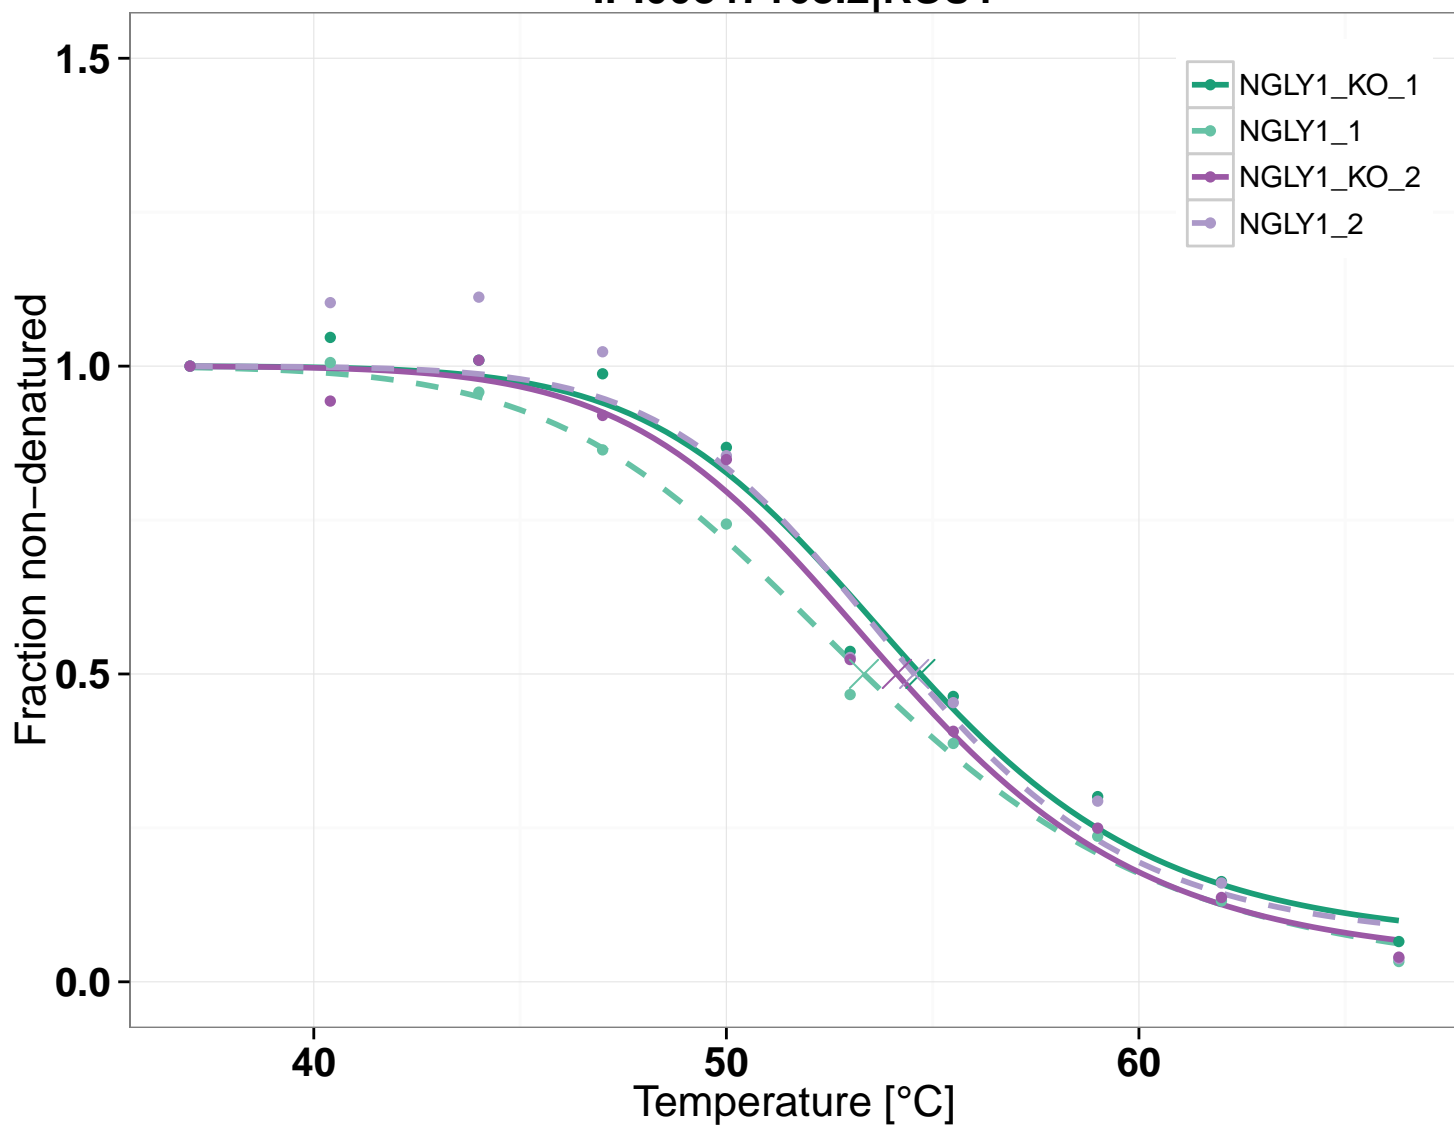

|            | meltPoint | slope  | plateau | R2   |
|------------|-----------|--------|---------|------|
| NGLY1_KO_1 | 54.7      | -0.076 | 0.06    | 0.99 |
| NGLY1_1    | 53.34     | -0.066 | 0       | 1    |
| NGLY1_KO_2 | 54.13     | -0.077 | 0.03    | 0.99 |
| NGLY1_2    | 54.55     | -0.081 | 0.06    | 0.97 |

Supplement: Supplementary file 4178 [file 1]

# IPI00098902.4|OGDH

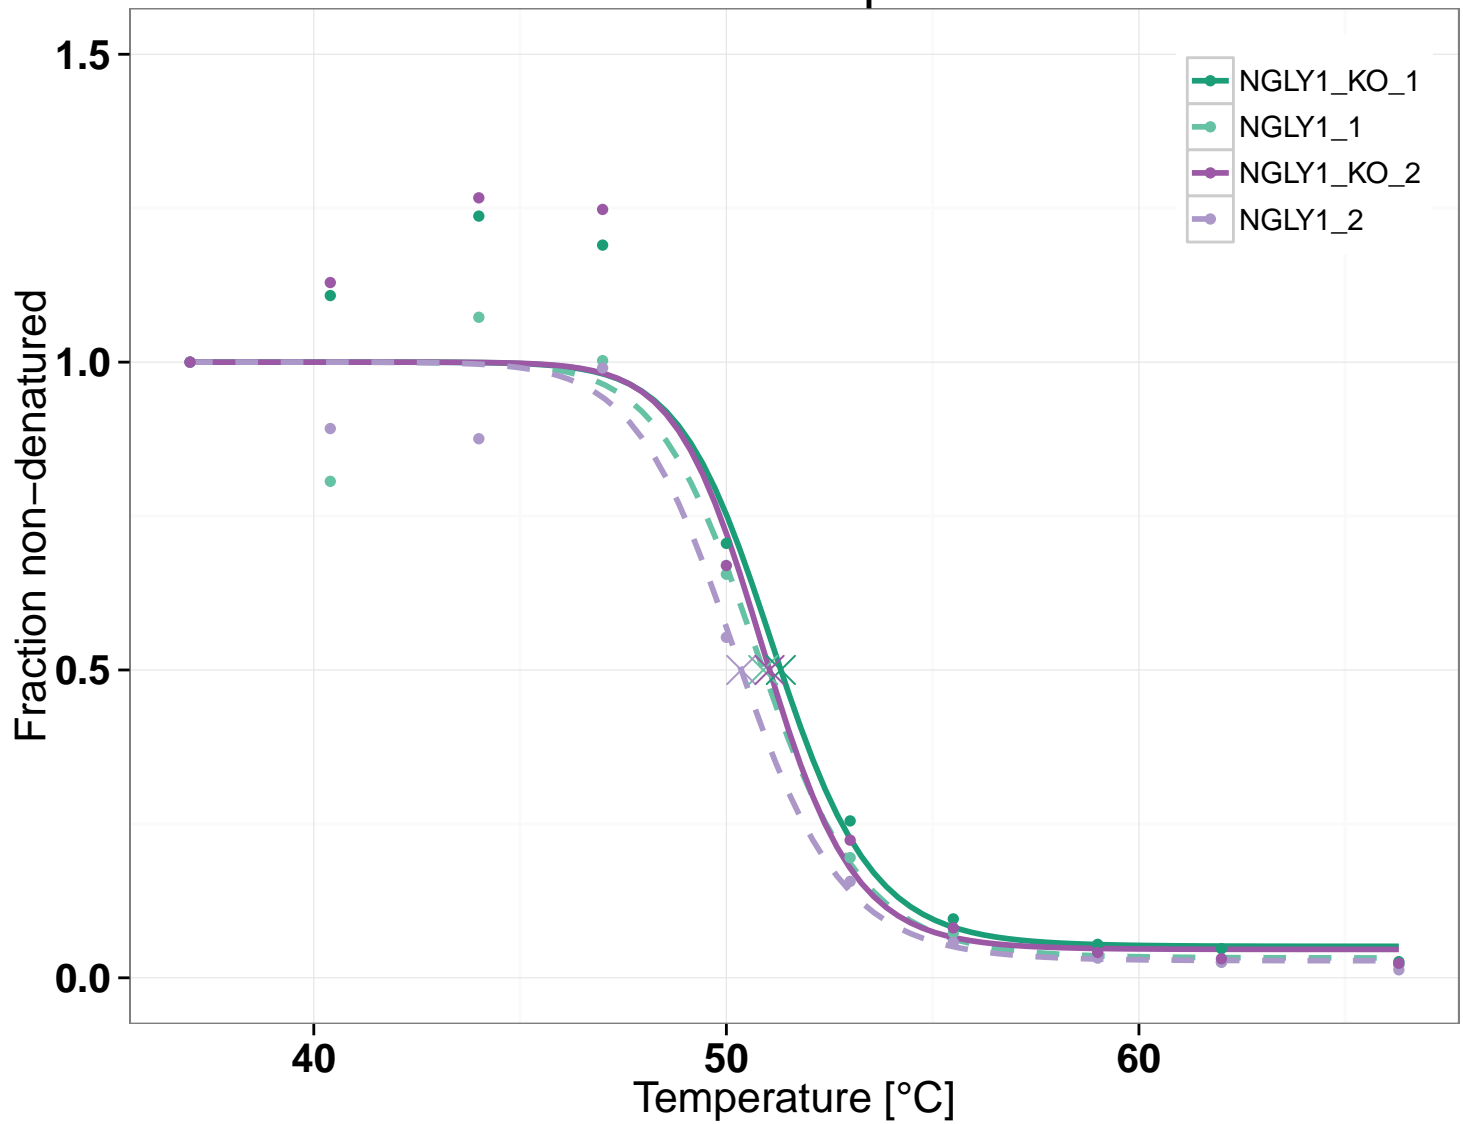

|            | meltPoint | slope | plateau | R2   |
|------------|-----------|-------|---------|------|
| NGLY1_KO_1 | 51.32     | -0.2  | 0.05    | 0.95 |
| NGLY1_1    | 50.89     | -0.19 | 0.03    | 0.98 |
| NGLY1_KO_2 | 51.05     | -0.22 | 0.05    | 0.94 |
| NGLY1_2    | 50.36     | -0.19 | 0.03    | 0.98 |

Supplement: Supplementary file 4179 [file 1]

# IPI00294903.3|PMM1

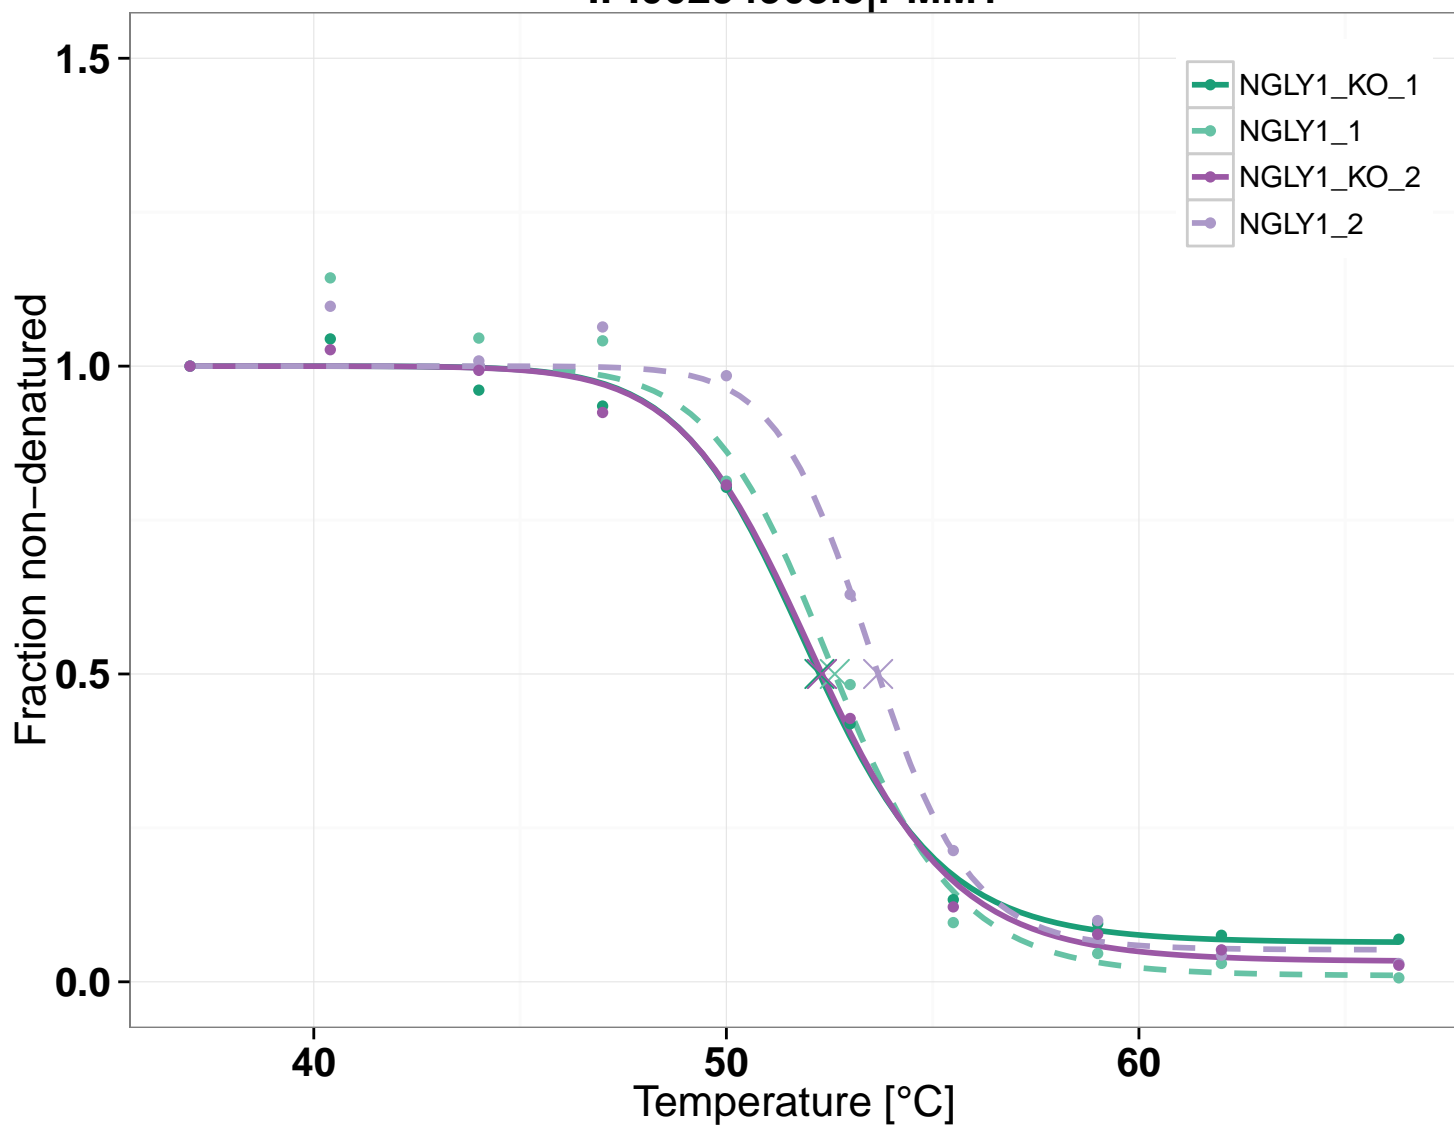

|            | meltPoint | slope | plateau | R2   |
|------------|-----------|-------|---------|------|
| NGLY1_KO_1 | 52.26     | -0.15 | 0.06    | 1    |
| NGLY1_1    | 52.63     | -0.17 | 0.01    | 0.98 |
| NGLY1_KO_2 | 52.32     | -0.15 | 0.03    | 1    |
| NGLY1_2    | 53.68     | -0.2  | 0.05    | 0.99 |

Supplement: Supplementary file 4180 [file 1]

# IPI00011488.4|STK4

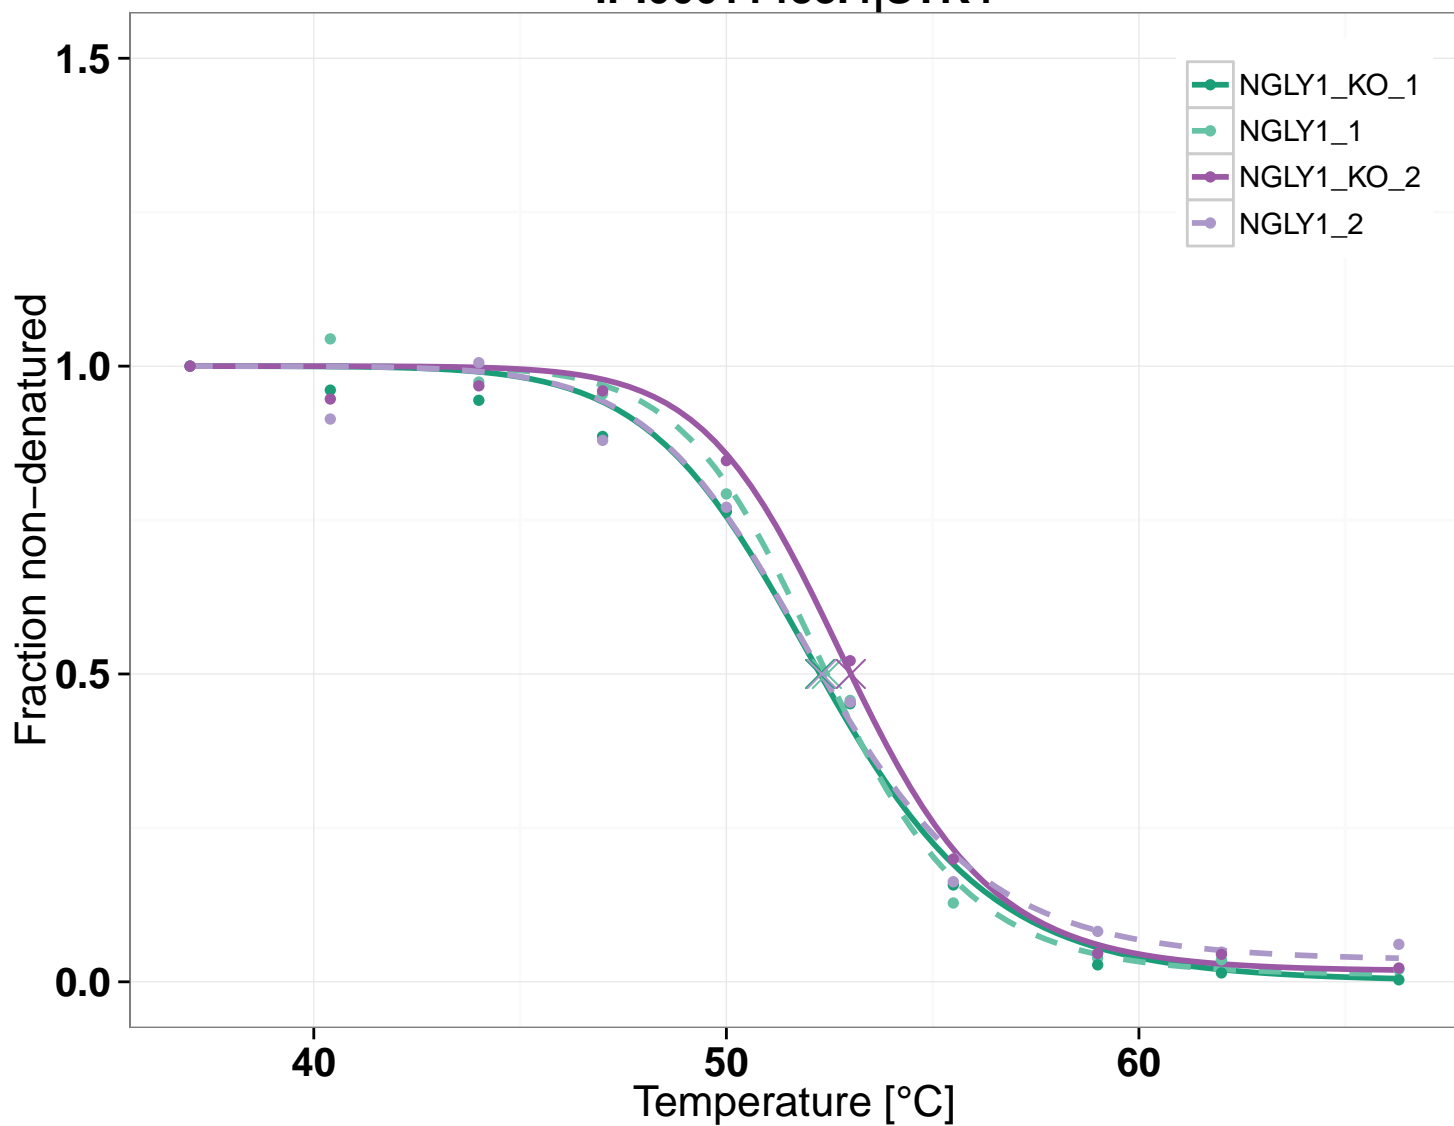

|            | meltPoint | slope | plateau | R2   |
|------------|-----------|-------|---------|------|
| NGLY1_KO_1 | 52.27     | -0.12 | 0       | 0.99 |
| NGLY1_1    | 52.44     | -0.14 | 0.01    | 1    |
| NGLY1_KO_2 | 53.02     | -0.14 | 0.02    | 1    |
| NGLY1_2    | 52.31     | -0.12 | 0.03    | 0.99 |

Supplement: Supplementary file 4181 [file 1]

# IPI00872620.1|OSTC

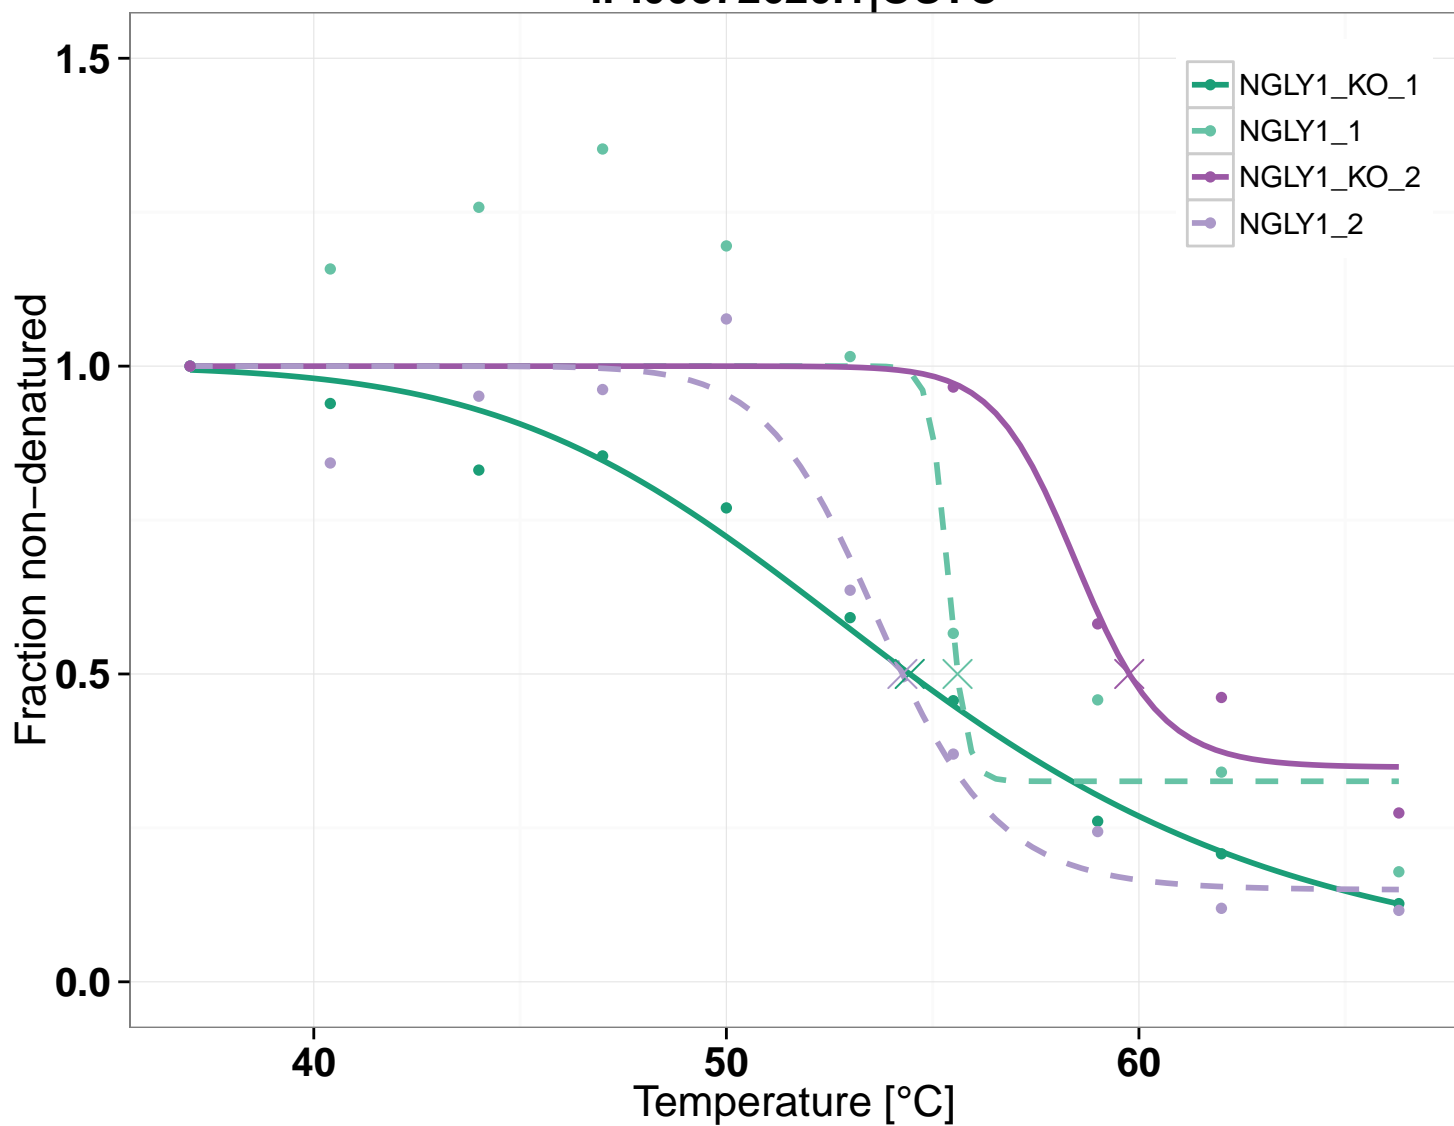

|            | meltPoint | slope  | plateau | R2    |
|------------|-----------|--------|---------|-------|
| NGLY1_KO_1 | 54.44     | -0.051 | 0       | 0.98  |
| NGLY1_1    | 55.6      | -0.76  | 0.33    | 0.82  |
| NGLY1_KO_2 | 59.77     | -0.16  | 0.35    | -0.08 |
| NGLY1_2    | 54.27     | -0.15  | 0.15    | 0.96  |

Supplement: Supplementary file 4182 [file 1]

IPI00168357.1|INO80E

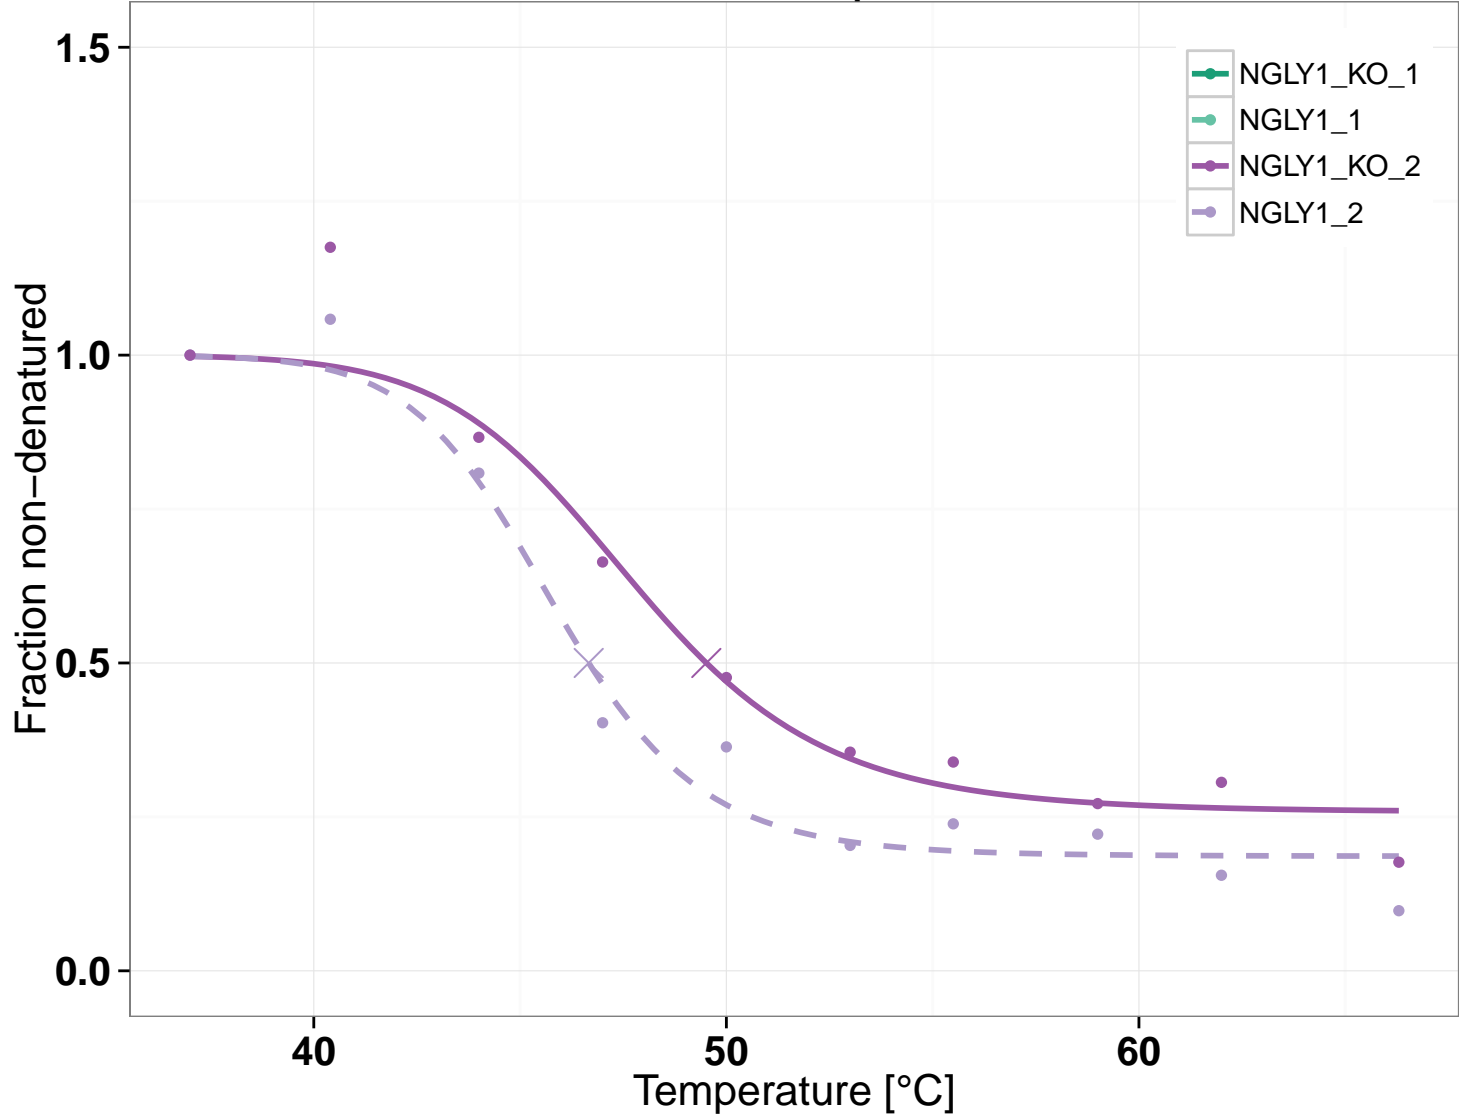

|            | meltPoint | slope | plateau | R2   |
|------------|-----------|-------|---------|------|
| NGLY1_KO_1 | -         | -     | -       | -    |
| NGLY1_1    | -         | -     | -       | -    |
| NGLY1_KO_2 | 49.51     | -0.08 | 0.26    | 0.95 |
| NGLY1_2    | 46.66     | -0.12 | 0.19    | 0.97 |

Supplement: Supplementary file 4183 [file 1]

# IPI00029132.3|BTK

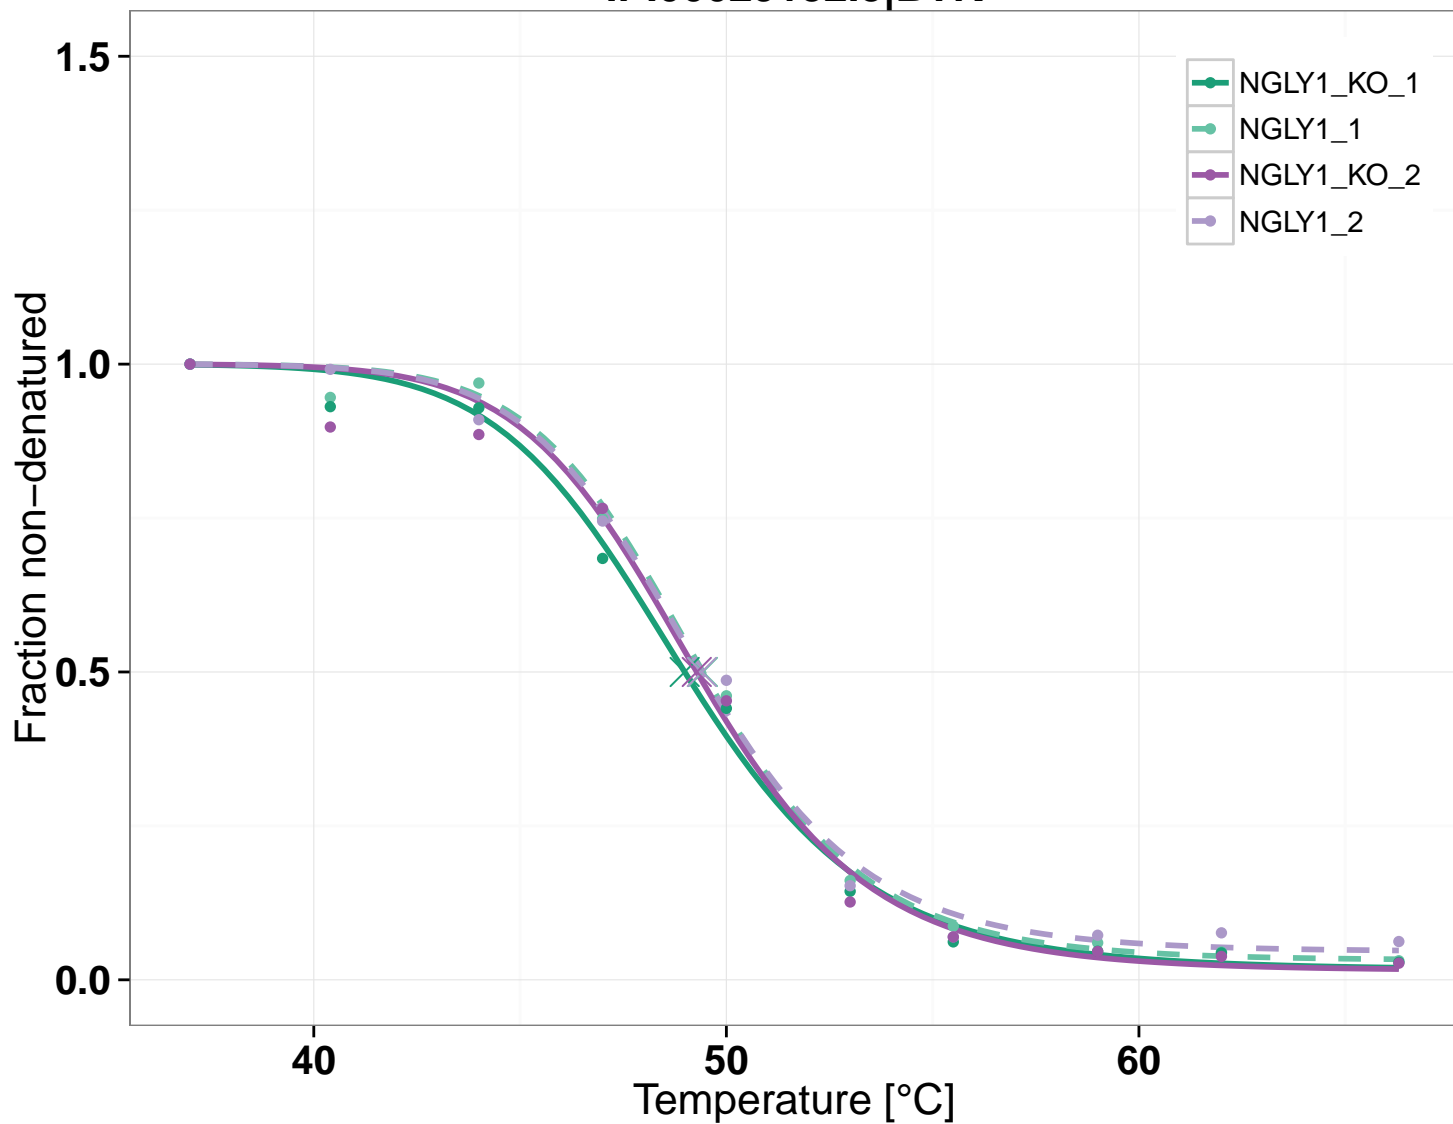

|            | meltPoint | slope | plateau | R2   |
|------------|-----------|-------|---------|------|
| NGLY1_KO_1 | 48.99     | -0.11 | 0.02    | 0.99 |
| NGLY1_1    | 49.43     | -0.12 | 0.03    | 1    |
| NGLY1_KO_2 | 49.28     | -0.12 | 0.01    | 0.99 |
| NGLY1_2    | 49.4      | -0.12 | 0.05    | 0.99 |

Supplement: Supplementary file 4184 [file 1]

# IPI00470407.3|NARG2

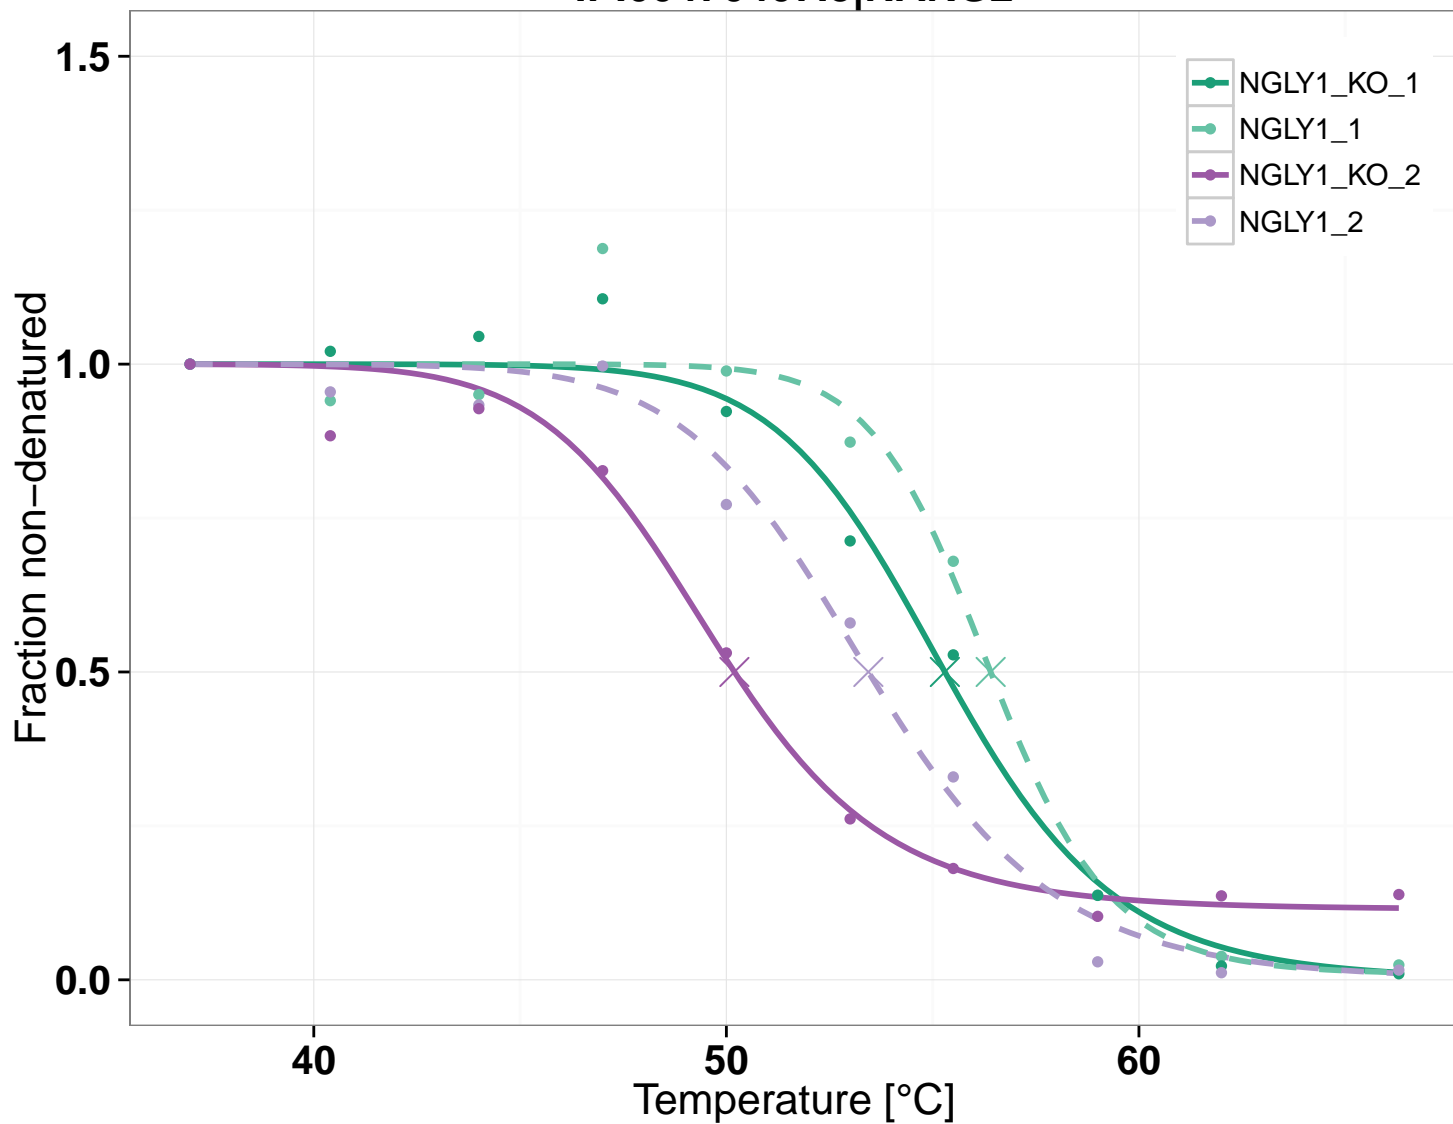

Supplement: Supplementary file 4185 [file 1]

IPI00153032.1|LTV1

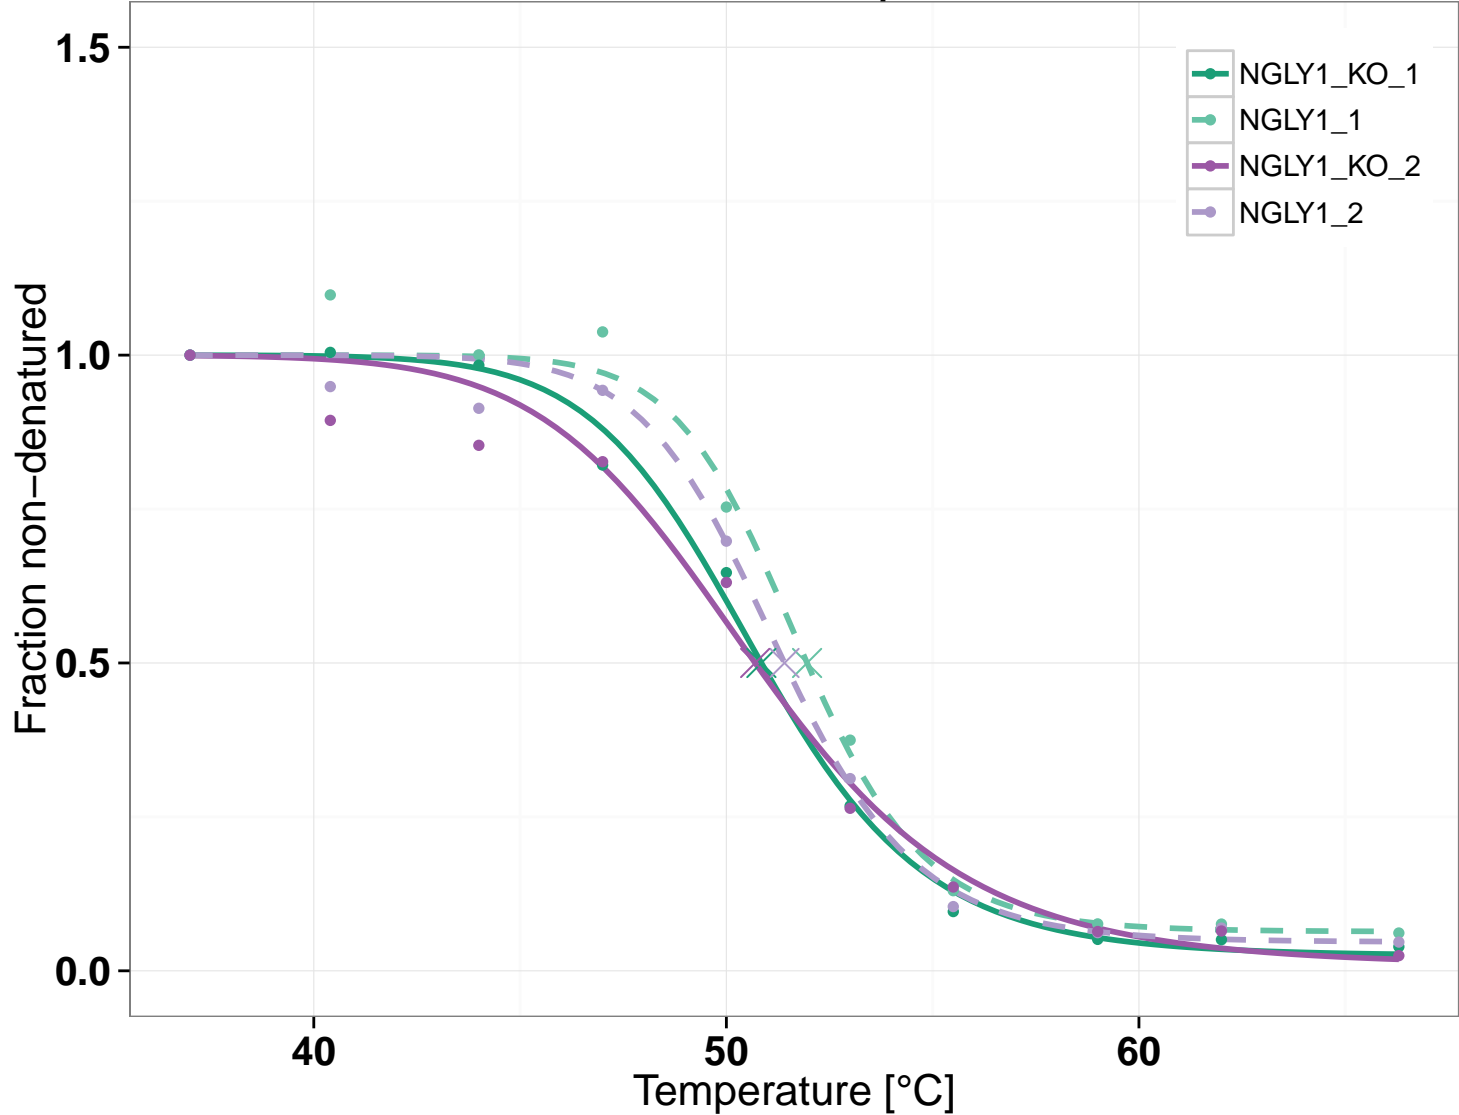

|            | meltPoint | slope  | plateau | R2   |
|------------|-----------|--------|---------|------|
| NGLY1_KO_1 | 50.85     | -0.12  | 0.02    | 1    |
| NGLY1_1    | 51.96     | -0.16  | 0.06    | 0.99 |
| NGLY1_KO_2 | 50.7      | -0.095 | 0.01    | 0.98 |
| NGLY1_2    | 51.41     | -0.14  | 0.05    | 0.99 |

Supplement: Supplementary file 4186 [file 1]

# IPI00102864.3|HK2

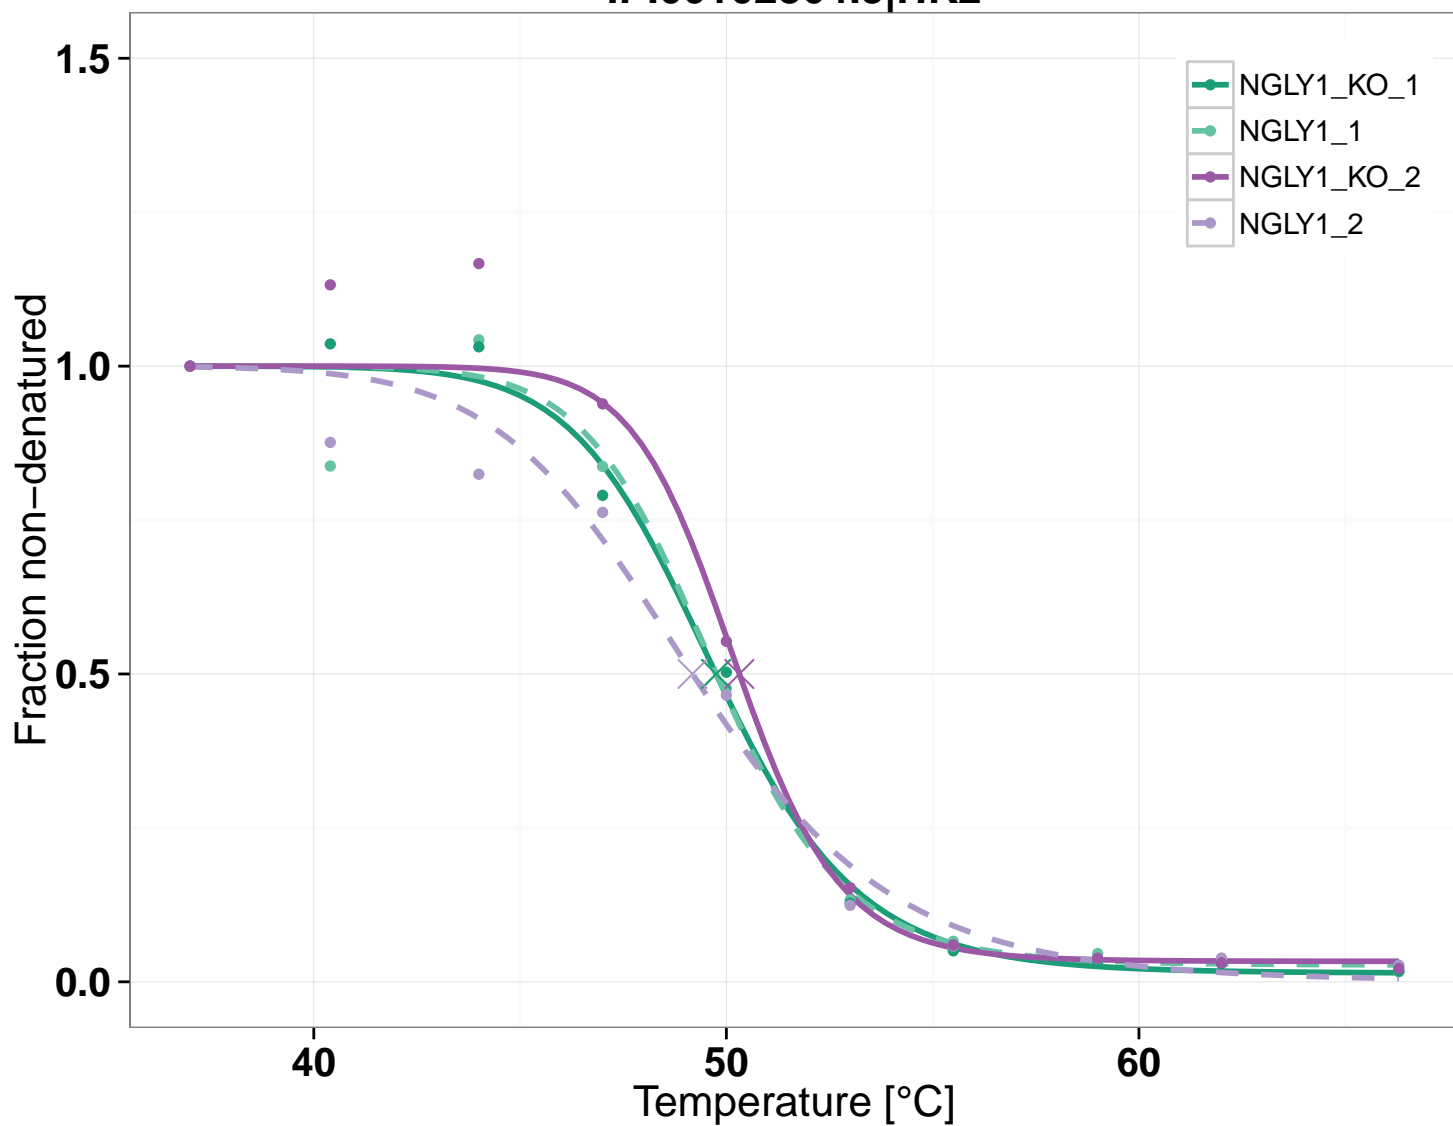

|            | meltPoint | slope | plateau | R2   |
|------------|-----------|-------|---------|------|
| NGLY1_KO_1 | 49.75     | -0.14 | 0.01    | 0.99 |
| NGLY1_1    | 49.76     | -0.15 | 0.03    | 0.98 |
| NGLY1_KO_2 | 50.32     | -0.19 | 0.03    | 0.98 |
| NGLY1_2    | 49.18     | -0.1  | 0       | 0.98 |

Supplement: Supplementary file 4187 [file 1]

IPI00004970.3|UTP20

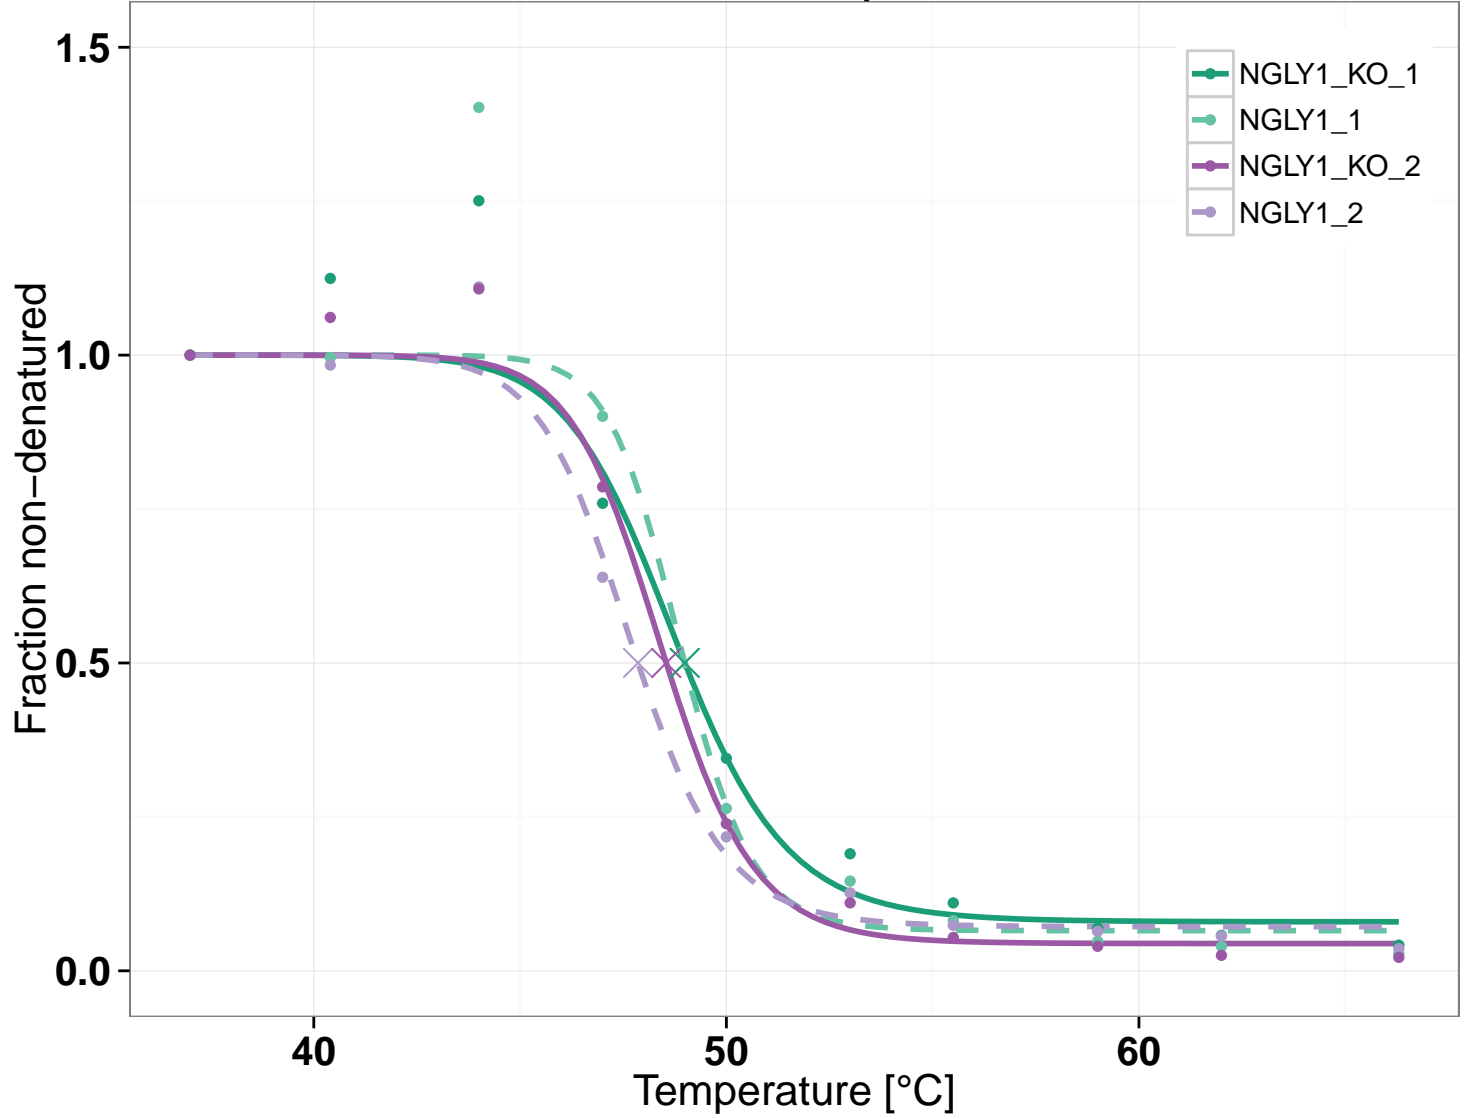

|            | meltPoint | slope | plateau | R2   |
|------------|-----------|-------|---------|------|
| NGLY1_KO_1 | 48.99     | -0.17 | 0.08    | 0.95 |
| NGLY1_1    | 48.99     | -0.27 | 0.07    | 0.93 |
| NGLY1_KO_2 | 48.54     | -0.21 | 0.04    | 0.99 |
| NGLY1_2    | 47.86     | -0.2  | 0.07    | 0.99 |

Supplement: Supplementary file 4188 [file 1]

IPI00290204.1|SNRNP70

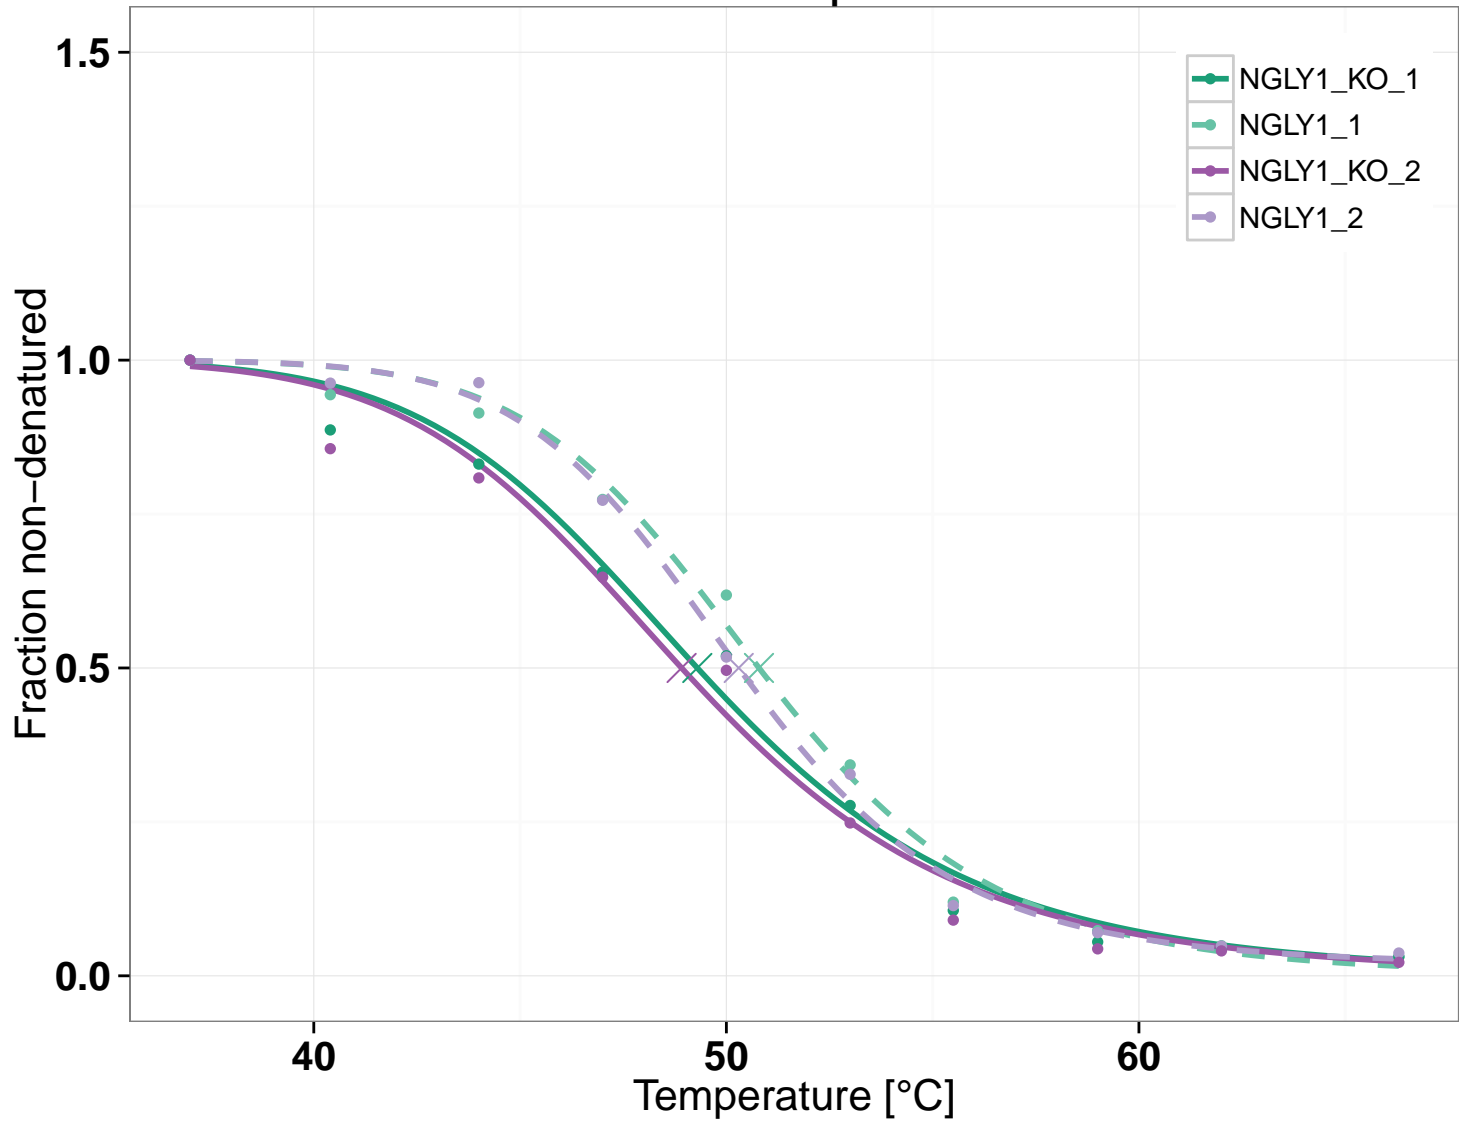

|            | meltPoint | slope  | plateau | R2   |
|------------|-----------|--------|---------|------|
| NGLY1_KO_1 | 49.3      | -0.074 | 0       | 0.99 |
| NGLY1_1    | 50.79     | -0.088 | 0       | 0.99 |
| NGLY1_KO_2 | 48.91     | -0.074 | 0       | 0.98 |
| NGLY1_2    | 50.3      | -0.093 | 0.02    | 1    |

Supplement: Supplementary file 4189 [file 1]

# IPI00219077.4|LTA4H

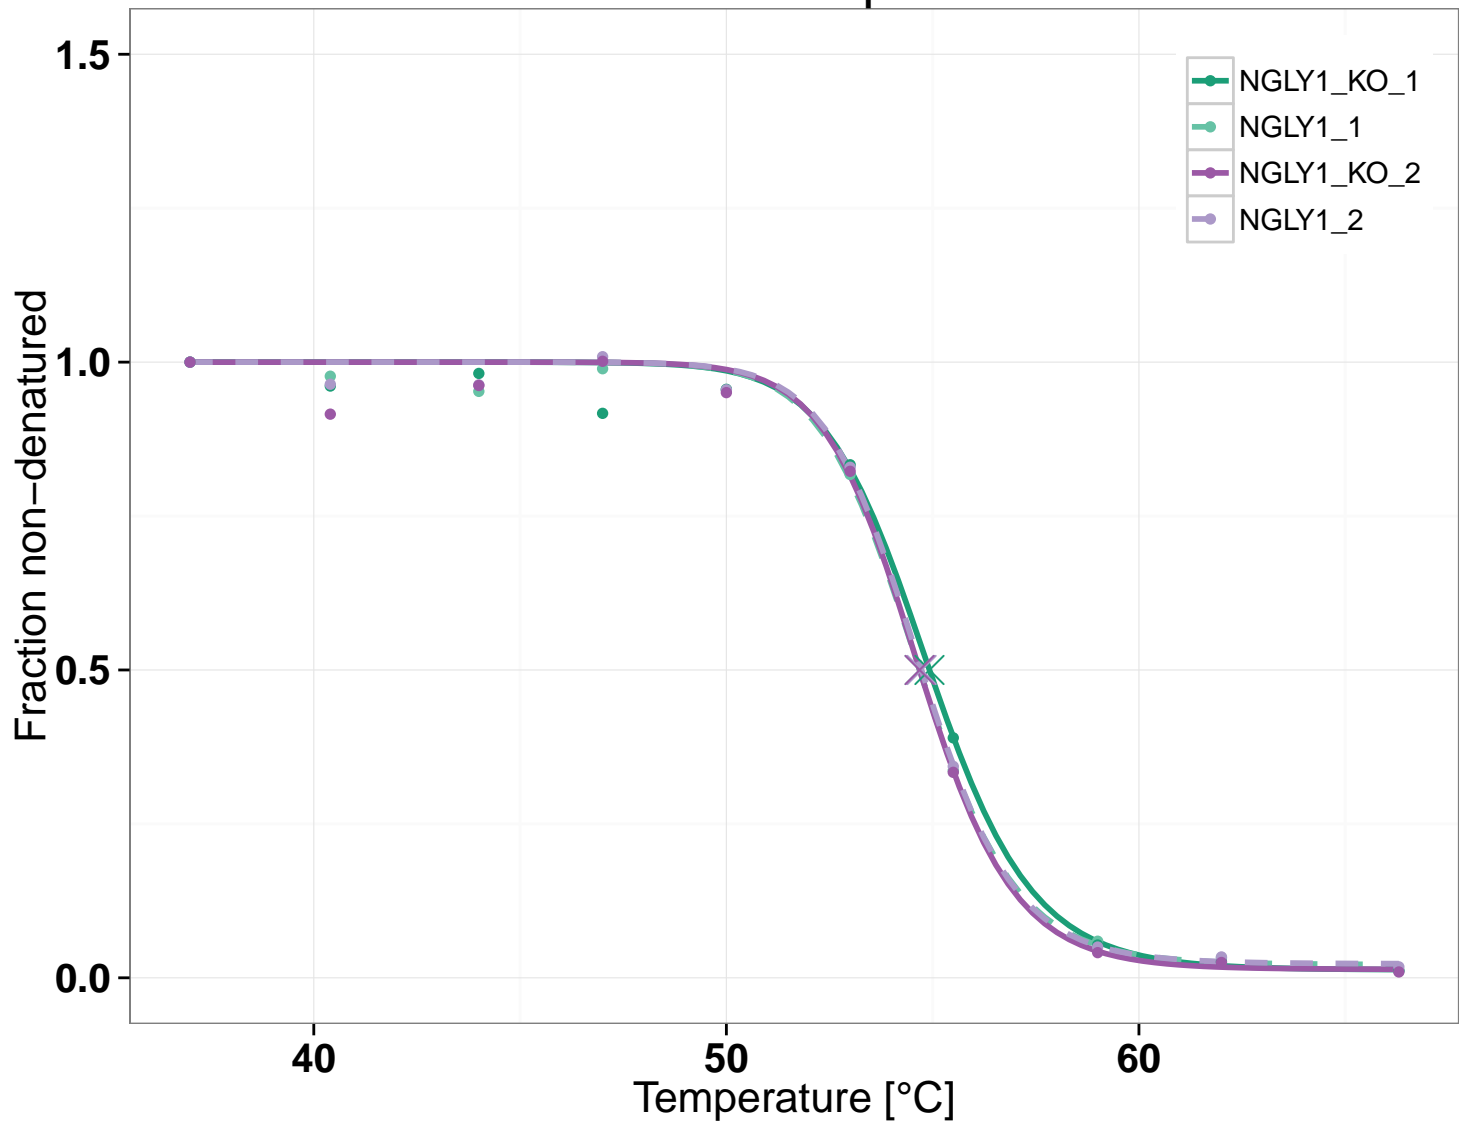

|            | meltPoint | slope | plateau | R2   |
|------------|-----------|-------|---------|------|
| NGLY1_KO_1 | 54.92     | -0.2  | 0.01    | 0.99 |
| NGLY1_1    | 54.68     | -0.21 | 0.02    | 1    |
| NGLY1_KO_2 | 54.68     | -0.21 | 0.01    | 0.99 |
| NGLY1_2    | 54.73     | -0.21 | 0.02    | 1    |

Supplement: Supplementary file 4190 [file 1]

IPI00102815.1|NOC3L

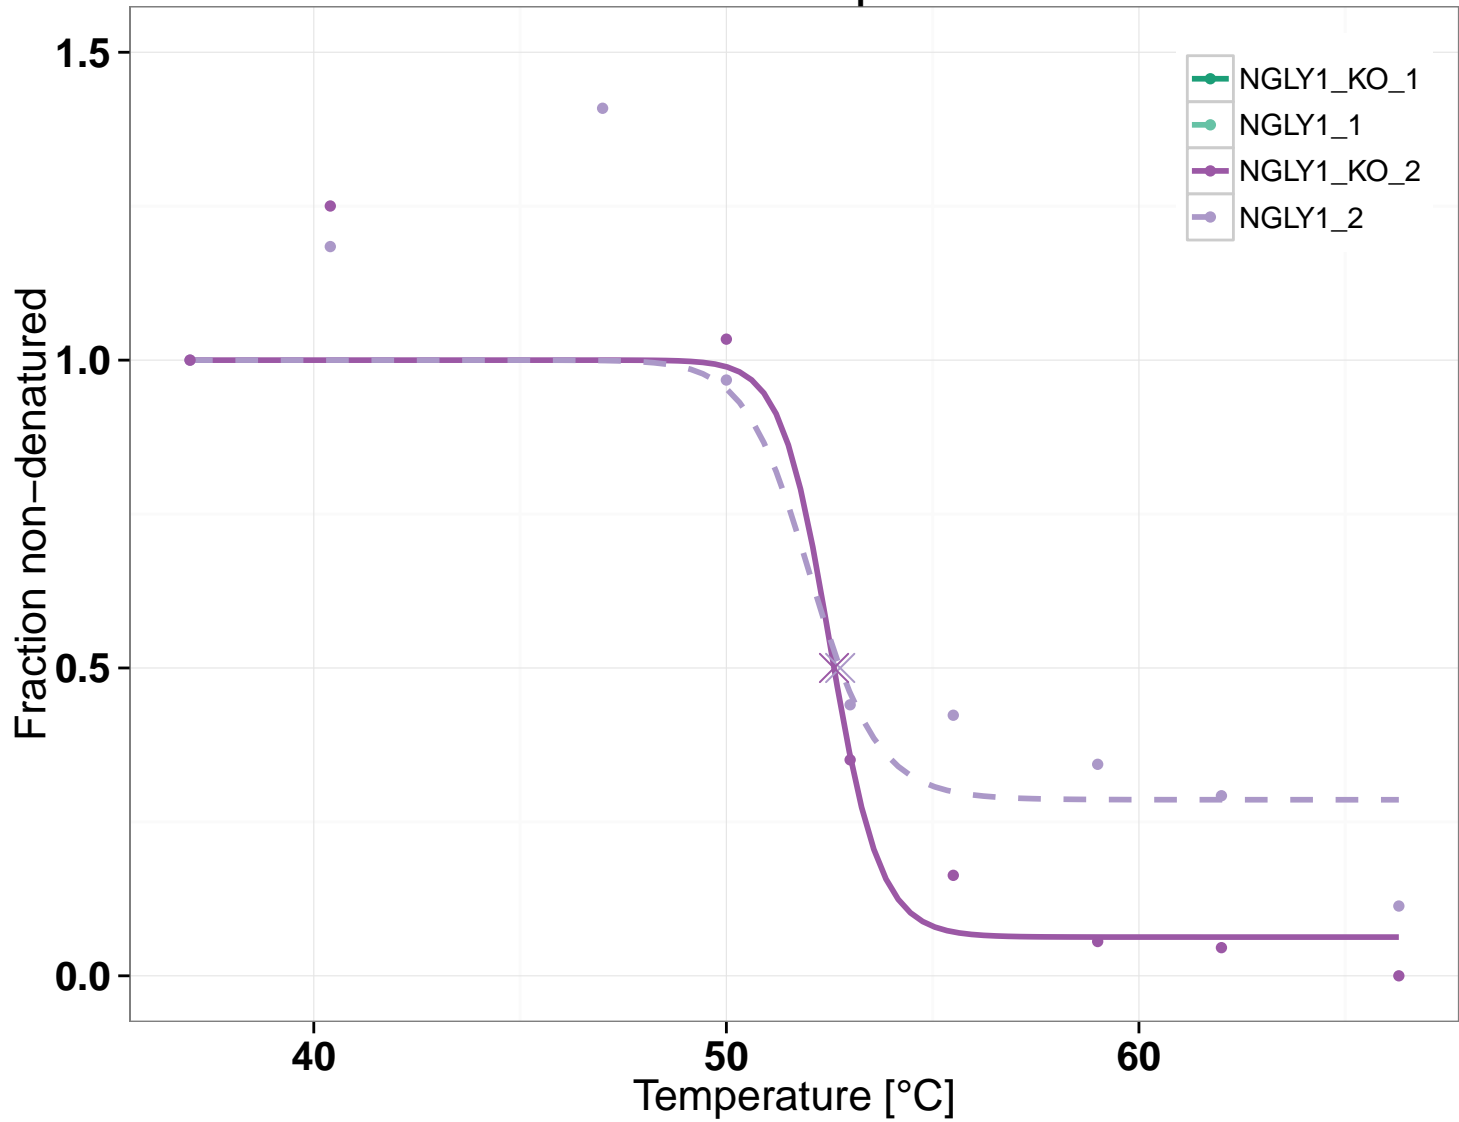

|            | meltPoint | slope | plateau | R2   |
|------------|-----------|-------|---------|------|
| NGLY1_KO_1 | —         | —     | —       | —    |
| NGLY1_1    | —         | —     | —       | —    |
| NGLY1_KO_2 | 52.61     | -0.39 | 0.06    | 0.54 |
| NGLY1_2    | 52.76     | -0.22 | 0.29    | 0.78 |

Supplement: Supplementary file 4191 [file 1]

IPI00008247.2|ANAPC5

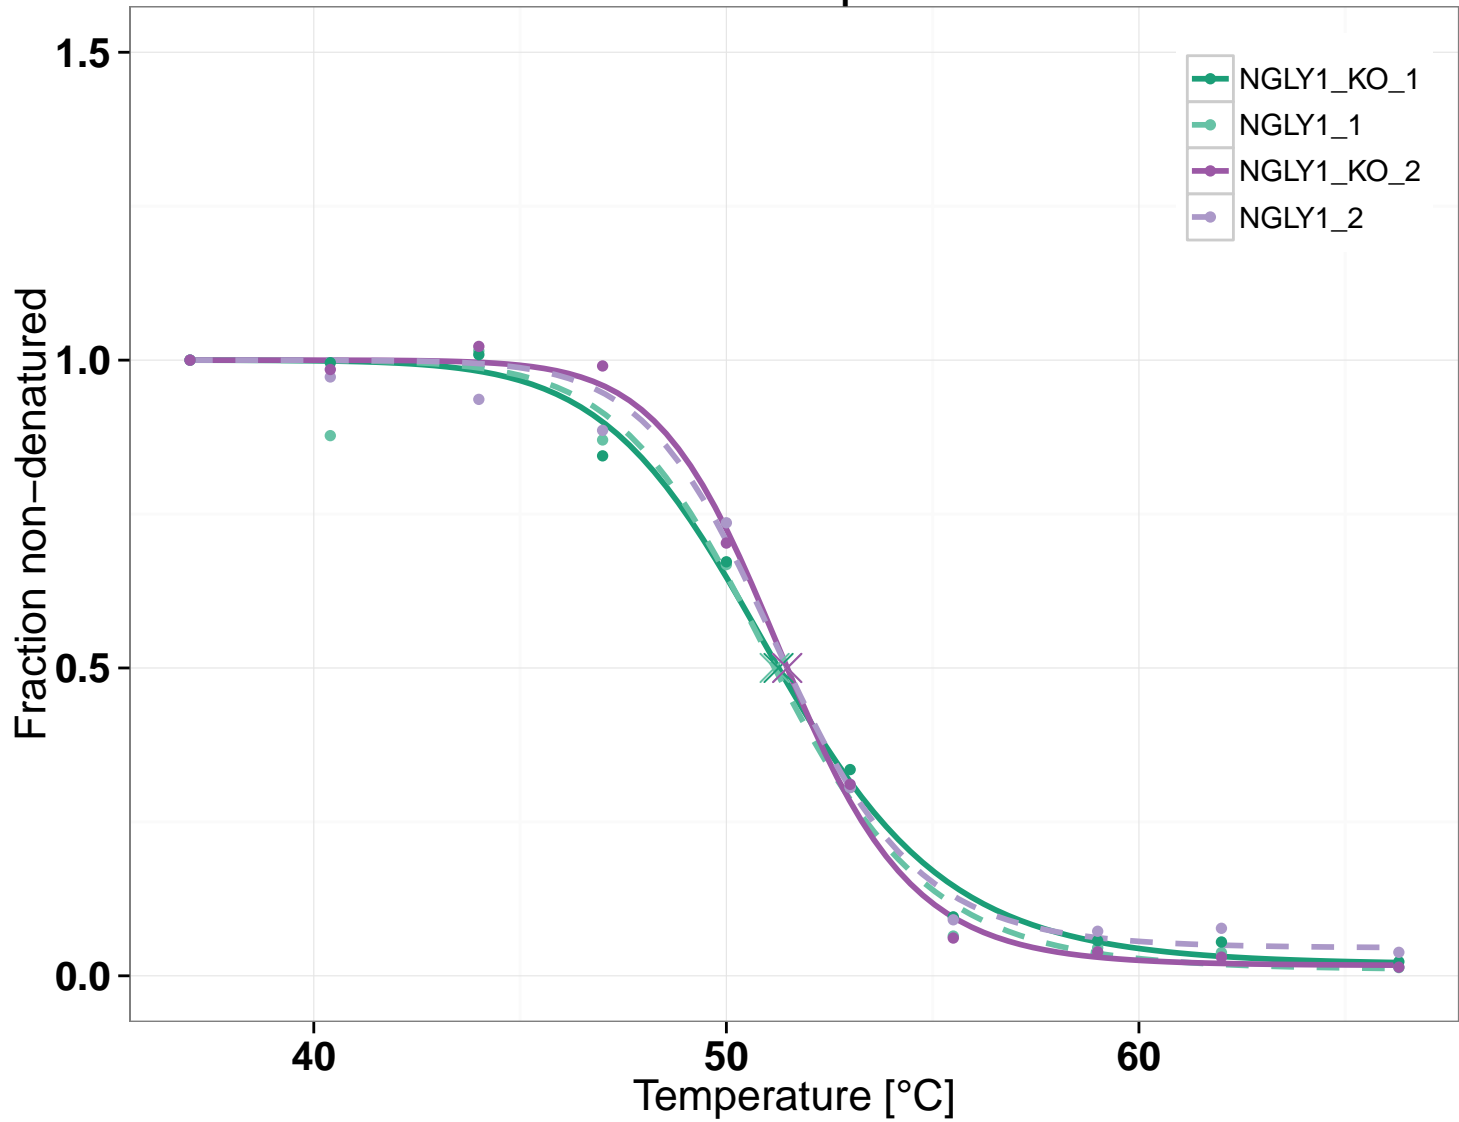

|            | meltPoint | slope | plateau | R2   |
|------------|-----------|-------|---------|------|
| NGLY1_KO_1 | 51.26     | -0.12 | 0.02    | 1    |
| NGLY1_1    | 51.17     | -0.13 | 0.01    | 0.99 |
| NGLY1_KO_2 | 51.48     | -0.16 | 0.02    | 1    |
| NGLY1_2    | 51.47     | -0.14 | 0.05    | 0.99 |

Supplement: Supplementary file 4192 [file 1]

IPI00021985.4|TM9SF4

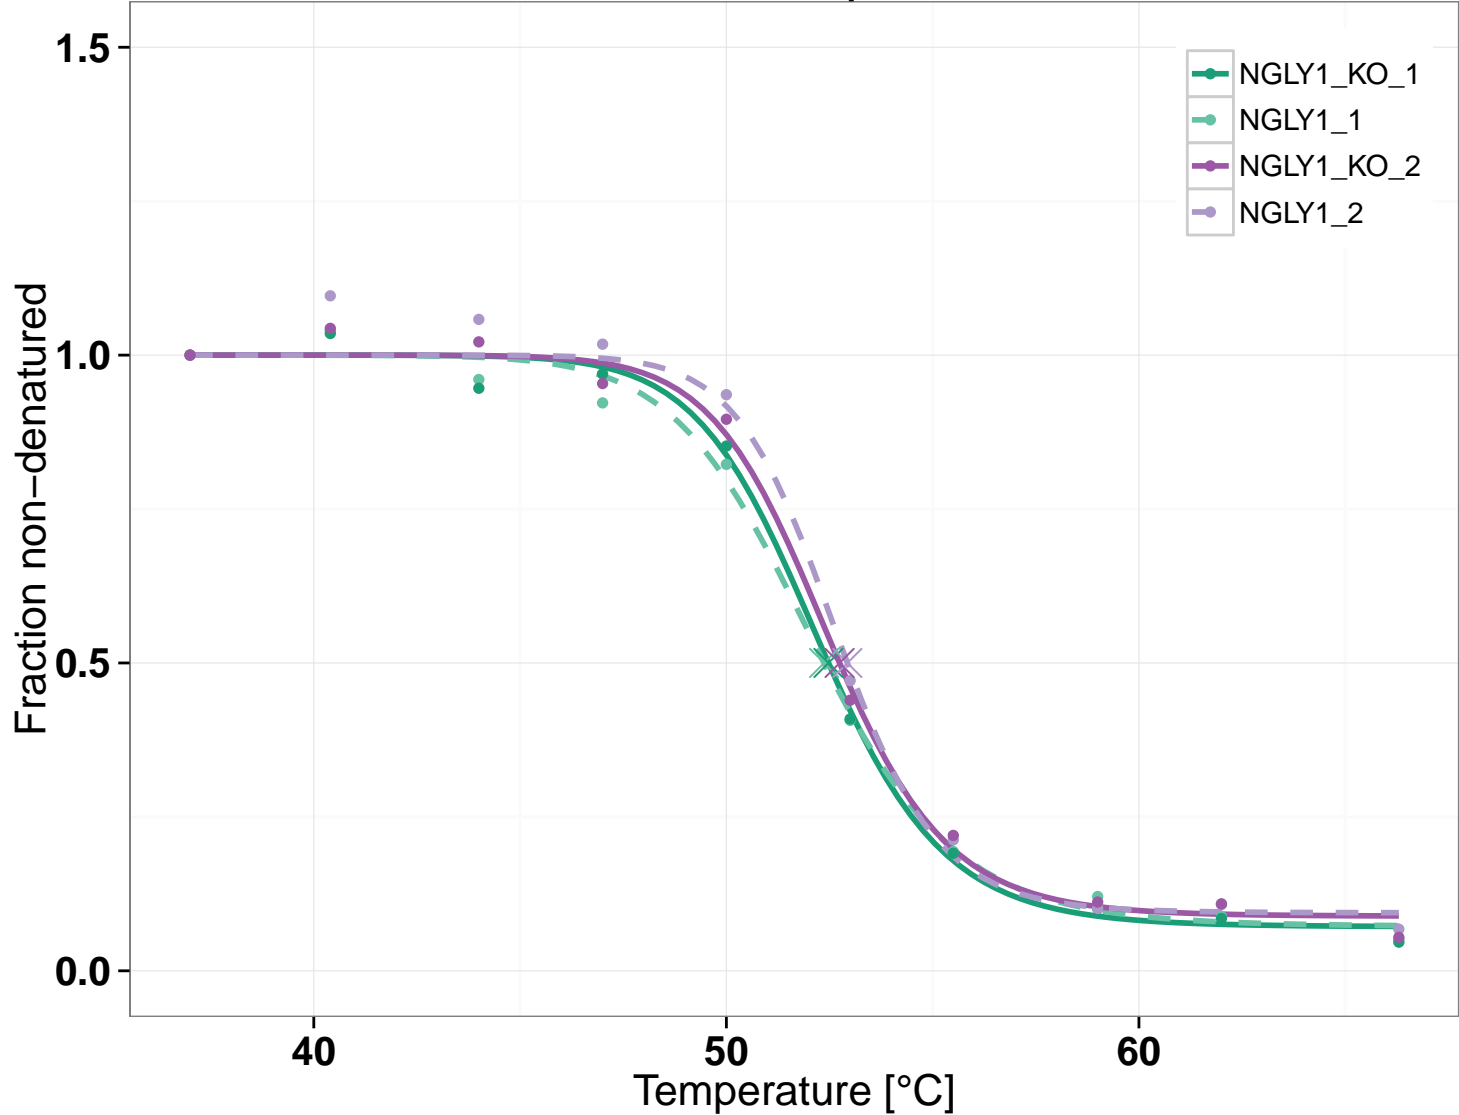

|            | meltPoint | slope | plateau | R2   |
|------------|-----------|-------|---------|------|
| NGLY1_KO_1 | 52.47     | -0.15 | 0.07    | 1    |
| NGLY1_1    | 52.37     | -0.14 | 0.07    | 1    |
| NGLY1_KO_2 | 52.74     | -0.16 | 0.09    | 1    |
| NGLY1_2    | 52.93     | -0.19 | 0.09    | 0.99 |

Supplement: Supplementary file 4193 [file 1]

IPI00152330.1|LRRC20

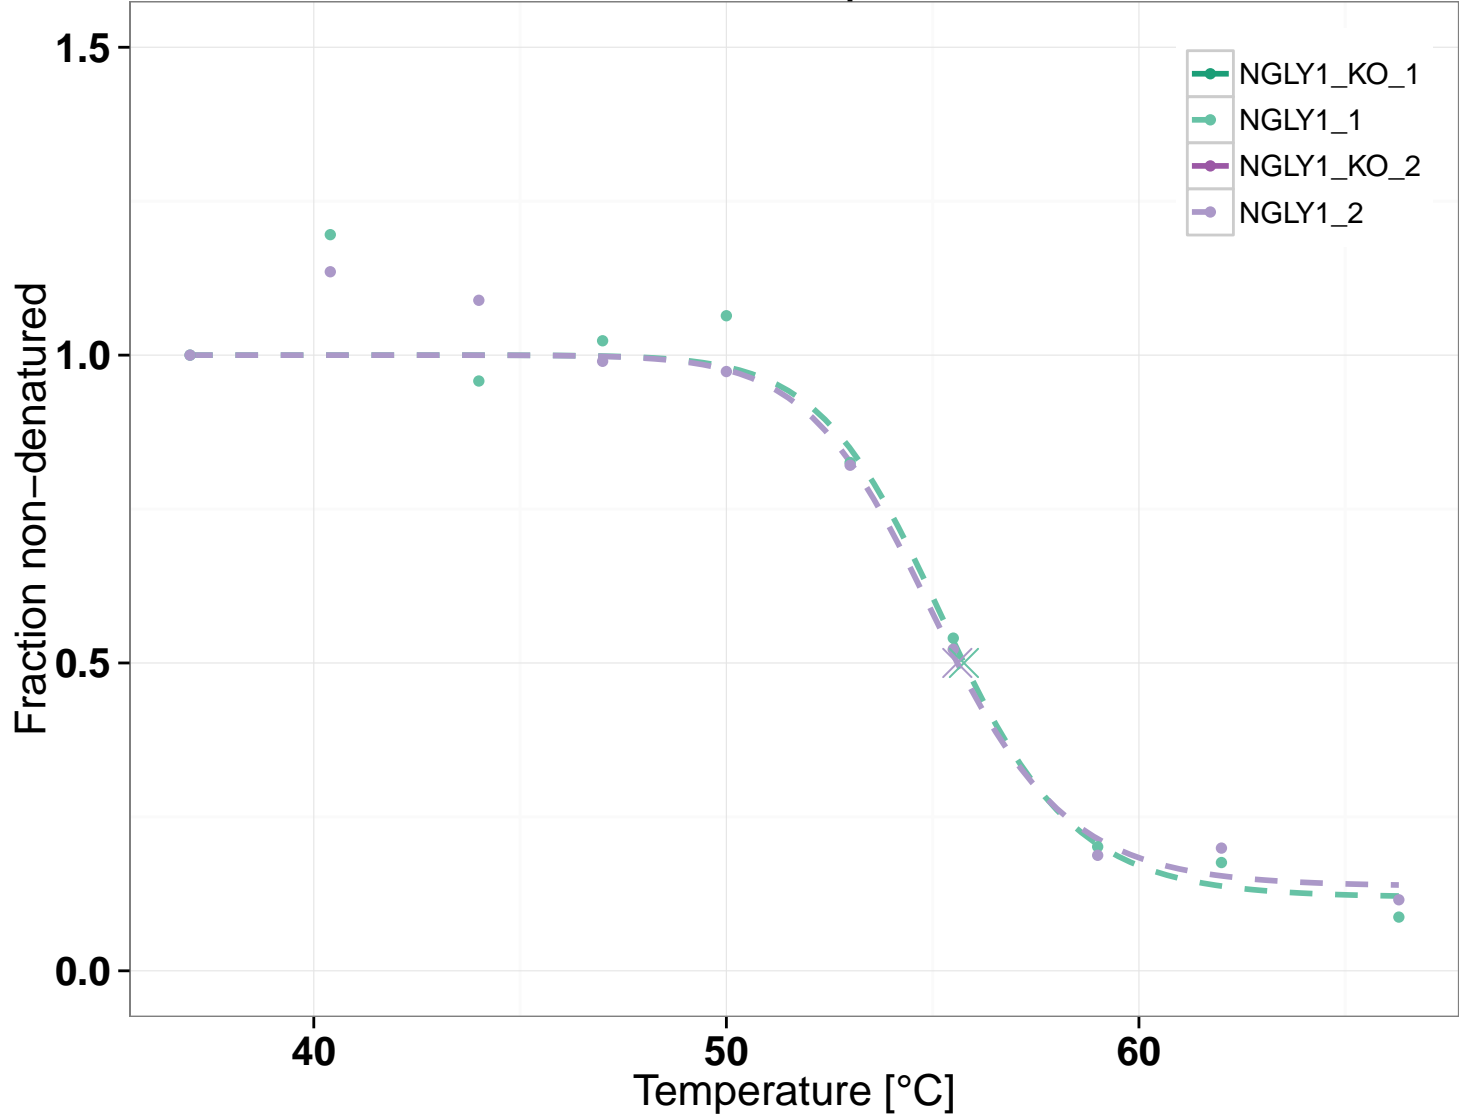

|            | meltPoint | slope | plateau | R2   |
|------------|-----------|-------|---------|------|
| NGLY1_KO_1 | -         | -     | -       | -    |
| NGLY1_1    | 55.76     | -0.14 | 0.12    | 0.97 |
| NGLY1_KO_2 | -         | -     | -       | -    |
| NGLY1_2    | 55.6      | -0.14 | 0.14    | 0.98 |

Supplement: Supplementary file 4194 [file 1]

IPI00641117.2|IKBKG

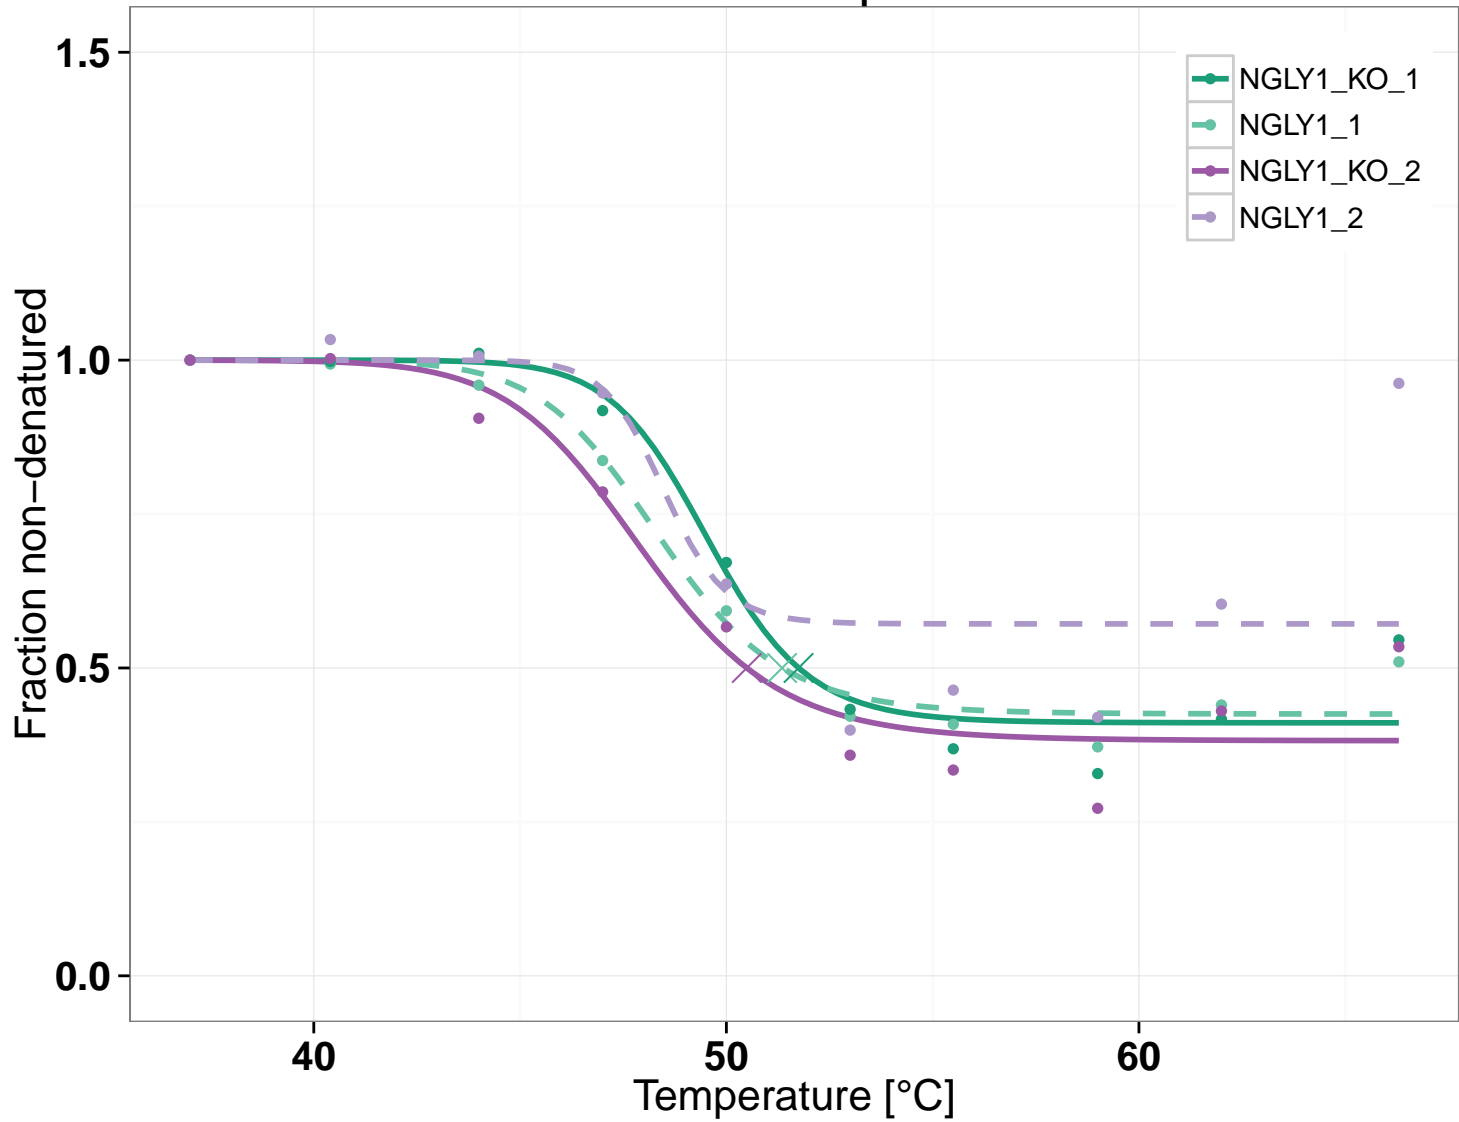

|            | meltPoint | slope  | plateau | R2   |
|------------|-----------|--------|---------|------|
| NGLY1_KO_1 | 51.75     | -0.12  | 0.41    | 0.96 |
| NGLY1_1    | 51.35     | -0.098 | 0.43    | 0.98 |
| NGLY1_KO_2 | 50.49     | -0.093 | 0.38    | 0.93 |
| NGLY1_2    | -         | -0.15  | 0.57    | 0.66 |

Supplement: Supplementary file 4195 [file 1]

# IPI00031583.4|USO1

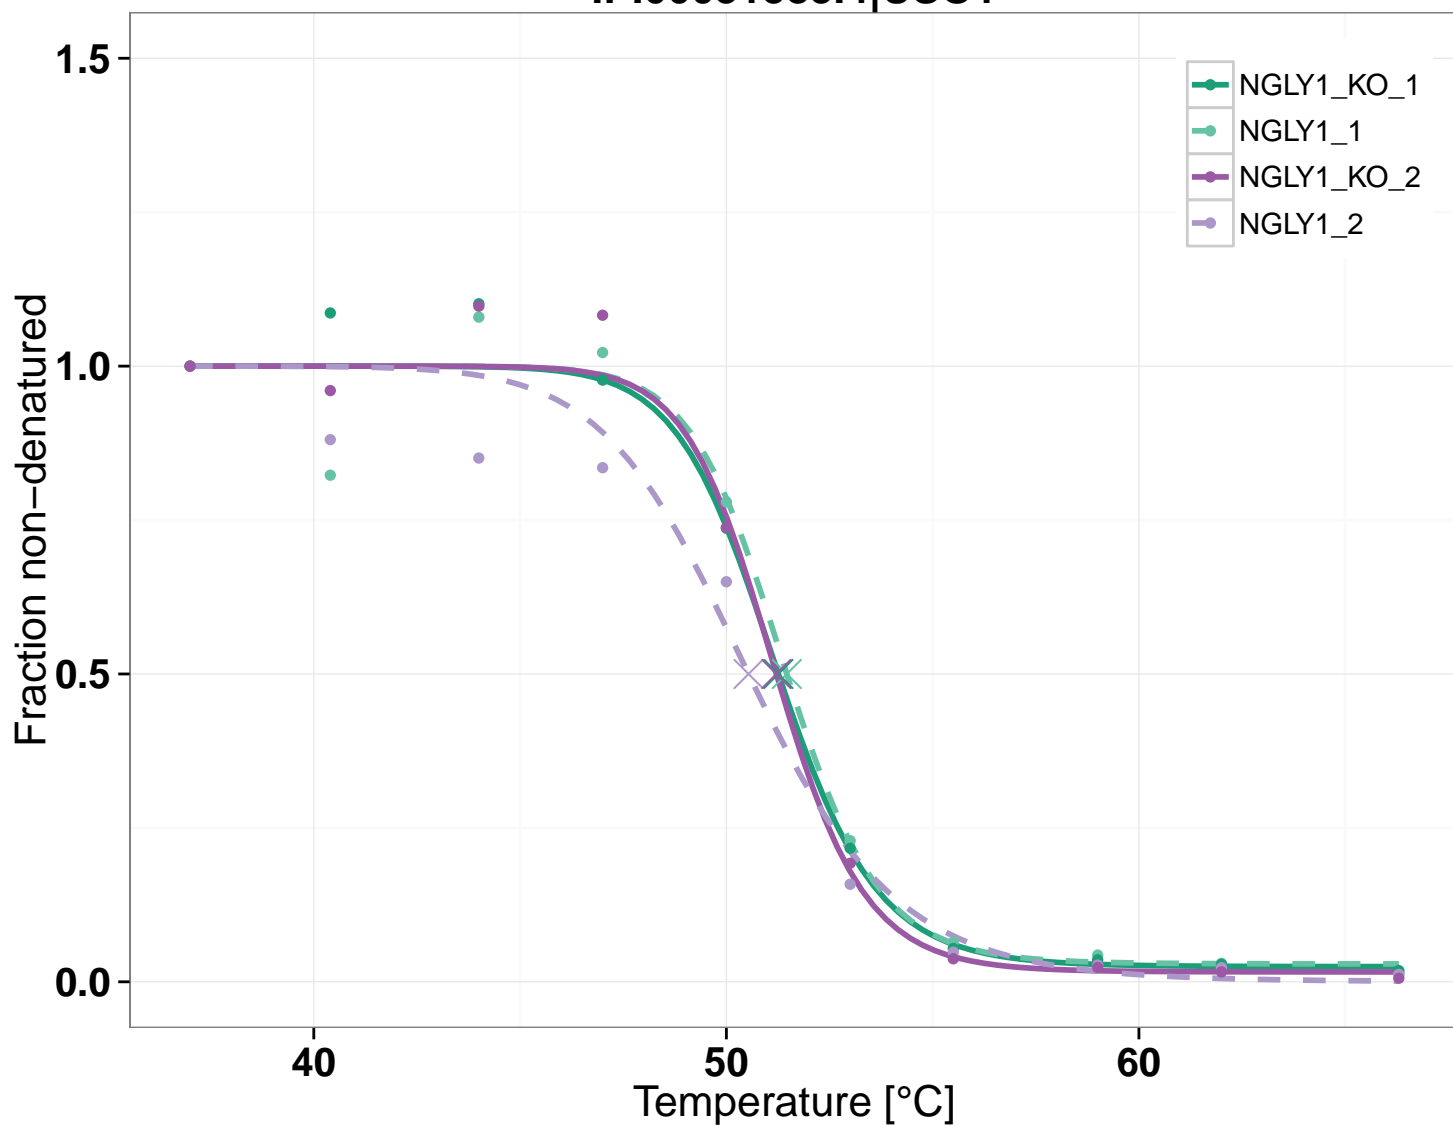

|            | meltPoint | slope | plateau | R2   |
|------------|-----------|-------|---------|------|
| NGLY1_KO_1 | 51.26     | -0.2  | 0.02    | 0.99 |
| NGLY1_1    | 51.47     | -0.21 | 0.03    | 0.98 |
| NGLY1_KO_2 | 51.21     | -0.23 | 0.02    | 0.99 |
| NGLY1_2    | 50.54     | -0.14 | 0       | 0.97 |

Supplement: Supplementary file 4196 [file 1]

IPI00033600.1|PPP1R7

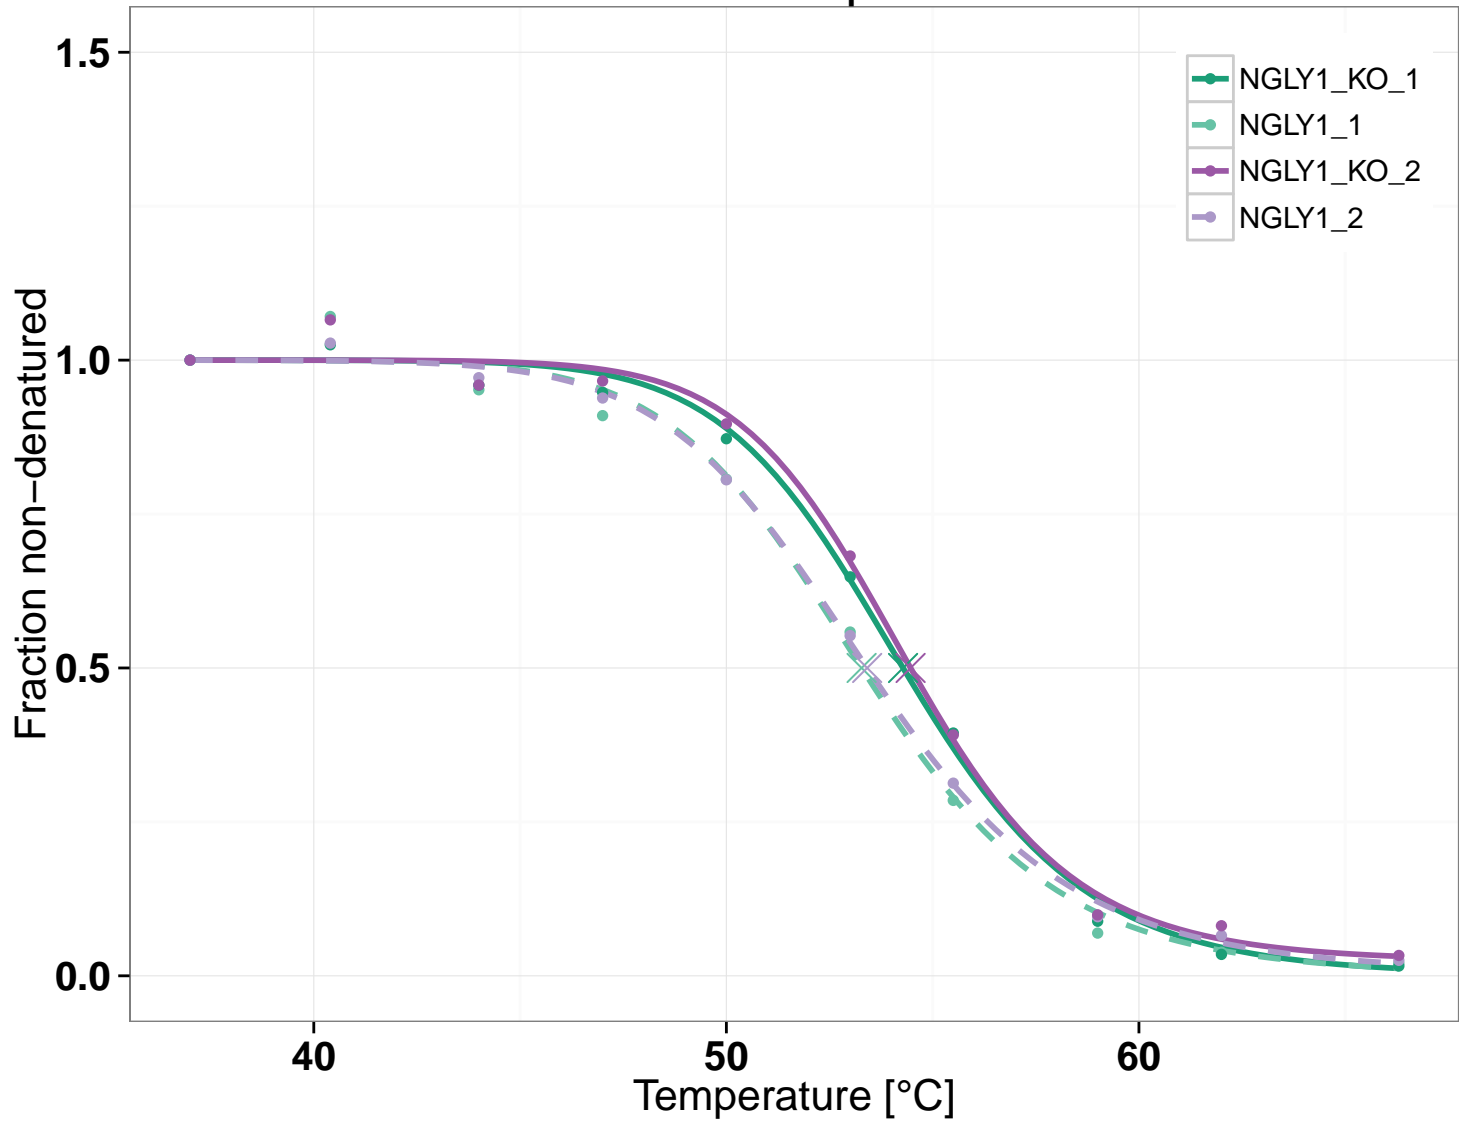

|            | meltPoint | slope | plateau | R2   |
|------------|-----------|-------|---------|------|
| NGLY1_KO_1 | 54.28     | -0.11 | 0       | 1    |
| NGLY1_1    | 53.28     | -0.11 | 0       | 0.99 |
| NGLY1_KO_2 | 54.47     | -0.12 | 0.02    | 0.99 |
| NGLY1_2    | 53.41     | -0.1  | 0       | 1    |

Supplement: Supplementary file 4197 [file 1]

IPI00033866.1|BTBD1

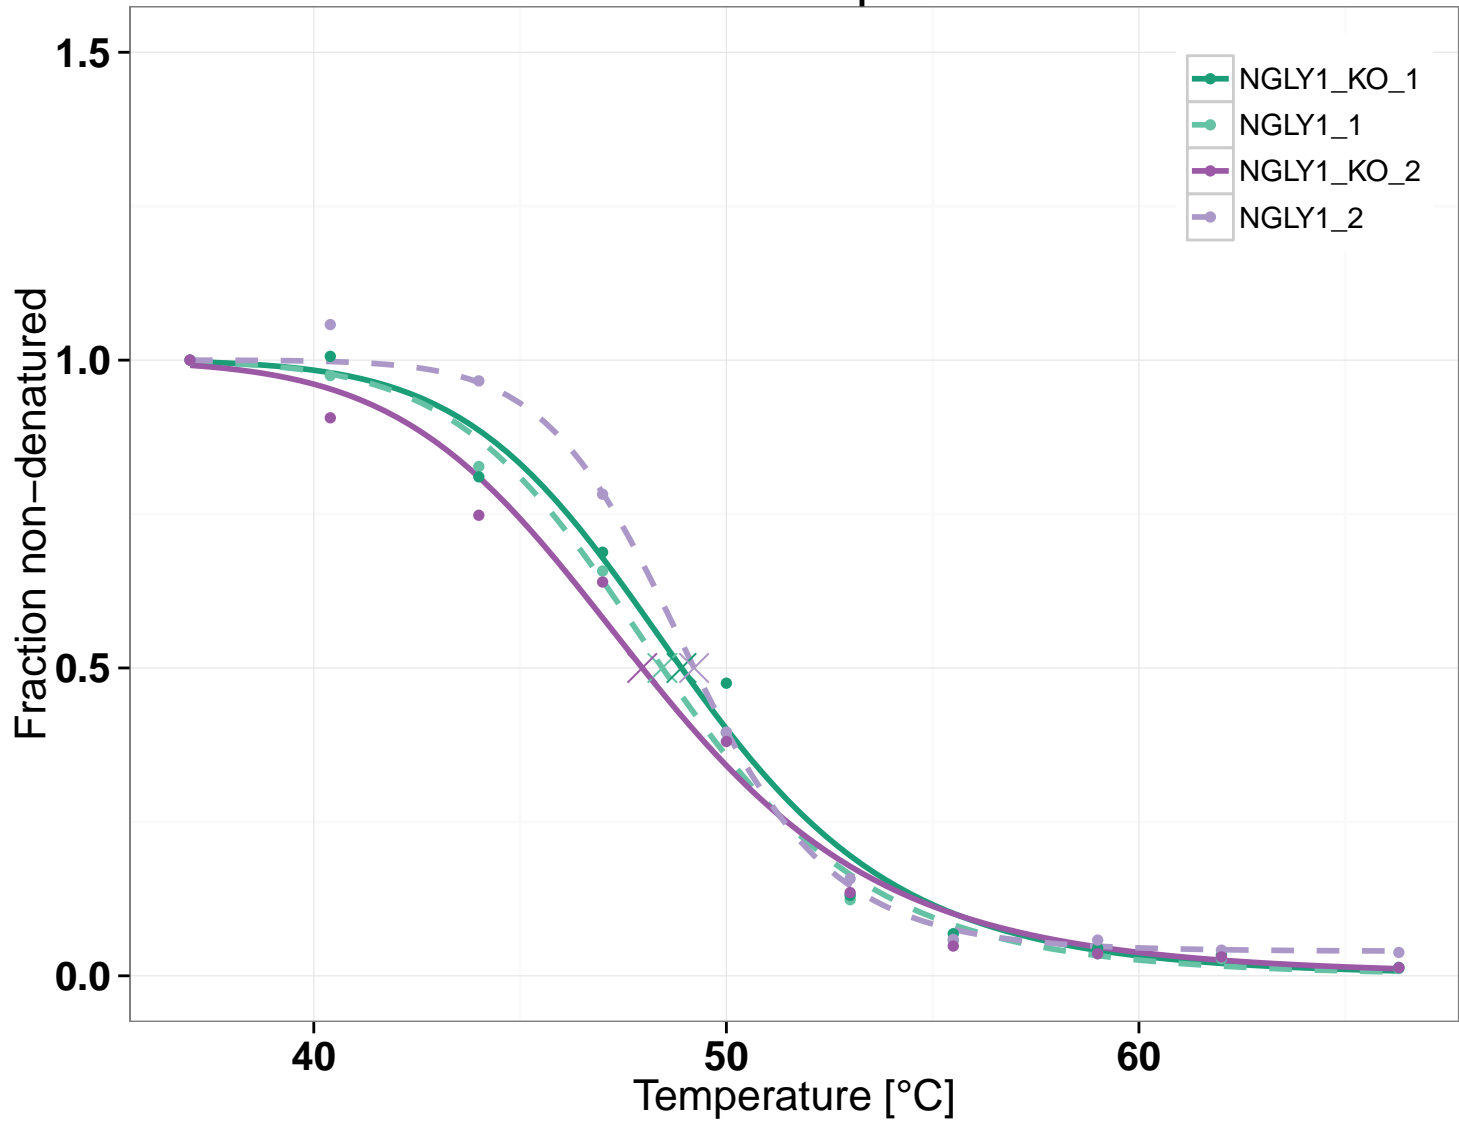

|            | meltPoint | slope  | plateau | R2   |
|------------|-----------|--------|---------|------|
| NGLY1_KO_1 | 48.91     | -0.095 | 0       | 0.99 |
| NGLY1_1    | 48.45     | -0.099 | 0       | 1    |
| NGLY1_KO_2 | 47.96     | -0.085 | 0       | 0.99 |
| NGLY1_2    | 49.22     | -0.14  | 0.04    | 1    |

Supplement: Supplementary file 4198 [file 1]

IPI00010118.7|PTOV1

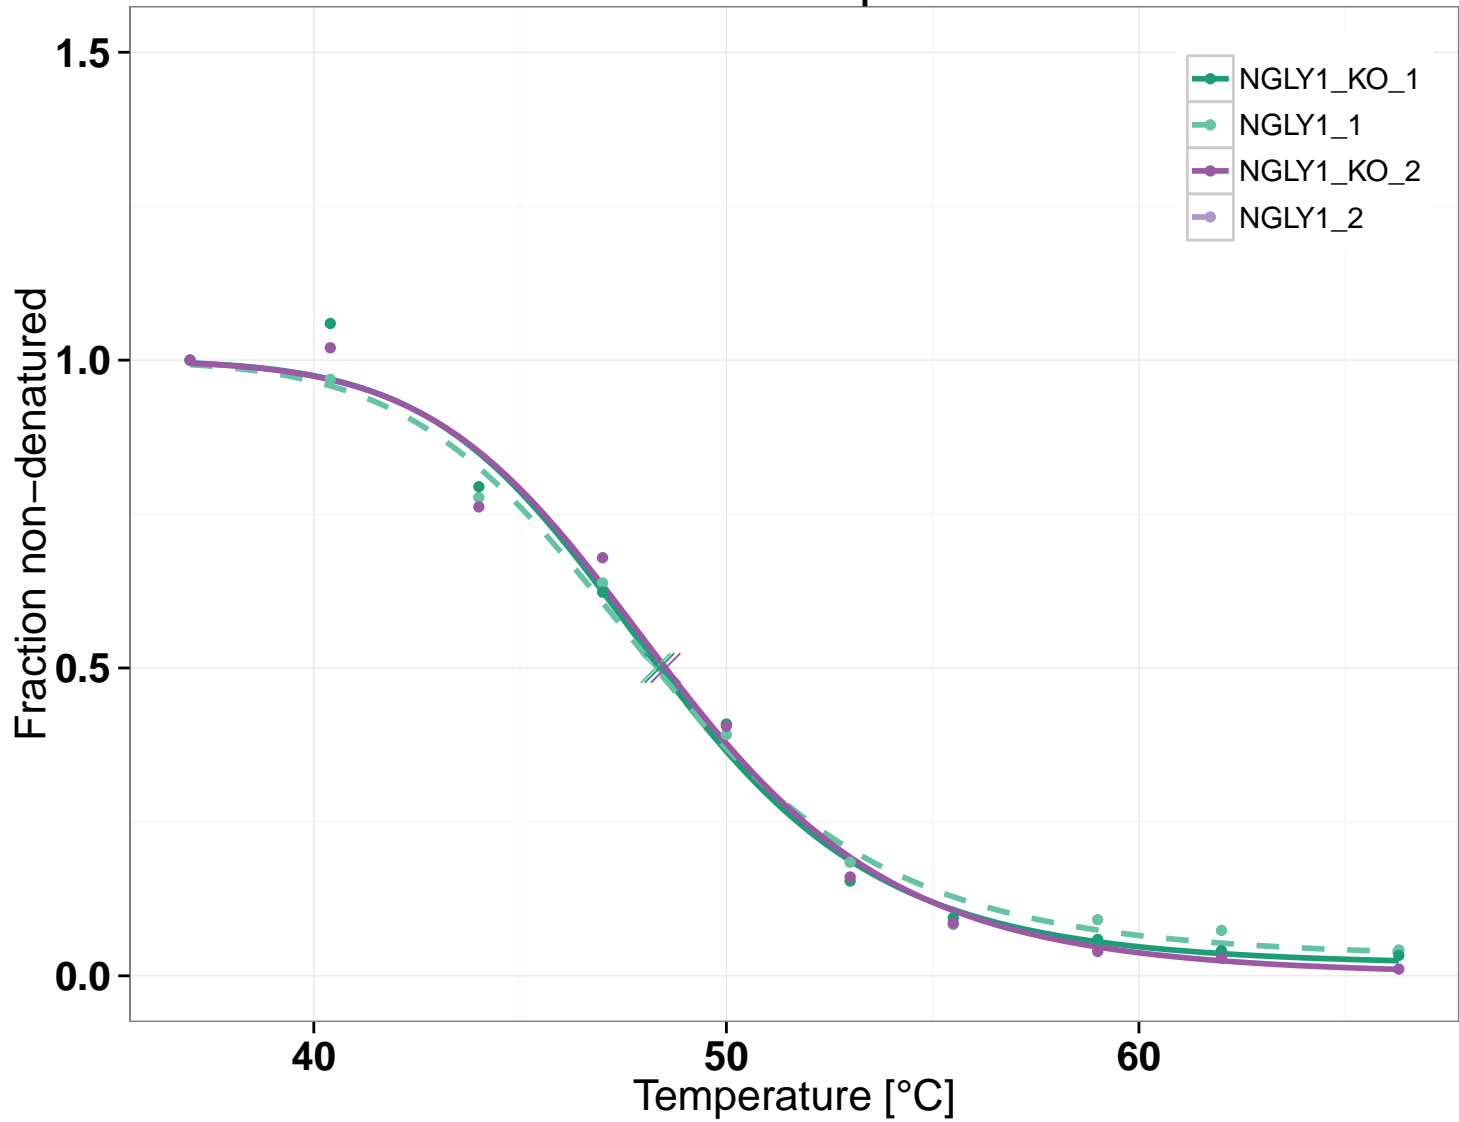

|            | meltPoint | slope  | plateau | R2   |
|------------|-----------|--------|---------|------|
| NGLY1_KO_1 | 48.38     | -0.091 | 0.02    | 0.99 |
| NGLY1_1    | 48.28     | -0.083 | 0.03    | 0.99 |
| NGLY1_KO_2 | 48.53     | -0.089 | 0       | 0.99 |
| NGLY1_2    | -         | -      | -       | -    |

Supplement: Supplementary file 4199 [file 1]

IPI00016387.4|PCF11

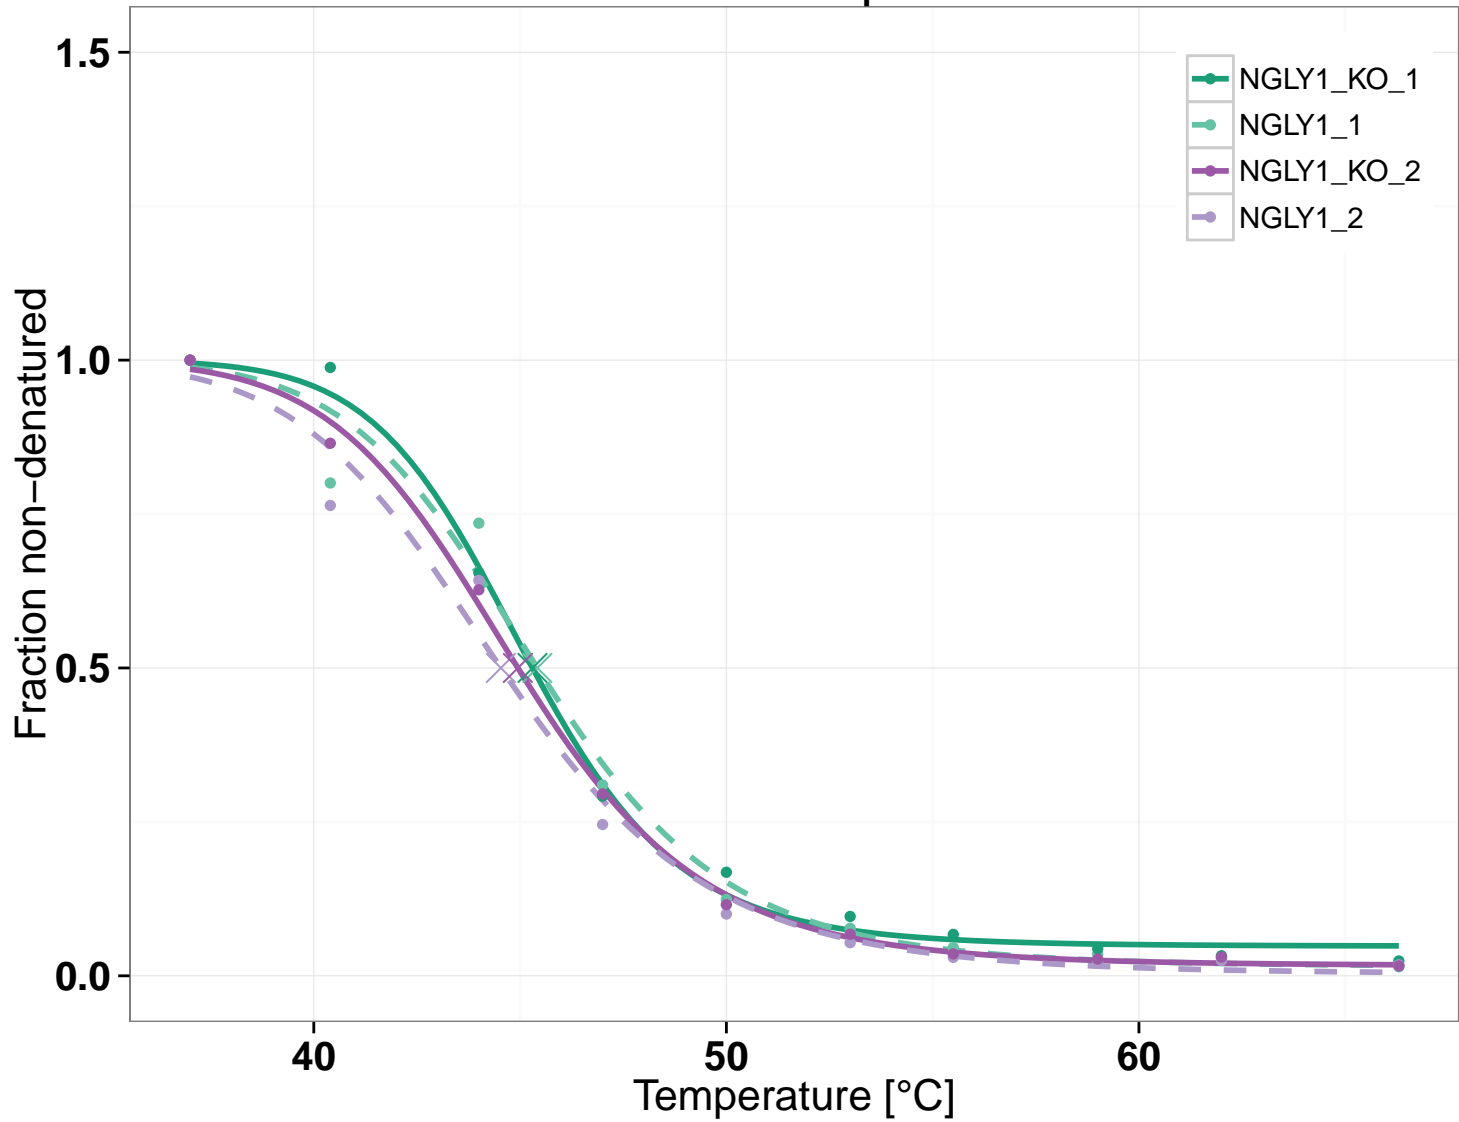

|            | meltPoint | slope | plateau | R2   |
|------------|-----------|-------|---------|------|
| NGLY1_KO_1 | 45.3      | -0.13 | 0.05    | 1    |
| NGLY1_1    | 45.42     | -0.11 | 0.02    | 0.98 |
| NGLY1_KO_2 | 44.95     | -0.11 | 0.02    | 1    |
| NGLY1_2    | 44.53     | -0.1  | 0       | 0.98 |

Supplement: Supplementary file 4200 [file 1]

# IPI00020965.1|UBE2H

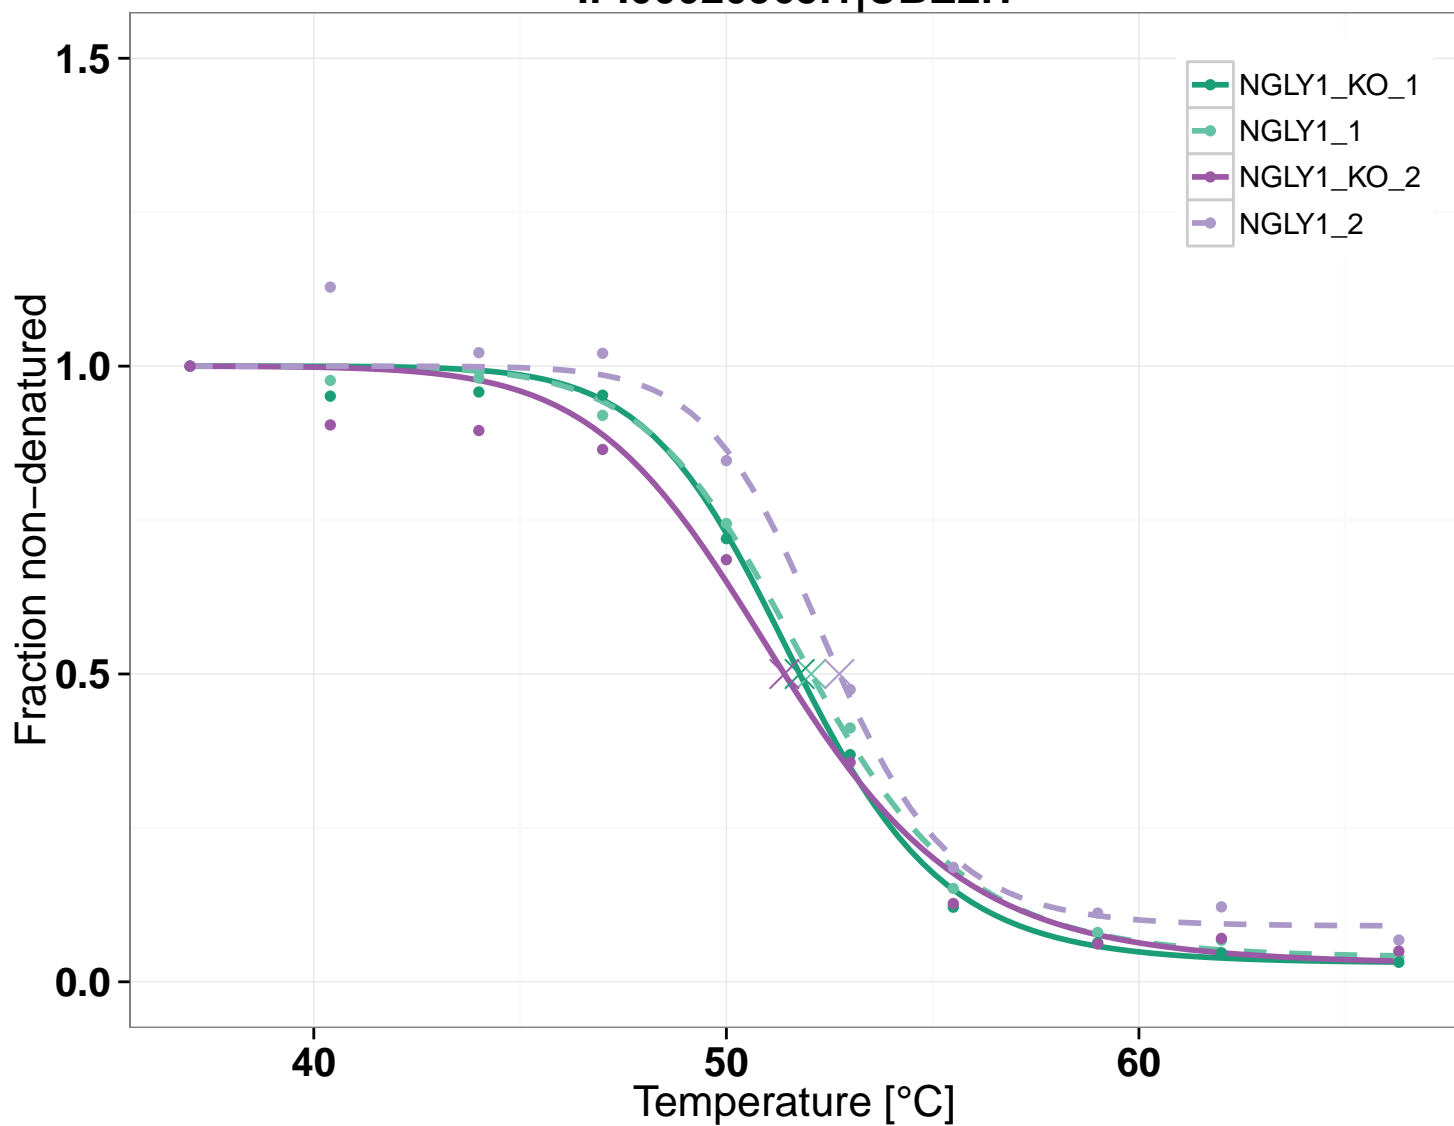

|            | meltPoint | slope | plateau | R2   |
|------------|-----------|-------|---------|------|
| NGLY1_KO_1 | 51.78     | -0.13 | 0.03    | 1    |
| NGLY1_1    | 52.06     | -0.12 | 0.04    | 1    |
| NGLY1_KO_2 | 51.41     | -0.11 | 0.03    | 0.99 |
| NGLY1_2    | 52.74     | -0.15 | 0.09    | 0.99 |

Supplement: Supplementary file 4201 [file 1]

# IPI00029403.1|SNX4

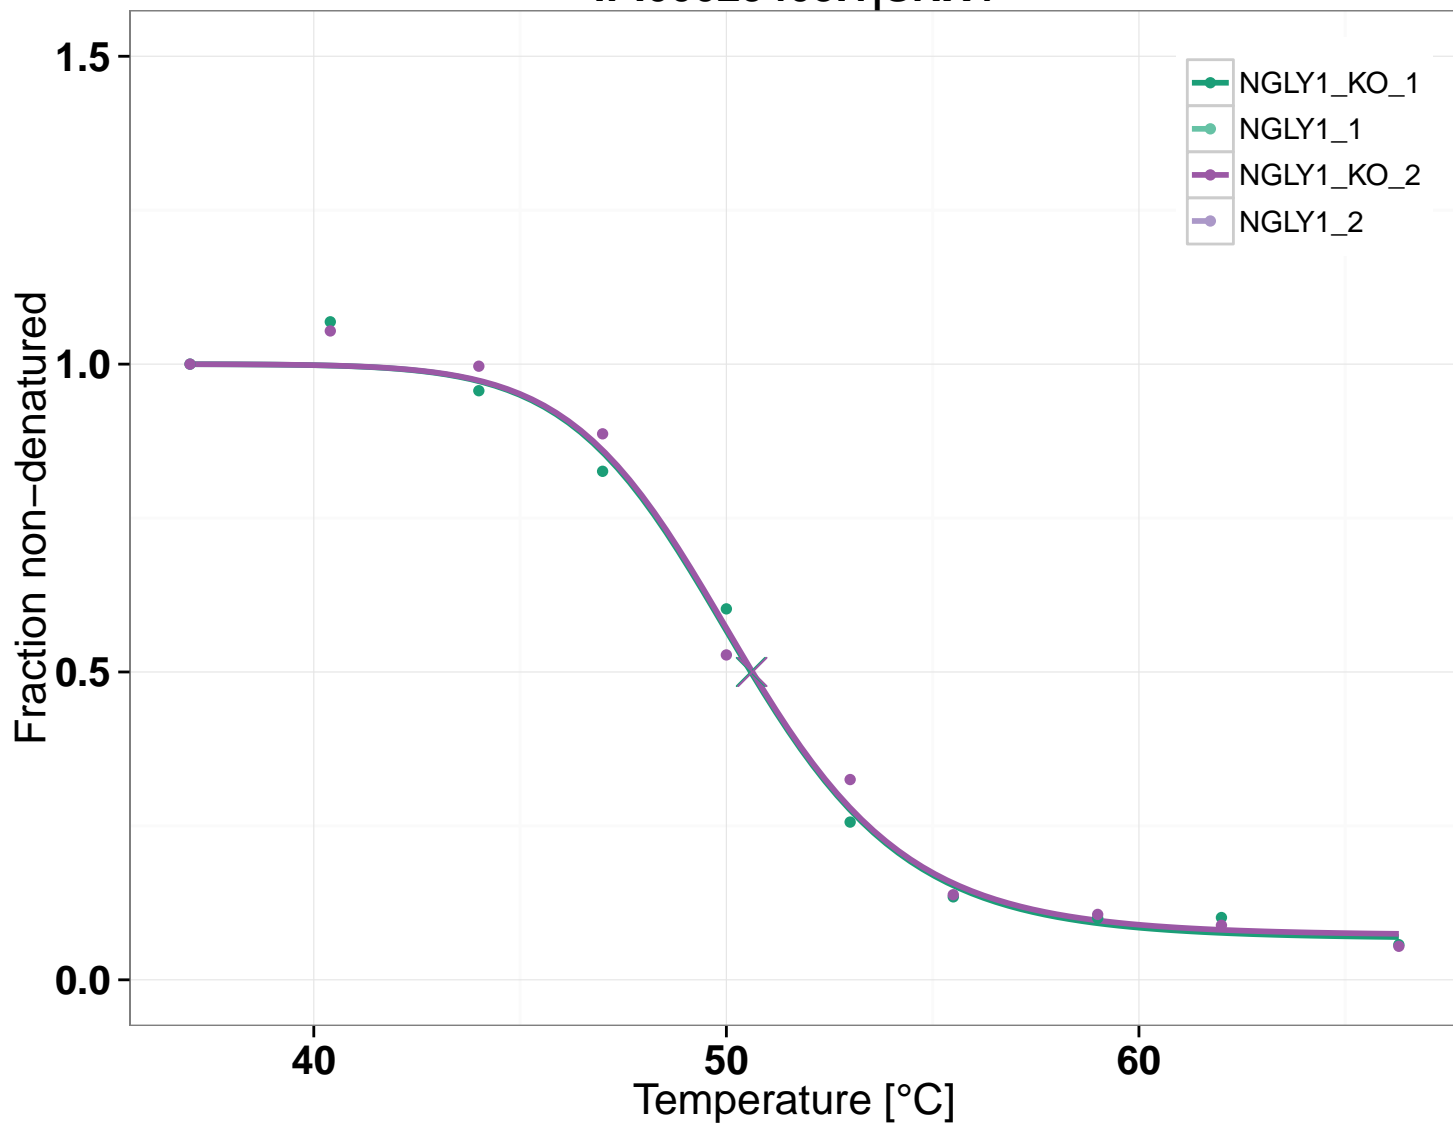

|            | meltPoint | slope | plateau | R2   |
|------------|-----------|-------|---------|------|
| NGLY1_KO_1 | 50.59     | -0.11 | 0.07    | 0.99 |
| NGLY1_1    | -         | -     | -       | -    |
| NGLY1_KO_2 | 50.63     | -0.11 | 0.07    | 0.99 |
| NGLY1_2    | -         | -     | -       | -    |

Supplement: Supplementary file 4202 [file 1]

IPI00031645.4|NUDT22

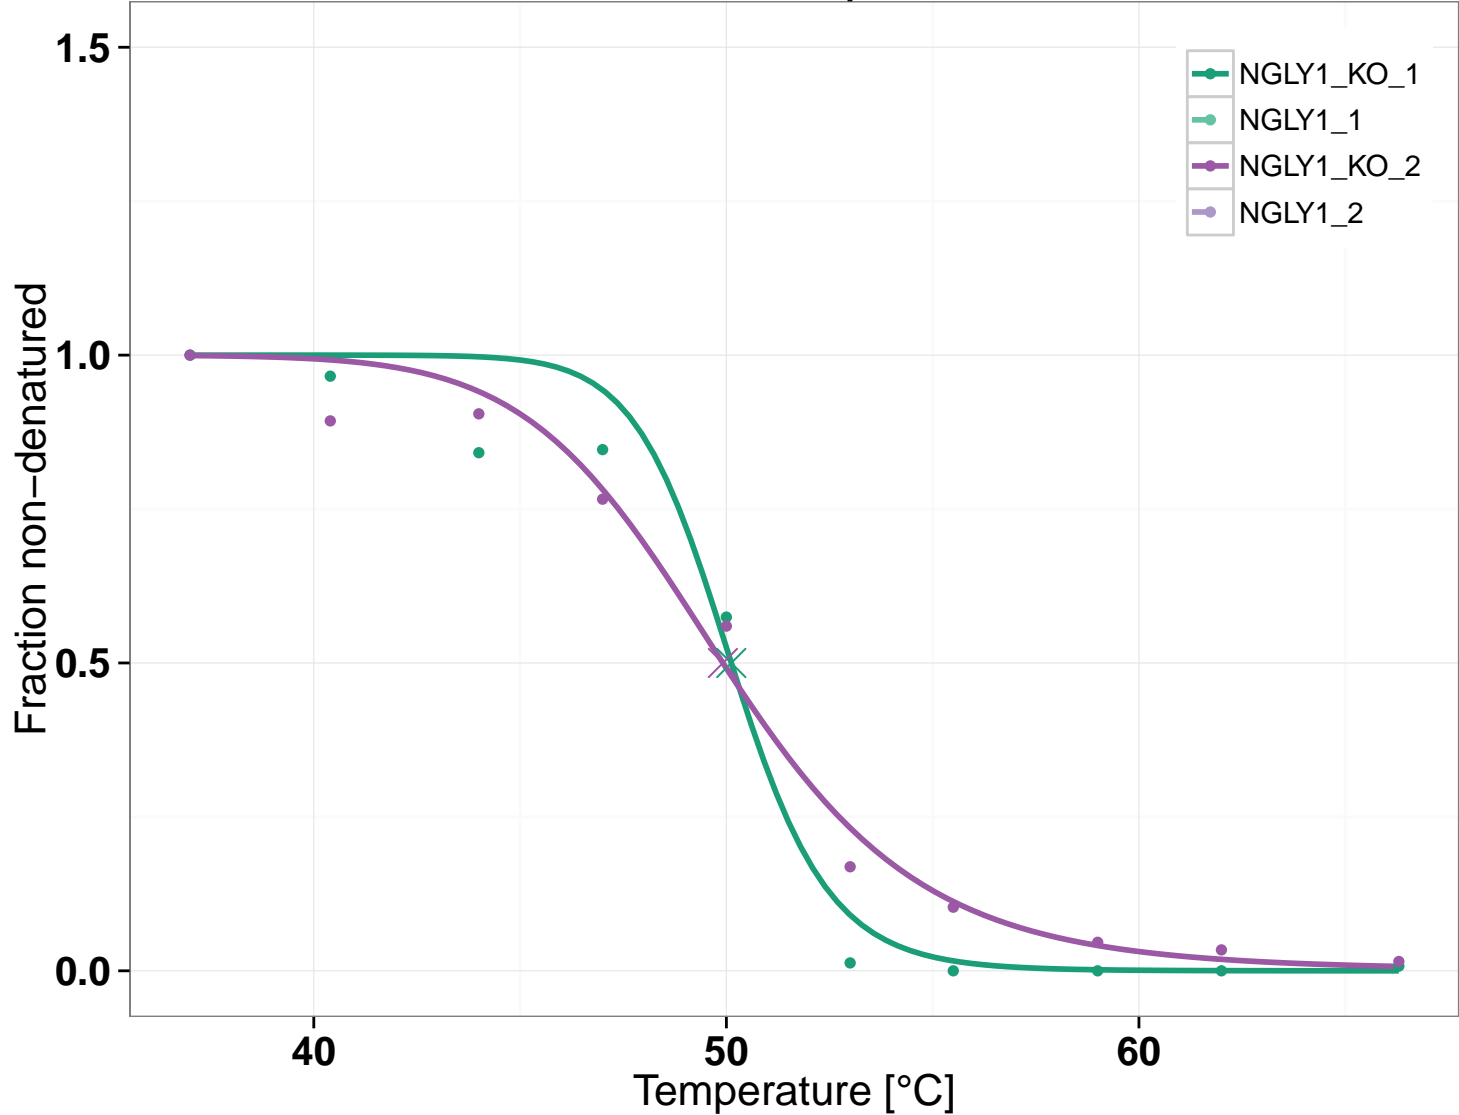

|            | meltPoint | slope | plateau | R2   |
|------------|-----------|-------|---------|------|
| NGLY1_KO_1 | 50.12     | -0.21 | 0       | 0.98 |
| NGLY1_1    | -         | -     | -       | -    |
| NGLY1_KO_2 | 49.92     | -0.1  | 0       | 0.99 |
| NGLY1_2    | -         | -     | -       | -    |

Supplement: Supplementary file 4203 [file 1]

# IPI00640703.3|XPO5

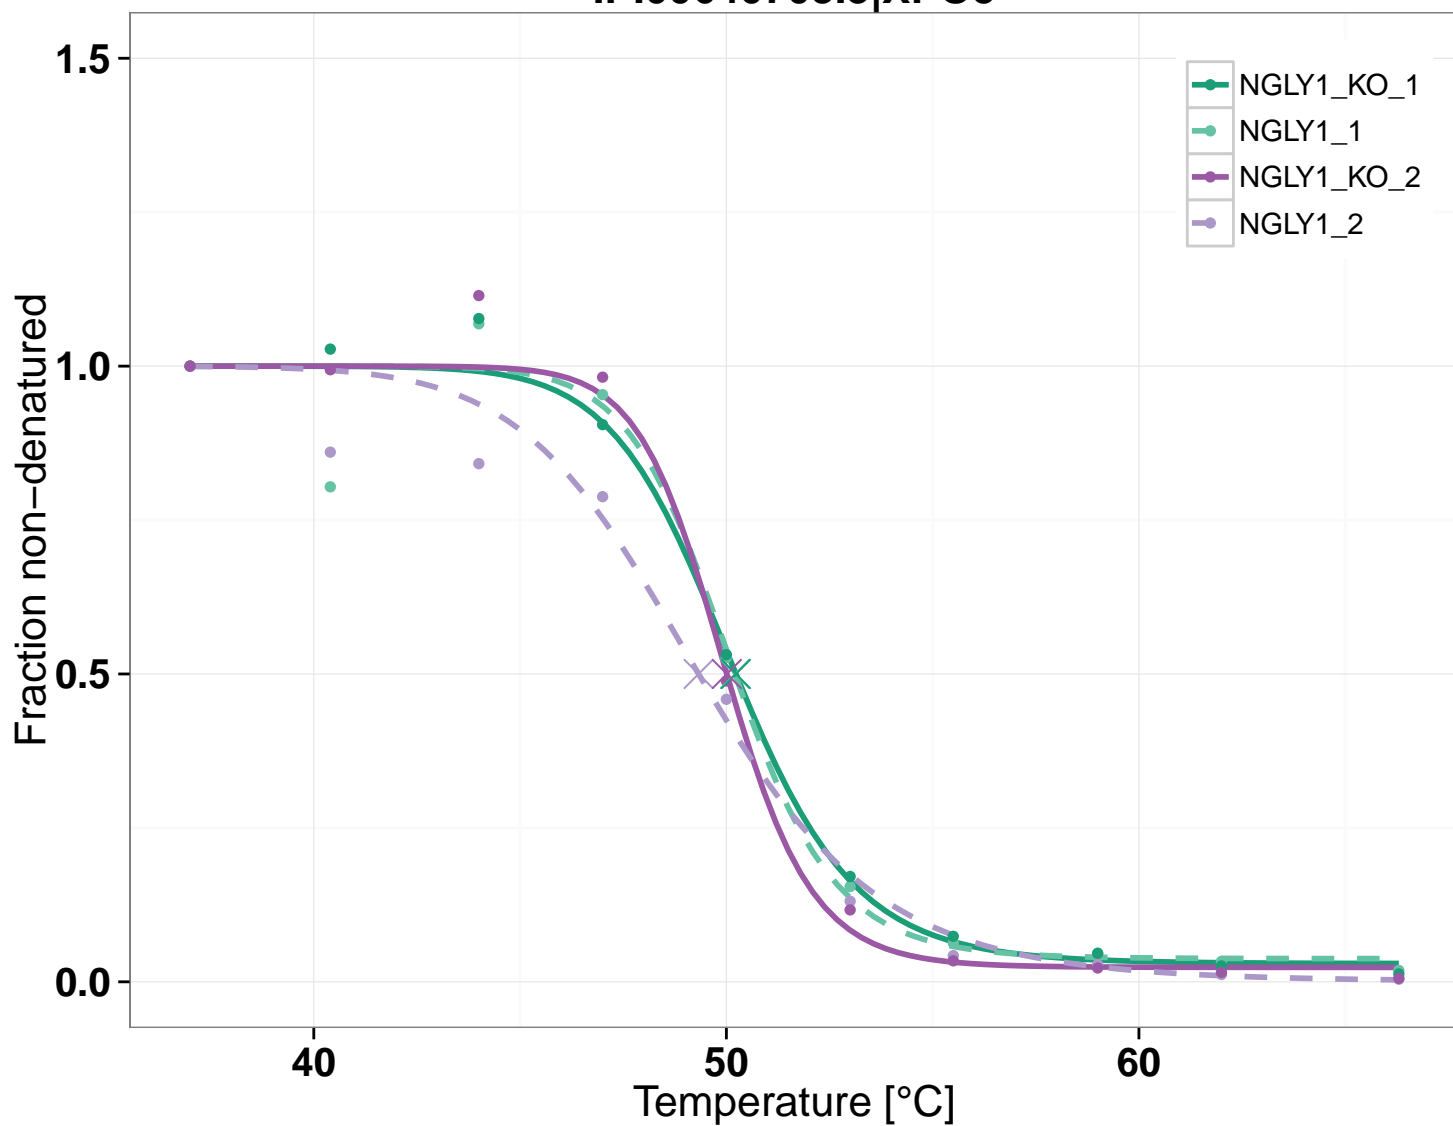

|            | meltPoint | slope | plateau | R2   |
|------------|-----------|-------|---------|------|
| NGLY1_KO_1 | 50.23     | -0.16 | 0.03    | 1    |
| NGLY1_1    | 50.21     | -0.19 | 0.04    | 0.98 |
| NGLY1_KO_2 | 50.01     | -0.23 | 0.02    | 0.99 |
| NGLY1_2    | 49.33     | -0.11 | 0       | 0.98 |

Supplement: Supplementary file 4204 [file 1]

IPI00395808.2|SLC17A5

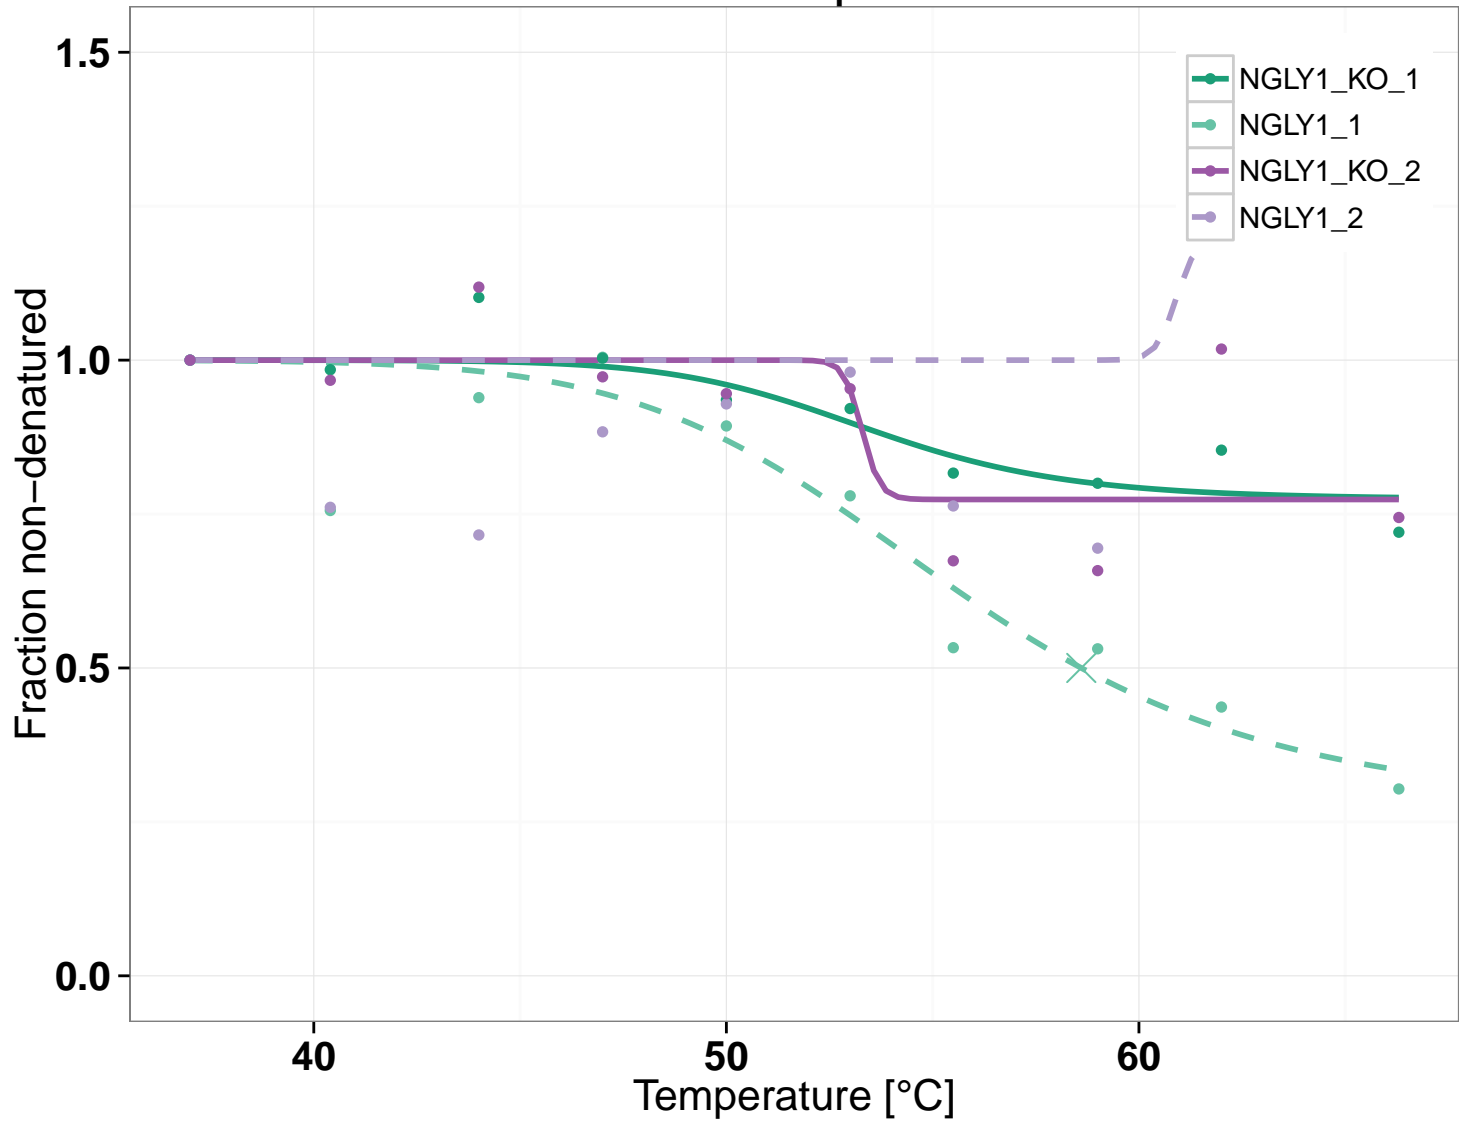

|            | meltPoint | slope  | plateau | R2   |
|------------|-----------|--------|---------|------|
| NGLY1_KO_1 | -         | -0.024 | 0.77    | 0.82 |
| NGLY1_1    | 58.6      | -0.048 | 0.27    | 0.86 |
| NGLY1_KO_2 | -         | -0.27  | 0.77    | 0.53 |
| NGLY1_2    | -         | 0.21   | 1.2     | 0.02 |

Supplement: Supplementary file 4205 [file 1]

# IPI00455153.2|NFU1

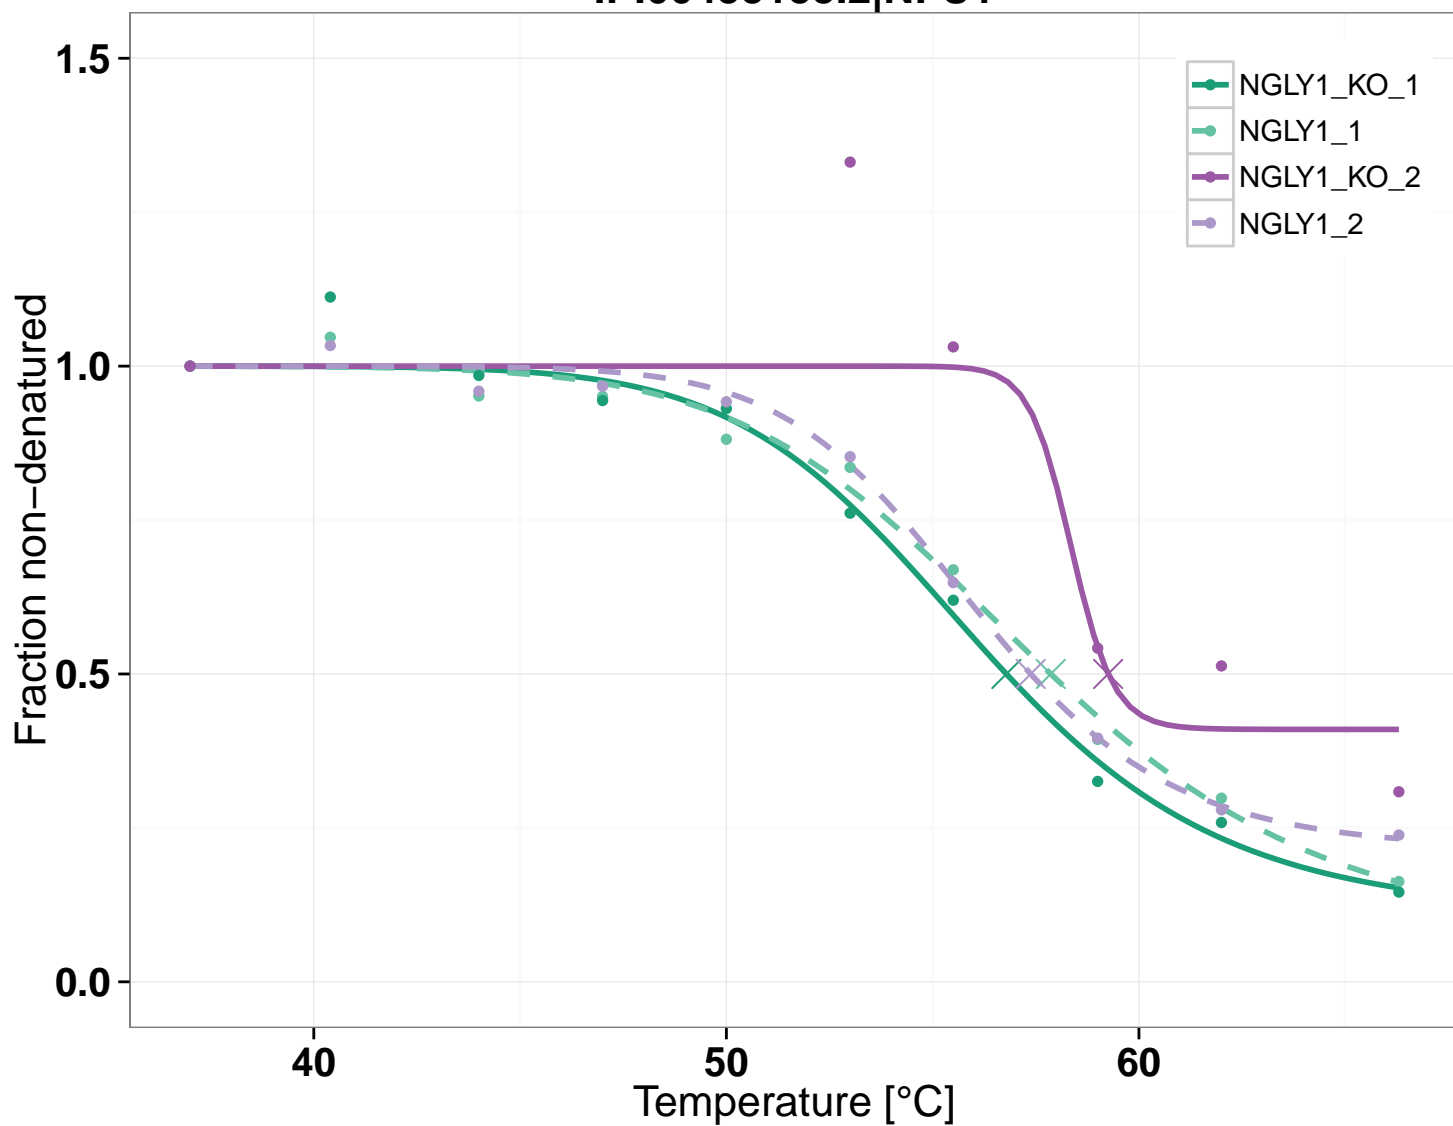

|            | meltPoint | slope  | plateau | R2   |
|------------|-----------|--------|---------|------|
| NGLY1_KO_1 | 56.79     | -0.076 | 0.11    | 0.98 |
| NGLY1_1    | 57.86     | -0.066 | 0.06    | 0.99 |
| NGLY1_KO_2 | 59.25     | -0.29  | 0.41    | 0.27 |
| NGLY1_2    | 57.38     | -0.084 | 0.21    | 1    |

Supplement: Supplementary file 4206 [file 1]

IPI00845348.1|ZRANB2

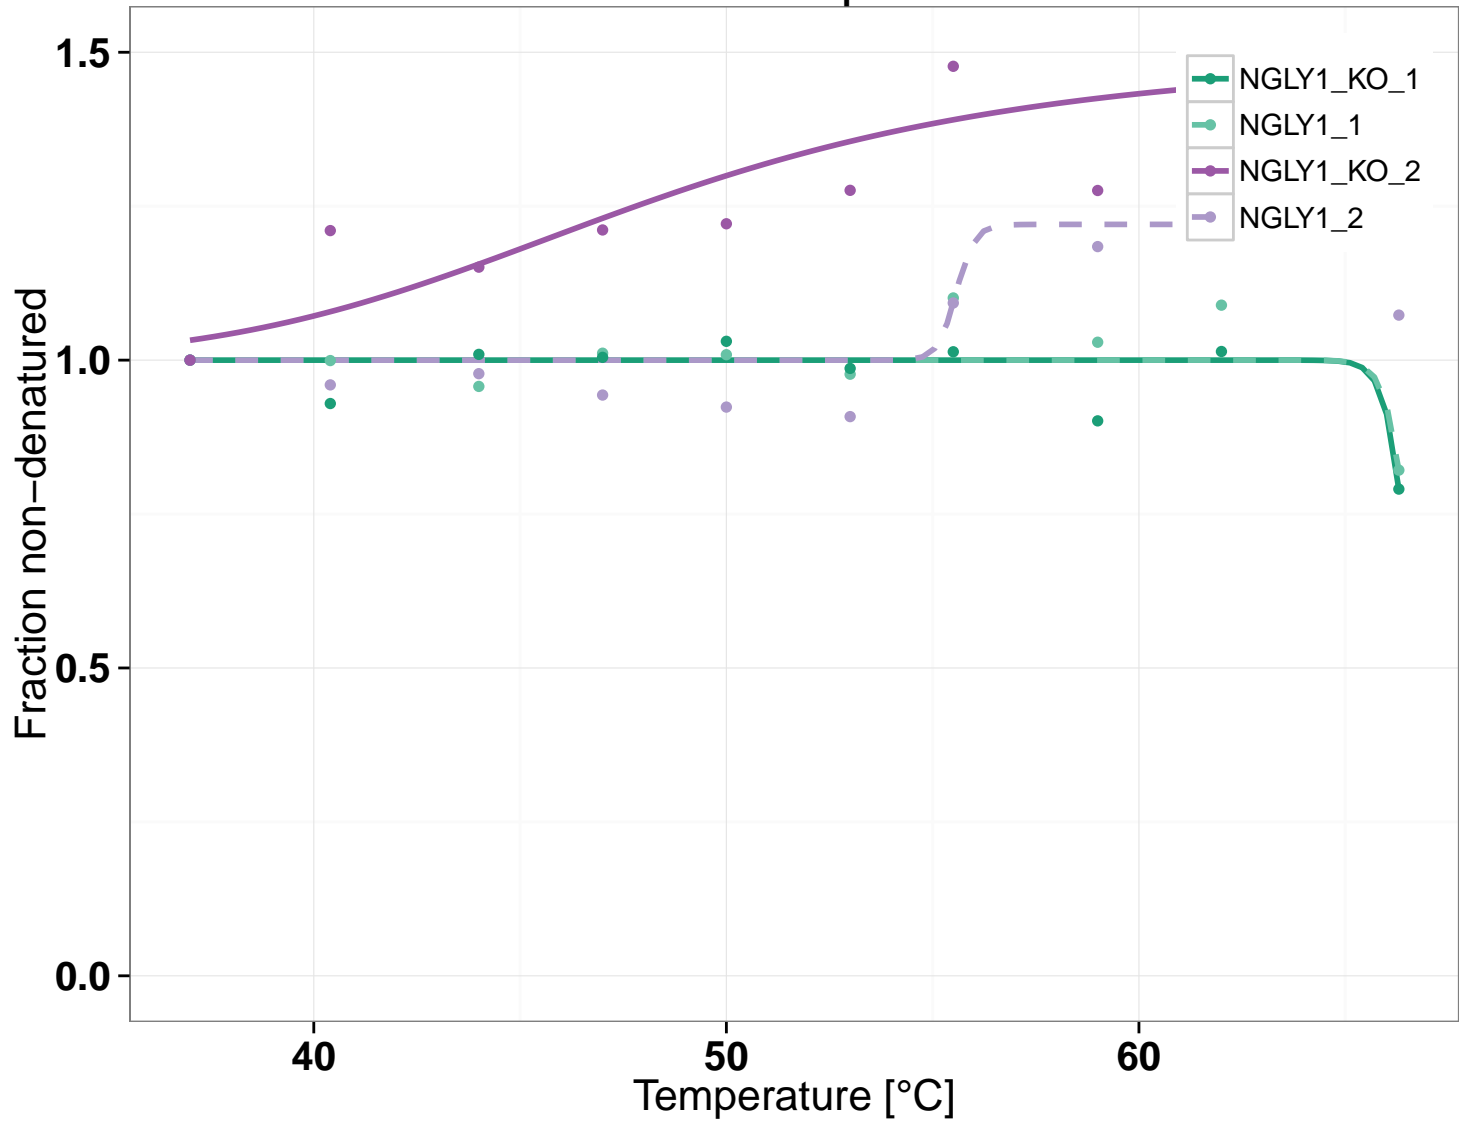

|            | meltPoint | slope | plateau | R2   |
|------------|-----------|-------|---------|------|
| NGLY1_KO_1 | -         | -     | 0       | 0.67 |
| NGLY1_1    | -         | -     | 0       | 0.6  |
| NGLY1_KO_2 | -         | 0.025 | 1.5     | 0.52 |
| NGLY1_2    | -         | 0.25  | 1.22    | 0.64 |

Supplement: Supplementary file 4207 [file 1]

IPI00000733.4|UTP18

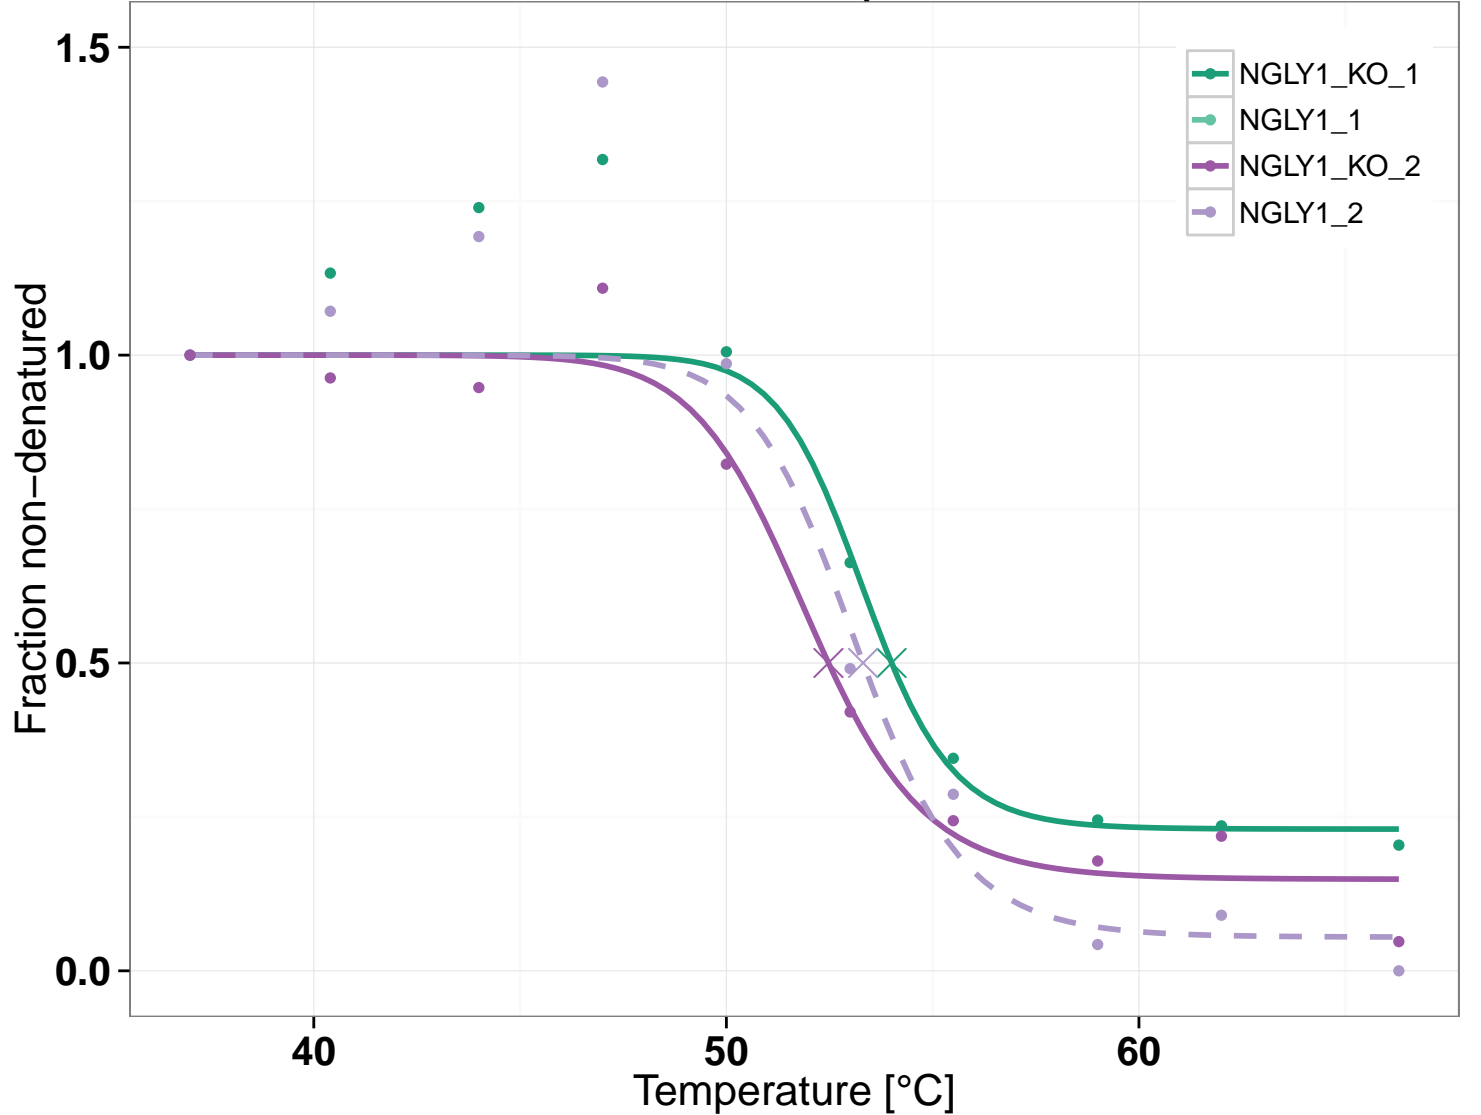

|            | meltPoint | slope | plateau | R2   |
|------------|-----------|-------|---------|------|
| NGLY1_KO_1 | 54        | -0.18 | 0.23    | 0.9  |
| NGLY1_1    | -         | -     | -       | -    |
| NGLY1_KO_2 | 52.47     | -0.15 | 0.15    | 0.98 |
| NGLY1_2    | 53.31     | -0.18 | 0.05    | 0.9  |

Supplement: Supplementary file 4208 [file 1]

# IPI00006482.1|ATP1A1

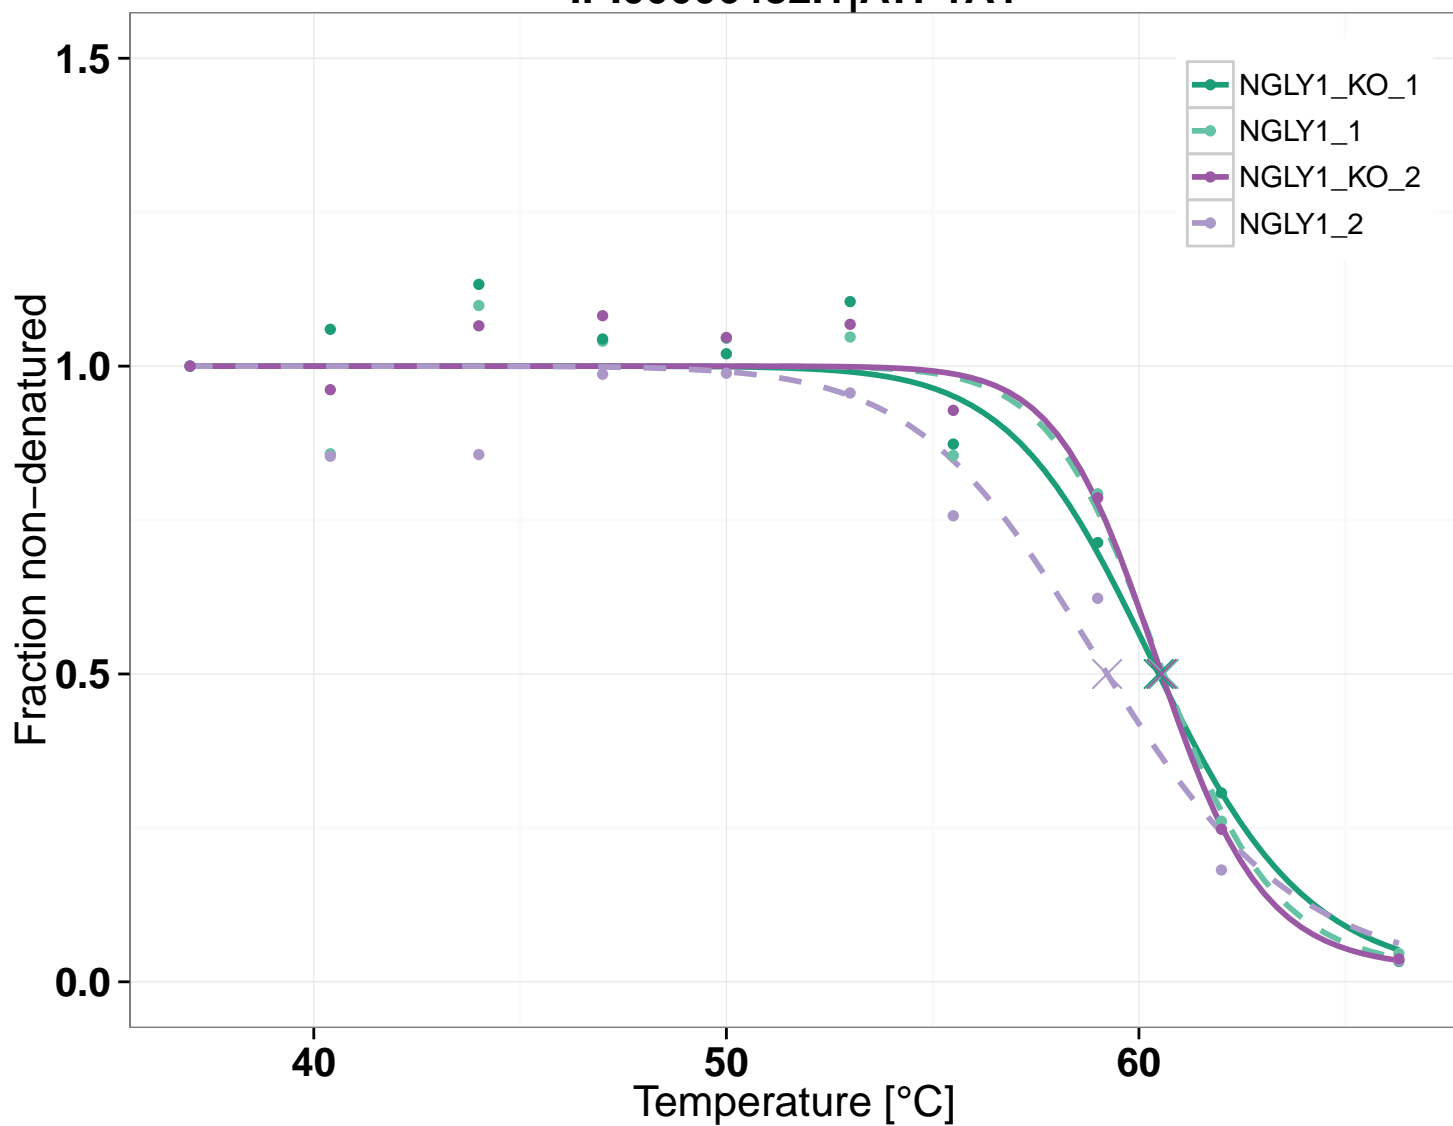

|            | meltPoint | slope | plateau | R2   |
|------------|-----------|-------|---------|------|
| NGLY1_KO_1 | 60.48     | -0.14 | 0       | 0.97 |
| NGLY1_1    | 60.6      | -0.18 | 0.02    | 0.95 |
| NGLY1_KO_2 | 60.55     | -0.2  | 0.02    | 0.98 |
| NGLY1_2    | 59.23     | -0.11 | 0       | 0.94 |

Supplement: Supplementary file 4209 [file 1]

# IPI00021435.3|PSMC2

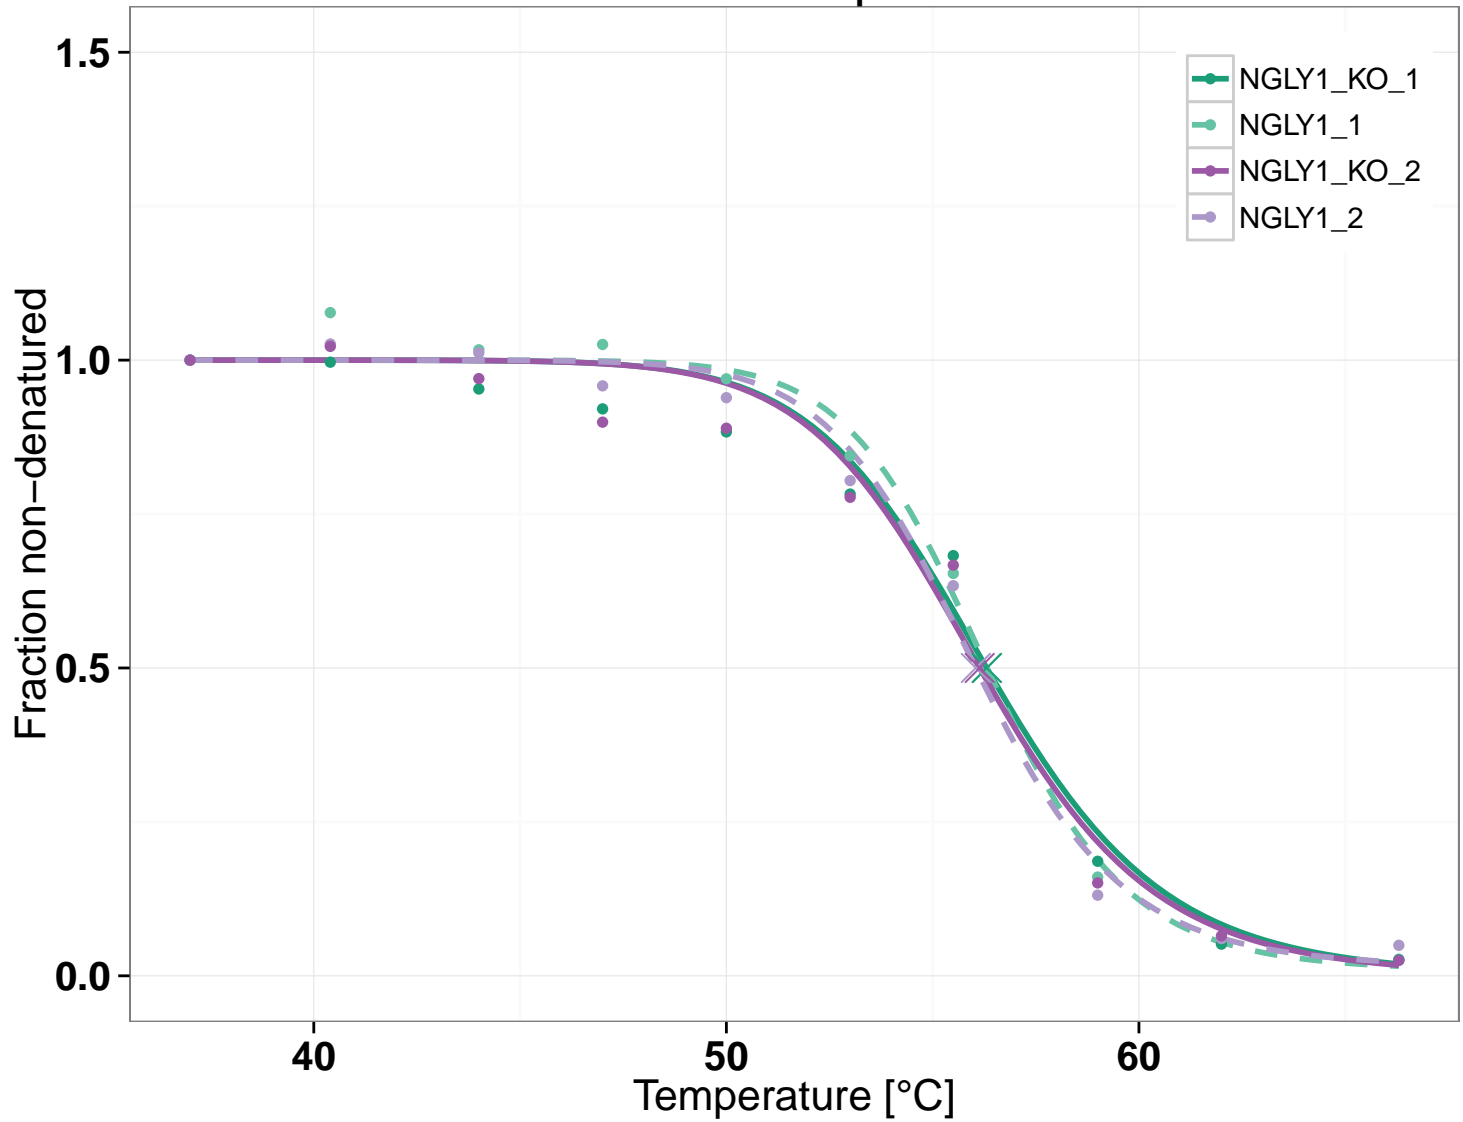

|            | meltPoint | slope | plateau | R2   |
|------------|-----------|-------|---------|------|
| NGLY1_KO_1 | 56.31     | -0.12 | 0       | 0.98 |
| NGLY1_1    | 56.32     | -0.15 | 0.01    | 0.99 |
| NGLY1_KO_2 | 56.14     | -0.12 | 0       | 0.98 |
| NGLY1_2    | 56.05     | -0.14 | 0.01    | 0.99 |

Supplement: Supplementary file 4210 [file 1]

IPI00012645.1|SPTBN2

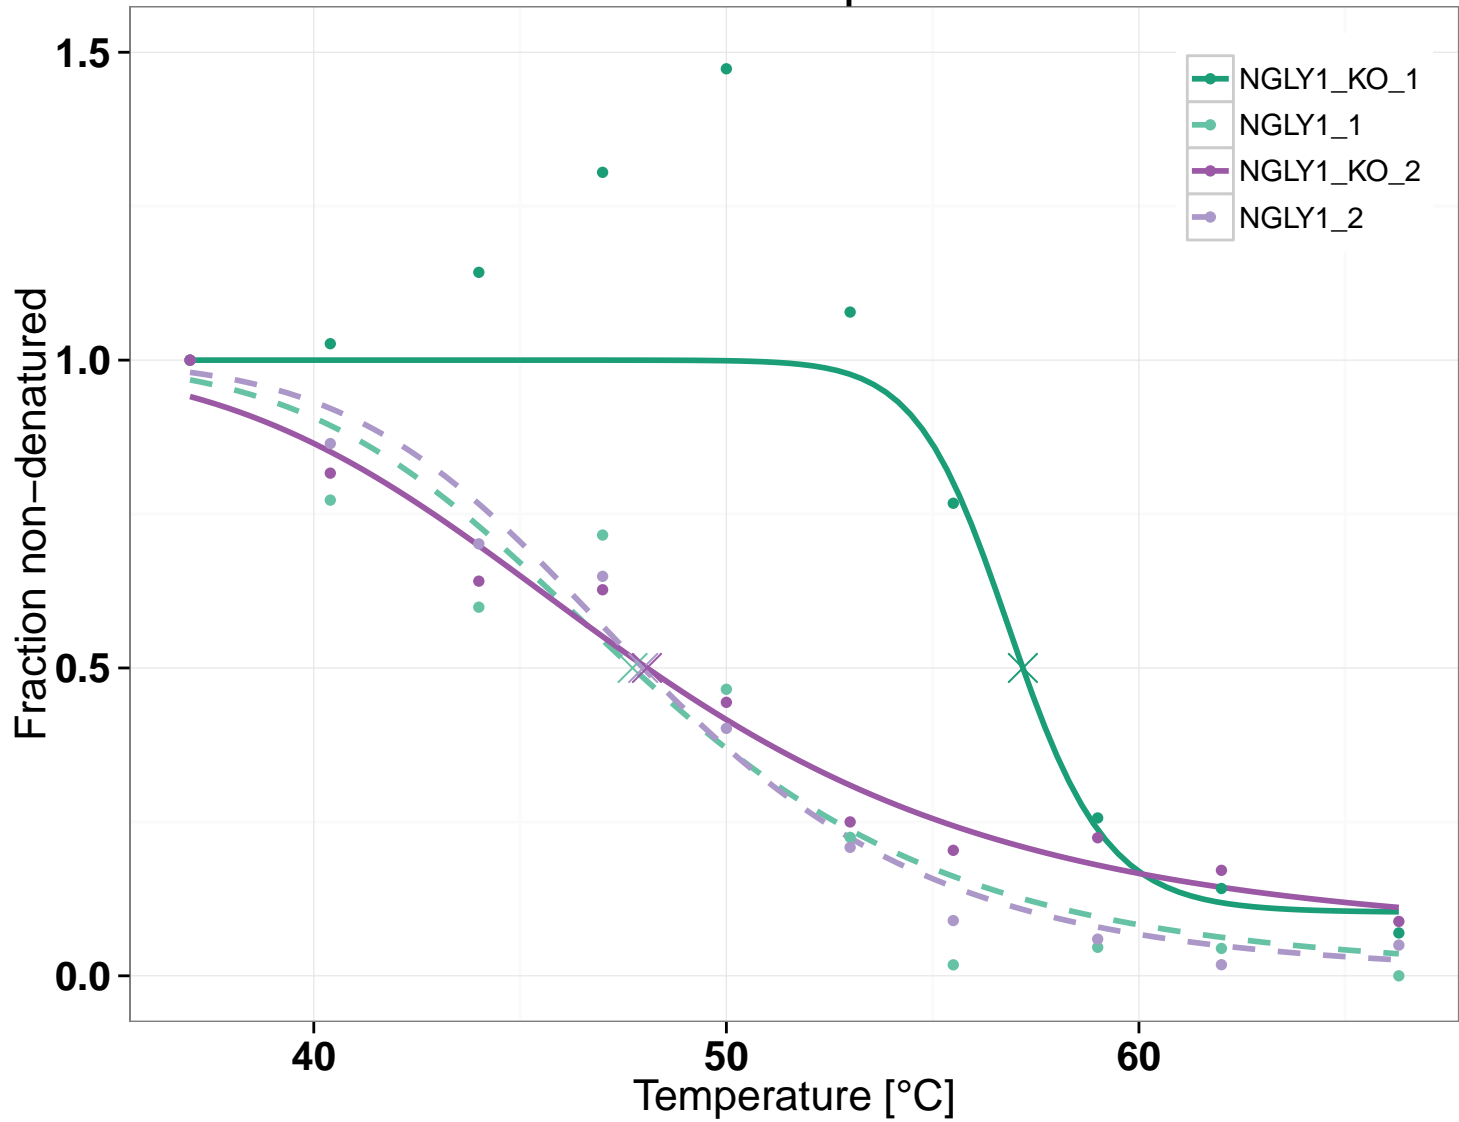

|            | meltPoint | slope  | plateau | R2   |
|------------|-----------|--------|---------|------|
| NGLY1_KO_1 | 57.19     | -0.19  | 0.1     | 0.84 |
| NGLY1_1    | 47.73     | -0.063 | 0       | 0.92 |
| NGLY1_KO_2 | 48.08     | -0.05  | 0.05    | 0.97 |
| NGLY1_2    | 47.98     | -0.07  | 0       | 0.98 |

Supplement: Supplementary file 4211 [file 1]

# IPI00016635.1|ZFP36L1

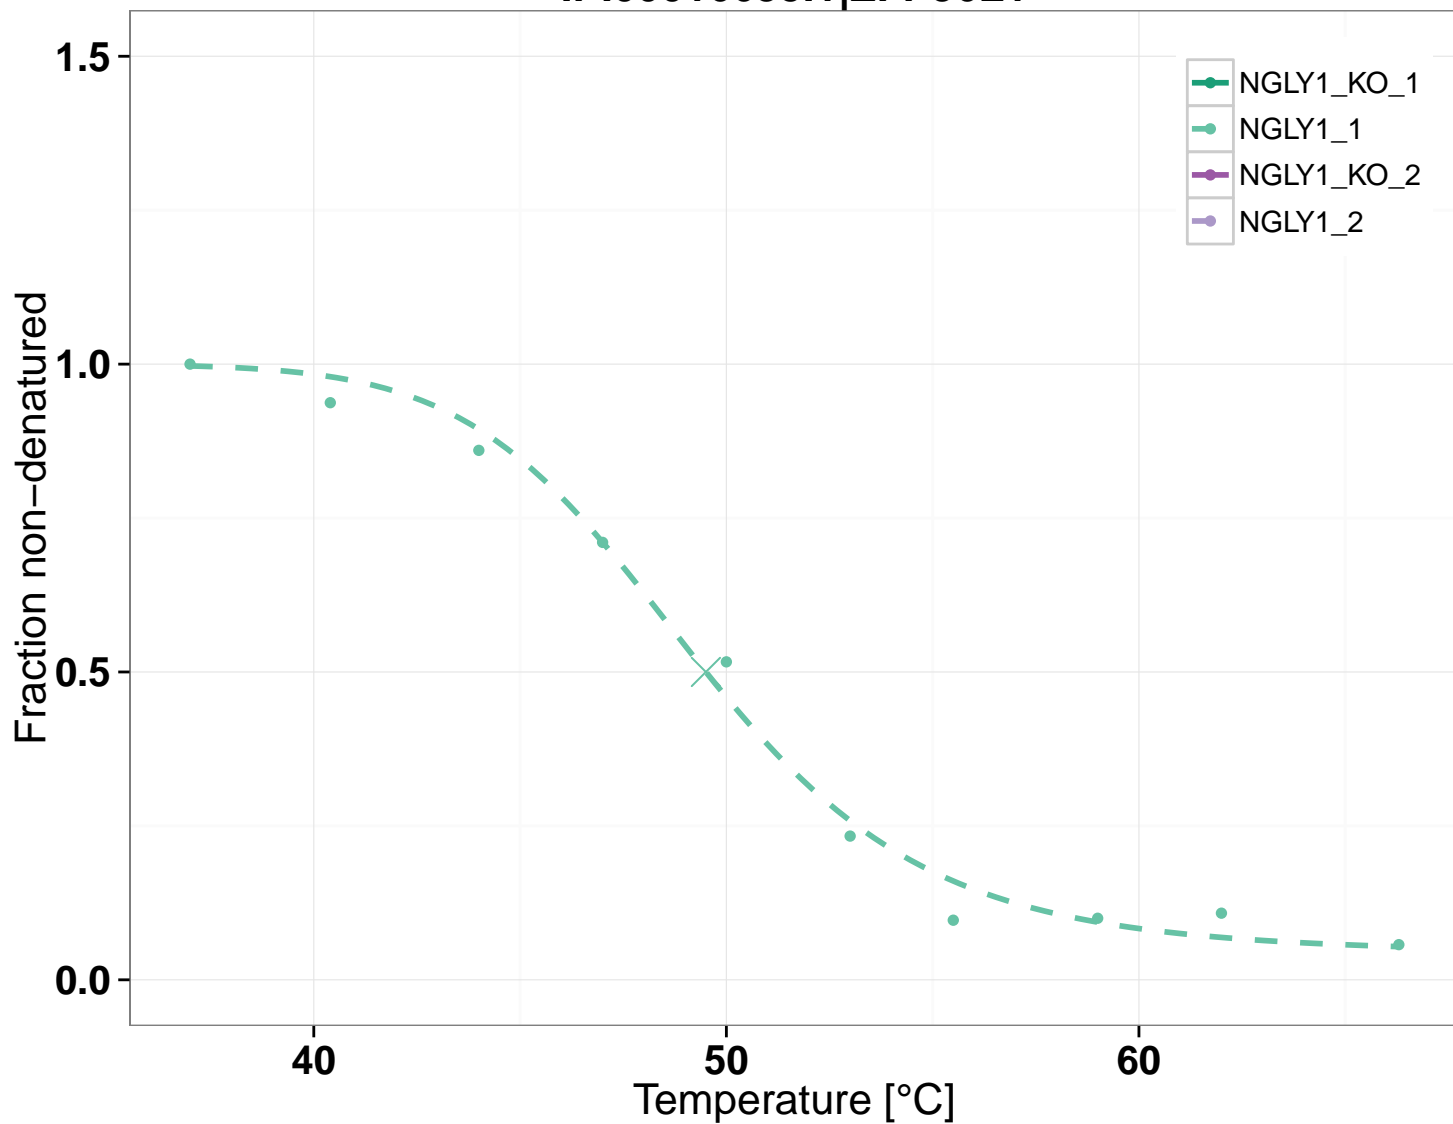

|            | meltPoint | slope  | plateau | R2   |
|------------|-----------|--------|---------|------|
| NGLY1_KO_1 | —         | —      | —       | —    |
| NGLY1_1    | 49.5      | -0.086 | 0.04    | 0.99 |
| NGLY1_KO_2 | —         | —      | —       | —    |
| NGLY1_2    | —         | —      | —       | —    |

Supplement: Supplementary file 4212 [file 1]

IPI00002424.1|PLEKHF2

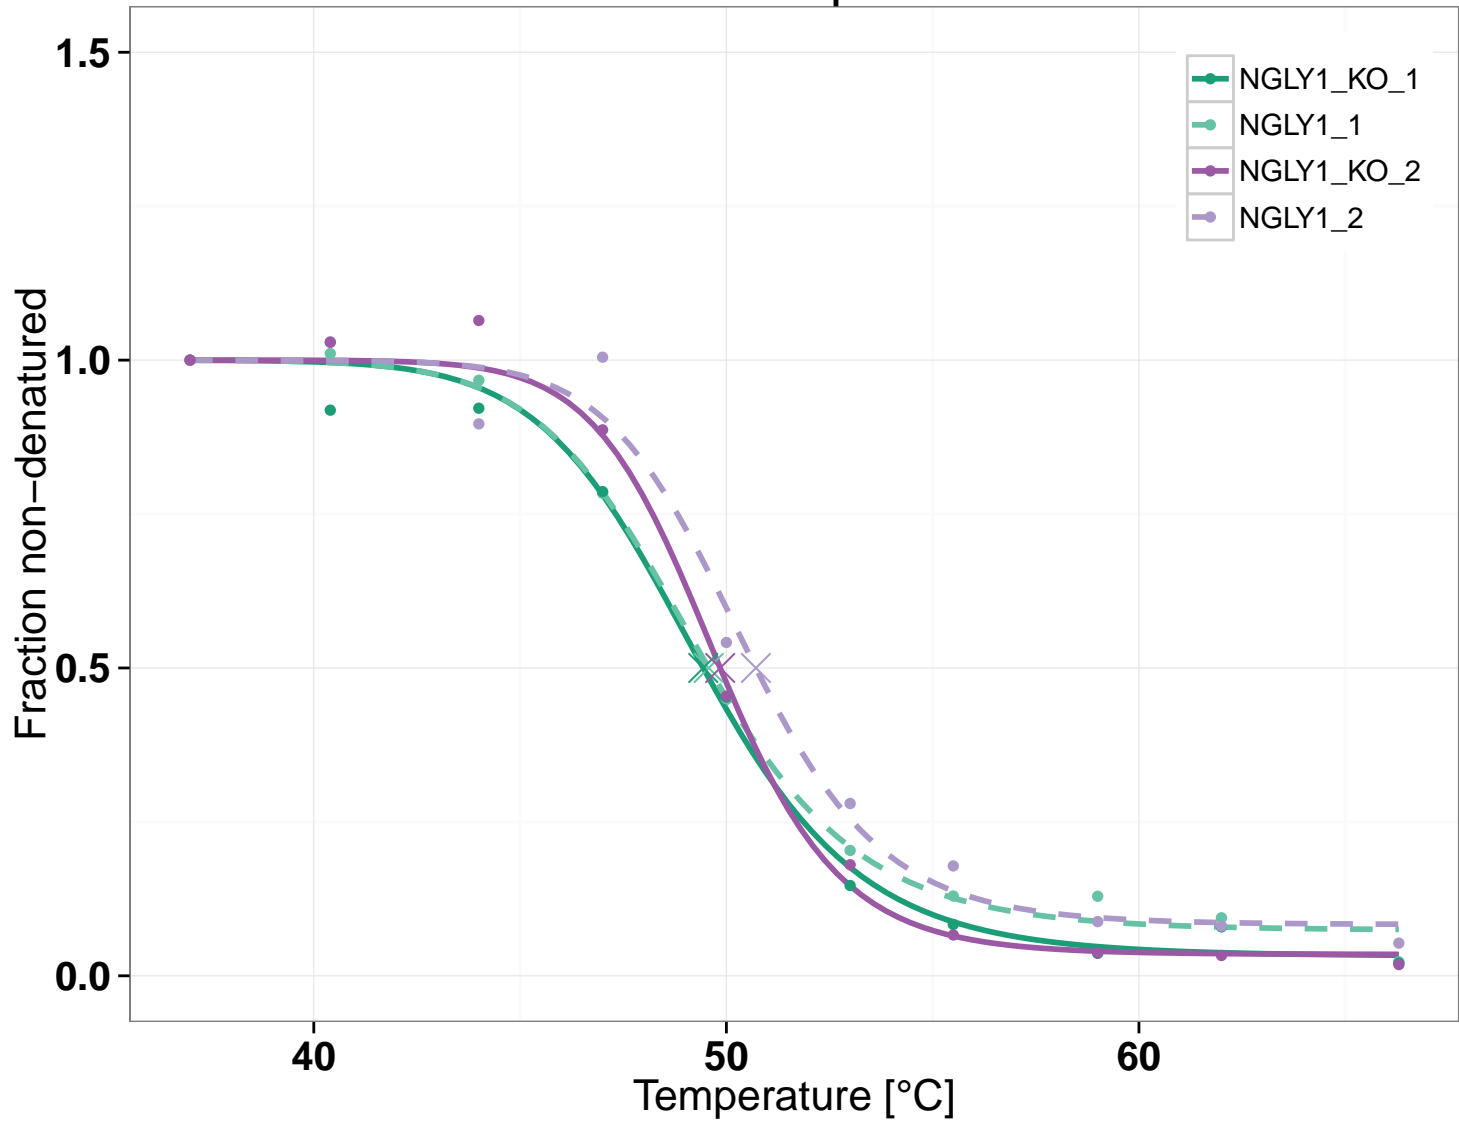

|            | meltPoint | slope | plateau | R2   |
|------------|-----------|-------|---------|------|
| NGLY1_KO_1 | 49.44     | -0.12 | 0.03    | 0.99 |
| NGLY1_1    | 49.57     | -0.12 | 0.07    | 1    |
| NGLY1_KO_2 | 49.85     | -0.16 | 0.03    | 1    |
| NGLY1_2    | 50.72     | -0.14 | 0.08    | 0.98 |

Supplement: Supplementary file 4213 [file 1]

IPI00012202.1|WDR77

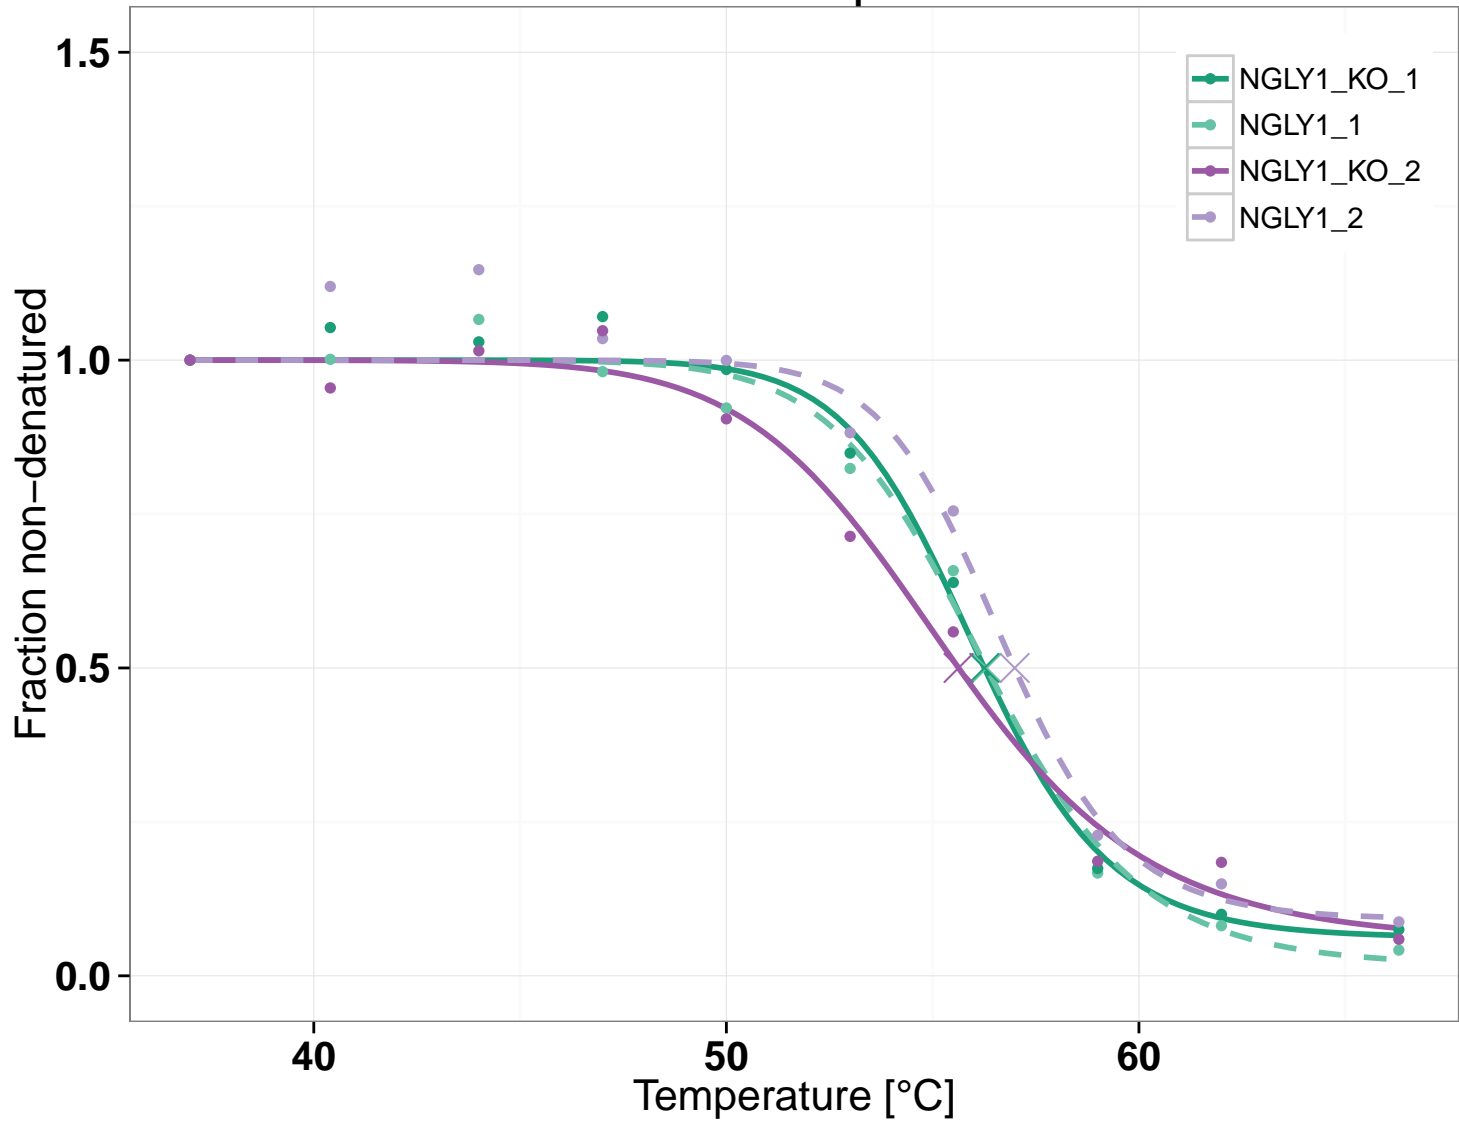

|            | meltPoint | slope  | plateau | R2   |
|------------|-----------|--------|---------|------|
| NGLY1_KO_1 | 56.25     | -0.15  | 0.06    | 0.99 |
| NGLY1_1    | 56.31     | -0.13  | 0.02    | 0.99 |
| NGLY1_KO_2 | 55.63     | -0.097 | 0.05    | 0.99 |
| NGLY1_2    | 56.99     | -0.15  | 0.09    | 0.97 |

Supplement: Supplementary file 4214 [file 1]

# IPI00243221.2|NRD1

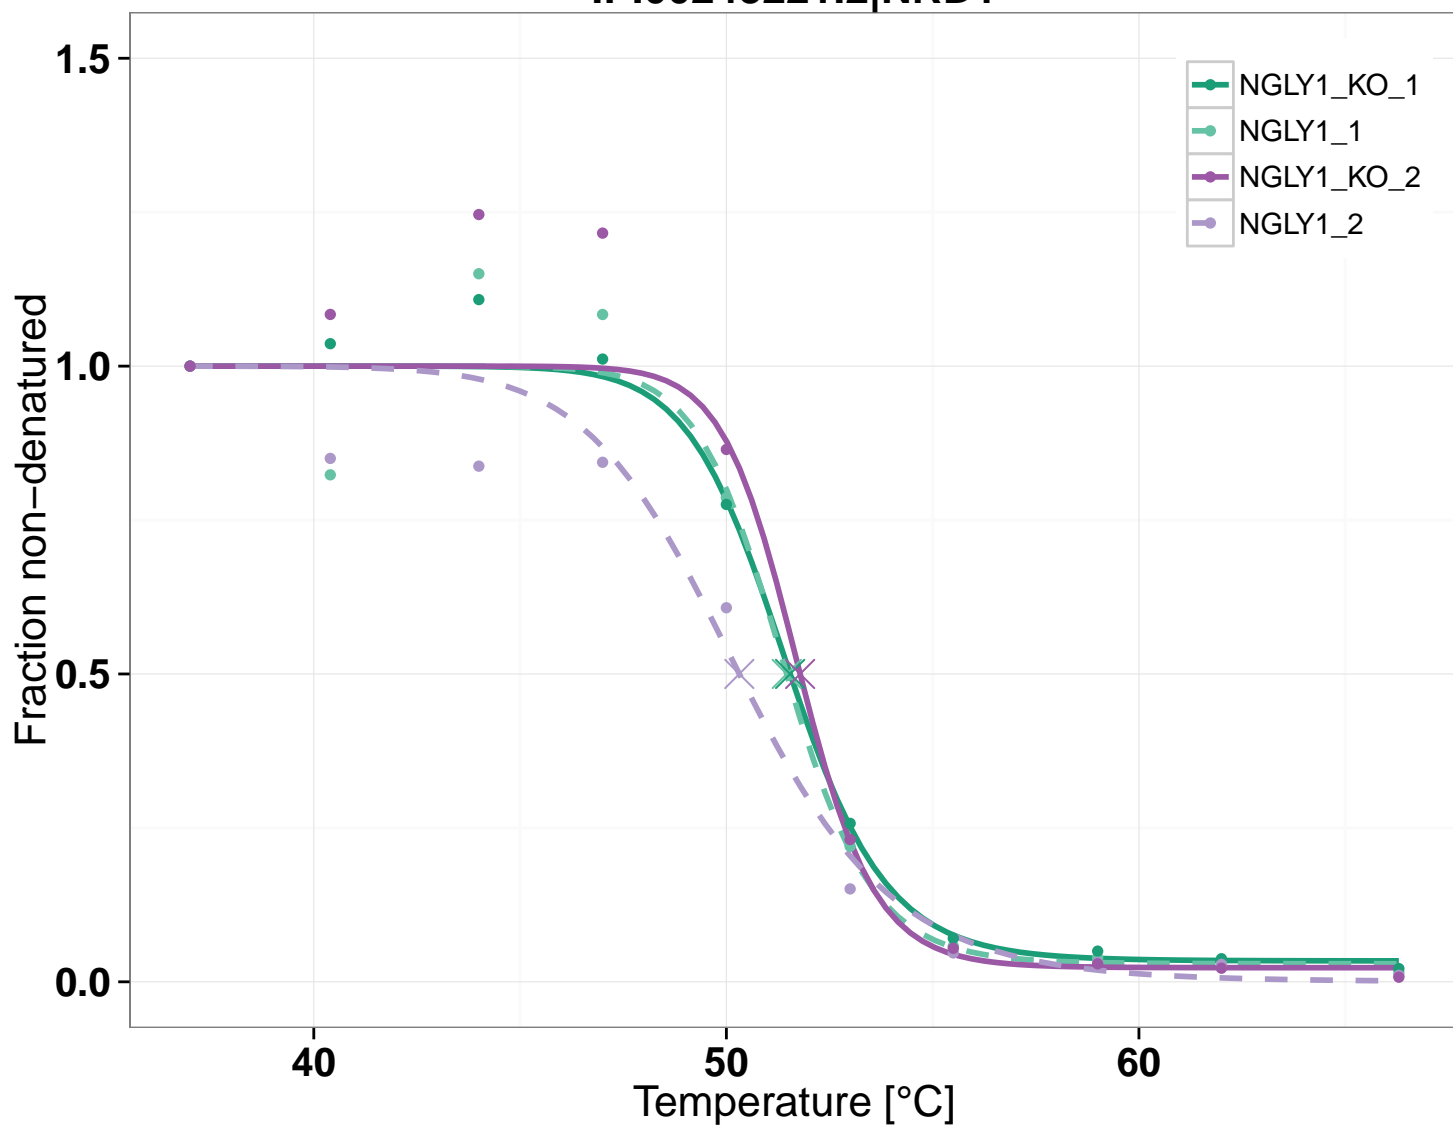

|            | meltPoint | slope | plateau | R2   |
|------------|-----------|-------|---------|------|
| NGLY1_KO_1 | 51.55     | -0.2  | 0.03    | 0.99 |
| NGLY1_1    | 51.46     | -0.23 | 0.03    | 0.97 |
| NGLY1_KO_2 | 51.79     | -0.26 | 0.02    | 0.96 |
| NGLY1_2    | 50.31     | -0.13 | 0       | 0.97 |

Supplement: Supplementary file 4215 [file 1]

IPI00873705.1|ATG4A

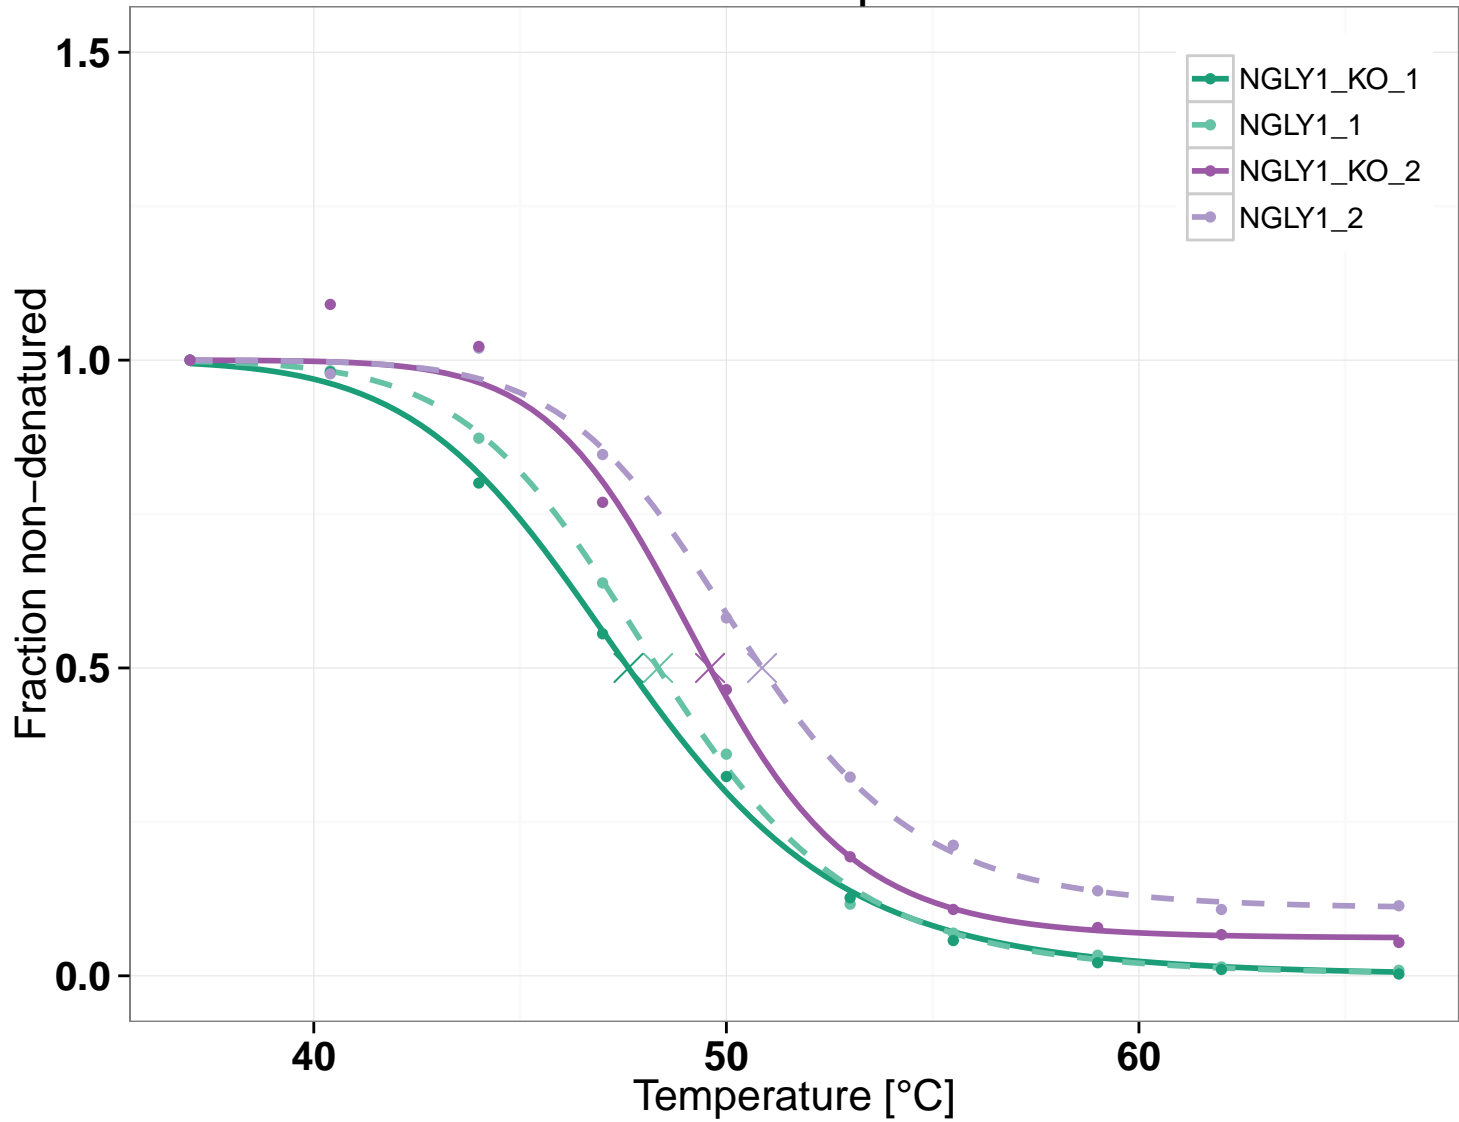

|            | meltPoint | slope  | plateau | R2   |
|------------|-----------|--------|---------|------|
| NGLY1_KO_1 | 47.63     | -0.096 | 0       | 1    |
| NGLY1_1    | 48.35     | -0.11  | 0       | 1    |
| NGLY1_KO_2 | 49.6      | -0.13  | 0.06    | 0.99 |
| NGLY1_2    | 50.87     | -0.1   | 0.11    | 1    |

Supplement: Supplementary file 4216 [file 1]

IPI00010863.5|ATOX1

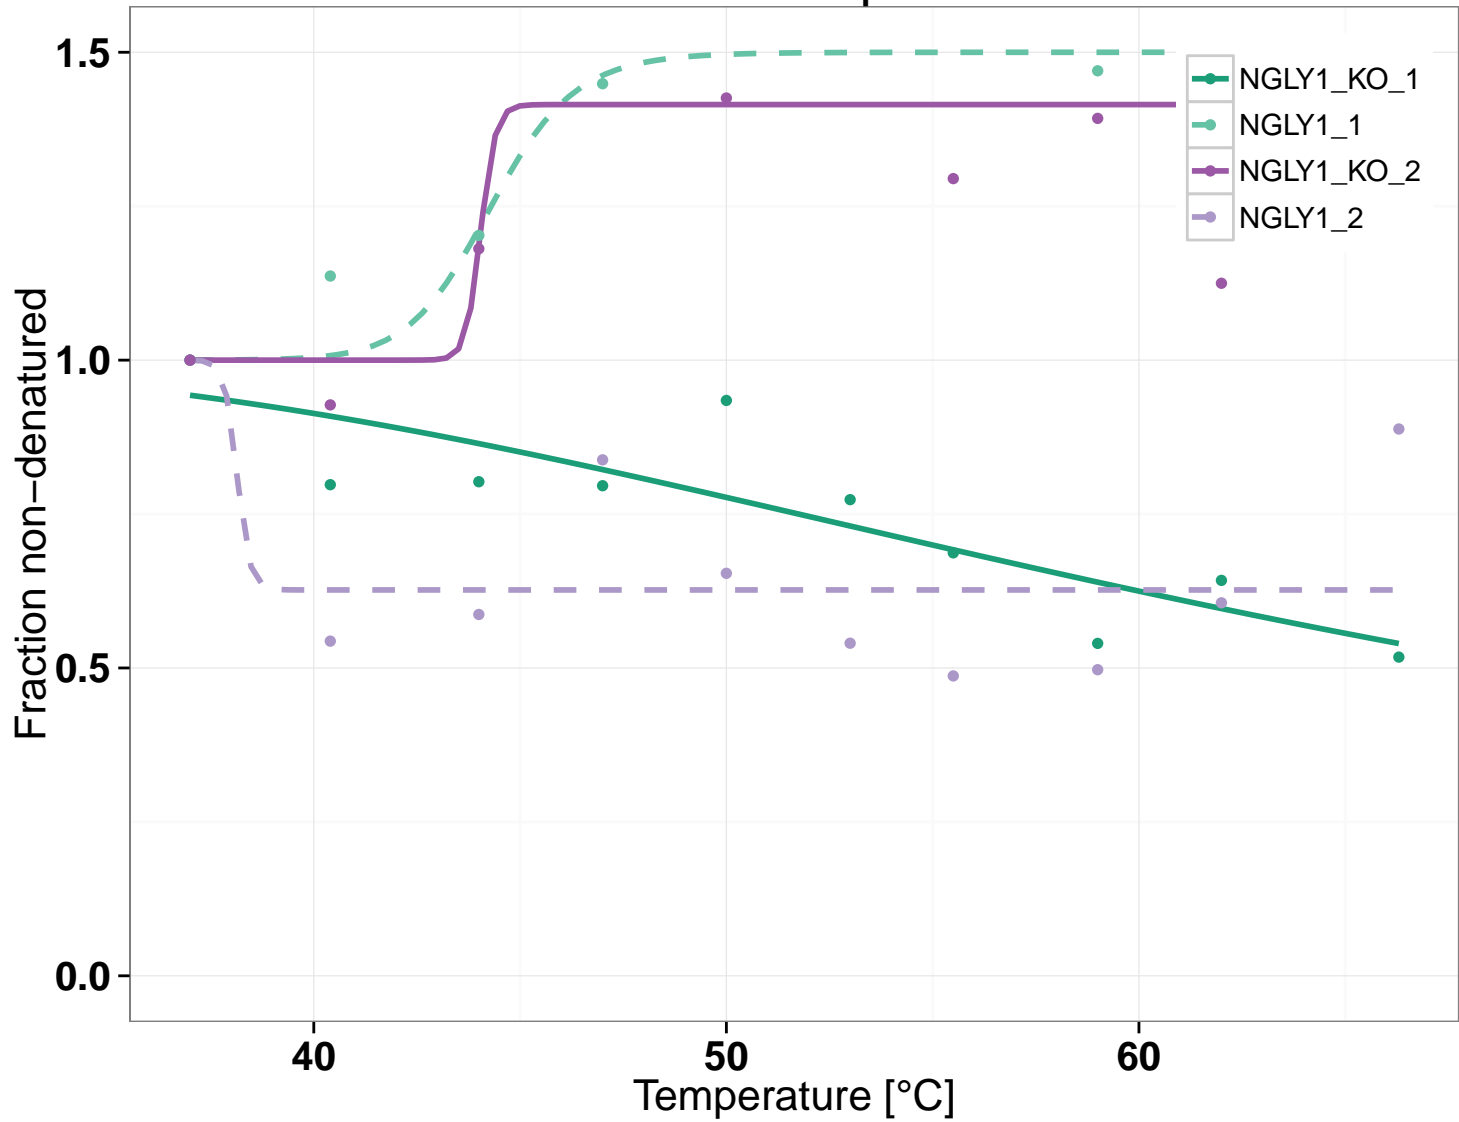

|            | meltPoint | slope  | plateau | R2   |
|------------|-----------|--------|---------|------|
| NGLY1_KO_1 | -         | -0.016 | 0       | 0.73 |
| NGLY1_1    | -         | 0.12   | 1.5     | 0.37 |
| NGLY1_KO_2 | -         | 0.59   | 1.42    | 0.66 |
| NGLY1_2    | -         | -0.61  | 0.63    | 0.43 |

Supplement: Supplementary file 4217 [file 1]

# IPI00845273.1|URG4

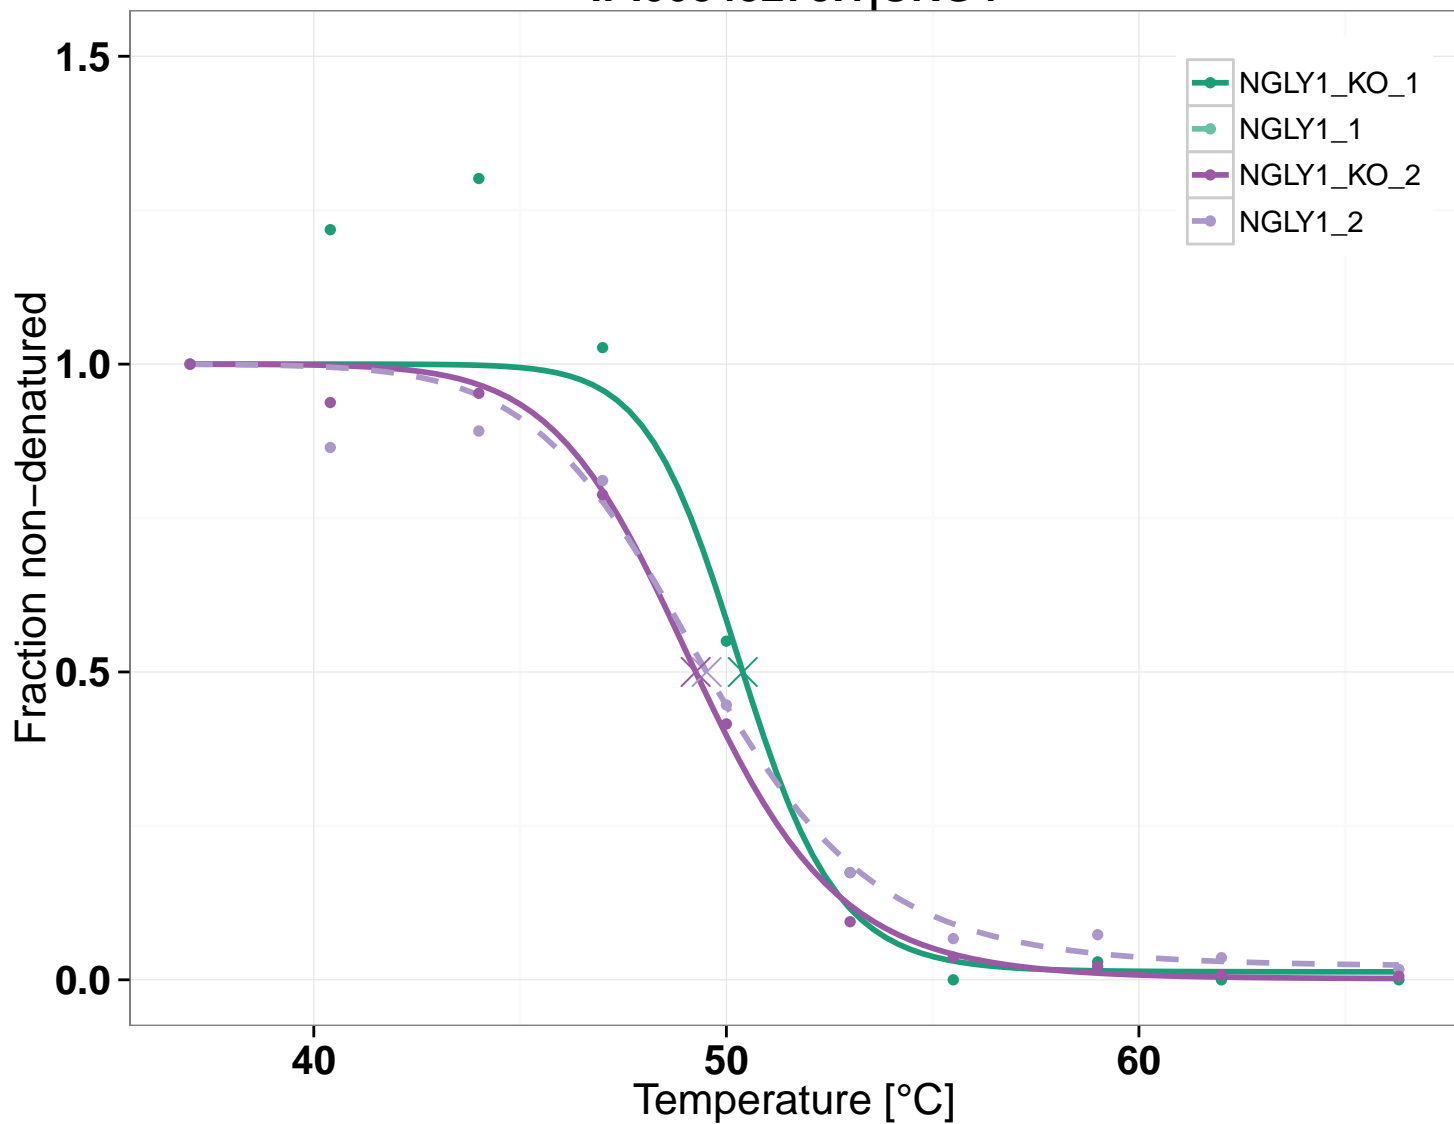

|            | meltPoint | slope | plateau | R2   |
|------------|-----------|-------|---------|------|
| NGLY1_KO_1 | 50.4      | -0.21 | 0.01    | 0.95 |
| NGLY1_1    | -         | -     | -       | -    |
| NGLY1_KO_2 | 49.26     | -0.14 | 0       | 1    |
| NGLY1_2    | 49.52     | -0.12 | 0.02    | 0.98 |

Supplement: Supplementary file 4218 [file 1]

IPI00550733.6|TBC1D2B

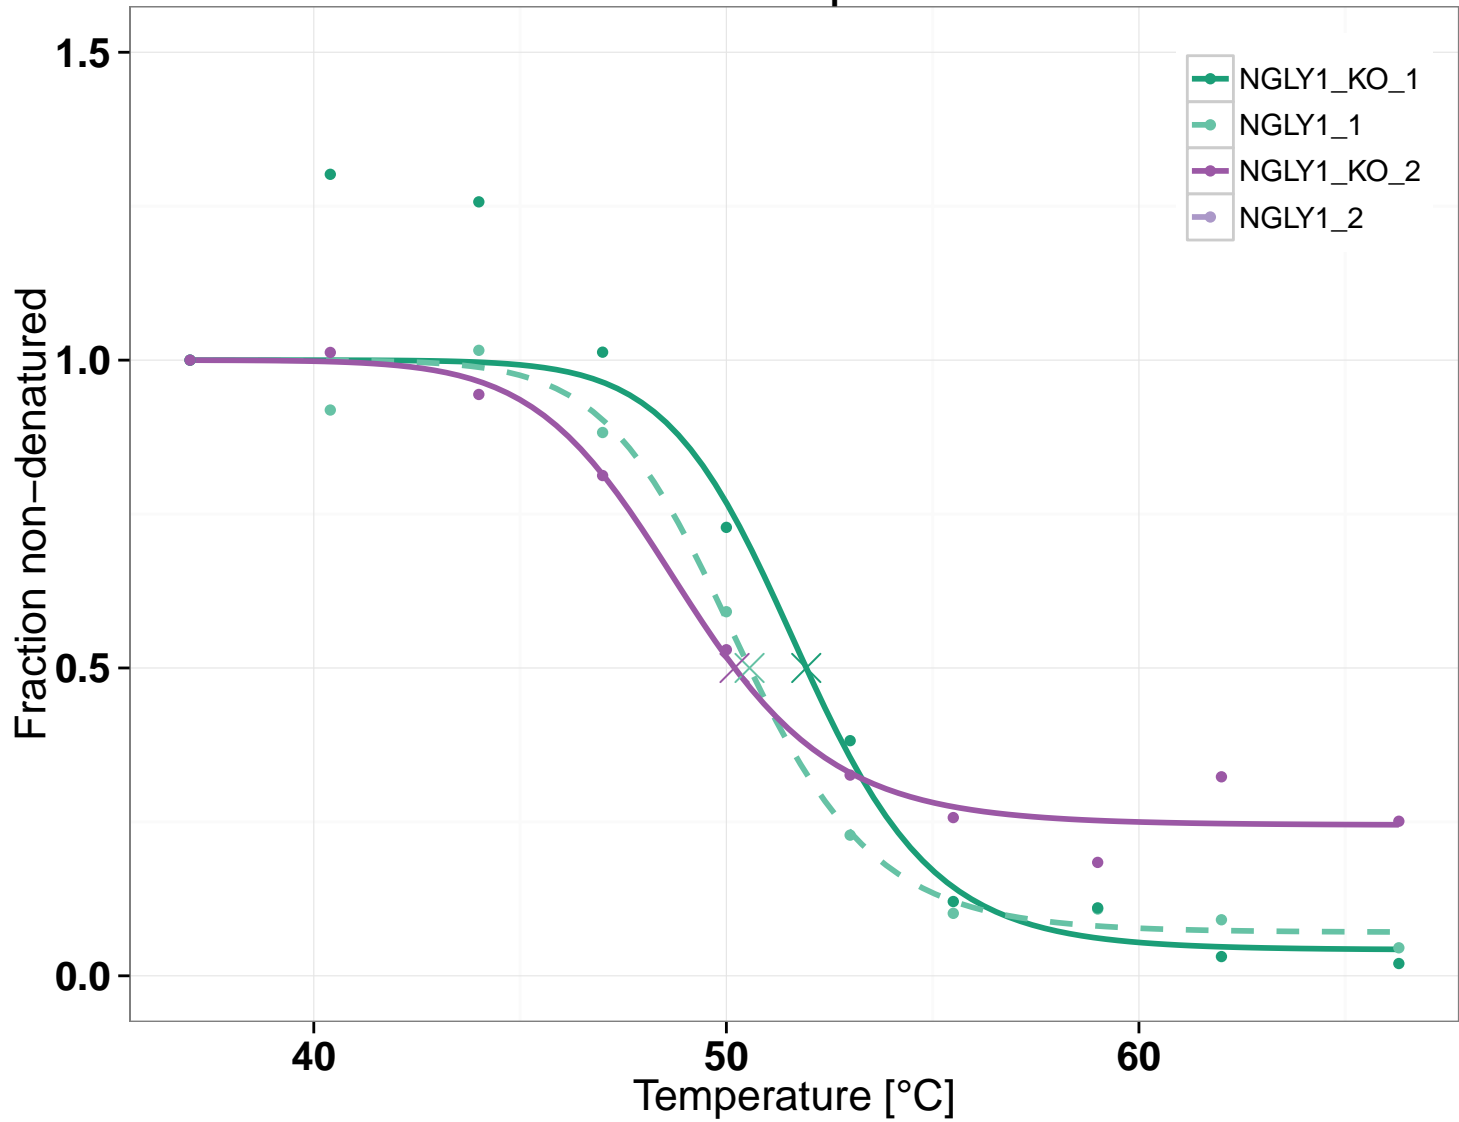

|            | meltPoint | slope | plateau | R2   |
|------------|-----------|-------|---------|------|
| NGLY1_KO_1 | 51.94     | -0.15 | 0.04    | 0.93 |
| NGLY1_1    | 50.56     | -0.14 | 0.07    | 0.99 |
| NGLY1_KO_2 | 50.2      | -0.1  | 0.24    | 0.99 |
| NGLY1_2    | -         | -     | -       | -    |

Supplement: Supplementary file 4219 [file 1]
