# Supplementary material (part 43 of 85)
Source: publisher figshare collection journal article supplement (https://gsajournals.figshare.com/articles/dataset/_/12014913)

IPI00329141.4|CHSY1

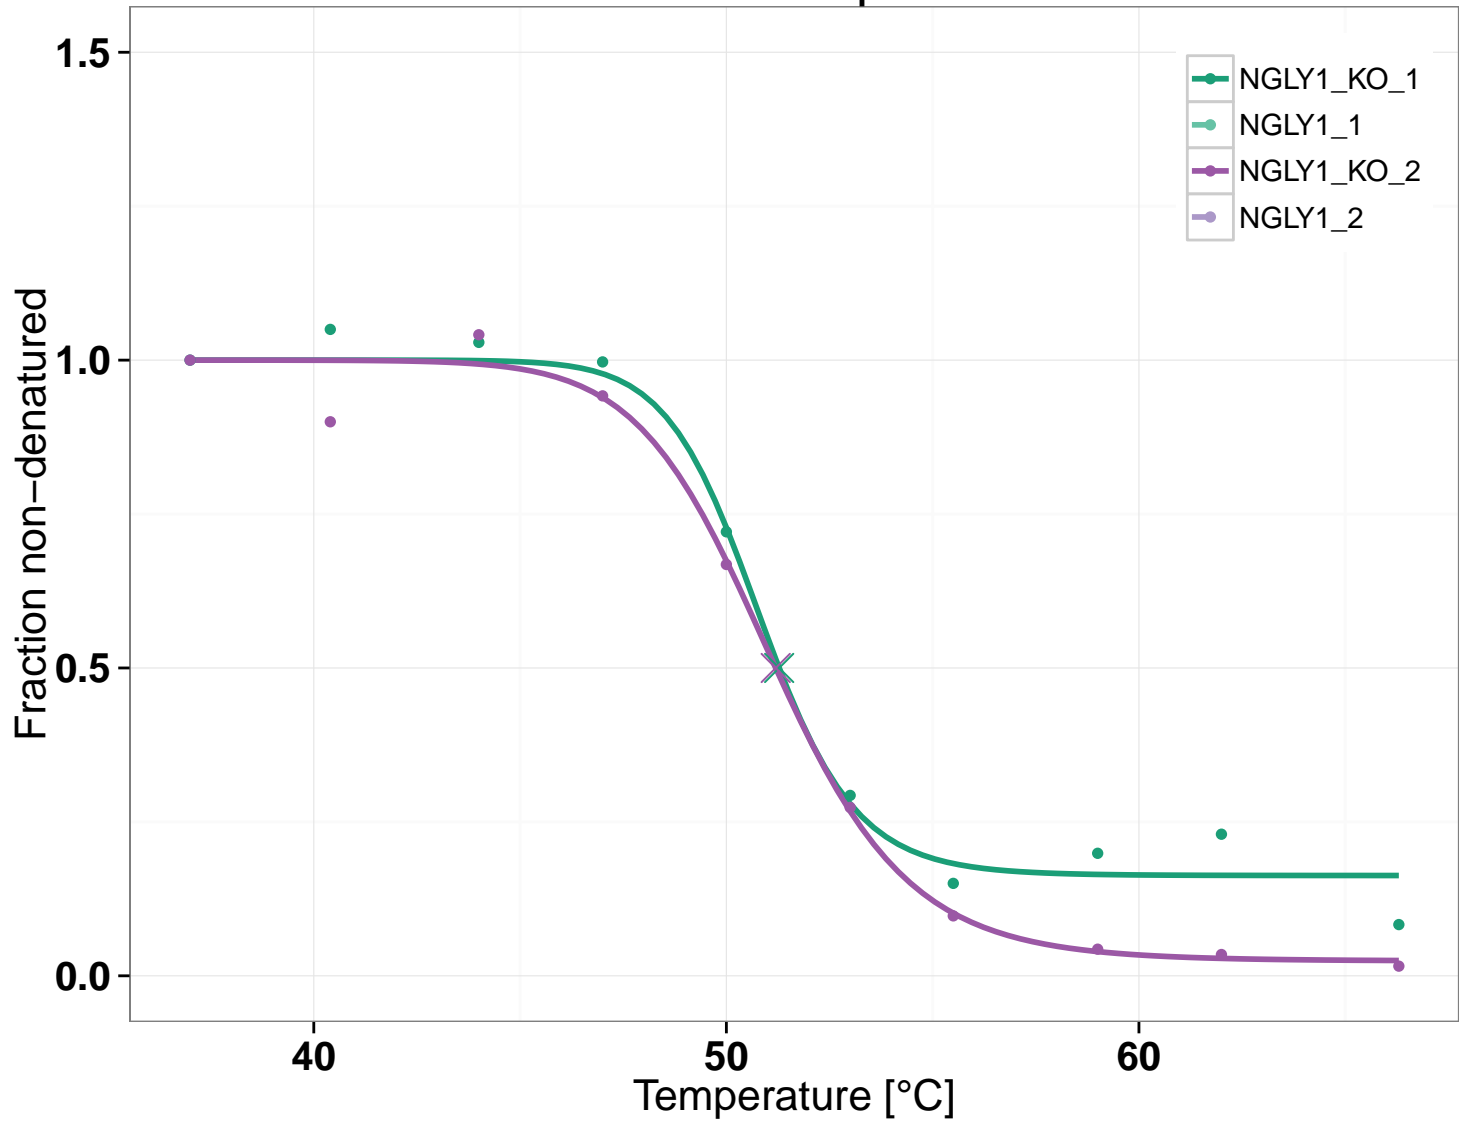

|            | meltPoint | slope | plateau | R2   |
|------------|-----------|-------|---------|------|
| NGLY1_KO_1 | 51.28     | -0.18 | 0.16    | 0.99 |
| NGLY1_1    | -         | -     | -       | -    |
| NGLY1_KO_2 | 51.2      | -0.15 | 0.02    | 0.99 |
| NGLY1_2    | -         | -     | -       | -    |

Supplement: Supplementary file 4220 [file 1]

IPI00012431.1|RNF26

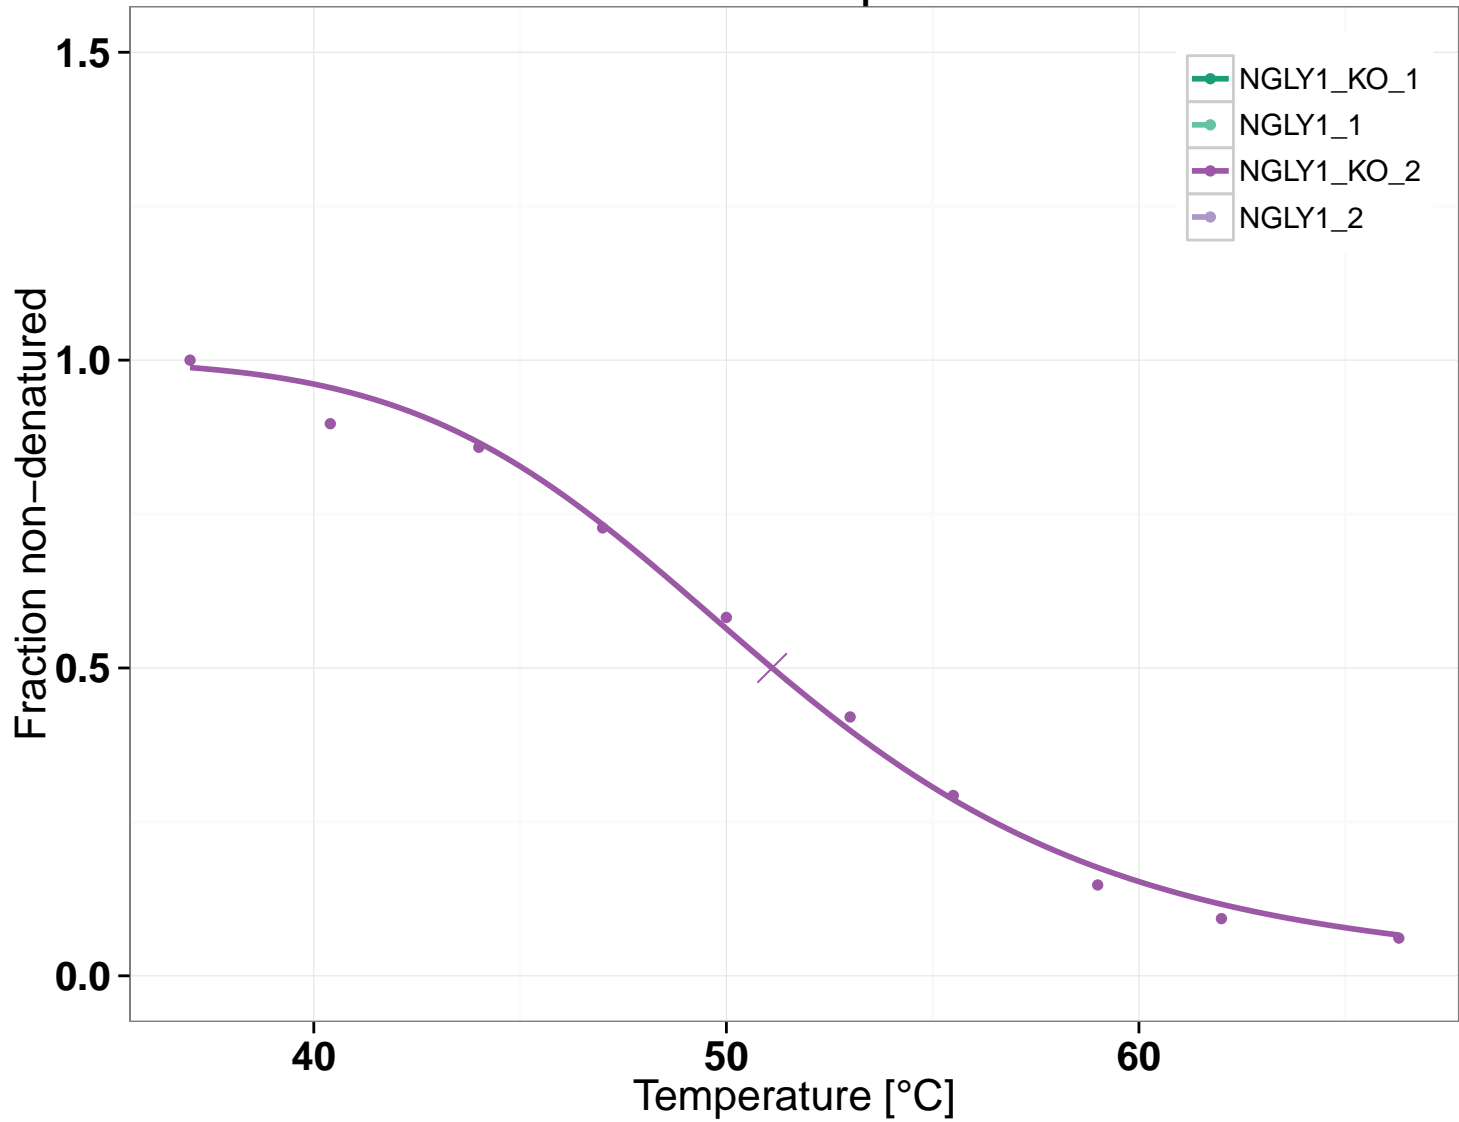

|            | meltPoint | slope  | plateau | R2   |
|------------|-----------|--------|---------|------|
| NGLY1_KO_1 | -         | -      | -       | -    |
| NGLY1_1    | -         | -      | -       | -    |
| NGLY1_KO_2 | 51.11     | -0.058 | 0       | 0.99 |
| NGLY1_2    | -         | -      | -       | -    |

Supplement: Supplementary file 4221 [file 1]

# IPI00743871.2|INTS7

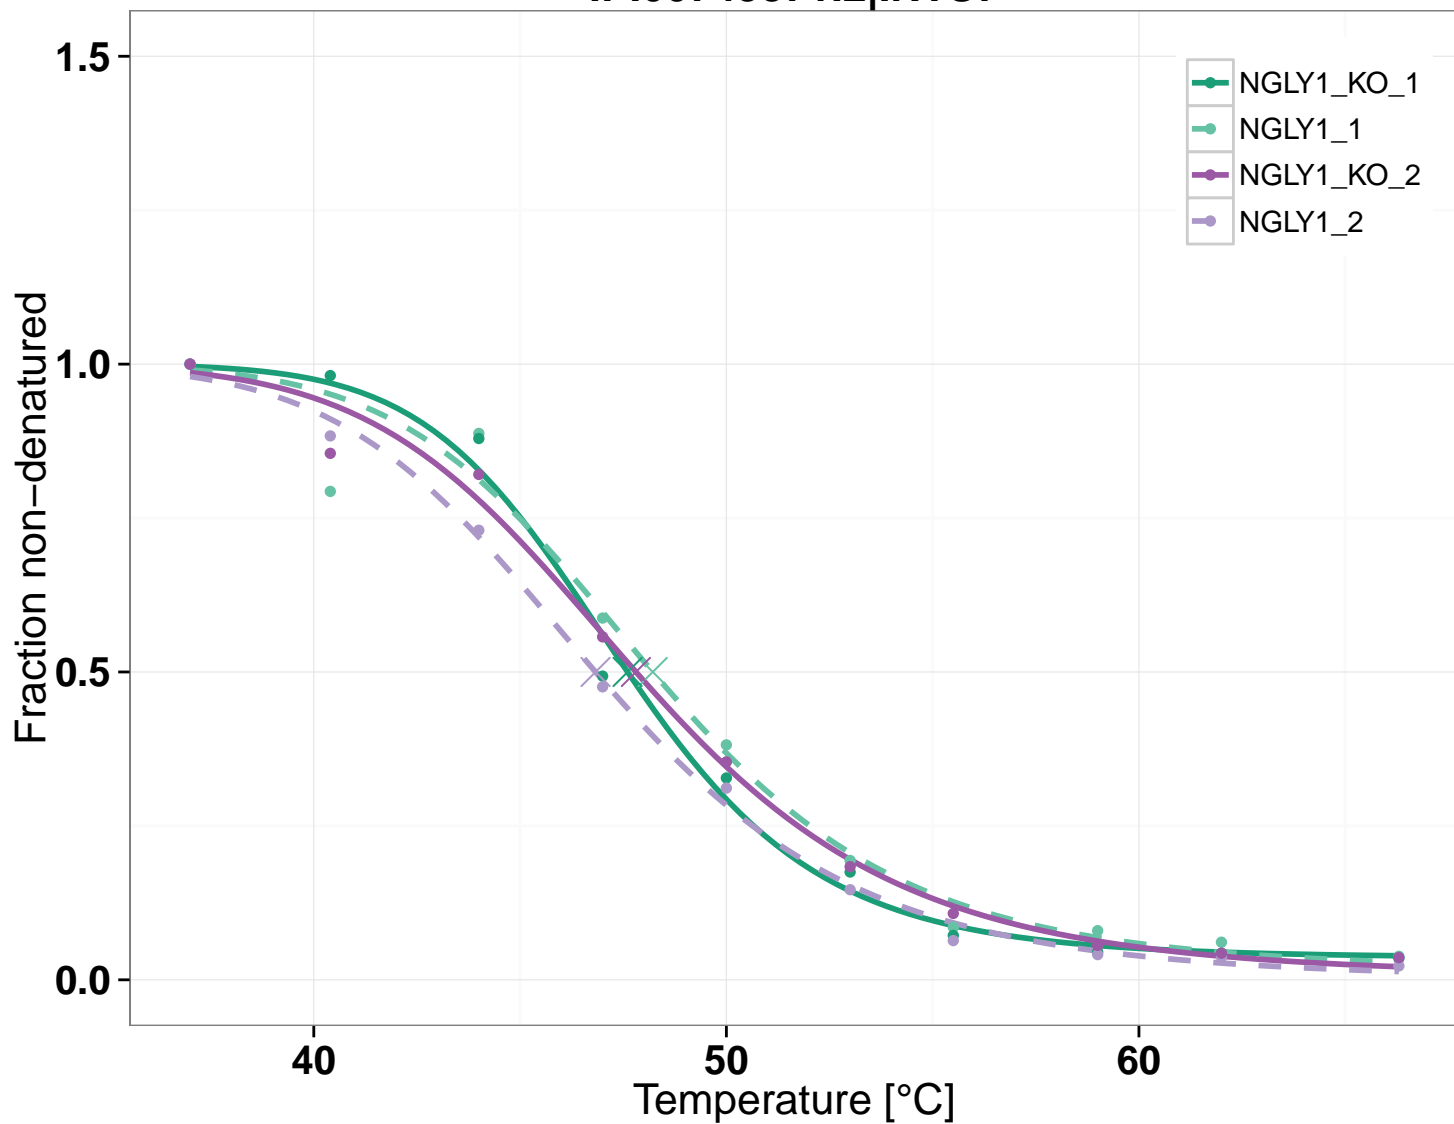

|            | meltPoint | slope  | plateau | R2   |
|------------|-----------|--------|---------|------|
| NGLY1_KO_1 | 47.61     | -0.1   | 0.04    | 0.99 |
| NGLY1_1    | 48.22     | -0.08  | 0.01    | 0.97 |
| NGLY1_KO_2 | 47.81     | -0.078 | 0       | 0.99 |
| NGLY1_2    | 46.83     | -0.079 | 0       | 1    |

Supplement: Supplementary file 4222 [file 1]

IPI00166130.1|FAM152B

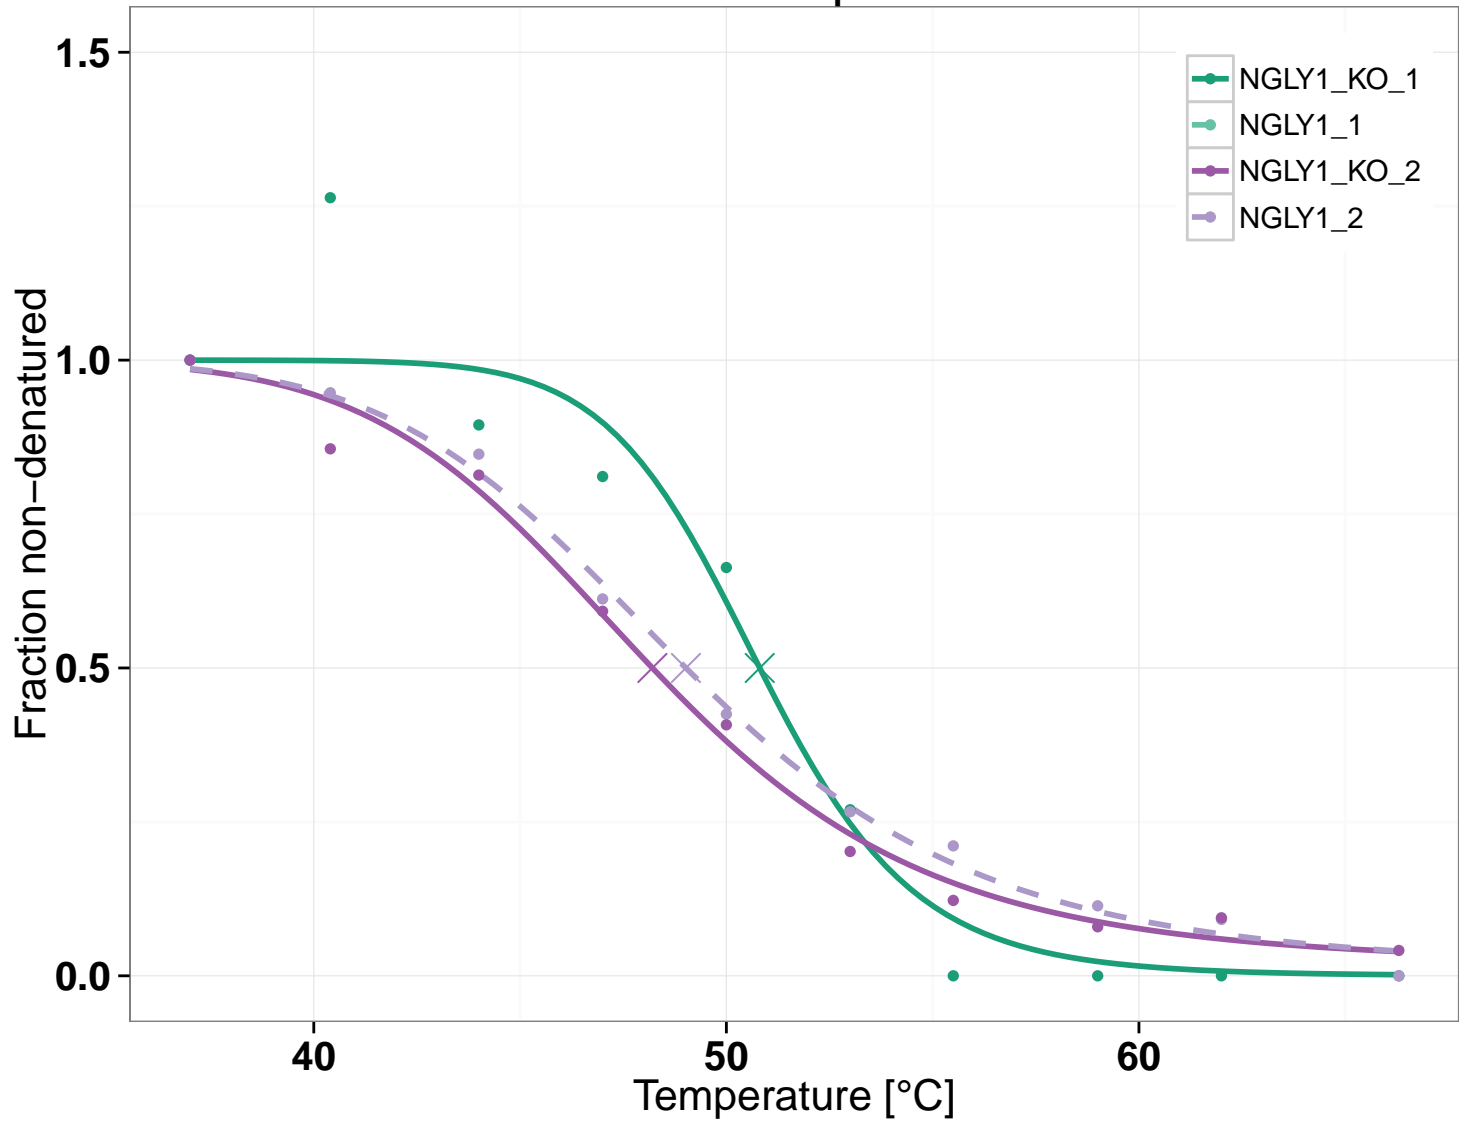

|            | meltPoint | slope  | plateau | R2   |
|------------|-----------|--------|---------|------|
| NGLY1_KO_1 | 50.81     | -0.13  | 0       | 0.95 |
| NGLY1_1    | –         | –      | –       | –    |
| NGLY1_KO_2 | 48.21     | -0.072 | 0.02    | 0.99 |
| NGLY1_2    | 49.02     | -0.068 | 0.01    | 1    |

Supplement: Supplementary file 4223 [file 1]

IPI00031138.3|C2ORF7

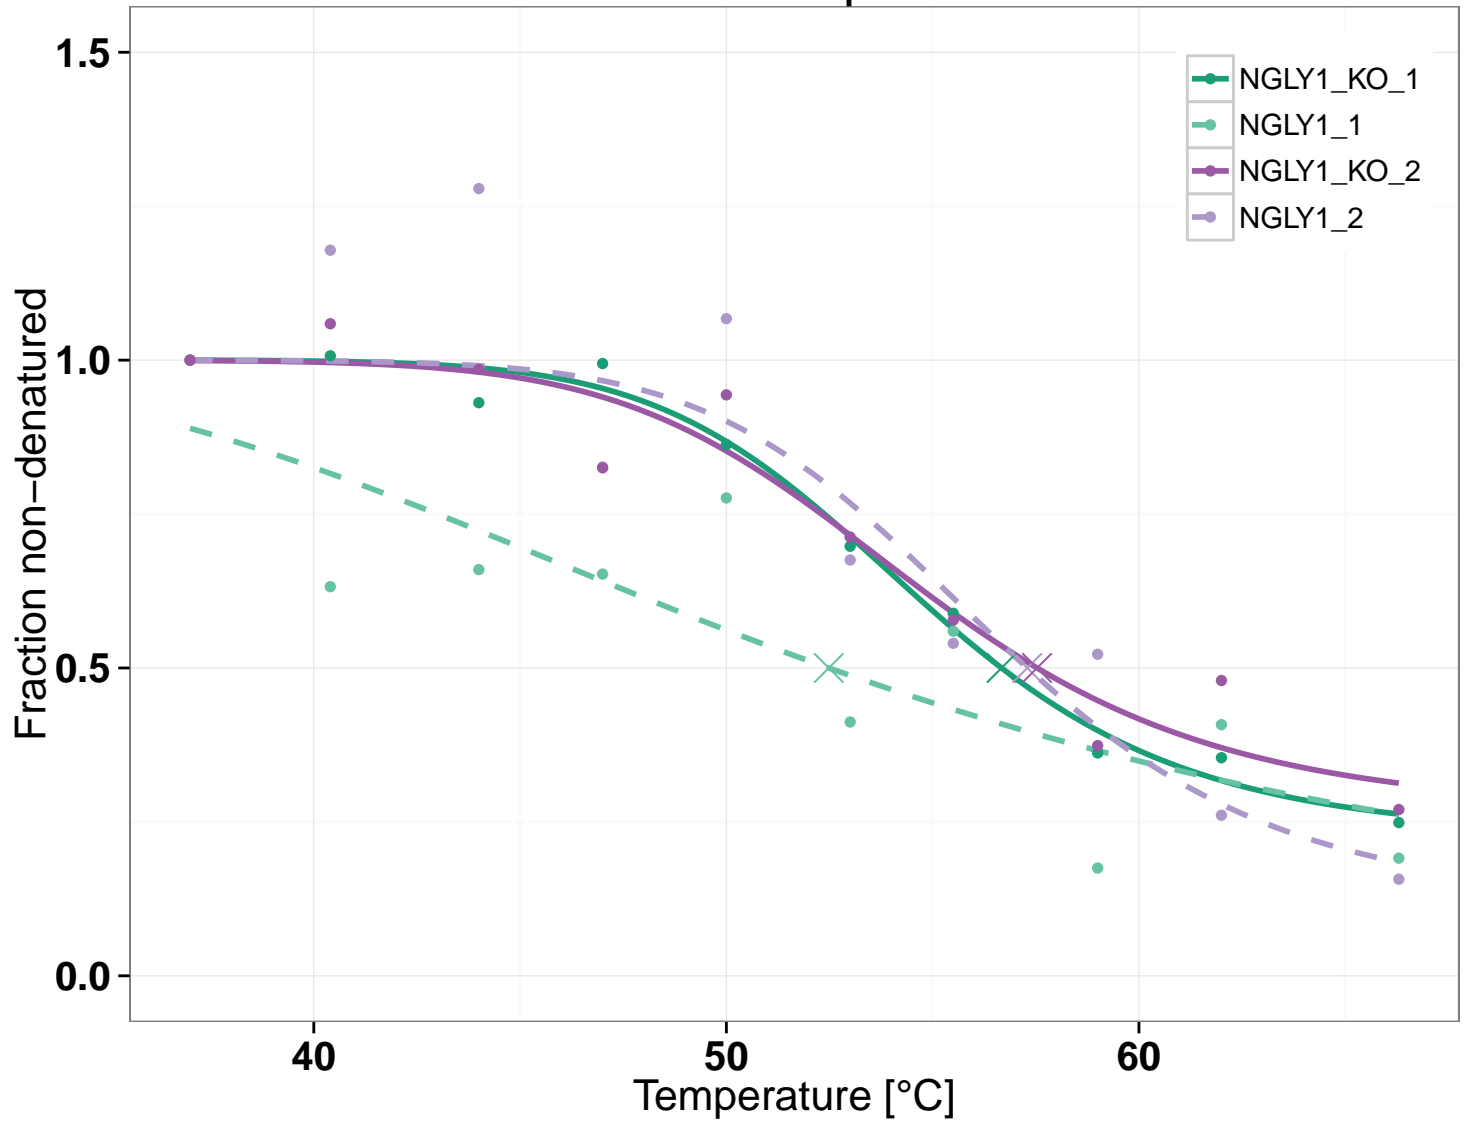

|            | meltPoint | slope  | plateau | R2   |
|------------|-----------|--------|---------|------|
| NGLY1_KO_1 | 56.67     | -0.061 | 0.22    | 0.99 |
| NGLY1_1    | 52.48     | -0.027 | 0       | 0.72 |
| NGLY1_KO_2 | 57.53     | -0.051 | 0.26    | 0.94 |
| NGLY1_2    | 57.29     | -0.065 | 0.11    | 0.86 |

Supplement: Supplementary file 4224 [file 1]

IPI00179265.4|SERF1A

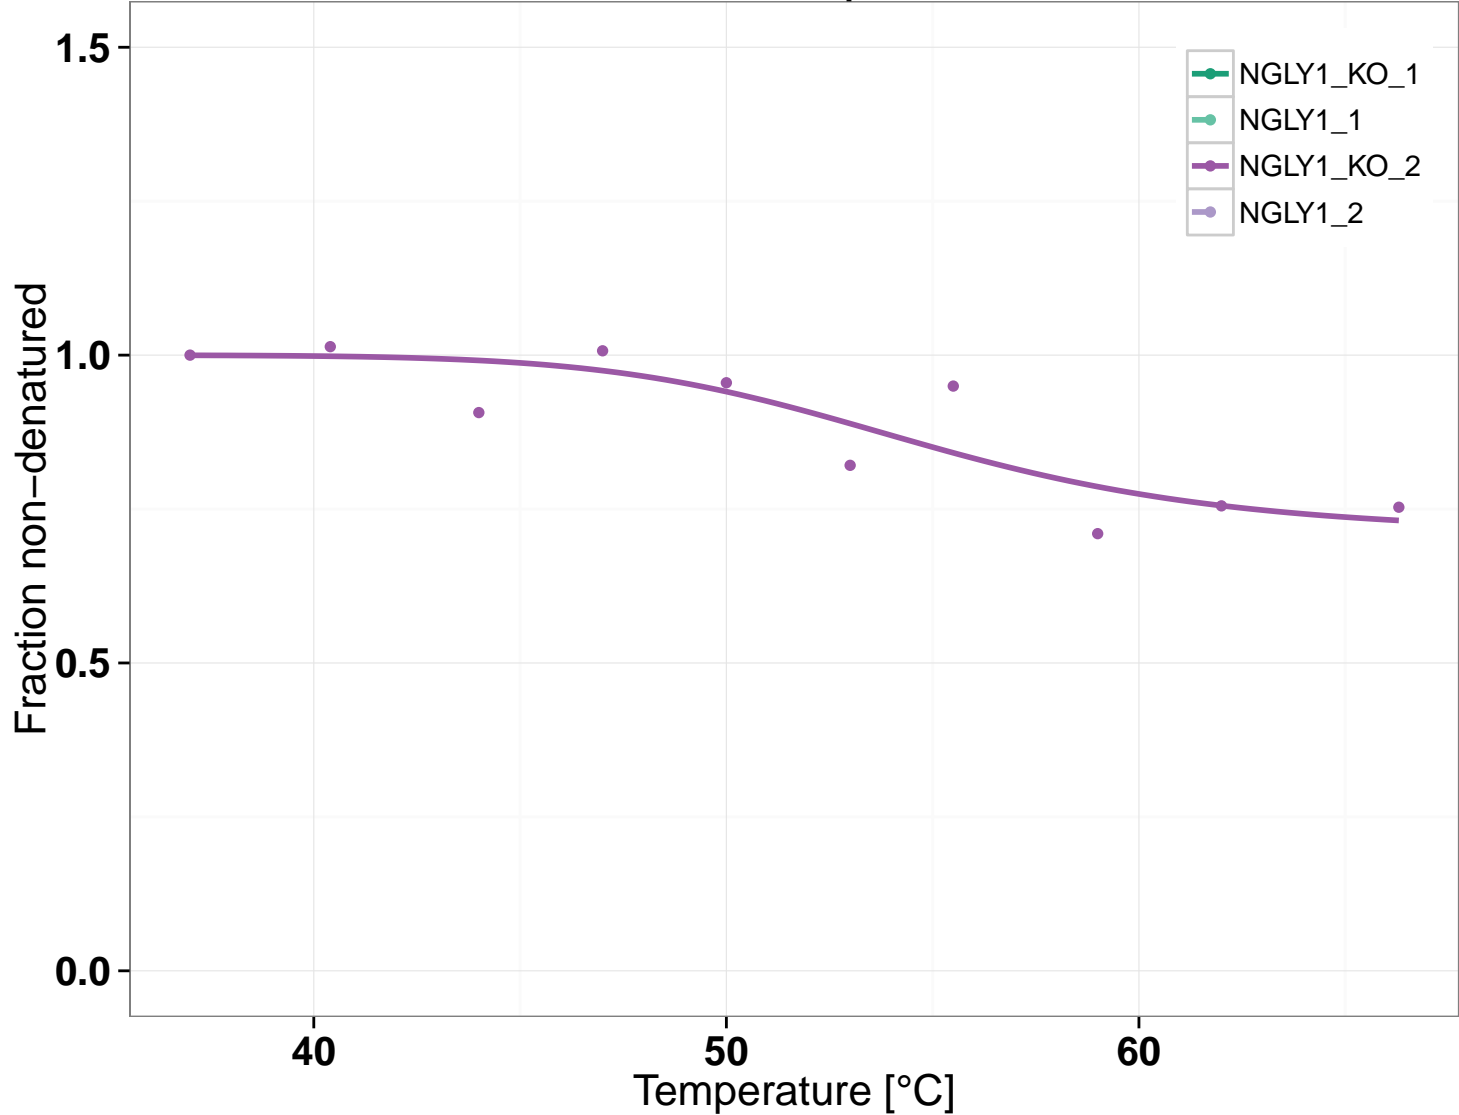

|            | meltPoint | slope  | plateau | R2   |
|------------|-----------|--------|---------|------|
| NGLY1_KO_1 | -         | -      | -       | -    |
| NGLY1_1    | -         | -      | -       | -    |
| NGLY1_KO_2 | -         | -0.019 | 0.71    | 0.75 |
| NGLY1_2    | -         | -      | -       | -    |

Supplement: Supplementary file 4225 [file 1]

IPI00290429.7|CBLL1

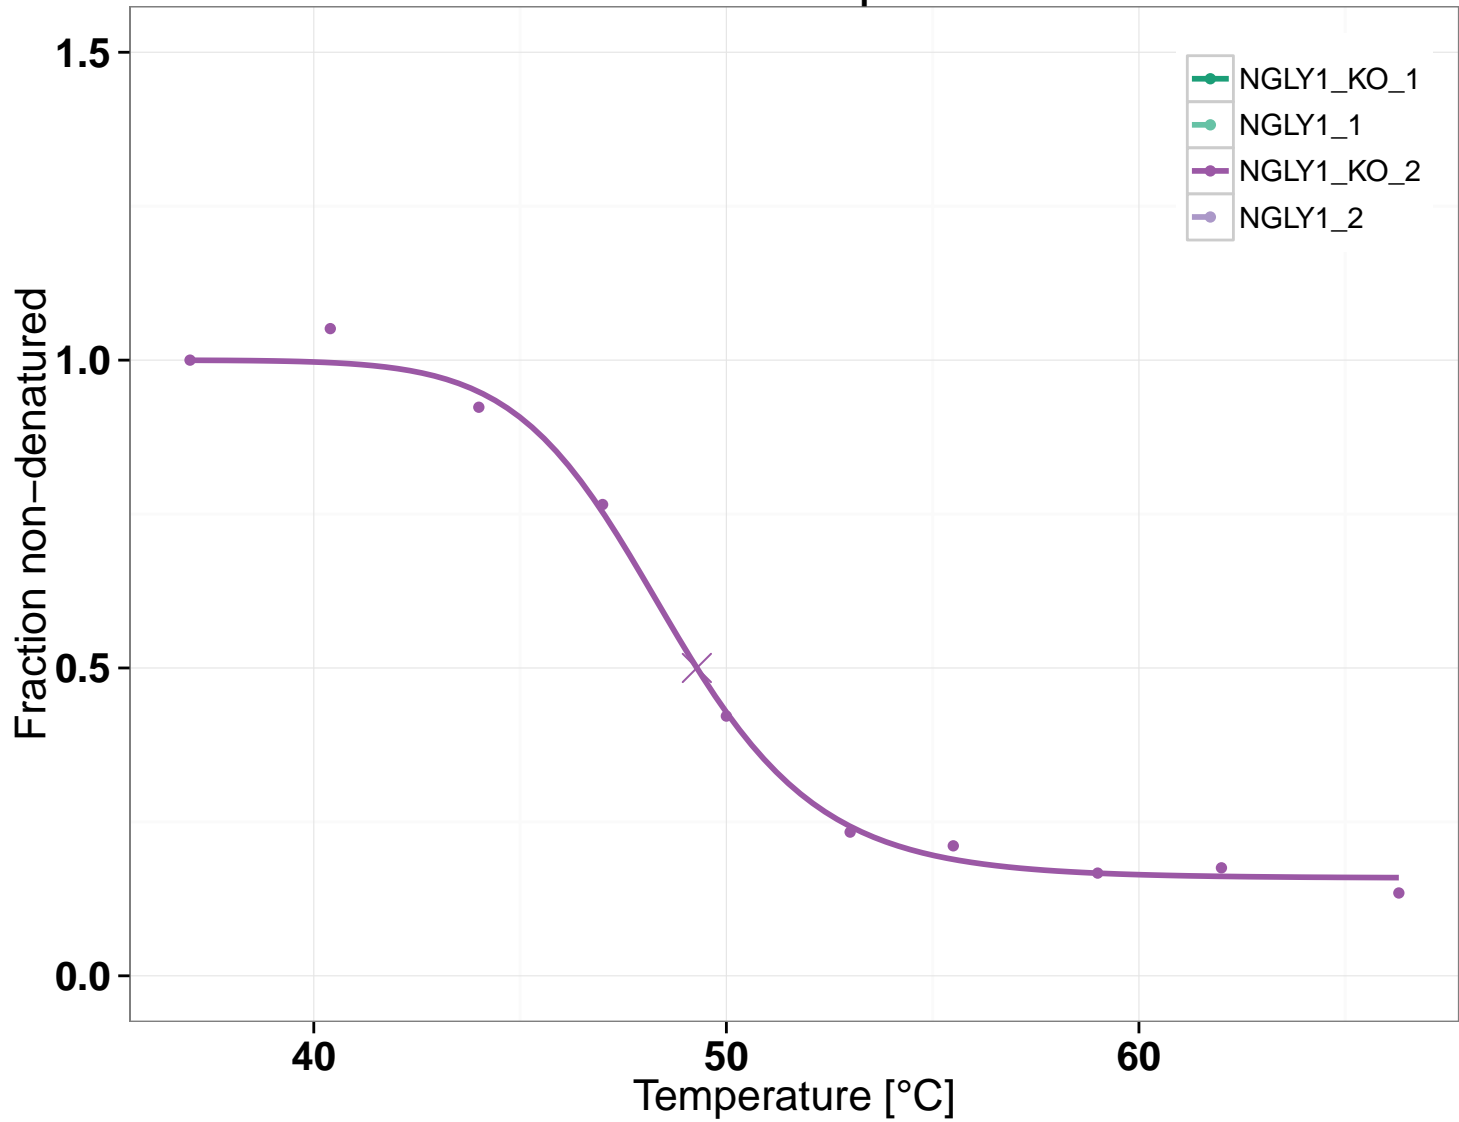

|            | meltPoint | slope | plateau | R2 |
|------------|-----------|-------|---------|----|
| NGLY1_KO_1 | -         | -     | -       | -  |
| NGLY1_1    | -         | -     | -       | -  |
| NGLY1_KO_2 | 49.28     | -0.11 | 0.16    | 1  |
| NGLY1_2    | -         | -     | -       | -  |

Supplement: Supplementary file 4226 [file 1]

IPI00550034.3|BCL7B

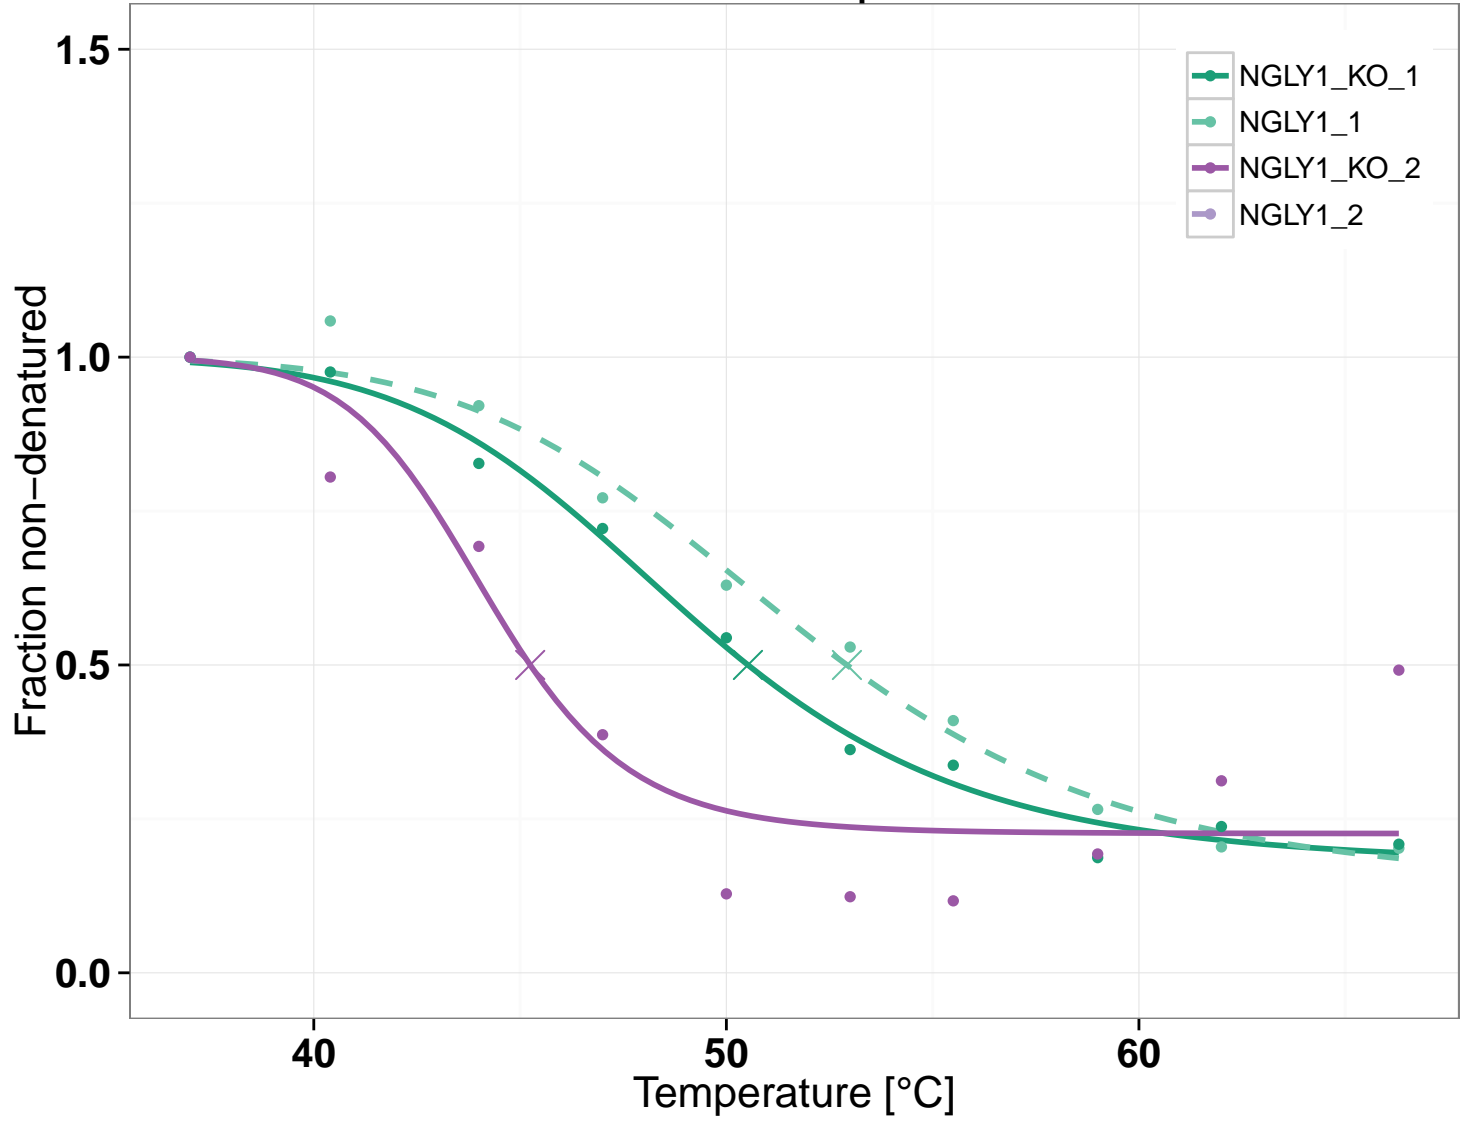

|            | meltPoint | slope  | plateau | R2   |
|------------|-----------|--------|---------|------|
| NGLY1_KO_1 | 50.52     | -0.061 | 0.17    | 0.99 |
| NGLY1_1    | 52.92     | -0.054 | 0.14    | 0.99 |
| NGLY1_KO_2 | 45.24     | -0.11  | 0.23    | 0.84 |
| NGLY1_2    | -         | -      | -       | -    |

Supplement: Supplementary file 4227 [file 1]

IPI00642245.4|LETMD1

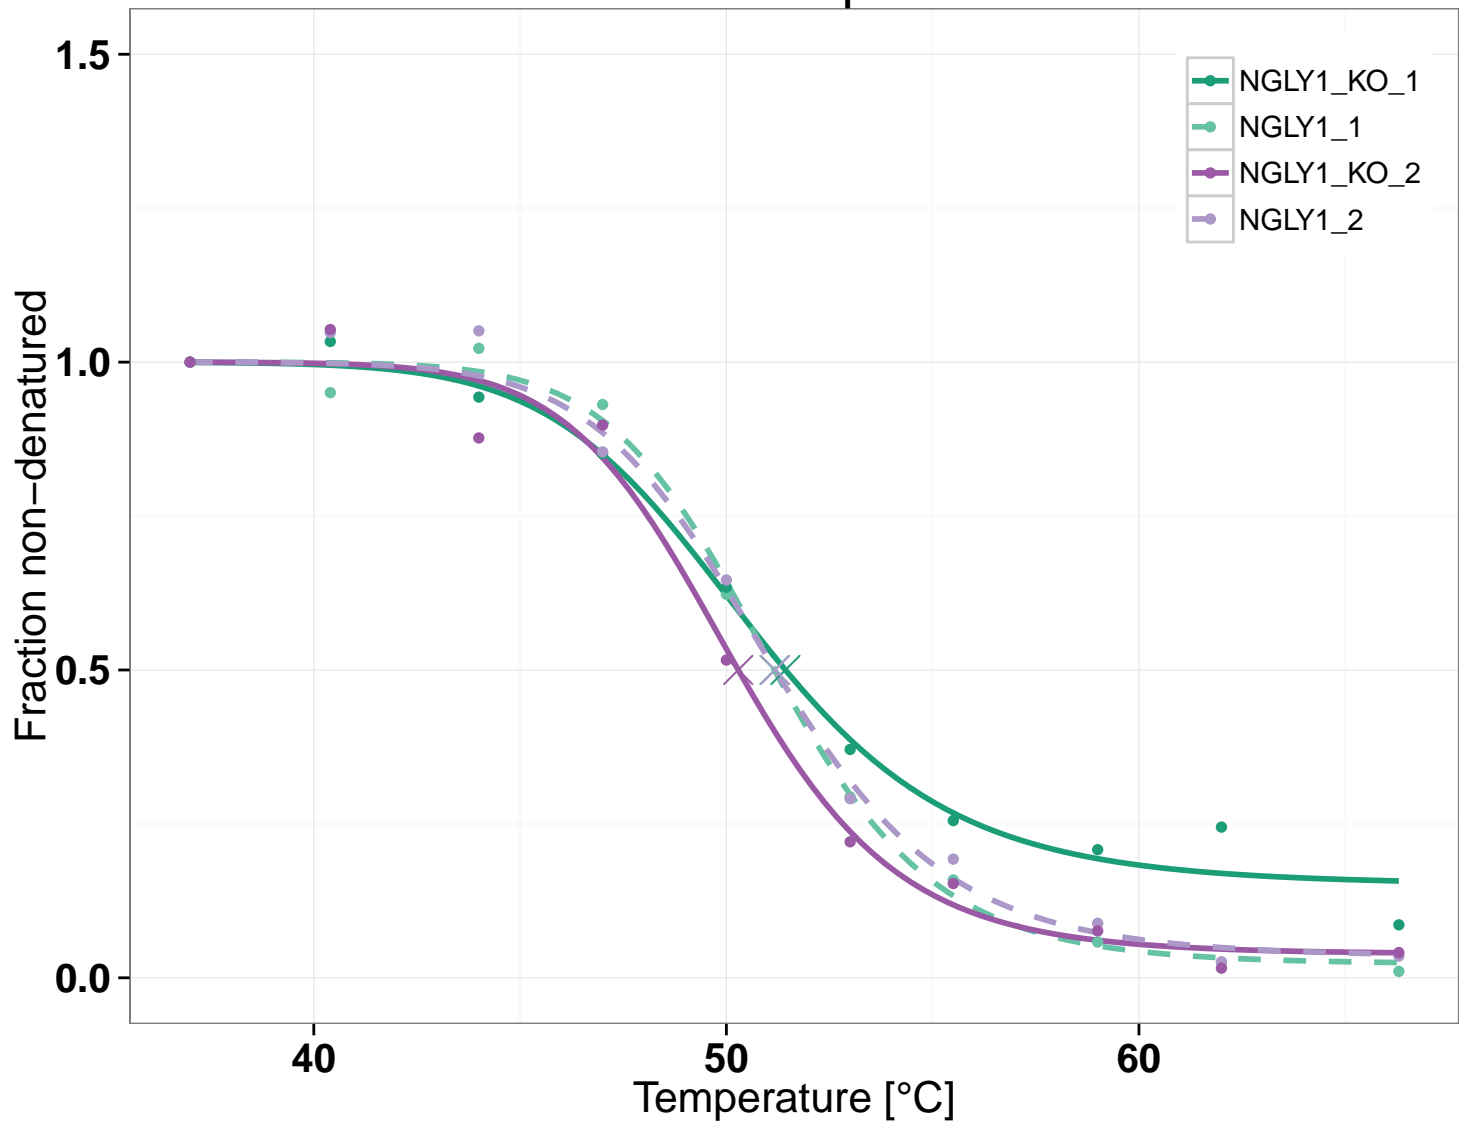

|            | meltPoint | slope  | plateau | R2   |
|------------|-----------|--------|---------|------|
| NGLY1_KO_1 | 51.43     | -0.087 | 0.15    | 0.99 |
| NGLY1_1    | 51.16     | -0.12  | 0.02    | 1    |
| NGLY1_KO_2 | 50.29     | -0.12  | 0.04    | 0.99 |
| NGLY1_2    | 51.18     | -0.11  | 0.03    | 0.99 |

Supplement: Supplementary file 4228 [file 1]

IPI00019977.2|GTF2E1

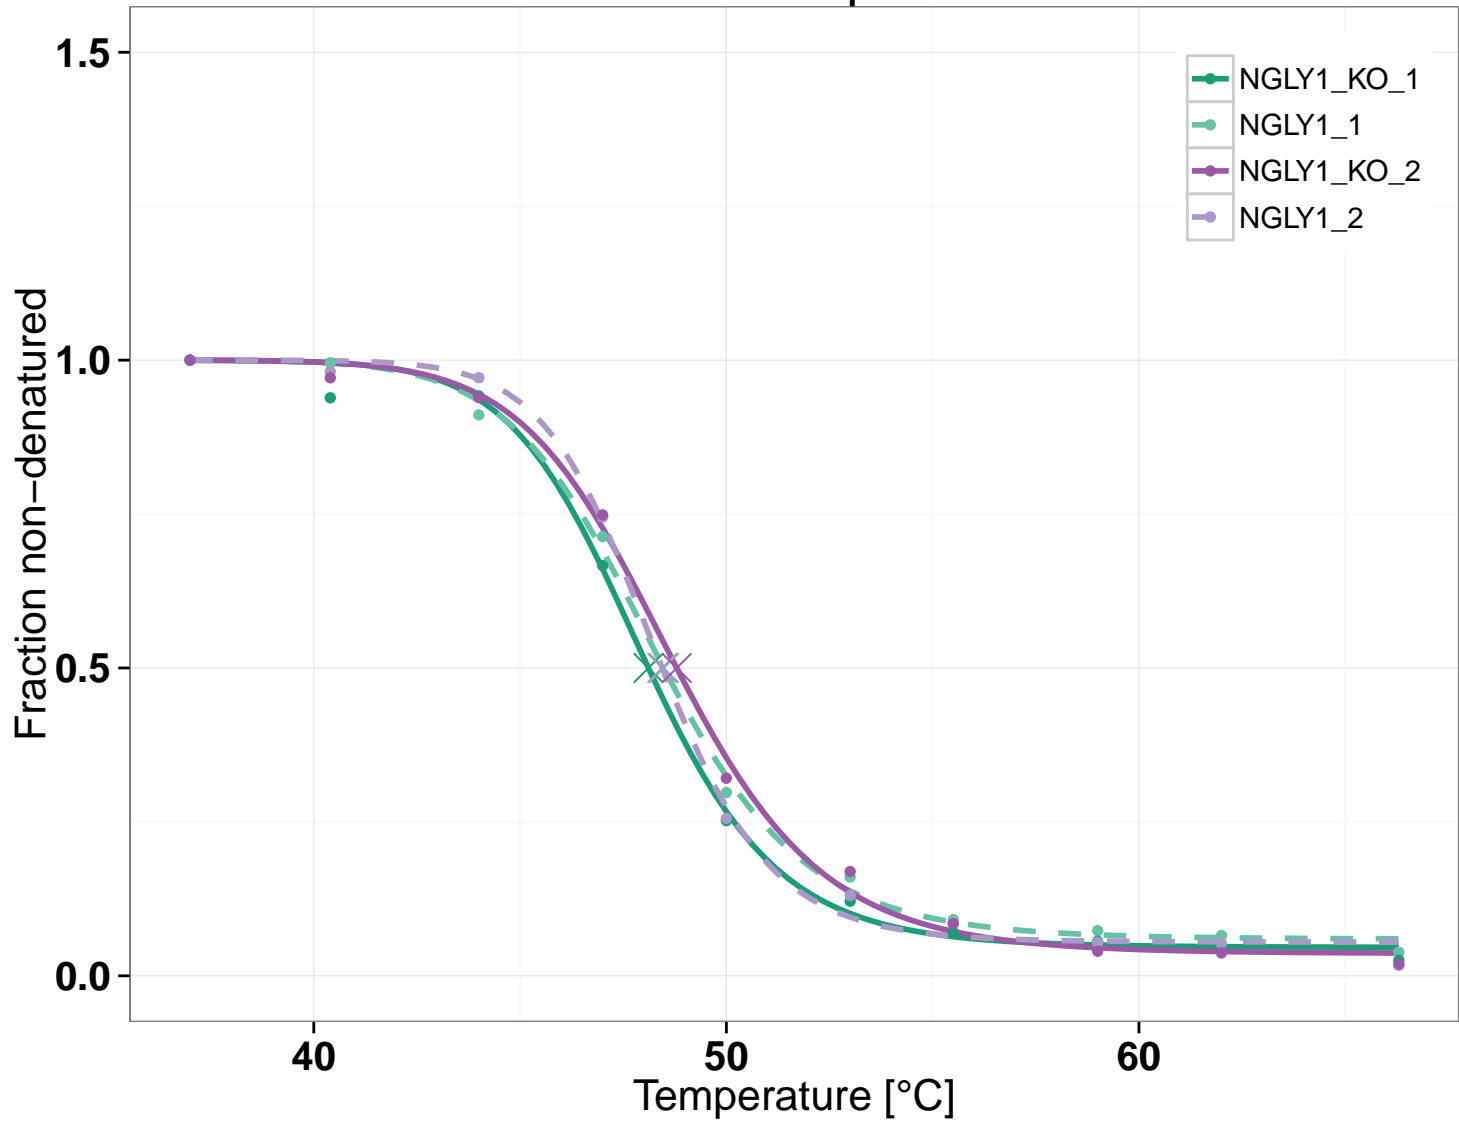

|            | meltPoint | slope | plateau | R2 |
|------------|-----------|-------|---------|----|
| NGLY1_KO_1 | 48.11     | -0.15 | 0.05    | 1  |
| NGLY1_1    | 48.48     | -0.13 | 0.06    | 1  |
| NGLY1_KO_2 | 48.8      | -0.13 | 0.04    | 1  |
| NGLY1_2    | 48.45     | -0.17 | 0.05    | 1  |

Supplement: Supplementary file 4229 [file 1]

# IPI00178972.5|WDR23

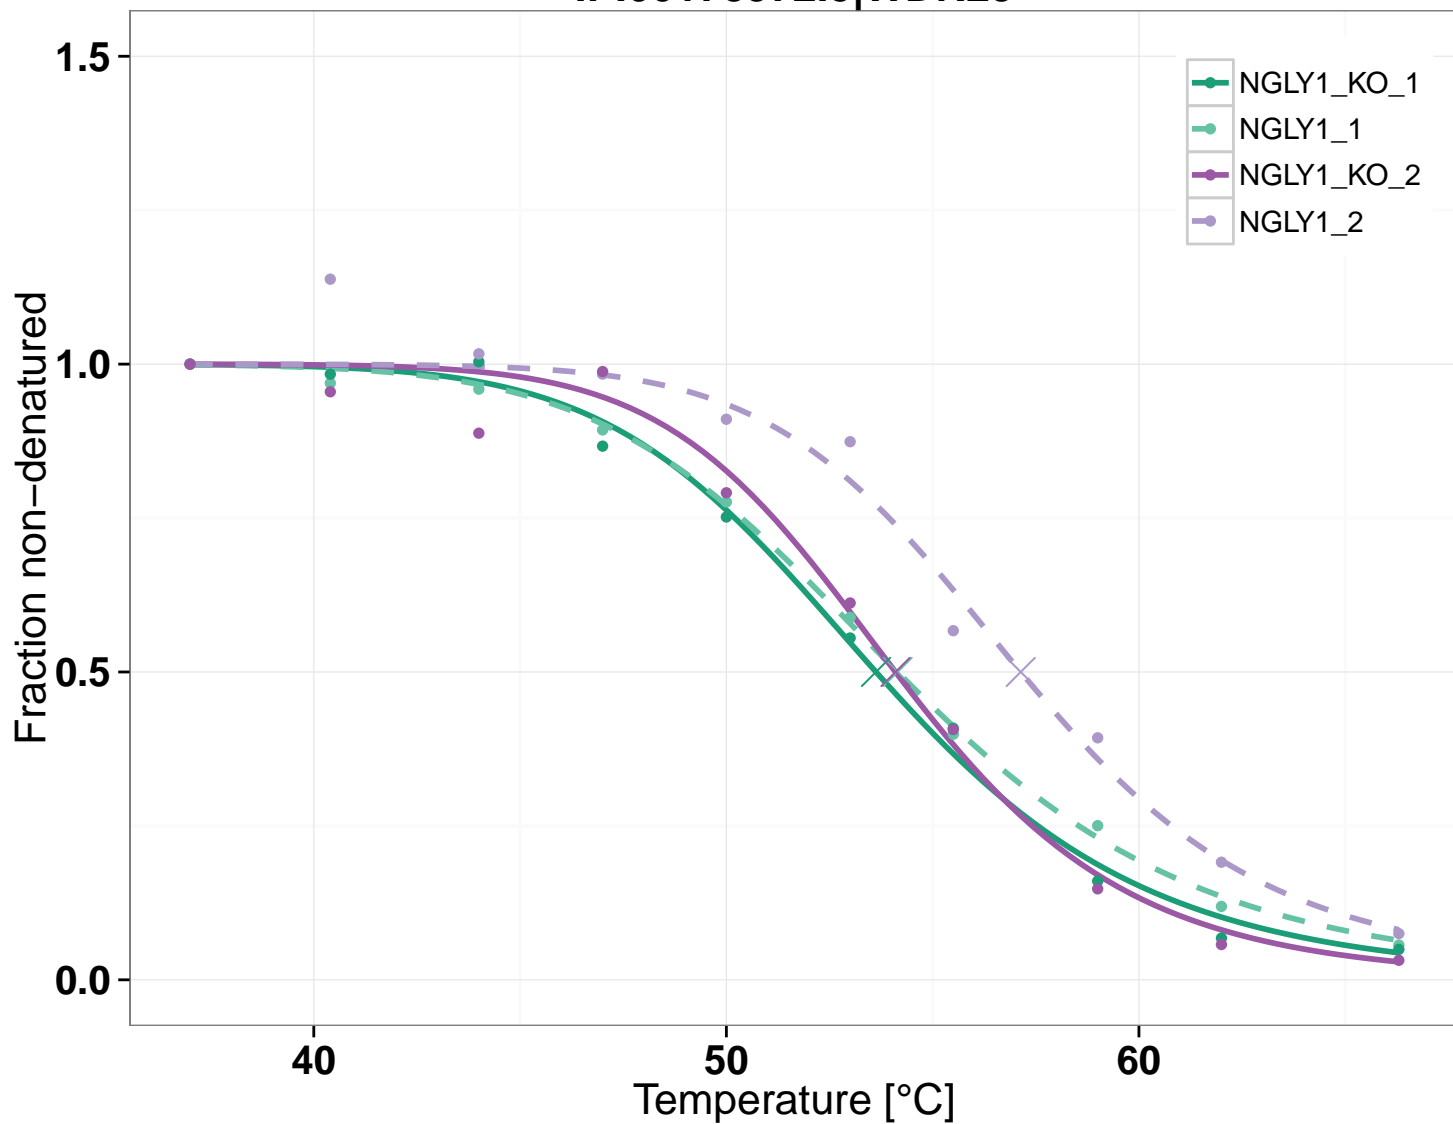

|            | meltPoint | slope  | plateau | R2   |
|------------|-----------|--------|---------|------|
| NGLY1_KO_1 | 53.63     | -0.076 | 0       | 1    |
| NGLY1_1    | 54.15     | -0.069 | 0       | 1    |
| NGLY1_KO_2 | 54.1      | -0.089 | 0       | 0.99 |
| NGLY1_2    | 57.14     | -0.082 | 0.01    | 0.98 |

Supplement: Supplementary file 4230 [file 1]

# IPI00217240.1|WDR75

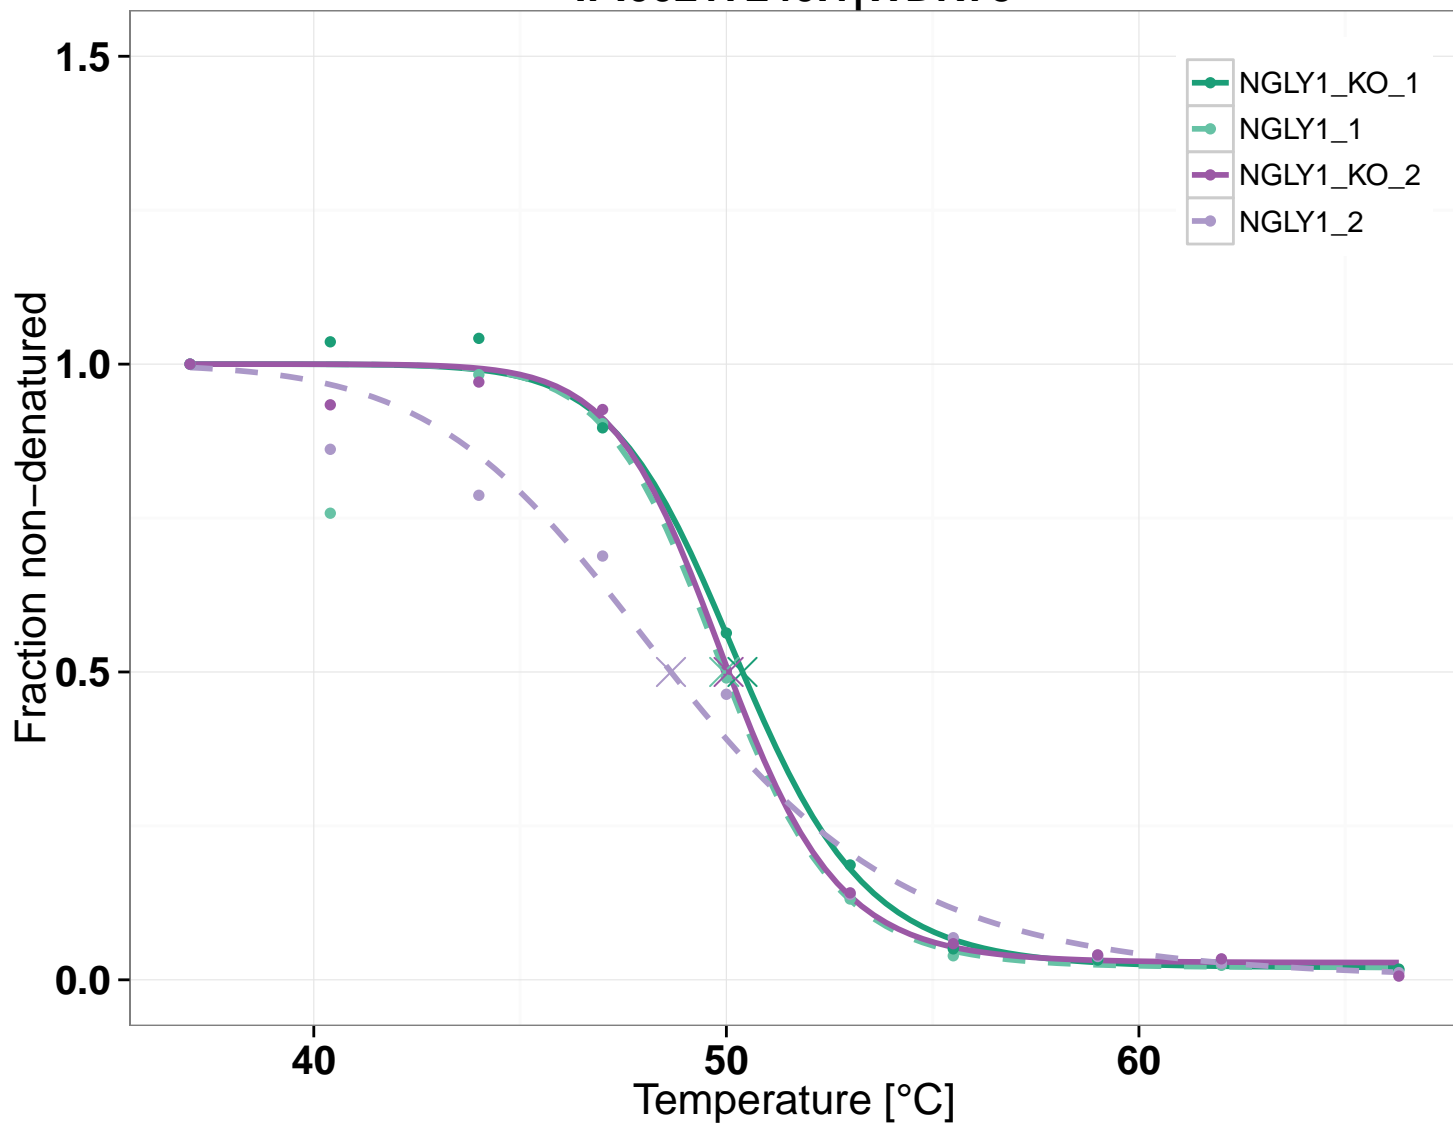

|            | meltPoint | slope  | plateau | R2   |
|------------|-----------|--------|---------|------|
| NGLY1_KO_1 | 50.39     | -0.16  | 0.02    | 1    |
| NGLY1_1    | 49.95     | -0.17  | 0.02    | 0.97 |
| NGLY1_KO_2 | 50.05     | -0.18  | 0.03    | 1    |
| NGLY1_2    | 48.66     | -0.086 | 0       | 0.98 |

Supplement: Supplementary file 4231 [file 1]

IPI00647368.1|IDH3G

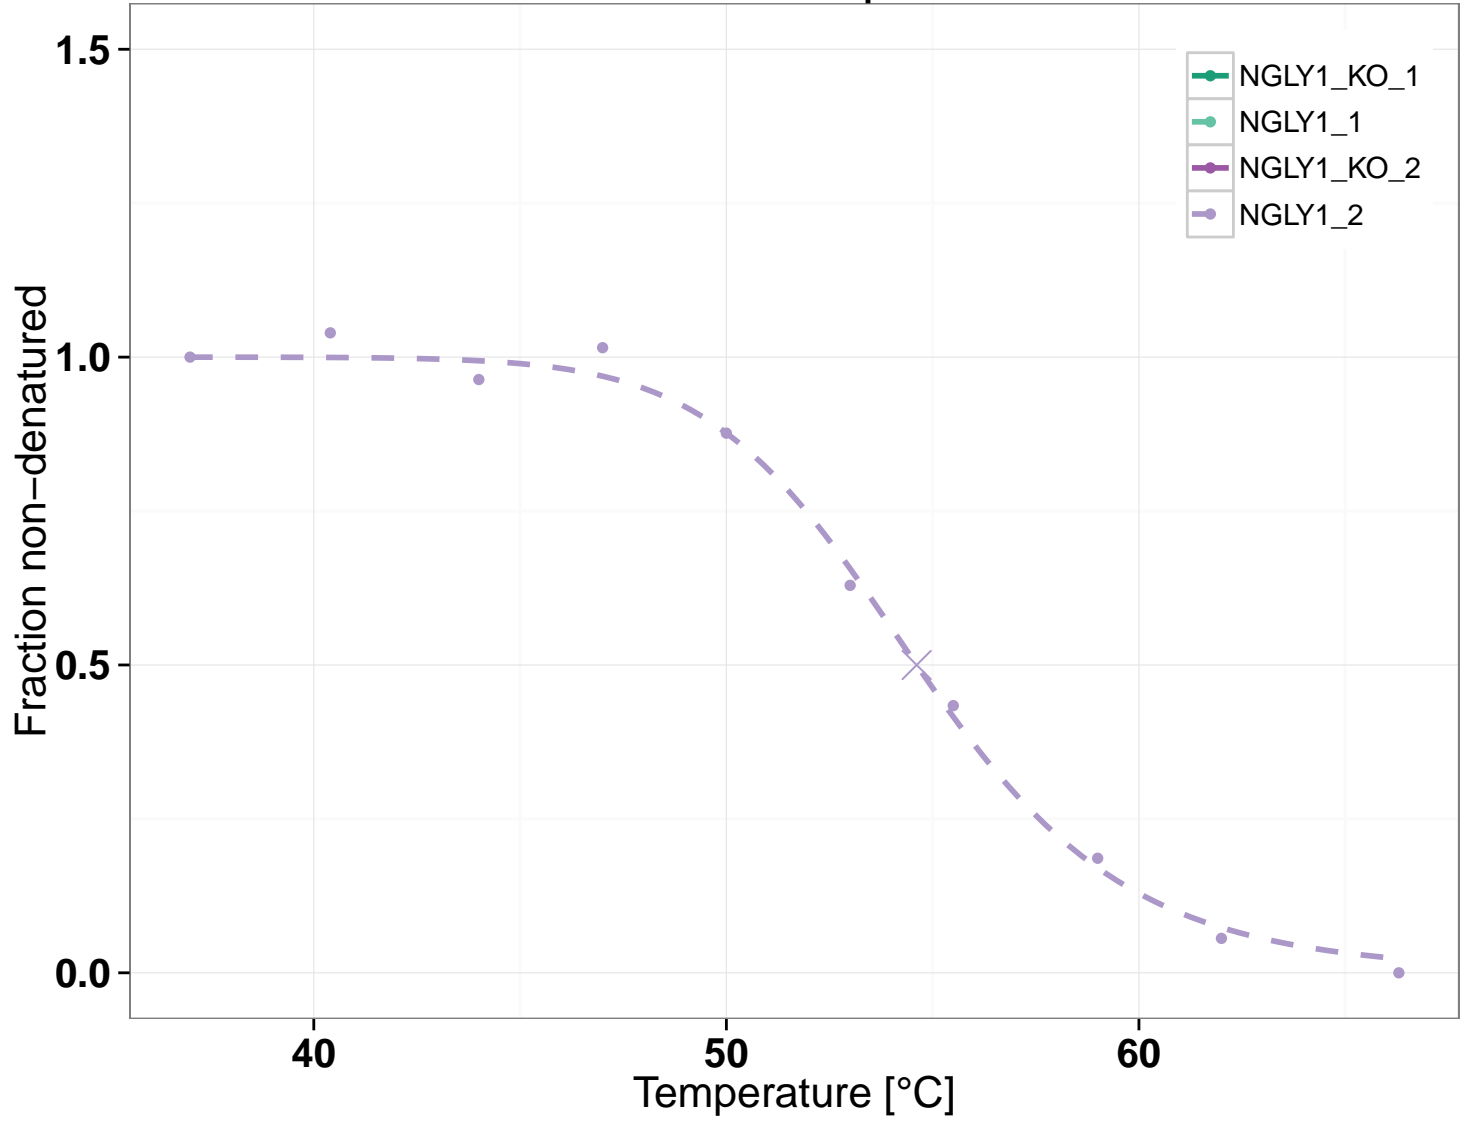

|            | meltPoint | slope  | plateau | R2 |
|------------|-----------|--------|---------|----|
| NGLY1_KO_1 | -         | -      | -       | -  |
| NGLY1_1    | -         | -      | -       | -  |
| NGLY1_KO_2 | -         | -      | -       | -  |
| NGLY1_2    | 54.61     | -0.098 | 0       | 1  |

Supplement: Supplementary file 4232 [file 1]

IPI00879741.1|5 KDA PROTEIN.

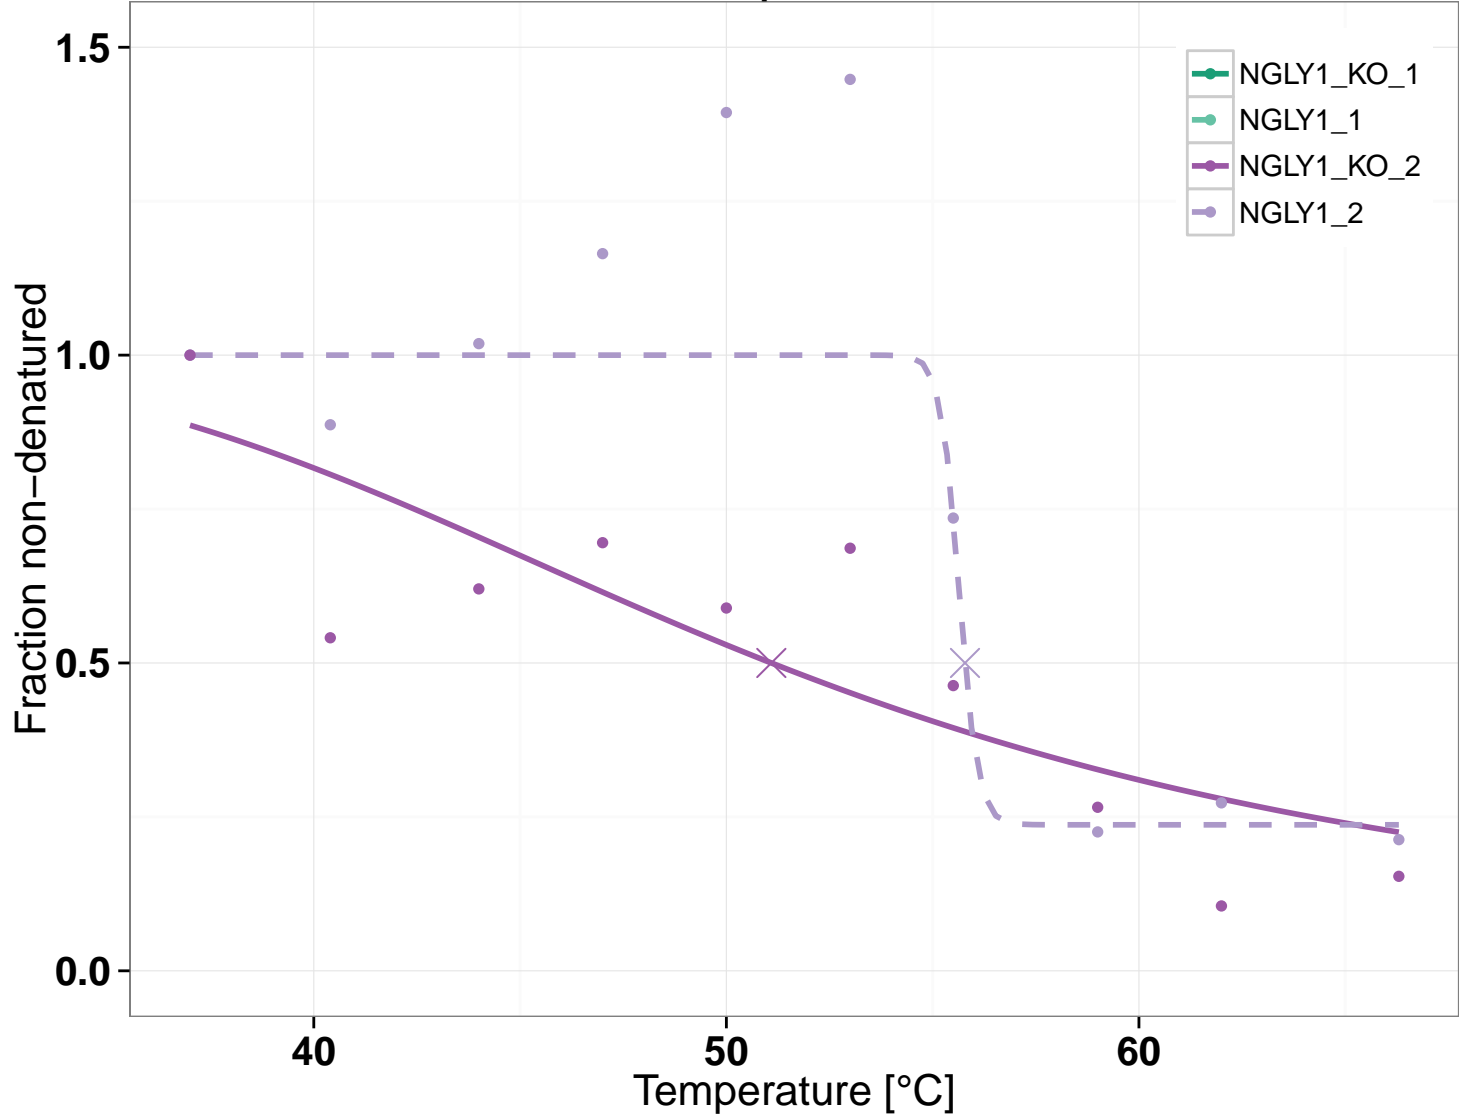

|            | meltPoint | slope | plateau | R2   |
|------------|-----------|-------|---------|------|
| NGLY1_KO_1 | -         | -     | -       | -    |
| NGLY1_1    | -         | -     | -       | -    |
| NGLY1_KO_2 | 51.09     | -0.03 | 0       | 0.71 |
| NGLY1_2    | 55.78     | -0.86 | 0.24    | 0.8  |

Supplement: Supplementary file 4233 [file 1]

IPI00396174.4|CCDC25

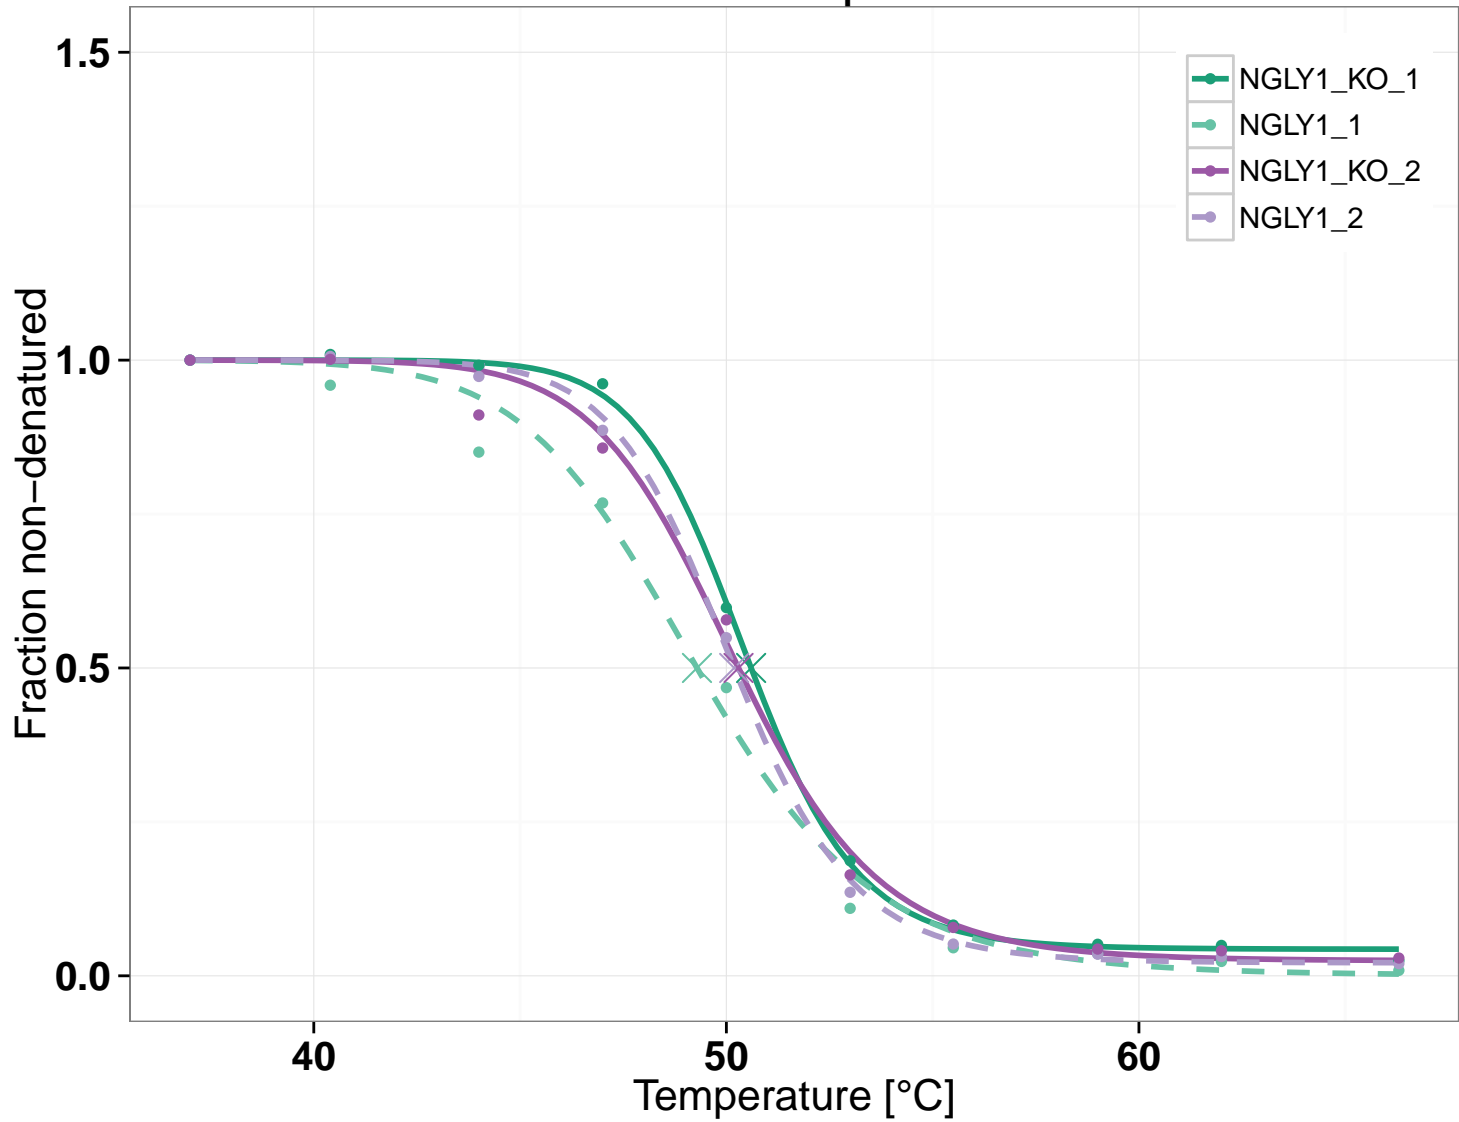

|            | meltPoint | slope | plateau | R2   |
|------------|-----------|-------|---------|------|
| NGLY1_KO_1 | 50.6      | -0.18 | 0.04    | 1    |
| NGLY1_1    | 49.29     | -0.12 | 0       | 0.99 |
| NGLY1_KO_2 | 50.29     | -0.14 | 0.02    | 0.99 |
| NGLY1_2    | 50.19     | -0.17 | 0.02    | 1    |

Supplement: Supplementary file 4234 [file 1]

IPI00026359.4|CAB39L

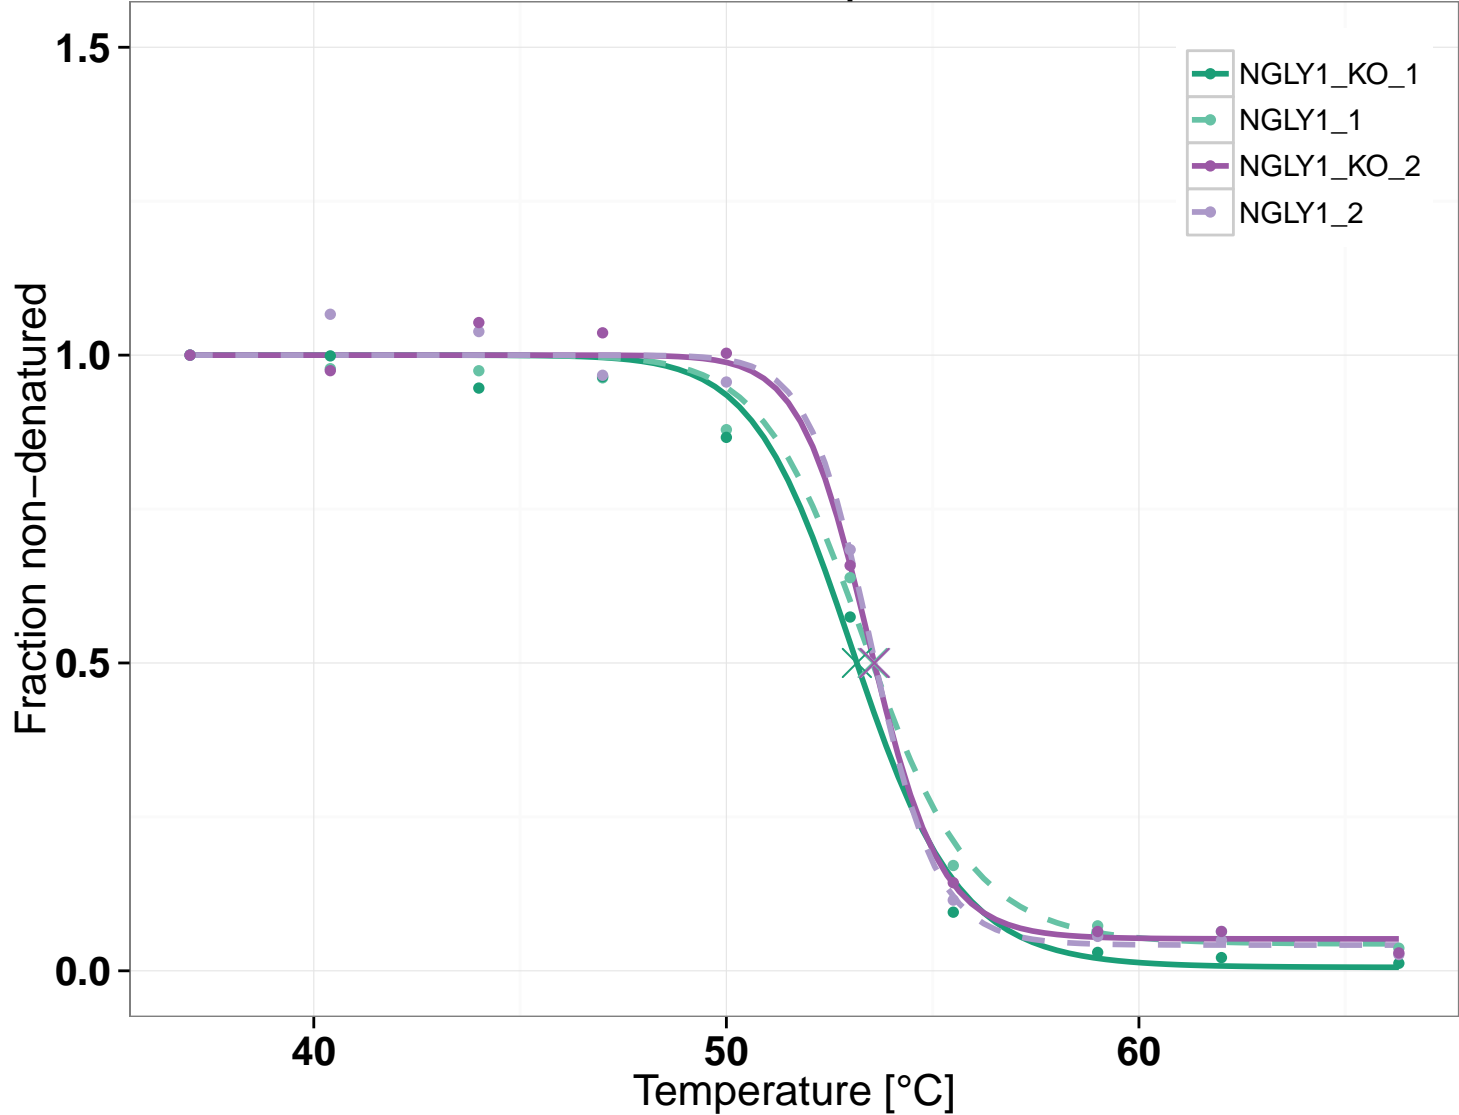

|            | meltPoint | slope | plateau | R2   |
|------------|-----------|-------|---------|------|
| NGLY1_KO_1 | 53.16     | -0.2  | 0.01    | 0.99 |
| NGLY1_1    | 53.54     | -0.19 | 0.04    | 0.99 |
| NGLY1_KO_2 | 53.59     | -0.28 | 0.05    | 1    |
| NGLY1_2    | 53.61     | -0.31 | 0.04    | 1    |

Supplement: Supplementary file 4235 [file 1]

IPI00642182.1|KLHL12

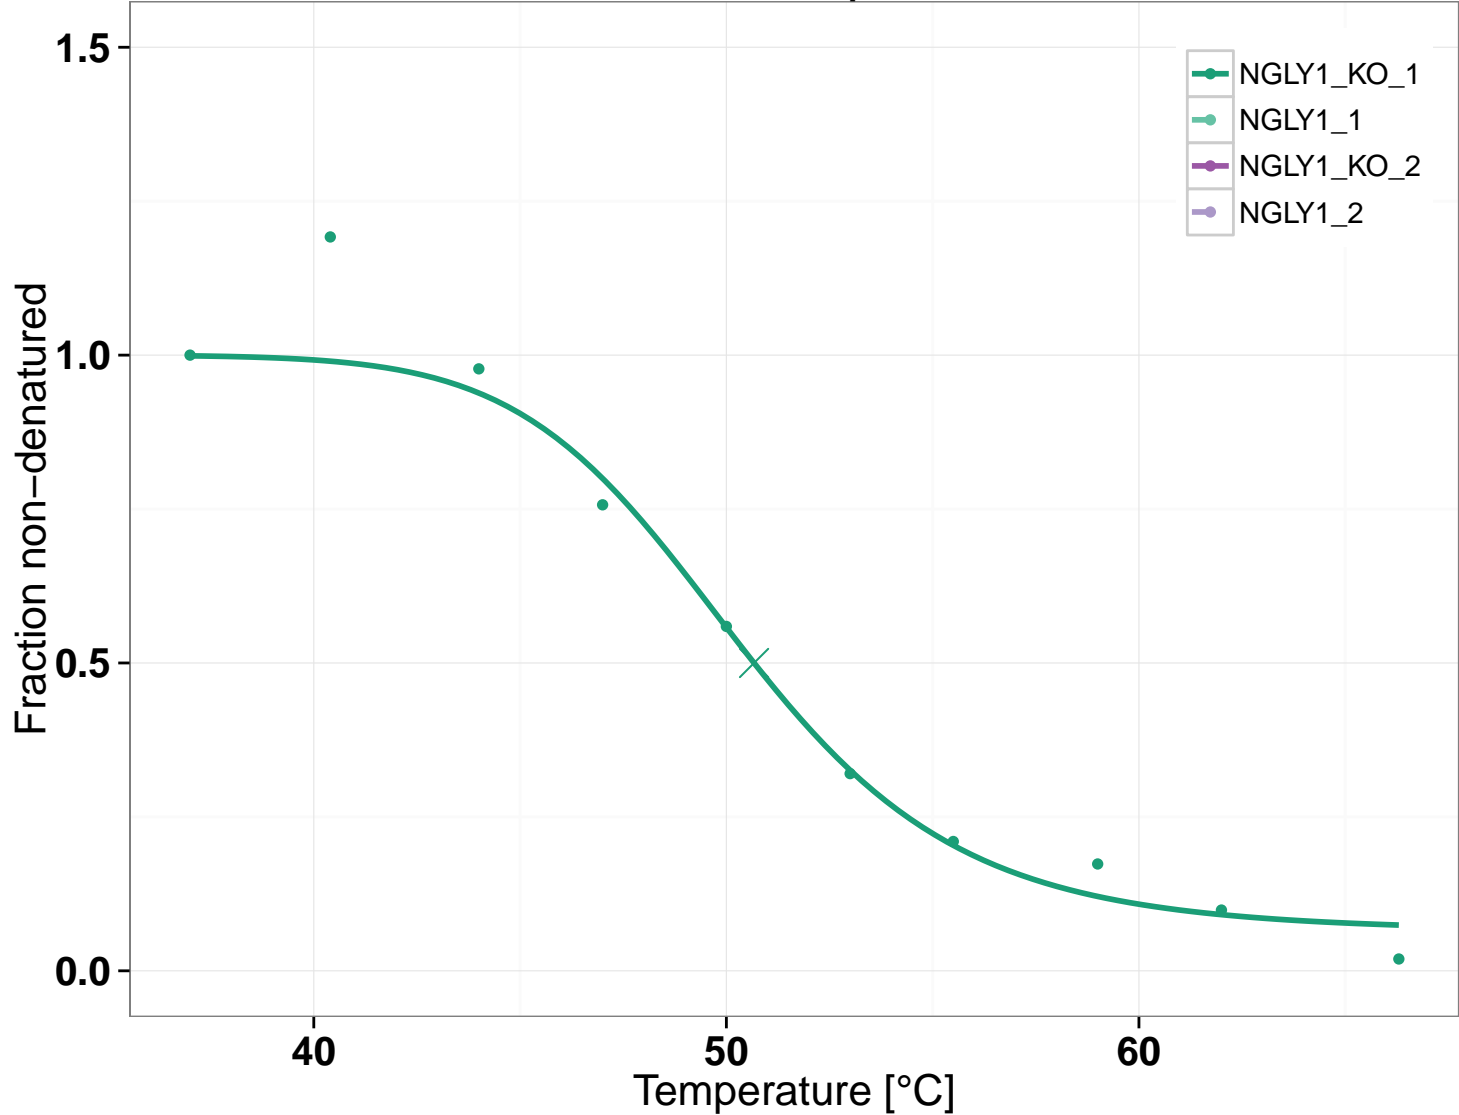

|            | meltPoint | slope  | plateau | R2   |
|------------|-----------|--------|---------|------|
| NGLY1_KO_1 | 50.67     | -0.087 | 0.06    | 0.97 |
| NGLY1_1    | -         | -      | -       | -    |
| NGLY1_KO_2 | -         | -      | -       | -    |
| NGLY1_2    | -         | -      | -       | -    |

Supplement: Supplementary file 4236 [file 1]

IPI00303944.6|NSUN4

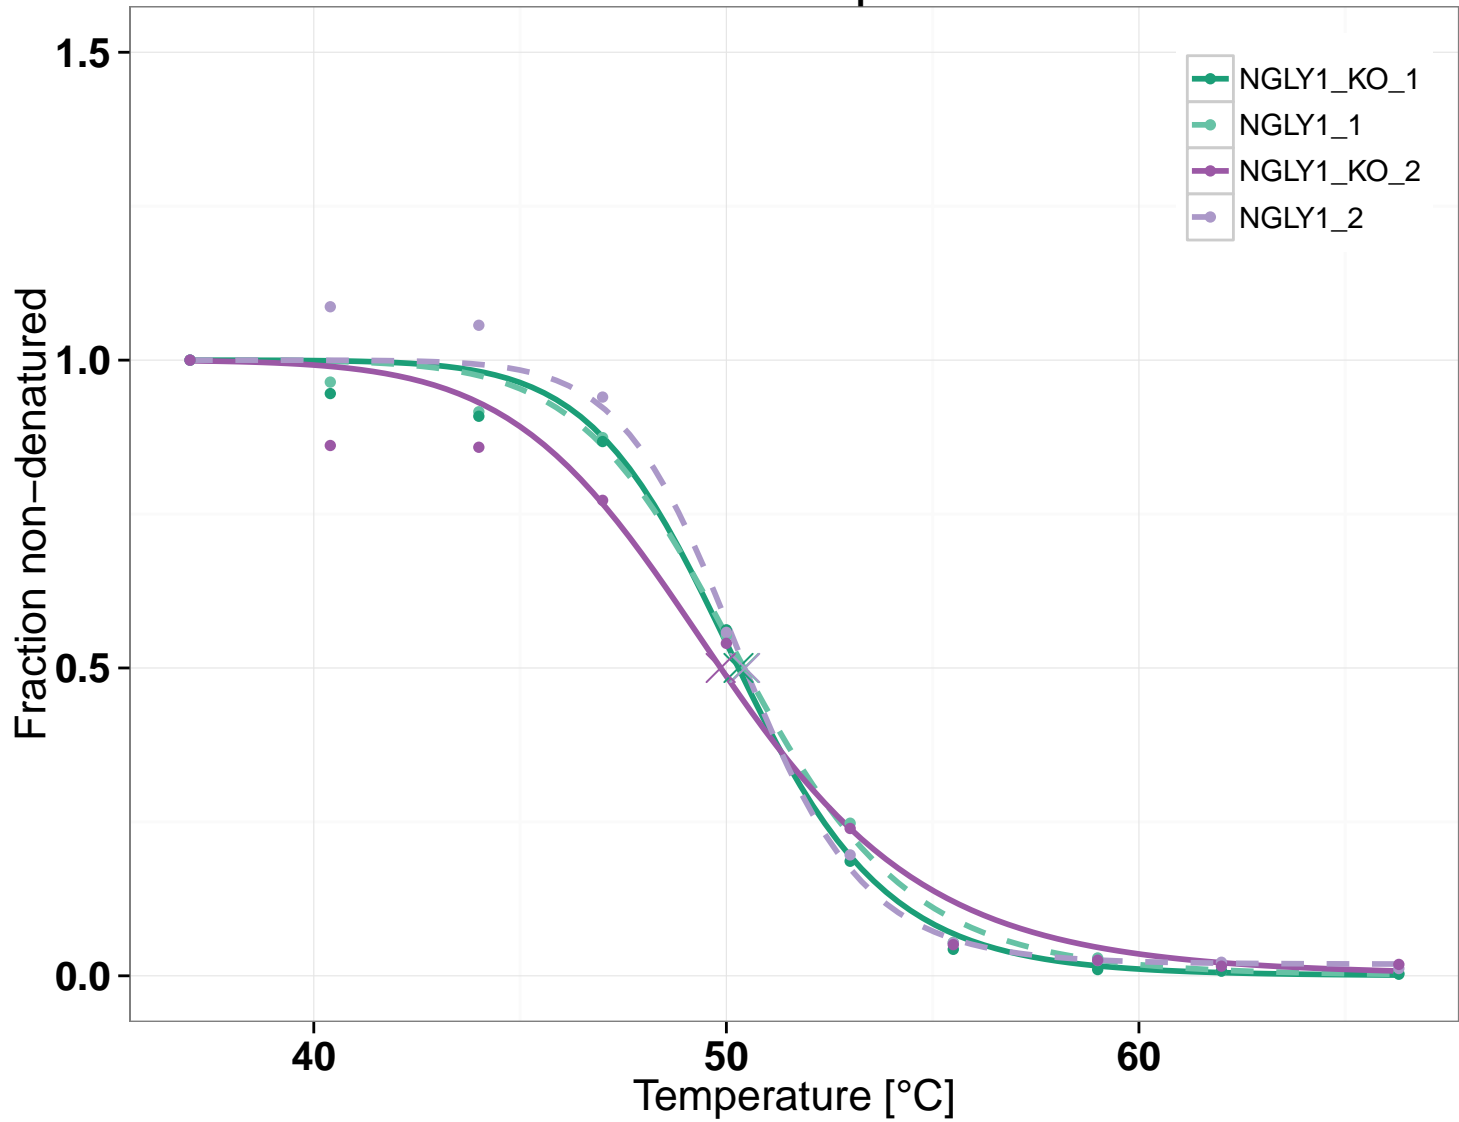

|            | meltPoint | slope  | plateau | R2   |
|------------|-----------|--------|---------|------|
| NGLY1_KO_1 | 50.29     | -0.14  | 0       | 0.99 |
| NGLY1_1    | 50.43     | -0.12  | 0       | 1    |
| NGLY1_KO_2 | 49.86     | -0.099 | 0       | 0.98 |
| NGLY1_2    | 50.46     | -0.17  | 0.02    | 0.99 |

Supplement: Supplementary file 4237 [file 1]

IPI00032187.5|NISCH

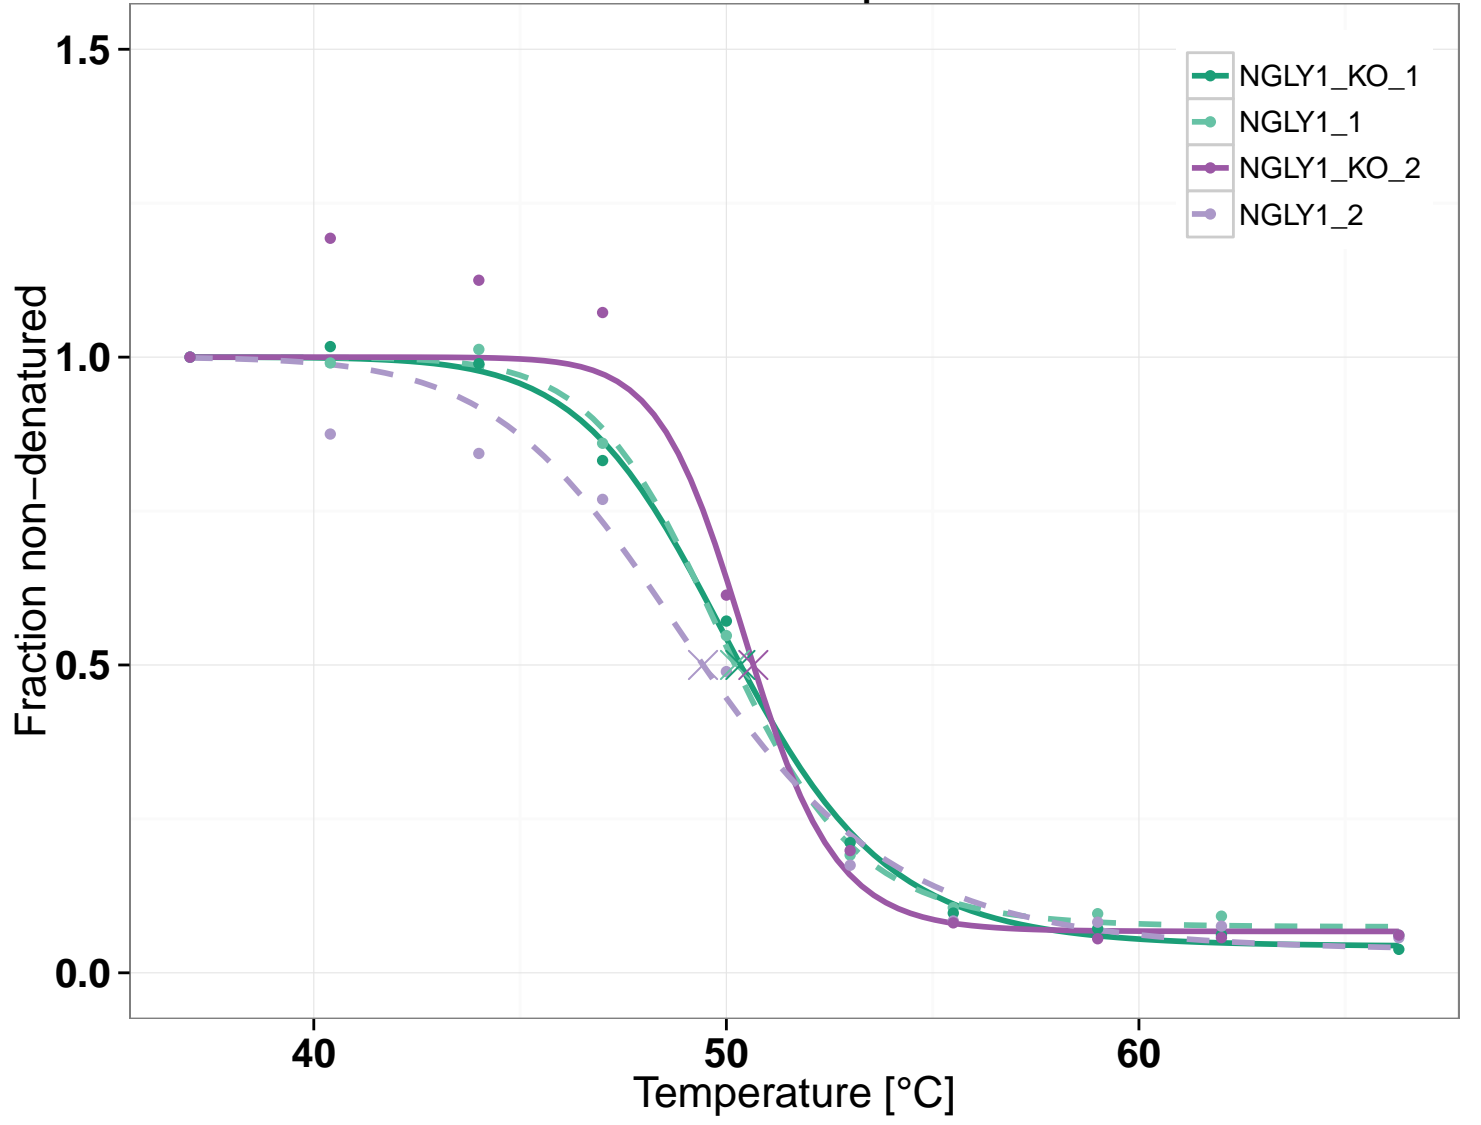

|            | meltPoint | slope  | plateau | R2   |
|------------|-----------|--------|---------|------|
| NGLY1_KO_1 | 50.34     | -0.13  | 0.04    | 1    |
| NGLY1_1    | 50.21     | -0.14  | 0.07    | 1    |
| NGLY1_KO_2 | 50.65     | -0.22  | 0.07    | 0.97 |
| NGLY1_2    | 49.43     | -0.099 | 0.04    | 0.98 |

Supplement: Supplementary file 4238 [file 1]

IPI00010717.1|MVK

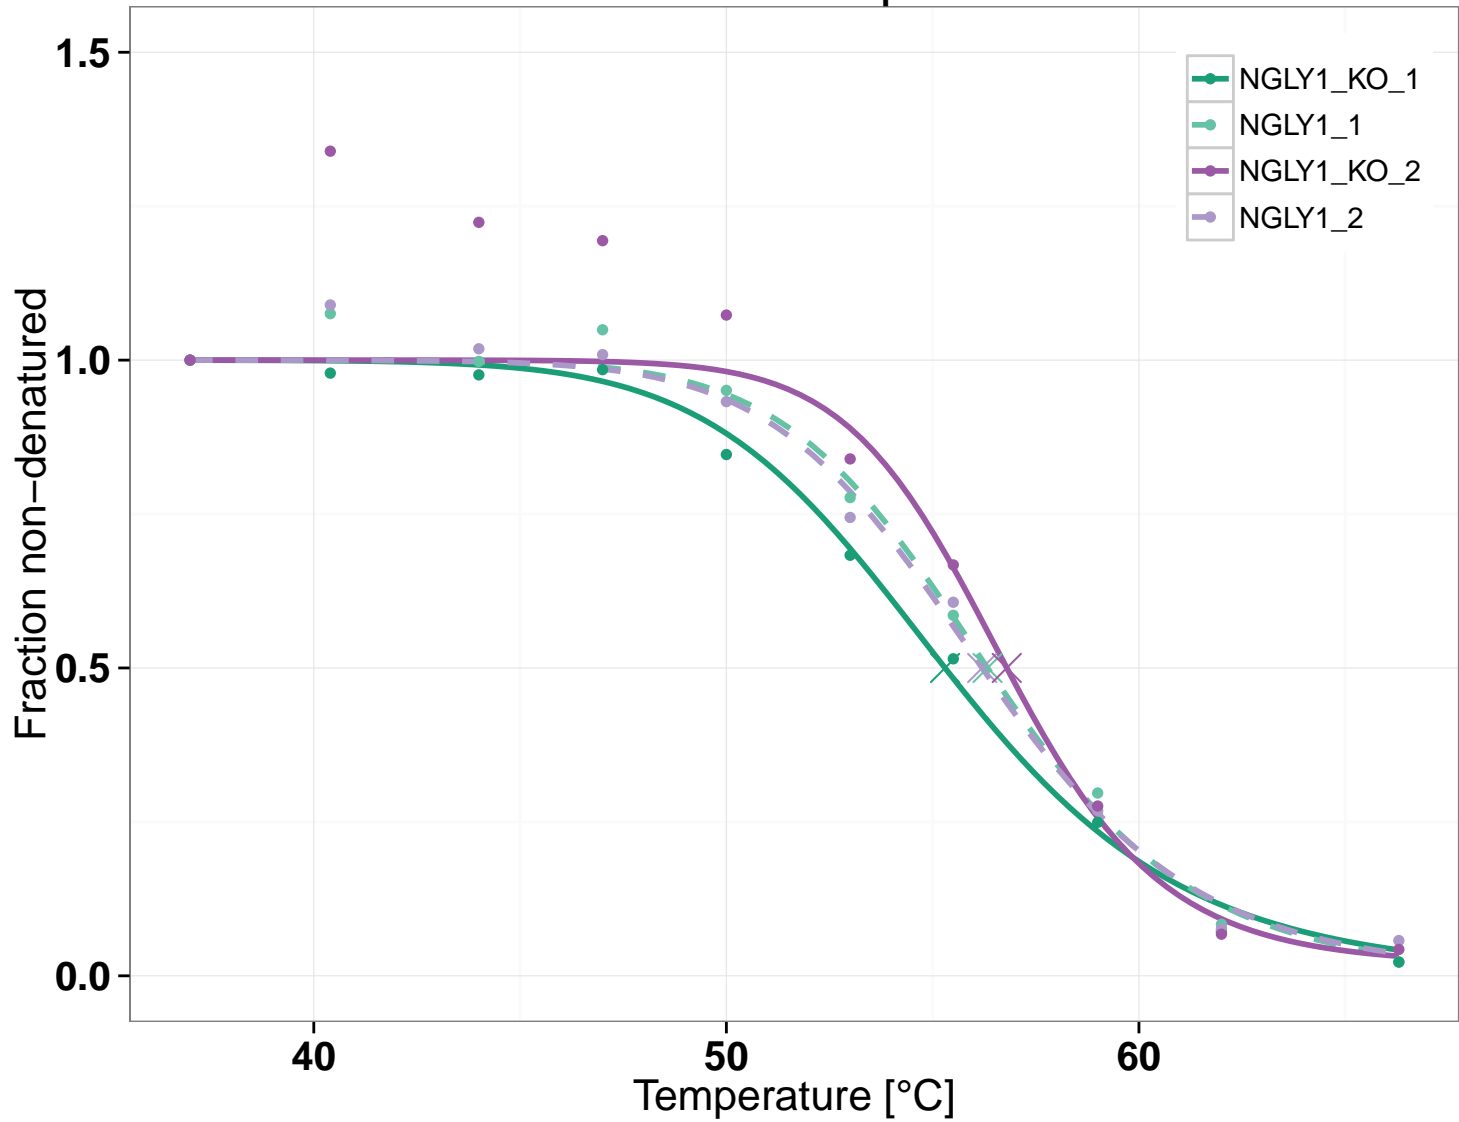

|            | meltPoint | slope  | plateau | R2   |
|------------|-----------|--------|---------|------|
| NGLY1_KO_1 | 55.3      | -0.086 | 0       | 1    |
| NGLY1_1    | 56.33     | -0.1   | 0       | 0.99 |
| NGLY1_KO_2 | 56.8      | -0.13  | 0.02    | 0.9  |
| NGLY1_2    | 56.2      | -0.097 | 0       | 0.99 |

Supplement: Supplementary file 4239 [file 1]

# IPI00153005.1|HVCN1

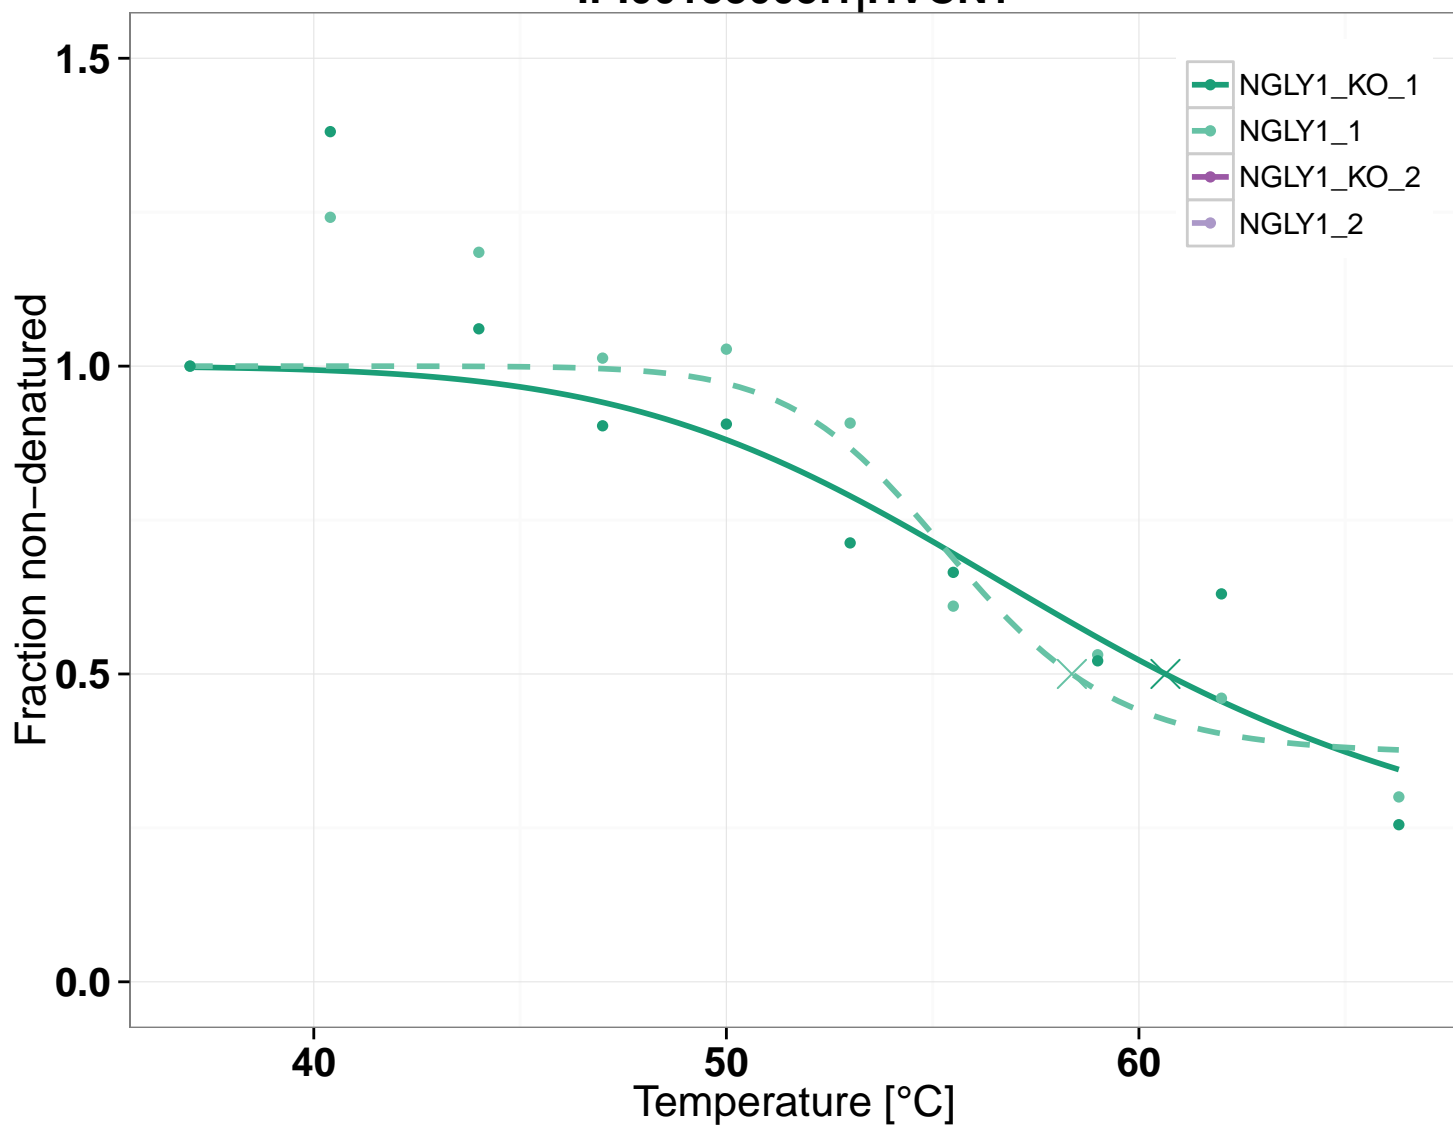

|            | meltPoint | slope  | plateau | R2   |
|------------|-----------|--------|---------|------|
| NGLY1_KO_1 | 60.64     | -0.04  | 0.16    | 0.77 |
| NGLY1_1    | 58.37     | -0.079 | 0.37    | 0.88 |
| NGLY1_KO_2 | -         | -      | -       | -    |
| NGLY1_2    | -         | -      | -       | -    |

Supplement: Supplementary file 4240 [file 1]

# IPI00018213.5|LRRC8D

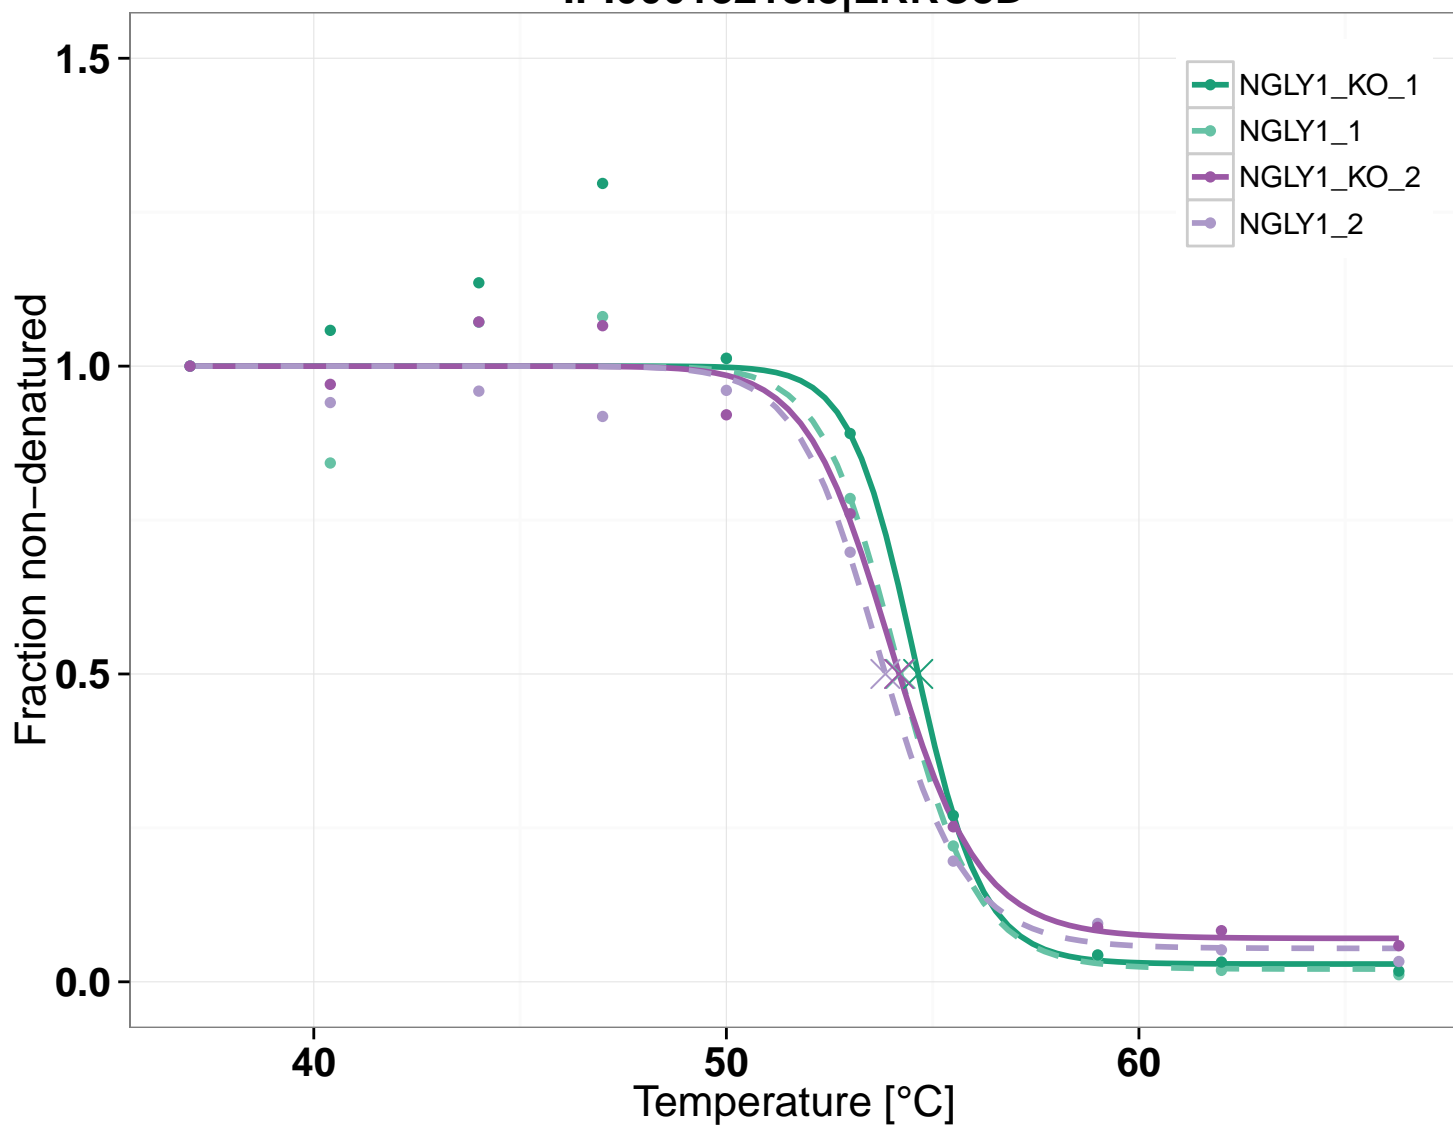

|            | meltPoint | slope | plateau | R2   |
|------------|-----------|-------|---------|------|
| NGLY1_KO_1 | 54.65     | -0.3  | 0.03    | 0.95 |
| NGLY1_1    | 54.22     | -0.26 | 0.02    | 0.98 |
| NGLY1_KO_2 | 54.19     | -0.22 | 0.07    | 0.99 |
| NGLY1_2    | 53.85     | -0.23 | 0.05    | 0.99 |

Supplement: Supplementary file 4241 [file 1]

# IPI00747533.2|PGD

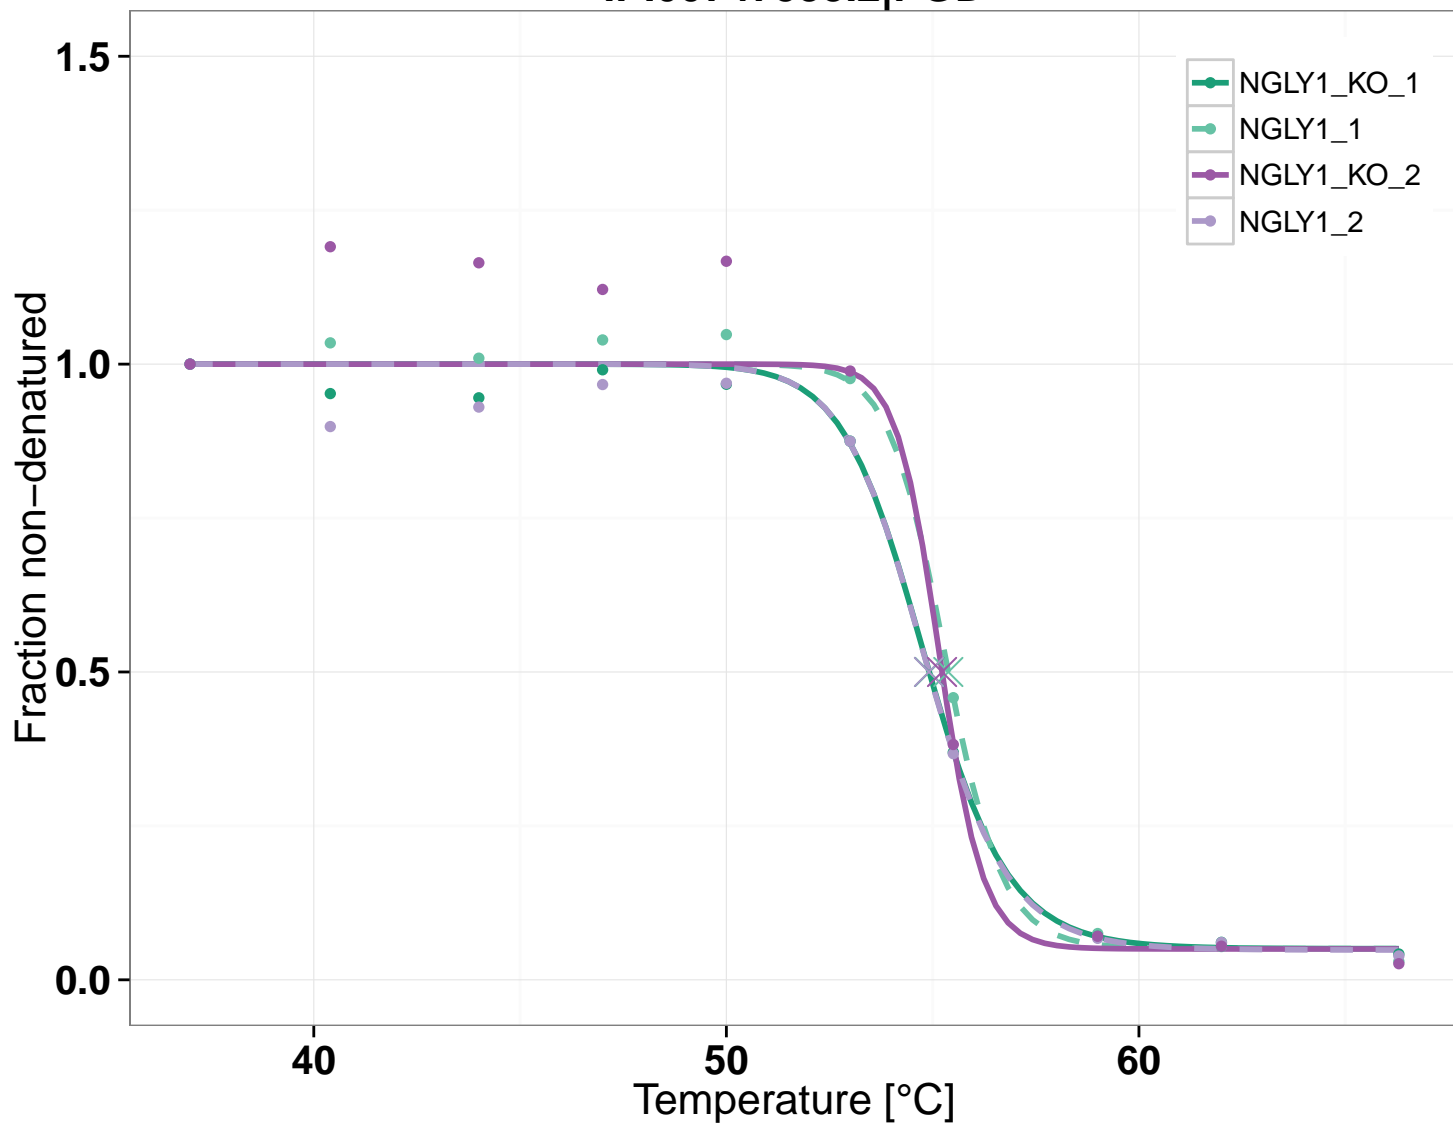

|            | meltPoint | slope | plateau | R2   |
|------------|-----------|-------|---------|------|
| NGLY1_KO_1 | 54.92     | -0.24 | 0.05    | 1    |
| NGLY1_1    | 55.38     | -0.34 | 0.05    | 1    |
| NGLY1_KO_2 | 55.23     | -0.45 | 0.05    | 0.96 |
| NGLY1_2    | 54.91     | -0.24 | 0.05    | 0.99 |

Supplement: Supplementary file 4242 [file 1]

IPI00909024.1|MTRF1

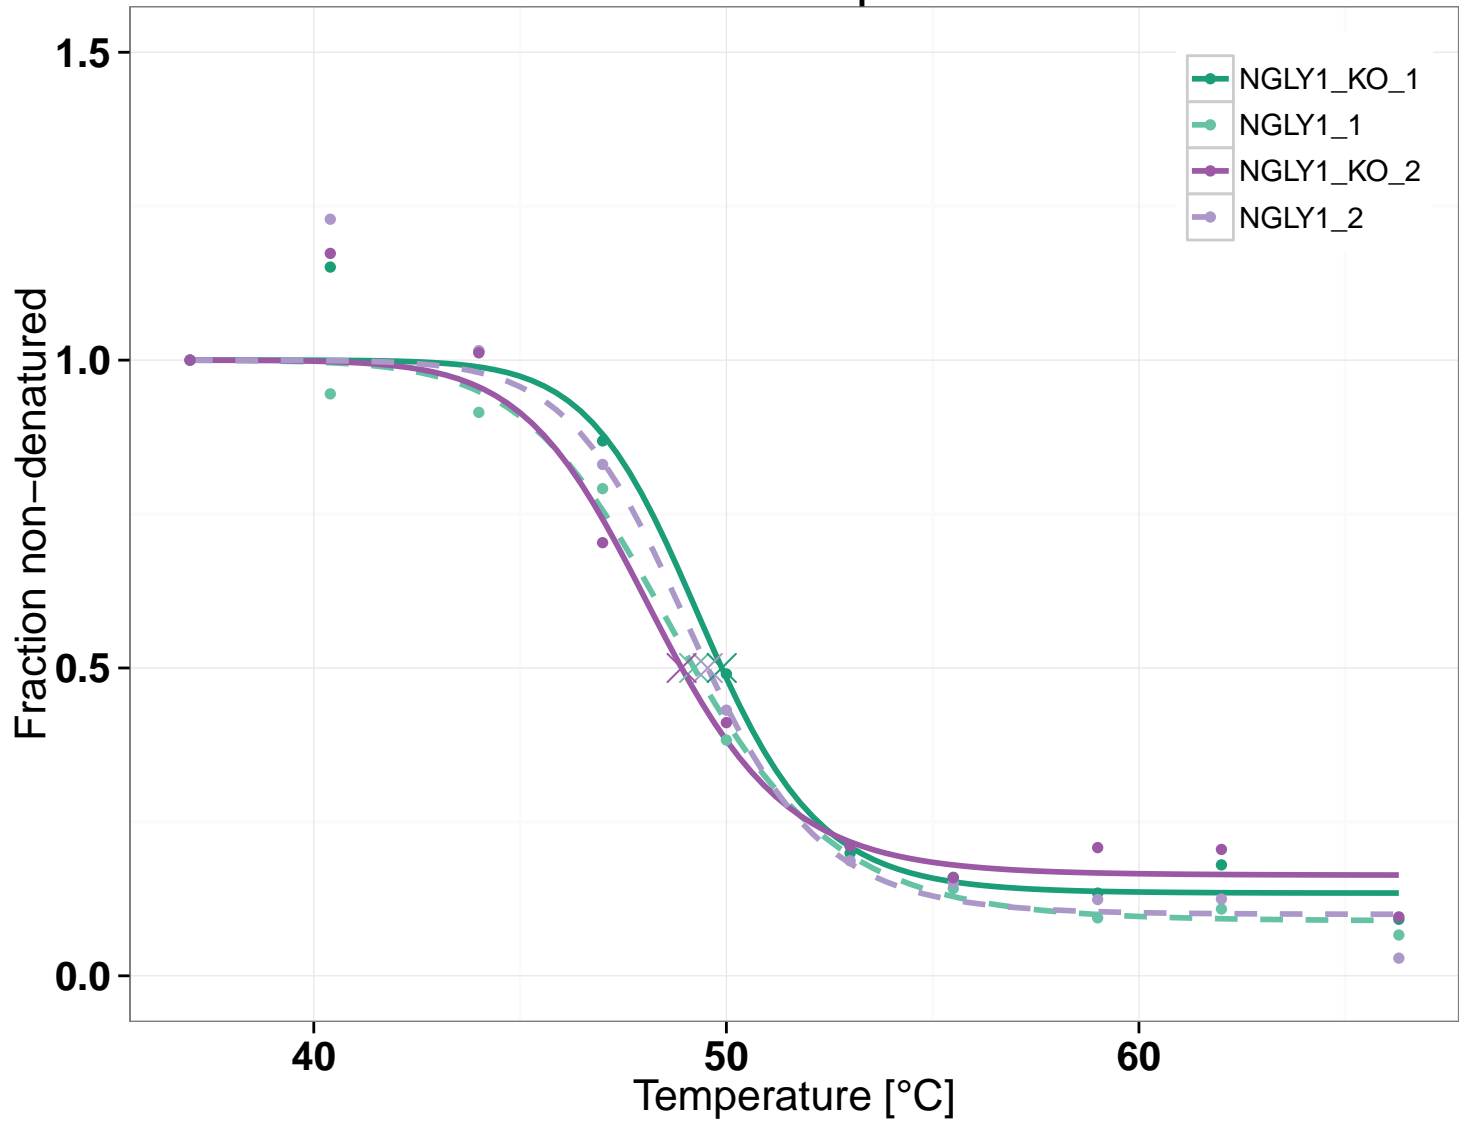

|            | meltPoint | slope | plateau | R2   |
|------------|-----------|-------|---------|------|
| NGLY1_KO_1 | 49.89     | -0.15 | 0.13    | 0.98 |
| NGLY1_1    | 49.22     | -0.12 | 0.09    | 1    |
| NGLY1_KO_2 | 48.91     | -0.13 | 0.16    | 0.97 |
| NGLY1_2    | 49.55     | -0.15 | 0.1     | 0.97 |

Supplement: Supplementary file 4243 [file 1]

IPI00298612.1|BCKDK

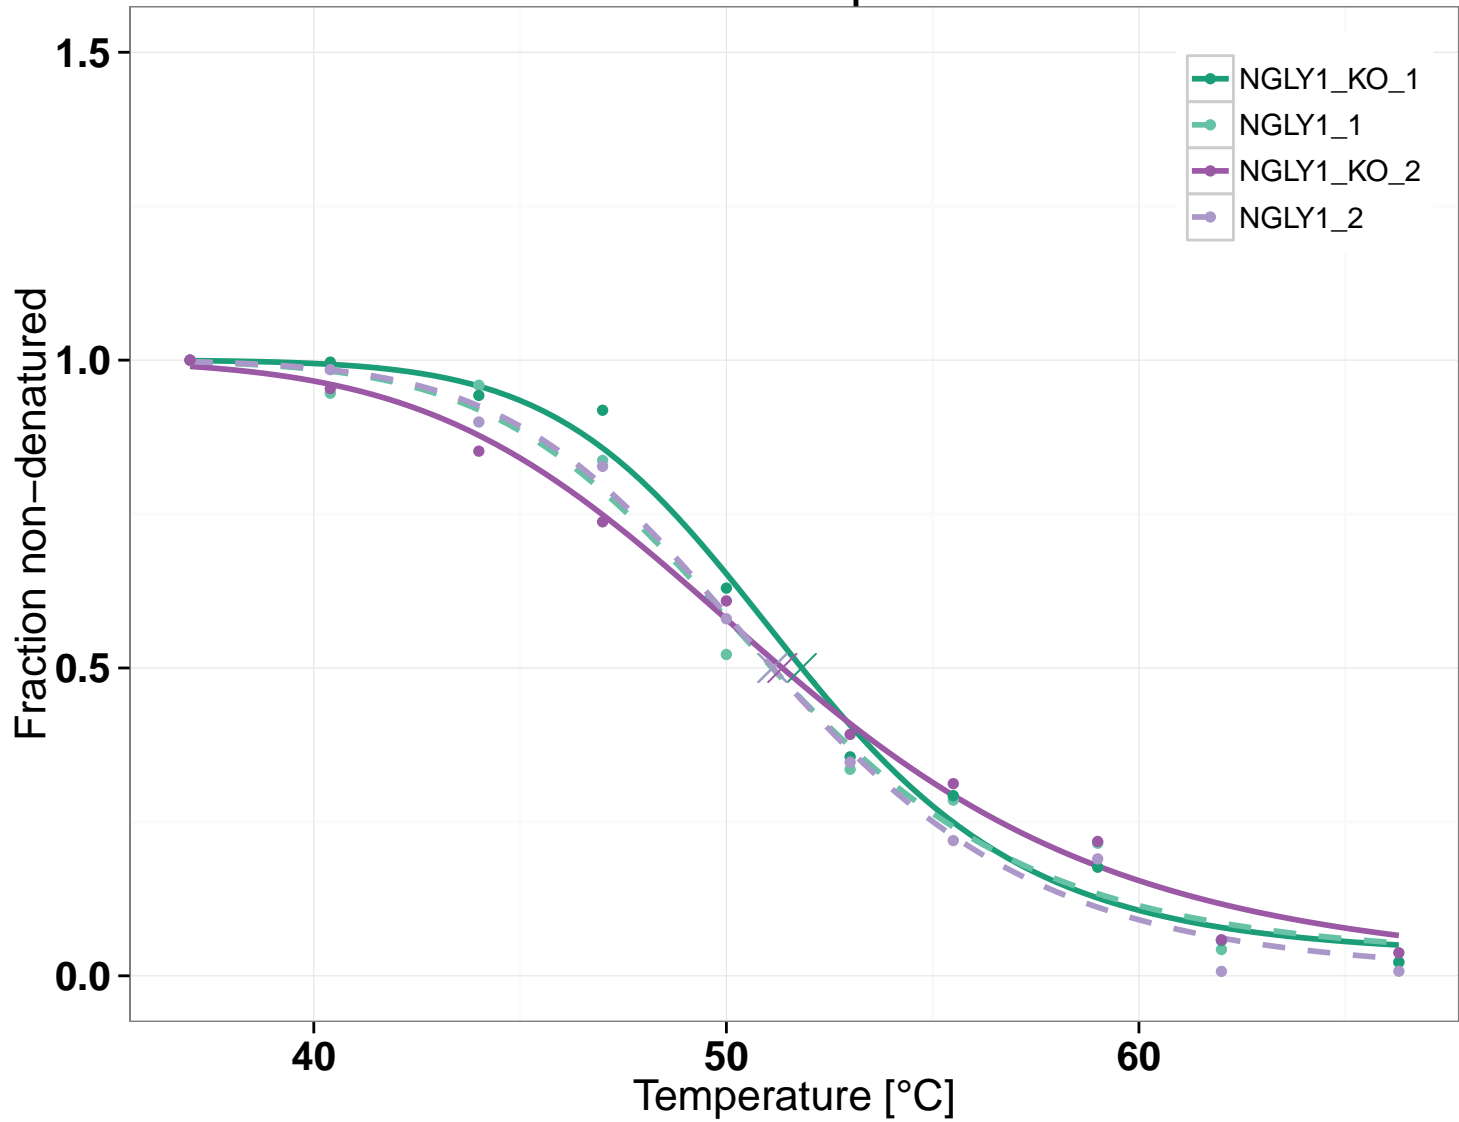

|            | meltPoint | slope  | plateau | R2   |
|------------|-----------|--------|---------|------|
| NGLY1_KO_1 | 51.83     | -0.084 | 0.03    | 0.99 |
| NGLY1_1    | 51.11     | -0.074 | 0.03    | 0.98 |
| NGLY1_KO_2 | 51.36     | -0.059 | 0       | 0.99 |
| NGLY1_2    | 51.13     | -0.077 | 0       | 0.99 |

Supplement: Supplementary file 4244 [file 1]

IPI00293533.4|NUP62

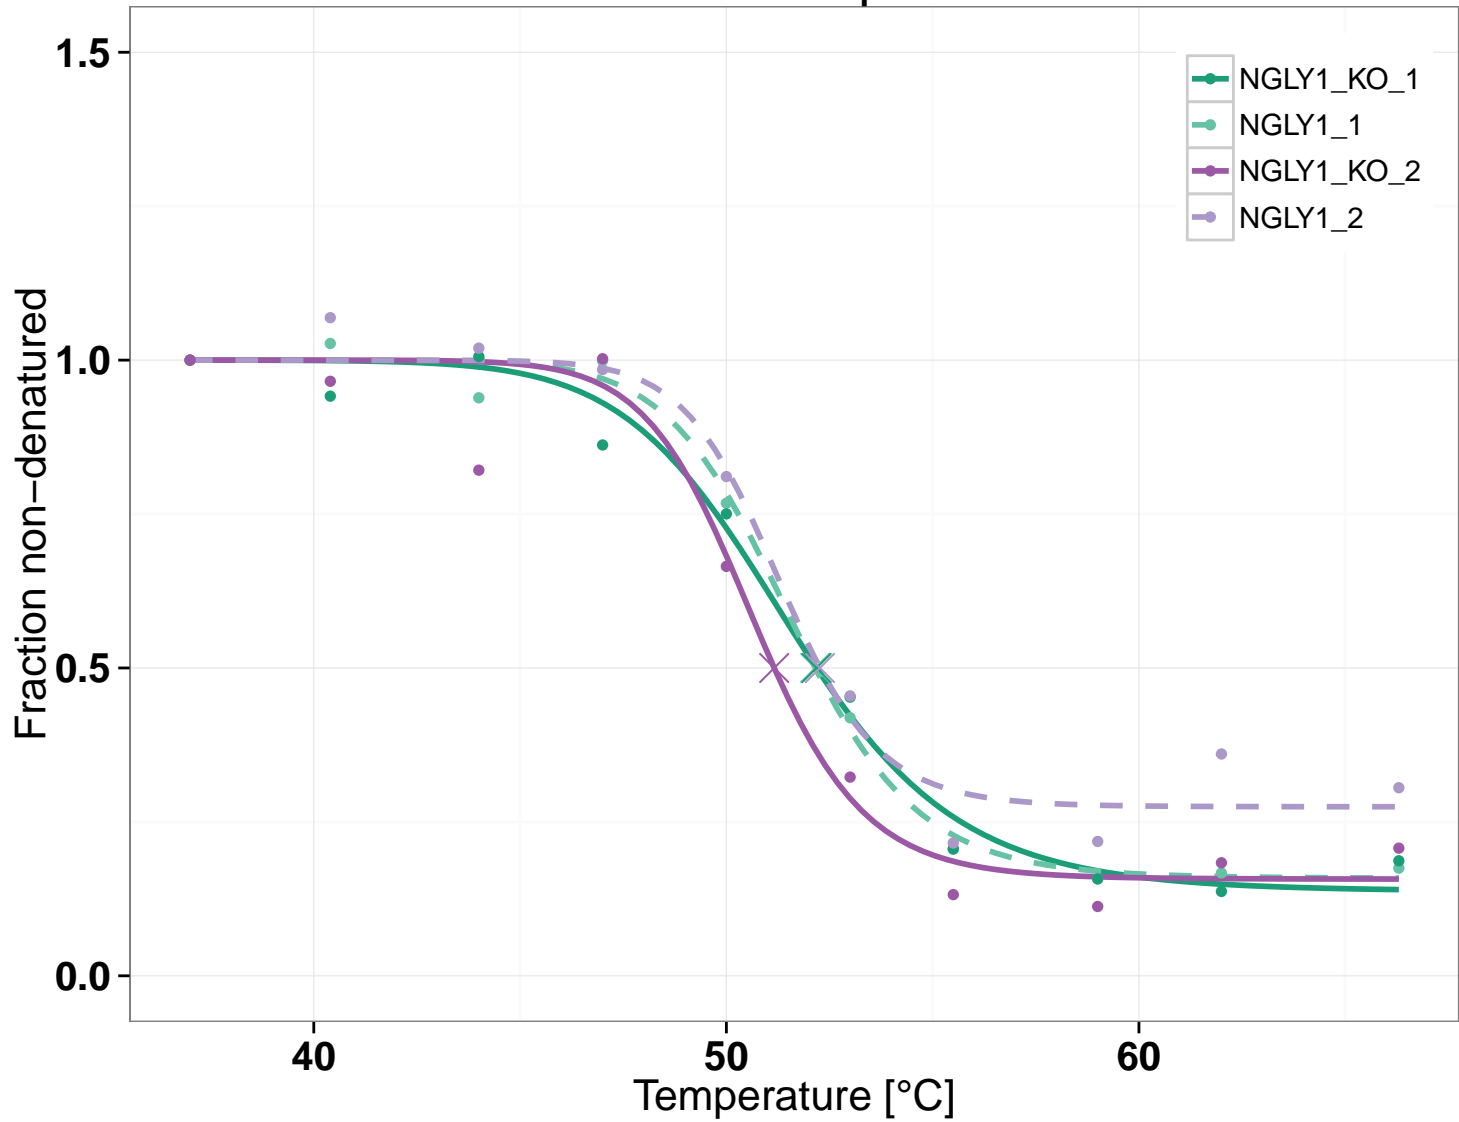

|            | meltPoint | slope | plateau | R2   |
|------------|-----------|-------|---------|------|
| NGLY1_KO_1 | 52.19     | -0.11 | 0.14    | 0.99 |
| NGLY1_1    | 52.15     | -0.14 | 0.16    | 1    |
| NGLY1_KO_2 | 51.16     | -0.16 | 0.16    | 0.97 |
| NGLY1_2    | 52.27     | -0.15 | 0.27    | 0.98 |

Supplement: Supplementary file 4245 [file 1]

# IPI00239815.9|CIRH1A

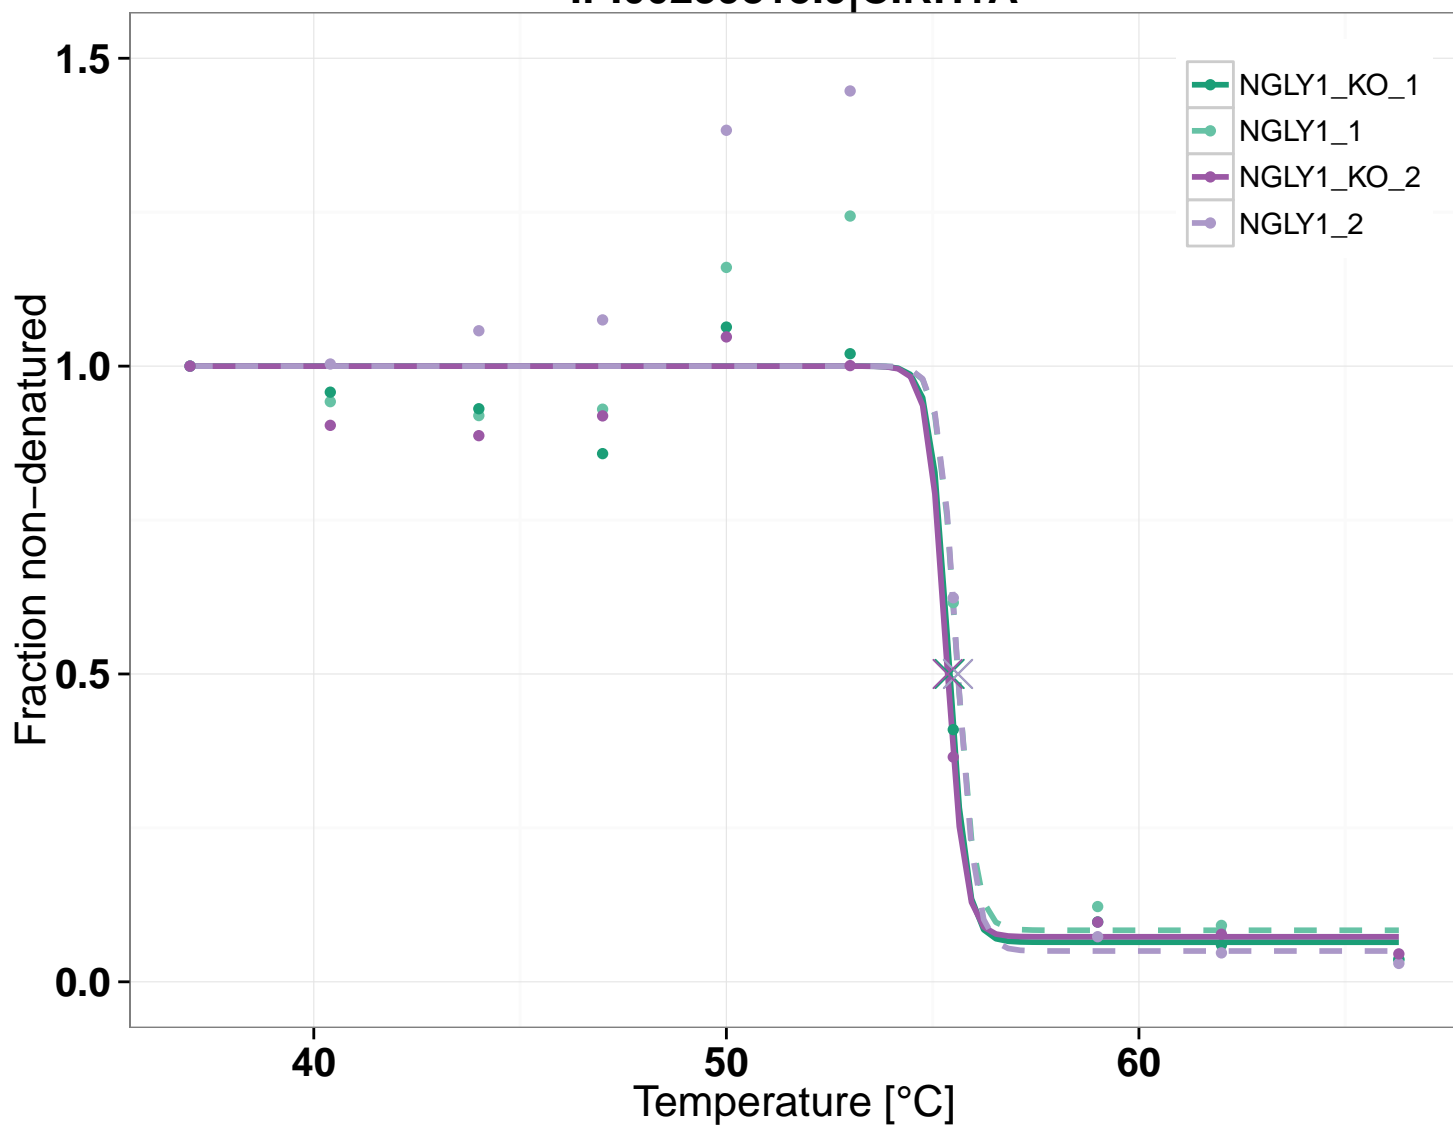

|            | meltPoint | slope | plateau | R2   |
|------------|-----------|-------|---------|------|
| NGLY1_KO_1 | 55.41     | -1.1  | 0.06    | 0.98 |
| NGLY1_1    | 55.61     | -1    | 0.08    | 0.95 |
| NGLY1_KO_2 | 55.36     | -1    | 0.07    | 0.98 |
| NGLY1_2    | 55.62     | -1.1  | 0.05    | 0.87 |

Supplement: Supplementary file 4246 [file 1]

IPI00101608.4|CRELD1

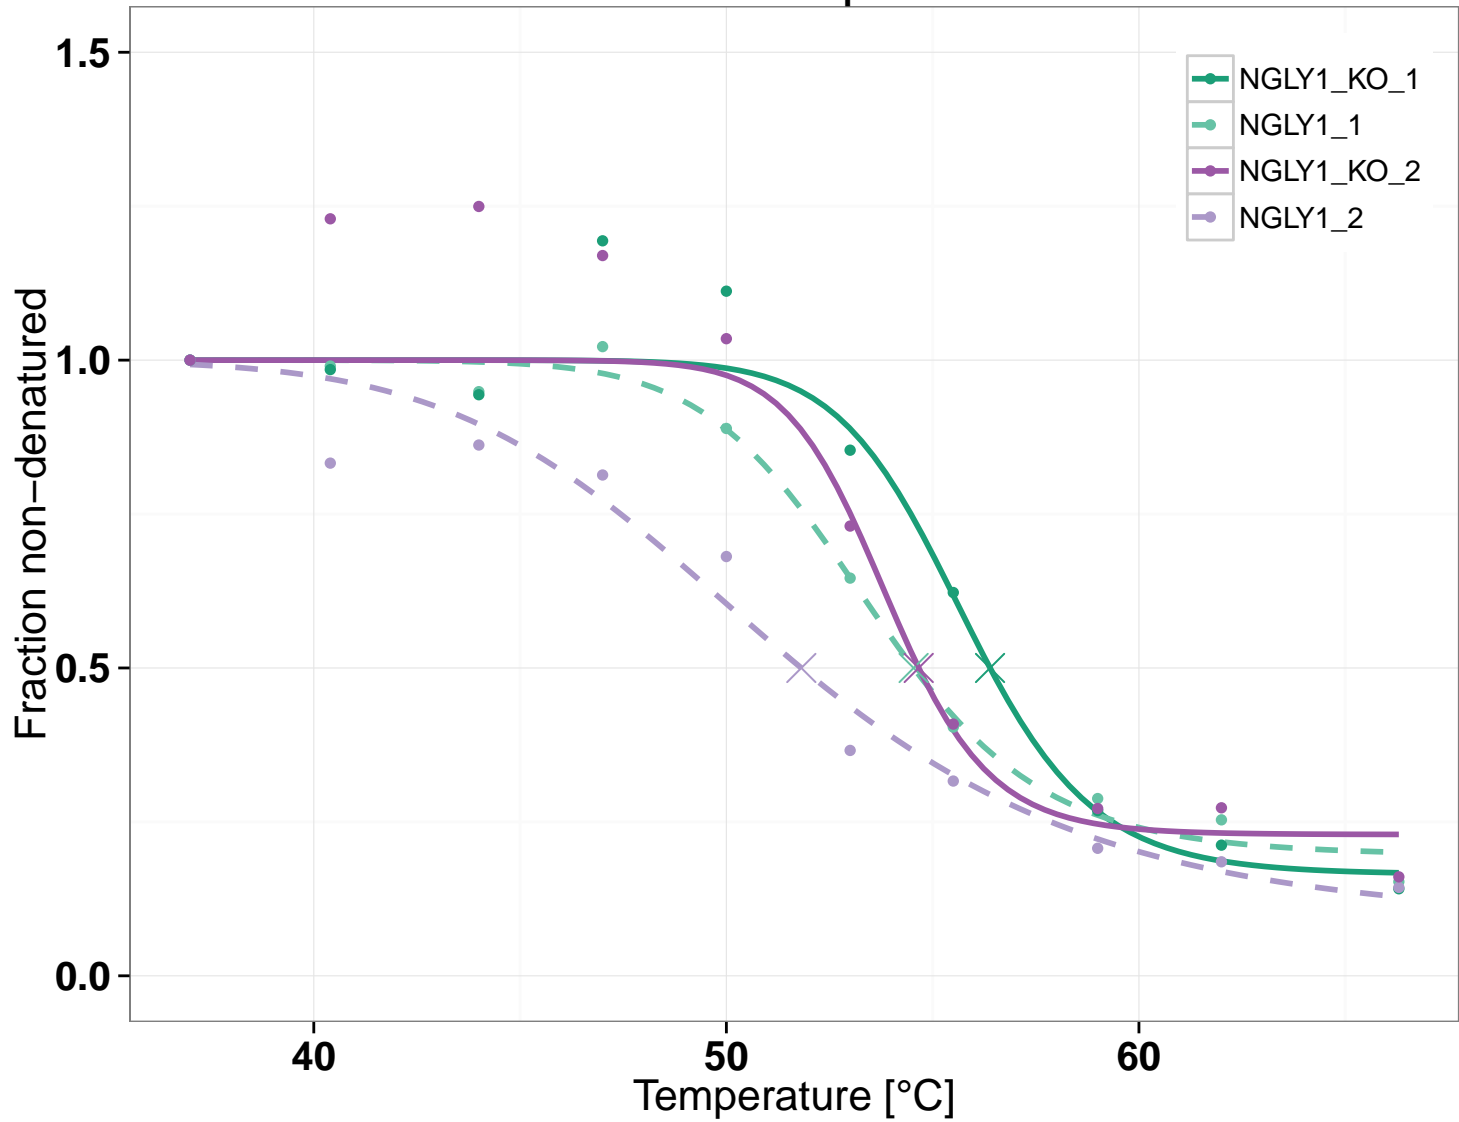

|            | meltPoint | slope  | plateau | R2   |
|------------|-----------|--------|---------|------|
| NGLY1_KO_1 | 56.39     | -0.13  | 0.16    | 0.96 |
| NGLY1_1    | 54.54     | -0.098 | 0.2     | 0.99 |
| NGLY1_KO_2 | 54.66     | -0.16  | 0.23    | 0.91 |
| NGLY1_2    | 51.82     | -0.059 | 0.08    | 0.97 |

Supplement: Supplementary file 4247 [file 1]

IPI00291928.8|RAB14

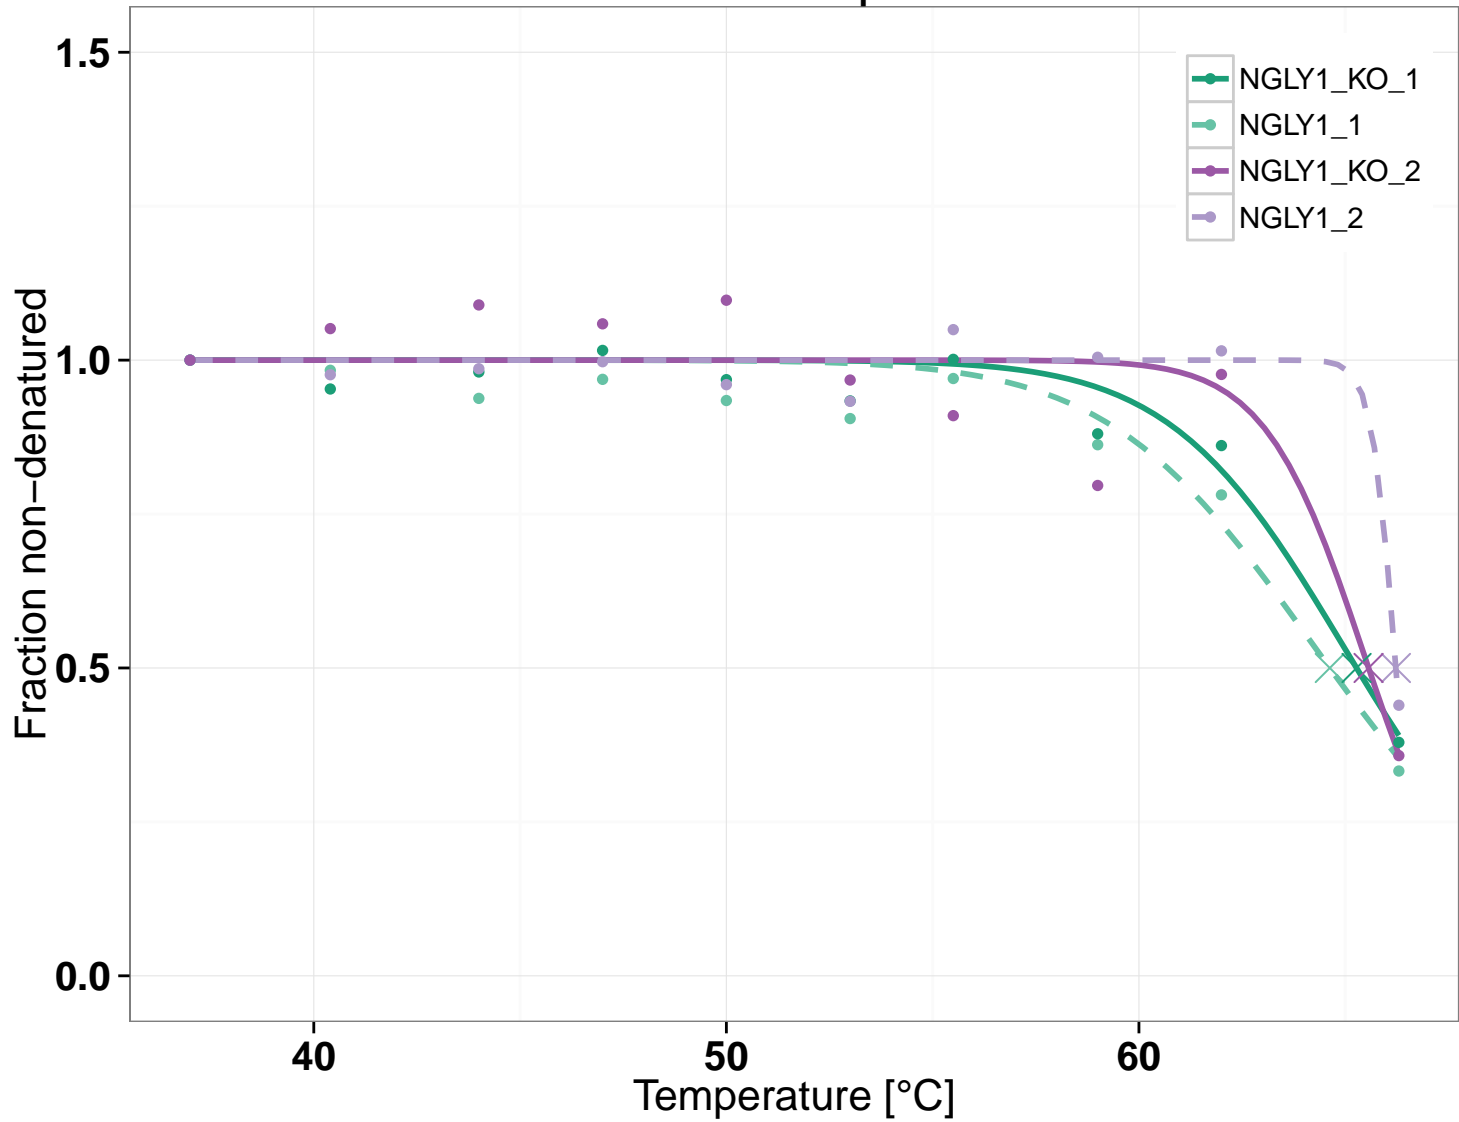

|            | meltPoint | slope  | plateau | R2   |
|------------|-----------|--------|---------|------|
| NGLY1_KO_1 | 65.28     | -0.11  | 0       | 0.95 |
| NGLY1_1    | 64.63     | -0.093 | 0       | 0.94 |
| NGLY1_KO_2 | 65.57     | -0.2   | 0       | 0.83 |
| NGLY1_2    | 66.23     | -0.86  | 0       | 0.97 |

Supplement: Supplementary file 4248 [file 1]

# IPI00008304.2|AKTIP

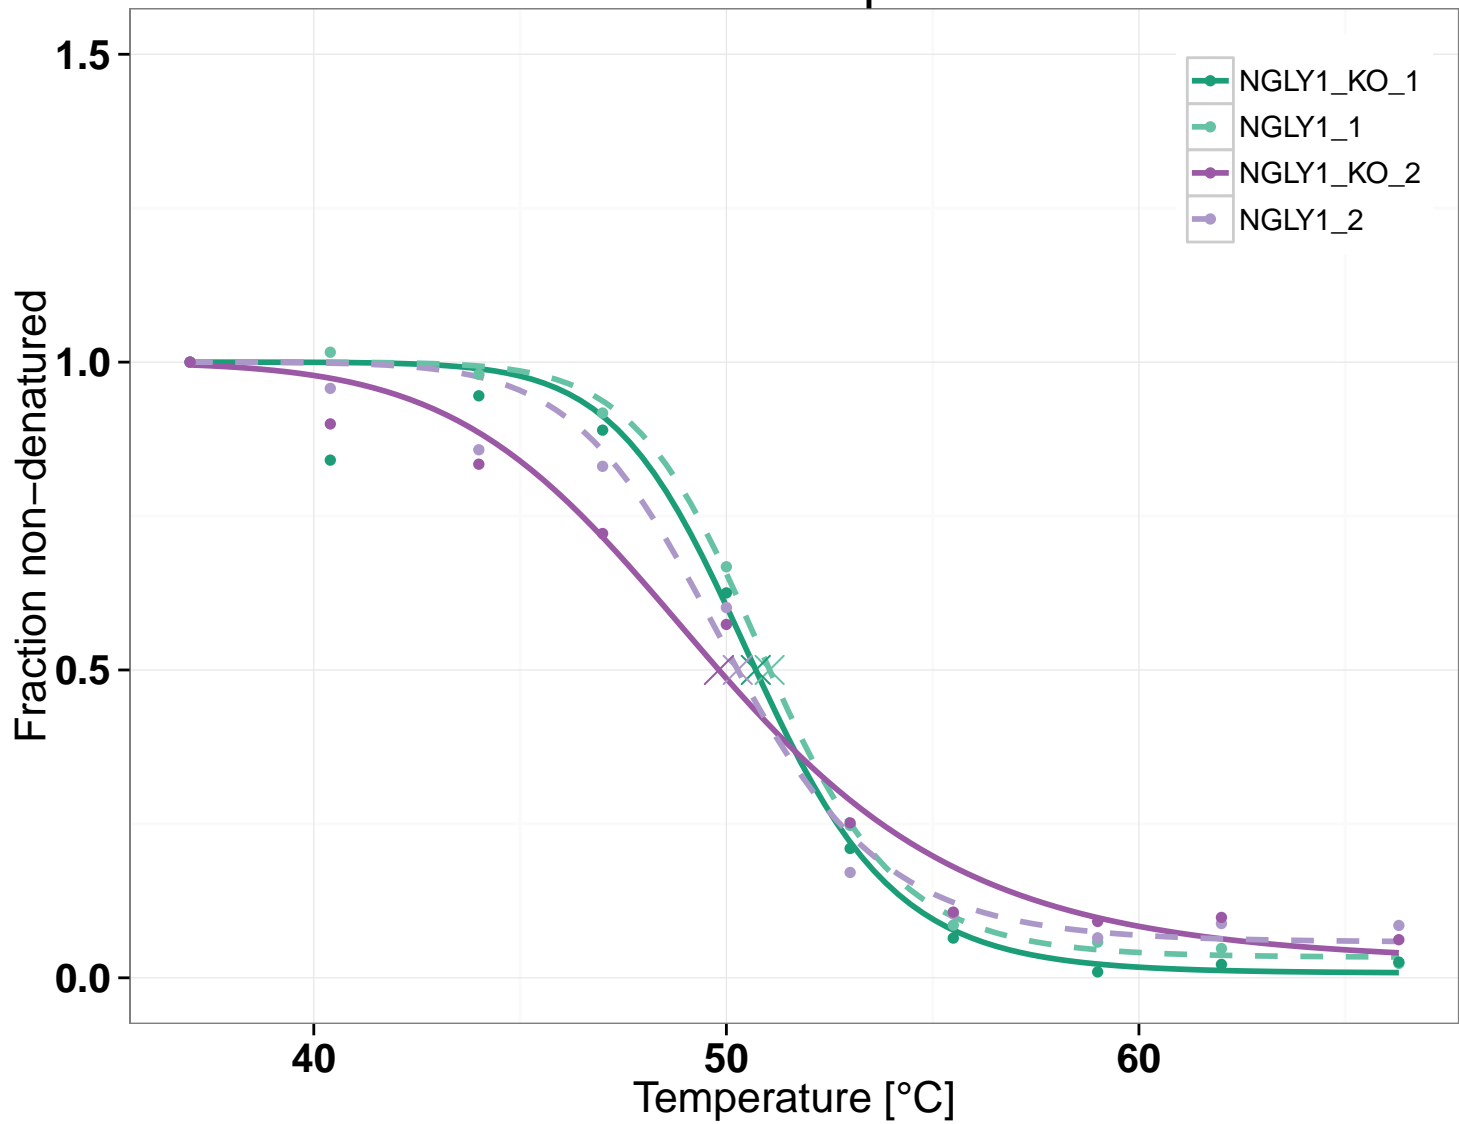

|            | meltPoint | slope  | plateau | R2   |
|------------|-----------|--------|---------|------|
| NGLY1_KO_1 | 50.71     | -0.15  | 0.01    | 0.98 |
| NGLY1_1    | 51.05     | -0.15  | 0.03    | 1    |
| NGLY1_KO_2 | 49.82     | -0.078 | 0.02    | 0.98 |
| NGLY1_2    | 50.28     | -0.13  | 0.06    | 0.98 |

Supplement: Supplementary file 4249 [file 1]

# IPI00014198.2|EXOSC7

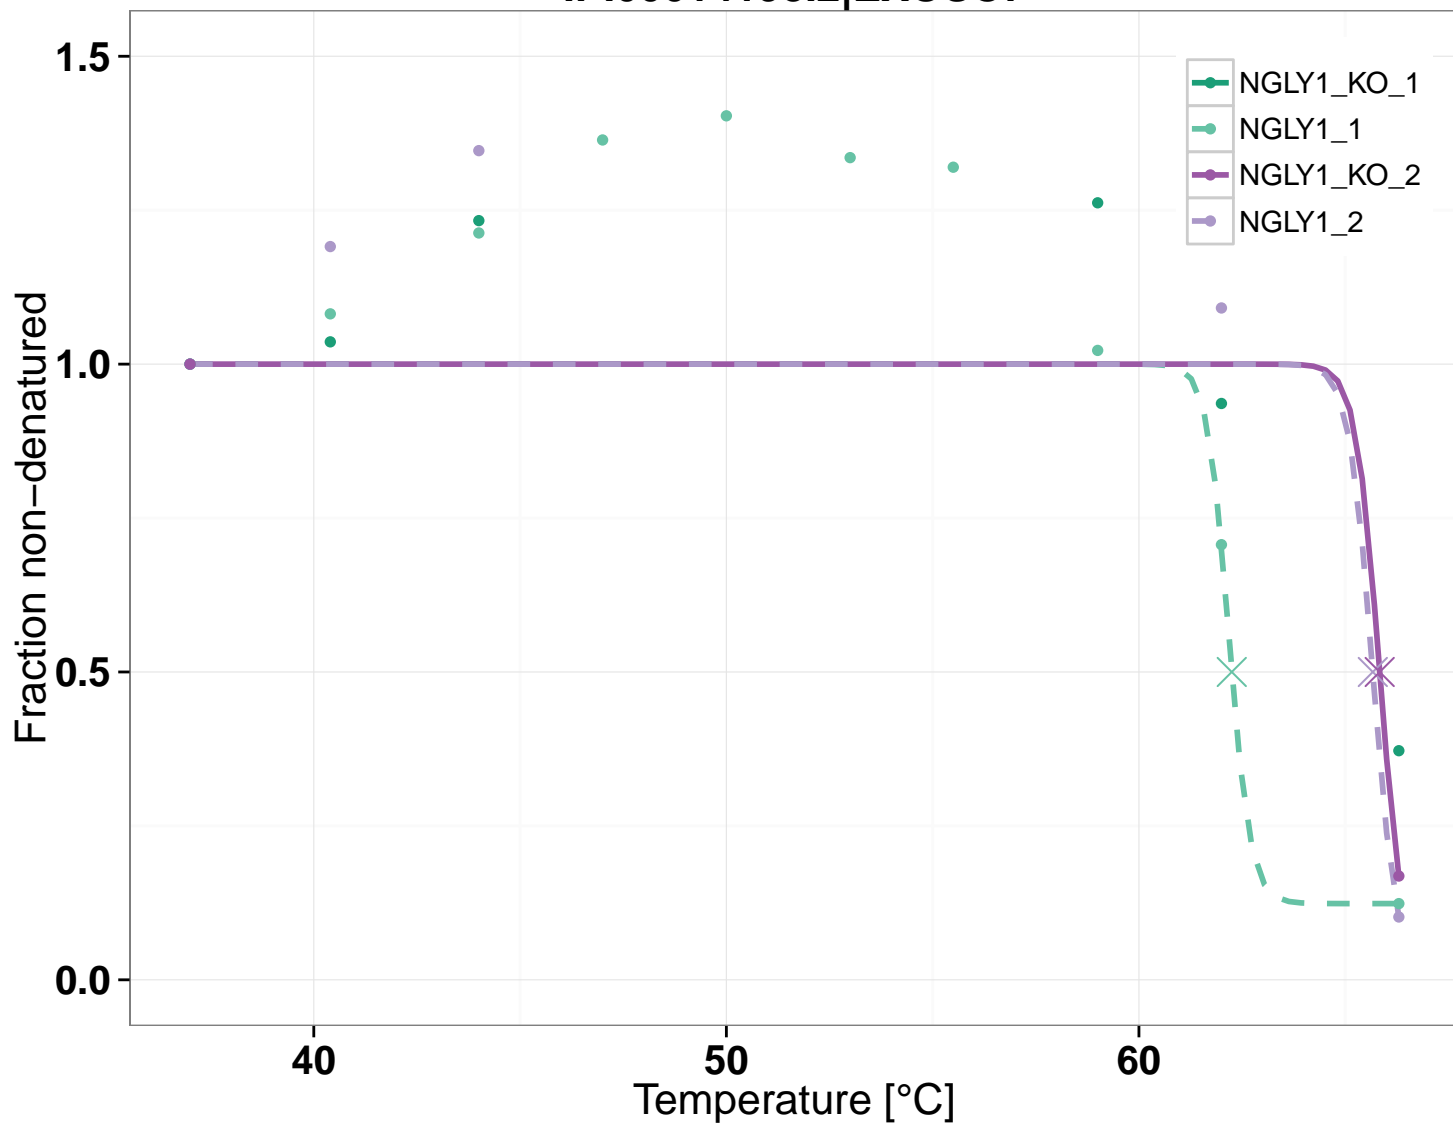

|            | meltPoint | slope | plateau | R2    |
|------------|-----------|-------|---------|-------|
| NGLY1_KO_1 | -         | -     | -       | -     |
| NGLY1_1    | 62.25     | -0.85 | 0.12    | 0.59  |
| NGLY1_KO_2 | 65.84     | -0.87 | 0       | -1.17 |
| NGLY1_2    | 65.67     | -0.87 | 0       | -0.1  |

Supplement: Supplementary file 4250 [file 1]

IPI00746691.2|C20ORF30

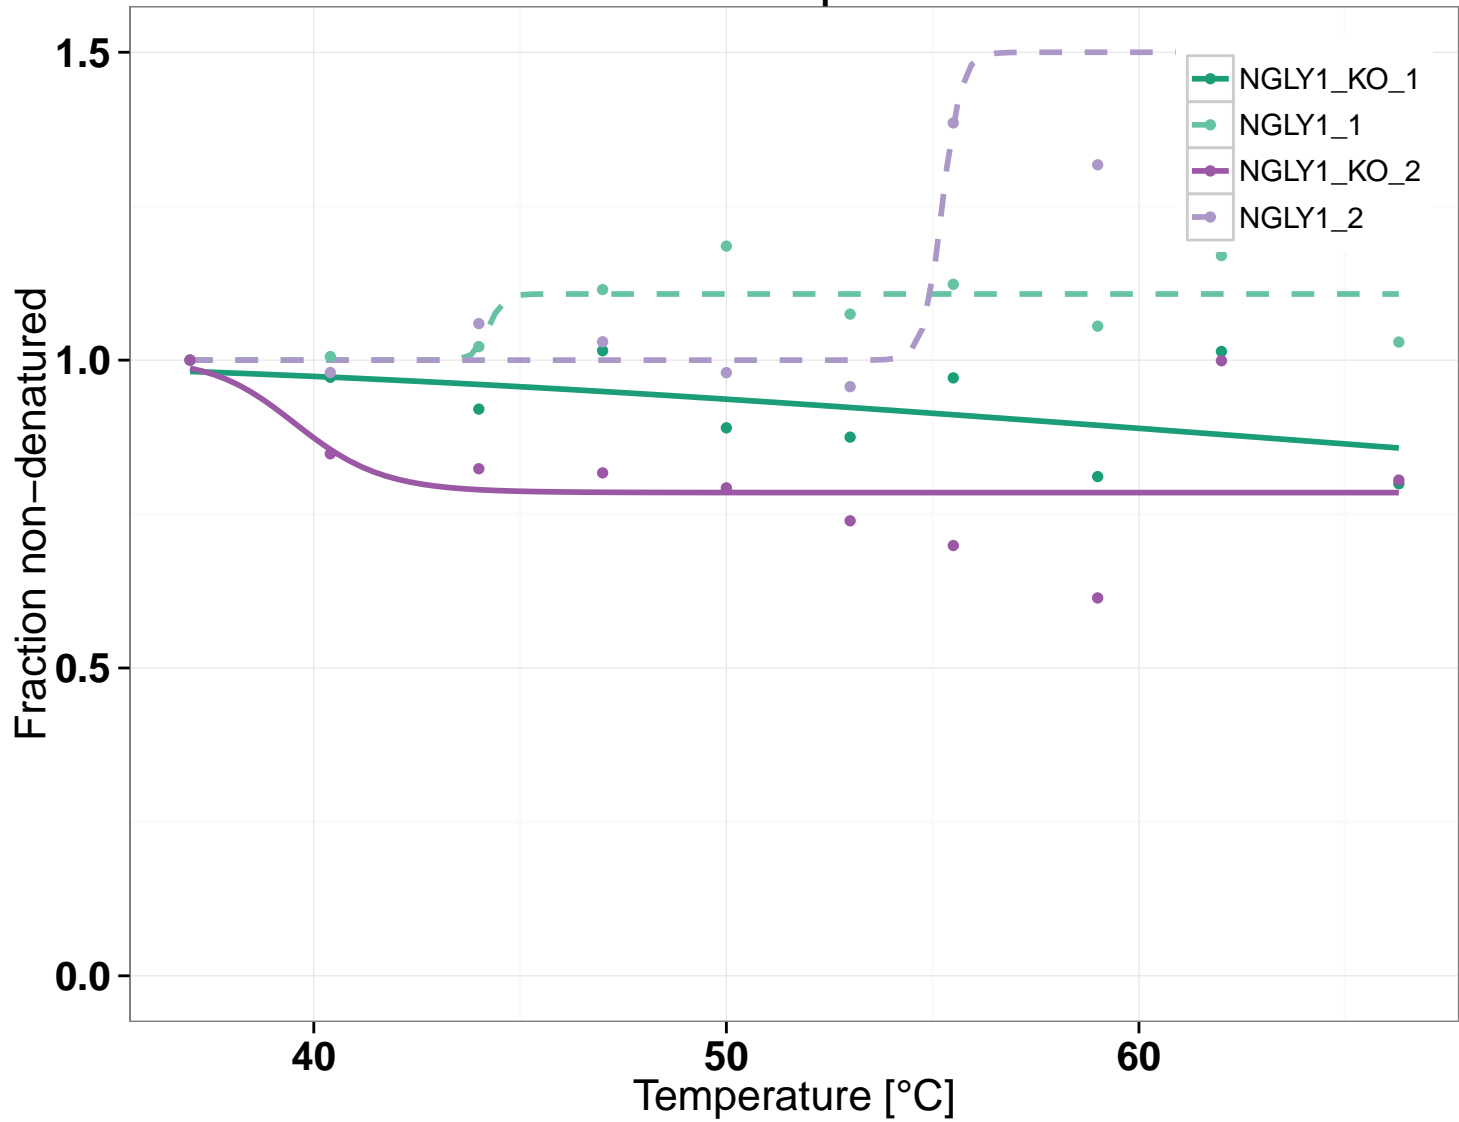

|            | meltPoint | slope   | plateau | R2   |
|------------|-----------|---------|---------|------|
| NGLY1_KO_1 | -         | -0.0051 | 0       | 0.27 |
| NGLY1_1    | -         | 0.15    | 1.11    | 0.5  |
| NGLY1_KO_2 | -         | -0.052  | 0.78    | 0.32 |
| NGLY1_2    | -         | 0.57    | 1.5     | 0.88 |

Supplement: Supplementary file 4251 [file 1]

IPI00791613.1|TUBA8

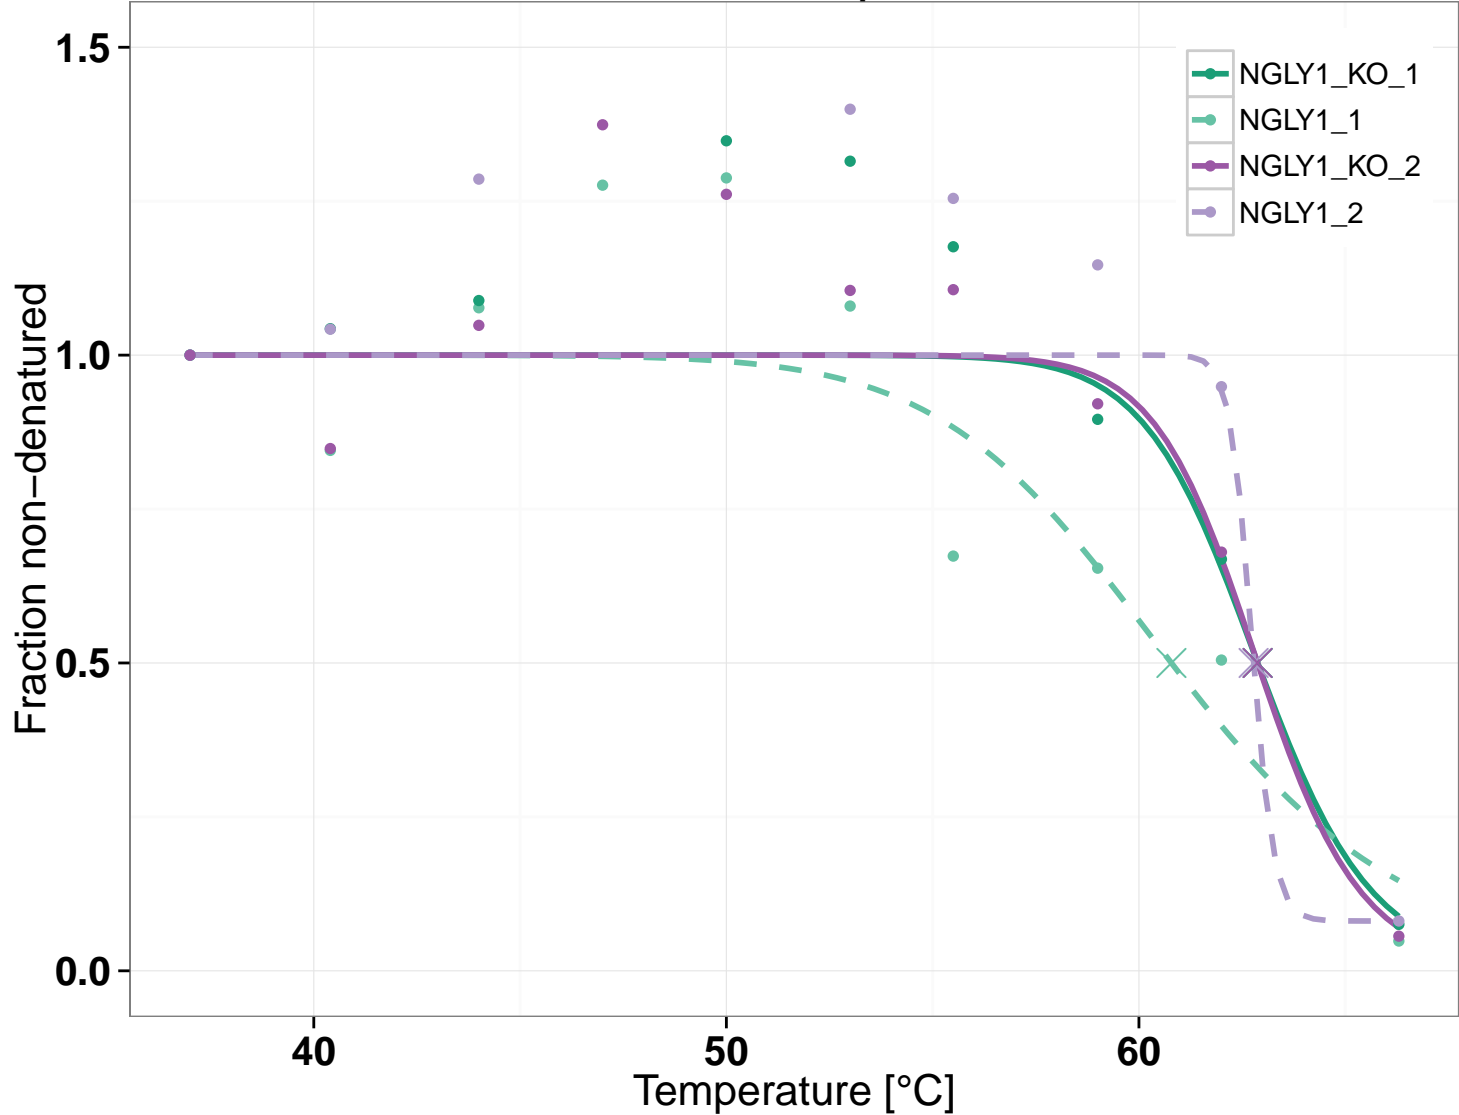

|            | meltPoint | slope  | plateau | R2   |
|------------|-----------|--------|---------|------|
| NGLY1_KO_1 | 62.88     | -0.18  | 0       | 0.63 |
| NGLY1_1    | 60.79     | -0.088 | 0       | 0.79 |
| NGLY1_KO_2 | 62.88     | -0.2   | 0       | 0.79 |
| NGLY1_2    | 62.78     | -0.88  | 0.08    | 0.43 |

Supplement: Supplementary file 4252 [file 1]

IPI00007057.4|ZFYVE20

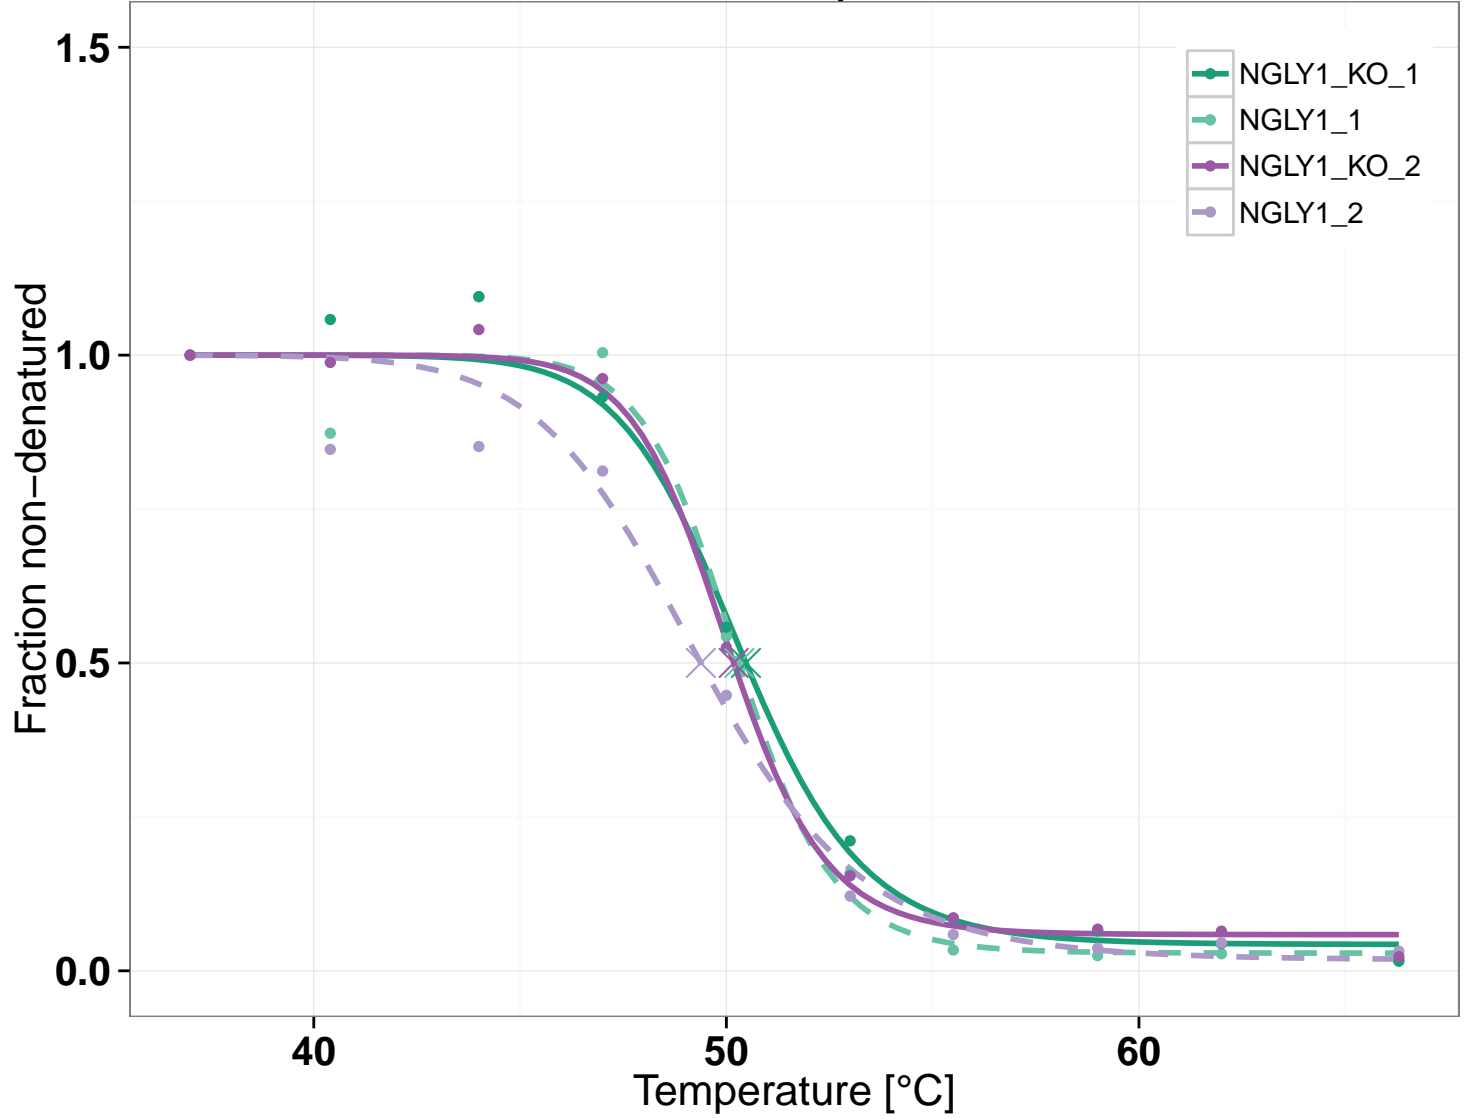

|            | meltPoint | slope | plateau | R2   |
|------------|-----------|-------|---------|------|
| NGLY1_KO_1 | 50.47     | -0.16 | 0.04    | 0.99 |
| NGLY1_1    | 50.31     | -0.21 | 0.03    | 0.98 |
| NGLY1_KO_2 | 50.18     | -0.2  | 0.06    | 1    |
| NGLY1_2    | 49.38     | -0.12 | 0.02    | 0.98 |

Supplement: Supplementary file 4253 [file 1]

# IPI00215831.2|RHBDD3

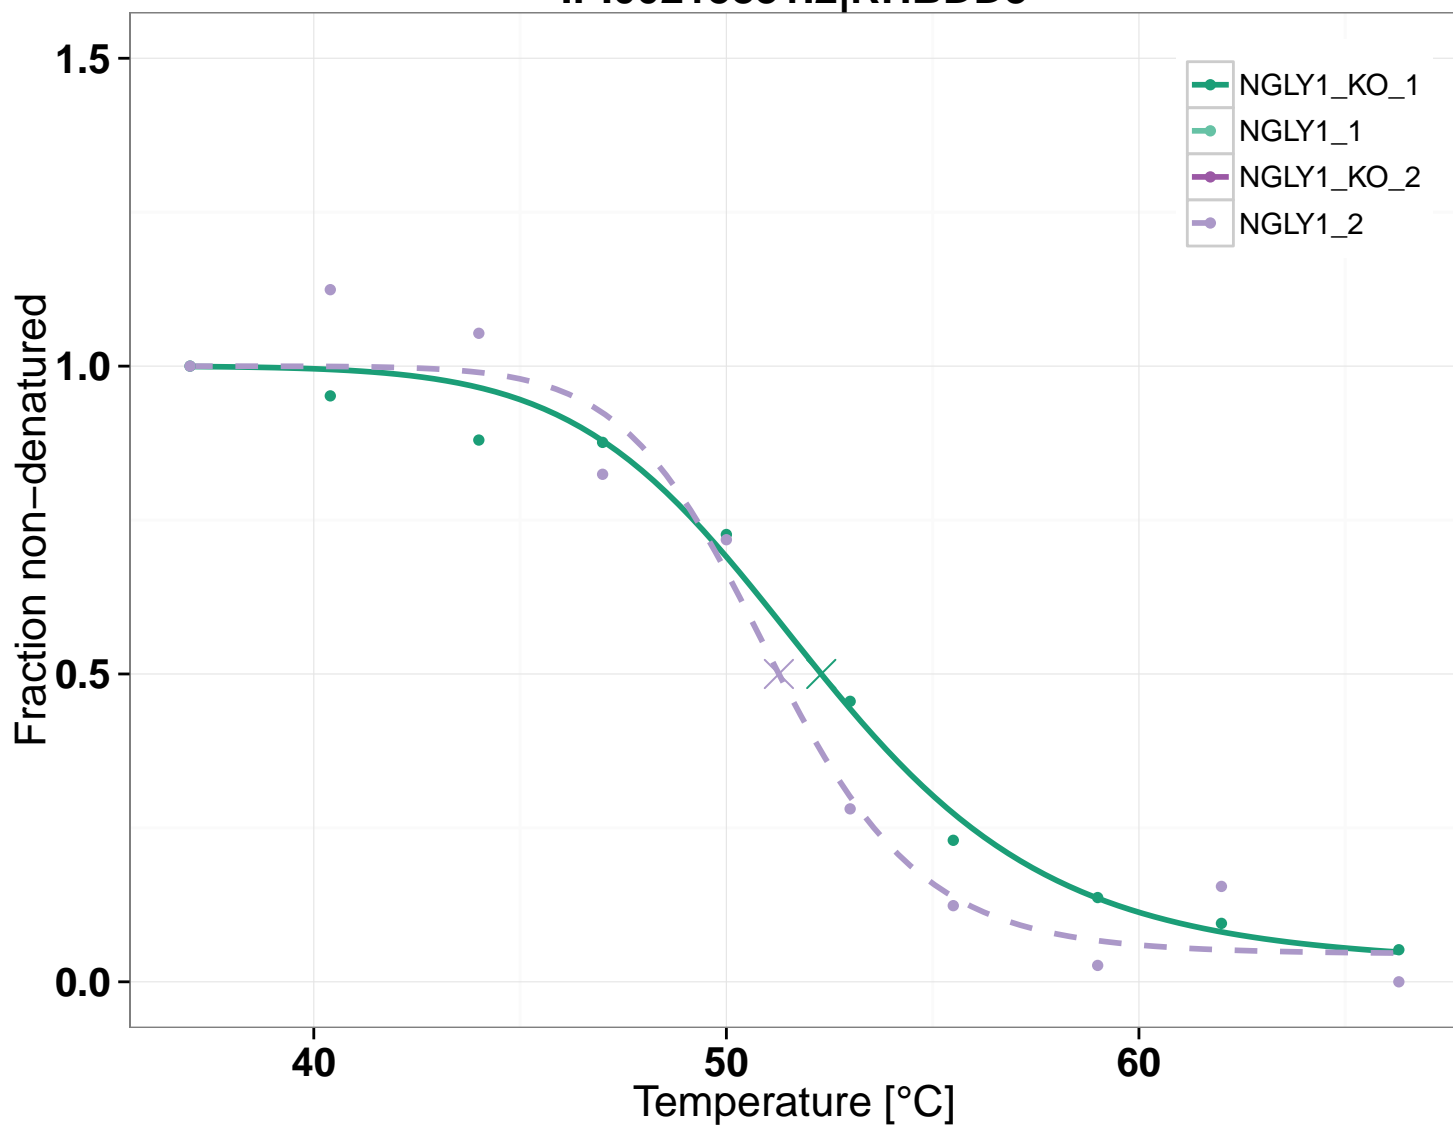

|            | meltPoint | slope  | plateau | R2   |
|------------|-----------|--------|---------|------|
| NGLY1_KO_1 | 52.3      | -0.084 | 0.03    | 0.99 |
| NGLY1_1    | -         | -      | -       | -    |
| NGLY1_KO_2 | -         | -      | -       | -    |
| NGLY1_2    | 51.27     | -0.13  | 0.05    | 0.97 |

Supplement: Supplementary file 4254 [file 1]

IPI00418991.5|QSER1

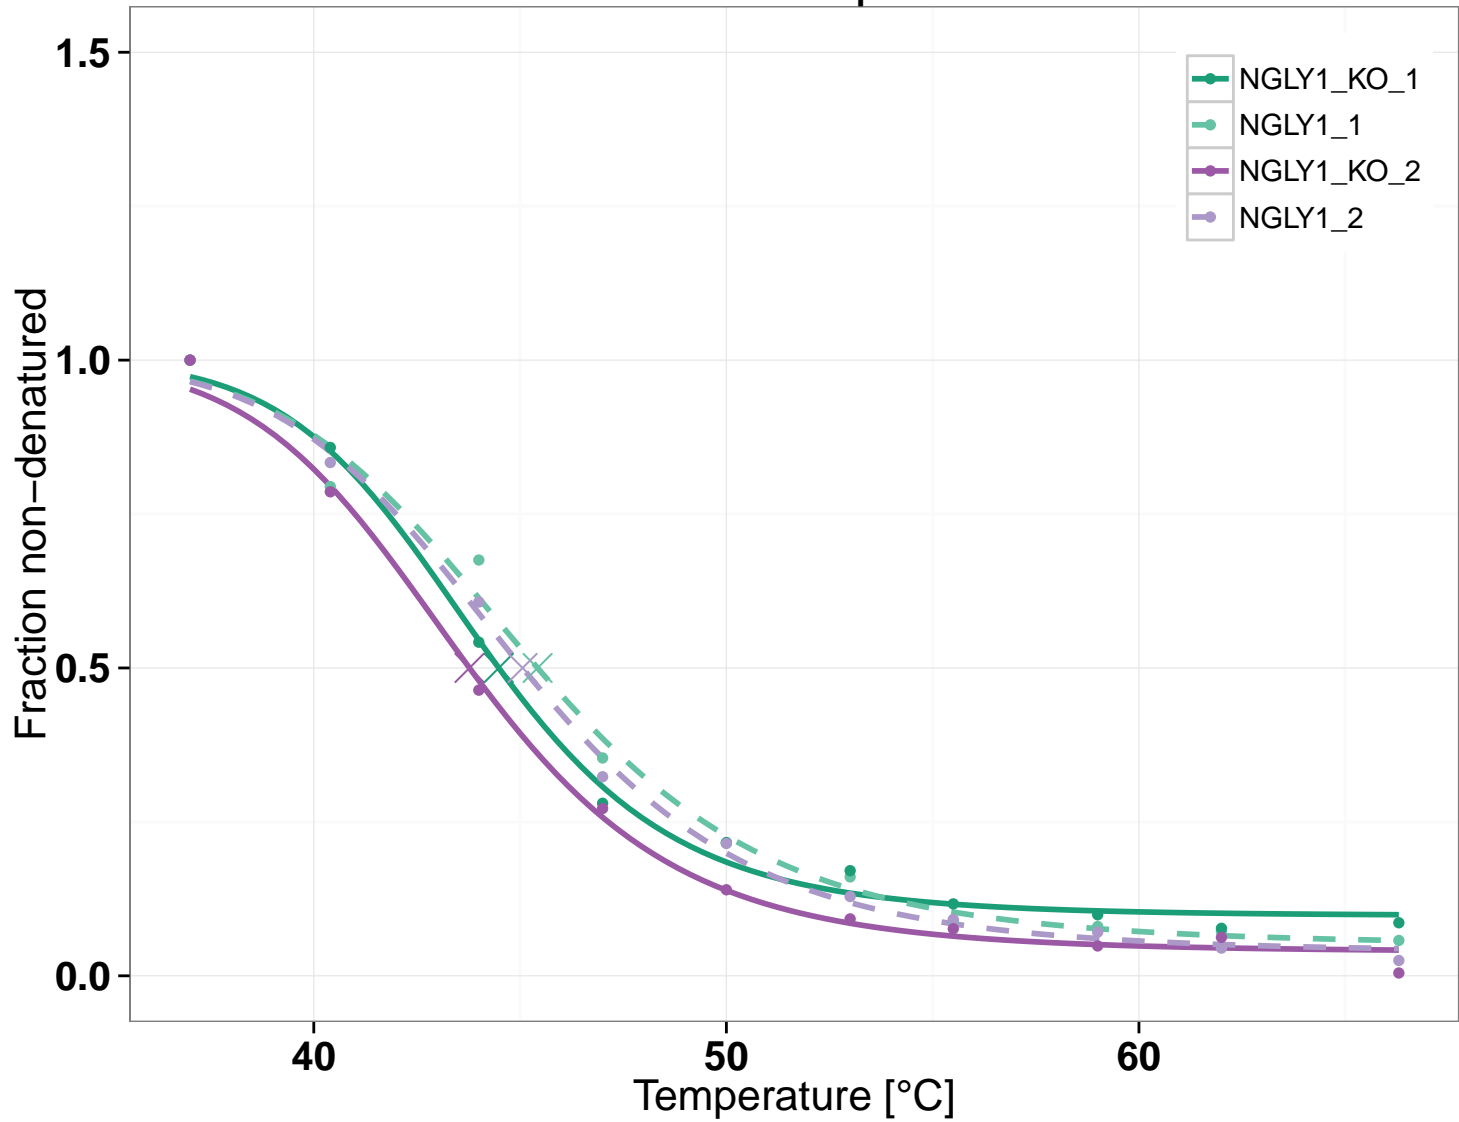

|            | meltPoint | slope  | plateau | R2   |
|------------|-----------|--------|---------|------|
| NGLY1_KO_1 | 44.48     | -0.096 | 0.1     | 1    |
| NGLY1_1    | 45.42     | -0.08  | 0.05    | 0.99 |
| NGLY1_KO_2 | 43.77     | -0.094 | 0.04    | 1    |
| NGLY1_2    | 45.06     | -0.084 | 0.04    | 1    |

Supplement: Supplementary file 4255 [file 1]

IPI00455390.5|YS033\_HUMAN

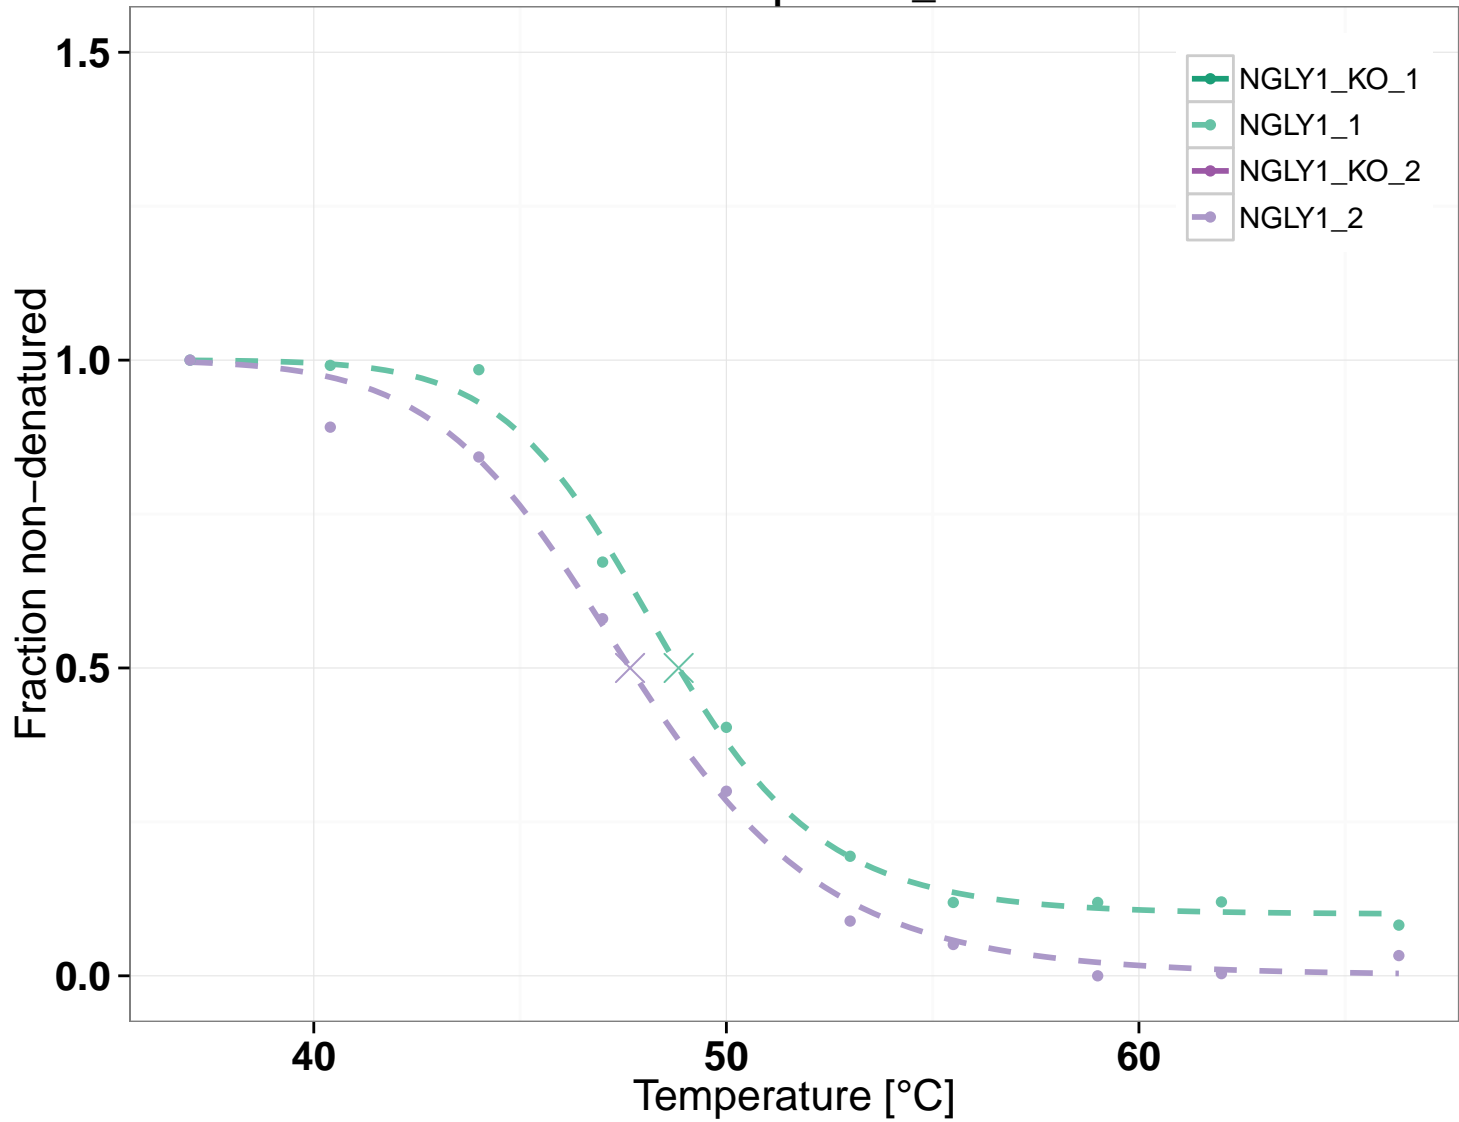

|            | meltPoint | slope | plateau | R2   |
|------------|-----------|-------|---------|------|
| NGLY1_KO_1 | -         | -     | -       | -    |
| NGLY1_1    | 48.84     | -0.12 | 0.1     | 1    |
| NGLY1_KO_2 | -         | -     | -       | -    |
| NGLY1_2    | 47.67     | -0.1  | 0       | 0.99 |

Supplement: Supplementary file 4256 [file 1]

IPI00000015.2|SFRS4

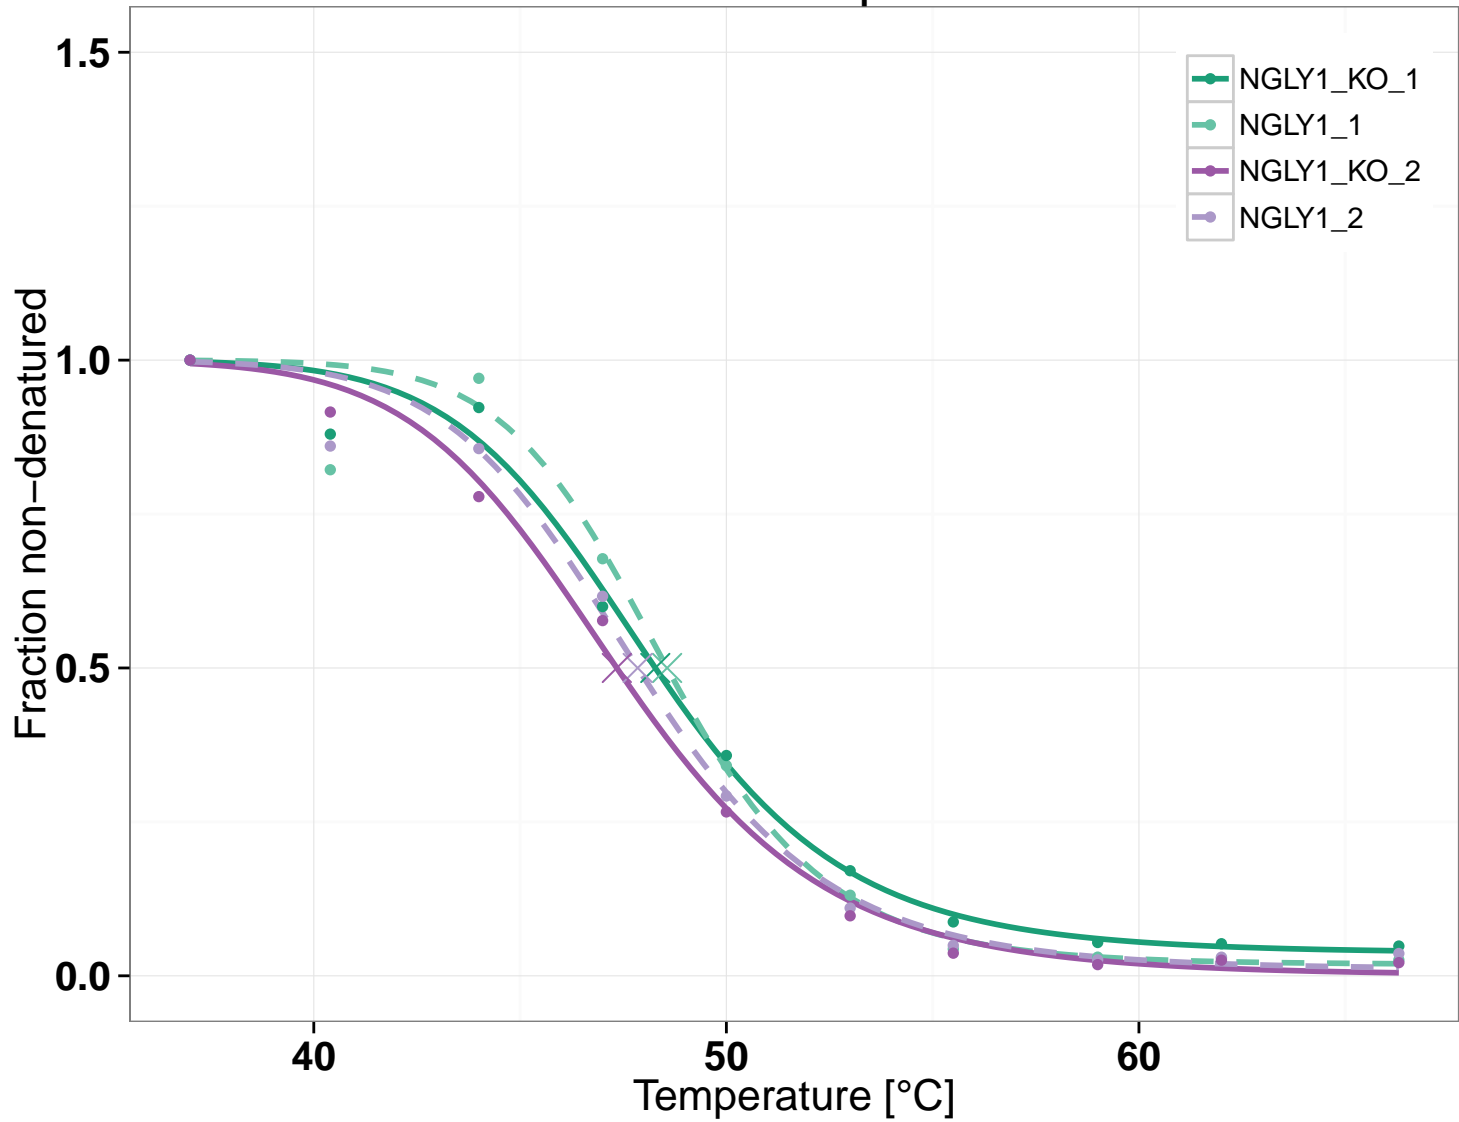

|            | meltPoint | slope  | plateau | R2   |
|------------|-----------|--------|---------|------|
| NGLY1_KO_1 | 48.28     | -0.1   | 0.04    | 0.99 |
| NGLY1_1    | 48.56     | -0.12  | 0.02    | 0.98 |
| NGLY1_KO_2 | 47.34     | -0.099 | 0       | 1    |
| NGLY1_2    | 47.85     | -0.11  | 0.01    | 0.99 |

Supplement: Supplementary file 4257 [file 1]

# IPI00160672.1|MAPKAPK5

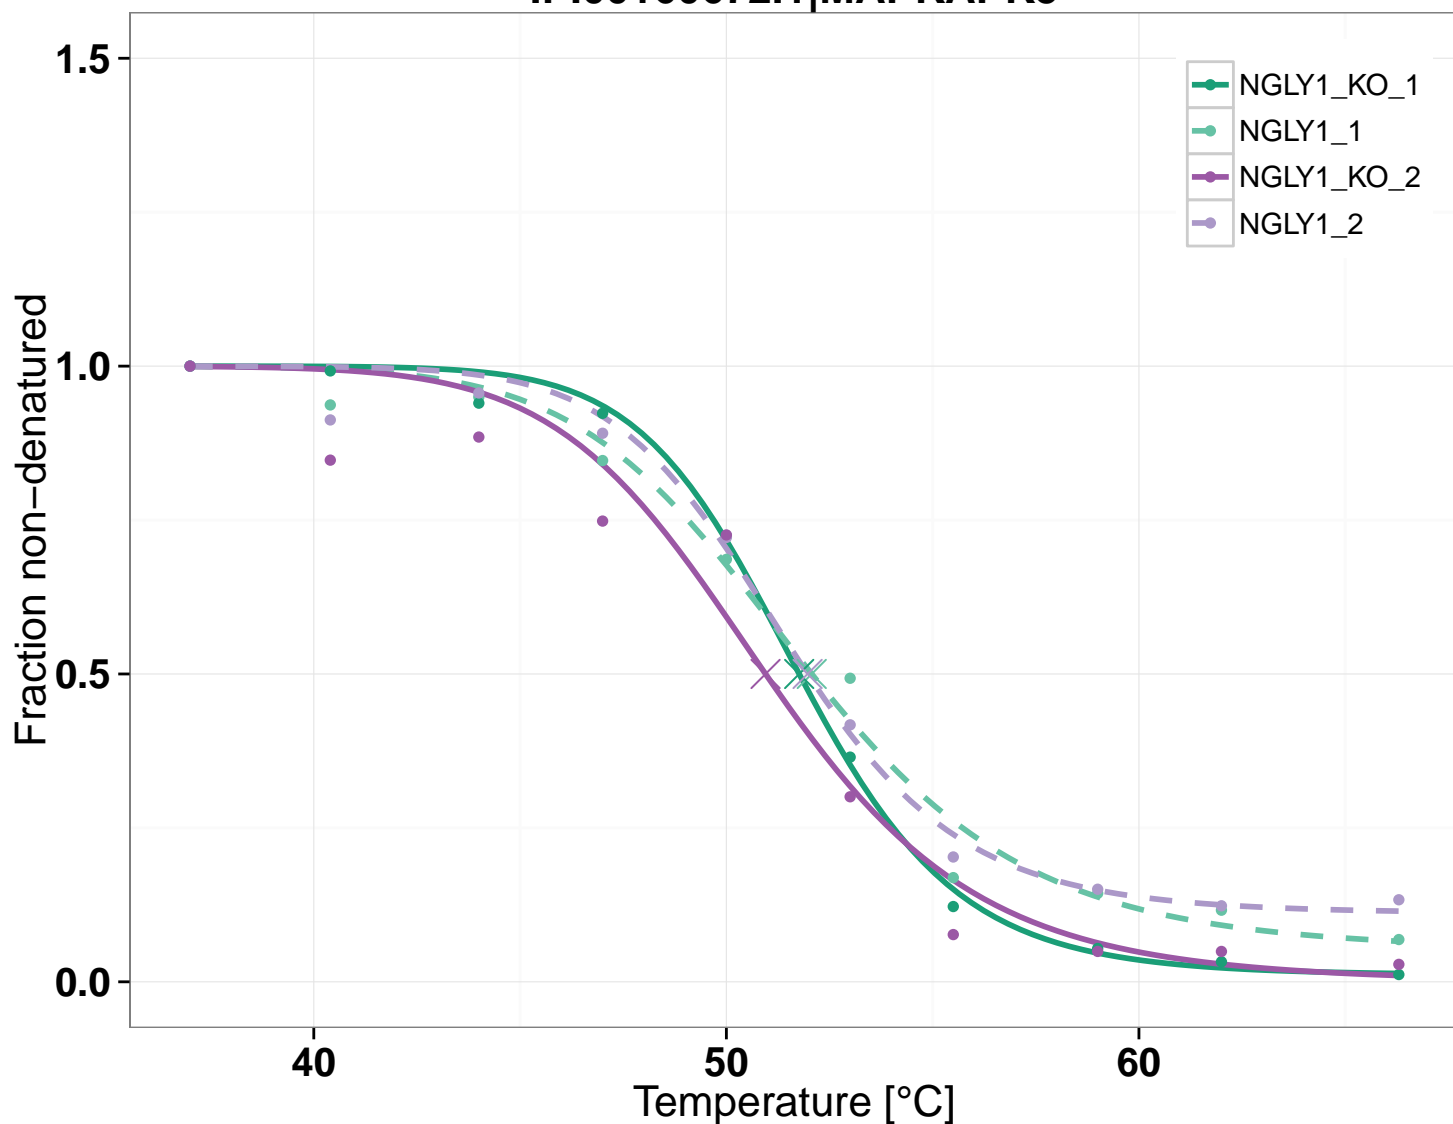

|            | meltPoint | slope  | plateau | R2   |
|------------|-----------|--------|---------|------|
| NGLY1_KO_1 | 51.77     | -0.13  | 0.01    | 1    |
| NGLY1_1    | 52.07     | -0.087 | 0.05    | 0.99 |
| NGLY1_KO_2 | 50.95     | -0.098 | 0       | 0.96 |
| NGLY1_2    | 51.97     | -0.11  | 0.11    | 0.99 |

Supplement: Supplementary file 4258 [file 1]

IPI00100984.4|HEATR3

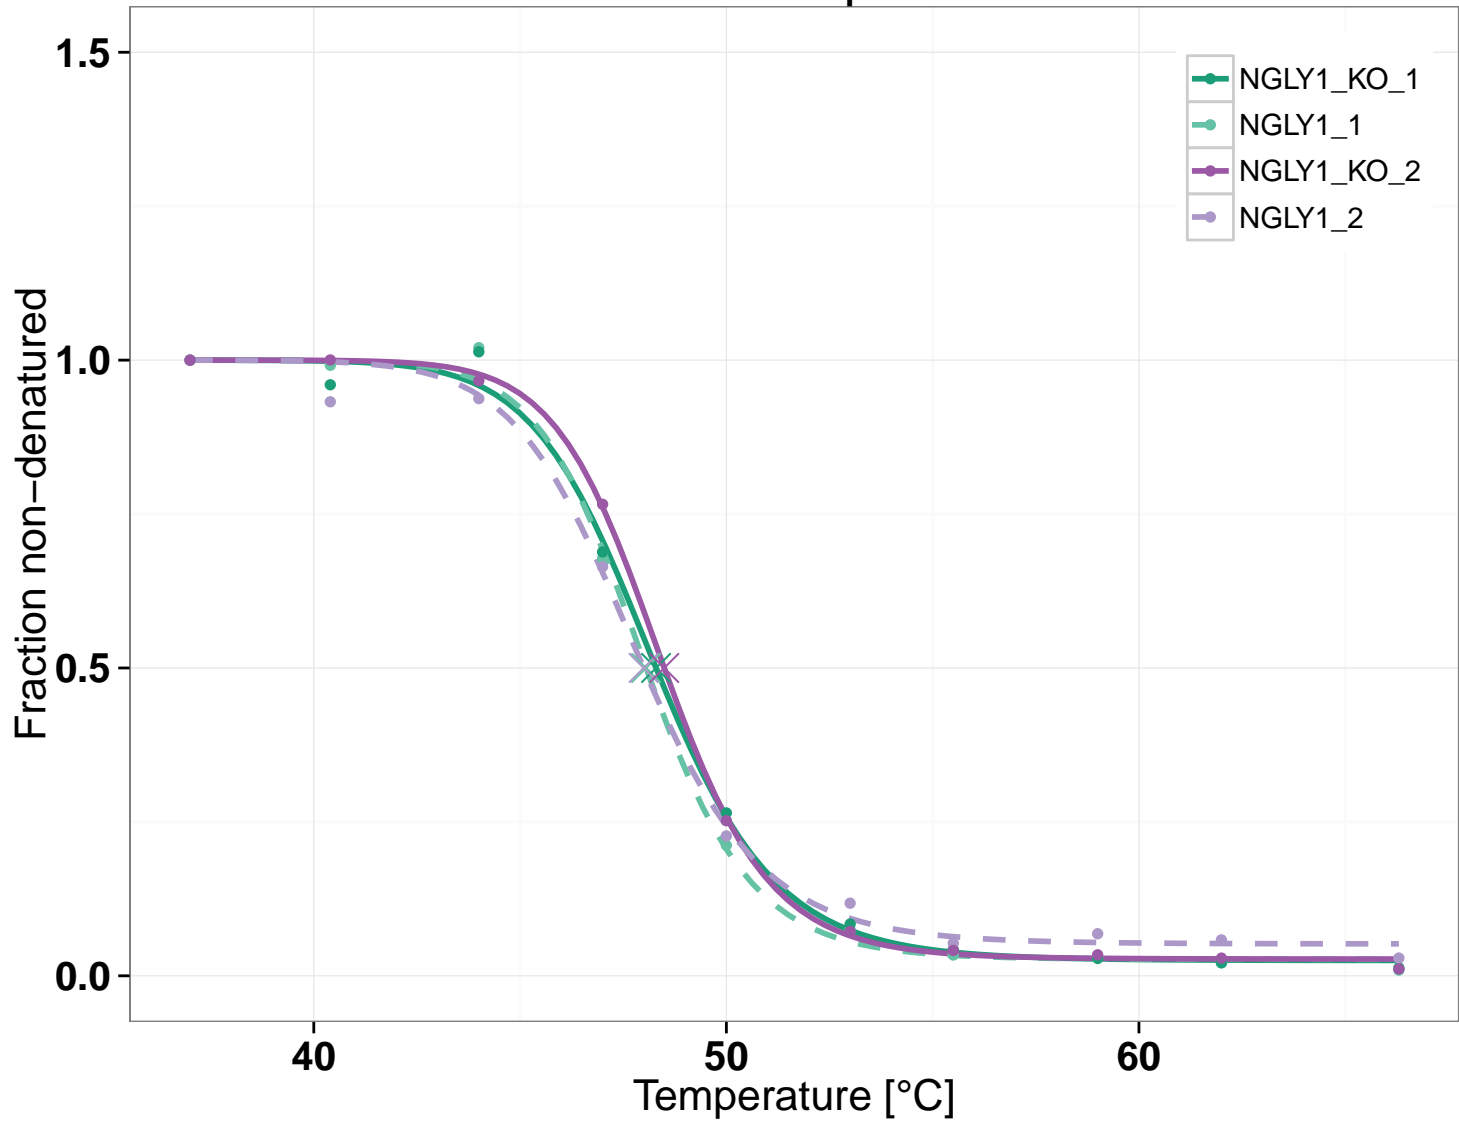

|            | meltPoint | slope | plateau | R2 |
|------------|-----------|-------|---------|----|
| NGLY1_KO_1 | 48.3      | -0.17 | 0.02    | 1  |
| NGLY1_1    | 48.05     | -0.19 | 0.03    | 1  |
| NGLY1_KO_2 | 48.49     | -0.19 | 0.03    | 1  |
| NGLY1_2    | 48        | -0.16 | 0.05    | 1  |

Supplement: Supplementary file 4259 [file 1]

IPI00335946.4|FAM120B

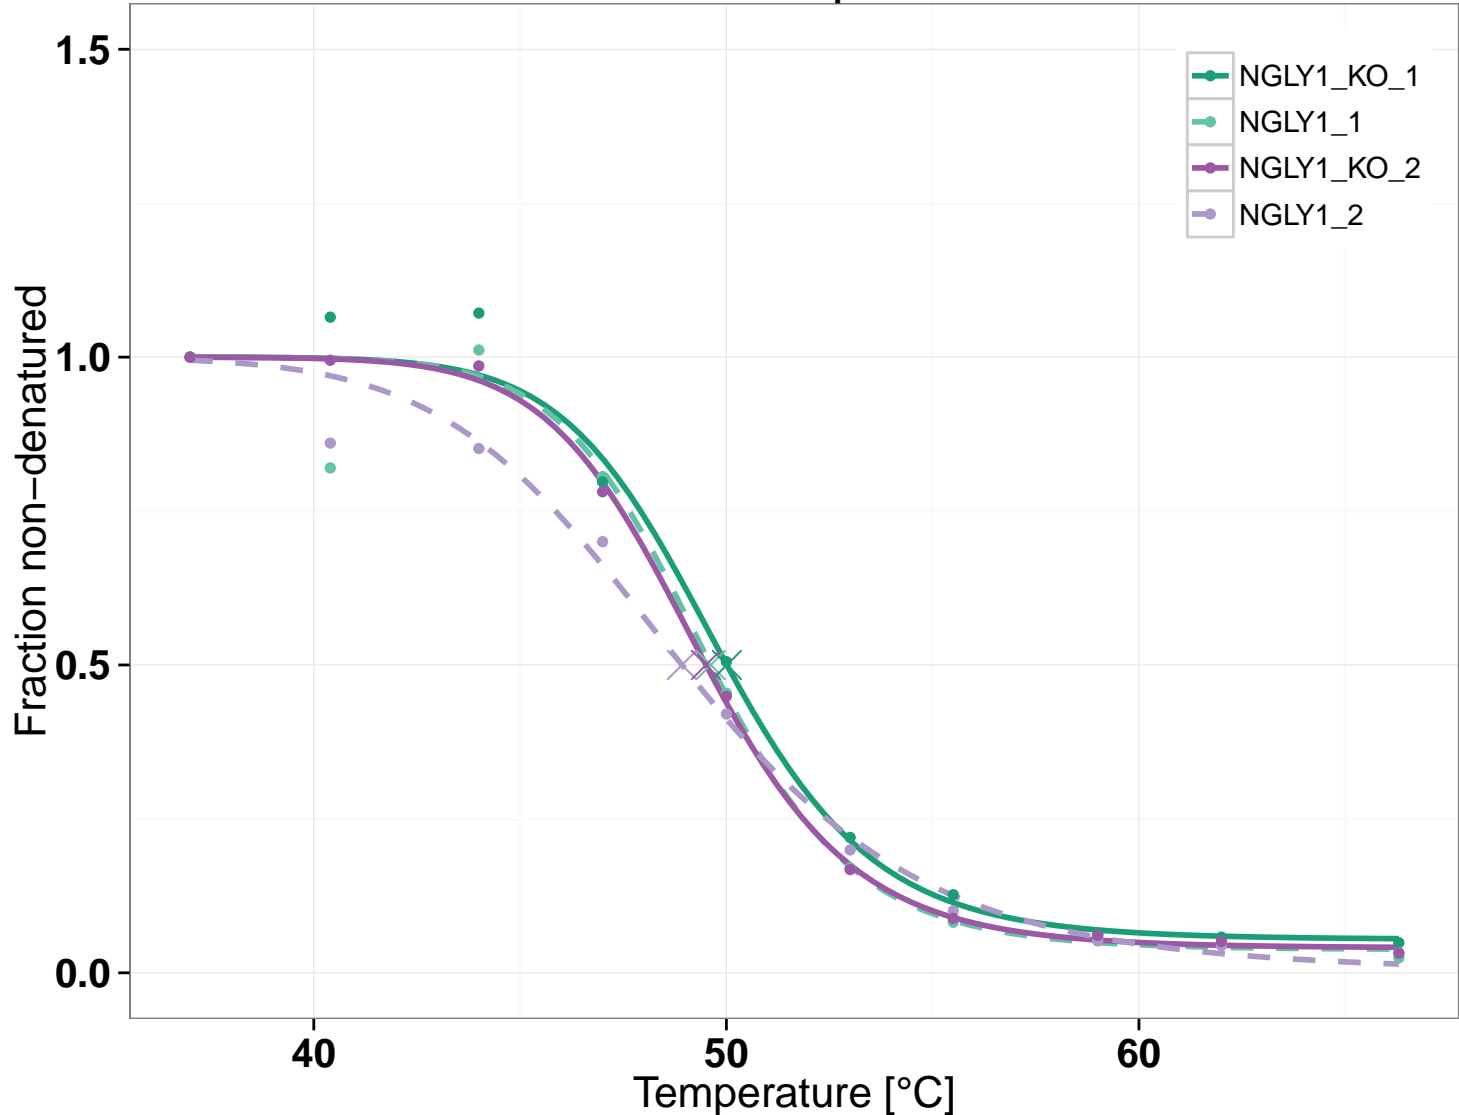

|            | meltPoint | slope  | plateau | R2   |
|------------|-----------|--------|---------|------|
| NGLY1_KO_1 | 50.01     | -0.13  | 0.05    | 0.99 |
| NGLY1_1    | 49.62     | -0.13  | 0.04    | 0.98 |
| NGLY1_KO_2 | 49.51     | -0.13  | 0.04    | 1    |
| NGLY1_2    | 48.92     | -0.085 | 0       | 0.99 |

Supplement: Supplementary file 4260 [file 1]

IPI00182540.5|CTNND1

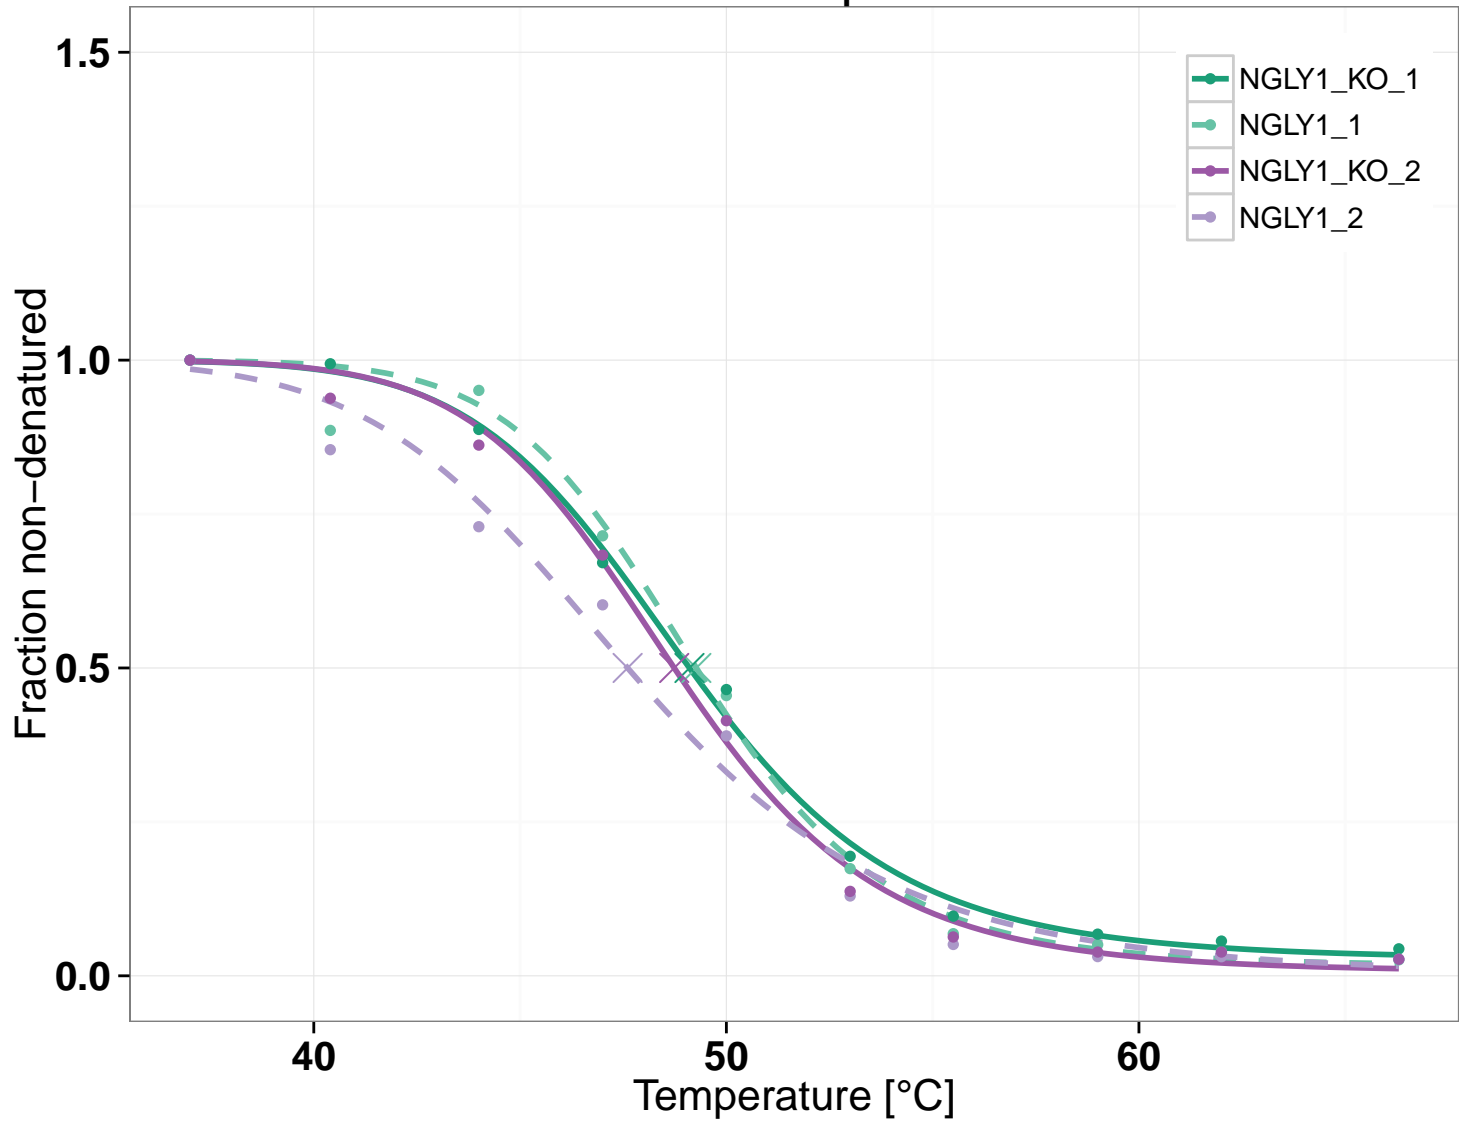

|            | meltPoint | slope  | plateau | R2   |
|------------|-----------|--------|---------|------|
| NGLY1_KO_1 | 49.11     | -0.094 | 0.03    | 1    |
| NGLY1_1    | 49.27     | -0.11  | 0.02    | 0.99 |
| NGLY1_KO_2 | 48.74     | -0.1   | 0.01    | 1    |
| NGLY1_2    | 47.61     | -0.079 | 0       | 0.98 |

Supplement: Supplementary file 4261 [file 1]

# IPI00029048.2|TTLL12

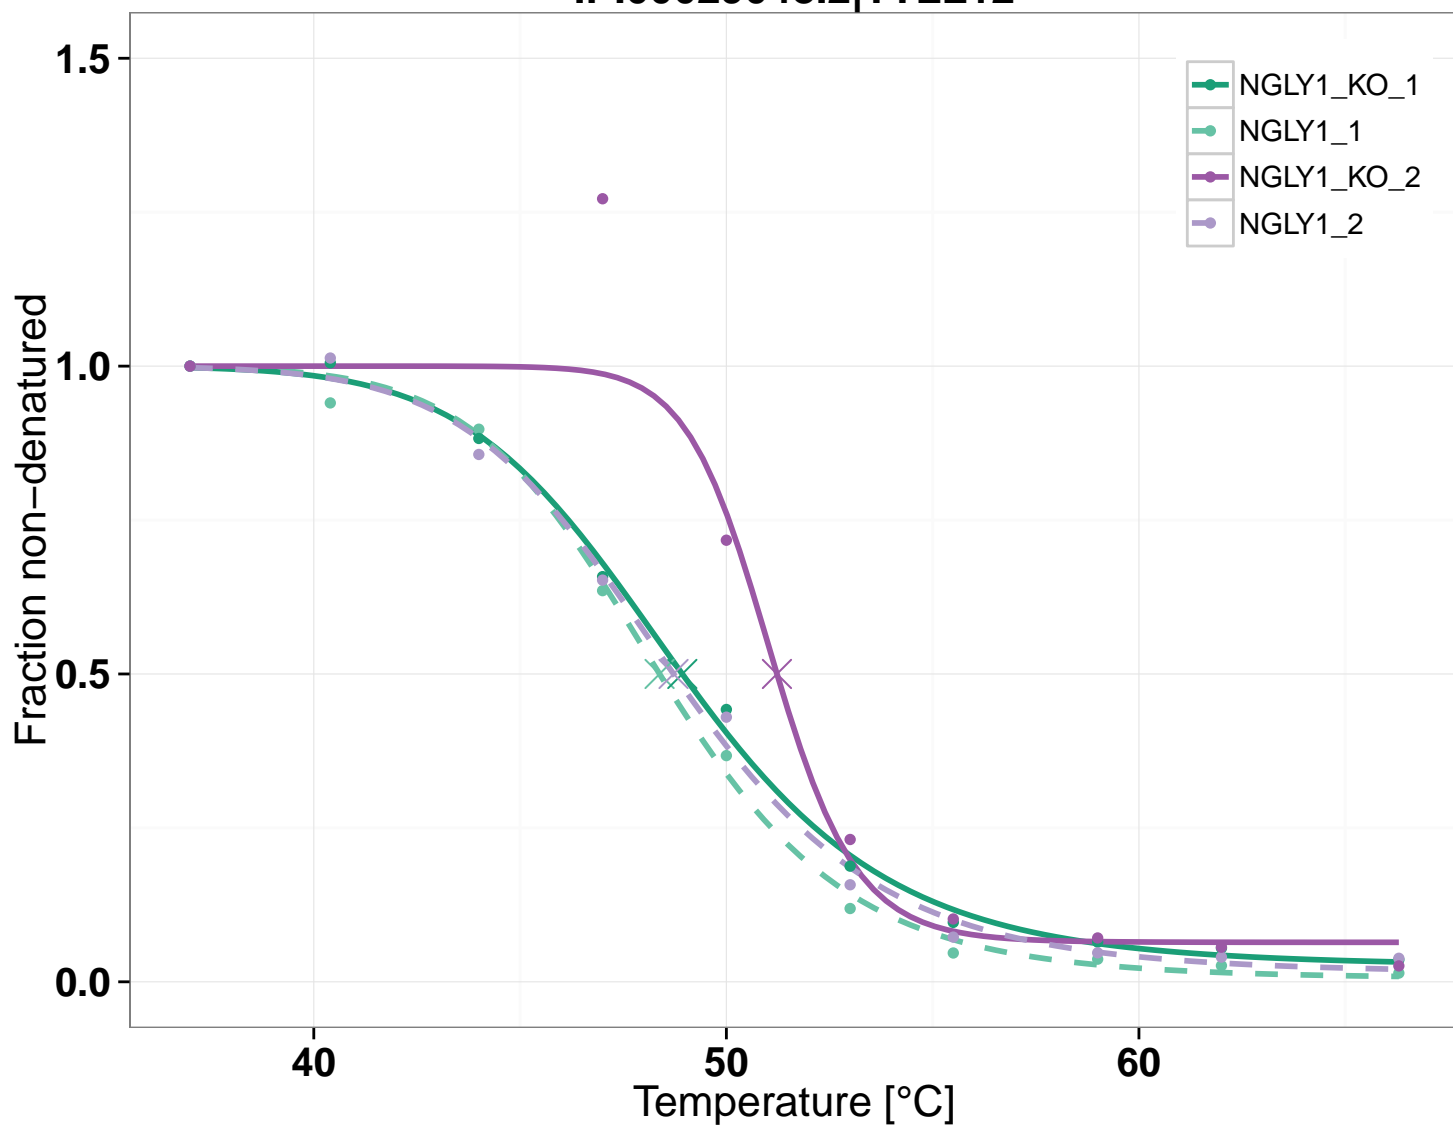

|            | meltPoint | slope  | plateau | R2   |
|------------|-----------|--------|---------|------|
| NGLY1_KO_1 | 48.93     | -0.095 | 0.03    | 1    |
| NGLY1_1    | 48.38     | -0.11  | 0.01    | 1    |
| NGLY1_KO_2 | 51.23     | -0.23  | 0.06    | 0.75 |
| NGLY1_2    | 48.72     | -0.097 | 0.01    | 1    |

Supplement: Supplementary file 4262 [file 1]

# IPI00013968.1|COX7C

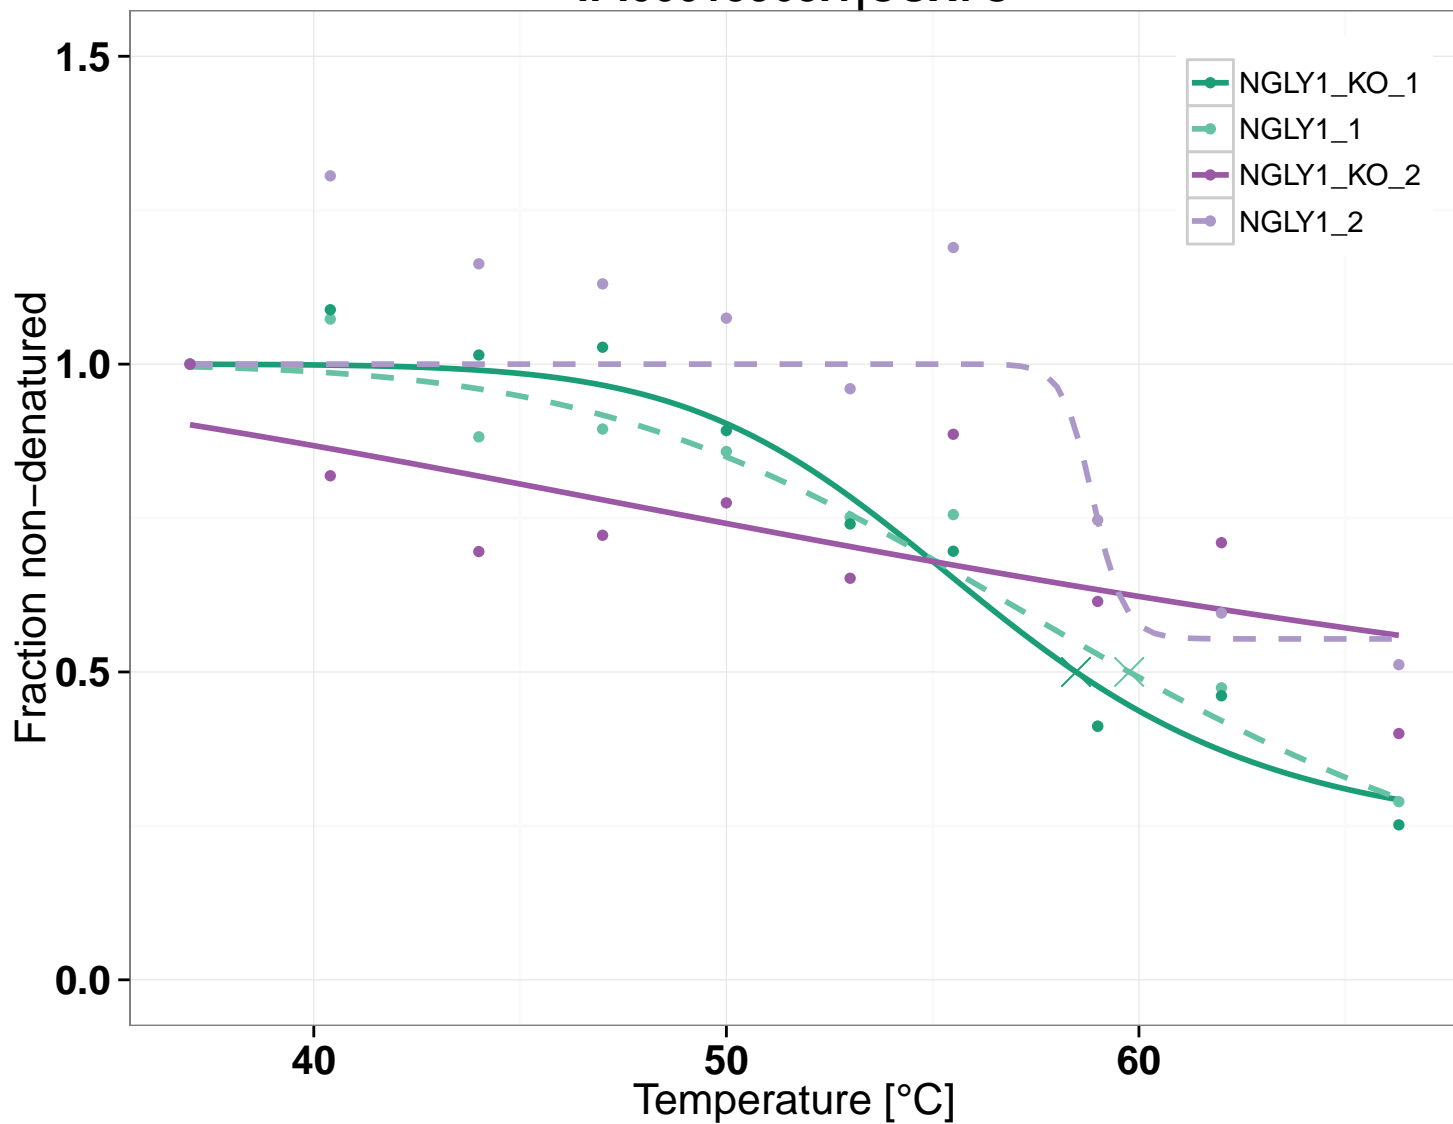

|            | meltPoint | slope  | plateau | R2   |
|------------|-----------|--------|---------|------|
| NGLY1_KO_1 | 58.48     | -0.055 | 0.23    | 0.96 |
| NGLY1_1    | 59.77     | -0.039 | 0       | 0.94 |
| NGLY1_KO_2 | -         | -0.013 | 0       | 0.51 |
| NGLY1_2    | -         | -0.3   | 0.55    | 0.71 |

Supplement: Supplementary file 4263 [file 1]

IPI00154588.3|SPPL2A

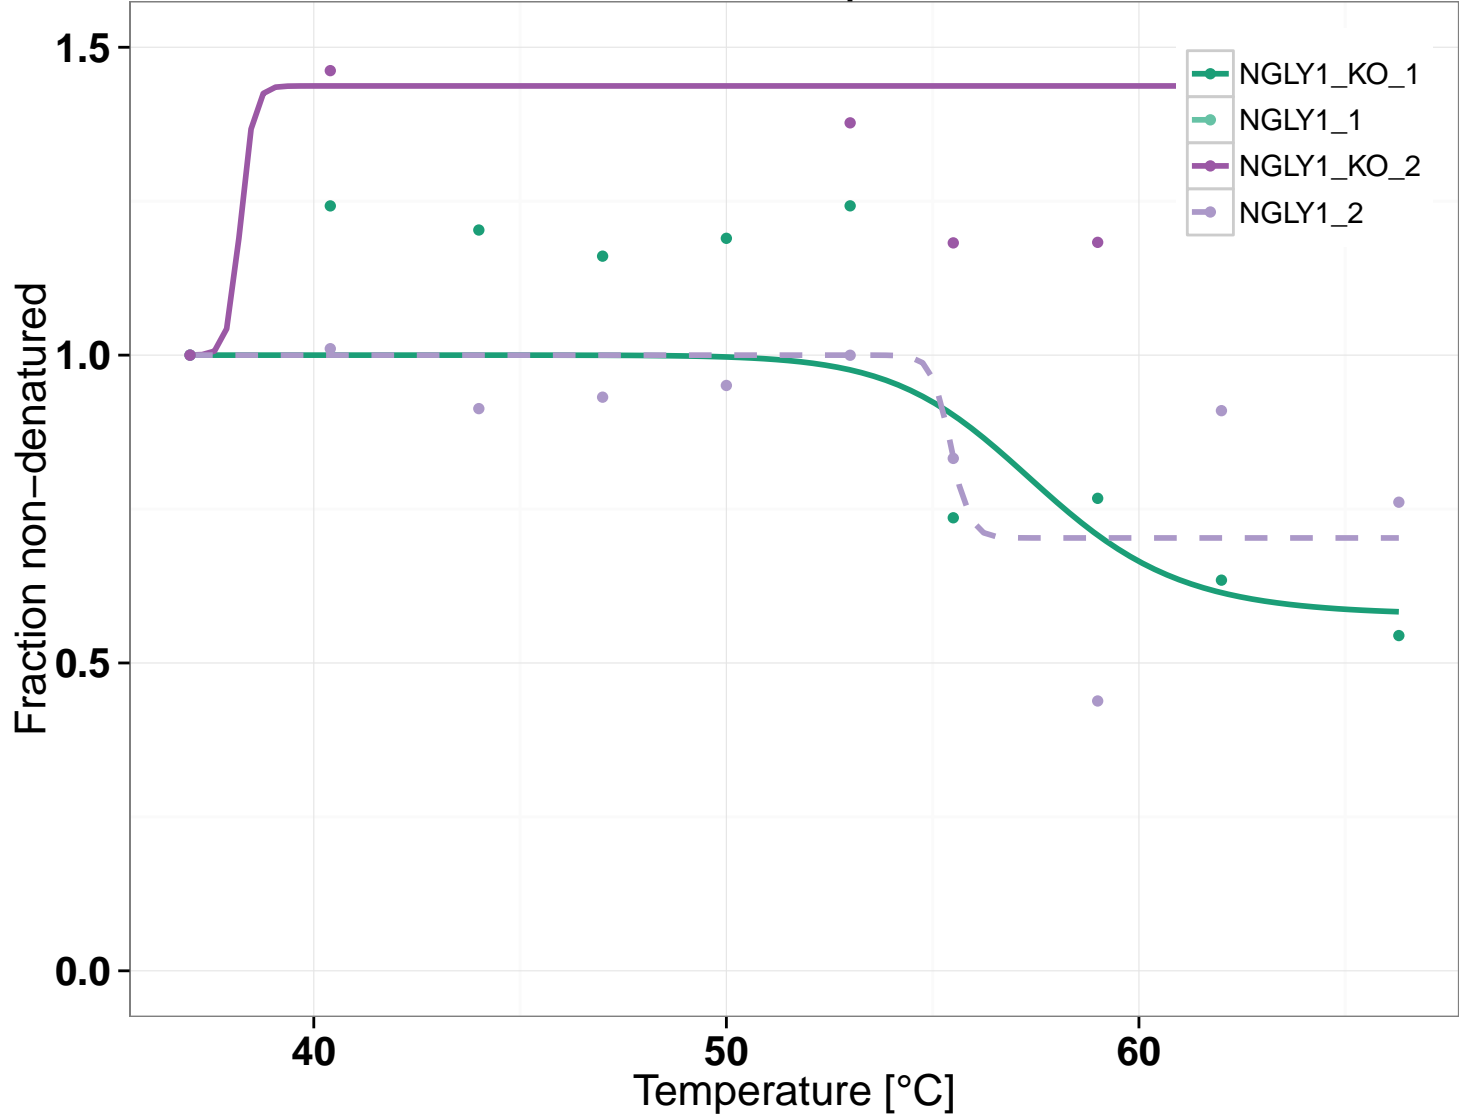

|            | meltPoint | slope | plateau | R2   |
|------------|-----------|-------|---------|------|
| NGLY1_KO_1 | —         | -0.06 | 0.58    | 0.61 |
| NGLY1_1    | —         | —     | —       | —    |
| NGLY1_KO_2 | —         | 0.71  | 1.44    | 0.41 |
| NGLY1_2    | —         | -0.33 | 0.7     | 0.51 |

Supplement: Supplementary file 4264 [file 1]

IPI00151360.2|GTPBP2

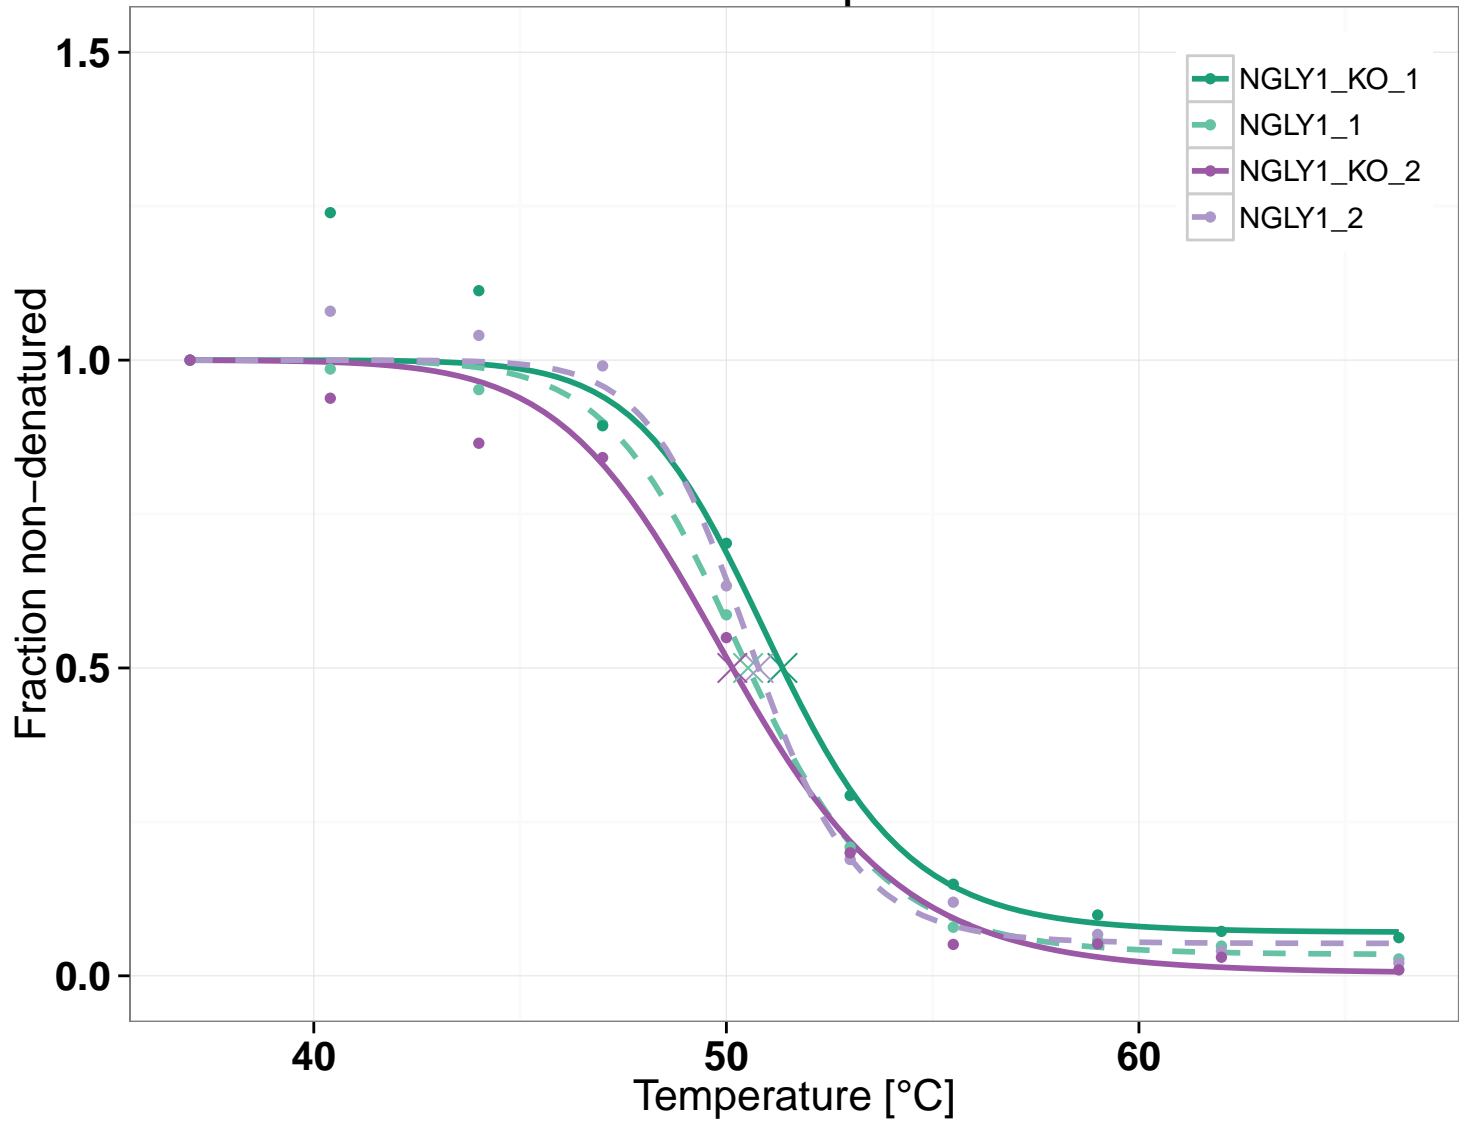

|            | meltPoint | slope | plateau | R2   |
|------------|-----------|-------|---------|------|
| NGLY1_KO_1 | 51.36     | -0.14 | 0.07    | 0.96 |
| NGLY1_1    | 50.53     | -0.14 | 0.03    | 1    |
| NGLY1_KO_2 | 50.15     | -0.12 | 0       | 0.99 |
| NGLY1_2    | 50.78     | -0.19 | 0.05    | 0.99 |

Supplement: Supplementary file 4265 [file 1]

IPI00791778.1|C12ORF41

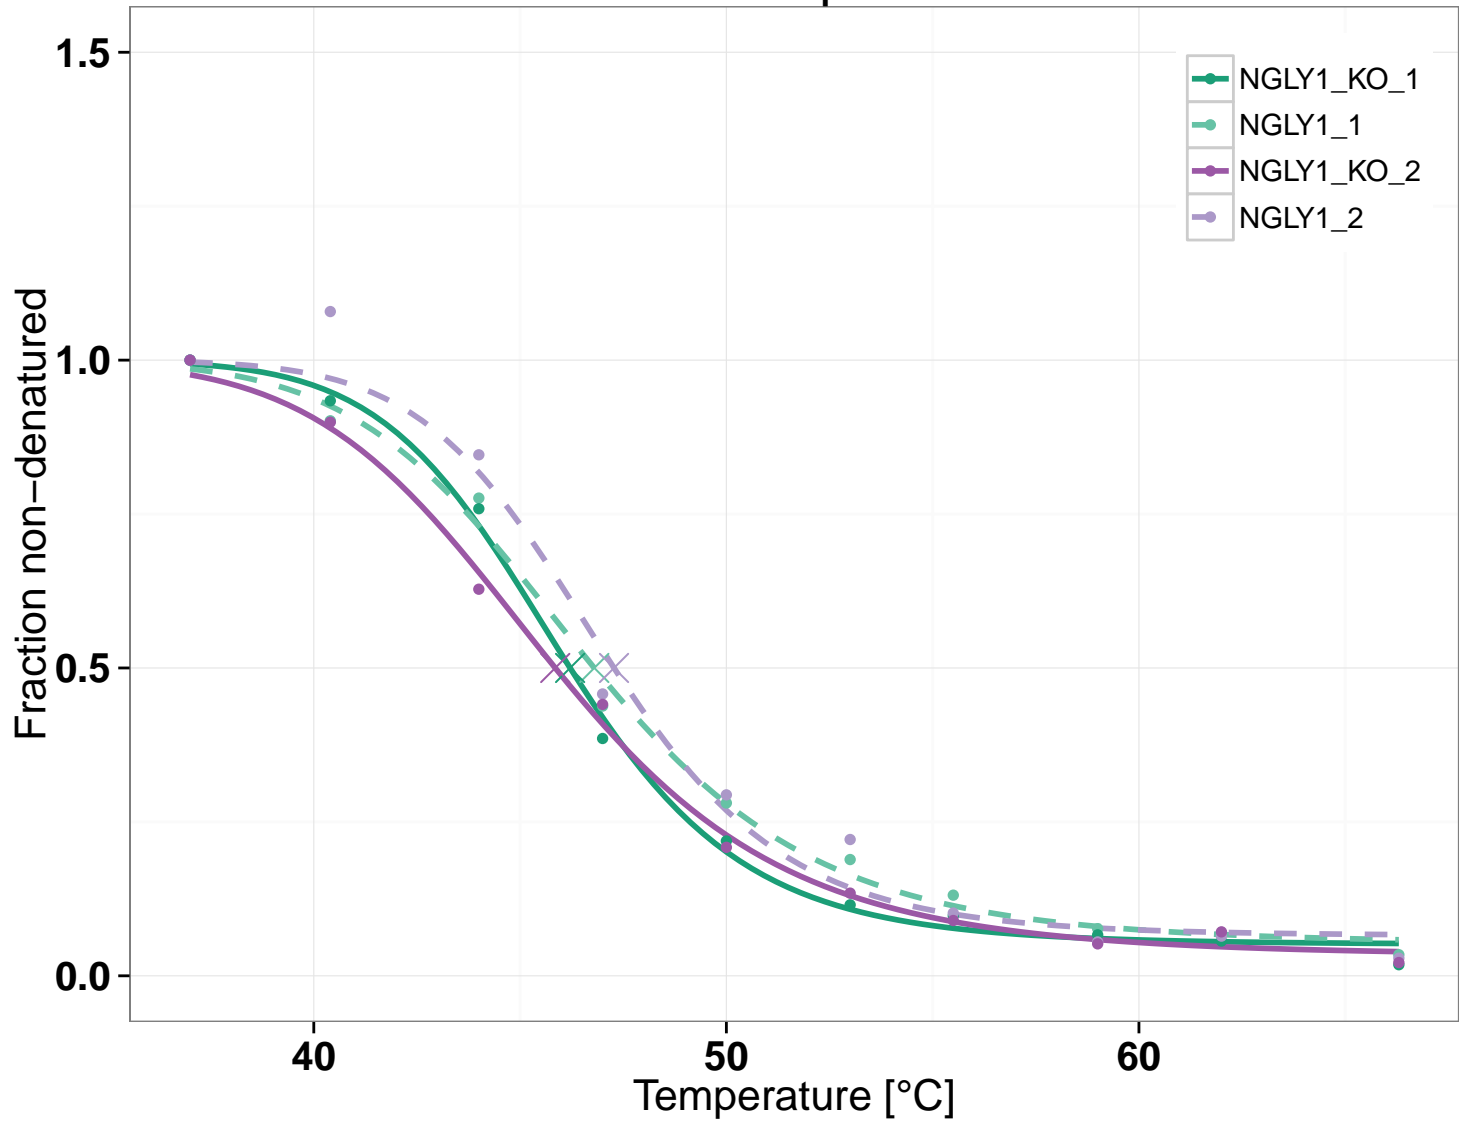

|            | meltPoint | slope  | plateau | R2   |
|------------|-----------|--------|---------|------|
| NGLY1_KO_1 | 46.21     | -0.11  | 0.05    | 1    |
| NGLY1_1    | 46.8      | -0.085 | 0.05    | 0.99 |
| NGLY1_KO_2 | 45.85     | -0.085 | 0.03    | 1    |
| NGLY1_2    | 47.28     | -0.11  | 0.06    | 0.98 |

Supplement: Supplementary file 4266 [file 1]

IPI00332082.1|ATXN7

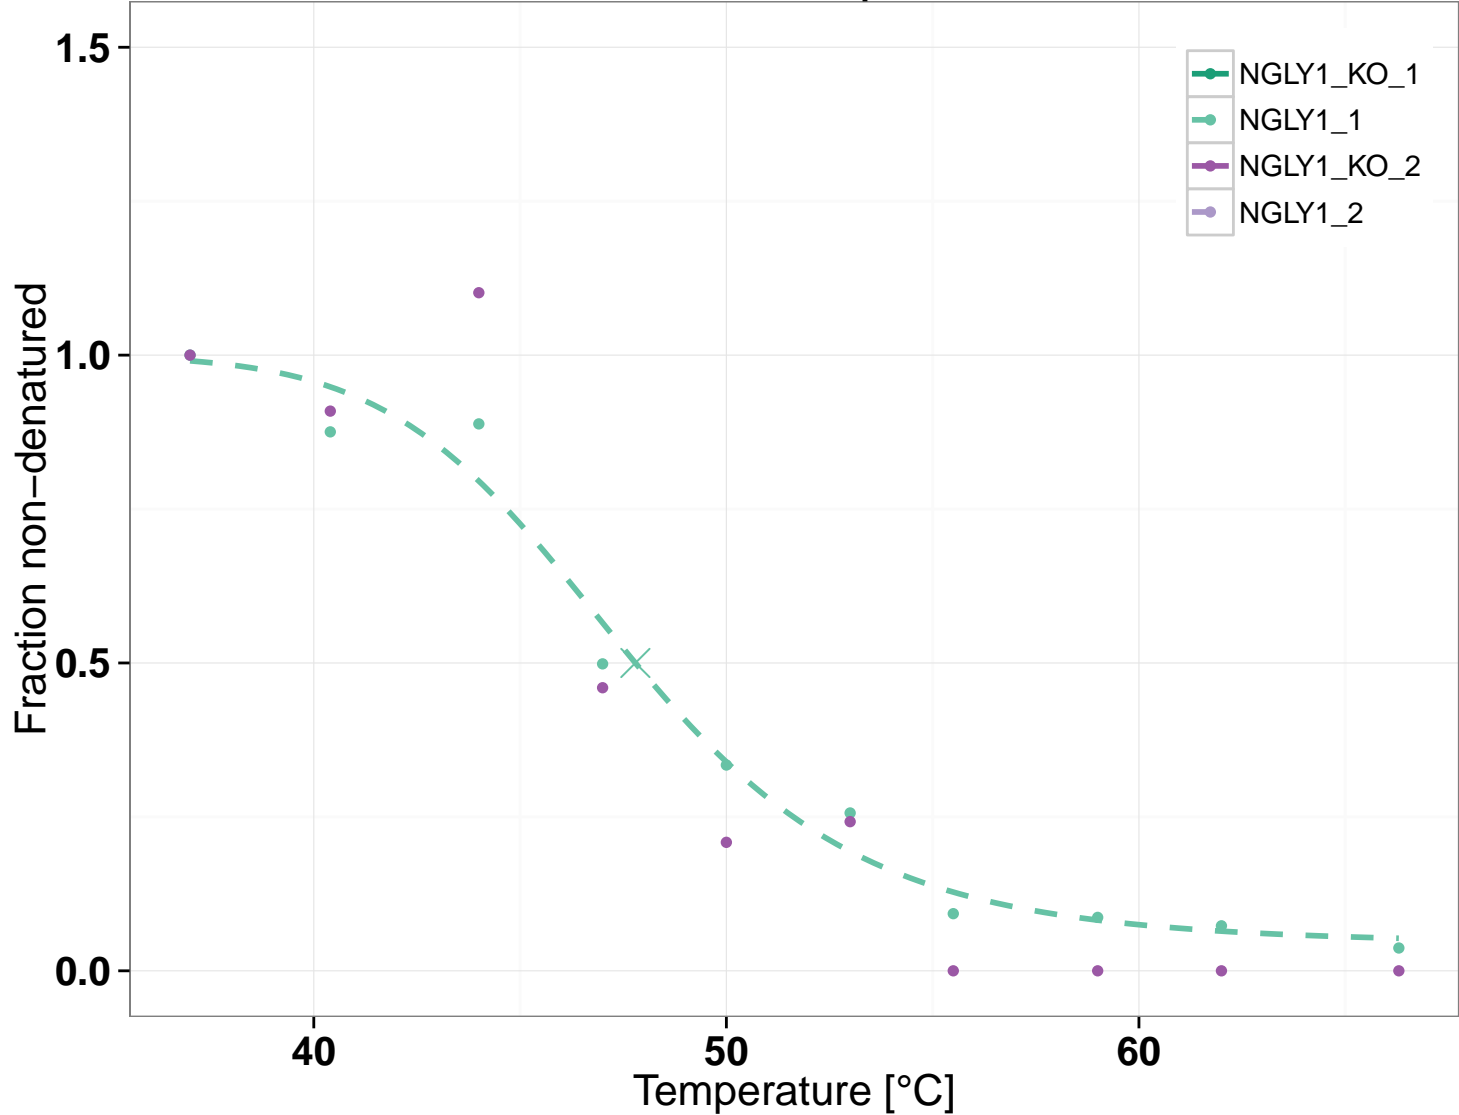

|            | meltPoint | slope  | plateau | R2   |
|------------|-----------|--------|---------|------|
| NGLY1_KO_1 | -         | -      | -       | -    |
| NGLY1_1    | 47.79     | -0.083 | 0.04    | 0.98 |
| NGLY1_KO_2 | -         | -      | -       | -    |
| NGLY1_2    | -         | -      | -       | -    |

Supplement: Supplementary file 4267 [file 1]

IPI00143753.6|SR140

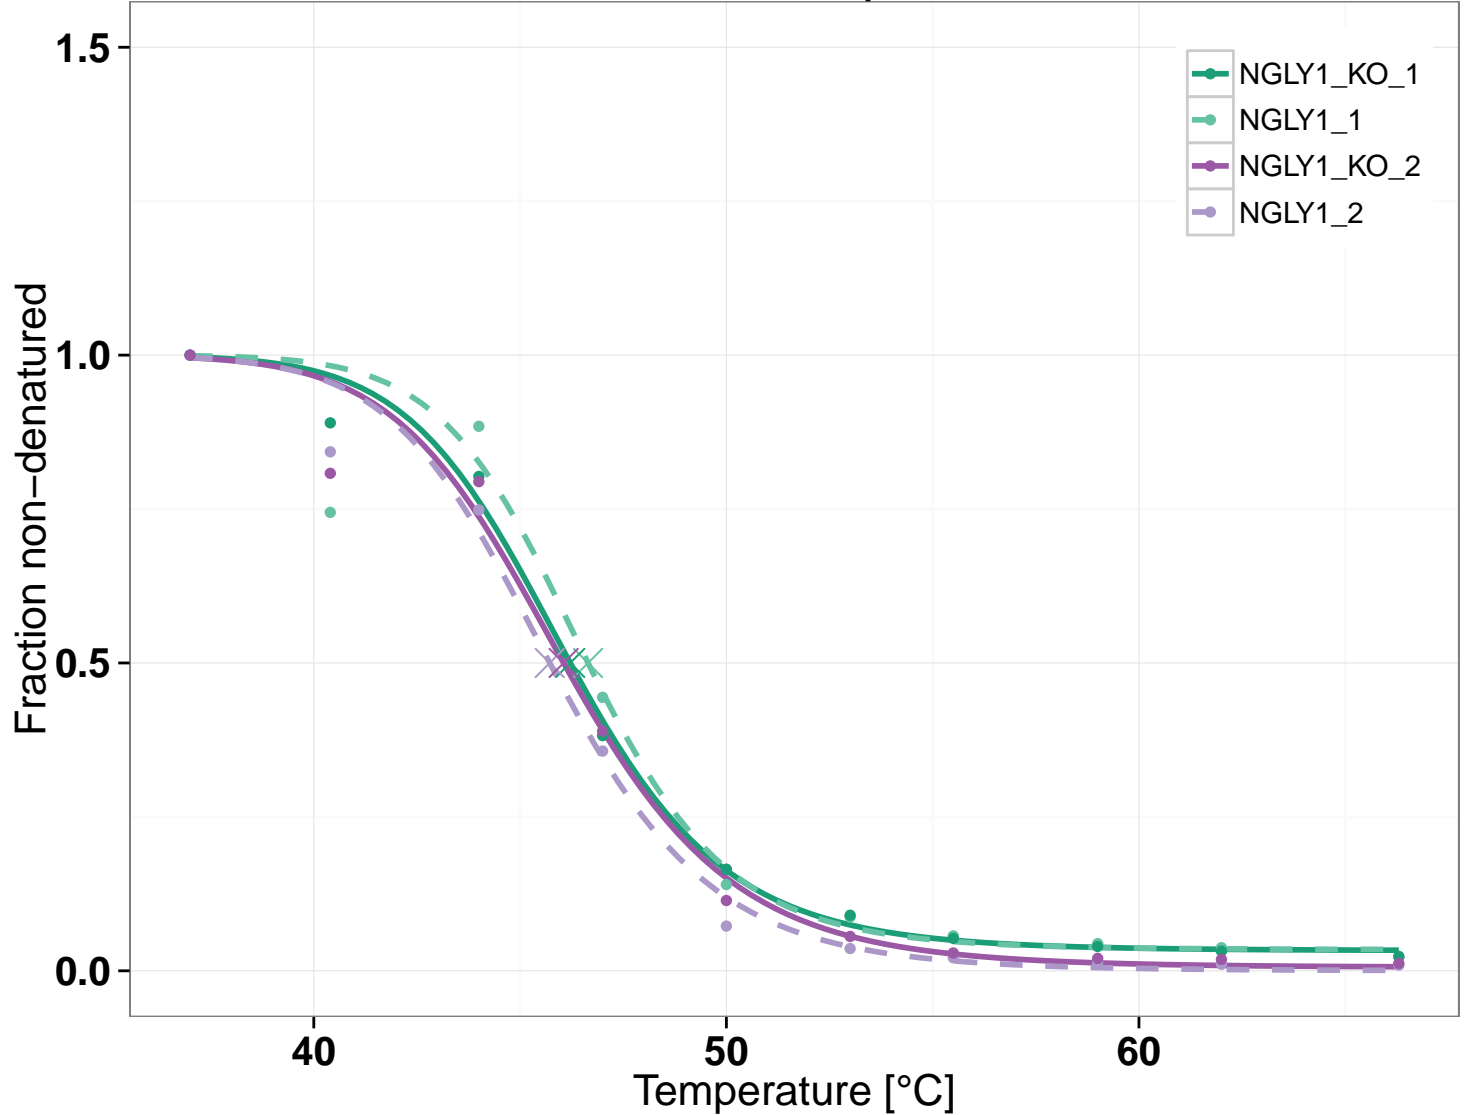

|            | meltPoint | slope | plateau | R2   |
|------------|-----------|-------|---------|------|
| NGLY1_KO_1 | 46.22     | -0.13 | 0.03    | 0.99 |
| NGLY1_1    | 46.65     | -0.14 | 0.03    | 0.96 |
| NGLY1_KO_2 | 46.06     | -0.12 | 0.01    | 0.98 |
| NGLY1_2    | 45.72     | -0.13 | 0       | 0.99 |

Supplement: Supplementary file 4268 [file 1]

# IPI00215917.3|ARF3

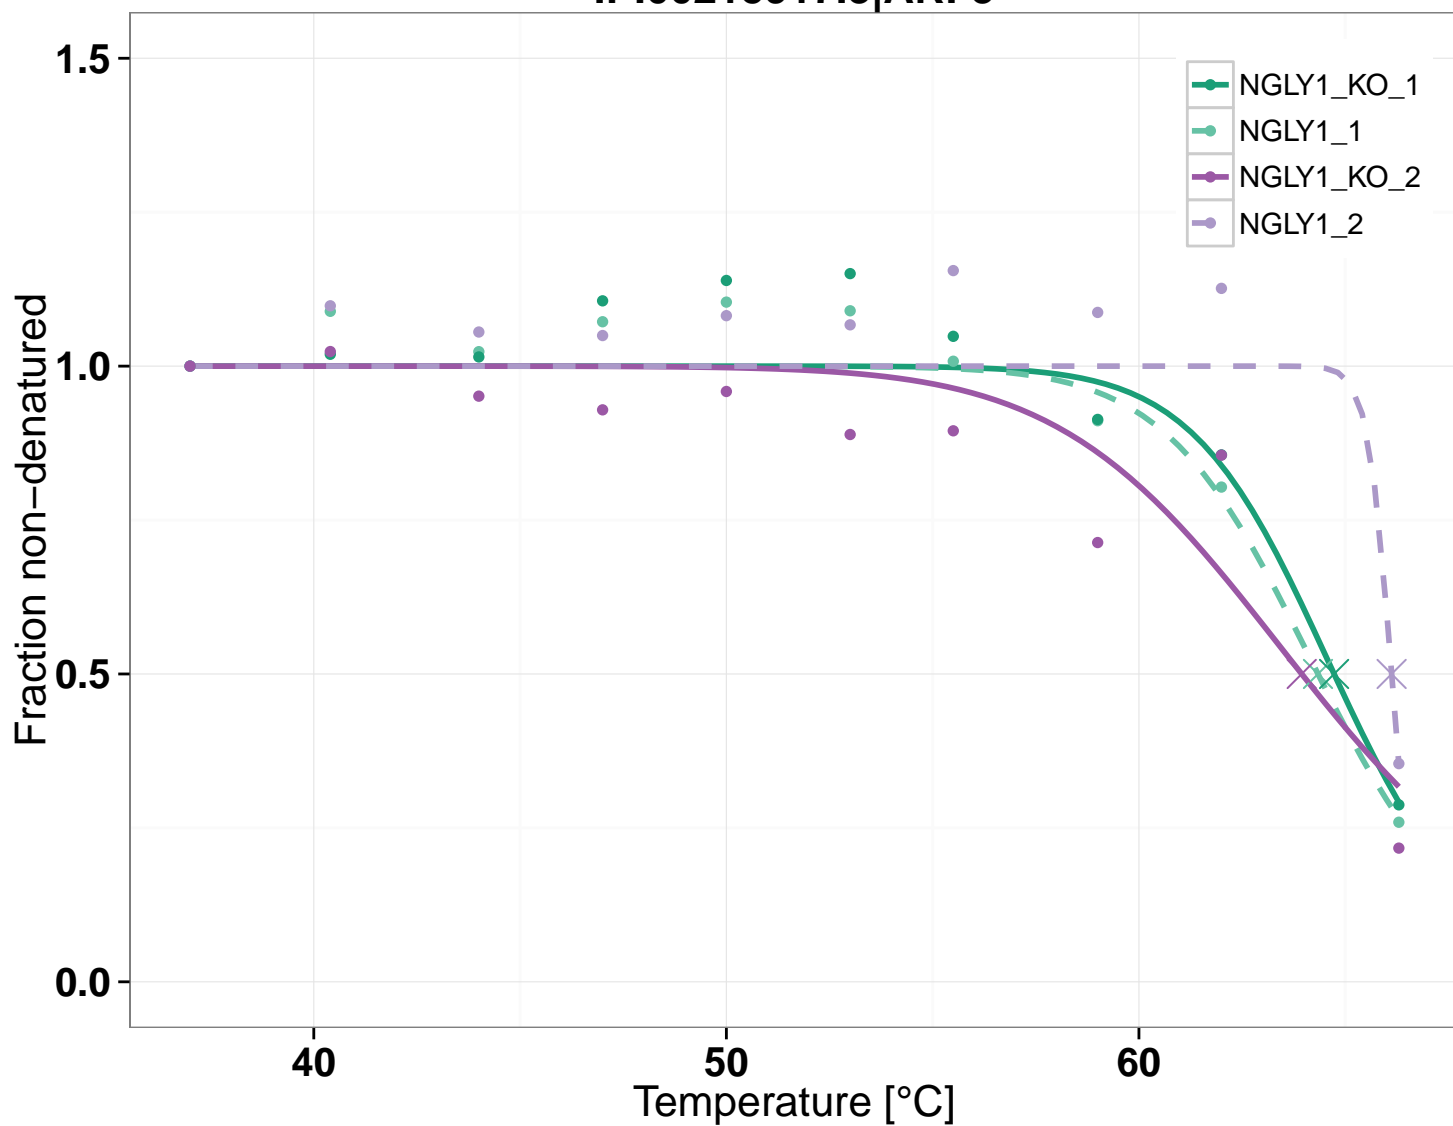

|            | meltPoint | slope  | plateau | R2   |
|------------|-----------|--------|---------|------|
| NGLY1_KO_1 | 64.73     | -0.15  | 0       | 0.89 |
| NGLY1_1    | 64.34     | -0.13  | 0       | 0.94 |
| NGLY1_KO_2 | 63.95     | -0.085 | 0       | 0.82 |
| NGLY1_2    | 66.12     | -0.86  | 0       | 0.85 |

Supplement: Supplementary file 4269 [file 1]

# IPI00646051.3|ABHD3

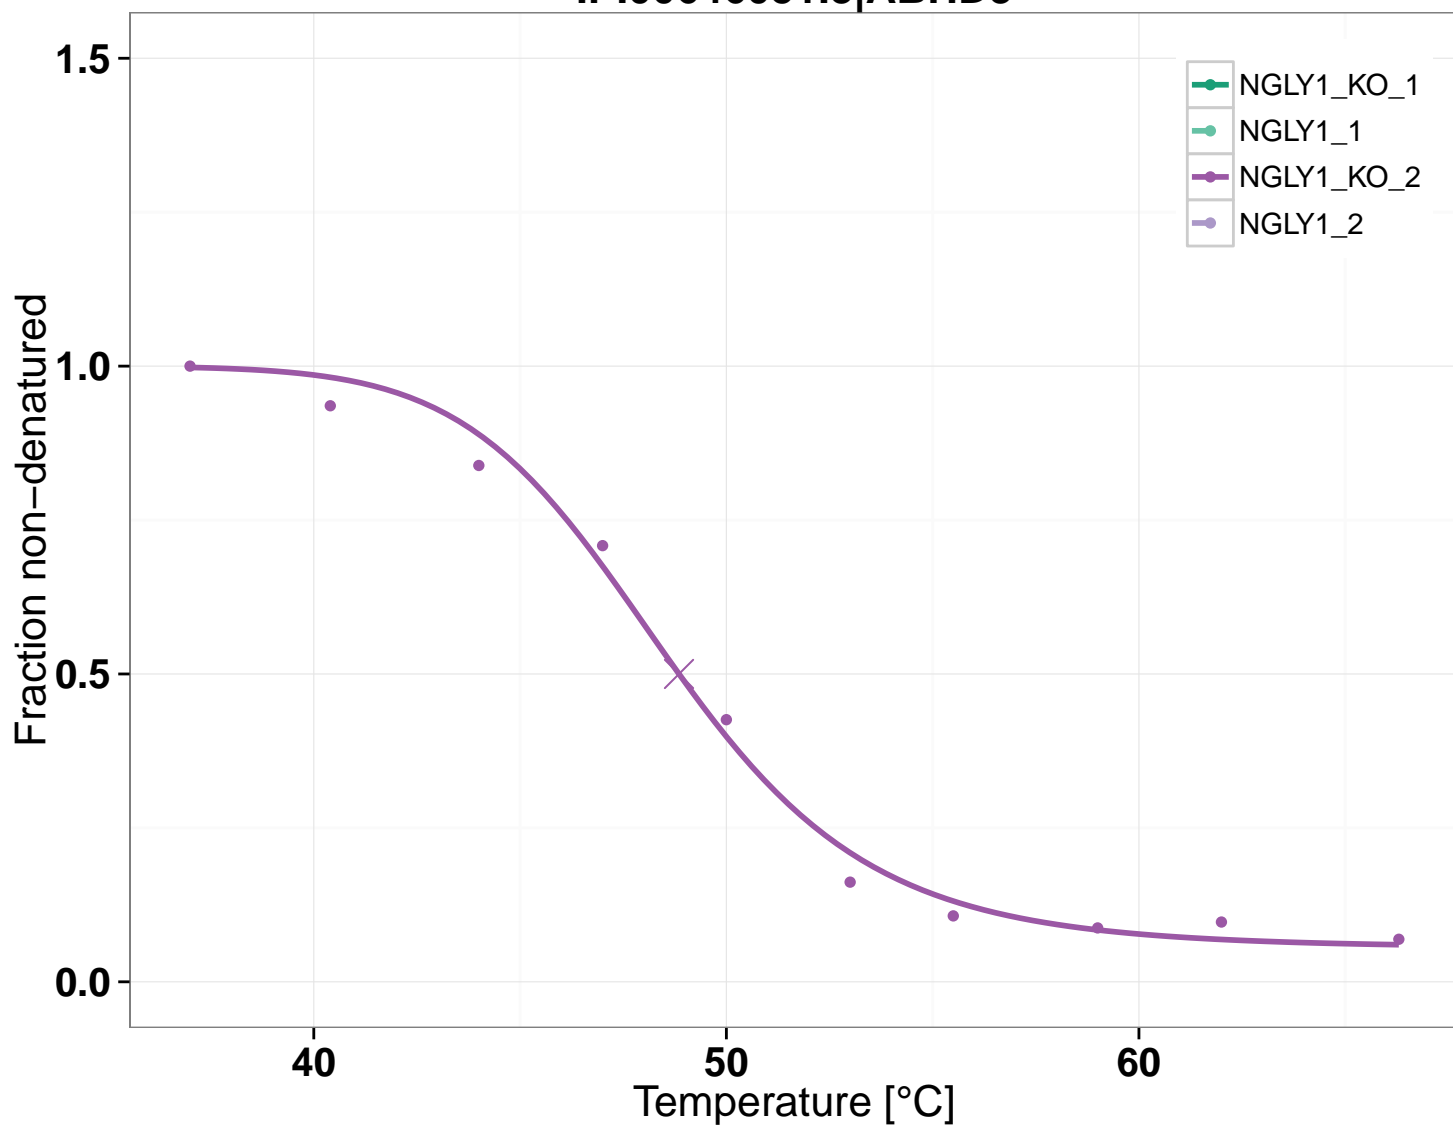

|            | meltPoint | slope  | plateau | R2   |
|------------|-----------|--------|---------|------|
| NGLY1_KO_1 | —         | —      | —       | —    |
| NGLY1_1    | —         | —      | —       | —    |
| NGLY1_KO_2 | 48.85     | -0.096 | 0.06    | 0.99 |
| NGLY1_2    | —         | —      | —       | —    |

Supplement: Supplementary file 4270 [file 1]

IPI00010951.2|EPPK1

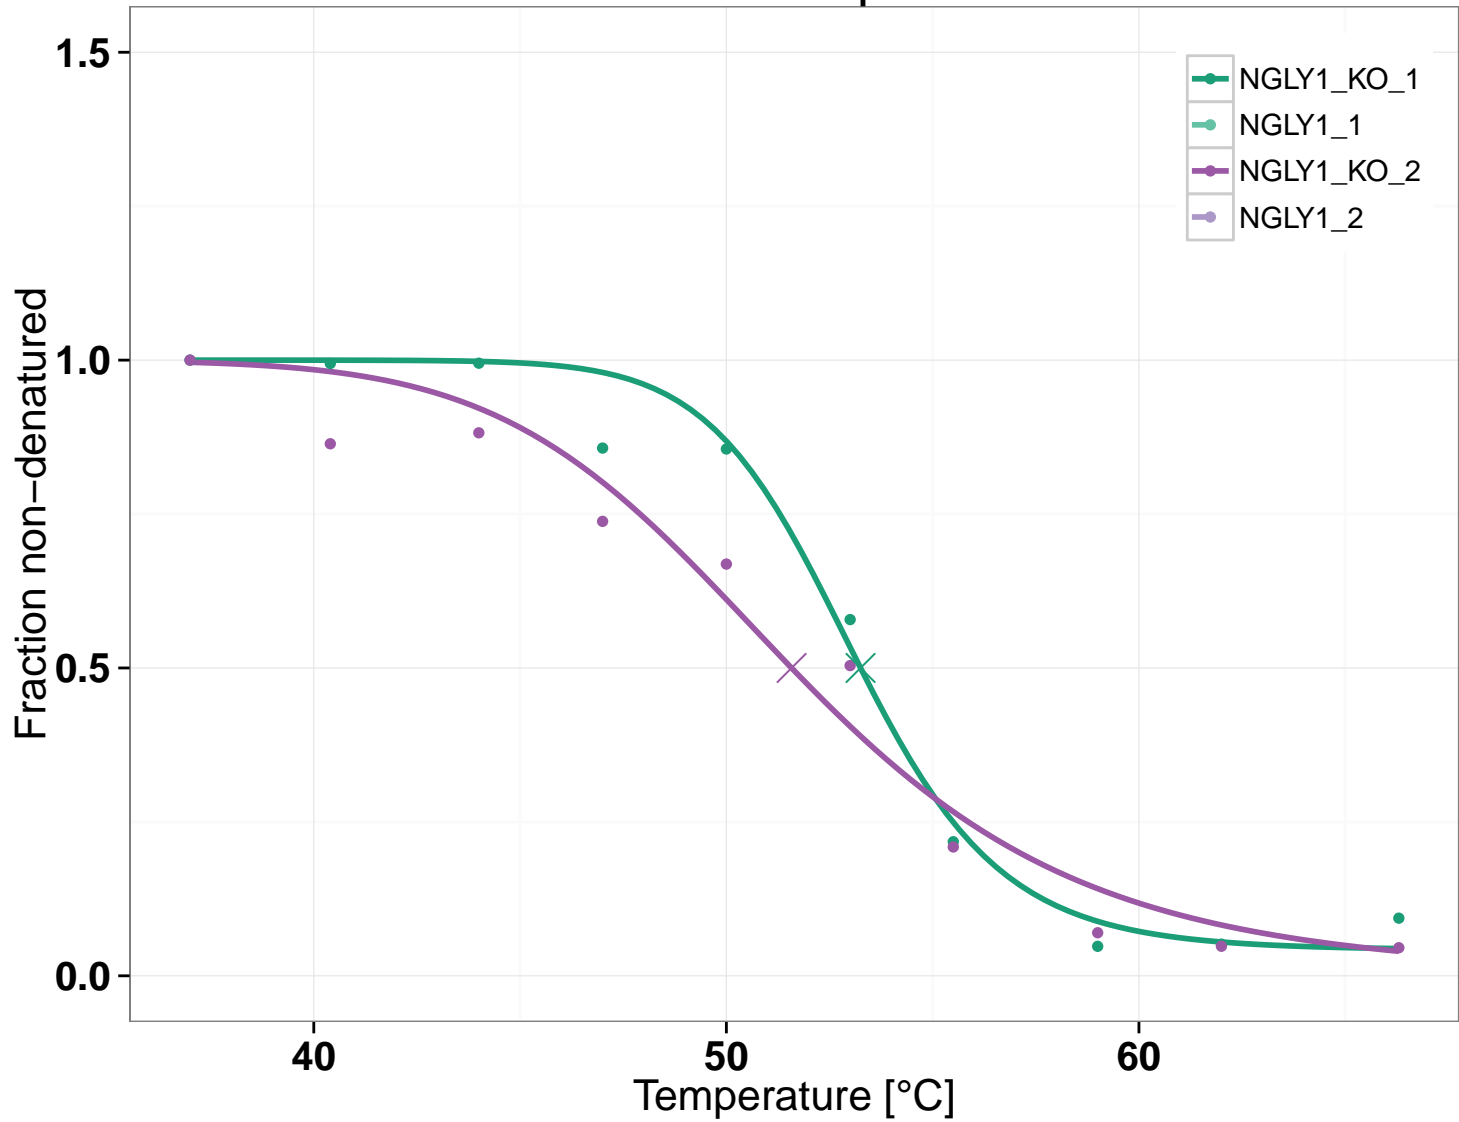

|            | meltPoint | slope  | plateau | R2   |
|------------|-----------|--------|---------|------|
| NGLY1_KO_1 | 53.25     | -0.13  | 0.04    | 0.99 |
| NGLY1_1    | -         | -      | -       | -    |
| NGLY1_KO_2 | 51.58     | -0.071 | 0       | 0.97 |
| NGLY1_2    | -         | -      | -       | -    |

Supplement: Supplementary file 4271 [file 1]

IPI00025746.5|ANKRD54

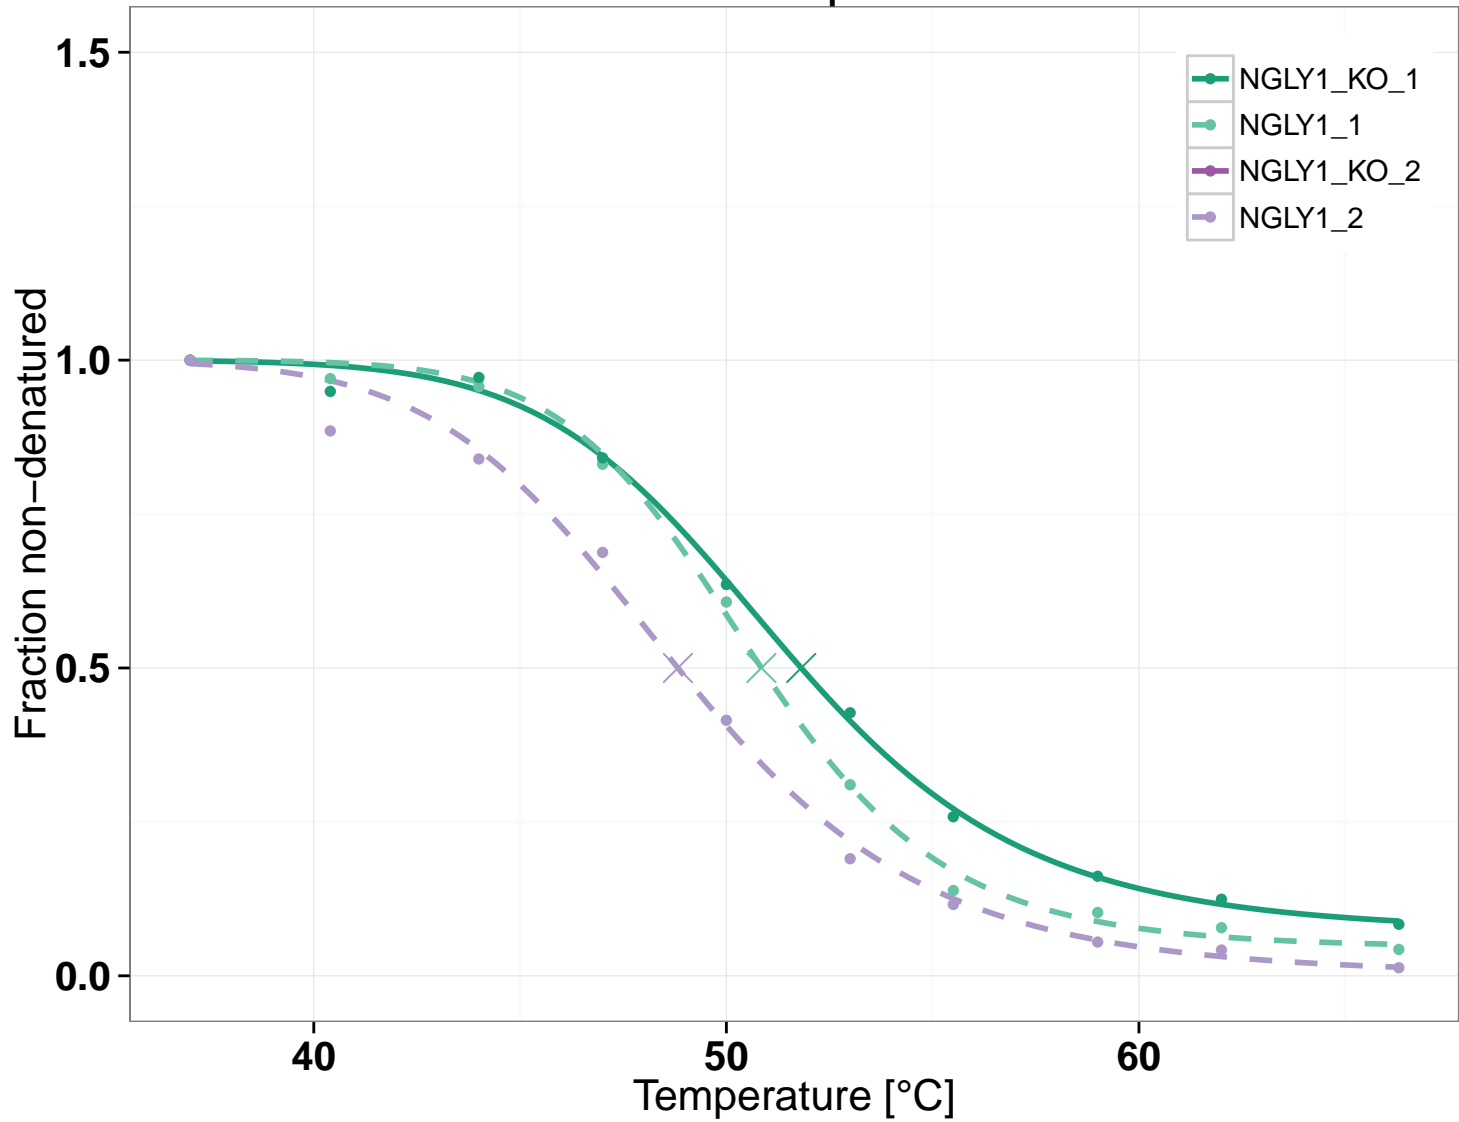

|            | meltPoint | slope  | plateau | R2   |
|------------|-----------|--------|---------|------|
| NGLY1_KO_1 | 51.81     | -0.079 | 0.07    | 1    |
| NGLY1_1    | 50.85     | -0.1   | 0.05    | 1    |
| NGLY1_KO_2 | -         | -      | -       | -    |
| NGLY1_2    | 48.82     | -0.084 | 0       | 0.99 |

Supplement: Supplementary file 4272 [file 1]

# IPI00888824.1|EML6

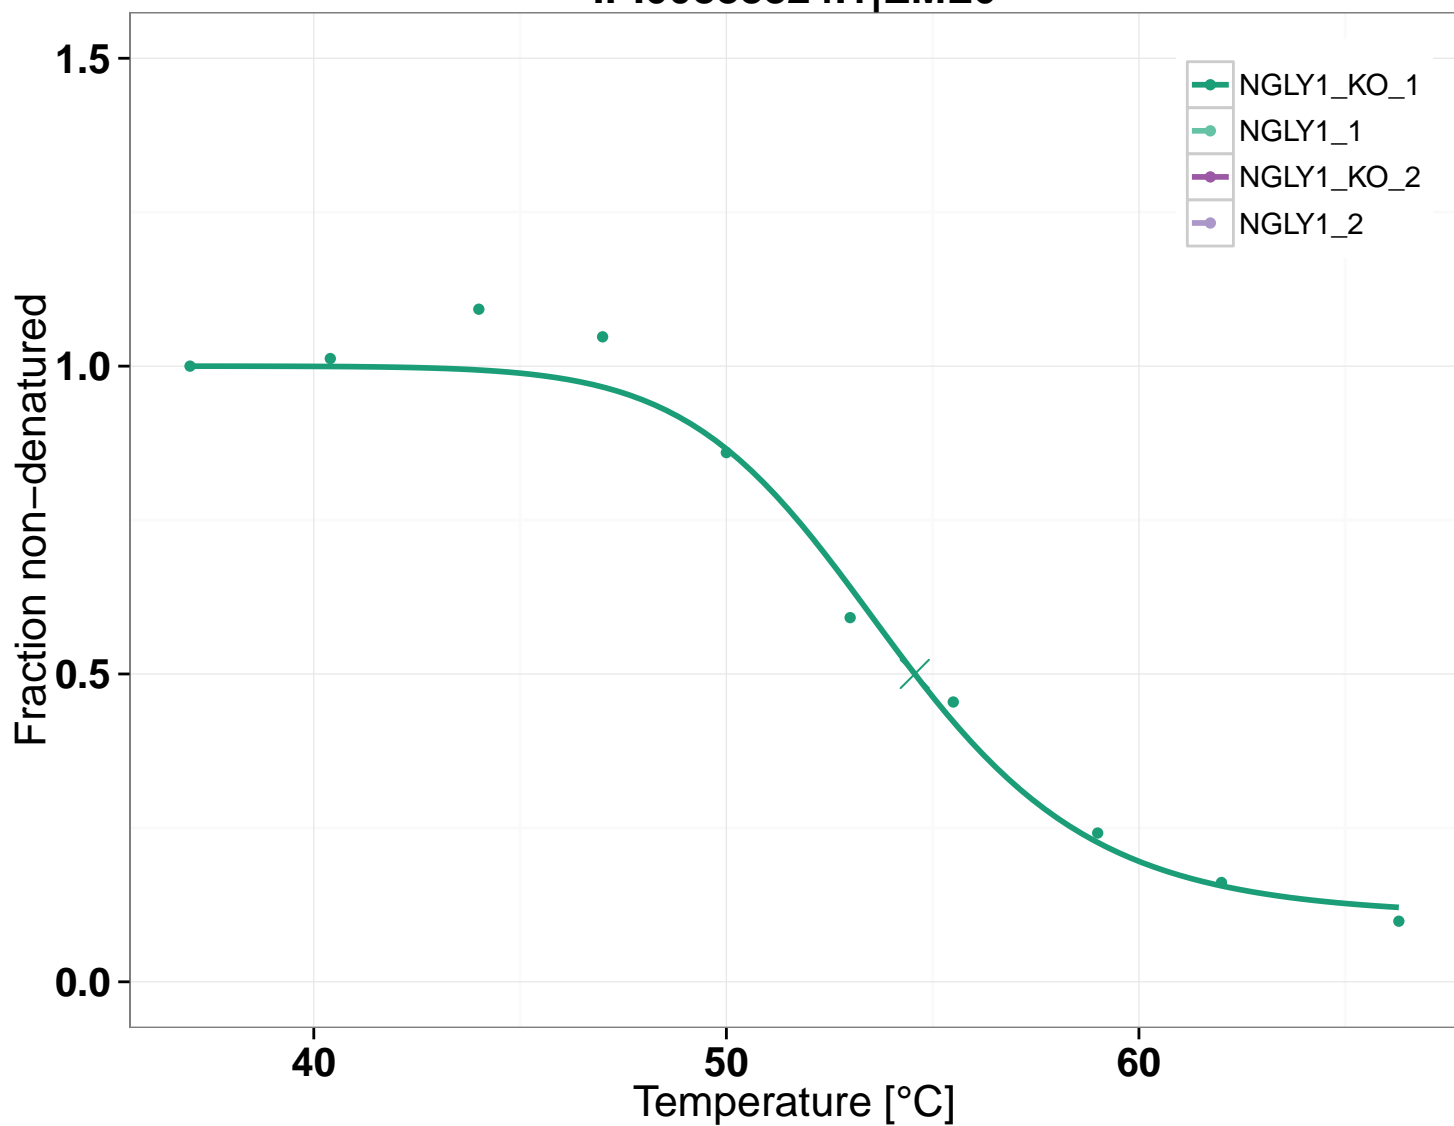

|            | meltPoint | slope  | plateau | R2   |
|------------|-----------|--------|---------|------|
| NGLY1_KO_1 | 54.57     | -0.091 | 0.11    | 0.99 |
| NGLY1_1    | -         | -      | -       | -    |
| NGLY1_KO_2 | -         | -      | -       | -    |
| NGLY1_2    | -         | -      | -       | -    |

Supplement: Supplementary file 4273 [file 1]

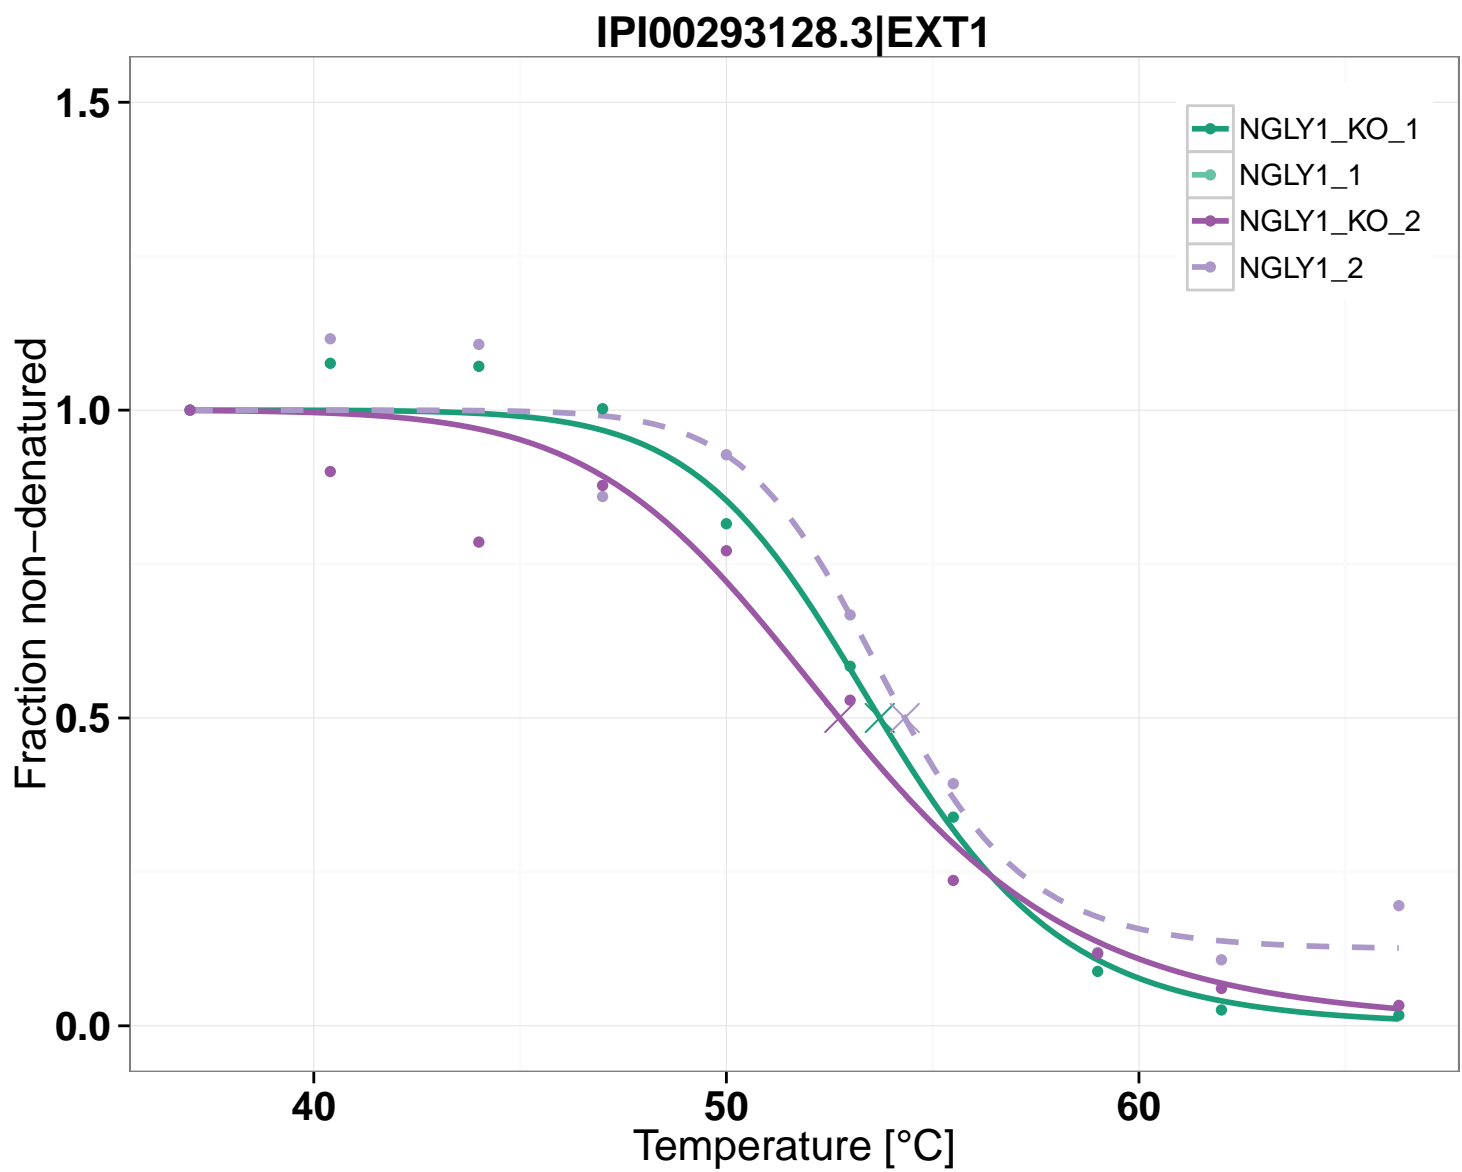

|            | meltPoint | slope  | plateau | R2   |
|------------|-----------|--------|---------|------|
| NGLY1_KO_1 | 53.72     | -0.11  | 0       | 0.99 |
| NGLY1_1    | -         | -      | -       | -    |
| NGLY1_KO_2 | 52.74     | -0.084 | 0       | 0.96 |
| NGLY1_2    | 54.32     | -0.13  | 0.12    | 0.97 |

Supplement: Supplementary file 4274 [file 1]

# IPI00011564.1|SDC4

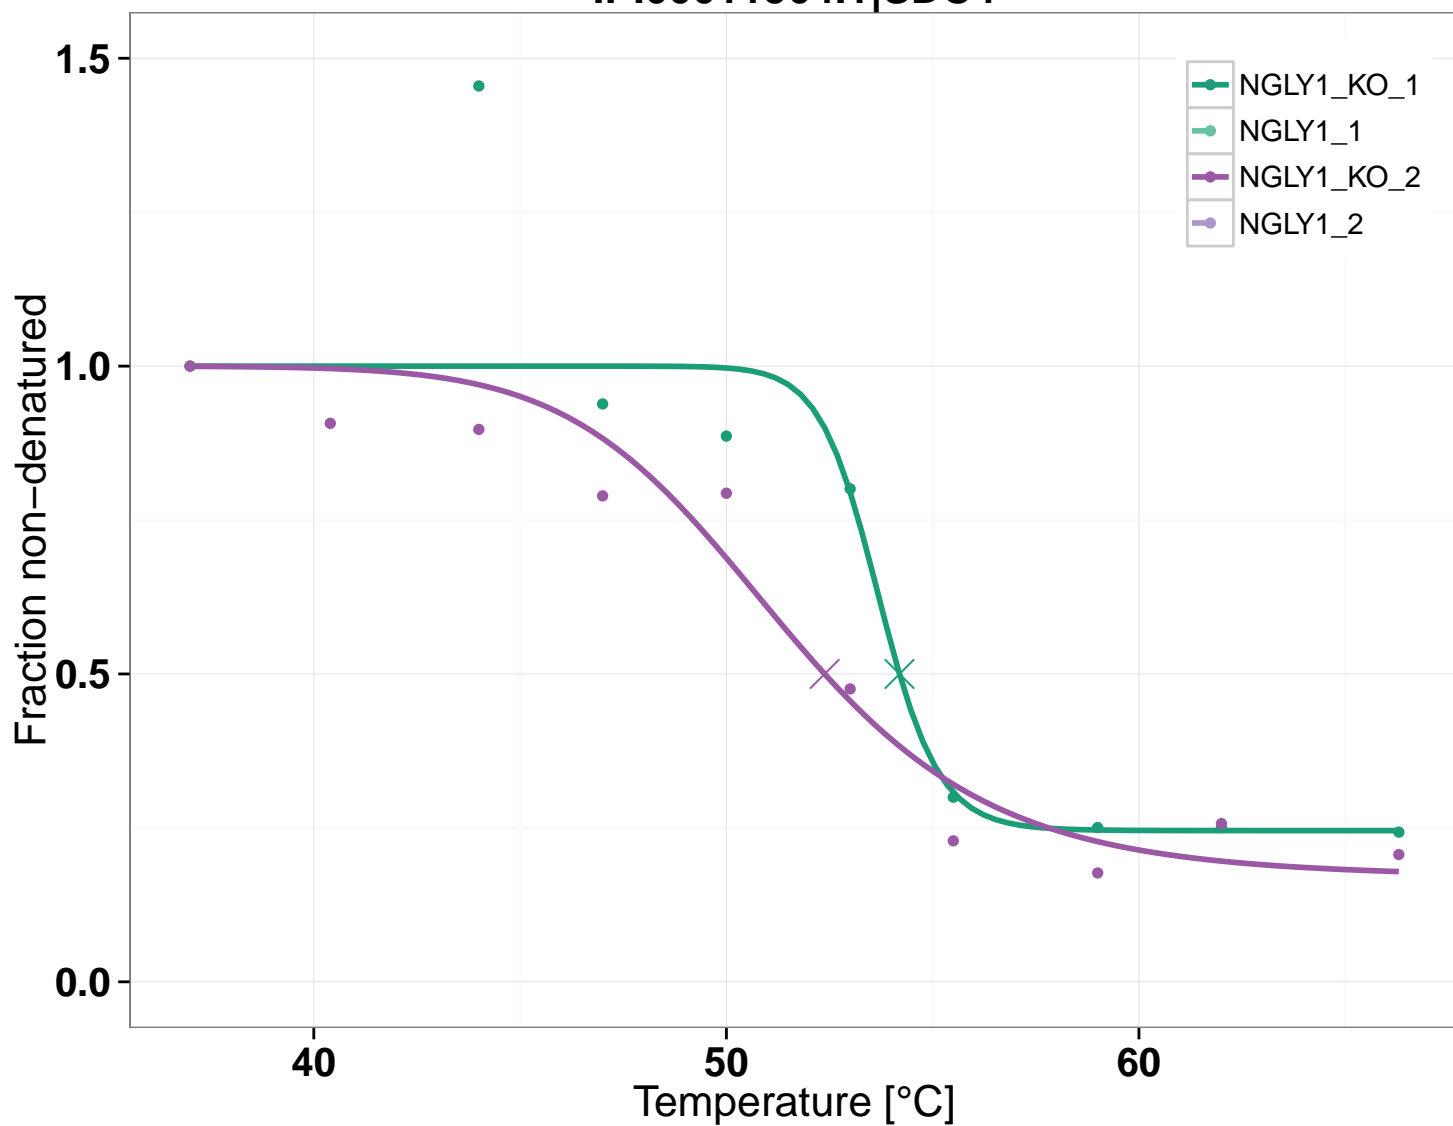

|            | meltPoint | slope  | plateau | R2   |
|------------|-----------|--------|---------|------|
| NGLY1_KO_1 | 54.2      | -0.26  | 0.25    | 0.66 |
| NGLY1_1    | -         | -      | -       | -    |
| NGLY1_KO_2 | 52.38     | -0.081 | 0.17    | 0.95 |
| NGLY1_2    | -         | -      | -       | -    |

Supplement: Supplementary file 4275 [file 1]

IPI00303932.6|HSPBAP1

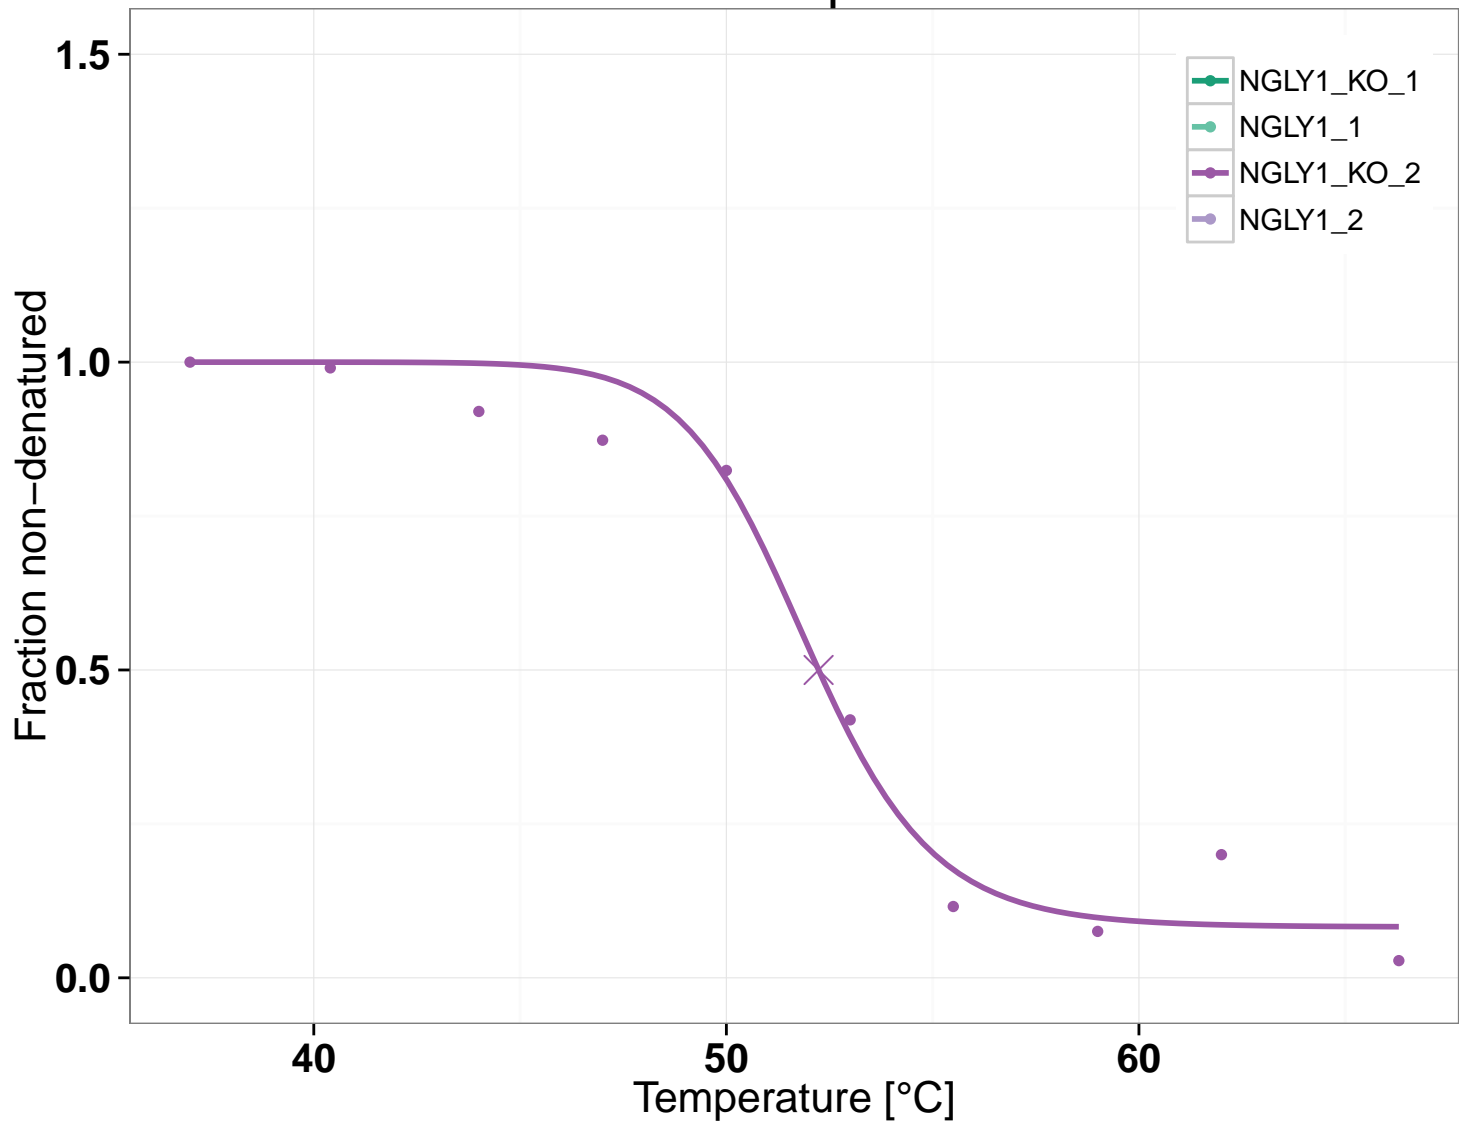

|            | meltPoint | slope | plateau | R2   |
|------------|-----------|-------|---------|------|
| NGLY1_KO_1 | —         | —     | —       | —    |
| NGLY1_1    | —         | —     | —       | —    |
| NGLY1_KO_2 | 52.24     | -0.15 | 0.08    | 0.98 |
| NGLY1_2    | —         | —     | —       | —    |

Supplement: Supplementary file 4276 [file 1]

IPI00297301.8|MIER2

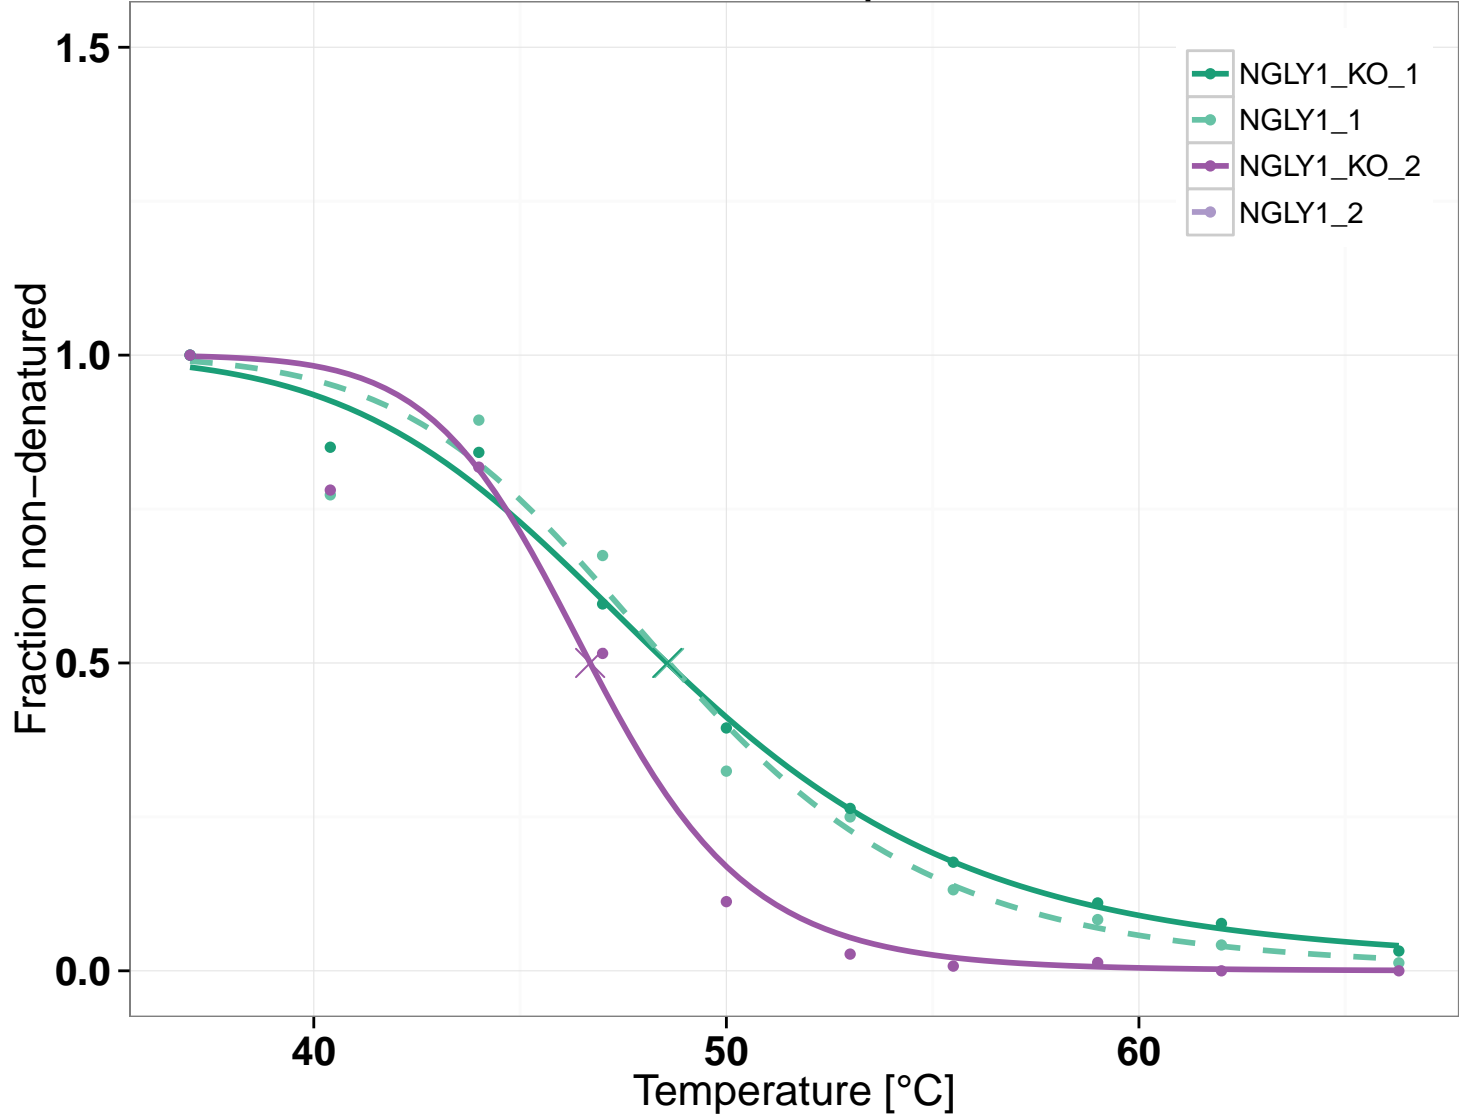

|            | meltPoint | slope  | plateau | R2   |
|------------|-----------|--------|---------|------|
| NGLY1_KO_1 | 48.57     | -0.066 | 0.01    | 0.99 |
| NGLY1_1    | 48.61     | -0.077 | 0       | 0.96 |
| NGLY1_KO_2 | 46.7      | -0.13  | 0       | 0.97 |
| NGLY1_2    | -         | -      | -       | -    |

Supplement: Supplementary file 4277 [file 1]

IPI00658198.1|GPR175

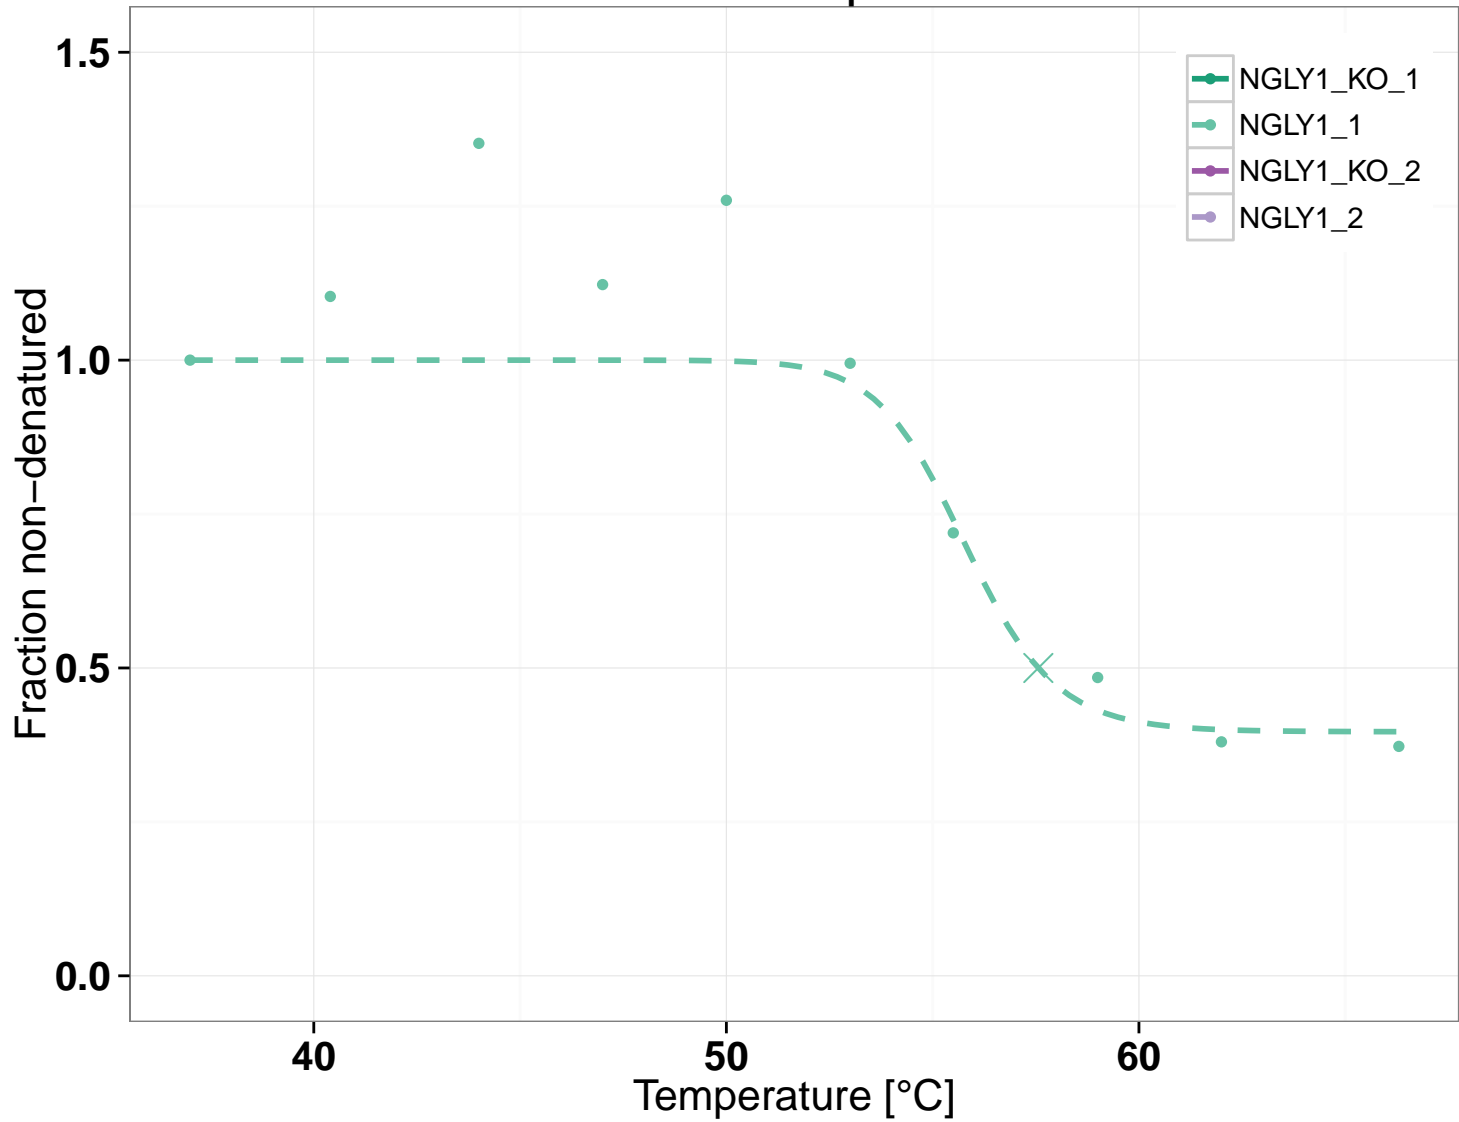

|            | meltPoint | slope | plateau | R2   |
|------------|-----------|-------|---------|------|
| NGLY1_KO_1 | -         | -     | -       | -    |
| NGLY1_1    | 57.56     | -0.14 | 0.4     | 0.81 |
| NGLY1_KO_2 | -         | -     | -       | -    |
| NGLY1_2    | -         | -     | -       | -    |

Supplement: Supplementary file 4278 [file 1]

IPI00472754.2|KIAA0319L

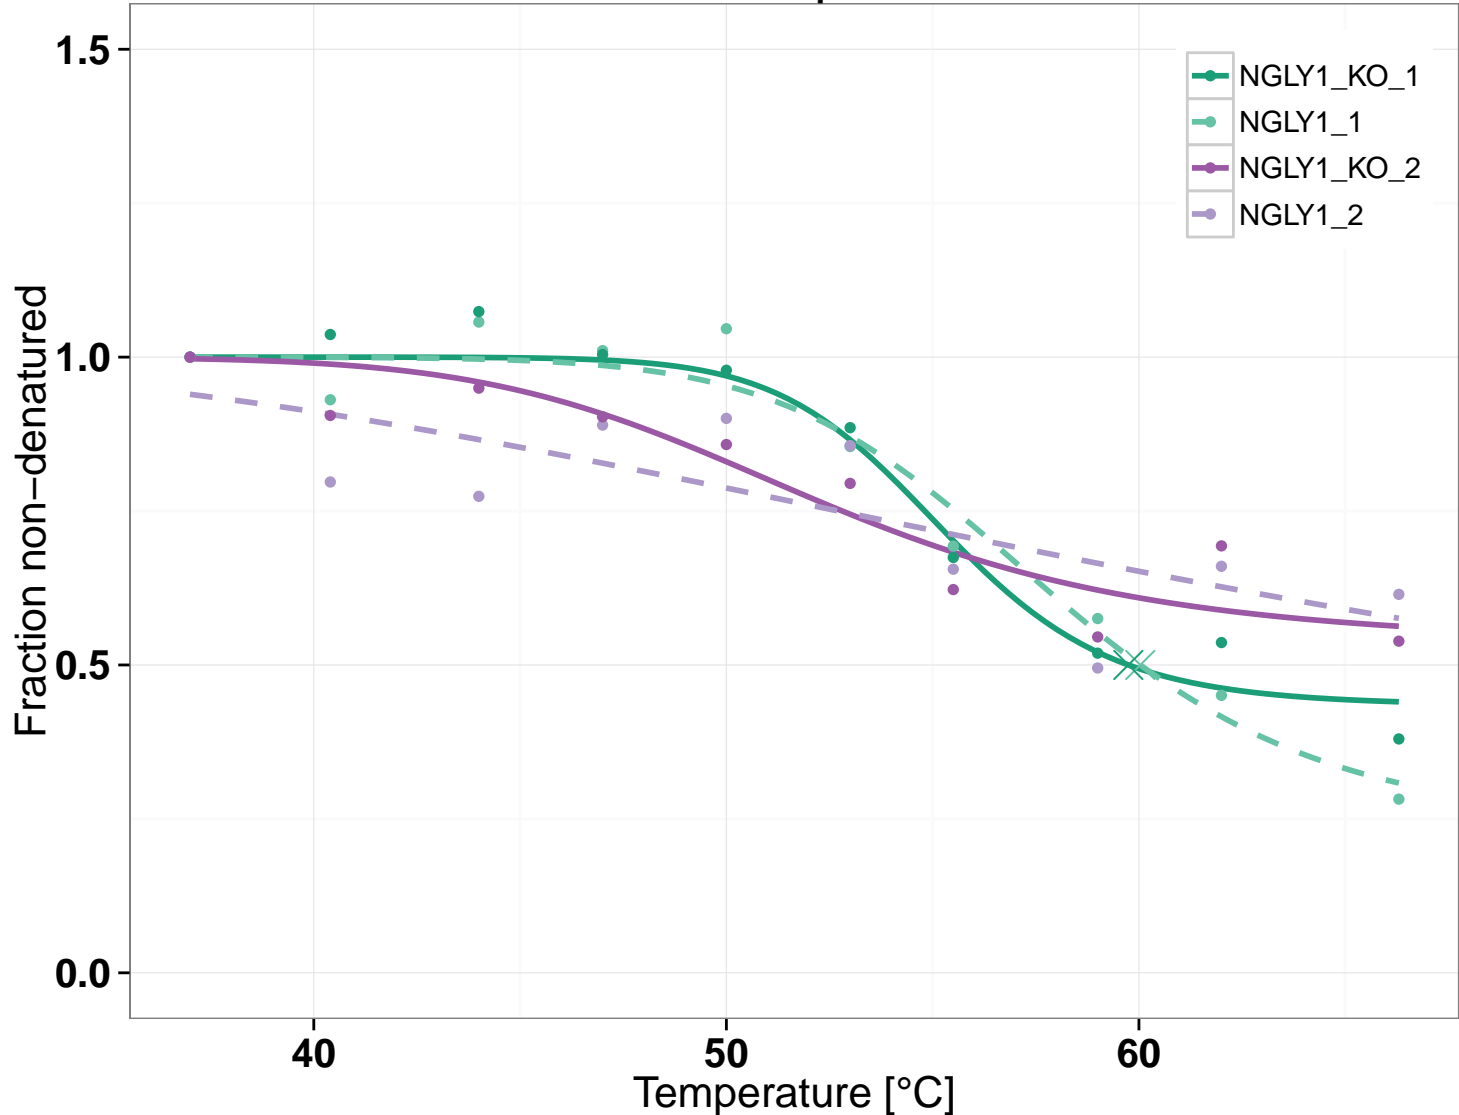

|            | meltPoint | slope  | plateau | R2   |
|------------|-----------|--------|---------|------|
| NGLY1_KO_1 | 59.74     | -0.07  | 0.43    | 0.97 |
| NGLY1_1    | 60.03     | -0.058 | 0.23    | 0.97 |
| NGLY1_KO_2 | -         | -0.029 | 0.53    | 0.88 |
| NGLY1_2    | -         | -0.014 | 0       | 0.6  |

Supplement: Supplementary file 4279 [file 1]

IPI00031651.1|C7ORF50

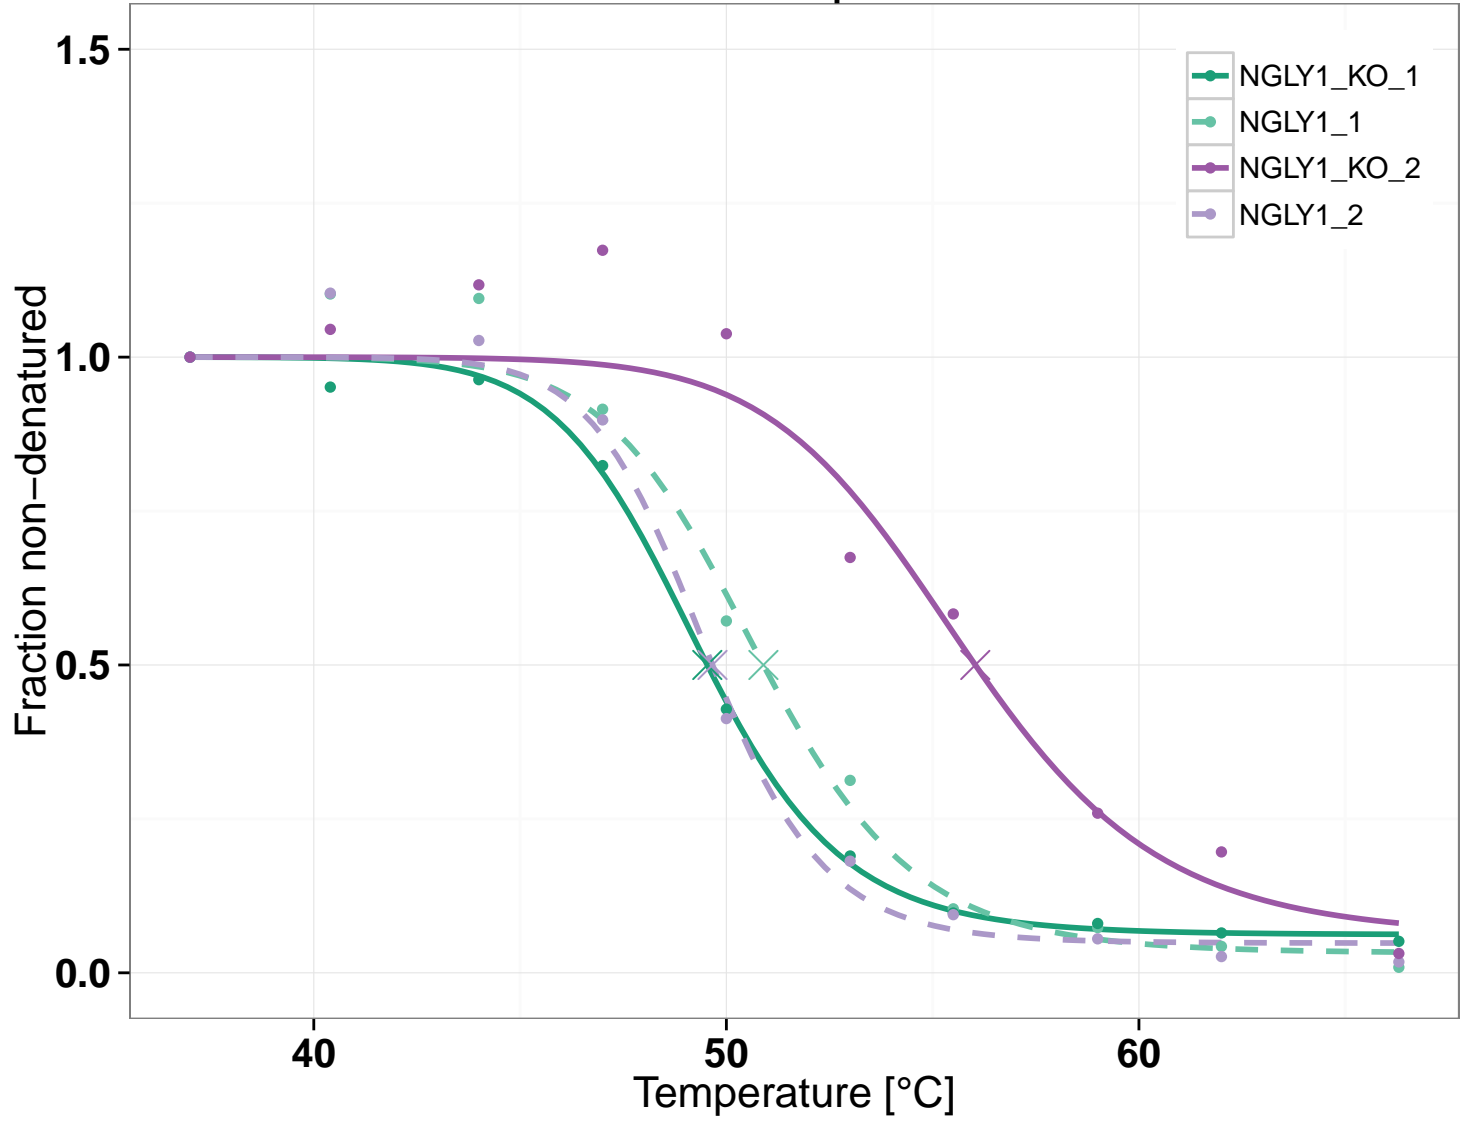

|            | meltPoint | slope  | plateau | R2   |
|------------|-----------|--------|---------|------|
| NGLY1_KO_1 | 49.54     | -0.13  | 0.06    | 1    |
| NGLY1_1    | 50.9      | -0.13  | 0.03    | 0.99 |
| NGLY1_KO_2 | 56.03     | -0.099 | 0.06    | 0.95 |
| NGLY1_2    | 49.66     | -0.17  | 0.05    | 0.99 |

Supplement: Supplementary file 4280 [file 1]

IPI00384341.1|SUPT3H

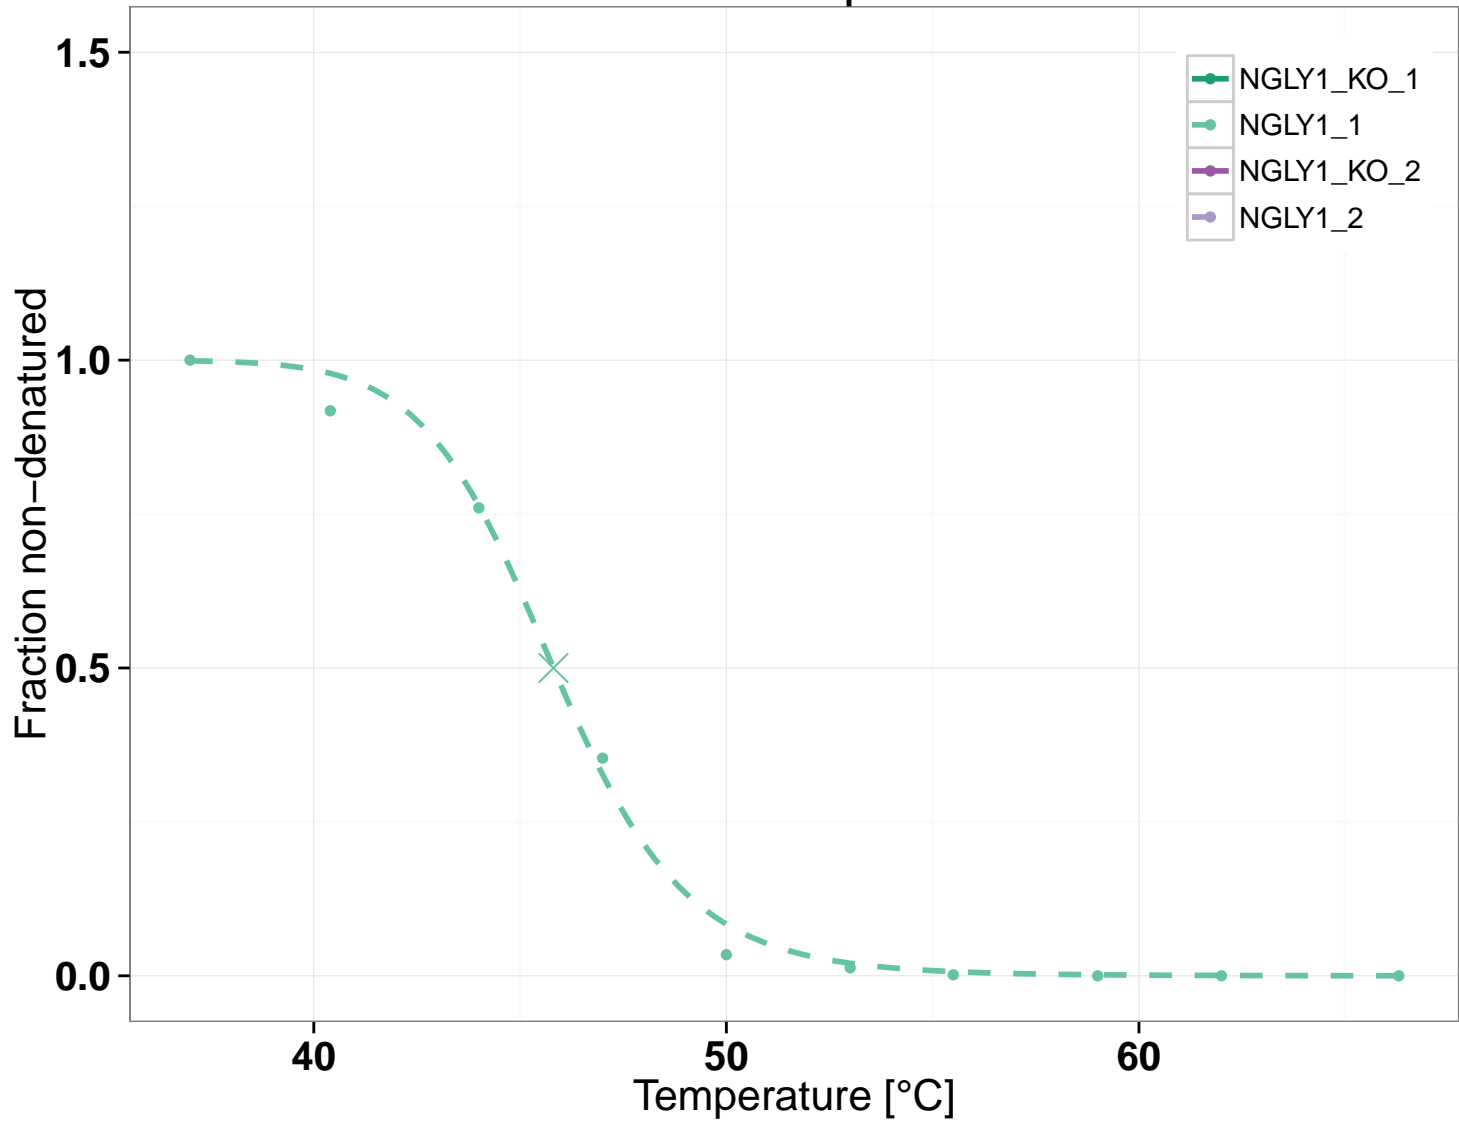

|            | meltPoint | slope | plateau | R2 |
|------------|-----------|-------|---------|----|
| NGLY1_KO_1 | -         | -     | -       | -  |
| NGLY1_1    | 45.81     | -0.16 | 0       | 1  |
| NGLY1_KO_2 | -         | -     | -       | -  |
| NGLY1_2    | -         | -     | -       | -  |

Supplement: Supplementary file 4281 [file 1]

IPI00006029.2|FOXK2

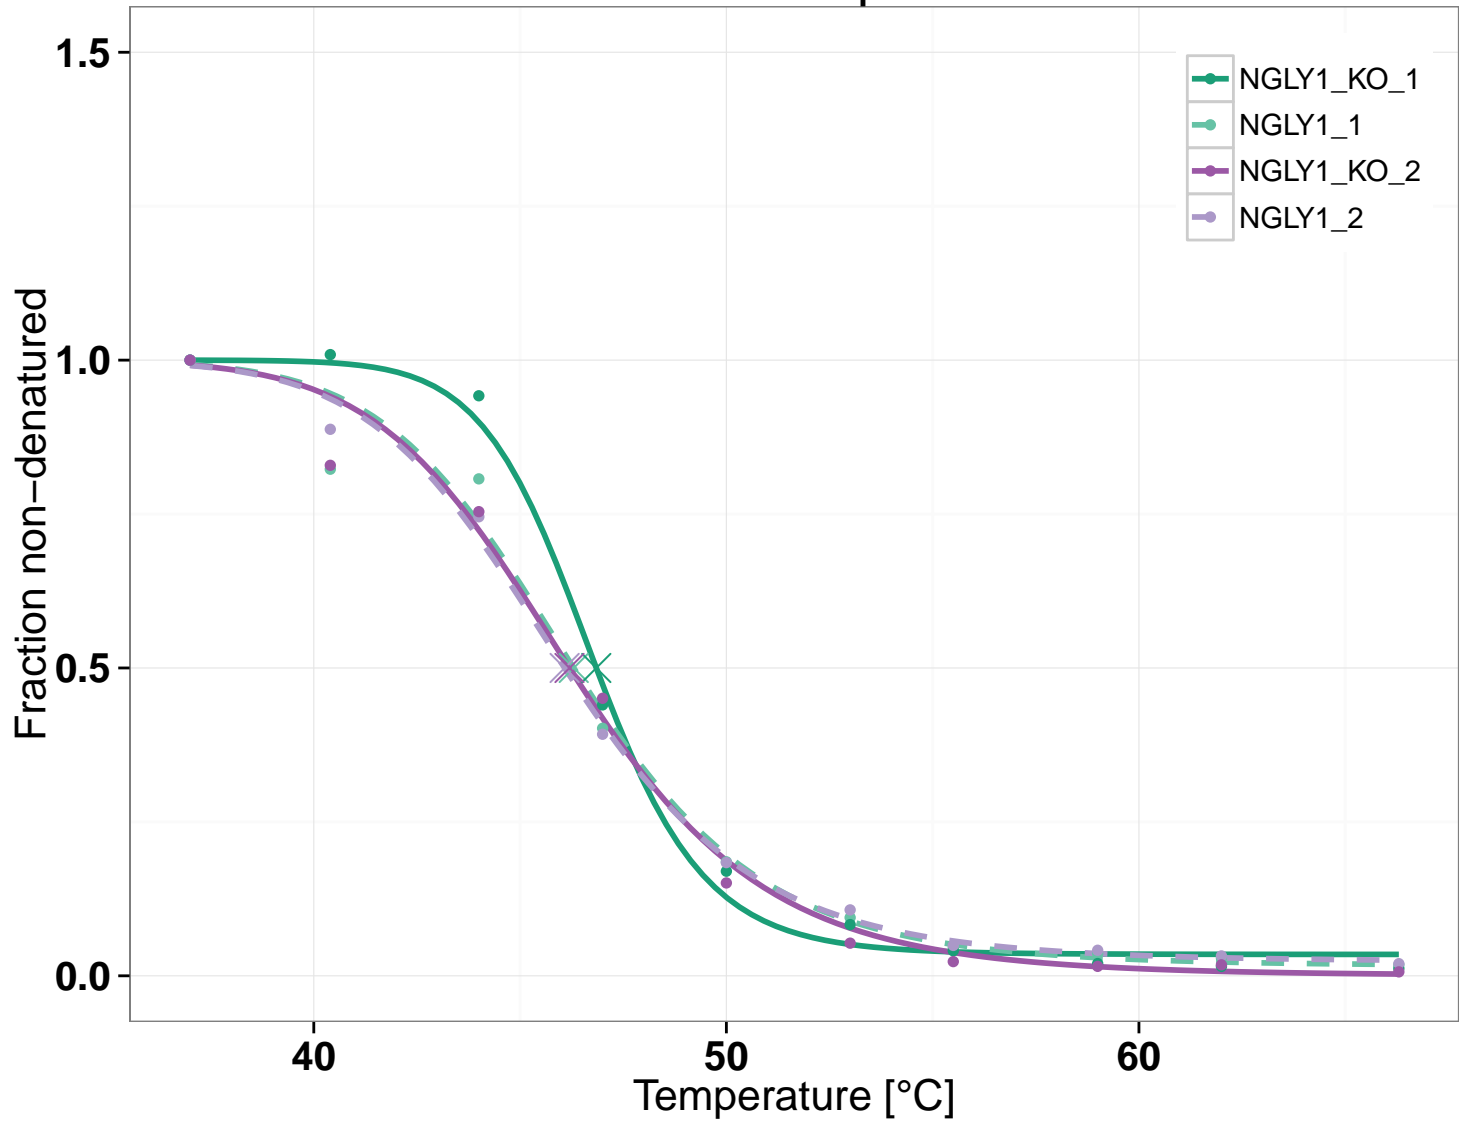

|            | meltPoint | slope | plateau | R2   |
|------------|-----------|-------|---------|------|
| NGLY1_KO_1 | 46.85     | -0.18 | 0.03    | 1    |
| NGLY1_1    | 46.3      | -0.11 | 0.02    | 0.98 |
| NGLY1_KO_2 | 46.2      | -0.11 | 0       | 0.99 |
| NGLY1_2    | 46.08     | -0.1  | 0.02    | 1    |

Supplement: Supplementary file 4282 [file 1]

IPI00014877.4|QPCTL

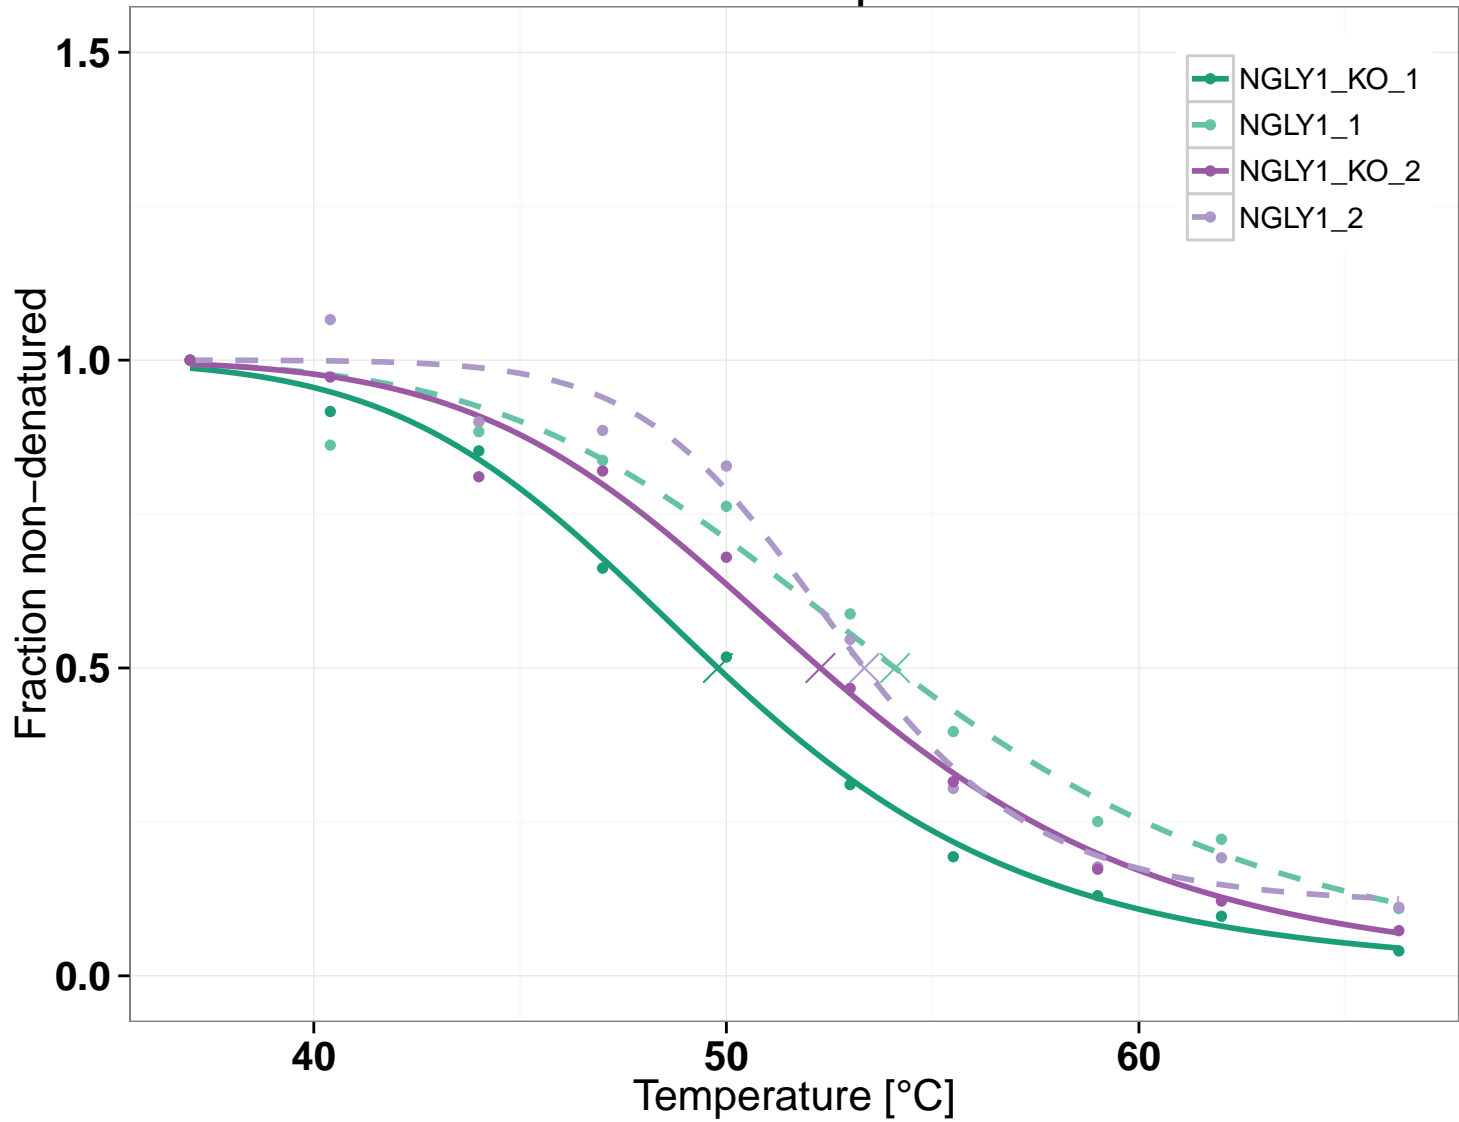

|            | meltPoint | slope  | plateau | R2   |
|------------|-----------|--------|---------|------|
| NGLY1_KO_1 | 49.8      | -0.064 | 0       | 1    |
| NGLY1_1    | 54.09     | -0.052 | 0       | 0.98 |
| NGLY1_KO_2 | 52.28     | -0.06  | 0       | 0.99 |
| NGLY1_2    | 53.35     | -0.091 | 0.11    | 0.98 |

Supplement: Supplementary file 4283 [file 1]

IPI00374975.2|LOC728188

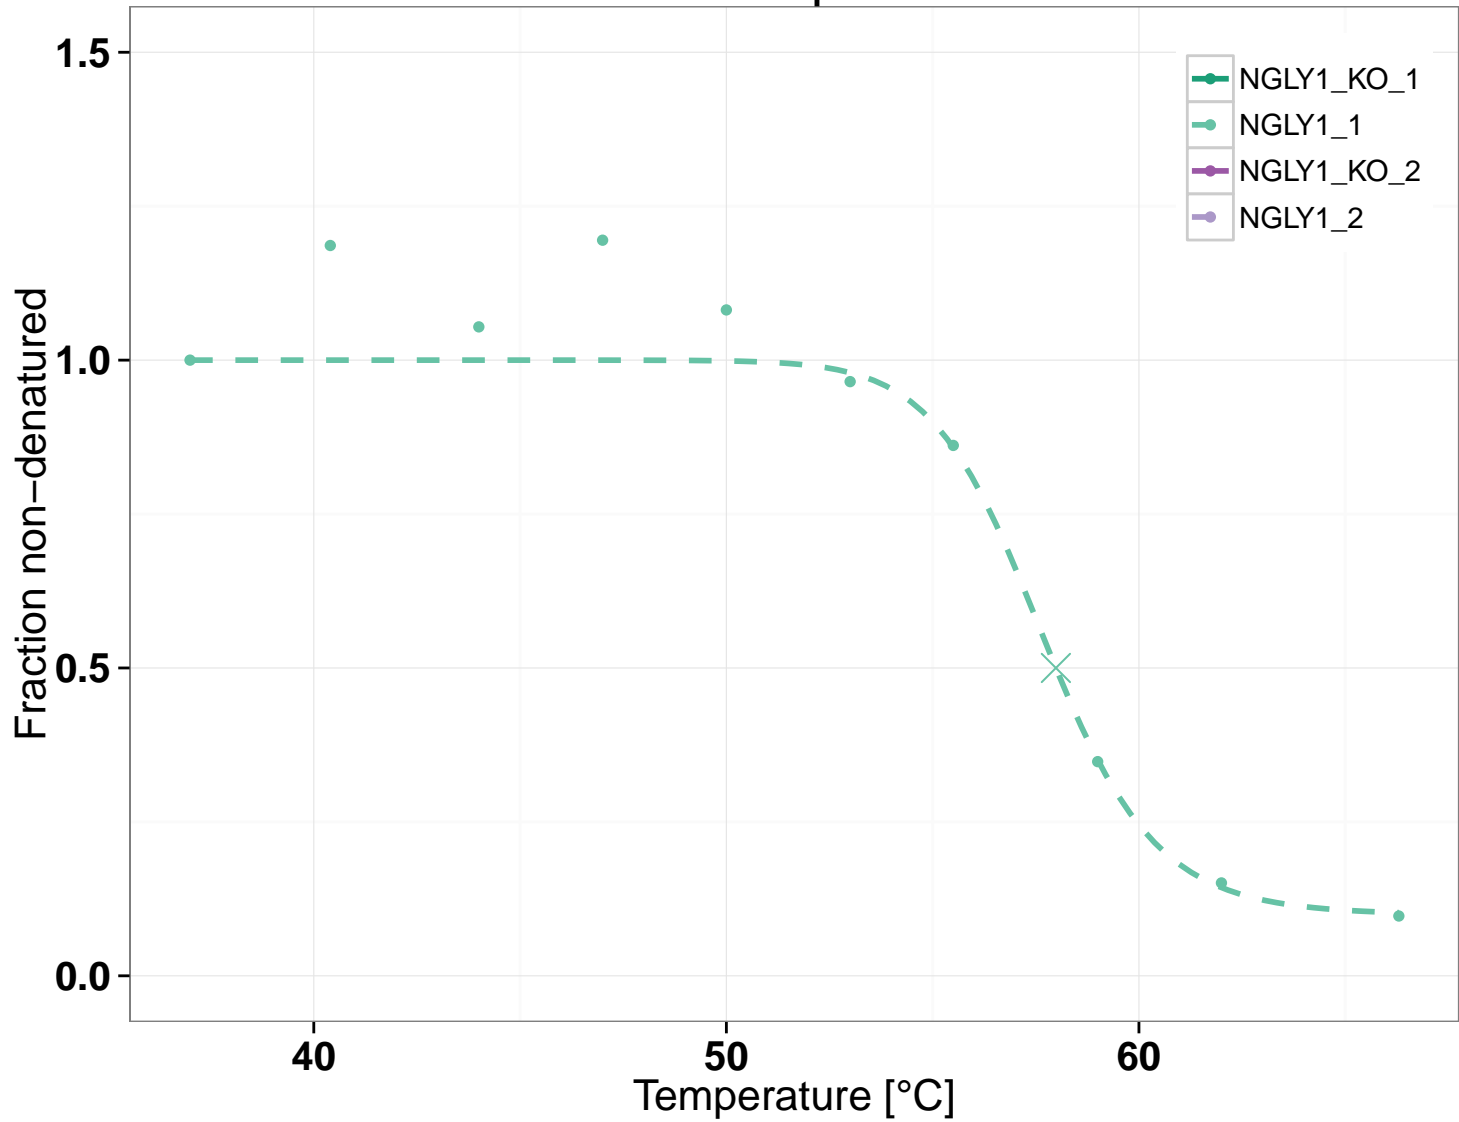

|            | meltPoint | slope | plateau | R2   |
|------------|-----------|-------|---------|------|
| NGLY1_KO_1 | -         | -     | -       | -    |
| NGLY1_1    | 57.99     | -0.17 | 0.1     | 0.95 |
| NGLY1_KO_2 | -         | -     | -       | -    |
| NGLY1_2    | -         | -     | -       | -    |

Supplement: Supplementary file 4284 [file 1]

IPI00152990.7|ATG2B

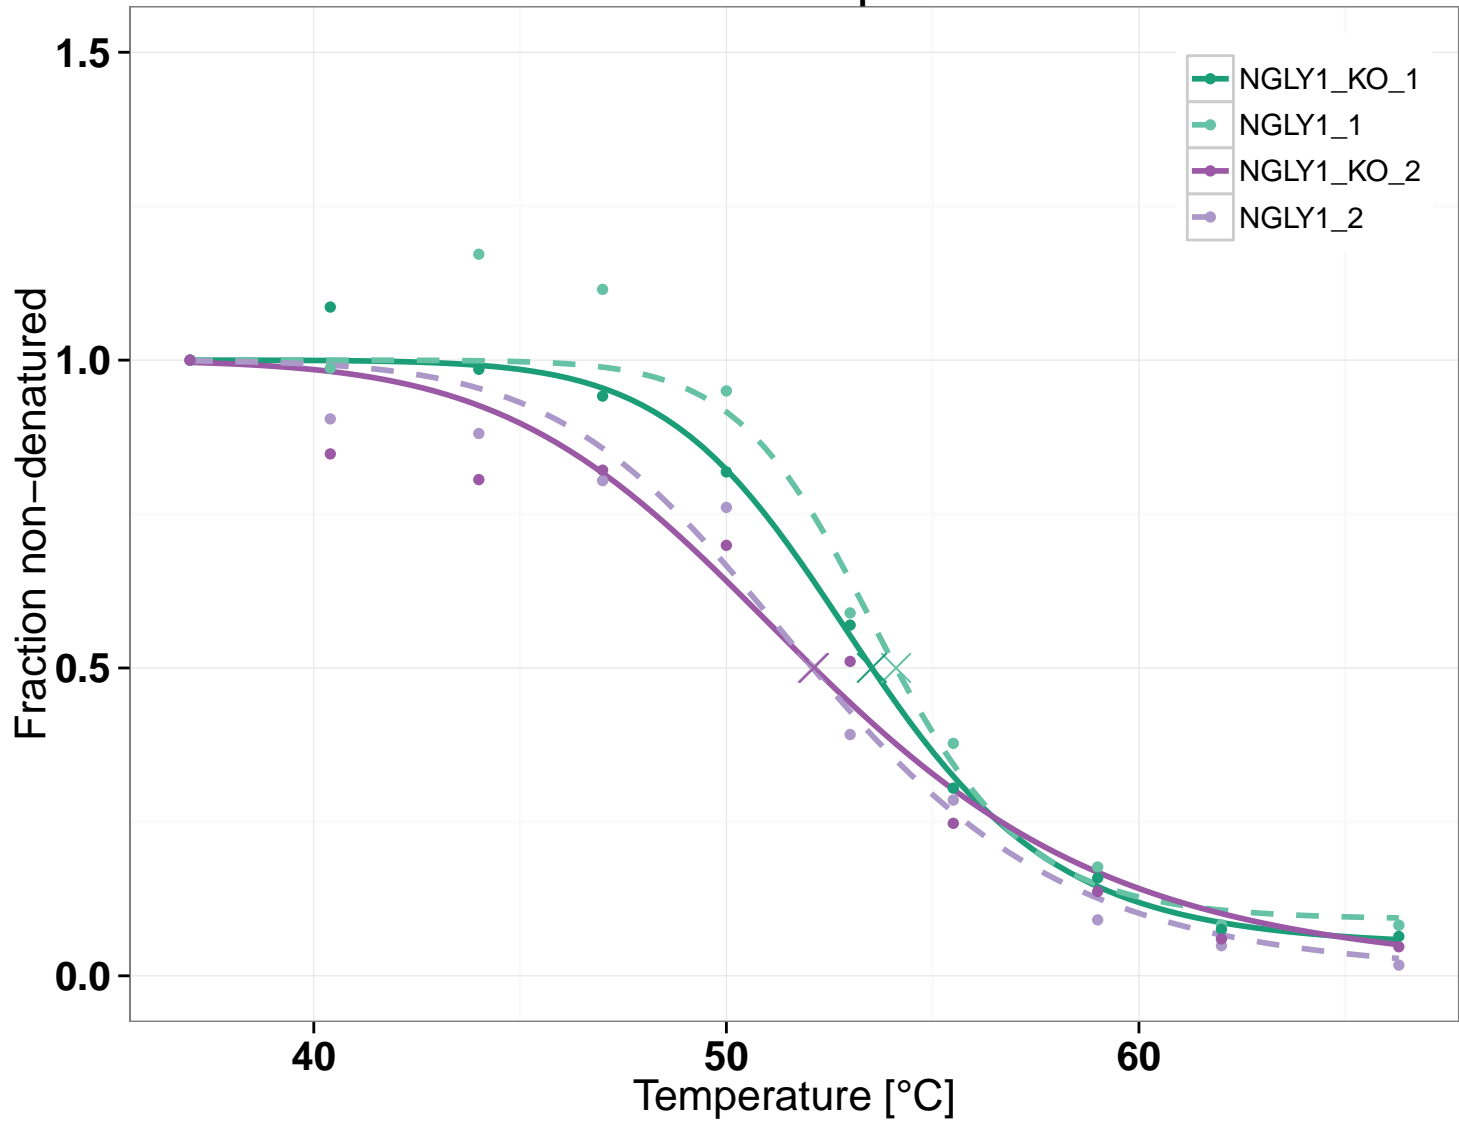

|            | meltPoint | slope  | plateau | R2   |
|------------|-----------|--------|---------|------|
| NGLY1_KO_1 | 53.53     | -0.1   | 0.05    | 0.99 |
| NGLY1_1    | 54.11     | -0.13  | 0.09    | 0.97 |
| NGLY1_KO_2 | 52.12     | -0.067 | 0       | 0.96 |
| NGLY1_2    | 52.09     | -0.08  | 0       | 0.98 |

Supplement: Supplementary file 4285 [file 1]

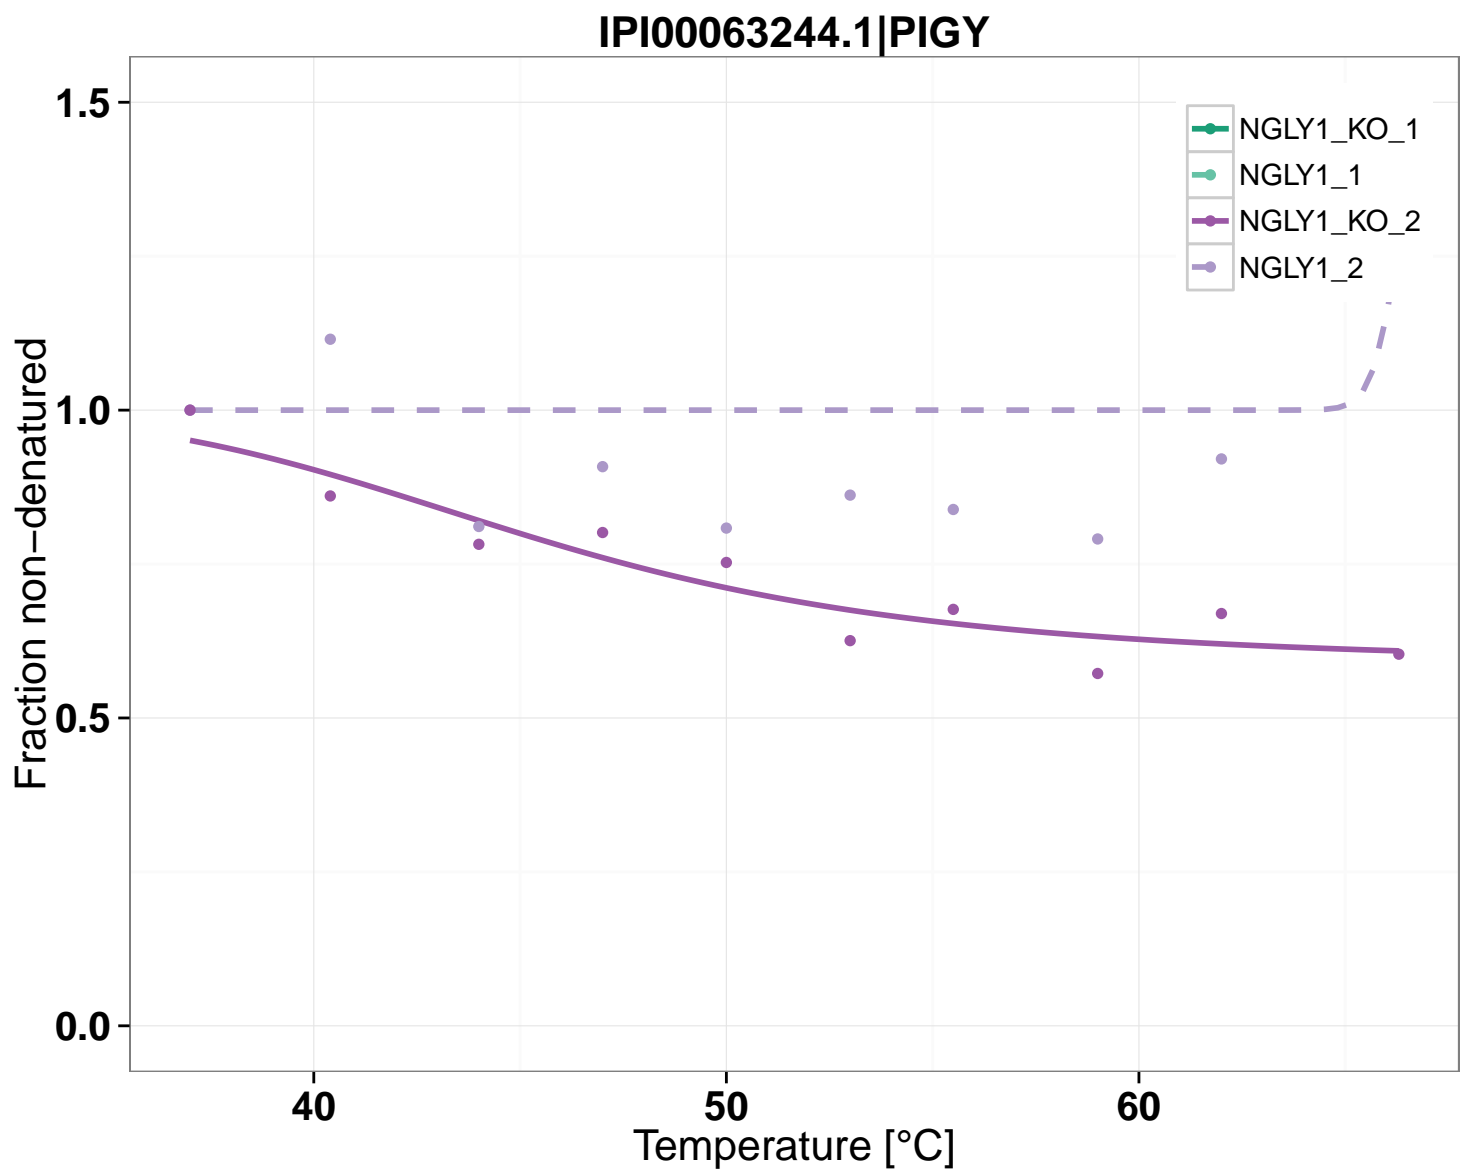

|            | meltPoint | slope  | plateau | R2   |
|------------|-----------|--------|---------|------|
| NGLY1_KO_1 | —         | —      | —       | —    |
| NGLY1_1    | —         | —      | —       | —    |
| NGLY1_KO_2 | —         | -0.021 | 0.59    | 0.89 |
| NGLY1_2    | —         | 0.42   | 1.5     | 0.14 |

Supplement: Supplementary file 4286 [file 1]

IPI00156791.6|KELCHL

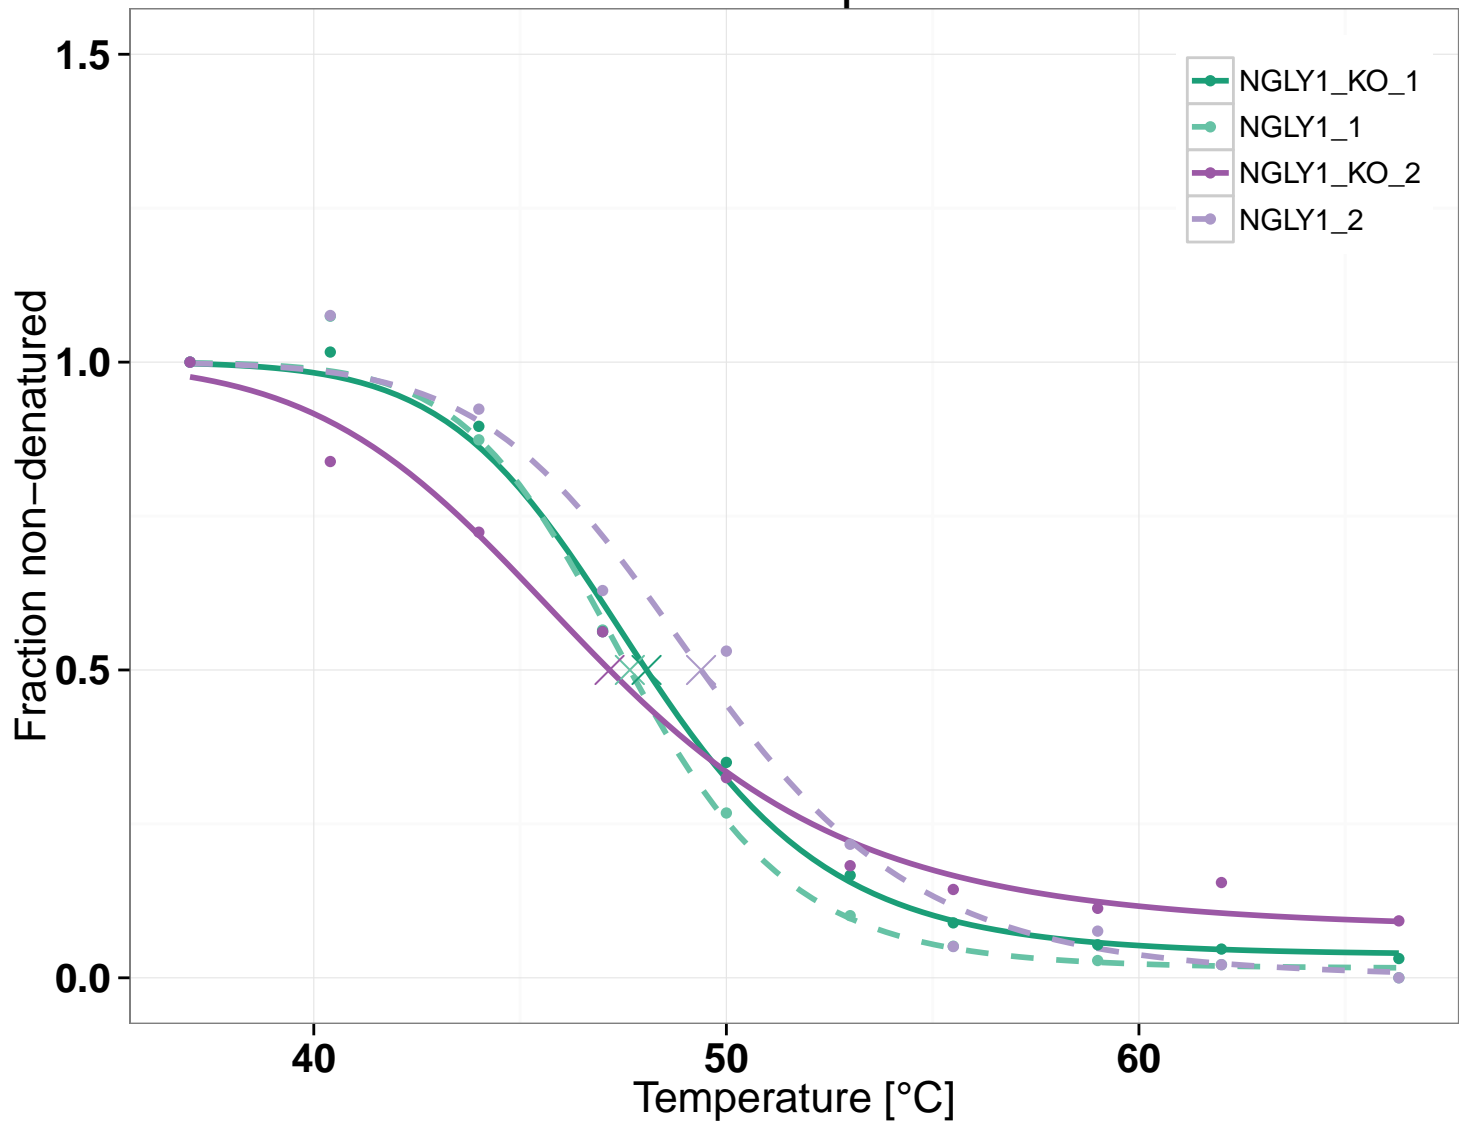

|            | meltPoint | slope  | plateau | R2   |
|------------|-----------|--------|---------|------|
| NGLY1_KO_1 | 48.07     | -0.1   | 0.04    | 1    |
| NGLY1_1    | 47.66     | -0.12  | 0.02    | 1    |
| NGLY1_KO_2 | 47.17     | -0.071 | 0.08    | 0.99 |
| NGLY1_2    | 49.39     | -0.094 | 0       | 0.98 |

Supplement: Supplementary file 4287 [file 1]

# IPI00021493.1|TNKS

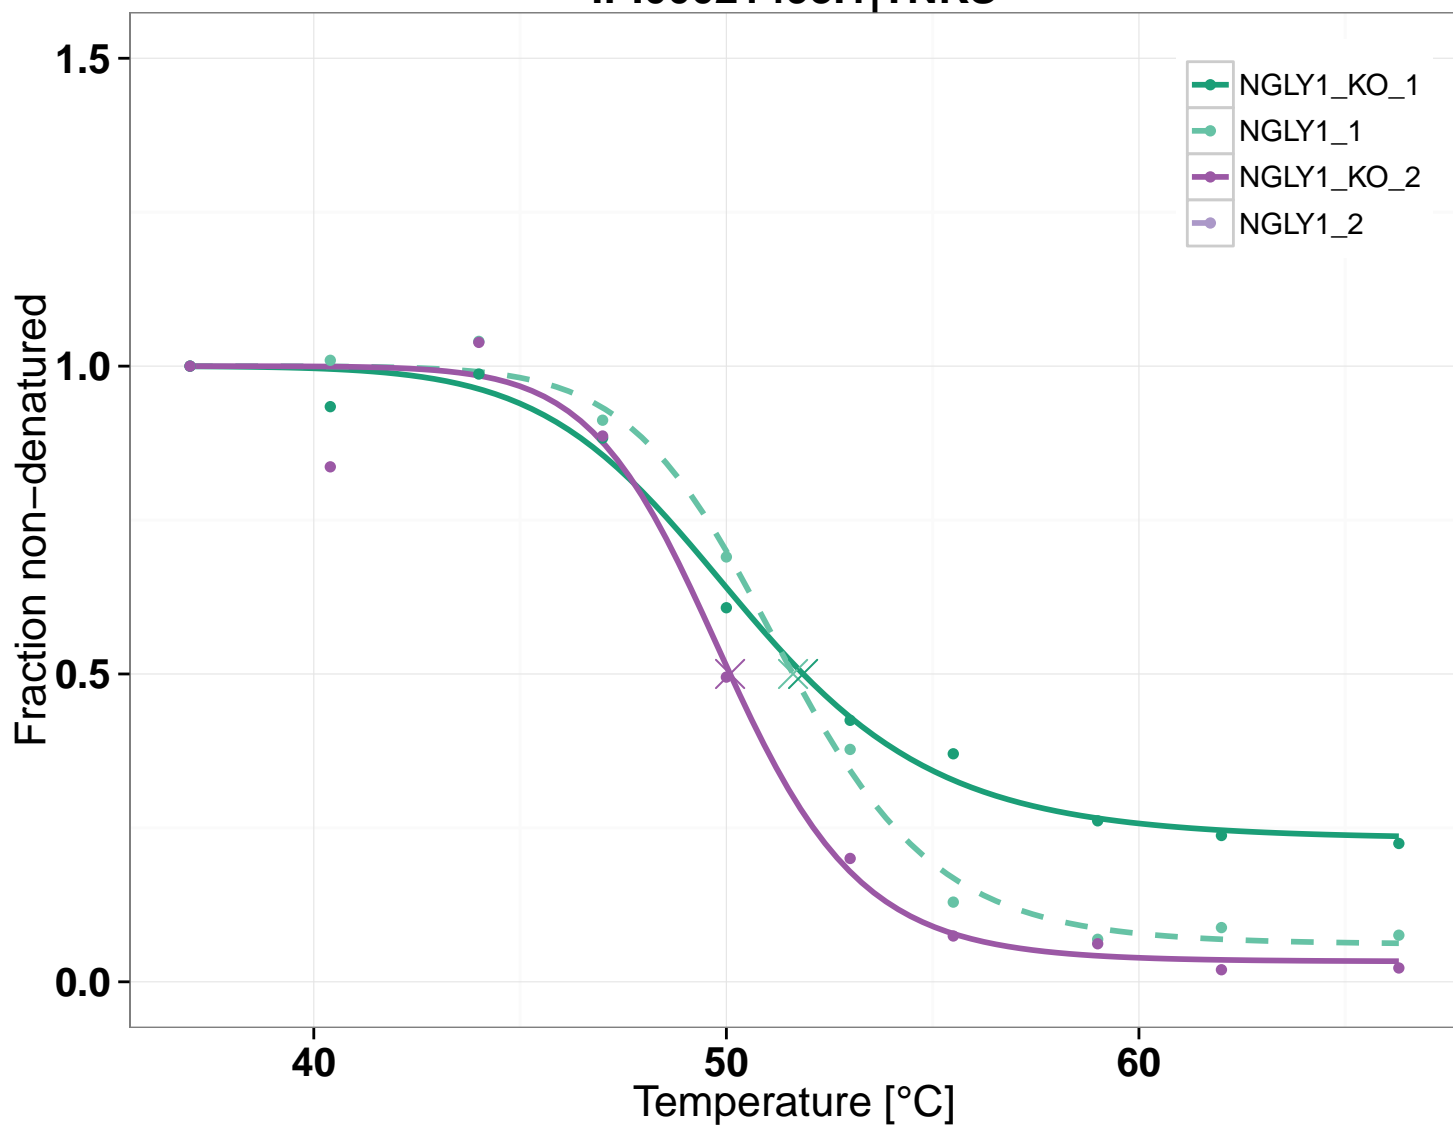

|            | meltPoint | slope | plateau | R2   |
|------------|-----------|-------|---------|------|
| NGLY1_KO_1 | 51.86     | -0.08 | 0.23    | 0.99 |
| NGLY1_1    | 51.62     | -0.13 | 0.06    | 1    |
| NGLY1_KO_2 | 50.09     | -0.15 | 0.03    | 0.98 |
| NGLY1_2    | -         | -     | -       | -    |

Supplement: Supplementary file 4288 [file 1]

# IPI00550703.3|PIGG

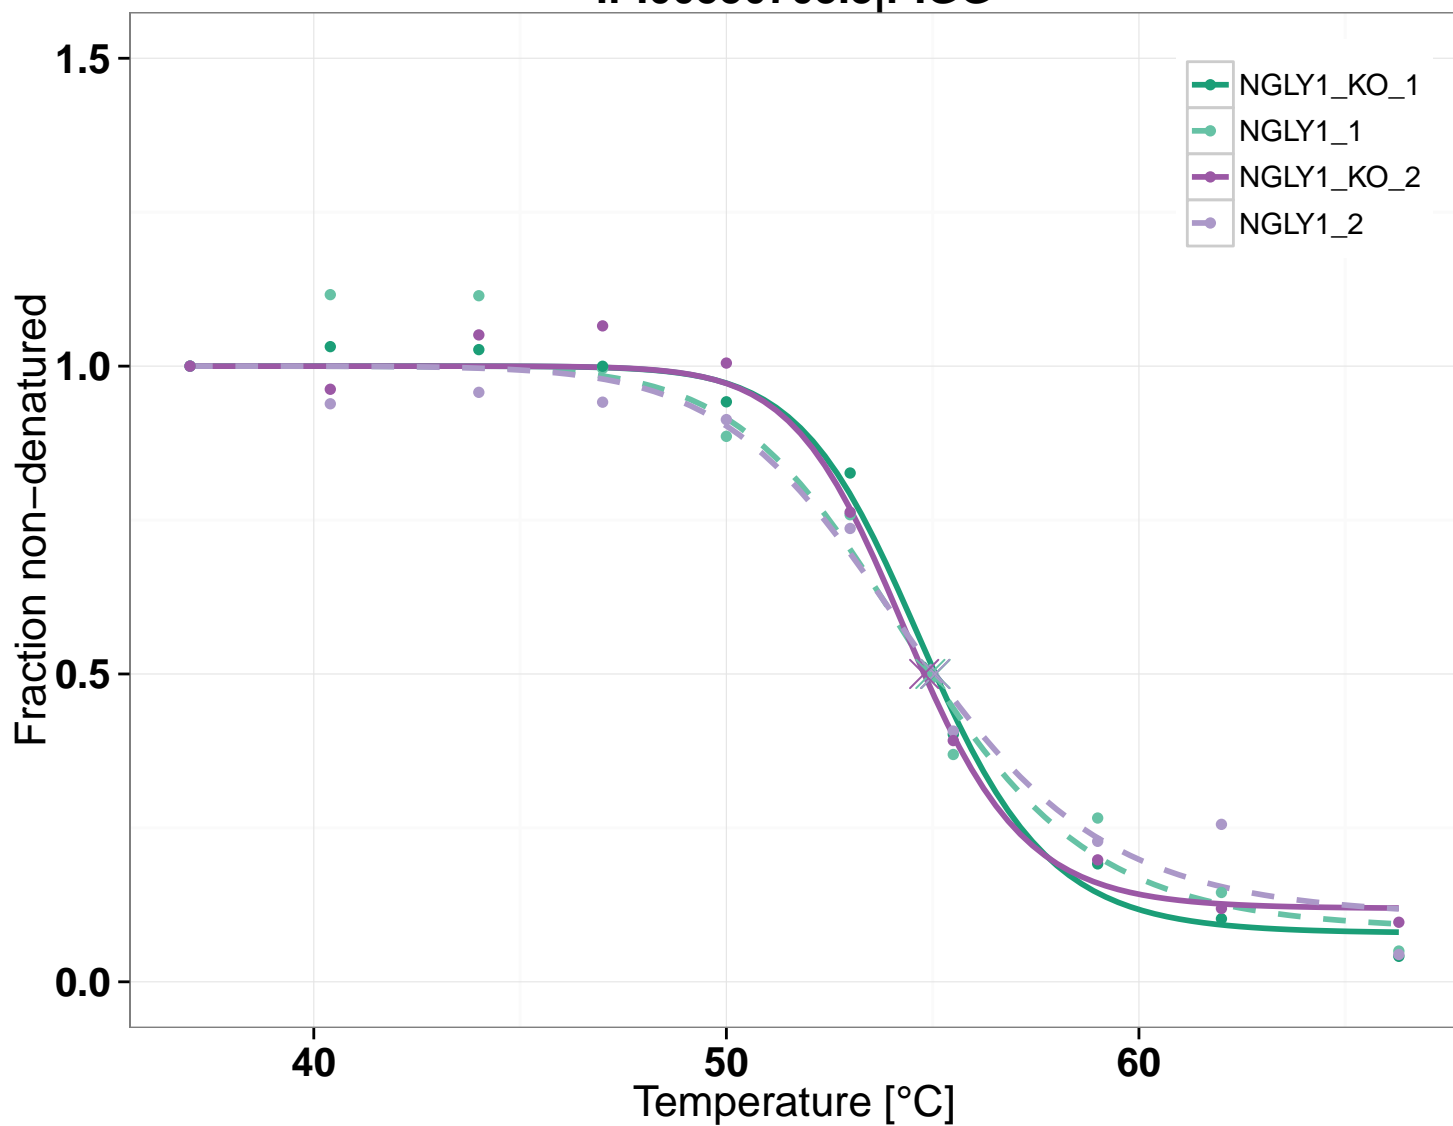

|            | meltPoint | slope  | plateau | R2   |
|------------|-----------|--------|---------|------|
| NGLY1_KO_1 | 55.07     | -0.15  | 0.08    | 0.99 |
| NGLY1_1    | 54.94     | -0.11  | 0.08    | 0.97 |
| NGLY1_KO_2 | 54.79     | -0.16  | 0.12    | 0.99 |
| NGLY1_2    | 55.06     | -0.097 | 0.1     | 0.98 |

Supplement: Supplementary file 4289 [file 1]

IPI00016074.1|MPHOSPH6

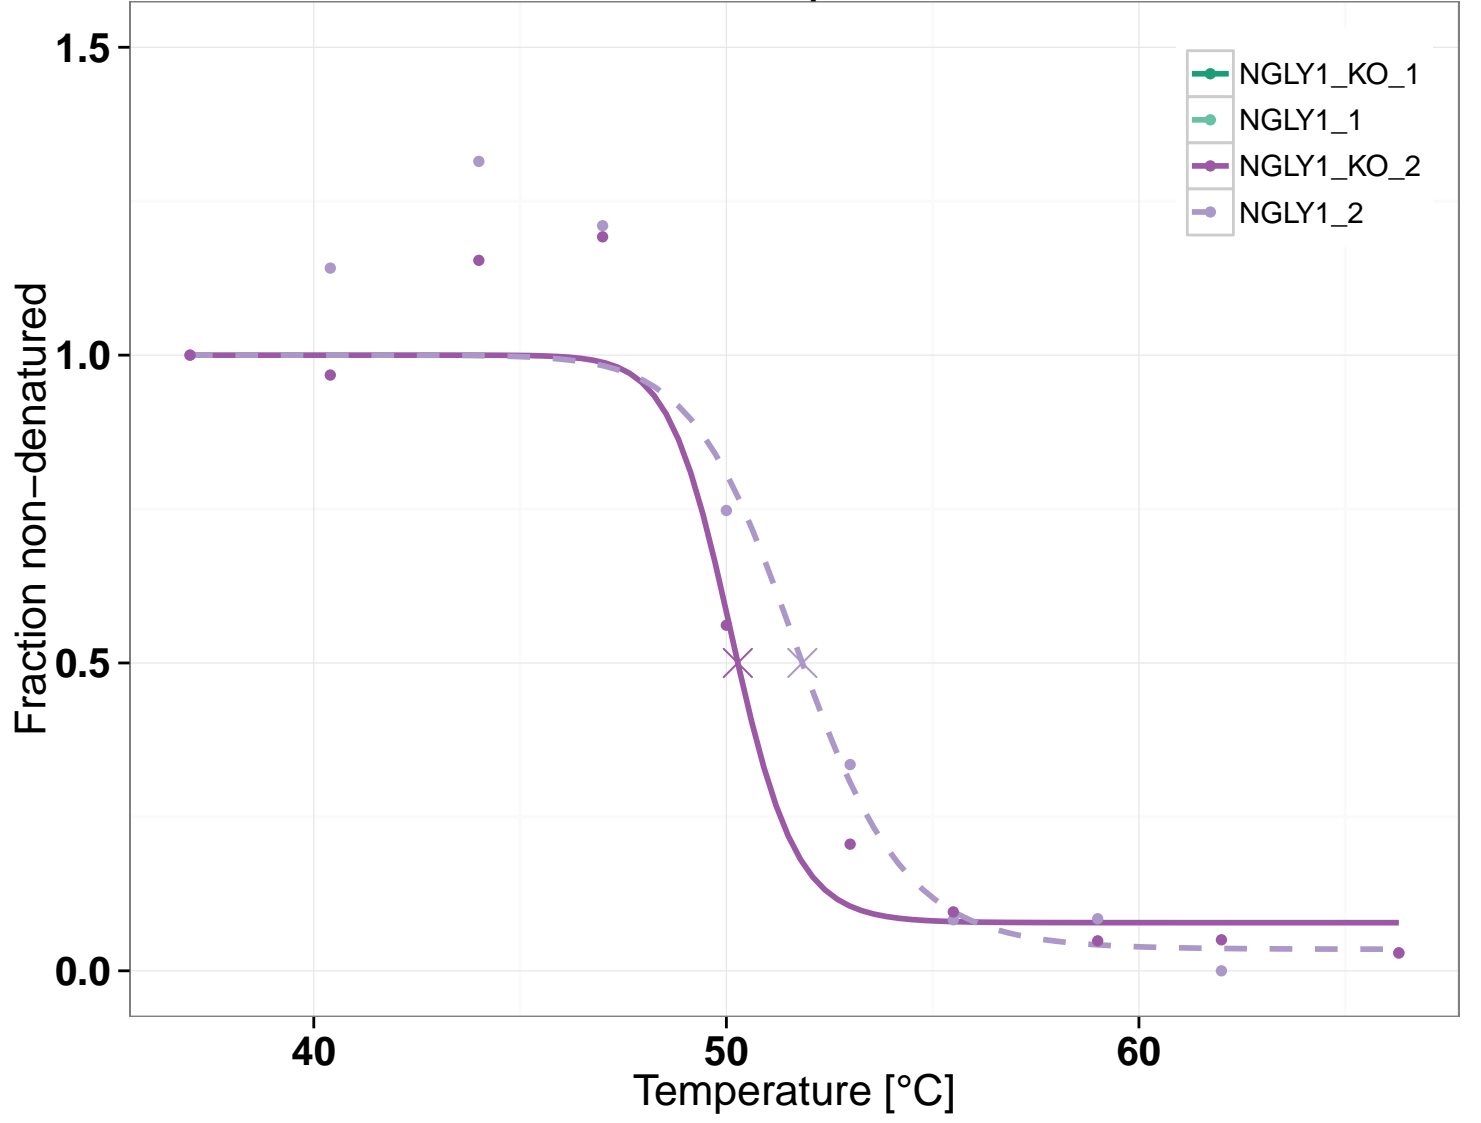

|            | meltPoint | slope | plateau | R2   |
|------------|-----------|-------|---------|------|
| NGLY1_KO_1 | —         | —     | —       | —    |
| NGLY1_1    | —         | —     | —       | —    |
| NGLY1_KO_2 | 50.28     | -0.3  | 0.08    | 0.96 |
| NGLY1_2    | 51.84     | -0.19 | 0.03    | 0.93 |

Supplement: Supplementary file 4290 [file 1]

IPI00302242.4|SLC2A8

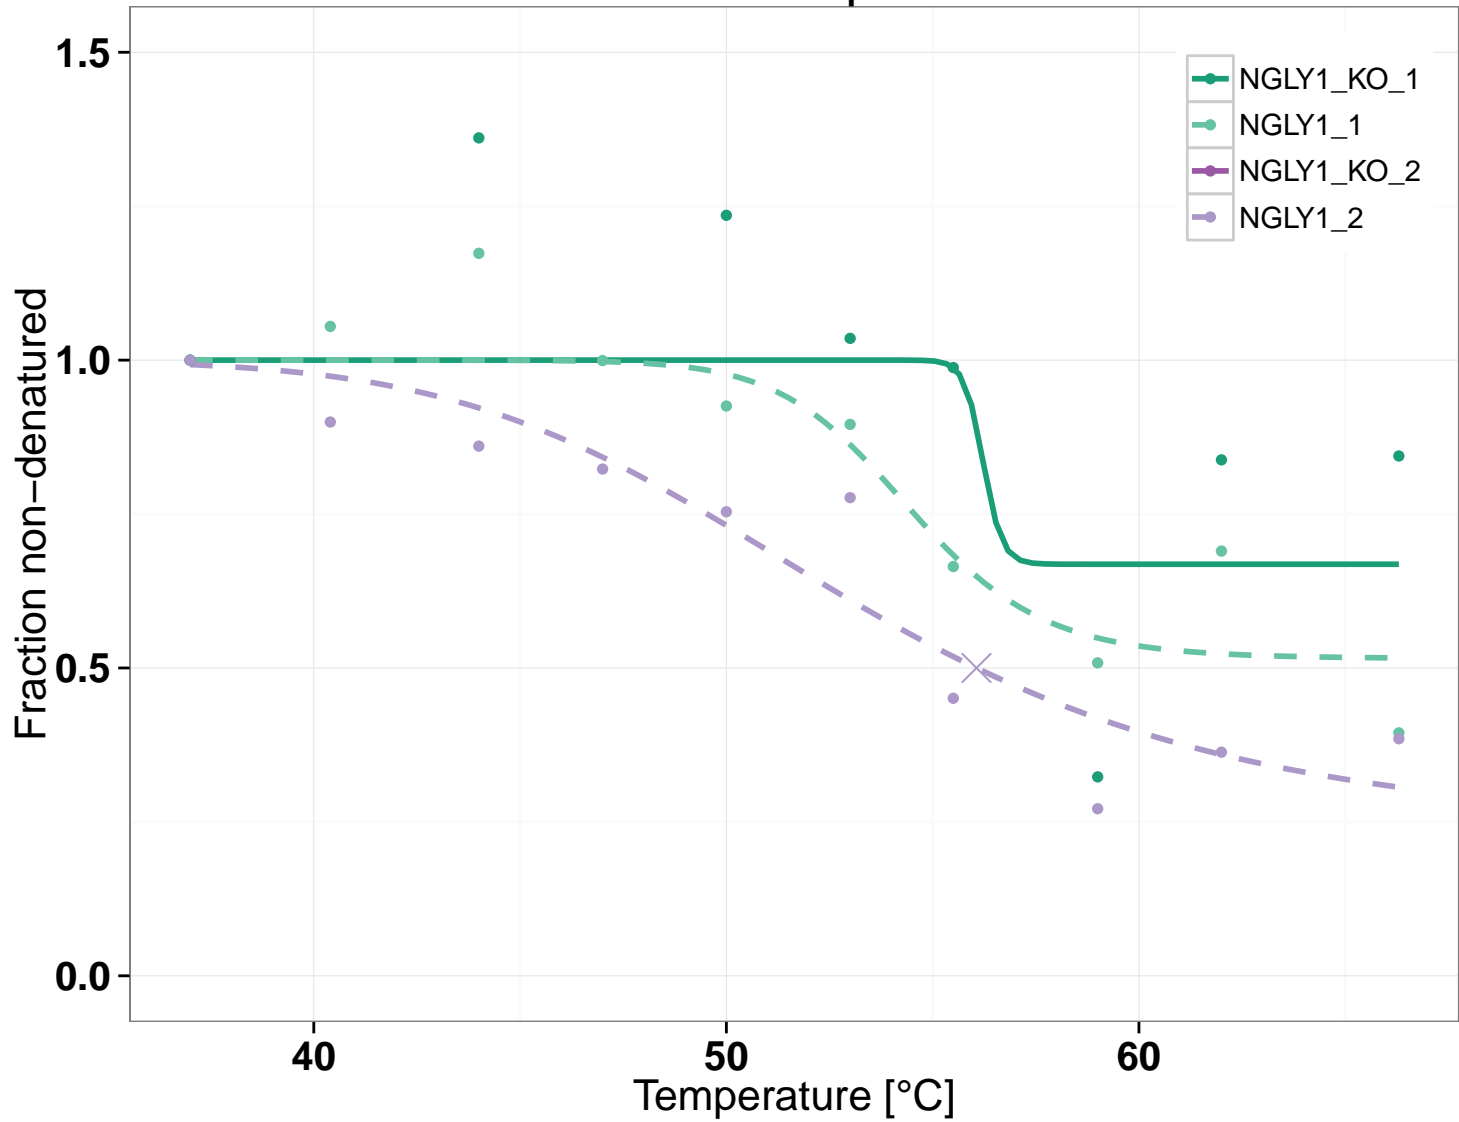

|            | meltPoint | slope  | plateau | R2   |
|------------|-----------|--------|---------|------|
| NGLY1_KO_1 | —         | −0.37  | 0.67    | 0.13 |
| NGLY1_1    | —         | −0.075 | 0.52    | 0.86 |
| NGLY1_KO_2 | —         | —      | —       | —    |
| NGLY1_2    | 56.06     | −0.041 | 0.23    | 0.89 |

Supplement: Supplementary file 4291 [file 1]

# IPI00550894.4|GNPDA2

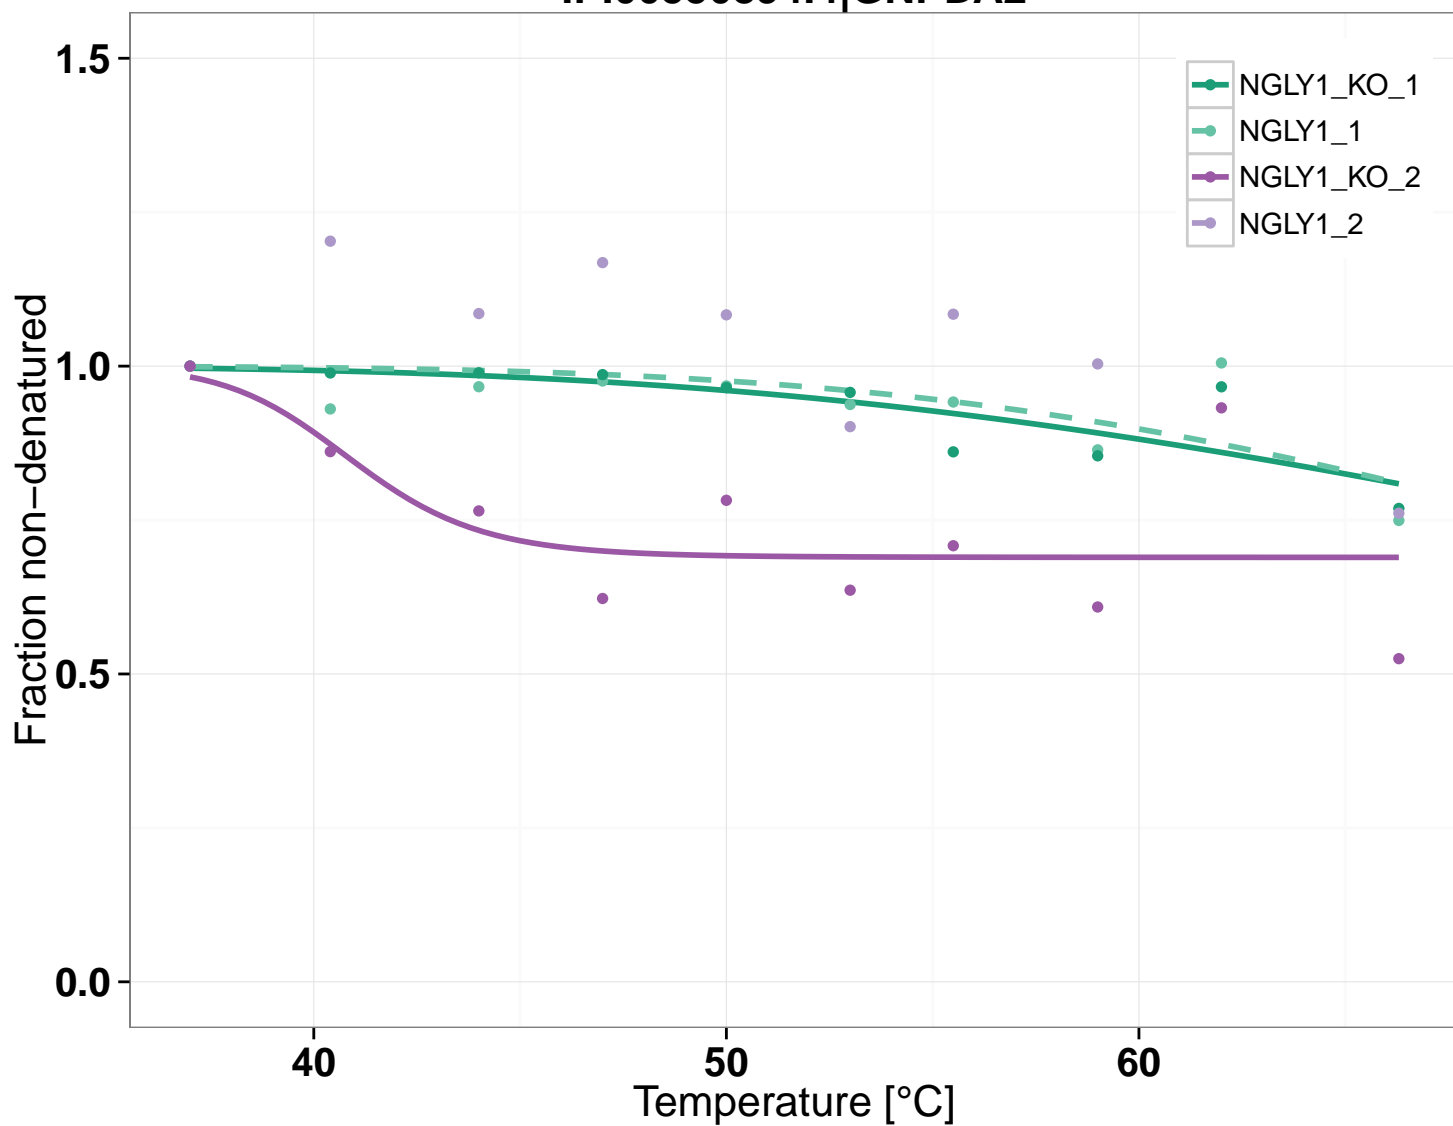

|            | meltPoint | slope | plateau | R2   |
|------------|-----------|-------|---------|------|
| NGLY1_KO_1 | —         | —     | 0       | 0.66 |
| NGLY1_1    | —         | —     | 0       | 0.45 |
| NGLY1_KO_2 | —         | -0.05 | 0.69    | 0.47 |
| NGLY1_2    | —         | —     | —       | —    |

Supplement: Supplementary file 4292 [file 1]

IPI00029343.2|CNTNAP2

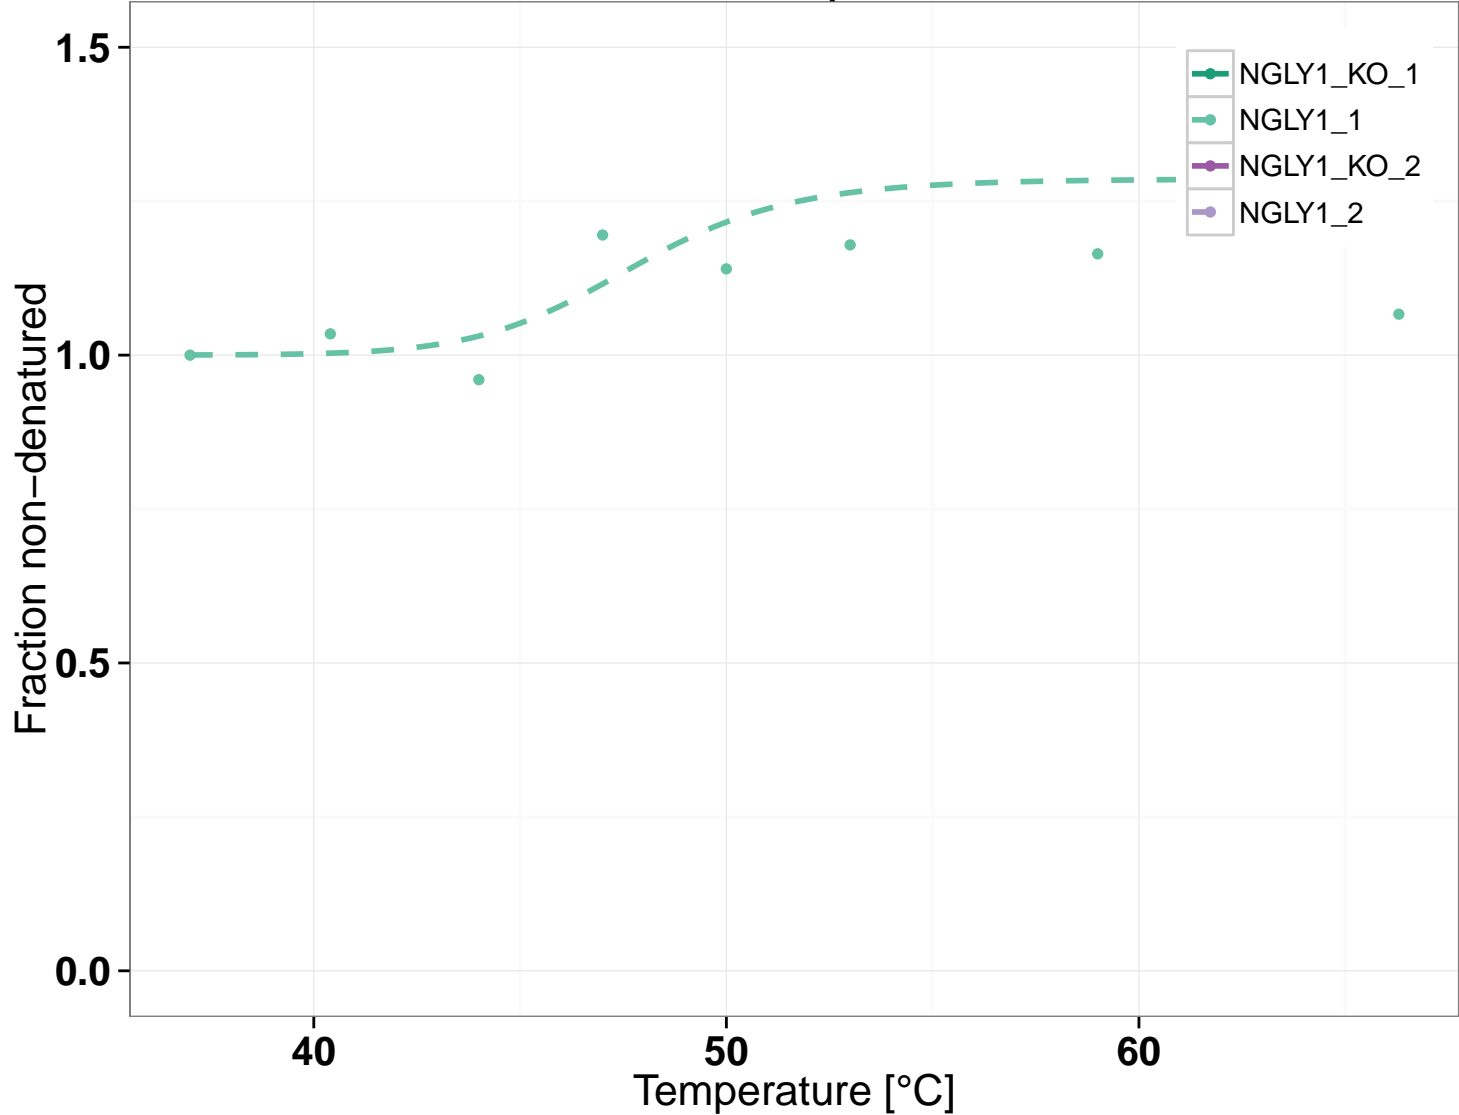

|            | meltPoint | slope | plateau | R2   |
|------------|-----------|-------|---------|------|
| NGLY1_KO_1 | —         | —     | —       | —    |
| NGLY1_1    | —         | 0.038 | 1.29    | 0.42 |
| NGLY1_KO_2 | —         | —     | —       | —    |
| NGLY1_2    | —         | —     | —       | —    |

Supplement: Supplementary file 4293 [file 1]

IPI00873893.1|TFE3

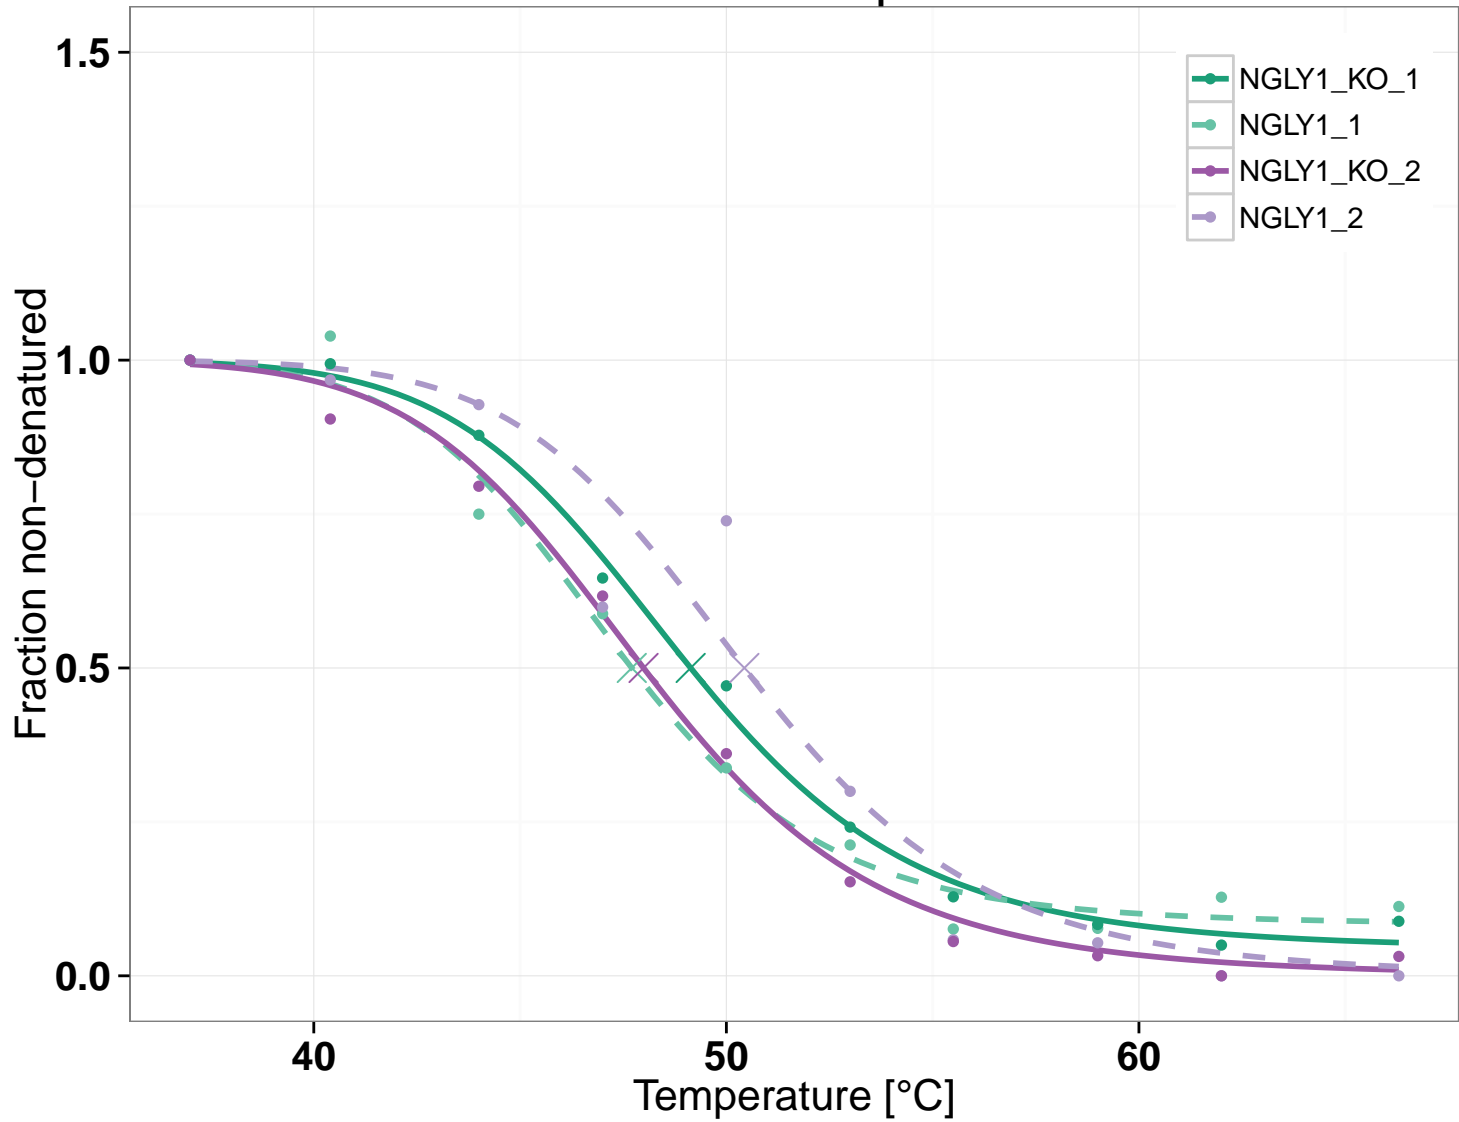

|            | meltPoint | slope  | plateau | R2   |
|------------|-----------|--------|---------|------|
| NGLY1_KO_1 | 49.13     | -0.085 | 0.04    | 1    |
| NGLY1_1    | 47.71     | -0.091 | 0.08    | 0.99 |
| NGLY1_KO_2 | 47.99     | -0.089 | 0       | 0.99 |
| NGLY1_2    | 50.44     | -0.088 | 0       | 0.95 |

Supplement: Supplementary file 4294 [file 1]

IPI00414384.1|HSDL2

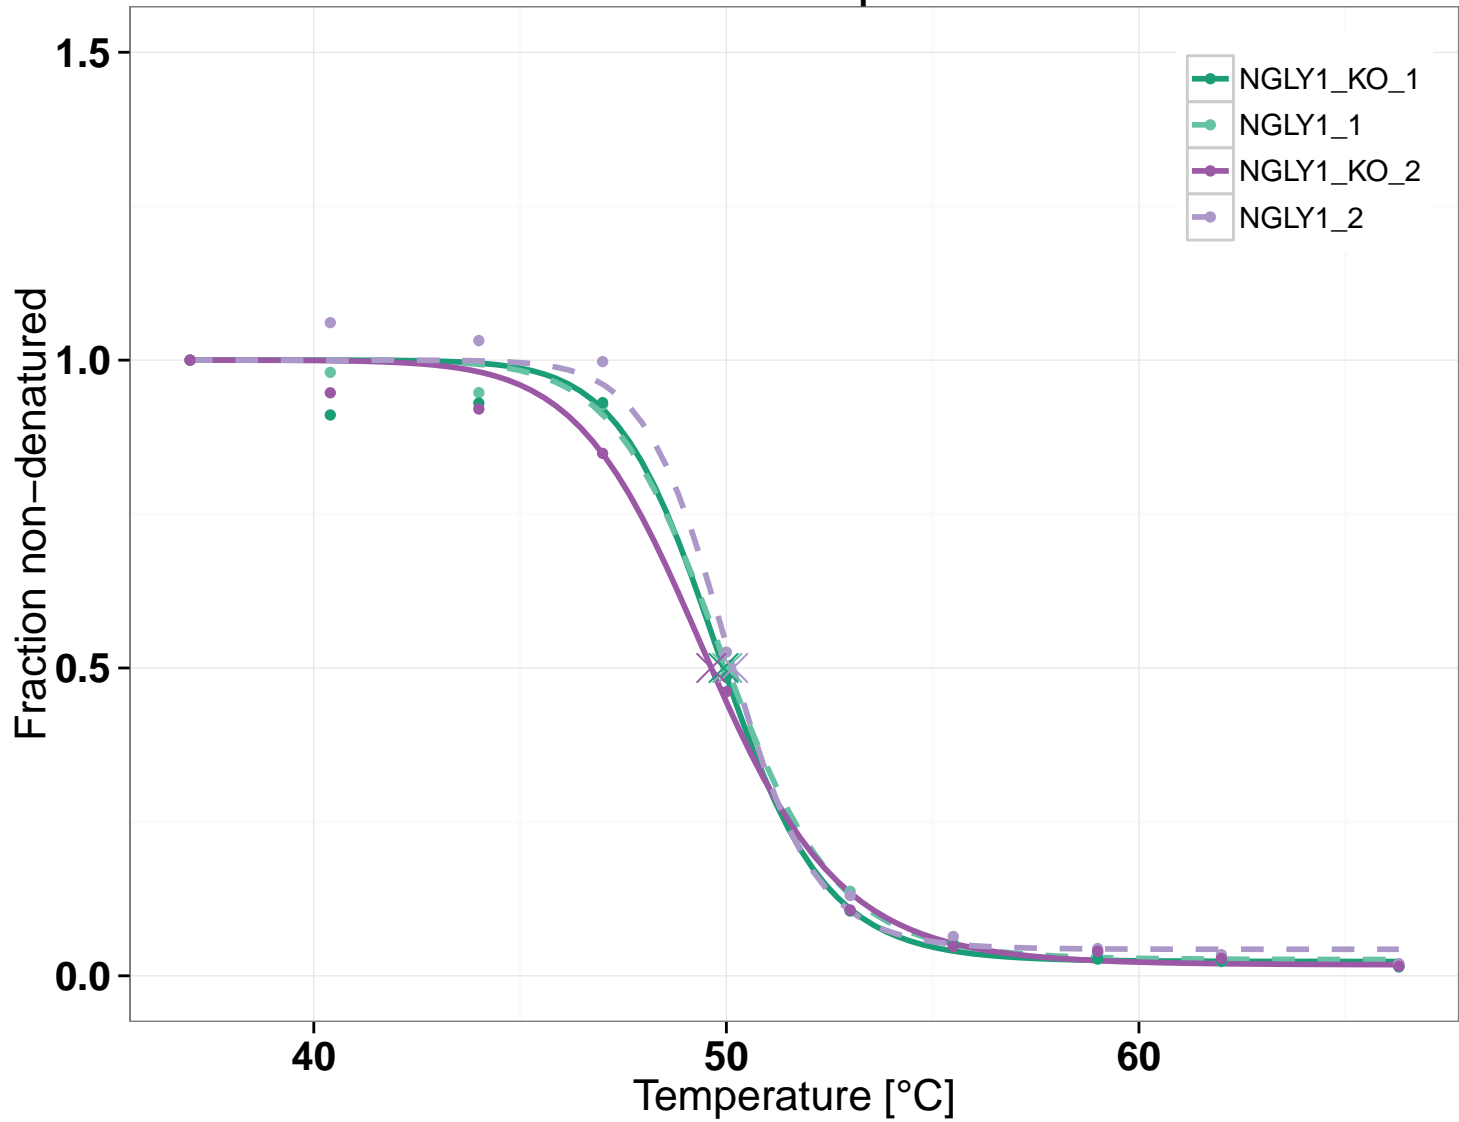

|            | meltPoint | slope | plateau | R2   |
|------------|-----------|-------|---------|------|
| NGLY1_KO_1 | 49.93     | -0.2  | 0.02    | 0.99 |
| NGLY1_1    | 50.02     | -0.18 | 0.03    | 1    |
| NGLY1_KO_2 | 49.63     | -0.15 | 0.02    | 1    |
| NGLY1_2    | 50.17     | -0.23 | 0.04    | 1    |

Supplement: Supplementary file 4295 [file 1]

# IPI00156984.3|CHMP1B

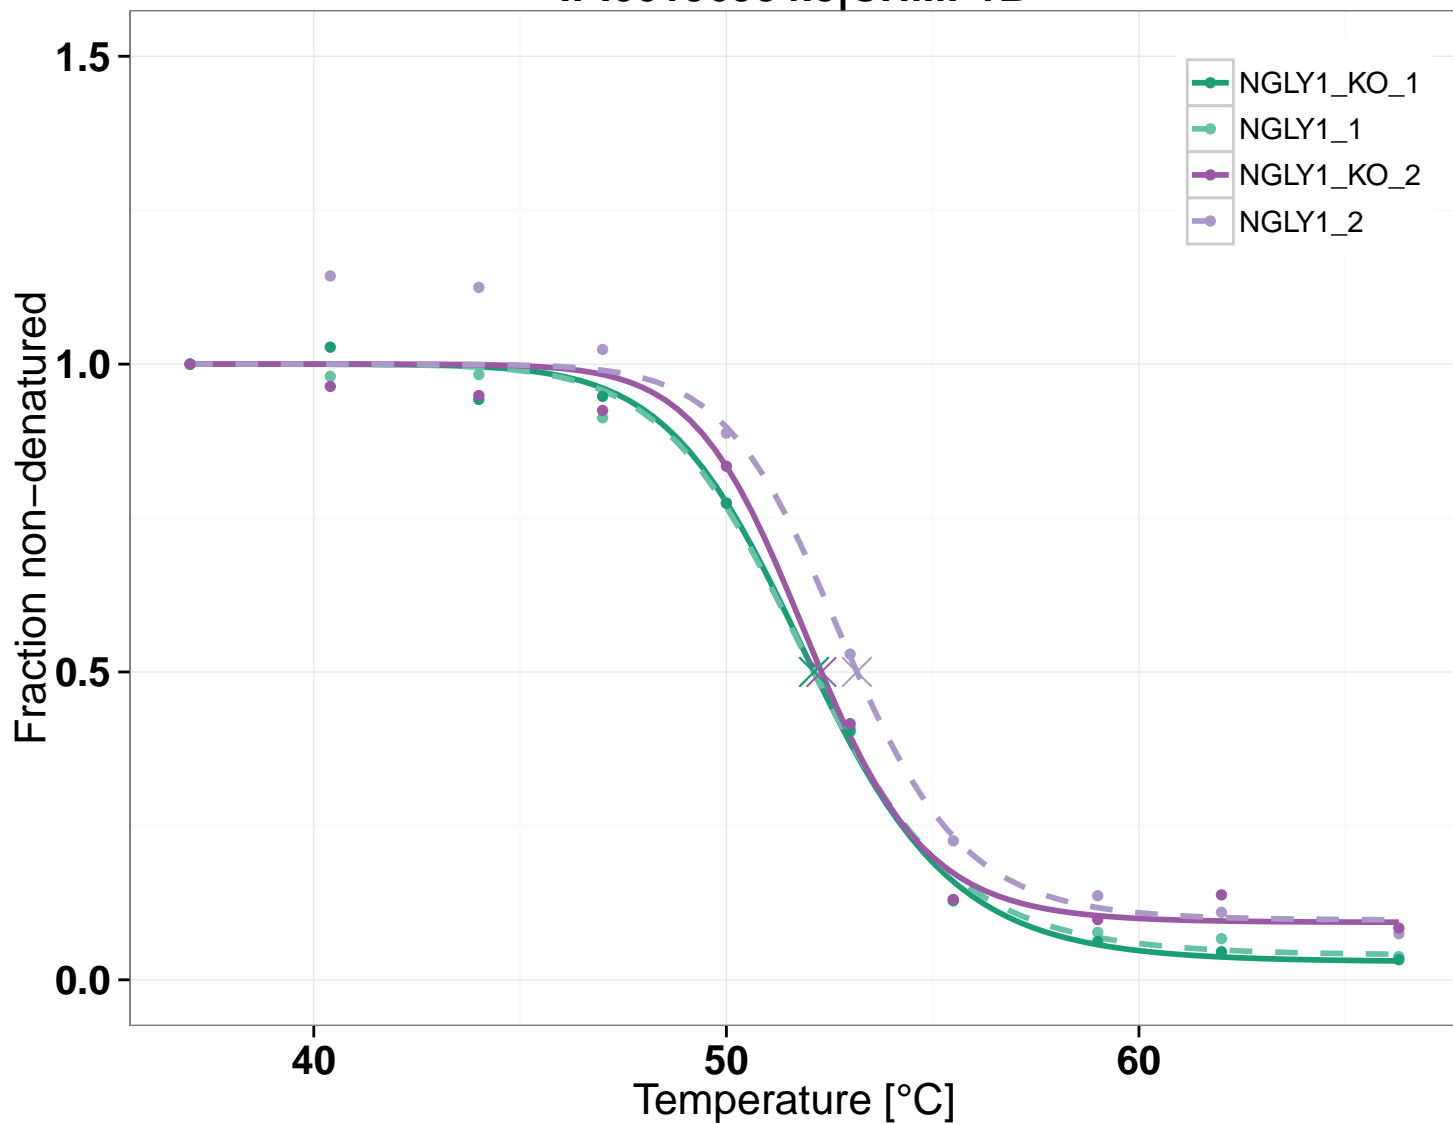

|            | meltPoint | slope | plateau | R2   |
|------------|-----------|-------|---------|------|
| NGLY1_KO_1 | 52.13     | -0.14 | 0.03    | 1    |
| NGLY1_1    | 52.11     | -0.13 | 0.04    | 1    |
| NGLY1_KO_2 | 52.3      | -0.16 | 0.09    | 0.99 |
| NGLY1_2    | 53.16     | -0.16 | 0.1     | 0.98 |

Supplement: Supplementary file 4296 [file 1]

IPI00030128.1|B4GALT4

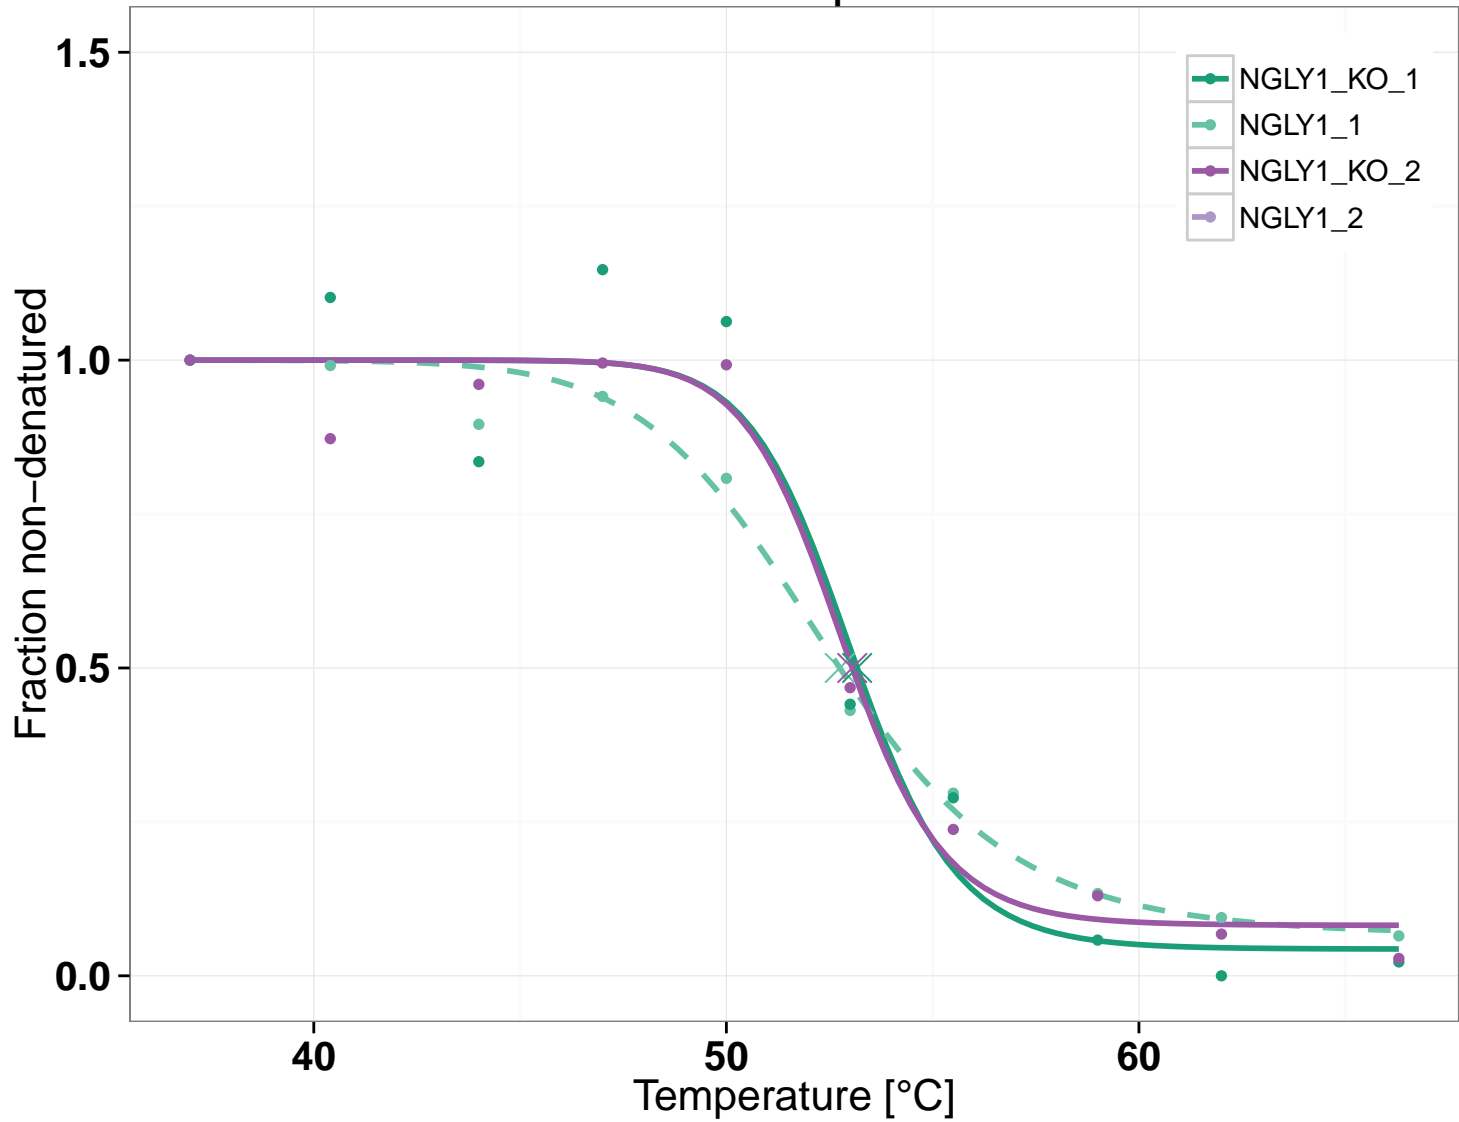

|            | meltPoint | slope | plateau | R2   |
|------------|-----------|-------|---------|------|
| NGLY1_KO_1 | 53.17     | -0.19 | 0.04    | 0.95 |
| NGLY1_1    | 52.75     | -0.1  | 0.07    | 0.99 |
| NGLY1_KO_2 | 53.05     | -0.19 | 0.08    | 0.98 |
| NGLY1_2    | -         | -     | -       | -    |

Supplement: Supplementary file 4297 [file 1]

IPI00008802.2|RGS20

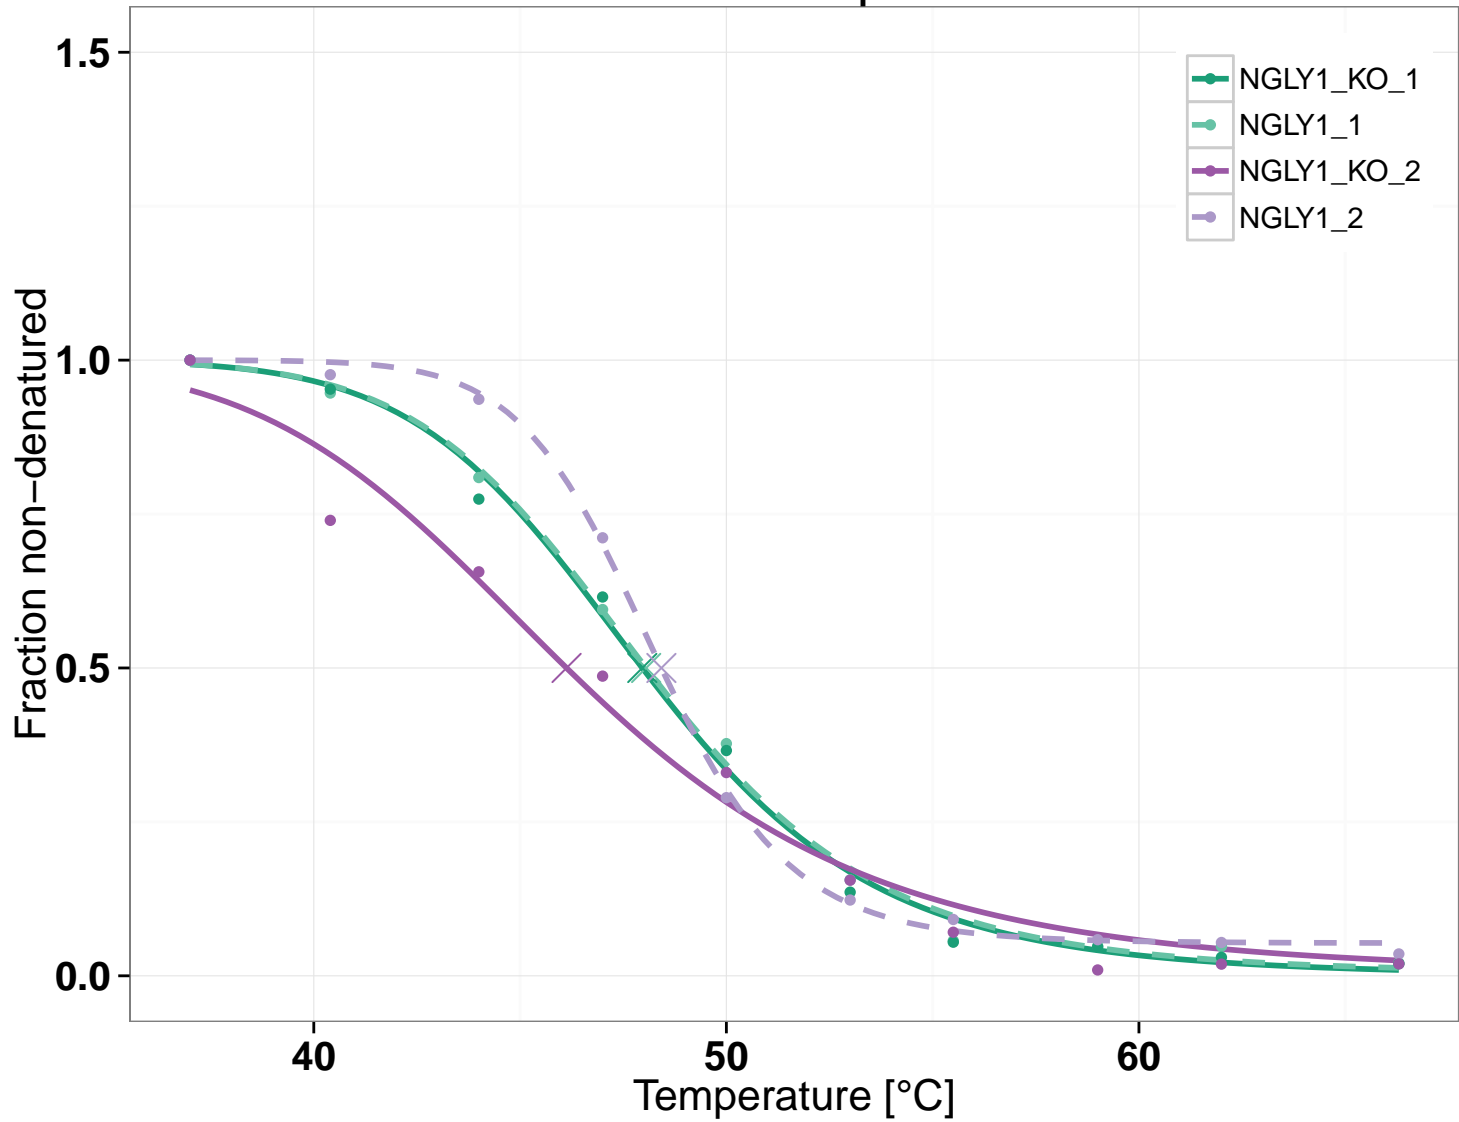

|            | meltPoint | slope  | plateau | R2   |
|------------|-----------|--------|---------|------|
| NGLY1_KO_1 | 47.96     | -0.089 | 0       | 1    |
| NGLY1_1    | 48.06     | -0.088 | 0       | 1    |
| NGLY1_KO_2 | 46.13     | -0.067 | 0       | 0.98 |
| NGLY1_2    | 48.43     | -0.14  | 0.05    | 1    |

Supplement: Supplementary file 4298 [file 1]

IPI00747637.1|HRC

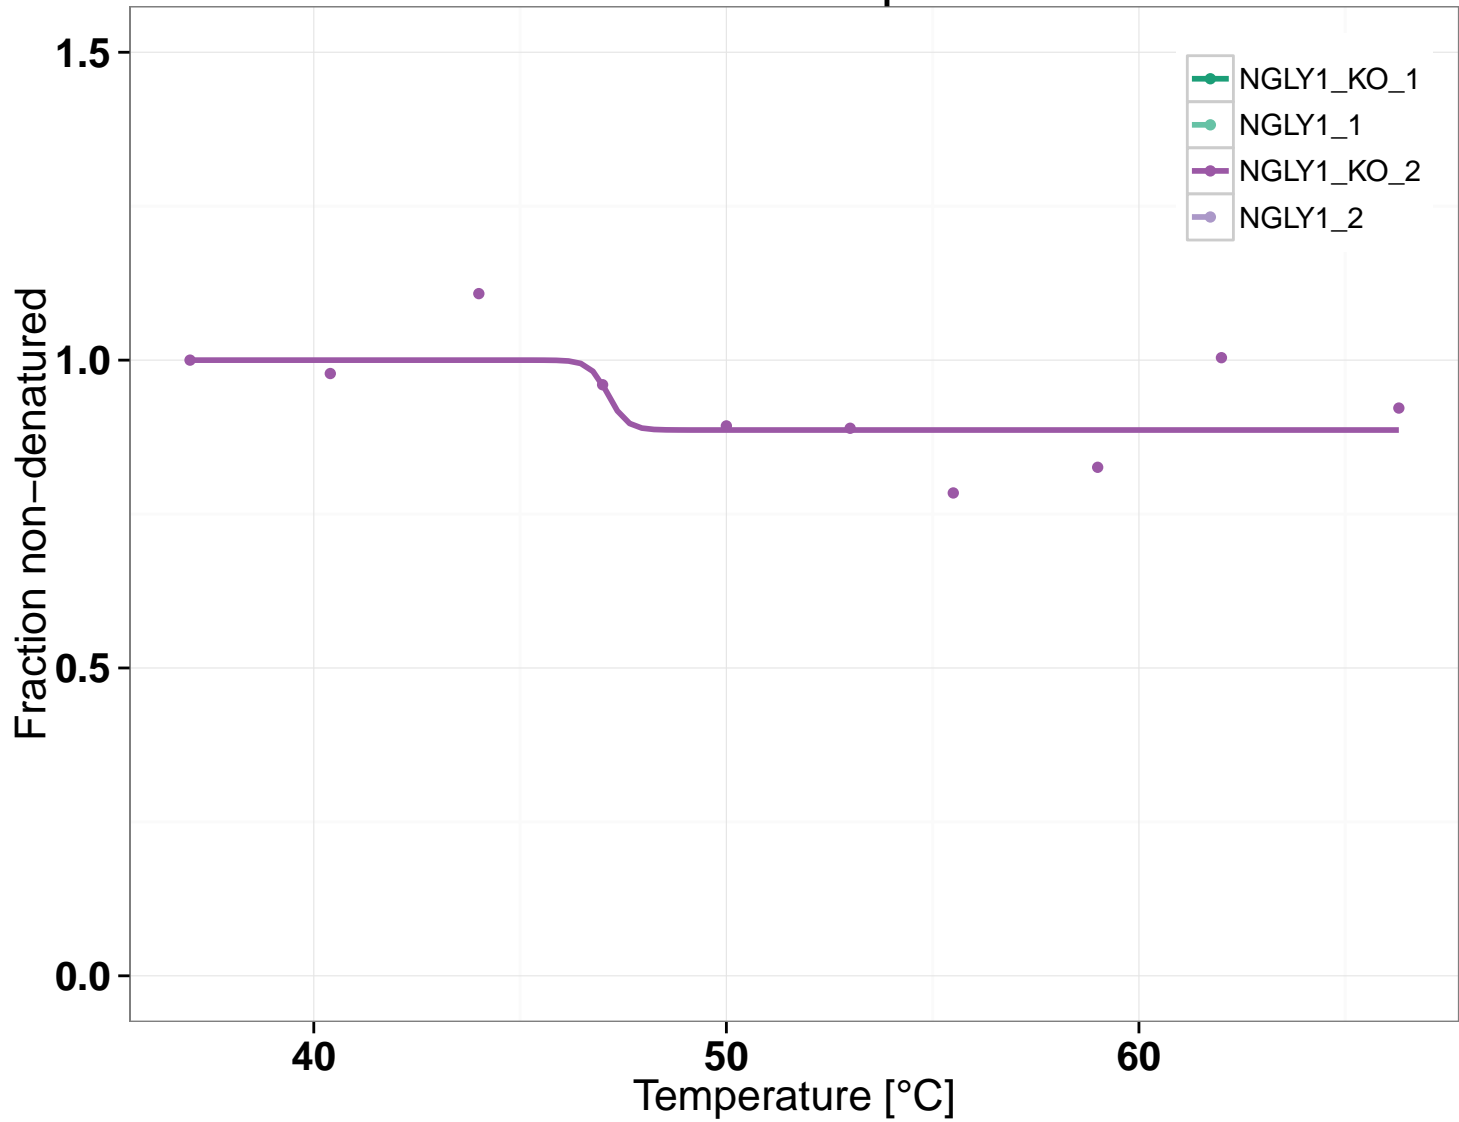

|            | meltPoint | slope | plateau | R2   |
|------------|-----------|-------|---------|------|
| NGLY1_KO_1 | —         | —     | —       | —    |
| NGLY1_1    | —         | —     | —       | —    |
| NGLY1_KO_2 | —         | -0.13 | 0.89    | 0.48 |
| NGLY1_2    | —         | —     | —       | —    |

Supplement: Supplementary file 4299 [file 1]

# IPI00152342.3|C18ORF32

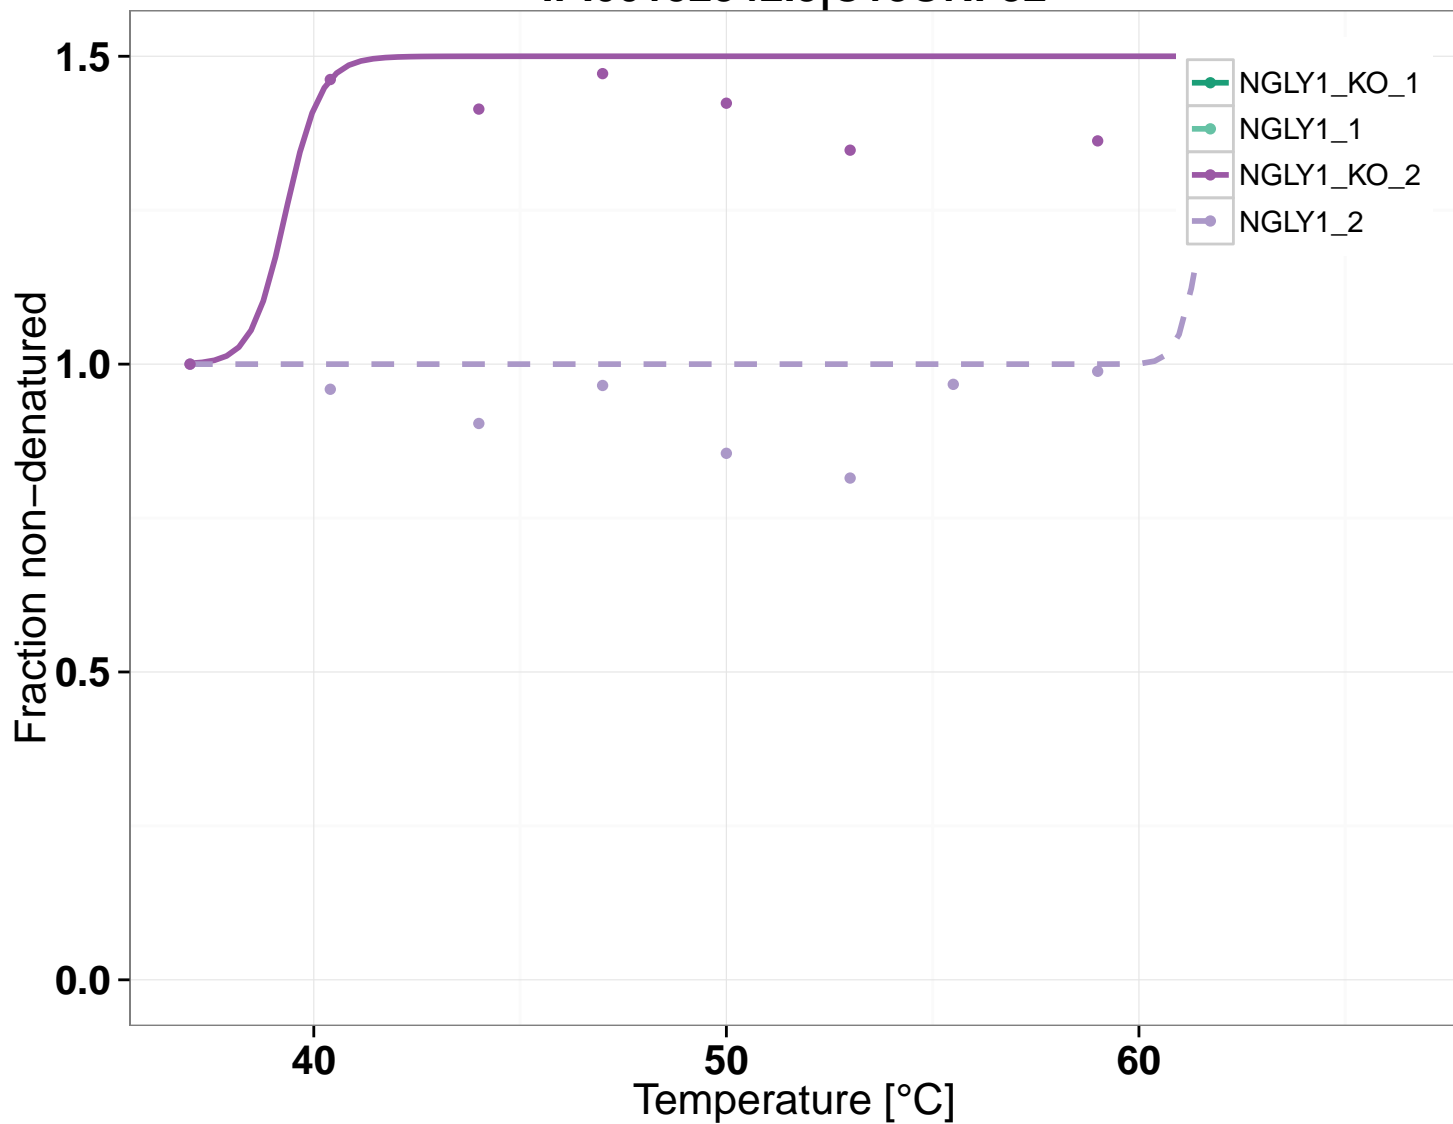

|            | meltPoint | slope | plateau | R2   |
|------------|-----------|-------|---------|------|
| NGLY1_KO_1 | —         | —     | —       | —    |
| NGLY1_1    | —         | —     | —       | —    |
| NGLY1_KO_2 | —         | 0.3   | 1.5     | 0.33 |
| NGLY1_2    | —         | 0.38  | 1.38    | 0.79 |

Supplement: Supplementary file 4300 [file 1]

IPI00829596.1|KIAA0323

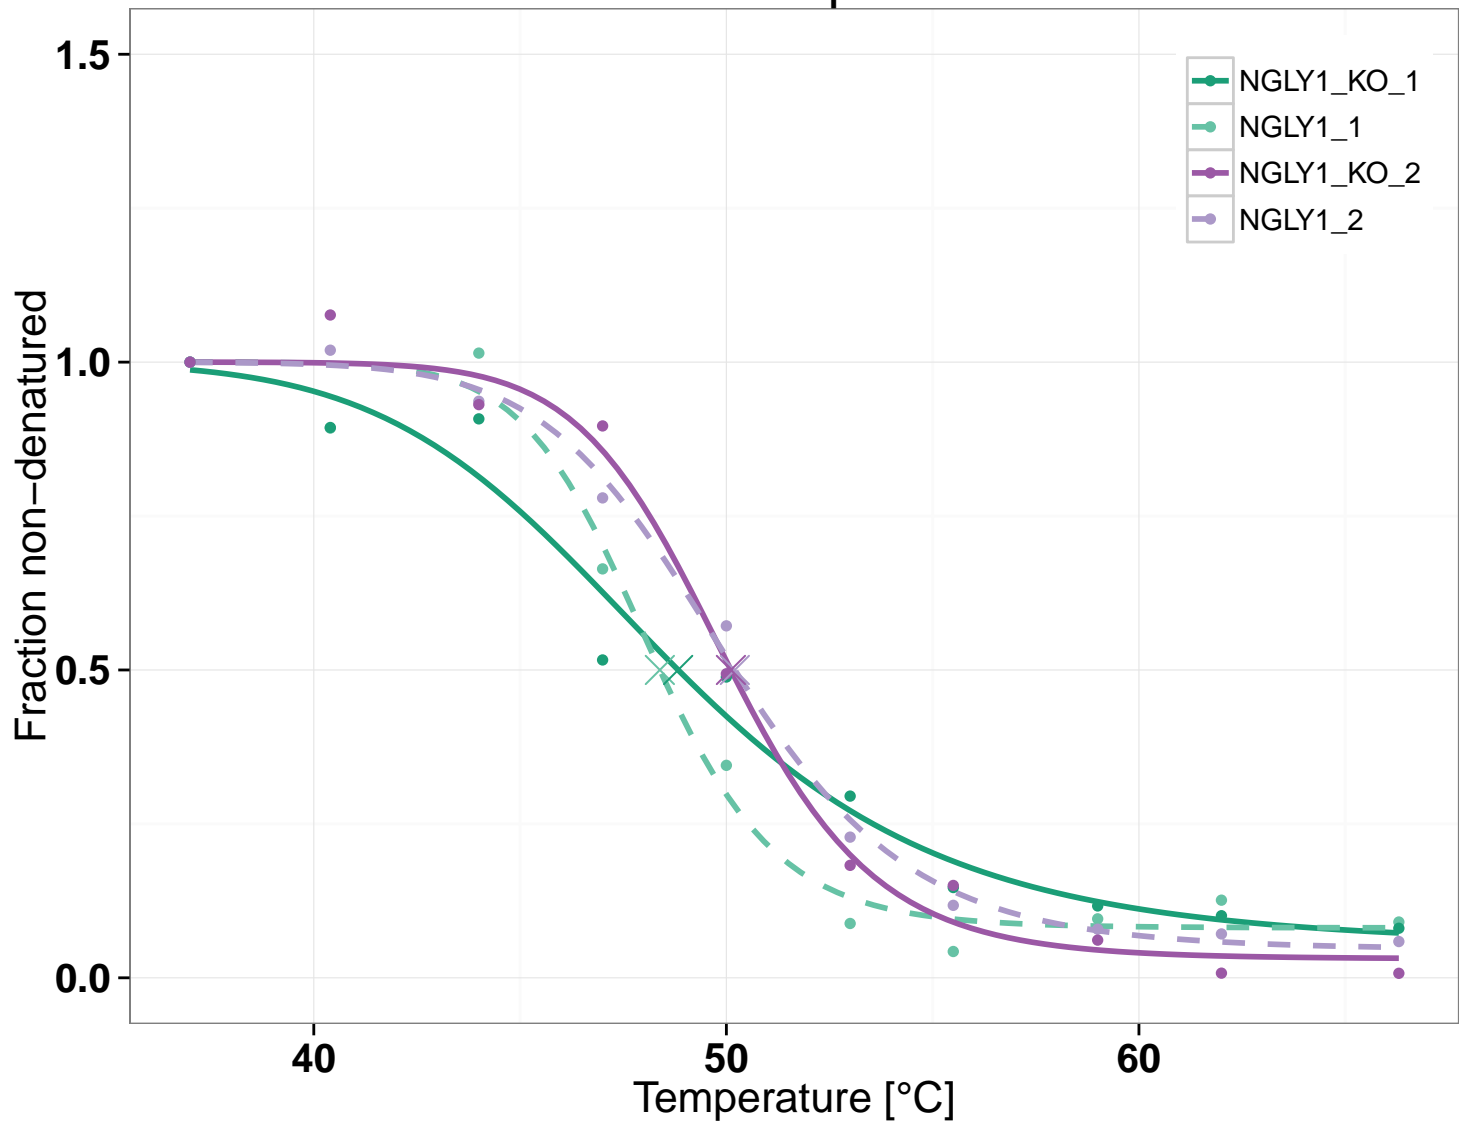

|            | meltPoint | slope | plateau | R2   |
|------------|-----------|-------|---------|------|
| NGLY1_KO_1 | 48.83     | -0.07 | 0.05    | 0.97 |
| NGLY1_1    | 48.39     | -0.15 | 0.08    | 0.98 |
| NGLY1_KO_2 | 50.11     | -0.13 | 0.03    | 0.99 |
| NGLY1_2    | 50.2      | -0.11 | 0.05    | 1    |

Supplement: Supplementary file 4301 [file 1]

IPI00218475.4|IFI35

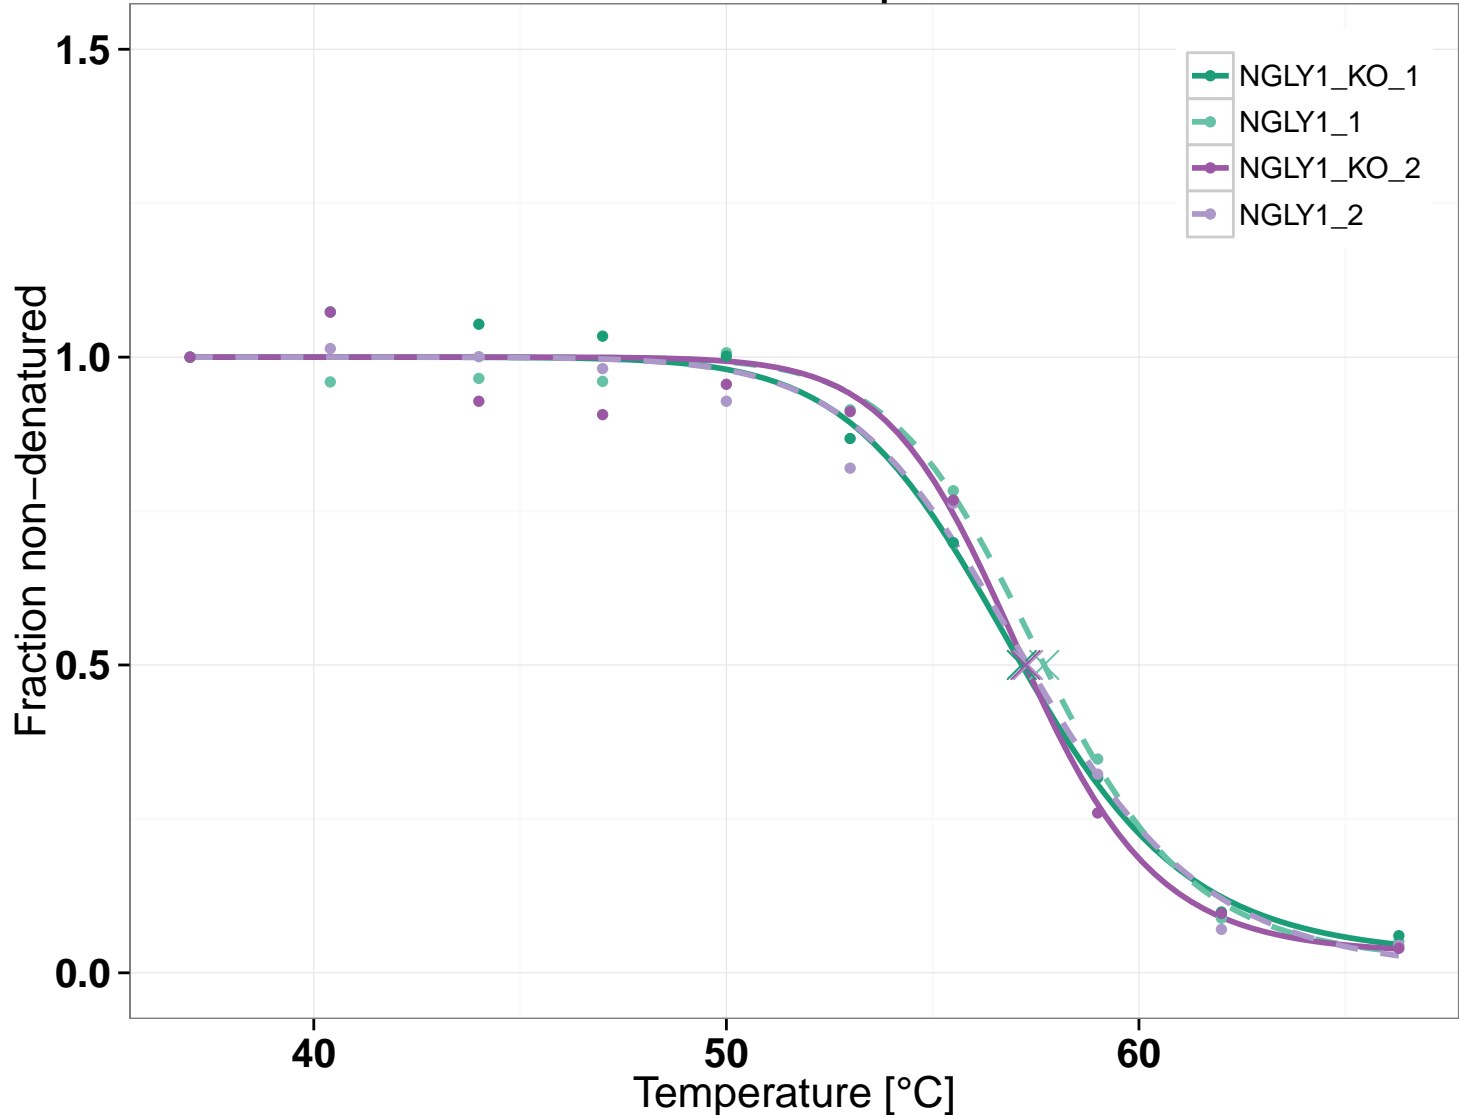

|            | meltPoint | slope | plateau | R2   |
|------------|-----------|-------|---------|------|
| NGLY1_KO_1 | 57.16     | -0.12 | 0.03    | 0.99 |
| NGLY1_1    | 57.7      | -0.14 | 0.02    | 1    |
| NGLY1_KO_2 | 57.25     | -0.15 | 0.03    | 0.98 |
| NGLY1_2    | 57.31     | -0.12 | 0       | 0.99 |

Supplement: Supplementary file 4302 [file 1]

IPI00013026.1|CYB561D2

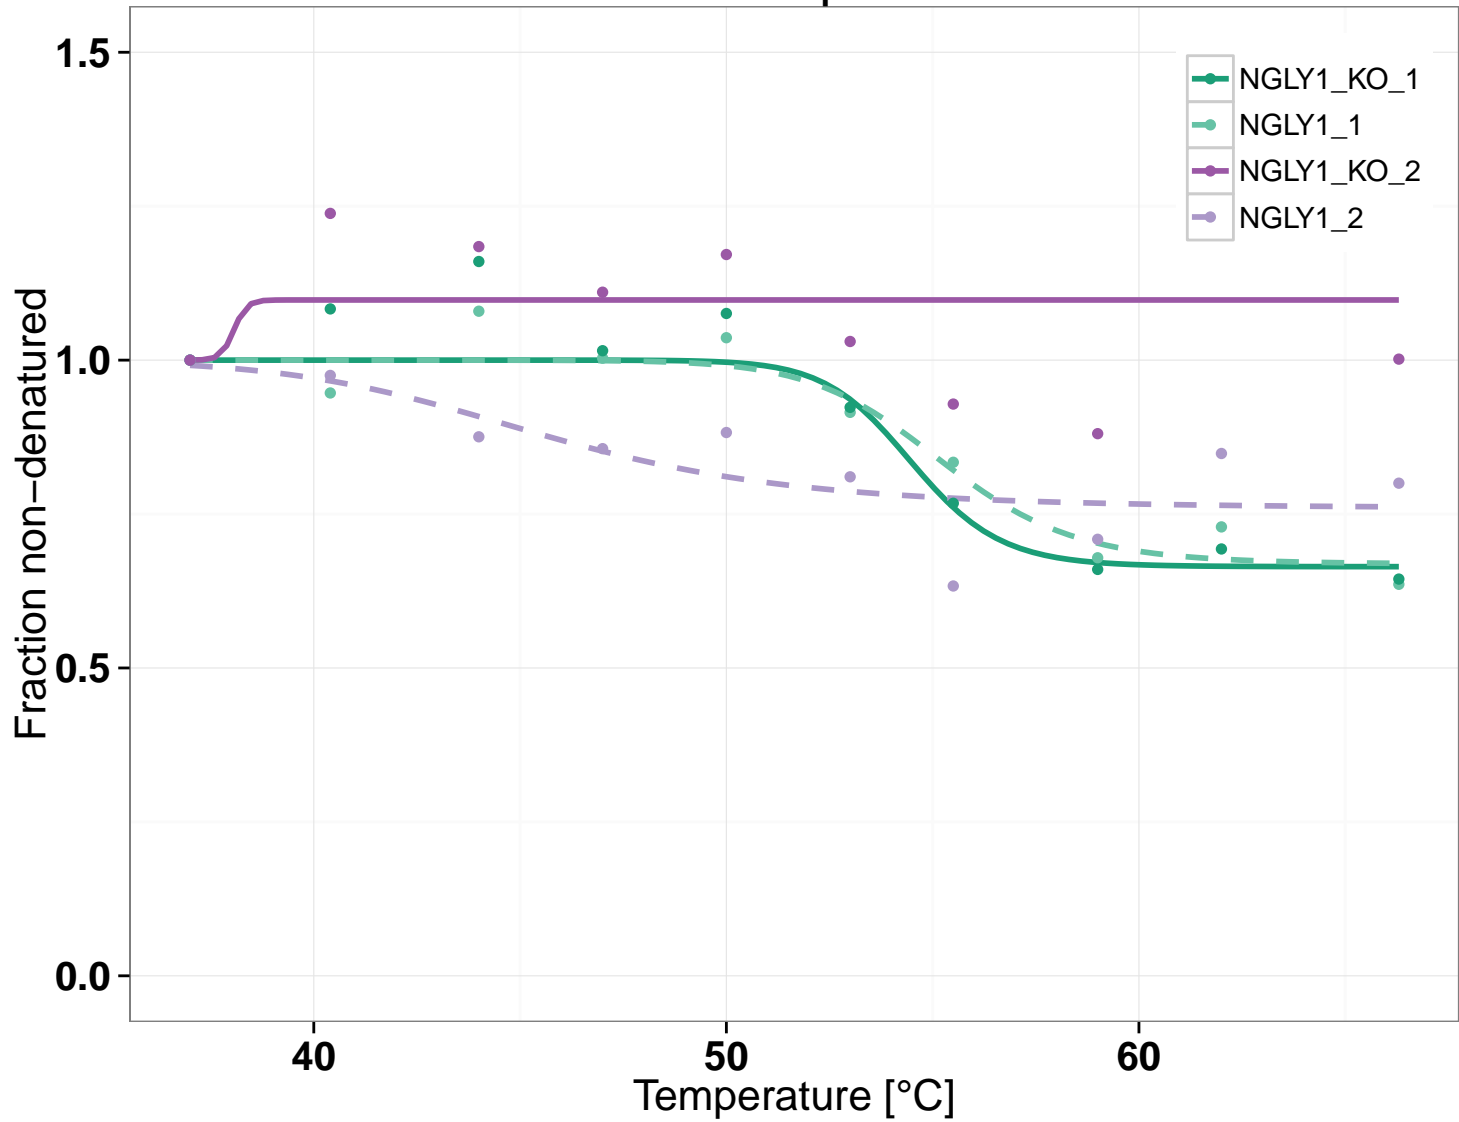

|            | meltPoint | slope  | plateau | R2   |
|------------|-----------|--------|---------|------|
| NGLY1_KO_1 | —         | -0.079 | 0.66    | 0.88 |
| NGLY1_1    | —         | -0.051 | 0.67    | 0.93 |
| NGLY1_KO_2 | —         | 0.16   | 1.1     | 0.05 |
| NGLY1_2    | —         | -0.019 | 0.76    | 0.64 |

Supplement: Supplementary file 4303 [file 1]

IPI00455268.4|TRMT5

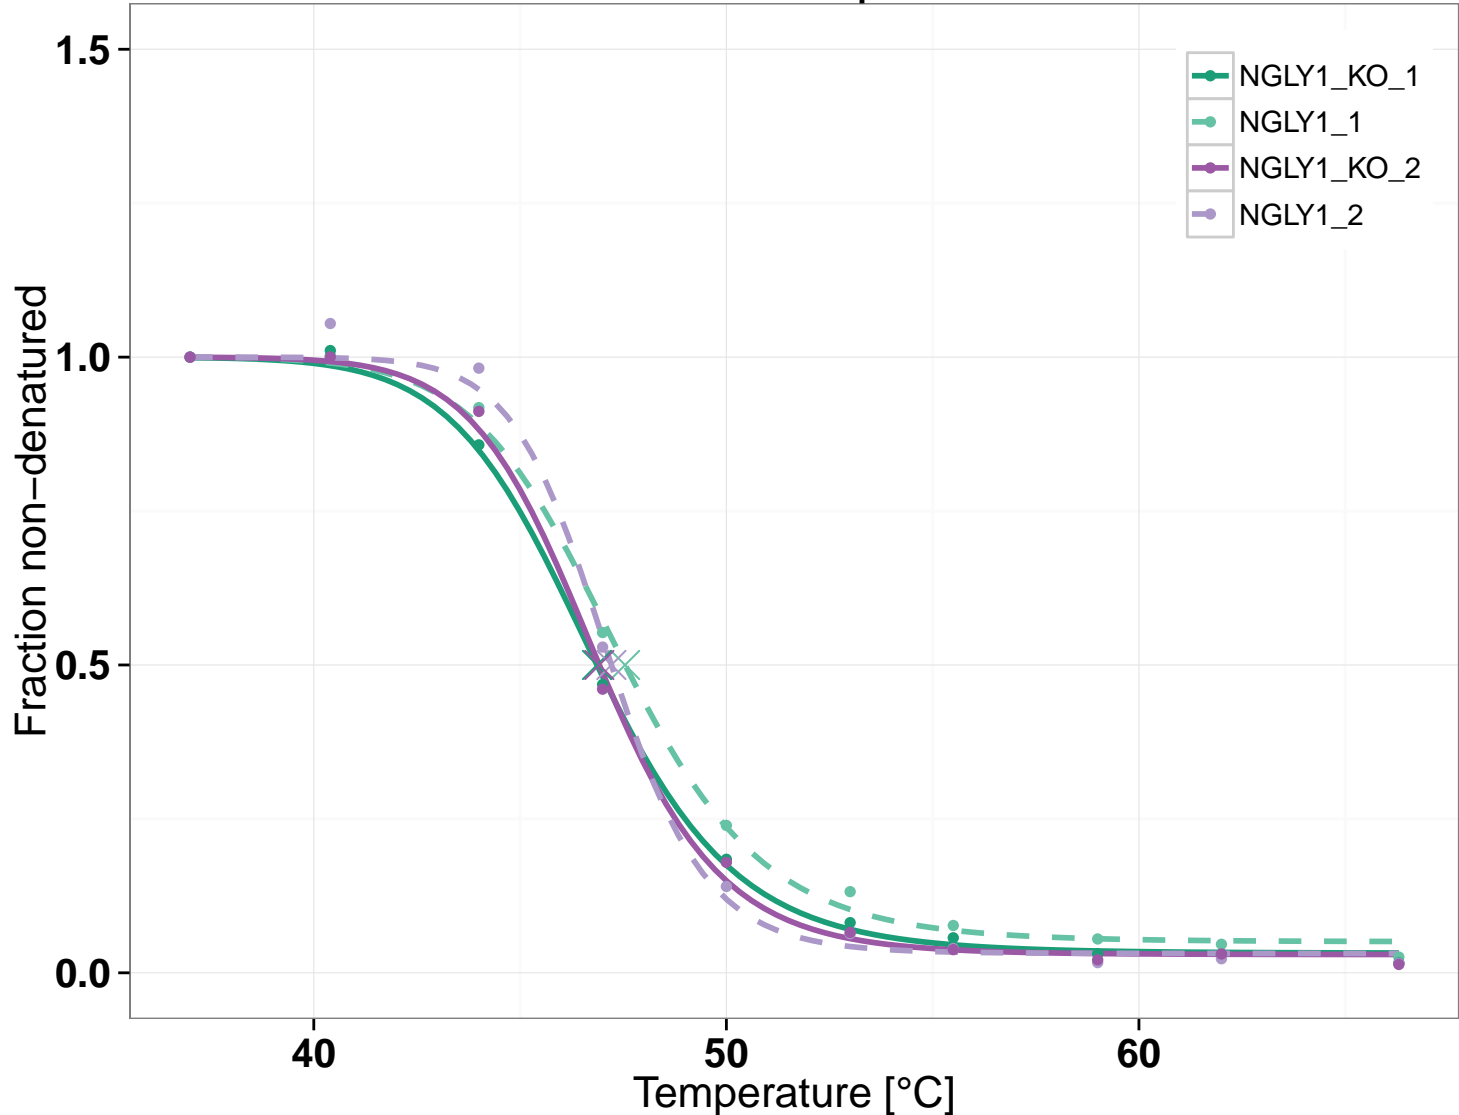

|            | meltPoint | slope | plateau | R2 |
|------------|-----------|-------|---------|----|
| NGLY1_KO_1 | 46.87     | -0.14 | 0.03    | 1  |
| NGLY1_1    | 47.55     | -0.13 | 0.05    | 1  |
| NGLY1_KO_2 | 46.92     | -0.16 | 0.03    | 1  |
| NGLY1_2    | 47.21     | -0.21 | 0.03    | 1  |

Supplement: Supplementary file 4304 [file 1]

IPI00100947.3|LENG1

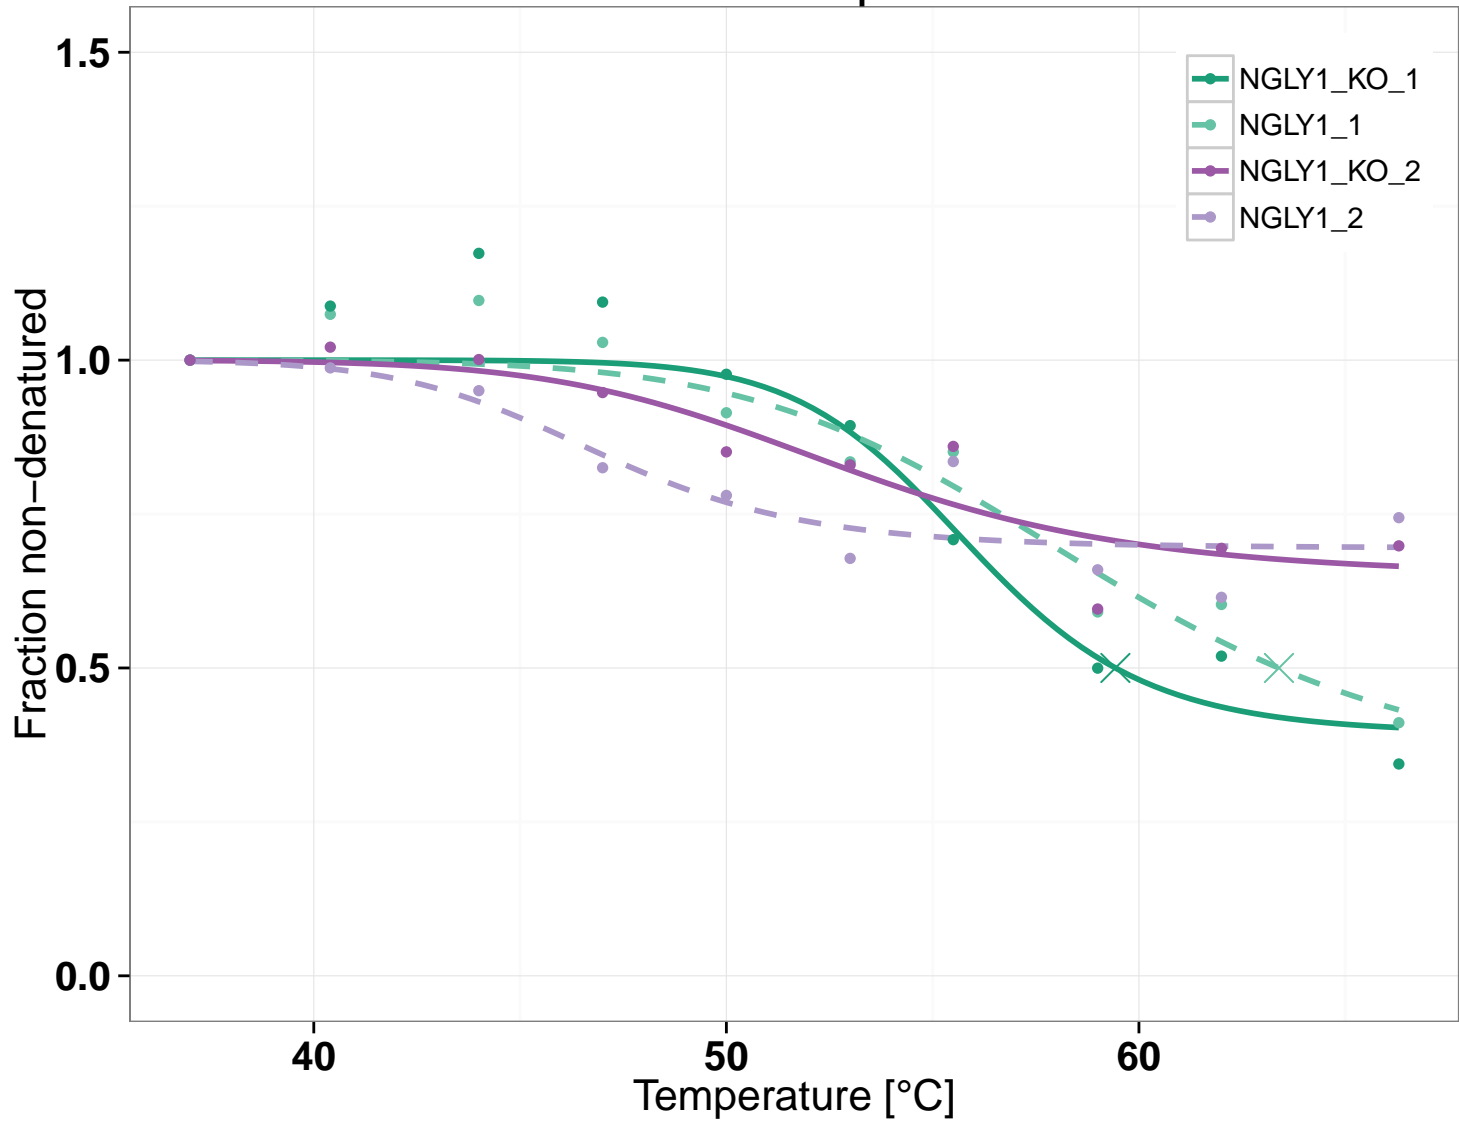

|            | meltPoint | slope  | plateau | R2   |
|------------|-----------|--------|---------|------|
| NGLY1_KO_1 | 59.43     | -0.071 | 0.39    | 0.92 |
| NGLY1_1    | 63.39     | -0.041 | 0.31    | 0.93 |
| NGLY1_KO_2 | -         | -0.025 | 0.65    | 0.87 |
| NGLY1_2    | -         | -0.031 | 0.69    | 0.83 |

Supplement: Supplementary file 4305 [file 1]

IPI00290542.1|STAM2

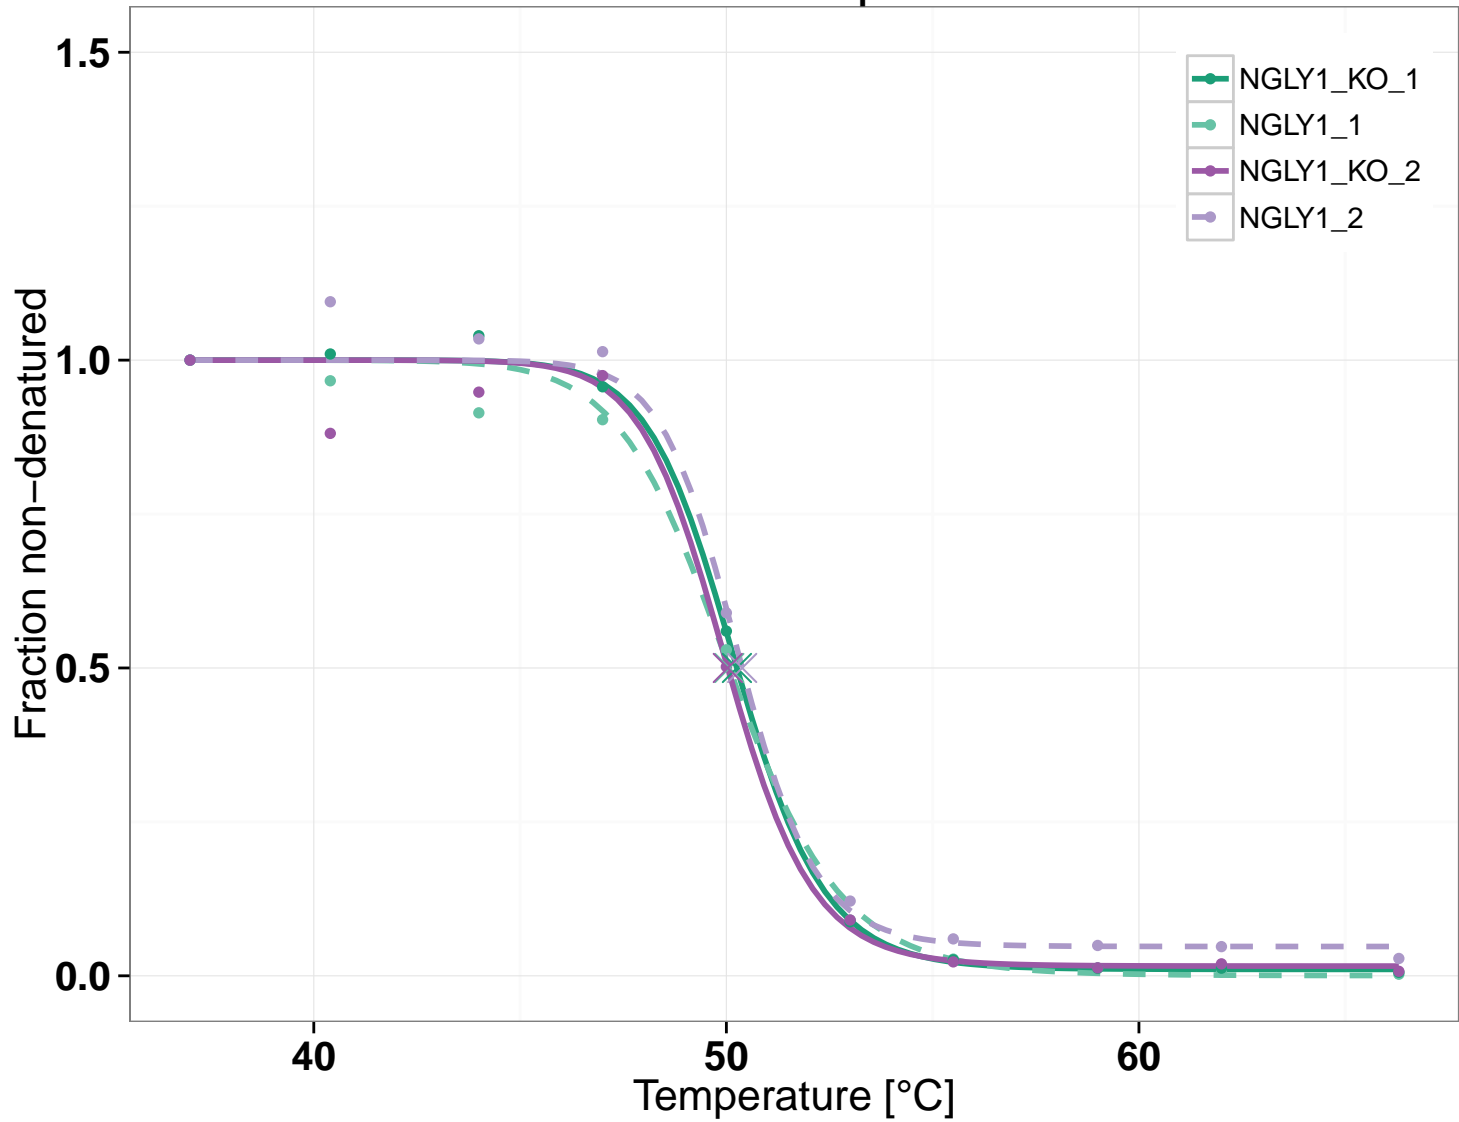

|            | meltPoint | slope | plateau | R2   |
|------------|-----------|-------|---------|------|
| NGLY1_KO_1 | 50.26     | -0.23 | 0.01    | 1    |
| NGLY1_1    | 50.07     | -0.18 | 0       | 1    |
| NGLY1_KO_2 | 50.03     | -0.24 | 0.02    | 0.99 |
| NGLY1_2    | 50.38     | -0.25 | 0.05    | 0.99 |

Supplement: Supplementary file 4306 [file 1]

# IPI00011126.6|PSMC1

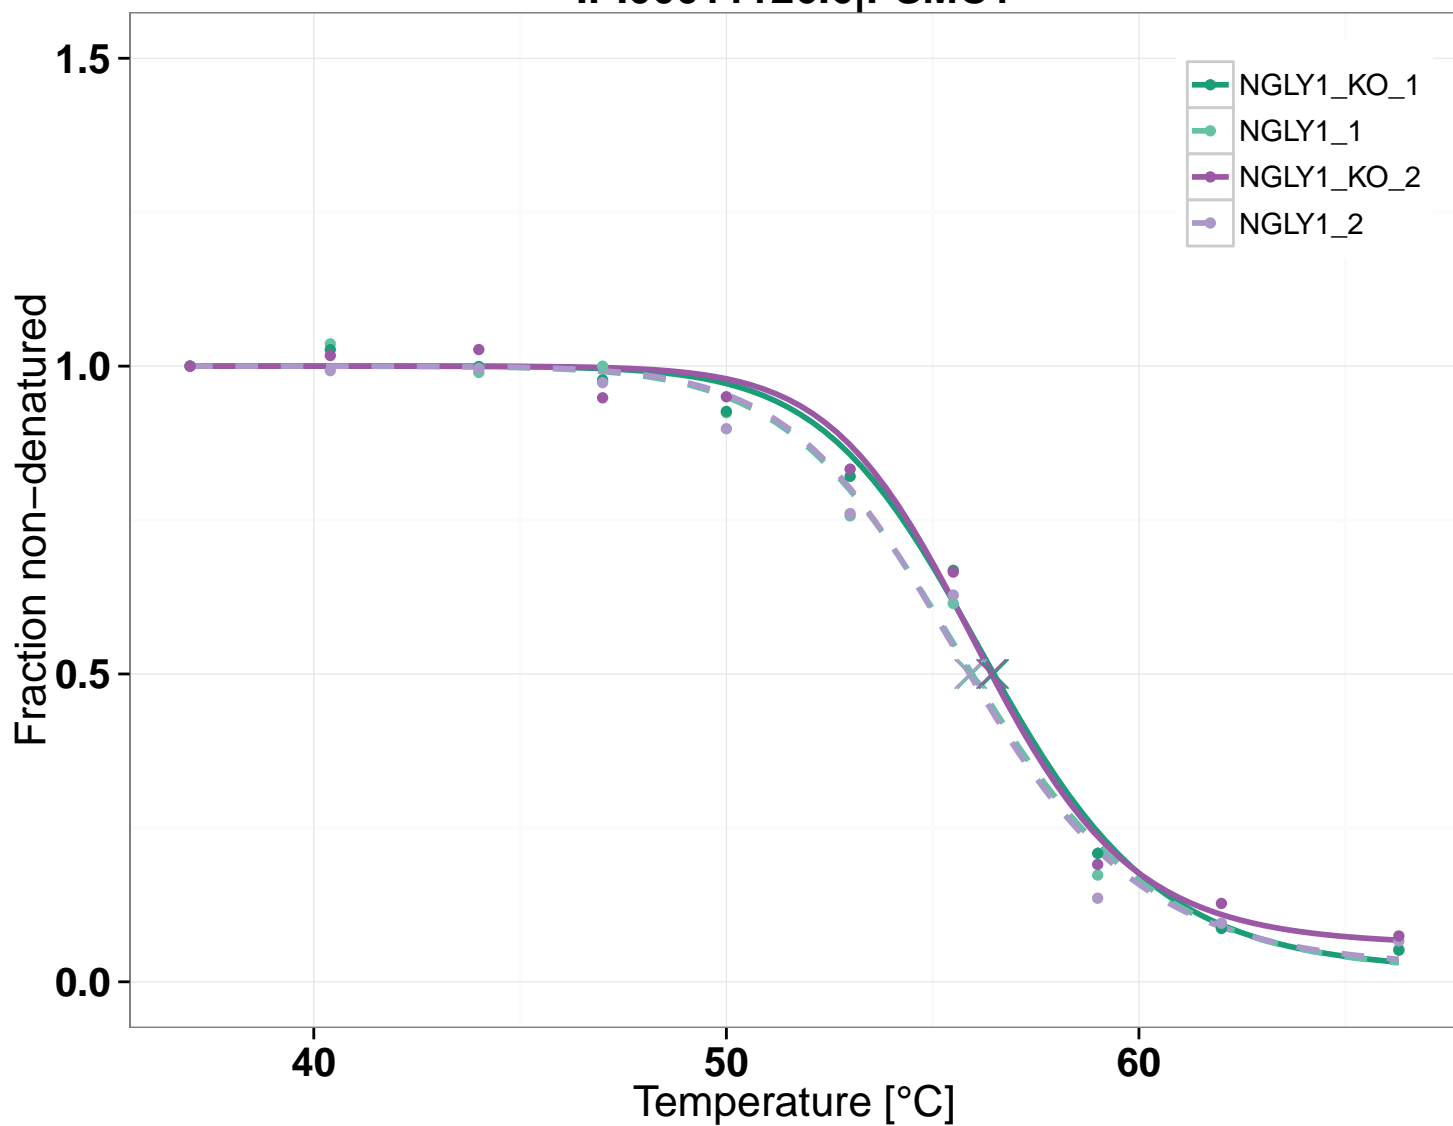

|            | meltPoint | slope | plateau | R2   |
|------------|-----------|-------|---------|------|
| NGLY1_KO_1 | 56.48     | -0.12 | 0.02    | 0.99 |
| NGLY1_1    | 55.96     | -0.11 | 0.01    | 0.99 |
| NGLY1_KO_2 | 56.42     | -0.13 | 0.06    | 0.99 |
| NGLY1_2    | 55.89     | -0.11 | 0.02    | 0.99 |

Supplement: Supplementary file 4307 [file 1]

IPI00328938.4|RNF138

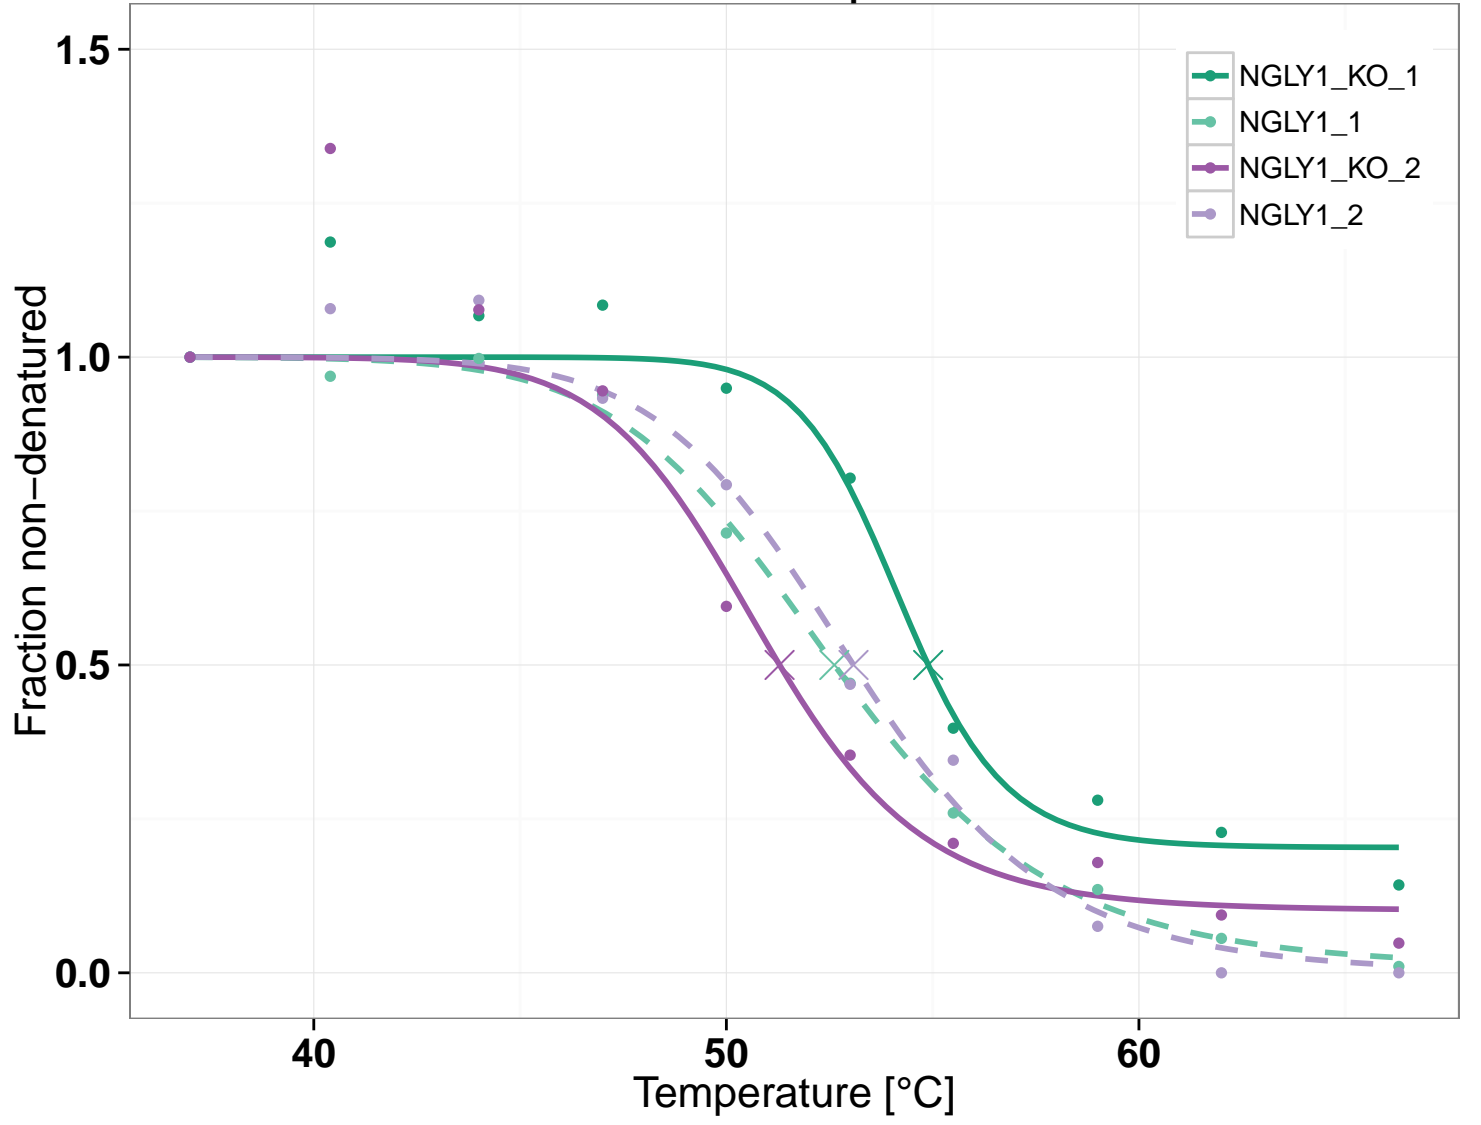

|            | meltPoint | slope  | plateau | R2   |
|------------|-----------|--------|---------|------|
| NGLY1_KO_1 | 54.89     | -0.16  | 0.2     | 0.96 |
| NGLY1_1    | 52.62     | -0.093 | 0.01    | 1    |
| NGLY1_KO_2 | 51.29     | -0.12  | 0.1     | 0.93 |
| NGLY1_2    | 53.08     | -0.1   | 0       | 0.99 |

Supplement: Supplementary file 4308 [file 1]

# IPI00006408.4|NOSIP

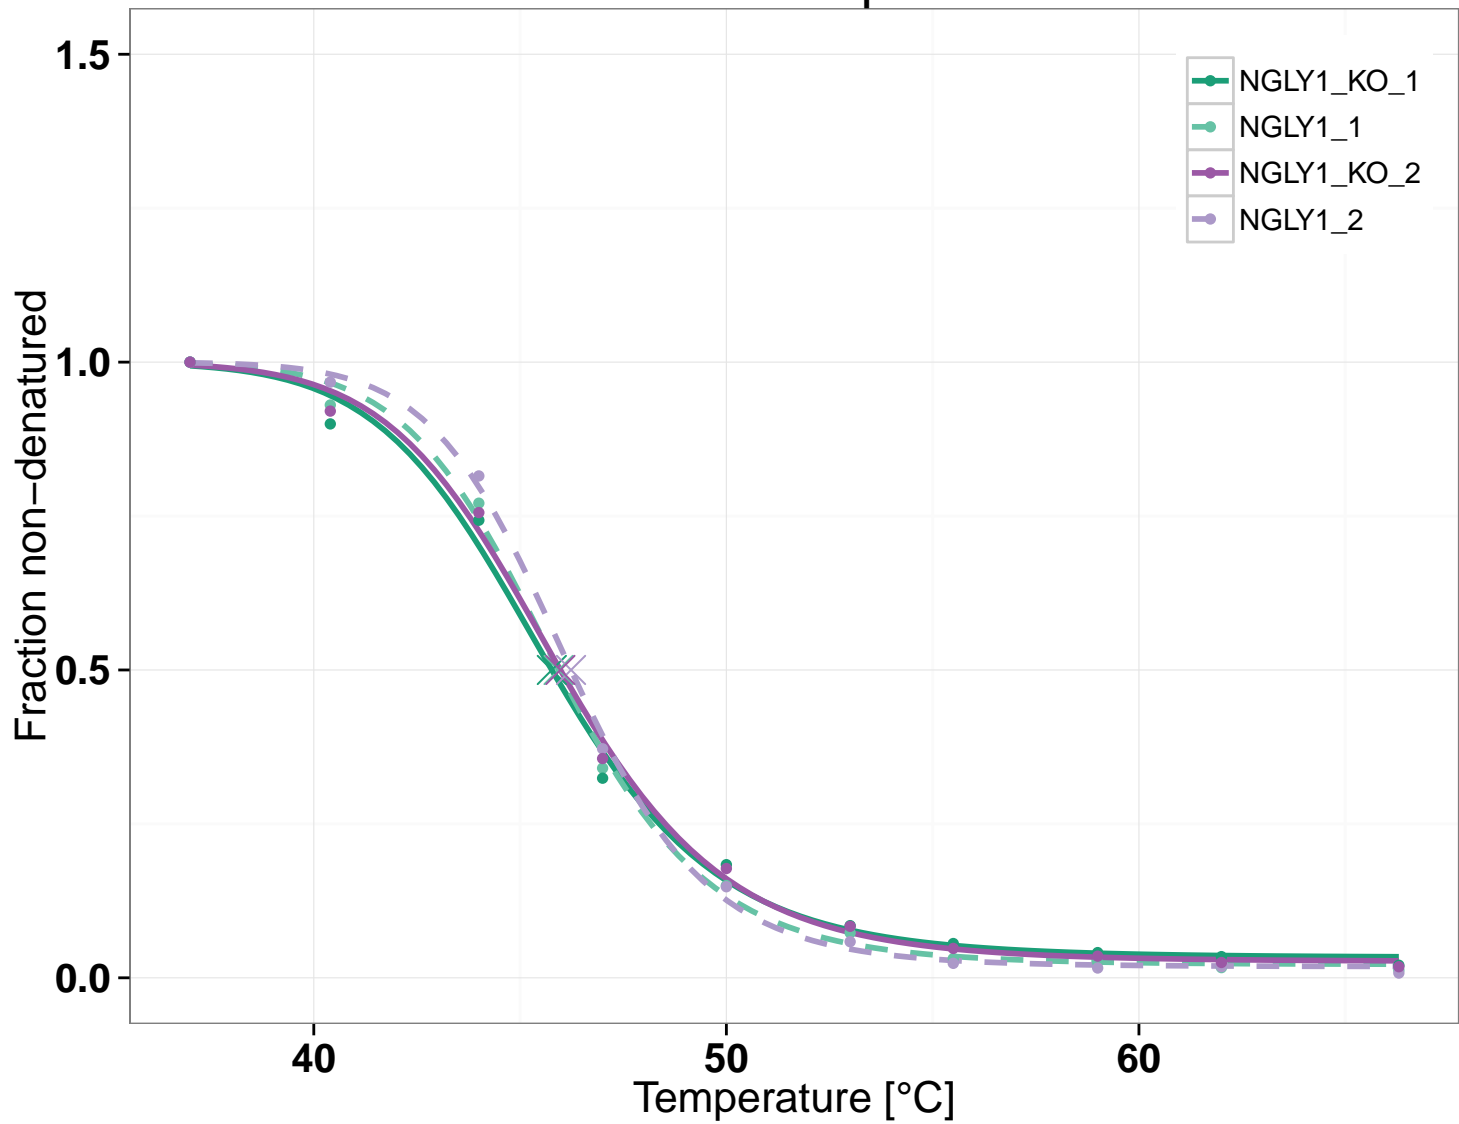

|            | meltPoint | slope | plateau | R2 |
|------------|-----------|-------|---------|----|
| NGLY1_KO_1 | 45.77     | -0.12 | 0.03    | 1  |
| NGLY1_1    | 45.93     | -0.13 | 0.02    | 1  |
| NGLY1_KO_2 | 45.98     | -0.12 | 0.03    | 1  |
| NGLY1_2    | 46.23     | -0.15 | 0.02    | 1  |

Supplement: Supplementary file 4309 [file 1]

IPI00554436.2|SFRS14

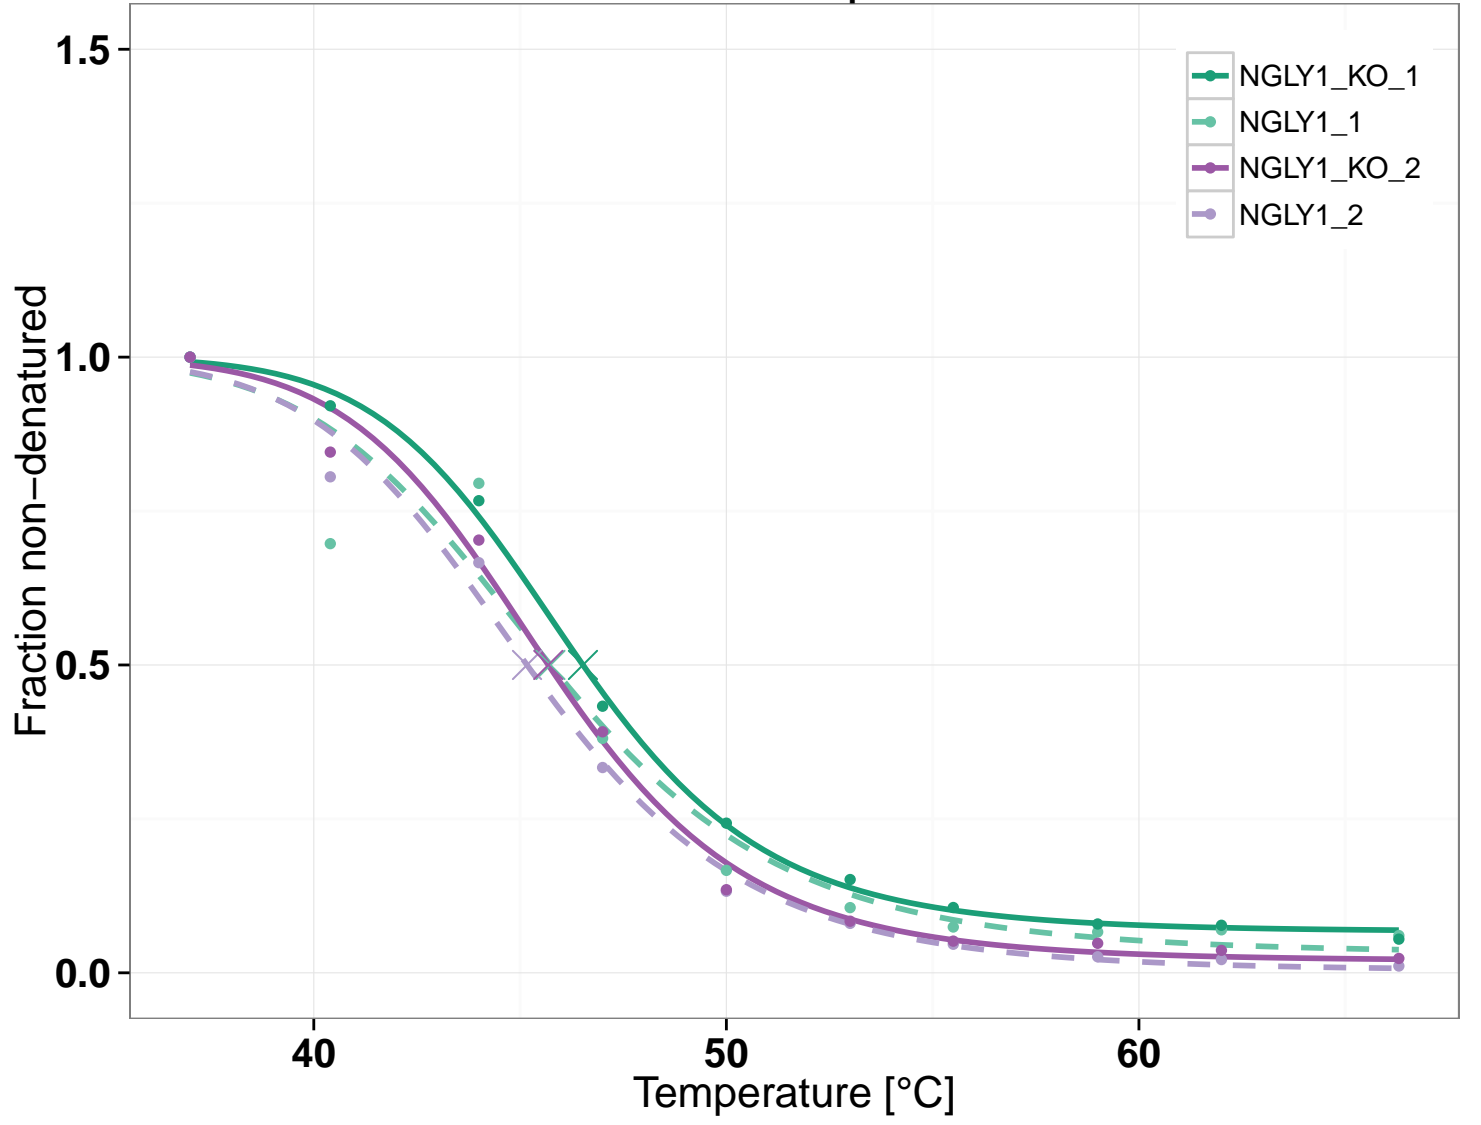

|            | meltPoint | slope  | plateau | R2   |
|------------|-----------|--------|---------|------|
| NGLY1_KO_1 | 46.52     | -0.099 | 0.07    | 1    |
| NGLY1_1    | 45.74     | -0.084 | 0.03    | 0.95 |
| NGLY1_KO_2 | 45.68     | -0.1   | 0.02    | 0.99 |
| NGLY1_2    | 45.17     | -0.094 | 0       | 0.99 |

Supplement: Supplementary file 4310 [file 1]

# IPI00101968.3|DBNL

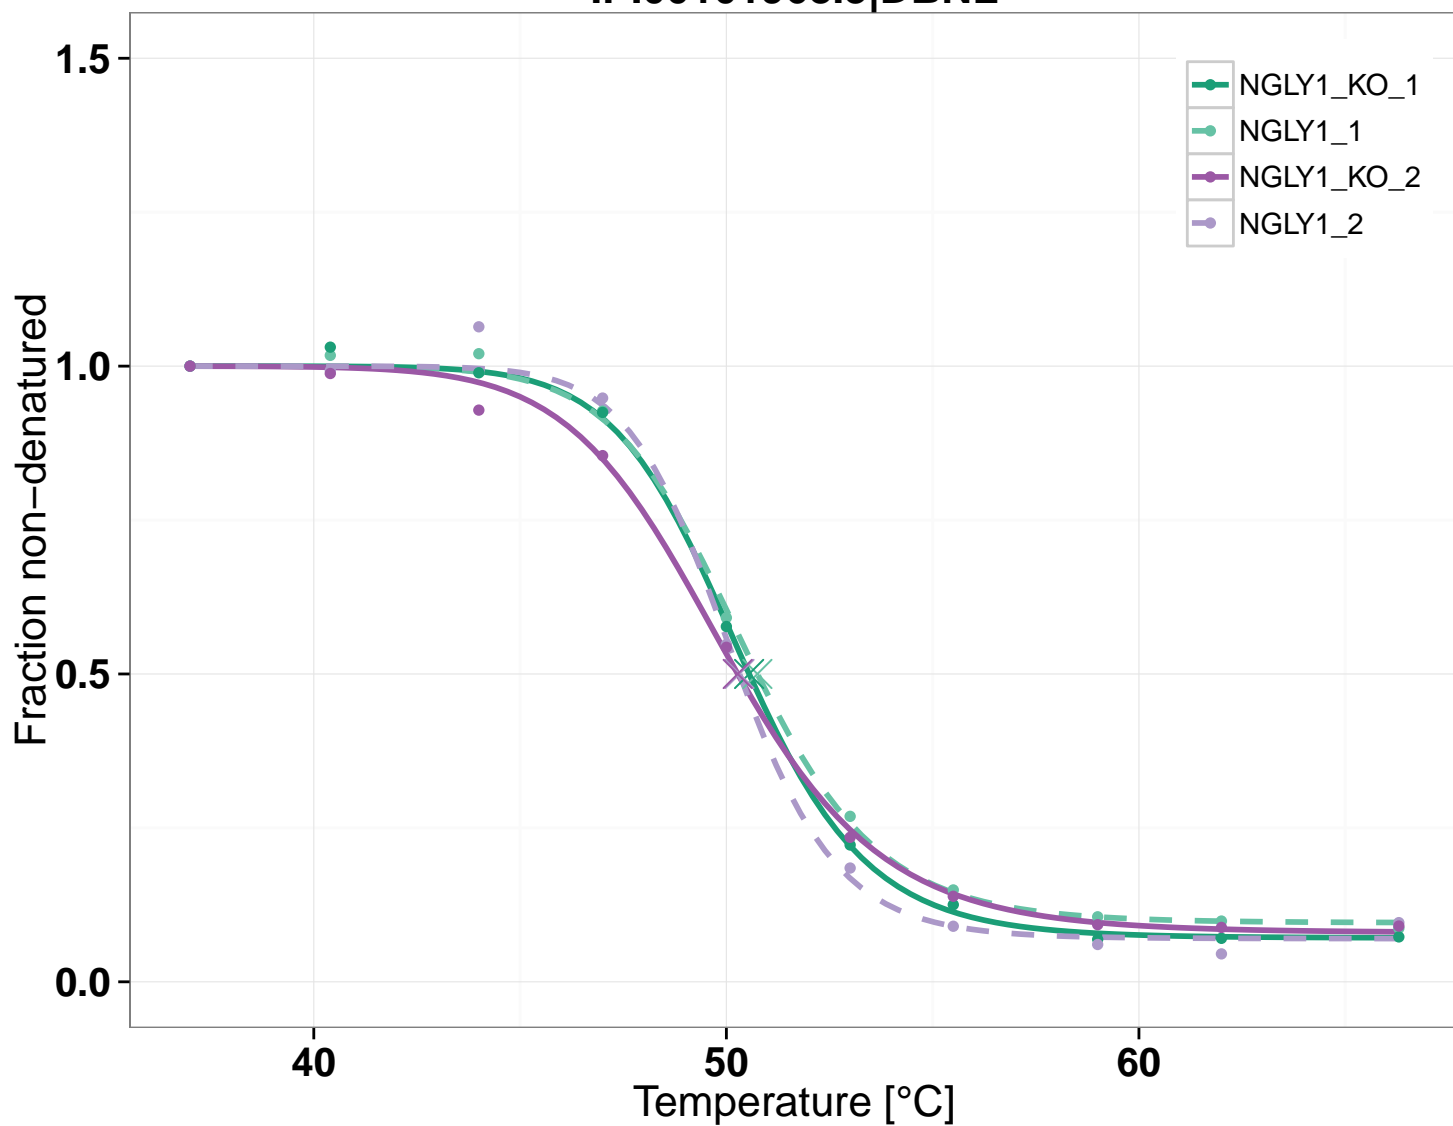

|            | meltPoint | slope | plateau | R2 |
|------------|-----------|-------|---------|----|
| NGLY1_KO_1 | 50.55     | -0.15 | 0.07    | 1  |
| NGLY1_1    | 50.75     | -0.14 | 0.1     | 1  |
| NGLY1_KO_2 | 50.28     | -0.12 | 0.08    | 1  |
| NGLY1_2    | 50.32     | -0.18 | 0.07    | 1  |

Supplement: Supplementary file 4311 [file 1]

IPI00328815.2|USP48

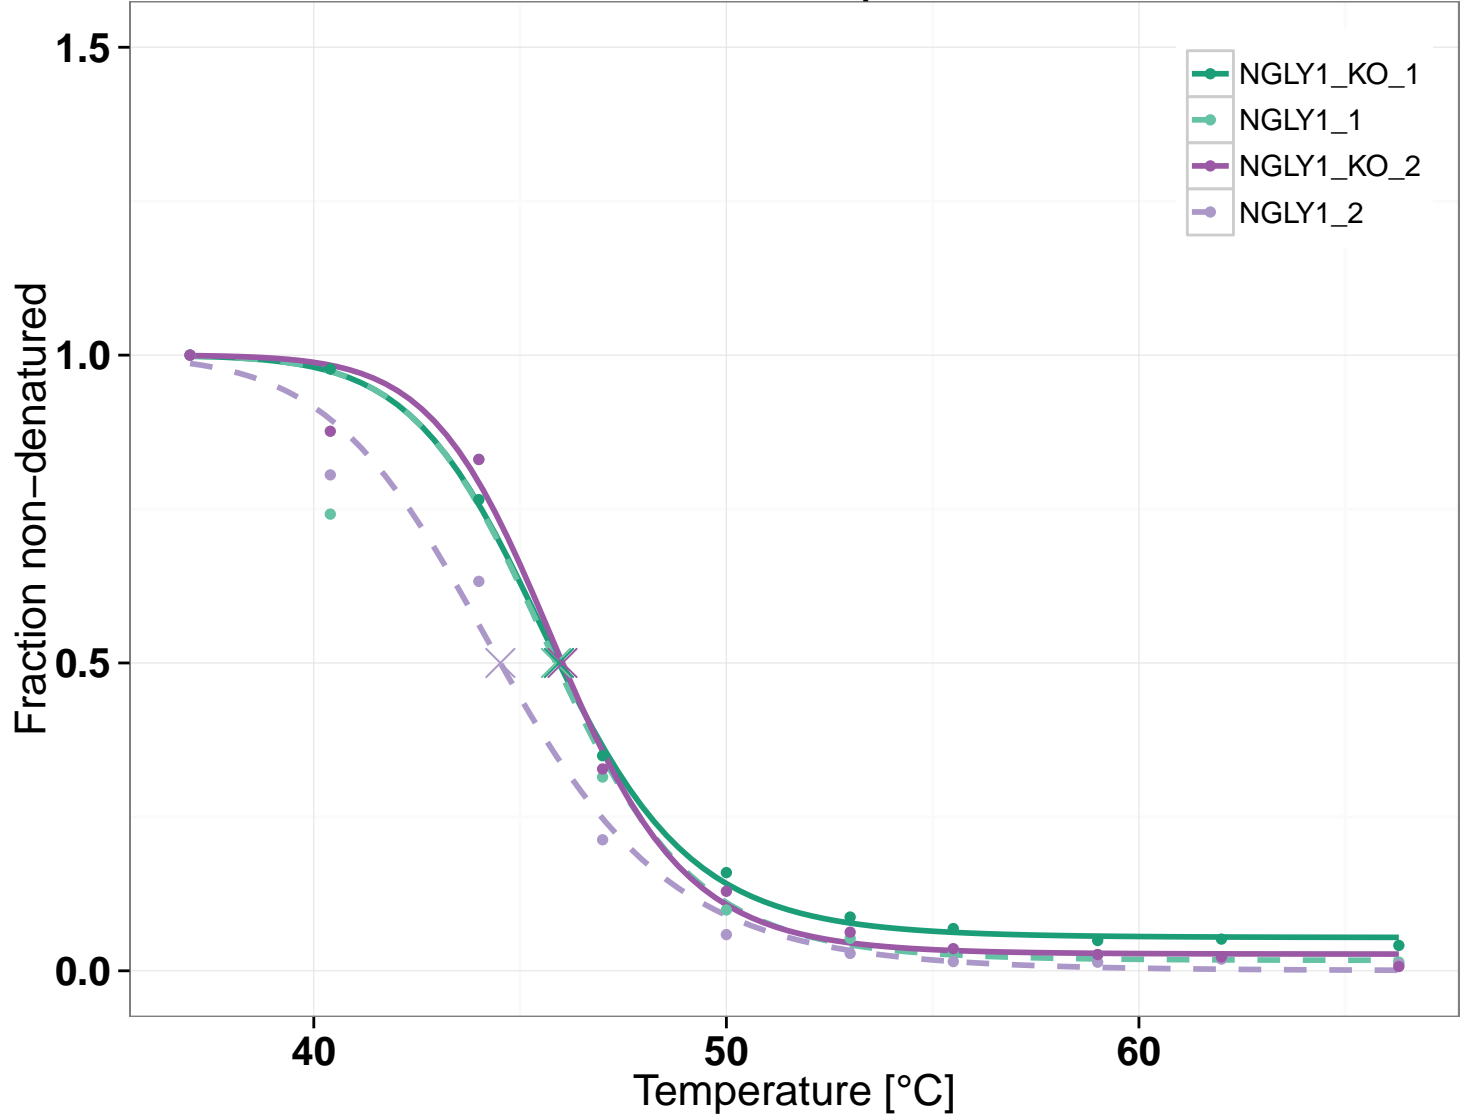

|            | meltPoint | slope | plateau | R2   |
|------------|-----------|-------|---------|------|
| NGLY1_KO_1 | 45.94     | -0.14 | 0.05    | 1    |
| NGLY1_1    | 45.87     | -0.14 | 0.02    | 0.96 |
| NGLY1_KO_2 | 46.03     | -0.16 | 0.03    | 0.99 |
| NGLY1_2    | 44.52     | -0.12 | 0       | 0.99 |

Supplement: Supplementary file 4312 [file 1]

IPI00375652.5|CPEB4

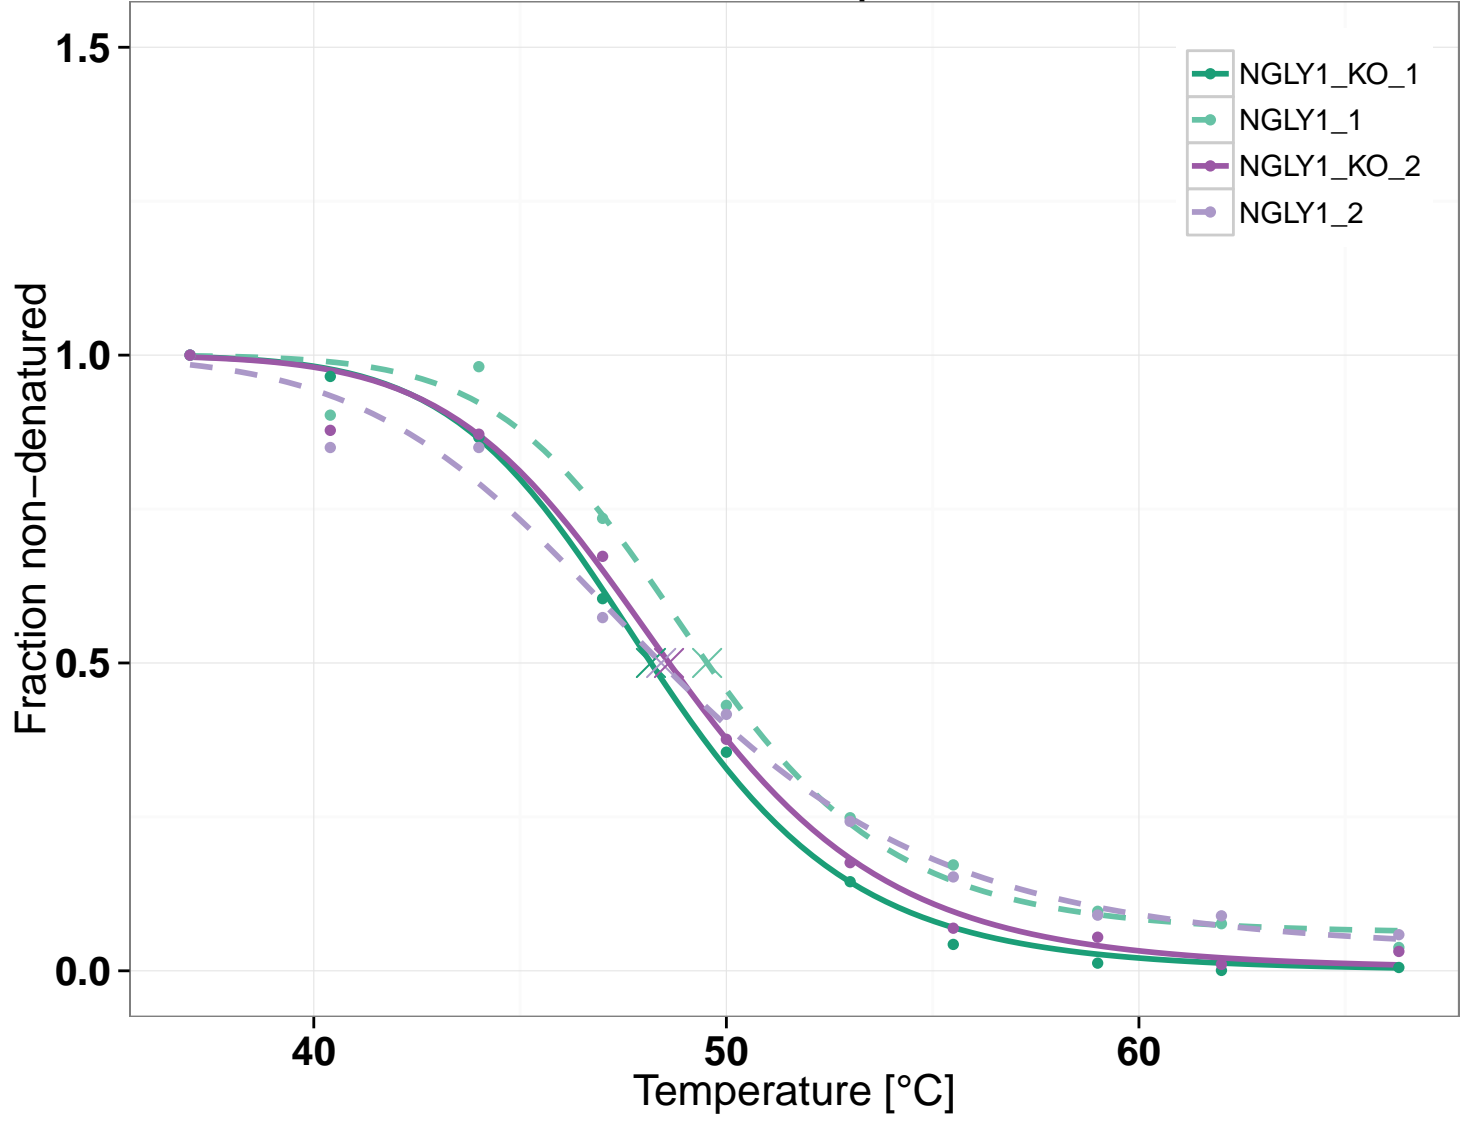

|            | meltPoint | slope  | plateau | R2   |
|------------|-----------|--------|---------|------|
| NGLY1_KO_1 | 48.17     | -0.1   | 0       | 1    |
| NGLY1_1    | 49.53     | -0.098 | 0.06    | 0.99 |
| NGLY1_KO_2 | 48.61     | -0.095 | 0       | 0.99 |
| NGLY1_2    | 48.42     | -0.07  | 0.03    | 0.99 |

Supplement: Supplementary file 4313 [file 1]

# IPI00783097.3|GARS

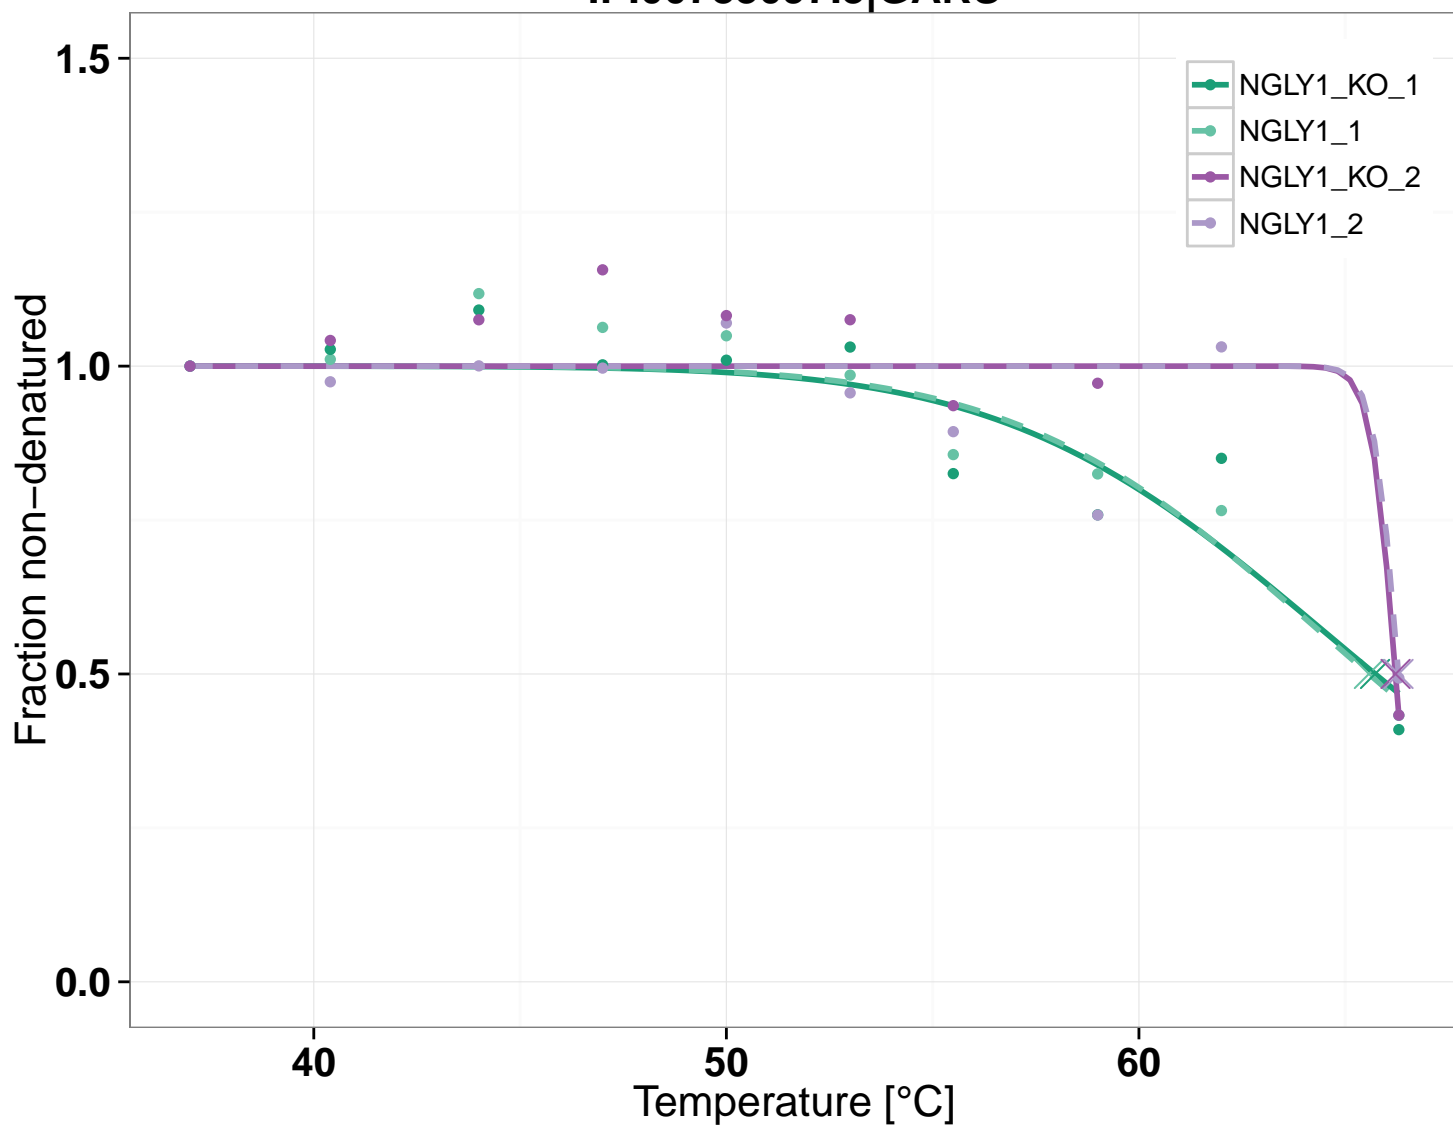

|            | meltPoint | slope  | plateau | R2   |
|------------|-----------|--------|---------|------|
| NGLY1_KO_1 | 65.72     | -0.056 | 0       | 0.85 |
| NGLY1_1    | 65.57     | -0.059 | 0       | 0.91 |
| NGLY1_KO_2 | 66.22     | -0.84  | 0       | 0.79 |
| NGLY1_2    | 66.29     | -0.84  | 0       | 0.71 |

Supplement: Supplementary file 4314 [file 1]

# IPI00329688.2|YIPF3

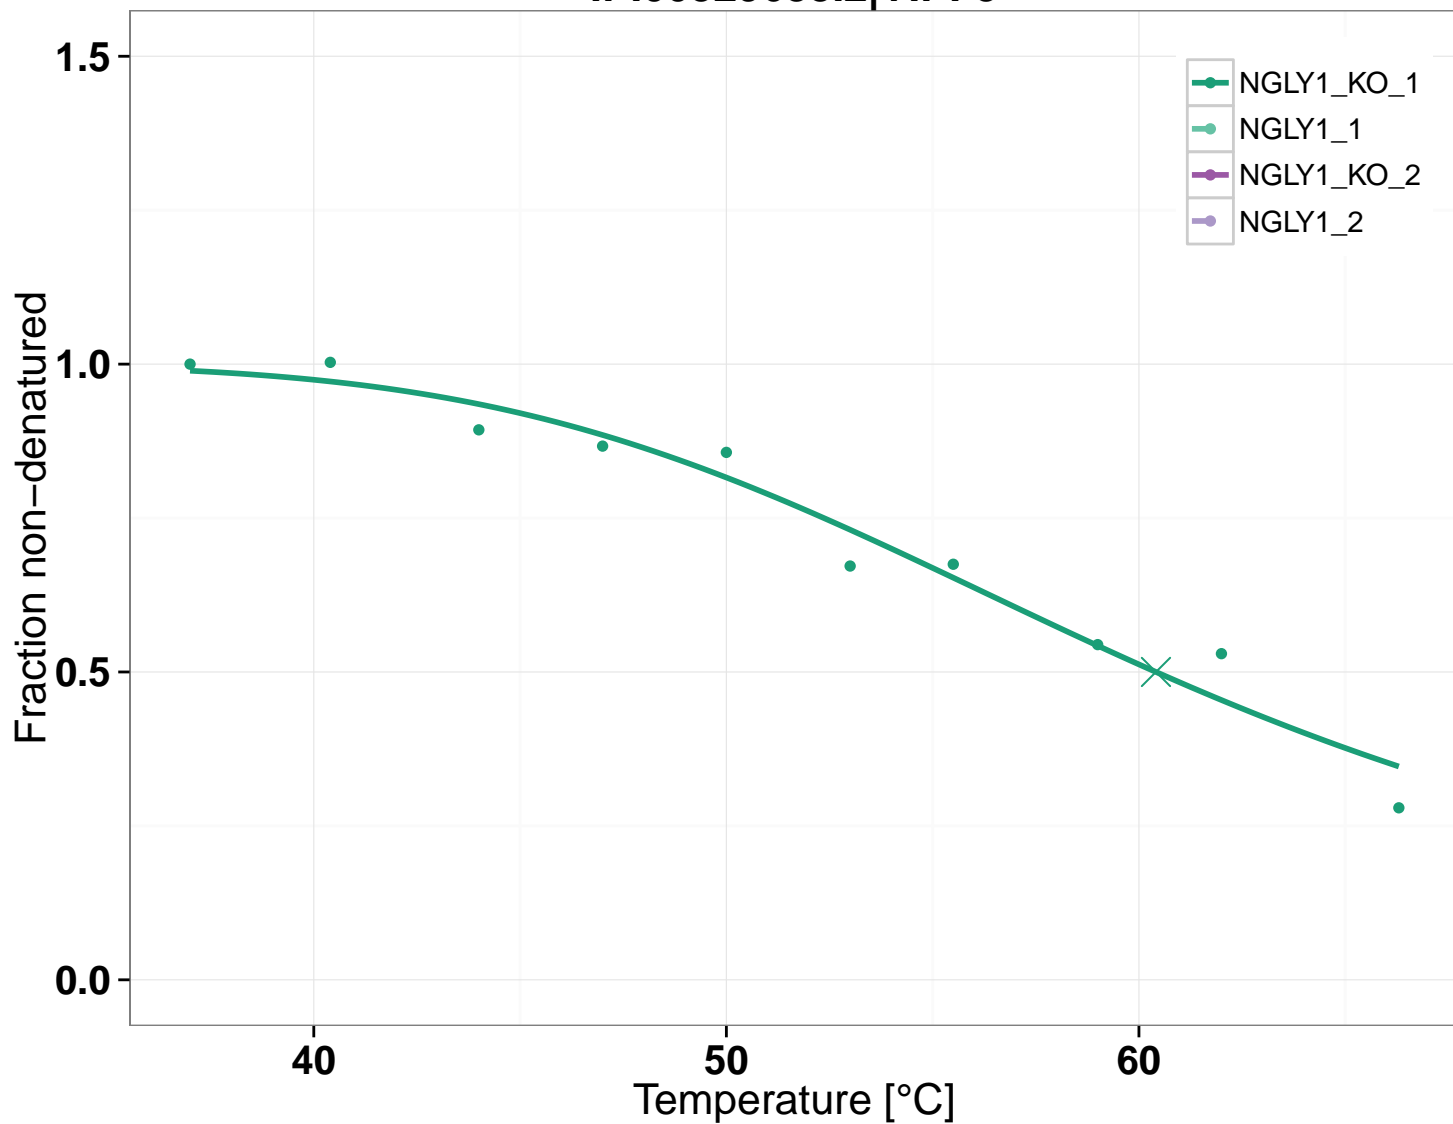

|            | meltPoint | slope  | plateau | R2   |
|------------|-----------|--------|---------|------|
| NGLY1_KO_1 | 60.41     | -0.032 | 0       | 0.96 |
| NGLY1_1    | -         | -      | -       | -    |
| NGLY1_KO_2 | -         | -      | -       | -    |
| NGLY1_2    | -         | -      | -       | -    |

Supplement: Supplementary file 4315 [file 1]

# IPI00003647.1|RAD1

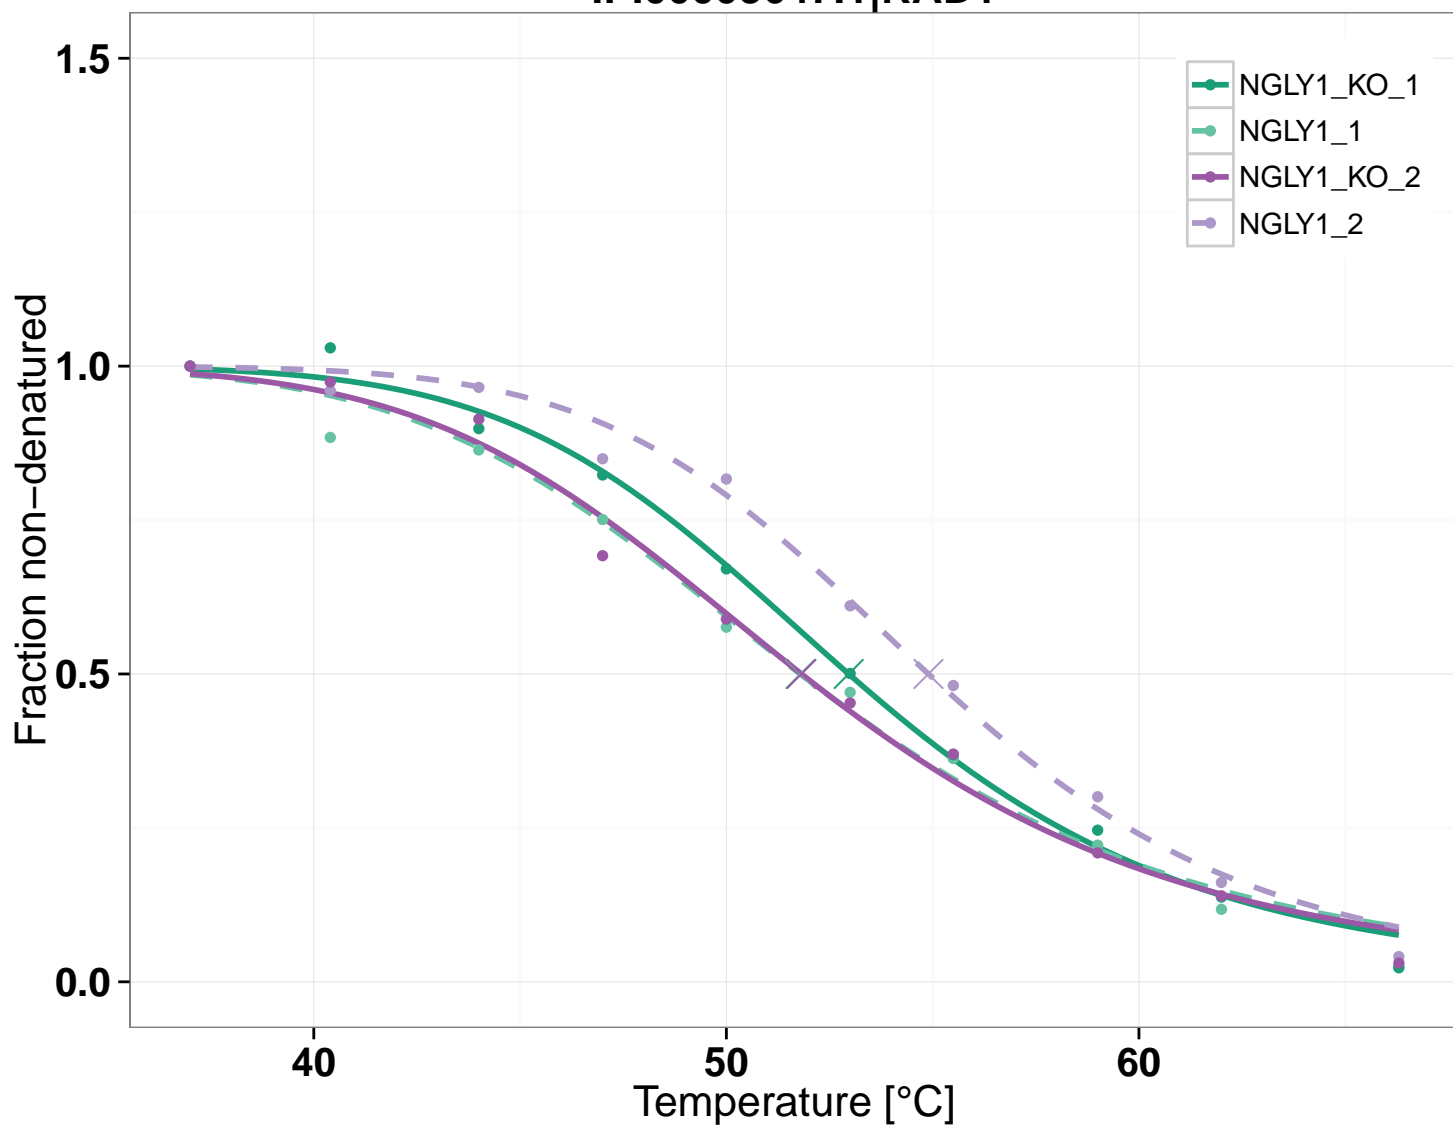

|            | meltPoint | slope  | plateau | R2   |
|------------|-----------|--------|---------|------|
| NGLY1_KO_1 | 52.97     | -0.06  | 0       | 0.99 |
| NGLY1_1    | 51.79     | -0.053 | 0       | 0.99 |
| NGLY1_KO_2 | 51.82     | -0.055 | 0       | 0.99 |
| NGLY1_2    | 54.9      | -0.063 | 0       | 0.99 |

Supplement: Supplementary file 4316 [file 1]

IPI00028095.3|FHIT

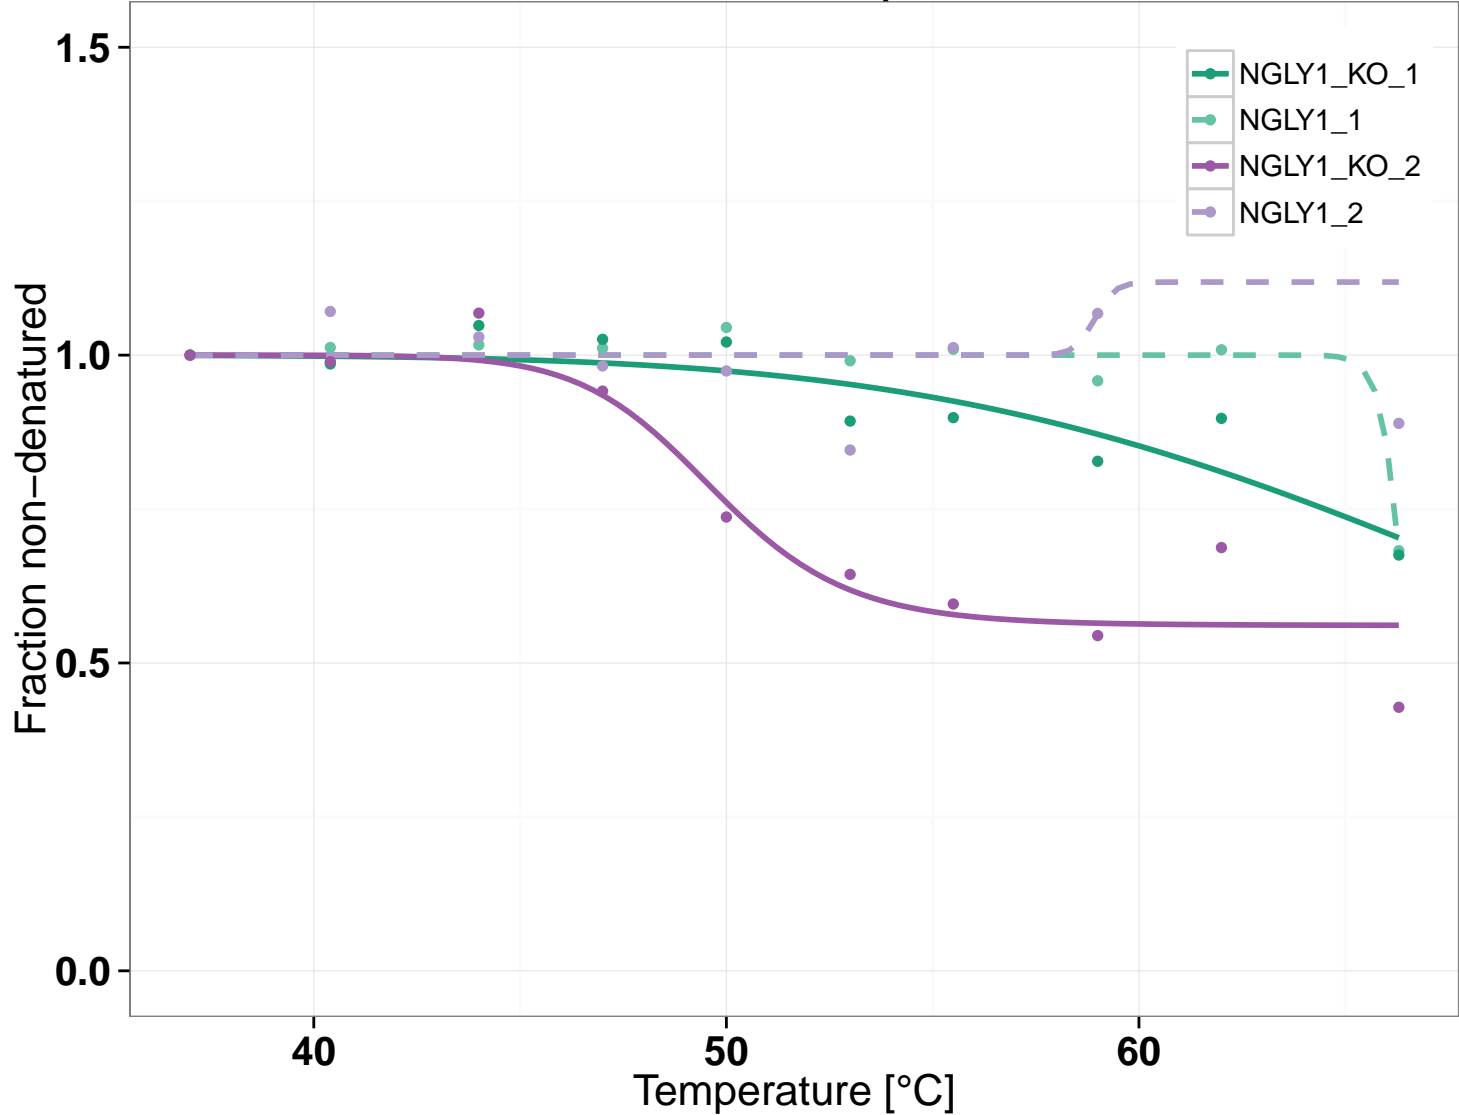

|            | meltPoint | slope  | plateau | R2   |
|------------|-----------|--------|---------|------|
| NGLY1_KO_1 | -         | -      | 0       | 0.82 |
| NGLY1_1    | -         | -      | 0       | 0.95 |
| NGLY1_KO_2 | -         | -0.067 | 0.56    | 0.91 |
| NGLY1_2    | -         | 0.13   | 1.12    | 0.17 |

Supplement: Supplementary file 4317 [file 1]

IPI00019971.4|STXBP2

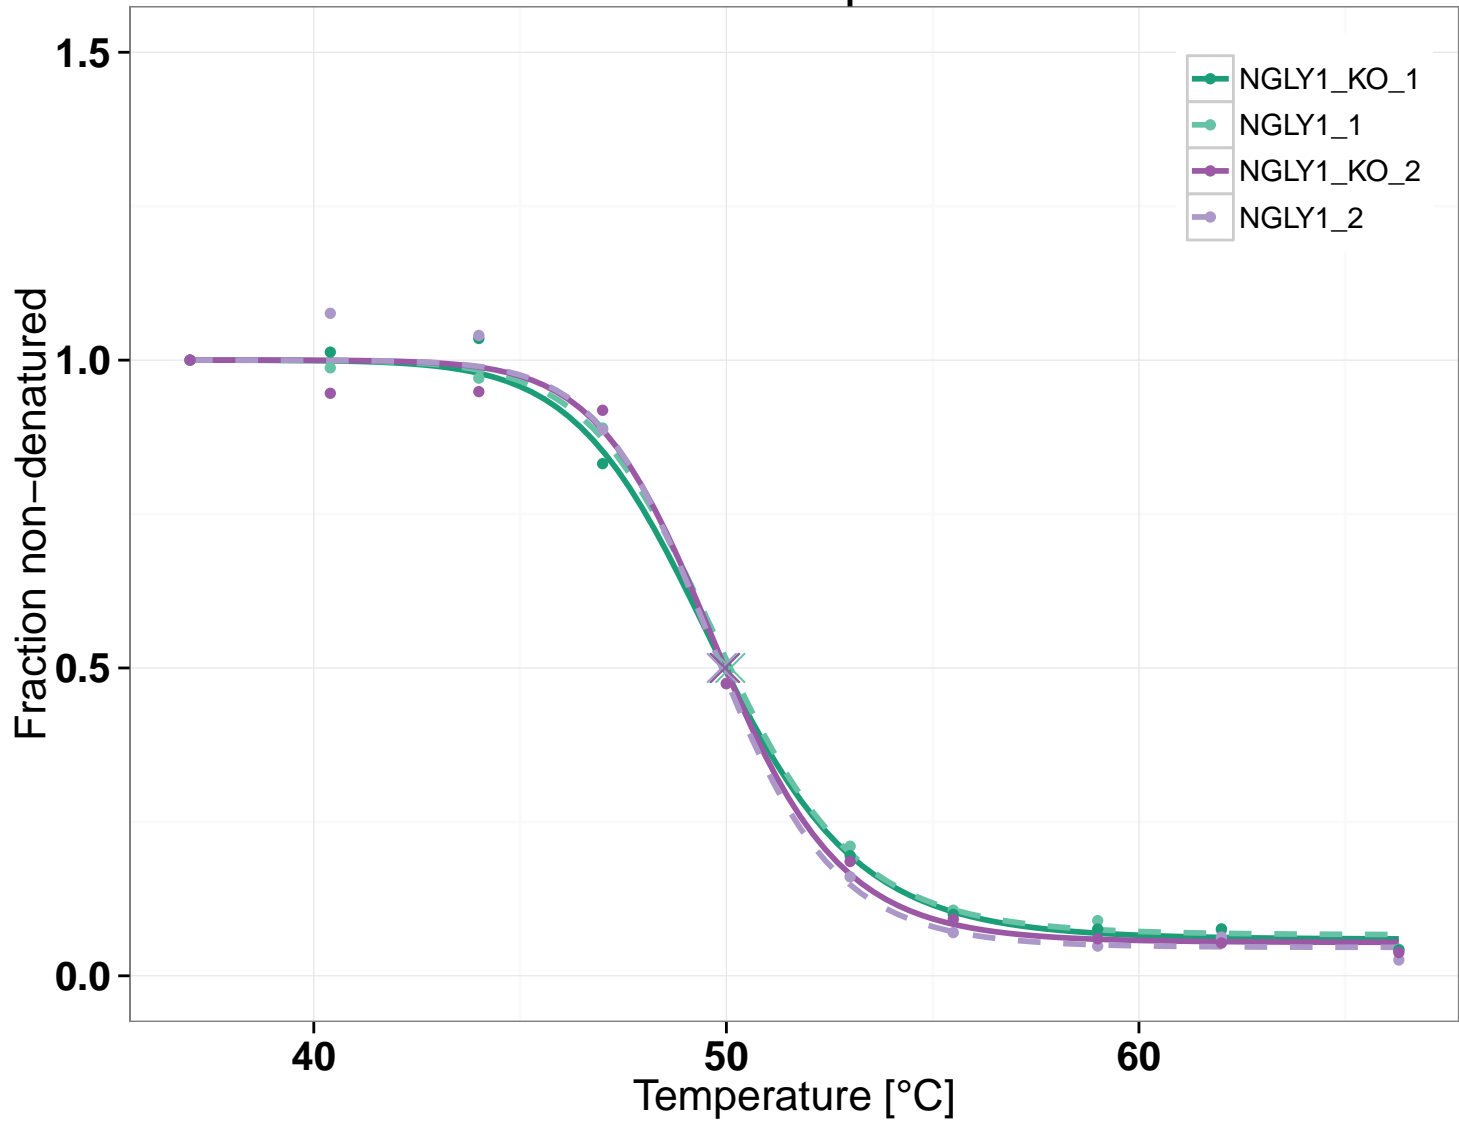

|            | meltPoint | slope | plateau | R2 |
|------------|-----------|-------|---------|----|
| NGLY1_KO_1 | 49.96     | -0.14 | 0.06    | 1  |
| NGLY1_1    | 50.1      | -0.14 | 0.07    | 1  |
| NGLY1_KO_2 | 49.97     | -0.16 | 0.05    | 1  |
| NGLY1_2    | 49.89     | -0.17 | 0.05    | 1  |

Supplement: Supplementary file 4318 [file 1]

# IPI00015808.3|GNL2

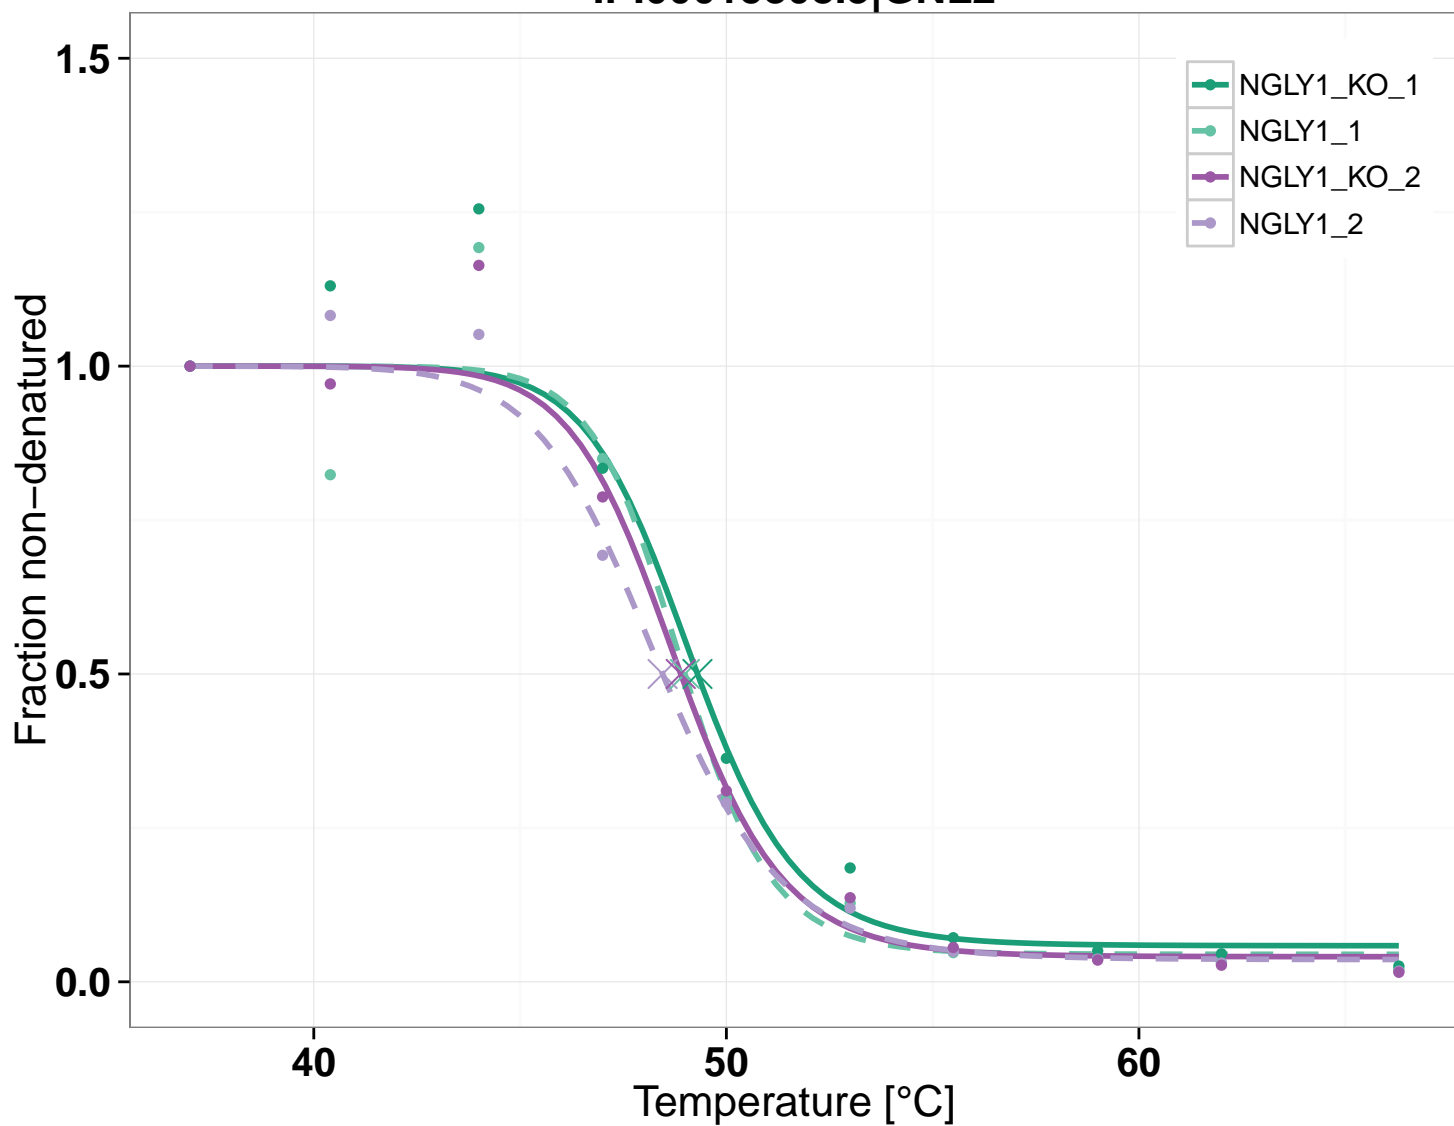

|            | meltPoint | slope | plateau | R2   |
|------------|-----------|-------|---------|------|
| NGLY1_KO_1 | 49.3      | -0.18 | 0.06    | 0.96 |
| NGLY1_1    | 48.99     | -0.22 | 0.04    | 0.96 |
| NGLY1_KO_2 | 48.89     | -0.19 | 0.04    | 0.98 |
| NGLY1_2    | 48.45     | -0.16 | 0.04    | 0.99 |

Supplement: Supplementary file 4319 [file 1]
