# Supplementary material (part 44 of 85)
Source: publisher figshare collection journal article supplement (https://gsajournals.figshare.com/articles/dataset/_/12014913)

IPI00878912.1|TRMT2A

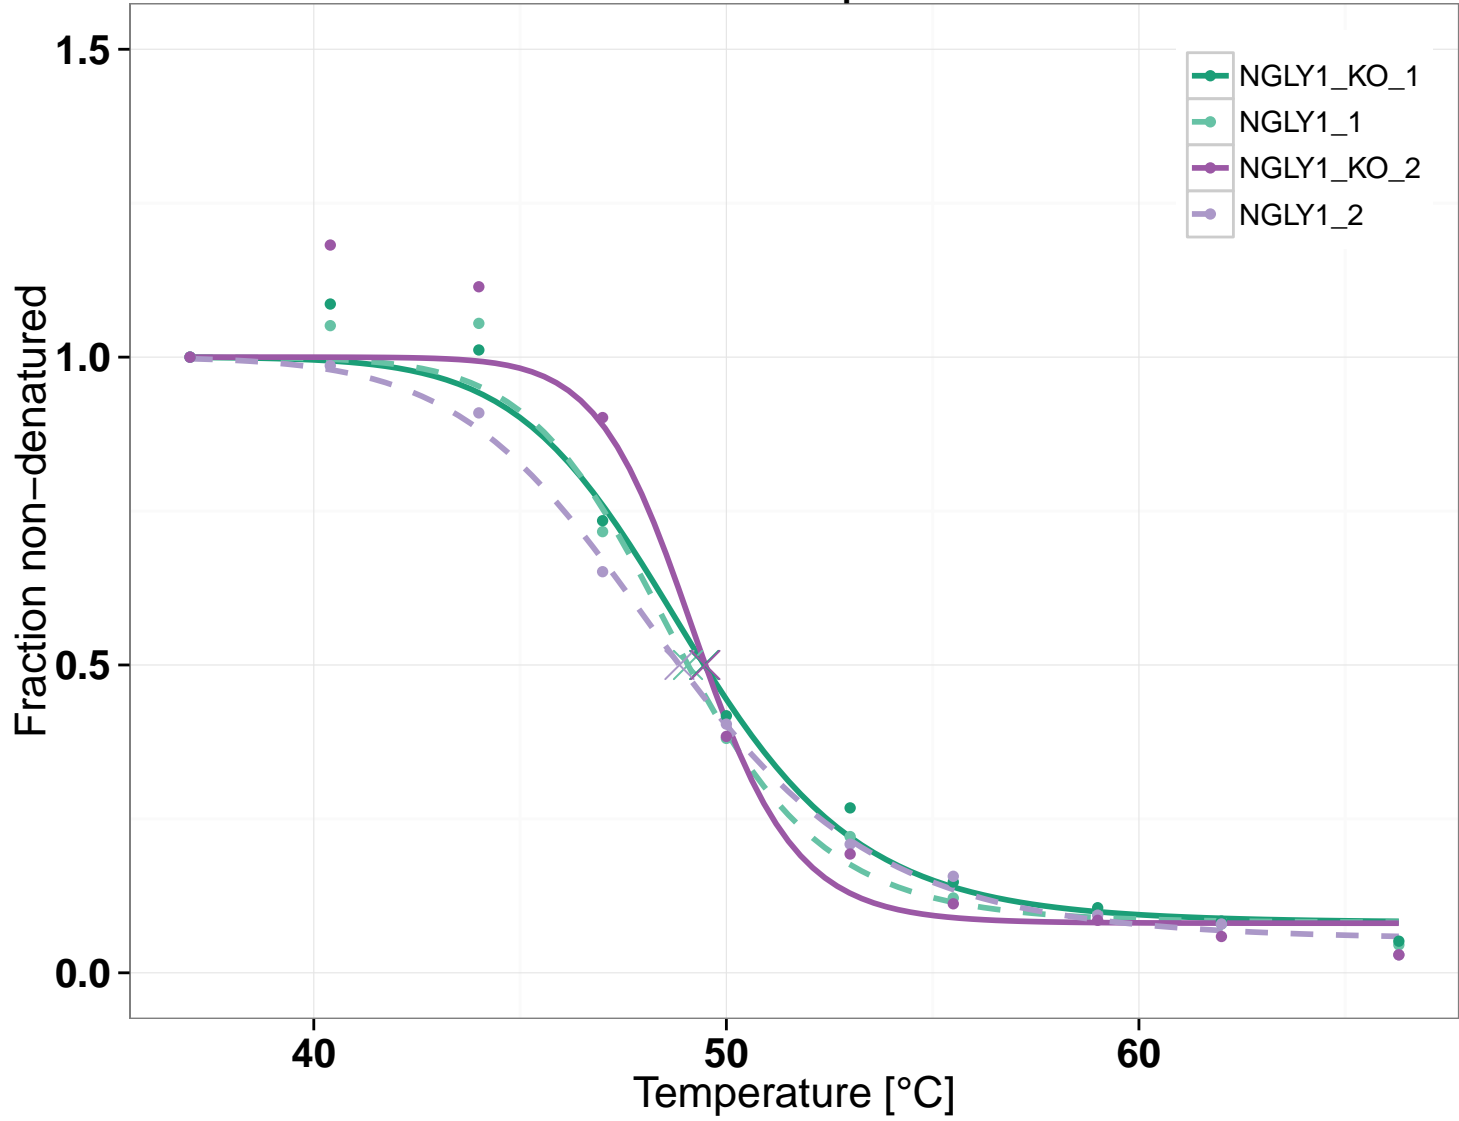

|            | meltPoint | slope  | plateau | R2   |
|------------|-----------|--------|---------|------|
| NGLY1_KO_1 | 49.46     | -0.11  | 0.08    | 0.99 |
| NGLY1_1    | 49.07     | -0.13  | 0.08    | 0.99 |
| NGLY1_KO_2 | 49.49     | -0.19  | 0.08    | 0.97 |
| NGLY1_2    | 48.86     | -0.093 | 0.05    | 1    |

Supplement: Supplementary file 4320 [file 1]

IPI00028881.1|NDUFA3

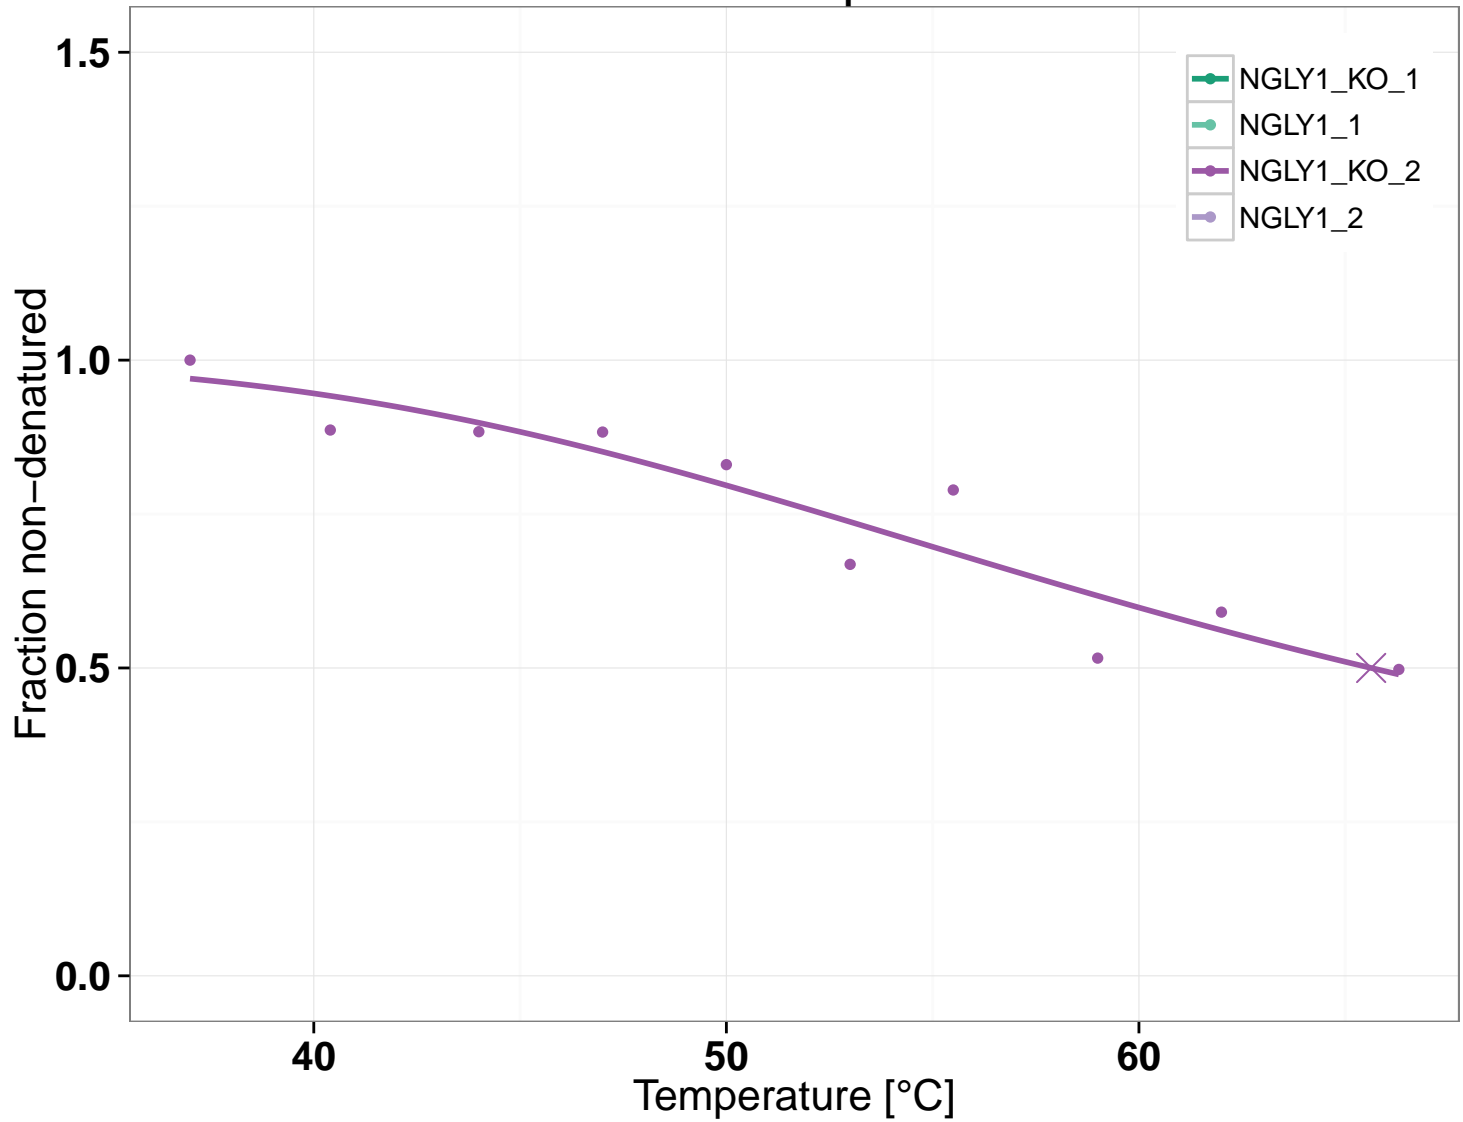

|            | meltPoint | slope | plateau | R2   |
|------------|-----------|-------|---------|------|
| NGLY1_KO_1 | —         | —     | —       | —    |
| NGLY1_1    | —         | —     | —       | —    |
| NGLY1_KO_2 | 65.63     | -0.02 | 0.09    | 0.88 |
| NGLY1_2    | —         | —     | —       | —    |

Supplement: Supplementary file 4321 [file 1]

# IPI00215919.5|ARF5

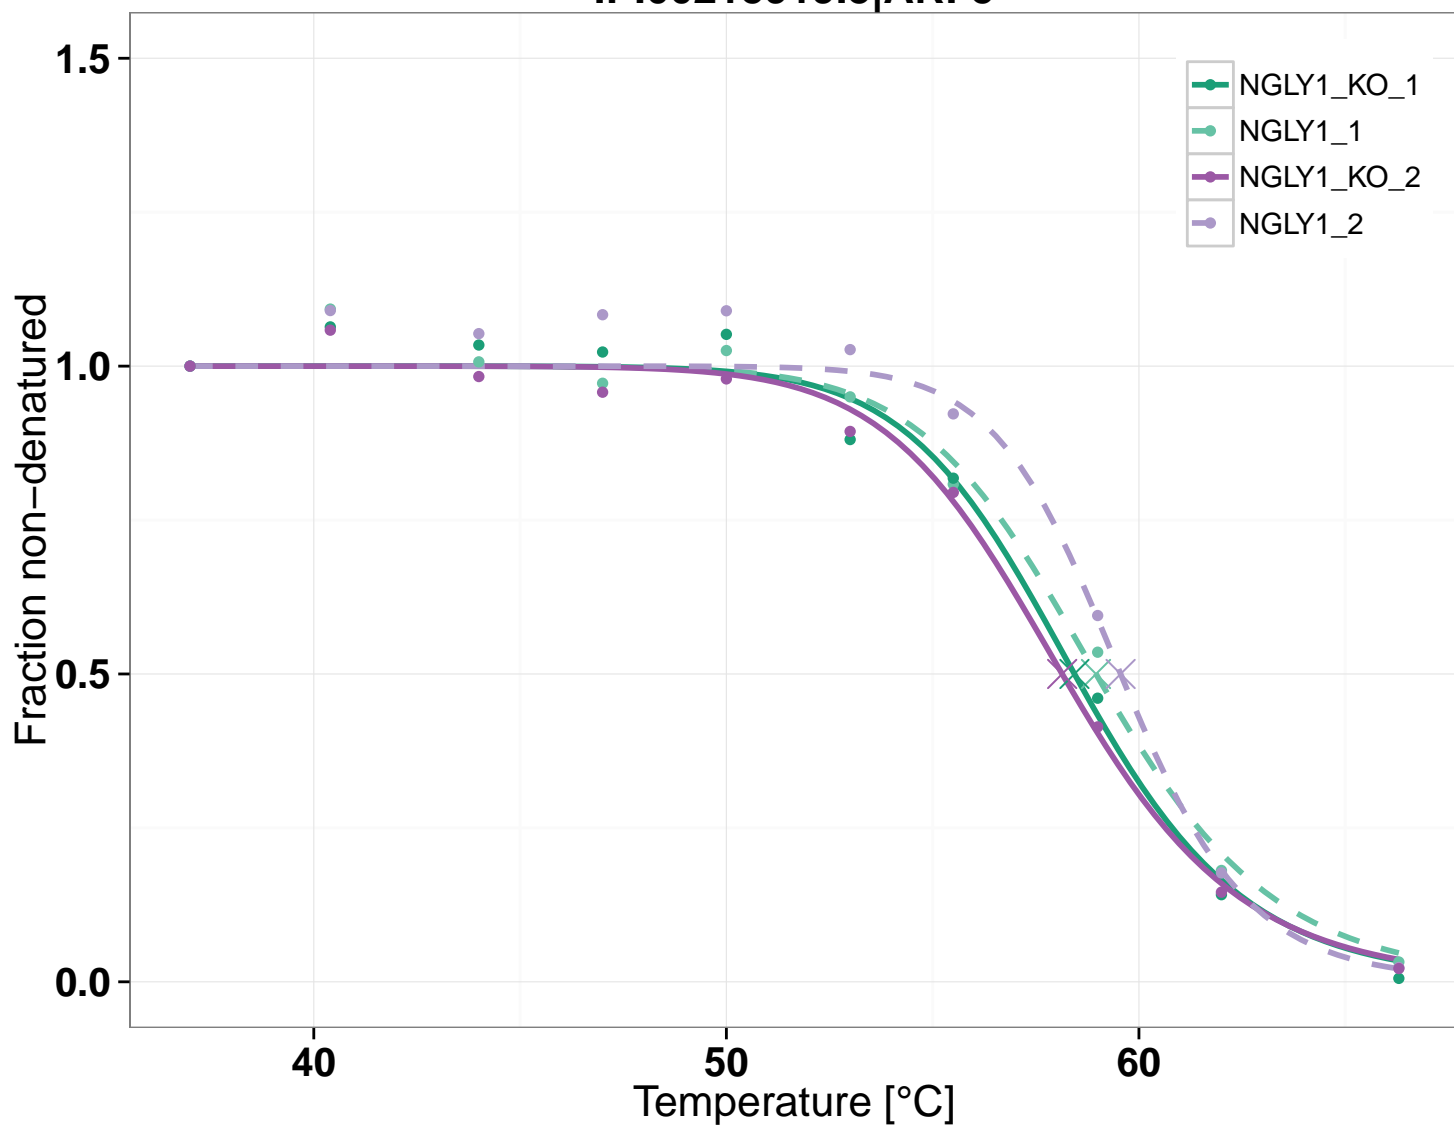

|            | meltPoint | slope | plateau | R2   |
|------------|-----------|-------|---------|------|
| NGLY1_KO_1 | 58.44     | -0.12 | 0       | 0.99 |
| NGLY1_1    | 58.96     | -0.12 | 0       | 0.99 |
| NGLY1_KO_2 | 58.14     | -0.12 | 0       | 0.99 |
| NGLY1_2    | 59.56     | -0.16 | 0       | 0.98 |

Supplement: Supplementary file 4322 [file 1]

IPI00445113.2|PSRC1

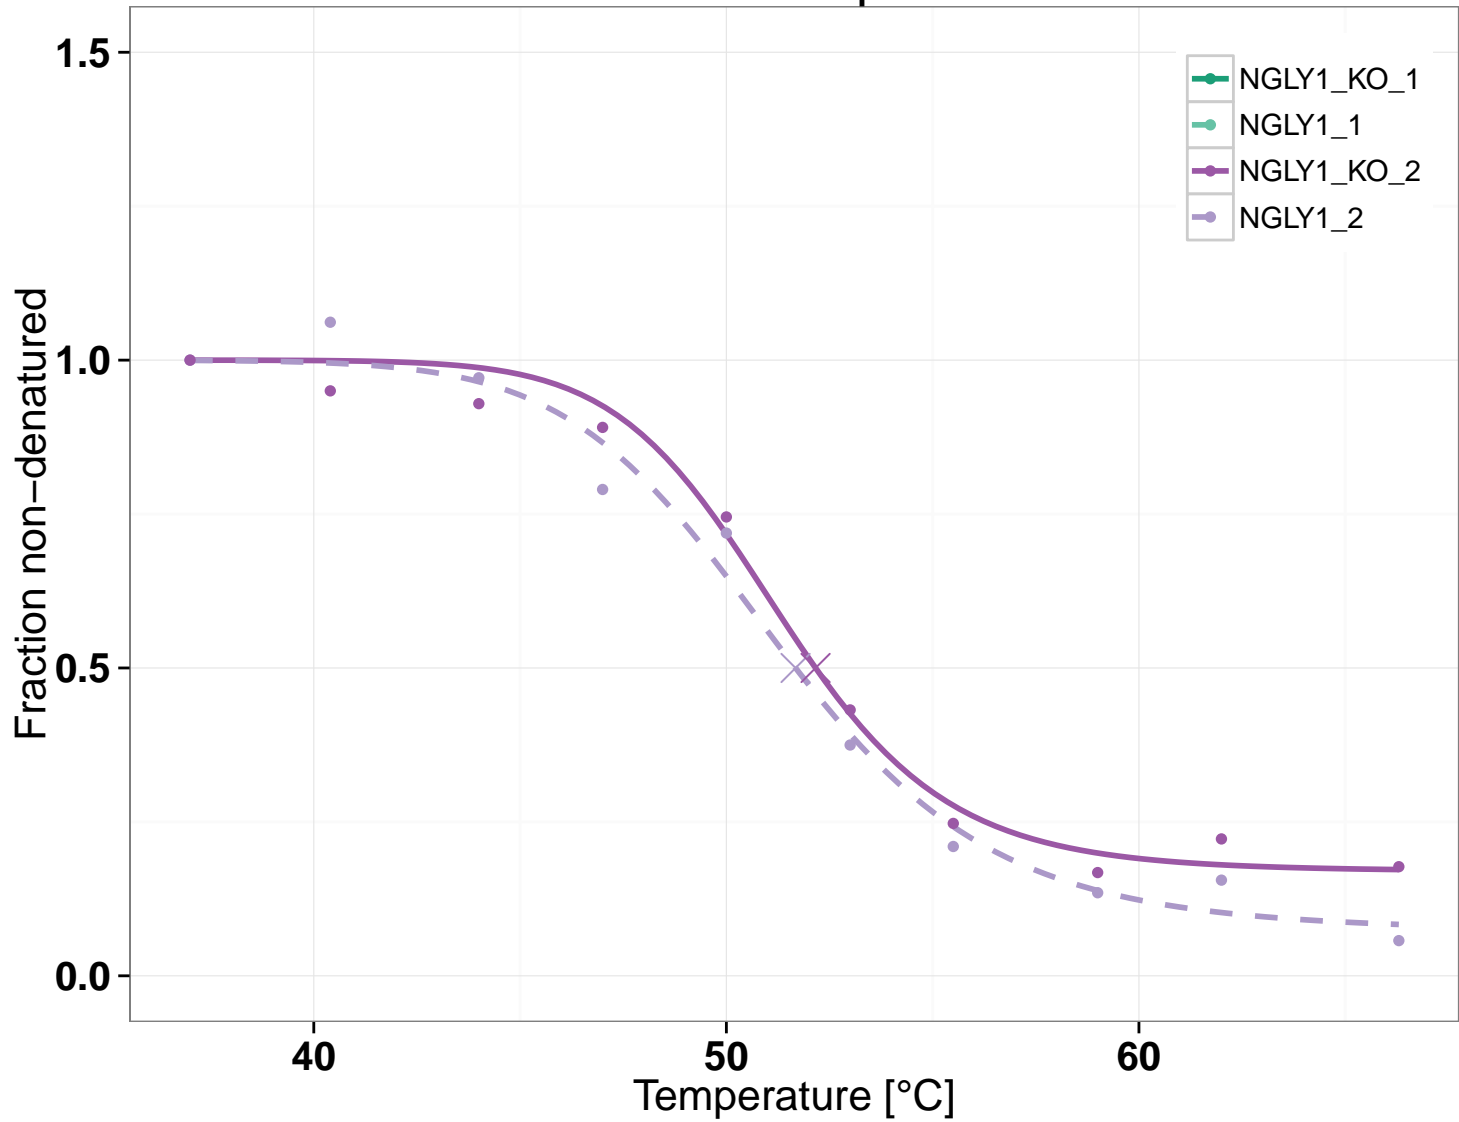

|            | meltPoint | slope | plateau | R2   |
|------------|-----------|-------|---------|------|
| NGLY1_KO_1 | —         | —     | —       | —    |
| NGLY1_1    | —         | —     | —       | —    |
| NGLY1_KO_2 | 52.16     | -0.1  | 0.17    | 0.99 |
| NGLY1_2    | 51.68     | -0.09 | 0.07    | 0.99 |

Supplement: Supplementary file 4323 [file 1]

IPI00447051.2|BCL7C

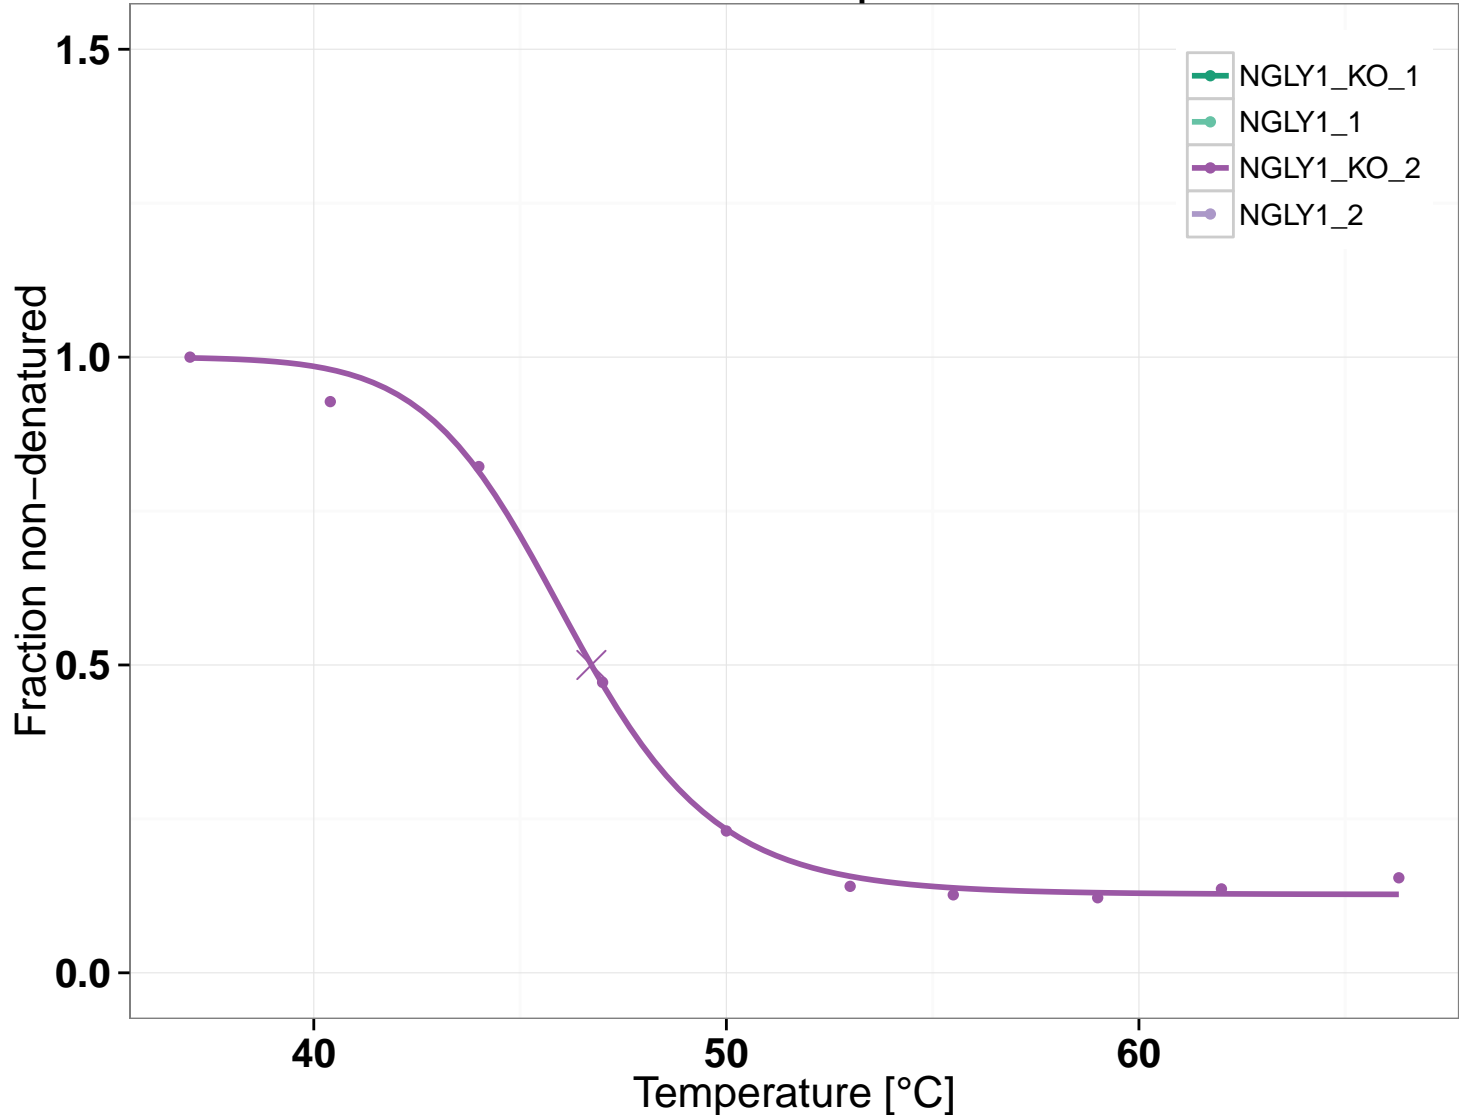

|            | meltPoint | slope | plateau | R2 |
|------------|-----------|-------|---------|----|
| NGLY1_KO_1 | —         | —     | —       | —  |
| NGLY1_1    | —         | —     | —       | —  |
| NGLY1_KO_2 | 46.73     | -0.12 | 0.13    | 1  |
| NGLY1_2    | —         | —     | —       | —  |

Supplement: Supplementary file 4324 [file 1]

# IPI00796864.1|DPM1

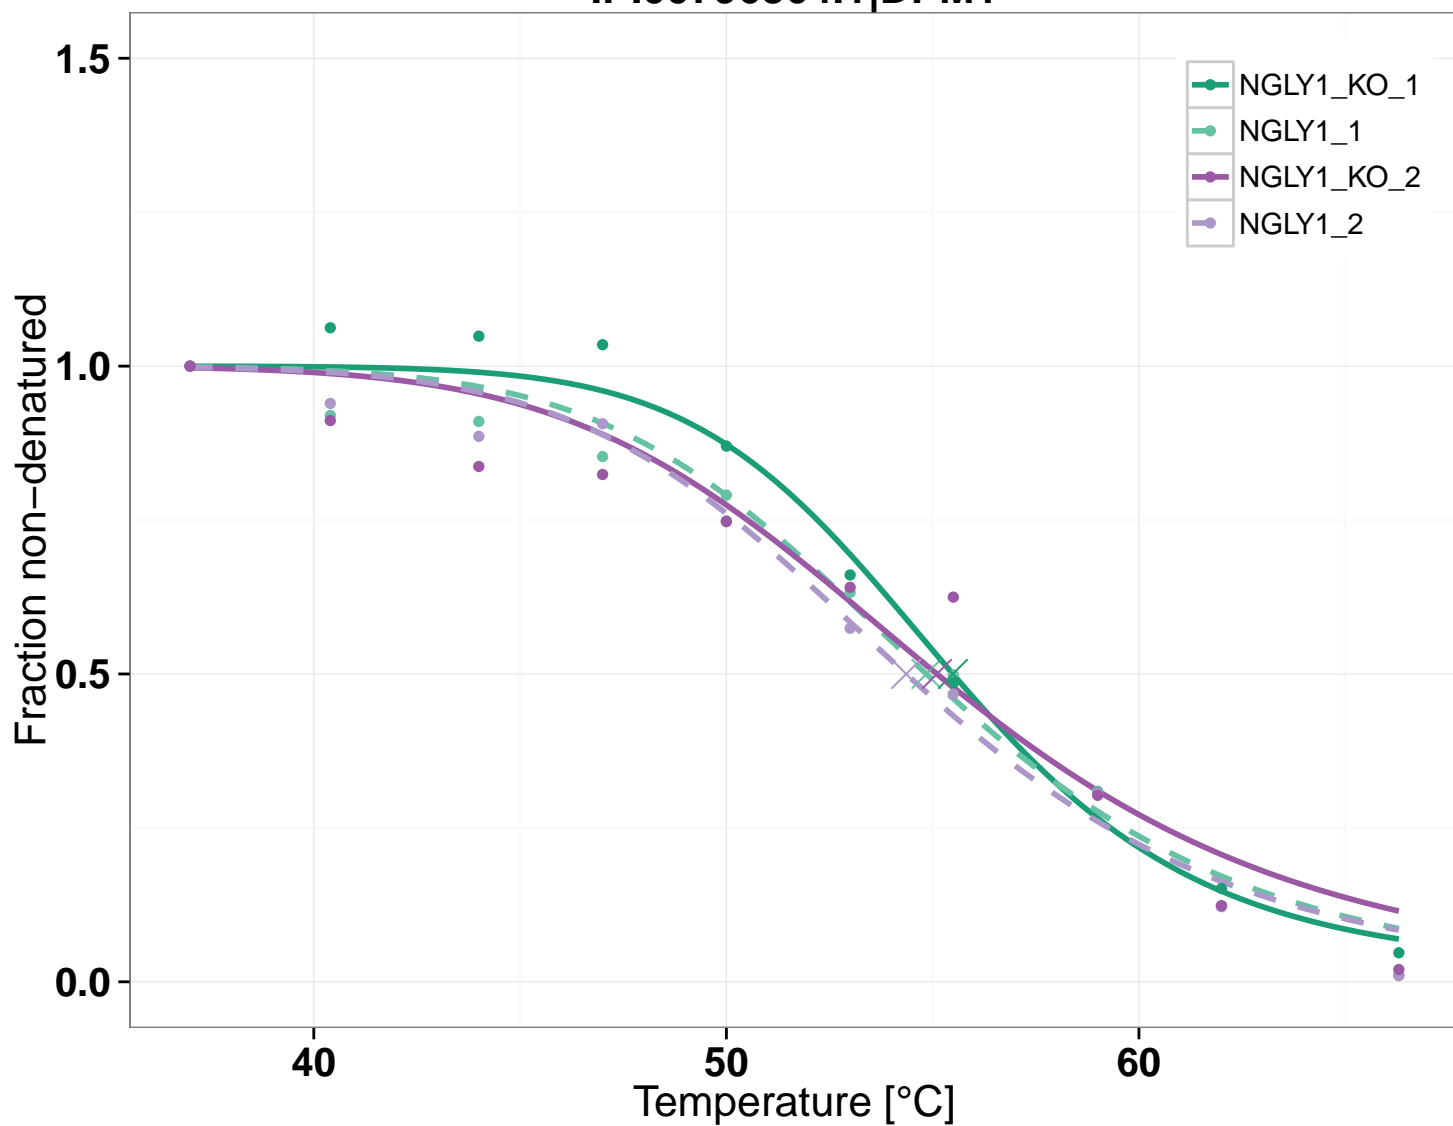

|            | meltPoint | slope  | plateau | R2   |
|------------|-----------|--------|---------|------|
| NGLY1_KO_1 | 55.49     | -0.08  | 0.02    | 0.99 |
| NGLY1_1    | 54.85     | -0.064 | 0       | 0.98 |
| NGLY1_KO_2 | 55.1      | -0.056 | 0       | 0.94 |
| NGLY1_2    | 54.36     | -0.062 | 0       | 0.98 |

Supplement: Supplementary file 4325 [file 1]

# IPI00604523.1|MRCL3

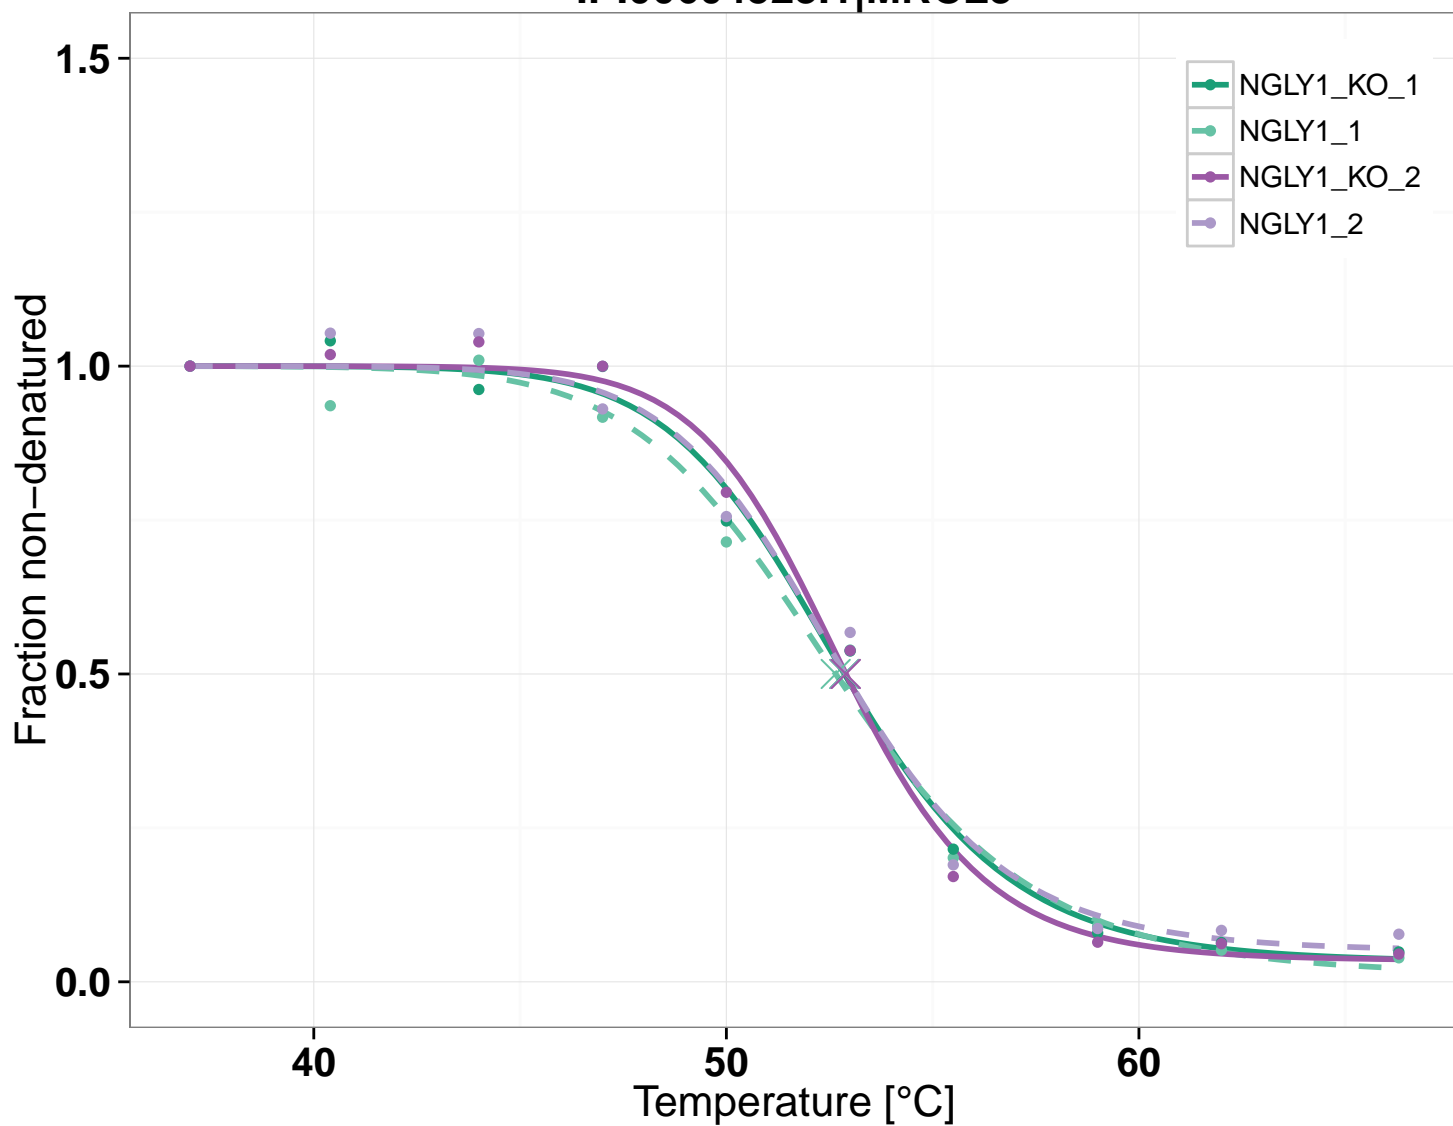

|            | meltPoint | slope | plateau | R2   |
|------------|-----------|-------|---------|------|
| NGLY1_KO_1 | 52.86     | -0.12 | 0.03    | 0.99 |
| NGLY1_1    | 52.65     | -0.1  | 0.01    | 0.99 |
| NGLY1_KO_2 | 52.9      | -0.14 | 0.03    | 0.99 |
| NGLY1_2    | 52.88     | -0.12 | 0.05    | 0.99 |

Supplement: Supplementary file 4326 [file 1]

IPI00411452.3|DOCK11

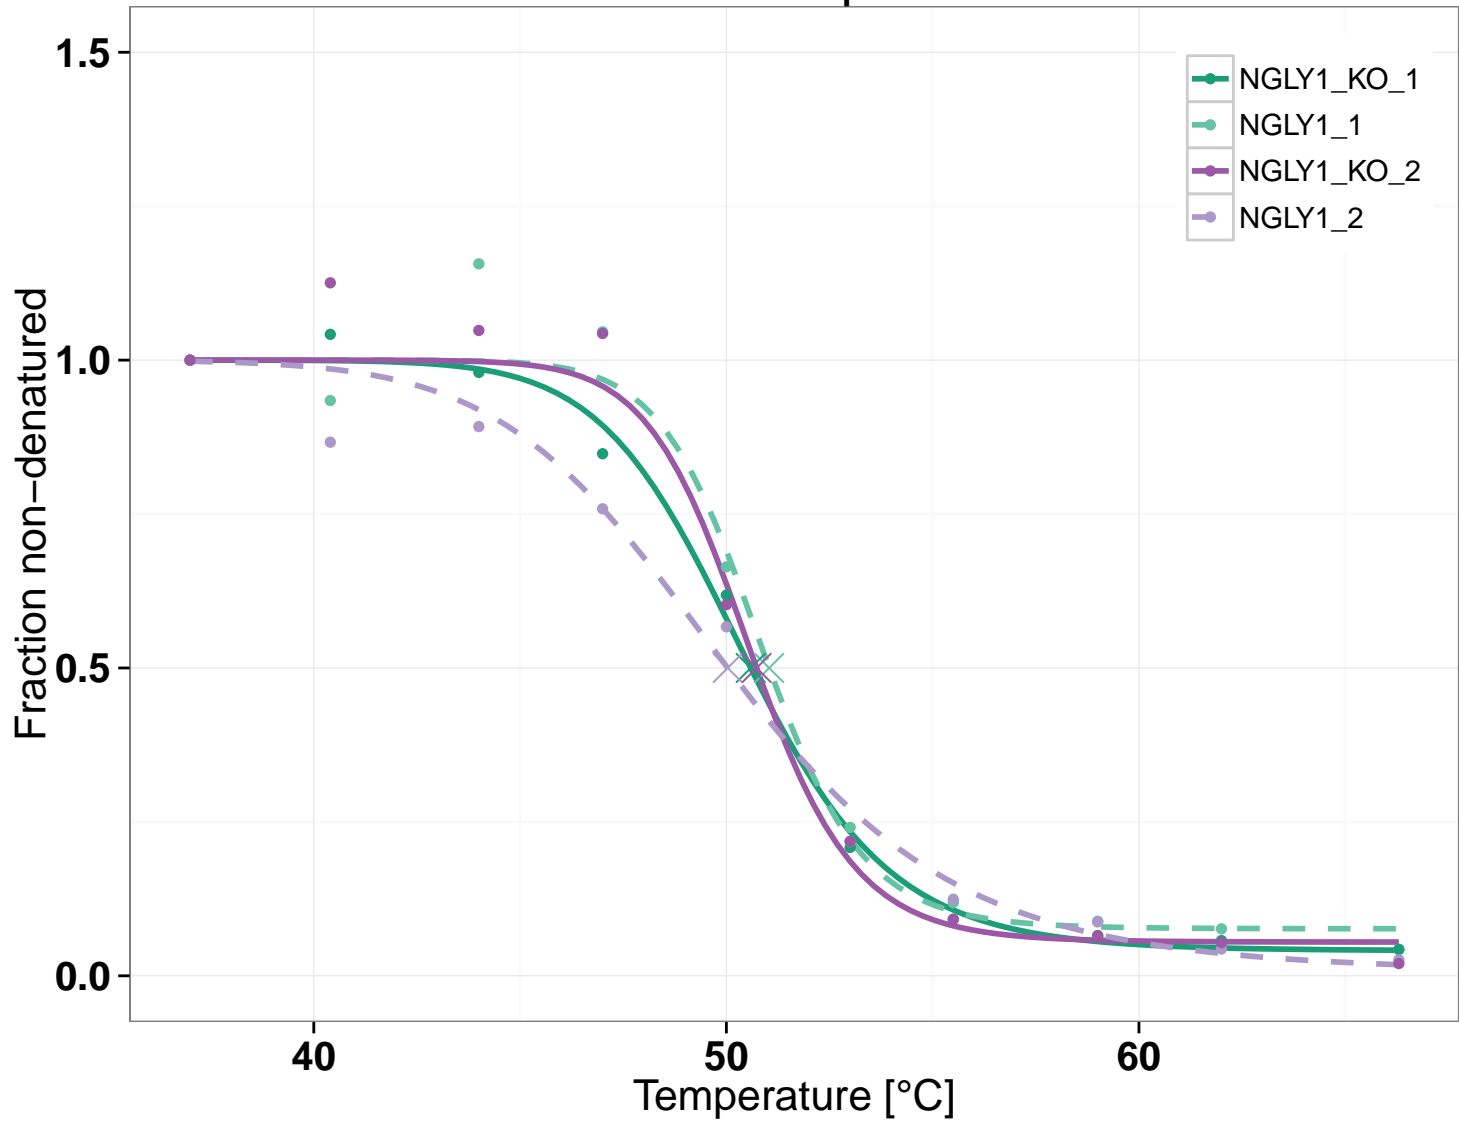

|            | meltPoint | slope | plateau | R2   |
|------------|-----------|-------|---------|------|
| NGLY1_KO_1 | 50.59     | -0.14 | 0.04    | 1    |
| NGLY1_1    | 51.04     | -0.19 | 0.08    | 0.98 |
| NGLY1_KO_2 | 50.73     | -0.19 | 0.05    | 0.99 |
| NGLY1_2    | 50.03     | -0.09 | 0.01    | 0.98 |

Supplement: Supplementary file 4327 [file 1]

IPI00646556.1|NDUFV2

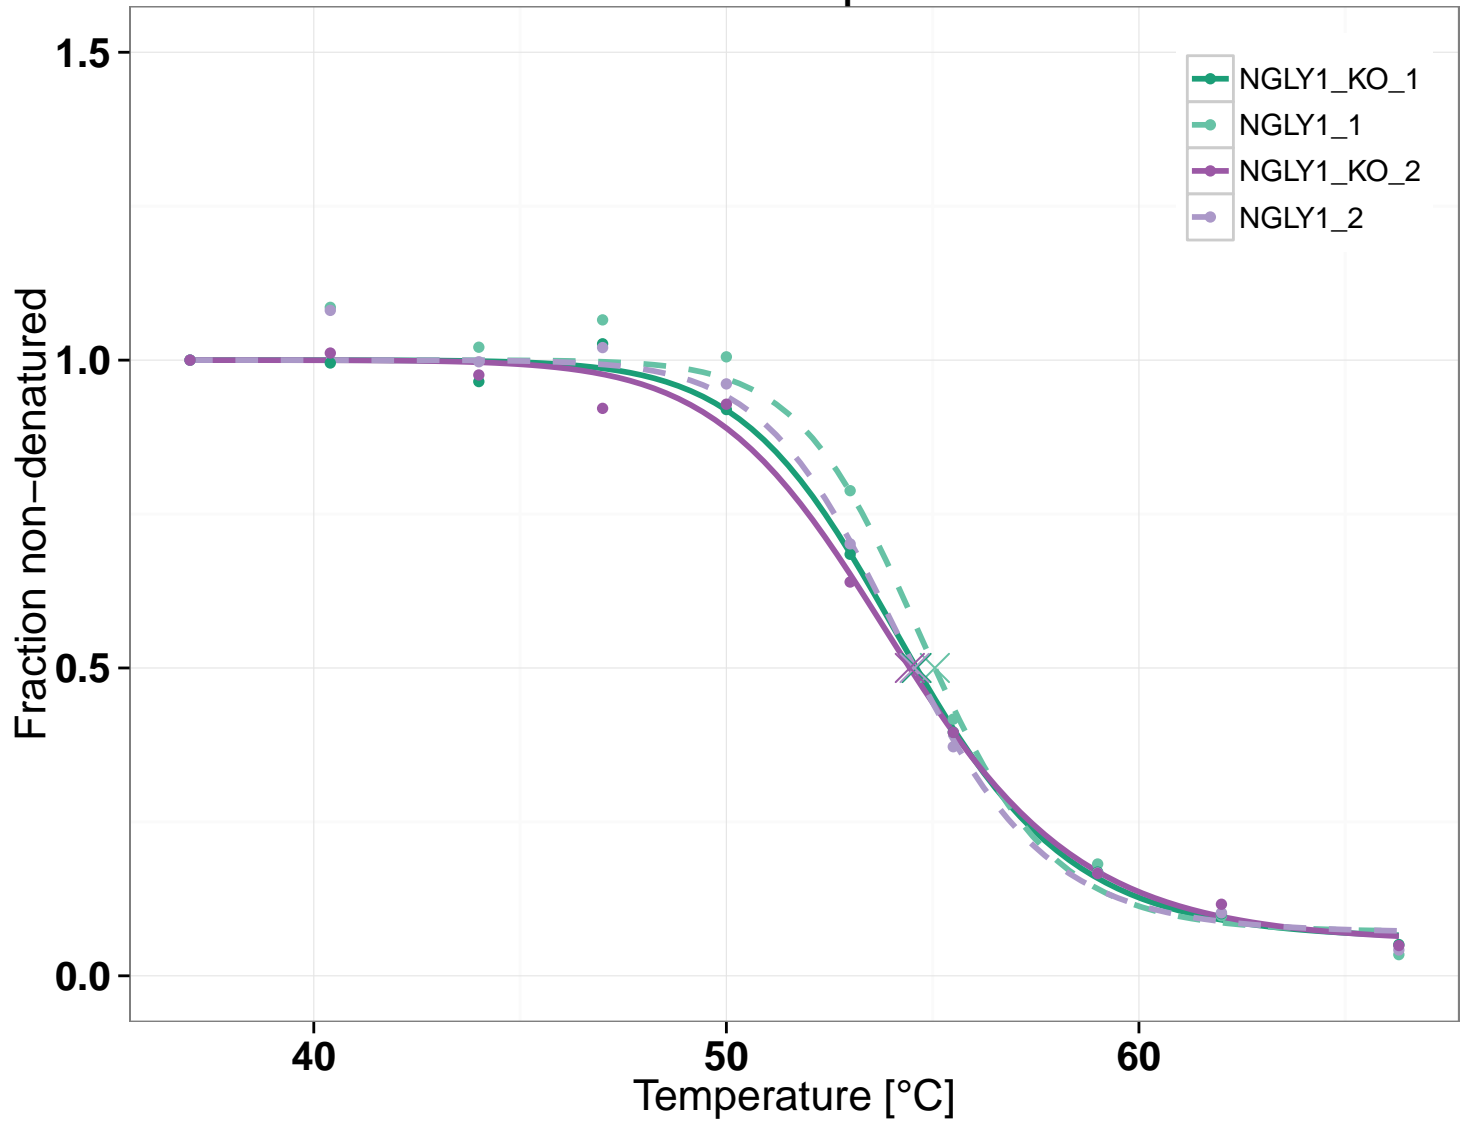

|            | meltPoint | slope | plateau | R2   |
|------------|-----------|-------|---------|------|
| NGLY1_KO_1 | 54.61     | -0.12 | 0.06    | 1    |
| NGLY1_1    | 55.05     | -0.15 | 0.07    | 0.99 |
| NGLY1_KO_2 | 54.45     | -0.11 | 0.05    | 1    |
| NGLY1_2    | 54.56     | -0.13 | 0.07    | 0.99 |

Supplement: Supplementary file 4328 [file 1]

IPI00640276.1|EFHA1

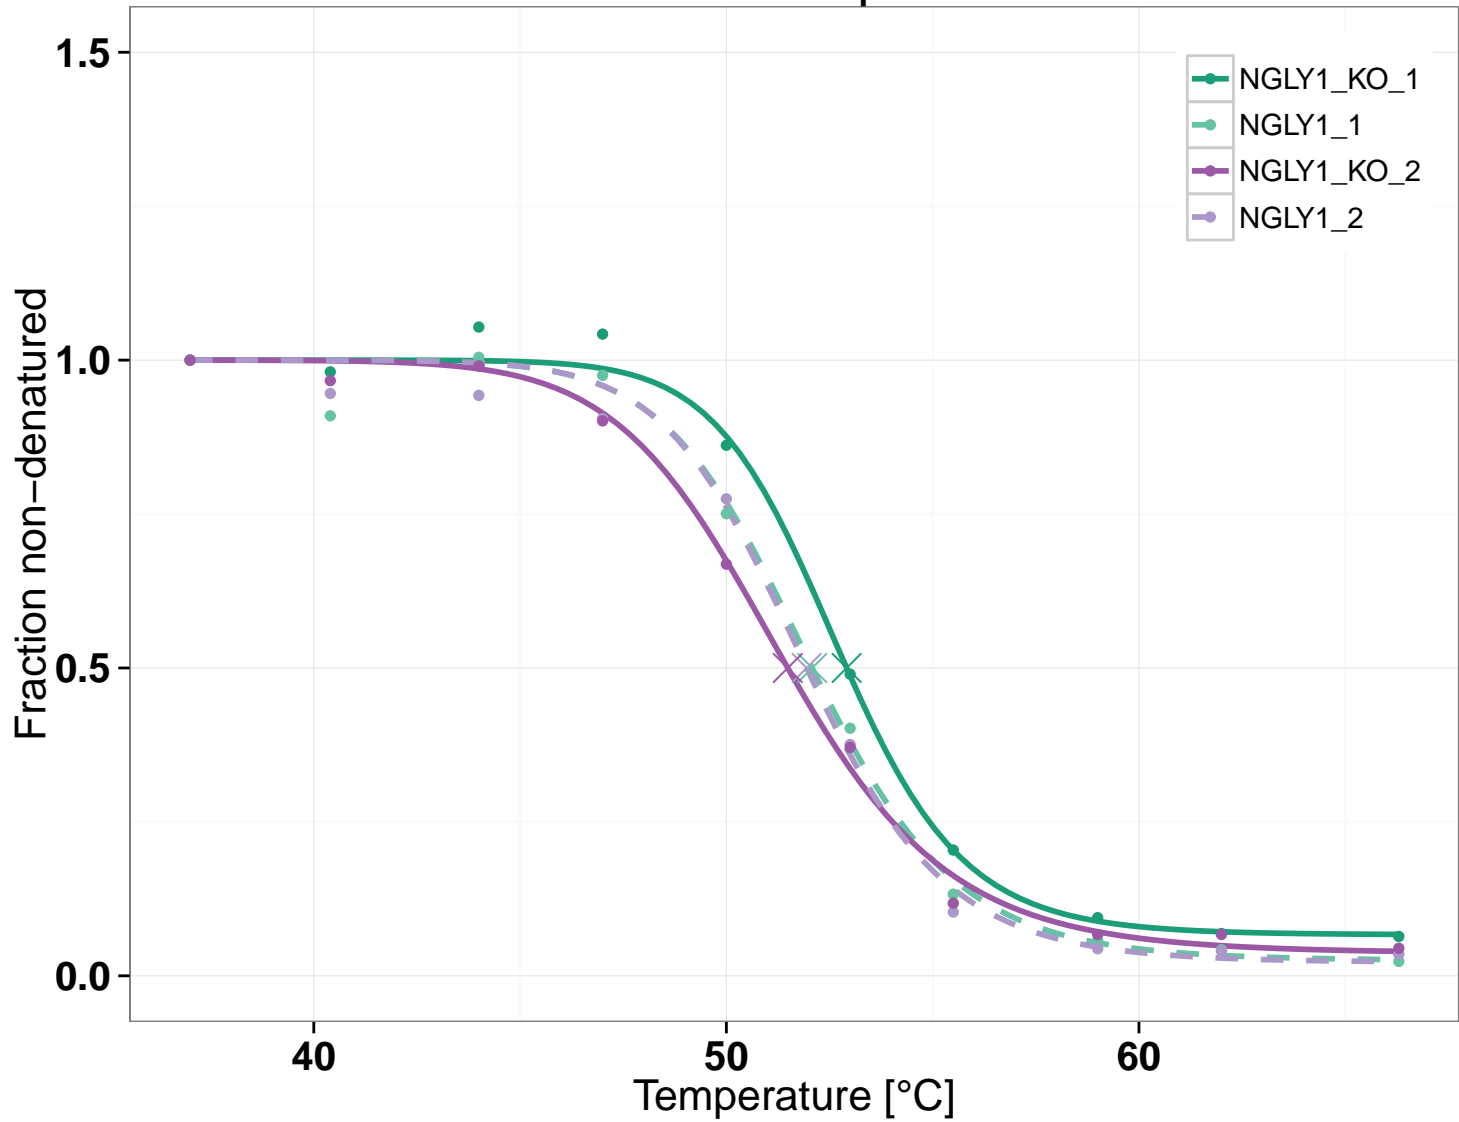

|            | meltPoint | slope | plateau | R2   |
|------------|-----------|-------|---------|------|
| NGLY1_KO_1 | 52.92     | -0.15 | 0.07    | 1    |
| NGLY1_1    | 52.08     | -0.14 | 0.02    | 0.99 |
| NGLY1_KO_2 | 51.49     | -0.12 | 0.04    | 1    |
| NGLY1_2    | 51.95     | -0.14 | 0.02    | 0.99 |

Supplement: Supplementary file 4329 [file 1]

IPI00015481.1|ZNF408

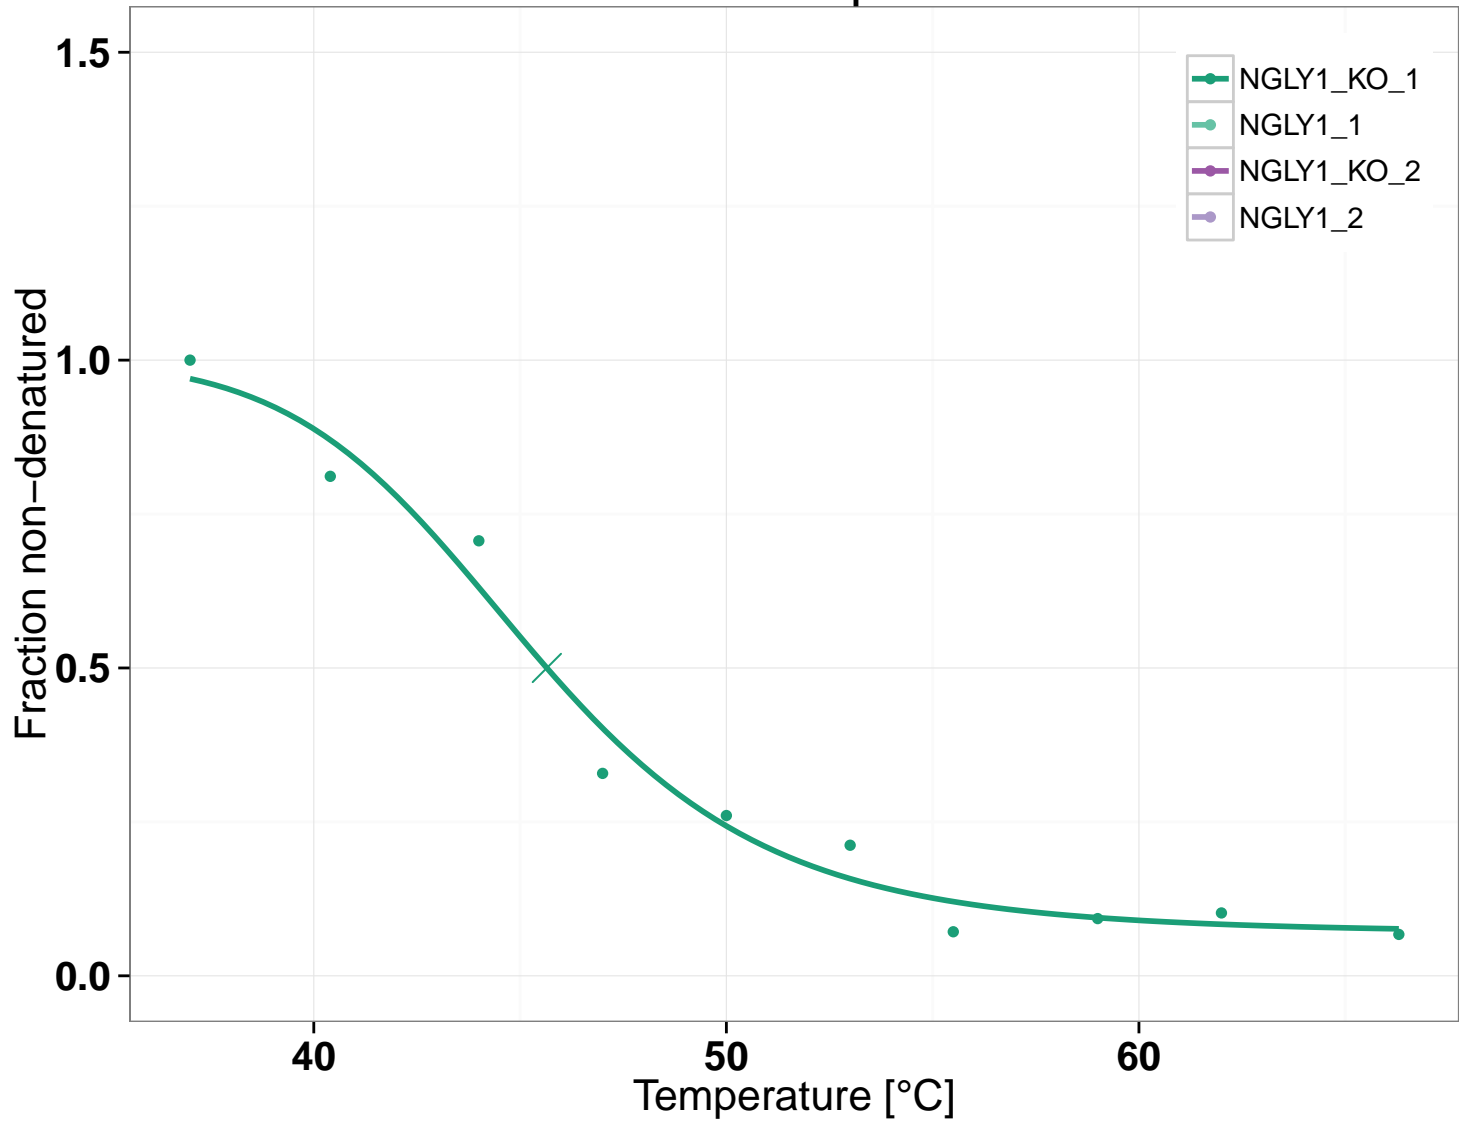

|            | meltPoint | slope | plateau | R2   |
|------------|-----------|-------|---------|------|
| NGLY1_KO_1 | 45.65     | -0.08 | 0.07    | 0.98 |
| NGLY1_1    | -         | -     | -       | -    |
| NGLY1_KO_2 | -         | -     | -       | -    |
| NGLY1_2    | -         | -     | -       | -    |

Supplement: Supplementary file 4330 [file 1]

IPI00441867.1|PEX19

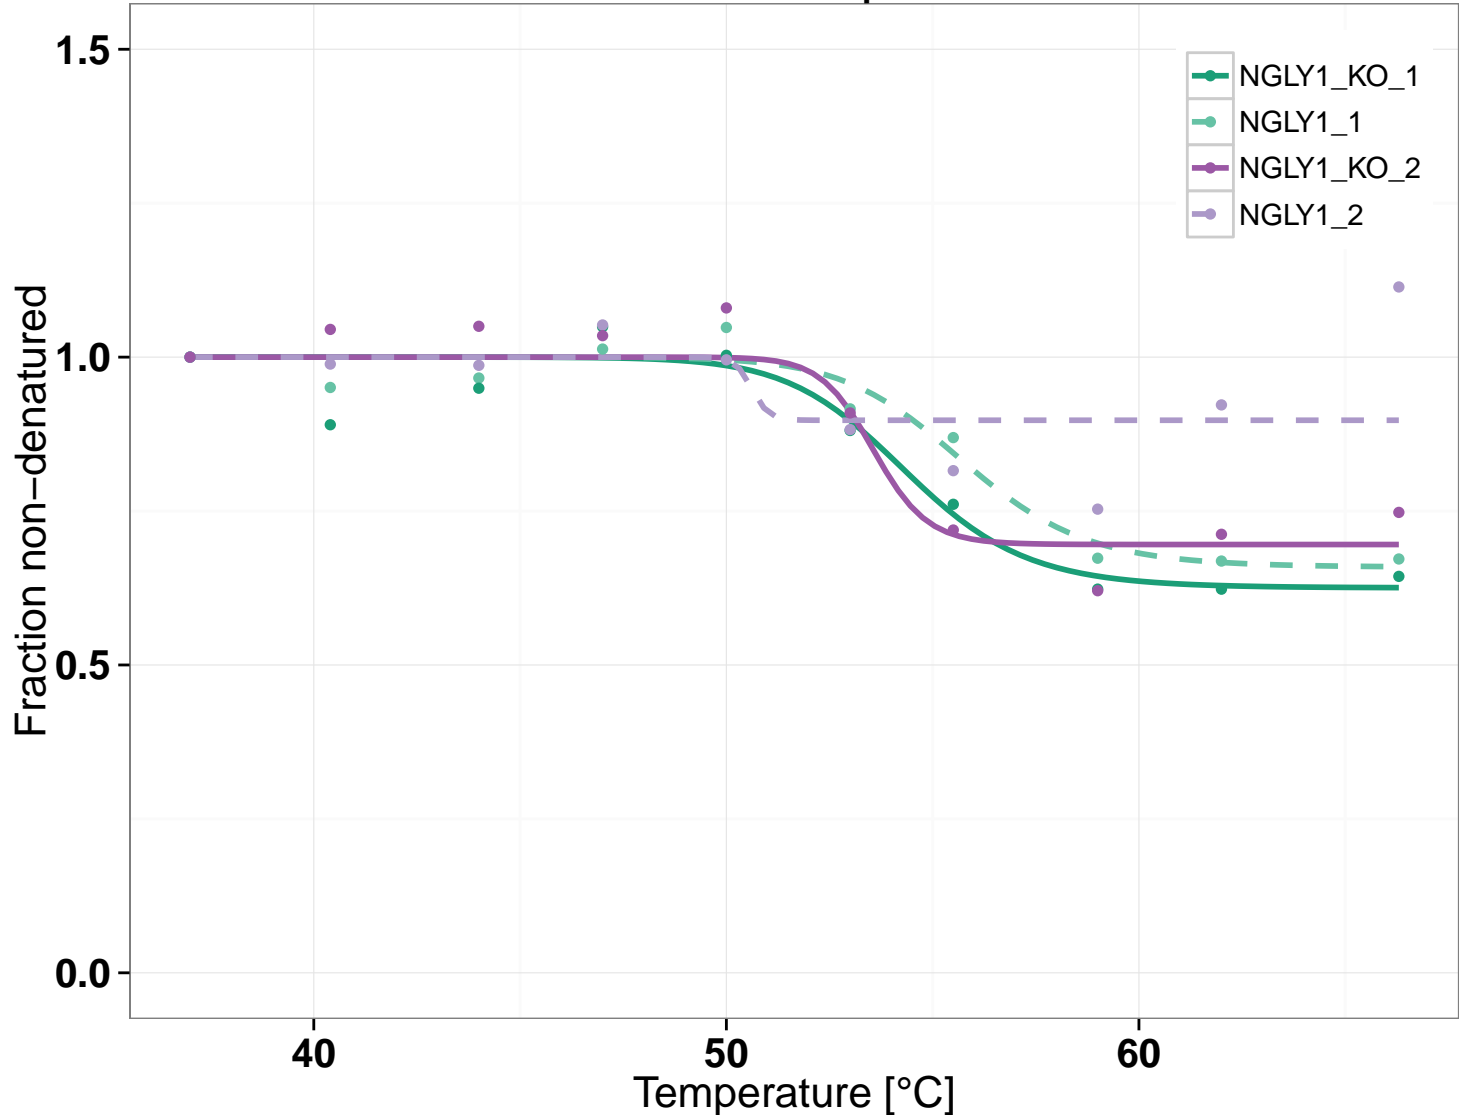

|            | meltPoint | slope  | plateau | R2   |
|------------|-----------|--------|---------|------|
| NGLY1_KO_1 | -         | -0.065 | 0.63    | 0.93 |
| NGLY1_1    | -         | -0.057 | 0.66    | 0.95 |
| NGLY1_KO_2 | -         | -0.12  | 0.7     | 0.92 |
| NGLY1_2    | -         | -0.13  | 0.9     | 0.27 |

Supplement: Supplementary file 4331 [file 1]

IPI00184376.4|C9ORF126

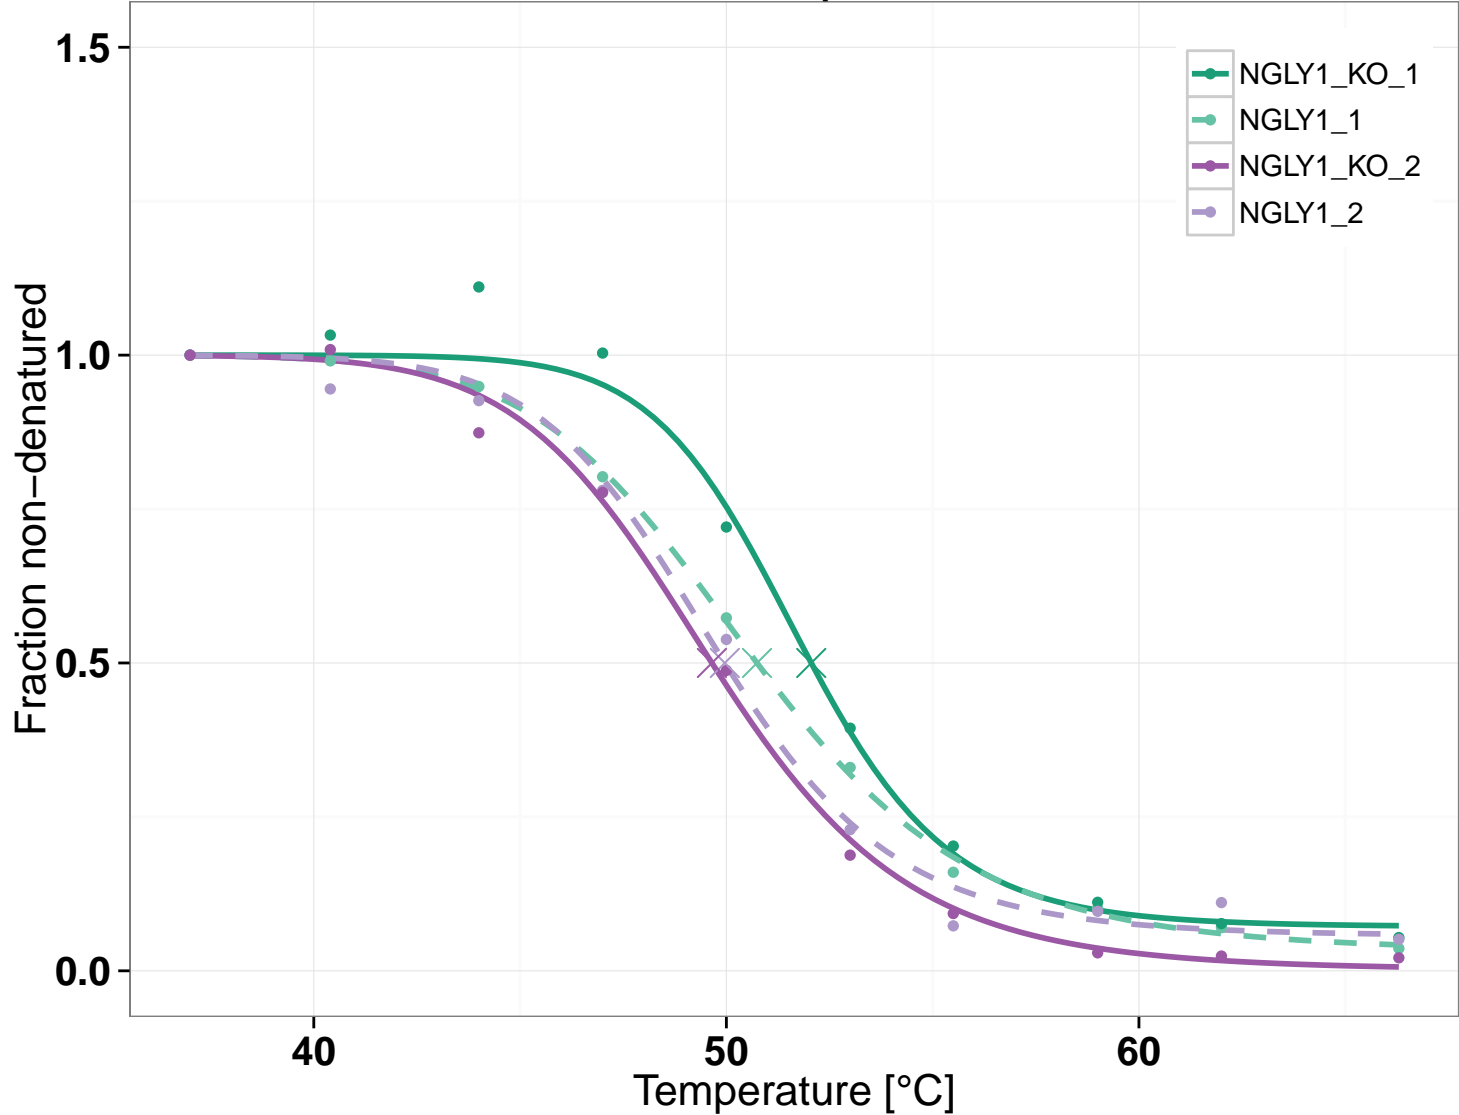

|            | meltPoint | slope  | plateau | R2   |
|------------|-----------|--------|---------|------|
| NGLY1_KO_1 | 52.06     | -0.13  | 0.07    | 0.99 |
| NGLY1_1    | 50.74     | -0.091 | 0.03    | 1    |
| NGLY1_KO_2 | 49.65     | -0.11  | 0       | 1    |
| NGLY1_2    | 49.96     | -0.11  | 0.06    | 0.99 |

Supplement: Supplementary file 4332 [file 1]

IPI00029472.2|ATE1

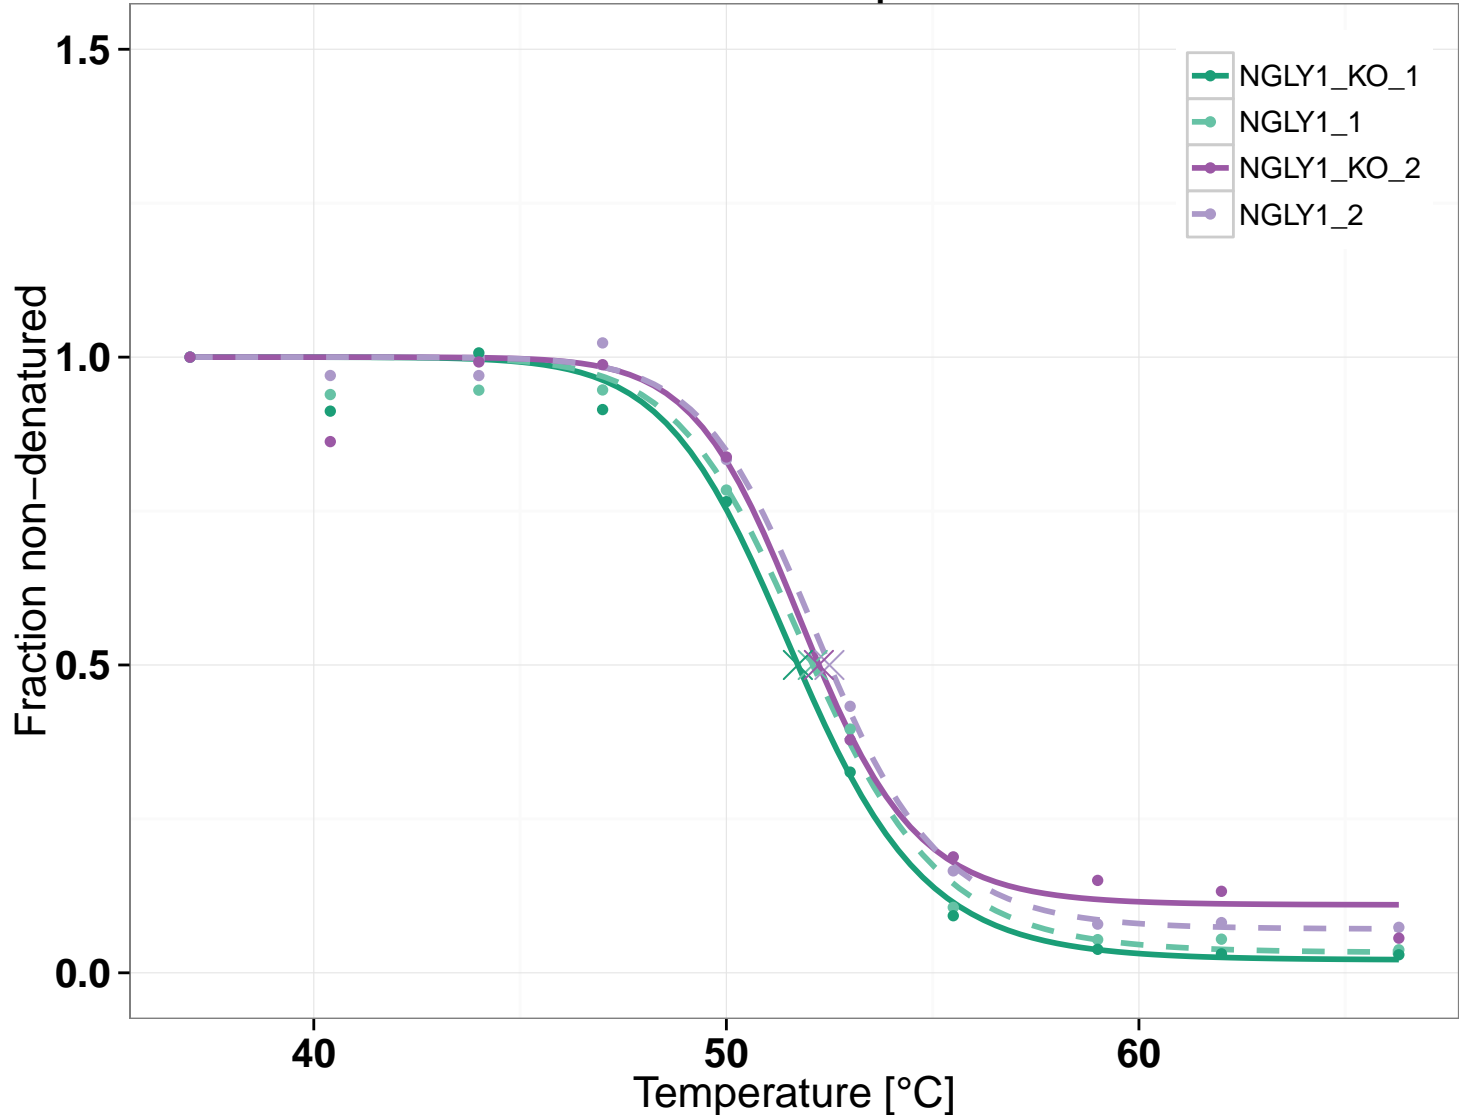

|            | meltPoint | slope | plateau | R2   |
|------------|-----------|-------|---------|------|
| NGLY1_KO_1 | 51.73     | -0.15 | 0.02    | 0.99 |
| NGLY1_1    | 52.09     | -0.15 | 0.03    | 0.99 |
| NGLY1_KO_2 | 52.24     | -0.16 | 0.11    | 0.98 |
| NGLY1_2    | 52.5      | -0.16 | 0.07    | 1    |

Supplement: Supplementary file 4333 [file 1]

IPI00027202.2|LOC100130829

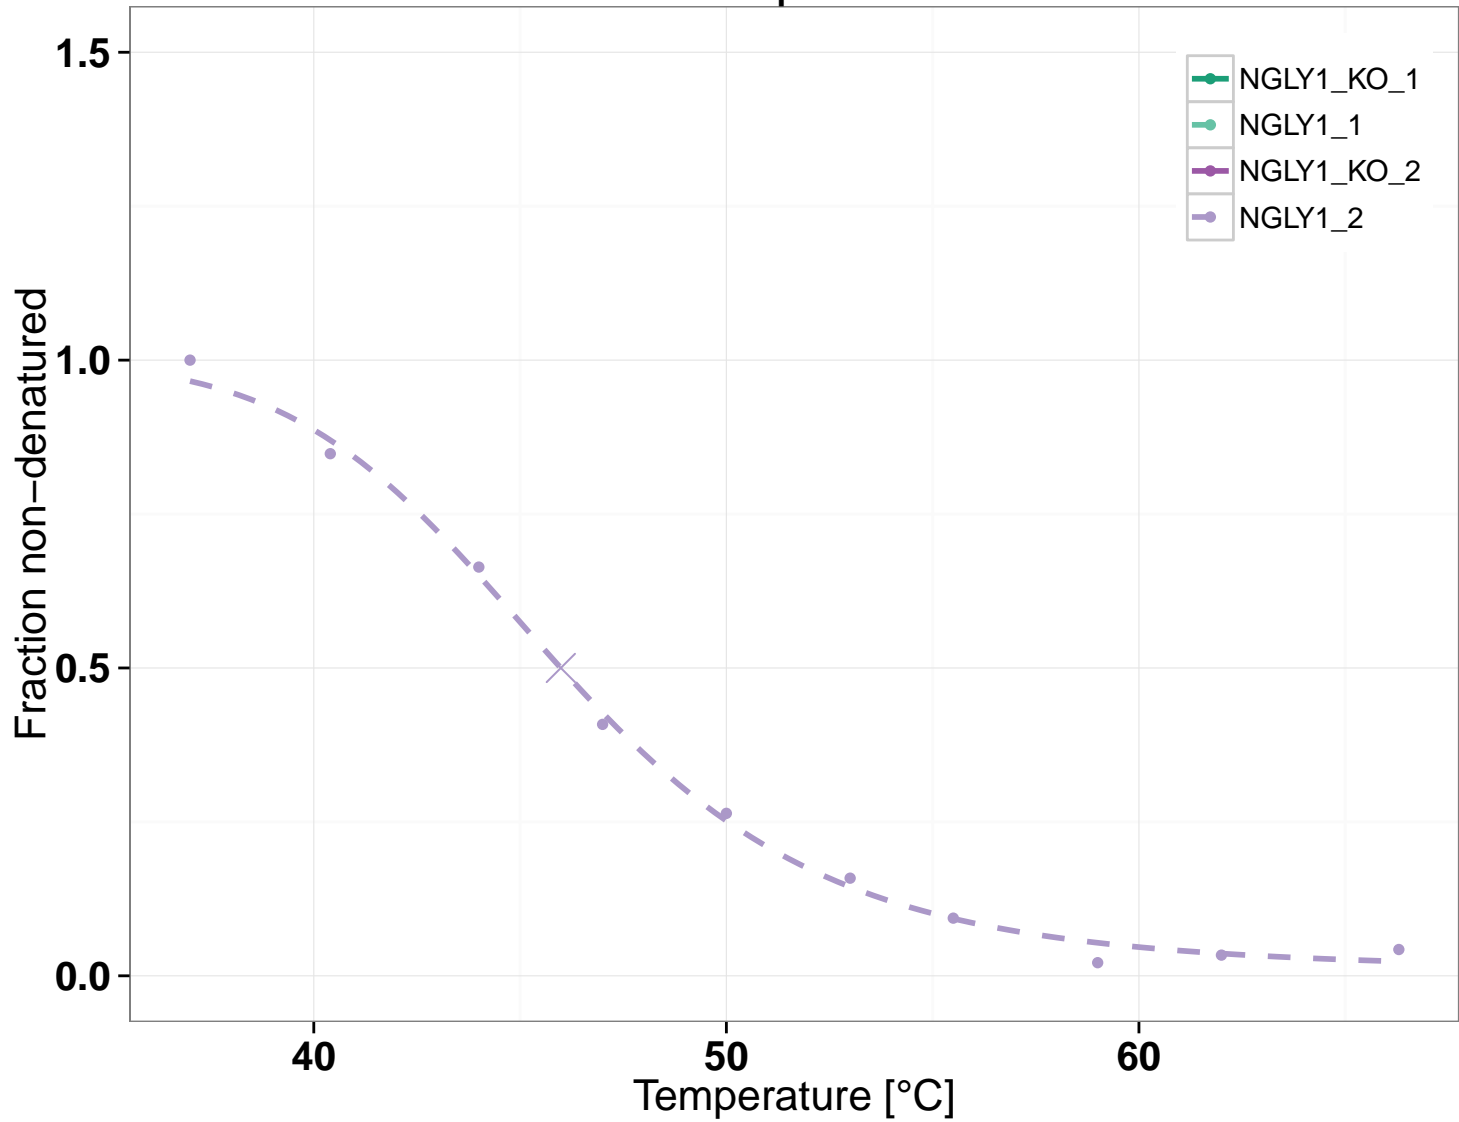

|            | meltPoint | slope  | plateau | R2 |
|------------|-----------|--------|---------|----|
| NGLY1_KO_1 | -         | -      | -       | -  |
| NGLY1_1    | -         | -      | -       | -  |
| NGLY1_KO_2 | -         | -      | -       | -  |
| NGLY1_2    | 45.99     | -0.076 | 0.01    | 1  |

Supplement: Supplementary file 4334 [file 1]

# IPI00005719.1|RAB1A

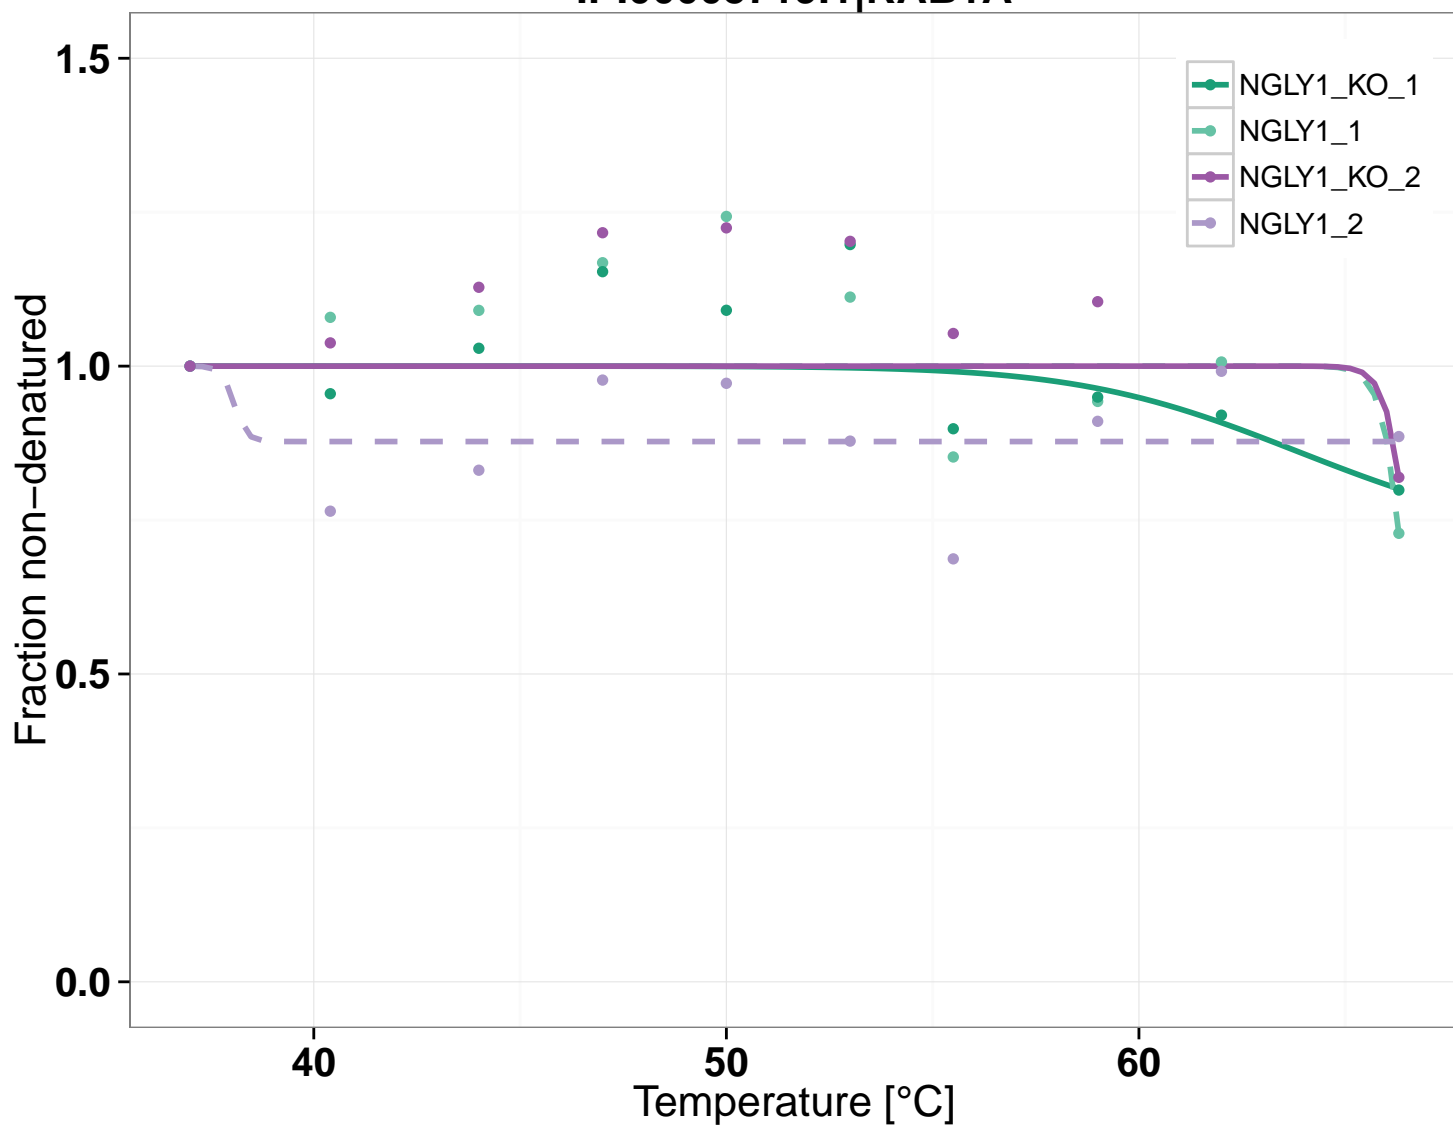

|            | meltPoint | slope  | plateau | R2    |
|------------|-----------|--------|---------|-------|
| NGLY1_KO_1 | -         | -0.026 | 0.7     | 0.37  |
| NGLY1_1    | -         | -      | 0       | 0.33  |
| NGLY1_KO_2 | -         | -      | 0       | -0.46 |
| NGLY1_2    | -         | -0.2   | 0.88    | 0.14  |

Supplement: Supplementary file 4335 [file 1]

IPI00004533.1|KIF3B

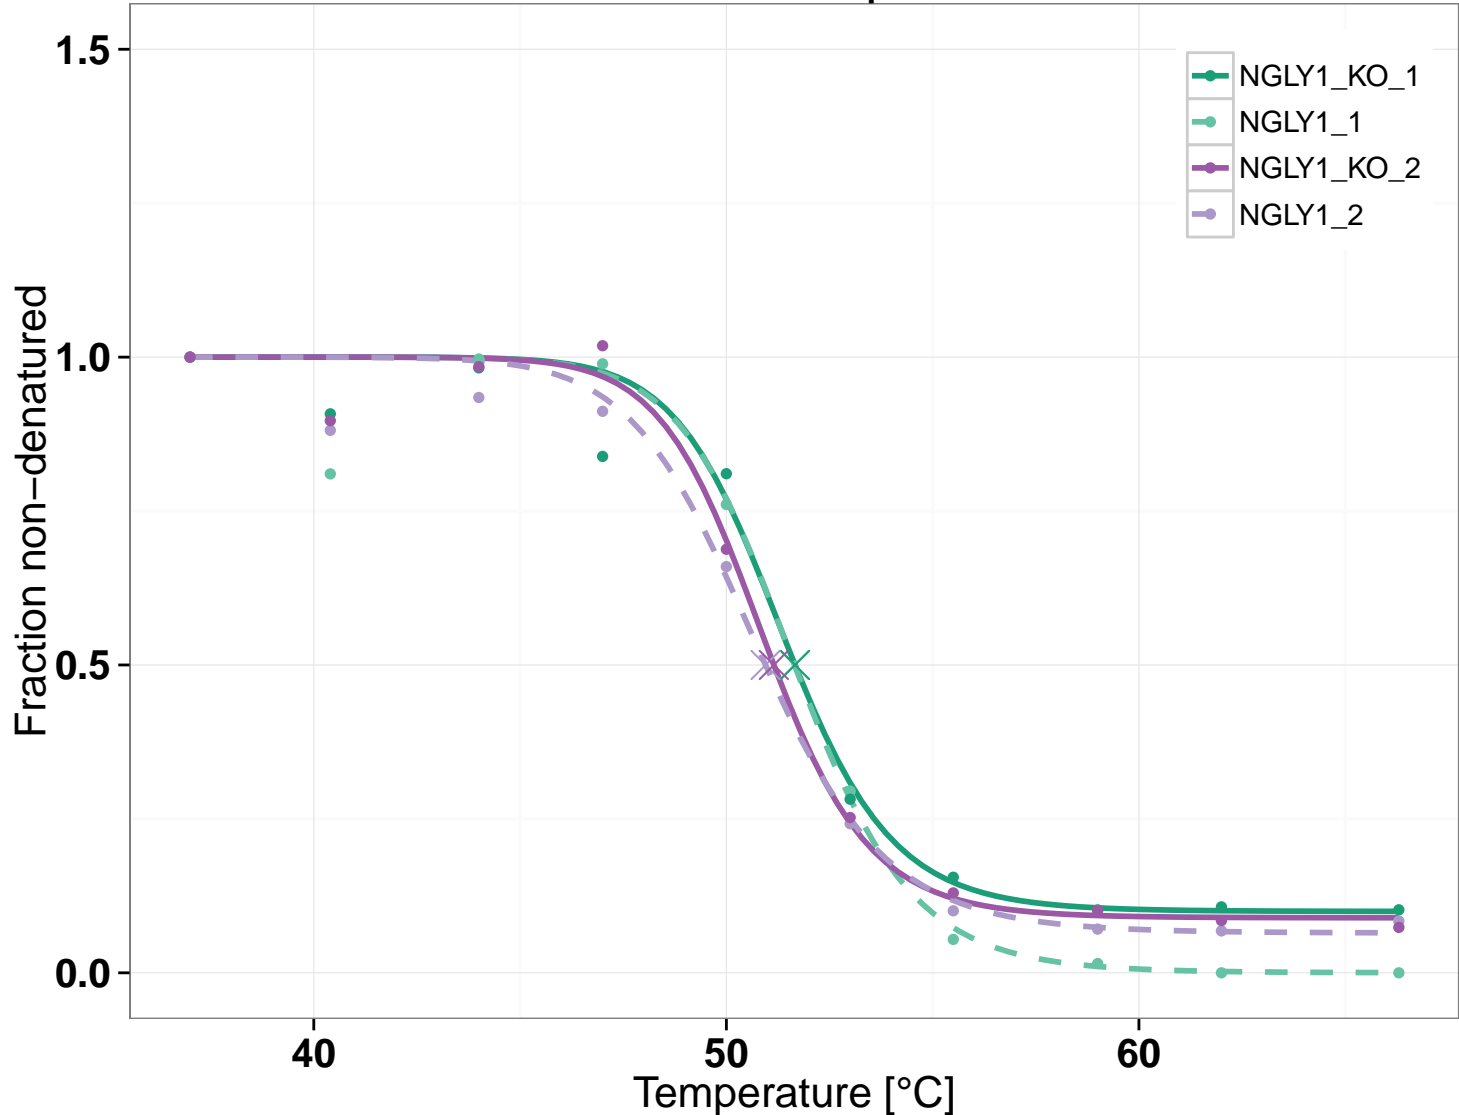

|            | meltPoint | slope | plateau | R2   |
|------------|-----------|-------|---------|------|
| NGLY1_KO_1 | 51.66     | -0.17 | 0.1     | 0.98 |
| NGLY1_1    | 51.65     | -0.18 | 0       | 0.98 |
| NGLY1_KO_2 | 51.15     | -0.18 | 0.09    | 0.99 |
| NGLY1_2    | 50.95     | -0.15 | 0.06    | 0.99 |

Supplement: Supplementary file 4336 [file 1]

IPI00290514.1|INTS9

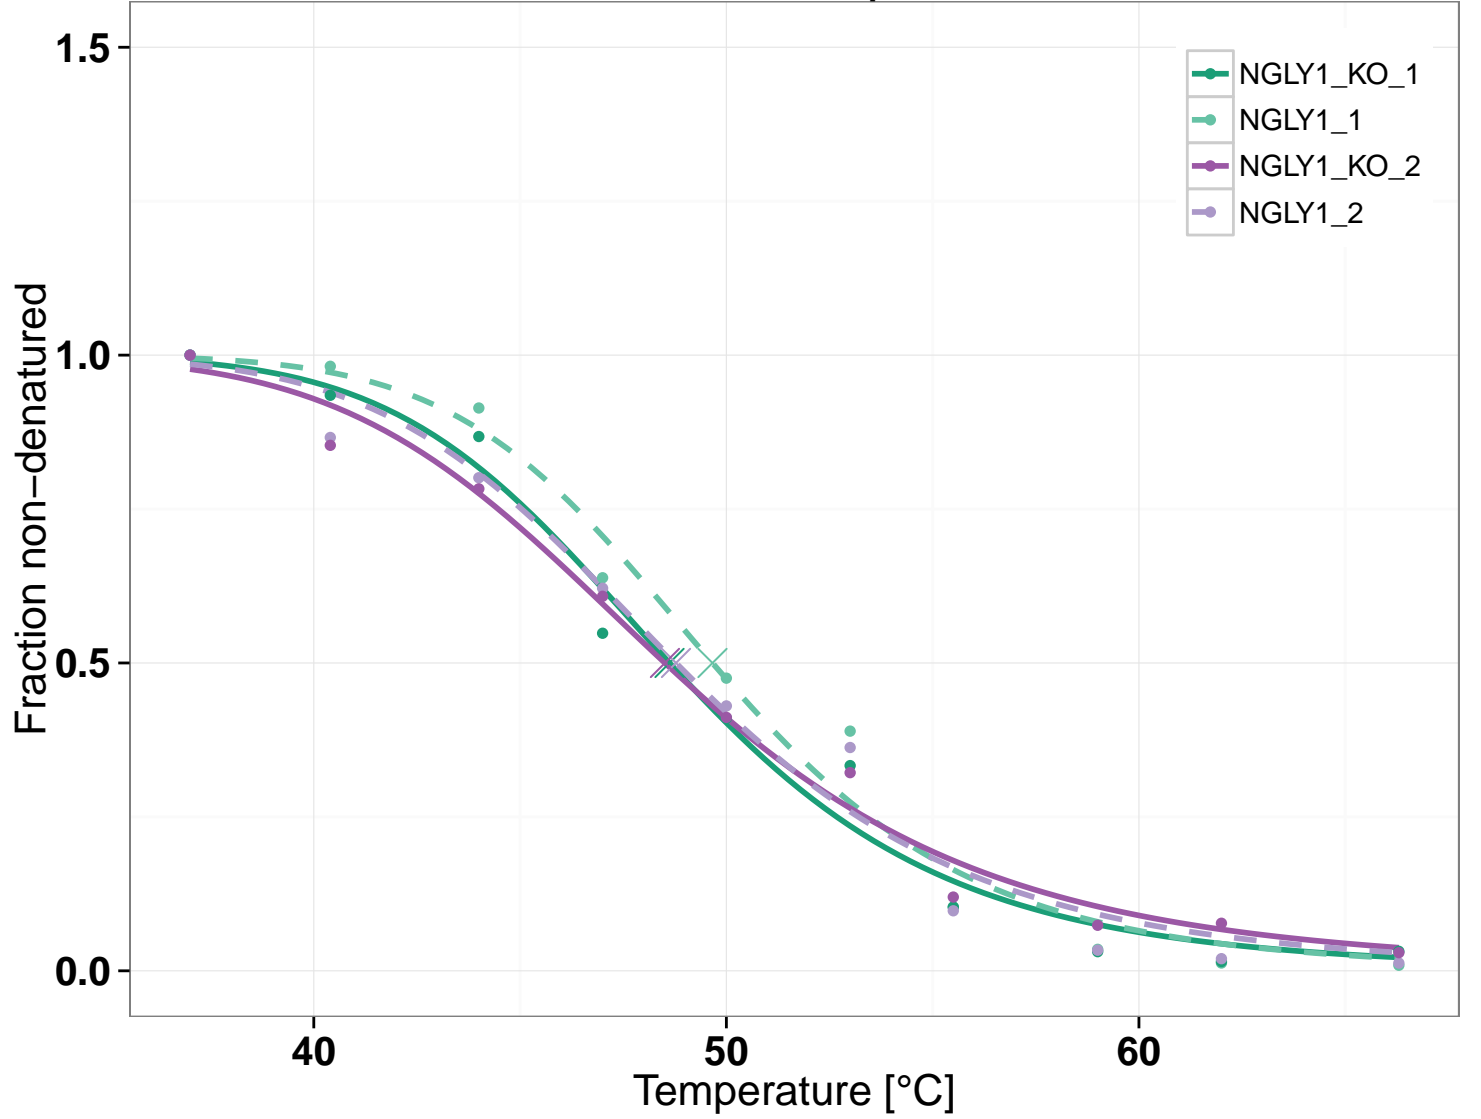

|            | meltPoint | slope  | plateau | R2   |
|------------|-----------|--------|---------|------|
| NGLY1_KO_1 | 48.62     | -0.075 | 0       | 0.98 |
| NGLY1_1    | 49.66     | -0.079 | 0       | 0.98 |
| NGLY1_KO_2 | 48.51     | -0.064 | 0       | 0.99 |
| NGLY1_2    | 48.78     | -0.069 | 0       | 0.98 |

Supplement: Supplementary file 4337 [file 1]

# IPI00301280.2|TMEM43

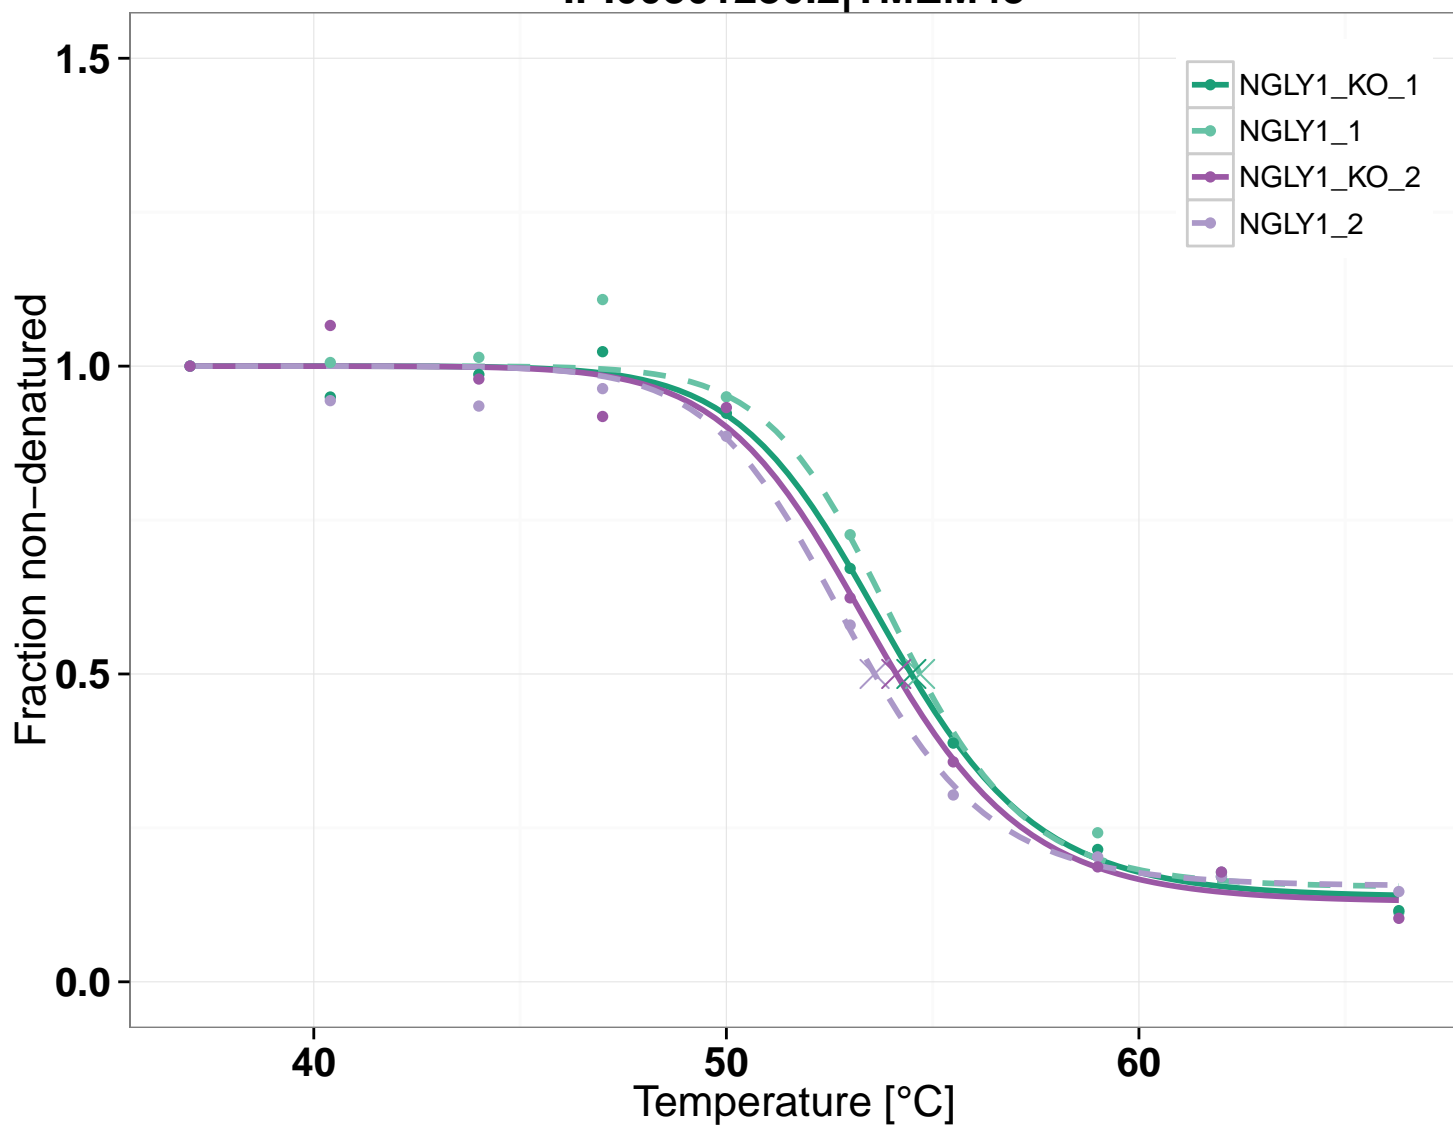

|            | meltPoint | slope | plateau | R2   |
|------------|-----------|-------|---------|------|
| NGLY1_KO_1 | 54.48     | -0.12 | 0.14    | 1    |
| NGLY1_1    | 54.7      | -0.13 | 0.15    | 0.99 |
| NGLY1_KO_2 | 54.12     | -0.12 | 0.13    | 0.99 |
| NGLY1_2    | 53.59     | -0.12 | 0.16    | 0.99 |

Supplement: Supplementary file 4338 [file 1]

IPI00163849.2|EPS15L1

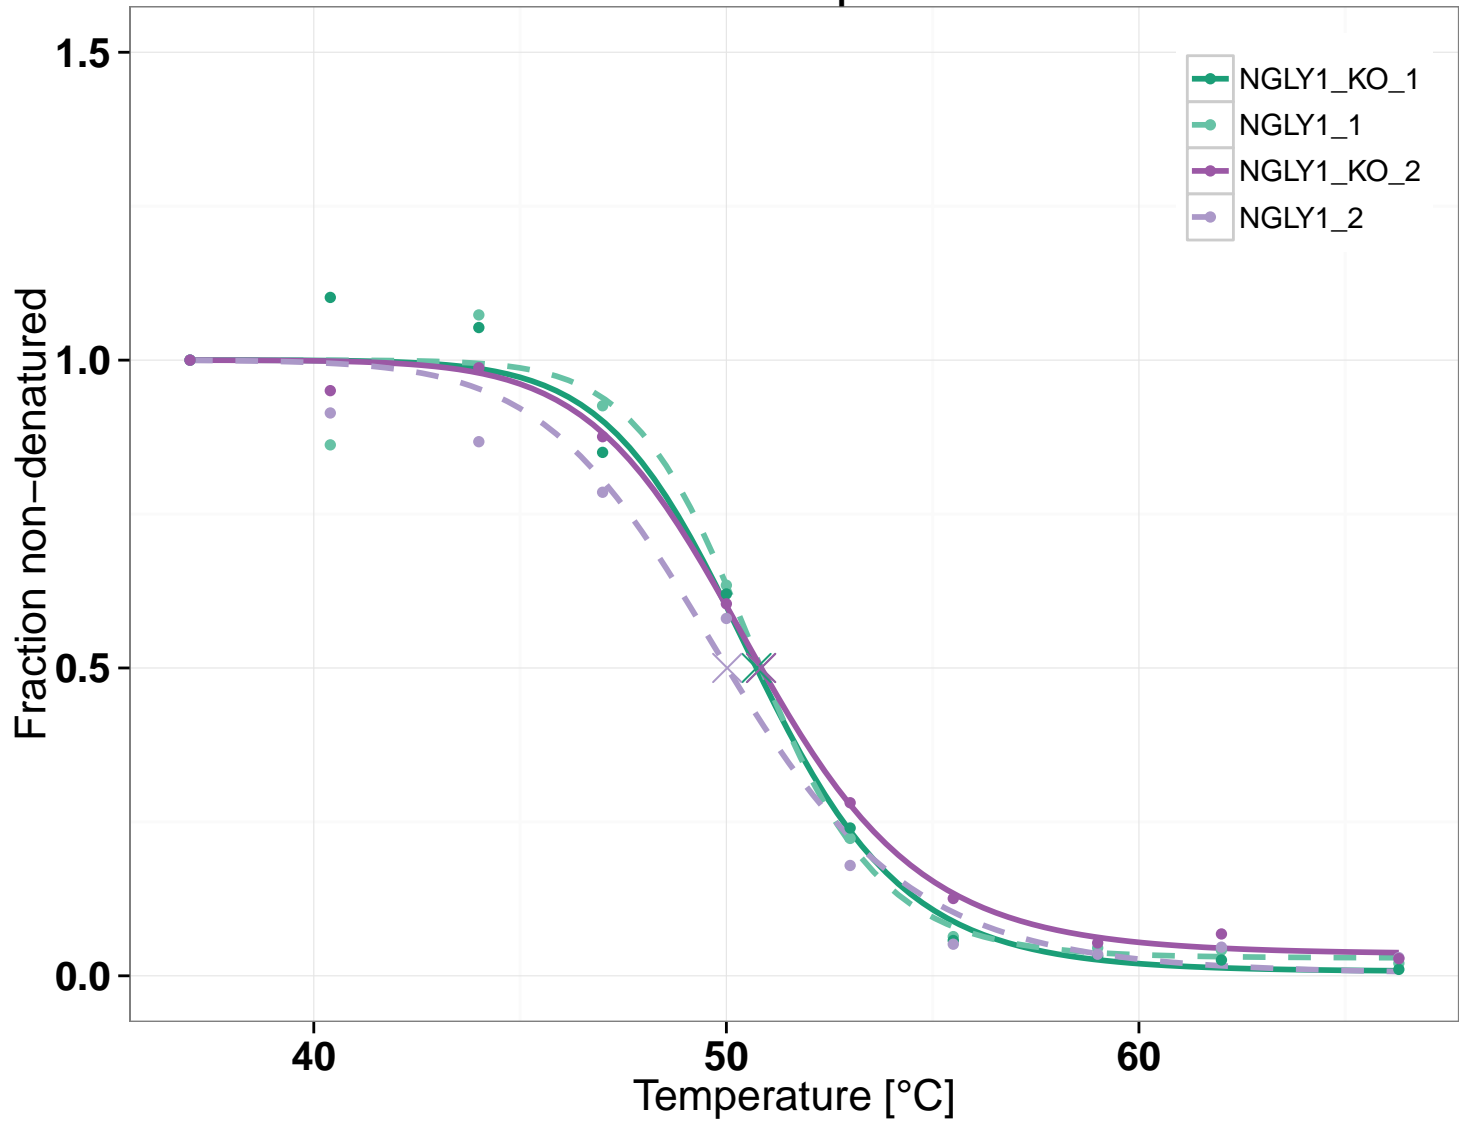

|            | meltPoint | slope | plateau | R2   |
|------------|-----------|-------|---------|------|
| NGLY1_KO_1 | 50.73     | -0.14 | 0.01    | 0.99 |
| NGLY1_1    | 50.84     | -0.16 | 0.03    | 0.99 |
| NGLY1_KO_2 | 50.84     | -0.12 | 0.04    | 1    |
| NGLY1_2    | 50.02     | -0.11 | 0       | 0.98 |

Supplement: Supplementary file 4339 [file 1]

IPI00017163.6|HECW2

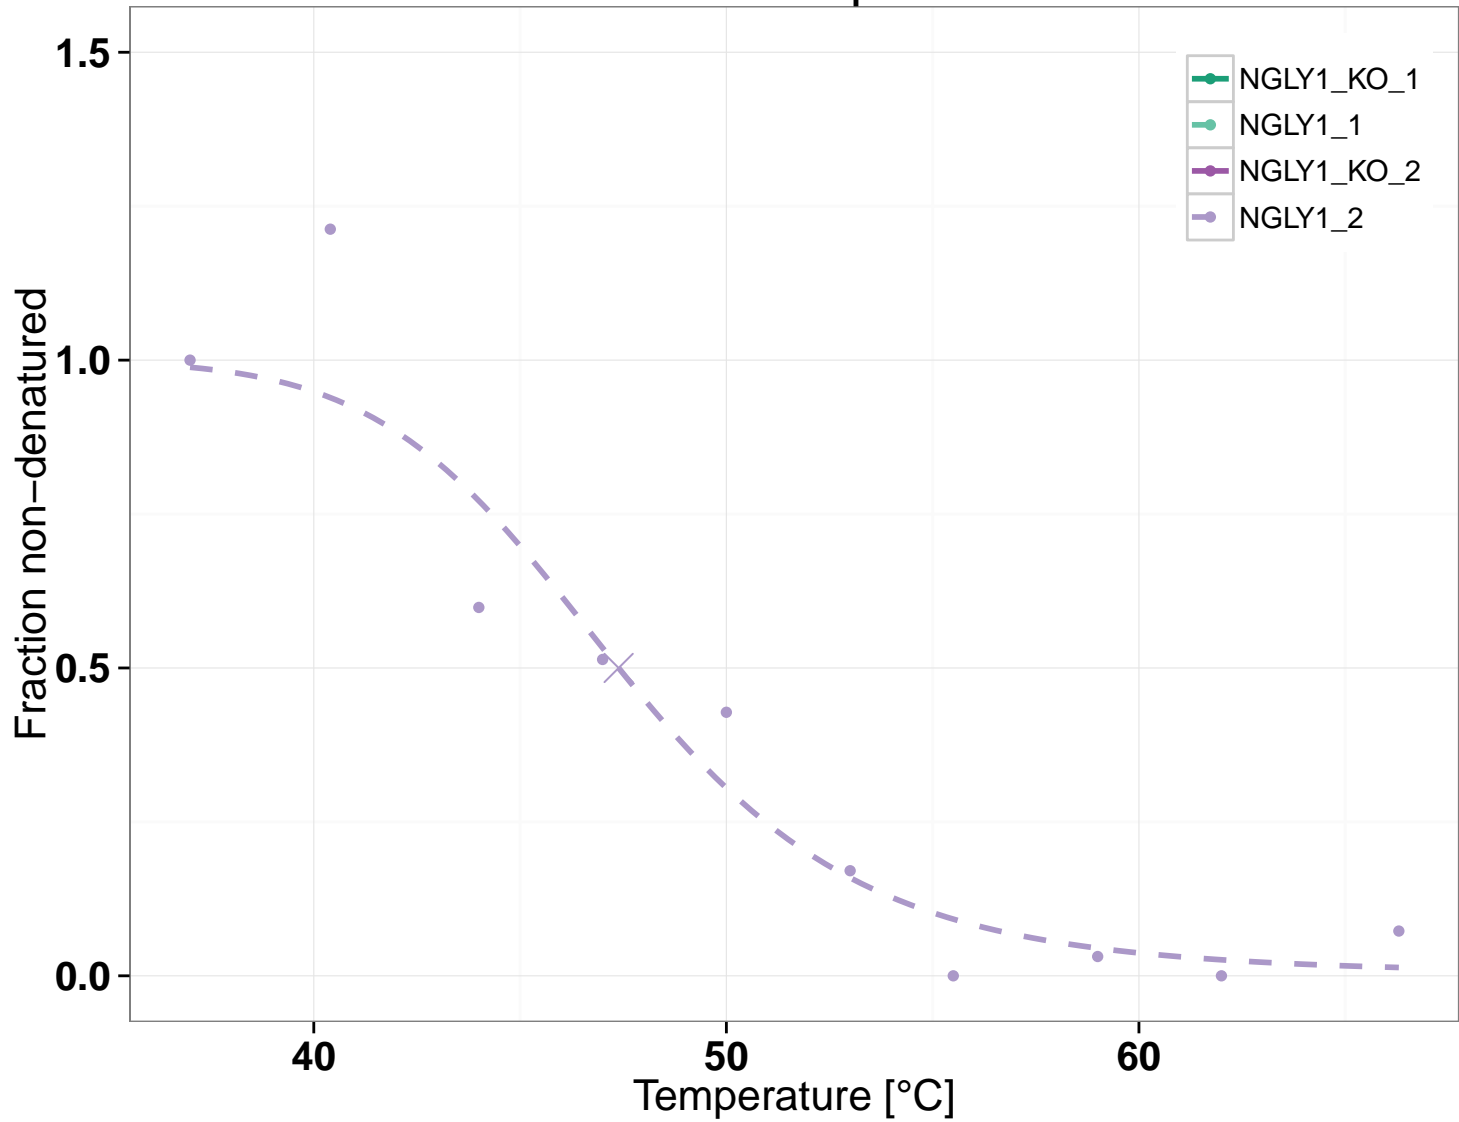

|            | meltPoint | slope  | plateau | R2   |
|------------|-----------|--------|---------|------|
| NGLY1_KO_1 | -         | -      | -       | -    |
| NGLY1_1    | -         | -      | -       | -    |
| NGLY1_KO_2 | -         | -      | -       | -    |
| NGLY1_2    | 47.39     | -0.085 | 0       | 0.92 |

Supplement: Supplementary file 4340 [file 1]

IPI00218437.2|CSNK1G3

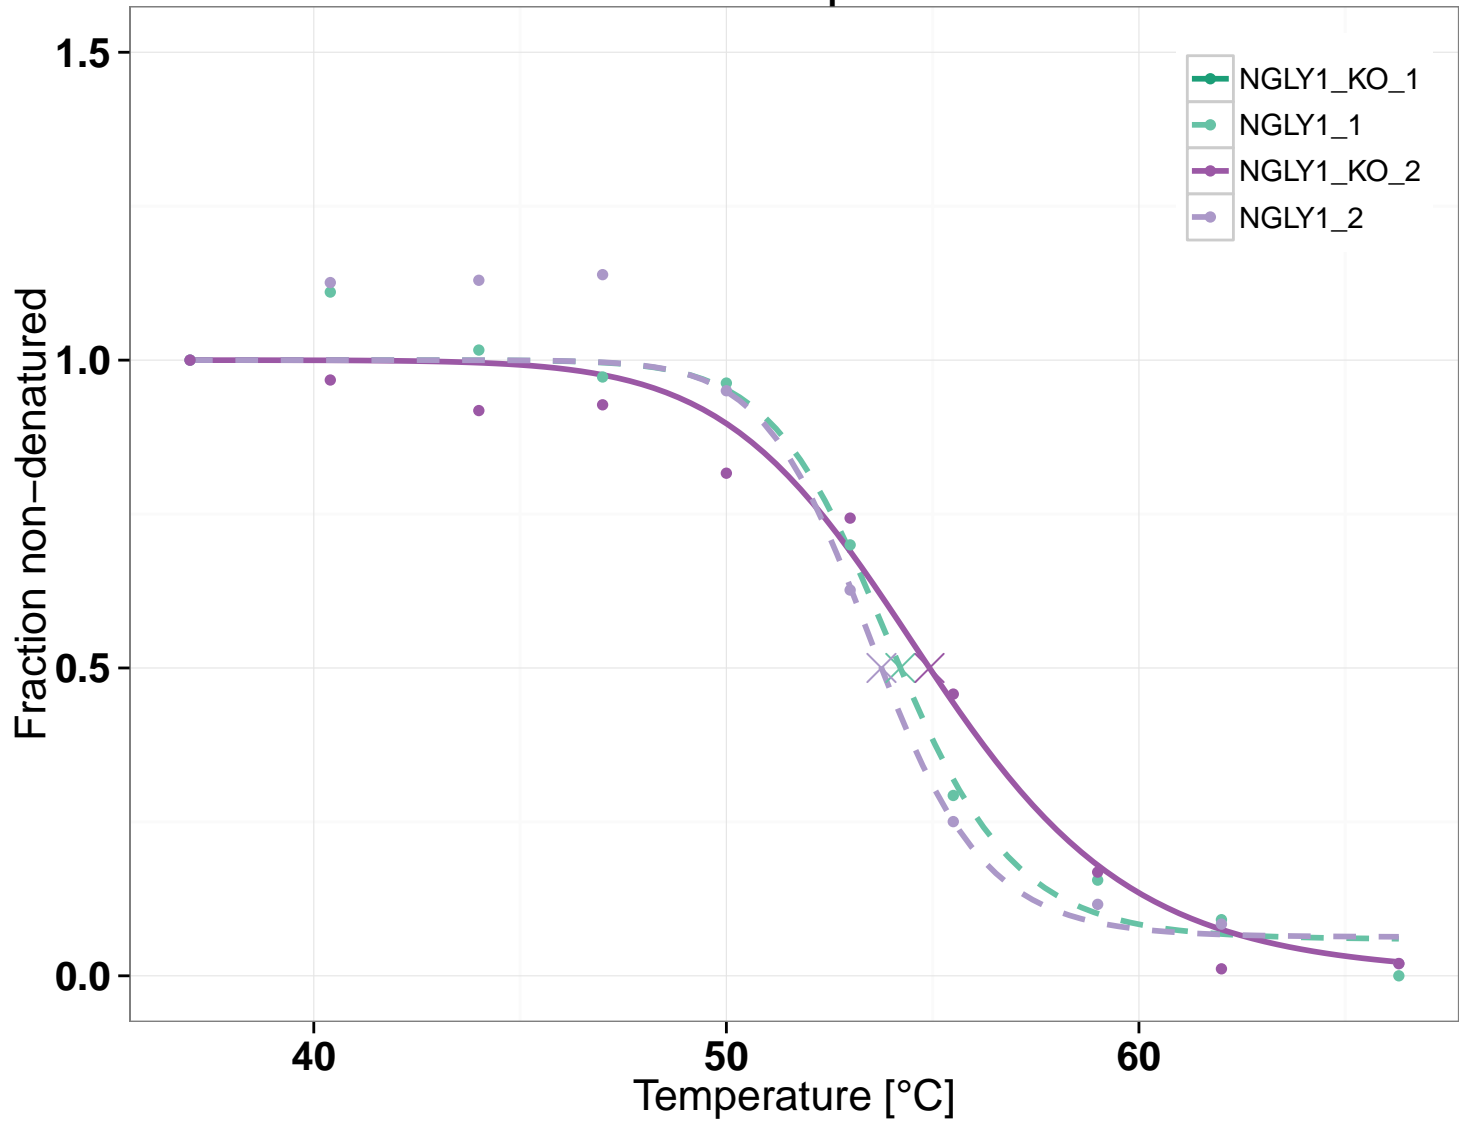

|            | meltPoint | slope | plateau | R2   |
|------------|-----------|-------|---------|------|
| NGLY1_KO_1 | –         | –     | –       | –    |
| NGLY1_1    | 54.22     | –0.16 | 0.06    | 0.99 |
| NGLY1_KO_2 | 54.92     | –0.1  | 0       | 0.98 |
| NGLY1_2    | 53.76     | –0.17 | 0.06    | 0.97 |

Supplement: Supplementary file 4341 [file 1]

# IPI00465034.3|SLC25A26

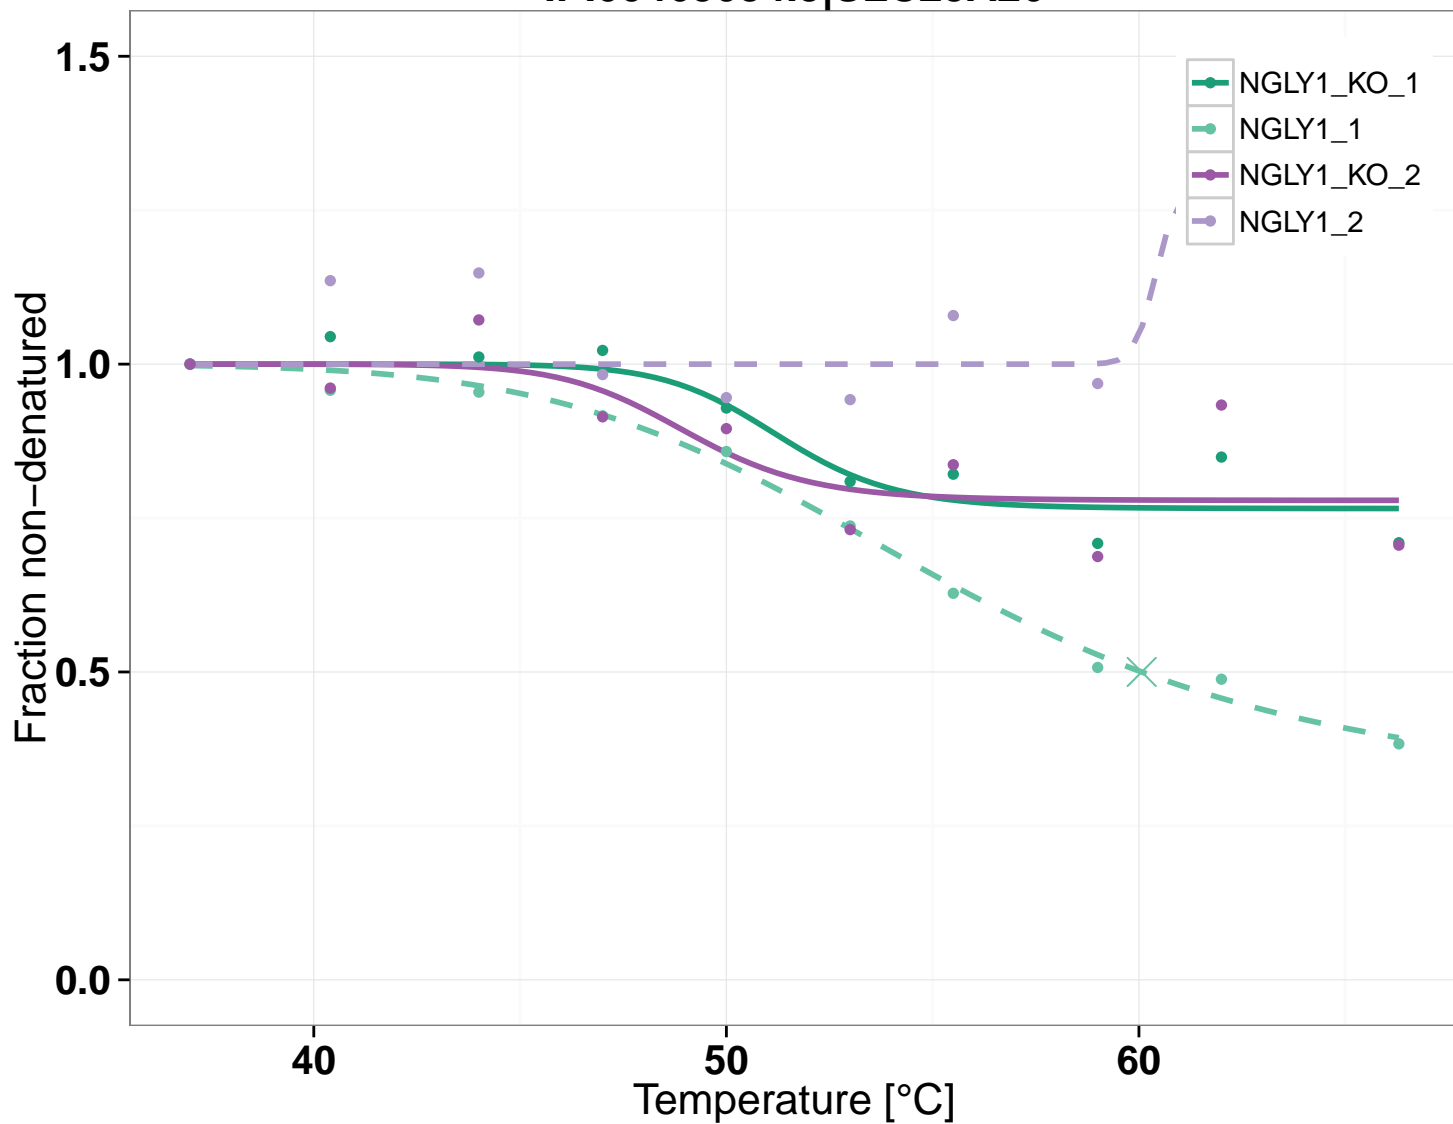

|            | meltPoint | slope  | plateau | R2   |
|------------|-----------|--------|---------|------|
| NGLY1_KO_1 | –         | –0.042 | 0.77    | 0.88 |
| NGLY1_1    | 60.07     | –0.037 | 0.31    | 0.99 |
| NGLY1_KO_2 | –         | –0.037 | 0.78    | 0.64 |
| NGLY1_2    | –         | 0.29   | 1.28    | 0.62 |

Supplement: Supplementary file 4342 [file 1]

IPI00374574.2|INPP5K

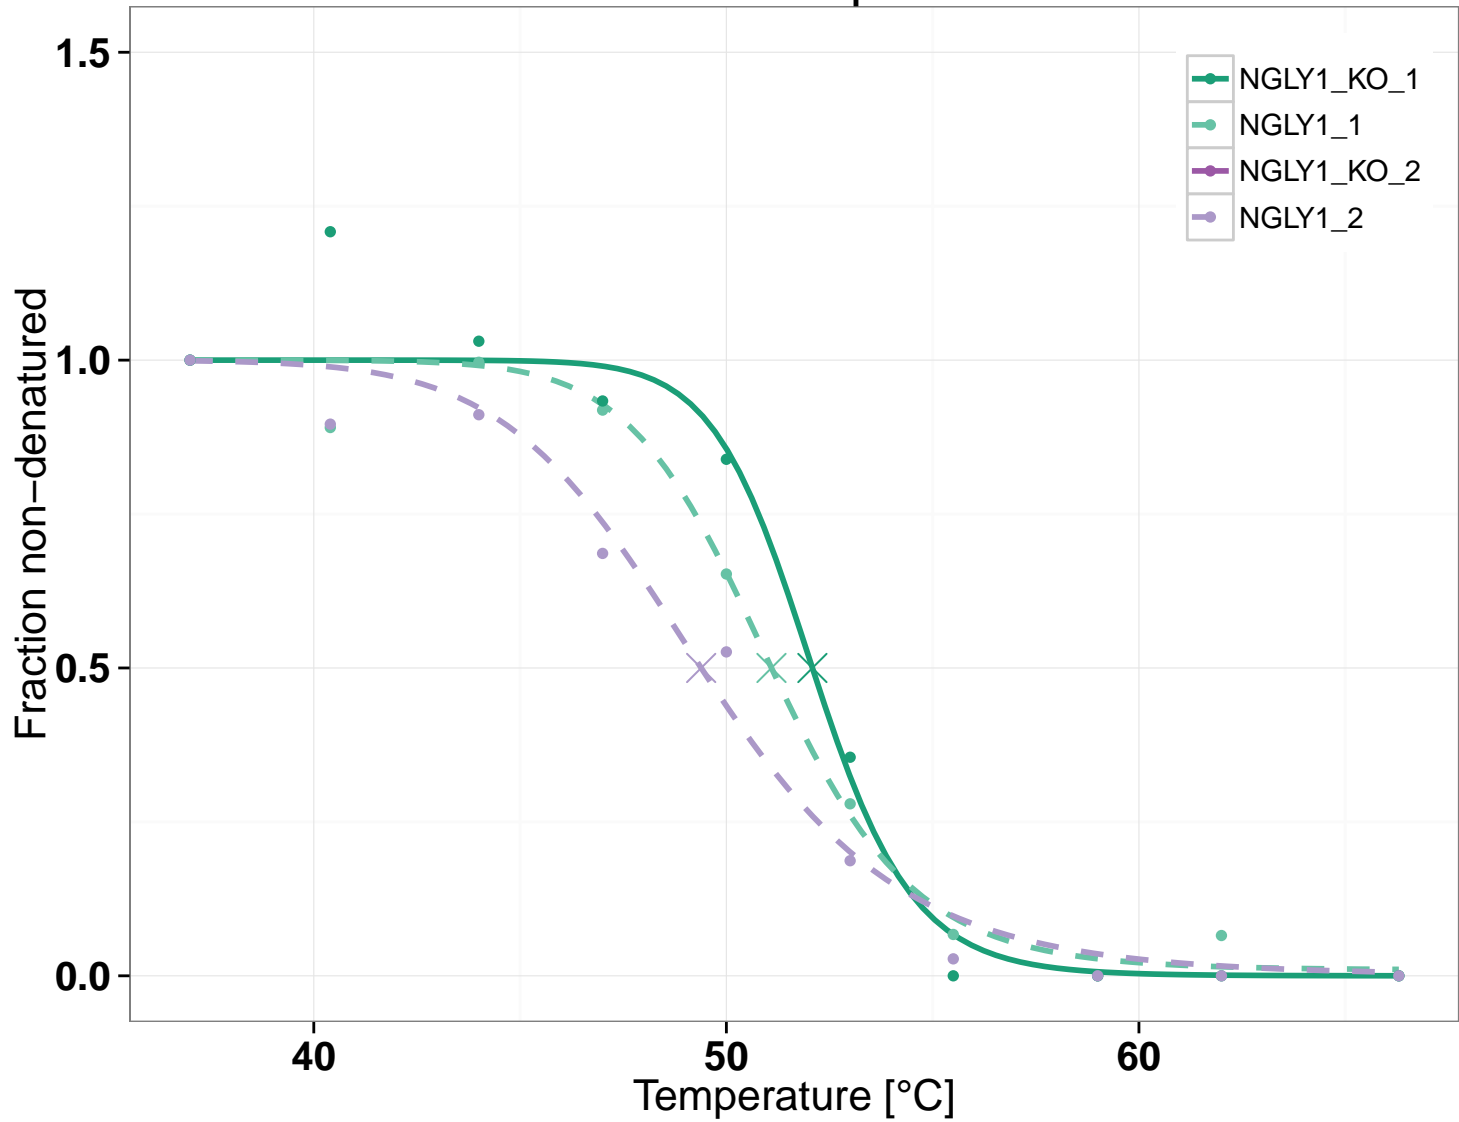

|            | meltPoint | slope | plateau | R2   |
|------------|-----------|-------|---------|------|
| NGLY1_KO_1 | 52.09     | -0.21 | 0       | 0.98 |
| NGLY1_1    | 51.09     | -0.14 | 0.01    | 0.99 |
| NGLY1_KO_2 | -         | -     | -       | -    |
| NGLY1_2    | 49.39     | -0.1  | 0       | 0.98 |

Supplement: Supplementary file 4343 [file 1]

# IPI00015842.1|RCN1

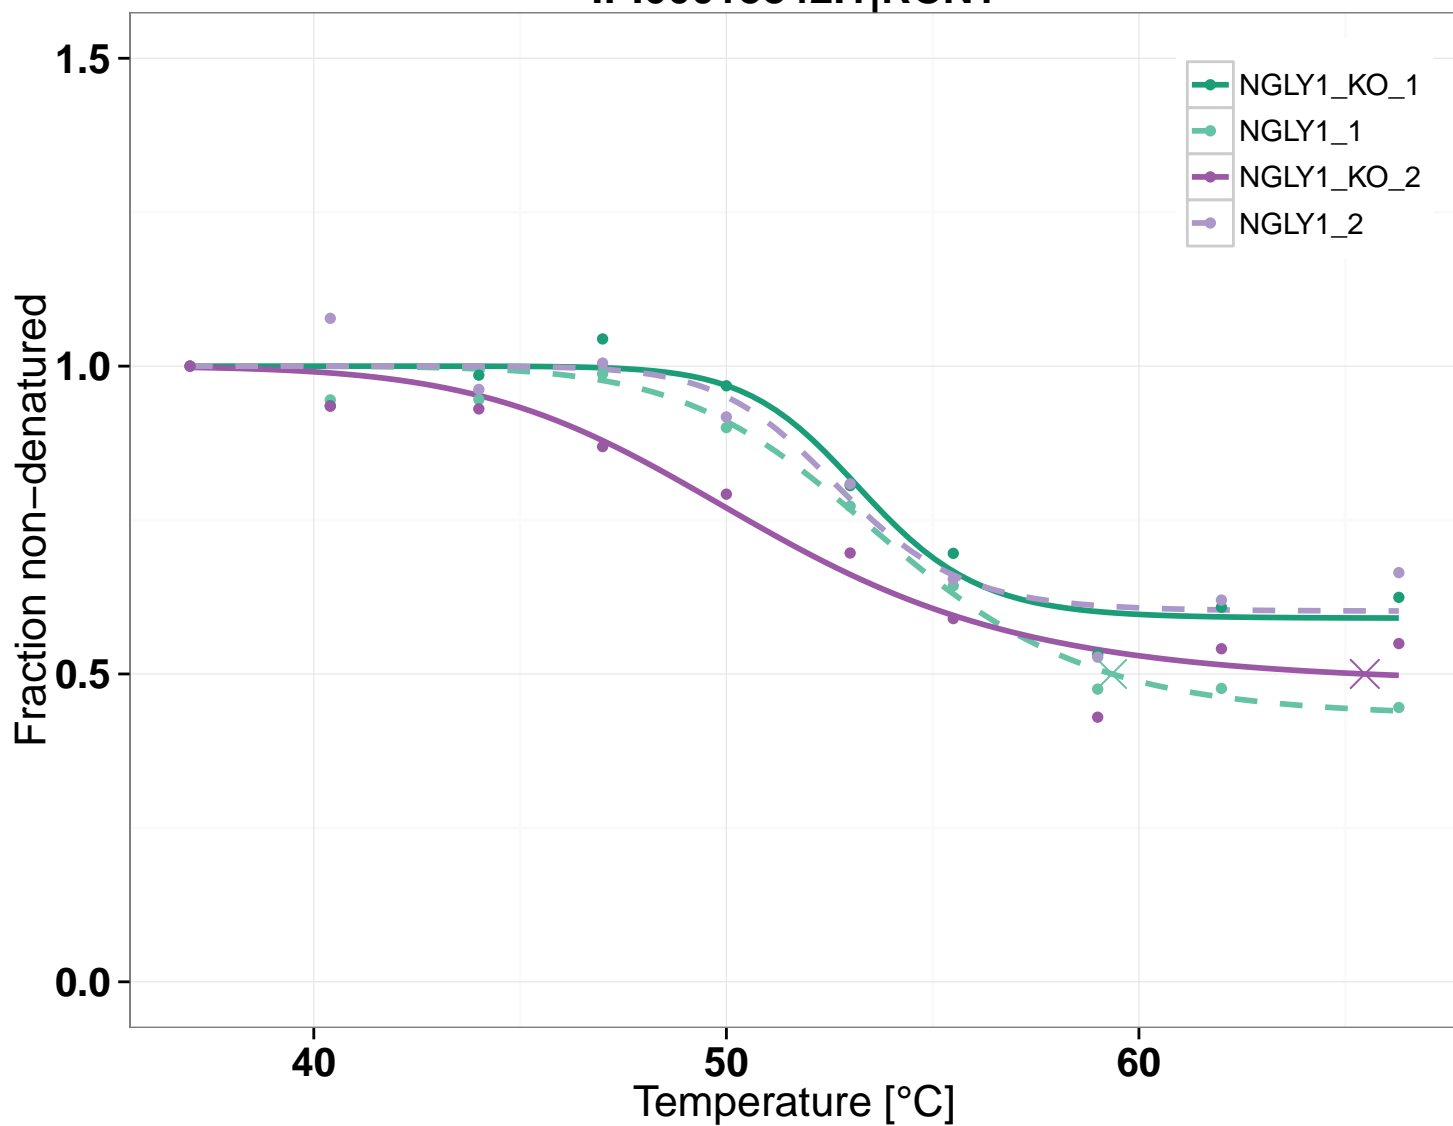

|            | meltPoint | slope  | plateau | R2   |
|------------|-----------|--------|---------|------|
| NGLY1_KO_1 | -         | -0.072 | 0.59    | 0.96 |
| NGLY1_1    | 59.35     | -0.057 | 0.43    | 0.98 |
| NGLY1_KO_2 | 65.48     | -0.039 | 0.48    | 0.94 |
| NGLY1_2    | -         | -0.067 | 0.6     | 0.94 |

Supplement: Supplementary file 4344 [file 1]

IPI00401773.4|VPS37C

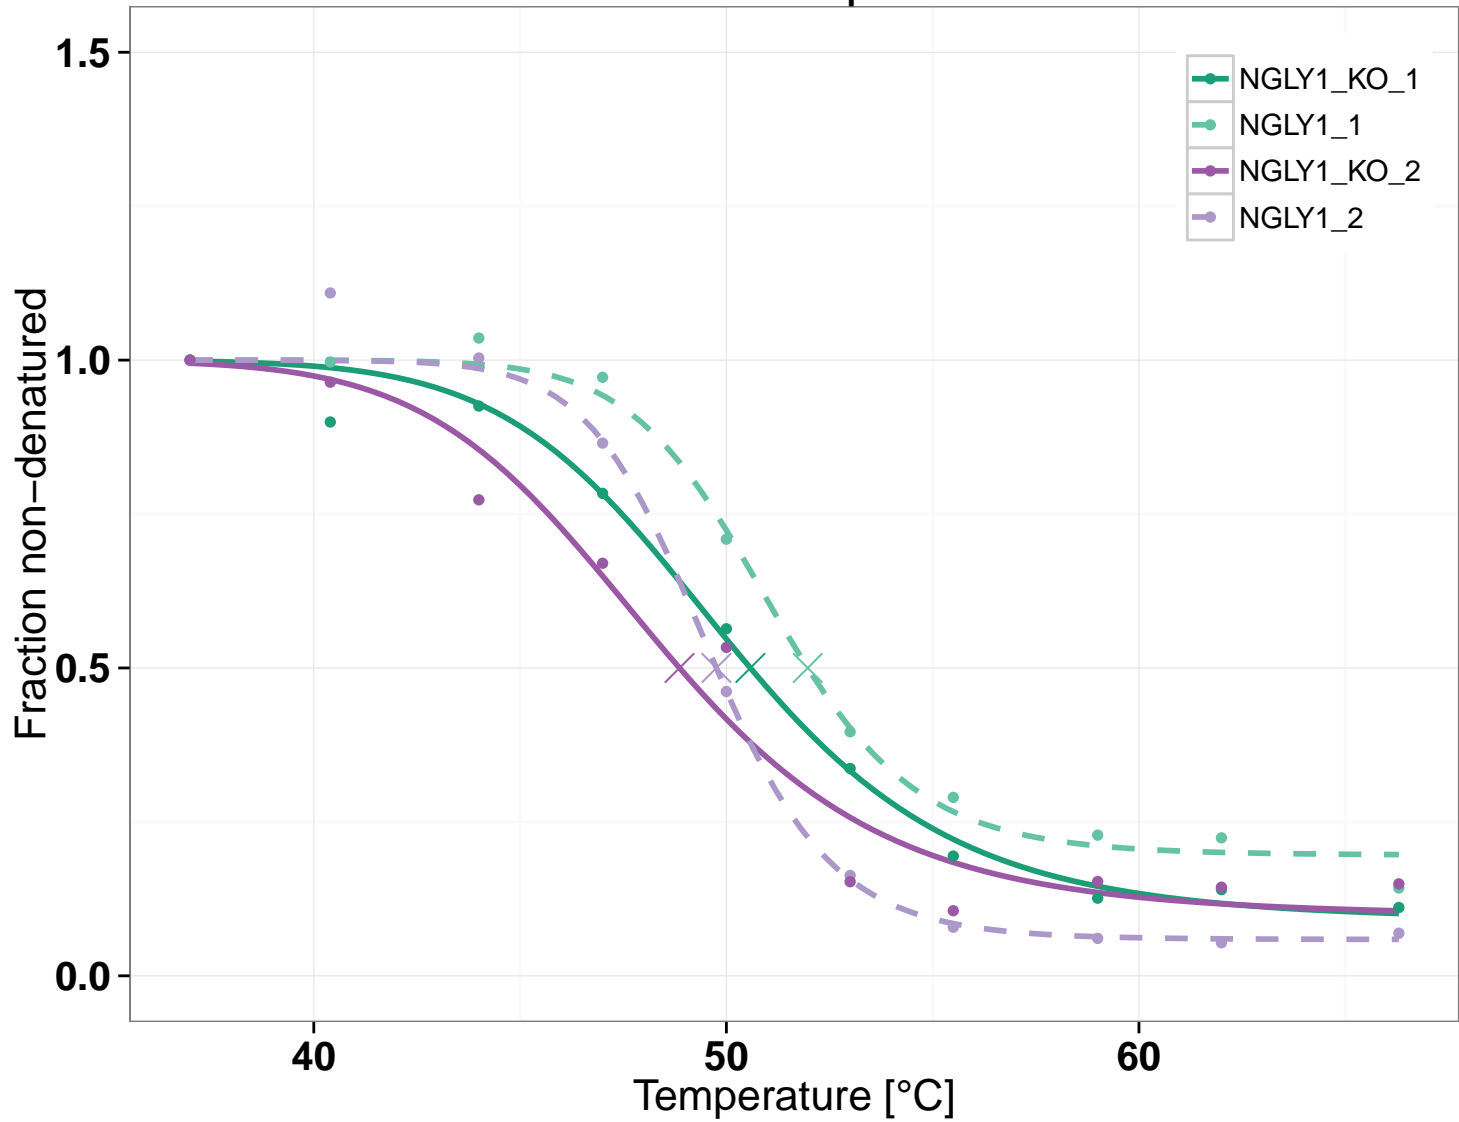

|            | meltPoint | slope  | plateau | R2   |
|------------|-----------|--------|---------|------|
| NGLY1_KO_1 | 50.58     | -0.083 | 0.09    | 0.99 |
| NGLY1_1    | 51.97     | -0.12  | 0.2     | 0.99 |
| NGLY1_KO_2 | 48.86     | -0.081 | 0.1     | 0.97 |
| NGLY1_2    | 49.76     | -0.16  | 0.06    | 0.99 |

Supplement: Supplementary file 4345 [file 1]

IPI00478837.1|ZNF580

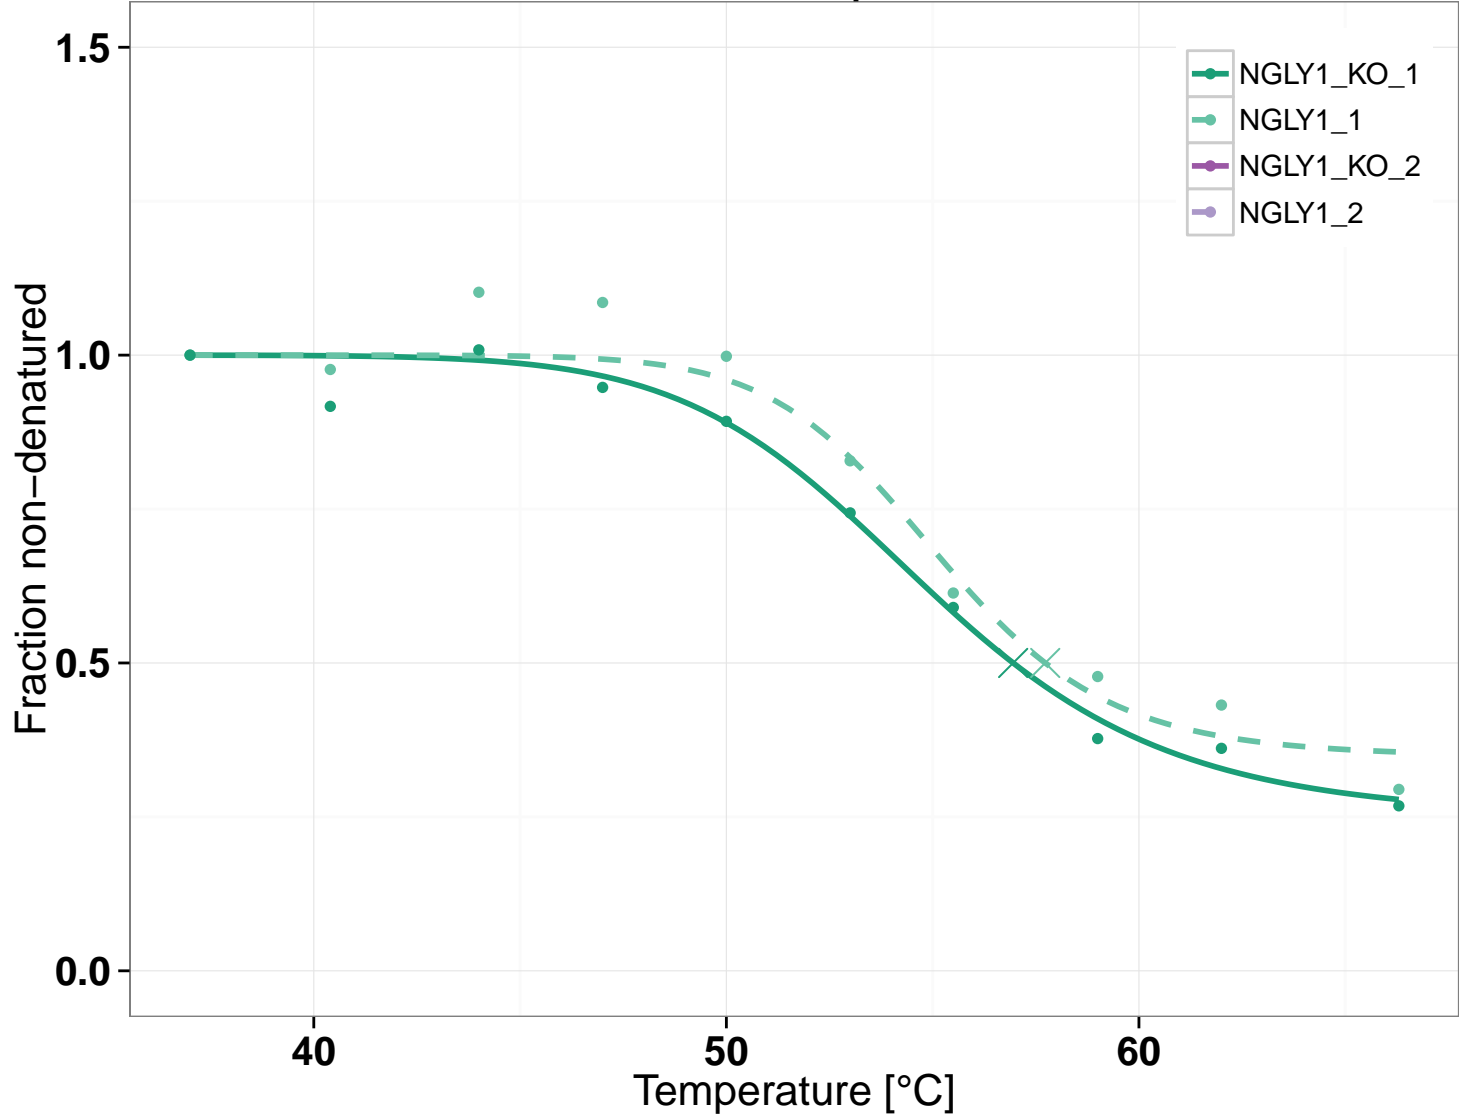

|            | meltPoint | slope  | plateau | R2   |
|------------|-----------|--------|---------|------|
| NGLY1_KO_1 | 56.95     | -0.064 | 0.25    | 0.99 |
| NGLY1_1    | 57.73     | -0.079 | 0.35    | 0.96 |
| NGLY1_KO_2 | -         | -      | -       | -    |
| NGLY1_2    | -         | -      | -       | -    |

Supplement: Supplementary file 4346 [file 1]

IPI00019964.1|C20ORF46

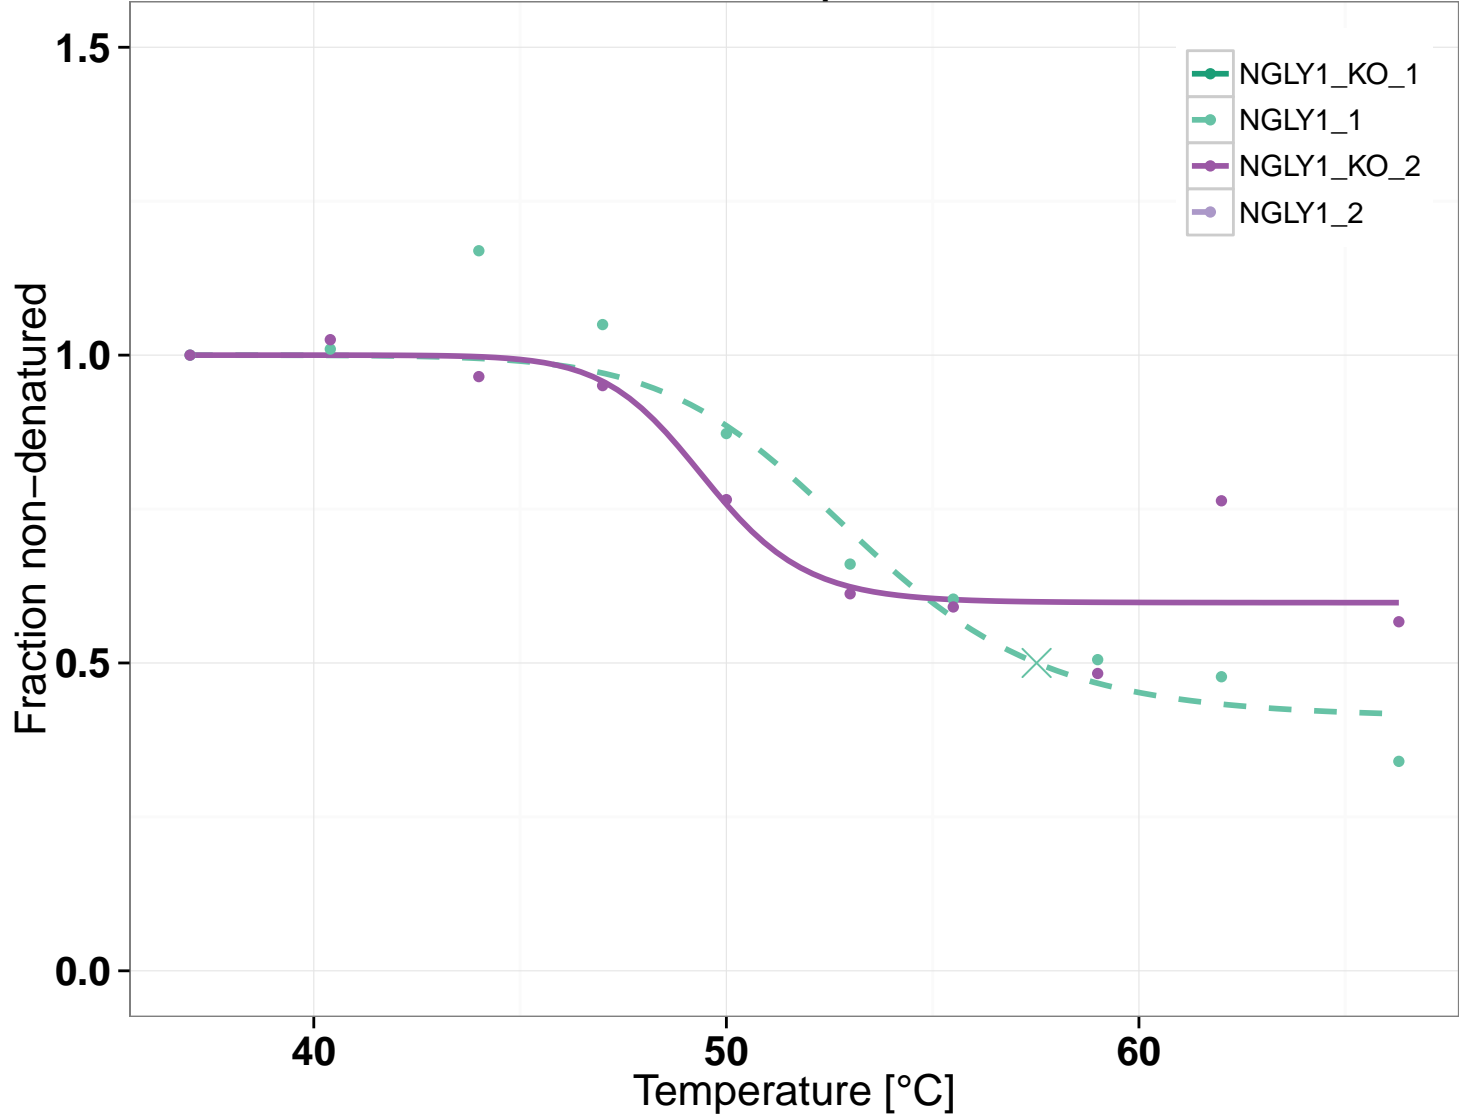

|            | meltPoint | slope  | plateau | R2   |
|------------|-----------|--------|---------|------|
| NGLY1_KO_1 | -         | -      | -       | -    |
| NGLY1_1    | 57.52     | -0.063 | 0.41    | 0.93 |
| NGLY1_KO_2 | -         | -0.082 | 0.6     | 0.88 |
| NGLY1_2    | -         | -      | -       | -    |

Supplement: Supplementary file 4347 [file 1]

IPI00478657.4|GRSF1

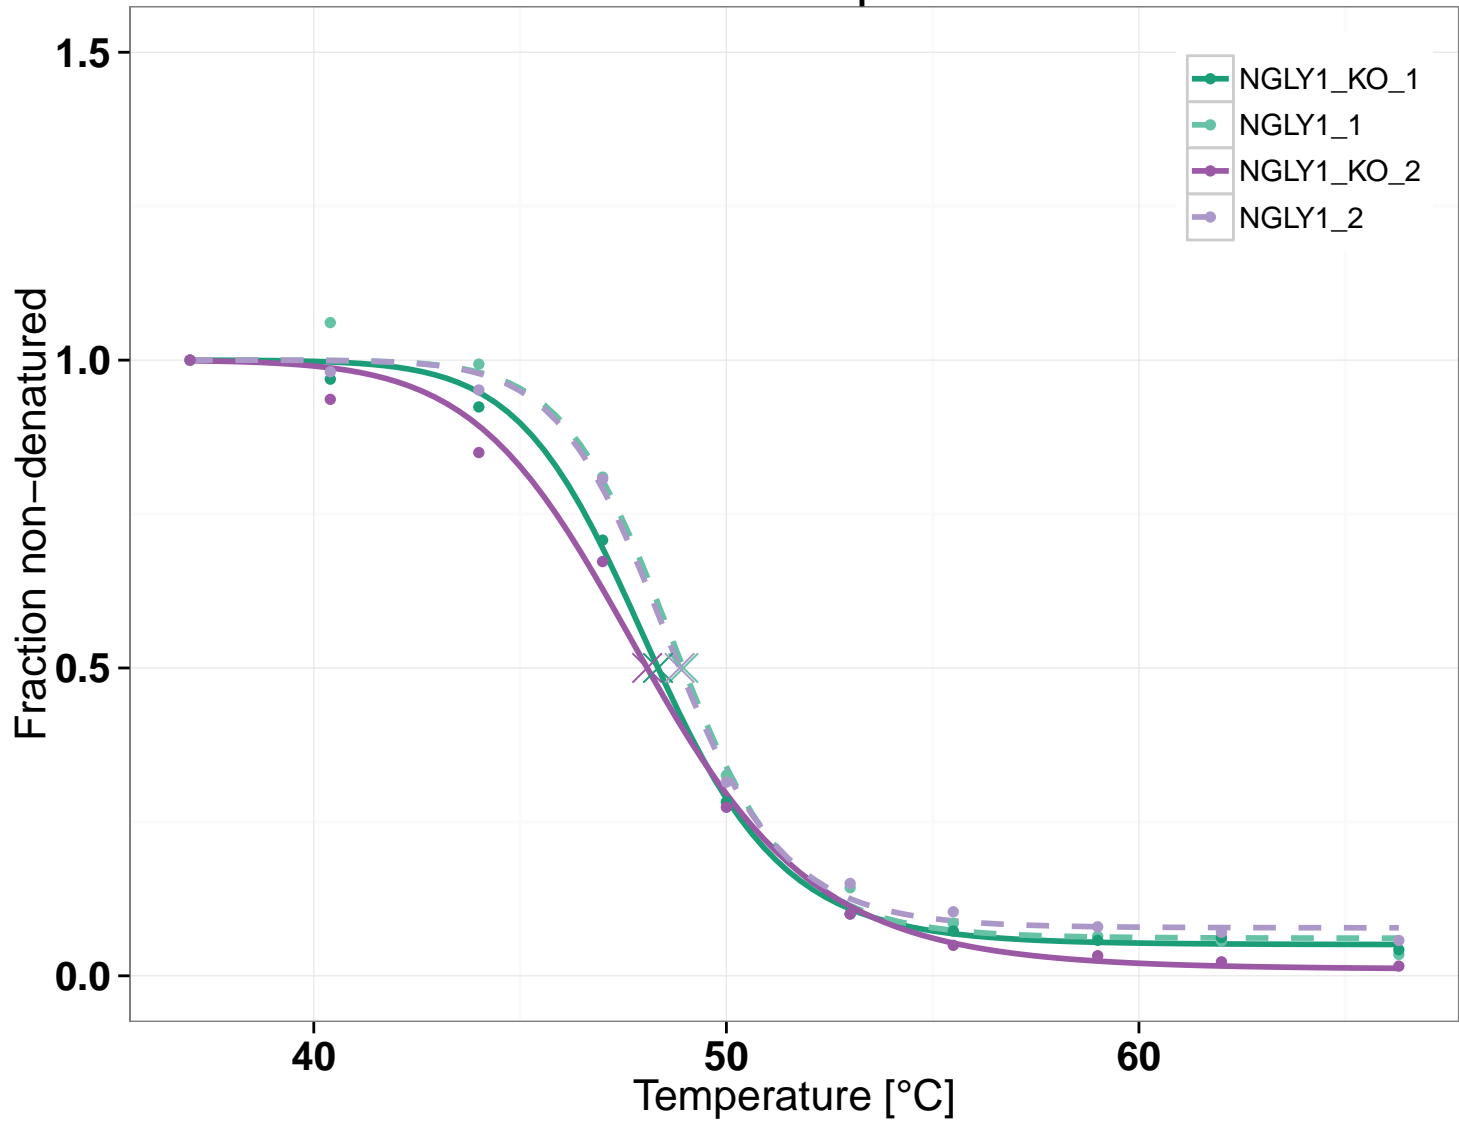

|            | meltPoint | slope | plateau | R2 |
|------------|-----------|-------|---------|----|
| NGLY1_KO_1 | 48.34     | -0.15 | 0.05    | 1  |
| NGLY1_1    | 48.96     | -0.17 | 0.06    | 1  |
| NGLY1_KO_2 | 48.08     | -0.12 | 0.01    | 1  |
| NGLY1_2    | 48.87     | -0.17 | 0.08    | 1  |

Supplement: Supplementary file 4348 [file 1]

IPI00293078.1|DDX27

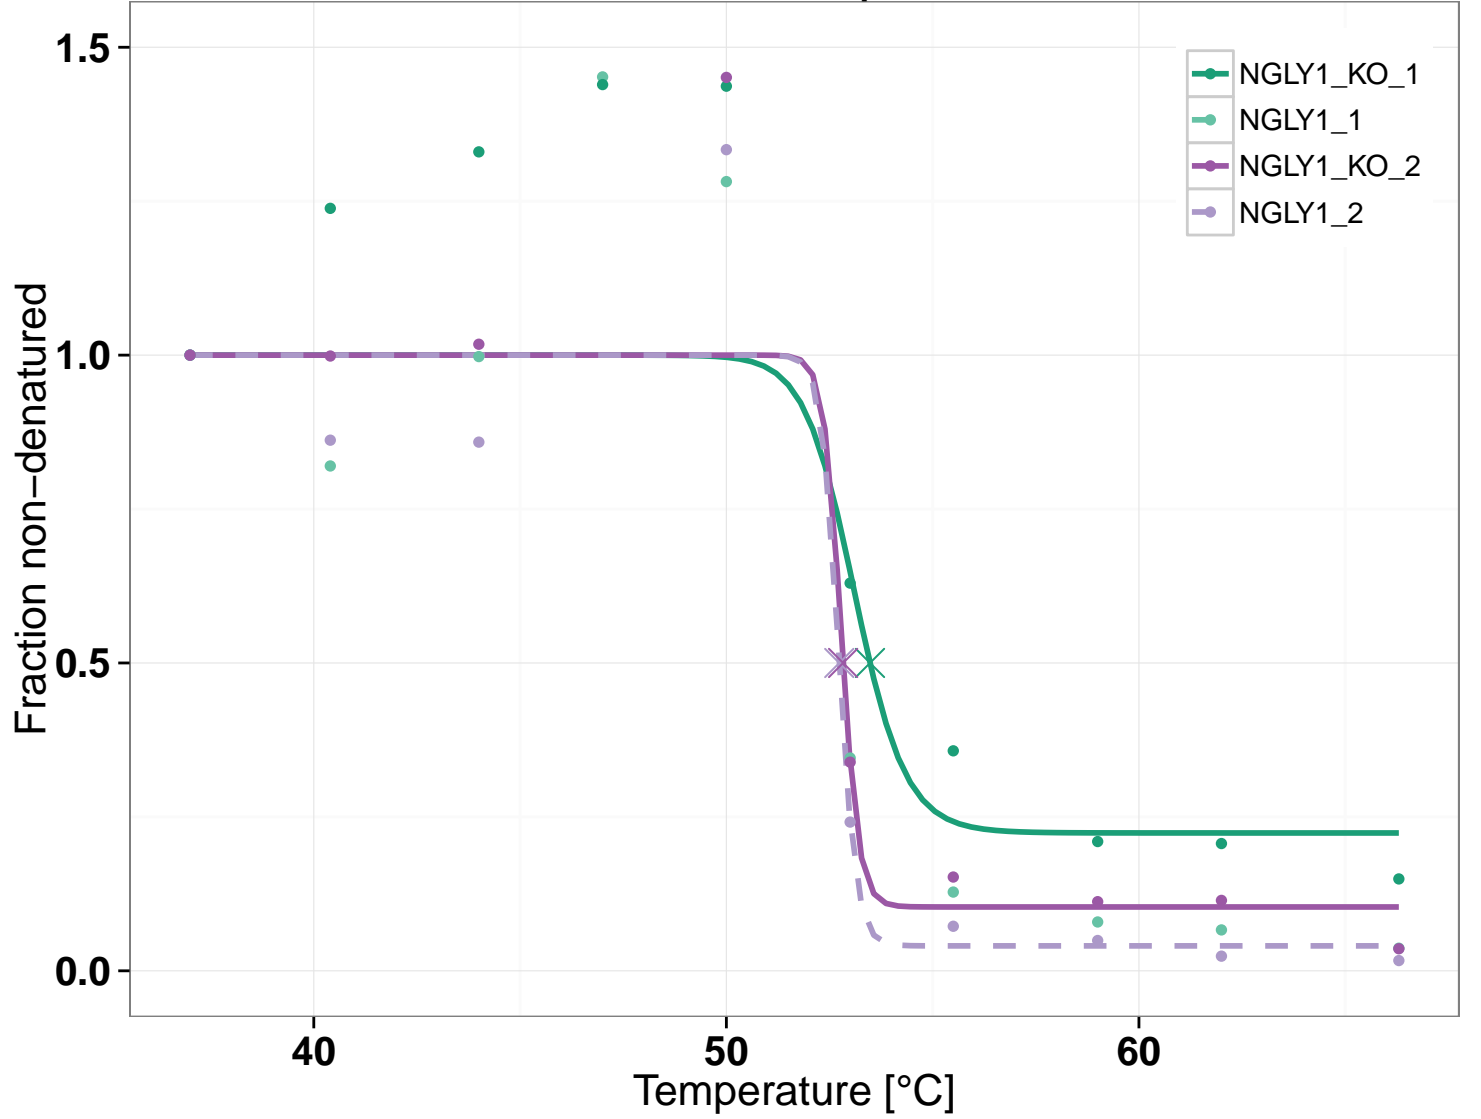

|            | meltPoint | slope | plateau | R2   |
|------------|-----------|-------|---------|------|
| NGLY1_KO_1 | 53.48     | -0.32 | 0.22    | 0.79 |
| NGLY1_1    | -         | -     | -       | -    |
| NGLY1_KO_2 | 52.83     | -1.1  | 0.1     | 0.81 |
| NGLY1_2    | 52.74     | -1.1  | 0.04    | 0.86 |

Supplement: Supplementary file 4349 [file 1]

IPI00745939.2|TBXA2R

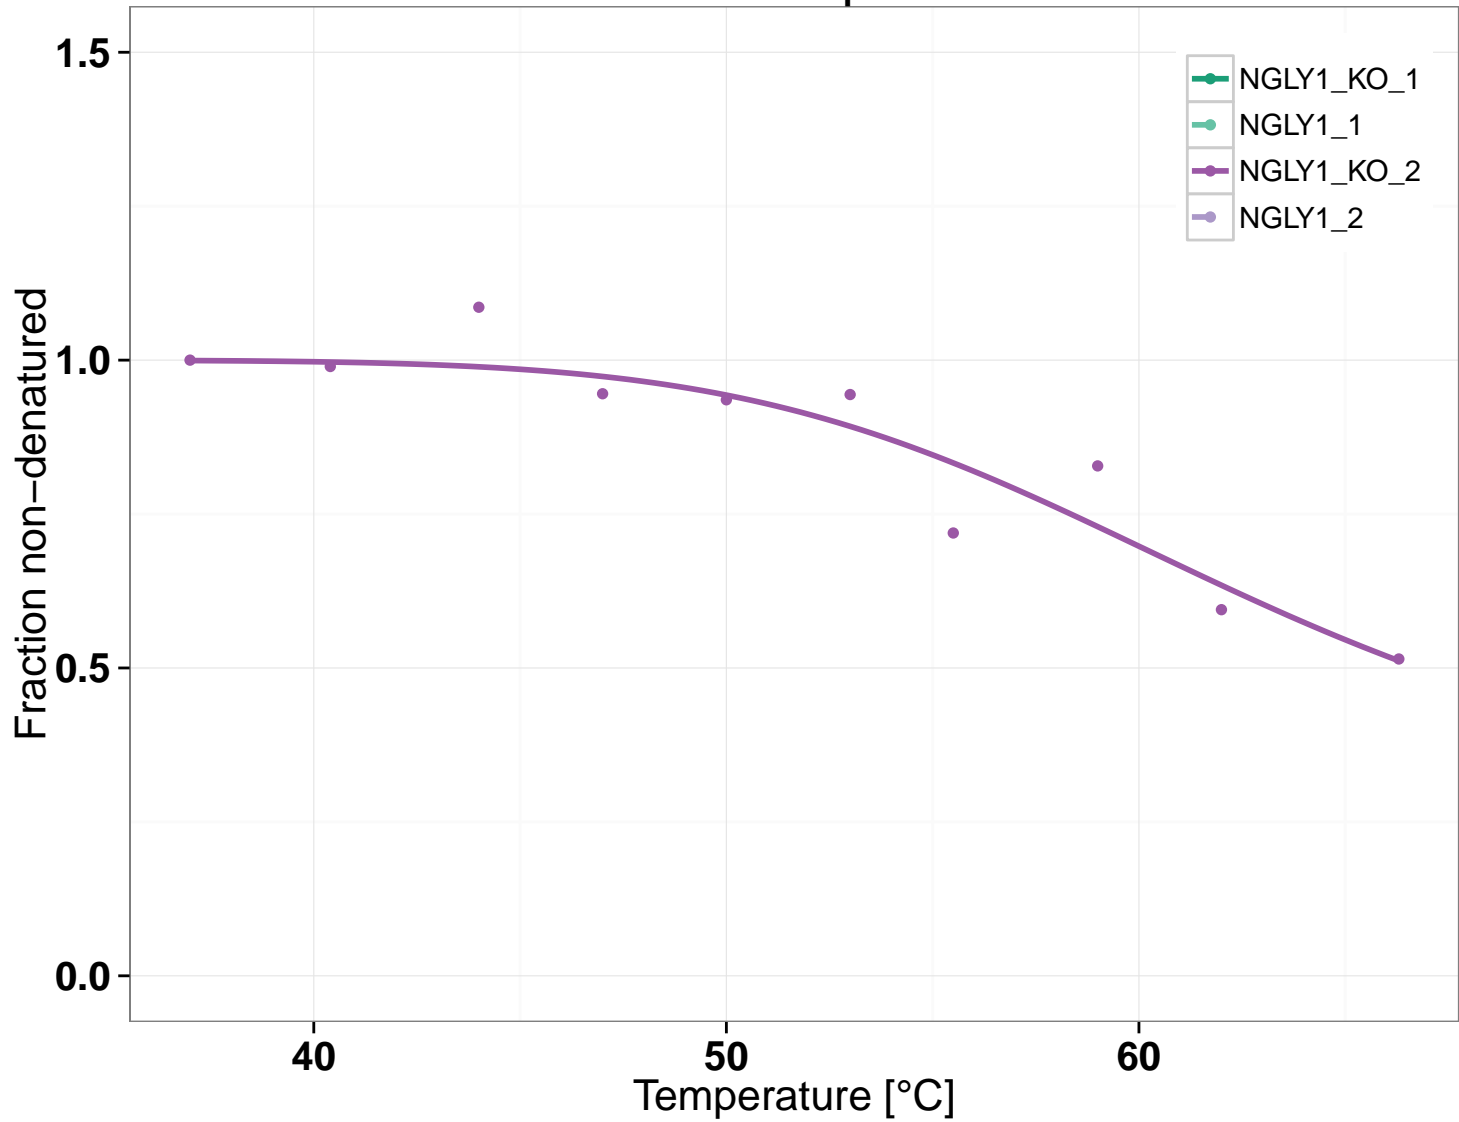

|            | meltPoint | slope  | plateau | R2   |
|------------|-----------|--------|---------|------|
| NGLY1_KO_1 | —         | —      | —       | —    |
| NGLY1_1    | —         | —      | —       | —    |
| NGLY1_KO_2 | —         | −0.032 | 0.24    | 0.88 |
| NGLY1_2    | —         | —      | —       | —    |

Supplement: Supplementary file 4350 [file 1]

IPI00183666.8|TRPV2

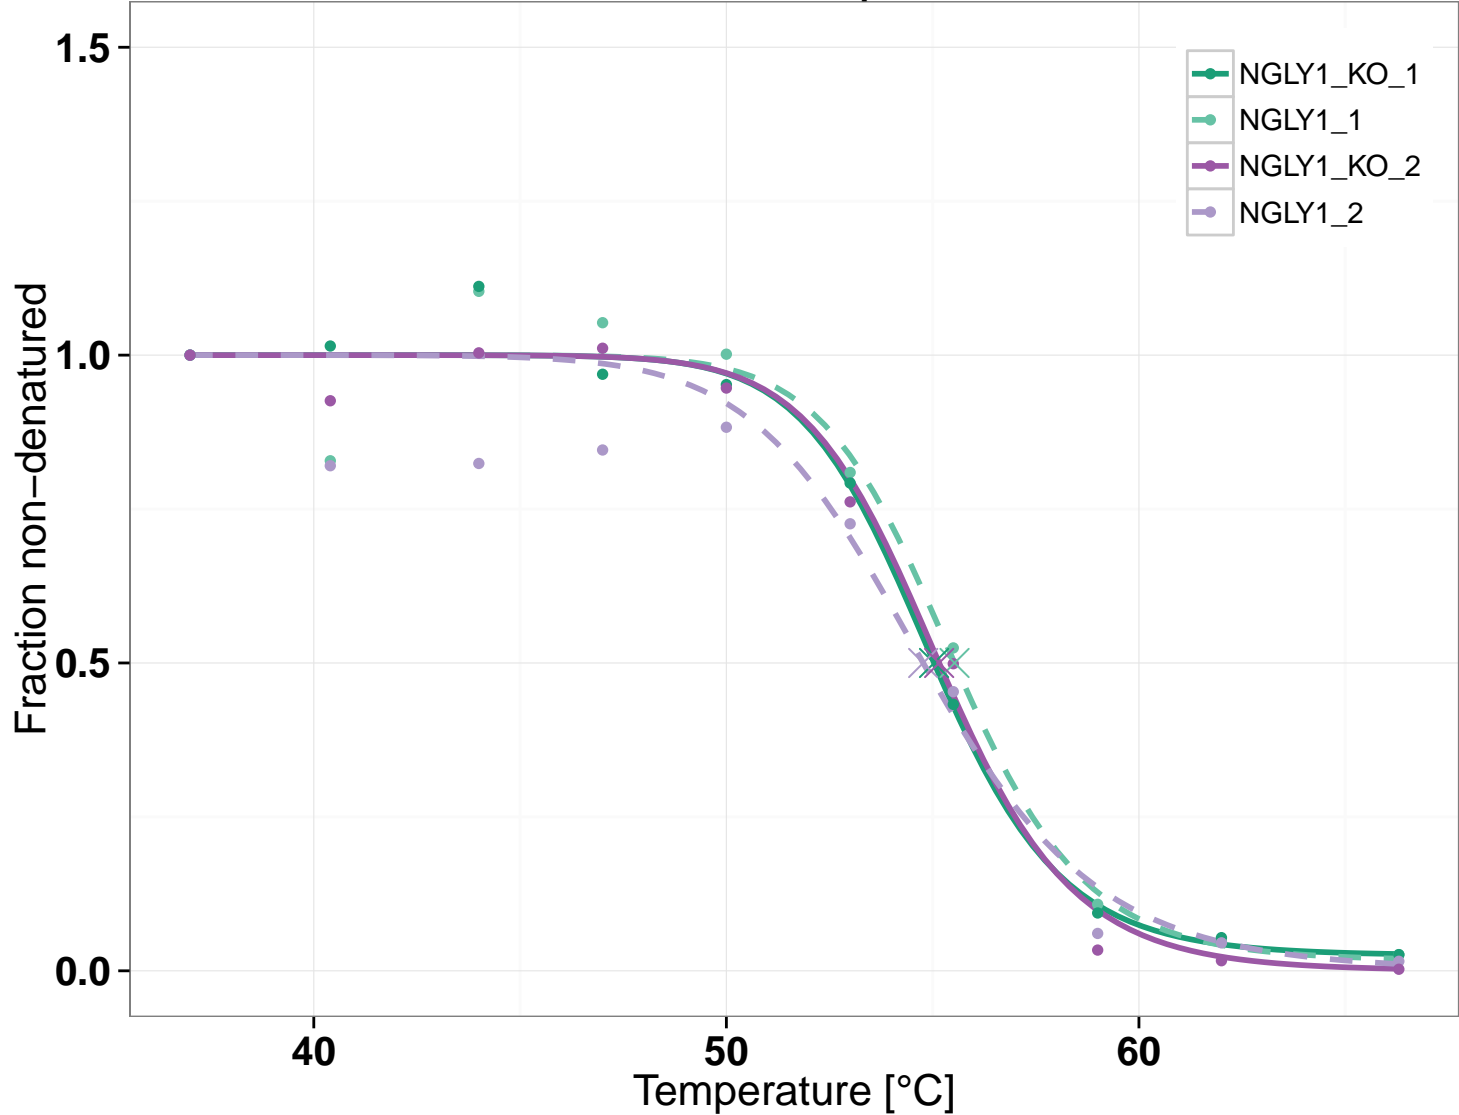

|            | meltPoint | slope | plateau | R2   |
|------------|-----------|-------|---------|------|
| NGLY1_KO_1 | 55.03     | -0.16 | 0.02    | 0.99 |
| NGLY1_1    | 55.53     | -0.15 | 0.02    | 0.97 |
| NGLY1_KO_2 | 55.16     | -0.15 | 0       | 0.99 |
| NGLY1_2    | 54.77     | -0.12 | 0       | 0.93 |

Supplement: Supplementary file 4351 [file 1]

IPI00383792.1|Q9Y6B5\_HUMAN

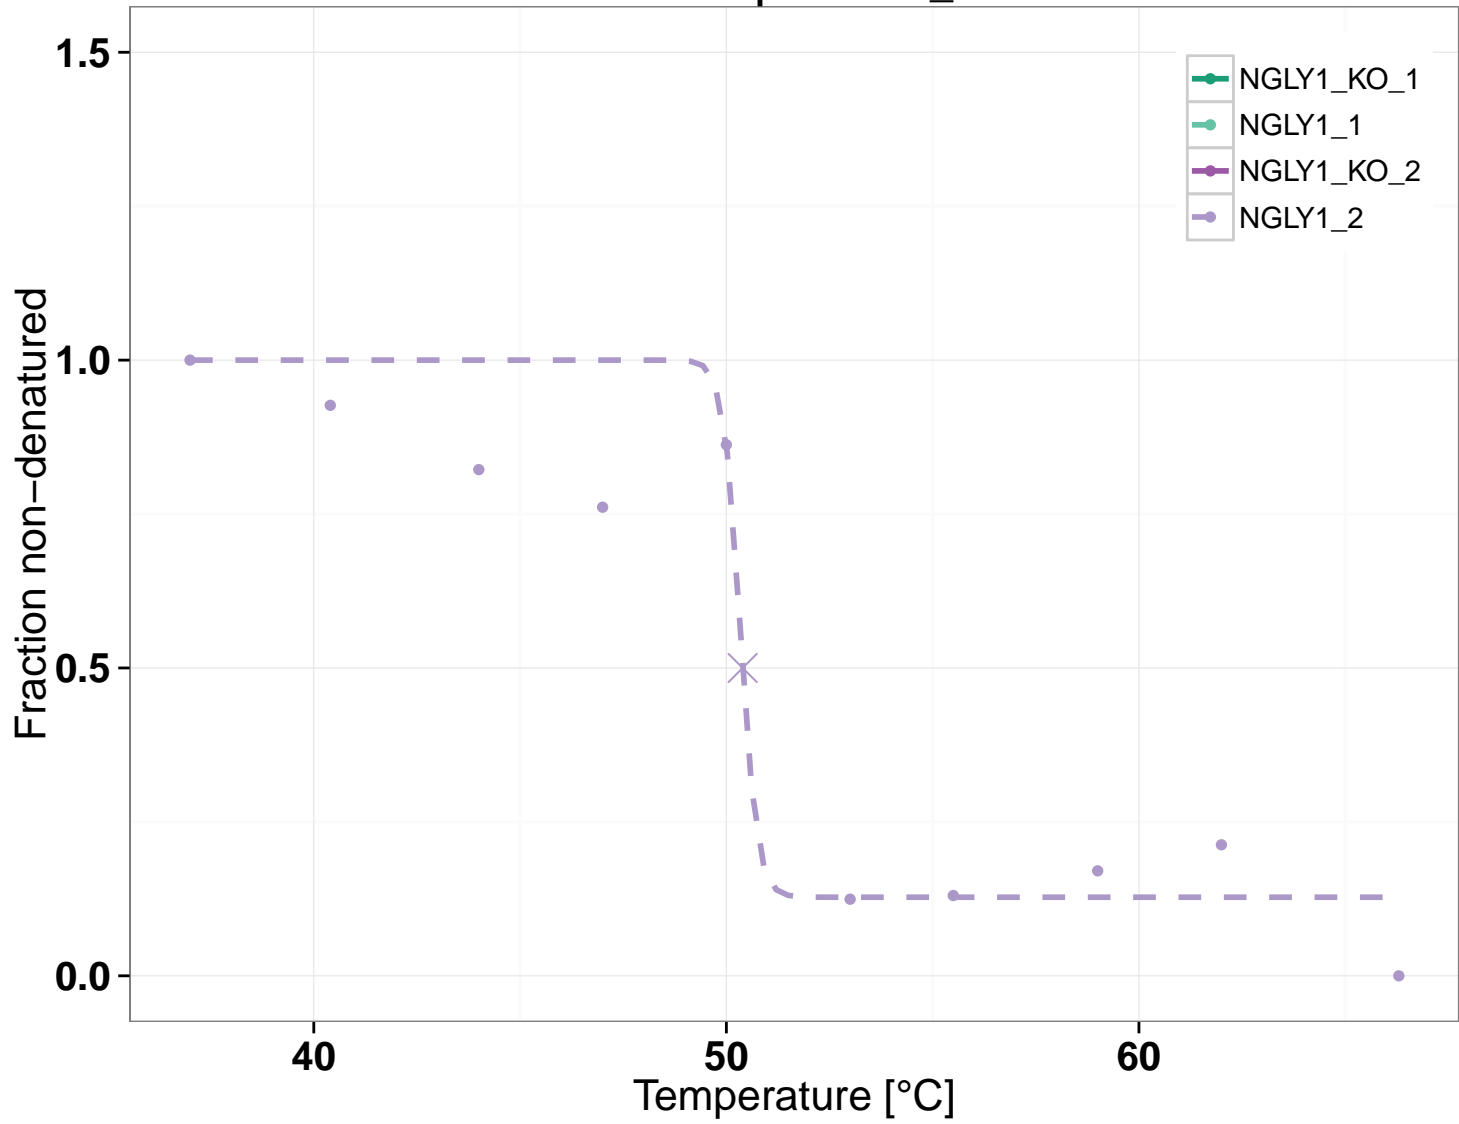

|            | meltPoint | slope | plateau | R2   |
|------------|-----------|-------|---------|------|
| NGLY1_KO_1 | -         | -     | -       | -    |
| NGLY1_1    | -         | -     | -       | -    |
| NGLY1_KO_2 | -         | -     | -       | -    |
| NGLY1_2    | 50.39     | -1.1  | 0.13    | 0.92 |

Supplement: Supplementary file 4352 [file 1]

IPI00604666.1|CCDC34

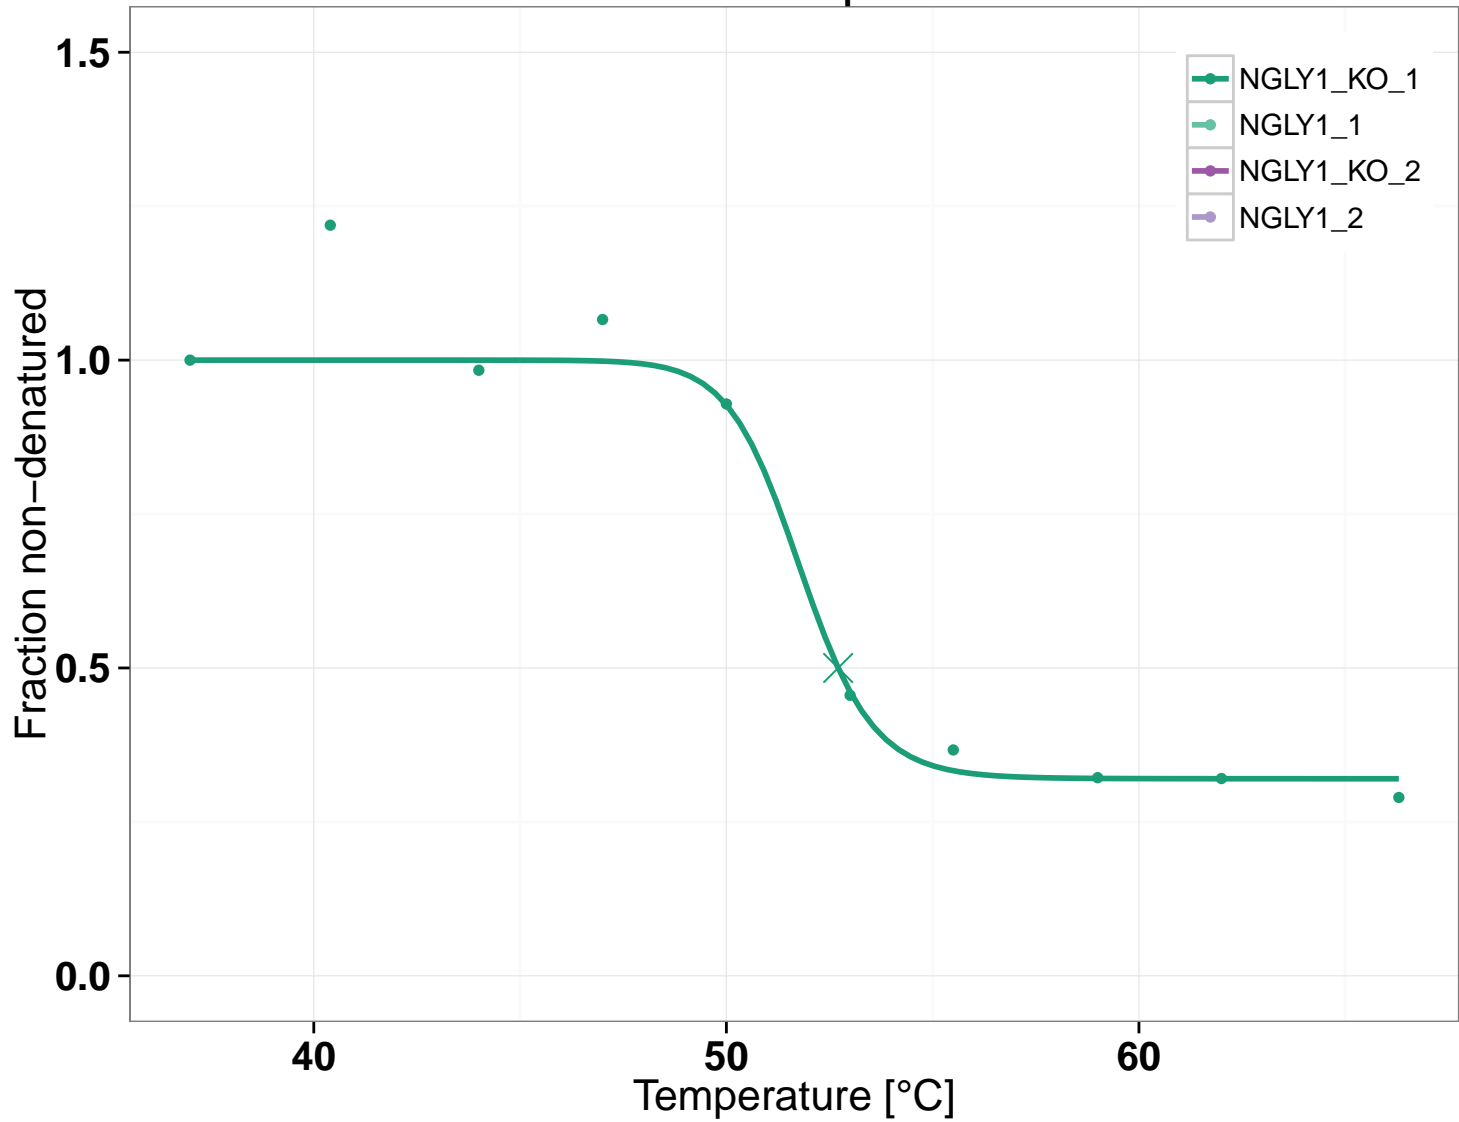

|            | meltPoint | slope | plateau | R2   |
|------------|-----------|-------|---------|------|
| NGLY1_KO_1 | 52.71     | -0.19 | 0.32    | 0.96 |
| NGLY1_1    | -         | -     | -       | -    |
| NGLY1_KO_2 | -         | -     | -       | -    |
| NGLY1_2    | -         | -     | -       | -    |

Supplement: Supplementary file 4353 [file 1]

IPI00177856.9|TRMT61A

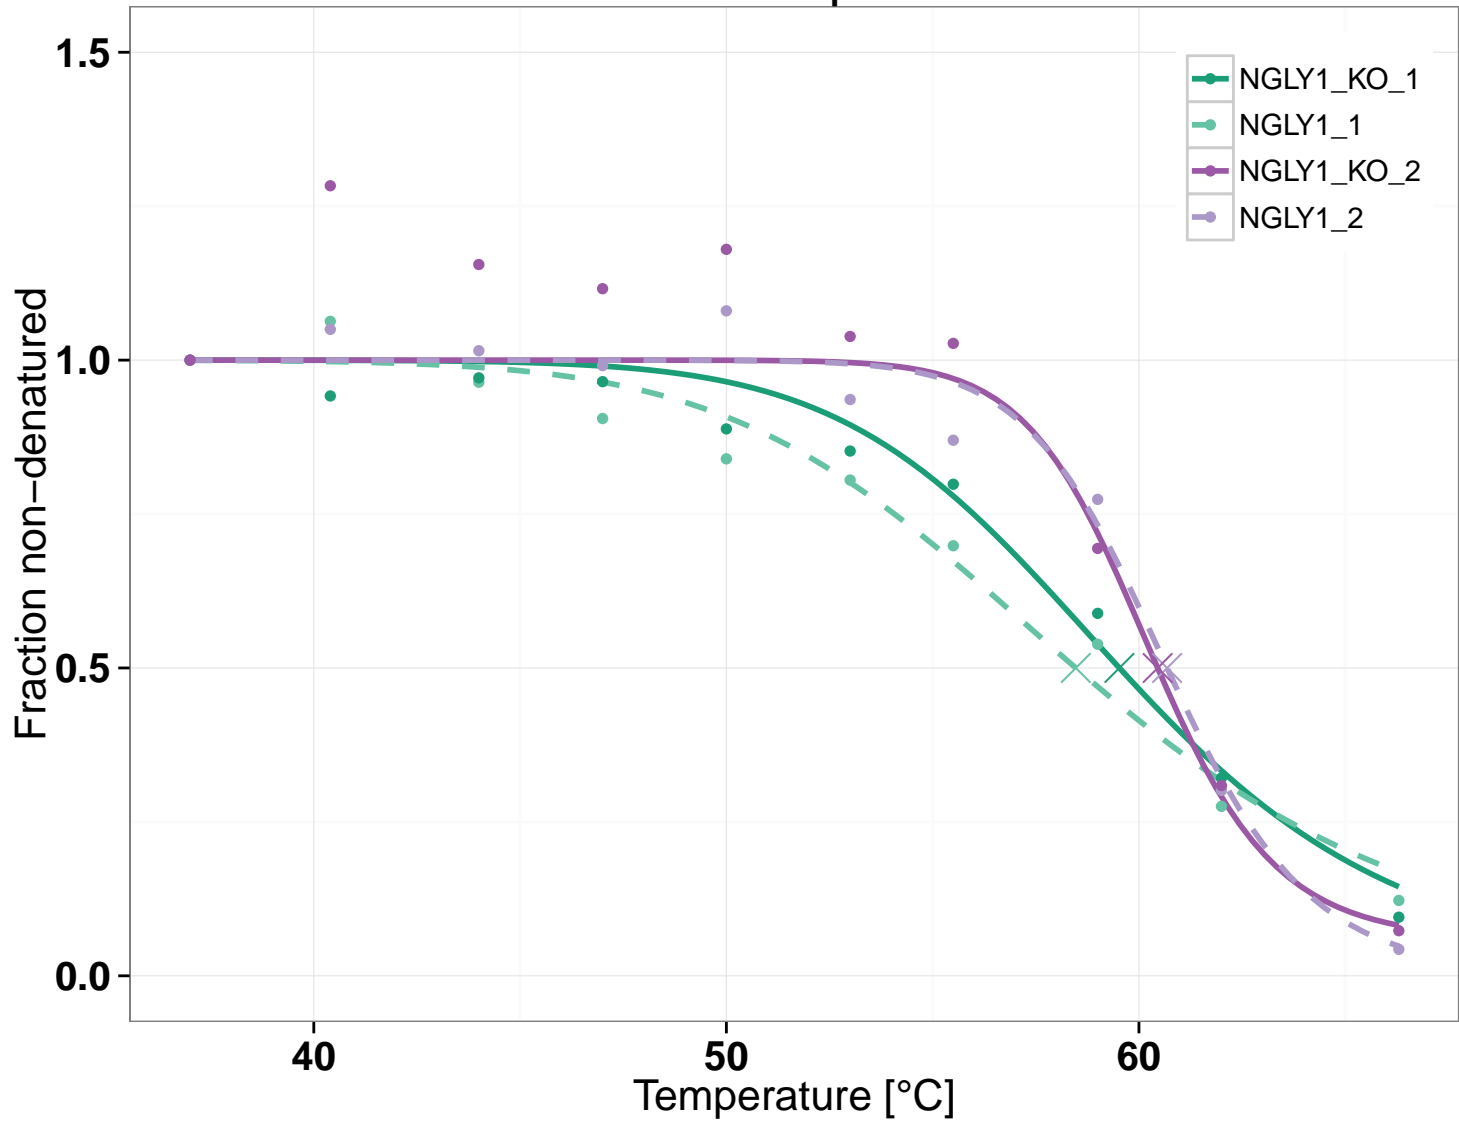

|            | meltPoint | slope  | plateau | R2   |
|------------|-----------|--------|---------|------|
| NGLY1_KO_1 | 59.53     | -0.074 | 0       | 0.98 |
| NGLY1_1    | 58.47     | -0.059 | 0       | 0.98 |
| NGLY1_KO_2 | 60.45     | -0.16  | 0.06    | 0.89 |
| NGLY1_2    | 60.68     | -0.15  | 0       | 0.98 |

Supplement: Supplementary file 4354 [file 1]

IPI00216308.5|VDAC1

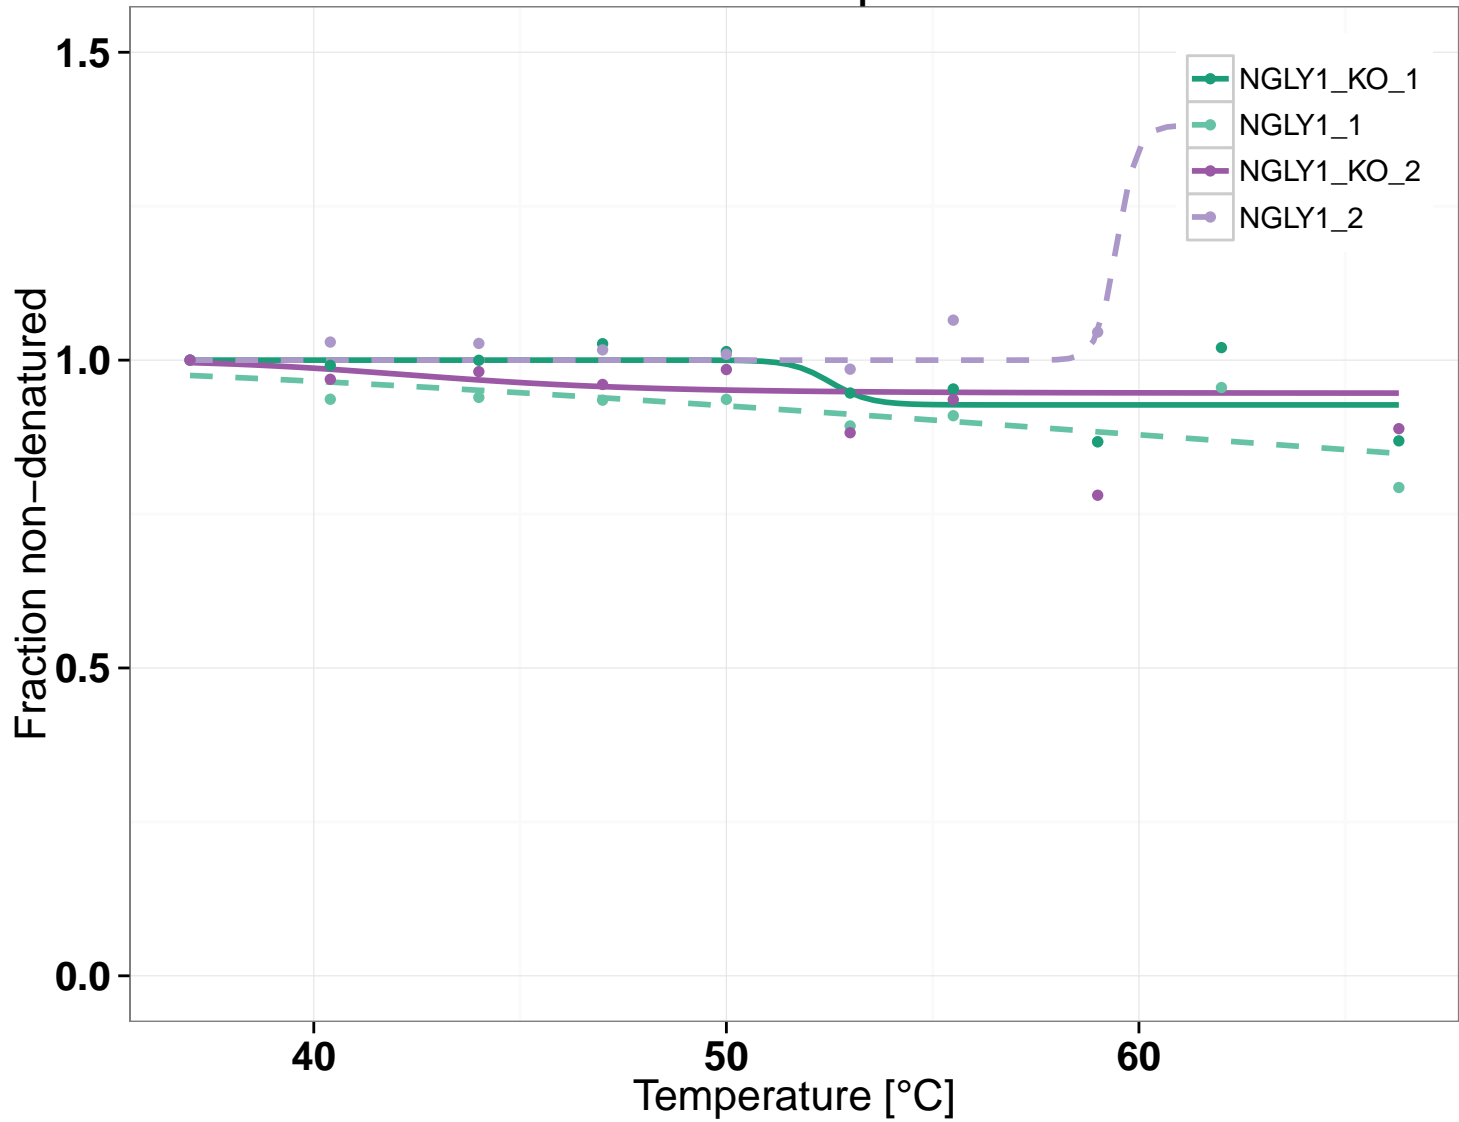

|            | meltPoint | slope   | plateau | R2   |
|------------|-----------|---------|---------|------|
| NGLY1_KO_1 | -         | -0.039  | 0.93    | 0.45 |
| NGLY1_1    | -         | -0.0048 | 0       | 0.55 |
| NGLY1_KO_2 | -         | -0.005  | 0.95    | 0.02 |
| NGLY1_2    | -         | 0.4     | 1.38    | 0.97 |

Supplement: Supplementary file 4355 [file 1]

IPI00432718.2|SUMF1

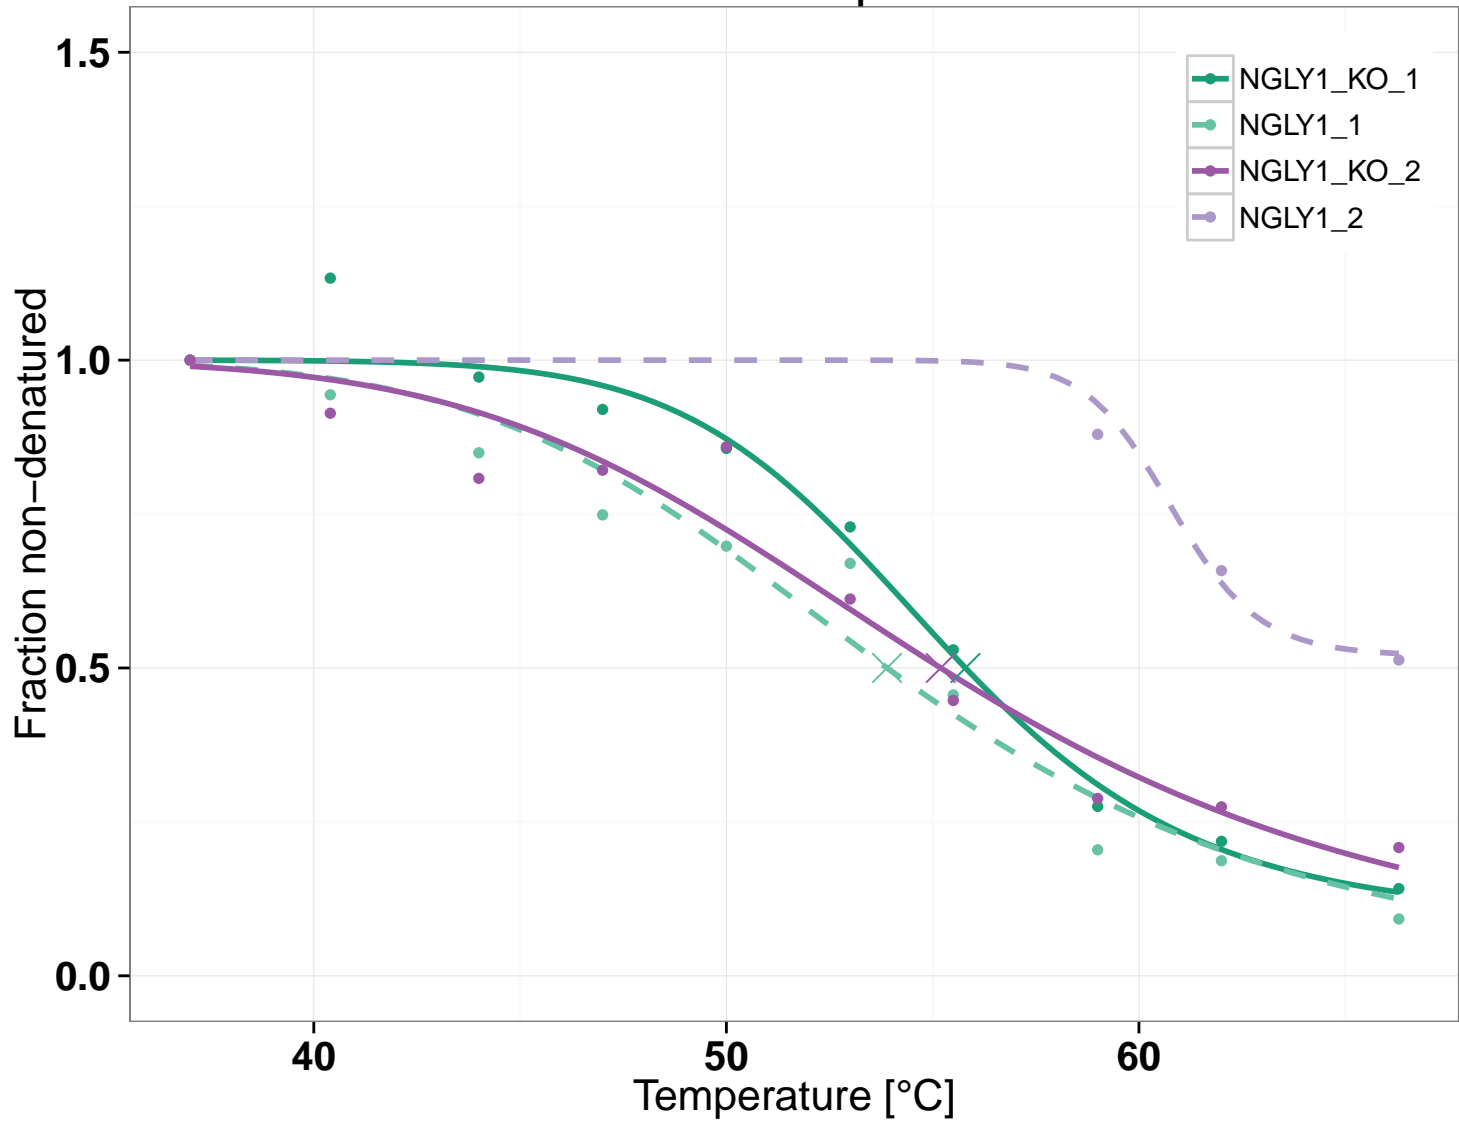

|            | meltPoint | slope  | plateau | R2    |
|------------|-----------|--------|---------|-------|
| NGLY1_KO_1 | 55.8      | -0.073 | 0.09    | 0.98  |
| NGLY1_1    | 53.89     | -0.05  | 0       | 0.96  |
| NGLY1_KO_2 | 55.2      | -0.044 | 0.01    | 0.95  |
| NGLY1_2    | -         | -0.11  | 0.52    | -0.53 |

Supplement: Supplementary file 4356 [file 1]

# IPI00023513.1|CHFR

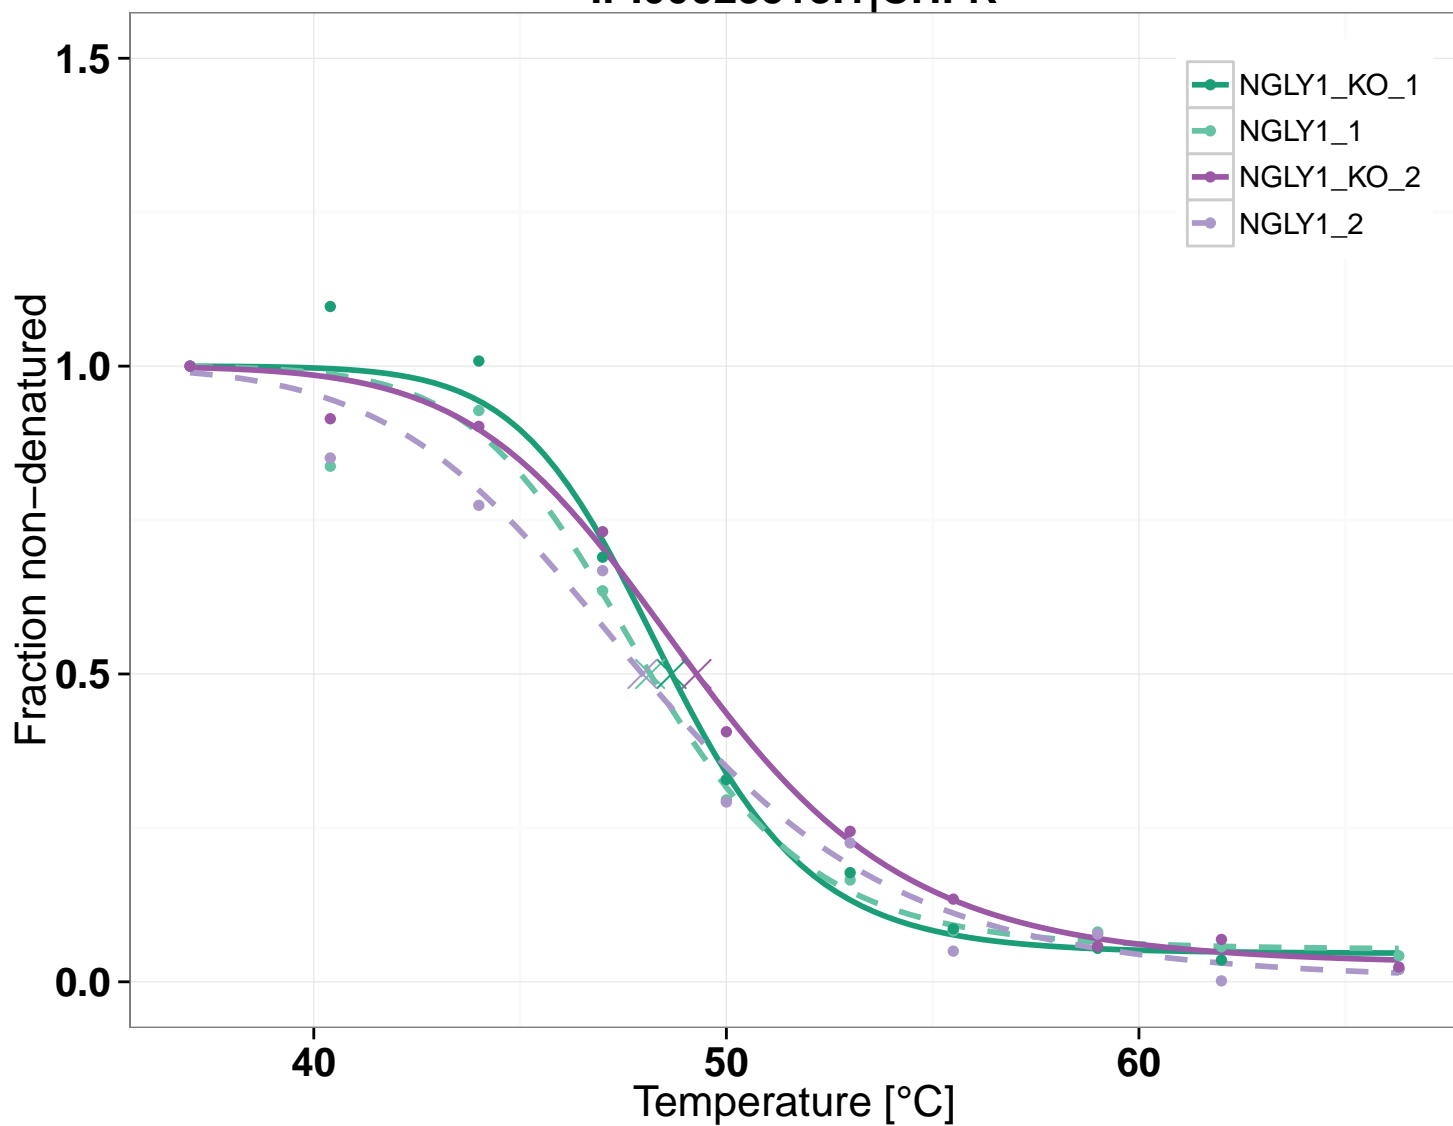

|            | meltPoint | slope  | plateau | R2   |
|------------|-----------|--------|---------|------|
| NGLY1_KO_1 | 48.67     | -0.13  | 0.05    | 0.99 |
| NGLY1_1    | 48.15     | -0.11  | 0.05    | 0.98 |
| NGLY1_KO_2 | 49.28     | -0.092 | 0.03    | 1    |
| NGLY1_2    | 47.97     | -0.081 | 0       | 0.98 |

Supplement: Supplementary file 4357 [file 1]

IPI00872803.1|MOBKL2B

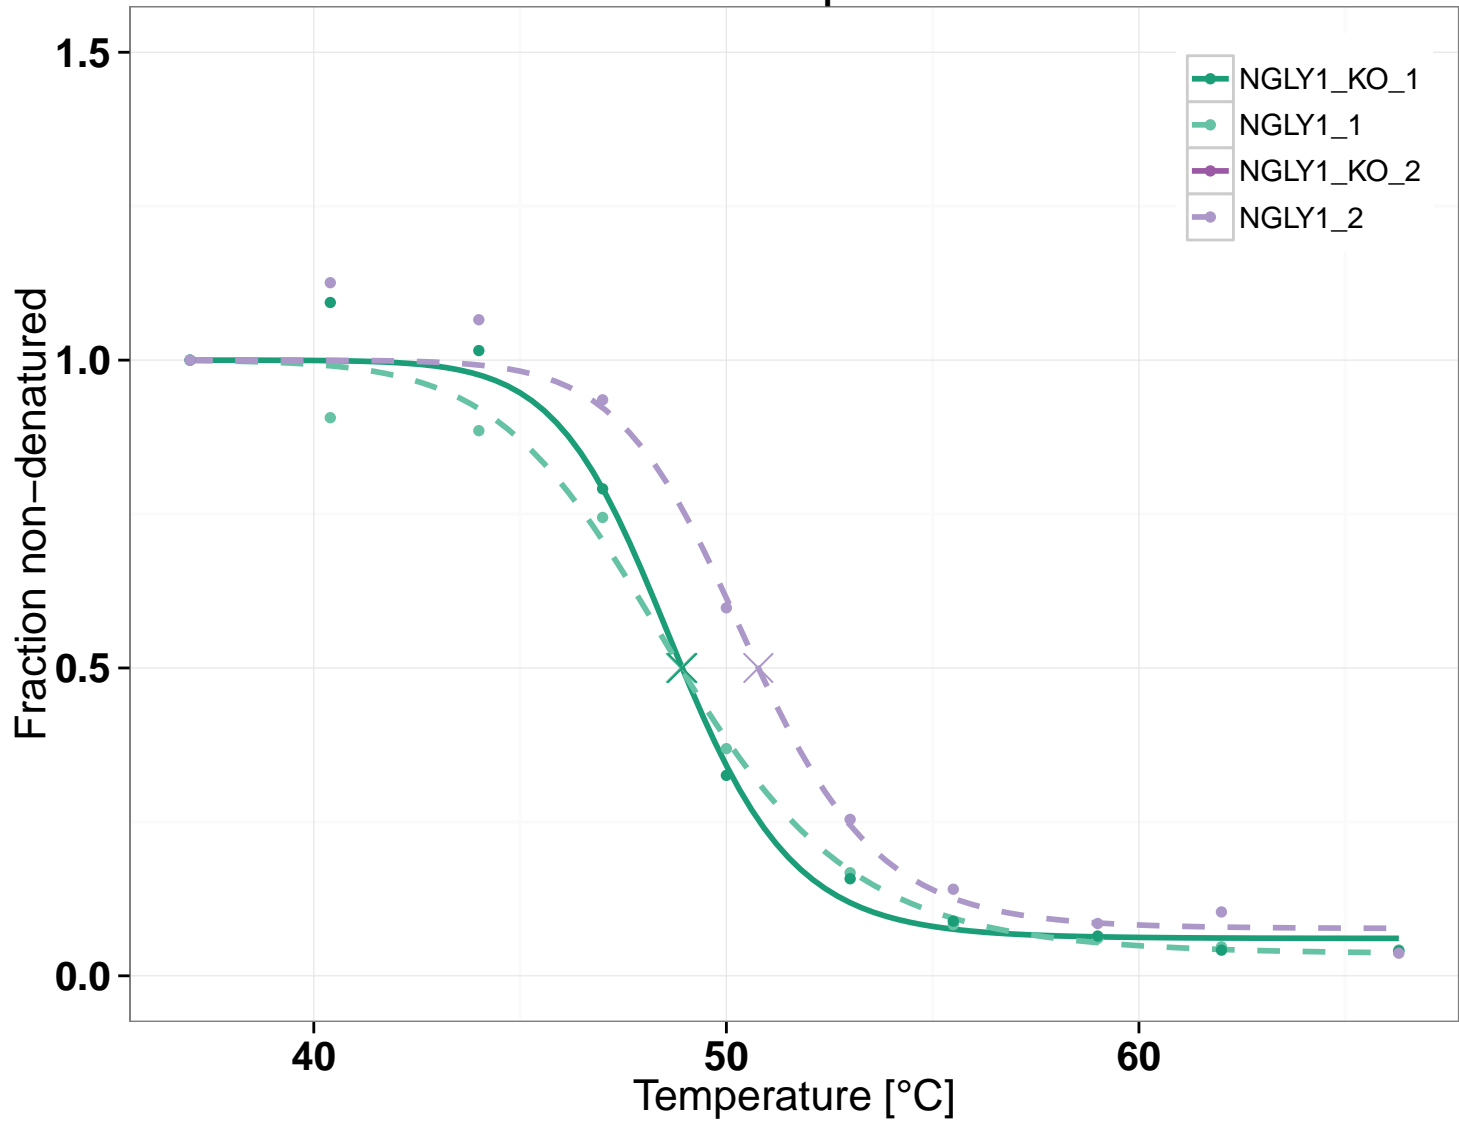

|            | meltPoint | slope | plateau | R2   |
|------------|-----------|-------|---------|------|
| NGLY1_KO_1 | 48.93     | -0.16 | 0.06    | 0.99 |
| NGLY1_1    | 48.9      | -0.11 | 0.04    | 0.99 |
| NGLY1_KO_2 | -         | -     | -       | -    |
| NGLY1_2    | 50.78     | -0.15 | 0.08    | 0.99 |

Supplement: Supplementary file 4358 [file 1]

# IPI00019927.2|PSMD7

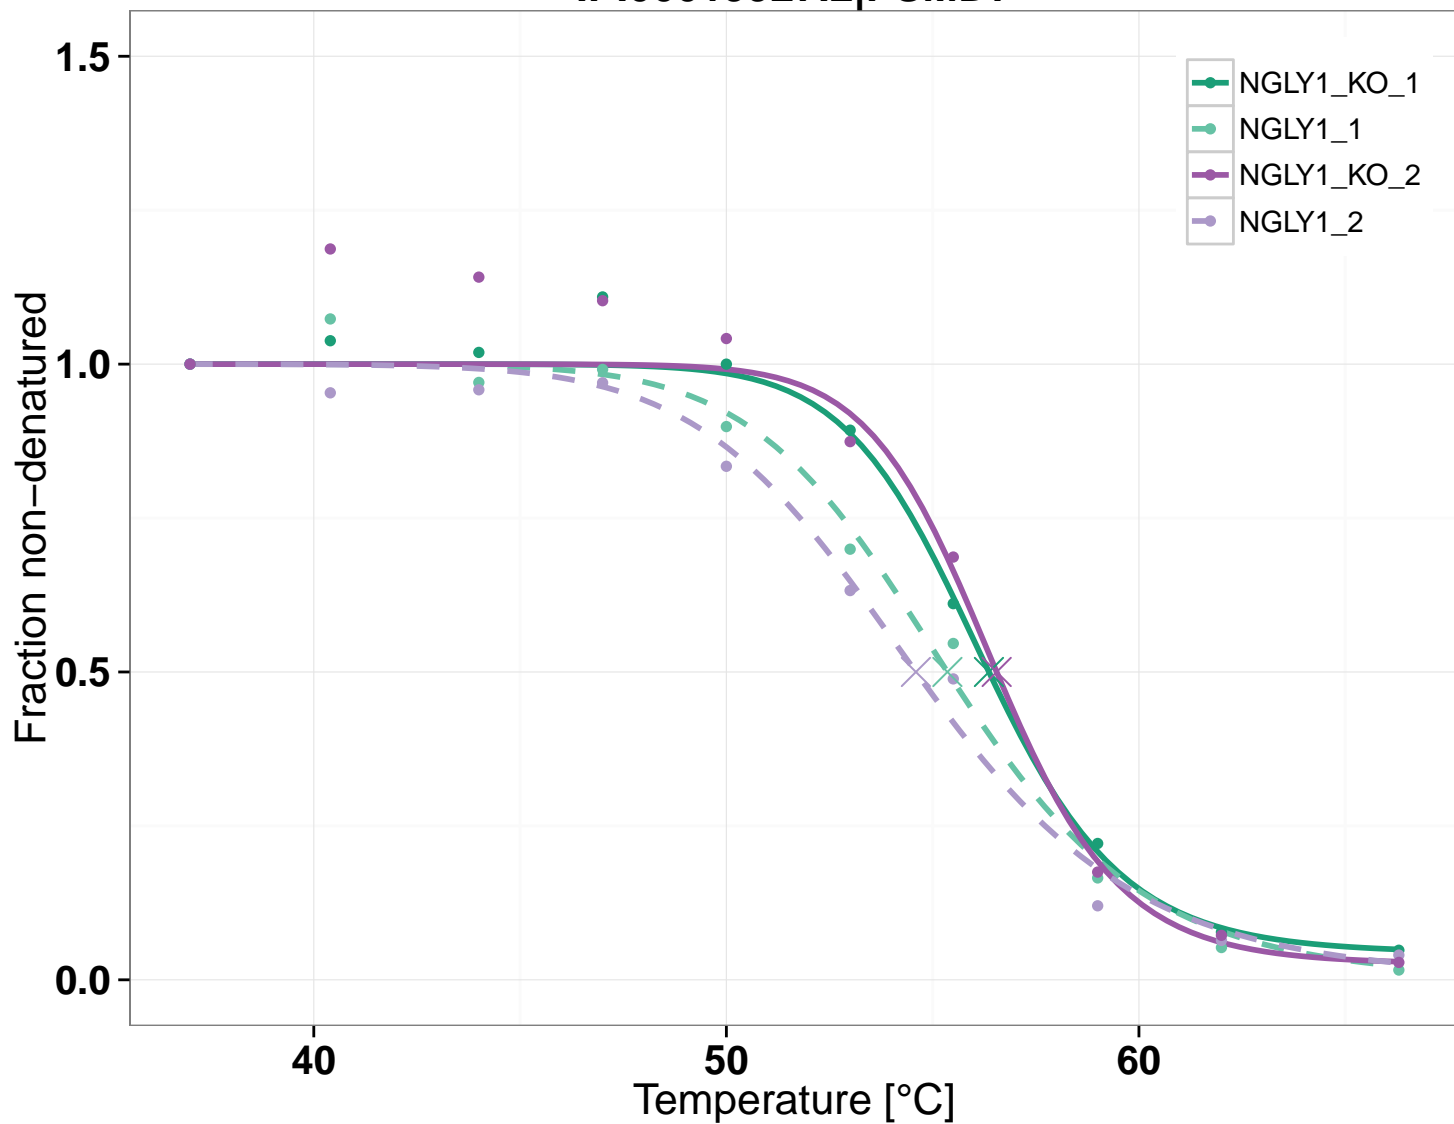

|            | meltPoint | slope  | plateau | R2   |
|------------|-----------|--------|---------|------|
| NGLY1_KO_1 | 56.36     | -0.14  | 0.04    | 0.99 |
| NGLY1_1    | 55.36     | -0.1   | 0       | 0.99 |
| NGLY1_KO_2 | 56.55     | -0.16  | 0.03    | 0.96 |
| NGLY1_2    | 54.59     | -0.094 | 0       | 0.99 |

Supplement: Supplementary file 4359 [file 1]

# IPI00397977.8|ZXDC

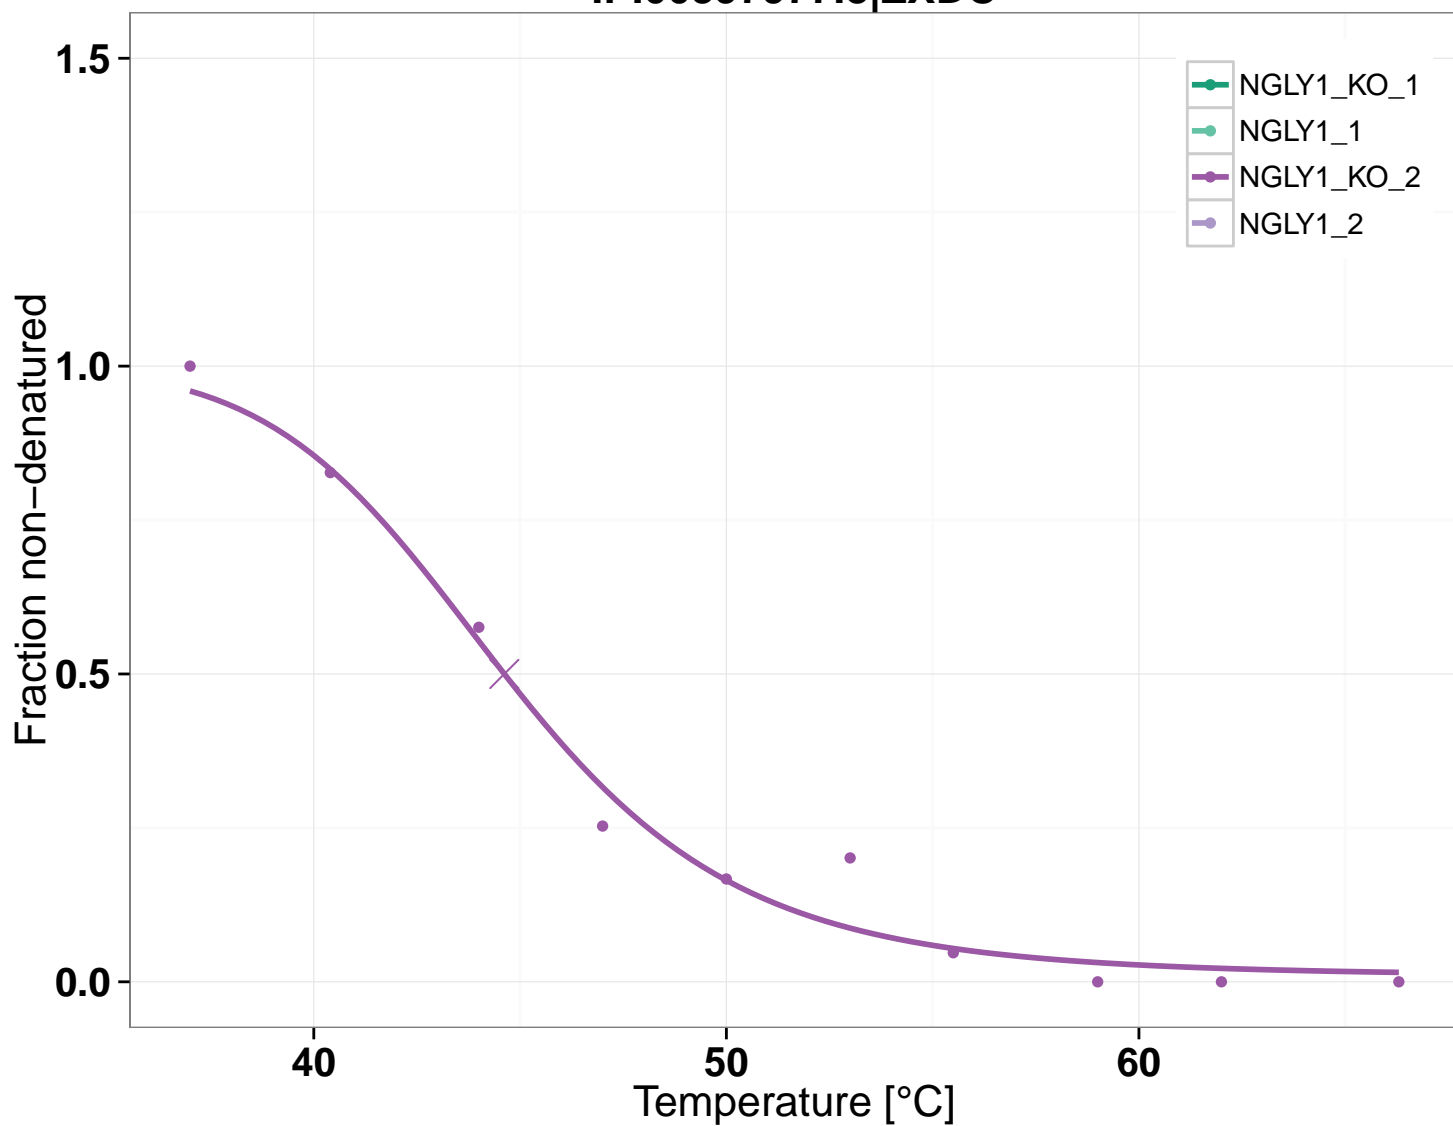

|            | meltPoint | slope  | plateau | R2   |
|------------|-----------|--------|---------|------|
| NGLY1_KO_1 | —         | —      | —       | —    |
| NGLY1_1    | —         | —      | —       | —    |
| NGLY1_KO_2 | 44.62     | -0.087 | 0.01    | 0.98 |
| NGLY1_2    | —         | —      | —       | —    |

Supplement: Supplementary file 4360 [file 1]

IPI00646954.1|ENAH

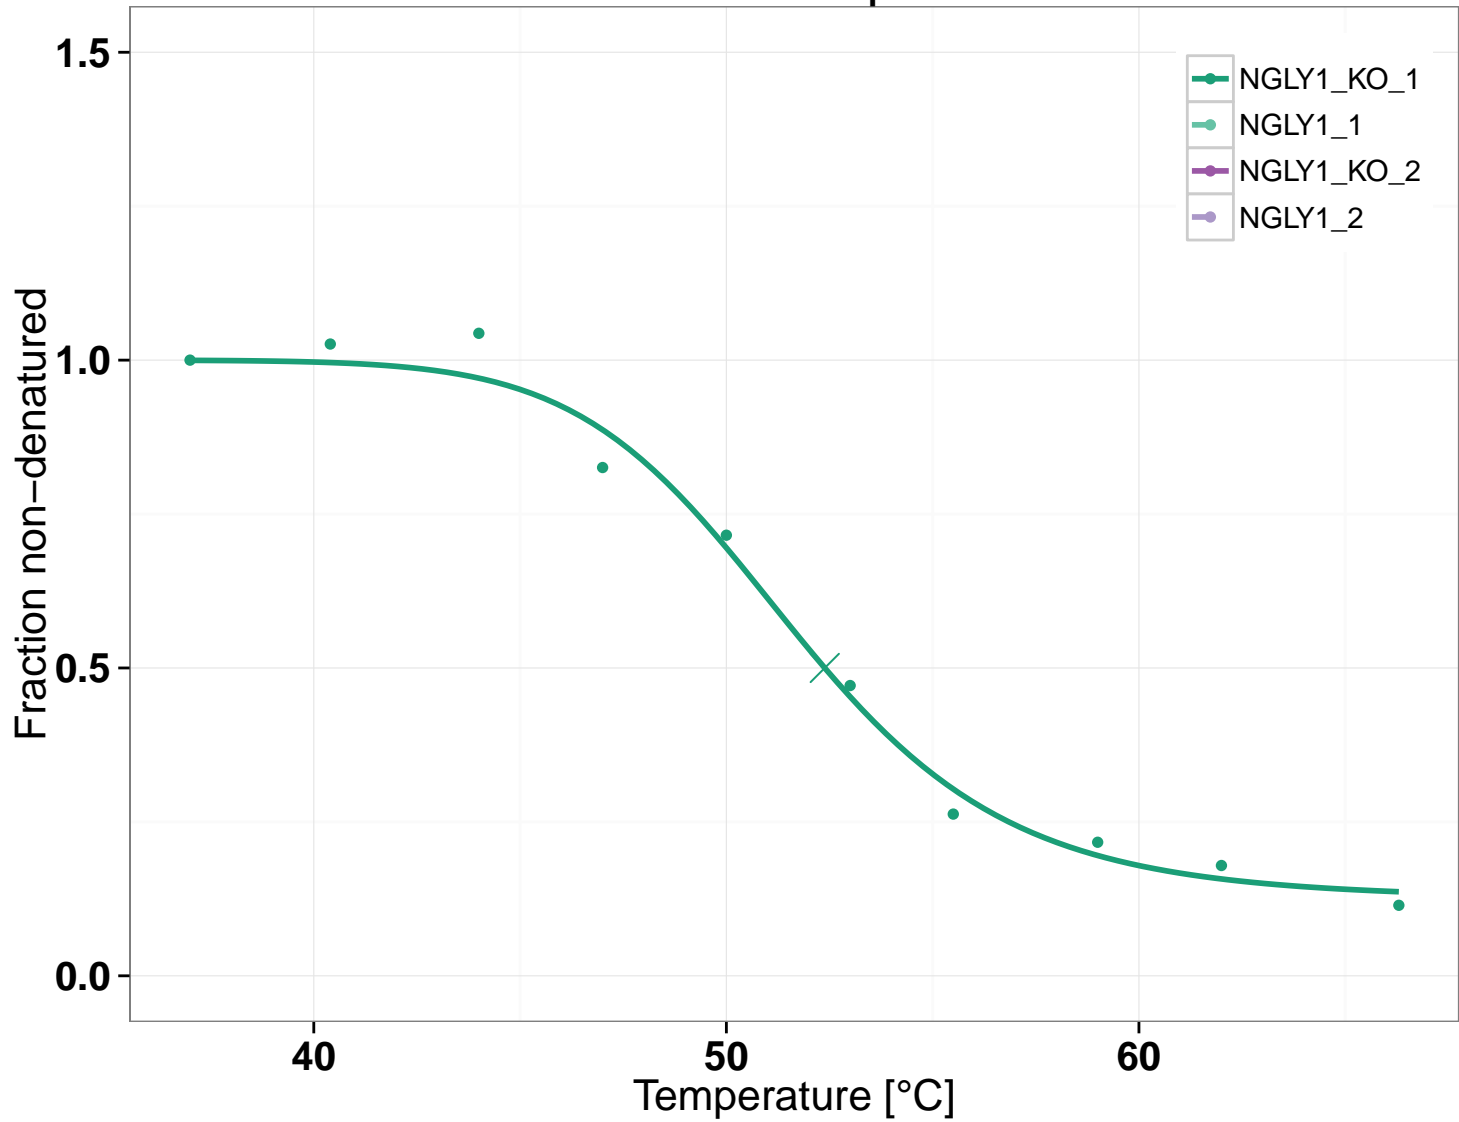

|            | meltPoint | slope  | plateau | R2   |
|------------|-----------|--------|---------|------|
| NGLY1_KO_1 | 52.38     | -0.083 | 0.12    | 0.99 |
| NGLY1_1    | -         | -      | -       | -    |
| NGLY1_KO_2 | -         | -      | -       | -    |
| NGLY1_2    | -         | -      | -       | -    |

Supplement: Supplementary file 4361 [file 1]

IPI00103743.2|BCL2L11

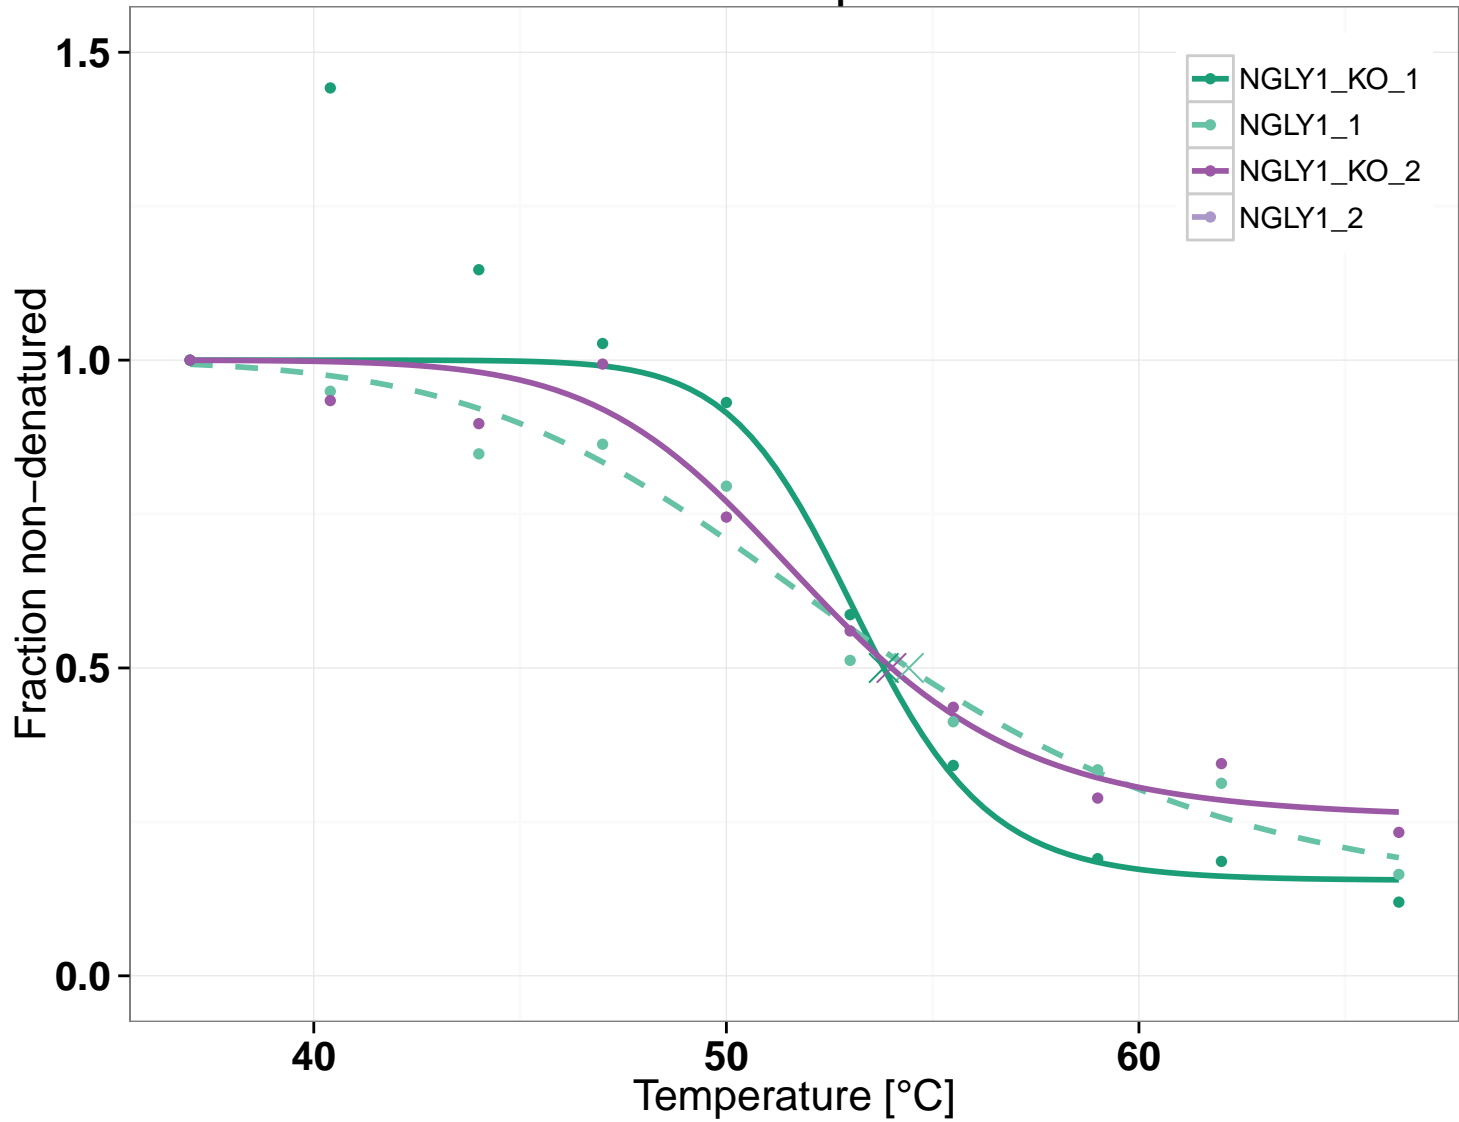

|            | meltPoint | slope  | plateau | R2   |
|------------|-----------|--------|---------|------|
| NGLY1_KO_1 | 53.81     | -0.13  | 0.15    | 0.89 |
| NGLY1_1    | 54.42     | -0.048 | 0.1     | 0.97 |
| NGLY1_KO_2 | 54        | -0.071 | 0.26    | 0.97 |
| NGLY1_2    | -         | -      | -       | -    |

Supplement: Supplementary file 4362 [file 1]

IPI00011077.4|MRPL32

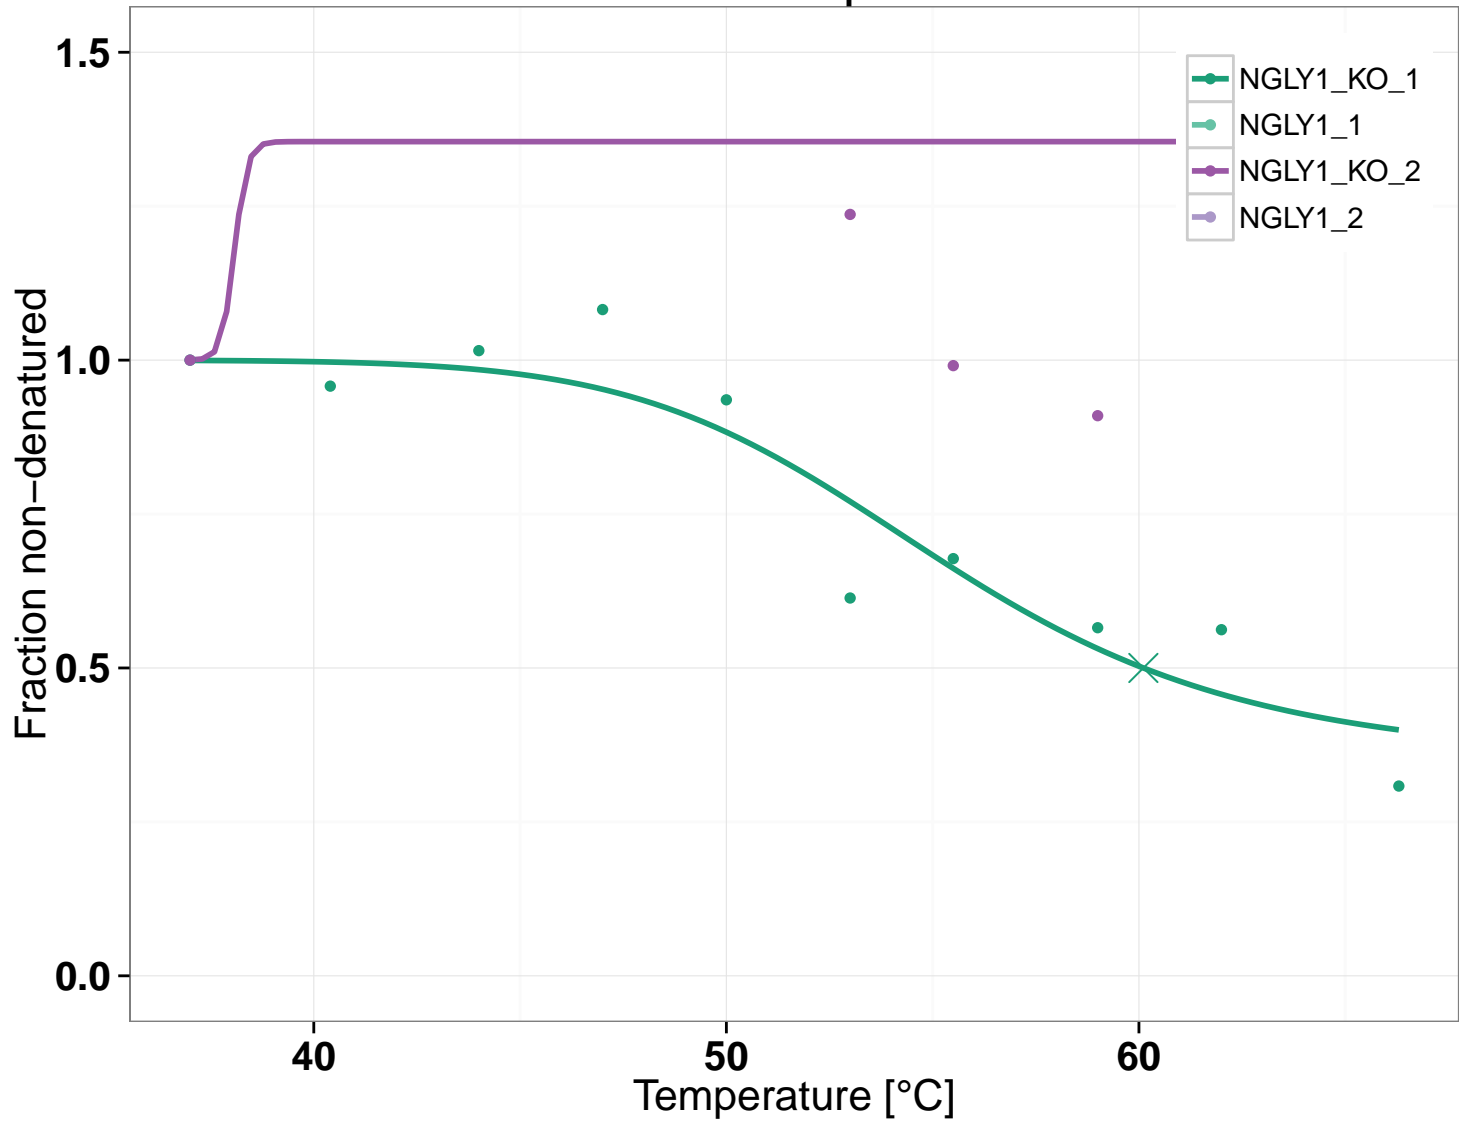

|            | meltPoint | slope  | plateau | R2   |
|------------|-----------|--------|---------|------|
| NGLY1_KO_1 | 60.11     | -0.044 | 0.35    | 0.89 |
| NGLY1_1    | -         | -      | -       | -    |
| NGLY1_KO_2 | -         | 0.58   | 1.35    | 0.15 |
| NGLY1_2    | -         | -      | -       | -    |

Supplement: Supplementary file 4363 [file 1]

IPI00873167.1|A8MXZ0\_HUMAN

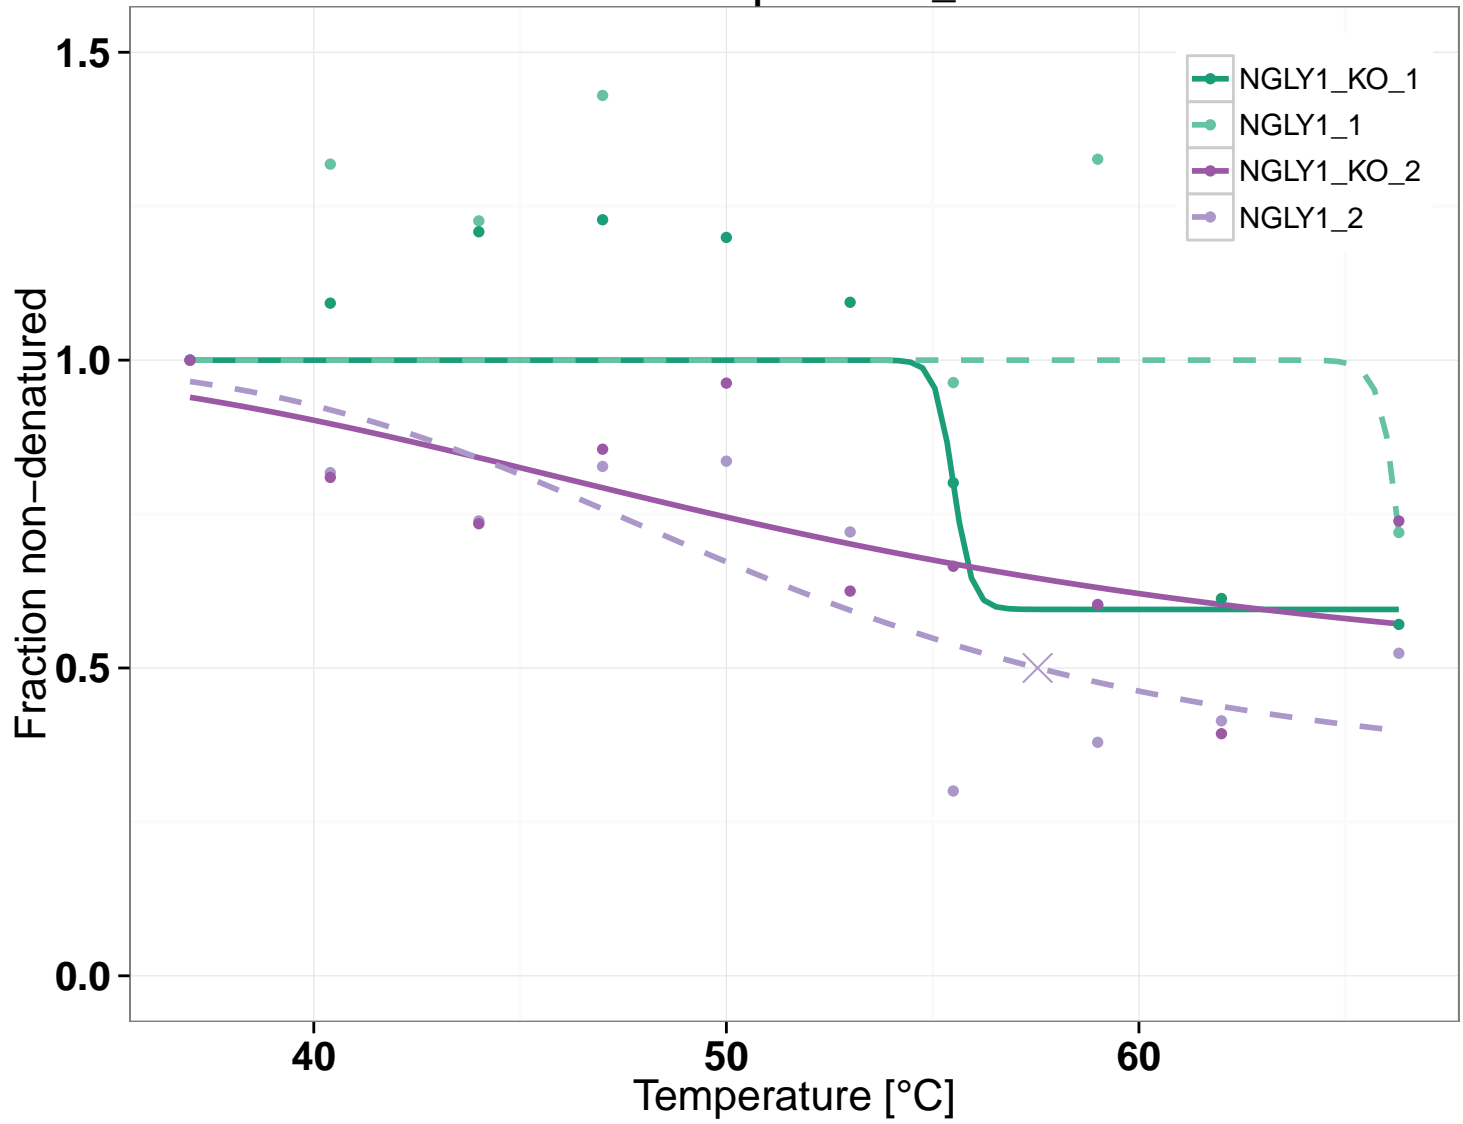

|            | meltPoint | slope  | plateau | R2    |
|------------|-----------|--------|---------|-------|
| NGLY1_KO_1 | -         | -0.46  | 0.6     | 0.76  |
| NGLY1_1    | -         | -      | 0       | -0.66 |
| NGLY1_KO_2 | -         | -0.016 | 0.44    | 0.48  |
| NGLY1_2    | 57.54     | -0.029 | 0.31    | 0.69  |

Supplement: Supplementary file 4364 [file 1]

# IPI00021917.1|RIPK2

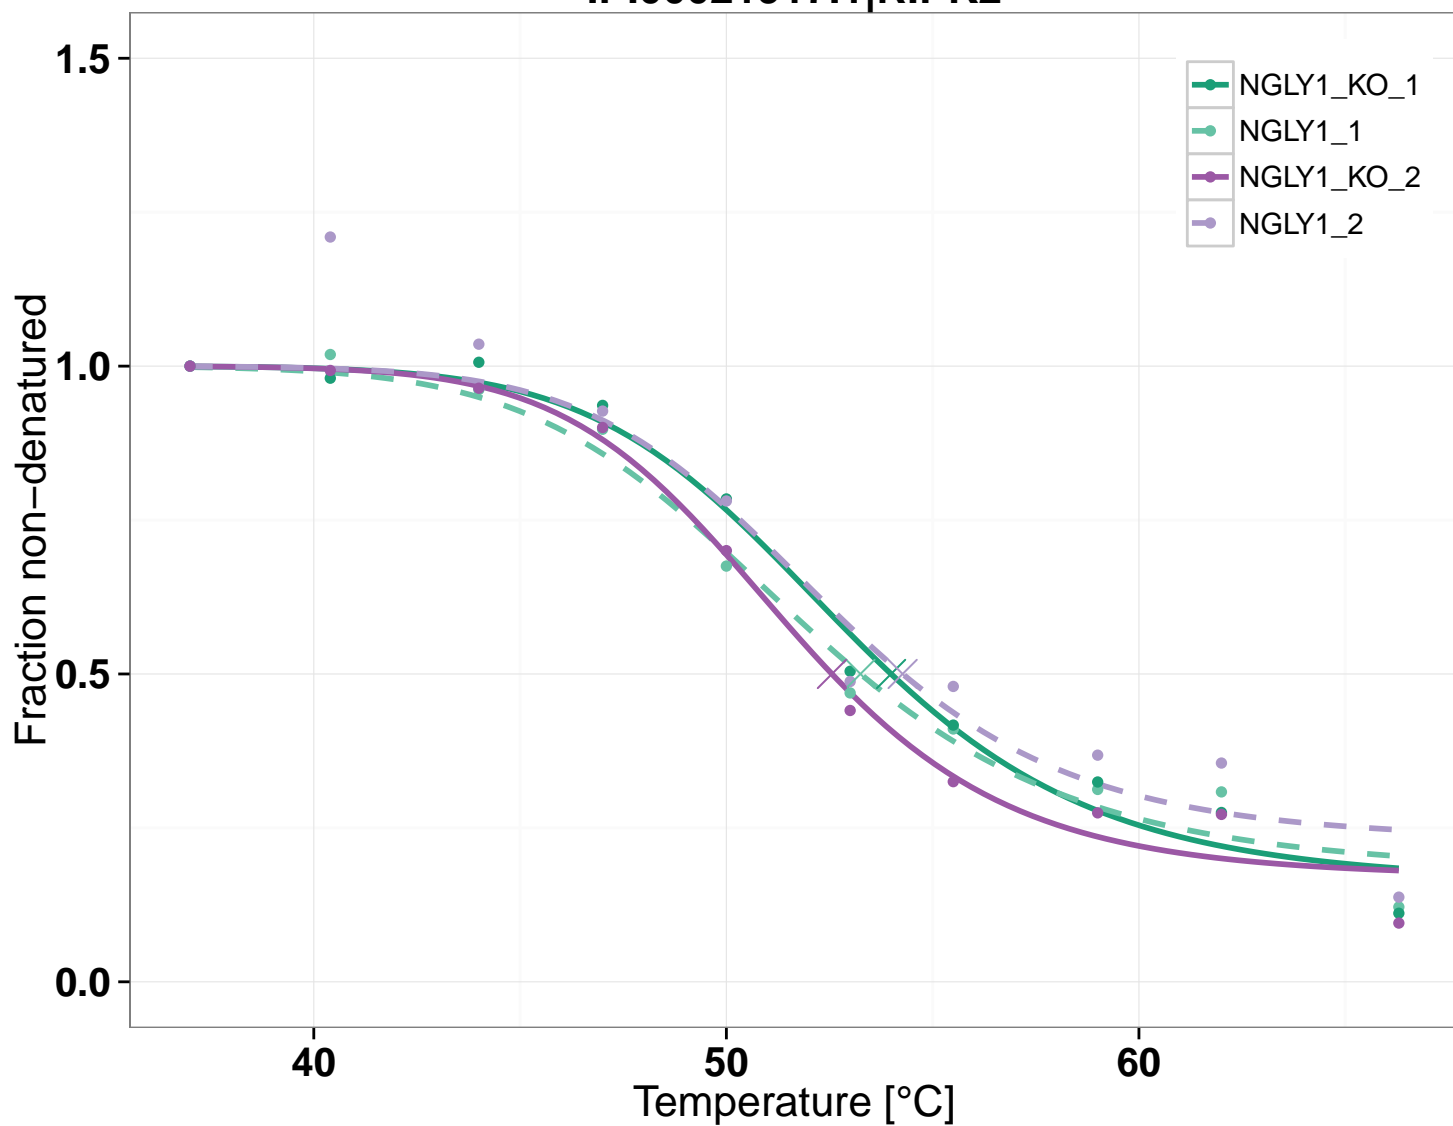

|            | meltPoint | slope  | plateau | R2   |
|------------|-----------|--------|---------|------|
| NGLY1_KO_1 | 53.99     | -0.069 | 0.16    | 0.98 |
| NGLY1_1    | 53.25     | -0.063 | 0.18    | 0.98 |
| NGLY1_KO_2 | 52.56     | -0.078 | 0.17    | 0.99 |
| NGLY1_2    | 54.27     | -0.066 | 0.23    | 0.93 |

Supplement: Supplementary file 4365 [file 1]

IPI00001757.1|RBM8A

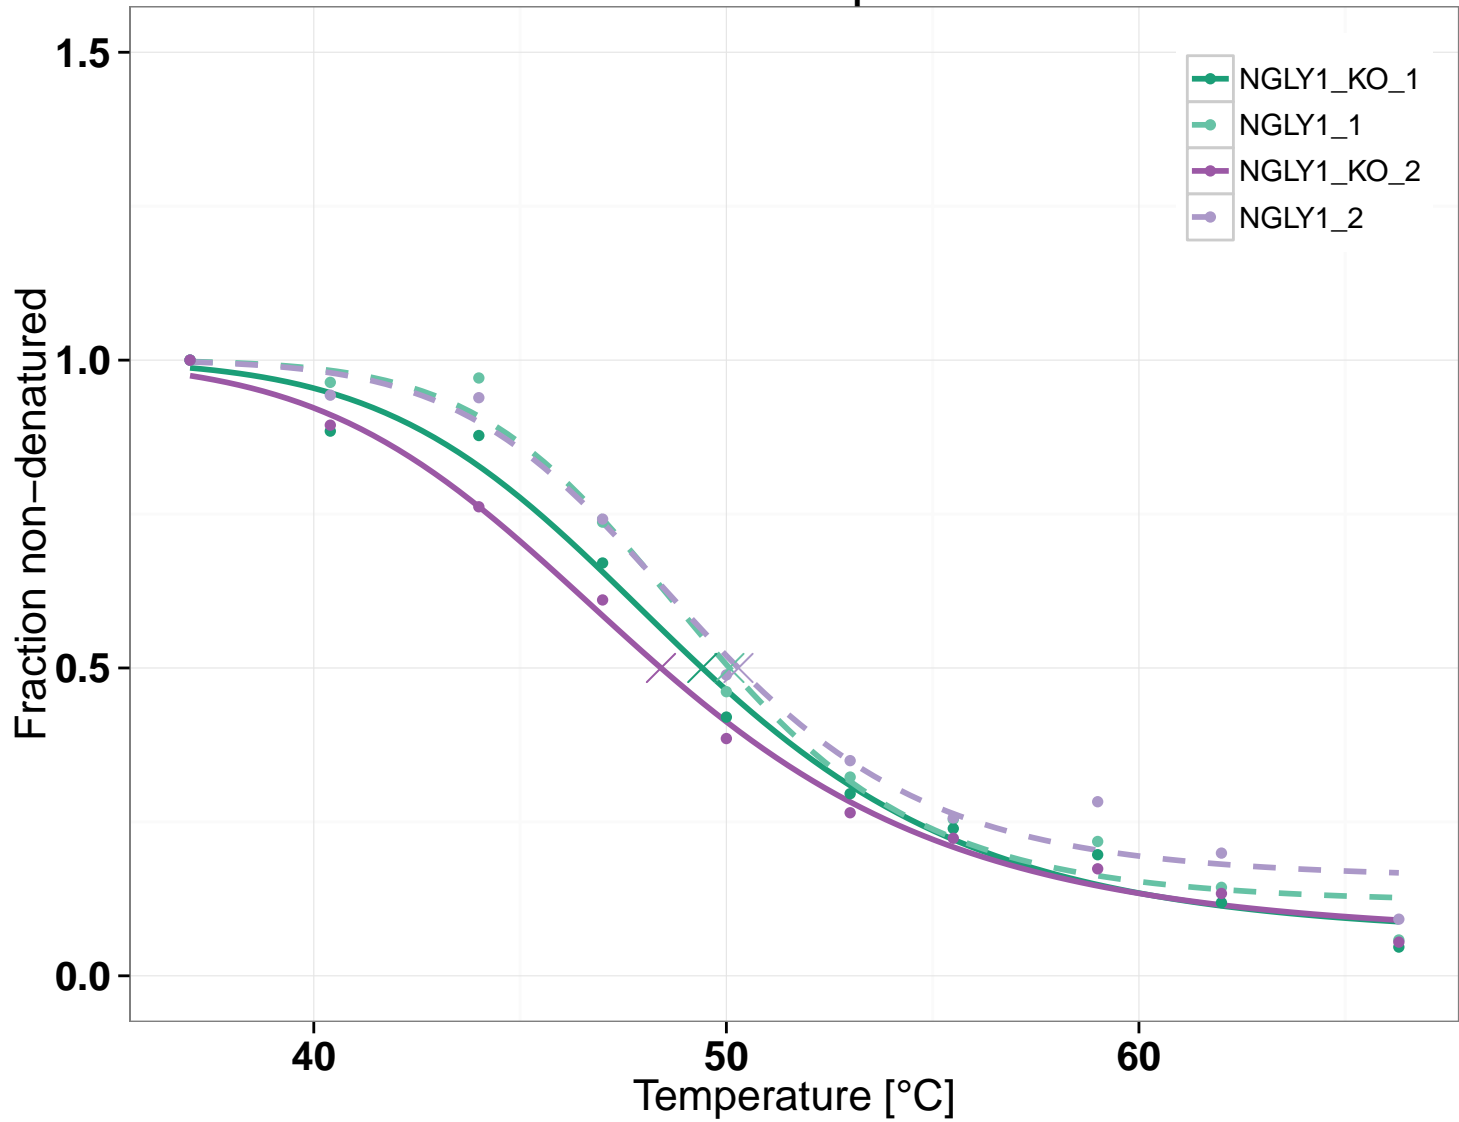

|            | meltPoint | slope  | plateau | R2   |
|------------|-----------|--------|---------|------|
| NGLY1_KO_1 | 49.42     | -0.065 | 0.06    | 0.99 |
| NGLY1_1    | 50.07     | -0.081 | 0.12    | 0.99 |
| NGLY1_KO_2 | 48.42     | -0.061 | 0.06    | 0.99 |
| NGLY1_2    | 50.29     | -0.074 | 0.16    | 0.98 |

Supplement: Supplementary file 4366 [file 1]

# IPI00647627.1|YIPF3

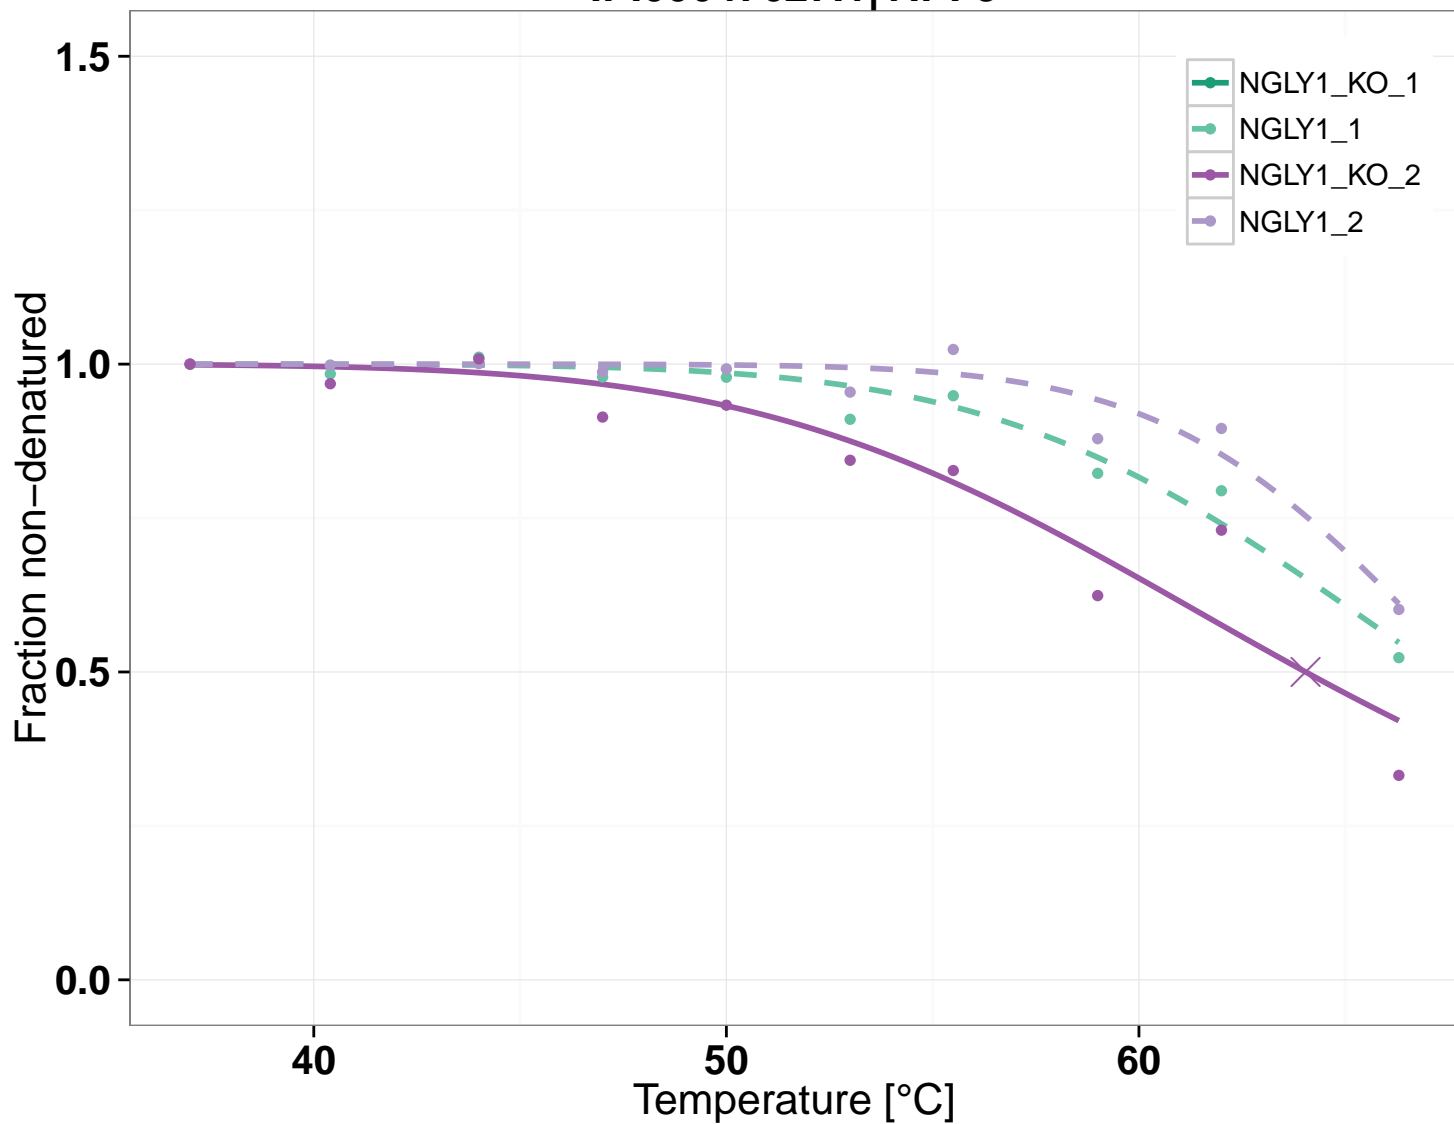

|            | meltPoint | slope  | plateau | R2   |
|------------|-----------|--------|---------|------|
| NGLY1_KO_1 | —         | —      | —       | —    |
| NGLY1_1    | —         | -0.046 | 0       | 0.96 |
| NGLY1_KO_2 | 64.04     | -0.038 | 0       | 0.9  |
| NGLY1_2    | —         | —      | 0       | 0.94 |

Supplement: Supplementary file 4367 [file 1]

IPI00456534.1|TTC7B

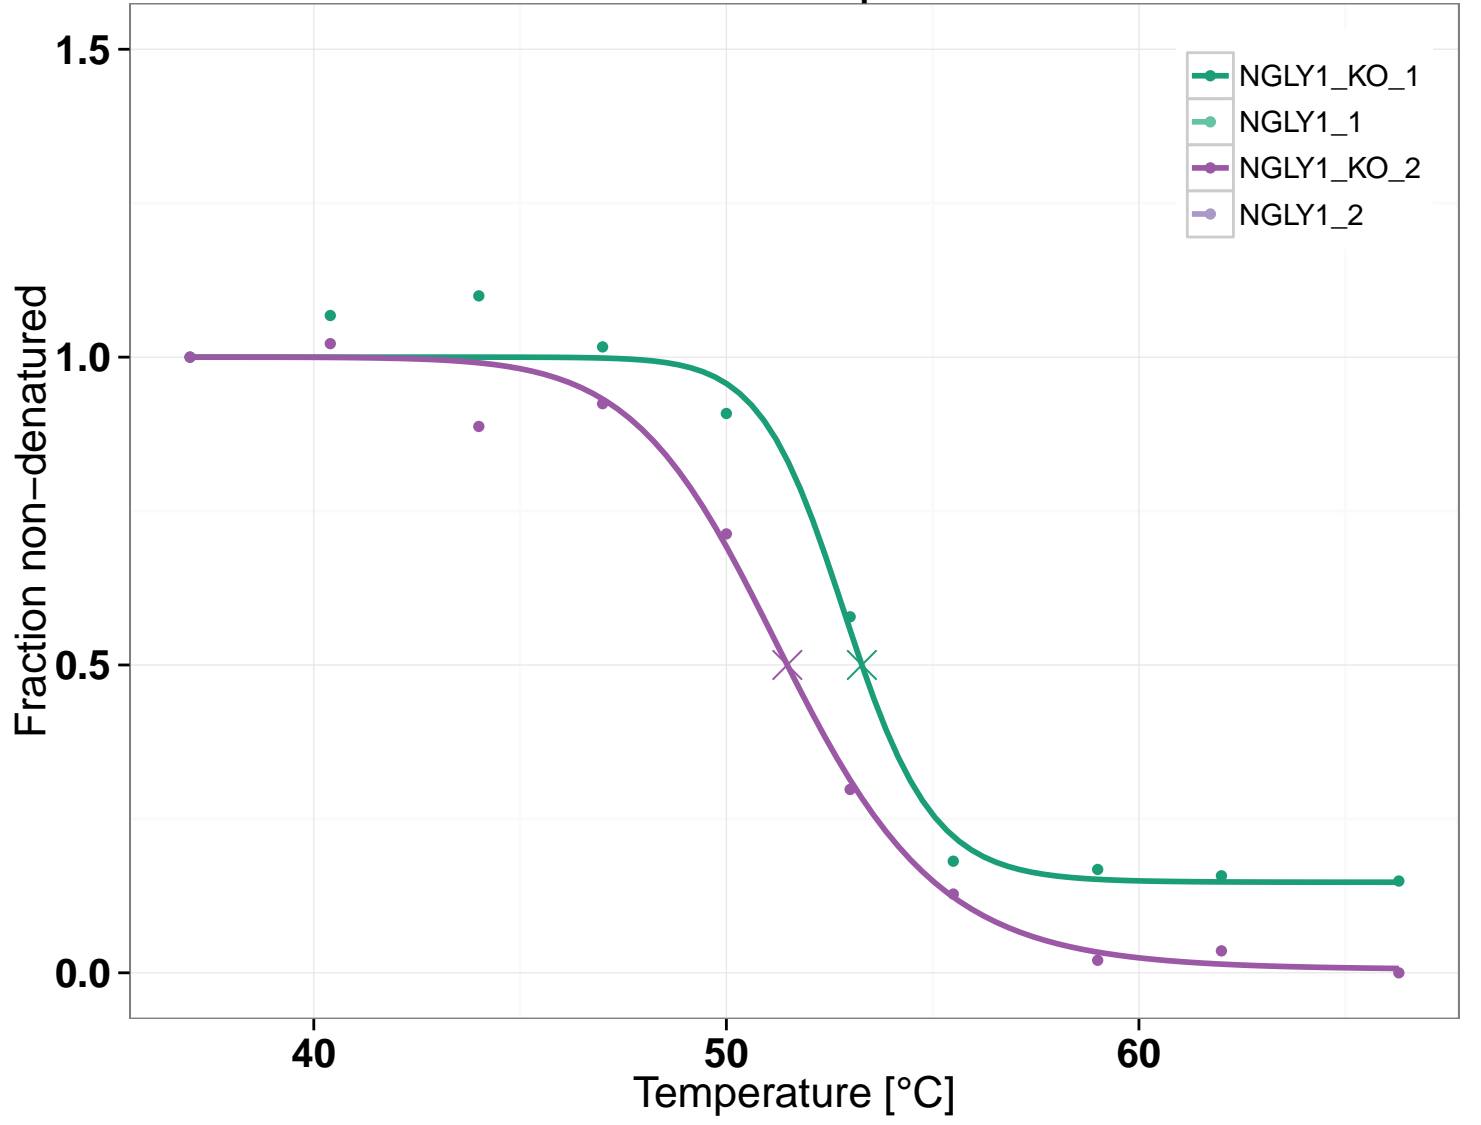

|            | meltPoint | slope | plateau | R2   |
|------------|-----------|-------|---------|------|
| NGLY1_KO_1 | 53.28     | -0.2  | 0.15    | 0.99 |
| NGLY1_1    | -         | -     | -       | -    |
| NGLY1_KO_2 | 51.48     | -0.13 | 0       | 0.99 |
| NGLY1_2    | -         | -     | -       | -    |

Supplement: Supplementary file 4368 [file 1]

IPI00014474.1|AKAP8

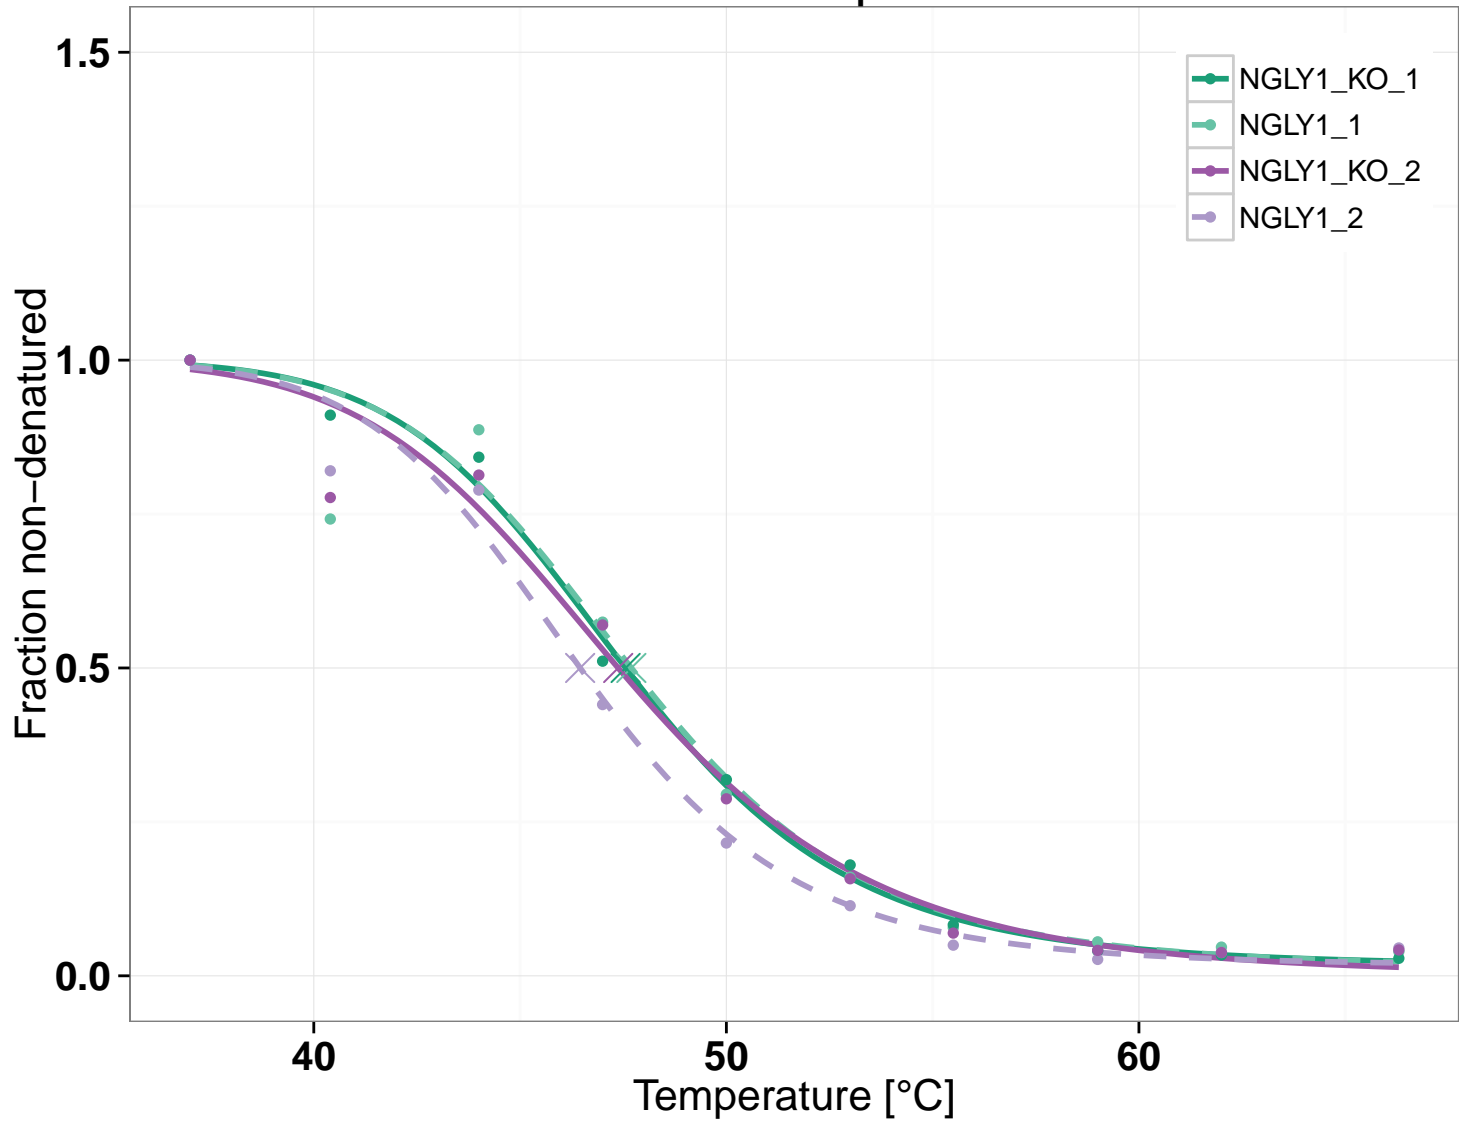

|            | meltPoint | slope  | plateau | R2   |
|------------|-----------|--------|---------|------|
| NGLY1_KO_1 | 47.56     | -0.089 | 0.02    | 1    |
| NGLY1_1    | 47.7      | -0.087 | 0.01    | 0.96 |
| NGLY1_KO_2 | 47.38     | -0.08  | 0       | 0.98 |
| NGLY1_2    | 46.46     | -0.095 | 0.02    | 0.99 |

Supplement: Supplementary file 4369 [file 1]

IPI00845242.2|TNFAIP8

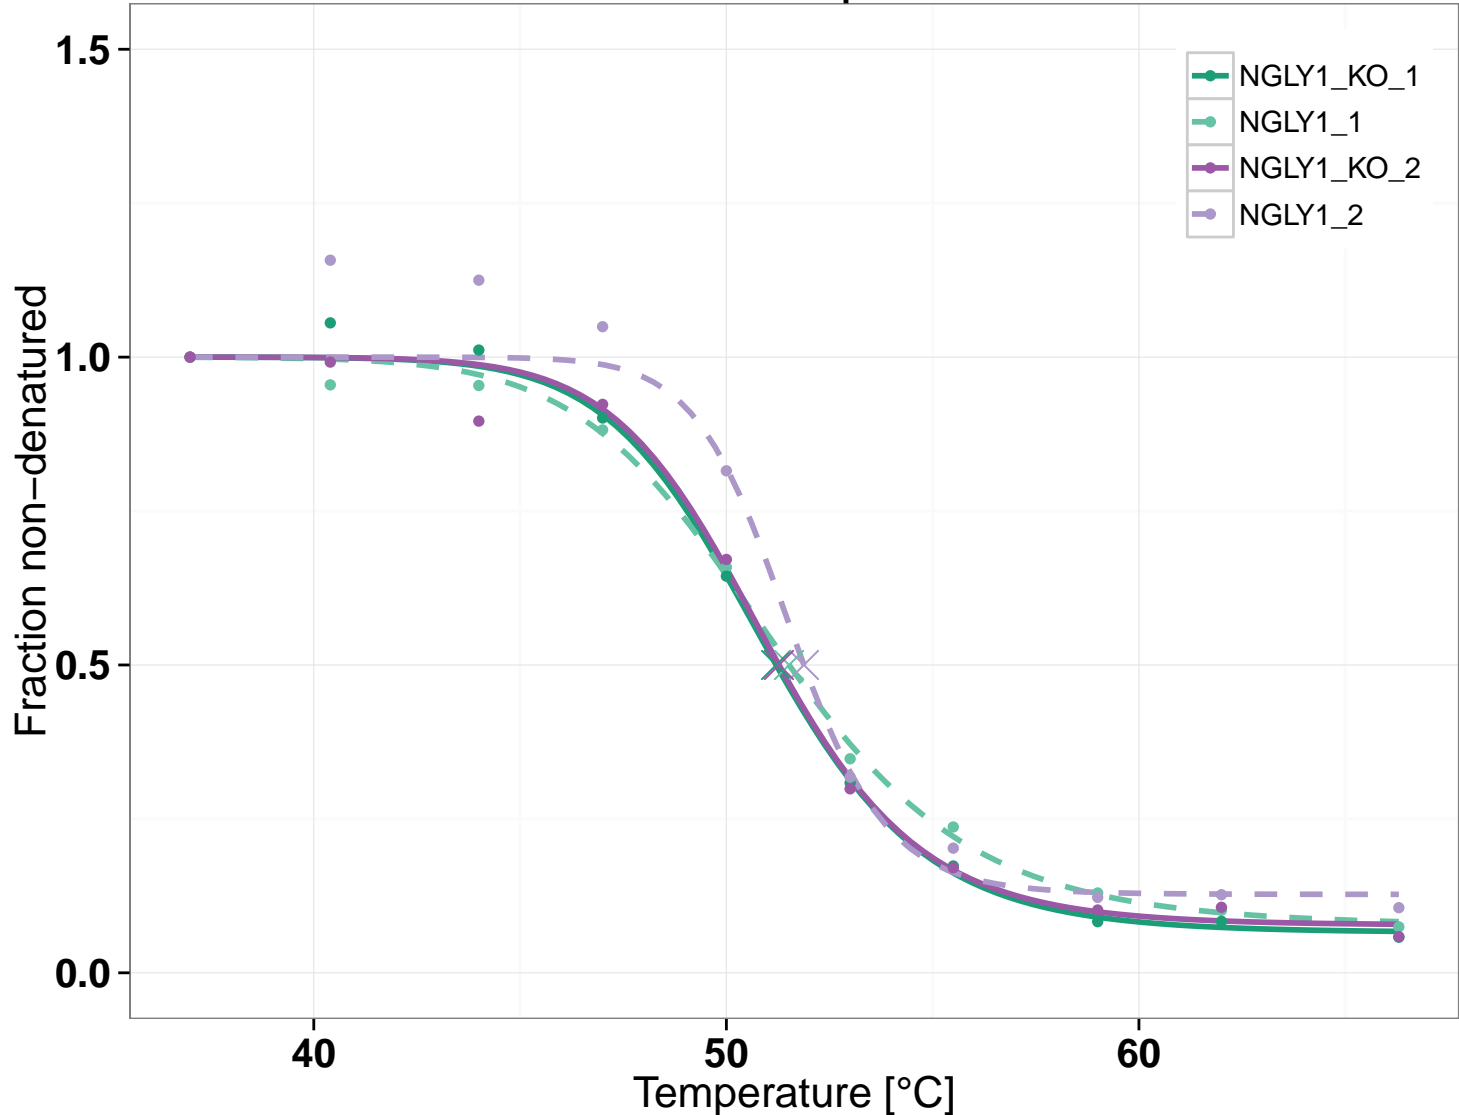

|            | meltPoint | slope  | plateau | R2   |
|------------|-----------|--------|---------|------|
| NGLY1_KO_1 | 51.21     | -0.12  | 0.07    | 1    |
| NGLY1_1    | 51.52     | -0.097 | 0.08    | 1    |
| NGLY1_KO_2 | 51.28     | -0.12  | 0.08    | 0.99 |
| NGLY1_2    | 51.88     | -0.19  | 0.13    | 0.98 |

Supplement: Supplementary file 4370 [file 1]

# IPI00329547.3|ZC3H13

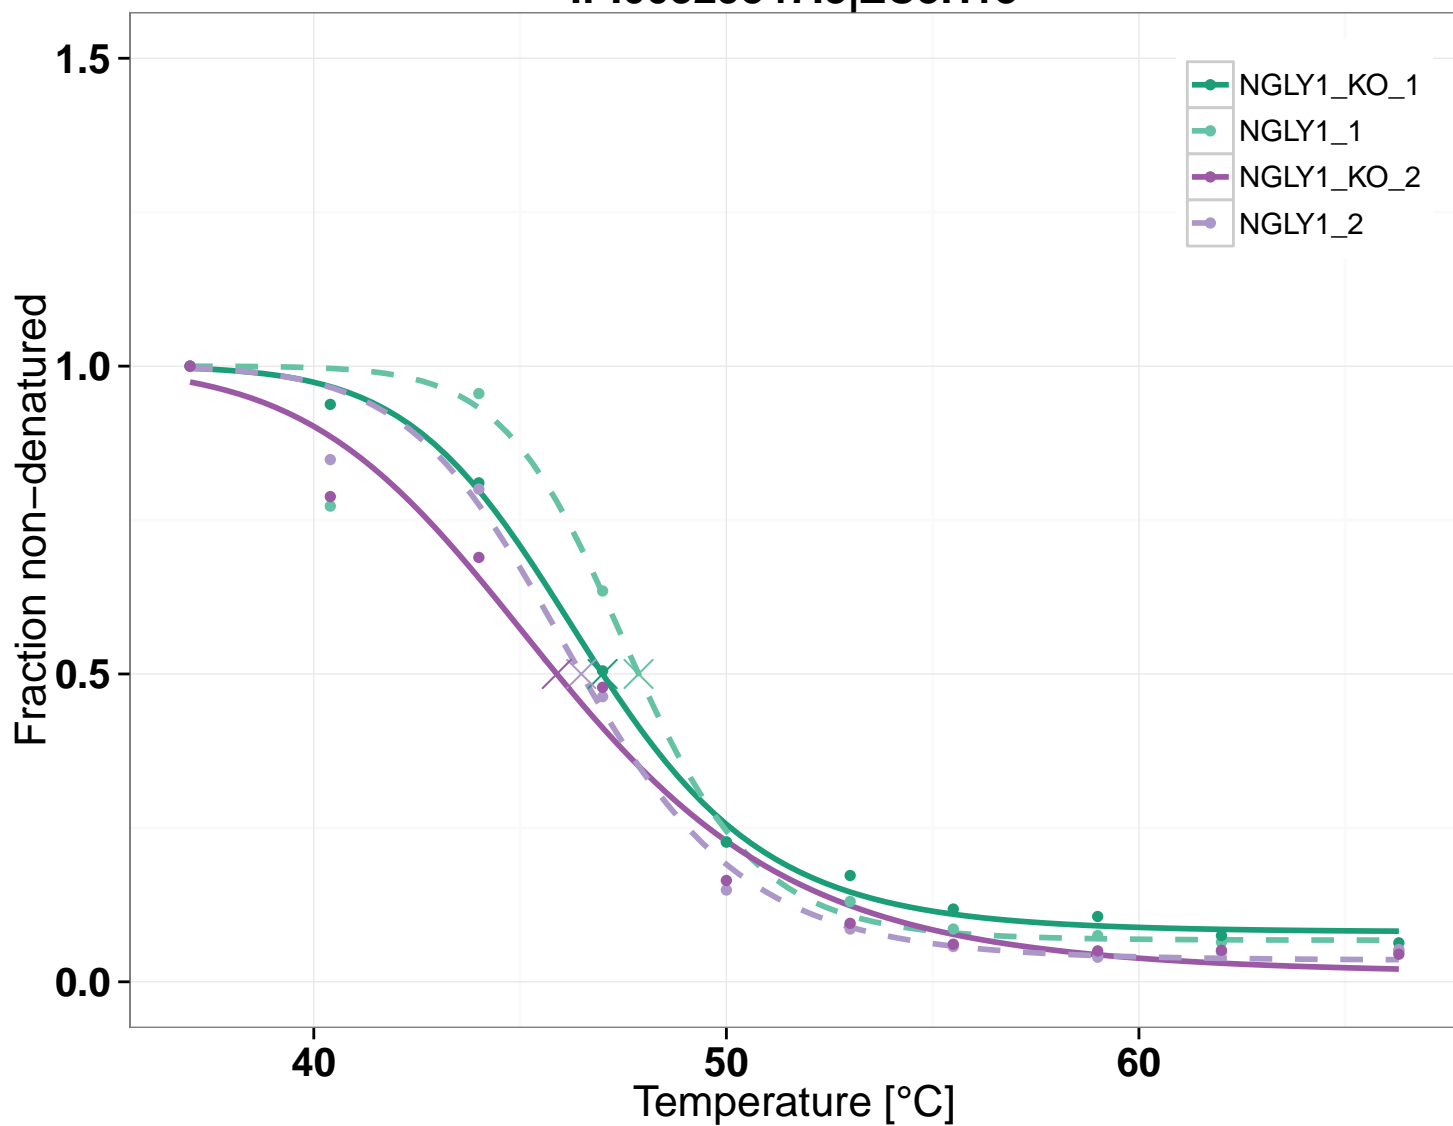

|            | meltPoint | slope  | plateau | R2   |
|------------|-----------|--------|---------|------|
| NGLY1_KO_1 | 47        | -0.11  | 0.08    | 1    |
| NGLY1_1    | 47.87     | -0.15  | 0.07    | 0.96 |
| NGLY1_KO_2 | 45.89     | -0.083 | 0.01    | 0.98 |
| NGLY1_2    | 46.48     | -0.12  | 0.03    | 0.99 |

Supplement: Supplementary file 4371 [file 1]

IPI00026606.2|SURF6

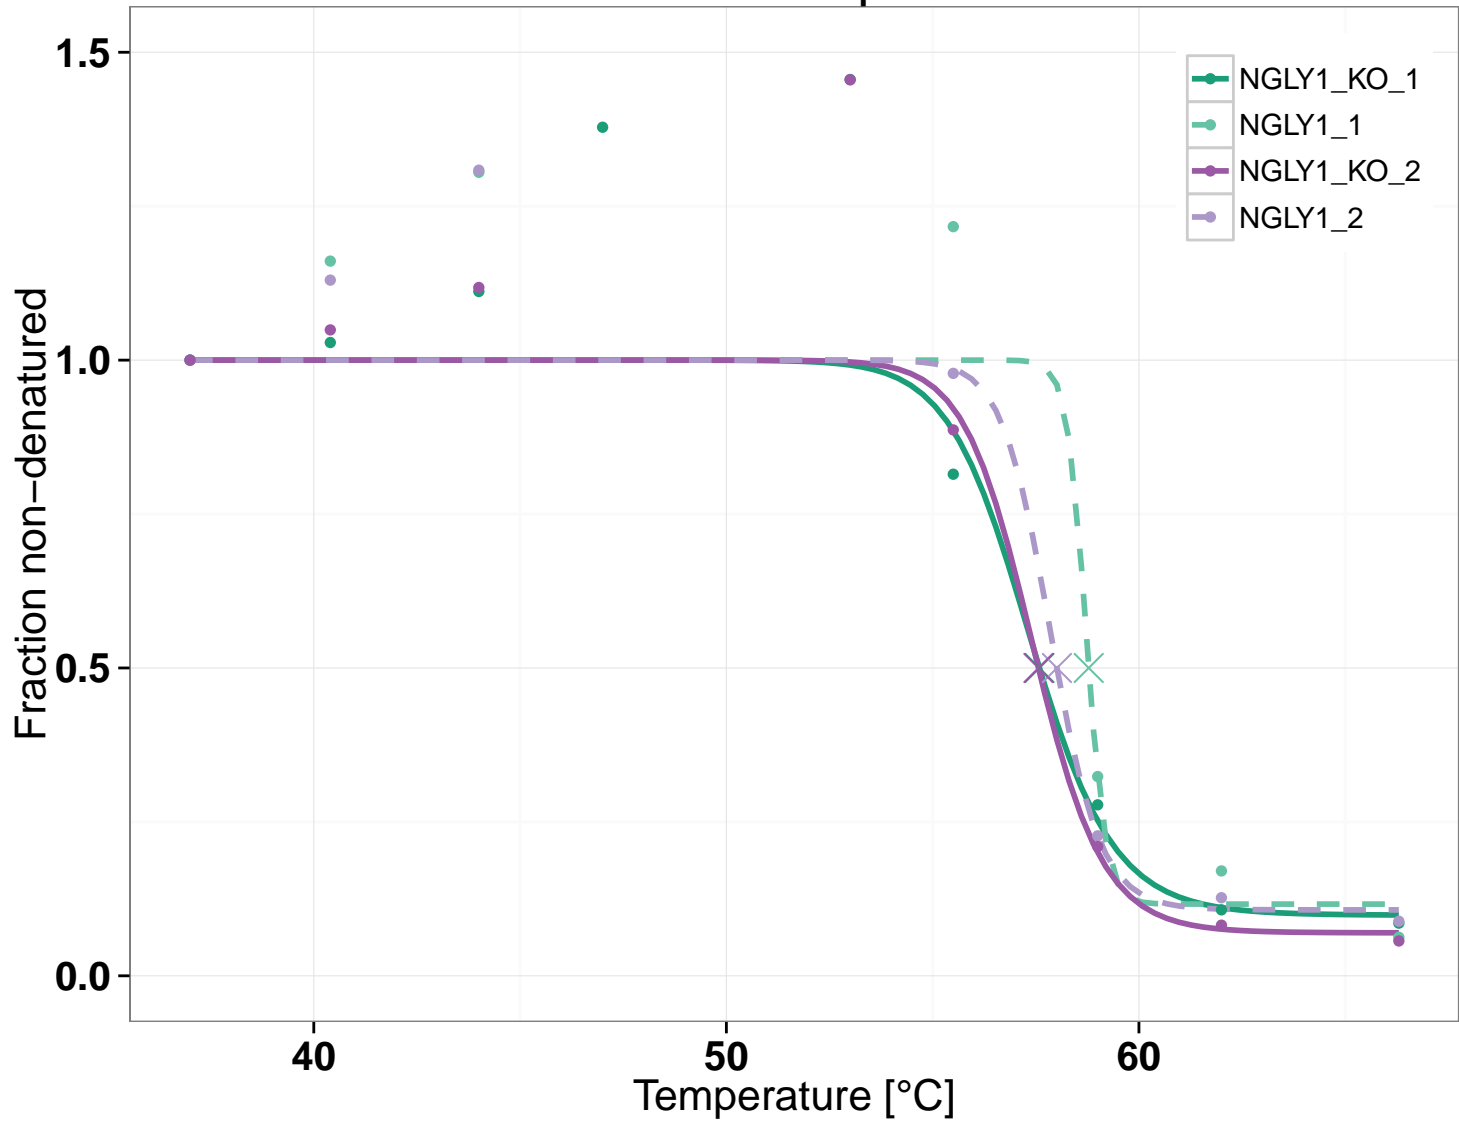

|            | meltPoint | slope | plateau | R2   |
|------------|-----------|-------|---------|------|
| NGLY1_KO_1 | 57.59     | -0.23 | 0.1     | 0.69 |
| NGLY1_1    | 58.78     | -0.94 | 0.12    | 0.41 |
| NGLY1_KO_2 | 57.56     | -0.28 | 0.07    | 0.64 |
| NGLY1_2    | 58.01     | -0.37 | 0.11    | 0.52 |

Supplement: Supplementary file 4372 [file 1]

IPI00152220.3|PHF19

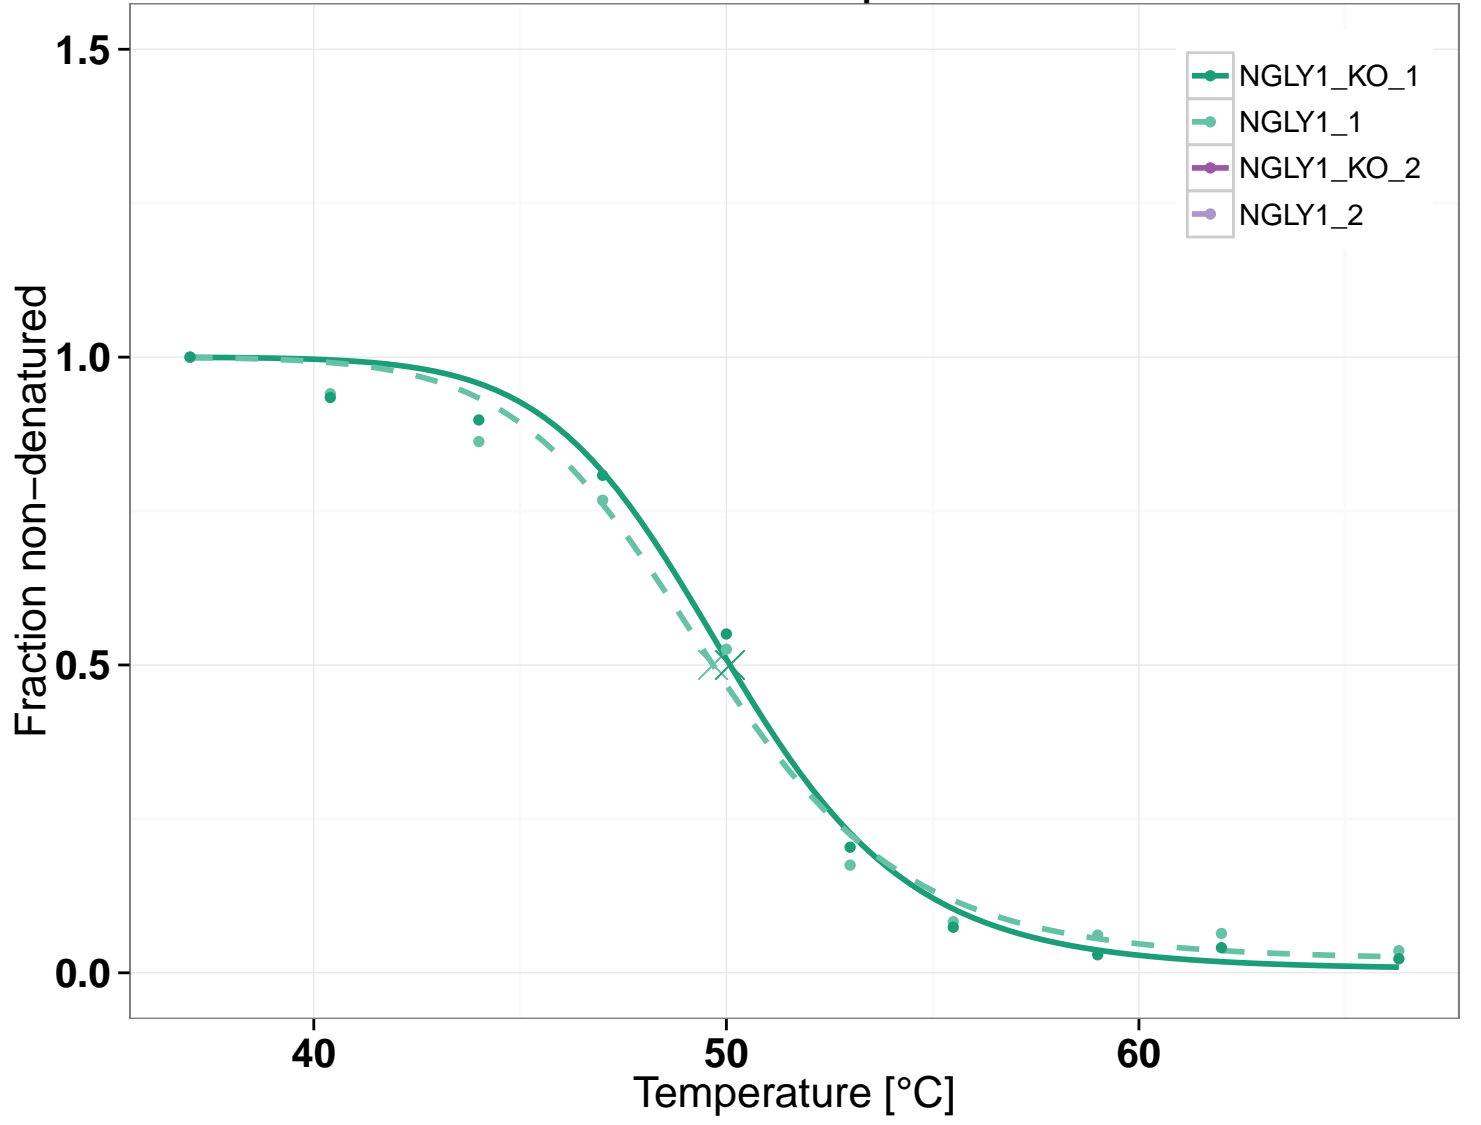

|            | meltPoint | slope | plateau | R2   |
|------------|-----------|-------|---------|------|
| NGLY1_KO_1 | 50.09     | -0.11 | 0.01    | 0.99 |
| NGLY1_1    | 49.68     | -0.1  | 0.02    | 0.99 |
| NGLY1_KO_2 | -         | -     | -       | -    |
| NGLY1_2    | -         | -     | -       | -    |

Supplement: Supplementary file 4373 [file 1]

IPI00018019.1|GPATCH2

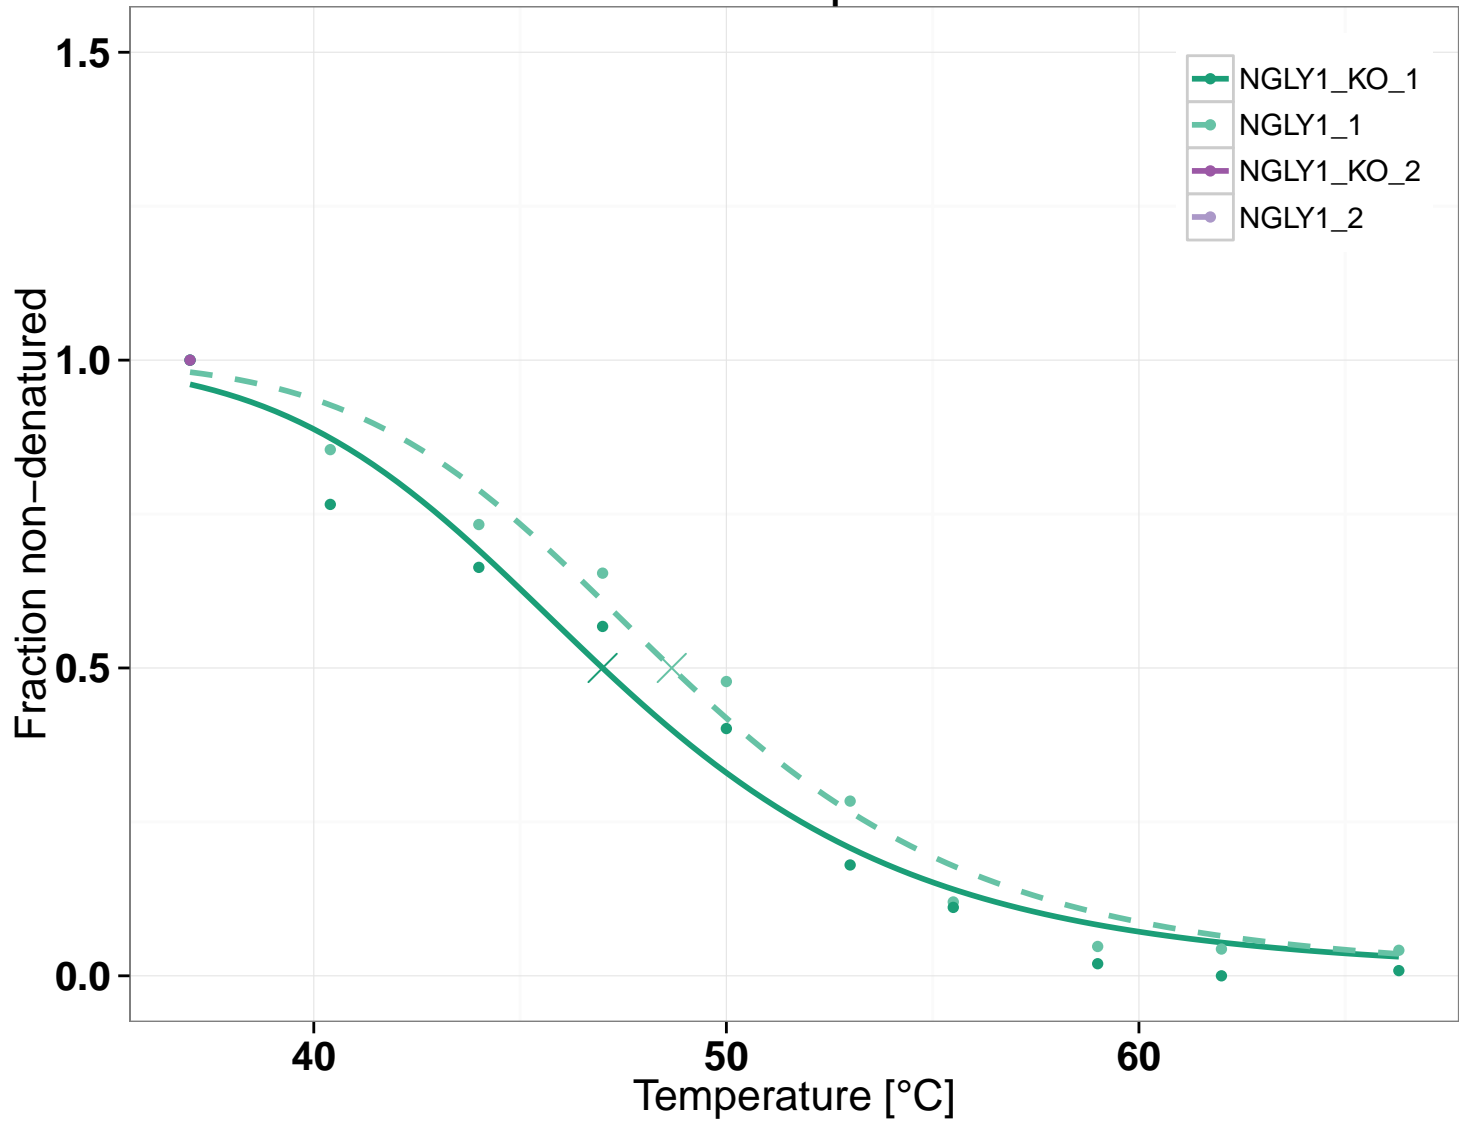

|            | meltPoint | slope  | plateau | R2   |
|------------|-----------|--------|---------|------|
| NGLY1_KO_1 | 47        | -0.065 | 0       | 0.97 |
| NGLY1_1    | 48.68     | -0.065 | 0       | 0.98 |
| NGLY1_KO_2 | -         | -      | -       | -    |
| NGLY1_2    | -         | -      | -       | -    |

Supplement: Supplementary file 4374 [file 1]

IPI00886874.1|LOC100129231

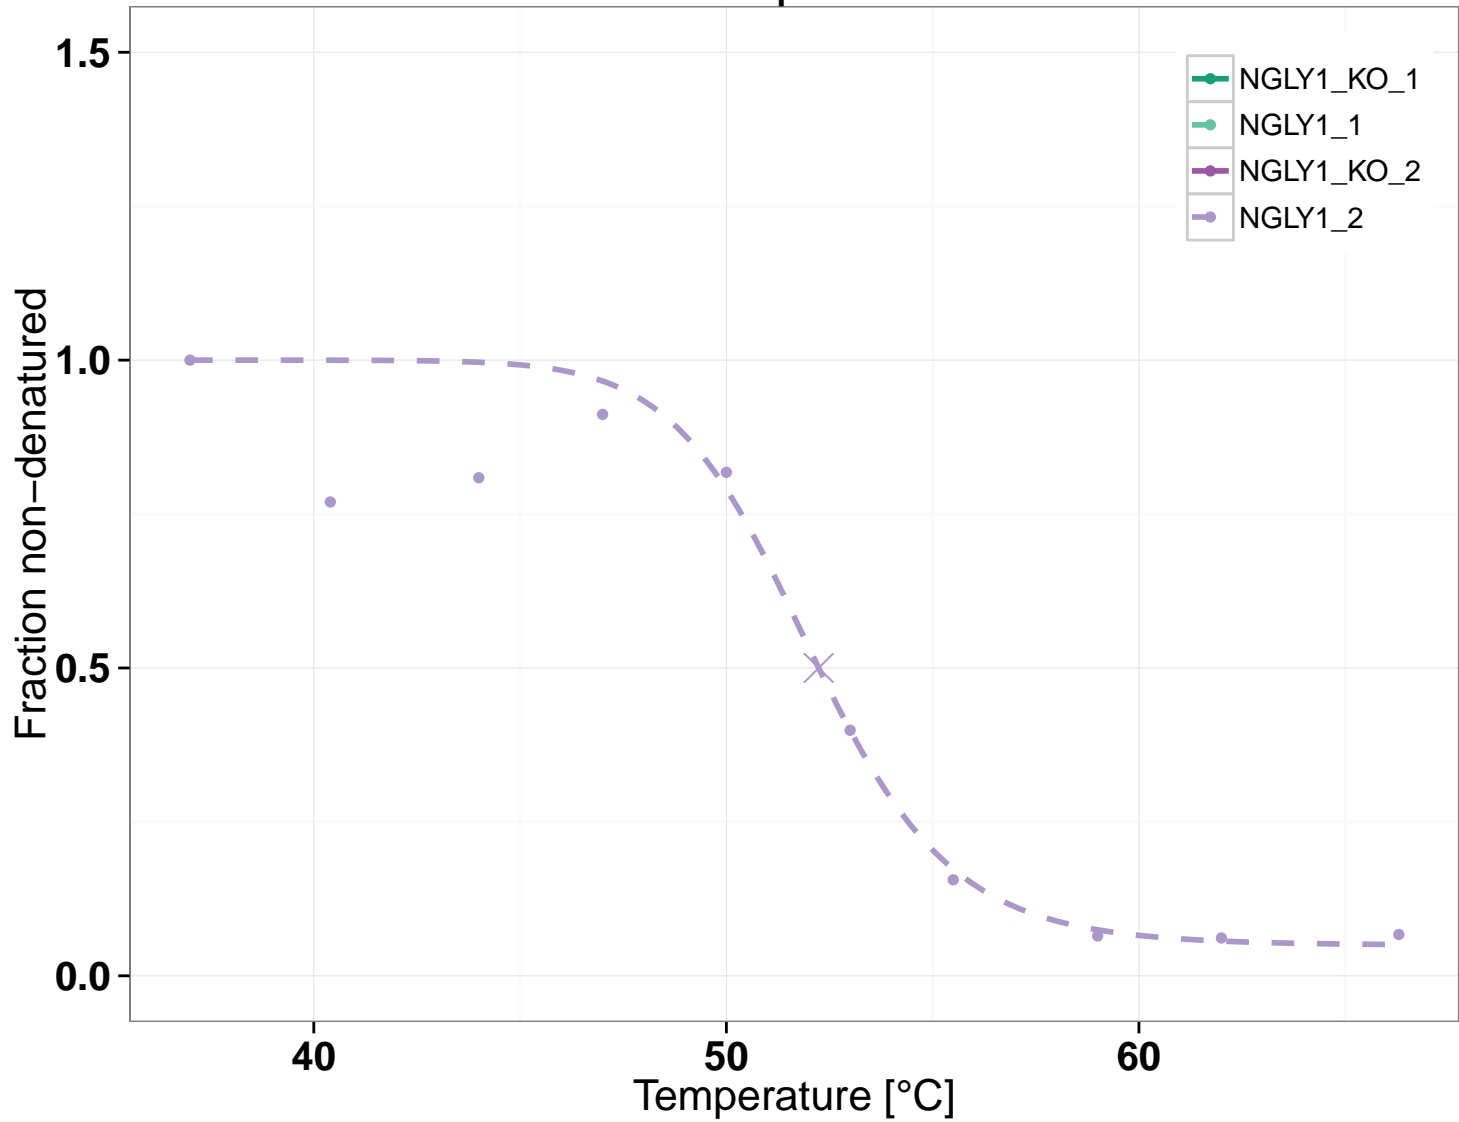

|            | meltPoint | slope | plateau | R2   |
|------------|-----------|-------|---------|------|
| NGLY1_KO_1 | —         | —     | —       | —    |
| NGLY1_1    | —         | —     | —       | —    |
| NGLY1_KO_2 | —         | —     | —       | —    |
| NGLY1_2    | 52.24     | -0.14 | 0.05    | 0.93 |

Supplement: Supplementary file 4375 [file 1]

# IPI00001141.4|TIMM22

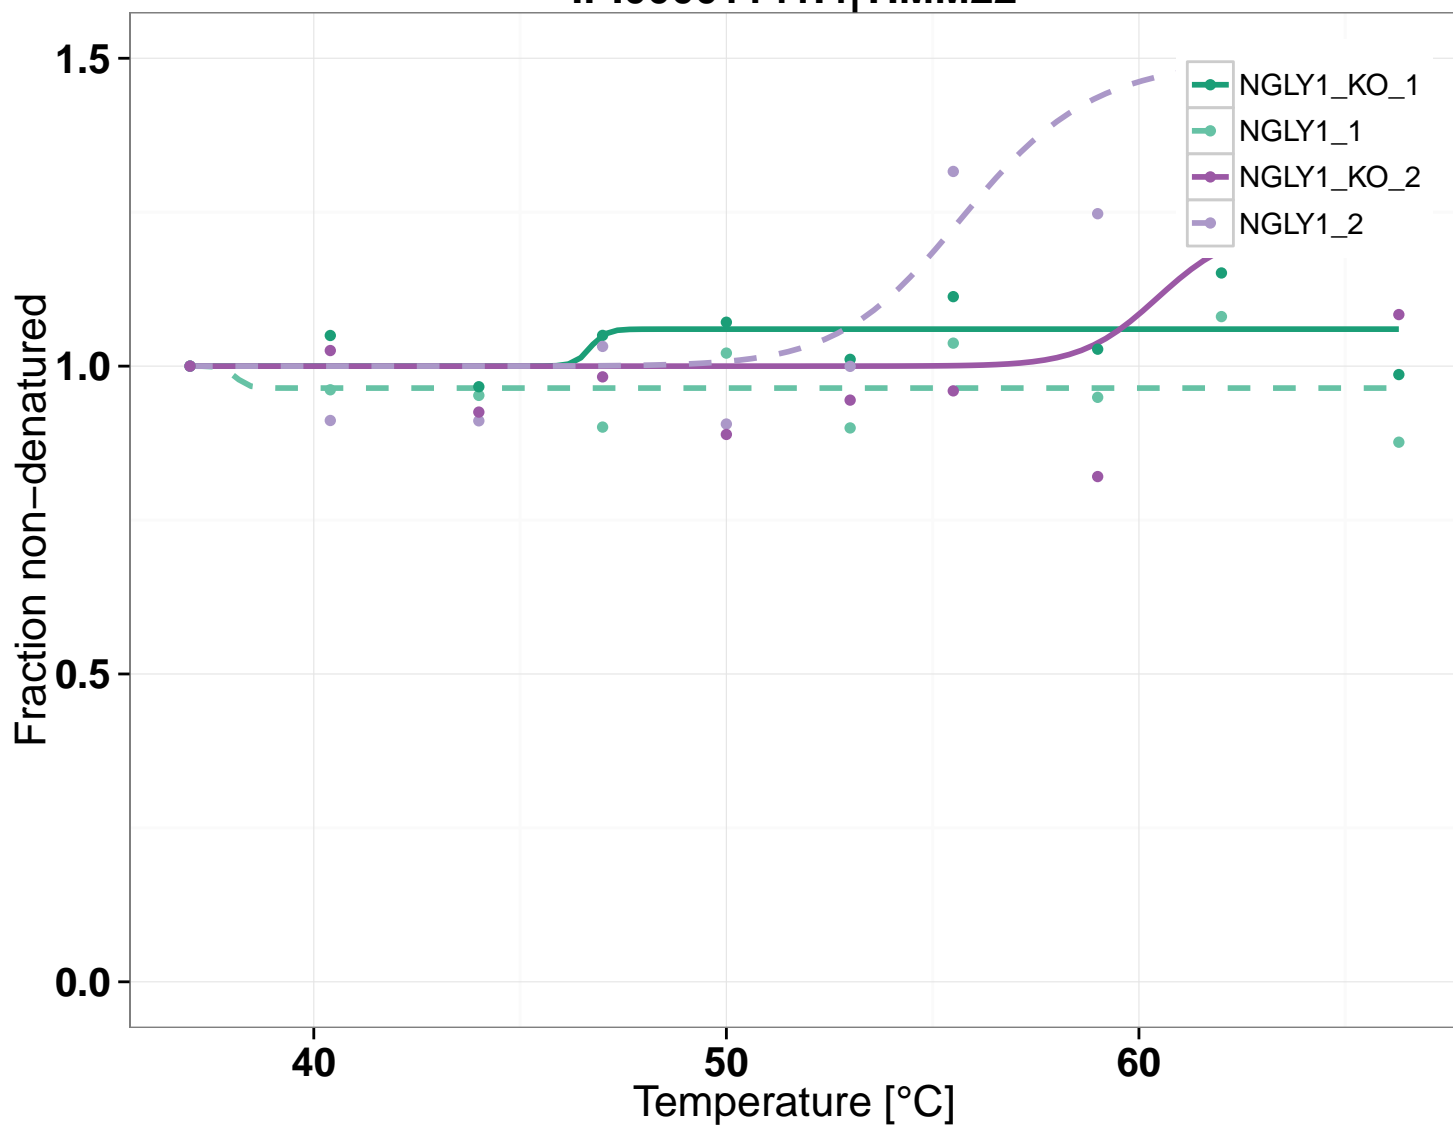

|            | meltPoint | slope  | plateau | R2   |
|------------|-----------|--------|---------|------|
| NGLY1_KO_1 | —         | 0.08   | 1.06    | 0.2  |
| NGLY1_1    | —         | -0.058 | 0.96    | 0.03 |
| NGLY1_KO_2 | —         | 0.06   | 1.23    | 0.39 |
| NGLY1_2    | —         | 0.081  | 1.5     | 0.82 |

Supplement: Supplementary file 4376 [file 1]

IPI00290239.2|CAMKK2

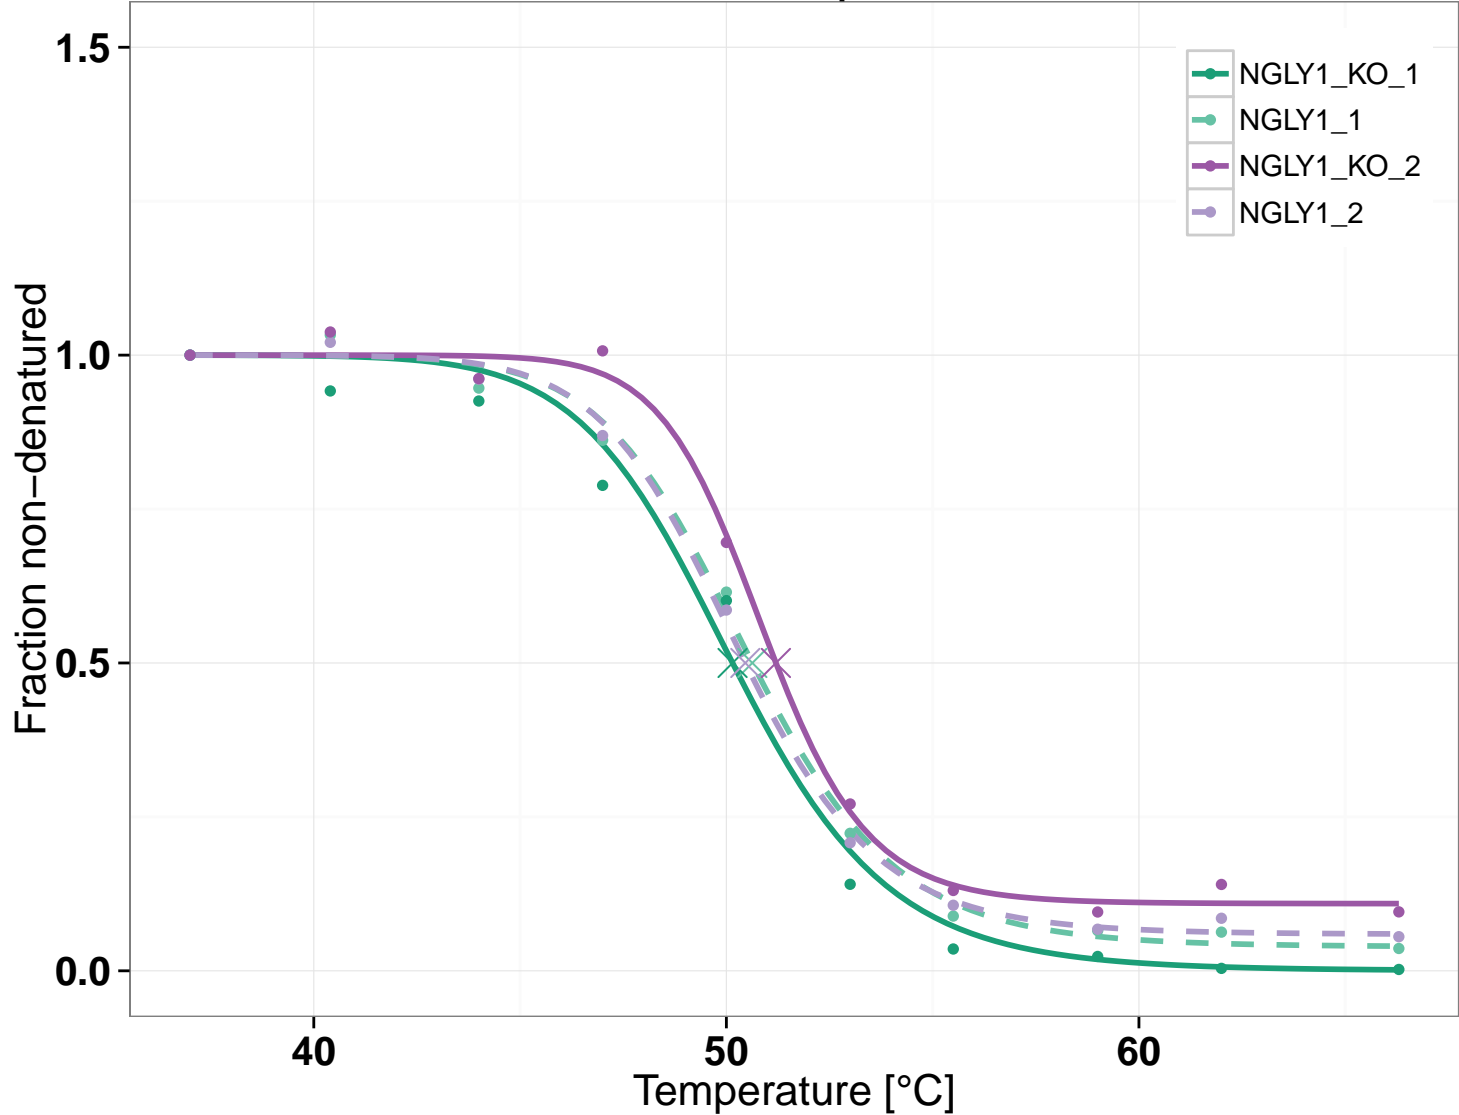

|            | meltPoint | slope | plateau | R2   |
|------------|-----------|-------|---------|------|
| NGLY1_KO_1 | 50.15     | -0.13 | 0       | 0.99 |
| NGLY1_1    | 50.63     | -0.13 | 0.04    | 1    |
| NGLY1_KO_2 | 51.2      | -0.18 | 0.11    | 1    |
| NGLY1_2    | 50.46     | -0.14 | 0.06    | 1    |

Supplement: Supplementary file 4377 [file 1]

IPI00027280.2|TOP2B

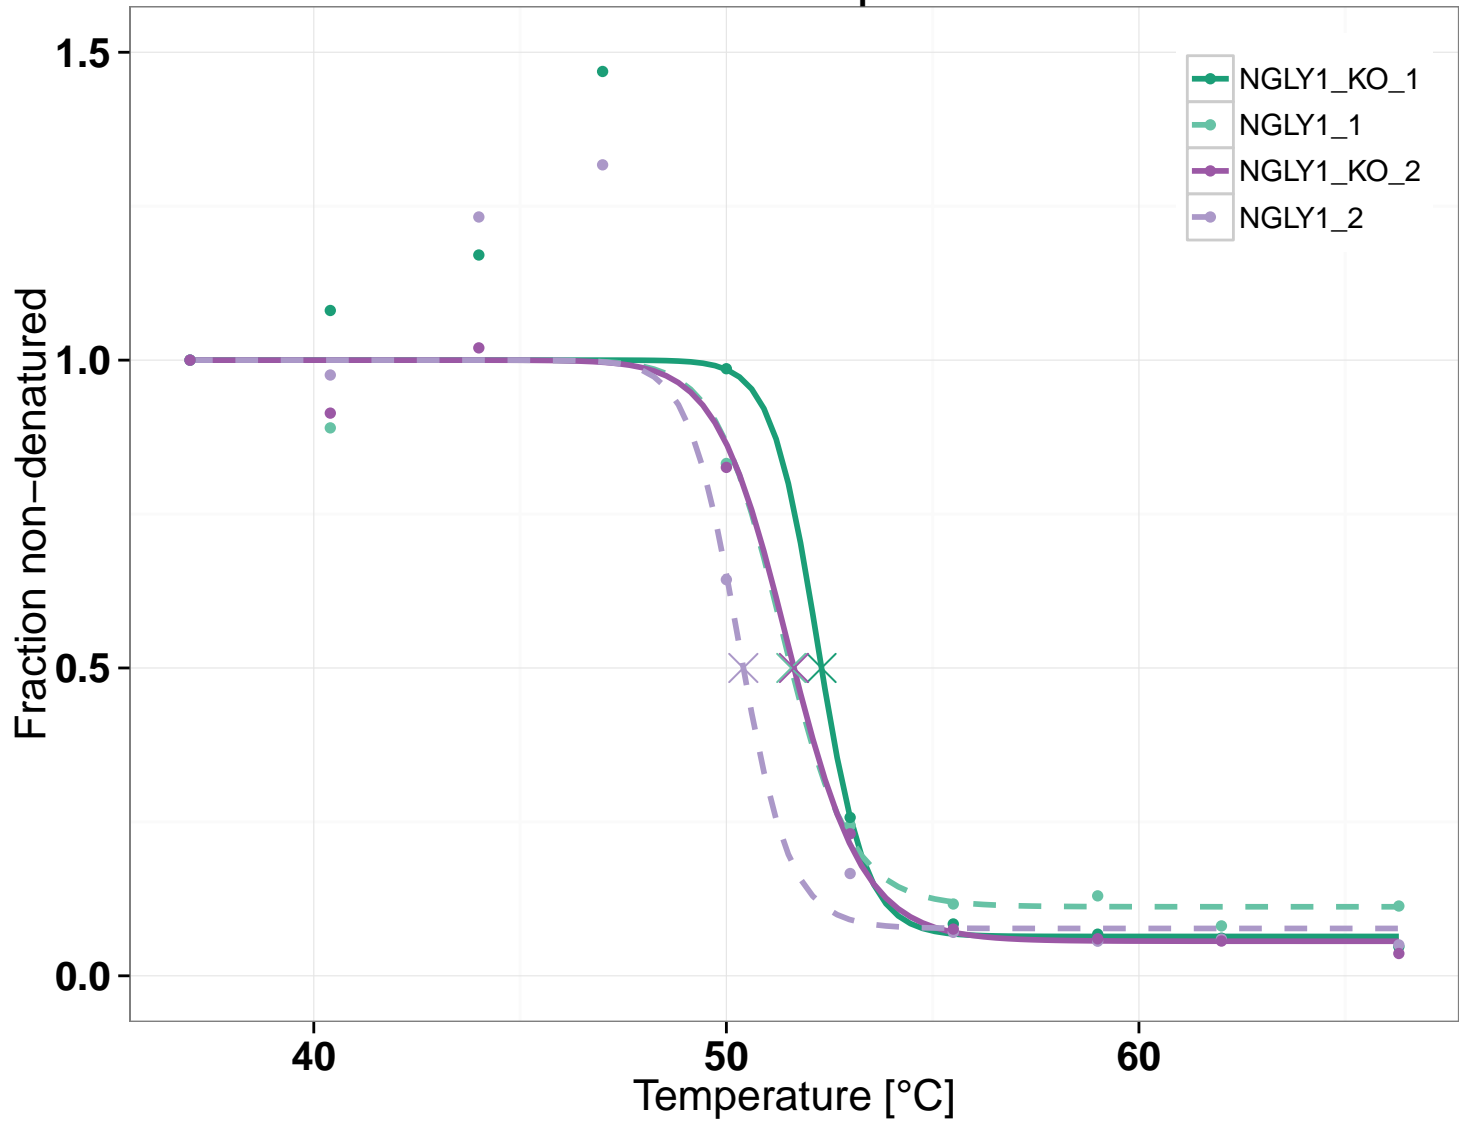

|            | meltPoint | slope | plateau | R2   |
|------------|-----------|-------|---------|------|
| NGLY1_KO_1 | 52.31     | -0.41 | 0.06    | 0.91 |
| NGLY1_1    | 51.57     | -0.27 | 0.11    | 0.76 |
| NGLY1_KO_2 | 51.64     | -0.27 | 0.06    | 0.86 |
| NGLY1_2    | 50.41     | -0.38 | 0.08    | 0.94 |

Supplement: Supplementary file 4378 [file 1]

IPI00017451.1|SF3A1

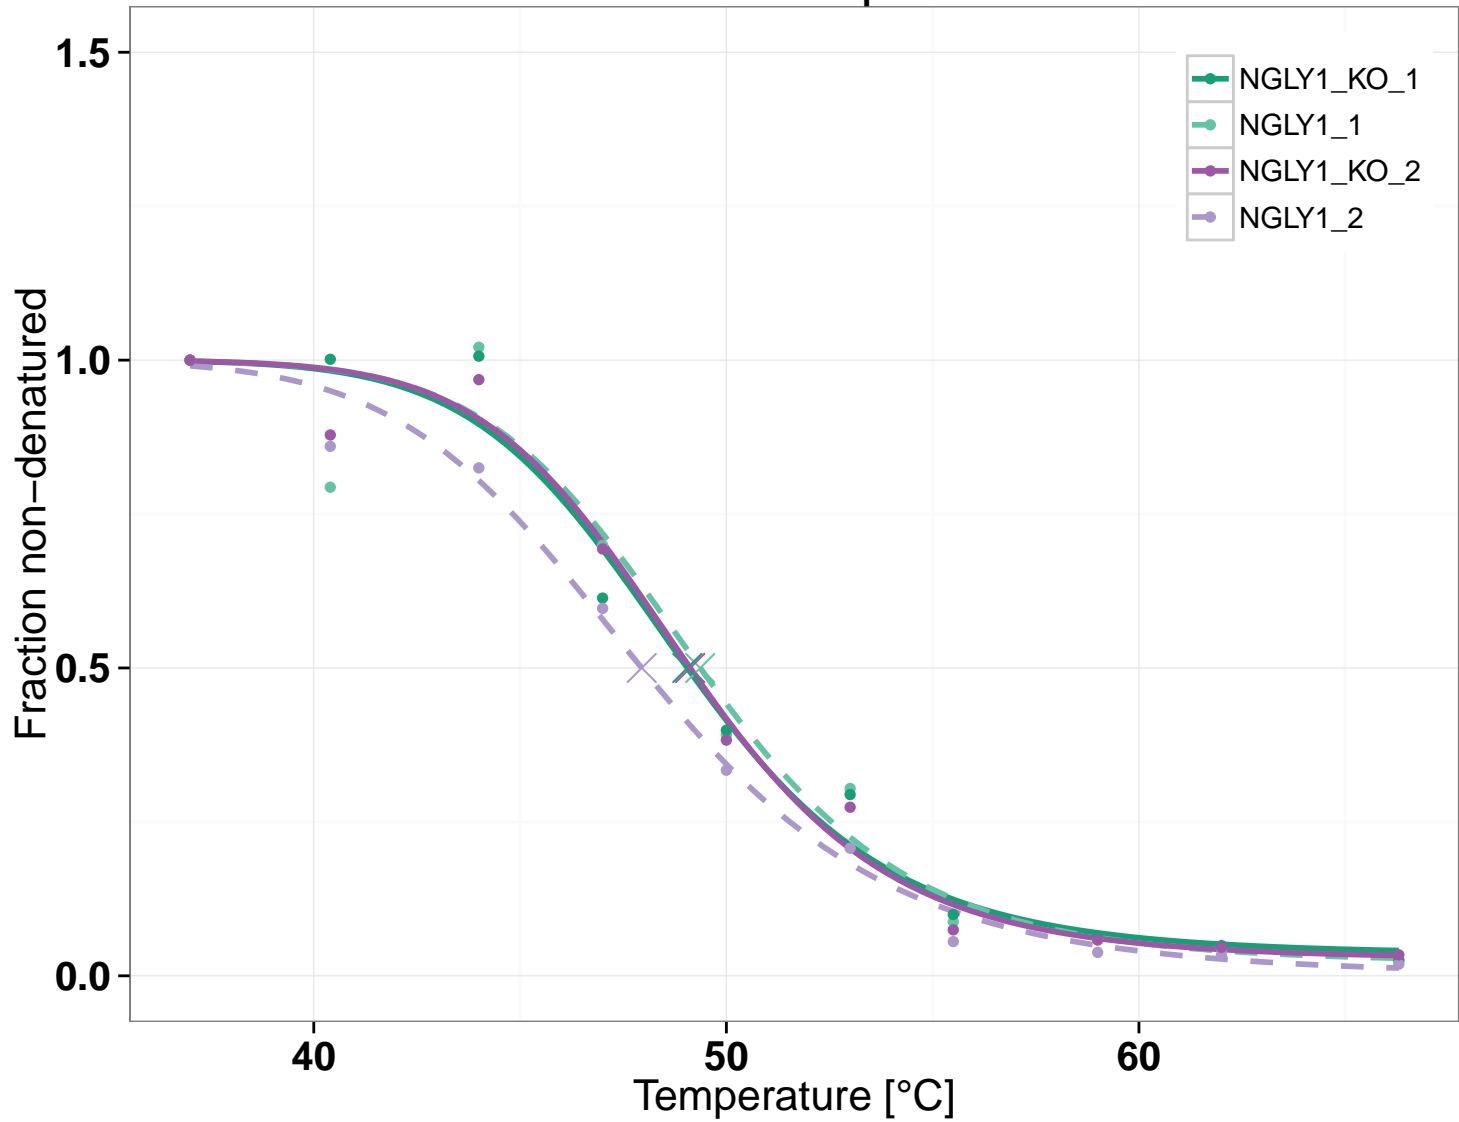

|            | meltPoint | slope  | plateau | R2   |
|------------|-----------|--------|---------|------|
| NGLY1_KO_1 | 49.05     | -0.095 | 0.03    | 0.98 |
| NGLY1_1    | 49.37     | -0.095 | 0.02    | 0.96 |
| NGLY1_KO_2 | 49.12     | -0.098 | 0.03    | 0.98 |
| NGLY1_2    | 47.95     | -0.084 | 0       | 0.99 |

Supplement: Supplementary file 4379 [file 1]

IPI00013219.1|ILK

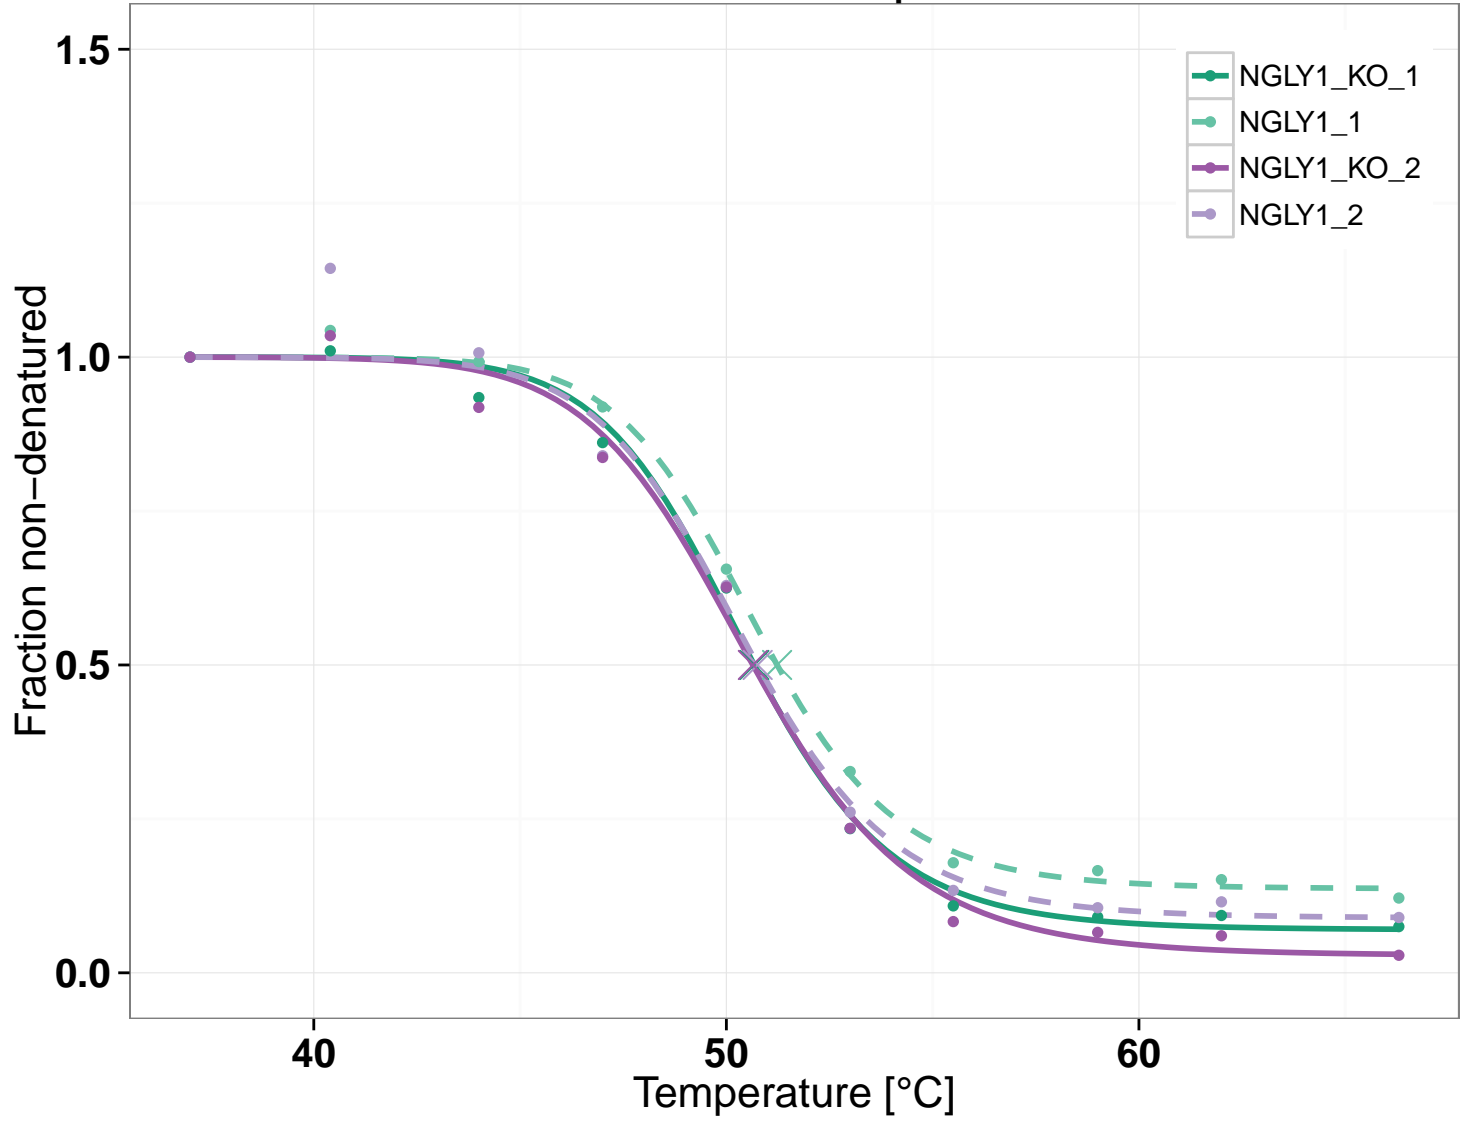

|            | meltPoint | slope | plateau | R2   |
|------------|-----------|-------|---------|------|
| NGLY1_KO_1 | 50.68     | -0.13 | 0.07    | 1    |
| NGLY1_1    | 51.23     | -0.13 | 0.14    | 1    |
| NGLY1_KO_2 | 50.64     | -0.12 | 0.03    | 0.99 |
| NGLY1_2    | 50.76     | -0.13 | 0.09    | 0.98 |

Supplement: Supplementary file 4380 [file 1]

IPI00552634.1|C20ORF27

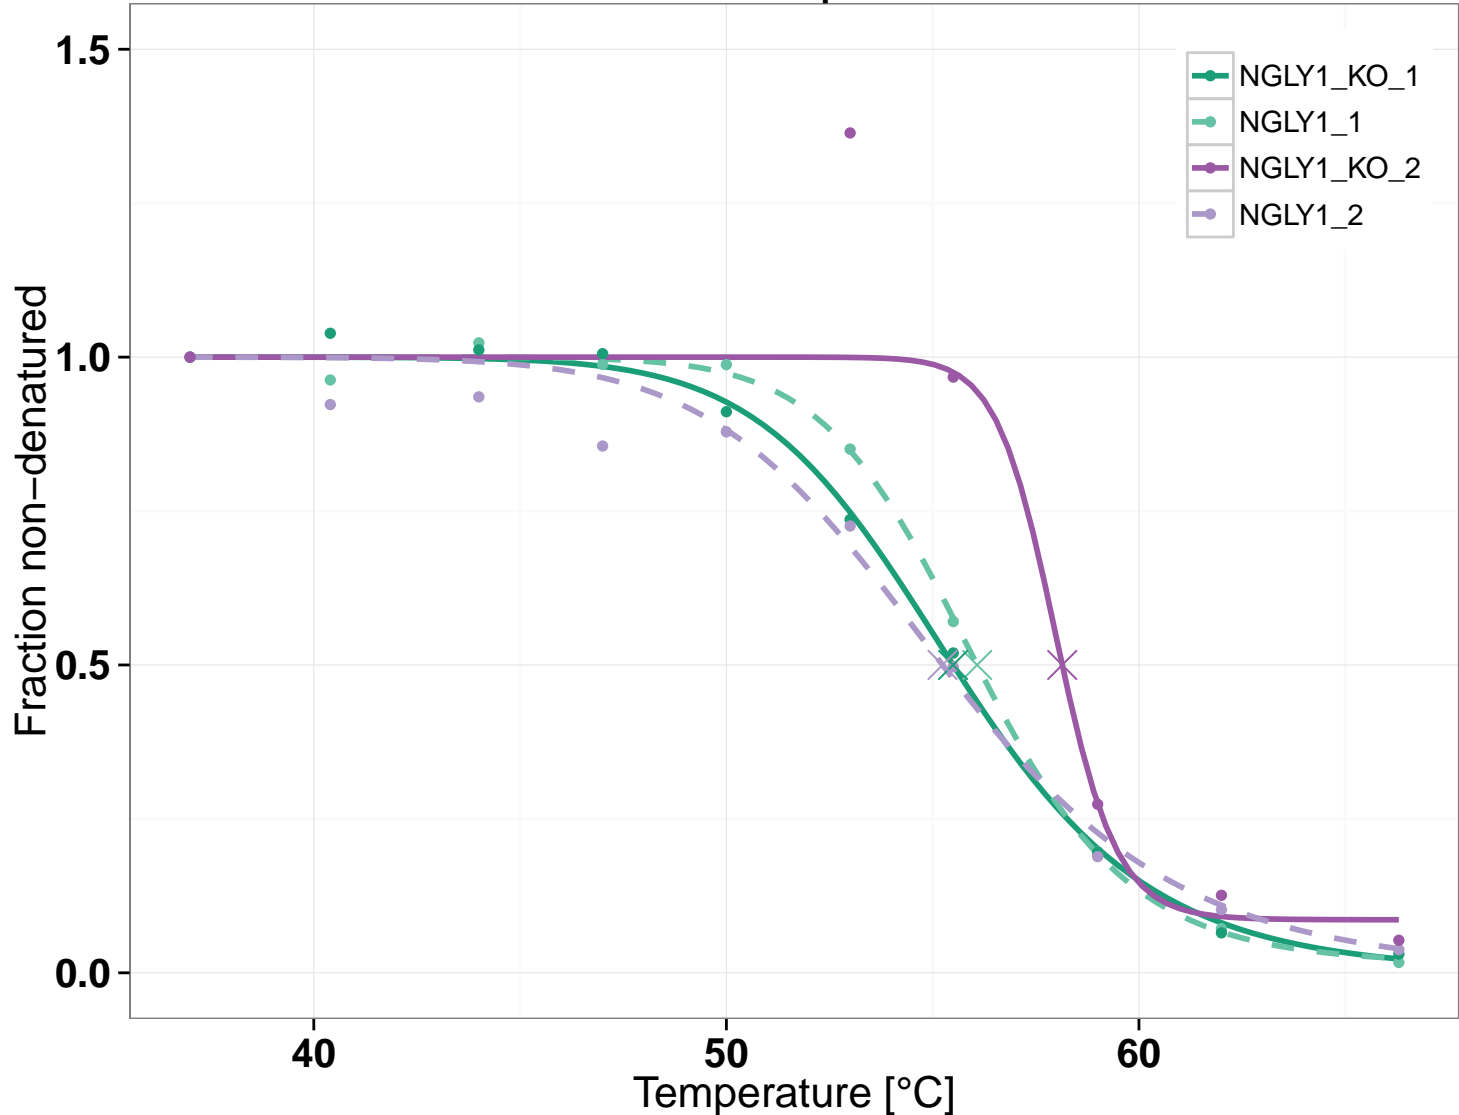

|            | meltPoint | slope  | plateau | R2   |
|------------|-----------|--------|---------|------|
| NGLY1_KO_1 | 55.5      | -0.1   | 0       | 1    |
| NGLY1_1    | 56.08     | -0.13  | 0.01    | 1    |
| NGLY1_KO_2 | 58.14     | -0.31  | 0.09    | 0.45 |
| NGLY1_2    | 55.24     | -0.088 | 0       | 0.98 |

Supplement: Supplementary file 4381 [file 1]

IPI00103057.2|FAM36A

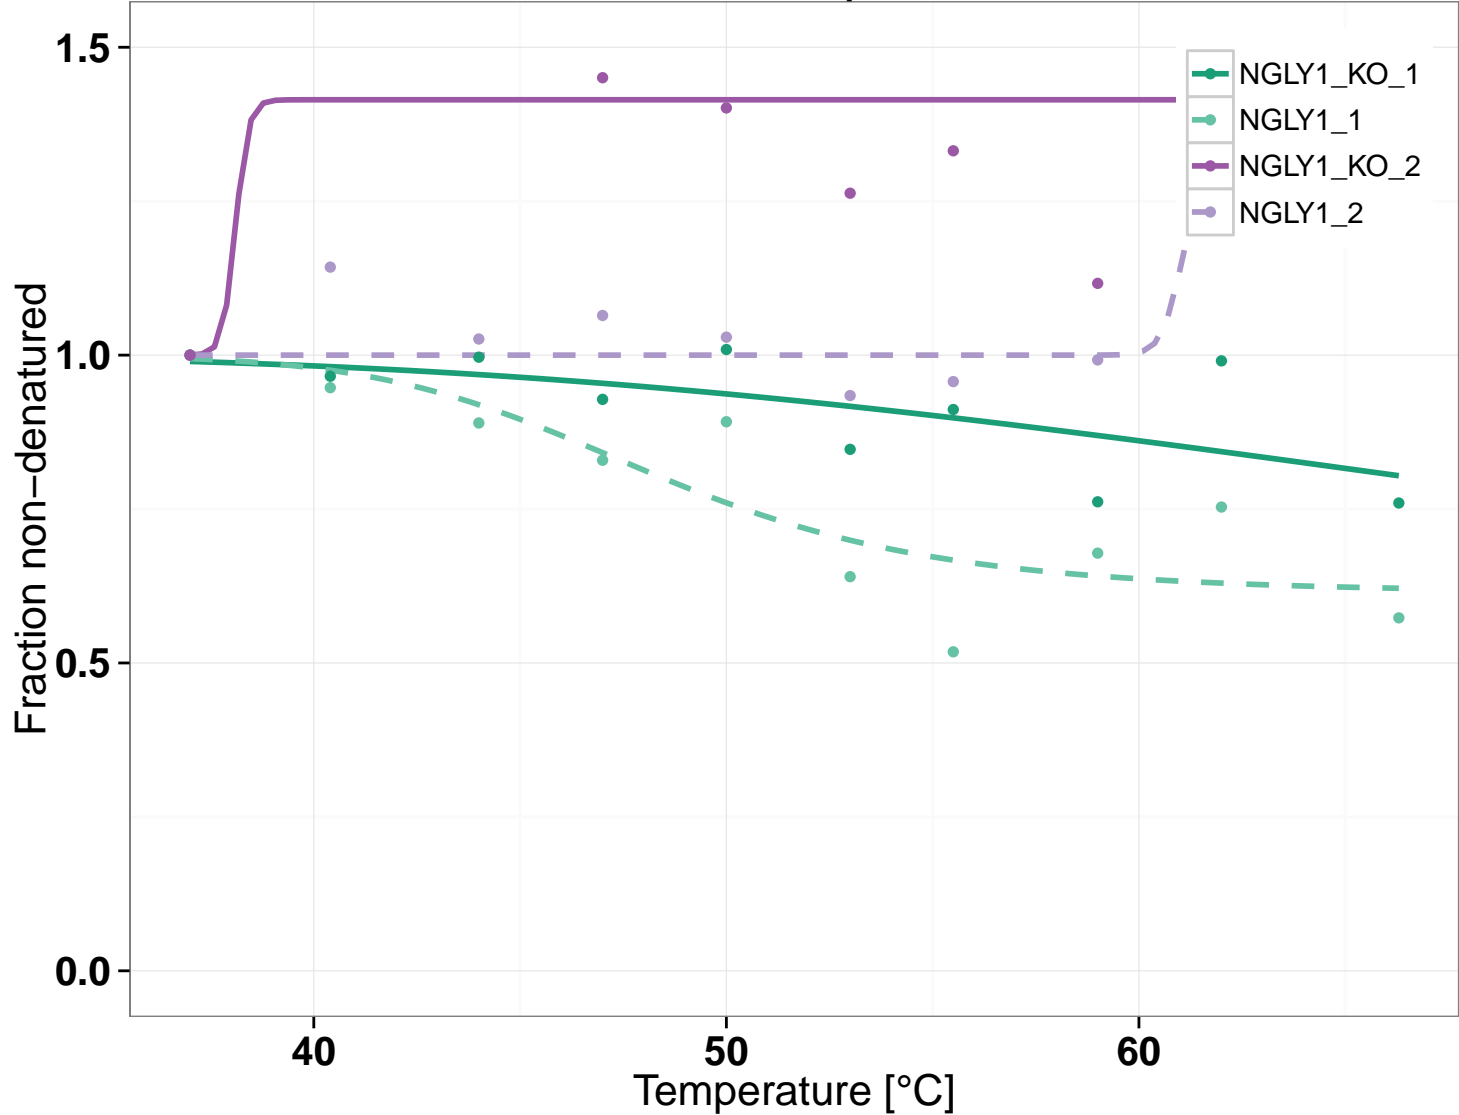

|            | meltPoint | slope  | plateau | R2   |
|------------|-----------|--------|---------|------|
| NGLY1_KO_1 | -         | -      | 0.12    | 0.43 |
| NGLY1_1    | -         | -0.028 | 0.61    | 0.74 |
| NGLY1_KO_2 | -         | 0.68   | 1.41    | 0.37 |
| NGLY1_2    | -         | 0.32   | 1.32    | 0.81 |

Supplement: Supplementary file 4382 [file 1]

# IPI00179326.7|BAIAP2L1

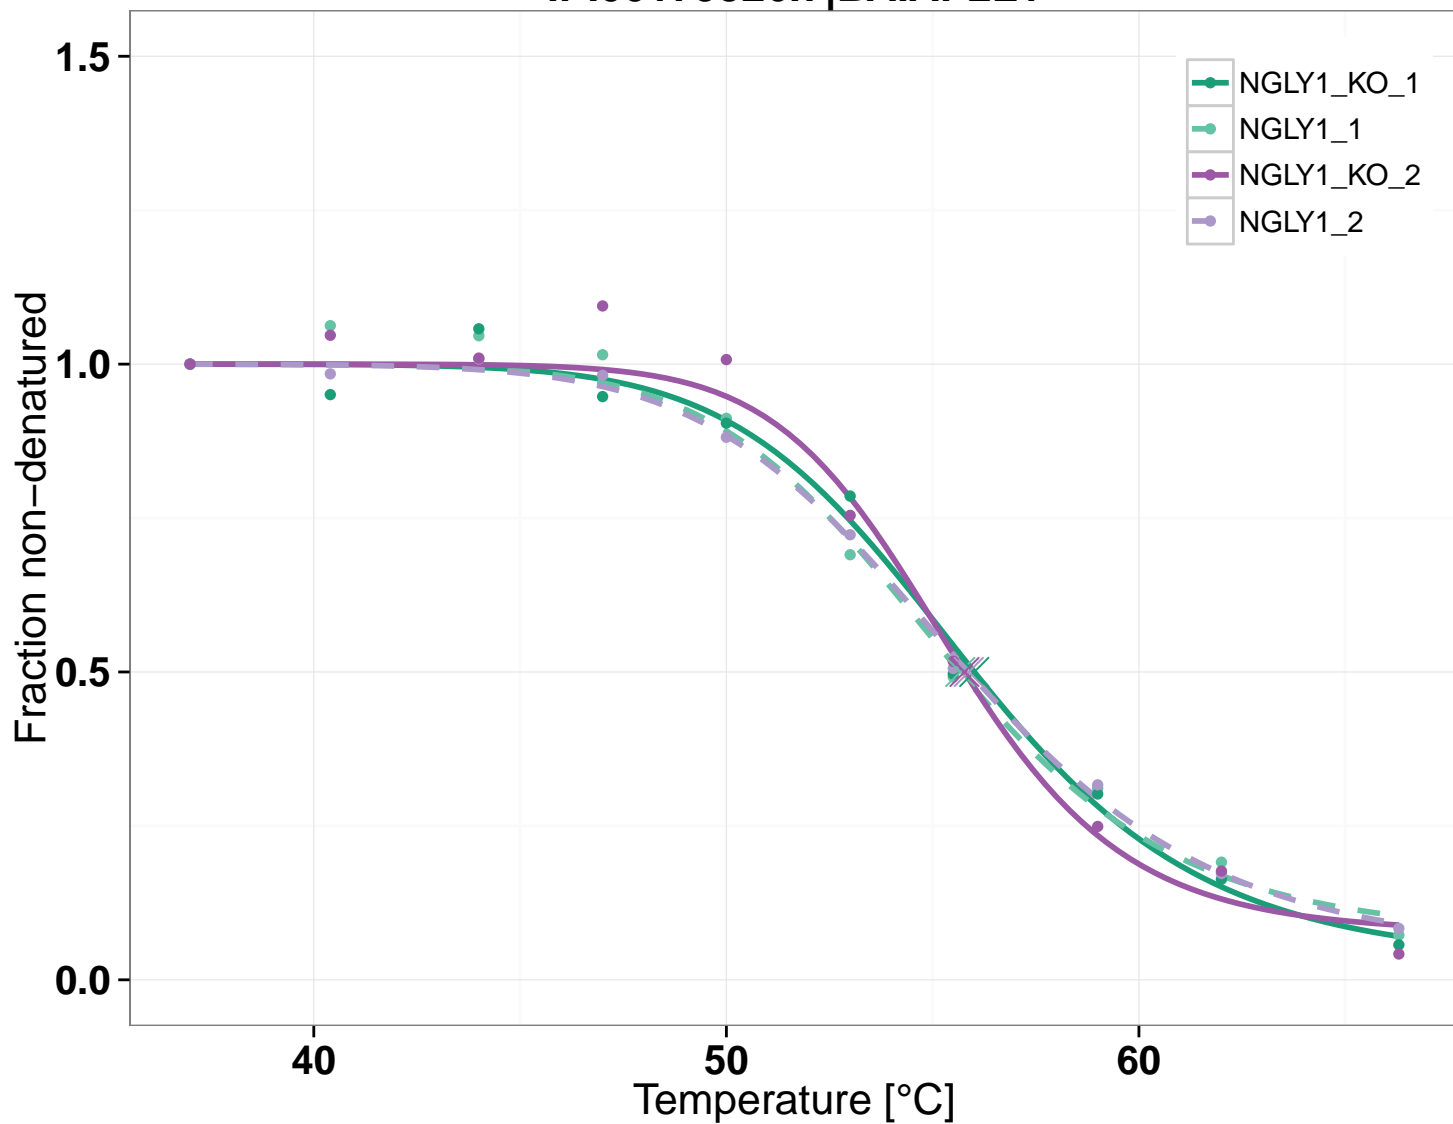

|            | meltPoint | slope  | plateau | R2   |
|------------|-----------|--------|---------|------|
| NGLY1_KO_1 | 56.01     | -0.085 | 0.03    | 0.99 |
| NGLY1_1    | 55.67     | -0.082 | 0.07    | 0.99 |
| NGLY1_KO_2 | 55.77     | -0.11  | 0.08    | 0.99 |
| NGLY1_2    | 55.87     | -0.077 | 0.04    | 1    |

Supplement: Supplementary file 4383 [file 1]

IPI00293848.1|CMTM4

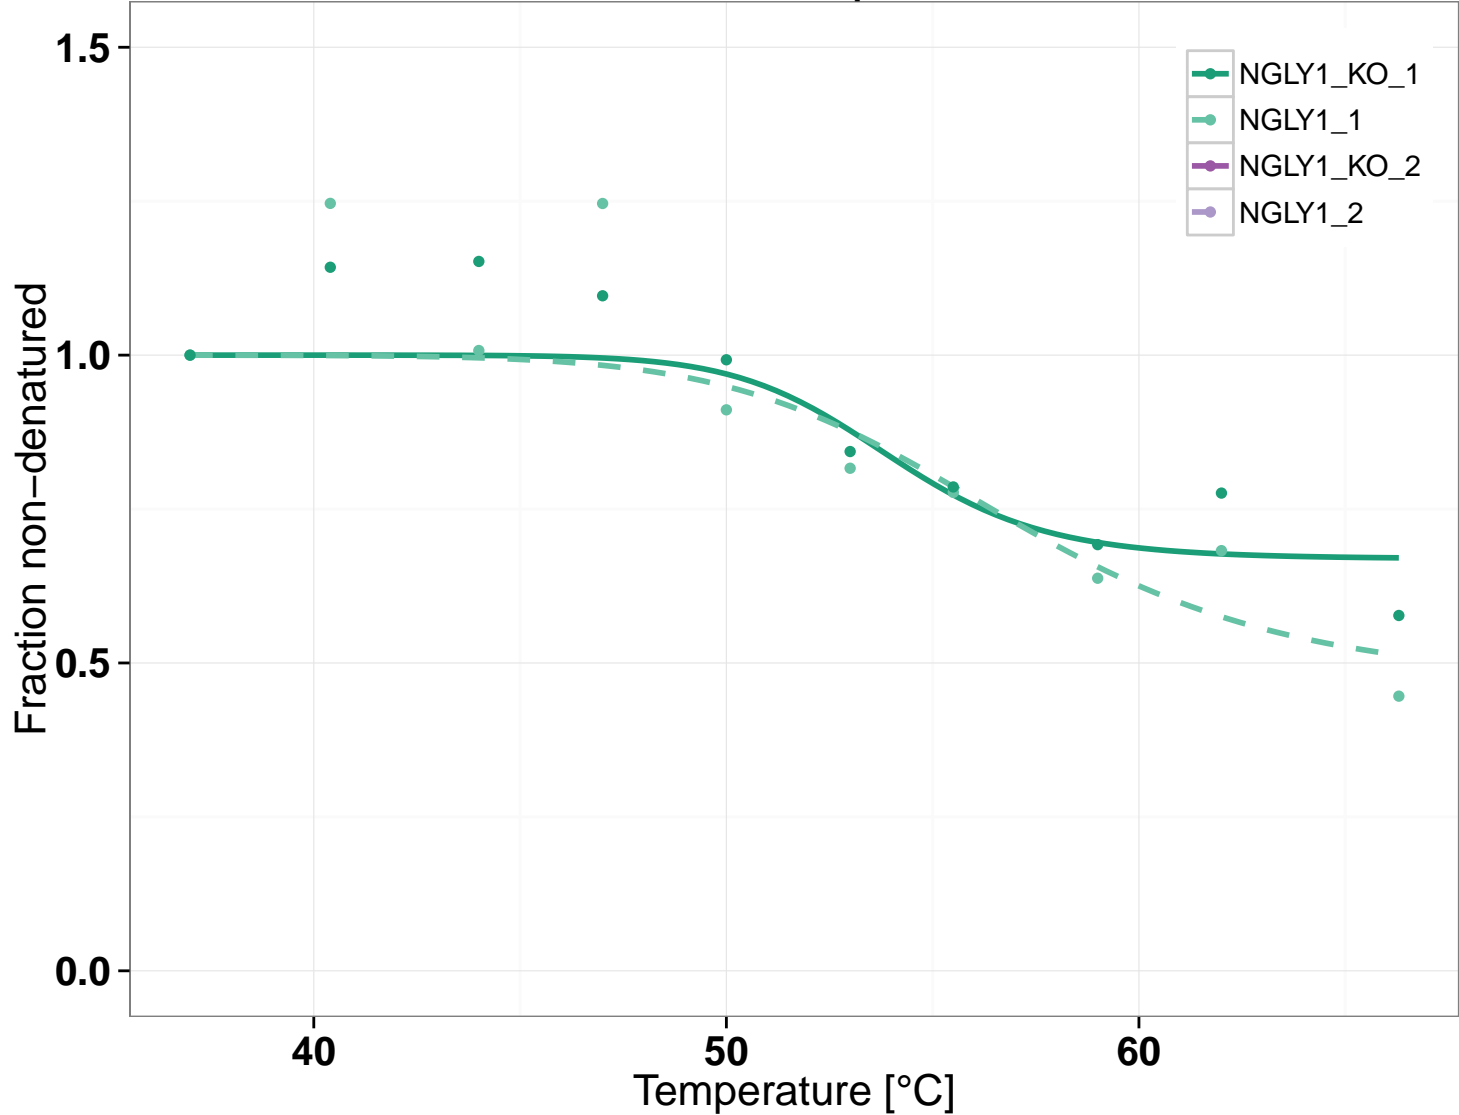

|            | meltPoint | slope  | plateau | R2   |
|------------|-----------|--------|---------|------|
| NGLY1_KO_1 | —         | -0.044 | 0.67    | 0.79 |
| NGLY1_1    | —         | -0.039 | 0.47    | 0.75 |
| NGLY1_KO_2 | —         | —      | —       | —    |
| NGLY1_2    | —         | —      | —       | —    |

Supplement: Supplementary file 4384 [file 1]

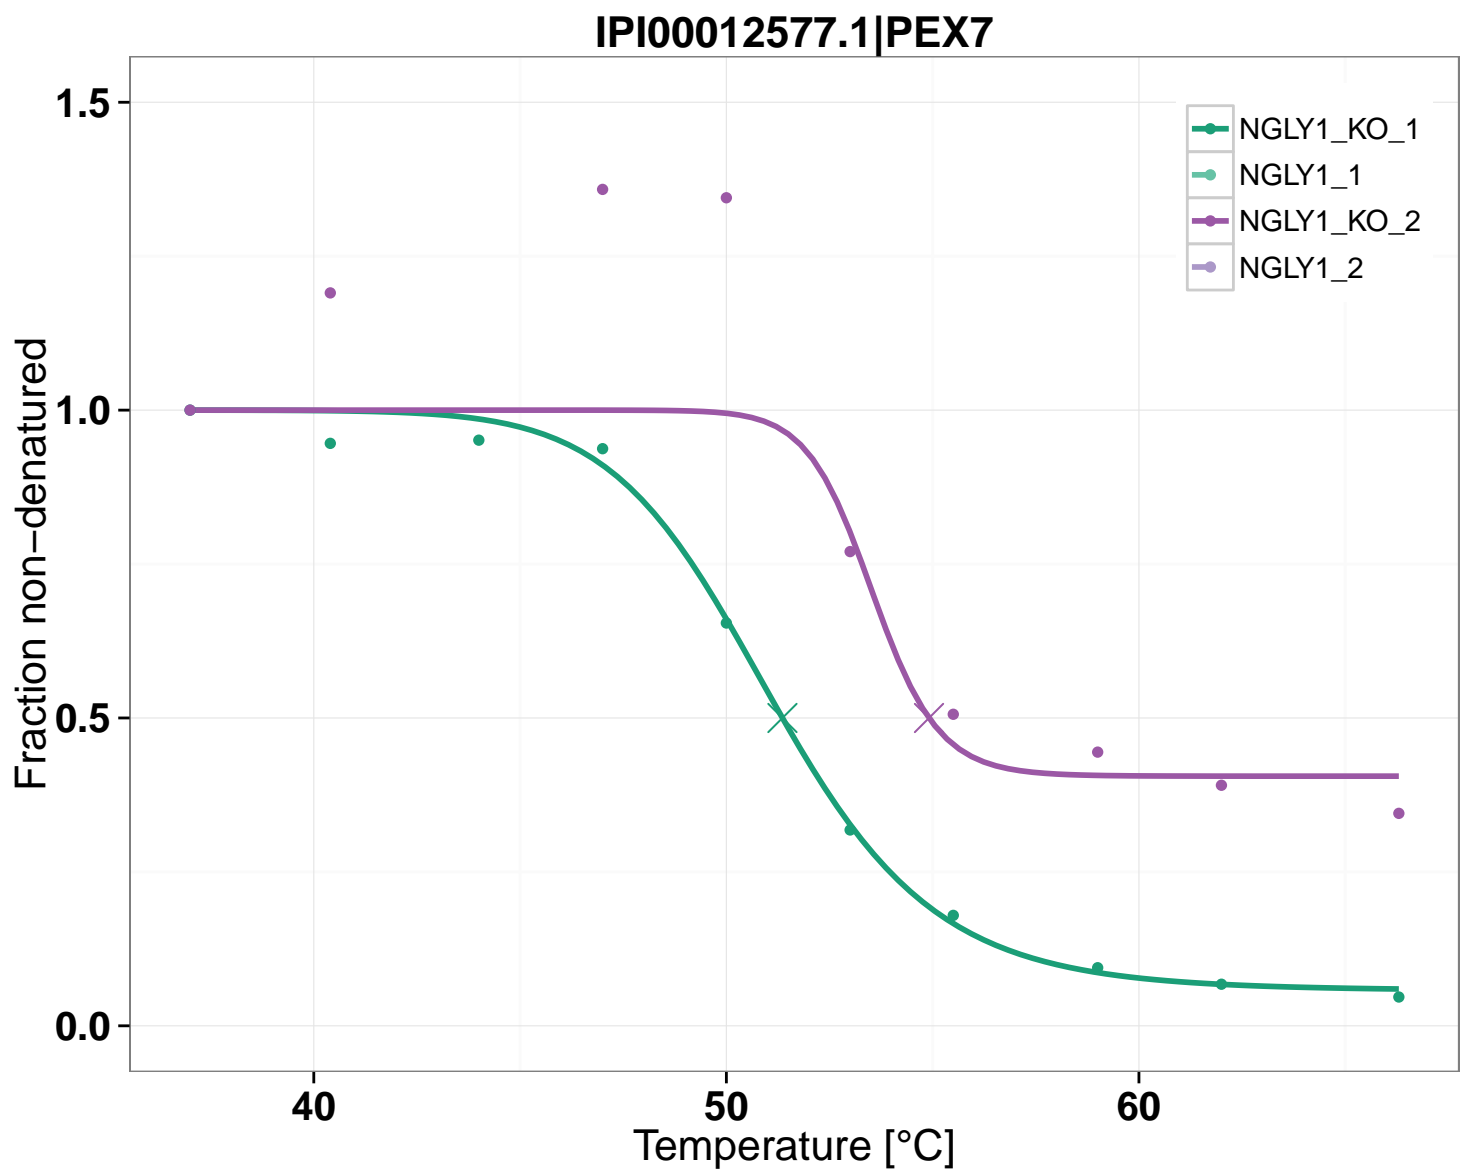

|            | meltPoint | slope | plateau | R2   |
|------------|-----------|-------|---------|------|
| NGLY1_KO_1 | 51.36     | -0.12 | 0.06    | 1    |
| NGLY1_1    | -         | -     | -       | -    |
| NGLY1_KO_2 | 54.91     | -0.19 | 0.41    | 0.65 |
| NGLY1_2    | -         | -     | -       | -    |

Supplement: Supplementary file 4385 [file 1]

IPI00333410.1|UBE2Q1

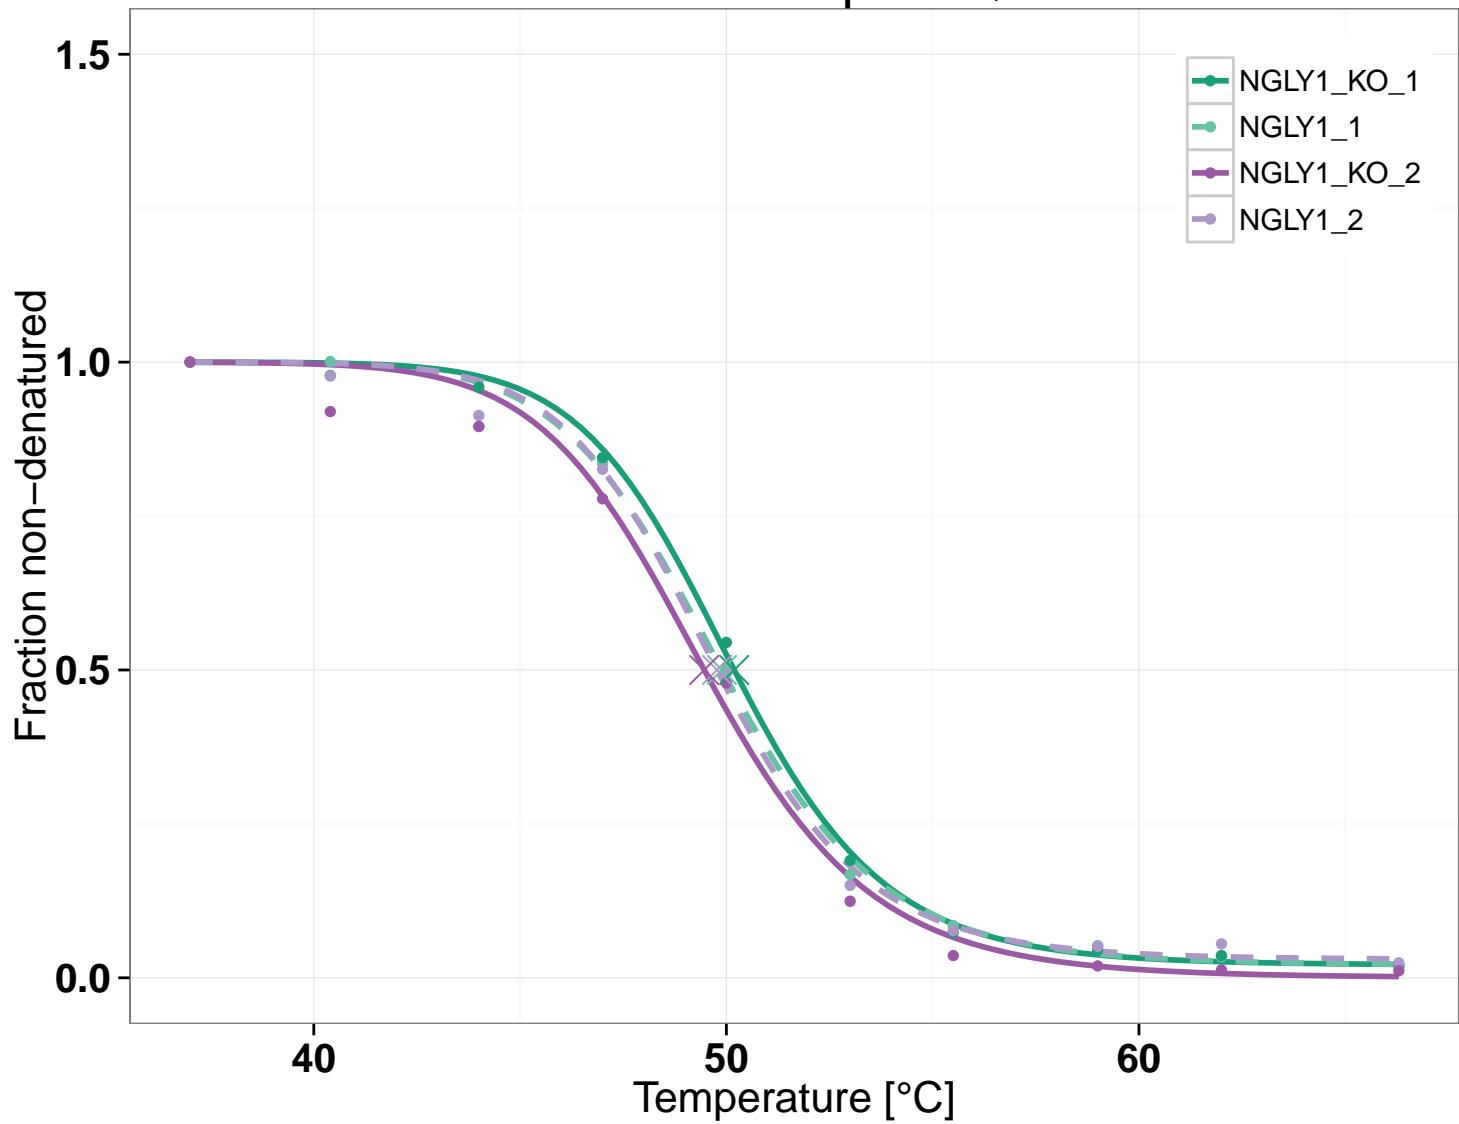

|            | meltPoint | slope | plateau | R2   |
|------------|-----------|-------|---------|------|
| NGLY1_KO_1 | 50.19     | -0.13 | 0.02    | 1    |
| NGLY1_1    | 49.89     | -0.13 | 0.02    | 1    |
| NGLY1_KO_2 | 49.46     | -0.12 | 0       | 0.99 |
| NGLY1_2    | 49.77     | -0.13 | 0.03    | 1    |

Supplement: Supplementary file 4386 [file 1]

IPI00024566.2|C1GALT1

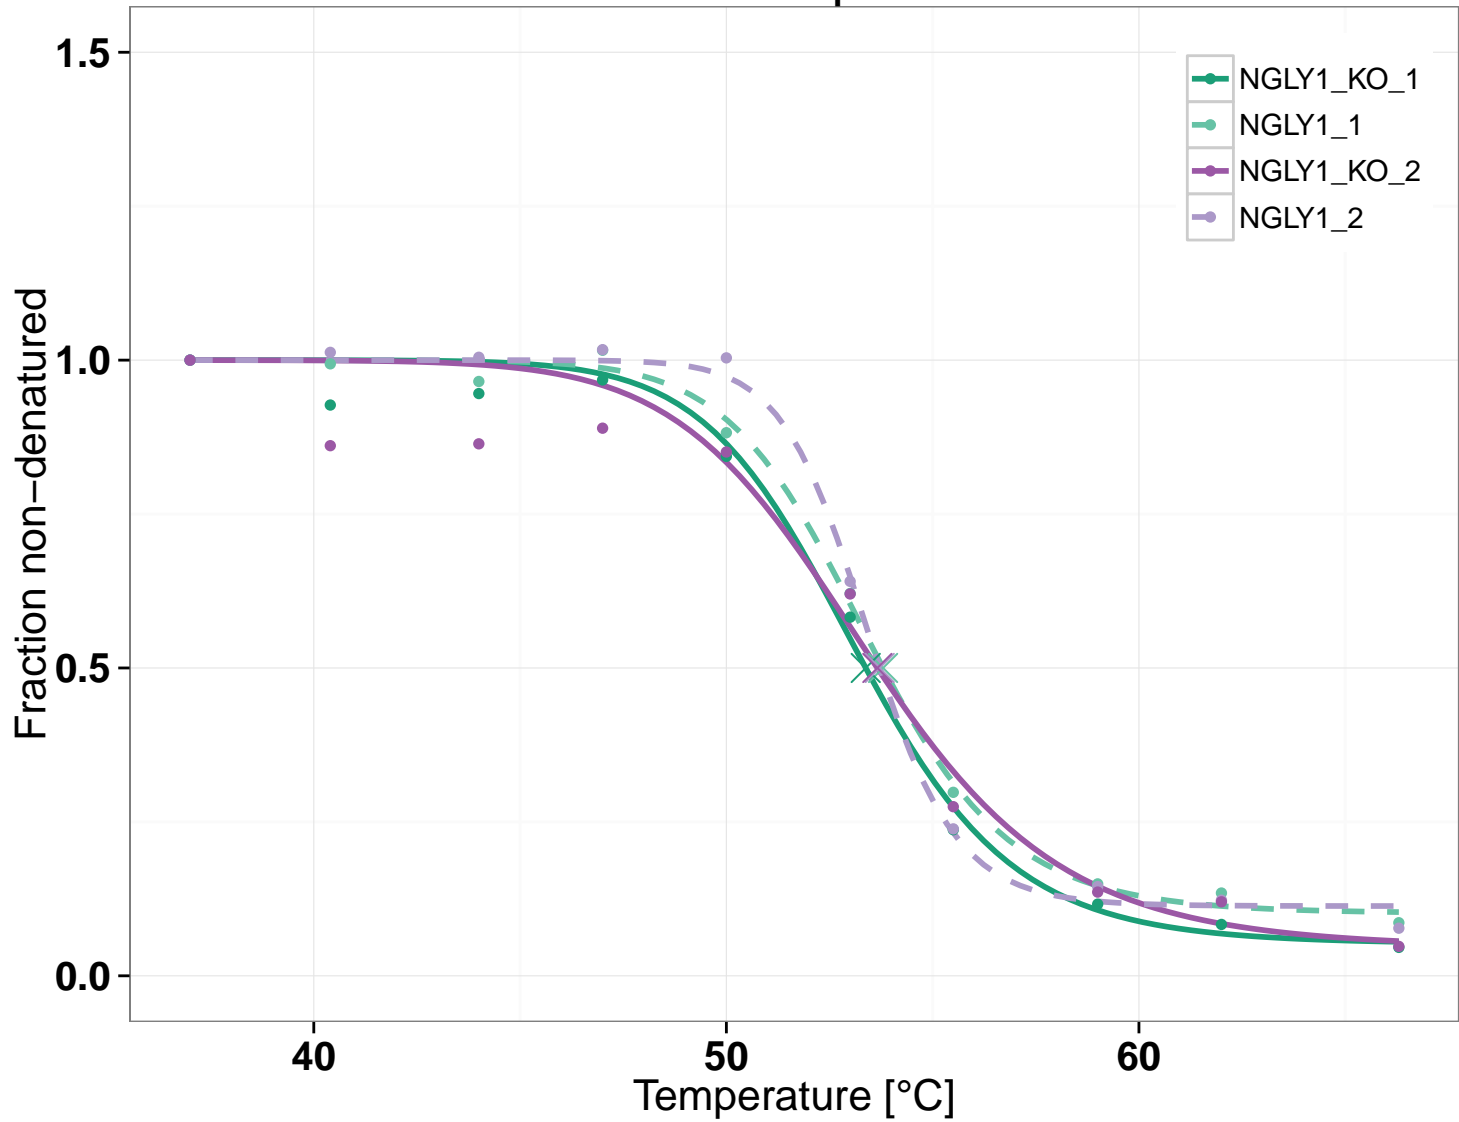

|            | meltPoint | slope | plateau | R2   |
|------------|-----------|-------|---------|------|
| NGLY1_KO_1 | 53.38     | -0.13 | 0.05    | 0.99 |
| NGLY1_1    | 53.8      | -0.13 | 0.1     | 1    |
| NGLY1_KO_2 | 53.66     | -0.1  | 0.04    | 0.96 |
| NGLY1_2    | 53.72     | -0.21 | 0.11    | 1    |

Supplement: Supplementary file 4387 [file 1]

IPI00478278.1|TREX2

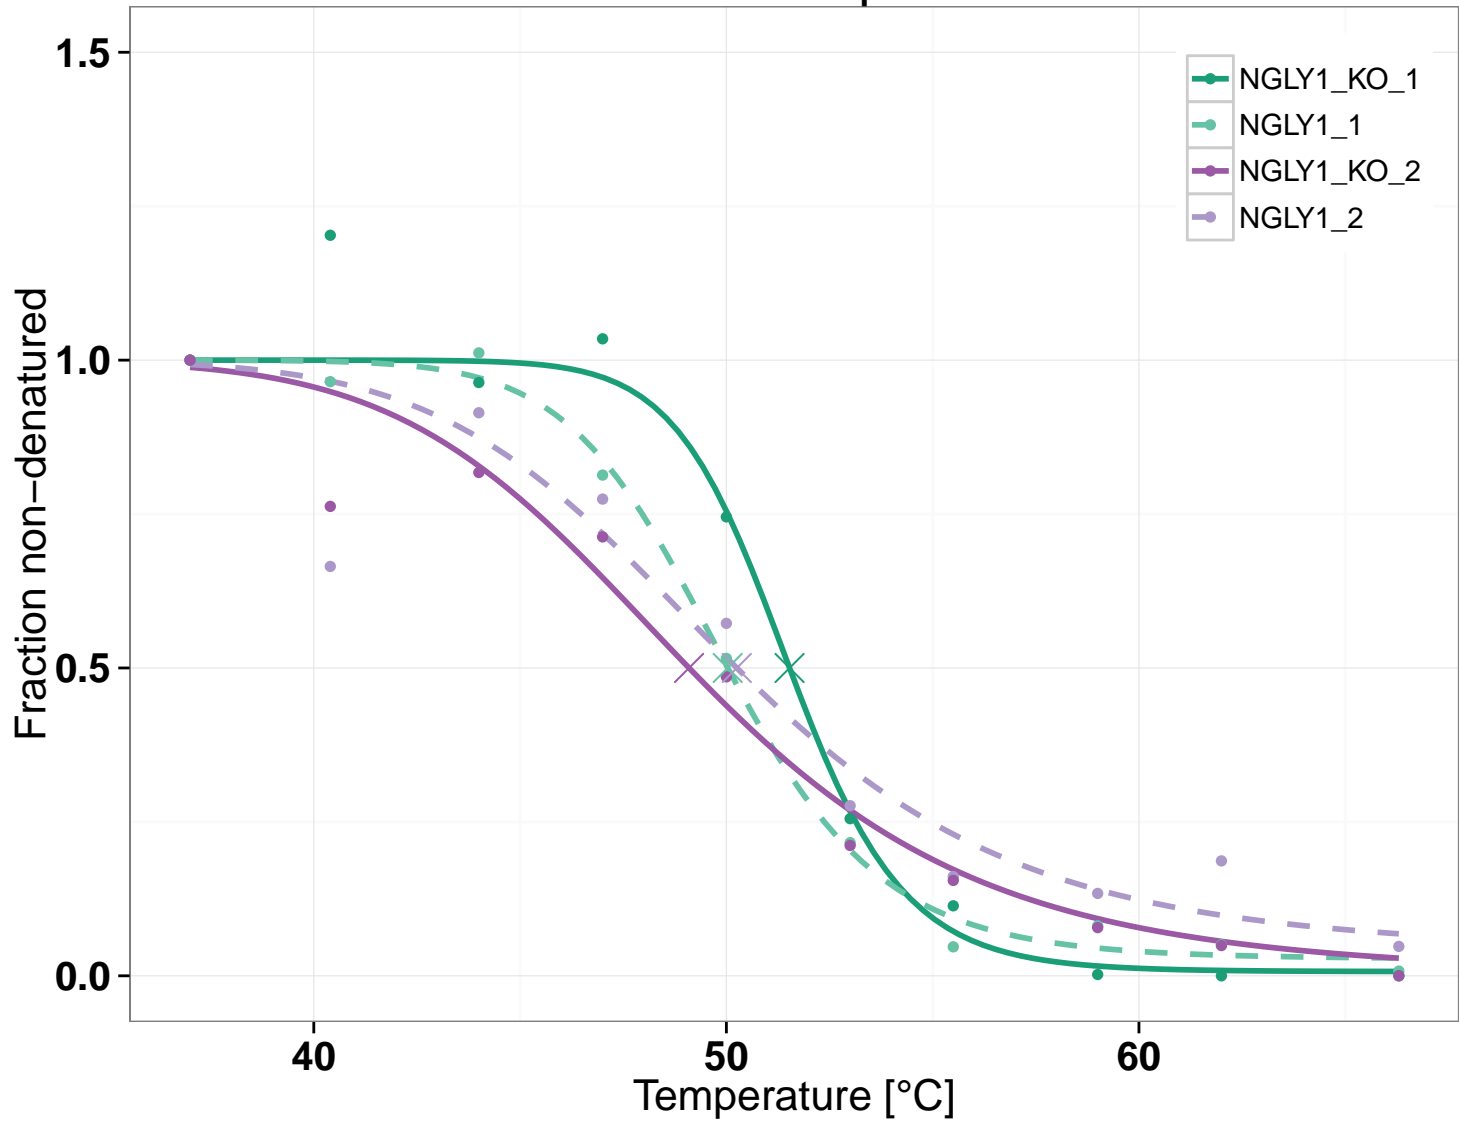

|            | meltPoint | slope  | plateau | R2   |
|------------|-----------|--------|---------|------|
| NGLY1_KO_1 | 51.53     | -0.18  | 0.01    | 0.98 |
| NGLY1_1    | 50.03     | -0.13  | 0.03    | 1    |
| NGLY1_KO_2 | 49.1      | -0.071 | 0       | 0.96 |
| NGLY1_2    | 50.25     | -0.069 | 0.04    | 0.9  |

Supplement: Supplementary file 4388 [file 1]

IPI00008223.3|RAD23B

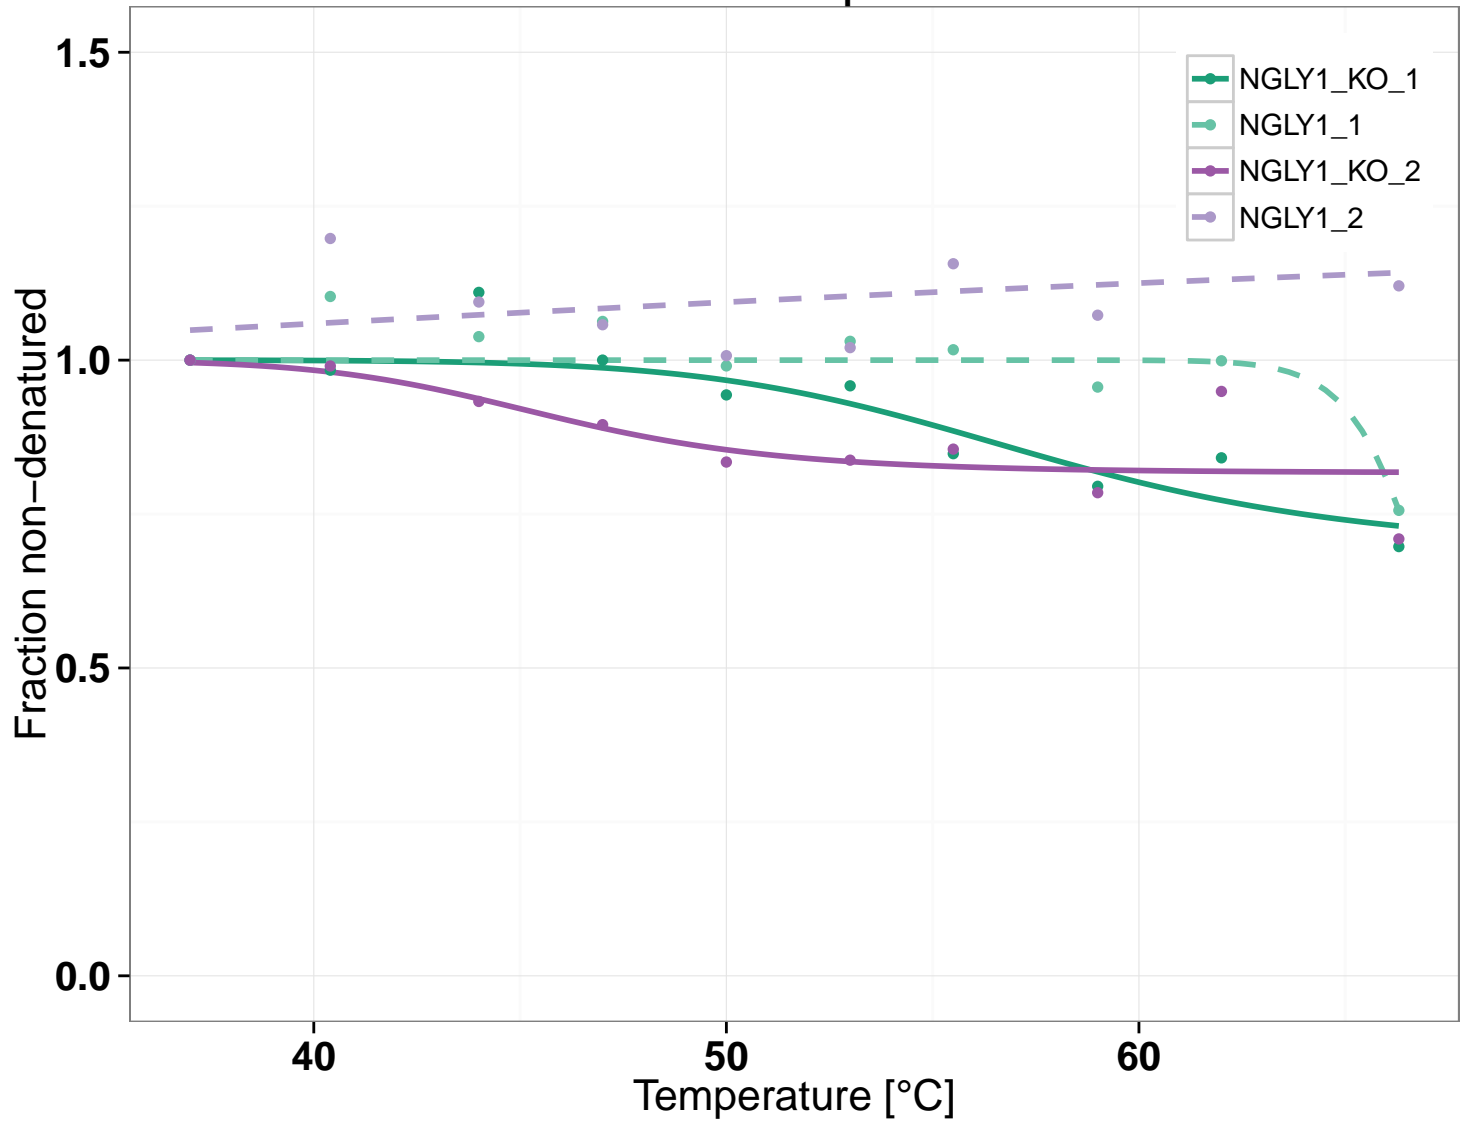

|            | meltPoint | slope  | plateau | R2   |
|------------|-----------|--------|---------|------|
| NGLY1_KO_1 | —         | -0.019 | 0.69    | 0.83 |
| NGLY1_1    | —         | —      | 0       | 0.75 |
| NGLY1_KO_2 | —         | -0.016 | 0.82    | 0.59 |
| NGLY1_2    | —         | 0.0036 | 1.5     | 0.12 |

Supplement: Supplementary file 4389 [file 1]

IPI00065063.3|DHRS1

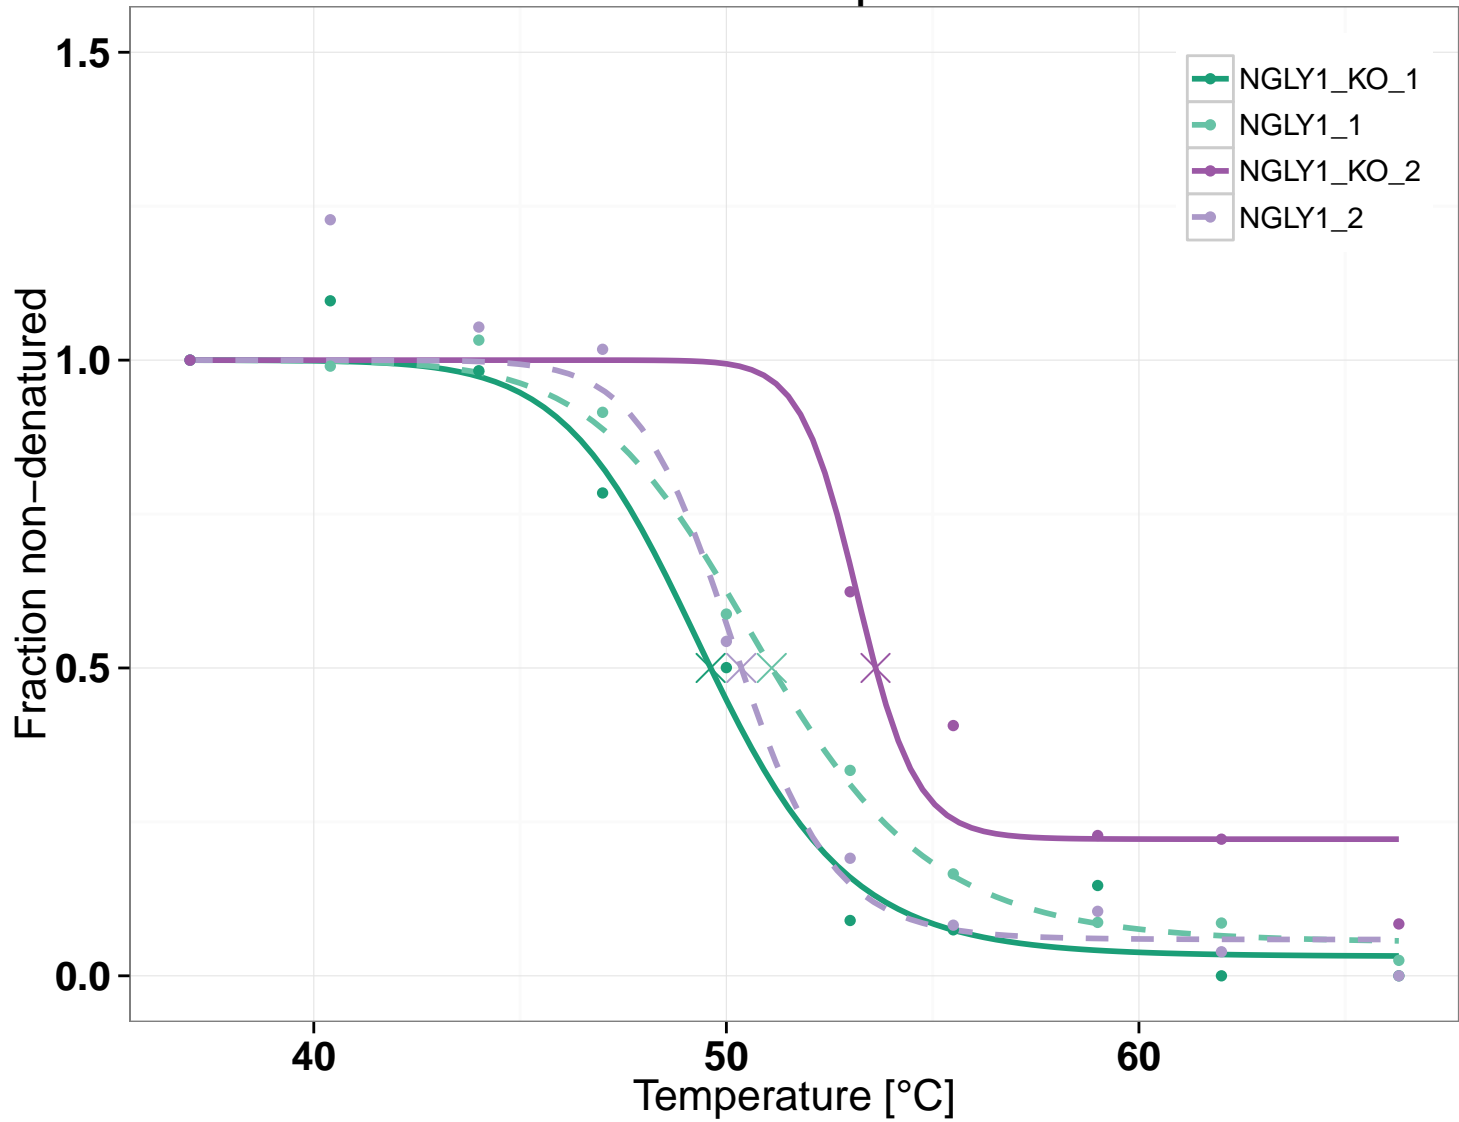

|            | meltPoint | slope | plateau | R2   |
|------------|-----------|-------|---------|------|
| NGLY1_KO_1 | 49.62     | -0.14 | 0.03    | 0.98 |
| NGLY1_1    | 51.1      | -0.11 | 0.05    | 1    |
| NGLY1_KO_2 | 53.62     | -0.28 | 0.22    | 0.3  |
| NGLY1_2    | 50.36     | -0.2  | 0.06    | 0.97 |

Supplement: Supplementary file 4390 [file 1]

IPI00060201.14|SYTL4

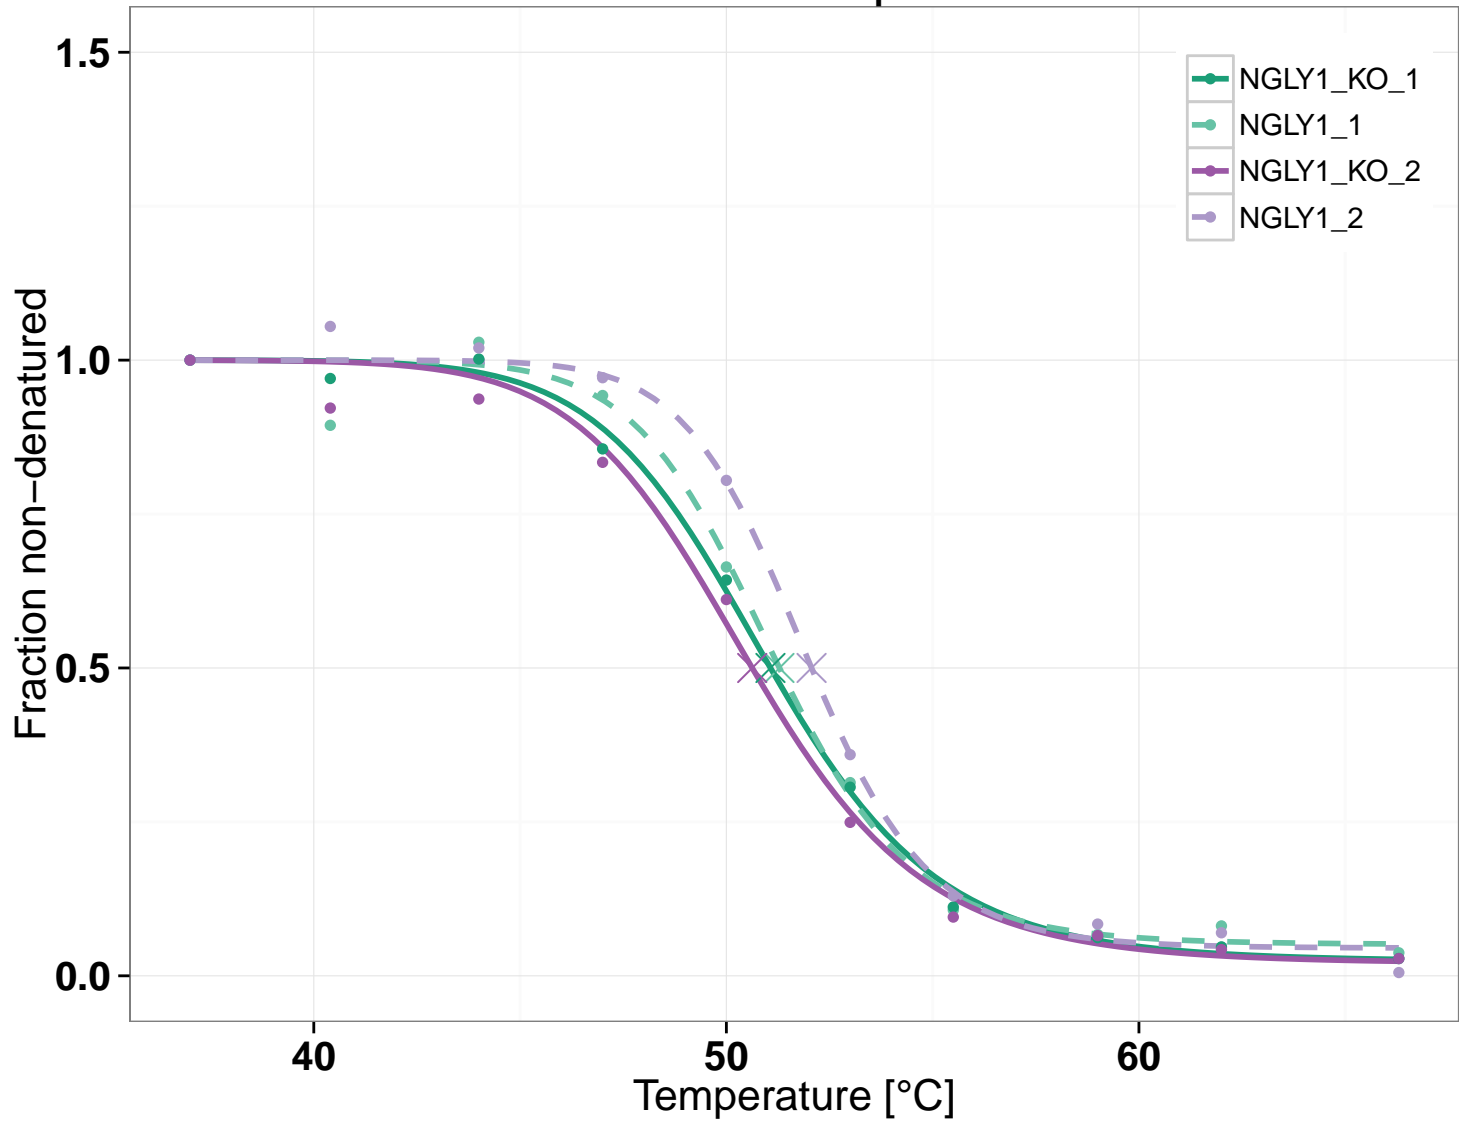

|            | meltPoint | slope | plateau | R2   |
|------------|-----------|-------|---------|------|
| NGLY1_KO_1 | 51.07     | -0.12 | 0.02    | 1    |
| NGLY1_1    | 51.29     | -0.14 | 0.05    | 0.99 |
| NGLY1_KO_2 | 50.63     | -0.12 | 0.02    | 0.99 |
| NGLY1_2    | 52.07     | -0.16 | 0.04    | 1    |

Supplement: Supplementary file 4391 [file 1]

# IPI00160622.1|CEP250

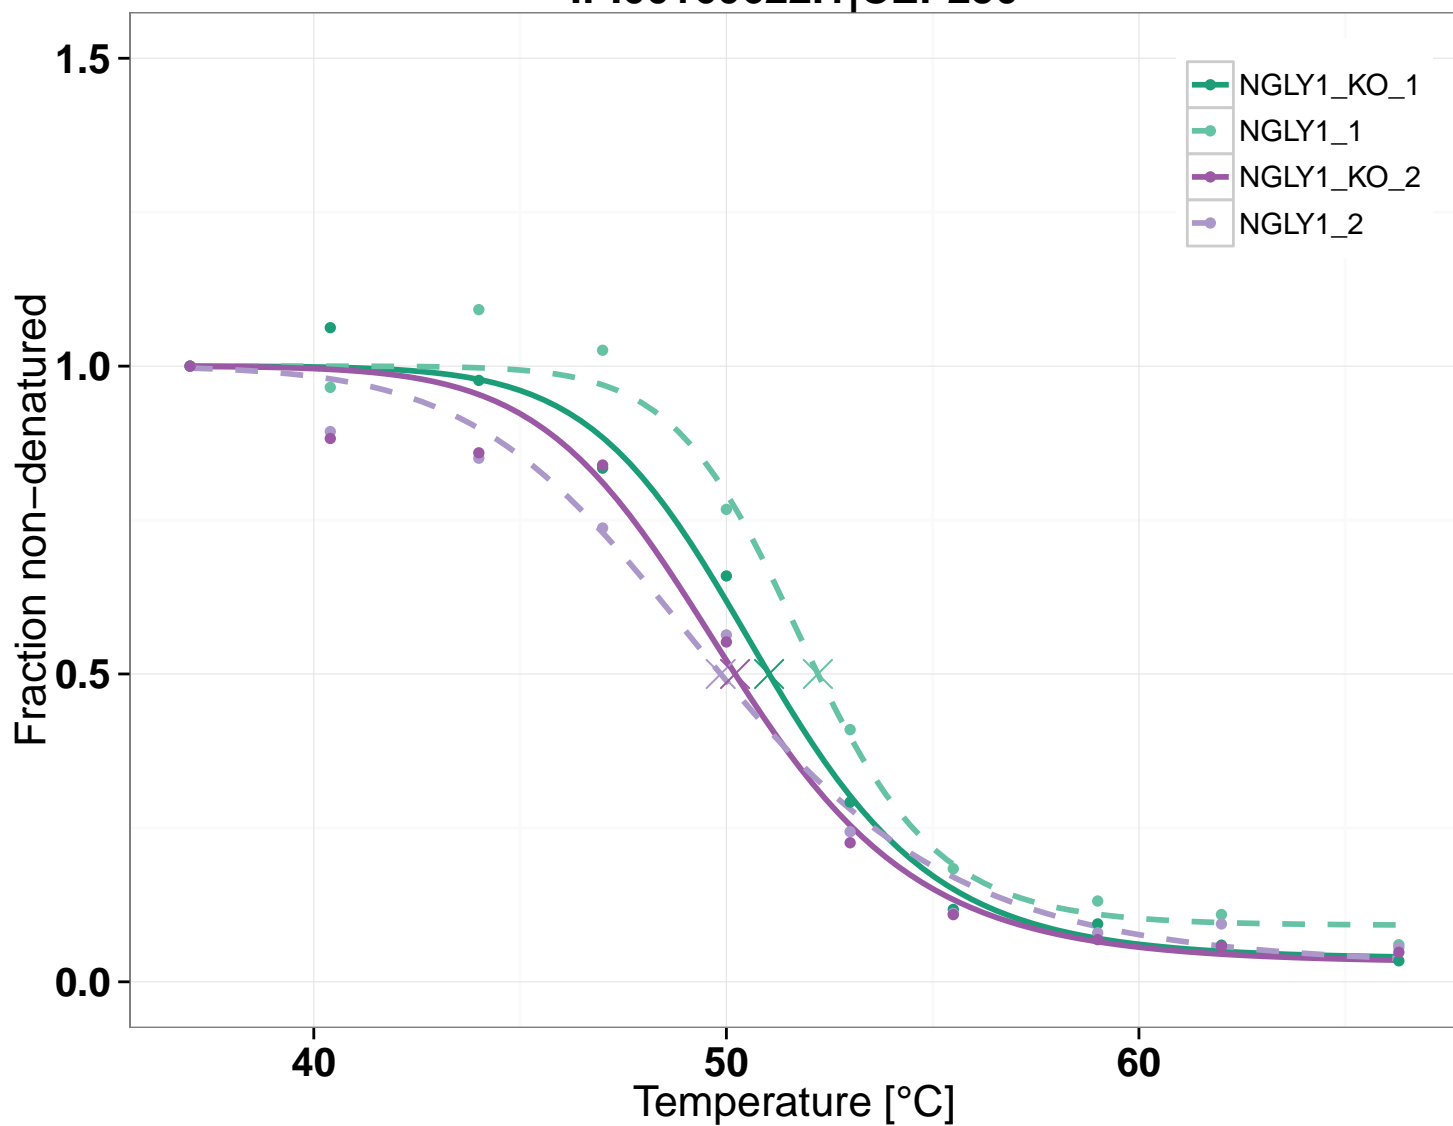

|            | meltPoint | slope  | plateau | R2   |
|------------|-----------|--------|---------|------|
| NGLY1_KO_1 | 51.04     | -0.12  | 0.04    | 0.99 |
| NGLY1_1    | 52.22     | -0.14  | 0.09    | 0.99 |
| NGLY1_KO_2 | 50.21     | -0.11  | 0.03    | 0.98 |
| NGLY1_2    | 49.86     | -0.083 | 0.02    | 0.98 |

Supplement: Supplementary file 4392 [file 1]

# IPI00010207.1|UFM1

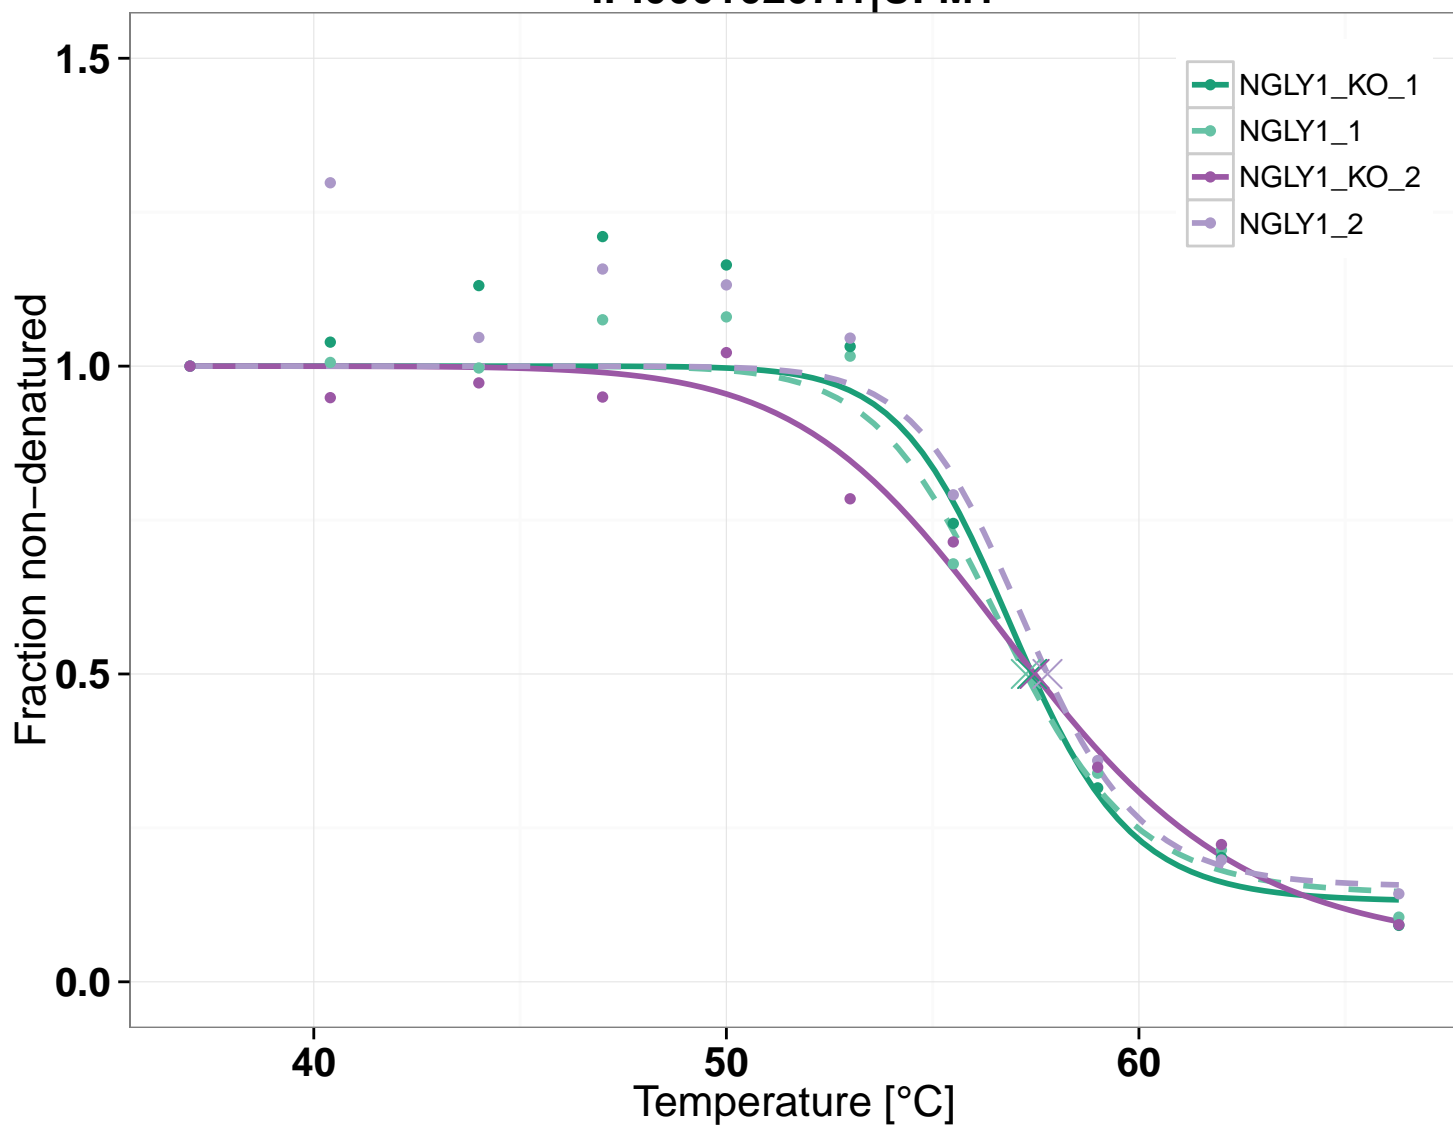

|            | meltPoint | slope  | plateau | R2   |
|------------|-----------|--------|---------|------|
| NGLY1_KO_1 | 57.41     | -0.15  | 0.13    | 0.94 |
| NGLY1_1    | 57.26     | -0.14  | 0.14    | 0.98 |
| NGLY1_KO_2 | 57.47     | -0.088 | 0.05    | 0.99 |
| NGLY1_2    | 57.78     | -0.15  | 0.15    | 0.91 |

Supplement: Supplementary file 4393 [file 1]

IPI00877156.1|KIAA1712

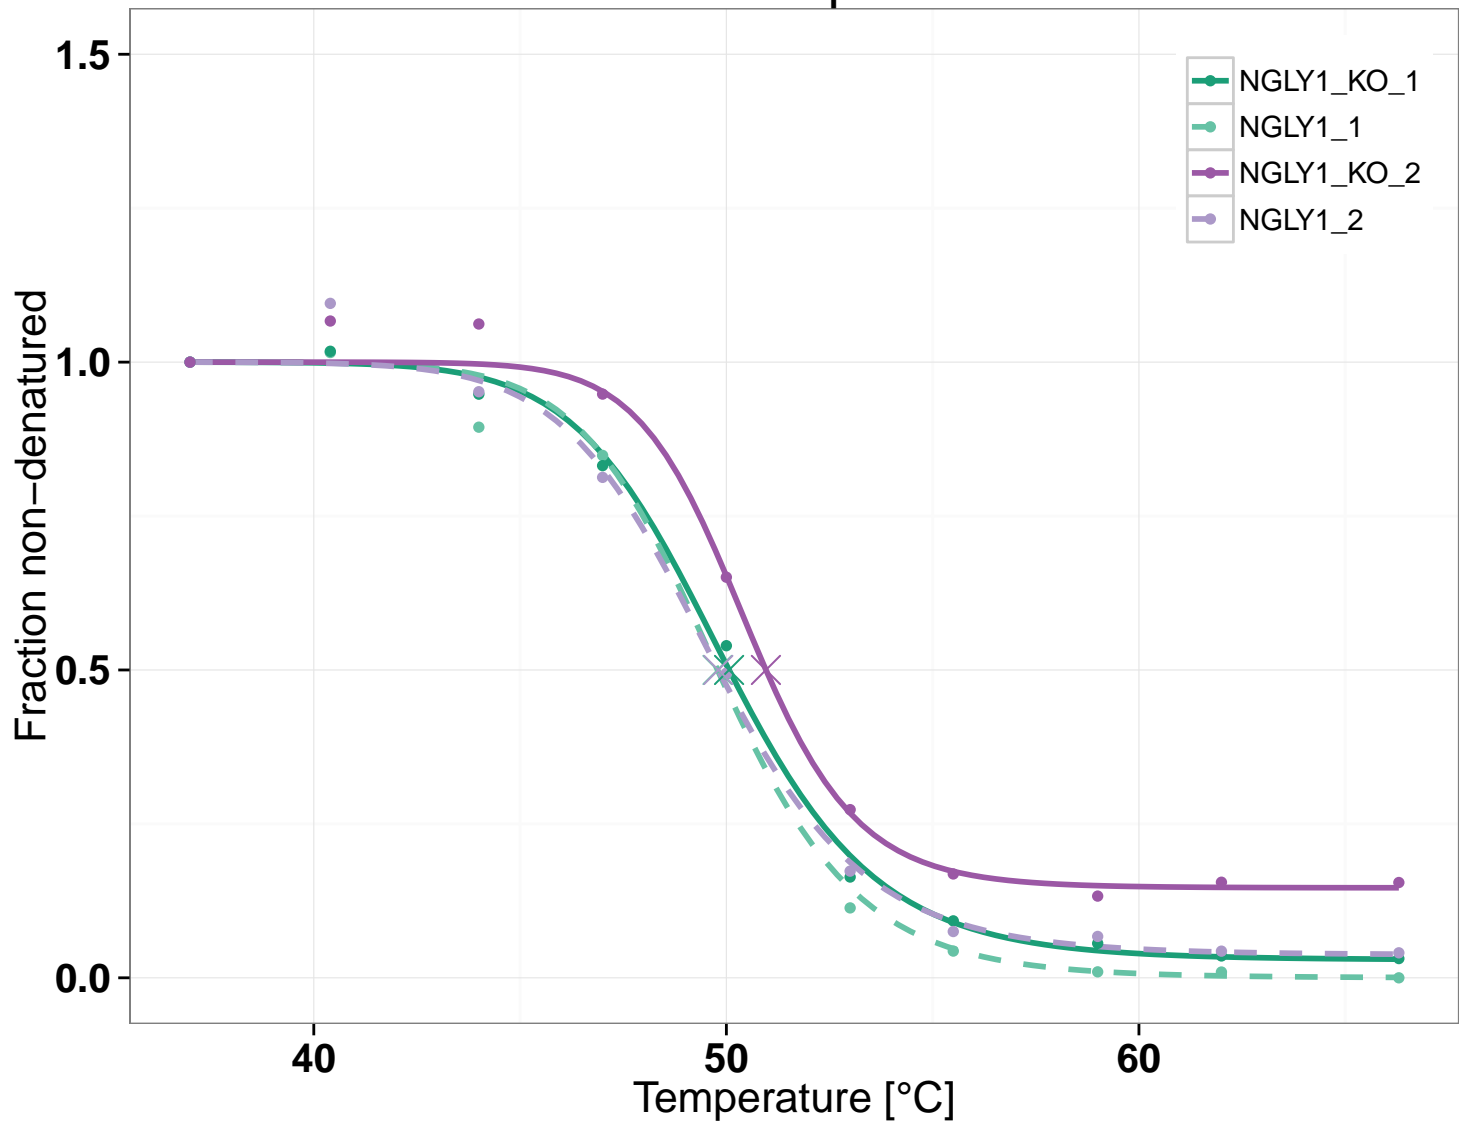

|            | meltPoint | slope | plateau | R2   |
|------------|-----------|-------|---------|------|
| NGLY1_KO_1 | 50.07     | -0.13 | 0.03    | 1    |
| NGLY1_1    | 49.79     | -0.15 | 0       | 1    |
| NGLY1_KO_2 | 50.96     | -0.16 | 0.15    | 0.99 |
| NGLY1_2    | 49.8      | -0.13 | 0.04    | 0.99 |

Supplement: Supplementary file 4394 [file 1]

IPI00302690.5|ACTR10

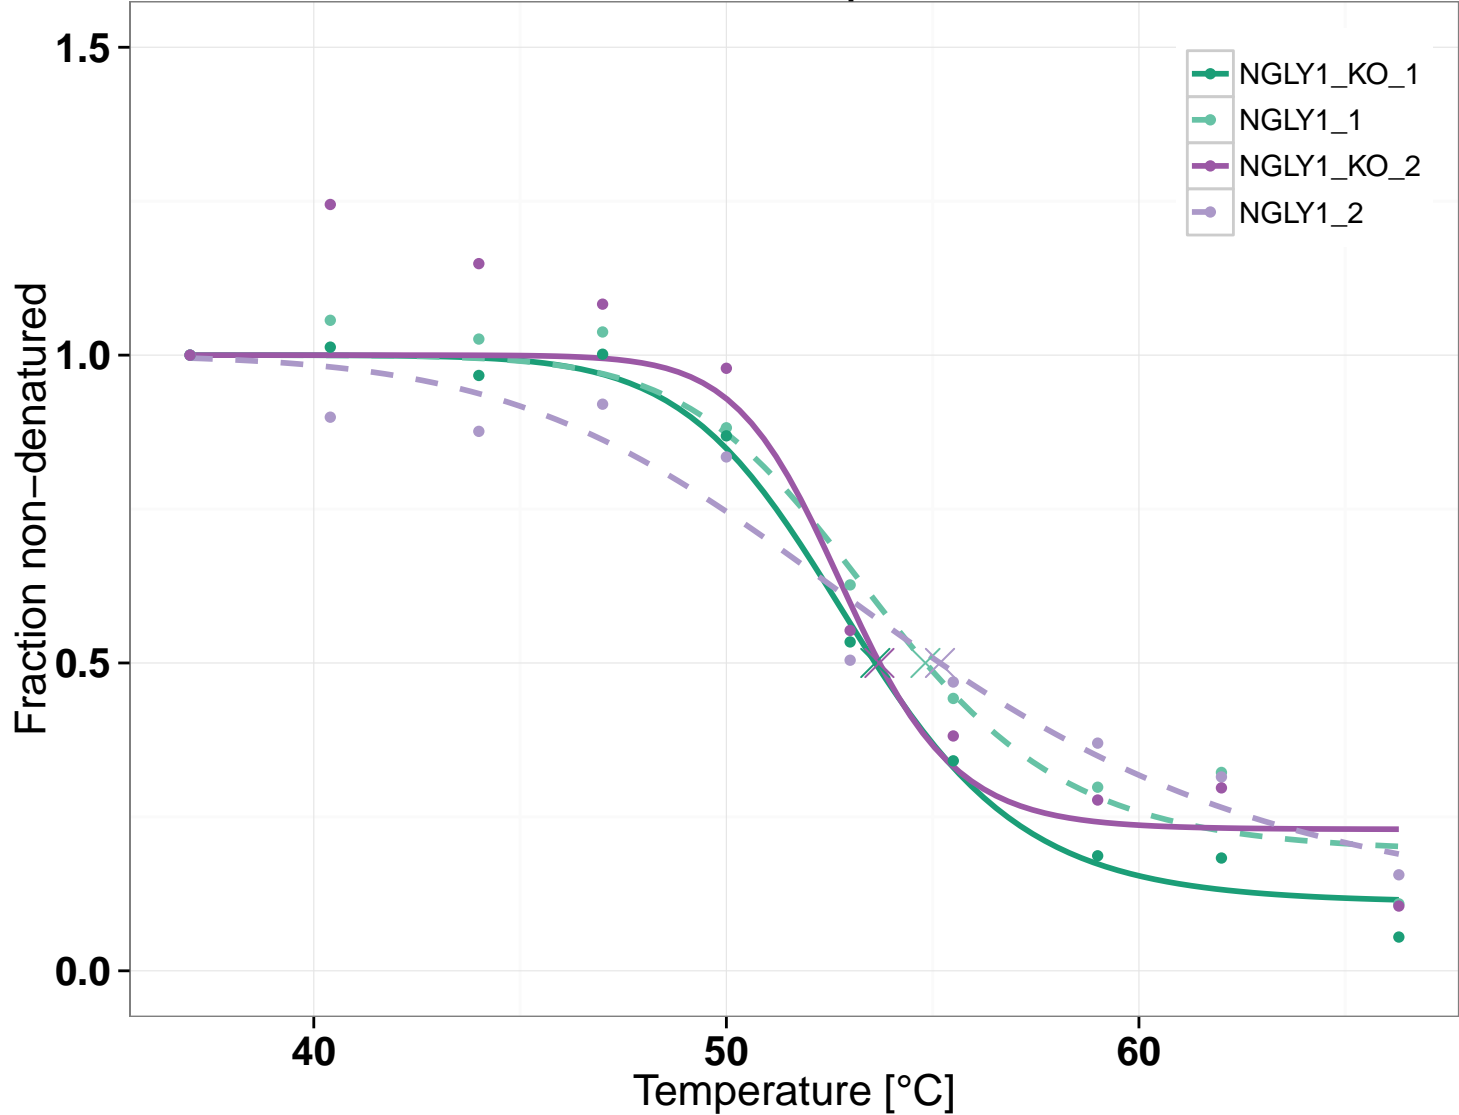

|            | meltPoint | slope  | plateau | R2   |
|------------|-----------|--------|---------|------|
| NGLY1_KO_1 | 53.61     | -0.11  | 0.11    | 0.99 |
| NGLY1_1    | 54.83     | -0.087 | 0.19    | 0.98 |
| NGLY1_KO_2 | 53.71     | -0.15  | 0.23    | 0.93 |
| NGLY1_2    | 55.18     | -0.049 | 0.08    | 0.96 |

Supplement: Supplementary file 4395 [file 1]

IPI00099820.4|RP5-1022P6 2

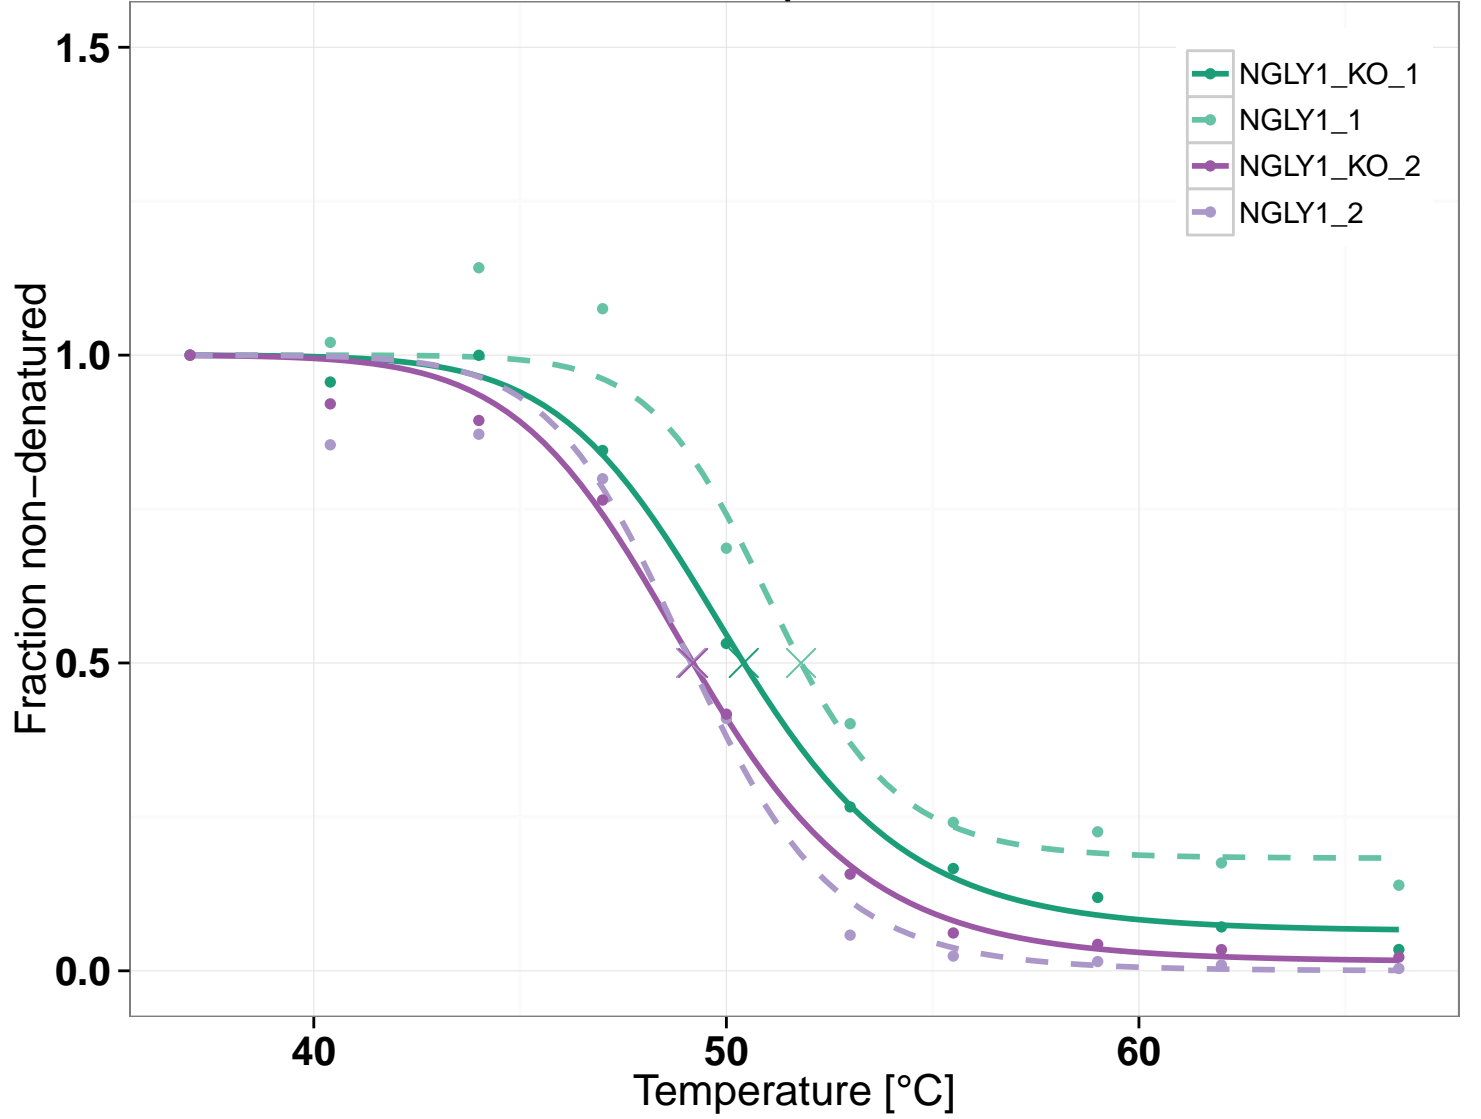

|            | meltPoint | slope | plateau | R2   |
|------------|-----------|-------|---------|------|
| NGLY1_KO_1 | 50.42     | -0.11 | 0.06    | 1    |
| NGLY1_1    | 51.81     | -0.14 | 0.18    | 0.97 |
| NGLY1_KO_2 | 49.19     | -0.12 | 0.01    | 0.99 |
| NGLY1_2    | 49.14     | -0.14 | 0       | 0.98 |

Supplement: Supplementary file 4396 [file 1]

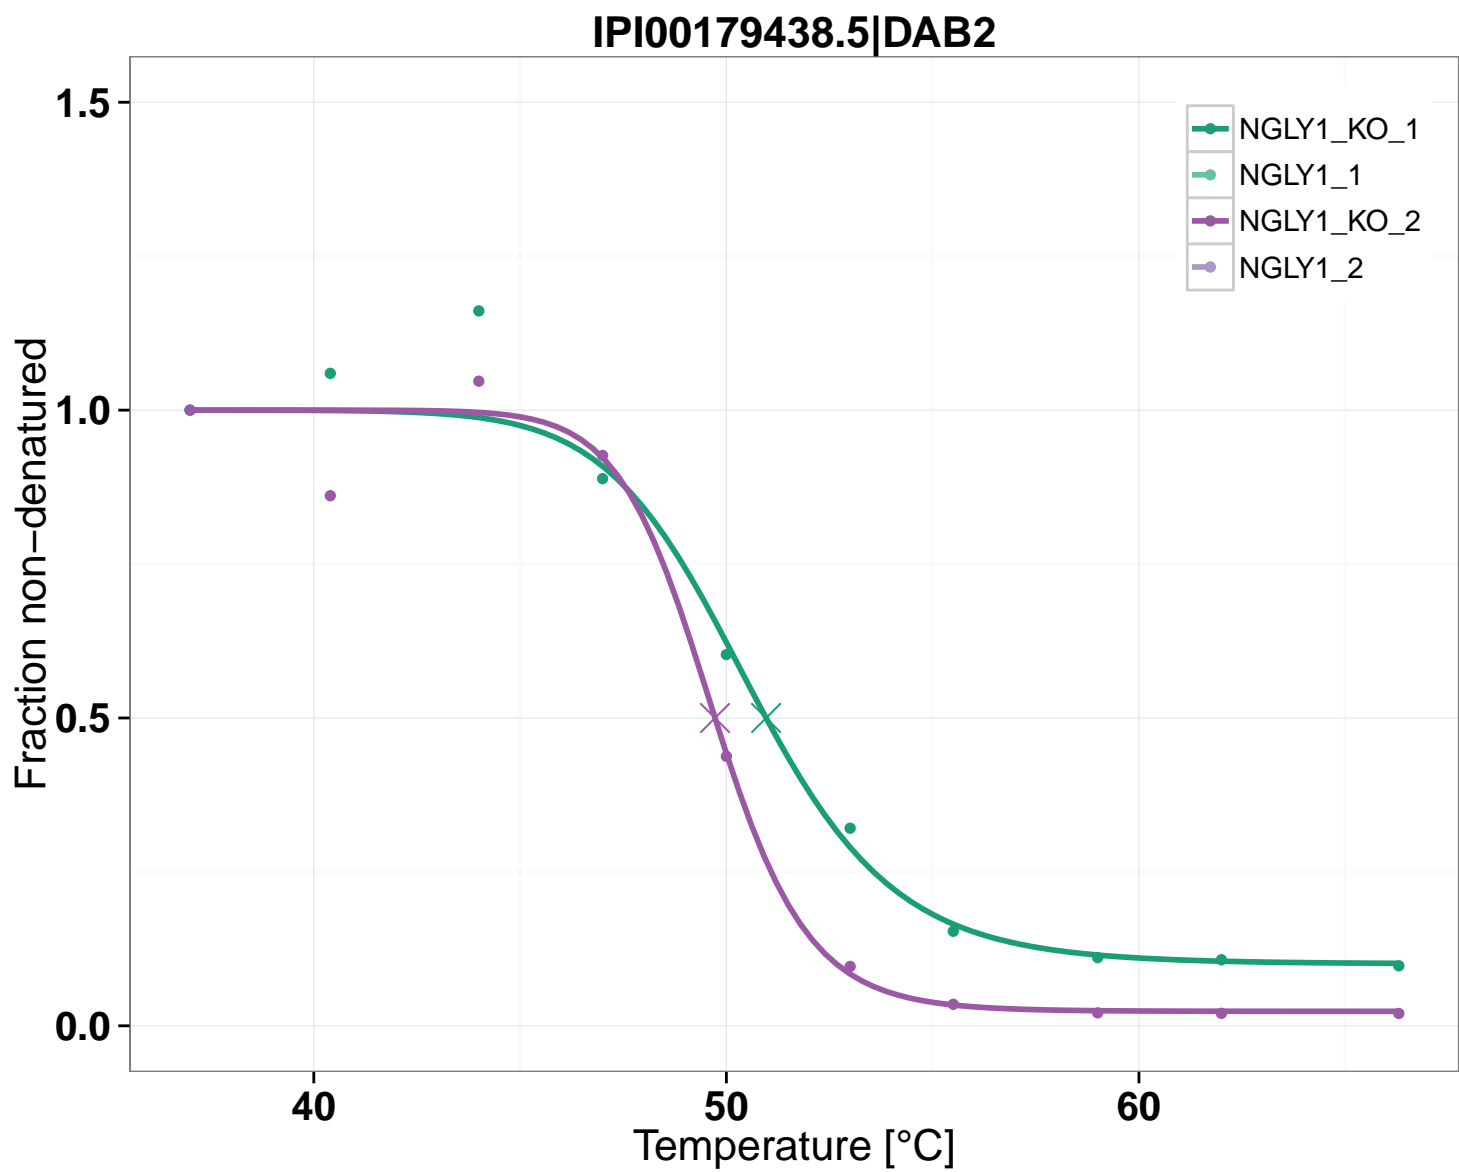

|            | meltPoint | slope | plateau | R2   |
|------------|-----------|-------|---------|------|
| NGLY1_KO_1 | 50.96     | -0.13 | 0.1     | 0.98 |
| NGLY1_1    | -         | -     | -       | -    |
| NGLY1_KO_2 | 49.72     | -0.21 | 0.02    | 0.99 |
| NGLY1_2    | -         | -     | -       | -    |

Supplement: Supplementary file 4397 [file 1]

# IPI00025252.1|PDIA3

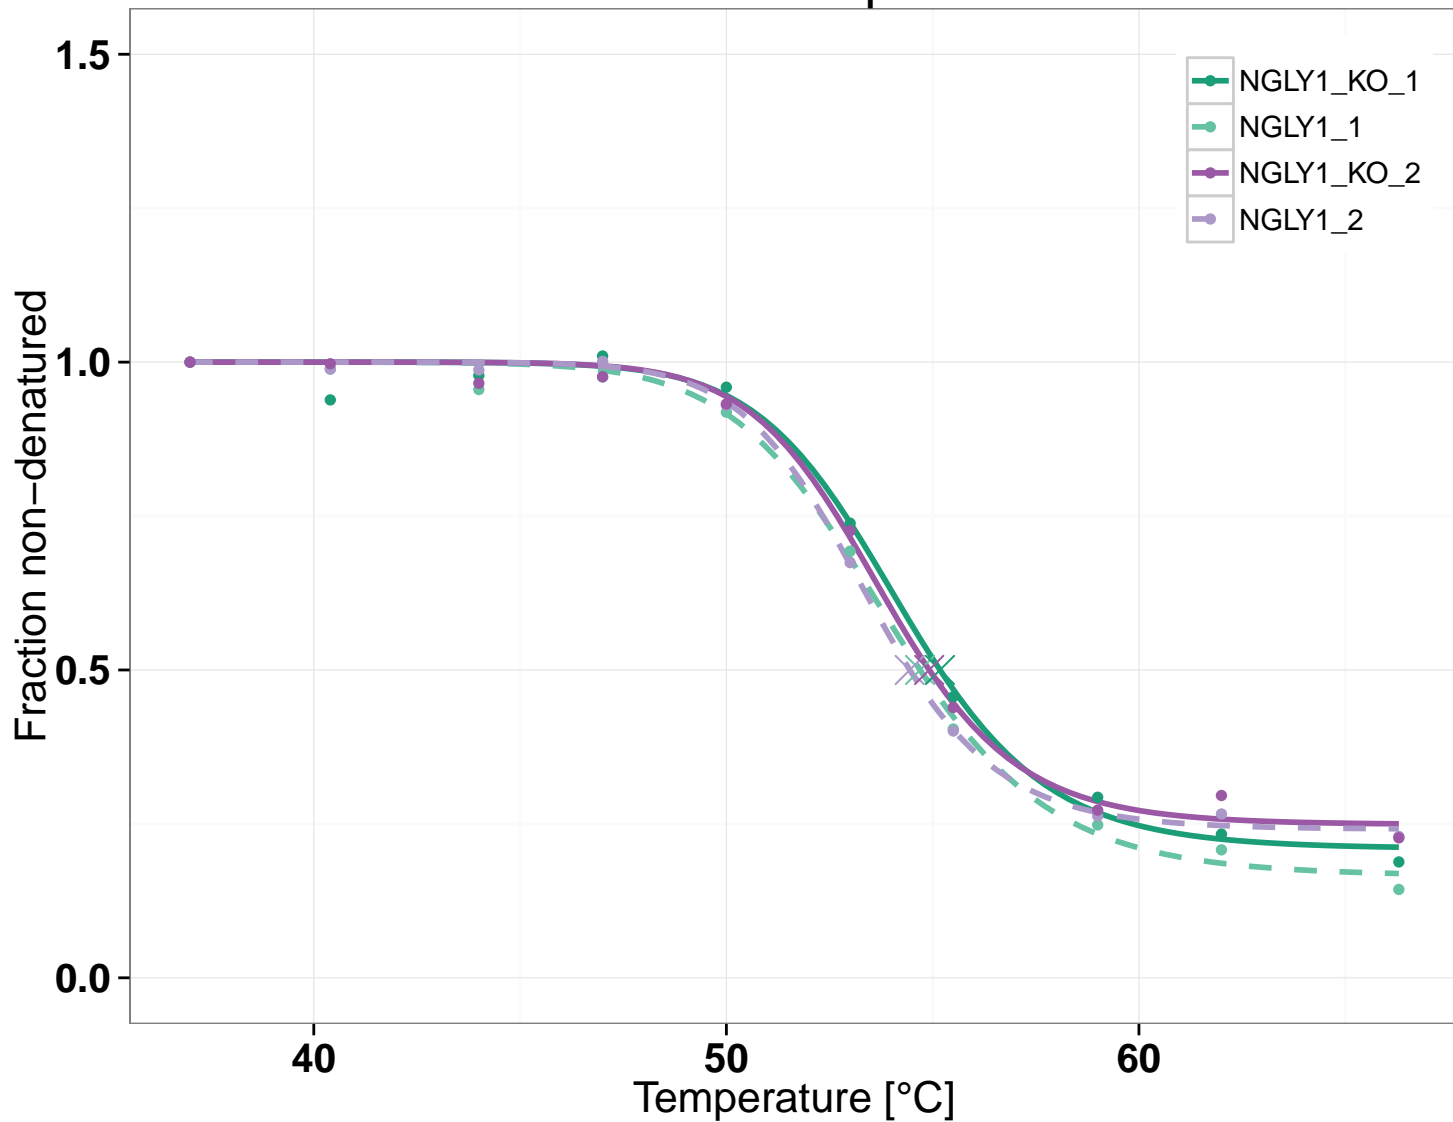

|            | meltPoint | slope | plateau | R2   |
|------------|-----------|-------|---------|------|
| NGLY1_KO_1 | 55.18     | -0.11 | 0.21    | 0.99 |
| NGLY1_1    | 54.7      | -0.11 | 0.16    | 1    |
| NGLY1_KO_2 | 54.92     | -0.12 | 0.25    | 1    |
| NGLY1_2    | 54.44     | -0.12 | 0.24    | 1    |

Supplement: Supplementary file 4398 [file 1]

IPI00168838.3|FLJ21865

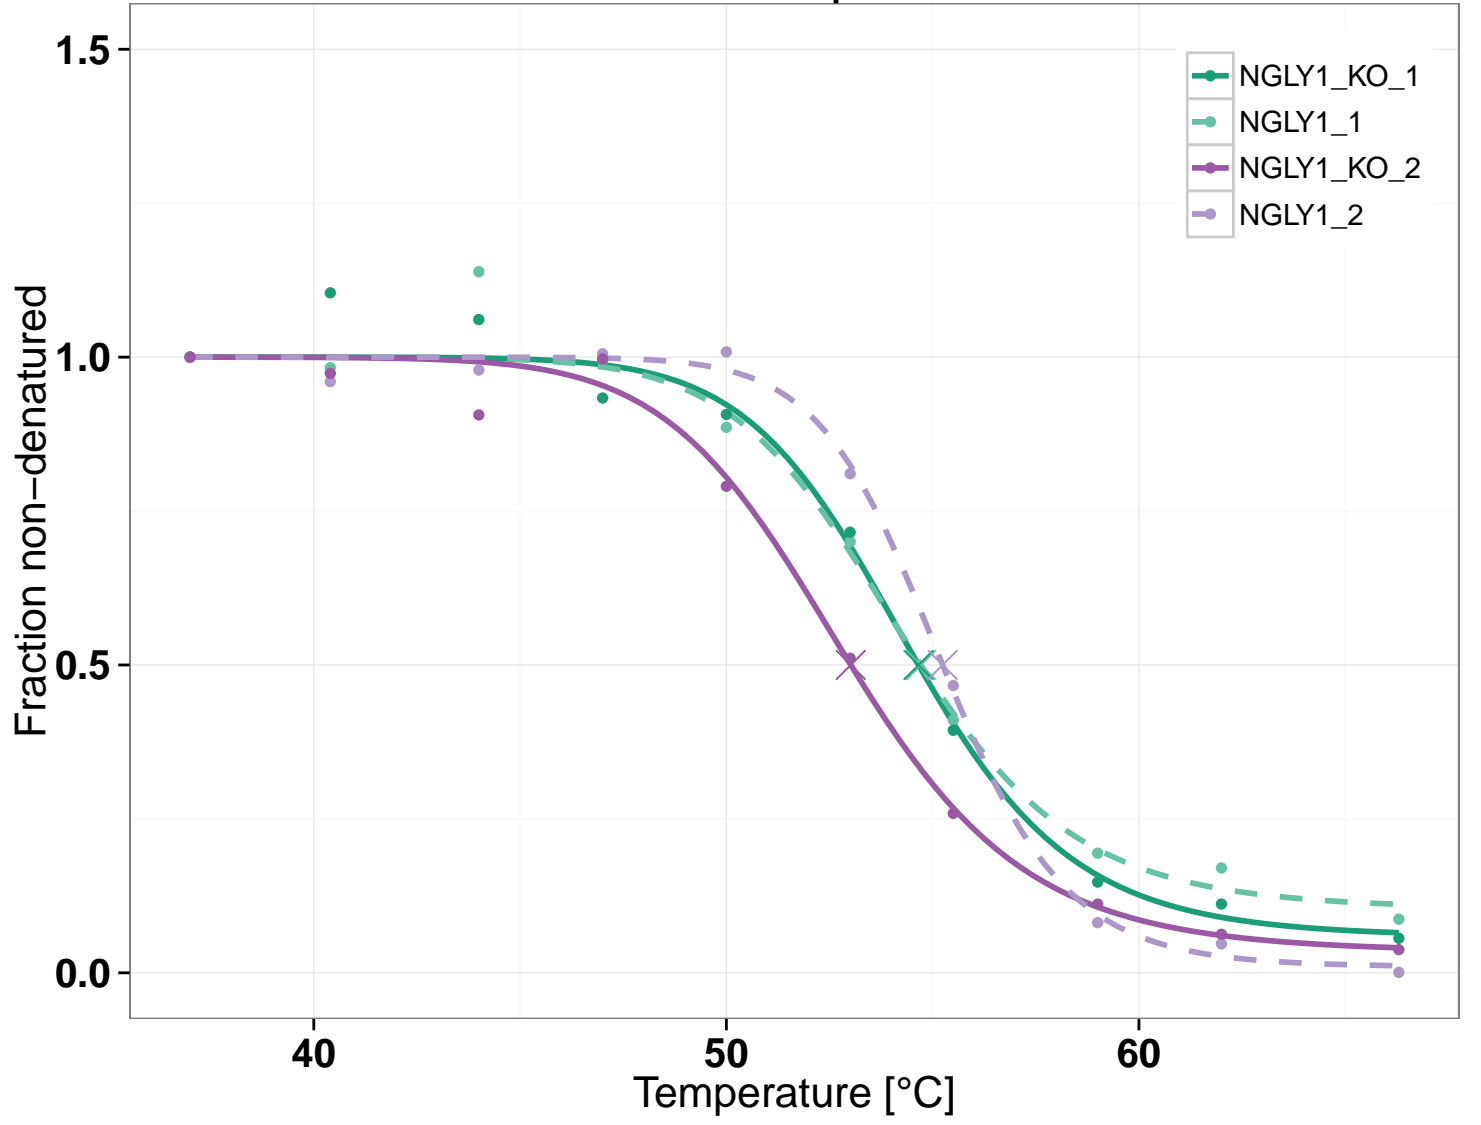

|            | meltPoint | slope | plateau | R2   |
|------------|-----------|-------|---------|------|
| NGLY1_KO_1 | 54.66     | -0.12 | 0.06    | 0.99 |
| NGLY1_1    | 54.71     | -0.11 | 0.1     | 0.98 |
| NGLY1_KO_2 | 53.02     | -0.11 | 0.03    | 0.99 |
| NGLY1_2    | 55.24     | -0.17 | 0.01    | 1    |

Supplement: Supplementary file 4399 [file 1]

IPI00328118.4|SPAG5

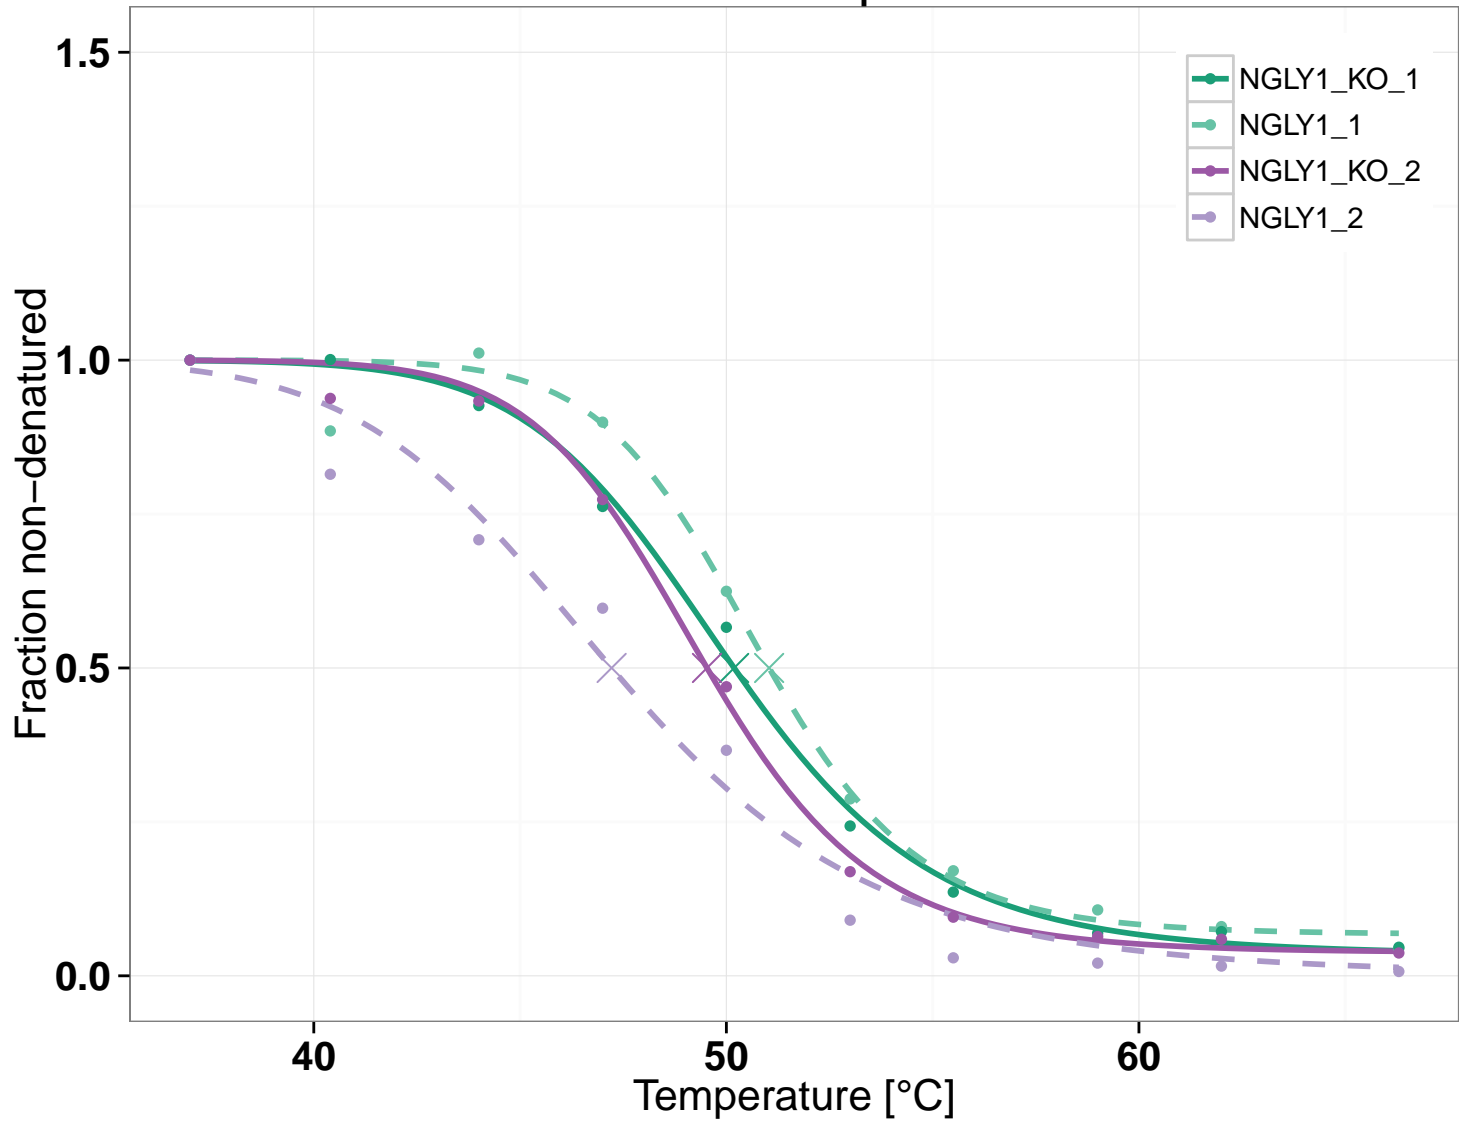

|            | meltPoint | slope  | plateau | R2   |
|------------|-----------|--------|---------|------|
| NGLY1_KO_1 | 50.19     | -0.098 | 0.03    | 1    |
| NGLY1_1    | 51.04     | -0.12  | 0.07    | 0.99 |
| NGLY1_KO_2 | 49.53     | -0.12  | 0.04    | 1    |
| NGLY1_2    | 47.22     | -0.08  | 0       | 0.97 |

Supplement: Supplementary file 4400 [file 1]

# IPI00299150.4|CTSS

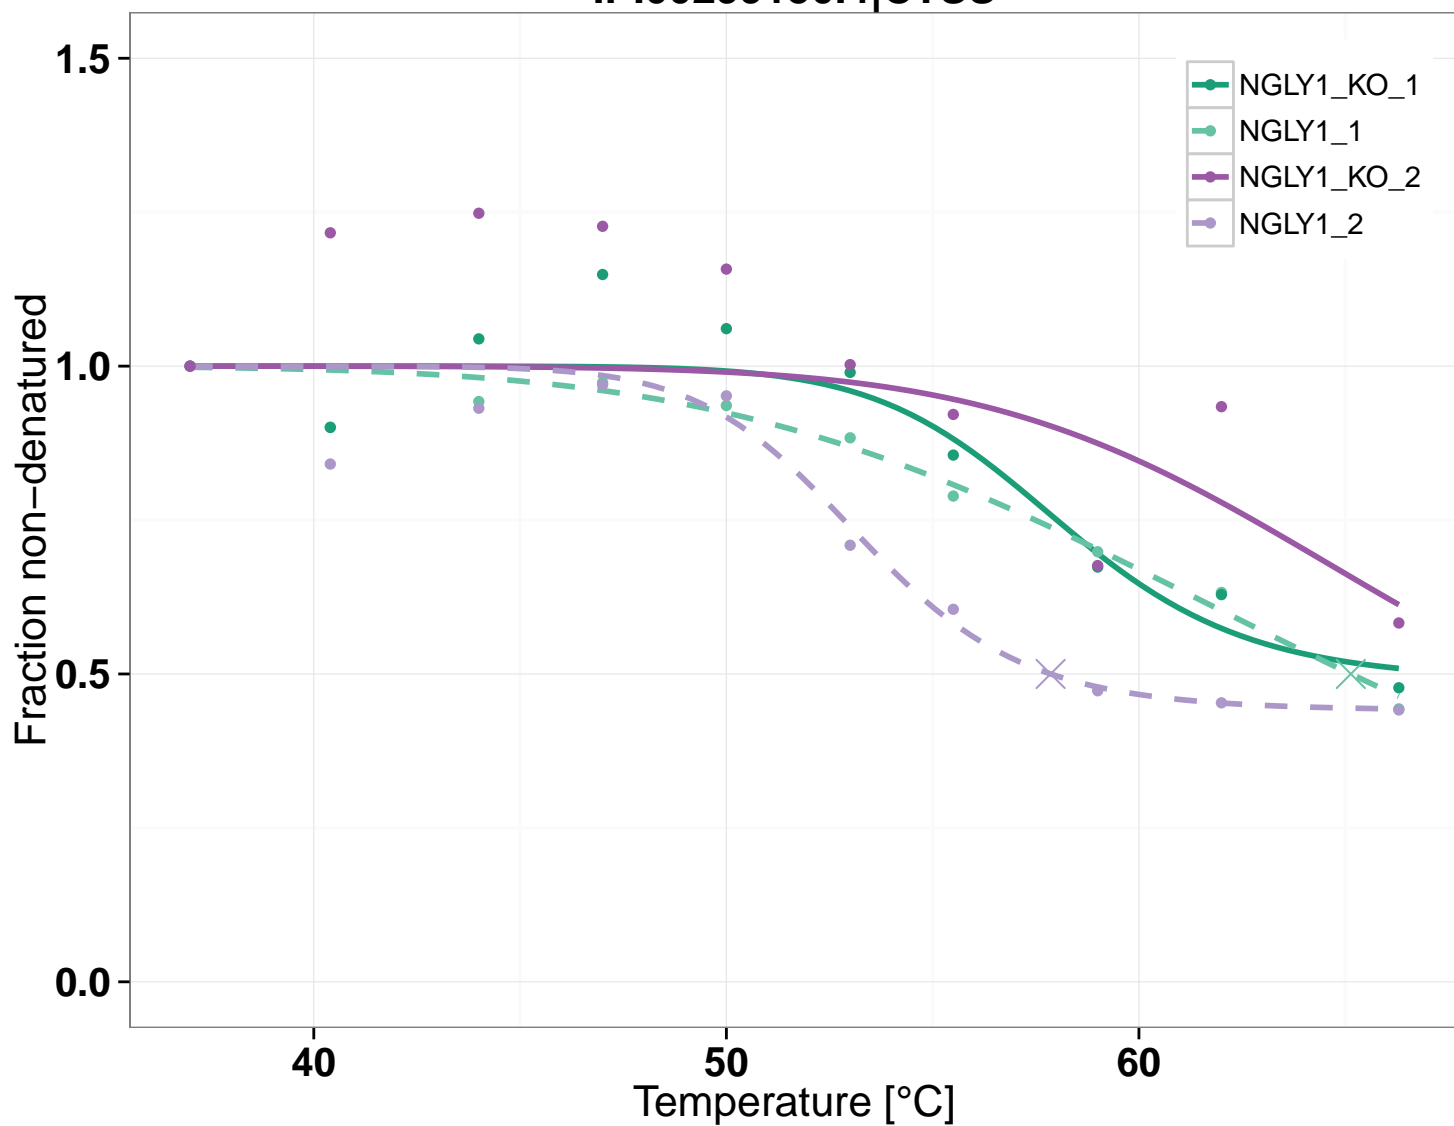

|            | meltPoint | slope  | plateau | R2   |
|------------|-----------|--------|---------|------|
| NGLY1_KO_1 | –         | –0.057 | 0.49    | 0.89 |
| NGLY1_1    | 65.14     | –0.034 | 0       | 0.96 |
| NGLY1_KO_2 | –         | –0.039 | 0.25    | 0.46 |
| NGLY1_2    | 57.86     | –0.071 | 0.44    | 0.93 |

Supplement: Supplementary file 4401 [file 1]

IPI00043565.3|ZNF830

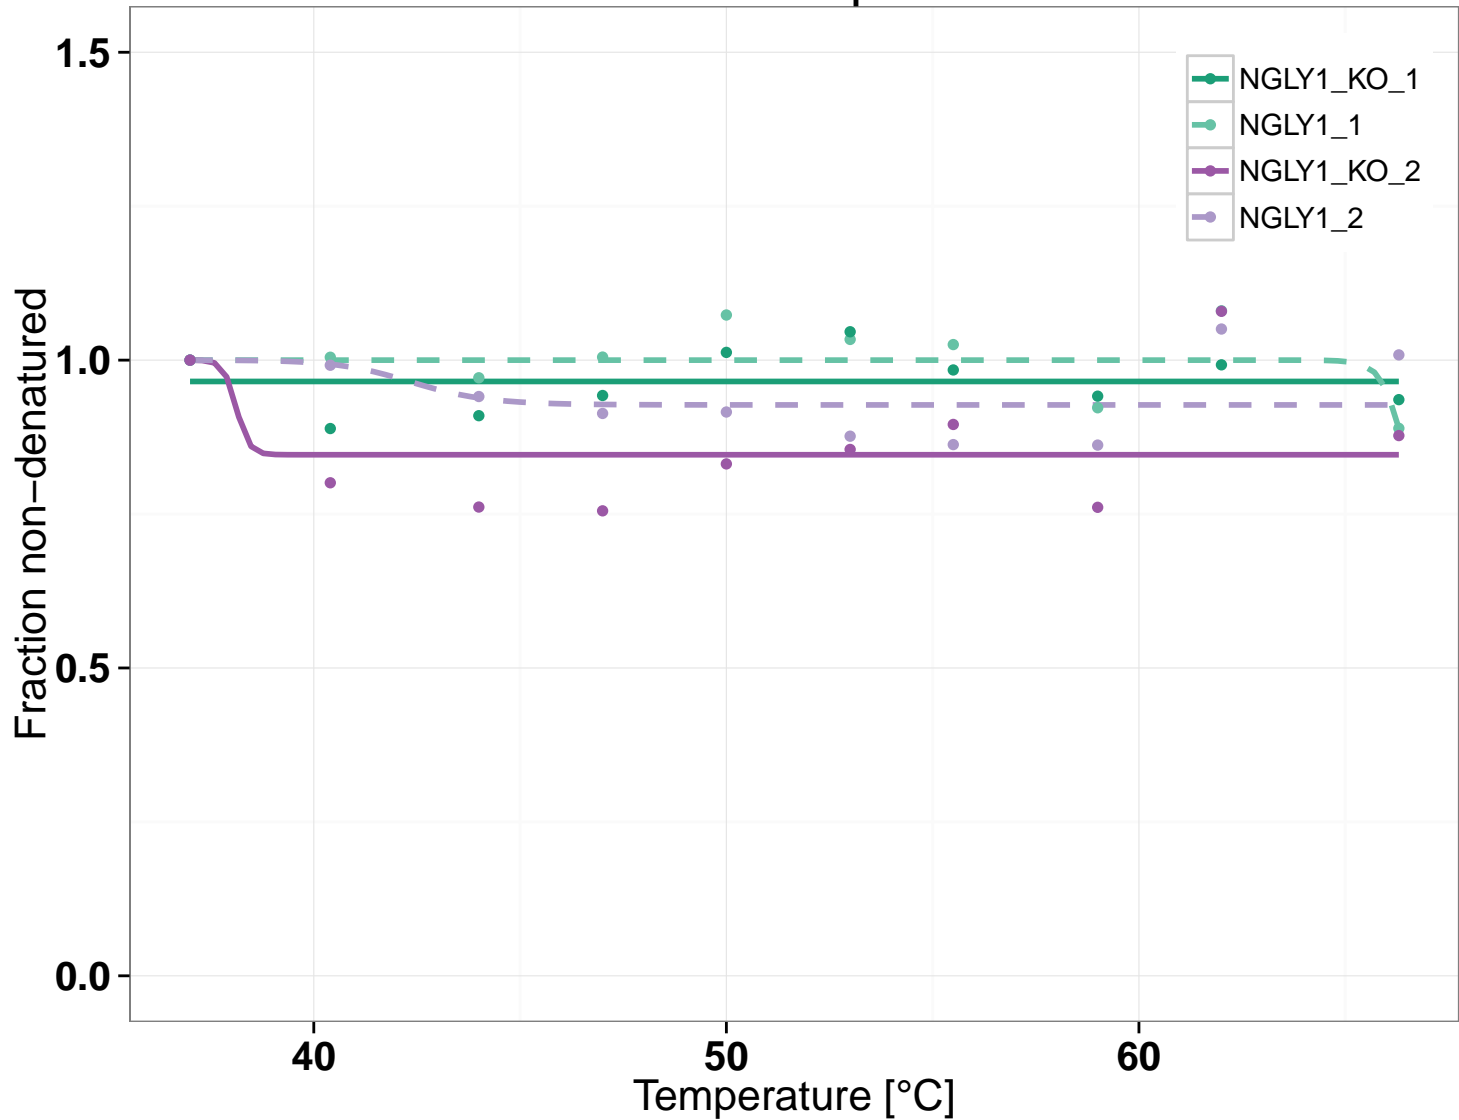

|            | meltPoint | slope | plateau | R2   |
|------------|-----------|-------|---------|------|
| NGLY1_KO_1 | —         | —     | 0.93    | 0    |
| NGLY1_1    | —         | —     | 0.06    | 0.38 |
| NGLY1_KO_2 | —         | -0.25 | 0.85    | 0.2  |
| NGLY1_2    | —         | -0.02 | 0.93    | 0.18 |

Supplement: Supplementary file 4402 [file 1]

# IPI00328828.5|ARID4B

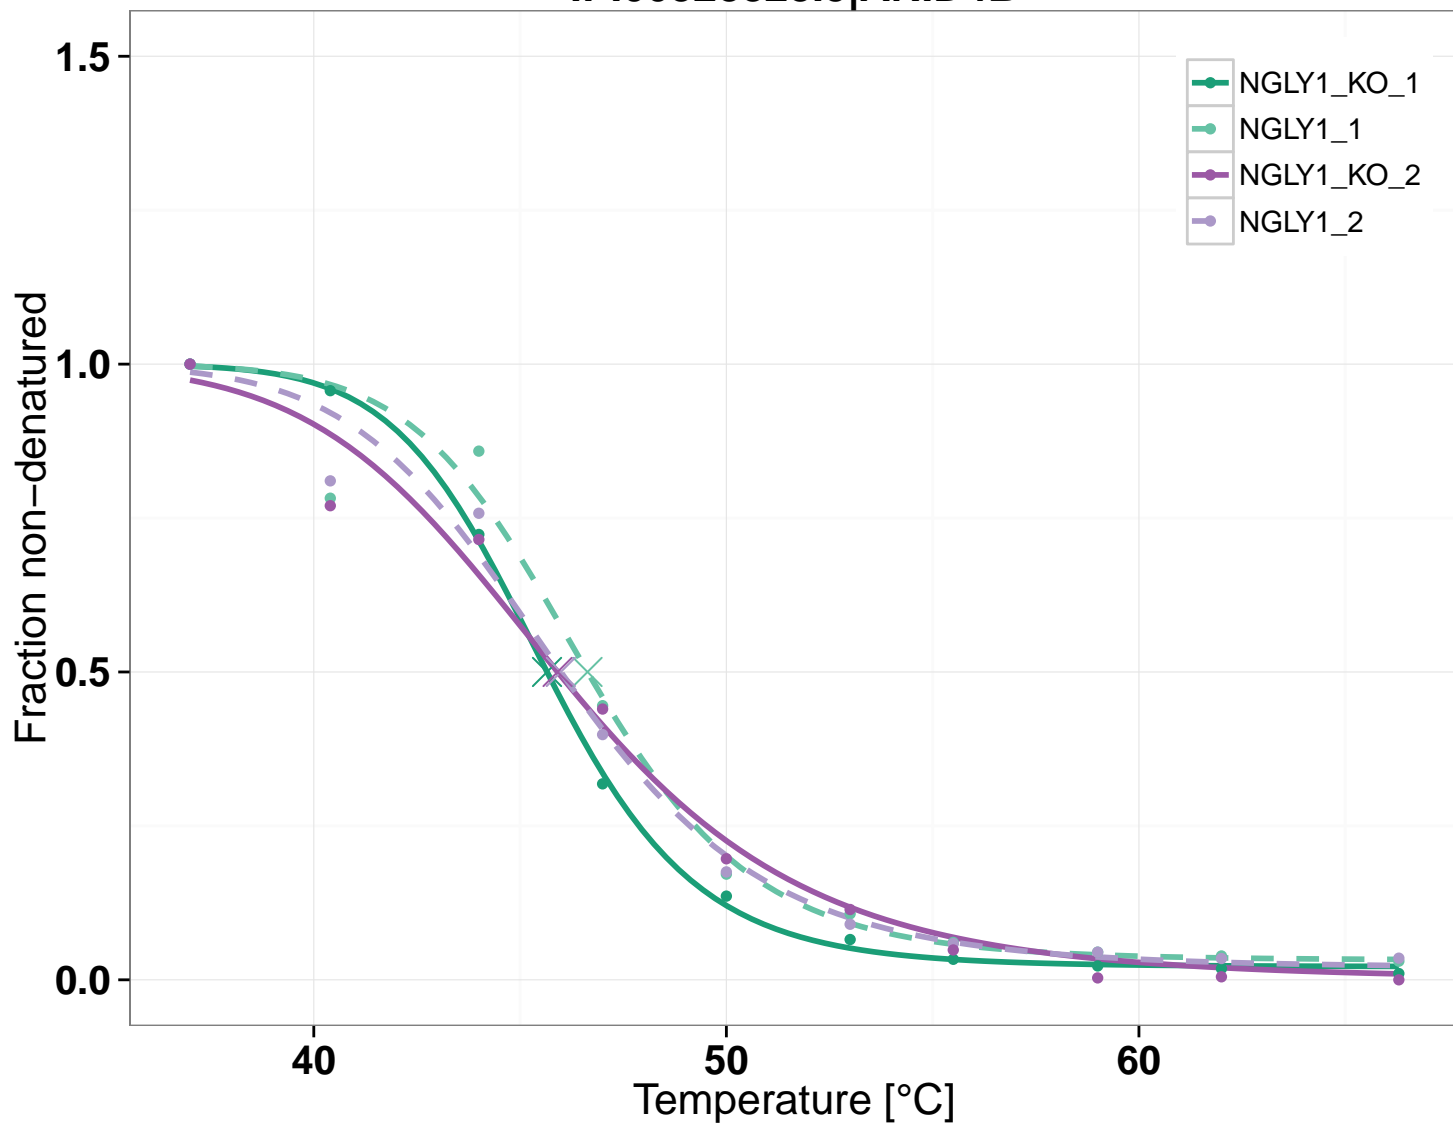

|            | meltPoint | slope  | plateau | R2   |
|------------|-----------|--------|---------|------|
| NGLY1_KO_1 | 45.65     | -0.13  | 0.02    | 1    |
| NGLY1_1    | 46.63     | -0.12  | 0.03    | 0.97 |
| NGLY1_KO_2 | 45.91     | -0.083 | 0       | 0.98 |
| NGLY1_2    | 45.99     | -0.097 | 0.02    | 0.99 |

Supplement: Supplementary file 4403 [file 1]

IPI00607605.4|MAEA

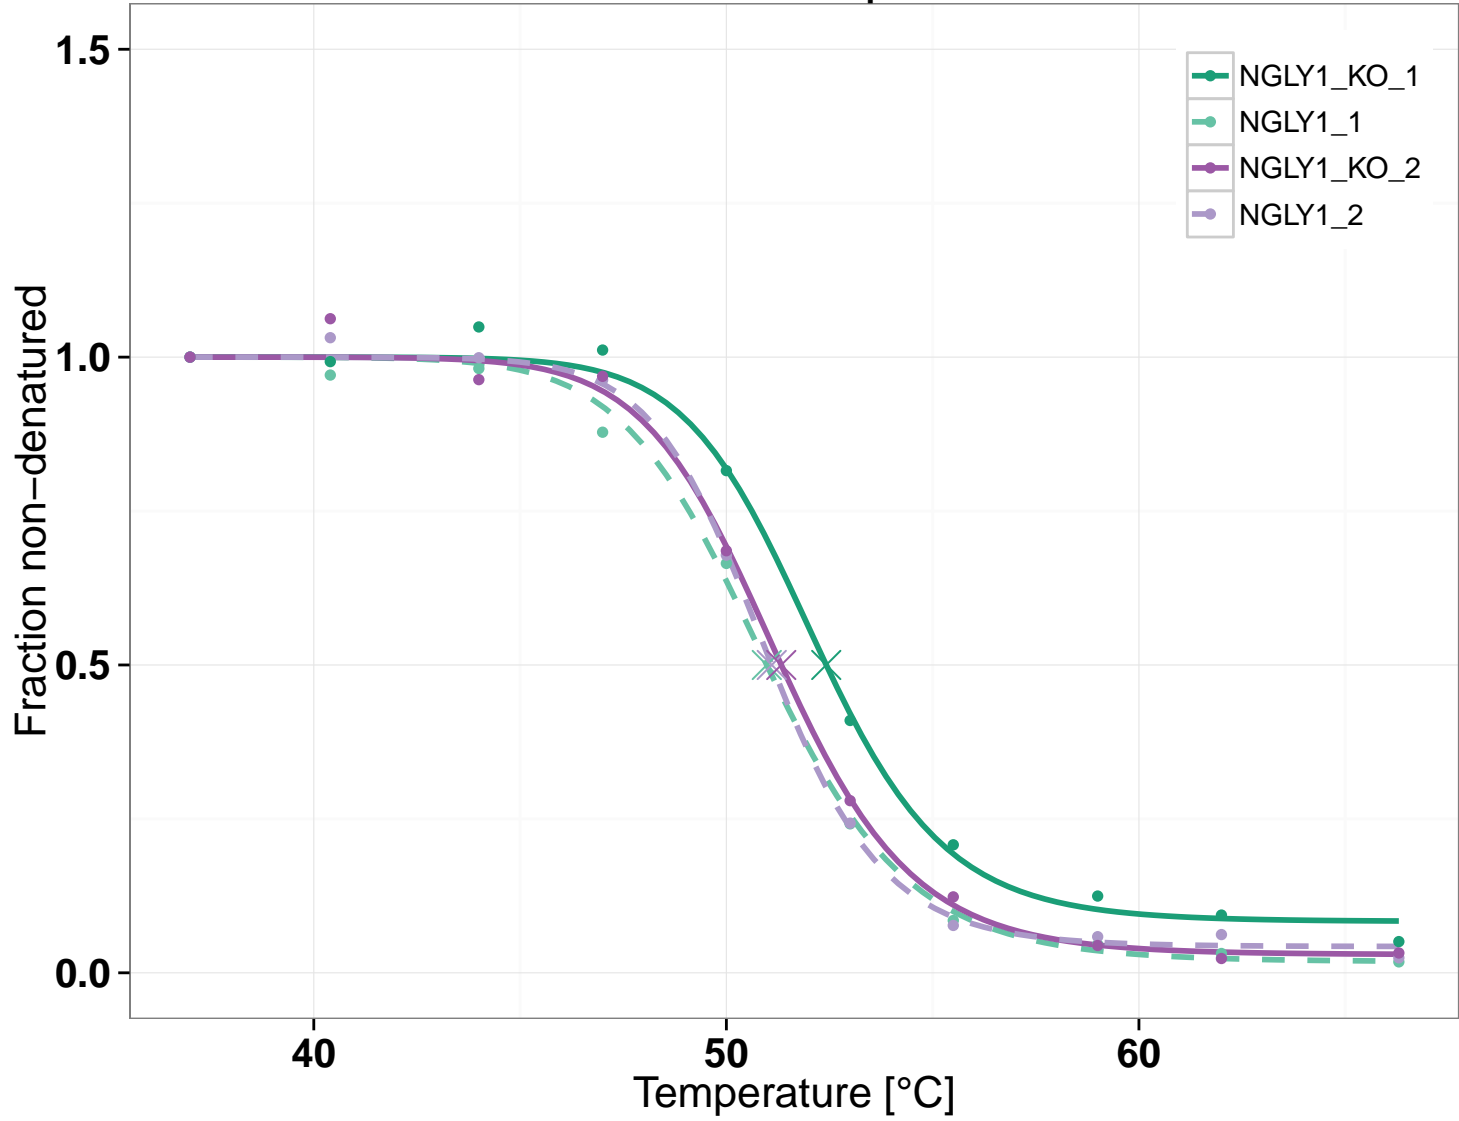

|            | meltPoint | slope | plateau | R2 |
|------------|-----------|-------|---------|----|
| NGLY1_KO_1 | 52.42     | -0.15 | 0.08    | 1  |
| NGLY1_1    | 50.98     | -0.14 | 0.02    | 1  |
| NGLY1_KO_2 | 51.33     | -0.15 | 0.03    | 1  |
| NGLY1_2    | 51.1      | -0.17 | 0.04    | 1  |

Supplement: Supplementary file 4404 [file 1]

# IPI00478260.1|NMT2

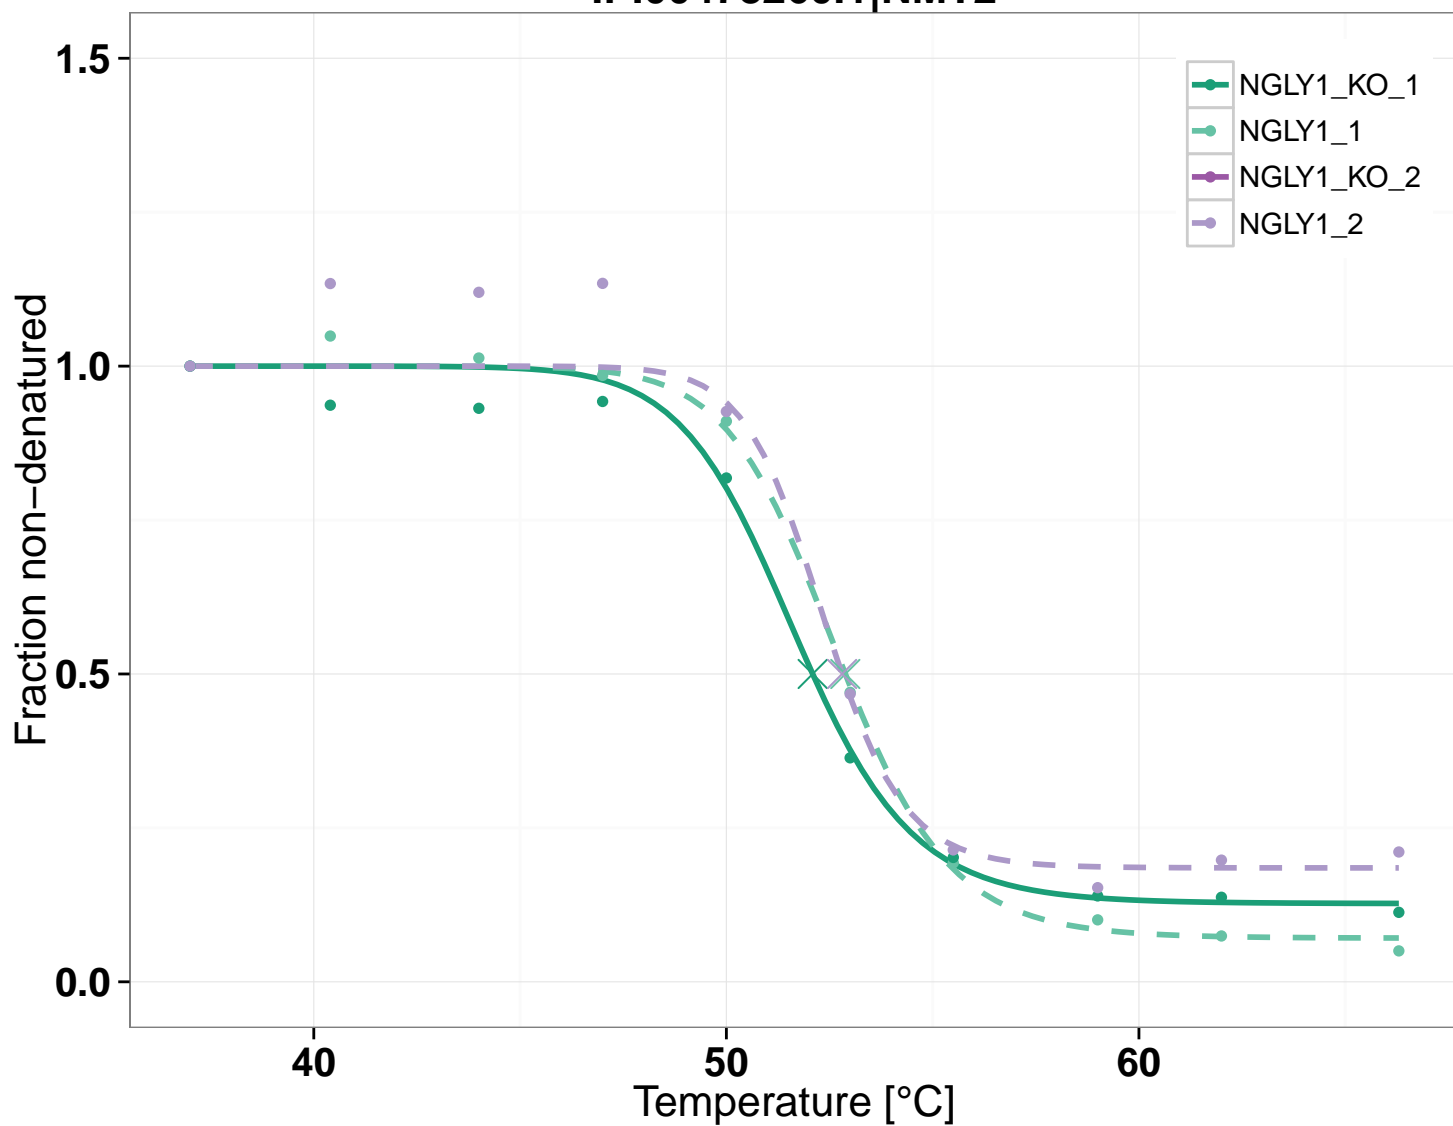

|            | meltPoint | slope | plateau | R2   |
|------------|-----------|-------|---------|------|
| NGLY1_KO_1 | 52.09     | -0.16 | 0.13    | 0.99 |
| NGLY1_1    | 52.88     | -0.17 | 0.07    | 1    |
| NGLY1_KO_2 | -         | -     | -       | -    |
| NGLY1_2    | 52.8      | -0.21 | 0.19    | 0.97 |

Supplement: Supplementary file 4405 [file 1]

# IPI00296053.3|FH

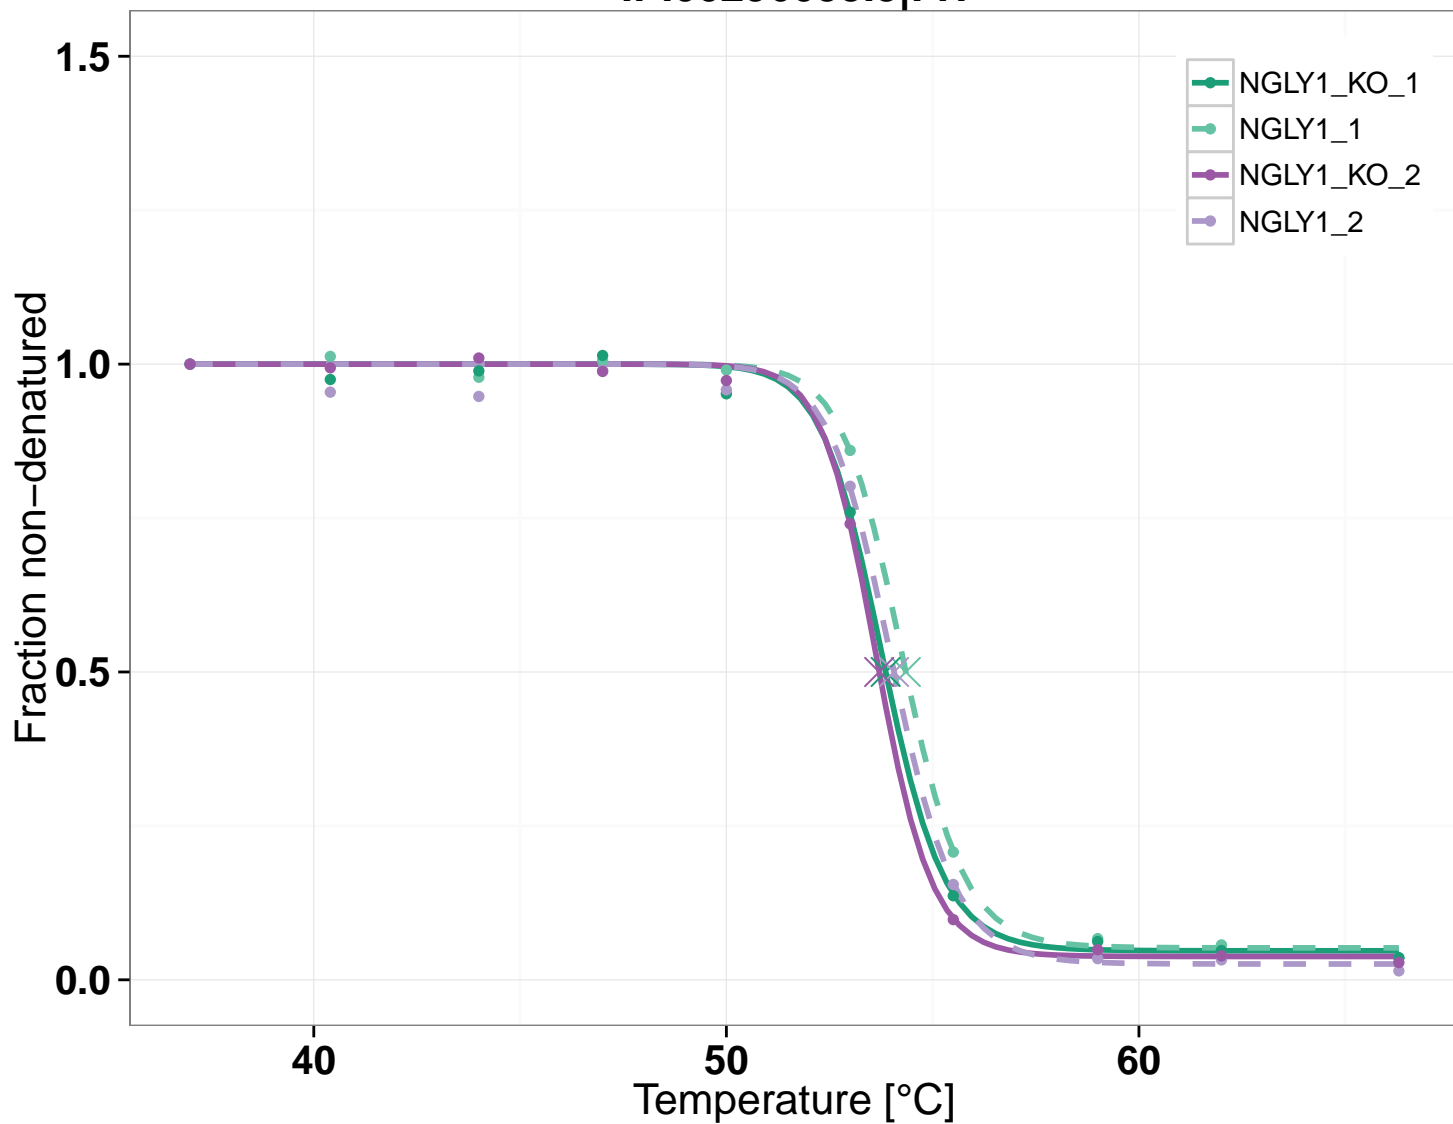

|            | meltPoint | slope | plateau | R2 |
|------------|-----------|-------|---------|----|
| NGLY1_KO_1 | 53.86     | -0.32 | 0.05    | 1  |
| NGLY1_1    | 54.35     | -0.32 | 0.05    | 1  |
| NGLY1_KO_2 | 53.71     | -0.36 | 0.04    | 1  |
| NGLY1_2    | 54.06     | -0.32 | 0.03    | 1  |

Supplement: Supplementary file 4406 [file 1]

IPI00295323.1|CHRNA5

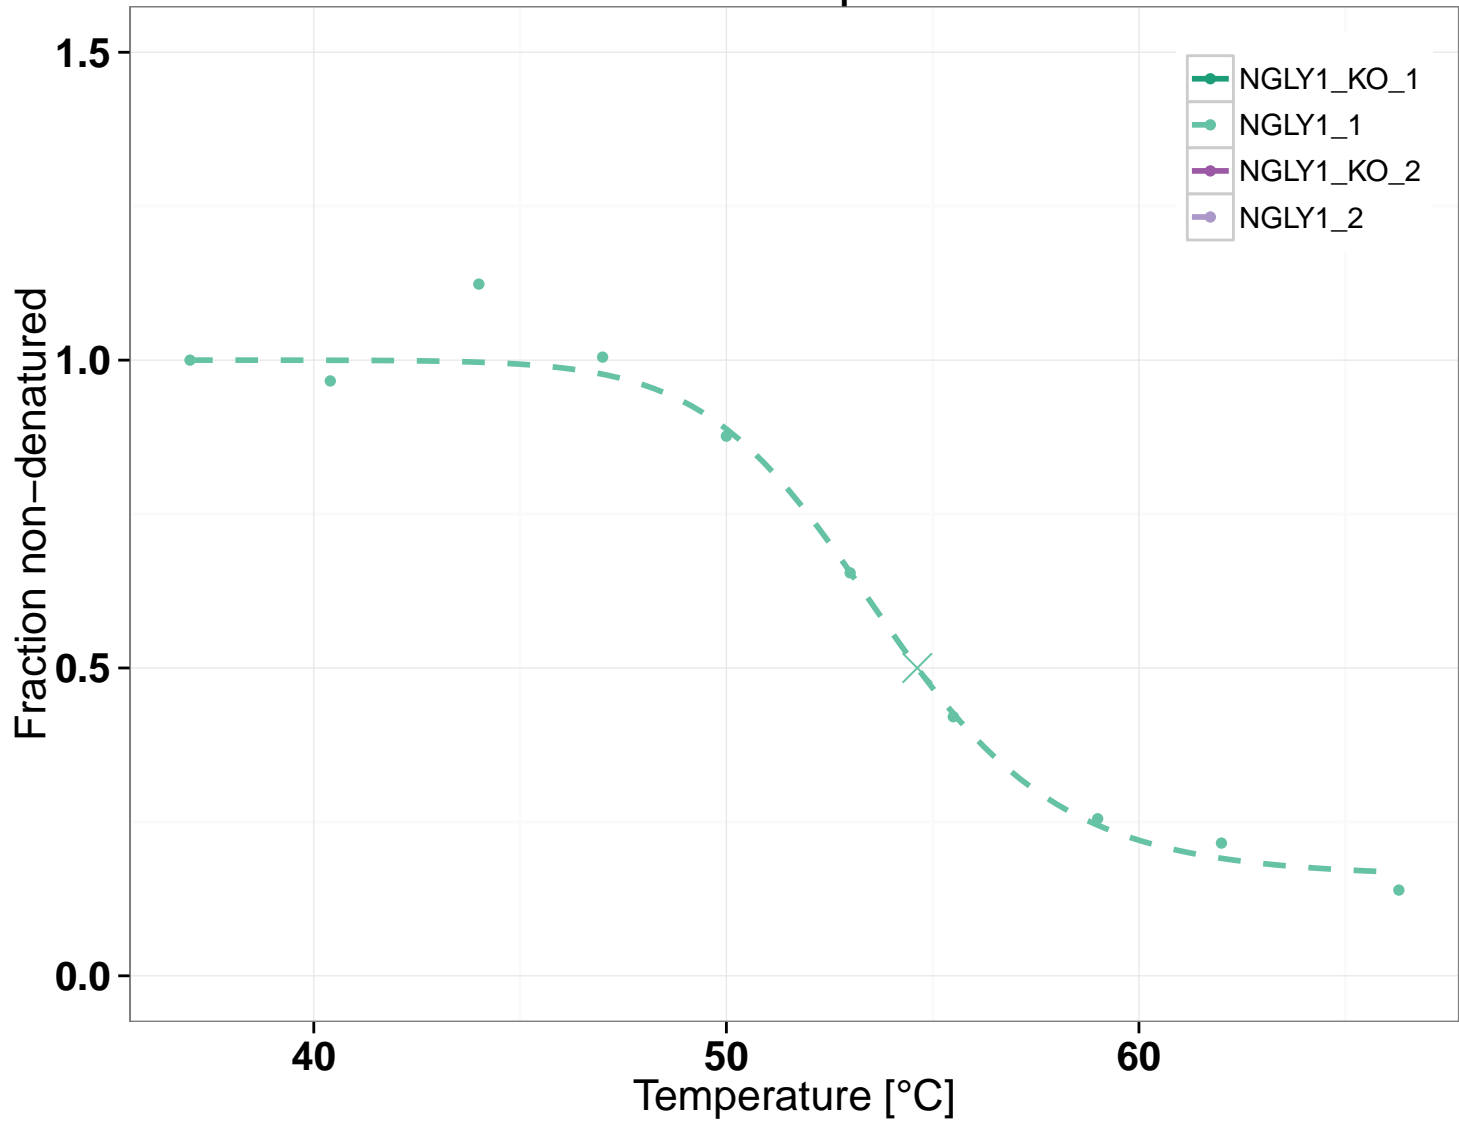

|            | meltPoint | slope  | plateau | R2   |
|------------|-----------|--------|---------|------|
| NGLY1_KO_1 | —         | —      | —       | —    |
| NGLY1_1    | 54.63     | -0.097 | 0.16    | 0.98 |
| NGLY1_KO_2 | —         | —      | —       | —    |
| NGLY1_2    | —         | —      | —       | —    |

Supplement: Supplementary file 4407 [file 1]

# IPI00297851.1|CHD1

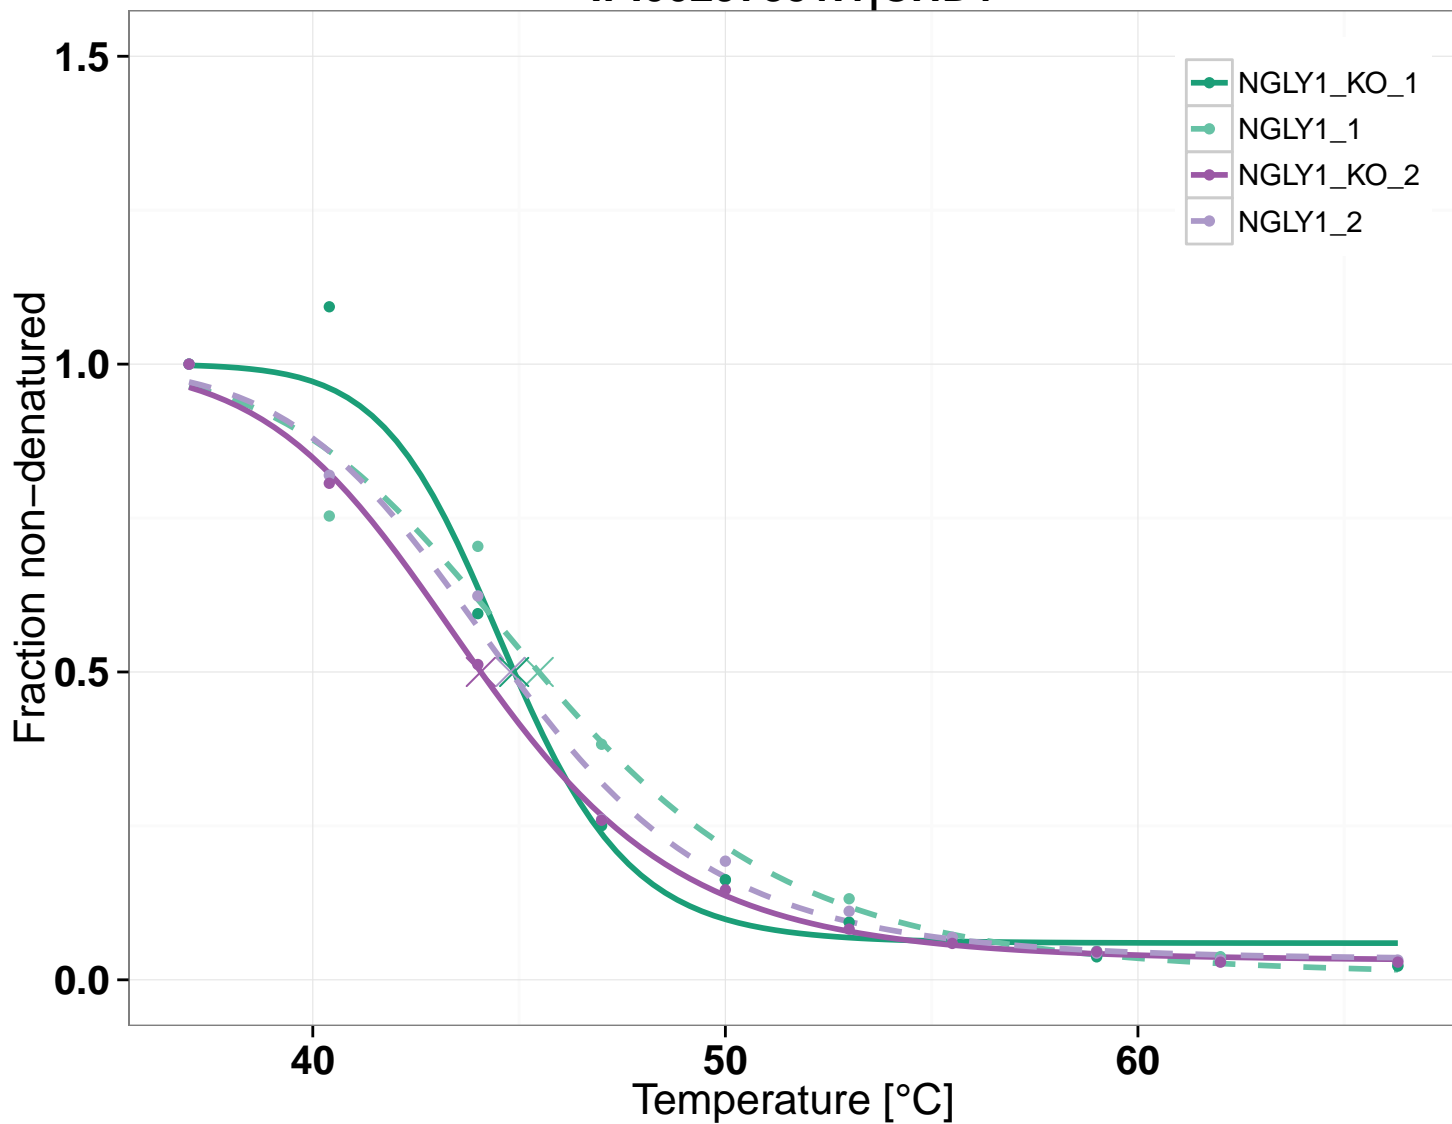

|            | meltPoint | slope  | plateau | R2   |
|------------|-----------|--------|---------|------|
| NGLY1_KO_1 | 44.88     | -0.16  | 0.06    | 0.98 |
| NGLY1_1    | 45.48     | -0.08  | 0.01    | 0.98 |
| NGLY1_KO_2 | 44.07     | -0.096 | 0.03    | 1    |
| NGLY1_2    | 44.79     | -0.093 | 0.03    | 0.99 |

Supplement: Supplementary file 4408 [file 1]

# IPI00788684.1|MPDU1

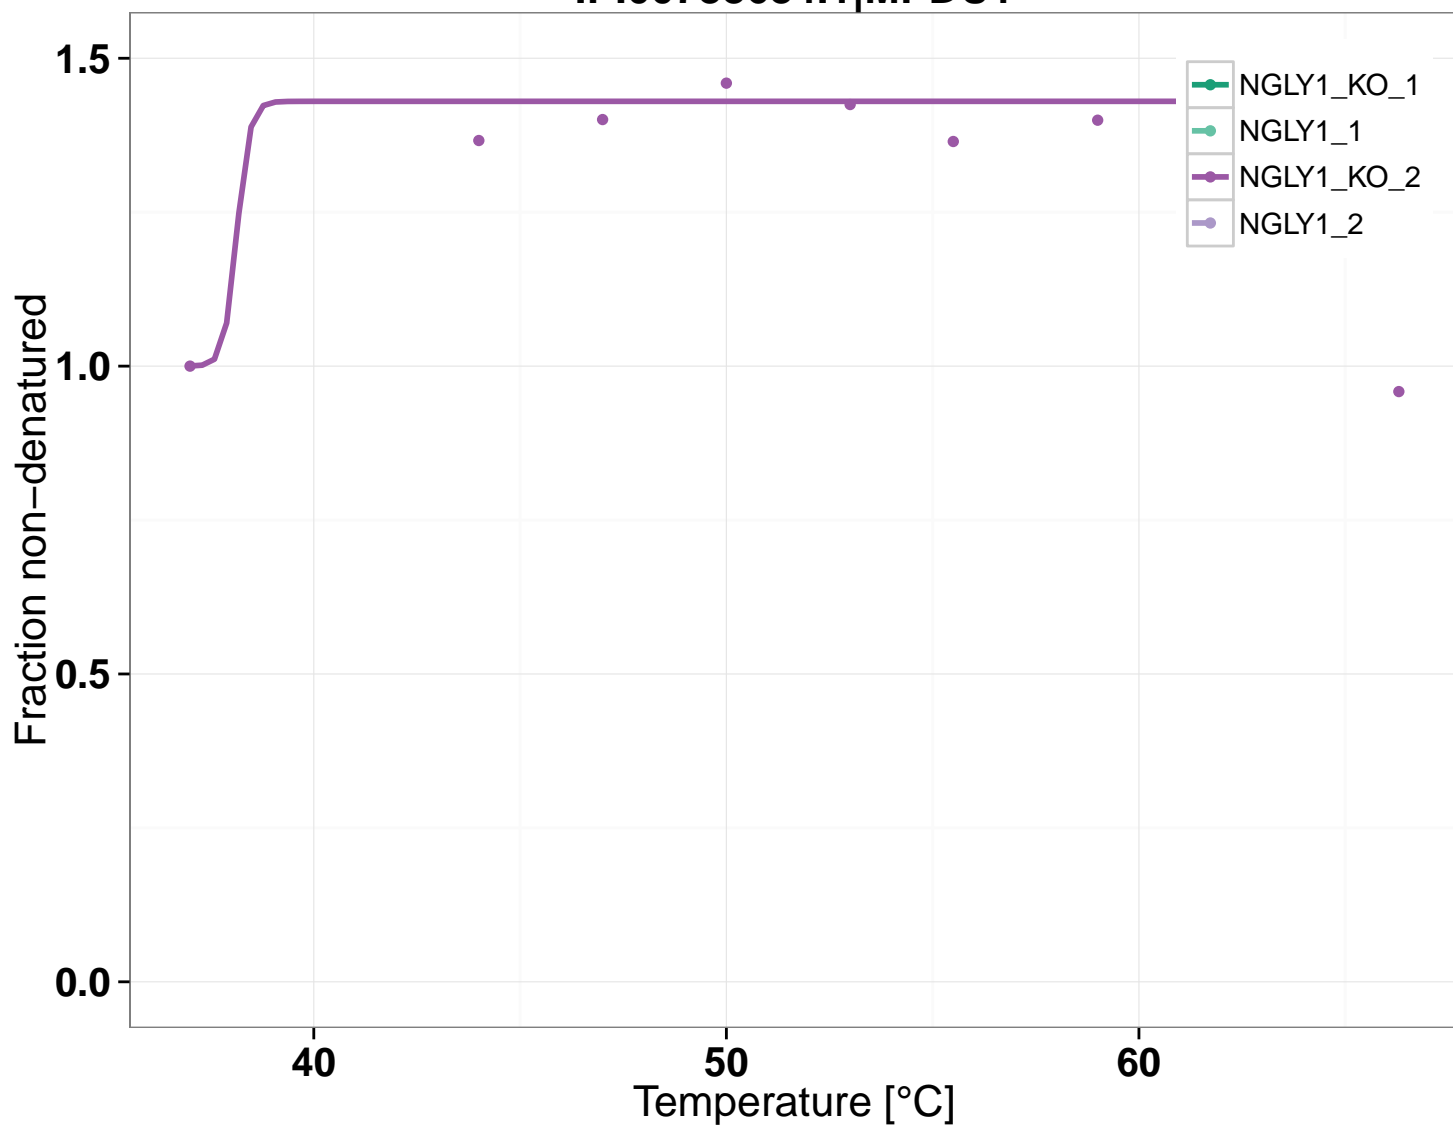

|            | meltPoint | slope | plateau | R2   |
|------------|-----------|-------|---------|------|
| NGLY1_KO_1 | -         | -     | -       | -    |
| NGLY1_1    | -         | -     | -       | -    |
| NGLY1_KO_2 | -         | 0.7   | 1.43    | 0.25 |
| NGLY1_2    | -         | -     | -       | -    |

Supplement: Supplementary file 4409 [file 1]

# IPI00384517.2|NUBPL

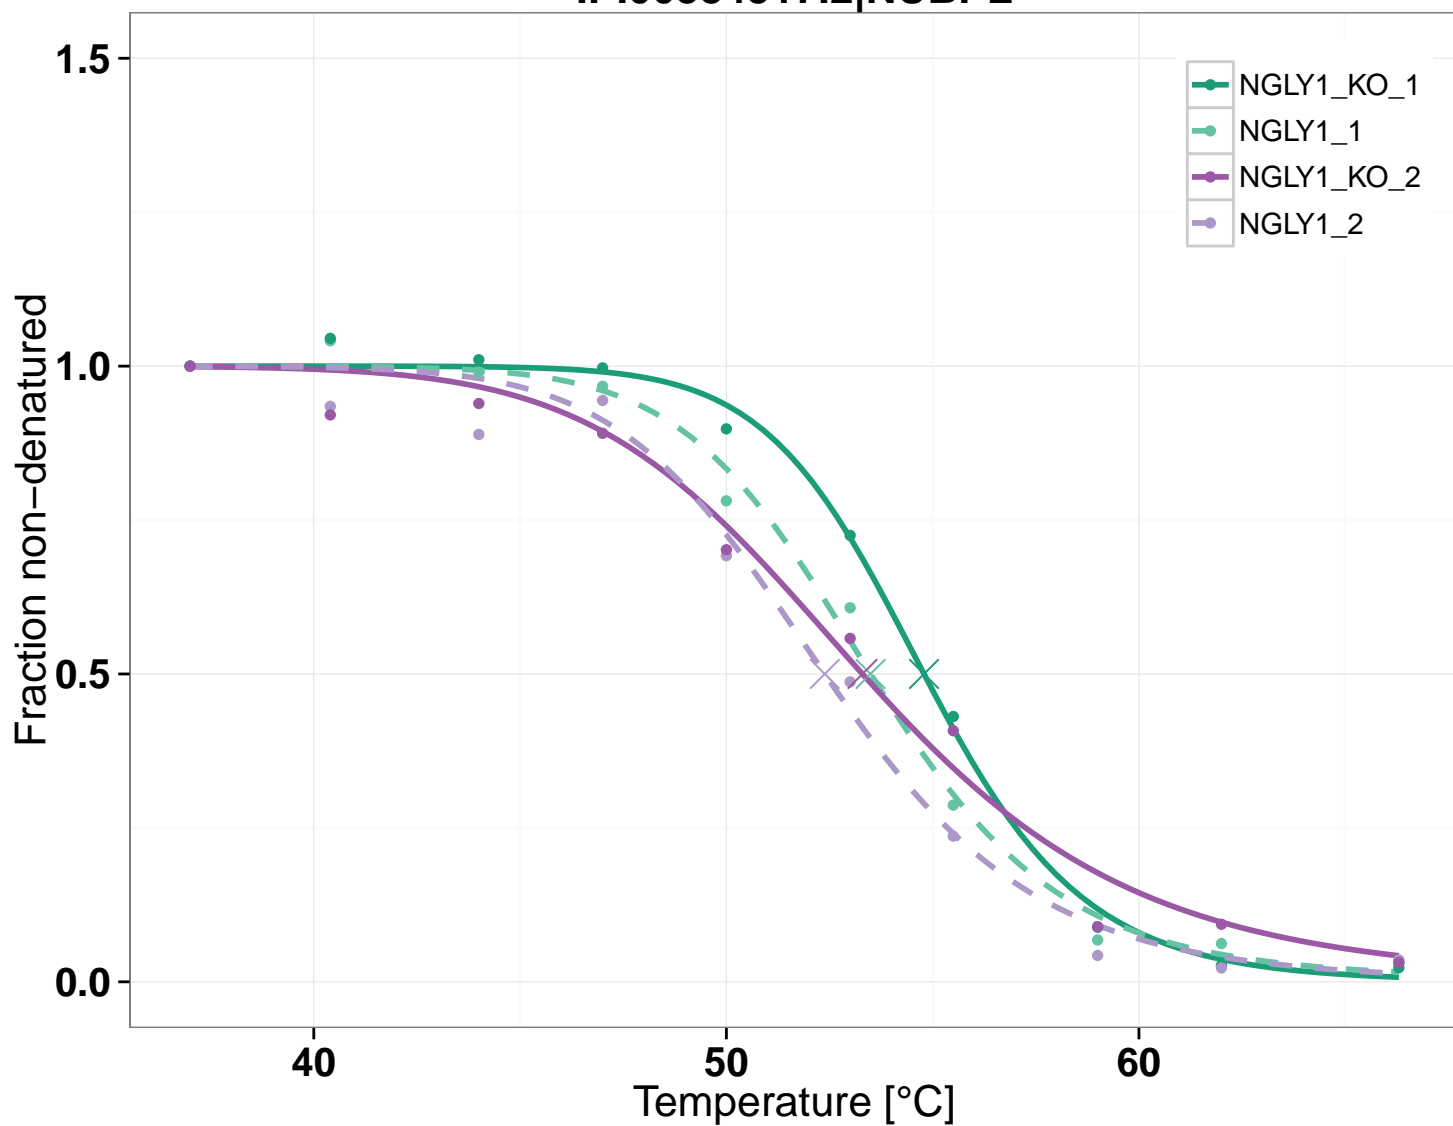

|            | meltPoint | slope  | plateau | R2   |
|------------|-----------|--------|---------|------|
| NGLY1_KO_1 | 54.79     | -0.13  | 0       | 1    |
| NGLY1_1    | 53.5      | -0.11  | 0       | 0.99 |
| NGLY1_KO_2 | 53.3      | -0.076 | 0       | 0.98 |
| NGLY1_2    | 52.38     | -0.099 | 0       | 0.99 |

Supplement: Supplementary file 4410 [file 1]

# IPI00294680.5|C15ORF23

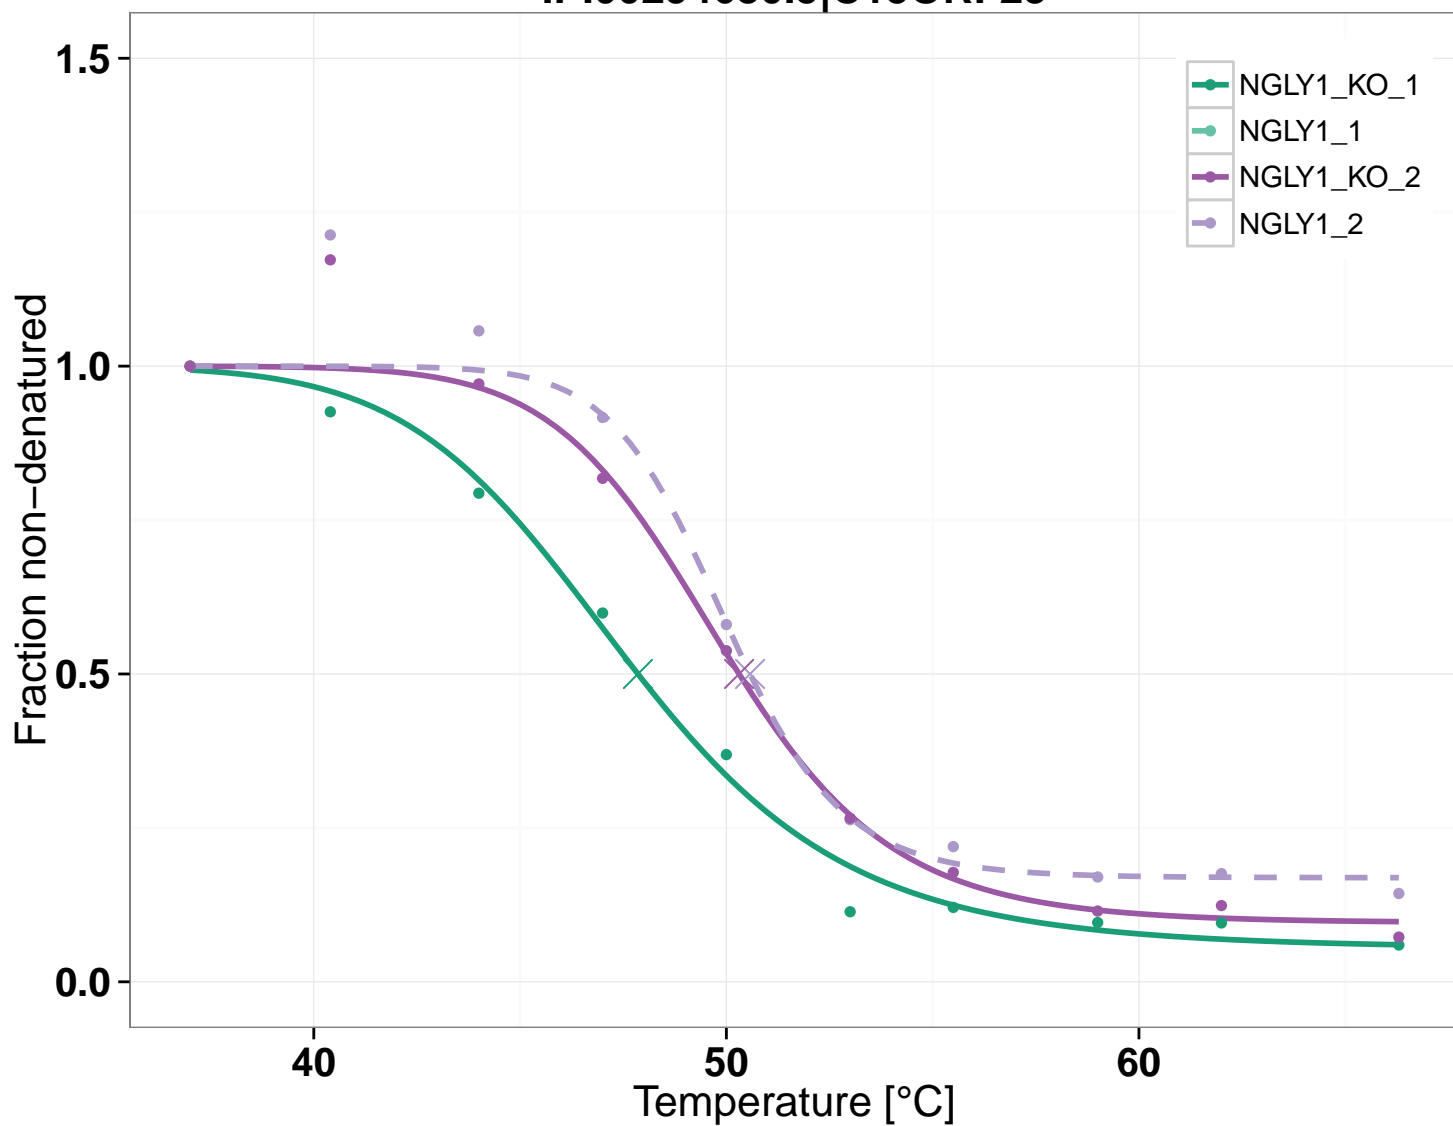

|            | meltPoint | slope  | plateau | R2   |
|------------|-----------|--------|---------|------|
| NGLY1_KO_1 | 47.86     | -0.088 | 0.05    | 0.99 |
| NGLY1_1    | —         | —      | —       | —    |
| NGLY1_KO_2 | 50.31     | -0.11  | 0.1     | 0.98 |
| NGLY1_2    | 50.57     | -0.15  | 0.17    | 0.97 |

Supplement: Supplementary file 4411 [file 1]

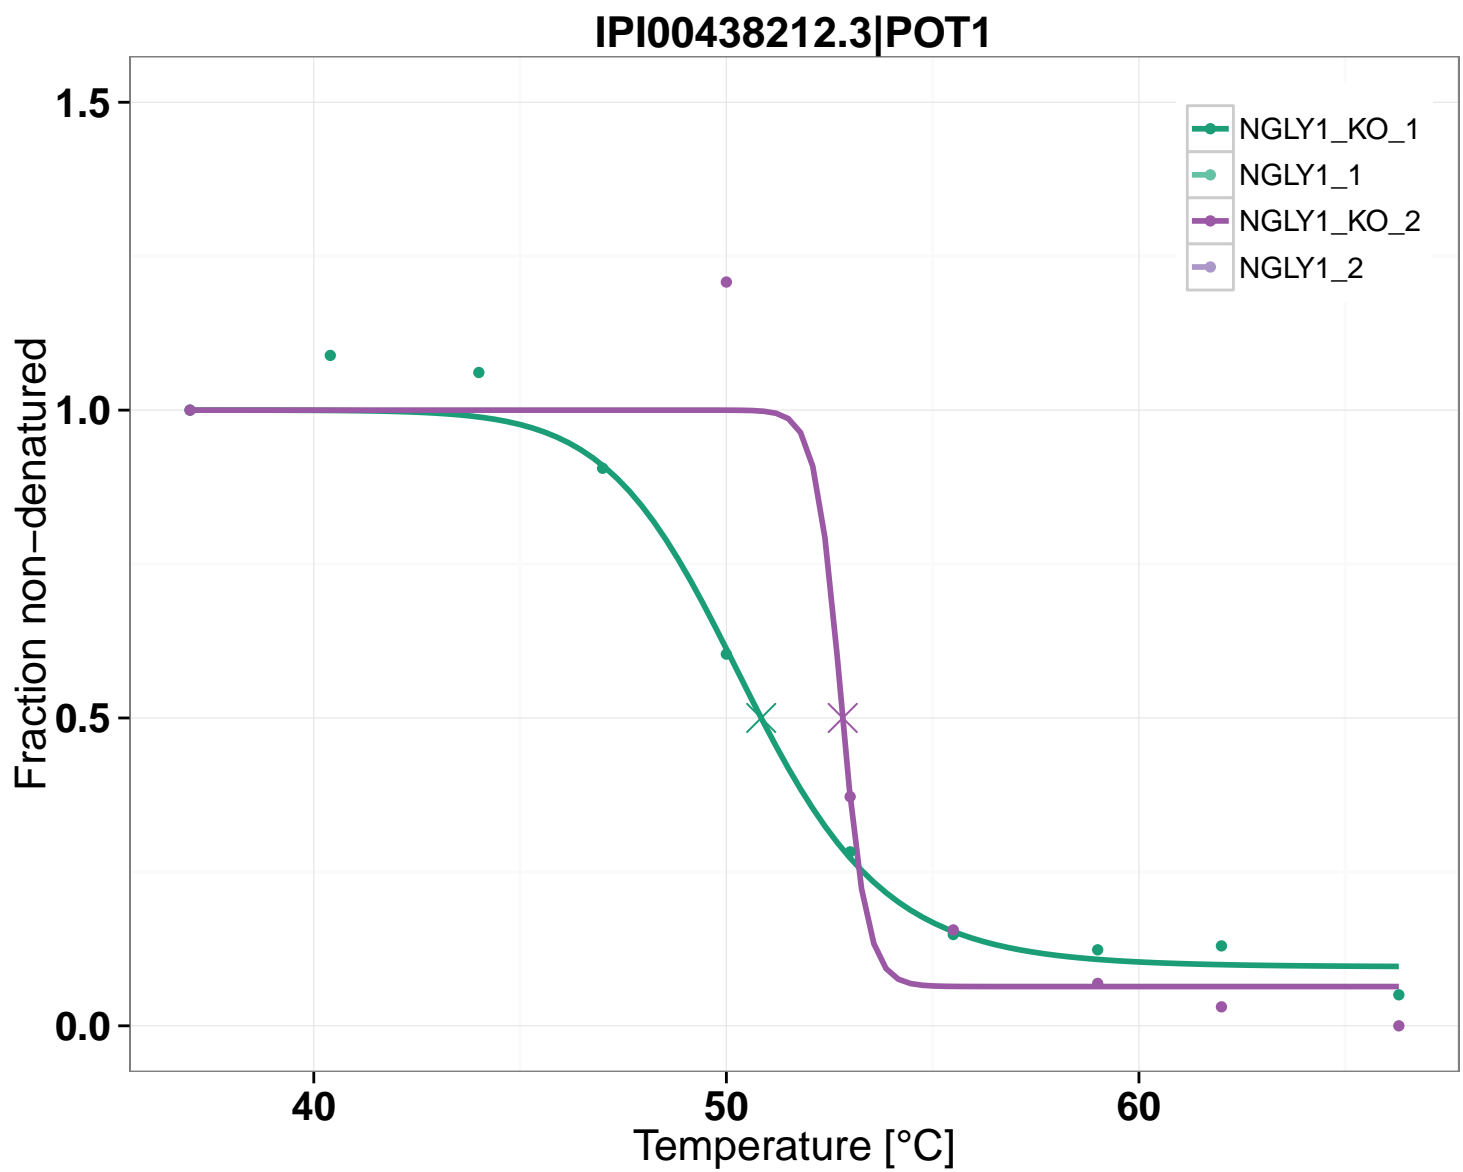

|            | meltPoint | slope | plateau | R2   |
|------------|-----------|-------|---------|------|
| NGLY1_KO_1 | 50.84     | -0.13 | 0.1     | 0.99 |
| NGLY1_1    | -         | -     | -       | -    |
| NGLY1_KO_2 | 52.82     | -0.75 | 0.06    | 0.49 |
| NGLY1_2    | -         | -     | -       | -    |

Supplement: Supplementary file 4412 [file 1]

# IPI00003789.3|NAT9

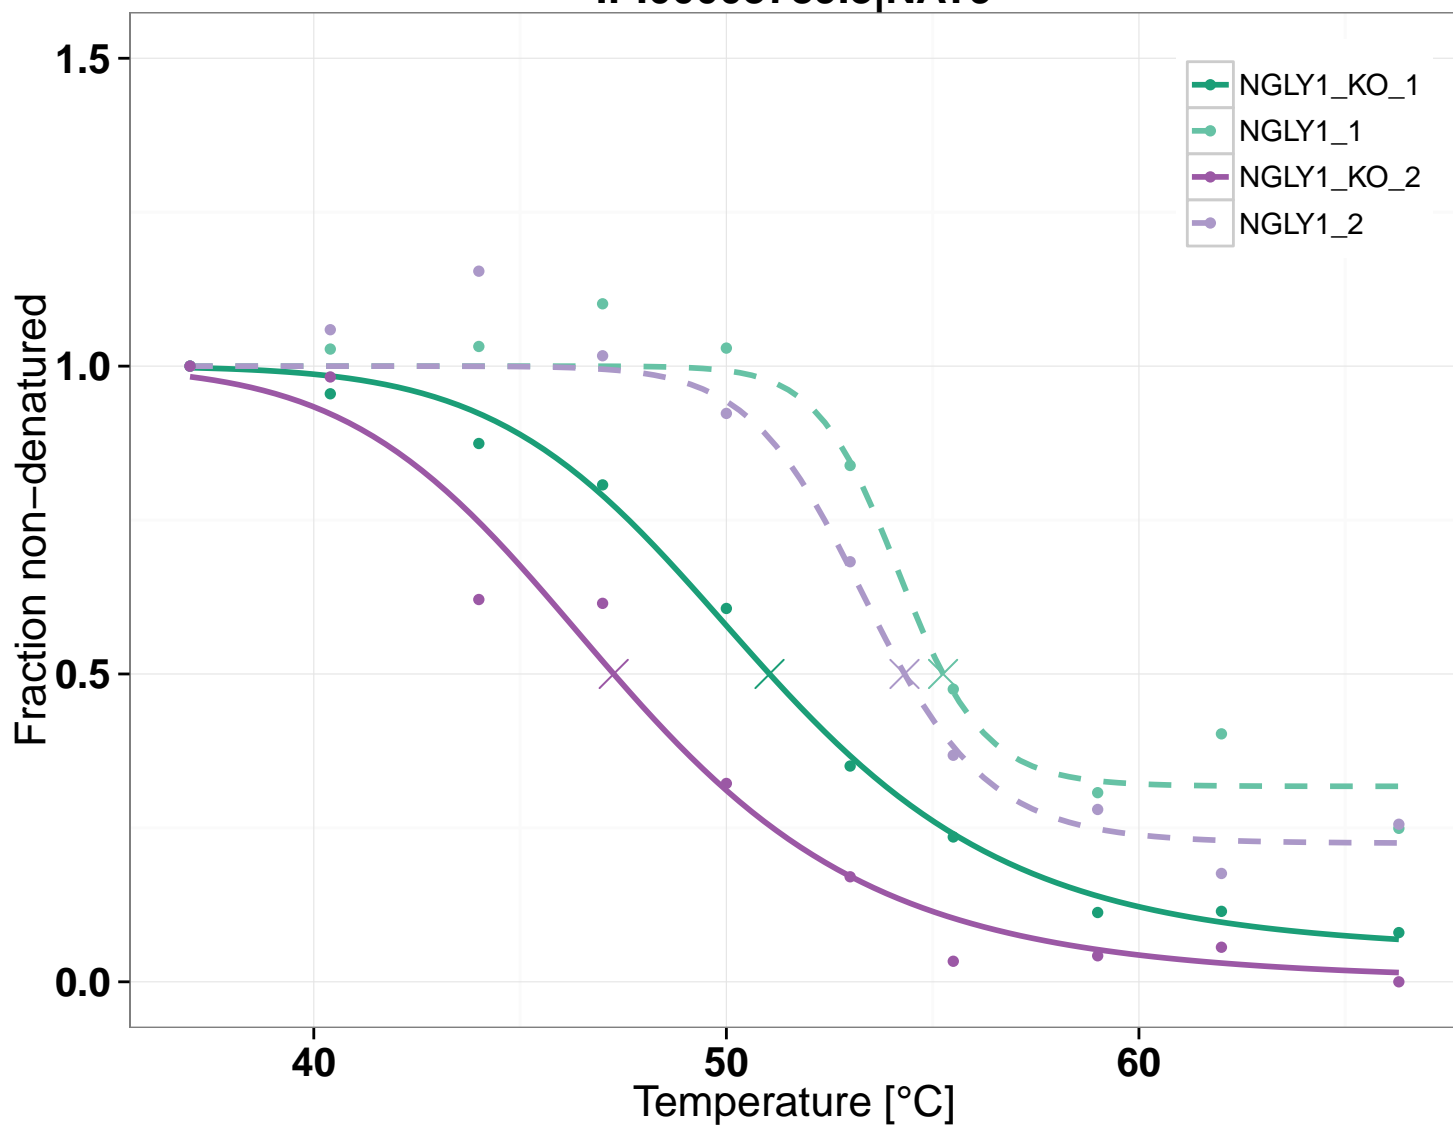

|            | meltPoint | slope  | plateau | R2   |
|------------|-----------|--------|---------|------|
| NGLY1_KO_1 | 51.05     | -0.076 | 0.05    | 1    |
| NGLY1_1    | 55.25     | -0.17  | 0.32    | 0.98 |
| NGLY1_KO_2 | 47.27     | -0.078 | 0       | 0.98 |
| NGLY1_2    | 54.32     | -0.13  | 0.22    | 0.97 |

Supplement: Supplementary file 4413 [file 1]

# IPI00793717.1|TCP10L

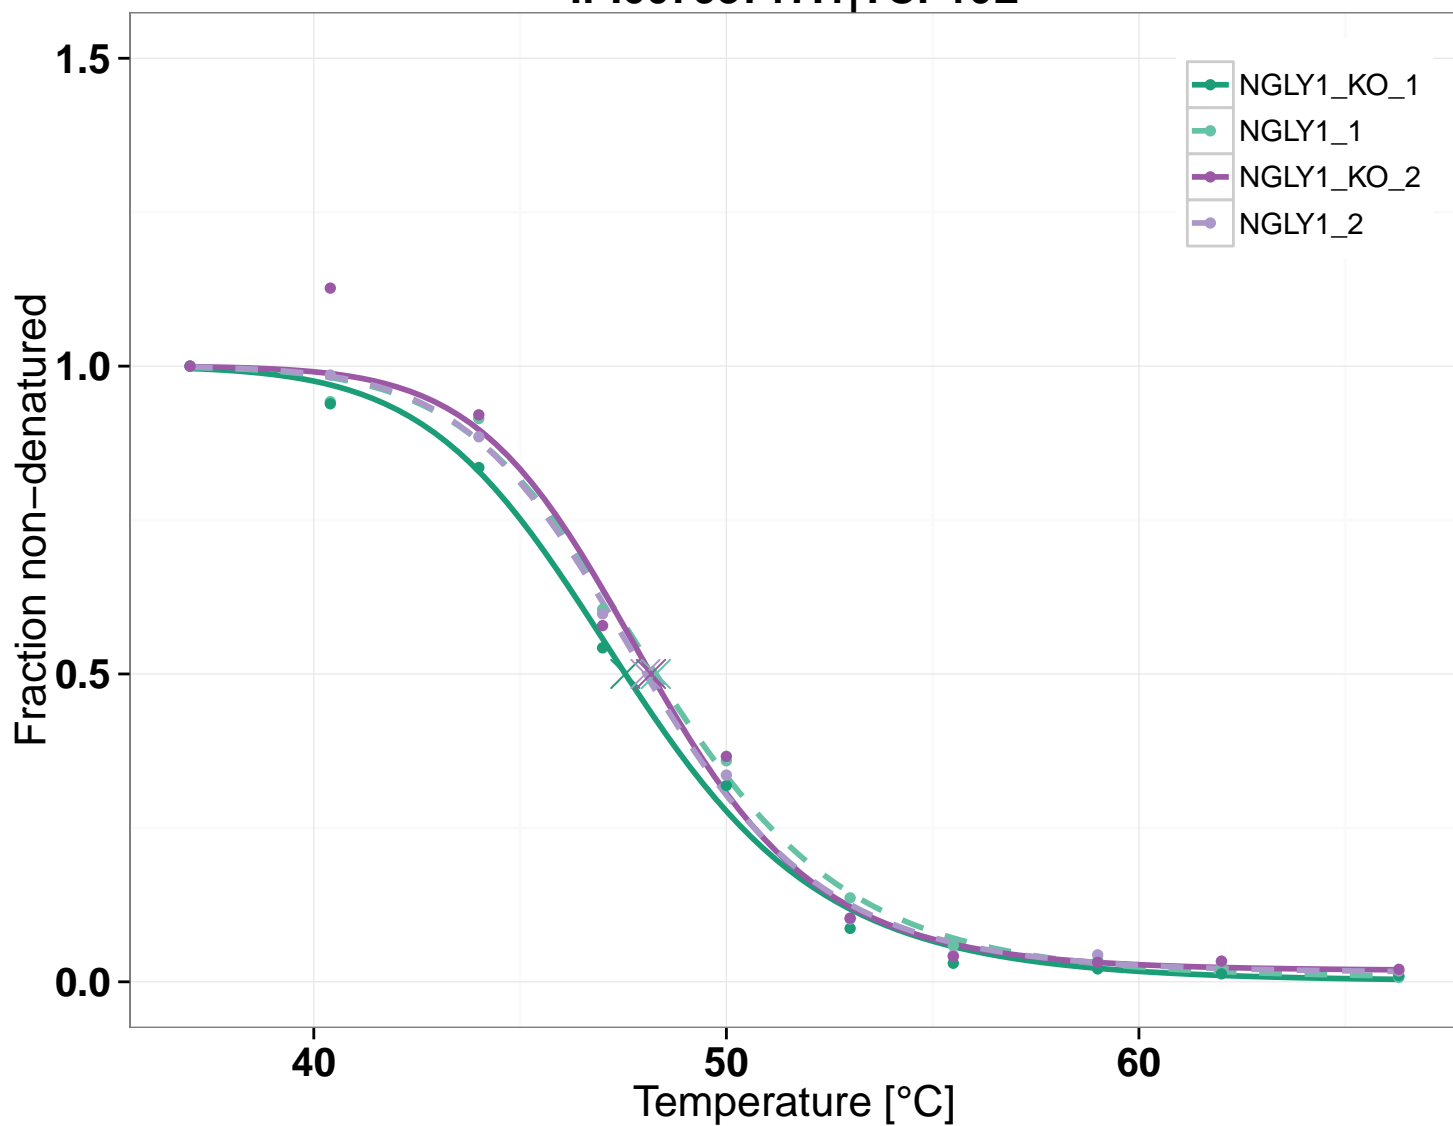

|            | meltPoint | slope | plateau | R2   |
|------------|-----------|-------|---------|------|
| NGLY1_KO_1 | 47.55     | -0.1  | 0       | 1    |
| NGLY1_1    | 48.29     | -0.11 | 0.01    | 1    |
| NGLY1_KO_2 | 48.17     | -0.12 | 0.02    | 0.98 |
| NGLY1_2    | 48.04     | -0.11 | 0.01    | 1    |

Supplement: Supplementary file 4414 [file 1]

IPI00382821.3|C5ORF32

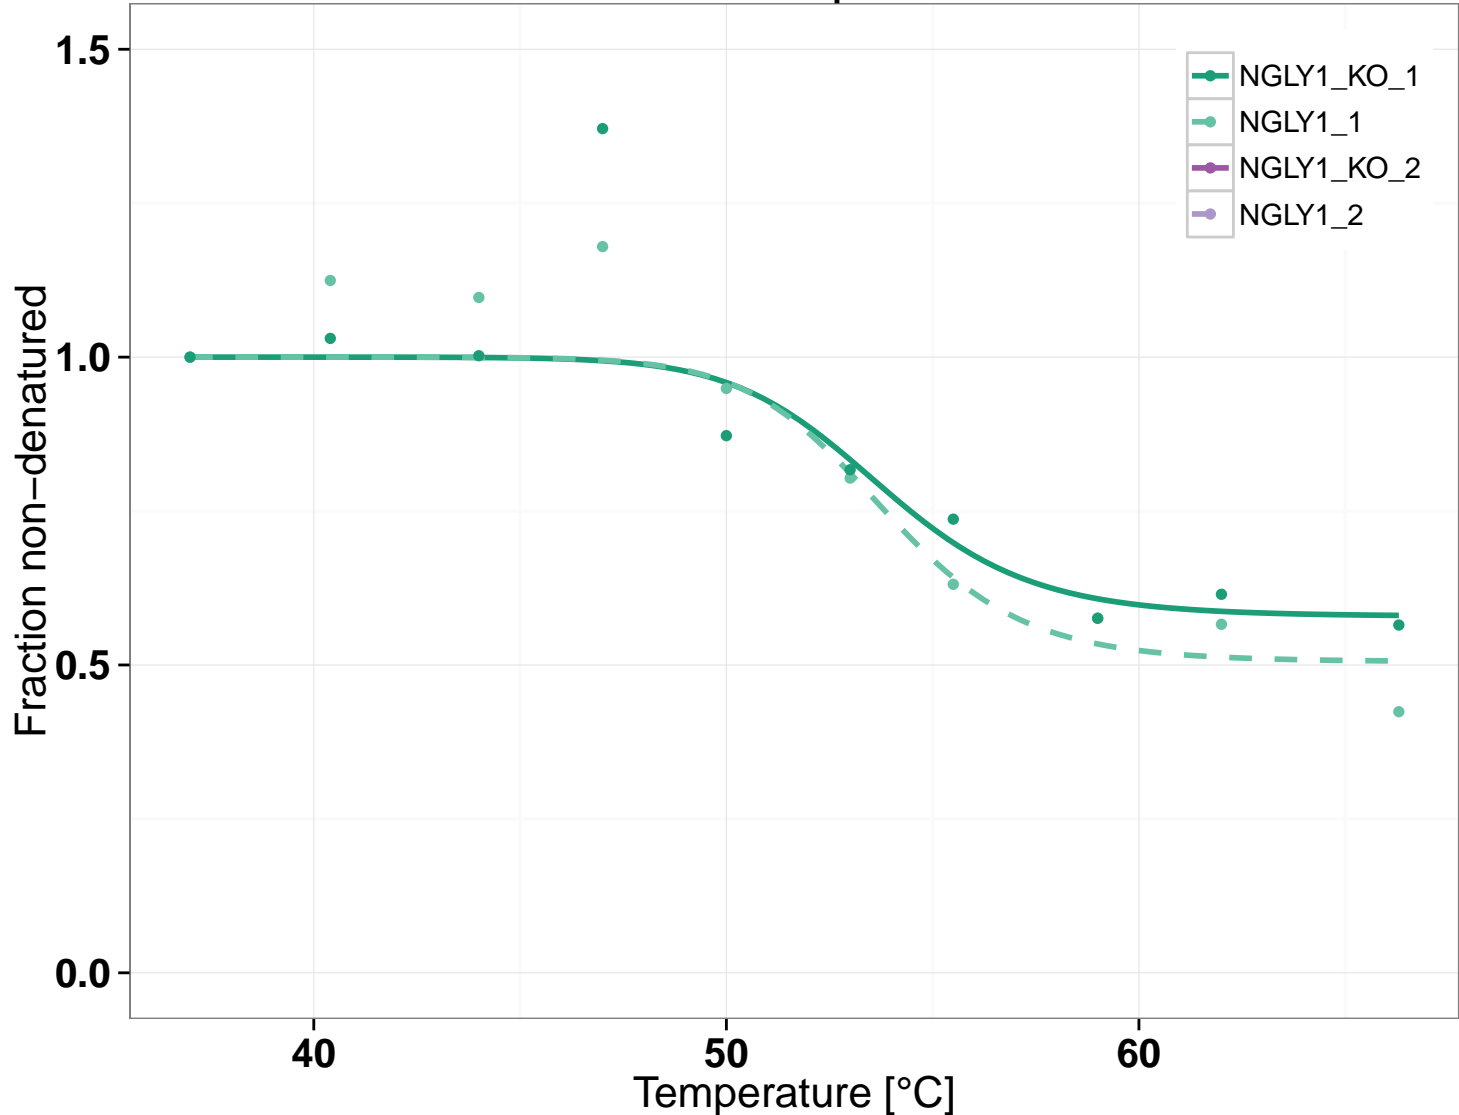

|            | meltPoint | slope  | plateau | R2   |
|------------|-----------|--------|---------|------|
| NGLY1_KO_1 | -         | -0.058 | 0.58    | 0.73 |
| NGLY1_1    | -         | -0.073 | 0.51    | 0.89 |
| NGLY1_KO_2 | -         | -      | -       | -    |
| NGLY1_2    | -         | -      | -       | -    |

Supplement: Supplementary file 4415 [file 1]

# IPI00299158.1|PVR

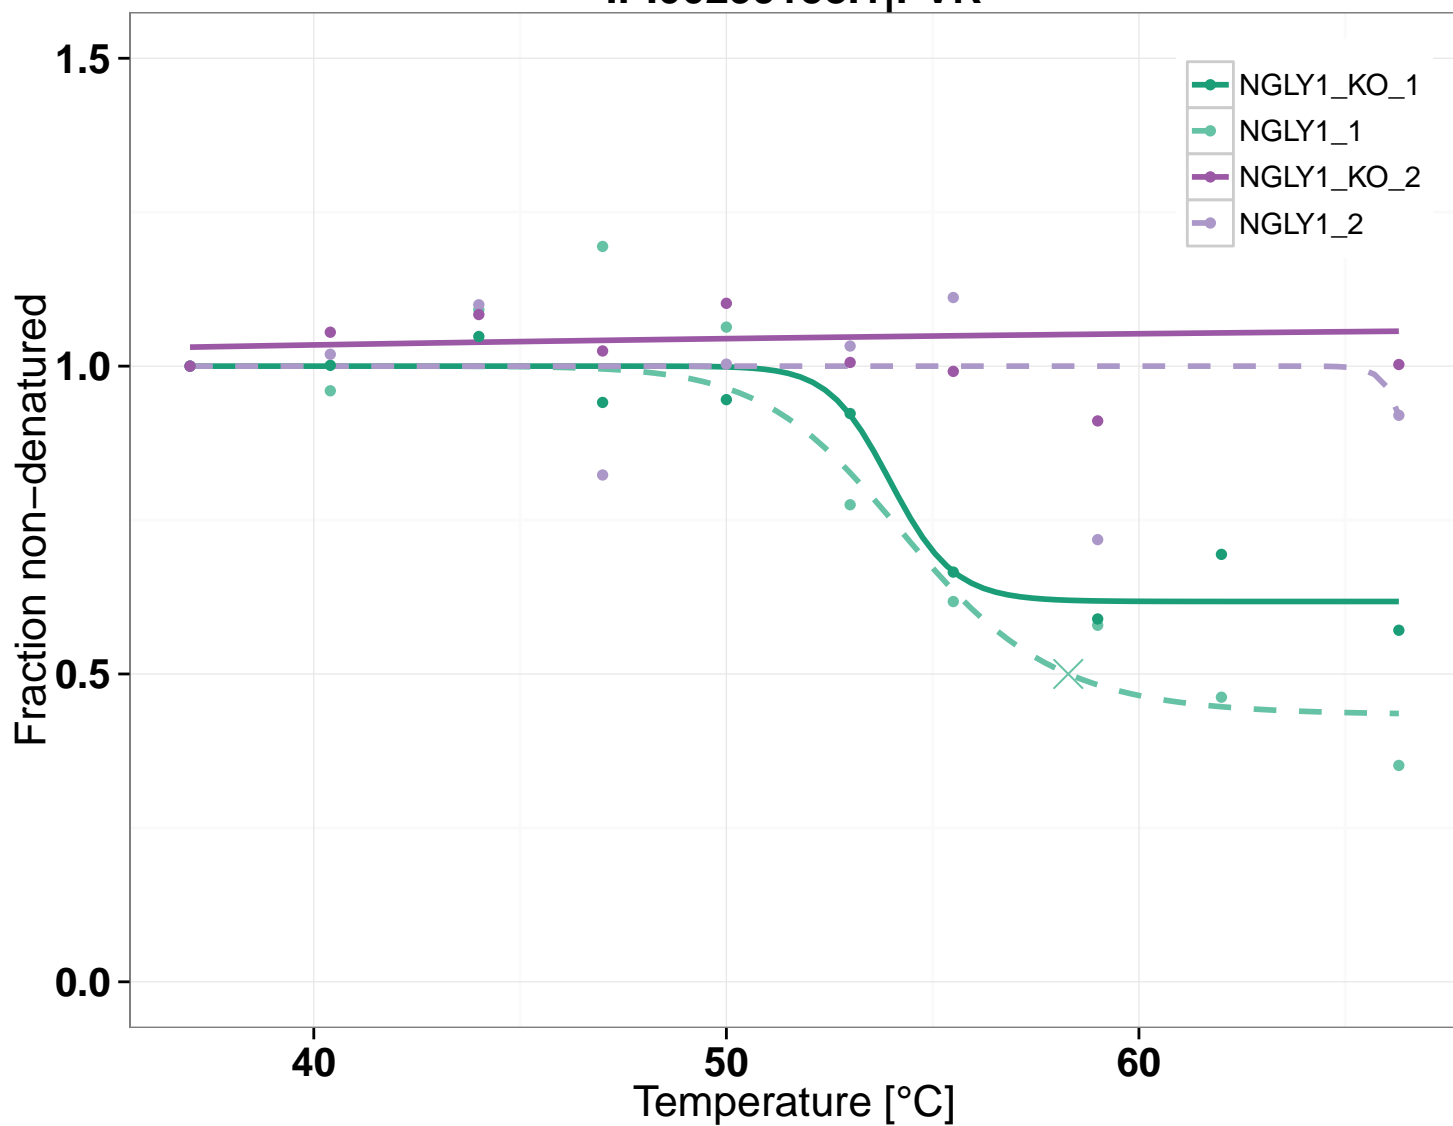

|            | meltPoint | slope | plateau | R2   |
|------------|-----------|-------|---------|------|
| NGLY1_KO_1 | -         | -0.13 | 0.62    | 0.94 |
| NGLY1_1    | 58.29     | -0.08 | 0.43    | 0.9  |
| NGLY1_KO_2 | -         | -     | 1.21    | 0.01 |
| NGLY1_2    | -         | -     | 0       | 0.03 |

Supplement: Supplementary file 4416 [file 1]

IPI00550308.1|CPNE1

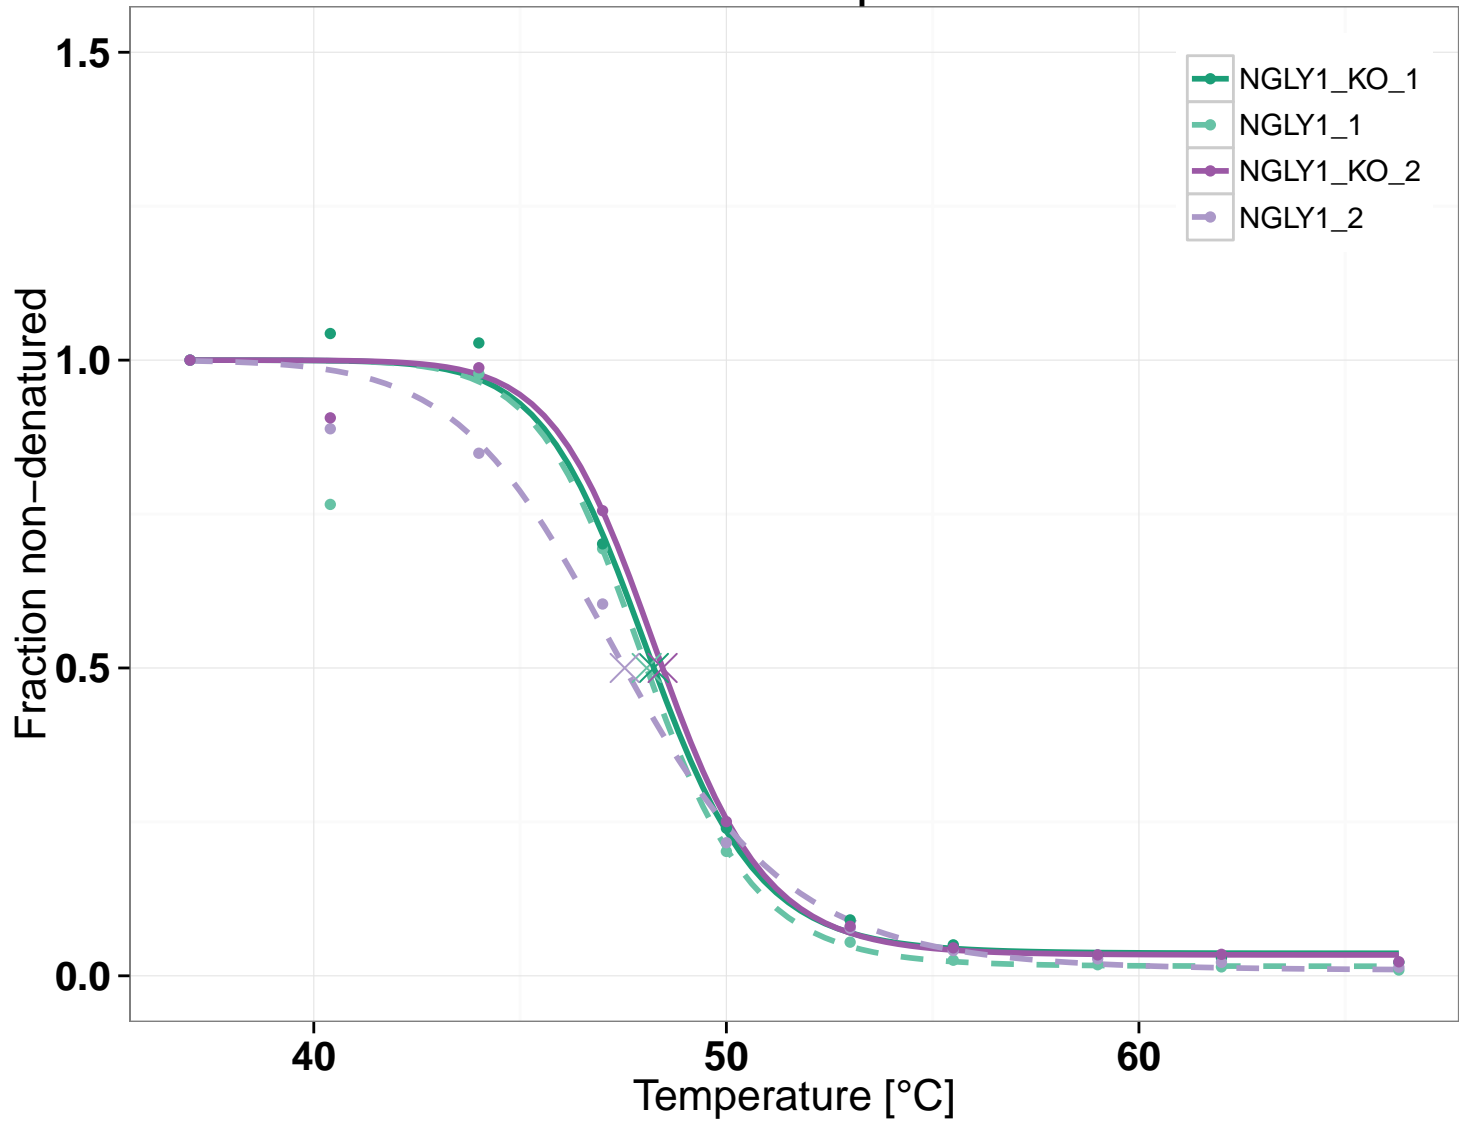

|            | meltPoint | slope | plateau | R2   |
|------------|-----------|-------|---------|------|
| NGLY1_KO_1 | 48.24     | -0.18 | 0.04    | 1    |
| NGLY1_1    | 48.07     | -0.19 | 0.02    | 0.97 |
| NGLY1_KO_2 | 48.45     | -0.19 | 0.03    | 0.99 |
| NGLY1_2    | 47.54     | -0.12 | 0.01    | 0.99 |

Supplement: Supplementary file 4417 [file 1]

# IPI00013940.3|SYNGR1

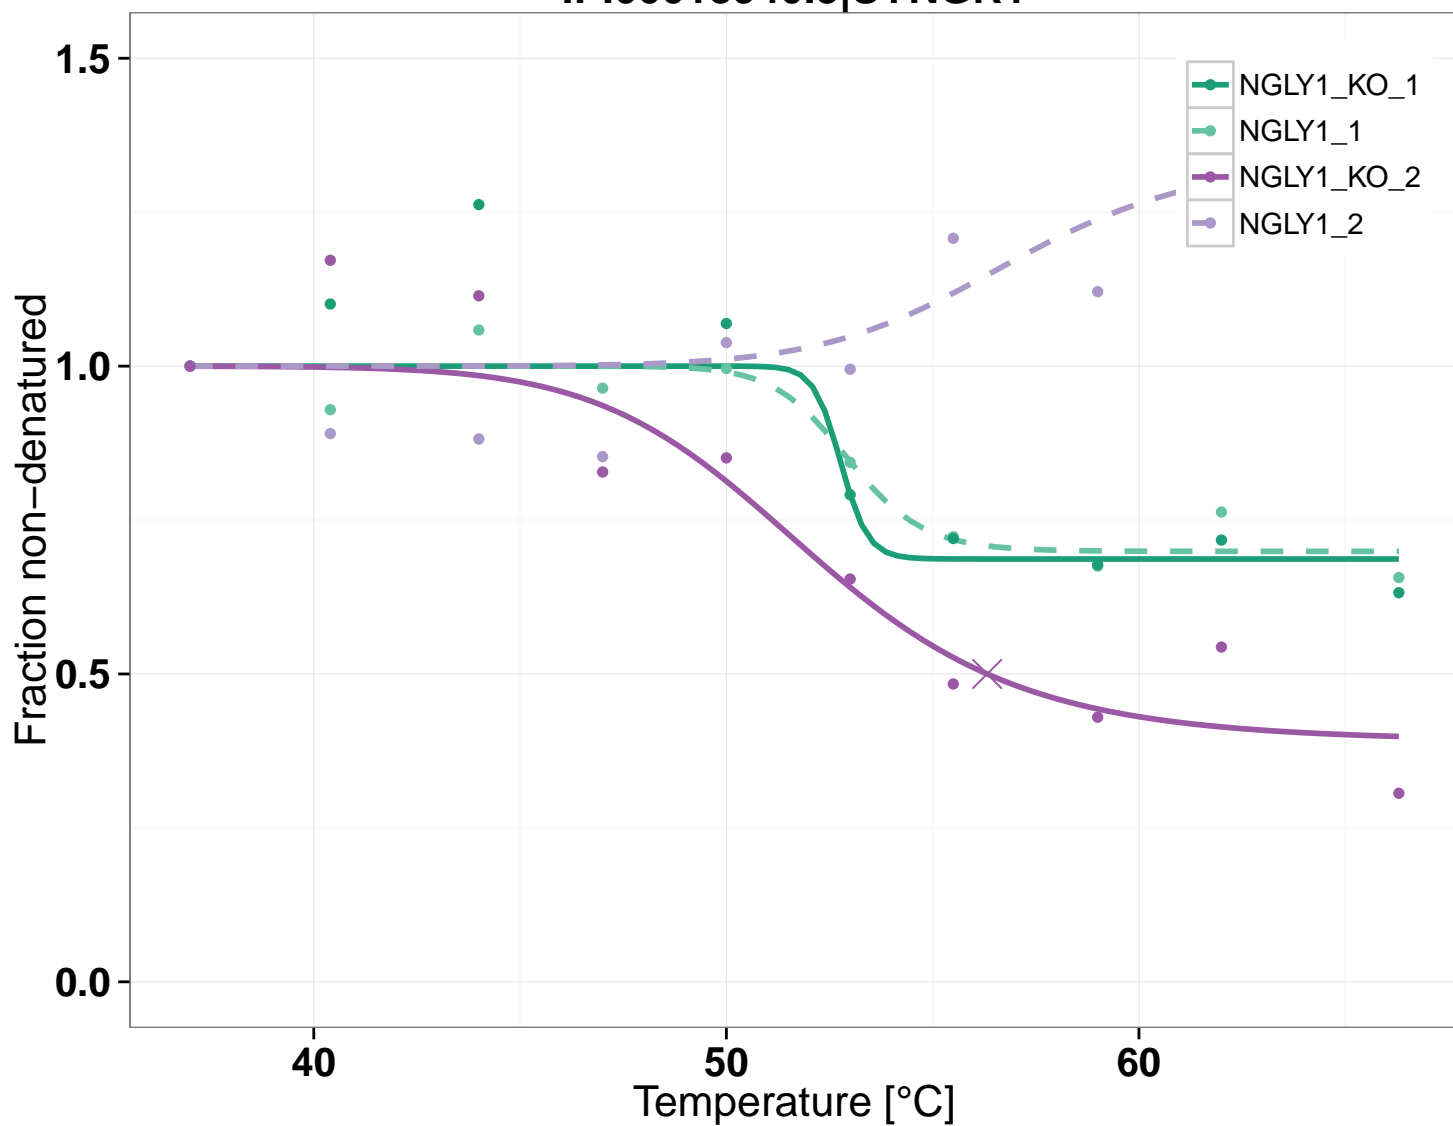

|            | meltPoint | slope  | plateau | R2   |
|------------|-----------|--------|---------|------|
| NGLY1_KO_1 | –         | –0.24  | 0.69    | 0.54 |
| NGLY1_1    | –         | –0.083 | 0.7     | 0.92 |
| NGLY1_KO_2 | 56.32     | –0.059 | 0.39    | 0.89 |
| NGLY1_2    | –         | 0.037  | 1.34    | 0.72 |

Supplement: Supplementary file 4418 [file 1]

IPI00747721.2|ZNF780B

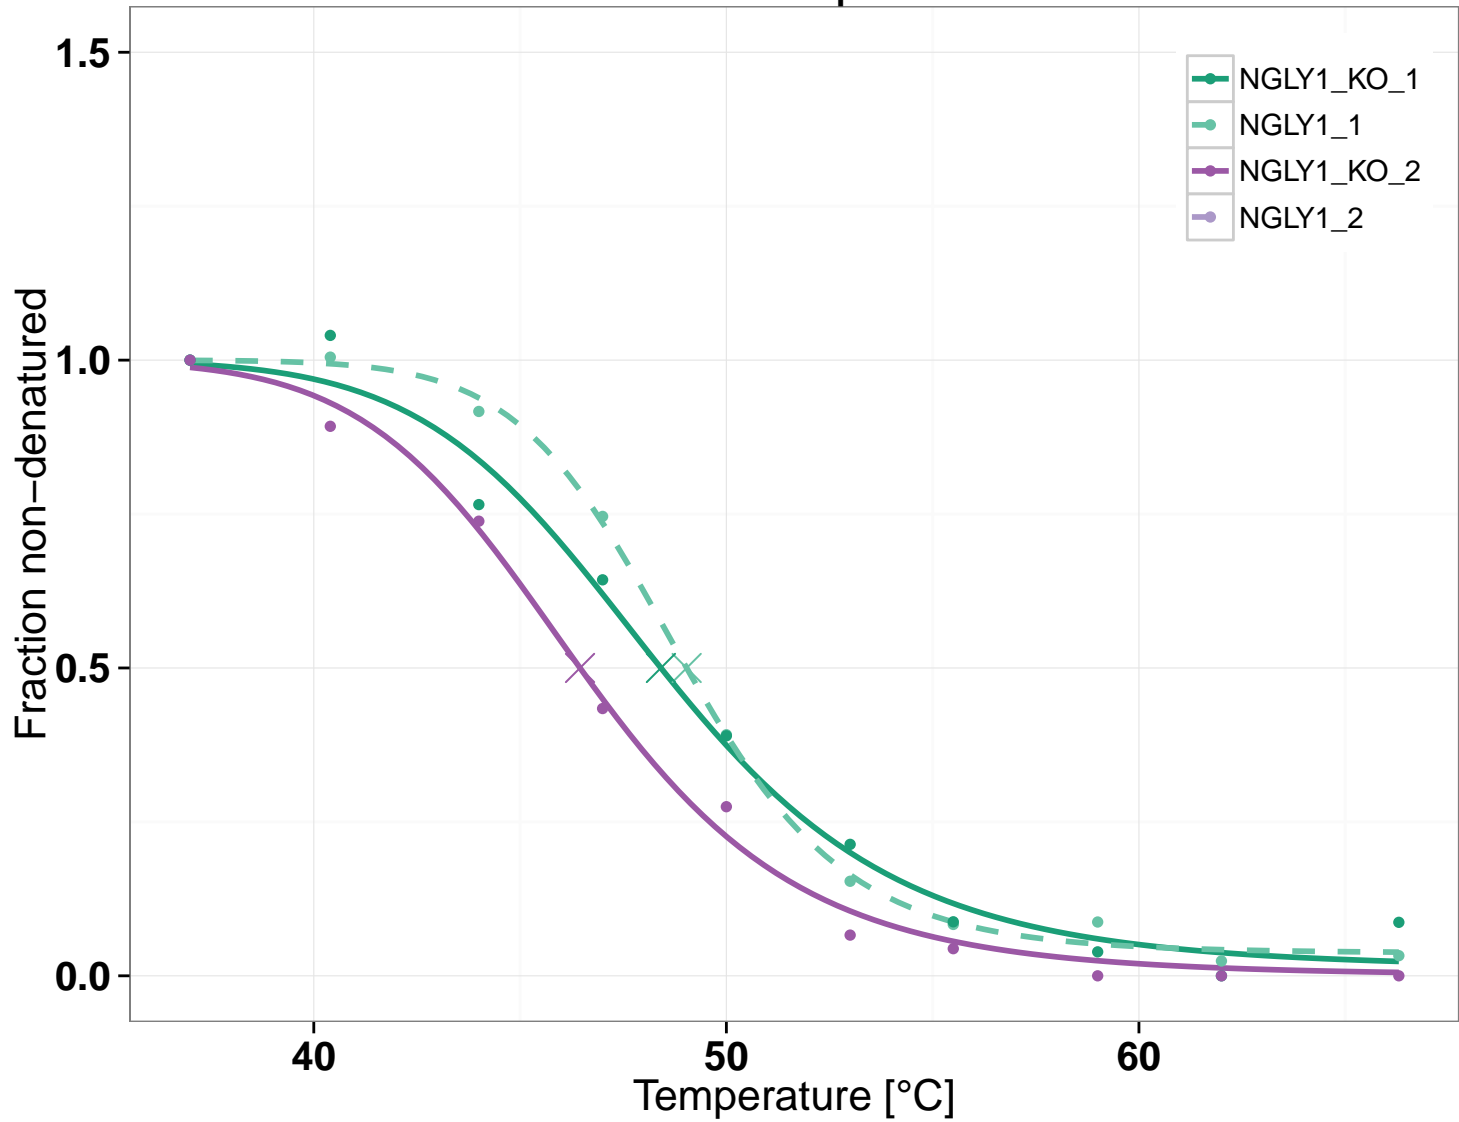

|            | meltPoint | slope  | plateau | R2   |
|------------|-----------|--------|---------|------|
| NGLY1_KO_1 | 48.41     | -0.085 | 0.01    | 0.99 |
| NGLY1_1    | 49.04     | -0.12  | 0.04    | 1    |
| NGLY1_KO_2 | 46.45     | -0.094 | 0       | 1    |
| NGLY1_2    | -         | -      | -       | -    |

Supplement: Supplementary file 4419 [file 1]
