# Supplementary material (part 45 of 85)
Source: publisher figshare collection journal article supplement (https://gsajournals.figshare.com/articles/dataset/_/12014913)

IPI00103521.1|STON2

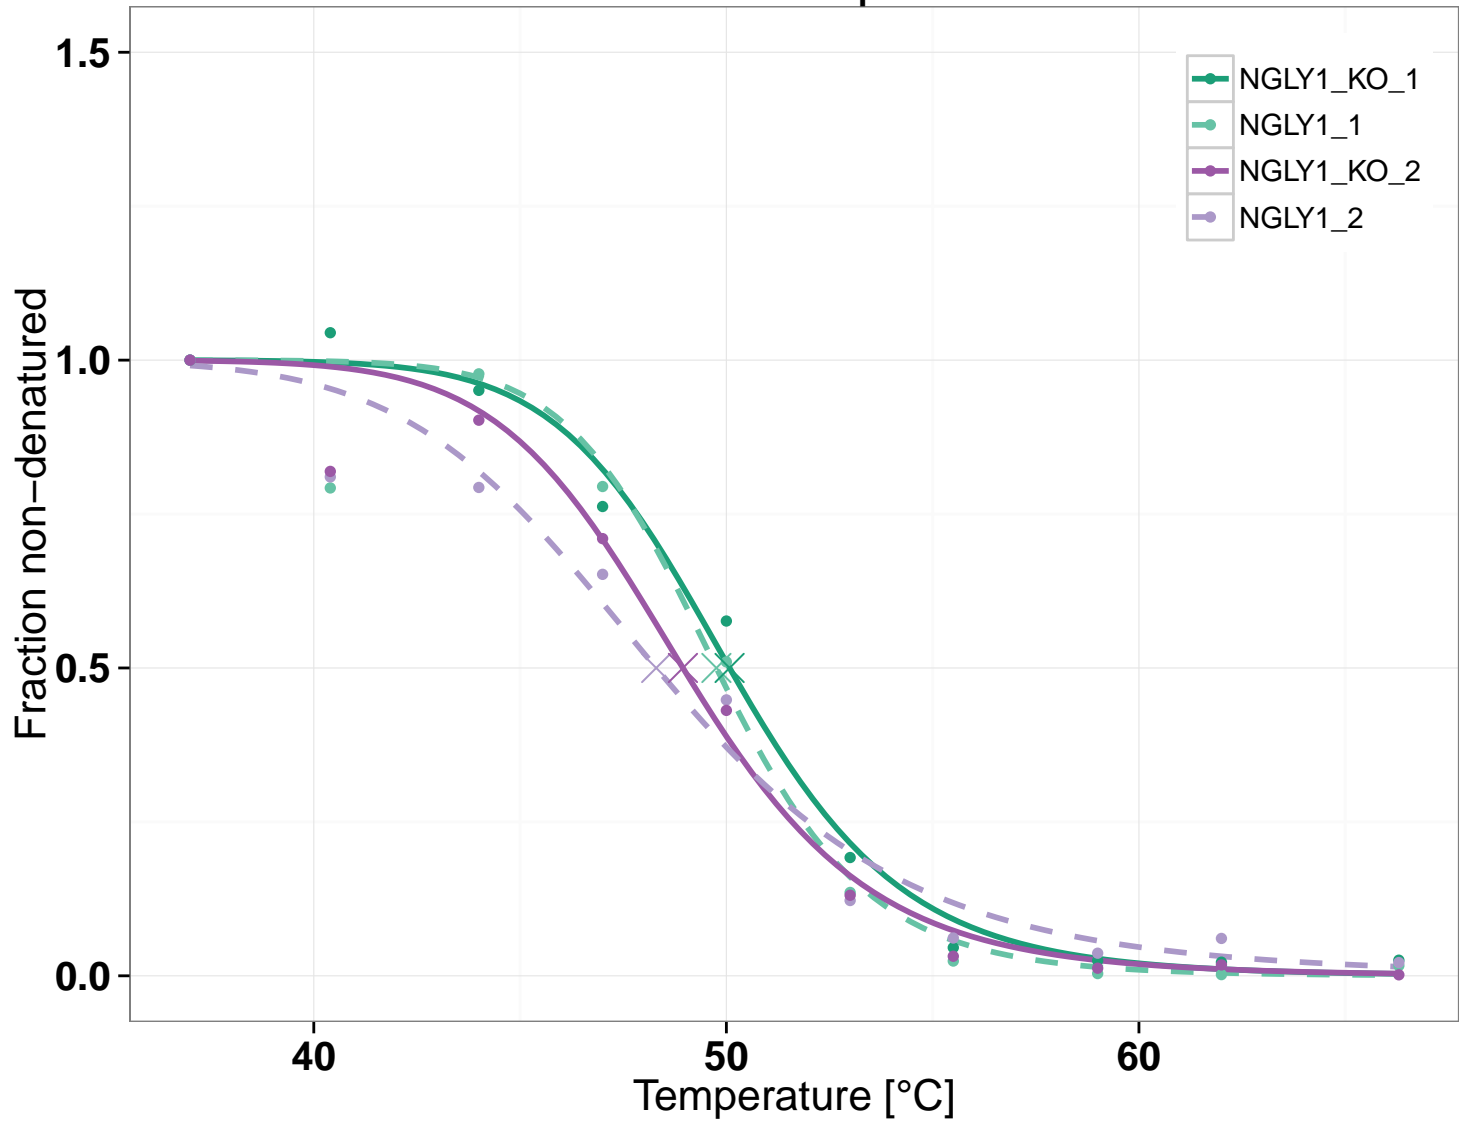

|            | meltPoint | slope  | plateau | R2   |
|------------|-----------|--------|---------|------|
| NGLY1_KO_1 | 50.08     | -0.12  | 0       | 0.99 |
| NGLY1_1    | 49.76     | -0.14  | 0       | 0.97 |
| NGLY1_KO_2 | 48.95     | -0.11  | 0       | 0.98 |
| NGLY1_2    | 48.3      | -0.081 | 0       | 0.97 |

Supplement: Supplementary file 4420 [file 1]

# IPI00032871.1|MSRB2

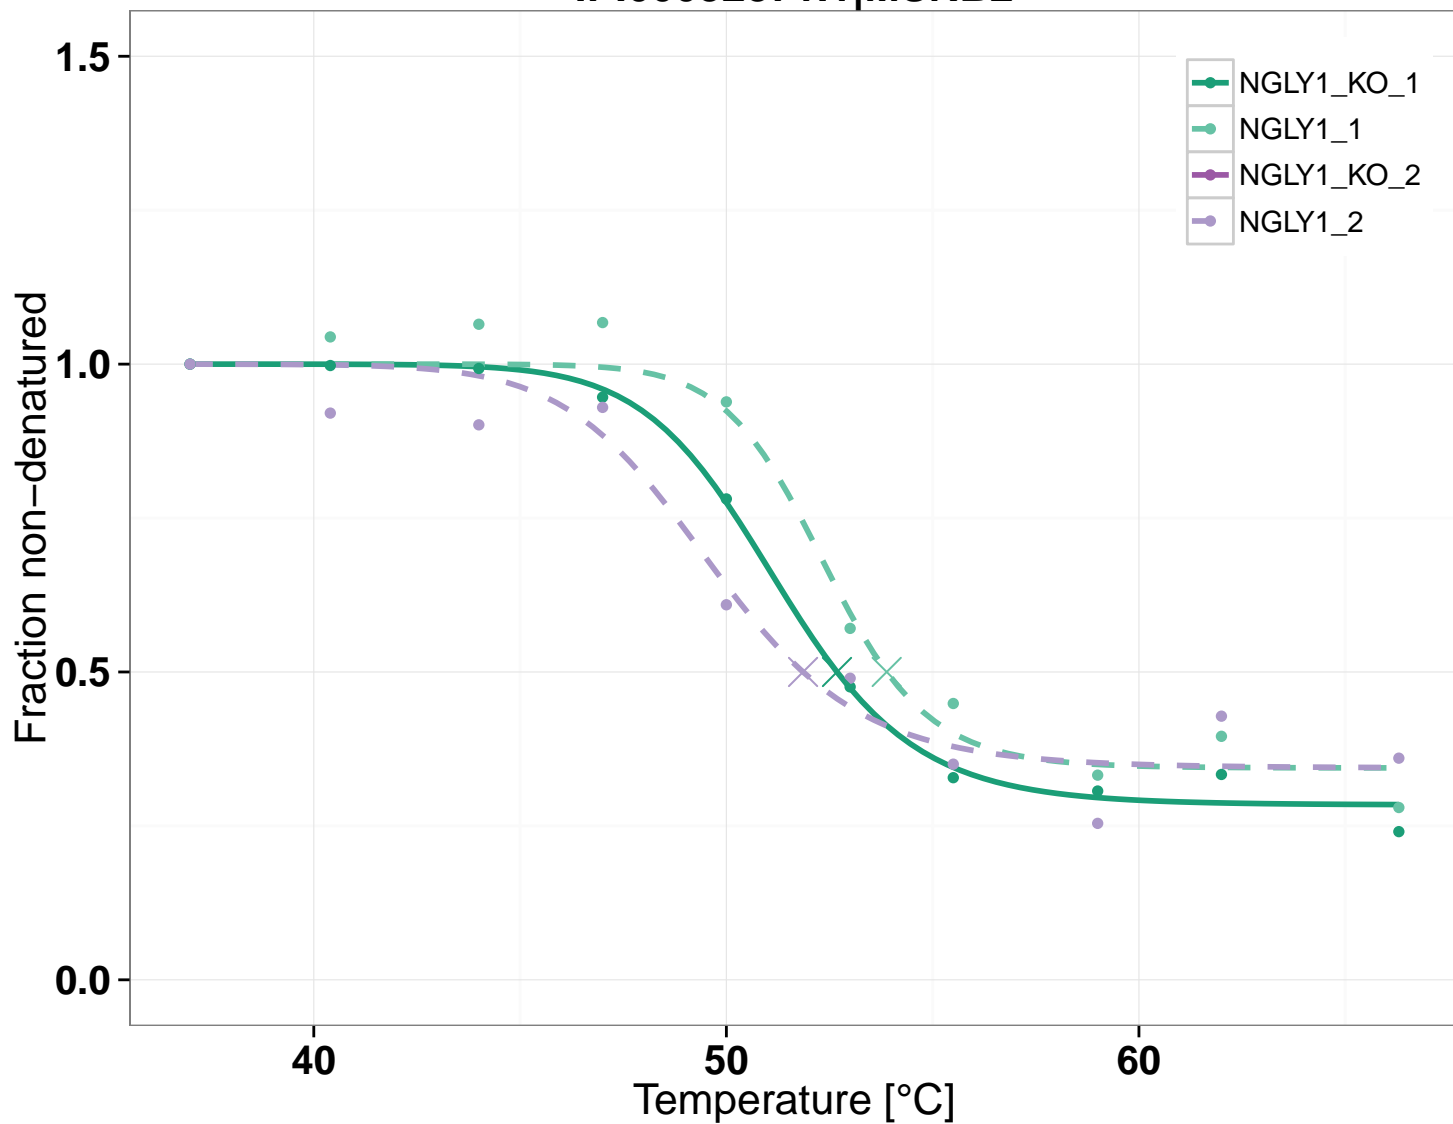

|            | meltPoint | slope  | plateau | R2   |
|------------|-----------|--------|---------|------|
| NGLY1_KO_1 | 52.68     | -0.11  | 0.28    | 1    |
| NGLY1_1    | 53.89     | -0.13  | 0.34    | 0.98 |
| NGLY1_KO_2 | -         | -      | -       | -    |
| NGLY1_2    | 51.86     | -0.091 | 0.34    | 0.95 |

Supplement: Supplementary file 4421 [file 1]

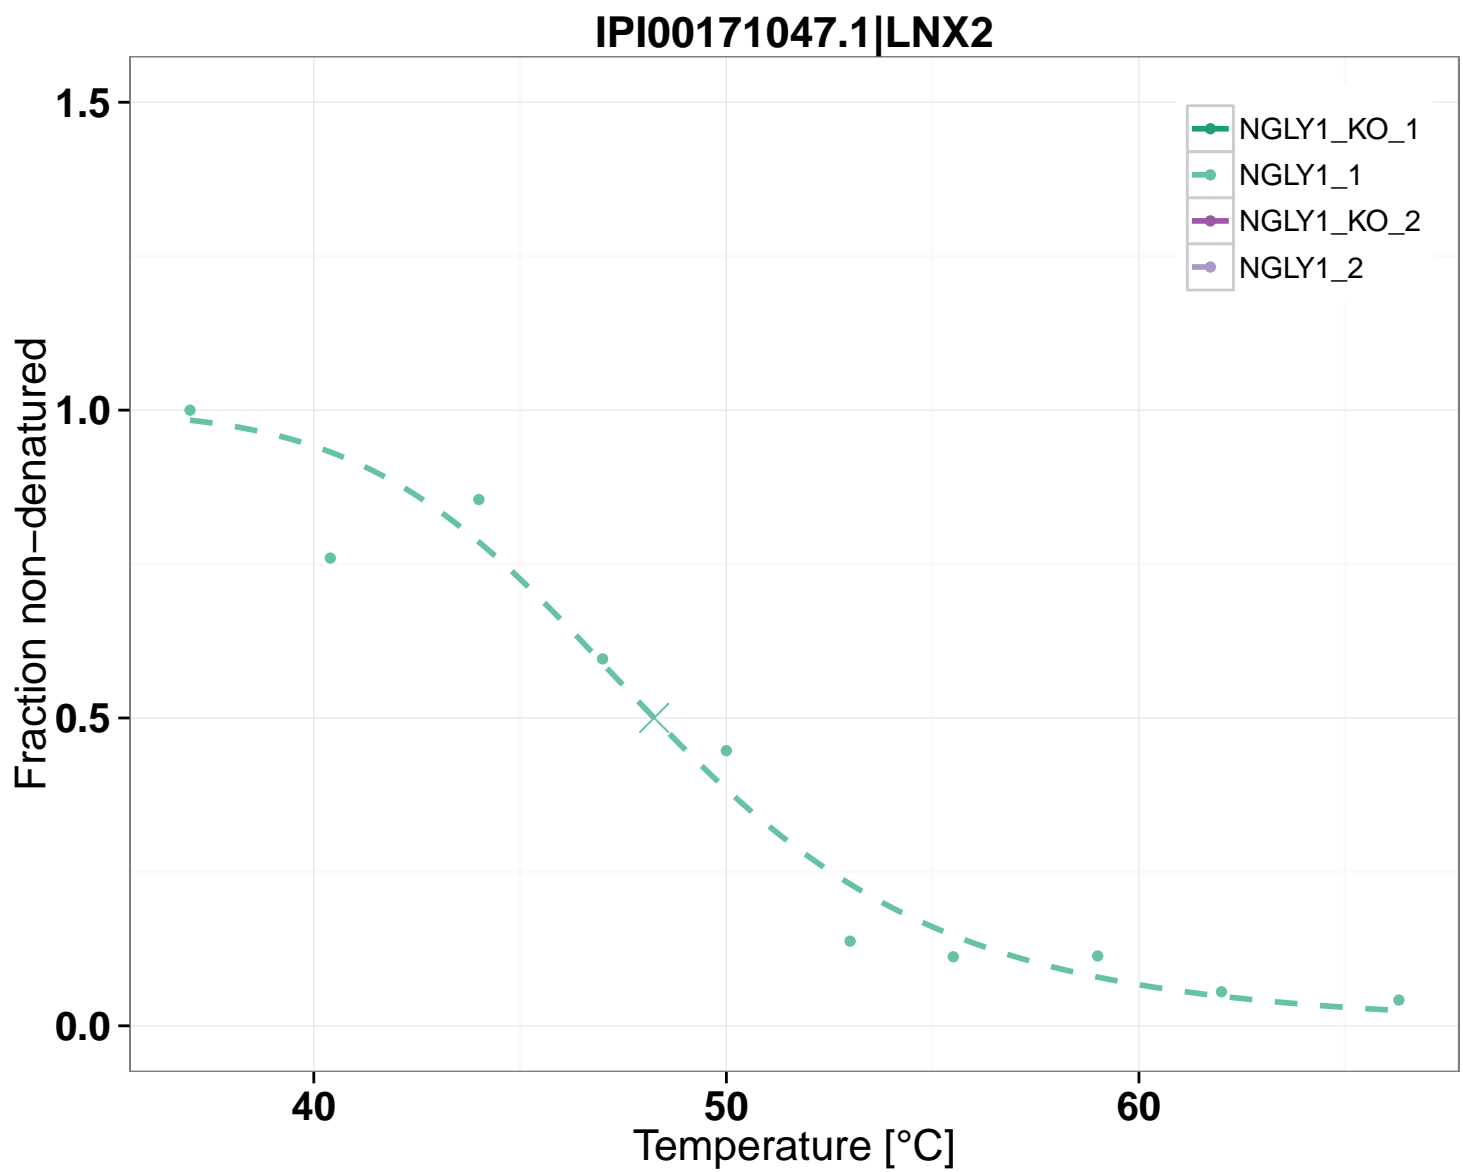

|            | meltPoint | slope  | plateau | R2   |
|------------|-----------|--------|---------|------|
| NGLY1_KO_1 | -         | -      | -       | -    |
| NGLY1_1    | 48.25     | -0.071 | 0       | 0.96 |
| NGLY1_KO_2 | -         | -      | -       | -    |
| NGLY1_2    | -         | -      | -       | -    |

Supplement: Supplementary file 4422 [file 1]

# IPI00216737.3|MINA

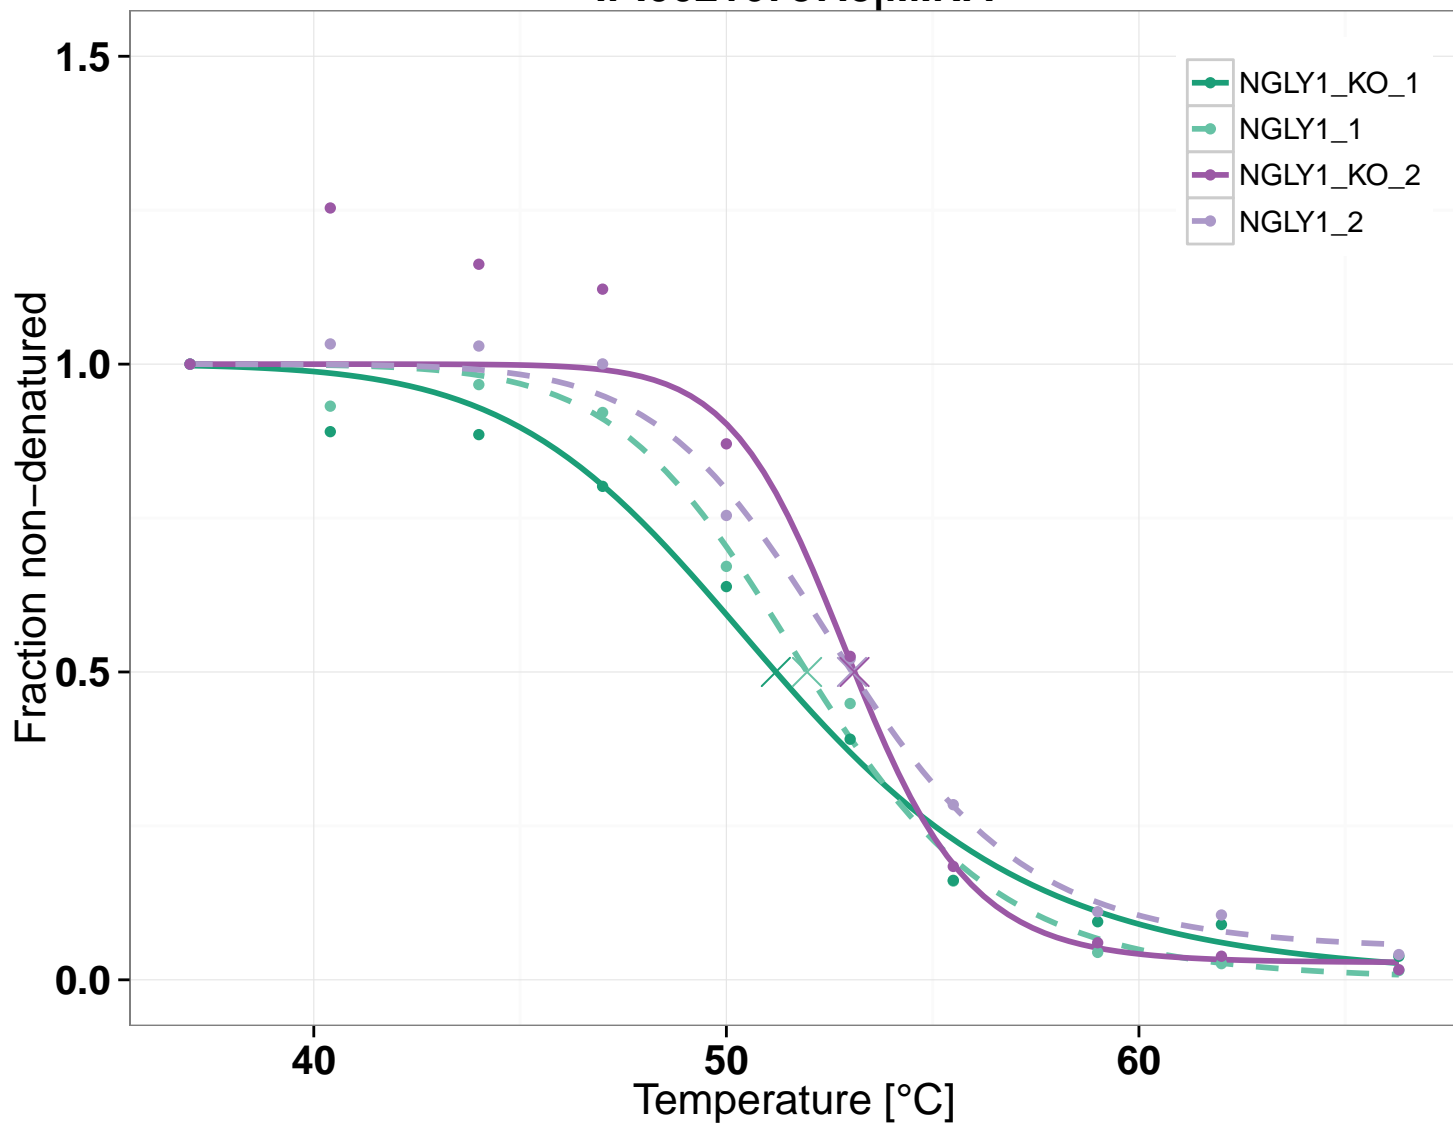

|            | meltPoint | slope  | plateau | R2   |
|------------|-----------|--------|---------|------|
| NGLY1_KO_1 | 51.2      | -0.078 | 0       | 0.99 |
| NGLY1_1    | 51.96     | -0.11  | 0       | 0.99 |
| NGLY1_KO_2 | 53.11     | -0.17  | 0.03    | 0.95 |
| NGLY1_2    | 53.04     | -0.11  | 0.05    | 0.99 |

Supplement: Supplementary file 4423 [file 1]

# IPI00103853.7|C18ORF22

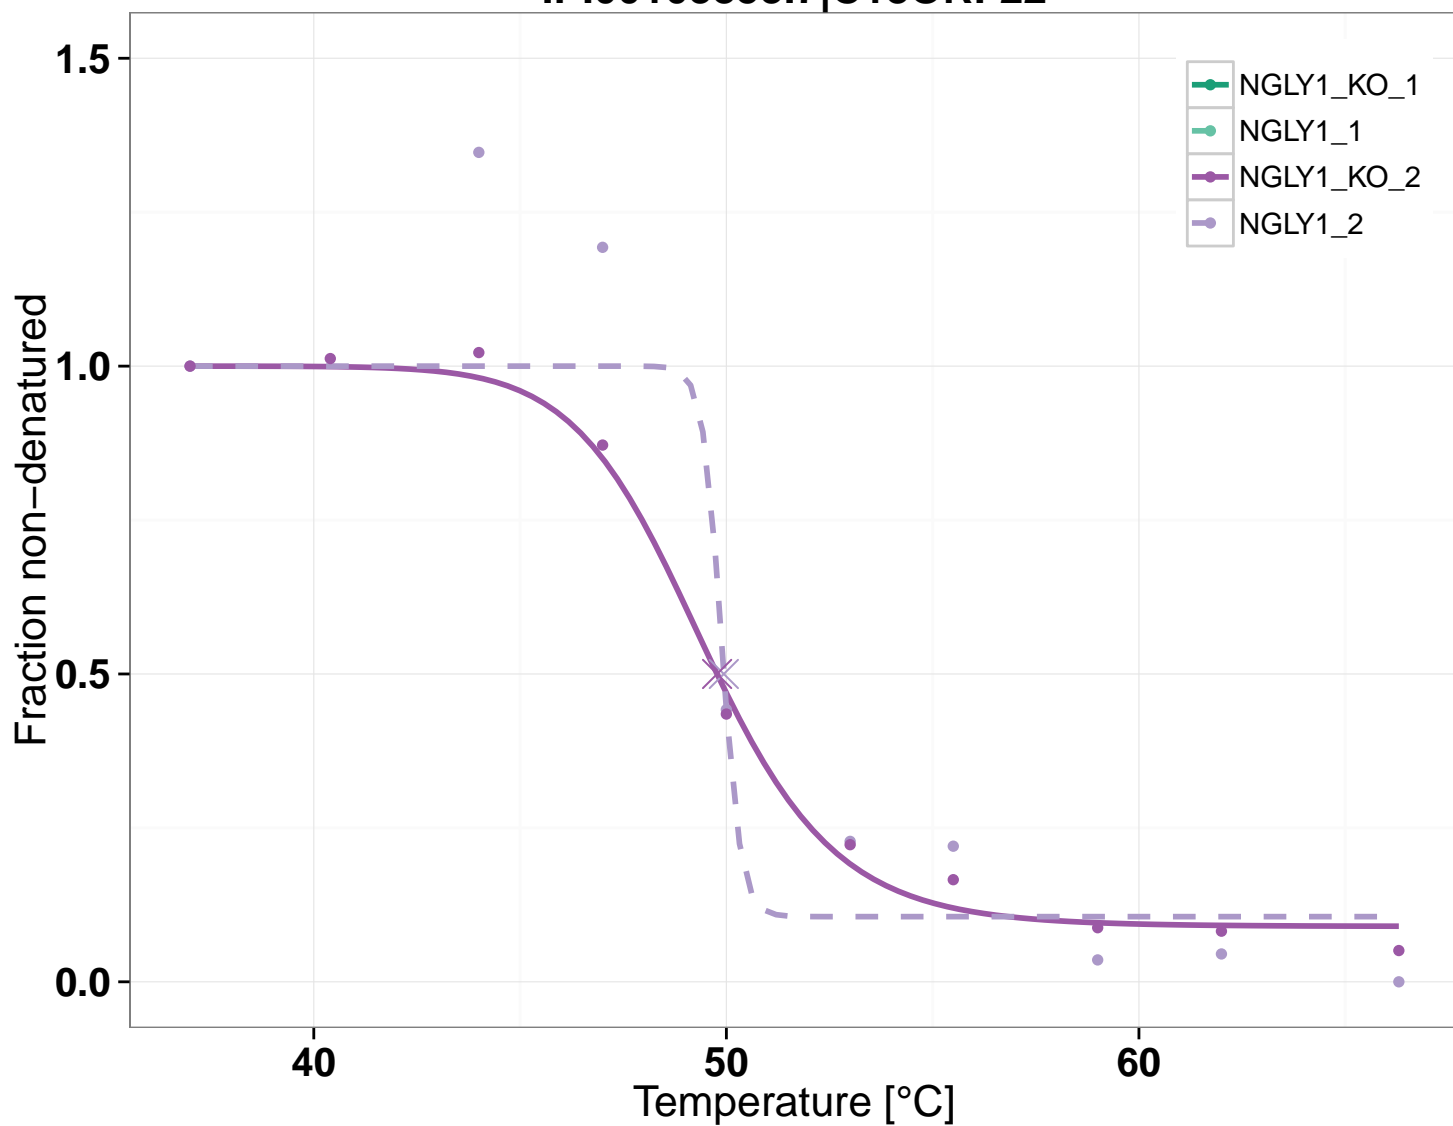

|            | meltPoint | slope | plateau | R2   |
|------------|-----------|-------|---------|------|
| NGLY1_KO_1 | —         | —     | —       | —    |
| NGLY1_1    | —         | —     | —       | —    |
| NGLY1_KO_2 | 49.78     | -0.14 | 0.09    | 1    |
| NGLY1_2    | 49.94     | -0.98 | 0.11    | 0.85 |

Supplement: Supplementary file 4424 [file 1]

IPI00013195.1|MRPL49

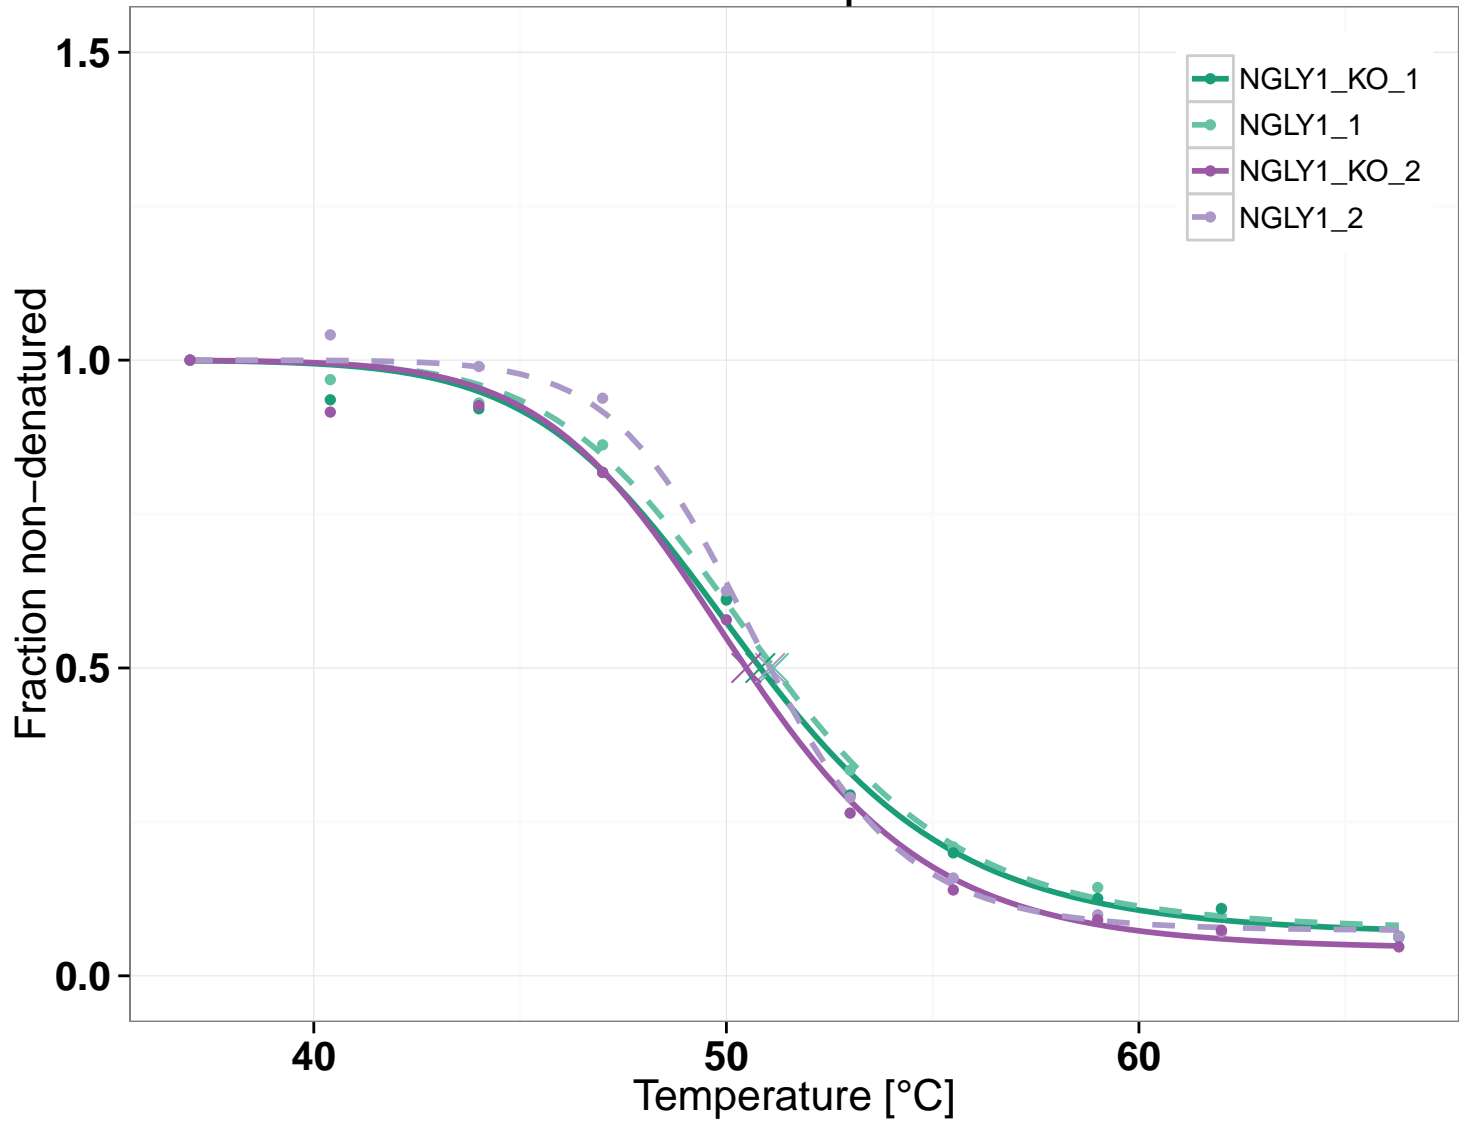

|            | meltPoint | slope  | plateau | R2   |
|------------|-----------|--------|---------|------|
| NGLY1_KO_1 | 50.82     | -0.091 | 0.07    | 0.99 |
| NGLY1_1    | 51.15     | -0.093 | 0.07    | 1    |
| NGLY1_KO_2 | 50.48     | -0.1   | 0.04    | 0.99 |
| NGLY1_2    | 51.06     | -0.13  | 0.07    | 1    |

Supplement: Supplementary file 4425 [file 1]

IPI00218240.3|MMSET

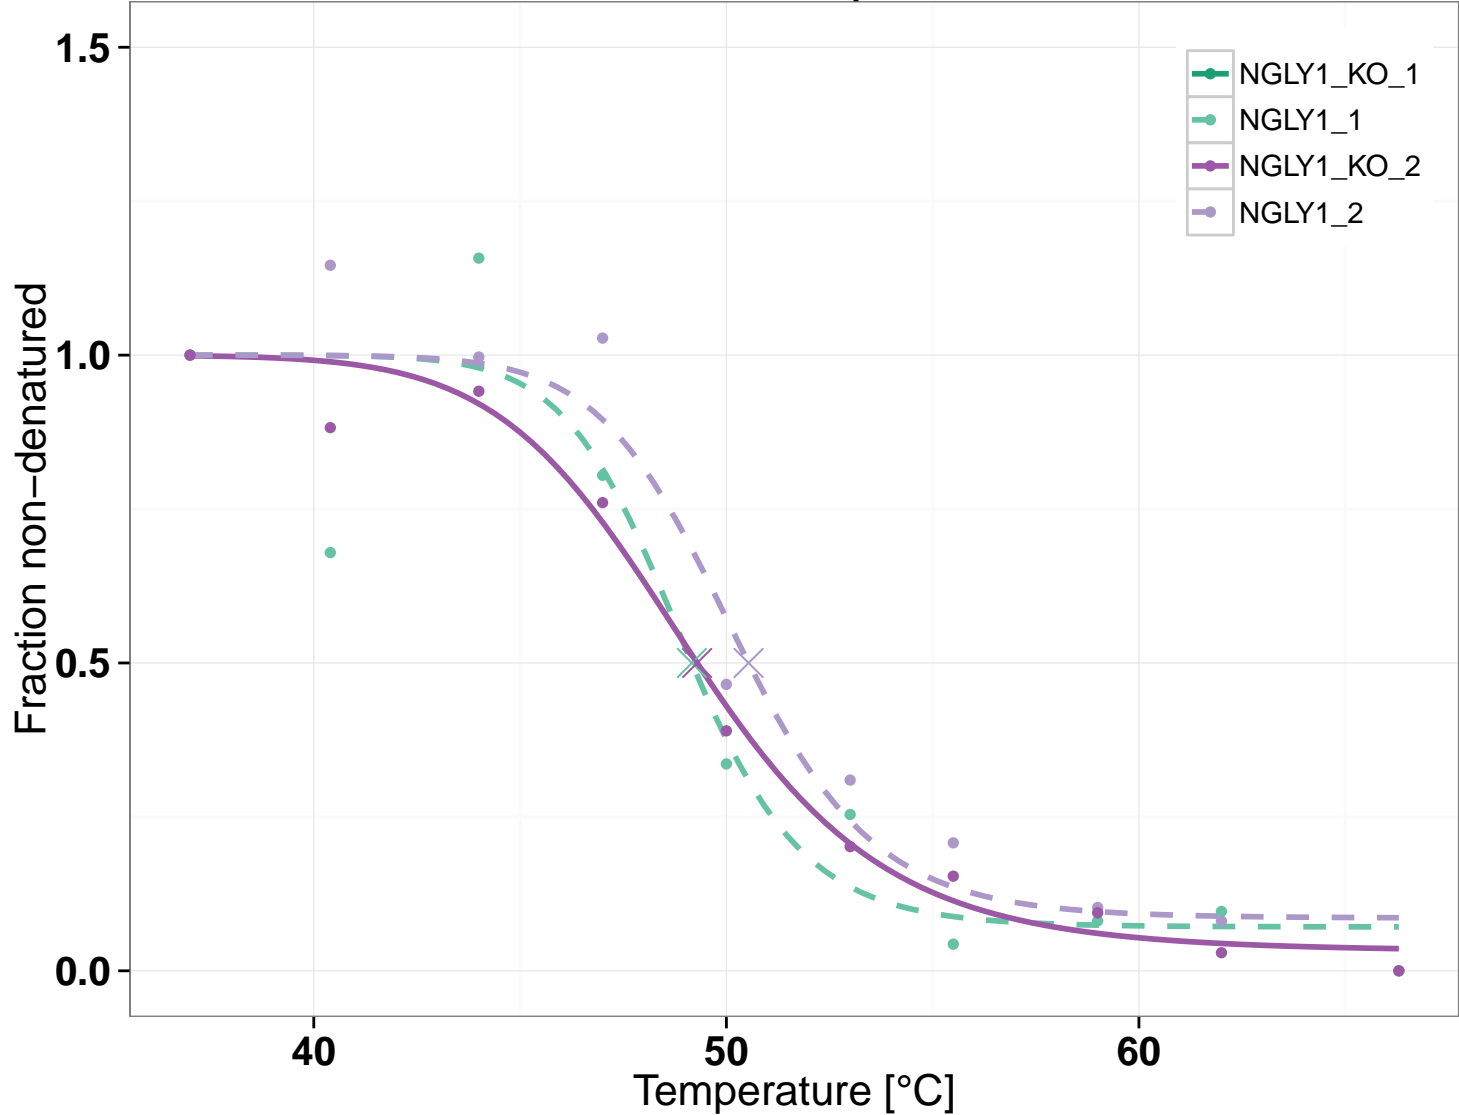

|            | meltPoint | slope | plateau | R2   |
|------------|-----------|-------|---------|------|
| NGLY1_KO_1 | -         | -     | -       | -    |
| NGLY1_1    | 49.16     | -0.16 | 0.07    | 0.91 |
| NGLY1_KO_2 | 49.29     | -0.1  | 0.03    | 0.99 |
| NGLY1_2    | 50.54     | -0.14 | 0.09    | 0.96 |

Supplement: Supplementary file 4426 [file 1]

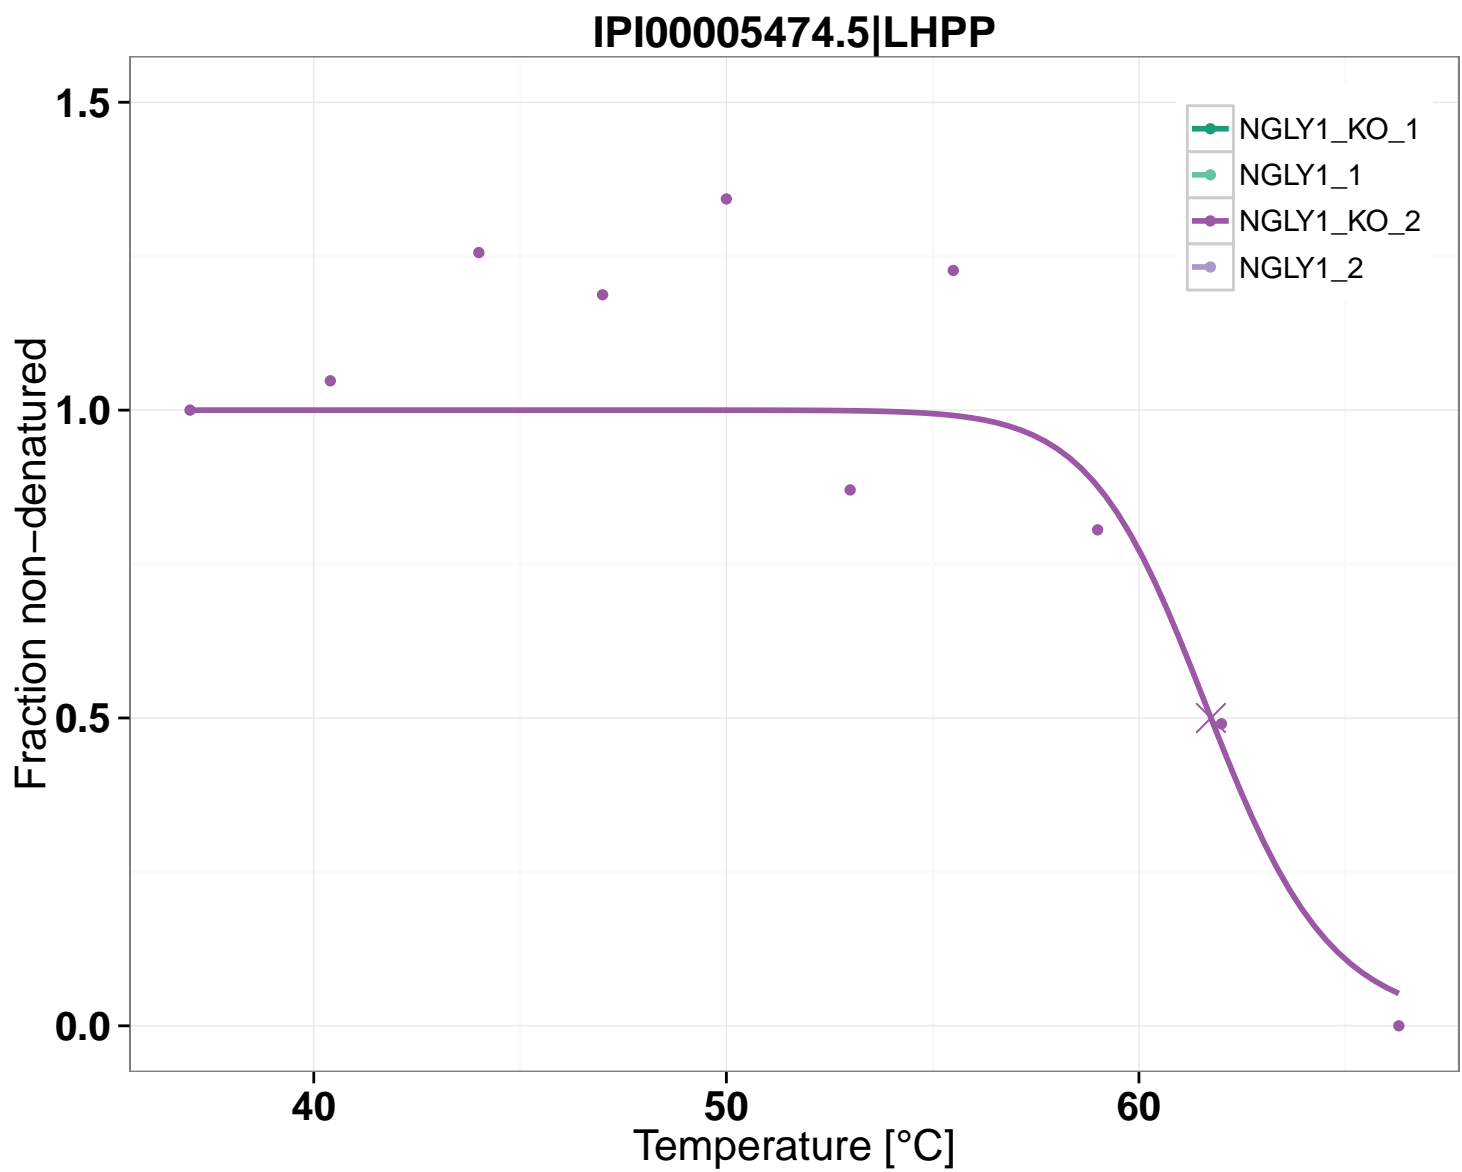

|            | meltPoint | slope | plateau | R2  |
|------------|-----------|-------|---------|-----|
| NGLY1_KO_1 | —         | —     | —       | —   |
| NGLY1_1    | —         | —     | —       | —   |
| NGLY1_KO_2 | 61.75     | -0.17 | 0       | 0.8 |
| NGLY1_2    | —         | —     | —       | —   |

Supplement: Supplementary file 4427 [file 1]

# IPI00006211.4|VAPB

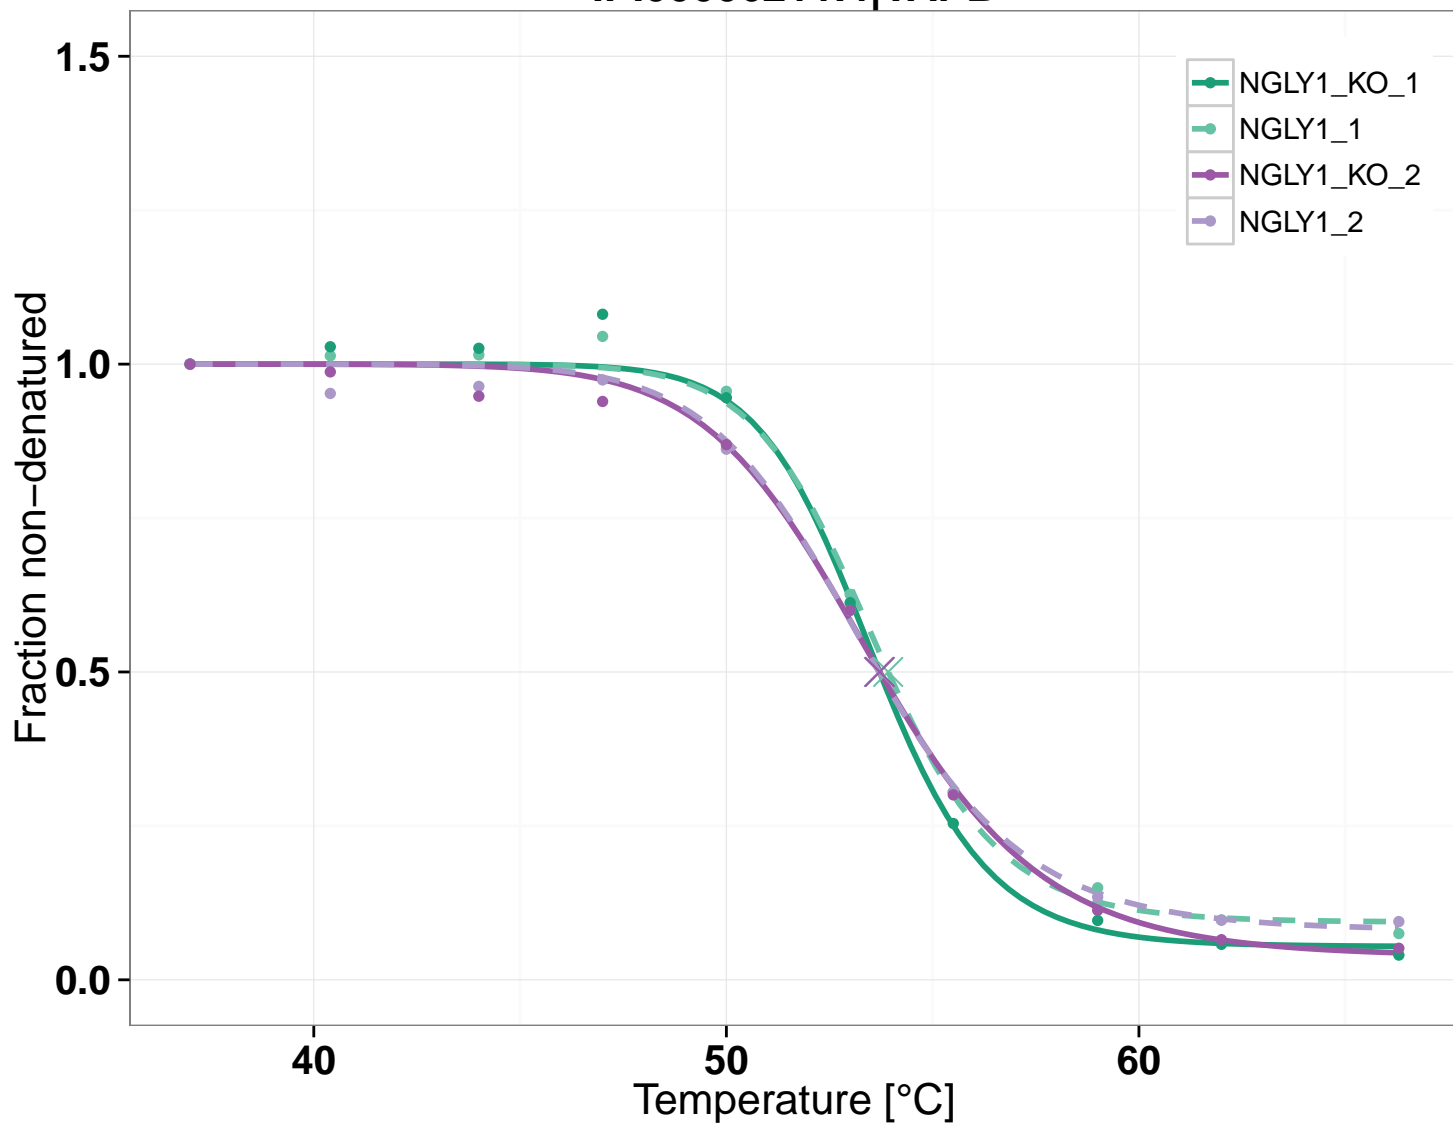

|            | meltPoint | slope | plateau | R2   |
|------------|-----------|-------|---------|------|
| NGLY1_KO_1 | 53.71     | -0.17 | 0.05    | 0.99 |
| NGLY1_1    | 53.92     | -0.15 | 0.09    | 1    |
| NGLY1_KO_2 | 53.72     | -0.12 | 0.04    | 1    |
| NGLY1_2    | 53.7      | -0.12 | 0.08    | 1    |

Supplement: Supplementary file 4428 [file 1]

IPI00291669.3|UBLCP1

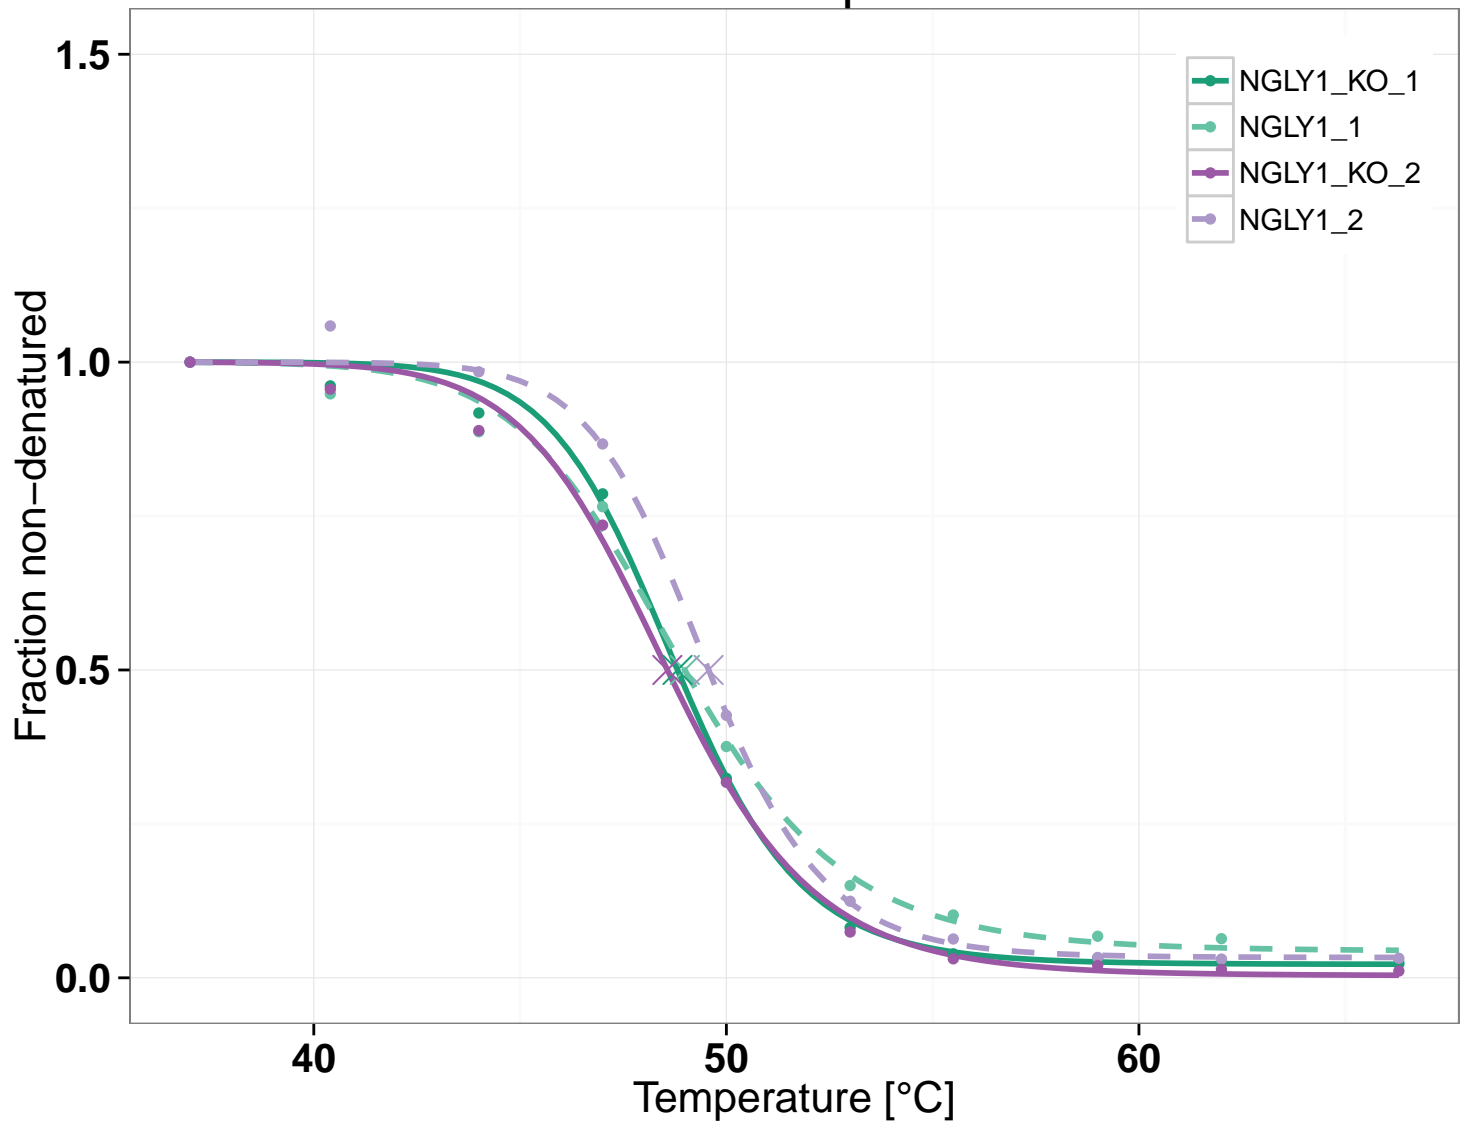

|            | meltPoint | slope | plateau | R2 |
|------------|-----------|-------|---------|----|
| NGLY1_KO_1 | 48.82     | -0.16 | 0.02    | 1  |
| NGLY1_1    | 48.99     | -0.12 | 0.04    | 1  |
| NGLY1_KO_2 | 48.57     | -0.14 | 0       | 1  |
| NGLY1_2    | 49.57     | -0.17 | 0.03    | 1  |

Supplement: Supplementary file 4429 [file 1]

# IPI00873562.1|NAGA

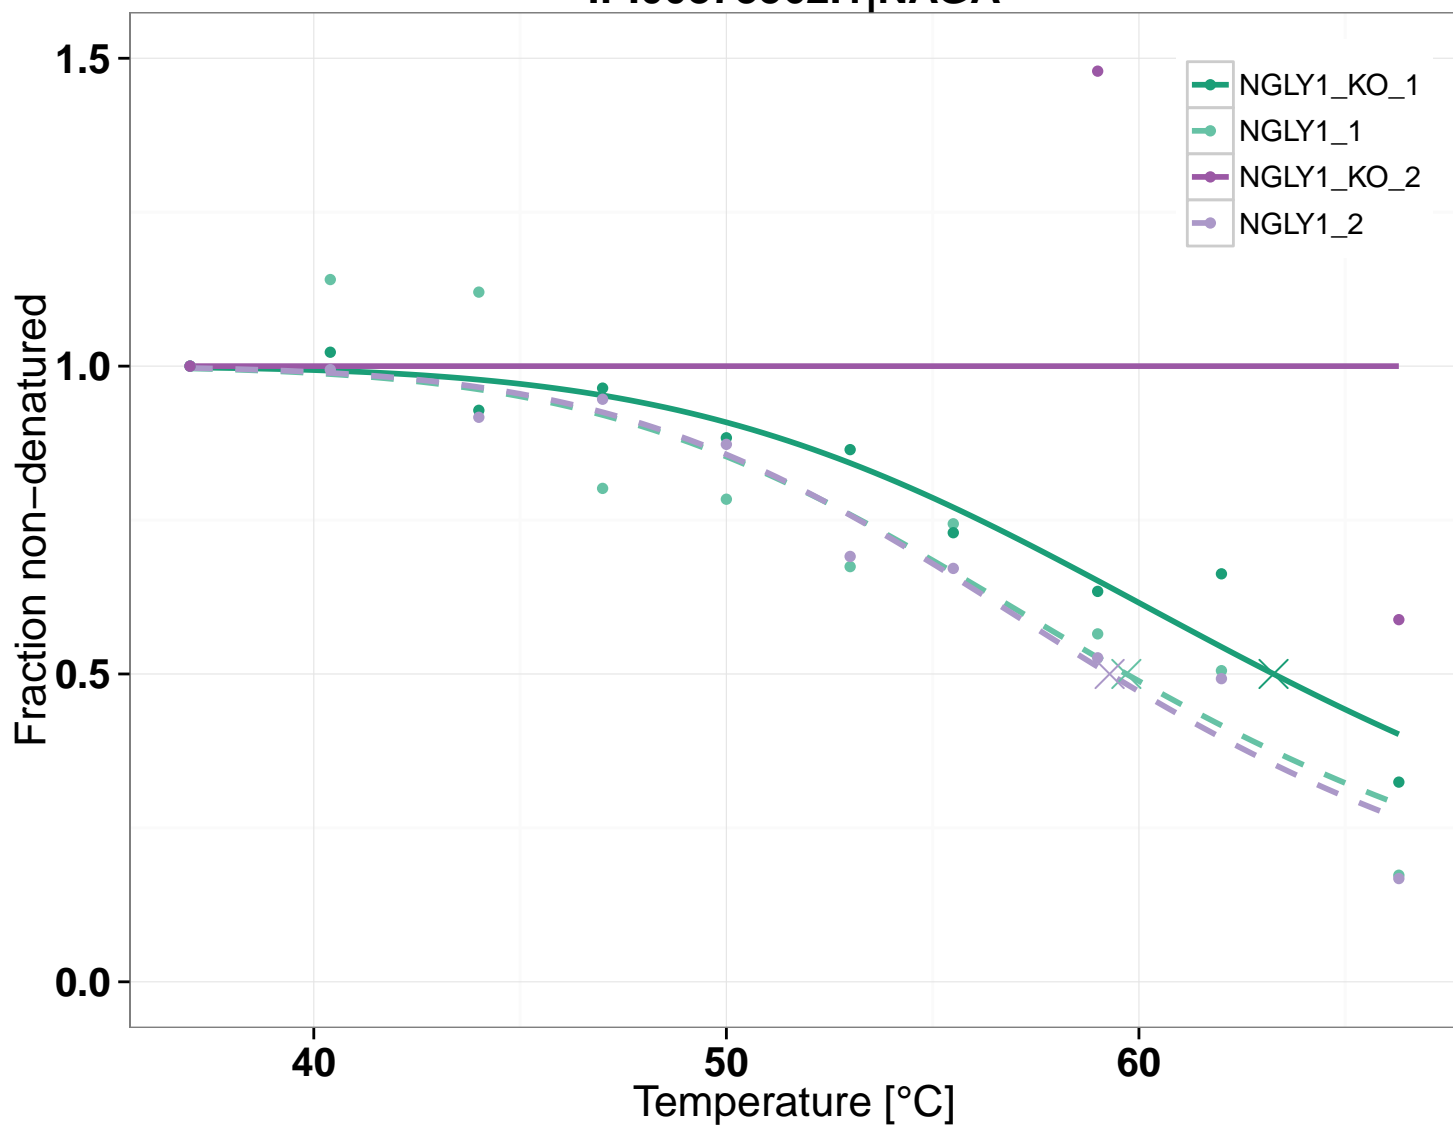

|            | meltPoint | slope  | plateau | R2    |
|------------|-----------|--------|---------|-------|
| NGLY1_KO_1 | 63.26     | -0.036 | 0       | 0.94  |
| NGLY1_1    | 59.7      | -0.04  | 0       | 0.87  |
| NGLY1_KO_2 | -         | -      | 0.23    | -1.89 |
| NGLY1_2    | 59.29     | -0.042 | 0       | 0.96  |

Supplement: Supplementary file 4430 [file 1]

IPI00410256.1|CTDP1

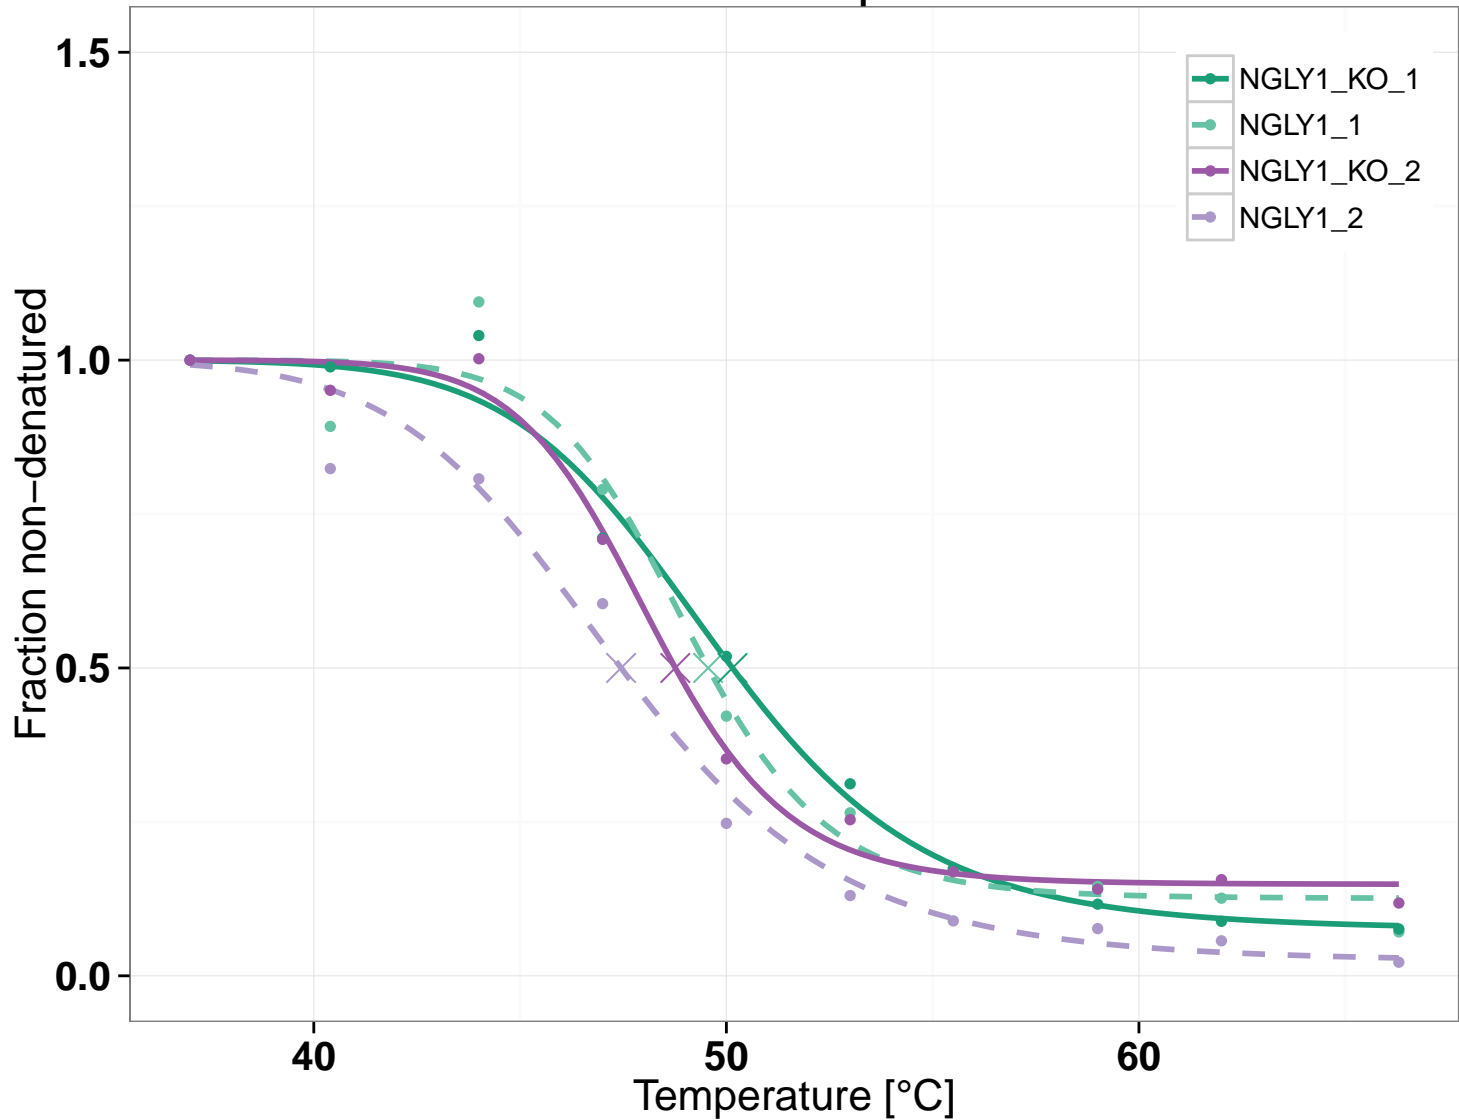

|            | meltPoint | slope  | plateau | R2   |
|------------|-----------|--------|---------|------|
| NGLY1_KO_1 | 50.15     | -0.093 | 0.07    | 0.99 |
| NGLY1_1    | 49.56     | -0.13  | 0.13    | 0.98 |
| NGLY1_KO_2 | 48.76     | -0.13  | 0.15    | 0.99 |
| NGLY1_2    | 47.45     | -0.091 | 0.02    | 0.98 |

Supplement: Supplementary file 4431 [file 1]

IPI00163391.6|METT10D

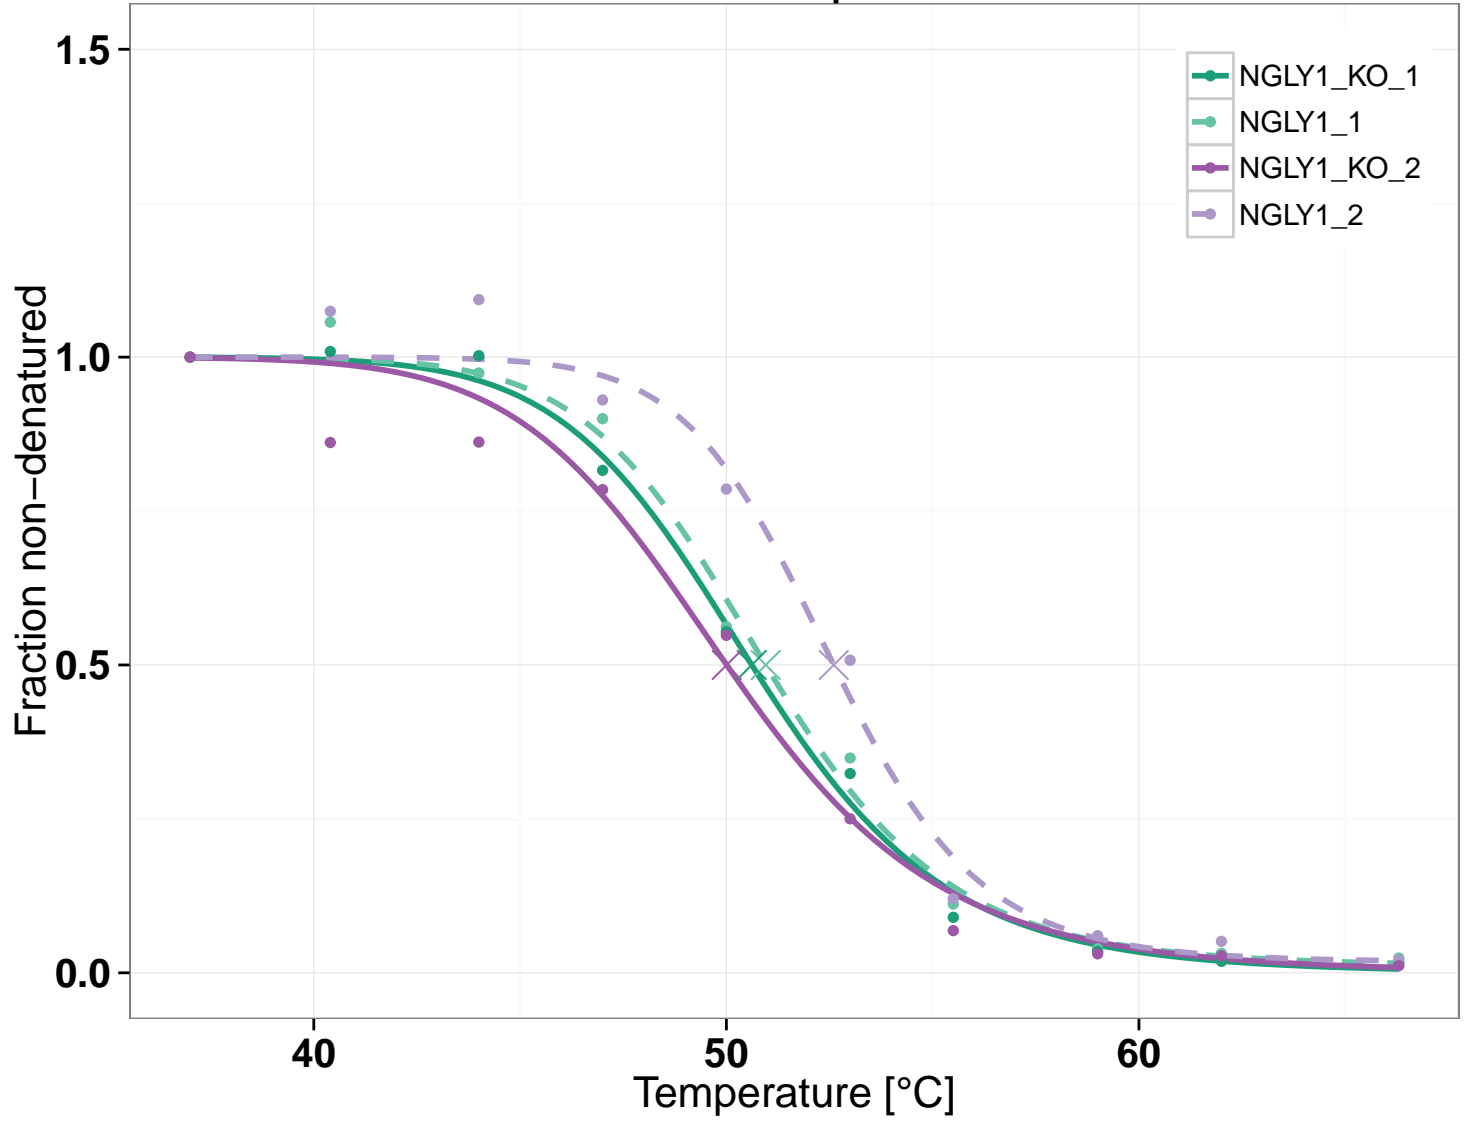

|            | meltPoint | slope  | plateau | R2   |
|------------|-----------|--------|---------|------|
| NGLY1_KO_1 | 50.62     | -0.11  | 0       | 1    |
| NGLY1_1    | 50.95     | -0.11  | 0.01    | 0.99 |
| NGLY1_KO_2 | 50.01     | -0.098 | 0       | 0.98 |
| NGLY1_2    | 52.6      | -0.14  | 0.02    | 0.99 |

Supplement: Supplementary file 4432 [file 1]

# IPI00217688.3|C12ORF60

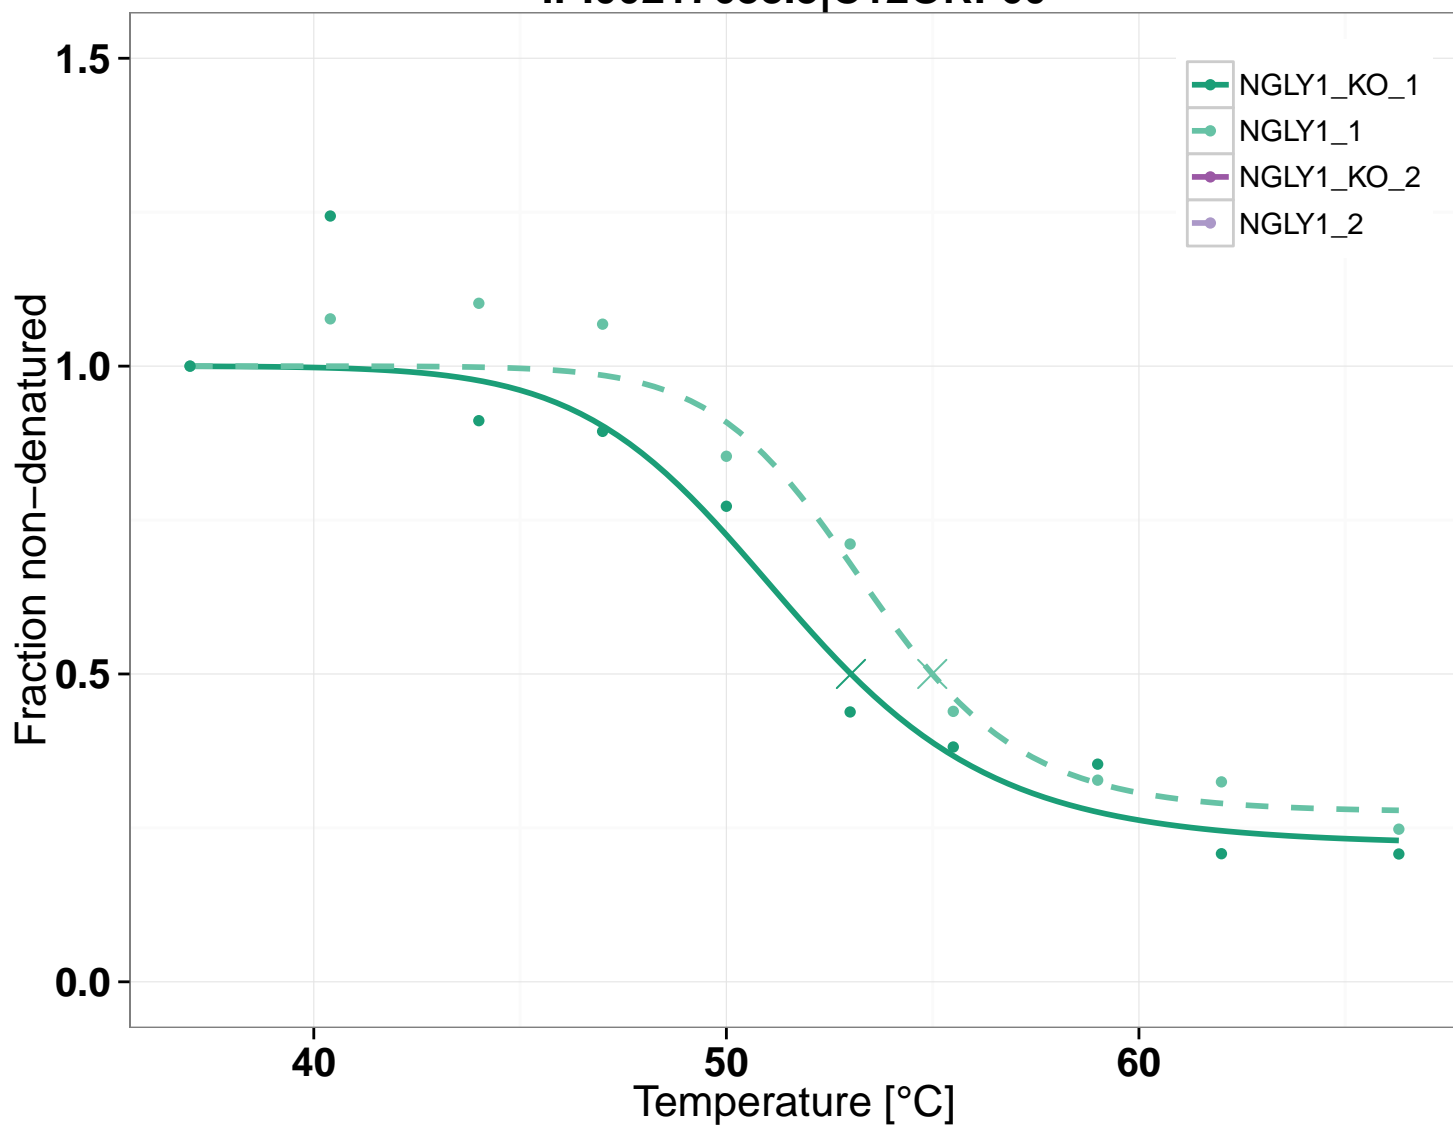

|            | meltPoint | slope  | plateau | R2   |
|------------|-----------|--------|---------|------|
| NGLY1_KO_1 | 53.02     | -0.078 | 0.22    | 0.93 |
| NGLY1_1    | 54.99     | -0.096 | 0.28    | 0.97 |
| NGLY1_KO_2 | -         | -      | -       | -    |
| NGLY1_2    | -         | -      | -       | -    |

Supplement: Supplementary file 4433 [file 1]

# IPI00885104.1|MPHOSPH8

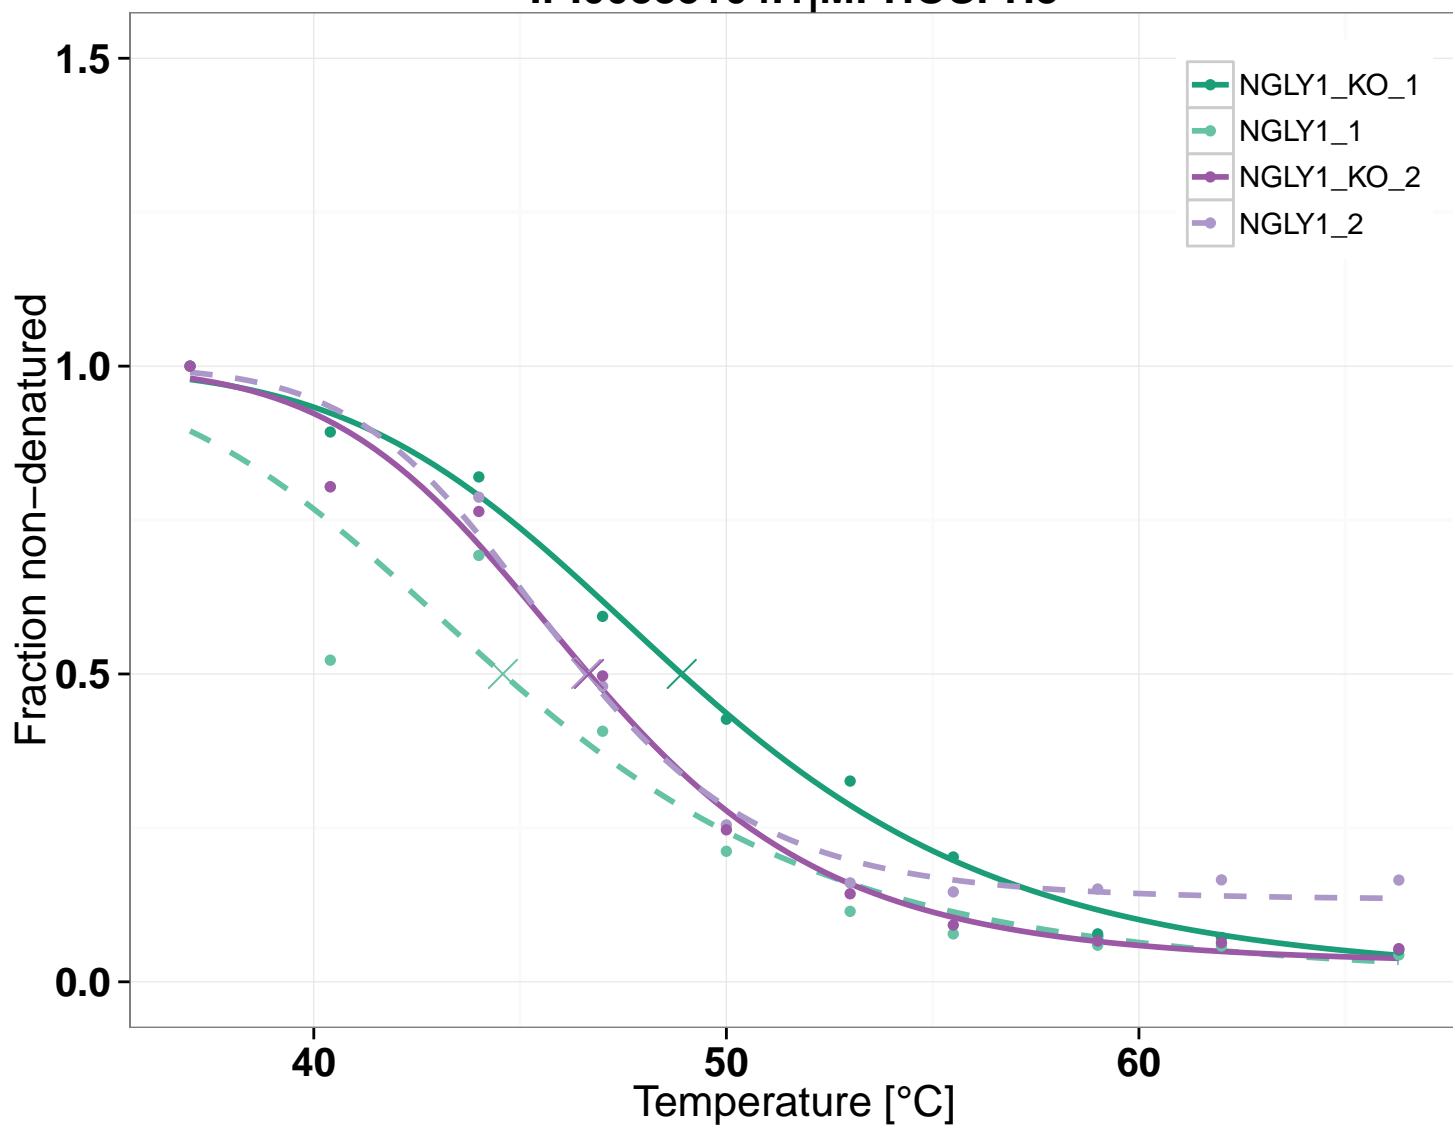

|            | meltPoint | slope  | plateau | R2   |
|------------|-----------|--------|---------|------|
| NGLY1_KO_1 | 48.92     | -0.062 | 0       | 0.99 |
| NGLY1_1    | 44.58     | -0.061 | 0       | 0.91 |
| NGLY1_KO_2 | 46.67     | -0.08  | 0.03    | 0.99 |
| NGLY1_2    | 46.6      | -0.089 | 0.13    | 0.97 |

Supplement: Supplementary file 4434 [file 1]

# IPI00787853.2|IMPAD1

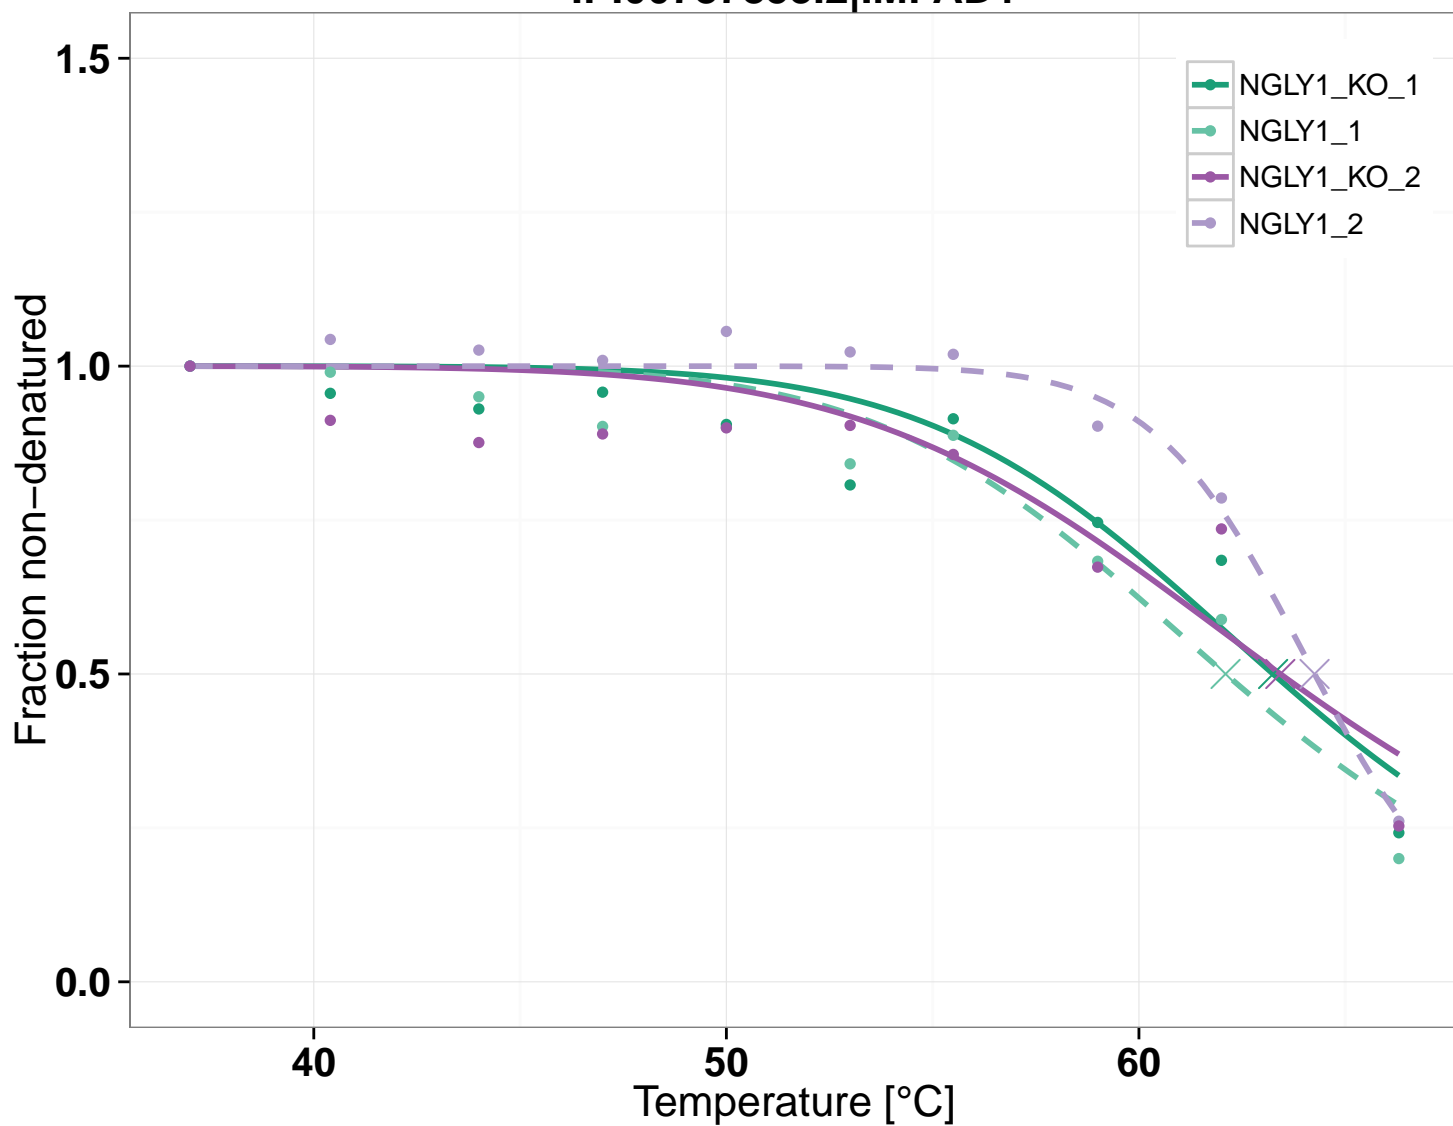

|            | meltPoint | slope  | plateau | R2   |
|------------|-----------|--------|---------|------|
| NGLY1_KO_1 | 63.25     | -0.06  | 0       | 0.88 |
| NGLY1_1    | 62.1      | -0.059 | 0       | 0.93 |
| NGLY1_KO_2 | 63.43     | -0.05  | 0       | 0.81 |
| NGLY1_2    | 64.26     | -0.13  | 0       | 0.98 |

Supplement: Supplementary file 4435 [file 1]

# IPI00908952.1|B4DDW9\_HUMAN

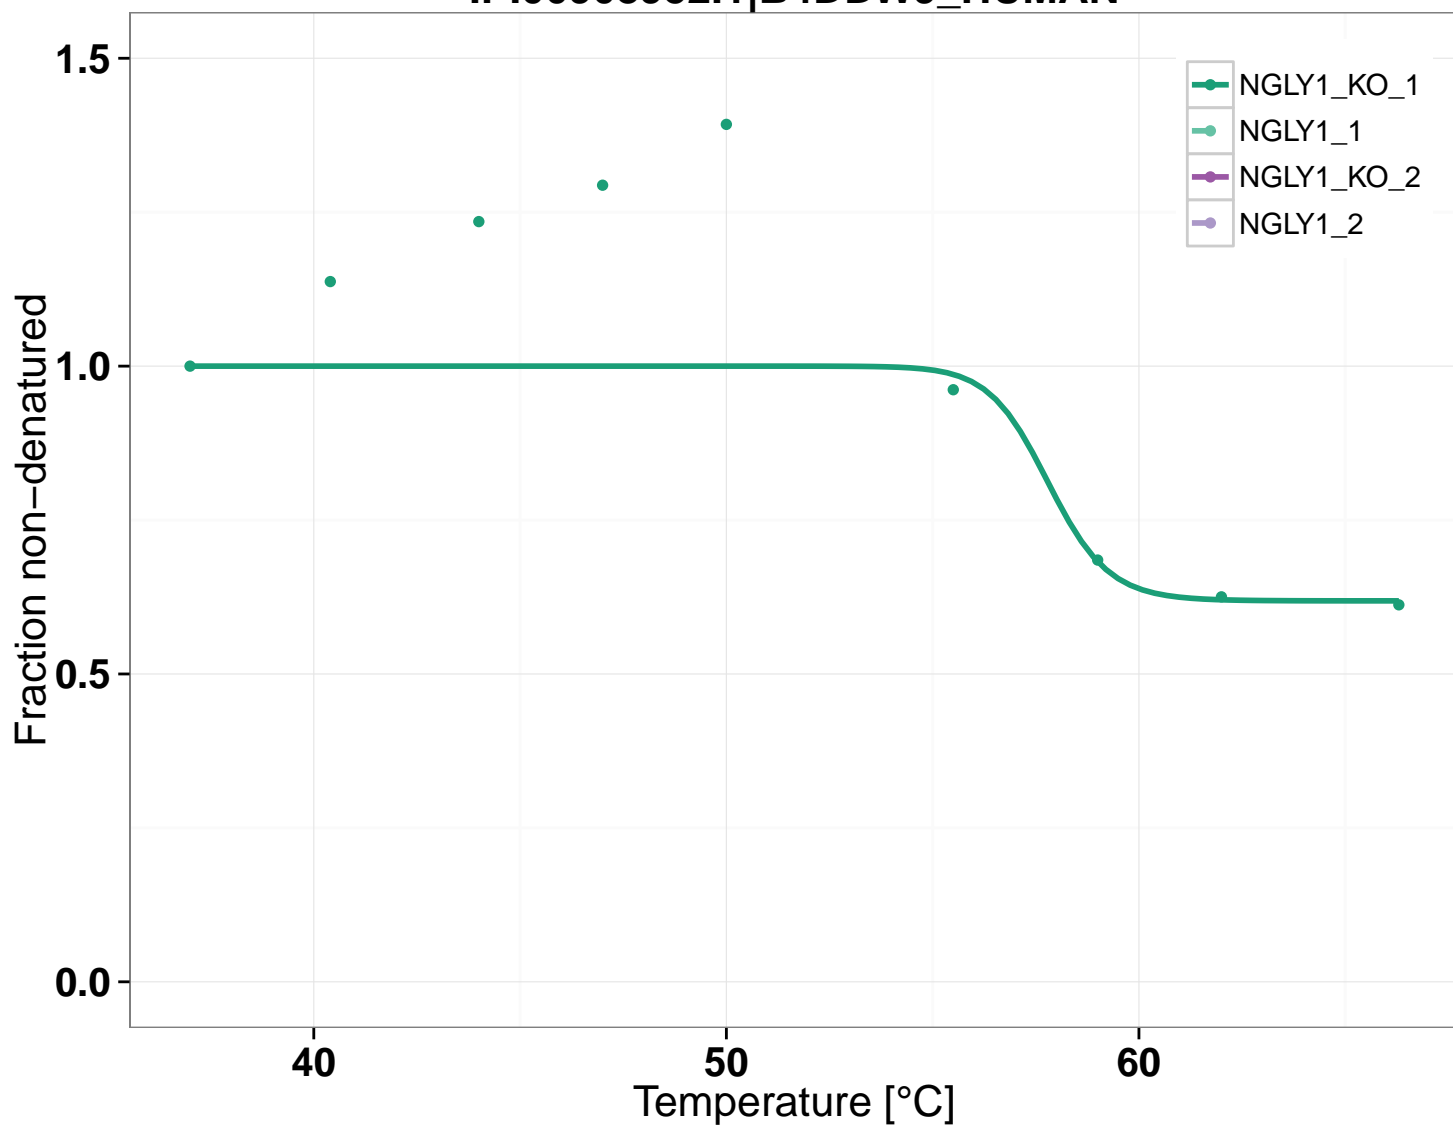

|            | meltPoint | slope | plateau | R2   |
|------------|-----------|-------|---------|------|
| NGLY1_KO_1 | —         | −0.13 | 0.62    | 0.32 |
| NGLY1_1    | —         | —     | —       | —    |
| NGLY1_KO_2 | —         | —     | —       | —    |
| NGLY1_2    | —         | —     | —       | —    |

Supplement: Supplementary file 4436 [file 1]

IPI00065931.4|AKAP13

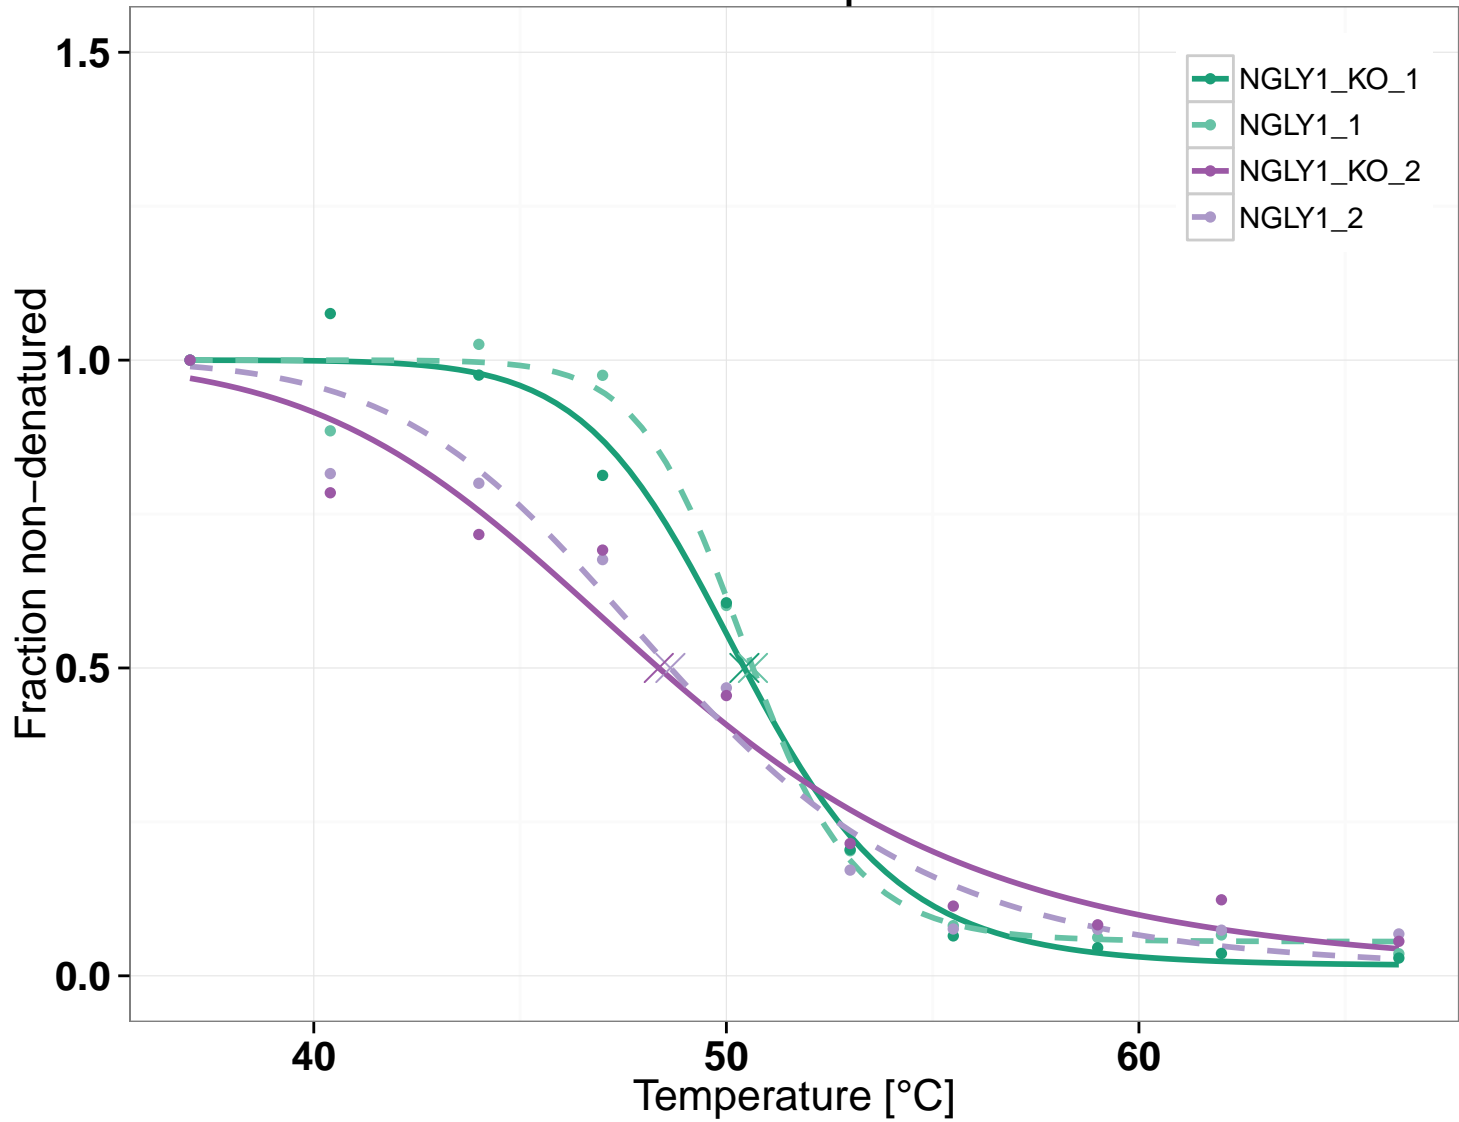

|            | meltPoint | slope  | plateau | R2   |
|------------|-----------|--------|---------|------|
| NGLY1_KO_1 | 50.44     | -0.13  | 0.02    | 0.99 |
| NGLY1_1    | 50.64     | -0.18  | 0.06    | 0.99 |
| NGLY1_KO_2 | 48.36     | -0.061 | 0       | 0.96 |
| NGLY1_2    | 48.64     | -0.076 | 0.01    | 0.97 |

Supplement: Supplementary file 4437 [file 1]

IPI00384207.3|TMEM135

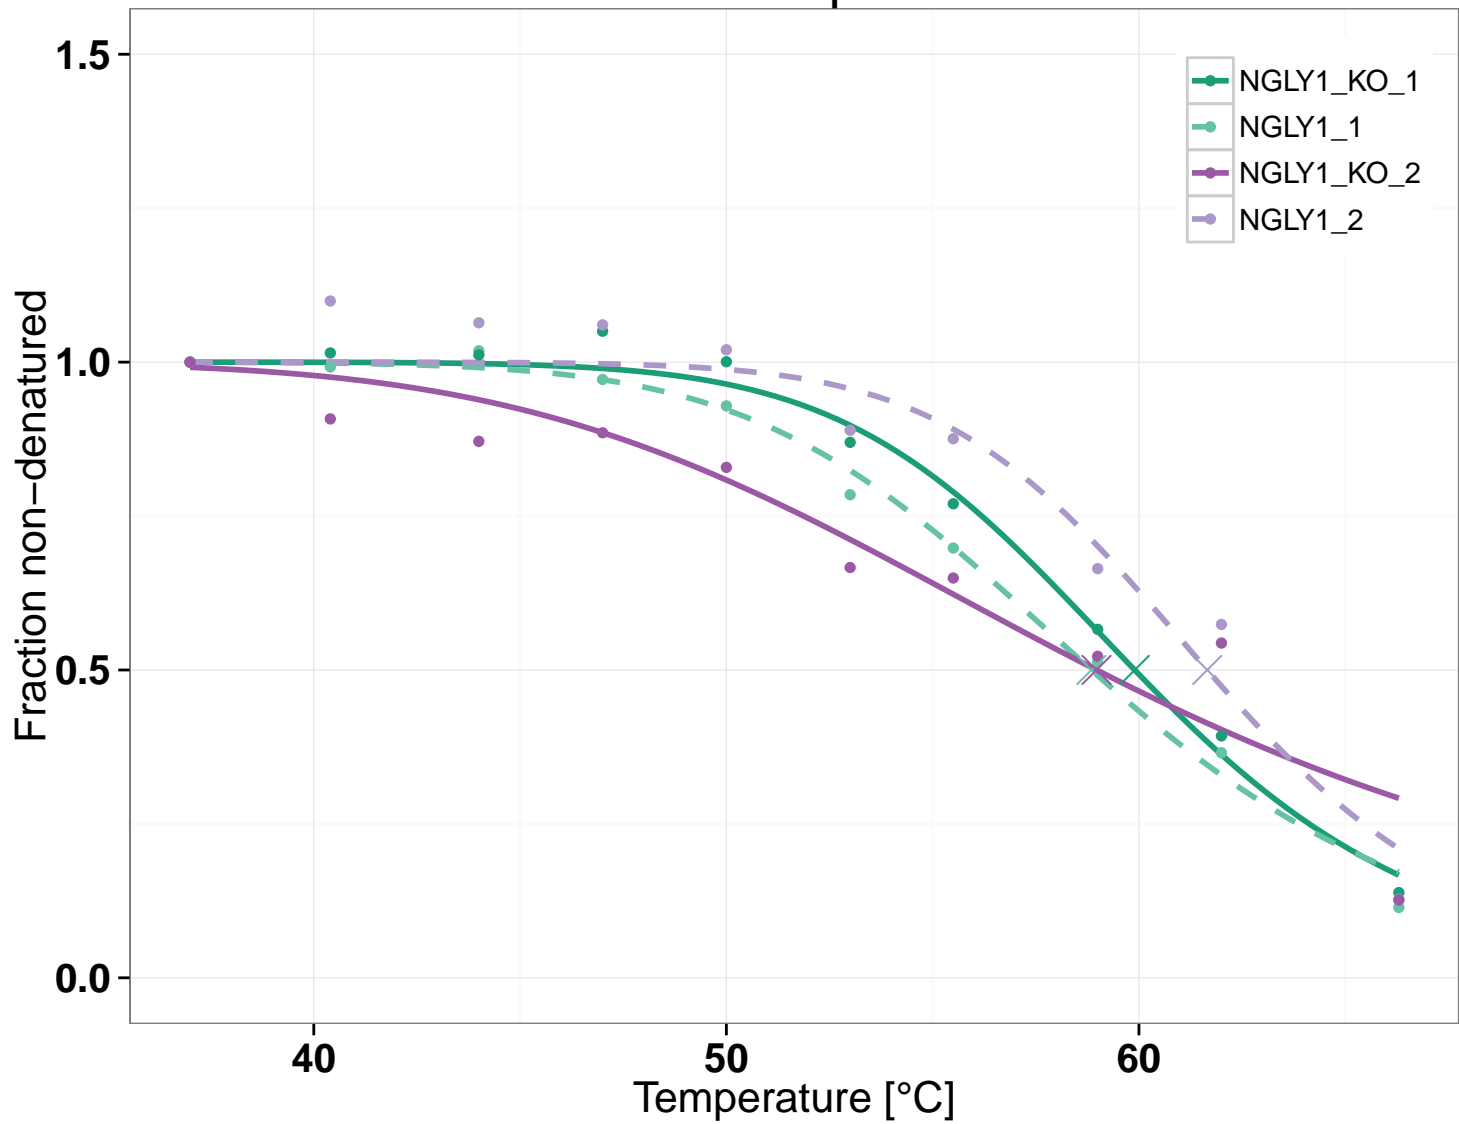

|            | meltPoint | slope  | plateau | R2   |
|------------|-----------|--------|---------|------|
| NGLY1_KO_1 | 59.9      | -0.071 | 0       | 0.99 |
| NGLY1_1    | 58.85     | -0.061 | 0       | 0.99 |
| NGLY1_KO_2 | 58.97     | -0.036 | 0       | 0.9  |
| NGLY1_2    | 61.66     | -0.078 | 0       | 0.95 |

Supplement: Supplementary file 4438 [file 1]

# IPI00010800.2|NES

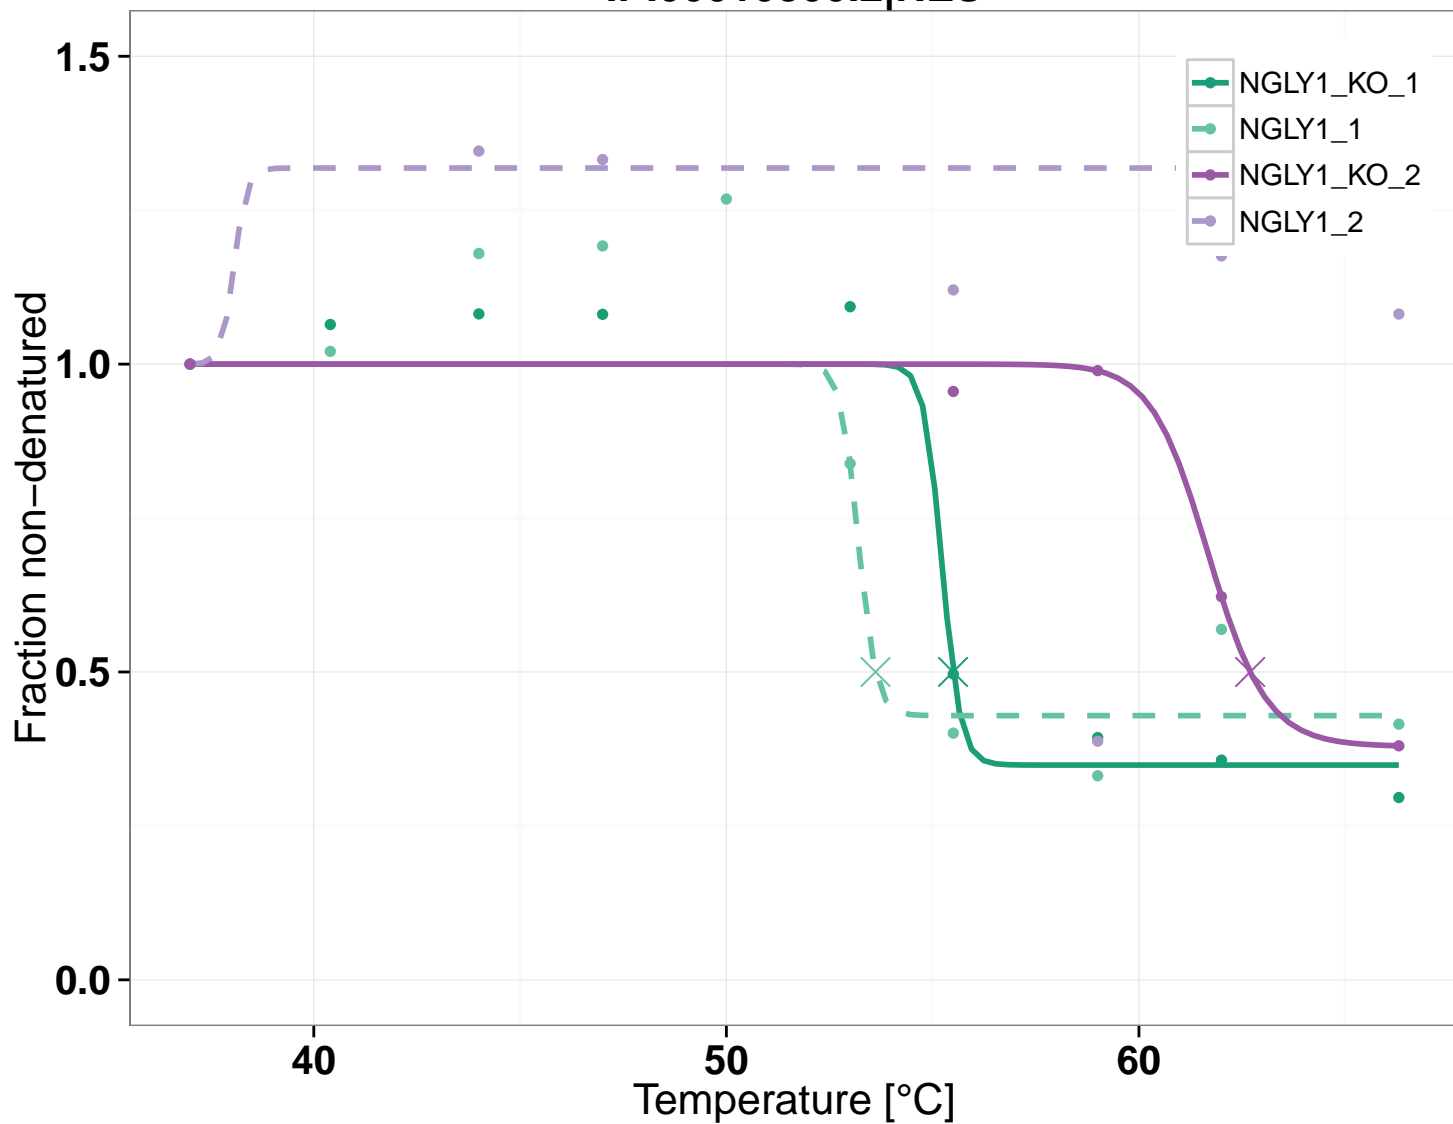

|            | meltPoint | slope | plateau | R2   |
|------------|-----------|-------|---------|------|
| NGLY1_KO_1 | 55.49     | -0.74 | 0.35    | 0.74 |
| NGLY1_1    | 53.62     | -0.67 | 0.43    | 0.85 |
| NGLY1_KO_2 | 62.7      | -0.22 | 0.38    | -0.3 |
| NGLY1_2    | -         | 0.52  | 1.32    | 0.05 |

Supplement: Supplementary file 4439 [file 1]

# IPI00456708.3|CEP192

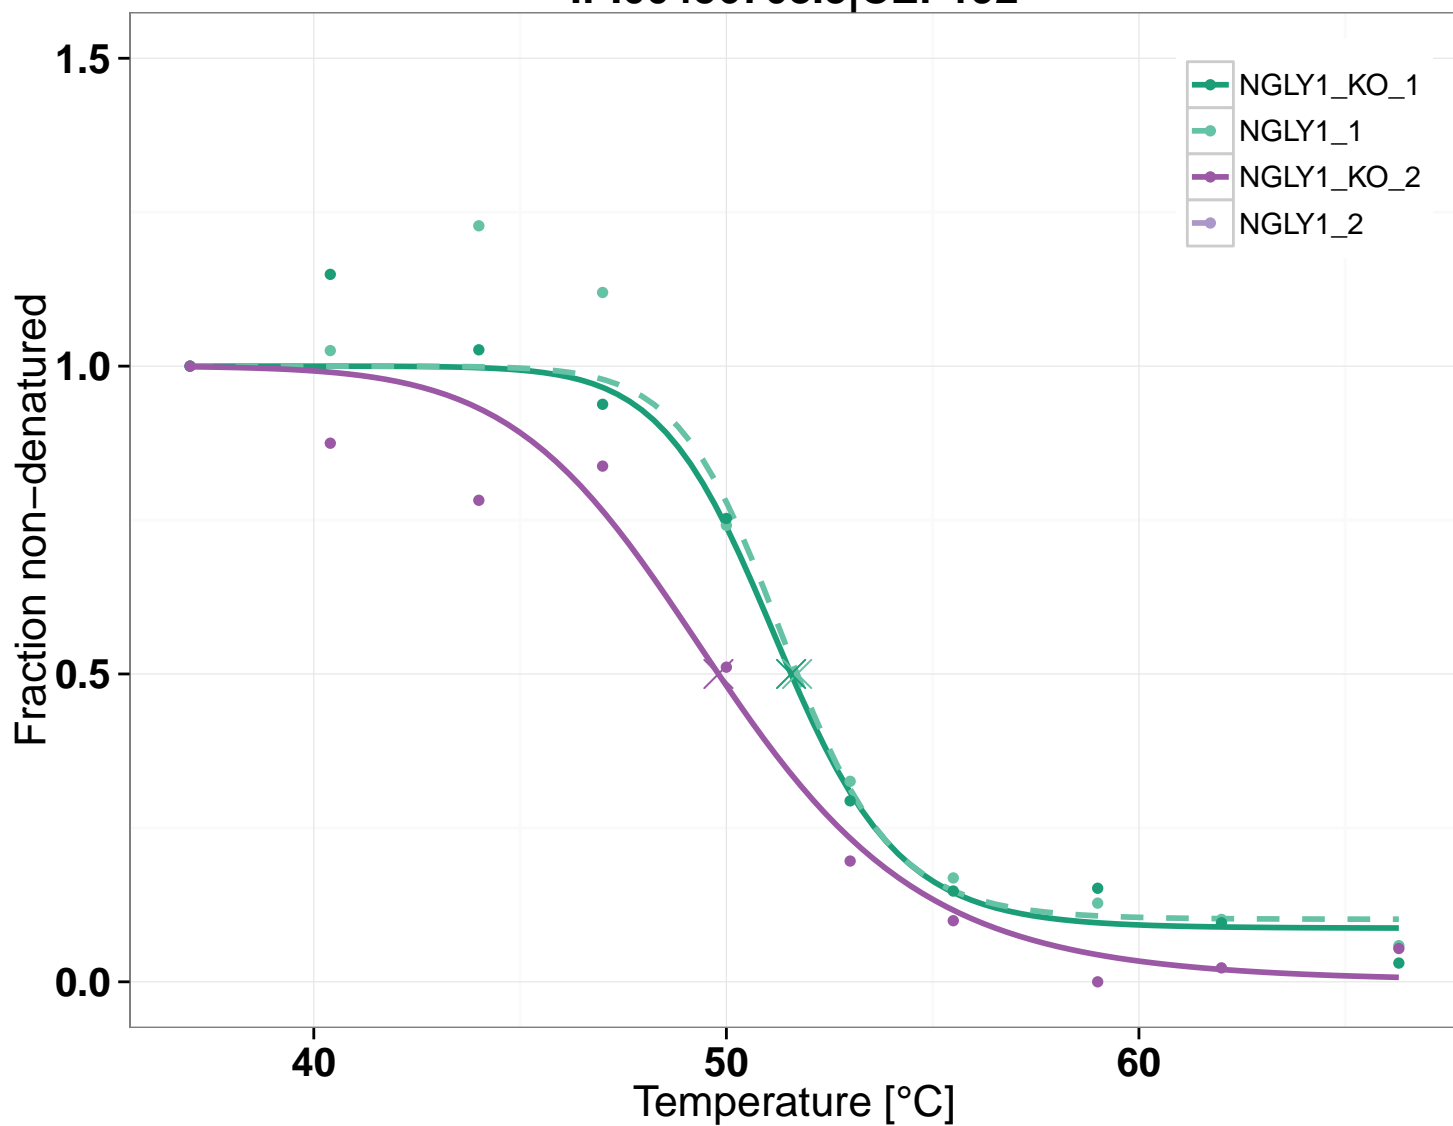

|            | meltPoint | slope | plateau | R2   |
|------------|-----------|-------|---------|------|
| NGLY1_KO_1 | 51.57     | -0.16 | 0.09    | 0.98 |
| NGLY1_1    | 51.72     | -0.17 | 0.1     | 0.96 |
| NGLY1_KO_2 | 49.81     | -0.1  | 0       | 0.97 |
| NGLY1_2    | —         | —     | —       | —    |

Supplement: Supplementary file 4440 [file 1]

# IPI00739940.4|FRYL

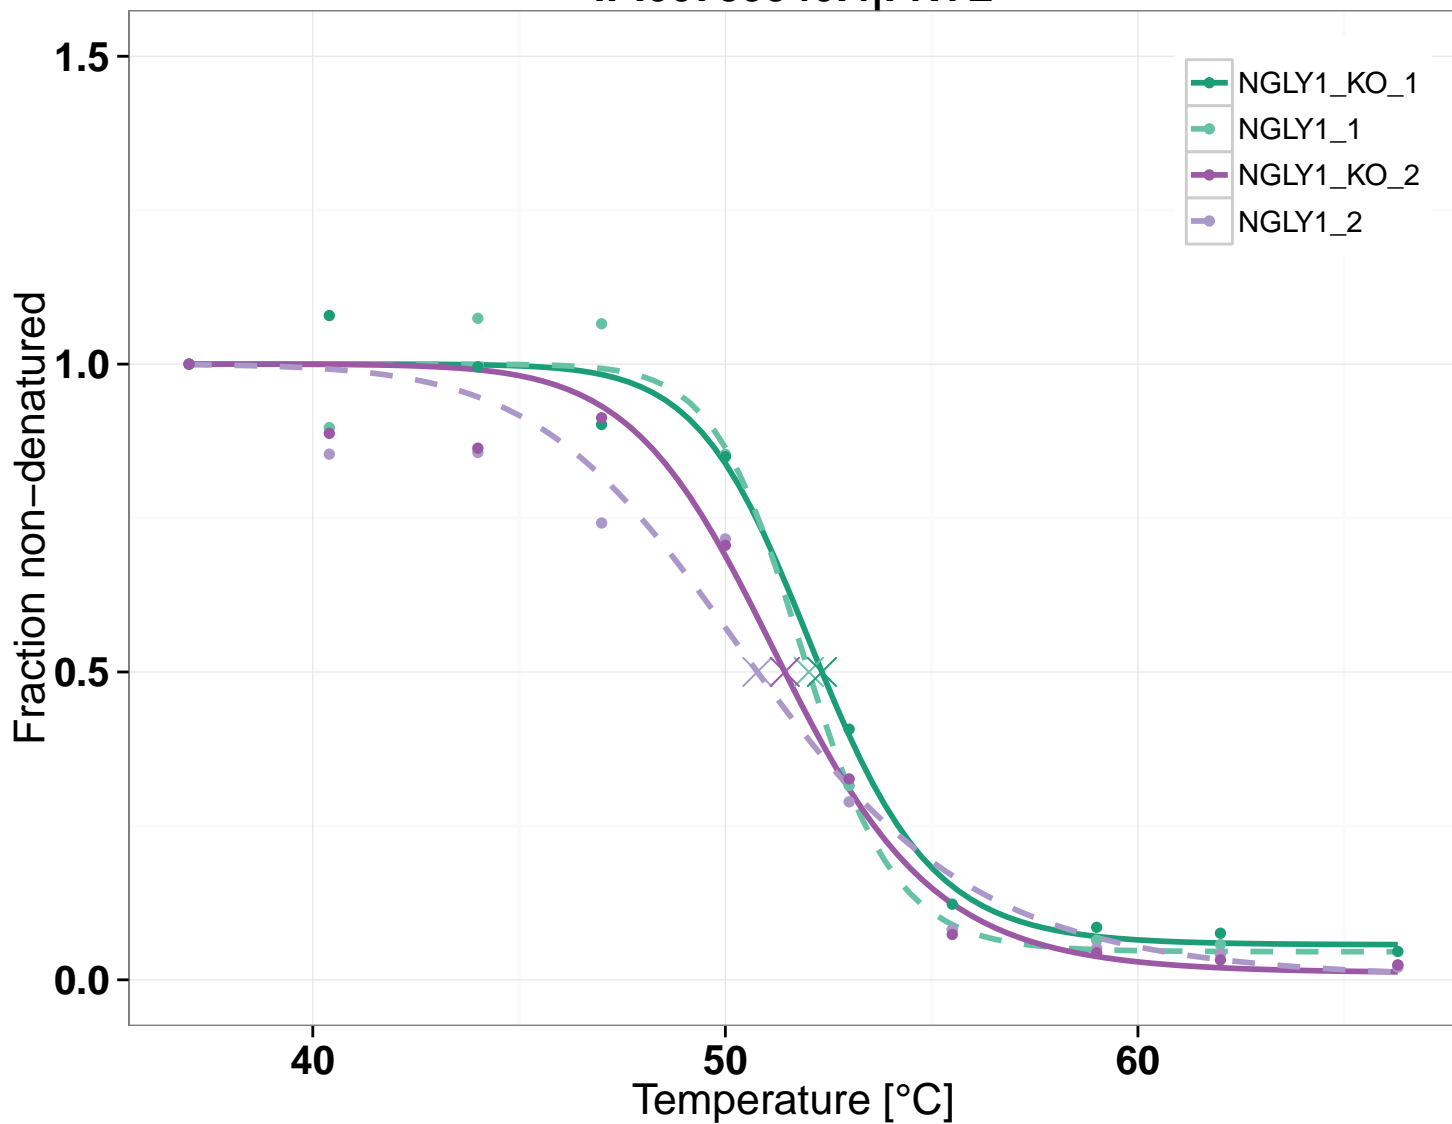

|            | meltPoint | slope  | plateau | R2   |
|------------|-----------|--------|---------|------|
| NGLY1_KO_1 | 52.34     | -0.17  | 0.06    | 0.99 |
| NGLY1_1    | 52.02     | -0.22  | 0.05    | 0.99 |
| NGLY1_KO_2 | 51.44     | -0.13  | 0.01    | 0.98 |
| NGLY1_2    | 50.78     | -0.093 | 0       | 0.96 |

Supplement: Supplementary file 4441 [file 1]

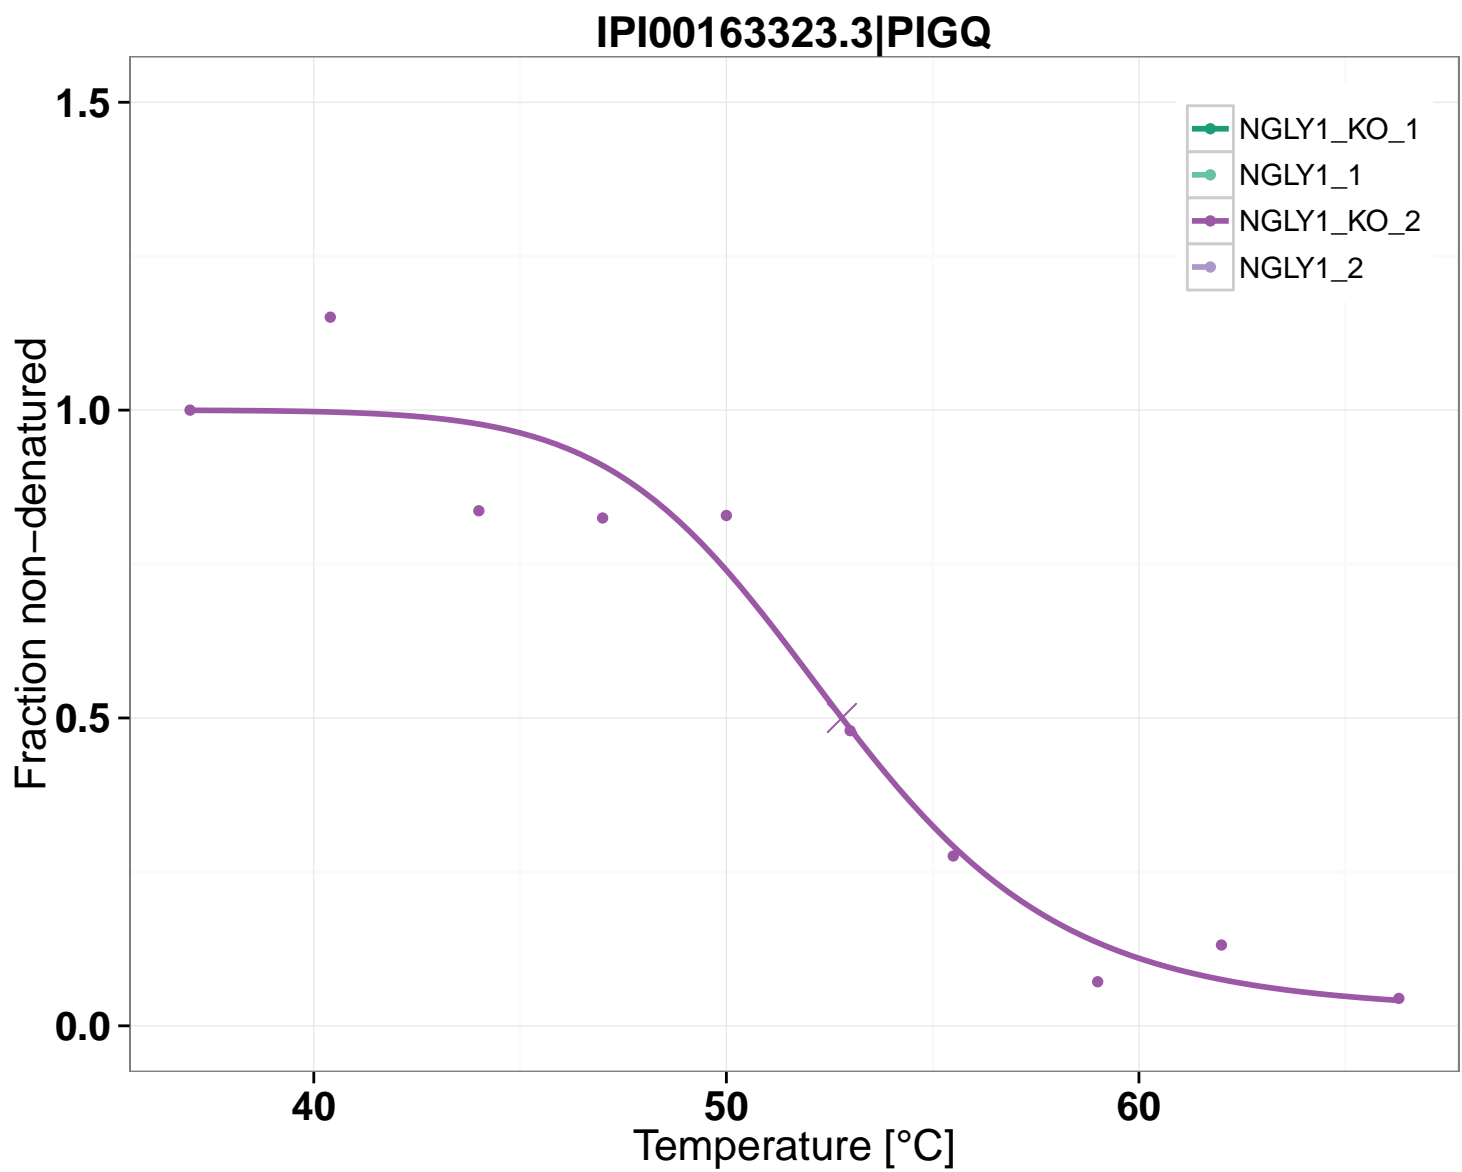

|            | meltPoint | slope  | plateau | R2   |
|------------|-----------|--------|---------|------|
| NGLY1_KO_1 | —         | —      | —       | —    |
| NGLY1_1    | —         | —      | —       | —    |
| NGLY1_KO_2 | 52.8      | −0.089 | 0.02    | 0.96 |
| NGLY1_2    | —         | —      | —       | —    |

Supplement: Supplementary file 4442 [file 1]

IPI00003377.1|SFRS7

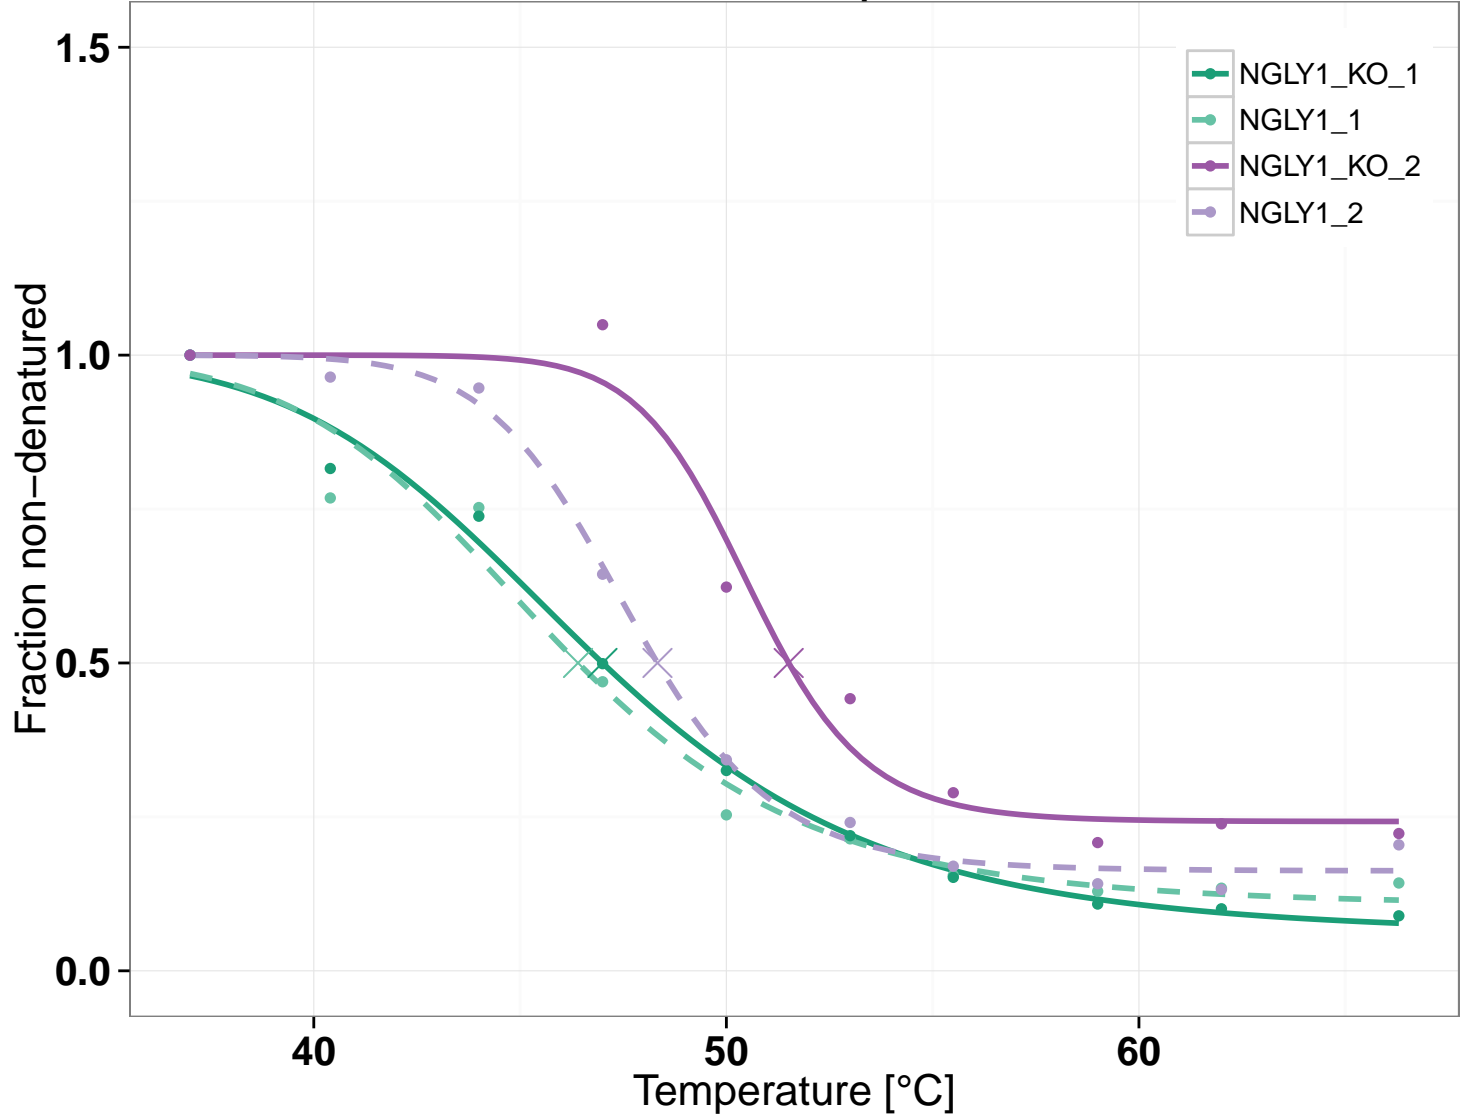

|            | meltPoint | slope  | plateau | R2   |
|------------|-----------|--------|---------|------|
| NGLY1_KO_1 | 47        | -0.066 | 0.06    | 0.99 |
| NGLY1_1    | 46.4      | -0.072 | 0.1     | 0.97 |
| NGLY1_KO_2 | 51.51     | -0.14  | 0.24    | 0.66 |
| NGLY1_2    | 48.33     | -0.12  | 0.16    | 1    |

Supplement: Supplementary file 4443 [file 1]

IPI00217811.9|HEXDC

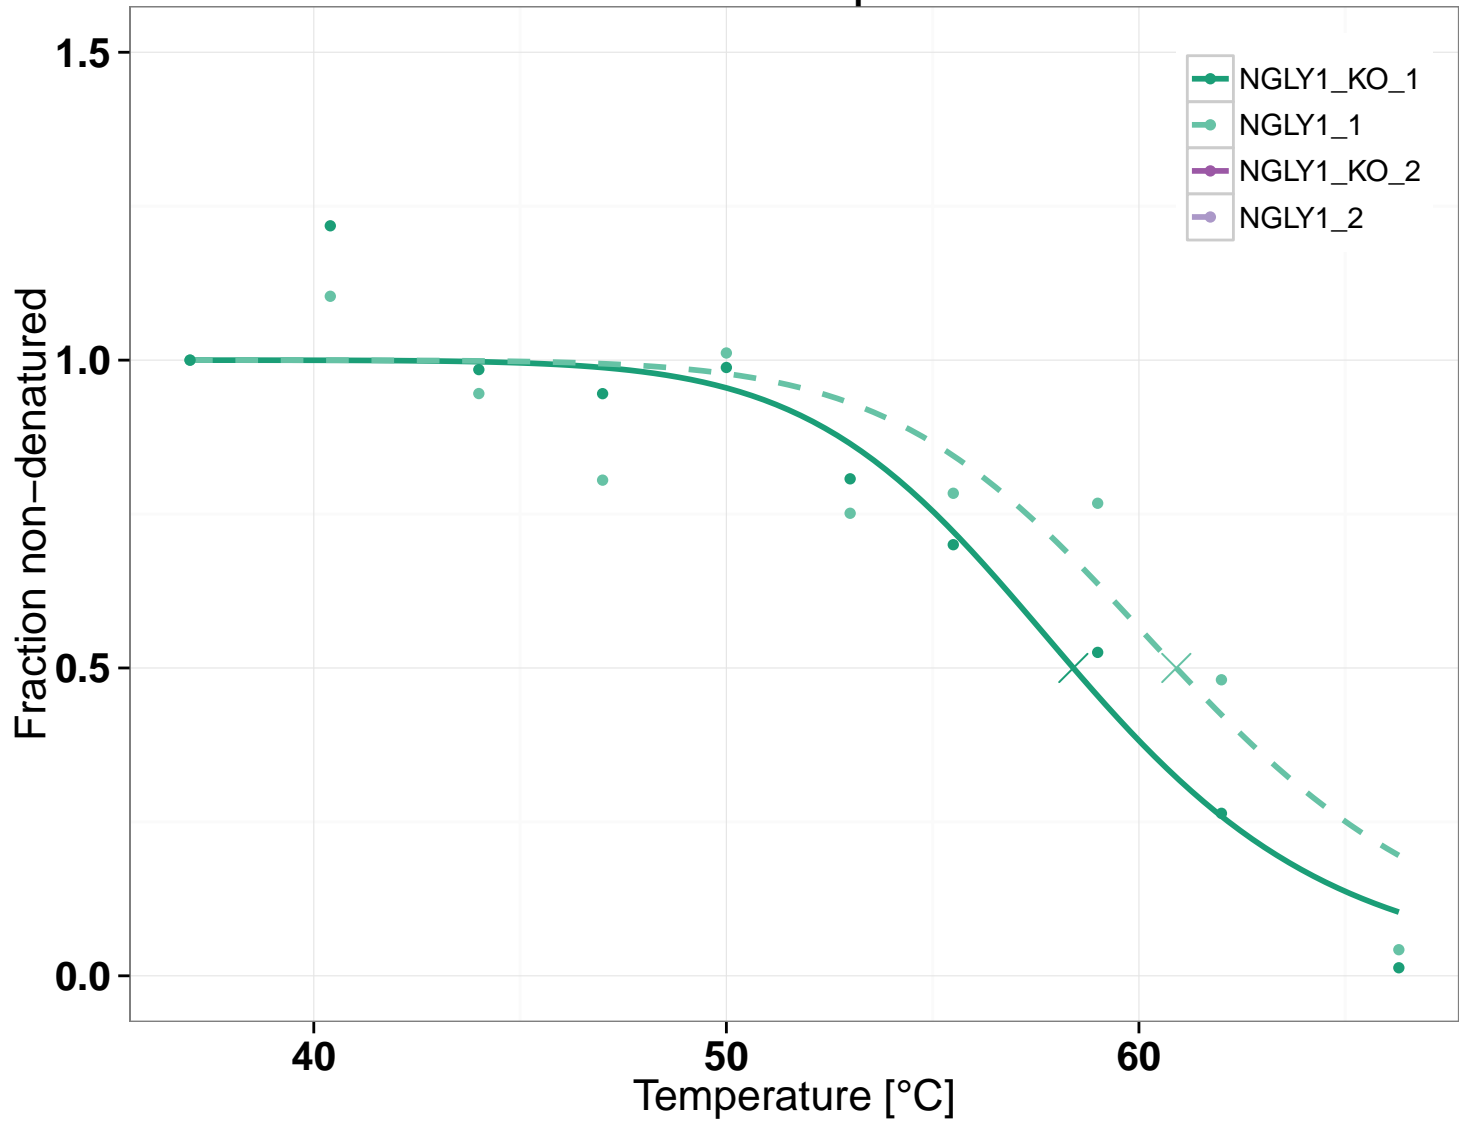

|            | meltPoint | slope  | plateau | R2   |
|------------|-----------|--------|---------|------|
| NGLY1_KO_1 | 58.41     | -0.079 | 0       | 0.95 |
| NGLY1_1    | 60.91     | -0.072 | 0       | 0.85 |
| NGLY1_KO_2 | -         | -      | -       | -    |
| NGLY1_2    | -         | -      | -       | -    |

Supplement: Supplementary file 4444 [file 1]

# IPI00215901.1|AK2

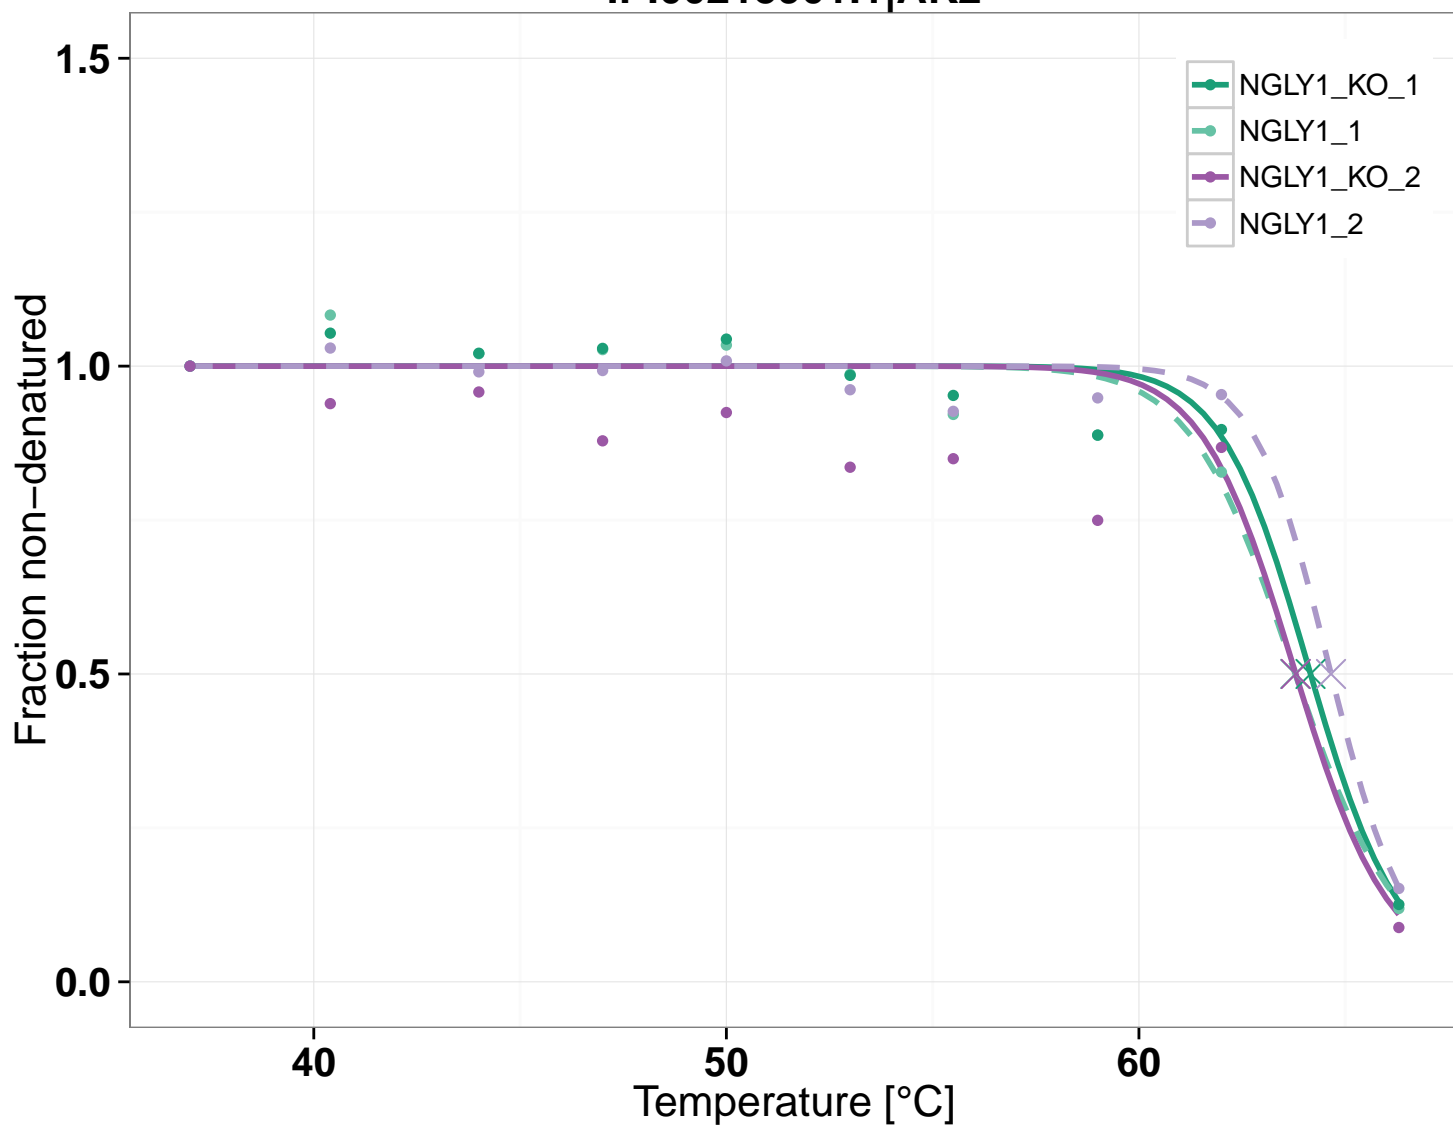

|            | meltPoint | slope | plateau | R2   |
|------------|-----------|-------|---------|------|
| NGLY1_KO_1 | 64.16     | -0.23 | 0       | 0.97 |
| NGLY1_1    | 63.79     | -0.2  | 0       | 0.96 |
| NGLY1_KO_2 | 63.8      | -0.22 | 0       | 0.78 |
| NGLY1_2    | 64.66     | -0.27 | 0       | 0.98 |

Supplement: Supplementary file 4445 [file 1]

IPI00016871.1|FGR

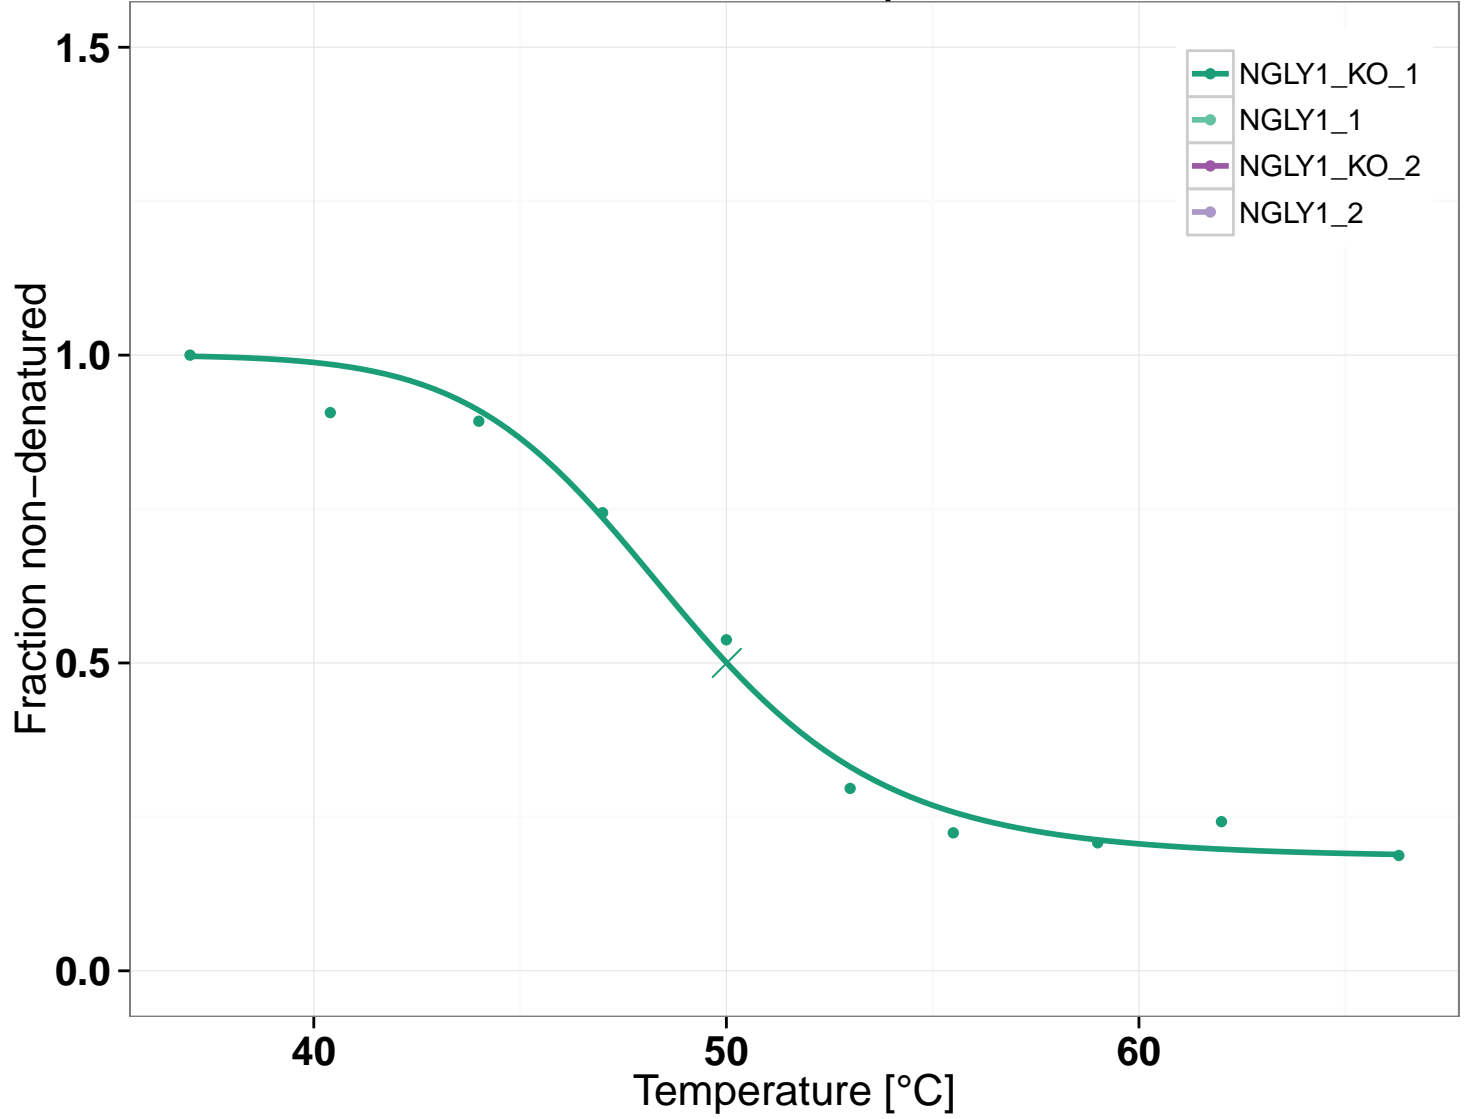

|            | meltPoint | slope  | plateau | R2   |
|------------|-----------|--------|---------|------|
| NGLY1_KO_1 | 50.01     | -0.081 | 0.18    | 0.99 |
| NGLY1_1    | -         | -      | -       | -    |
| NGLY1_KO_2 | -         | -      | -       | -    |
| NGLY1_2    | -         | -      | -       | -    |

Supplement: Supplementary file 4446 [file 1]

IPI00874185.1|HIBCH

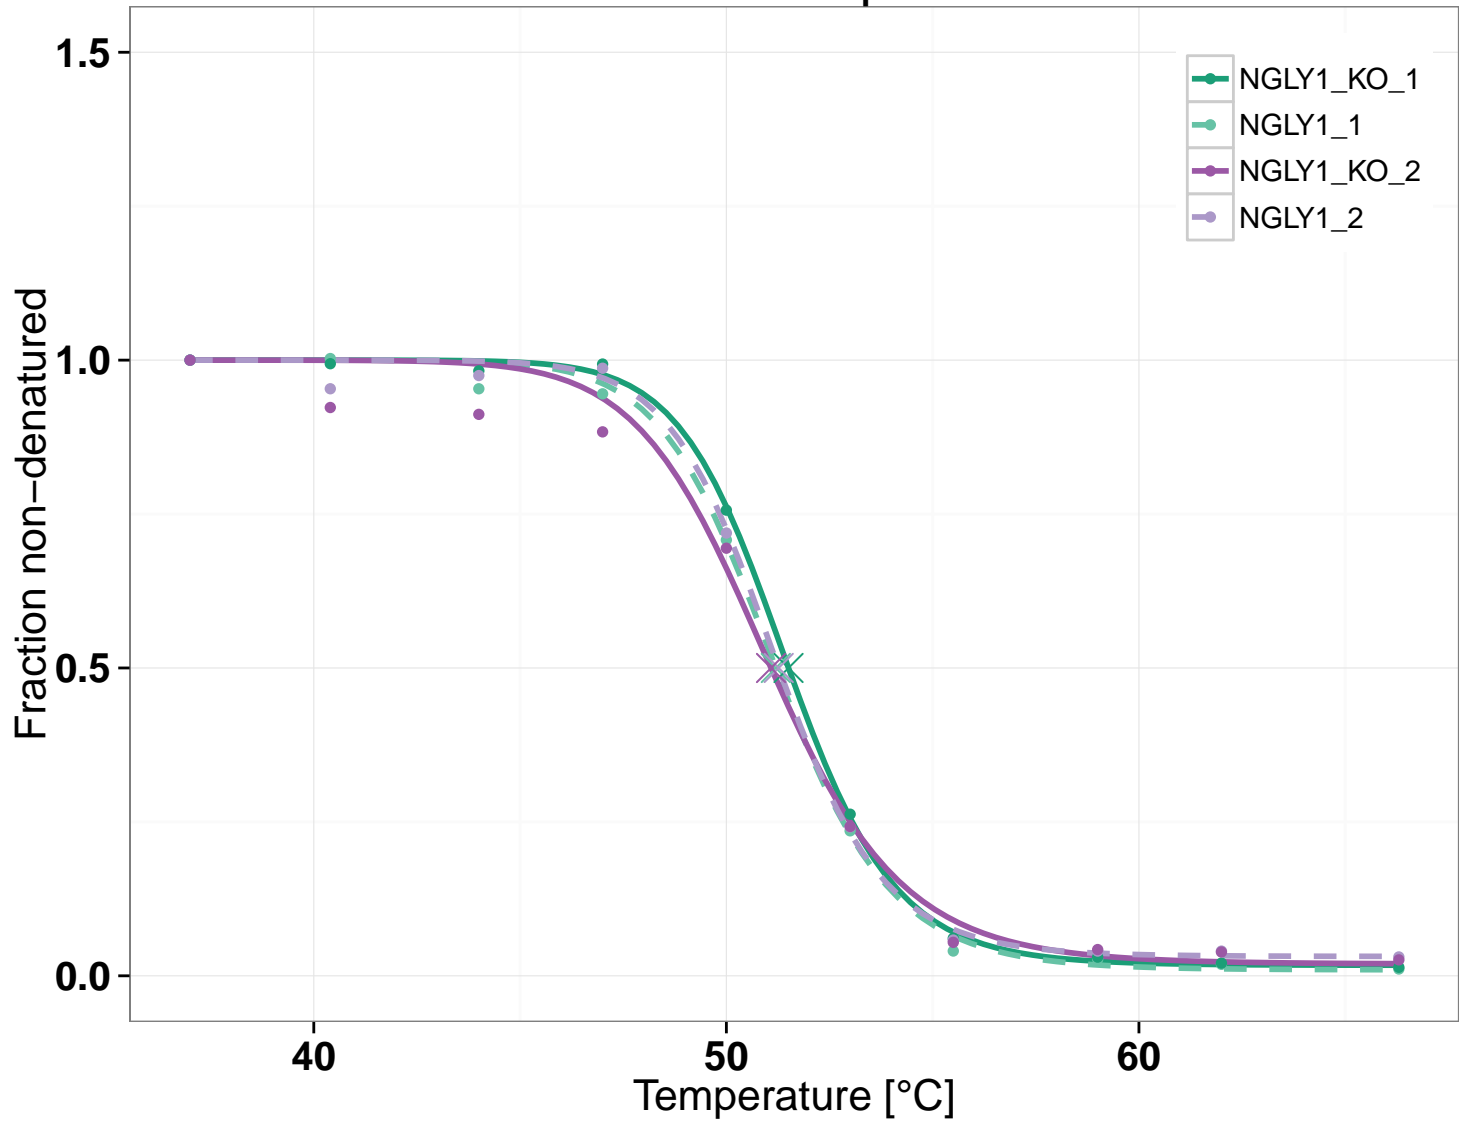

|            | meltPoint | slope | plateau | R2   |
|------------|-----------|-------|---------|------|
| NGLY1_KO_1 | 51.51     | -0.19 | 0.02    | 1    |
| NGLY1_1    | 51.2      | -0.18 | 0.01    | 1    |
| NGLY1_KO_2 | 51.08     | -0.15 | 0.02    | 0.99 |
| NGLY1_2    | 51.27     | -0.19 | 0.03    | 1    |

Supplement: Supplementary file 4447 [file 1]

# IPI00013290.5|HDGF2

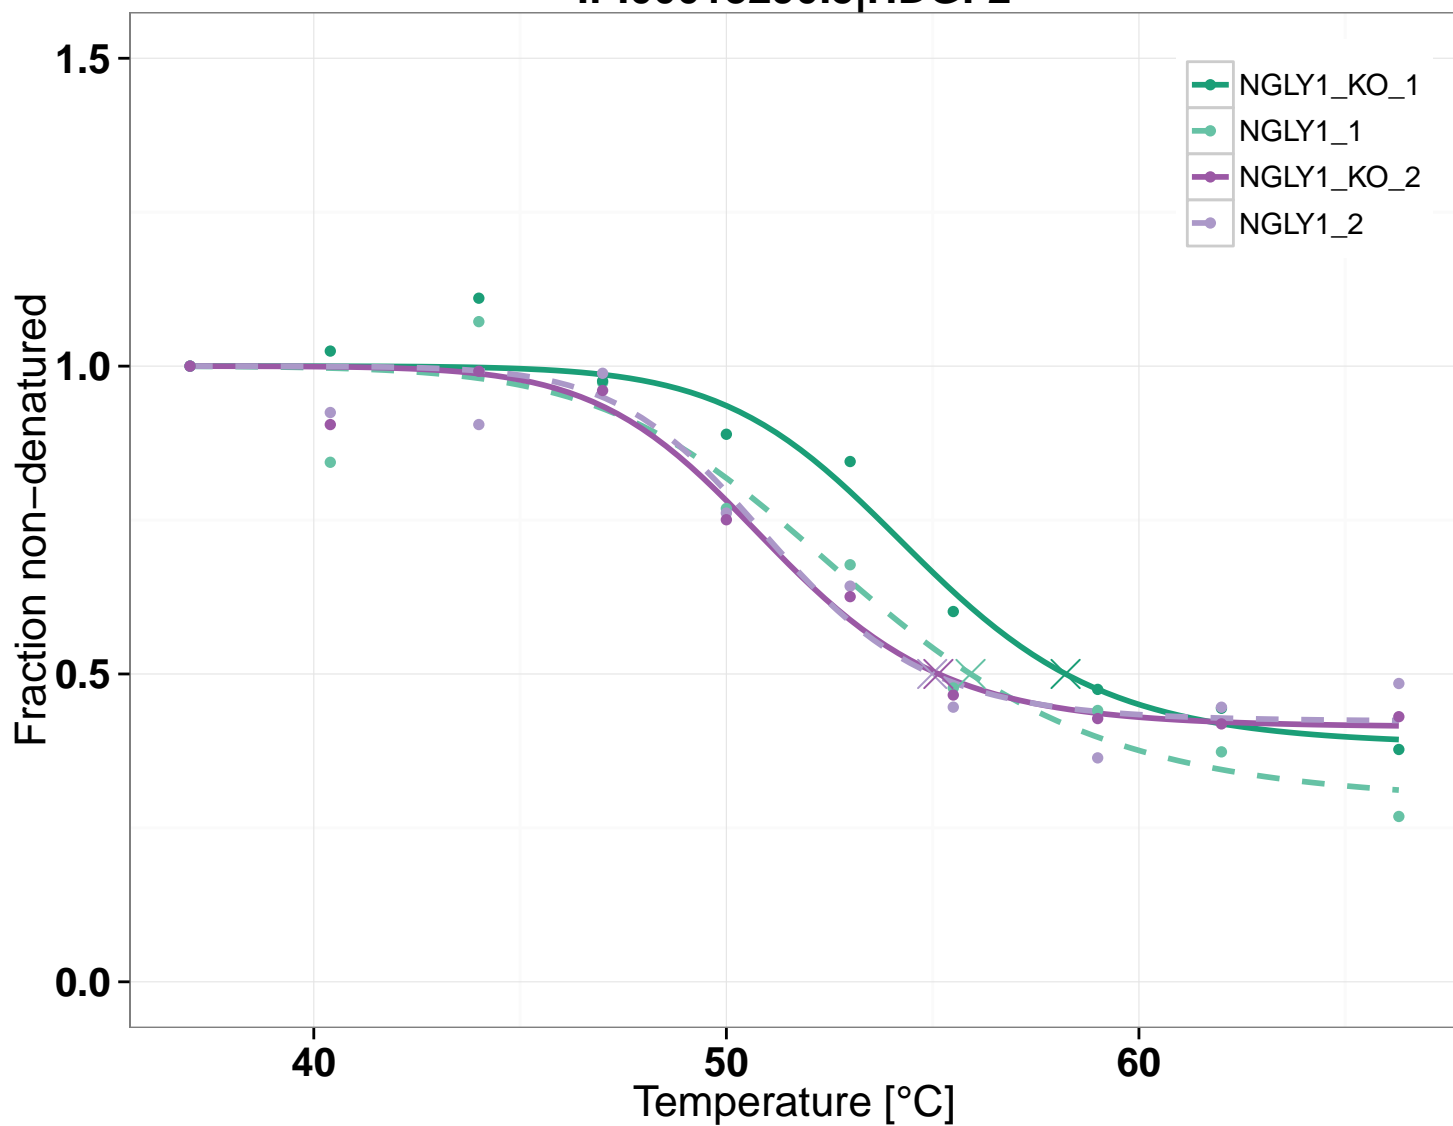

|            | meltPoint | slope  | plateau | R2   |
|------------|-----------|--------|---------|------|
| NGLY1_KO_1 | 58.22     | -0.067 | 0.38    | 0.97 |
| NGLY1_1    | 55.92     | -0.058 | 0.29    | 0.94 |
| NGLY1_KO_2 | 55.14     | -0.069 | 0.41    | 0.98 |
| NGLY1_2    | 54.99     | -0.076 | 0.42    | 0.95 |

Supplement: Supplementary file 4448 [file 1]

# IPI00032202.3|WDR37

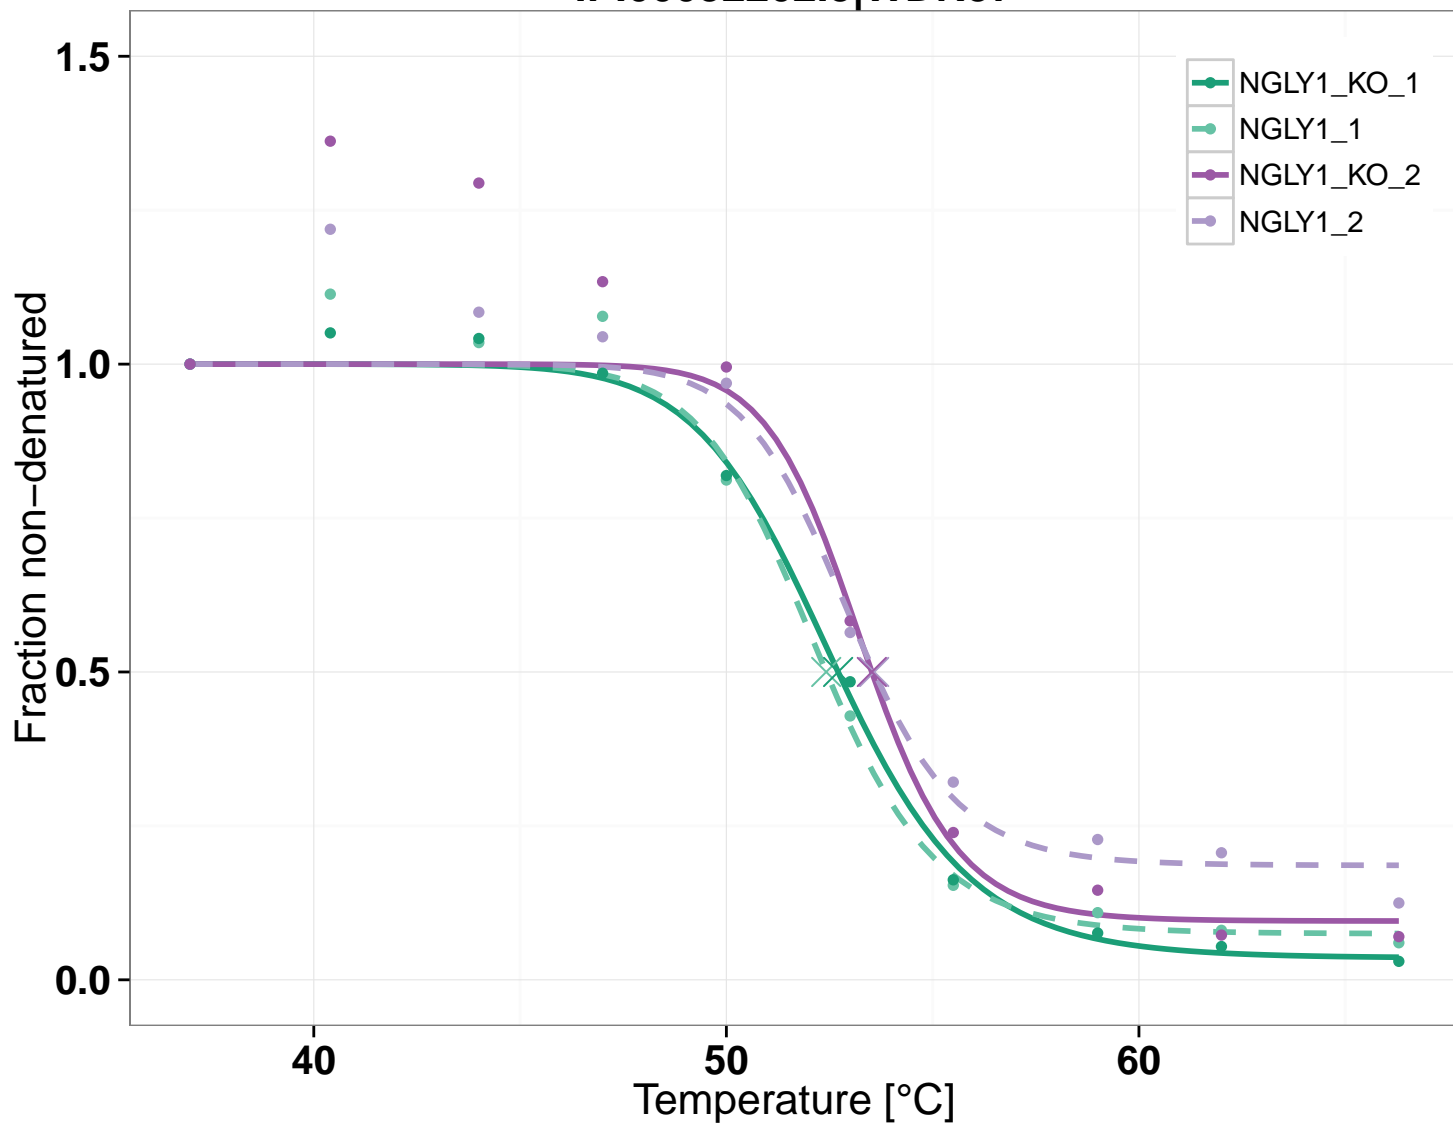

|            | meltPoint | slope | plateau | R2   |
|------------|-----------|-------|---------|------|
| NGLY1_KO_1 | 52.71     | -0.14 | 0.04    | 1    |
| NGLY1_1    | 52.42     | -0.16 | 0.07    | 0.99 |
| NGLY1_KO_2 | 53.53     | -0.2  | 0.1     | 0.9  |
| NGLY1_2    | 53.58     | -0.16 | 0.19    | 0.96 |

Supplement: Supplementary file 4449 [file 1]

IPI00414362.3|C21ORF2

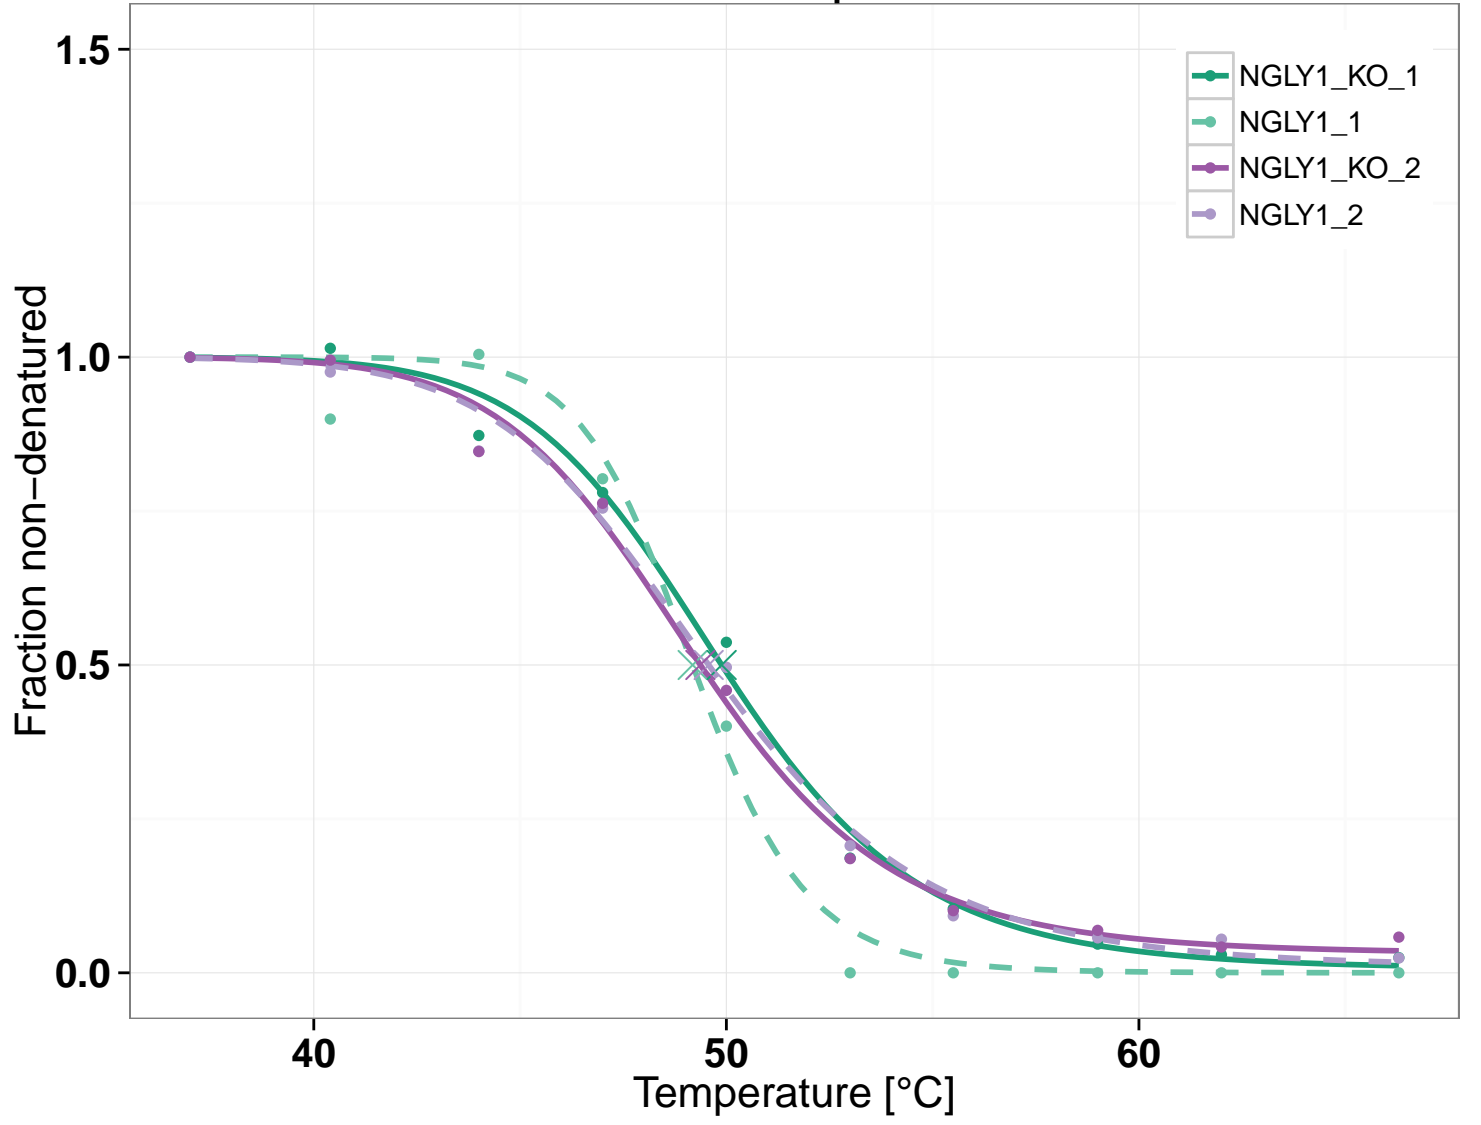

|            | meltPoint | slope  | plateau | R2   |
|------------|-----------|--------|---------|------|
| NGLY1_KO_1 | 49.89     | -0.1   | 0.01    | 0.99 |
| NGLY1_1    | 49.18     | -0.18  | 0       | 0.99 |
| NGLY1_KO_2 | 49.37     | -0.1   | 0.03    | 0.99 |
| NGLY1_2    | 49.57     | -0.095 | 0.01    | 0.99 |

Supplement: Supplementary file 4450 [file 1]

IPI00293746.2|C1ORF35

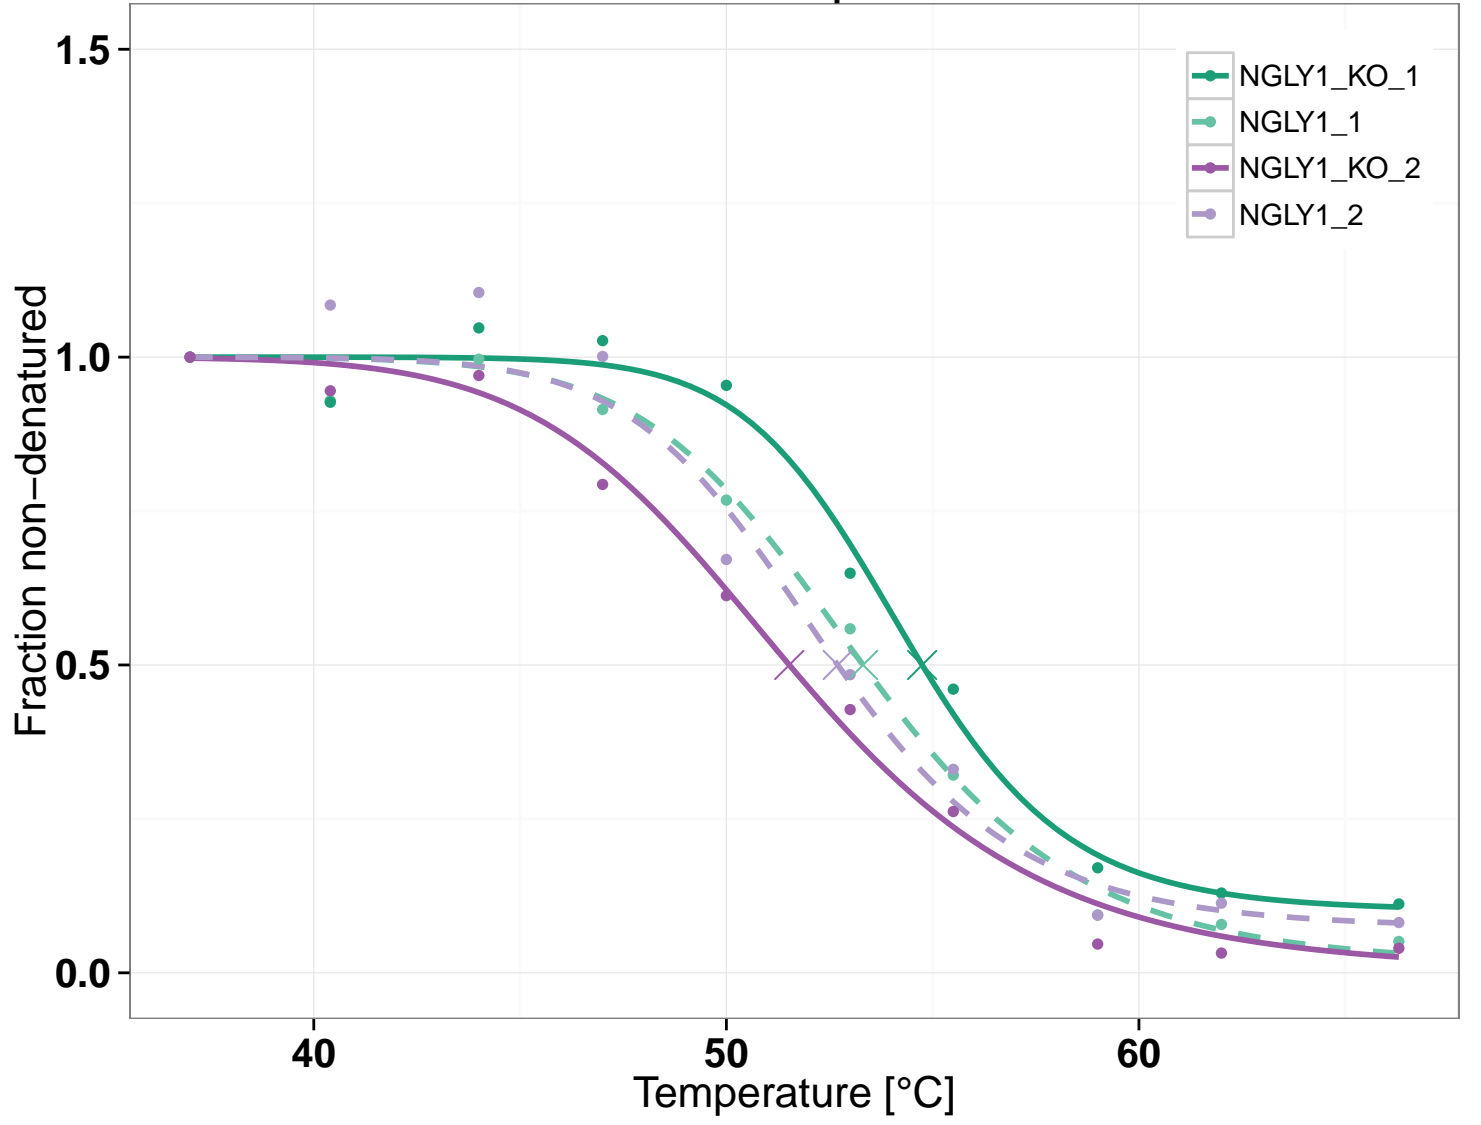

|            | meltPoint | slope  | plateau | R2   |
|------------|-----------|--------|---------|------|
| NGLY1_KO_1 | 54.75     | -0.11  | 0.1     | 0.99 |
| NGLY1_1    | 53.31     | -0.092 | 0.01    | 0.99 |
| NGLY1_KO_2 | 51.53     | -0.08  | 0       | 0.99 |
| NGLY1_2    | 52.7      | -0.098 | 0.07    | 0.98 |

Supplement: Supplementary file 4451 [file 1]

IPI00036742.6|KIAA1429

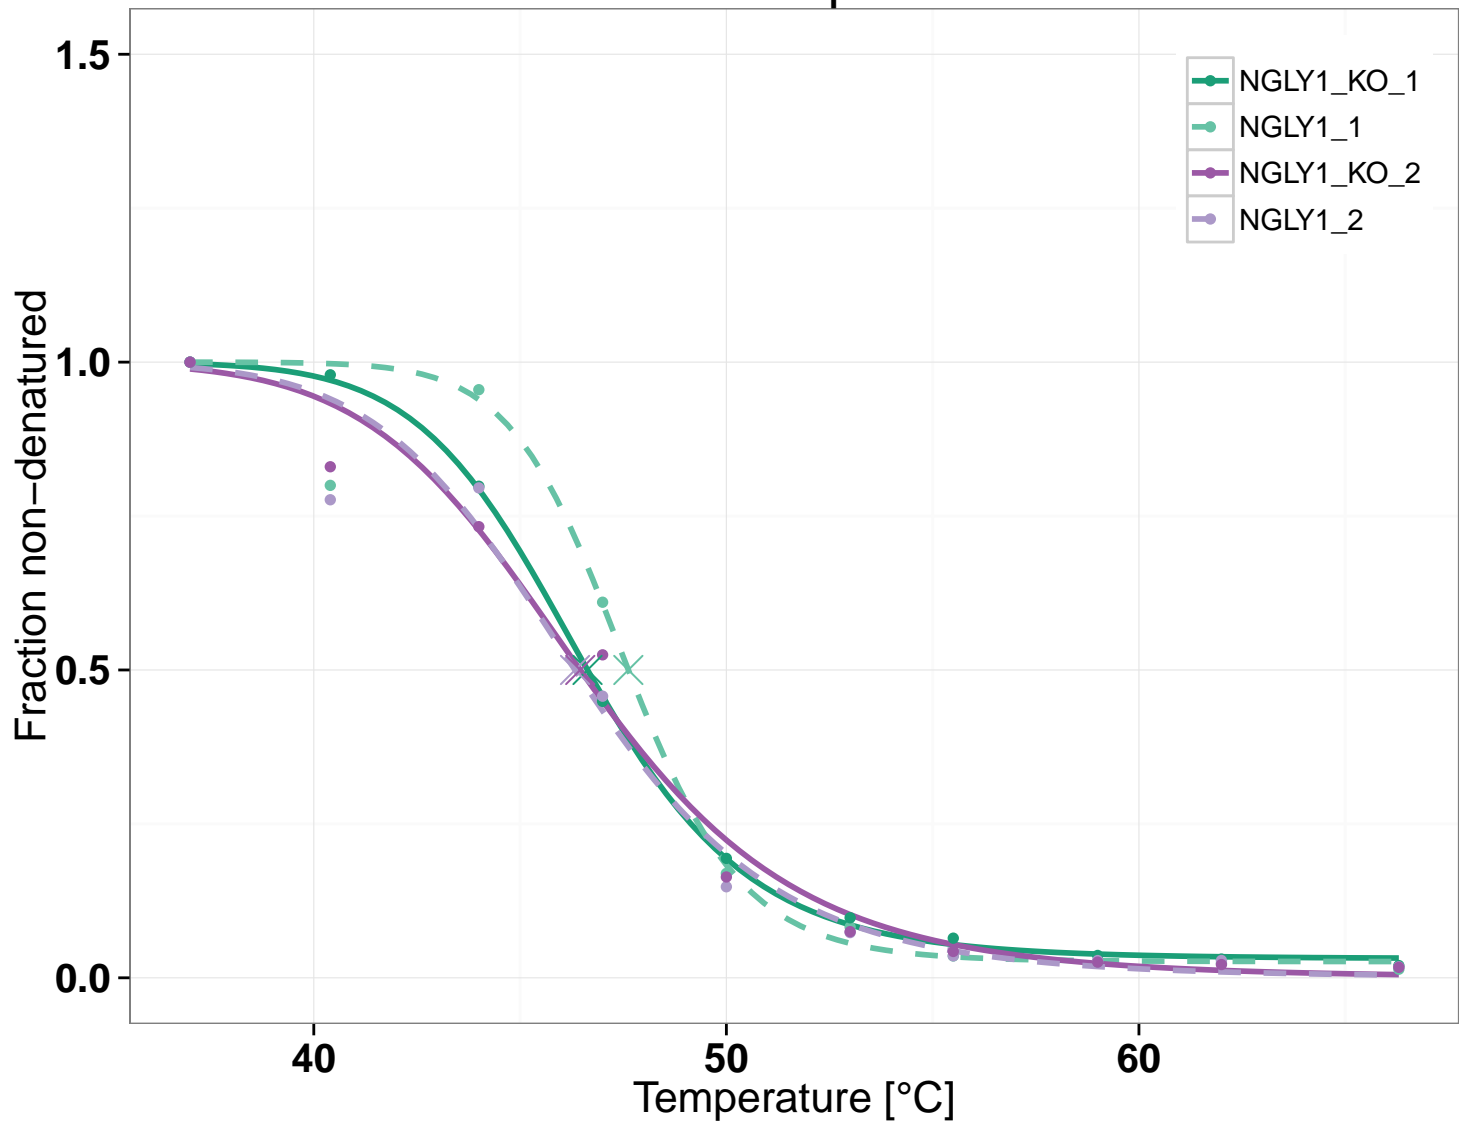

|            | meltPoint | slope  | plateau | R2   |
|------------|-----------|--------|---------|------|
| NGLY1_KO_1 | 46.63     | -0.12  | 0.03    | 1    |
| NGLY1_1    | 47.62     | -0.17  | 0.03    | 0.97 |
| NGLY1_KO_2 | 46.46     | -0.096 | 0       | 0.98 |
| NGLY1_2    | 46.33     | -0.1   | 0       | 0.97 |

Supplement: Supplementary file 4452 [file 1]

IPI00004084.3|ATF6B

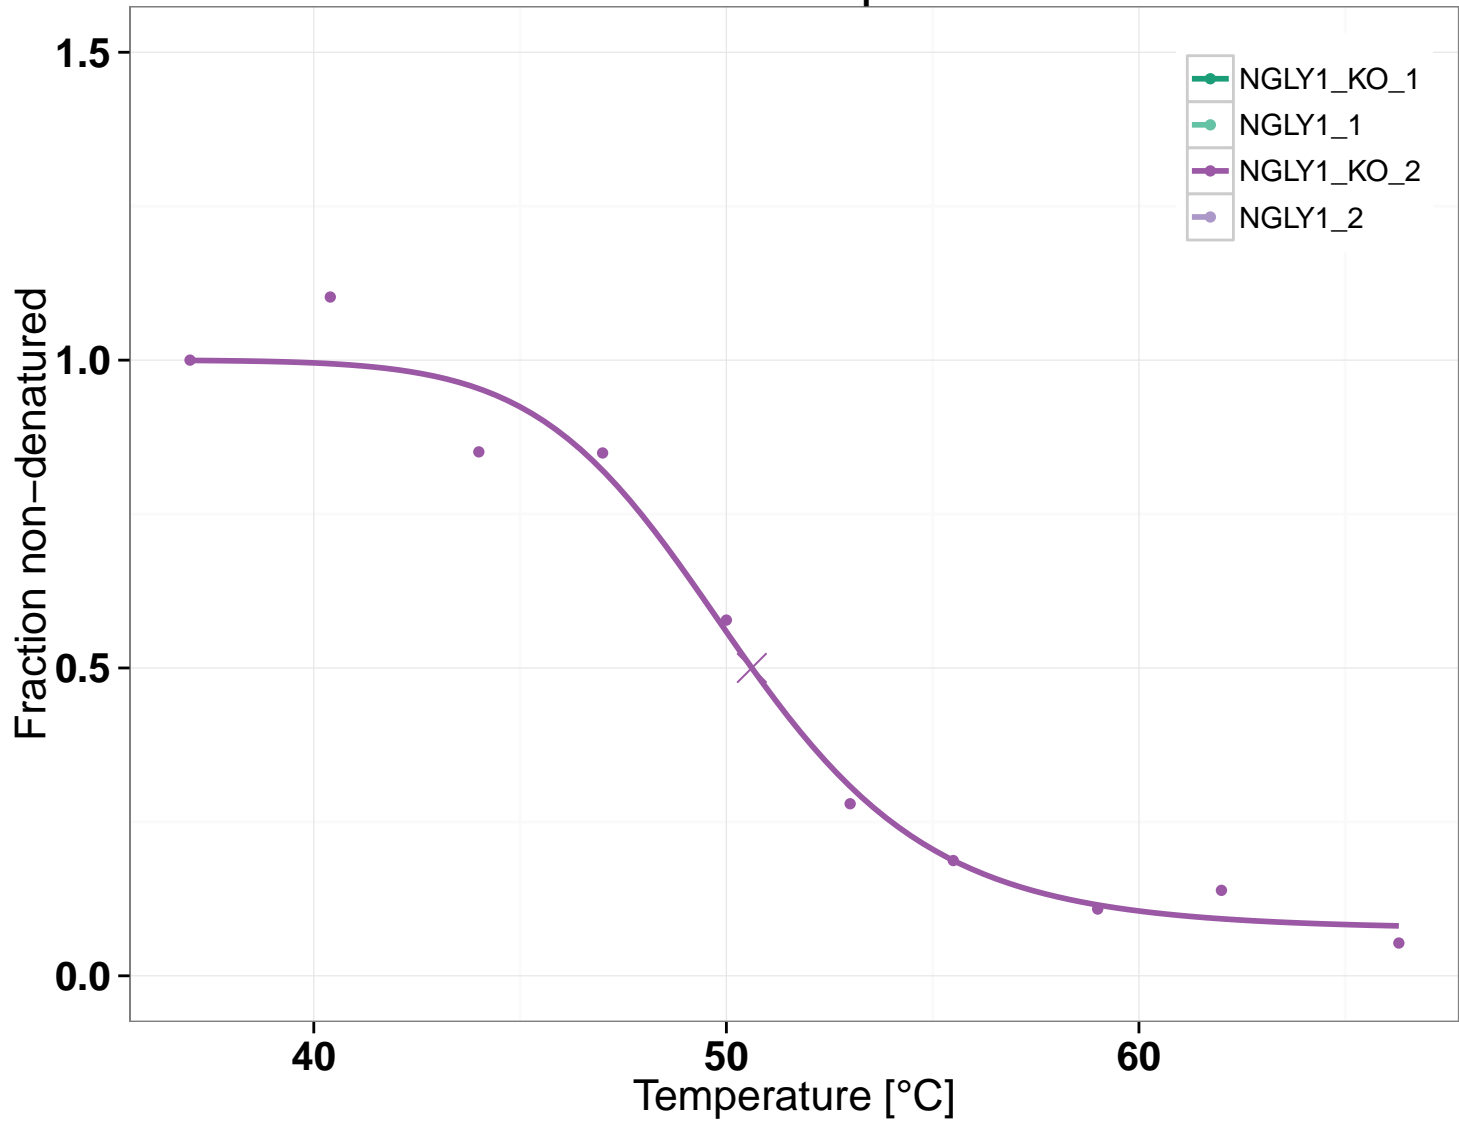

|            | meltPoint | slope  | plateau | R2   |
|------------|-----------|--------|---------|------|
| NGLY1_KO_1 | —         | —      | —       | —    |
| NGLY1_1    | —         | —      | —       | —    |
| NGLY1_KO_2 | 50.62     | -0.097 | 0.08    | 0.98 |
| NGLY1_2    | —         | —      | —       | —    |

Supplement: Supplementary file 4453 [file 1]

IPI00018218.1|ZDHHC4

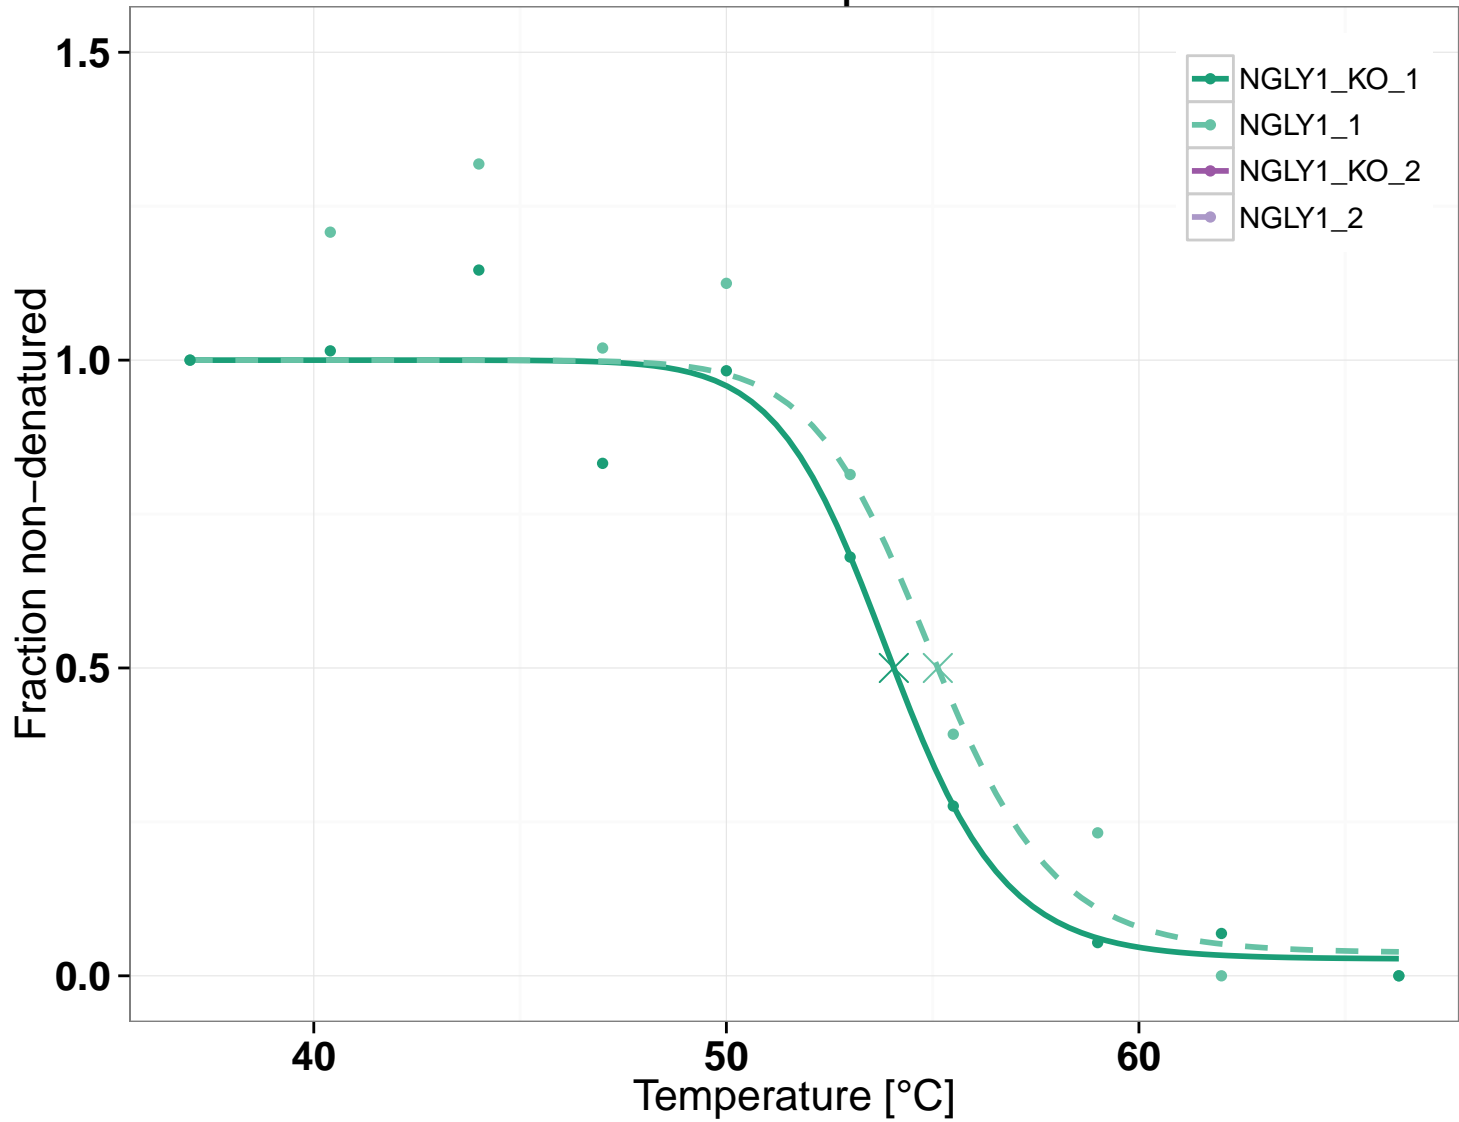

|            | meltPoint | slope | plateau | R2   |
|------------|-----------|-------|---------|------|
| NGLY1_KO_1 | 54.06     | -0.18 | 0.03    | 0.97 |
| NGLY1_1    | 55.13     | -0.16 | 0.04    | 0.92 |
| NGLY1_KO_2 | -         | -     | -       | -    |
| NGLY1_2    | -         | -     | -       | -    |

Supplement: Supplementary file 4454 [file 1]

IPI00794659.1|RPS20

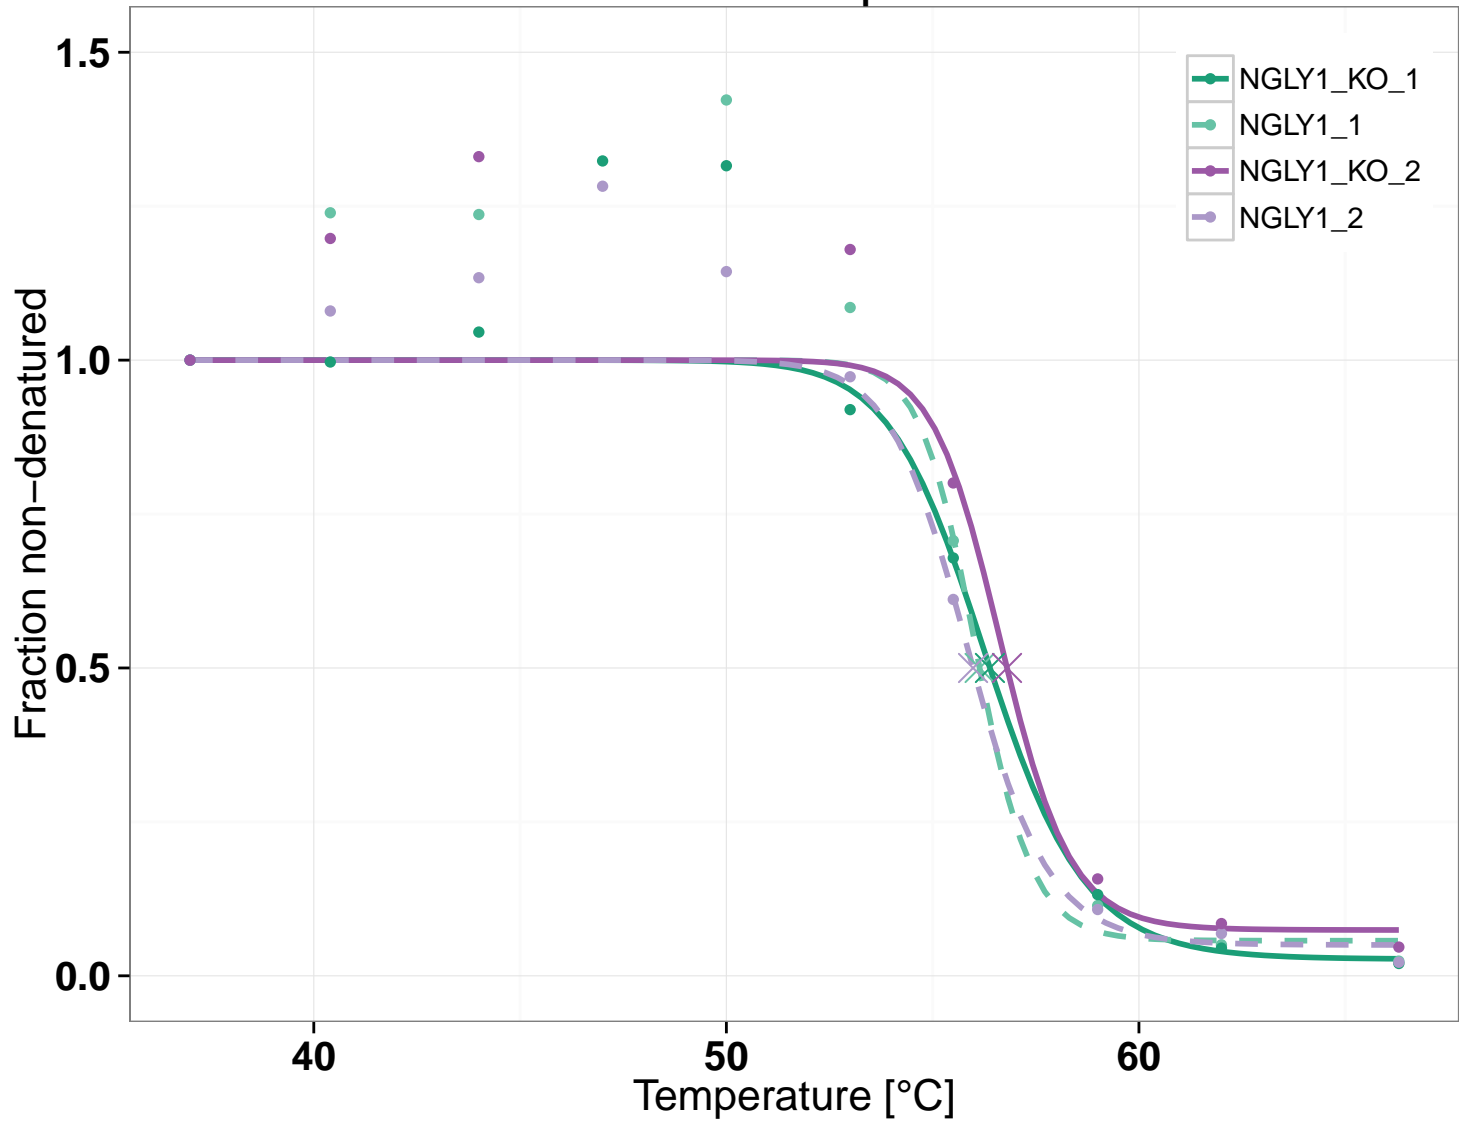

|            | meltPoint | slope | plateau | R2   |
|------------|-----------|-------|---------|------|
| NGLY1_KO_1 | 56.39     | -0.2  | 0.03    | 0.91 |
| NGLY1_1    | 56.14     | -0.35 | 0.06    | 0.82 |
| NGLY1_KO_2 | 56.8      | -0.28 | 0.07    | 0.76 |
| NGLY1_2    | 55.98     | -0.25 | 0.05    | 0.94 |

Supplement: Supplementary file 4455 [file 1]

IPI00005495.3|ATXN3

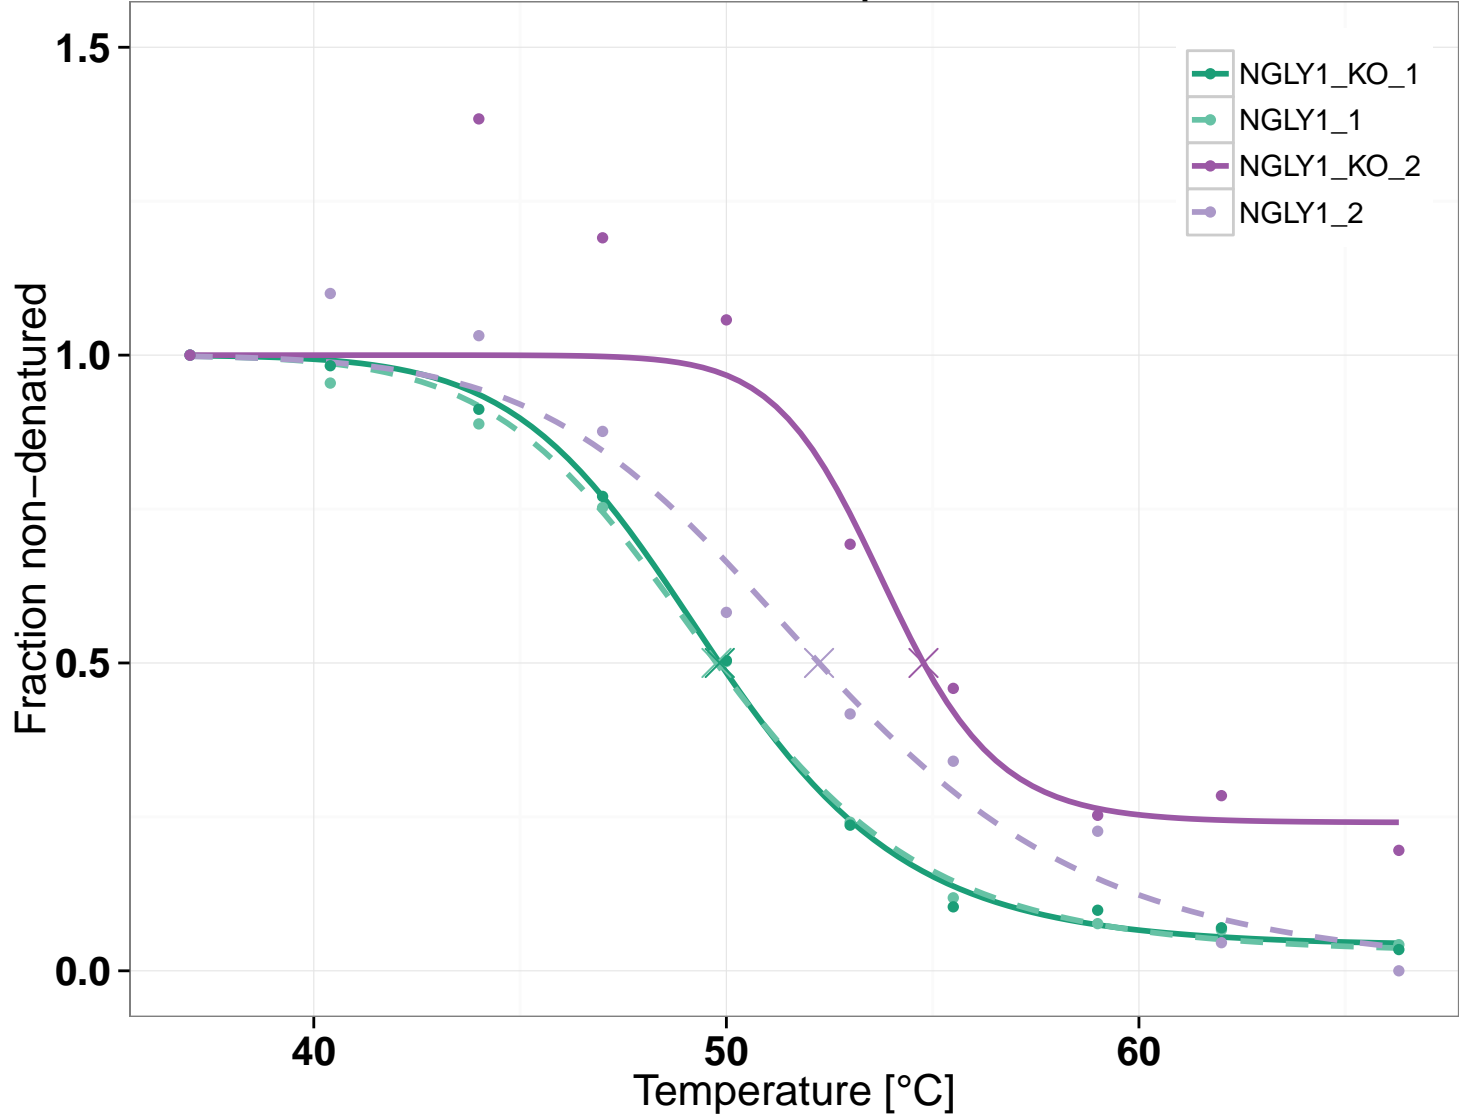

|            | meltPoint | slope  | plateau | R2   |
|------------|-----------|--------|---------|------|
| NGLY1_KO_1 | 49.84     | -0.1   | 0.04    | 1    |
| NGLY1_1    | 49.76     | -0.093 | 0.03    | 1    |
| NGLY1_KO_2 | 54.78     | -0.14  | 0.24    | 0.74 |
| NGLY1_2    | 52.25     | -0.074 | 0       | 0.97 |

Supplement: Supplementary file 4456 [file 1]

# IPI00294728.1|DMXL1

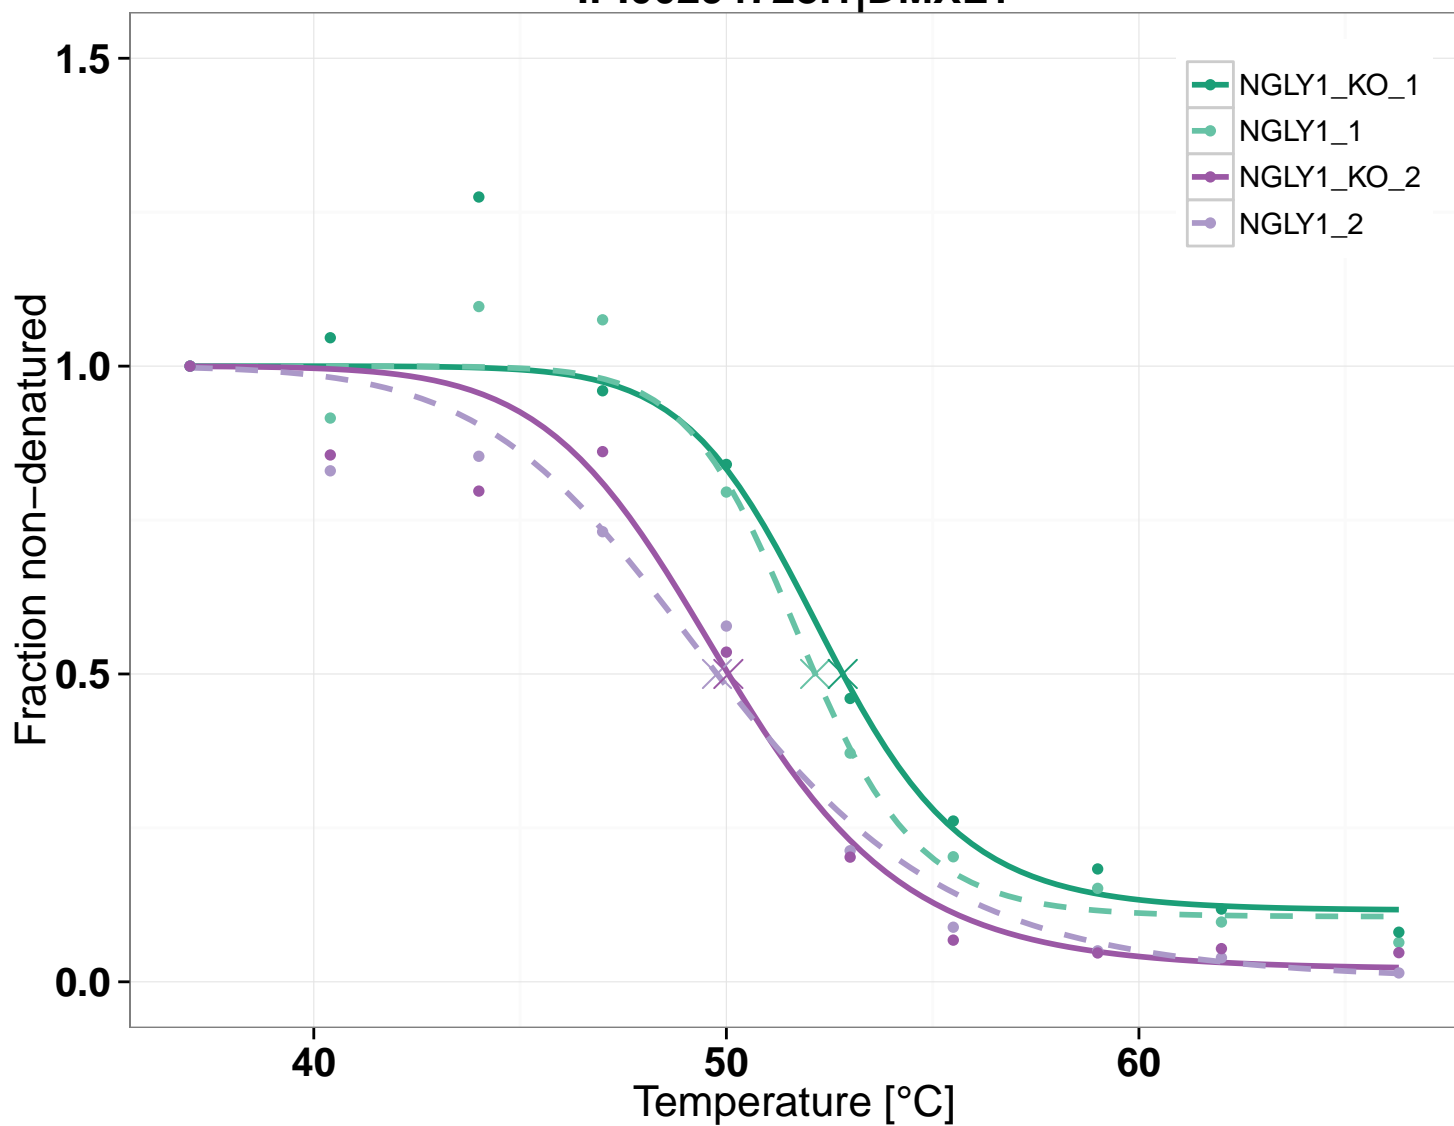

|            | meltPoint | slope  | plateau | R2   |
|------------|-----------|--------|---------|------|
| NGLY1_KO_1 | 52.82     | -0.13  | 0.12    | 0.95 |
| NGLY1_1    | 52.15     | -0.16  | 0.11    | 0.98 |
| NGLY1_KO_2 | 50.05     | -0.11  | 0.02    | 0.96 |
| NGLY1_2    | 49.77     | -0.088 | 0       | 0.97 |

Supplement: Supplementary file 4457 [file 1]

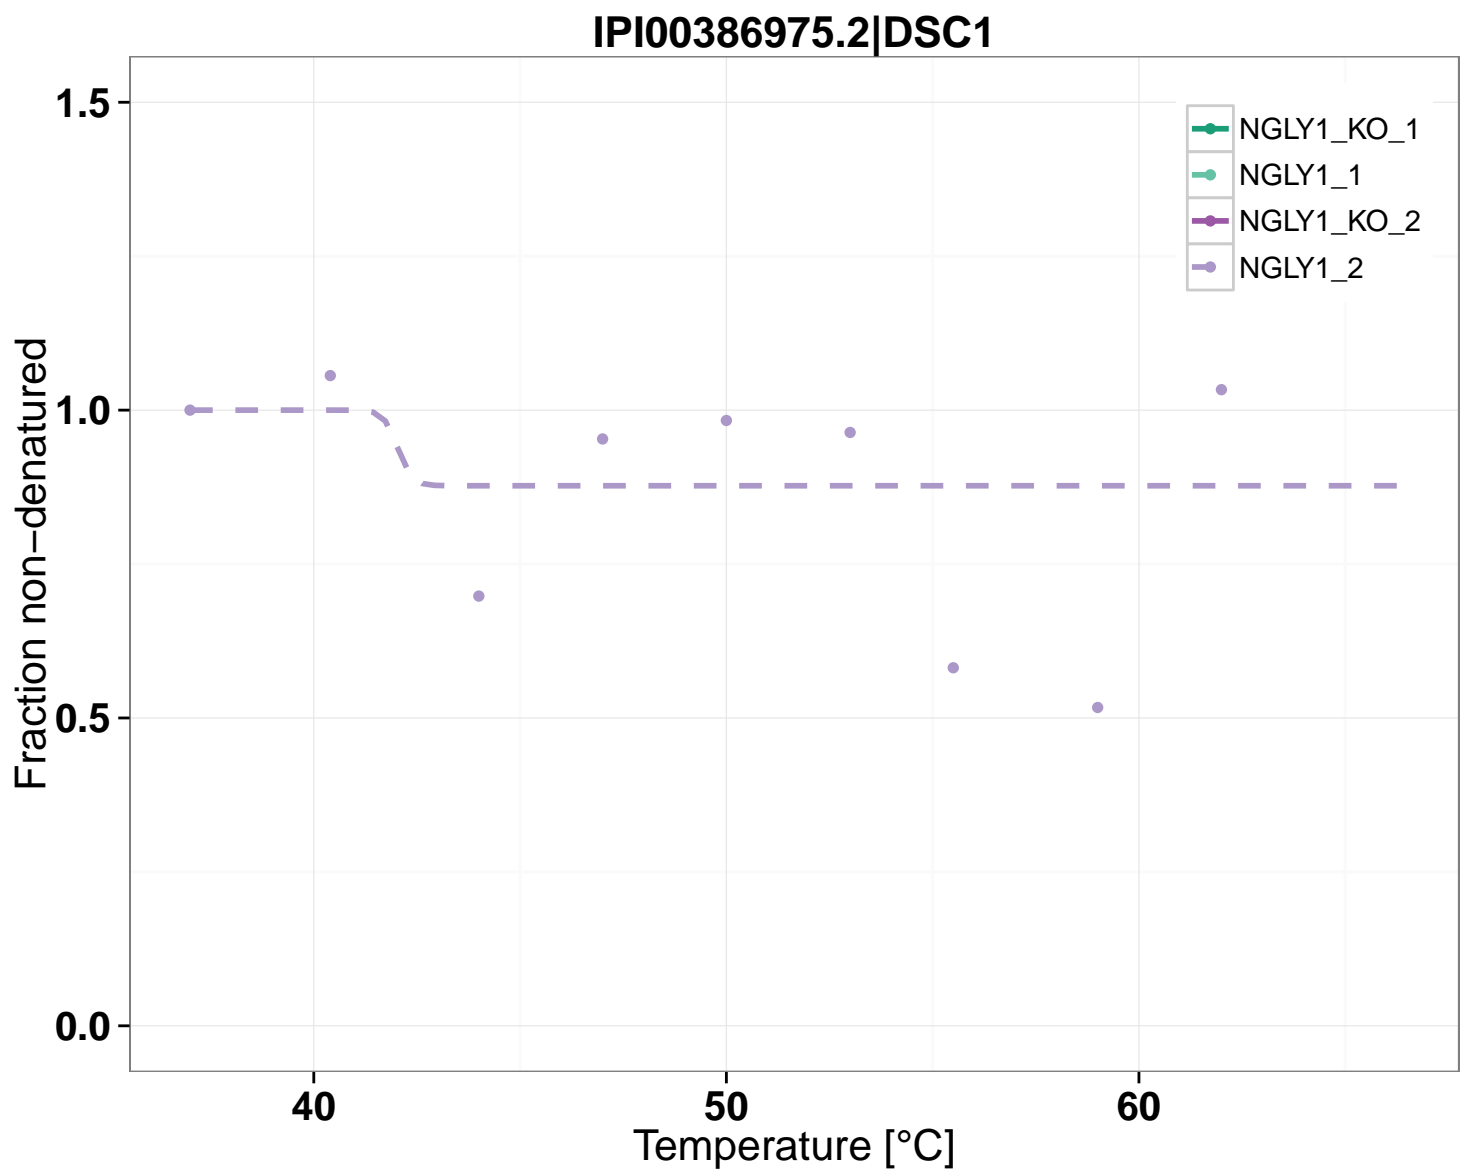

|            | meltPoint | slope | plateau | R2   |
|------------|-----------|-------|---------|------|
| NGLY1_KO_1 | -         | -     | -       | -    |
| NGLY1_1    | -         | -     | -       | -    |
| NGLY1_KO_2 | -         | -     | -       | -    |
| NGLY1_2    | -         | -0.18 | 0.88    | 0.07 |

Supplement: Supplementary file 4458 [file 1]

# IPI00054042.1|GTF2I

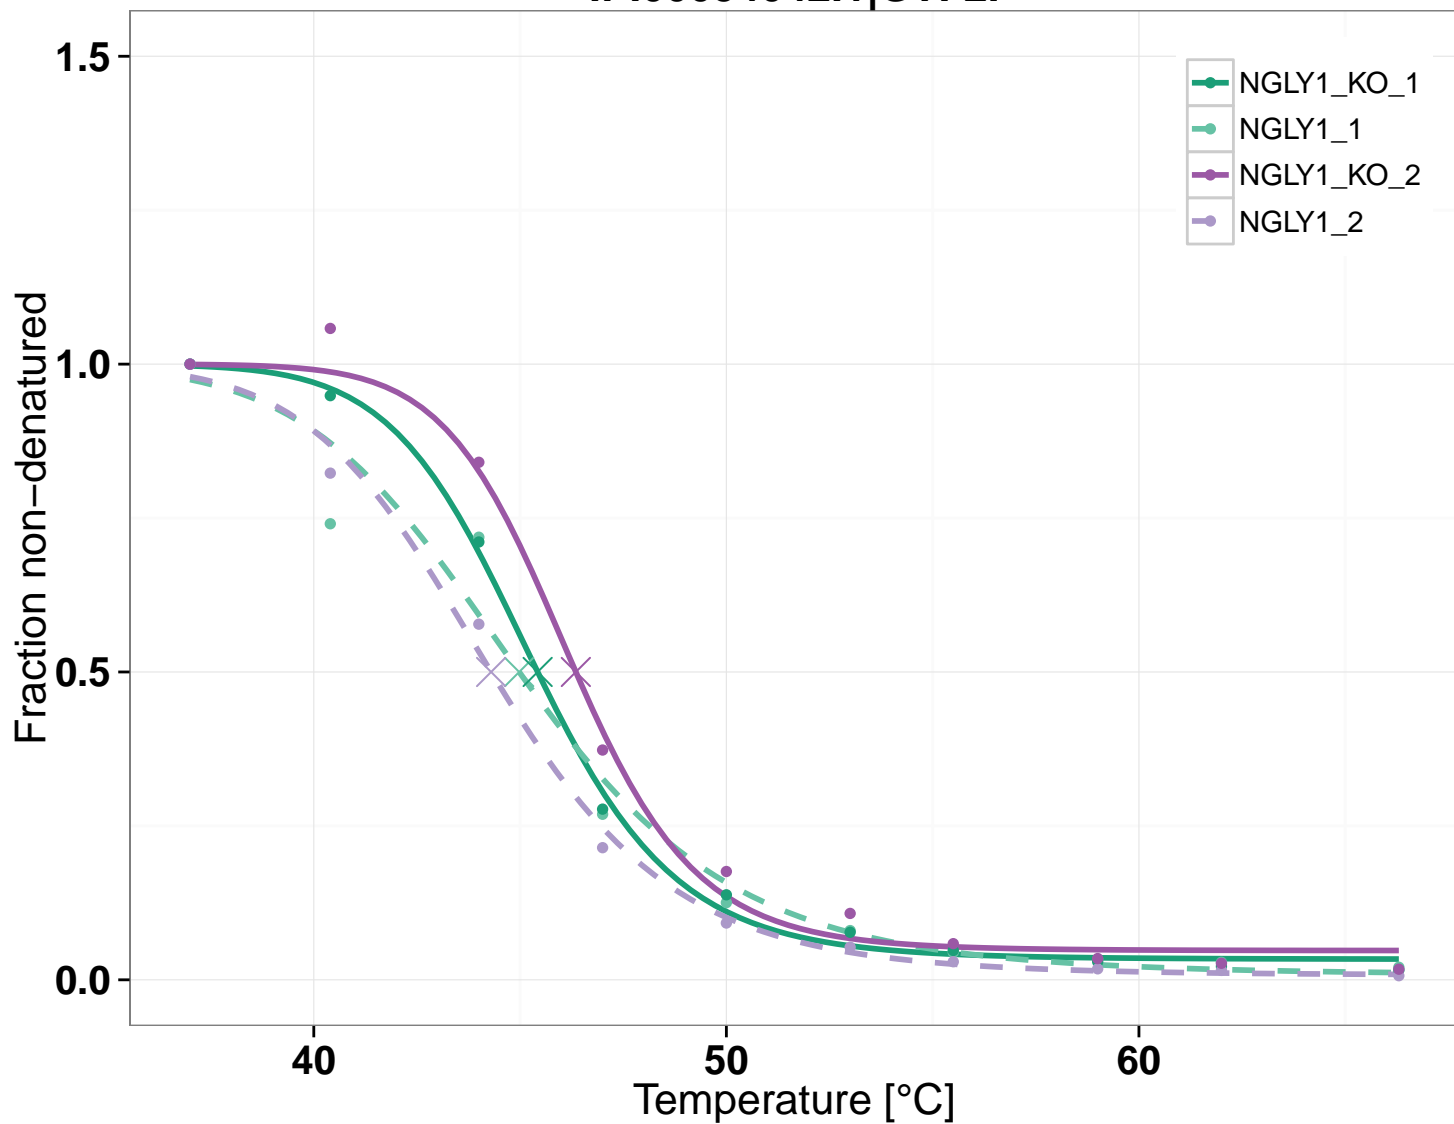

|            | meltPoint | slope  | plateau | R2   |
|------------|-----------|--------|---------|------|
| NGLY1_KO_1 | 45.43     | -0.14  | 0.03    | 1    |
| NGLY1_1    | 44.98     | -0.095 | 0.01    | 0.97 |
| NGLY1_KO_2 | 46.35     | -0.16  | 0.05    | 0.99 |
| NGLY1_2    | 44.3      | -0.11  | 0.01    | 1    |

Supplement: Supplementary file 4459 [file 1]

# IPI00000279.3|ZC3H15

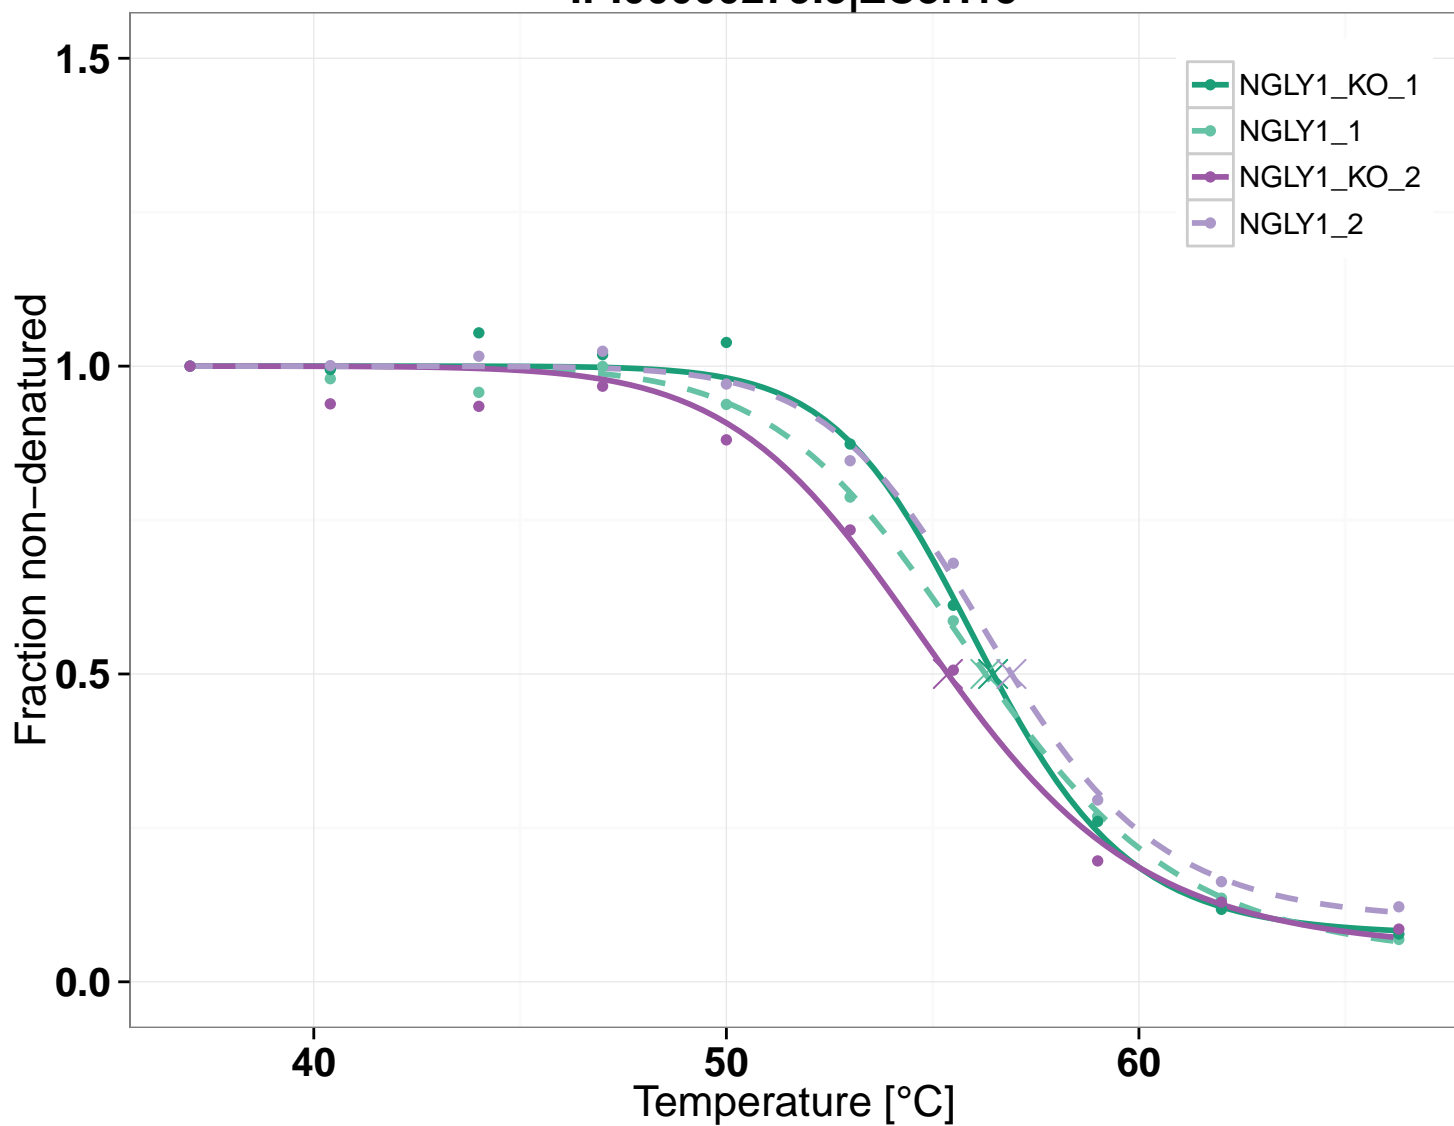

|            | meltPoint | slope  | plateau | R2   |
|------------|-----------|--------|---------|------|
| NGLY1_KO_1 | 56.47     | -0.13  | 0.08    | 1    |
| NGLY1_1    | 56.28     | -0.097 | 0.04    | 1    |
| NGLY1_KO_2 | 55.37     | -0.095 | 0.05    | 0.99 |
| NGLY1_2    | 56.91     | -0.11  | 0.1     | 1    |

Supplement: Supplementary file 4460 [file 1]

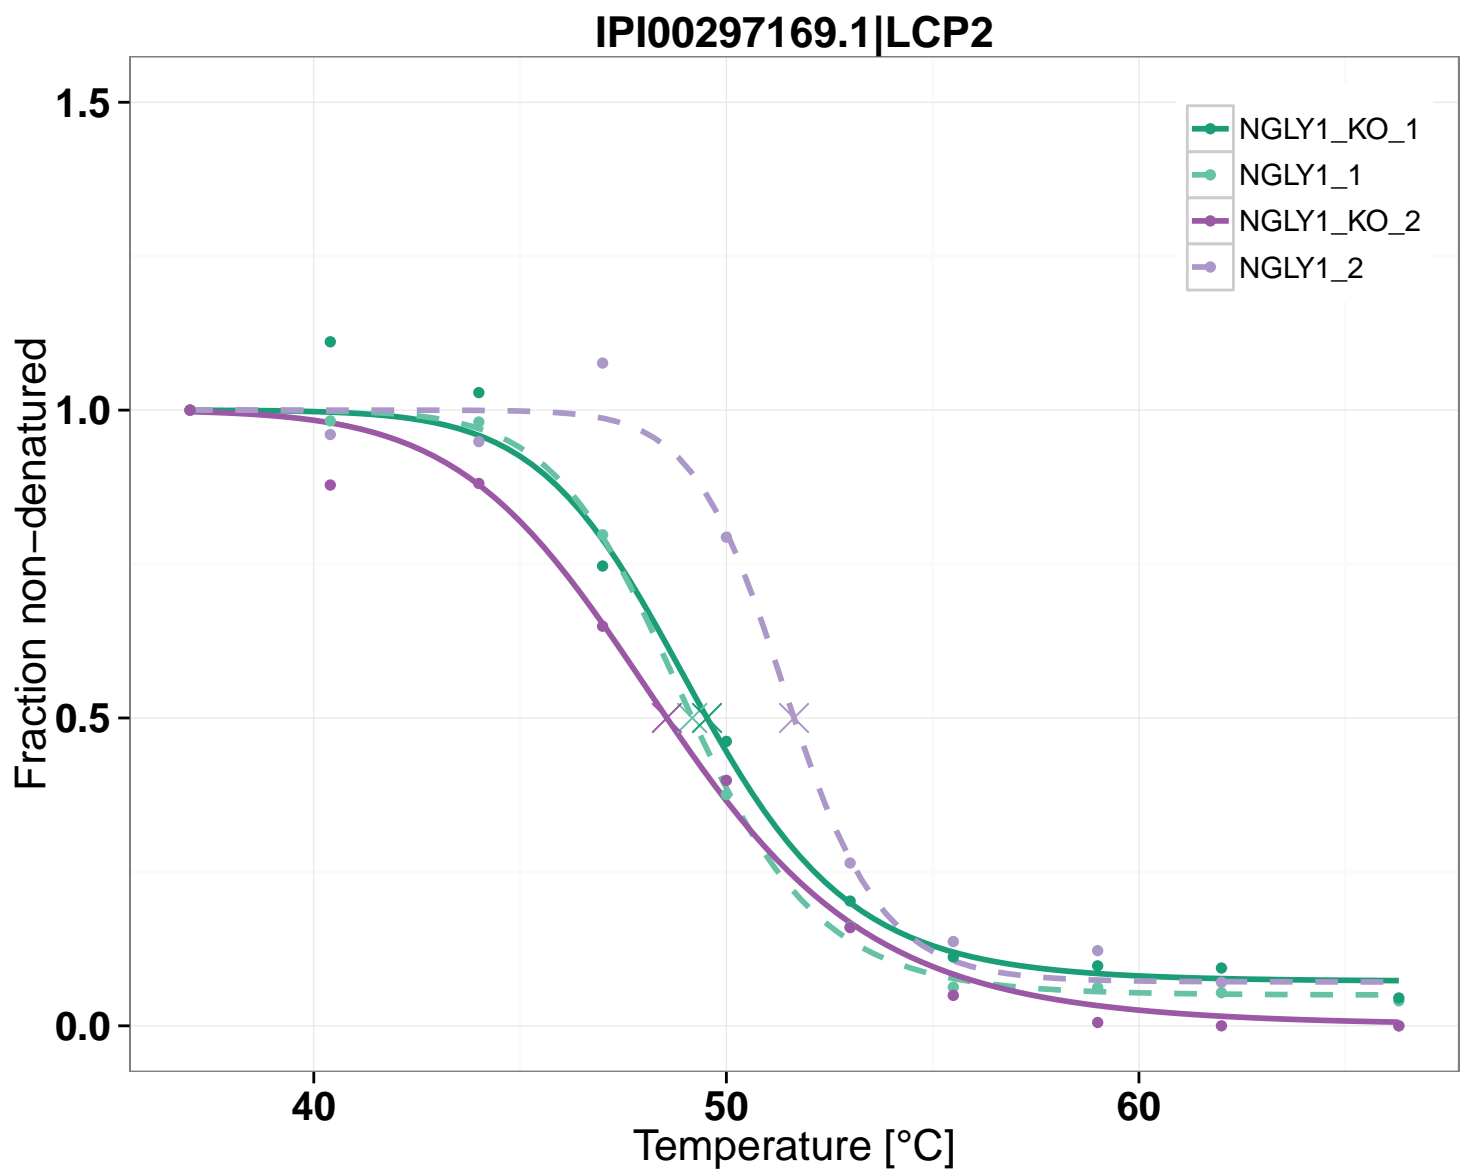

|            | meltPoint | slope | plateau | R2   |
|------------|-----------|-------|---------|------|
| NGLY1_KO_1 | 49.53     | -0.12 | 0.07    | 0.99 |
| NGLY1_1    | 49.17     | -0.15 | 0.05    | 1    |
| NGLY1_KO_2 | 48.56     | -0.1  | 0       | 0.99 |
| NGLY1_2    | 51.64     | -0.2  | 0.07    | 0.99 |

Supplement: Supplementary file 4461 [file 1]

# IPI00174853.6|KCTD1

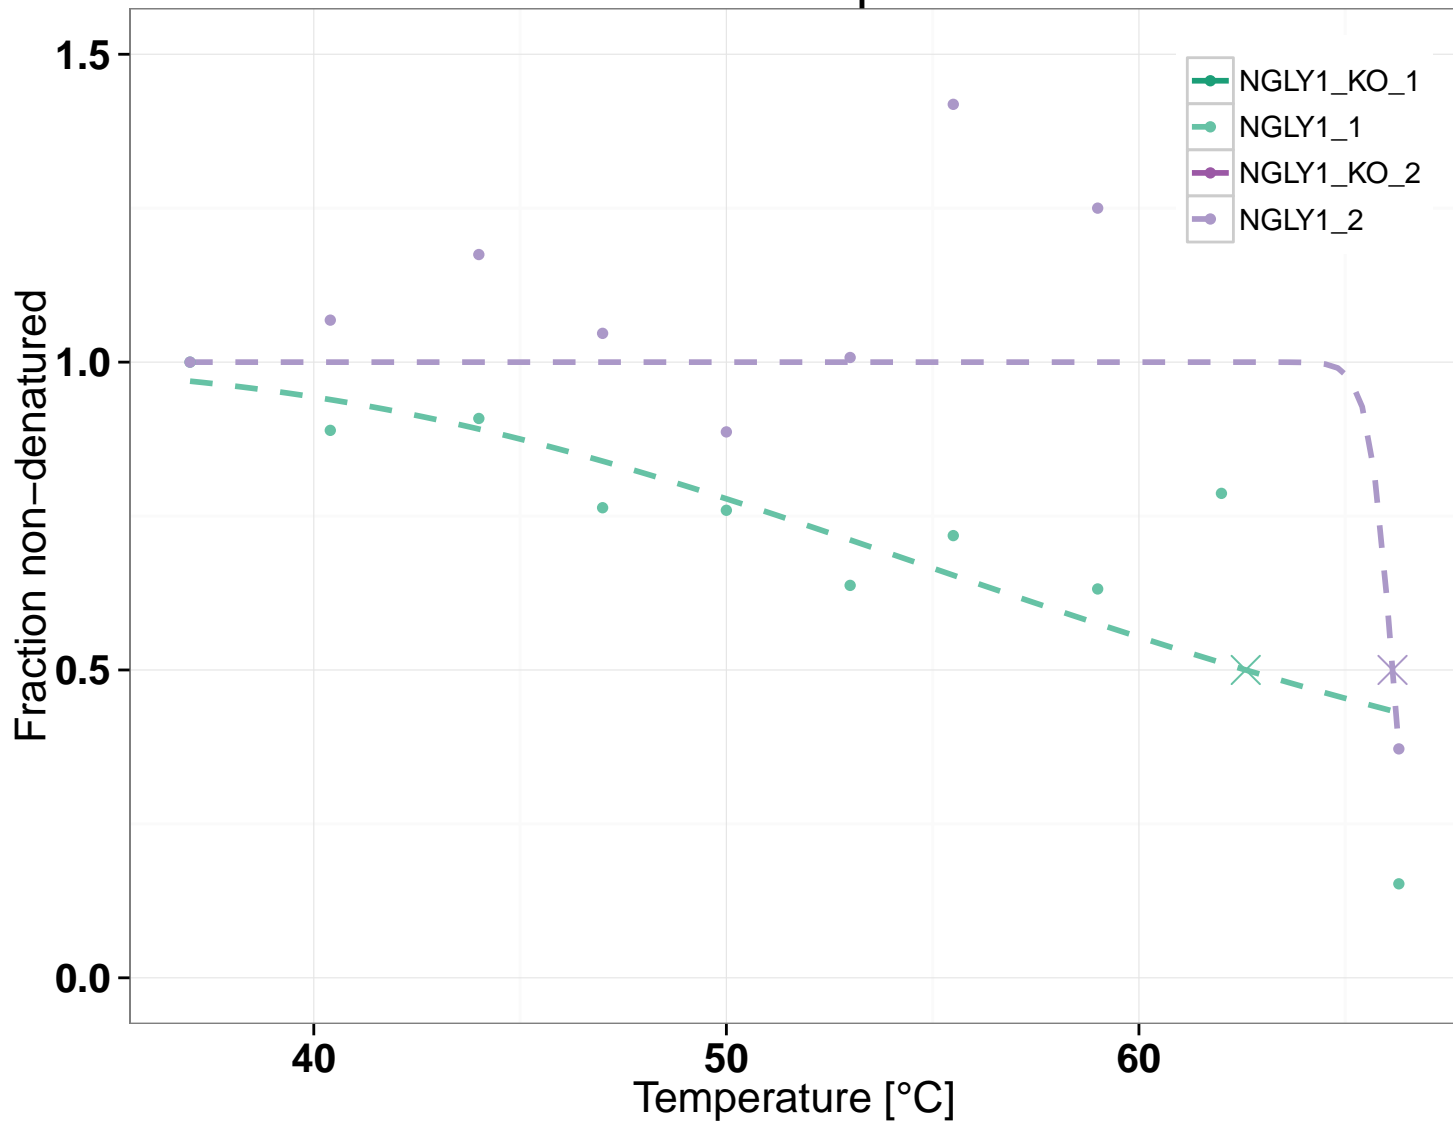

|            | meltPoint | slope  | plateau | R2   |
|------------|-----------|--------|---------|------|
| NGLY1_KO_1 | -         | -      | -       | -    |
| NGLY1_1    | 62.59     | -0.023 | 0       | 0.64 |
| NGLY1_KO_2 | -         | -      | -       | -    |
| NGLY1_2    | 66.15     | -0.86  | 0       | 0.38 |

Supplement: Supplementary file 4462 [file 1]

IPI00065438.3|FAM82A1

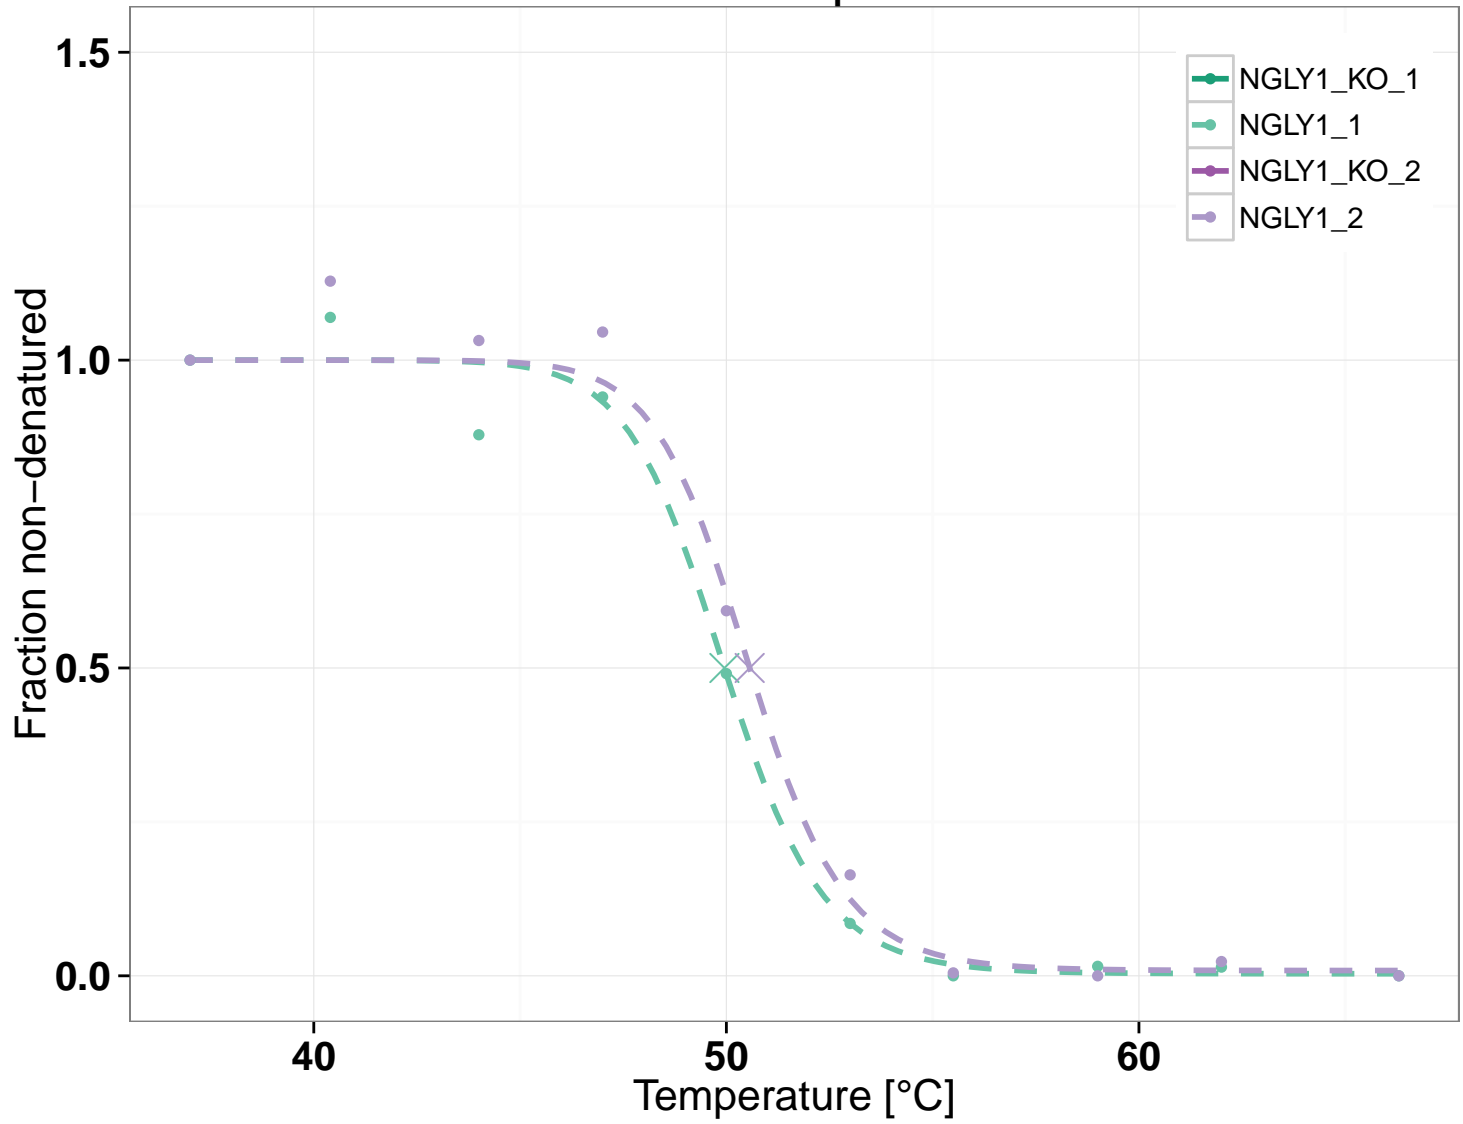

|            | meltPoint | slope | plateau | R2   |
|------------|-----------|-------|---------|------|
| NGLY1_KO_1 | -         | -     | -       | -    |
| NGLY1_1    | 49.95     | -0.21 | 0       | 0.99 |
| NGLY1_KO_2 | -         | -     | -       | -    |
| NGLY1_2    | 50.57     | -0.21 | 0.01    | 0.99 |

Supplement: Supplementary file 4463 [file 1]

# IPI00294618.1|PRCC

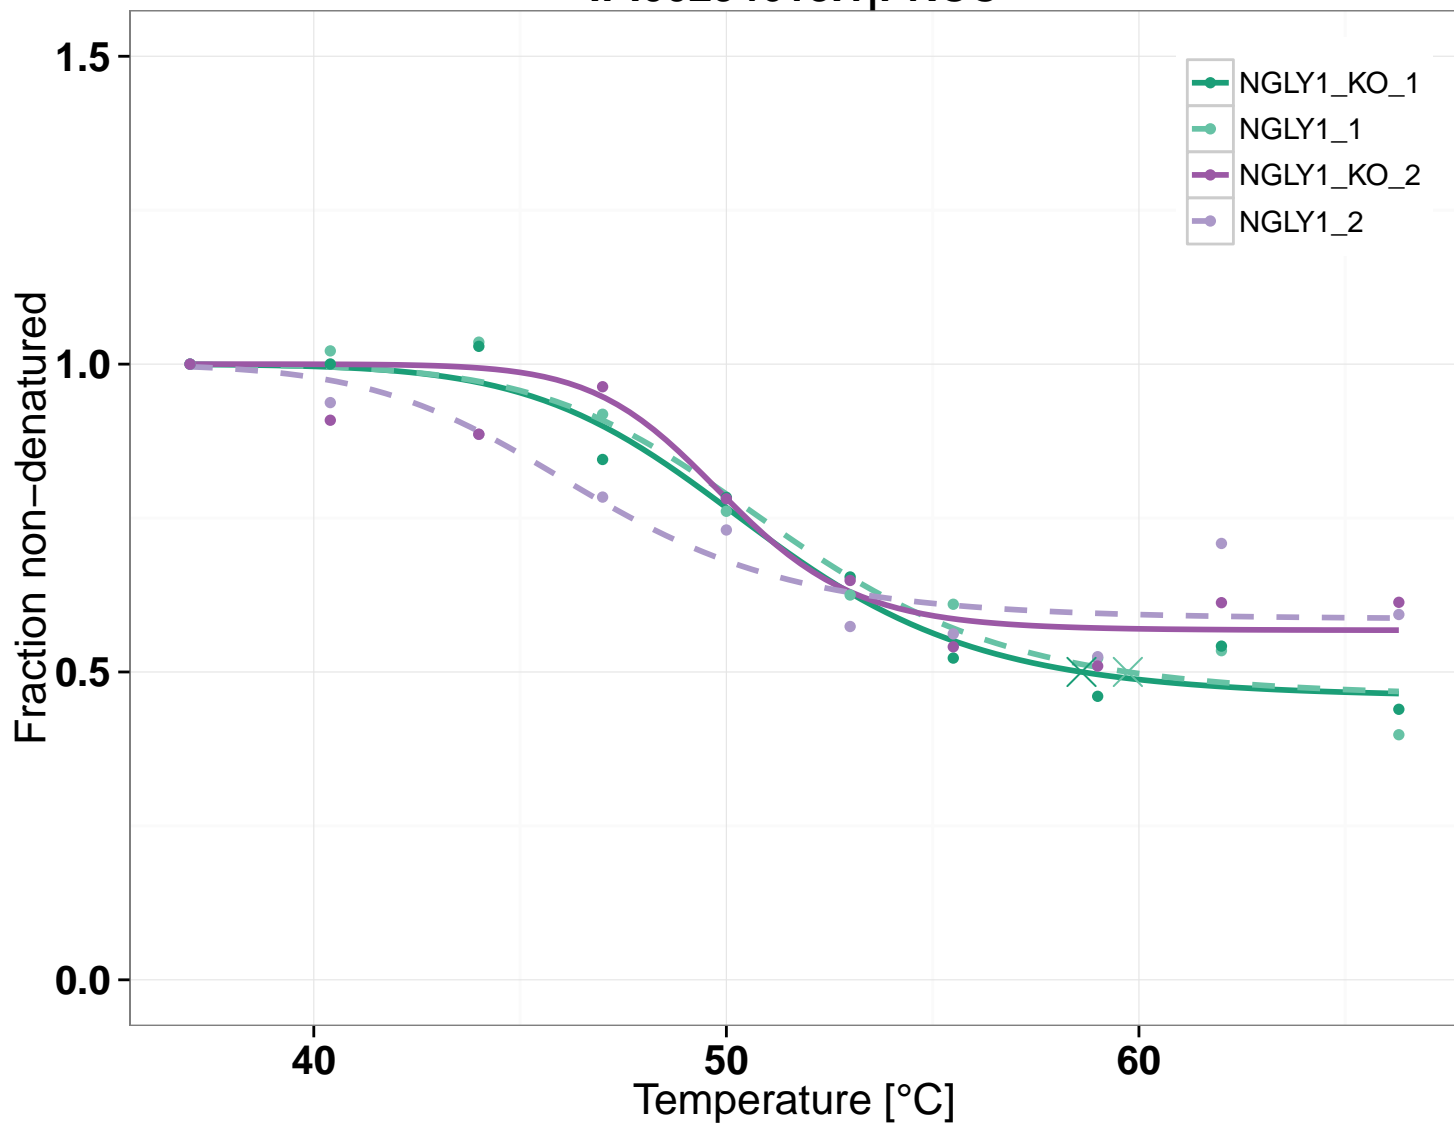

|            | meltPoint | slope  | plateau | R2   |
|------------|-----------|--------|---------|------|
| NGLY1_KO_1 | 58.61     | -0.05  | 0.46    | 0.97 |
| NGLY1_1    | 59.73     | -0.047 | 0.46    | 0.97 |
| NGLY1_KO_2 | -         | -0.068 | 0.57    | 0.9  |
| NGLY1_2    | -         | -0.04  | 0.59    | 0.89 |

Supplement: Supplementary file 4464 [file 1]

IPI00853627.1|KIAA1430

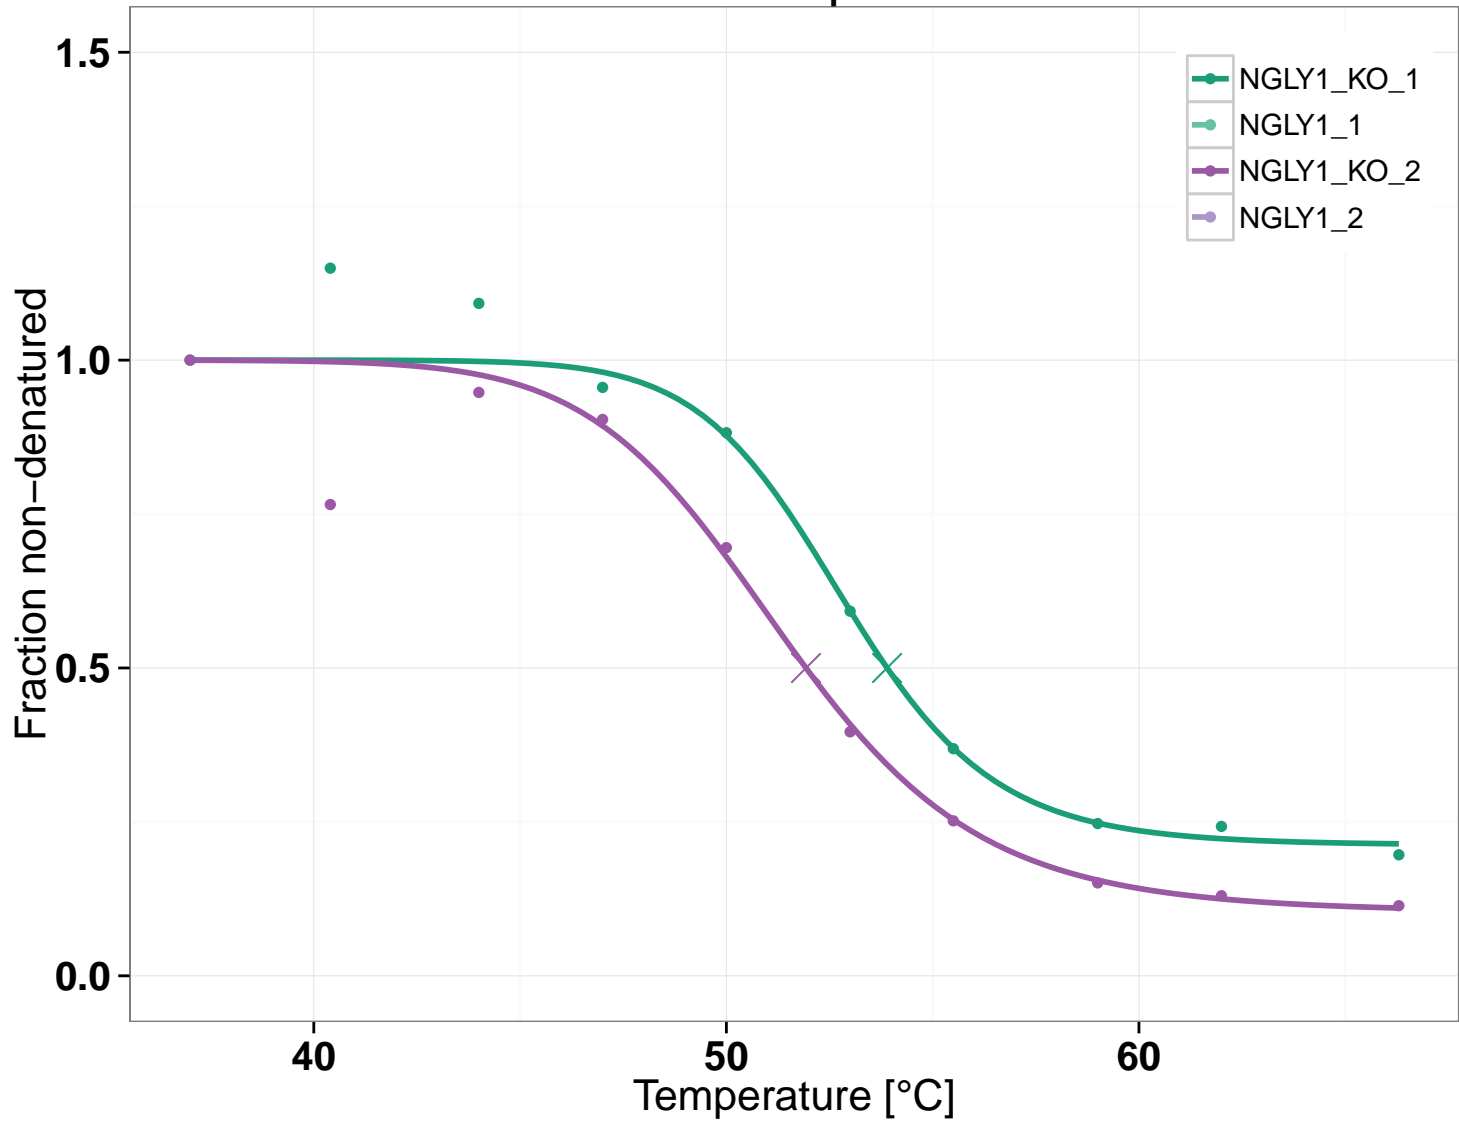

|            | meltPoint | slope  | plateau | R2   |
|------------|-----------|--------|---------|------|
| NGLY1_KO_1 | 53.9      | -0.11  | 0.21    | 0.98 |
| NGLY1_1    | -         | -      | -       | -    |
| NGLY1_KO_2 | 51.93     | -0.095 | 0.1     | 0.95 |
| NGLY1_2    | -         | -      | -       | -    |

Supplement: Supplementary file 4465 [file 1]

# IPI00385161.1|MUC1

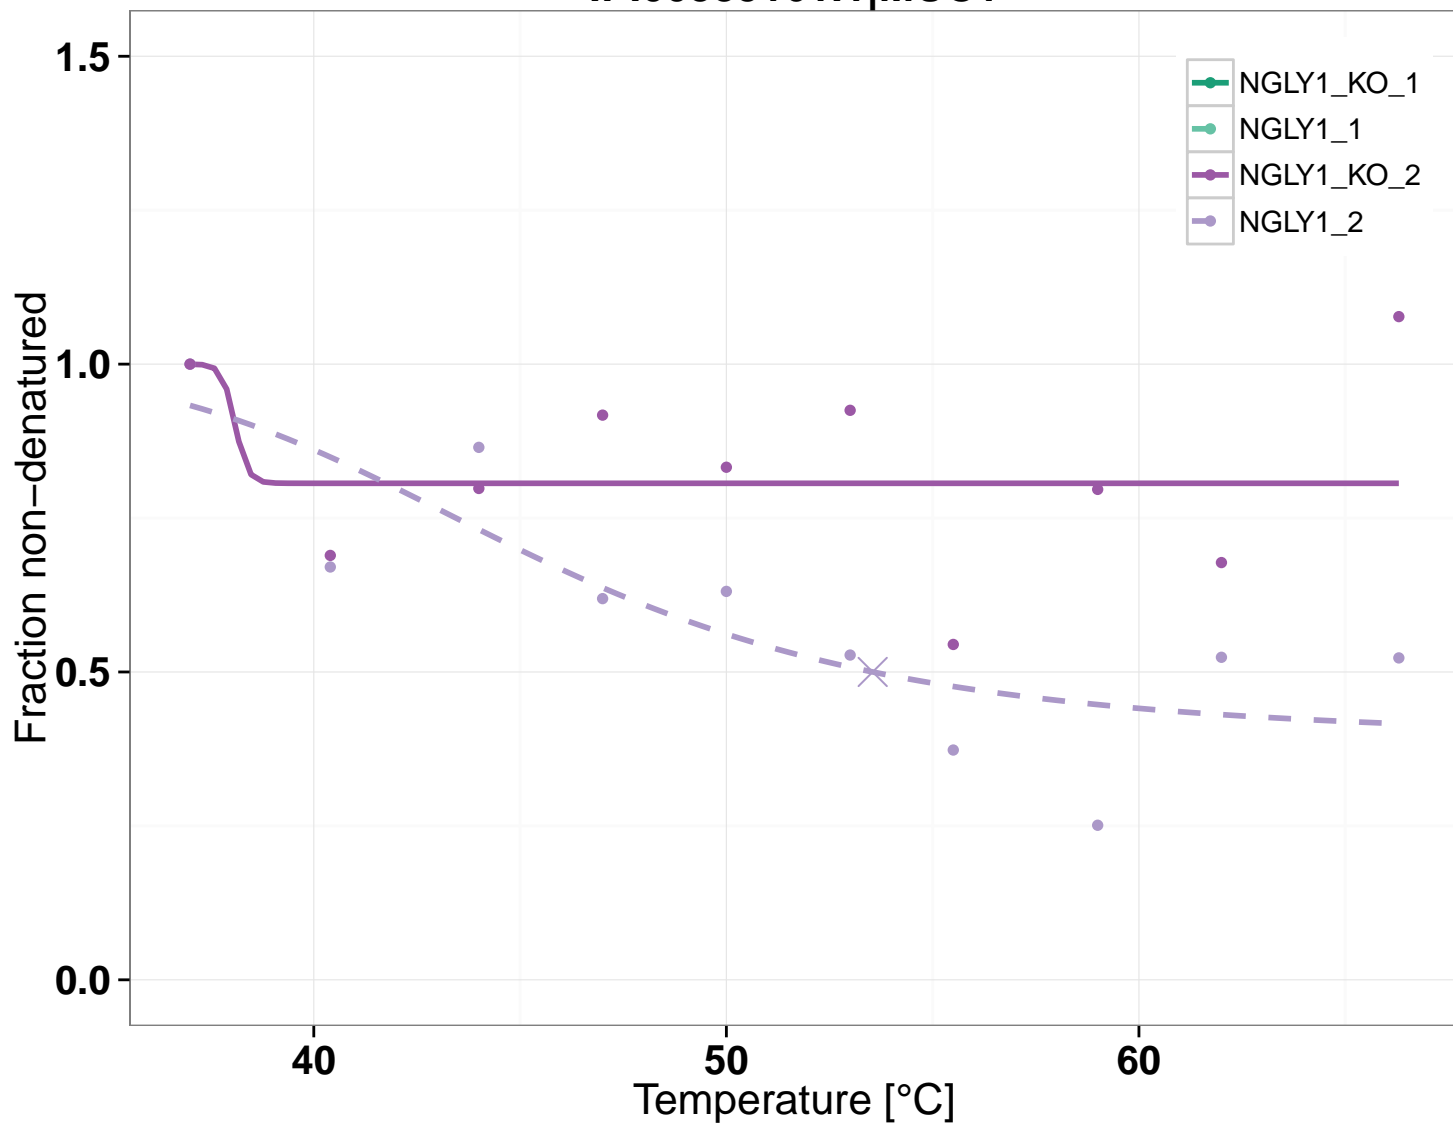

|            | meltPoint | slope  | plateau | R2   |
|------------|-----------|--------|---------|------|
| NGLY1_KO_1 | -         | -      | -       | -    |
| NGLY1_1    | -         | -      | -       | -    |
| NGLY1_KO_2 | -         | -0.32  | 0.81    | 0.14 |
| NGLY1_2    | 53.55     | -0.034 | 0.39    | 0.7  |

Supplement: Supplementary file 4466 [file 1]

IPI00170972.2|C9ORF64

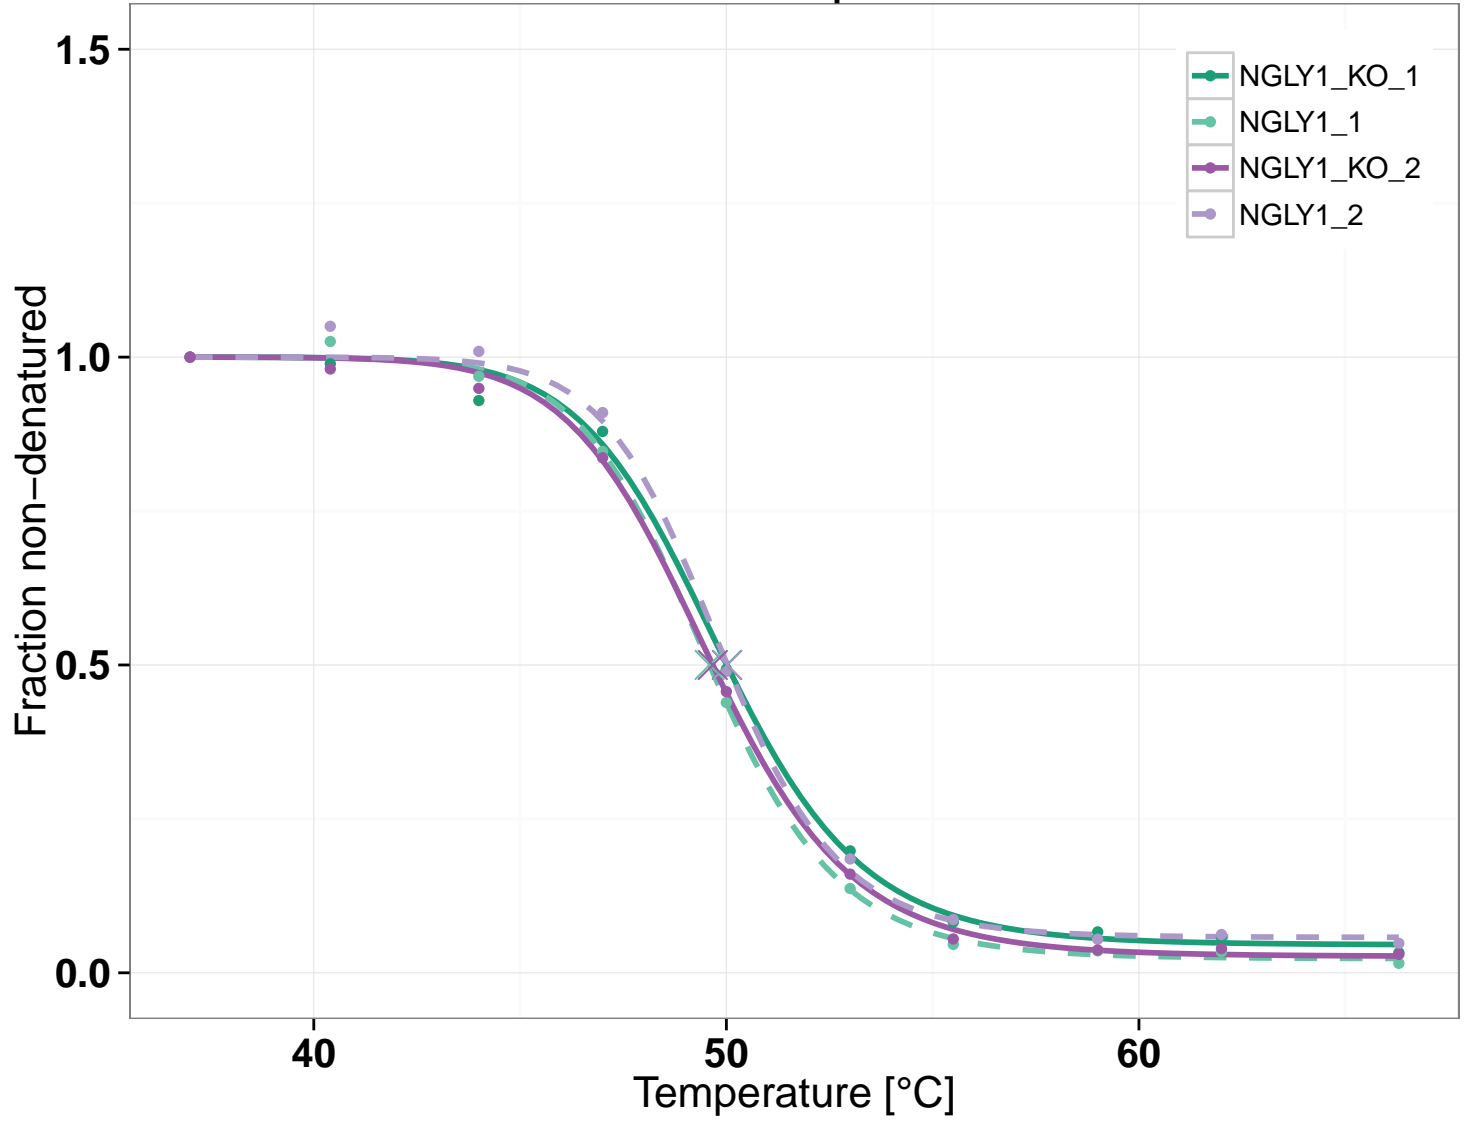

|            | meltPoint | slope | plateau | R2 |
|------------|-----------|-------|---------|----|
| NGLY1_KO_1 | 50.01     | -0.14 | 0.05    | 1  |
| NGLY1_1    | 49.59     | -0.15 | 0.02    | 1  |
| NGLY1_KO_2 | 49.67     | -0.14 | 0.03    | 1  |
| NGLY1_2    | 50.03     | -0.16 | 0.06    | 1  |

Supplement: Supplementary file 4467 [file 1]

IPI00167419.9|ANKRD44

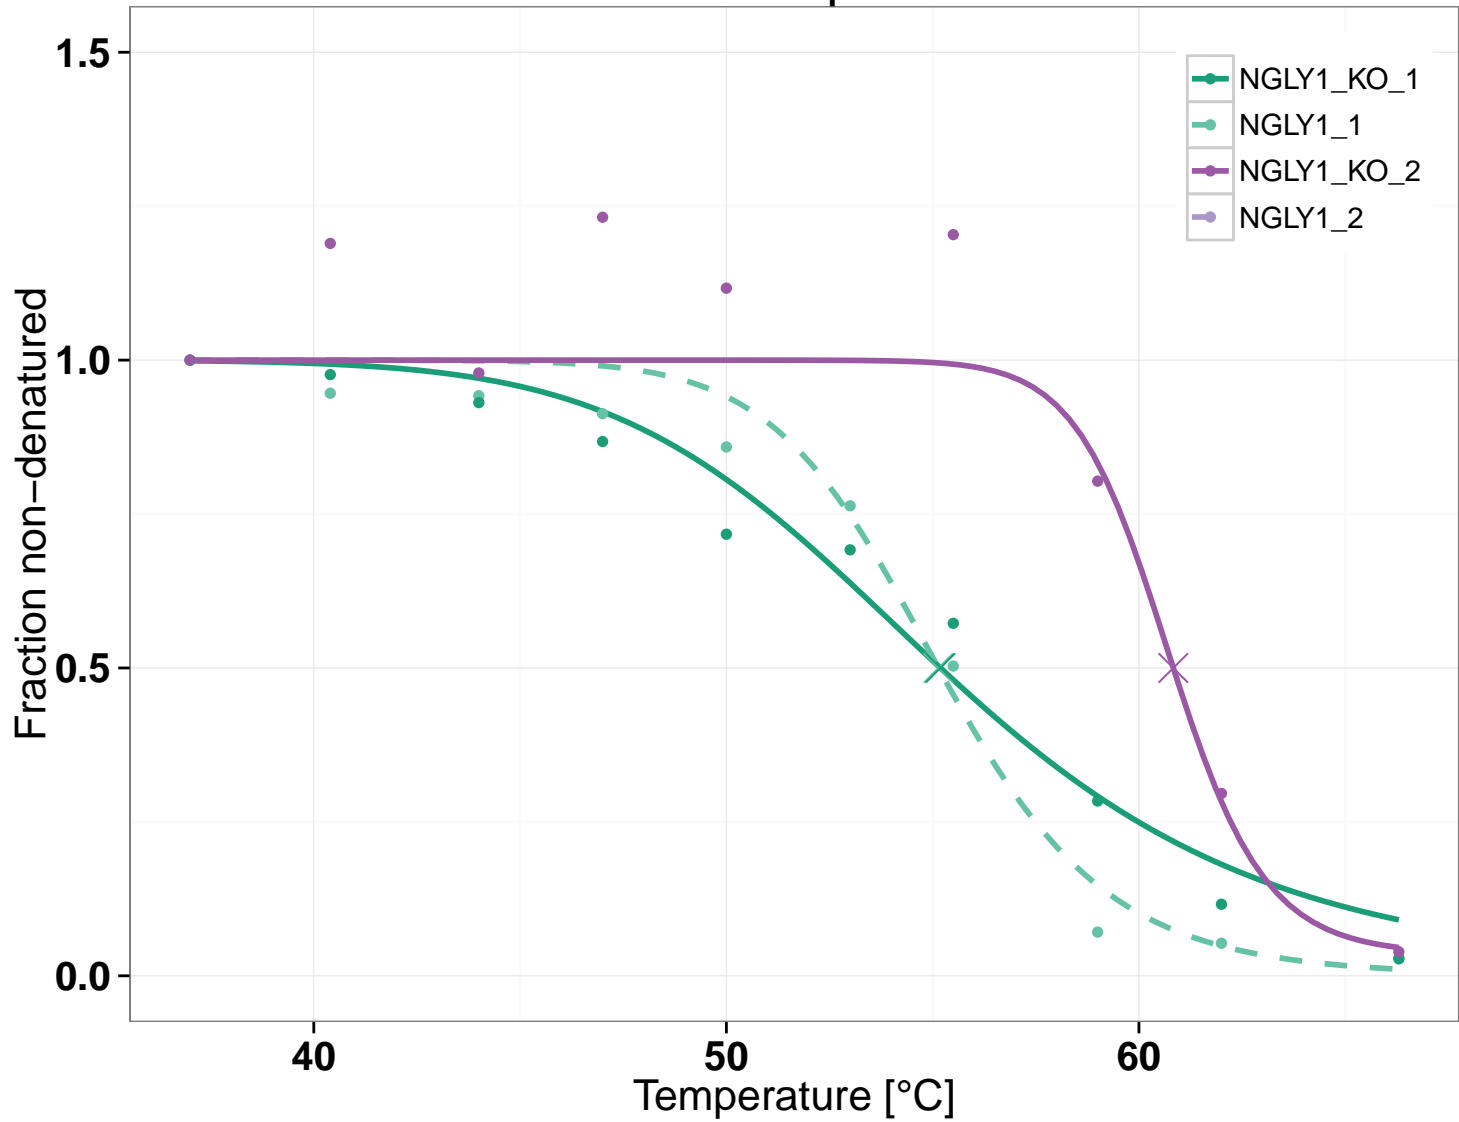

|            | meltPoint | slope  | plateau | R2   |
|------------|-----------|--------|---------|------|
| NGLY1_KO_1 | 55.19     | -0.064 | 0       | 0.97 |
| NGLY1_1    | 55.14     | -0.12  | 0       | 0.98 |
| NGLY1_KO_2 | 60.83     | -0.21  | 0.03    | 0.75 |
| NGLY1_2    | -         | -      | -       | -    |

Supplement: Supplementary file 4468 [file 1]

IPI00301305.3|UBAP1

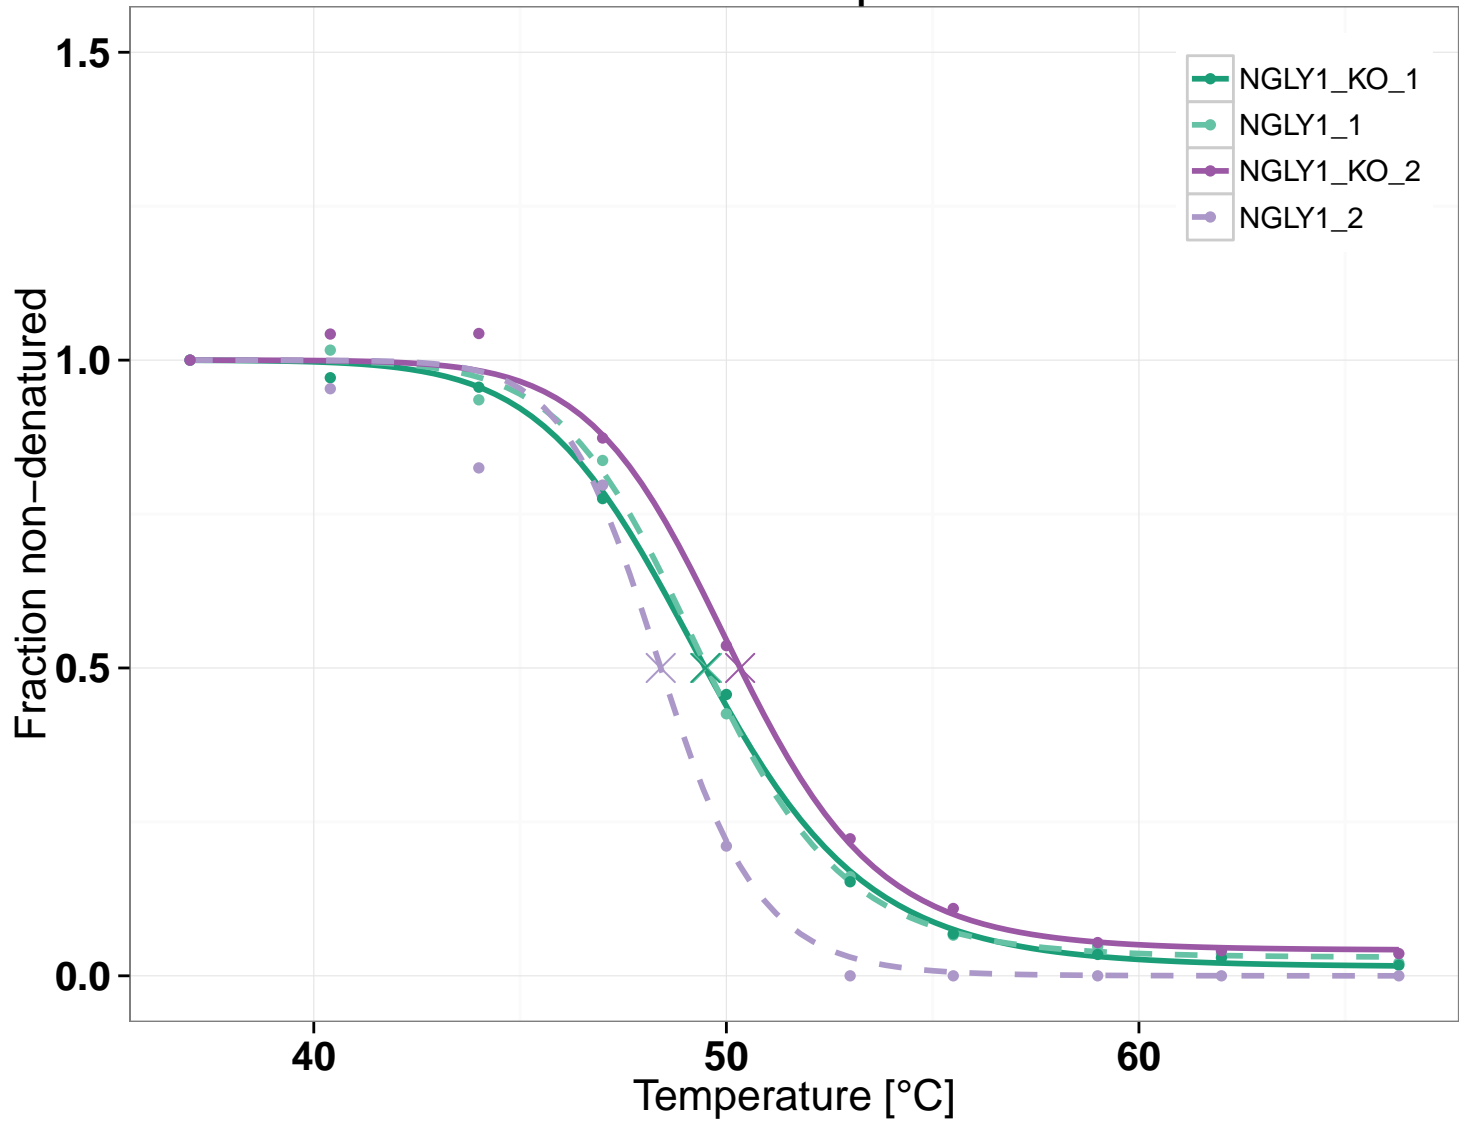

|            | meltPoint | slope | plateau | R2   |
|------------|-----------|-------|---------|------|
| NGLY1_KO_1 | 49.49     | -0.12 | 0.01    | 1    |
| NGLY1_1    | 49.53     | -0.14 | 0.03    | 1    |
| NGLY1_KO_2 | 50.33     | -0.14 | 0.04    | 1    |
| NGLY1_2    | 48.41     | -0.21 | 0       | 0.98 |

Supplement: Supplementary file 4469 [file 1]

IPI00418340.6|C2ORF3

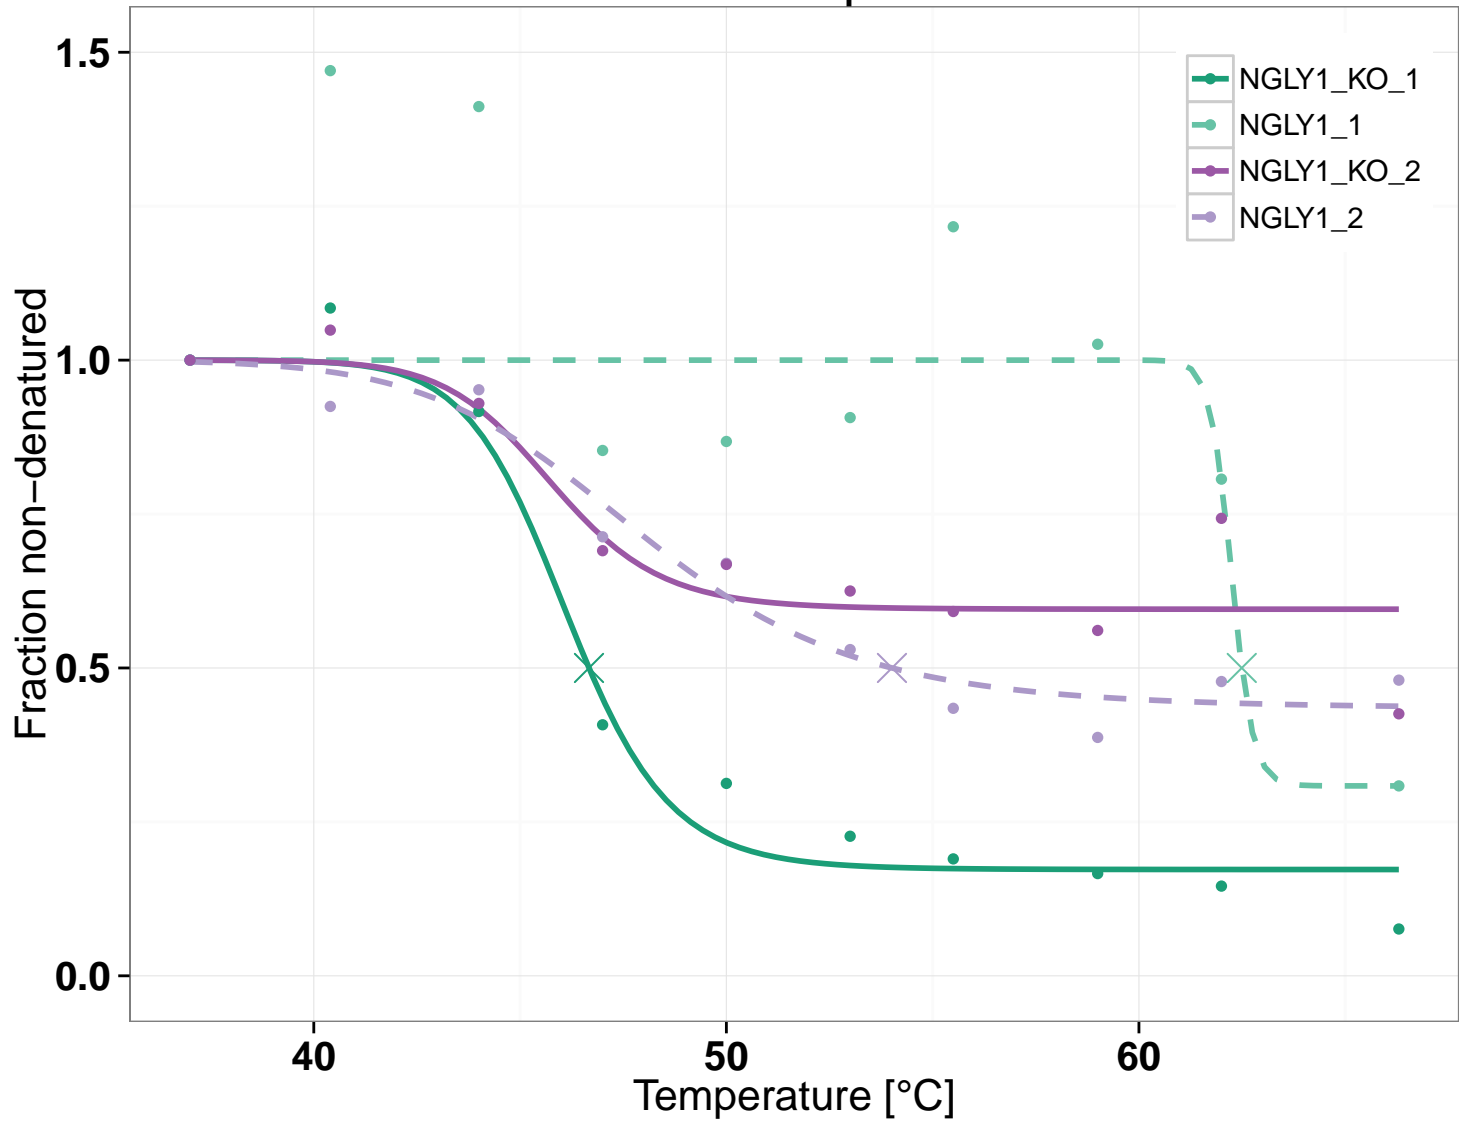

|            | meltPoint | slope  | plateau | R2   |
|------------|-----------|--------|---------|------|
| NGLY1_KO_1 | 46.67     | -0.17  | 0.17    | 0.98 |
| NGLY1_1    | 62.49     | -0.67  | 0.31    | 0.51 |
| NGLY1_KO_2 | -         | -0.077 | 0.6     | 0.84 |
| NGLY1_2    | 54.01     | -0.054 | 0.43    | 0.96 |

Supplement: Supplementary file 4470 [file 1]

# IPI00031000.3|VKORC1

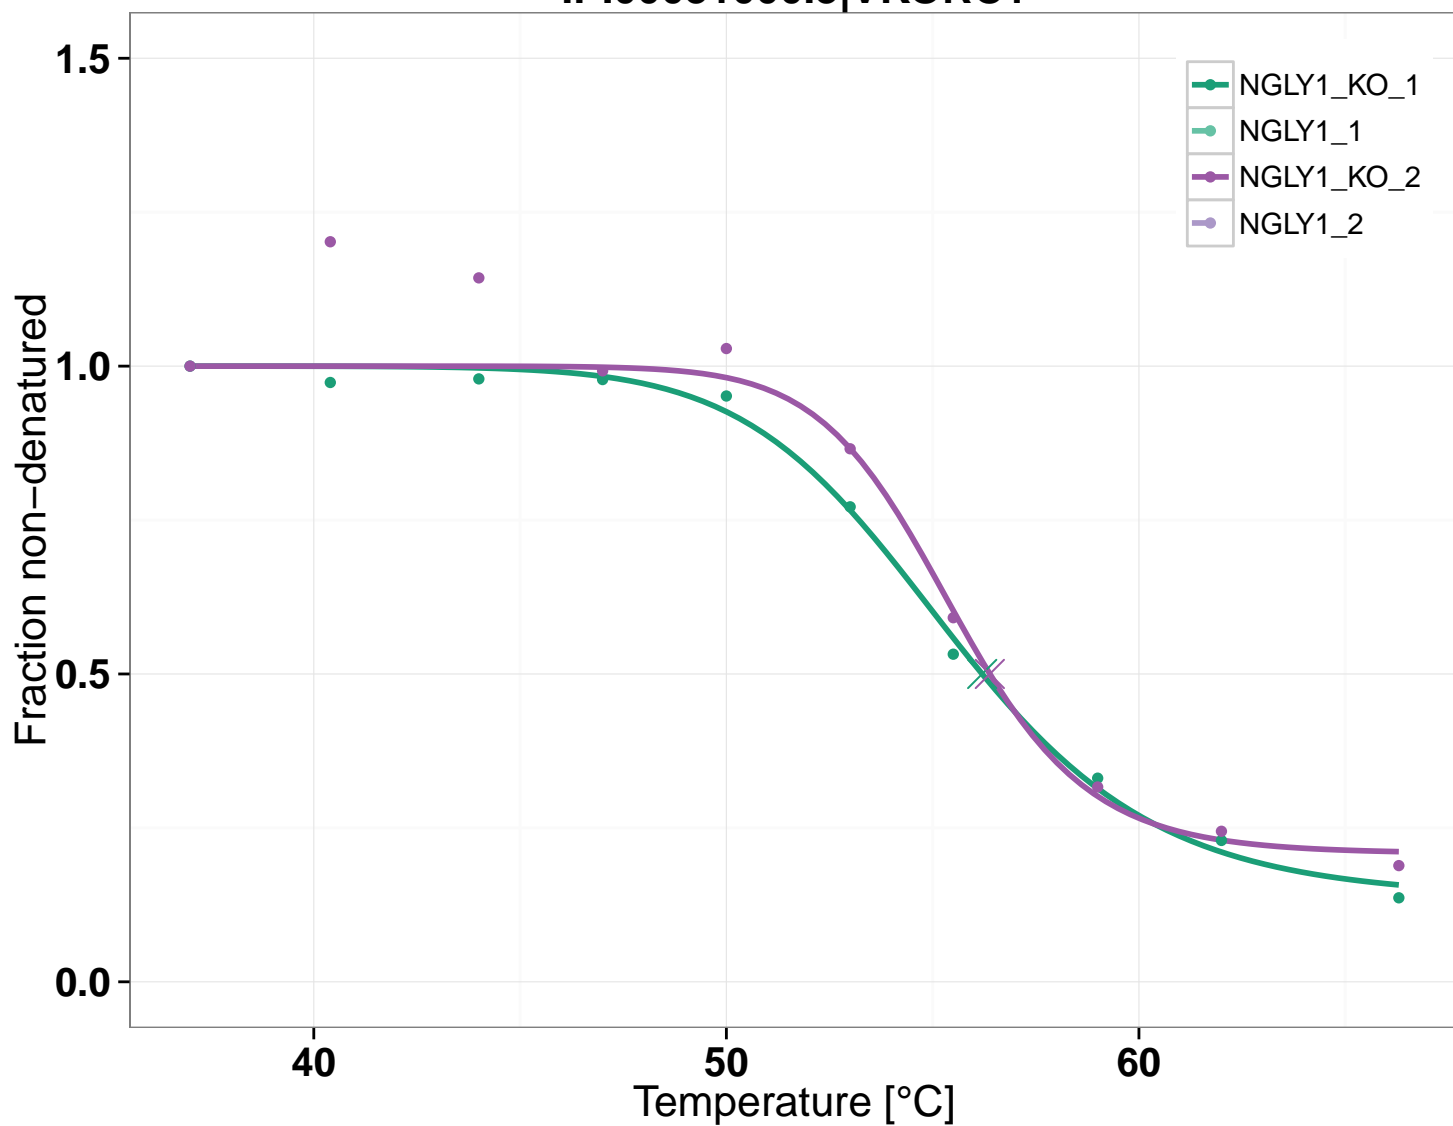

|            | meltPoint | slope  | plateau | R2   |
|------------|-----------|--------|---------|------|
| NGLY1_KO_1 | 56.2      | -0.086 | 0.13    | 1    |
| NGLY1_1    | -         | -      | -       | -    |
| NGLY1_KO_2 | 56.39     | -0.12  | 0.21    | 0.95 |
| NGLY1_2    | -         | -      | -       | -    |

Supplement: Supplementary file 4471 [file 1]

IPI00844000.1|KIAA0776

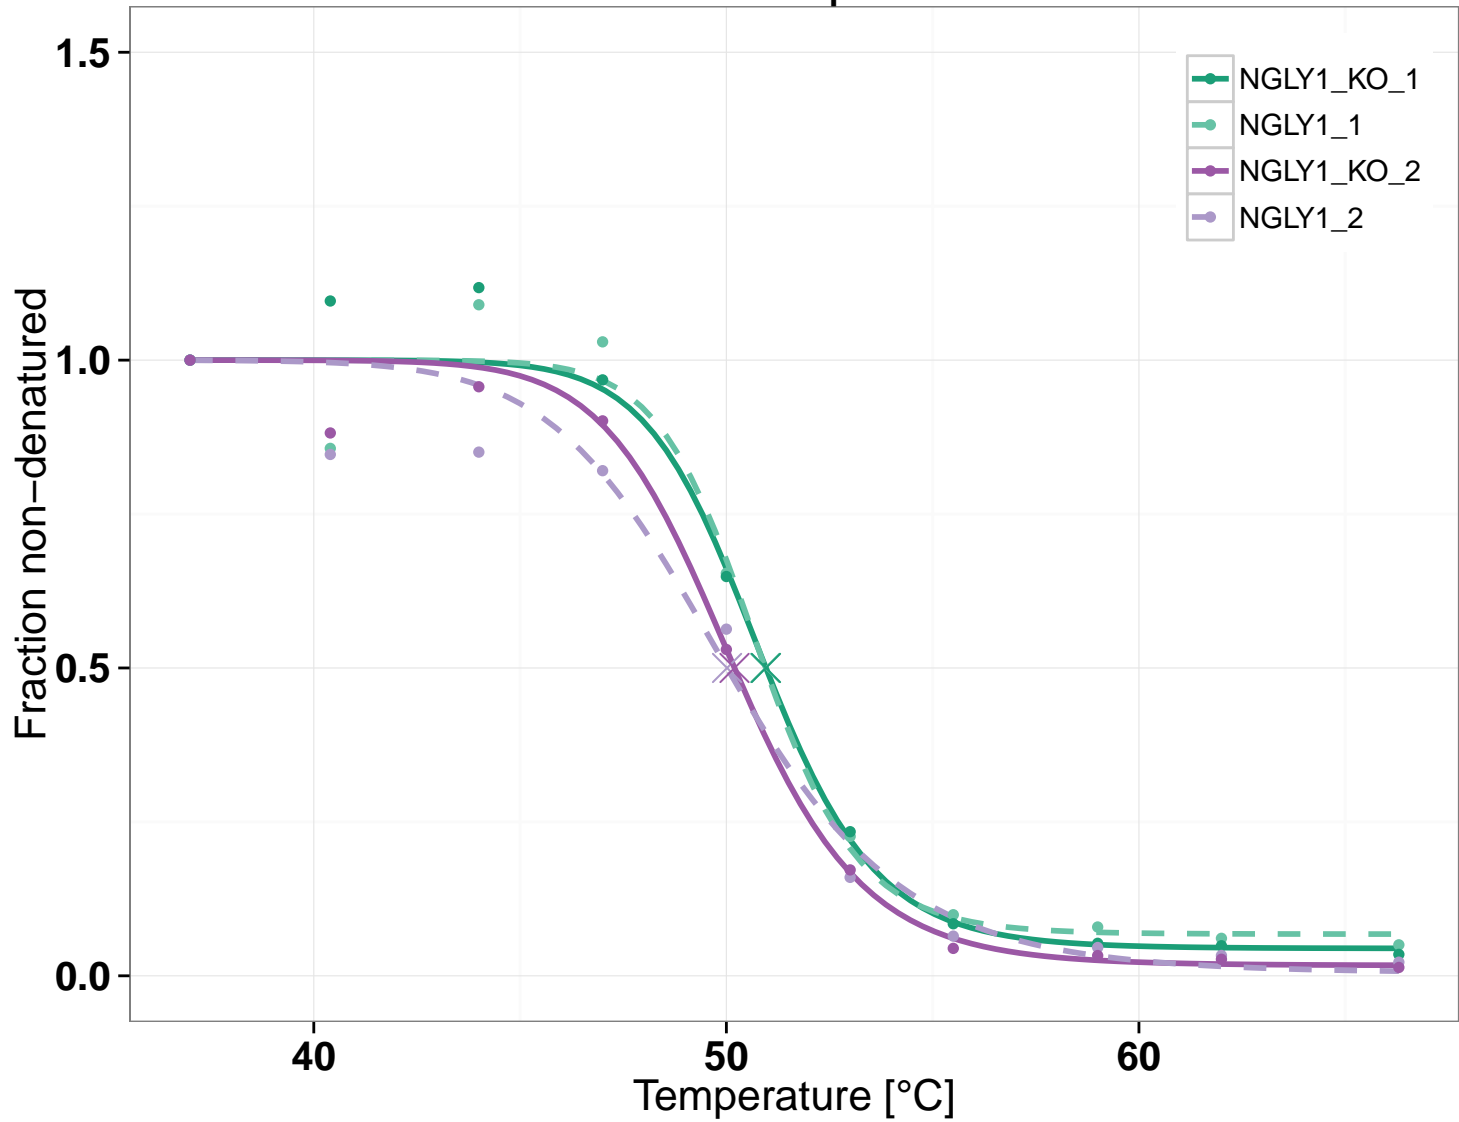

|            | meltPoint | slope | plateau | R2   |
|------------|-----------|-------|---------|------|
| NGLY1_KO_1 | 50.96     | -0.17 | 0.04    | 0.99 |
| NGLY1_1    | 50.94     | -0.19 | 0.07    | 0.98 |
| NGLY1_KO_2 | 50.2      | -0.16 | 0.02    | 0.99 |
| NGLY1_2    | 50.02     | -0.12 | 0       | 0.97 |

Supplement: Supplementary file 4472 [file 1]

IPI00171291.1|FBXO6

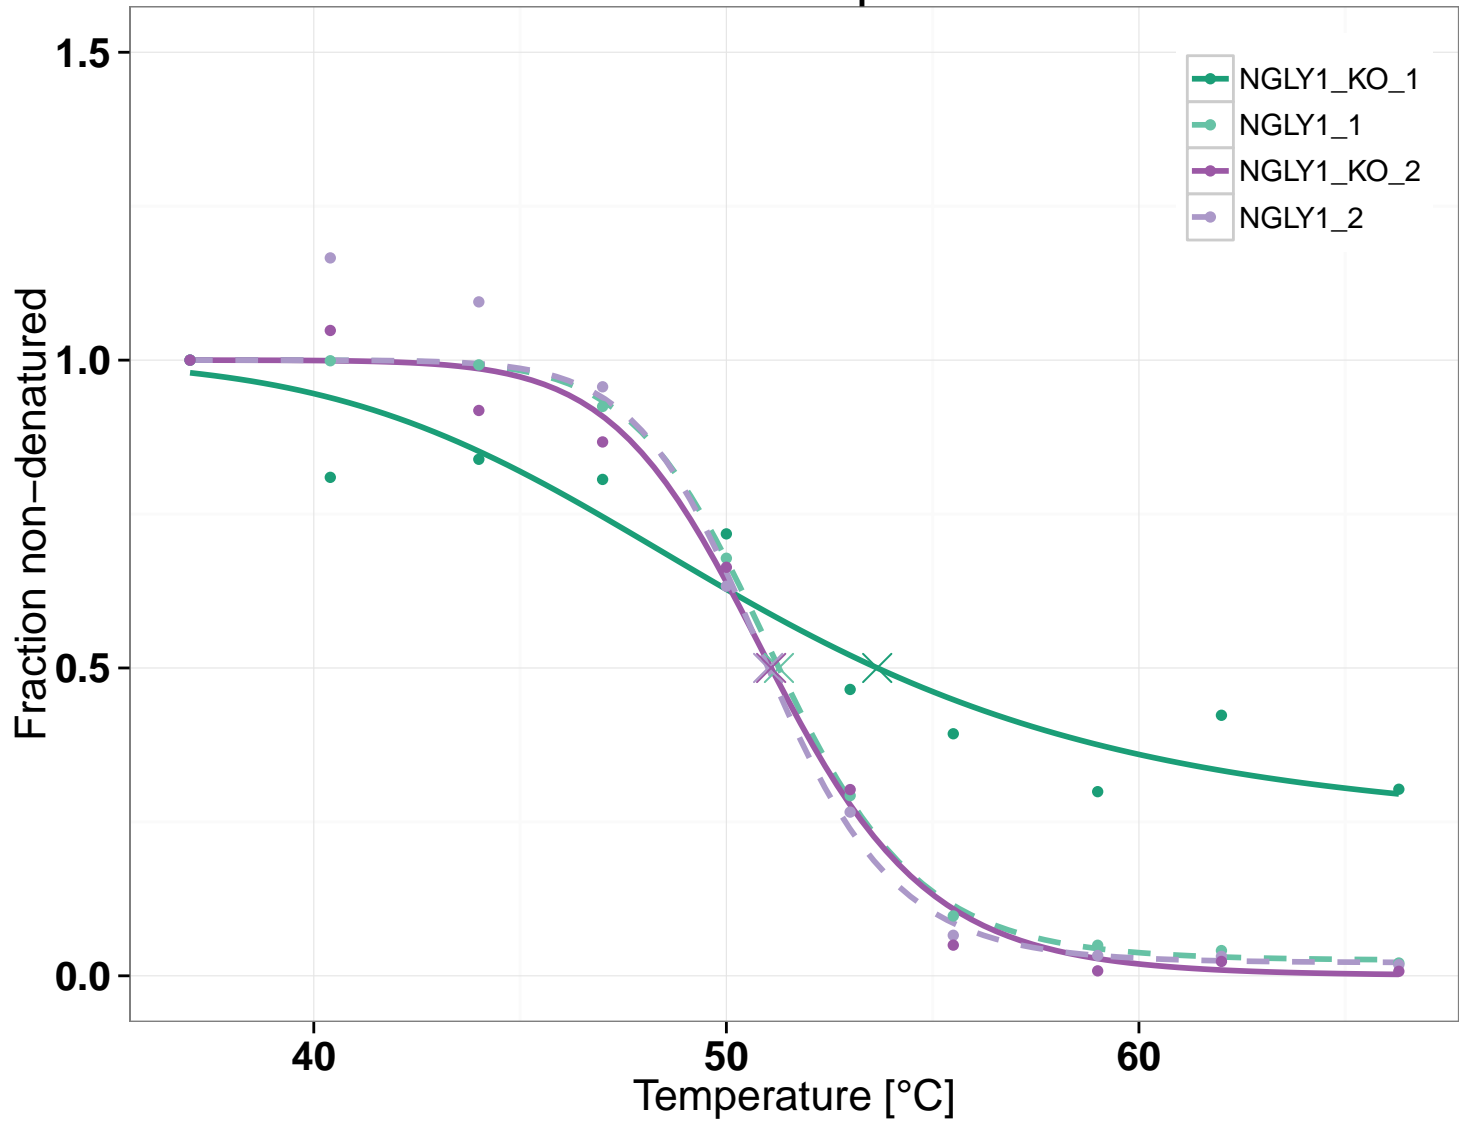

|            | meltPoint | slope | plateau | R2   |
|------------|-----------|-------|---------|------|
| NGLY1_KO_1 | 53.66     | -0.04 | 0.23    | 0.92 |
| NGLY1_1    | 51.27     | -0.14 | 0.02    | 1    |
| NGLY1_KO_2 | 51.09     | -0.13 | 0       | 0.99 |
| NGLY1_2    | 51.01     | -0.16 | 0.02    | 0.98 |

Supplement: Supplementary file 4473 [file 1]

IPI00065515.6|CWF19L2

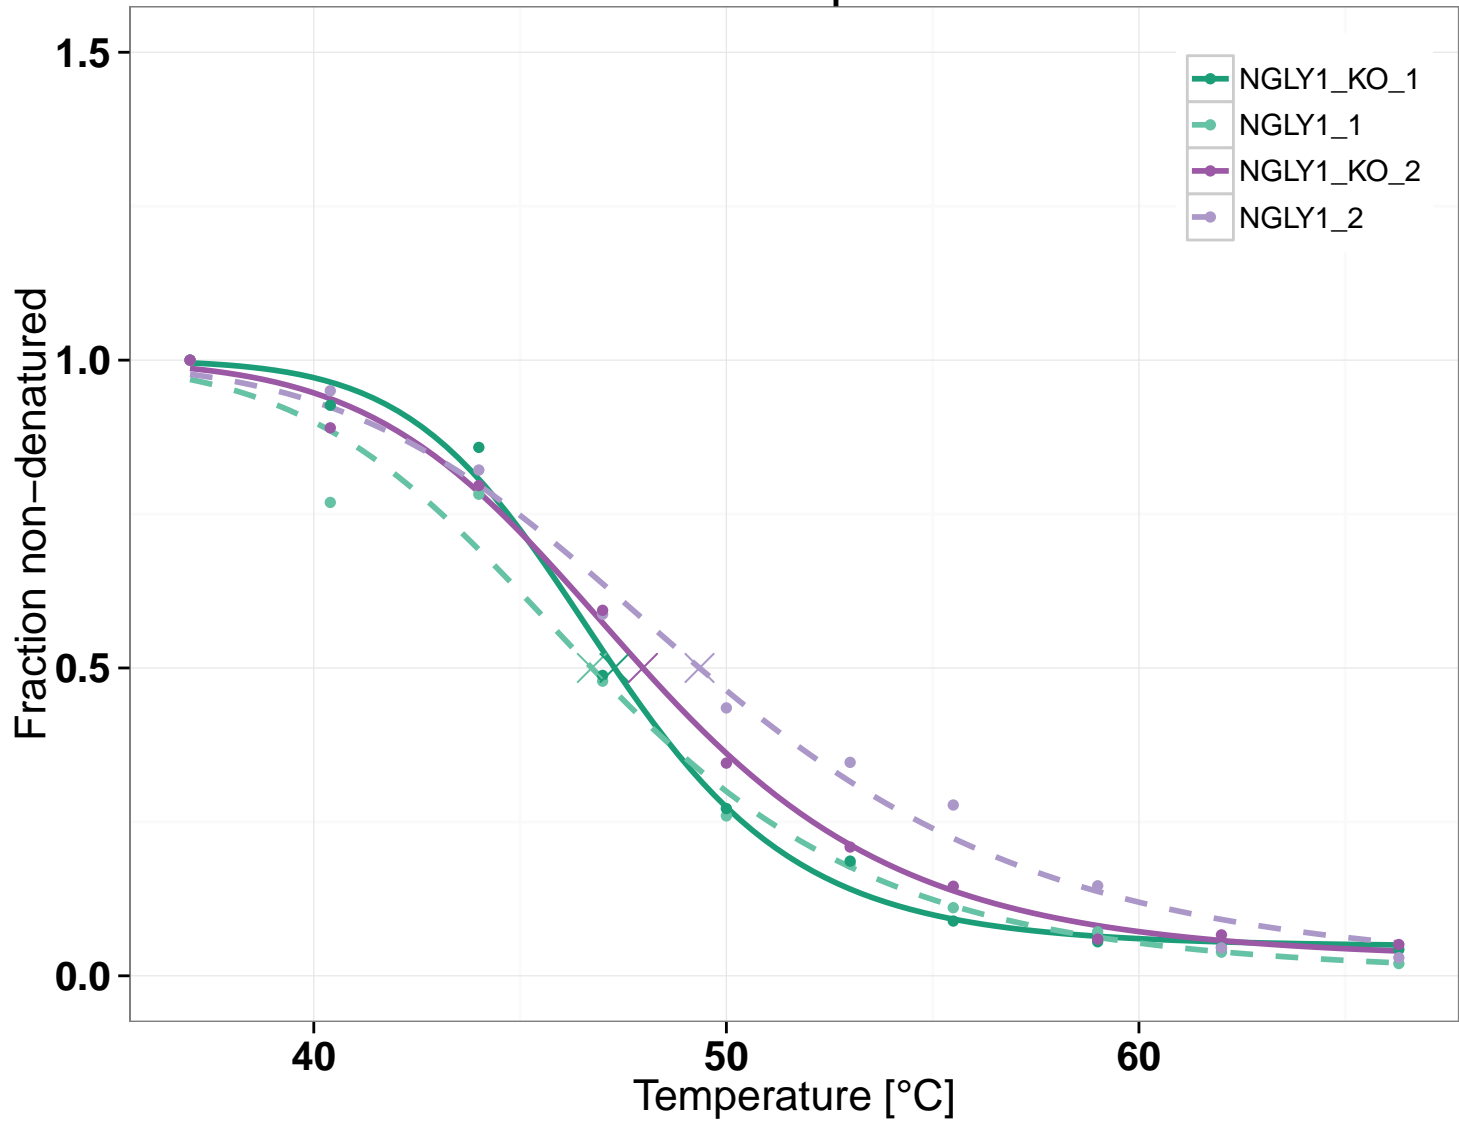

|            | meltPoint | slope  | plateau | R2   |
|------------|-----------|--------|---------|------|
| NGLY1_KO_1 | 47.29     | -0.1   | 0.05    | 0.99 |
| NGLY1_1    | 46.74     | -0.071 | 0       | 0.98 |
| NGLY1_KO_2 | 47.98     | -0.076 | 0.02    | 1    |
| NGLY1_2    | 49.35     | -0.059 | 0       | 0.99 |

Supplement: Supplementary file 4474 [file 1]

IPI00166833.3|LASS5

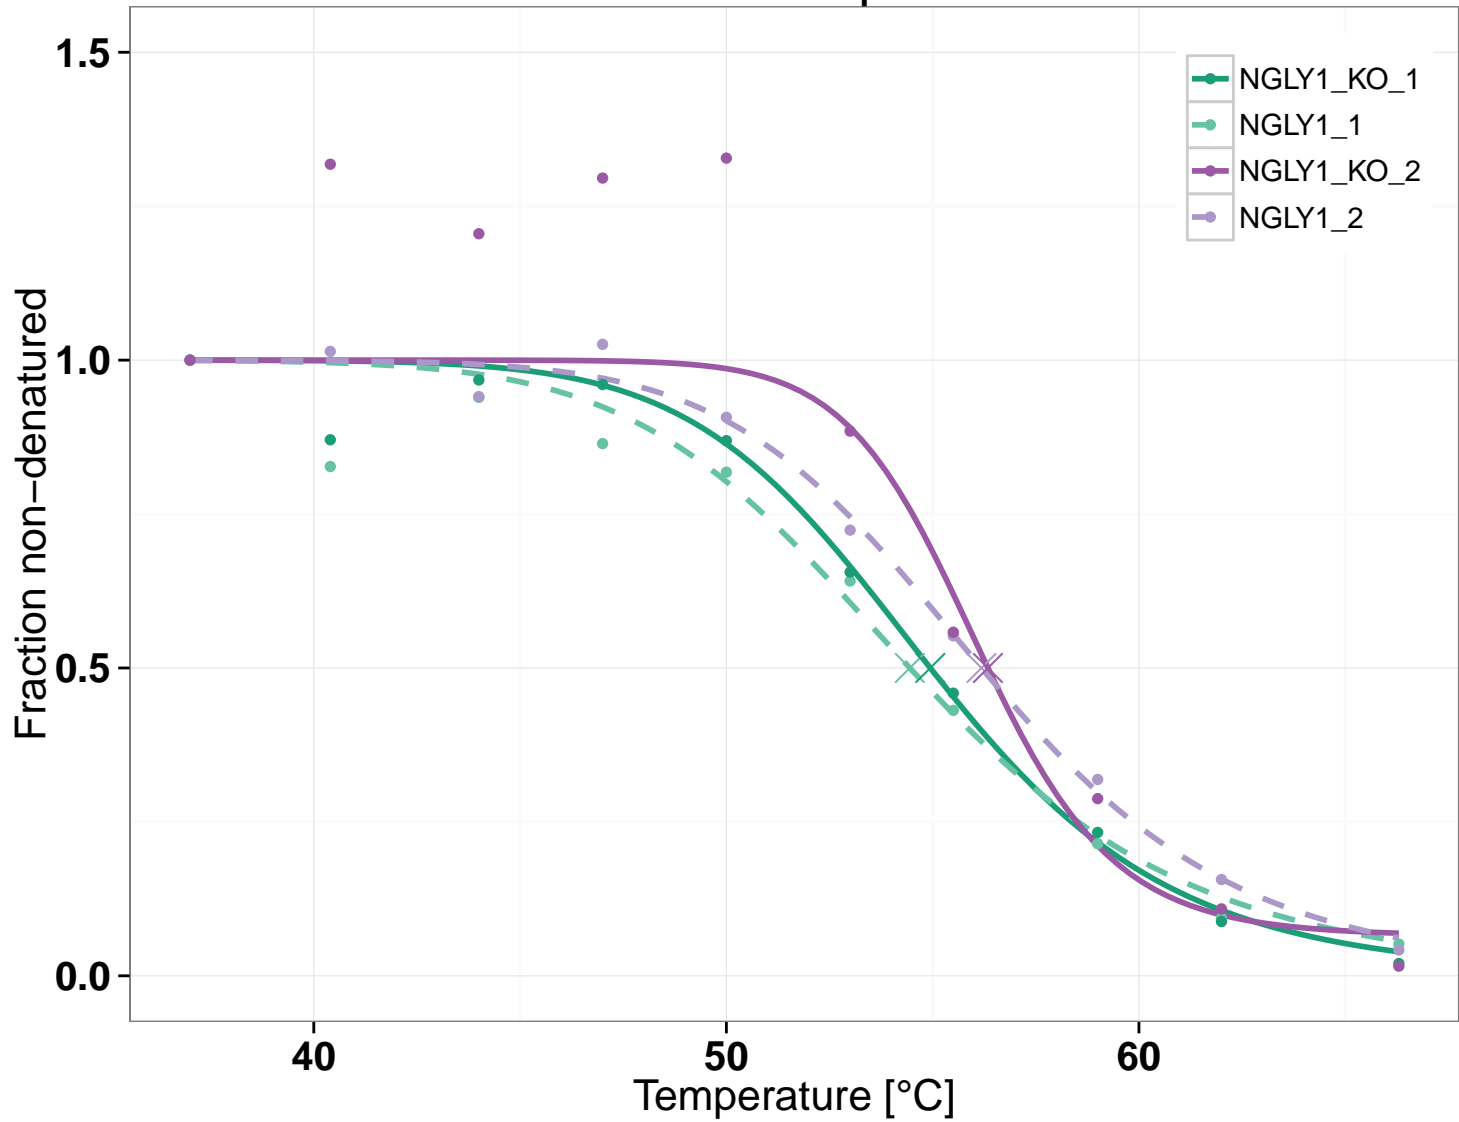

|            | meltPoint | slope  | plateau | R2   |
|------------|-----------|--------|---------|------|
| NGLY1_KO_1 | 54.94     | -0.086 | 0       | 0.99 |
| NGLY1_1    | 54.45     | -0.074 | 0       | 0.97 |
| NGLY1_KO_2 | 56.34     | -0.14  | 0.06    | 0.85 |
| NGLY1_2    | 56.18     | -0.081 | 0       | 0.99 |

Supplement: Supplementary file 4475 [file 1]

IPI00376954.7|TAL1

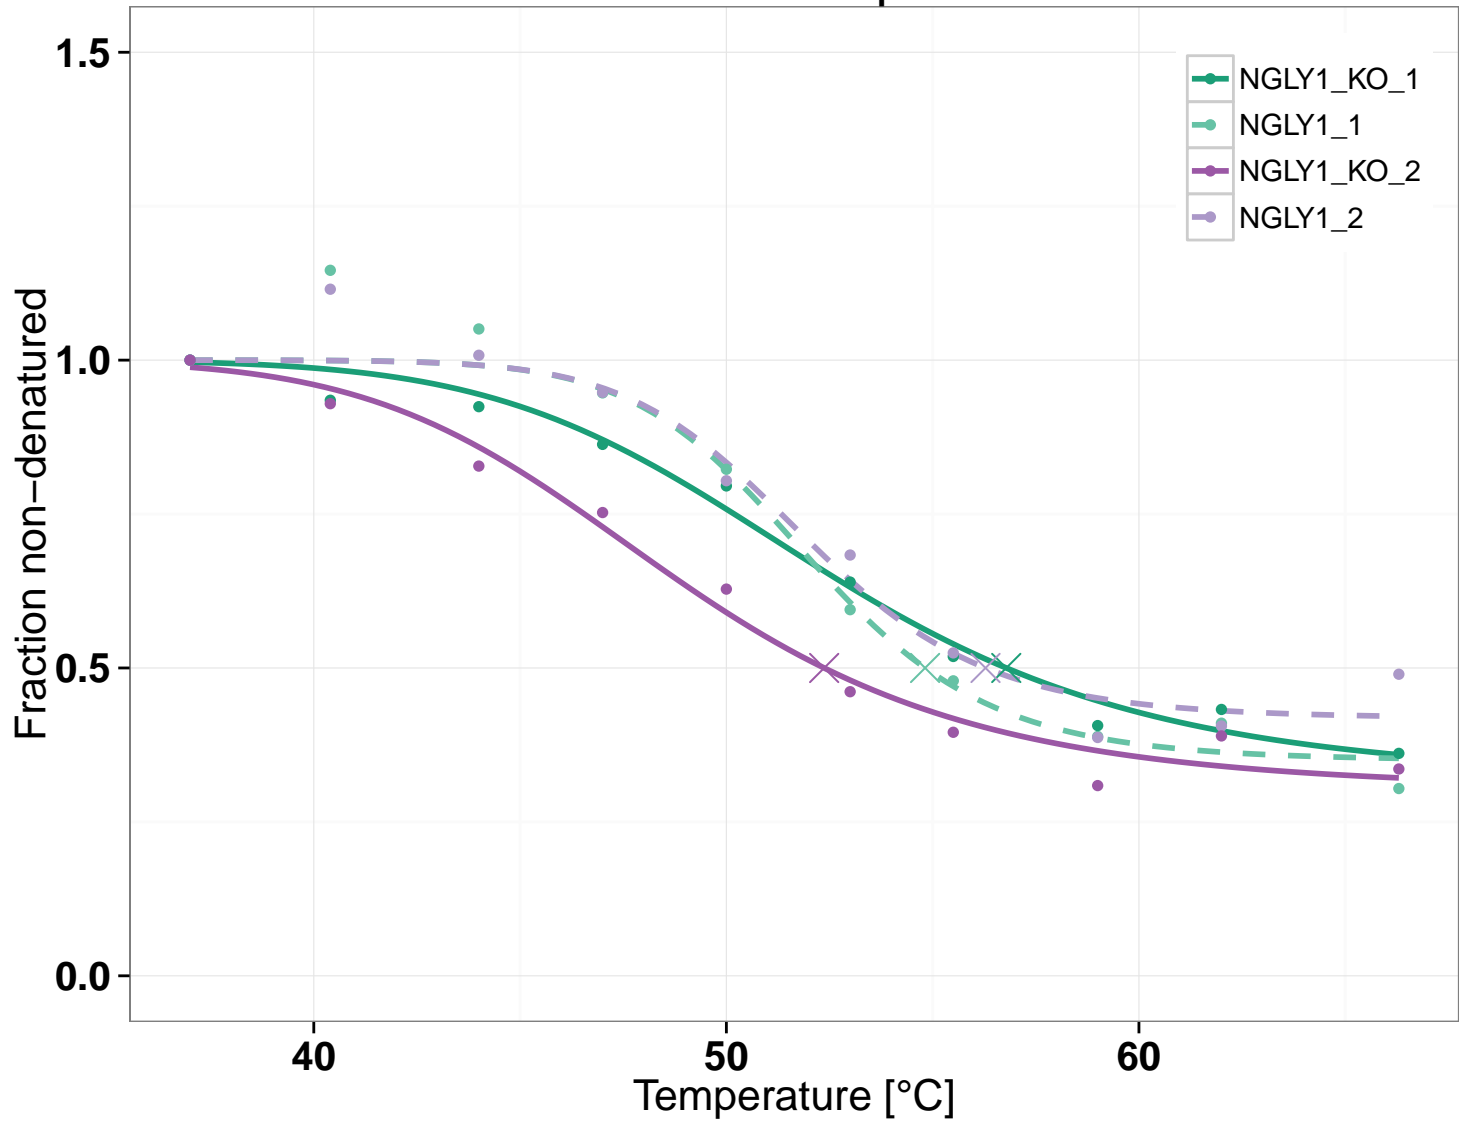

|            | meltPoint | slope  | plateau | R2   |
|------------|-----------|--------|---------|------|
| NGLY1_KO_1 | 56.78     | -0.043 | 0.32    | 0.99 |
| NGLY1_1    | 54.82     | -0.075 | 0.35    | 0.97 |
| NGLY1_KO_2 | 52.37     | -0.048 | 0.3     | 0.98 |
| NGLY1_2    | 56.28     | -0.066 | 0.42    | 0.96 |

Supplement: Supplementary file 4476 [file 1]

IPI00060521.1|FLYWCH2

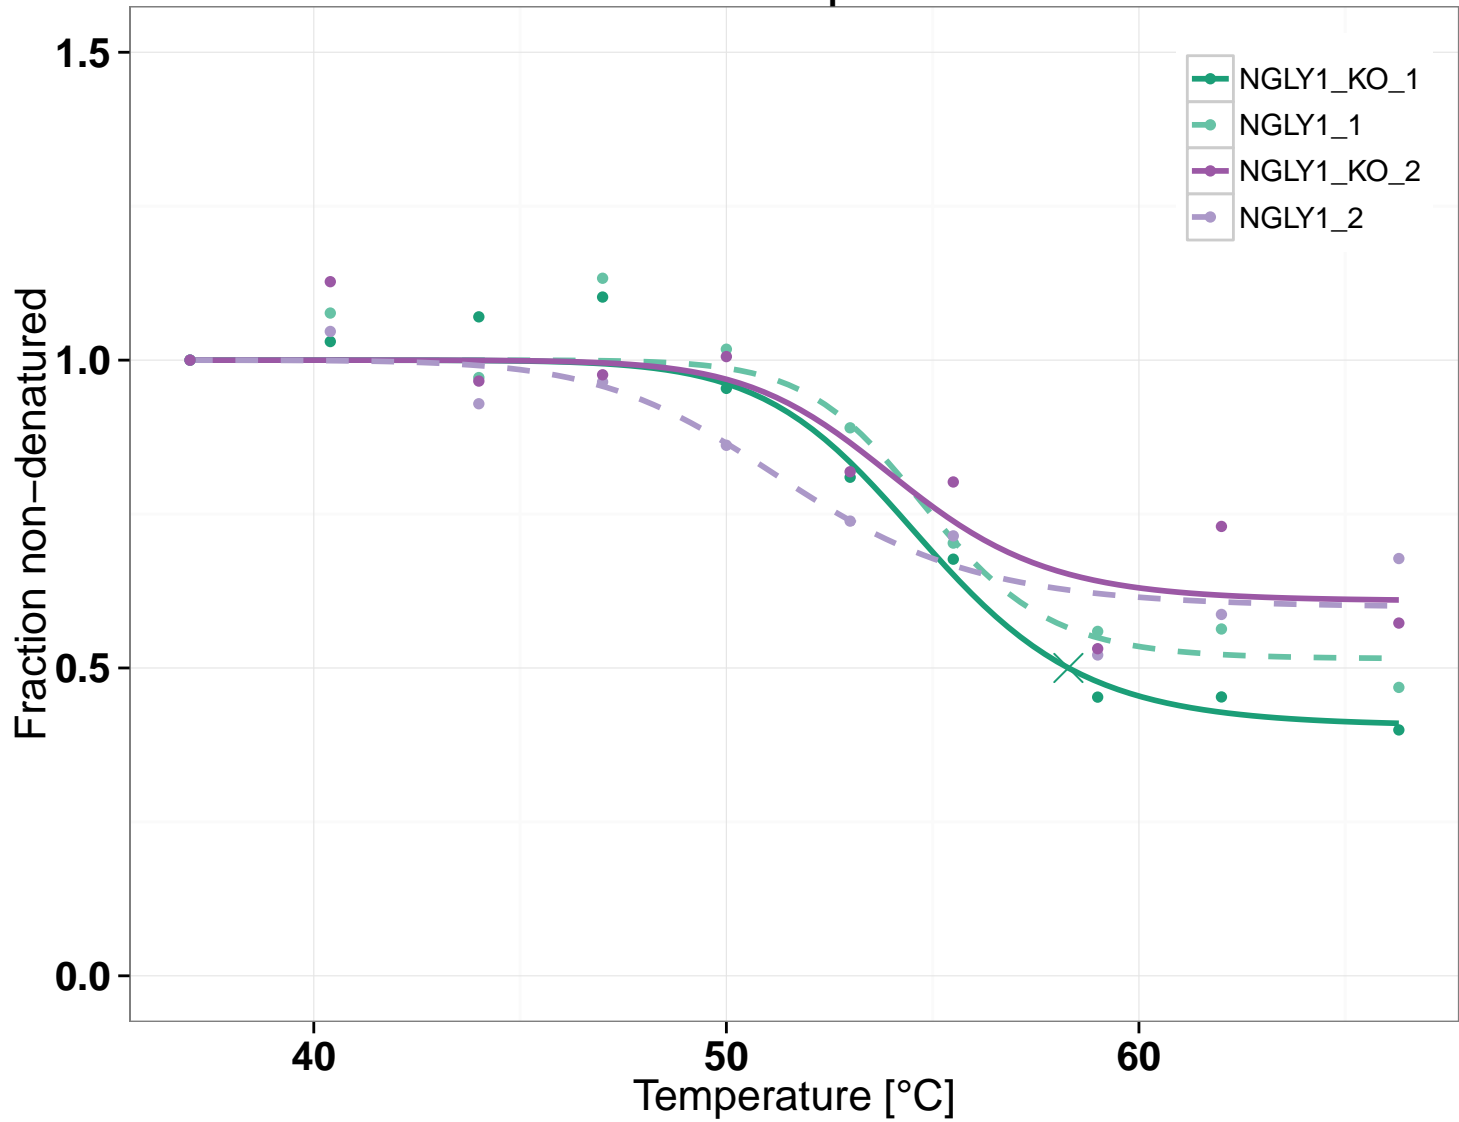

|            | meltPoint | slope  | plateau | R2   |
|------------|-----------|--------|---------|------|
| NGLY1_KO_1 | 58.29     | -0.076 | 0.41    | 0.97 |
| NGLY1_1    | -         | -0.082 | 0.51    | 0.94 |
| NGLY1_KO_2 | -         | -0.053 | 0.61    | 0.85 |
| NGLY1_2    | -         | -0.044 | 0.6     | 0.92 |

Supplement: Supplementary file 4477 [file 1]

IPI00247871.2|TCERG1

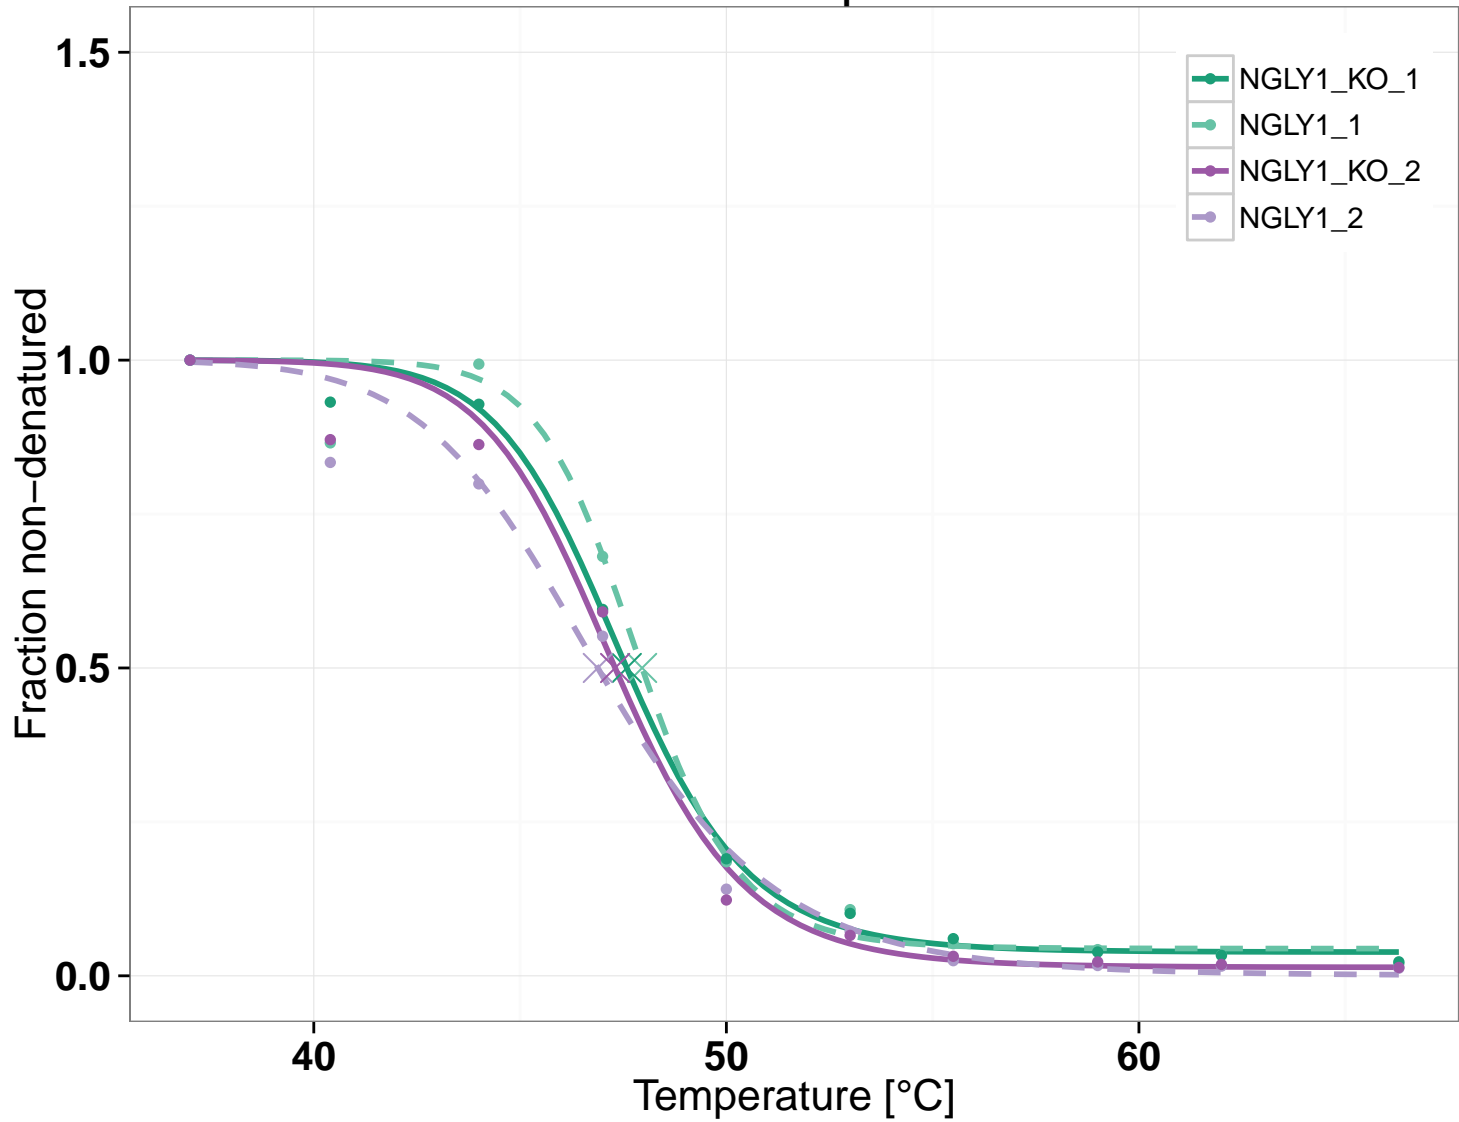

|            | meltPoint | slope | plateau | R2   |
|------------|-----------|-------|---------|------|
| NGLY1_KO_1 | 47.59     | -0.16 | 0.04    | 1    |
| NGLY1_1    | 47.96     | -0.2  | 0.04    | 0.99 |
| NGLY1_KO_2 | 47.3      | -0.16 | 0.01    | 0.99 |
| NGLY1_2    | 46.88     | -0.12 | 0       | 0.98 |

Supplement: Supplementary file 4478 [file 1]

IPI00010080.2|OXSR1

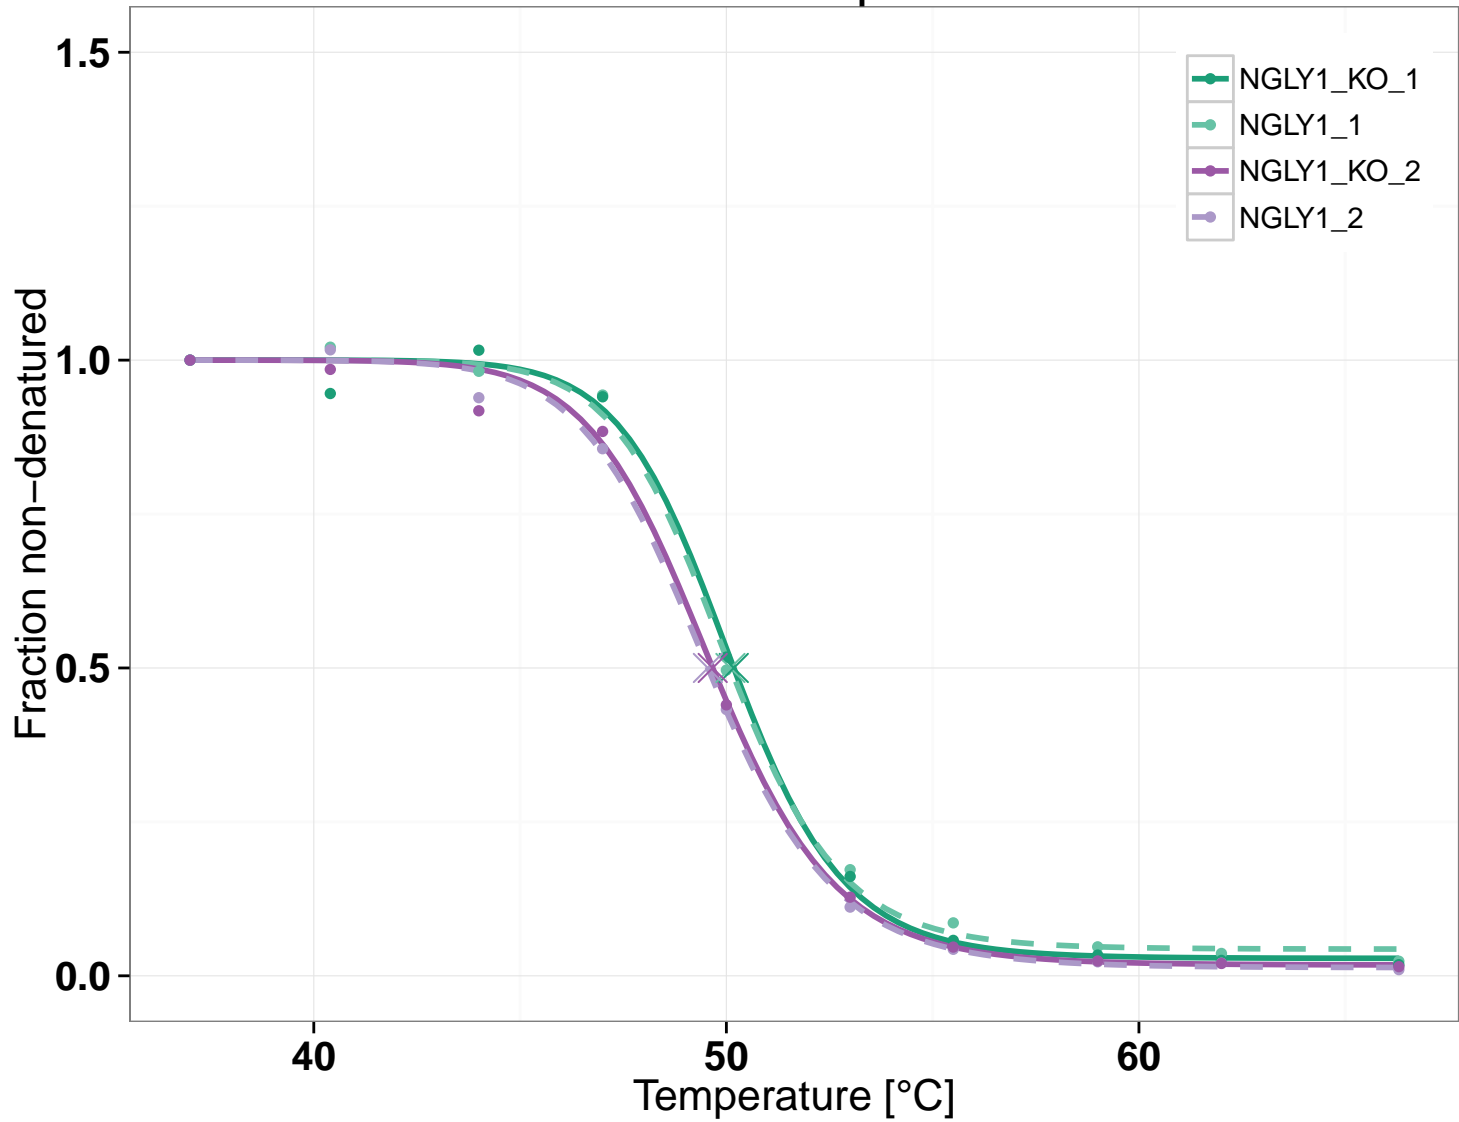

|            | meltPoint | slope | plateau | R2 |
|------------|-----------|-------|---------|----|
| NGLY1_KO_1 | 50.18     | -0.18 | 0.03    | 1  |
| NGLY1_1    | 50.1      | -0.17 | 0.04    | 1  |
| NGLY1_KO_2 | 49.67     | -0.16 | 0.02    | 1  |
| NGLY1_2    | 49.55     | -0.16 | 0.01    | 1  |

Supplement: Supplementary file 4479 [file 1]

IPI00394989.2|FAIM

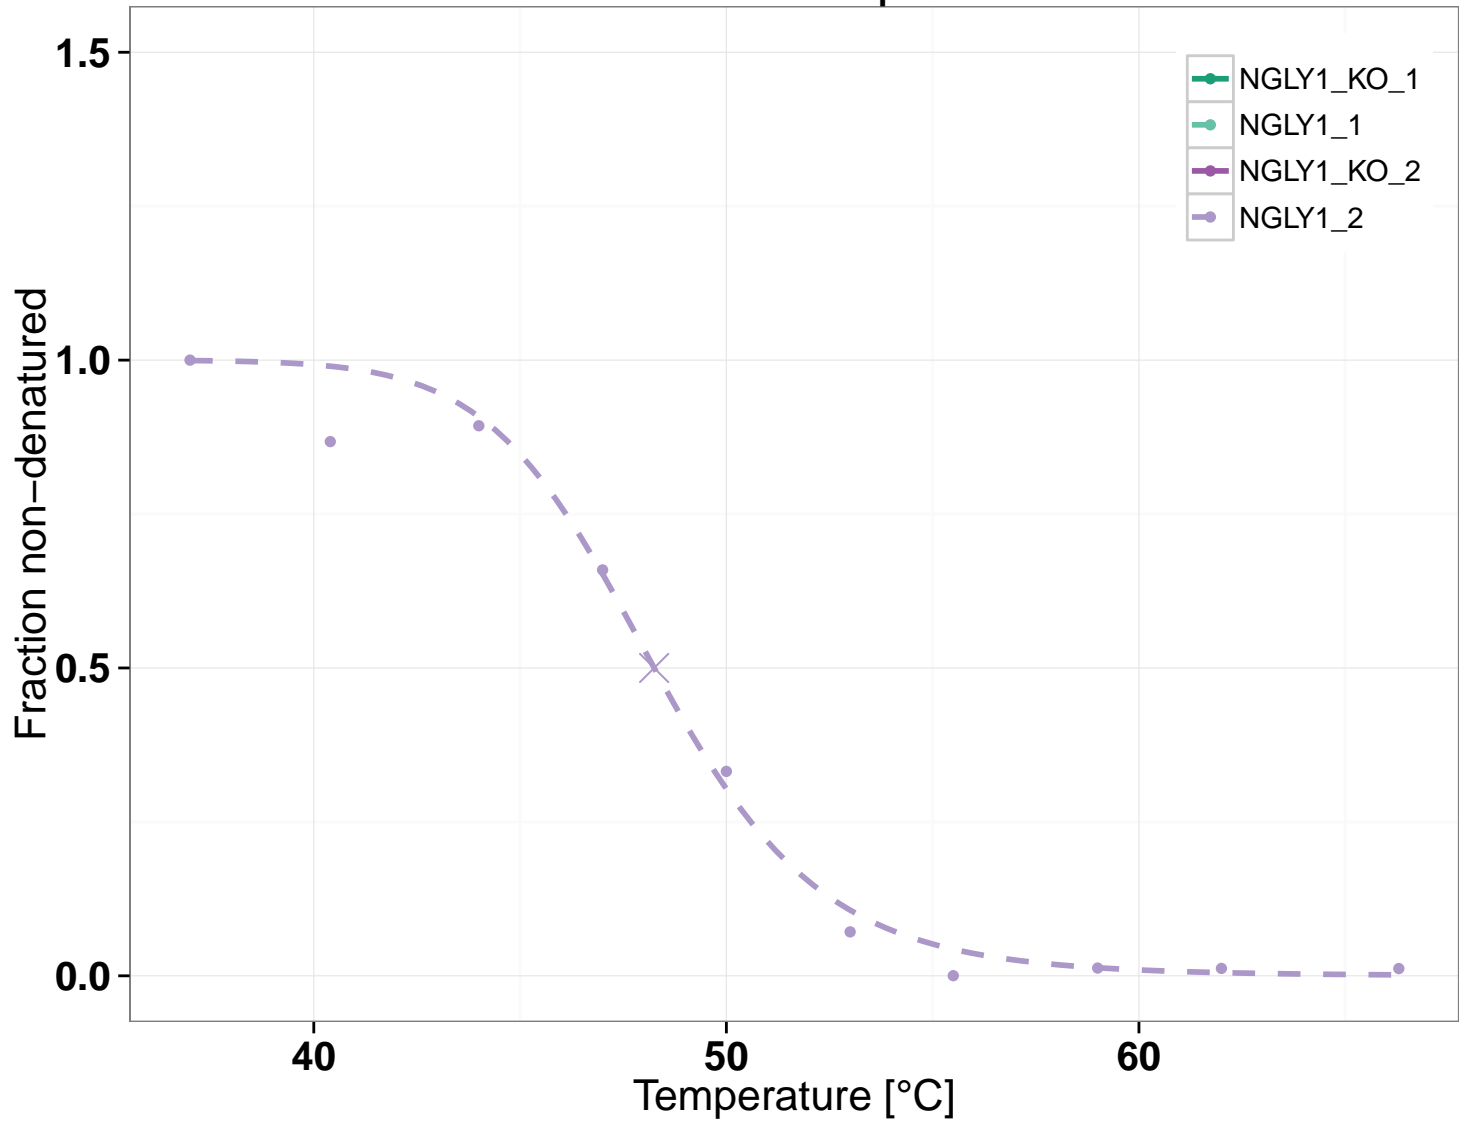

|            | meltPoint | slope | plateau | R2   |
|------------|-----------|-------|---------|------|
| NGLY1_KO_1 | -         | -     | -       | -    |
| NGLY1_1    | -         | -     | -       | -    |
| NGLY1_KO_2 | -         | -     | -       | -    |
| NGLY1_2    | 48.25     | -0.12 | 0       | 0.99 |

Supplement: Supplementary file 4480 [file 1]

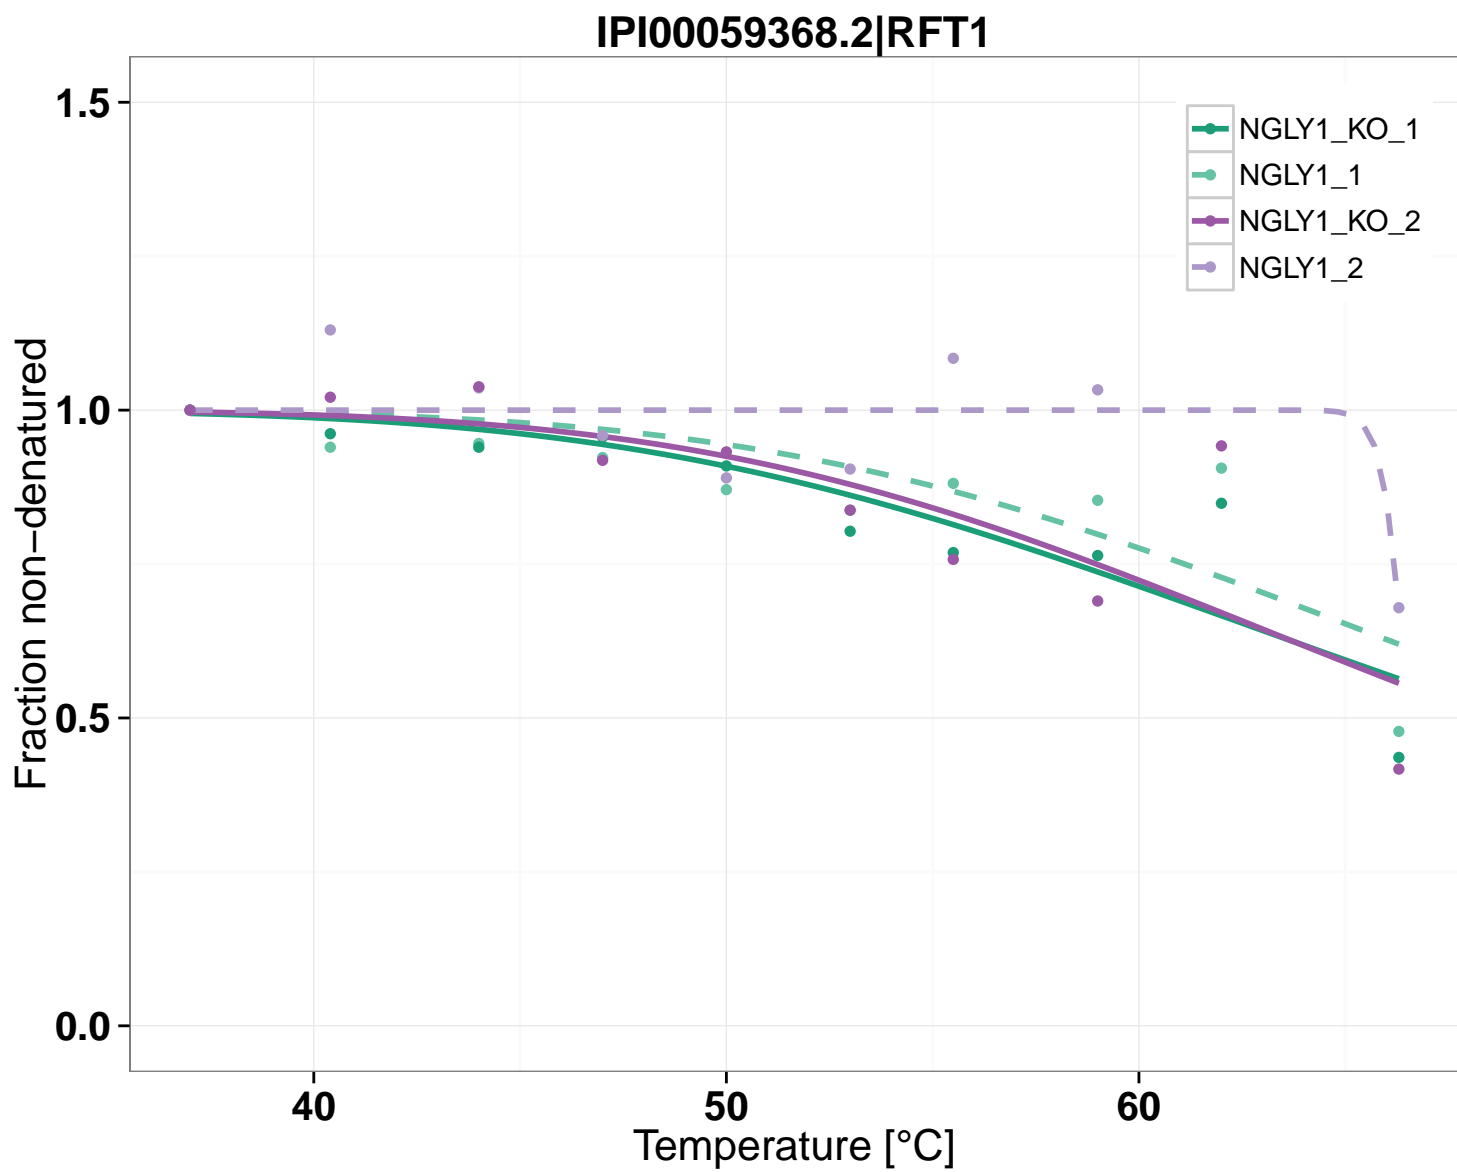

|            | meltPoint | slope  | plateau | R2   |
|------------|-----------|--------|---------|------|
| NGLY1_KO_1 | —         | −0.024 | 0       | 0.76 |
| NGLY1_1    | —         | −0.026 | 0       | 0.62 |
| NGLY1_KO_2 | —         | −0.027 | 0       | 0.67 |
| NGLY1_2    | —         | —      | 0       | 0.42 |

Supplement: Supplementary file 4481 [file 1]

# IPI00552793.2|CHCHD7

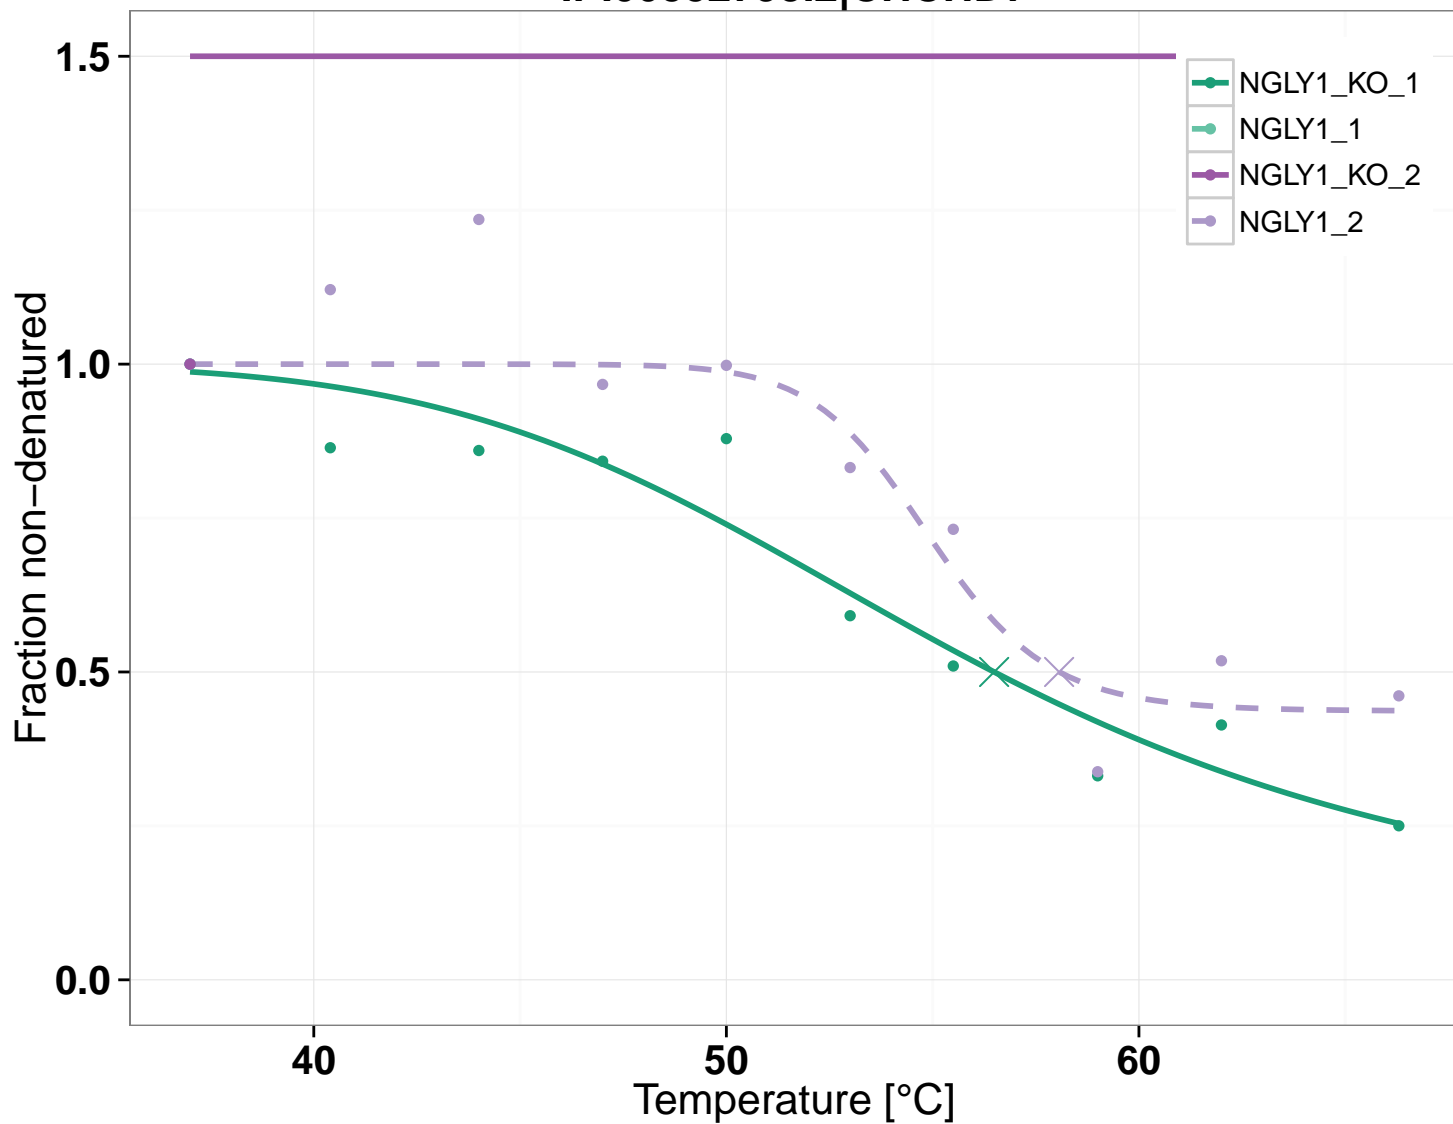

|            | meltPoint | slope  | plateau | R2    |
|------------|-----------|--------|---------|-------|
| NGLY1_KO_1 | 56.49     | -0.038 | 0.07    | 0.93  |
| NGLY1_1    | -         | -      | -       | -     |
| NGLY1_KO_2 | -         | -      | 1.5     | -1.72 |
| NGLY1_2    | 58.07     | -0.098 | 0.44    | 0.87  |

Supplement: Supplementary file 4482 [file 1]

# IPI00893344.1|ZNF74

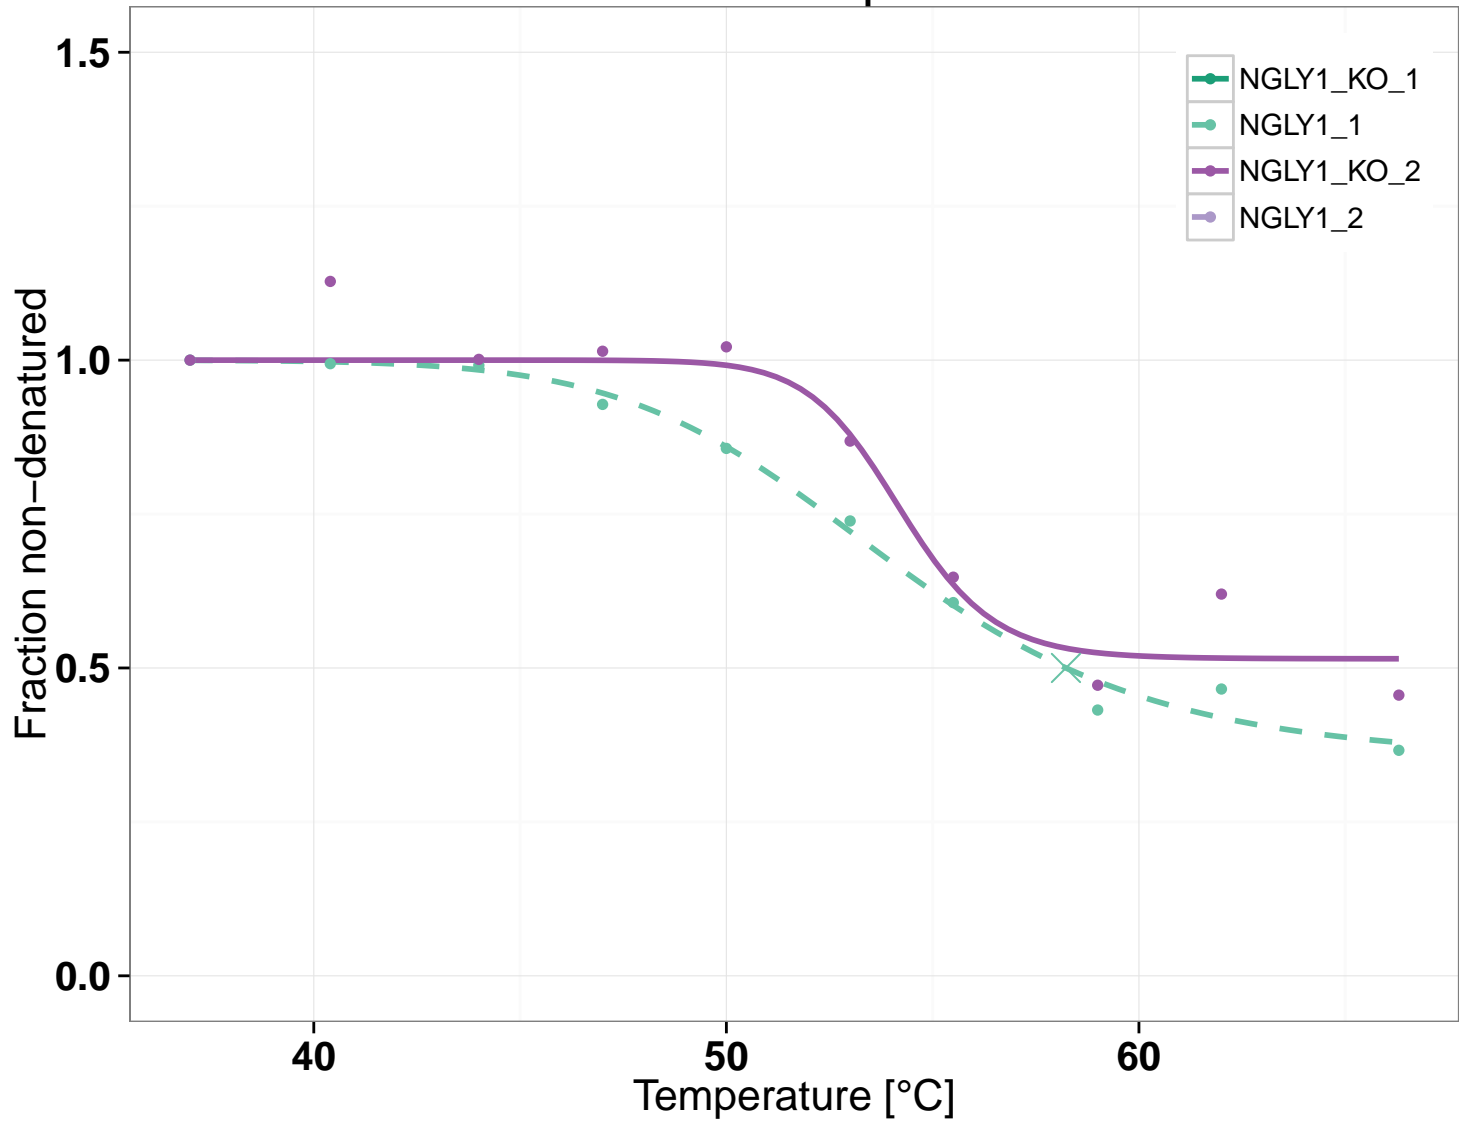

|            | meltPoint | slope | plateau | R2   |
|------------|-----------|-------|---------|------|
| NGLY1_KO_1 | -         | -     | -       | -    |
| NGLY1_1    | 58.23     | -0.05 | 0.35    | 0.99 |
| NGLY1_KO_2 | -         | -0.11 | 0.51    | 0.94 |
| NGLY1_2    | -         | -     | -       | -    |

Supplement: Supplementary file 4483 [file 1]

# IPI00008726.3|IREB2

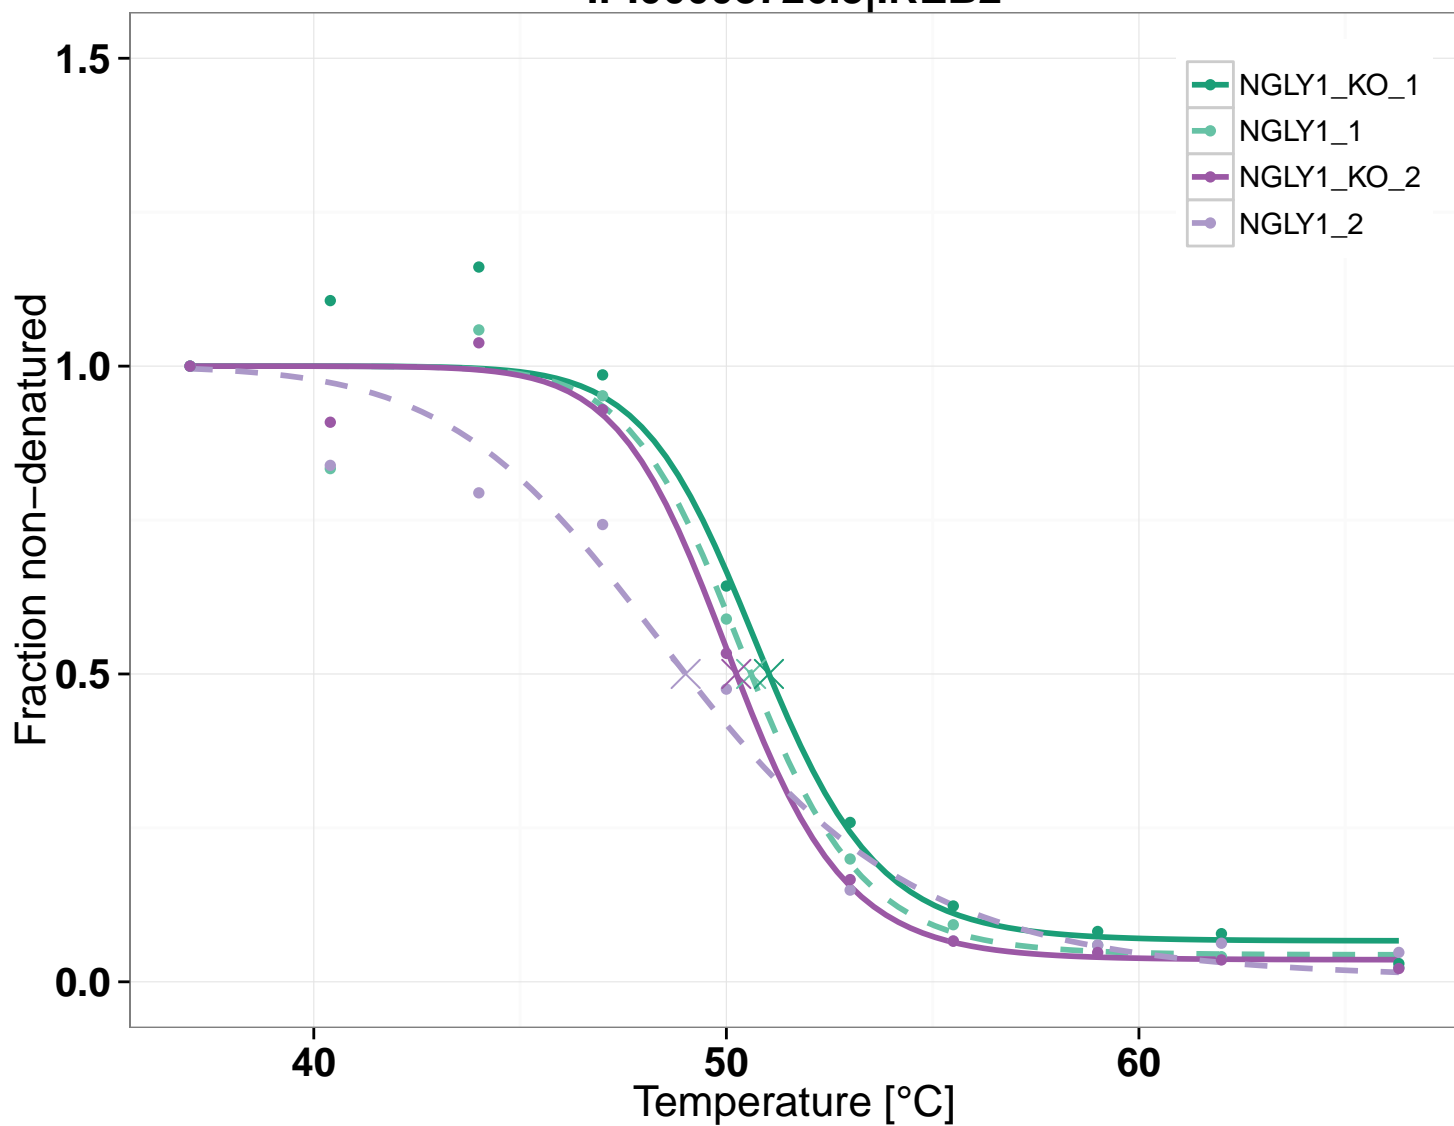

|            | meltPoint | slope  | plateau | R2   |
|------------|-----------|--------|---------|------|
| NGLY1_KO_1 | 51.03     | -0.16  | 0.07    | 0.98 |
| NGLY1_1    | 50.6      | -0.17  | 0.04    | 0.98 |
| NGLY1_KO_2 | 50.24     | -0.17  | 0.04    | 0.99 |
| NGLY1_2    | 49.01     | -0.087 | 0       | 0.97 |

Supplement: Supplementary file 4484 [file 1]

IPI00071318.1|LUC7L

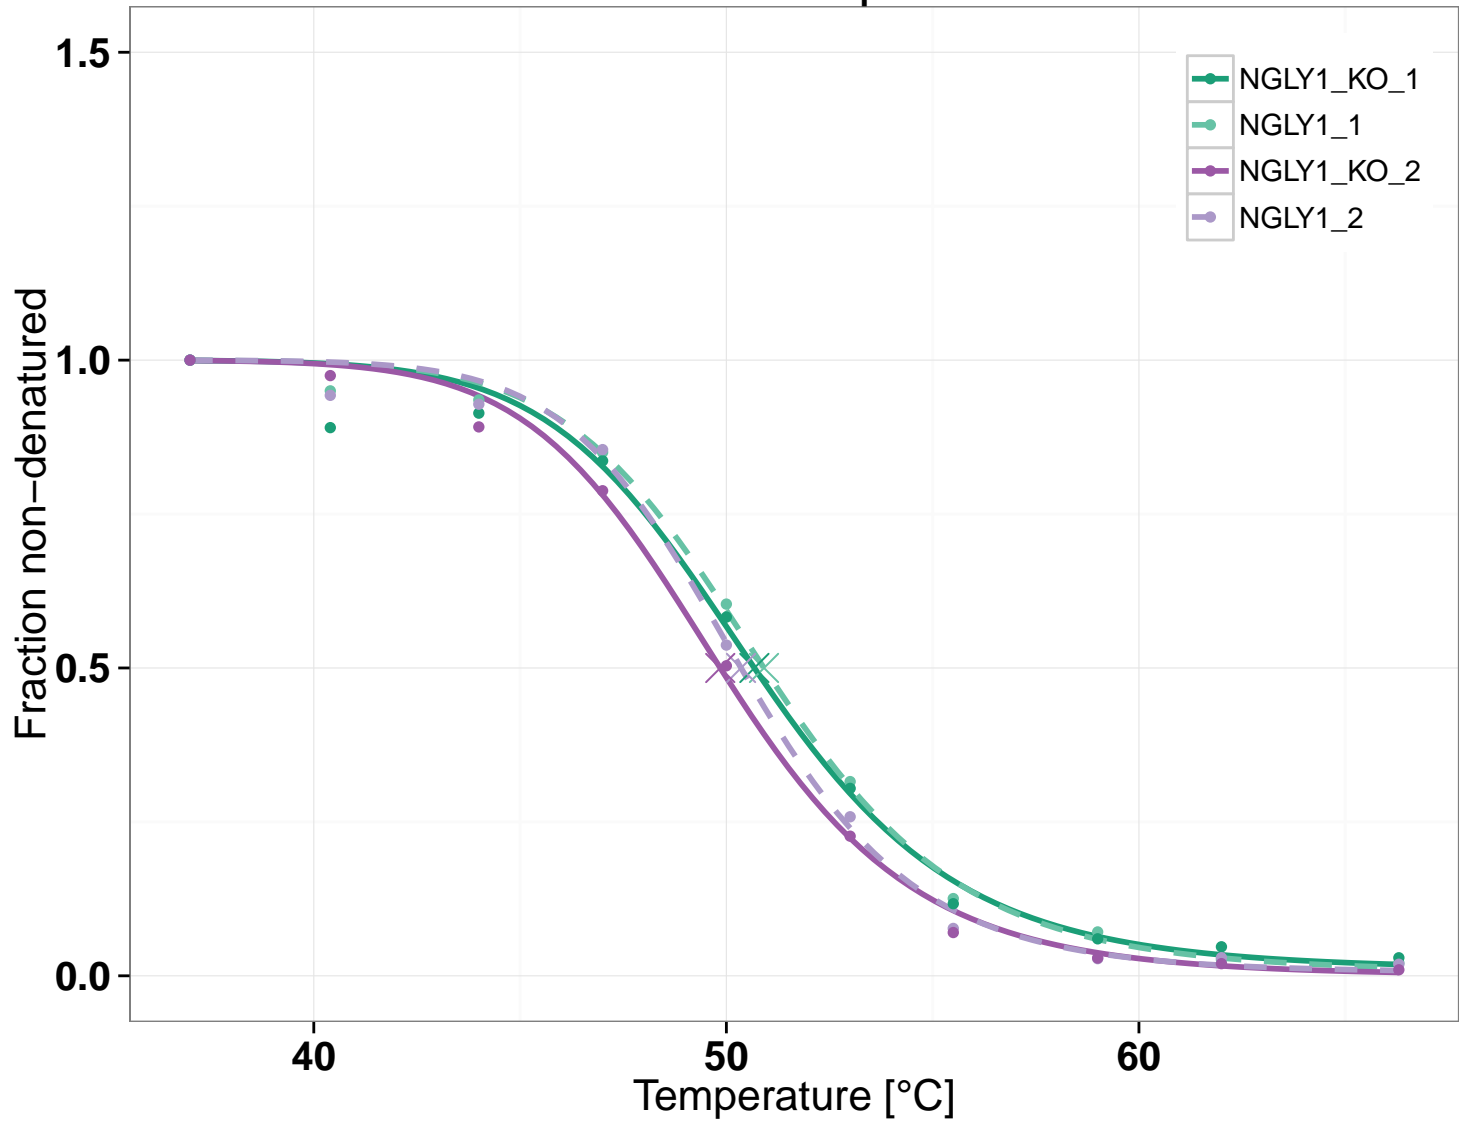

|            | meltPoint | slope  | plateau | R2   |
|------------|-----------|--------|---------|------|
| NGLY1_KO_1 | 50.68     | -0.099 | 0.01    | 0.99 |
| NGLY1_1    | 50.91     | -0.1   | 0.01    | 1    |
| NGLY1_KO_2 | 49.85     | -0.11  | 0       | 1    |
| NGLY1_2    | 50.36     | -0.12  | 0.01    | 1    |

Supplement: Supplementary file 4485 [file 1]

# IPI00025277.5|PDCD6

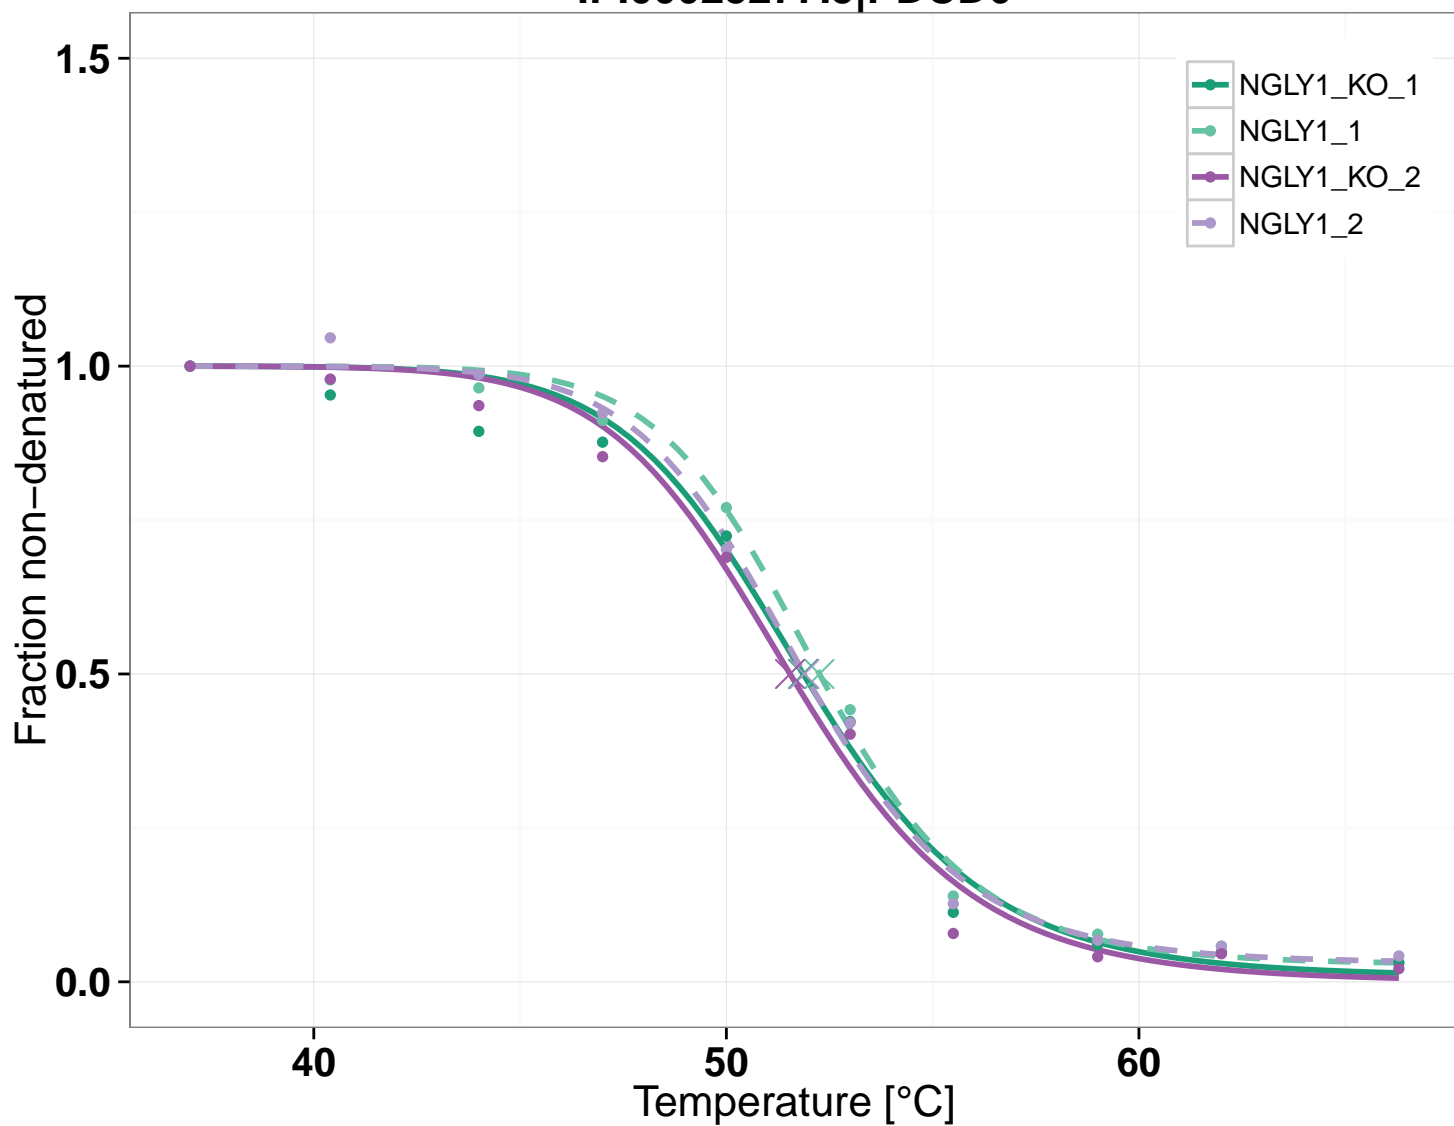

|            | meltPoint | slope | plateau | R2   |
|------------|-----------|-------|---------|------|
| NGLY1_KO_1 | 51.86     | -0.11 | 0.01    | 0.99 |
| NGLY1_1    | 52.26     | -0.13 | 0.03    | 1    |
| NGLY1_KO_2 | 51.54     | -0.11 | 0       | 0.99 |
| NGLY1_2    | 51.89     | -0.12 | 0.03    | 1    |

Supplement: Supplementary file 4486 [file 1]

IPI00043490.3|CMTM3

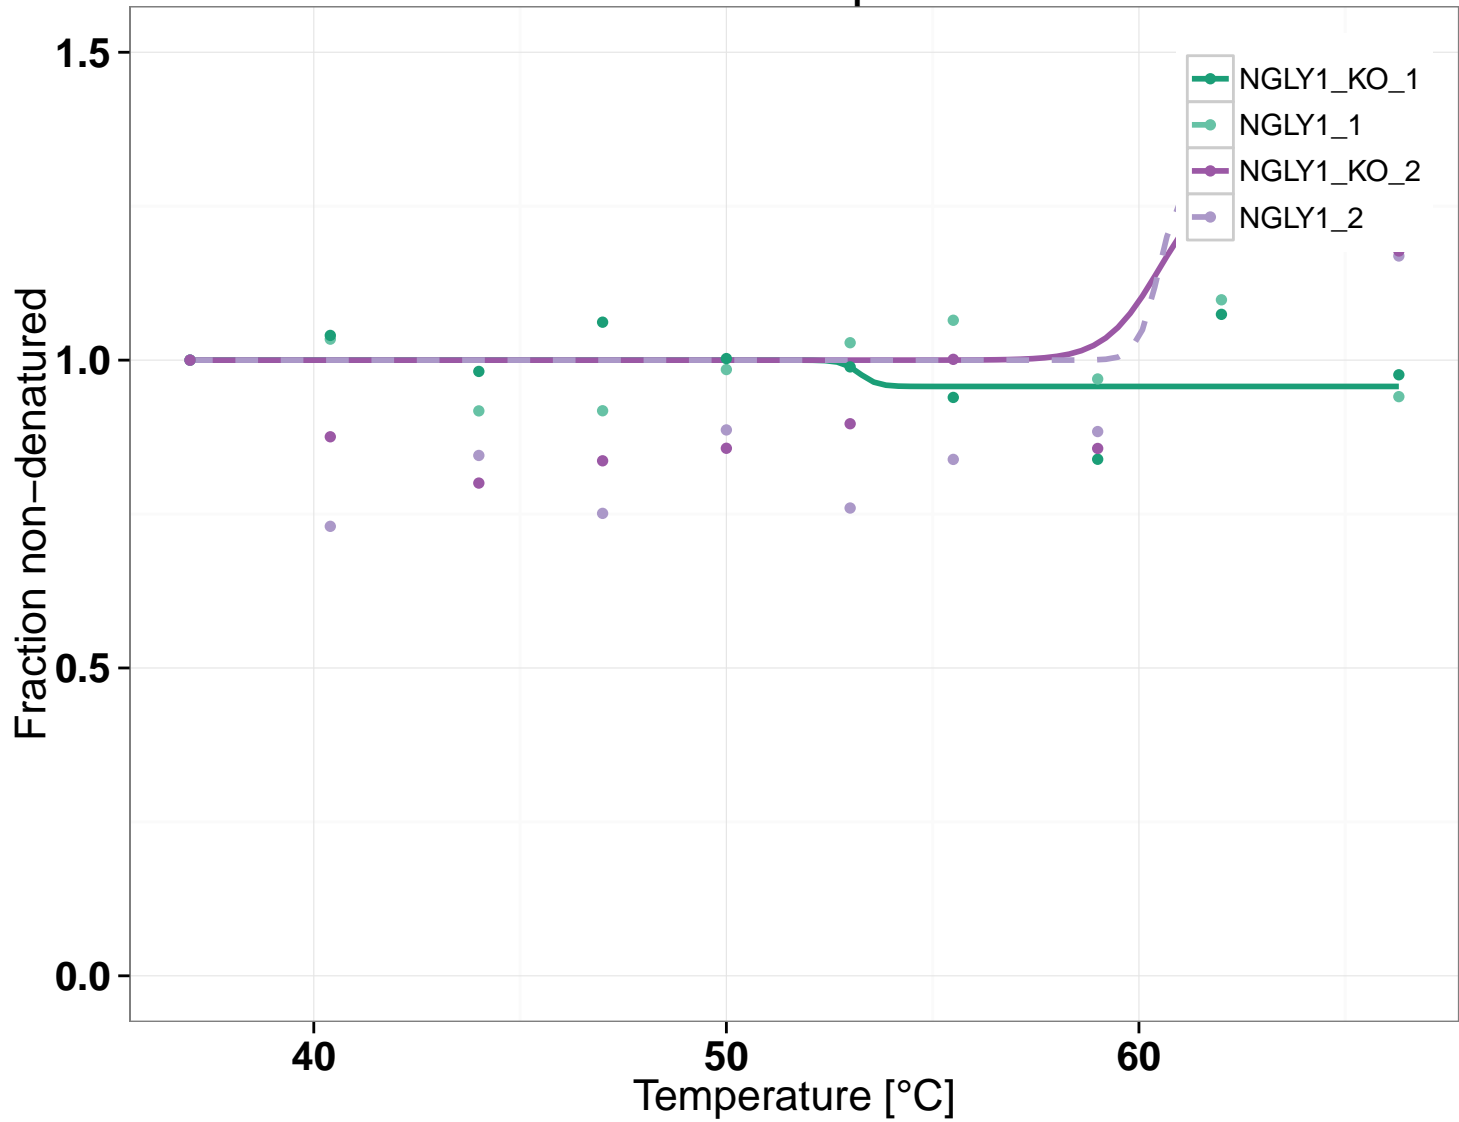

|            | meltPoint | slope | plateau | R2   |
|------------|-----------|-------|---------|------|
| NGLY1_KO_1 | —         | −0.05 | 0.96    | 0.16 |
| NGLY1_1    | —         | —     | —       | —    |
| NGLY1_KO_2 | —         | 0.11  | 1.3     | 0.46 |
| NGLY1_2    | —         | 0.29  | 1.28    | 0.27 |

Supplement: Supplementary file 4487 [file 1]

# IPI00020062.2|MBNL3

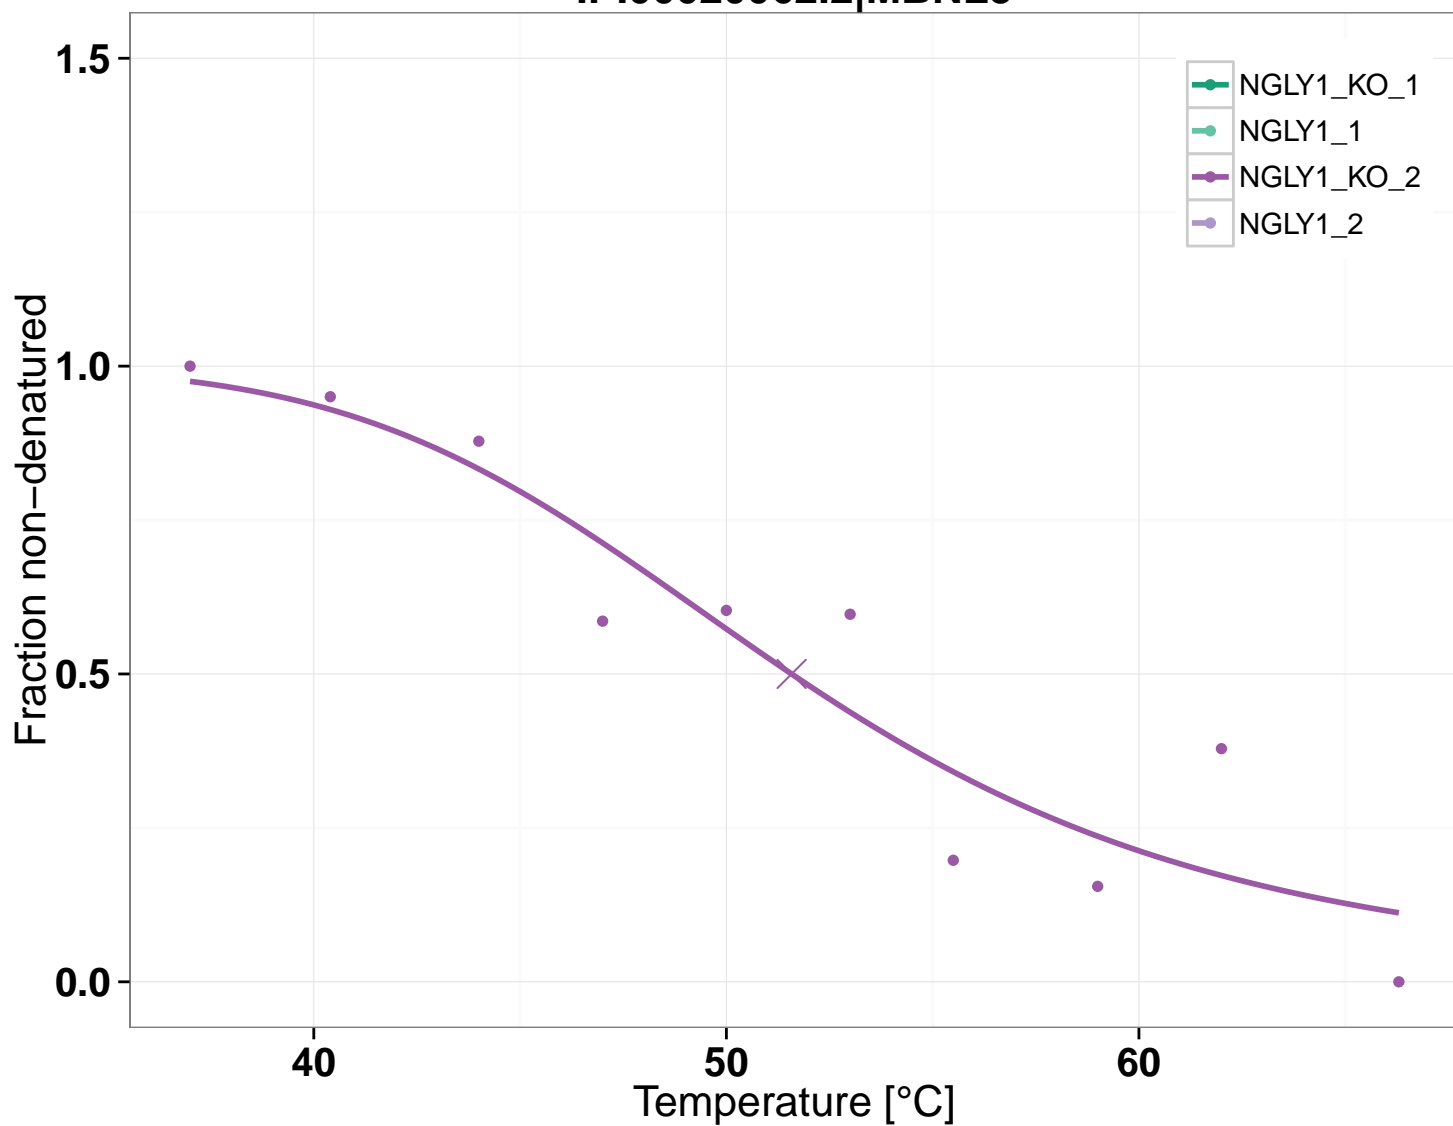

|            | meltPoint | slope  | plateau | R2   |
|------------|-----------|--------|---------|------|
| NGLY1_KO_1 | —         | —      | —       | —    |
| NGLY1_1    | —         | —      | —       | —    |
| NGLY1_KO_2 | 51.58     | -0.047 | 0       | 0.88 |
| NGLY1_2    | —         | —      | —       | —    |

Supplement: Supplementary file 4488 [file 1]

# IPI00018251.1|NCOA2

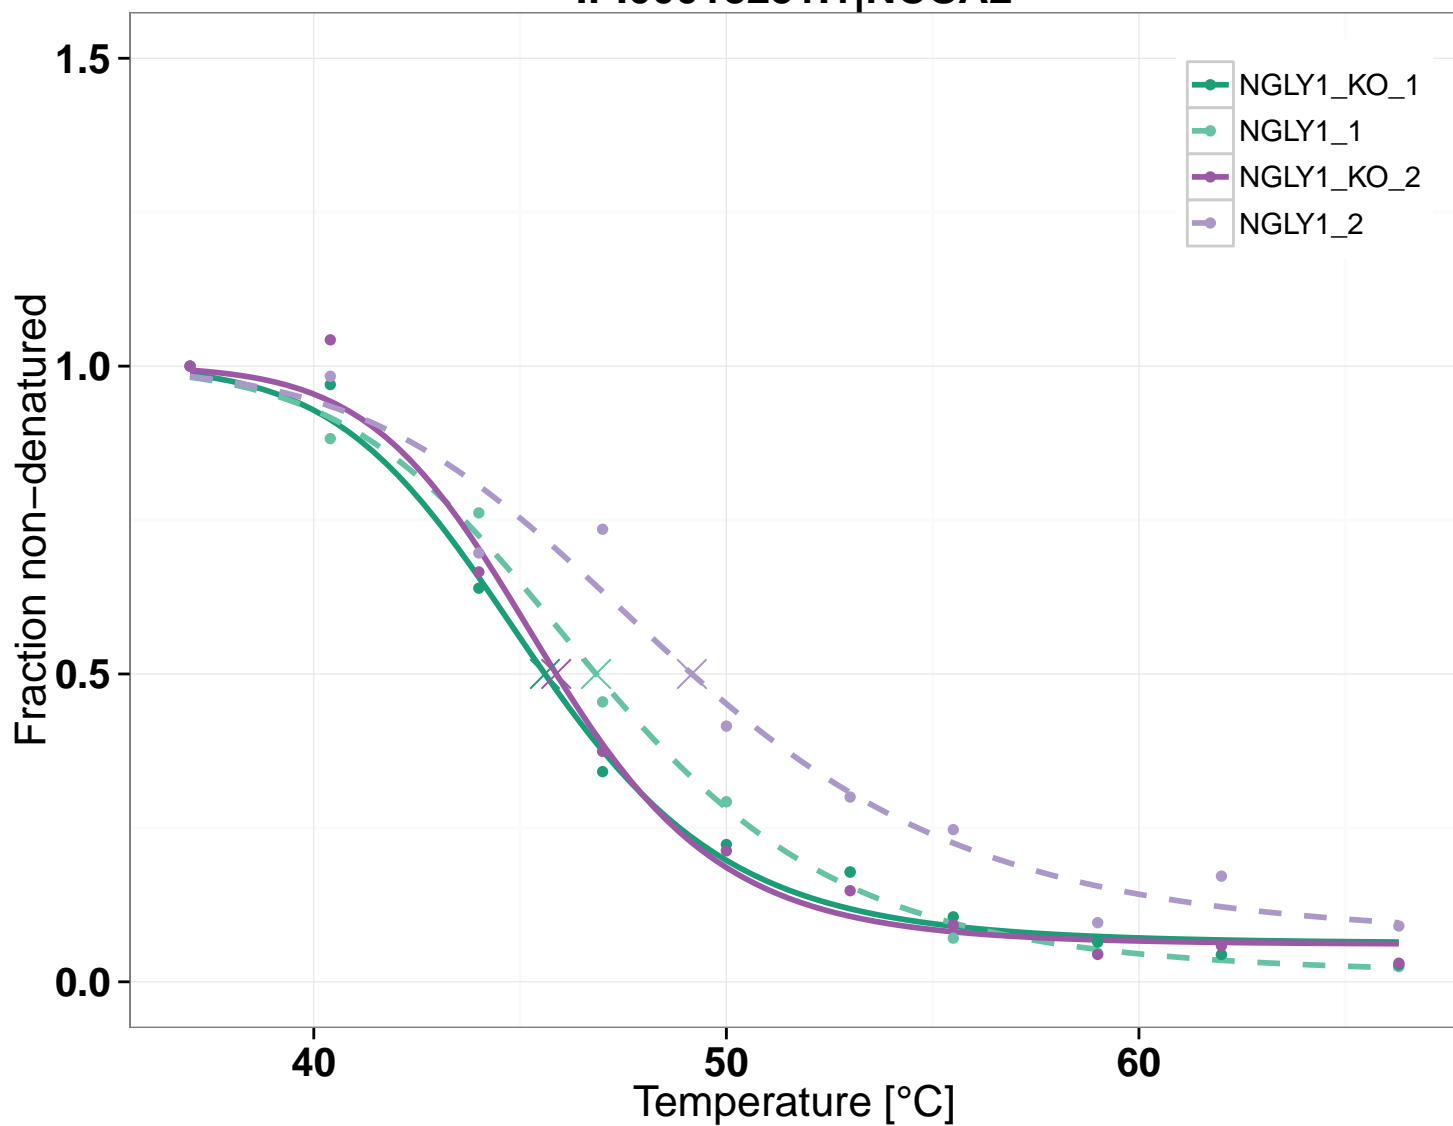

|            | meltPoint | slope  | plateau | R2   |
|------------|-----------|--------|---------|------|
| NGLY1_KO_1 | 45.6      | -0.099 | 0.06    | 0.99 |
| NGLY1_1    | 46.84     | -0.081 | 0.01    | 1    |
| NGLY1_KO_2 | 45.88     | -0.11  | 0.06    | 0.99 |
| NGLY1_2    | 49.16     | -0.063 | 0.07    | 0.97 |

Supplement: Supplementary file 4489 [file 1]

IPI00158992.2|SNAPC4

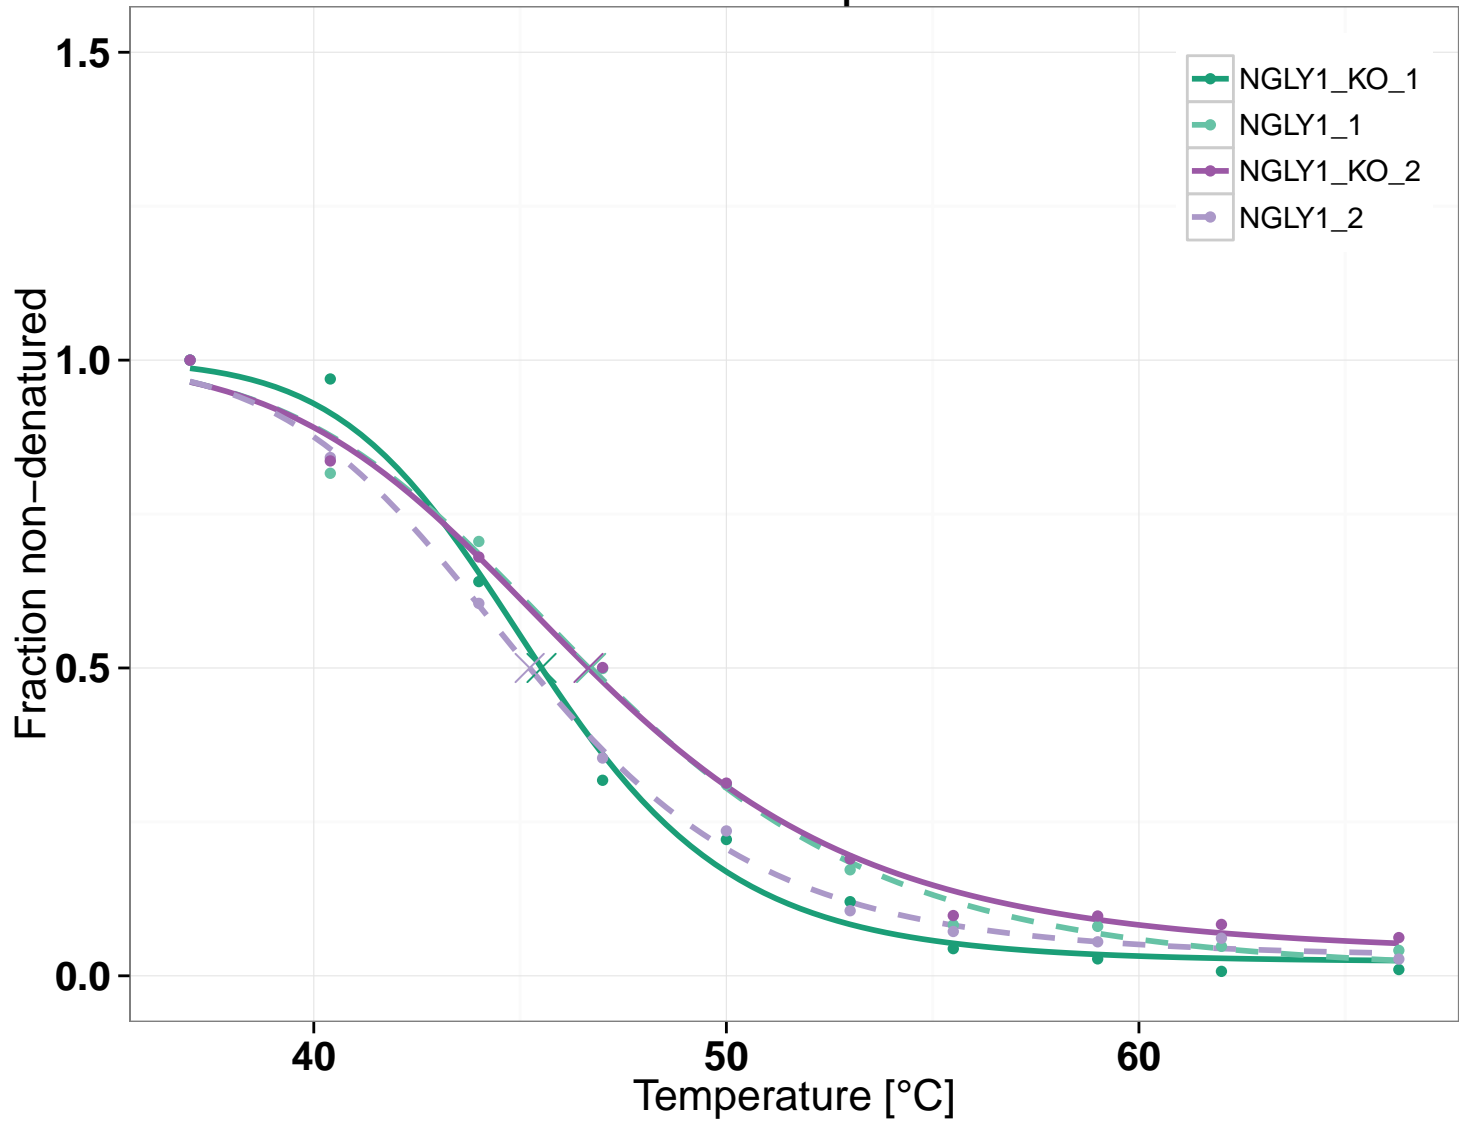

|            | meltPoint | slope  | plateau | R2   |
|------------|-----------|--------|---------|------|
| NGLY1_KO_1 | 45.52     | -0.1   | 0.02    | 0.99 |
| NGLY1_1    | 46.72     | -0.069 | 0       | 0.99 |
| NGLY1_KO_2 | 46.66     | -0.069 | 0.03    | 1    |
| NGLY1_2    | 45.23     | -0.083 | 0.03    | 1    |

Supplement: Supplementary file 4490 [file 1]

# IPI00398825.4|PASK

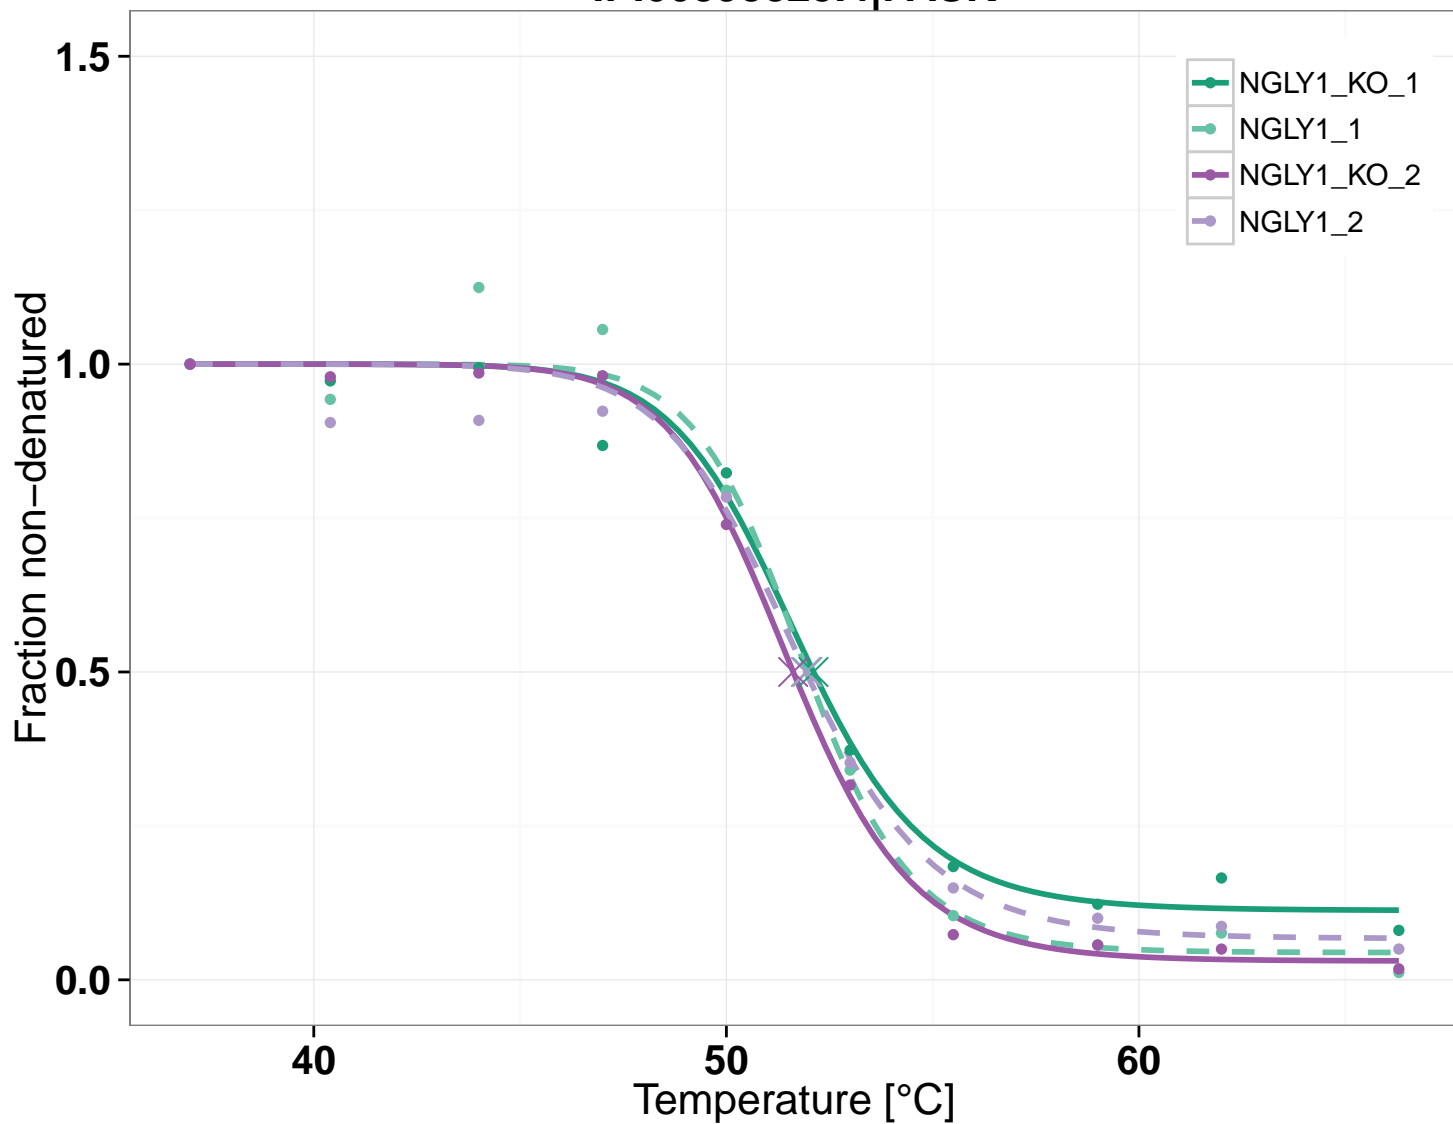

|            | meltPoint | slope | plateau | R2   |
|------------|-----------|-------|---------|------|
| NGLY1_KO_1 | 52.11     | -0.14 | 0.11    | 0.99 |
| NGLY1_1    | 51.96     | -0.18 | 0.04    | 0.99 |
| NGLY1_KO_2 | 51.62     | -0.16 | 0.03    | 1    |
| NGLY1_2    | 51.93     | -0.14 | 0.07    | 0.99 |

Supplement: Supplementary file 4491 [file 1]

# IPI00744598.2|POLE

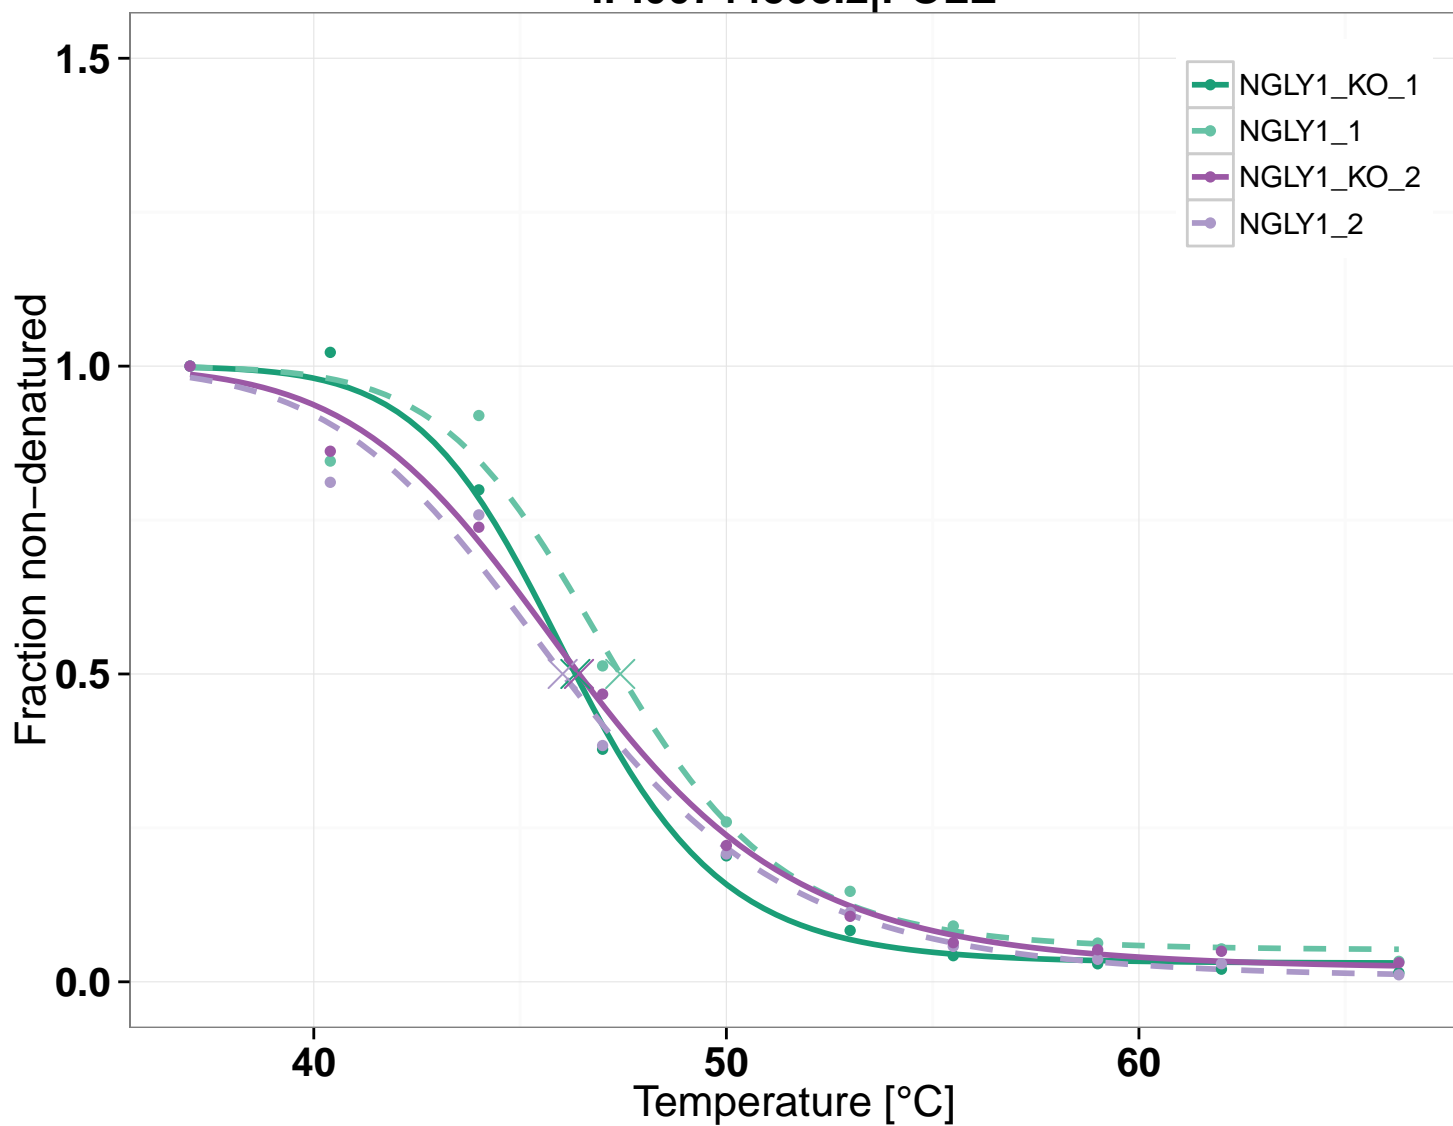

|            | meltPoint | slope  | plateau | R2   |
|------------|-----------|--------|---------|------|
| NGLY1_KO_1 | 46.34     | -0.13  | 0.03    | 1    |
| NGLY1_1    | 47.43     | -0.11  | 0.05    | 0.98 |
| NGLY1_KO_2 | 46.43     | -0.091 | 0.02    | 1    |
| NGLY1_2    | 46.03     | -0.089 | 0.01    | 0.99 |

Supplement: Supplementary file 4492 [file 1]

IPI00002483.4|SLC30A1

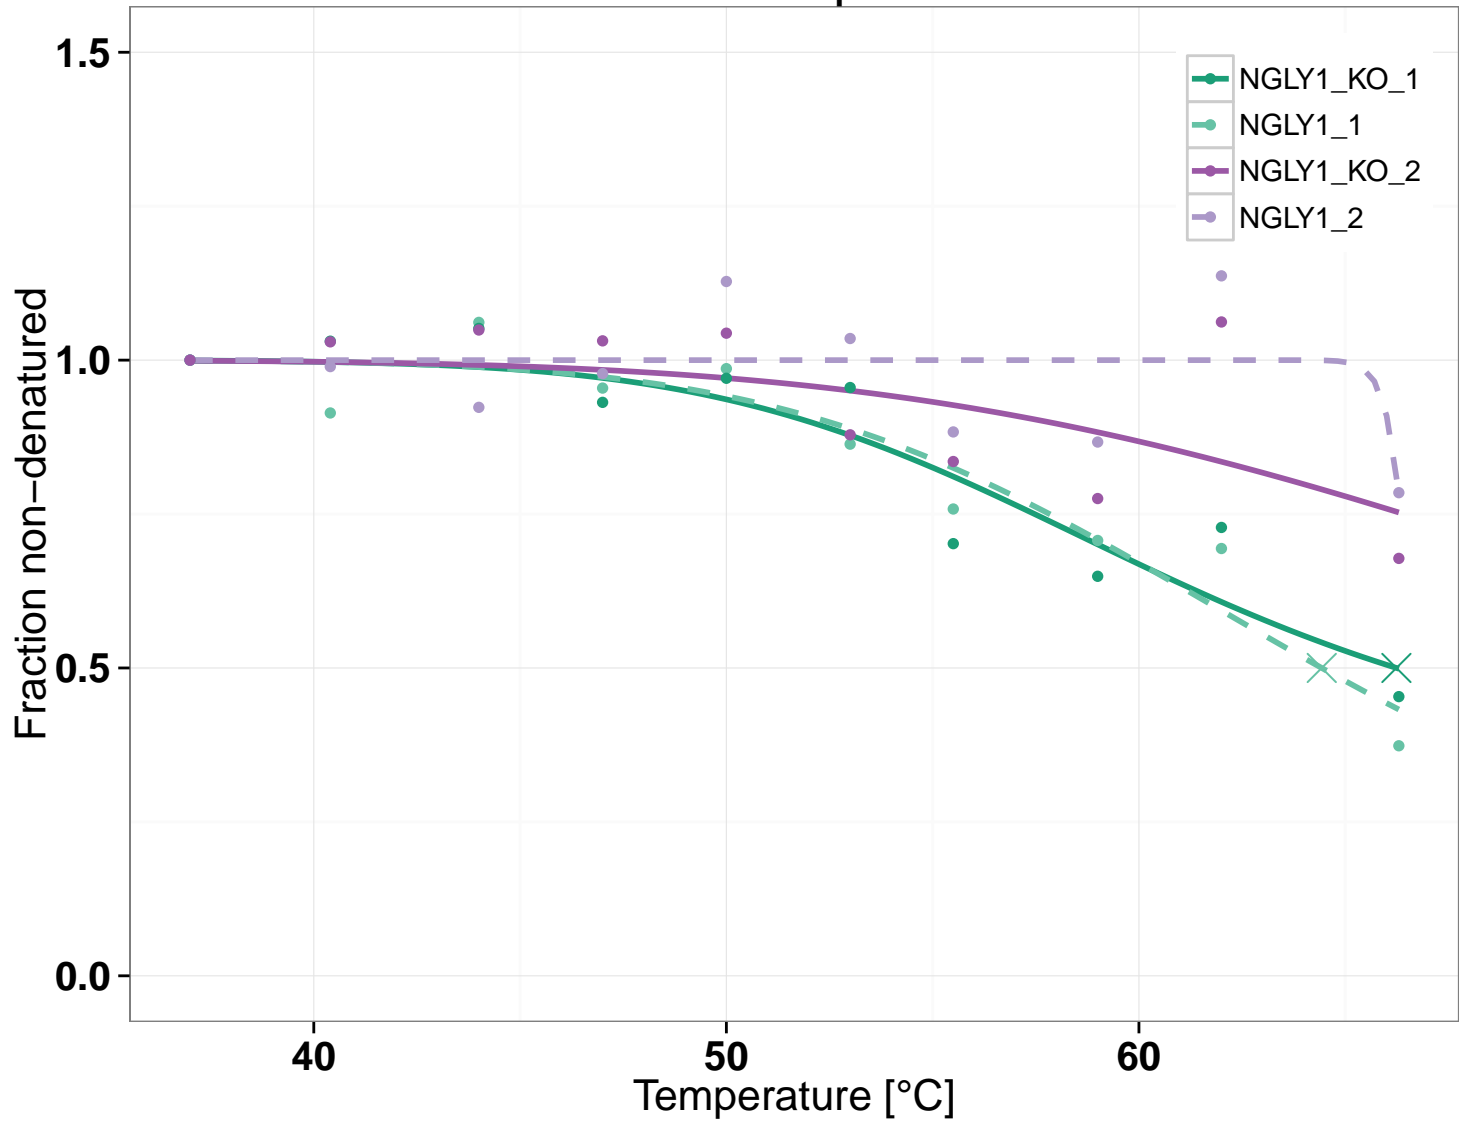

|            | meltPoint | slope  | plateau | R2   |
|------------|-----------|--------|---------|------|
| NGLY1_KO_1 | 66.24     | -0.032 | 0.31    | 0.88 |
| NGLY1_1    | 64.43     | -0.039 | 0       | 0.91 |
| NGLY1_KO_2 | -         | -      | 0       | 0.44 |
| NGLY1_2    | -         | -      | 0       | 0.34 |

Supplement: Supplementary file 4493 [file 1]

IPI00045800.6|TOR2A

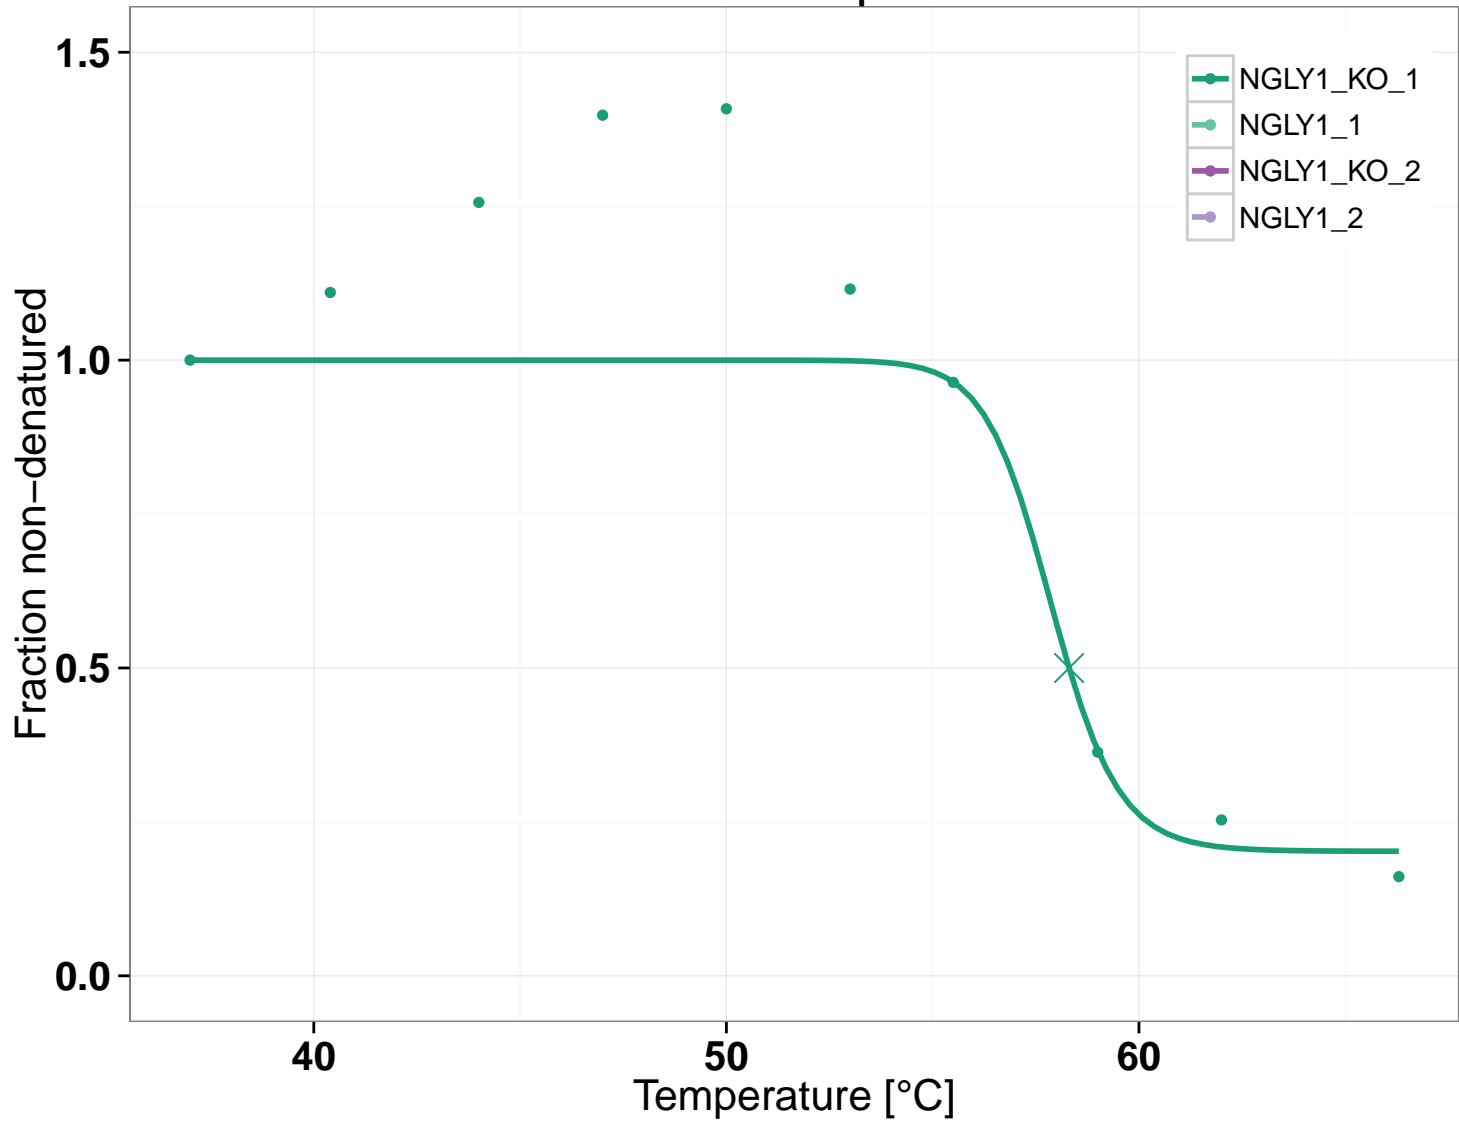

|            | meltPoint | slope | plateau | R2   |
|------------|-----------|-------|---------|------|
| NGLY1_KO_1 | 58.31     | -0.25 | 0.2     | 0.79 |
| NGLY1_1    | -         | -     | -       | -    |
| NGLY1_KO_2 | -         | -     | -       | -    |
| NGLY1_2    | -         | -     | -       | -    |

Supplement: Supplementary file 4494 [file 1]

IPI00304660.3|ZFAND6

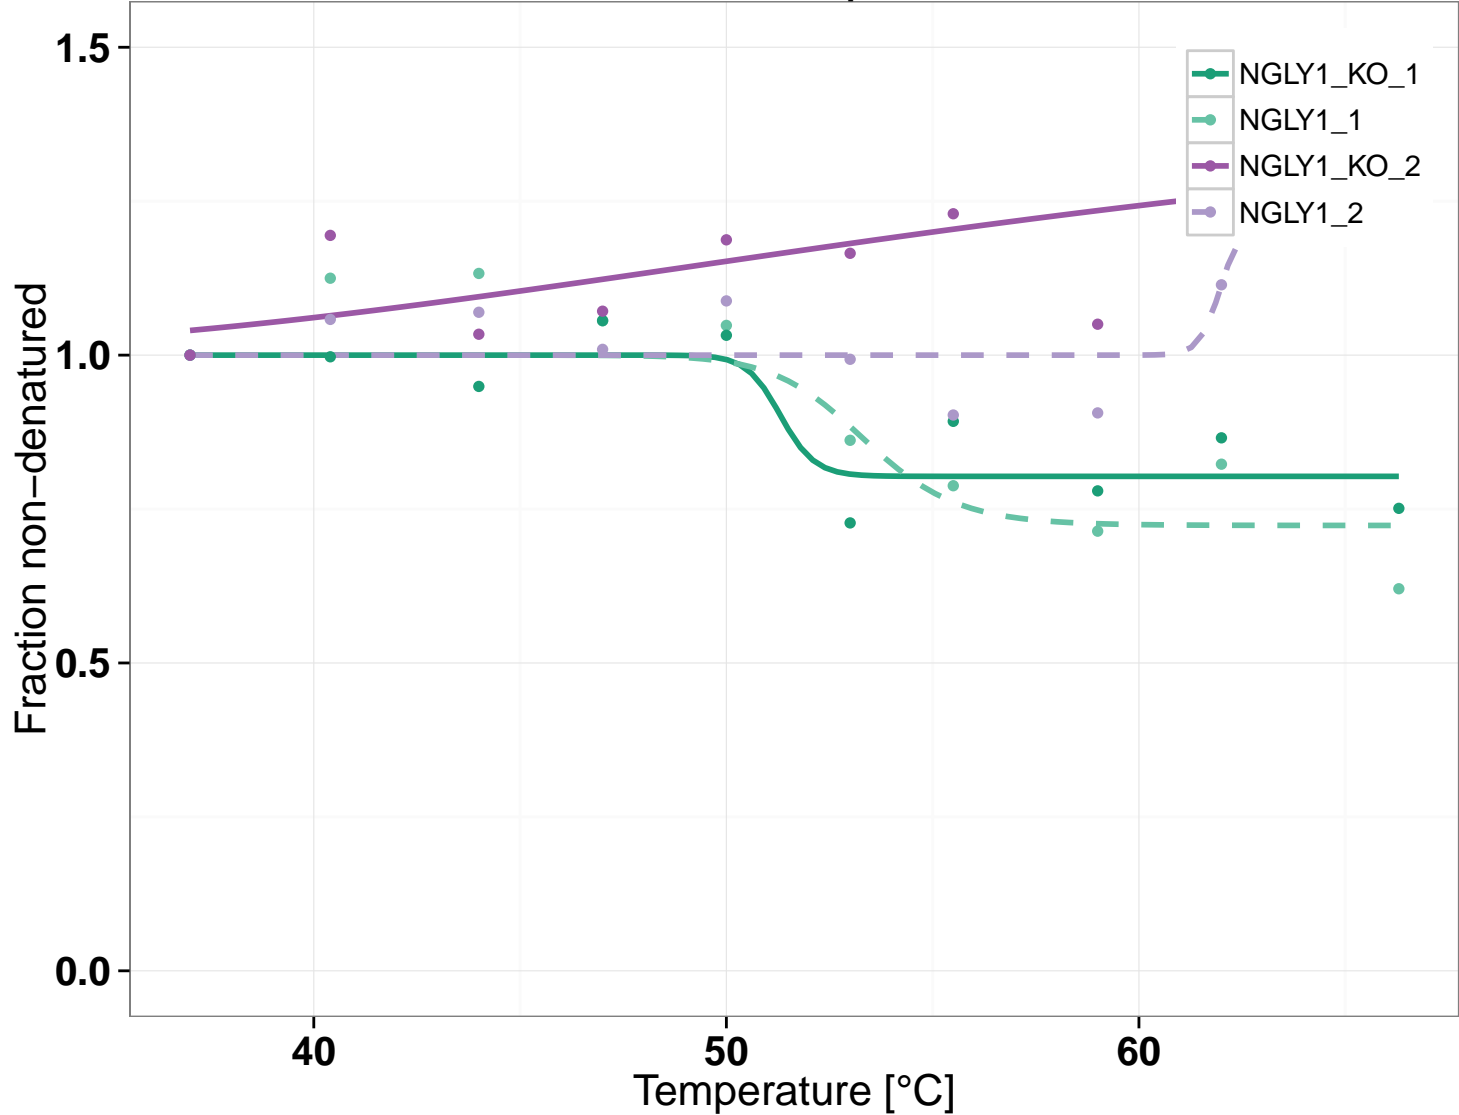

|            | meltPoint | slope  | plateau | R2   |
|------------|-----------|--------|---------|------|
| NGLY1_KO_1 | —         | −0.12  | 0.8     | 0.78 |
| NGLY1_1    | —         | −0.062 | 0.72    | 0.79 |
| NGLY1_KO_2 | —         | 0.0098 | 1.5     | 0.29 |
| NGLY1_2    | —         | 0.21   | 1.22    | 0.58 |

Supplement: Supplementary file 4495 [file 1]

# IPI00018387.1|FURIN

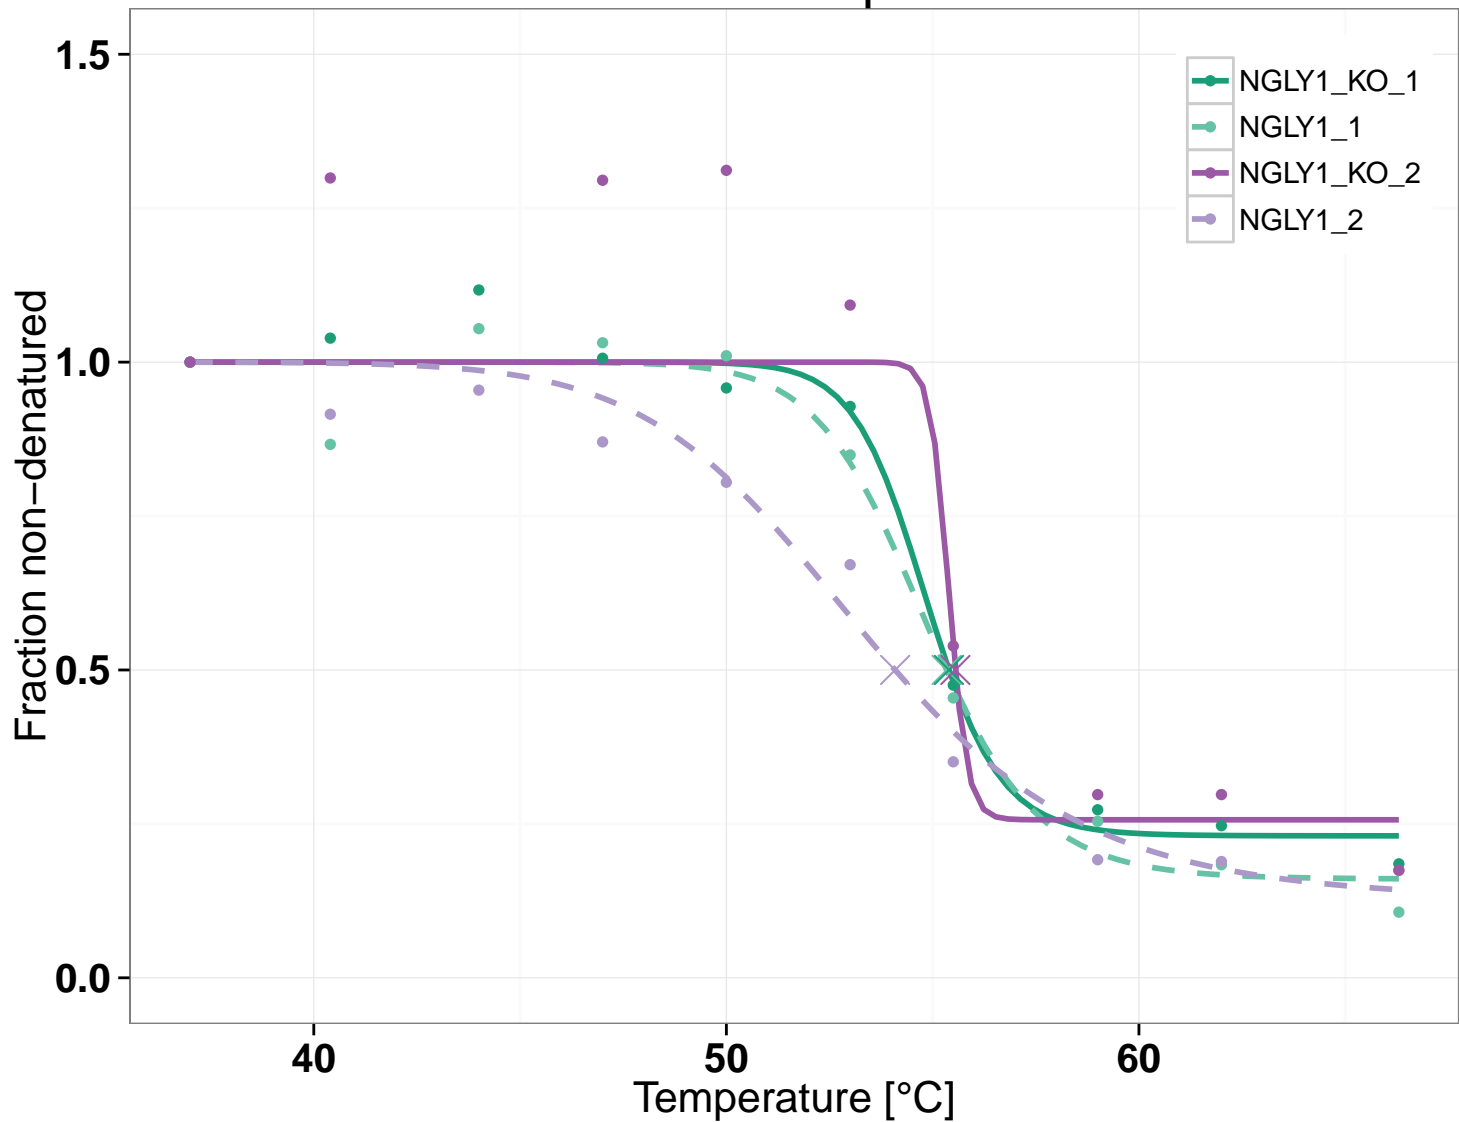

|            | meltPoint | slope  | plateau | R2   |
|------------|-----------|--------|---------|------|
| NGLY1_KO_1 | 55.4      | -0.22  | 0.23    | 0.98 |
| NGLY1_1    | 55.34     | -0.16  | 0.16    | 0.98 |
| NGLY1_KO_2 | 55.55     | -0.84  | 0.26    | 0.72 |
| NGLY1_2    | 54.09     | -0.082 | 0.13    | 0.98 |

Supplement: Supplementary file 4496 [file 1]

# IPI00031821.1|ITM2B

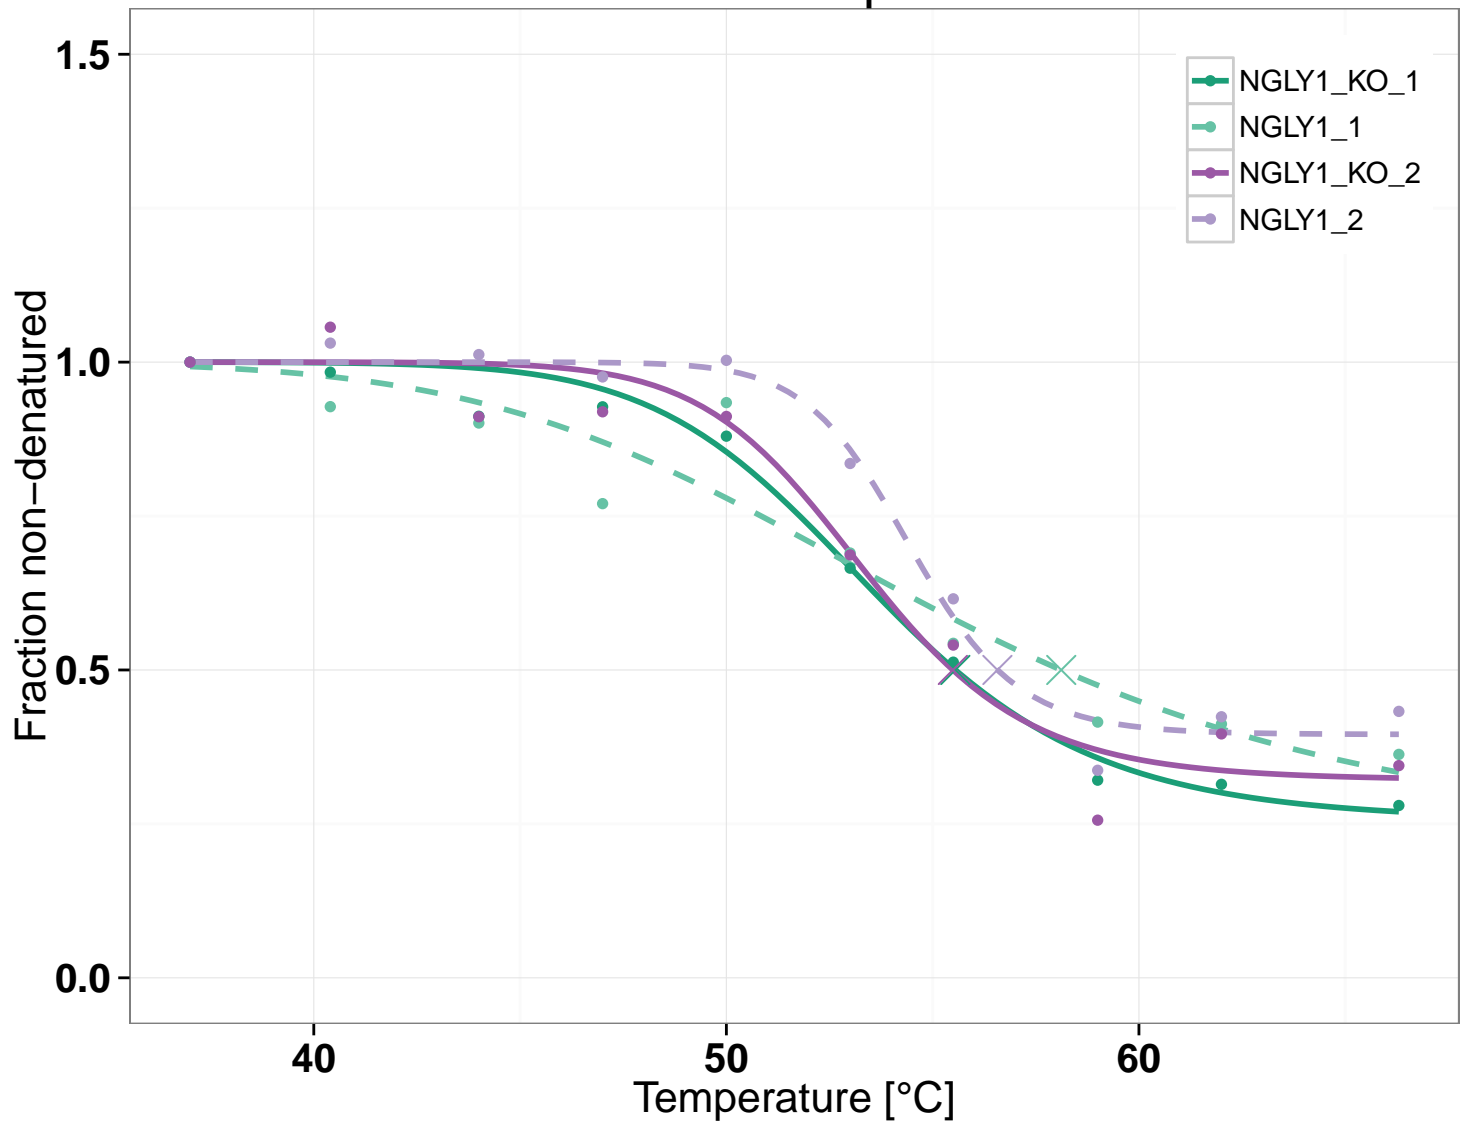

|            | meltPoint | slope  | plateau | R2   |
|------------|-----------|--------|---------|------|
| NGLY1_KO_1 | 55.55     | -0.07  | 0.25    | 0.99 |
| NGLY1_1    | 58.12     | -0.036 | 0.21    | 0.92 |
| NGLY1_KO_2 | 55.49     | -0.085 | 0.32    | 0.96 |
| NGLY1_2    | 56.57     | -0.12  | 0.4     | 0.98 |

Supplement: Supplementary file 4497 [file 1]

IPI00016568.1|AK3L1

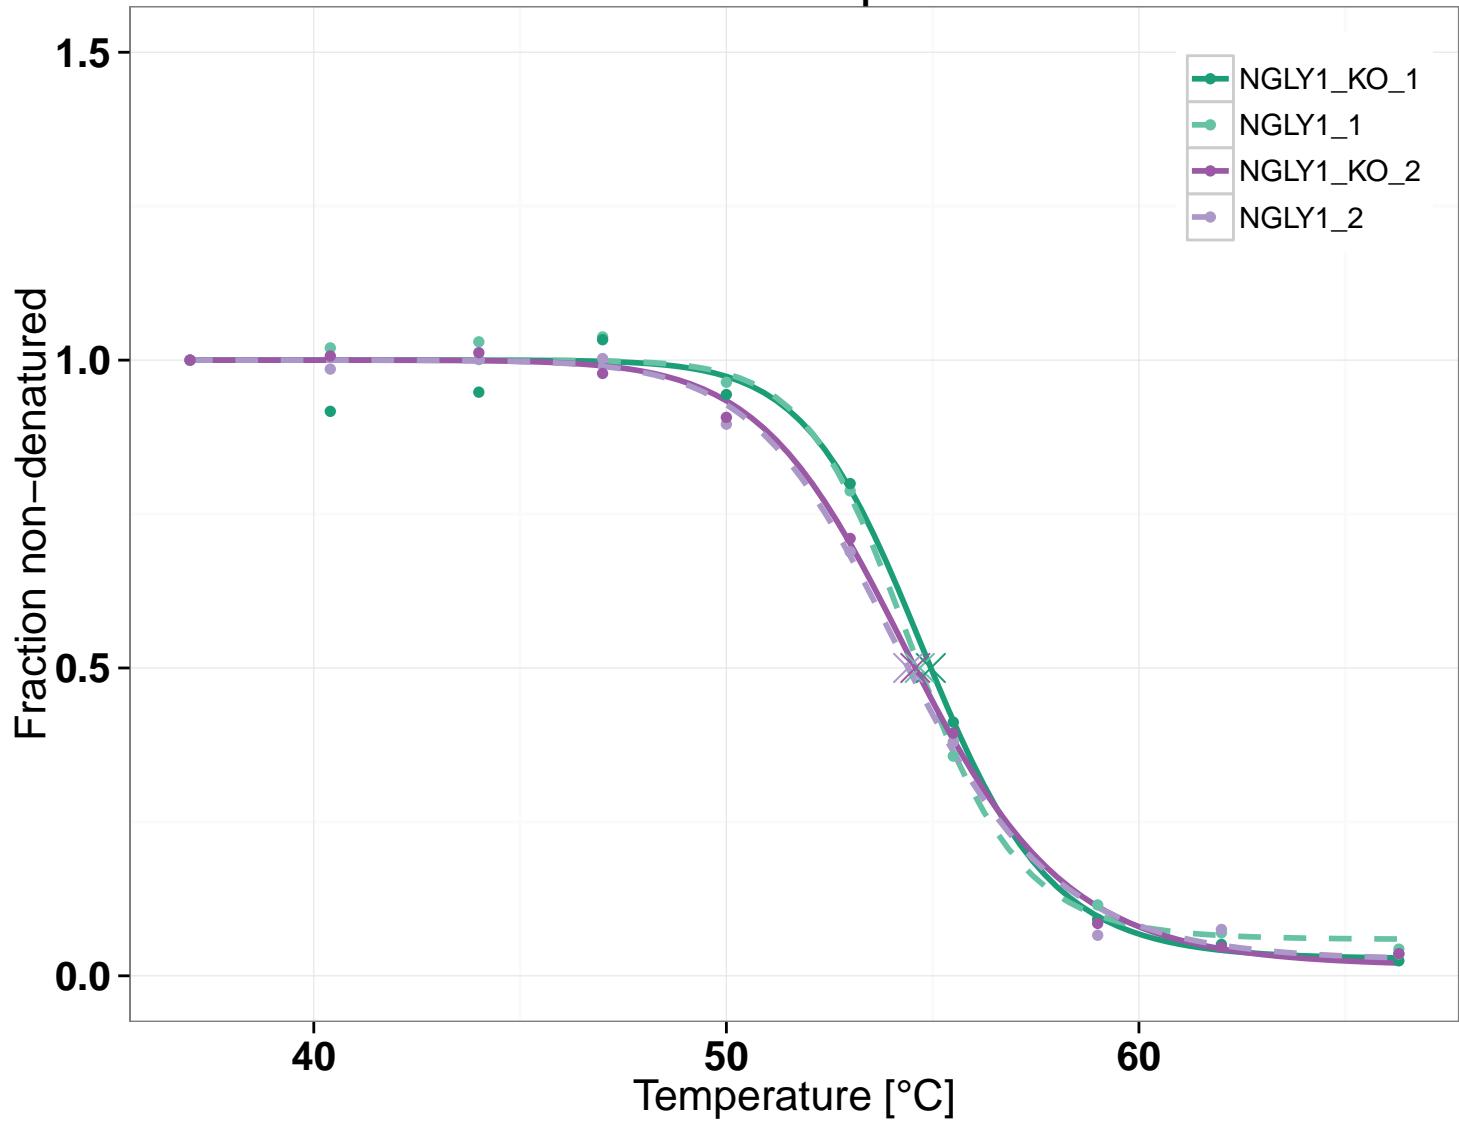

|            | meltPoint | slope | plateau | R2   |
|------------|-----------|-------|---------|------|
| NGLY1_KO_1 | 54.96     | -0.16 | 0.03    | 0.99 |
| NGLY1_1    | 54.69     | -0.18 | 0.06    | 1    |
| NGLY1_KO_2 | 54.58     | -0.13 | 0.02    | 1    |
| NGLY1_2    | 54.41     | -0.13 | 0.02    | 1    |

Supplement: Supplementary file 4498 [file 1]

IPI00005666.1|JMJD2A

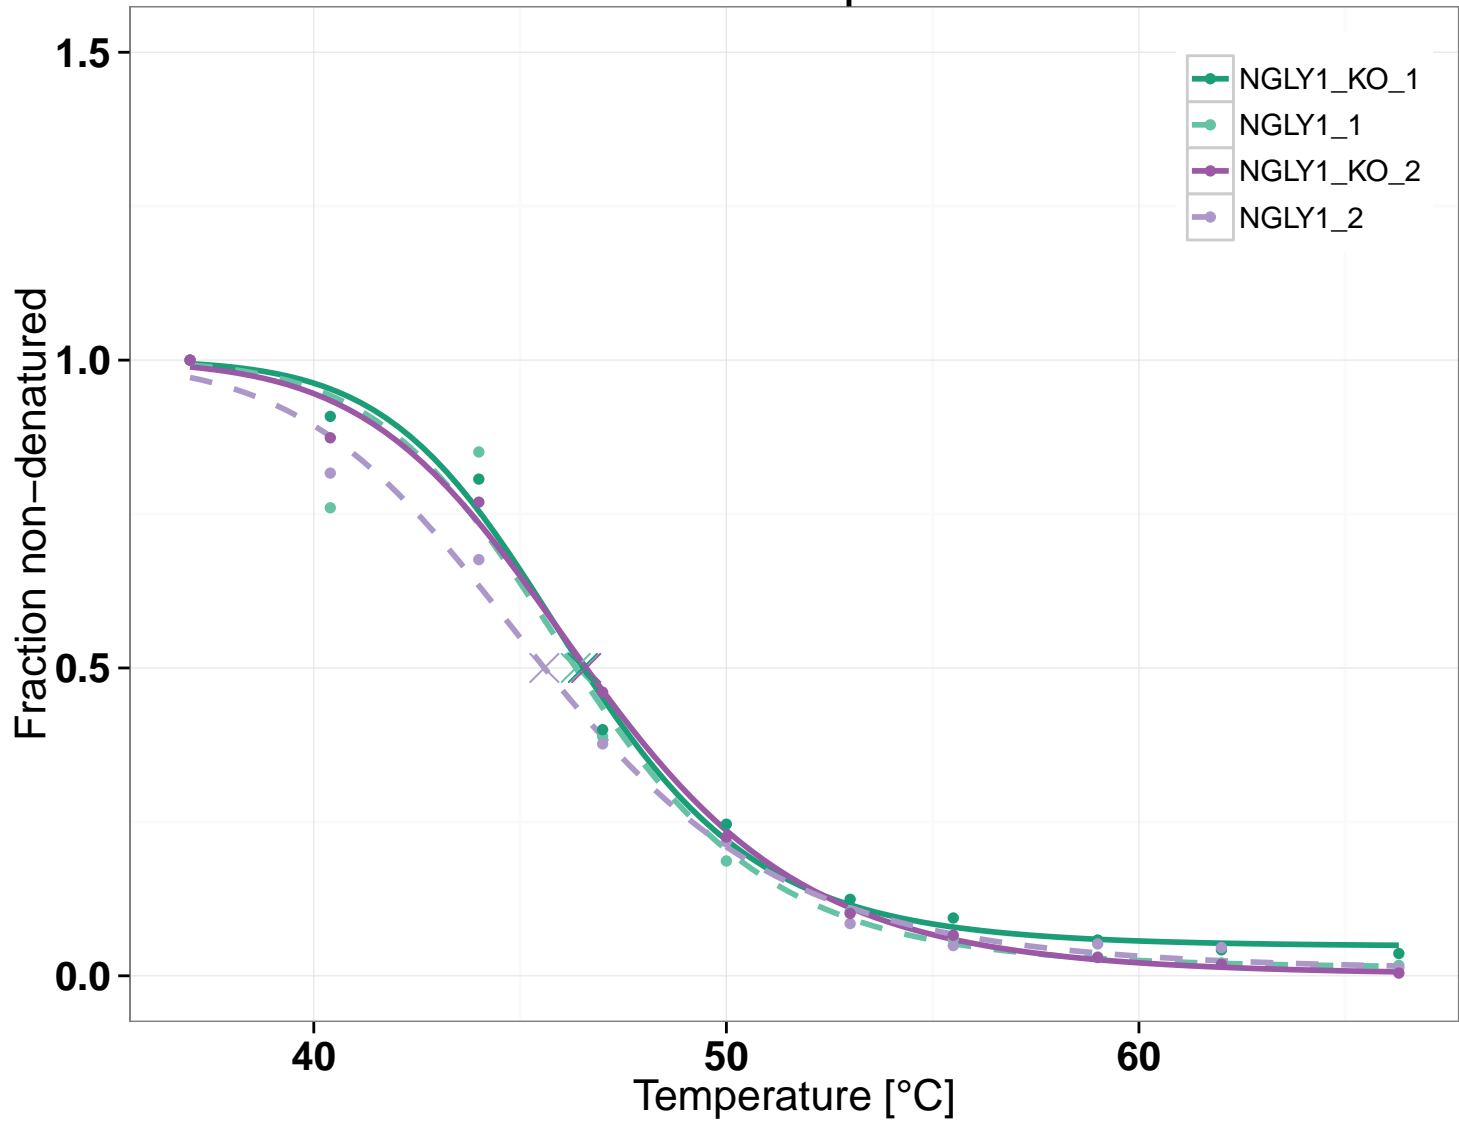

|            | meltPoint | slope  | plateau | R2   |
|------------|-----------|--------|---------|------|
| NGLY1_KO_1 | 46.52     | -0.11  | 0.05    | 0.99 |
| NGLY1_1    | 46.35     | -0.1   | 0.01    | 0.96 |
| NGLY1_KO_2 | 46.6      | -0.094 | 0       | 1    |
| NGLY1_2    | 45.59     | -0.085 | 0.01    | 0.99 |

Supplement: Supplementary file 4499 [file 1]

IPI00397017.3|LOC644790

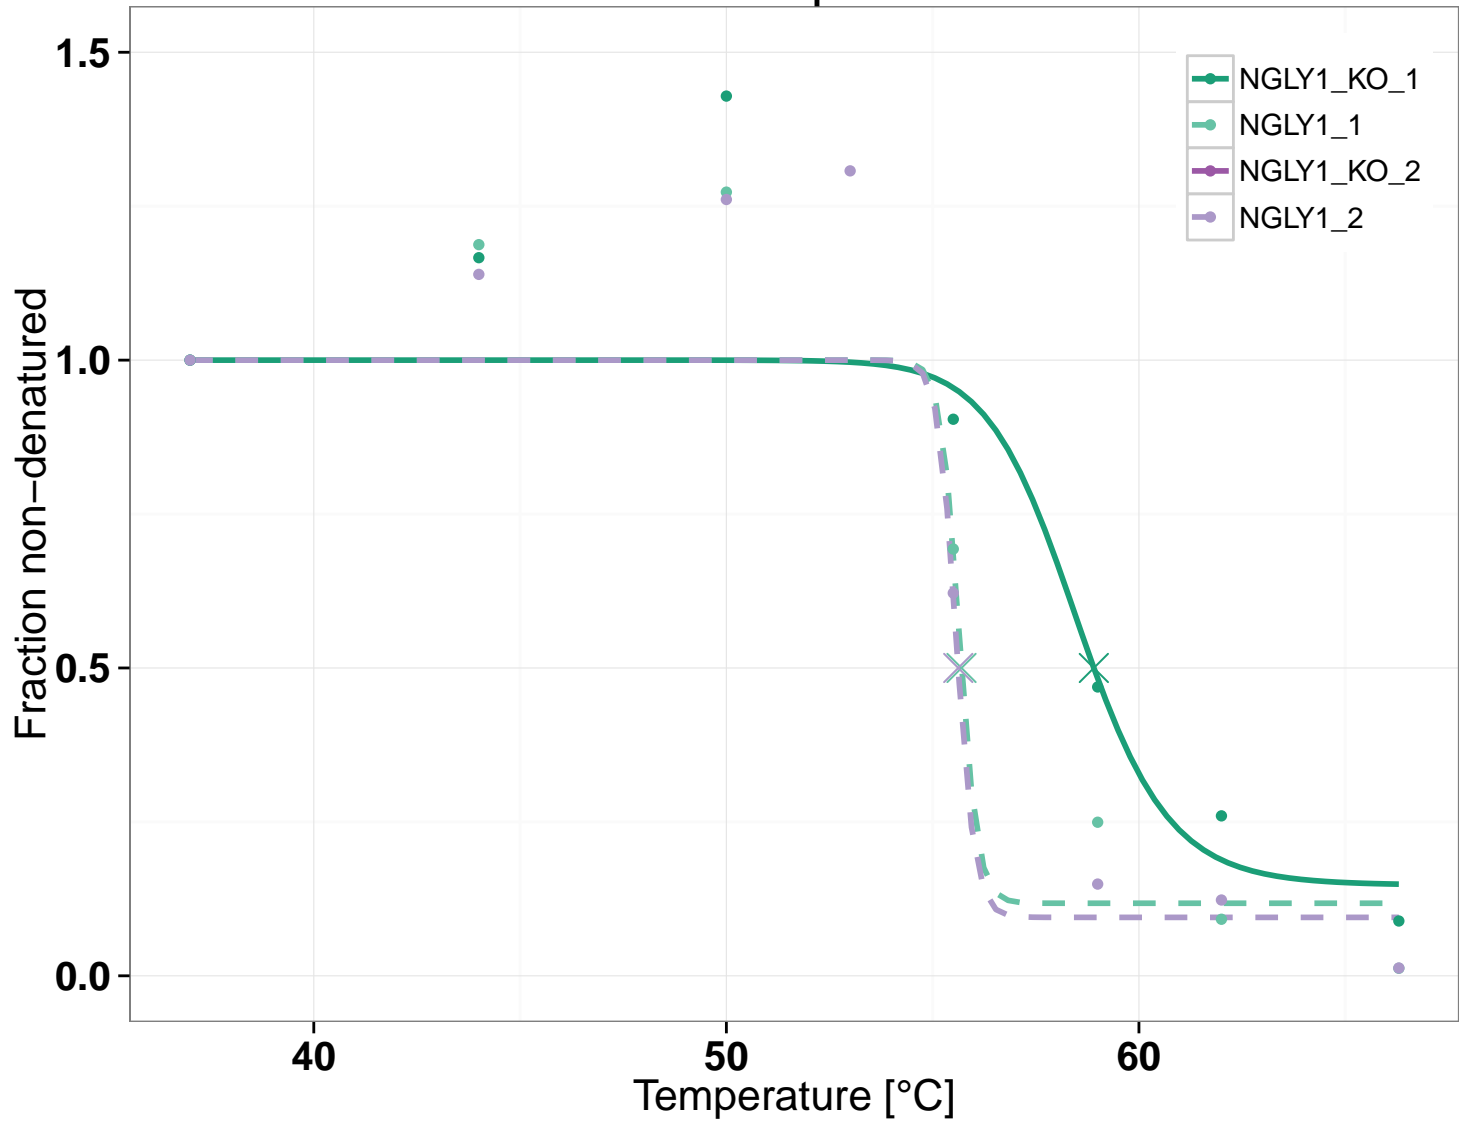

|            | meltPoint | slope | plateau | R2   |
|------------|-----------|-------|---------|------|
| NGLY1_KO_1 | 58.91     | -0.19 | 0.15    | 0.25 |
| NGLY1_1    | 55.7      | -0.99 | 0.12    | 0.23 |
| NGLY1_KO_2 | -         | -     | -       | -    |
| NGLY1_2    | 55.62     | -1    | 0.09    | 0.72 |

Supplement: Supplementary file 4500 [file 1]

IPI00221012.7|USP9X

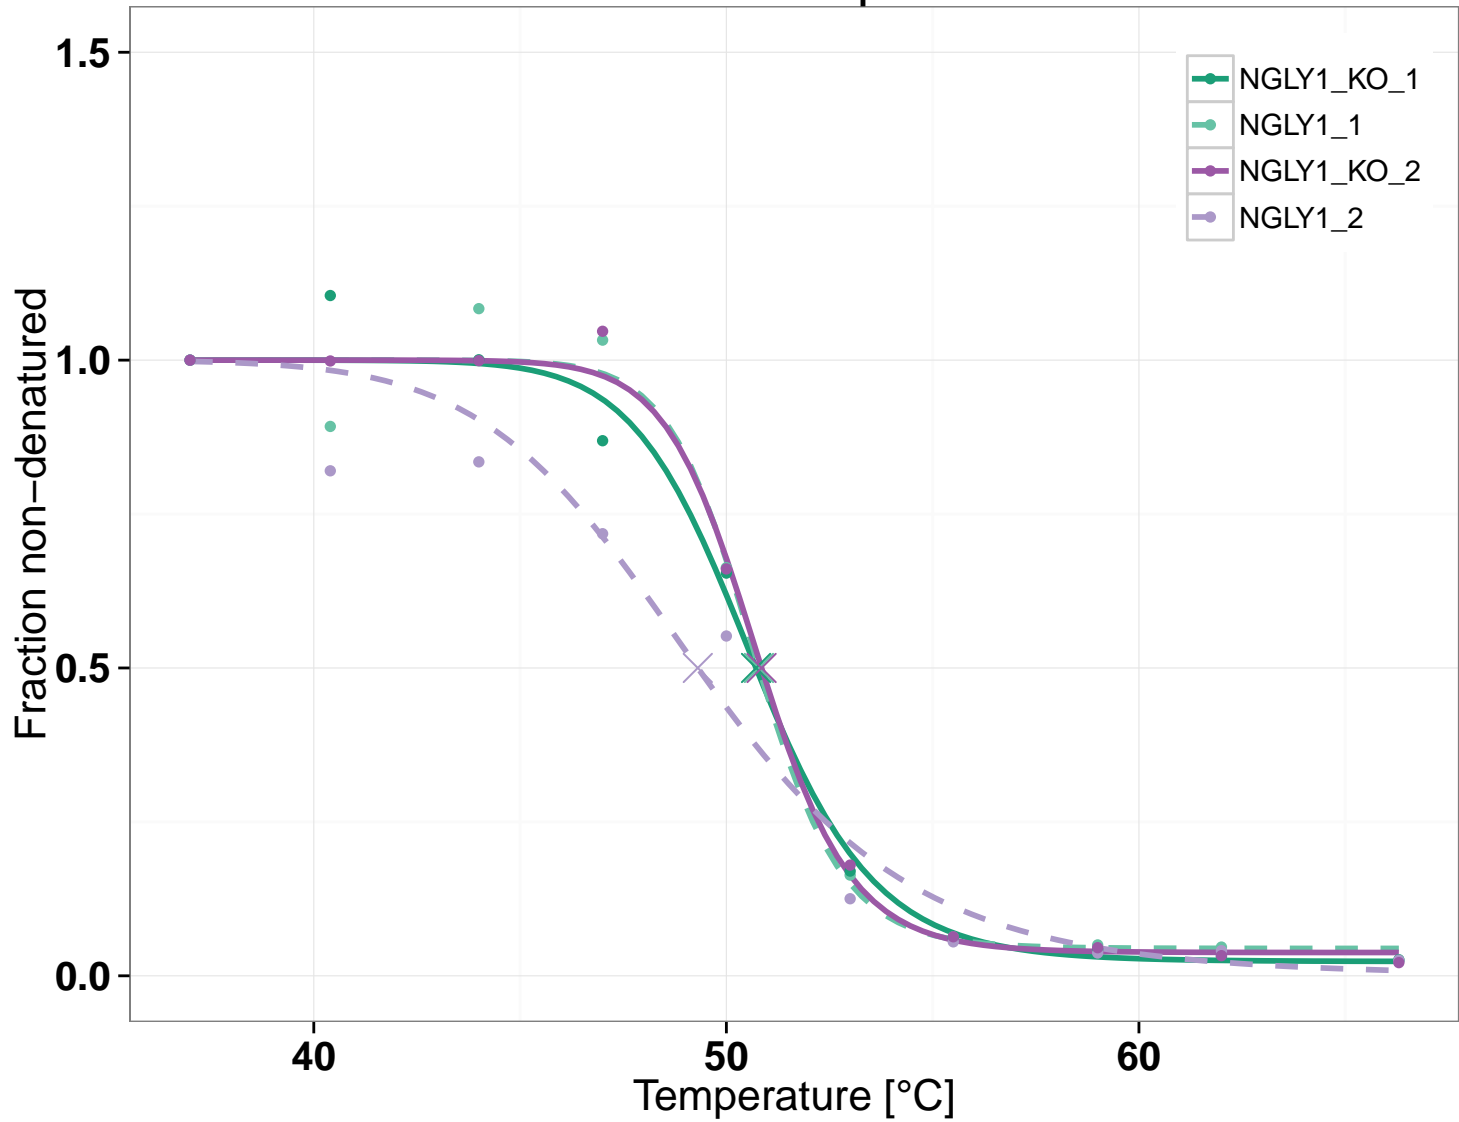

|            | meltPoint | slope  | plateau | R2   |
|------------|-----------|--------|---------|------|
| NGLY1_KO_1 | 50.72     | -0.17  | 0.02    | 0.99 |
| NGLY1_1    | 50.79     | -0.23  | 0.04    | 0.99 |
| NGLY1_KO_2 | 50.85     | -0.21  | 0.04    | 1    |
| NGLY1_2    | 49.31     | -0.095 | 0       | 0.96 |

Supplement: Supplementary file 4501 [file 1]

# IPI00062050.1|C14ORF126

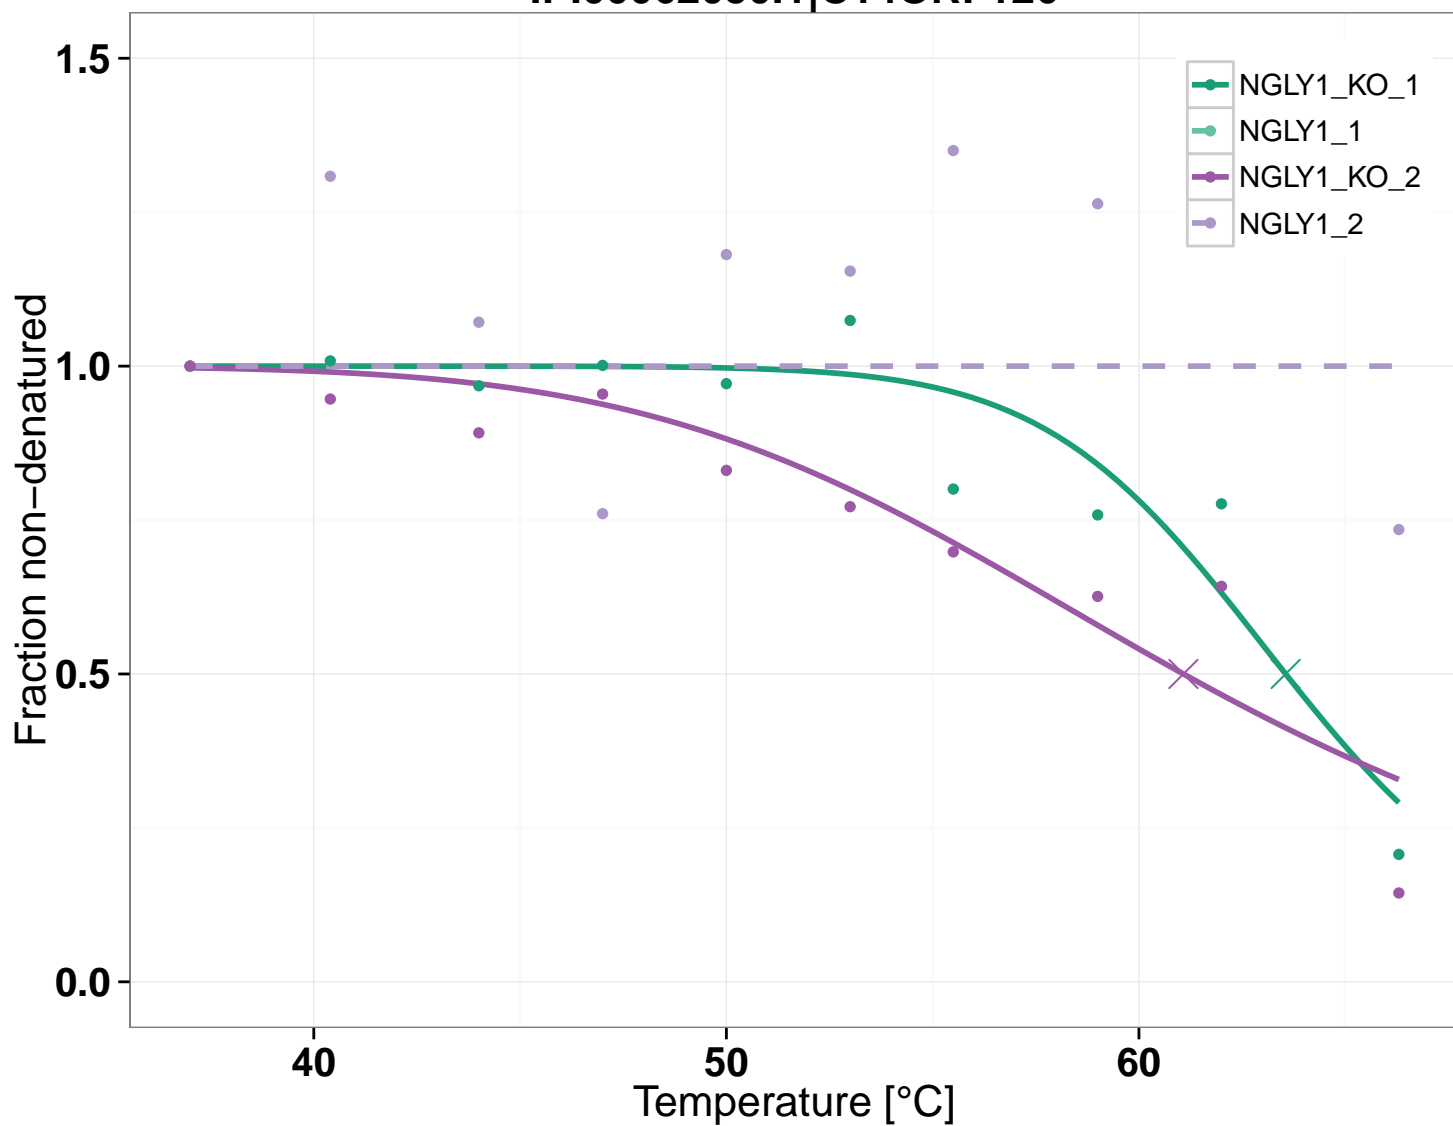

|            | meltPoint | slope  | plateau | R2    |
|------------|-----------|--------|---------|-------|
| NGLY1_KO_1 | 63.56     | -0.085 | 0       | 0.88  |
| NGLY1_1    | -         | -      | -       | -     |
| NGLY1_KO_2 | 61.08     | -0.039 | 0       | 0.86  |
| NGLY1_2    | -         | -      | 0       | -0.29 |

Supplement: Supplementary file 4502 [file 1]

# IPI00291922.2|PSMA5

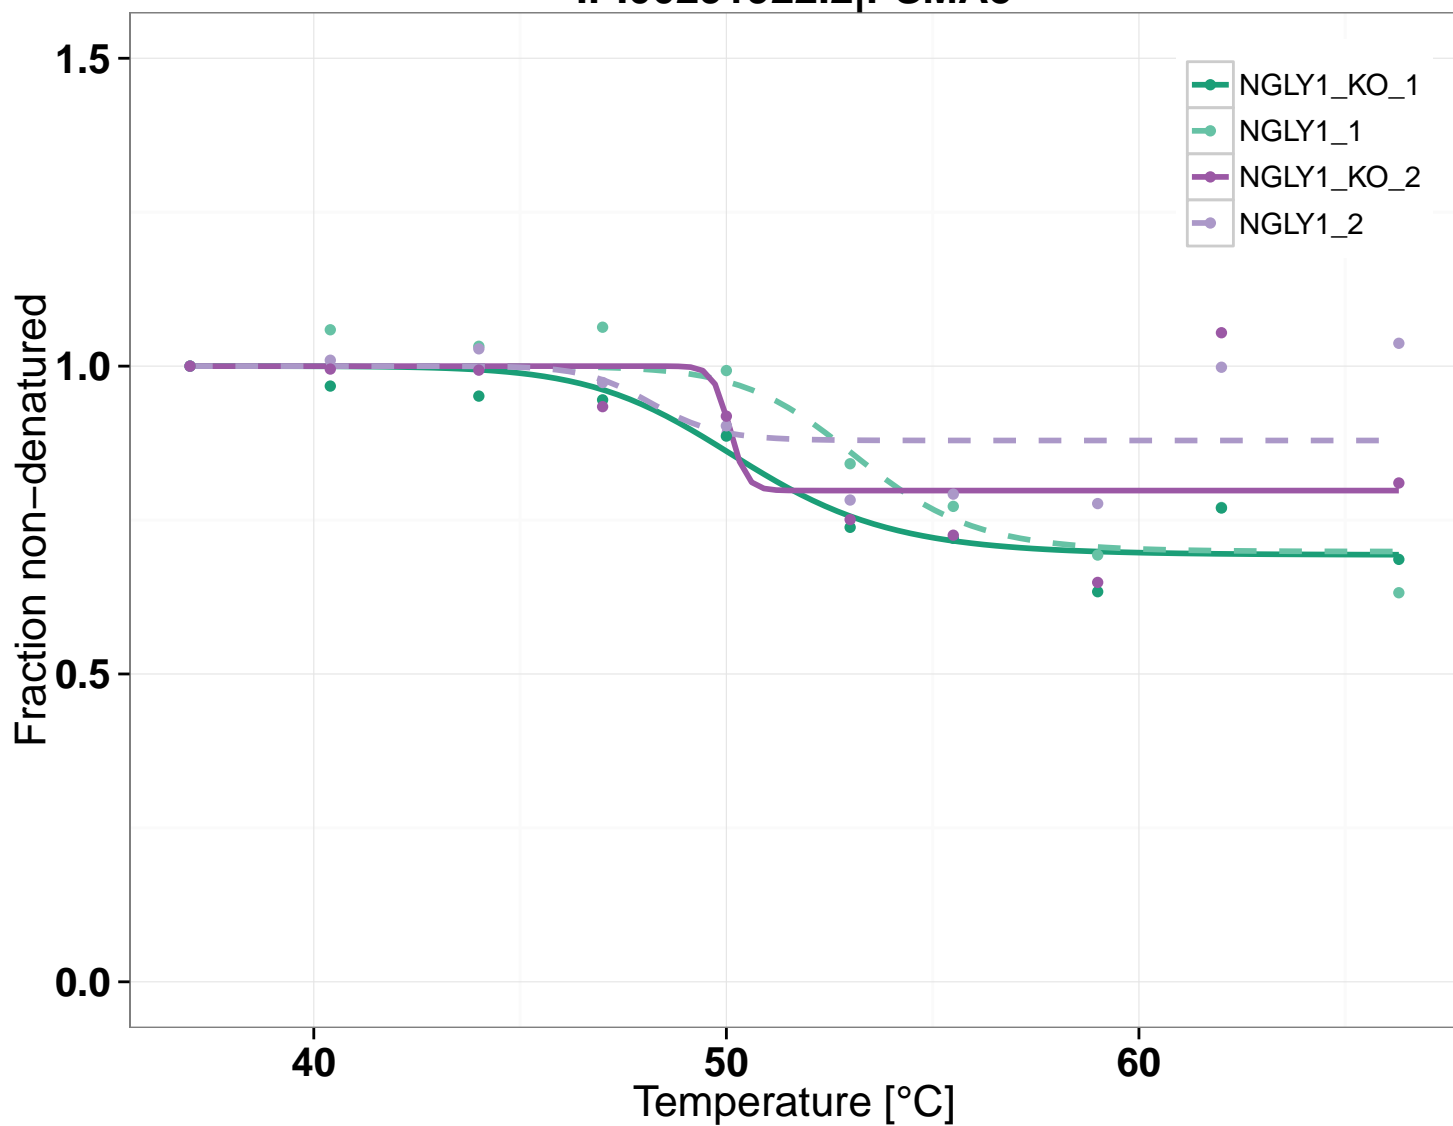

|            | meltPoint | slope  | plateau | R2   |
|------------|-----------|--------|---------|------|
| NGLY1_KO_1 | —         | -0.042 | 0.69    | 0.91 |
| NGLY1_1    | —         | -0.053 | 0.7     | 0.92 |
| NGLY1_KO_2 | —         | -0.25  | 0.8     | 0.43 |
| NGLY1_2    | —         | -0.037 | 0.88    | 0.35 |

Supplement: Supplementary file 4503 [file 1]

IPI00300074.3|FARSB

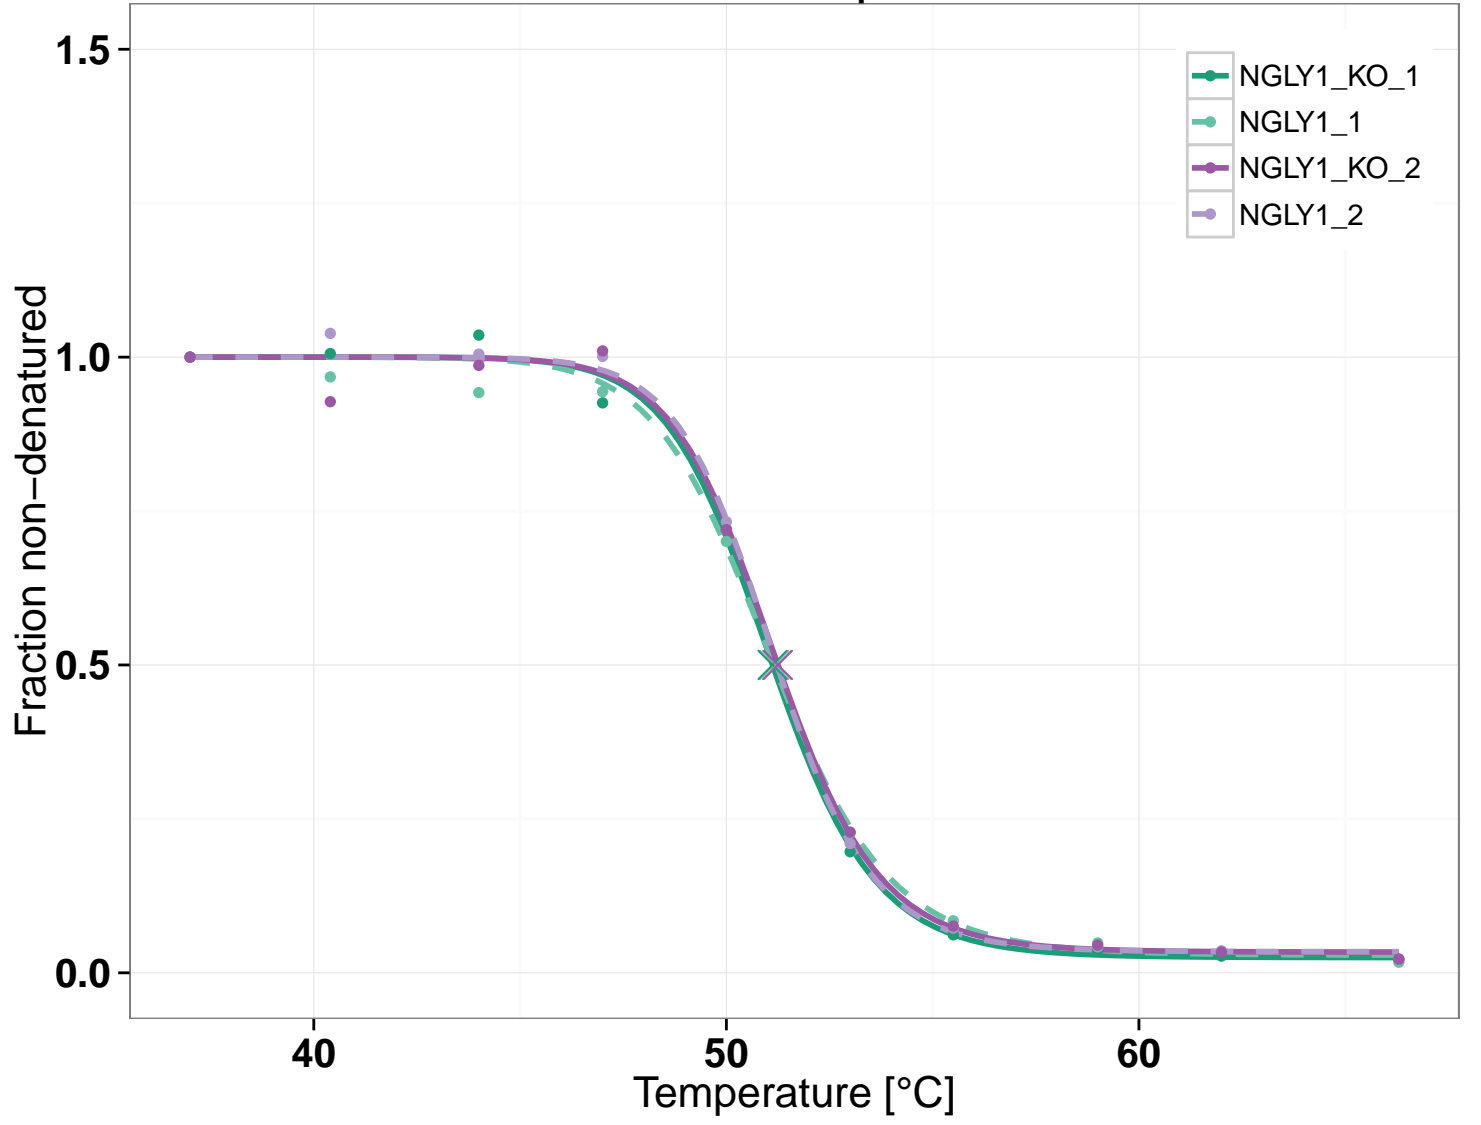

|            | meltPoint | slope | plateau | R2 |
|------------|-----------|-------|---------|----|
| NGLY1_KO_1 | 51.12     | -0.19 | 0.02    | 1  |
| NGLY1_1    | 51.15     | -0.17 | 0.03    | 1  |
| NGLY1_KO_2 | 51.25     | -0.19 | 0.03    | 1  |
| NGLY1_2    | 51.23     | -0.2  | 0.03    | 1  |

Supplement: Supplementary file 4504 [file 1]

IPI00032872.3|MRPS16

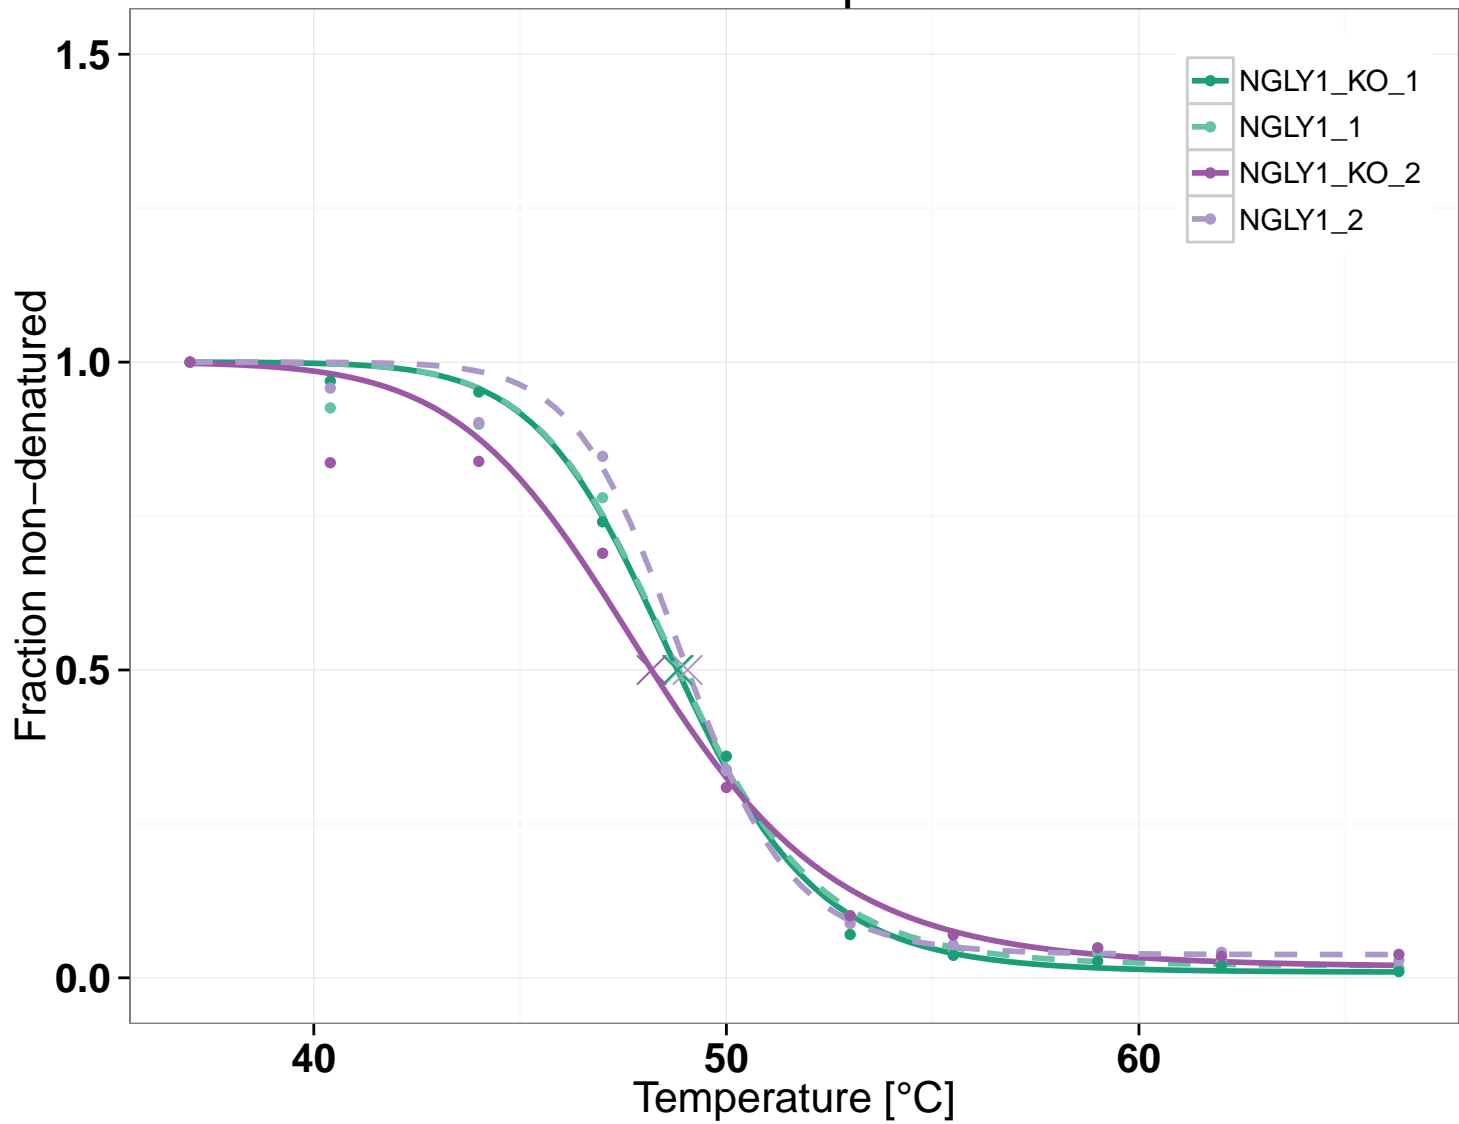

|            | meltPoint | slope | plateau | R2   |
|------------|-----------|-------|---------|------|
| NGLY1_KO_1 | 48.81     | -0.15 | 0.01    | 1    |
| NGLY1_1    | 48.85     | -0.14 | 0.02    | 0.99 |
| NGLY1_KO_2 | 48.19     | -0.11 | 0.02    | 0.98 |
| NGLY1_2    | 49.06     | -0.18 | 0.04    | 0.99 |

Supplement: Supplementary file 4505 [file 1]

IPI00383704.5|DULLARD

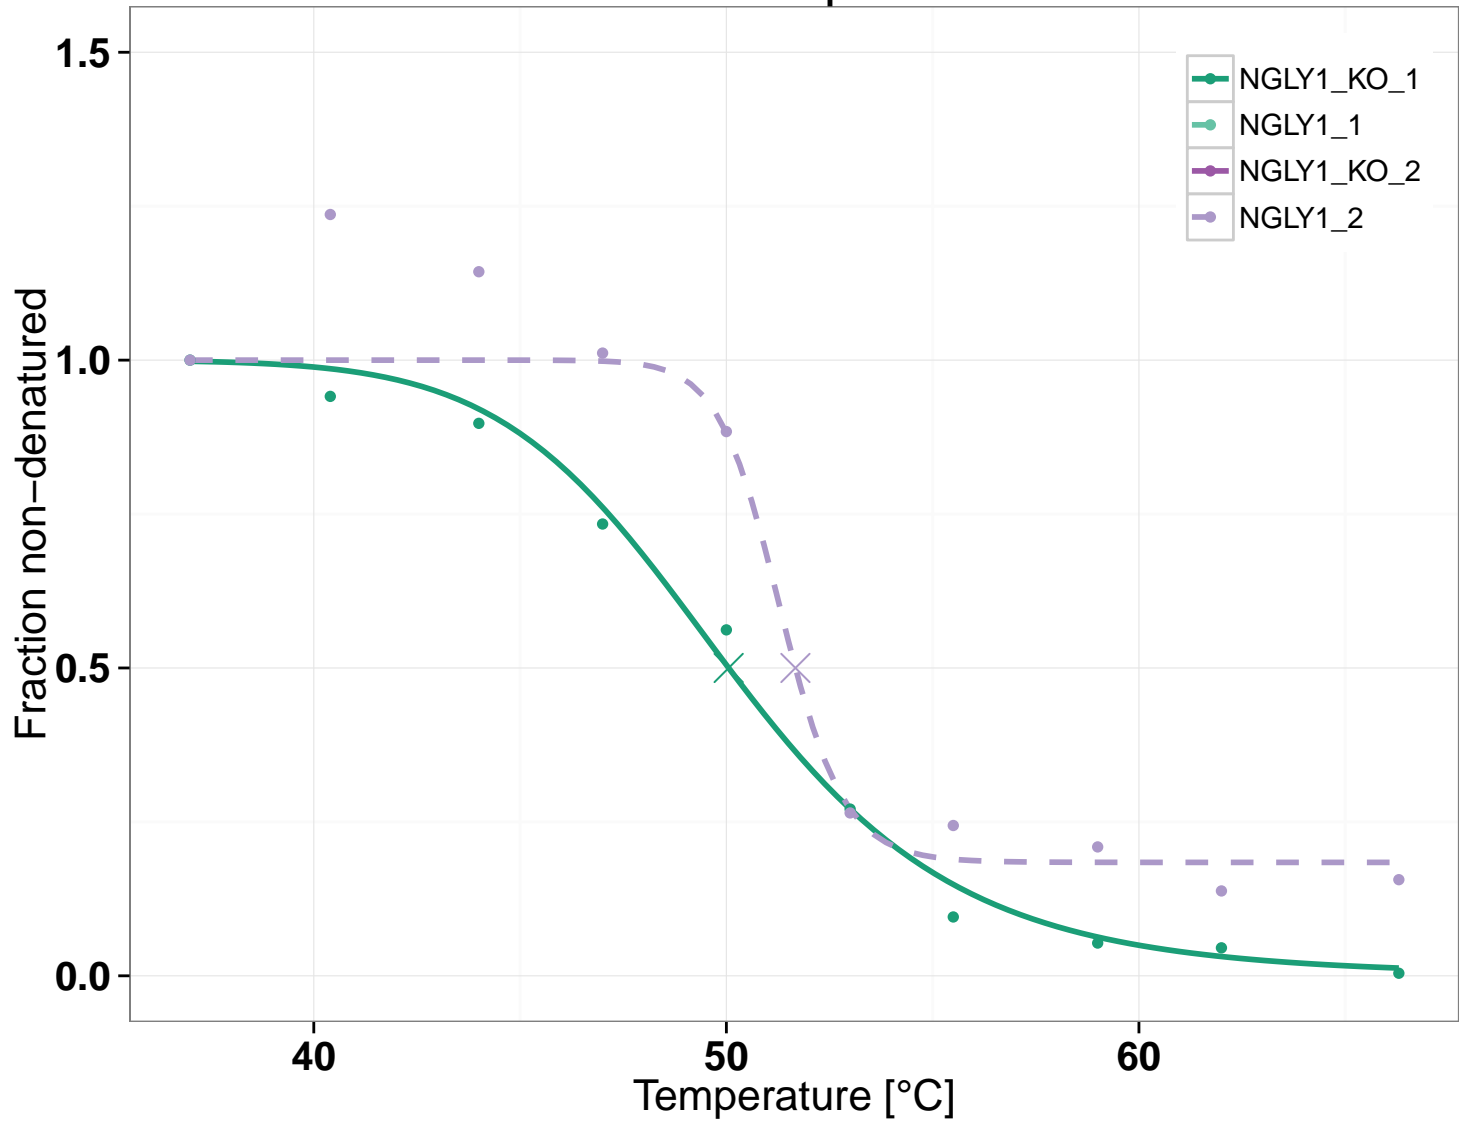

|            | meltPoint | slope | plateau | R2   |
|------------|-----------|-------|---------|------|
| NGLY1_KO_1 | 50.06     | -0.09 | 0       | 0.99 |
| NGLY1_1    | -         | -     | -       | -    |
| NGLY1_KO_2 | -         | -     | -       | -    |
| NGLY1_2    | 51.67     | -0.27 | 0.18    | 0.96 |

Supplement: Supplementary file 4506 [file 1]

# IPI00015944.3|EML2

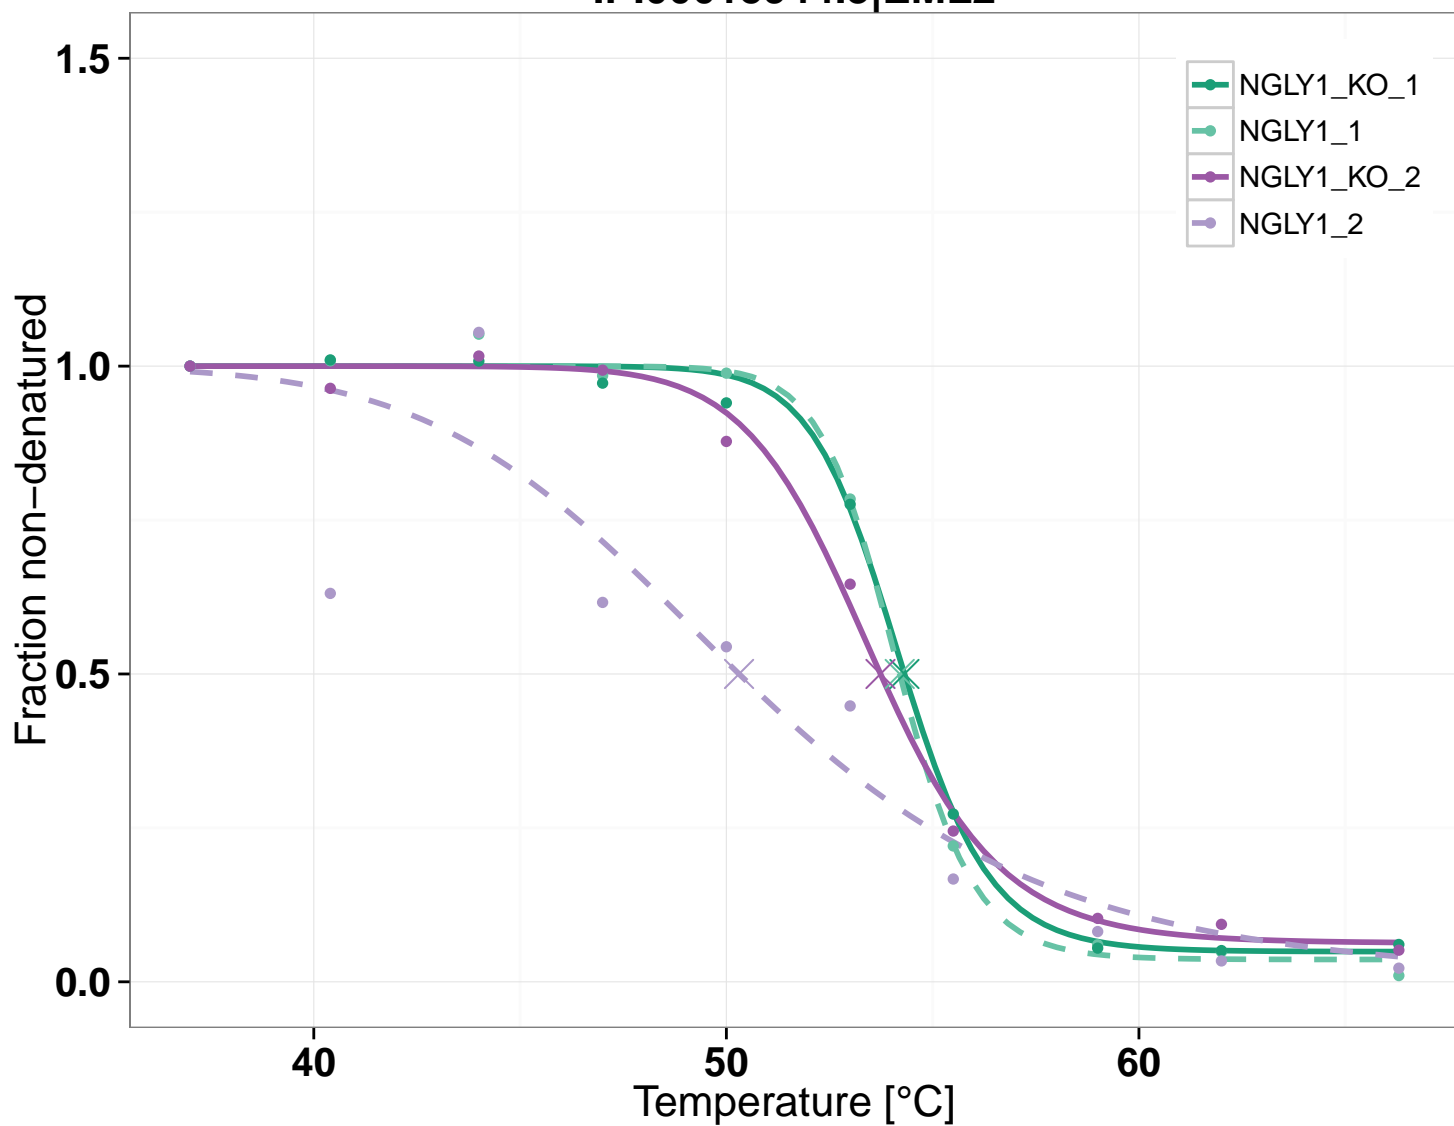

|            | meltPoint | slope  | plateau | R2   |
|------------|-----------|--------|---------|------|
| NGLY1_KO_1 | 54.32     | -0.22  | 0.05    | 1    |
| NGLY1_1    | 54.2      | -0.26  | 0.04    | 1    |
| NGLY1_KO_2 | 53.74     | -0.15  | 0.06    | 1    |
| NGLY1_2    | 50.31     | -0.067 | 0       | 0.87 |

Supplement: Supplementary file 4507 [file 1]

# IPI00166657.3|FBXW8

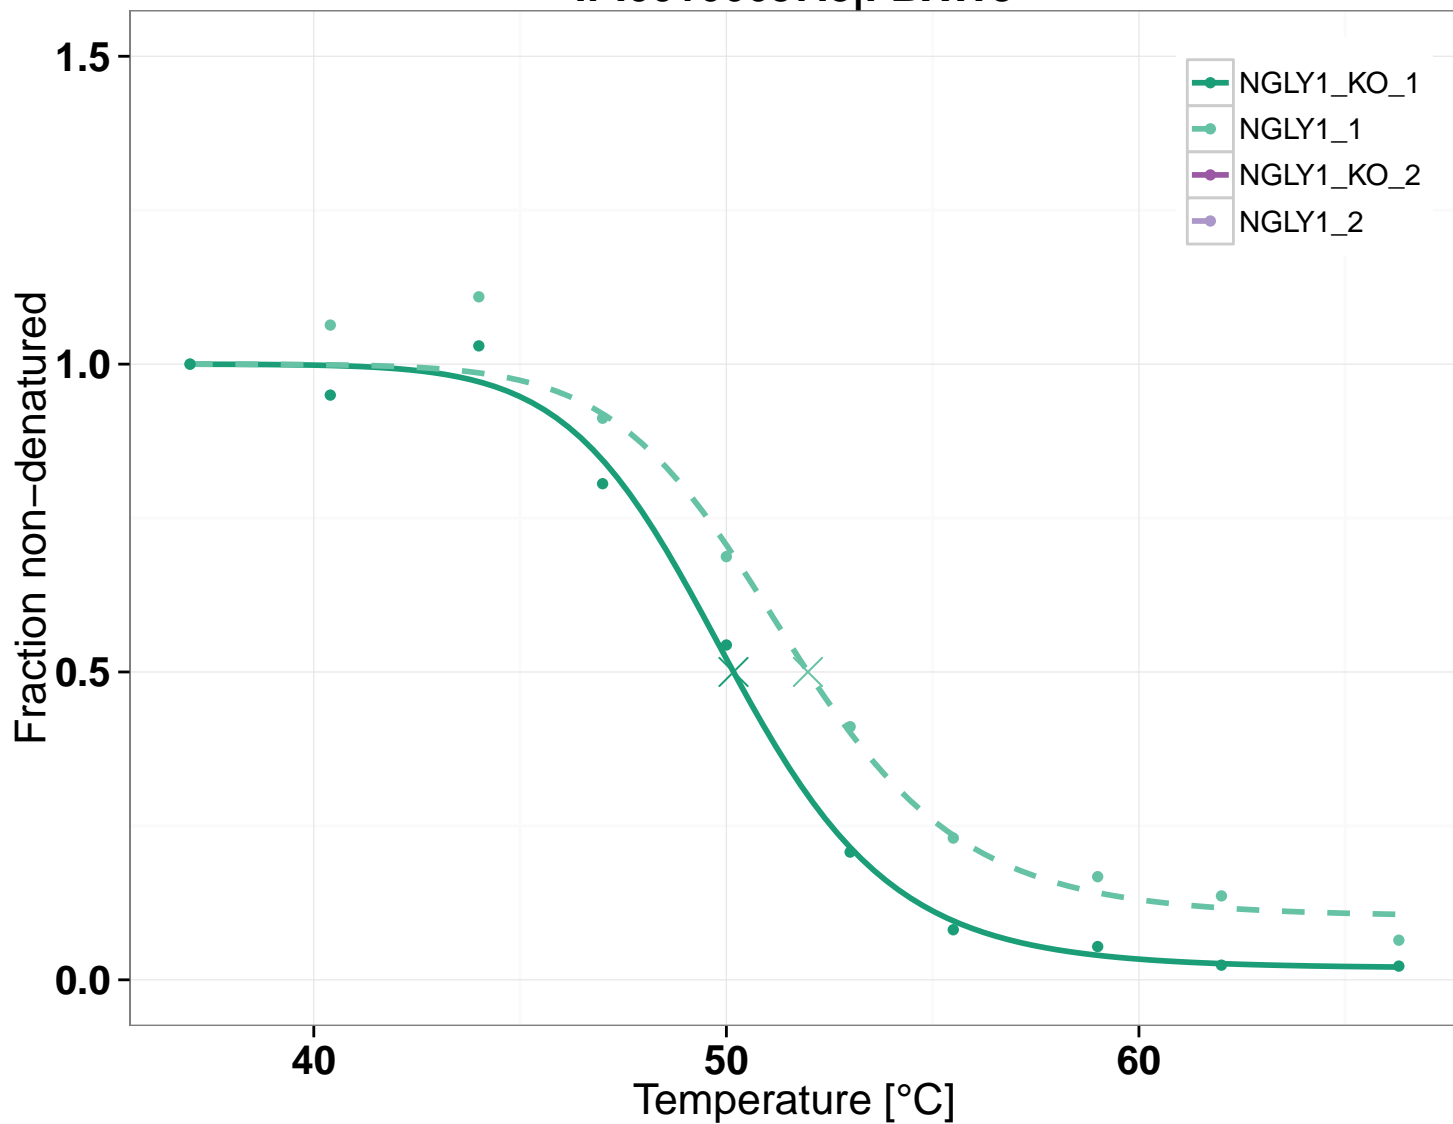

|            | meltPoint | slope | plateau | R2   |
|------------|-----------|-------|---------|------|
| NGLY1_KO_1 | 50.17     | -0.12 | 0.02    | 1    |
| NGLY1_1    | 51.98     | -0.11 | 0.1     | 0.99 |
| NGLY1_KO_2 | -         | -     | -       | -    |
| NGLY1_2    | -         | -     | -       | -    |

Supplement: Supplementary file 4508 [file 1]

# IPI00903256.1|ZC3H14

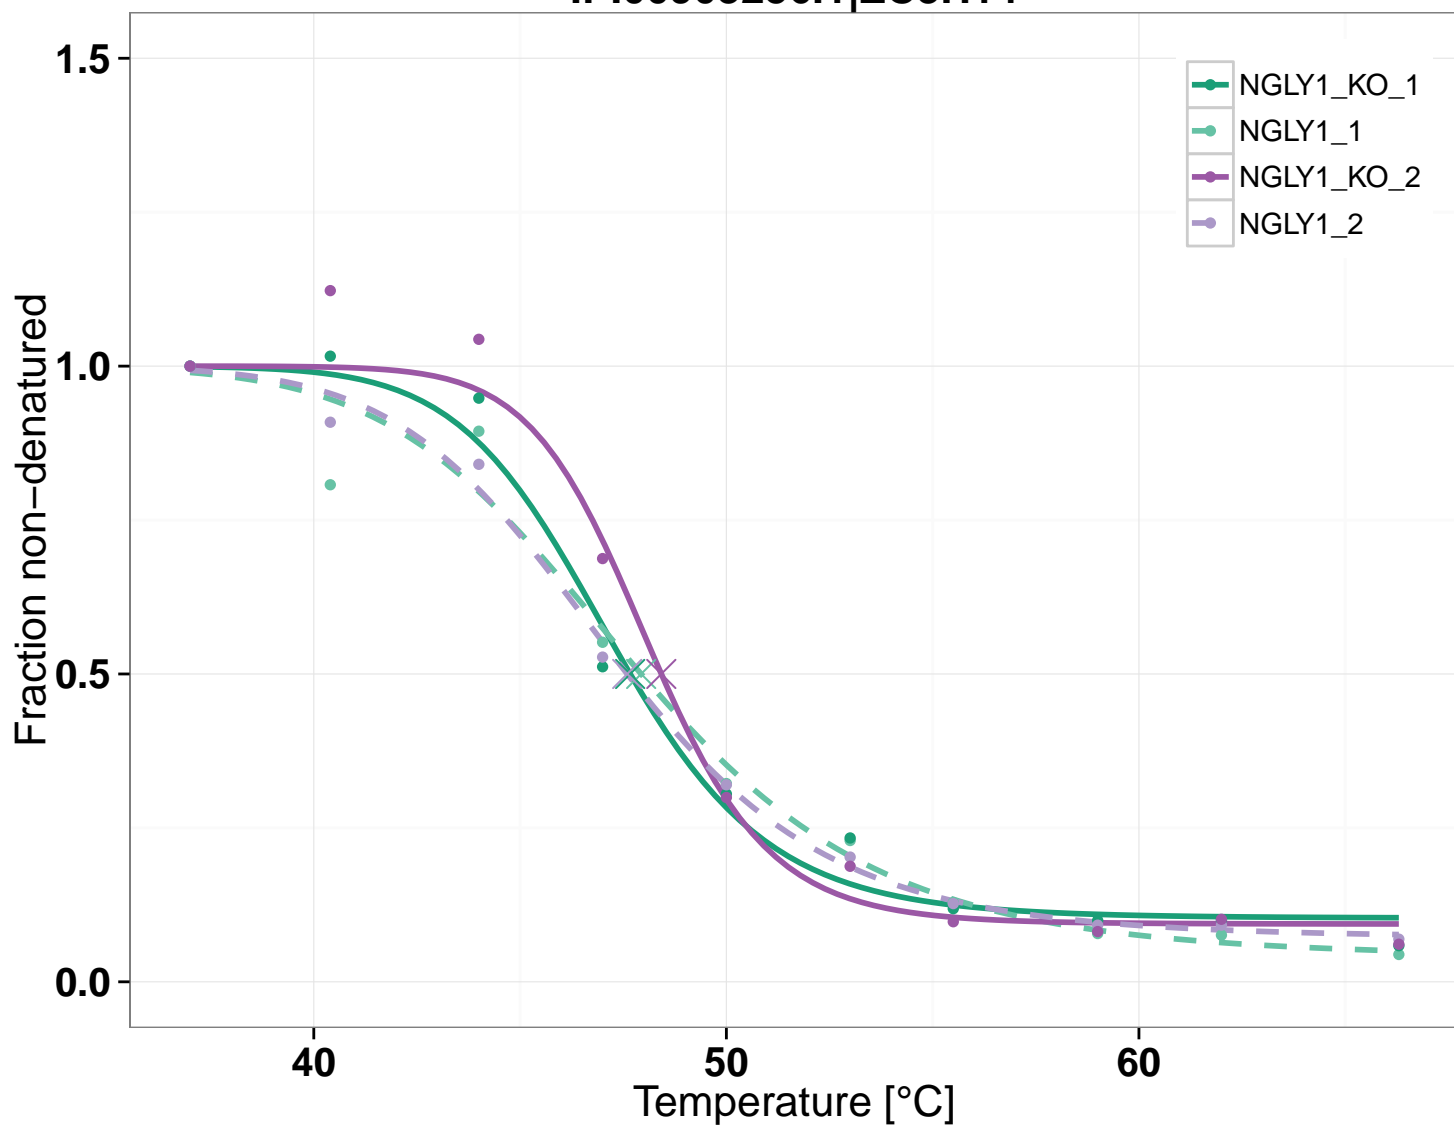

|            | meltPoint | slope  | plateau | R2   |
|------------|-----------|--------|---------|------|
| NGLY1_KO_1 | 47.67     | -0.12  | 0.1     | 0.99 |
| NGLY1_1    | 47.93     | -0.08  | 0.04    | 0.97 |
| NGLY1_KO_2 | 48.42     | -0.16  | 0.09    | 0.98 |
| NGLY1_2    | 47.6      | -0.089 | 0.07    | 1    |

Supplement: Supplementary file 4509 [file 1]

IPI00015609.1|C4ORF30

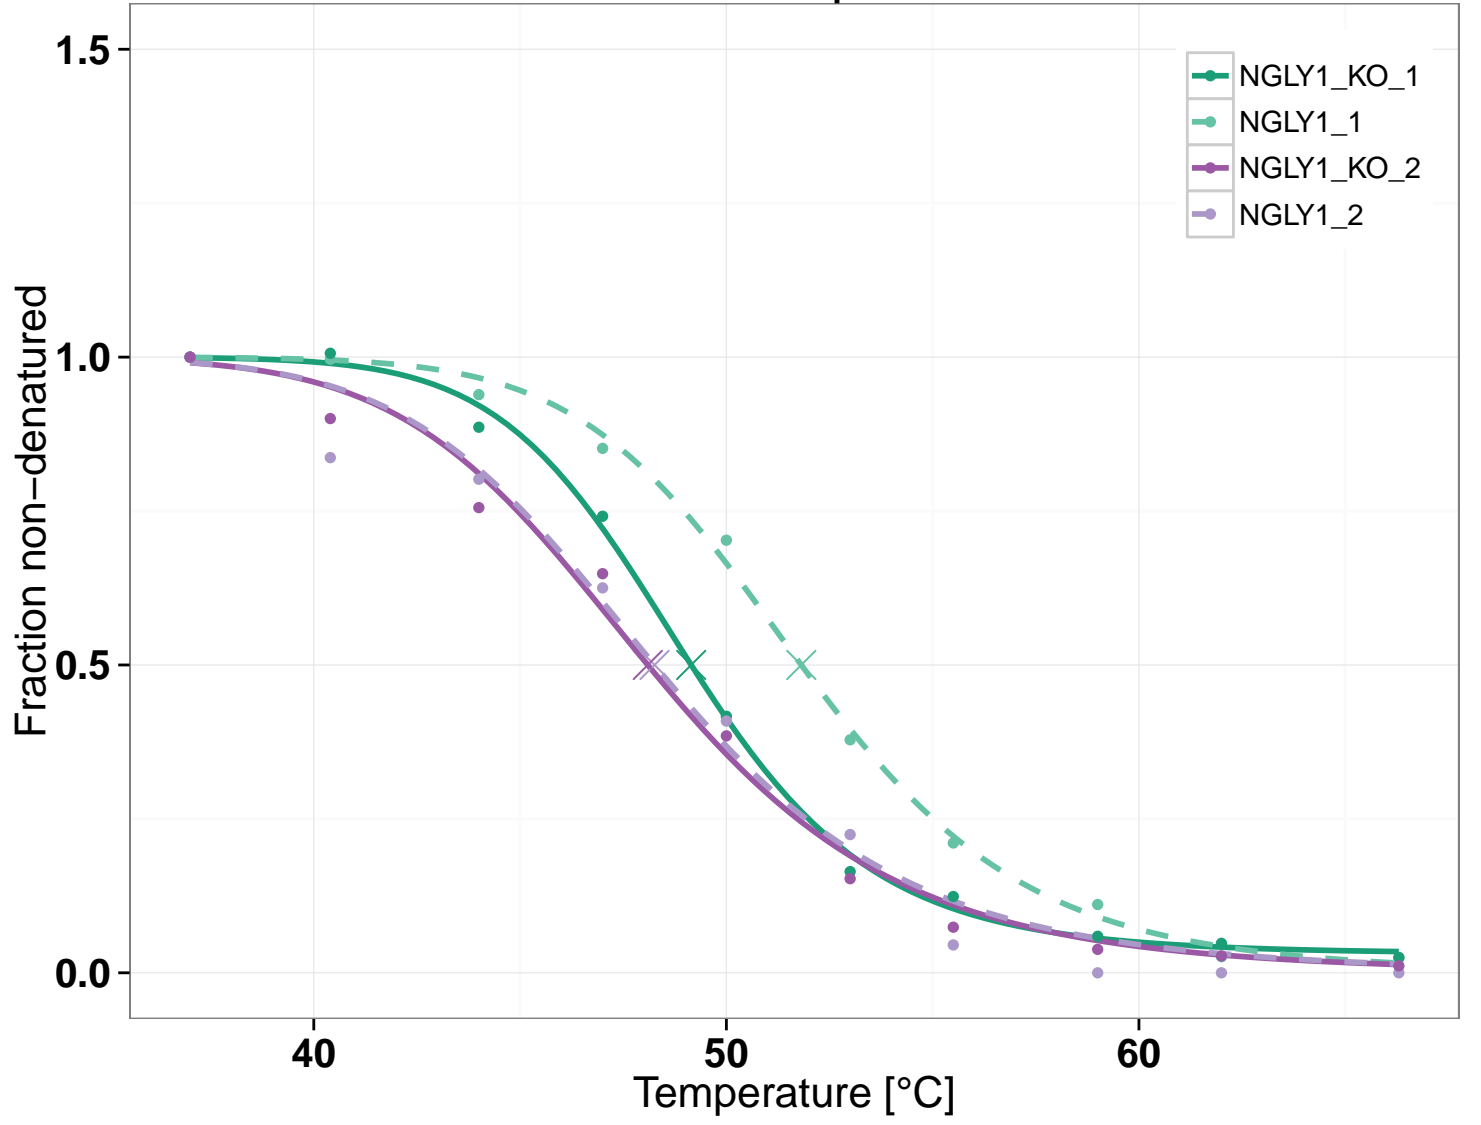

|            | meltPoint | slope  | plateau | R2   |
|------------|-----------|--------|---------|------|
| NGLY1_KO_1 | 49.15     | -0.11  | 0.03    | 1    |
| NGLY1_1    | 51.82     | -0.092 | 0       | 1    |
| NGLY1_KO_2 | 48.1      | -0.083 | 0       | 0.99 |
| NGLY1_2    | 48.26     | -0.082 | 0       | 0.98 |

Supplement: Supplementary file 4510 [file 1]

# IPI00761082.1|CENPV

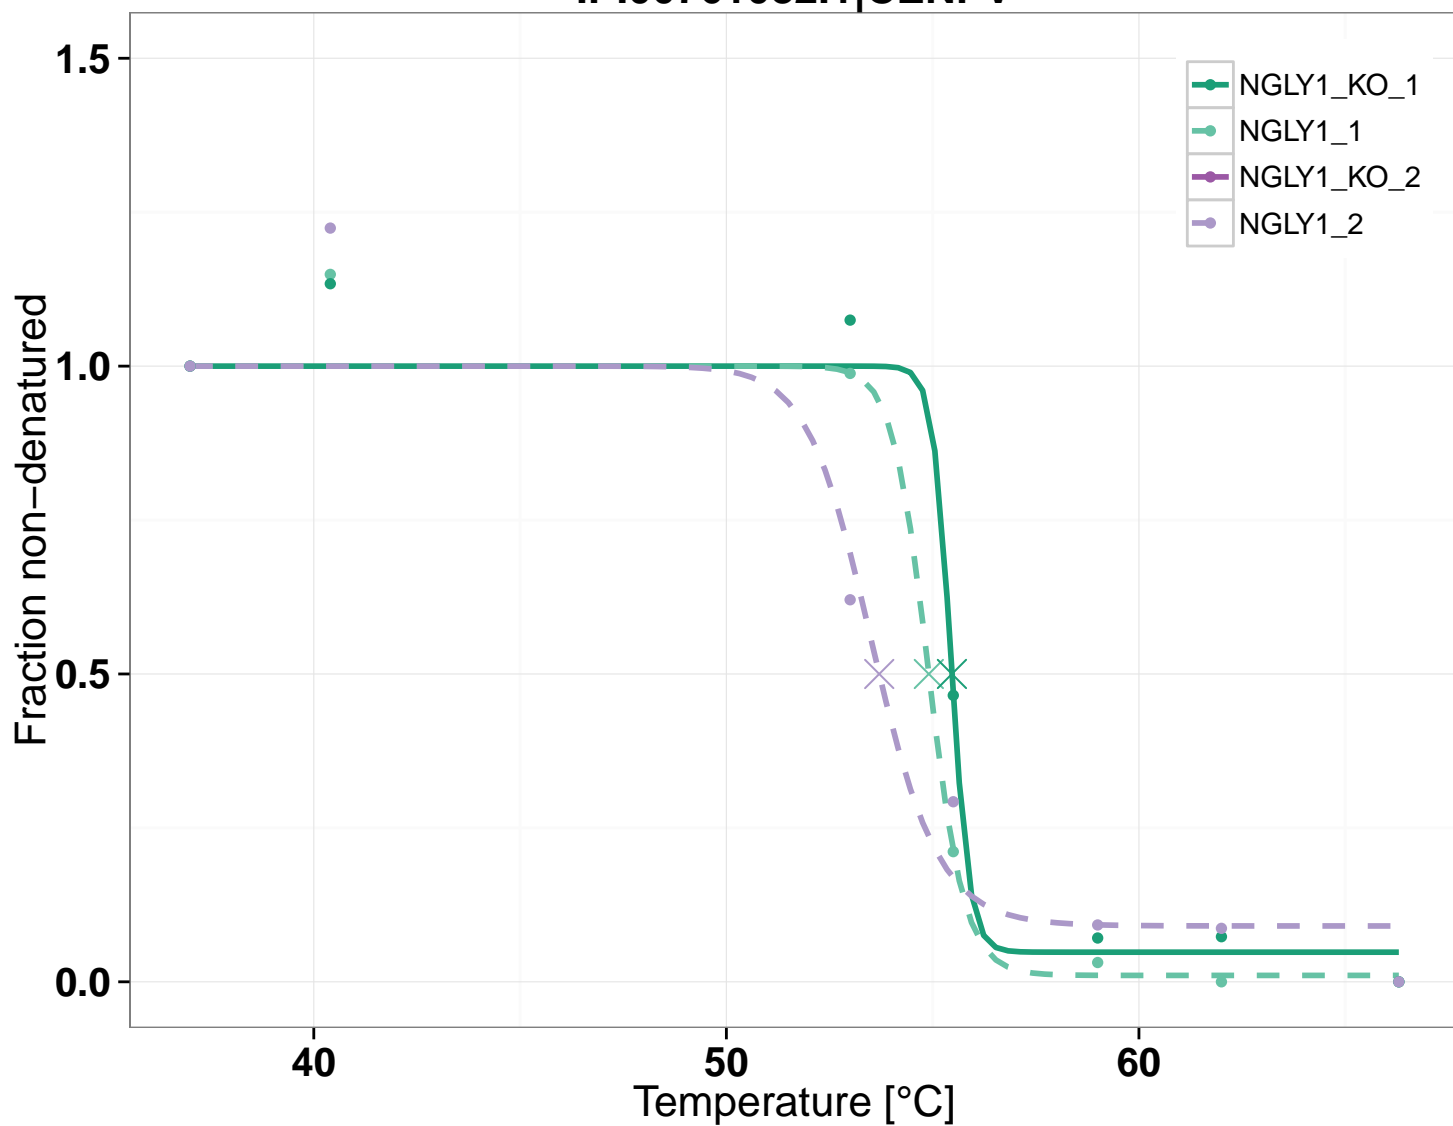

|            | meltPoint | slope | plateau | R2   |
|------------|-----------|-------|---------|------|
| NGLY1_KO_1 | 55.47     | -1.1  | 0.05    | 0.27 |
| NGLY1_1    | 54.91     | -0.57 | 0.01    | 0.36 |
| NGLY1_KO_2 | -         | -     | -       | -    |
| NGLY1_2    | 53.71     | -0.29 | 0.09    | 0.61 |

Supplement: Supplementary file 4511 [file 1]

IPI00009913.7|TTRAP

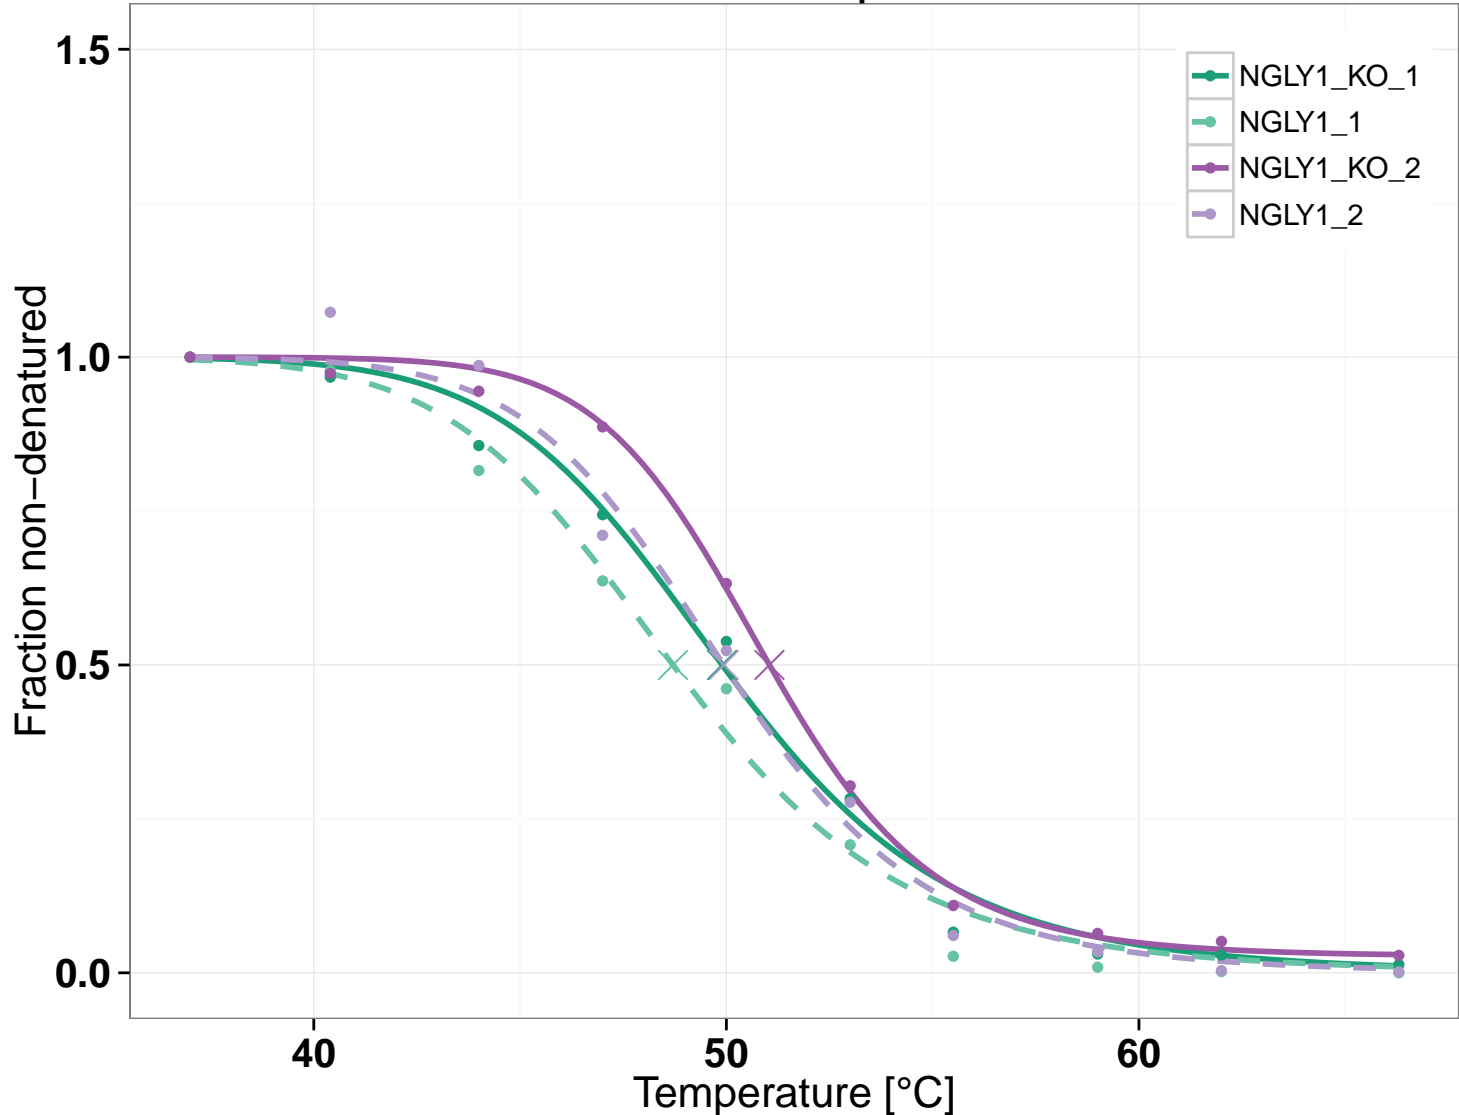

|            | meltPoint | slope  | plateau | R2   |
|------------|-----------|--------|---------|------|
| NGLY1_KO_1 | 49.9      | -0.092 | 0       | 0.99 |
| NGLY1_1    | 48.71     | -0.091 | 0       | 0.99 |
| NGLY1_KO_2 | 51.04     | -0.12  | 0.03    | 1    |
| NGLY1_2    | 49.94     | -0.1   | 0       | 0.99 |

Supplement: Supplementary file 4512 [file 1]

IPI00552548.1|SLC30A9

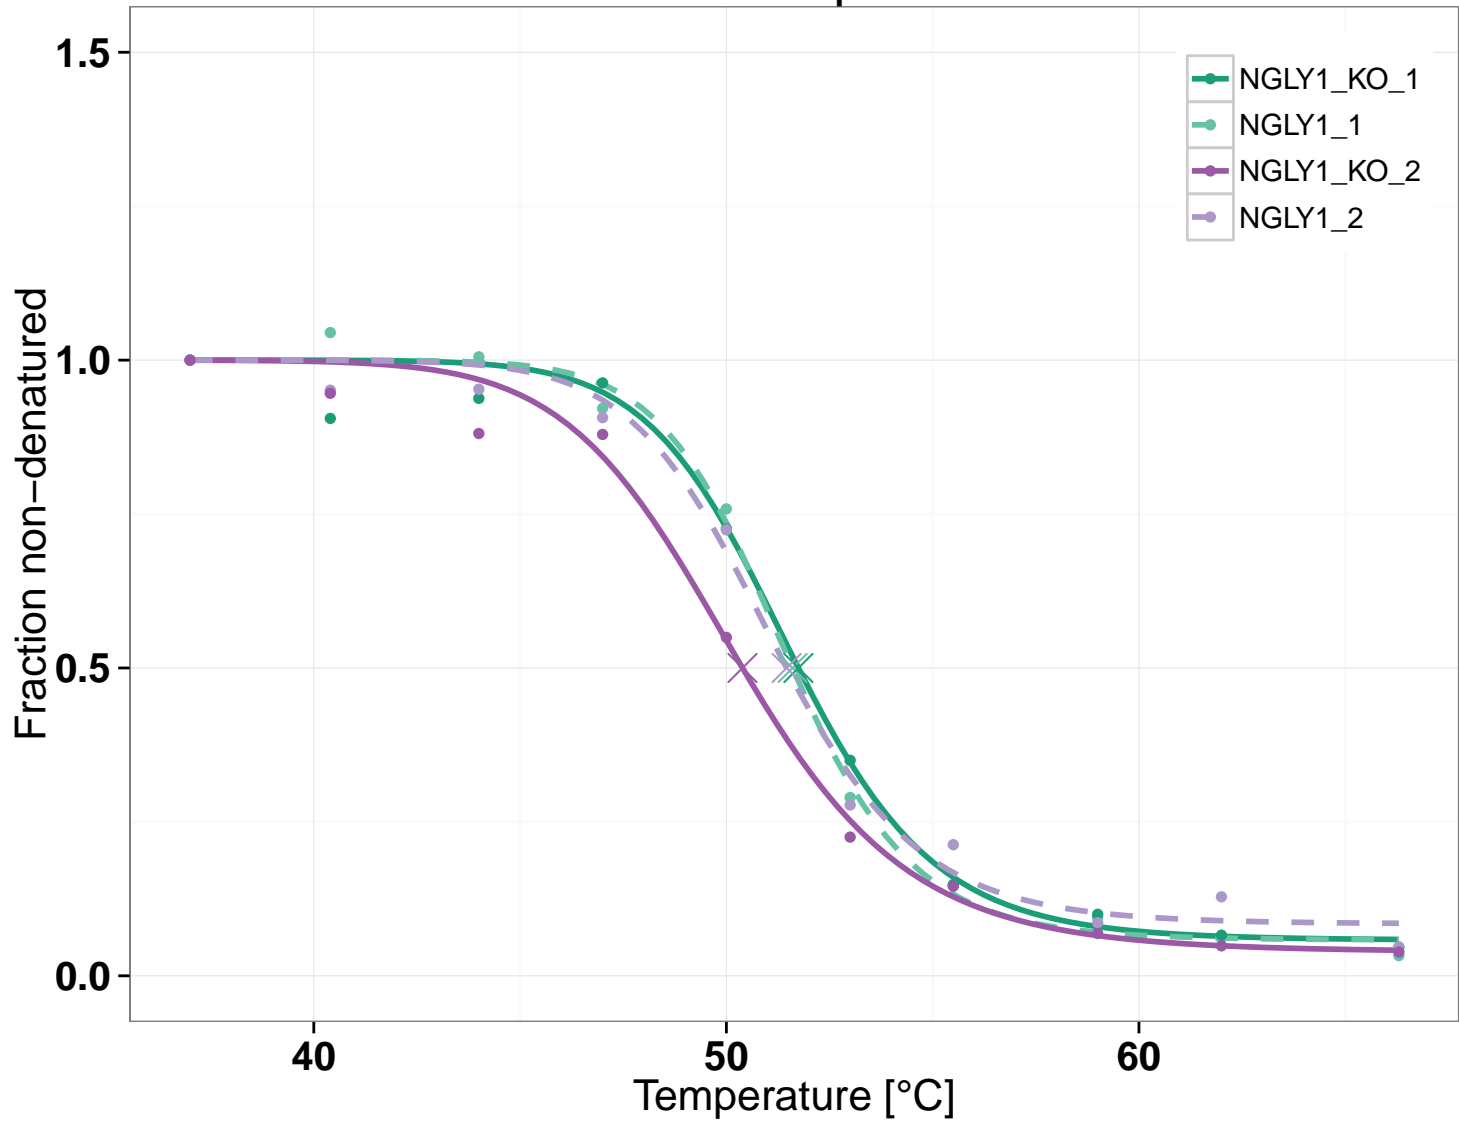

|            | meltPoint | slope | plateau | R2   |
|------------|-----------|-------|---------|------|
| NGLY1_KO_1 | 51.75     | -0.14 | 0.06    | 0.99 |
| NGLY1_1    | 51.6      | -0.15 | 0.06    | 1    |
| NGLY1_KO_2 | 50.39     | -0.12 | 0.04    | 0.99 |
| NGLY1_2    | 51.46     | -0.13 | 0.08    | 0.99 |

Supplement: Supplementary file 4513 [file 1]

# IPI00003861.1|UGCG

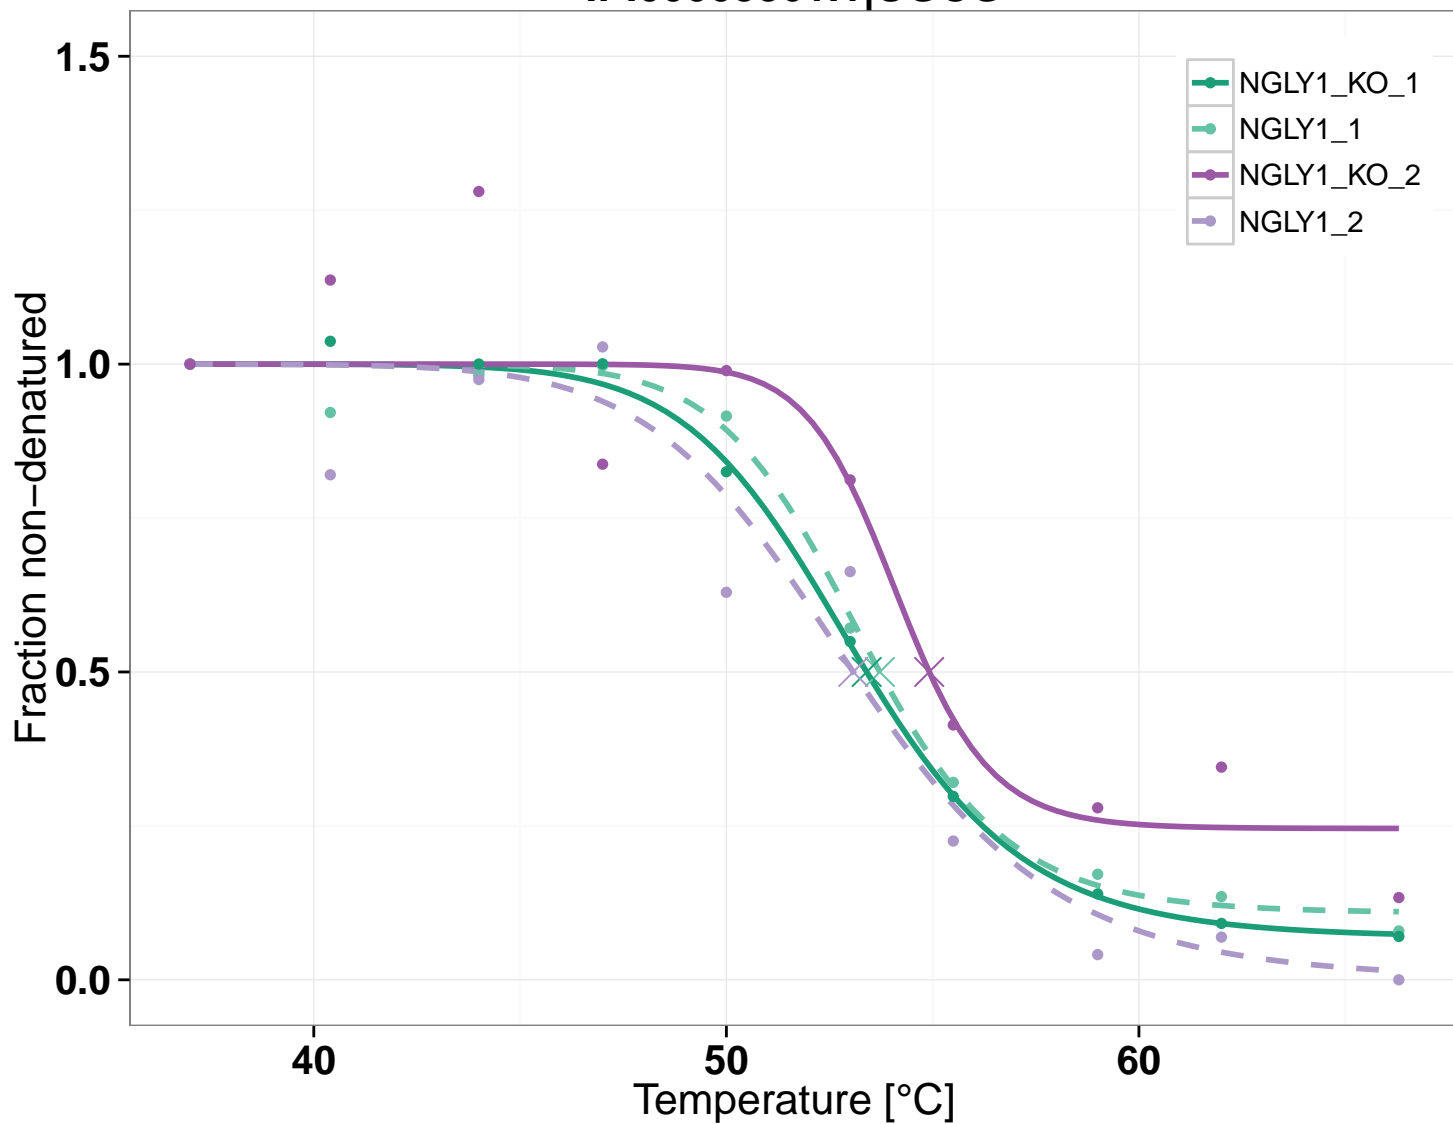

|            | meltPoint | slope | plateau | R2   |
|------------|-----------|-------|---------|------|
| NGLY1_KO_1 | 53.4      | -0.11 | 0.07    | 1    |
| NGLY1_1    | 53.72     | -0.13 | 0.11    | 0.99 |
| NGLY1_KO_2 | 54.92     | -0.17 | 0.25    | 0.9  |
| NGLY1_2    | 53.07     | -0.1  | 0       | 0.94 |

Supplement: Supplementary file 4514 [file 1]

# IPI00412410.1|GAS6

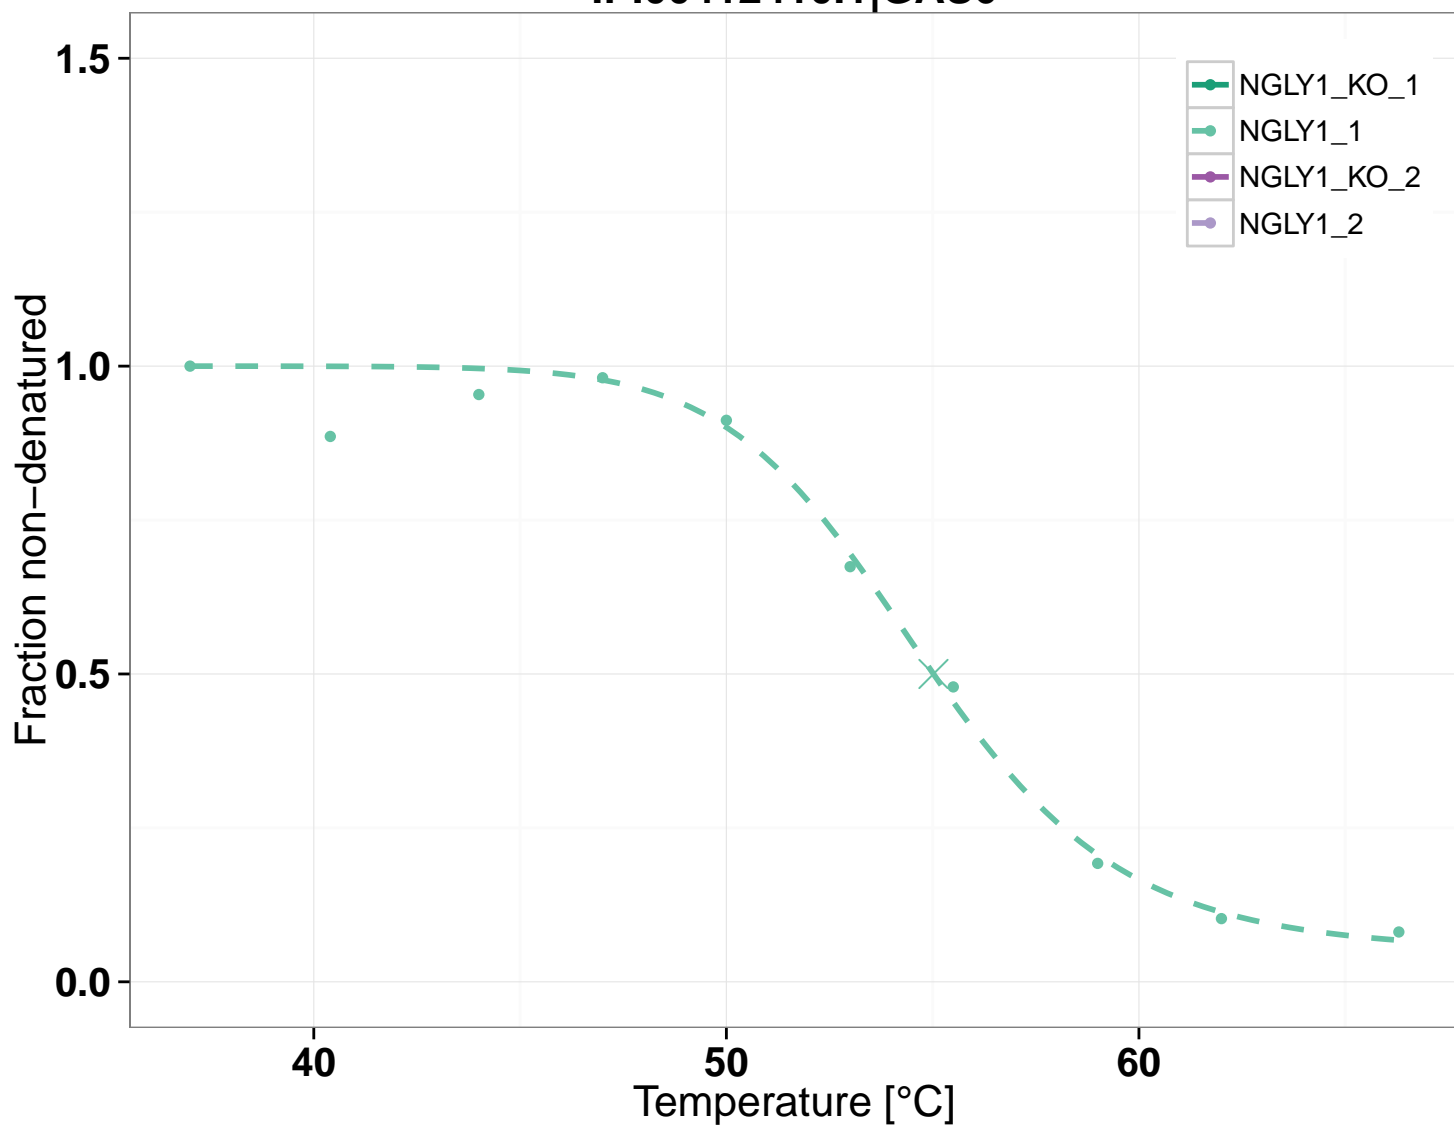

|            | meltPoint | slope  | plateau | R2   |
|------------|-----------|--------|---------|------|
| NGLY1_KO_1 | -         | -      | -       | -    |
| NGLY1_1    | 55.02     | -0.099 | 0.05    | 0.99 |
| NGLY1_KO_2 | -         | -      | -       | -    |
| NGLY1_2    | -         | -      | -       | -    |

Supplement: Supplementary file 4515 [file 1]

# IPI00002460.3|ANXA7

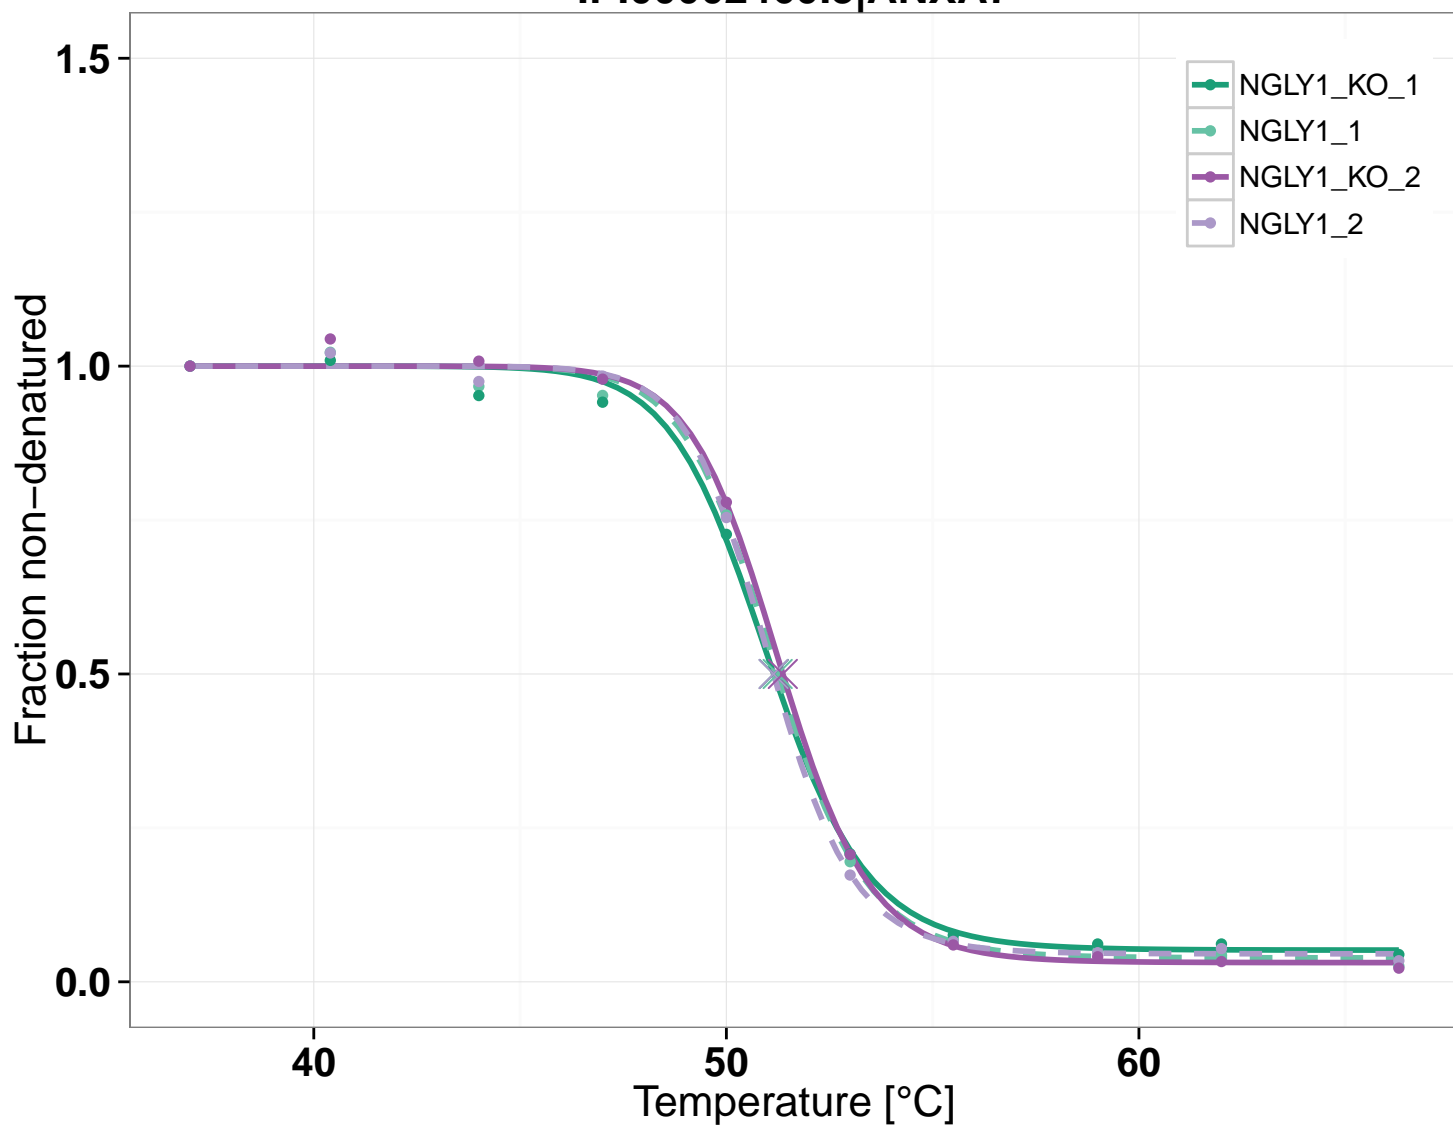

|            | meltPoint | slope | plateau | R2 |
|------------|-----------|-------|---------|----|
| NGLY1_KO_1 | 51.15     | -0.2  | 0.05    | 1  |
| NGLY1_1    | 51.24     | -0.21 | 0.04    | 1  |
| NGLY1_KO_2 | 51.37     | -0.22 | 0.03    | 1  |
| NGLY1_2    | 51.14     | -0.24 | 0.05    | 1  |

Supplement: Supplementary file 4516 [file 1]

IPI00902614.2|USP24

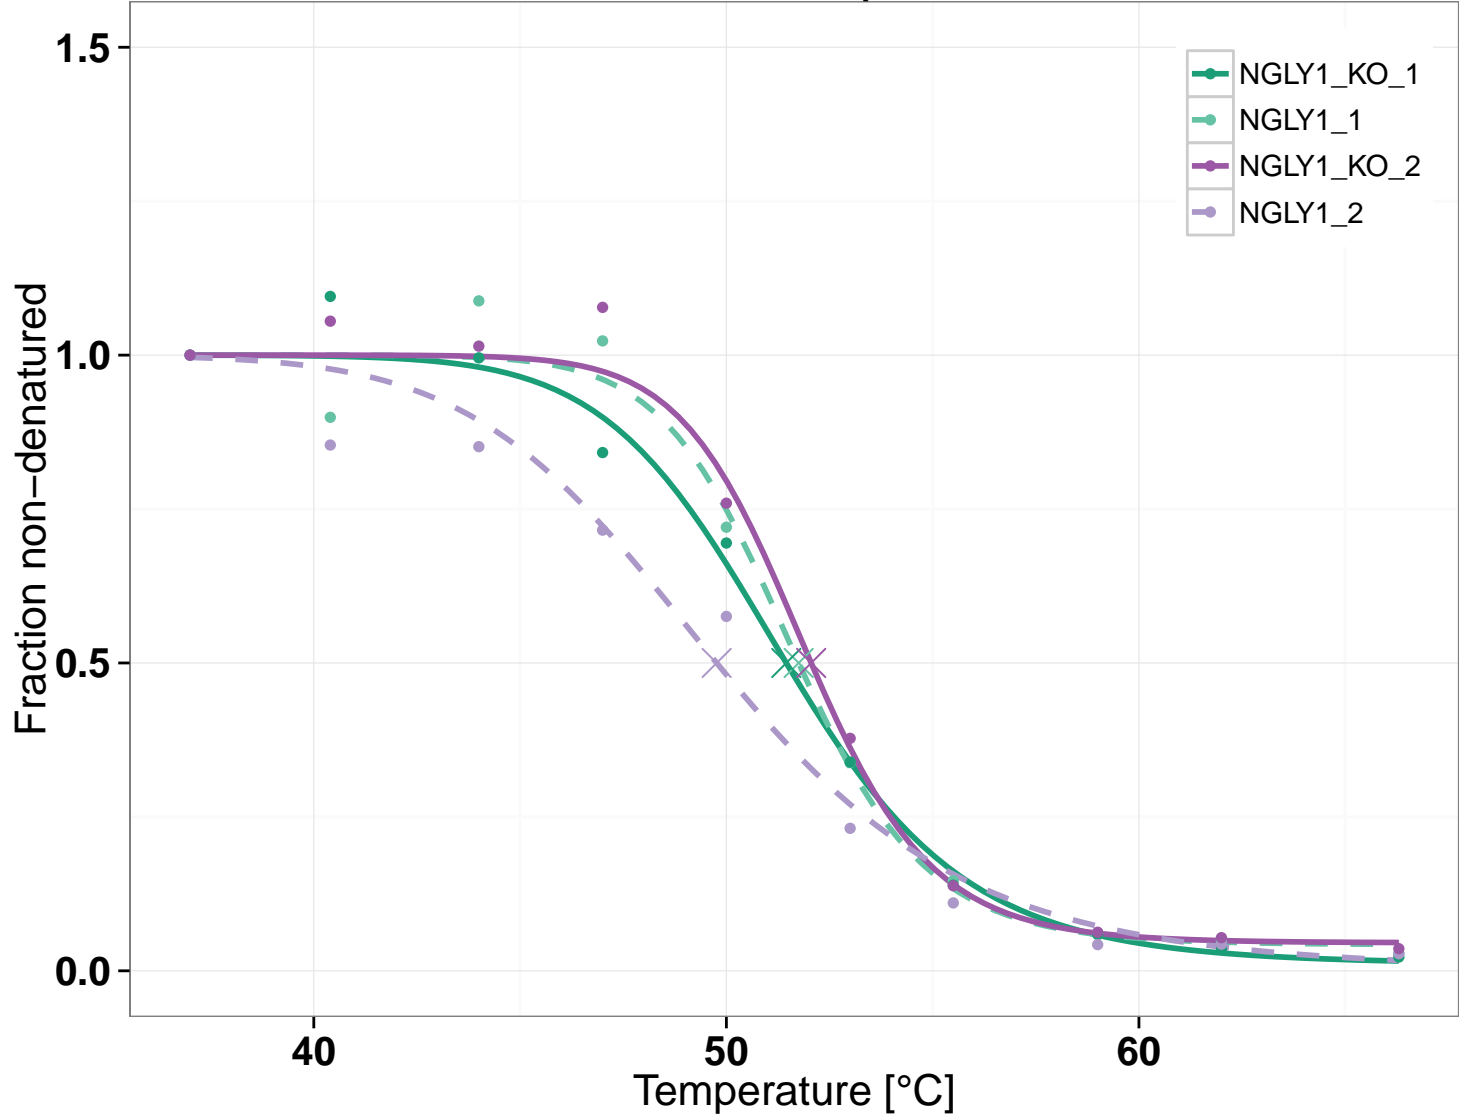

|            | meltPoint | slope  | plateau | R2   |
|------------|-----------|--------|---------|------|
| NGLY1_KO_1 | 51.45     | -0.11  | 0.01    | 0.99 |
| NGLY1_1    | 51.75     | -0.15  | 0.04    | 0.99 |
| NGLY1_KO_2 | 52.06     | -0.16  | 0.05    | 0.99 |
| NGLY1_2    | 49.77     | -0.083 | 0       | 0.98 |

Supplement: Supplementary file 4517 [file 1]

# IPI00033486.2|POLG2

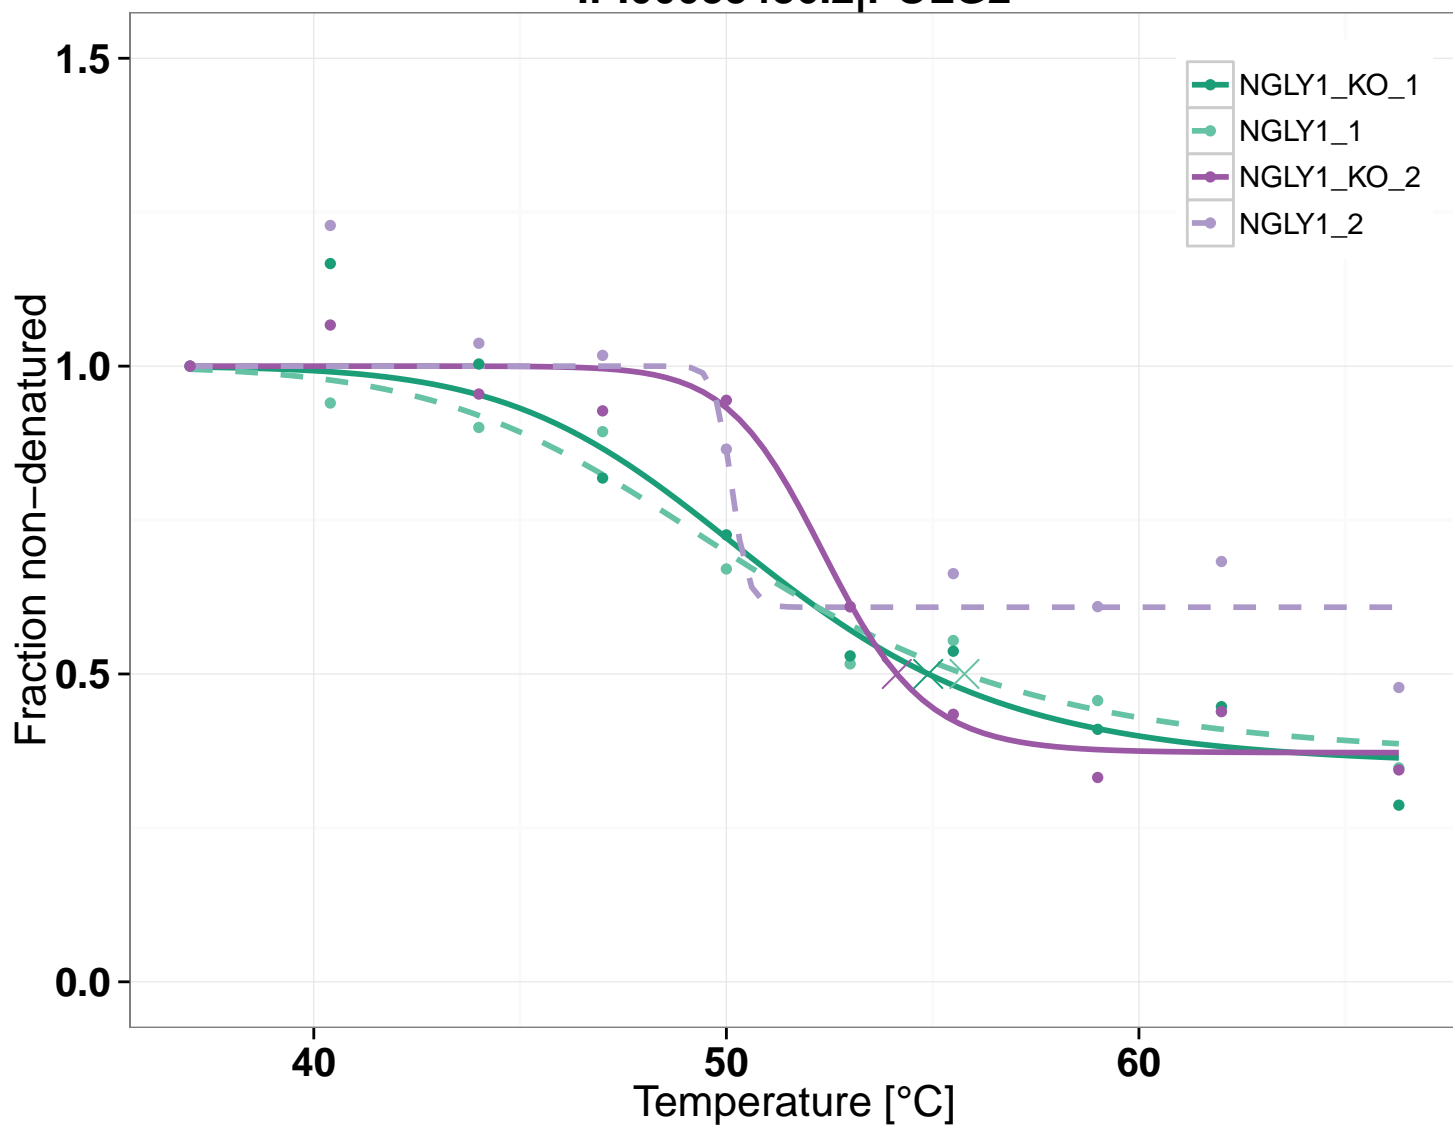

|            | meltPoint | slope  | plateau | R2   |
|------------|-----------|--------|---------|------|
| NGLY1_KO_1 | 54.89     | -0.053 | 0.35    | 0.94 |
| NGLY1_1    | 55.77     | -0.043 | 0.36    | 0.97 |
| NGLY1_KO_2 | 54.13     | -0.13  | 0.37    | 0.98 |
| NGLY1_2    | -         | -0.49  | 0.61    | 0.85 |

Supplement: Supplementary file 4518 [file 1]

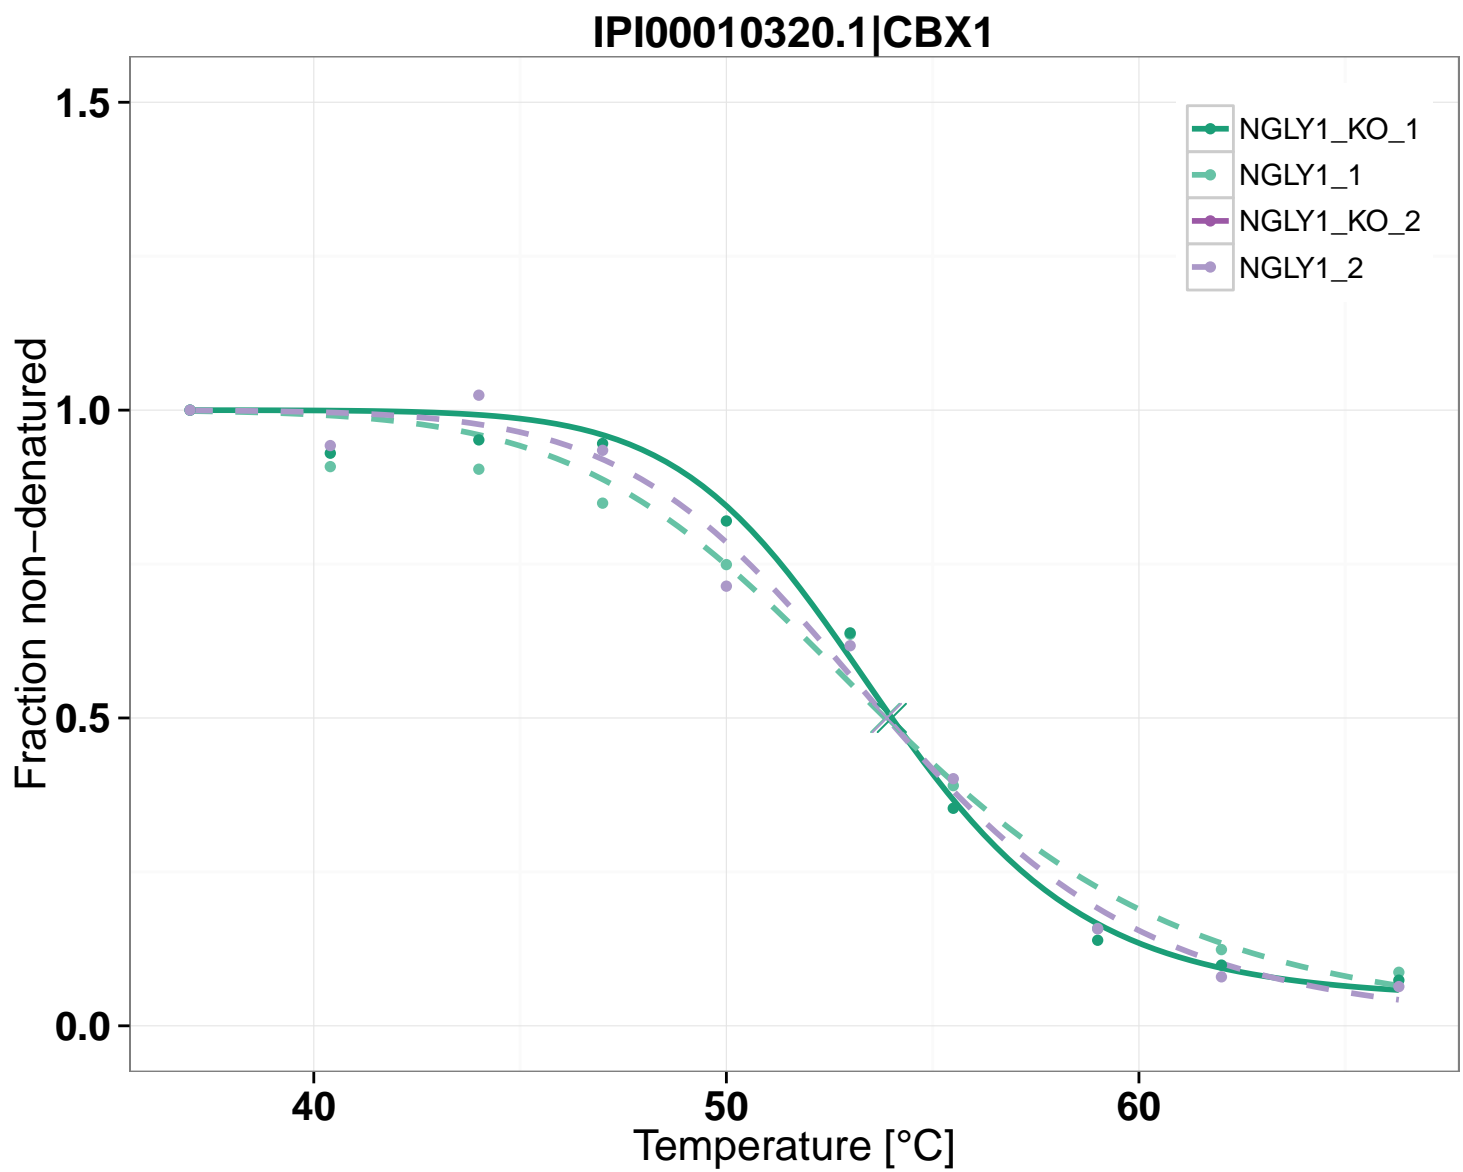

|            | meltPoint | slope  | plateau | R2   |
|------------|-----------|--------|---------|------|
| NGLY1_KO_1 | 54.01     | -0.097 | 0.04    | 0.99 |
| NGLY1_1    | 53.85     | -0.067 | 0       | 0.98 |
| NGLY1_KO_2 | -         | -      | -       | -    |
| NGLY1_2    | 53.89     | -0.078 | 0       | 0.99 |

Supplement: Supplementary file 4519 [file 1]
