# Supplementary material (part 46 of 85)
Source: publisher figshare collection journal article supplement (https://gsajournals.figshare.com/articles/dataset/_/12014913)

# IPI00026215.1|FEN1

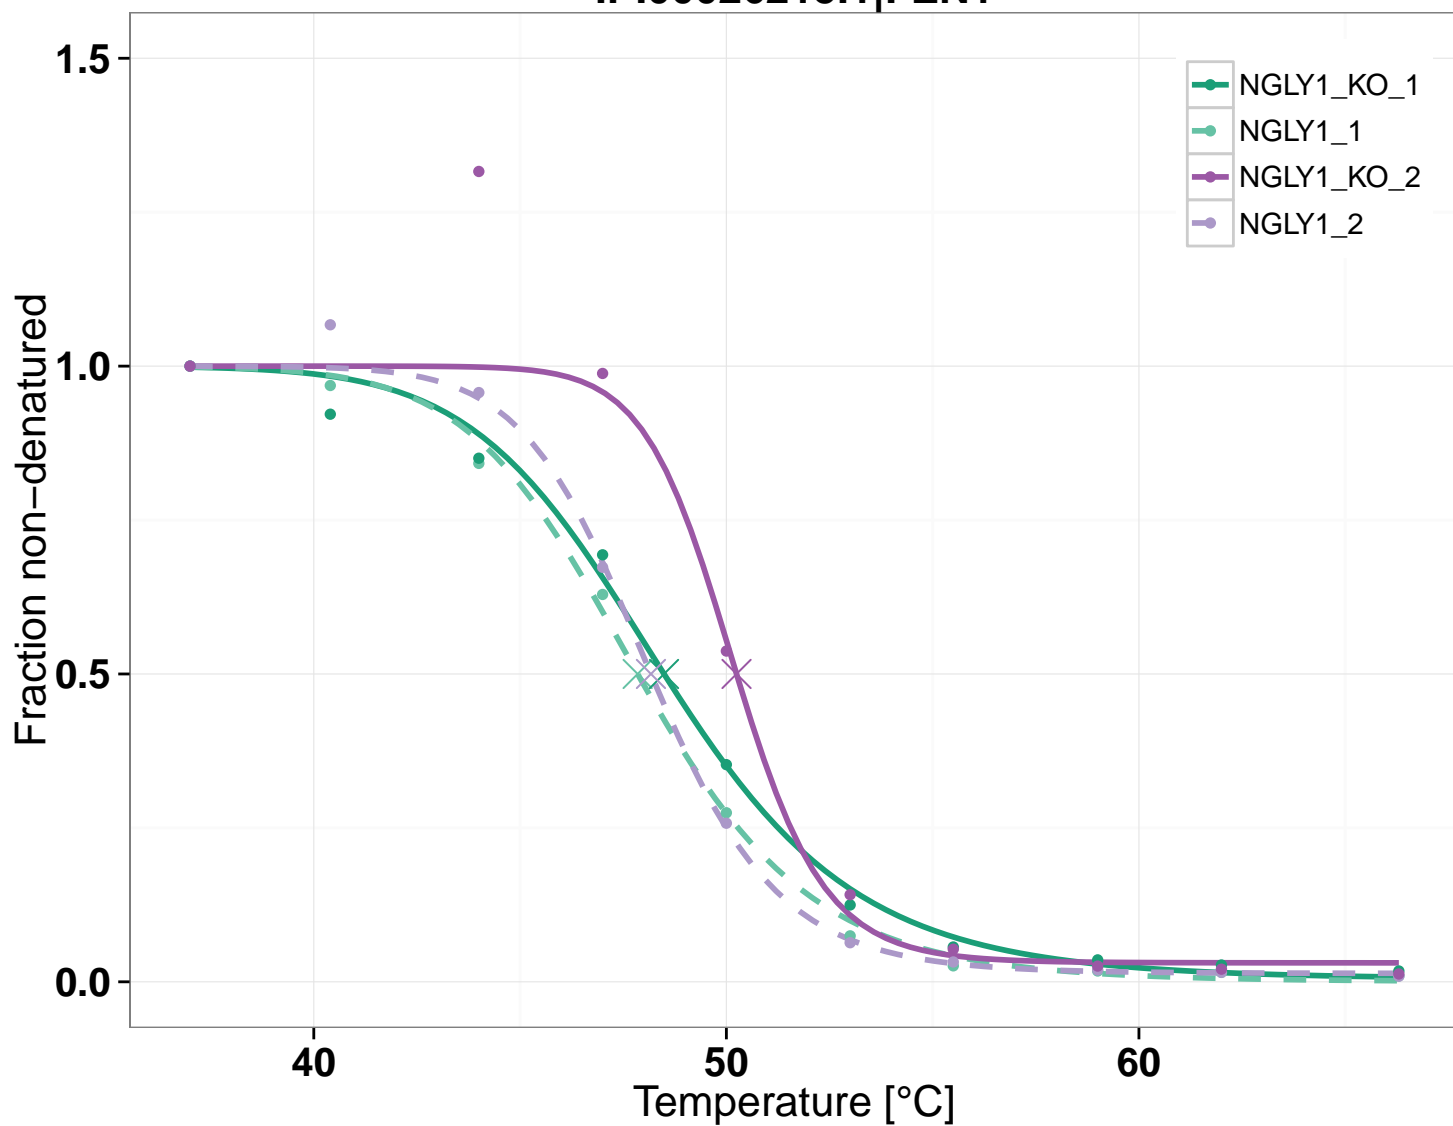

|            | meltPoint | slope | plateau | R2   |
|------------|-----------|-------|---------|------|
| NGLY1_KO_1 | 48.49     | -0.11 | 0       | 0.99 |
| NGLY1_1    | 47.85     | -0.12 | 0       | 1    |
| NGLY1_KO_2 | 50.25     | -0.22 | 0.03    | 0.87 |
| NGLY1_2    | 48.17     | -0.16 | 0.01    | 1    |

Supplement: Supplementary file 4520 [file 1]

IPI00903259.1|SUPT5H

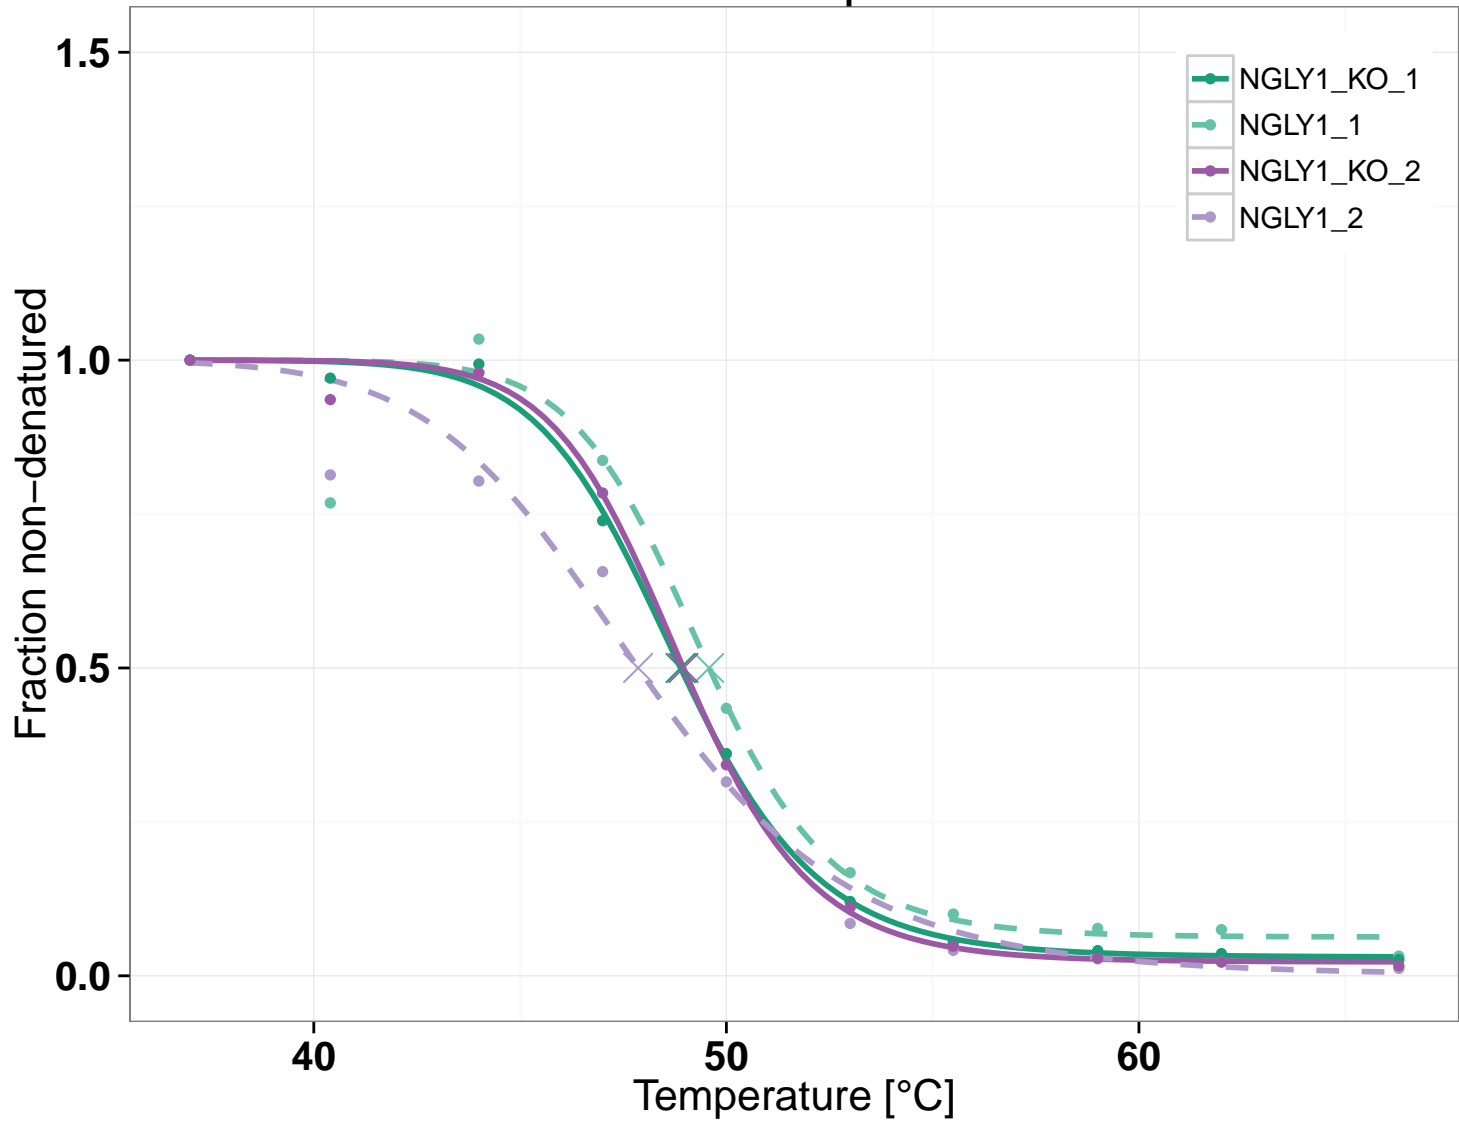

|            | meltPoint | slope  | plateau | R2   |
|------------|-----------|--------|---------|------|
| NGLY1_KO_1 | 48.89     | -0.14  | 0.03    | 1    |
| NGLY1_1    | 49.58     | -0.15  | 0.06    | 0.96 |
| NGLY1_KO_2 | 48.96     | -0.16  | 0.02    | 1    |
| NGLY1_2    | 47.86     | -0.098 | 0       | 0.98 |

Supplement: Supplementary file 4521 [file 1]

IPI00006723.5|SNRNP40

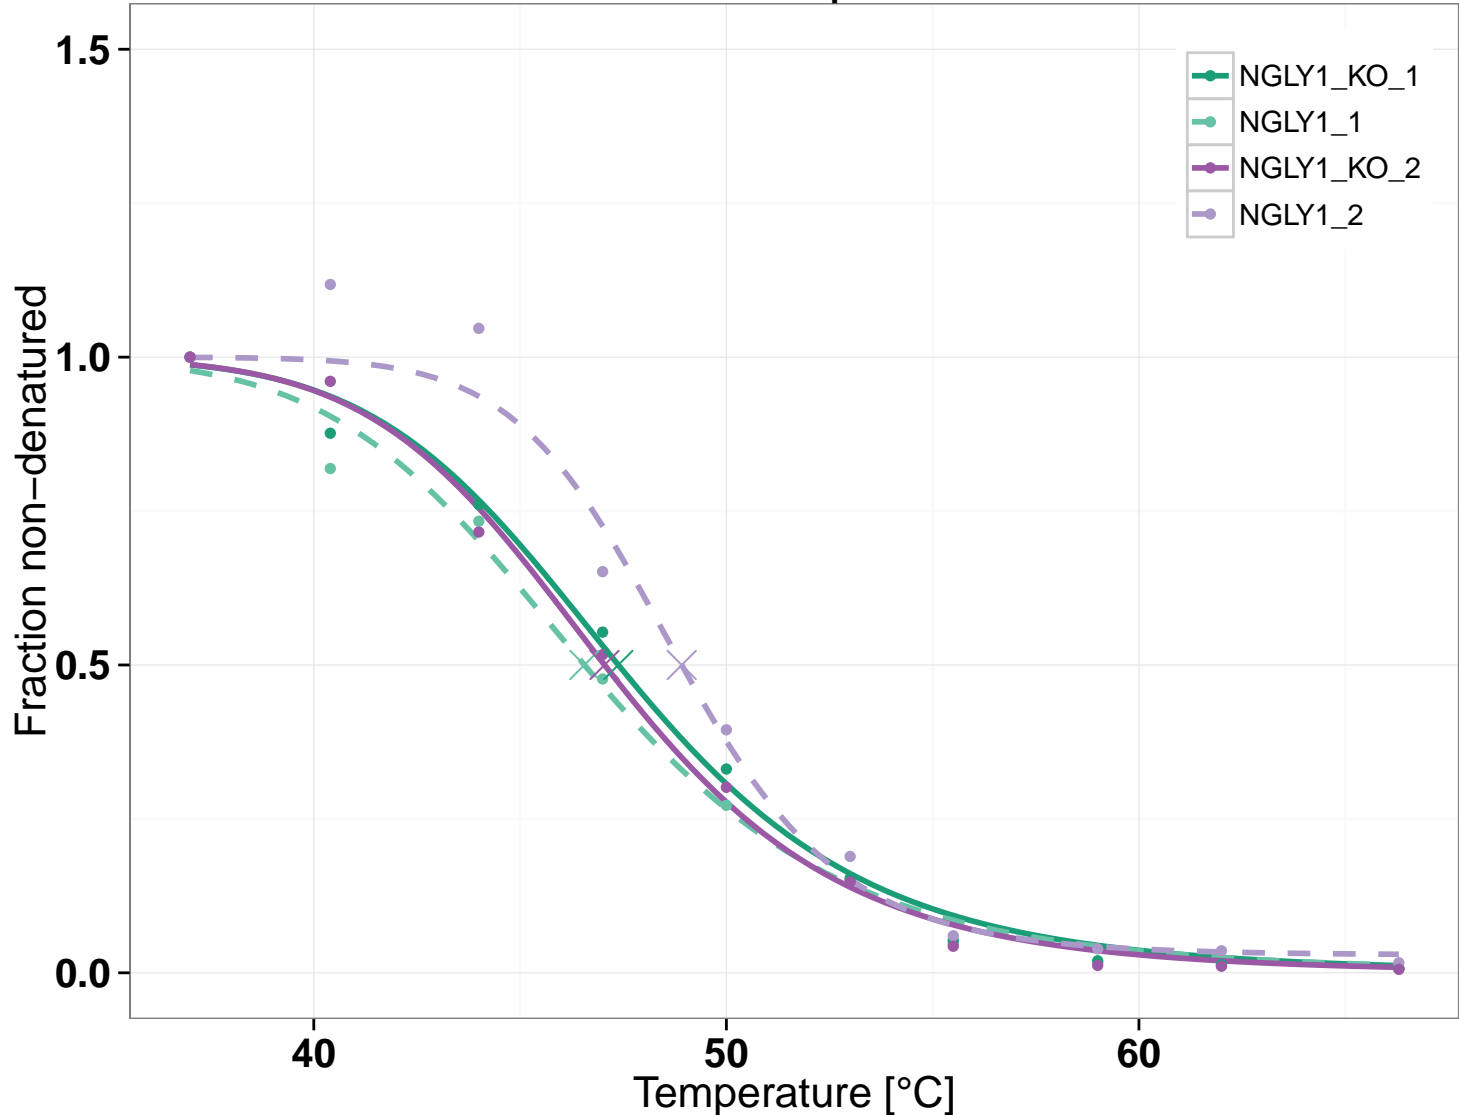

|            | meltPoint | slope  | plateau | R2   |
|------------|-----------|--------|---------|------|
| NGLY1_KO_1 | 47.38     | -0.083 | 0       | 0.99 |
| NGLY1_1    | 46.56     | -0.08  | 0       | 0.99 |
| NGLY1_KO_2 | 47.05     | -0.088 | 0       | 1    |
| NGLY1_2    | 48.92     | -0.12  | 0.03    | 0.98 |

Supplement: Supplementary file 4522 [file 1]

# IPI00152890.1|NOL6

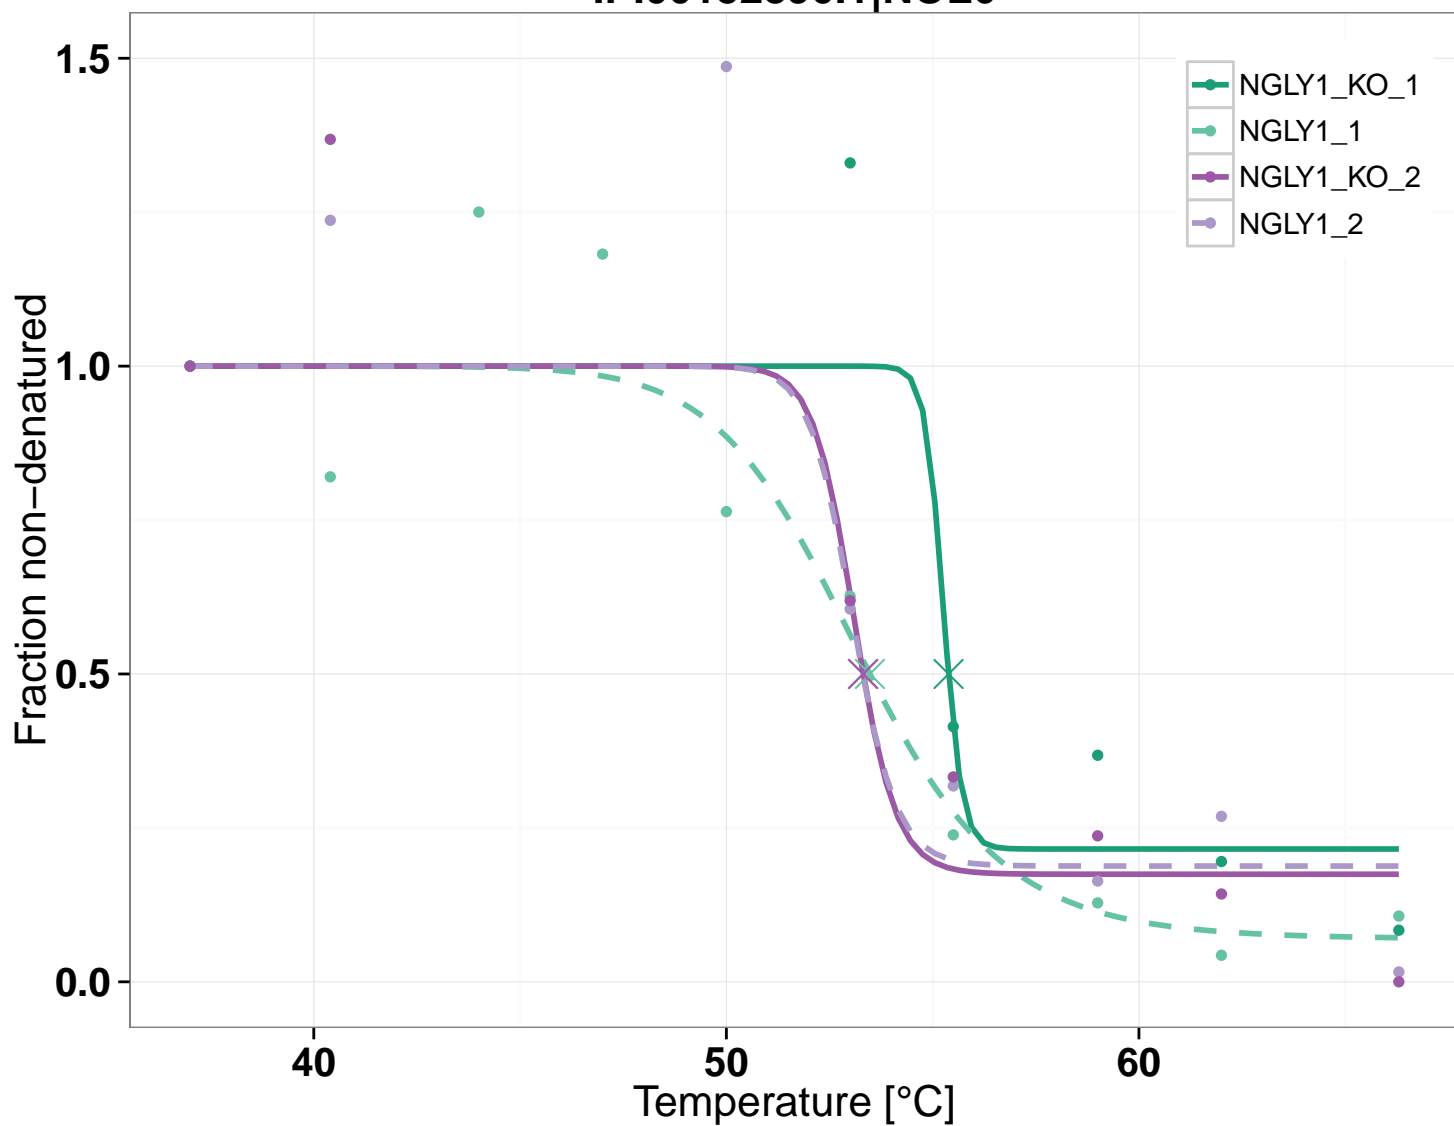

|            | meltPoint | slope | plateau | R2    |
|------------|-----------|-------|---------|-------|
| NGLY1_KO_1 | 55.39     | -0.89 | 0.22    | -0.02 |
| NGLY1_1    | 53.48     | -0.13 | 0.07    | 0.92  |
| NGLY1_KO_2 | 53.32     | -0.41 | 0.17    | 0.18  |
| NGLY1_2    | 53.3      | -0.39 | 0.19    | 0.24  |

Supplement: Supplementary file 4523 [file 1]

IPI00103259.3|C4ORF3

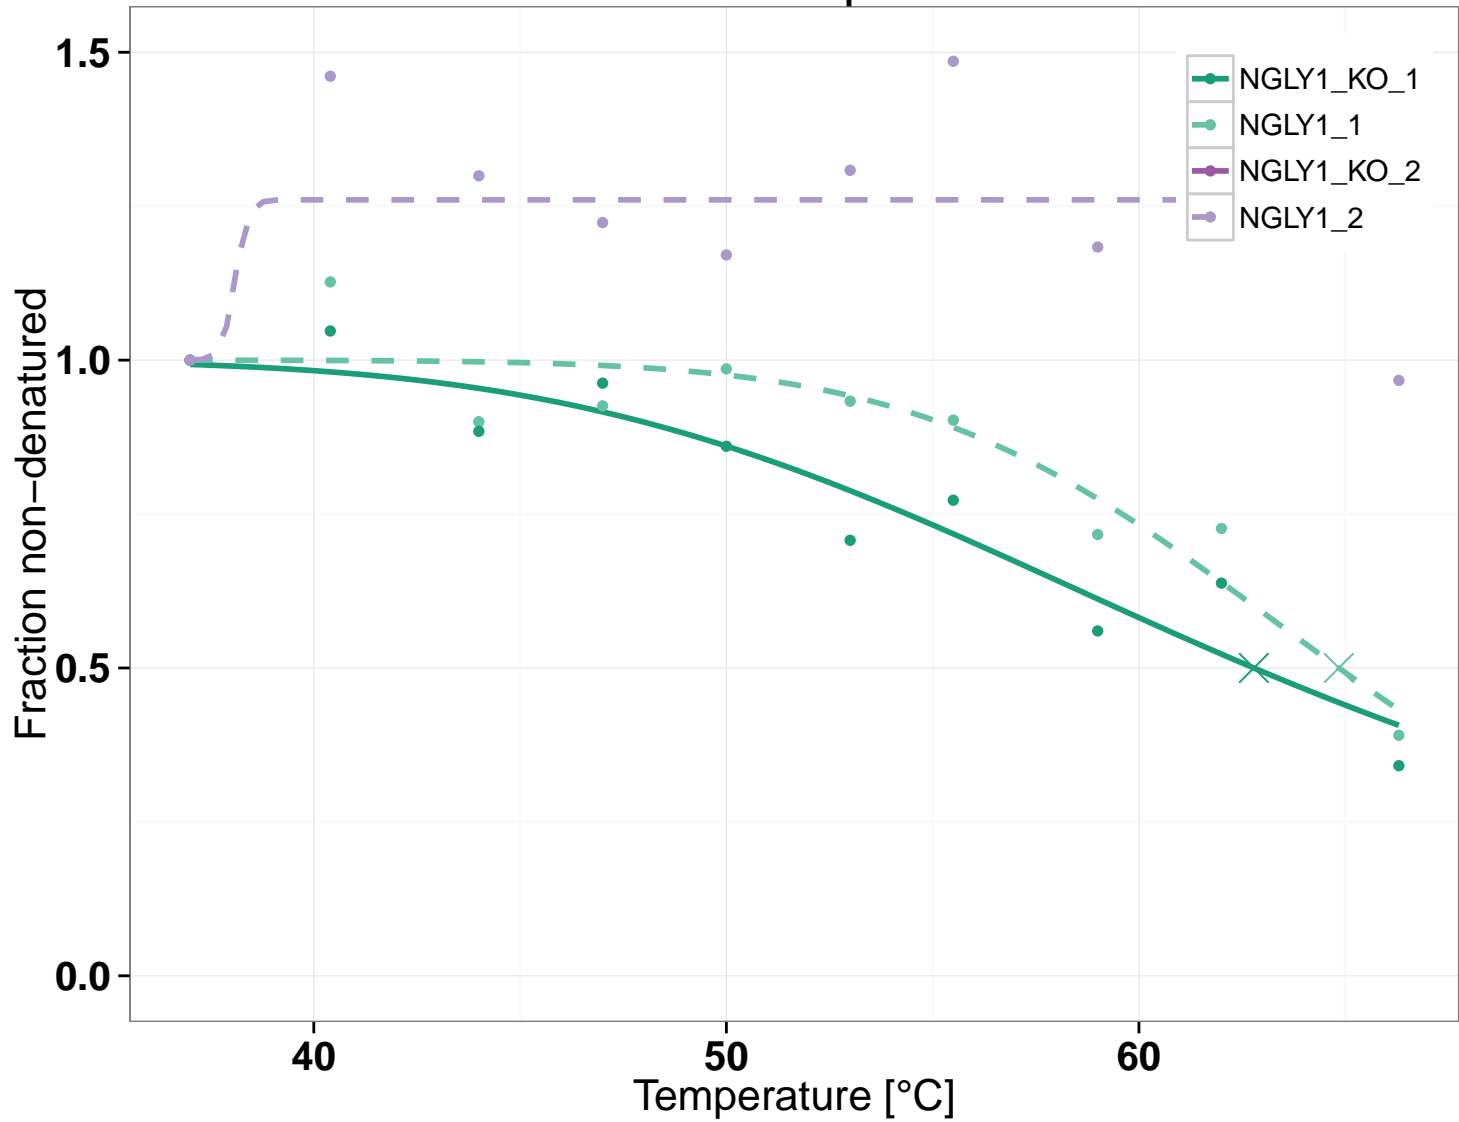

|            | meltPoint | slope  | plateau | R2   |
|------------|-----------|--------|---------|------|
| NGLY1_KO_1 | 62.79     | -0.03  | 0       | 0.91 |
| NGLY1_1    | 64.85     | -0.049 | 0       | 0.89 |
| NGLY1_KO_2 | -         | -      | -       | -    |
| NGLY1_2    | -         | 0.43   | 1.26    | 0.24 |

Supplement: Supplementary file 4524 [file 1]

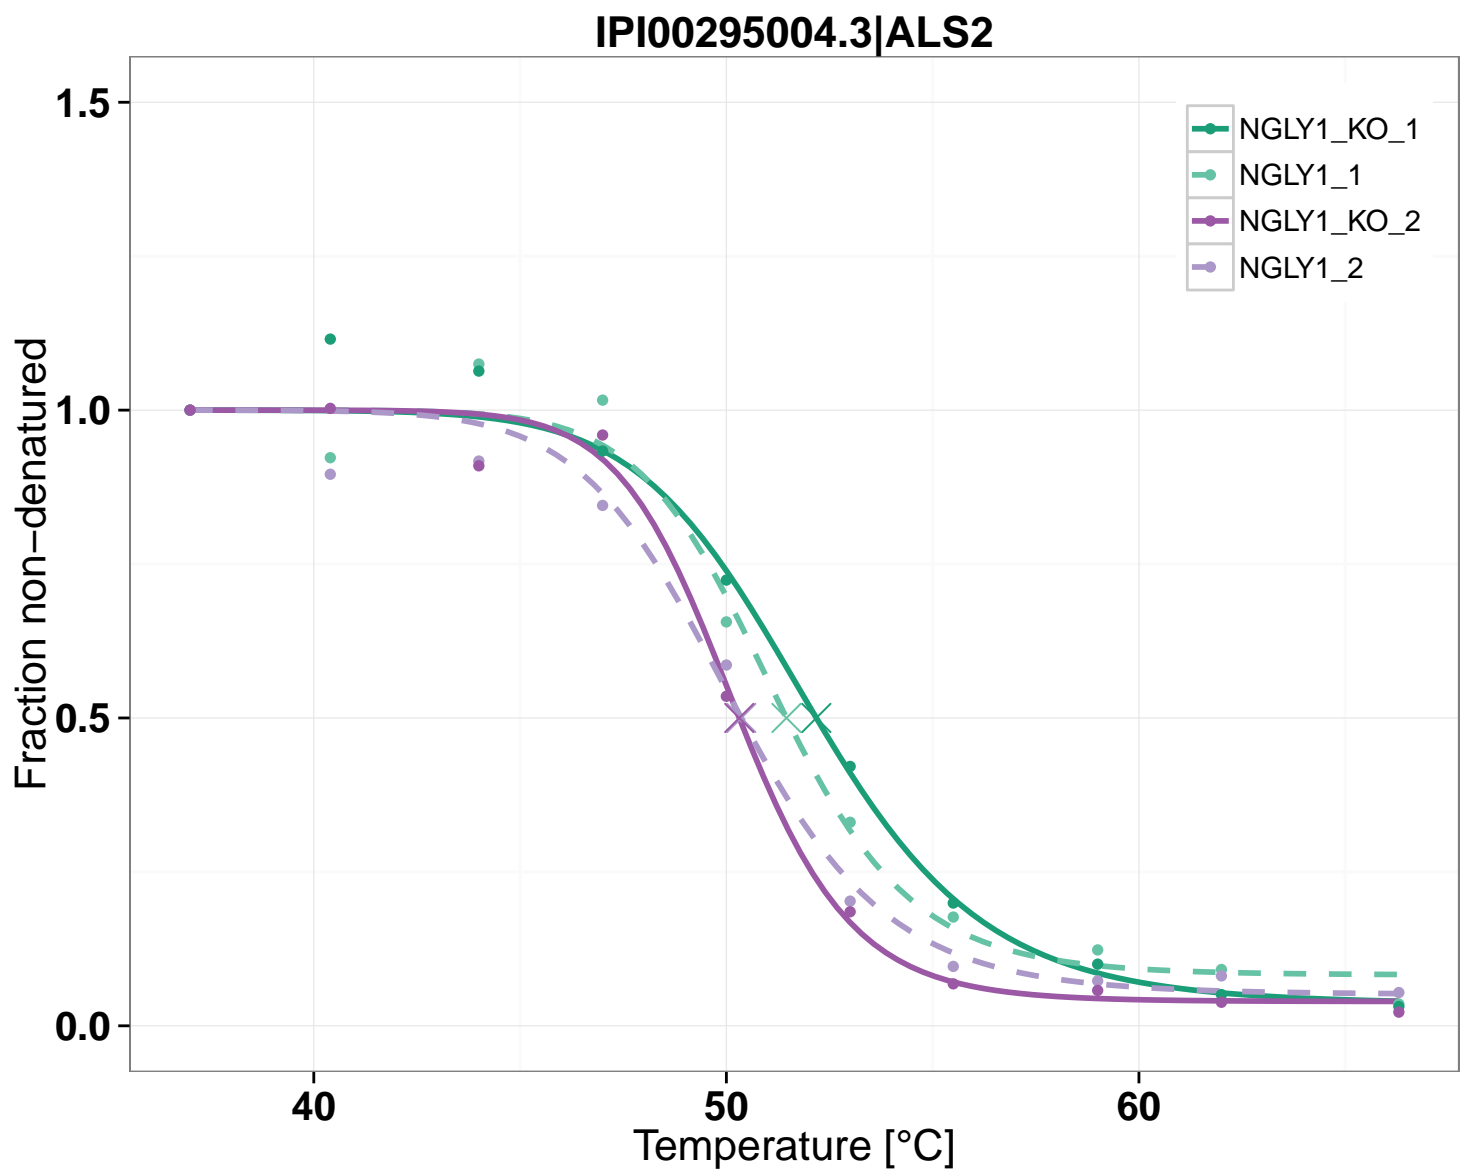

|            | meltPoint | slope | plateau | R2   |
|------------|-----------|-------|---------|------|
| NGLY1_KO_1 | 52.18     | -0.11 | 0.04    | 0.99 |
| NGLY1_1    | 51.46     | -0.14 | 0.08    | 0.99 |
| NGLY1_KO_2 | 50.31     | -0.17 | 0.04    | 0.99 |
| NGLY1_2    | 50.36     | -0.13 | 0.05    | 0.99 |

Supplement: Supplementary file 4525 [file 1]

IPI00871364.1|CMC1

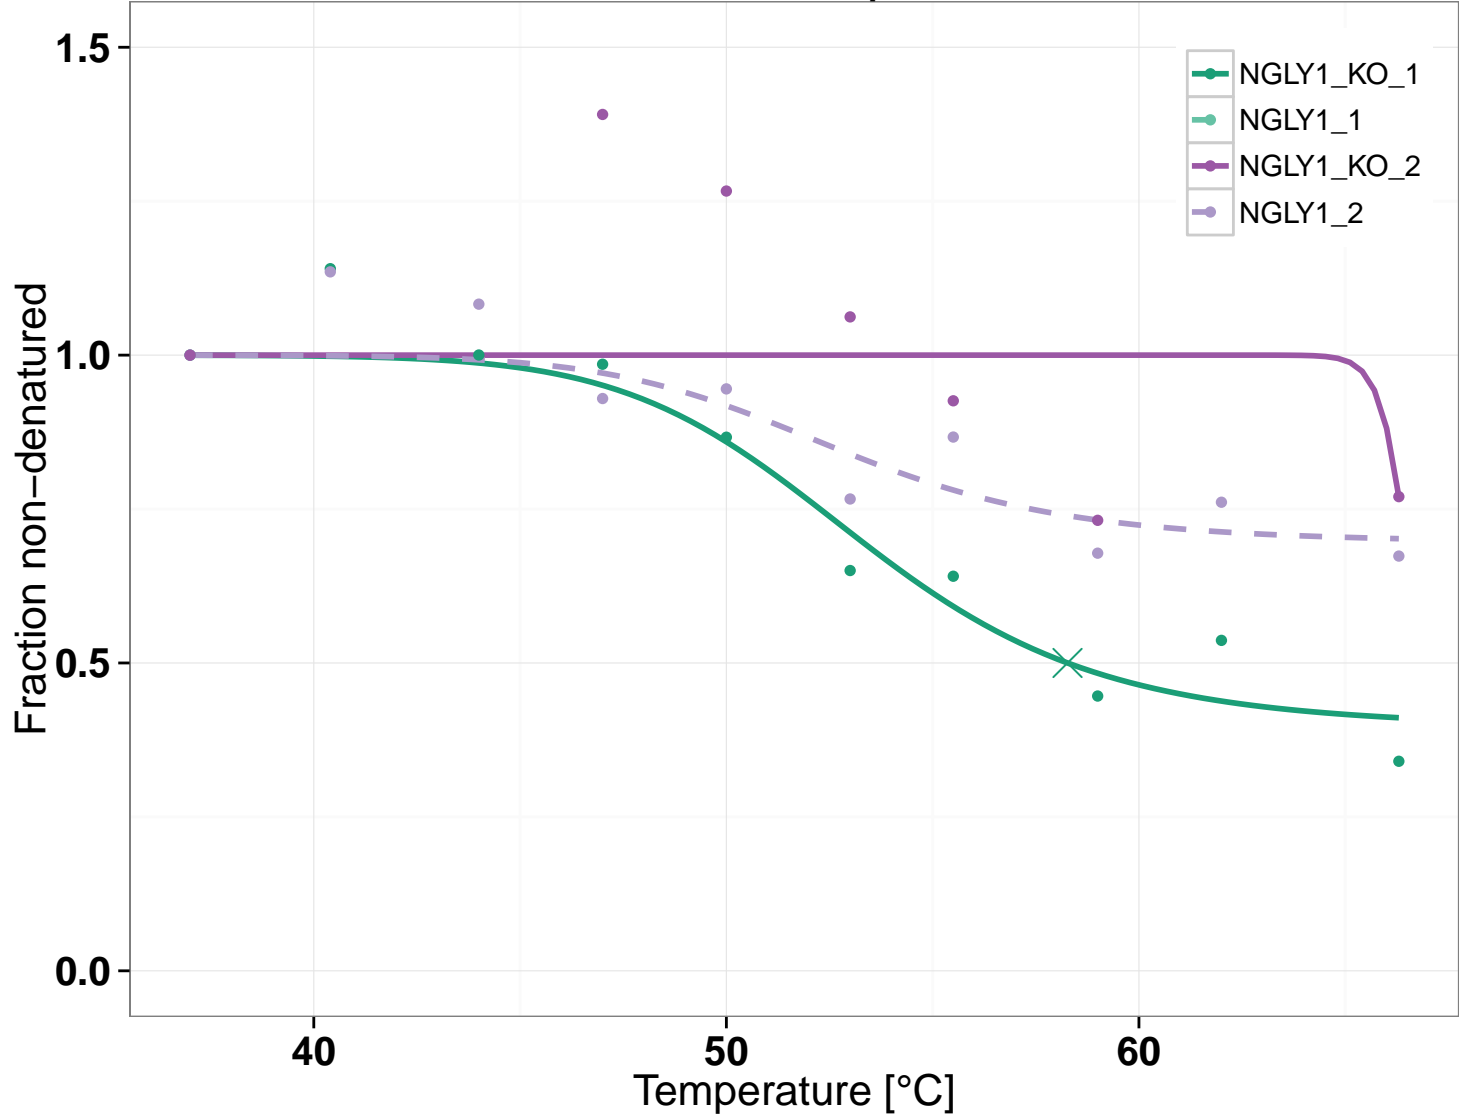

|            | meltPoint | slope  | plateau | R2    |
|------------|-----------|--------|---------|-------|
| NGLY1_KO_1 | 58.27     | -0.052 | 0.39    | 0.93  |
| NGLY1_1    | -         | -      | -       | -     |
| NGLY1_KO_2 | -         | -      | 0       | -0.24 |
| NGLY1_2    | -         | -0.027 | 0.7     | 0.8   |

Supplement: Supplementary file 4526 [file 1]

IPI00335589.5|RNMTL1

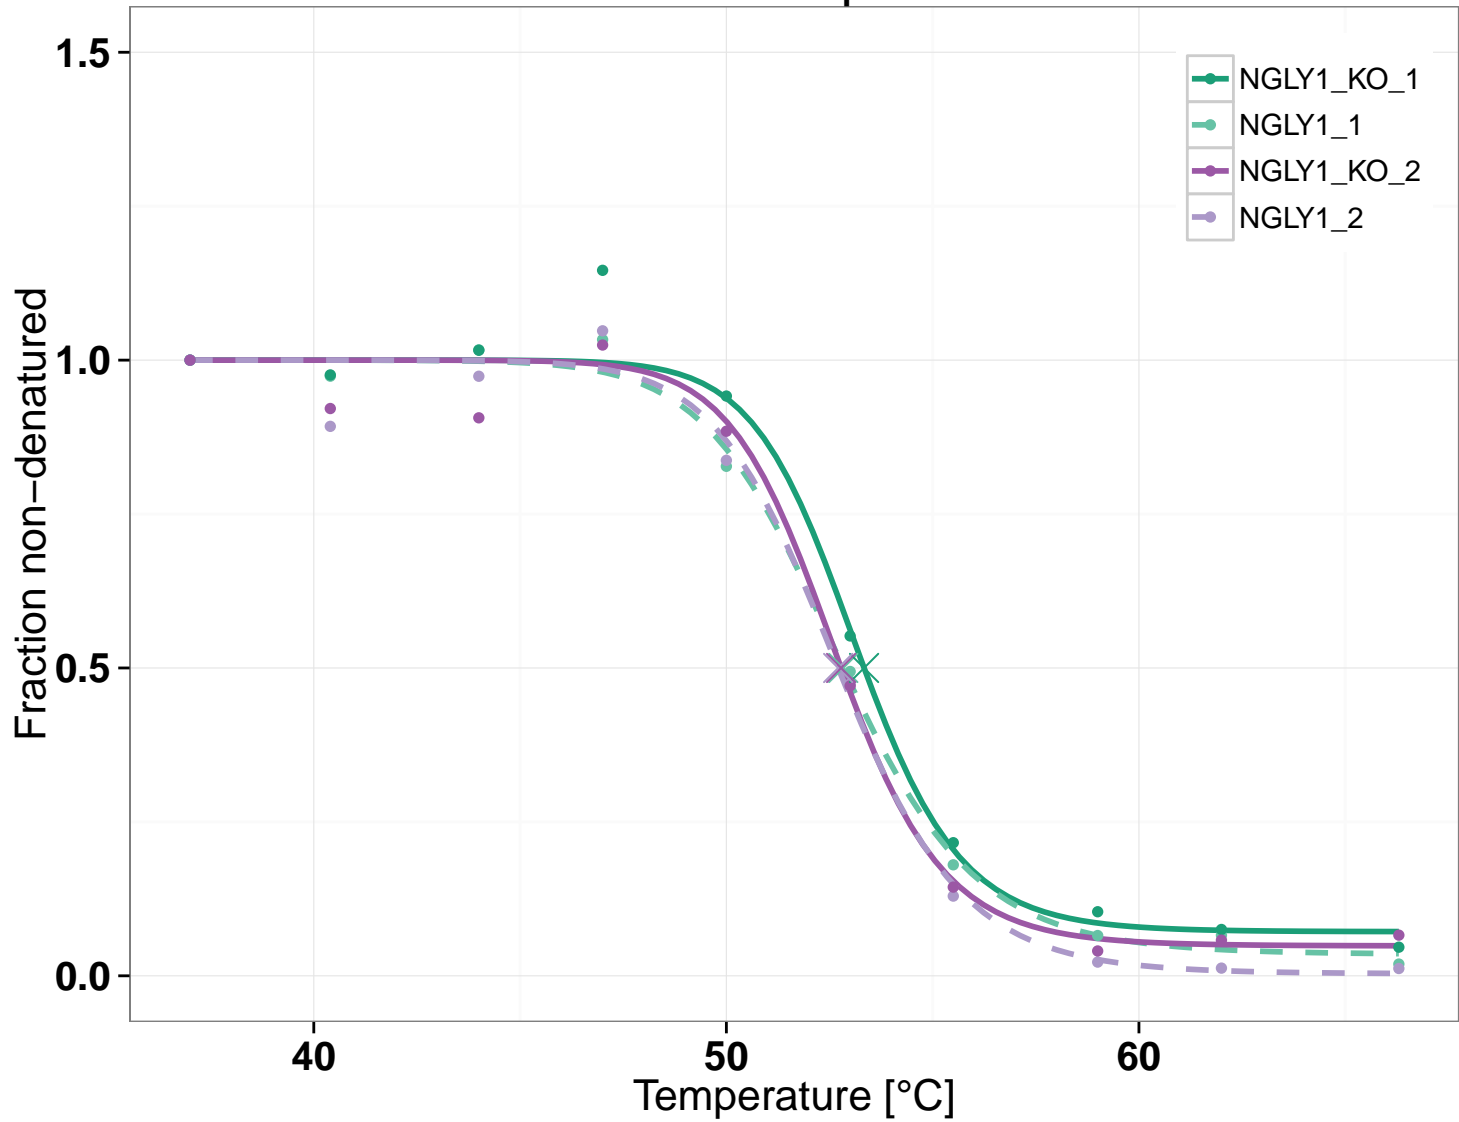

|            | meltPoint | slope | plateau | R2   |
|------------|-----------|-------|---------|------|
| NGLY1_KO_1 | 53.34     | -0.18 | 0.07    | 0.99 |
| NGLY1_1    | 52.83     | -0.15 | 0.03    | 1    |
| NGLY1_KO_2 | 52.78     | -0.18 | 0.05    | 0.99 |
| NGLY1_2    | 52.71     | -0.17 | 0       | 0.99 |

Supplement: Supplementary file 4527 [file 1]

IPI00009507.1|SYPL1

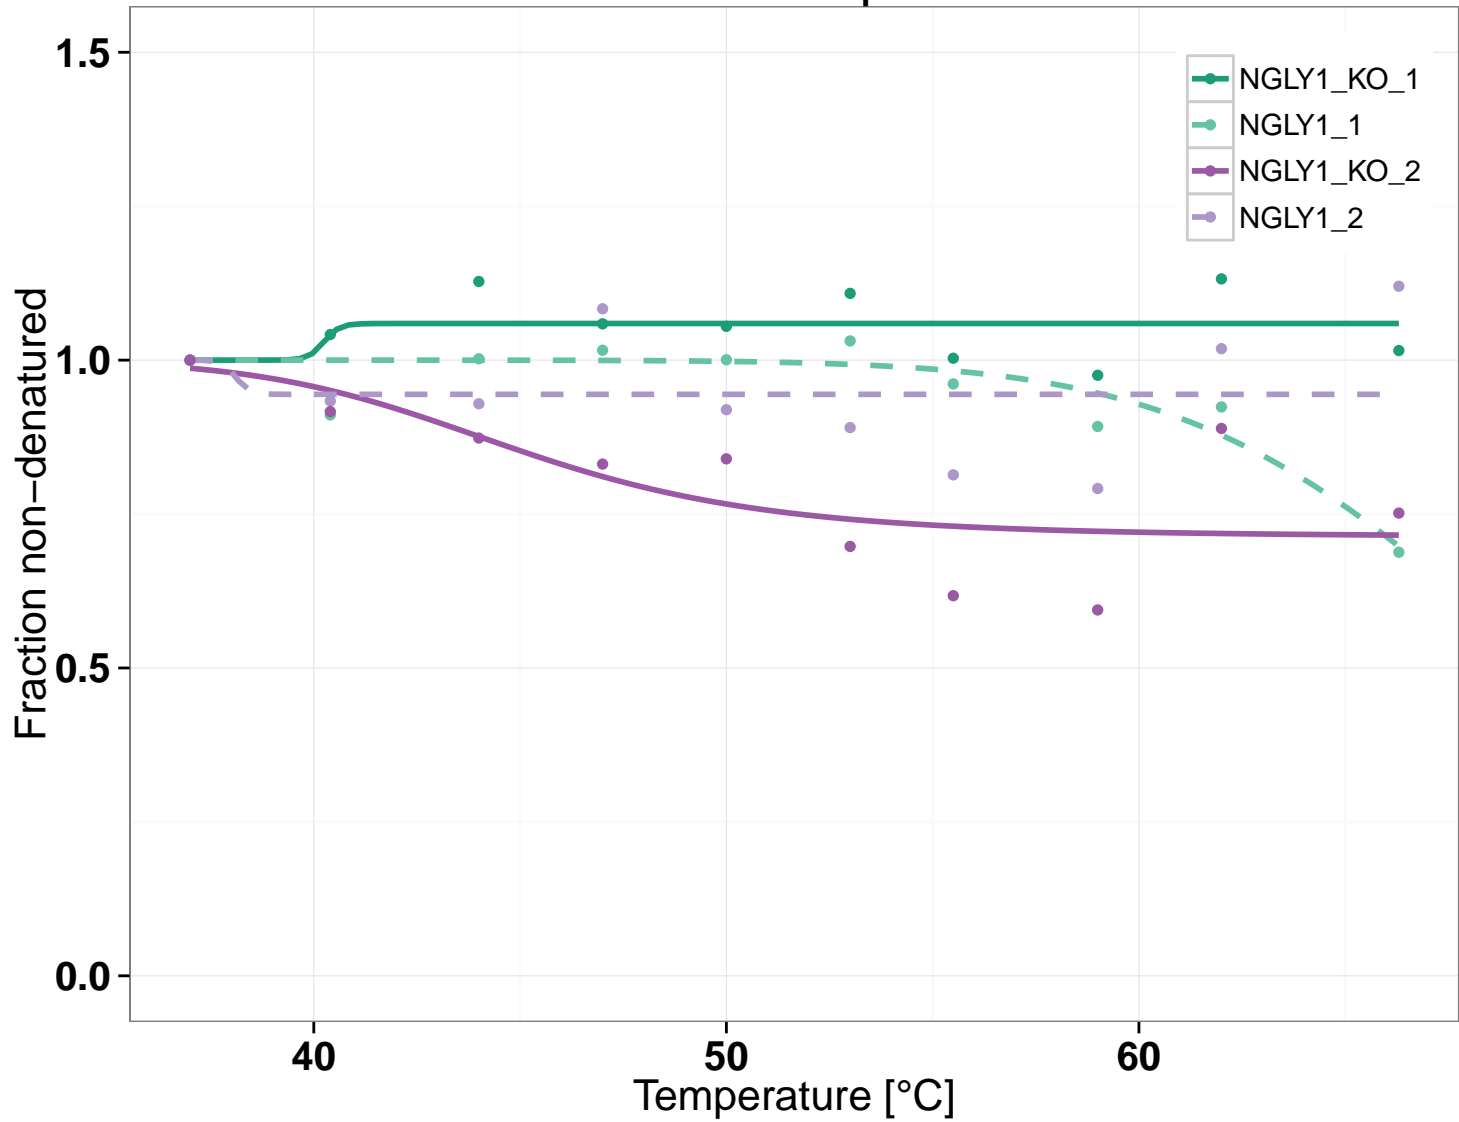

|            | meltPoint | slope  | plateau | R2   |
|------------|-----------|--------|---------|------|
| NGLY1_KO_1 | -         | 0.081  | 1.06    | 0.12 |
| NGLY1_1    | -         | -      | 0       | 0.84 |
| NGLY1_KO_2 | -         | -0.023 | 0.71    | 0.57 |
| NGLY1_2    | -         | -0.091 | 0.94    | 0.03 |

Supplement: Supplementary file 4528 [file 1]

# IPI00017910.8|PRR5

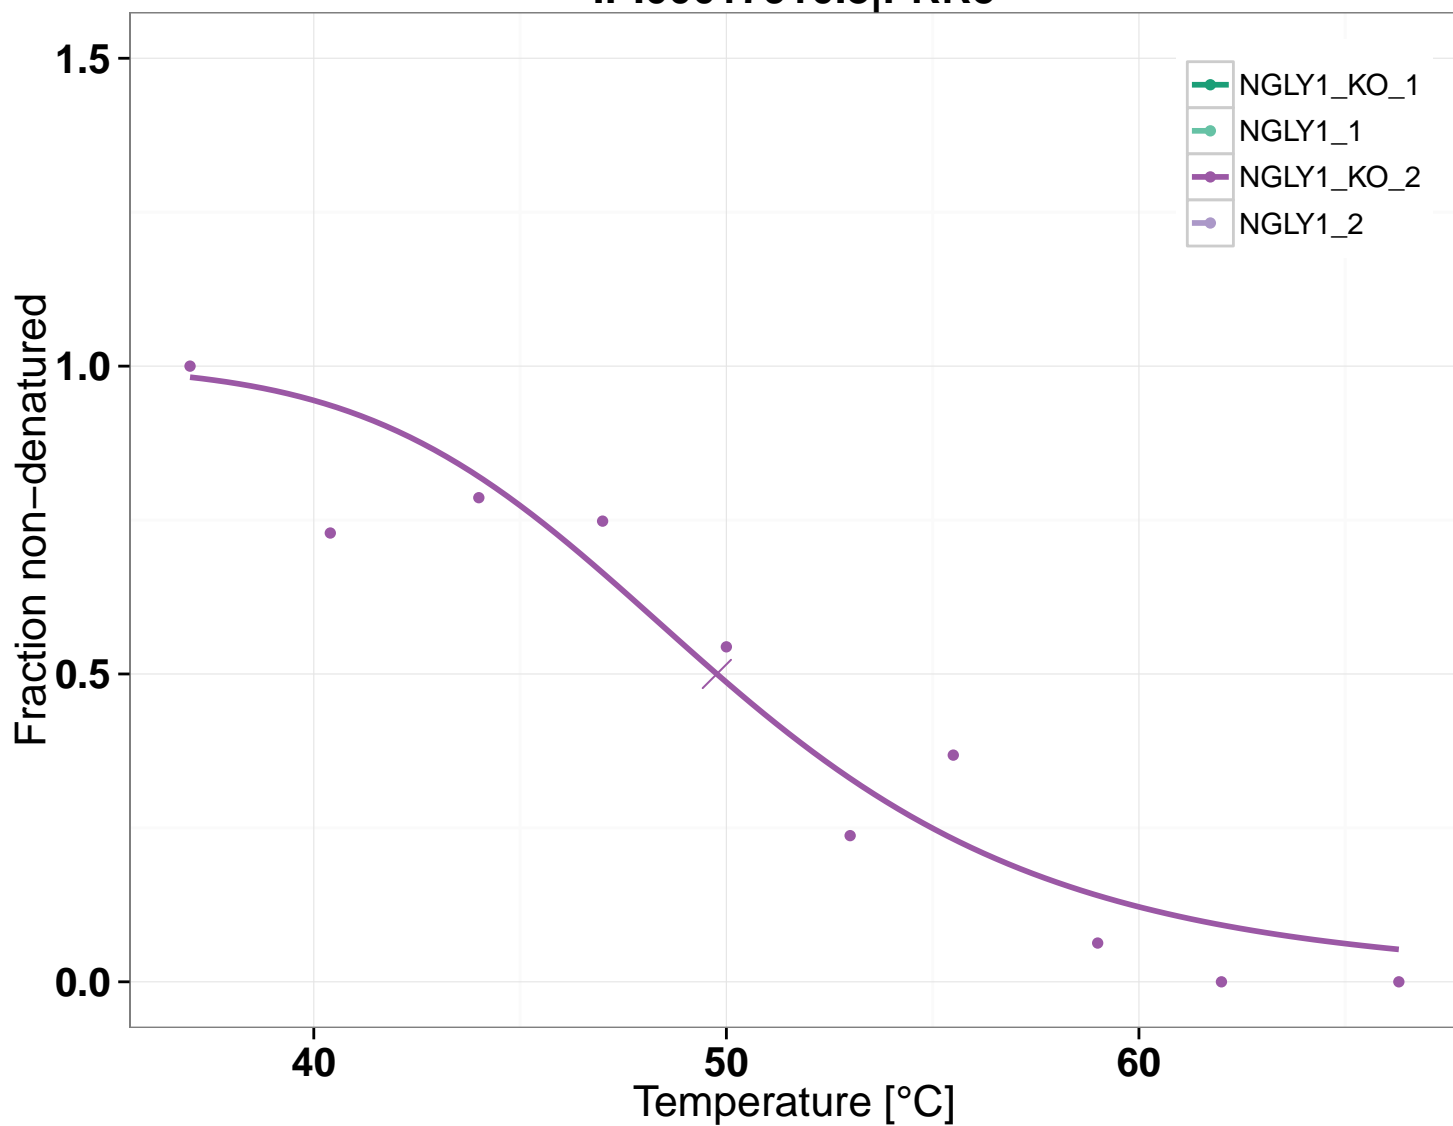

|            | meltPoint | slope | plateau | R2   |
|------------|-----------|-------|---------|------|
| NGLY1_KO_1 | —         | —     | —       | —    |
| NGLY1_1    | —         | —     | —       | —    |
| NGLY1_KO_2 | 49.77     | -0.06 | 0       | 0.92 |
| NGLY1_2    | —         | —     | —       | —    |

Supplement: Supplementary file 4529 [file 1]

# IPI00908725.1|ZC3H18

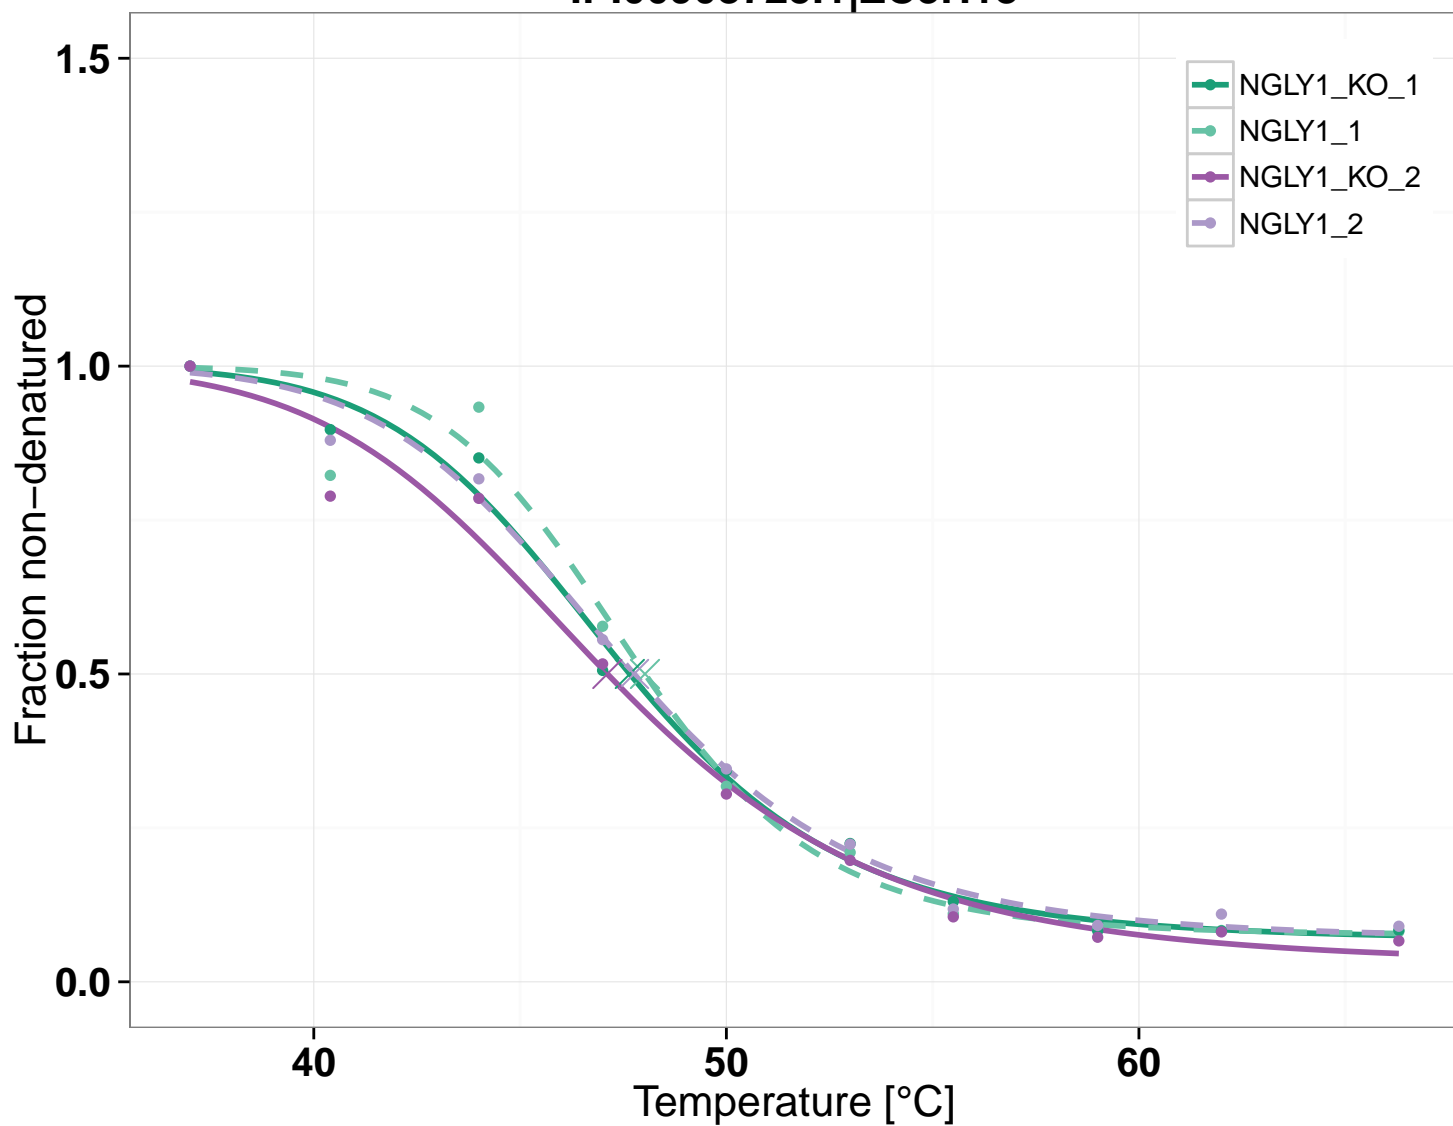

|            | meltPoint | slope  | plateau | R2   |
|------------|-----------|--------|---------|------|
| NGLY1_KO_1 | 47.66     | -0.084 | 0.07    | 0.99 |
| NGLY1_1    | 48.03     | -0.1   | 0.08    | 0.98 |
| NGLY1_KO_2 | 47.11     | -0.071 | 0.03    | 0.98 |
| NGLY1_2    | 47.76     | -0.08  | 0.07    | 0.99 |

Supplement: Supplementary file 4530 [file 1]

IPI00642159.2|CCDC40

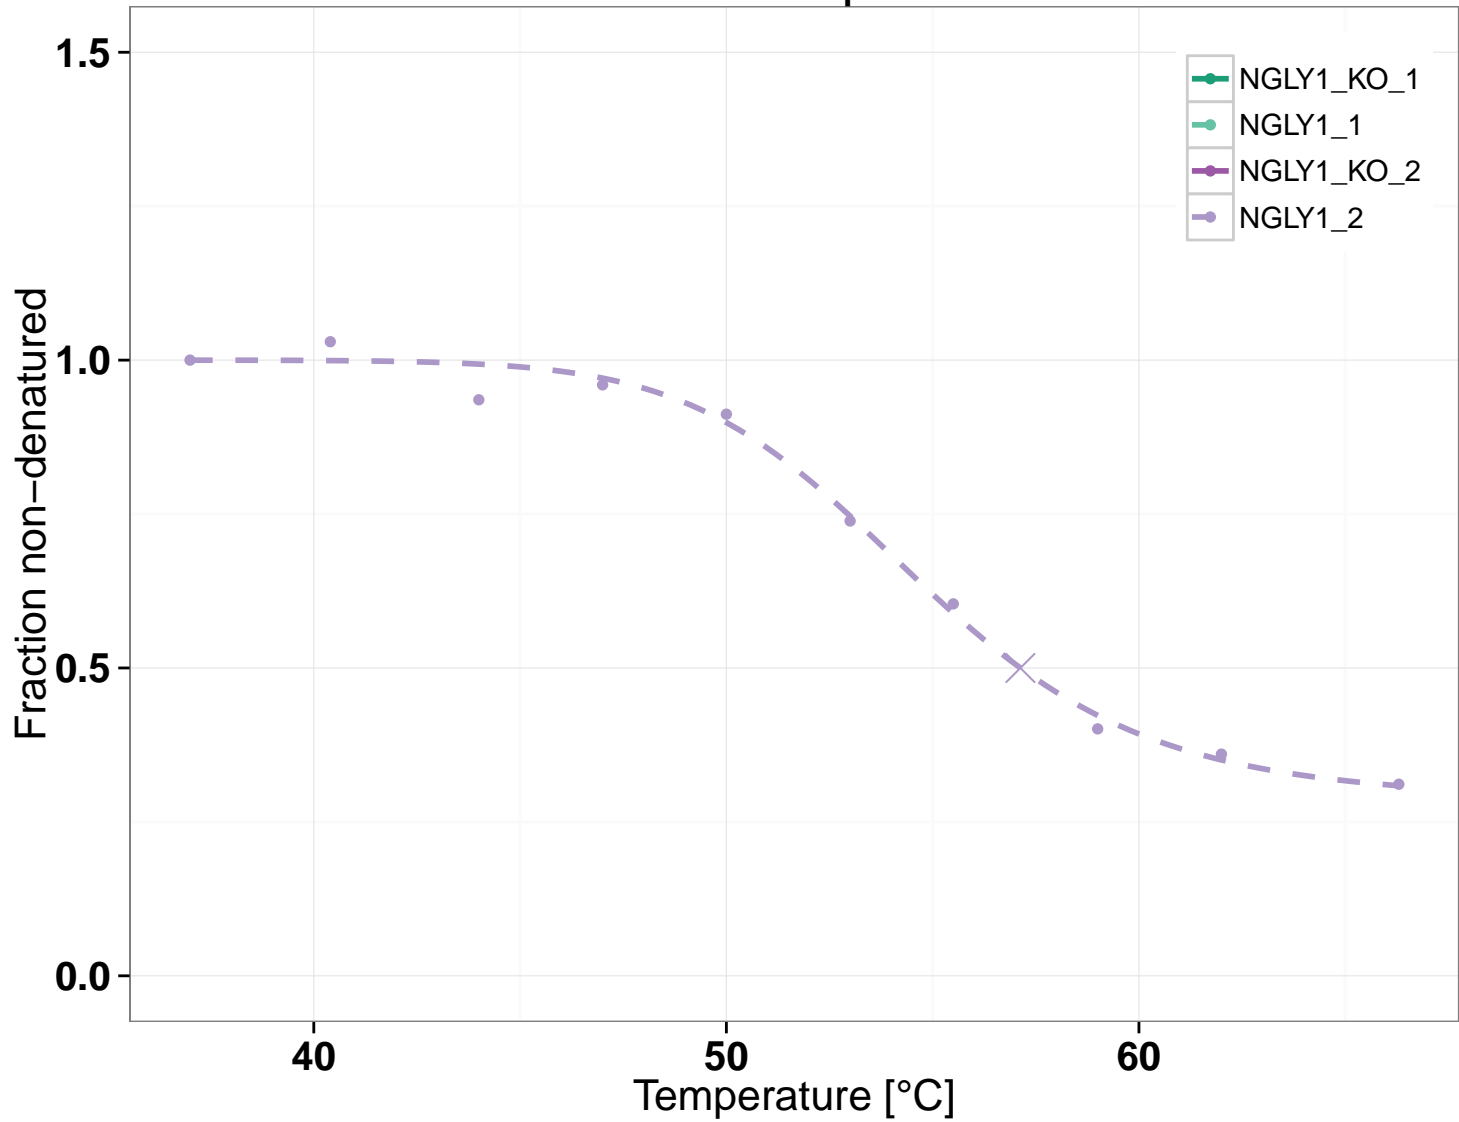

|            | meltPoint | slope  | plateau | R2   |
|------------|-----------|--------|---------|------|
| NGLY1_KO_1 | —         | —      | —       | —    |
| NGLY1_1    | —         | —      | —       | —    |
| NGLY1_KO_2 | —         | —      | —       | —    |
| NGLY1_2    | 57.13     | -0.064 | 0.29    | 0.99 |

Supplement: Supplementary file 4531 [file 1]

IPI00177509.4|MGC52424

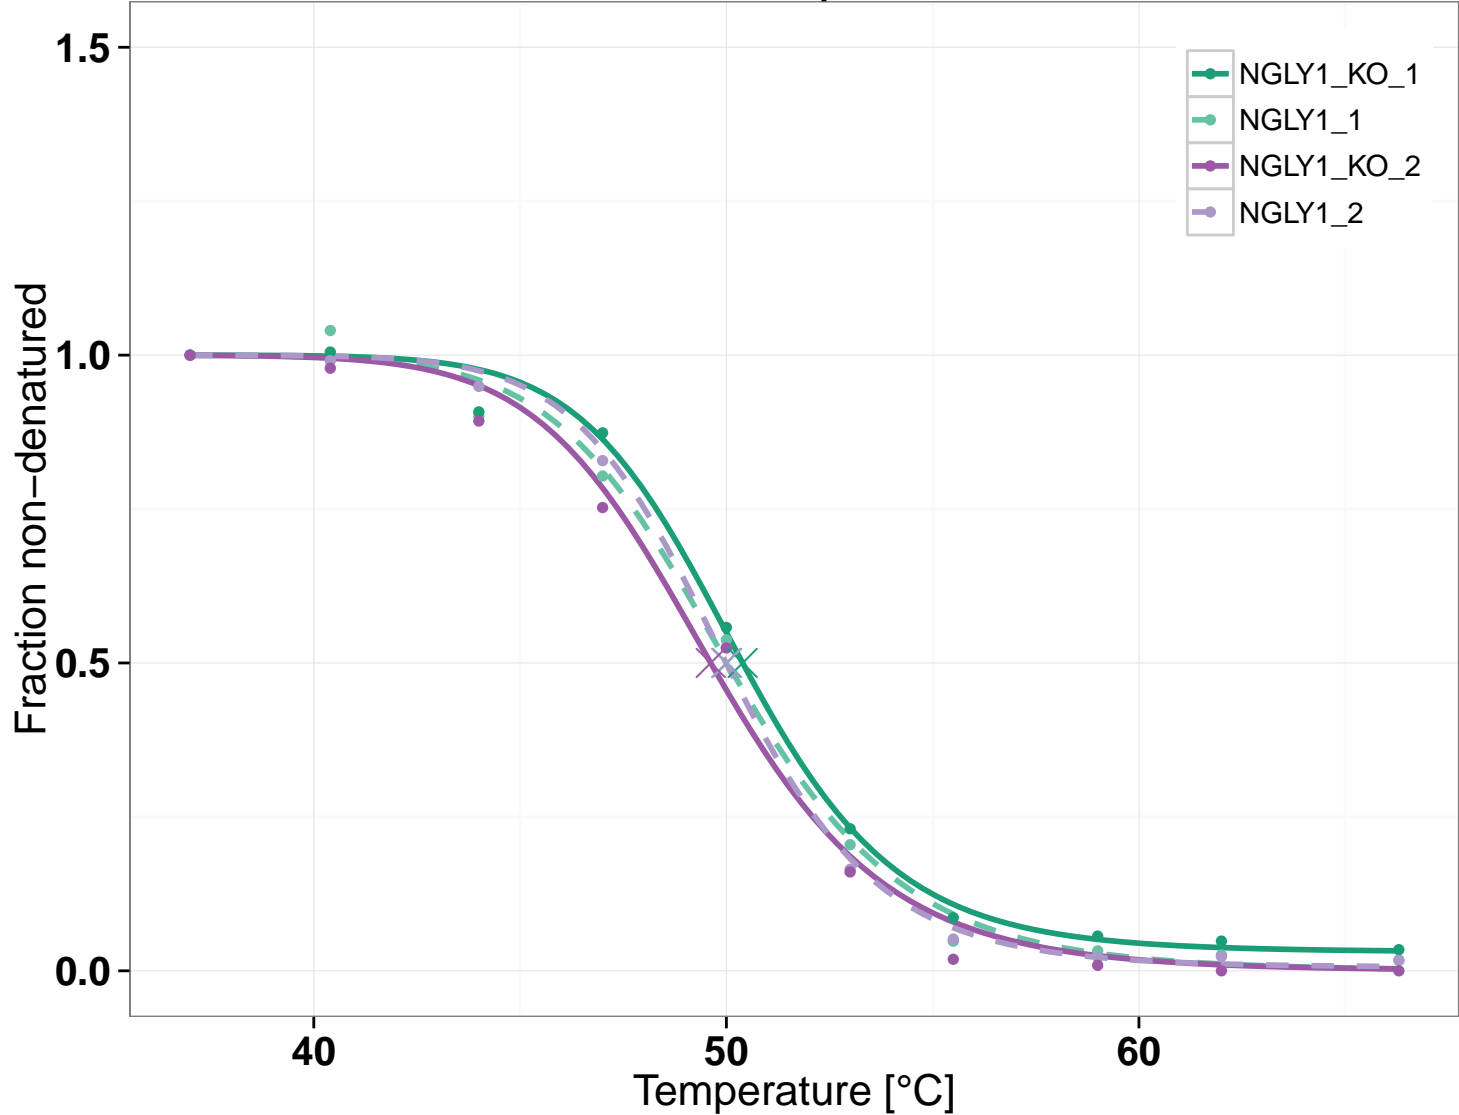

|            | meltPoint | slope | plateau | R2   |
|------------|-----------|-------|---------|------|
| NGLY1_KO_1 | 50.4      | -0.13 | 0.03    | 1    |
| NGLY1_1    | 50.02     | -0.12 | 0       | 0.99 |
| NGLY1_KO_2 | 49.62     | -0.12 | 0       | 0.99 |
| NGLY1_2    | 49.99     | -0.13 | 0.01    | 1    |

Supplement: Supplementary file 4532 [file 1]

IPI00217831.4|ANKRD13A

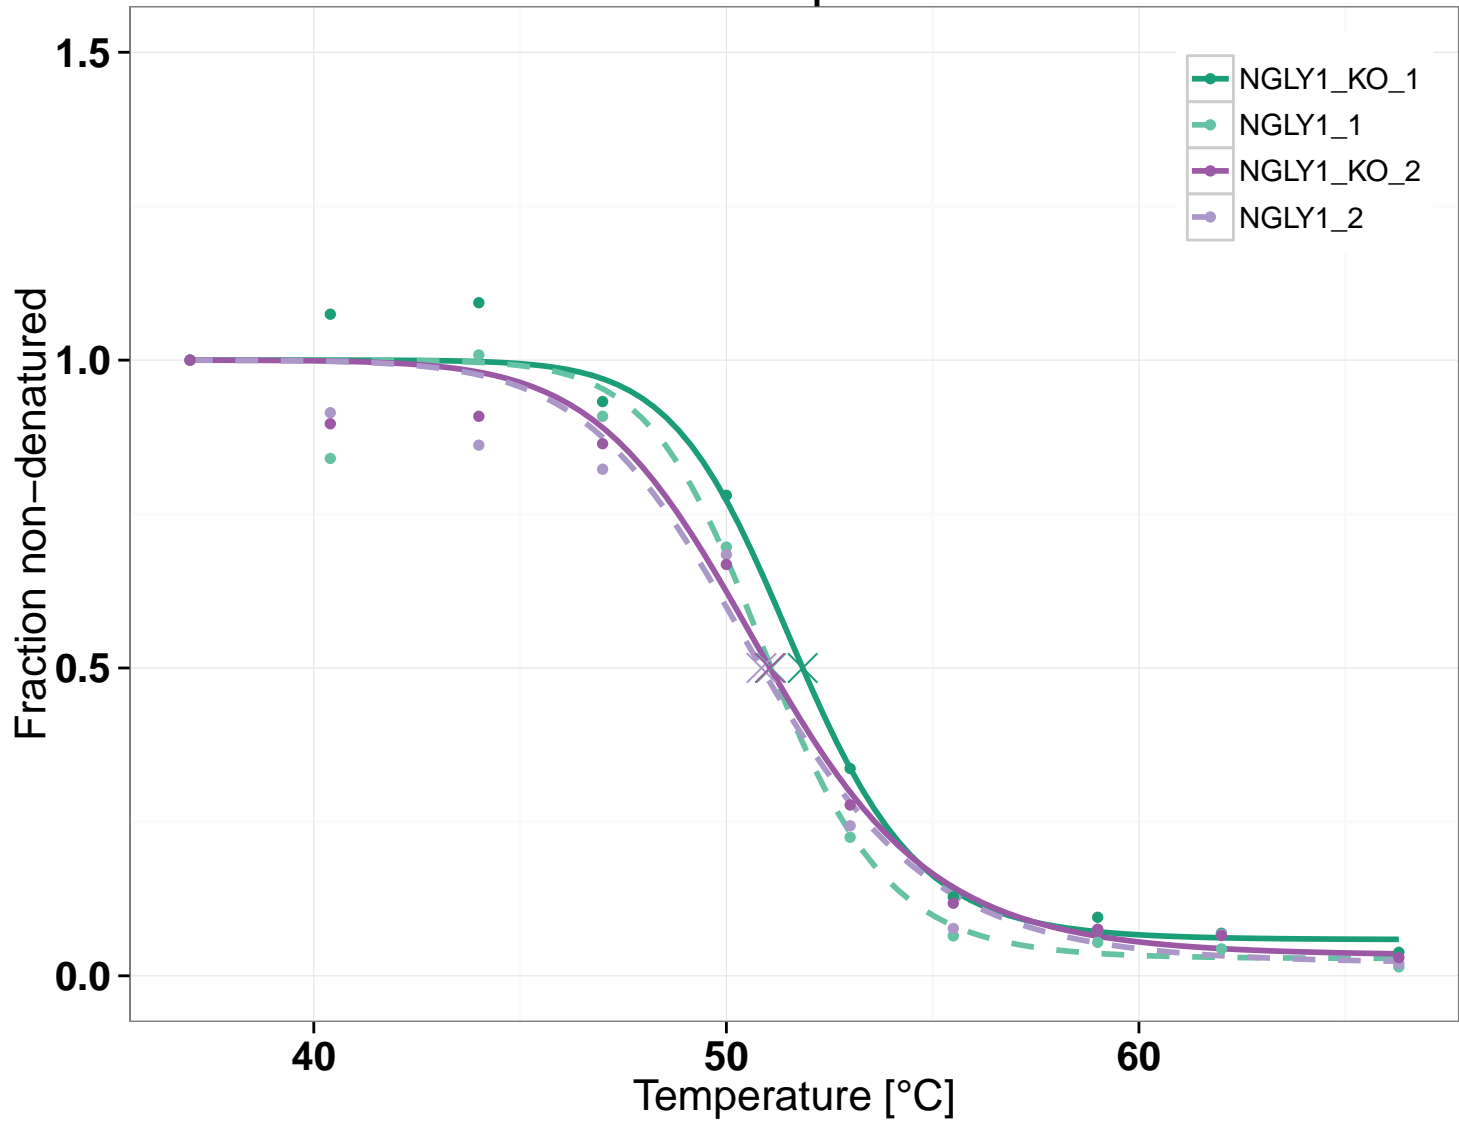

|            | meltPoint | slope | plateau | R2   |
|------------|-----------|-------|---------|------|
| NGLY1_KO_1 | 51.85     | -0.16 | 0.06    | 0.99 |
| NGLY1_1    | 51.09     | -0.17 | 0.03    | 0.98 |
| NGLY1_KO_2 | 51.06     | -0.12 | 0.03    | 0.99 |
| NGLY1_2    | 50.85     | -0.12 | 0.02    | 0.98 |

Supplement: Supplementary file 4533 [file 1]

IPI00303343.7|SCAF1

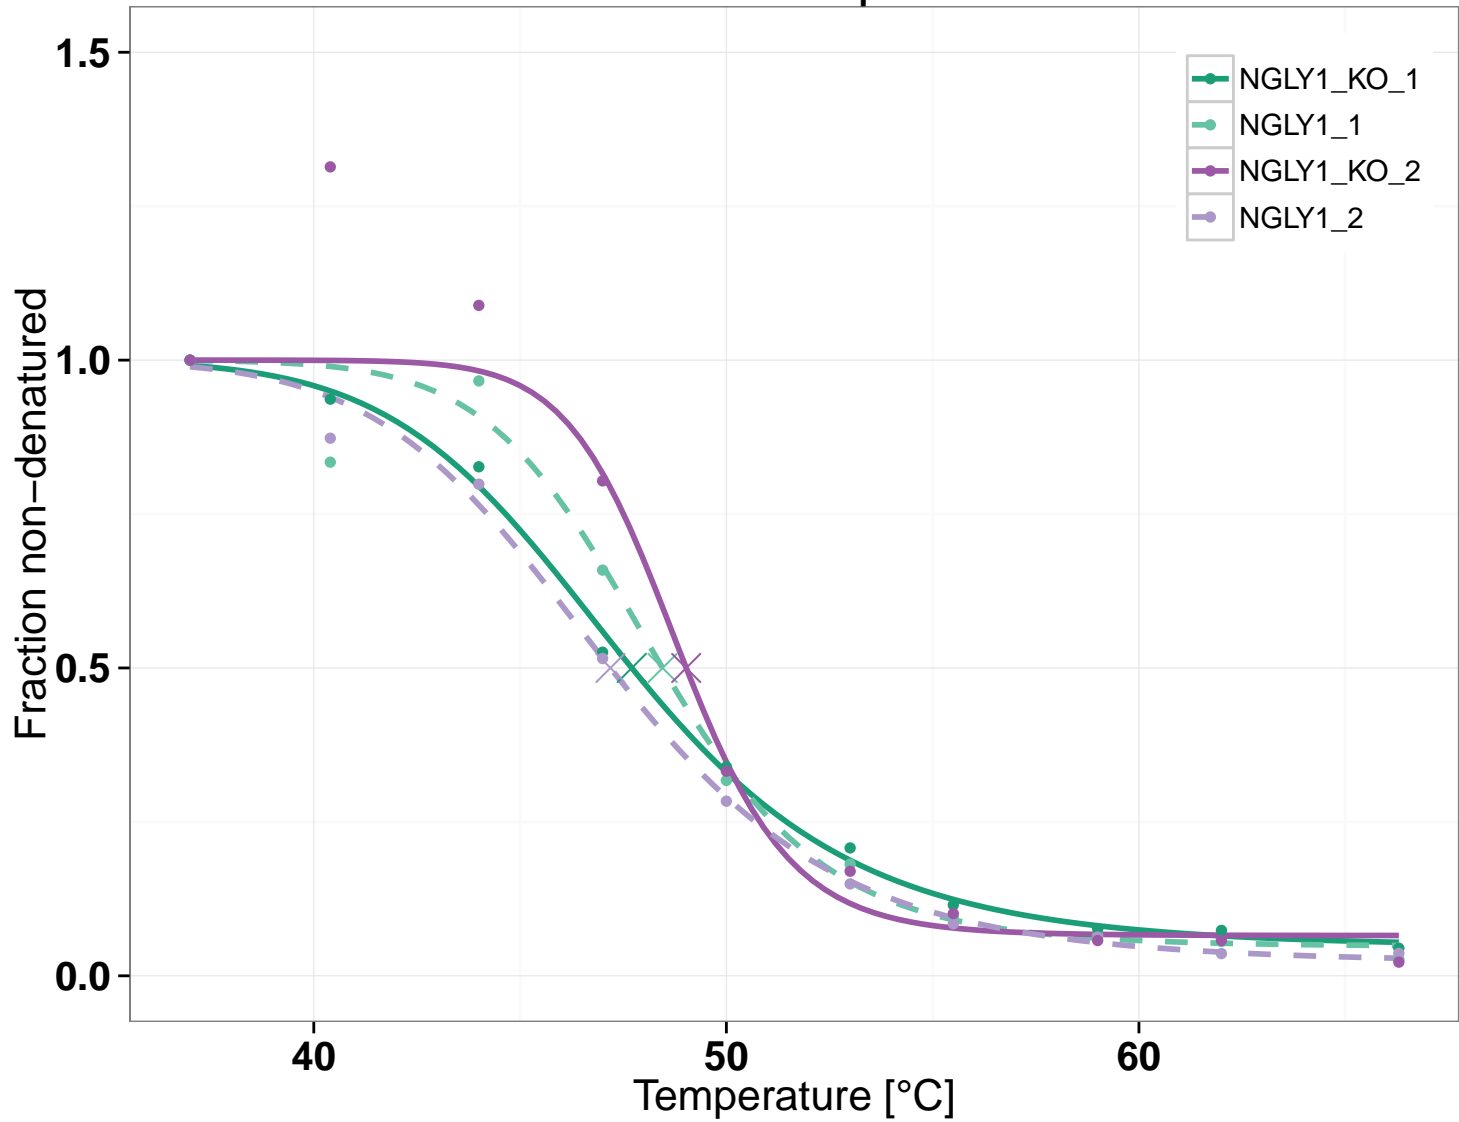

|            | meltPoint | slope  | plateau | R2   |
|------------|-----------|--------|---------|------|
| NGLY1_KO_1 | 47.71     | -0.085 | 0.05    | 1    |
| NGLY1_1    | 48.45     | -0.12  | 0.05    | 0.98 |
| NGLY1_KO_2 | 49.03     | -0.17  | 0.07    | 0.95 |
| NGLY1_2    | 47.19     | -0.087 | 0.02    | 1    |

Supplement: Supplementary file 4534 [file 1]

IPI00328580.2|TRPT1

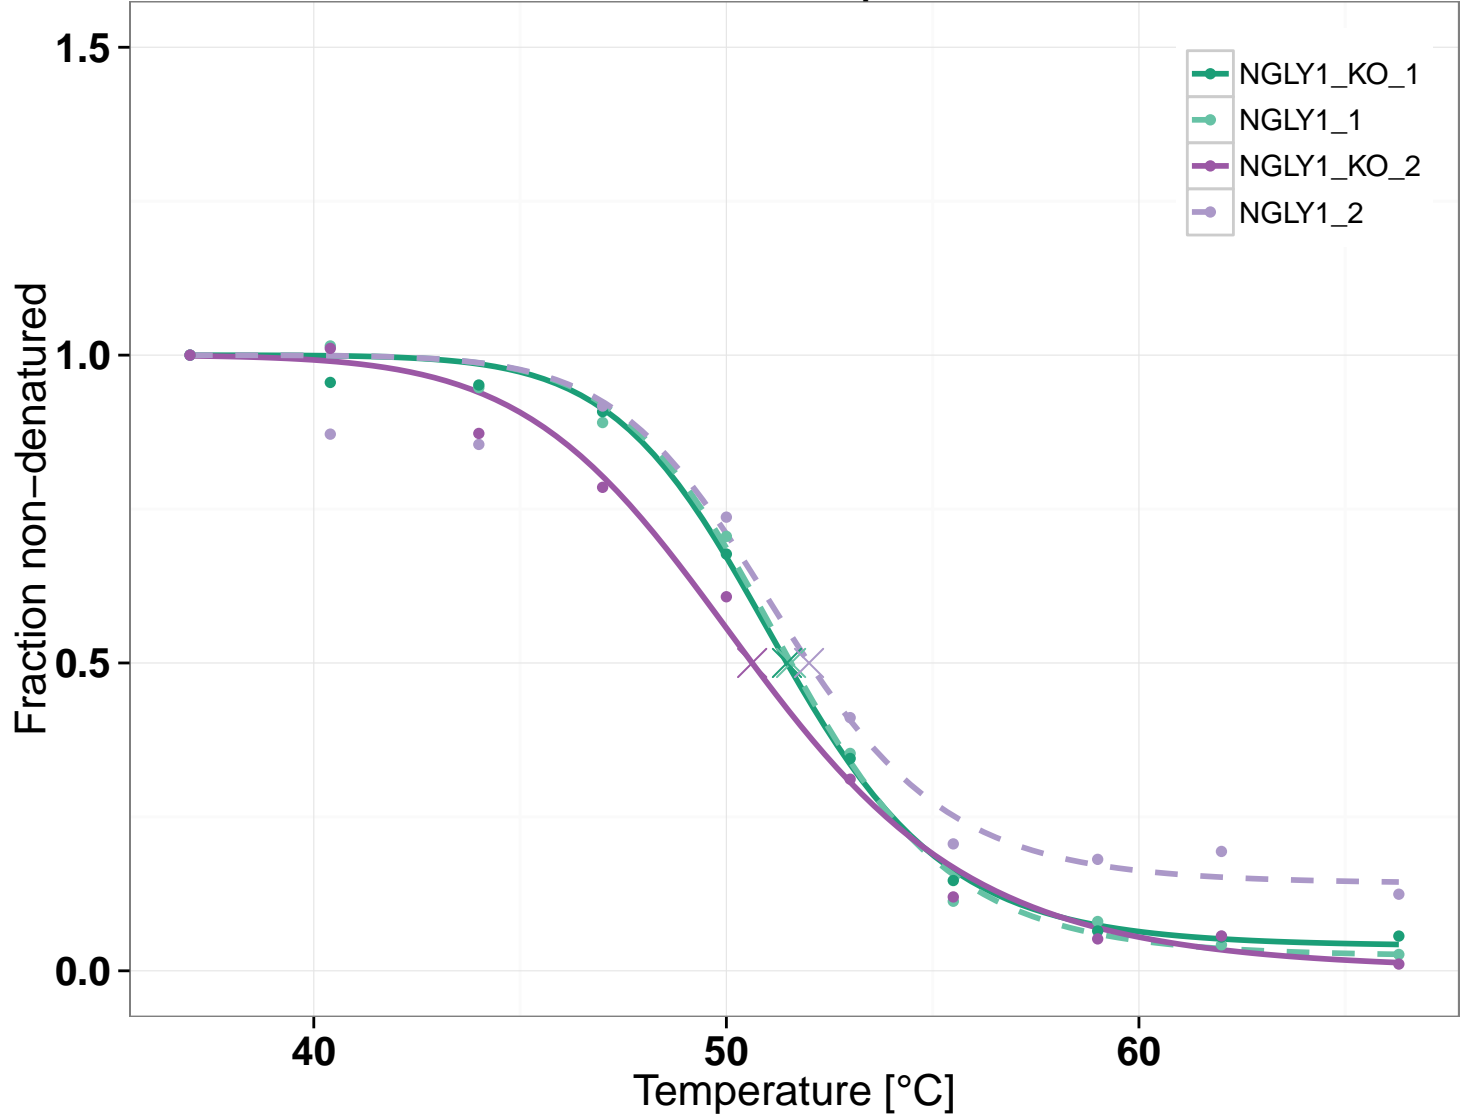

|            | meltPoint | slope  | plateau | R2   |
|------------|-----------|--------|---------|------|
| NGLY1_KO_1 | 51.47     | -0.12  | 0.04    | 1    |
| NGLY1_1    | 51.57     | -0.12  | 0.02    | 1    |
| NGLY1_KO_2 | 50.63     | -0.091 | 0       | 0.99 |
| NGLY1_2    | 52        | -0.11  | 0.14    | 0.97 |

Supplement: Supplementary file 4535 [file 1]

# IPI00464990.1|GP1BB

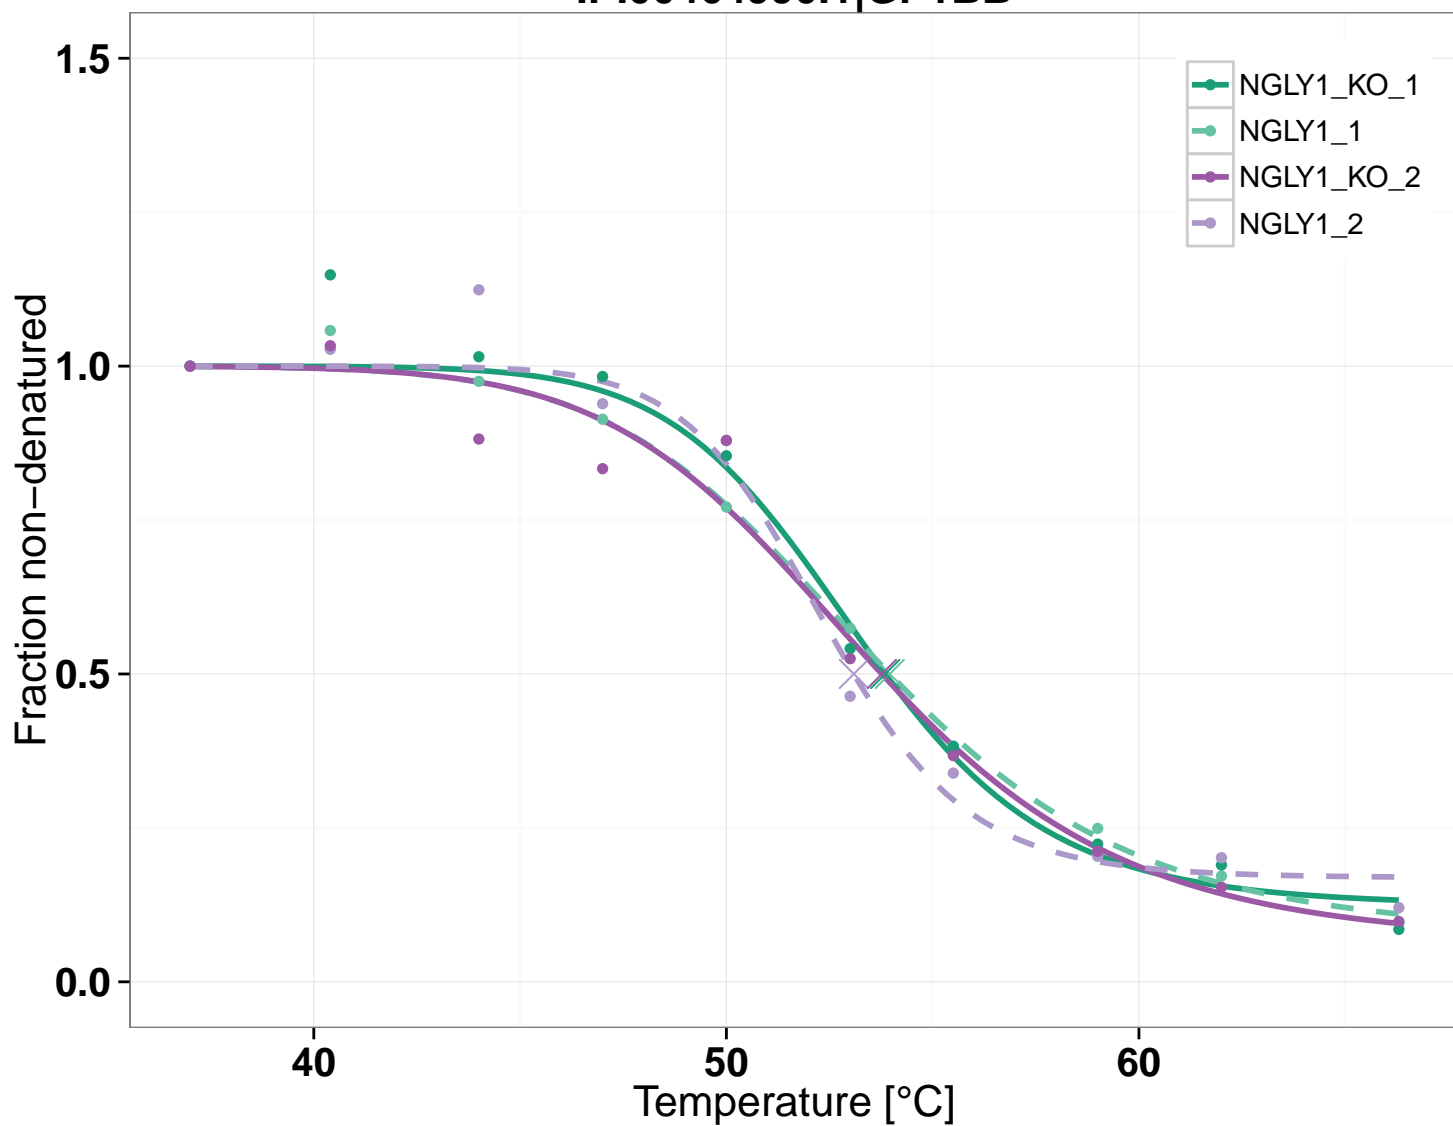

|            | meltPoint | slope  | plateau | R2   |
|------------|-----------|--------|---------|------|
| NGLY1_KO_1 | 53.85     | -0.096 | 0.12    | 0.98 |
| NGLY1_1    | 53.96     | -0.073 | 0.07    | 1    |
| NGLY1_KO_2 | 53.77     | -0.075 | 0.06    | 0.98 |
| NGLY1_2    | 53.09     | -0.12  | 0.17    | 0.98 |

Supplement: Supplementary file 4536 [file 1]

IPI00005609.2|VWA5A

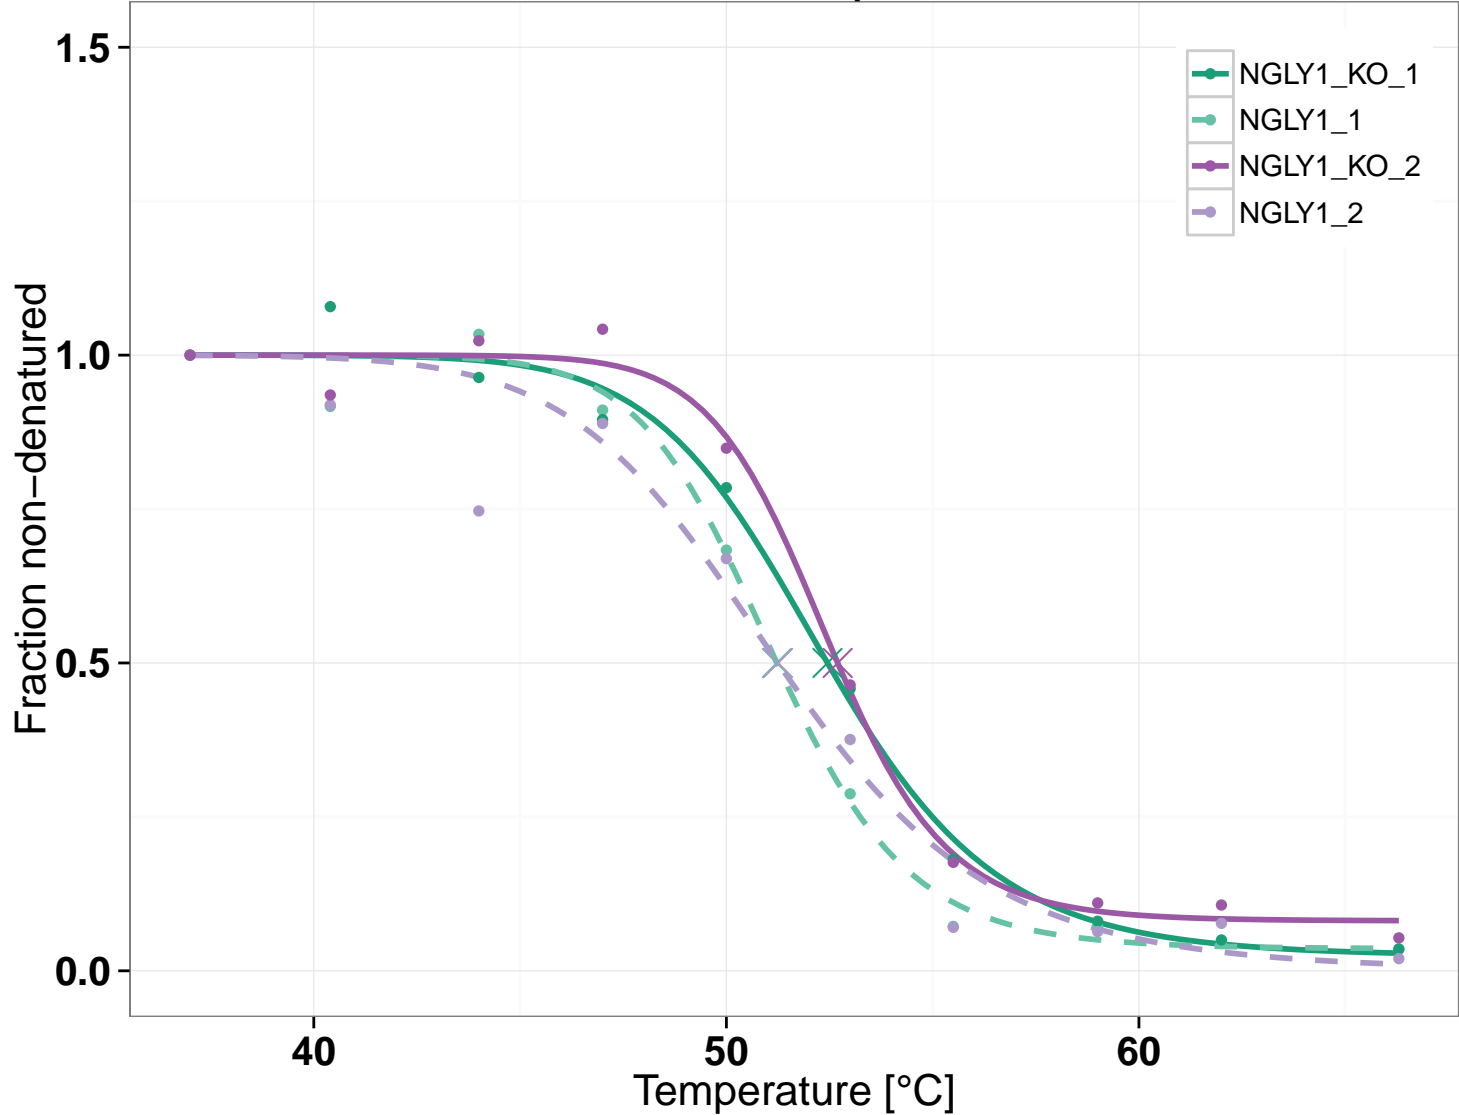

|            | meltPoint | slope  | plateau | R2   |
|------------|-----------|--------|---------|------|
| NGLY1_KO_1 | 52.45     | -0.12  | 0.02    | 0.99 |
| NGLY1_1    | 51.22     | -0.15  | 0.04    | 0.99 |
| NGLY1_KO_2 | 52.7      | -0.16  | 0.08    | 0.99 |
| NGLY1_2    | 51.25     | -0.098 | 0       | 0.95 |

Supplement: Supplementary file 4537 [file 1]

IPI00156887.5|SUV39H1

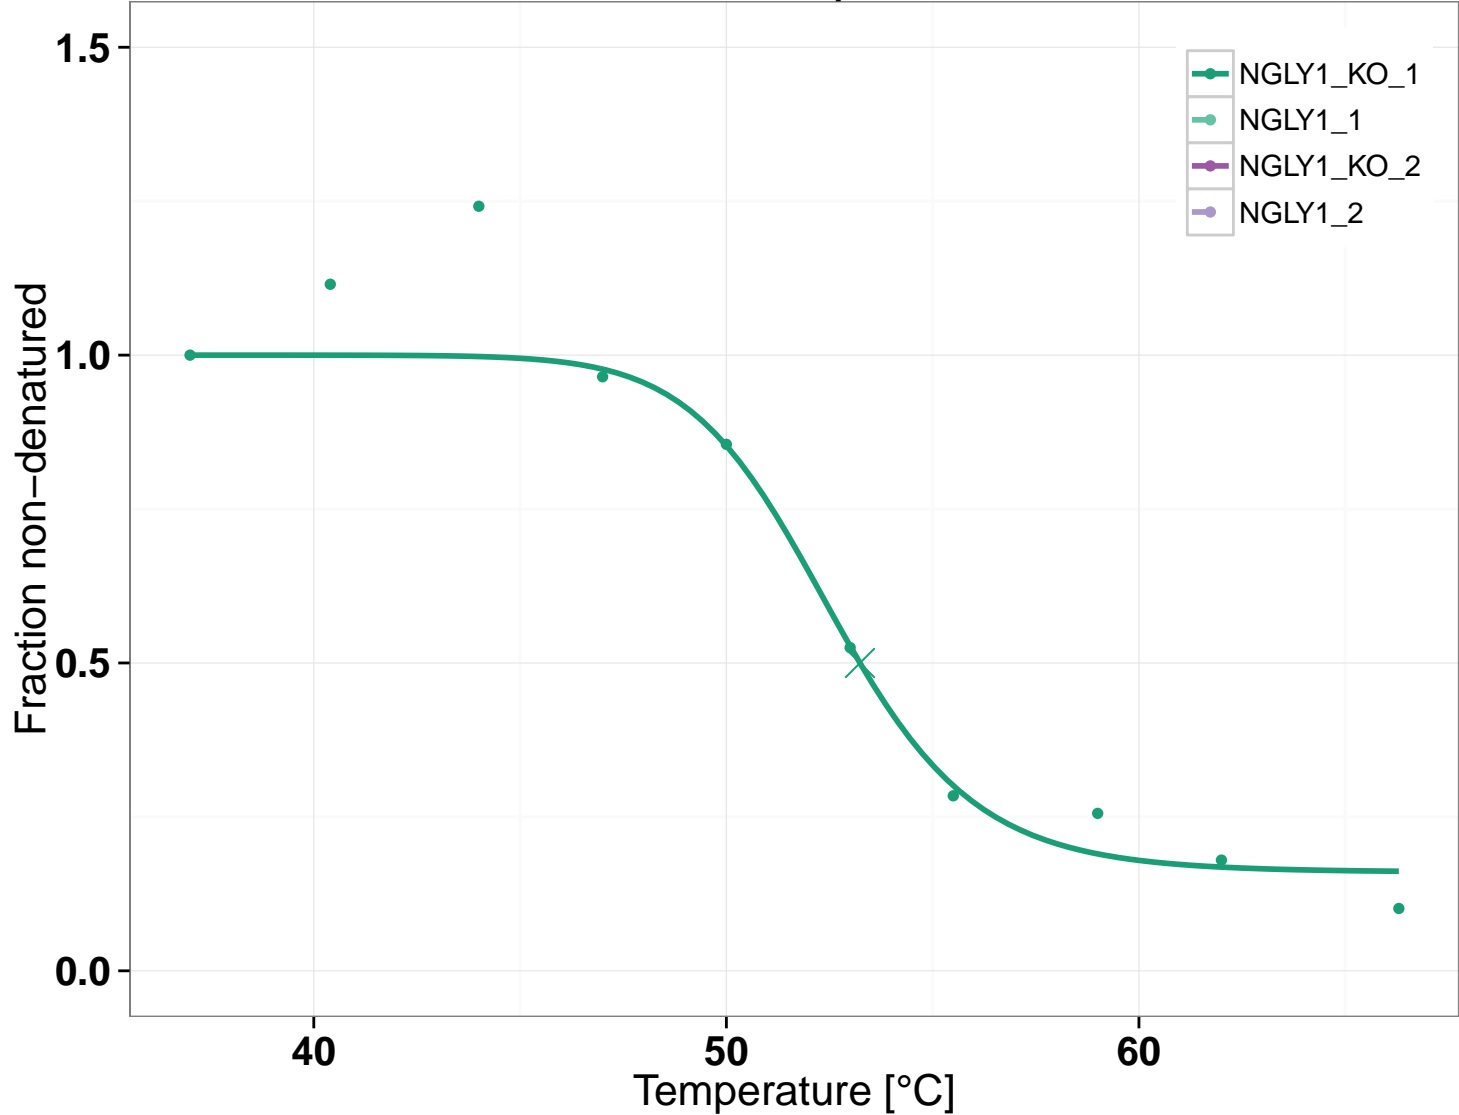

|            | meltPoint | slope | plateau | R2   |
|------------|-----------|-------|---------|------|
| NGLY1_KO_1 | 53.24     | -0.12 | 0.16    | 0.95 |
| NGLY1_1    | -         | -     | -       | -    |
| NGLY1_KO_2 | -         | -     | -       | -    |
| NGLY1_2    | -         | -     | -       | -    |

Supplement: Supplementary file 4538 [file 1]

IPI00872320.1|ZNF304

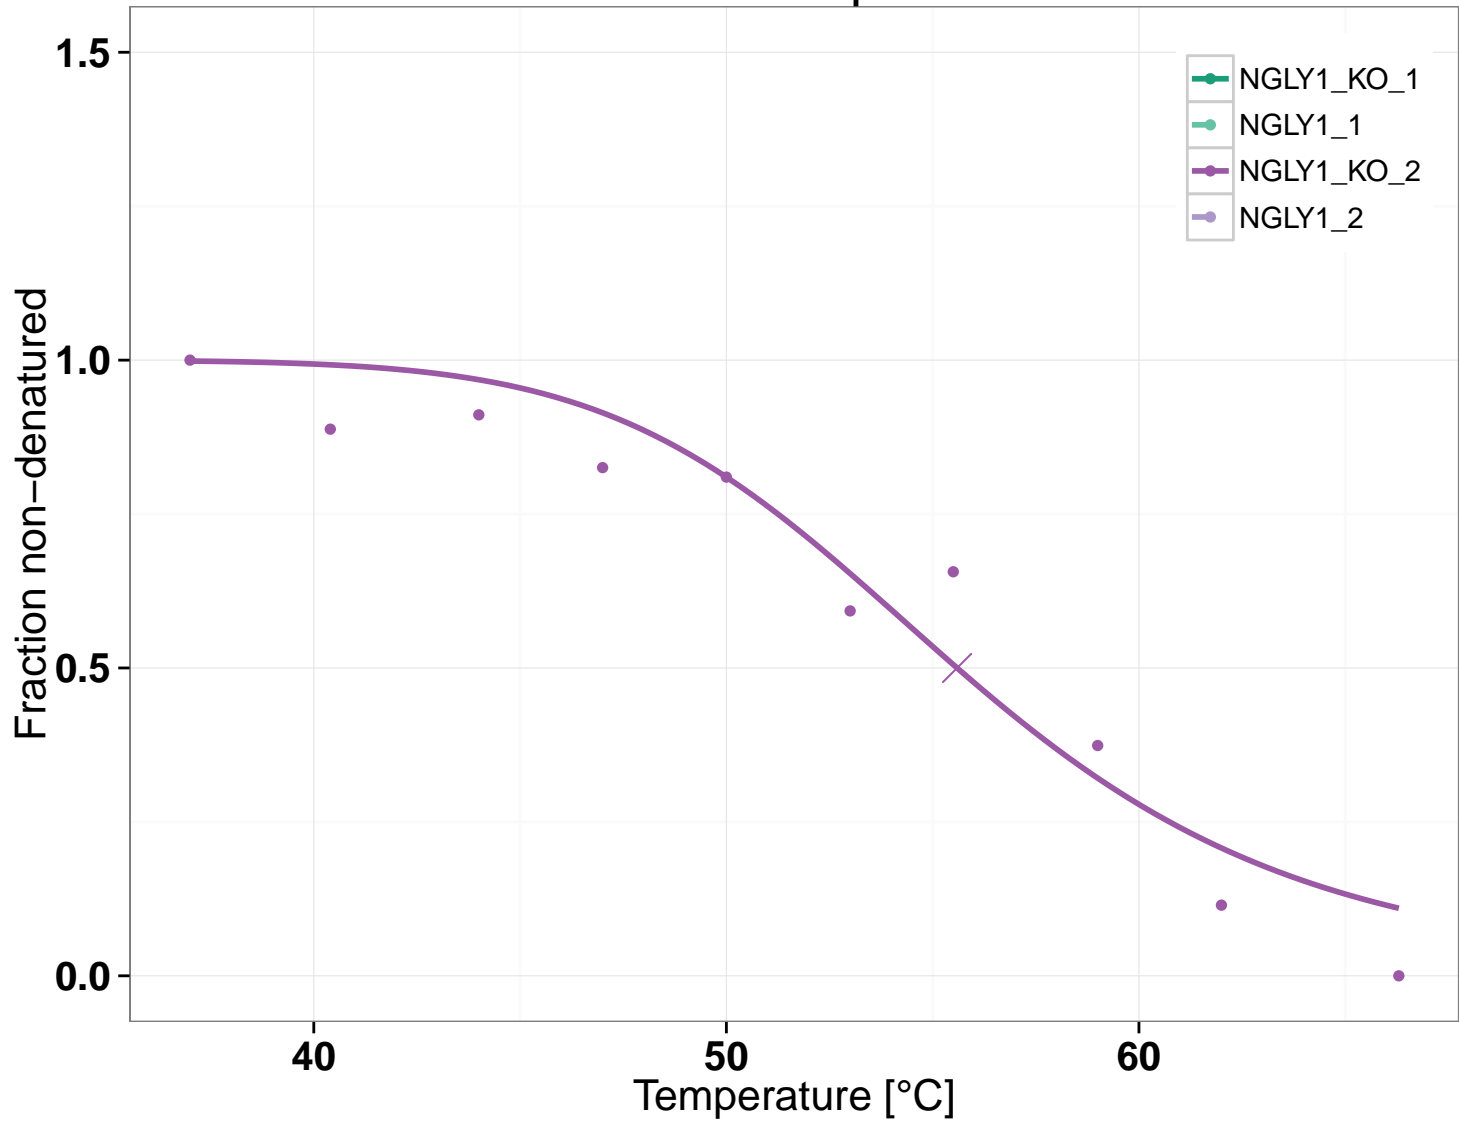

|            | meltPoint | slope | plateau | R2   |
|------------|-----------|-------|---------|------|
| NGLY1_KO_1 | —         | —     | —       | —    |
| NGLY1_1    | —         | —     | —       | —    |
| NGLY1_KO_2 | 55.59     | -0.06 | 0       | 0.93 |
| NGLY1_2    | —         | —     | —       | —    |

Supplement: Supplementary file 4539 [file 1]

# IPI00607579.2|HPS1

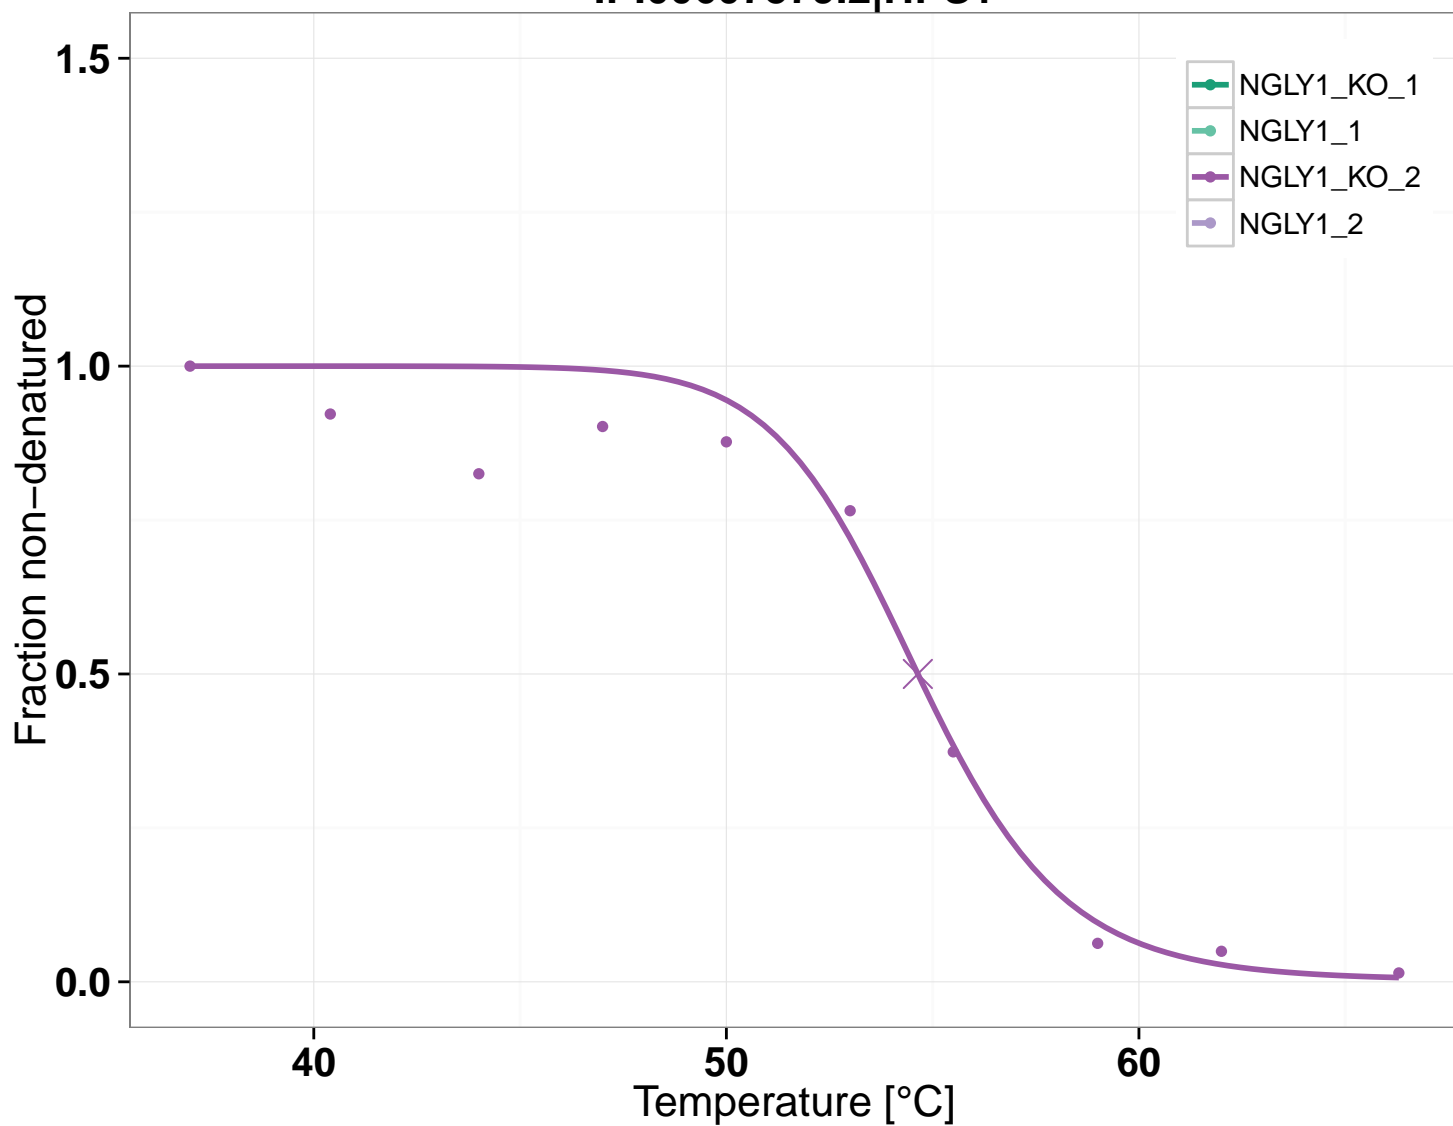

|            | meltPoint | slope | plateau | R2   |
|------------|-----------|-------|---------|------|
| NGLY1_KO_1 | —         | —     | —       | —    |
| NGLY1_1    | —         | —     | —       | —    |
| NGLY1_KO_2 | 54.64     | -0.14 | 0       | 0.96 |
| NGLY1_2    | —         | —     | —       | —    |

Supplement: Supplementary file 4540 [file 1]

IPI00644055.3|HNRNPR

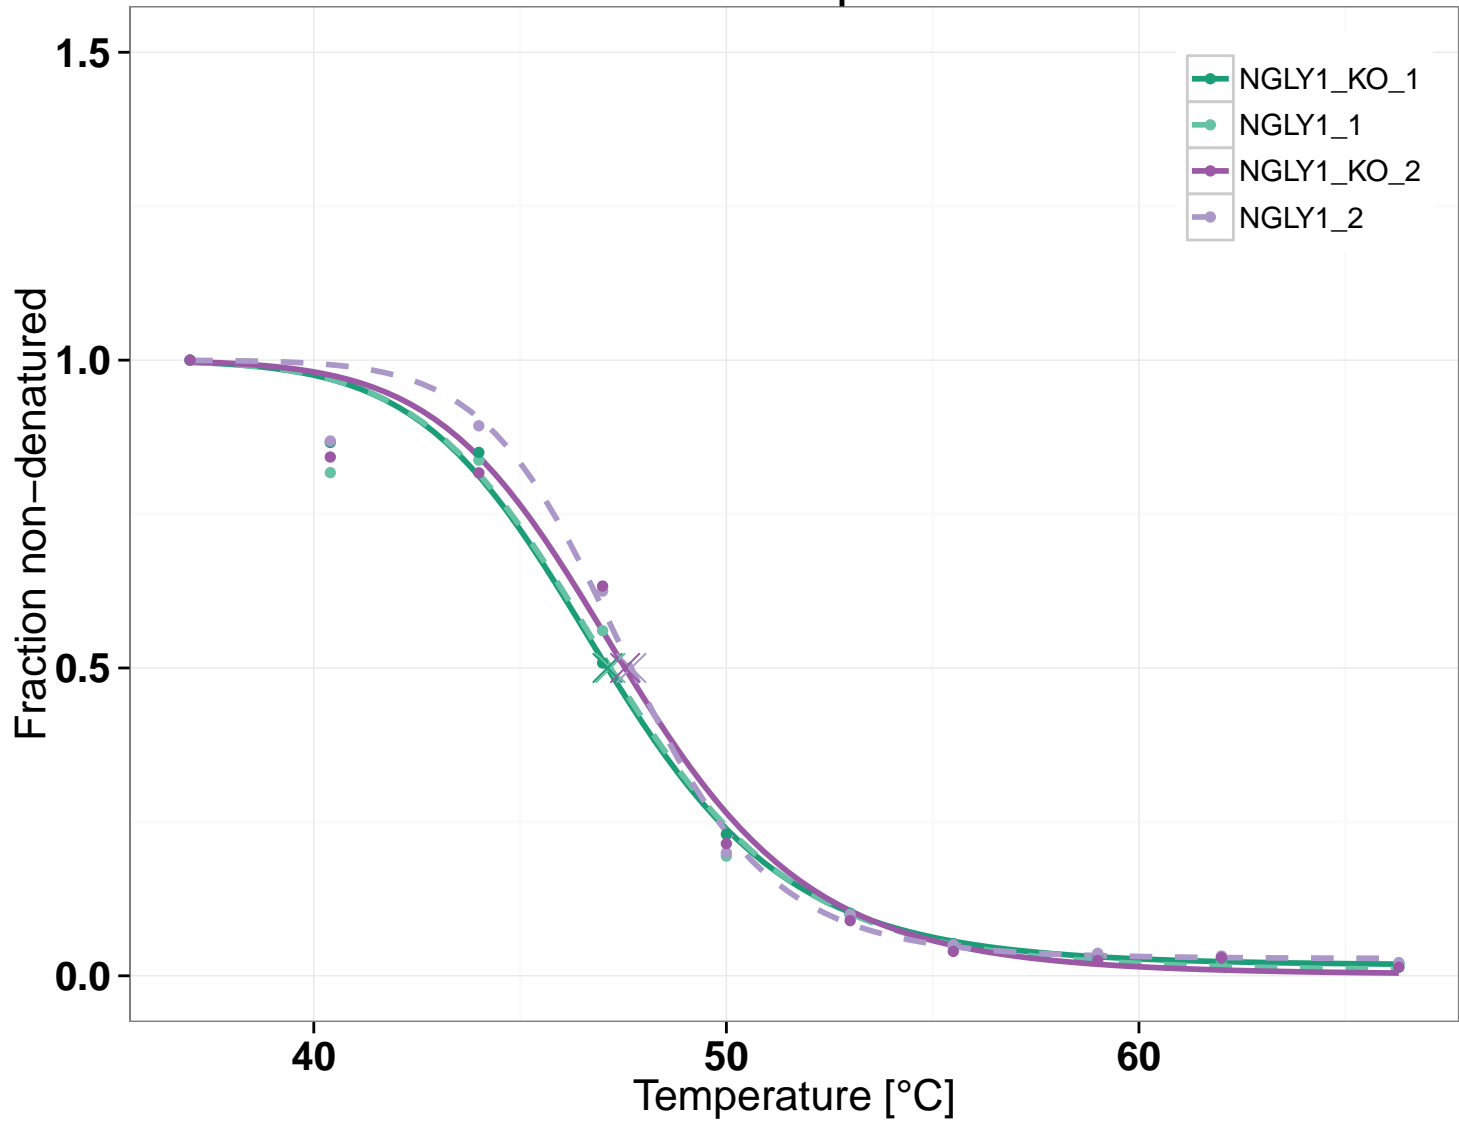

|            | meltPoint | slope | plateau | R2   |
|------------|-----------|-------|---------|------|
| NGLY1_KO_1 | 47.12     | -0.11 | 0.02    | 0.99 |
| NGLY1_1    | 47.19     | -0.11 | 0.01    | 0.98 |
| NGLY1_KO_2 | 47.55     | -0.11 | 0       | 0.98 |
| NGLY1_2    | 47.69     | -0.14 | 0.03    | 0.99 |

Supplement: Supplementary file 4541 [file 1]

IPI00152705.6|SH3RF2

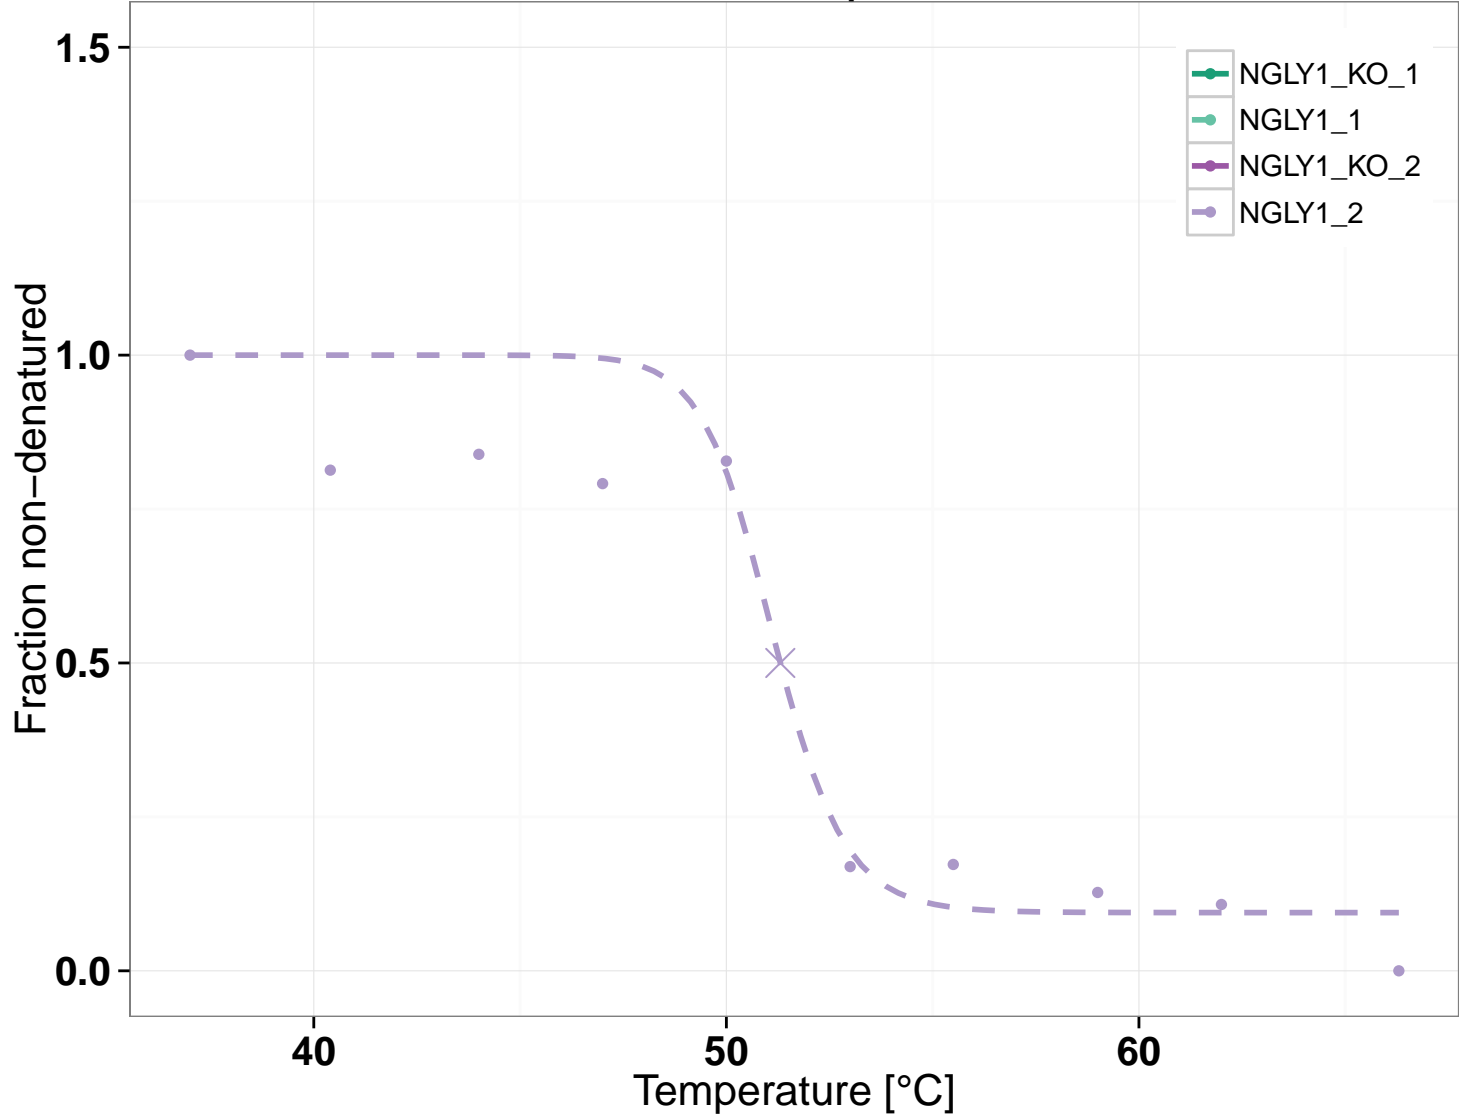

|            | meltPoint | slope | plateau | R2   |
|------------|-----------|-------|---------|------|
| NGLY1_KO_1 | -         | -     | -       | -    |
| NGLY1_1    | -         | -     | -       | -    |
| NGLY1_KO_2 | -         | -     | -       | -    |
| NGLY1_2    | 51.31     | -0.26 | 0.09    | 0.92 |

Supplement: Supplementary file 4542 [file 1]

IPI00028571.2|STK19

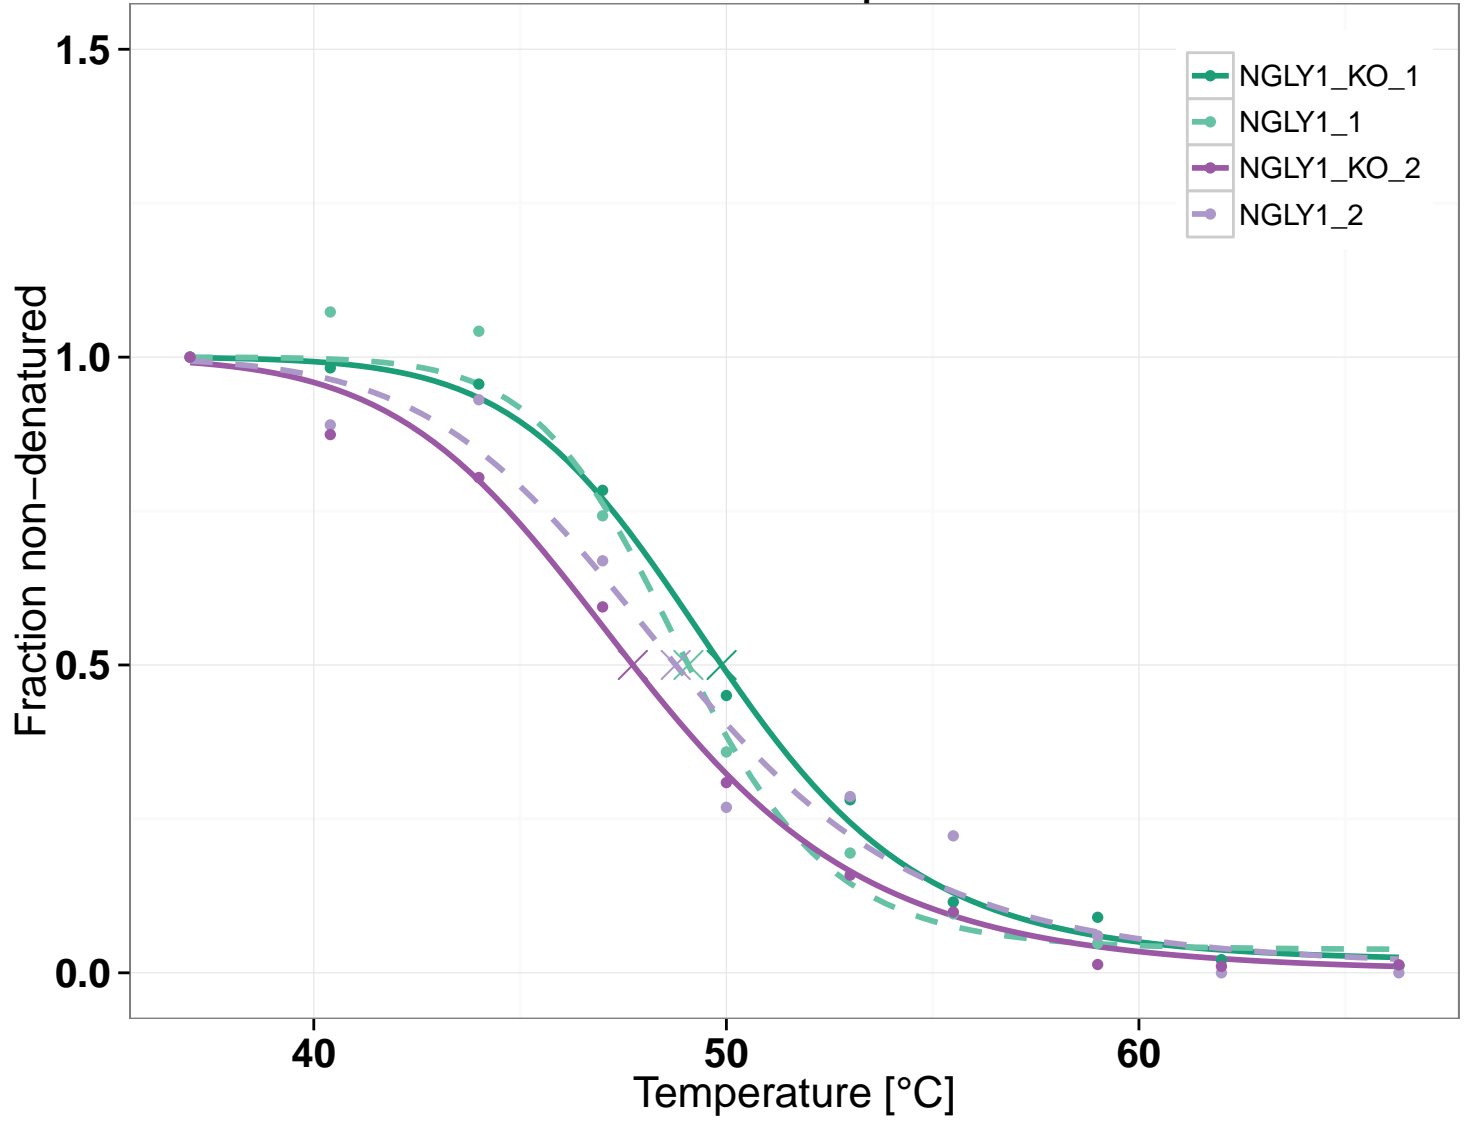

|            | meltPoint | slope  | plateau | R2   |
|------------|-----------|--------|---------|------|
| NGLY1_KO_1 | 49.89     | -0.099 | 0.02    | 1    |
| NGLY1_1    | 49.08     | -0.13  | 0.04    | 0.99 |
| NGLY1_KO_2 | 47.73     | -0.087 | 0       | 0.99 |
| NGLY1_2    | 48.77     | -0.082 | 0.01    | 0.97 |

Supplement: Supplementary file 4543 [file 1]

IPI00294292.3|RAD54L

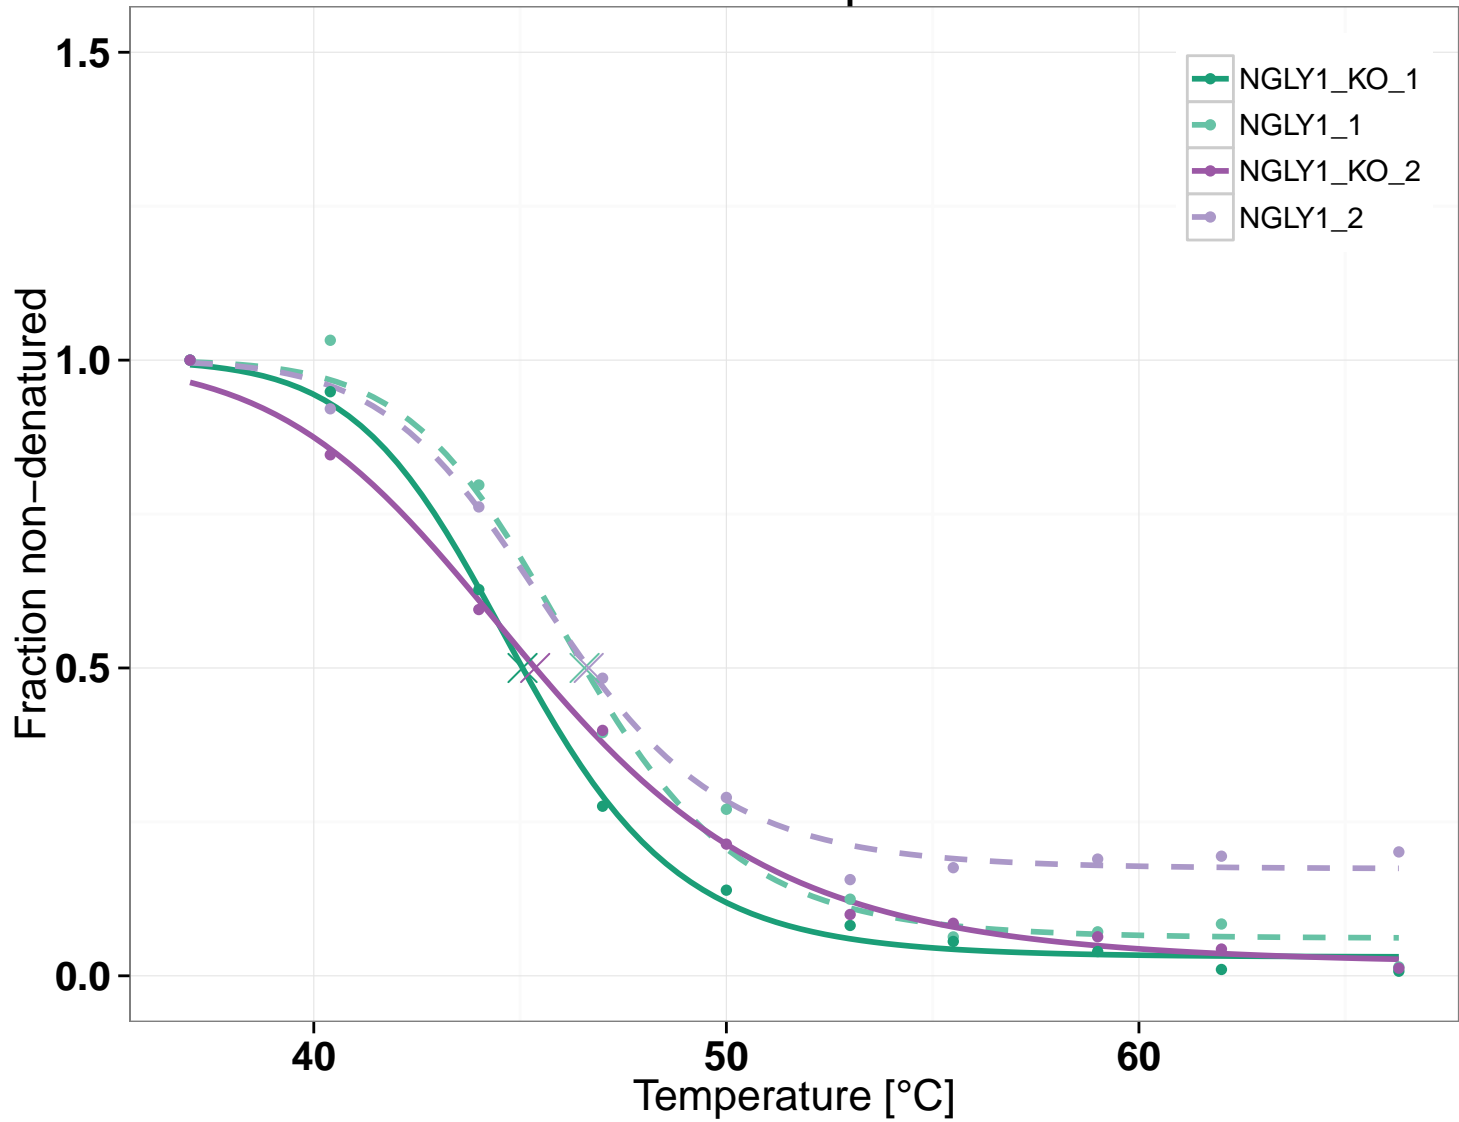

|            | meltPoint | slope  | plateau | R2   |
|------------|-----------|--------|---------|------|
| NGLY1_KO_1 | 45.06     | -0.12  | 0.03    | 1    |
| NGLY1_1    | 46.56     | -0.12  | 0.06    | 0.99 |
| NGLY1_KO_2 | 45.37     | -0.081 | 0.02    | 1    |
| NGLY1_2    | 46.66     | -0.1   | 0.17    | 0.99 |

Supplement: Supplementary file 4544 [file 1]

# IPI00009931.3|HDHD3

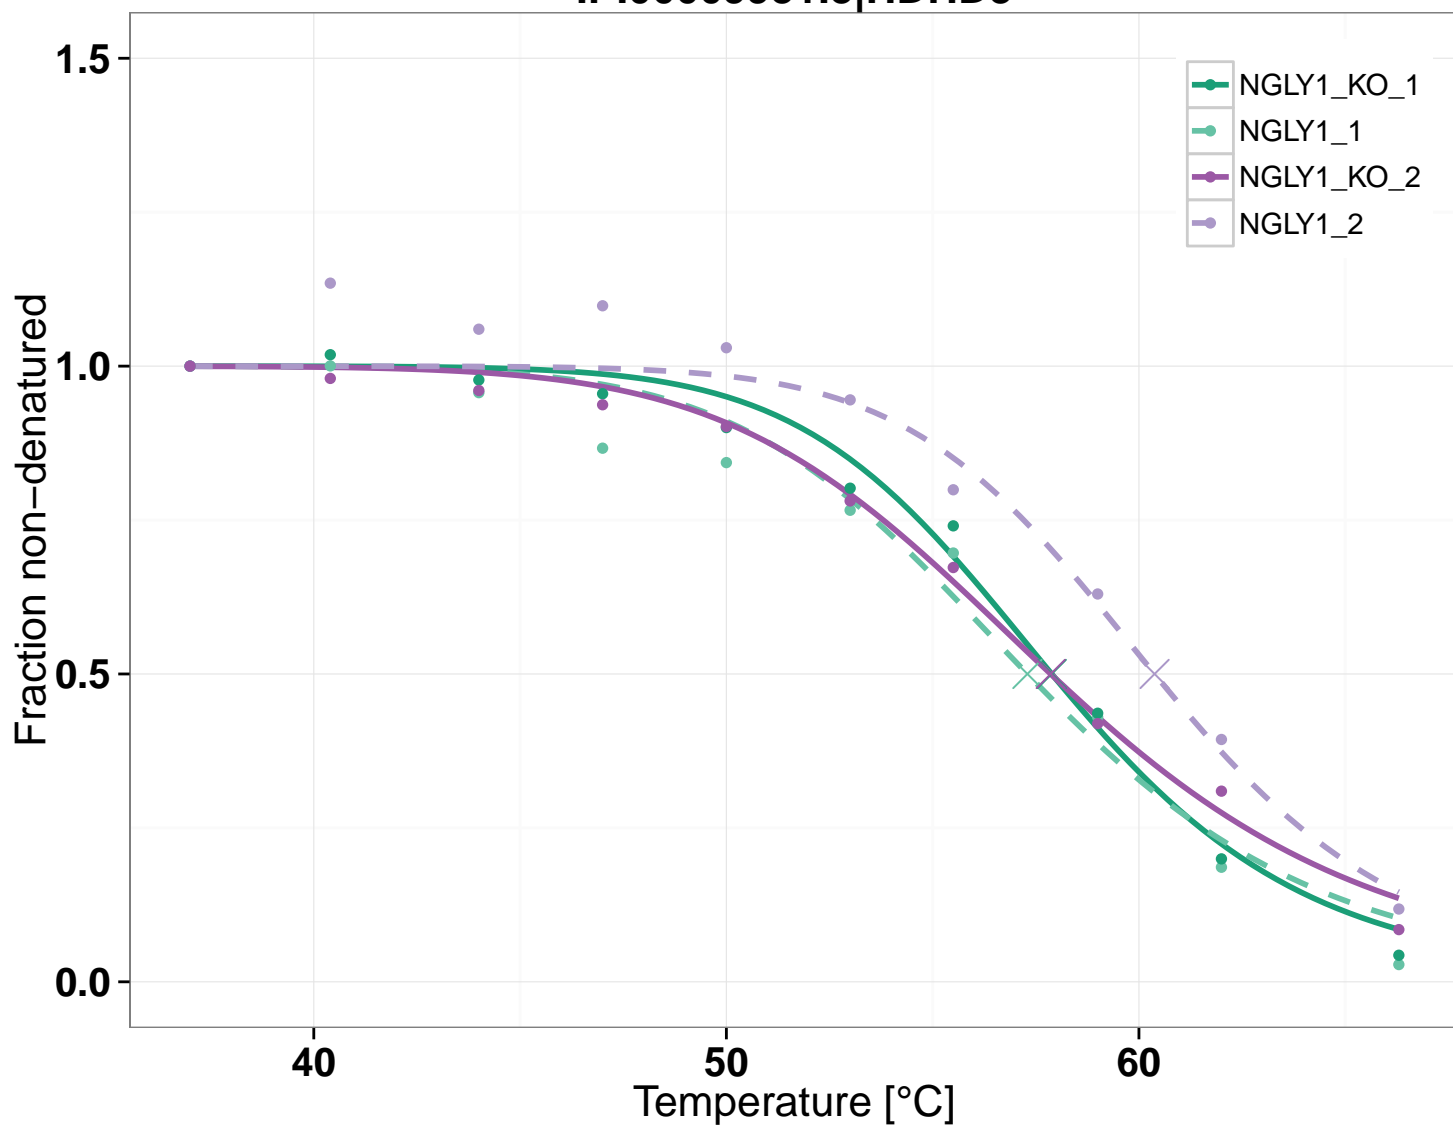

|            | meltPoint | slope  | plateau | R2   |
|------------|-----------|--------|---------|------|
| NGLY1_KO_1 | 57.89     | -0.082 | 0       | 0.99 |
| NGLY1_1    | 57.3      | -0.07  | 0       | 0.97 |
| NGLY1_KO_2 | 57.86     | -0.064 | 0       | 0.99 |
| NGLY1_2    | 60.38     | -0.083 | 0       | 0.96 |

Supplement: Supplementary file 4545 [file 1]

IPI00816044.1|C3ORF10

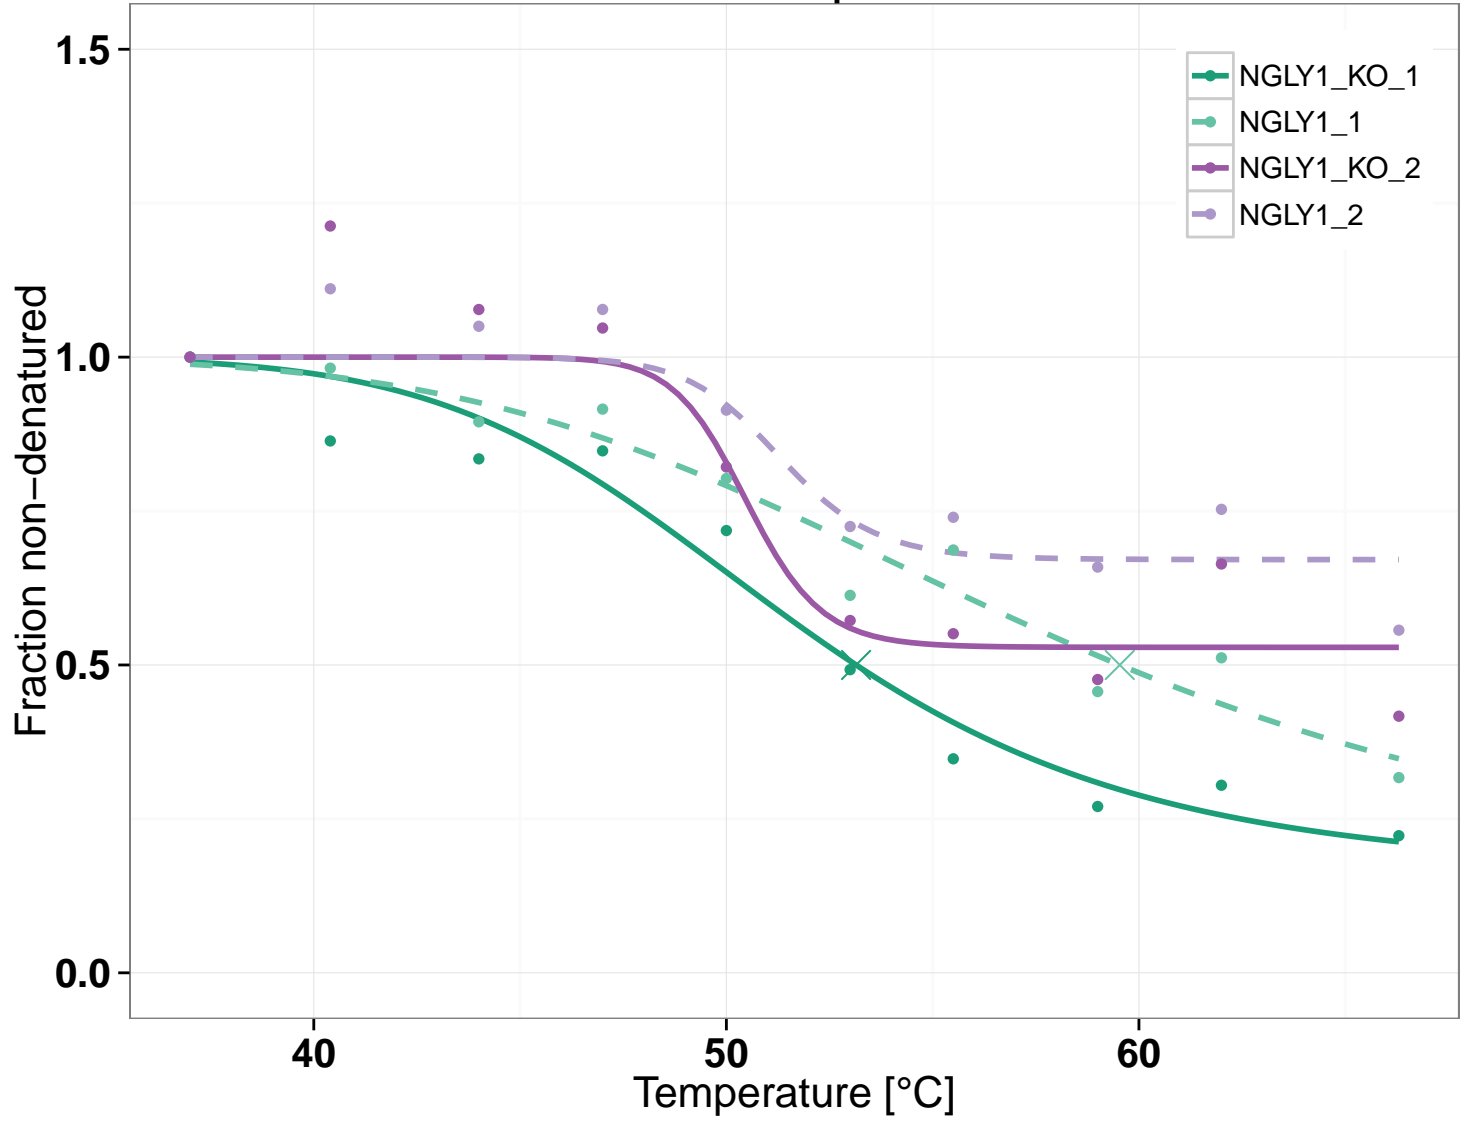

|            | meltPoint | slope  | plateau | R2   |
|------------|-----------|--------|---------|------|
| NGLY1_KO_1 | 53.14     | -0.05  | 0.16    | 0.96 |
| NGLY1_1    | 59.54     | -0.032 | 0.11    | 0.95 |
| NGLY1_KO_2 | -         | -0.13  | 0.53    | 0.88 |
| NGLY1_2    | -         | -0.071 | 0.67    | 0.87 |

Supplement: Supplementary file 4546 [file 1]

IPI00251559.8|RNF20

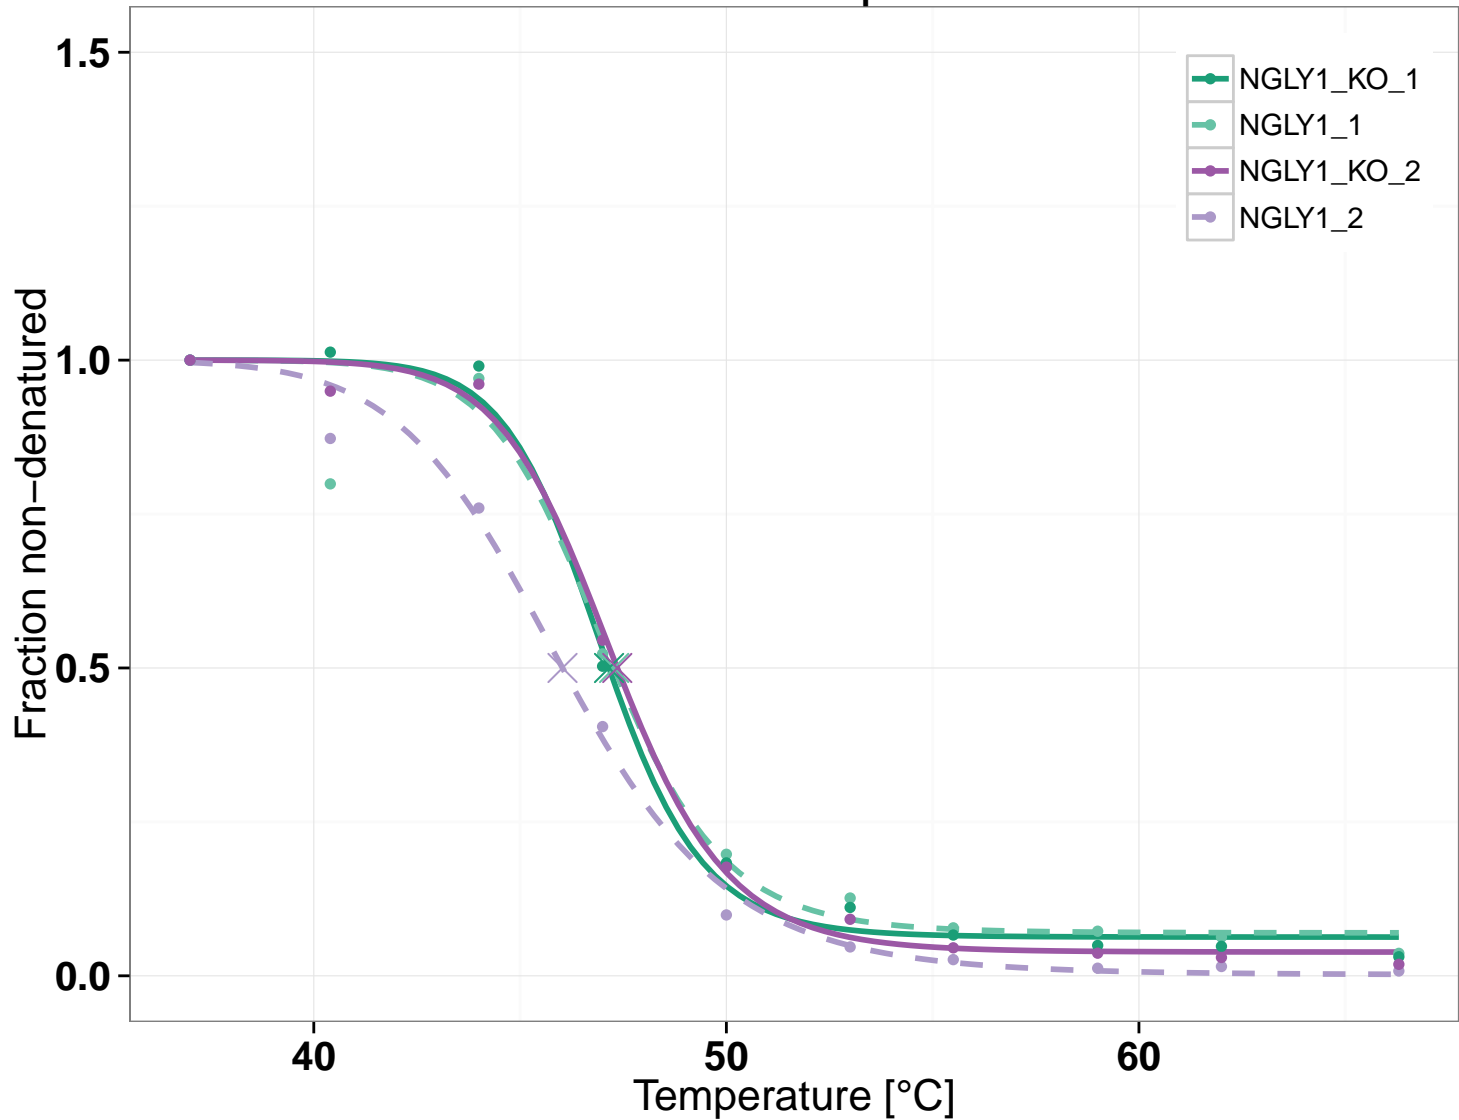

|            | meltPoint | slope | plateau | R2   |
|------------|-----------|-------|---------|------|
| NGLY1_KO_1 | 47.16     | -0.19 | 0.06    | 1    |
| NGLY1_1    | 47.28     | -0.16 | 0.07    | 0.97 |
| NGLY1_KO_2 | 47.36     | -0.17 | 0.04    | 1    |
| NGLY1_2    | 46.03     | -0.12 | 0       | 0.99 |

Supplement: Supplementary file 4547 [file 1]

# IPI00030177.2|RBPJ

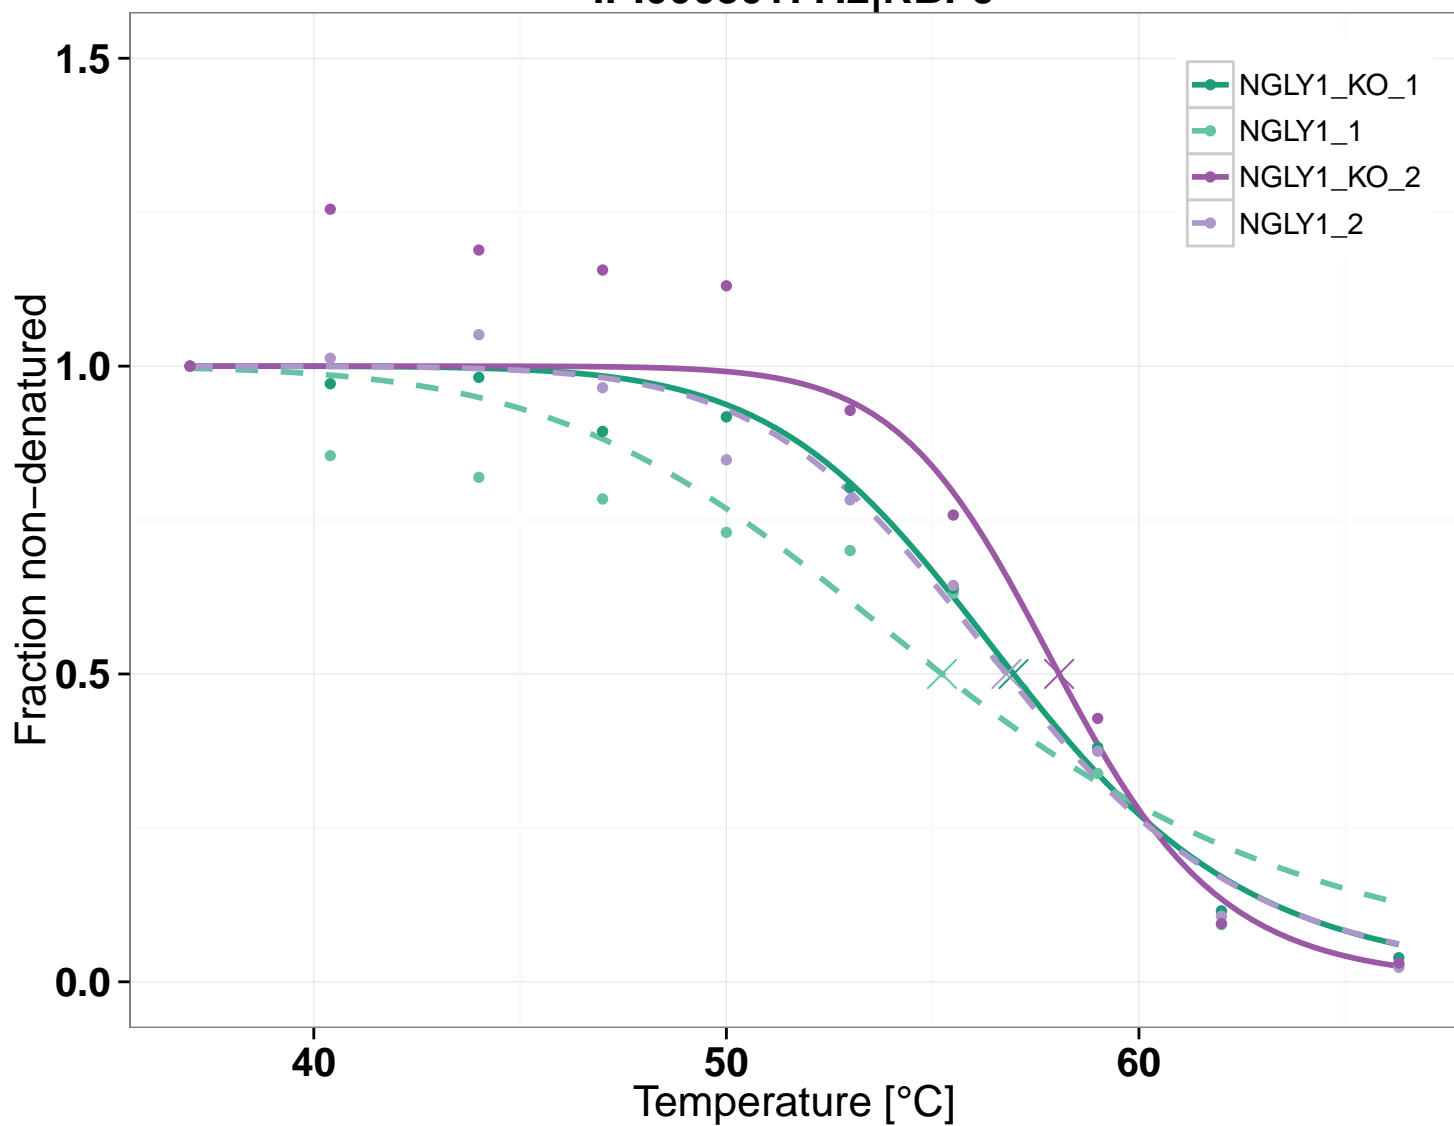

|            | meltPoint | slope  | plateau | R2   |
|------------|-----------|--------|---------|------|
| NGLY1_KO_1 | 56.96     | -0.086 | 0       | 0.99 |
| NGLY1_1    | 55.23     | -0.054 | 0       | 0.9  |
| NGLY1_KO_2 | 58.06     | -0.13  | 0       | 0.92 |
| NGLY1_2    | 56.79     | -0.084 | 0       | 0.99 |

Supplement: Supplementary file 4548 [file 1]

# IPI00742124.2|UBXN7

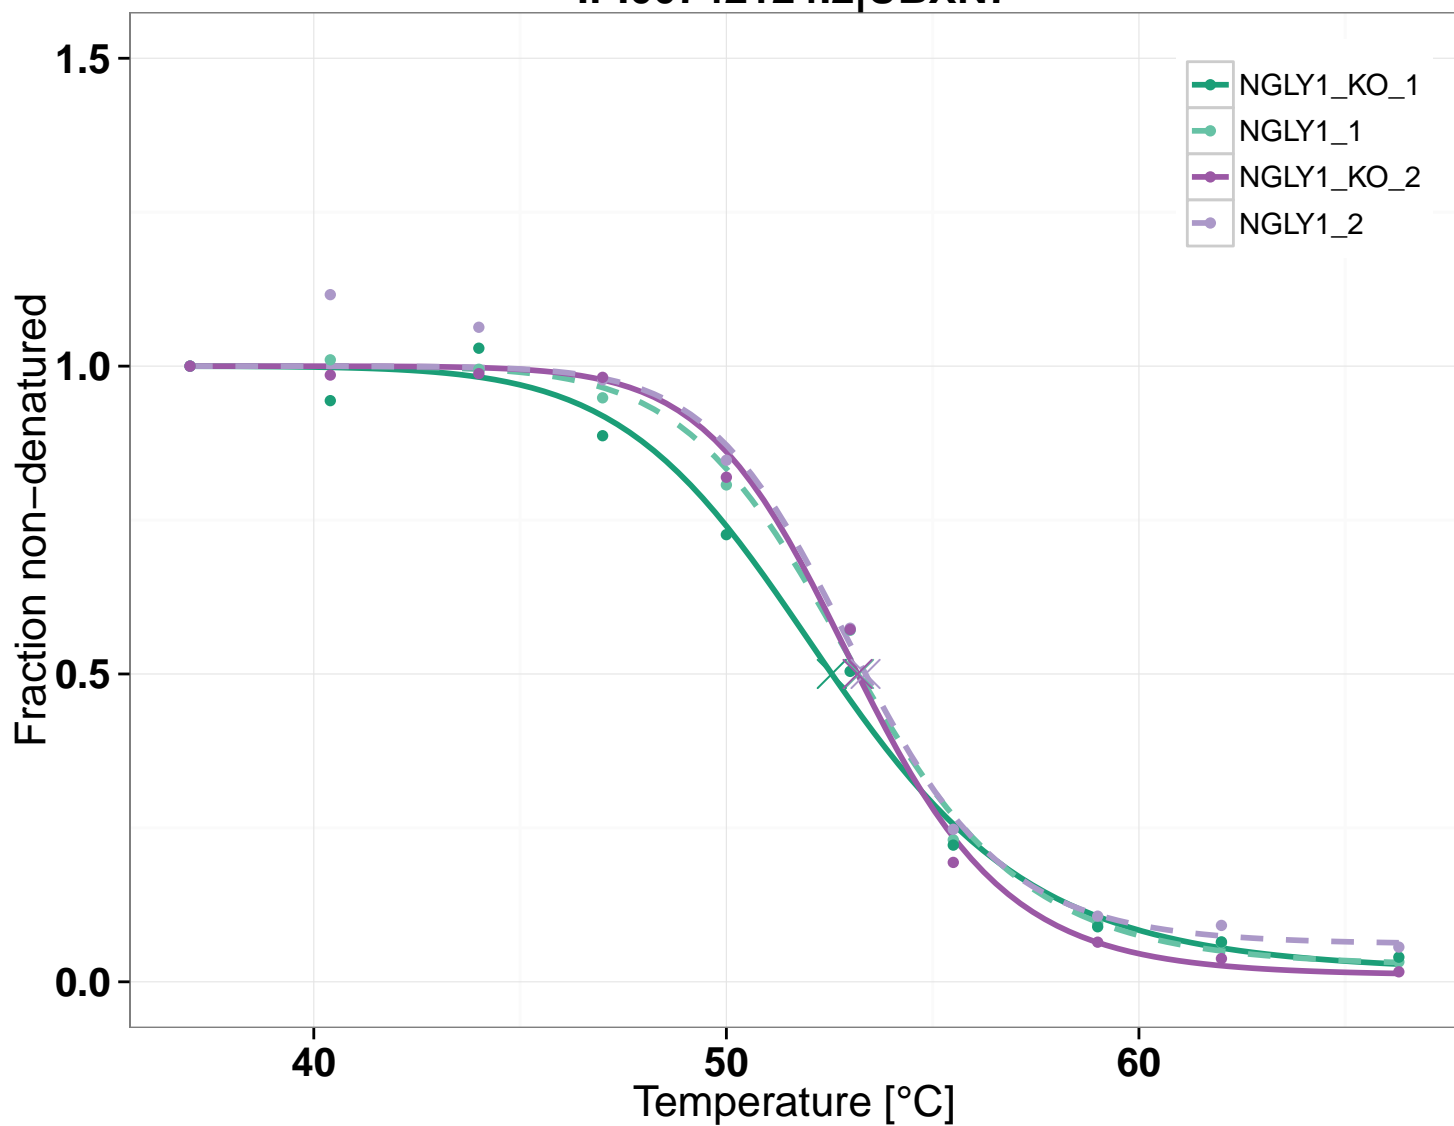

|            | meltPoint | slope  | plateau | R2   |
|------------|-----------|--------|---------|------|
| NGLY1_KO_1 | 52.56     | -0.098 | 0.02    | 0.99 |
| NGLY1_1    | 53.22     | -0.12  | 0.03    | 1    |
| NGLY1_KO_2 | 53.18     | -0.13  | 0.01    | 1    |
| NGLY1_2    | 53.37     | -0.13  | 0.06    | 0.99 |

Supplement: Supplementary file 4549 [file 1]

IPI00018808.4|C12ORF35

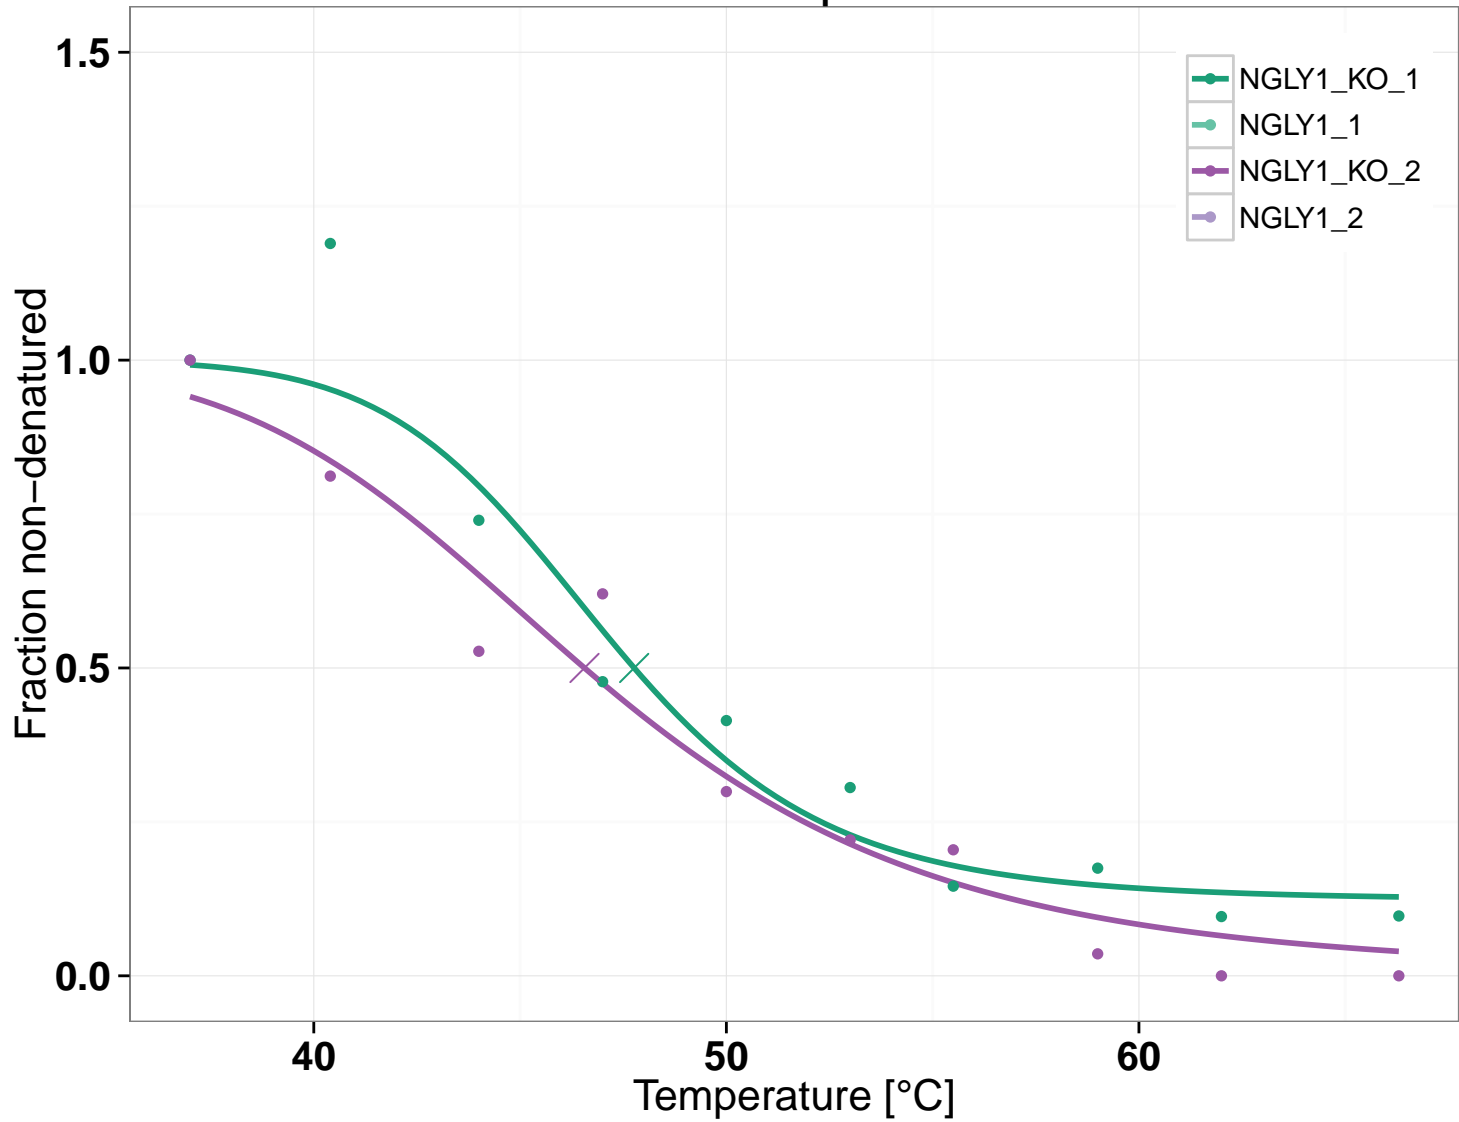

|            | meltPoint | slope  | plateau | R2   |
|------------|-----------|--------|---------|------|
| NGLY1_KO_1 | 47.77     | -0.083 | 0.12    | 0.94 |
| NGLY1_1    | —         | —      | —       | —    |
| NGLY1_KO_2 | 46.56     | -0.059 | 0       | 0.95 |
| NGLY1_2    | —         | —      | —       | —    |

Supplement: Supplementary file 4550 [file 1]

IPI00005709.1|HS3ST3B1

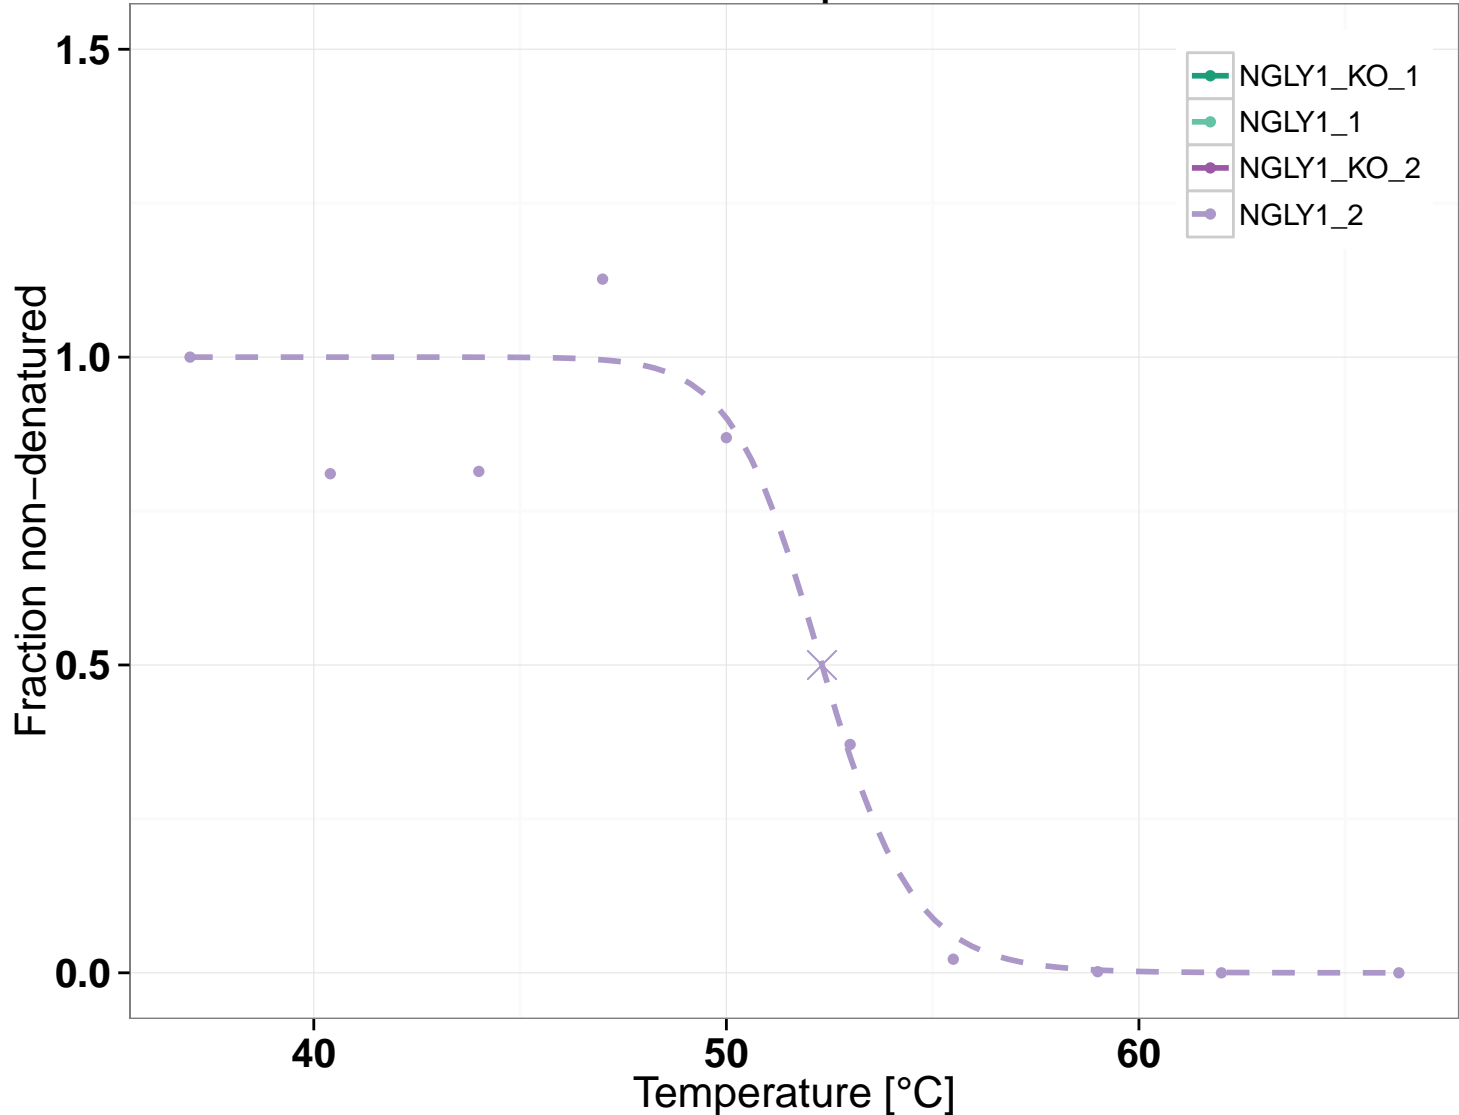

|            | meltPoint | slope | plateau | R2   |
|------------|-----------|-------|---------|------|
| NGLY1_KO_1 | -         | -     | -       | -    |
| NGLY1_1    | -         | -     | -       | -    |
| NGLY1_KO_2 | -         | -     | -       | -    |
| NGLY1_2    | 52.32     | -0.23 | 0       | 0.95 |

Supplement: Supplementary file 4551 [file 1]

IPI00152875.3|ZNF384

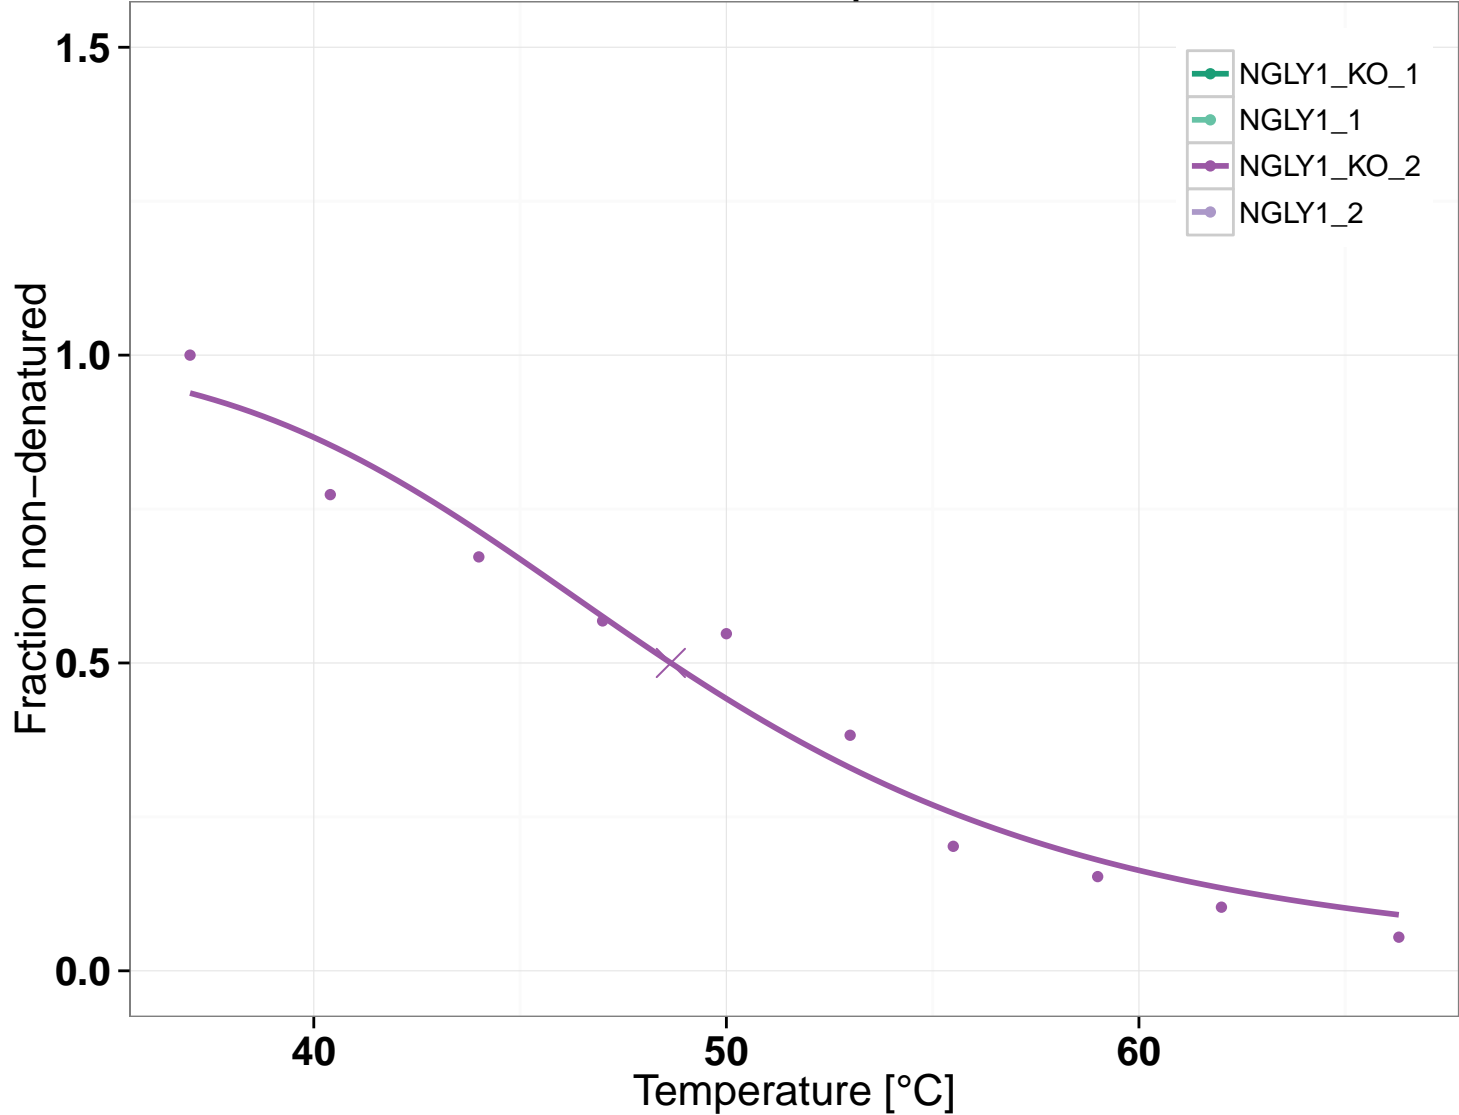

|            | meltPoint | slope  | plateau | R2   |
|------------|-----------|--------|---------|------|
| NGLY1_KO_1 | —         | —      | —       | —    |
| NGLY1_1    | —         | —      | —       | —    |
| NGLY1_KO_2 | 48.65     | -0.047 | 0       | 0.96 |
| NGLY1_2    | —         | —      | —       | —    |

Supplement: Supplementary file 4552 [file 1]

# IPI00884105.2|LAMP1

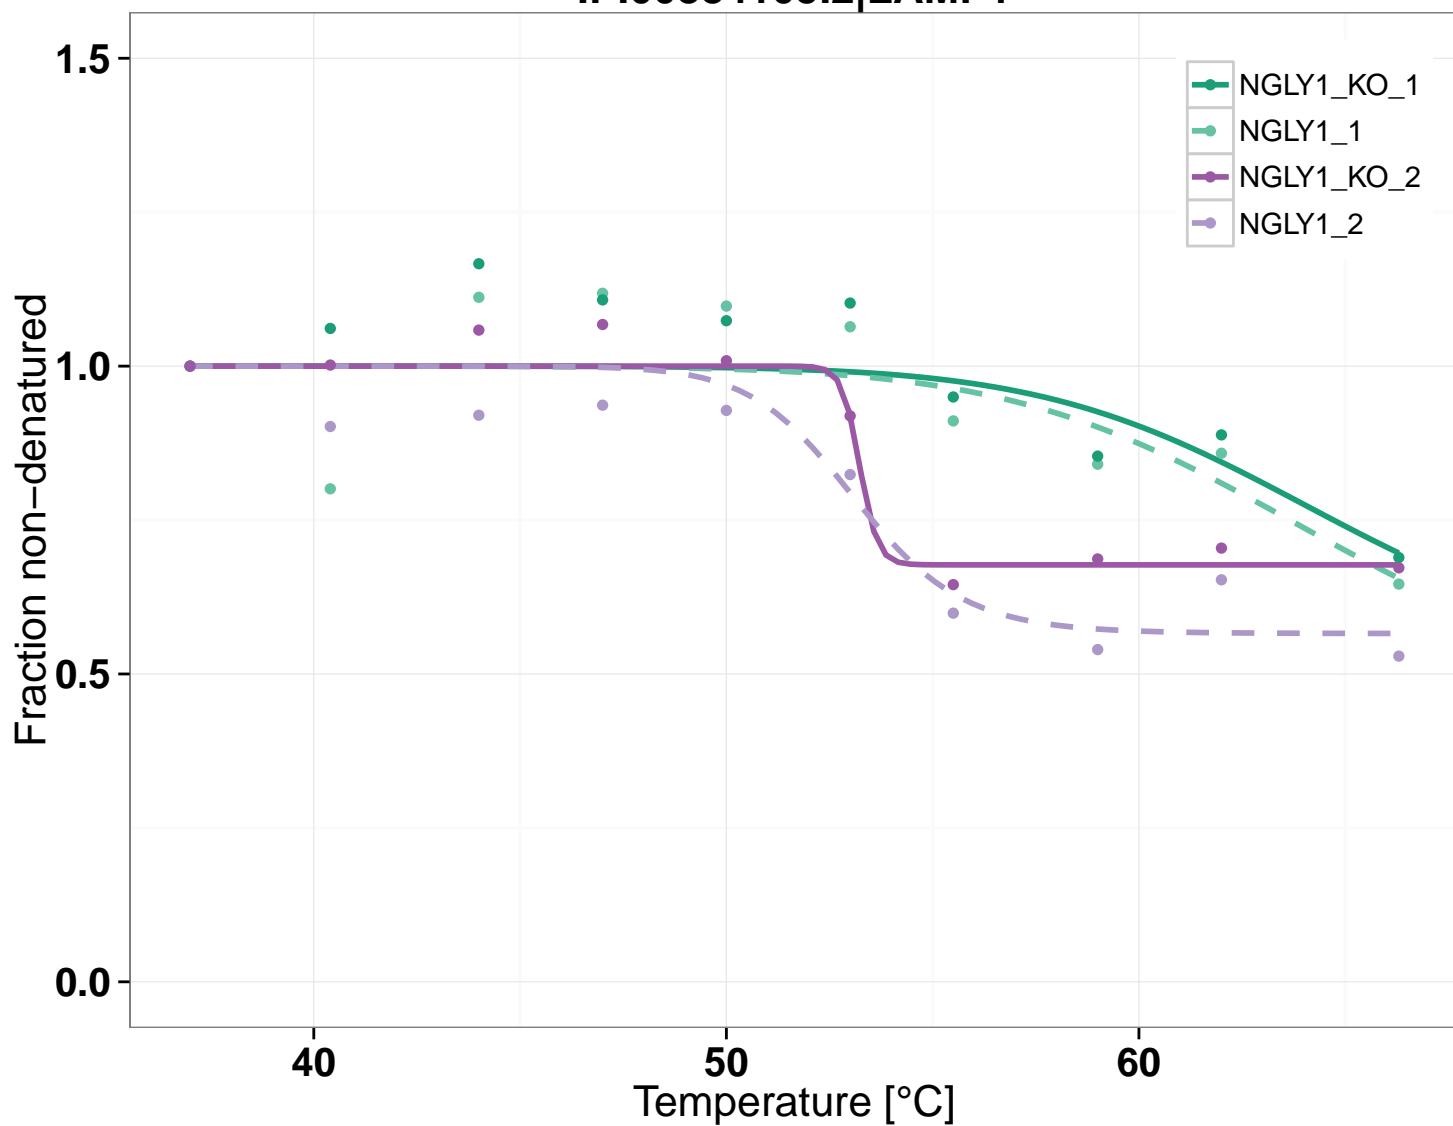

|            | meltPoint | slope  | plateau | R2   |
|------------|-----------|--------|---------|------|
| NGLY1_KO_1 | —         | −0.035 | 0.49    | 0.64 |
| NGLY1_1    | —         | −0.037 | 0.42    | 0.6  |
| NGLY1_KO_2 | —         | −0.38  | 0.68    | 0.96 |
| NGLY1_2    | —         | −0.084 | 0.57    | 0.89 |

Supplement: Supplementary file 4553 [file 1]

# IPI00020567.2|ARHGAP1

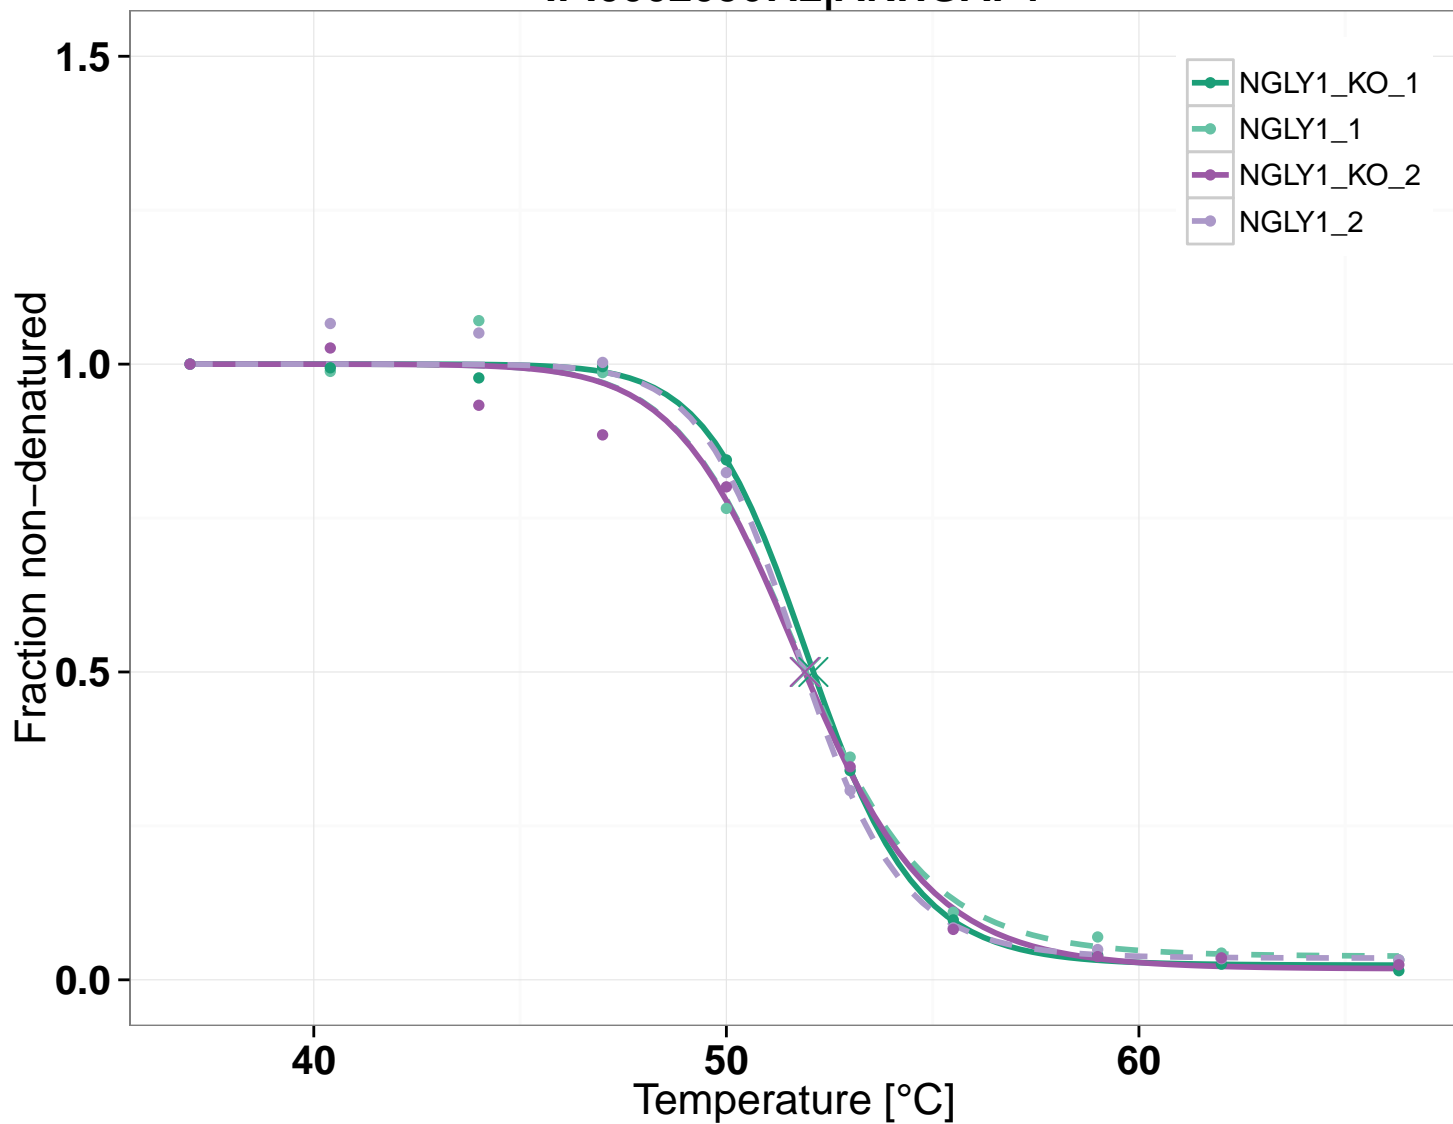

|            | meltPoint | slope | plateau | R2   |
|------------|-----------|-------|---------|------|
| NGLY1_KO_1 | 52.11     | -0.19 | 0.02    | 1    |
| NGLY1_1    | 51.93     | -0.16 | 0.04    | 1    |
| NGLY1_KO_2 | 51.9      | -0.16 | 0.02    | 0.99 |
| NGLY1_2    | 51.9      | -0.2  | 0.04    | 1    |

Supplement: Supplementary file 4554 [file 1]

IPI00604491.1|ZCCHC6

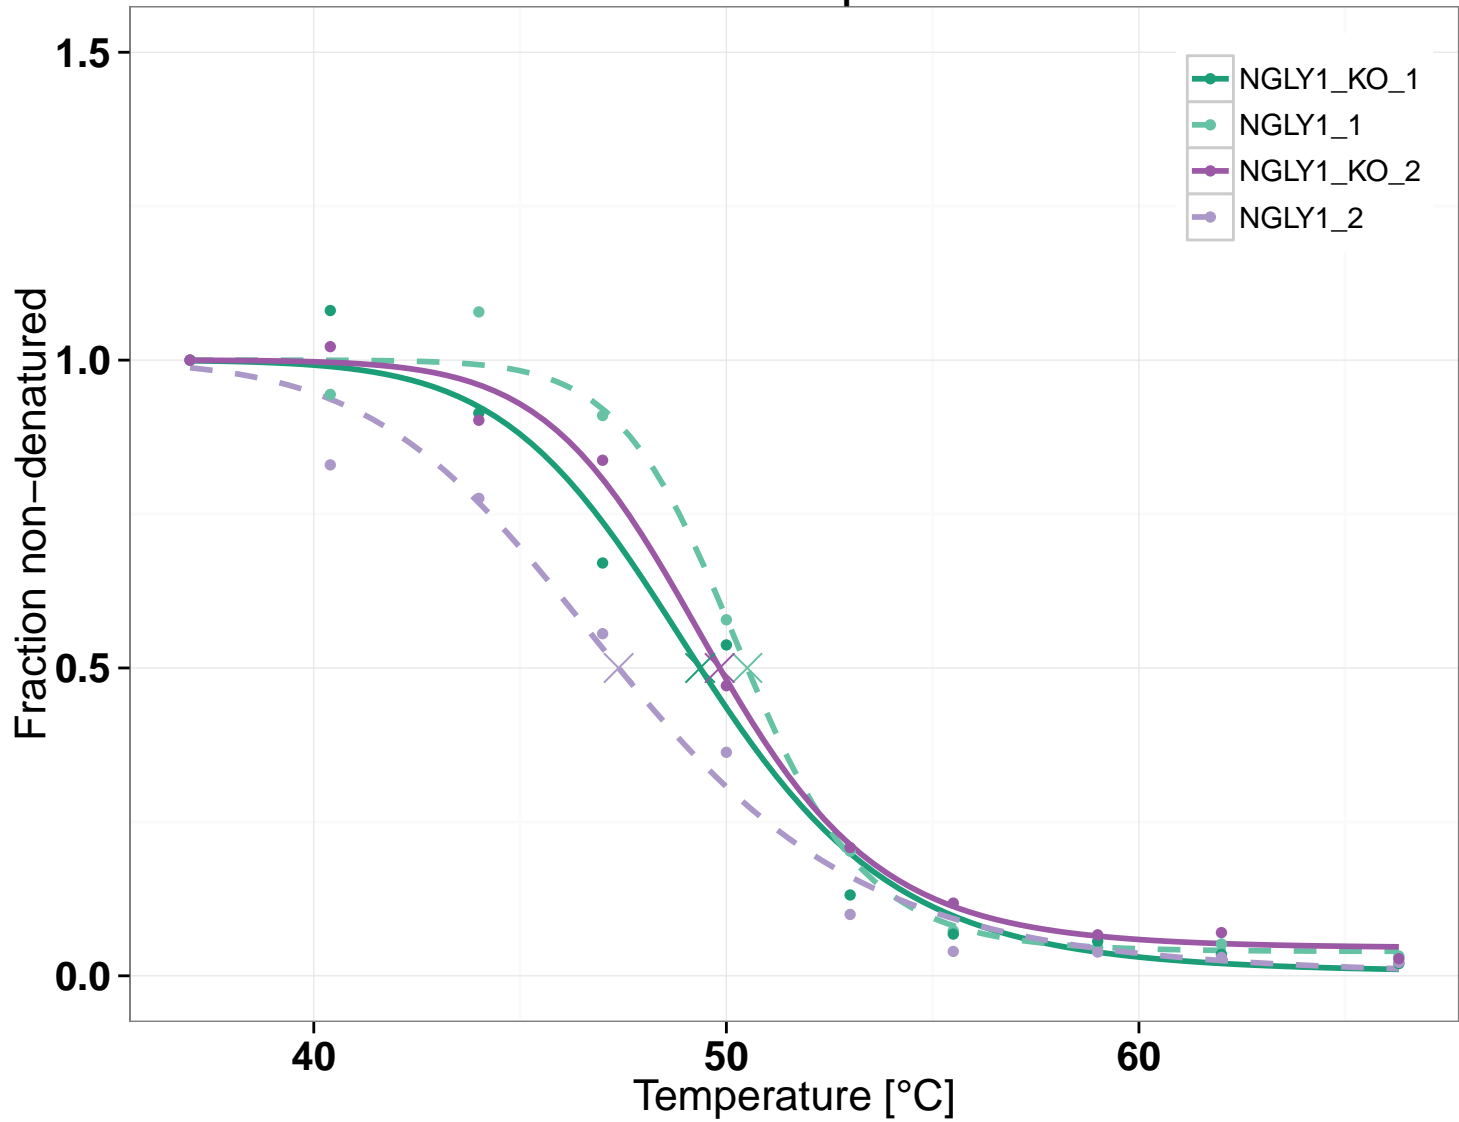

|            | meltPoint | slope  | plateau | R2   |
|------------|-----------|--------|---------|------|
| NGLY1_KO_1 | 49.37     | -0.1   | 0.01    | 0.98 |
| NGLY1_1    | 50.51     | -0.16  | 0.04    | 0.99 |
| NGLY1_KO_2 | 49.84     | -0.12  | 0.05    | 1    |
| NGLY1_2    | 47.39     | -0.084 | 0       | 0.98 |

Supplement: Supplementary file 4555 [file 1]

# IPI00012060.1|UBE2B

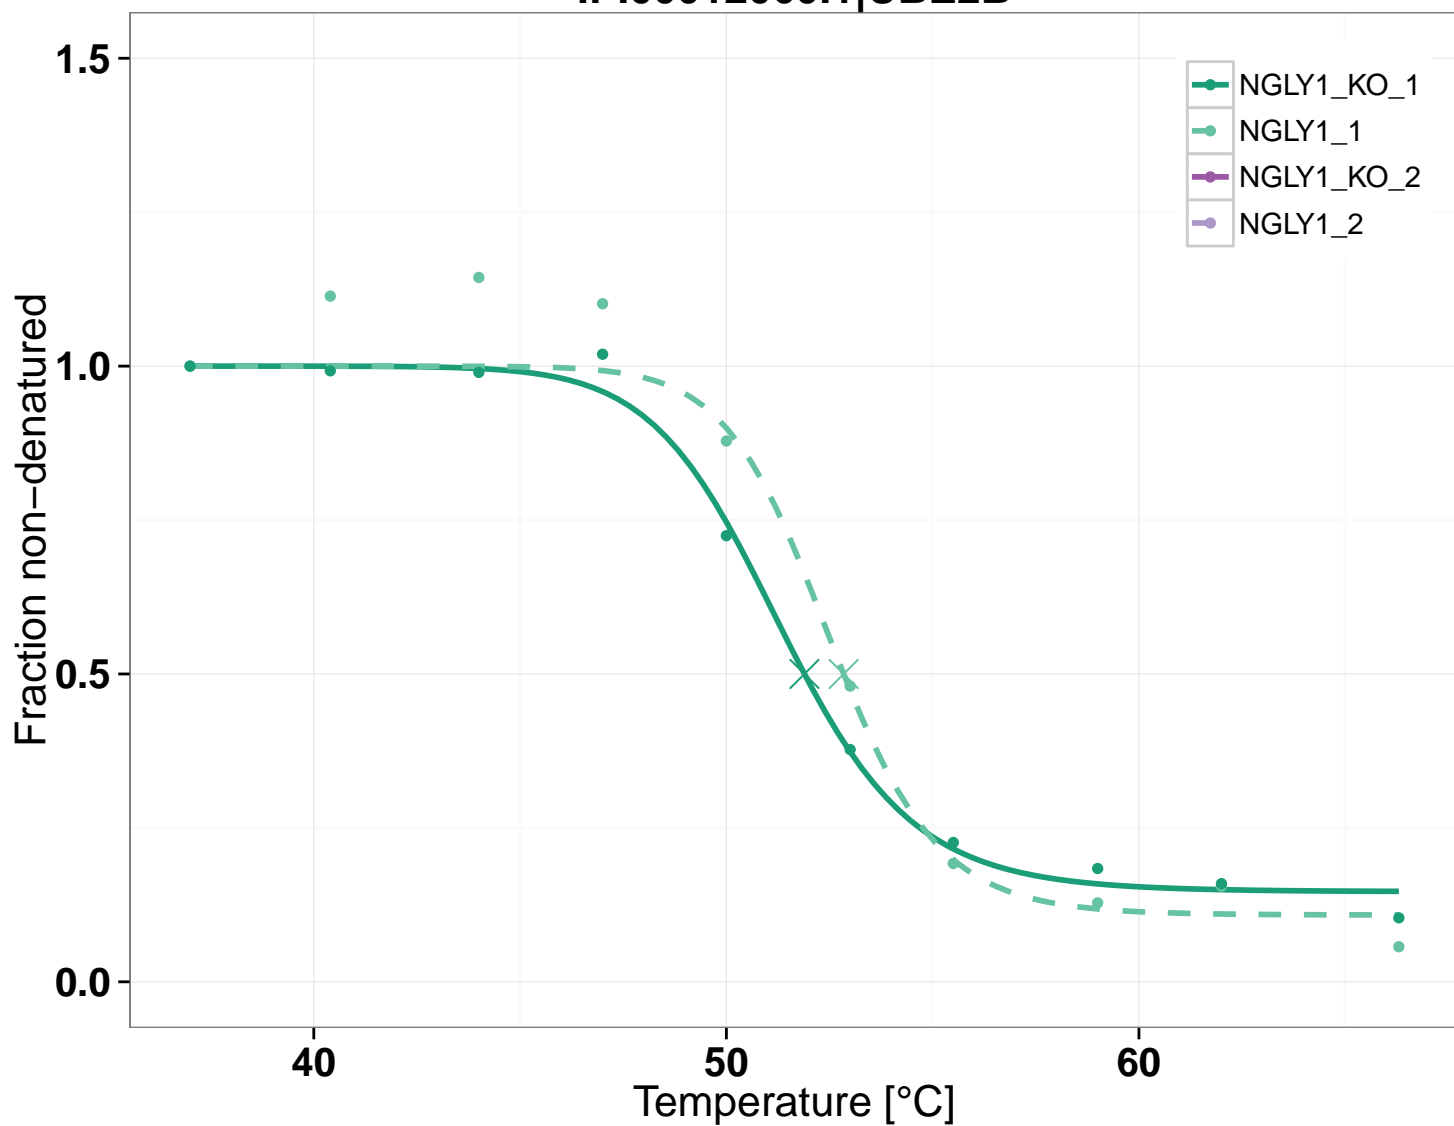

|            | meltPoint | slope | plateau | R2   |
|------------|-----------|-------|---------|------|
| NGLY1_KO_1 | 51.89     | -0.13 | 0.15    | 1    |
| NGLY1_1    | 52.84     | -0.17 | 0.11    | 0.97 |
| NGLY1_KO_2 | -         | -     | -       | -    |
| NGLY1_2    | -         | -     | -       | -    |

Supplement: Supplementary file 4556 [file 1]

IPI00064193.3|TXNDC10

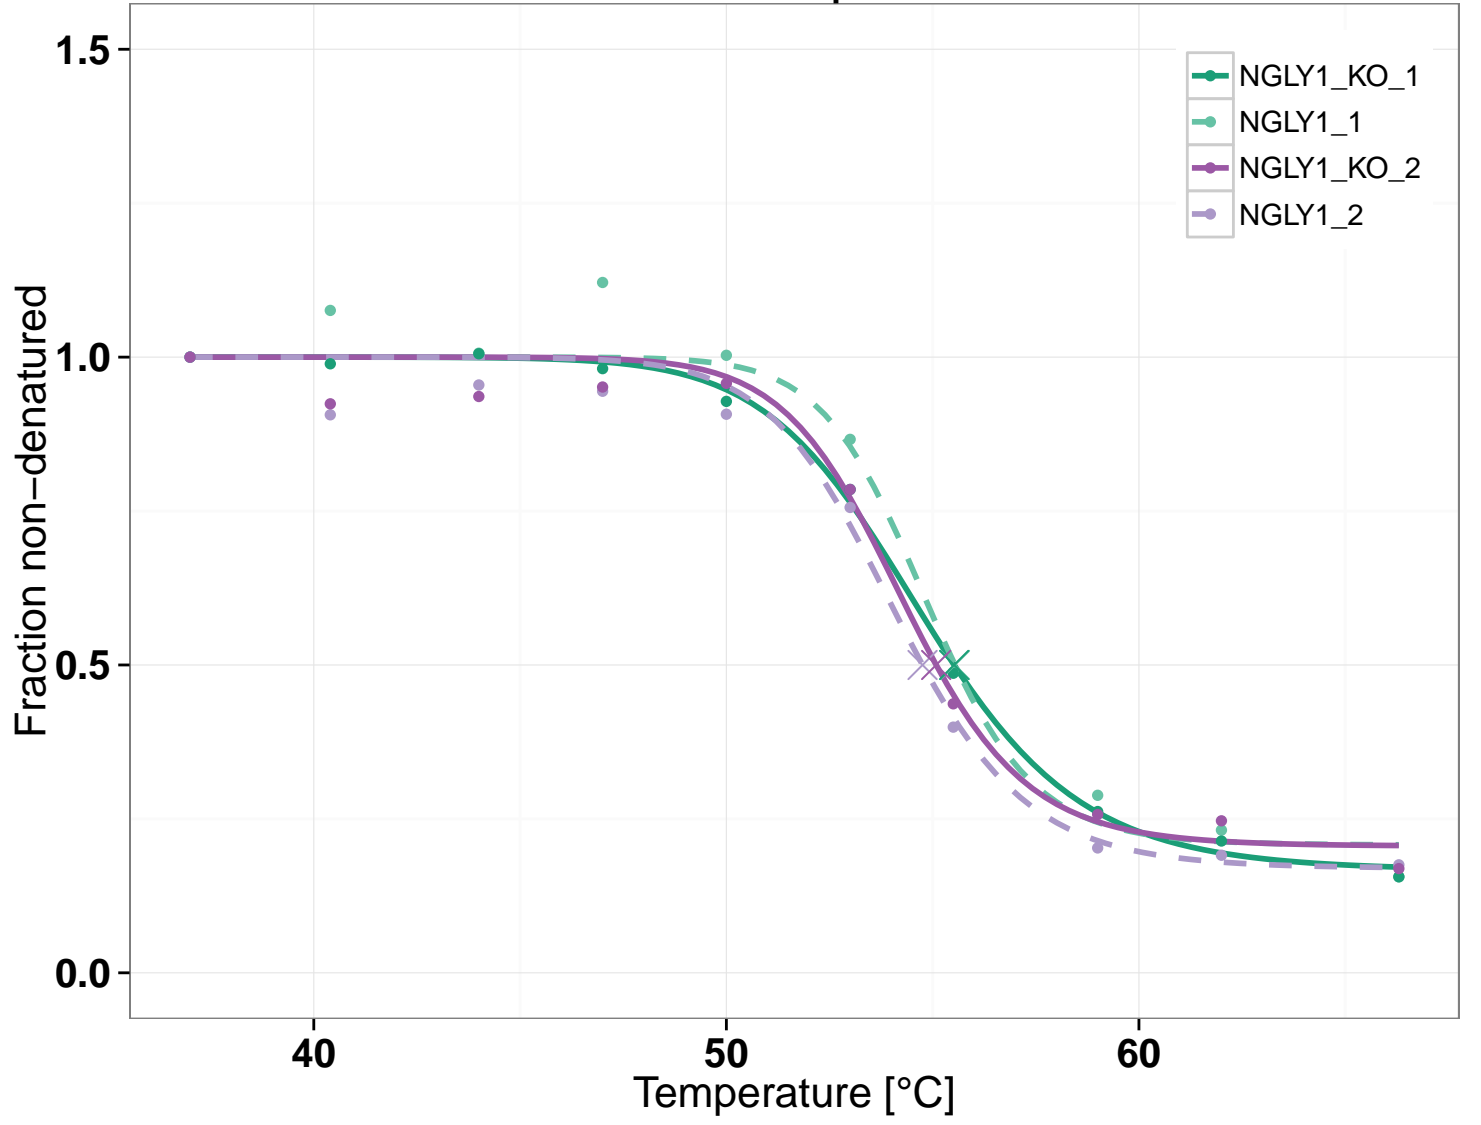

|            | meltPoint | slope | plateau | R2   |
|------------|-----------|-------|---------|------|
| NGLY1_KO_1 | 55.52     | -0.11 | 0.17    | 1    |
| NGLY1_1    | 55.54     | -0.16 | 0.21    | 0.98 |
| NGLY1_KO_2 | 55.09     | -0.14 | 0.21    | 0.99 |
| NGLY1_2    | 54.75     | -0.13 | 0.17    | 0.99 |

Supplement: Supplementary file 4557 [file 1]

IPI00009901.1|NUTF2

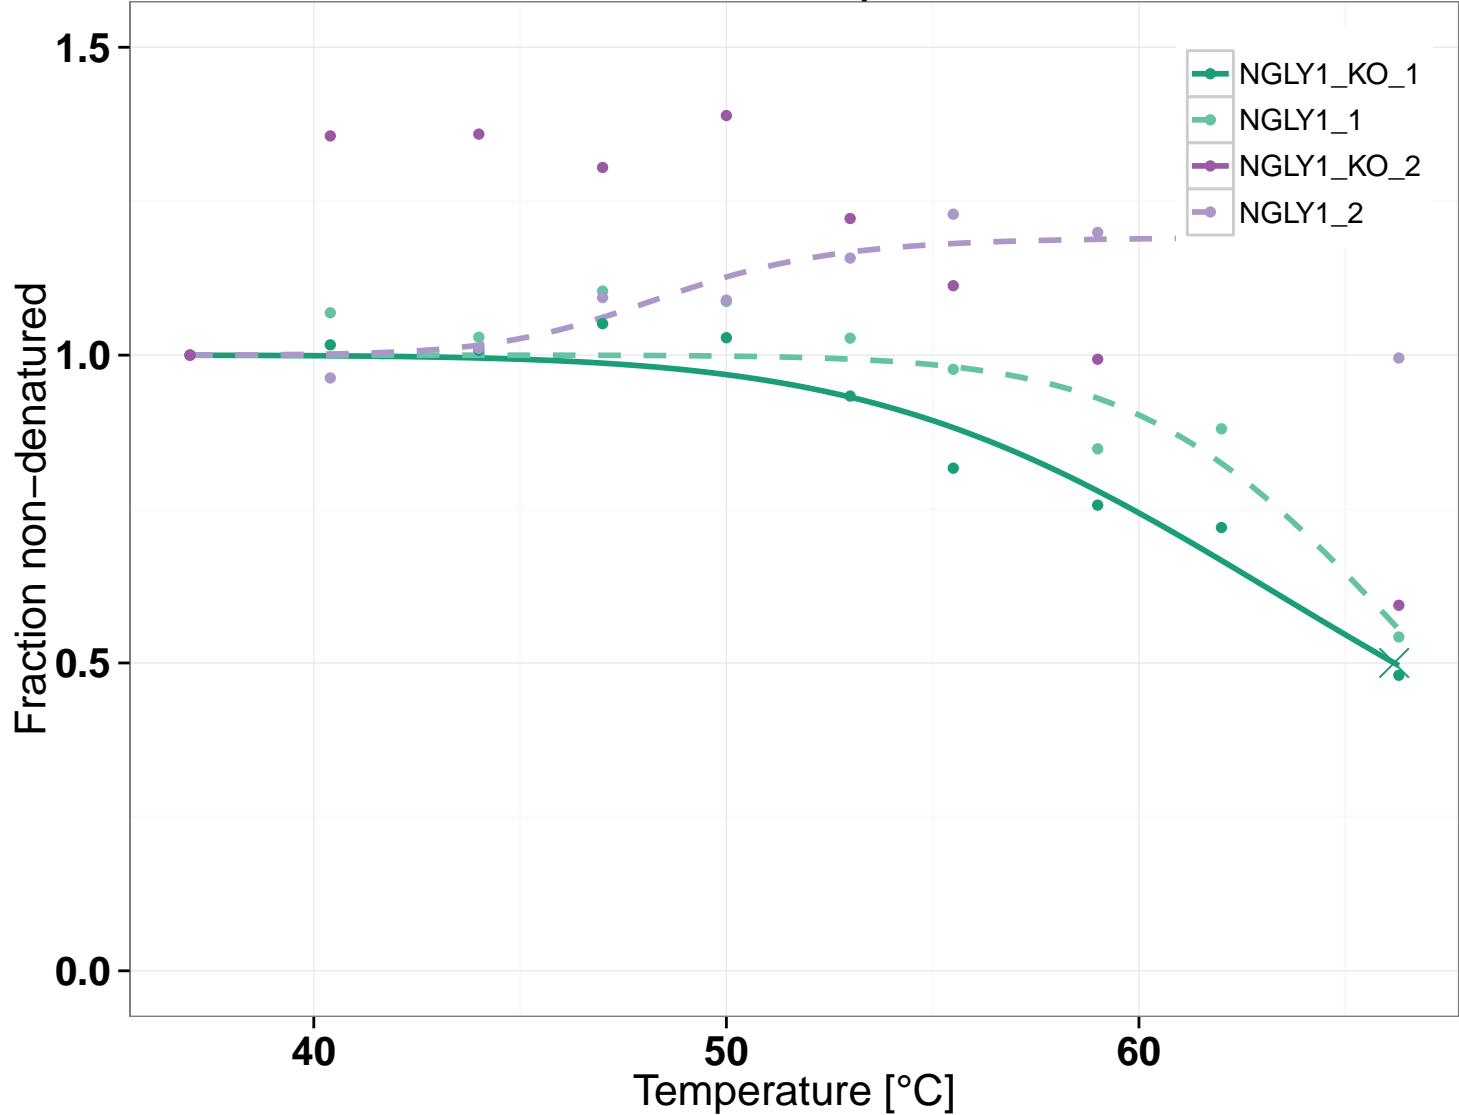

|            | meltPoint | slope | plateau | R2   |
|------------|-----------|-------|---------|------|
| NGLY1_KO_1 | 66.19     | -0.04 | 0.06    | 0.95 |
| NGLY1_1    | -         | -     | 0       | 0.86 |
| NGLY1_KO_2 | -         | -     | -       | -    |
| NGLY1_2    | -         | 0.023 | 1.19    | 0.49 |

Supplement: Supplementary file 4558 [file 1]

# IPI00008303.5|NAGPA

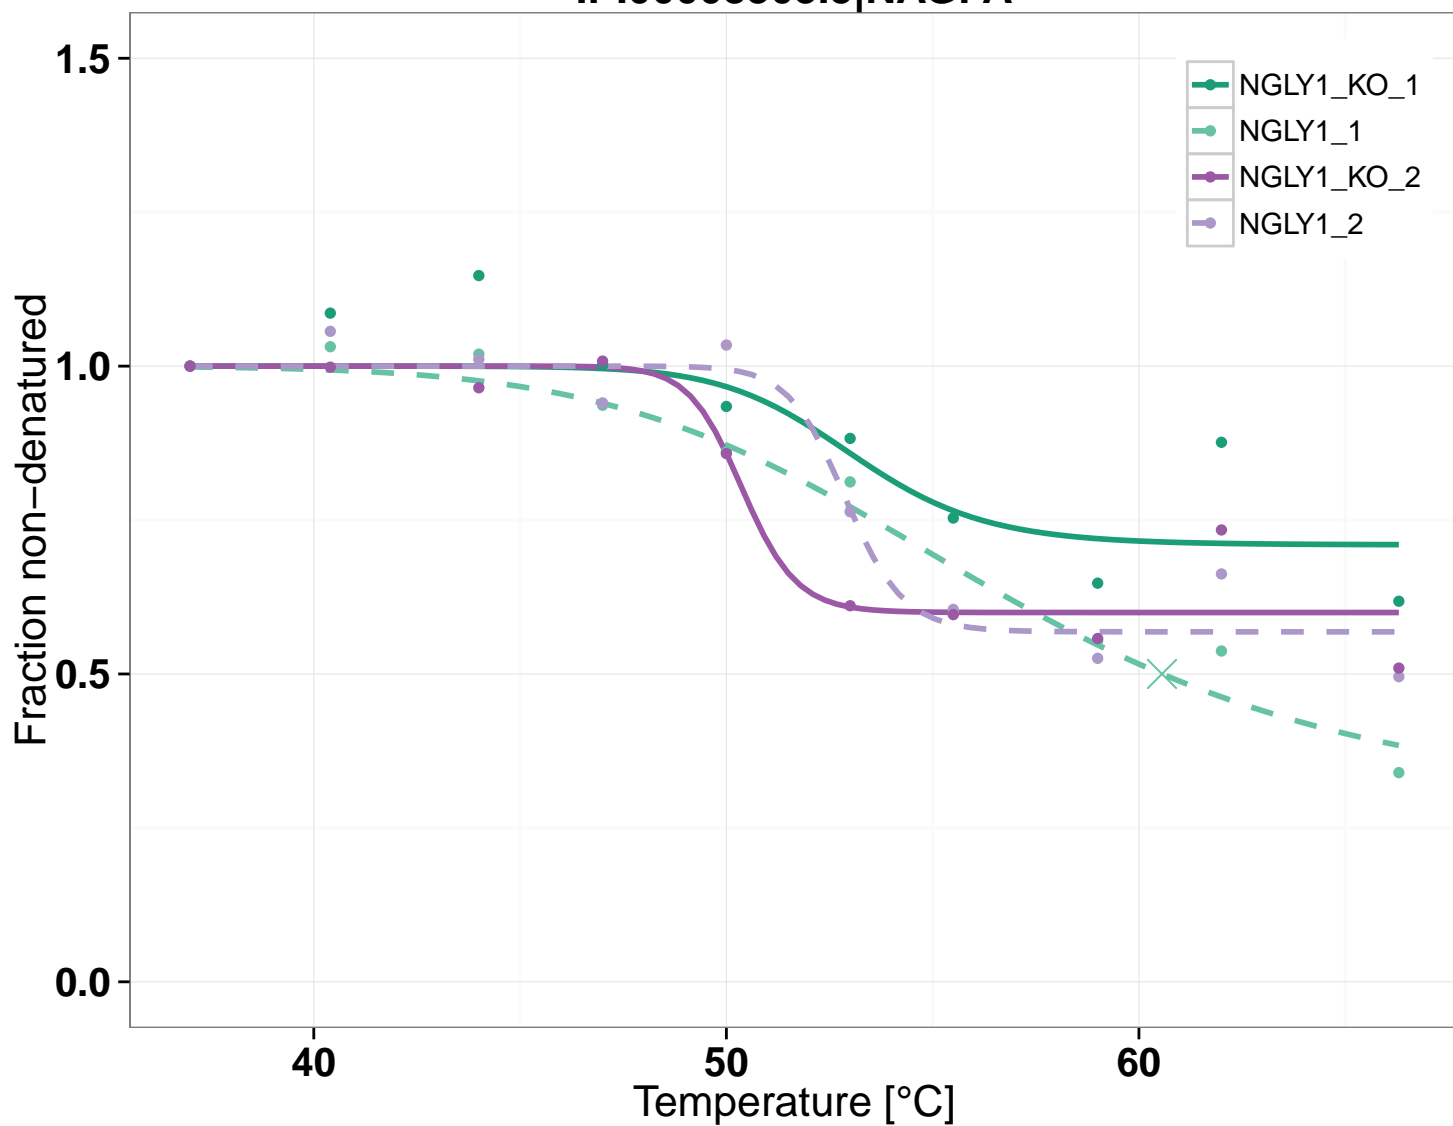

|            | meltPoint | slope  | plateau | R2   |
|------------|-----------|--------|---------|------|
| NGLY1_KO_1 | –         | –0.045 | 0.71    | 0.75 |
| NGLY1_1    | 60.56     | –0.039 | 0.28    | 0.97 |
| NGLY1_KO_2 | –         | –0.15  | 0.6     | 0.92 |
| NGLY1_2    | –         | –0.15  | 0.57    | 0.94 |

Supplement: Supplementary file 4559 [file 1]

IPI00792352.1|RAN

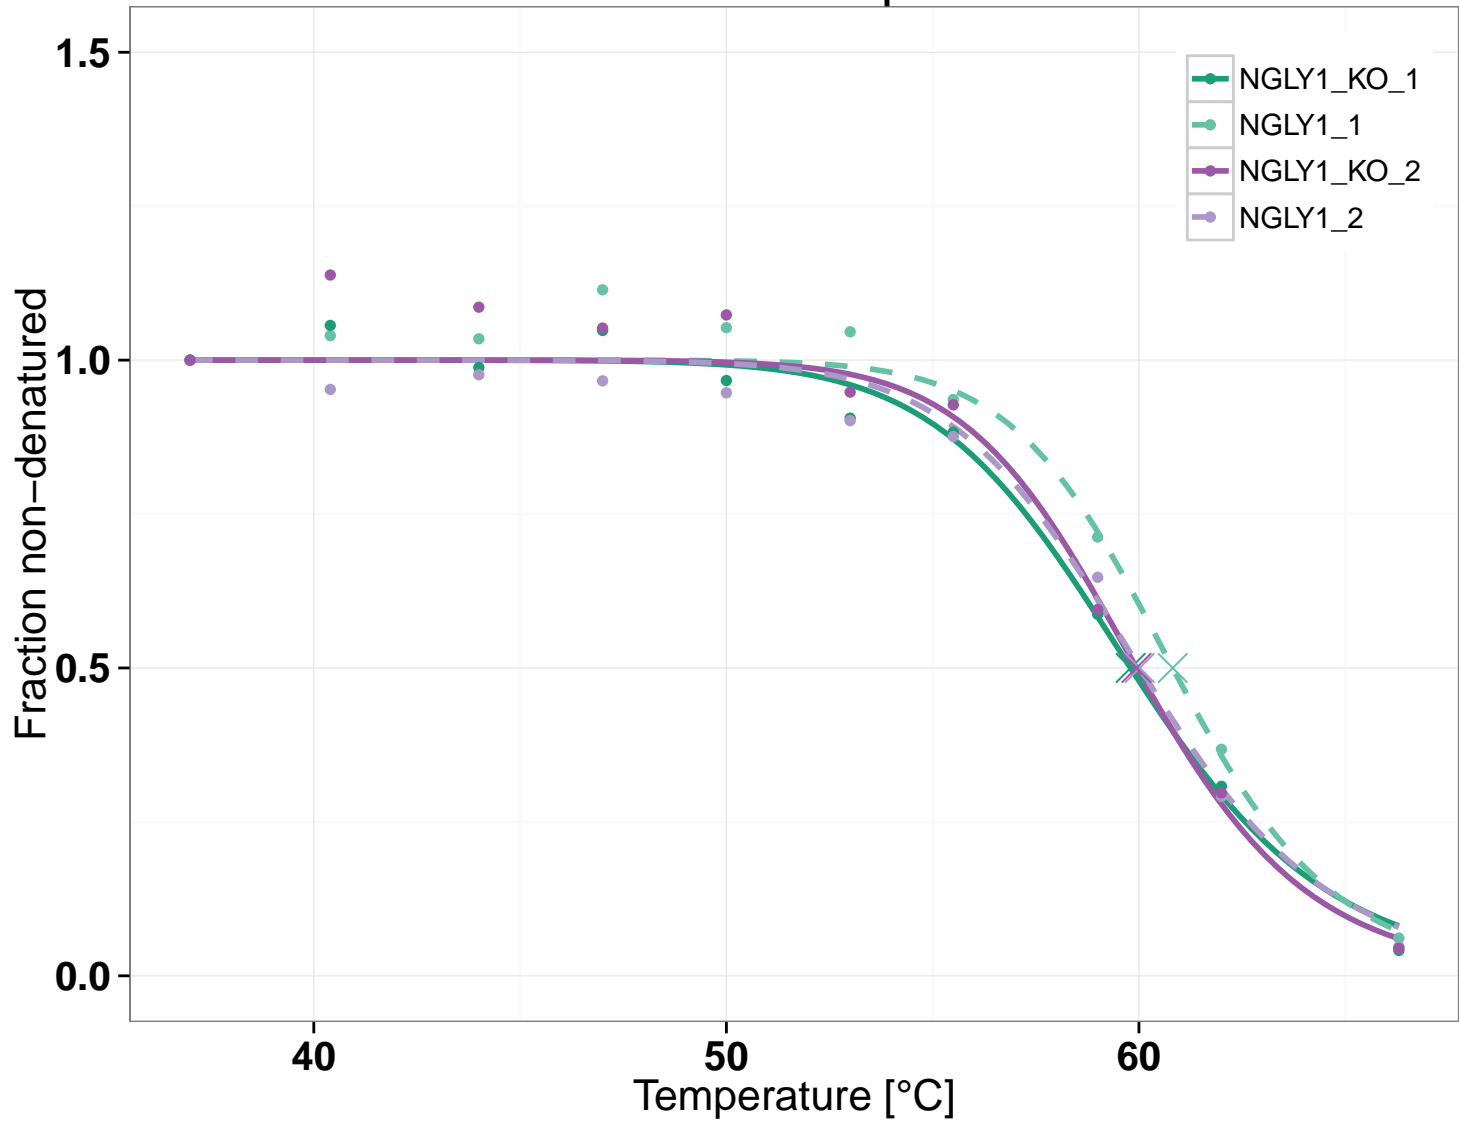

|            | meltPoint | slope | plateau | R2   |
|------------|-----------|-------|---------|------|
| NGLY1_KO_1 | 59.8      | -0.1  | 0       | 0.99 |
| NGLY1_1    | 60.82     | -0.13 | 0       | 0.98 |
| NGLY1_KO_2 | 59.94     | -0.12 | 0       | 0.97 |
| NGLY1_2    | 60.02     | -0.11 | 0       | 0.99 |

Supplement: Supplementary file 4560 [file 1]

IPI00410013.3|ZC3H3

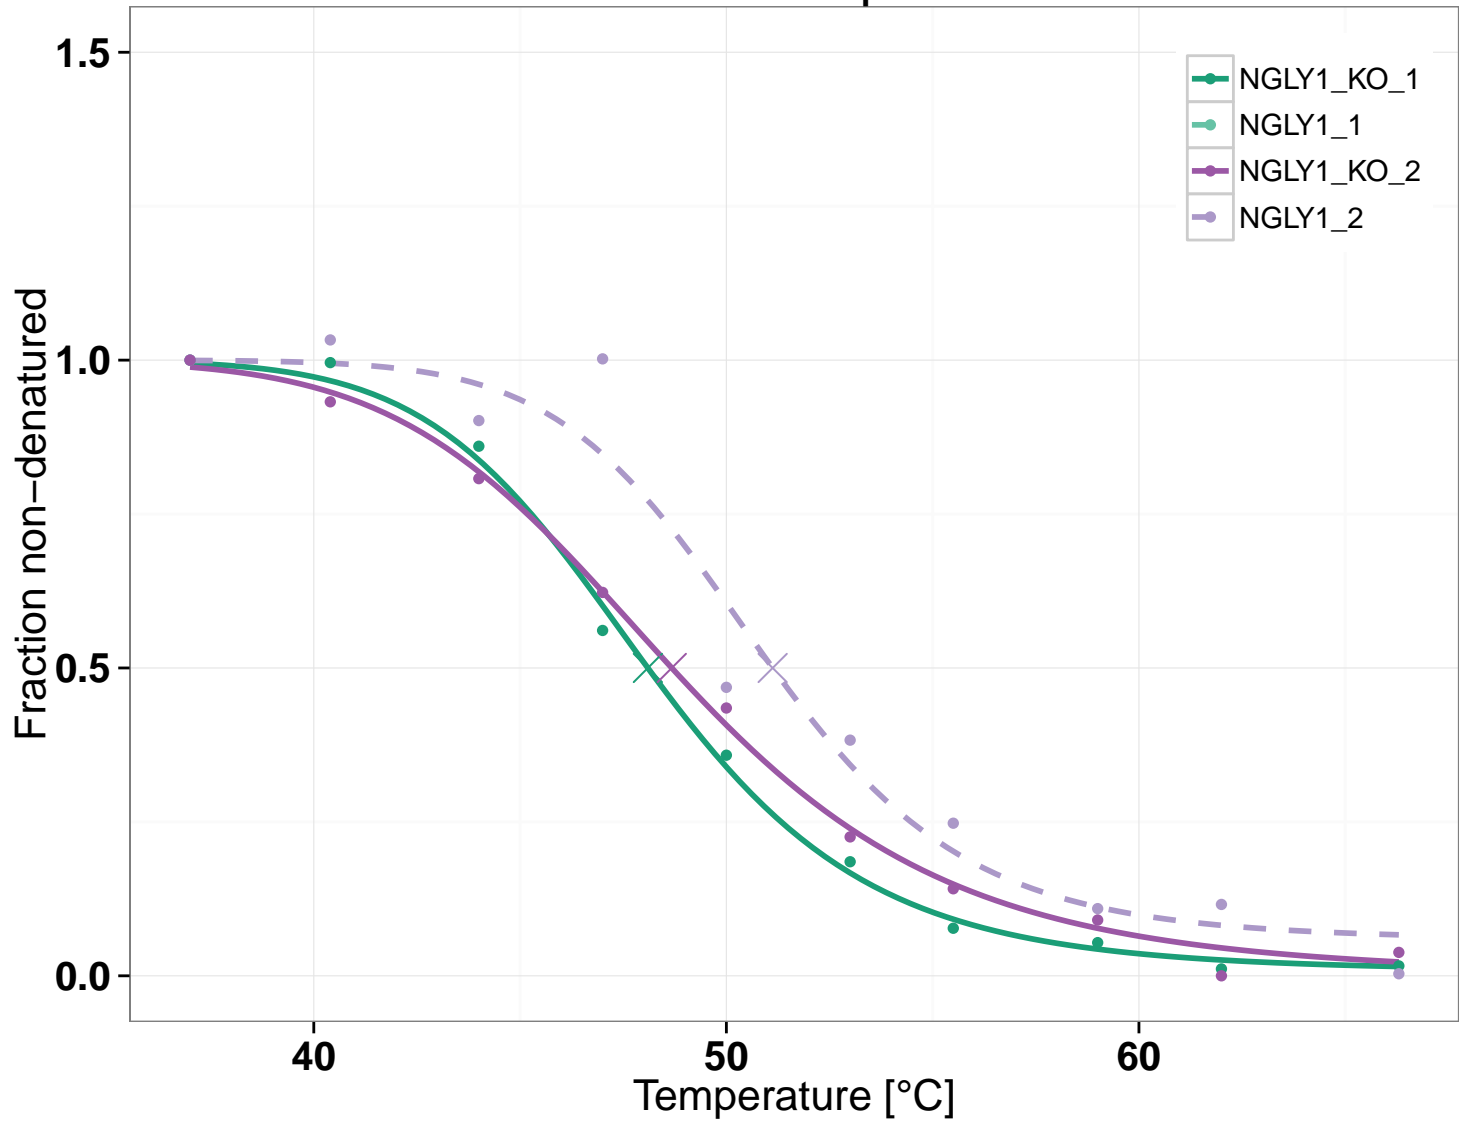

|            | meltPoint | slope  | plateau | R2   |
|------------|-----------|--------|---------|------|
| NGLY1_KO_1 | 48.1      | -0.093 | 0.01    | 1    |
| NGLY1_1    | -         | -      | -       | -    |
| NGLY1_KO_2 | 48.68     | -0.074 | 0       | 1    |
| NGLY1_2    | 51.12     | -0.095 | 0.06    | 0.96 |

Supplement: Supplementary file 4561 [file 1]

IPI00289499.3|ATIC

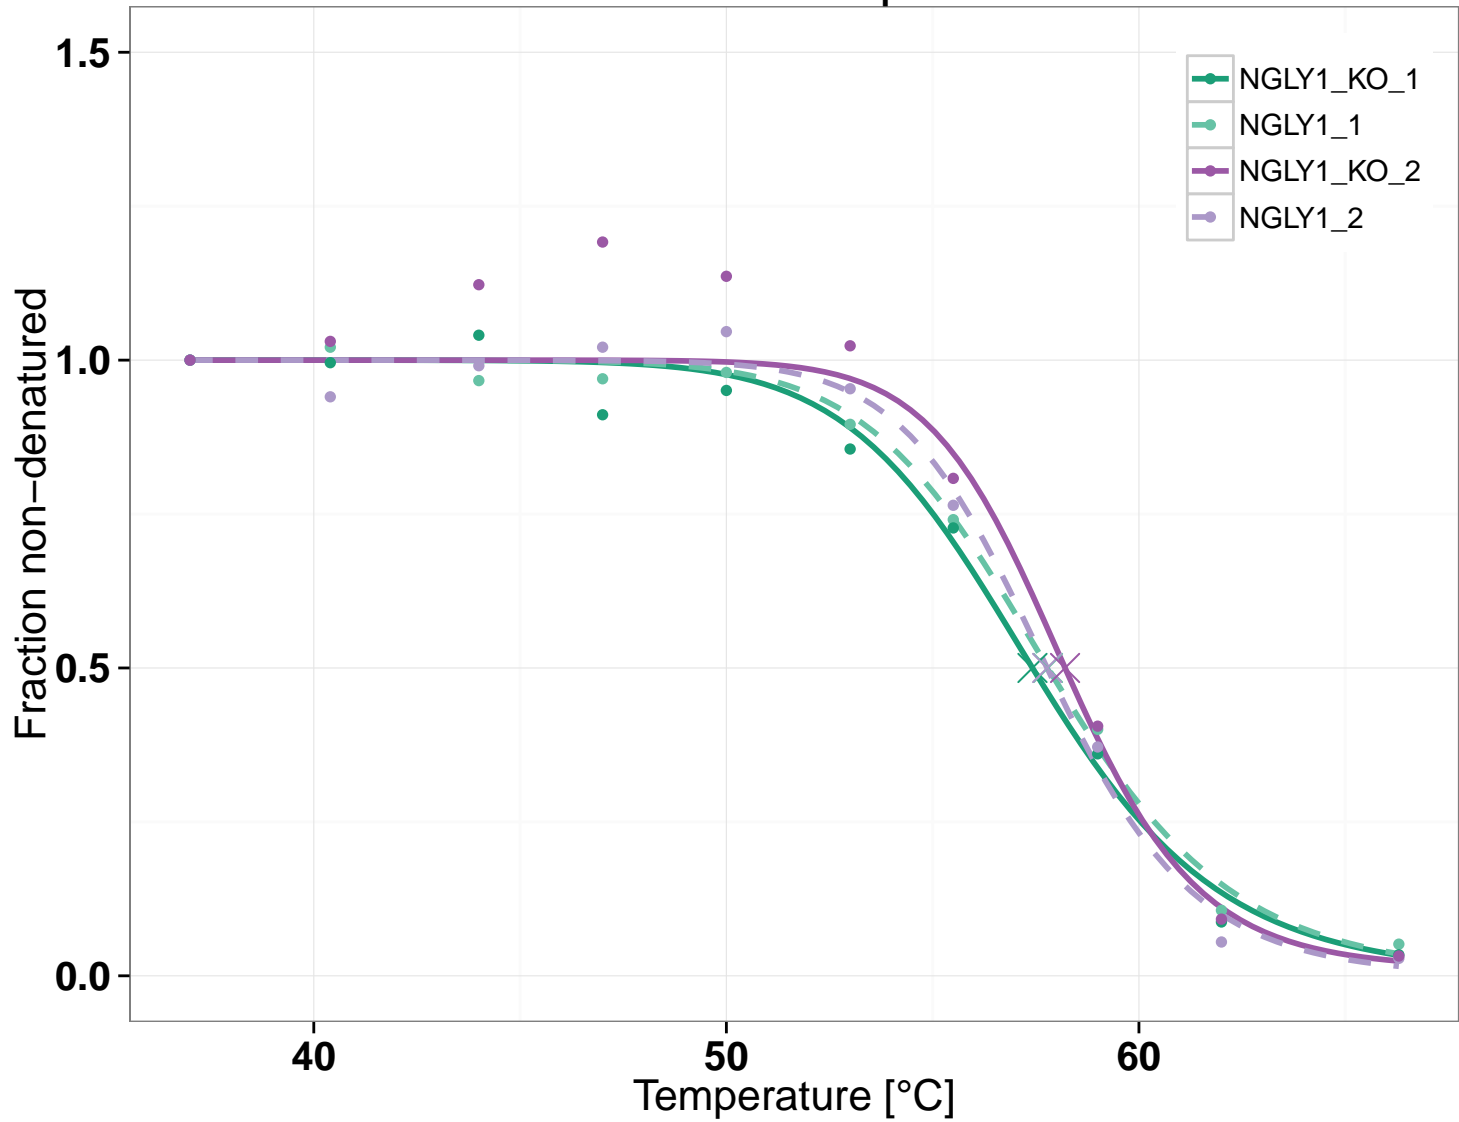

|            | meltPoint | slope | plateau | R2   |
|------------|-----------|-------|---------|------|
| NGLY1_KO_1 | 57.42     | -0.11 | 0       | 0.99 |
| NGLY1_1    | 57.8      | -0.11 | 0       | 1    |
| NGLY1_KO_2 | 58.21     | -0.15 | 0.01    | 0.96 |
| NGLY1_2    | 57.77     | -0.14 | 0       | 0.99 |

Supplement: Supplementary file 4562 [file 1]

IPI00888398.2|RNF187

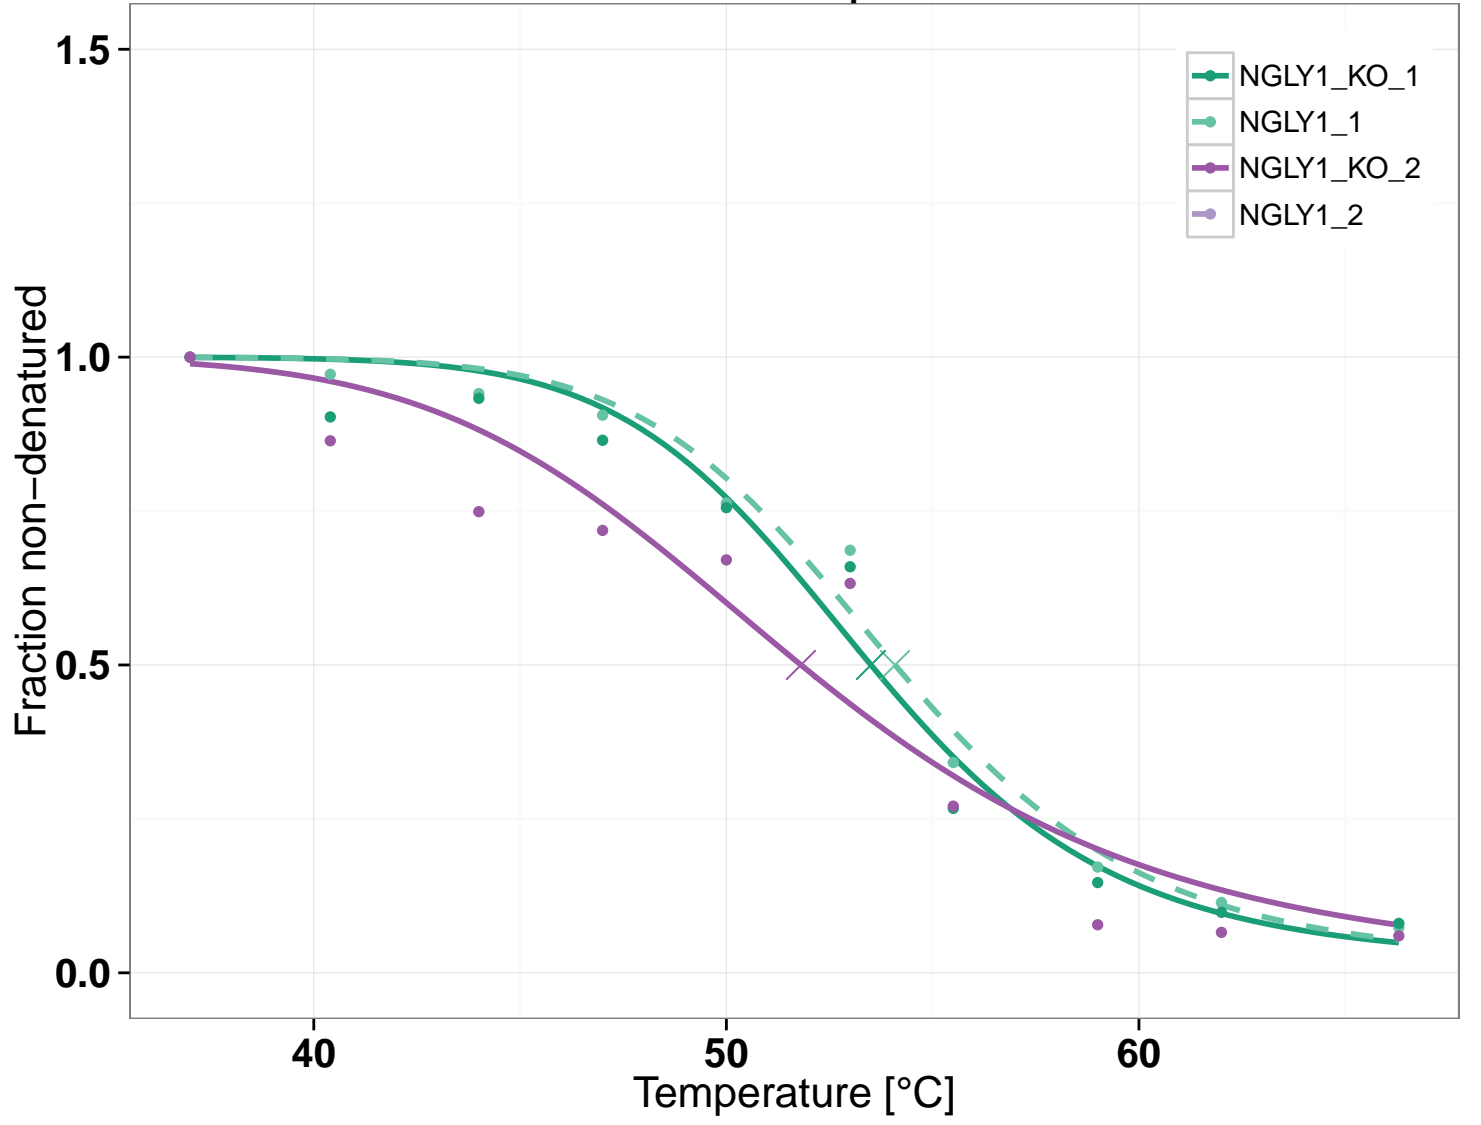

|            | meltPoint | slope  | plateau | R2   |
|------------|-----------|--------|---------|------|
| NGLY1_KO_1 | 53.5      | -0.082 | 0.02    | 0.97 |
| NGLY1_1    | 54.09     | -0.08  | 0.02    | 0.99 |
| NGLY1_KO_2 | 51.81     | -0.056 | 0       | 0.92 |
| NGLY1_2    | -         | -      | -       | -    |

Supplement: Supplementary file 4563 [file 1]

# IPI00003482.1|DECR1

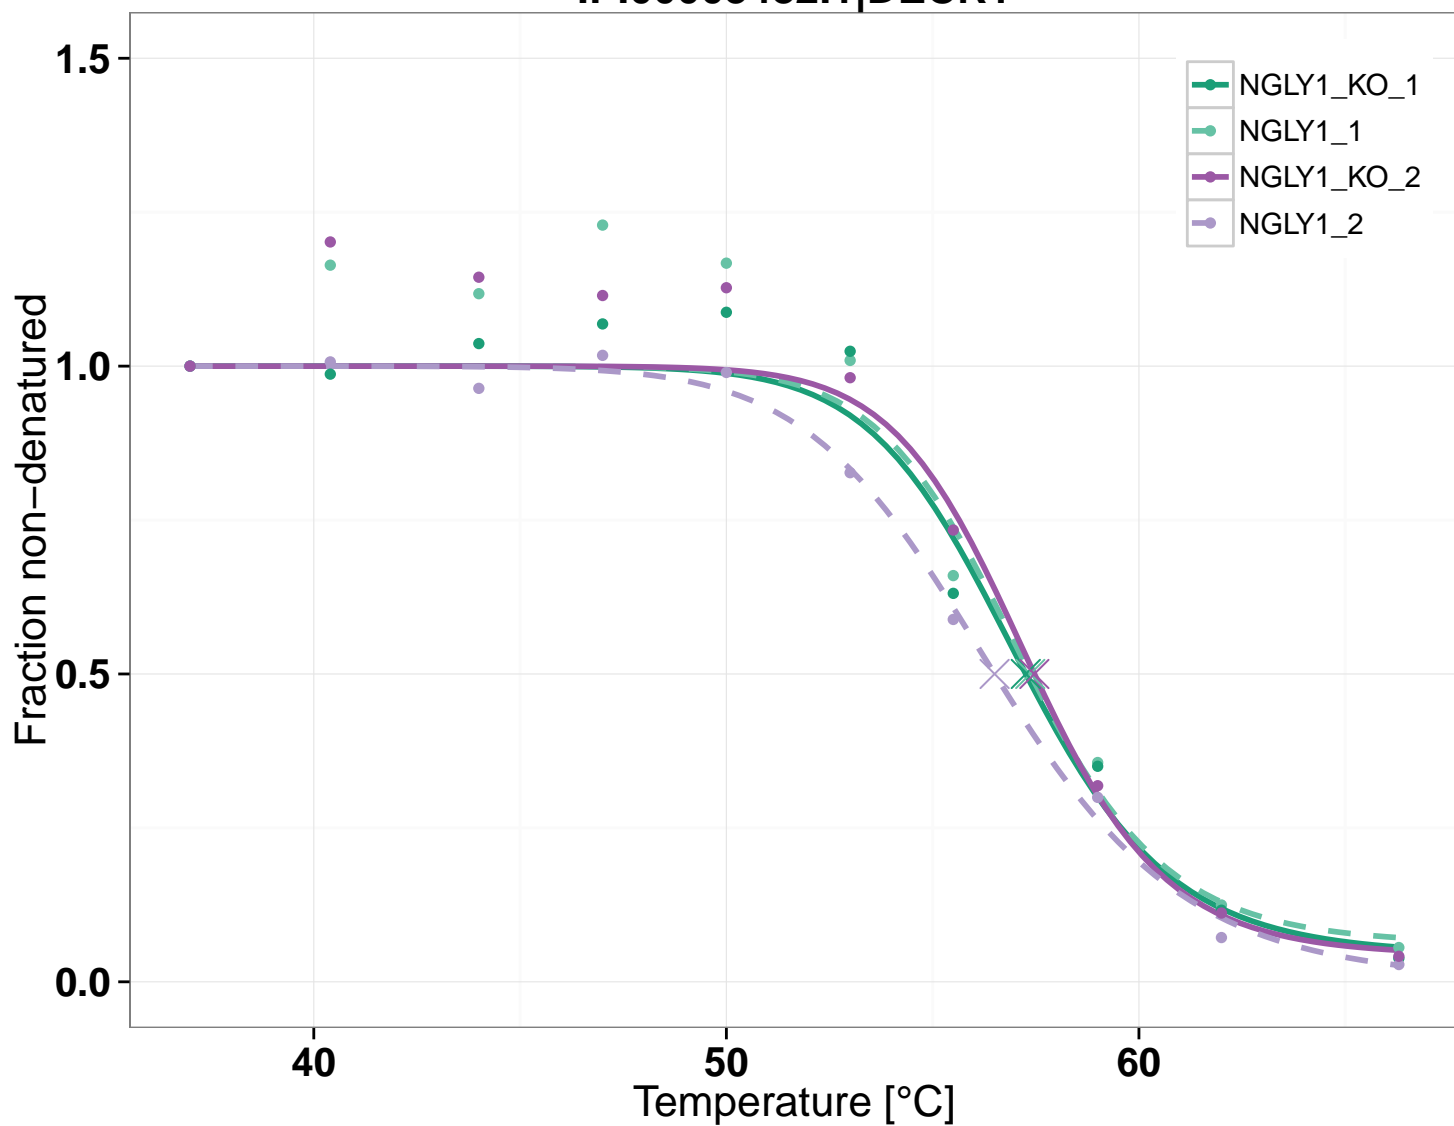

|            | meltPoint | slope | plateau | R2   |
|------------|-----------|-------|---------|------|
| NGLY1_KO_1 | 57.26     | -0.13 | 0.04    | 0.98 |
| NGLY1_1    | 57.37     | -0.13 | 0.06    | 0.92 |
| NGLY1_KO_2 | 57.47     | -0.14 | 0.04    | 0.95 |
| NGLY1_2    | 56.5      | -0.11 | 0       | 1    |

Supplement: Supplementary file 4564 [file 1]

# IPI00872639.1|ADA

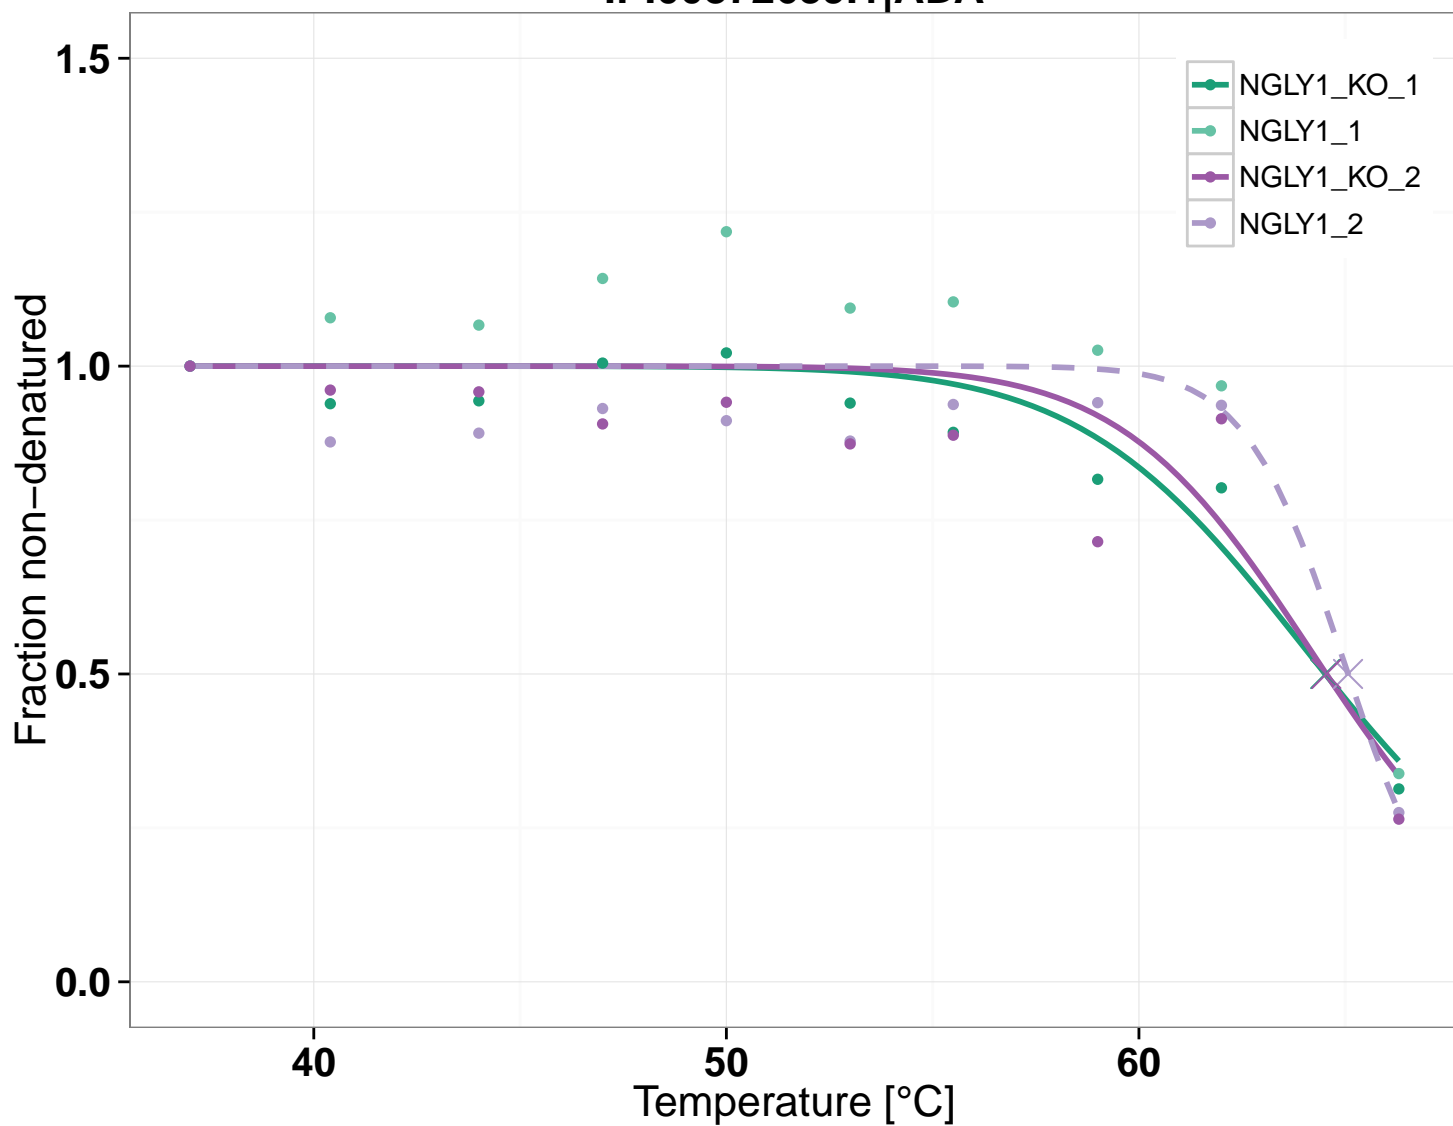

|            | meltPoint | slope  | plateau | R2   |
|------------|-----------|--------|---------|------|
| NGLY1_KO_1 | 64.52     | -0.084 | 0       | 0.92 |
| NGLY1_1    | -         | -      | -       | -    |
| NGLY1_KO_2 | 64.54     | -0.1   | 0       | 0.73 |
| NGLY1_2    | 65.07     | -0.2   | 0       | 0.84 |

Supplement: Supplementary file 4565 [file 1]

IPI00010244.4|MRPS11

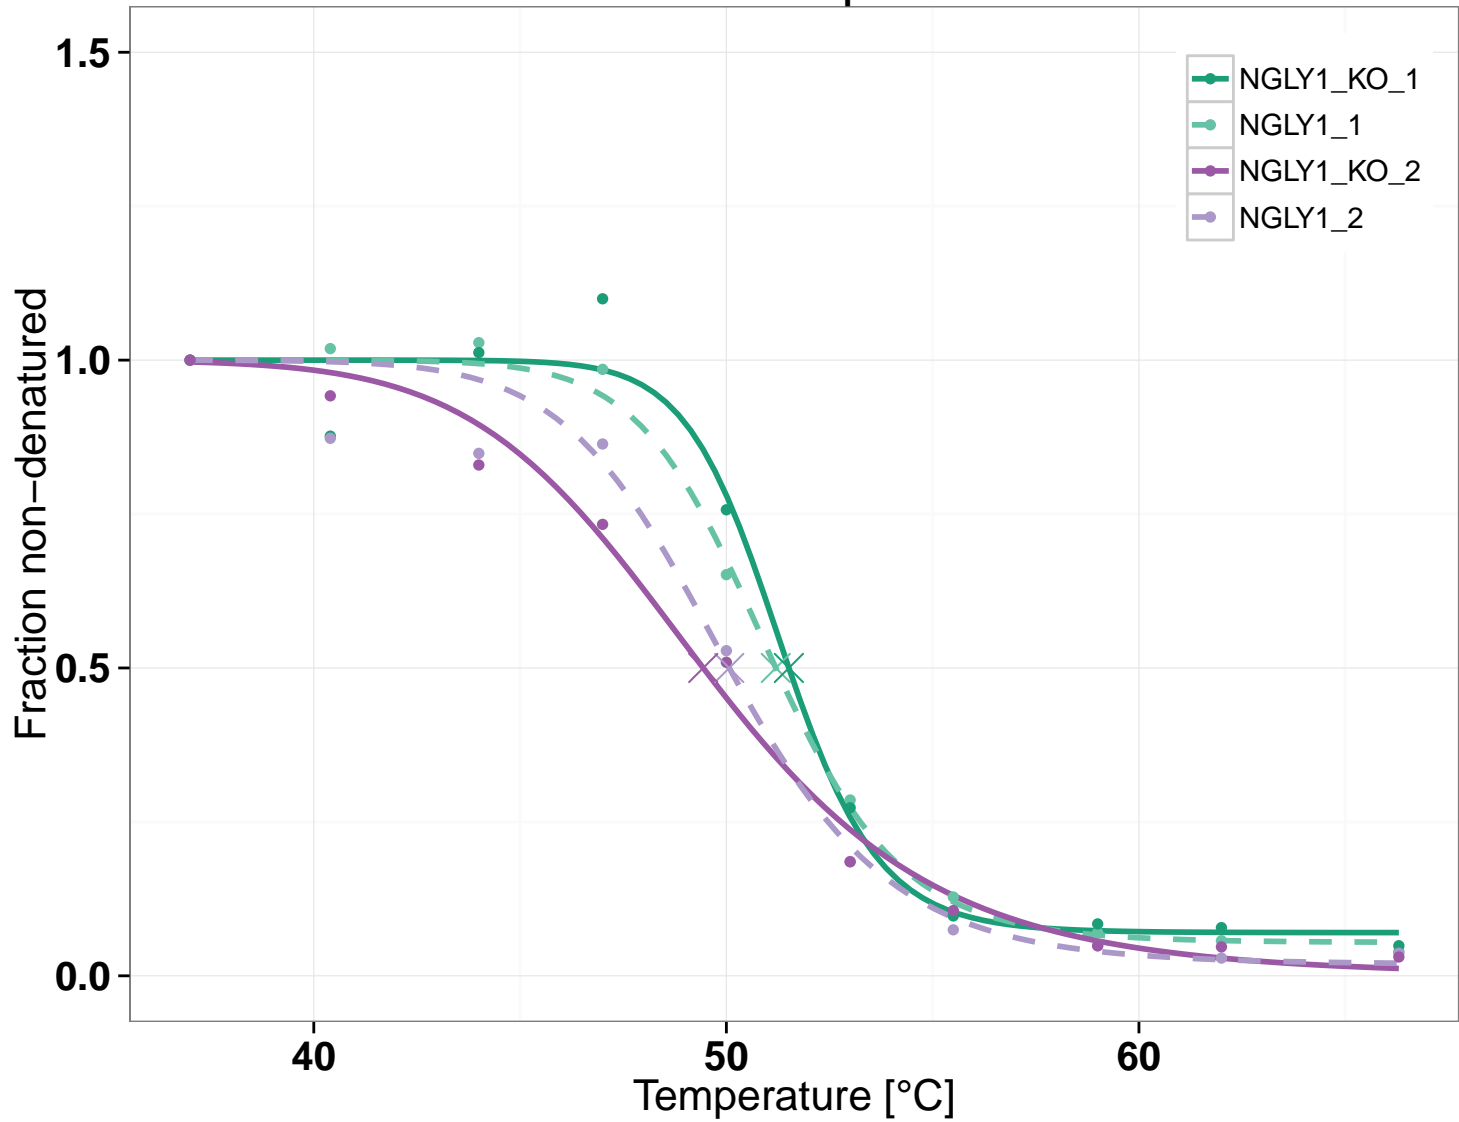

|            | meltPoint | slope  | plateau | R2   |
|------------|-----------|--------|---------|------|
| NGLY1_KO_1 | 51.52     | -0.2   | 0.07    | 0.98 |
| NGLY1_1    | 51.2      | -0.15  | 0.05    | 1    |
| NGLY1_KO_2 | 49.44     | -0.089 | 0       | 0.99 |
| NGLY1_2    | 50.07     | -0.12  | 0.02    | 0.98 |

Supplement: Supplementary file 4566 [file 1]

IPI00019884.1|ACTN2

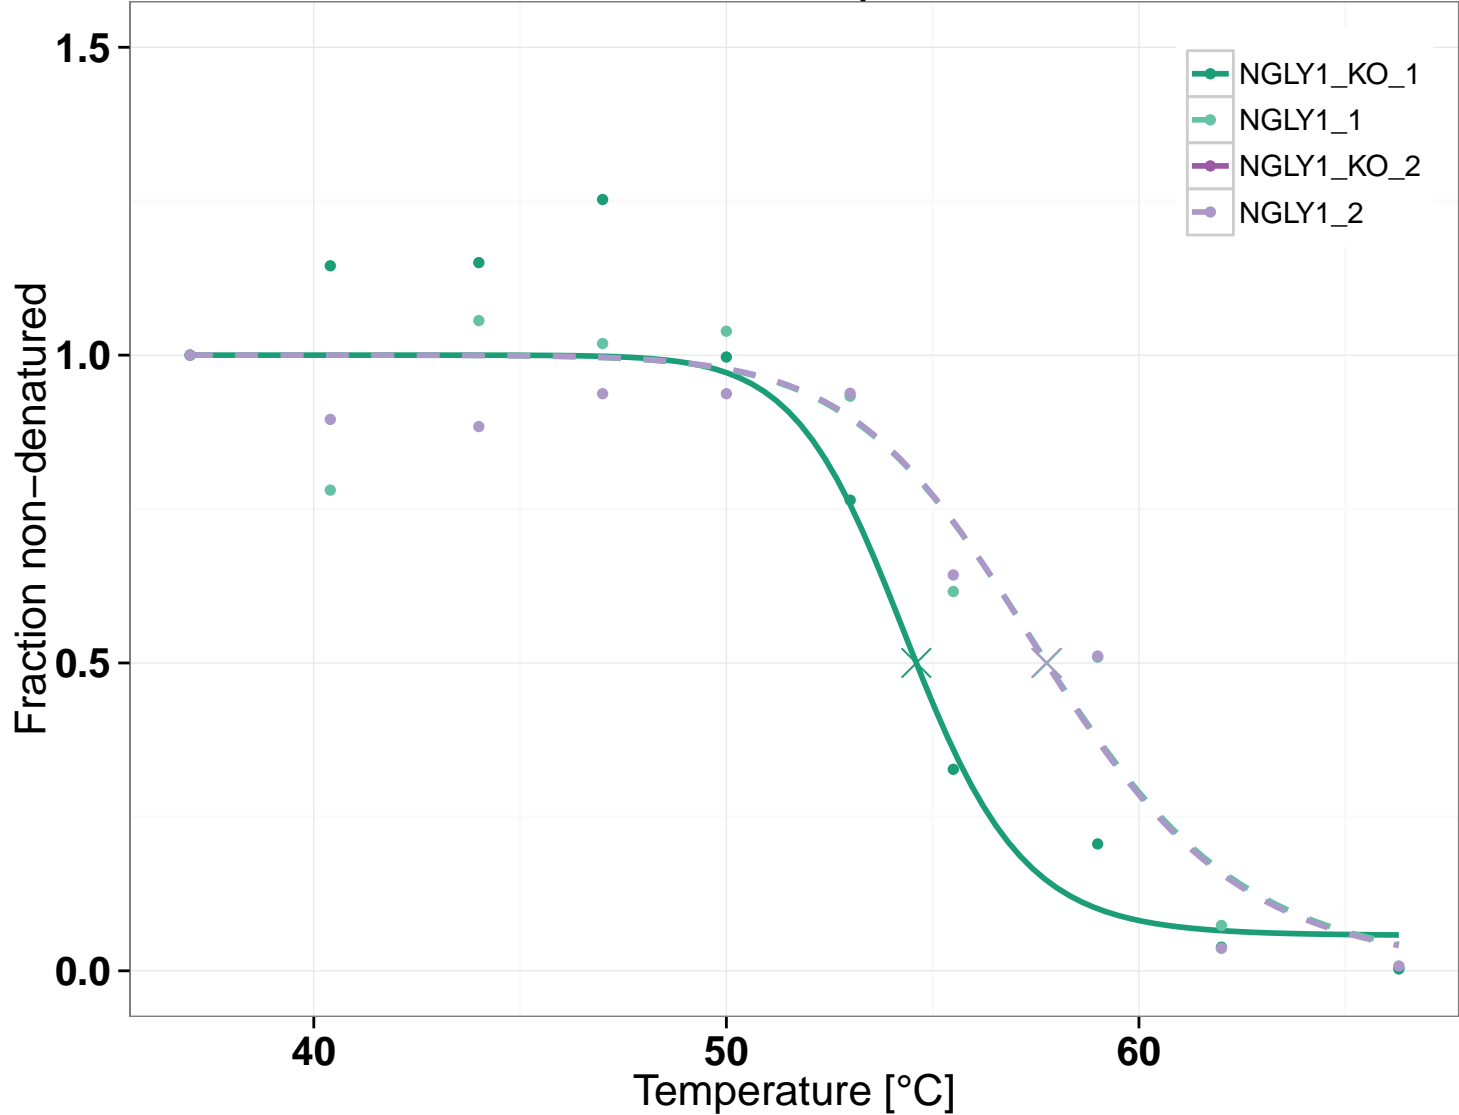

|            | meltPoint | slope | plateau | R2   |
|------------|-----------|-------|---------|------|
| NGLY1_KO_1 | 54.6      | -0.17 | 0.06    | 0.94 |
| NGLY1_1    | 57.77     | -0.11 | 0       | 0.93 |
| NGLY1_KO_2 | -         | -     | -       | -    |
| NGLY1_2    | 57.75     | -0.11 | 0       | 0.94 |

Supplement: Supplementary file 4567 [file 1]

IPI00216748.1|DEDD

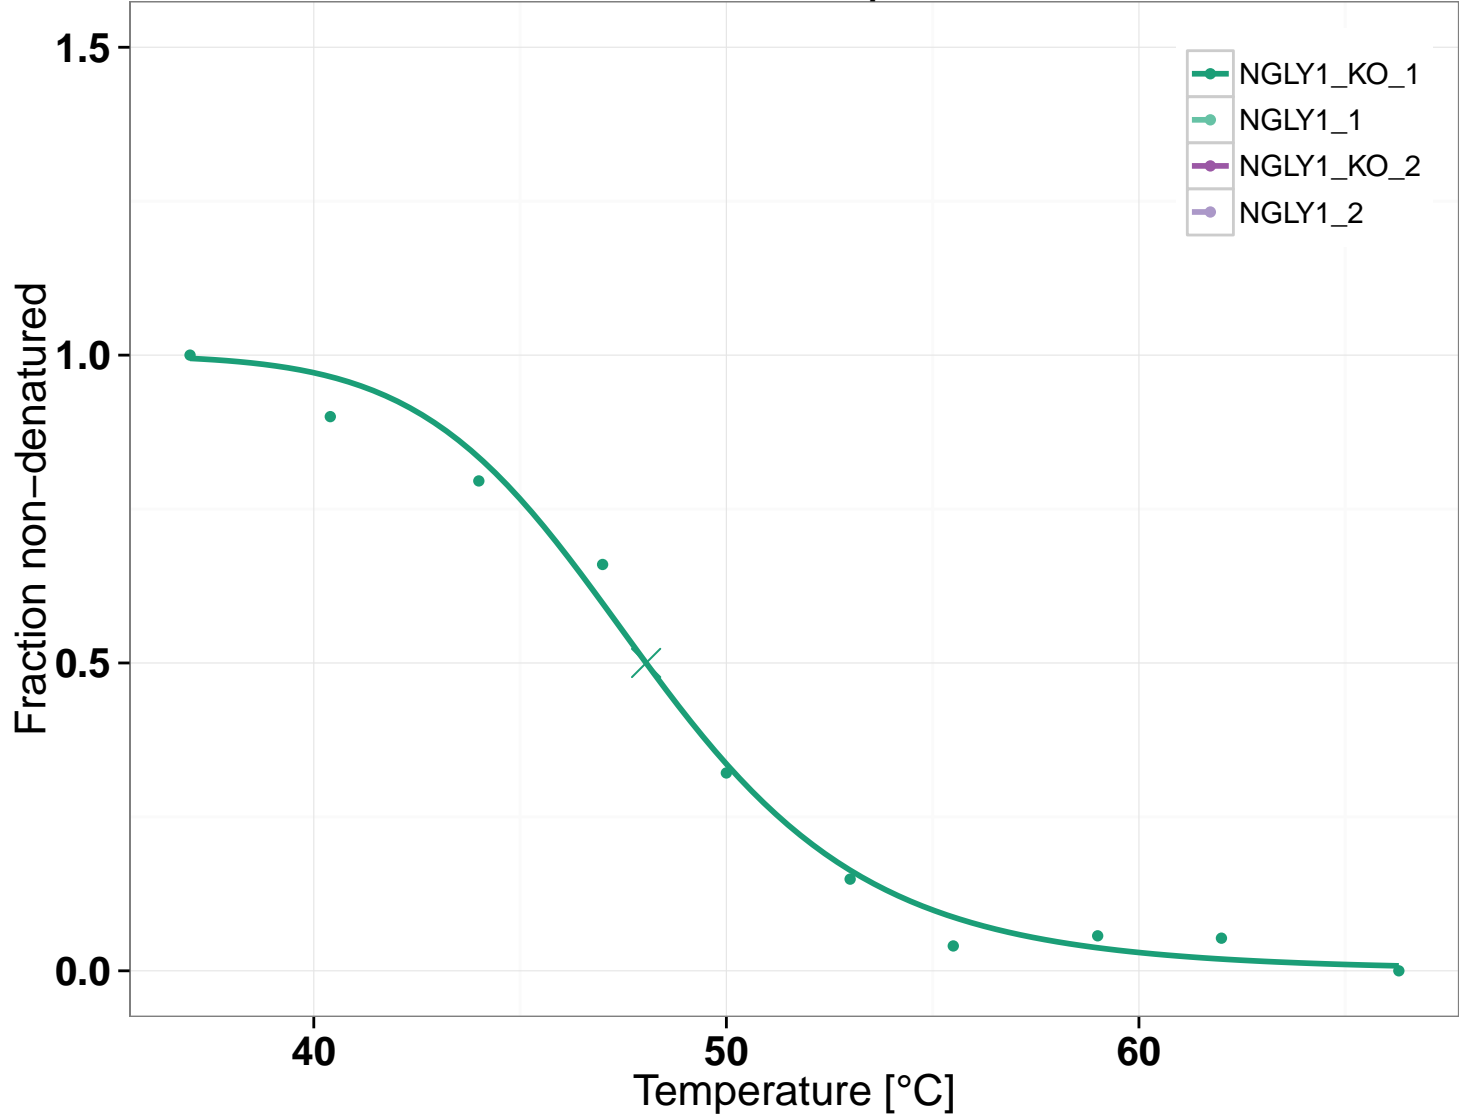

|            | meltPoint | slope  | plateau | R2   |
|------------|-----------|--------|---------|------|
| NGLY1_KO_1 | 48.05     | -0.092 | 0       | 0.99 |
| NGLY1_1    | -         | -      | -       | -    |
| NGLY1_KO_2 | -         | -      | -       | -    |
| NGLY1_2    | -         | -      | -       | -    |

Supplement: Supplementary file 4568 [file 1]

IPI00022225.3|C19ORF29

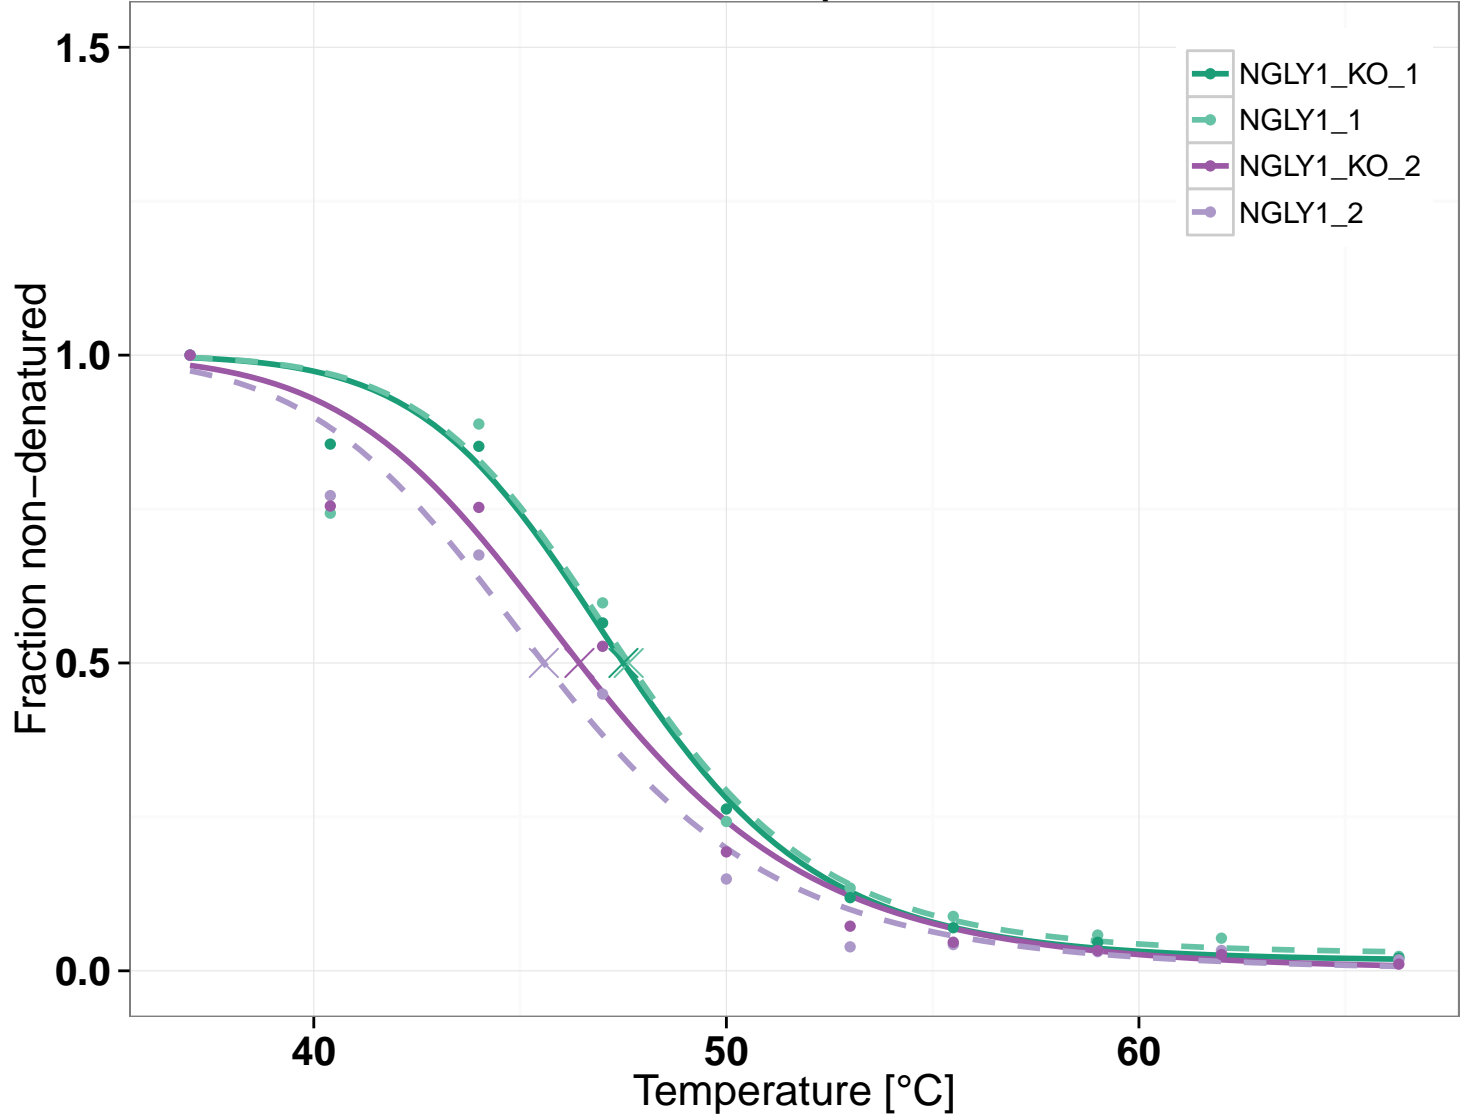

|            | meltPoint | slope  | plateau | R2   |
|------------|-----------|--------|---------|------|
| NGLY1_KO_1 | 47.51     | -0.1   | 0.02    | 0.99 |
| NGLY1_1    | 47.63     | -0.1   | 0.03    | 0.96 |
| NGLY1_KO_2 | 46.44     | -0.087 | 0       | 0.97 |
| NGLY1_2    | 45.58     | -0.088 | 0       | 0.98 |

Supplement: Supplementary file 4569 [file 1]

IPI00339384.5|RDH11

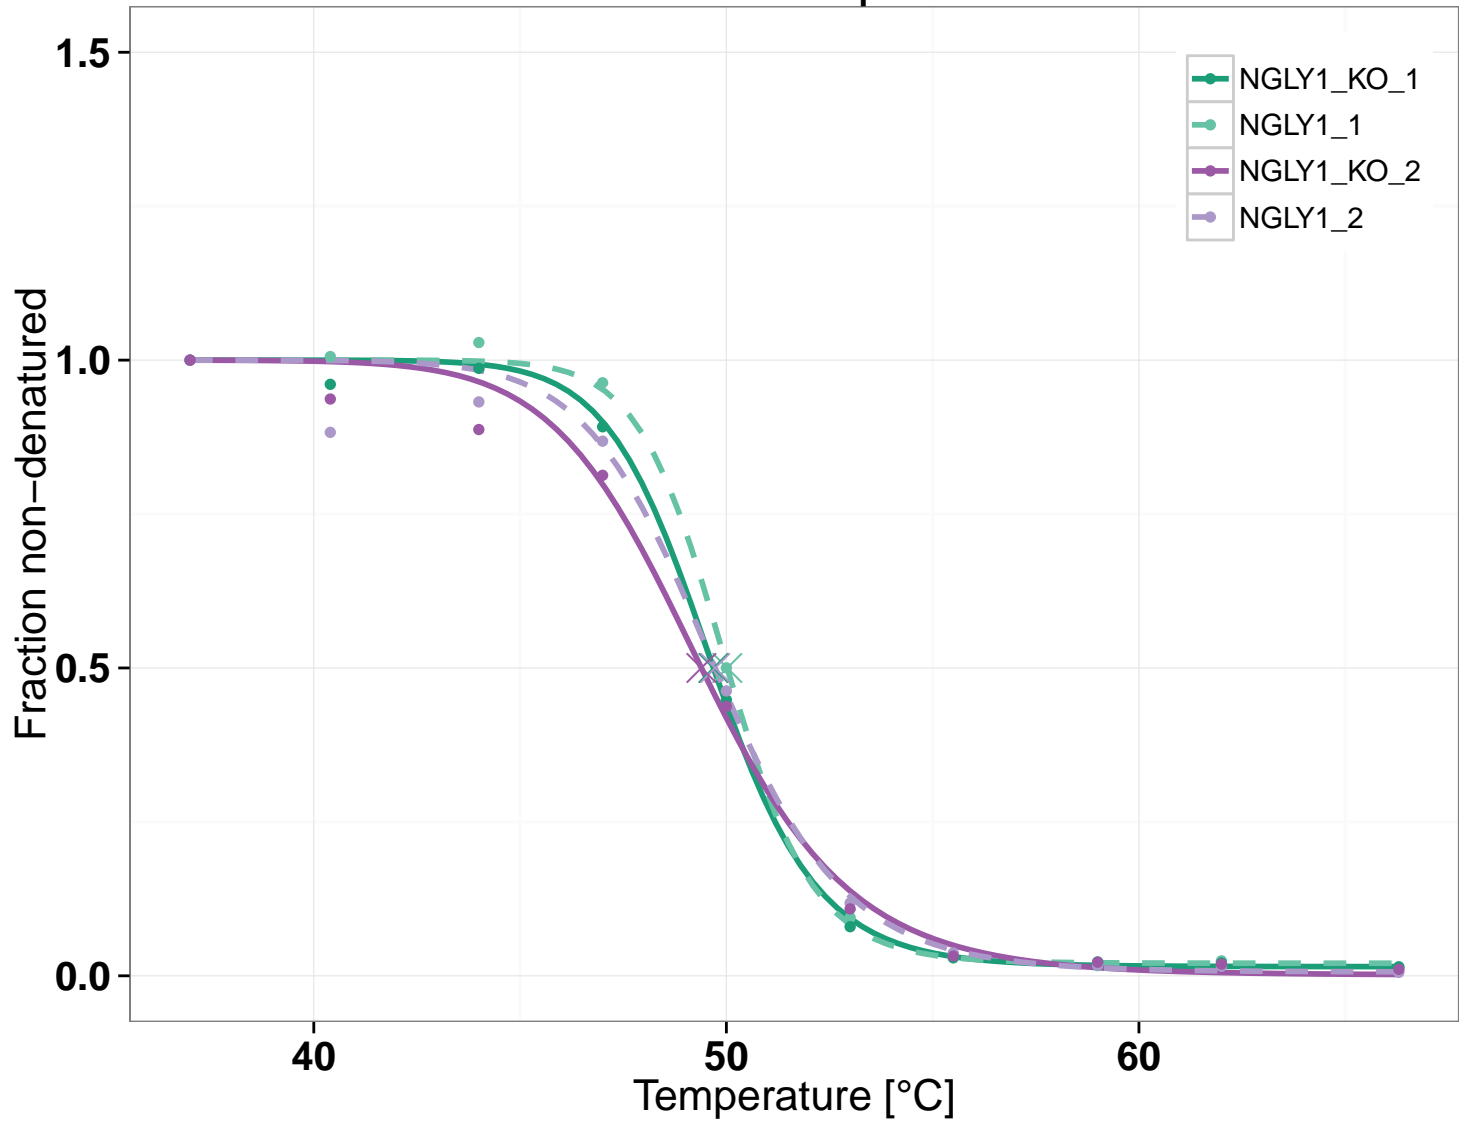

|            | meltPoint | slope | plateau | R2   |
|------------|-----------|-------|---------|------|
| NGLY1_KO_1 | 49.69     | -0.19 | 0.01    | 1    |
| NGLY1_1    | 50.02     | -0.23 | 0.02    | 1    |
| NGLY1_KO_2 | 49.39     | -0.14 | 0       | 0.99 |
| NGLY1_2    | 49.73     | -0.16 | 0.01    | 0.99 |

Supplement: Supplementary file 4570 [file 1]

IPI00009146.4|TRAFD1

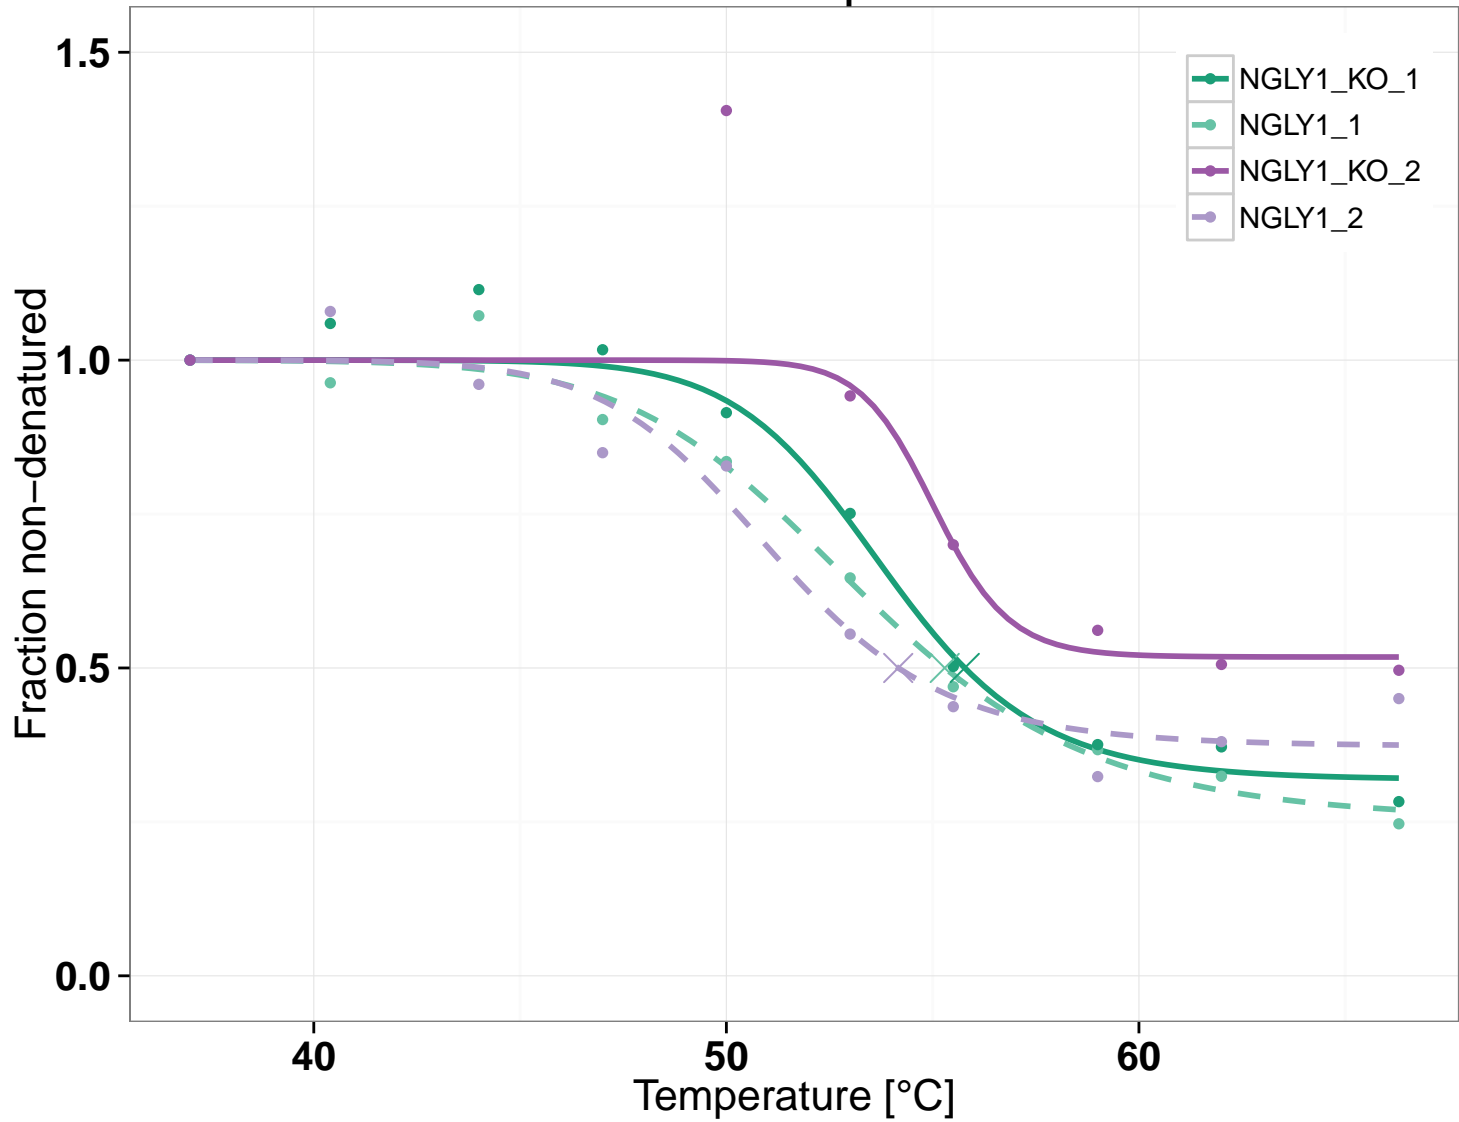

|            | meltPoint | slope  | plateau | R2   |
|------------|-----------|--------|---------|------|
| NGLY1_KO_1 | 55.78     | -0.093 | 0.32    | 0.98 |
| NGLY1_1    | 55.29     | -0.066 | 0.25    | 0.99 |
| NGLY1_KO_2 | -         | -0.13  | 0.52    | 0.24 |
| NGLY1_2    | 54.17     | -0.075 | 0.37    | 0.96 |

Supplement: Supplementary file 4571 [file 1]

IPI00022402.3|FAM32A

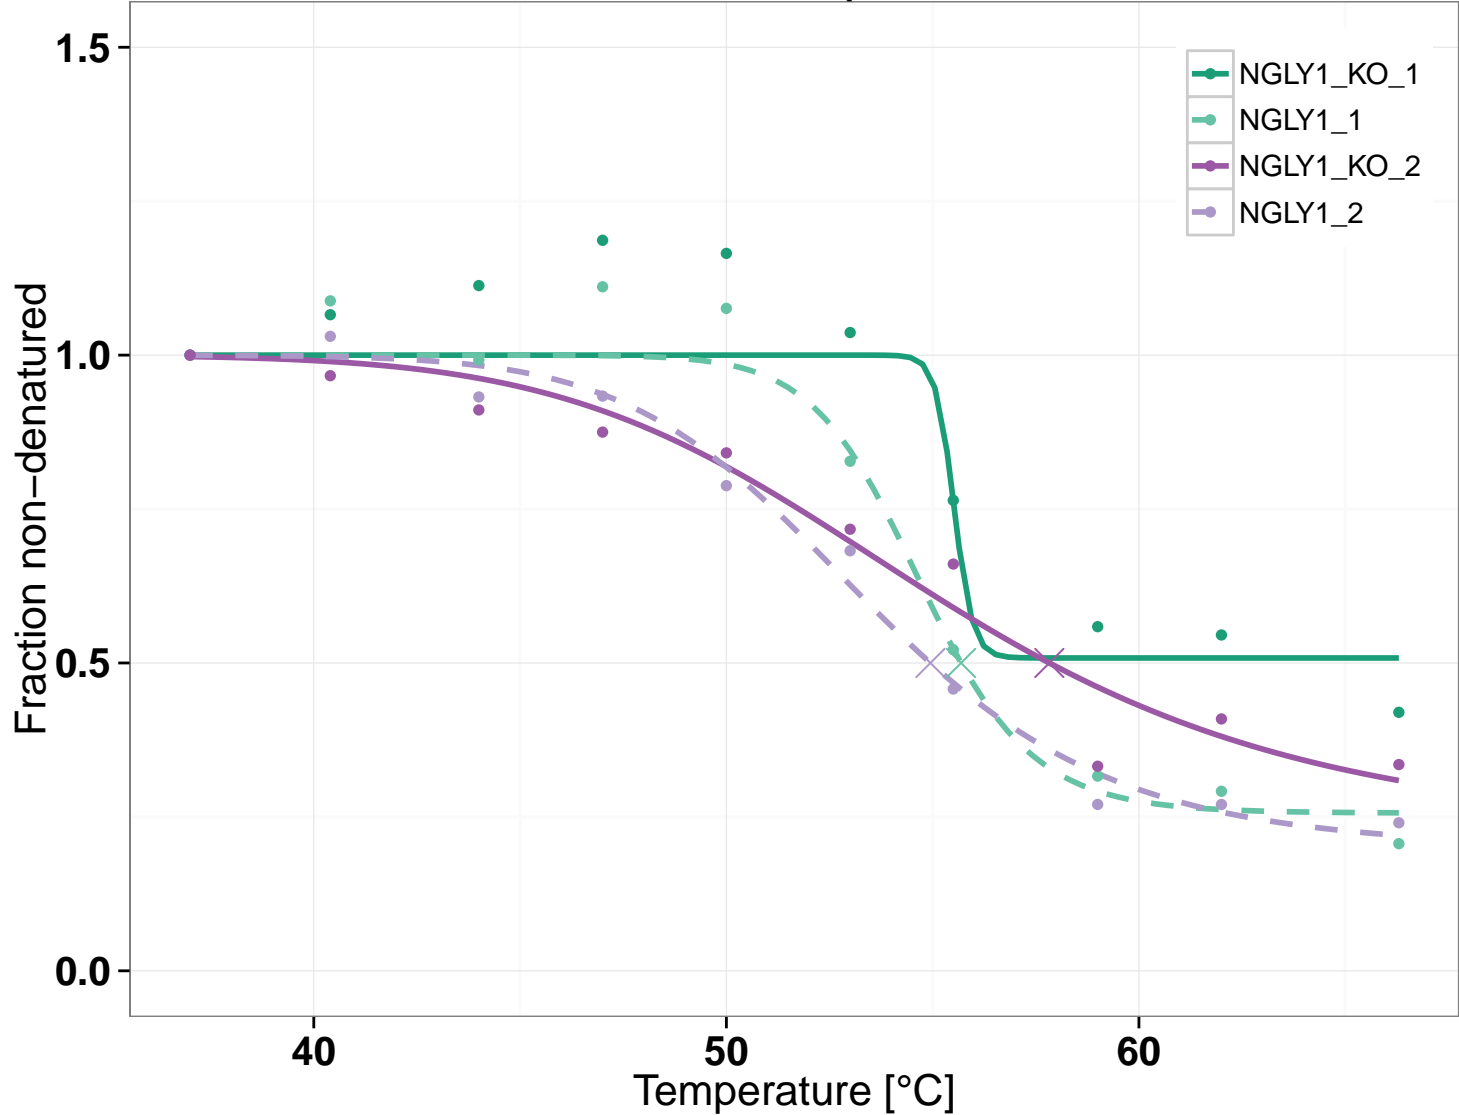

|            | meltPoint | slope  | plateau | R2   |
|------------|-----------|--------|---------|------|
| NGLY1_KO_1 | –         | –0.55  | 0.51    | 0.88 |
| NGLY1_1    | 55.69     | –0.14  | 0.26    | 0.97 |
| NGLY1_KO_2 | 57.83     | –0.043 | 0.22    | 0.95 |
| NGLY1_2    | 54.95     | –0.068 | 0.2     | 0.99 |

Supplement: Supplementary file 4572 [file 1]

IPI00456694.2|DDX26B

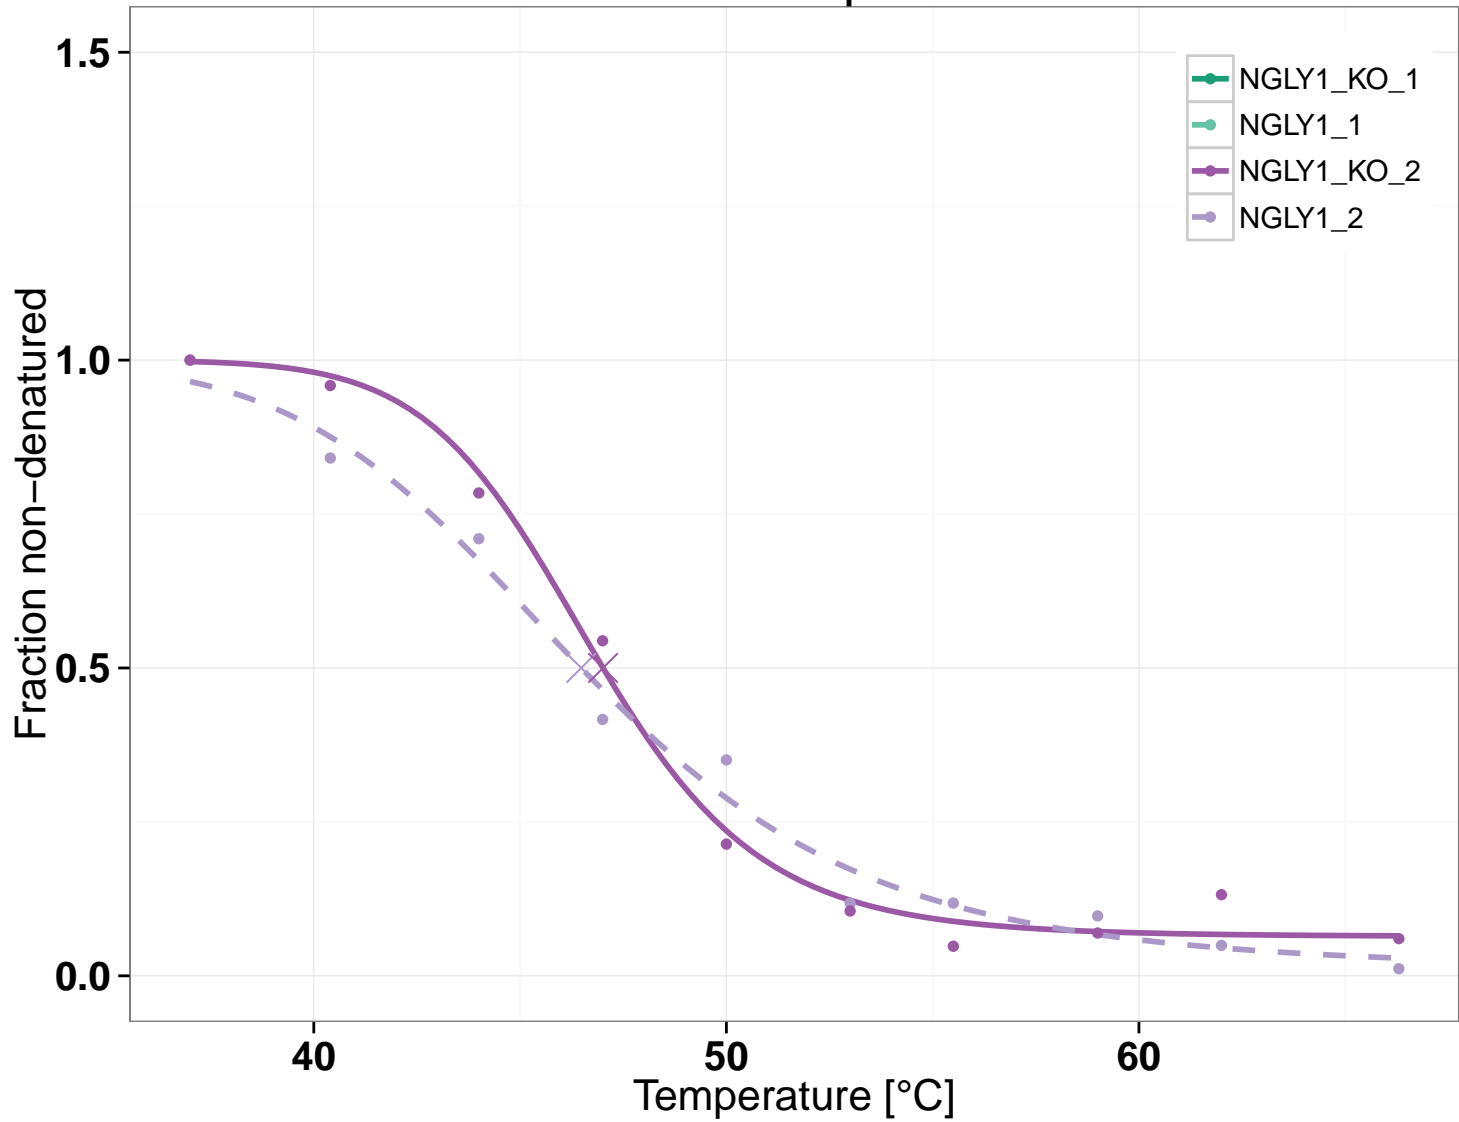

|            | meltPoint | slope  | plateau | R2   |
|------------|-----------|--------|---------|------|
| NGLY1_KO_1 | —         | —      | —       | —    |
| NGLY1_1    | —         | —      | —       | —    |
| NGLY1_KO_2 | 47.01     | -0.12  | 0.06    | 0.99 |
| NGLY1_2    | 46.48     | -0.071 | 0.01    | 0.99 |

Supplement: Supplementary file 4573 [file 1]

IPI00472049.4|C22ORF29

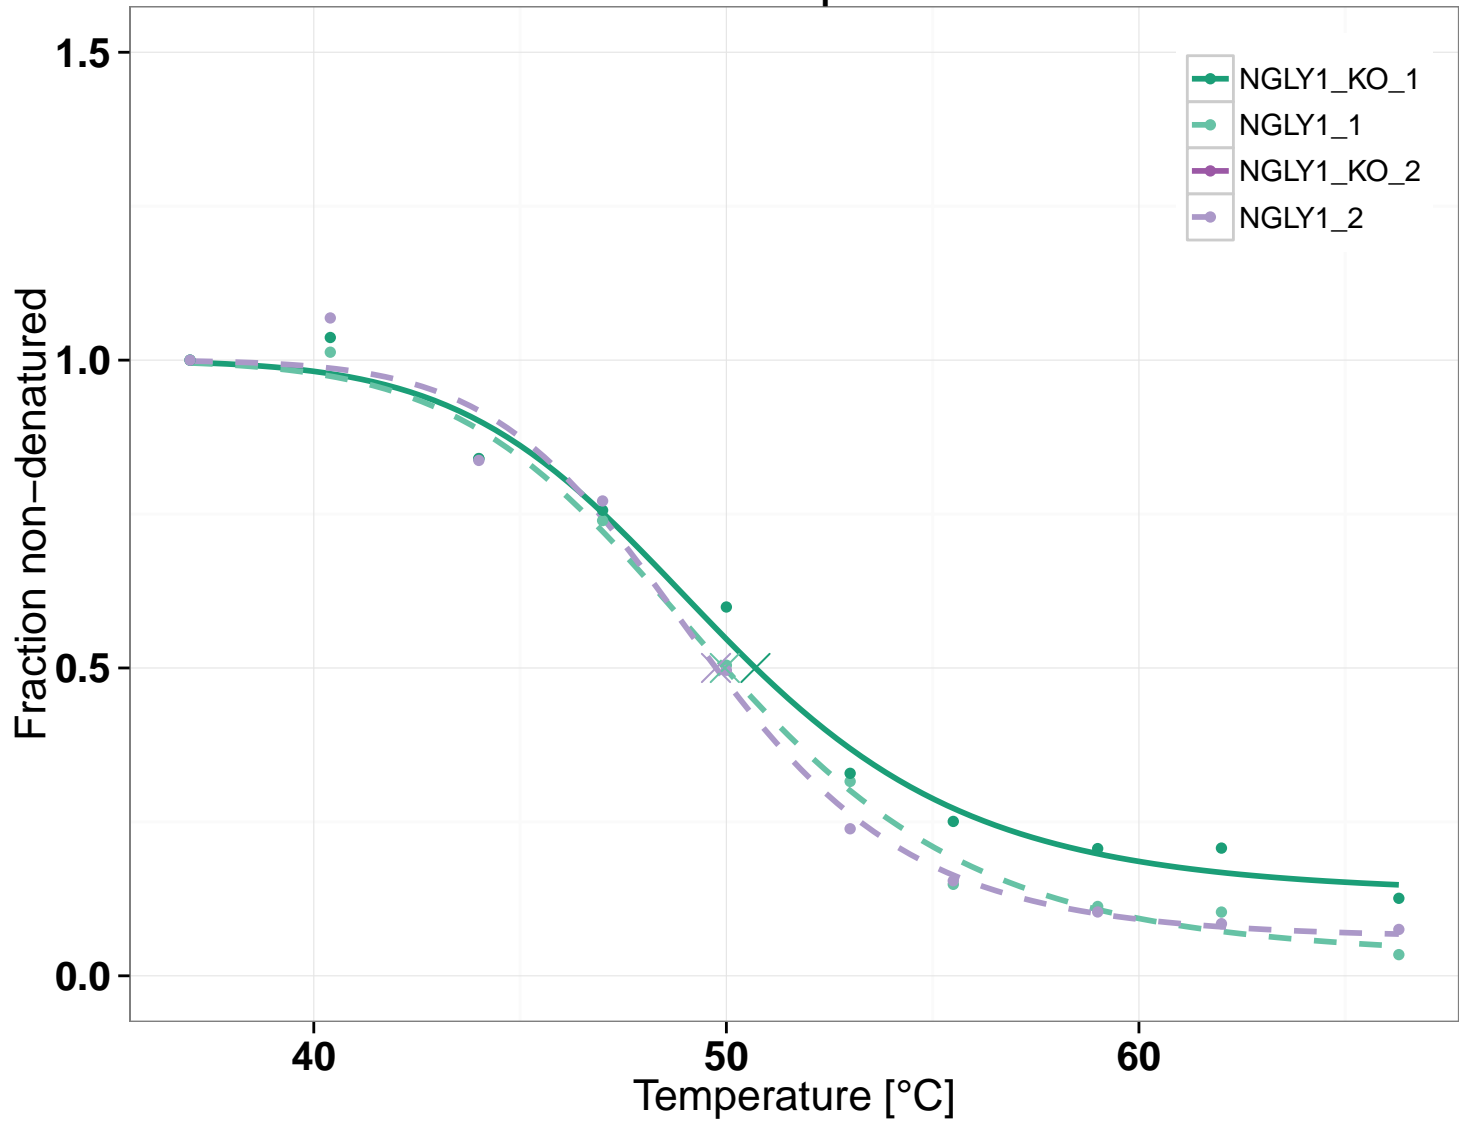

|            | meltPoint | slope  | plateau | R2   |
|------------|-----------|--------|---------|------|
| NGLY1_KO_1 | 50.71     | -0.07  | 0.13    | 0.99 |
| NGLY1_1    | 49.96     | -0.077 | 0.03    | 0.99 |
| NGLY1_KO_2 | -         | -      | -       | -    |
| NGLY1_2    | 49.75     | -0.092 | 0.06    | 0.99 |

Supplement: Supplementary file 4574 [file 1]

IPI00215974.2|QTRT1

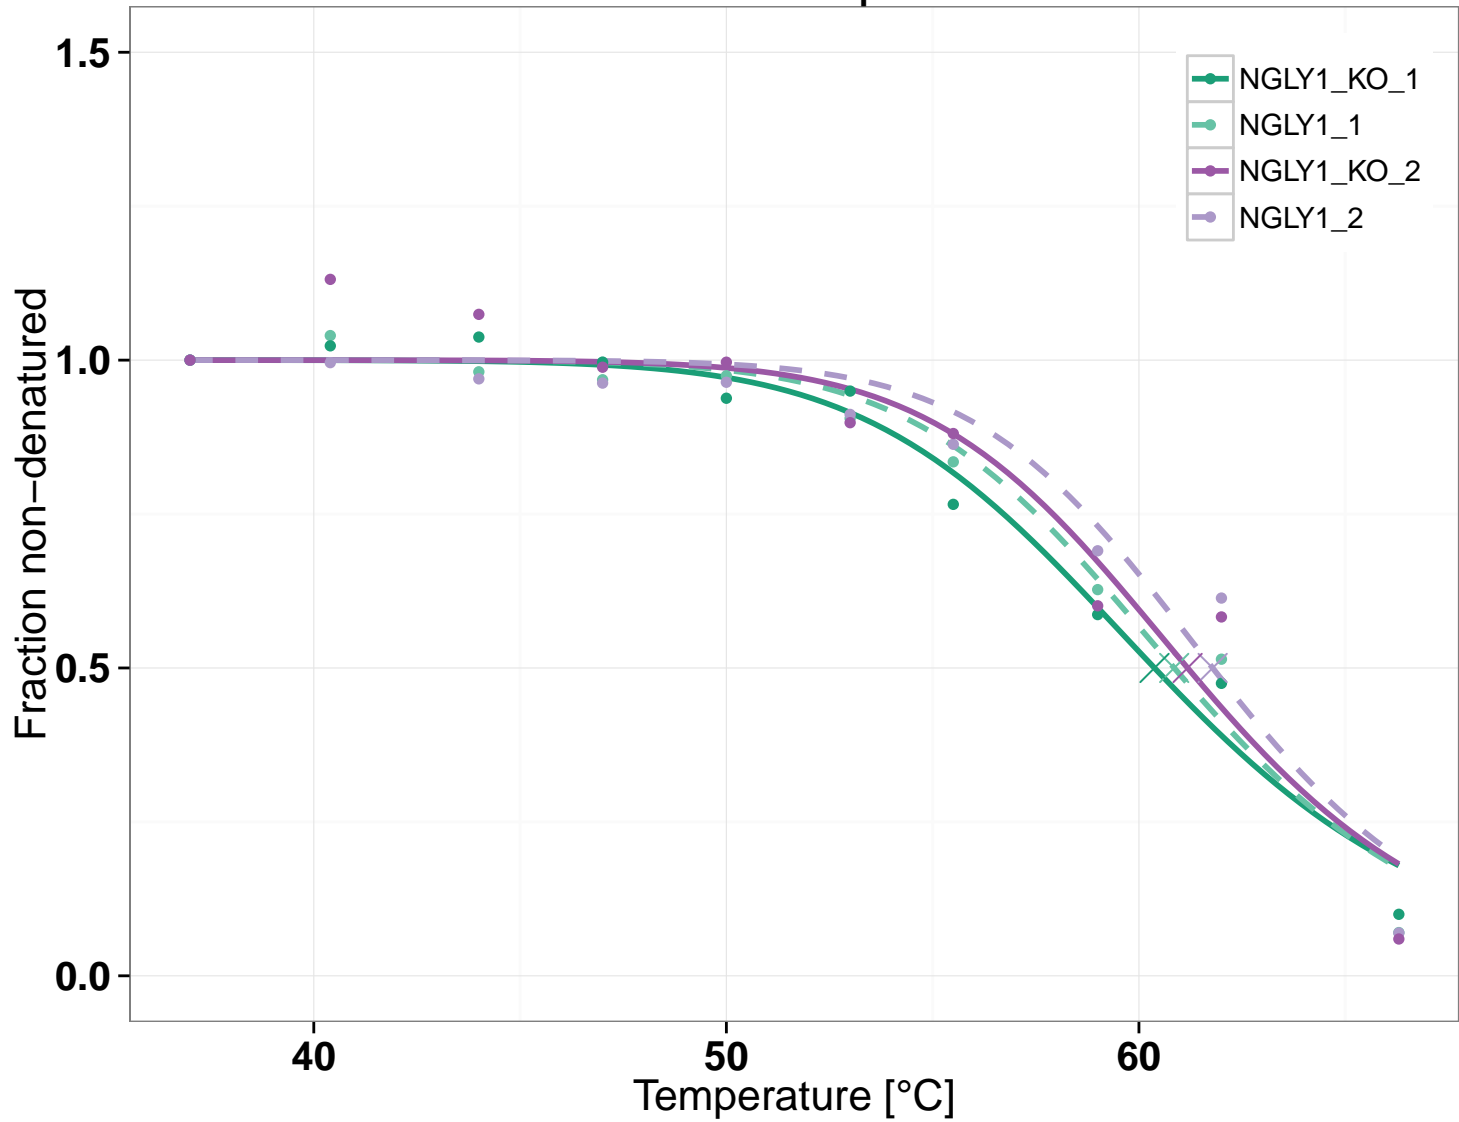

|            | meltPoint | slope  | plateau | R2   |
|------------|-----------|--------|---------|------|
| NGLY1_KO_1 | 60.38     | -0.072 | 0       | 0.98 |
| NGLY1_1    | 60.85     | -0.078 | 0       | 0.97 |
| NGLY1_KO_2 | 61.18     | -0.081 | 0       | 0.93 |
| NGLY1_2    | 61.79     | -0.086 | 0       | 0.94 |

Supplement: Supplementary file 4575 [file 1]

IPI00028611.1|NR2F2

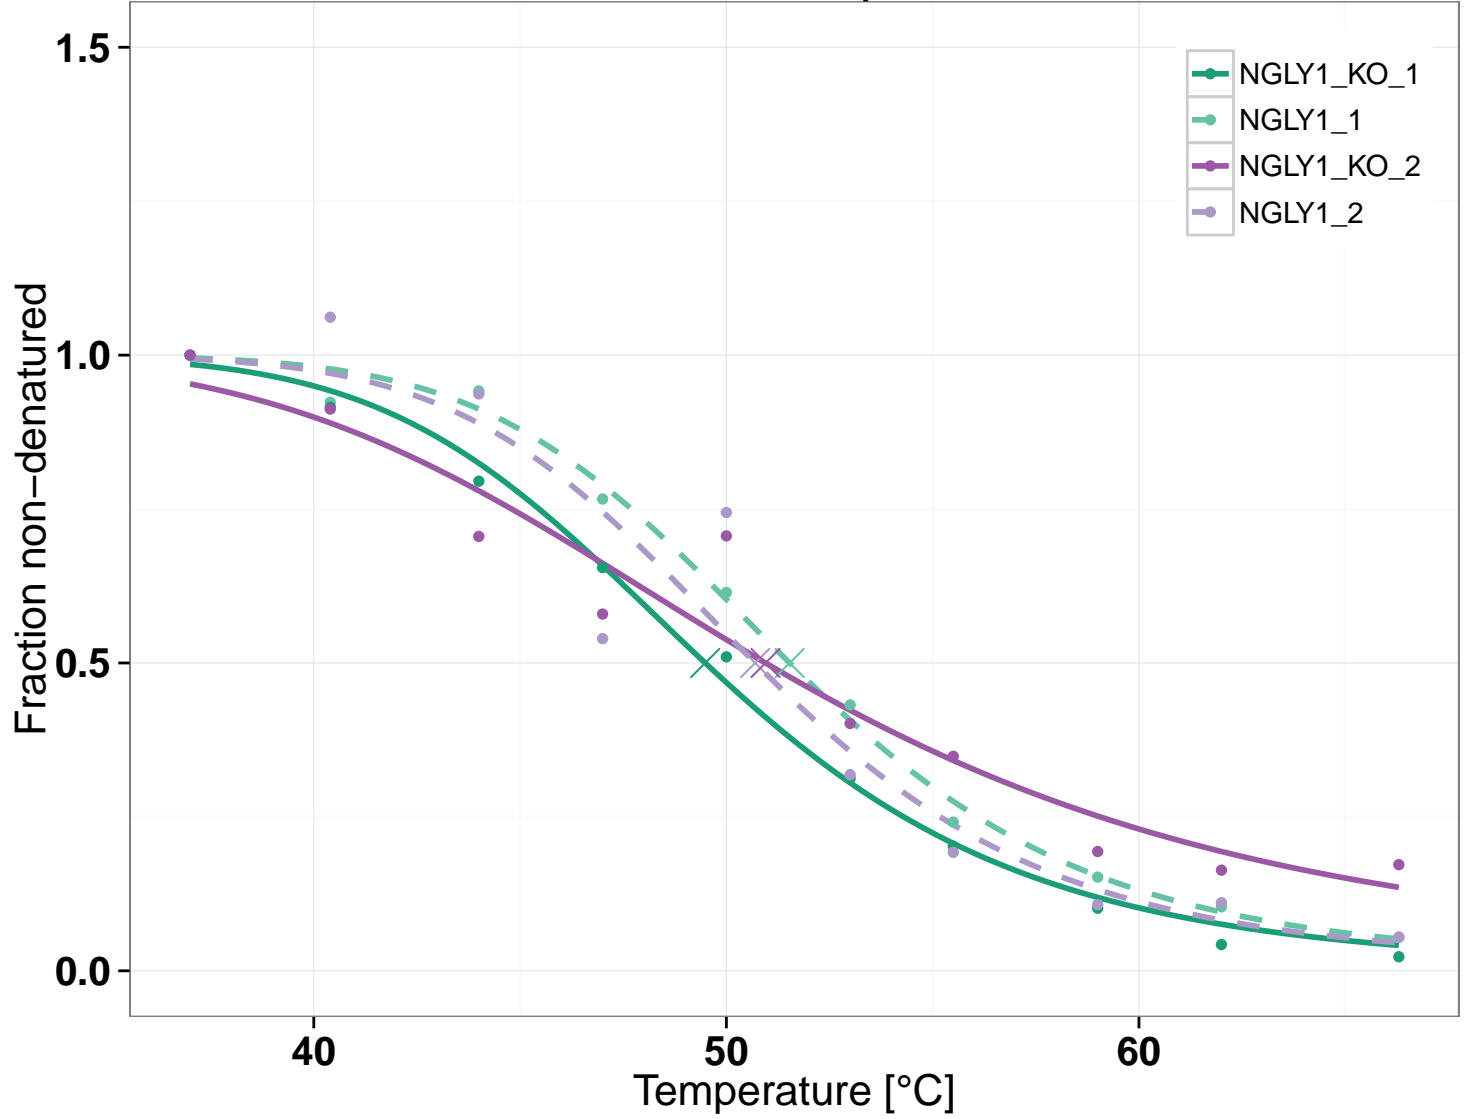

|            | meltPoint | slope  | plateau | R2   |
|------------|-----------|--------|---------|------|
| NGLY1_KO_1 | 49.49     | -0.064 | 0       | 1    |
| NGLY1_1    | 51.53     | -0.068 | 0.01    | 0.99 |
| NGLY1_KO_2 | 50.95     | -0.042 | 0       | 0.94 |
| NGLY1_2    | 50.7      | -0.069 | 0.01    | 0.93 |

Supplement: Supplementary file 4576 [file 1]

IPI00304866.4|TNFAIP2

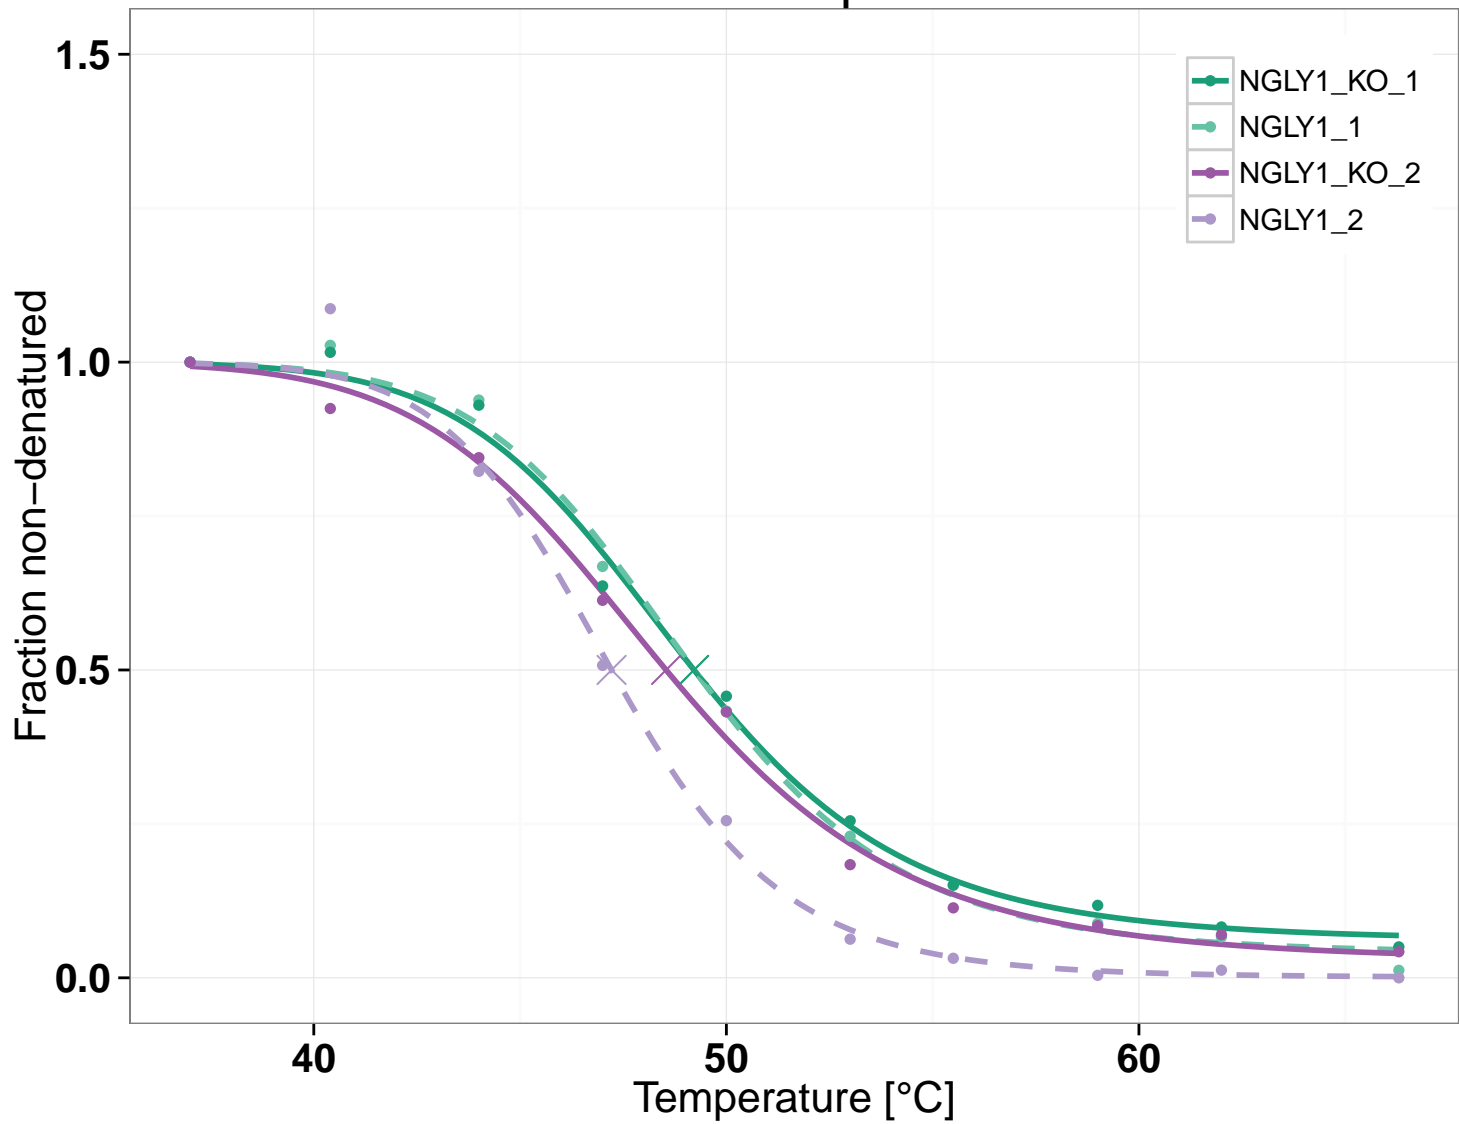

|            | meltPoint | slope  | plateau | R2   |
|------------|-----------|--------|---------|------|
| NGLY1_KO_1 | 49.21     | -0.087 | 0.06    | 0.99 |
| NGLY1_1    | 49.22     | -0.093 | 0.04    | 1    |
| NGLY1_KO_2 | 48.54     | -0.083 | 0.03    | 1    |
| NGLY1_2    | 47.22     | -0.12  | 0       | 0.99 |

Supplement: Supplementary file 4577 [file 1]

IPI00220308.1|NF2

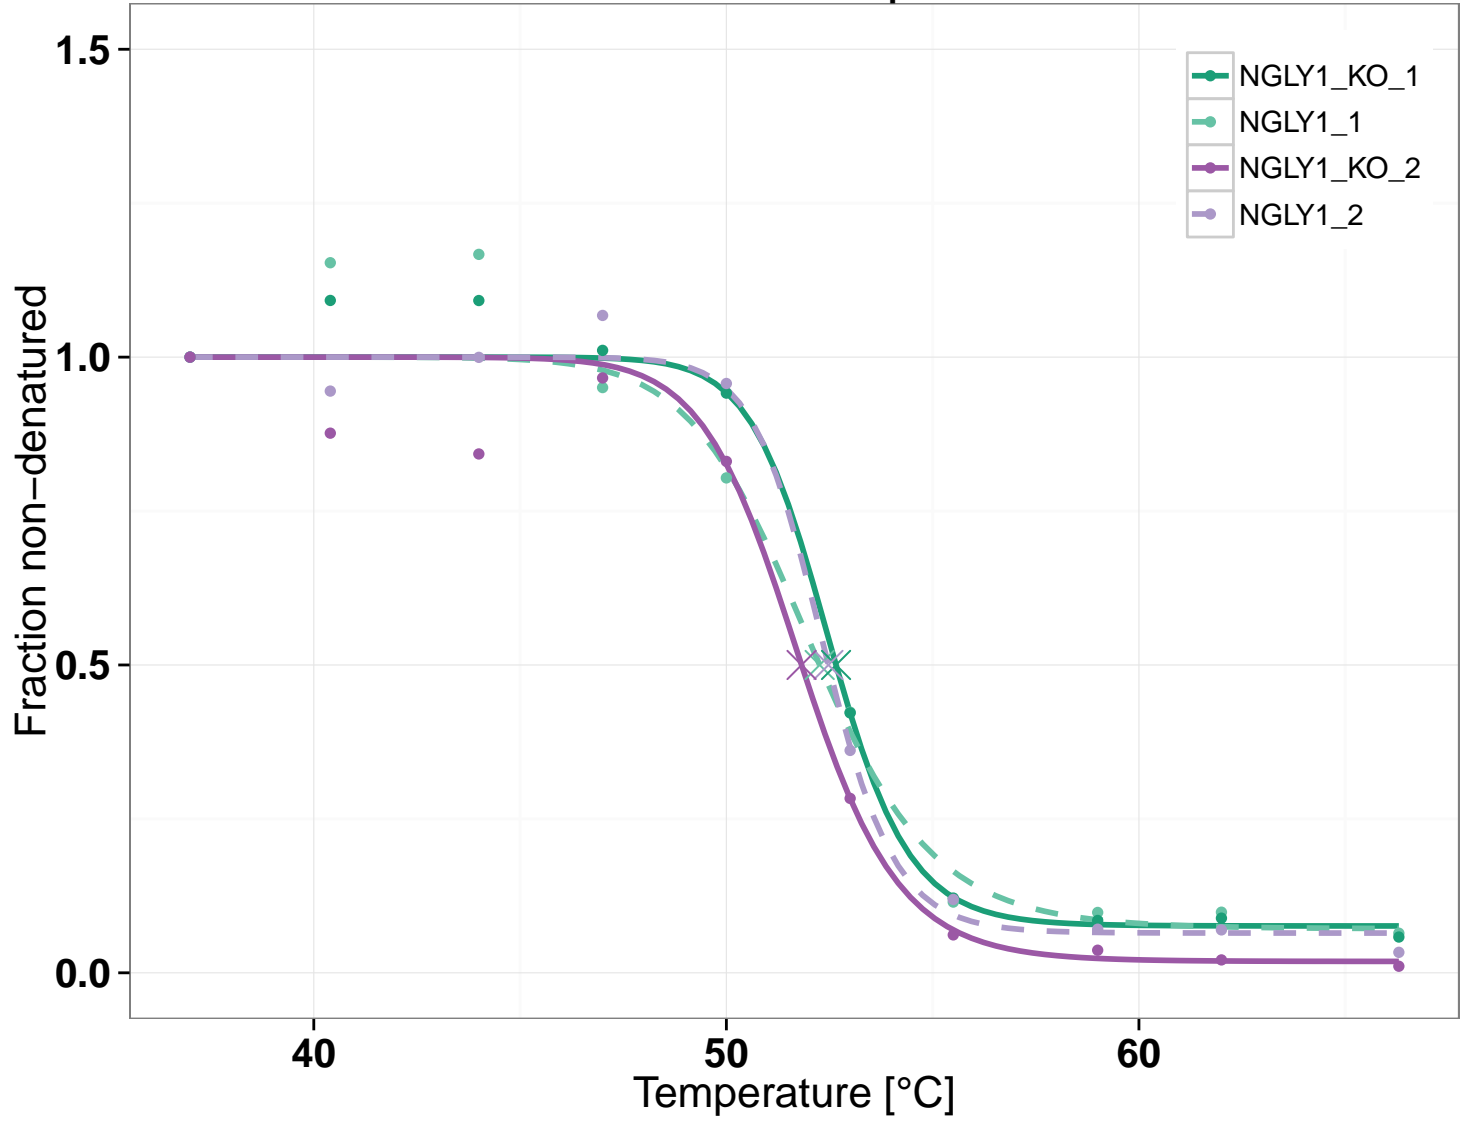

|            | meltPoint | slope | plateau | R2   |
|------------|-----------|-------|---------|------|
| NGLY1_KO_1 | 52.66     | -0.24 | 0.08    | 0.99 |
| NGLY1_1    | 52.26     | -0.16 | 0.07    | 0.97 |
| NGLY1_KO_2 | 51.82     | -0.21 | 0.02    | 0.98 |
| NGLY1_2    | 52.47     | -0.27 | 0.06    | 1    |

Supplement: Supplementary file 4578 [file 1]

IPI00005657.1|PFDN6

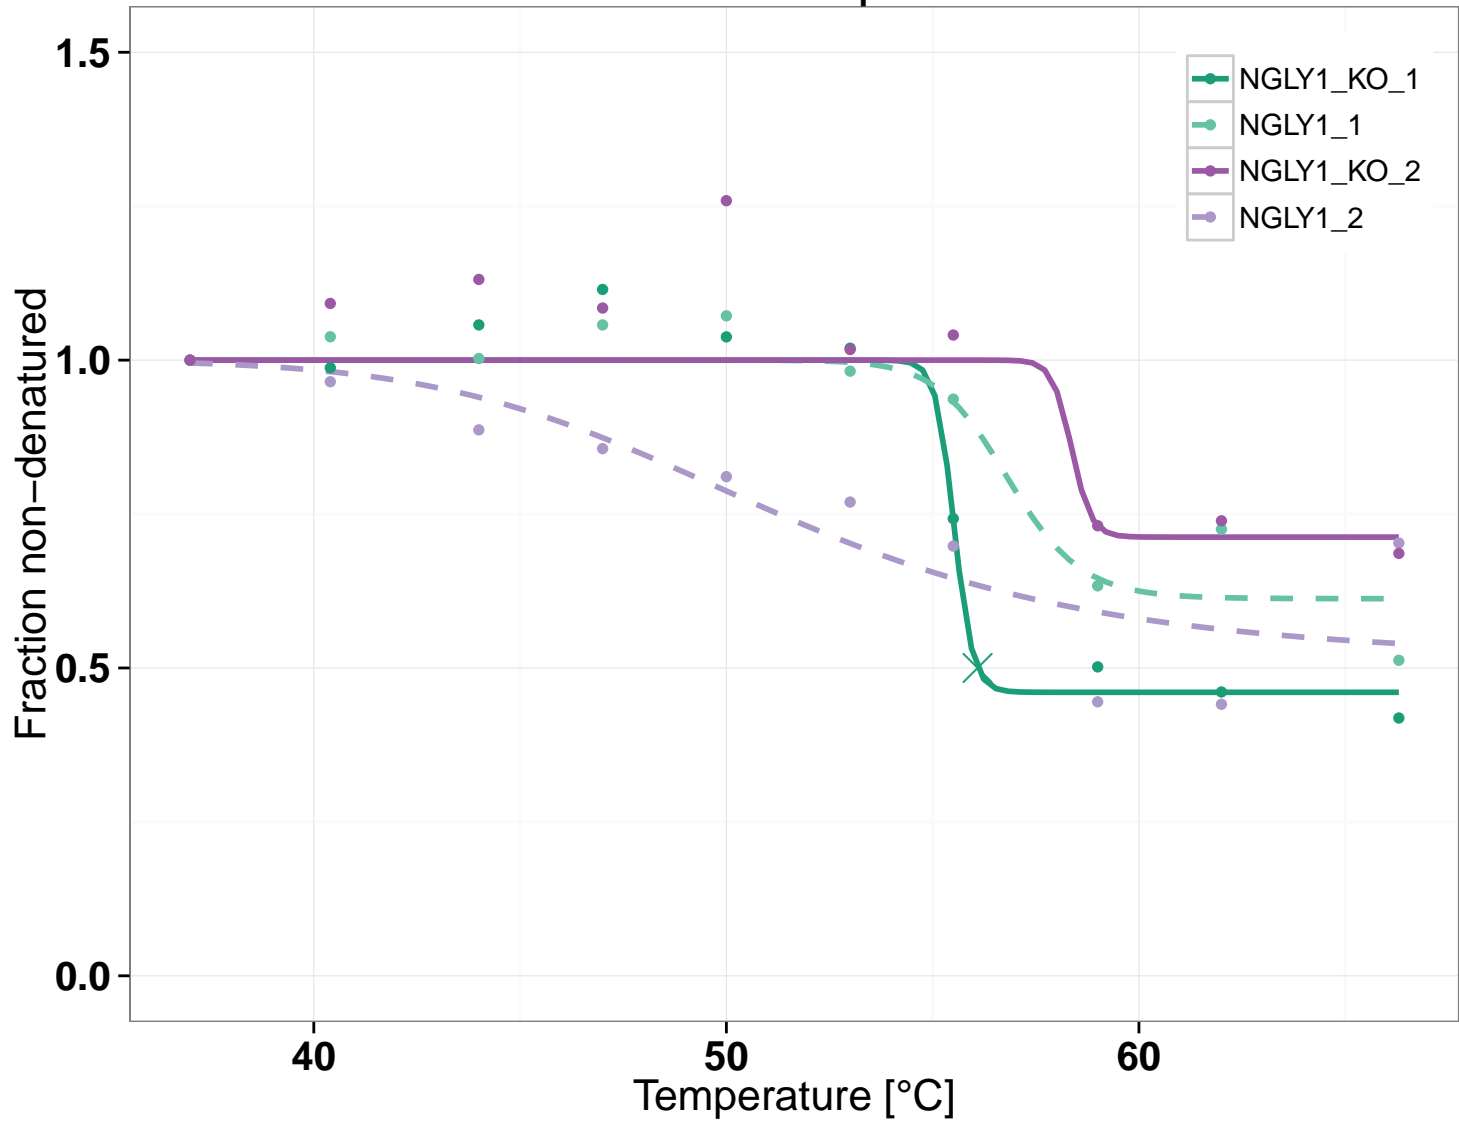

|            | meltPoint | slope | plateau | R2   |
|------------|-----------|-------|---------|------|
| NGLY1_KO_1 | 56.09     | -0.61 | 0.46    | 0.97 |
| NGLY1_1    | -         | -0.11 | 0.61    | 0.91 |
| NGLY1_KO_2 | -         | -0.31 | 0.71    | 0.69 |
| NGLY1_2    | -         | -0.03 | 0.51    | 0.78 |

Supplement: Supplementary file 4579 [file 1]

IPI00022095.3|PEG10

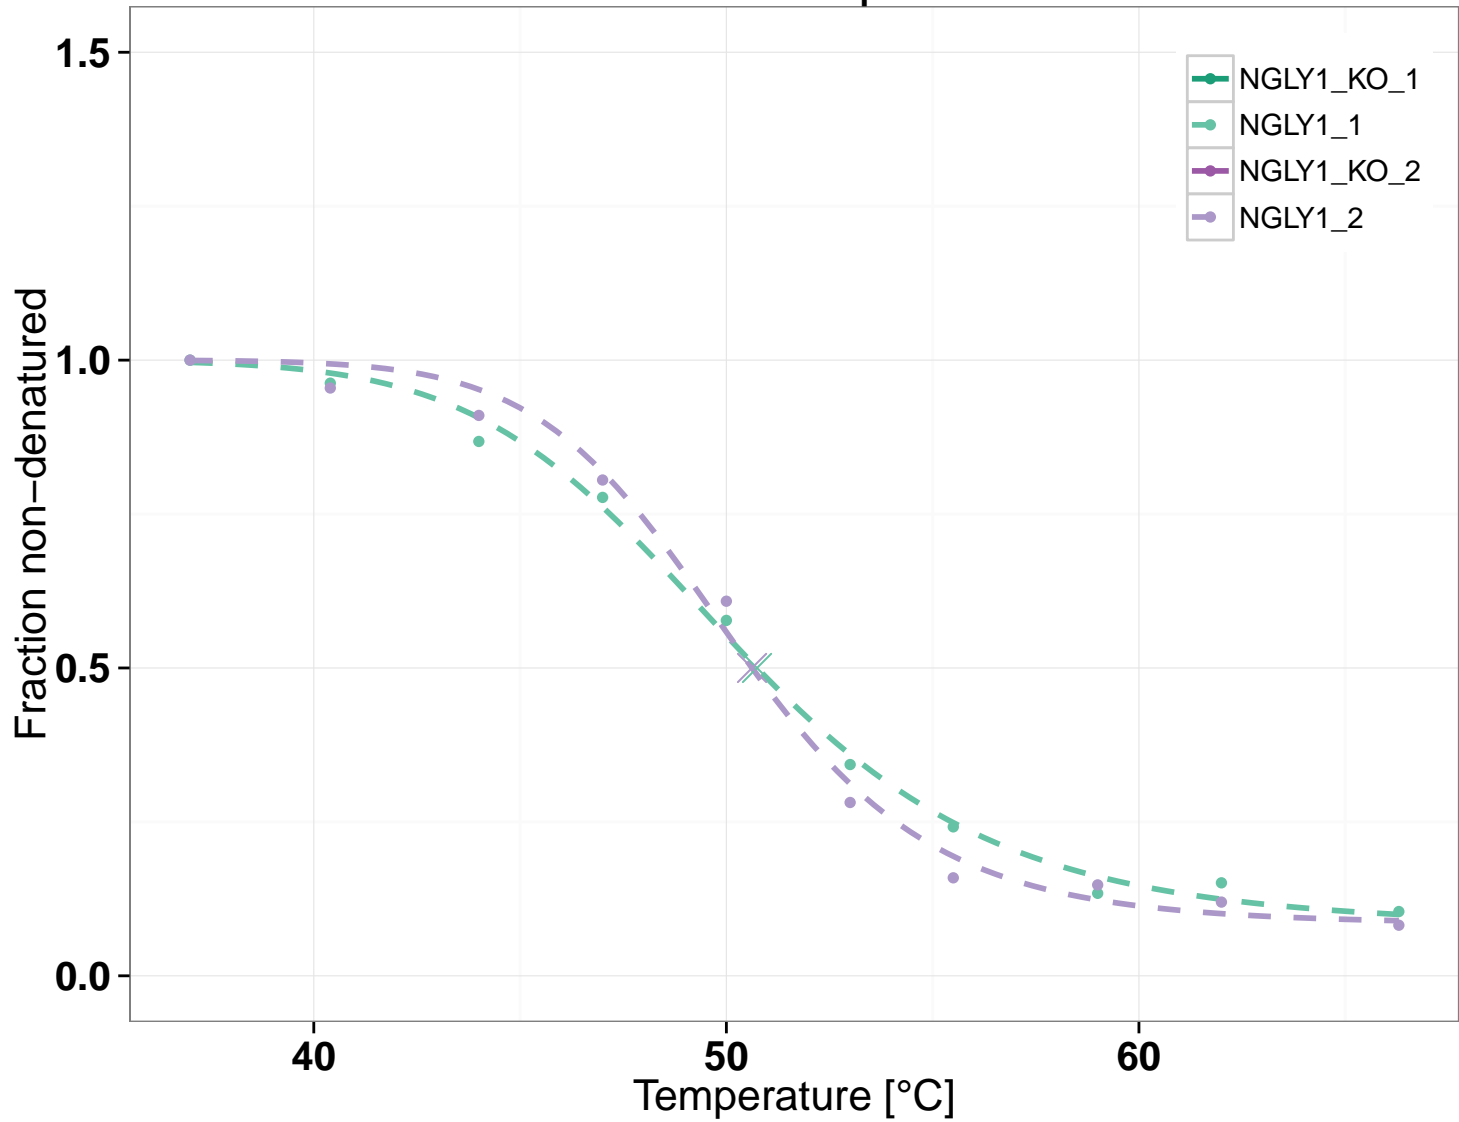

|            | meltPoint | slope  | plateau | R2   |
|------------|-----------|--------|---------|------|
| NGLY1_KO_1 | -         | -      | -       | -    |
| NGLY1_1    | 50.74     | -0.072 | 0.08    | 1    |
| NGLY1_KO_2 | -         | -      | -       | -    |
| NGLY1_2    | 50.62     | -0.095 | 0.08    | 0.99 |

Supplement: Supplementary file 4580 [file 1]

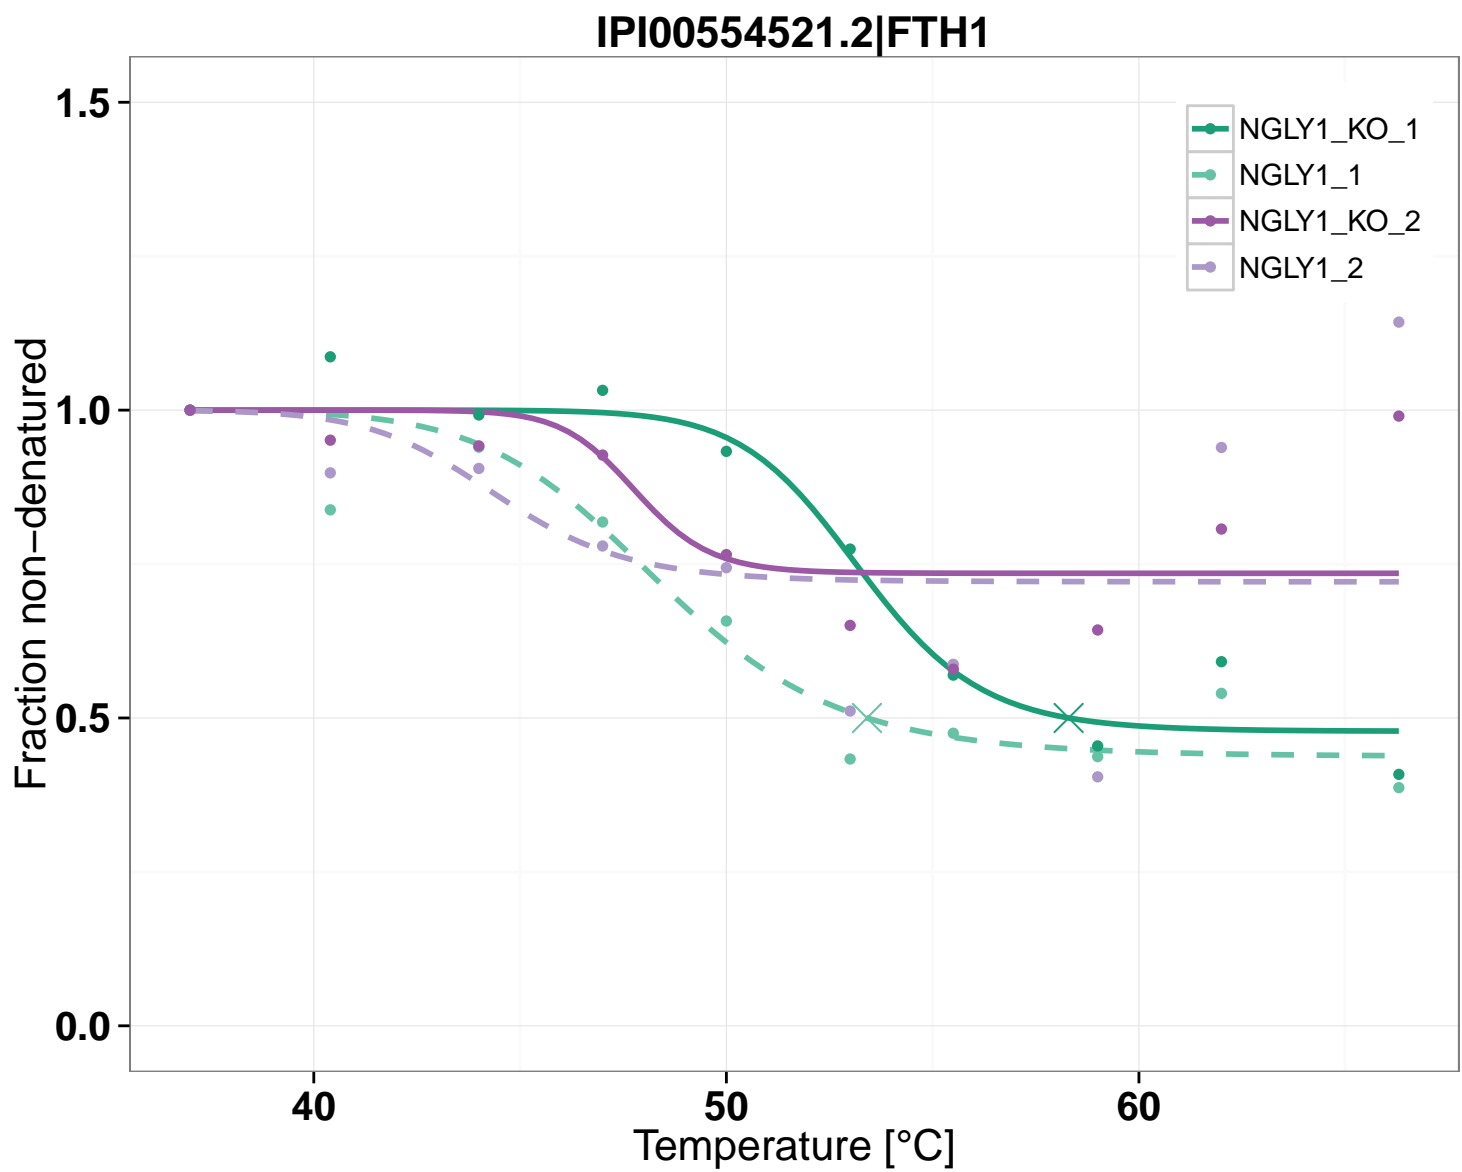

|            | meltPoint | slope  | plateau | R2   |
|------------|-----------|--------|---------|------|
| NGLY1_KO_1 | 58.3      | -0.089 | 0.48    | 0.95 |
| NGLY1_1    | 53.41     | -0.065 | 0.44    | 0.91 |
| NGLY1_KO_2 | -         | -0.073 | 0.73    | 0.49 |
| NGLY1_2    | -         | -0.044 | 0.72    | 0.18 |

Supplement: Supplementary file 4581 [file 1]

IPI00171475.2|NFATC2IP

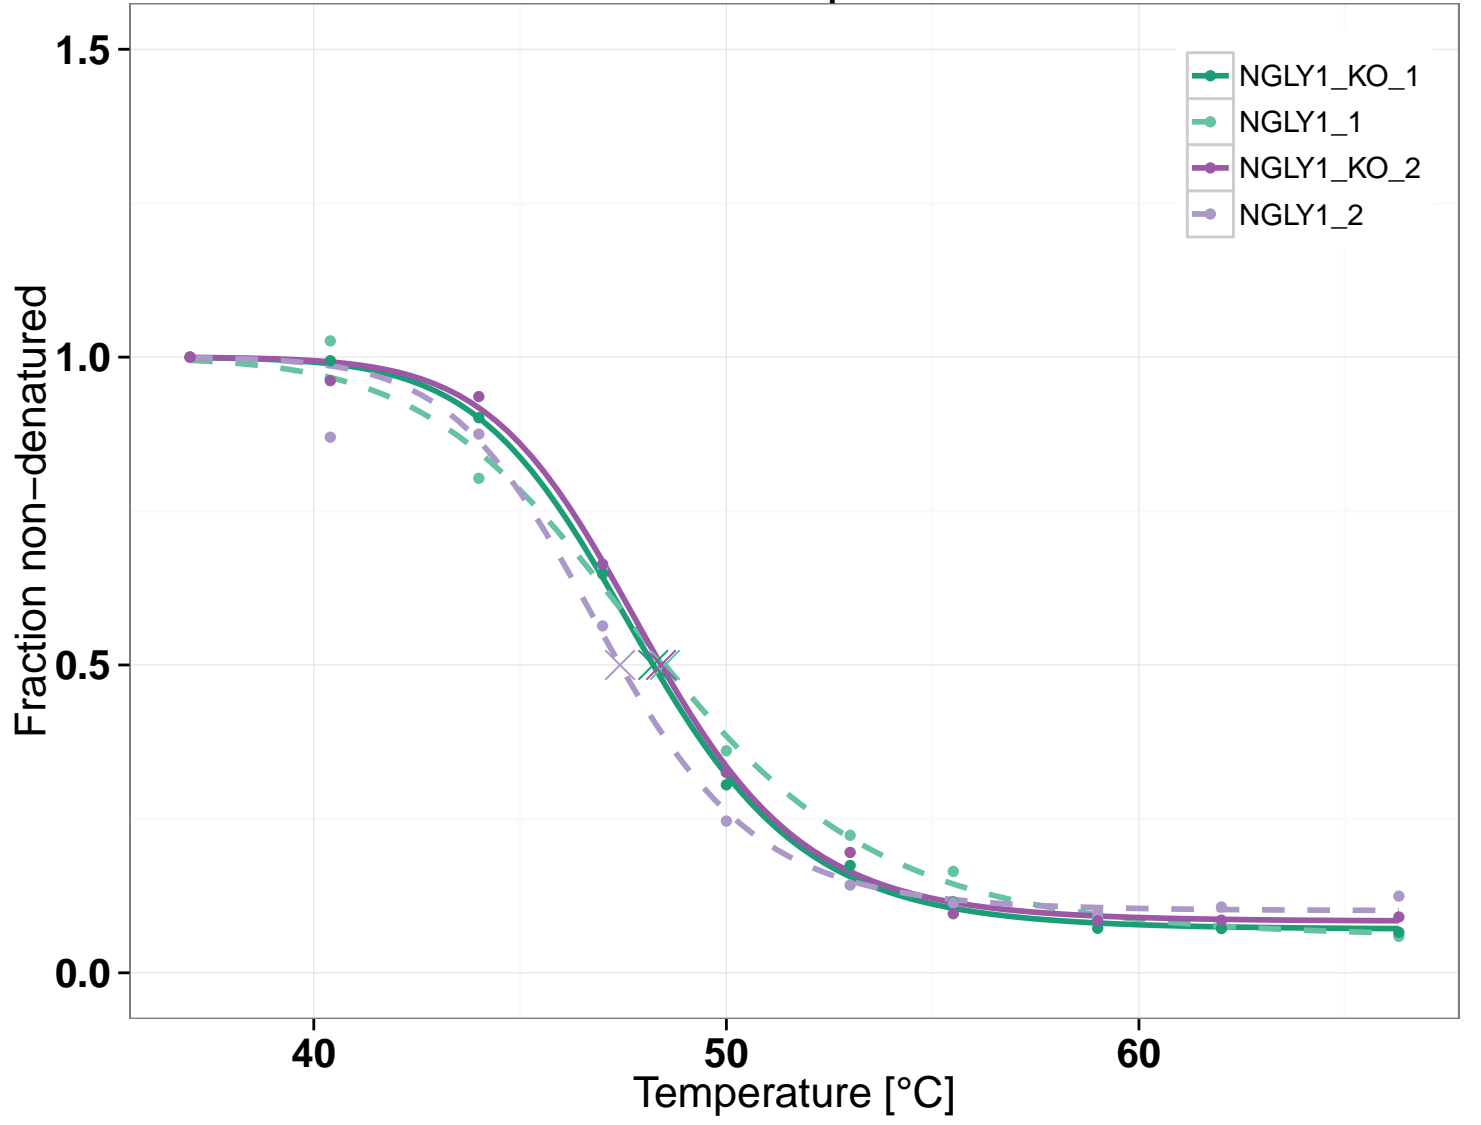

|            | meltPoint | slope  | plateau | R2   |
|------------|-----------|--------|---------|------|
| NGLY1_KO_1 | 48.23     | -0.12  | 0.07    | 1    |
| NGLY1_1    | 48.51     | -0.085 | 0.06    | 0.99 |
| NGLY1_KO_2 | 48.42     | -0.12  | 0.08    | 1    |
| NGLY1_2    | 47.42     | -0.12  | 0.1     | 0.99 |

Supplement: Supplementary file 4582 [file 1]

# IPI00478521.5|RILPL1

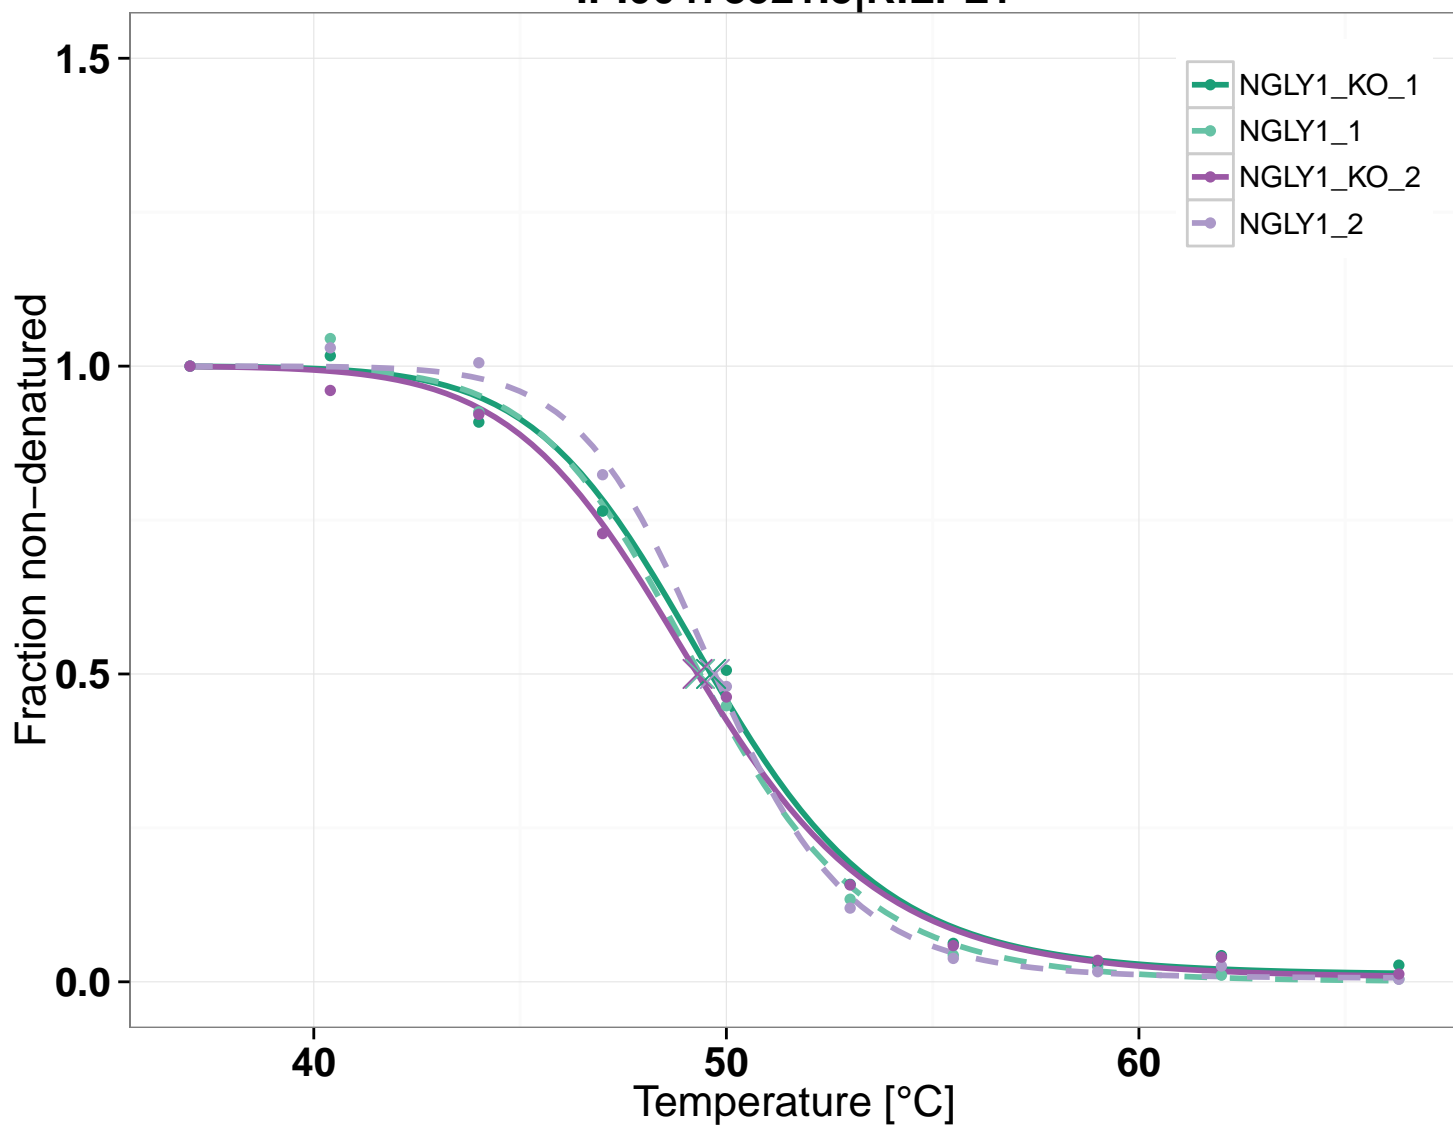

|            | meltPoint | slope | plateau | R2 |
|------------|-----------|-------|---------|----|
| NGLY1_KO_1 | 49.63     | -0.12 | 0.01    | 1  |
| NGLY1_1    | 49.36     | -0.13 | 0       | 1  |
| NGLY1_KO_2 | 49.3      | -0.11 | 0.01    | 1  |
| NGLY1_2    | 49.72     | -0.15 | 0.01    | 1  |

Supplement: Supplementary file 4583 [file 1]

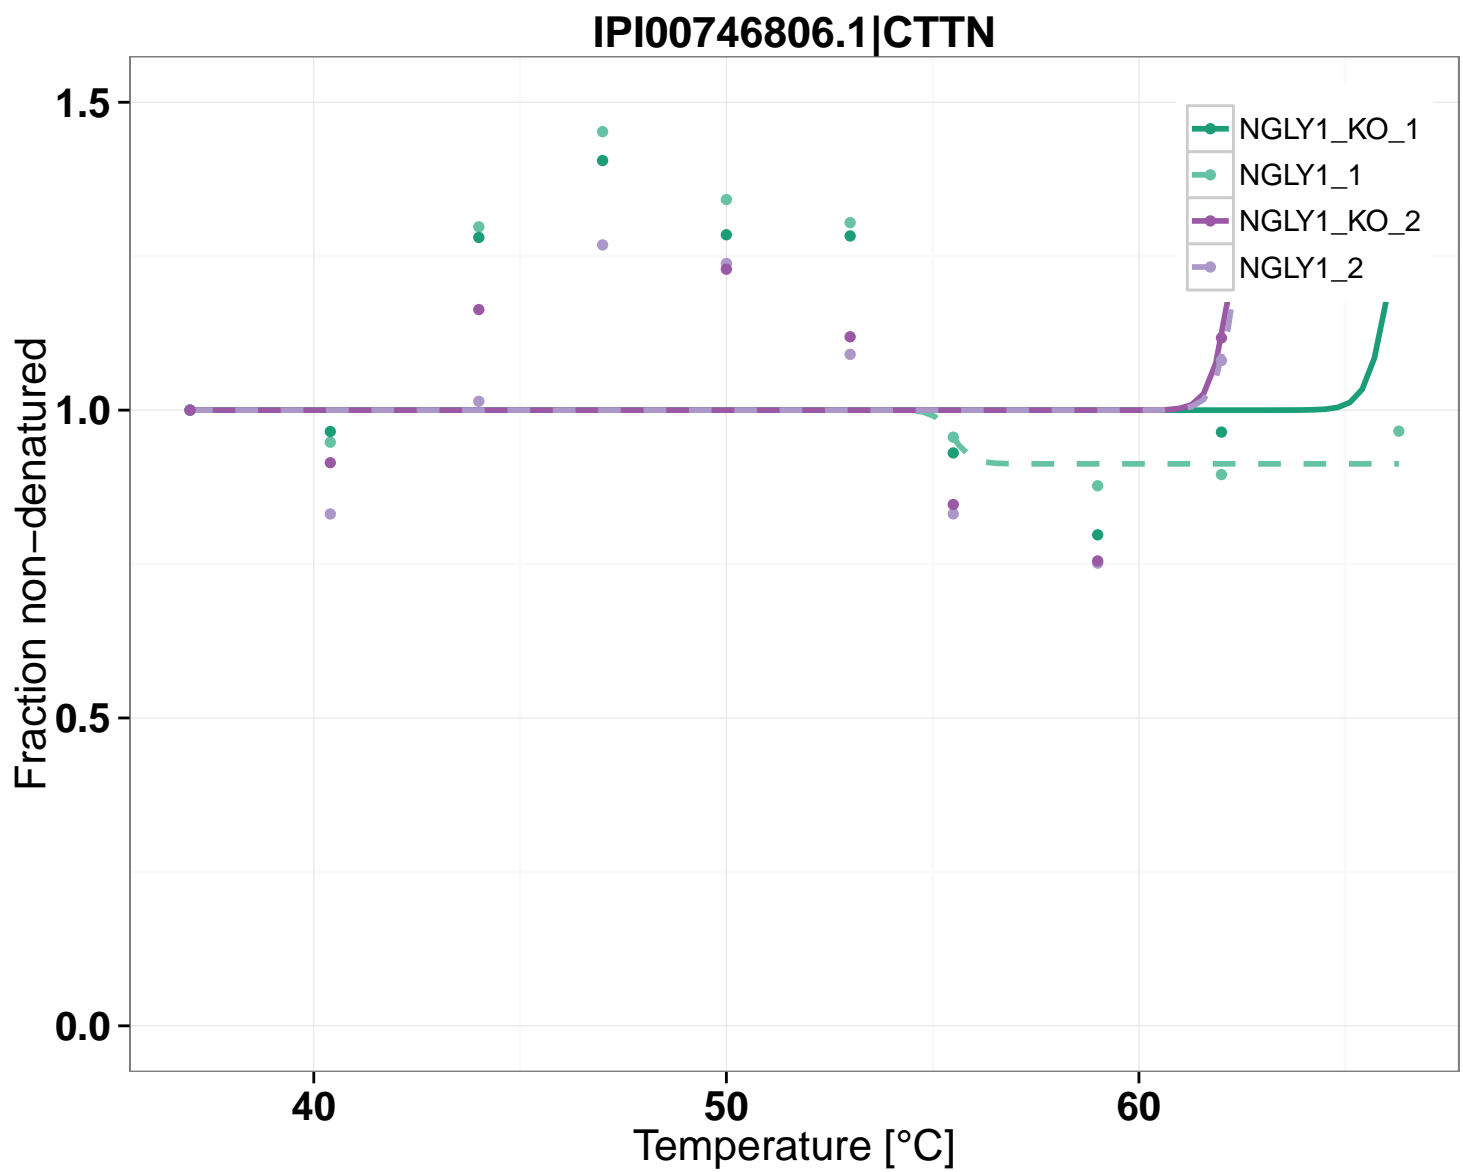

|            | meltPoint | slope  | plateau | R2    |
|------------|-----------|--------|---------|-------|
| NGLY1_KO_1 | —         | 0.43   | 1.5     | -0.14 |
| NGLY1_1    | —         | -0.098 | 0.91    | -0.19 |
| NGLY1_KO_2 | —         | 0.48   | 1.5     | 0.36  |
| NGLY1_2    | —         | 0.48   | 1.5     | 0.52  |

Supplement: Supplementary file 4584 [file 1]

IPI00217882.3|SORT1

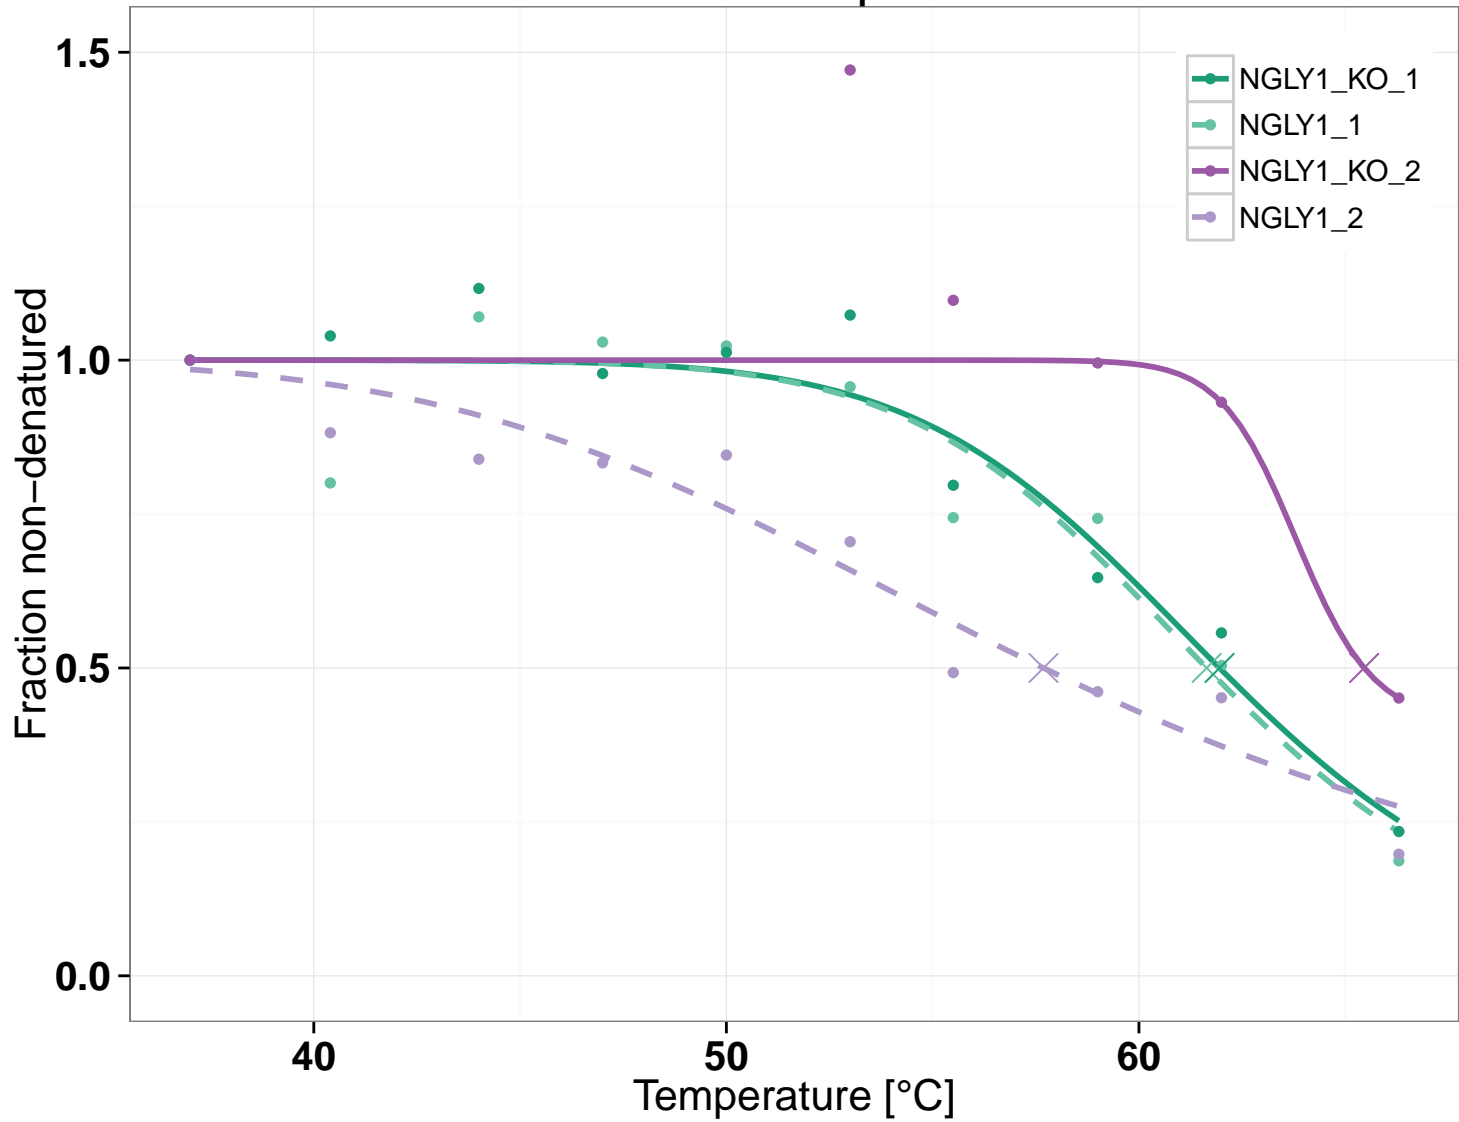

|            | meltPoint | slope  | plateau | R2    |
|------------|-----------|--------|---------|-------|
| NGLY1_KO_1 | 61.95     | -0.068 | 0       | 0.94  |
| NGLY1_1    | 61.64     | -0.069 | 0       | 0.9   |
| NGLY1_KO_2 | 65.46     | -0.16  | 0.41    | -0.23 |
| NGLY1_2    | 57.69     | -0.035 | 0       | 0.93  |

Supplement: Supplementary file 4585 [file 1]

IPI00398007.1|USP40

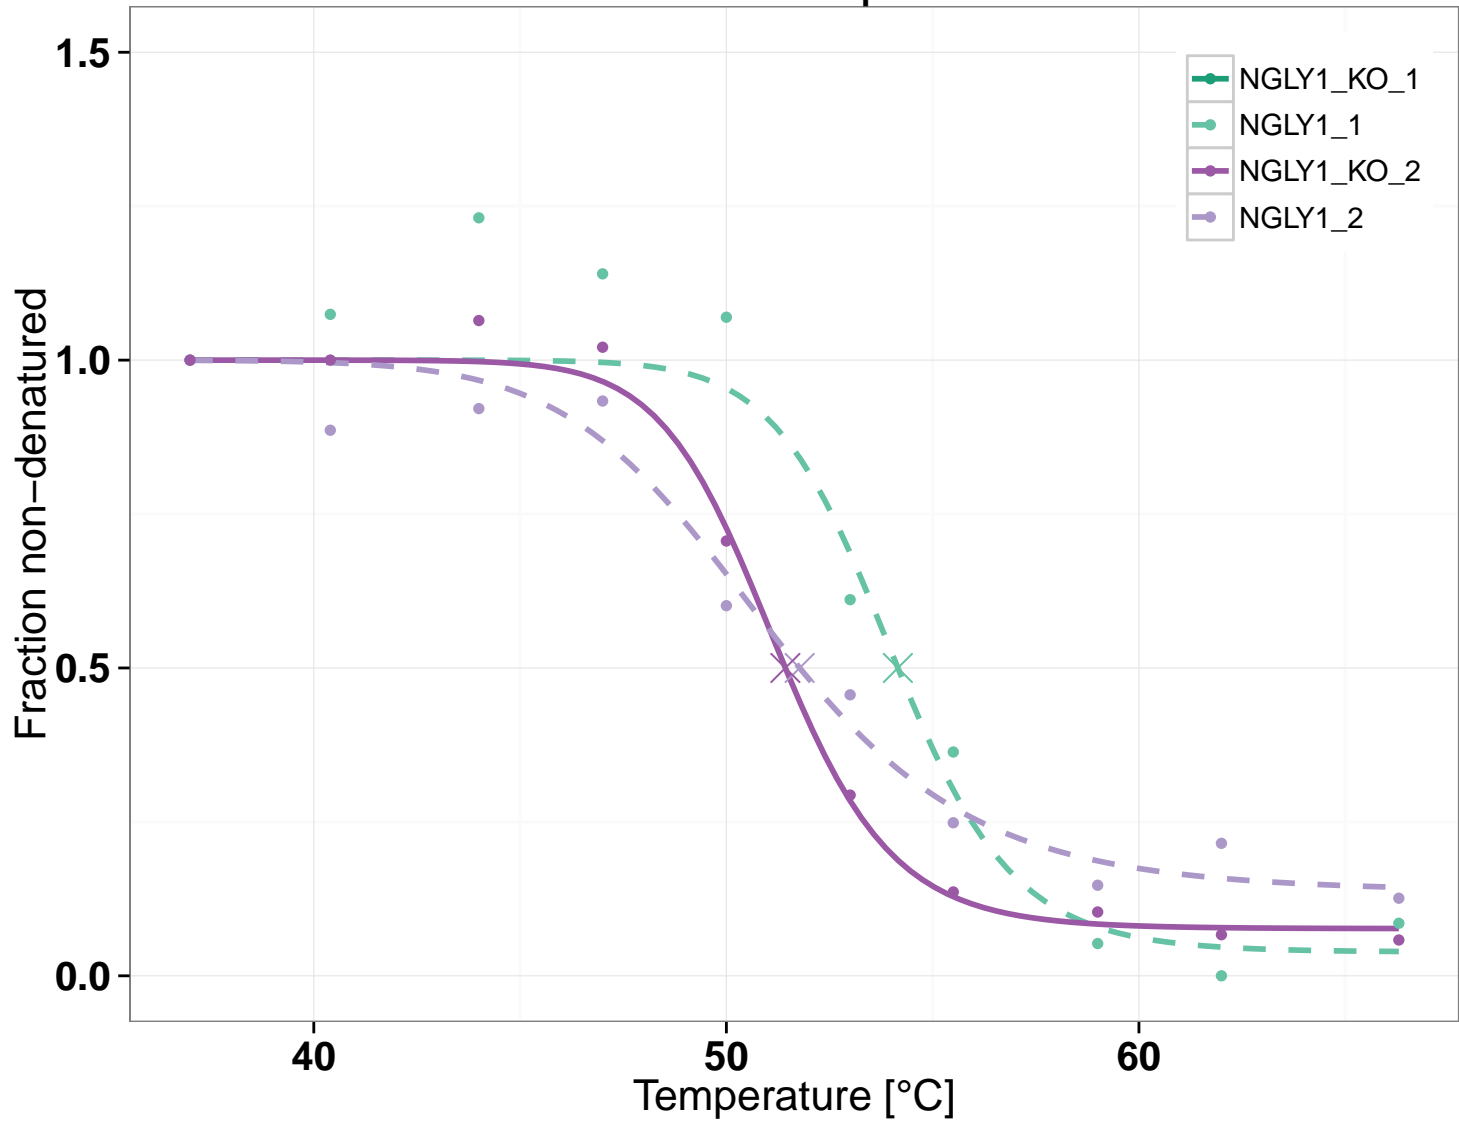

|            | meltPoint | slope  | plateau | R2   |
|------------|-----------|--------|---------|------|
| NGLY1_KO_1 | –         | –      | –       | –    |
| NGLY1_1    | 54.16     | –0.17  | 0.04    | 0.95 |
| NGLY1_KO_2 | 51.43     | –0.16  | 0.08    | 1    |
| NGLY1_2    | 51.78     | –0.087 | 0.14    | 0.97 |

Supplement: Supplementary file 4586 [file 1]

IPI00465237.1|ASPHD2

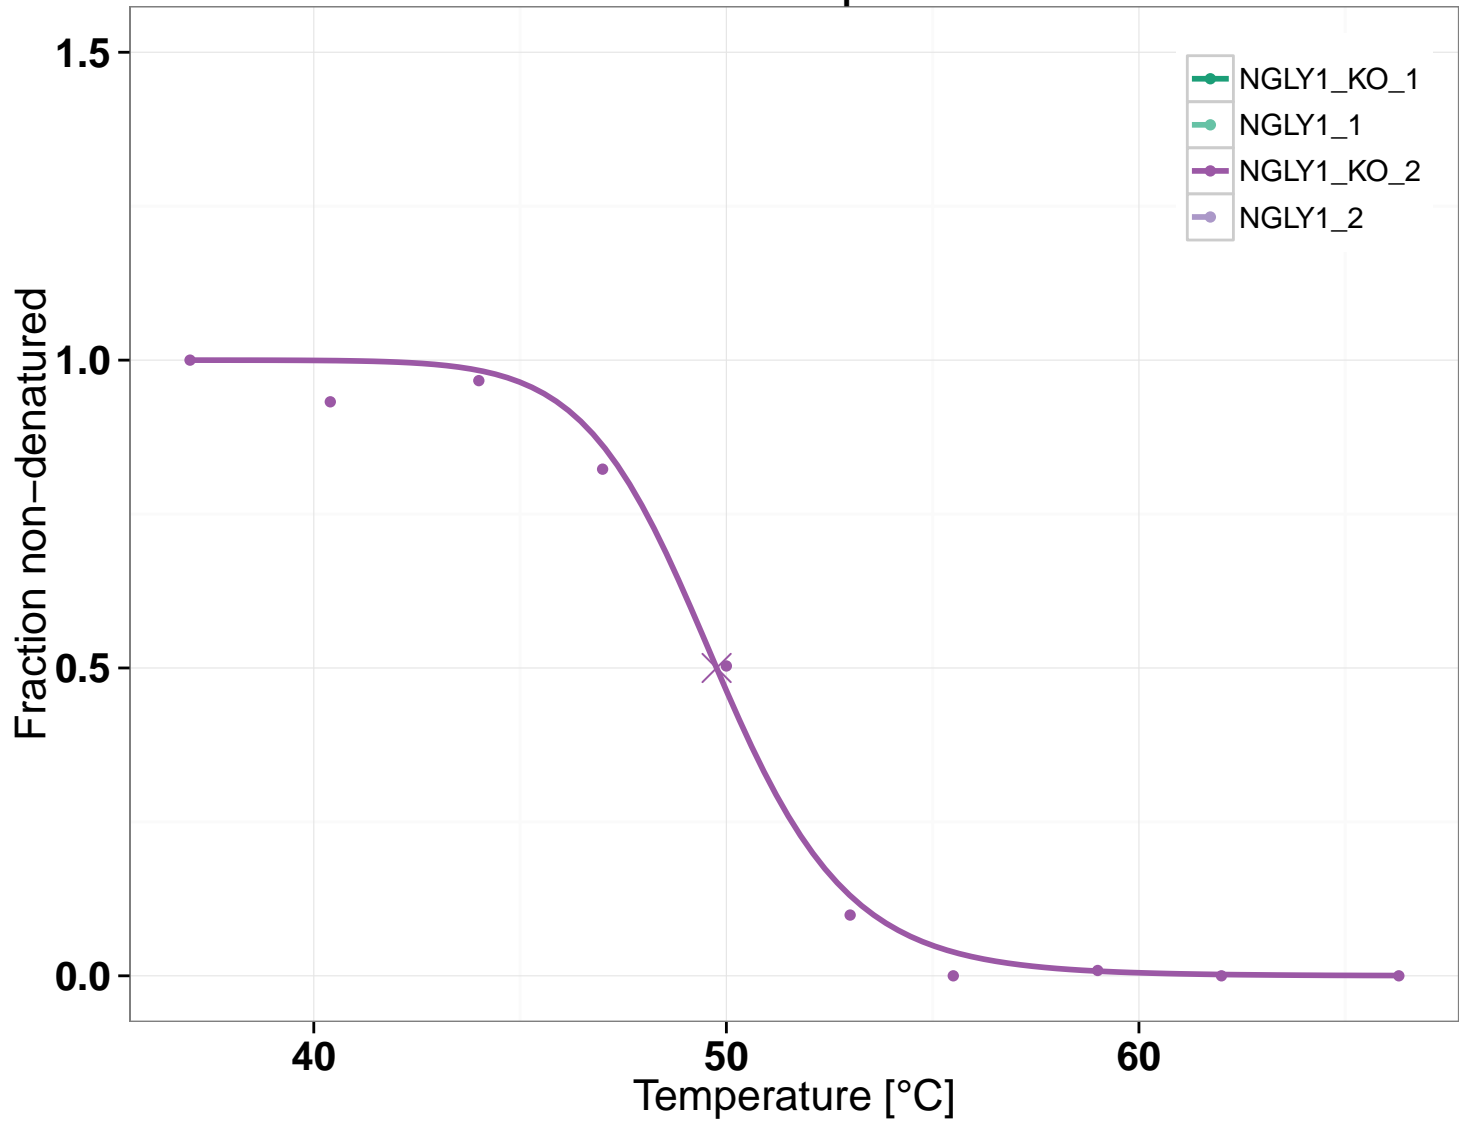

|            | meltPoint | slope | plateau | R2   |
|------------|-----------|-------|---------|------|
| NGLY1_KO_1 | —         | —     | —       | —    |
| NGLY1_1    | —         | —     | —       | —    |
| NGLY1_KO_2 | 49.76     | -0.16 | 0       | 0.99 |
| NGLY1_2    | —         | —     | —       | —    |

Supplement: Supplementary file 4587 [file 1]

# IPI00290189.5|BBS4

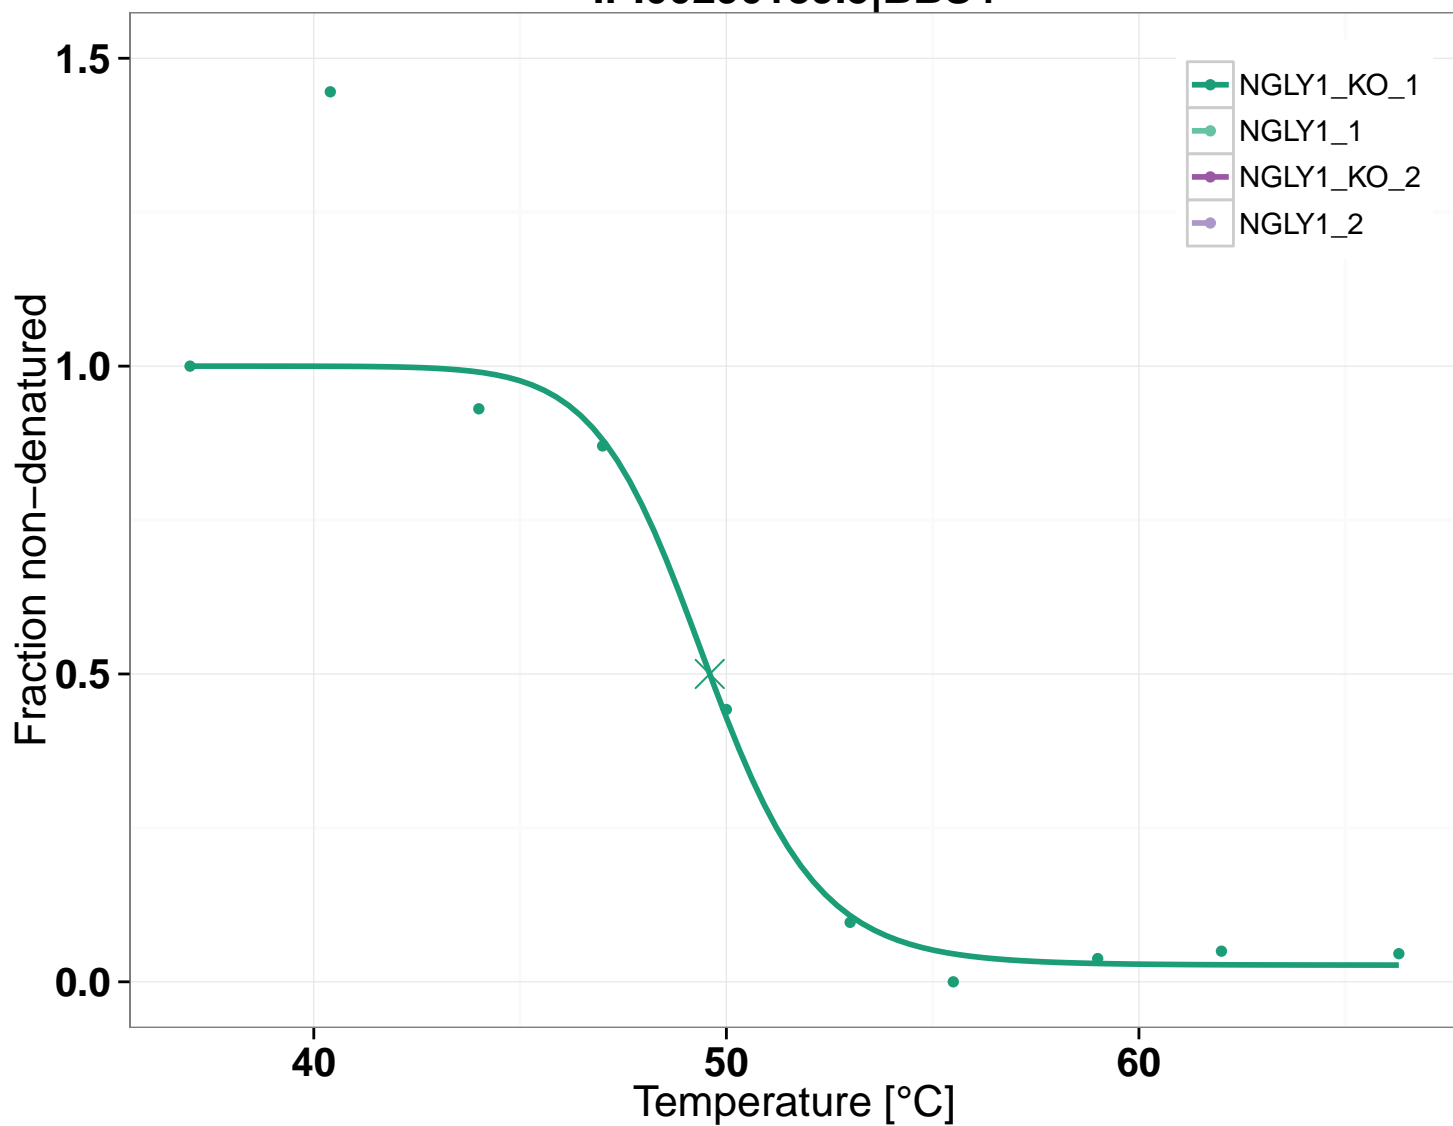

|            | meltPoint | slope | plateau | R2   |
|------------|-----------|-------|---------|------|
| NGLY1_KO_1 | 49.6      | -0.18 | 0.03    | 0.92 |
| NGLY1_1    | -         | -     | -       | -    |
| NGLY1_KO_2 | -         | -     | -       | -    |
| NGLY1_2    | -         | -     | -       | -    |

Supplement: Supplementary file 4588 [file 1]

# IPI00647008.1|BRD7

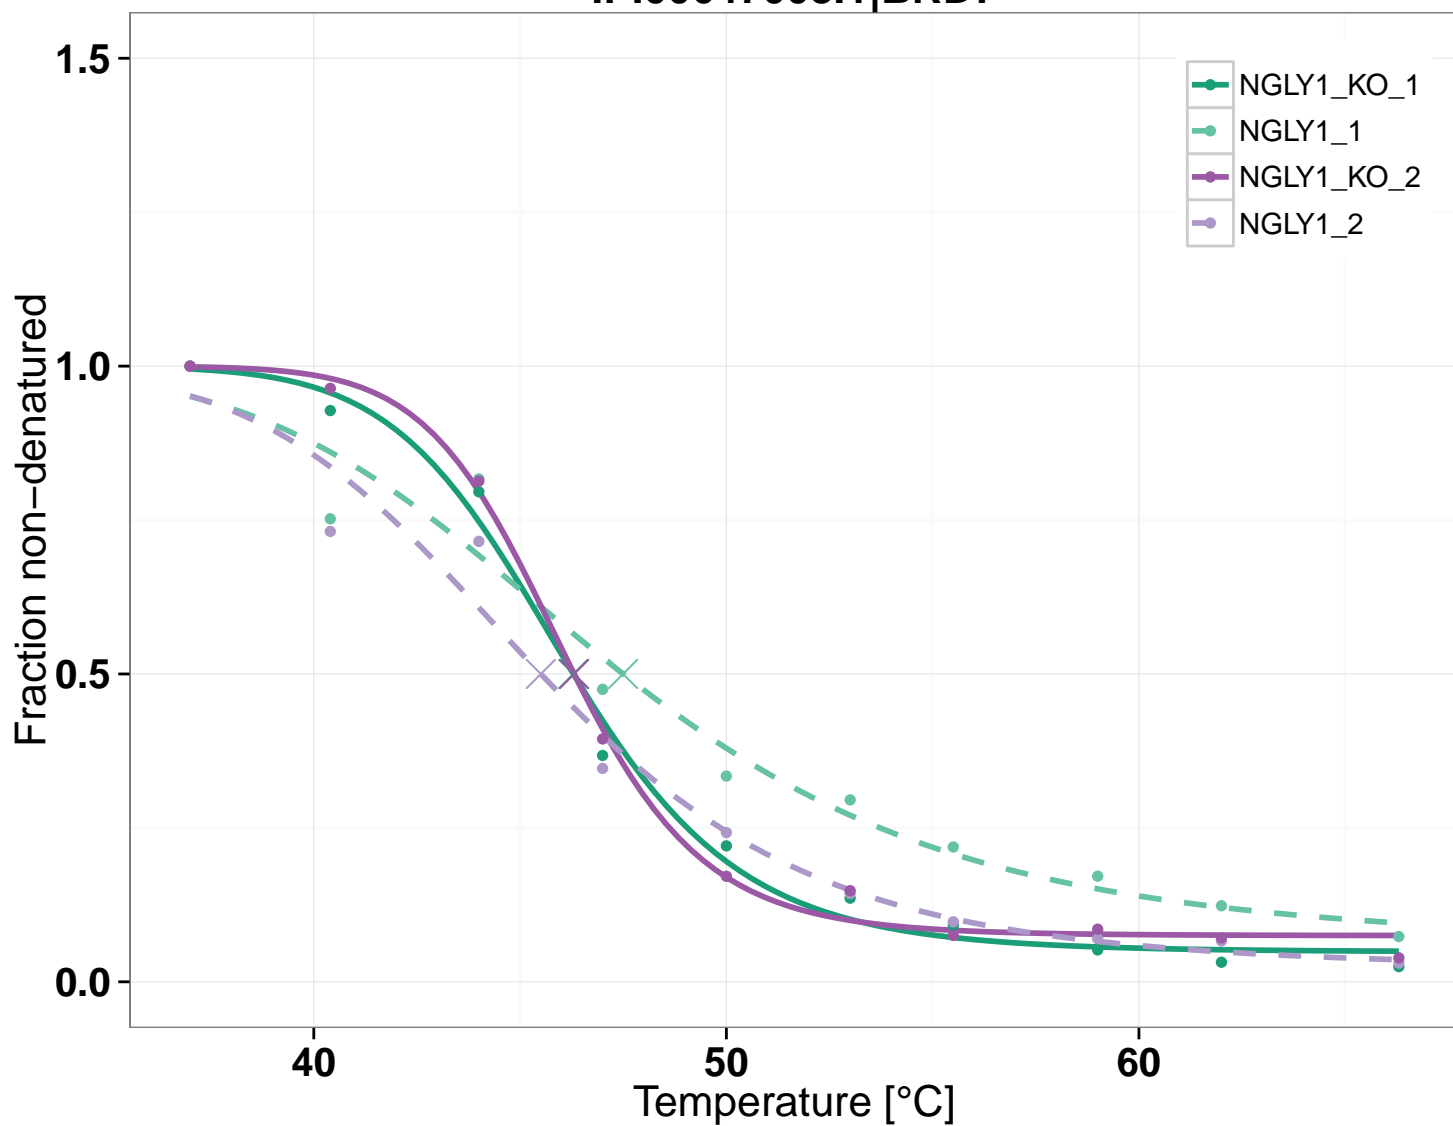

|            | meltPoint | slope  | plateau | R2   |
|------------|-----------|--------|---------|------|
| NGLY1_KO_1 | 46.29     | -0.11  | 0.05    | 0.99 |
| NGLY1_1    | 47.5      | -0.056 | 0.06    | 0.96 |
| NGLY1_KO_2 | 46.31     | -0.14  | 0.08    | 1    |
| NGLY1_2    | 45.5      | -0.072 | 0.02    | 0.97 |

Supplement: Supplementary file 4589 [file 1]

IPI00155839.5|C5ORF45

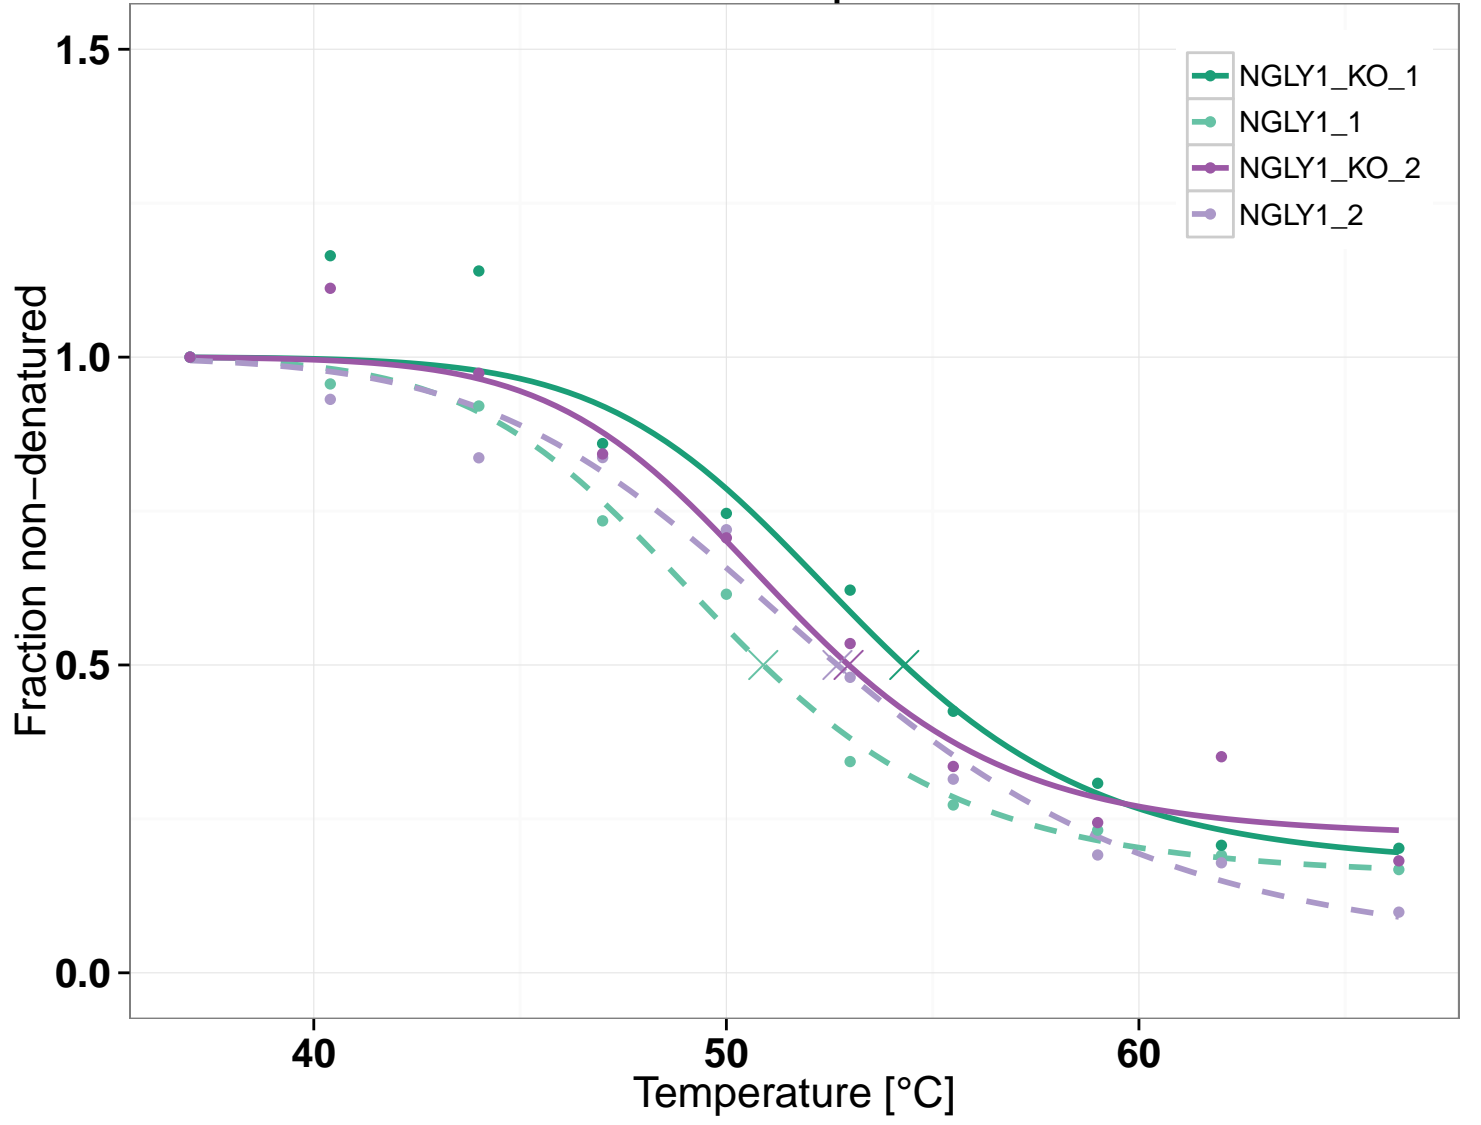

|            | meltPoint | slope  | plateau | R2   |
|------------|-----------|--------|---------|------|
| NGLY1_KO_1 | 54.31     | -0.069 | 0.17    | 0.95 |
| NGLY1_1    | 50.9      | -0.071 | 0.15    | 0.99 |
| NGLY1_KO_2 | 52.96     | -0.071 | 0.22    | 0.97 |
| NGLY1_2    | 52.69     | -0.059 | 0.02    | 0.98 |

Supplement: Supplementary file 4590 [file 1]

IPI00302607.5|ZMIZ2

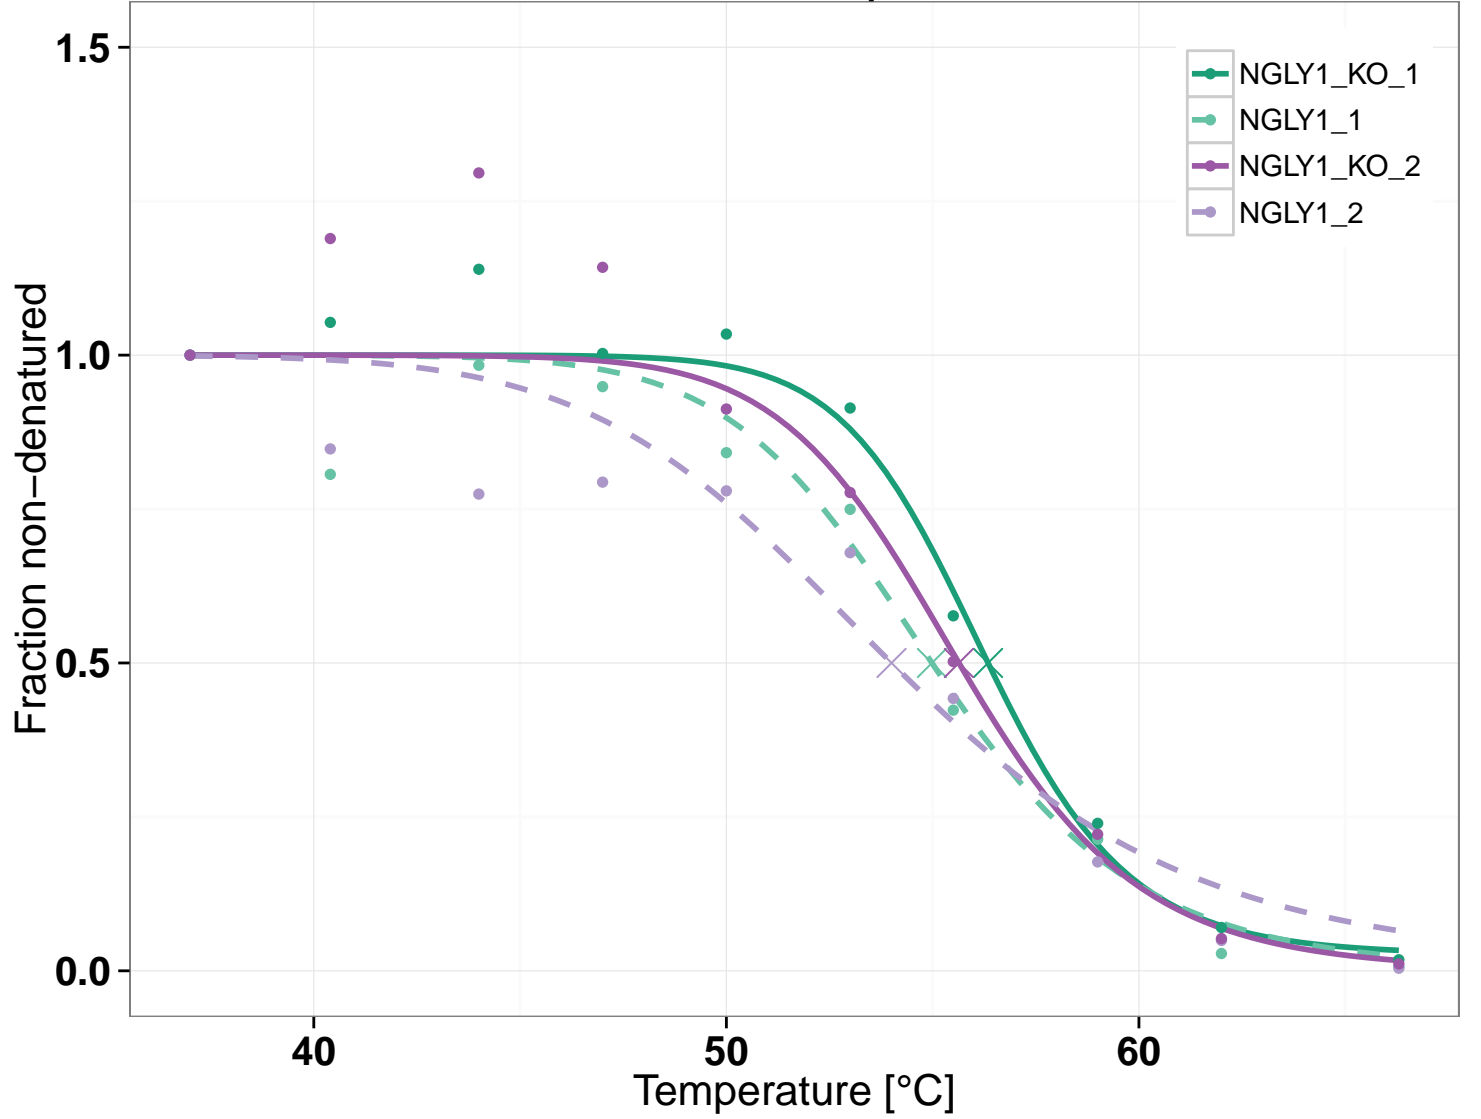

|            | meltPoint | slope  | plateau | R2   |
|------------|-----------|--------|---------|------|
| NGLY1_KO_1 | 56.34     | -0.14  | 0.03    | 0.98 |
| NGLY1_1    | 54.98     | -0.1   | 0       | 0.97 |
| NGLY1_KO_2 | 55.64     | -0.11  | 0       | 0.93 |
| NGLY1_2    | 54        | -0.068 | 0       | 0.92 |

Supplement: Supplementary file 4591 [file 1]

IPI00376195.5|ISCA2

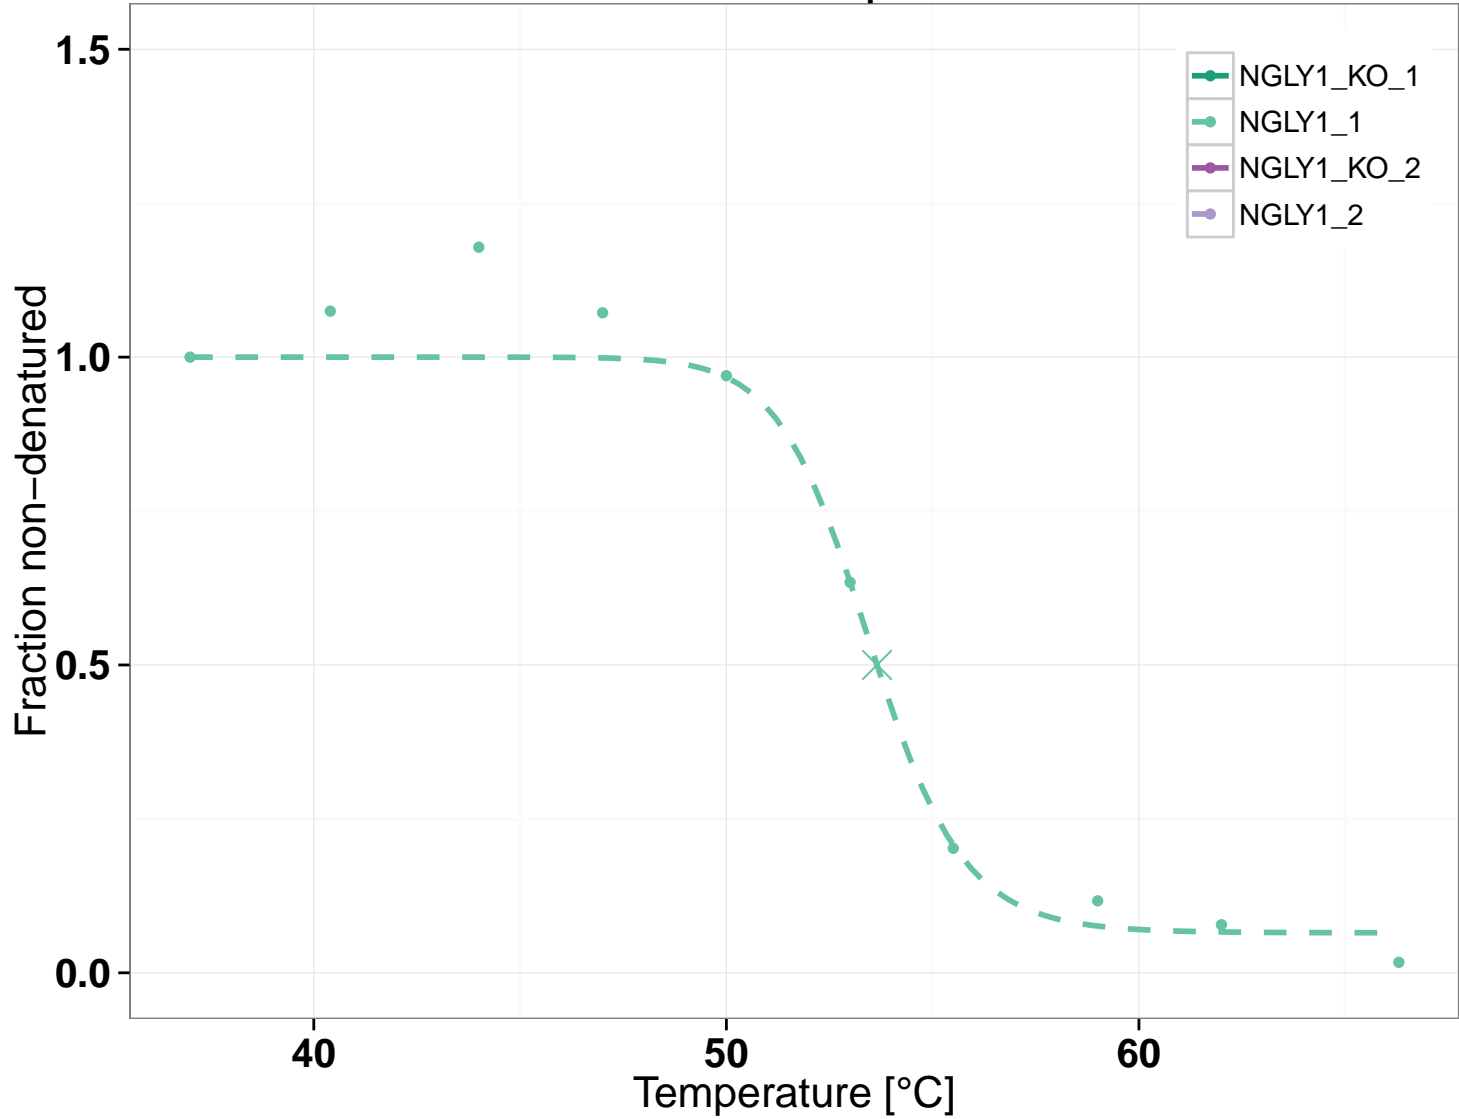

|            | meltPoint | slope | plateau | R2   |
|------------|-----------|-------|---------|------|
| NGLY1_KO_1 | -         | -     | -       | -    |
| NGLY1_1    | 53.65     | -0.21 | 0.06    | 0.98 |
| NGLY1_KO_2 | -         | -     | -       | -    |
| NGLY1_2    | -         | -     | -       | -    |

Supplement: Supplementary file 4592 [file 1]

IPI00009366.2|S100PBP

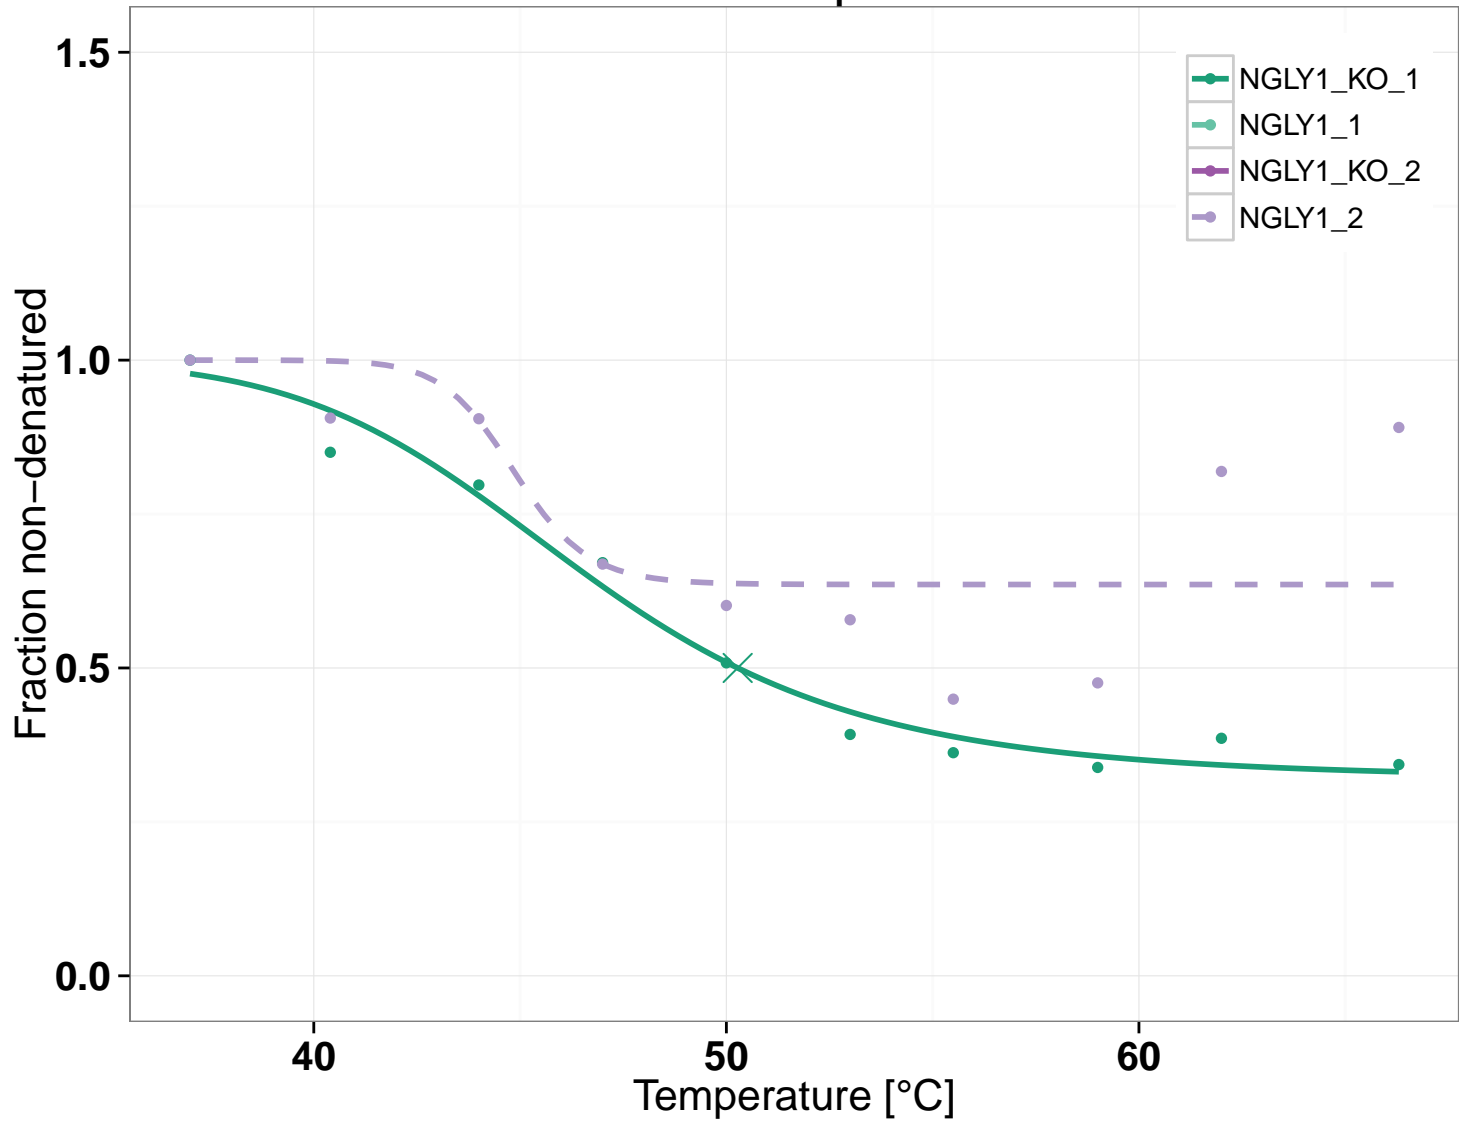

|            | meltPoint | slope | plateau | R2   |
|------------|-----------|-------|---------|------|
| NGLY1_KO_1 | 50.27     | -0.05 | 0.32    | 0.98 |
| NGLY1_1    | -         | -     | -       | -    |
| NGLY1_KO_2 | -         | -     | -       | -    |
| NGLY1_2    | -         | -0.1  | 0.64    | 0.51 |

Supplement: Supplementary file 4593 [file 1]

# IPI00872409.1|RAP1GAP

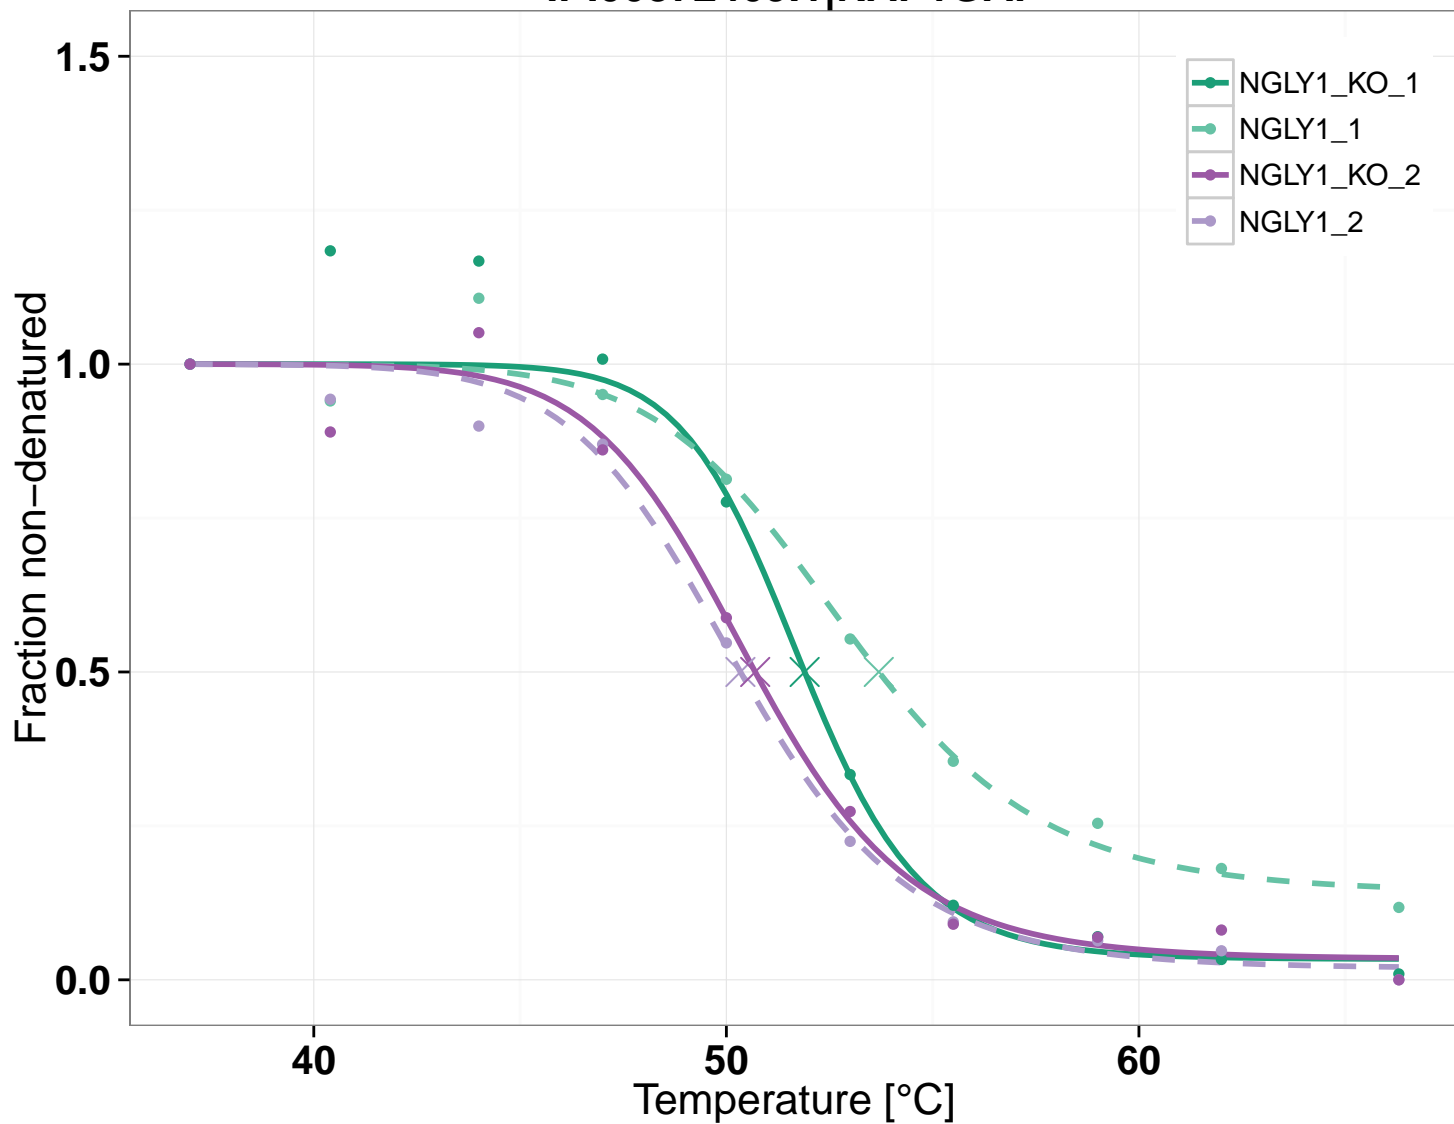

|            | meltPoint | slope  | plateau | R2   |
|------------|-----------|--------|---------|------|
| NGLY1_KO_1 | 51.9      | -0.17  | 0.03    | 0.97 |
| NGLY1_1    | 53.69     | -0.092 | 0.14    | 0.98 |
| NGLY1_KO_2 | 50.7      | -0.13  | 0.03    | 0.99 |
| NGLY1_2    | 50.34     | -0.12  | 0.02    | 0.99 |

Supplement: Supplementary file 4594 [file 1]

IPI00402083.1|TATDN3

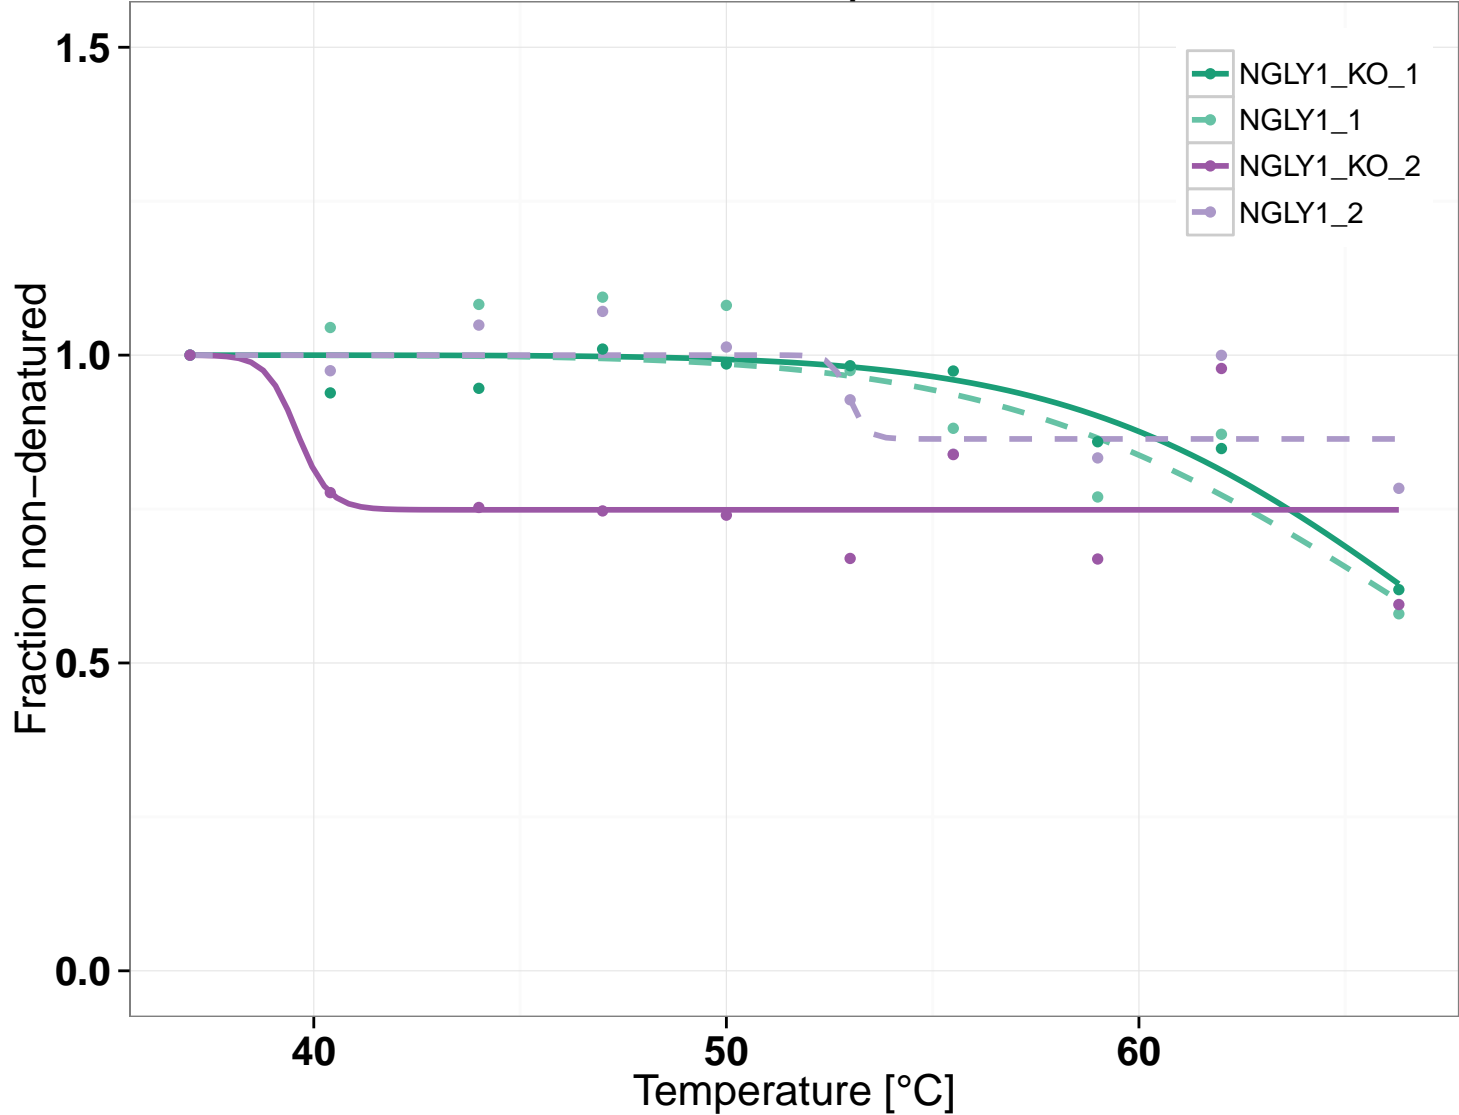

|            | meltPoint | slope | plateau | R2   |
|------------|-----------|-------|---------|------|
| NGLY1_KO_1 | -         | -     | 0       | 0.92 |
| NGLY1_1    | -         | -     | 0       | 0.79 |
| NGLY1_KO_2 | -         | -0.17 | 0.75    | 0.37 |
| NGLY1_2    | -         | -0.16 | 0.86    | 0.61 |

Supplement: Supplementary file 4595 [file 1]

IPI00017504.2|C9ORF40

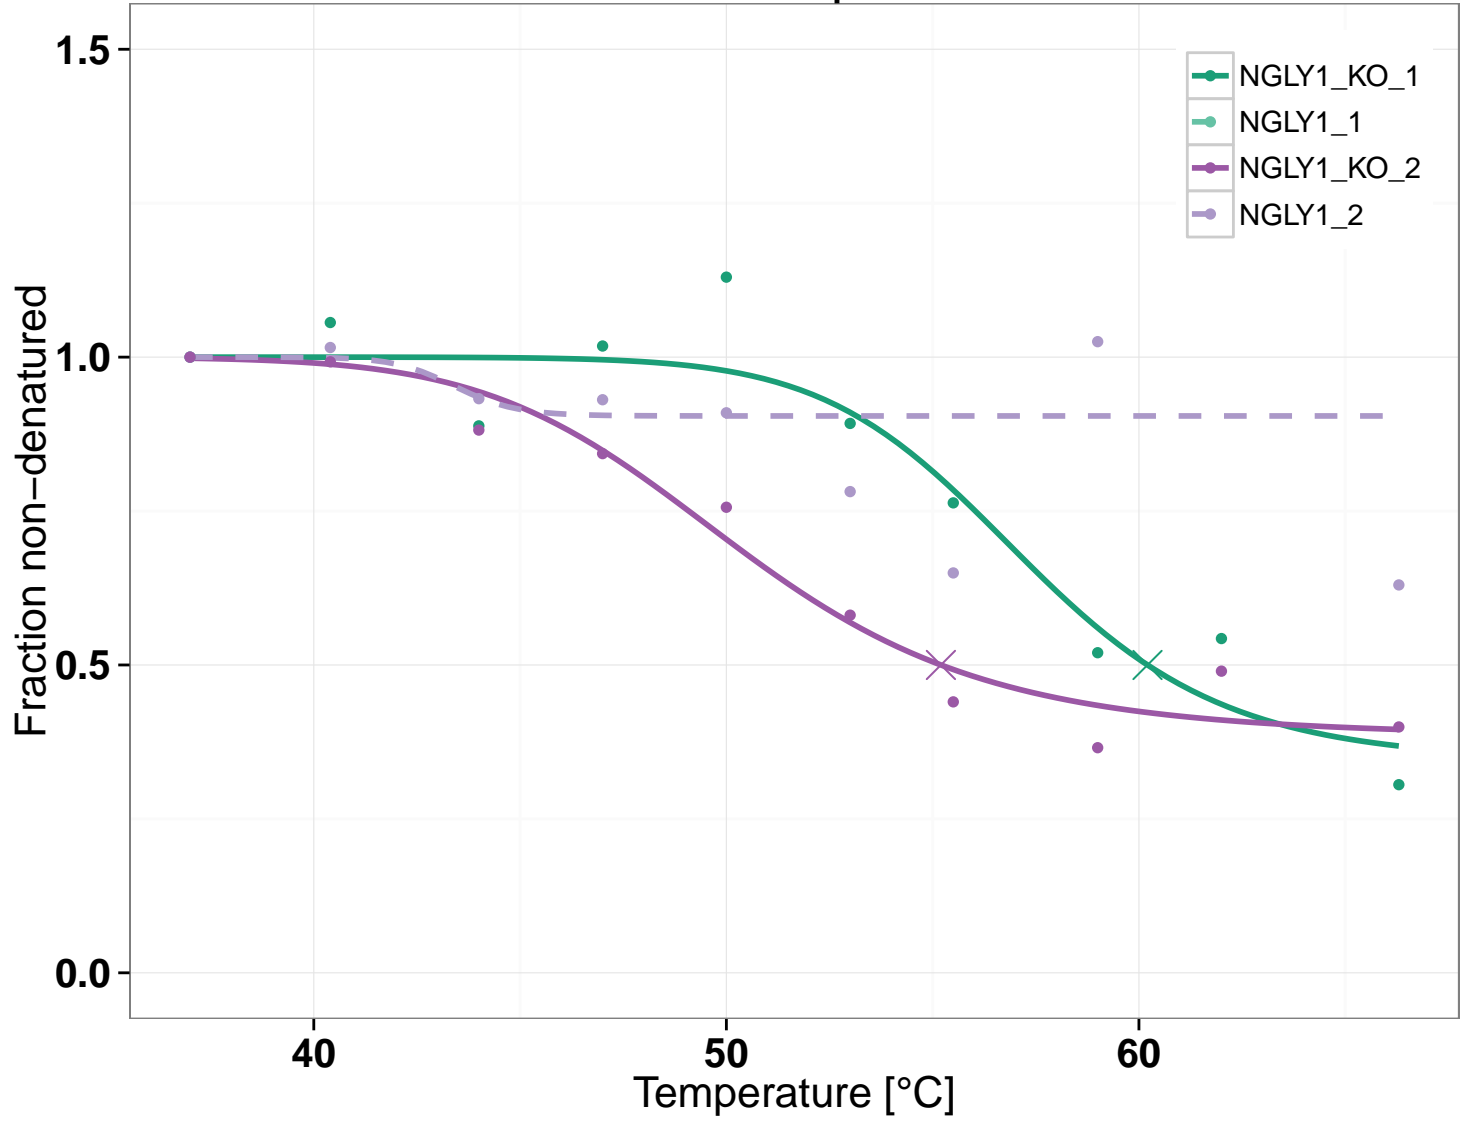

|            | meltPoint | slope  | plateau | R2   |
|------------|-----------|--------|---------|------|
| NGLY1_KO_1 | 60.21     | -0.067 | 0.34    | 0.91 |
| NGLY1_1    | -         | -      | -       | -    |
| NGLY1_KO_2 | 55.2      | -0.051 | 0.38    | 0.96 |
| NGLY1_2    | -         | -0.033 | 0.9     | 0.04 |

Supplement: Supplementary file 4596 [file 1]

# IPI00876896.1|GTF2F2

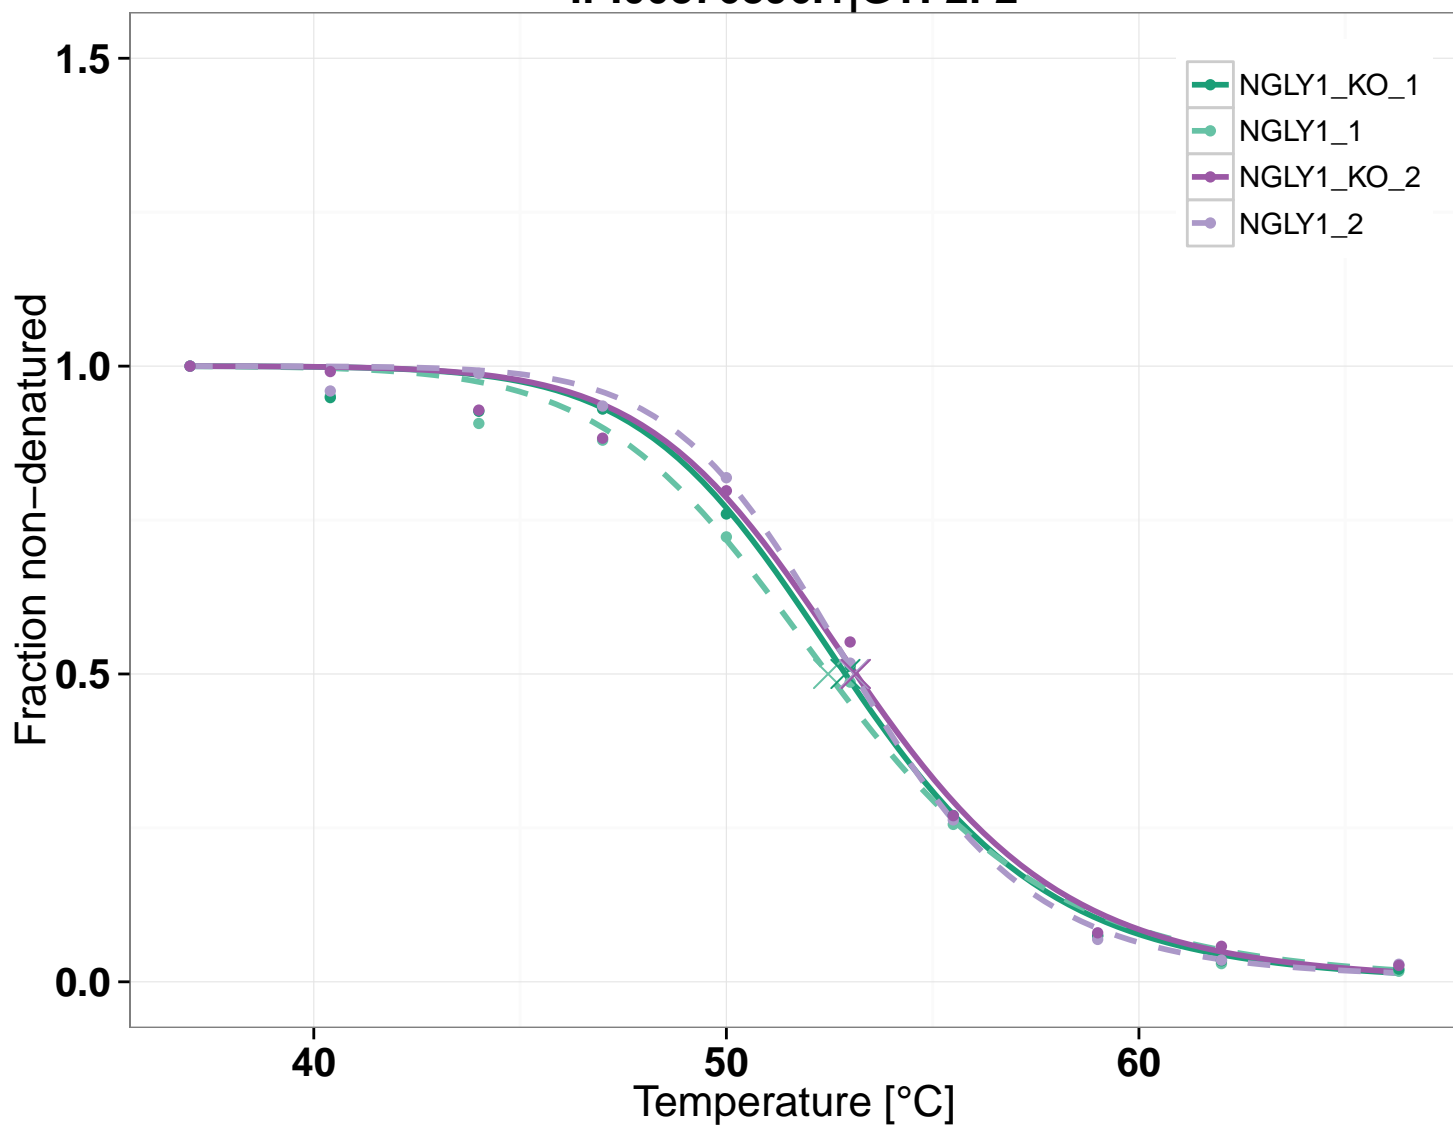

|            | meltPoint | slope  | plateau | R2   |
|------------|-----------|--------|---------|------|
| NGLY1_KO_1 | 52.89     | -0.1   | 0       | 1    |
| NGLY1_1    | 52.47     | -0.091 | 0       | 0.99 |
| NGLY1_KO_2 | 53.14     | -0.099 | 0       | 0.99 |
| NGLY1_2    | 53.1      | -0.11  | 0.01    | 1    |

Supplement: Supplementary file 4597 [file 1]

IPI00028003.1|COX7B

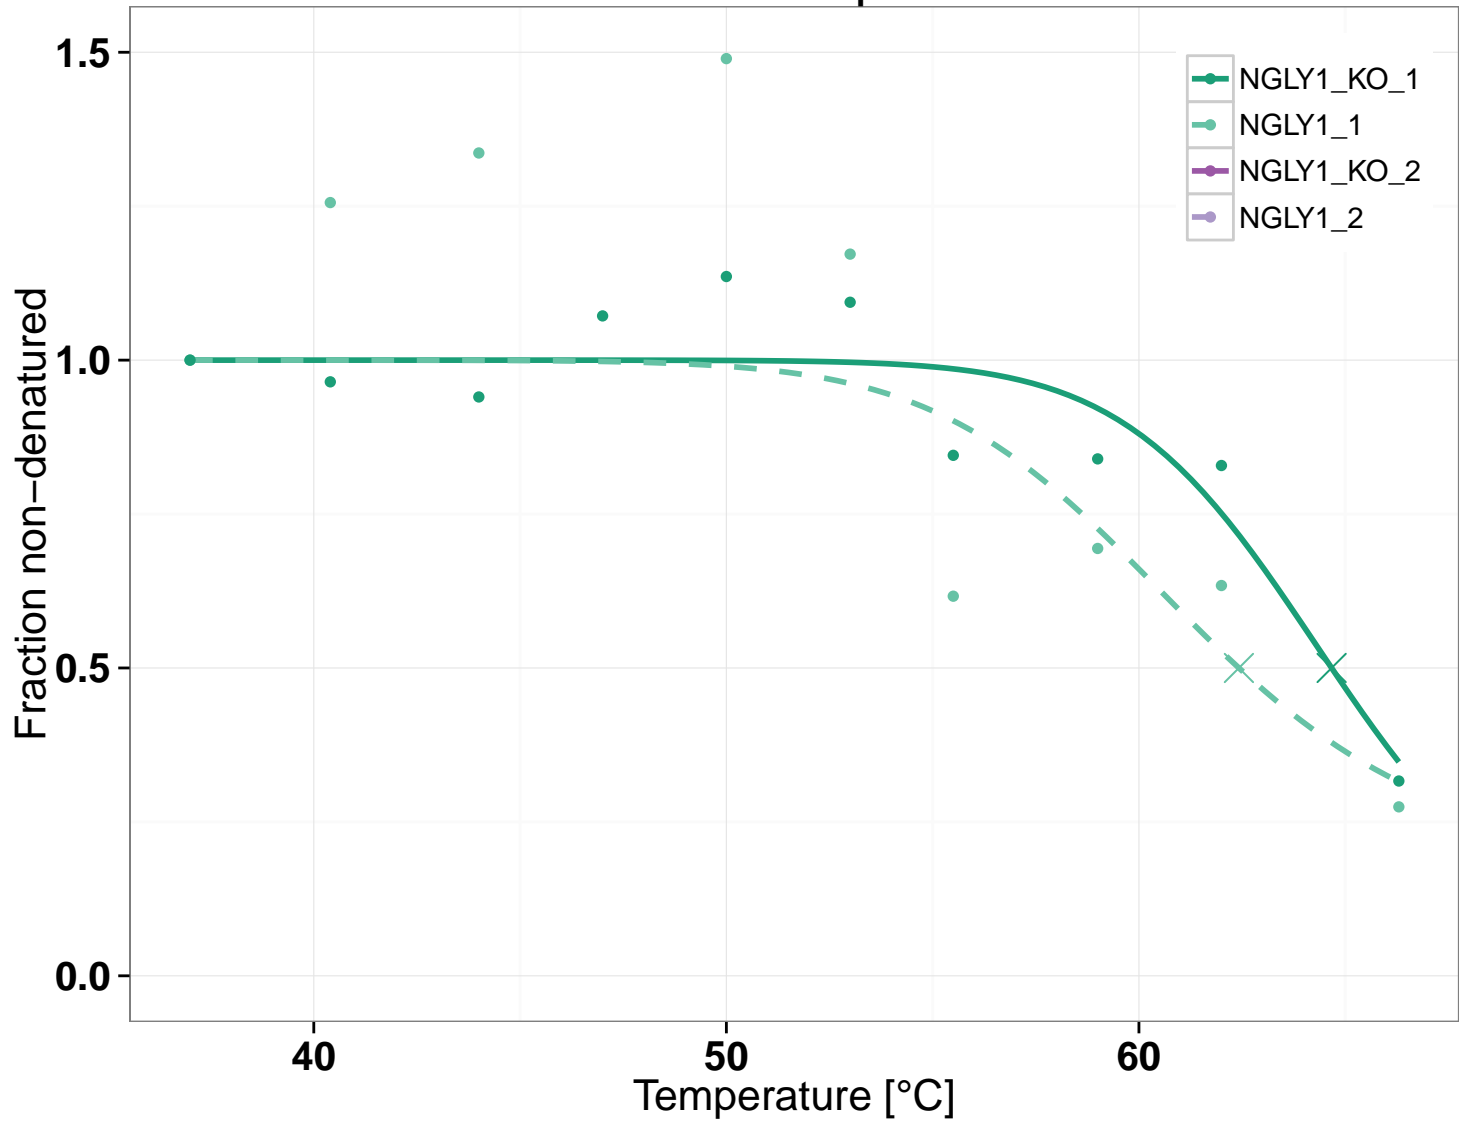

|            | meltPoint | slope  | plateau | R2   |
|------------|-----------|--------|---------|------|
| NGLY1_KO_1 | 64.67     | -0.1   | 0       | 0.85 |
| NGLY1_1    | 62.42     | -0.068 | 0.17    | 0.48 |
| NGLY1_KO_2 | -         | -      | -       | -    |
| NGLY1_2    | -         | -      | -       | -    |

Supplement: Supplementary file 4598 [file 1]

IPI00788925.1|BCAT2

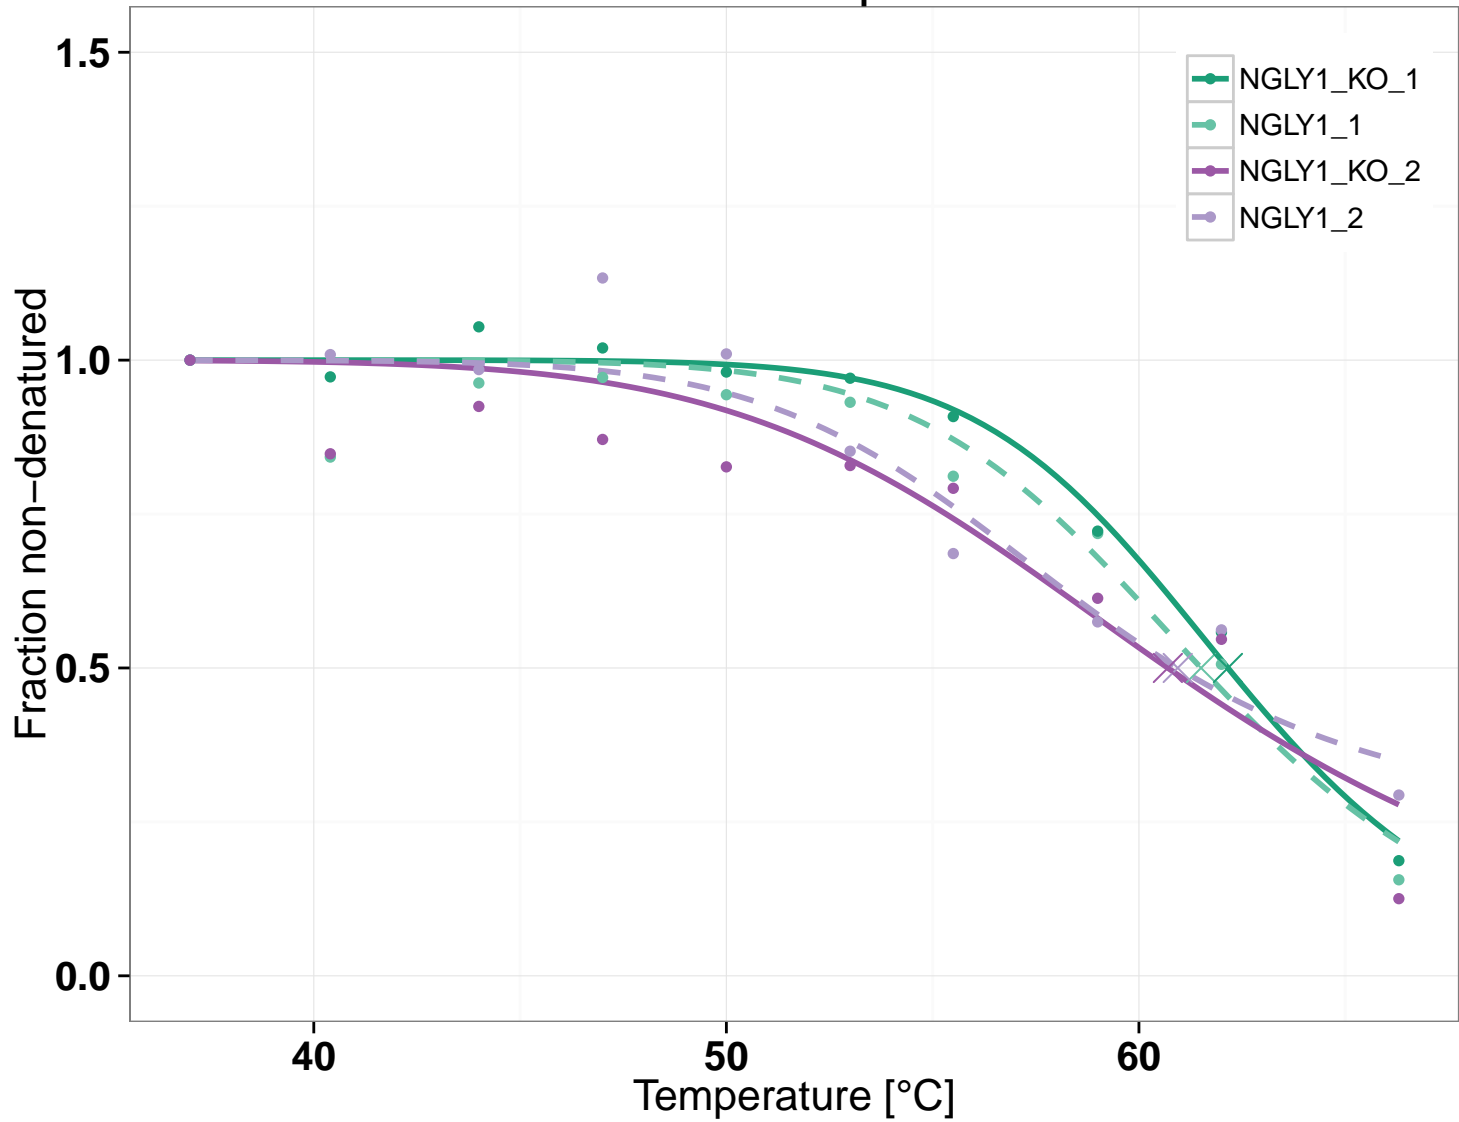

|            | meltPoint | slope  | plateau | R2   |
|------------|-----------|--------|---------|------|
| NGLY1_KO_1 | 62.16     | -0.083 | 0       | 0.99 |
| NGLY1_1    | 61.51     | -0.073 | 0       | 0.94 |
| NGLY1_KO_2 | 60.7      | -0.048 | 0       | 0.86 |
| NGLY1_2    | 60.94     | -0.051 | 0.25    | 0.93 |

Supplement: Supplementary file 4599 [file 1]

IPI00873189.1|SLC35B2

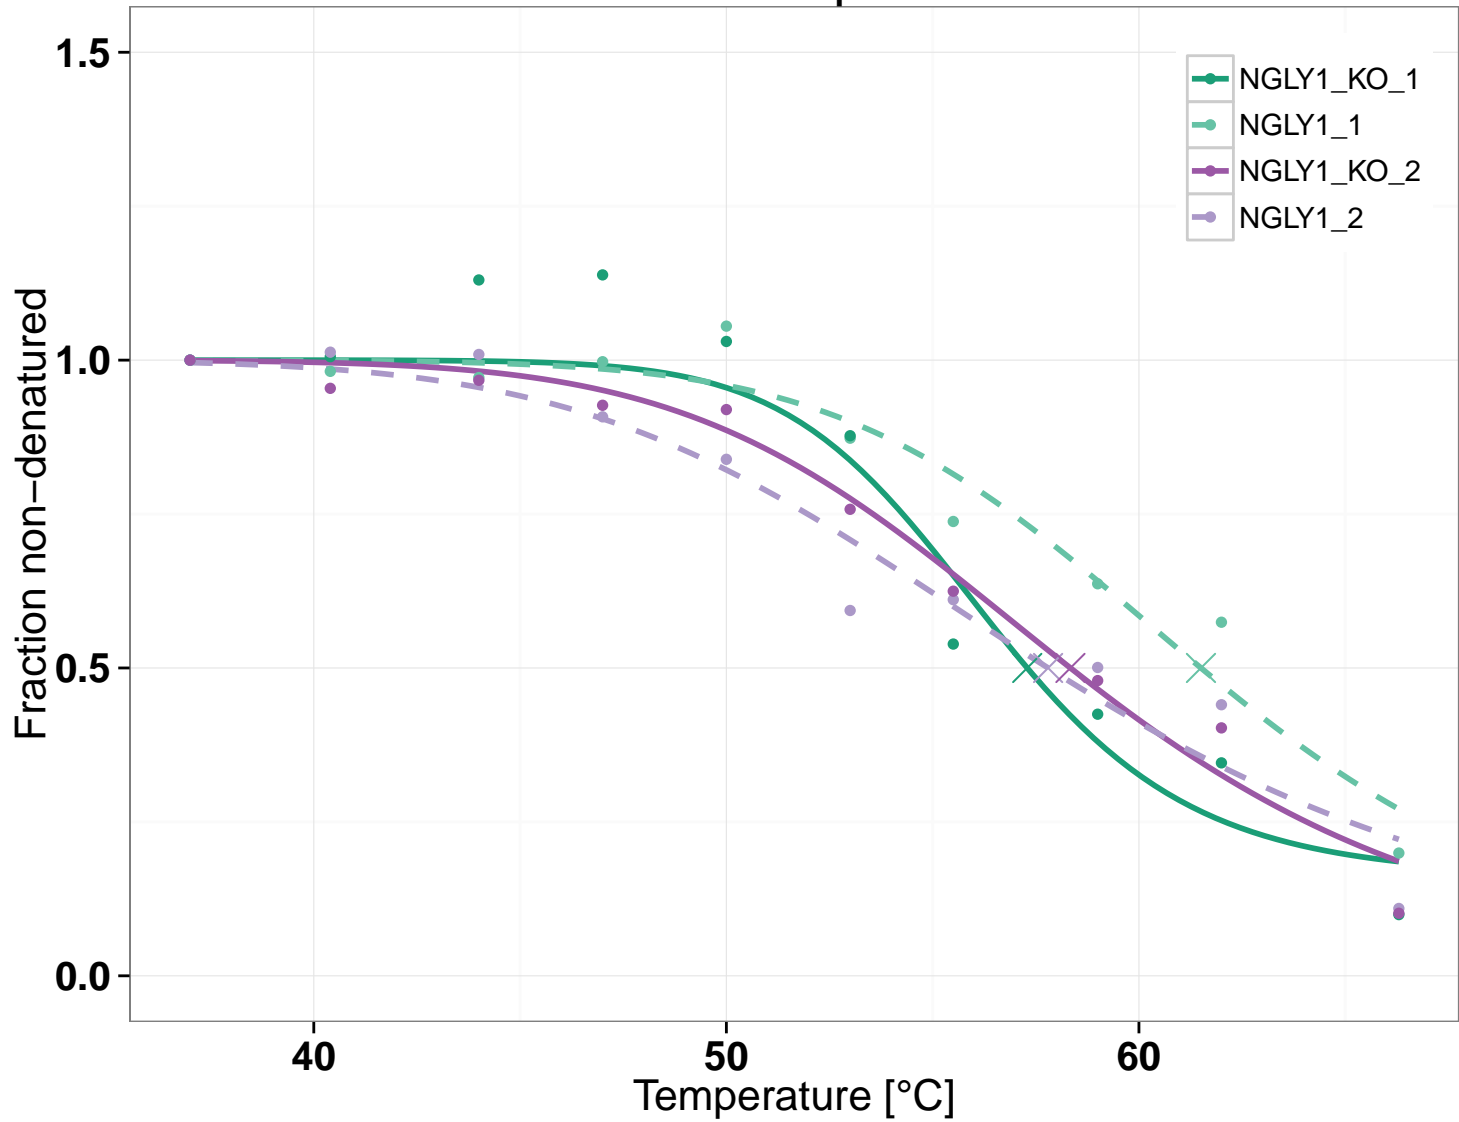

|            | meltPoint | slope  | plateau | R2   |
|------------|-----------|--------|---------|------|
| NGLY1_KO_1 | 57.29     | -0.086 | 0.16    | 0.94 |
| NGLY1_1    | 61.5      | -0.057 | 0       | 0.95 |
| NGLY1_KO_2 | 58.34     | -0.054 | 0       | 0.98 |
| NGLY1_2    | 57.8      | -0.044 | 0       | 0.95 |

Supplement: Supplementary file 4600 [file 1]

# IPI00017670.2|SMPD2

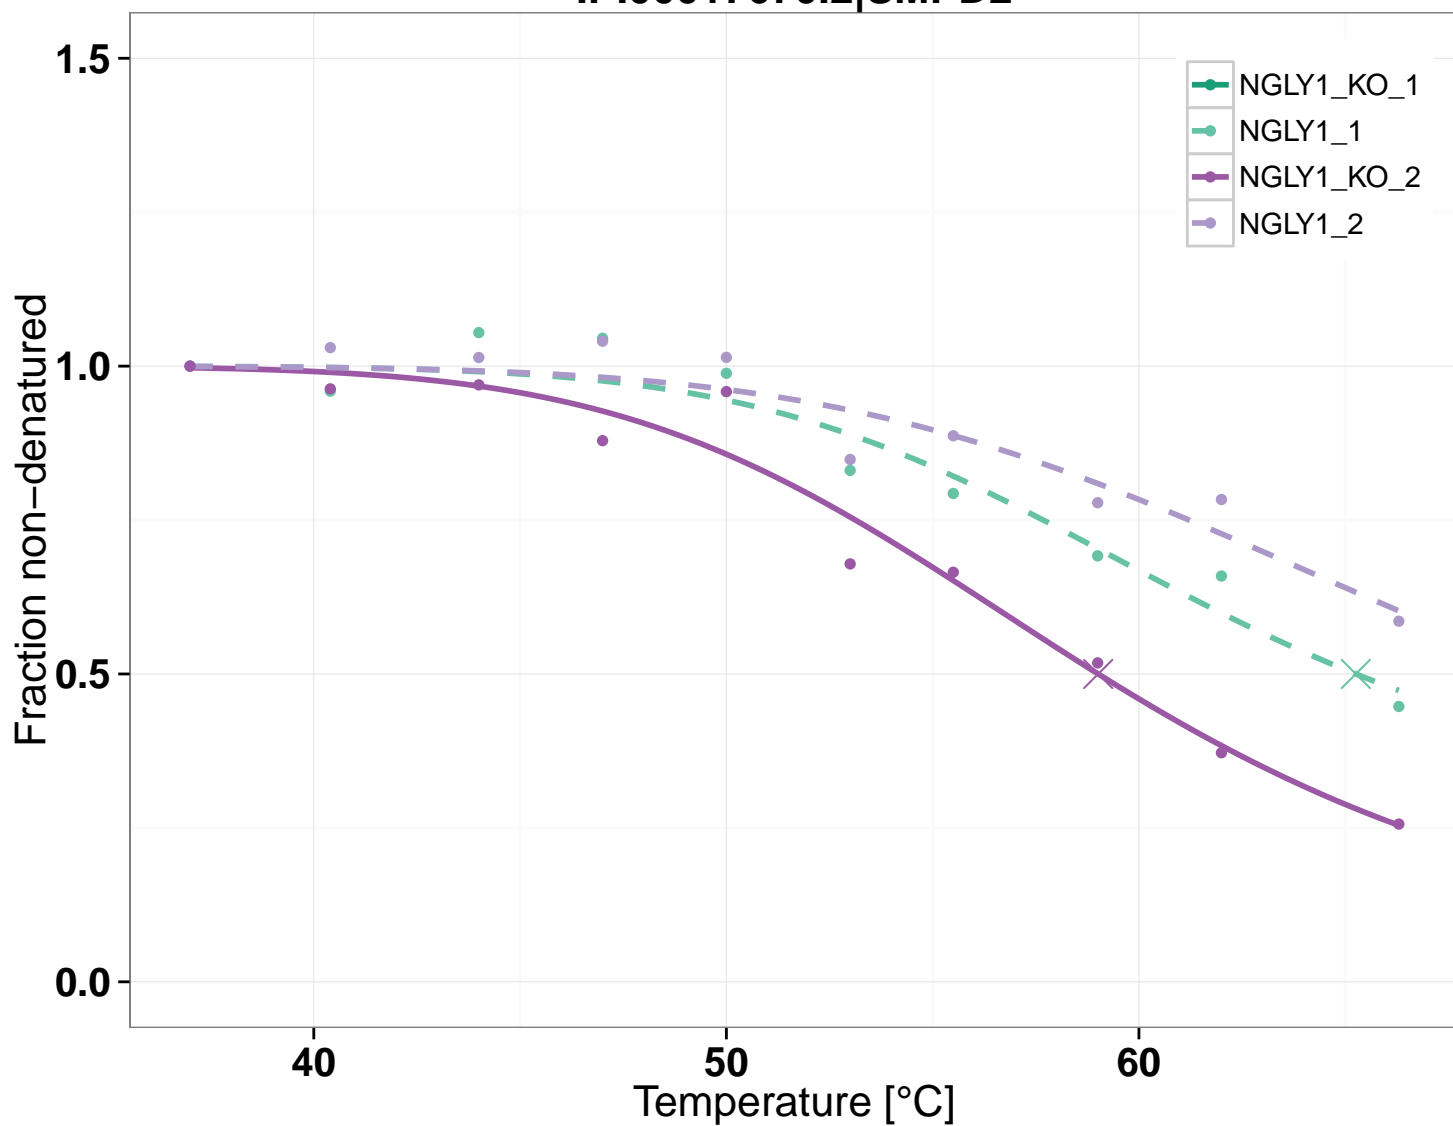

|            | meltPoint | slope  | plateau | R2   |
|------------|-----------|--------|---------|------|
| NGLY1_KO_1 | –         | –      | –       | –    |
| NGLY1_1    | 65.26     | –0.036 | 0.25    | 0.94 |
| NGLY1_KO_2 | 59.01     | –0.044 | 0.01    | 0.97 |
| NGLY1_2    | –         | –0.029 | 0.15    | 0.91 |

Supplement: Supplementary file 4601 [file 1]

# IPI00473014.5|DSTN

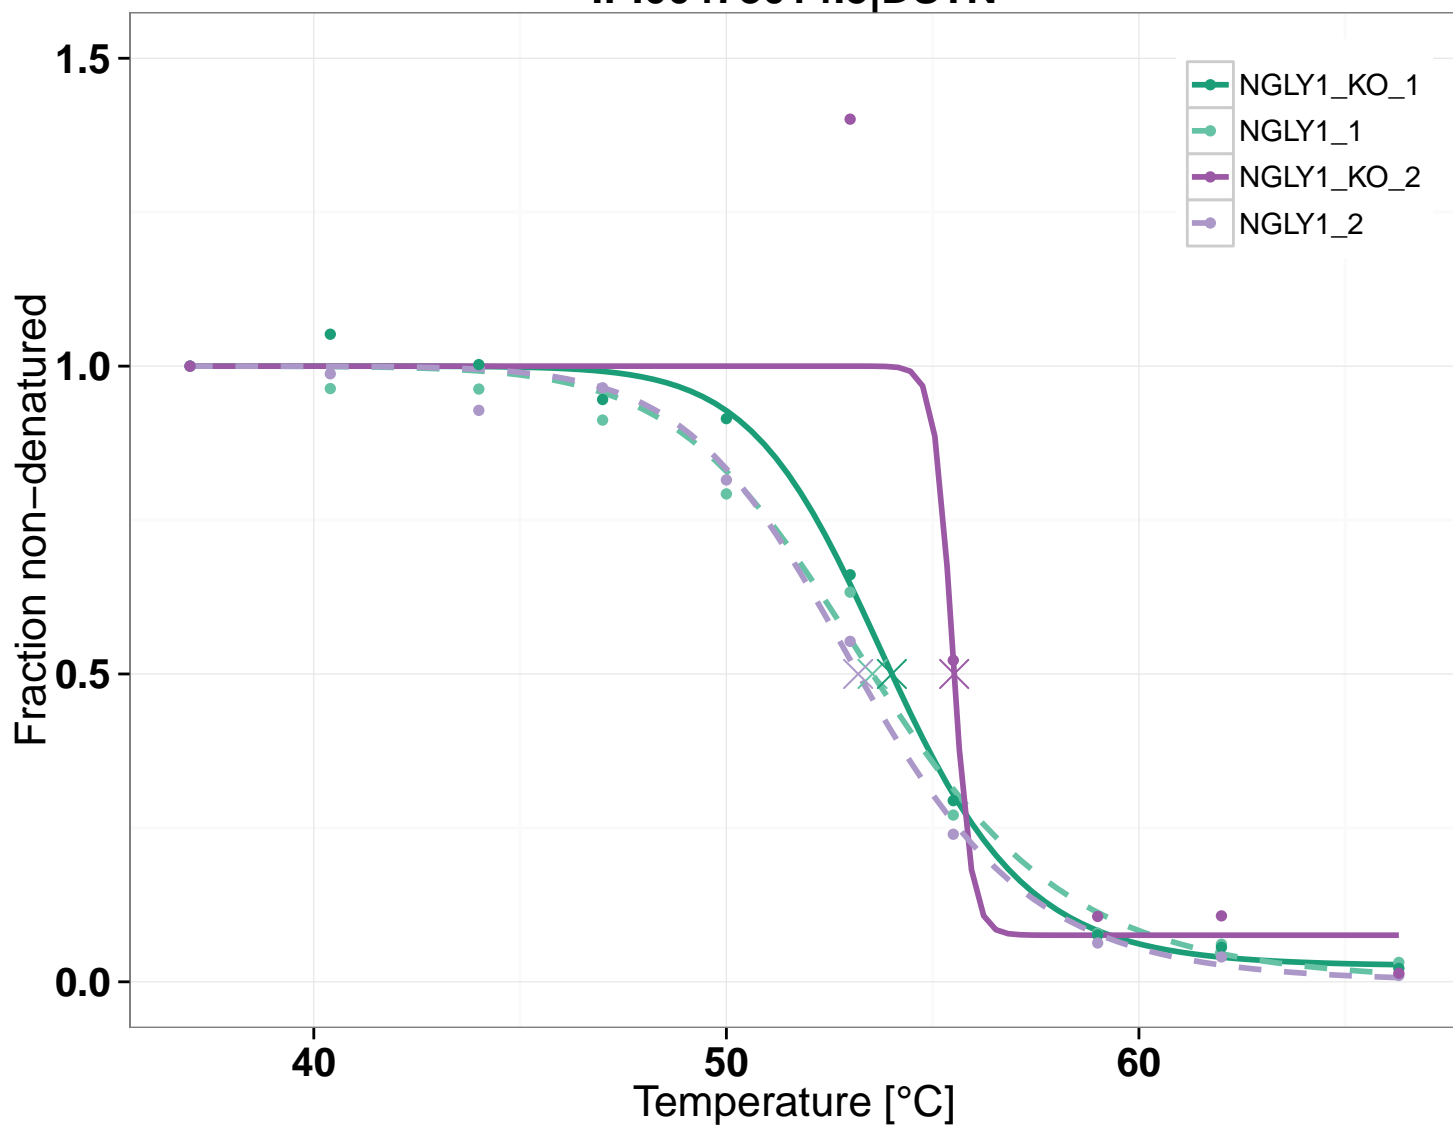

|            | meltPoint | slope | plateau | R2   |
|------------|-----------|-------|---------|------|
| NGLY1_KO_1 | 54.01     | -0.15 | 0.03    | 1    |
| NGLY1_1    | 53.54     | -0.1  | 0       | 0.99 |
| NGLY1_KO_2 | 55.52     | -1    | 0.08    | 0.35 |
| NGLY1_2    | 53.2      | -0.12 | 0       | 1    |

Supplement: Supplementary file 4602 [file 1]

IPI00885072.1|C12ORF56

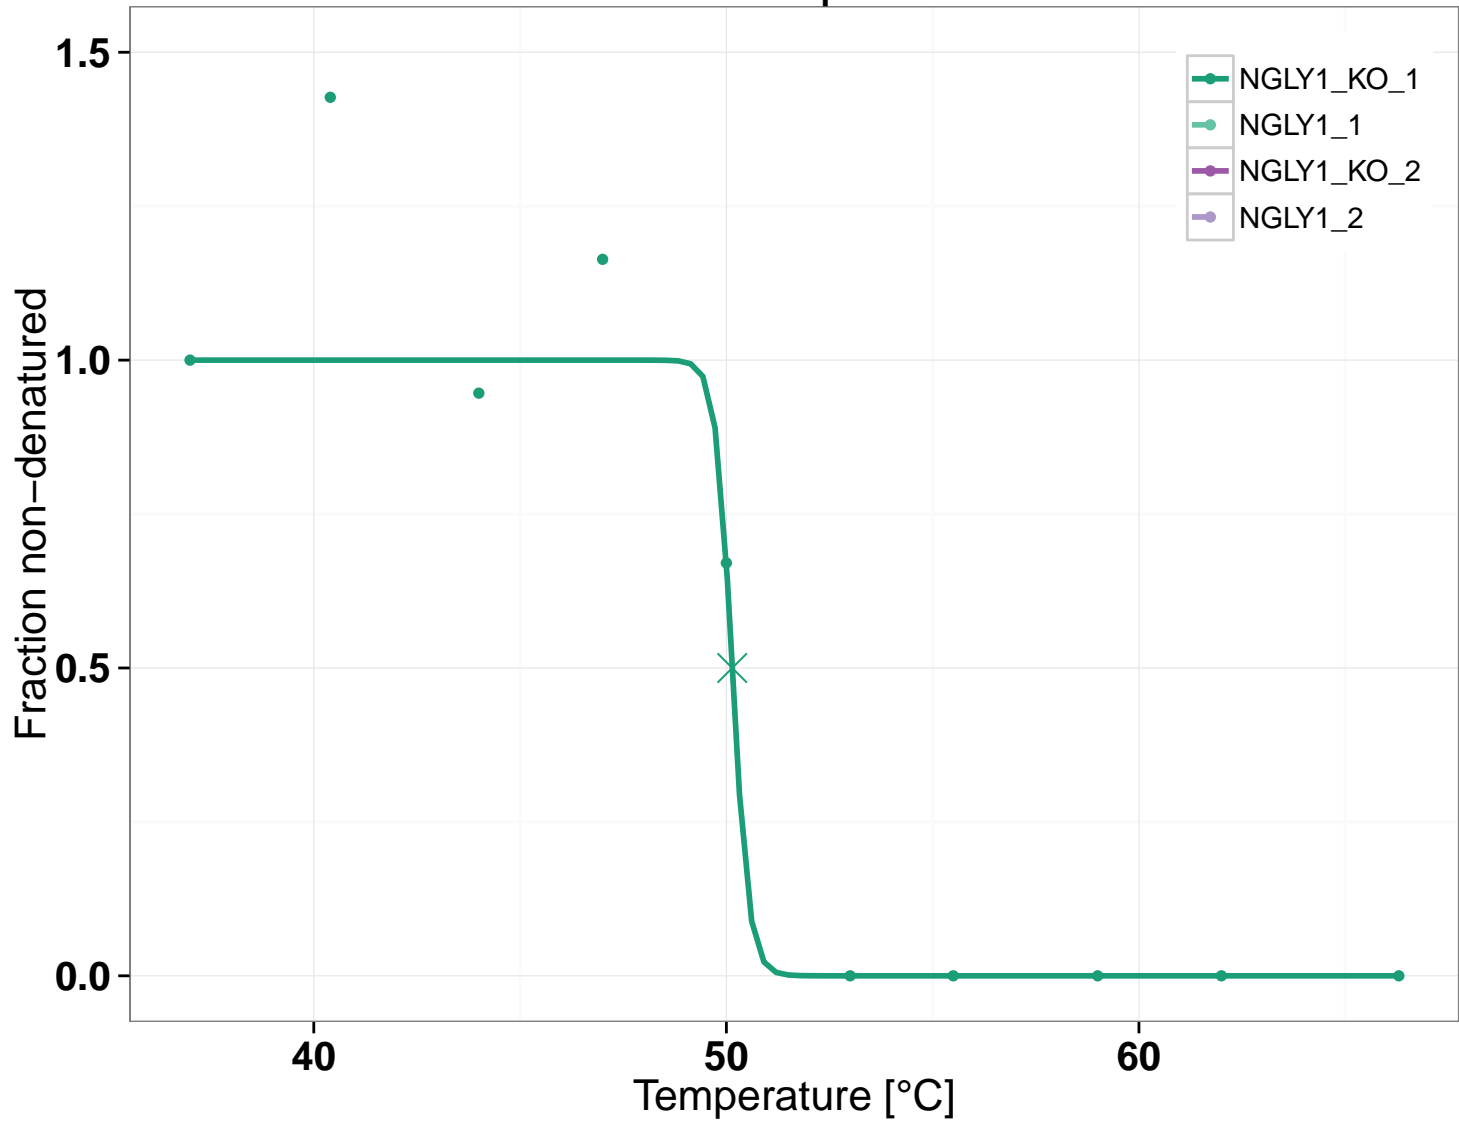

|            | meltPoint | slope | plateau | R2   |
|------------|-----------|-------|---------|------|
| NGLY1_KO_1 | 50.14     | -1.2  | 0       | 0.93 |
| NGLY1_1    | -         | -     | -       | -    |
| NGLY1_KO_2 | -         | -     | -       | -    |
| NGLY1_2    | -         | -     | -       | -    |

Supplement: Supplementary file 4603 [file 1]

IPI00101186.6|RRP12

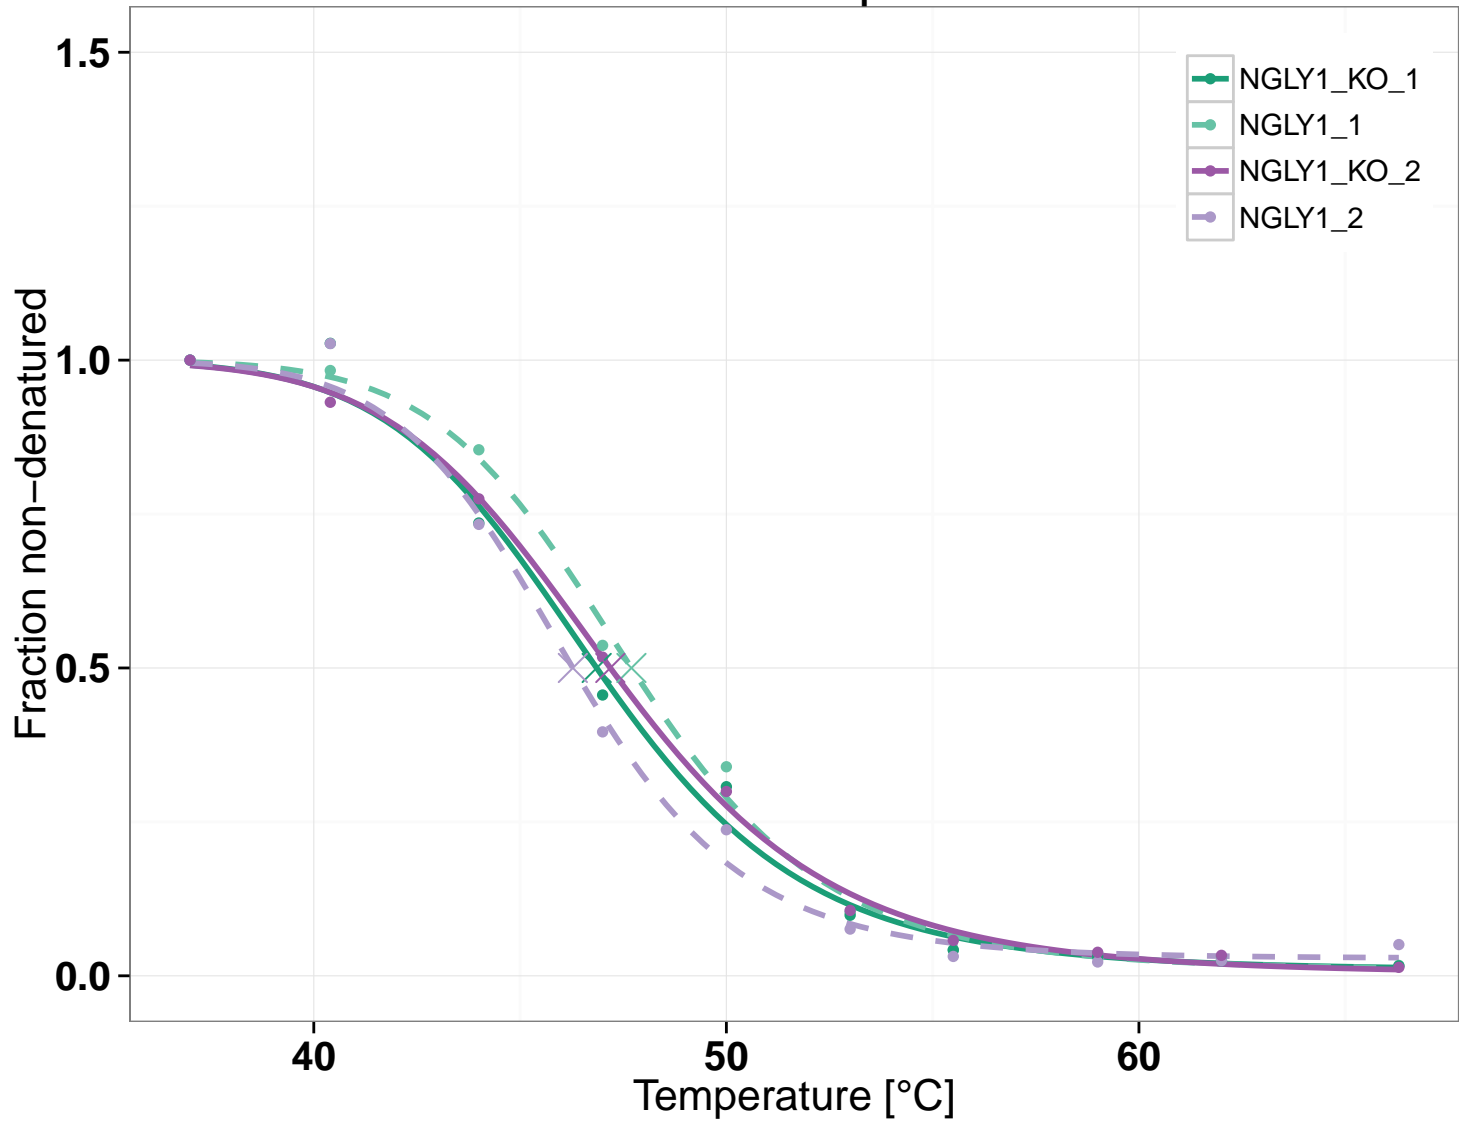

|            | meltPoint | slope  | plateau | R2   |
|------------|-----------|--------|---------|------|
| NGLY1_KO_1 | 46.86     | -0.097 | 0.01    | 0.99 |
| NGLY1_1    | 47.7      | -0.1   | 0.01    | 1    |
| NGLY1_KO_2 | 47.19     | -0.092 | 0       | 1    |
| NGLY1_2    | 46.28     | -0.11  | 0.03    | 0.99 |

Supplement: Supplementary file 4604 [file 1]

IPI00477181.1|RNF220

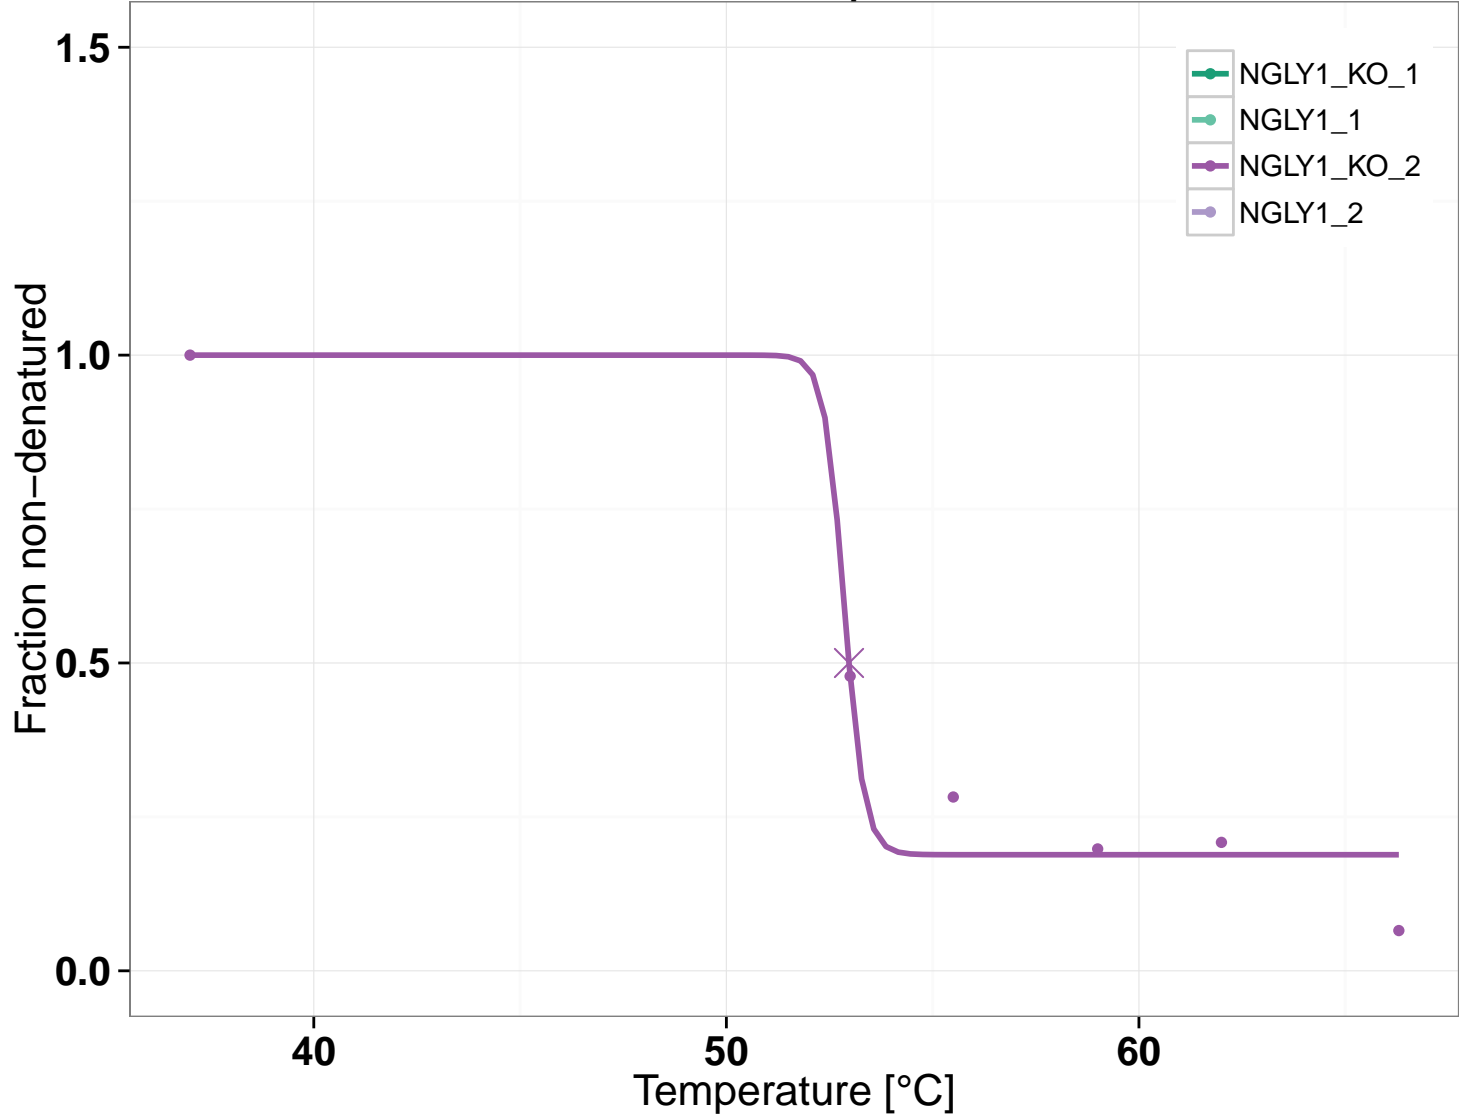

|            | meltPoint | slope | plateau | R2  |
|------------|-----------|-------|---------|-----|
| NGLY1_KO_1 | —         | —     | —       | —   |
| NGLY1_1    | —         | —     | —       | —   |
| NGLY1_KO_2 | 52.97     | -0.84 | 0.19    | 0.3 |
| NGLY1_2    | —         | —     | —       | —   |

Supplement: Supplementary file 4605 [file 1]

IPI00293000.2|GPR175

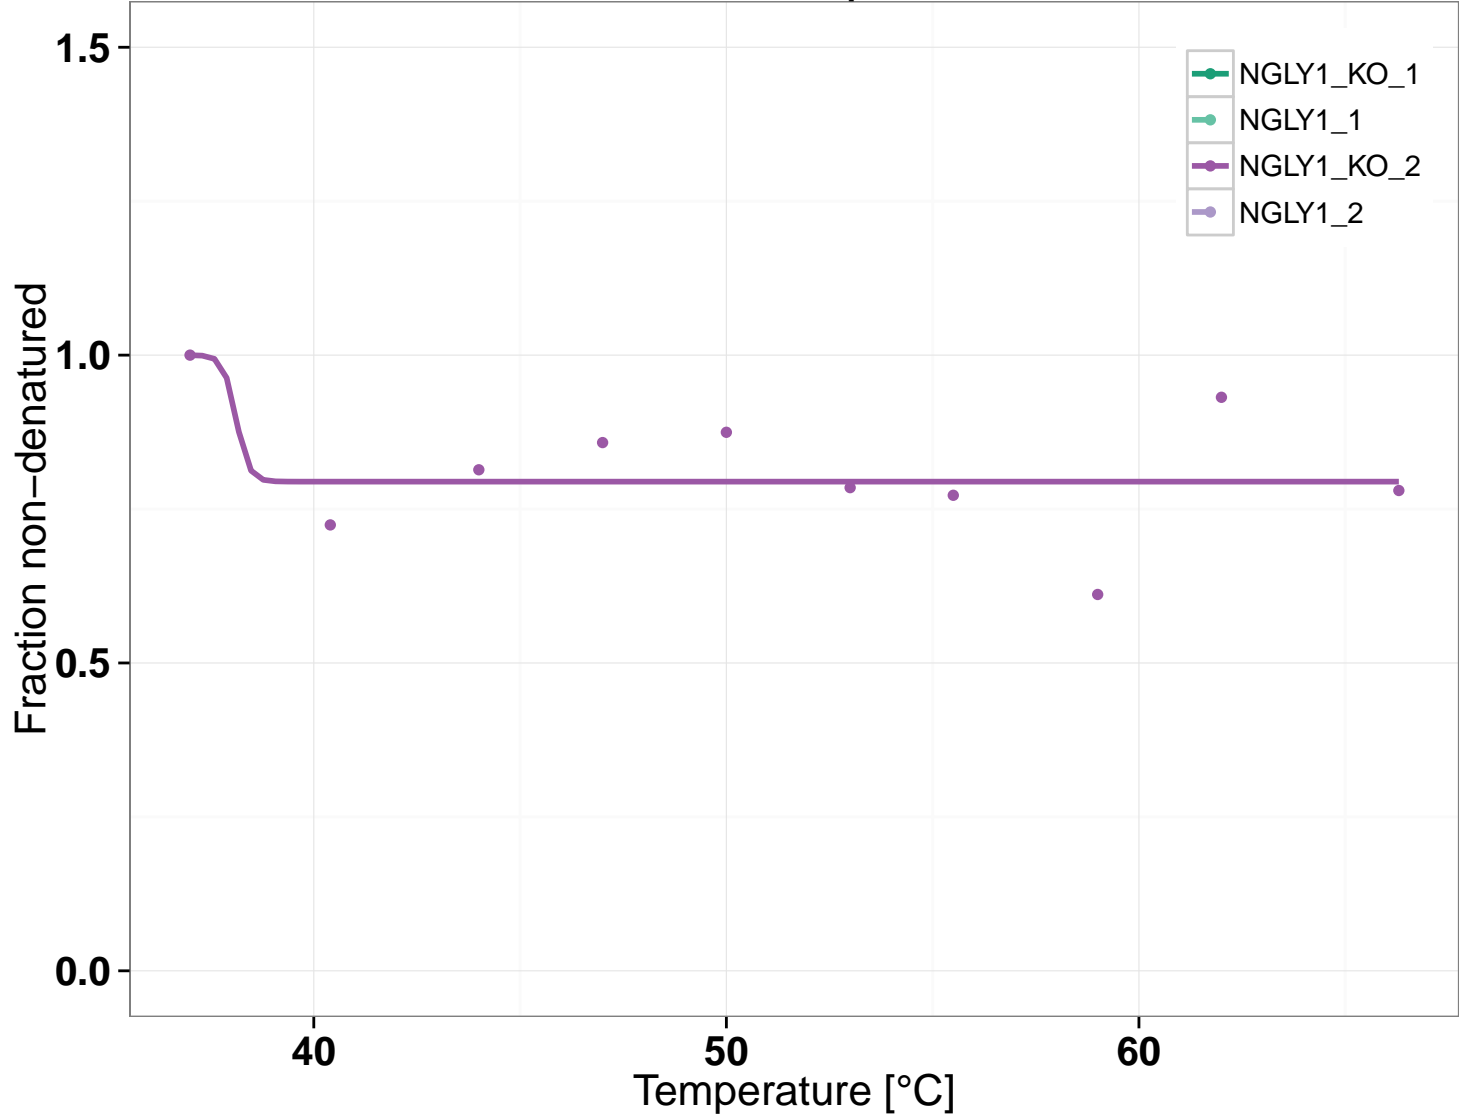

|            | meltPoint | slope | plateau | R2   |
|------------|-----------|-------|---------|------|
| NGLY1_KO_1 | —         | —     | —       | —    |
| NGLY1_1    | —         | —     | —       | —    |
| NGLY1_KO_2 | —         | -0.34 | 0.79    | 0.36 |
| NGLY1_2    | —         | —     | —       | —    |

Supplement: Supplementary file 4606 [file 1]

IPI00853358.1|A5YRU9\_HUMAN

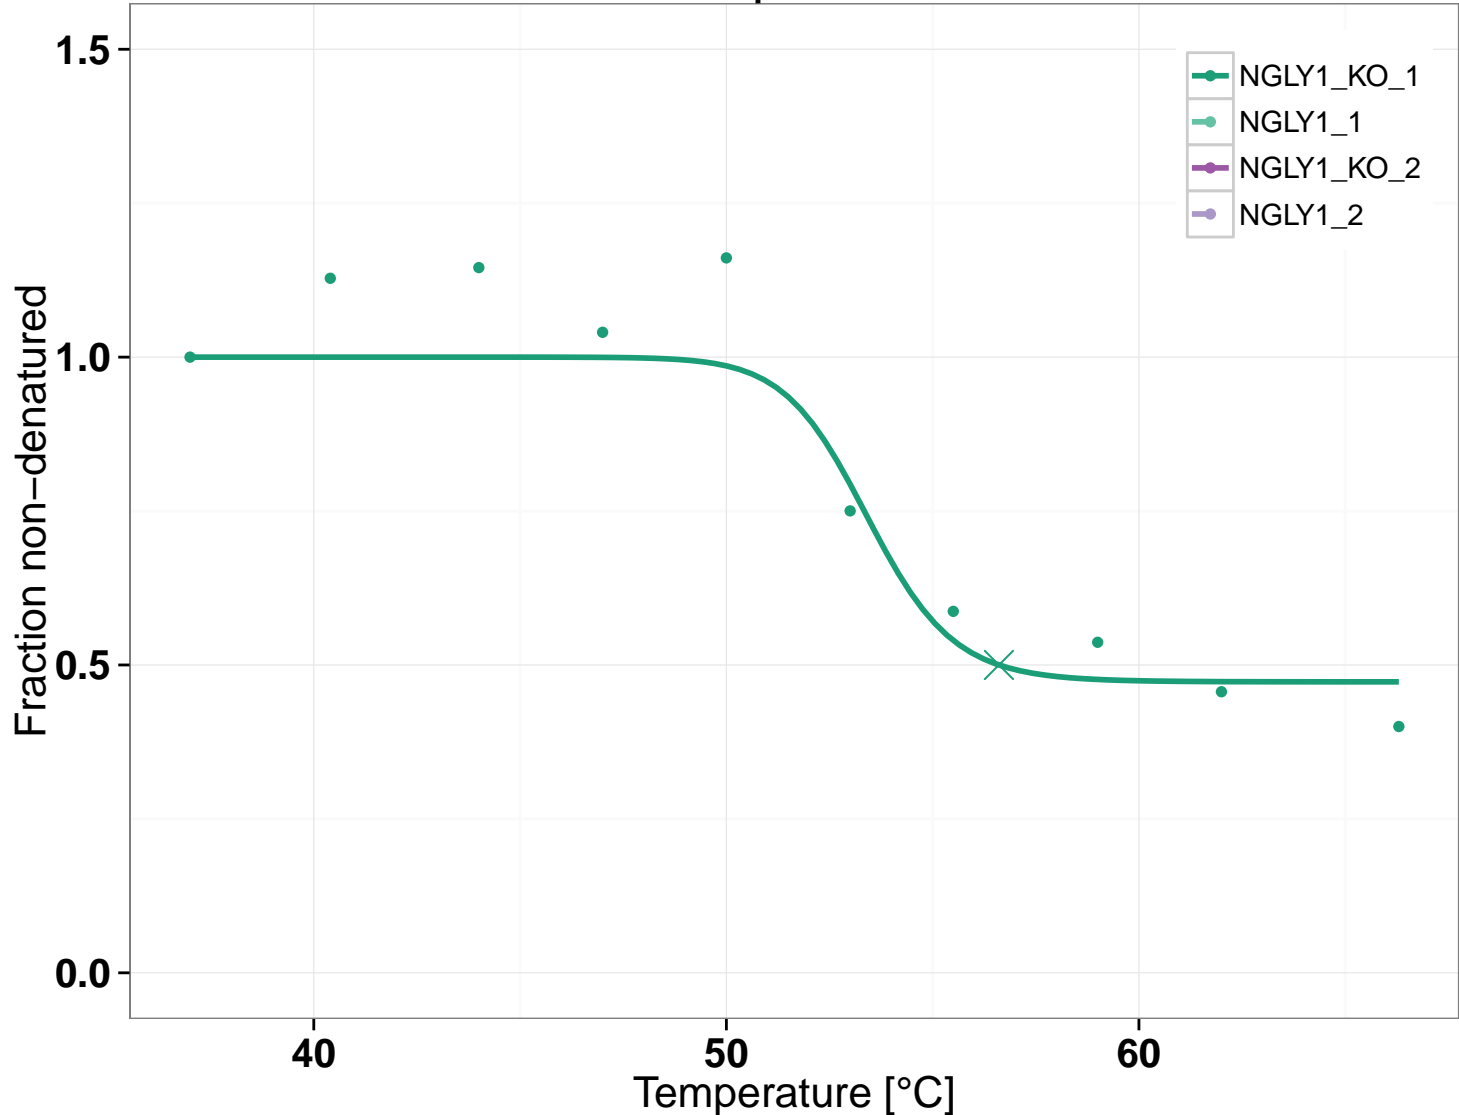

|            | meltPoint | slope | plateau | R2  |
|------------|-----------|-------|---------|-----|
| NGLY1_KO_1 | 56.61     | -0.13 | 0.47    | 0.9 |
| NGLY1_1    | -         | -     | -       | -   |
| NGLY1_KO_2 | -         | -     | -       | -   |
| NGLY1_2    | -         | -     | -       | -   |

Supplement: Supplementary file 4607 [file 1]

IPI00739581.2|ATAD2B

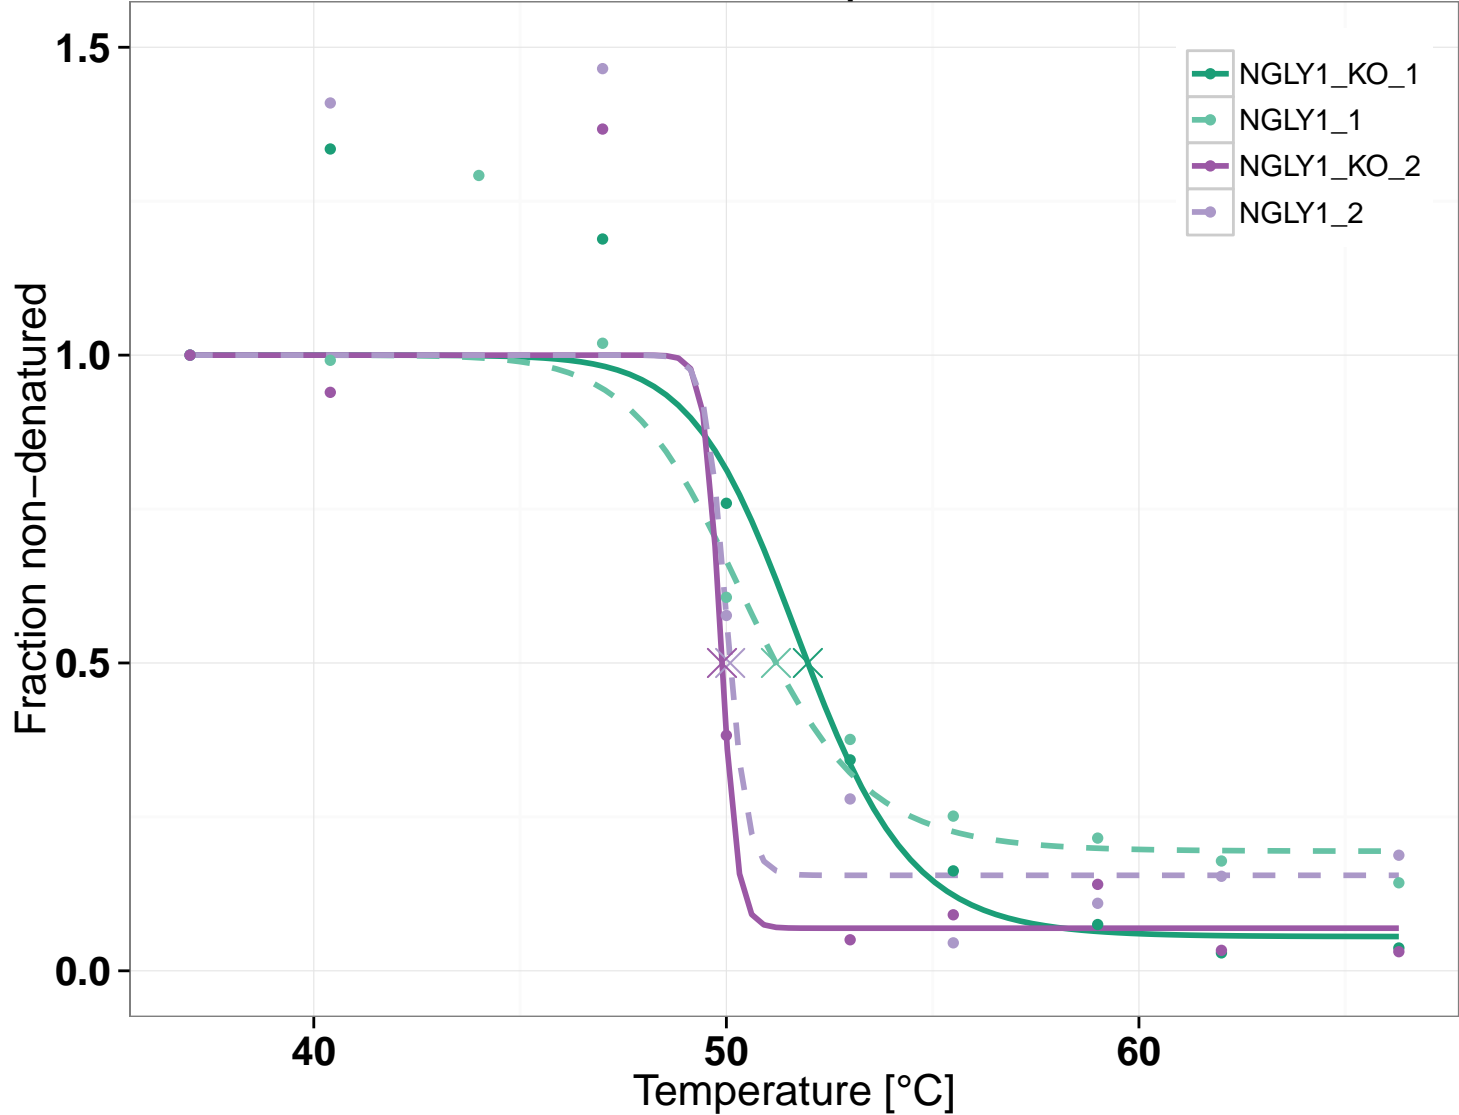

|            | meltPoint | slope | plateau | R2   |
|------------|-----------|-------|---------|------|
| NGLY1_KO_1 | 51.98     | -0.18 | 0.06    | 0.8  |
| NGLY1_1    | 51.2      | -0.14 | 0.19    | 0.94 |
| NGLY1_KO_2 | 49.89     | -1.2  | 0.07    | 0.84 |
| NGLY1_2    | 50.09     | -0.85 | 0.16    | 0.71 |

Supplement: Supplementary file 4608 [file 1]

# IPI00748093.2|YIPF5

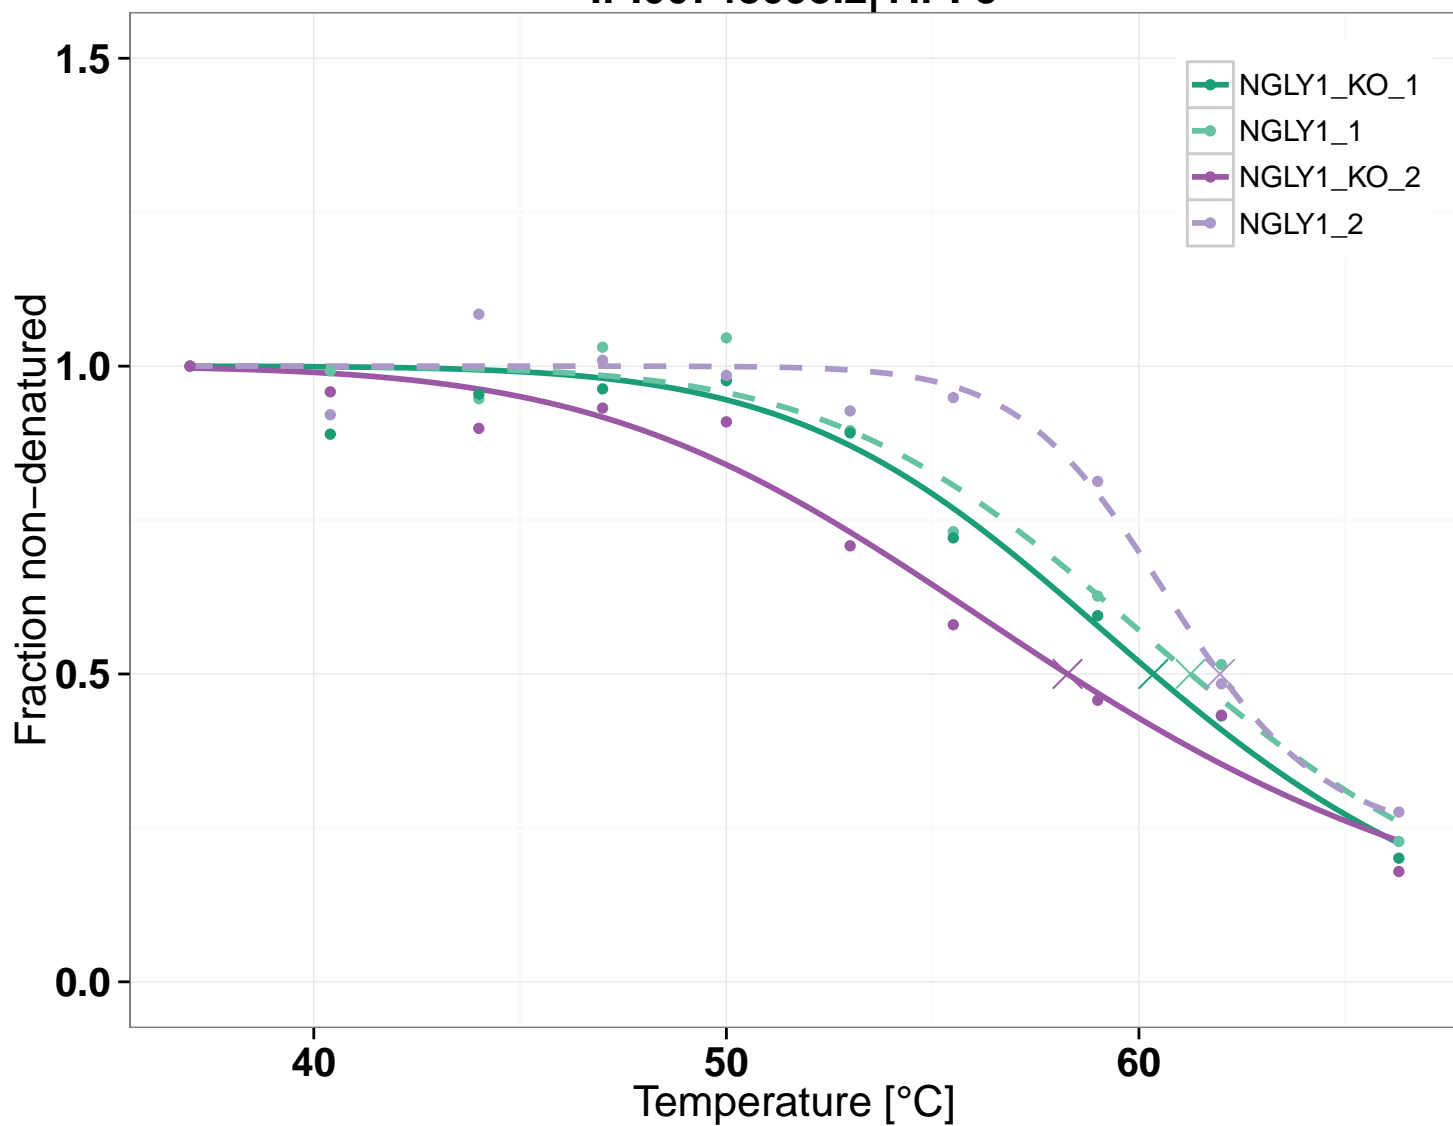

|            | meltPoint | slope  | plateau | R2   |
|------------|-----------|--------|---------|------|
| NGLY1_KO_1 | 60.35     | -0.058 | 0       | 0.97 |
| NGLY1_1    | 61.25     | -0.057 | 0       | 0.97 |
| NGLY1_KO_2 | 58.27     | -0.045 | 0       | 0.97 |
| NGLY1_2    | 61.96     | -0.1   | 0.22    | 0.97 |

Supplement: Supplementary file 4609 [file 1]

IPI00218606.7|RPS23

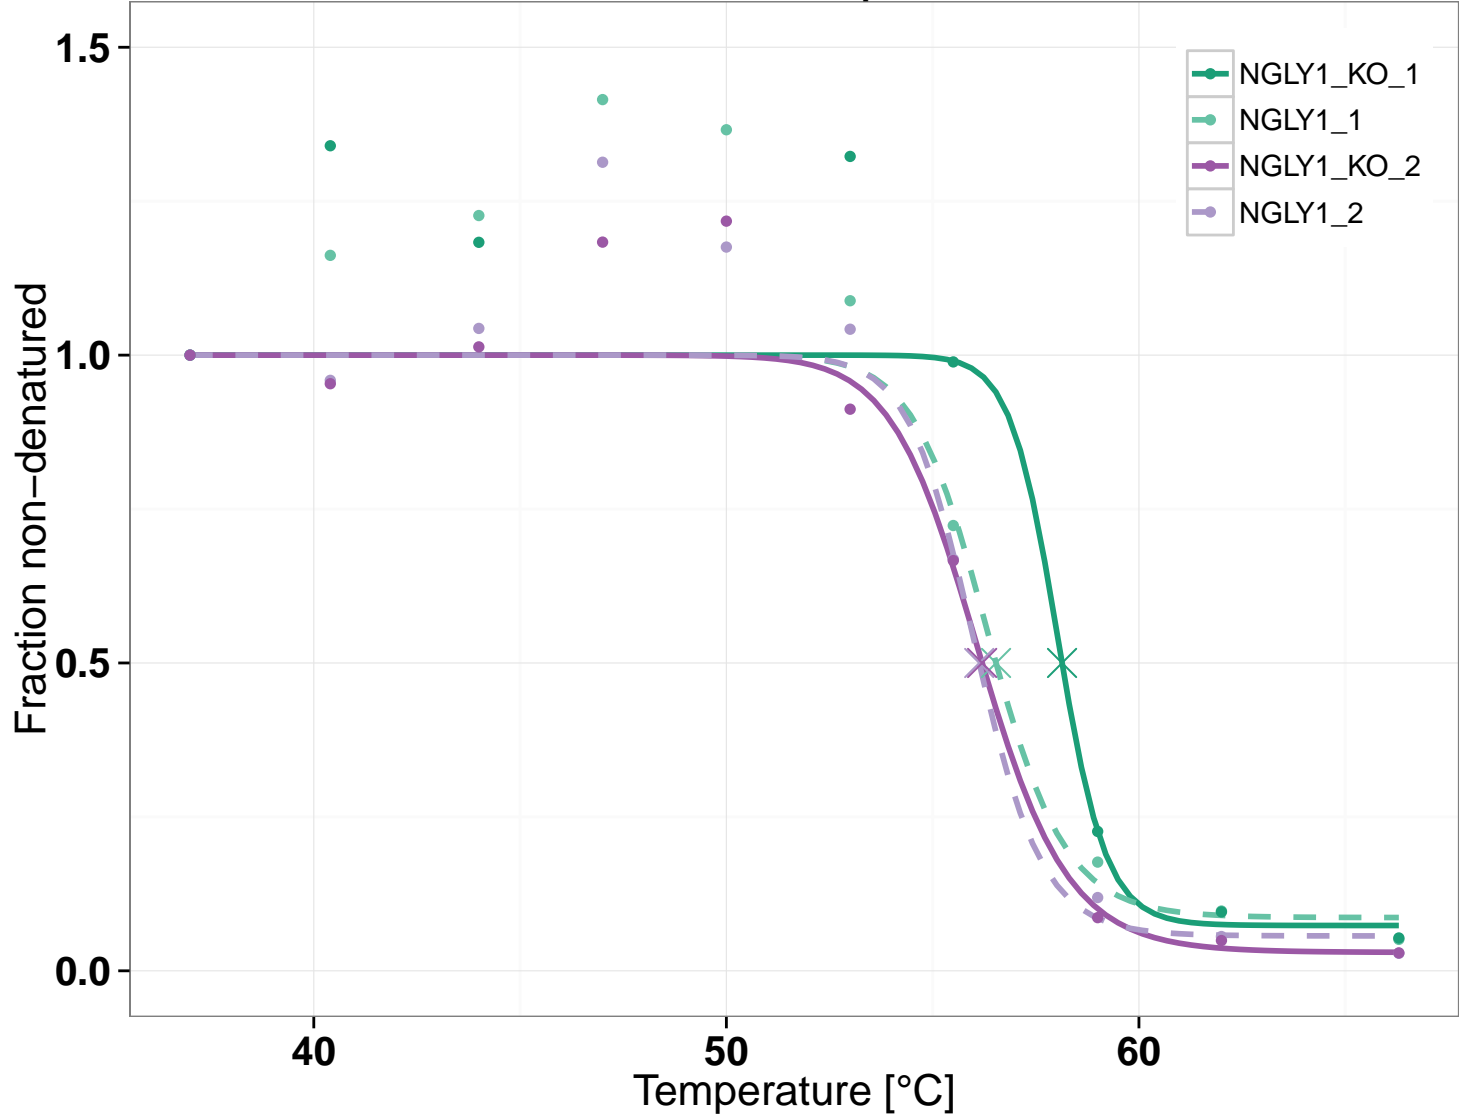

|            | meltPoint | slope | plateau | R2   |
|------------|-----------|-------|---------|------|
| NGLY1_KO_1 | 58.14     | -0.4  | 0.07    | 0.64 |
| NGLY1_1    | 56.54     | -0.25 | 0.09    | 0.85 |
| NGLY1_KO_2 | 56.2      | -0.23 | 0.03    | 0.96 |
| NGLY1_2    | 56.13     | -0.29 | 0.06    | 0.94 |

Supplement: Supplementary file 4610 [file 1]

IPI00013296.3|LOC100130553

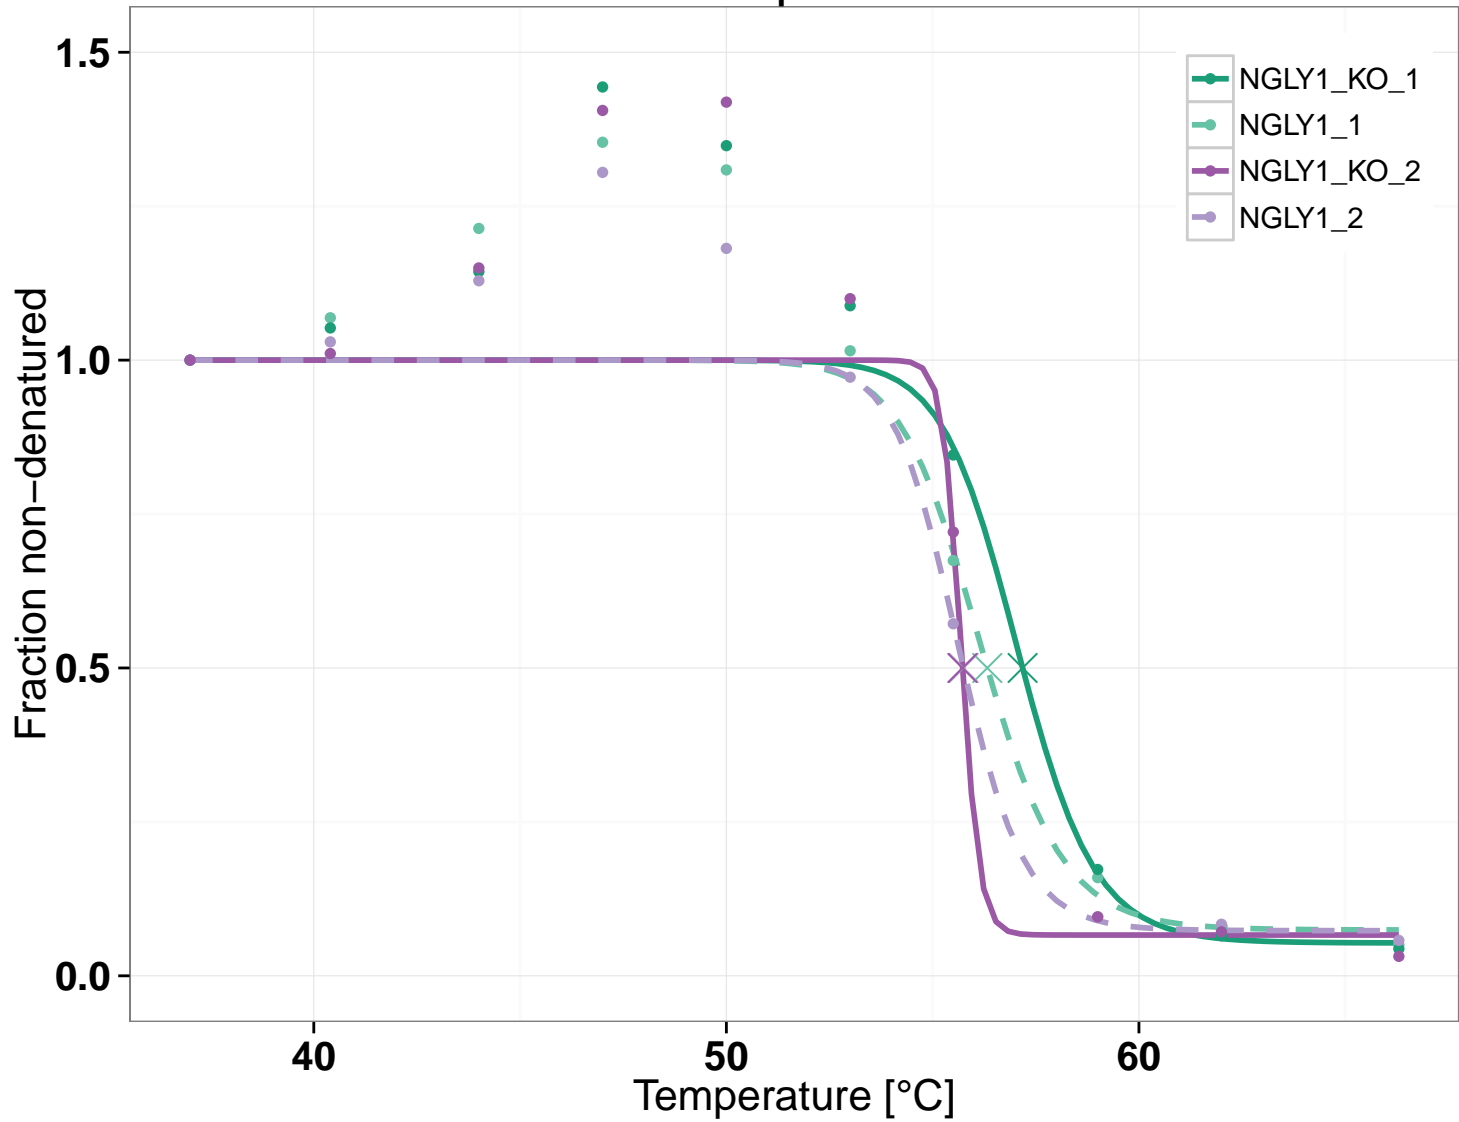

|            | meltPoint | slope | plateau | R2   |
|------------|-----------|-------|---------|------|
| NGLY1_KO_1 | 57.18     | -0.25 | 0.05    | 0.86 |
| NGLY1_1    | 56.32     | -0.23 | 0.07    | 0.89 |
| NGLY1_KO_2 | 55.72     | -1    | 0.07    | 0.86 |
| NGLY1_2    | 55.75     | -0.29 | 0.07    | 0.93 |

Supplement: Supplementary file 4611 [file 1]

IPI00015839.1|RAB20

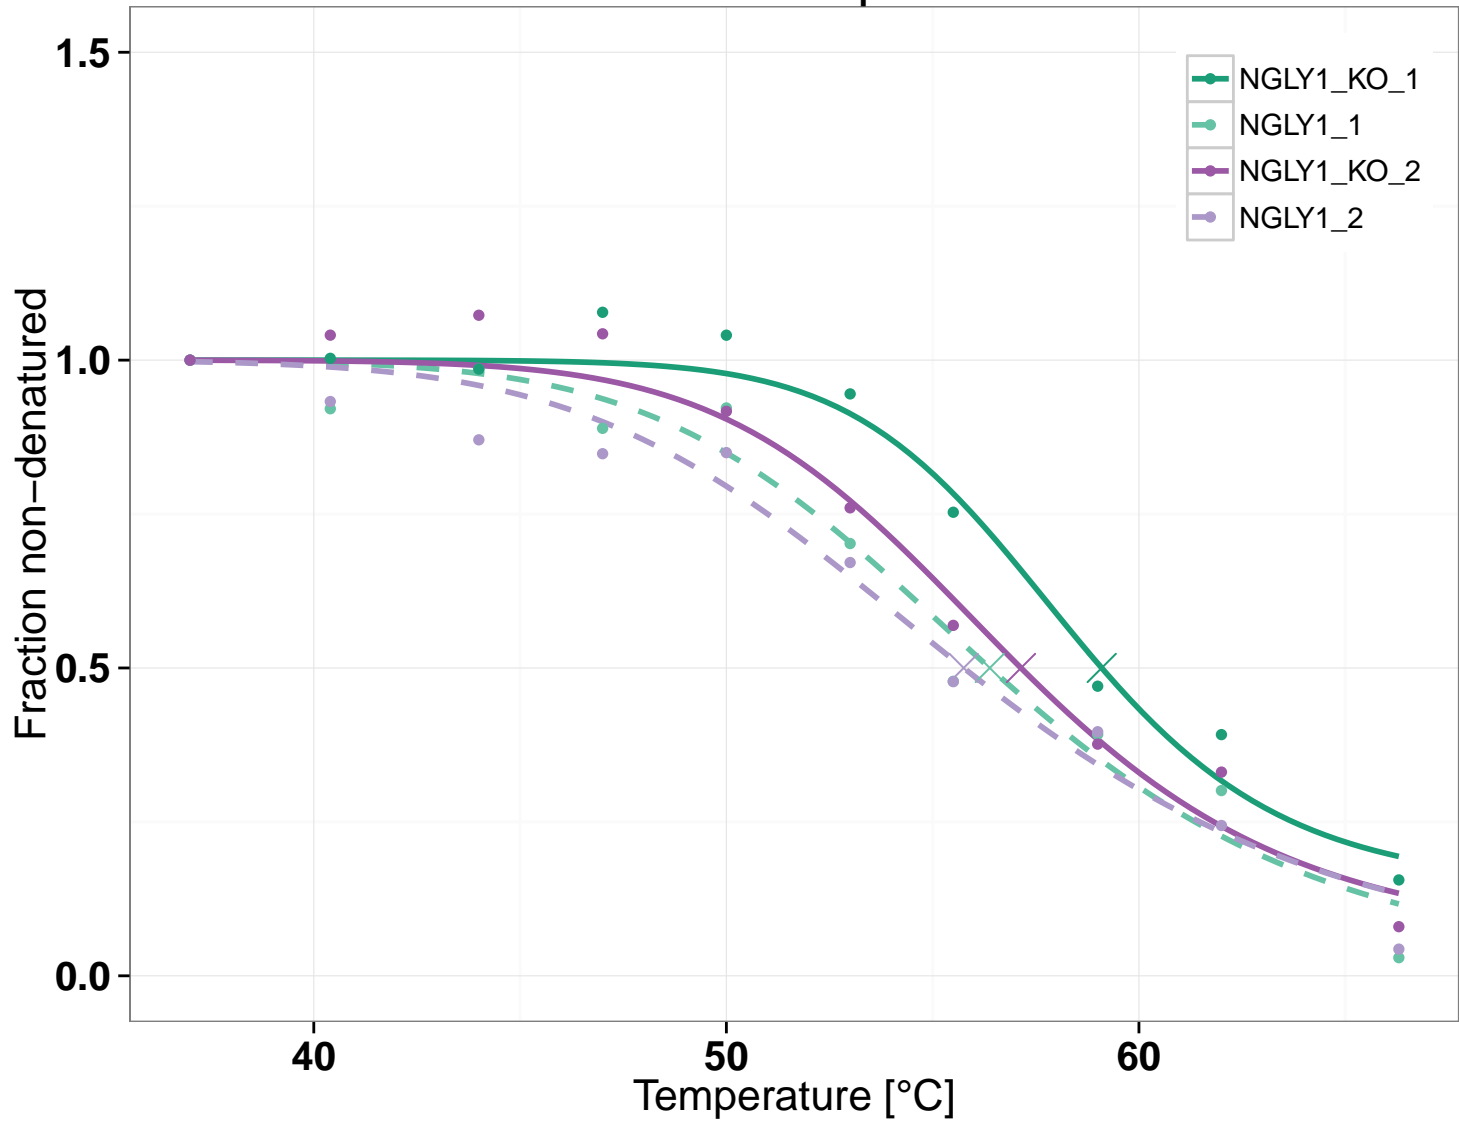

|            | meltPoint | slope  | plateau | R2   |
|------------|-----------|--------|---------|------|
| NGLY1_KO_1 | 59.1      | -0.083 | 0.14    | 0.98 |
| NGLY1_1    | 56.39     | -0.061 | 0       | 0.97 |
| NGLY1_KO_2 | 57.14     | -0.069 | 0.05    | 0.98 |
| NGLY1_2    | 55.75     | -0.054 | 0       | 0.97 |

Supplement: Supplementary file 4612 [file 1]

IPI00002790.3|SEL1L

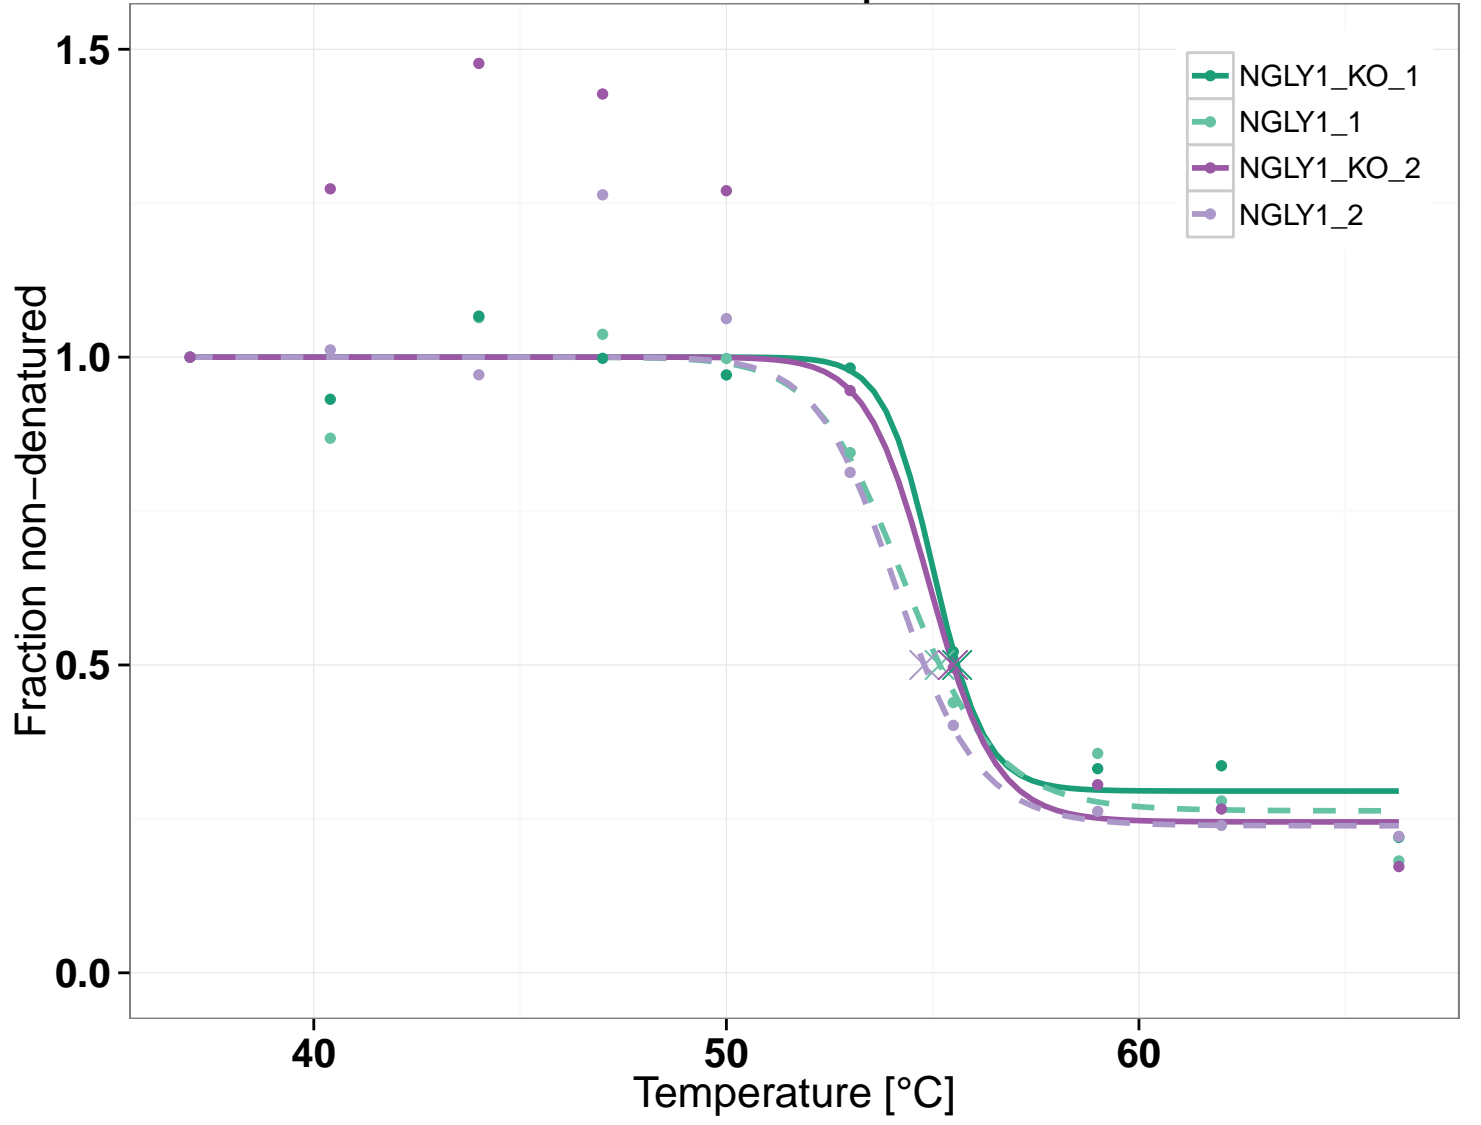

|            | meltPoint | slope | plateau | R2   |
|------------|-----------|-------|---------|------|
| NGLY1_KO_1 | 55.59     | -0.29 | 0.3     | 0.98 |
| NGLY1_1    | 55.17     | -0.17 | 0.26    | 0.97 |
| NGLY1_KO_2 | 55.49     | -0.24 | 0.25    | 0.76 |
| NGLY1_2    | 54.8      | -0.19 | 0.24    | 0.95 |

Supplement: Supplementary file 4613 [file 1]

IPI00642126.3|KIAA1618

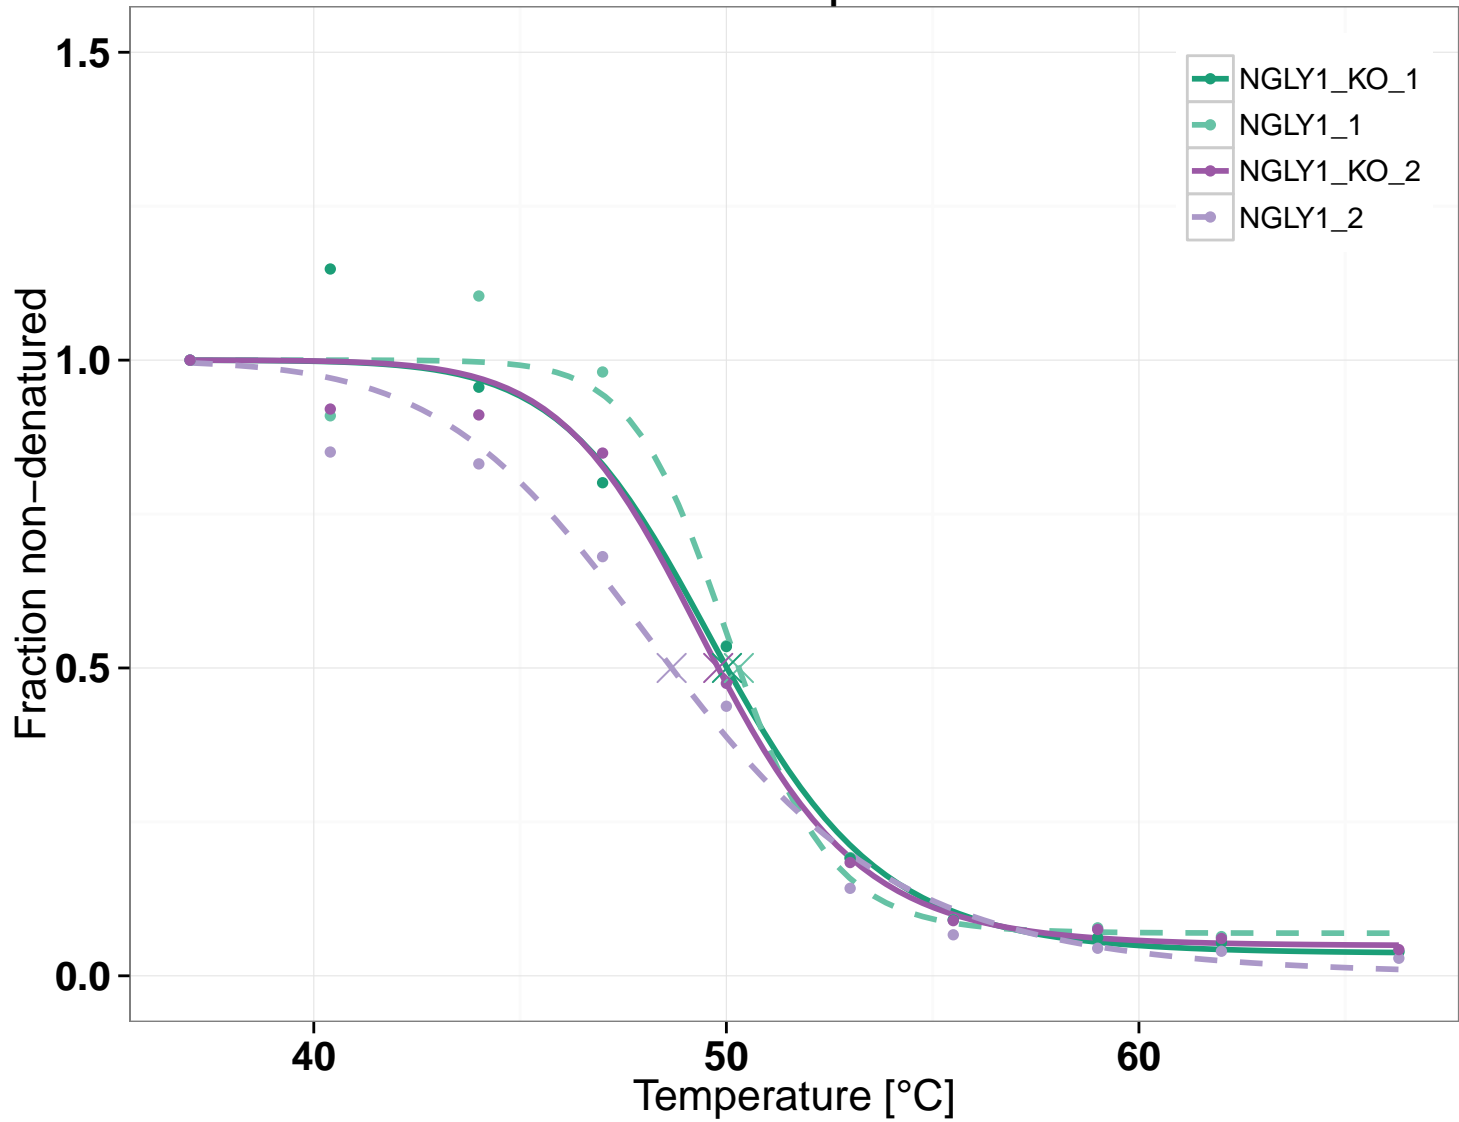

|            | meltPoint | slope  | plateau | R2   |
|------------|-----------|--------|---------|------|
| NGLY1_KO_1 | 50.01     | -0.12  | 0.04    | 0.99 |
| NGLY1_1    | 50.3      | -0.19  | 0.07    | 0.99 |
| NGLY1_KO_2 | 49.8      | -0.13  | 0.05    | 0.99 |
| NGLY1_2    | 48.67     | -0.089 | 0       | 0.98 |

Supplement: Supplementary file 4614 [file 1]

IPI00293434.2|SRP14

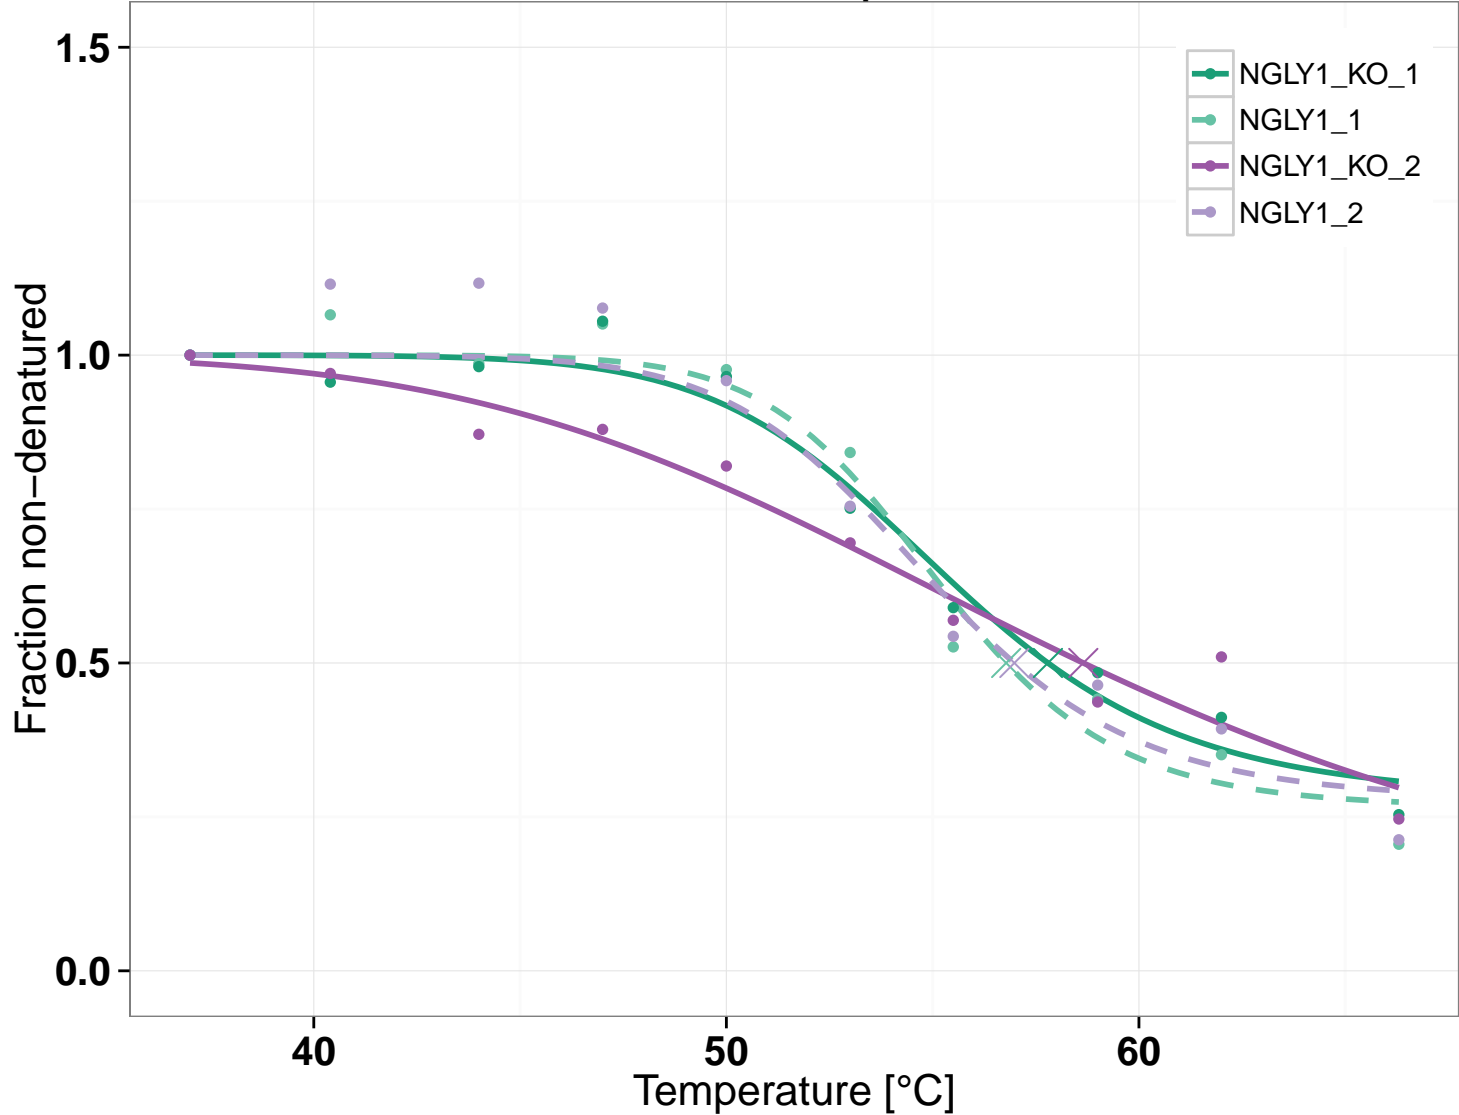

|            | meltPoint | slope  | plateau | R2   |
|------------|-----------|--------|---------|------|
| NGLY1_KO_1 | 57.79     | -0.063 | 0.28    | 0.97 |
| NGLY1_1    | 56.78     | -0.087 | 0.26    | 0.97 |
| NGLY1_KO_2 | 58.65     | -0.034 | 0       | 0.96 |
| NGLY1_2    | 56.98     | -0.073 | 0.28    | 0.95 |

Supplement: Supplementary file 4615 [file 1]

IPI00005477.3|TWISTNB

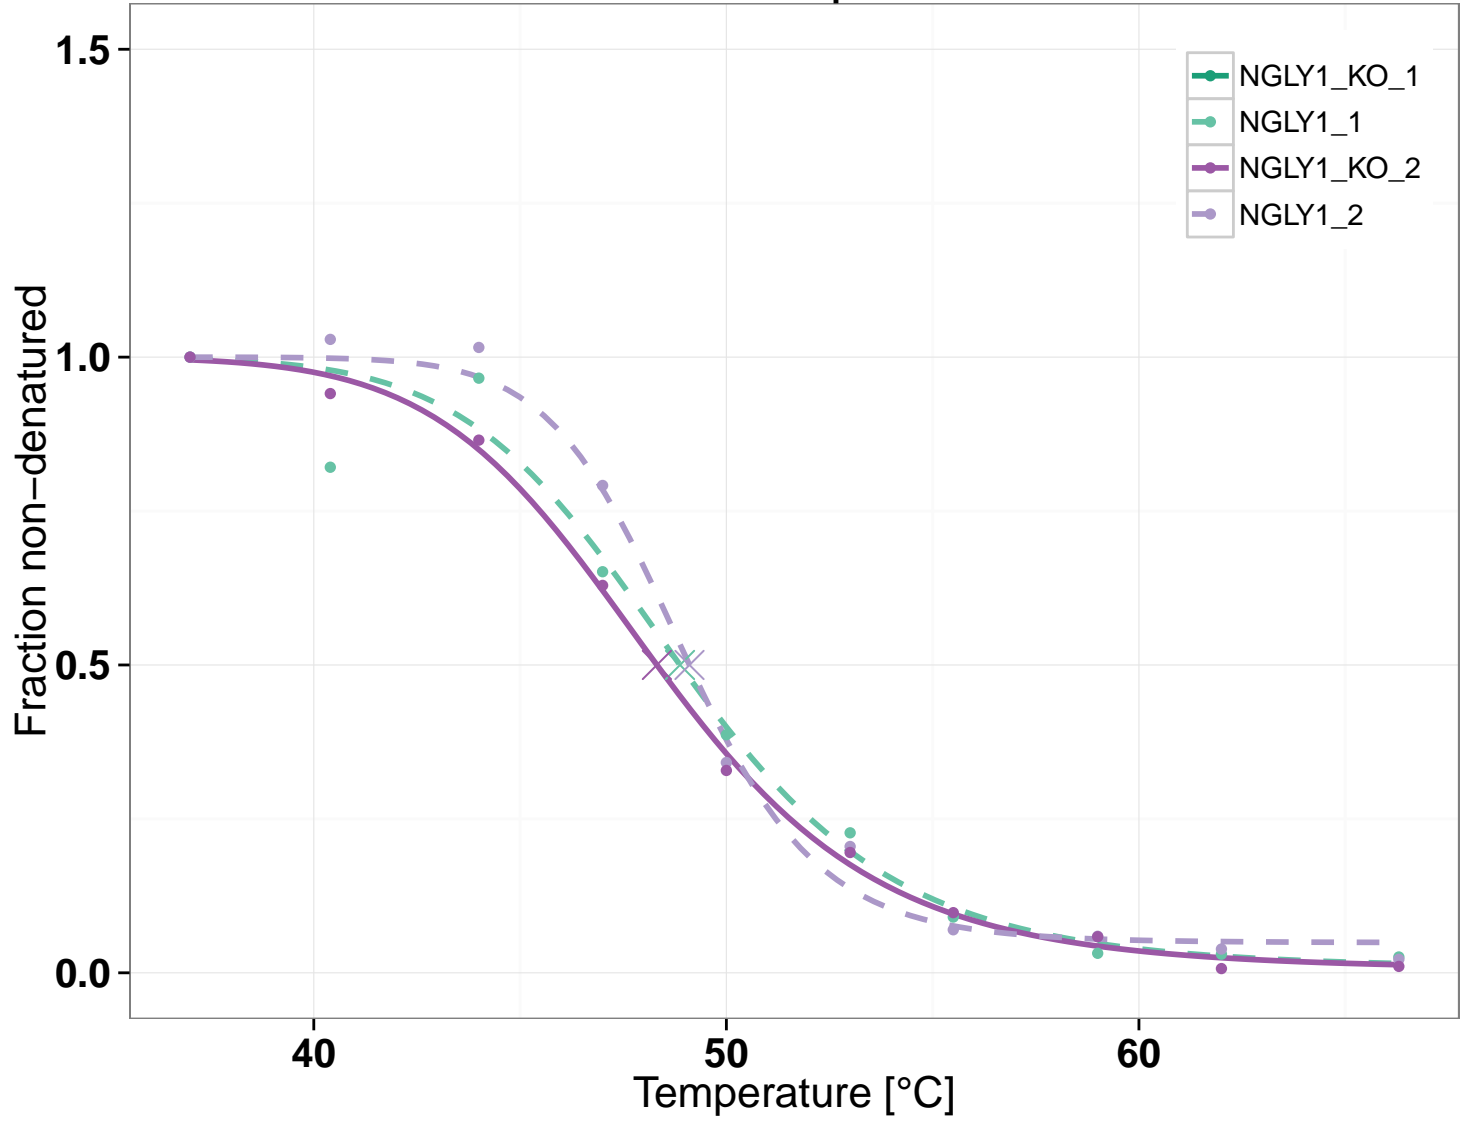

|            | meltPoint | slope  | plateau | R2   |
|------------|-----------|--------|---------|------|
| NGLY1_KO_1 | -         | -      | -       | -    |
| NGLY1_1    | 48.88     | -0.094 | 0.01    | 0.98 |
| NGLY1_KO_2 | 48.32     | -0.092 | 0.01    | 1    |
| NGLY1_2    | 49.11     | -0.15  | 0.05    | 0.99 |

Supplement: Supplementary file 4616 [file 1]

IPI00022258.1|AMMECR1

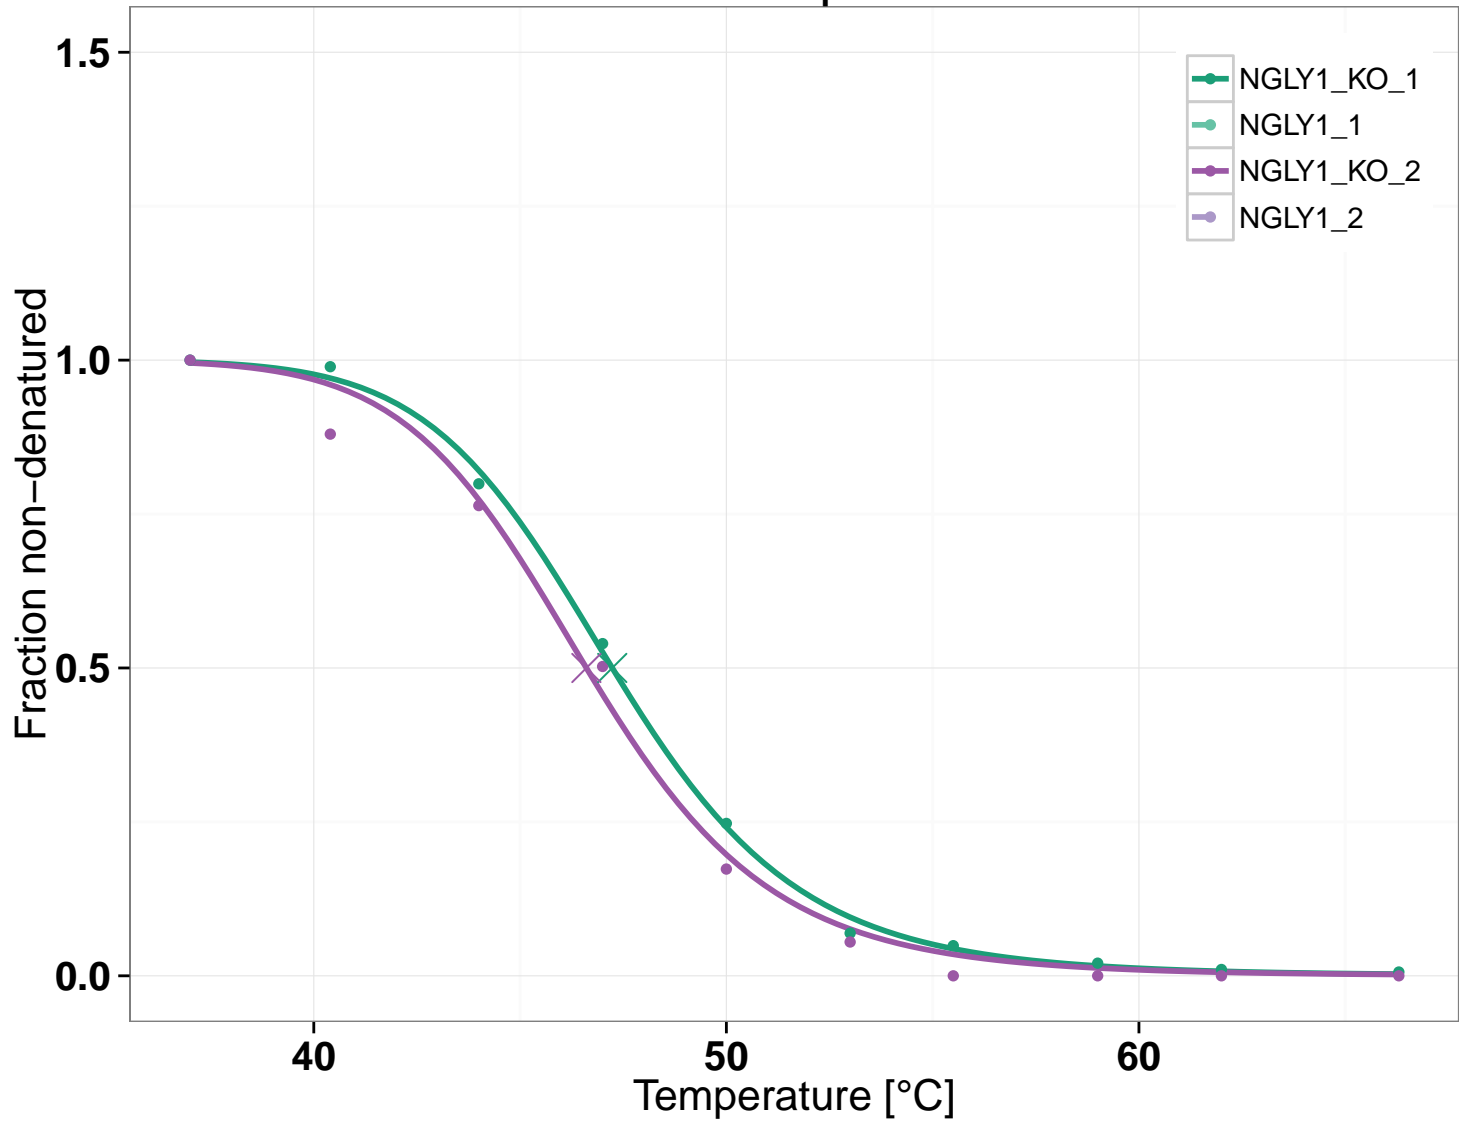

|            | meltPoint | slope | plateau | R2   |
|------------|-----------|-------|---------|------|
| NGLY1_KO_1 | 47.23     | -0.11 | 0       | 1    |
| NGLY1_1    | -         | -     | -       | -    |
| NGLY1_KO_2 | 46.61     | -0.11 | 0       | 0.99 |
| NGLY1_2    | -         | -     | -       | -    |

Supplement: Supplementary file 4617 [file 1]

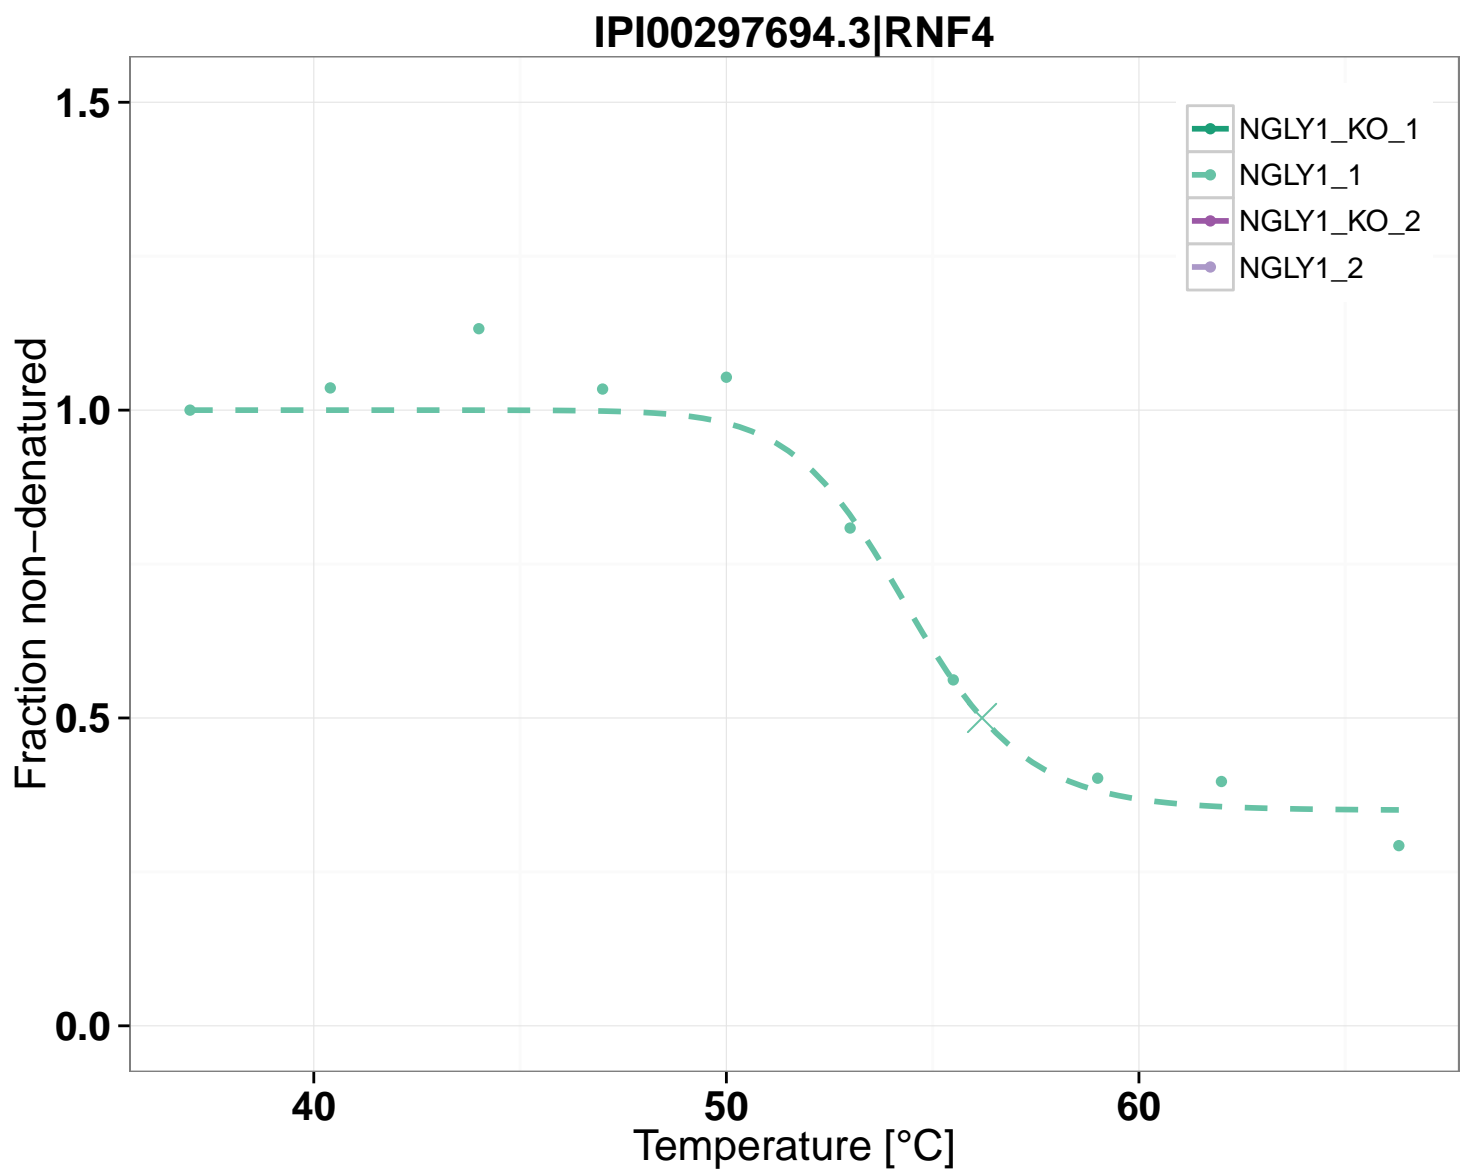

|            | meltPoint | slope | plateau | R2   |
|------------|-----------|-------|---------|------|
| NGLY1_KO_1 | —         | —     | —       | —    |
| NGLY1_1    | 56.2      | -0.11 | 0.35    | 0.97 |
| NGLY1_KO_2 | —         | —     | —       | —    |
| NGLY1_2    | —         | —     | —       | —    |

Supplement: Supplementary file 4618 [file 1]

# IPI00014952.1|GDAP2

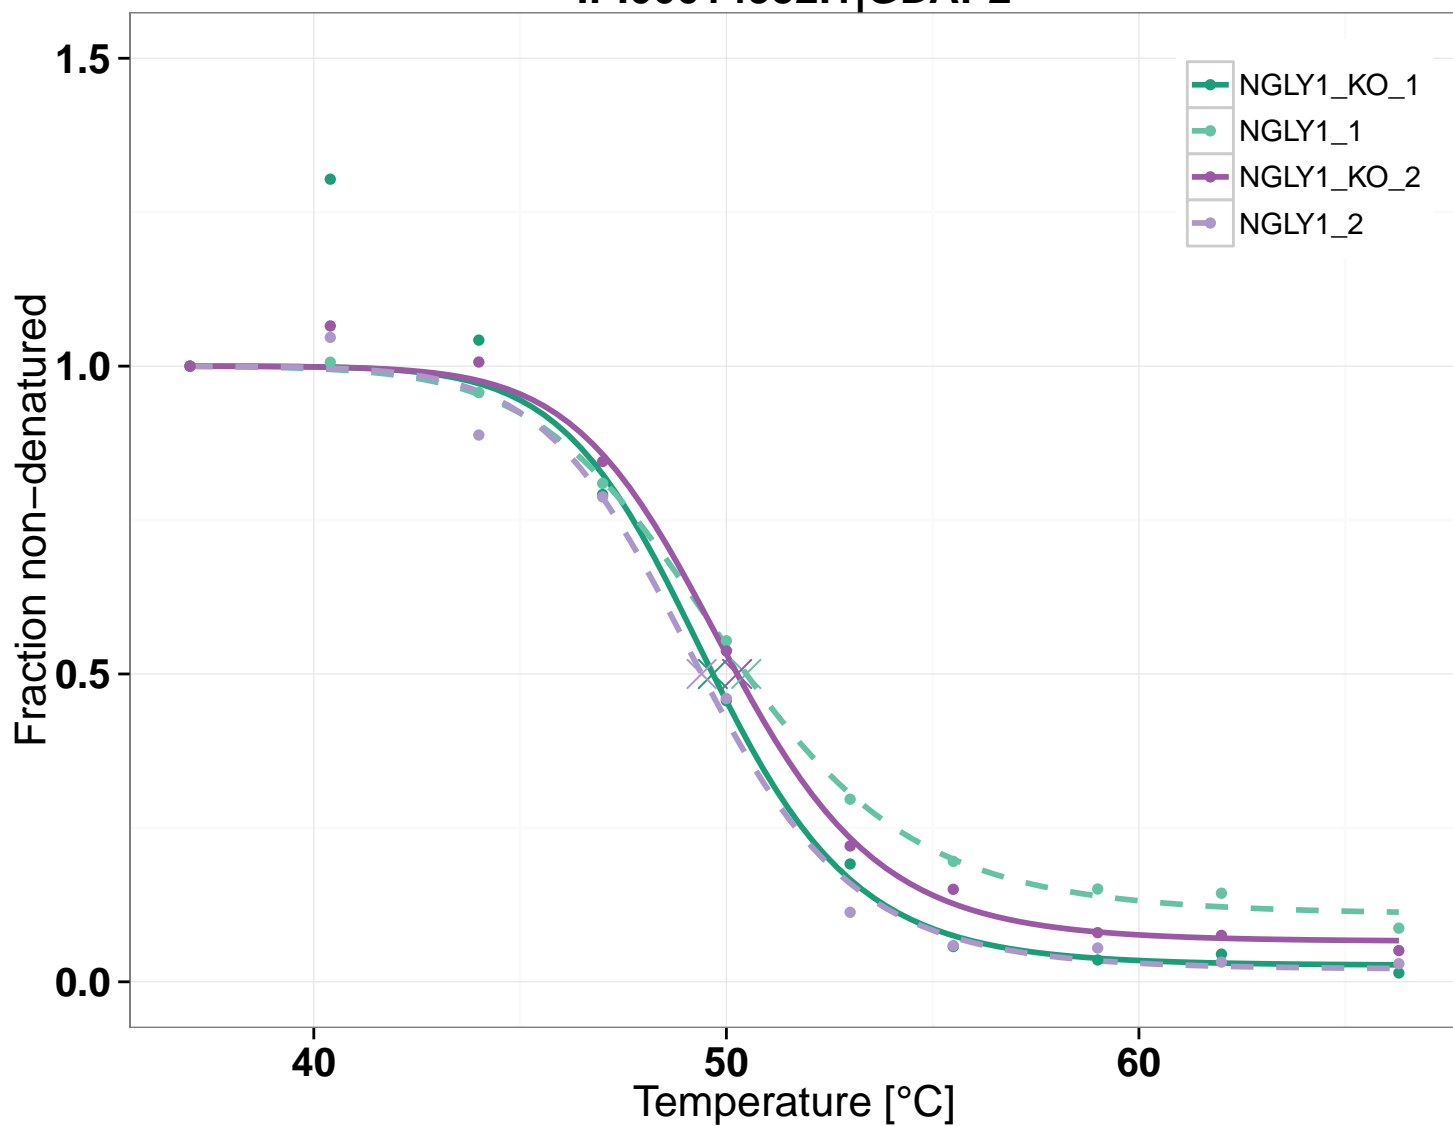

|            | meltPoint | slope  | plateau | R2   |
|------------|-----------|--------|---------|------|
| NGLY1_KO_1 | 49.67     | -0.14  | 0.03    | 0.95 |
| NGLY1_1    | 50.48     | -0.098 | 0.11    | 1    |
| NGLY1_KO_2 | 50.26     | -0.13  | 0.07    | 1    |
| NGLY1_2    | 49.4      | -0.13  | 0.02    | 0.99 |

Supplement: Supplementary file 4619 [file 1]
