# Supplementary material (part 47 of 85)
Source: publisher figshare collection journal article supplement (https://gsajournals.figshare.com/articles/dataset/_/12014913)

# IPI00395627.3|CACYPBP

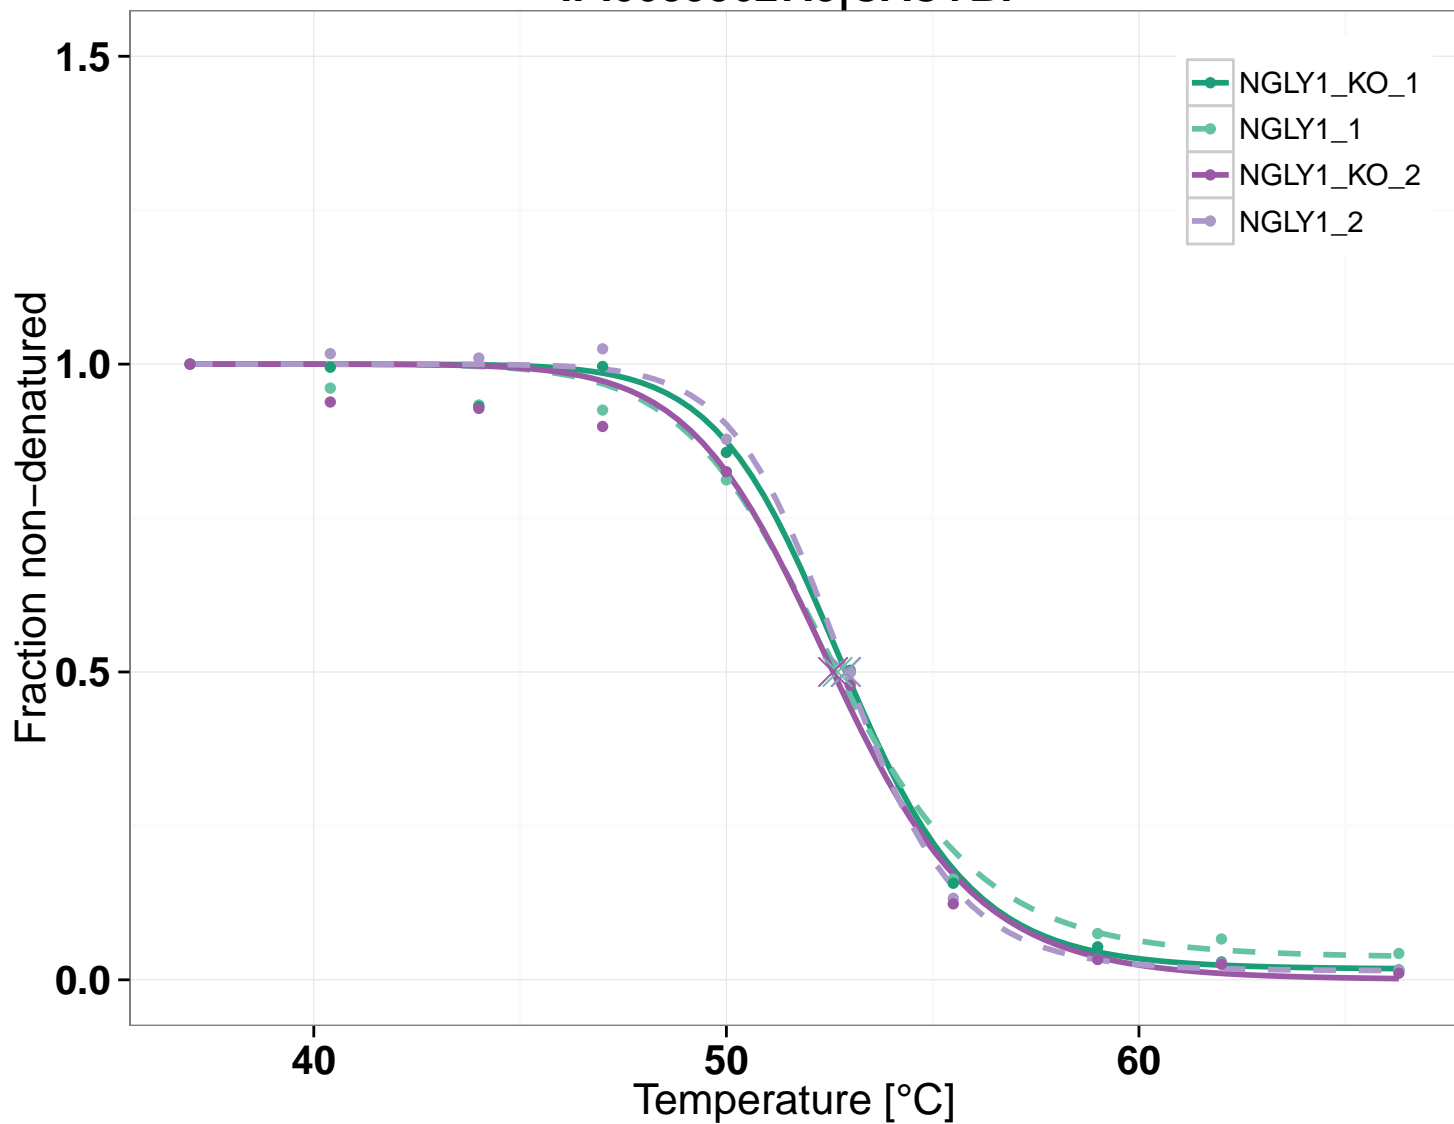

|            | meltPoint | slope | plateau | R2   |
|------------|-----------|-------|---------|------|
| NGLY1_KO_1 | 52.89     | -0.16 | 0.02    | 1    |
| NGLY1_1    | 52.7      | -0.13 | 0.04    | 0.99 |
| NGLY1_KO_2 | 52.59     | -0.14 | 0       | 0.99 |
| NGLY1_2    | 52.91     | -0.18 | 0.01    | 1    |

Supplement: Supplementary file 4620 [file 1]

IPI00401758.1|ANKS3

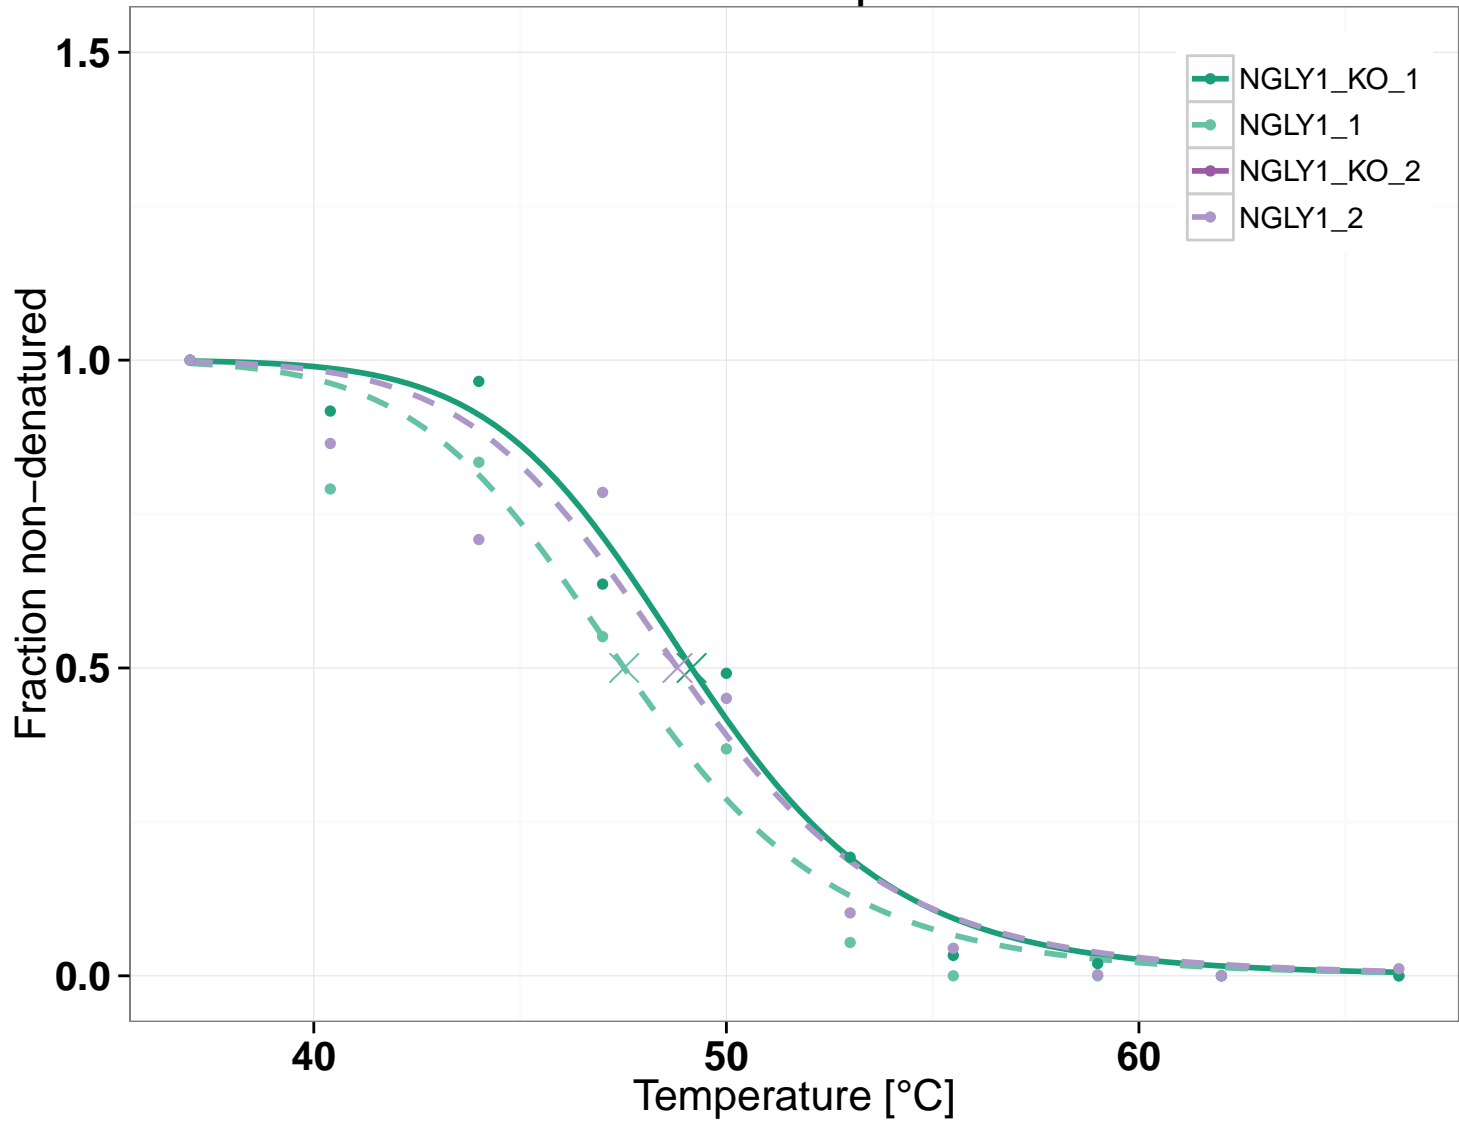

|            | meltPoint | slope  | plateau | R2   |
|------------|-----------|--------|---------|------|
| NGLY1_KO_1 | 49.16     | -0.1   | 0       | 0.99 |
| NGLY1_1    | 47.52     | -0.098 | 0       | 0.97 |
| NGLY1_KO_2 | -         | -      | -       | -    |
| NGLY1_2    | 48.82     | -0.097 | 0       | 0.95 |

Supplement: Supplementary file 4621 [file 1]

IPI00007061.1|GOLT1B

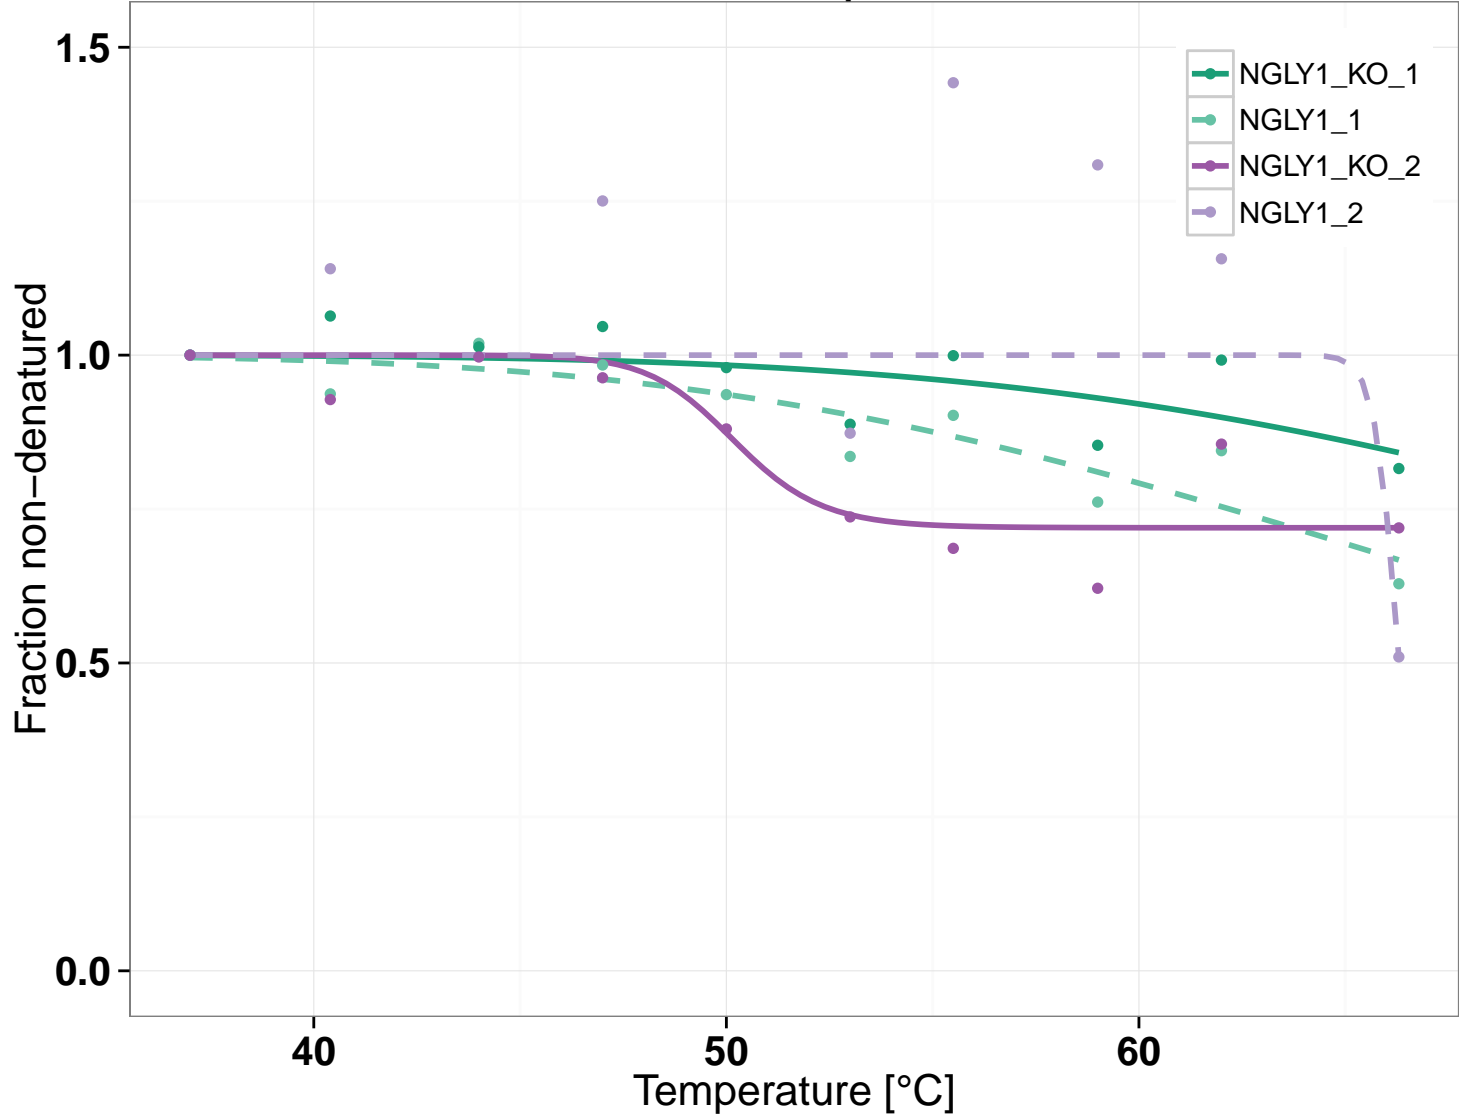

|            | meltPoint | slope  | plateau | R2    |
|------------|-----------|--------|---------|-------|
| NGLY1_KO_1 | -         | -      | 0       | 0.5   |
| NGLY1_1    | -         | -      | 0       | 0.83  |
| NGLY1_KO_2 | -         | -0.066 | 0.72    | 0.79  |
| NGLY1_2    | -         | -      | 0       | -0.14 |

Supplement: Supplementary file 4622 [file 1]

IPI00794402.1|ARHGDIA

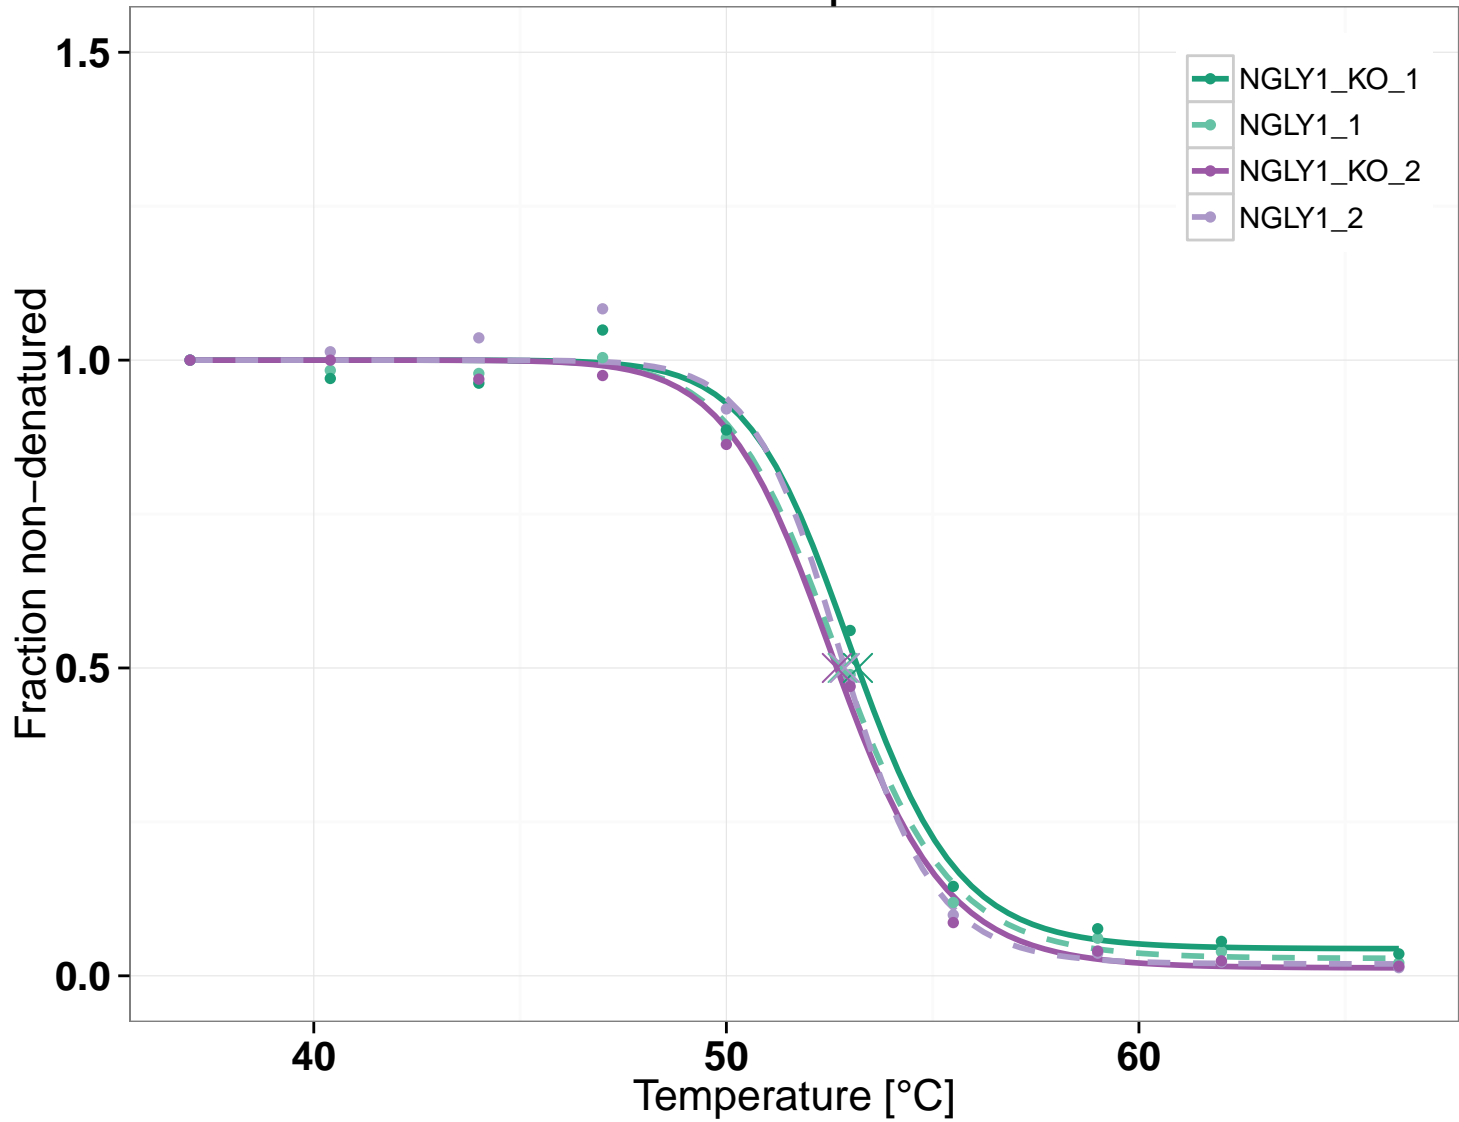

|            | meltPoint | slope | plateau | R2   |
|------------|-----------|-------|---------|------|
| NGLY1_KO_1 | 53.19     | -0.19 | 0.04    | 0.99 |
| NGLY1_1    | 52.82     | -0.18 | 0.03    | 1    |
| NGLY1_KO_2 | 52.68     | -0.18 | 0.01    | 1    |
| NGLY1_2    | 52.87     | -0.22 | 0.02    | 1    |

Supplement: Supplementary file 4623 [file 1]

IPI00337340.3|ZNF223

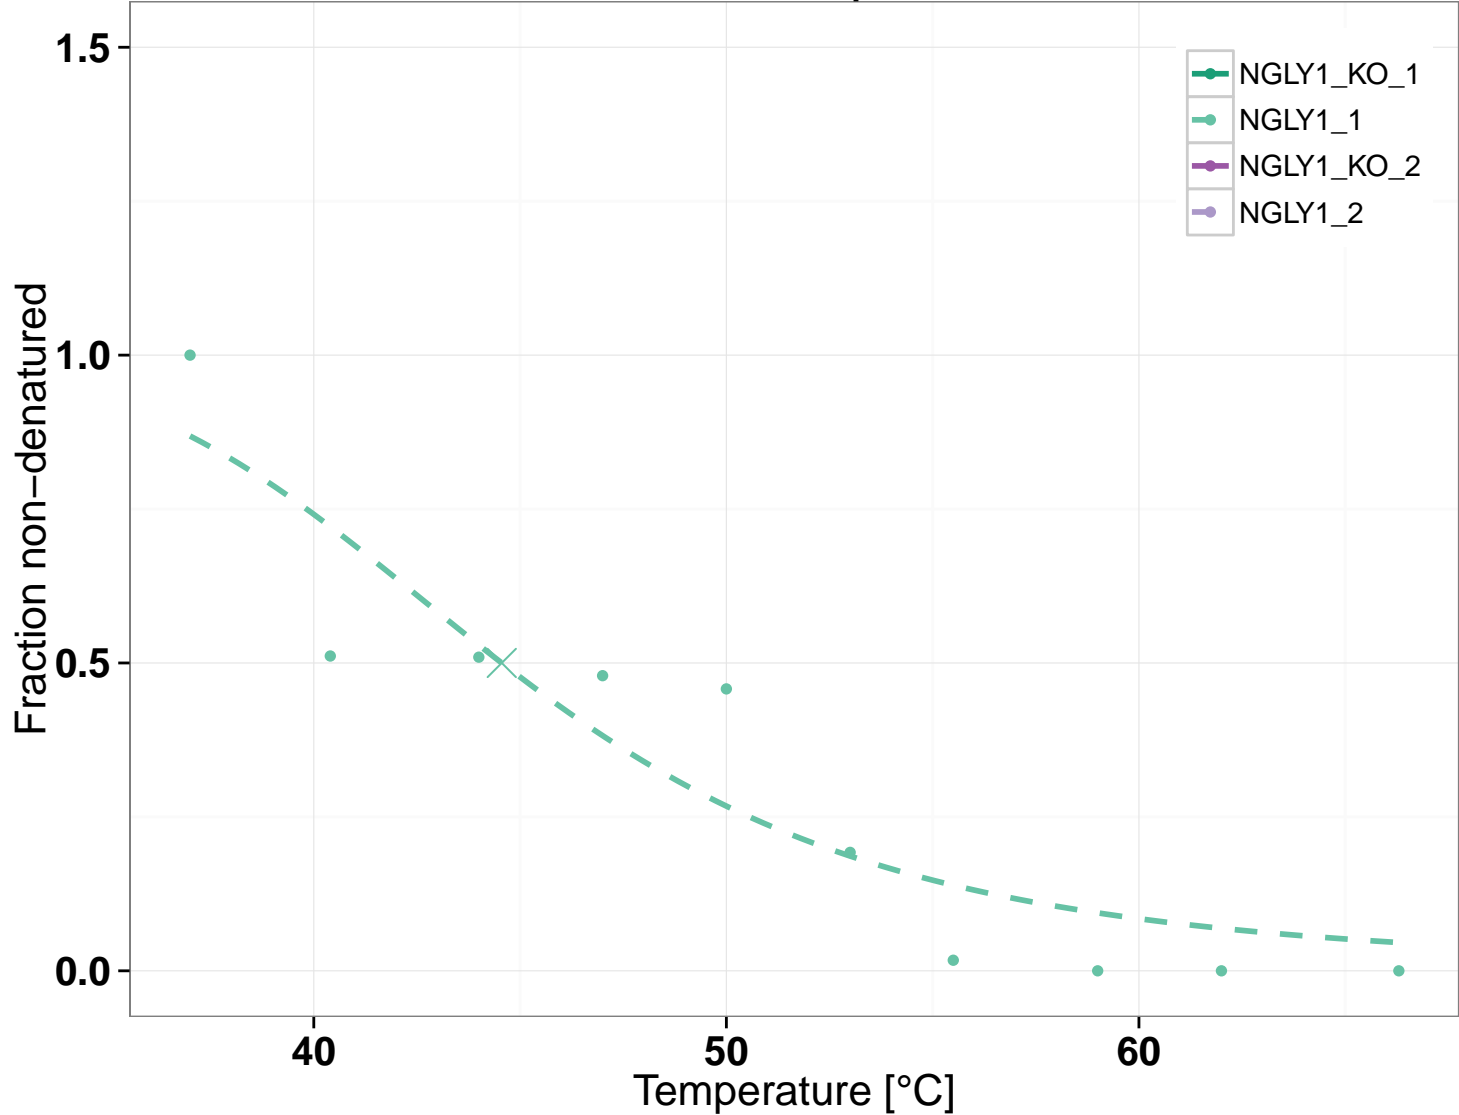

|            | meltPoint | slope  | plateau | R2   |
|------------|-----------|--------|---------|------|
| NGLY1_KO_1 | -         | -      | -       | -    |
| NGLY1_1    | 44.56     | -0.054 | 0       | 0.86 |
| NGLY1_KO_2 | -         | -      | -       | -    |
| NGLY1_2    | -         | -      | -       | -    |

Supplement: Supplementary file 4624 [file 1]

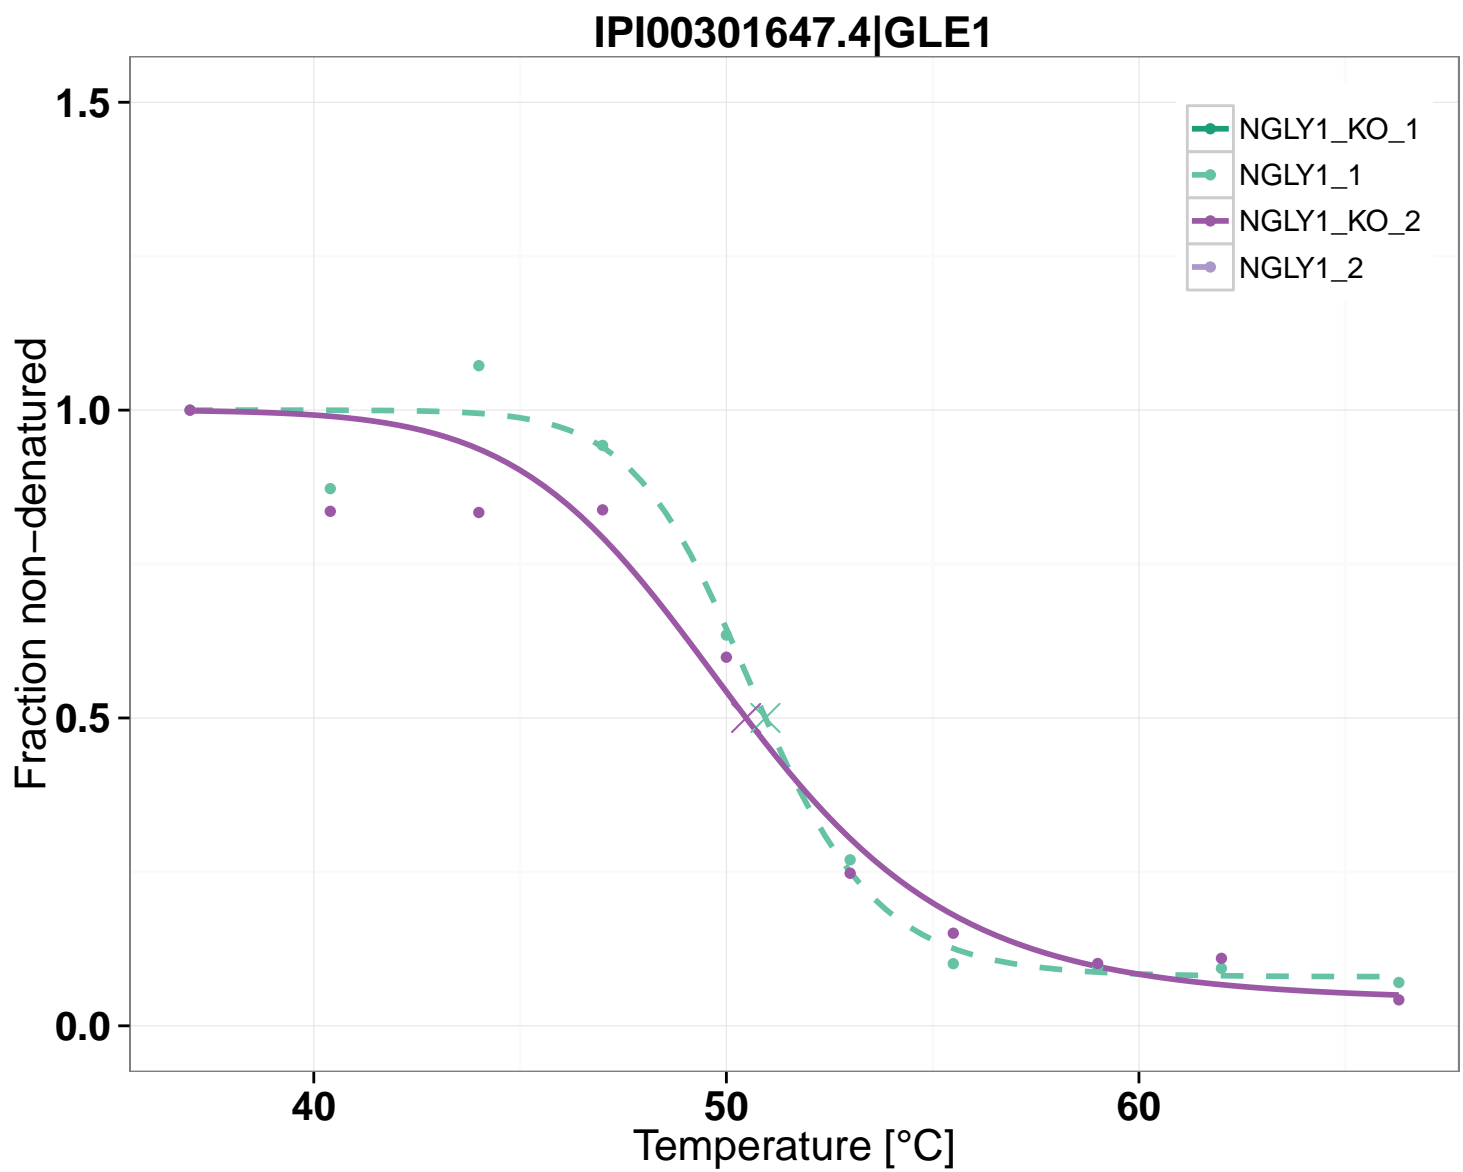

|            | meltPoint | slope | plateau | R2   |
|------------|-----------|-------|---------|------|
| NGLY1_KO_1 | —         | —     | —       | —    |
| NGLY1_1    | 50.95     | -0.15 | 0.08    | 0.99 |
| NGLY1_KO_2 | 50.48     | -0.09 | 0.04    | 0.96 |
| NGLY1_2    | —         | —     | —       | —    |

Supplement: Supplementary file 4625 [file 1]

IPI00295502.6|WIZ

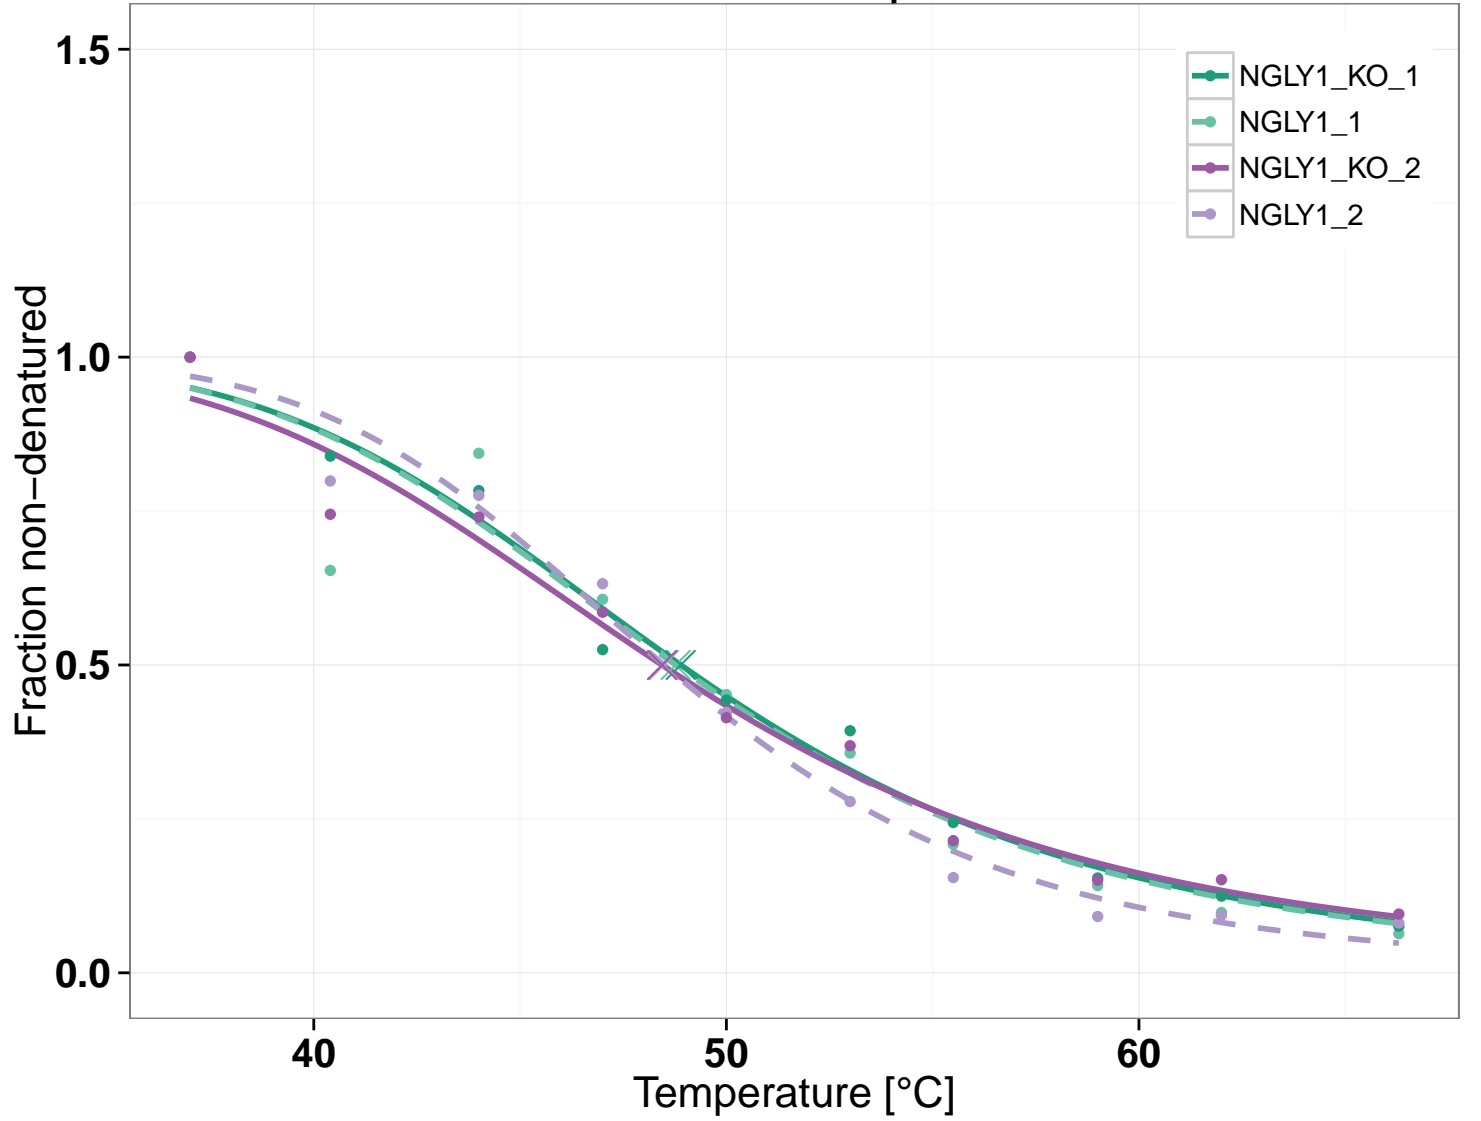

|            | meltPoint | slope  | plateau | R2   |
|------------|-----------|--------|---------|------|
| NGLY1_KO_1 | 48.89     | -0.049 | 0       | 0.98 |
| NGLY1_1    | 48.77     | -0.05  | 0       | 0.93 |
| NGLY1_KO_2 | 48.44     | -0.046 | 0       | 0.98 |
| NGLY1_2    | 48.48     | -0.059 | 0       | 0.98 |

Supplement: Supplementary file 4626 [file 1]

# IPI00619902.1|ABCA3

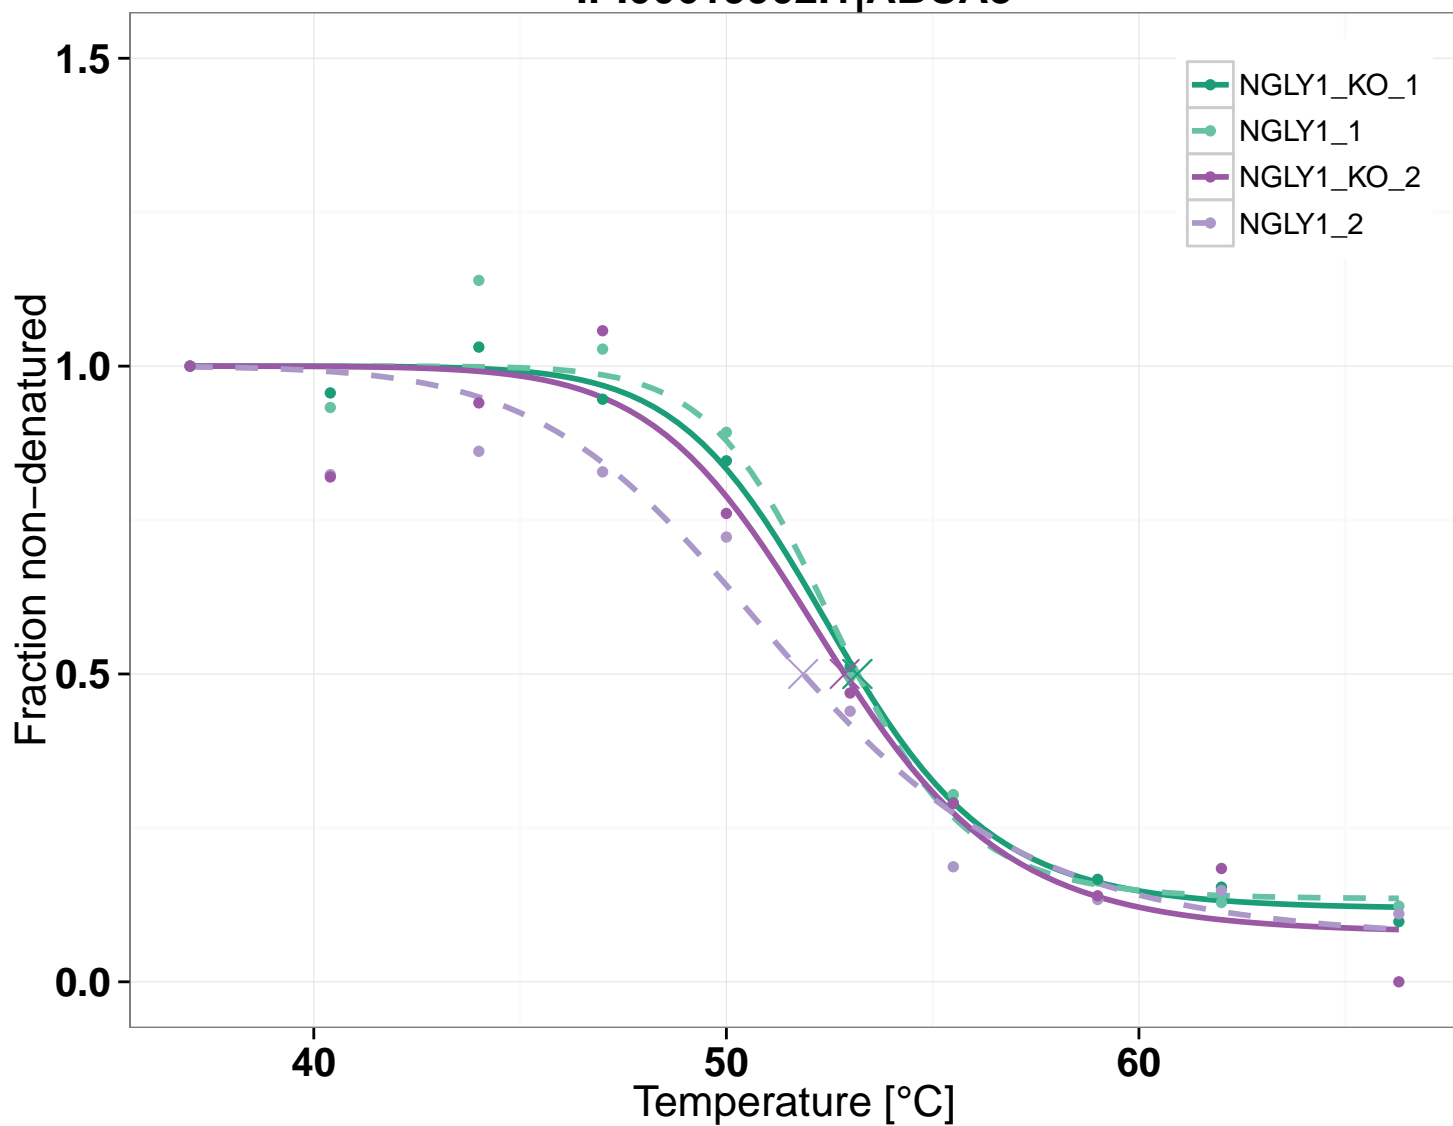

|            | meltPoint | slope  | plateau | R2   |
|------------|-----------|--------|---------|------|
| NGLY1_KO_1 | 53.17     | -0.12  | 0.12    | 1    |
| NGLY1_1    | 53.18     | -0.14  | 0.13    | 0.98 |
| NGLY1_KO_2 | 52.87     | -0.11  | 0.08    | 0.96 |
| NGLY1_2    | 51.86     | -0.078 | 0.07    | 0.95 |

Supplement: Supplementary file 4627 [file 1]

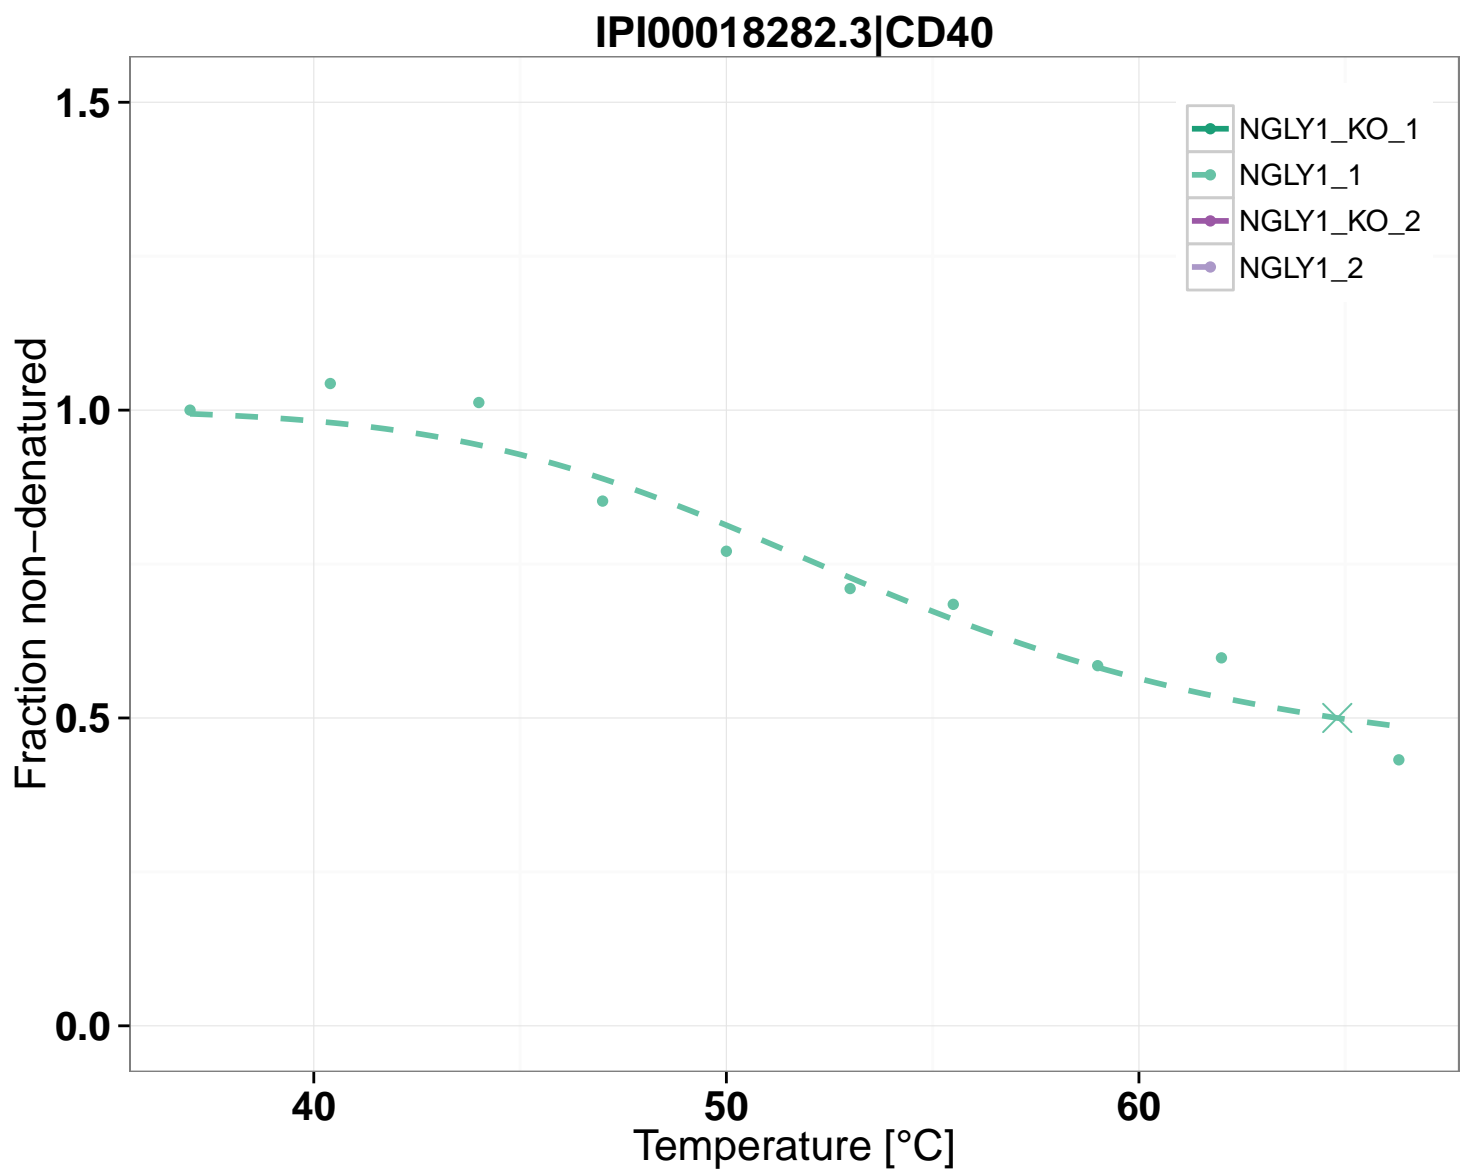

|            | meltPoint | slope  | plateau | R2   |
|------------|-----------|--------|---------|------|
| NGLY1_KO_1 | —         | —      | —       | —    |
| NGLY1_1    | 64.81     | -0.029 | 0.41    | 0.95 |
| NGLY1_KO_2 | —         | —      | —       | —    |
| NGLY1_2    | —         | —      | —       | —    |

Supplement: Supplementary file 4628 [file 1]

IPI00795030.1|LASS6

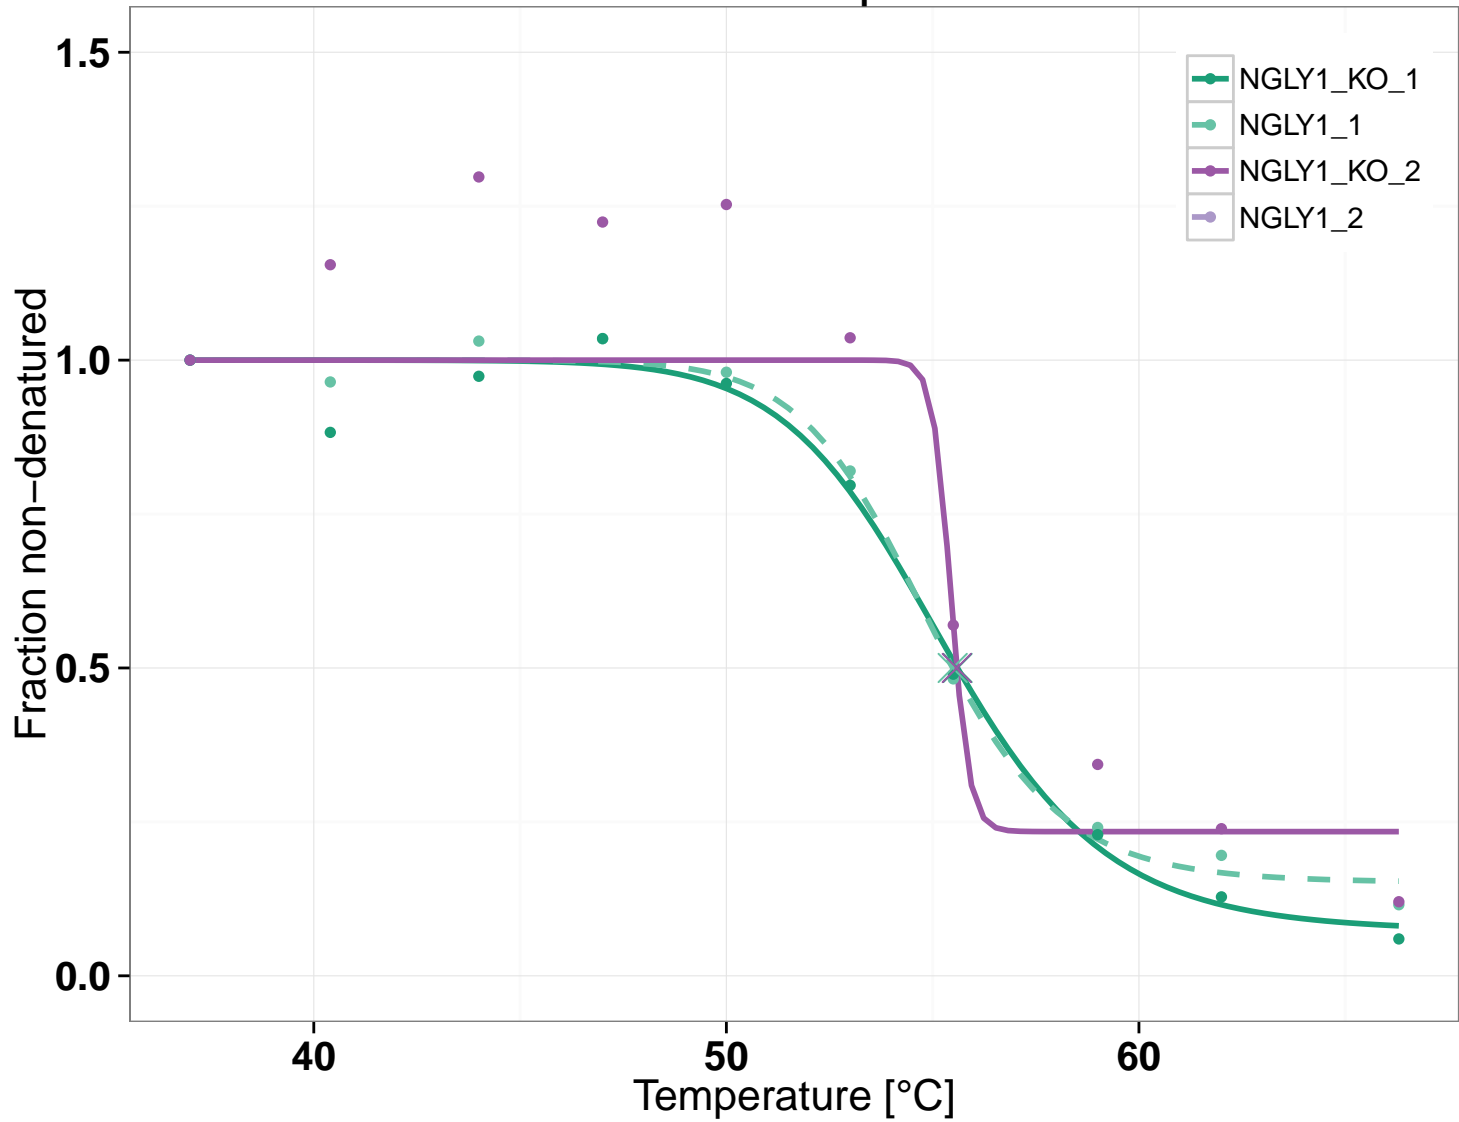

|            | meltPoint | slope | plateau | R2   |
|------------|-----------|-------|---------|------|
| NGLY1_KO_1 | 55.6      | -0.12 | 0.07    | 0.99 |
| NGLY1_1    | 55.49     | -0.13 | 0.15    | 1    |
| NGLY1_KO_2 | 55.59     | -0.86 | 0.23    | 0.87 |
| NGLY1_2    | -         | -     | -       | -    |

Supplement: Supplementary file 4629 [file 1]

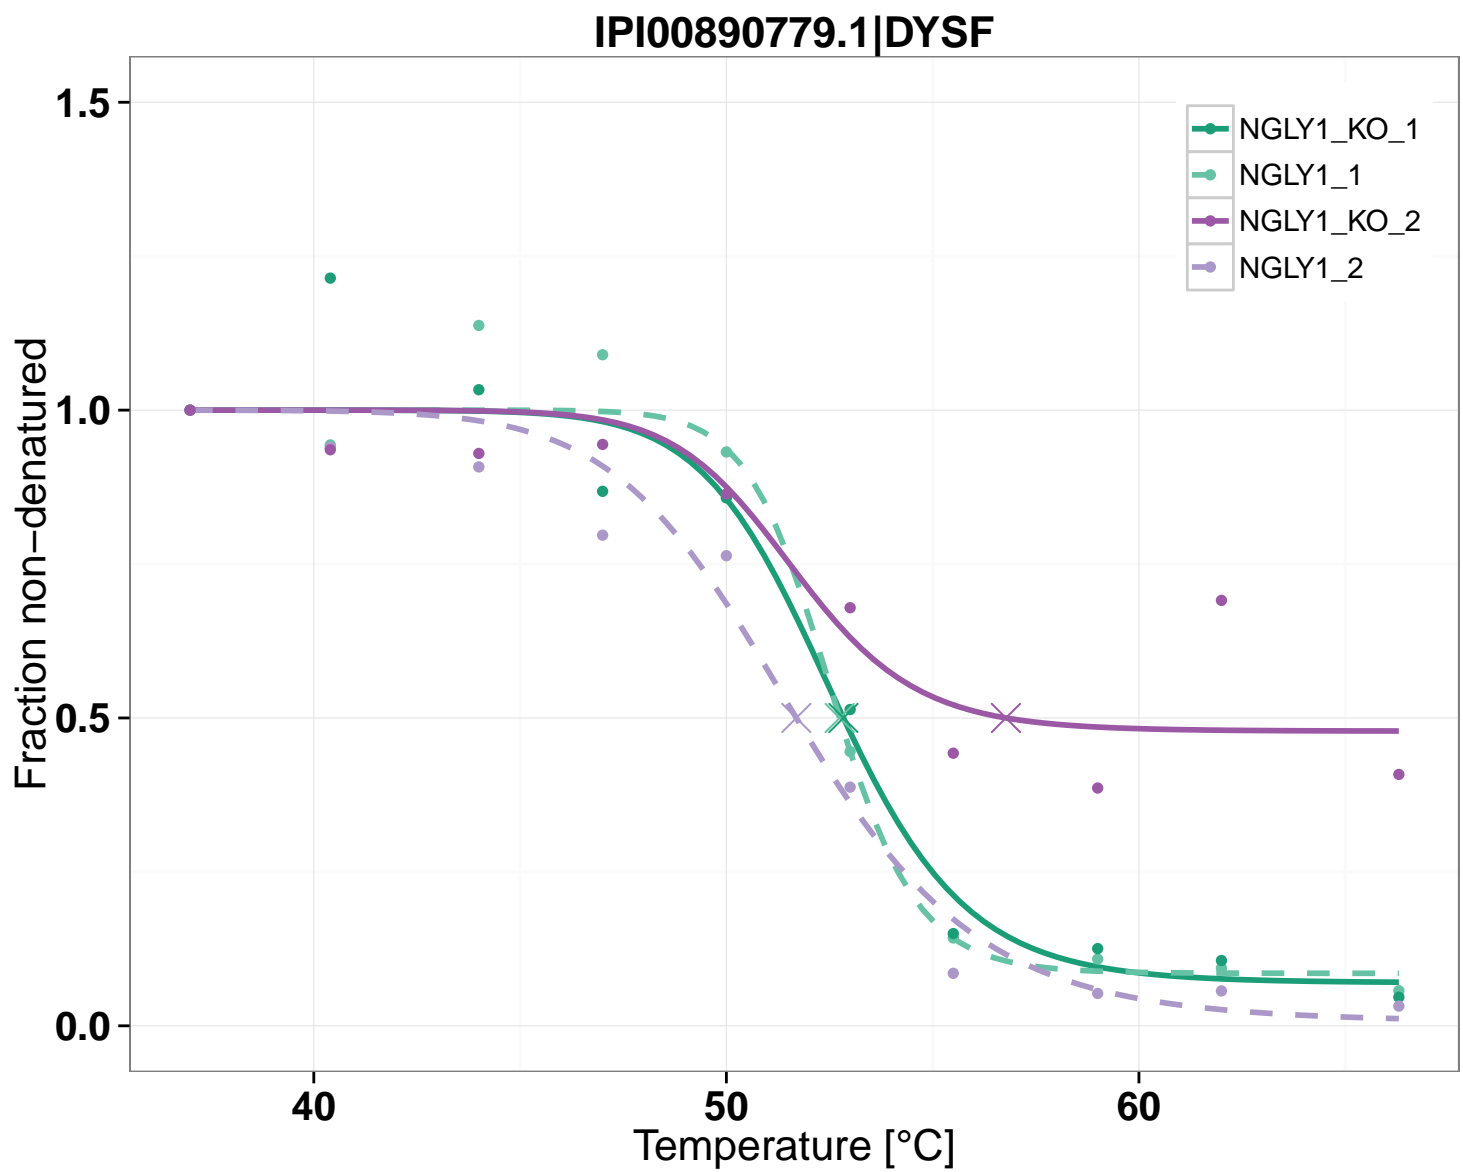

|            | meltPoint | slope  | plateau | R2   |
|------------|-----------|--------|---------|------|
| NGLY1_KO_1 | 52.84     | -0.15  | 0.07    | 0.96 |
| NGLY1_1    | 52.75     | -0.22  | 0.09    | 0.98 |
| NGLY1_KO_2 | 56.78     | -0.088 | 0.48    | 0.85 |
| NGLY1_2    | 51.7      | -0.11  | 0.01    | 0.98 |

Supplement: Supplementary file 4630 [file 1]

IPI00789370.1|SHMT2

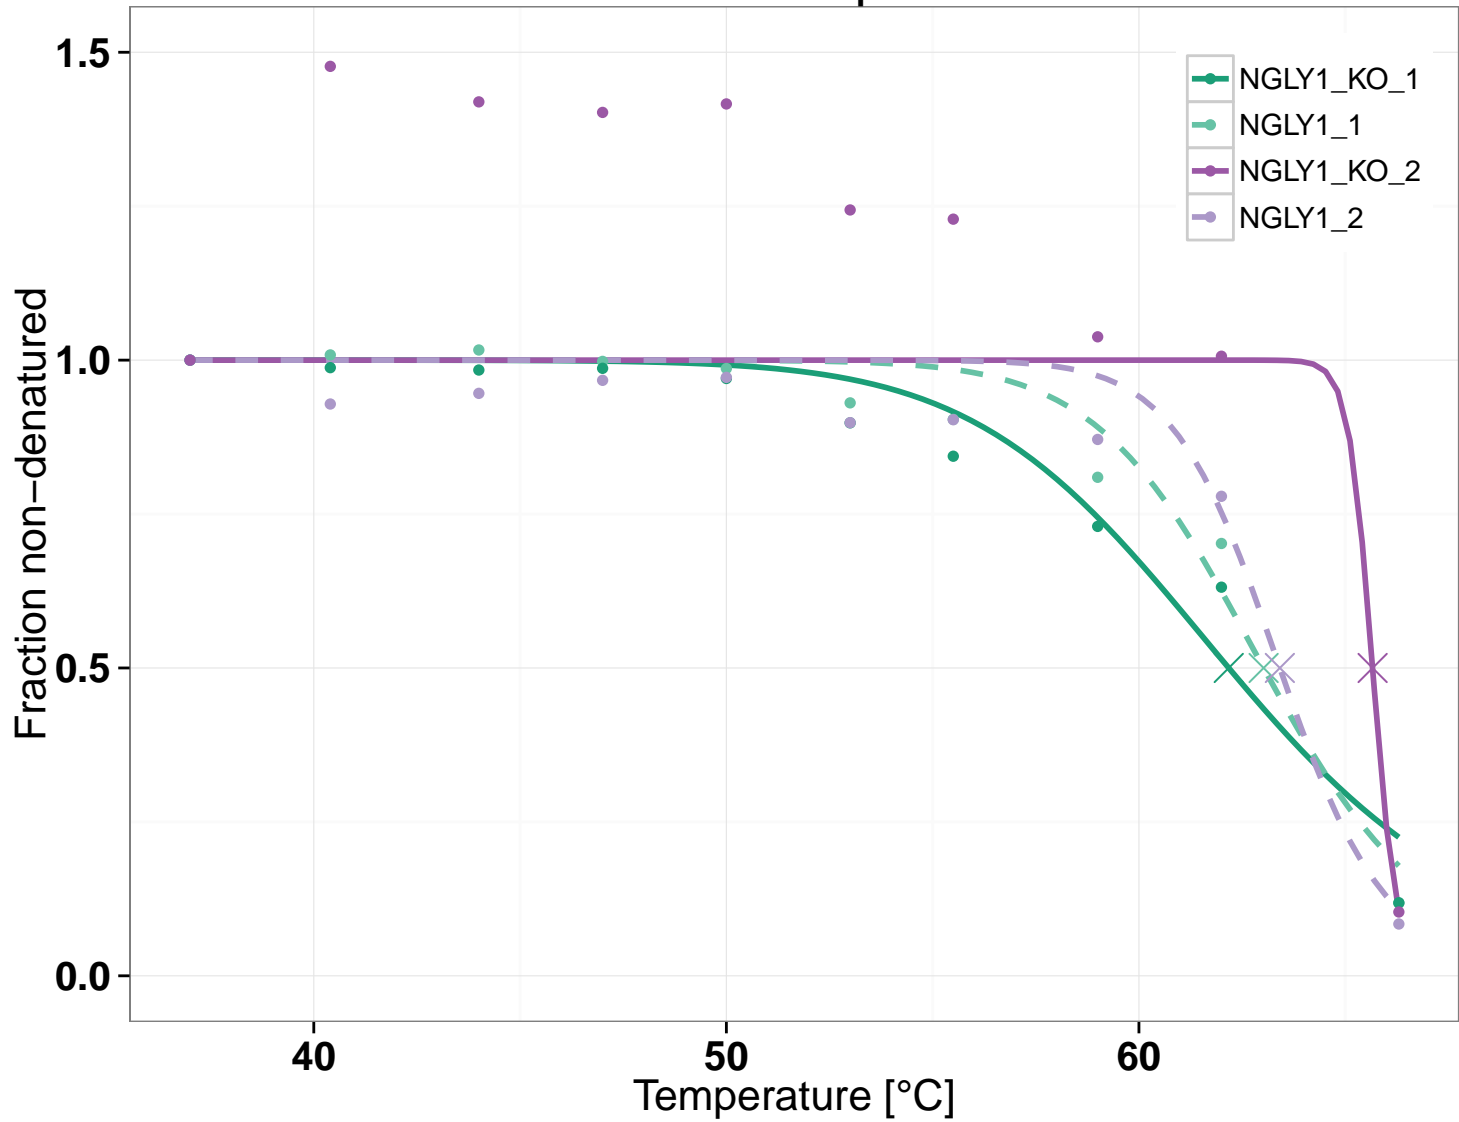

|            | meltPoint | slope  | plateau | R2   |
|------------|-----------|--------|---------|------|
| NGLY1_KO_1 | 62.18     | -0.081 | 0       | 0.95 |
| NGLY1_1    | 63.02     | -0.12  | 0       | 0.96 |
| NGLY1_KO_2 | 65.66     | -0.86  | 0       | 0.42 |
| NGLY1_2    | 63.42     | -0.19  | 0       | 0.94 |

Supplement: Supplementary file 4631 [file 1]

# IPI00902584.1|VASP

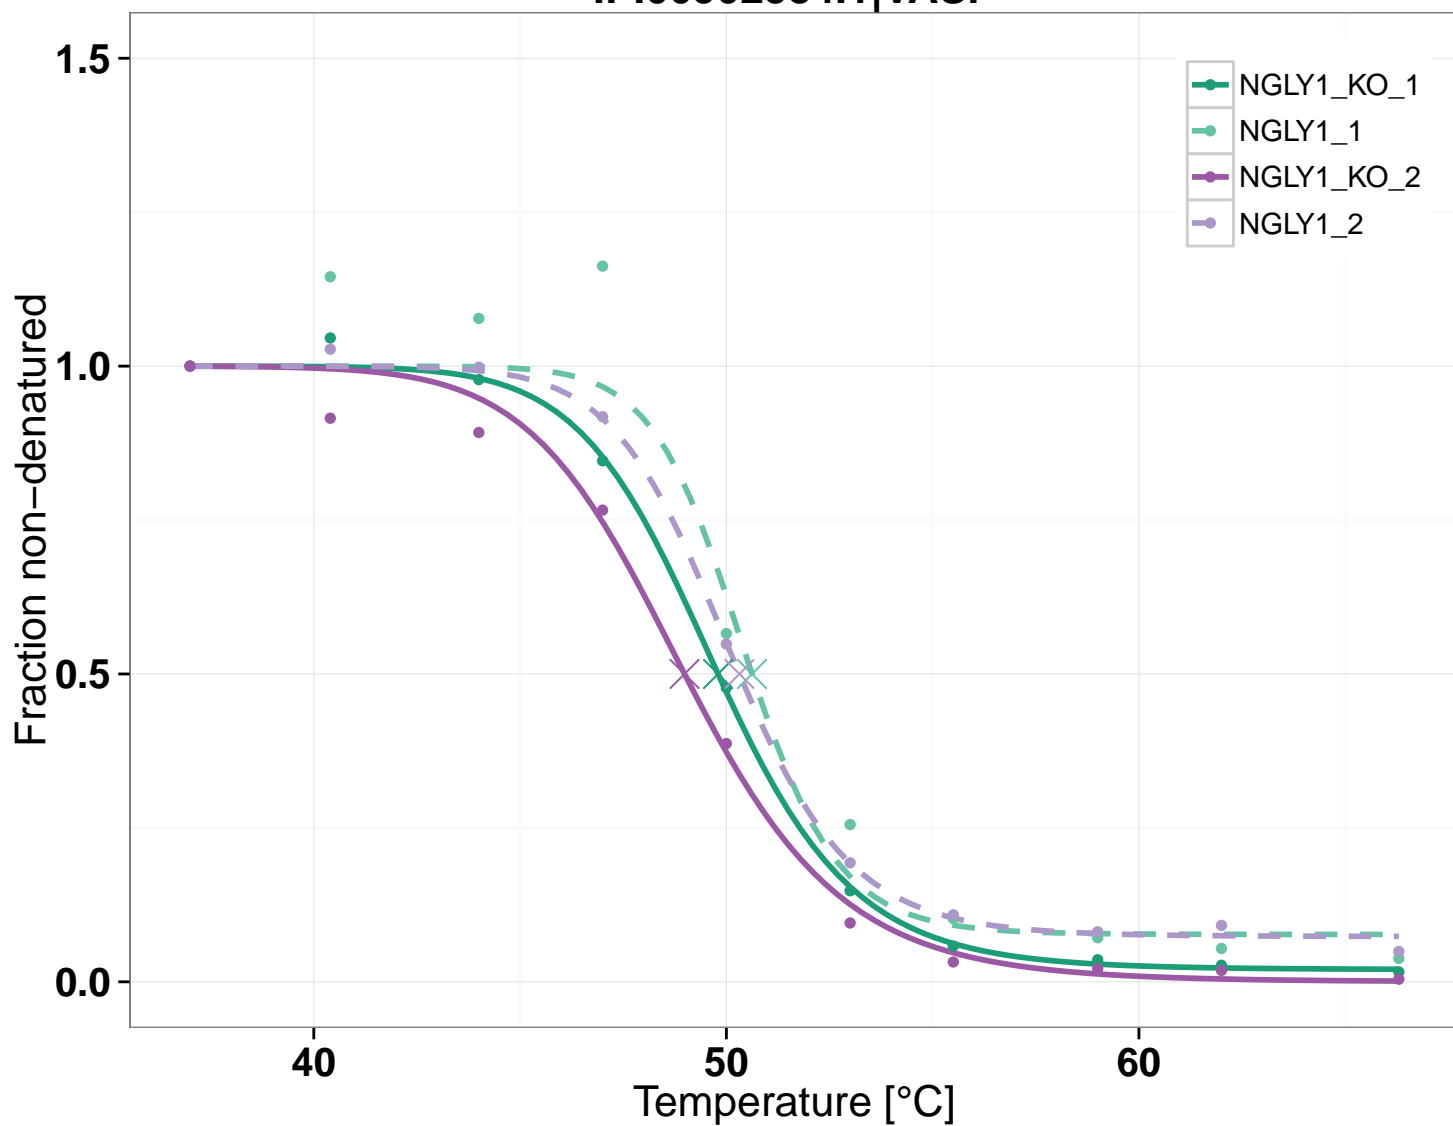

|            | meltPoint | slope | plateau | R2   |
|------------|-----------|-------|---------|------|
| NGLY1_KO_1 | 49.8      | -0.15 | 0.02    | 1    |
| NGLY1_1    | 50.62     | -0.21 | 0.08    | 0.96 |
| NGLY1_KO_2 | 48.99     | -0.13 | 0       | 0.99 |
| NGLY1_2    | 50.32     | -0.16 | 0.07    | 1    |

Supplement: Supplementary file 4632 [file 1]

IPI00514013.1|KIAA1958

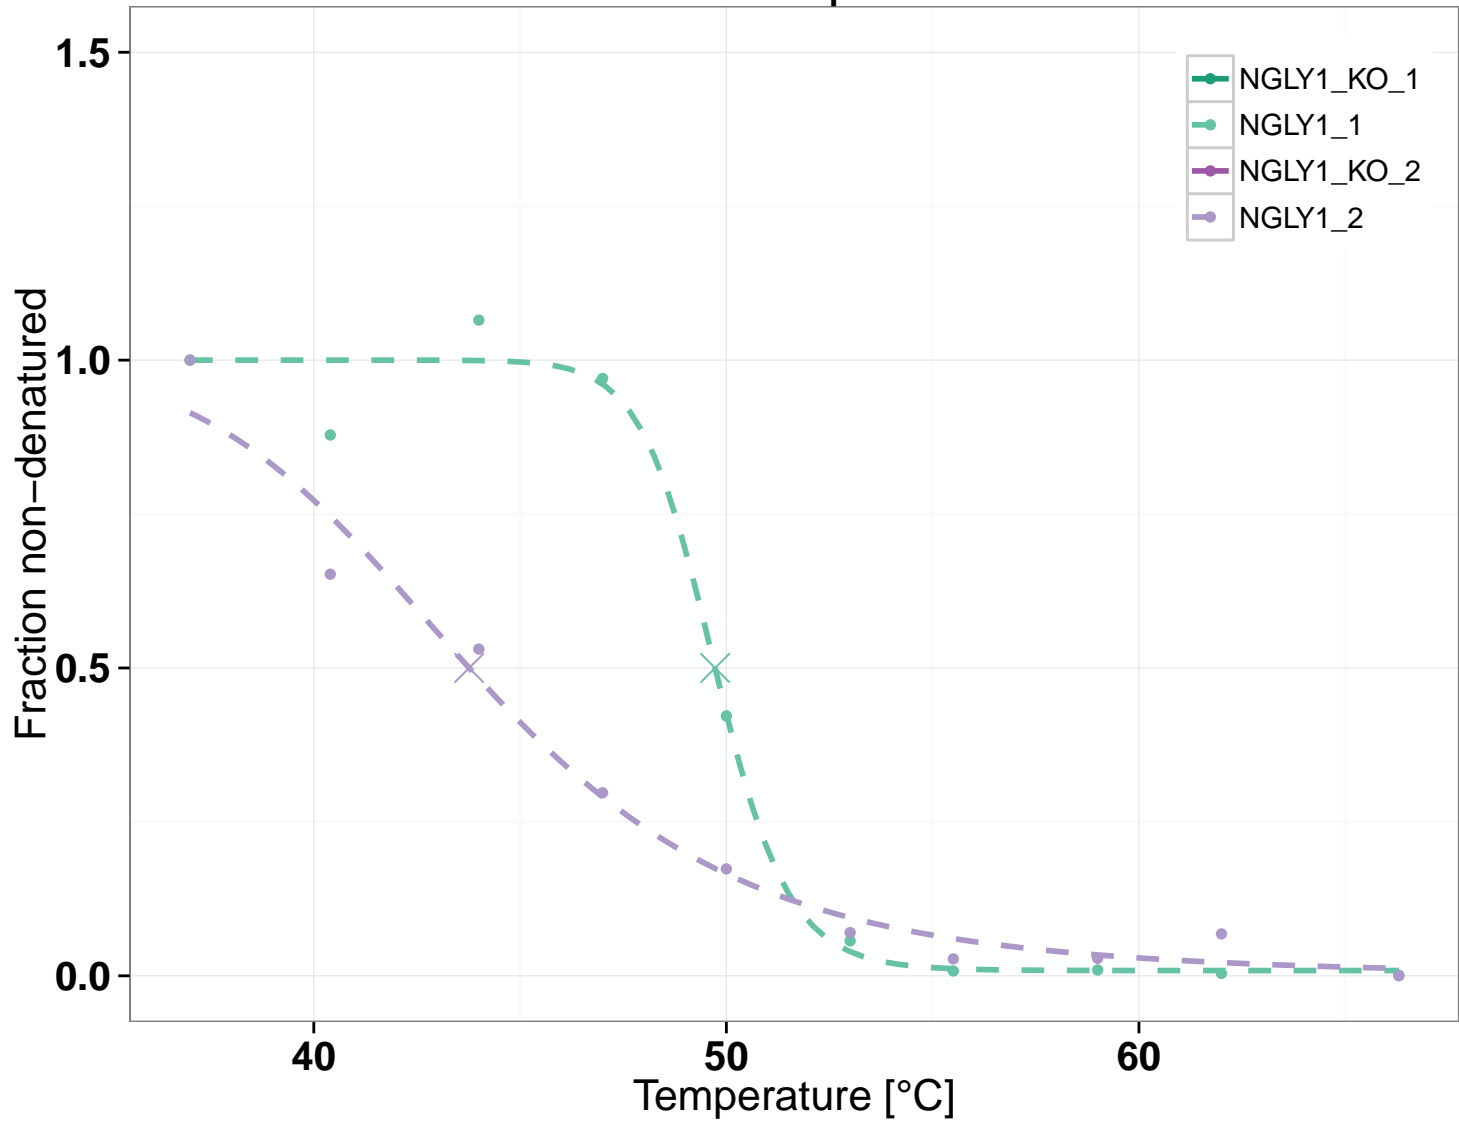

|            | meltPoint | slope  | plateau | R2   |
|------------|-----------|--------|---------|------|
| NGLY1_KO_1 | -         | -      | -       | -    |
| NGLY1_1    | 49.73     | -0.28  | 0.01    | 0.99 |
| NGLY1_KO_2 | -         | -      | -       | -    |
| NGLY1_2    | 43.77     | -0.076 | 0       | 0.98 |

Supplement: Supplementary file 4633 [file 1]

# IPI00290544.2|GDAP1

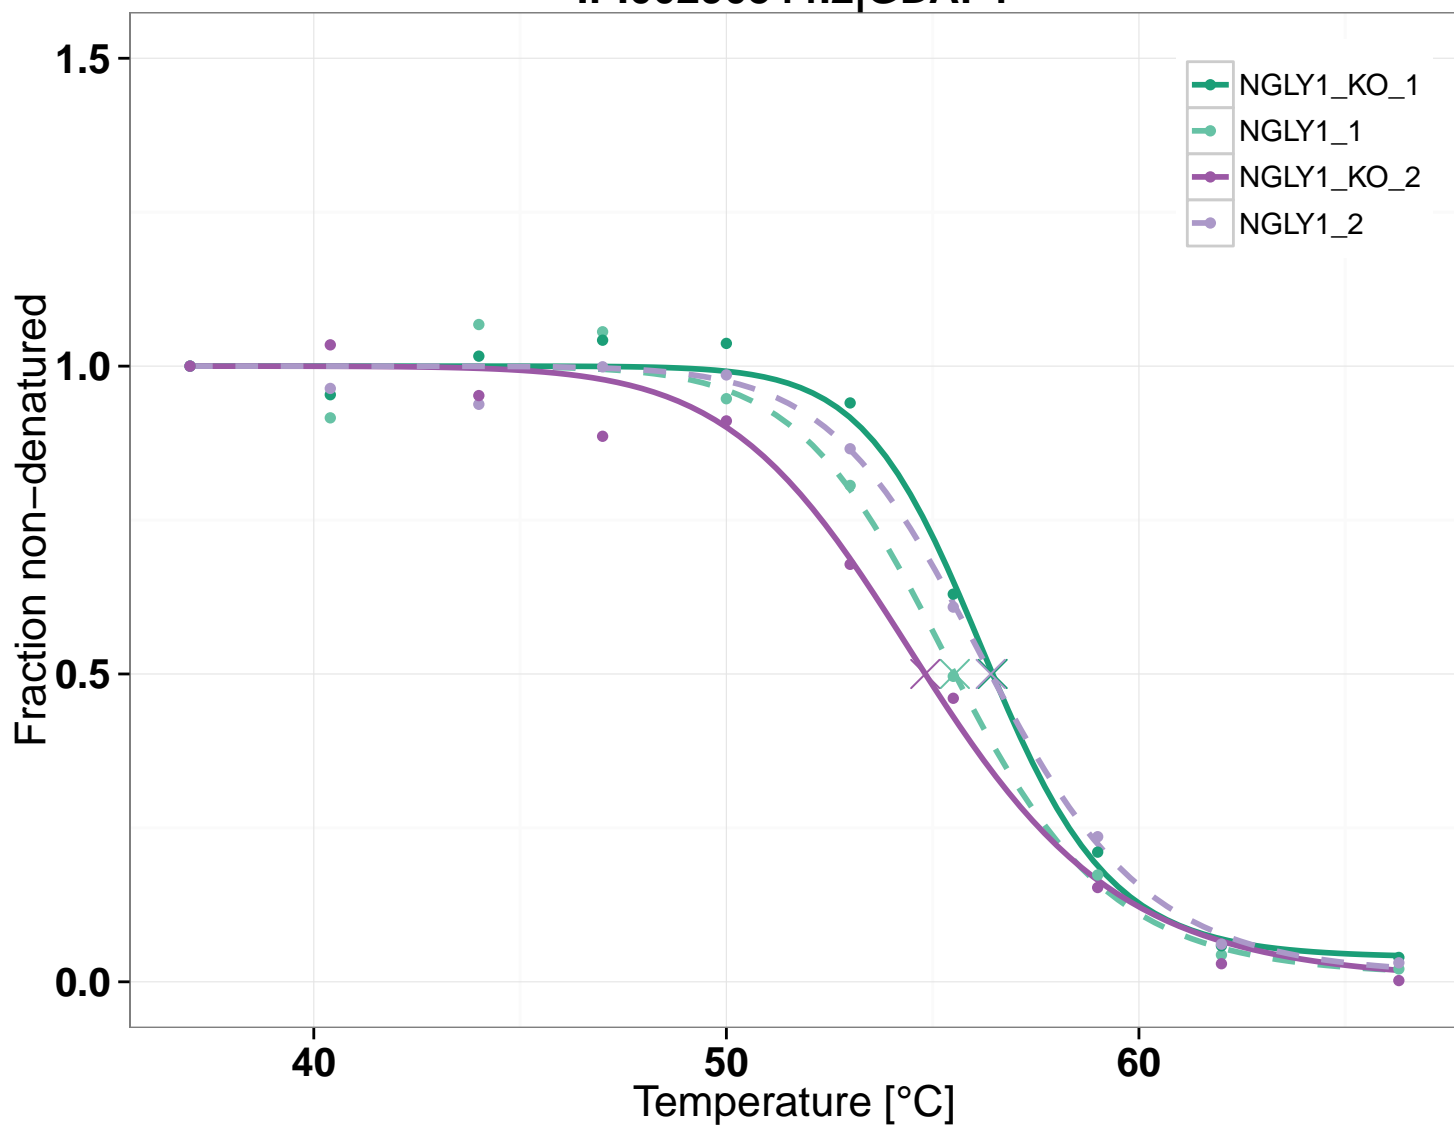

|            | meltPoint | slope | plateau | R2   |
|------------|-----------|-------|---------|------|
| NGLY1_KO_1 | 56.45     | -0.16 | 0.04    | 1    |
| NGLY1_1    | 55.54     | -0.13 | 0.01    | 0.99 |
| NGLY1_KO_2 | 54.82     | -0.11 | 0       | 0.99 |
| NGLY1_2    | 56.41     | -0.13 | 0.01    | 1    |

Supplement: Supplementary file 4634 [file 1]

IPI00783872.2|M11S1

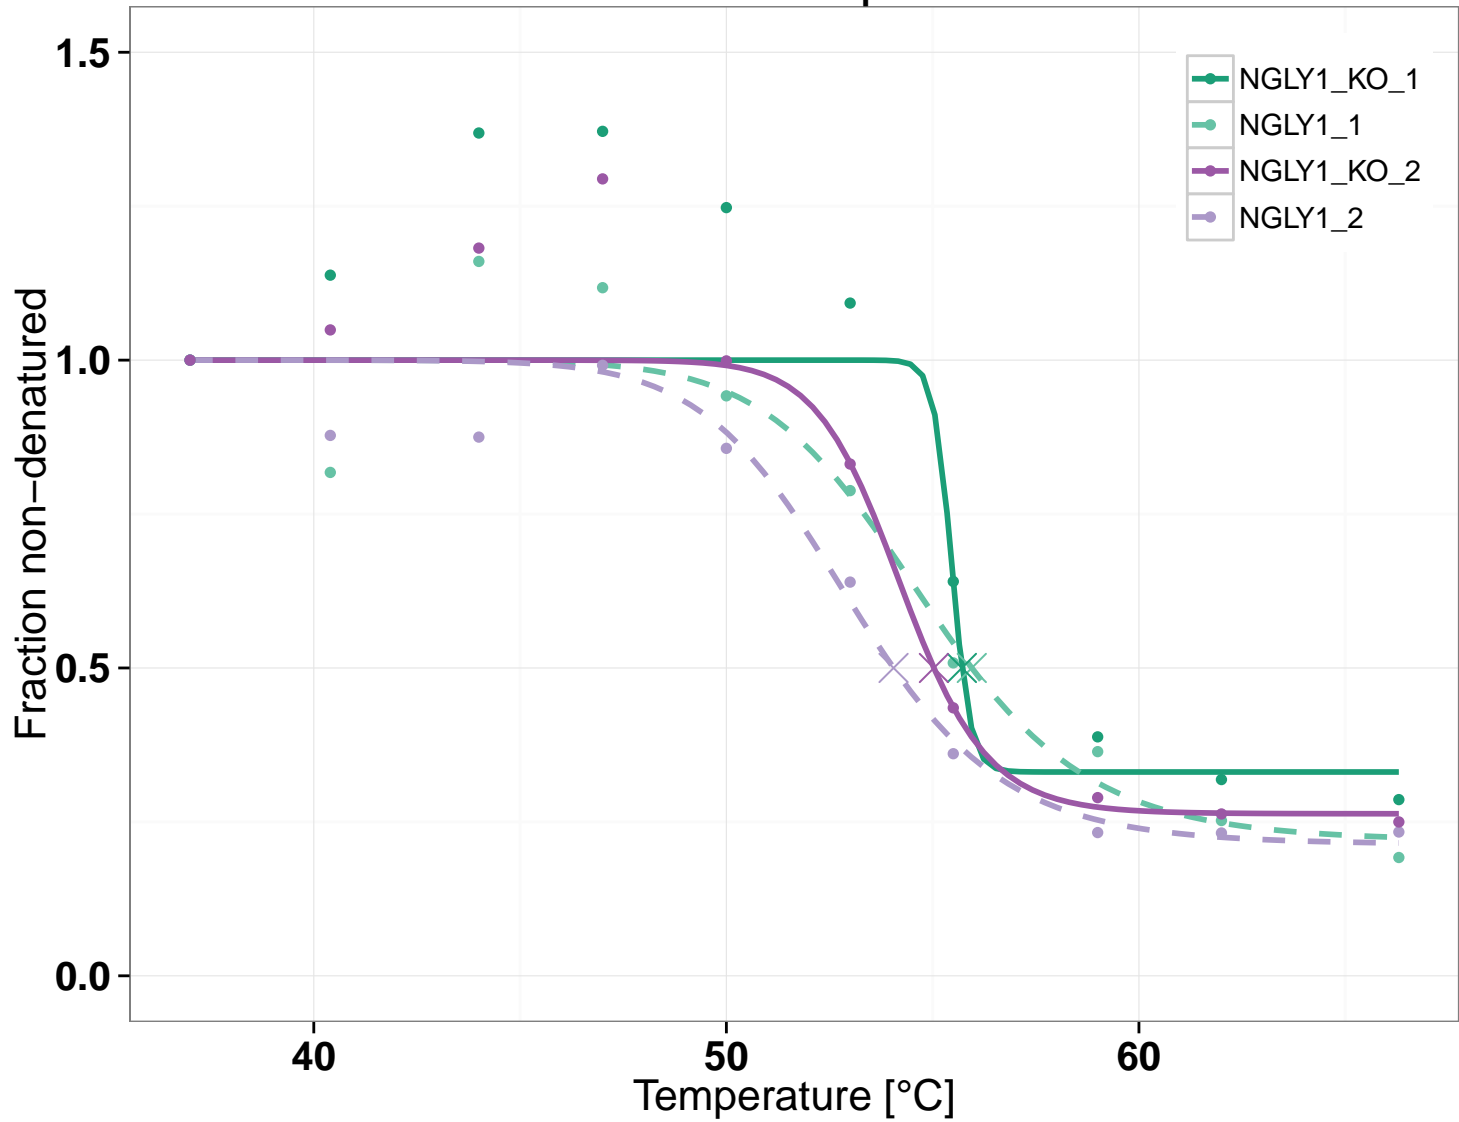

|            | meltPoint | slope | plateau | R2   |
|------------|-----------|-------|---------|------|
| NGLY1_KO_1 | 55.71     | -0.75 | 0.33    | 0.78 |
| NGLY1_1    | 55.95     | -0.1  | 0.22    | 0.93 |
| NGLY1_KO_2 | 55.03     | -0.18 | 0.26    | 0.92 |
| NGLY1_2    | 54.05     | -0.11 | 0.21    | 0.97 |

Supplement: Supplementary file 4635 [file 1]

IPI00412433.1|MAP3K5

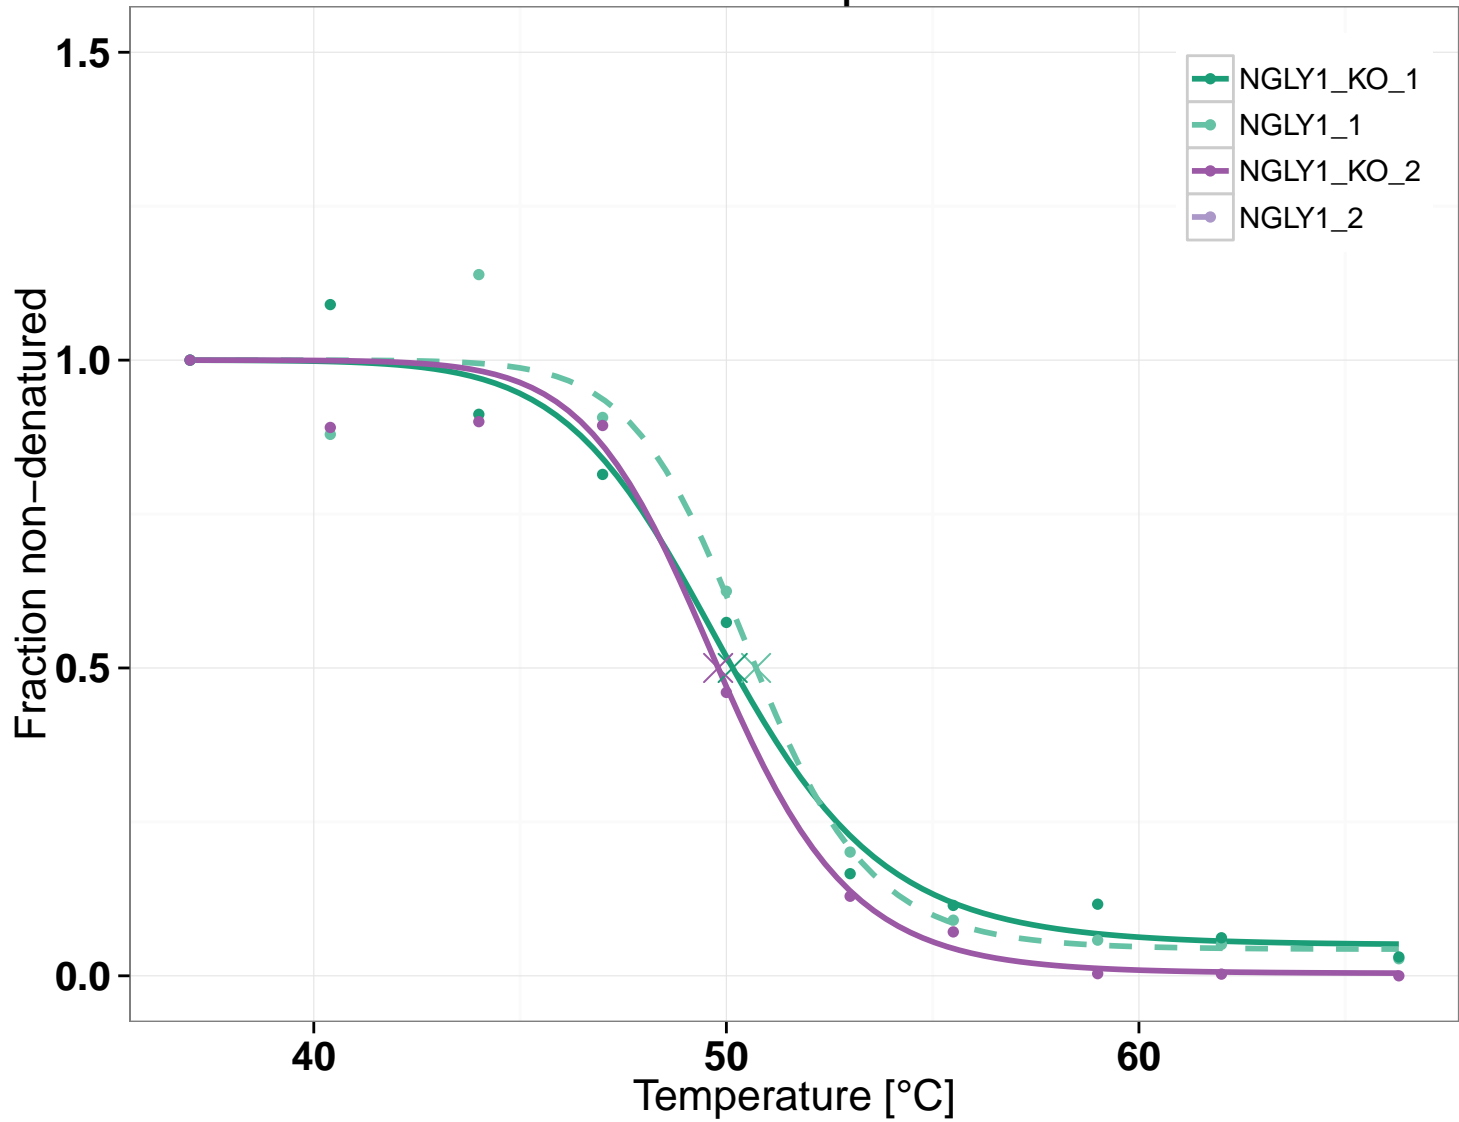

|            | meltPoint | slope | plateau | R2   |
|------------|-----------|-------|---------|------|
| NGLY1_KO_1 | 50.15     | -0.12 | 0.05    | 0.99 |
| NGLY1_1    | 50.72     | -0.16 | 0.04    | 0.98 |
| NGLY1_KO_2 | 49.8      | -0.15 | 0       | 0.99 |
| NGLY1_2    | -         | -     | -       | -    |

Supplement: Supplementary file 4636 [file 1]

IPI00746221.2|LOC348262

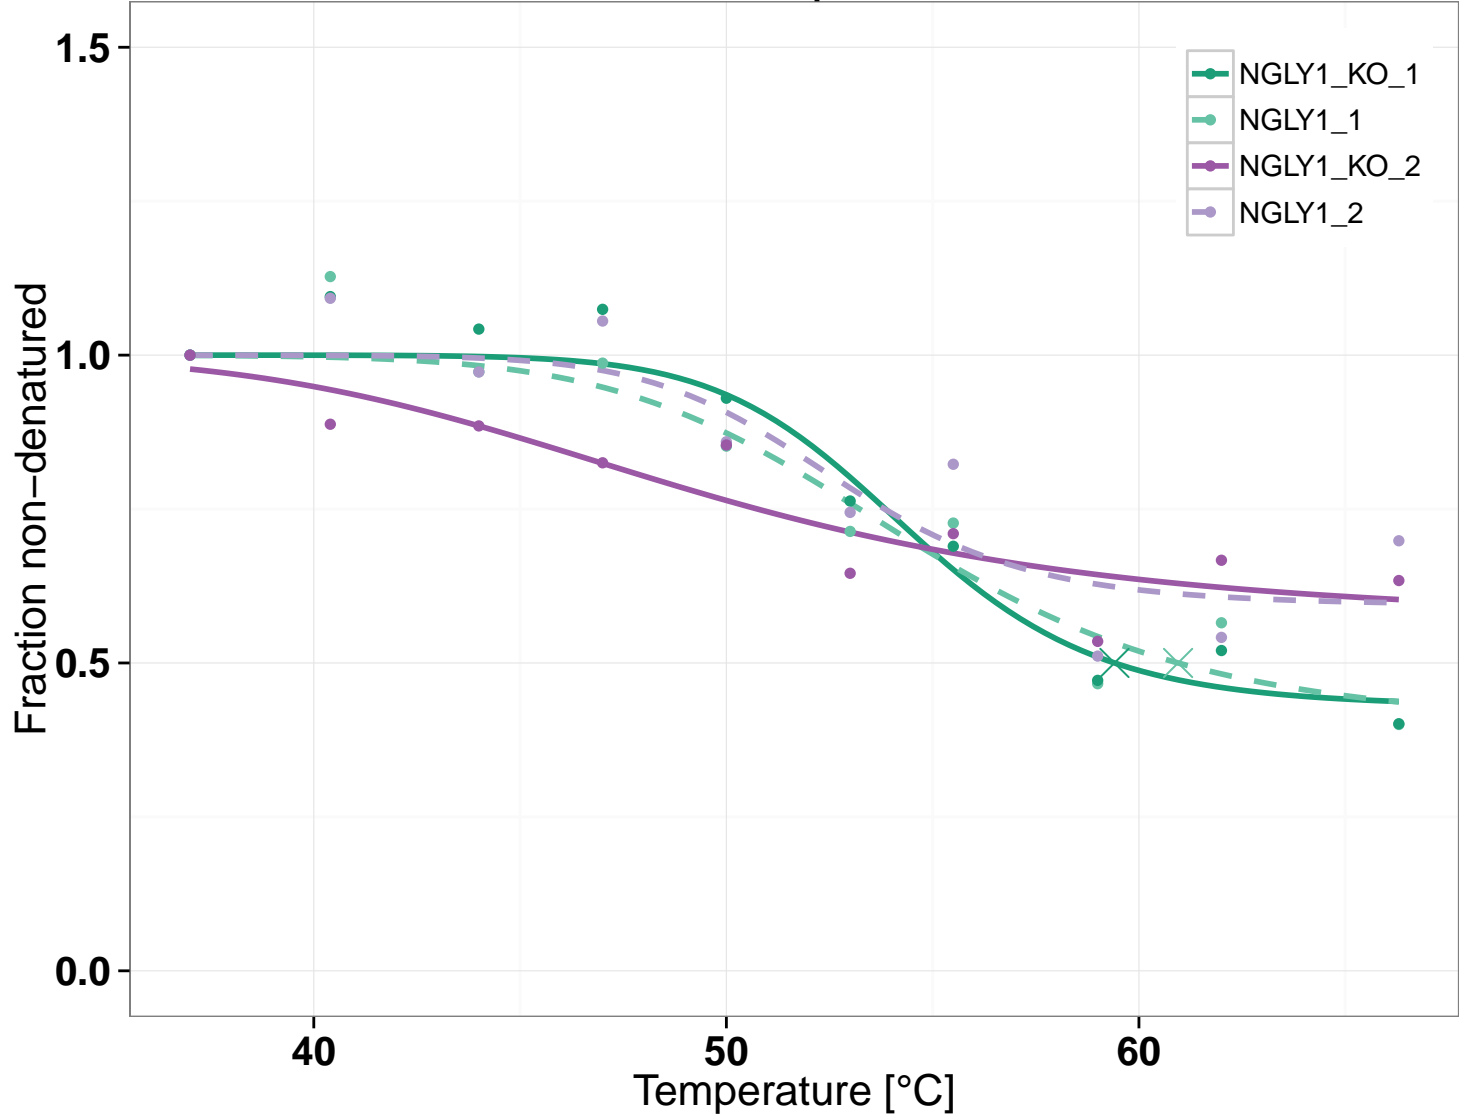

|            | meltPoint | slope  | plateau | R2   |
|------------|-----------|--------|---------|------|
| NGLY1_KO_1 | 59.41     | -0.062 | 0.43    | 0.96 |
| NGLY1_1    | 60.95     | -0.042 | 0.4     | 0.93 |
| NGLY1_KO_2 | -         | -0.021 | 0.56    | 0.84 |
| NGLY1_2    | -         | -0.044 | 0.59    | 0.83 |

Supplement: Supplementary file 4637 [file 1]

IPI00015228.1|CYTH2

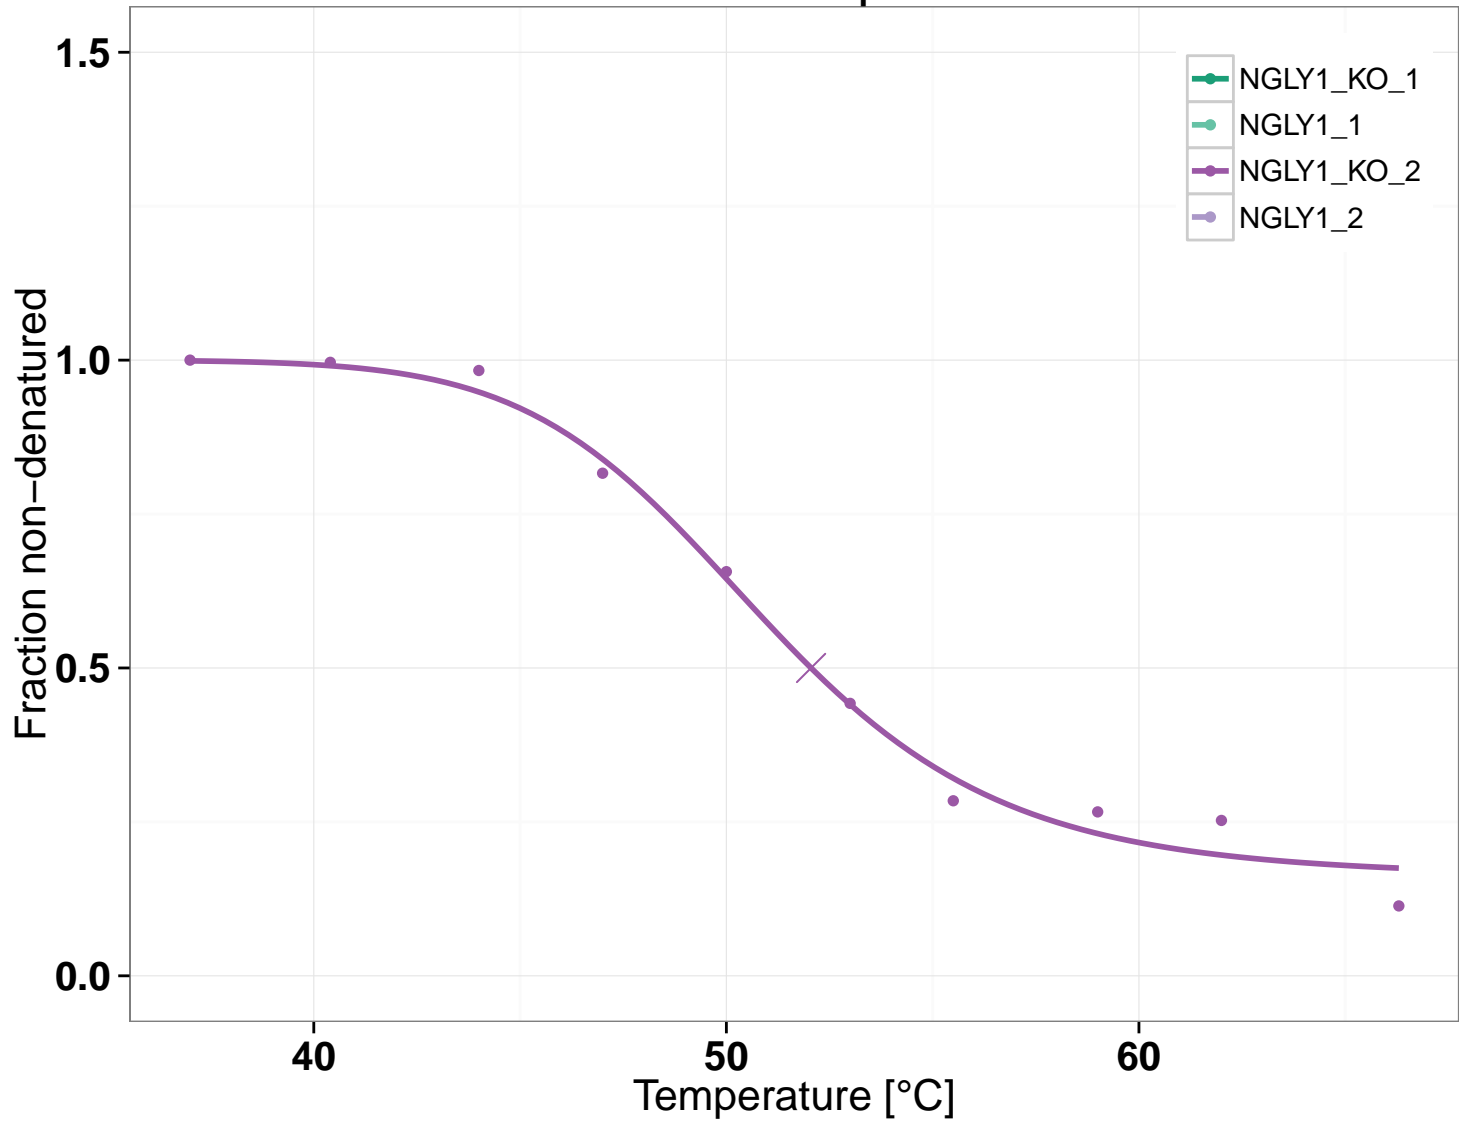

|            | meltPoint | slope  | plateau | R2   |
|------------|-----------|--------|---------|------|
| NGLY1_KO_1 | —         | —      | —       | —    |
| NGLY1_1    | —         | —      | —       | —    |
| NGLY1_KO_2 | 52.05     | -0.073 | 0.16    | 0.99 |
| NGLY1_2    | —         | —      | —       | —    |

Supplement: Supplementary file 4638 [file 1]

# IPI00651657.2|KSR1

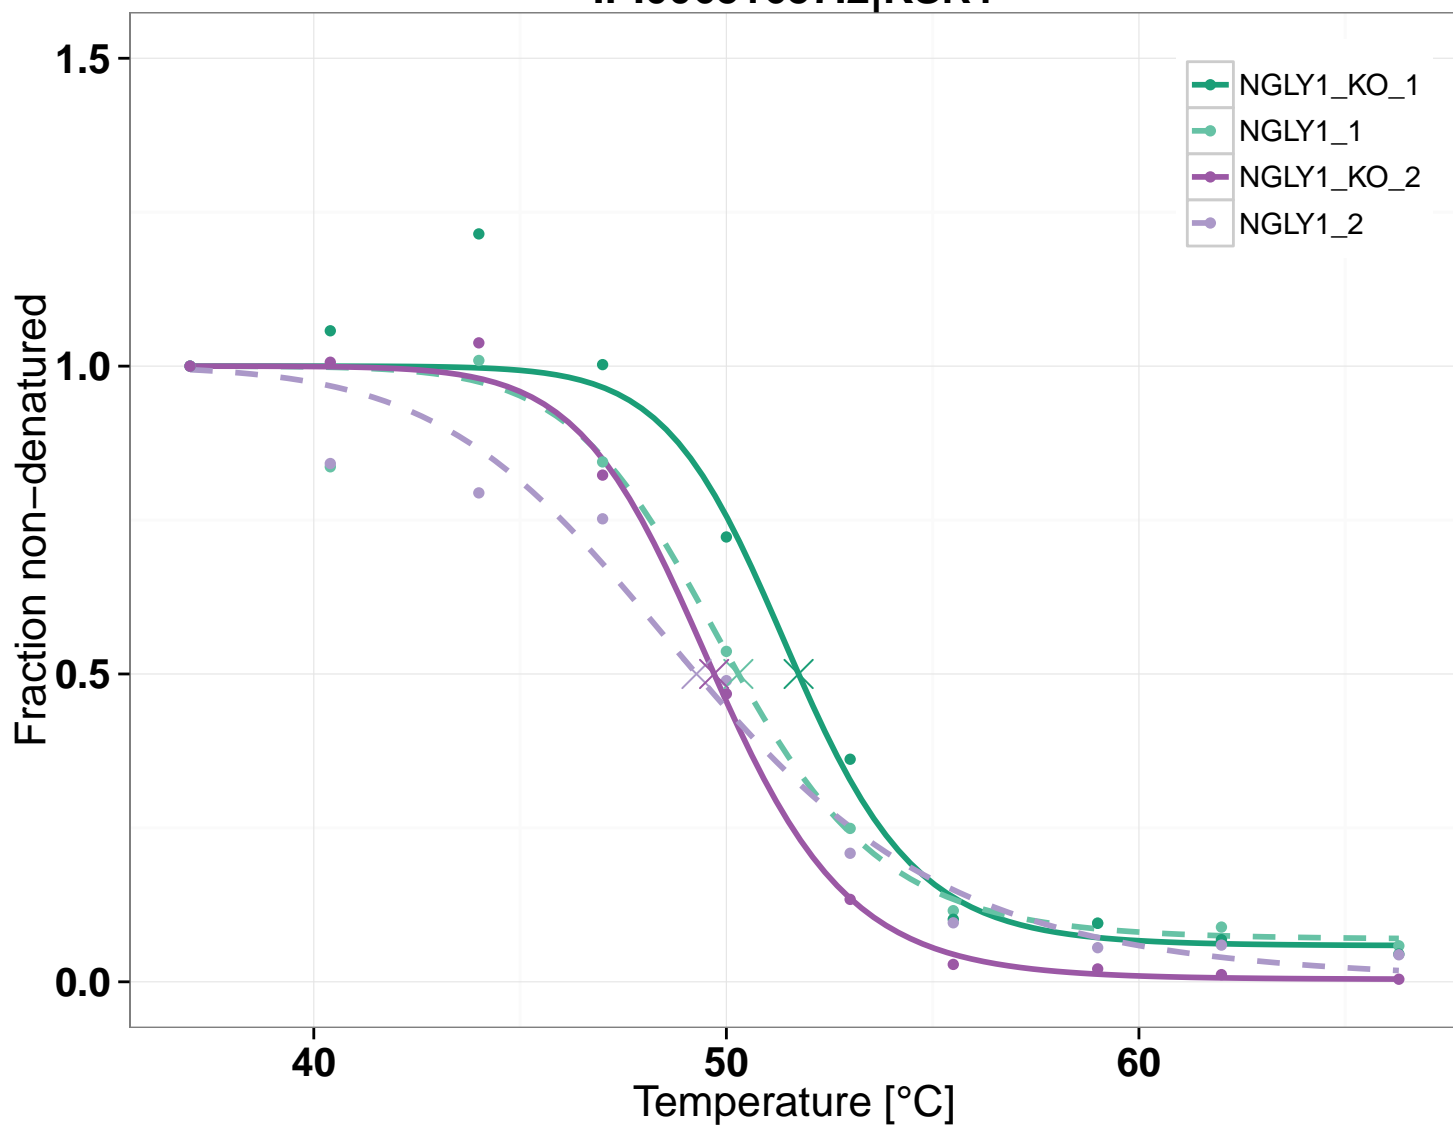

|            | meltPoint | slope | plateau | R2   |
|------------|-----------|-------|---------|------|
| NGLY1_KO_1 | 51.75     | -0.15 | 0.06    | 0.97 |
| NGLY1_1    | 50.29     | -0.12 | 0.07    | 0.98 |
| NGLY1_KO_2 | 49.7      | -0.15 | 0       | 1    |
| NGLY1_2    | 49.28     | -0.08 | 0       | 0.97 |

Supplement: Supplementary file 4639 [file 1]

IPI00477355.3|KIAA1279

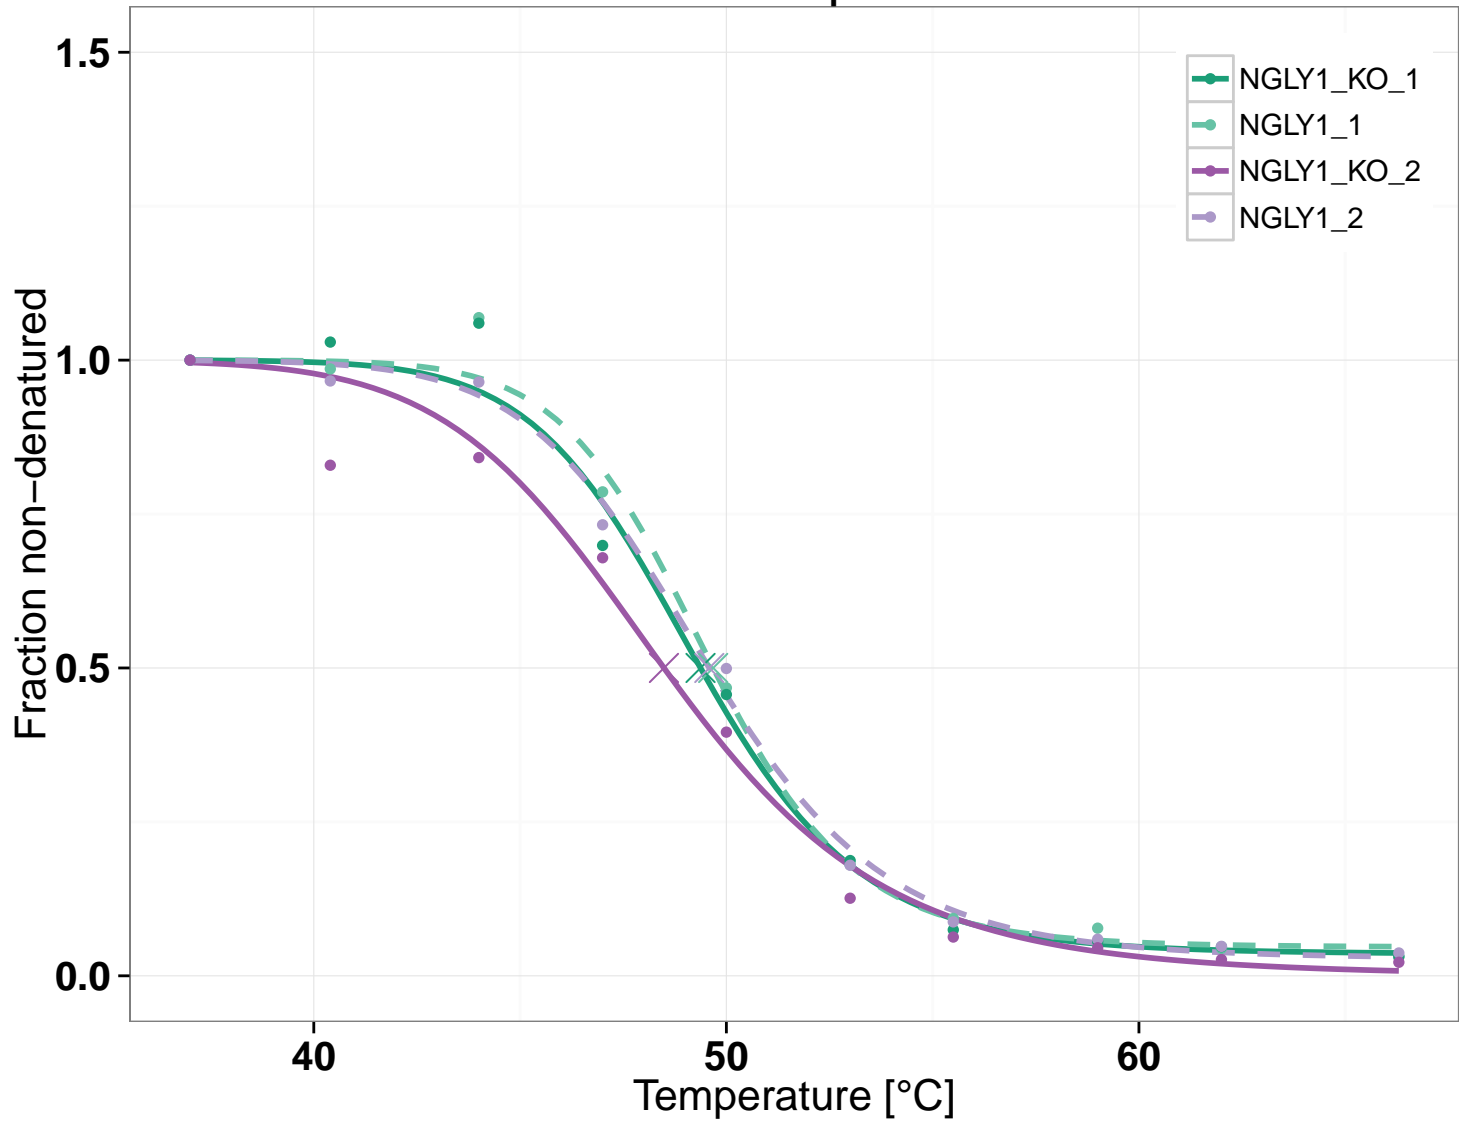

|            | meltPoint | slope  | plateau | R2   |
|------------|-----------|--------|---------|------|
| NGLY1_KO_1 | 49.37     | -0.12  | 0.04    | 0.99 |
| NGLY1_1    | 49.68     | -0.13  | 0.05    | 0.99 |
| NGLY1_KO_2 | 48.49     | -0.094 | 0       | 0.98 |
| NGLY1_2    | 49.59     | -0.11  | 0.03    | 1    |

Supplement: Supplementary file 4640 [file 1]

IPI00871903.1|PLRG1

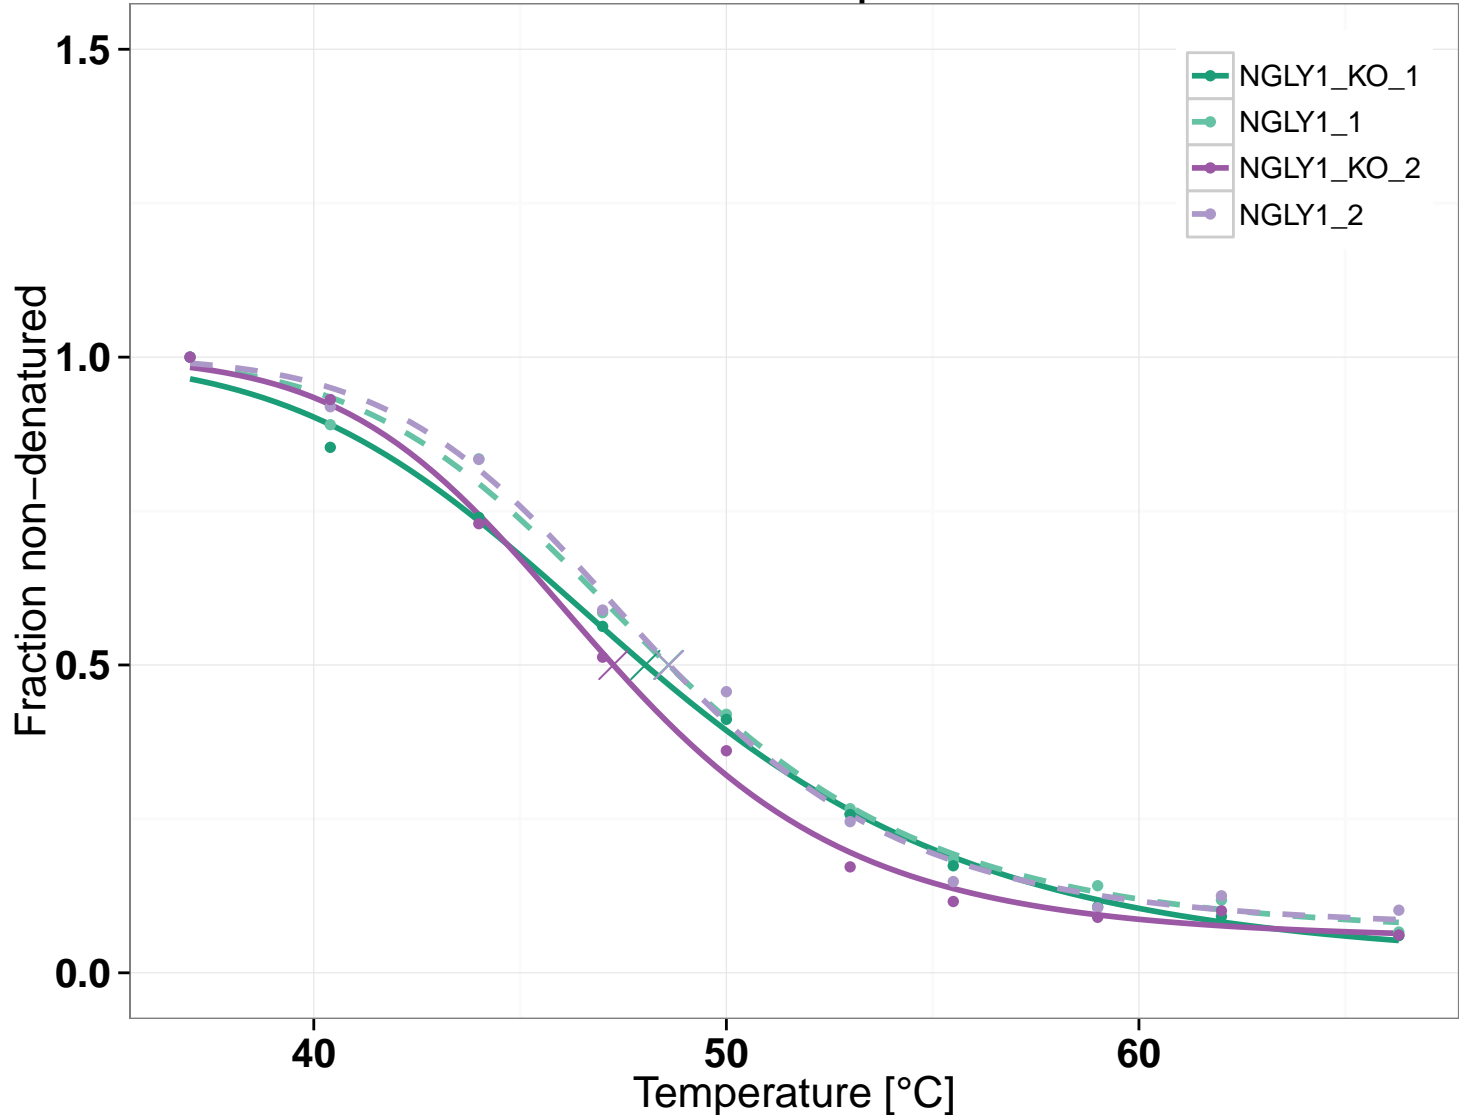

|            | meltPoint | slope  | plateau | R2   |
|------------|-----------|--------|---------|------|
| NGLY1_KO_1 | 48.04     | -0.059 | 0.01    | 1    |
| NGLY1_1    | 48.59     | -0.068 | 0.06    | 1    |
| NGLY1_KO_2 | 47.26     | -0.077 | 0.05    | 1    |
| NGLY1_2    | 48.61     | -0.074 | 0.07    | 0.99 |

Supplement: Supplementary file 4641 [file 1]

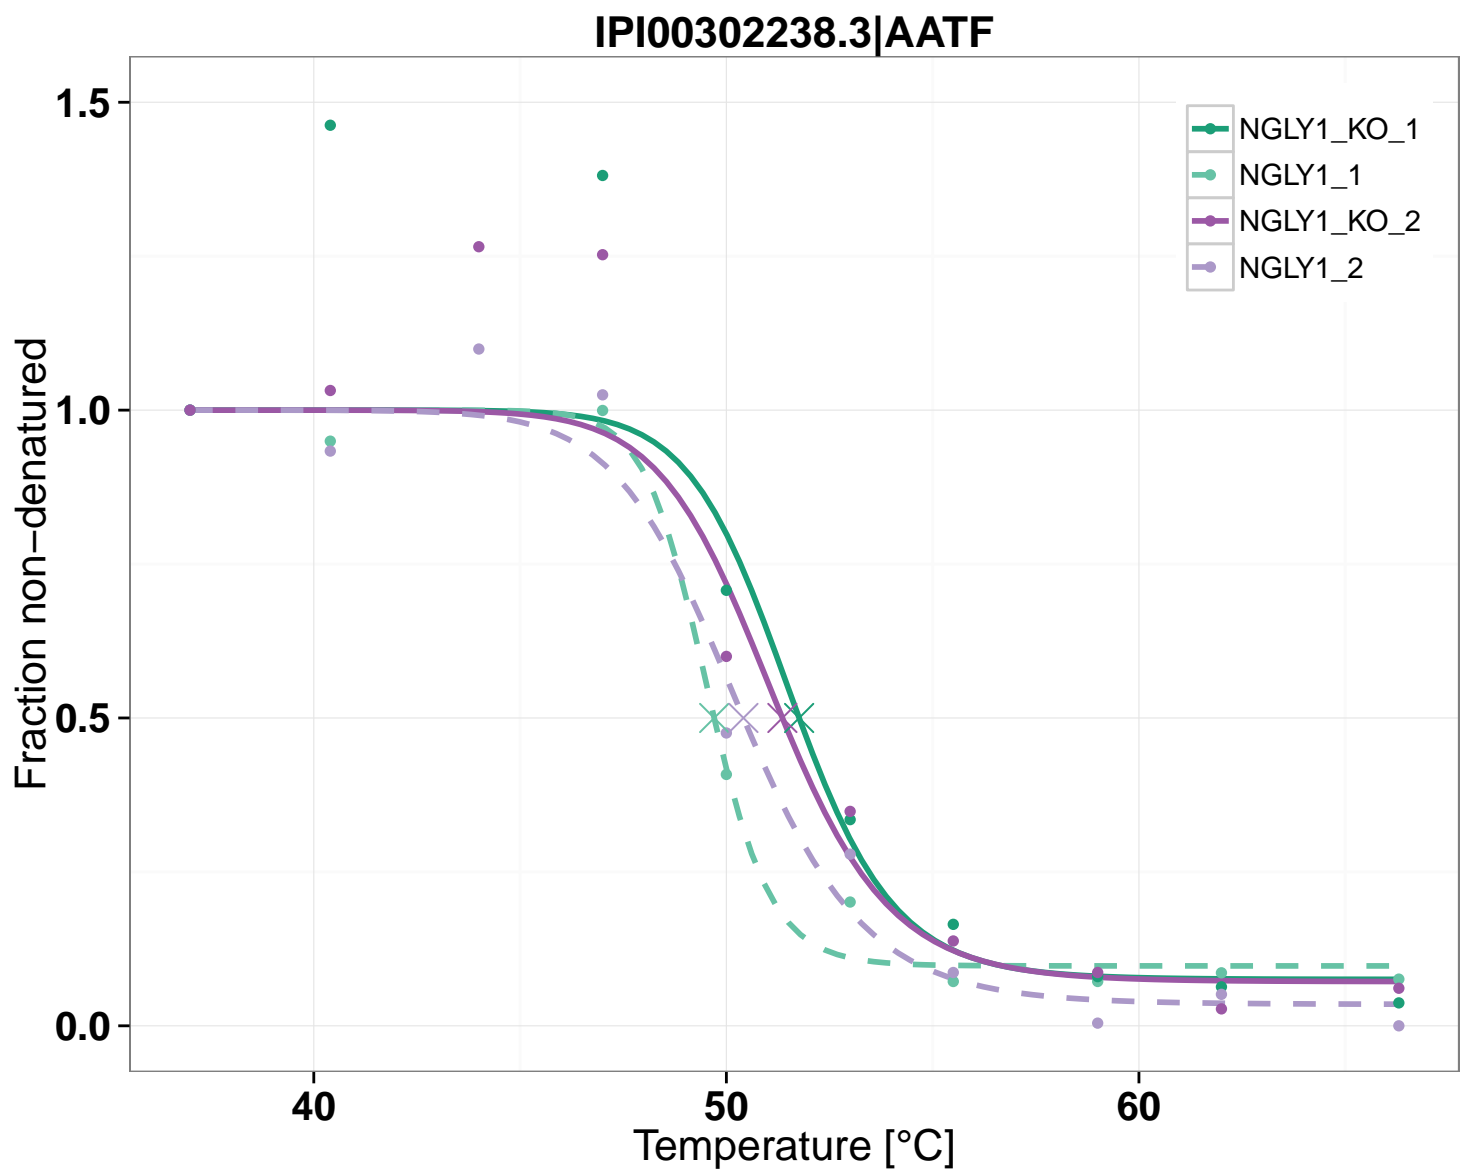

|            | meltPoint | slope | plateau | R2   |
|------------|-----------|-------|---------|------|
| NGLY1_KO_1 | 51.76     | -0.18 | 0.08    | 0.77 |
| NGLY1_1    | 49.7      | -0.29 | 0.1     | 0.87 |
| NGLY1_KO_2 | 51.36     | -0.17 | 0.07    | 0.92 |
| NGLY1_2    | 50.41     | -0.16 | 0.03    | 0.98 |

Supplement: Supplementary file 4642 [file 1]

# IPI00220306.1|MAPK8

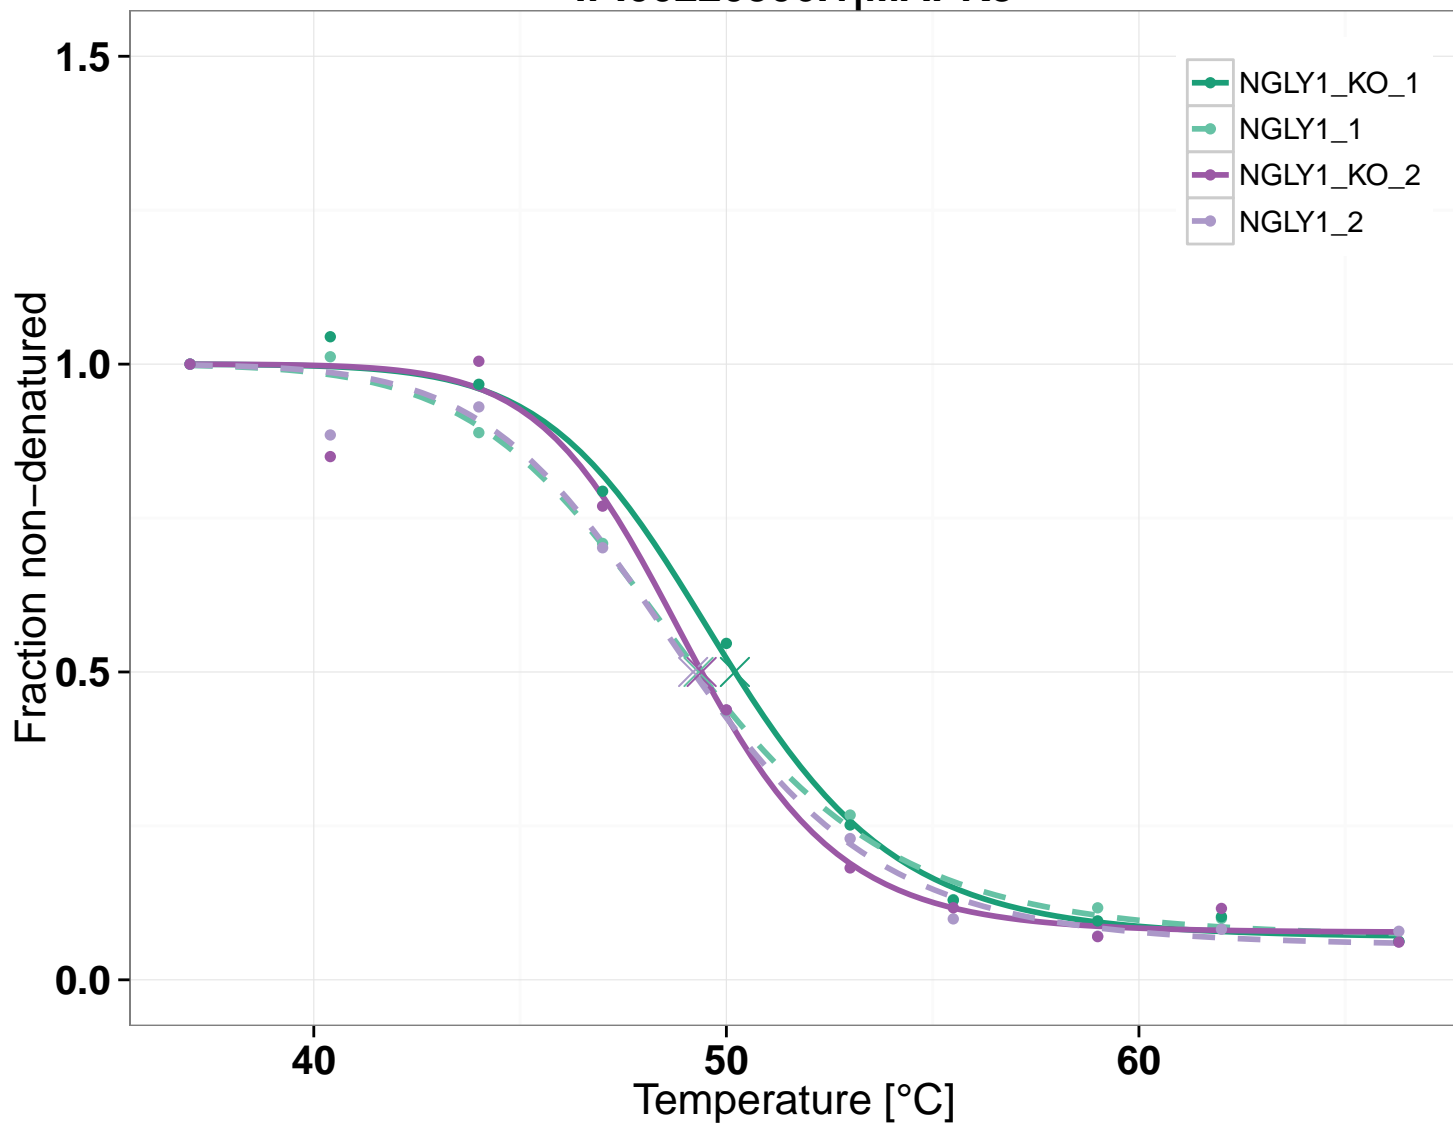

|            | meltPoint | slope  | plateau | R2   |
|------------|-----------|--------|---------|------|
| NGLY1_KO_1 | 50.21     | -0.11  | 0.07    | 1    |
| NGLY1_1    | 49.33     | -0.09  | 0.07    | 1    |
| NGLY1_KO_2 | 49.4      | -0.13  | 0.08    | 0.98 |
| NGLY1_2    | 49.19     | -0.098 | 0.05    | 0.99 |

Supplement: Supplementary file 4643 [file 1]

# IPI00395488.2|VASN

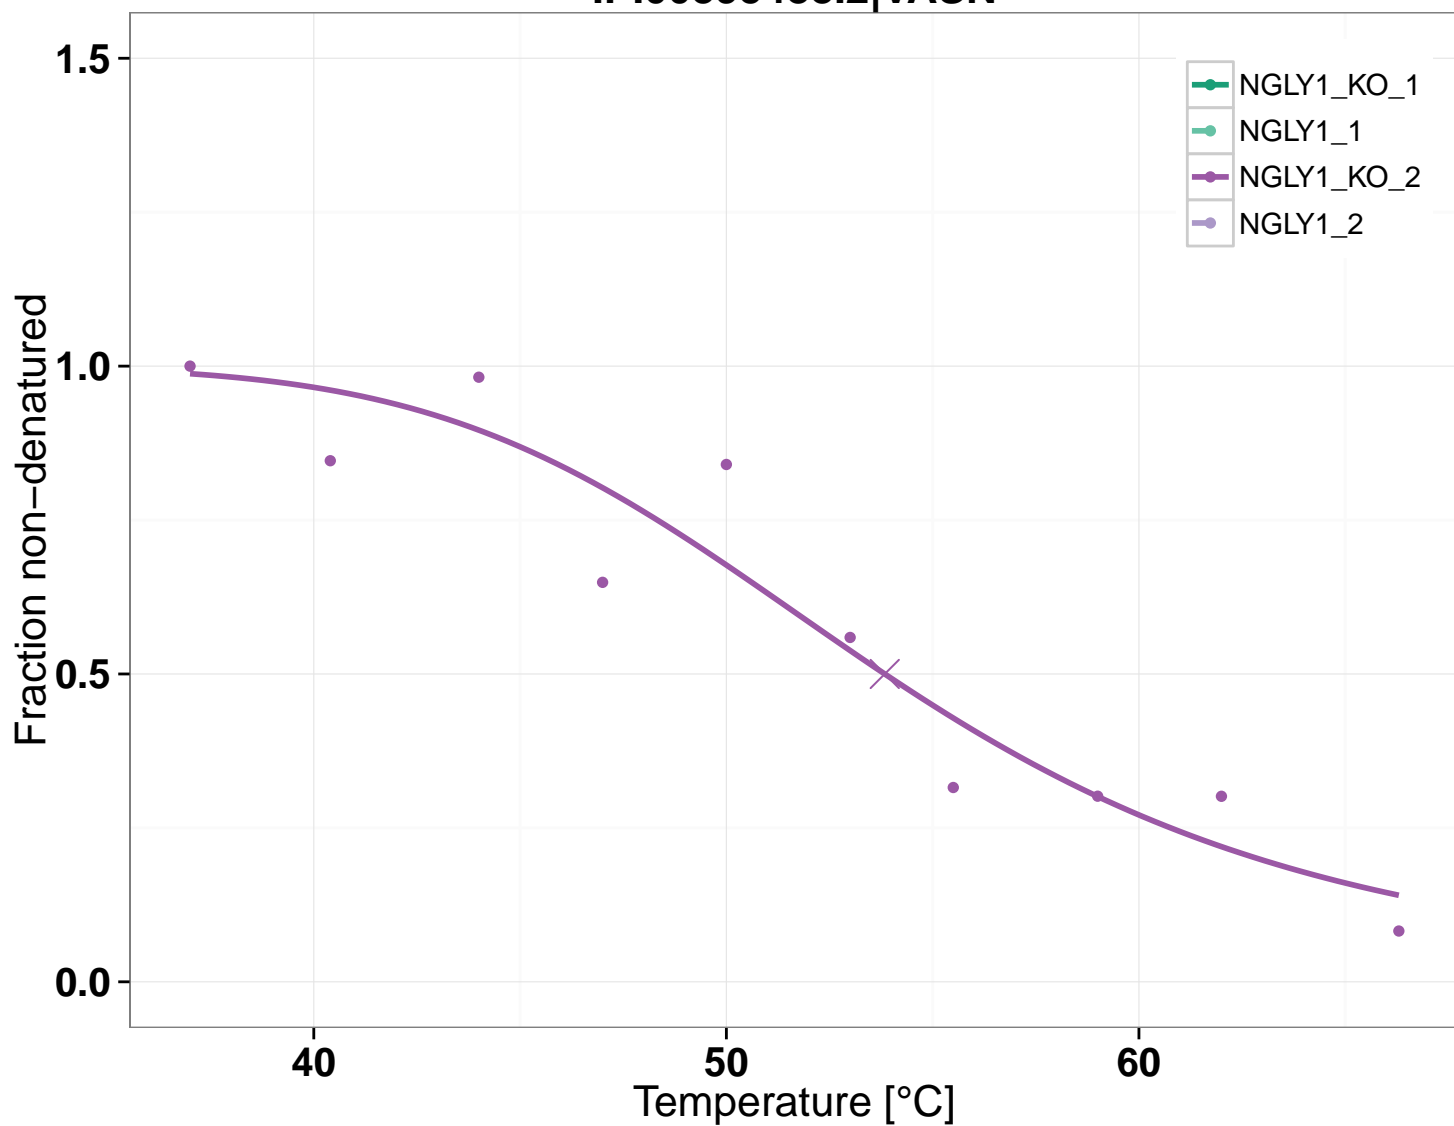

|            | meltPoint | slope  | plateau | R2  |
|------------|-----------|--------|---------|-----|
| NGLY1_KO_1 | —         | —      | —       | —   |
| NGLY1_1    | —         | —      | —       | —   |
| NGLY1_KO_2 | 53.84     | -0.047 | 0       | 0.9 |
| NGLY1_2    | —         | —      | —       | —   |

Supplement: Supplementary file 4644 [file 1]

IPI00173347.9|HECW1

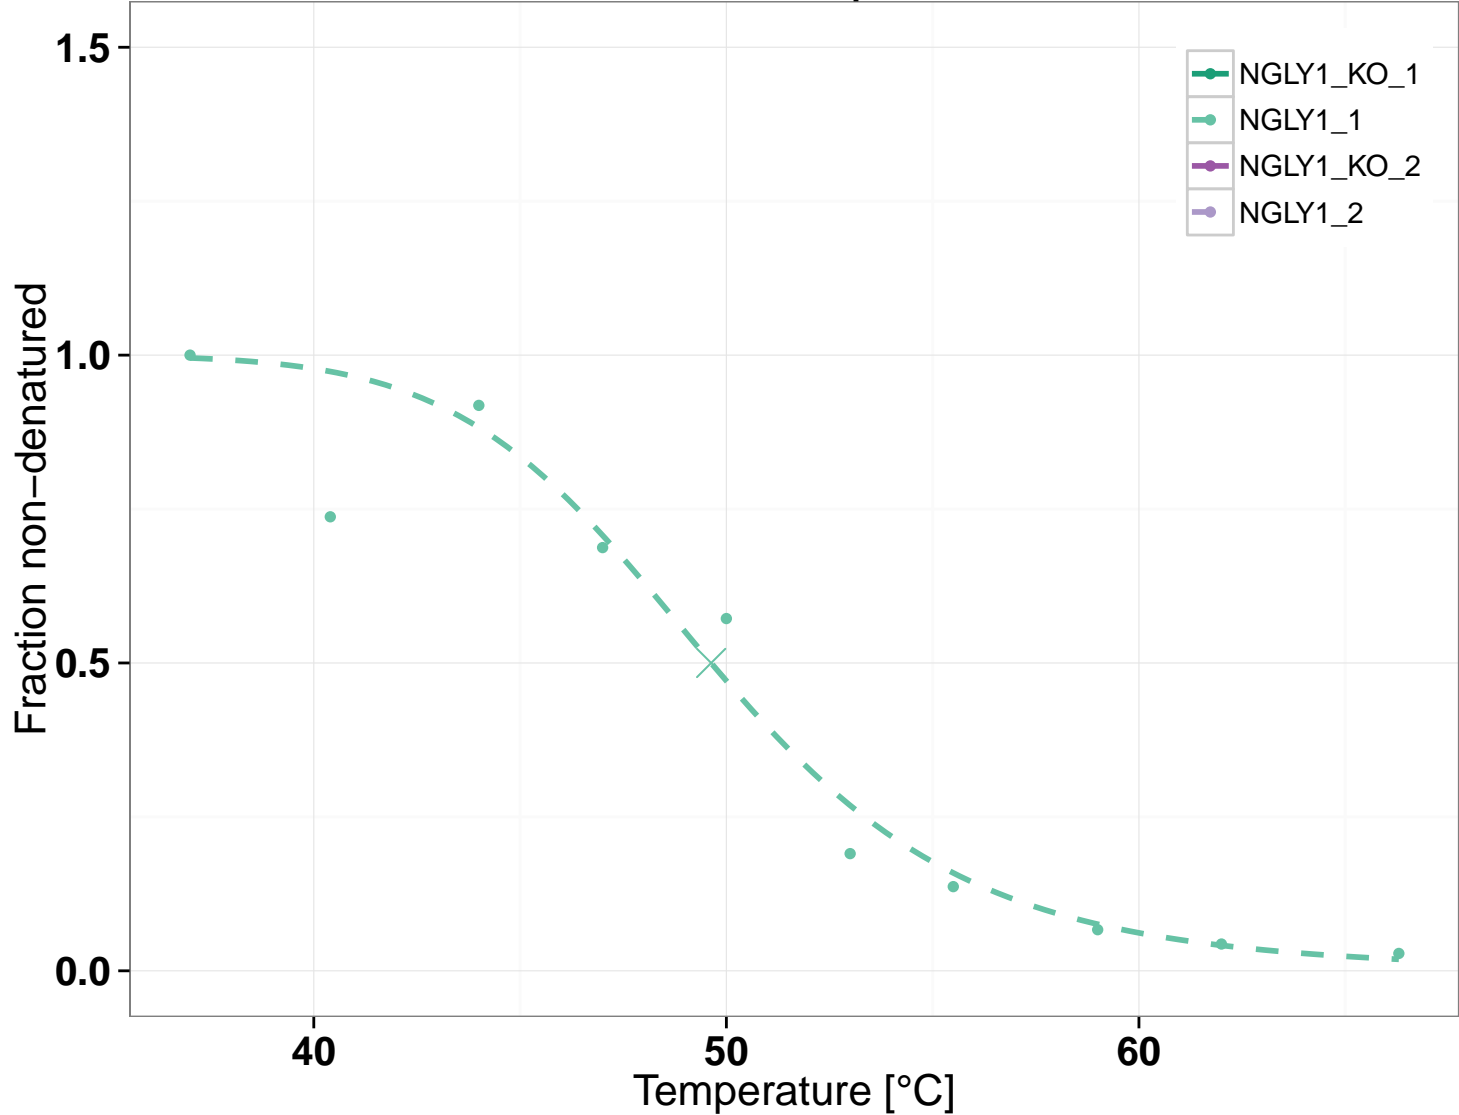

|            | meltPoint | slope  | plateau | R2   |
|------------|-----------|--------|---------|------|
| NGLY1_KO_1 | -         | -      | -       | -    |
| NGLY1_1    | 49.63     | -0.081 | 0       | 0.94 |
| NGLY1_KO_2 | -         | -      | -       | -    |
| NGLY1_2    | -         | -      | -       | -    |

Supplement: Supplementary file 4645 [file 1]

IPI00152949.4|TMEM168

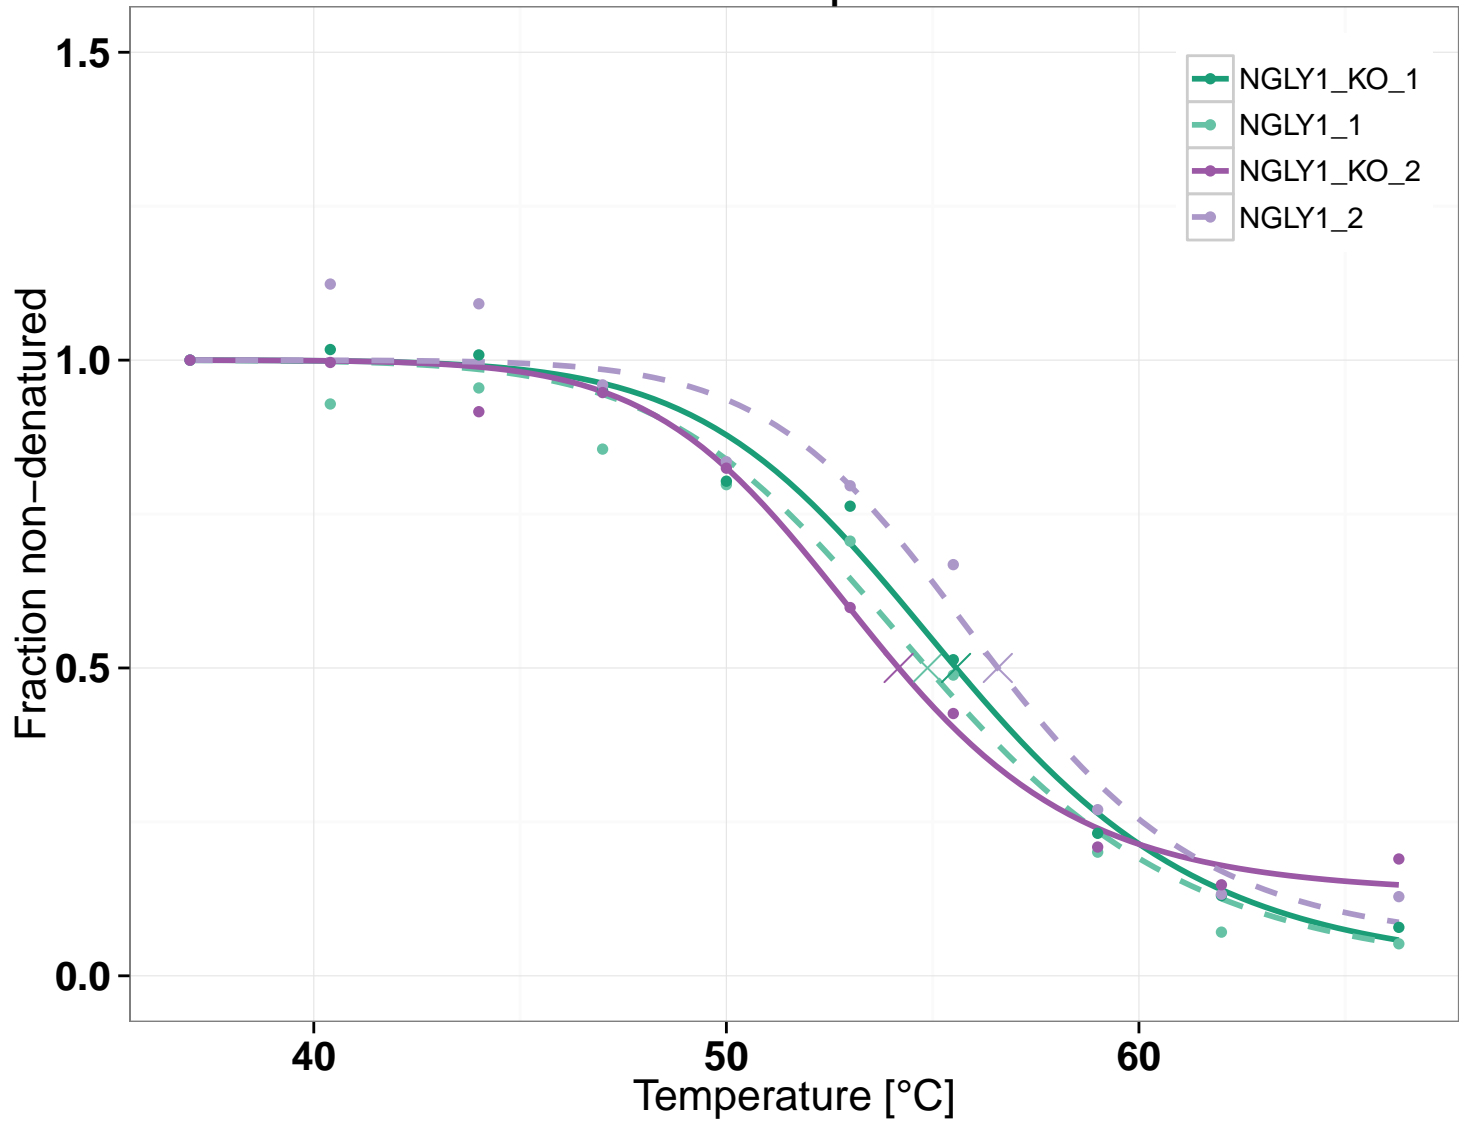

|            | meltPoint | slope  | plateau | R2   |
|------------|-----------|--------|---------|------|
| NGLY1_KO_1 | 55.57     | -0.081 | 0.01    | 0.99 |
| NGLY1_1    | 54.88     | -0.078 | 0       | 0.98 |
| NGLY1_KO_2 | 54.17     | -0.084 | 0.13    | 0.99 |
| NGLY1_2    | 56.58     | -0.089 | 0.05    | 0.97 |

Supplement: Supplementary file 4646 [file 1]

# IPI00001885.1|SNX8

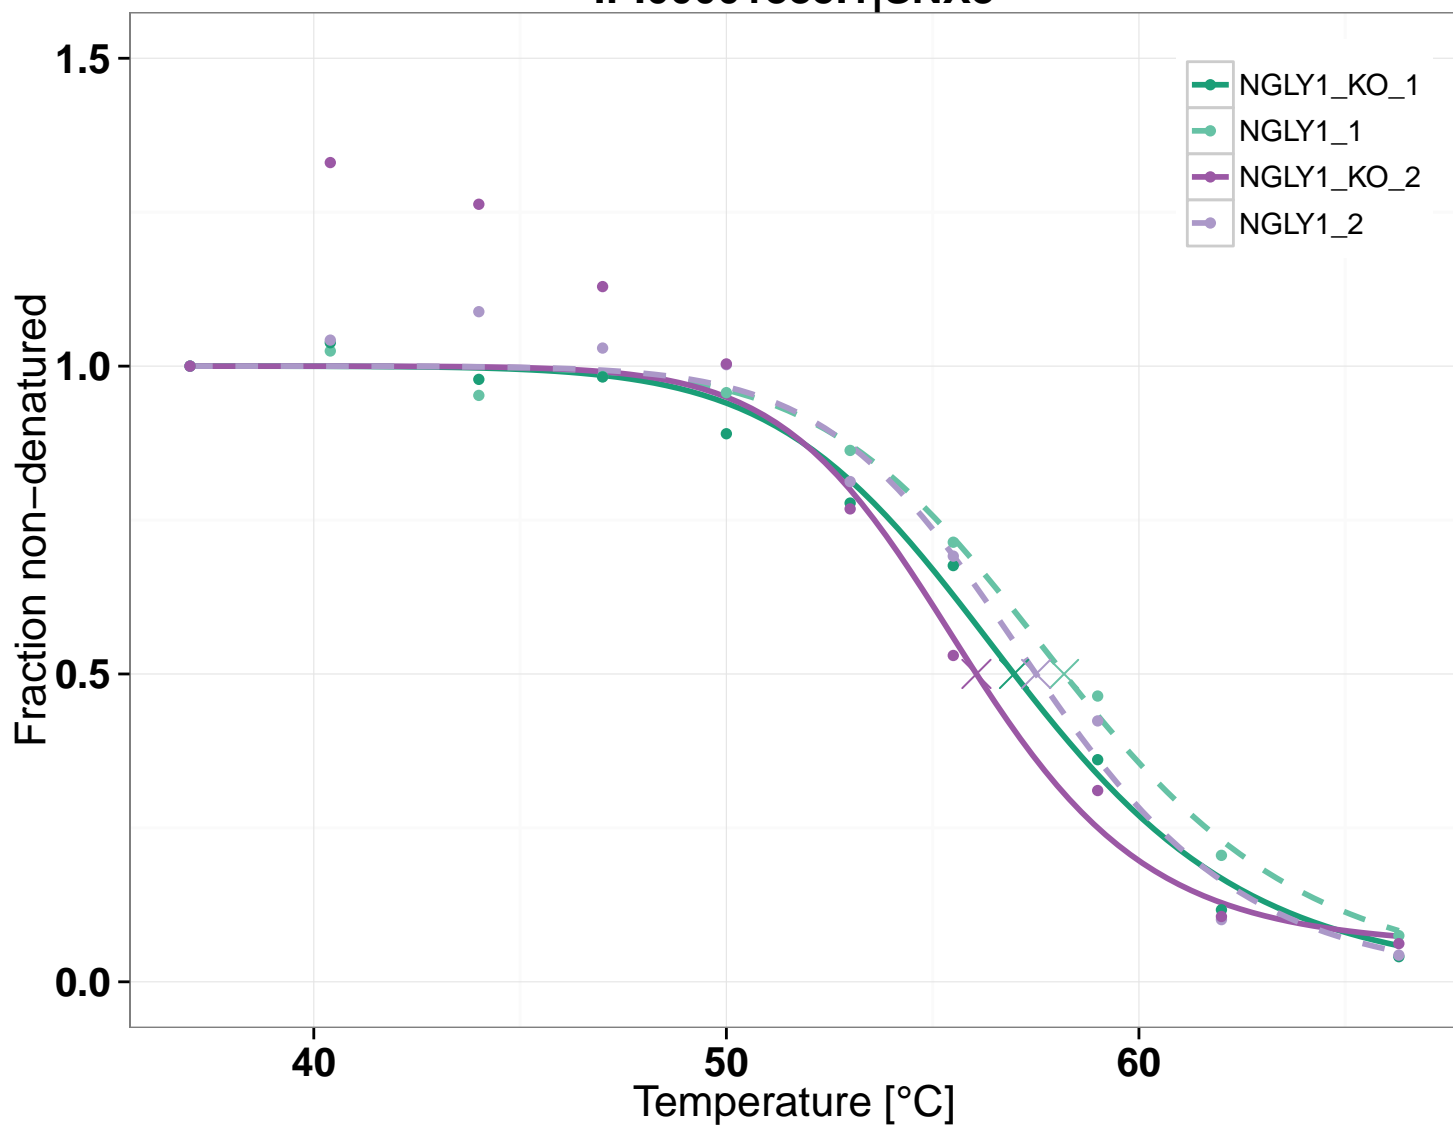

|            | meltPoint | slope  | plateau | R2   |
|------------|-----------|--------|---------|------|
| NGLY1_KO_1 | 56.97     | -0.087 | 0       | 0.99 |
| NGLY1_1    | 58.19     | -0.085 | 0       | 1    |
| NGLY1_KO_2 | 56.06     | -0.11  | 0.06    | 0.9  |
| NGLY1_2    | 57.51     | -0.098 | 0       | 0.98 |

Supplement: Supplementary file 4647 [file 1]

# IPI00005039.1|MTIF2

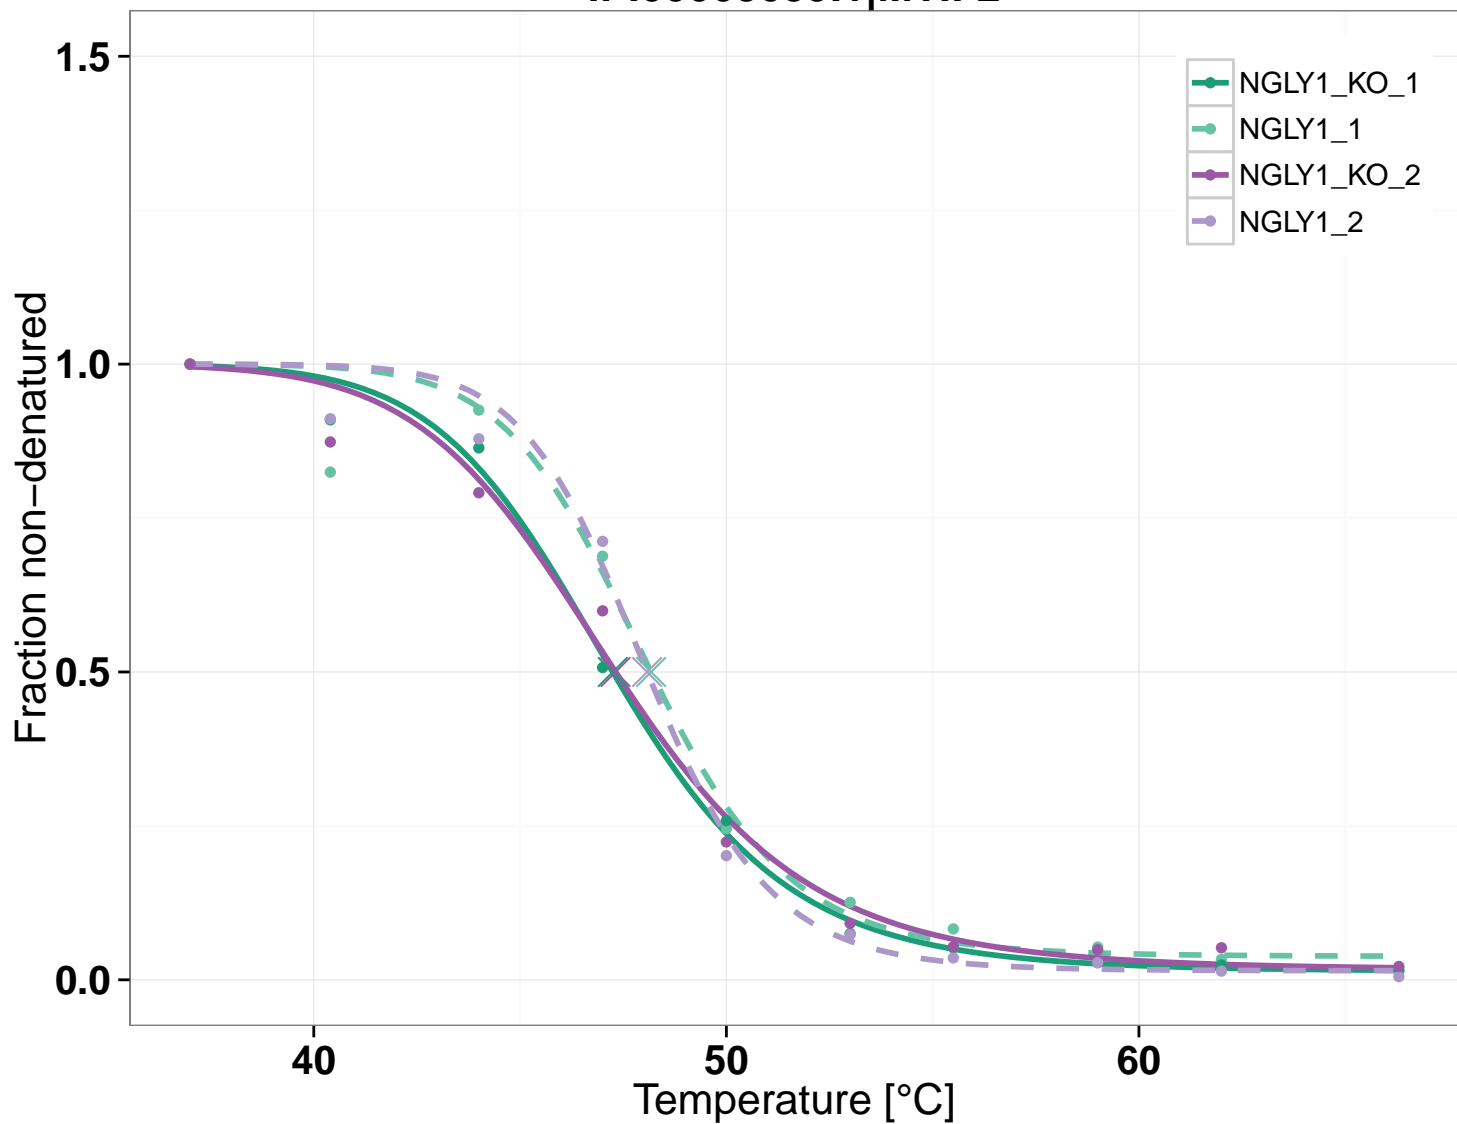

|            | meltPoint | slope | plateau | R2   |
|------------|-----------|-------|---------|------|
| NGLY1_KO_1 | 47.25     | -0.11 | 0.01    | 1    |
| NGLY1_1    | 48.18     | -0.14 | 0.04    | 0.98 |
| NGLY1_KO_2 | 47.32     | -0.1  | 0.02    | 0.99 |
| NGLY1_2    | 48.08     | -0.16 | 0.01    | 0.99 |

Supplement: Supplementary file 4648 [file 1]

IPI00470418.1|DHRS7

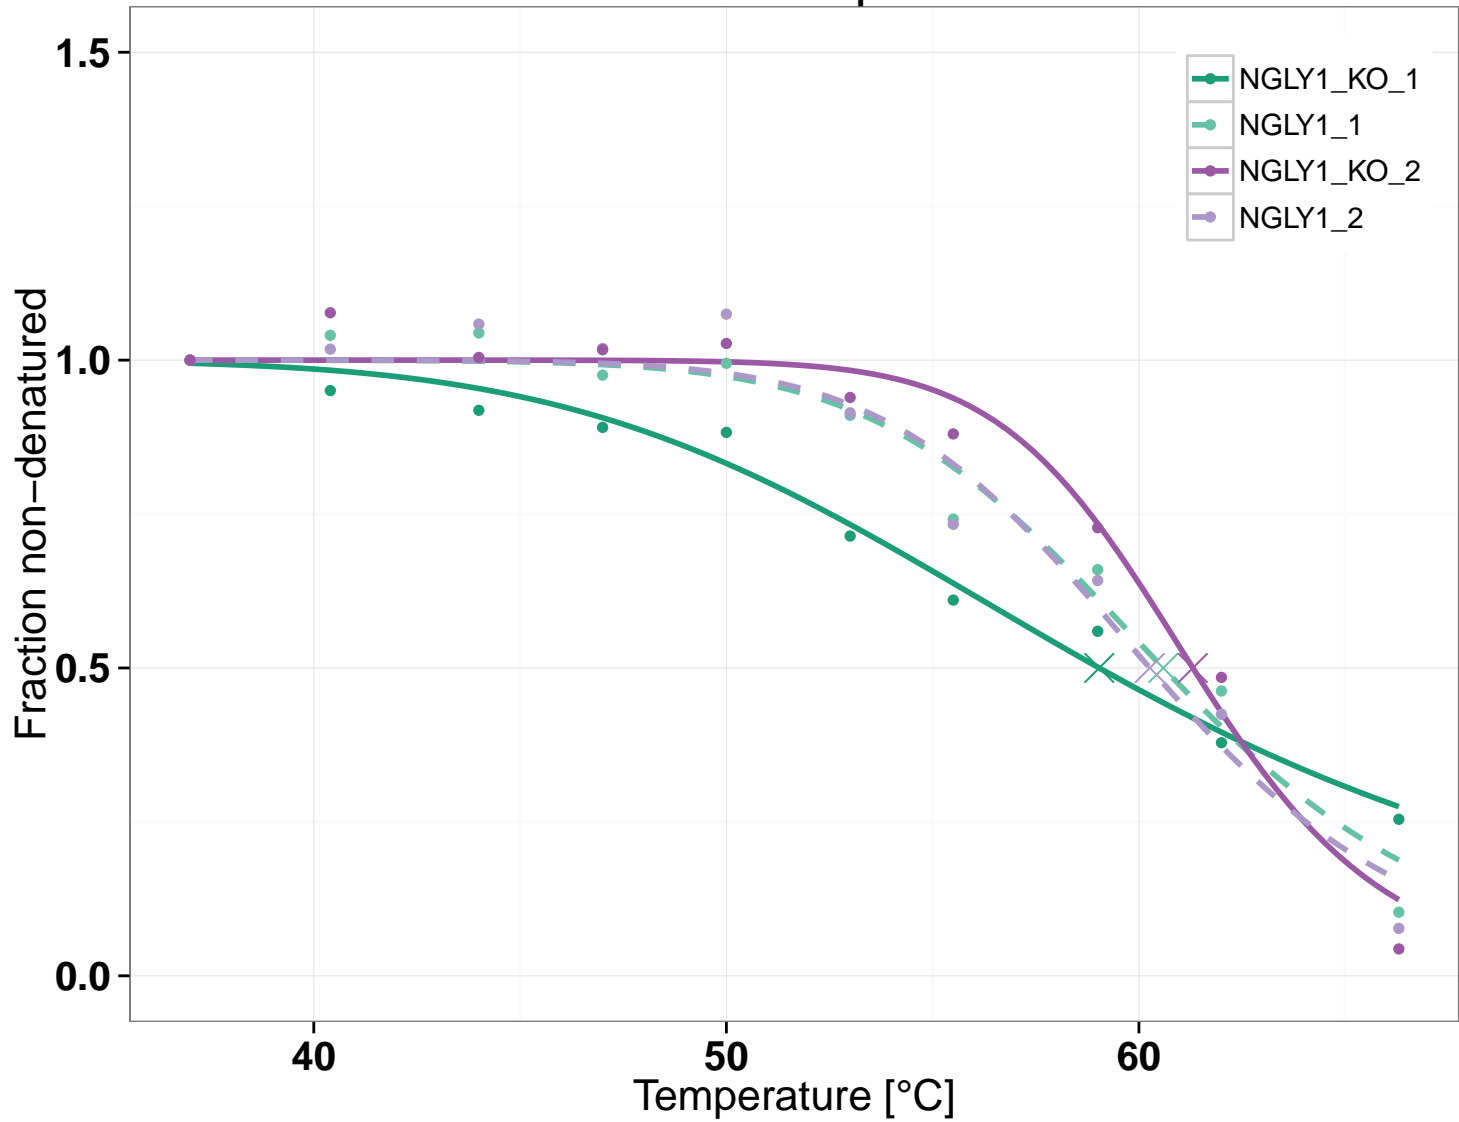

|            | meltPoint | slope  | plateau | R2   |
|------------|-----------|--------|---------|------|
| NGLY1_KO_1 | 59.04     | -0.039 | 0       | 0.98 |
| NGLY1_1    | 60.59     | -0.071 | 0       | 0.97 |
| NGLY1_KO_2 | 61.31     | -0.11  | 0       | 0.98 |
| NGLY1_2    | 60.26     | -0.078 | 0       | 0.97 |

Supplement: Supplementary file 4649 [file 1]

IPI00024062.2|EPB41L1

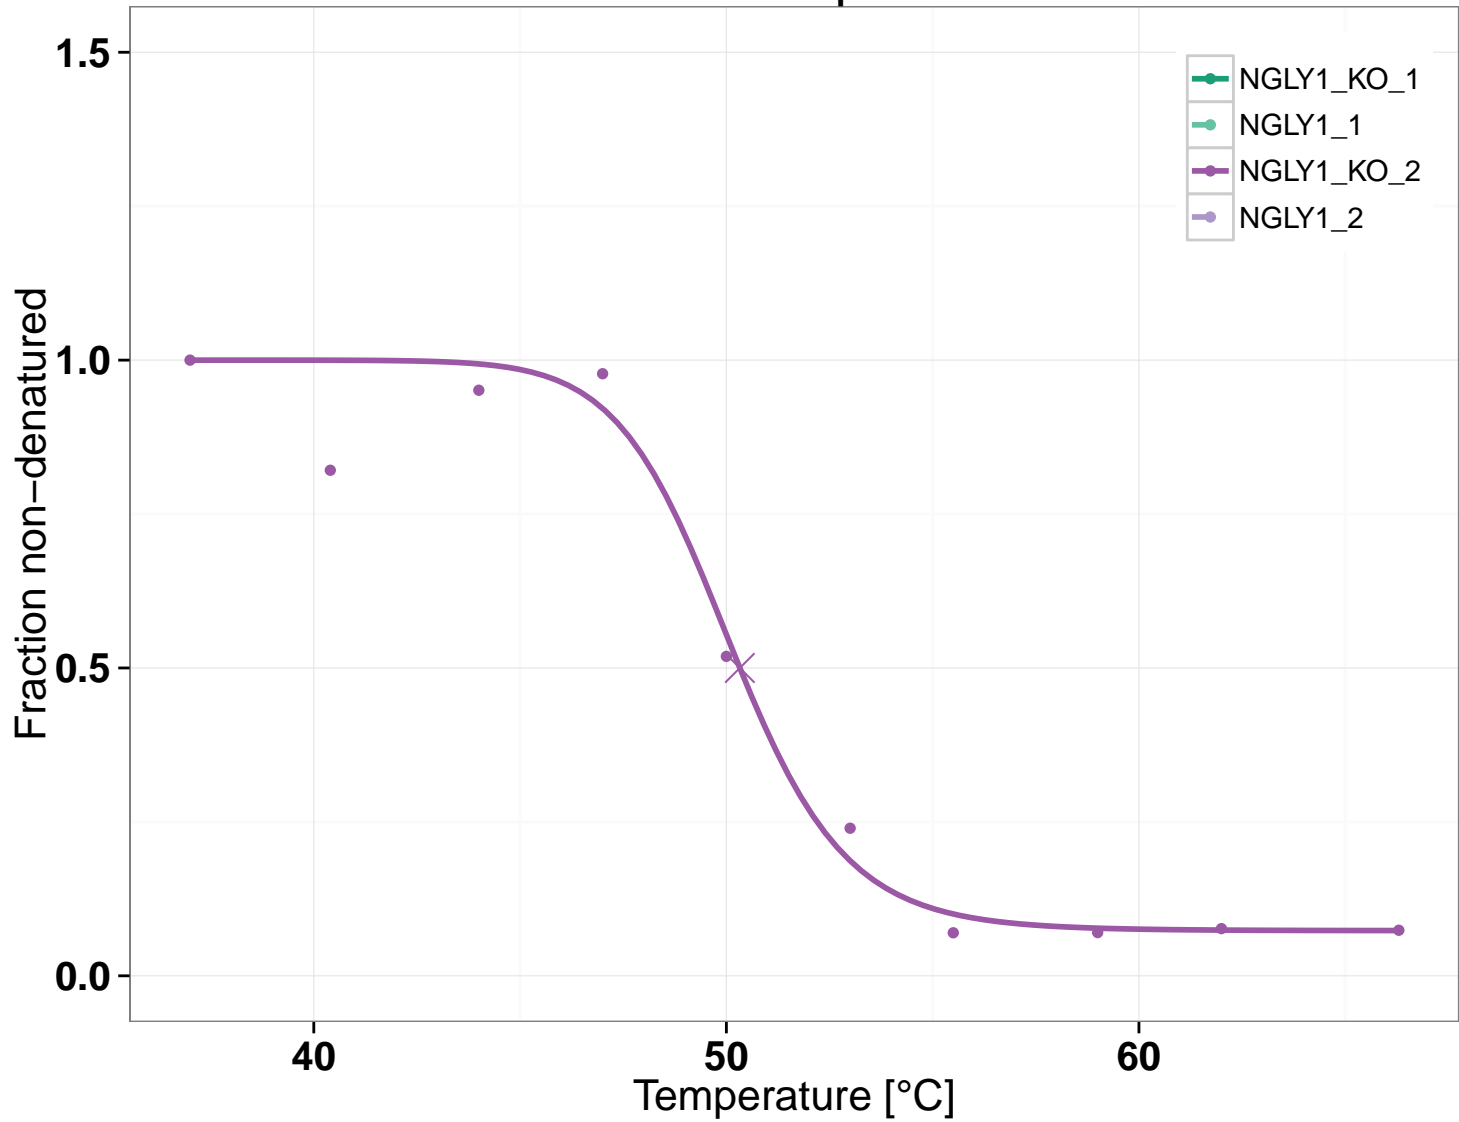

|            | meltPoint | slope | plateau | R2   |
|------------|-----------|-------|---------|------|
| NGLY1_KO_1 | —         | —     | —       | —    |
| NGLY1_1    | —         | —     | —       | —    |
| NGLY1_KO_2 | 50.33     | −0.17 | 0.07    | 0.97 |
| NGLY1_2    | —         | —     | —       | —    |

Supplement: Supplementary file 4650 [file 1]

# IPI00217493.5|MB

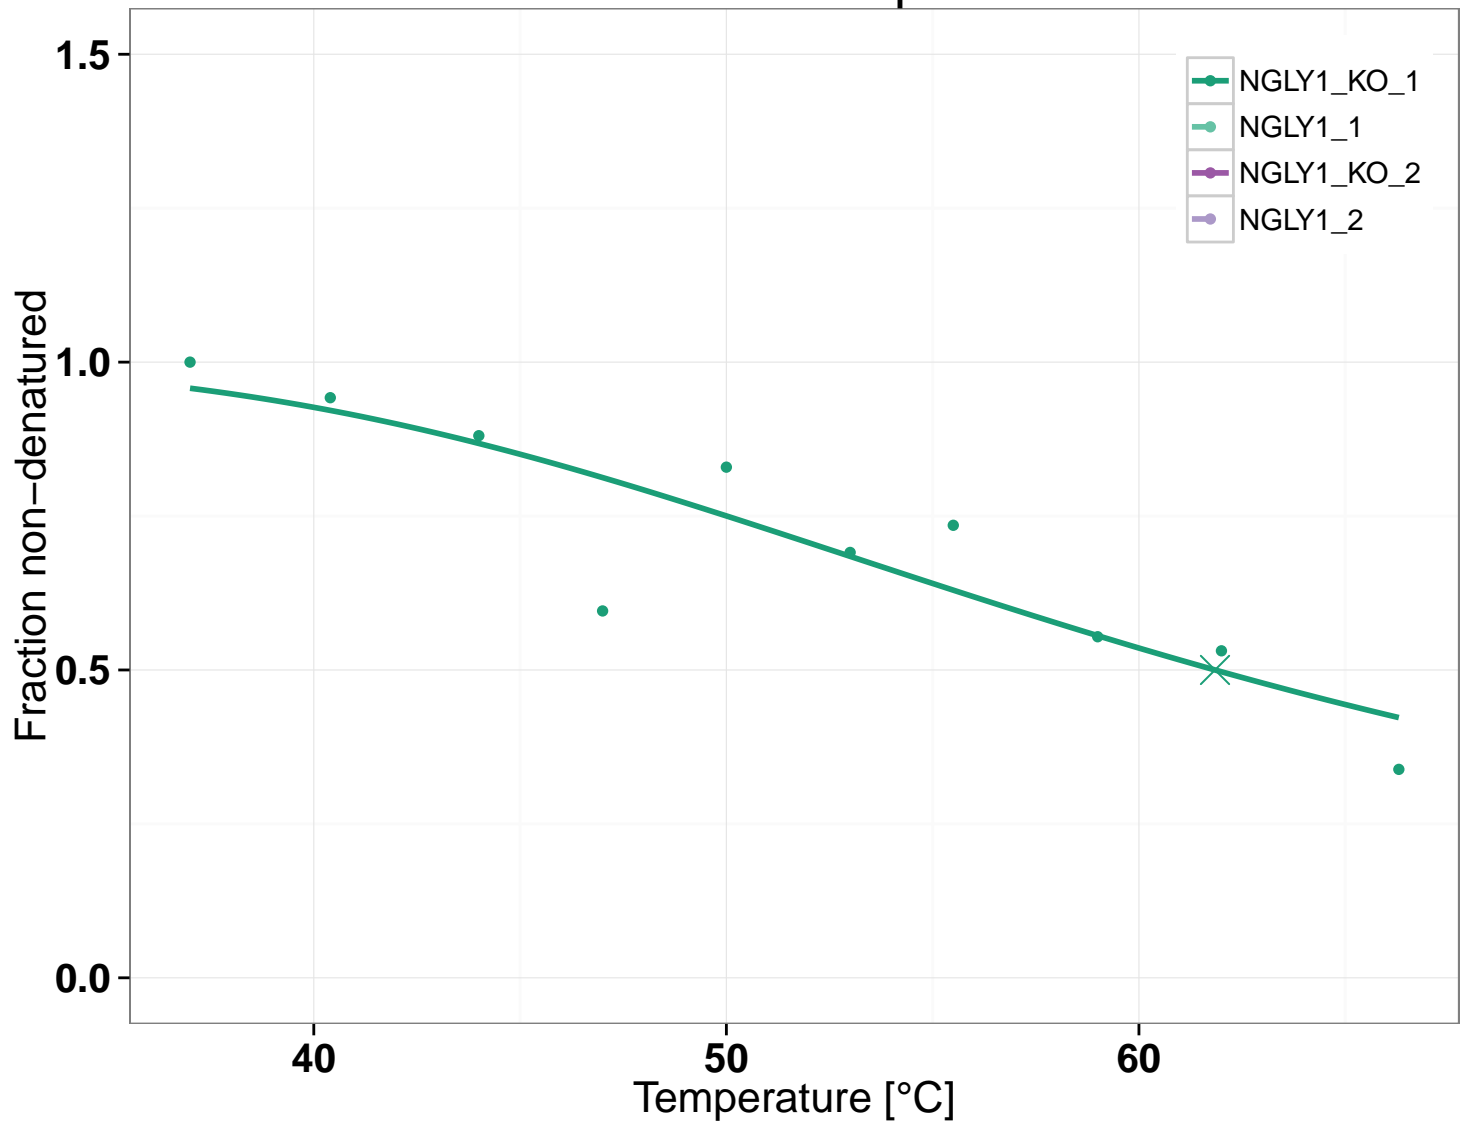

|            | meltPoint | slope  | plateau | R2   |
|------------|-----------|--------|---------|------|
| NGLY1_KO_1 | 61.84     | -0.022 | 0       | 0.81 |
| NGLY1_1    | -         | -      | -       | -    |
| NGLY1_KO_2 | -         | -      | -       | -    |
| NGLY1_2    | -         | -      | -       | -    |

Supplement: Supplementary file 4651 [file 1]

IPI00176829.2|RASSF3

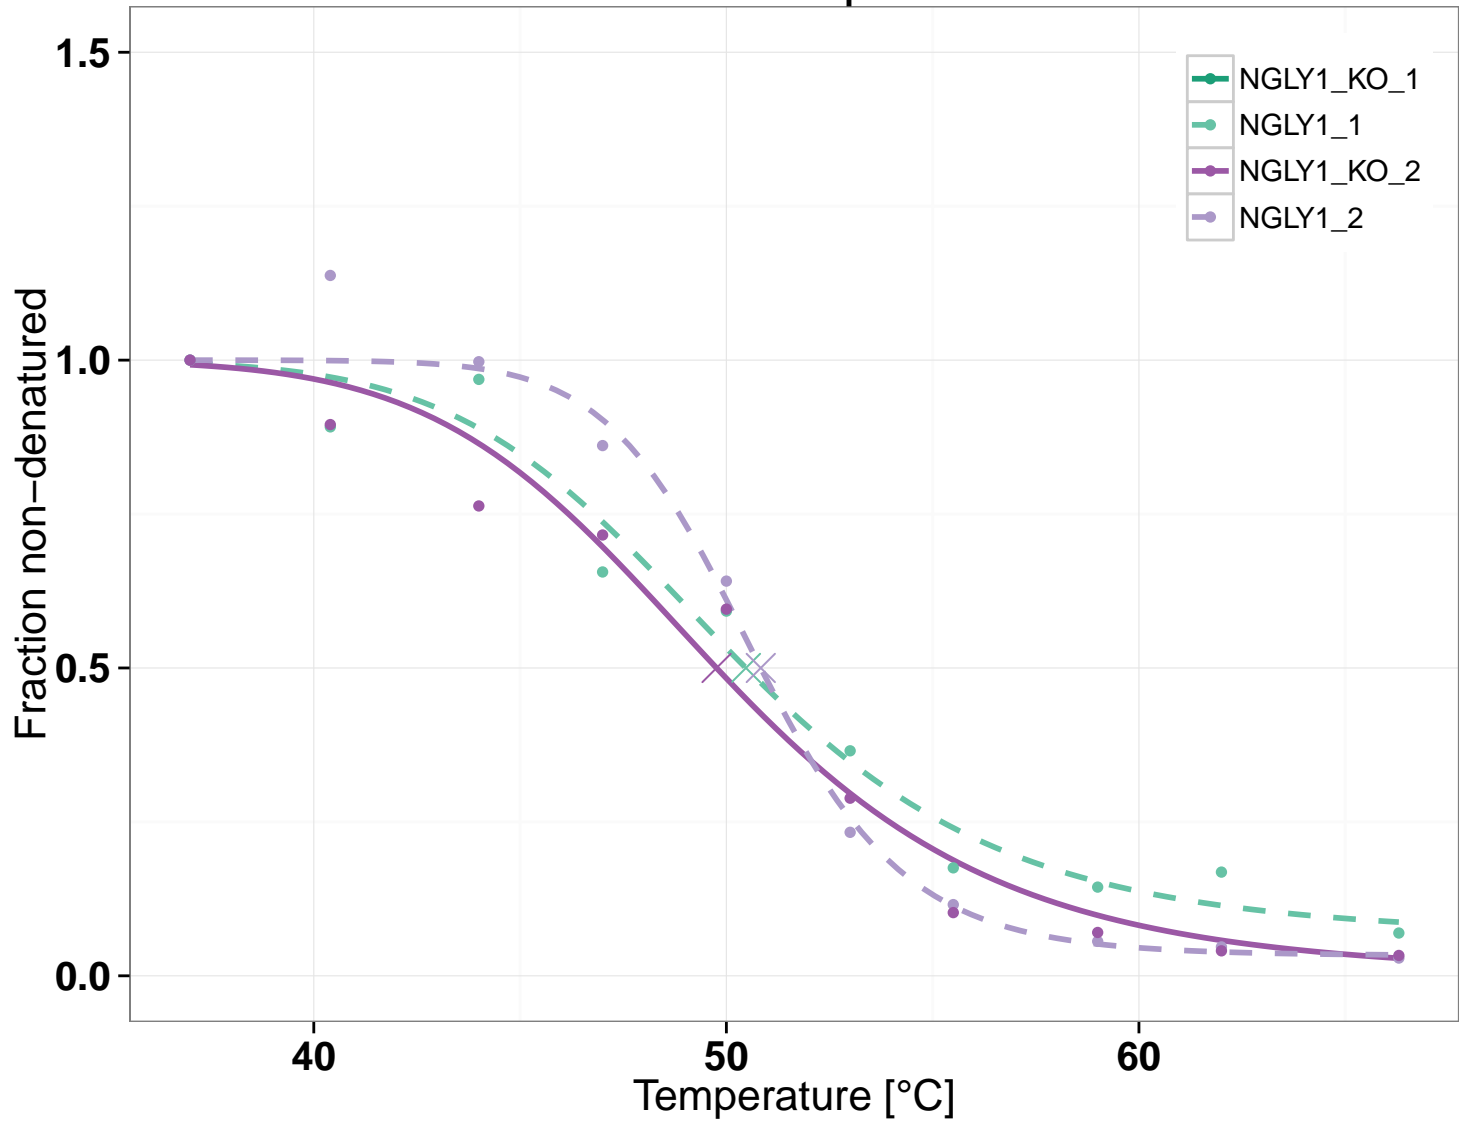

|            | meltPoint | slope  | plateau | R2   |
|------------|-----------|--------|---------|------|
| NGLY1_KO_1 | -         | -      | -       | -    |
| NGLY1_1    | 50.47     | -0.07  | 0.06    | 0.97 |
| NGLY1_KO_2 | 49.76     | -0.073 | 0       | 0.97 |
| NGLY1_2    | 50.83     | -0.13  | 0.03    | 0.99 |

Supplement: Supplementary file 4652 [file 1]

# IPI00010090.1|GCLM

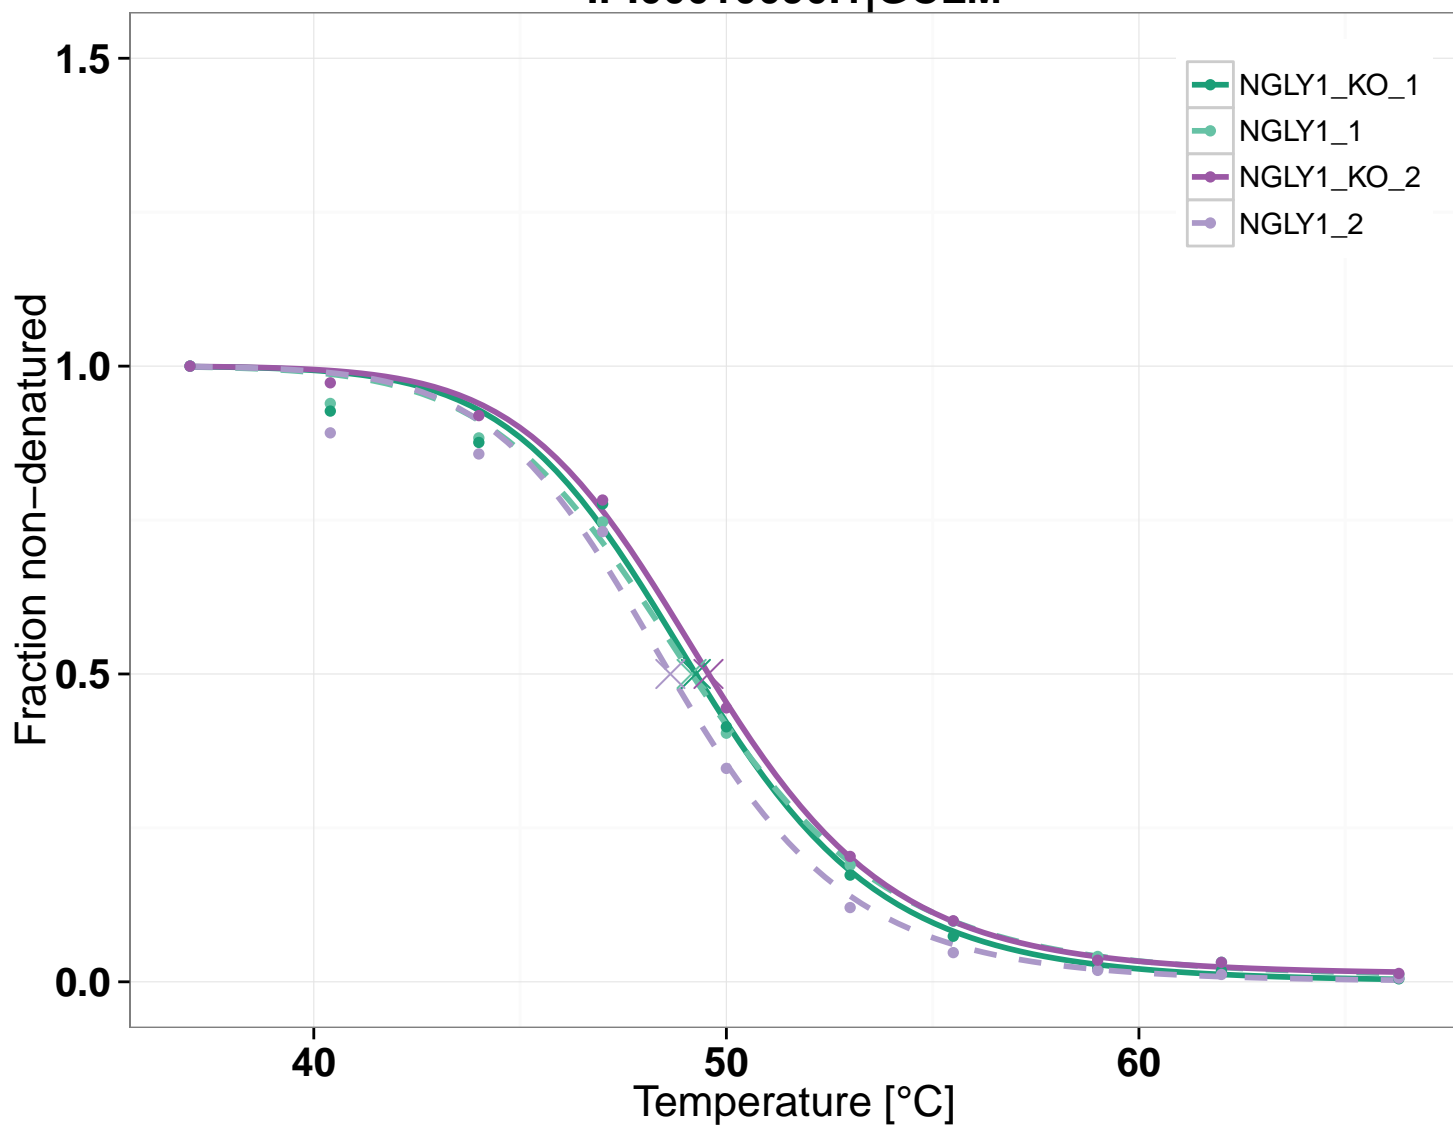

|            | meltPoint | slope | plateau | R2   |
|------------|-----------|-------|---------|------|
| NGLY1_KO_1 | 49.26     | -0.11 | 0       | 0.99 |
| NGLY1_1    | 49.16     | -0.1  | 0.01    | 1    |
| NGLY1_KO_2 | 49.57     | -0.11 | 0.01    | 1    |
| NGLY1_2    | 48.64     | -0.11 | 0       | 0.99 |

Supplement: Supplementary file 4653 [file 1]

IPI00184708.2|SLC25A29

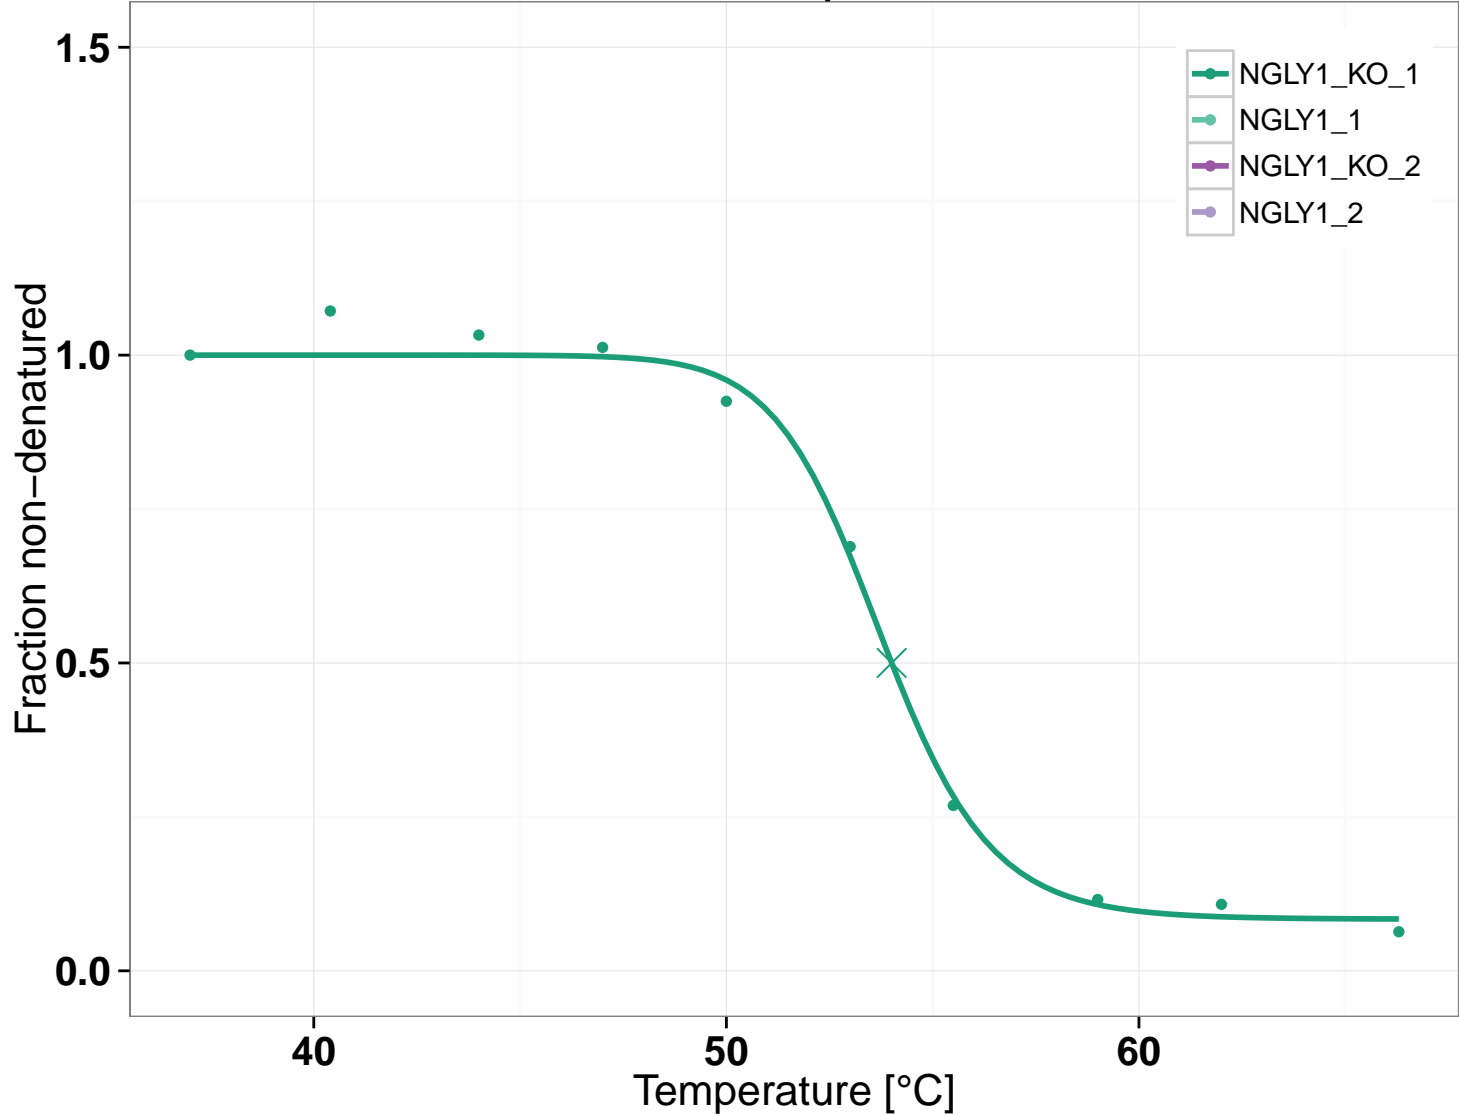

|            | meltPoint | slope | plateau | R2   |
|------------|-----------|-------|---------|------|
| NGLY1_KO_1 | 54.01     | -0.17 | 0.08    | 0.99 |
| NGLY1_1    | -         | -     | -       | -    |
| NGLY1_KO_2 | -         | -     | -       | -    |
| NGLY1_2    | -         | -     | -       | -    |

Supplement: Supplementary file 4654 [file 1]

IPI00220835.7|SEC61B

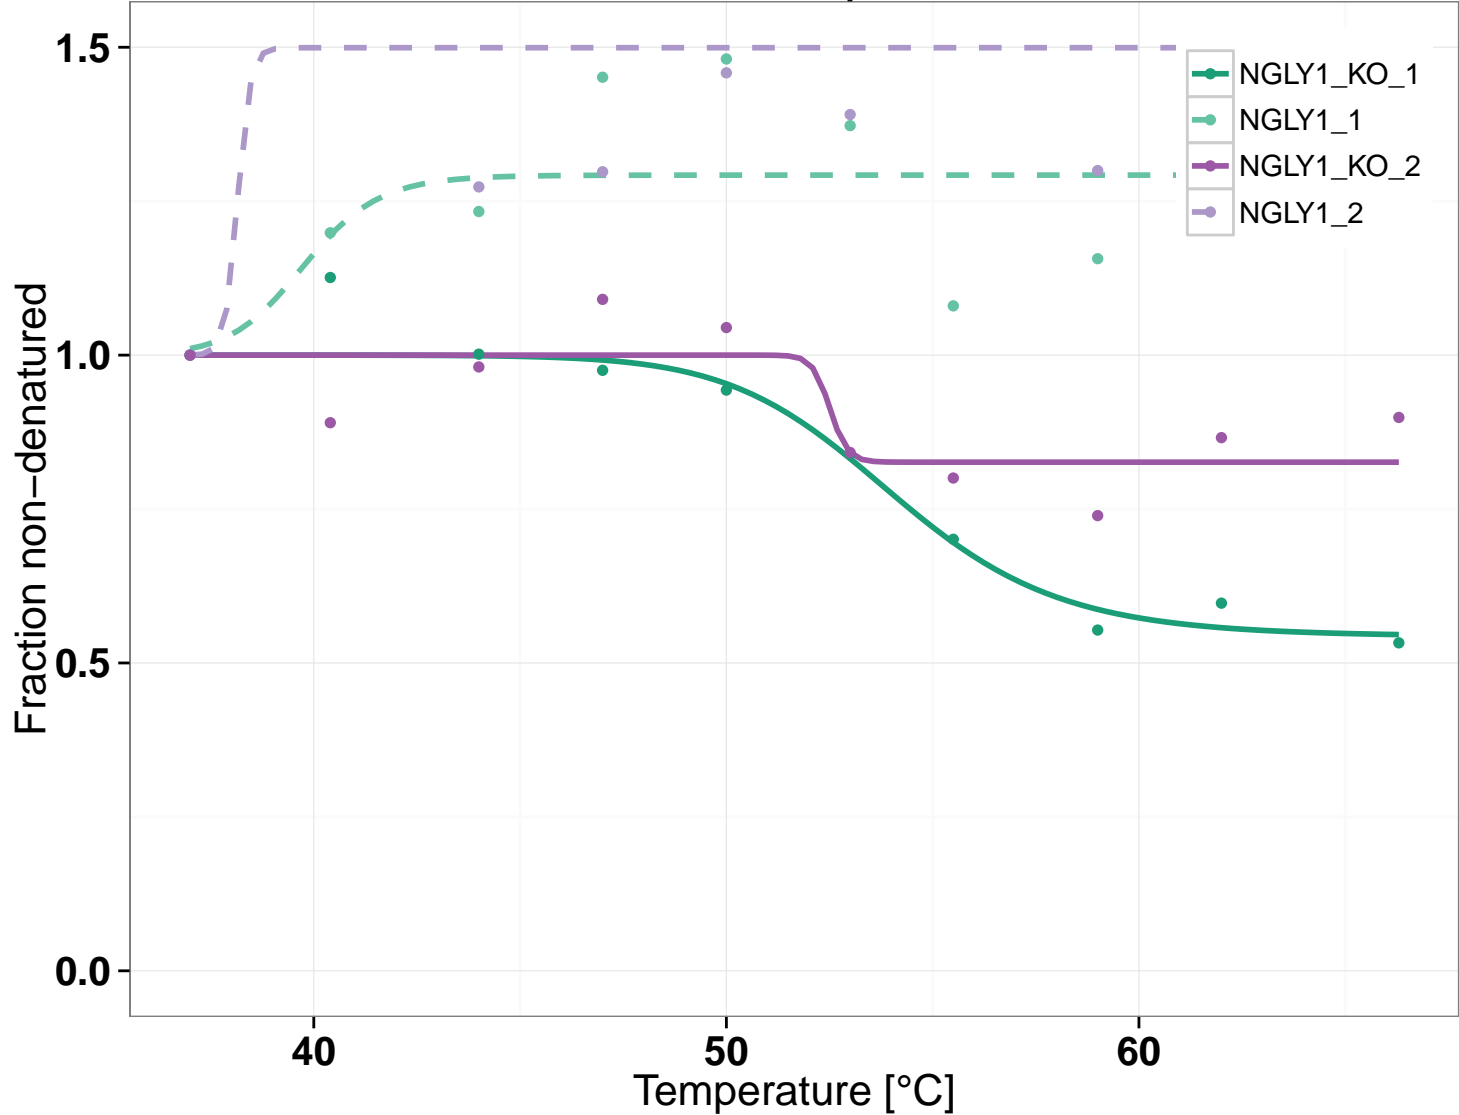

|            | meltPoint | slope  | plateau | R2   |
|------------|-----------|--------|---------|------|
| NGLY1_KO_1 | —         | -0.057 | 0.54    | 0.95 |
| NGLY1_1    | —         | 0.081  | 1.29    | 0.37 |
| NGLY1_KO_2 | —         | -0.21  | 0.83    | 0.66 |
| NGLY1_2    | —         | 0.82   | 1.5     | 0.36 |

Supplement: Supplementary file 4655 [file 1]

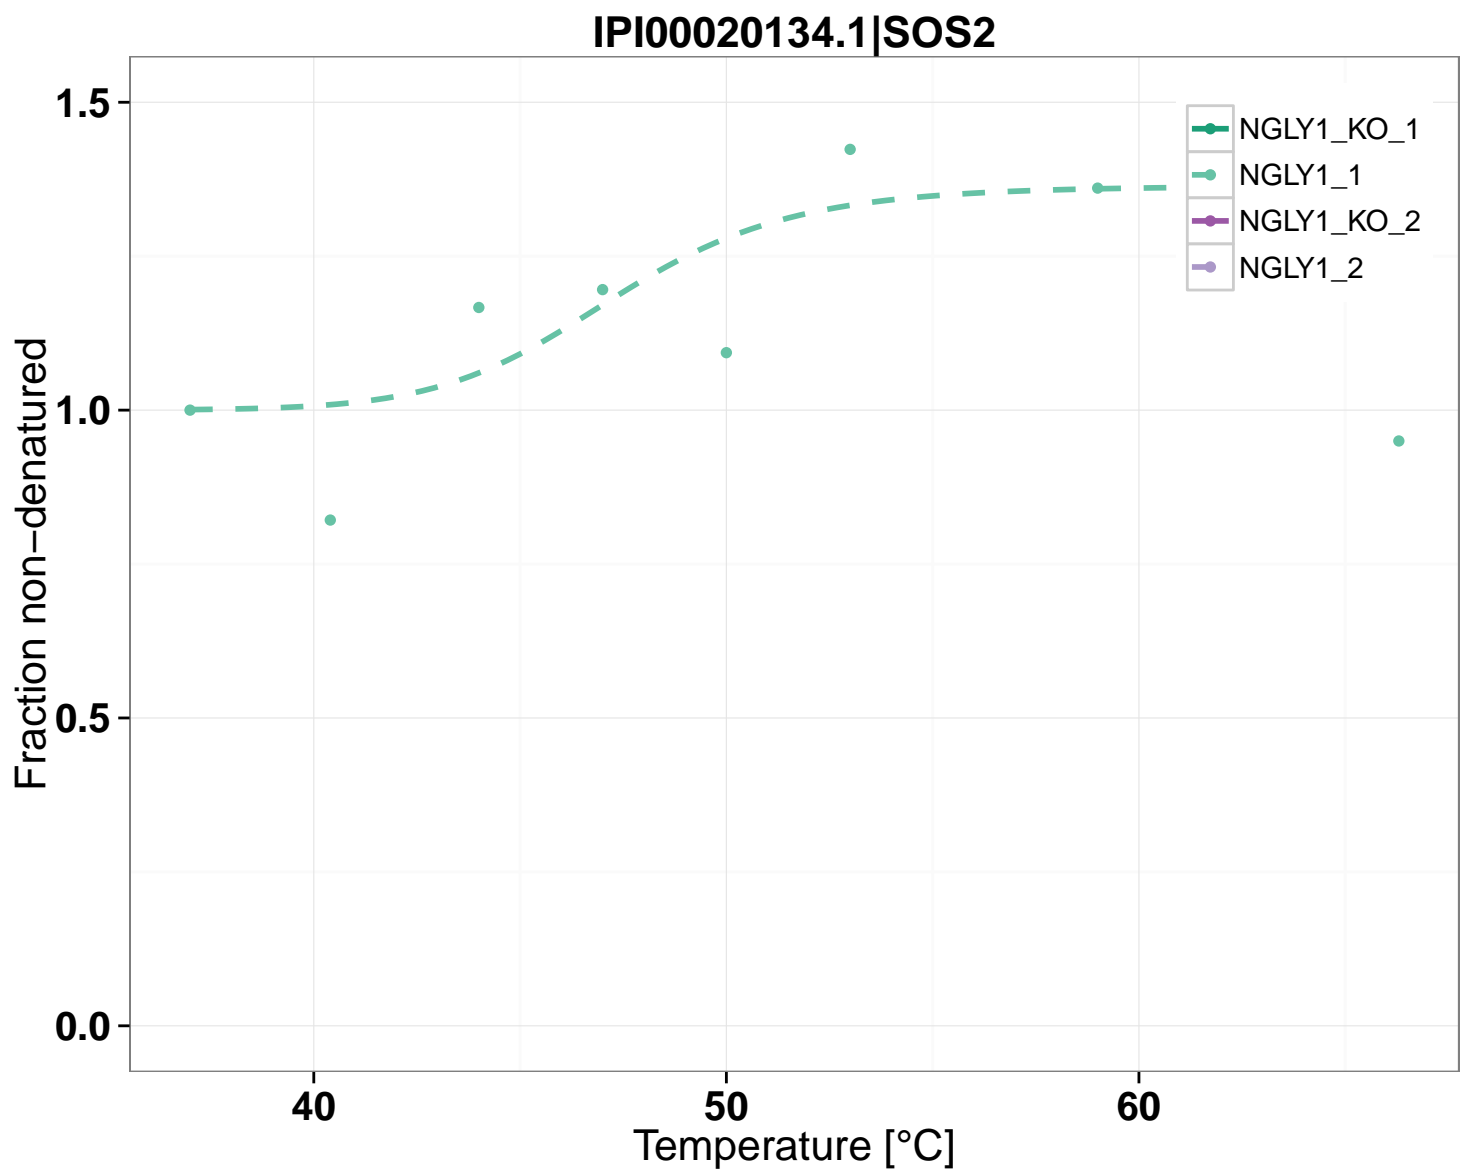

|            | meltPoint | slope | plateau | R2   |
|------------|-----------|-------|---------|------|
| NGLY1_KO_1 | –         | –     | –       | –    |
| NGLY1_1    | –         | 0.042 | 1.36    | 0.42 |
| NGLY1_KO_2 | –         | –     | –       | –    |
| NGLY1_2    | –         | –     | –       | –    |

Supplement: Supplementary file 4656 [file 1]

# IPI00010279.4|GDE1

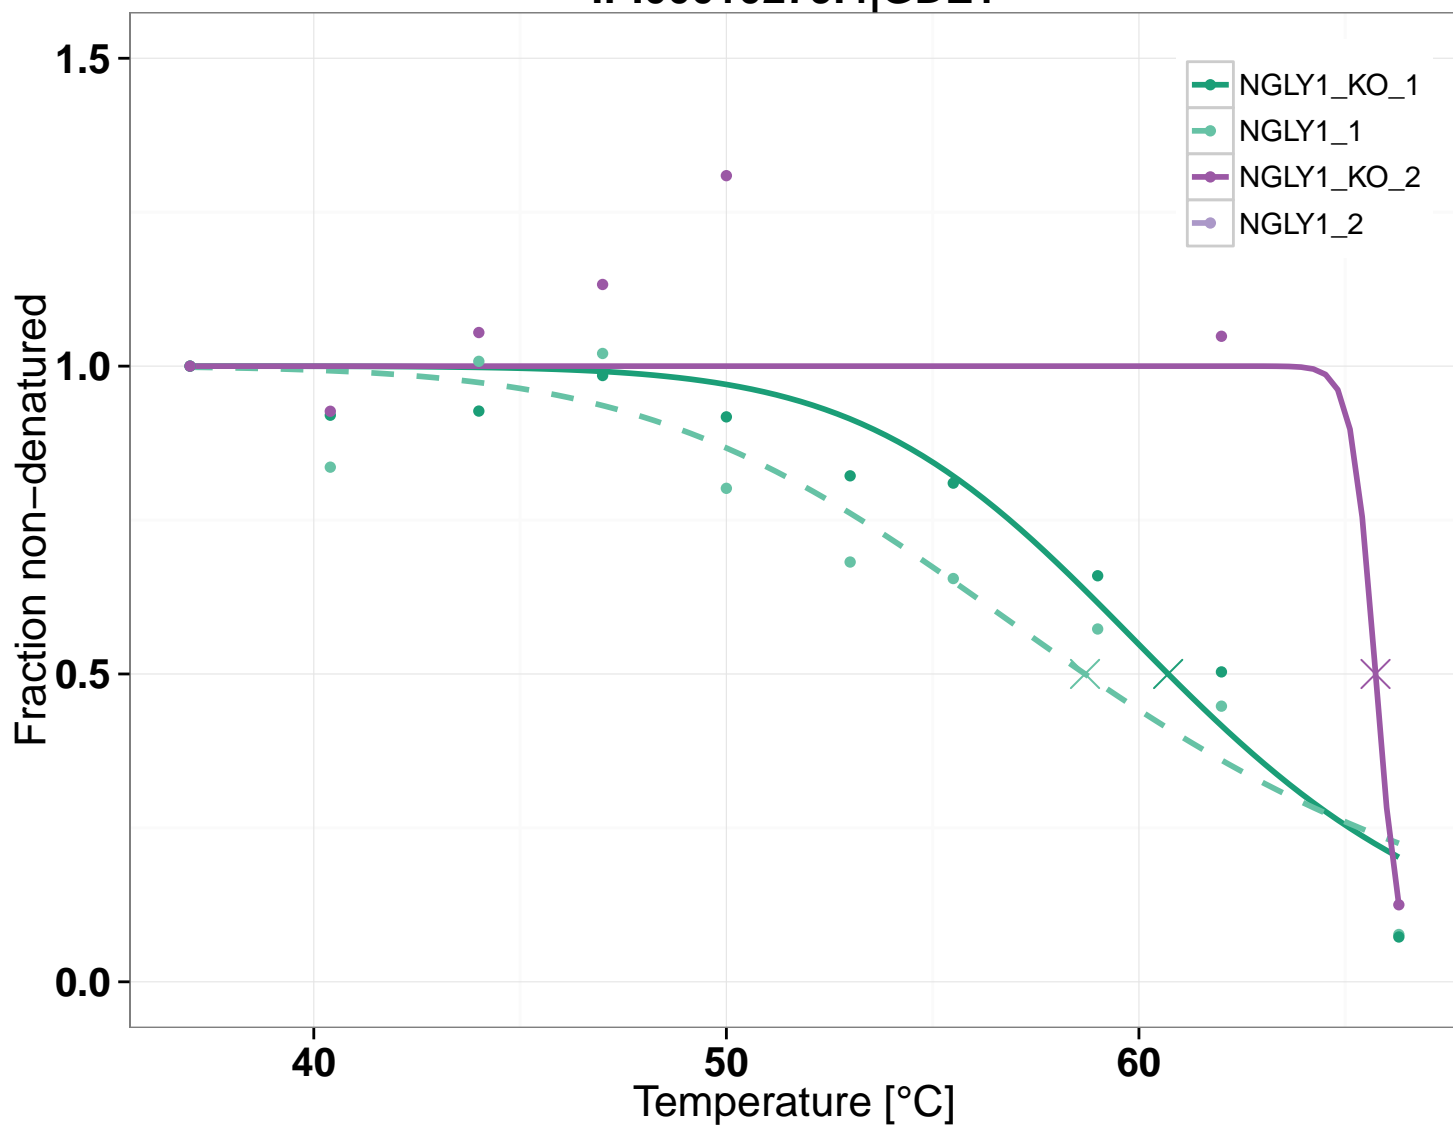

|            | meltPoint | slope  | plateau | R2   |
|------------|-----------|--------|---------|------|
| NGLY1_KO_1 | 60.71     | -0.068 | 0       | 0.93 |
| NGLY1_1    | 58.69     | -0.047 | 0       | 0.9  |
| NGLY1_KO_2 | 65.73     | -0.87  | 0       | 0.28 |
| NGLY1_2    | -         | -      | -       | -    |

Supplement: Supplementary file 4657 [file 1]

# IPI00000203.1|LRP6

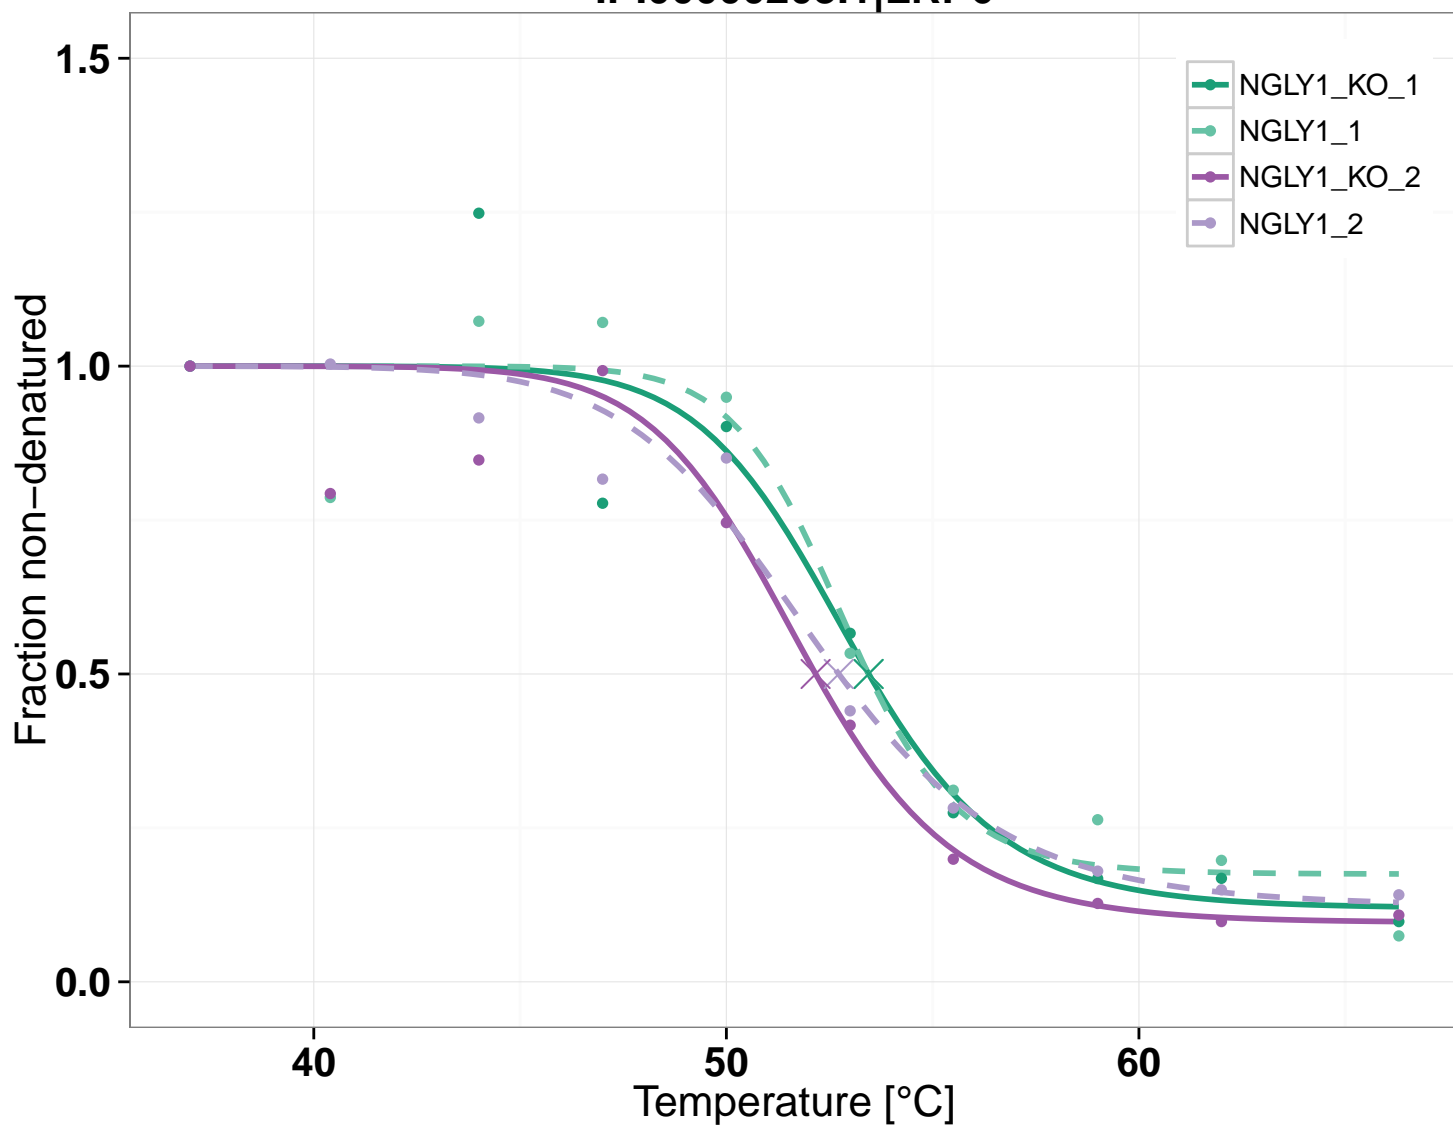

|            | meltPoint | slope  | plateau | R2   |
|------------|-----------|--------|---------|------|
| NGLY1_KO_1 | 53.45     | -0.12  | 0.12    | 0.68 |
| NGLY1_1    | 53.44     | -0.15  | 0.17    | 0.95 |
| NGLY1_KO_2 | 52.16     | -0.12  | 0.1     | 0.95 |
| NGLY1_2    | 52.72     | -0.095 | 0.12    | 0.98 |

Supplement: Supplementary file 4658 [file 1]

IPI00465113.2|EXDL2

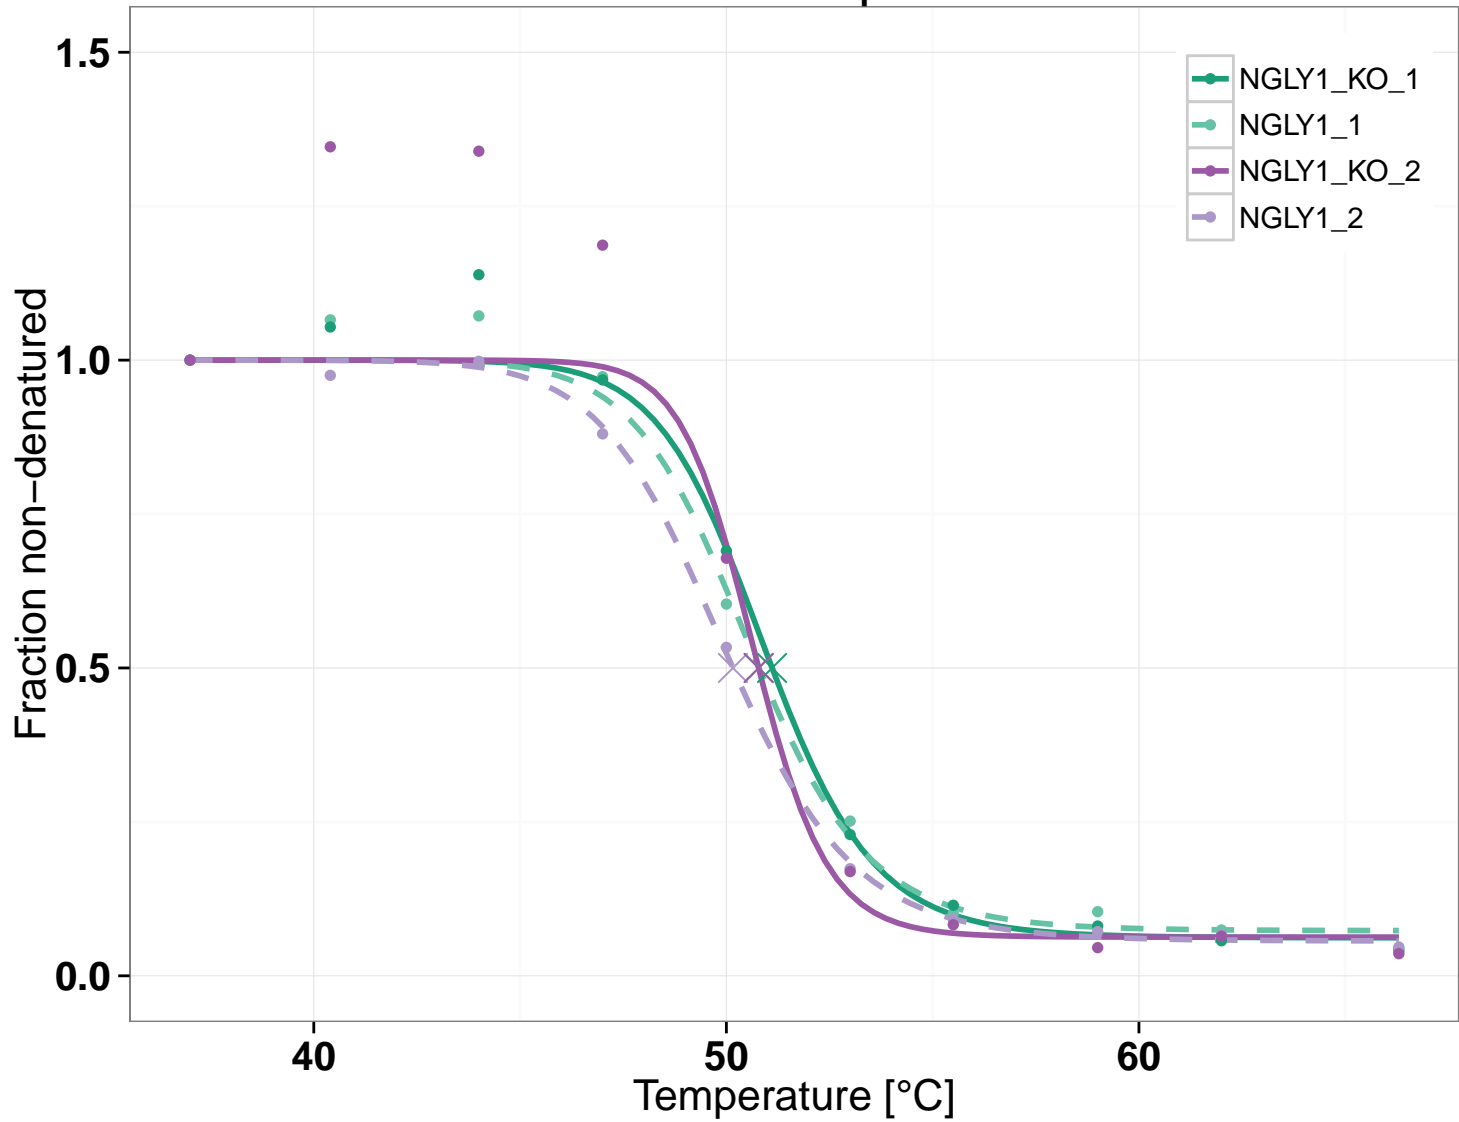

|            | meltPoint | slope | plateau | R2   |
|------------|-----------|-------|---------|------|
| NGLY1_KO_1 | 51.11     | -0.18 | 0.06    | 0.99 |
| NGLY1_1    | 50.79     | -0.16 | 0.07    | 0.99 |
| NGLY1_KO_2 | 50.78     | -0.26 | 0.06    | 0.91 |
| NGLY1_2    | 50.16     | -0.15 | 0.06    | 1    |

Supplement: Supplementary file 4659 [file 1]

IPI00798127.1|RPS27A

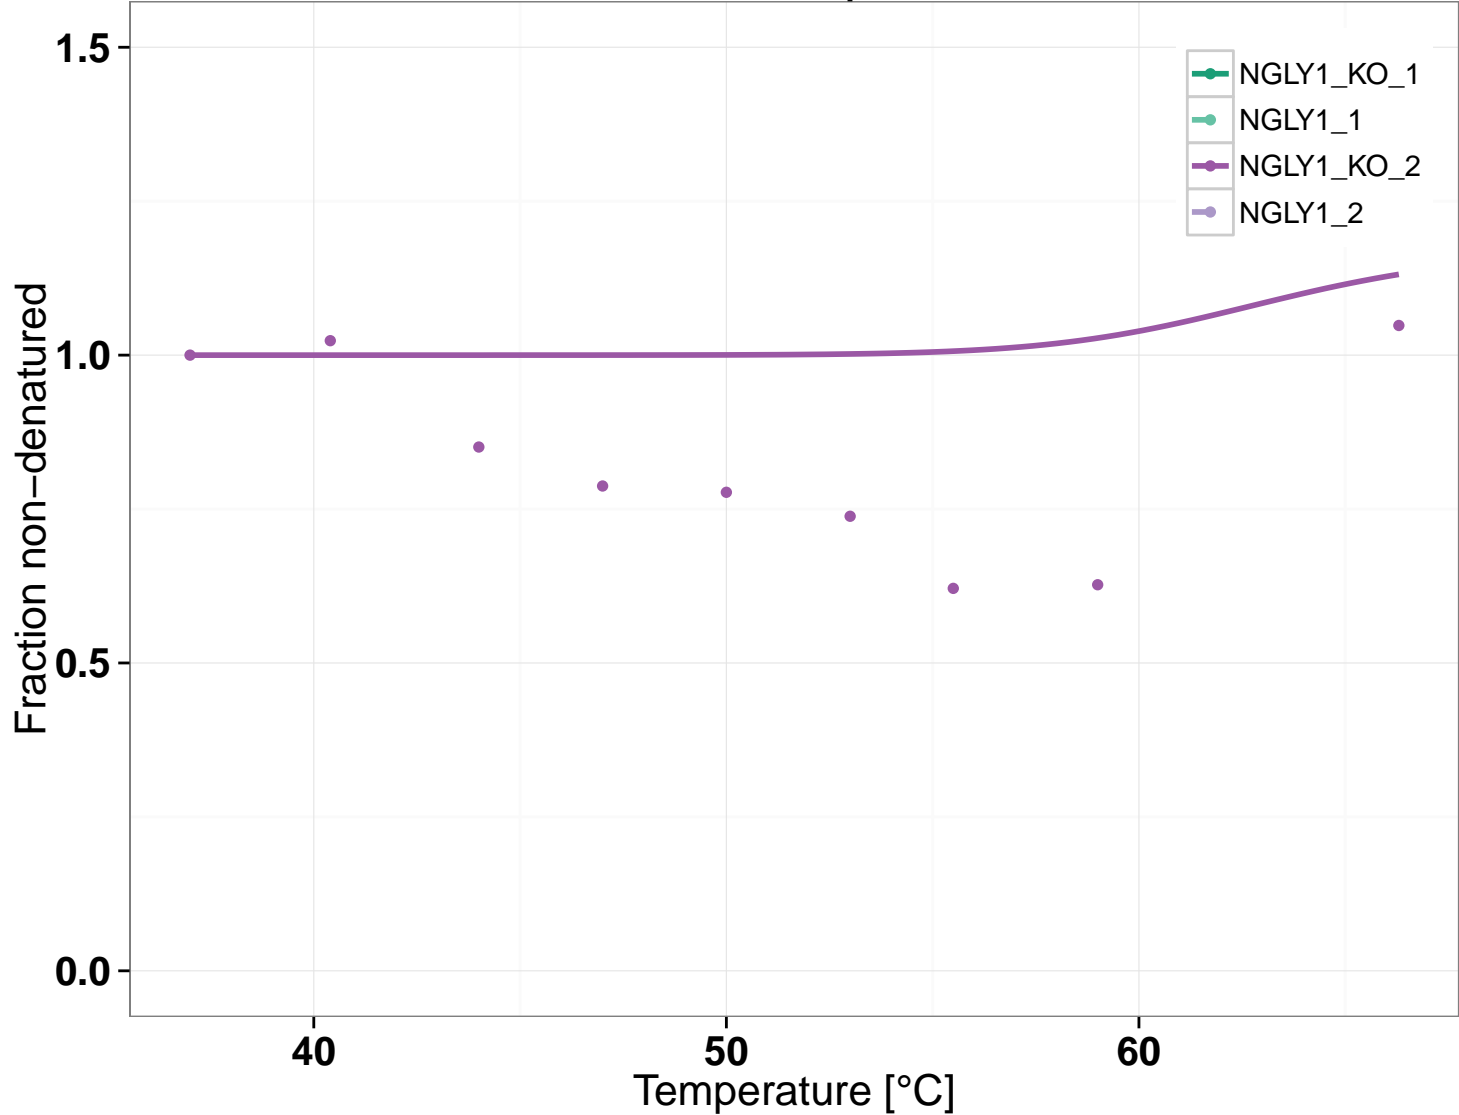

|            | meltPoint | slope | plateau | R2    |
|------------|-----------|-------|---------|-------|
| NGLY1_KO_1 | -         | -     | -       | -     |
| NGLY1_1    | -         | -     | -       | -     |
| NGLY1_KO_2 | -         | 0.016 | 1.17    | -0.17 |
| NGLY1_2    | -         | -     | -       | -     |

Supplement: Supplementary file 4660 [file 1]

# IPI00009659.3|RPRD1B

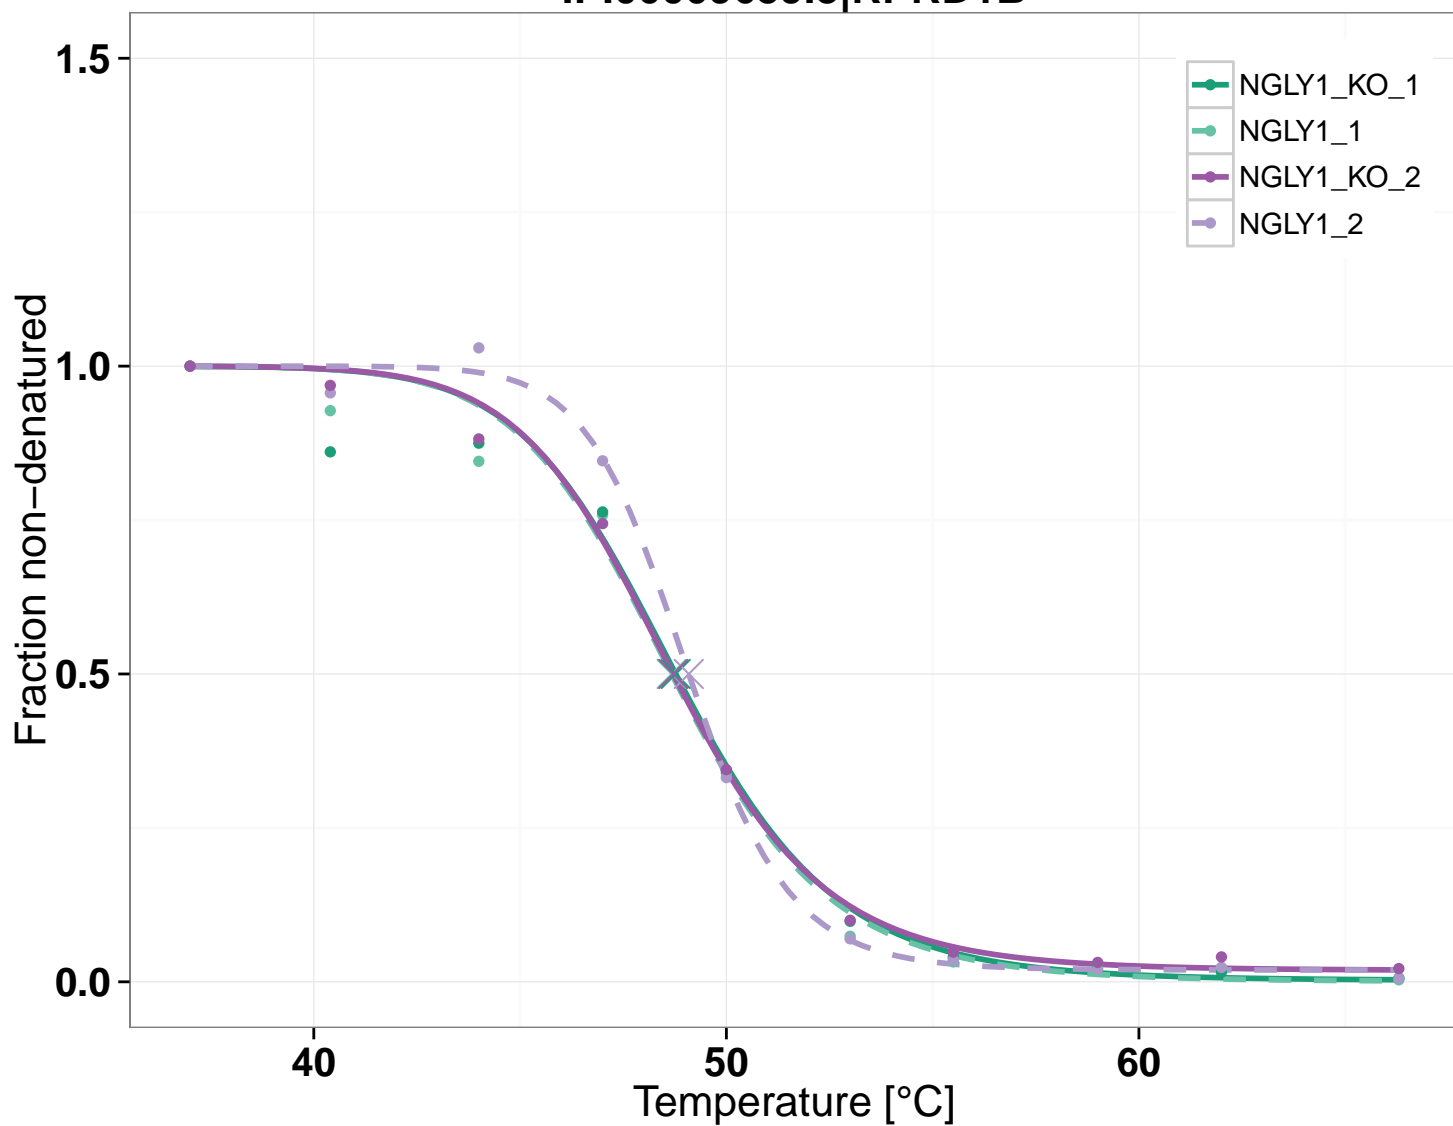

|            | meltPoint | slope | plateau | R2   |
|------------|-----------|-------|---------|------|
| NGLY1_KO_1 | 48.77     | -0.13 | 0       | 0.98 |
| NGLY1_1    | 48.67     | -0.13 | 0       | 0.99 |
| NGLY1_KO_2 | 48.71     | -0.13 | 0.02    | 1    |
| NGLY1_2    | 49.09     | -0.2  | 0.02    | 1    |

Supplement: Supplementary file 4661 [file 1]

# IPI00030702.1|IDH3A

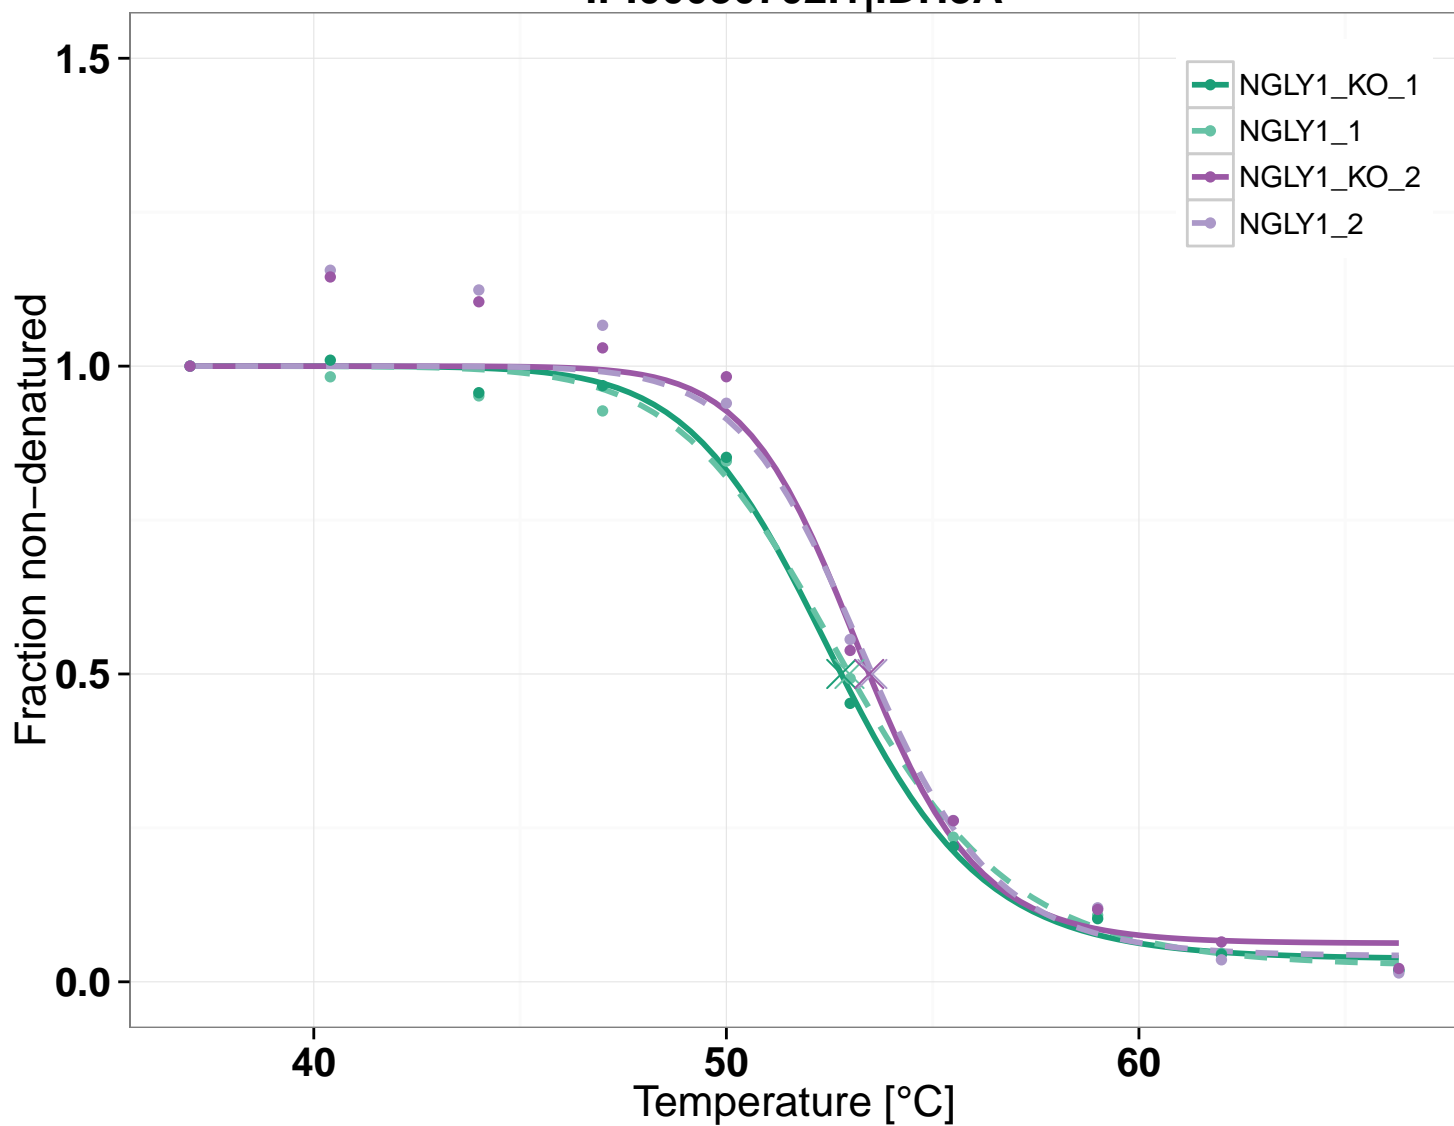

|            | meltPoint | slope | plateau | R2   |
|------------|-----------|-------|---------|------|
| NGLY1_KO_1 | 52.79     | -0.13 | 0.04    | 1    |
| NGLY1_1    | 52.98     | -0.12 | 0.02    | 1    |
| NGLY1_KO_2 | 53.46     | -0.17 | 0.06    | 0.98 |
| NGLY1_2    | 53.54     | -0.15 | 0.04    | 0.98 |

Supplement: Supplementary file 4662 [file 1]

IPI00009335.2|C8ORF30A

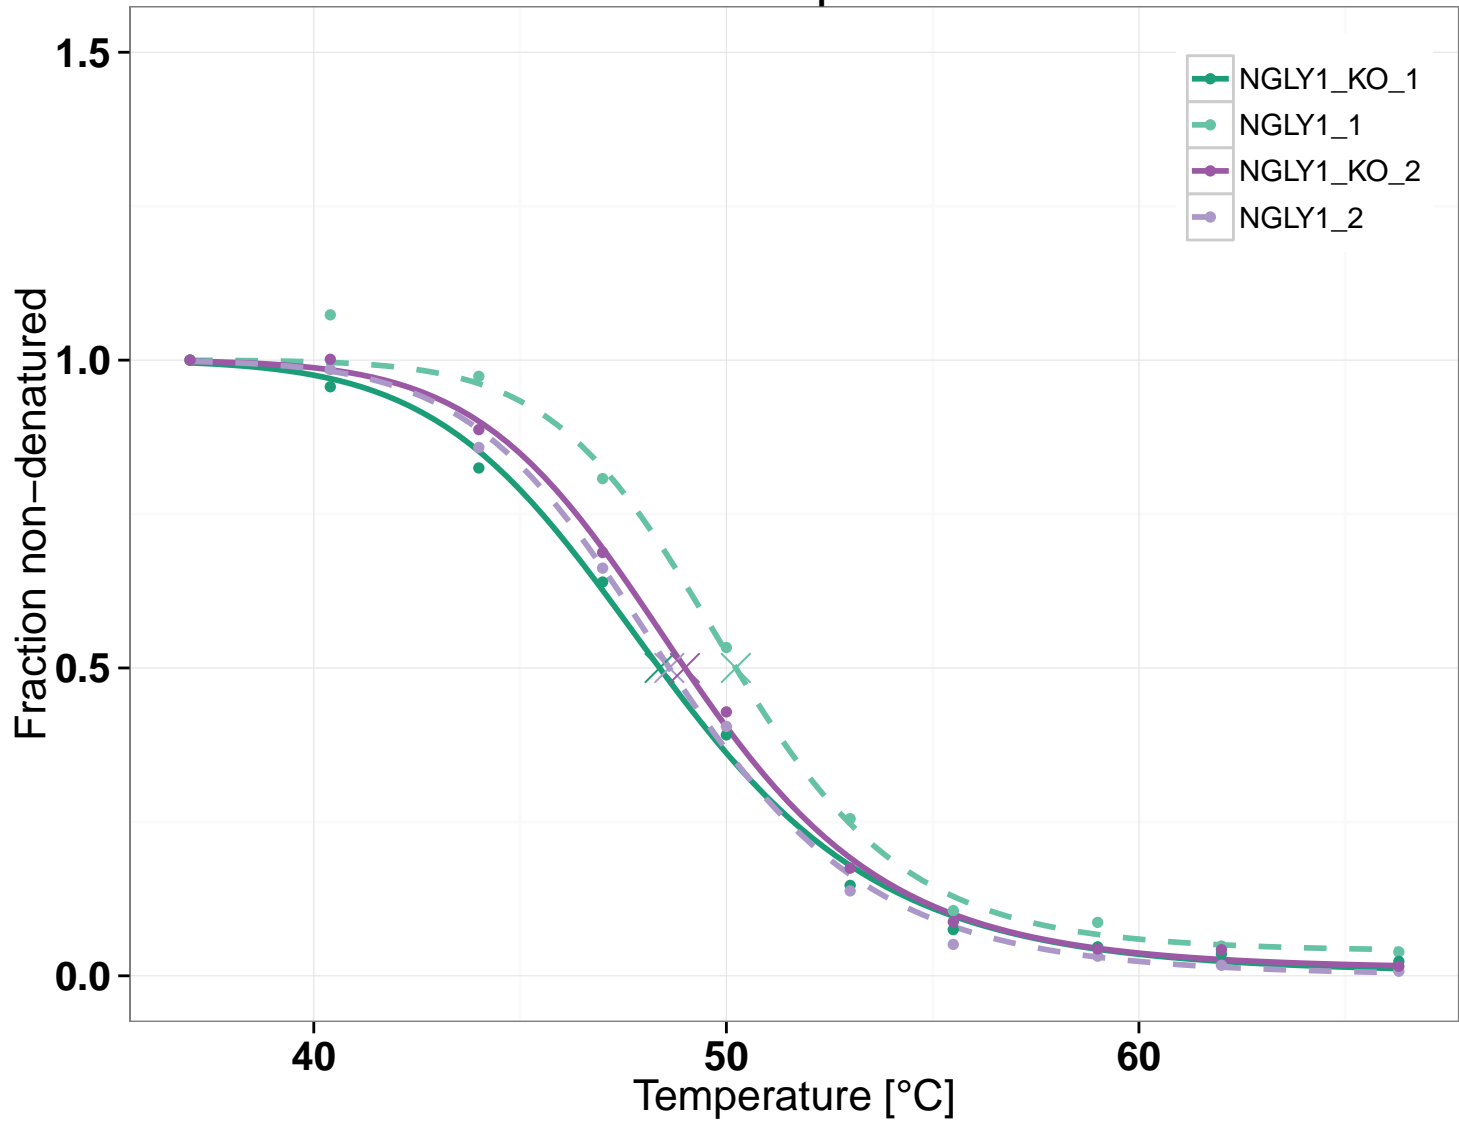

|            | meltPoint | slope  | plateau | R2 |
|------------|-----------|--------|---------|----|
| NGLY1_KO_1 | 48.38     | -0.092 | 0       | 1  |
| NGLY1_1    | 50.23     | -0.11  | 0.04    | 1  |
| NGLY1_KO_2 | 48.99     | -0.1   | 0.01    | 1  |
| NGLY1_2    | 48.62     | -0.1   | 0       | 1  |

Supplement: Supplementary file 4663 [file 1]

IPI00010550.3|FOXL2

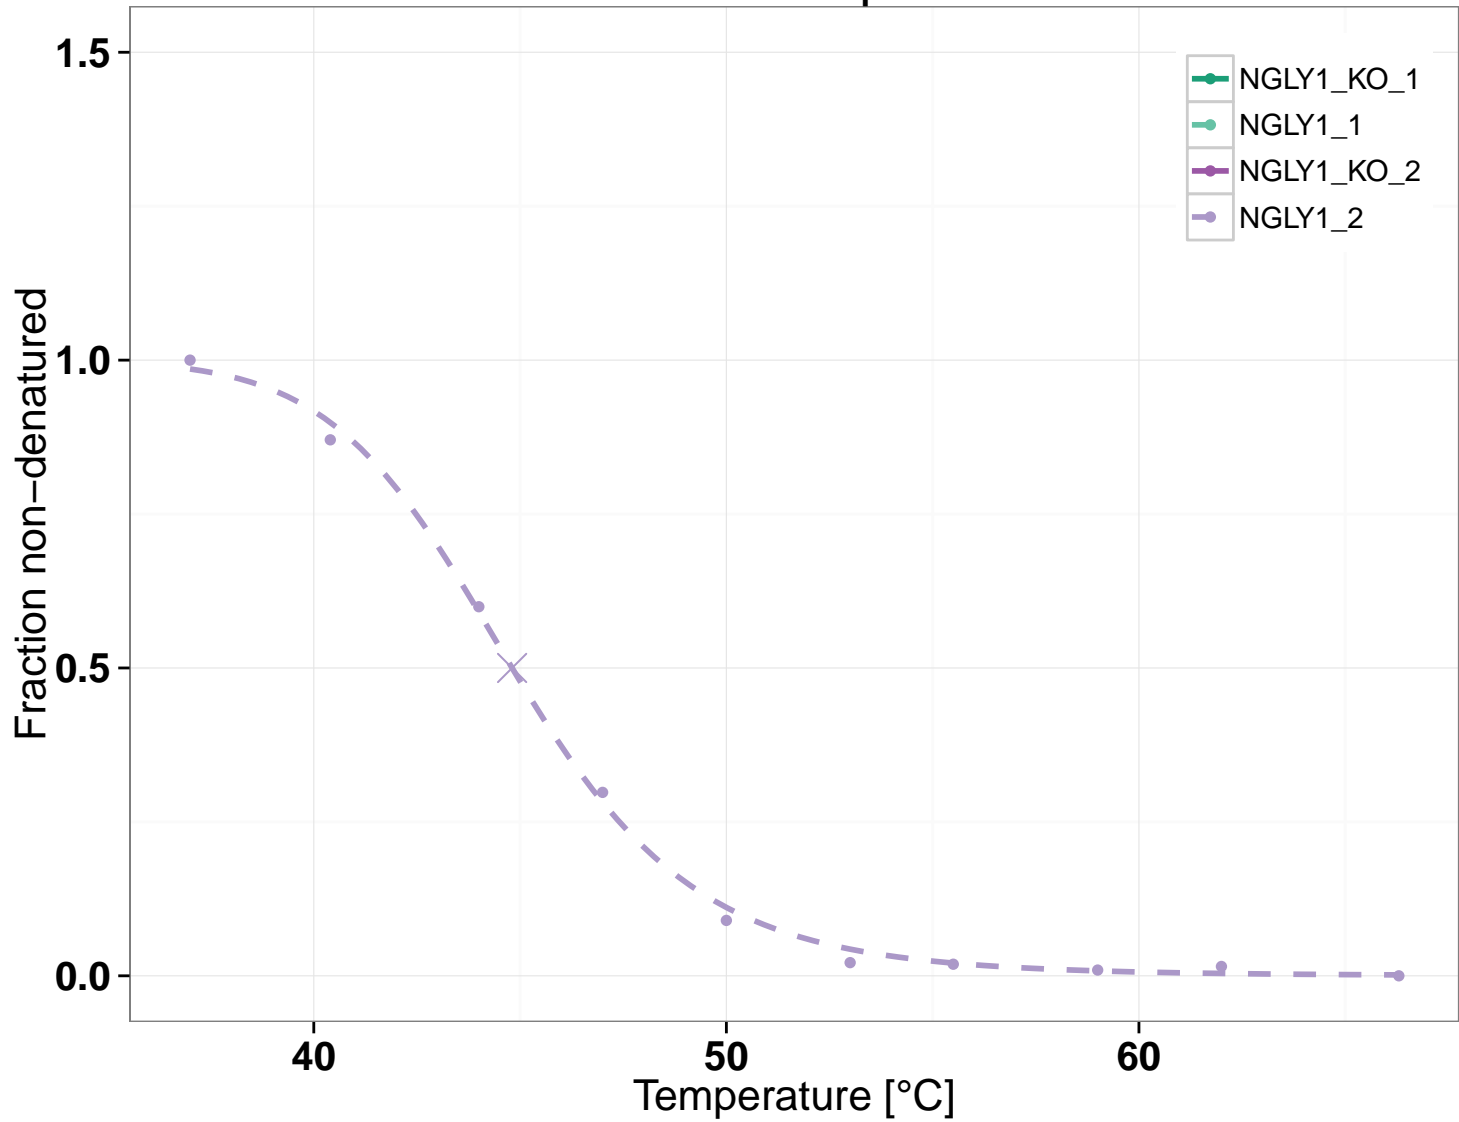

|            | meltPoint | slope | plateau | R2 |
|------------|-----------|-------|---------|----|
| NGLY1_KO_1 | -         | -     | -       | -  |
| NGLY1_1    | -         | -     | -       | -  |
| NGLY1_KO_2 | -         | -     | -       | -  |
| NGLY1_2    | 44.81     | -0.11 | 0       | 1  |

Supplement: Supplementary file 4664 [file 1]

IPI00871728.3|FAM115A

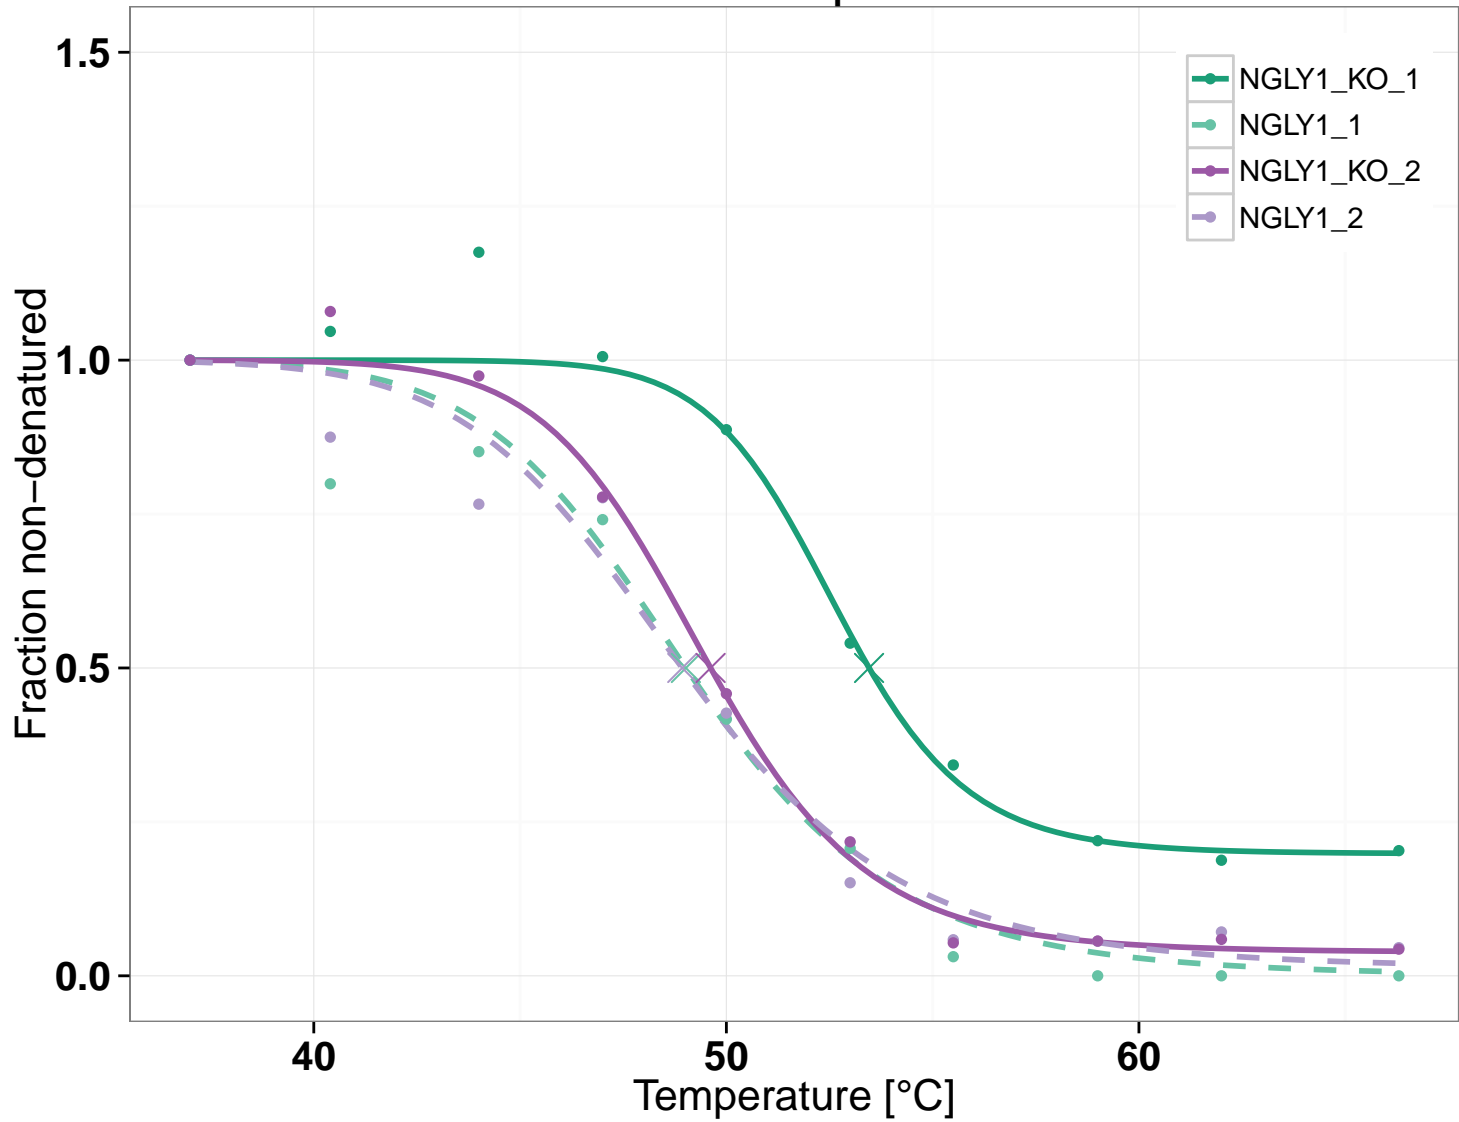

|            | meltPoint | slope  | plateau | R2   |
|------------|-----------|--------|---------|------|
| NGLY1_KO_1 | 53.46     | -0.13  | 0.2     | 0.98 |
| NGLY1_1    | 49.02     | -0.099 | 0       | 0.97 |
| NGLY1_KO_2 | 49.62     | -0.12  | 0.04    | 0.99 |
| NGLY1_2    | 48.93     | -0.093 | 0.01    | 0.97 |

Supplement: Supplementary file 4665 [file 1]

IPI00640047.1|ZNF771

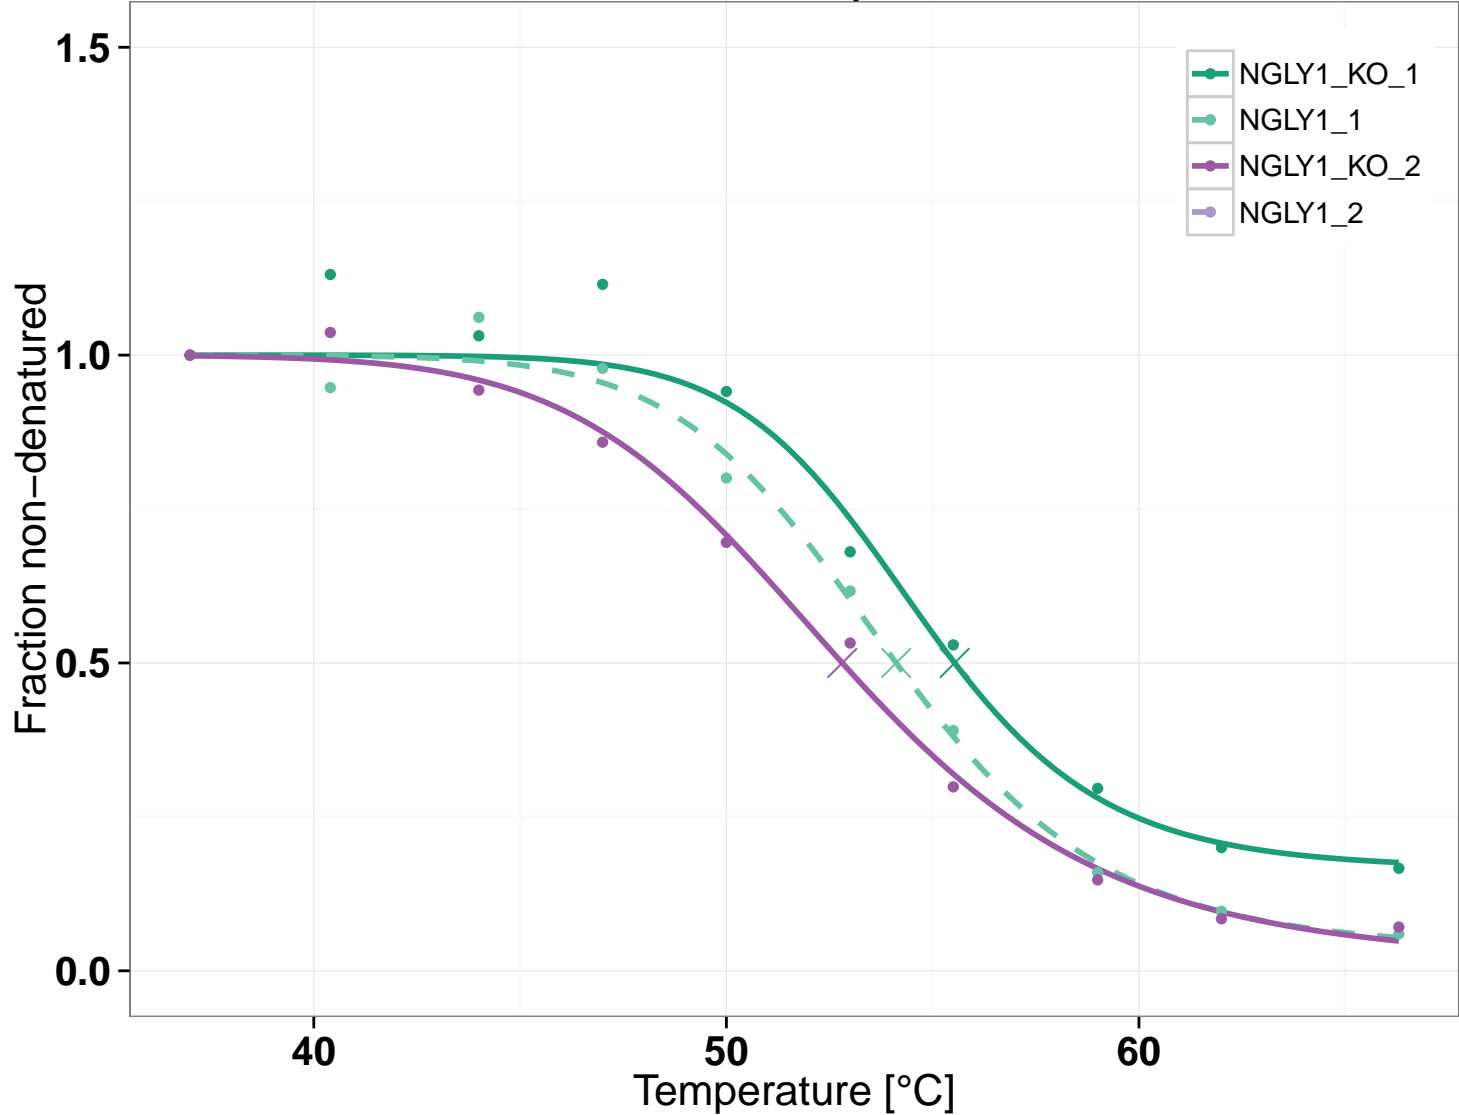

|            | meltPoint | slope  | plateau | R2   |
|------------|-----------|--------|---------|------|
| NGLY1_KO_1 | 55.53     | -0.095 | 0.17    | 0.97 |
| NGLY1_1    | 54.12     | -0.093 | 0.03    | 0.99 |
| NGLY1_KO_2 | 52.81     | -0.076 | 0.01    | 1    |
| NGLY1_2    | -         | -      | -       | -    |

Supplement: Supplementary file 4666 [file 1]

# IPI00011274.3|HNRPDL

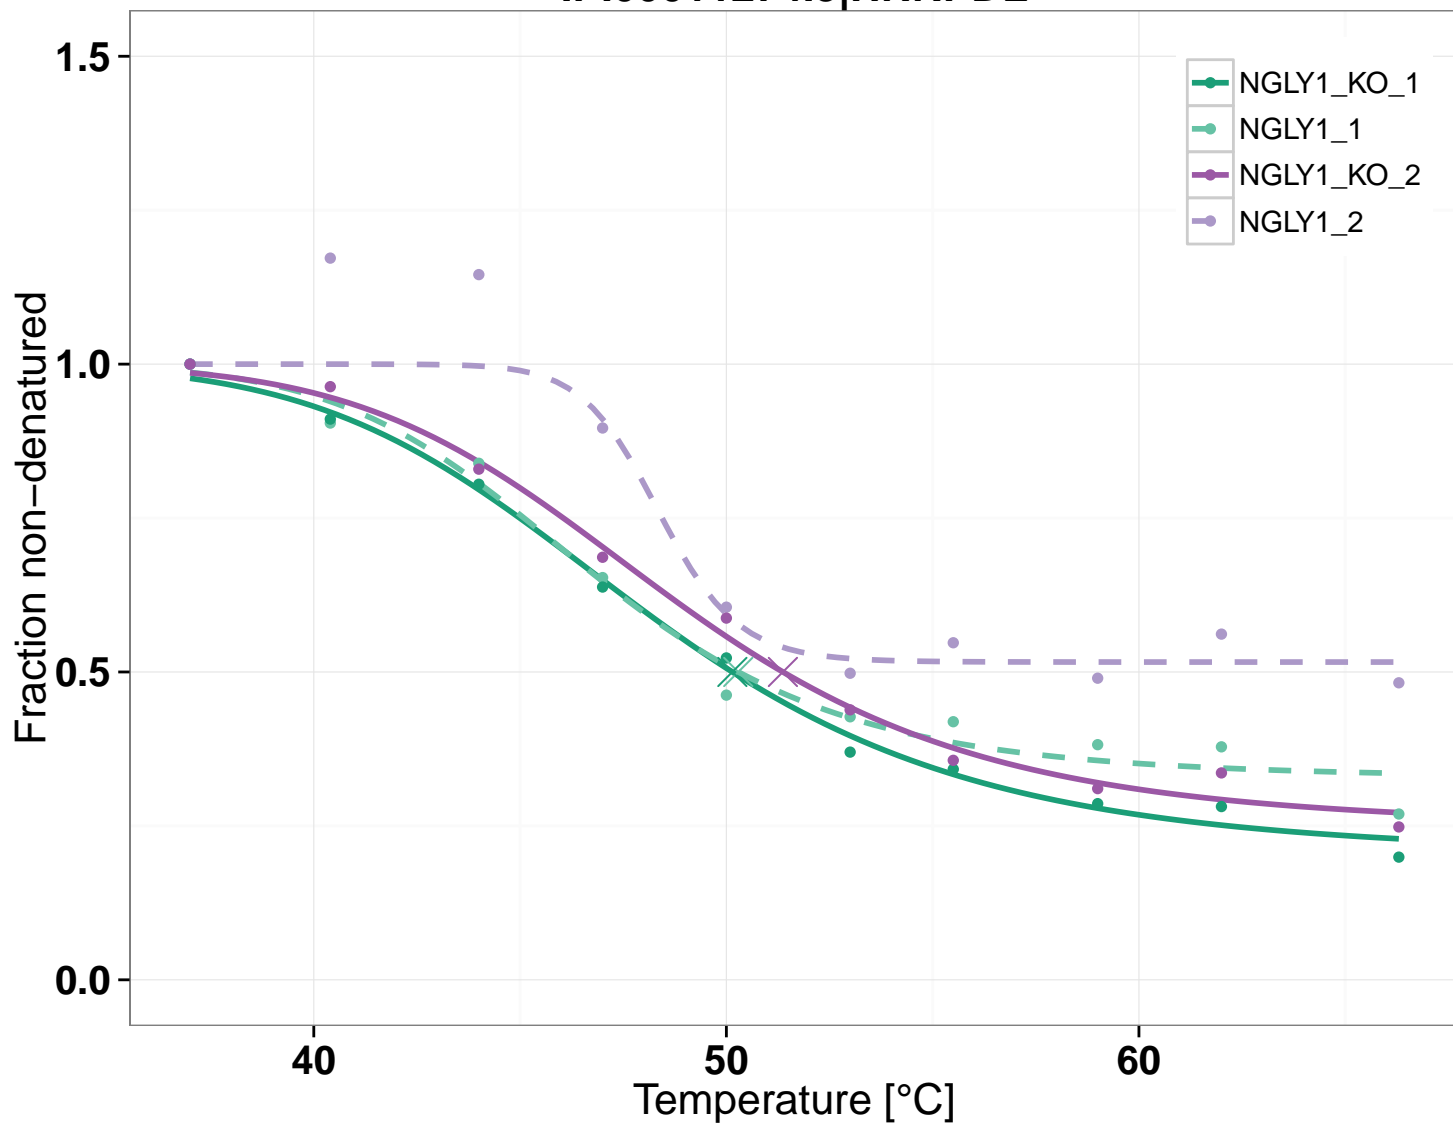

|            | meltPoint | slope  | plateau | R2   |
|------------|-----------|--------|---------|------|
| NGLY1_KO_1 | 50.15     | -0.051 | 0.2     | 0.99 |
| NGLY1_1    | 50.29     | -0.054 | 0.33    | 0.98 |
| NGLY1_KO_2 | 51.37     | -0.05  | 0.25    | 0.99 |
| NGLY1_2    | -         | -0.13  | 0.52    | 0.92 |

Supplement: Supplementary file 4667 [file 1]

IPI00019487.3|NUDT15

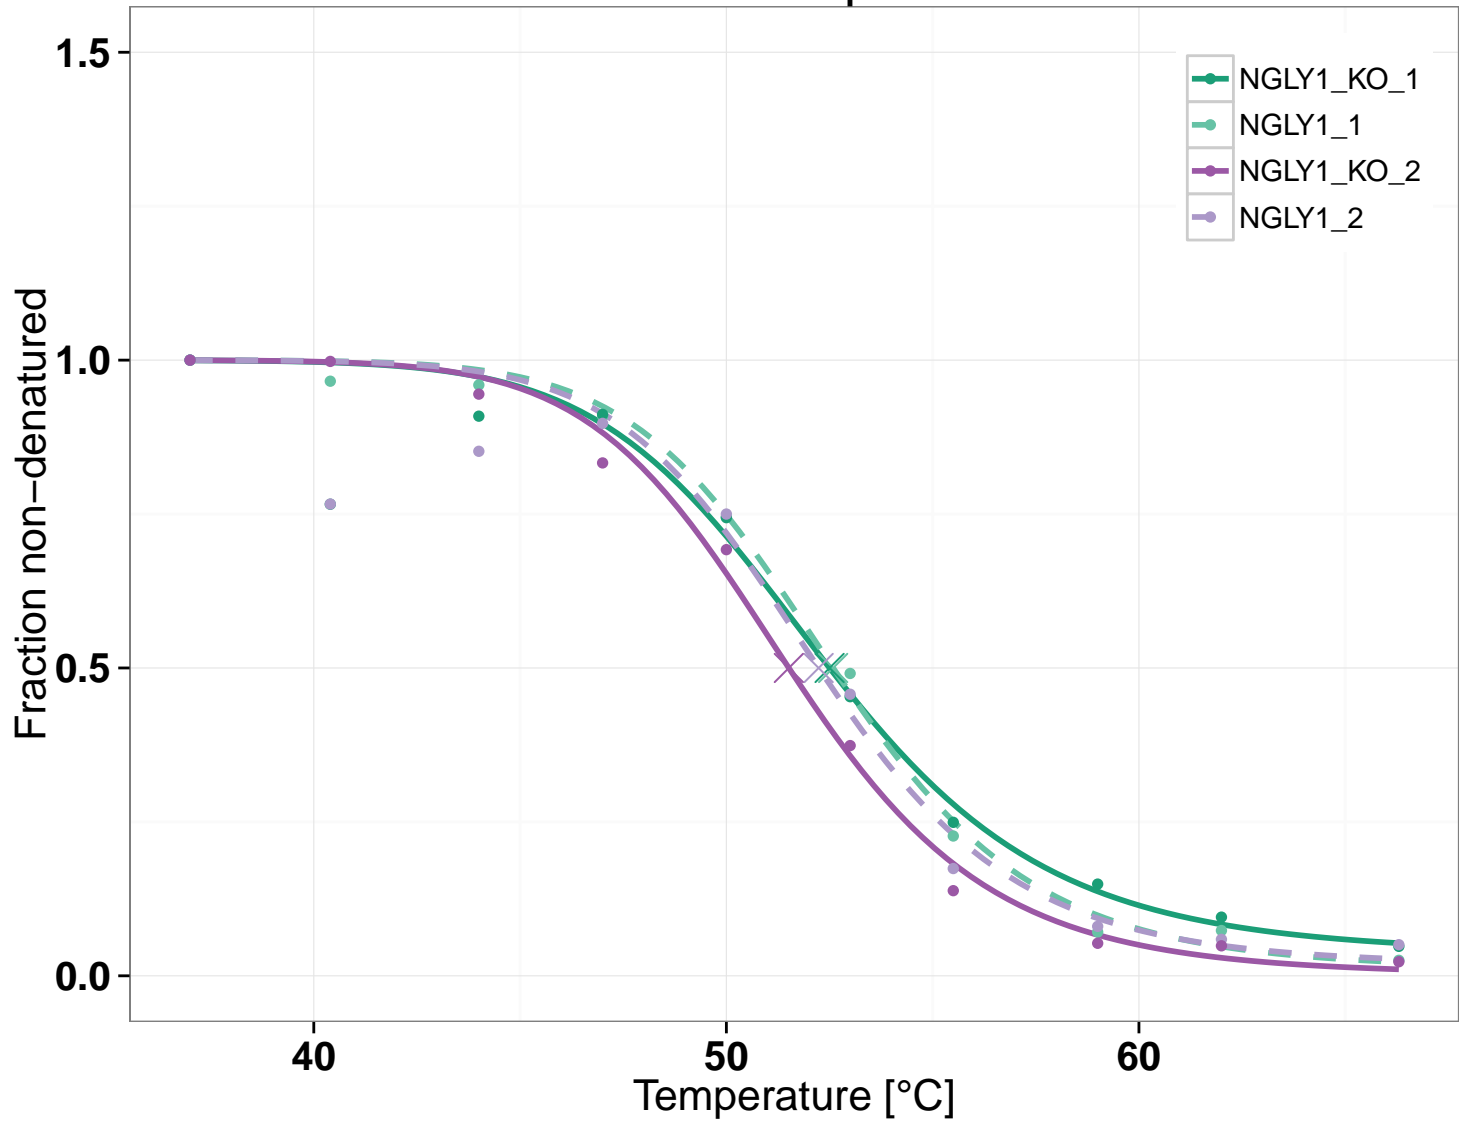

|            | meltPoint | slope  | plateau | R2   |
|------------|-----------|--------|---------|------|
| NGLY1_KO_1 | 52.5      | -0.088 | 0.04    | 0.95 |
| NGLY1_1    | 52.59     | -0.1   | 0.01    | 1    |
| NGLY1_KO_2 | 51.51     | -0.1   | 0       | 1    |
| NGLY1_2    | 52.24     | -0.1   | 0.02    | 0.94 |

Supplement: Supplementary file 4668 [file 1]

IPI00059944.3|RNF25

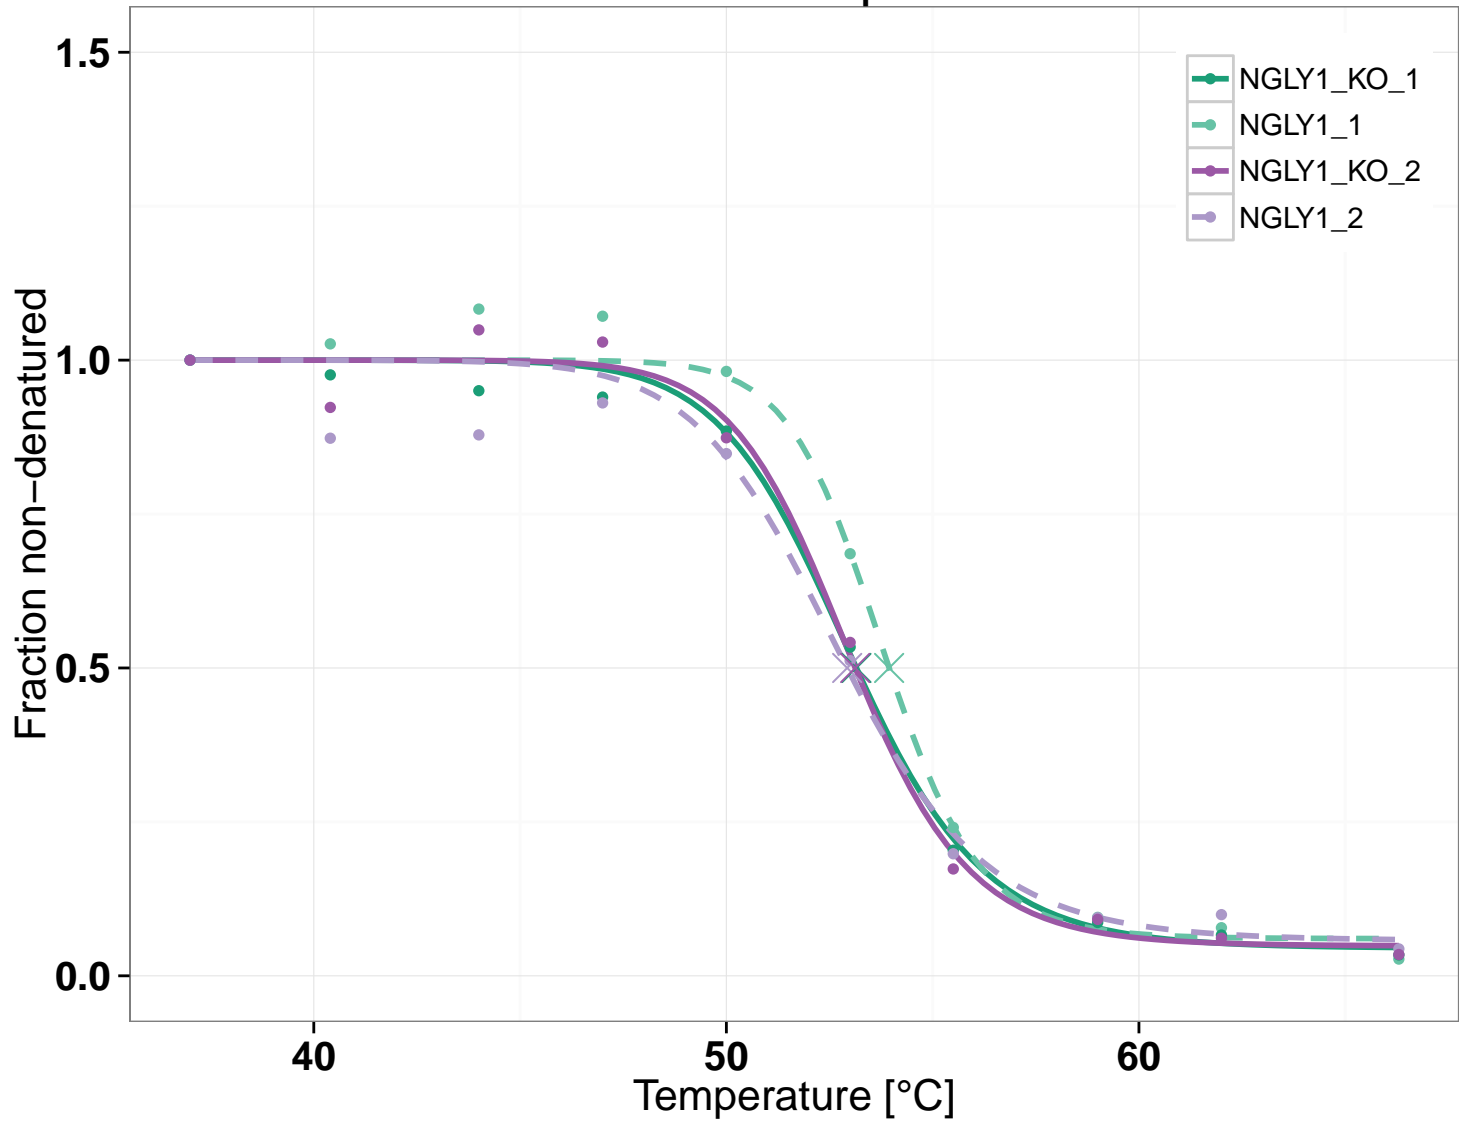

|            | meltPoint | slope | plateau | R2   |
|------------|-----------|-------|---------|------|
| NGLY1_KO_1 | 53.15     | -0.15 | 0.04    | 1    |
| NGLY1_1    | 53.95     | -0.2  | 0.06    | 0.99 |
| NGLY1_KO_2 | 53.12     | -0.16 | 0.05    | 0.99 |
| NGLY1_2    | 52.93     | -0.13 | 0.06    | 0.98 |

Supplement: Supplementary file 4669 [file 1]

IPI00030851.2|SEC24B

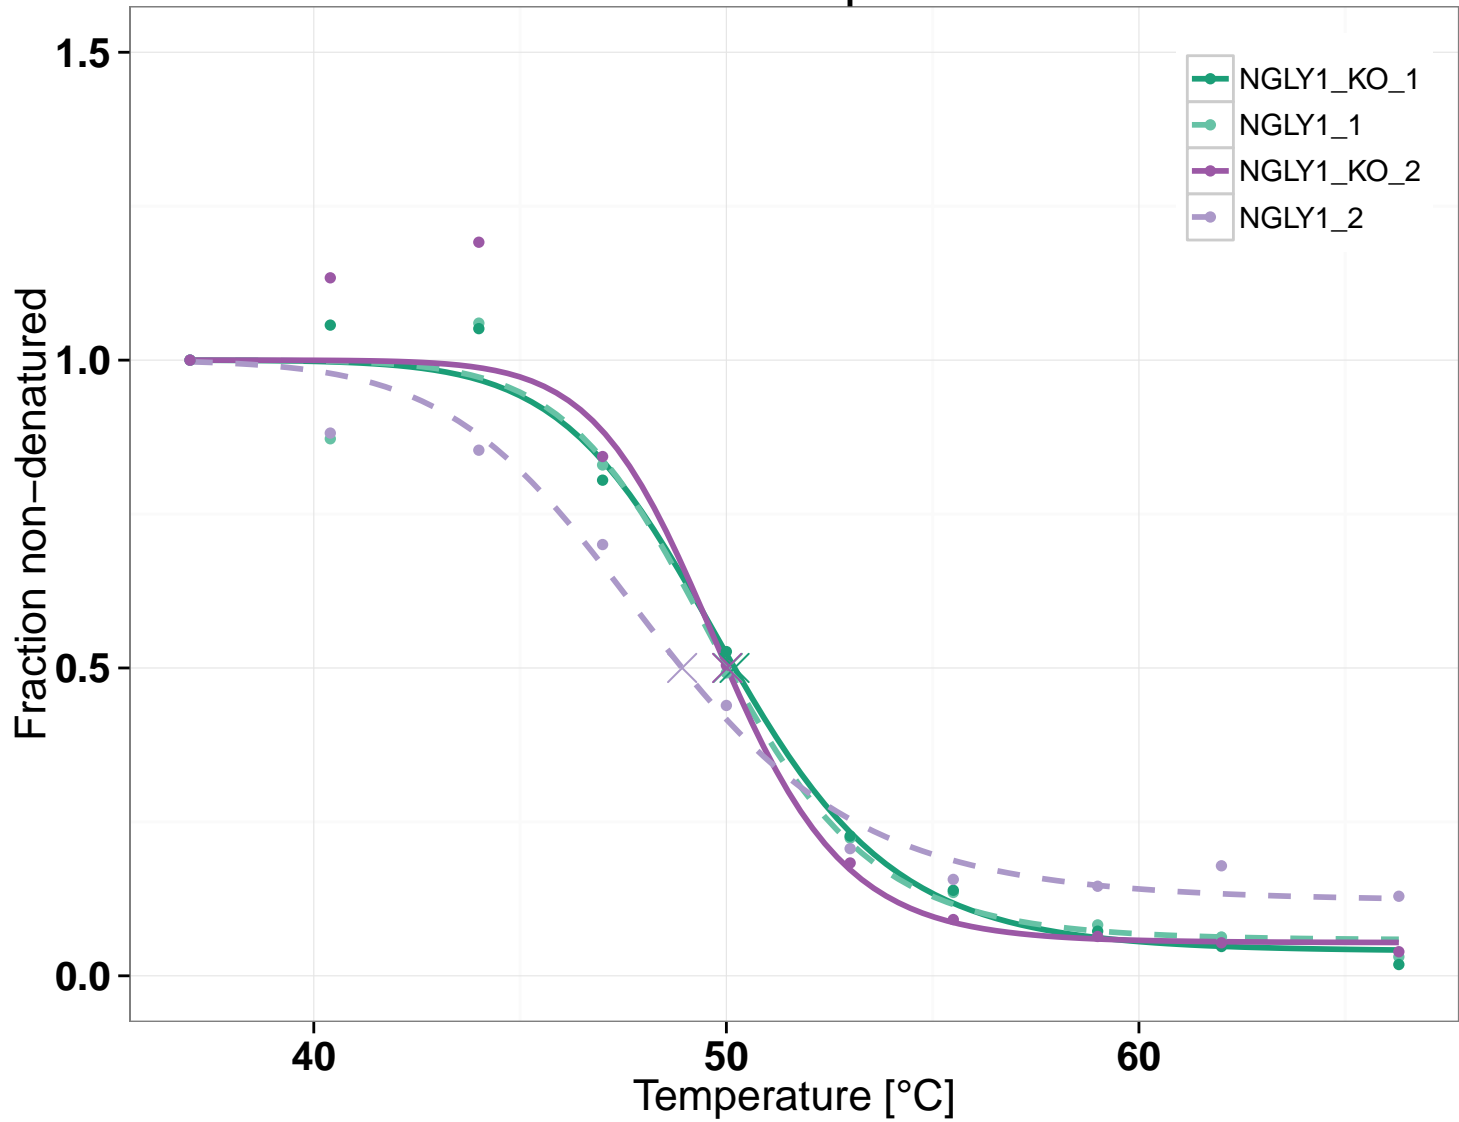

|            | meltPoint | slope  | plateau | R2   |
|------------|-----------|--------|---------|------|
| NGLY1_KO_1 | 50.2      | -0.12  | 0.04    | 0.99 |
| NGLY1_1    | 50.04     | -0.13  | 0.06    | 0.98 |
| NGLY1_KO_2 | 50.02     | -0.16  | 0.05    | 0.97 |
| NGLY1_2    | 48.93     | -0.088 | 0.12    | 0.98 |

Supplement: Supplementary file 4670 [file 1]

# IPI00215963.5|GSE1

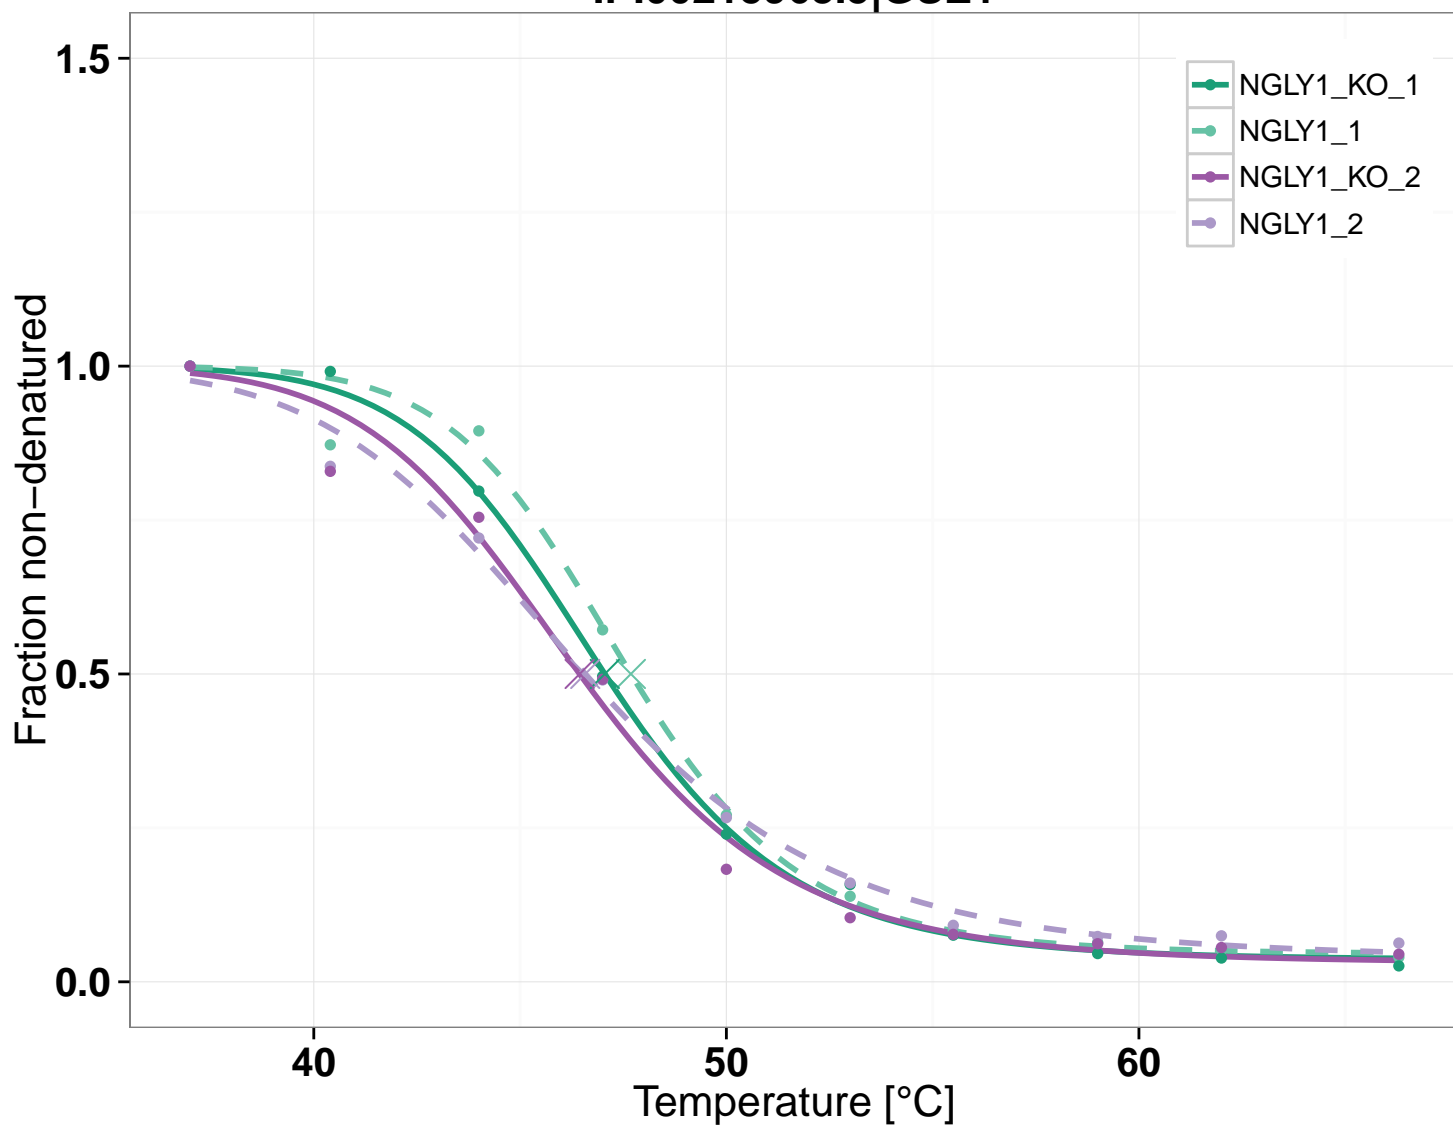

|            | meltPoint | slope  | plateau | R2   |
|------------|-----------|--------|---------|------|
| NGLY1_KO_1 | 47.05     | -0.1   | 0.04    | 1    |
| NGLY1_1    | 47.69     | -0.11  | 0.05    | 0.99 |
| NGLY1_KO_2 | 46.44     | -0.094 | 0.03    | 0.99 |
| NGLY1_2    | 46.58     | -0.077 | 0.04    | 0.99 |

Supplement: Supplementary file 4671 [file 1]

IPI00167861.3|SMG5

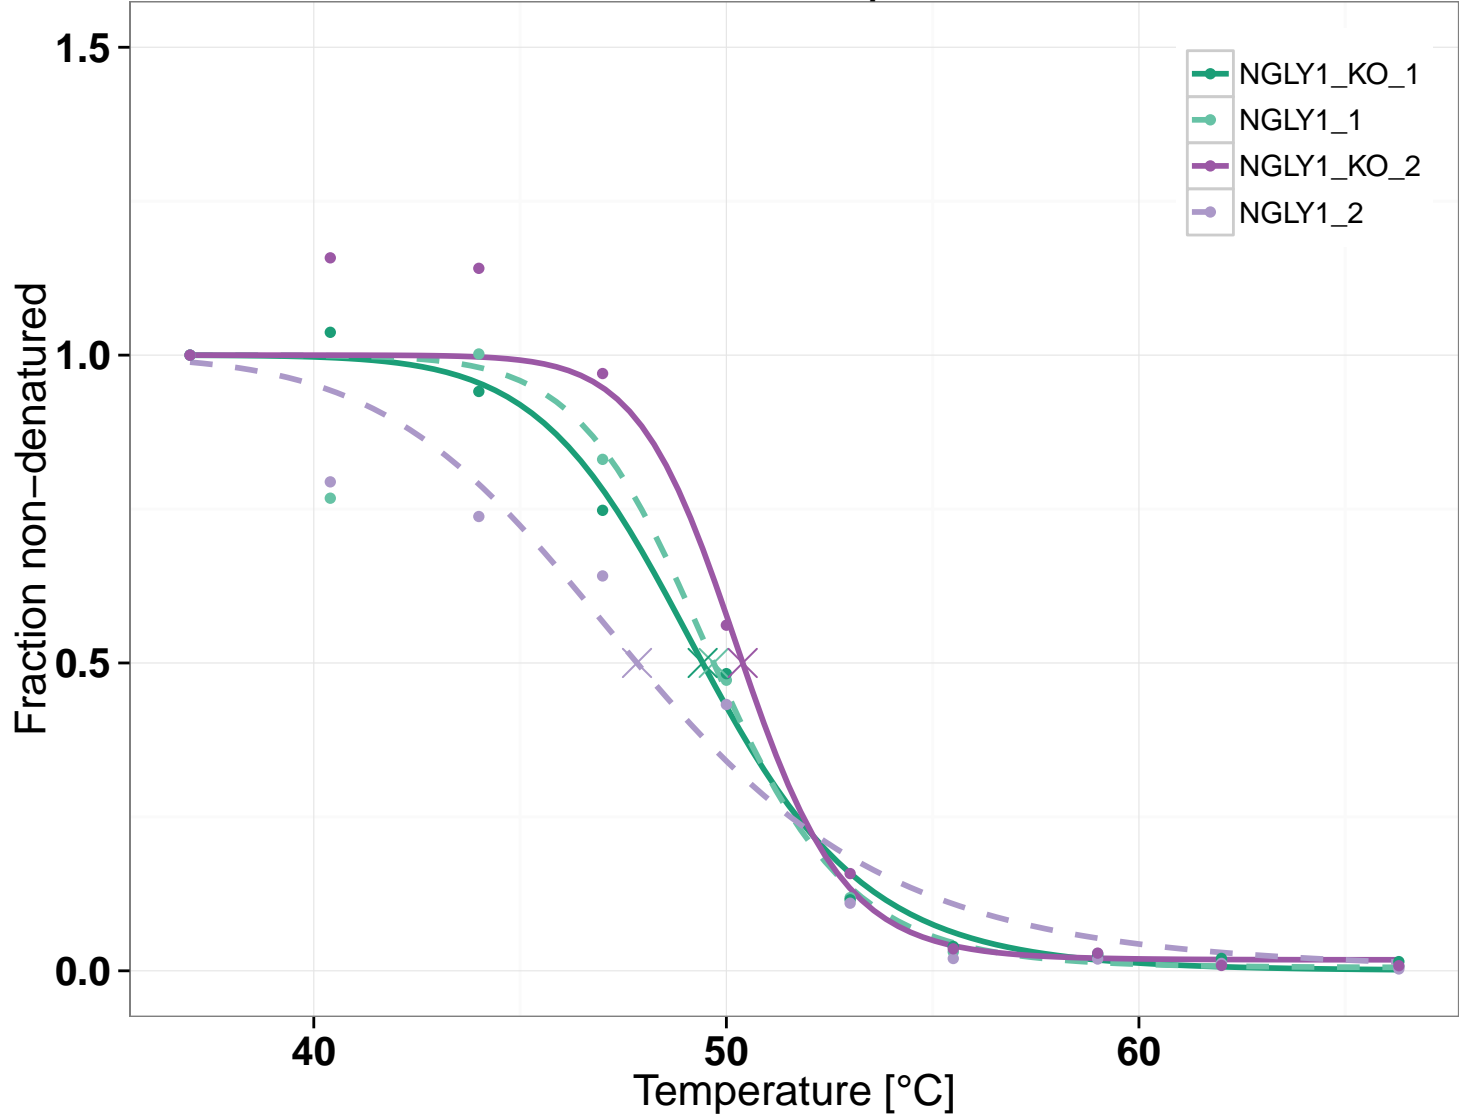

|            | meltPoint | slope  | plateau | R2   |
|------------|-----------|--------|---------|------|
| NGLY1_KO_1 | 49.42     | -0.13  | 0       | 1    |
| NGLY1_1    | 49.69     | -0.15  | 0.01    | 0.97 |
| NGLY1_KO_2 | 50.4      | -0.2   | 0.02    | 0.98 |
| NGLY1_2    | 47.83     | -0.081 | 0       | 0.96 |

Supplement: Supplementary file 4672 [file 1]

# IPI00844508.1|CGN

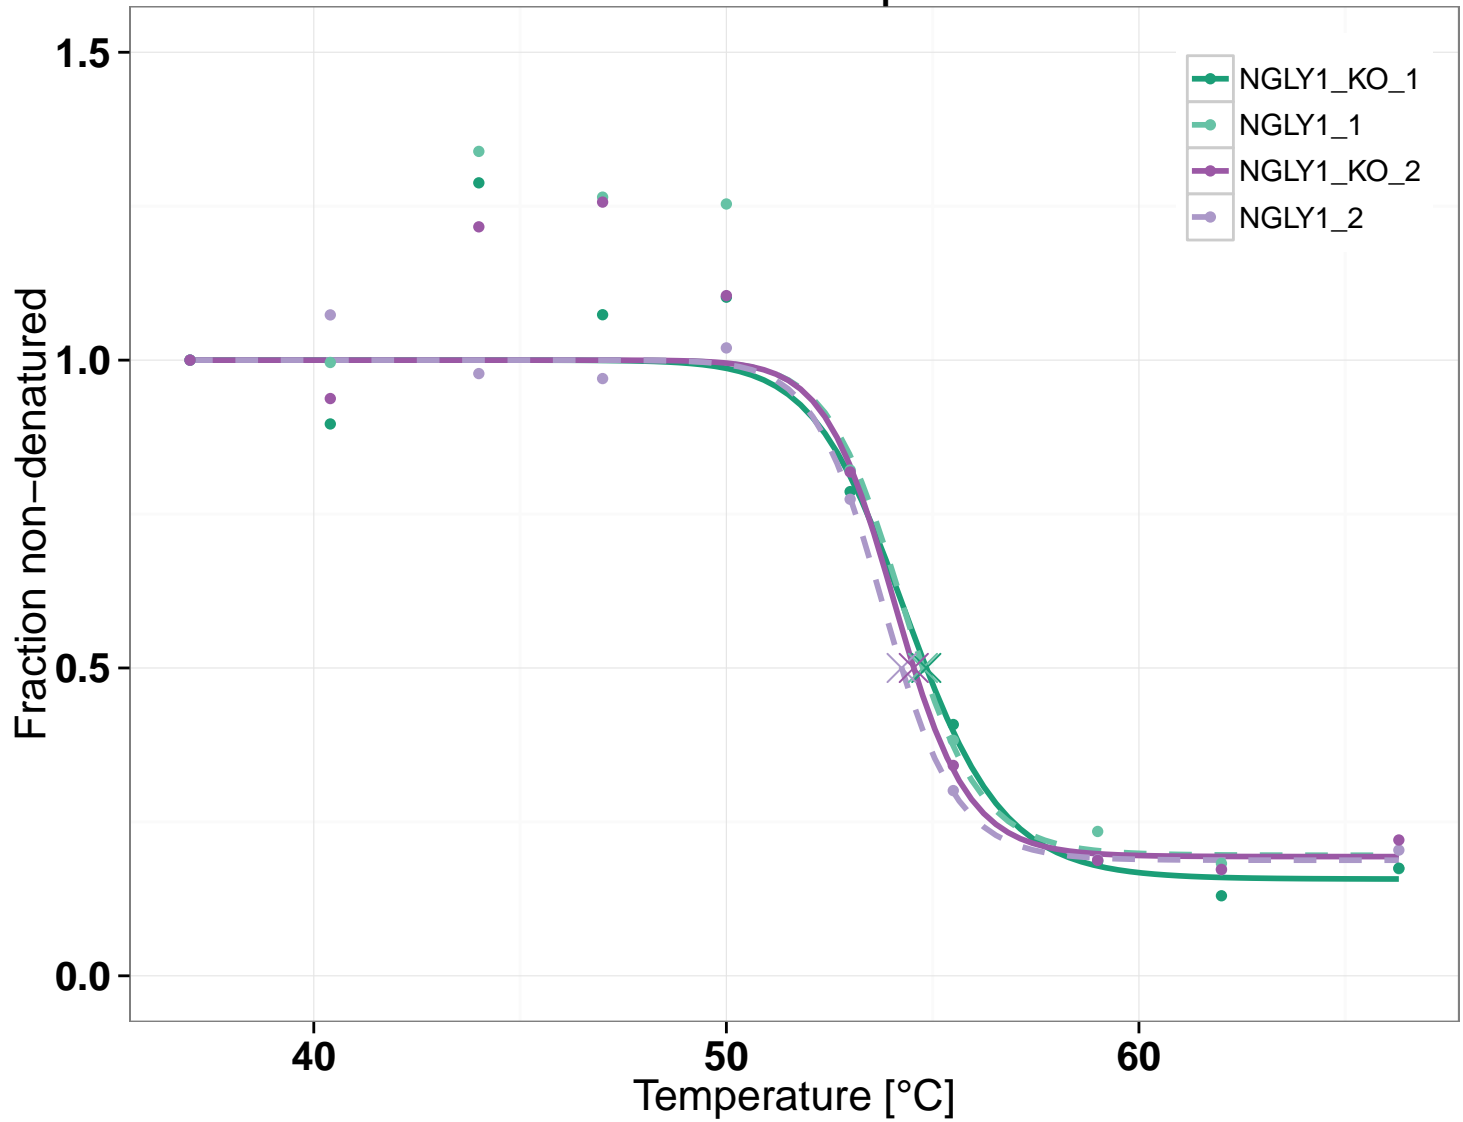

|            | meltPoint | slope | plateau | R2   |
|------------|-----------|-------|---------|------|
| NGLY1_KO_1 | 54.85     | -0.18 | 0.16    | 0.93 |
| NGLY1_1    | 54.76     | -0.22 | 0.2     | 0.88 |
| NGLY1_KO_2 | 54.54     | -0.23 | 0.19    | 0.93 |
| NGLY1_2    | 54.25     | -0.23 | 0.19    | 0.99 |

Supplement: Supplementary file 4673 [file 1]

# IPI00033143.1|EIF3K

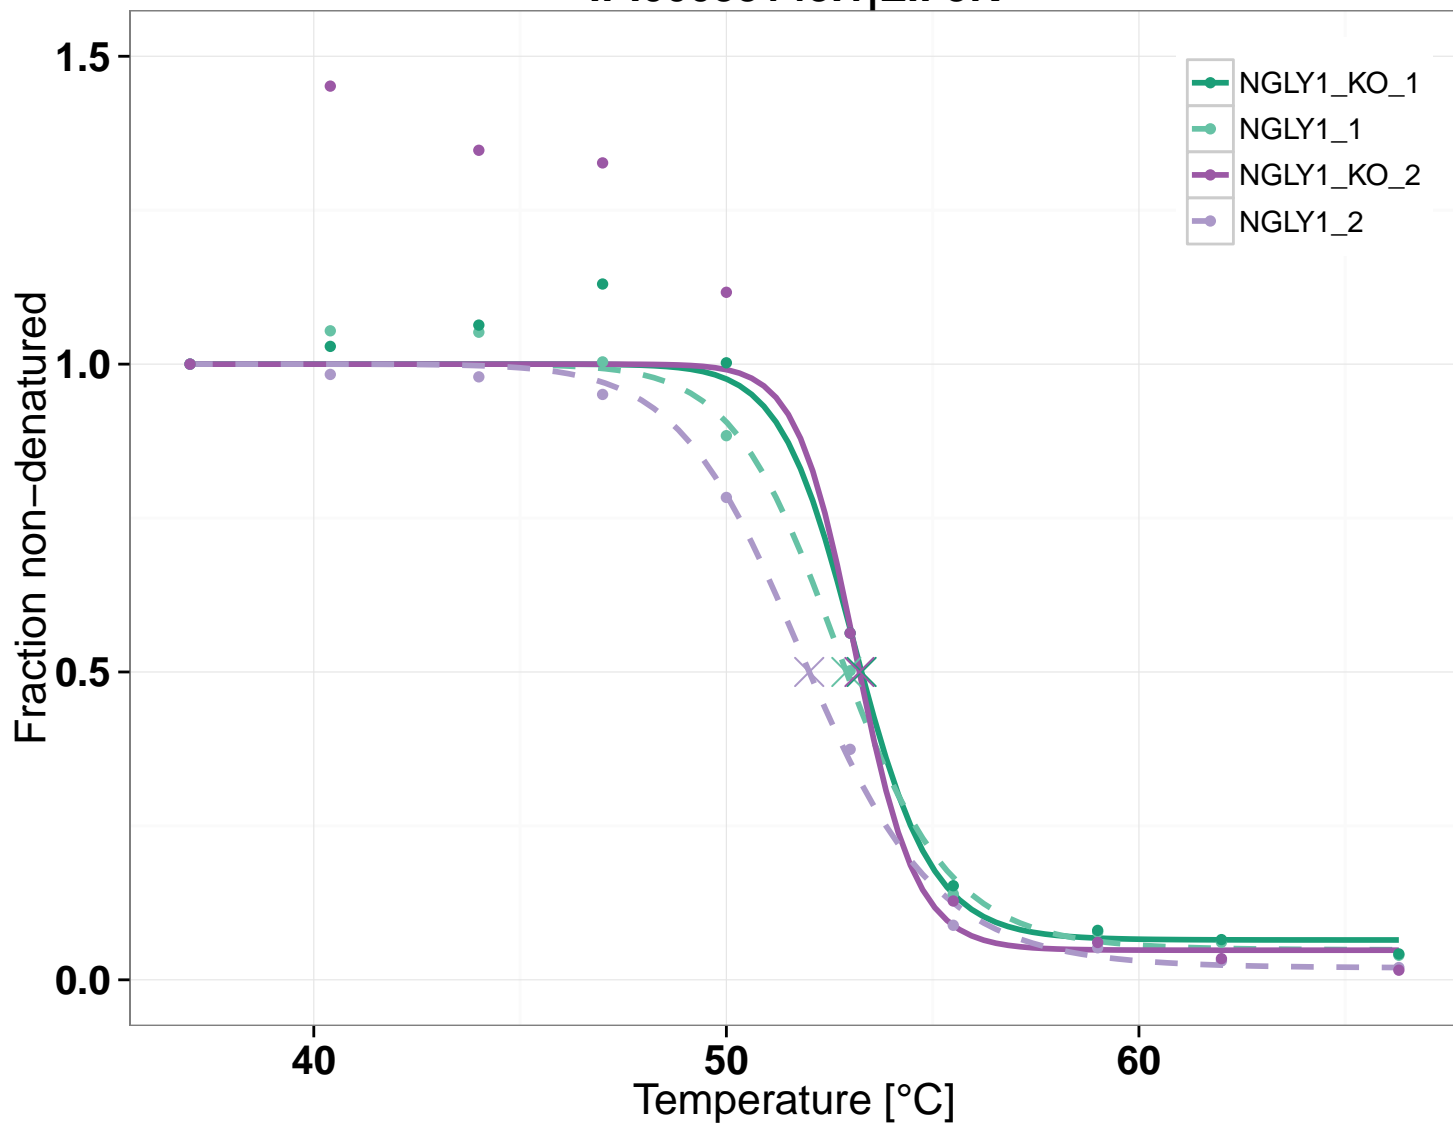

|            | meltPoint | slope | plateau | R2   |
|------------|-----------|-------|---------|------|
| NGLY1_KO_1 | 53.28     | -0.25 | 0.06    | 0.99 |
| NGLY1_1    | 52.91     | -0.18 | 0.05    | 1    |
| NGLY1_KO_2 | 53.23     | -0.33 | 0.05    | 0.86 |
| NGLY1_2    | 52.01     | -0.16 | 0.02    | 1    |

Supplement: Supplementary file 4674 [file 1]

IPI00783751.2|Q15300\_HUMAN

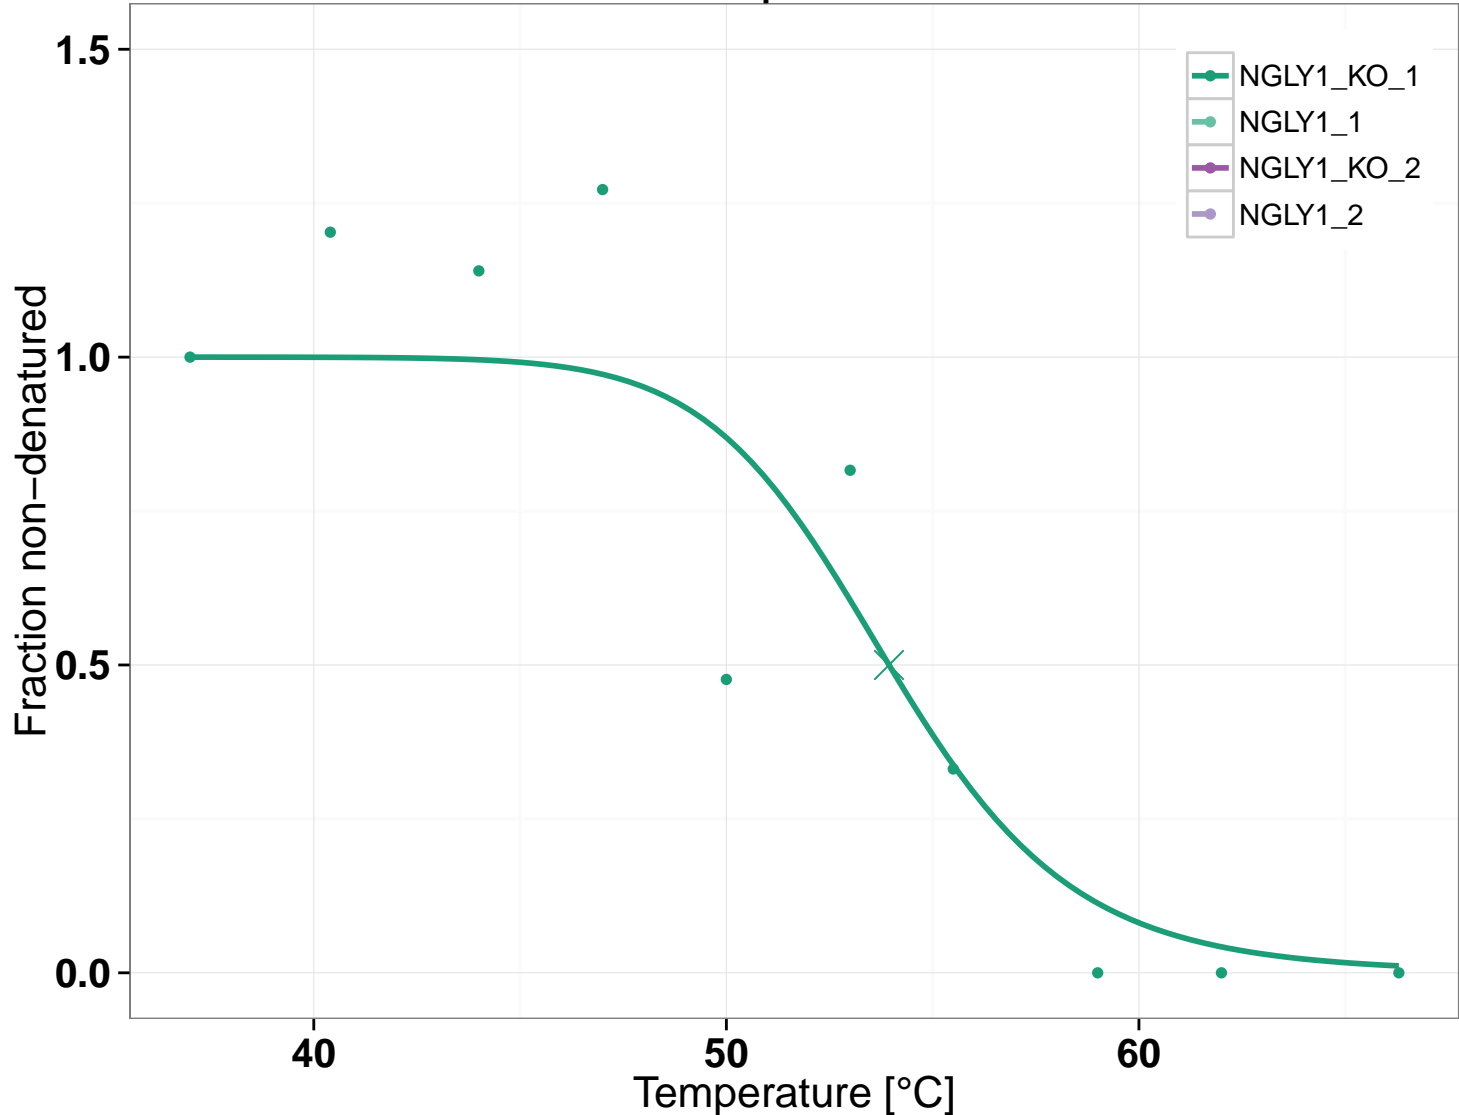

|            | meltPoint | slope | plateau | R2   |
|------------|-----------|-------|---------|------|
| NGLY1_KO_1 | 53.94     | -0.11 | 0       | 0.85 |
| NGLY1_1    | -         | -     | -       | -    |
| NGLY1_KO_2 | -         | -     | -       | -    |
| NGLY1_2    | -         | -     | -       | -    |

Supplement: Supplementary file 4675 [file 1]

# IPI00556385.1|ADPGK

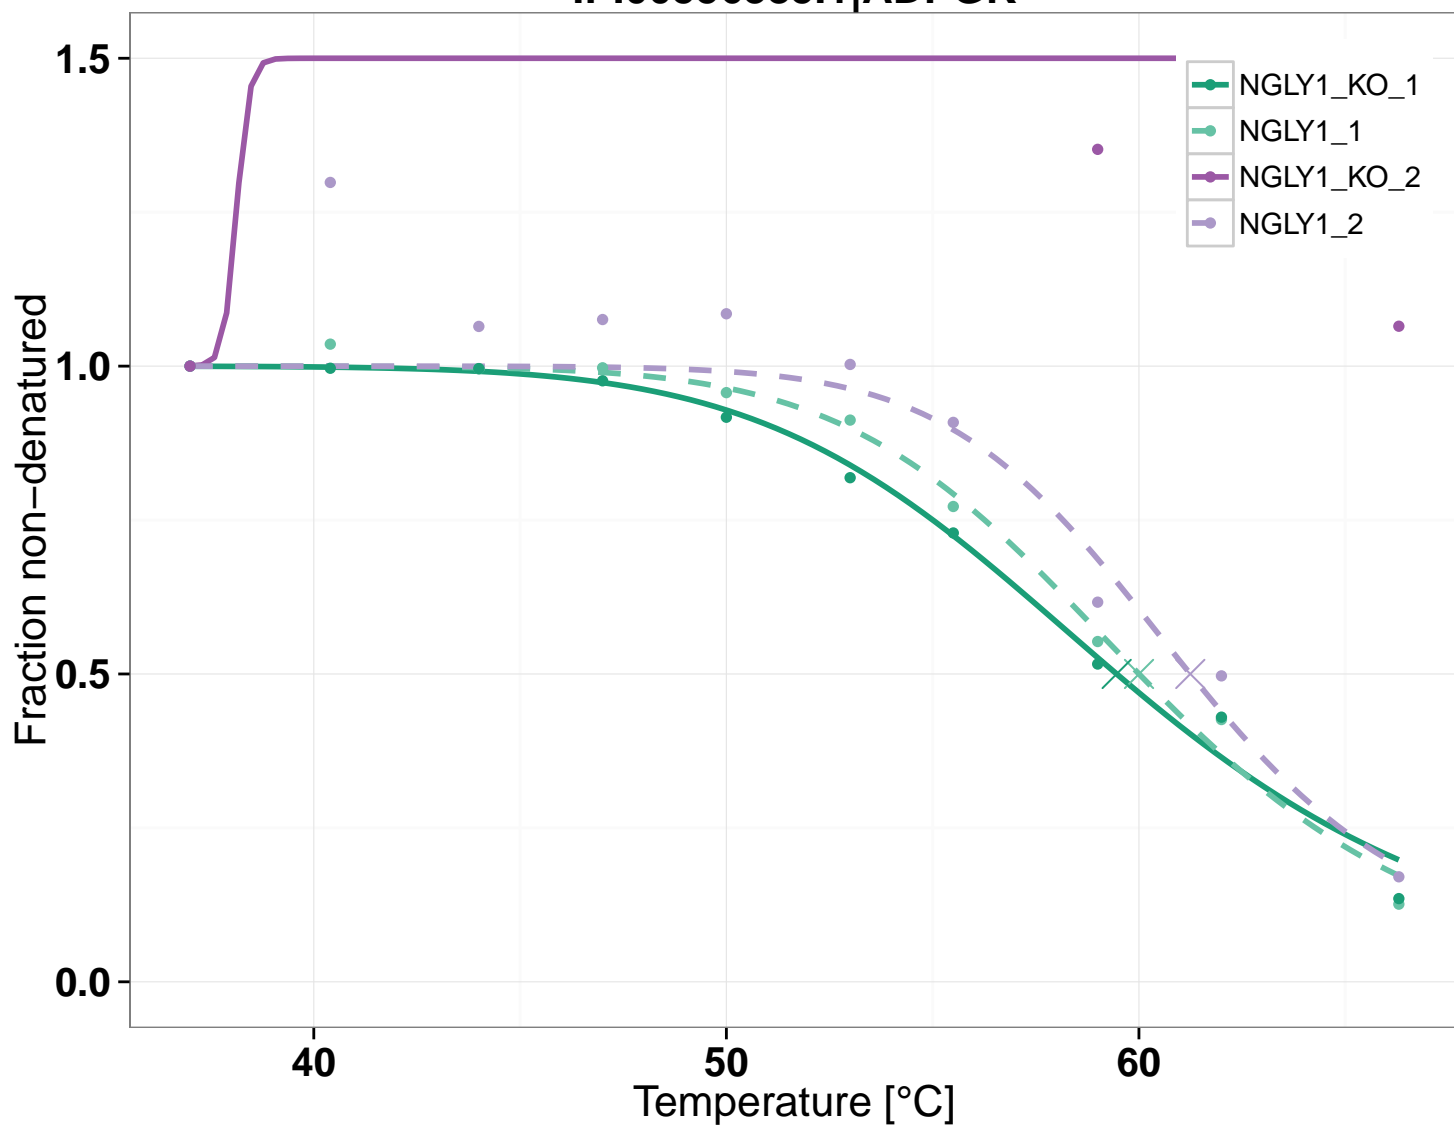

|            | meltPoint | slope  | plateau | R2   |
|------------|-----------|--------|---------|------|
| NGLY1_KO_1 | 59.46     | -0.058 | 0       | 0.99 |
| NGLY1_1    | 60        | -0.07  | 0       | 0.99 |
| NGLY1_KO_2 | -         | 0.82   | 1.5     | 0.22 |
| NGLY1_2    | 61.24     | -0.085 | 0.04    | 0.89 |

Supplement: Supplementary file 4676 [file 1]

IPI00219604.3|MAP2K1

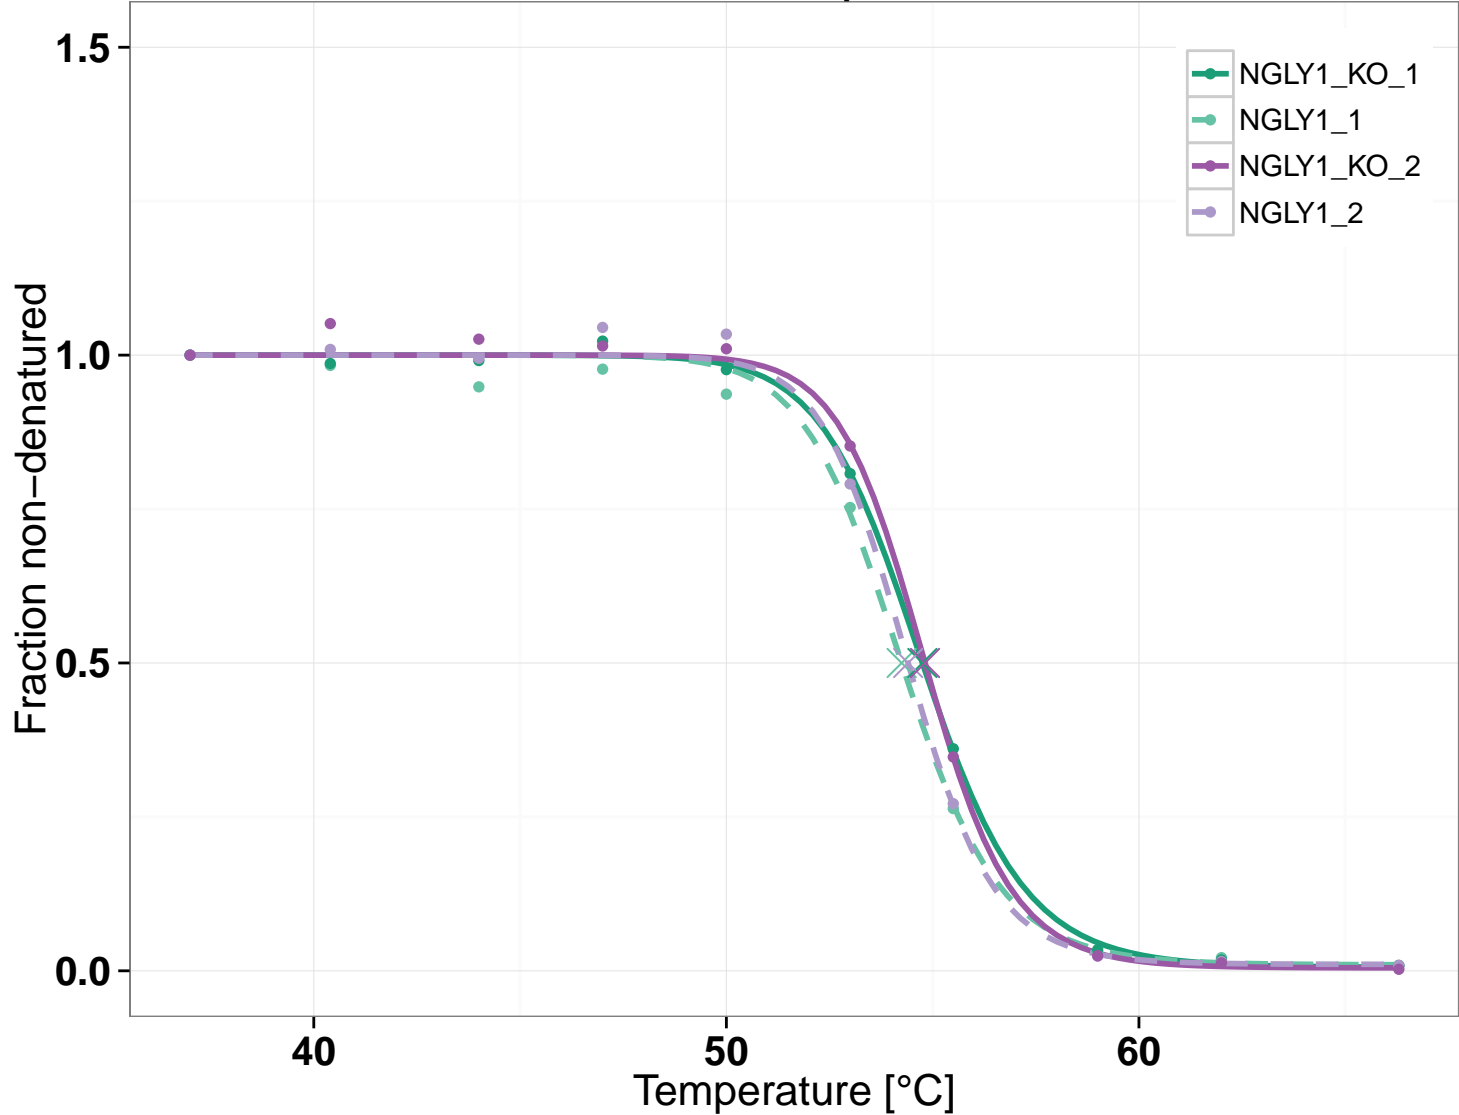

|            | meltPoint | slope | plateau | R2 |
|------------|-----------|-------|---------|----|
| NGLY1_KO_1 | 54.75     | -0.2  | 0.01    | 1  |
| NGLY1_1    | 54.25     | -0.21 | 0.01    | 1  |
| NGLY1_KO_2 | 54.82     | -0.24 | 0       | 1  |
| NGLY1_2    | 54.41     | -0.24 | 0.01    | 1  |

Supplement: Supplementary file 4677 [file 1]

IPI00383762.4|COL2A1

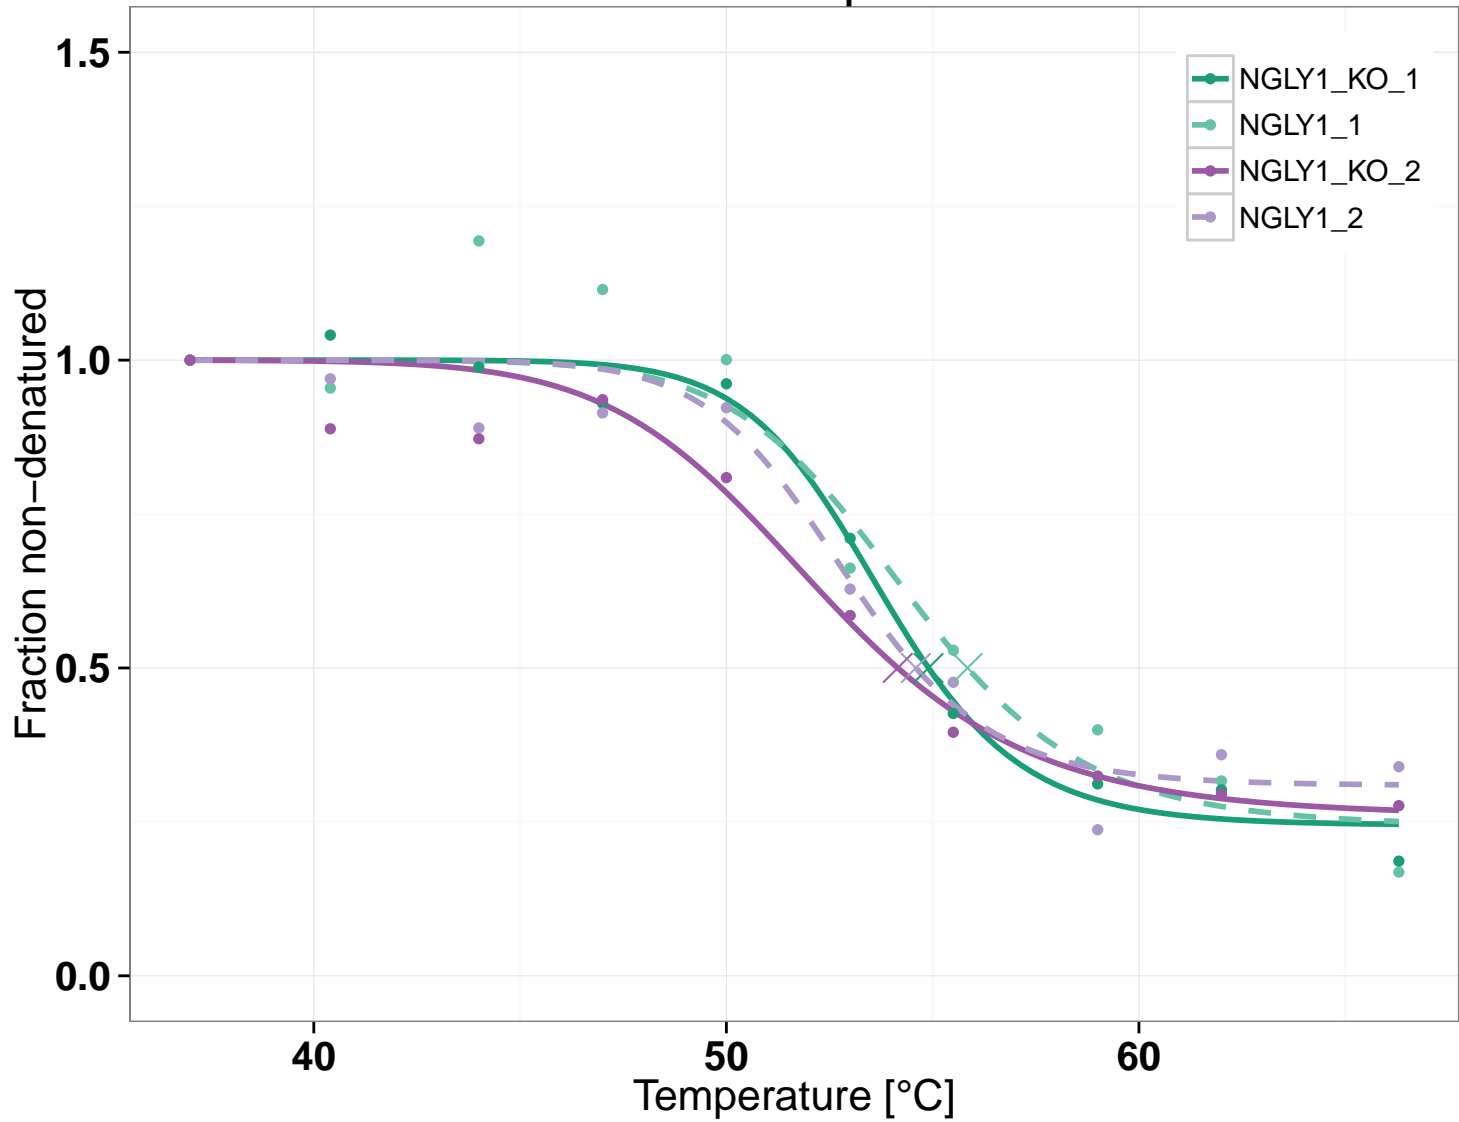

|            | meltPoint | slope  | plateau | R2   |
|------------|-----------|--------|---------|------|
| NGLY1_KO_1 | 54.9      | -0.11  | 0.24    | 0.99 |
| NGLY1_1    | 55.85     | -0.089 | 0.24    | 0.93 |
| NGLY1_KO_2 | 54.15     | -0.073 | 0.26    | 0.97 |
| NGLY1_2    | 54.59     | -0.1   | 0.31    | 0.96 |

Supplement: Supplementary file 4678 [file 1]

IPI00032343.4|LOC152217

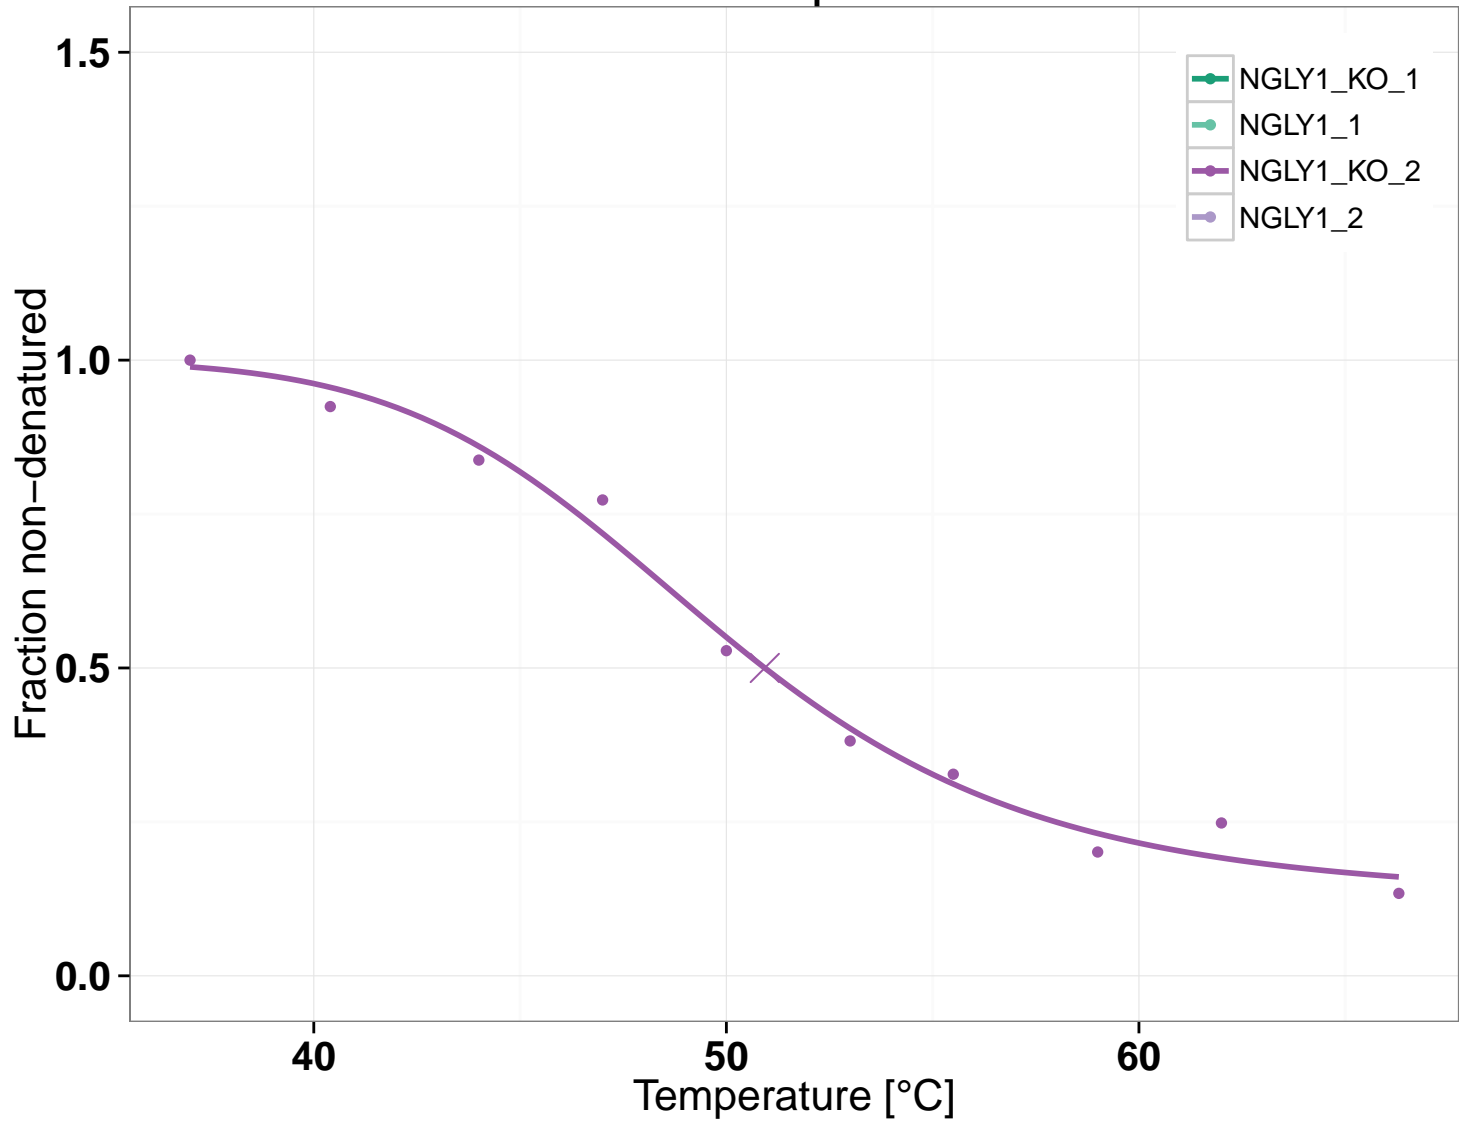

|            | meltPoint | slope  | plateau | R2   |
|------------|-----------|--------|---------|------|
| NGLY1_KO_1 | -         | -      | -       | -    |
| NGLY1_1    | -         | -      | -       | -    |
| NGLY1_KO_2 | 50.93     | -0.057 | 0.12    | 0.99 |
| NGLY1_2    | -         | -      | -       | -    |

Supplement: Supplementary file 4679 [file 1]

# IPI00007309.1|TIMM23

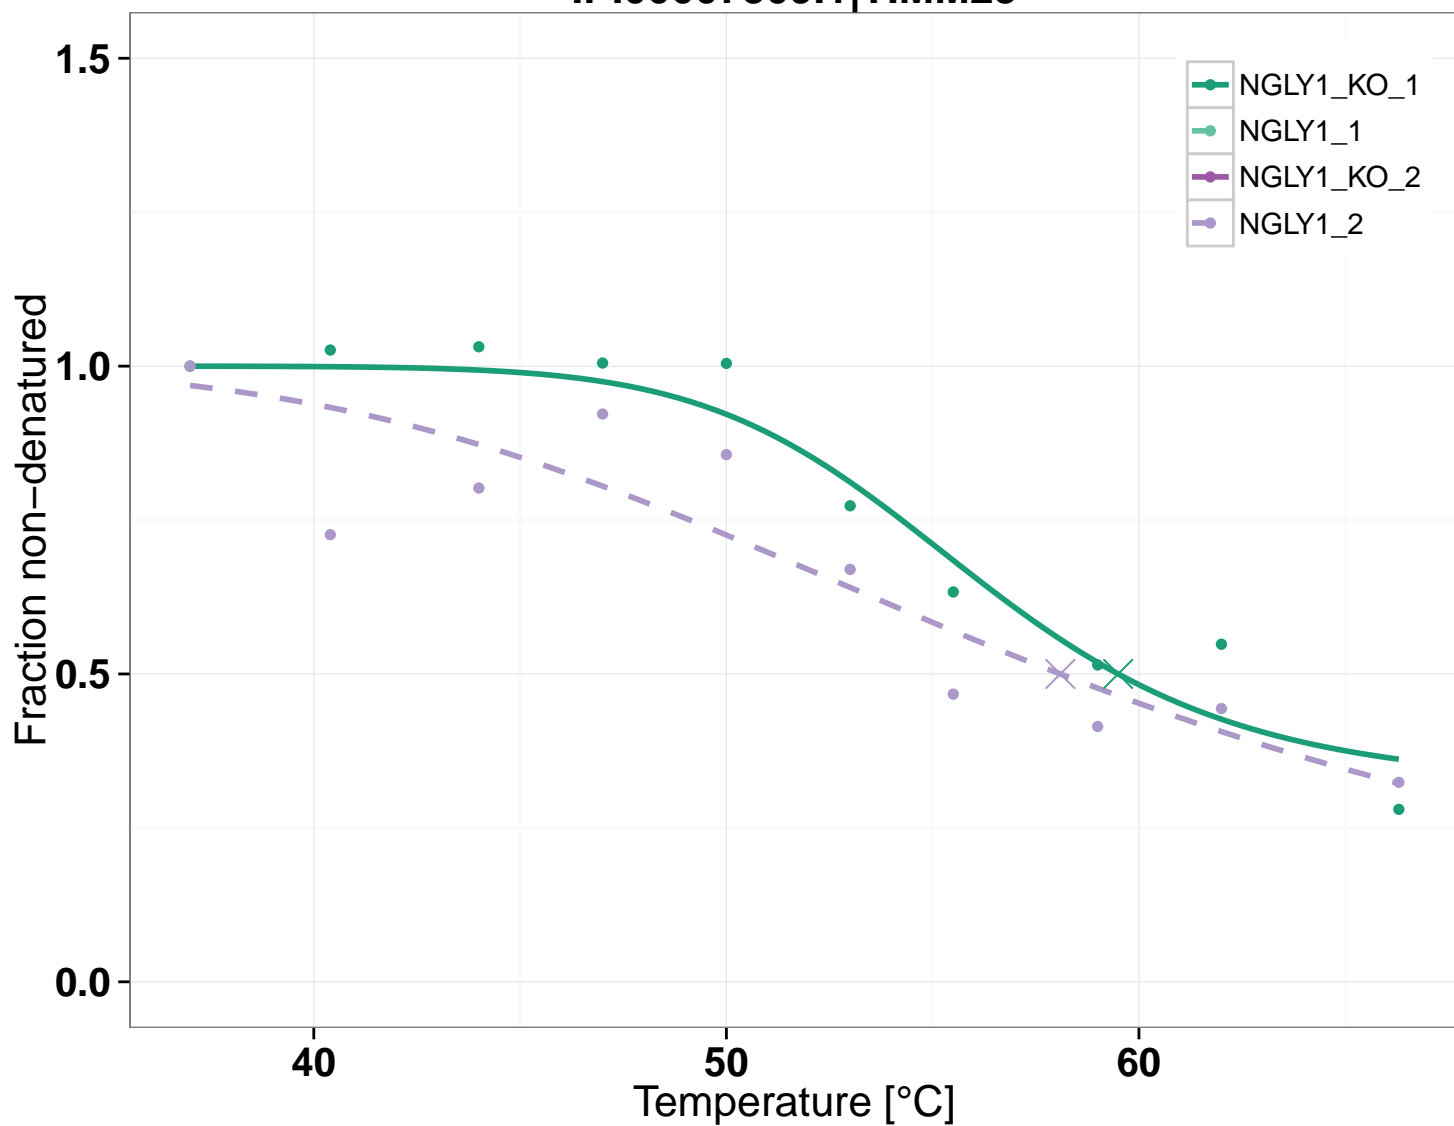

|            | meltPoint | slope  | plateau | R2   |
|------------|-----------|--------|---------|------|
| NGLY1_KO_1 | 59.5      | -0.053 | 0.32    | 0.95 |
| NGLY1_1    | —         | —      | —       | —    |
| NGLY1_KO_2 | —         | —      | —       | —    |
| NGLY1_2    | 58.09     | -0.029 | 0       | 0.81 |

Supplement: Supplementary file 4680 [file 1]

IPI00444873.4|DNM2

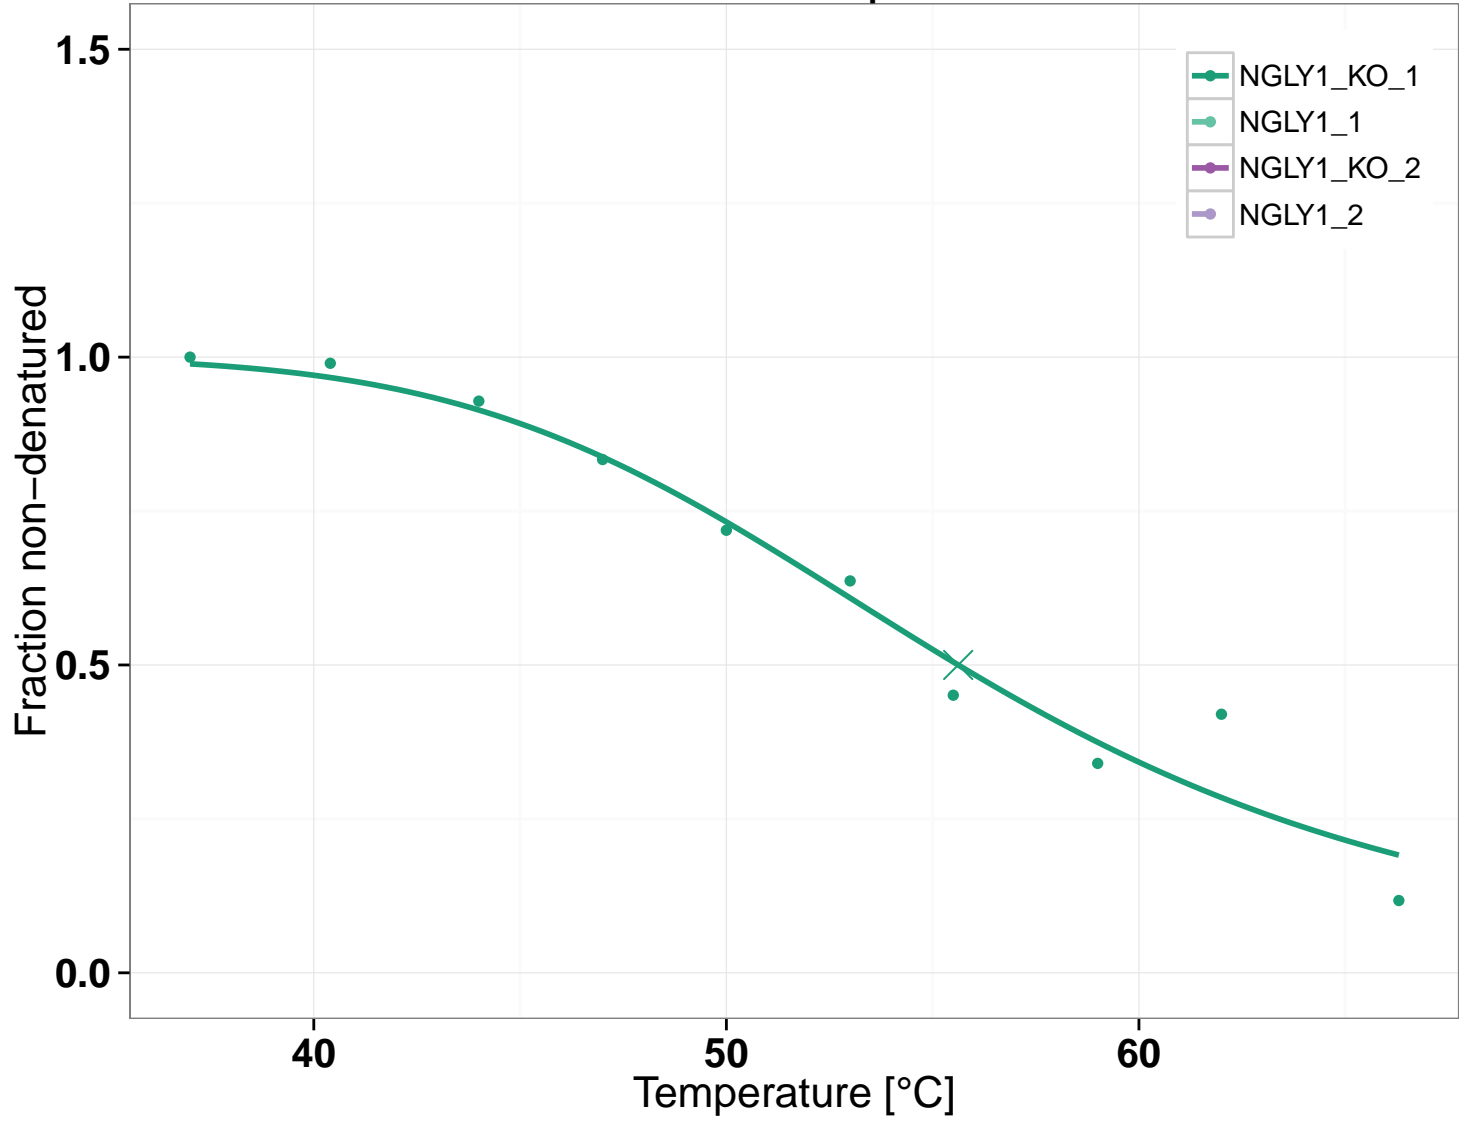

|            | meltPoint | slope  | plateau | R2   |
|------------|-----------|--------|---------|------|
| NGLY1_KO_1 | 55.62     | -0.042 | 0       | 0.96 |
| NGLY1_1    | -         | -      | -       | -    |
| NGLY1_KO_2 | -         | -      | -       | -    |
| NGLY1_2    | -         | -      | -       | -    |

Supplement: Supplementary file 4681 [file 1]

IPI00219695.3|PTPN2

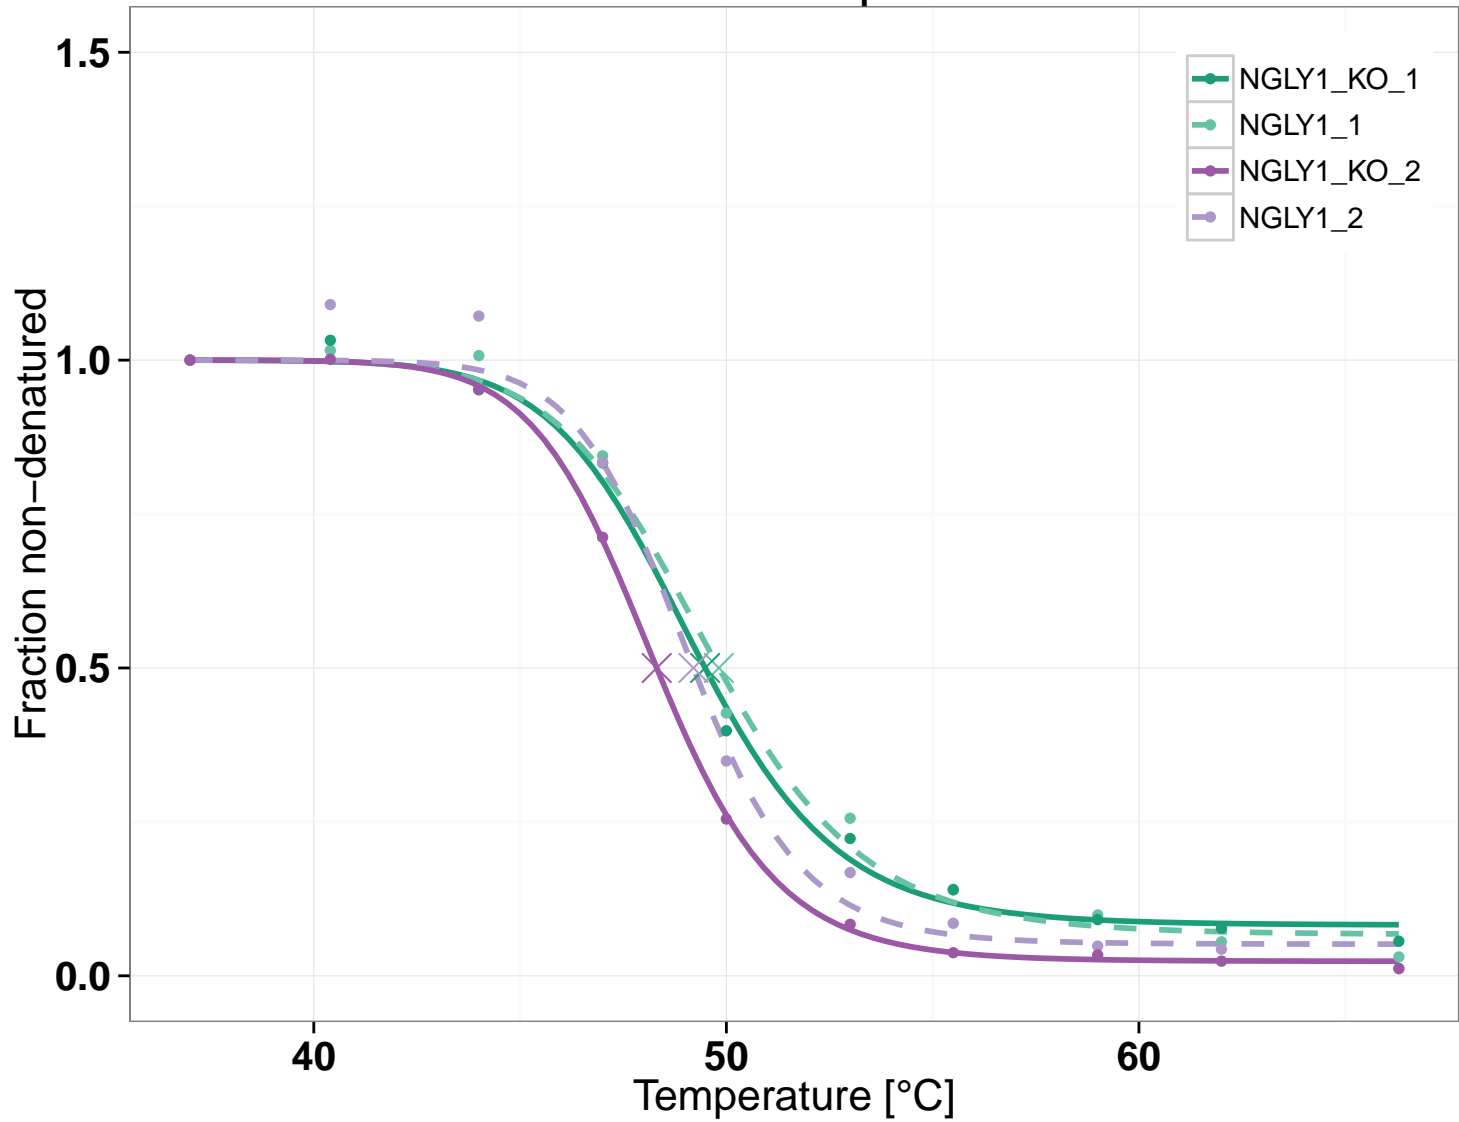

|            | meltPoint | slope | plateau | R2   |
|------------|-----------|-------|---------|------|
| NGLY1_KO_1 | 49.48     | -0.13 | 0.08    | 1    |
| NGLY1_1    | 49.82     | -0.12 | 0.07    | 0.99 |
| NGLY1_KO_2 | 48.31     | -0.16 | 0.02    | 1    |
| NGLY1_2    | 49.2      | -0.17 | 0.05    | 0.99 |

Supplement: Supplementary file 4682 [file 1]

# IPI00020557.1|LRP1

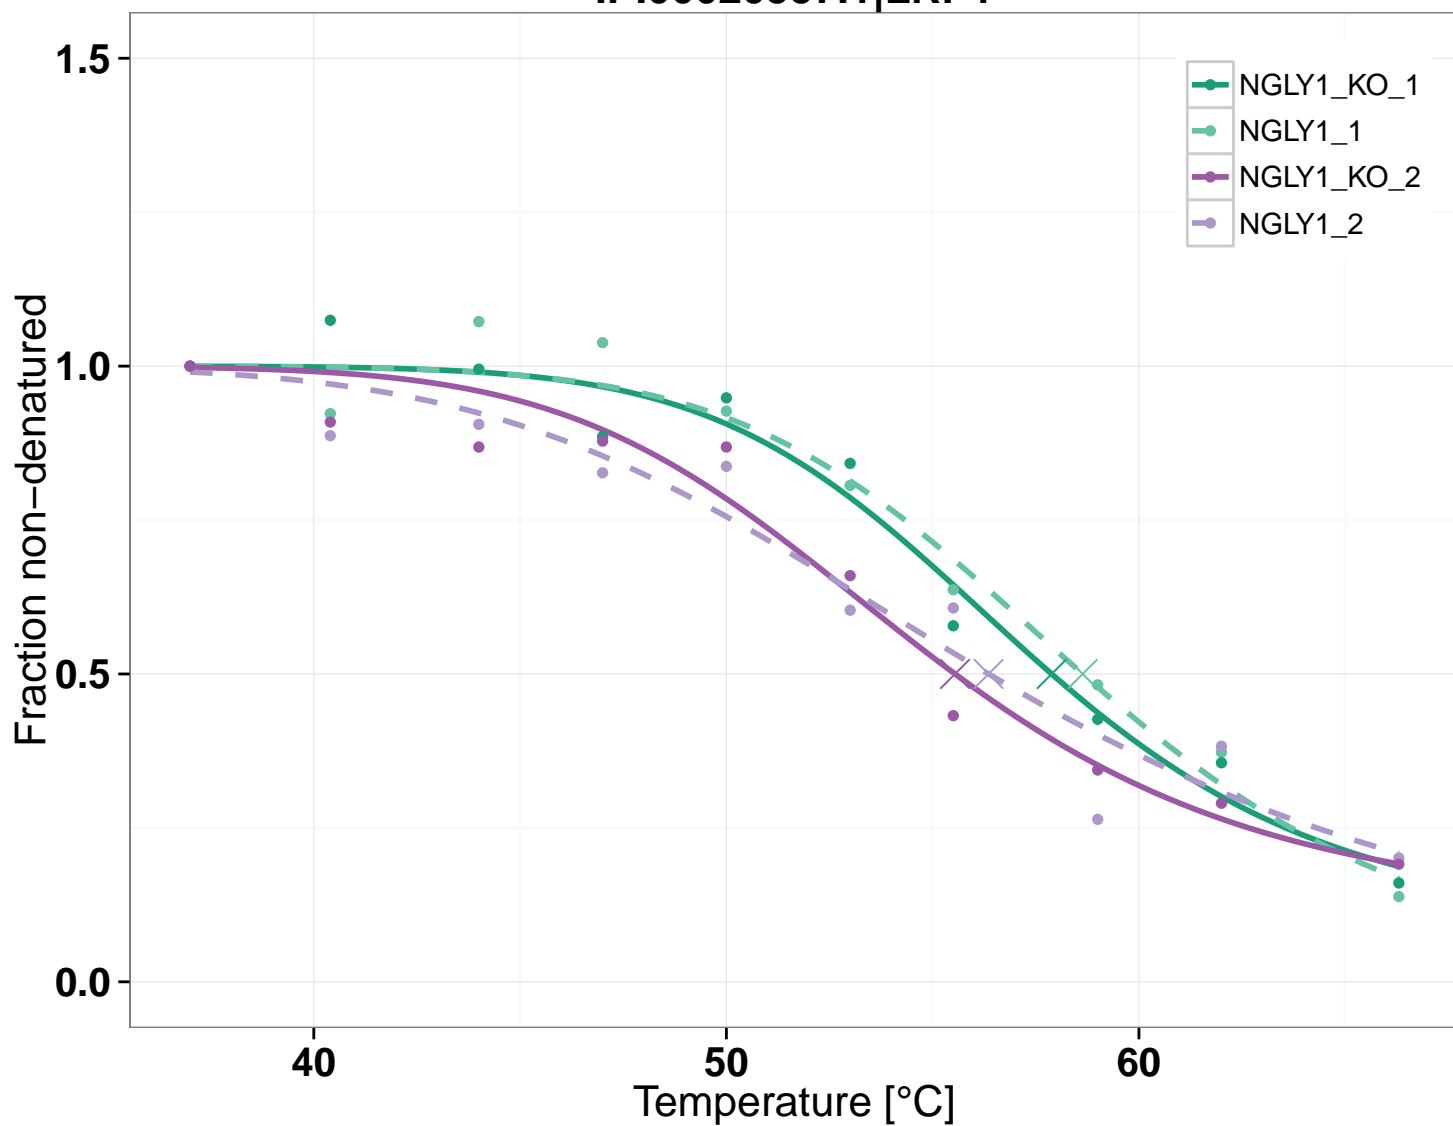

|            | meltPoint | slope  | plateau | R2   |
|------------|-----------|--------|---------|------|
| NGLY1_KO_1 | 57.88     | -0.062 | 0.09    | 0.97 |
| NGLY1_1    | 58.64     | -0.06  | 0       | 0.97 |
| NGLY1_KO_2 | 55.54     | -0.054 | 0.11    | 0.97 |
| NGLY1_2    | 56.36     | -0.041 | 0       | 0.94 |

Supplement: Supplementary file 4683 [file 1]

# IPI00375358.2|RFC1

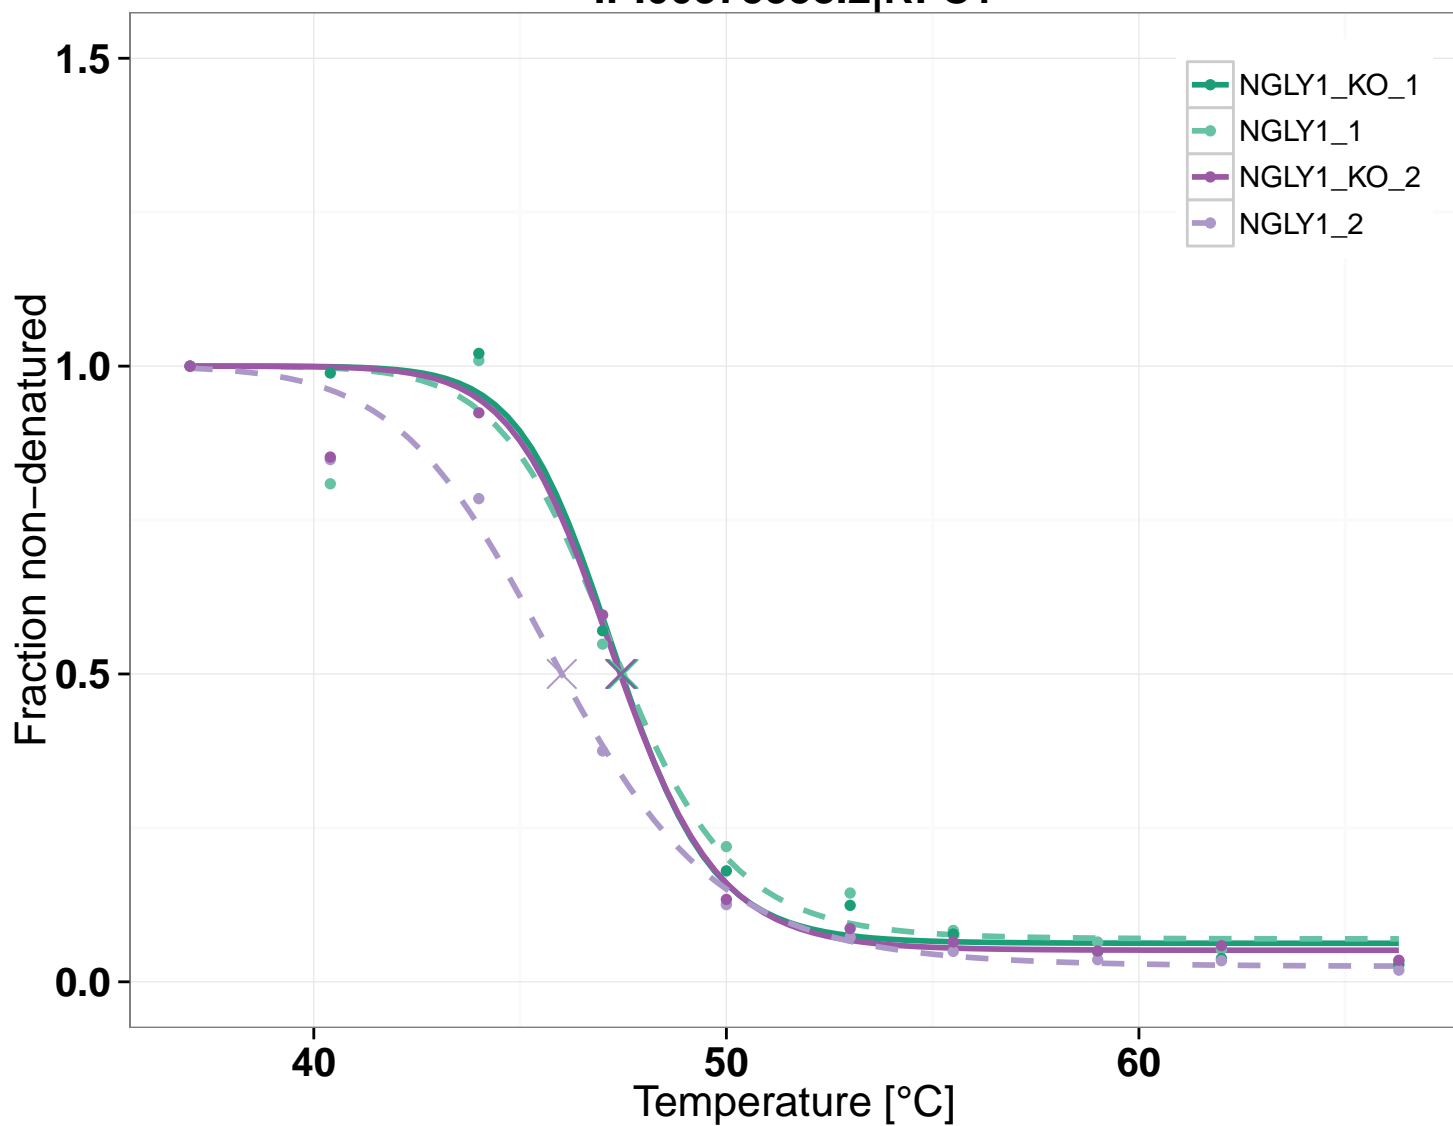

|            | meltPoint | slope | plateau | R2   |
|------------|-----------|-------|---------|------|
| NGLY1_KO_1 | 47.46     | -0.2  | 0.06    | 0.99 |
| NGLY1_1    | 47.51     | -0.16 | 0.07    | 0.97 |
| NGLY1_KO_2 | 47.43     | -0.19 | 0.05    | 0.98 |
| NGLY1_2    | 46.01     | -0.12 | 0.02    | 0.99 |

Supplement: Supplementary file 4684 [file 1]

# IPI00016342.1|RAB7A

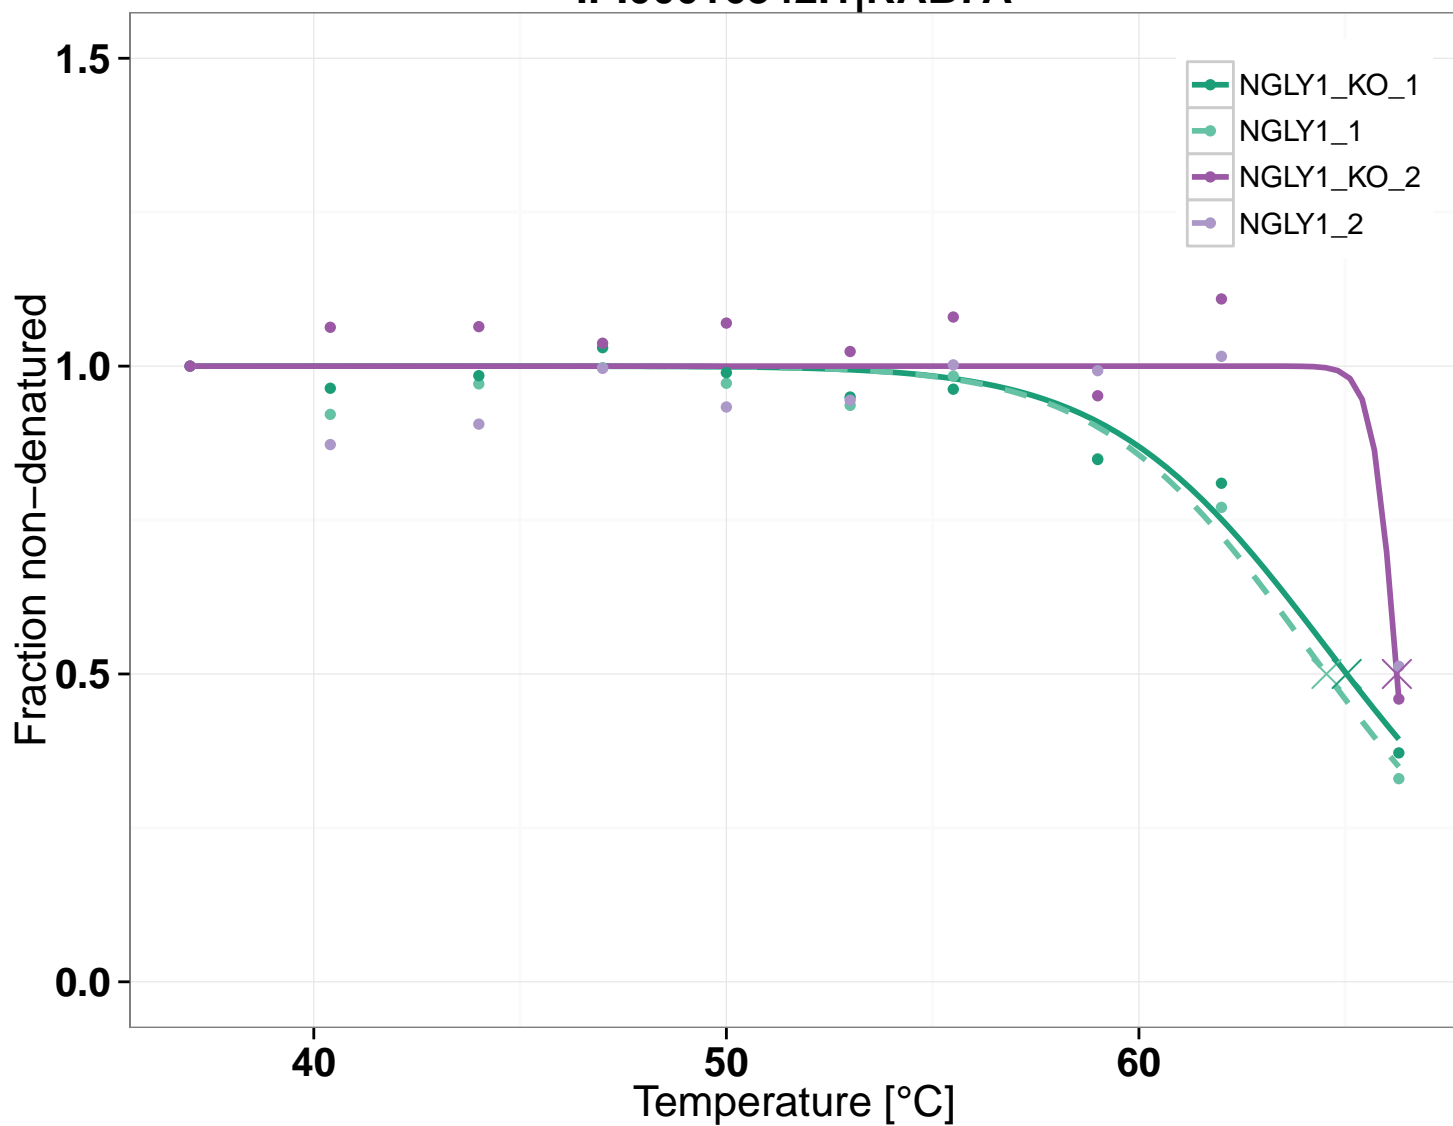

|            | meltPoint | slope  | plateau | R2   |
|------------|-----------|--------|---------|------|
| NGLY1_KO_1 | 65.03     | -0.087 | 0       | 0.96 |
| NGLY1_1    | 64.55     | -0.092 | 0       | 0.96 |
| NGLY1_KO_2 | 66.25     | -0.84  | 0       | 0.89 |
| NGLY1_2    | -         | -      | -       | -    |

Supplement: Supplementary file 4685 [file 1]

IPI00043294.1|C7ORF26

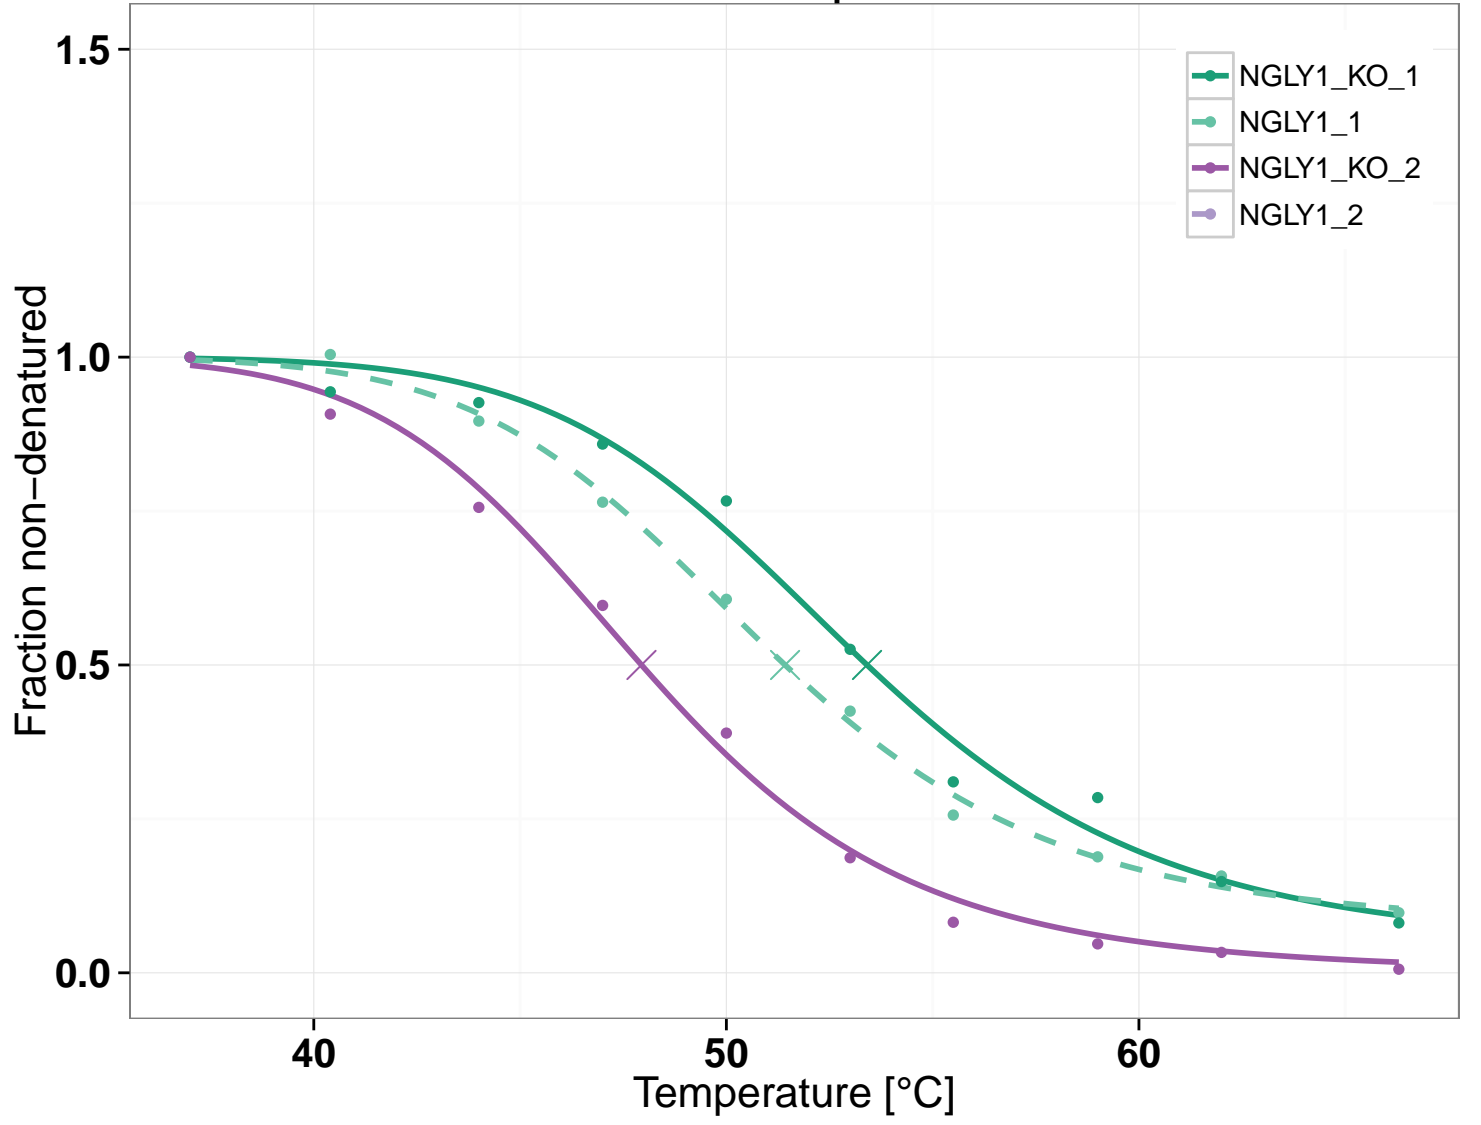

|            | meltPoint | slope  | plateau | R2   |
|------------|-----------|--------|---------|------|
| NGLY1_KO_1 | 53.41     | -0.065 | 0.04    | 0.99 |
| NGLY1_1    | 51.42     | -0.066 | 0.07    | 1    |
| NGLY1_KO_2 | 47.94     | -0.077 | 0       | 1    |
| NGLY1_2    | -         | -      | -       | -    |

Supplement: Supplementary file 4686 [file 1]

IPI00792503.1|TAPBP

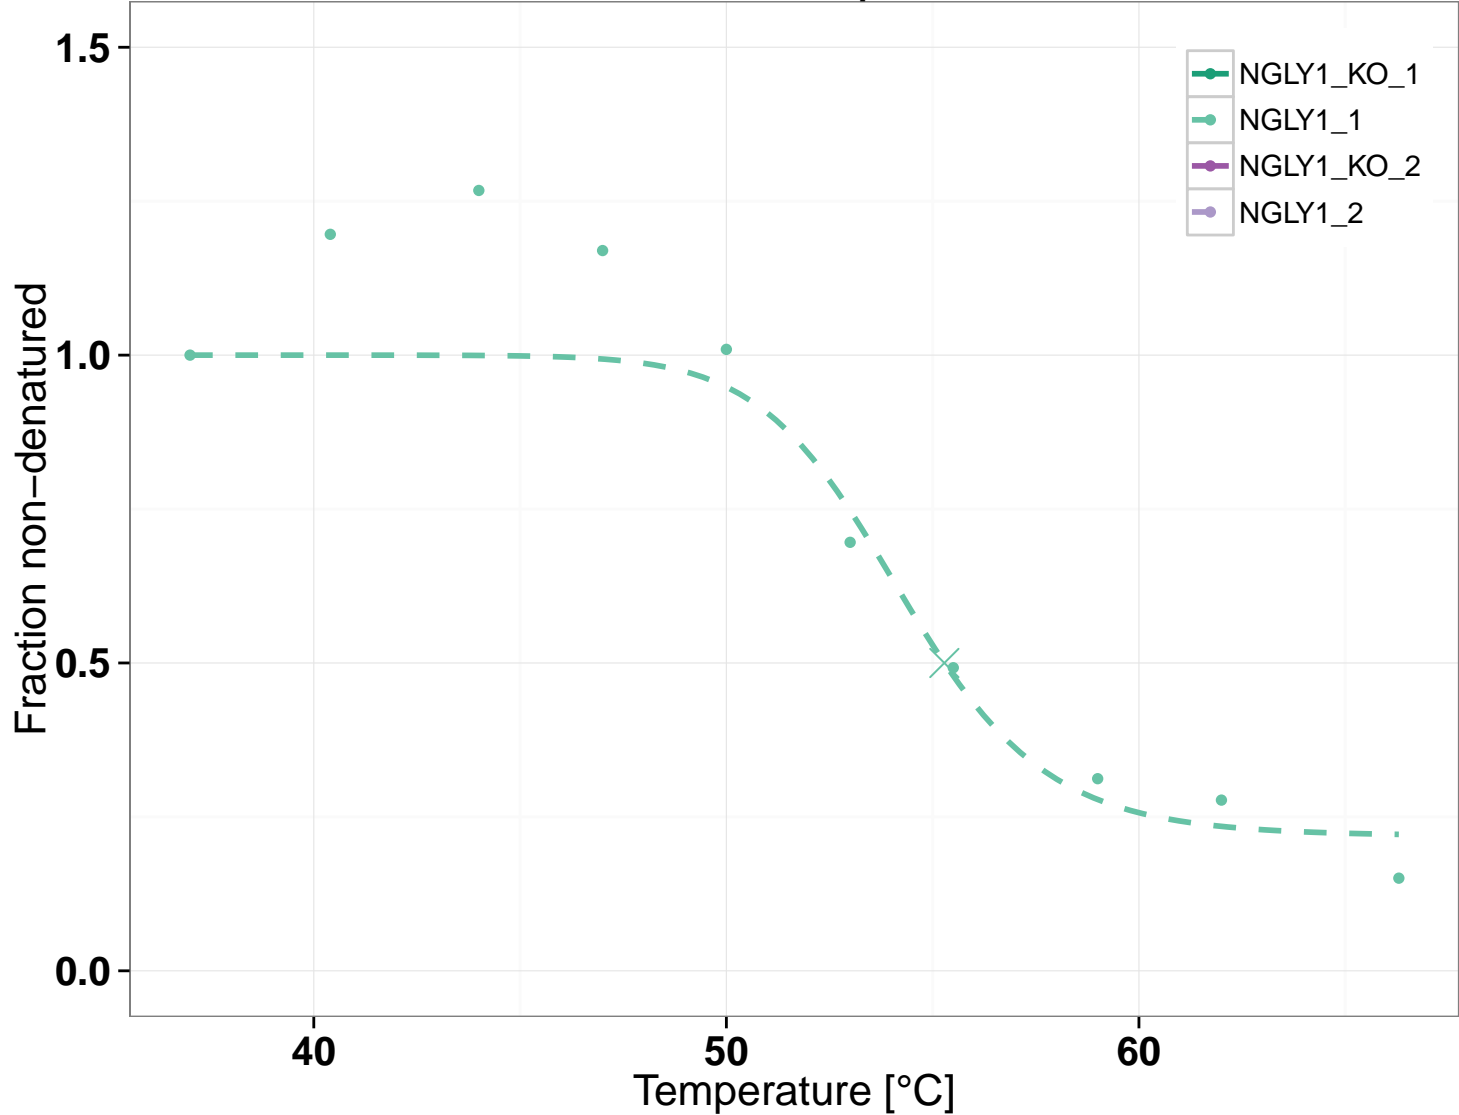

|            | meltPoint | slope | plateau | R2  |
|------------|-----------|-------|---------|-----|
| NGLY1_KO_1 | —         | —     | —       | —   |
| NGLY1_1    | 55.28     | -0.11 | 0.22    | 0.9 |
| NGLY1_KO_2 | —         | —     | —       | —   |
| NGLY1_2    | —         | —     | —       | —   |

Supplement: Supplementary file 4687 [file 1]

# IPI00292856.4|CBLB

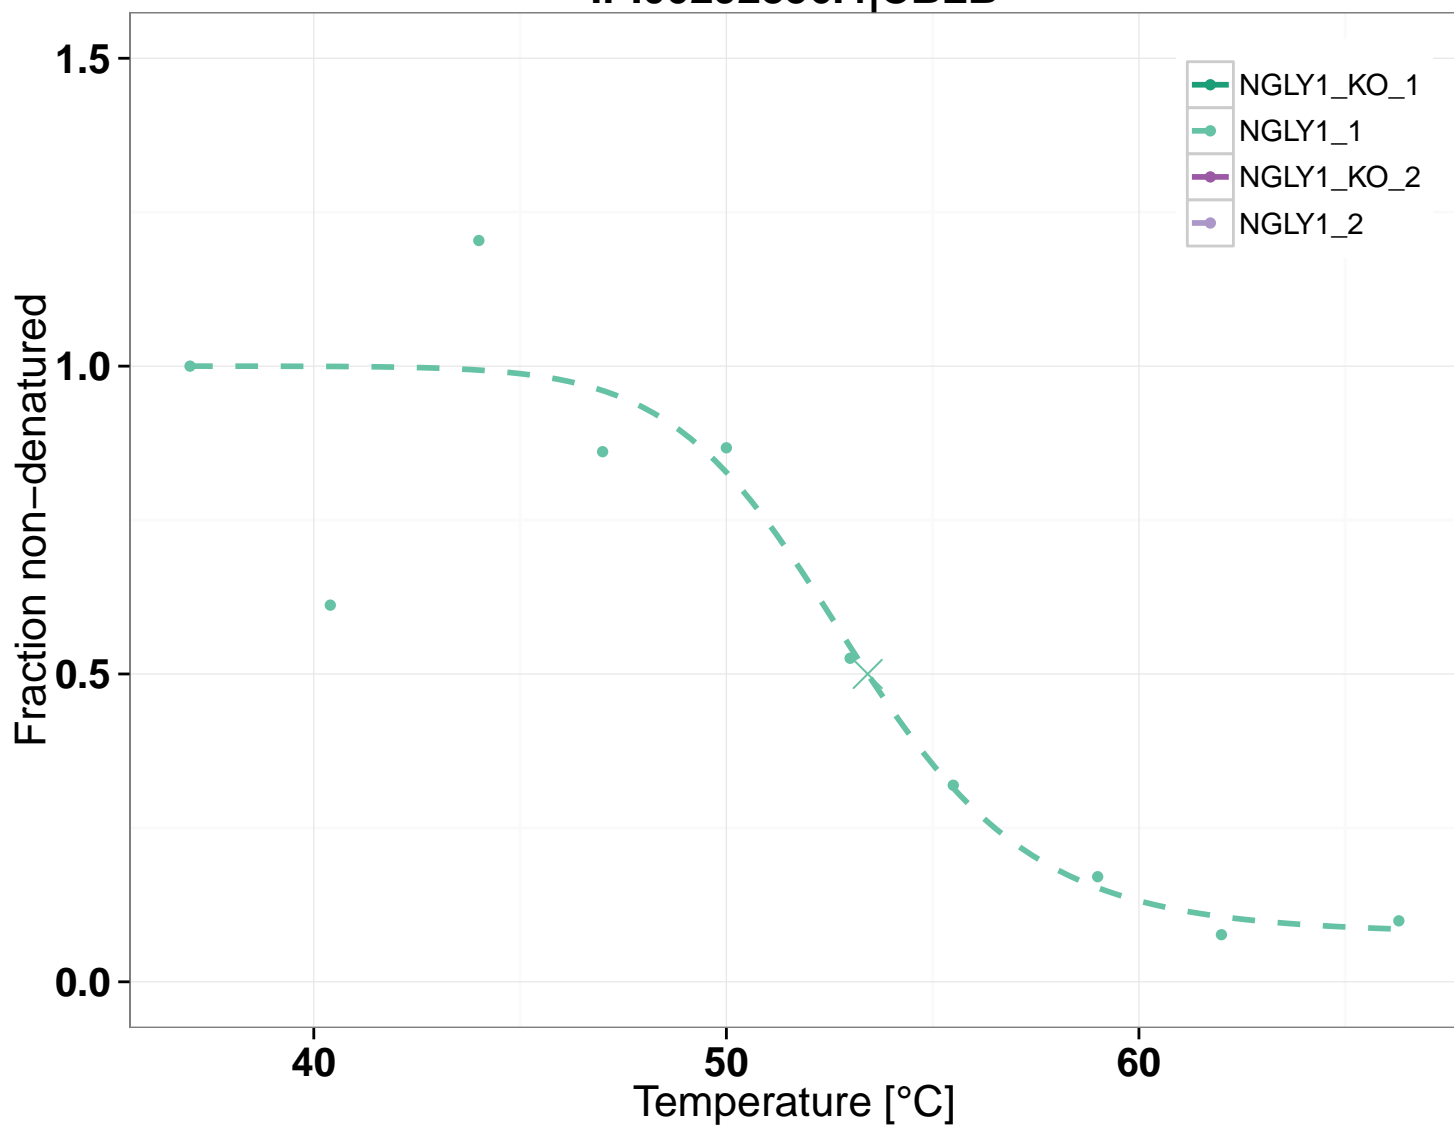

|            | meltPoint | slope | plateau | R2   |
|------------|-----------|-------|---------|------|
| NGLY1_KO_1 | —         | —     | —       | —    |
| NGLY1_1    | 53.43     | -0.11 | 0.08    | 0.86 |
| NGLY1_KO_2 | —         | —     | —       | —    |
| NGLY1_2    | —         | —     | —       | —    |

Supplement: Supplementary file 4688 [file 1]

IPI00291646.2|MTHFD1L

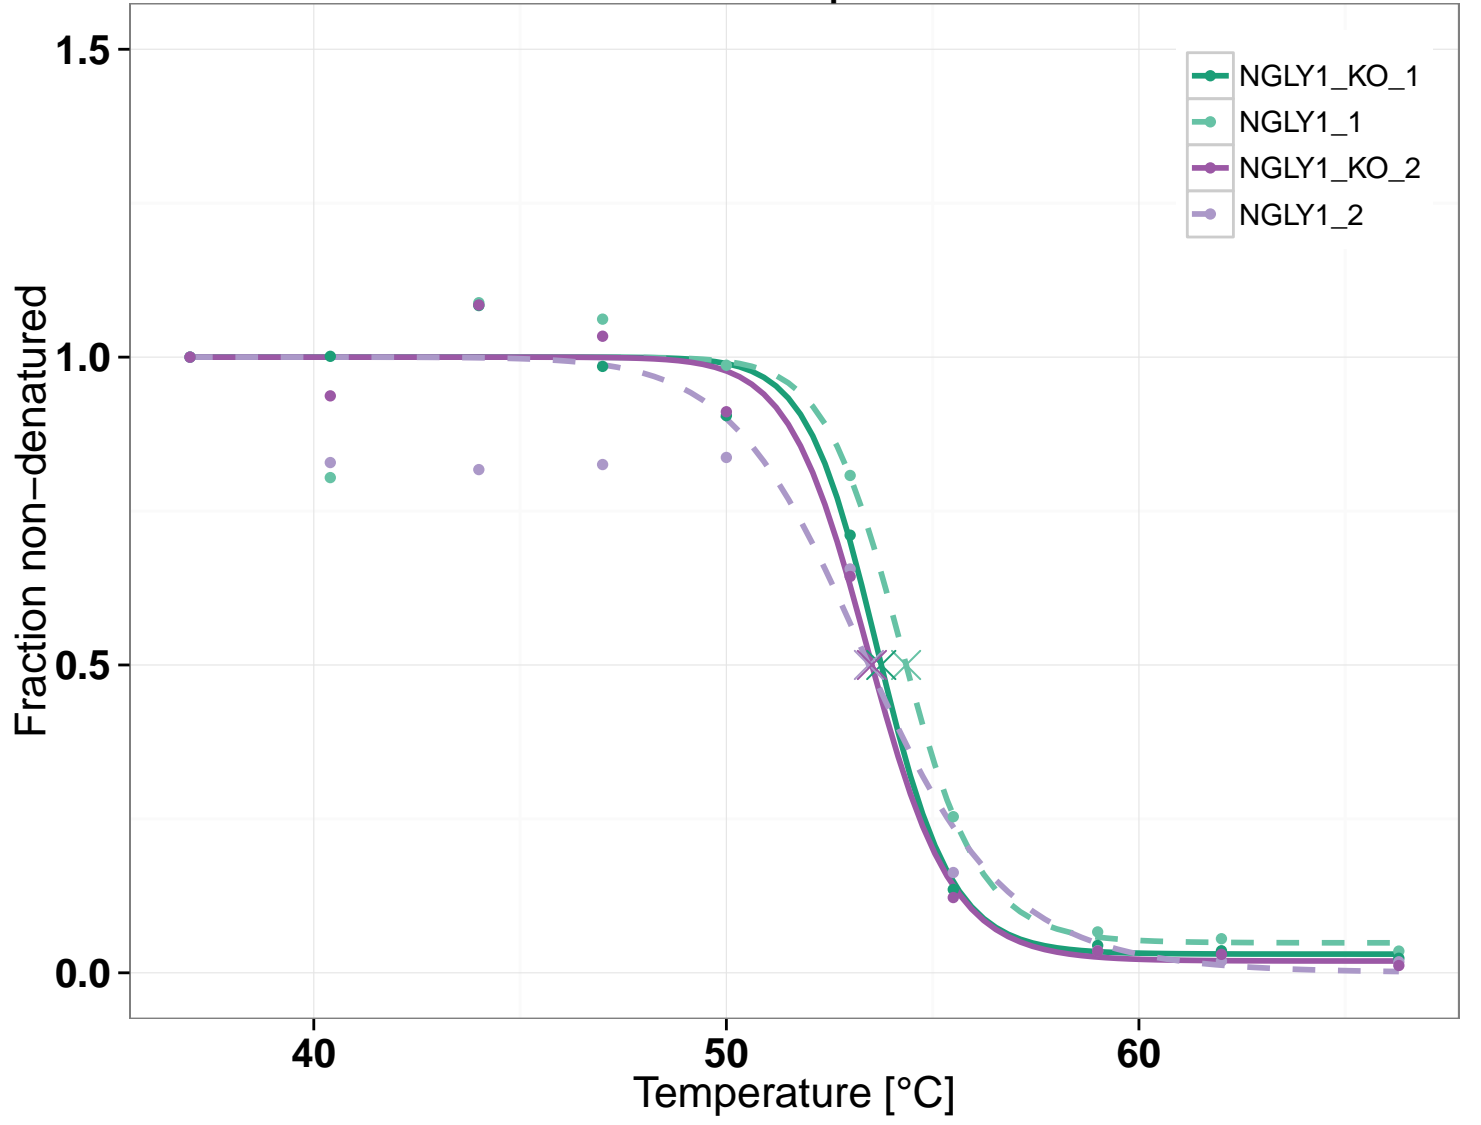

|            | meltPoint | slope | plateau | R2   |
|------------|-----------|-------|---------|------|
| NGLY1_KO_1 | 53.75     | -0.28 | 0.03    | 0.99 |
| NGLY1_1    | 54.36     | -0.25 | 0.05    | 0.97 |
| NGLY1_KO_2 | 53.53     | -0.25 | 0.02    | 0.99 |
| NGLY1_2    | 53.46     | -0.15 | 0       | 0.93 |

Supplement: Supplementary file 4689 [file 1]

# IPI00028357.2|XPO4

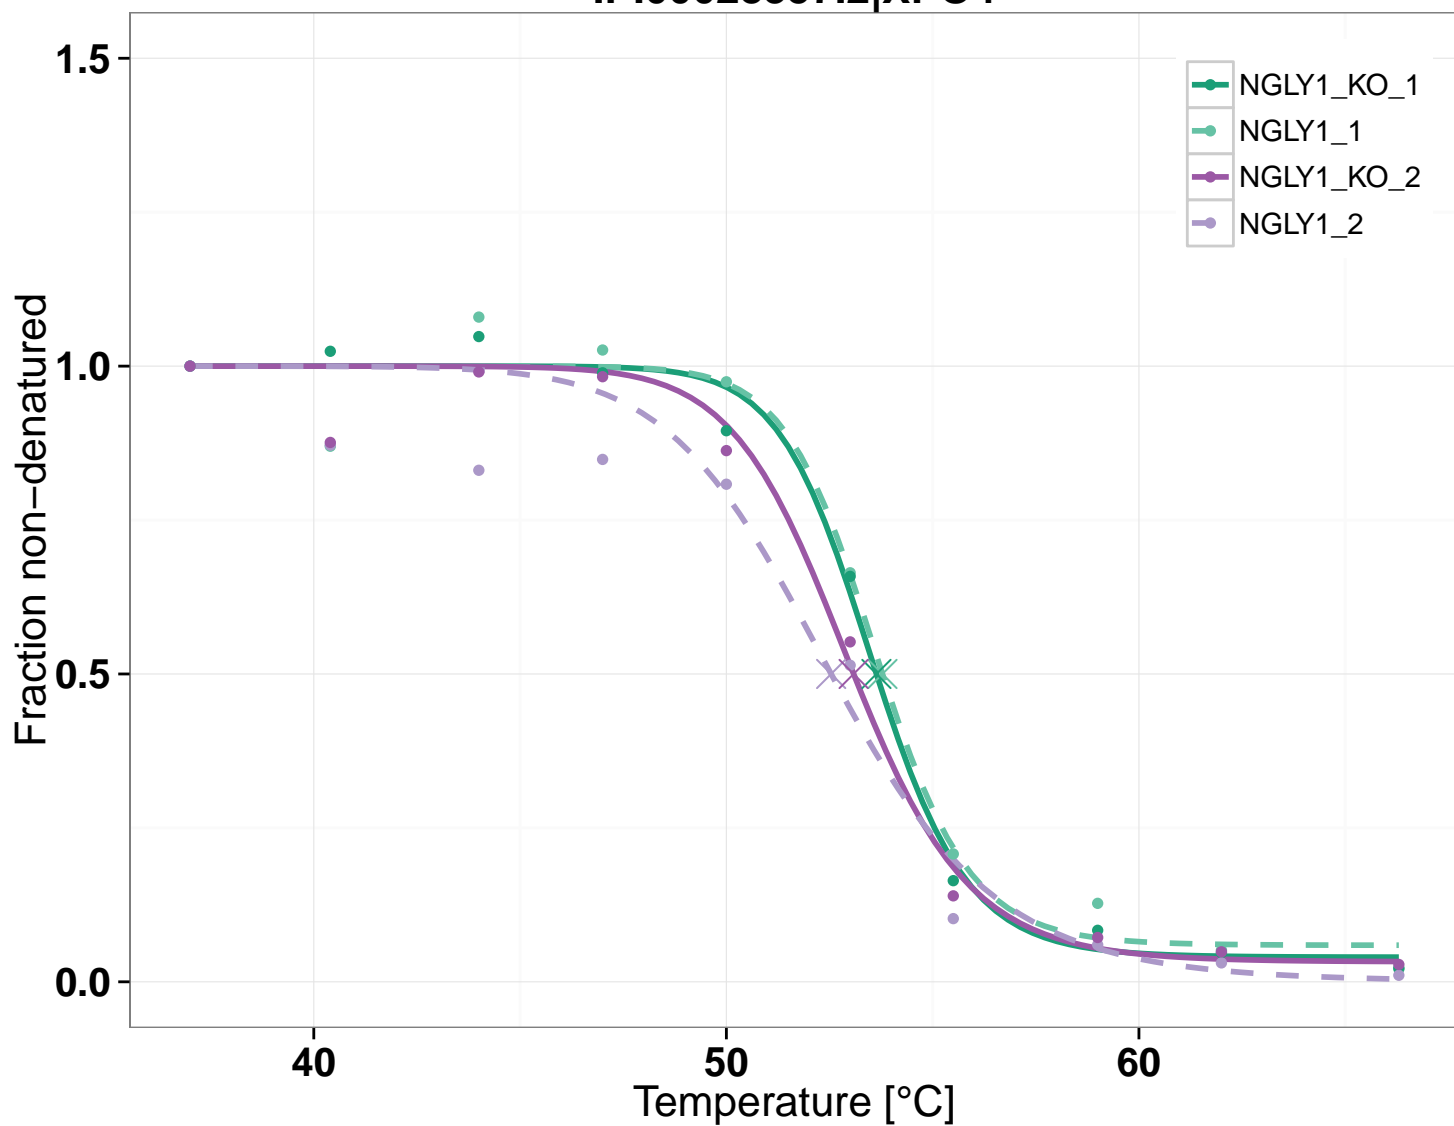

|            | meltPoint | slope | plateau | R2   |
|------------|-----------|-------|---------|------|
| NGLY1_KO_1 | 53.64     | -0.21 | 0.04    | 0.99 |
| NGLY1_1    | 53.78     | -0.21 | 0.06    | 0.98 |
| NGLY1_KO_2 | 53.08     | -0.17 | 0.03    | 0.99 |
| NGLY1_2    | 52.54     | -0.13 | 0       | 0.95 |

Supplement: Supplementary file 4690 [file 1]

IPI00294739.1|SAMHD1

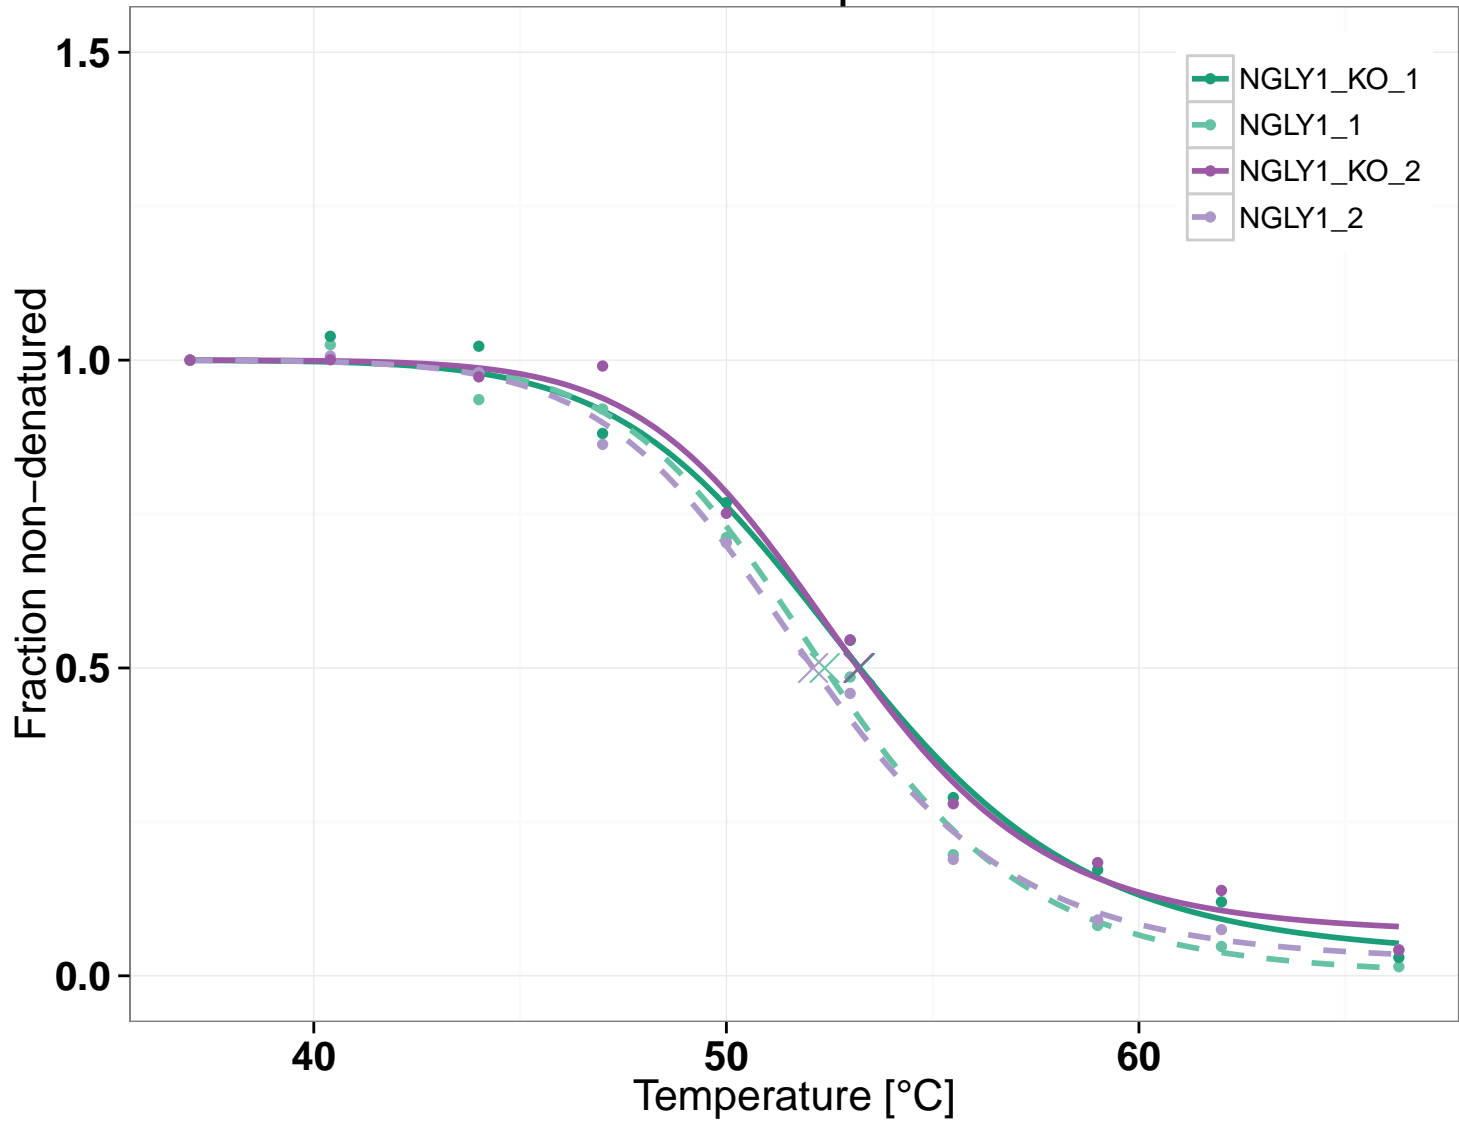

|            | meltPoint | slope  | plateau | R2   |
|------------|-----------|--------|---------|------|
| NGLY1_KO_1 | 53.23     | -0.086 | 0.03    | 0.99 |
| NGLY1_1    | 52.38     | -0.1   | 0       | 1    |
| NGLY1_KO_2 | 53.2      | -0.095 | 0.07    | 0.99 |
| NGLY1_2    | 52.1      | -0.097 | 0.02    | 1    |

Supplement: Supplementary file 4691 [file 1]

IPI00829741.1|ANKLE2

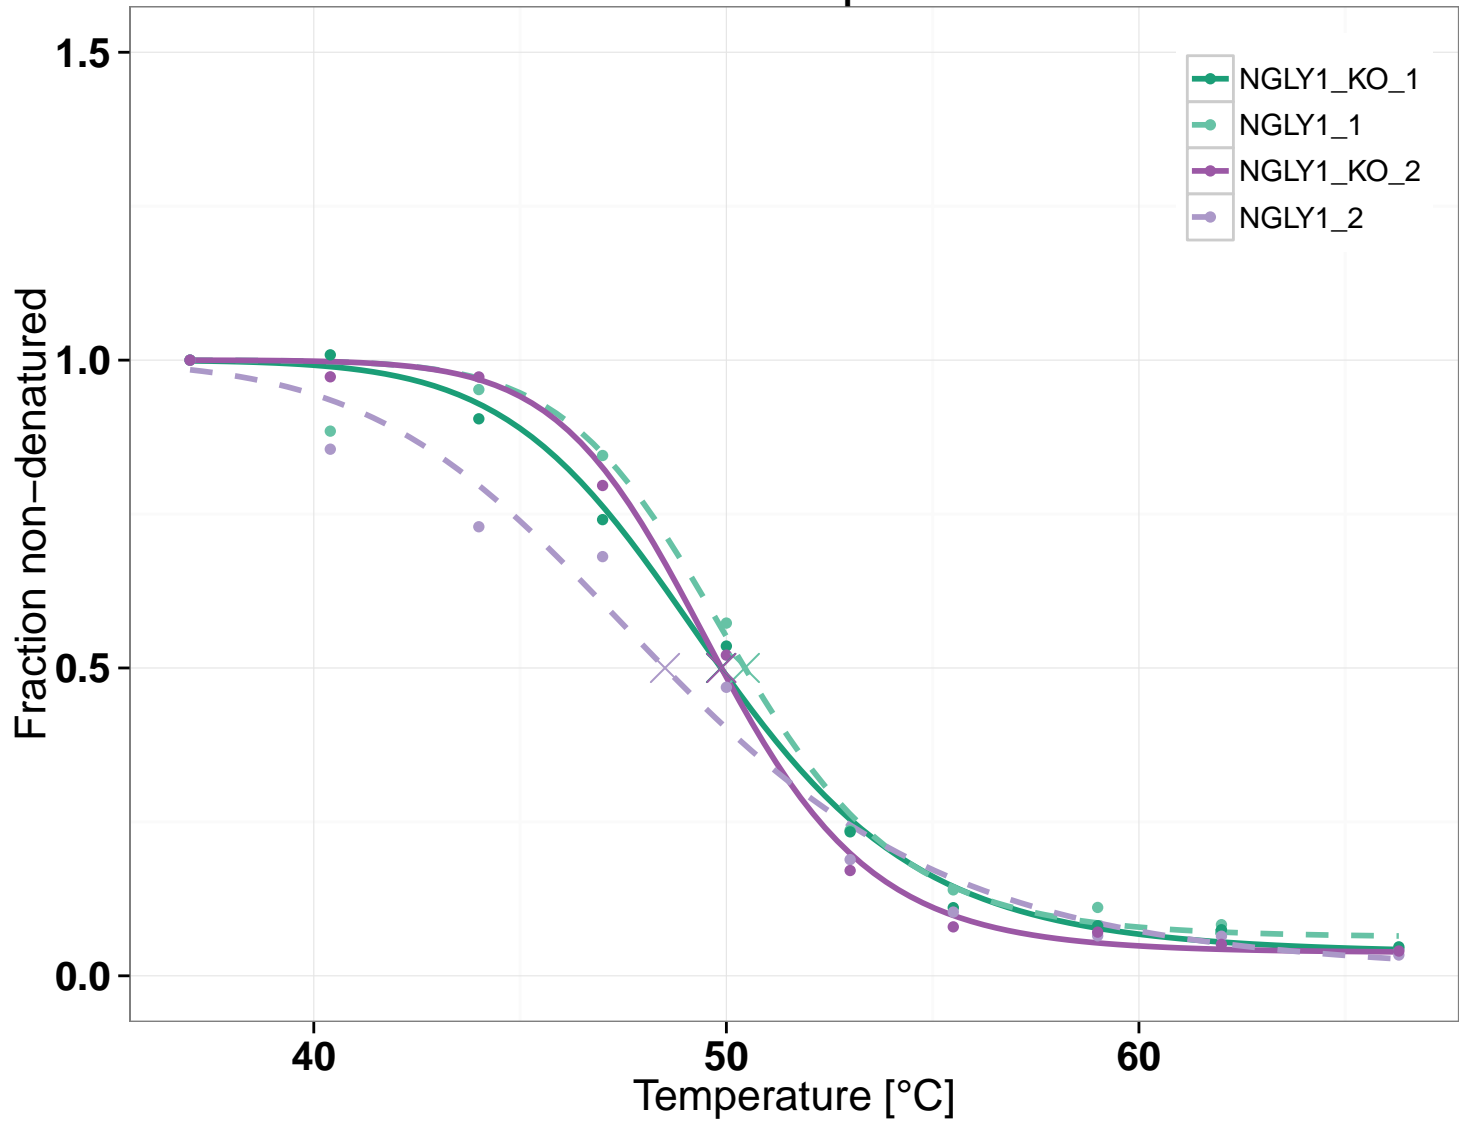

|            | meltPoint | slope  | plateau | R2   |
|------------|-----------|--------|---------|------|
| NGLY1_KO_1 | 49.87     | -0.096 | 0.04    | 1    |
| NGLY1_1    | 50.45     | -0.11  | 0.06    | 0.99 |
| NGLY1_KO_2 | 49.88     | -0.13  | 0.04    | 1    |
| NGLY1_2    | 48.51     | -0.07  | 0       | 0.98 |

Supplement: Supplementary file 4693 [file 1]

IPI00025329.1|RPL19

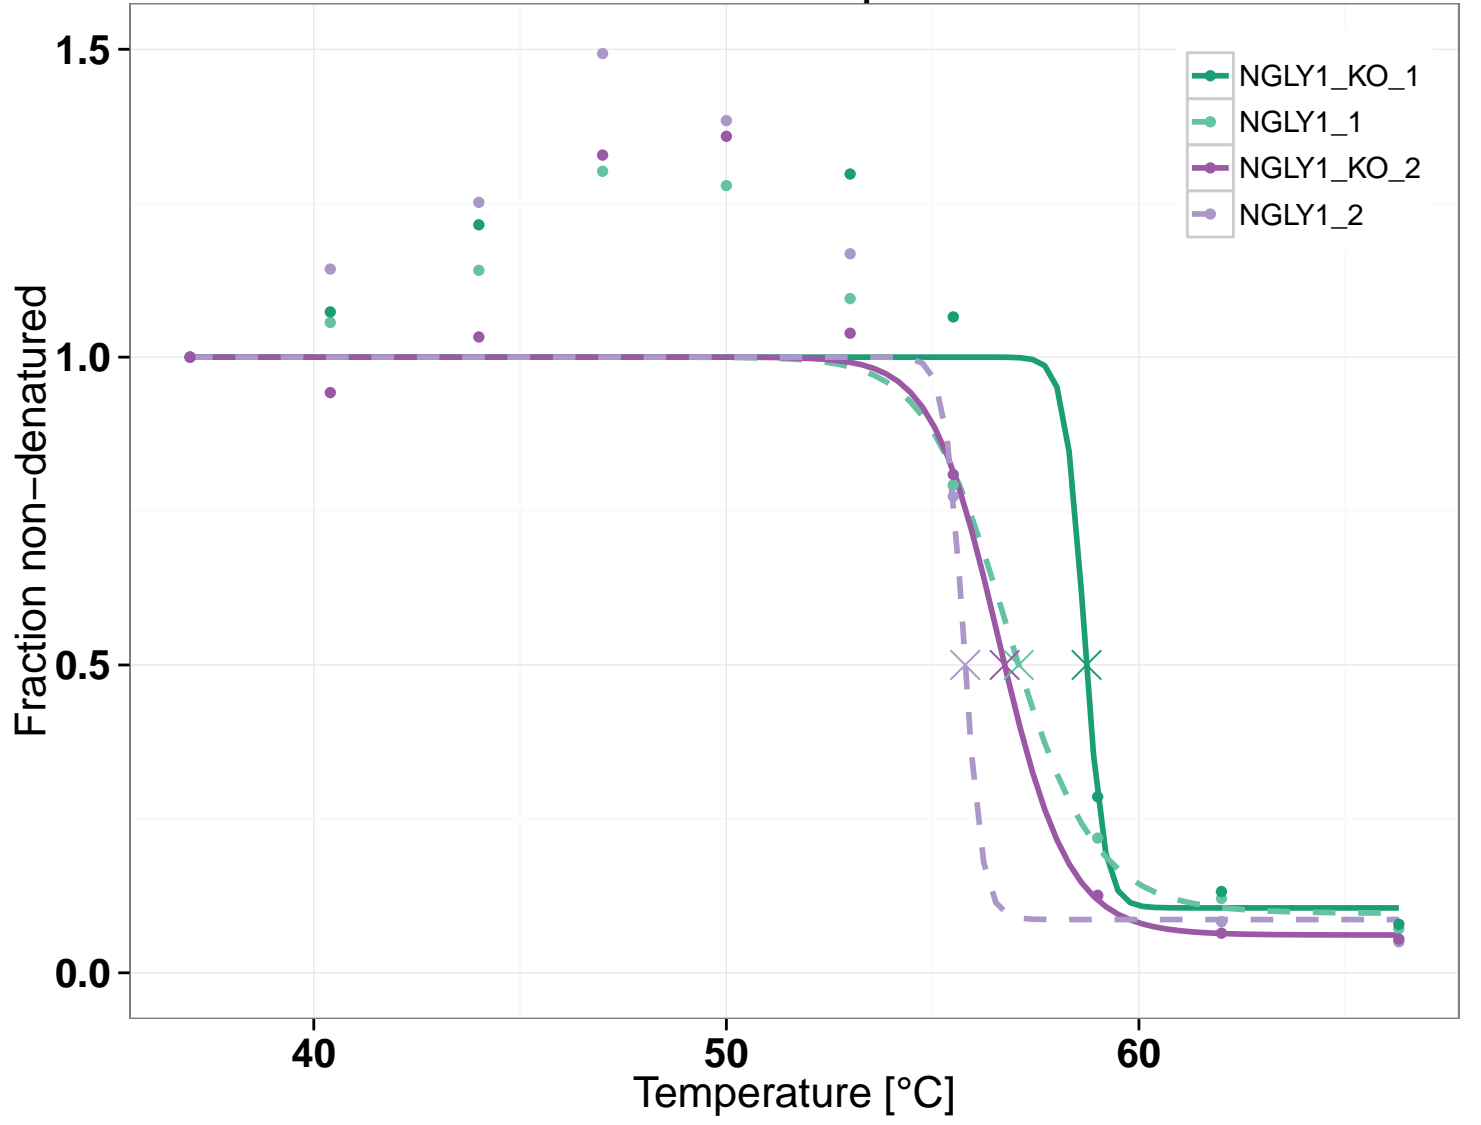

|            | meltPoint | slope | plateau | R2   |
|------------|-----------|-------|---------|------|
| NGLY1_KO_1 | 58.73     | -0.95 | 0.11    | 0.7  |
| NGLY1_1    | 57.09     | -0.22 | 0.1     | 0.9  |
| NGLY1_KO_2 | 56.75     | -0.28 | 0.06    | 0.89 |
| NGLY1_2    | 55.79     | -1    | 0.09    | 0.82 |

Supplement: Supplementary file 4694 [file 1]

IPI00166066.1|ORMDL3

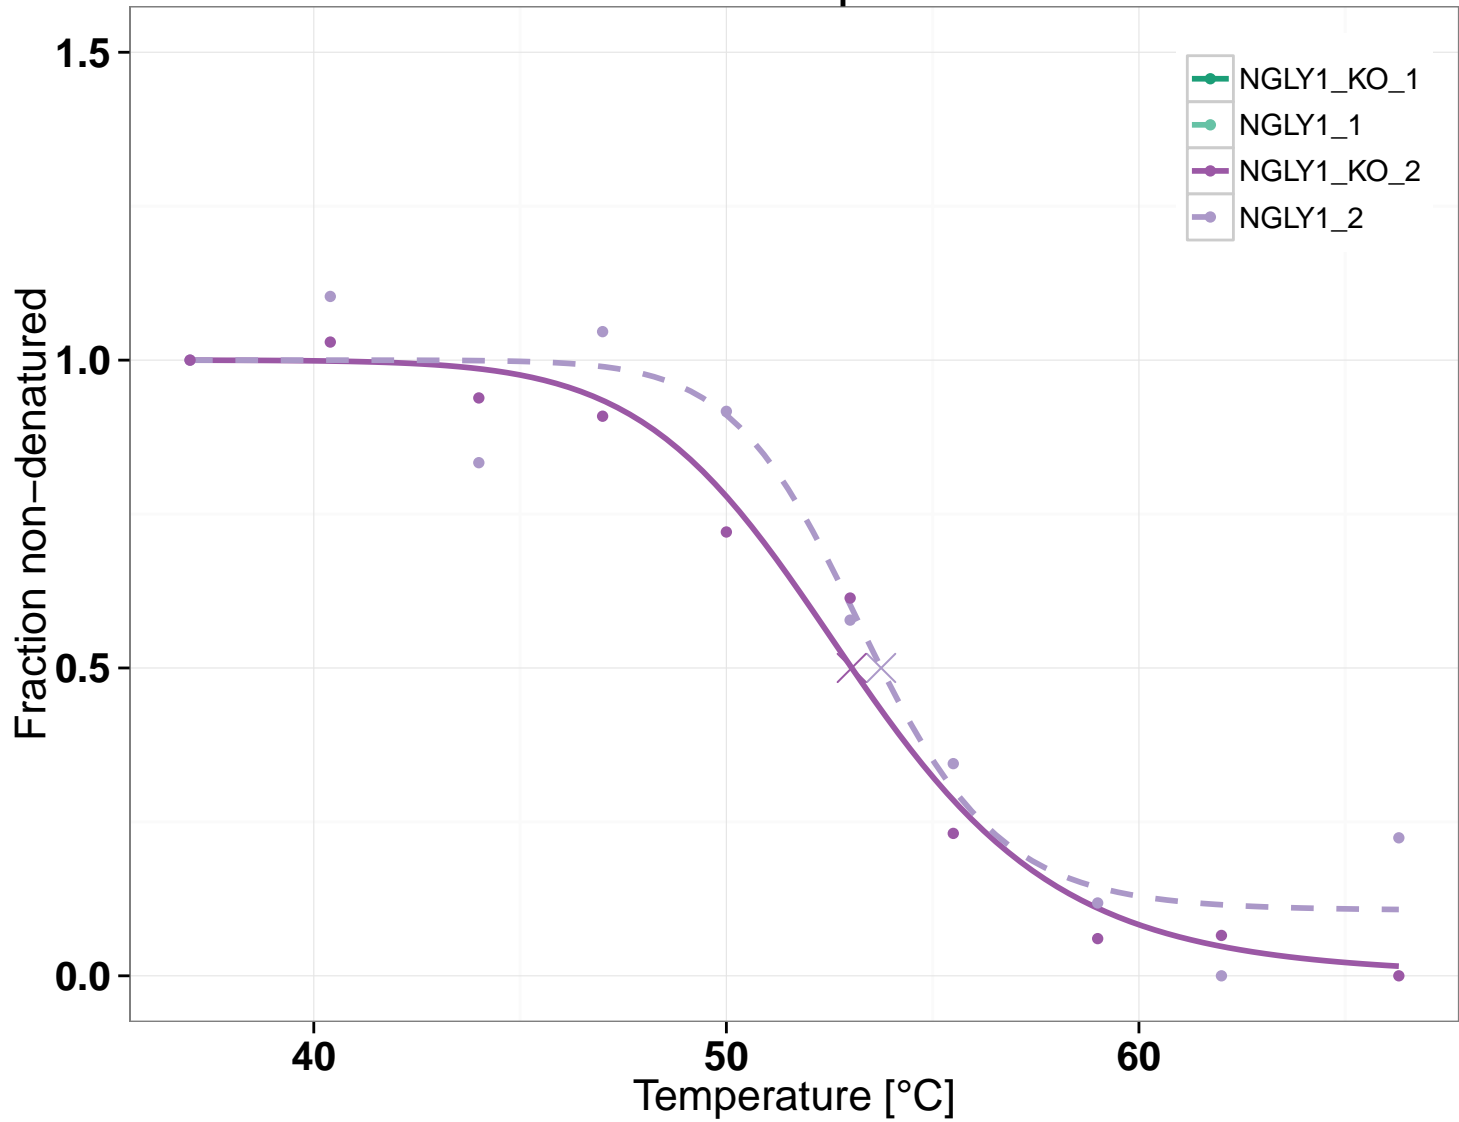

|            | meltPoint | slope  | plateau | R2   |
|------------|-----------|--------|---------|------|
| NGLY1_KO_1 | —         | —      | —       | —    |
| NGLY1_1    | —         | —      | —       | —    |
| NGLY1_KO_2 | 53.04     | -0.099 | 0       | 0.98 |
| NGLY1_2    | 53.75     | -0.14  | 0.11    | 0.95 |

Supplement: Supplementary file 4695 [file 1]

# IPI00013909.1|AIFM2

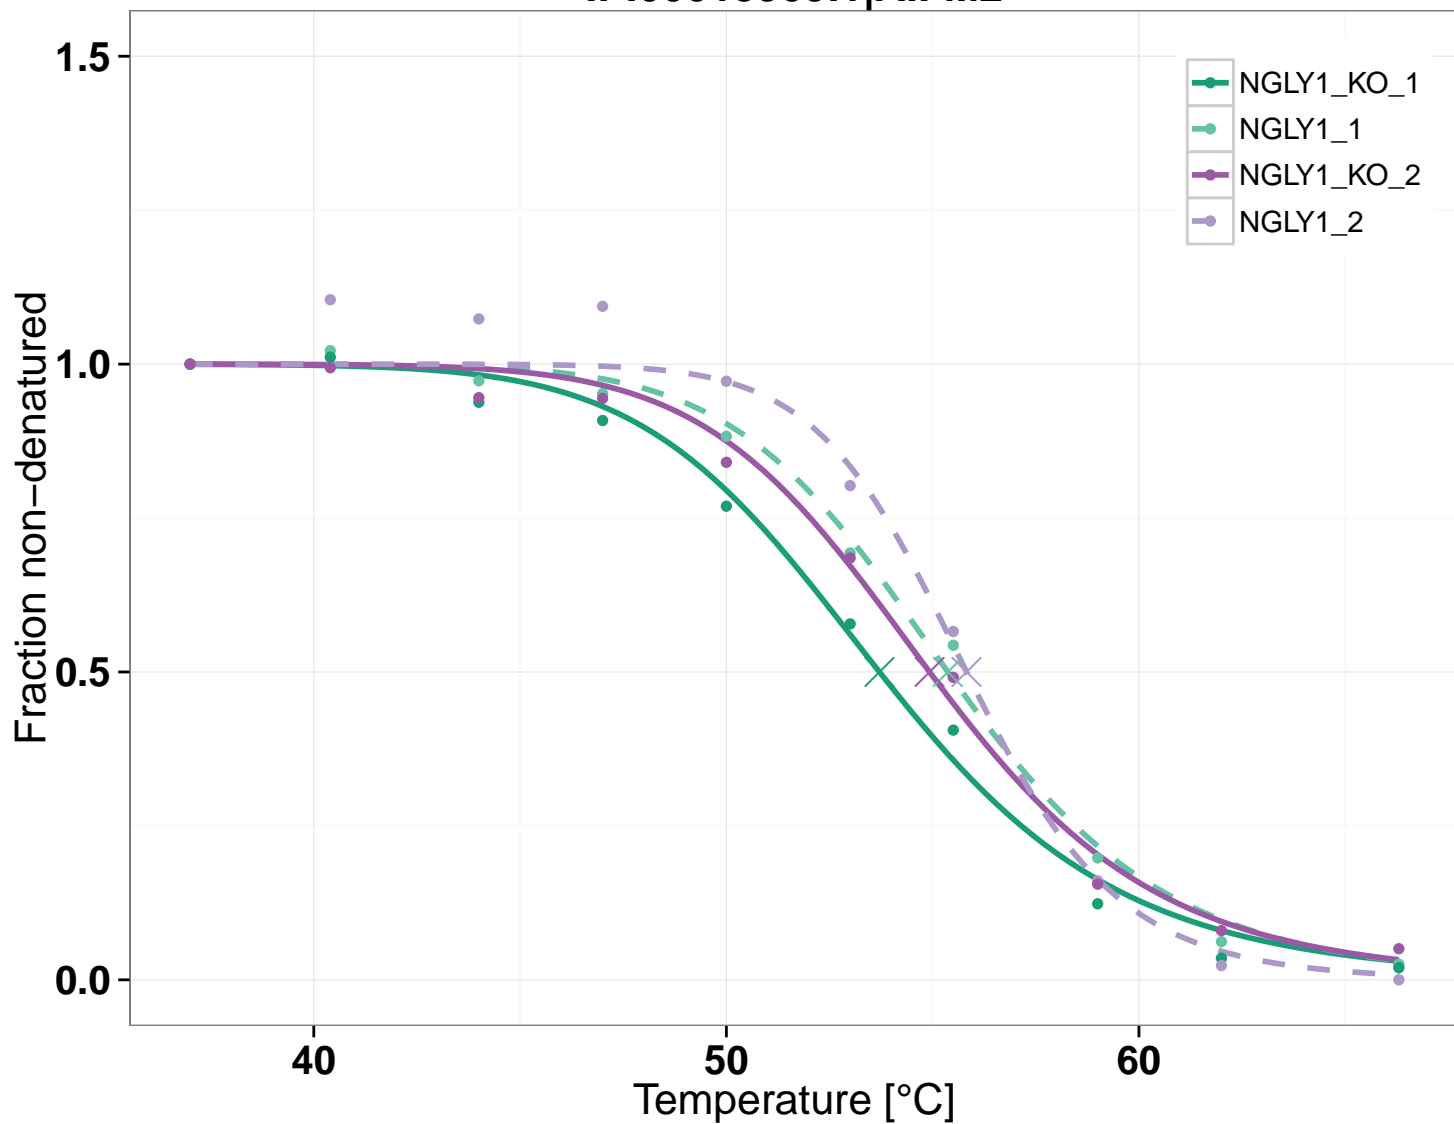

|            | meltPoint | slope  | plateau | R2   |
|------------|-----------|--------|---------|------|
| NGLY1_KO_1 | 53.71     | -0.086 | 0       | 0.99 |
| NGLY1_1    | 55.37     | -0.095 | 0       | 0.99 |
| NGLY1_KO_2 | 54.93     | -0.091 | 0       | 0.99 |
| NGLY1_2    | 55.82     | -0.14  | 0       | 0.99 |

Supplement: Supplementary file 4696 [file 1]

IPI00736464.1|MYO1F

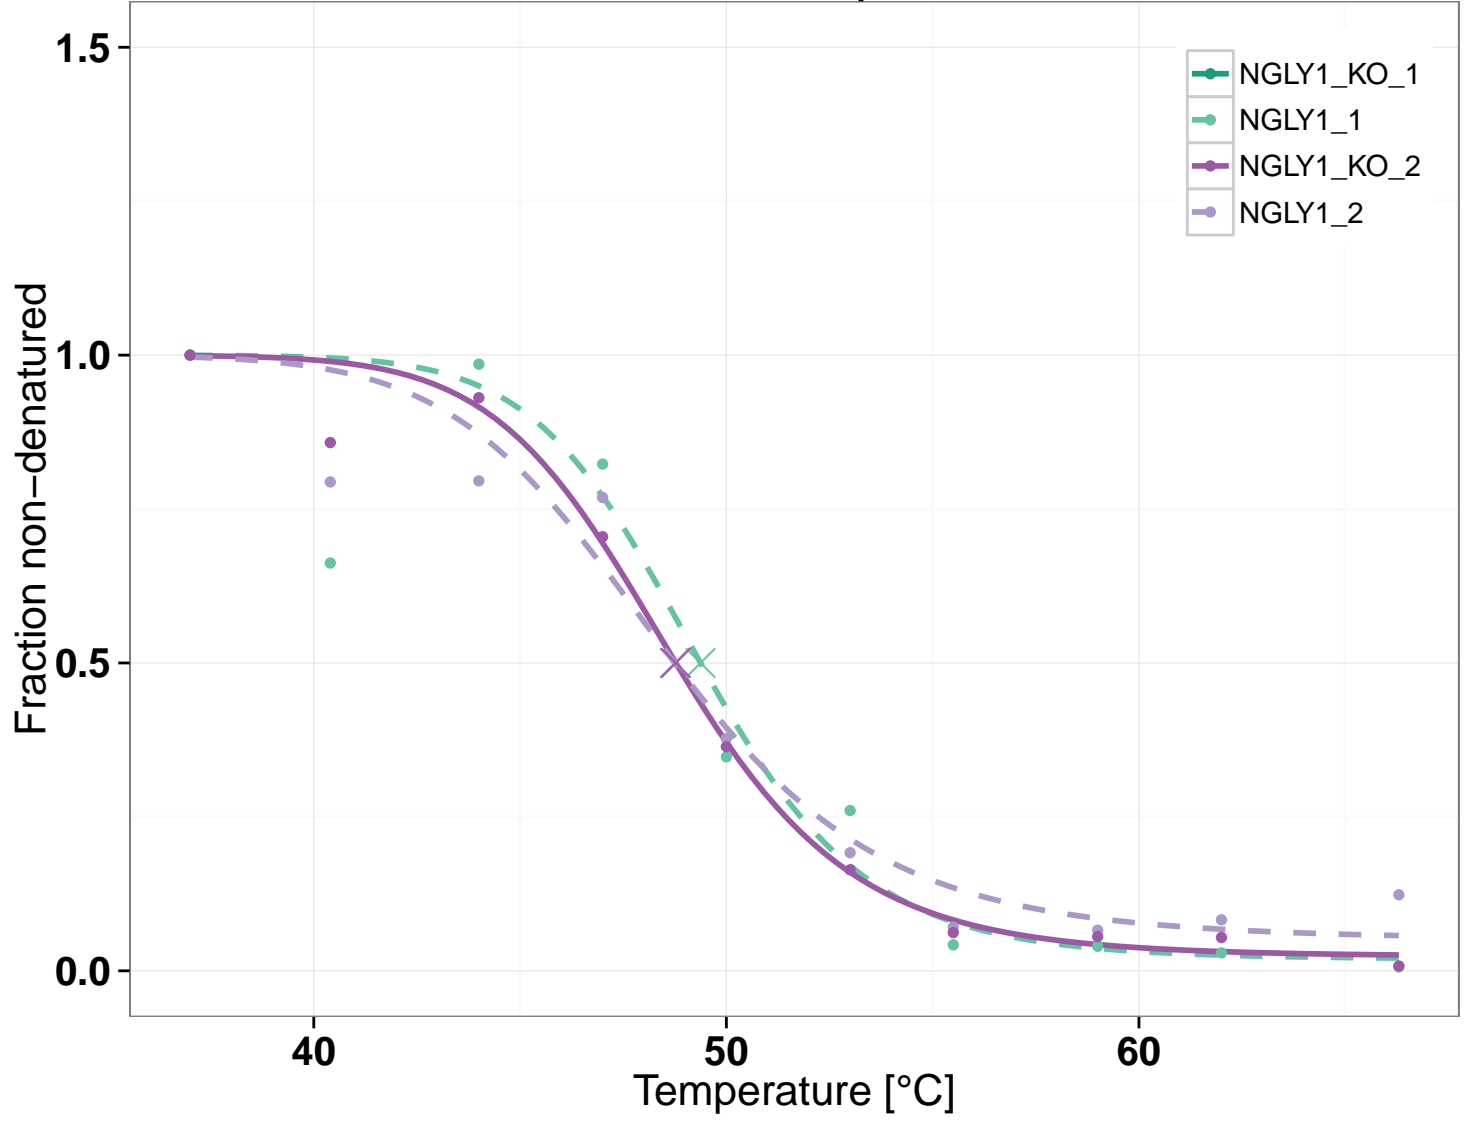

|            | meltPoint | slope  | plateau | R2   |
|------------|-----------|--------|---------|------|
| NGLY1_KO_1 | -         | -      | -       | -    |
| NGLY1_1    | 49.37     | -0.12  | 0.02    | 0.91 |
| NGLY1_KO_2 | 48.77     | -0.11  | 0.02    | 0.99 |
| NGLY1_2    | 48.75     | -0.091 | 0.05    | 0.95 |

Supplement: Supplementary file 4697 [file 1]

IPI00607554.1|USP47

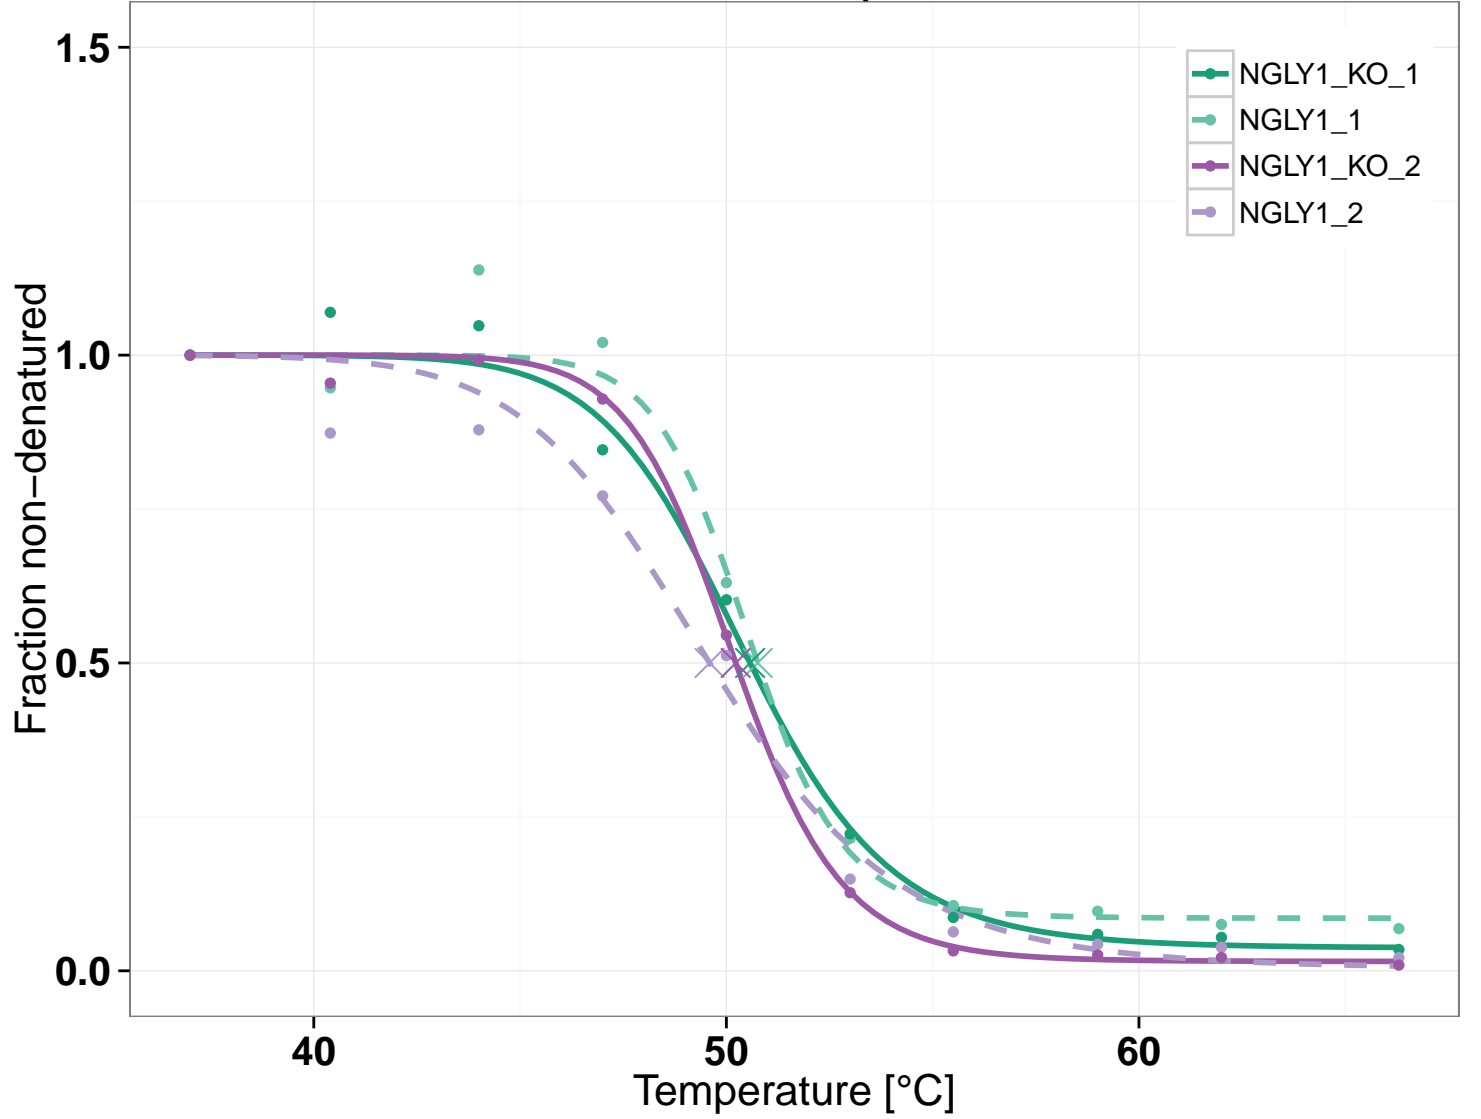

|            | meltPoint | slope | plateau | R2   |
|------------|-----------|-------|---------|------|
| NGLY1_KO_1 | 50.58     | -0.14 | 0.04    | 0.99 |
| NGLY1_1    | 50.76     | -0.2  | 0.09    | 0.99 |
| NGLY1_KO_2 | 50.23     | -0.19 | 0.02    | 1    |
| NGLY1_2    | 49.59     | -0.11 | 0       | 0.98 |

Supplement: Supplementary file 4698 [file 1]

# IPI00218597.6|ECE2

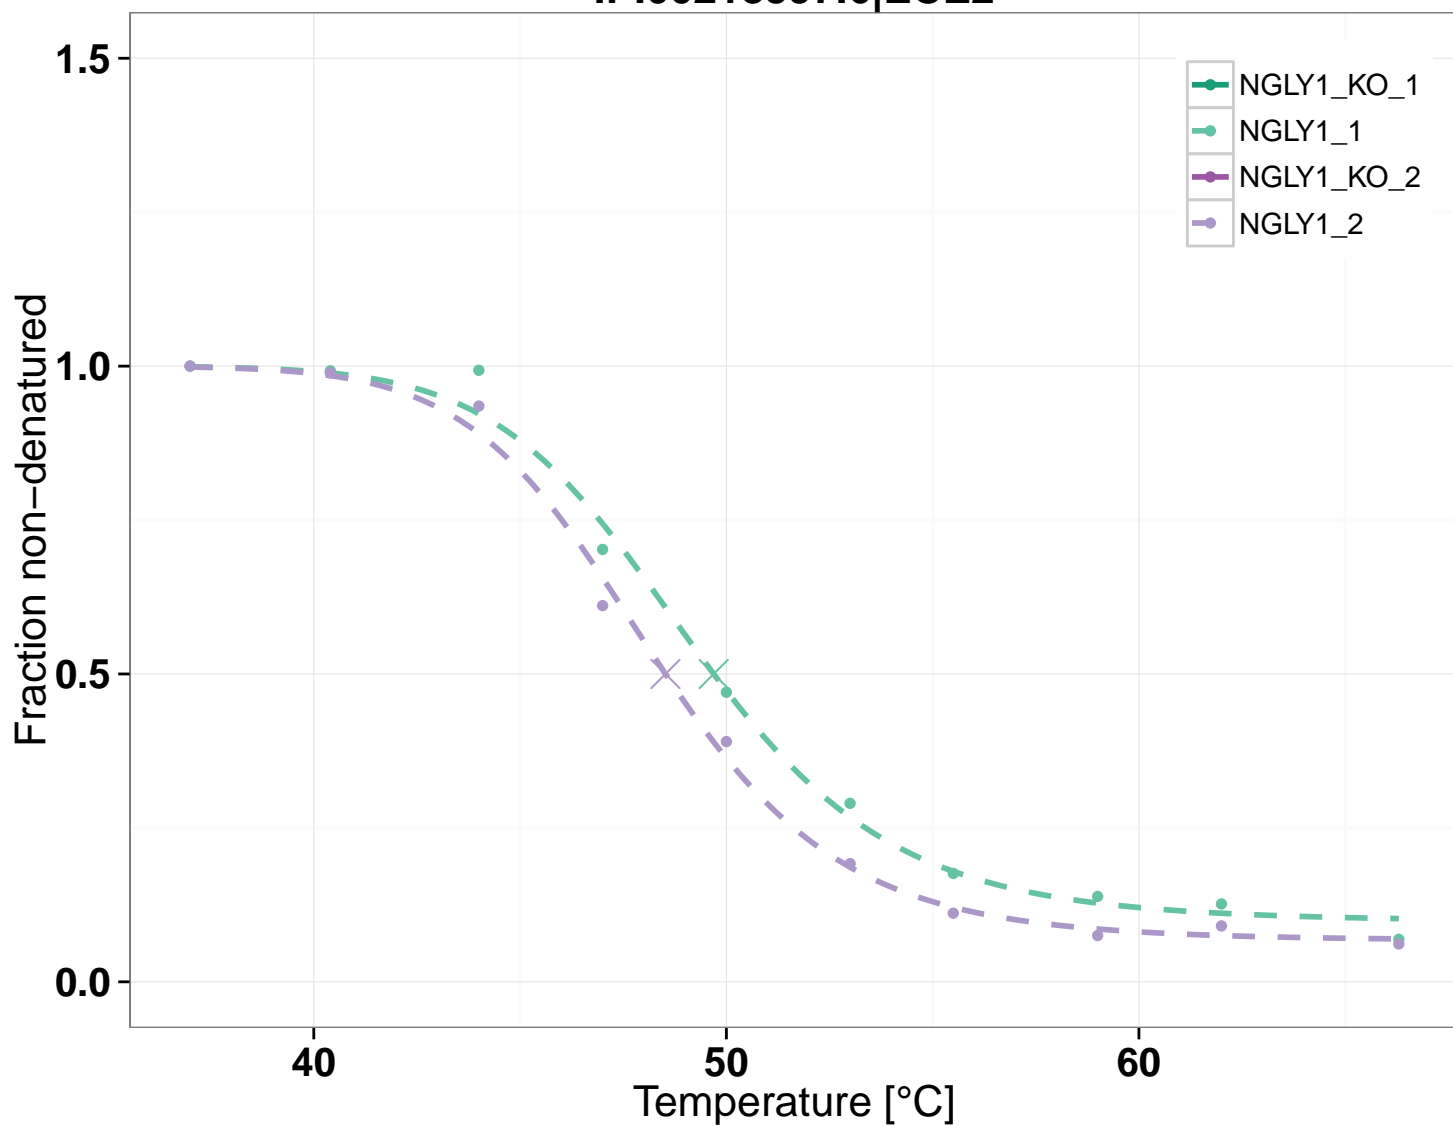

|            | meltPoint | slope  | plateau | R2   |
|------------|-----------|--------|---------|------|
| NGLY1_KO_1 | –         | –      | –       | –    |
| NGLY1_1    | 49.69     | –0.094 | 0.1     | 0.99 |
| NGLY1_KO_2 | –         | –      | –       | –    |
| NGLY1_2    | 48.52     | –0.1   | 0.07    | 1    |

Supplement: Supplementary file 4699 [file 1]

IPI00000875.7|EEF1G

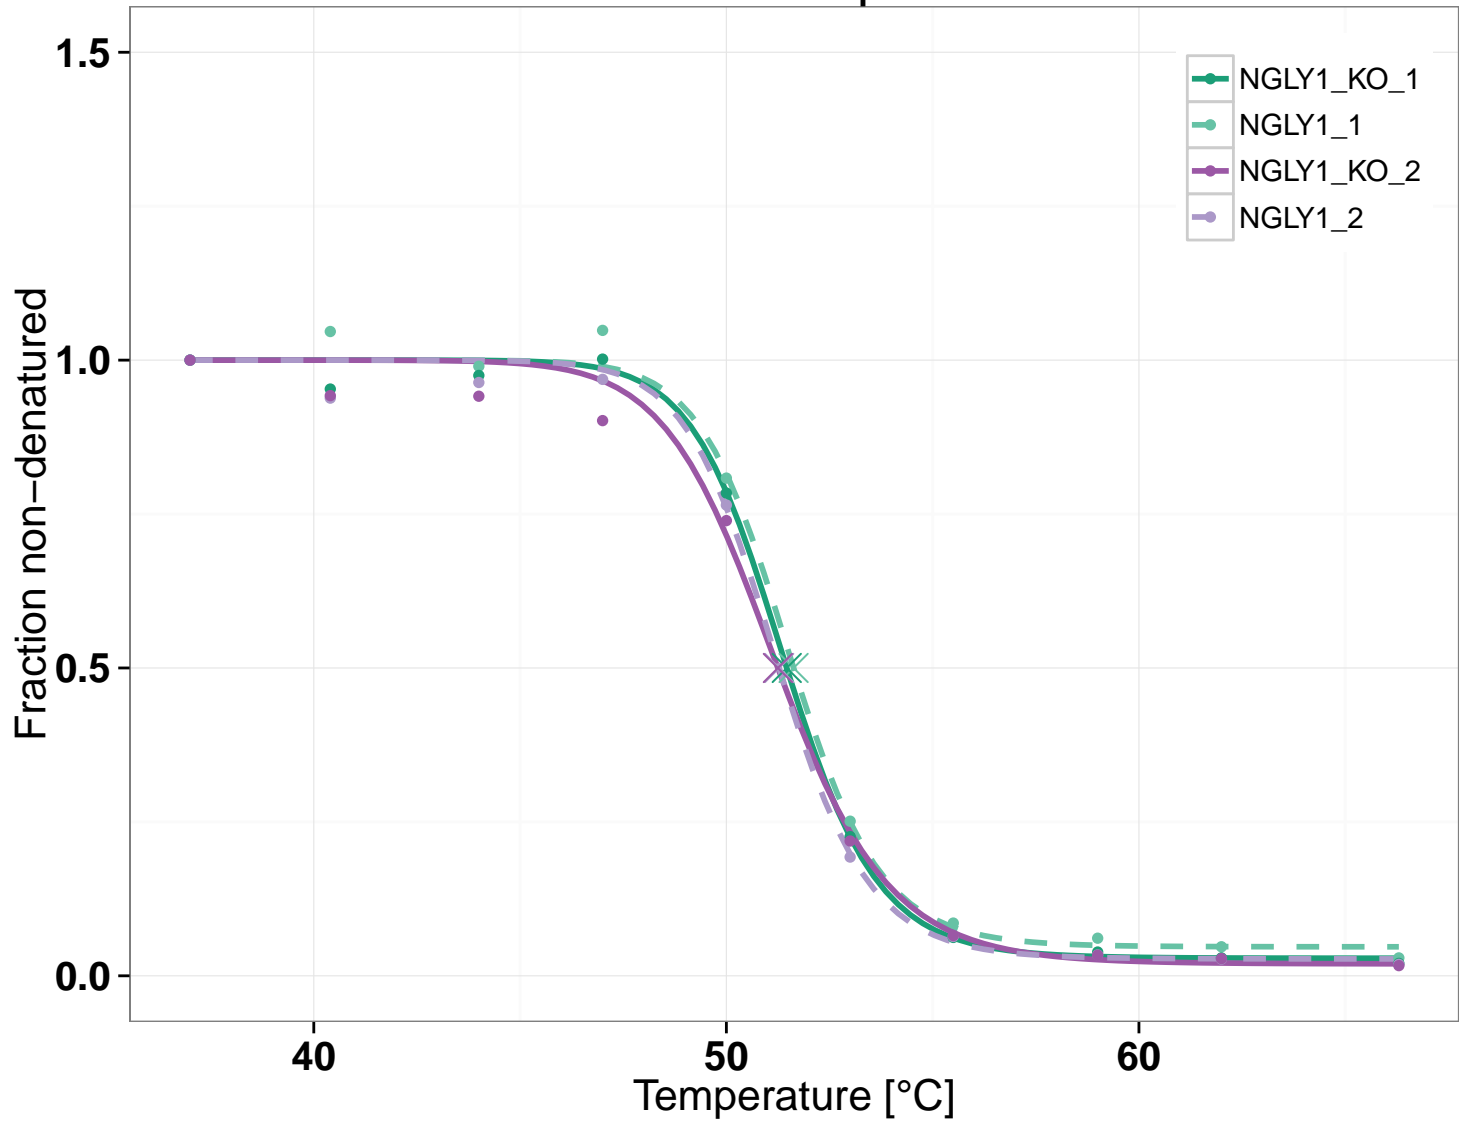

|            | meltPoint | slope | plateau | R2   |
|------------|-----------|-------|---------|------|
| NGLY1_KO_1 | 51.46     | -0.21 | 0.03    | 1    |
| NGLY1_1    | 51.63     | -0.22 | 0.05    | 1    |
| NGLY1_KO_2 | 51.25     | -0.18 | 0.02    | 0.99 |
| NGLY1_2    | 51.28     | -0.22 | 0.03    | 1    |

Supplement: Supplementary file 4700 [file 1]

IPI00013122.1|CDC37

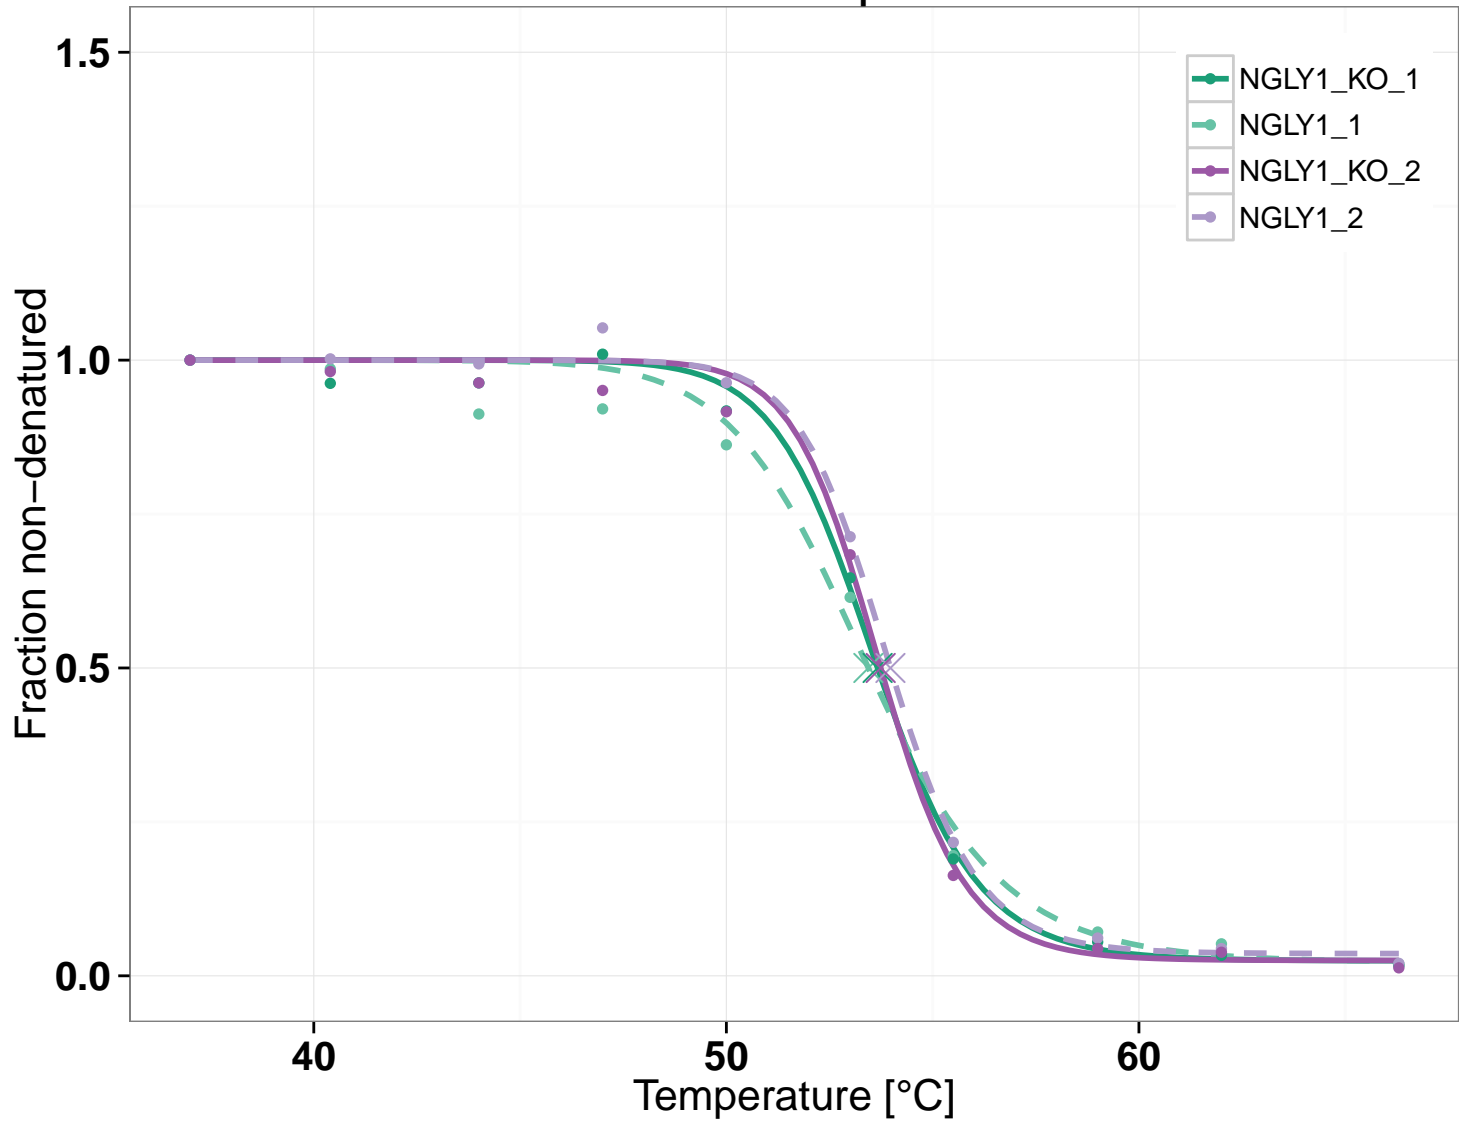

|            | meltPoint | slope | plateau | R2   |
|------------|-----------|-------|---------|------|
| NGLY1_KO_1 | 53.67     | -0.2  | 0.02    | 1    |
| NGLY1_1    | 53.44     | -0.15 | 0.02    | 0.99 |
| NGLY1_KO_2 | 53.74     | -0.23 | 0.02    | 1    |
| NGLY1_2    | 53.98     | -0.22 | 0.04    | 1    |

Supplement: Supplementary file 4701 [file 1]

IPI00307257.4|TBC1D9B

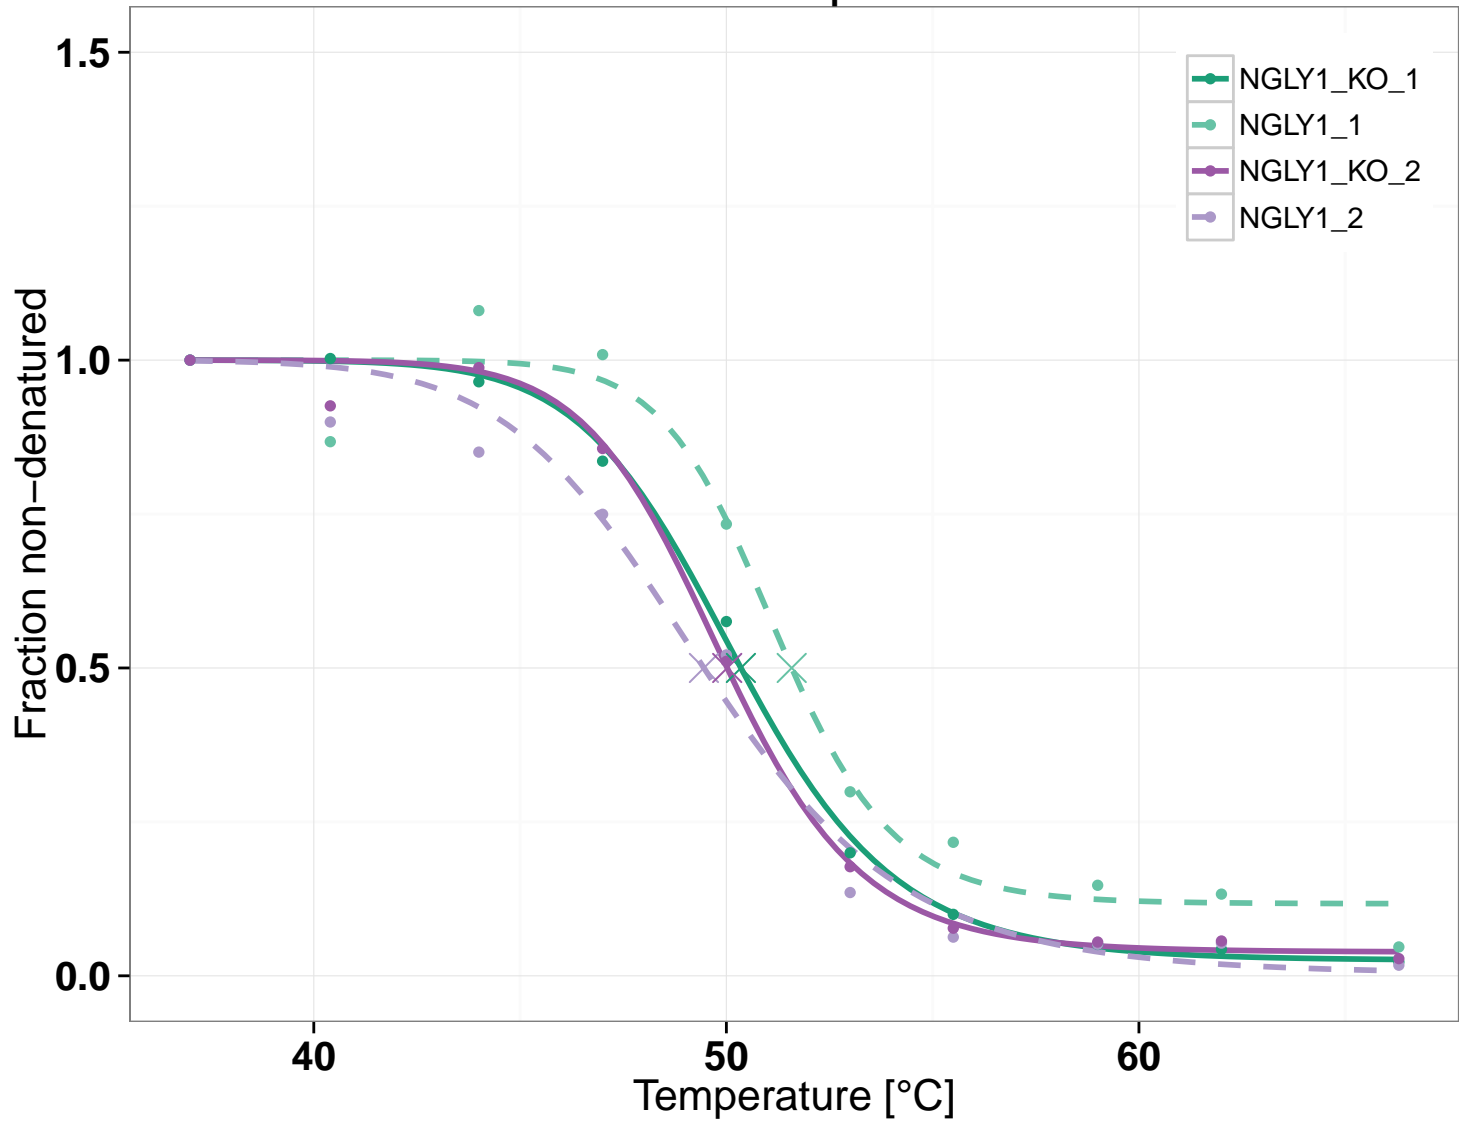

|            | meltPoint | slope | plateau | R2   |
|------------|-----------|-------|---------|------|
| NGLY1_KO_1 | 50.35     | -0.13 | 0.02    | 1    |
| NGLY1_1    | 51.58     | -0.16 | 0.12    | 0.98 |
| NGLY1_KO_2 | 50.02     | -0.14 | 0.04    | 1    |
| NGLY1_2    | 49.46     | -0.1  | 0       | 0.98 |

Supplement: Supplementary file 4702 [file 1]

# IPI00306791.2|SORBS1

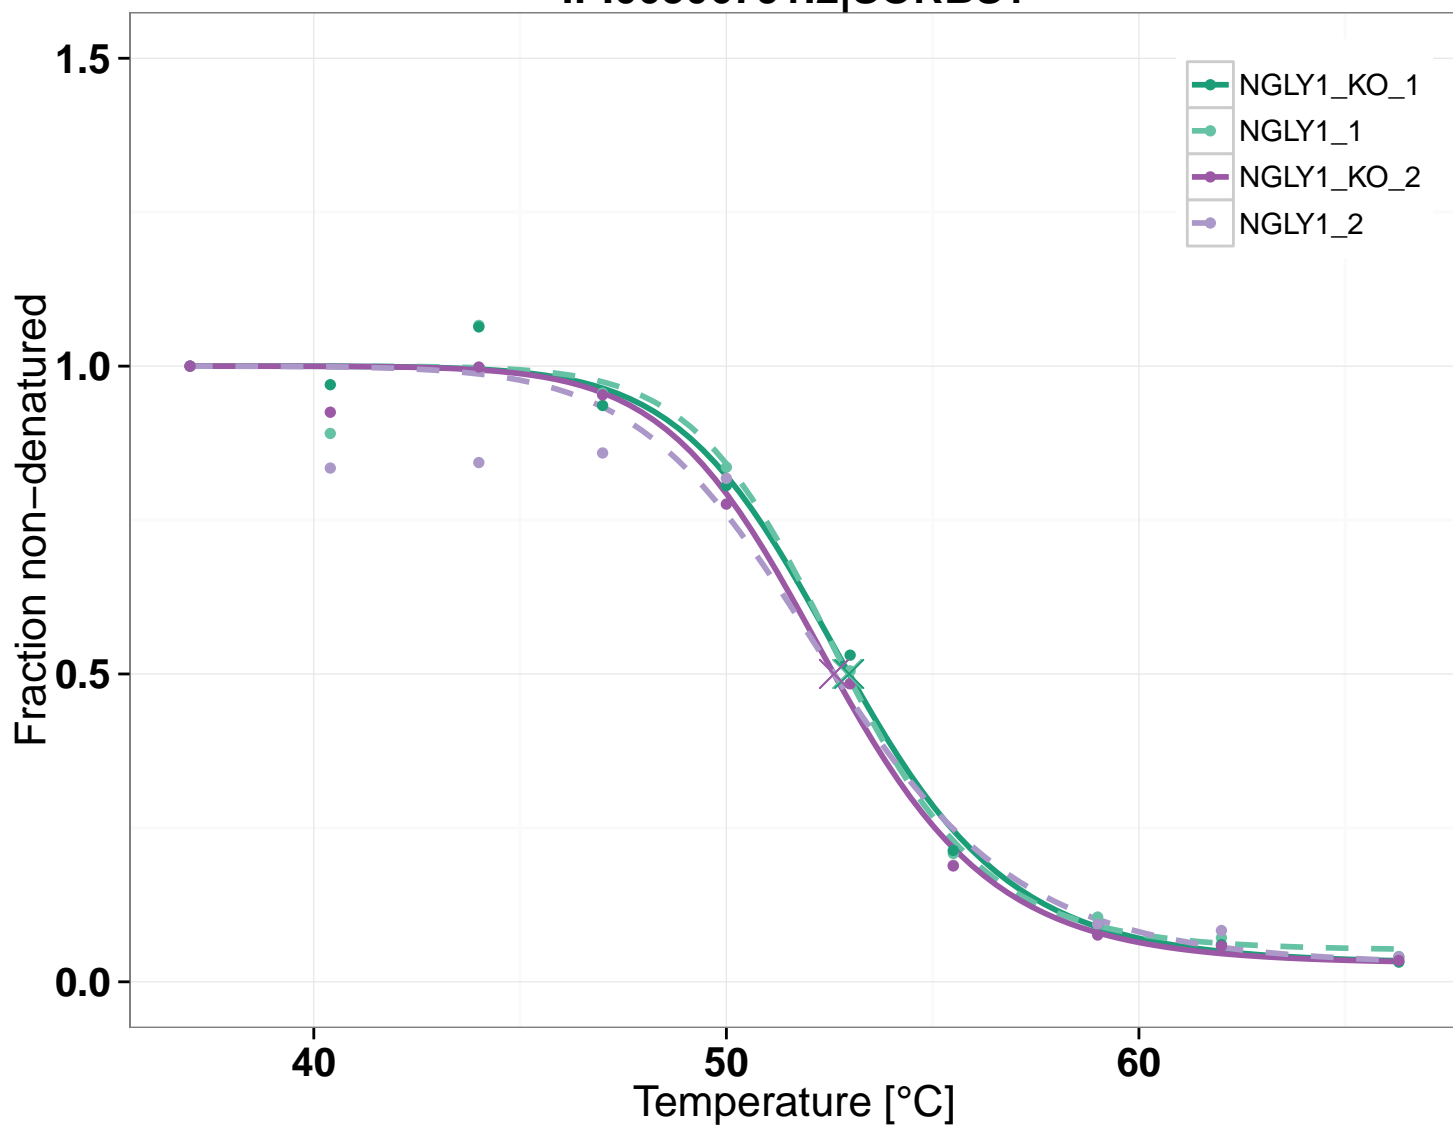

|            | meltPoint | slope | plateau | R2   |
|------------|-----------|-------|---------|------|
| NGLY1_KO_1 | 52.98     | -0.12 | 0.03    | 0.99 |
| NGLY1_1    | 52.93     | -0.13 | 0.05    | 0.99 |
| NGLY1_KO_2 | 52.61     | -0.12 | 0.03    | 1    |
| NGLY1_2    | 52.61     | -0.1  | 0.03    | 0.95 |

Supplement: Supplementary file 4703 [file 1]

IPI00300278.3|MED8

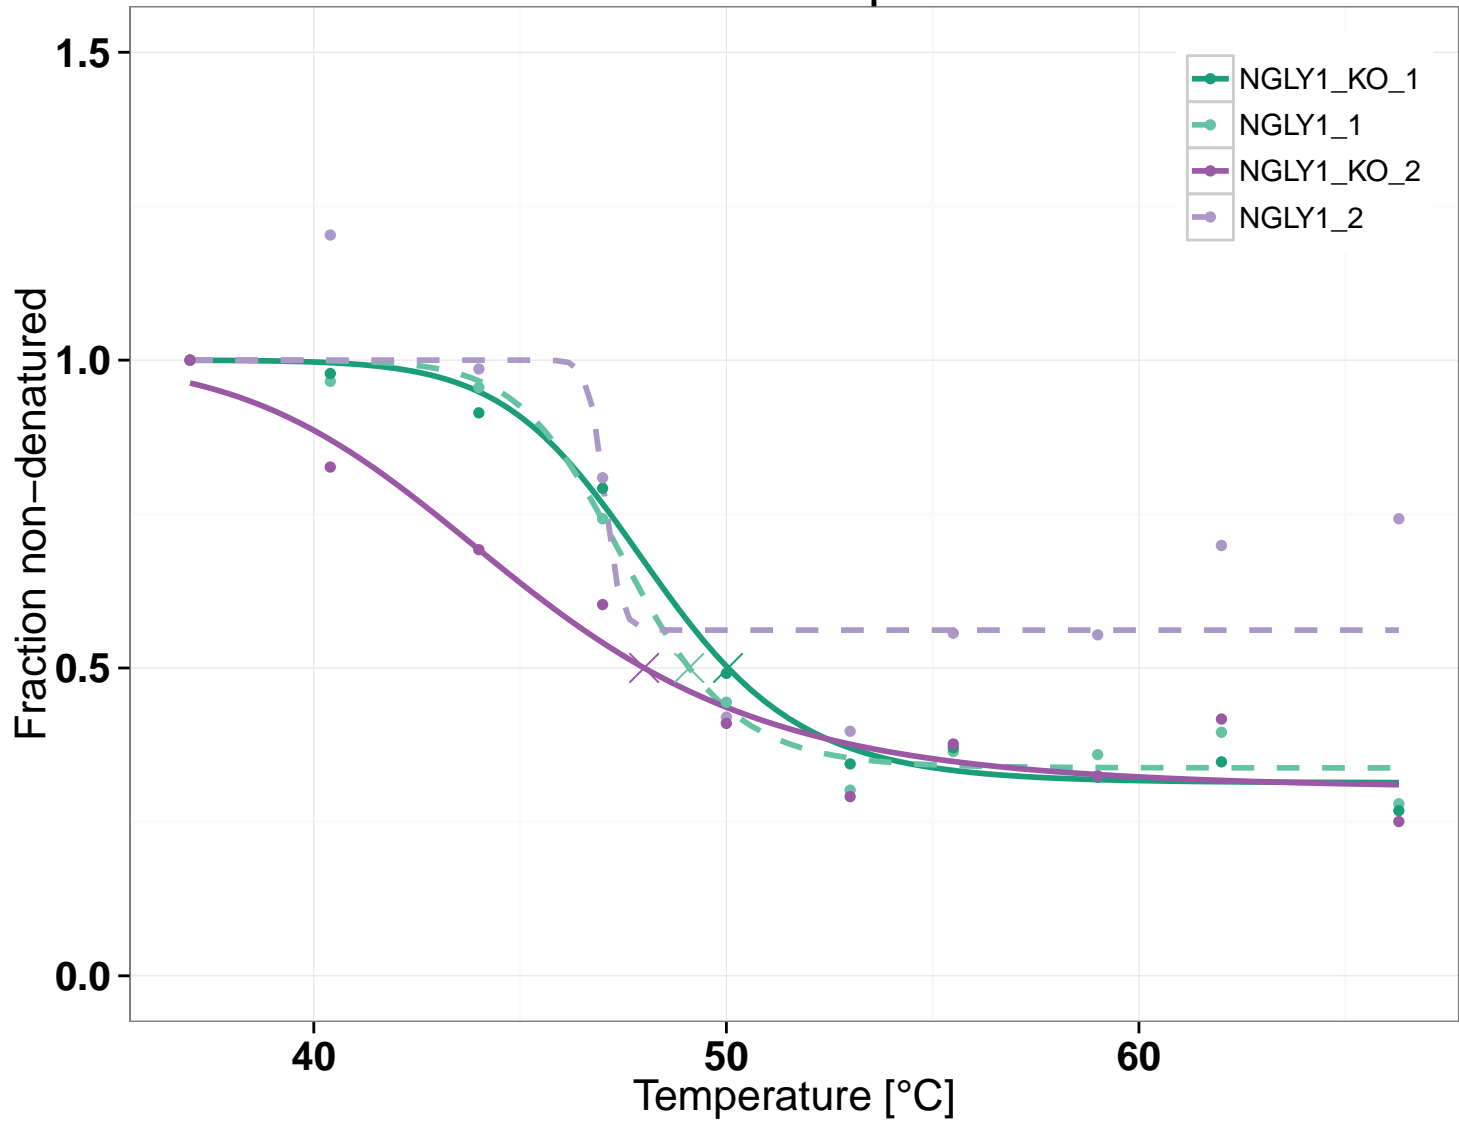

|            | meltPoint | slope  | plateau | R2   |
|------------|-----------|--------|---------|------|
| NGLY1_KO_1 | 50.04     | -0.095 | 0.31    | 0.99 |
| NGLY1_1    | 49.1      | -0.13  | 0.34    | 0.99 |
| NGLY1_KO_2 | 48.01     | -0.055 | 0.3     | 0.95 |
| NGLY1_2    | -         | -0.58  | 0.56    | 0.78 |

Supplement: Supplementary file 4704 [file 1]

# IPI00334282.2|FAM3C

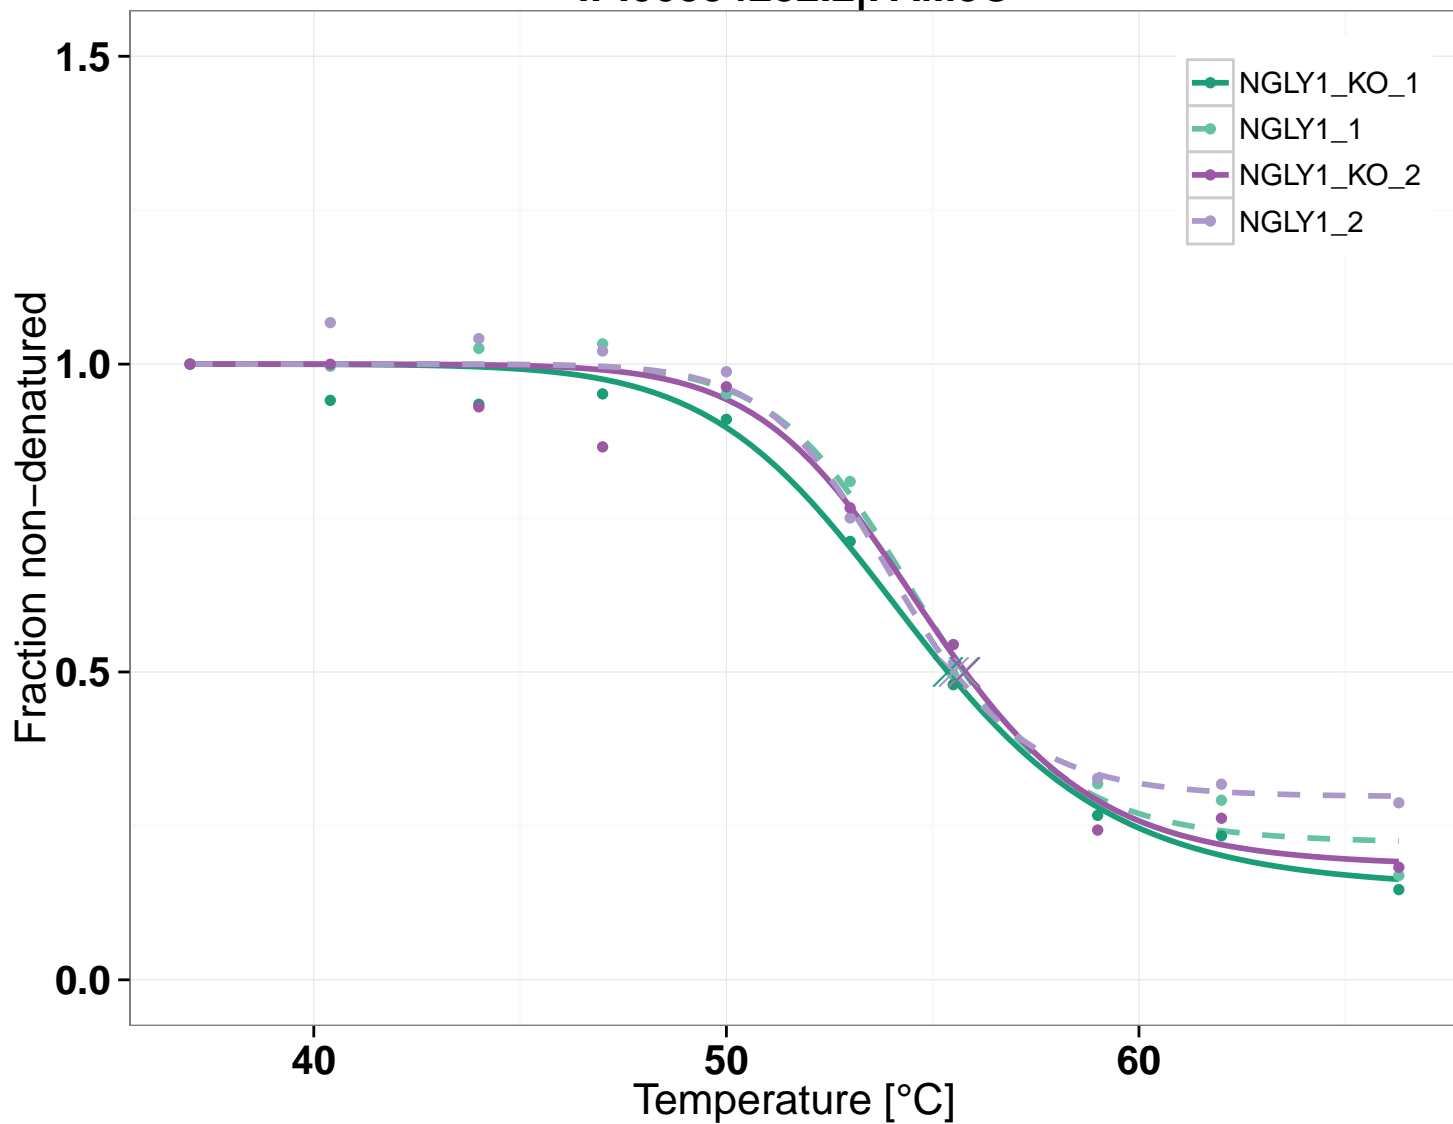

|            | meltPoint | slope  | plateau | R2   |
|------------|-----------|--------|---------|------|
| NGLY1_KO_1 | 55.37     | -0.087 | 0.15    | 0.99 |
| NGLY1_1    | 55.76     | -0.11  | 0.22    | 0.99 |
| NGLY1_KO_2 | 55.79     | -0.1   | 0.18    | 0.98 |
| NGLY1_2    | 55.51     | -0.11  | 0.3     | 0.99 |

Supplement: Supplementary file 4705 [file 1]

# IPI00029662.1|KCNH2

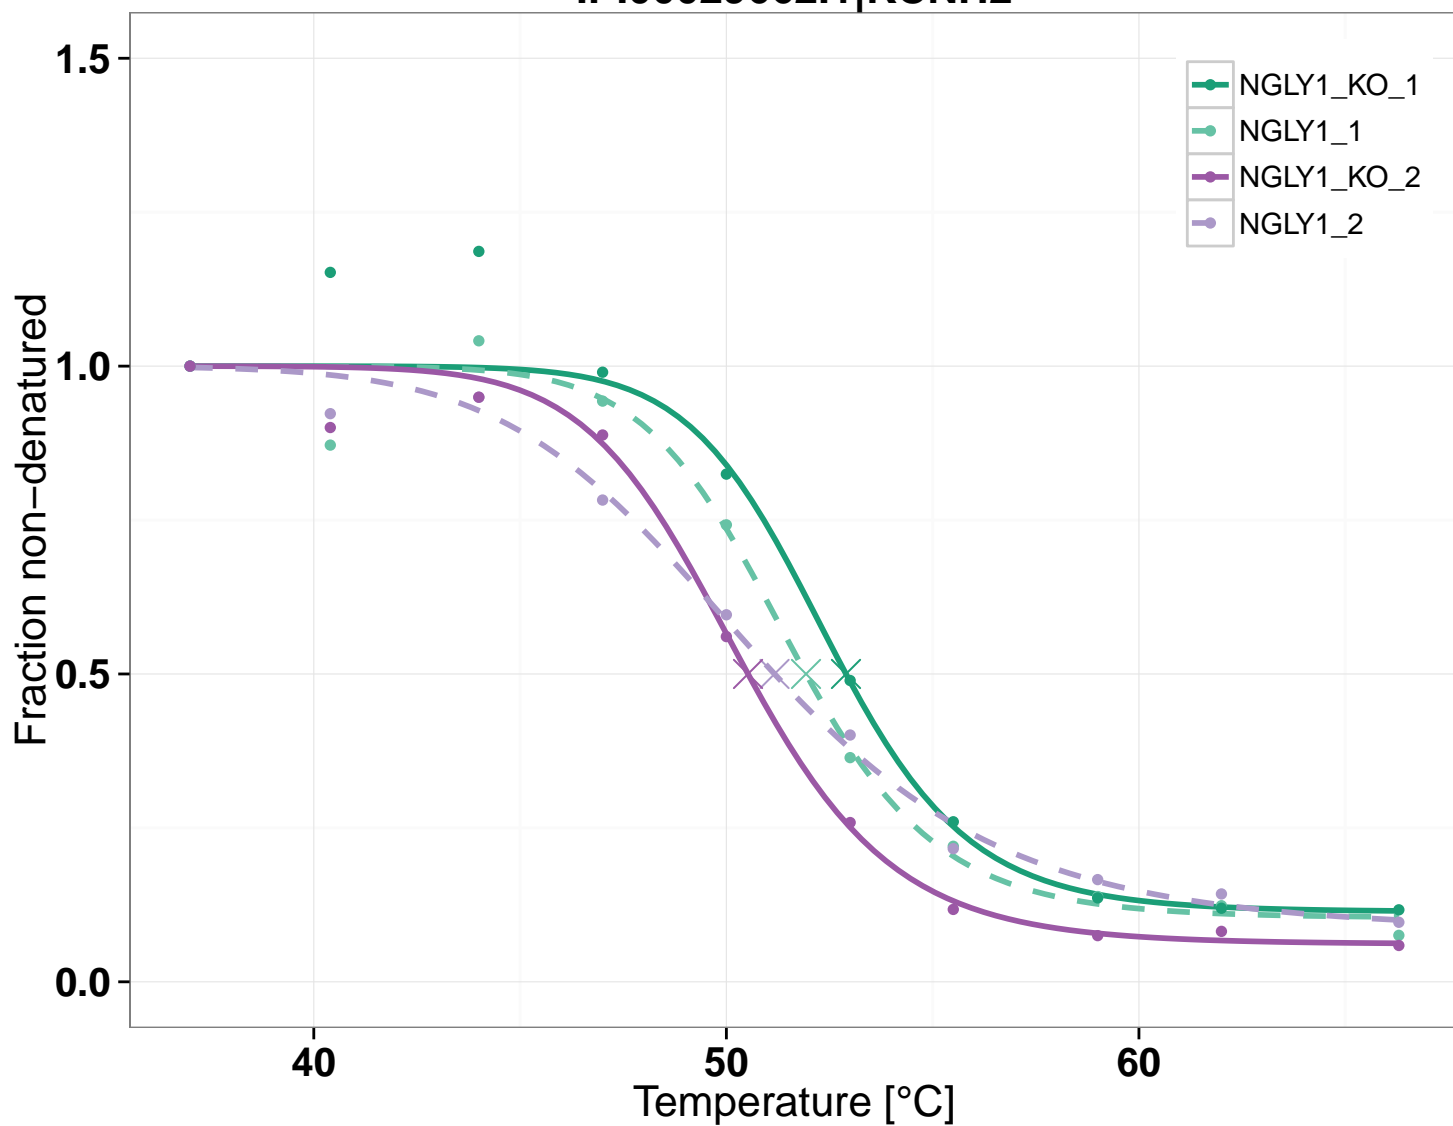

|            | meltPoint | slope  | plateau | R2   |
|------------|-----------|--------|---------|------|
| NGLY1_KO_1 | 52.9      | -0.13  | 0.11    | 0.97 |
| NGLY1_1    | 51.93     | -0.13  | 0.1     | 0.99 |
| NGLY1_KO_2 | 50.52     | -0.13  | 0.06    | 0.99 |
| NGLY1_2    | 51.17     | -0.075 | 0.08    | 0.99 |

Supplement: Supplementary file 4706 [file 1]

# IPI00027745.4|GUSB

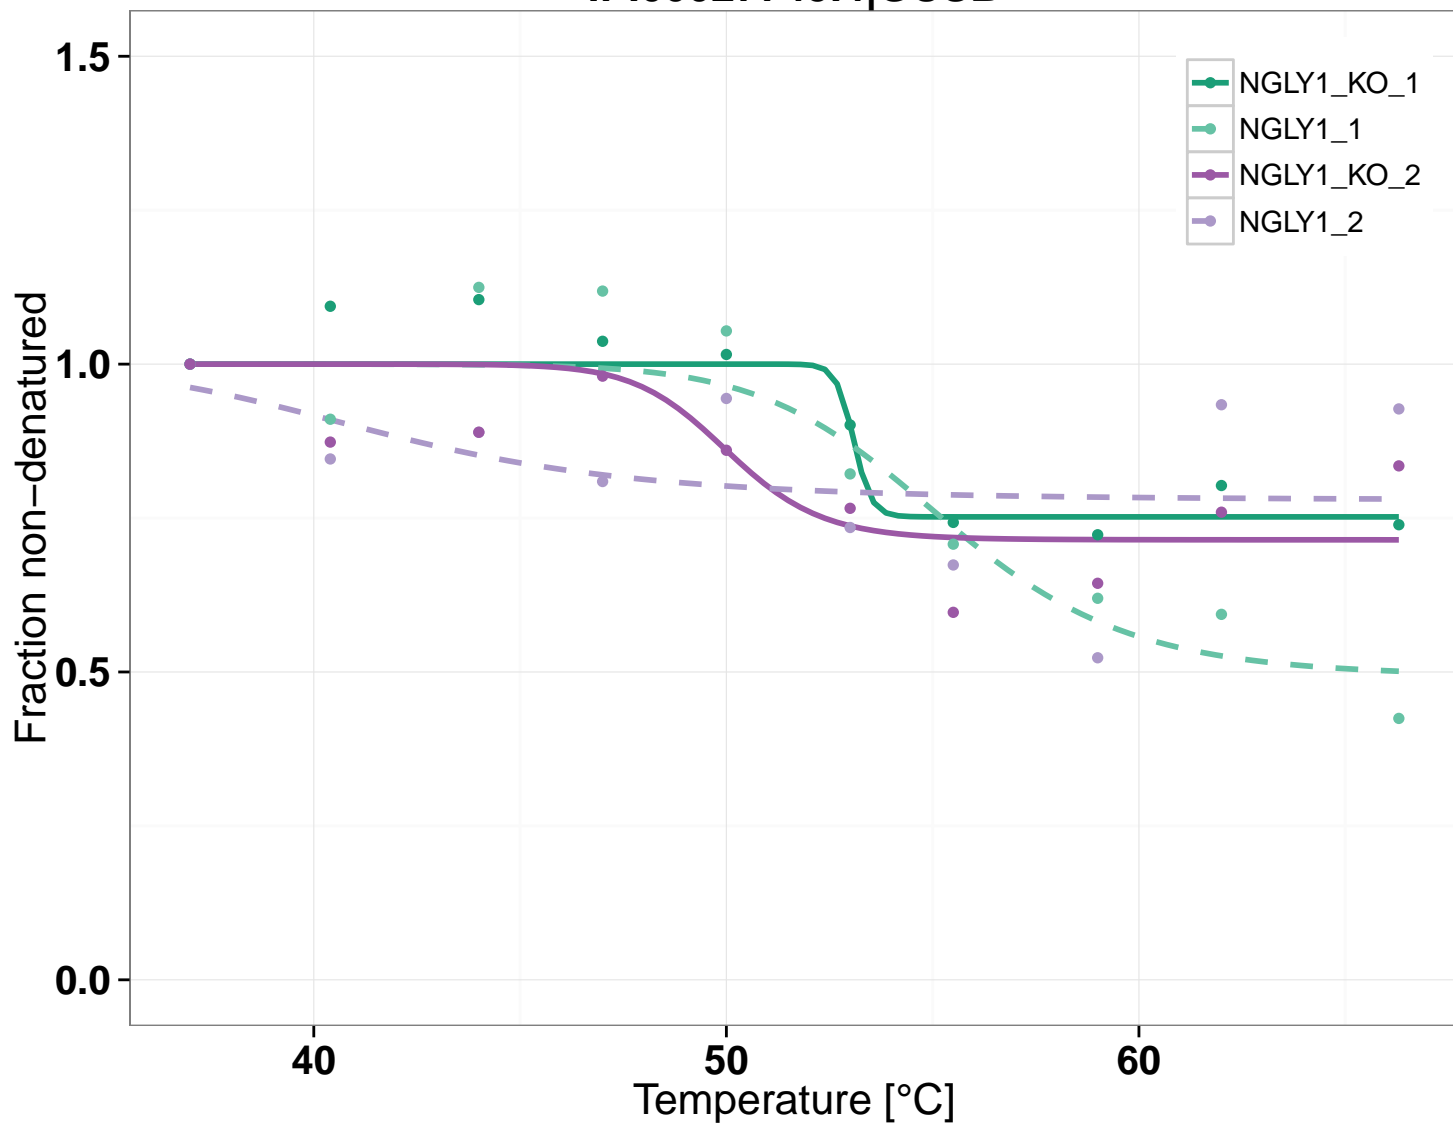

|            | meltPoint | slope  | plateau | R2   |
|------------|-----------|--------|---------|------|
| NGLY1_KO_1 | —         | -0.29  | 0.75    | 0.88 |
| NGLY1_1    | —         | -0.057 | 0.49    | 0.88 |
| NGLY1_KO_2 | —         | -0.063 | 0.71    | 0.58 |
| NGLY1_2    | —         | -0.017 | 0.78    | 0.2  |

Supplement: Supplementary file 4707 [file 1]

IPI00878181.2|TBC1D10B

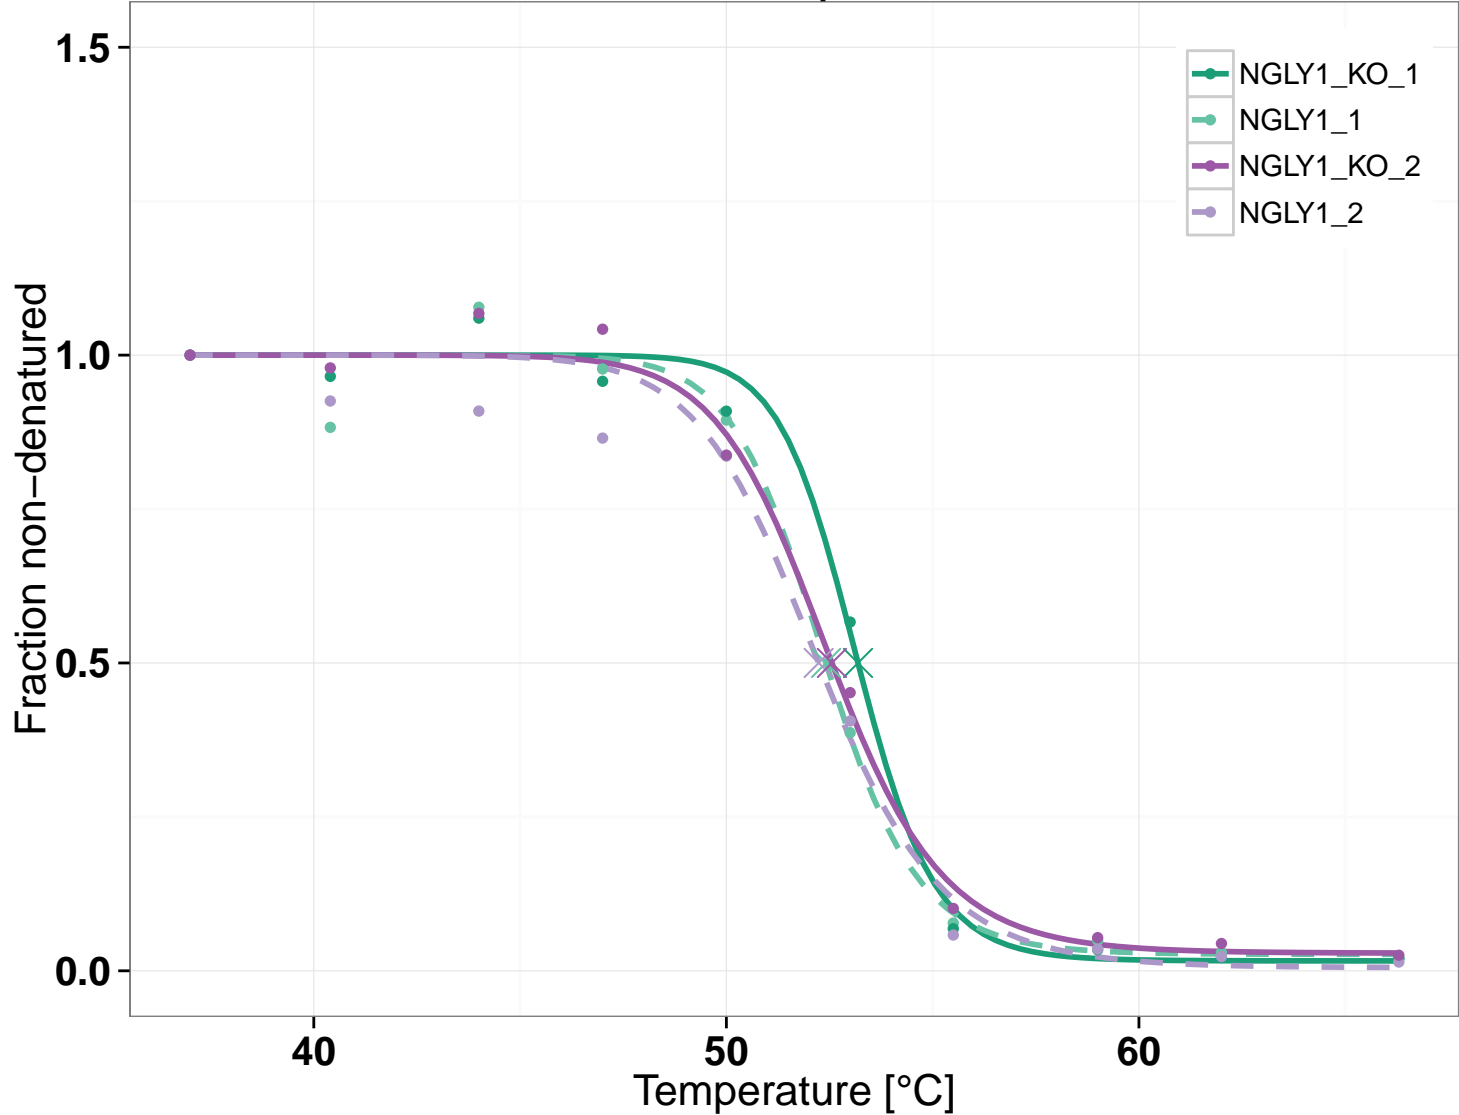

|            | meltPoint | slope | plateau | R2   |
|------------|-----------|-------|---------|------|
| NGLY1_KO_1 | 53.19     | -0.26 | 0.02    | 0.99 |
| NGLY1_1    | 52.42     | -0.21 | 0.03    | 0.99 |
| NGLY1_KO_2 | 52.56     | -0.18 | 0.03    | 0.99 |
| NGLY1_2    | 52.24     | -0.17 | 0       | 0.98 |

Supplement: Supplementary file 4708 [file 1]

IPI00299084.1|TMEM33

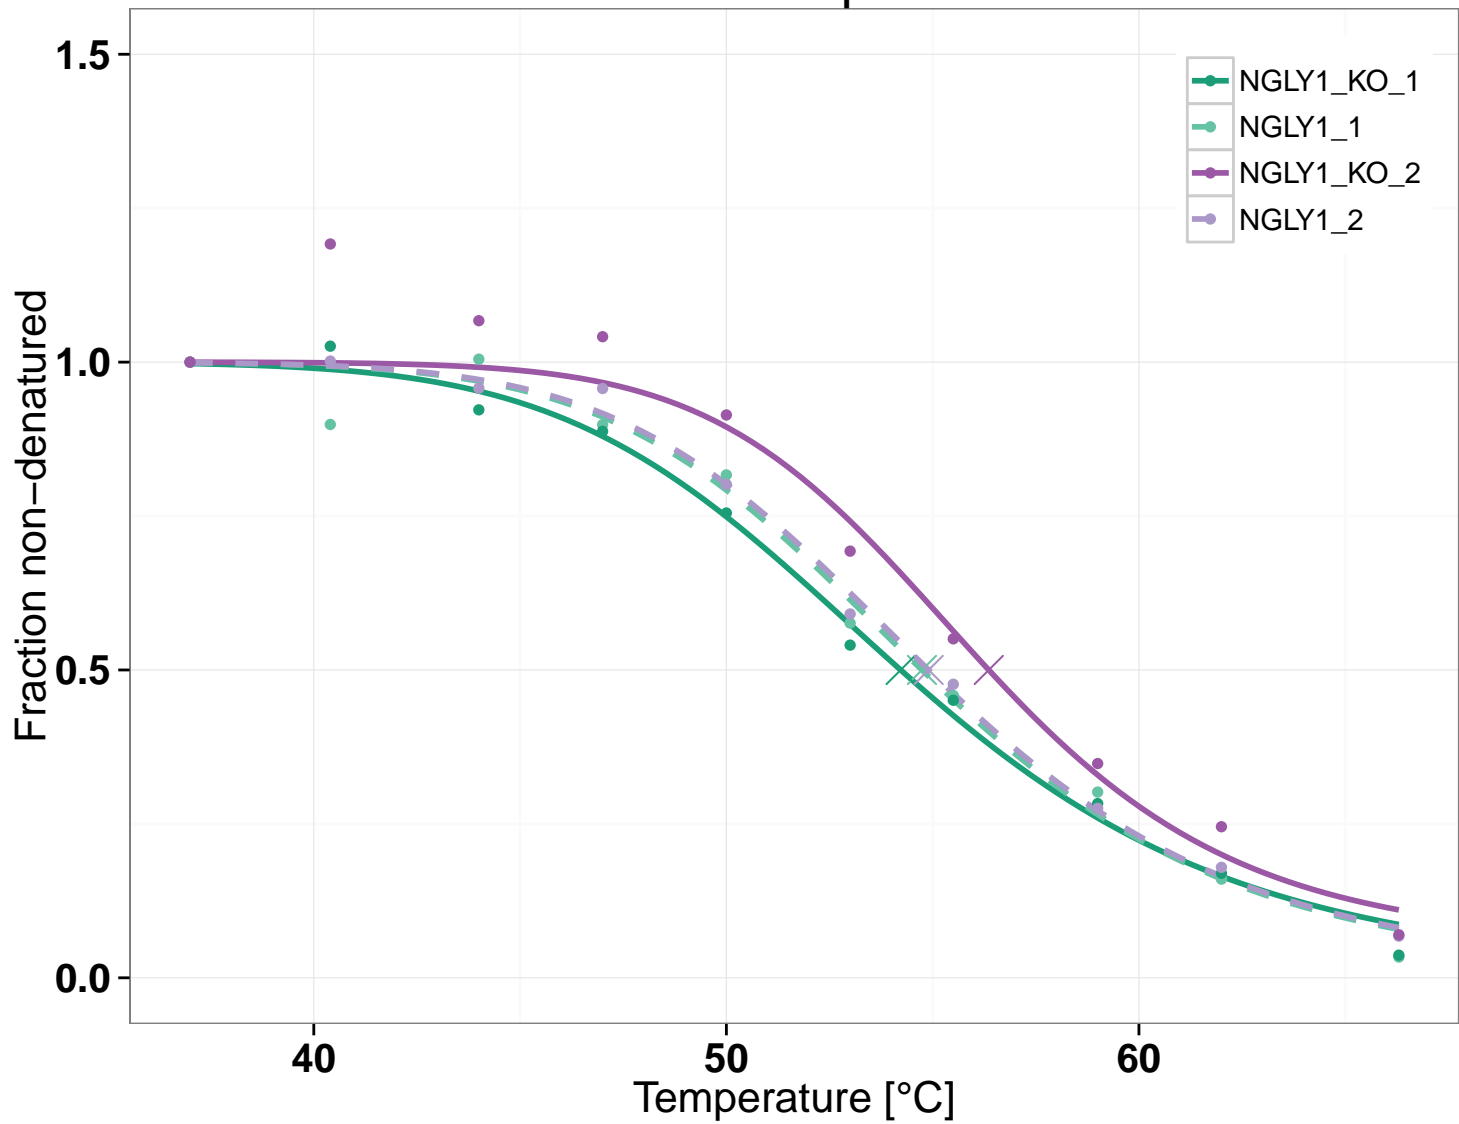

|            | meltPoint | slope  | plateau | R2   |
|------------|-----------|--------|---------|------|
| NGLY1_KO_1 | 54.22     | -0.061 | 0       | 0.99 |
| NGLY1_1    | 54.74     | -0.066 | 0       | 0.99 |
| NGLY1_KO_2 | 56.36     | -0.074 | 0.05    | 0.96 |
| NGLY1_2    | 54.9      | -0.066 | 0       | 1    |

Supplement: Supplementary file 4709 [file 1]

IPI00909627.1|PKMYT1

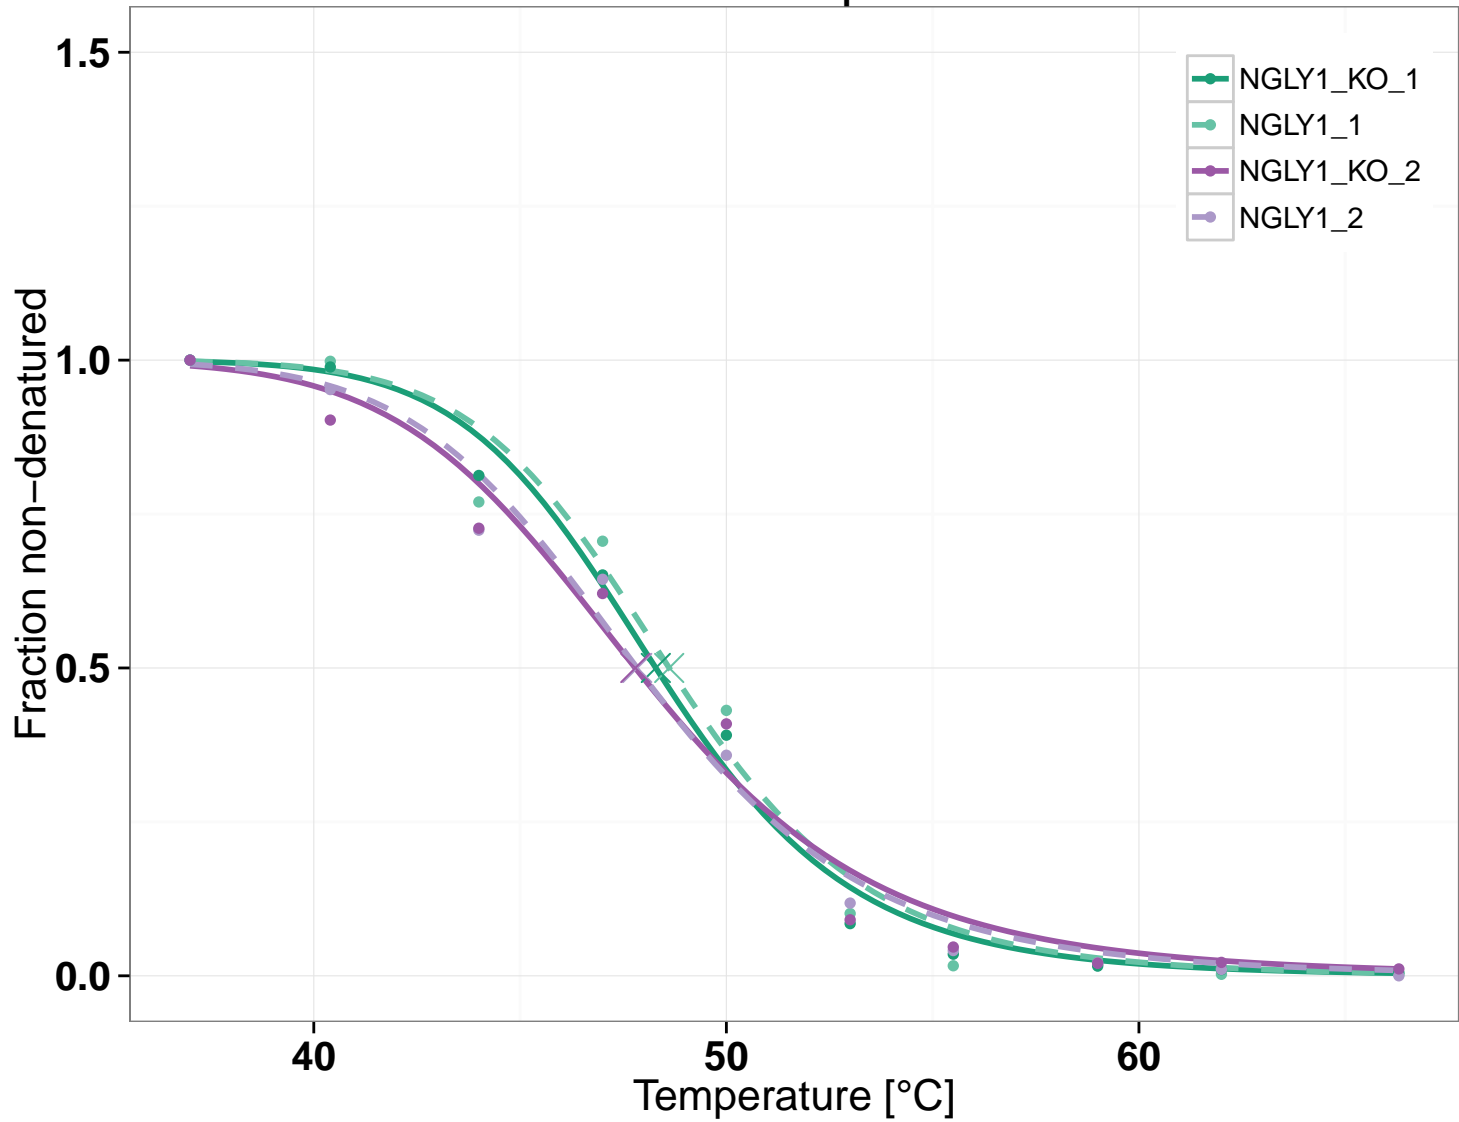

|            | meltPoint | slope  | plateau | R2   |
|------------|-----------|--------|---------|------|
| NGLY1_KO_1 | 48.29     | -0.11  | 0       | 0.99 |
| NGLY1_1    | 48.61     | -0.1   | 0       | 0.98 |
| NGLY1_KO_2 | 47.79     | -0.085 | 0       | 0.98 |
| NGLY1_2    | 47.84     | -0.09  | 0       | 0.99 |

Supplement: Supplementary file 4710 [file 1]

# IPI00171186.1|PDCD7

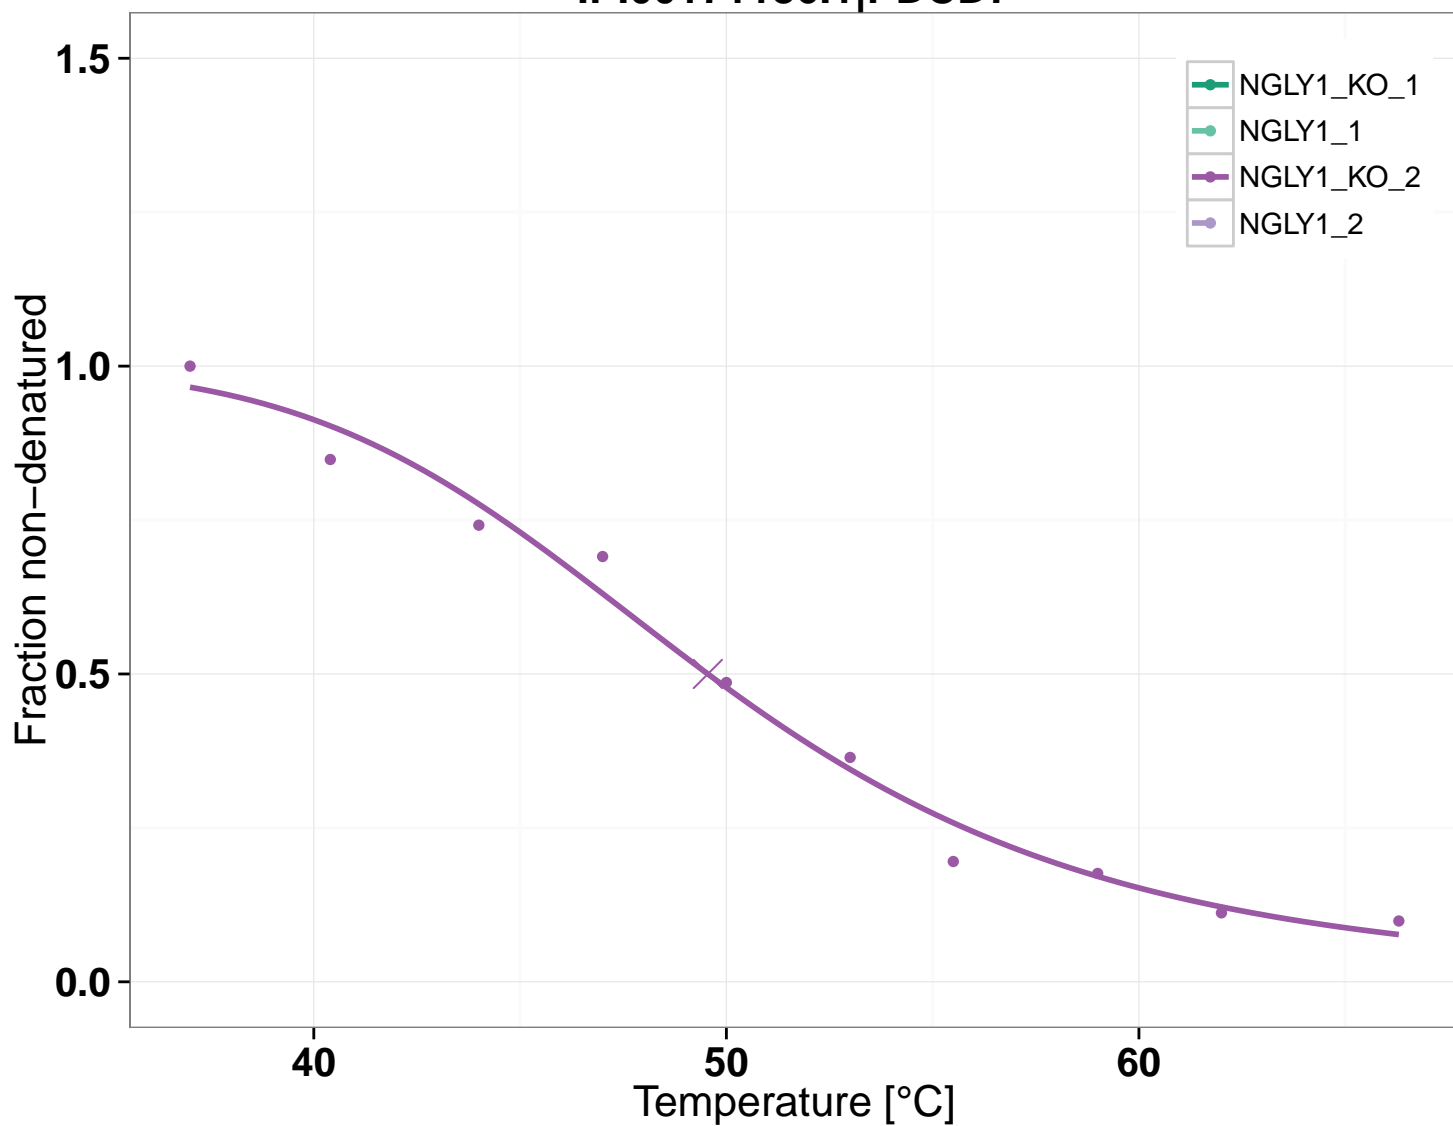

|            | meltPoint | slope  | plateau | R2   |
|------------|-----------|--------|---------|------|
| NGLY1_KO_1 | —         | —      | —       | —    |
| NGLY1_1    | —         | —      | —       | —    |
| NGLY1_KO_2 | 49.55     | -0.052 | 0       | 0.99 |
| NGLY1_2    | —         | —      | —       | —    |

Supplement: Supplementary file 4711 [file 1]

IPI00871222.1|METTL10

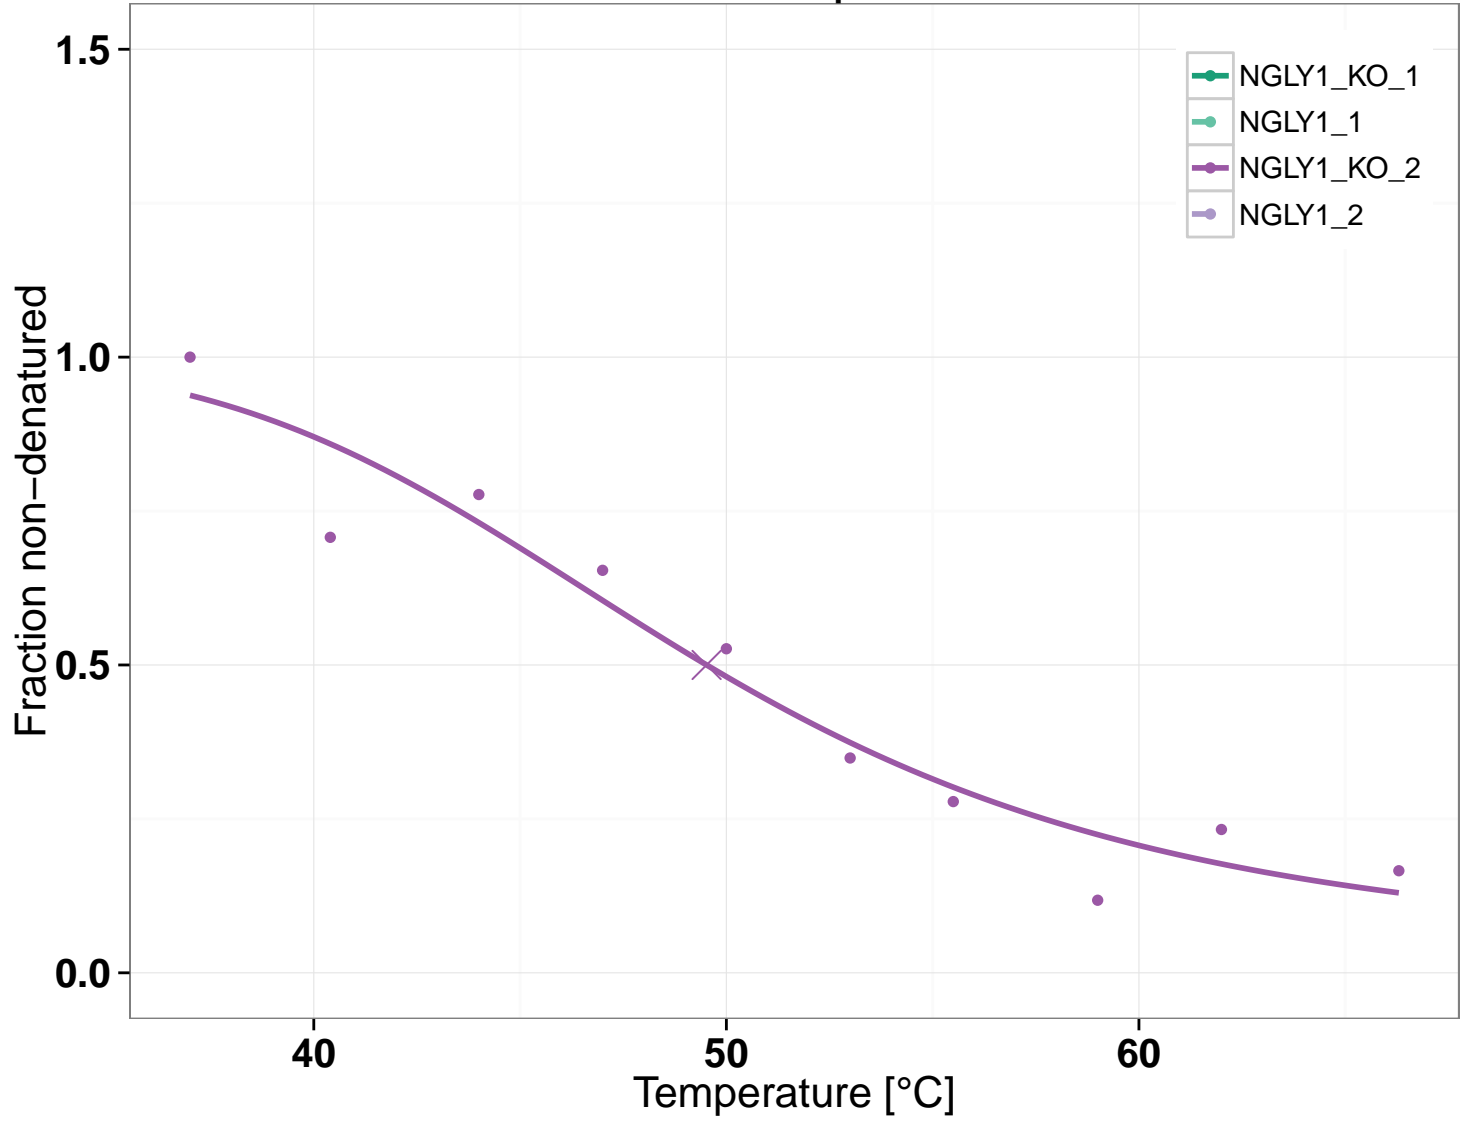

|            | meltPoint | slope  | plateau | R2   |
|------------|-----------|--------|---------|------|
| NGLY1_KO_1 | —         | —      | —       | —    |
| NGLY1_1    | —         | —      | —       | —    |
| NGLY1_KO_2 | 49.52     | -0.043 | 0.02    | 0.94 |
| NGLY1_2    | —         | —      | —       | —    |

Supplement: Supplementary file 4712 [file 1]

IPI00397571.1|NSFL1C

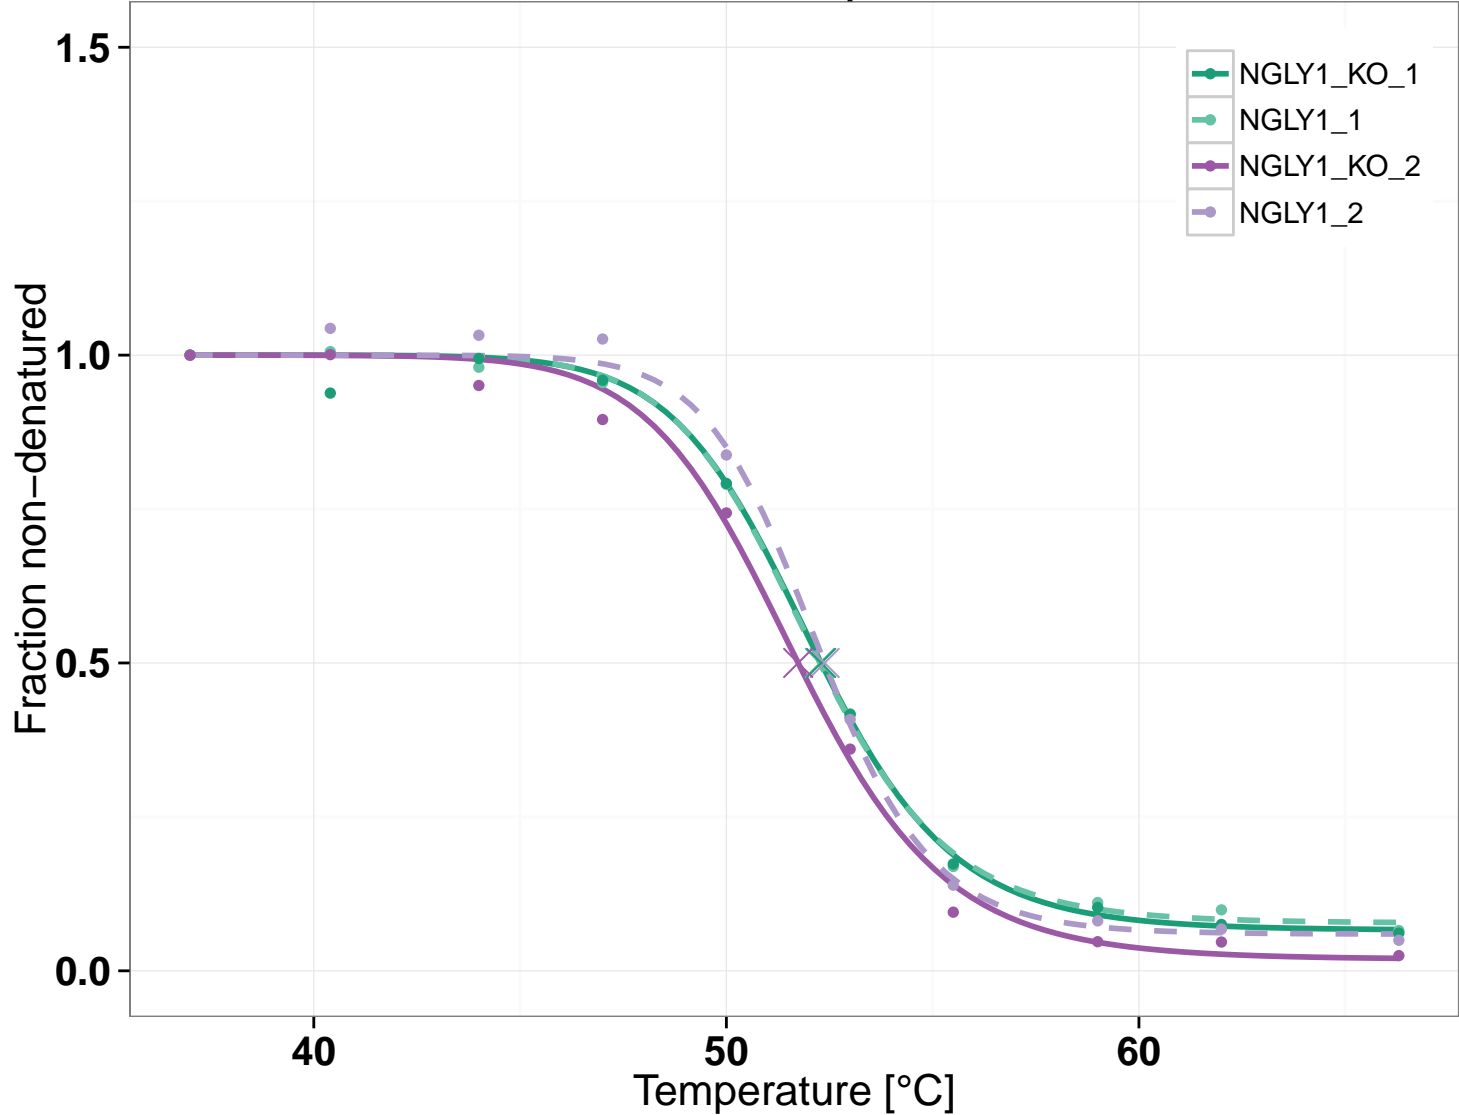

|            | meltPoint | slope | plateau | R2 |
|------------|-----------|-------|---------|----|
| NGLY1_KO_1 | 52.3      | -0.14 | 0.07    | 1  |
| NGLY1_1    | 52.27     | -0.14 | 0.08    | 1  |
| NGLY1_KO_2 | 51.74     | -0.14 | 0.02    | 1  |
| NGLY1_2    | 52.38     | -0.17 | 0.06    | 1  |

Supplement: Supplementary file 4713 [file 1]

IPI00031650.3|NUDT16L1

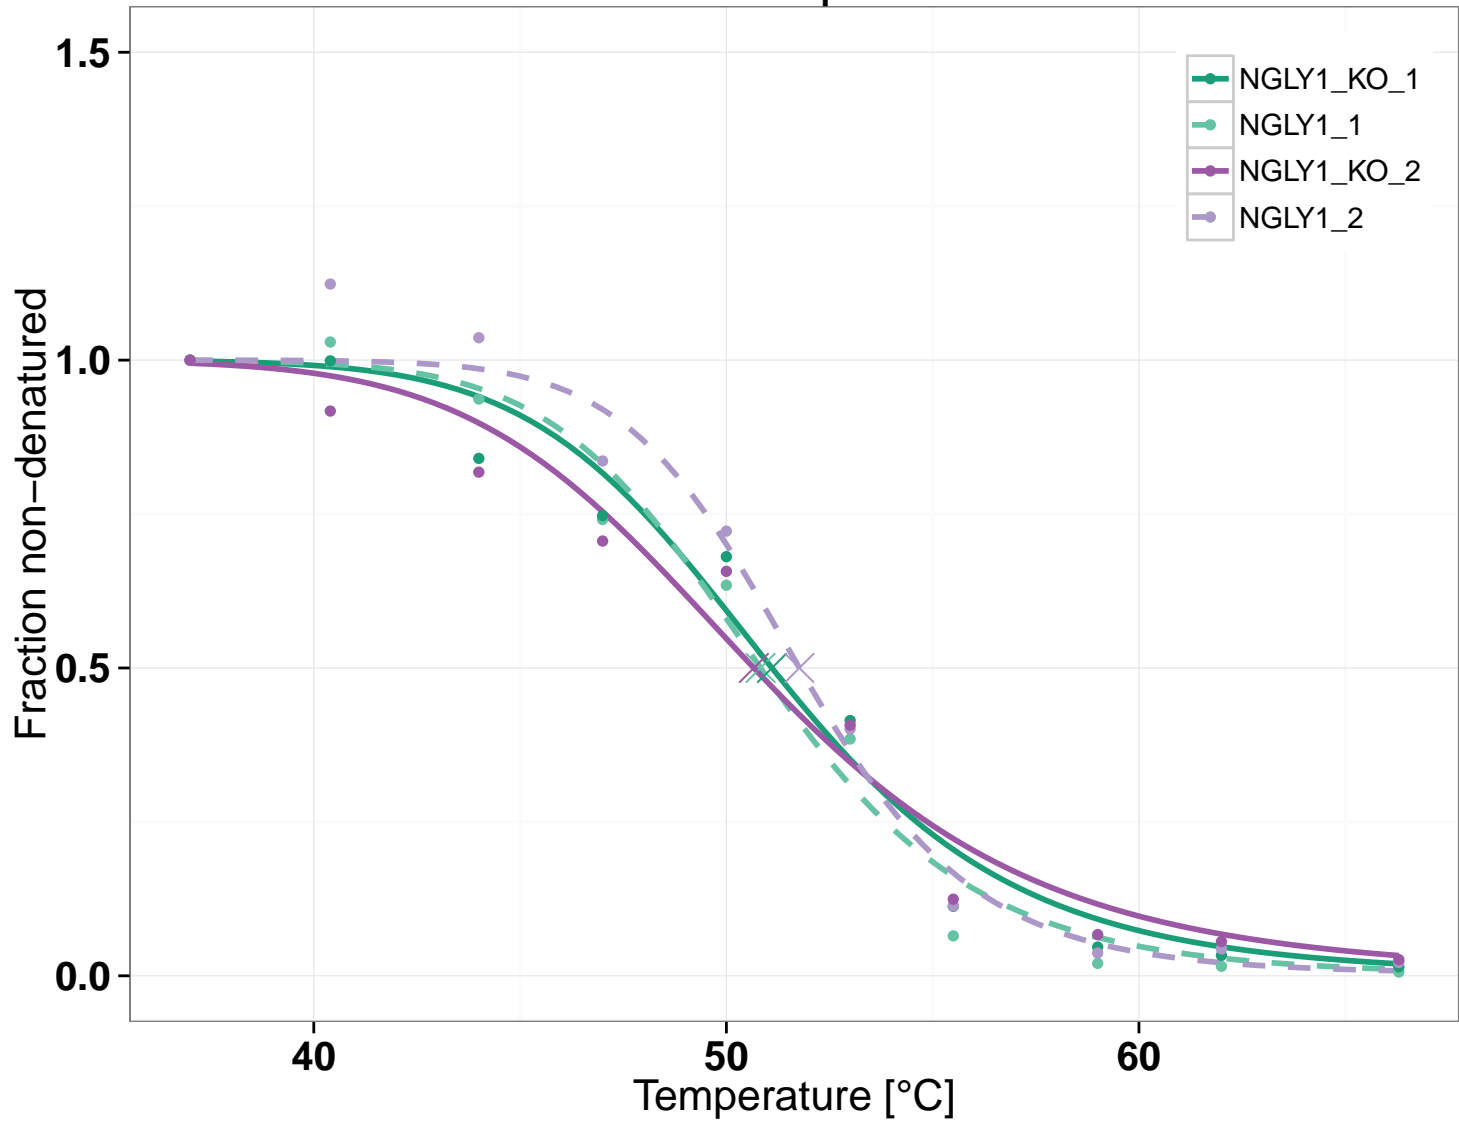

|            | meltPoint | slope  | plateau | R2   |
|------------|-----------|--------|---------|------|
| NGLY1_KO_1 | 51.1      | -0.085 | 0       | 0.98 |
| NGLY1_1    | 50.83     | -0.097 | 0       | 0.98 |
| NGLY1_KO_2 | 50.67     | -0.072 | 0       | 0.97 |
| NGLY1_2    | 51.77     | -0.12  | 0       | 0.98 |

Supplement: Supplementary file 4714 [file 1]

IPI00014340.2|PPP1R12C

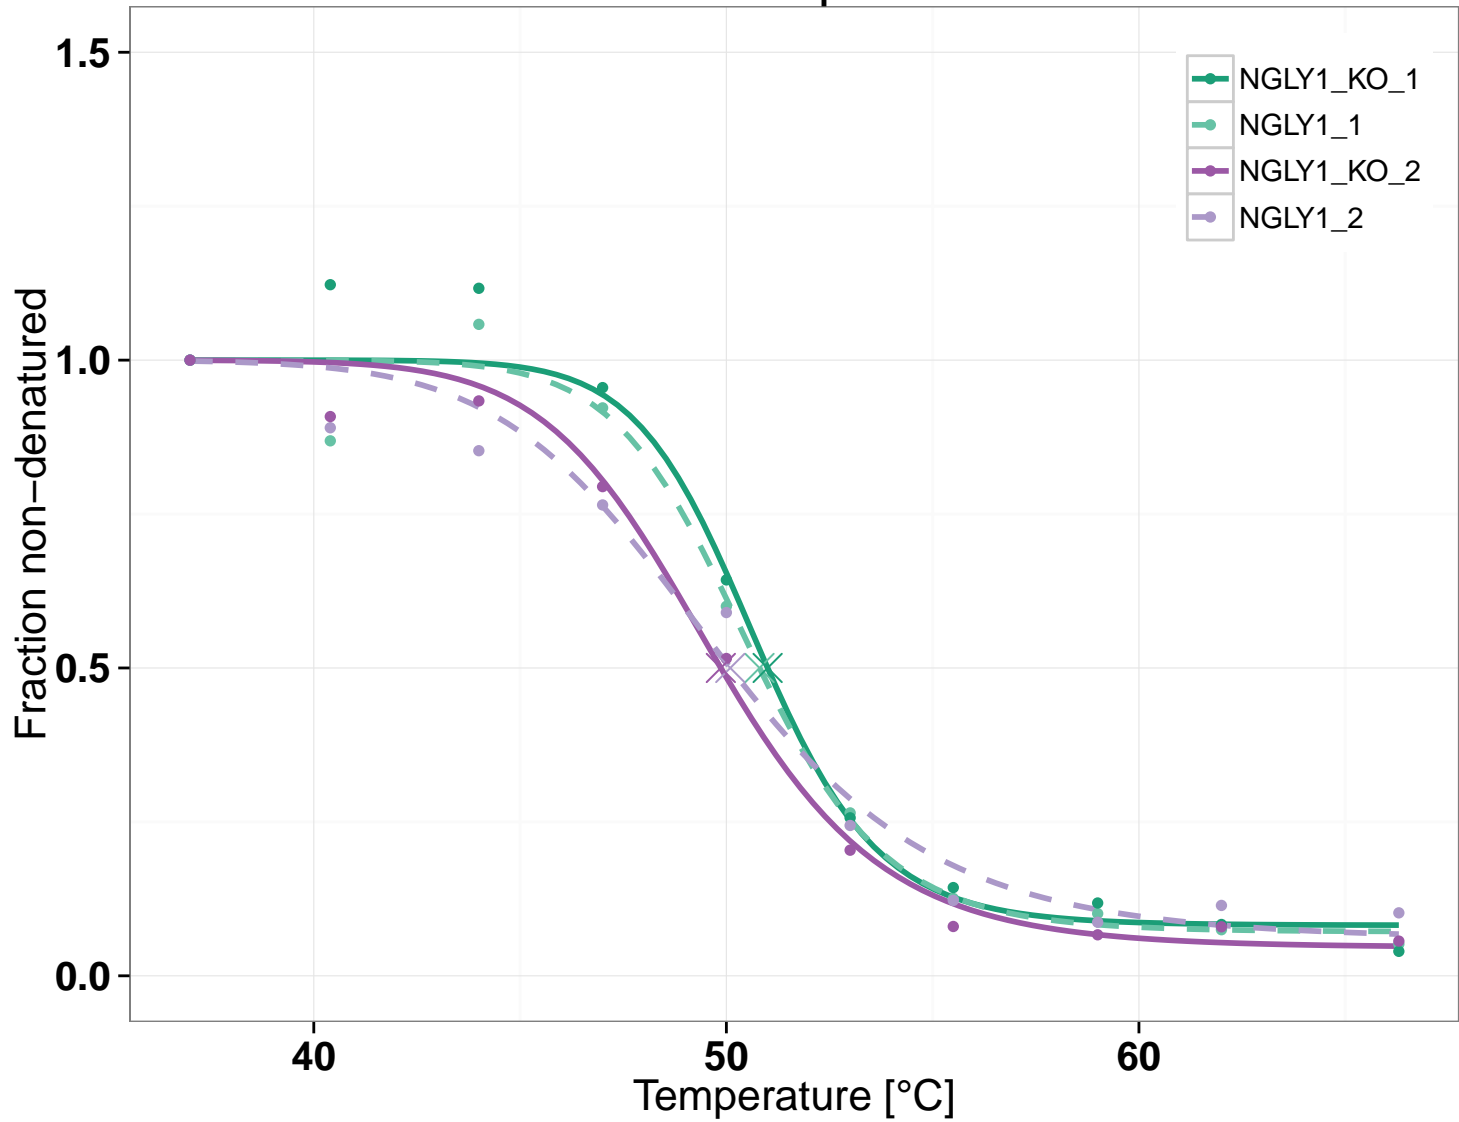

|            | meltPoint | slope  | plateau | R2   |
|------------|-----------|--------|---------|------|
| NGLY1_KO_1 | 51        | -0.16  | 0.08    | 0.98 |
| NGLY1_1    | 50.8      | -0.14  | 0.07    | 0.99 |
| NGLY1_KO_2 | 49.87     | -0.12  | 0.05    | 0.99 |
| NGLY1_2    | 50.09     | -0.089 | 0.06    | 0.98 |

Supplement: Supplementary file 4715 [file 1]

# IPI00448095.3|DCXR

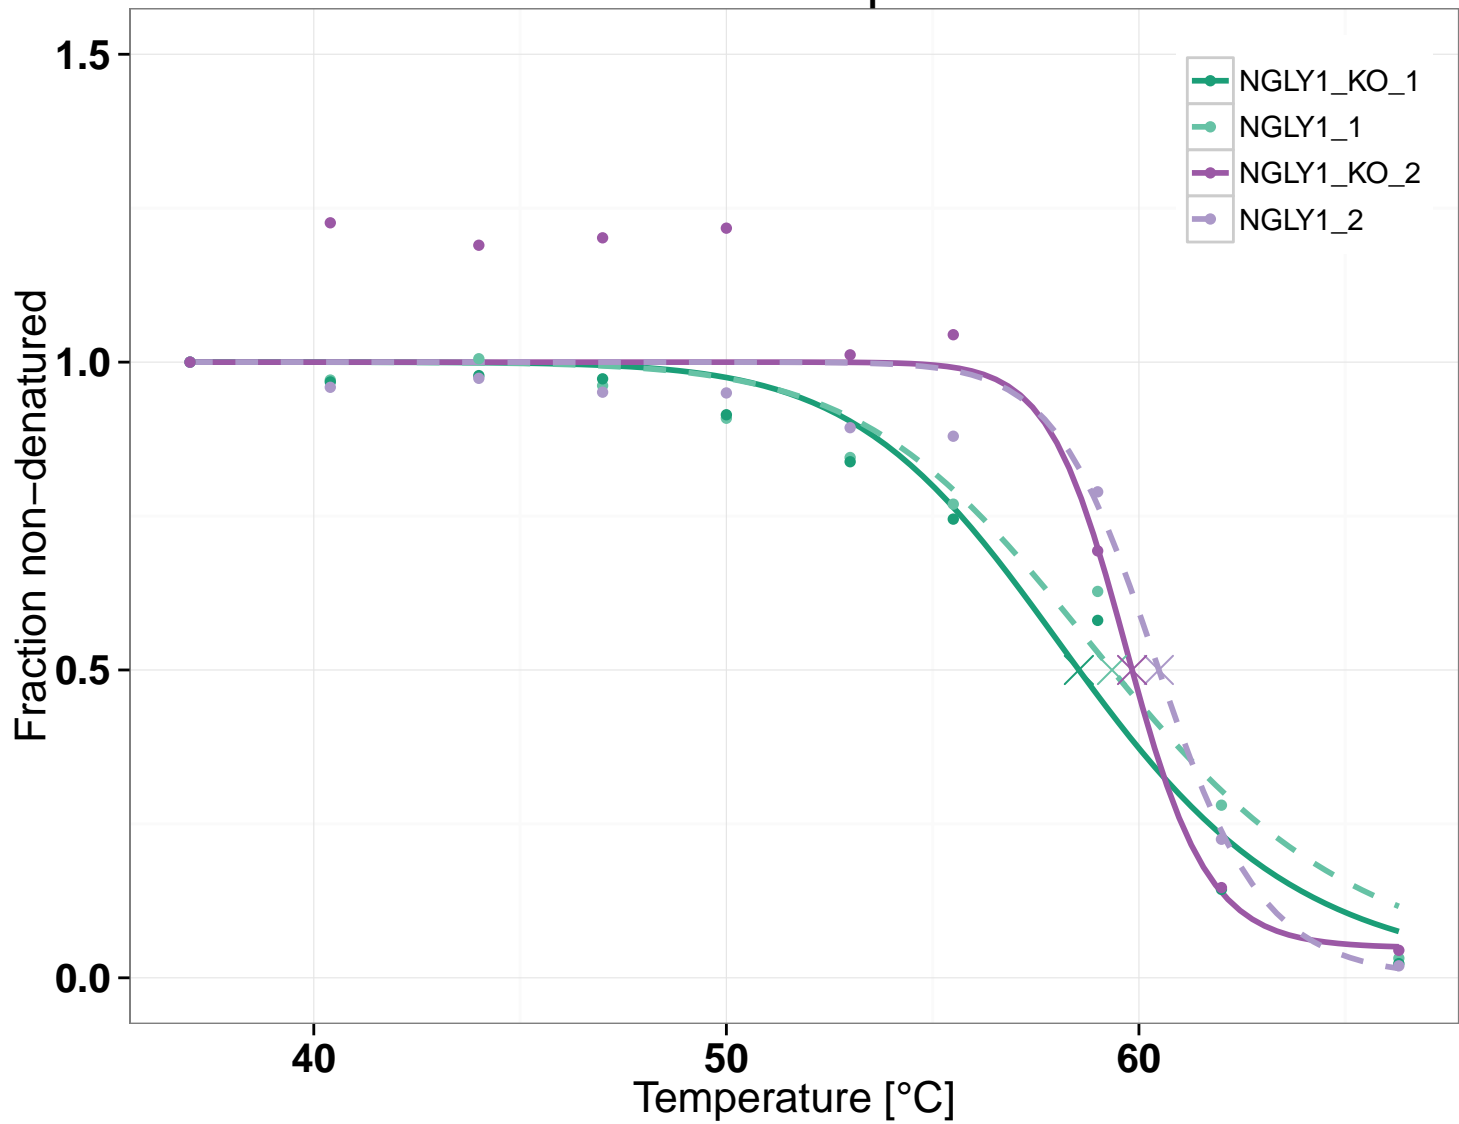

|            | meltPoint | slope  | plateau | R2   |
|------------|-----------|--------|---------|------|
| NGLY1_KO_1 | 58.54     | -0.092 | 0       | 0.97 |
| NGLY1_1    | 59.35     | -0.082 | 0       | 0.97 |
| NGLY1_KO_2 | 59.83     | -0.25  | 0.05    | 0.9  |
| NGLY1_2    | 60.48     | -0.2   | 0       | 0.97 |

Supplement: Supplementary file 4716 [file 1]

IPI00642378.2|LASS2

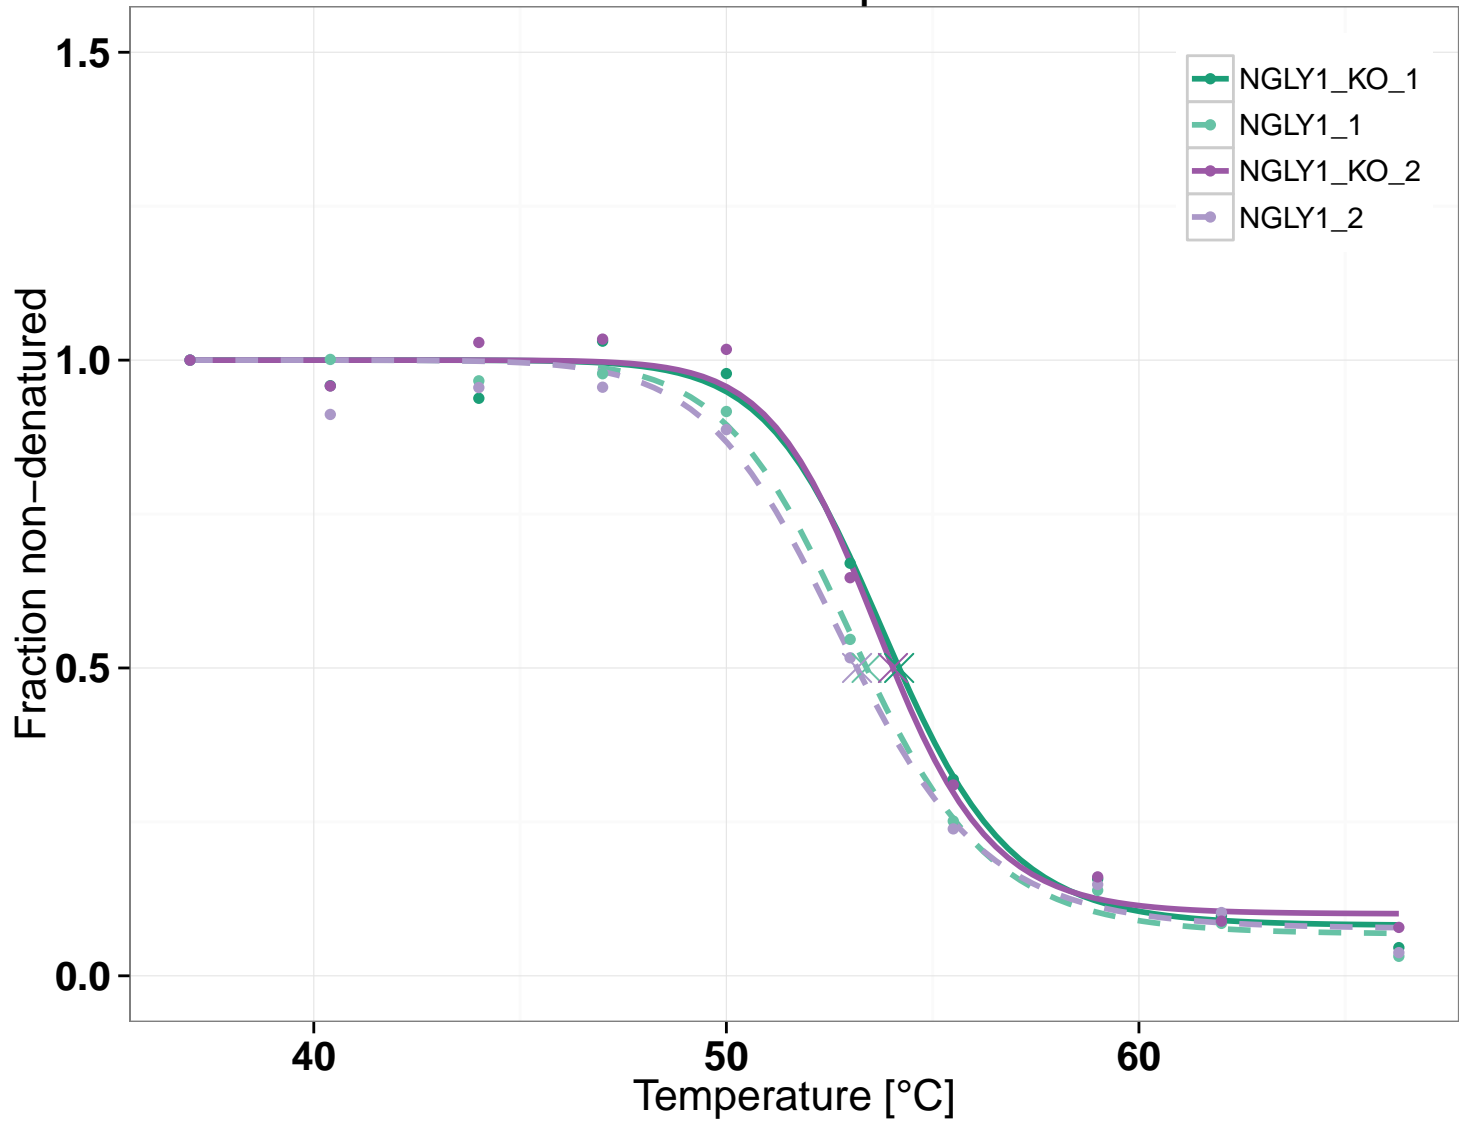

|            | meltPoint | slope | plateau | R2   |
|------------|-----------|-------|---------|------|
| NGLY1_KO_1 | 54.19     | -0.15 | 0.08    | 0.99 |
| NGLY1_1    | 53.4      | -0.14 | 0.07    | 1    |
| NGLY1_KO_2 | 54.04     | -0.17 | 0.1     | 0.99 |
| NGLY1_2    | 53.17     | -0.14 | 0.08    | 0.99 |

Supplement: Supplementary file 4717 [file 1]

# IPI00647465.2|KIFAP3

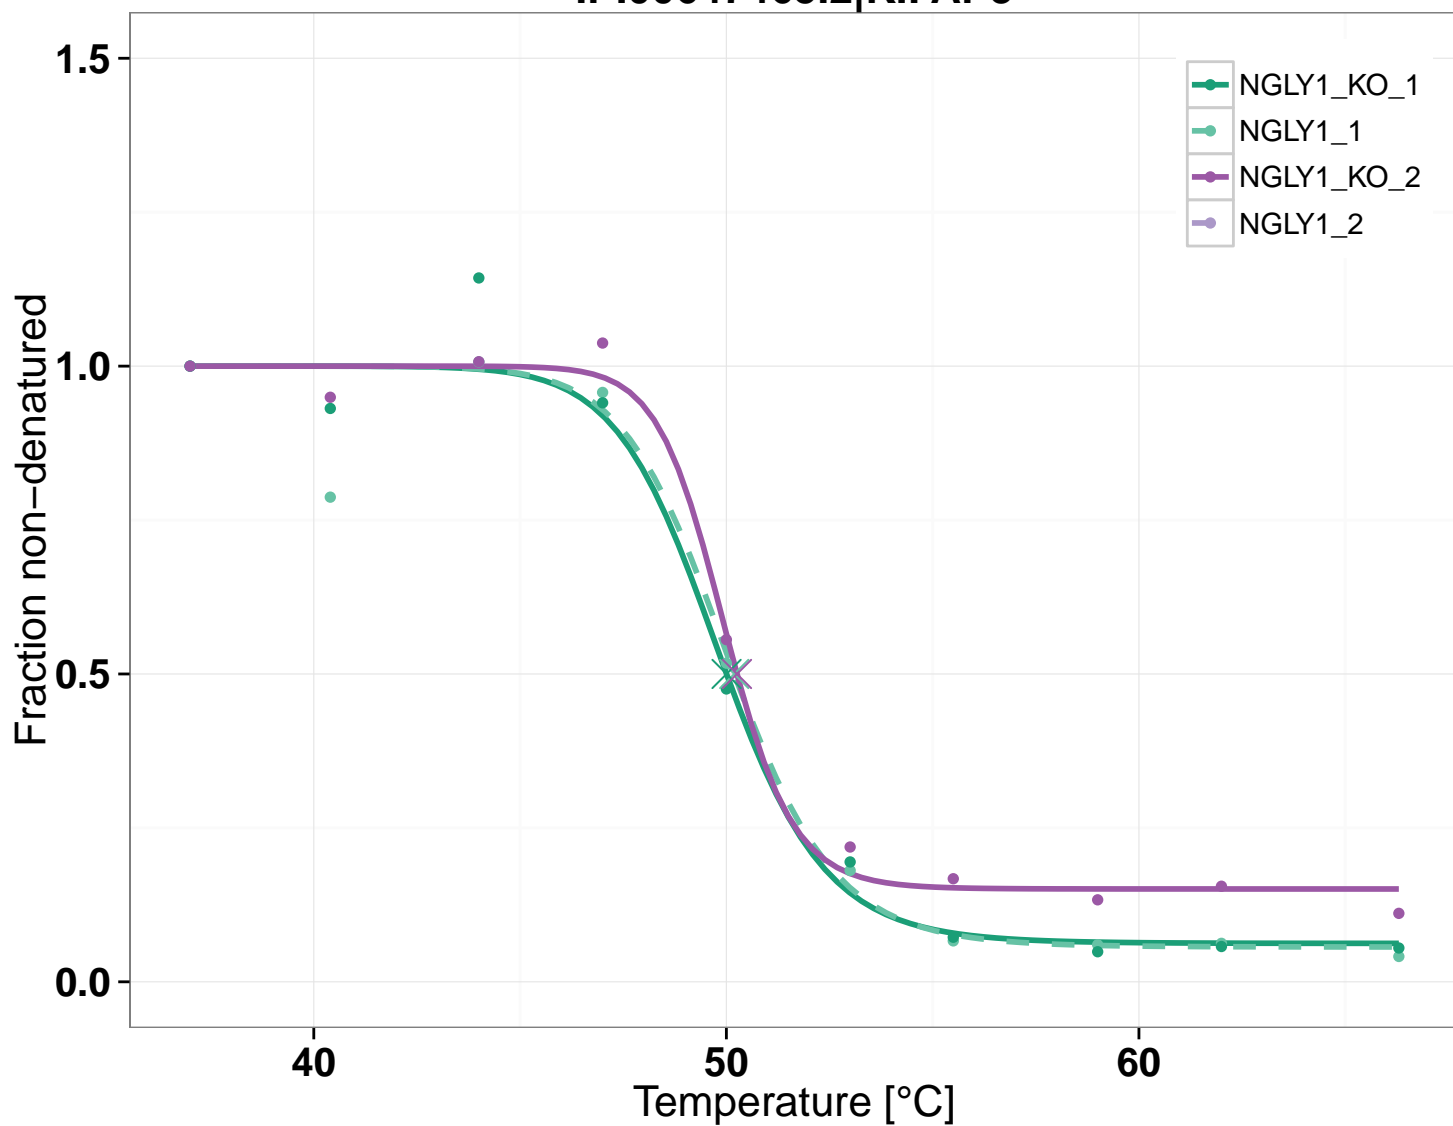

|            | meltPoint | slope | plateau | R2   |
|------------|-----------|-------|---------|------|
| NGLY1_KO_1 | 50        | -0.19 | 0.06    | 0.98 |
| NGLY1_1    | 50.19     | -0.18 | 0.06    | 0.97 |
| NGLY1_KO_2 | 50.26     | -0.26 | 0.15    | 0.99 |
| NGLY1_2    | -         | -     | -       | -    |

Supplement: Supplementary file 4718 [file 1]

IPI00217007.2|KIAA2013

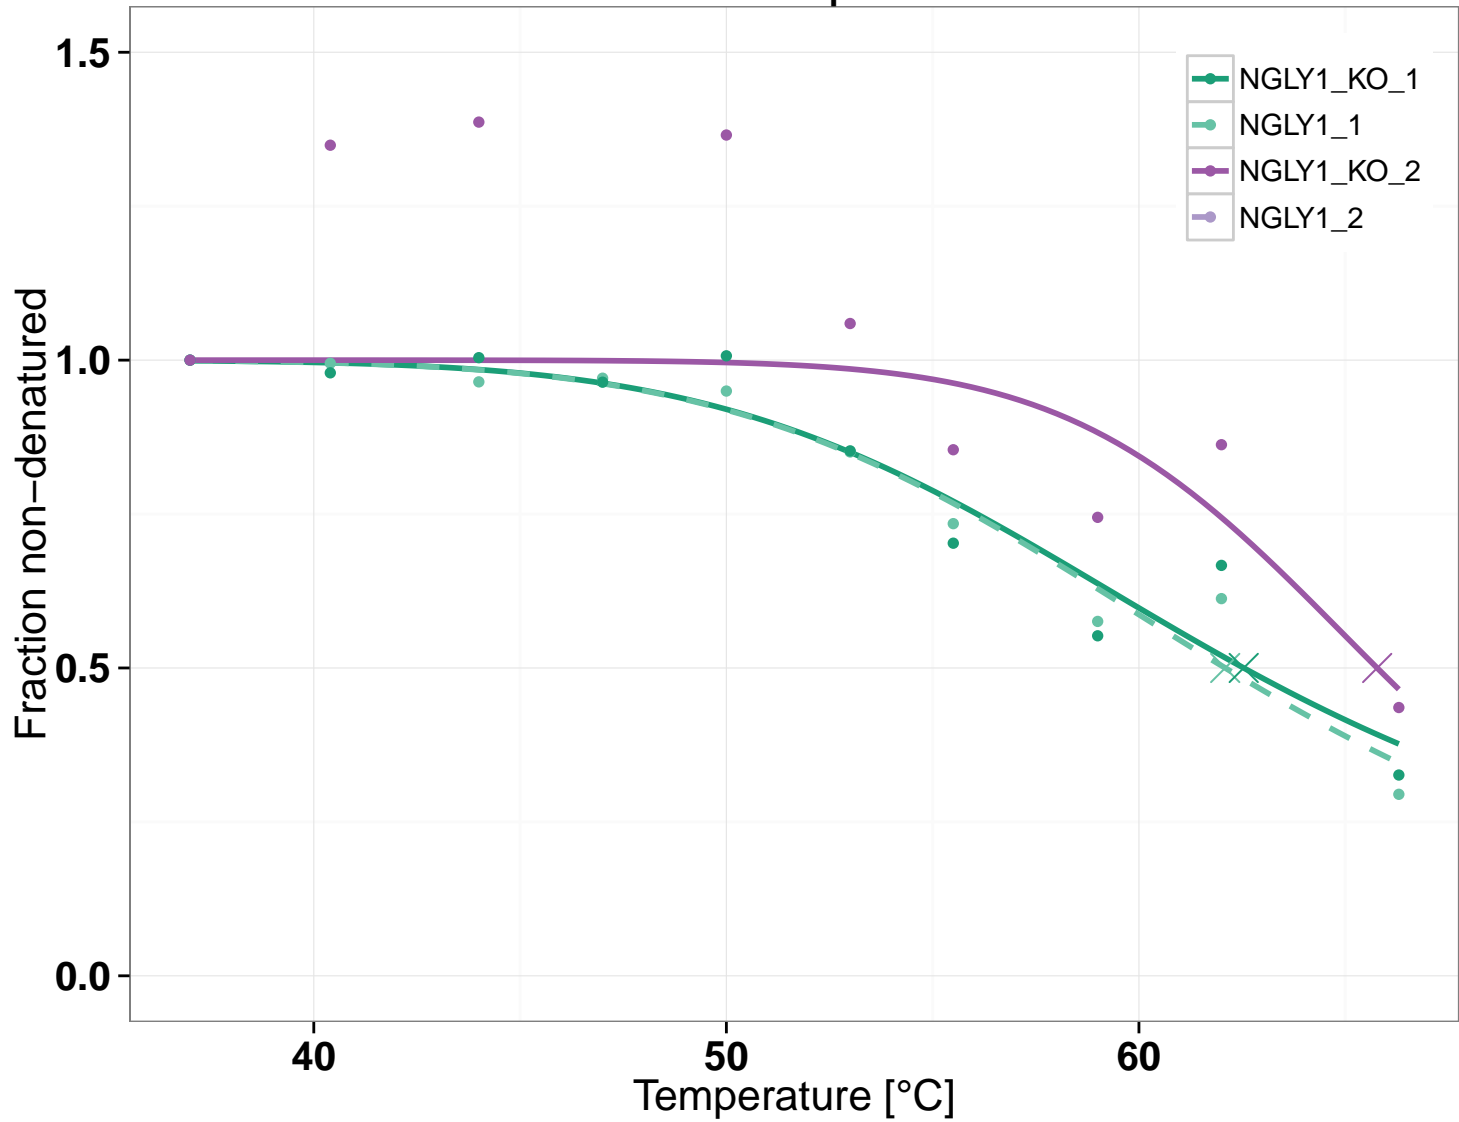

|            | meltPoint | slope  | plateau | R2   |
|------------|-----------|--------|---------|------|
| NGLY1_KO_1 | 62.54     | -0.04  | 0.08    | 0.91 |
| NGLY1_1    | 62.09     | -0.042 | 0       | 0.96 |
| NGLY1_KO_2 | 65.77     | -0.068 | 0       | 0.31 |
| NGLY1_2    | -         | -      | -       | -    |

Supplement: Supplementary file 4719 [file 1]

IPI00514983.4|HSPH1

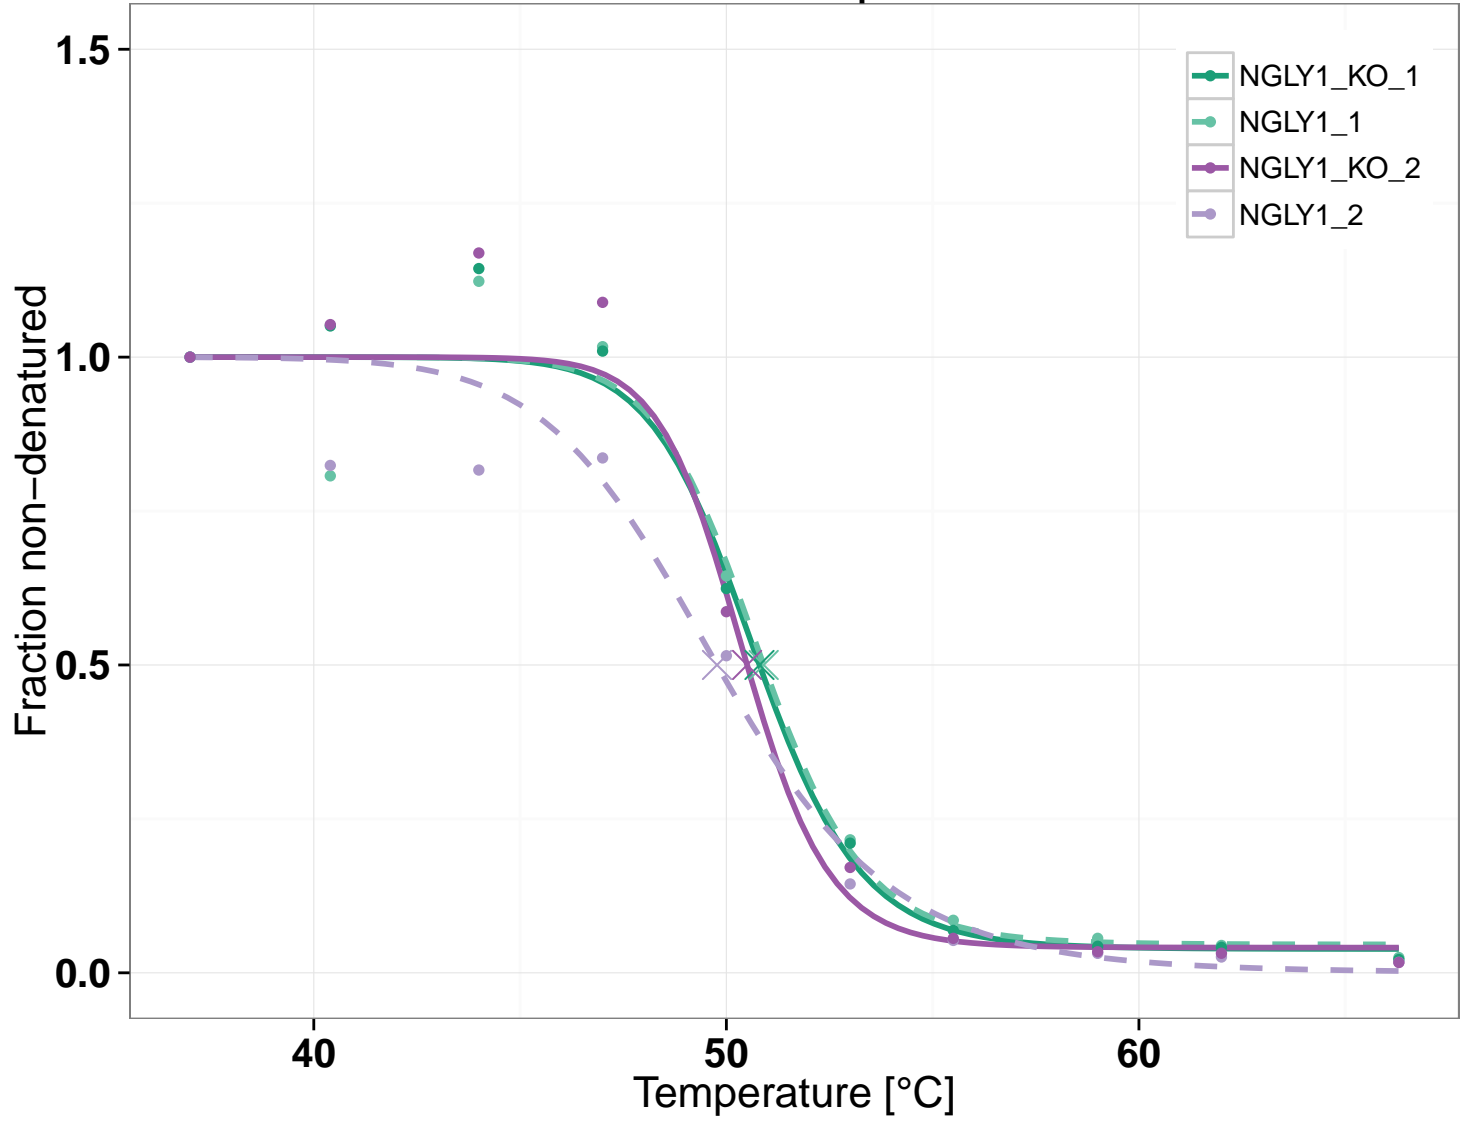

|            | meltPoint | slope | plateau | R2   |
|------------|-----------|-------|---------|------|
| NGLY1_KO_1 | 50.8      | -0.19 | 0.04    | 0.99 |
| NGLY1_1    | 50.91     | -0.19 | 0.05    | 0.97 |
| NGLY1_KO_2 | 50.5      | -0.23 | 0.04    | 0.98 |
| NGLY1_2    | 49.77     | -0.12 | 0       | 0.96 |

Supplement: Supplementary file 4720 [file 1]
