# Supplementary material (part 48 of 85)
Source: publisher figshare collection journal article supplement (https://gsajournals.figshare.com/articles/dataset/_/12014913)

IPI00217536.3|RHOT1

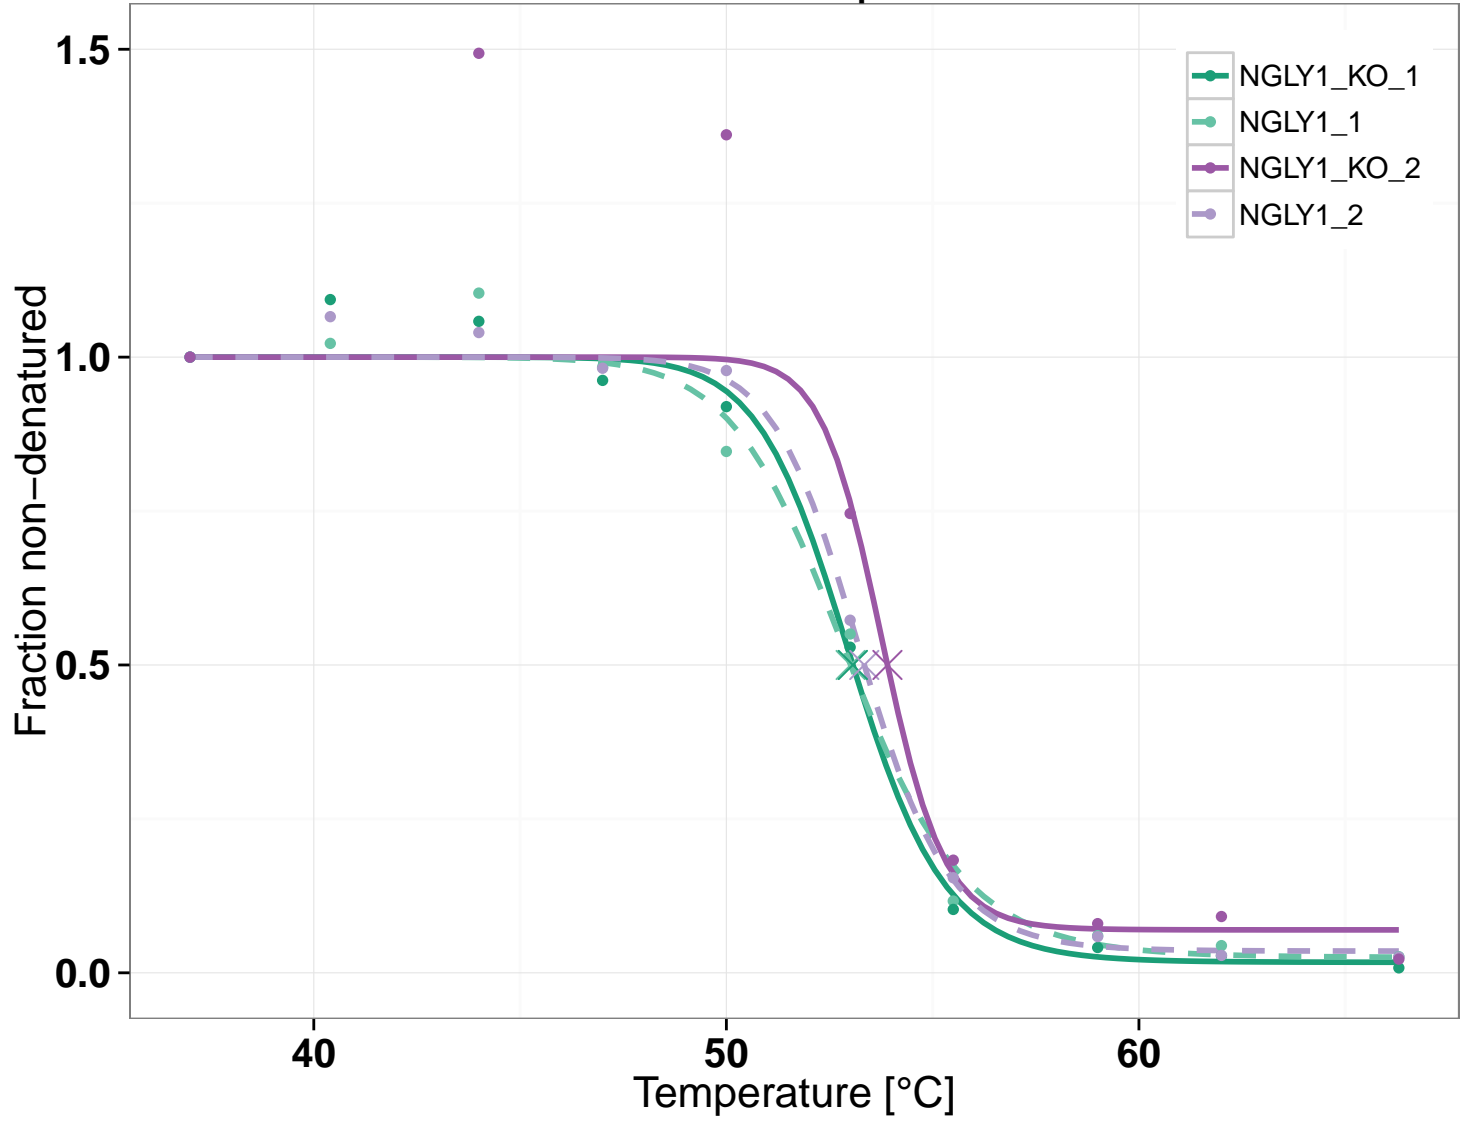

|            | meltPoint | slope | plateau | R2   |
|------------|-----------|-------|---------|------|
| NGLY1_KO_1 | 53.07     | -0.22 | 0.02    | 0.99 |
| NGLY1_1    | 53.01     | -0.17 | 0.02    | 0.99 |
| NGLY1_KO_2 | 53.9      | -0.31 | 0.07    | 0.75 |
| NGLY1_2    | 53.34     | -0.22 | 0.04    | 1    |

Supplement: Supplementary file 4721 [file 1]

IPI00179298.5|HUWE1

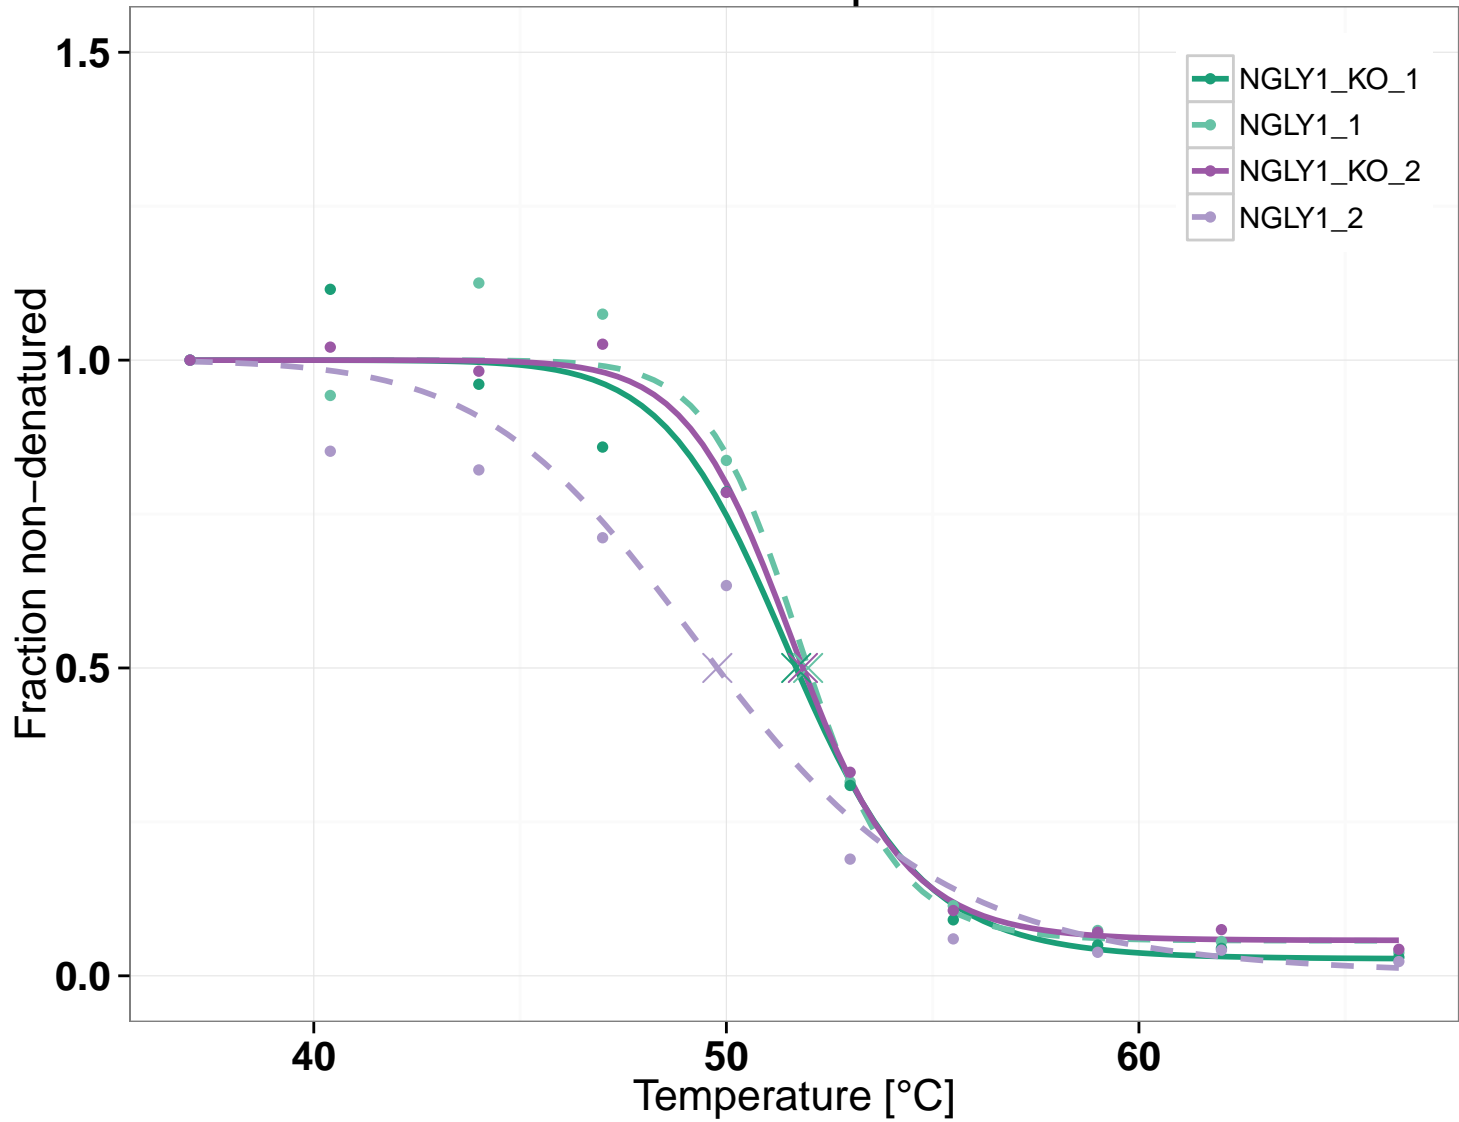

|            | meltPoint | slope  | plateau | R2   |
|------------|-----------|--------|---------|------|
| NGLY1_KO_1 | 51.69     | -0.15  | 0.03    | 0.99 |
| NGLY1_1    | 51.98     | -0.2   | 0.06    | 0.99 |
| NGLY1_KO_2 | 51.85     | -0.18  | 0.06    | 1    |
| NGLY1_2    | 49.78     | -0.089 | 0       | 0.96 |

Supplement: Supplementary file 4722 [file 1]

IPI00889161.1|LOC283523

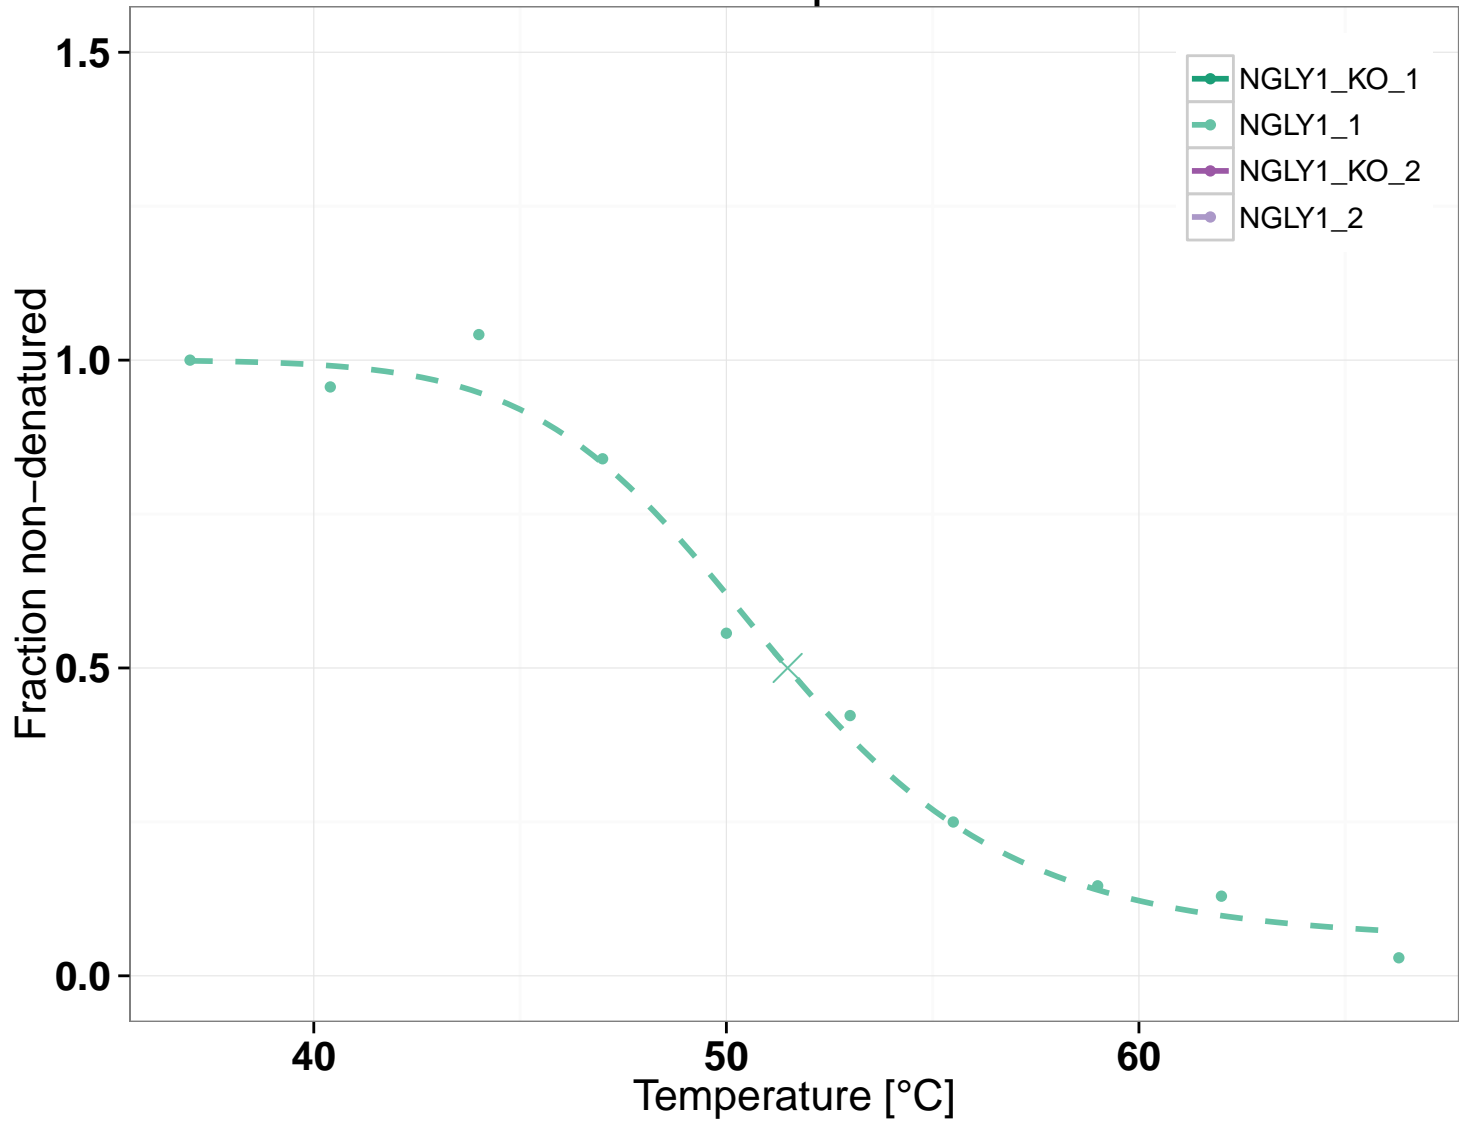

|            | meltPoint | slope  | plateau | R2   |
|------------|-----------|--------|---------|------|
| NGLY1_KO_1 | —         | —      | —       | —    |
| NGLY1_1    | 51.49     | -0.082 | 0.06    | 0.99 |
| NGLY1_KO_2 | —         | —      | —       | —    |
| NGLY1_2    | —         | —      | —       | —    |

Supplement: Supplementary file 4723 [file 1]

# IPI00034319.2|CUTA

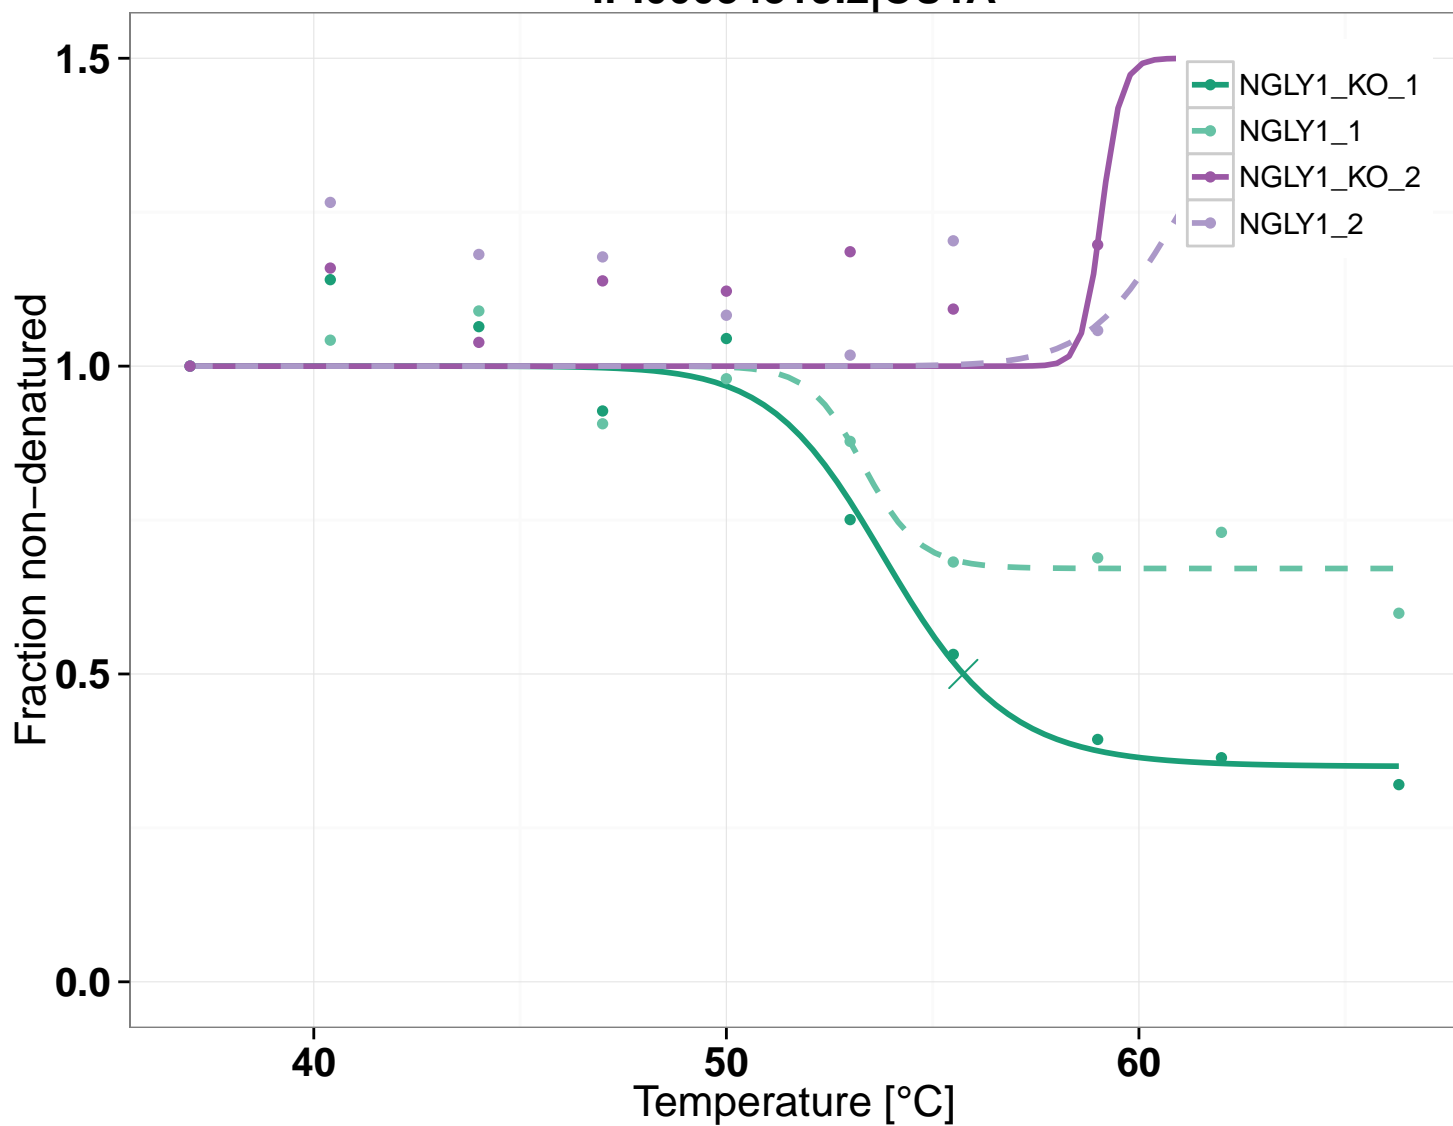

|            | meltPoint | slope | plateau | R2   |
|------------|-----------|-------|---------|------|
| NGLY1_KO_1 | 55.74     | -0.11 | 0.35    | 0.96 |
| NGLY1_1    | -         | -0.12 | 0.67    | 0.9  |
| NGLY1_KO_2 | -         | 0.53  | 1.5     | 0.65 |
| NGLY1_2    | -         | 0.11  | 1.5     | 0.27 |

Supplement: Supplementary file 4724 [file 1]

IPI00183208.3|FBXO22

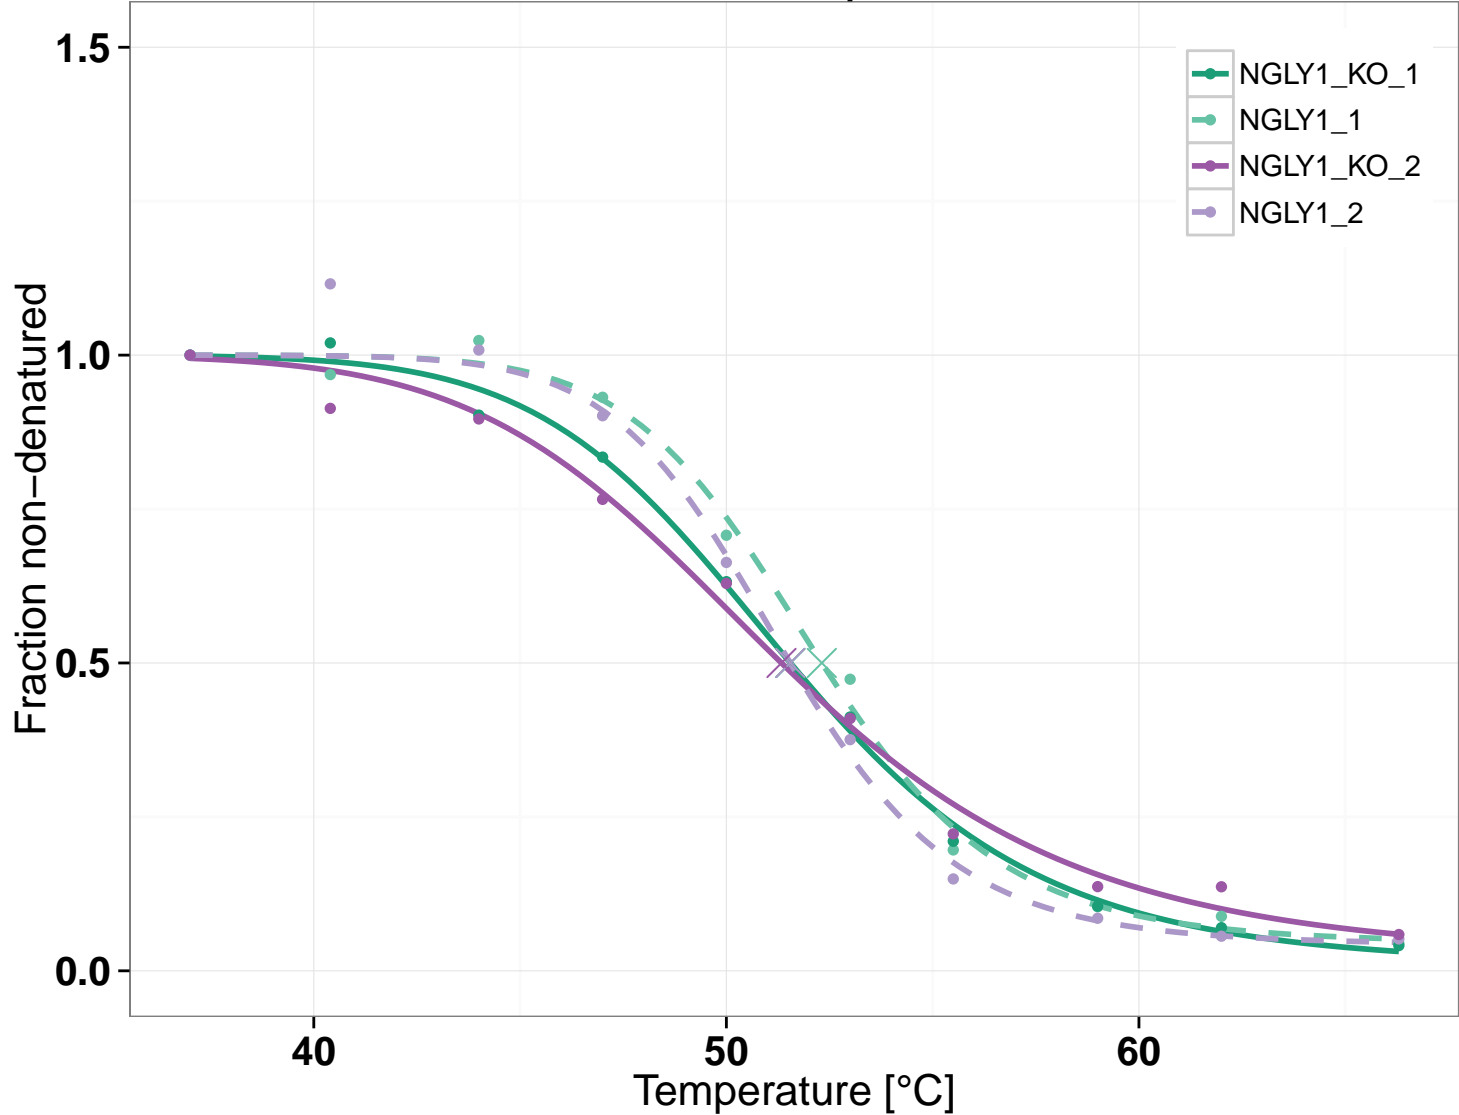

|            | meltPoint | slope  | plateau | R2   |
|------------|-----------|--------|---------|------|
| NGLY1_KO_1 | 51.55     | -0.081 | 0.01    | 1    |
| NGLY1_1    | 52.31     | -0.11  | 0.04    | 1    |
| NGLY1_KO_2 | 51.34     | -0.067 | 0.02    | 0.99 |
| NGLY1_2    | 51.55     | -0.11  | 0.04    | 0.99 |

Supplement: Supplementary file 4725 [file 1]

IPI00166388.6|SHARPIN

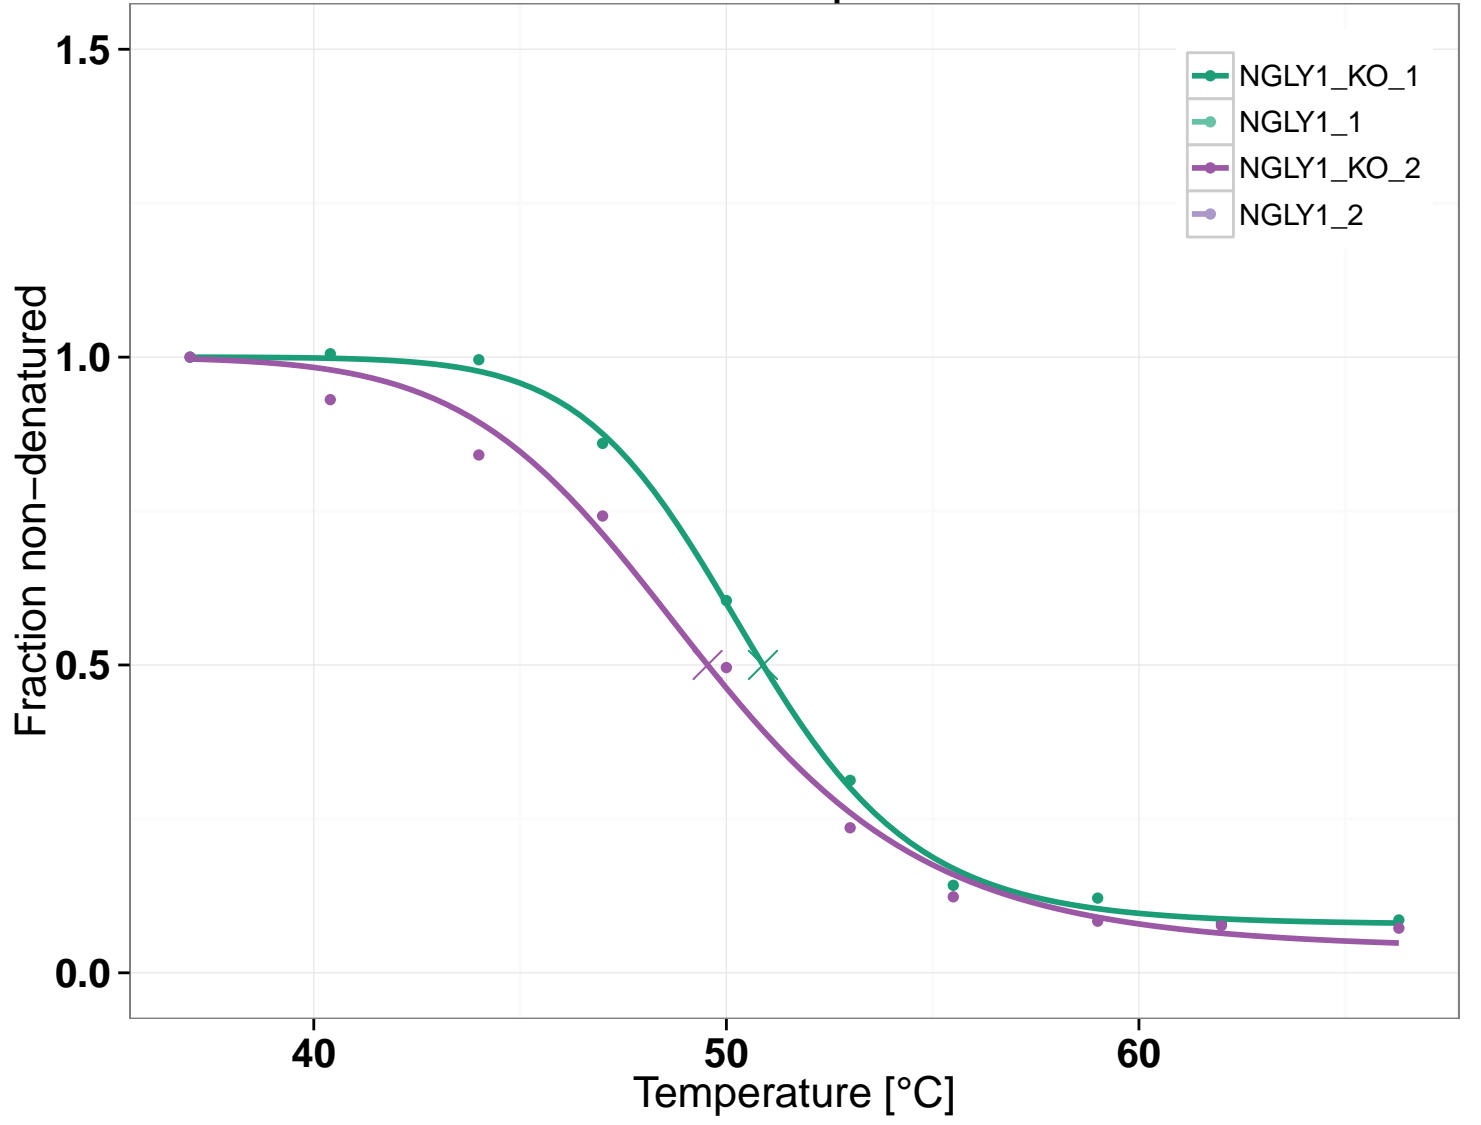

|            | meltPoint | slope  | plateau | R2   |
|------------|-----------|--------|---------|------|
| NGLY1_KO_1 | 50.89     | -0.11  | 0.08    | 1    |
| NGLY1_1    | -         | -      | -       | -    |
| NGLY1_KO_2 | 49.55     | -0.086 | 0.04    | 0.99 |
| NGLY1_2    | -         | -      | -       | -    |

Supplement: Supplementary file 4726 [file 1]

IPI00300186.6|FASTKD1

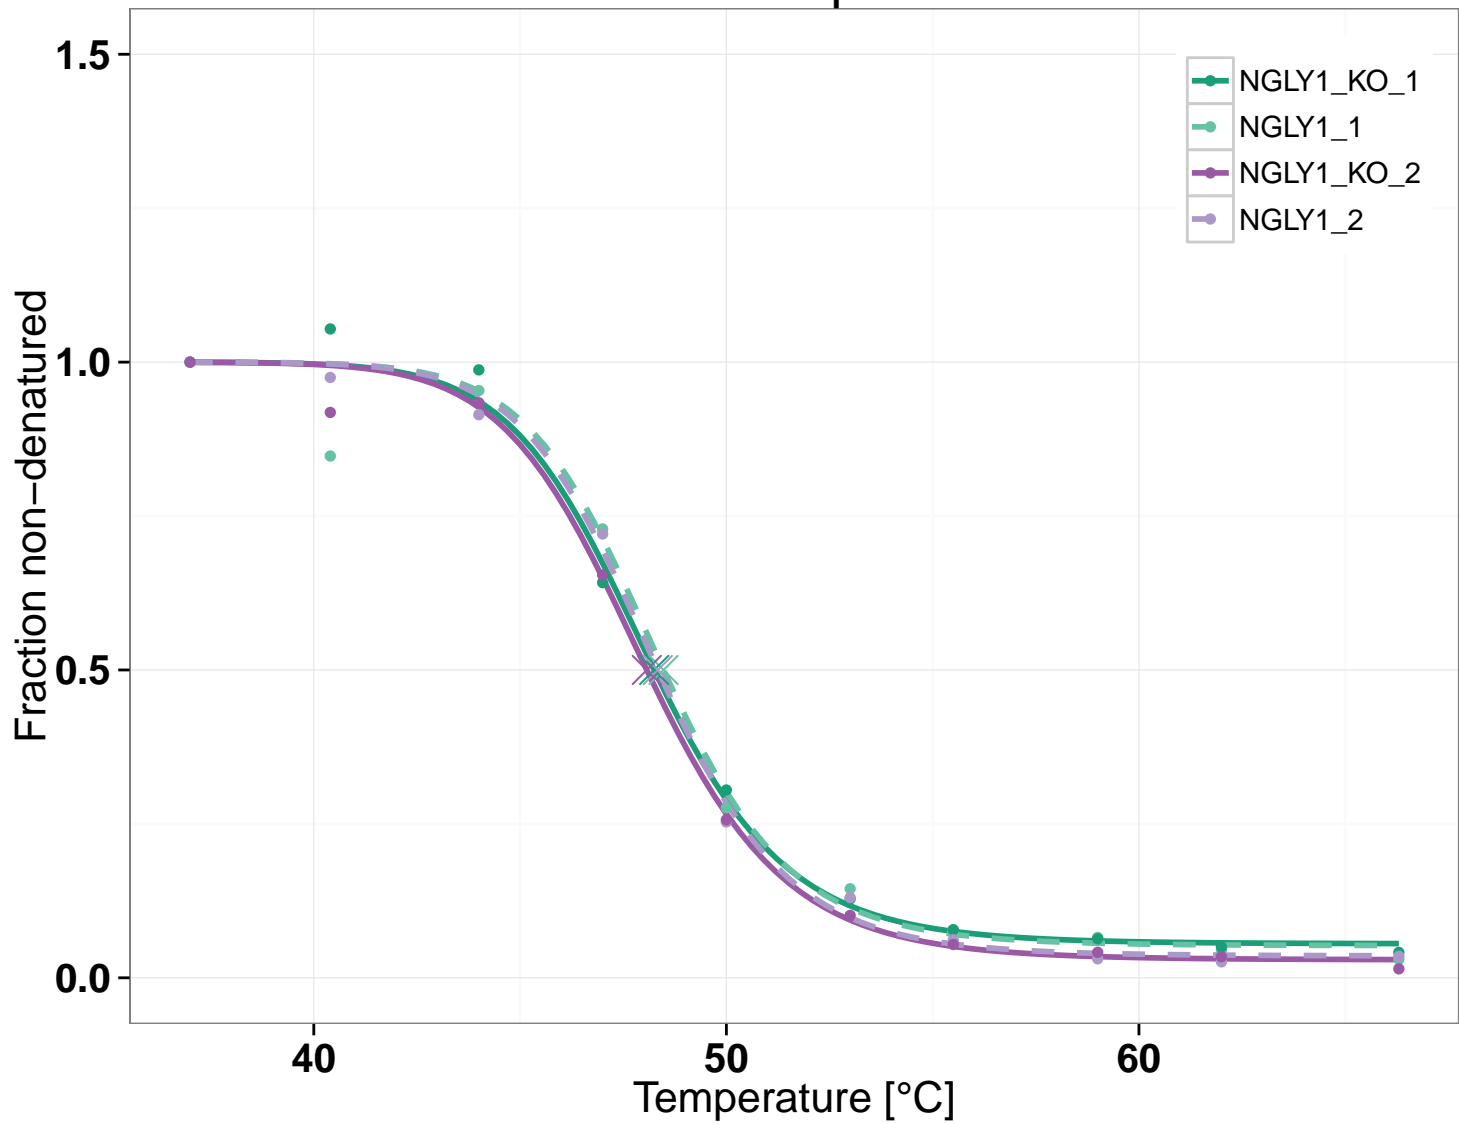

|            | meltPoint | slope | plateau | R2   |
|------------|-----------|-------|---------|------|
| NGLY1_KO_1 | 48.25     | -0.14 | 0.06    | 1    |
| NGLY1_1    | 48.48     | -0.15 | 0.05    | 0.98 |
| NGLY1_KO_2 | 48.07     | -0.14 | 0.03    | 1    |
| NGLY1_2    | 48.34     | -0.15 | 0.04    | 1    |

Supplement: Supplementary file 4727 [file 1]

IPI00166127.3|C4ORF33

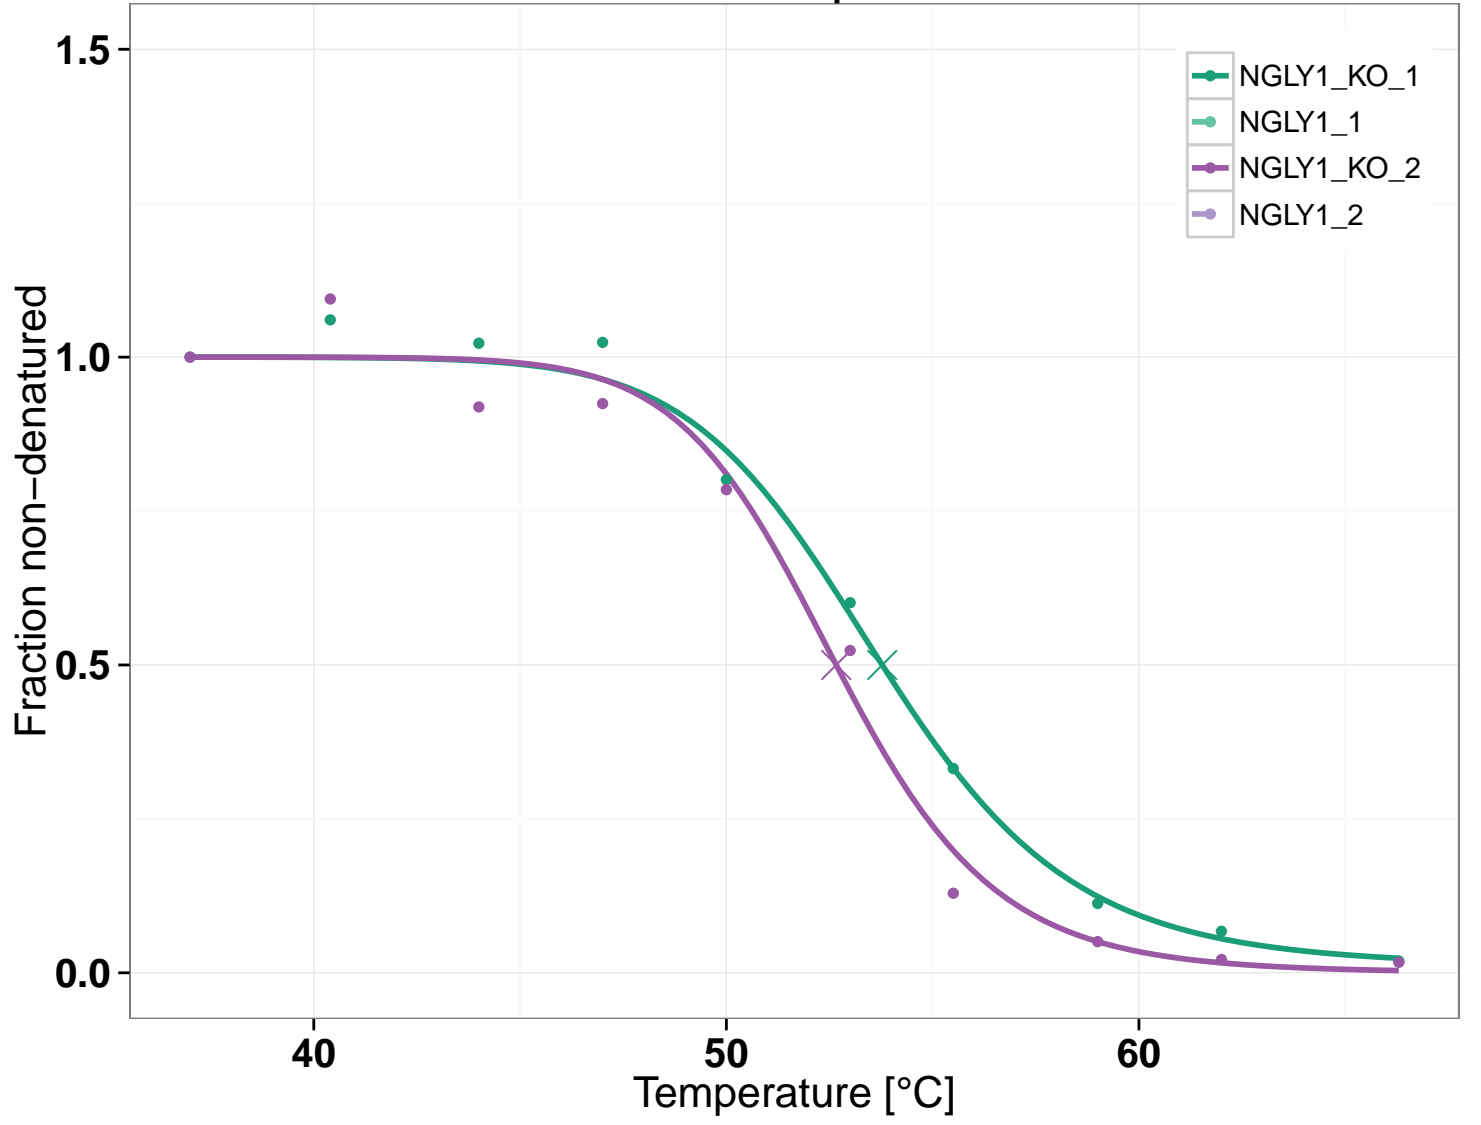

|            | meltPoint | slope | plateau | R2   |
|------------|-----------|-------|---------|------|
| NGLY1_KO_1 | 53.78     | -0.11 | 0.01    | 0.99 |
| NGLY1_1    | -         | -     | -       | -    |
| NGLY1_KO_2 | 52.66     | -0.13 | 0       | 0.99 |
| NGLY1_2    | -         | -     | -       | -    |

Supplement: Supplementary file 4728 [file 1]

IPI00549942.3|B3KNS4\_HUMAN

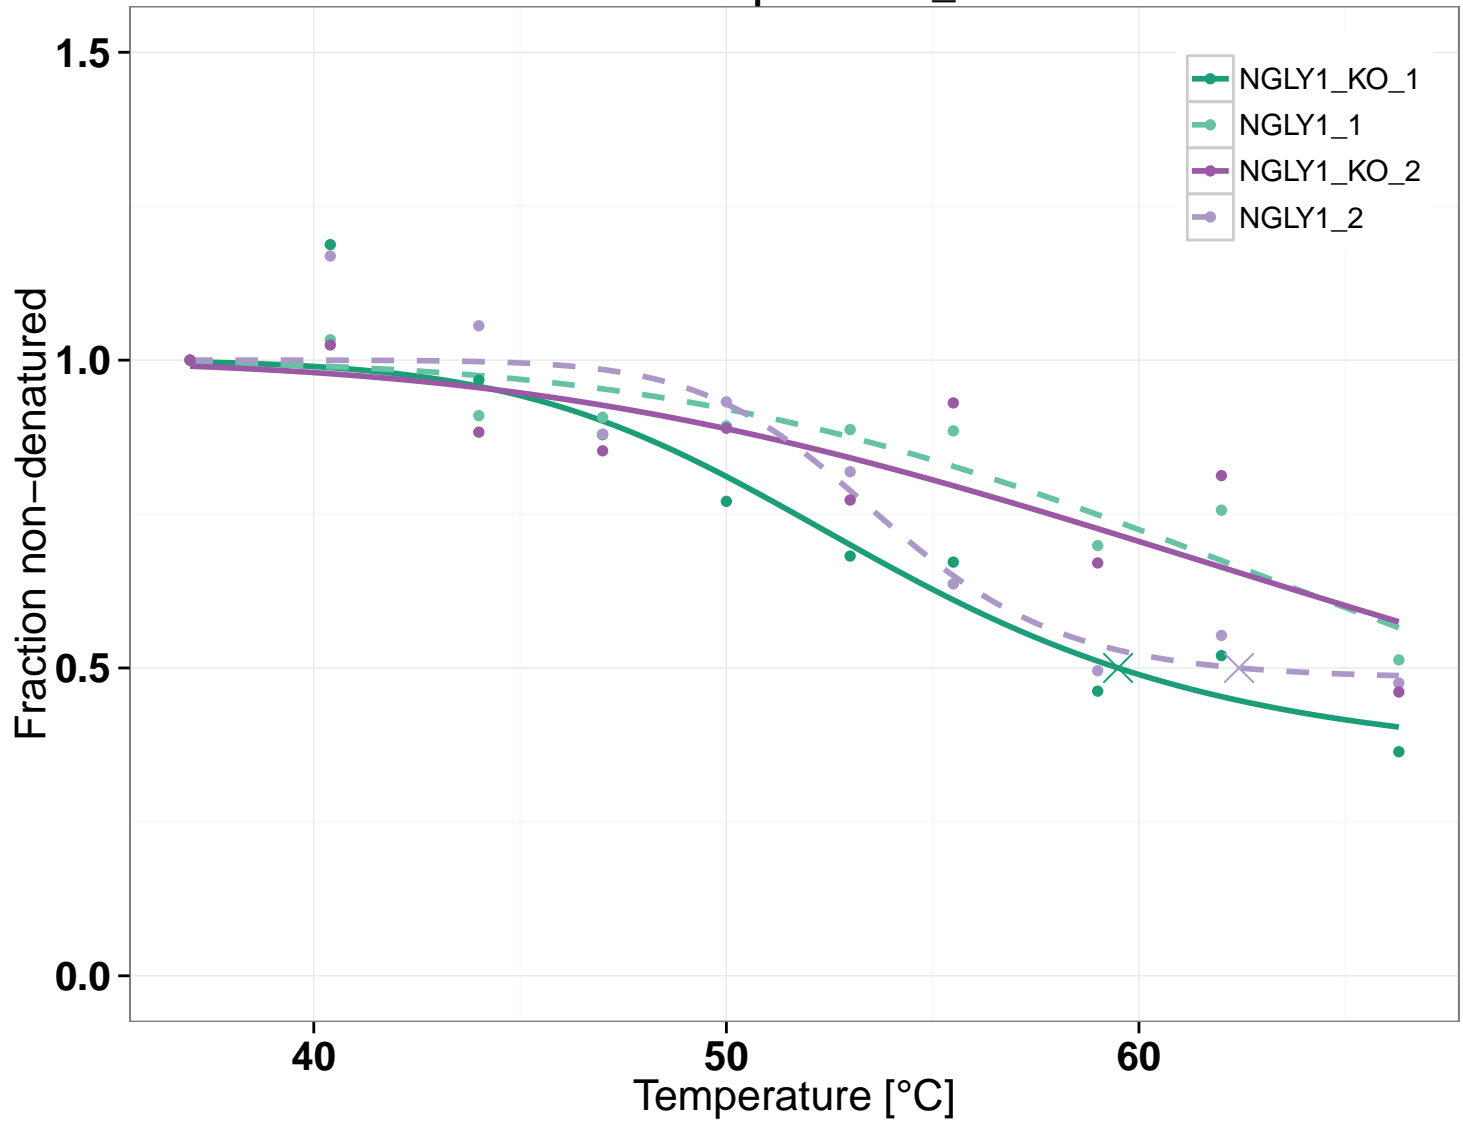

|            | meltPoint | slope  | plateau | R2   |
|------------|-----------|--------|---------|------|
| NGLY1_KO_1 | 59.5      | -0.038 | 0.34    | 0.91 |
| NGLY1_1    | -         | -0.026 | 0       | 0.88 |
| NGLY1_KO_2 | -         | -0.021 | 0       | 0.7  |
| NGLY1_2    | 62.43     | -0.058 | 0.48    | 0.91 |

Supplement: Supplementary file 4729 [file 1]

IPI00395002.1|HOMER3

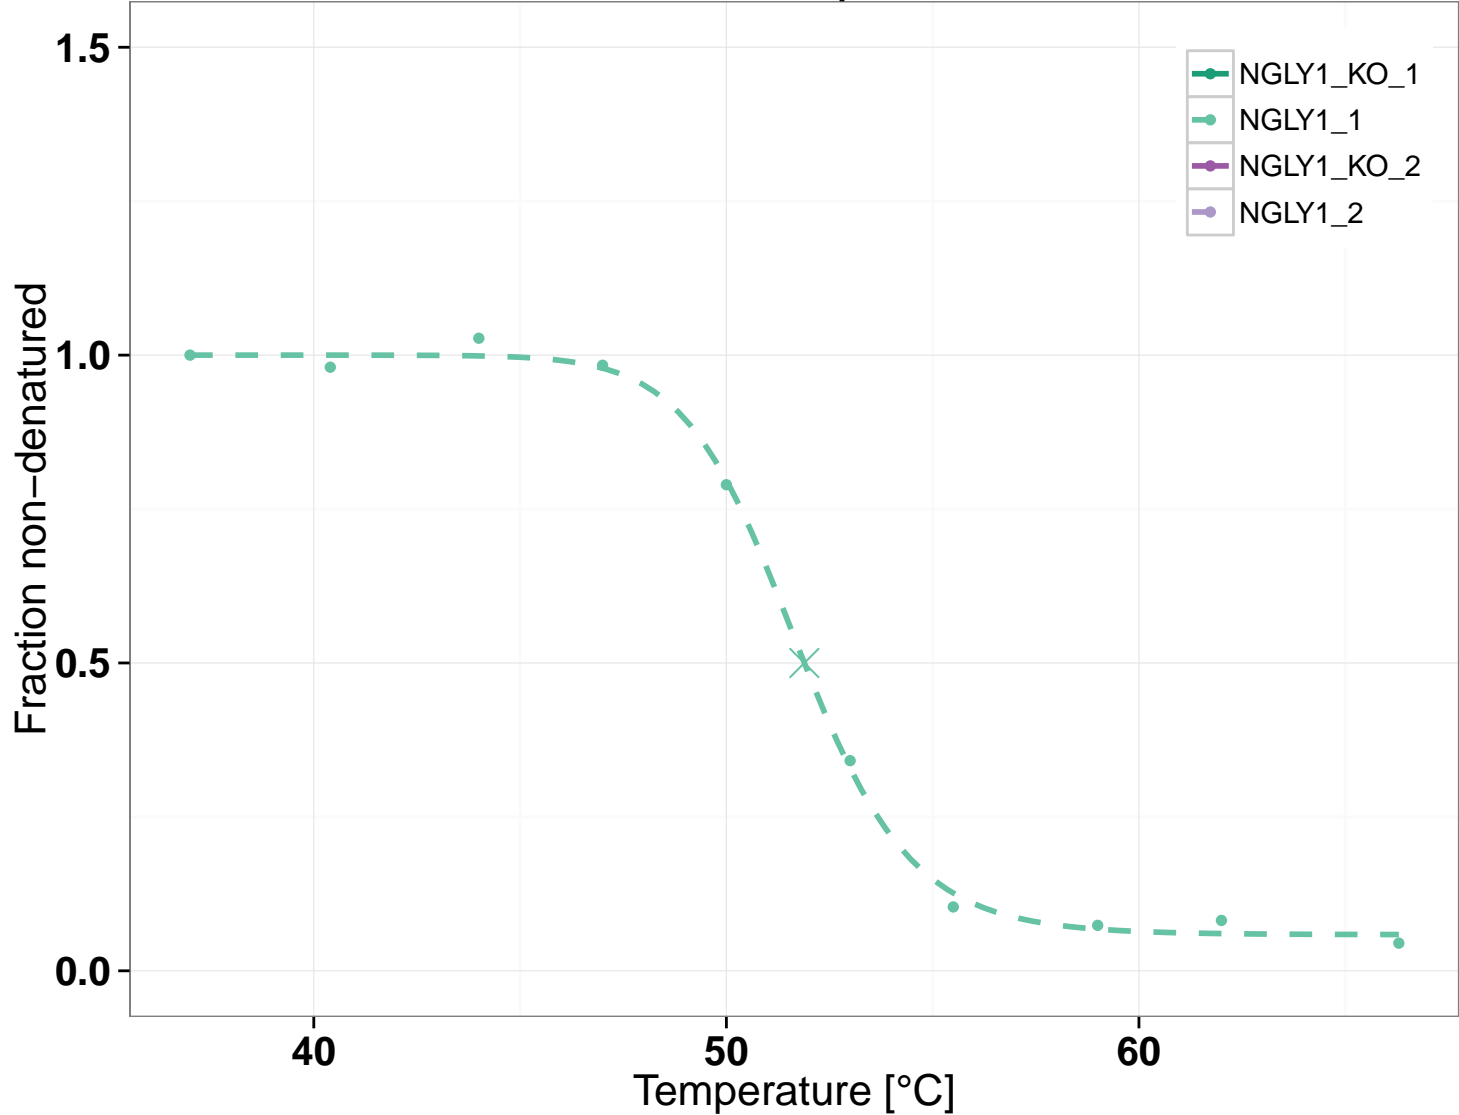

|            | meltPoint | slope | plateau | R2 |
|------------|-----------|-------|---------|----|
| NGLY1_KO_1 | -         | -     | -       | -  |
| NGLY1_1    | 51.89     | -0.17 | 0.06    | 1  |
| NGLY1_KO_2 | -         | -     | -       | -  |
| NGLY1_2    | -         | -     | -       | -  |

Supplement: Supplementary file 4730 [file 1]

# IPI00795842.1|MAN2C1

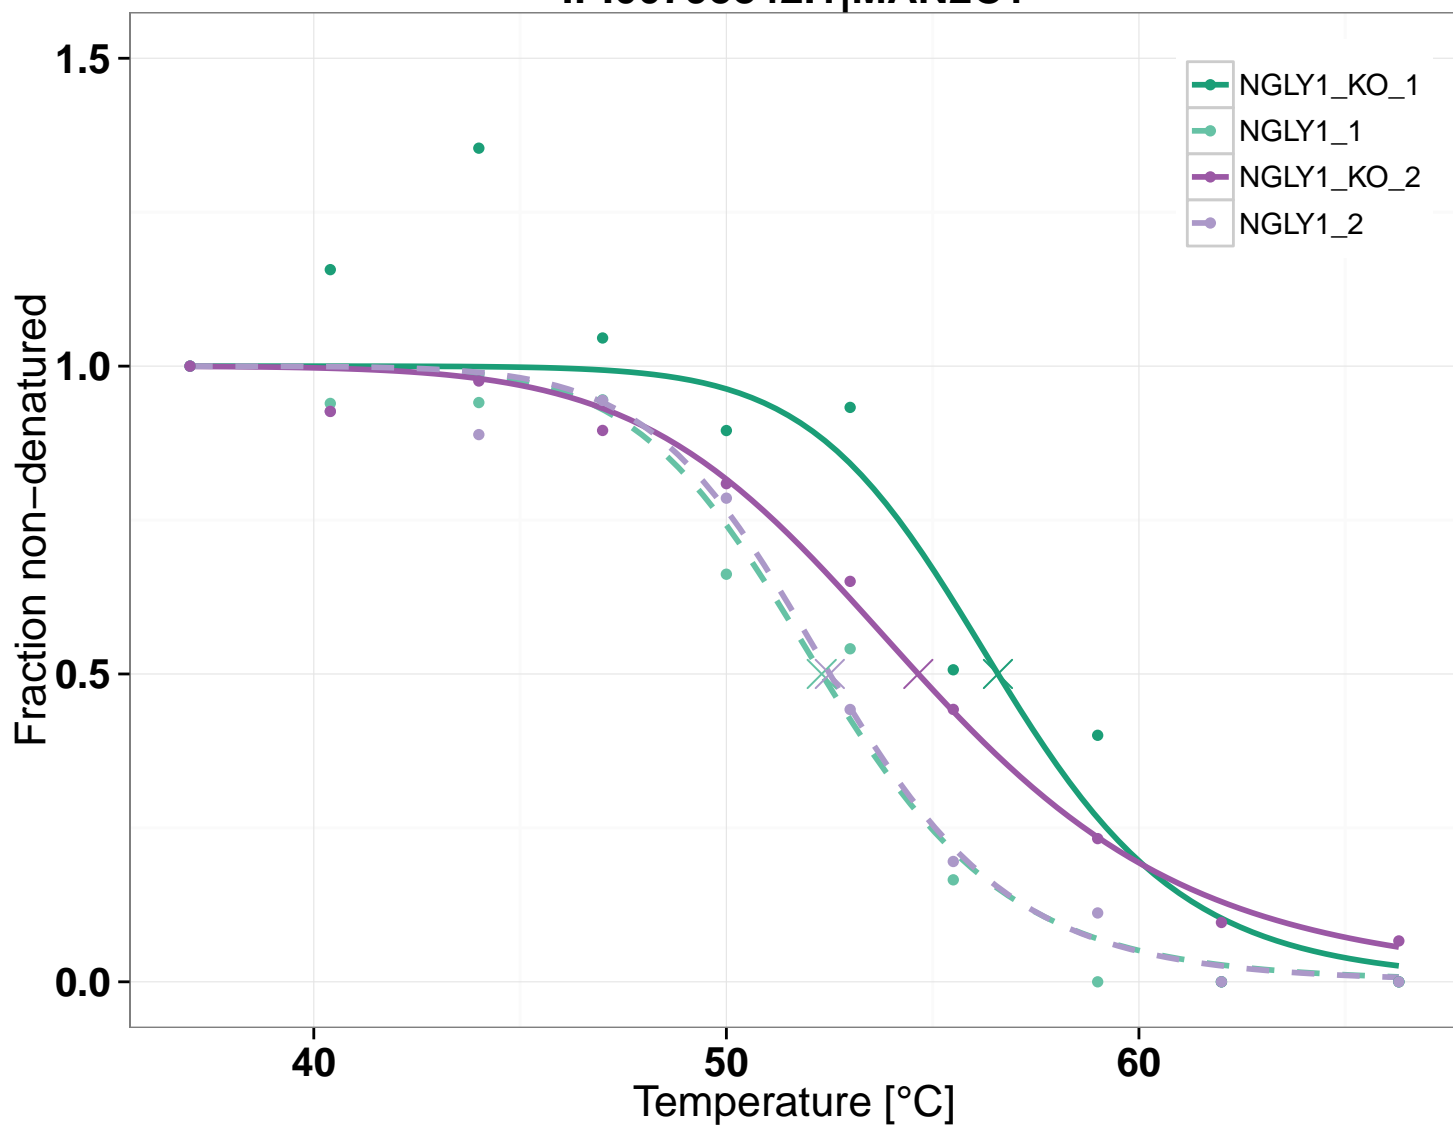

|            | meltPoint | slope  | plateau | R2   |
|------------|-----------|--------|---------|------|
| NGLY1_KO_1 | 56.58     | -0.11  | 0       | 0.9  |
| NGLY1_1    | 52.31     | -0.11  | 0       | 0.98 |
| NGLY1_KO_2 | 54.65     | -0.074 | 0       | 0.99 |
| NGLY1_2    | 52.51     | -0.11  | 0       | 0.99 |

Supplement: Supplementary file 4731 [file 1]

IPI00005184.1|TRIM24

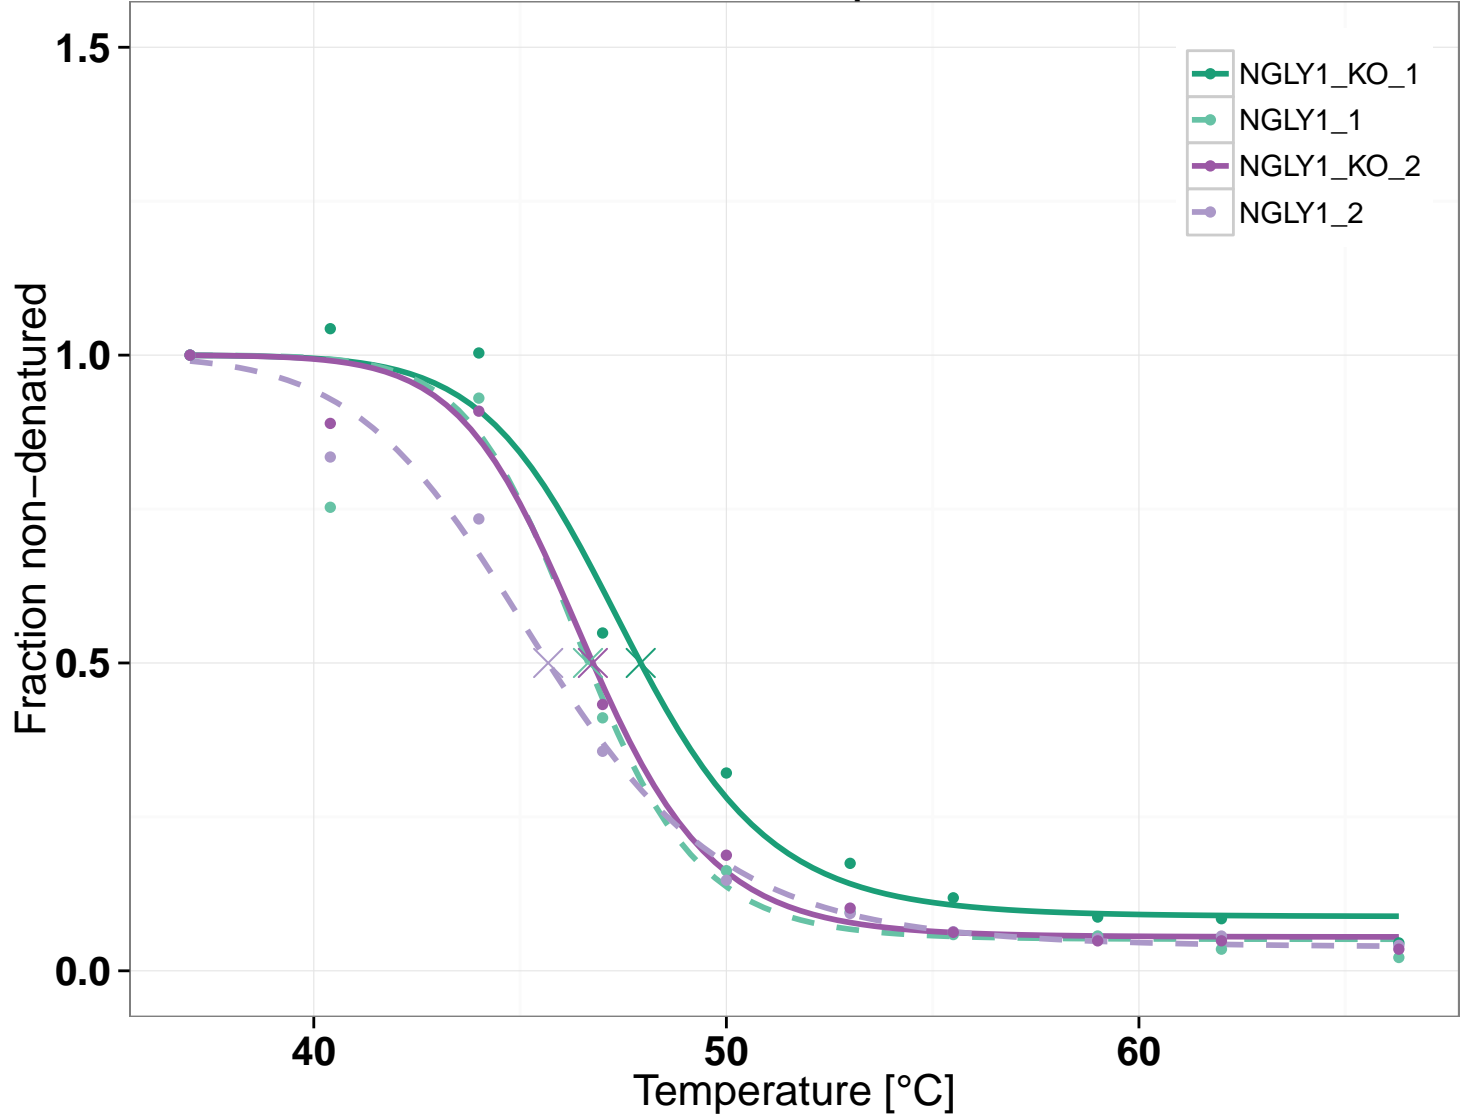

|            | meltPoint | slope | plateau | R2   |
|------------|-----------|-------|---------|------|
| NGLY1_KO_1 | 47.92     | -0.13 | 0.09    | 0.99 |
| NGLY1_1    | 46.65     | -0.17 | 0.05    | 0.95 |
| NGLY1_KO_2 | 46.76     | -0.15 | 0.06    | 0.99 |
| NGLY1_2    | 45.68     | -0.11 | 0.04    | 0.99 |

Supplement: Supplementary file 4732 [file 1]

# IPI00418382.1|OPLAH

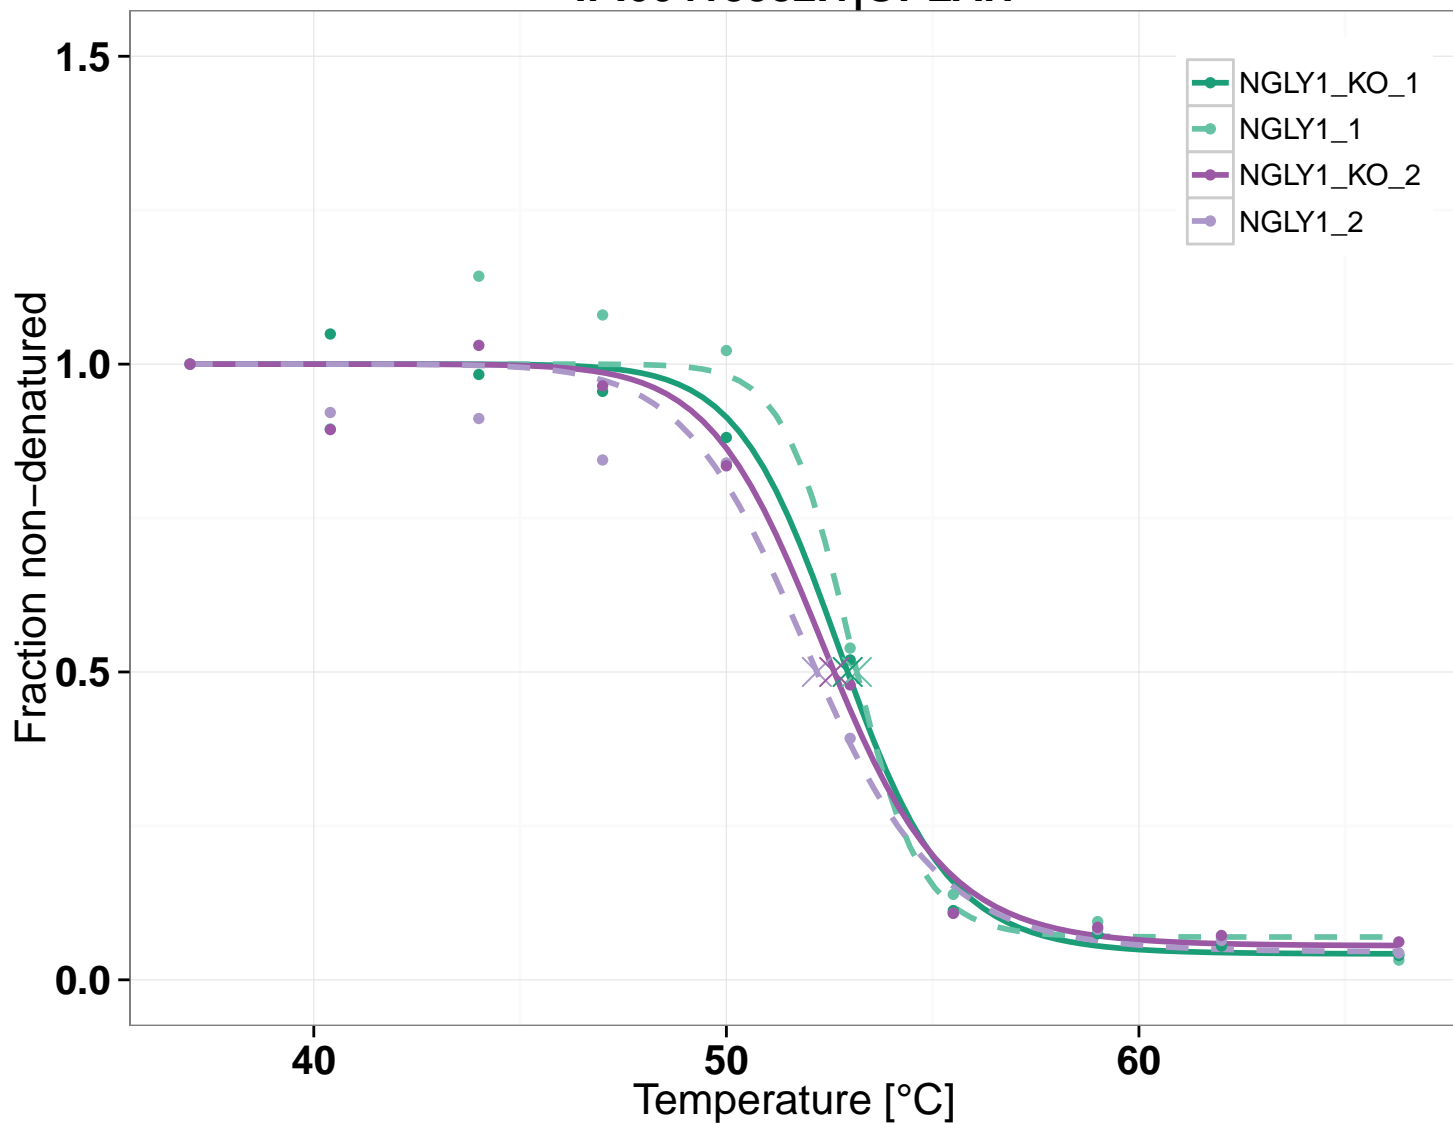

|            | meltPoint | slope | plateau | R2   |
|------------|-----------|-------|---------|------|
| NGLY1_KO_1 | 52.94     | -0.19 | 0.04    | 1    |
| NGLY1_1    | 53.16     | -0.28 | 0.07    | 0.98 |
| NGLY1_KO_2 | 52.61     | -0.16 | 0.06    | 0.99 |
| NGLY1_2    | 52.19     | -0.15 | 0.05    | 0.98 |

Supplement: Supplementary file 4733 [file 1]

# IPI00024381.1|CLP1

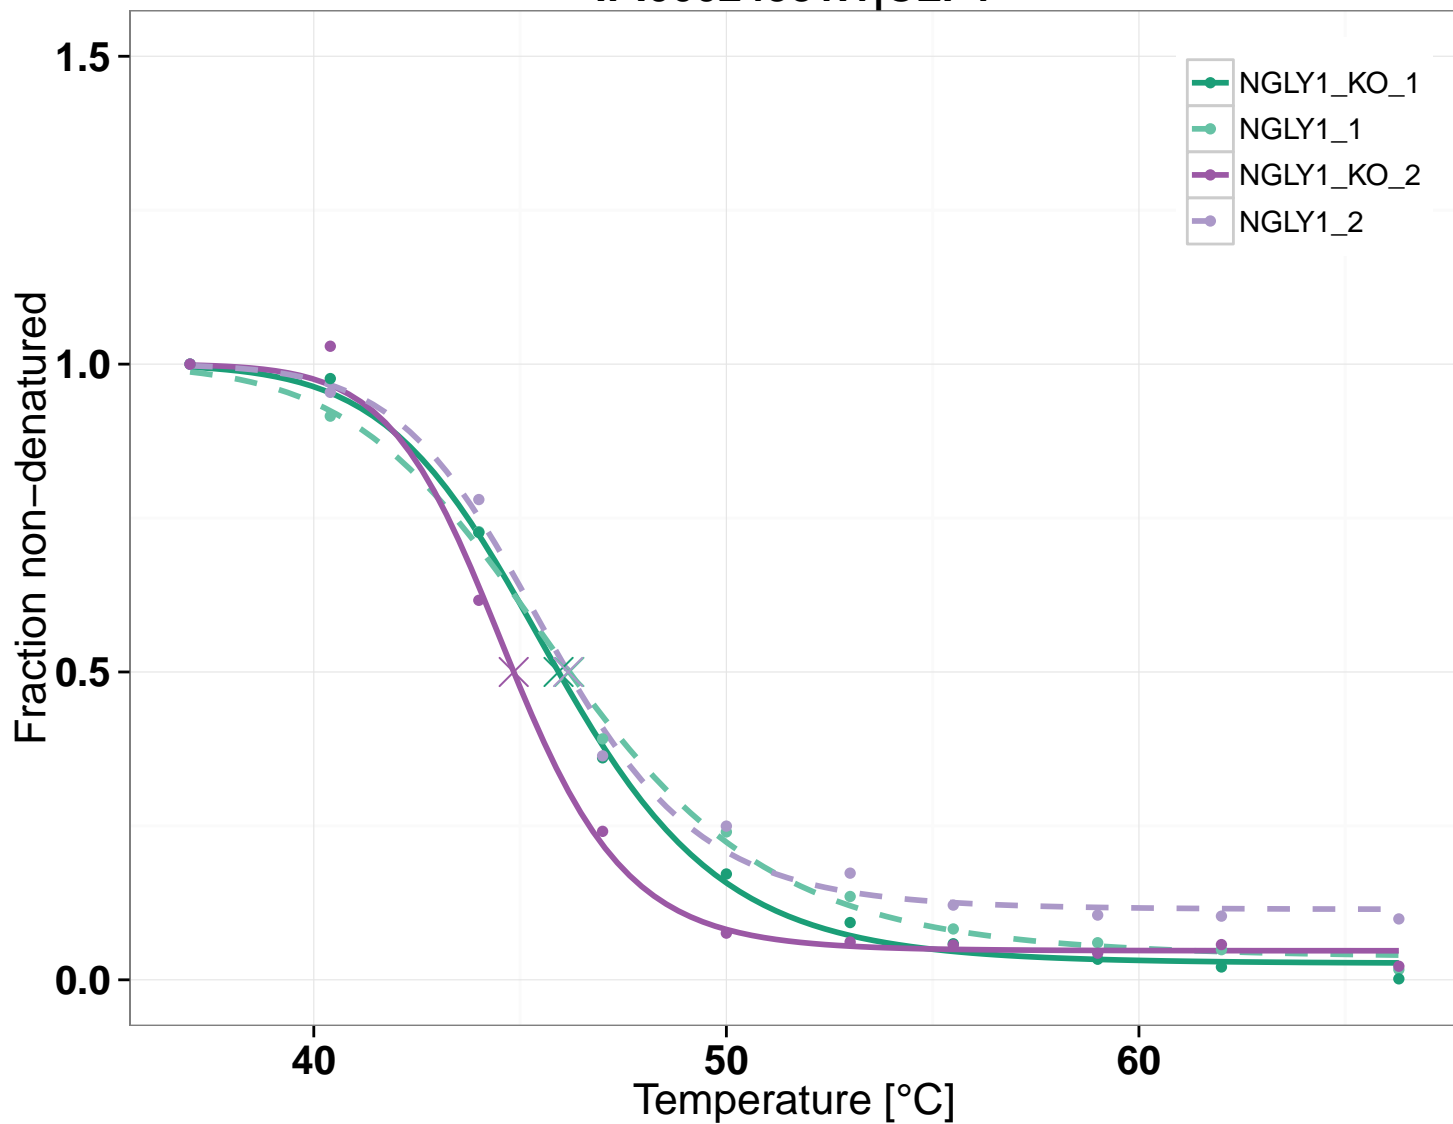

|            | meltPoint | slope  | plateau | R2   |
|------------|-----------|--------|---------|------|
| NGLY1_KO_1 | 45.93     | -0.12  | 0.03    | 1    |
| NGLY1_1    | 46.19     | -0.094 | 0.04    | 1    |
| NGLY1_KO_2 | 44.85     | -0.17  | 0.05    | 1    |
| NGLY1_2    | 46.16     | -0.12  | 0.11    | 0.99 |

Supplement: Supplementary file 4734 [file 1]

# IPI00298625.2|LYN

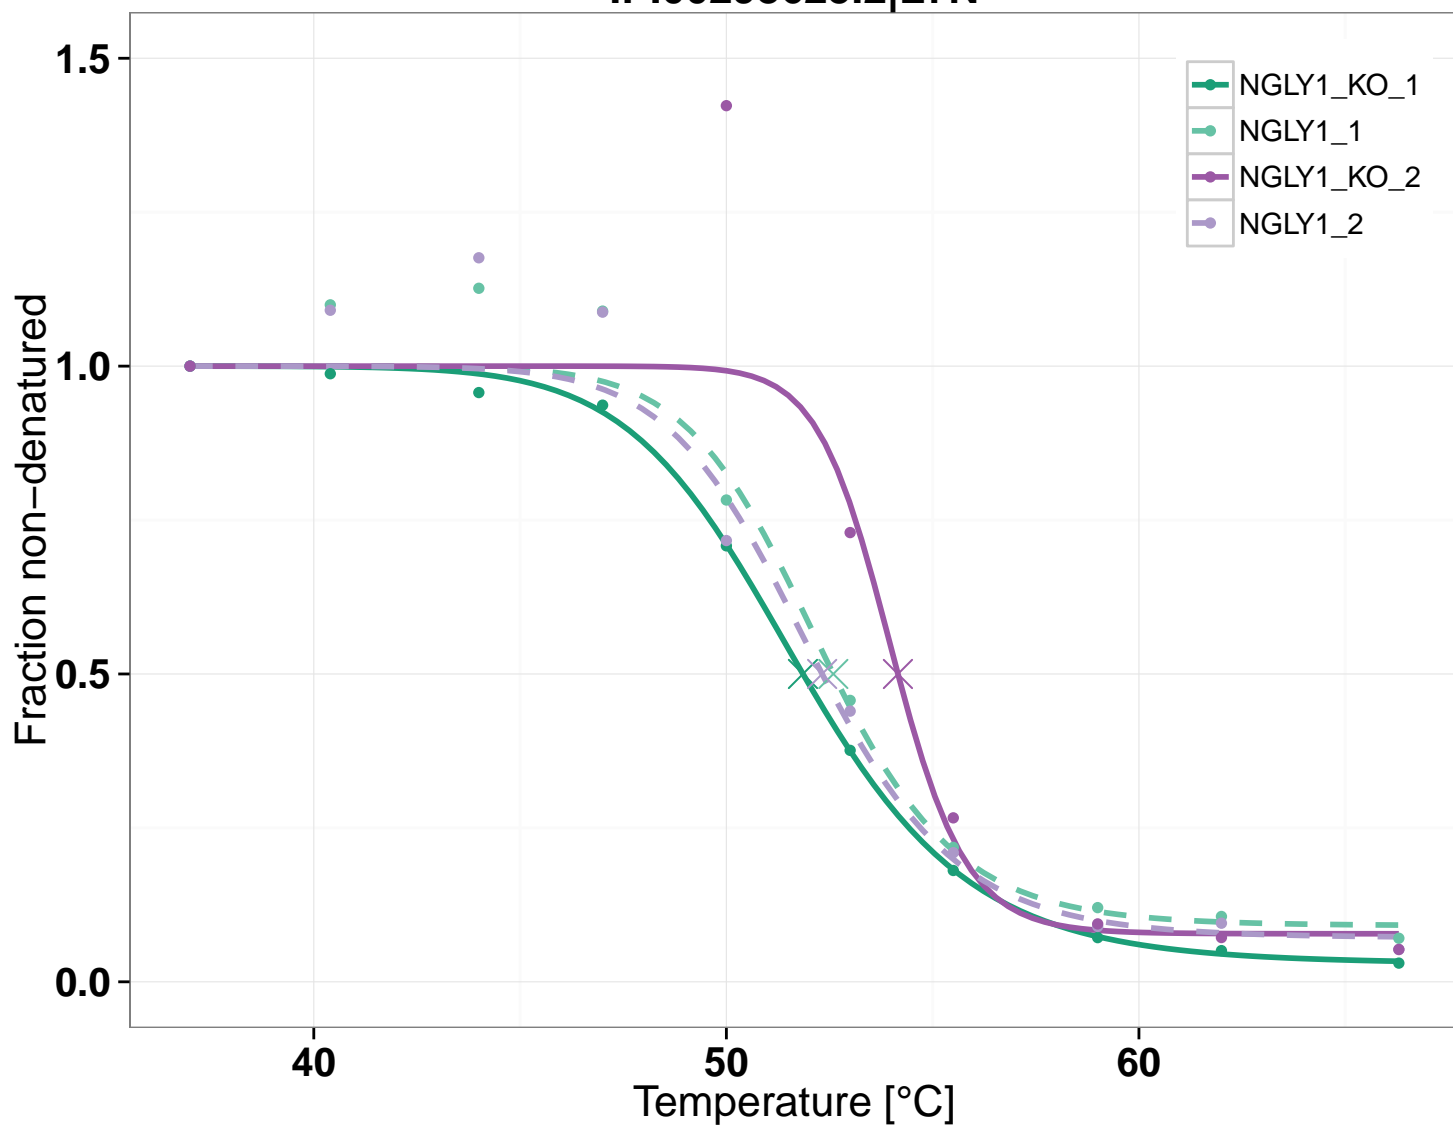

|            | meltPoint | slope | plateau | R2   |
|------------|-----------|-------|---------|------|
| NGLY1_KO_1 | 51.86     | -0.12 | 0.03    | 1    |
| NGLY1_1    | 52.59     | -0.14 | 0.09    | 0.98 |
| NGLY1_KO_2 | 54.16     | -0.26 | 0.08    | 0.47 |
| NGLY1_2    | 52.32     | -0.13 | 0.07    | 0.97 |

Supplement: Supplementary file 4735 [file 1]

# IPI00007941.4|HEXIM1

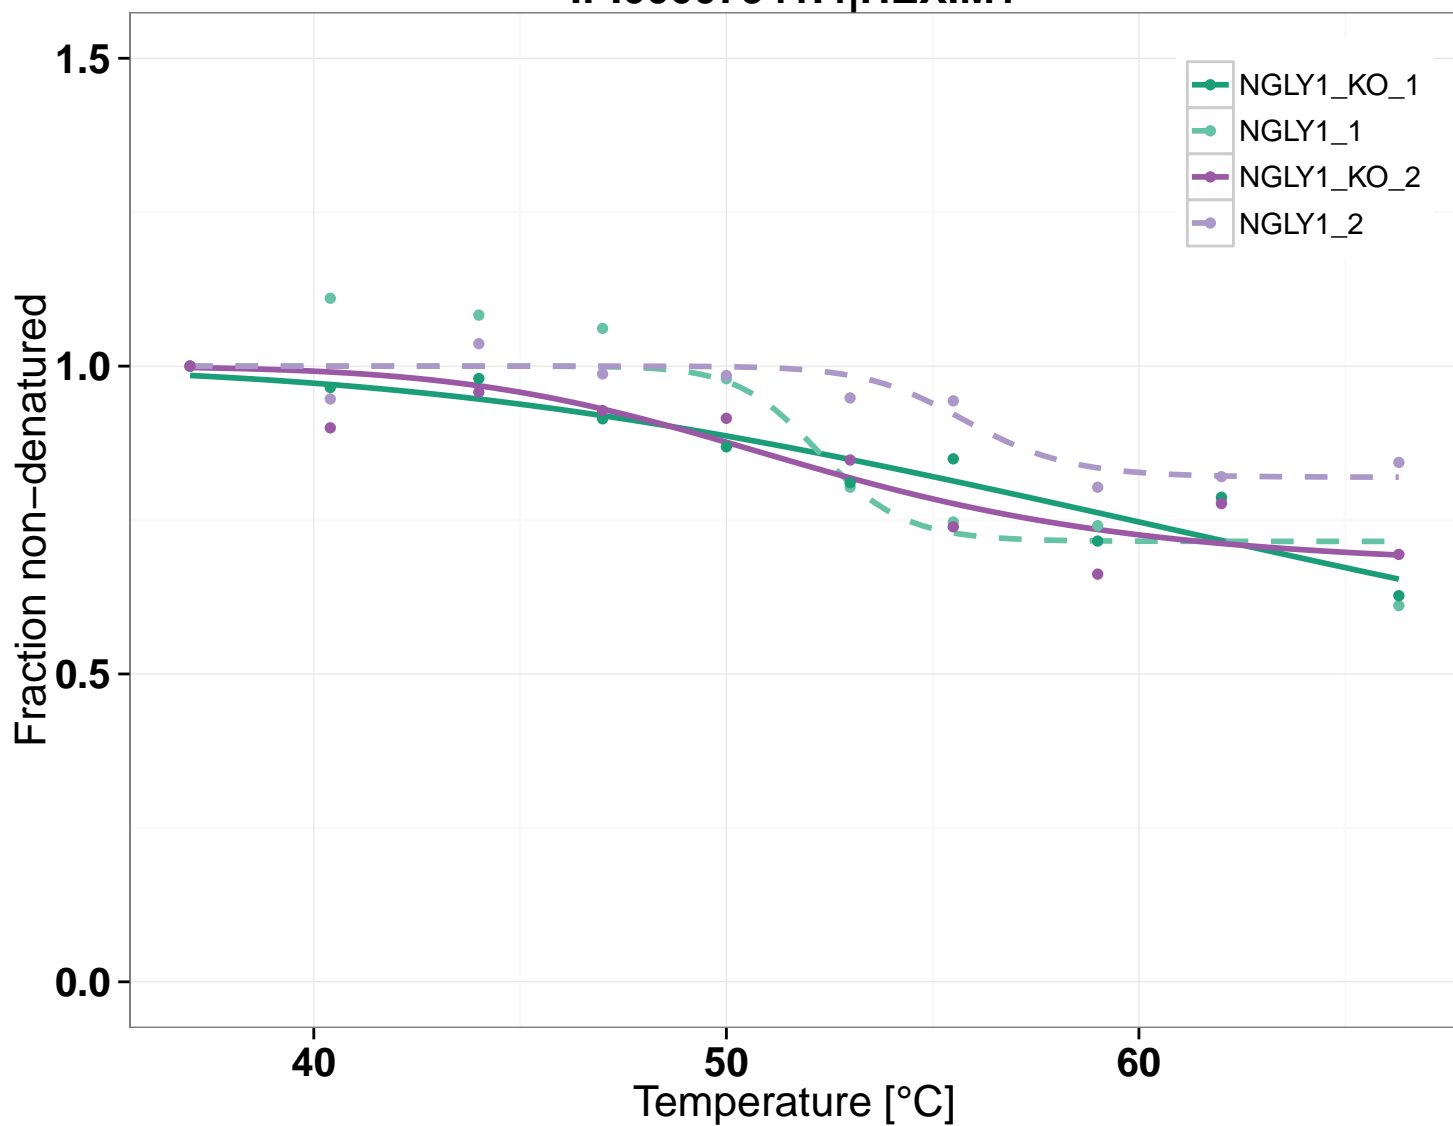

|            | meltPoint | slope  | plateau | R2   |
|------------|-----------|--------|---------|------|
| NGLY1_KO_1 | —         | −0.015 | 0.15    | 0.91 |
| NGLY1_1    | —         | −0.07  | 0.72    | 0.86 |
| NGLY1_KO_2 | —         | −0.02  | 0.67    | 0.83 |
| NGLY1_2    | —         | −0.036 | 0.82    | 0.87 |

Supplement: Supplementary file 4736 [file 1]

IPI00867509.1|CORO1C

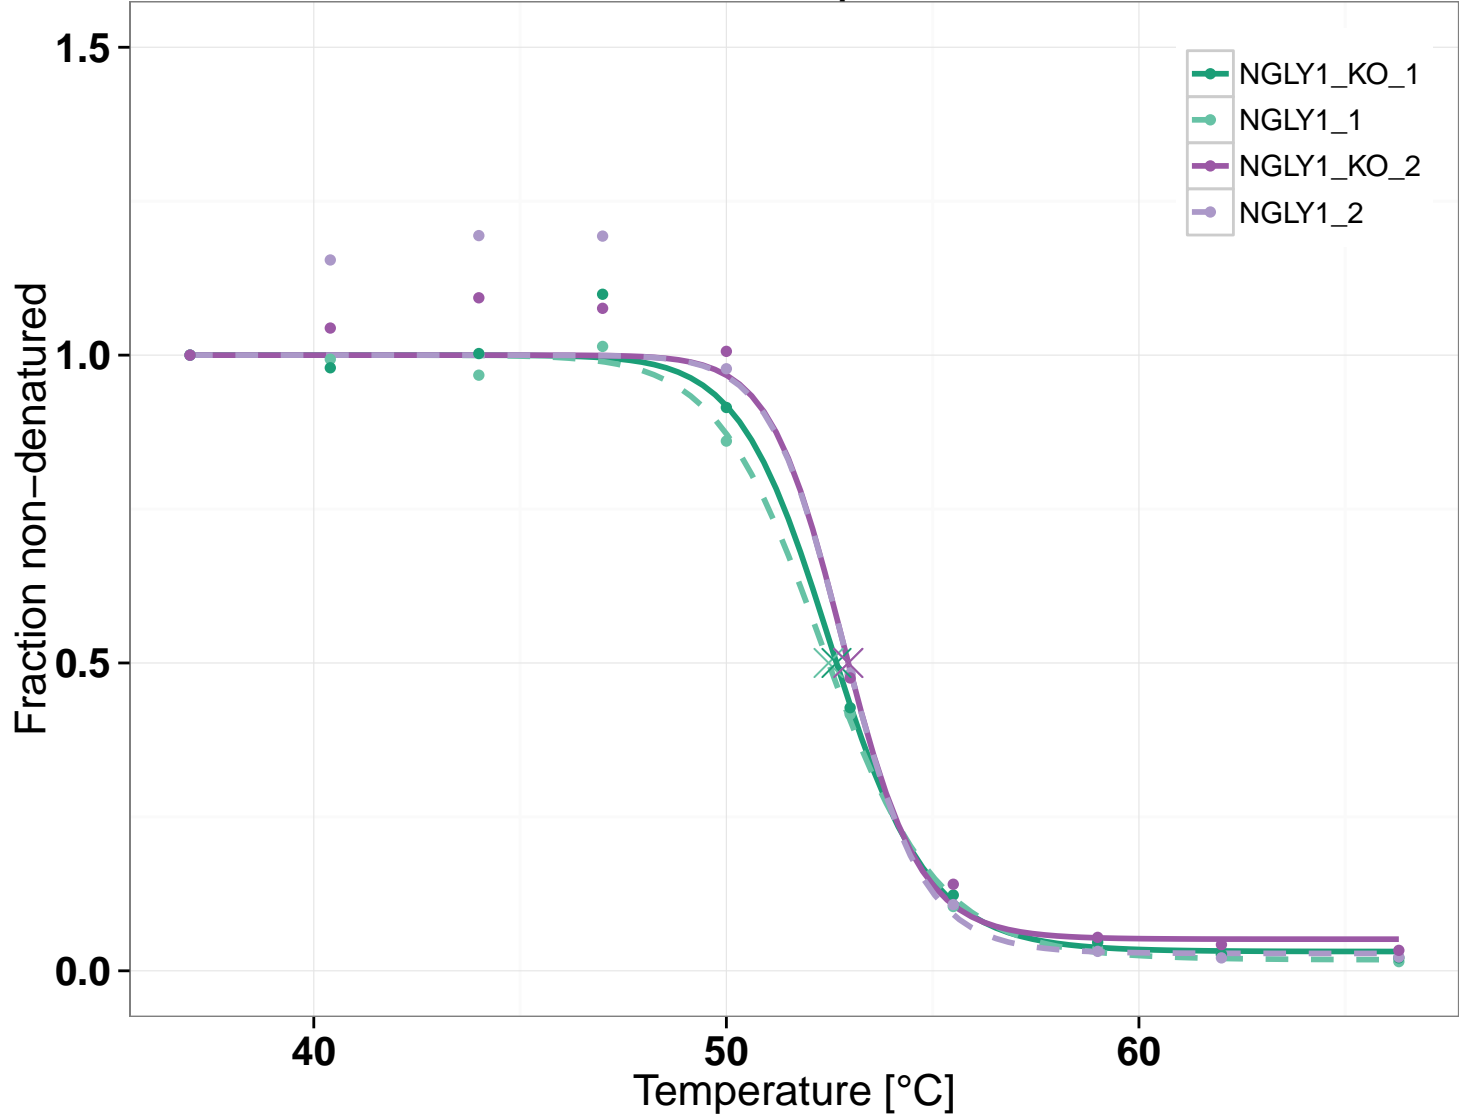

|            | meltPoint | slope | plateau | R2   |
|------------|-----------|-------|---------|------|
| NGLY1_KO_1 | 52.67     | -0.21 | 0.03    | 0.99 |
| NGLY1_1    | 52.48     | -0.18 | 0.02    | 1    |
| NGLY1_KO_2 | 52.96     | -0.26 | 0.05    | 0.99 |
| NGLY1_2    | 52.96     | -0.26 | 0.03    | 0.96 |

Supplement: Supplementary file 4737 [file 1]

IPI00292020.3|SRM

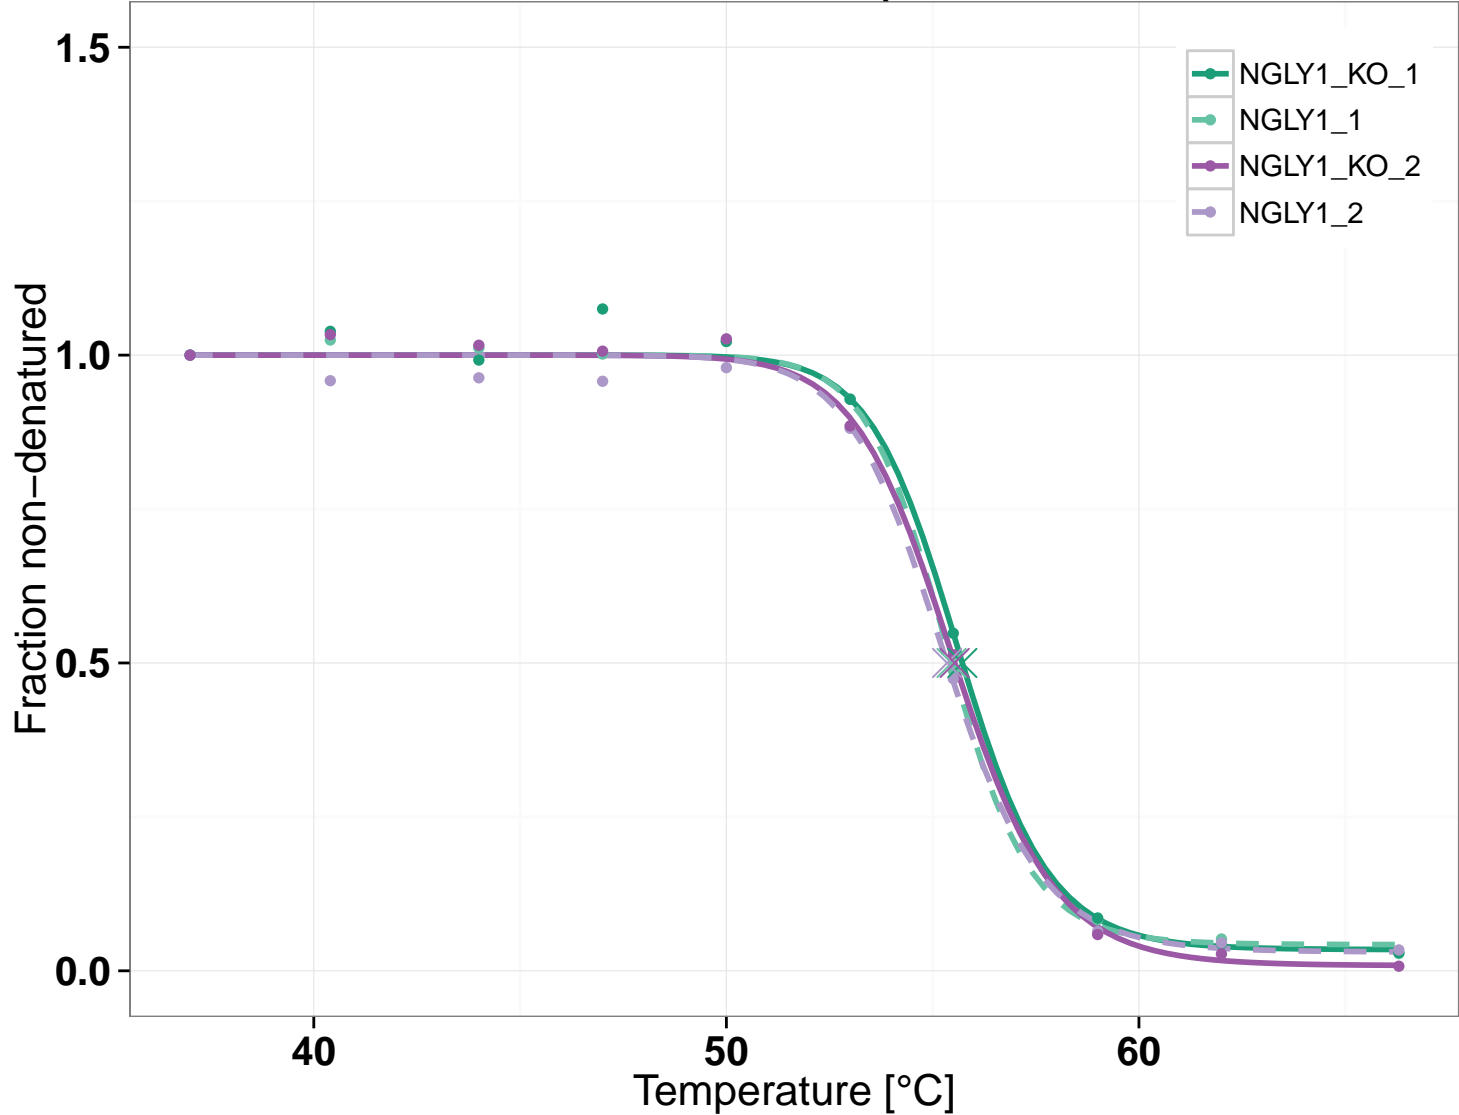

|            | meltPoint | slope | plateau | R2 |
|------------|-----------|-------|---------|----|
| NGLY1_KO_1 | 55.72     | -0.22 | 0.03    | 1  |
| NGLY1_1    | 55.46     | -0.24 | 0.04    | 1  |
| NGLY1_KO_2 | 55.53     | -0.2  | 0.01    | 1  |
| NGLY1_2    | 55.35     | -0.21 | 0.03    | 1  |

Supplement: Supplementary file 4738 [file 1]

IPI00332428.5|MAK16

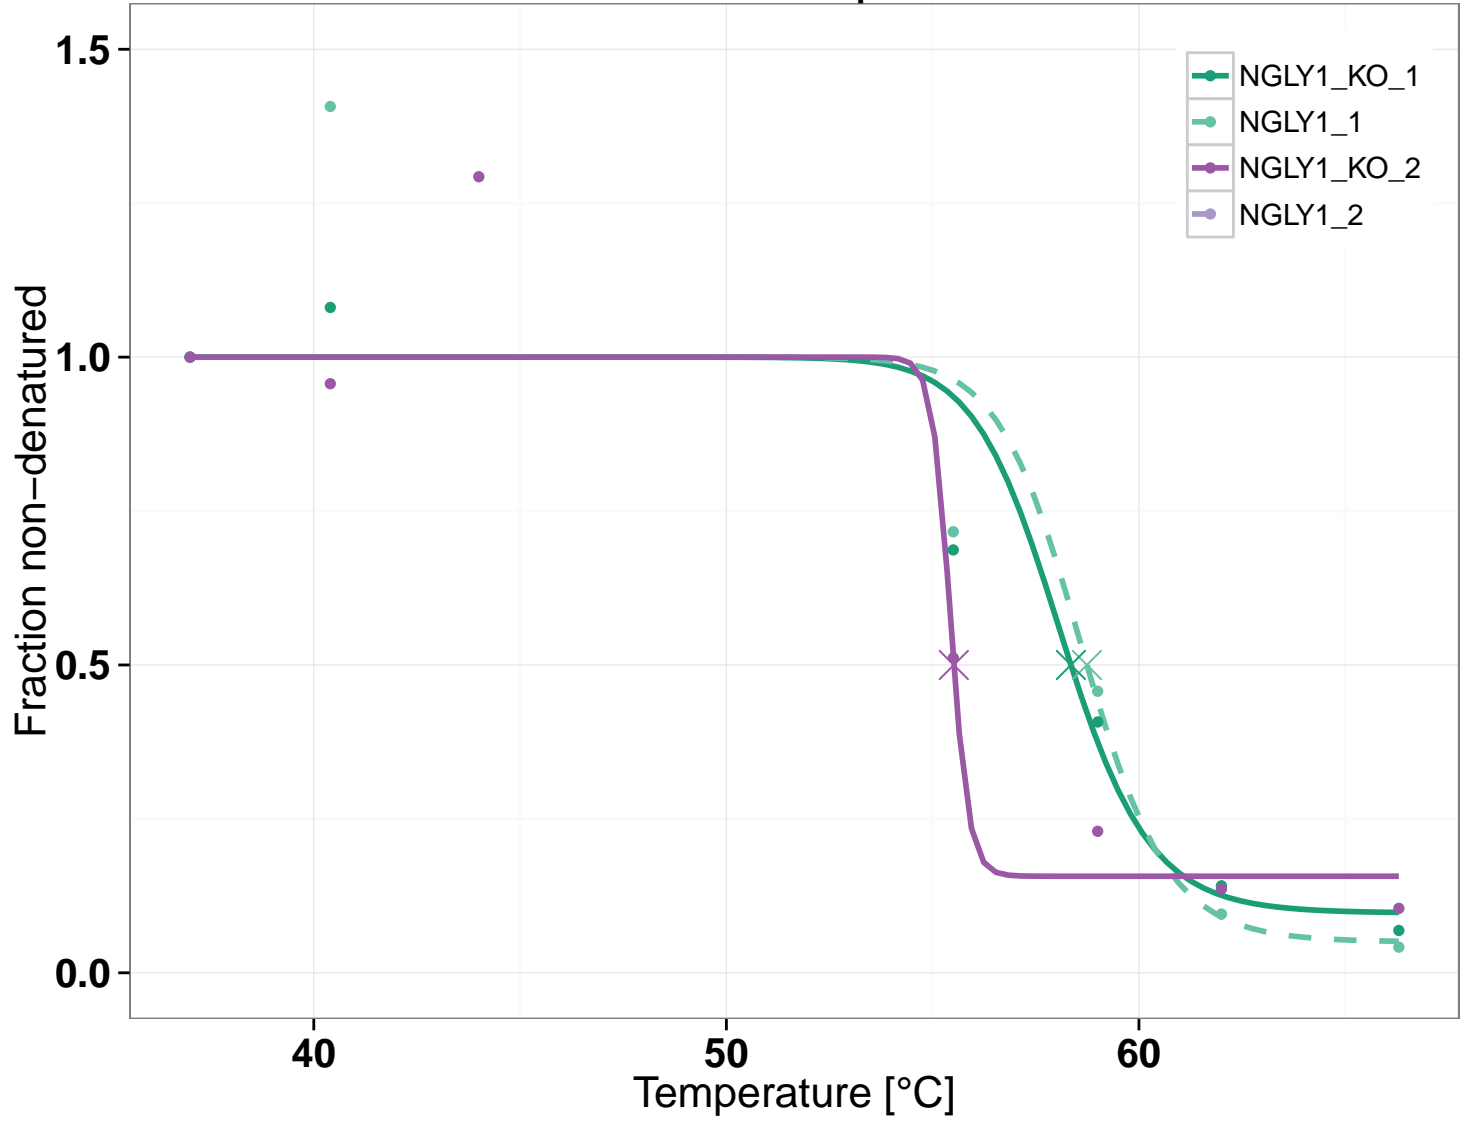

|            | meltPoint | slope | plateau | R2   |
|------------|-----------|-------|---------|------|
| NGLY1_KO_1 | 58.35     | -0.21 | 0.1     | -0.1 |
| NGLY1_1    | 58.74     | -0.23 | 0.05    | -0.2 |
| NGLY1_KO_2 | 55.51     | -0.95 | 0.16    | 0.12 |
| NGLY1_2    | -         | -     | -       | -    |

Supplement: Supplementary file 4739 [file 1]

IPI00025792.2|SUPT3H

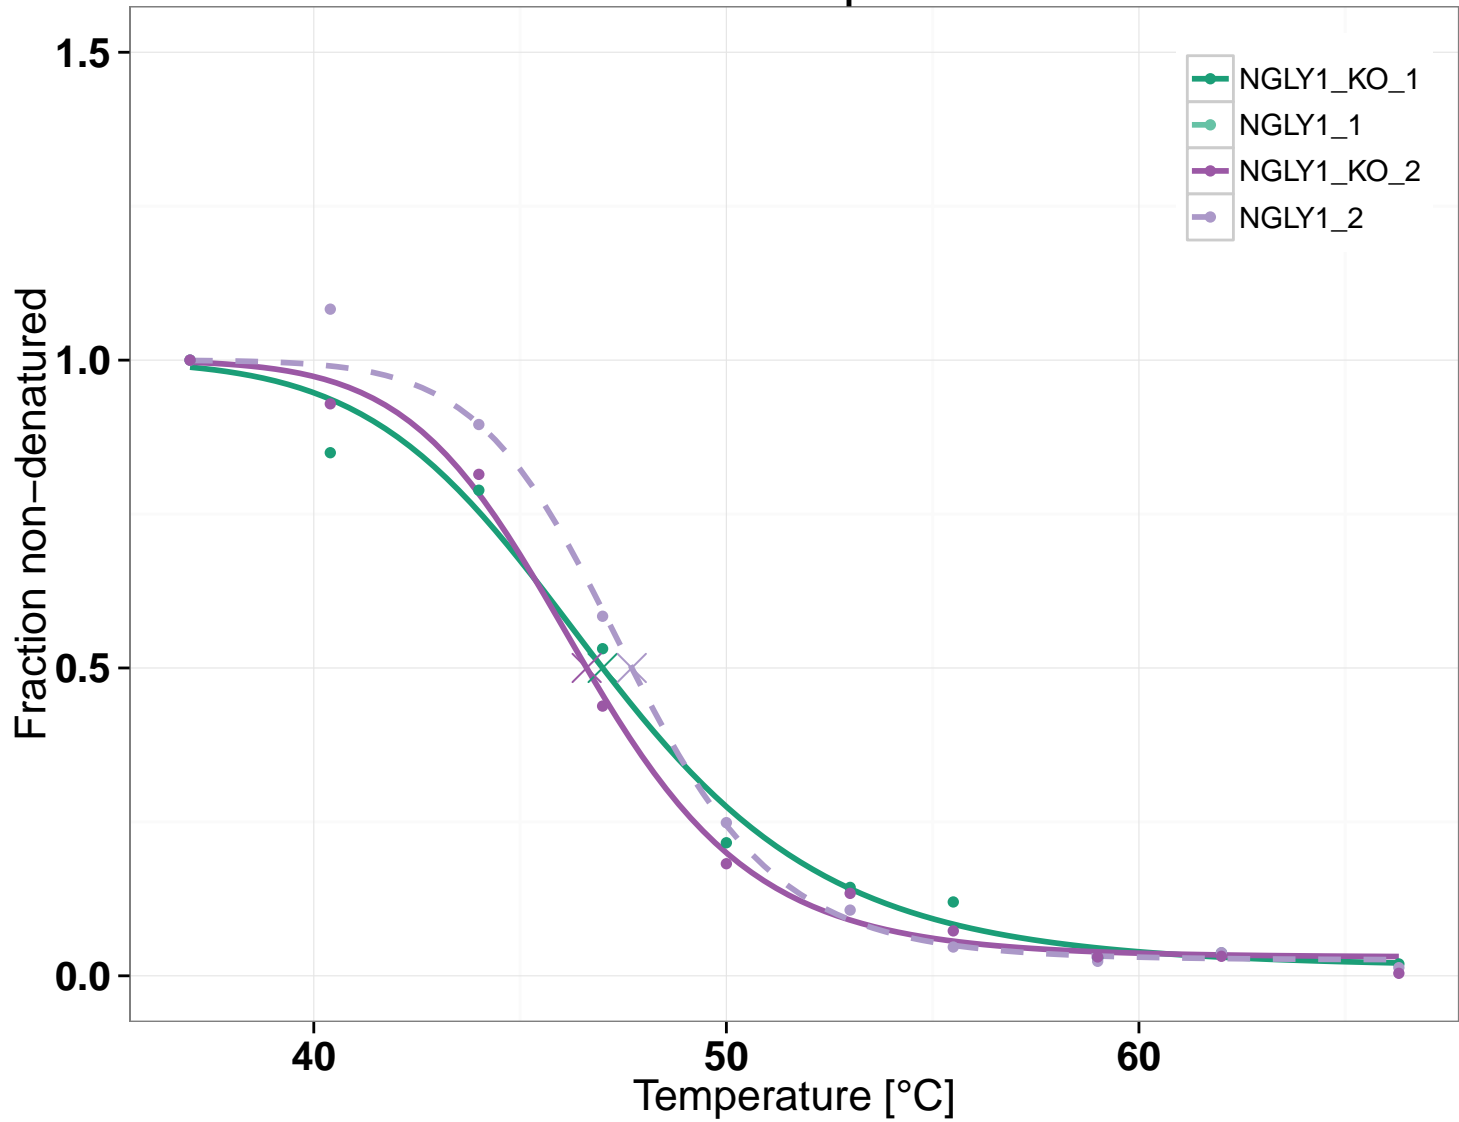

|            | meltPoint | slope  | plateau | R2   |
|------------|-----------|--------|---------|------|
| NGLY1_KO_1 | 47        | -0.088 | 0.01    | 0.99 |
| NGLY1_1    | -         | -      | -       | -    |
| NGLY1_KO_2 | 46.61     | -0.12  | 0.03    | 1    |
| NGLY1_2    | 47.71     | -0.13  | 0.03    | 0.99 |

Supplement: Supplementary file 4740 [file 1]

# IPI00908404.1|GNS

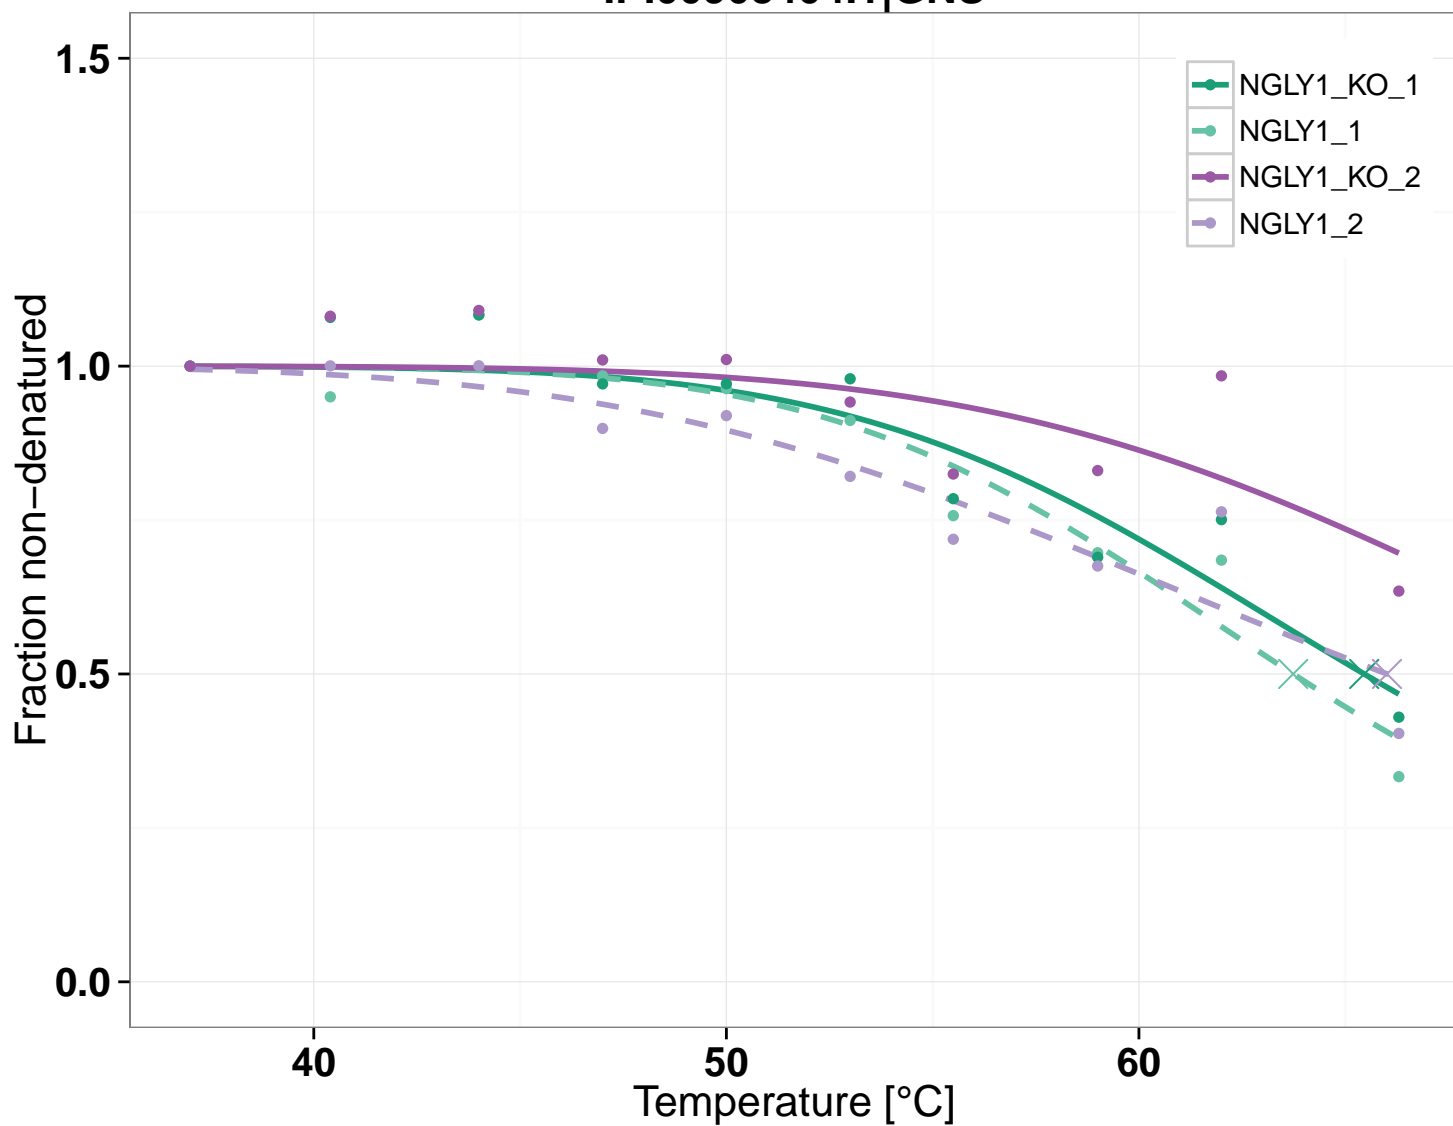

|            | meltPoint | slope  | plateau | R2   |
|------------|-----------|--------|---------|------|
| NGLY1_KO_1 | 65.46     | -0.041 | 0       | 0.89 |
| NGLY1_1    | 63.74     | -0.045 | 0       | 0.93 |
| NGLY1_KO_2 | -         | -      | 0       | 0.64 |
| NGLY1_2    | 66.01     | -0.028 | 0       | 0.87 |

Supplement: Supplementary file 4741 [file 1]

# IPI00513791.2|DOCK7

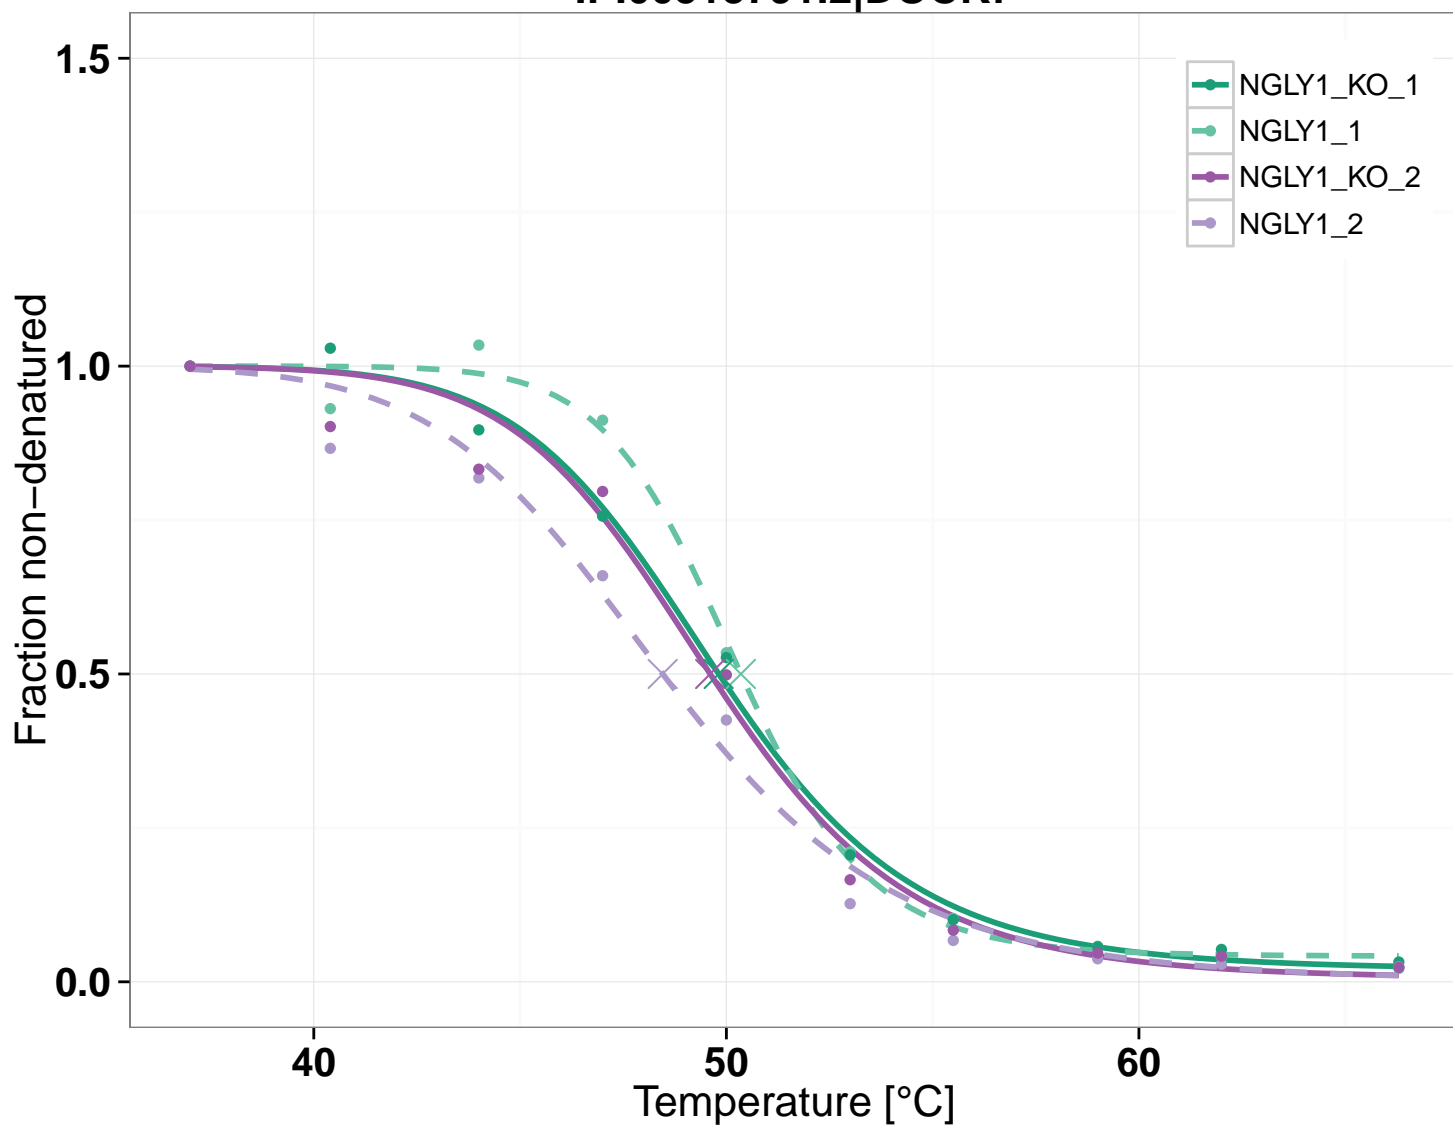

|            | meltPoint | slope  | plateau | R2   |
|------------|-----------|--------|---------|------|
| NGLY1_KO_1 | 49.81     | -0.1   | 0.02    | 1    |
| NGLY1_1    | 50.35     | -0.15  | 0.04    | 1    |
| NGLY1_KO_2 | 49.61     | -0.1   | 0       | 0.98 |
| NGLY1_2    | 48.46     | -0.089 | 0       | 0.99 |

Supplement: Supplementary file 4742 [file 1]

IPI00908461.1|ZCCHC17

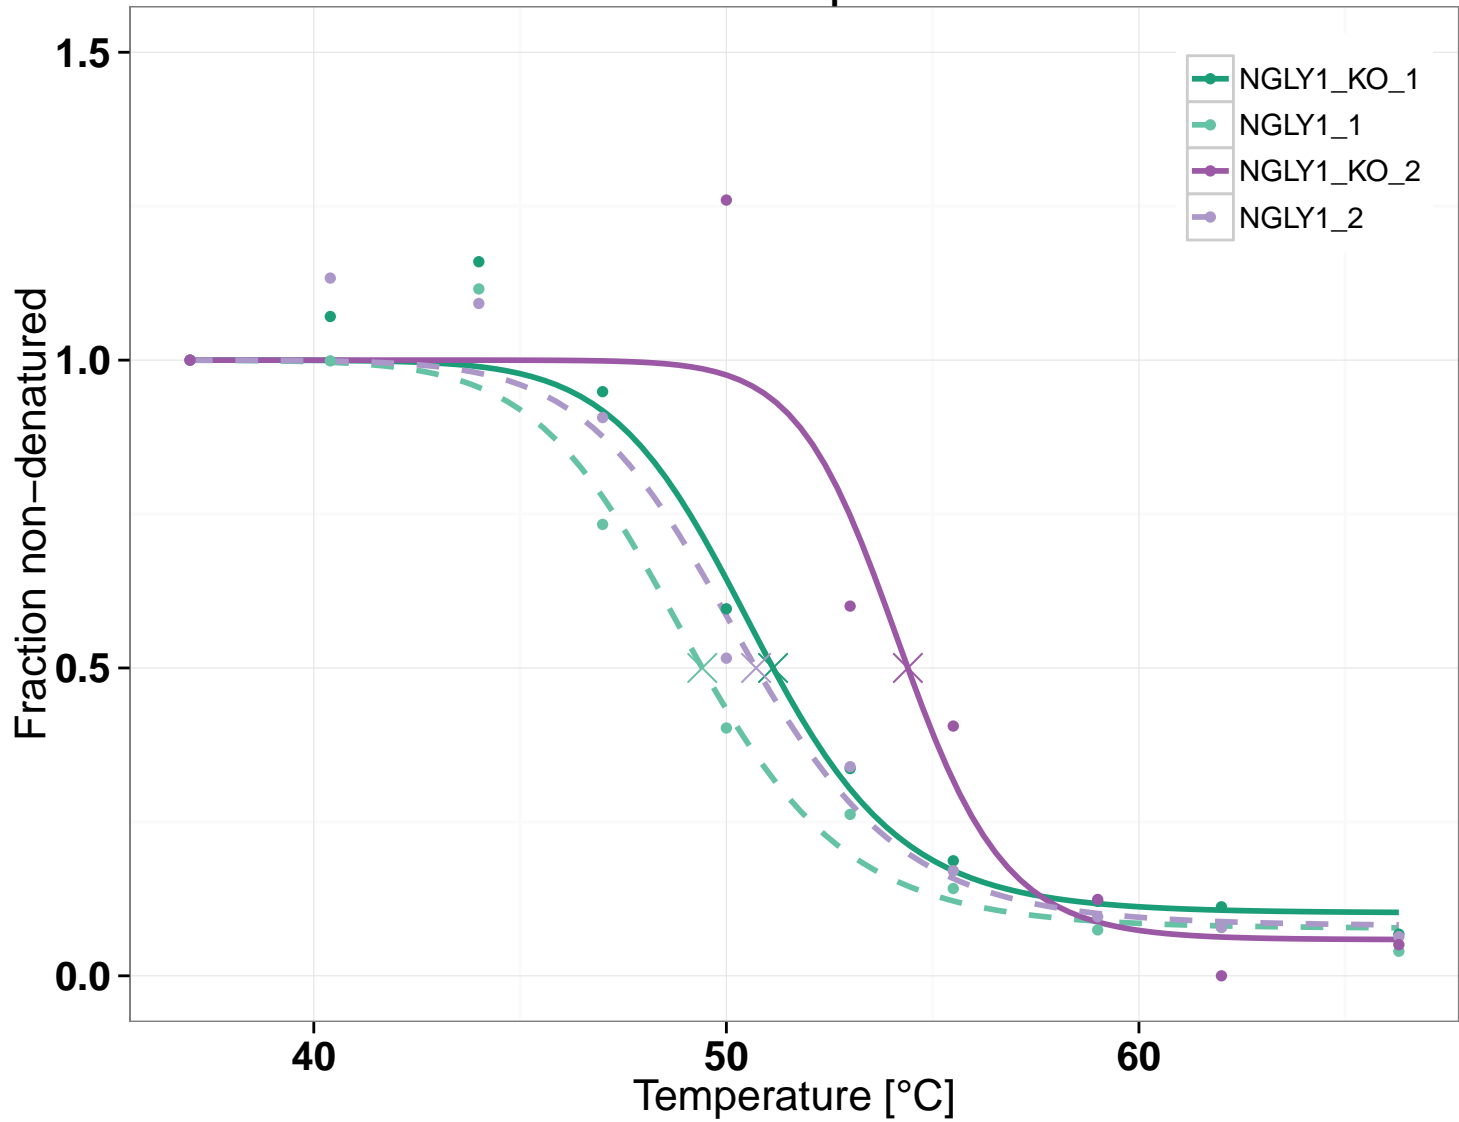

|            | meltPoint | slope | plateau | R2   |
|------------|-----------|-------|---------|------|
| NGLY1_KO_1 | 51.13     | -0.13 | 0.1     | 0.98 |
| NGLY1_1    | 49.42     | -0.12 | 0.08    | 0.98 |
| NGLY1_KO_2 | 54.4      | -0.19 | 0.06    | -0.1 |
| NGLY1_2    | 50.72     | -0.12 | 0.08    | 0.98 |

Supplement: Supplementary file 4743 [file 1]

IPI00062866.3|ZC3HAV1L

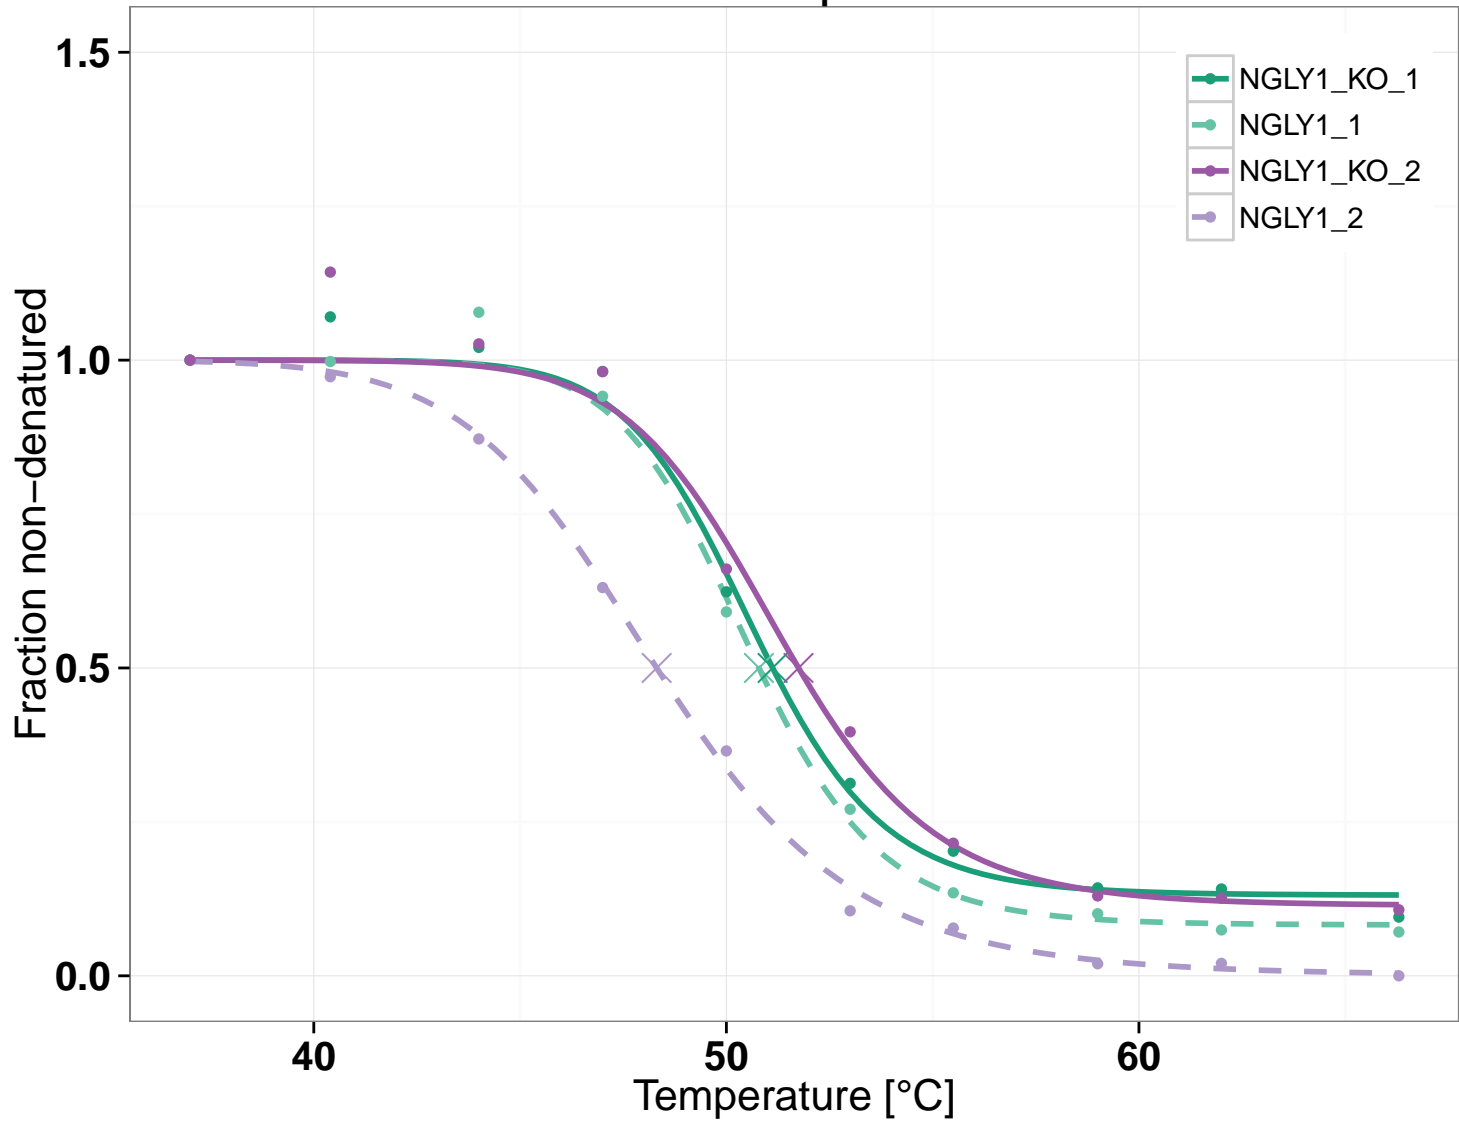

|            | meltPoint | slope | plateau | R2   |
|------------|-----------|-------|---------|------|
| NGLY1_KO_1 | 51.12     | -0.14 | 0.13    | 0.99 |
| NGLY1_1    | 50.79     | -0.15 | 0.08    | 0.99 |
| NGLY1_KO_2 | 51.75     | -0.12 | 0.11    | 0.98 |
| NGLY1_2    | 48.31     | -0.11 | 0       | 1    |

Supplement: Supplementary file 4744 [file 1]

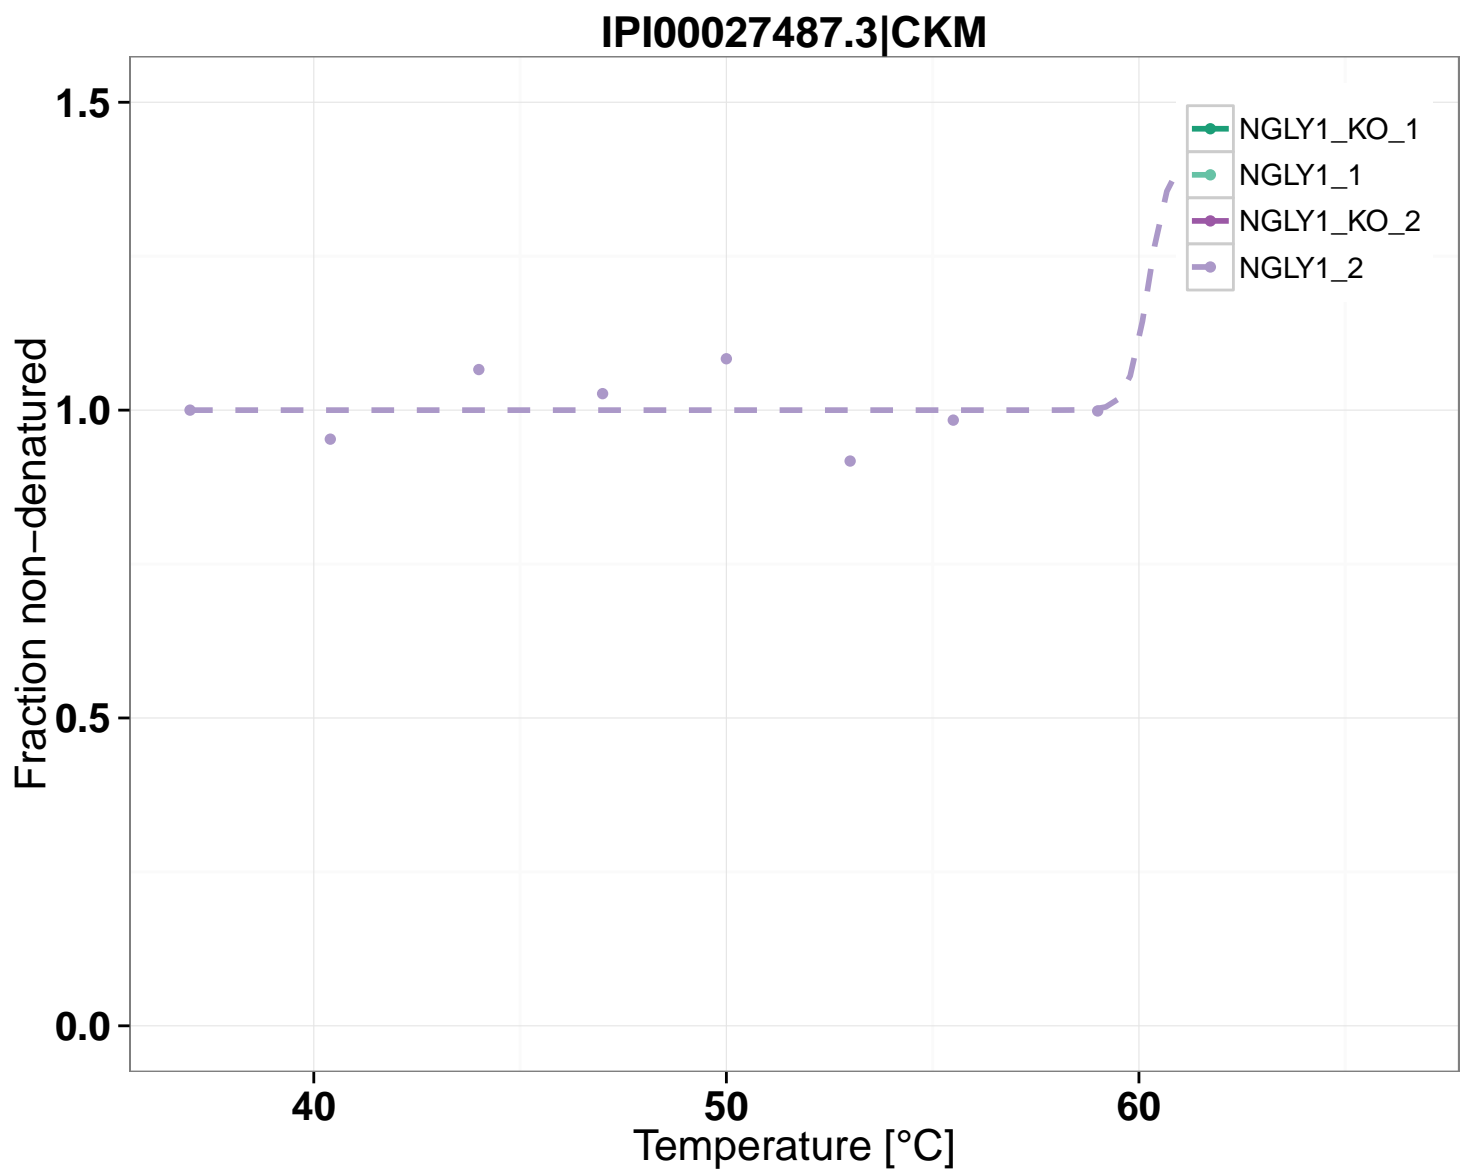

|            | meltPoint | slope | plateau | R2   |
|------------|-----------|-------|---------|------|
| NGLY1_KO_1 | —         | —     | —       | —    |
| NGLY1_1    | —         | —     | —       | —    |
| NGLY1_KO_2 | —         | —     | —       | —    |
| NGLY1_2    | —         | 0.43  | 1.41    | 0.92 |

Supplement: Supplementary file 4745 [file 1]

# IPI00220567.5|MTHFS

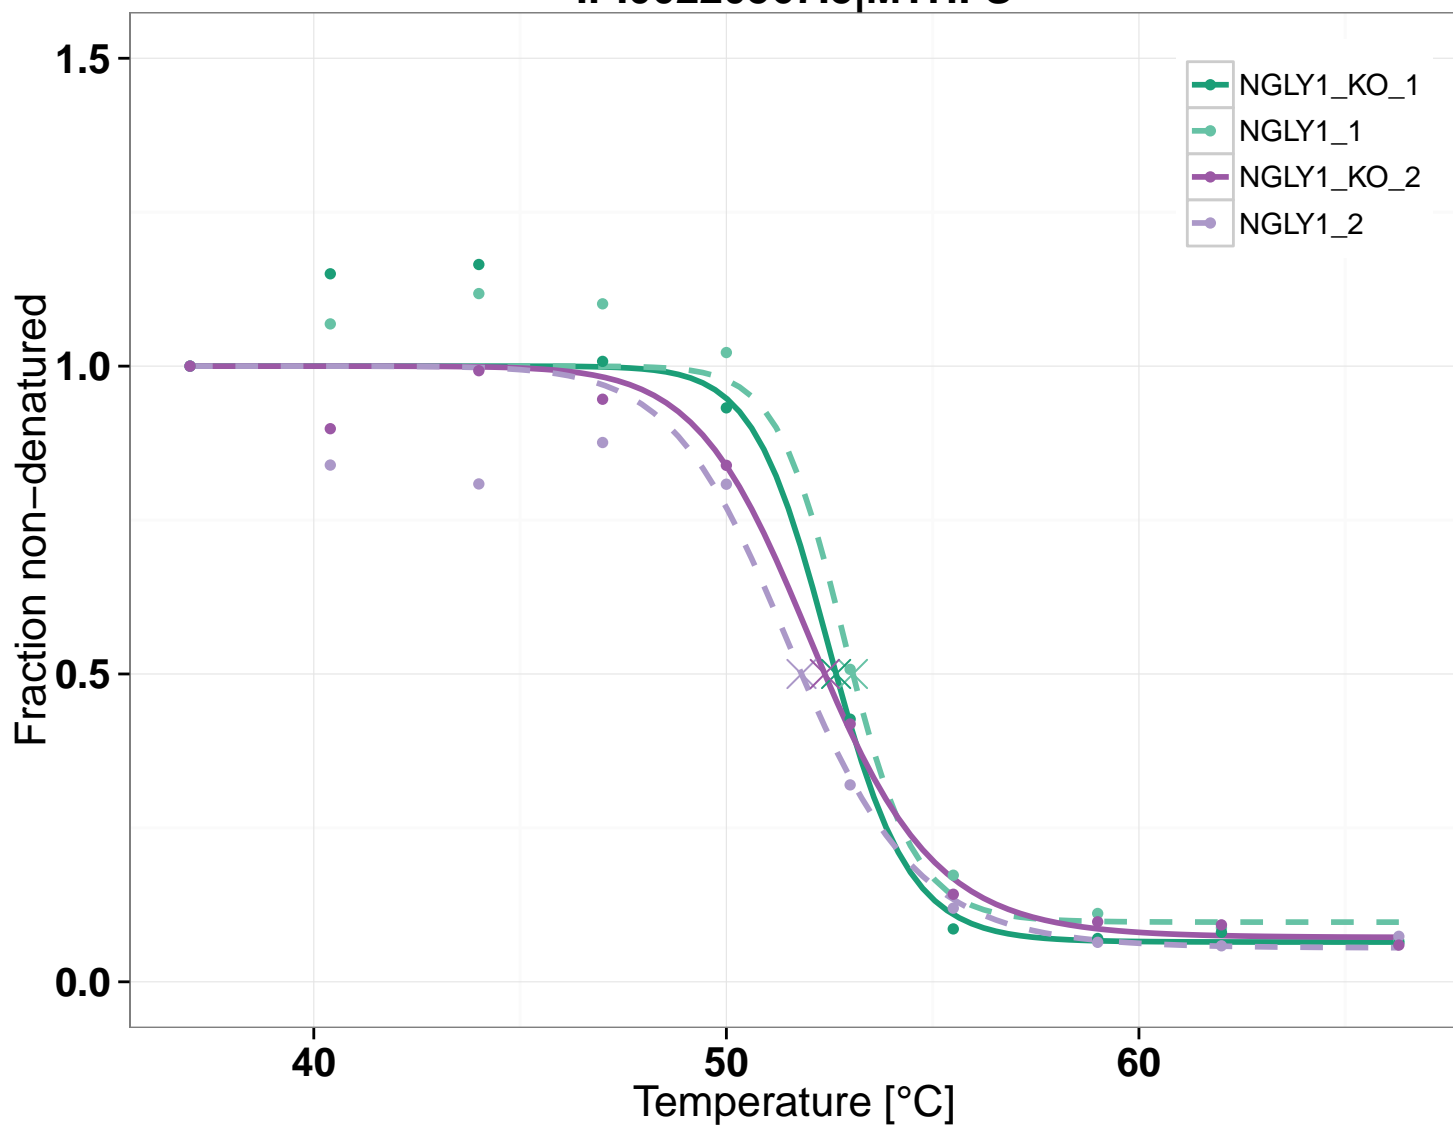

|            | meltPoint | slope | plateau | R2   |
|------------|-----------|-------|---------|------|
| NGLY1_KO_1 | 52.66     | -0.25 | 0.06    | 0.98 |
| NGLY1_1    | 53.07     | -0.27 | 0.1     | 0.98 |
| NGLY1_KO_2 | 52.39     | -0.16 | 0.07    | 0.99 |
| NGLY1_2    | 51.82     | -0.16 | 0.05    | 0.95 |

Supplement: Supplementary file 4746 [file 1]

# IPI00218852.3|VIL1

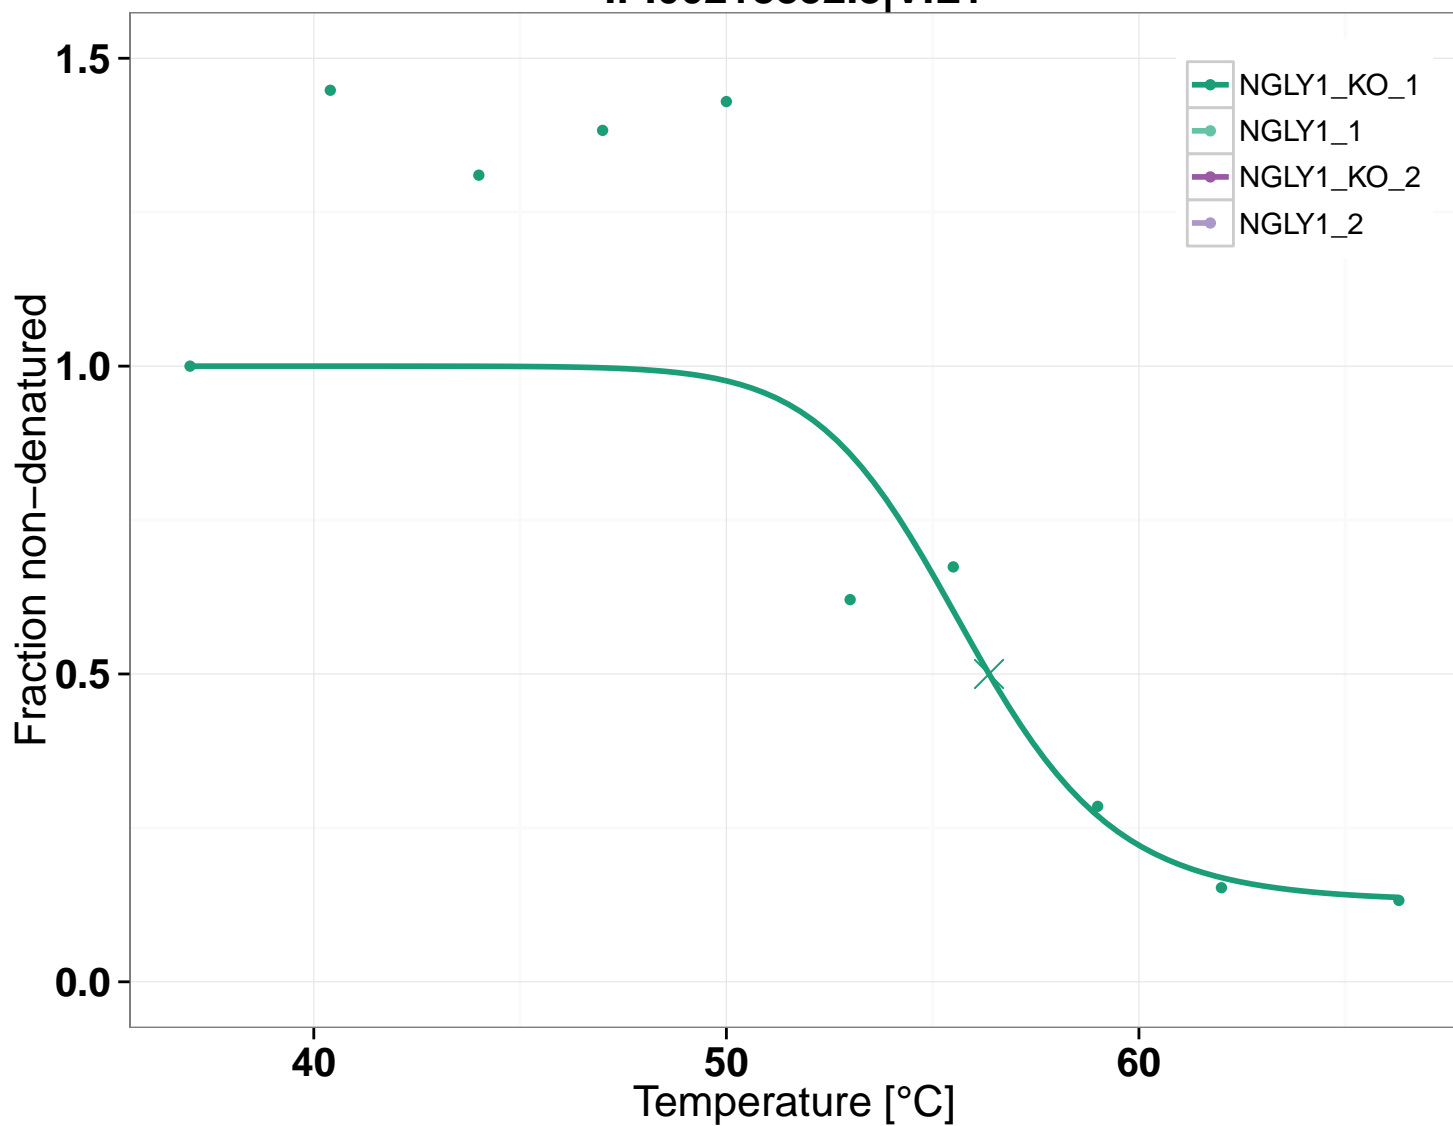

|            | meltPoint | slope | plateau | R2   |
|------------|-----------|-------|---------|------|
| NGLY1_KO_1 | 56.37     | -0.12 | 0.13    | 0.73 |
| NGLY1_1    | —         | —     | —       | —    |
| NGLY1_KO_2 | —         | —     | —       | —    |
| NGLY1_2    | —         | —     | —       | —    |

Supplement: Supplementary file 4747 [file 1]

IPI00748037.2|NAPB

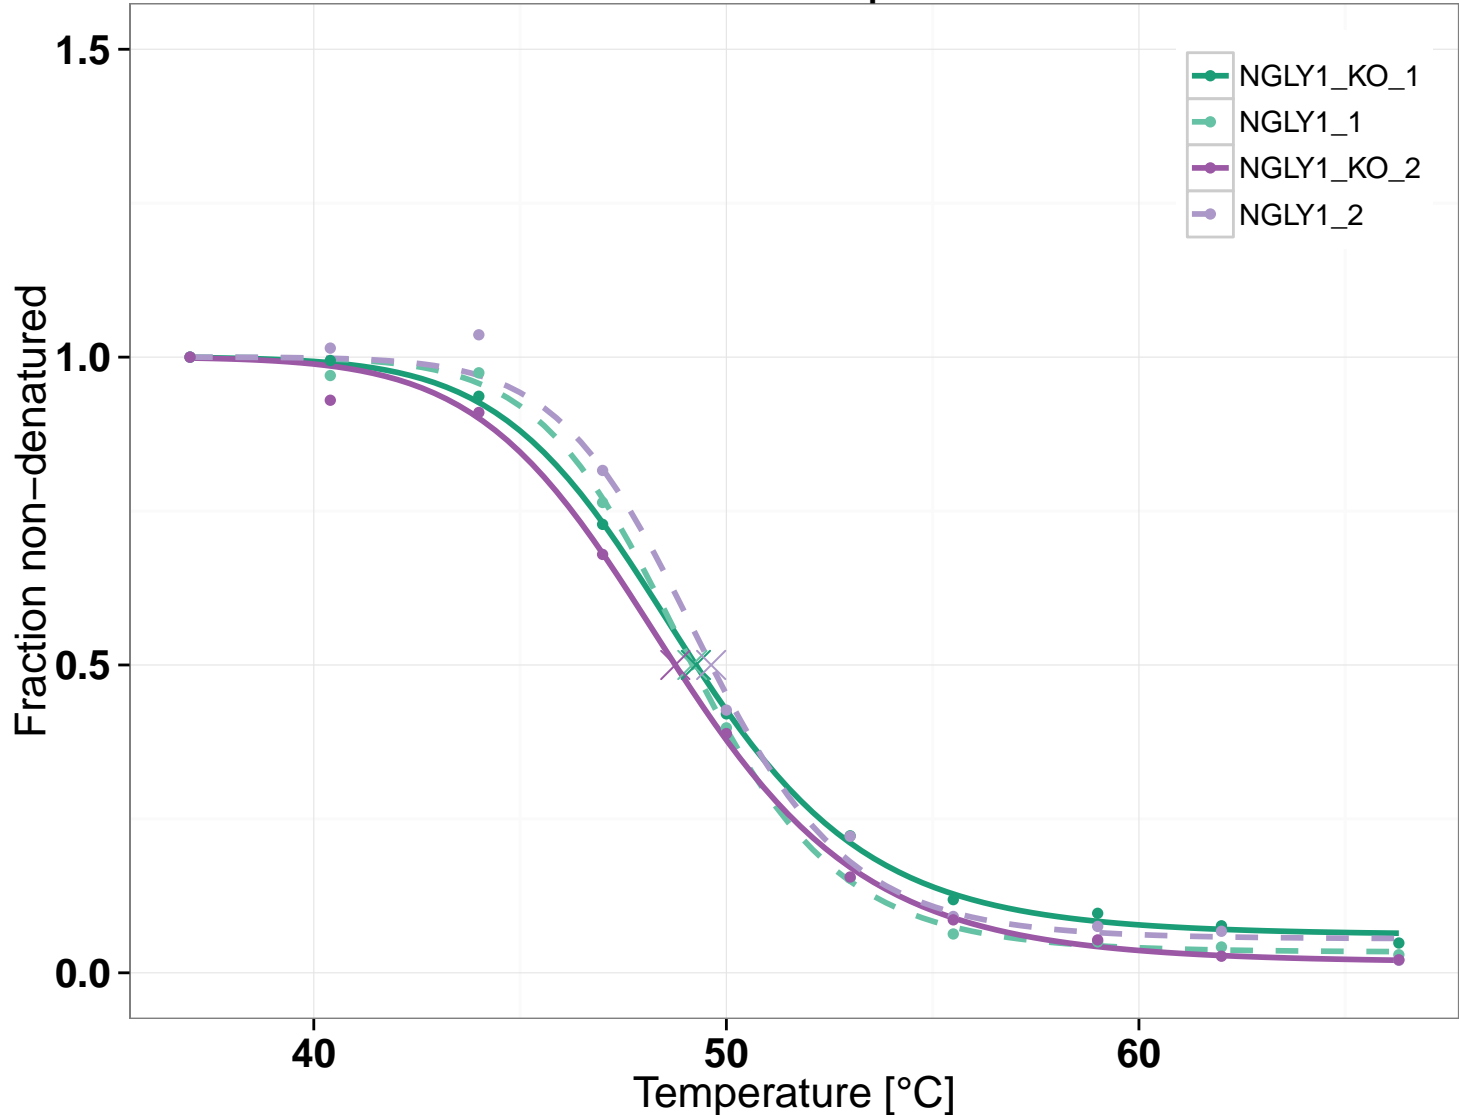

|            | meltPoint | slope | plateau | R2 |
|------------|-----------|-------|---------|----|
| NGLY1_KO_1 | 49.26     | -0.11 | 0.06    | 1  |
| NGLY1_1    | 49.17     | -0.13 | 0.03    | 1  |
| NGLY1_KO_2 | 48.76     | -0.1  | 0.02    | 1  |
| NGLY1_2    | 49.63     | -0.13 | 0.06    | 1  |

Supplement: Supplementary file 4748 [file 1]

# IPI00300805.4|LRSAM1

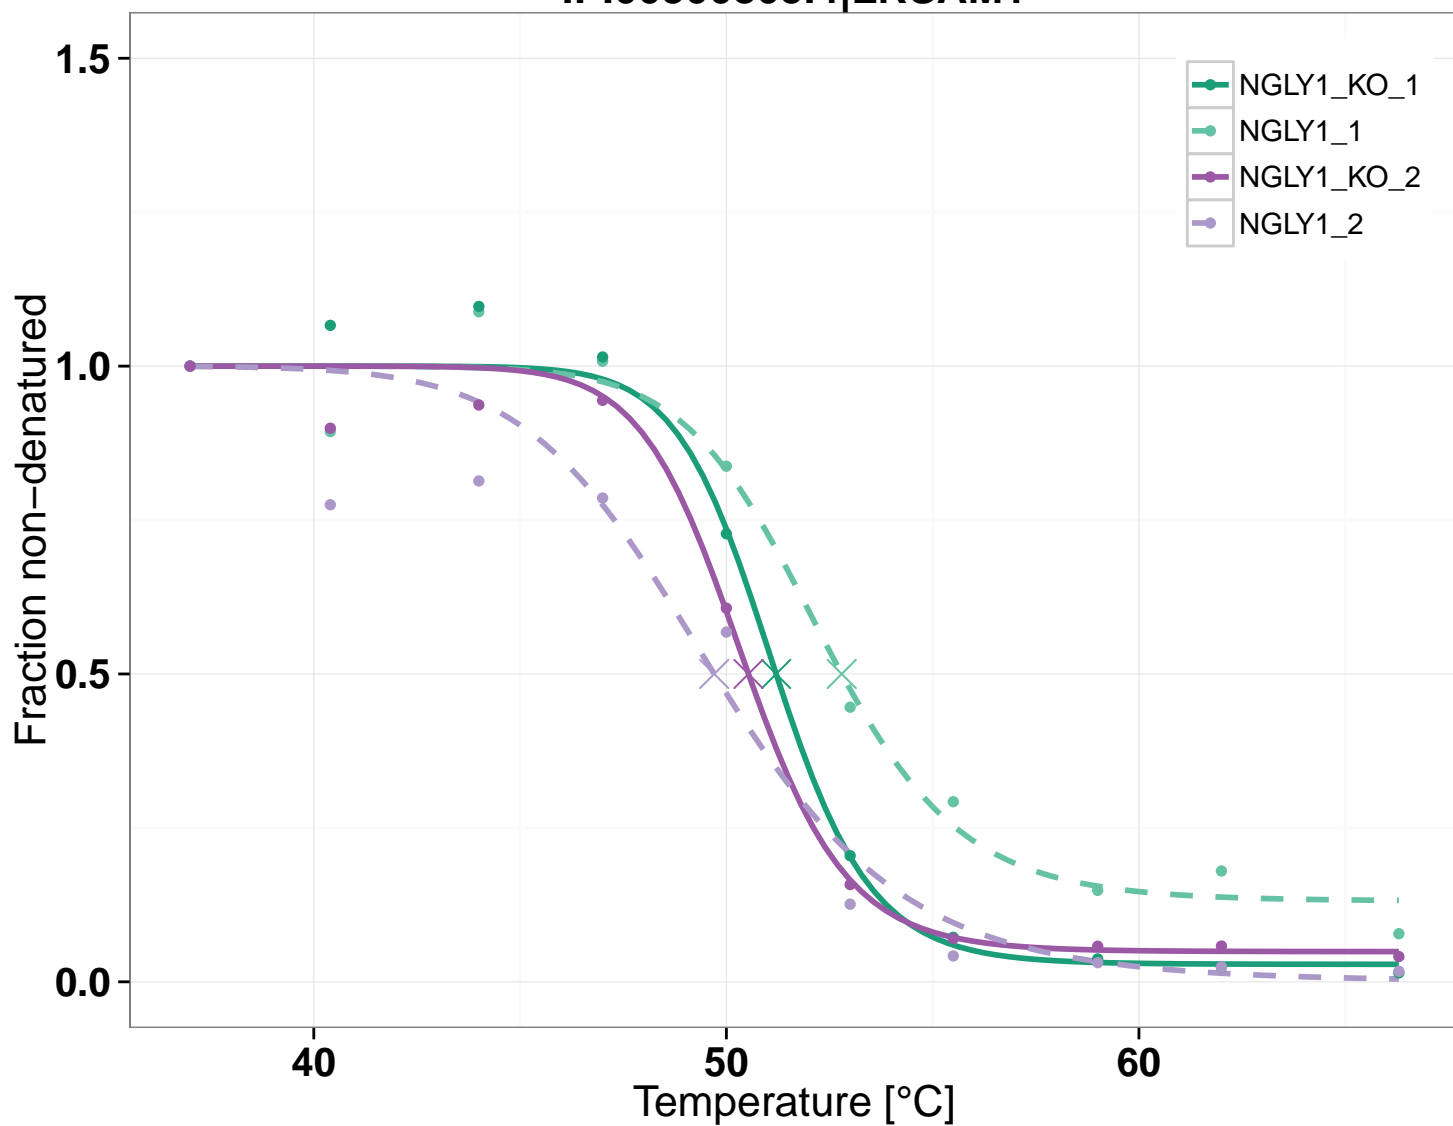

|            | meltPoint | slope | plateau | R2   |
|------------|-----------|-------|---------|------|
| NGLY1_KO_1 | 51.21     | -0.21 | 0.03    | 0.99 |
| NGLY1_1    | 52.8      | -0.13 | 0.13    | 0.98 |
| NGLY1_KO_2 | 50.54     | -0.19 | 0.05    | 0.99 |
| NGLY1_2    | 49.71     | -0.11 | 0       | 0.94 |

Supplement: Supplementary file 4749 [file 1]

# IPI00479529.2|KIF13B

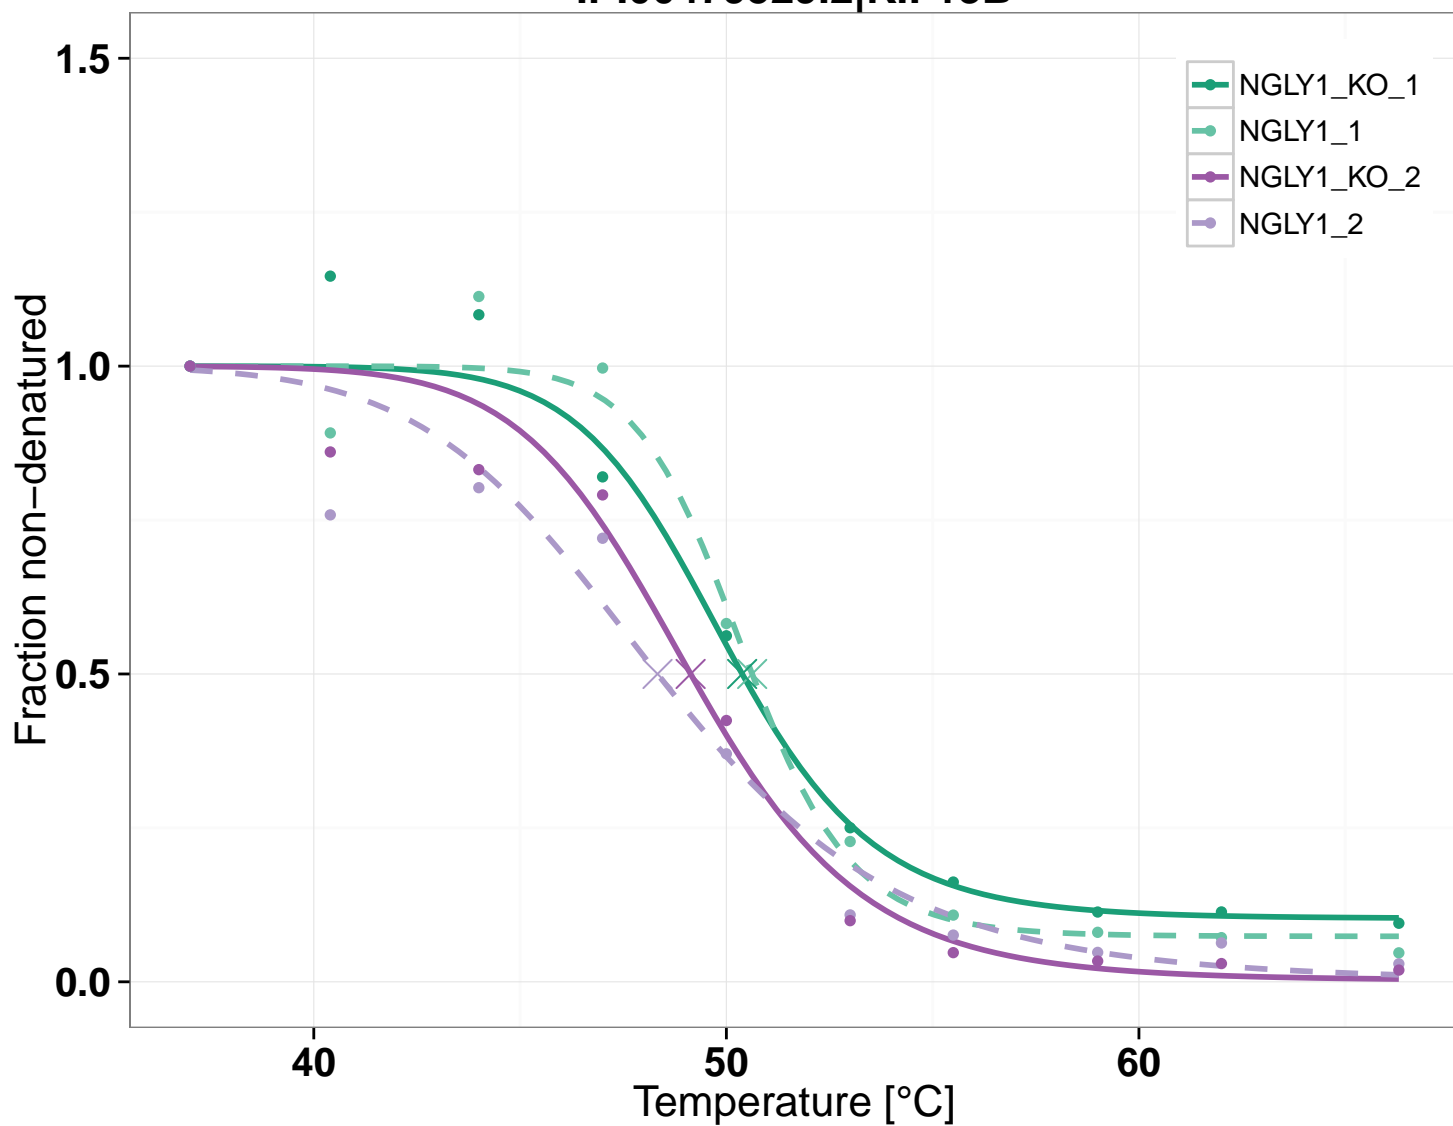

|            | meltPoint | slope  | plateau | R2   |
|------------|-----------|--------|---------|------|
| NGLY1_KO_1 | 50.38     | -0.12  | 0.1     | 0.98 |
| NGLY1_1    | 50.63     | -0.18  | 0.07    | 0.98 |
| NGLY1_KO_2 | 49.13     | -0.12  | 0       | 0.98 |
| NGLY1_2    | 48.33     | -0.087 | 0       | 0.95 |

Supplement: Supplementary file 4750 [file 1]

IPI00746666.6|BET1L

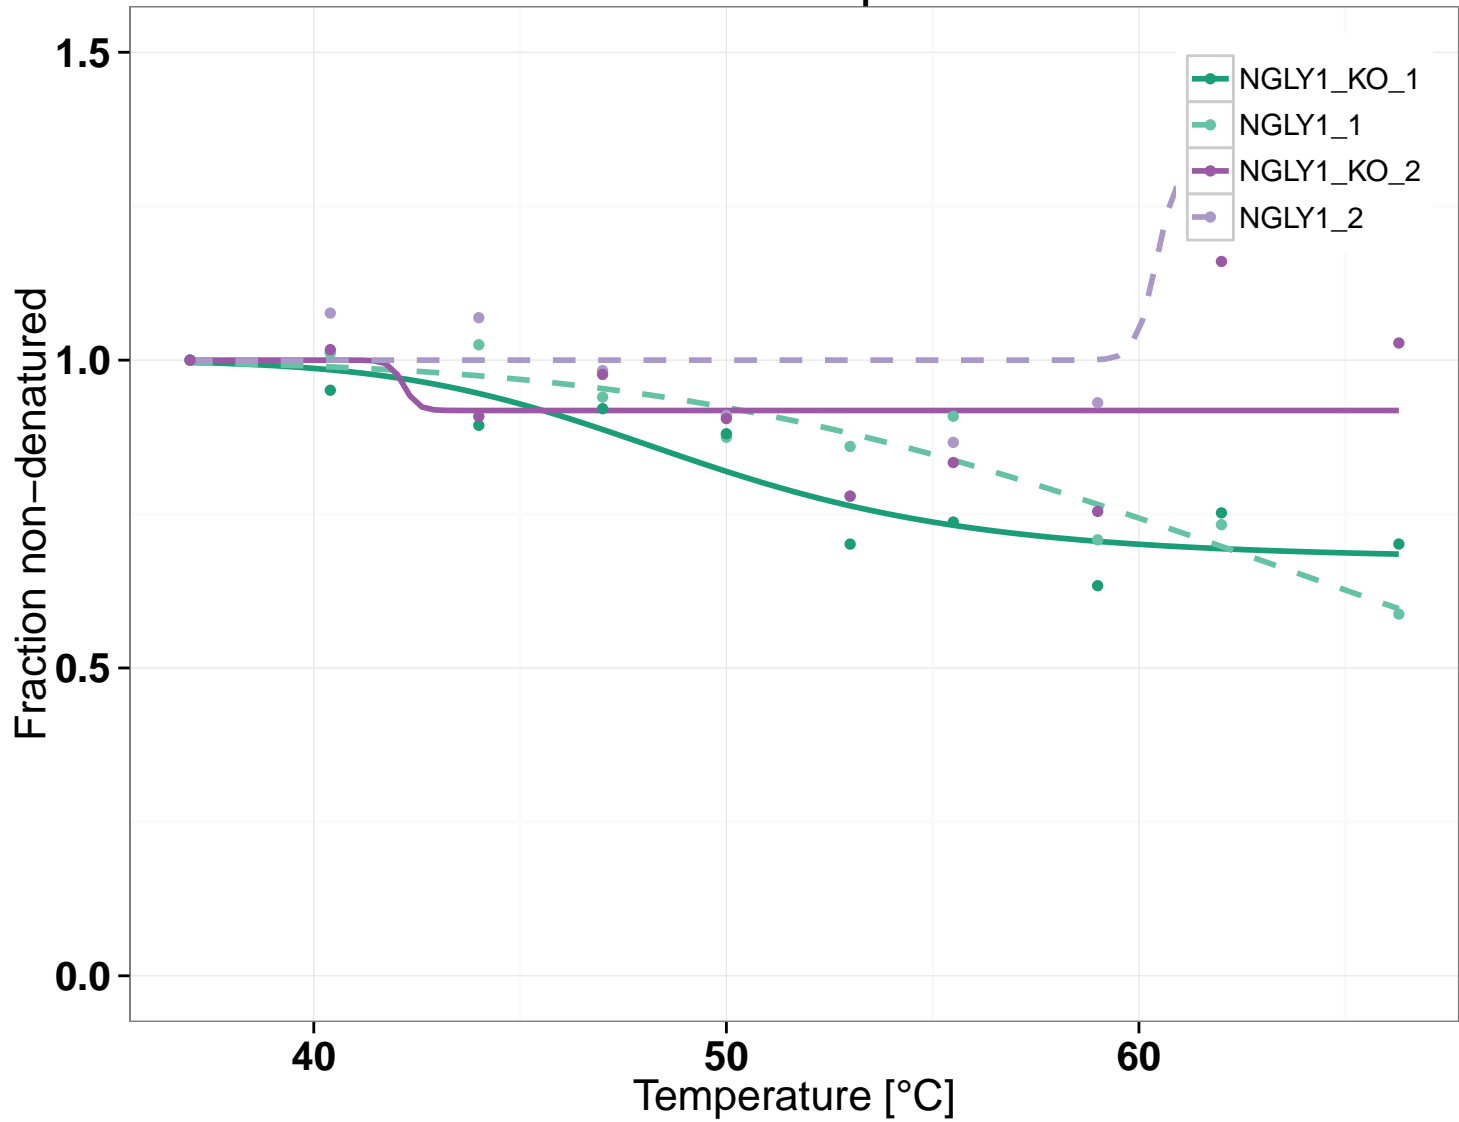

|            | meltPoint | slope  | plateau | R2   |
|------------|-----------|--------|---------|------|
| NGLY1_KO_1 | -         | -0.023 | 0.68    | 0.85 |
| NGLY1_1    | -         | -0.024 | 0       | 0.92 |
| NGLY1_KO_2 | -         | -0.12  | 0.92    | 0.09 |
| NGLY1_2    | -         | 0.33   | 1.32    | 0.64 |

Supplement: Supplementary file 4751 [file 1]

# IPI00328941.4|GBGT1

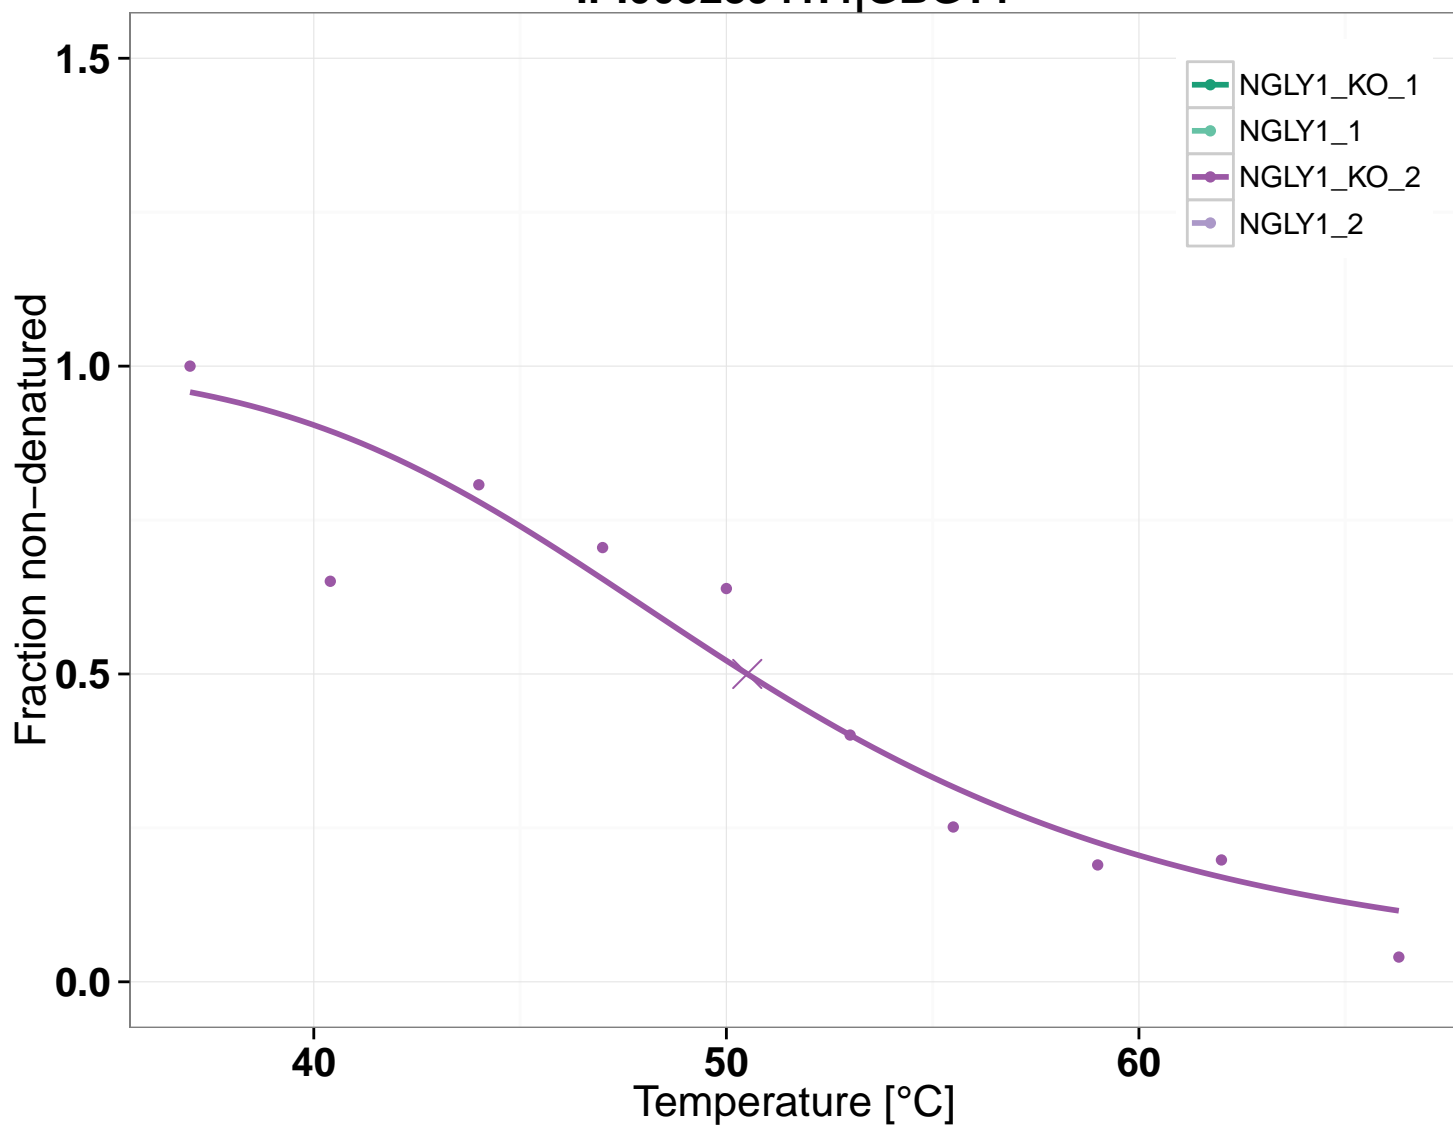

|            | meltPoint | slope  | plateau | R2  |
|------------|-----------|--------|---------|-----|
| NGLY1_KO_1 | —         | —      | —       | —   |
| NGLY1_1    | —         | —      | —       | —   |
| NGLY1_KO_2 | 50.51     | -0.045 | 0       | 0.9 |
| NGLY1_2    | —         | —      | —       | —   |

Supplement: Supplementary file 4752 [file 1]

IPI00011218.1|CSF1R

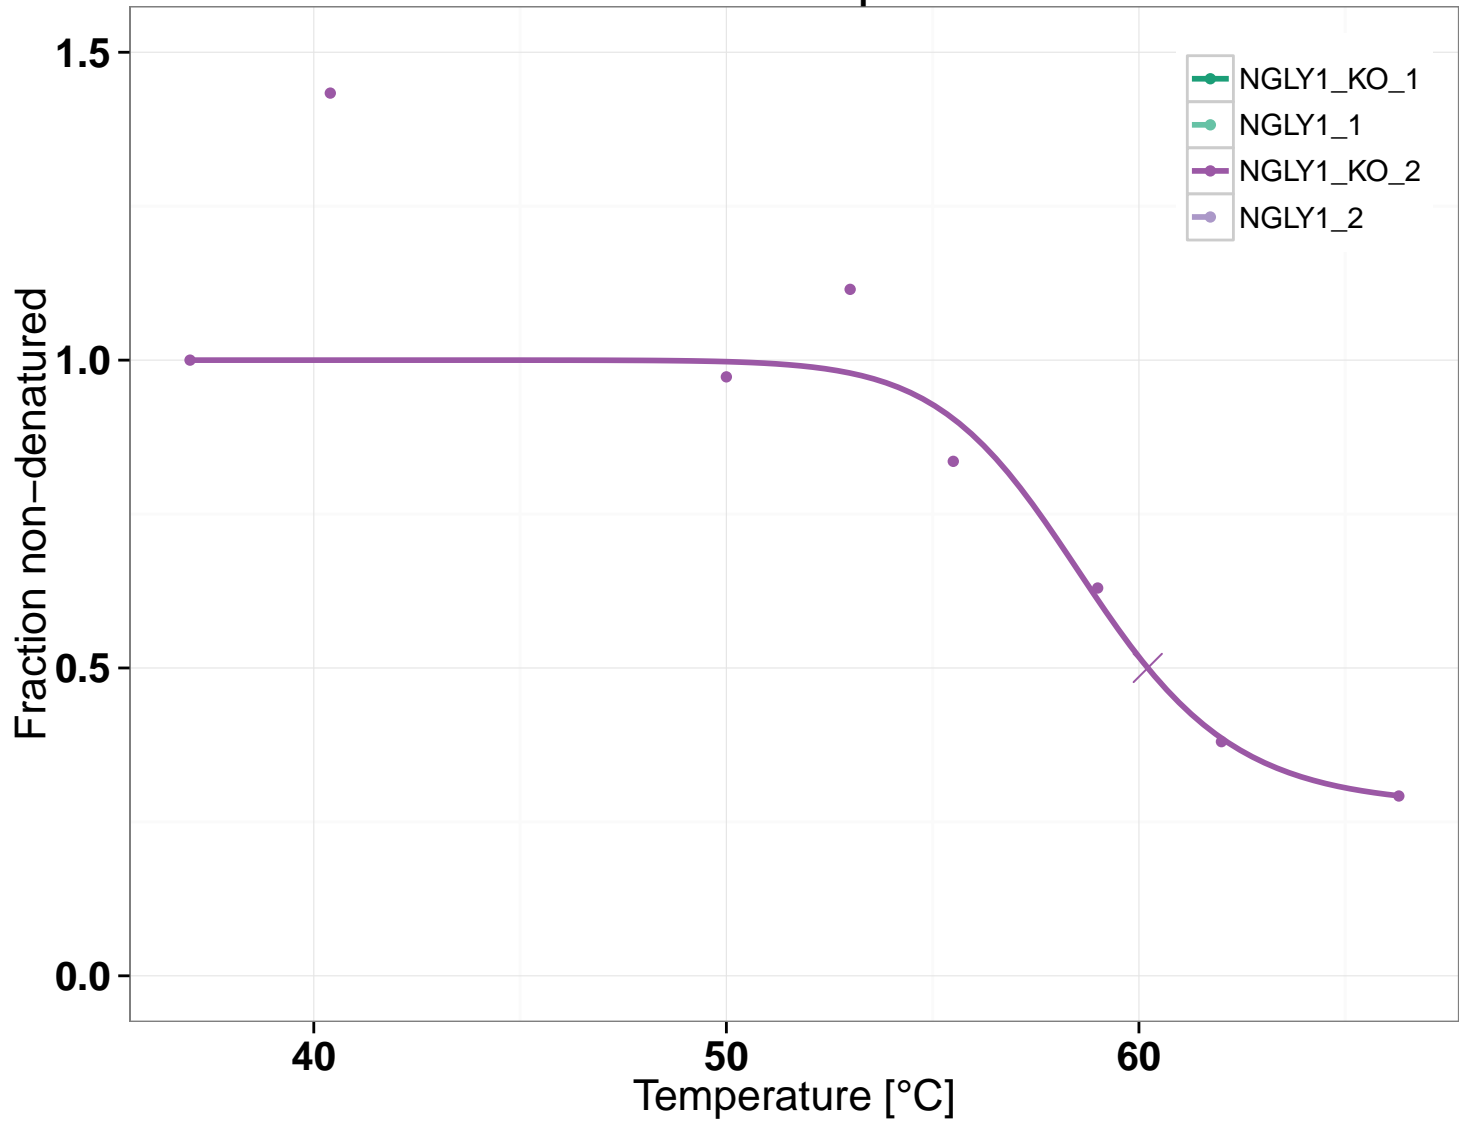

|            | meltPoint | slope | plateau | R2   |
|------------|-----------|-------|---------|------|
| NGLY1_KO_1 | —         | —     | —       | —    |
| NGLY1_1    | —         | —     | —       | —    |
| NGLY1_KO_2 | 60.21     | −0.1  | 0.27    | 0.57 |
| NGLY1_2    | —         | —     | —       | —    |

Supplement: Supplementary file 4753 [file 1]

IPI00914897.1|KIAA1602

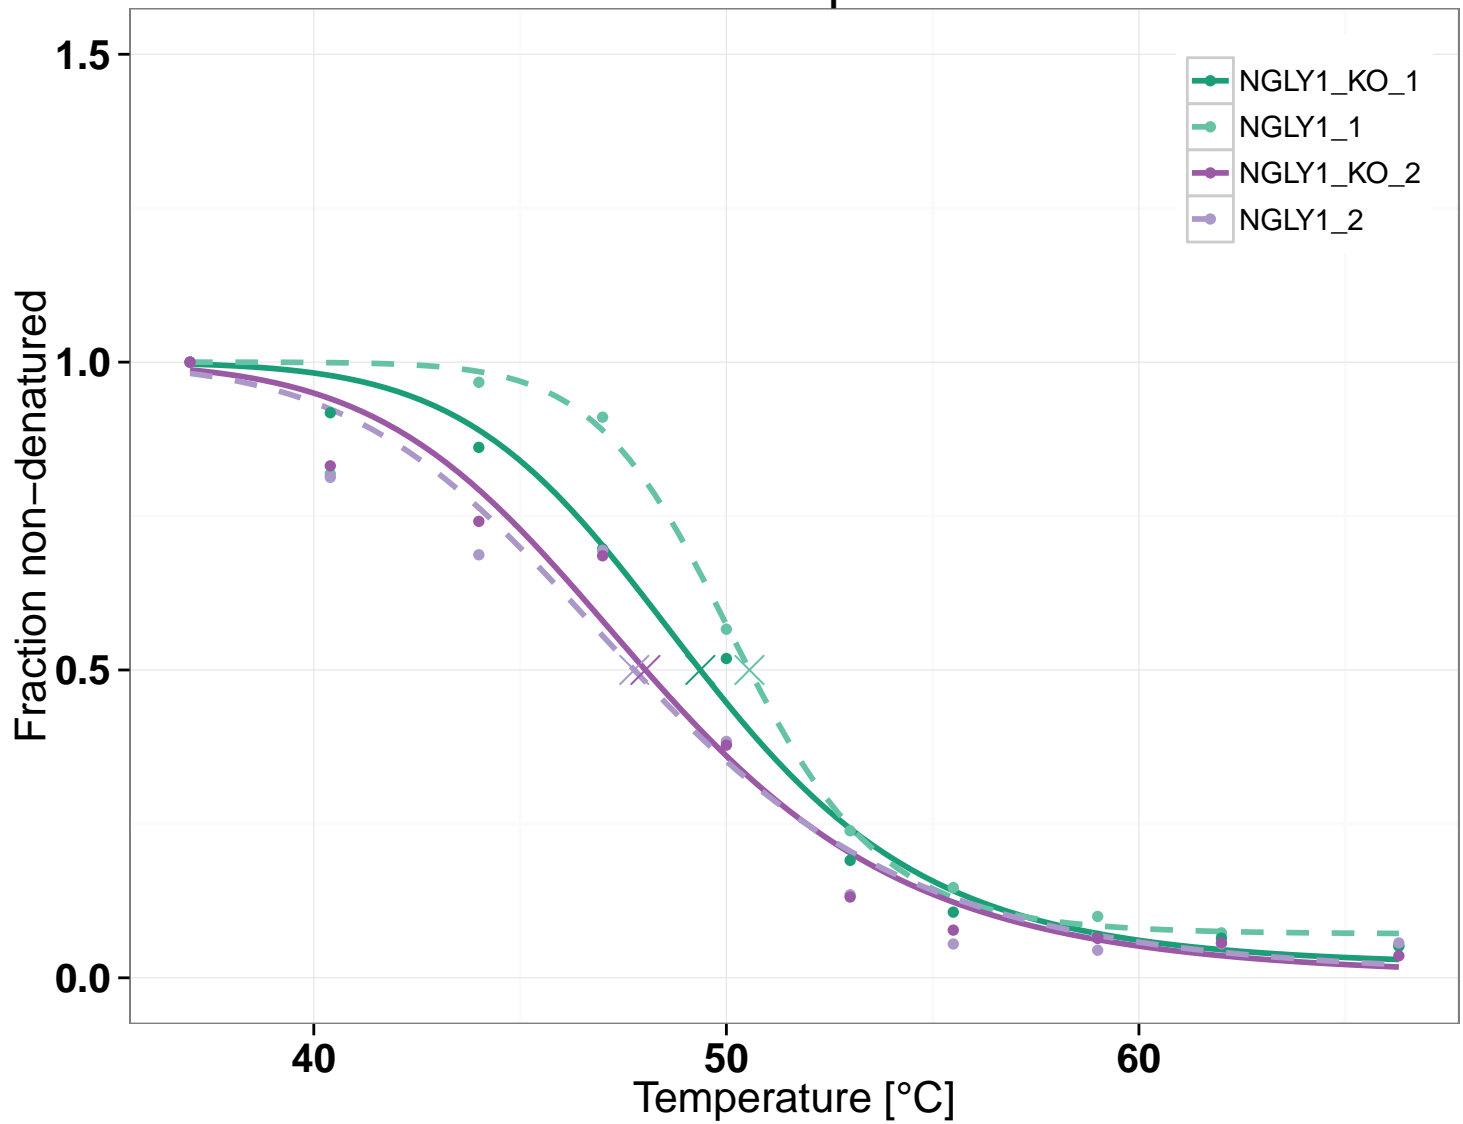

|            | meltPoint | slope  | plateau | R2   |
|------------|-----------|--------|---------|------|
| NGLY1_KO_1 | 49.37     | -0.087 | 0.02    | 0.99 |
| NGLY1_1    | 50.56     | -0.13  | 0.07    | 0.98 |
| NGLY1_KO_2 | 48.04     | -0.077 | 0       | 0.97 |
| NGLY1_2    | 47.77     | -0.073 | 0       | 0.96 |

Supplement: Supplementary file 4754 [file 1]

IPI00795627.2|MRPL3

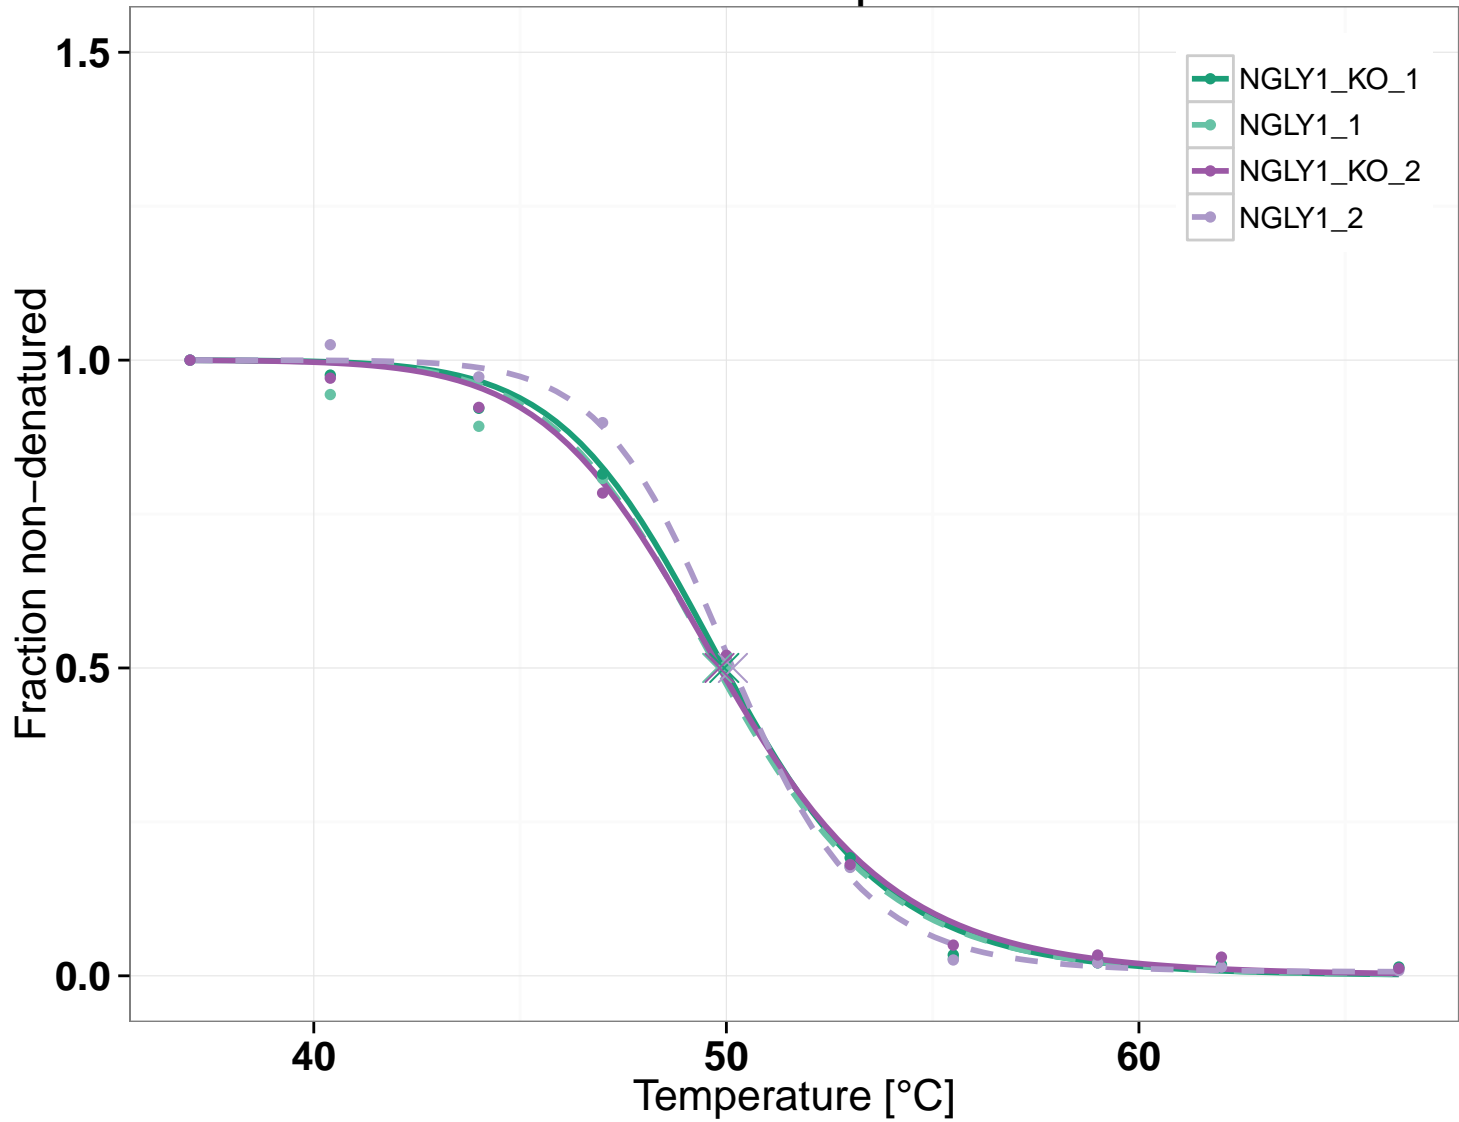

|            | meltPoint | slope | plateau | R2   |
|------------|-----------|-------|---------|------|
| NGLY1_KO_1 | 49.95     | -0.12 | 0       | 1    |
| NGLY1_1    | 49.78     | -0.12 | 0       | 0.99 |
| NGLY1_KO_2 | 49.83     | -0.12 | 0       | 1    |
| NGLY1_2    | 50.16     | -0.16 | 0.01    | 1    |

Supplement: Supplementary file 4755 [file 1]

# IPI00418366.5|ADCK5

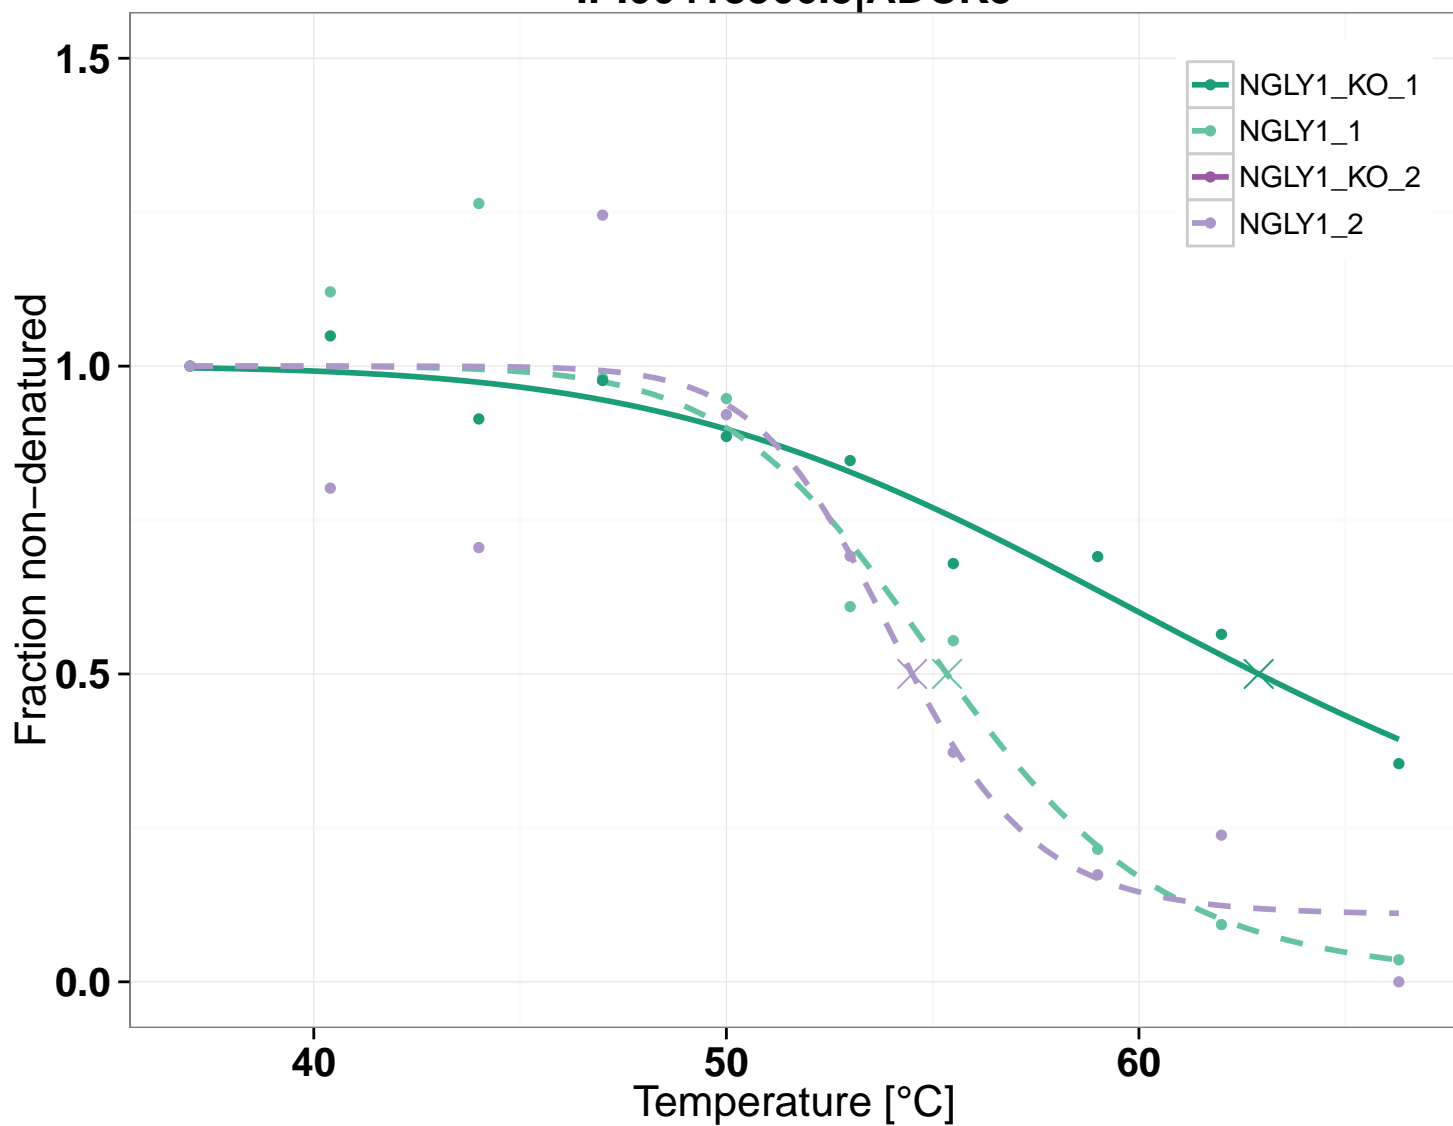

|            | meltPoint | slope  | plateau | R2   |
|------------|-----------|--------|---------|------|
| NGLY1_KO_1 | 62.9      | -0.035 | 0       | 0.95 |
| NGLY1_1    | 55.35     | -0.093 | 0       | 0.94 |
| NGLY1_KO_2 | -         | -      | -       | -    |
| NGLY1_2    | 54.5      | -0.13  | 0.11    | 0.85 |

Supplement: Supplementary file 4756 [file 1]

# IPI00514914.3|DIAPH2

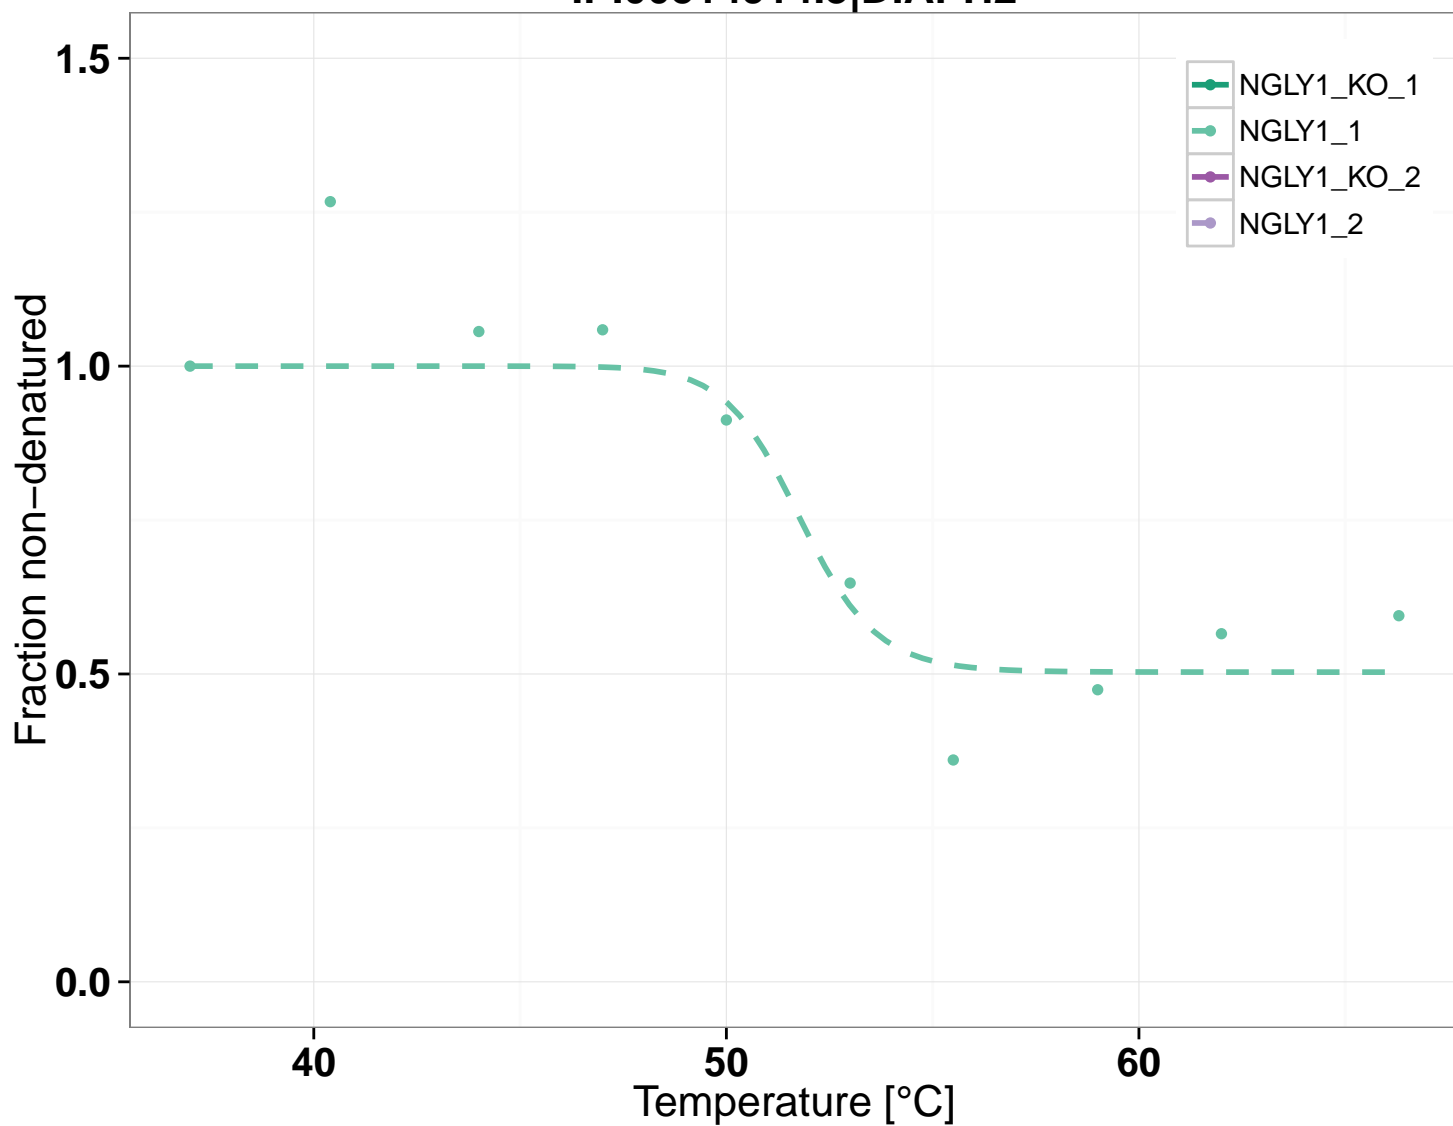

|            | meltPoint | slope | plateau | R2   |
|------------|-----------|-------|---------|------|
| NGLY1_KO_1 | —         | —     | —       | —    |
| NGLY1_1    | —         | -0.14 | 0.5     | 0.86 |
| NGLY1_KO_2 | —         | —     | —       | —    |
| NGLY1_2    | —         | —     | —       | —    |

Supplement: Supplementary file 4757 [file 1]

IPI00014307.4|MTMR2

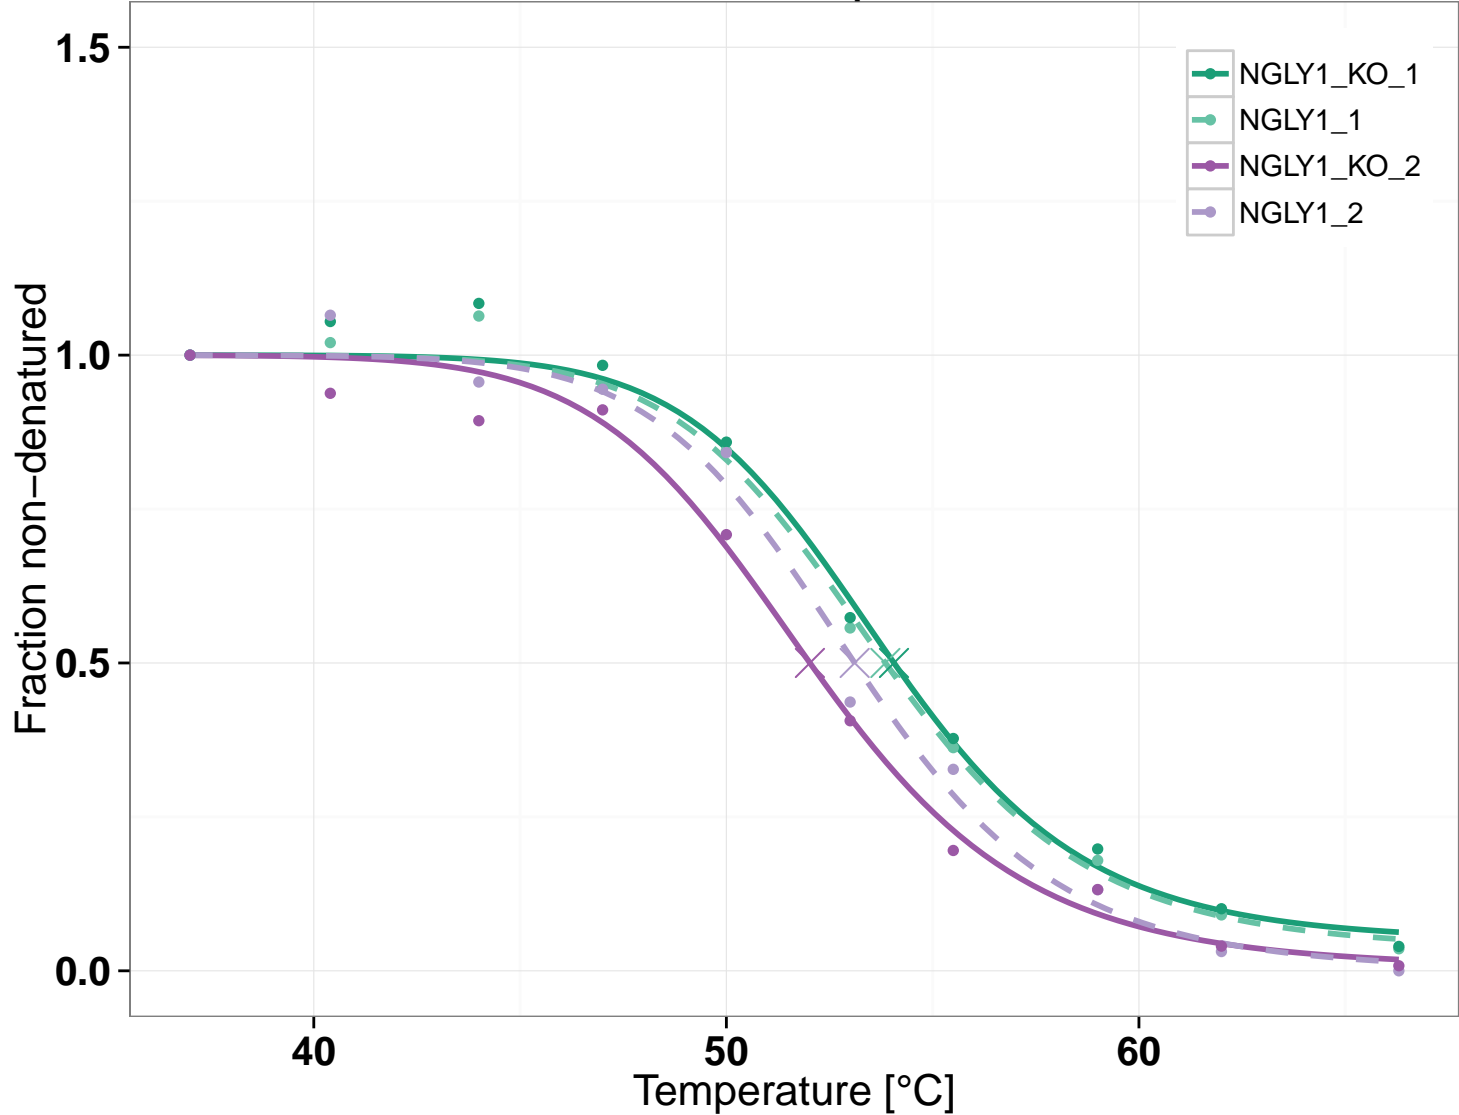

|            | meltPoint | slope  | plateau | R2   |
|------------|-----------|--------|---------|------|
| NGLY1_KO_1 | 54.06     | -0.098 | 0.05    | 0.99 |
| NGLY1_1    | 53.85     | -0.095 | 0.03    | 1    |
| NGLY1_KO_2 | 52.03     | -0.095 | 0       | 0.99 |
| NGLY1_2    | 53.11     | -0.1   | 0       | 0.99 |

Supplement: Supplementary file 4758 [file 1]

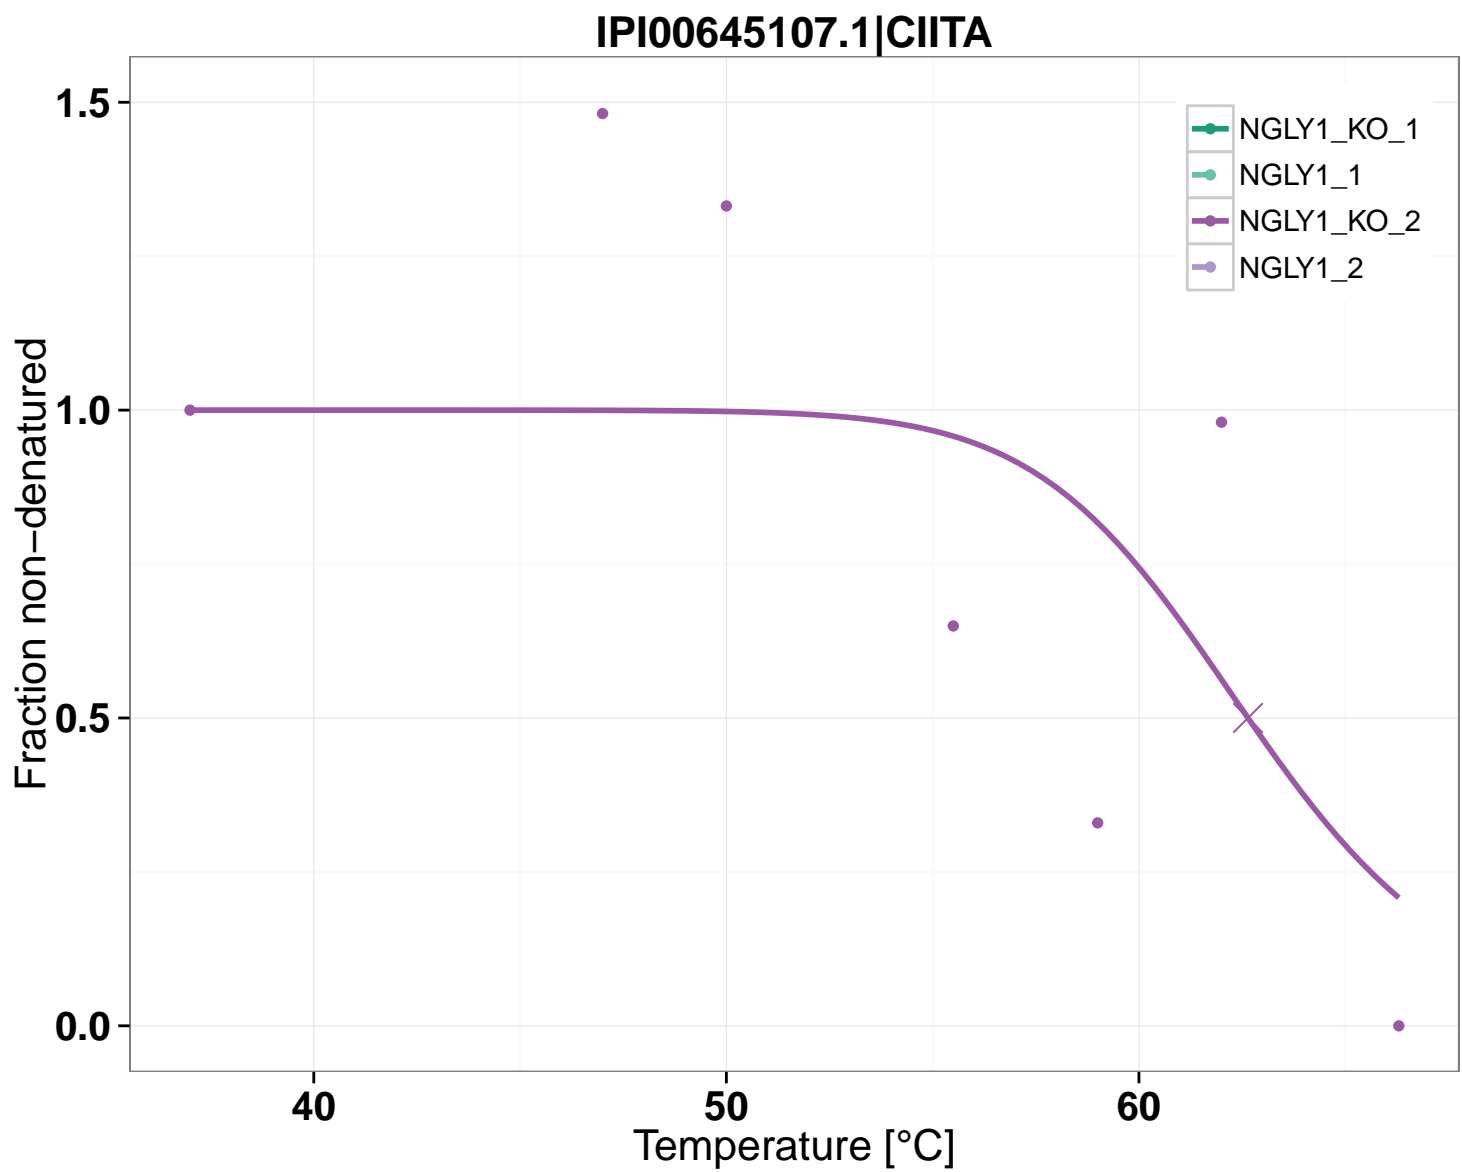

|            | meltPoint | slope  | plateau | R2    |
|------------|-----------|--------|---------|-------|
| NGLY1_KO_1 | —         | —      | —       | —     |
| NGLY1_1    | —         | —      | —       | —     |
| NGLY1_KO_2 | 62.64     | -0.097 | 0       | -0.14 |
| NGLY1_2    | —         | —      | —       | —     |

Supplement: Supplementary file 4759 [file 1]

# IPI00796331.2|FBXW4

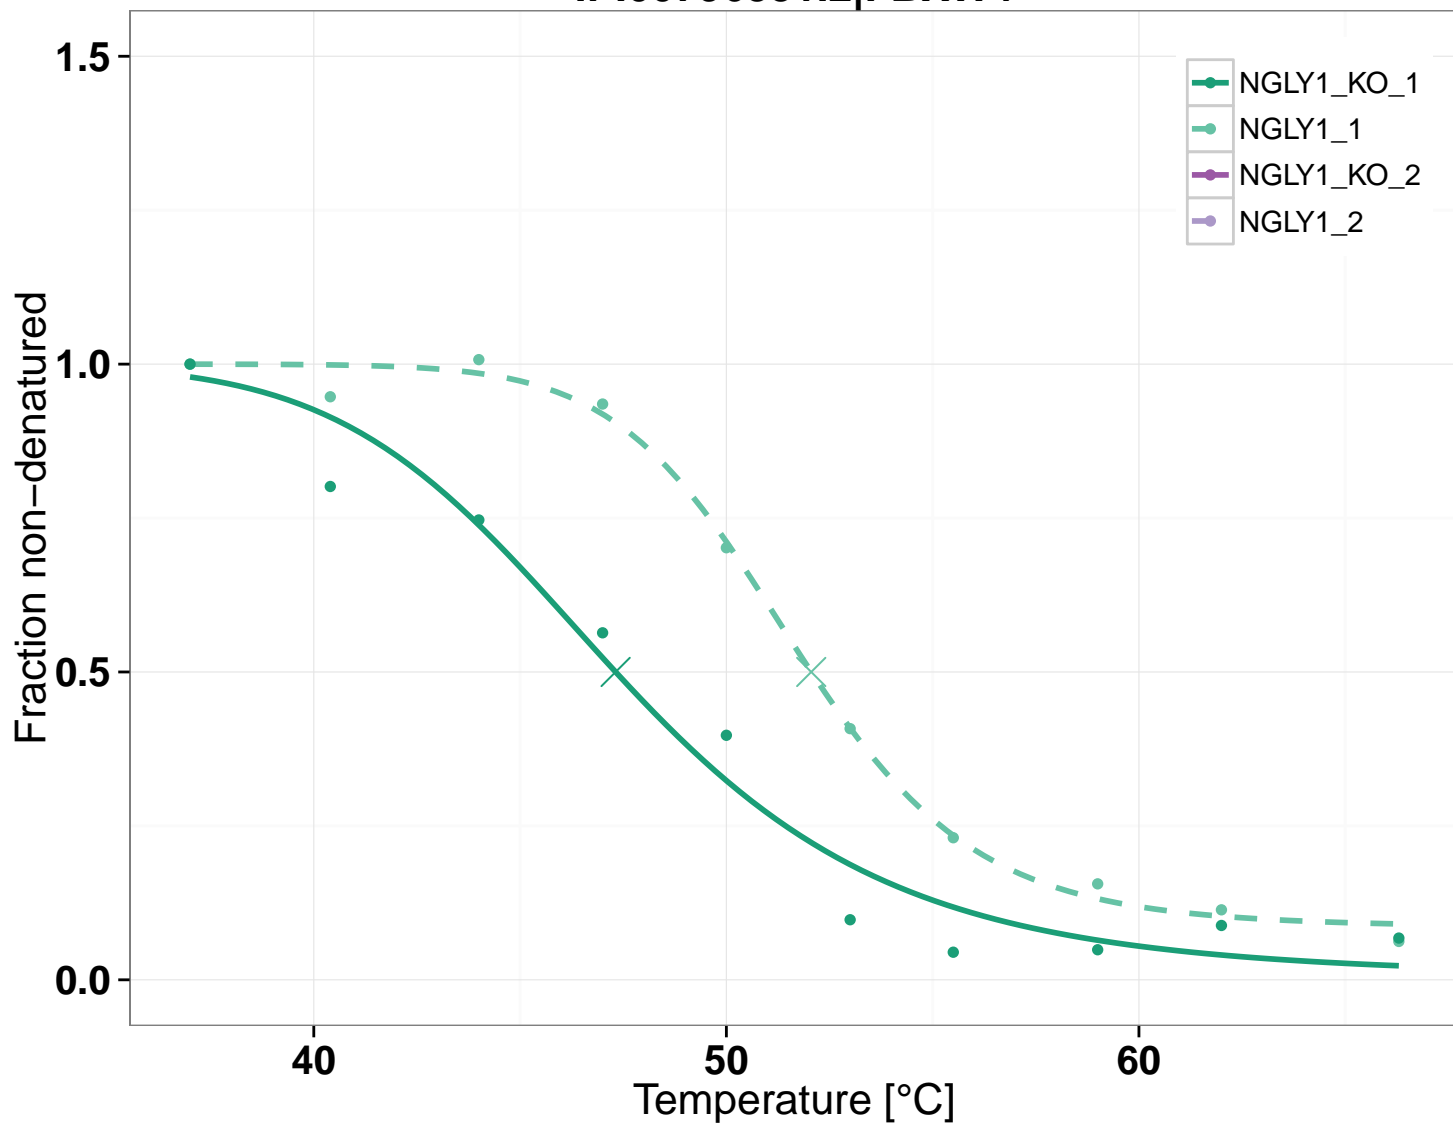

|            | meltPoint | slope  | plateau | R2   |
|------------|-----------|--------|---------|------|
| NGLY1_KO_1 | 47.32     | -0.074 | 0       | 0.97 |
| NGLY1_1    | 52.06     | -0.11  | 0.09    | 1    |
| NGLY1_KO_2 | -         | -      | -       | -    |
| NGLY1_2    | -         | -      | -       | -    |

Supplement: Supplementary file 4760 [file 1]

IPI00884896.1|TXNRD1

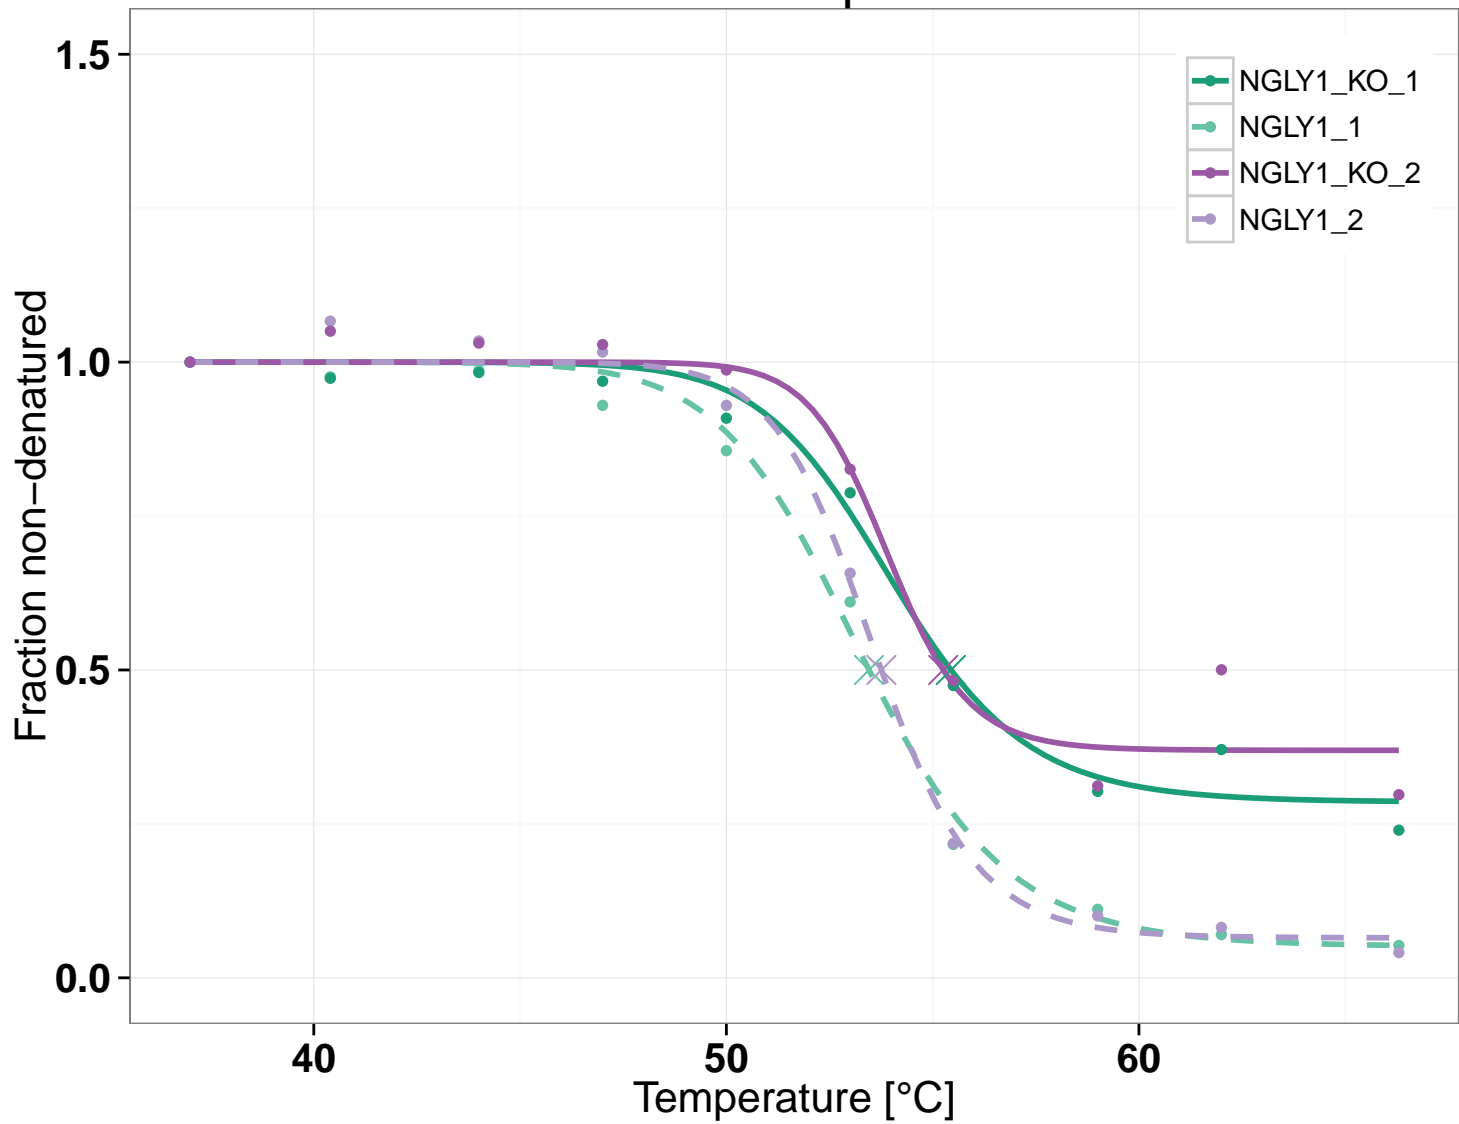

|            | meltPoint | slope | plateau | R2   |
|------------|-----------|-------|---------|------|
| NGLY1_KO_1 | 55.44     | -0.11 | 0.29    | 0.98 |
| NGLY1_1    | 53.46     | -0.14 | 0.05    | 0.99 |
| NGLY1_KO_2 | 55.26     | -0.16 | 0.37    | 0.97 |
| NGLY1_2    | 53.76     | -0.19 | 0.06    | 1    |

Supplement: Supplementary file 4761 [file 1]

IPI00220402.3|PPP1R2

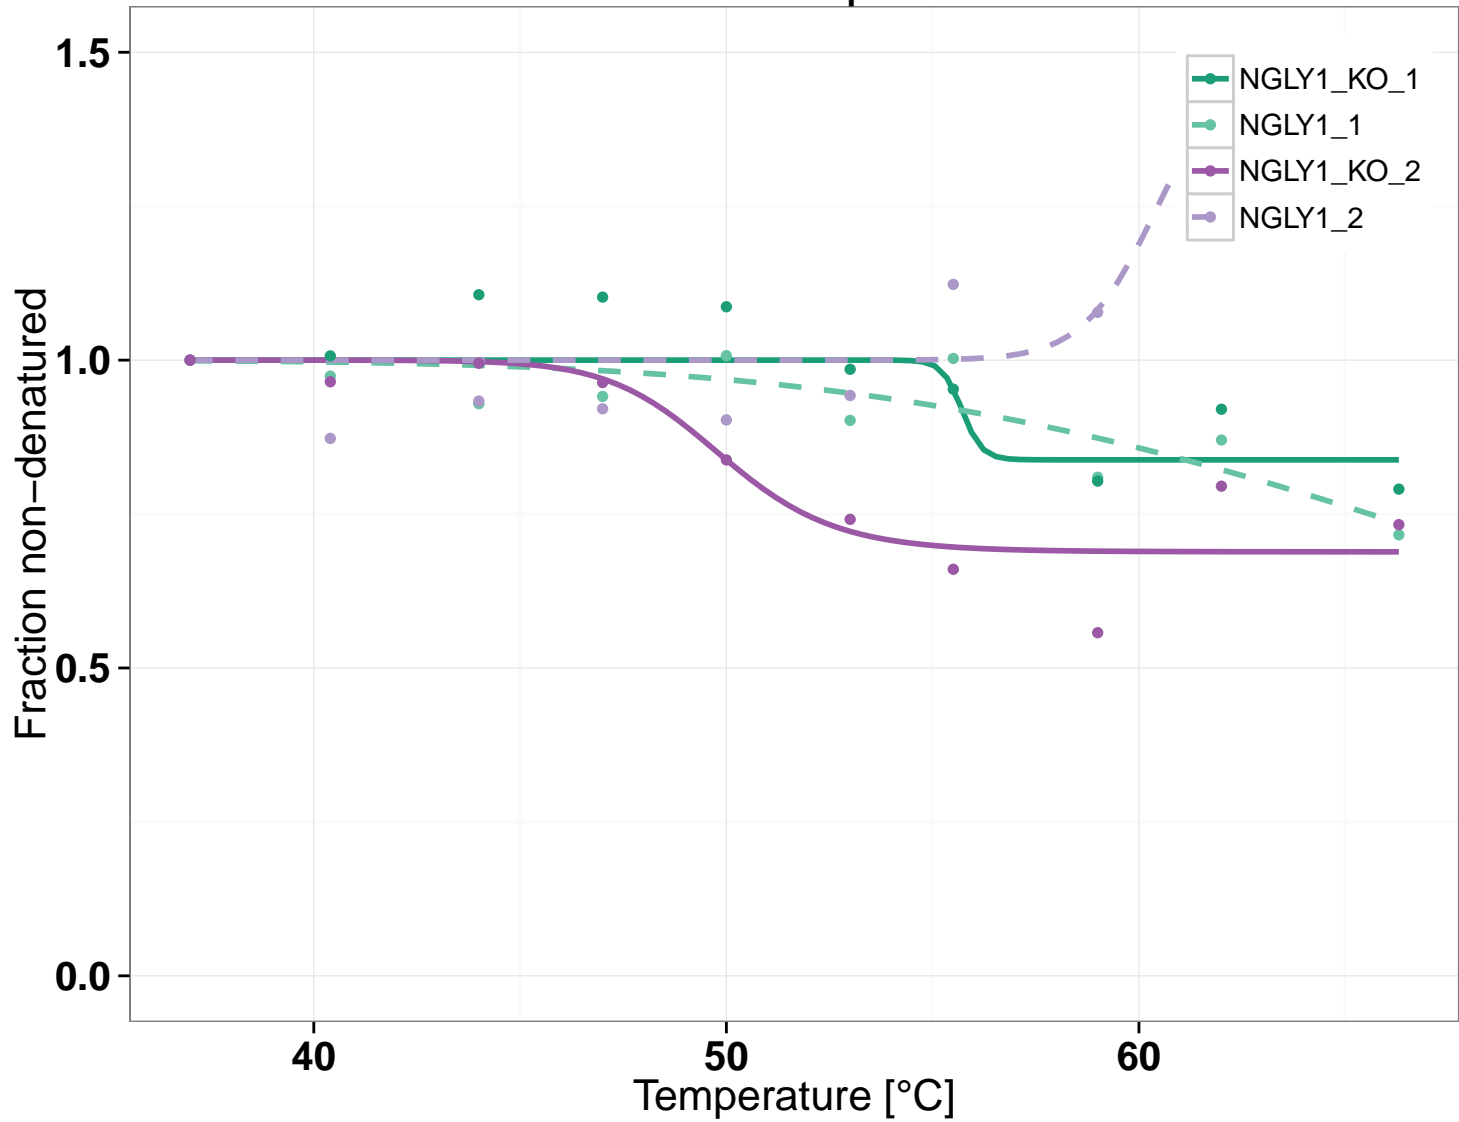

|            | meltPoint | slope  | plateau | R2   |
|------------|-----------|--------|---------|------|
| NGLY1_KO_1 | -         | -0.17  | 0.84    | 0.65 |
| NGLY1_1    | -         | -      | 0       | 0.71 |
| NGLY1_KO_2 | -         | -0.057 | 0.69    | 0.84 |
| NGLY1_2    | -         | 0.14   | 1.5     | 0.88 |

Supplement: Supplementary file 4762 [file 1]

IPI00008497.1|ODC1

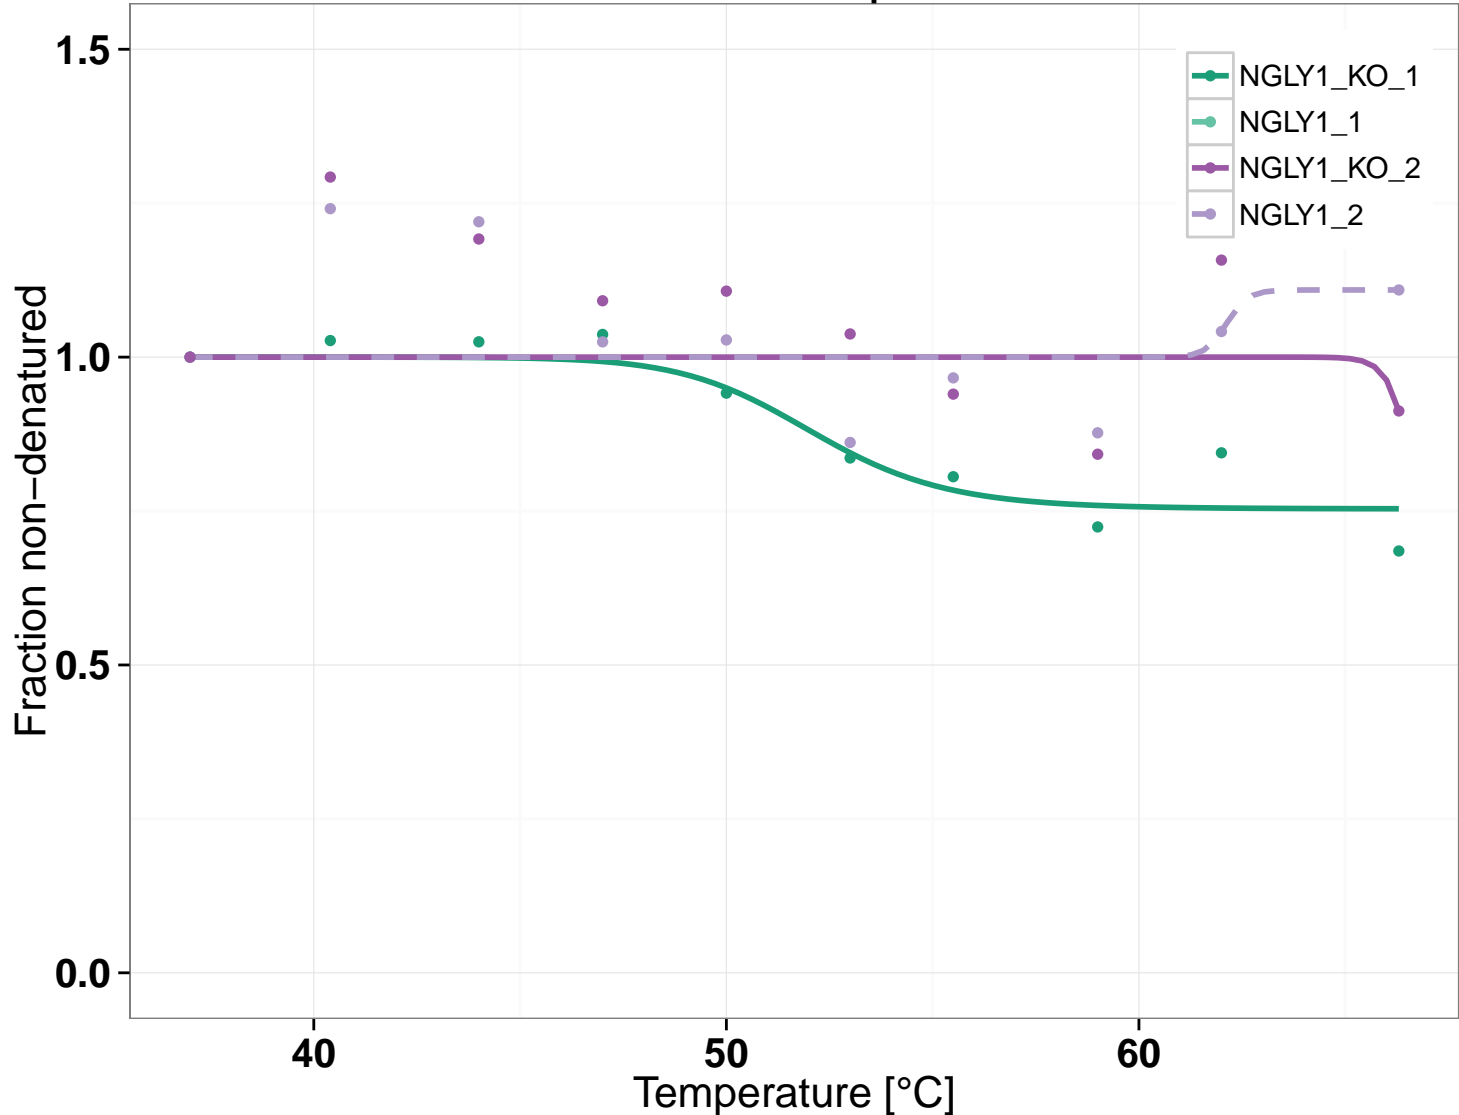

|            | meltPoint | slope  | plateau | R2    |
|------------|-----------|--------|---------|-------|
| NGLY1_KO_1 | -         | -0.038 | 0.75    | 0.88  |
| NGLY1_1    | -         | -      | -       | -     |
| NGLY1_KO_2 | -         | -      | 0       | -0.15 |
| NGLY1_2    | -         | 0.11   | 1.11    | 0     |

Supplement: Supplementary file 4763 [file 1]

# IPI00298961.3|XPO1

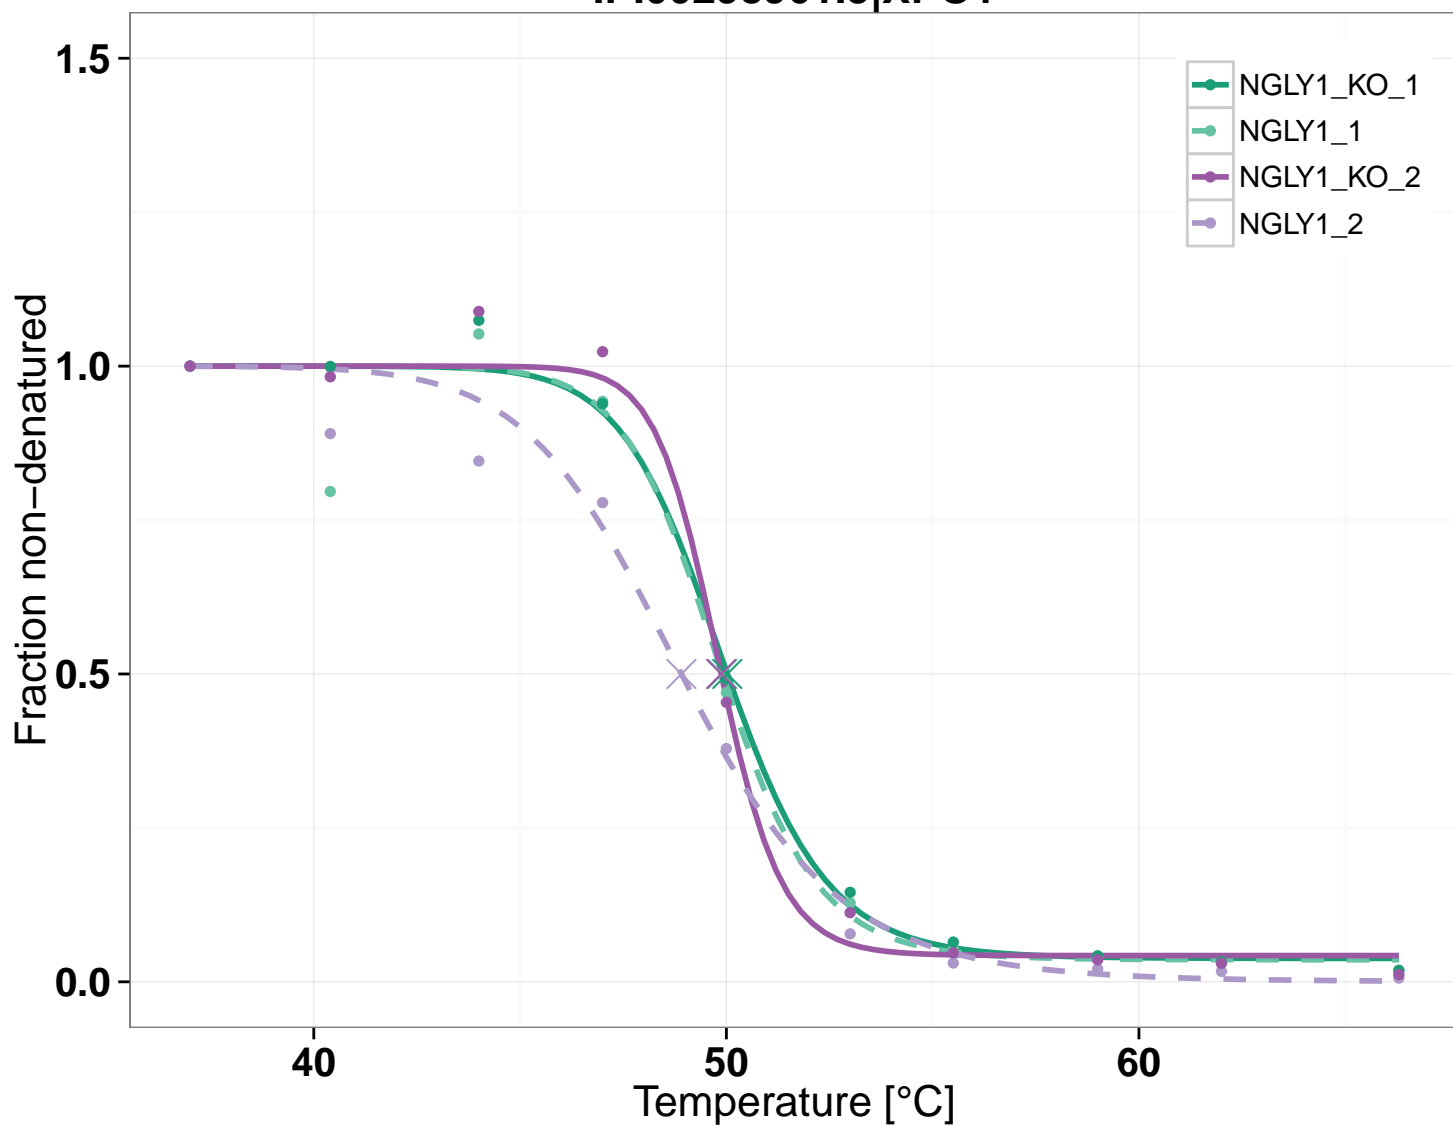

|            | meltPoint | slope | plateau | R2   |
|------------|-----------|-------|---------|------|
| NGLY1_KO_1 | 50.02     | -0.19 | 0.04    | 1    |
| NGLY1_1    | 49.9      | -0.2  | 0.04    | 0.97 |
| NGLY1_KO_2 | 49.88     | -0.31 | 0.04    | 0.99 |
| NGLY1_2    | 48.91     | -0.13 | 0       | 0.98 |

Supplement: Supplementary file 4764 [file 1]

IPI00000305.3|MED11

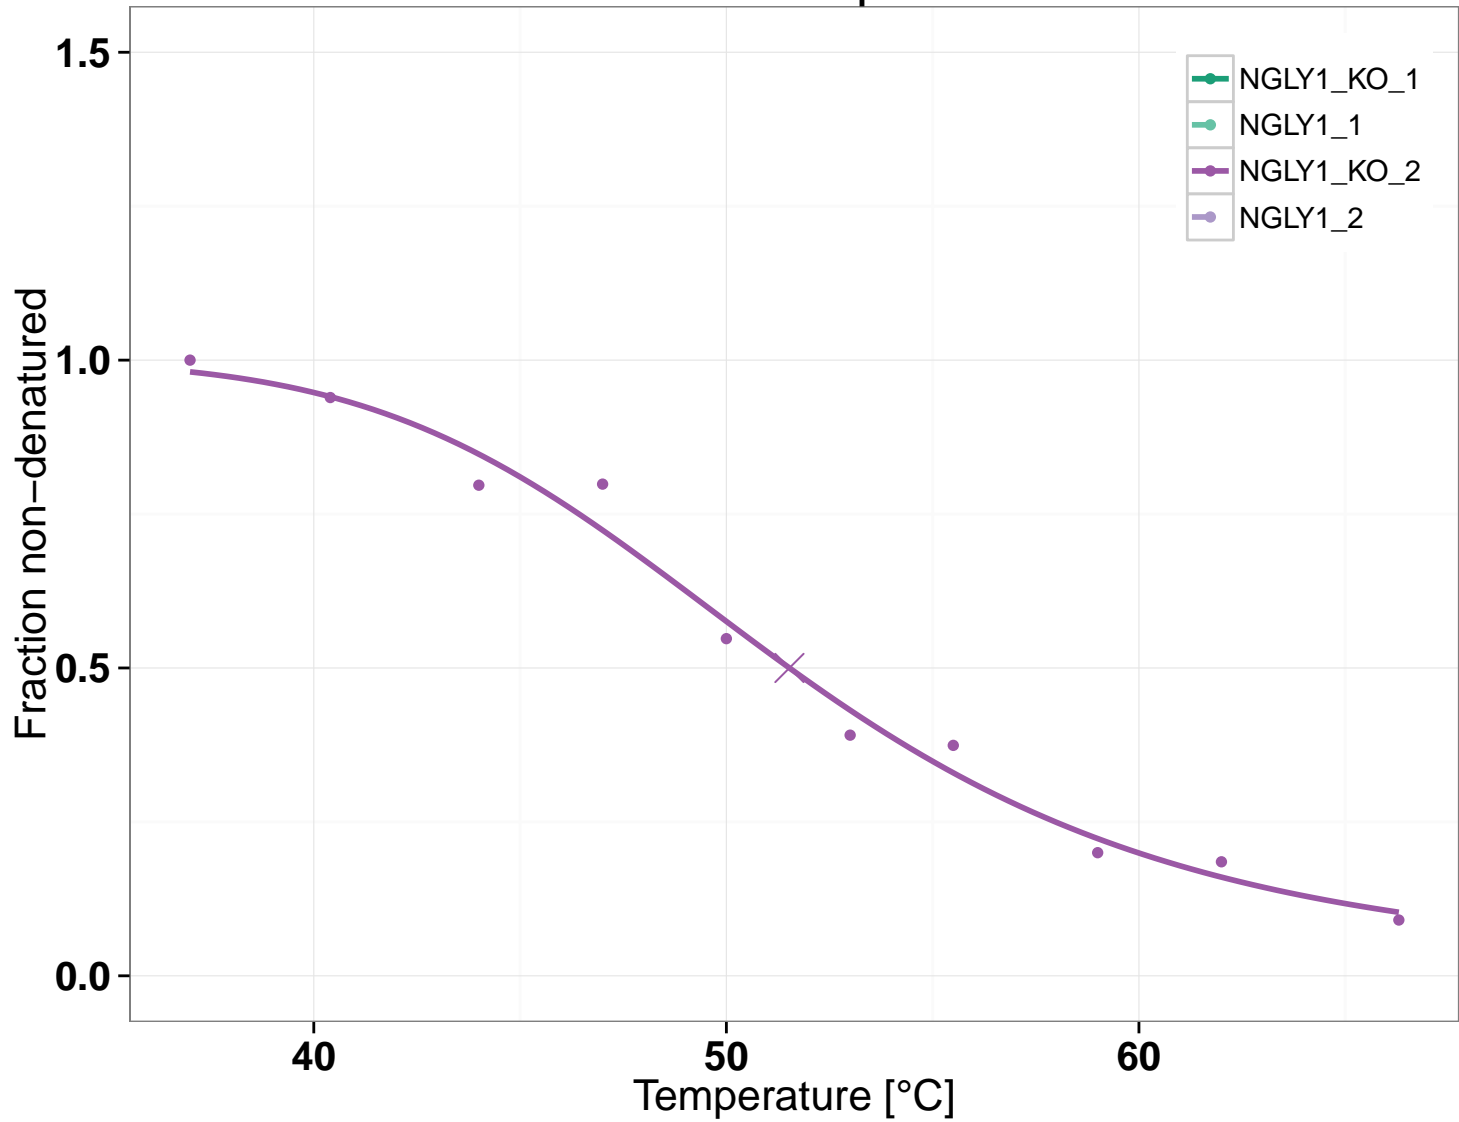

|            | meltPoint | slope | plateau | R2   |
|------------|-----------|-------|---------|------|
| NGLY1_KO_1 | —         | —     | —       | —    |
| NGLY1_1    | —         | —     | —       | —    |
| NGLY1_KO_2 | 51.53     | -0.05 | 0.01    | 0.99 |
| NGLY1_2    | —         | —     | —       | —    |

Supplement: Supplementary file 4765 [file 1]

IPI00290094.4|SFRS8

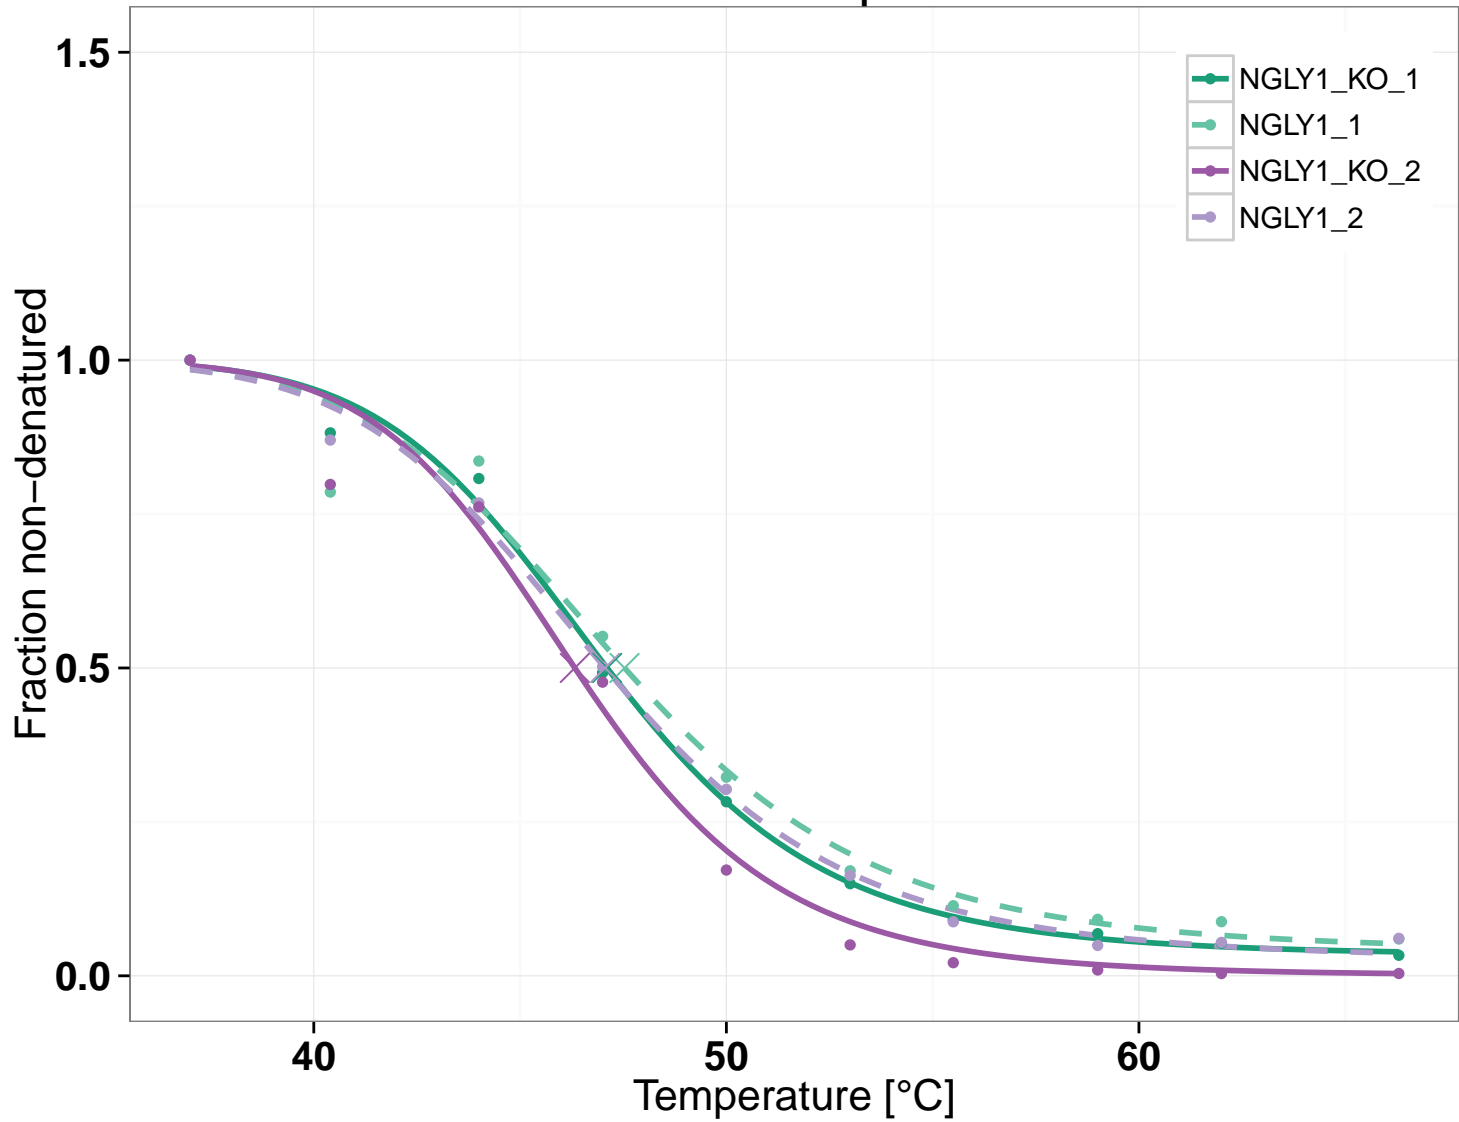

|            | meltPoint | slope  | plateau | R2   |
|------------|-----------|--------|---------|------|
| NGLY1_KO_1 | 47.11     | -0.09  | 0.03    | 1    |
| NGLY1_1    | 47.53     | -0.078 | 0.04    | 0.98 |
| NGLY1_KO_2 | 46.33     | -0.1   | 0       | 0.98 |
| NGLY1_2    | 47.06     | -0.082 | 0.03    | 1    |

Supplement: Supplementary file 4766 [file 1]

# IPI00019376.6|SEPT11

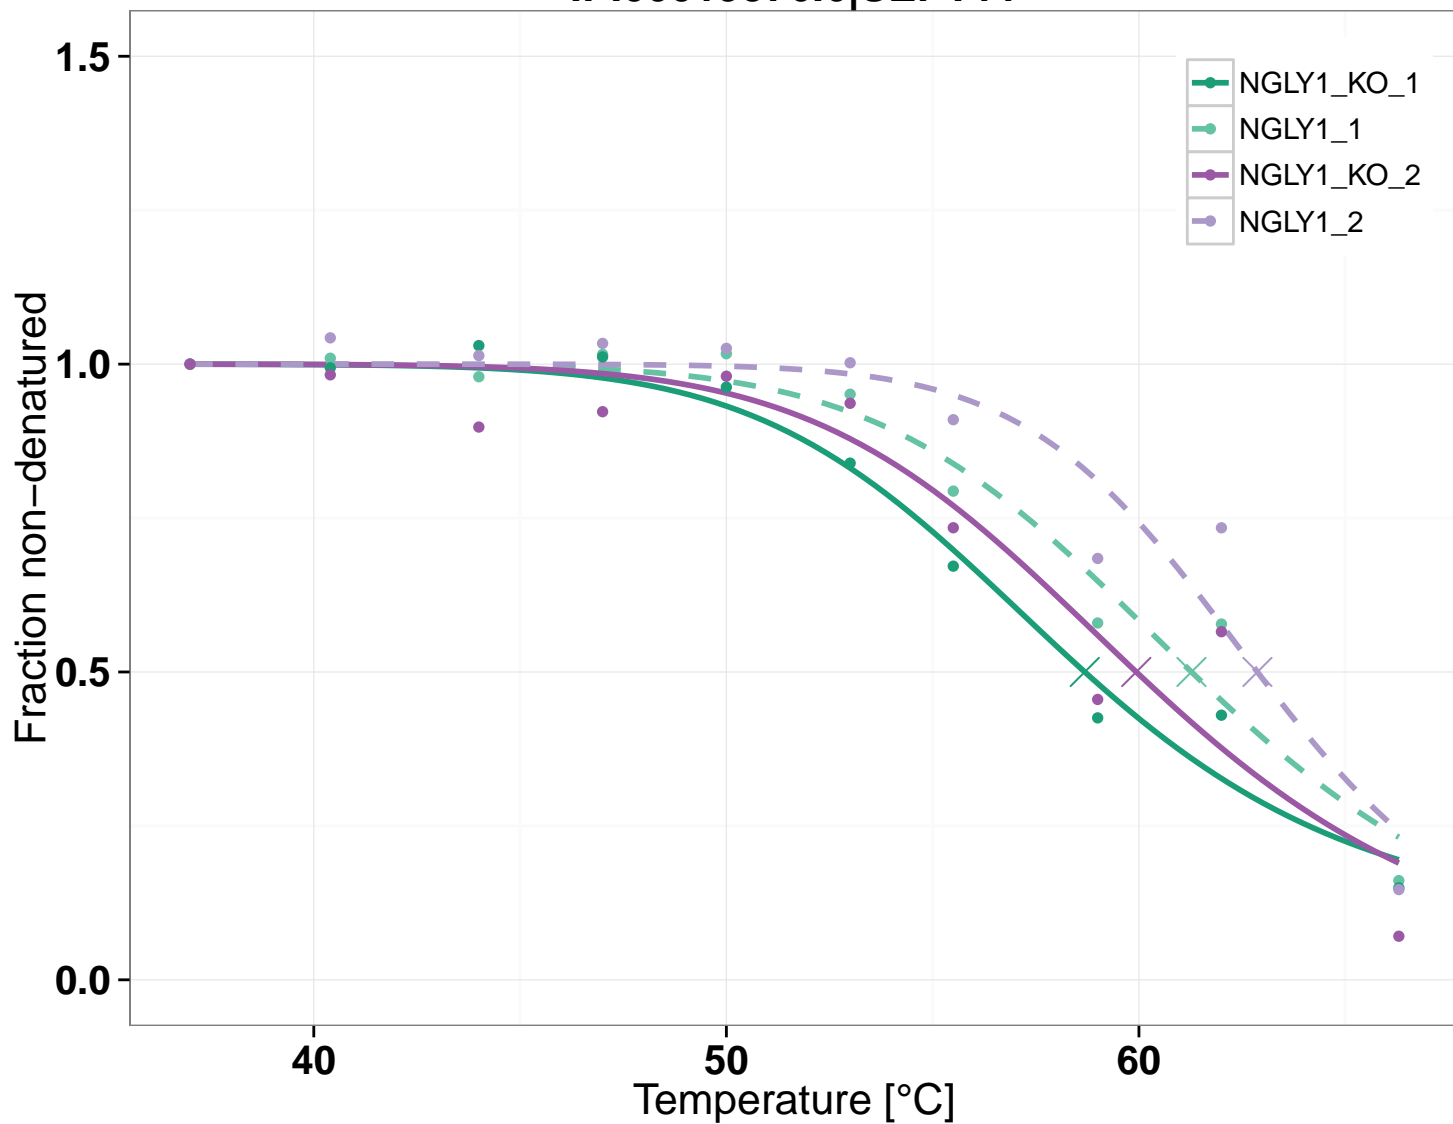

|            | meltPoint | slope  | plateau | R2   |
|------------|-----------|--------|---------|------|
| NGLY1_KO_1 | 58.69     | -0.063 | 0.08    | 0.98 |
| NGLY1_1    | 61.27     | -0.066 | 0       | 0.96 |
| NGLY1_KO_2 | 59.94     | -0.064 | 0       | 0.9  |
| NGLY1_2    | 62.87     | -0.089 | 0       | 0.92 |

Supplement: Supplementary file 4767 [file 1]

# IPI00216725.2|PHKA1

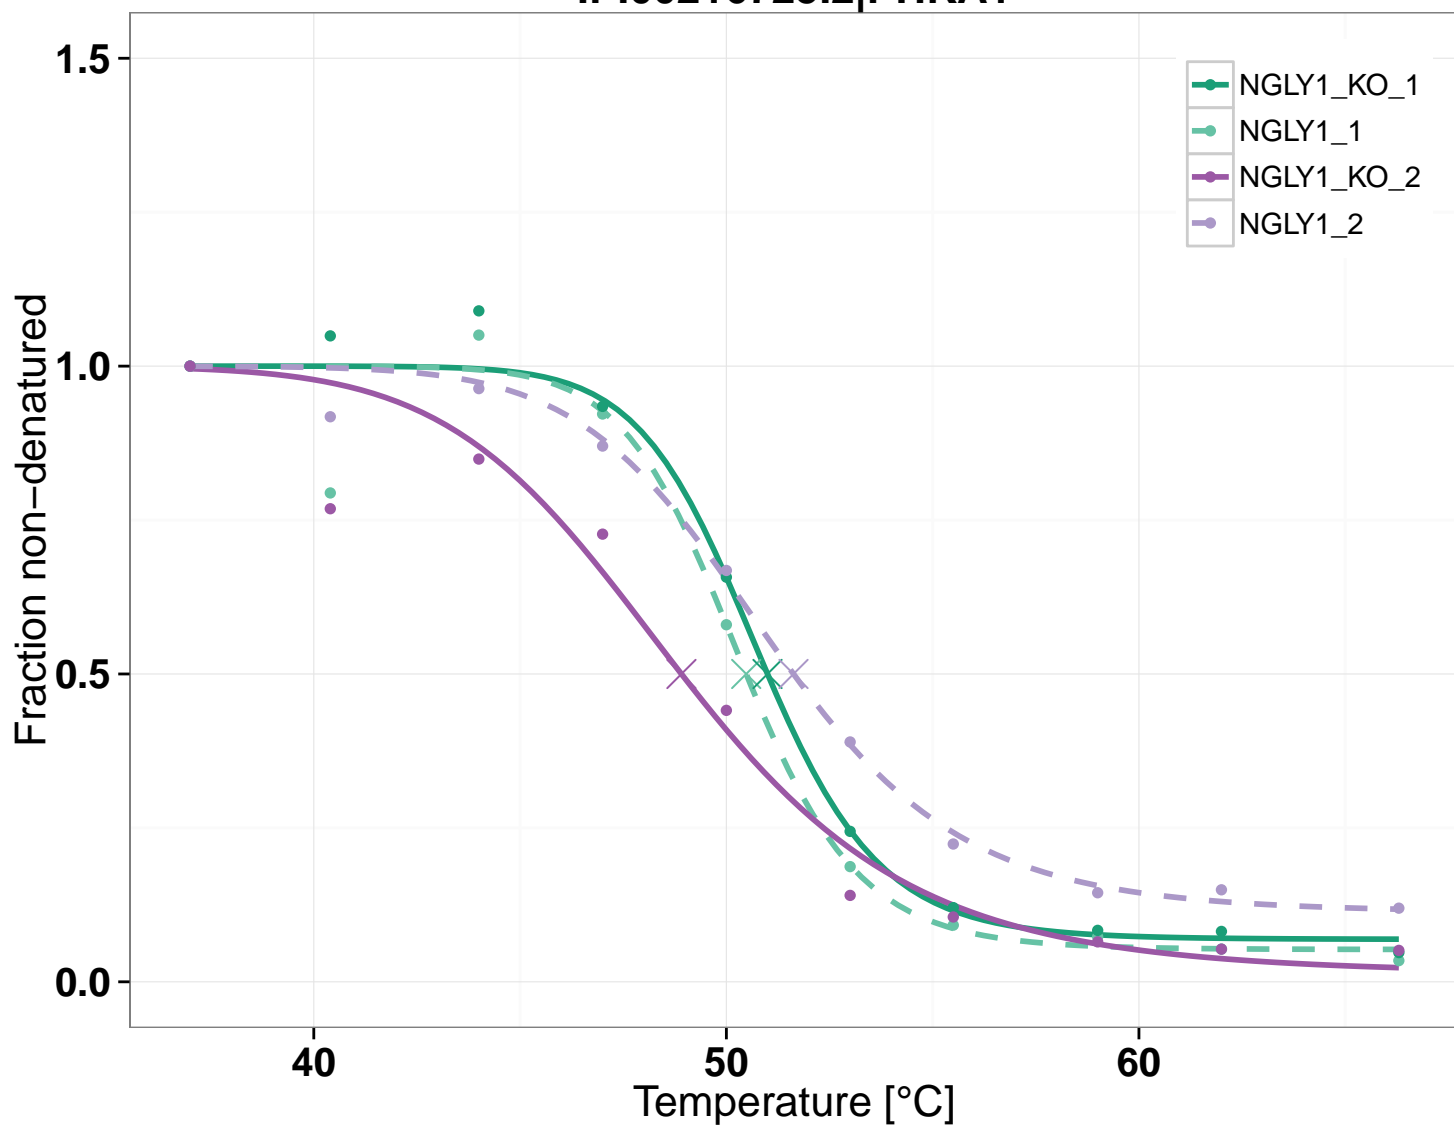

|            | meltPoint | slope  | plateau | R2   |
|------------|-----------|--------|---------|------|
| NGLY1_KO_1 | 51        | -0.16  | 0.07    | 0.99 |
| NGLY1_1    | 50.48     | -0.17  | 0.05    | 0.97 |
| NGLY1_KO_2 | 48.91     | -0.088 | 0.01    | 0.96 |
| NGLY1_2    | 51.63     | -0.096 | 0.11    | 0.99 |

Supplement: Supplementary file 4768 [file 1]

IPI00900288.1|ICA1

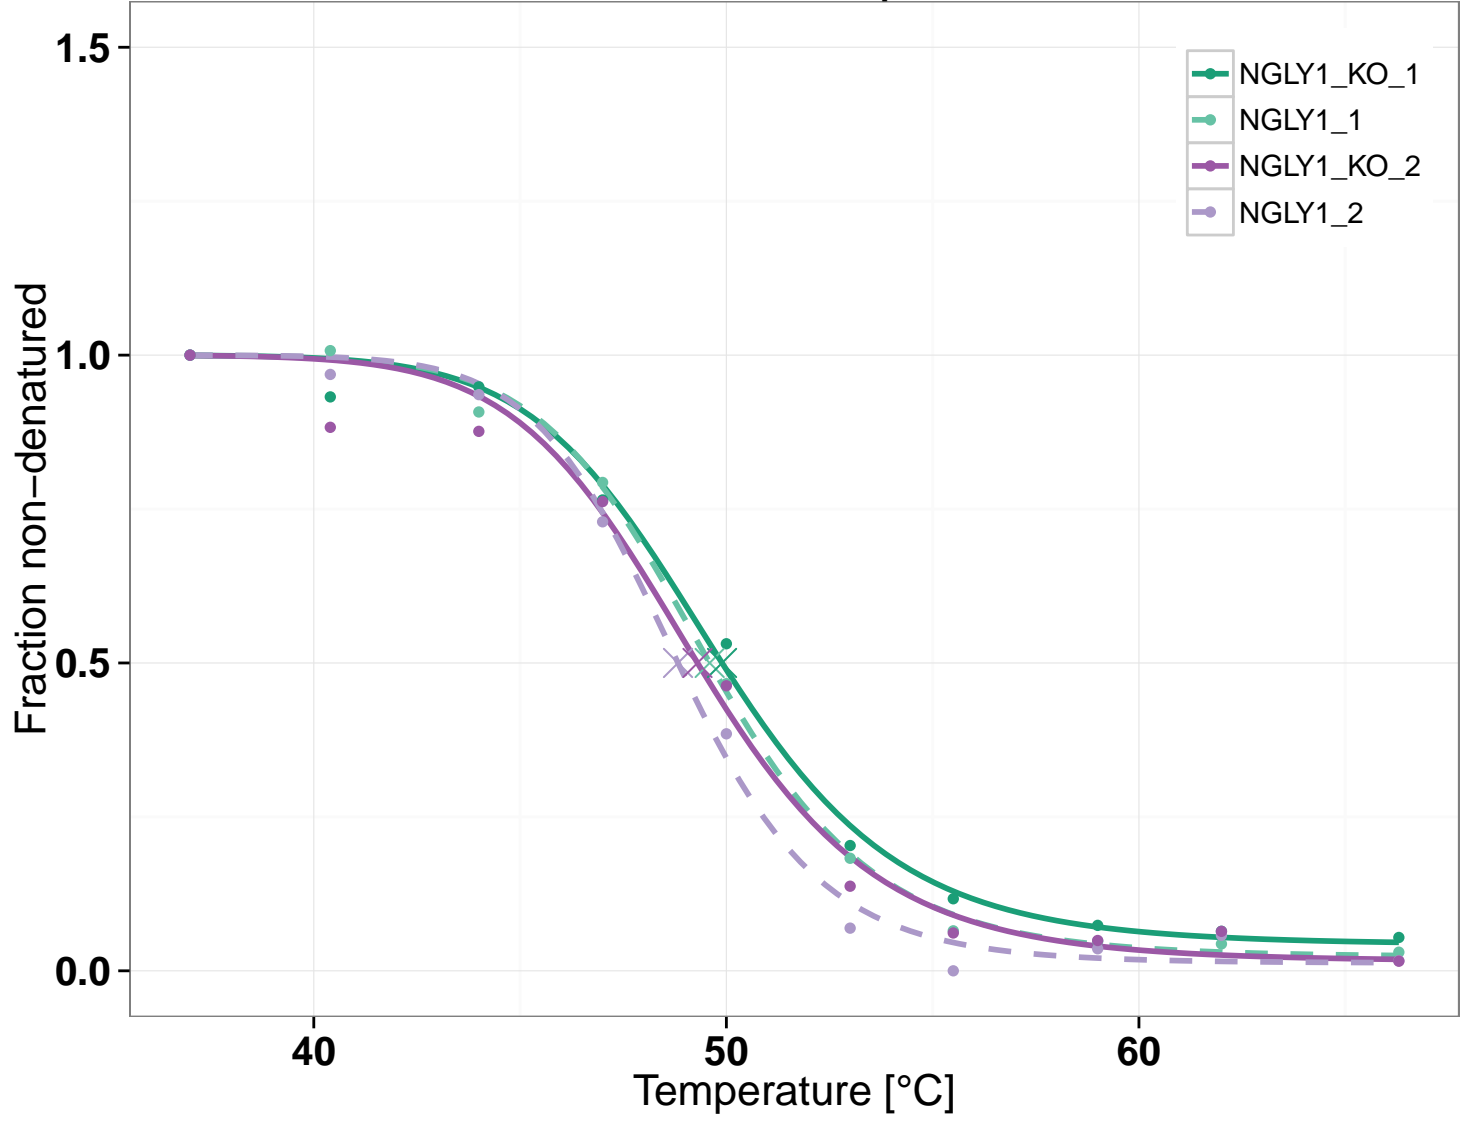

|            | meltPoint | slope | plateau | R2   |
|------------|-----------|-------|---------|------|
| NGLY1_KO_1 | 49.9      | -0.11 | 0.04    | 0.99 |
| NGLY1_1    | 49.6      | -0.12 | 0.02    | 1    |
| NGLY1_KO_2 | 49.3      | -0.11 | 0.02    | 0.99 |
| NGLY1_2    | 48.83     | -0.14 | 0.01    | 0.99 |

Supplement: Supplementary file 4769 [file 1]

IPI00442171.4|PREPL

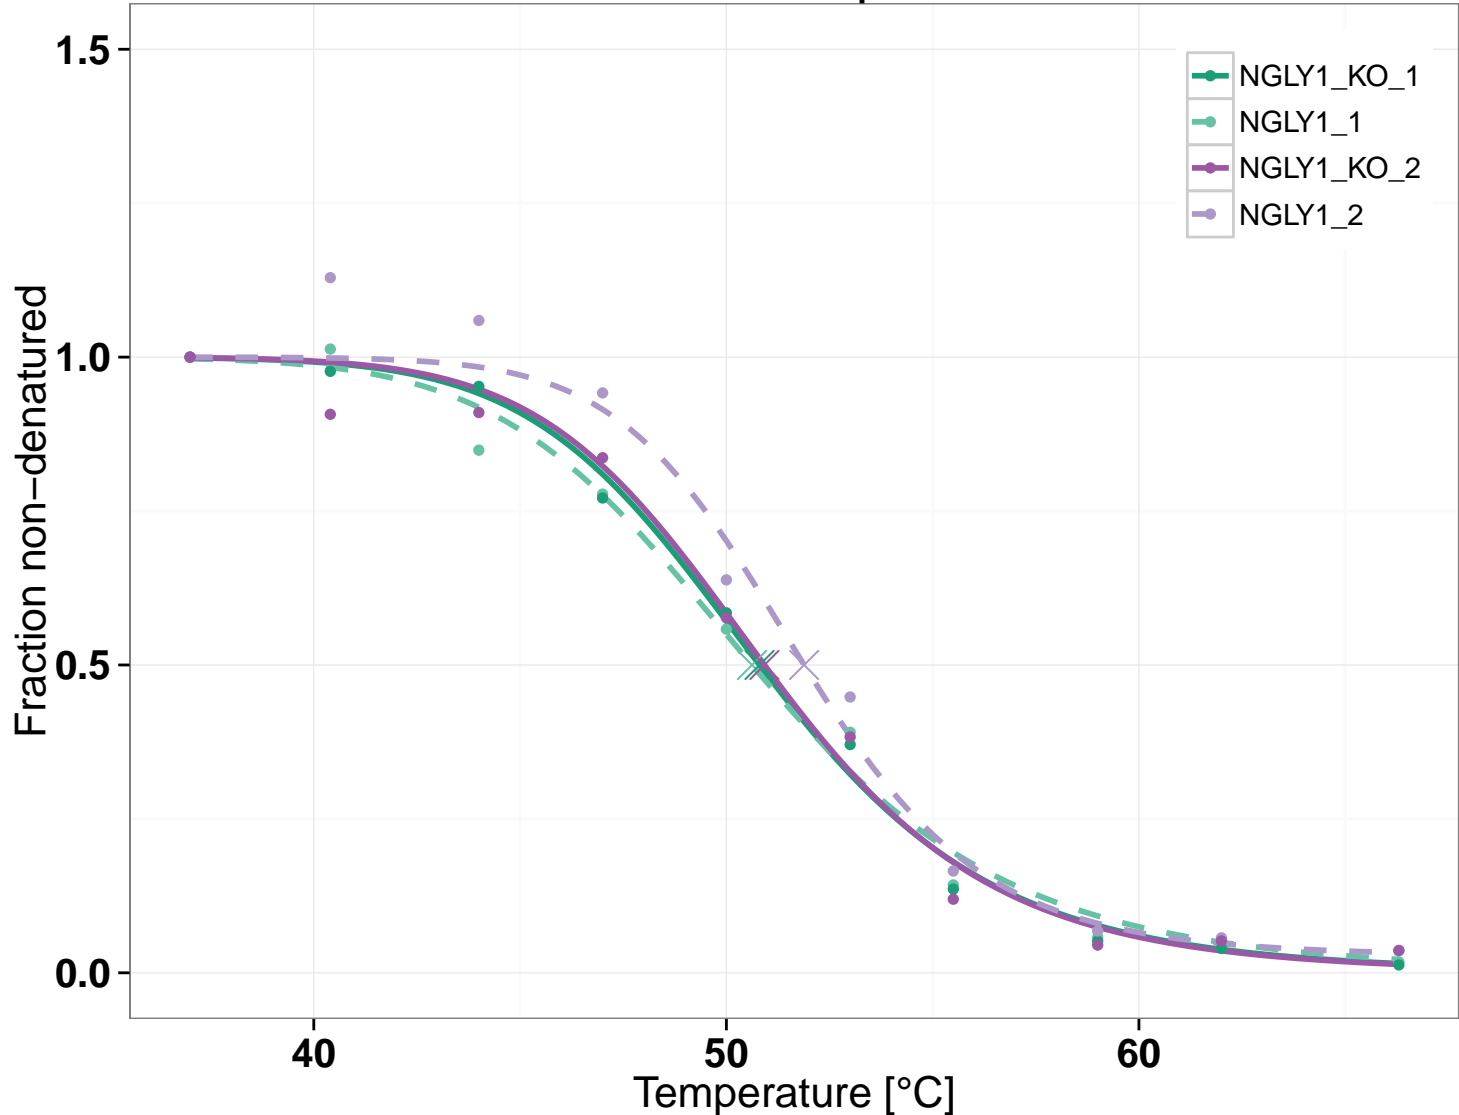

|            | meltPoint | slope  | plateau | R2   |
|------------|-----------|--------|---------|------|
| NGLY1_KO_1 | 50.8      | -0.089 | 0       | 1    |
| NGLY1_1    | 50.62     | -0.081 | 0       | 0.99 |
| NGLY1_KO_2 | 50.92     | -0.092 | 0       | 0.99 |
| NGLY1_2    | 51.88     | -0.11  | 0.03    | 0.98 |

Supplement: Supplementary file 4770 [file 1]

IPI00004324.1|TRAPPC3

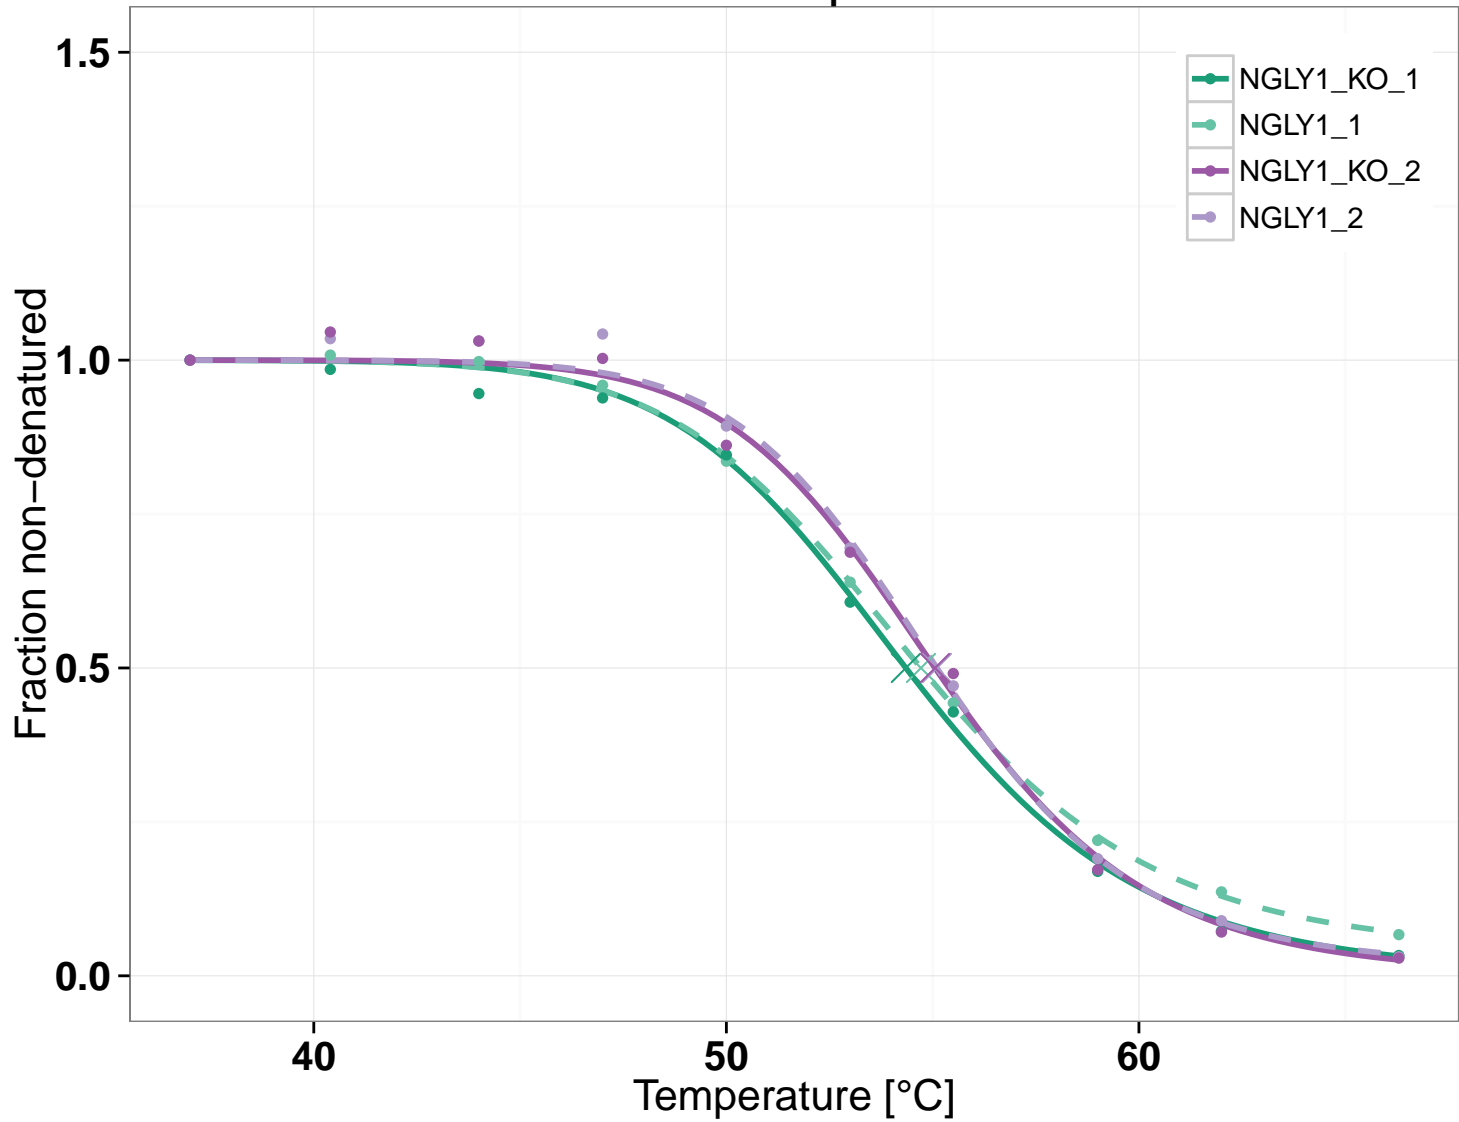

|            | meltPoint | slope  | plateau | R2 |
|------------|-----------|--------|---------|----|
| NGLY1_KO_1 | 54.35     | -0.088 | 0       | 1  |
| NGLY1_1    | 54.72     | -0.082 | 0.03    | 1  |
| NGLY1_KO_2 | 55.06     | -0.098 | 0       | 1  |
| NGLY1_2    | 55.1      | -0.1   | 0.01    | 1  |

Supplement: Supplementary file 4771 [file 1]

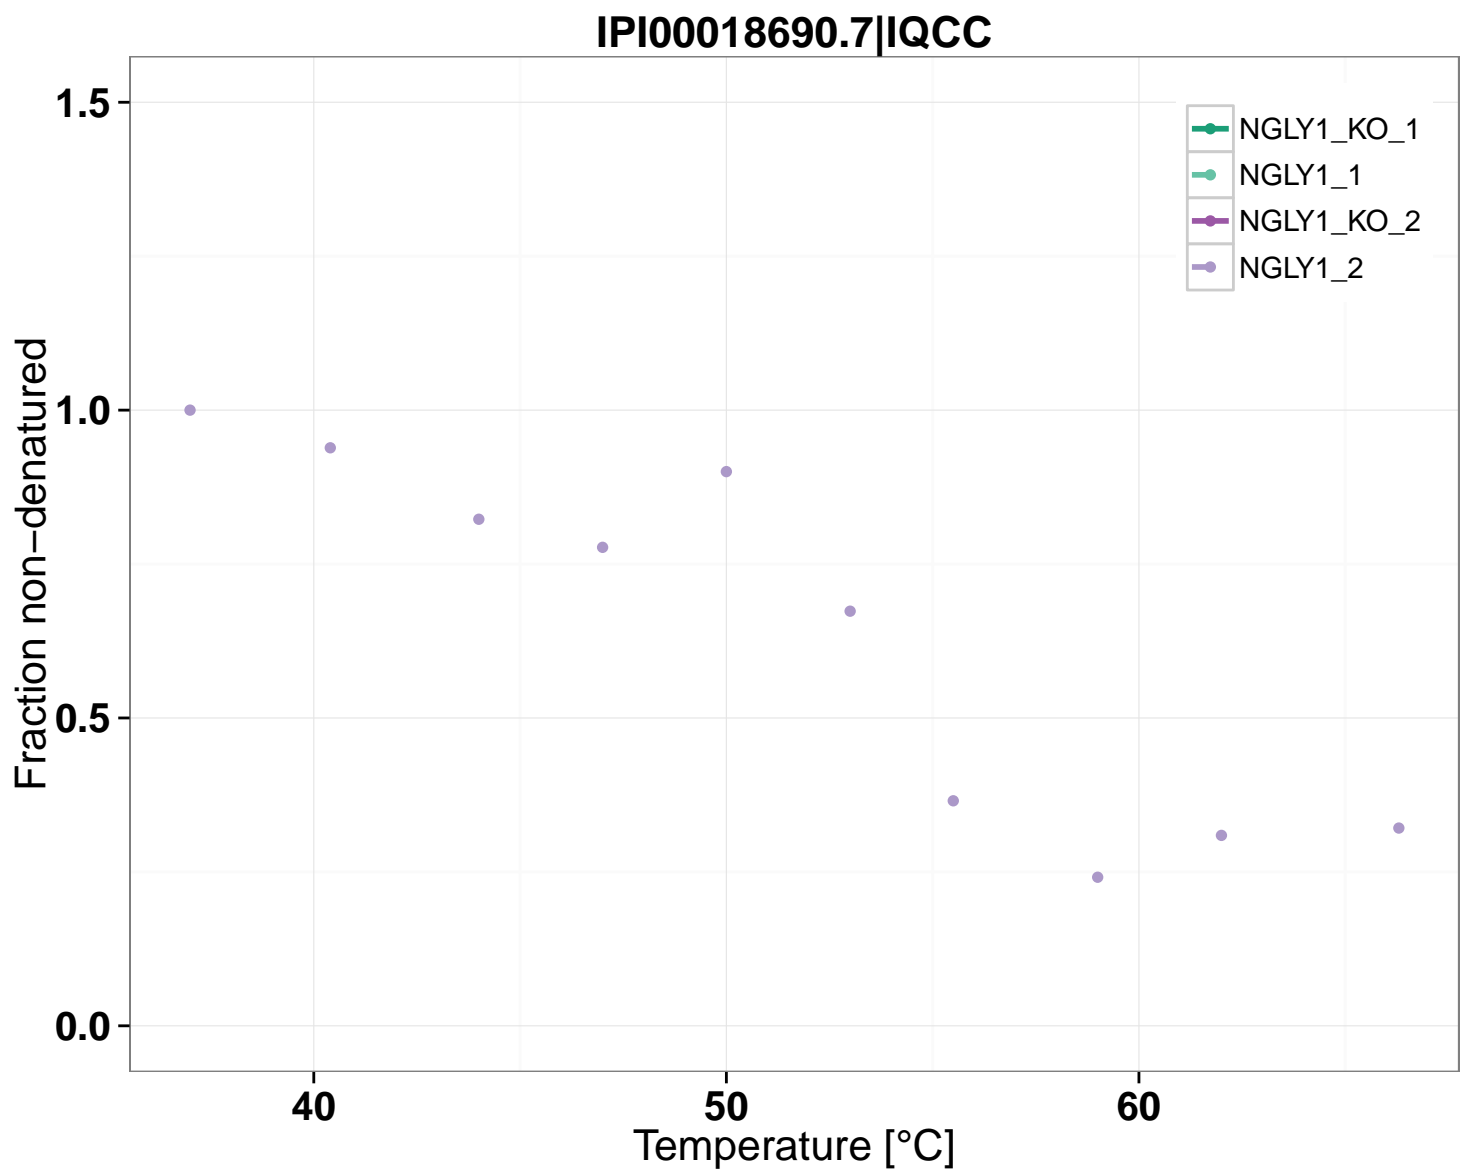

|            | meltPoint | slope | plateau | R2 |
|------------|-----------|-------|---------|----|
| NGLY1_KO_1 | -         | -     | -       | -  |
| NGLY1_1    | -         | -     | -       | -  |
| NGLY1_KO_2 | -         | -     | -       | -  |
| NGLY1_2    | -         | -     | -       | -  |

Supplement: Supplementary file 4772 [file 1]

IPI00910883.1|CALCOCO2

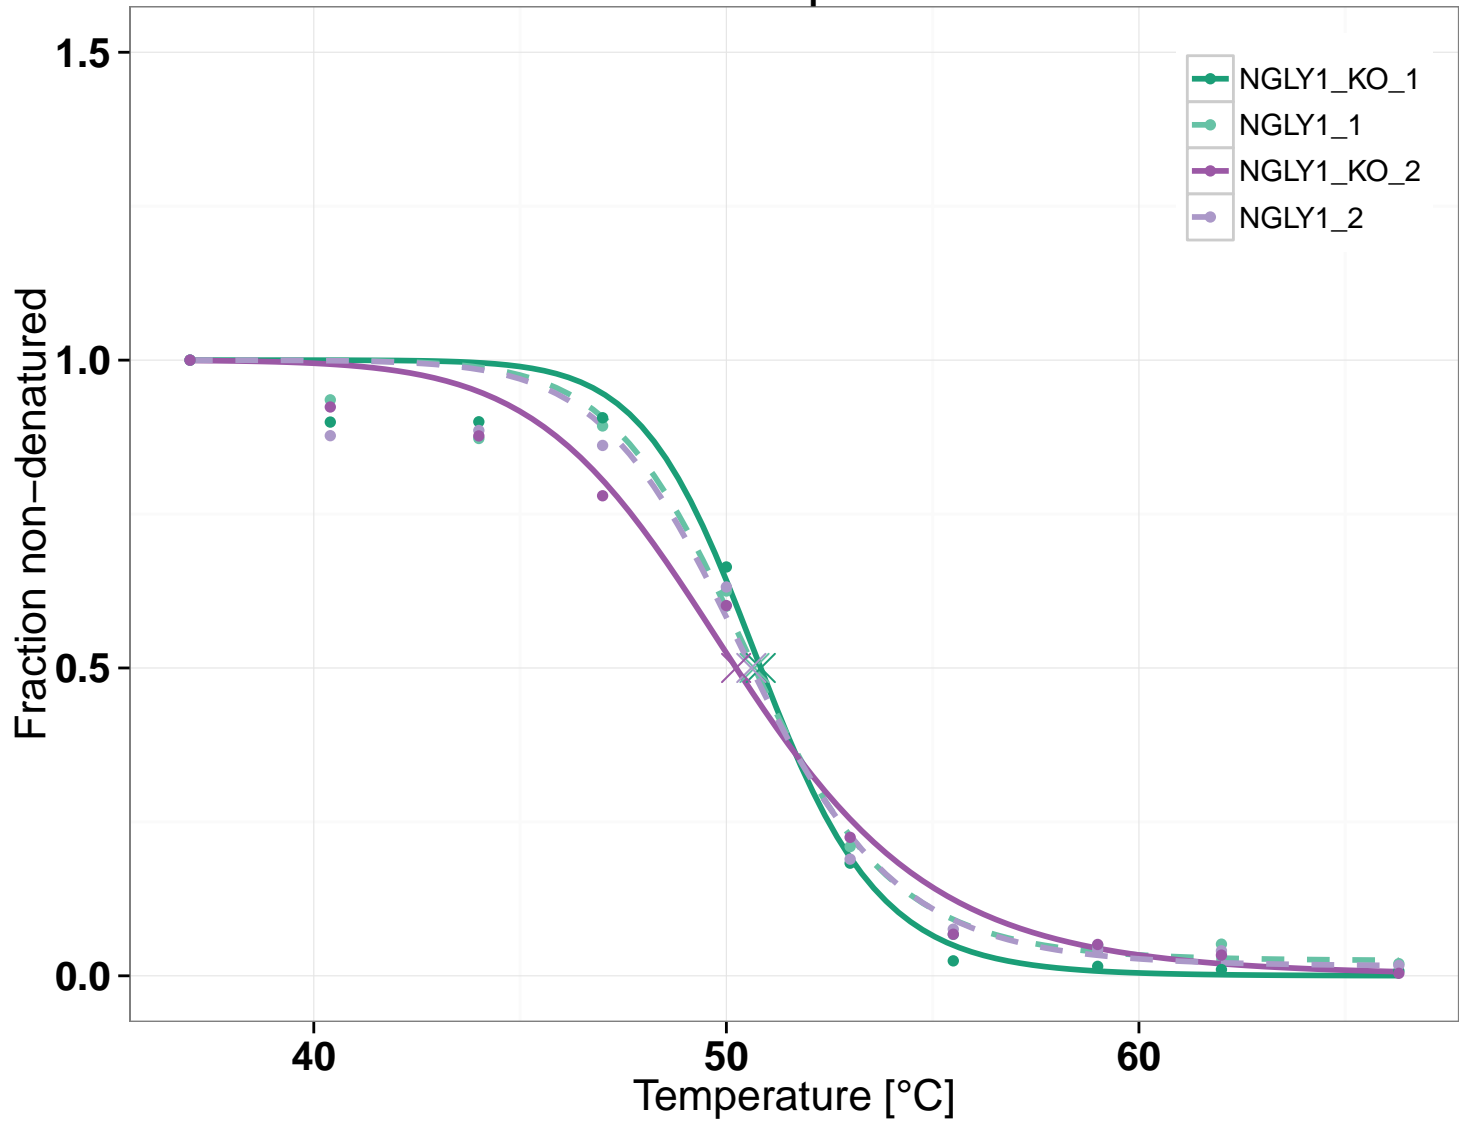

|            | meltPoint | slope | plateau | R2   |
|------------|-----------|-------|---------|------|
| NGLY1_KO_1 | 50.83     | -0.17 | 0       | 0.99 |
| NGLY1_1    | 50.68     | -0.14 | 0.02    | 0.99 |
| NGLY1_KO_2 | 50.24     | -0.1  | 0       | 0.99 |
| NGLY1_2    | 50.61     | -0.14 | 0.02    | 0.98 |

Supplement: Supplementary file 4773 [file 1]

IPI00398974.4|ZDHHC20

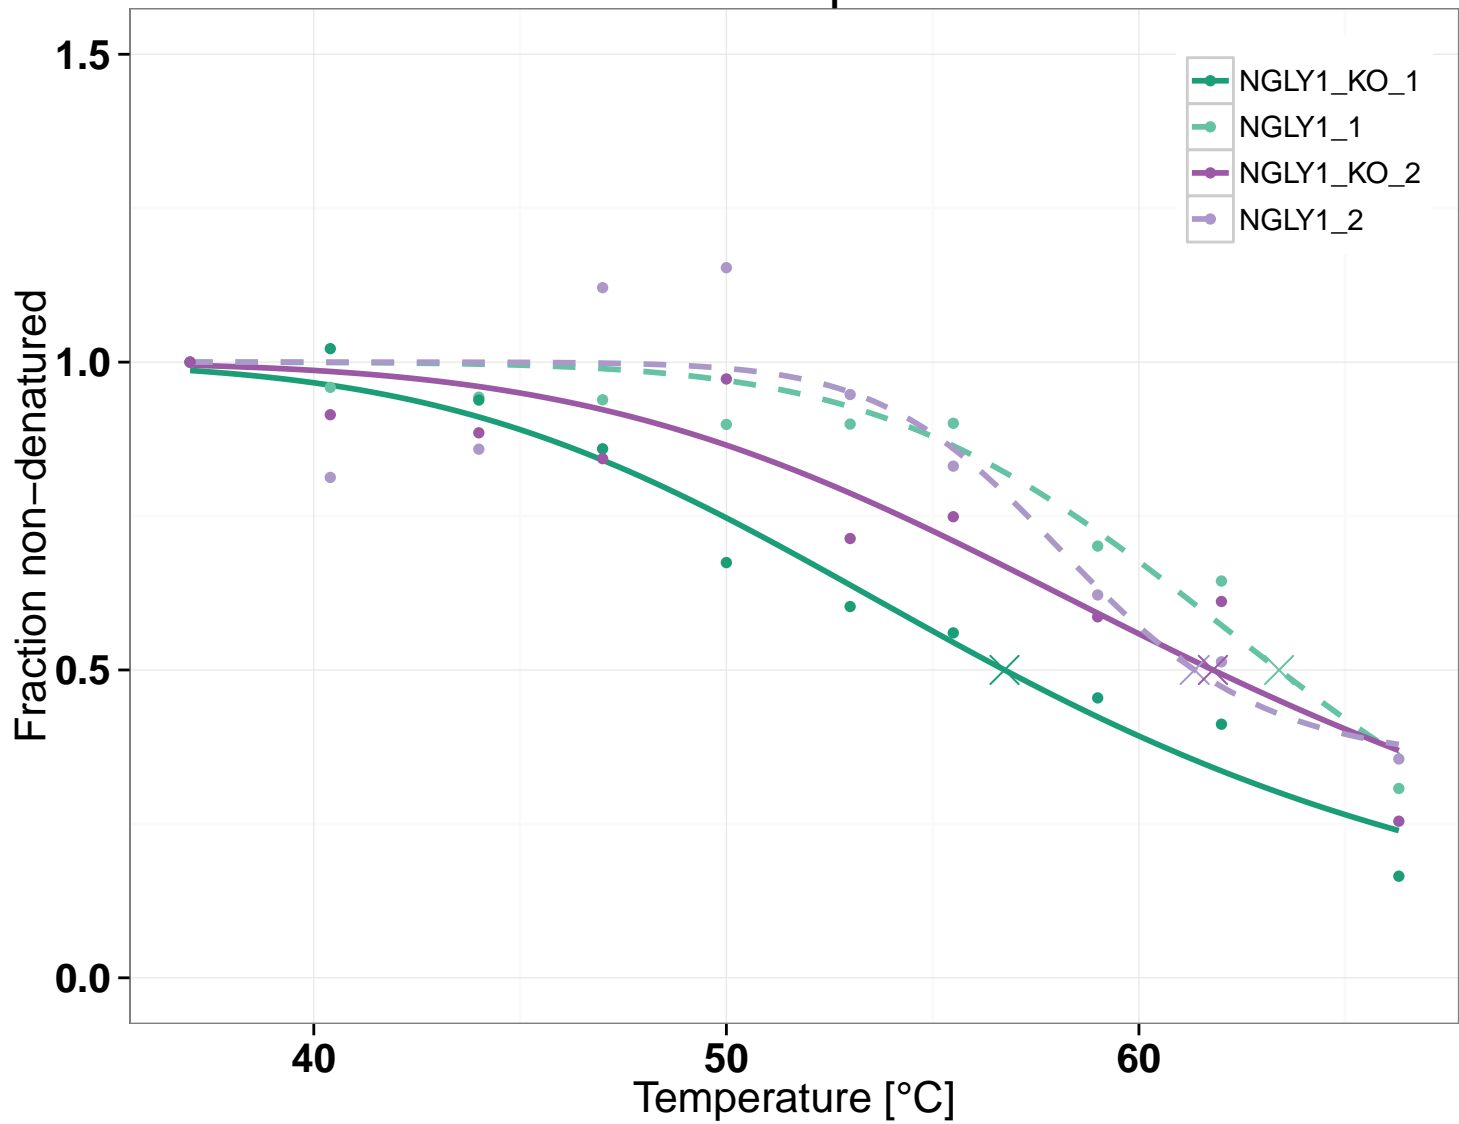

|            | meltPoint | slope  | plateau | R2   |
|------------|-----------|--------|---------|------|
| NGLY1_KO_1 | 56.74     | -0.038 | 0       | 0.97 |
| NGLY1_1    | 63.4      | -0.052 | 0       | 0.94 |
| NGLY1_KO_2 | 61.79     | -0.034 | 0       | 0.86 |
| NGLY1_2    | 61.35     | -0.069 | 0.35    | 0.83 |

Supplement: Supplementary file 4774 [file 1]

IPI00001600.1|C16ORF53

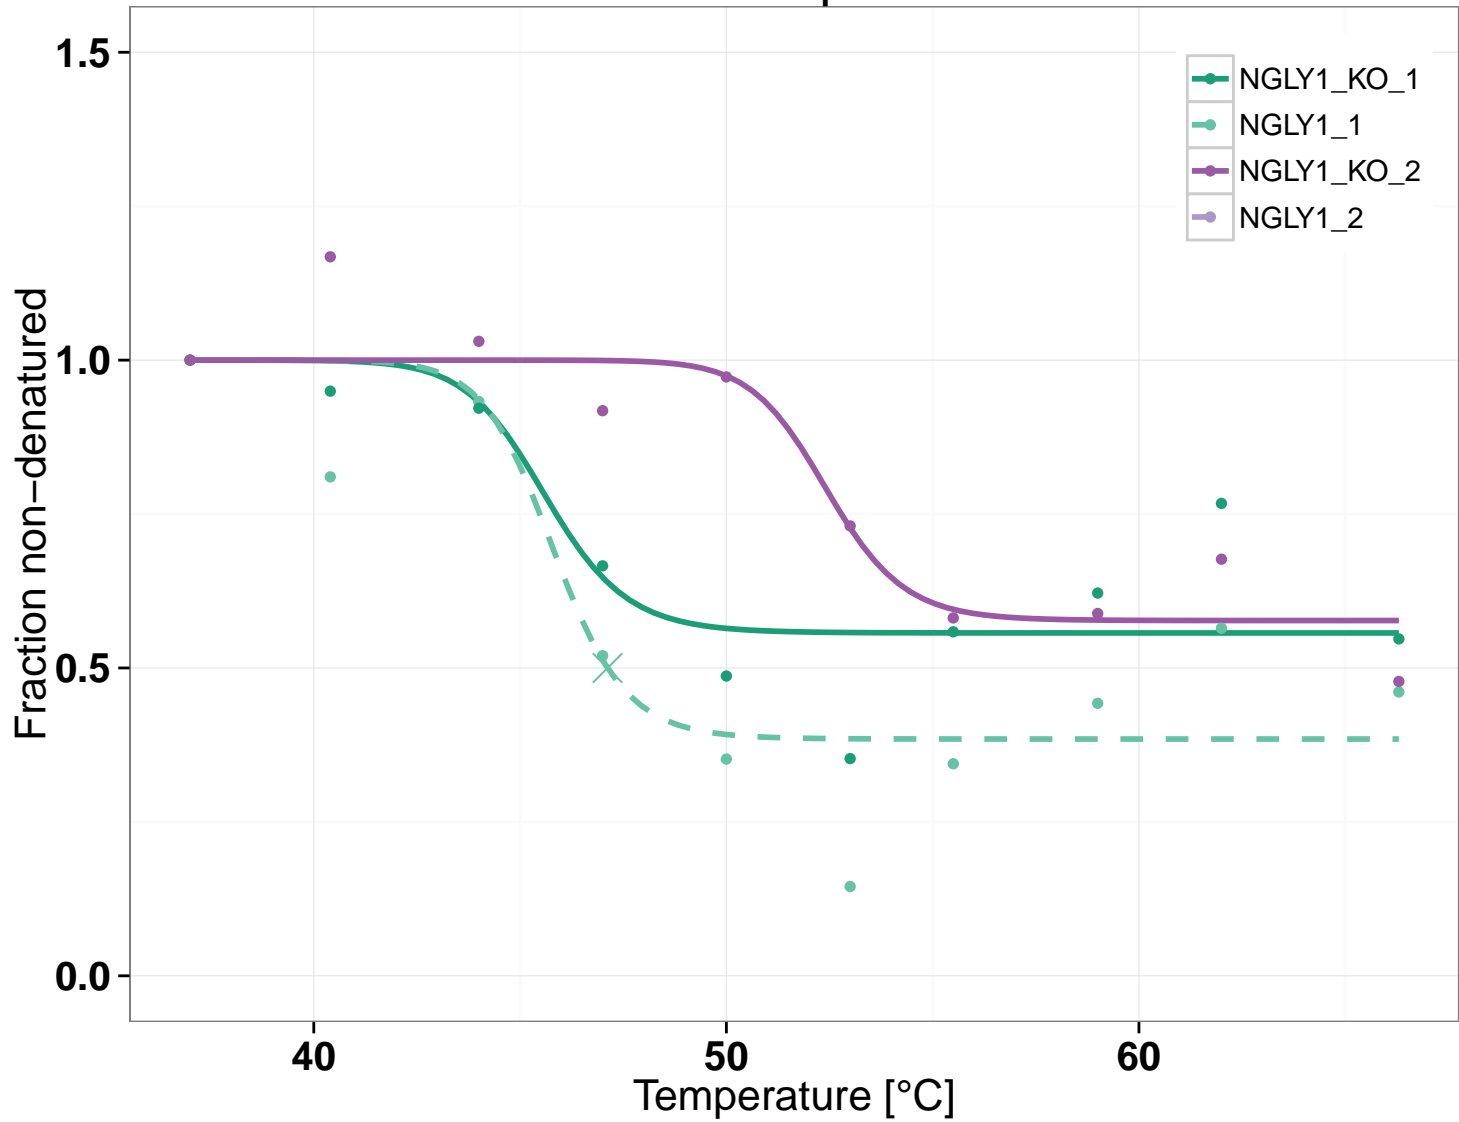

|            | meltPoint | slope | plateau | R2   |
|------------|-----------|-------|---------|------|
| NGLY1_KO_1 | -         | -0.11 | 0.56    | 0.76 |
| NGLY1_1    | 47.12     | -0.18 | 0.38    | 0.8  |
| NGLY1_KO_2 | -         | -0.11 | 0.58    | 0.89 |
| NGLY1_2    | -         | -     | -       | -    |

Supplement: Supplementary file 4775 [file 1]

IPI00008121.4|RIMKLB

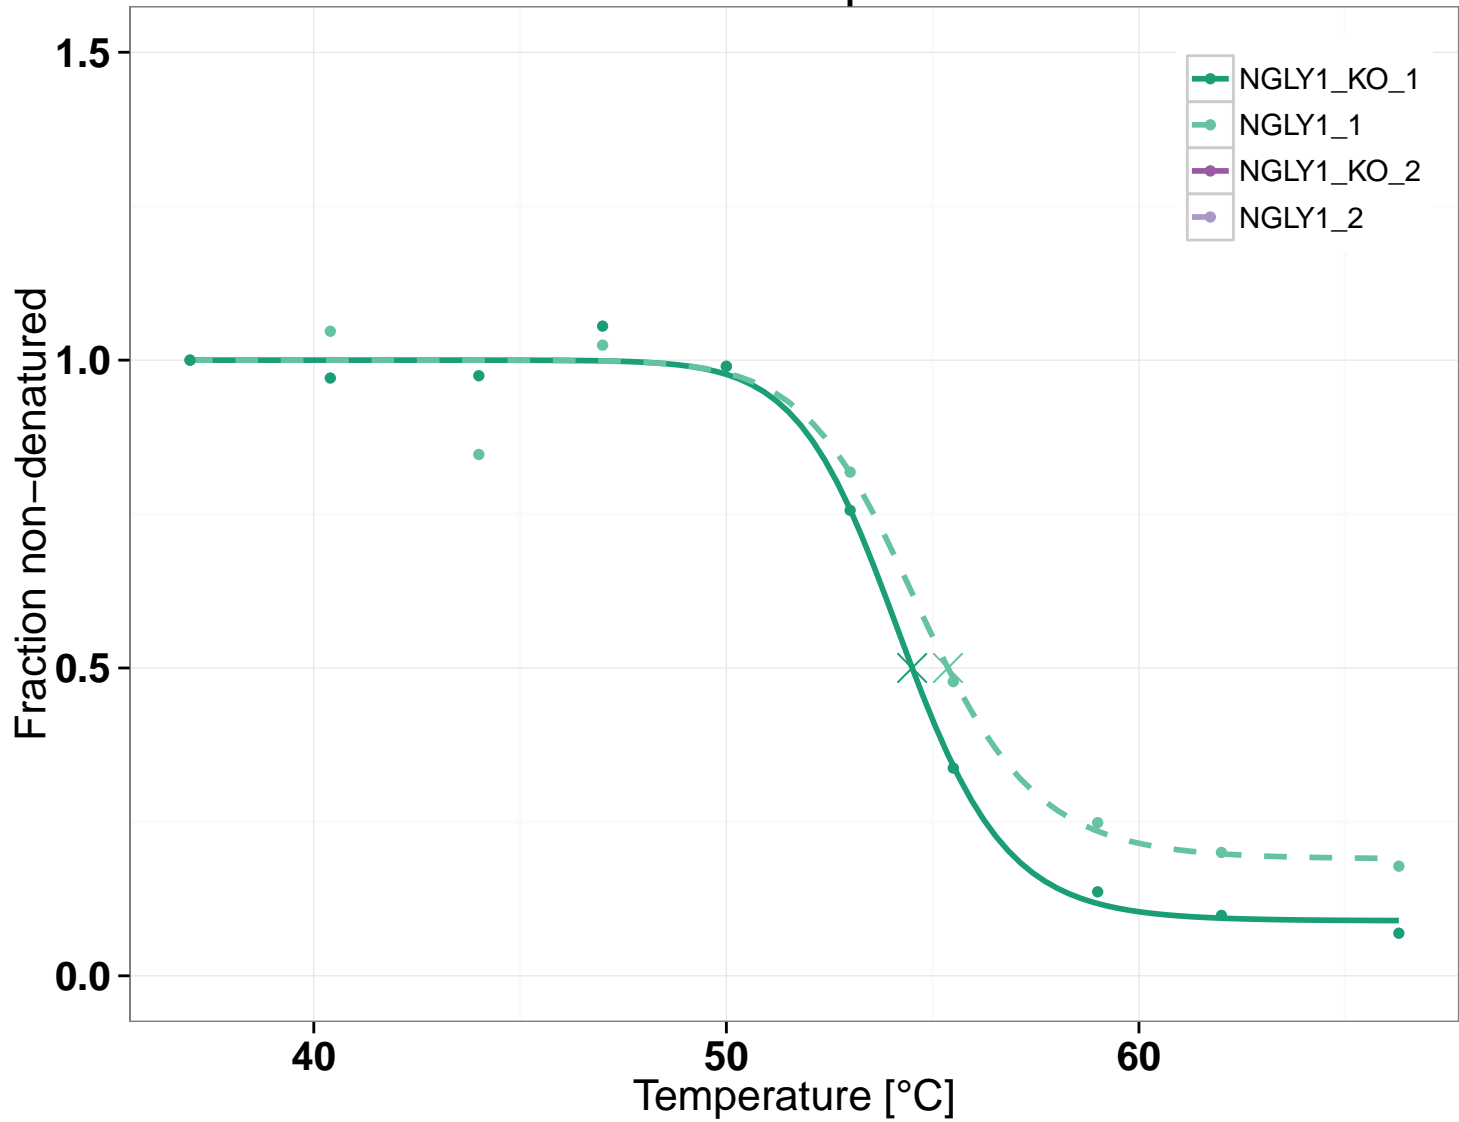

|            | meltPoint | slope | plateau | R2   |
|------------|-----------|-------|---------|------|
| NGLY1_KO_1 | 54.5      | -0.18 | 0.09    | 1    |
| NGLY1_1    | 55.37     | -0.14 | 0.19    | 0.98 |
| NGLY1_KO_2 | -         | -     | -       | -    |
| NGLY1_2    | -         | -     | -       | -    |

Supplement: Supplementary file 4776 [file 1]

# IPI00021174.1|GGA3

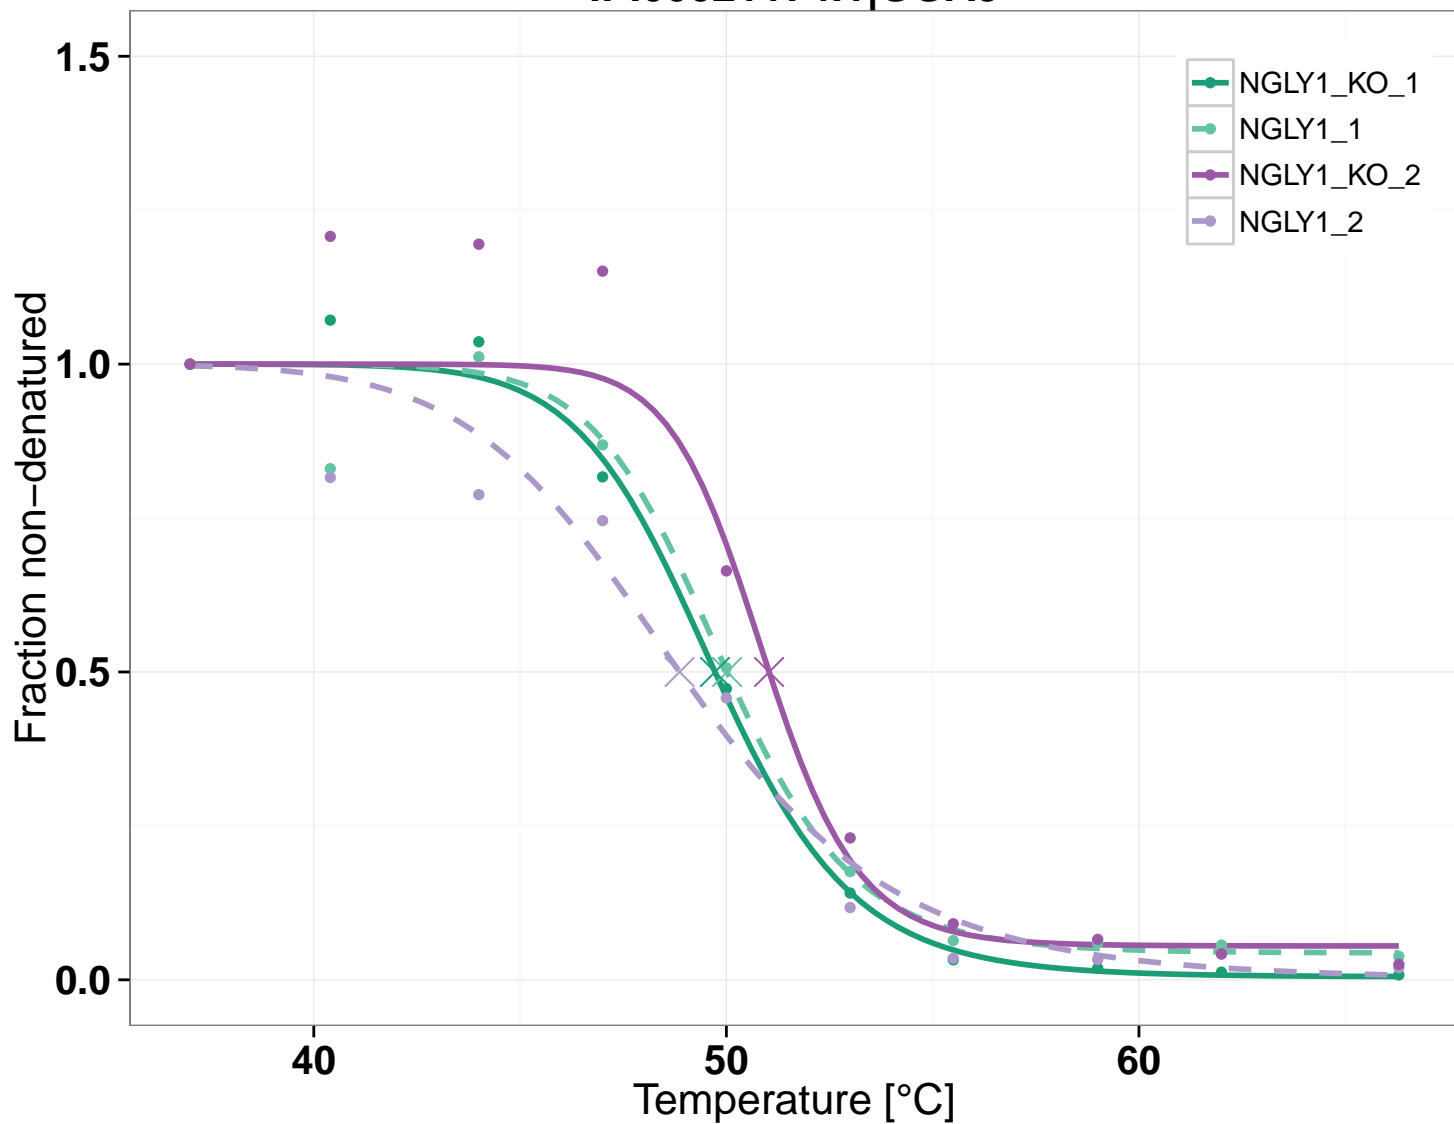

|            | meltPoint | slope  | plateau | R2   |
|------------|-----------|--------|---------|------|
| NGLY1_KO_1 | 49.72     | -0.15  | 0       | 1    |
| NGLY1_1    | 50.02     | -0.15  | 0.04    | 0.98 |
| NGLY1_KO_2 | 51.04     | -0.21  | 0.05    | 0.95 |
| NGLY1_2    | 48.87     | -0.096 | 0       | 0.96 |

Supplement: Supplementary file 4777 [file 1]

IPI00020540.4|TMEM126B

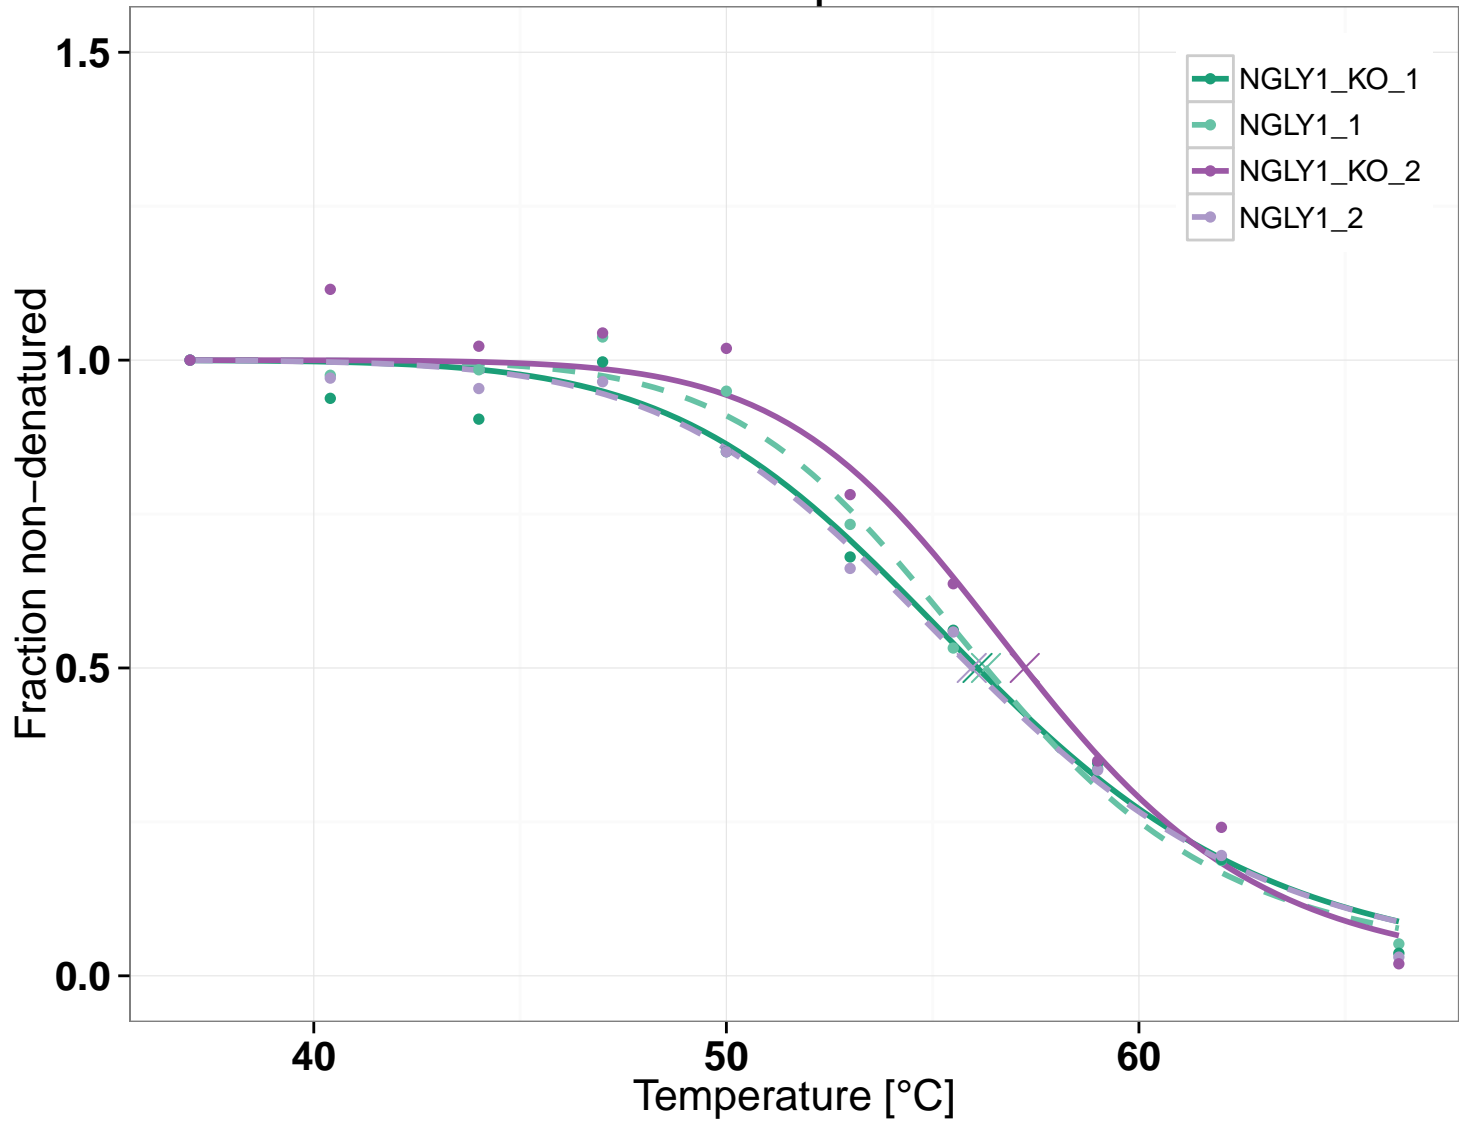

|            | meltPoint | slope  | plateau | R2   |
|------------|-----------|--------|---------|------|
| NGLY1_KO_1 | 56.09     | -0.069 | 0       | 0.98 |
| NGLY1_1    | 56.29     | -0.082 | 0.02    | 0.99 |
| NGLY1_KO_2 | 57.23     | -0.086 | 0       | 0.98 |
| NGLY1_2    | 55.95     | -0.068 | 0       | 0.99 |

Supplement: Supplementary file 4778 [file 1]

IPI00299906.4|HIF1AN

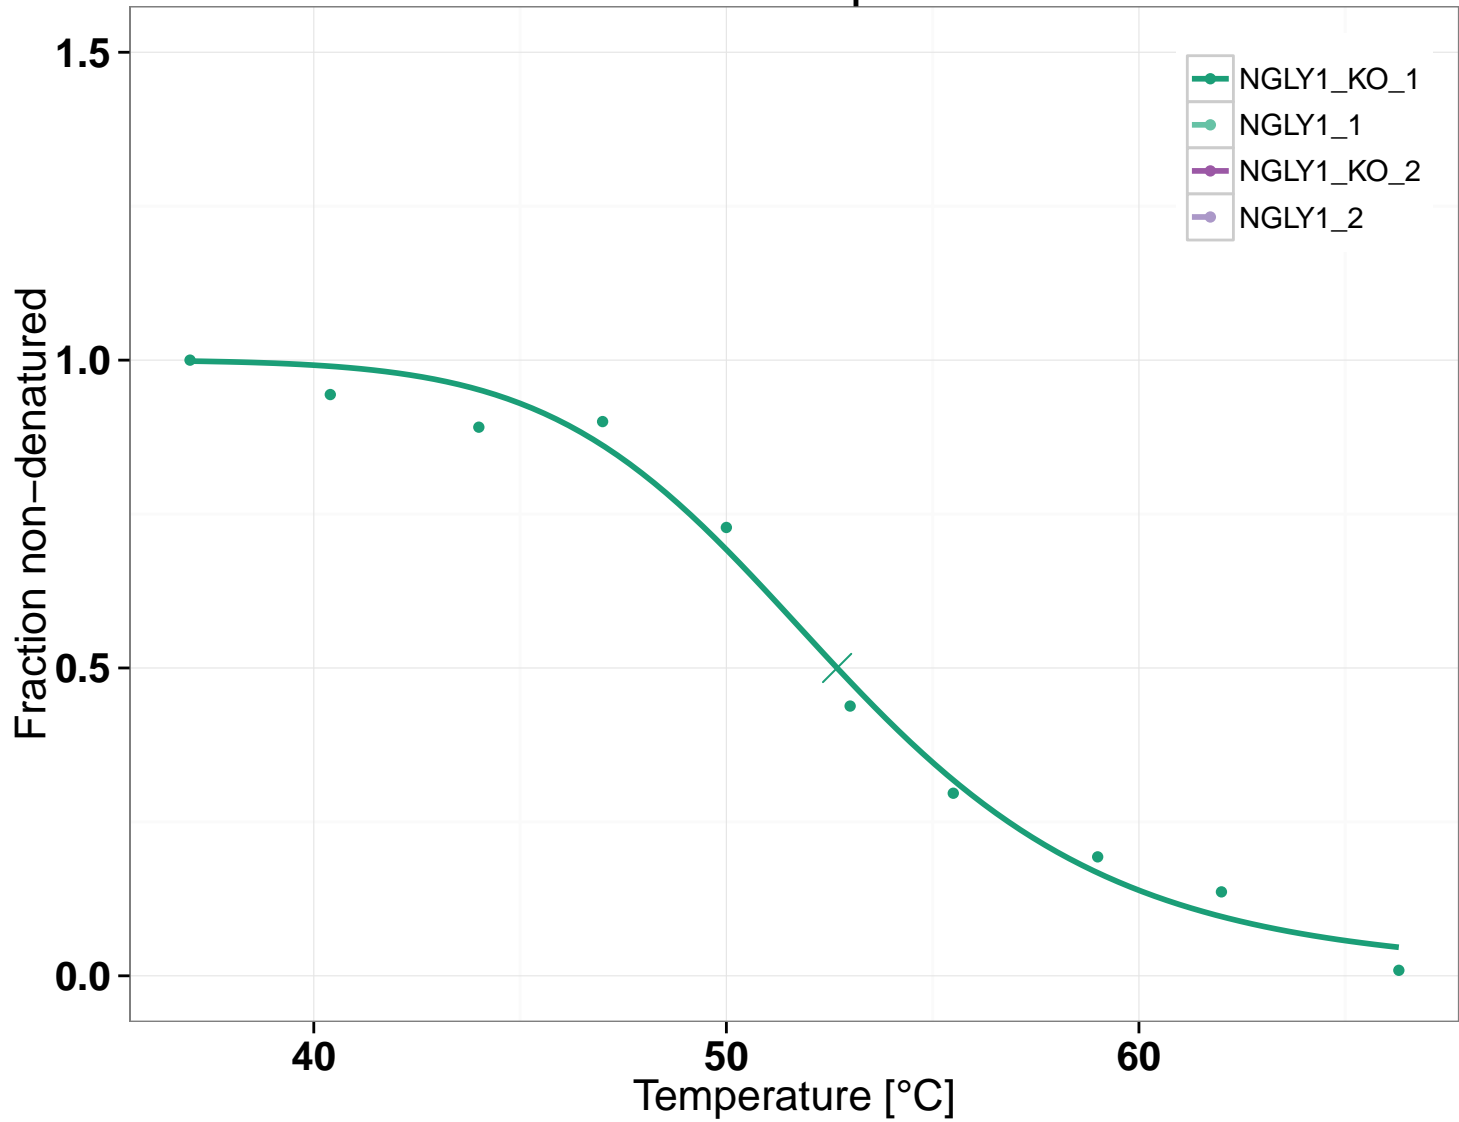

|            | meltPoint | slope  | plateau | R2   |
|------------|-----------|--------|---------|------|
| NGLY1_KO_1 | 52.68     | -0.073 | 0       | 0.99 |
| NGLY1_1    | -         | -      | -       | -    |
| NGLY1_KO_2 | -         | -      | -       | -    |
| NGLY1_2    | -         | -      | -       | -    |

Supplement: Supplementary file 4779 [file 1]

# IPI00012315.2|NME3

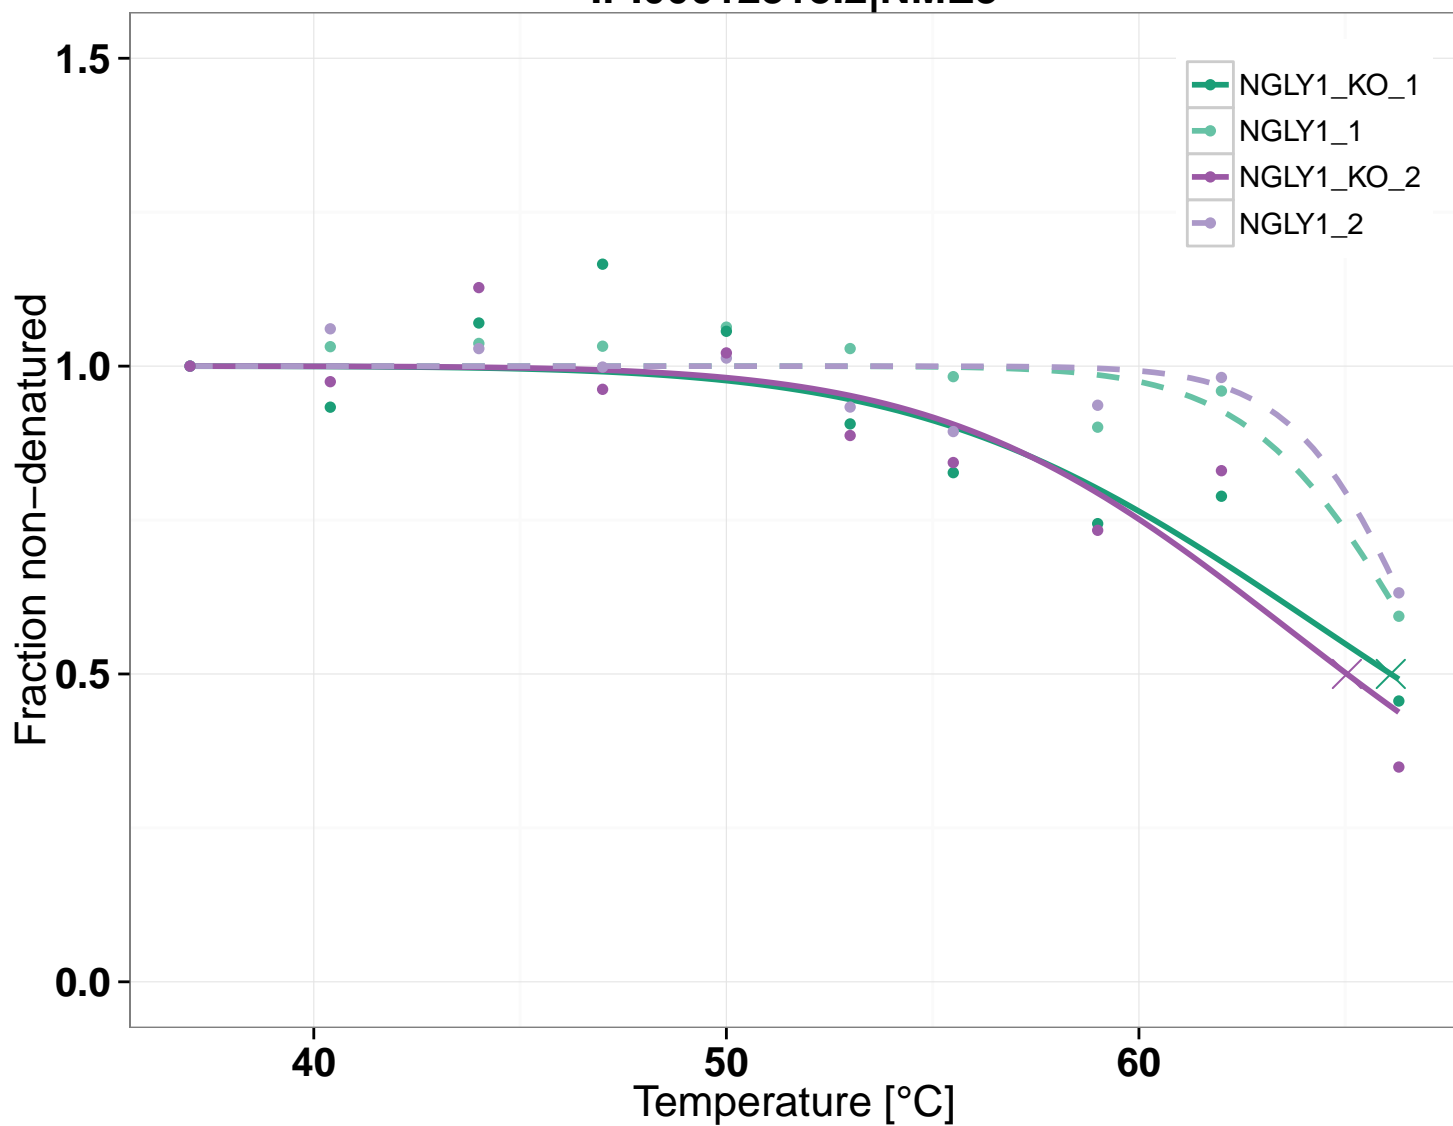

|            | meltPoint | slope  | plateau | R2   |
|------------|-----------|--------|---------|------|
| NGLY1_KO_1 | 66.1      | -0.045 | 0       | 0.81 |
| NGLY1_1    | –         | –      | 0       | 0.9  |
| NGLY1_KO_2 | 65.04     | -0.052 | 0       | 0.83 |
| NGLY1_2    | –         | –      | 0       | 0.82 |

Supplement: Supplementary file 4780 [file 1]

# IPI00019495.1|DYNLT1

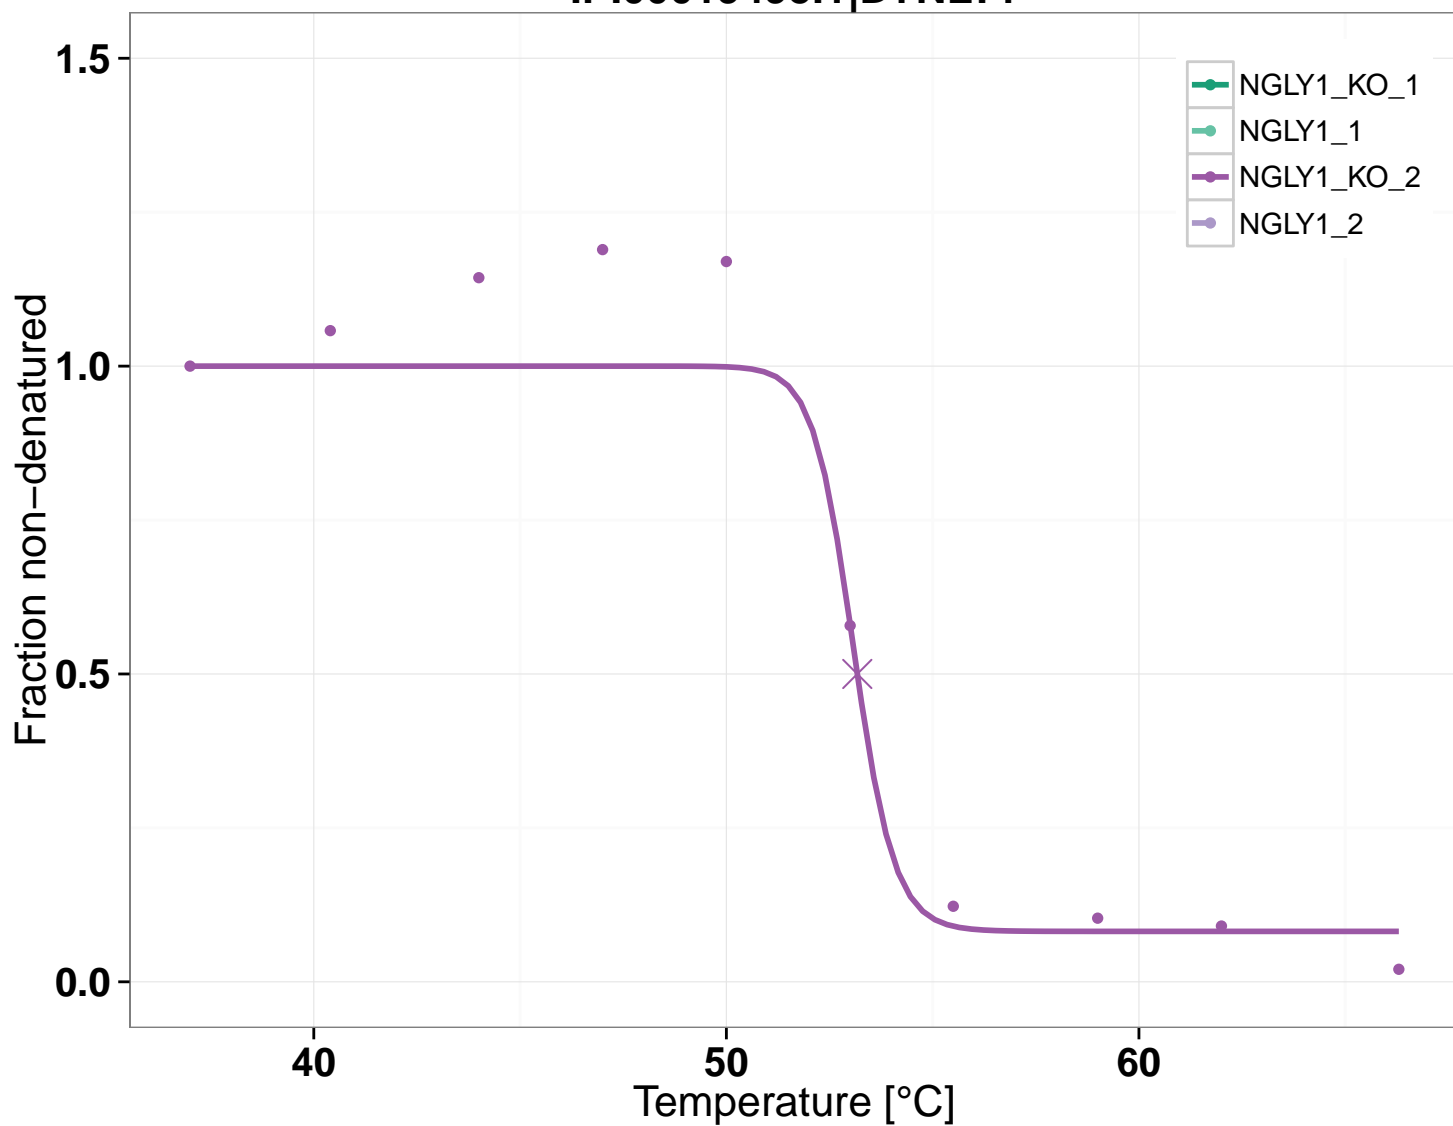

|            | meltPoint | slope | plateau | R2   |
|------------|-----------|-------|---------|------|
| NGLY1_KO_1 | —         | —     | —       | —    |
| NGLY1_1    | —         | —     | —       | —    |
| NGLY1_KO_2 | 53.17     | -0.47 | 0.08    | 0.96 |
| NGLY1_2    | —         | —     | —       | —    |

Supplement: Supplementary file 4781 [file 1]

IPI00065500.3|C1ORF58

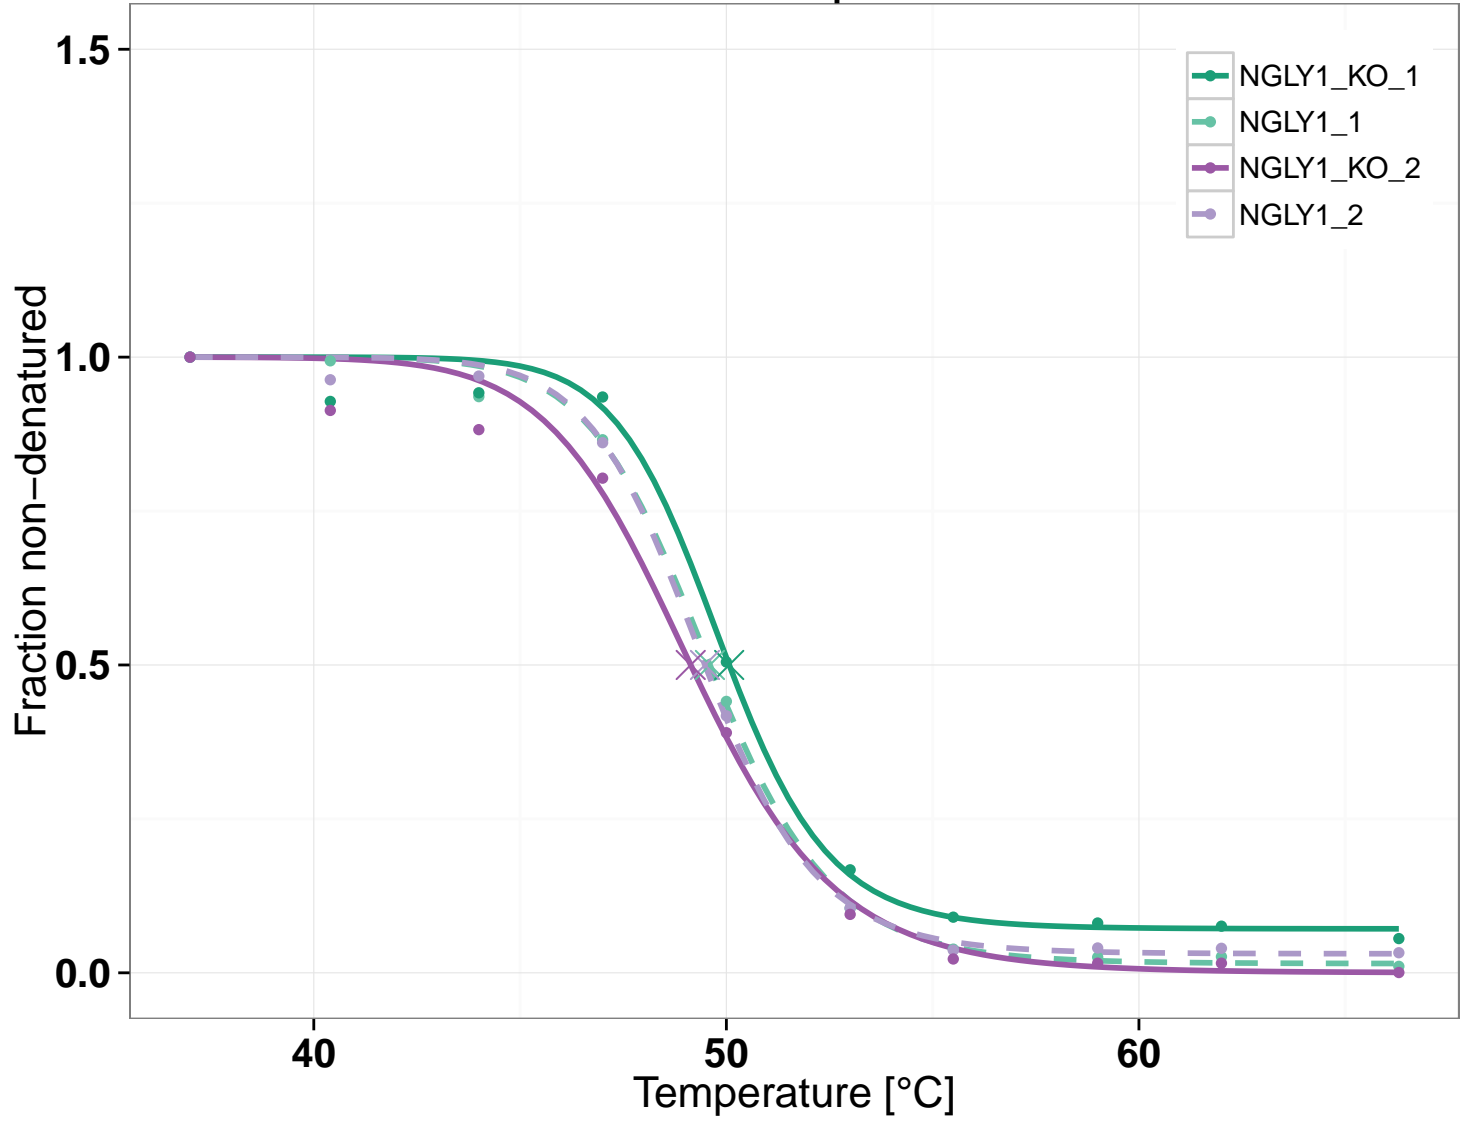

|            | meltPoint | slope | plateau | R2   |
|------------|-----------|-------|---------|------|
| NGLY1_KO_1 | 50.07     | -0.18 | 0.07    | 0.99 |
| NGLY1_1    | 49.6      | -0.17 | 0.01    | 1    |
| NGLY1_KO_2 | 49.14     | -0.14 | 0       | 0.99 |
| NGLY1_2    | 49.48     | -0.17 | 0.03    | 1    |

Supplement: Supplementary file 4782 [file 1]

IPI00295889.2|SRP19

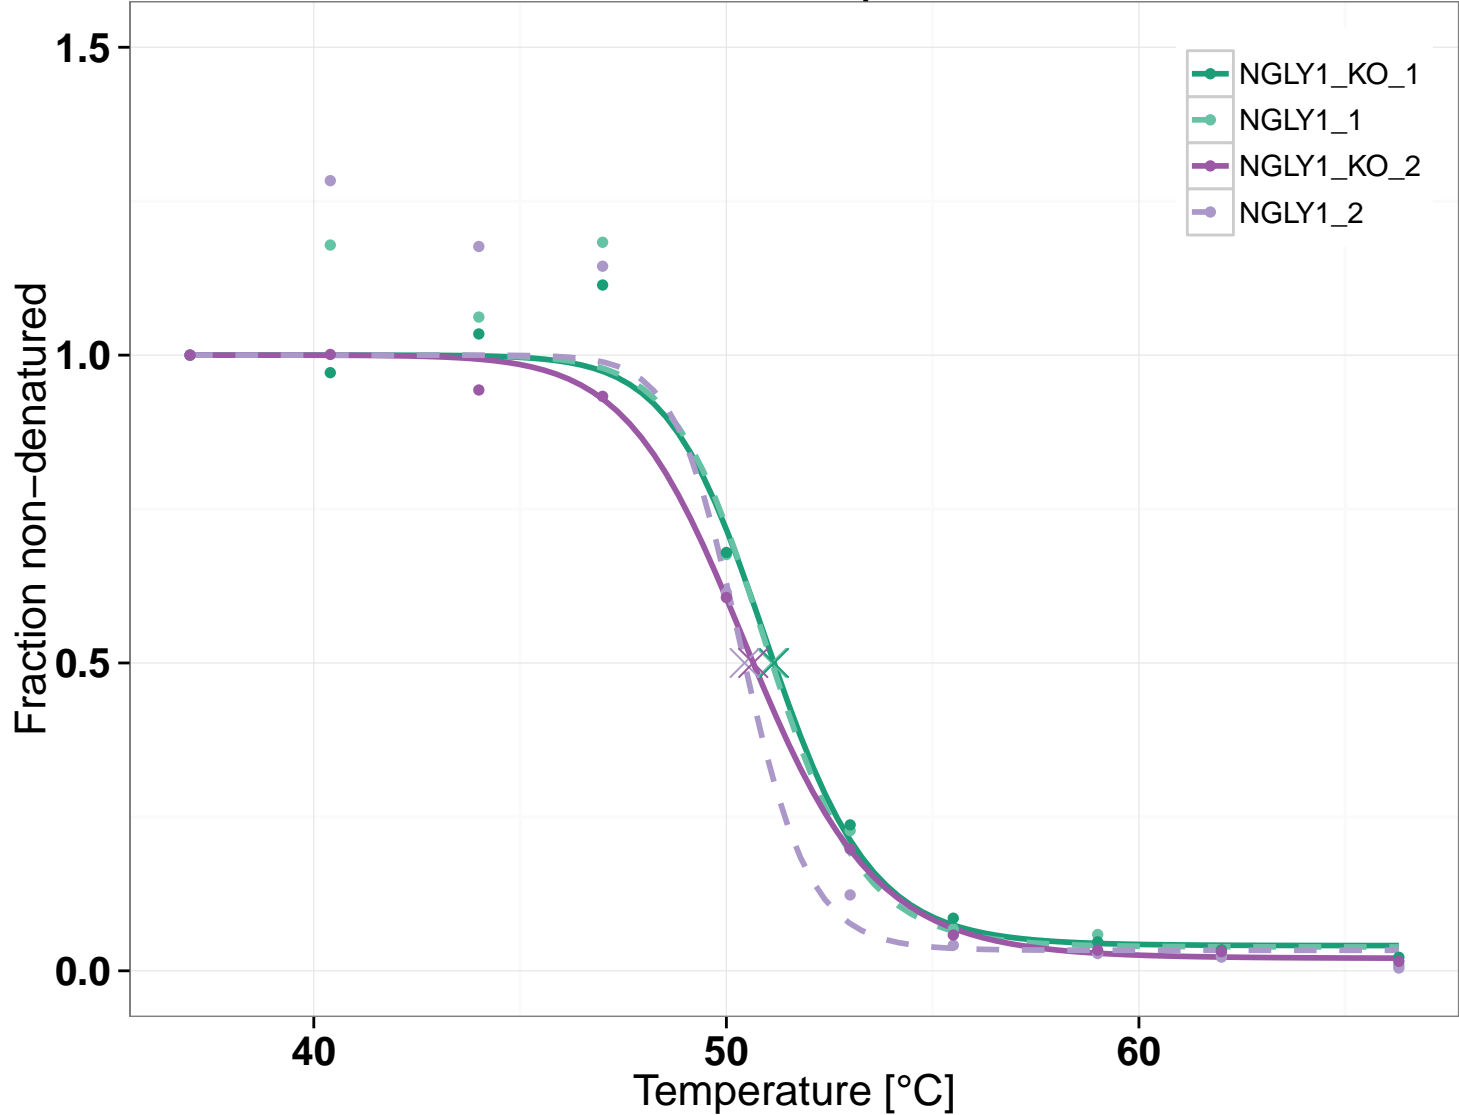

|            | meltPoint | slope | plateau | R2   |
|------------|-----------|-------|---------|------|
| NGLY1_KO_1 | 51.15     | -0.2  | 0.04    | 0.99 |
| NGLY1_1    | 51.1      | -0.21 | 0.04    | 0.97 |
| NGLY1_KO_2 | 50.65     | -0.16 | 0.02    | 1    |
| NGLY1_2    | 50.44     | -0.3  | 0.03    | 0.95 |

Supplement: Supplementary file 4783 [file 1]

# IPI00011654.2|TUBB

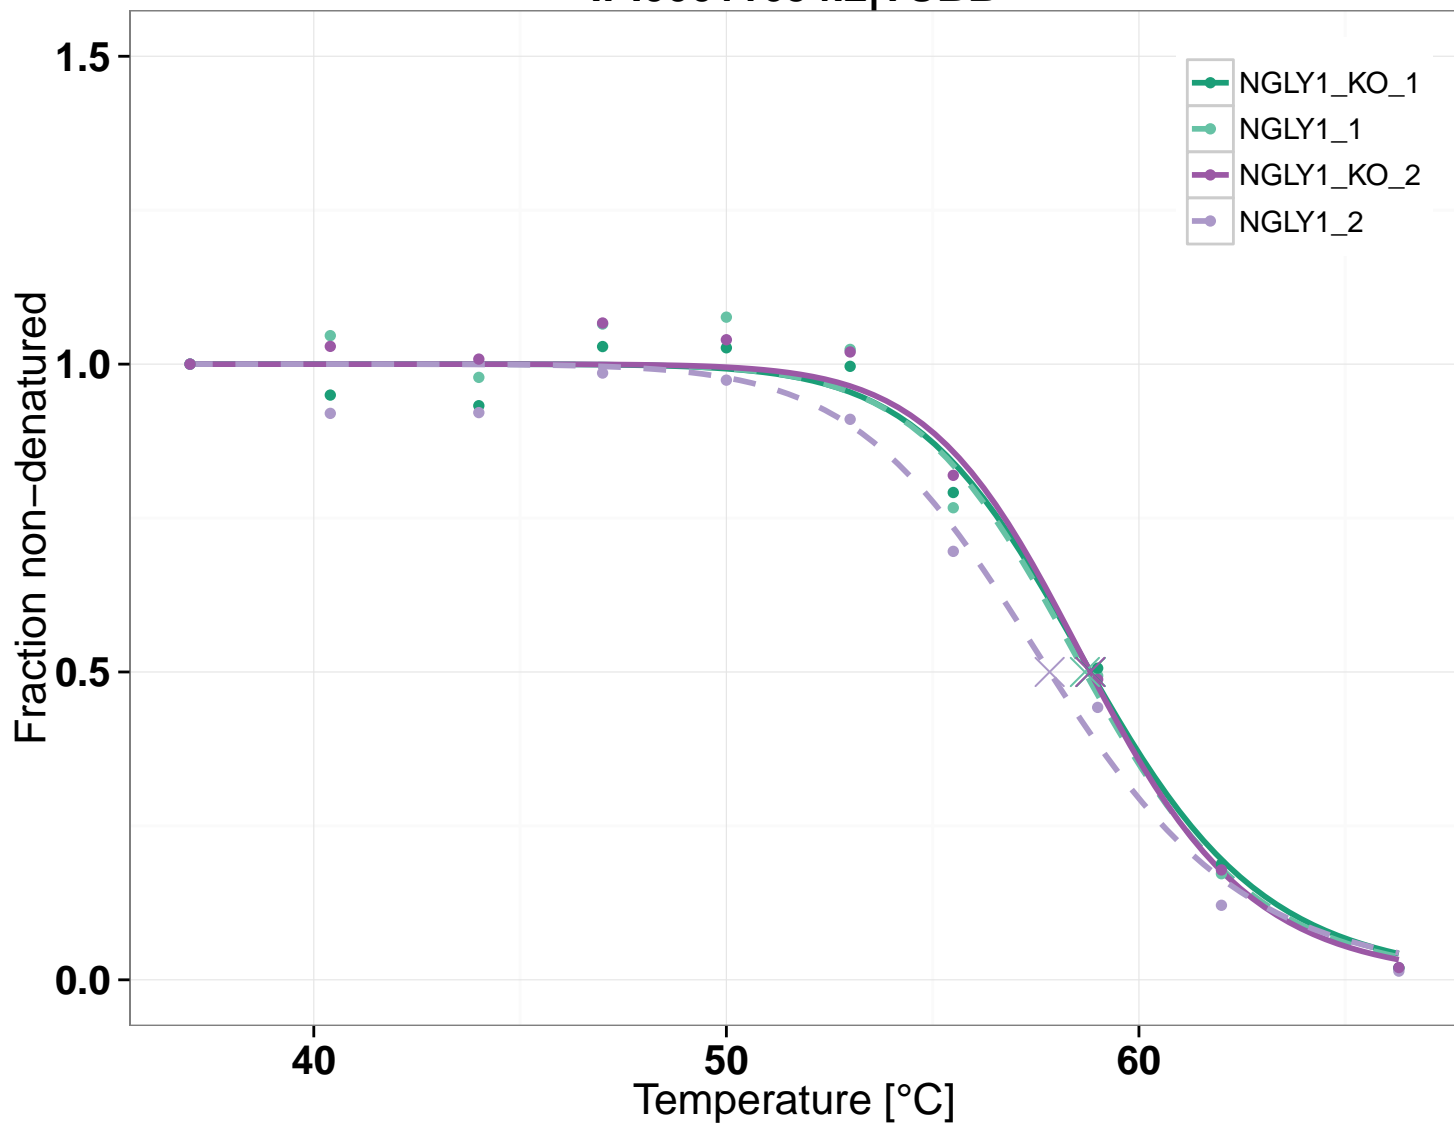

|            | meltPoint | slope | plateau | R2   |
|------------|-----------|-------|---------|------|
| NGLY1_KO_1 | 58.83     | -0.12 | 0       | 0.99 |
| NGLY1_1    | 58.69     | -0.12 | 0       | 0.98 |
| NGLY1_KO_2 | 58.82     | -0.13 | 0       | 0.99 |
| NGLY1_2    | 57.84     | -0.11 | 0       | 0.98 |

Supplement: Supplementary file 4784 [file 1]

# IPI00872684.1|EZR

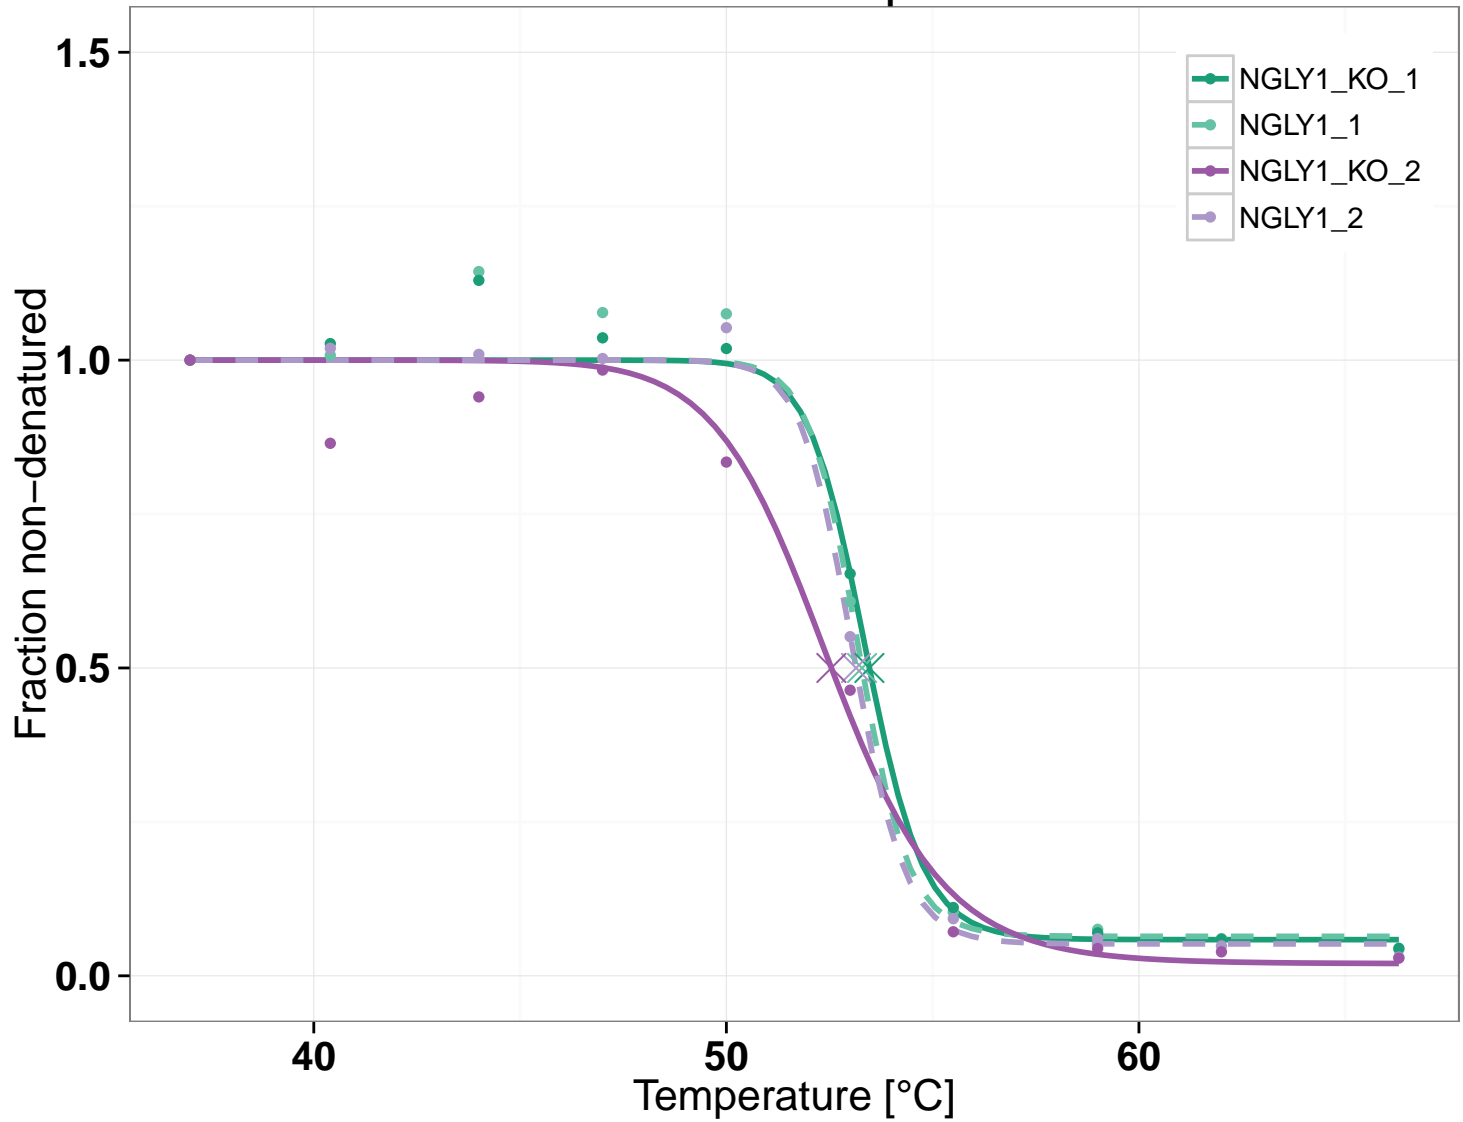

|            | meltPoint | slope | plateau | R2   |
|------------|-----------|-------|---------|------|
| NGLY1_KO_1 | 53.47     | -0.34 | 0.06    | 0.99 |
| NGLY1_1    | 53.29     | -0.38 | 0.06    | 0.98 |
| NGLY1_KO_2 | 52.55     | -0.18 | 0.02    | 0.98 |
| NGLY1_2    | 53.14     | -0.38 | 0.05    | 1    |

Supplement: Supplementary file 4785 [file 1]

# IPI00908403.1|ARL2

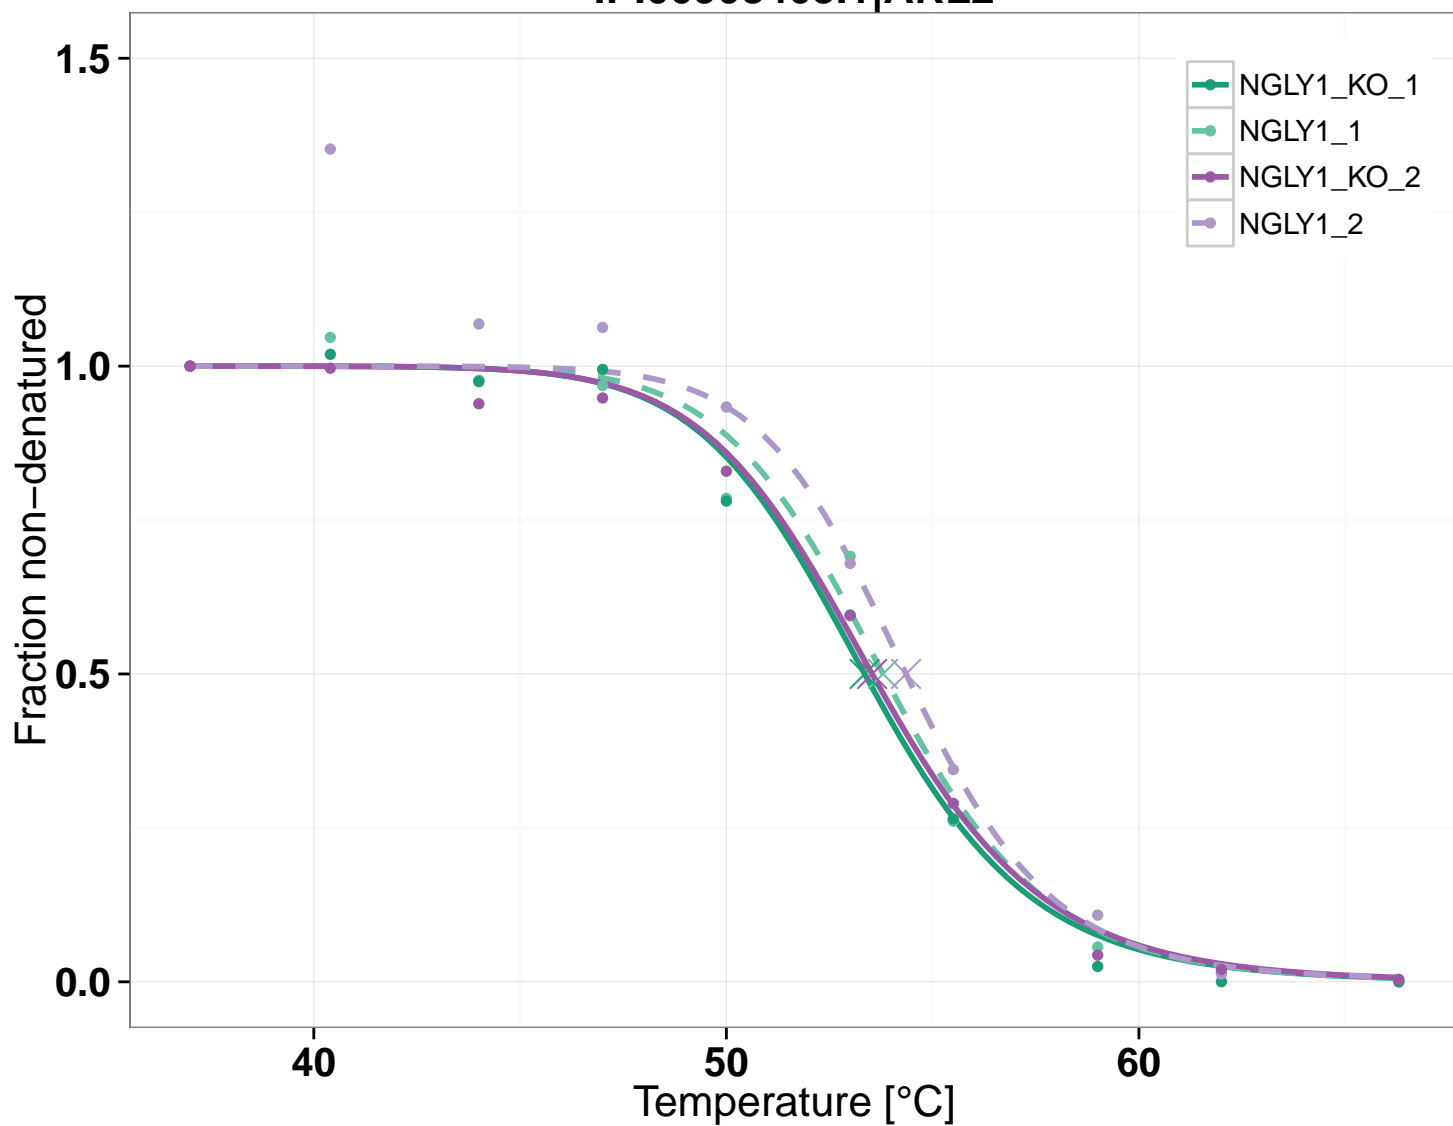

|            | meltPoint | slope | plateau | R2   |
|------------|-----------|-------|---------|------|
| NGLY1_KO_1 | 53.35     | -0.12 | 0       | 0.99 |
| NGLY1_1    | 53.8      | -0.13 | 0       | 0.99 |
| NGLY1_KO_2 | 53.53     | -0.12 | 0       | 1    |
| NGLY1_2    | 54.35     | -0.14 | 0       | 0.94 |

Supplement: Supplementary file 4786 [file 1]

IPI00004350.1|GTF2A1

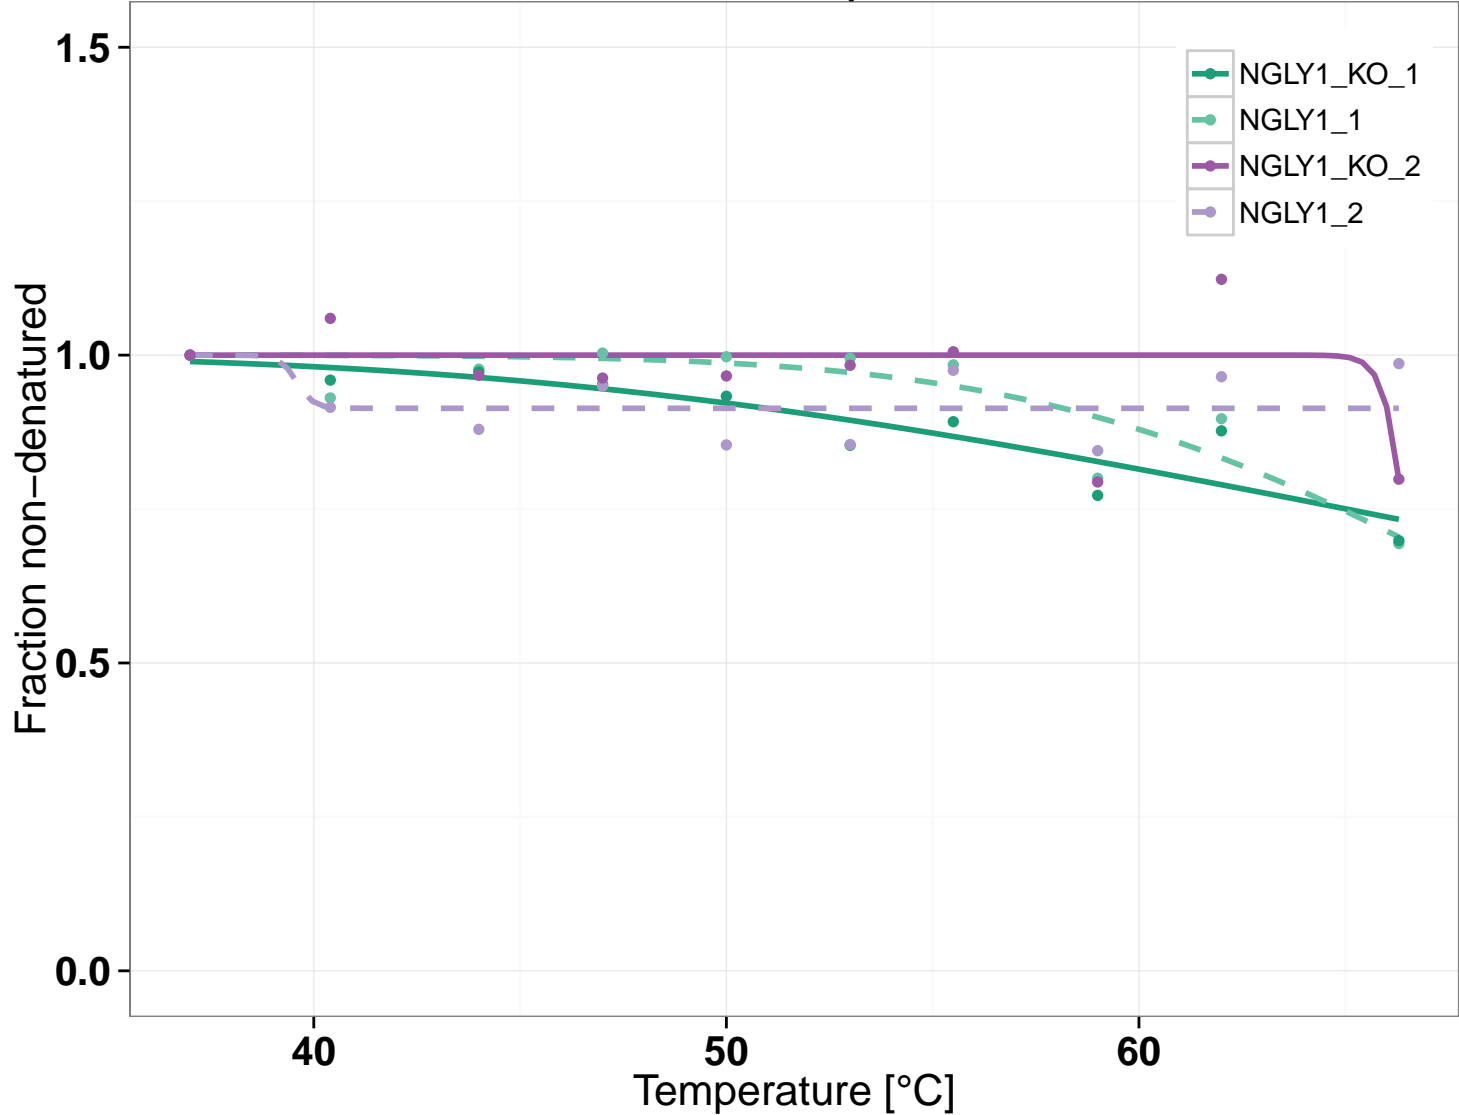

|            | meltPoint | slope | plateau | R2   |
|------------|-----------|-------|---------|------|
| NGLY1_KO_1 | -         | -     | 0       | 0.82 |
| NGLY1_1    | -         | -     | 0       | 0.79 |
| NGLY1_KO_2 | -         | -     | 0       | 0.31 |
| NGLY1_2    | -         | -0.11 | 0.91    | 0.21 |

Supplement: Supplementary file 4787 [file 1]

IPI00643365.2|ALG11

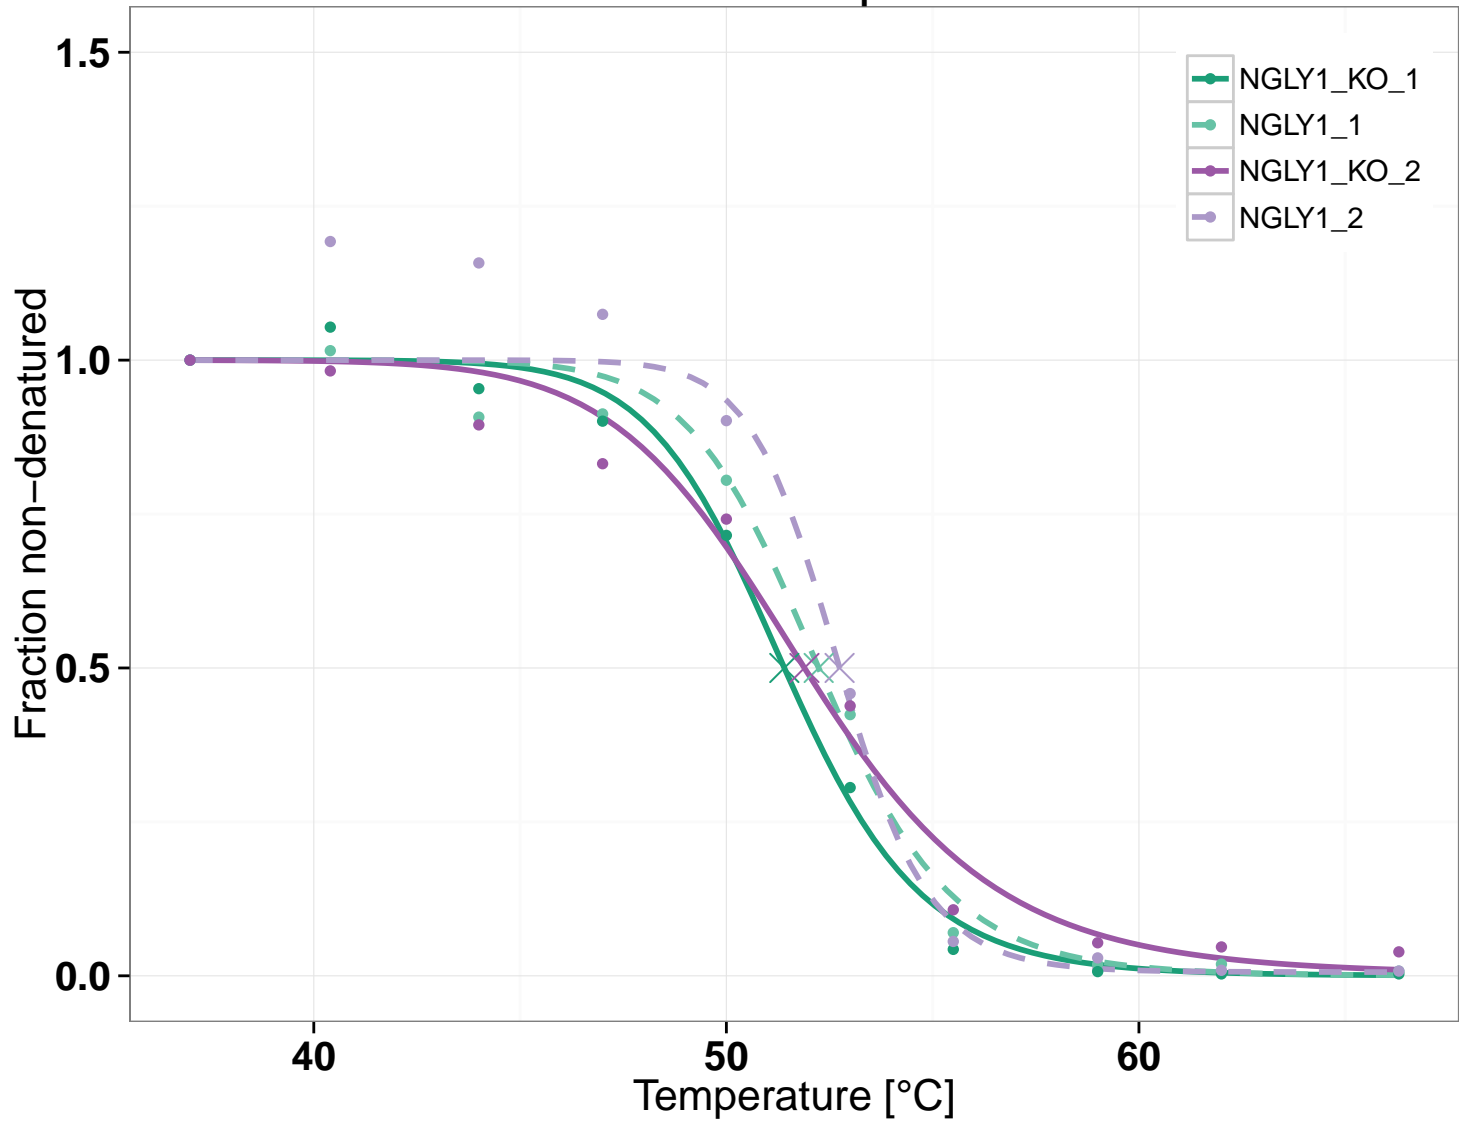

|            | meltPoint | slope | plateau | R2   |
|------------|-----------|-------|---------|------|
| NGLY1_KO_1 | 51.41     | -0.15 | 0       | 0.99 |
| NGLY1_1    | 52.24     | -0.16 | 0       | 0.99 |
| NGLY1_KO_2 | 51.89     | -0.11 | 0       | 0.98 |
| NGLY1_2    | 52.74     | -0.23 | 0.01    | 0.97 |

Supplement: Supplementary file 4789 [file 1]

IPI00007401.1|IPO8

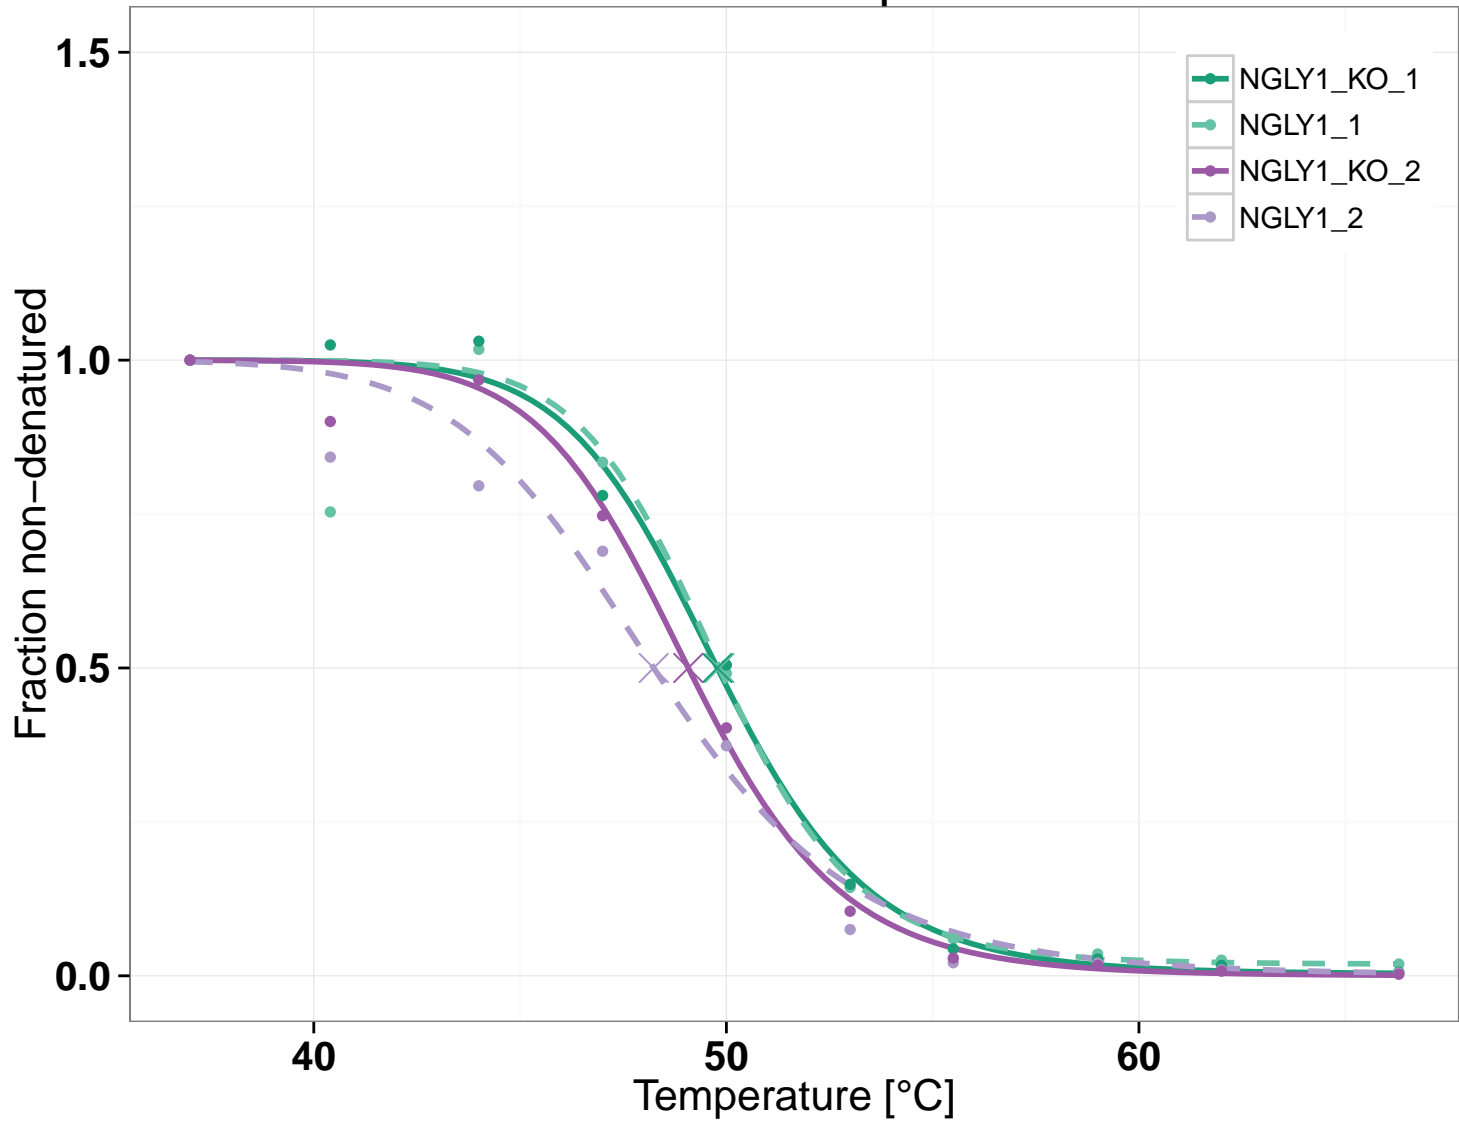

|            | meltPoint | slope | plateau | R2   |
|------------|-----------|-------|---------|------|
| NGLY1_KO_1 | 49.78     | -0.13 | 0       | 1    |
| NGLY1_1    | 49.83     | -0.15 | 0.02    | 0.96 |
| NGLY1_KO_2 | 49.08     | -0.14 | 0       | 0.99 |
| NGLY1_2    | 48.24     | -0.1  | 0       | 0.98 |

Supplement: Supplementary file 4790 [file 1]

IPI00013677.1|MED21

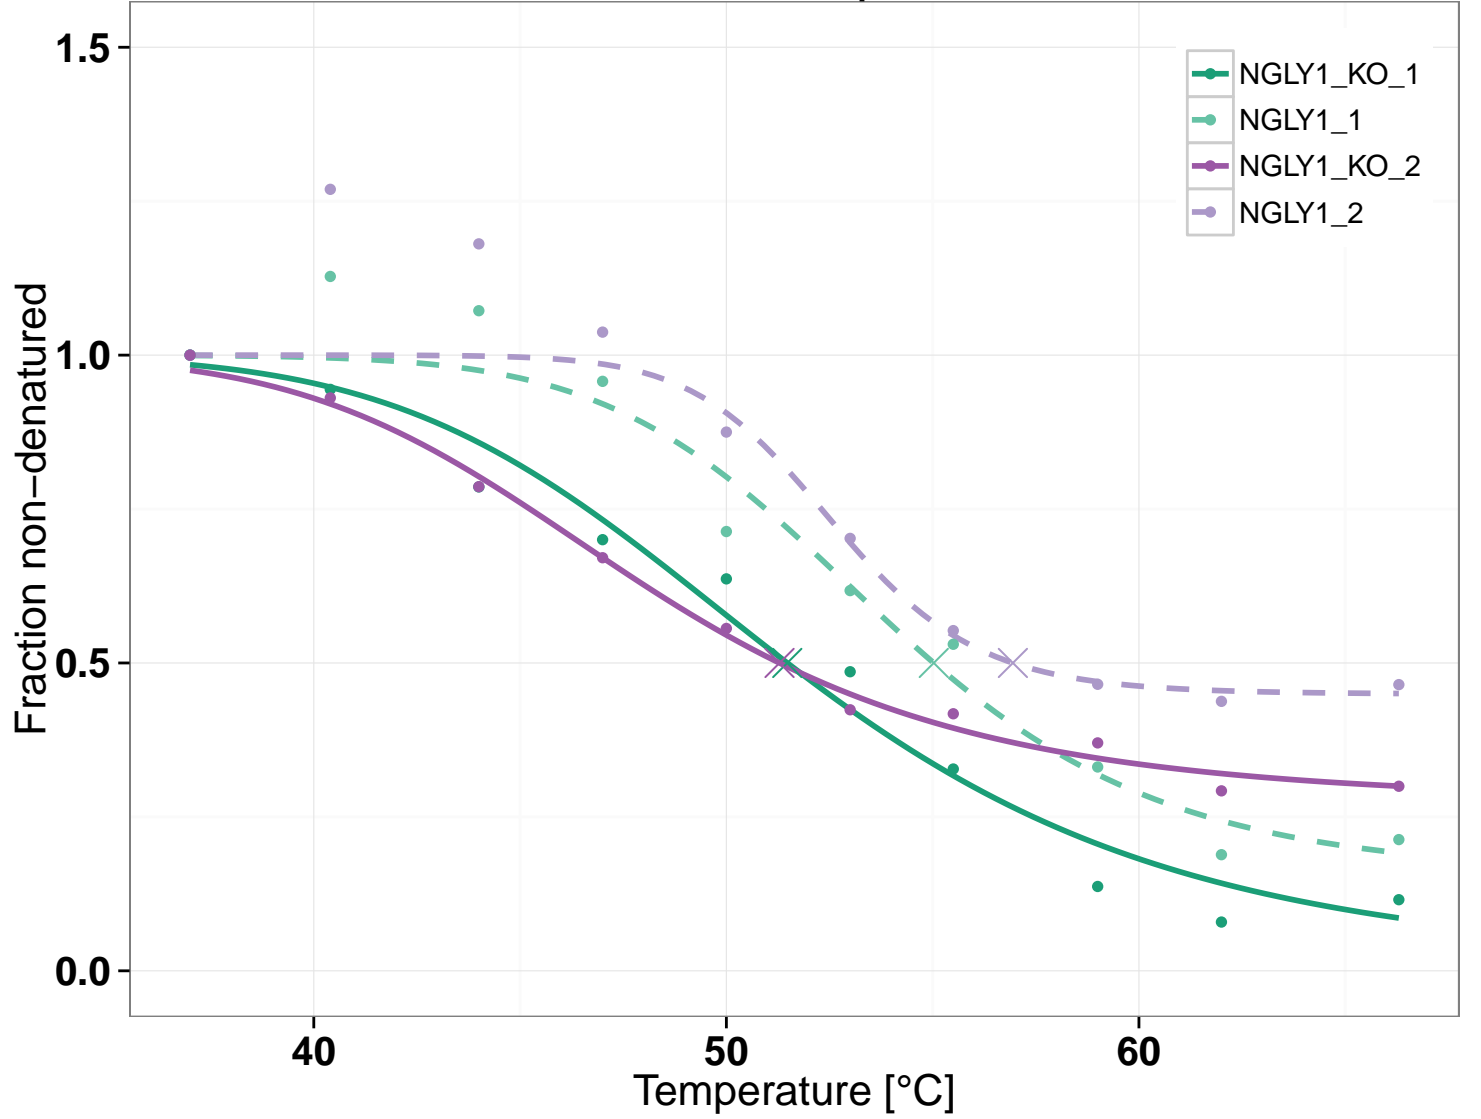

|            | meltPoint | slope  | plateau | R2   |
|------------|-----------|--------|---------|------|
| NGLY1_KO_1 | 51.48     | -0.053 | 0       | 0.98 |
| NGLY1_1    | 55.03     | -0.063 | 0.15    | 0.96 |
| NGLY1_KO_2 | 51.29     | -0.045 | 0.27    | 0.99 |
| NGLY1_2    | 56.95     | -0.079 | 0.45    | 0.88 |

Supplement: Supplementary file 4791 [file 1]

# IPI00303161.3|ESAM

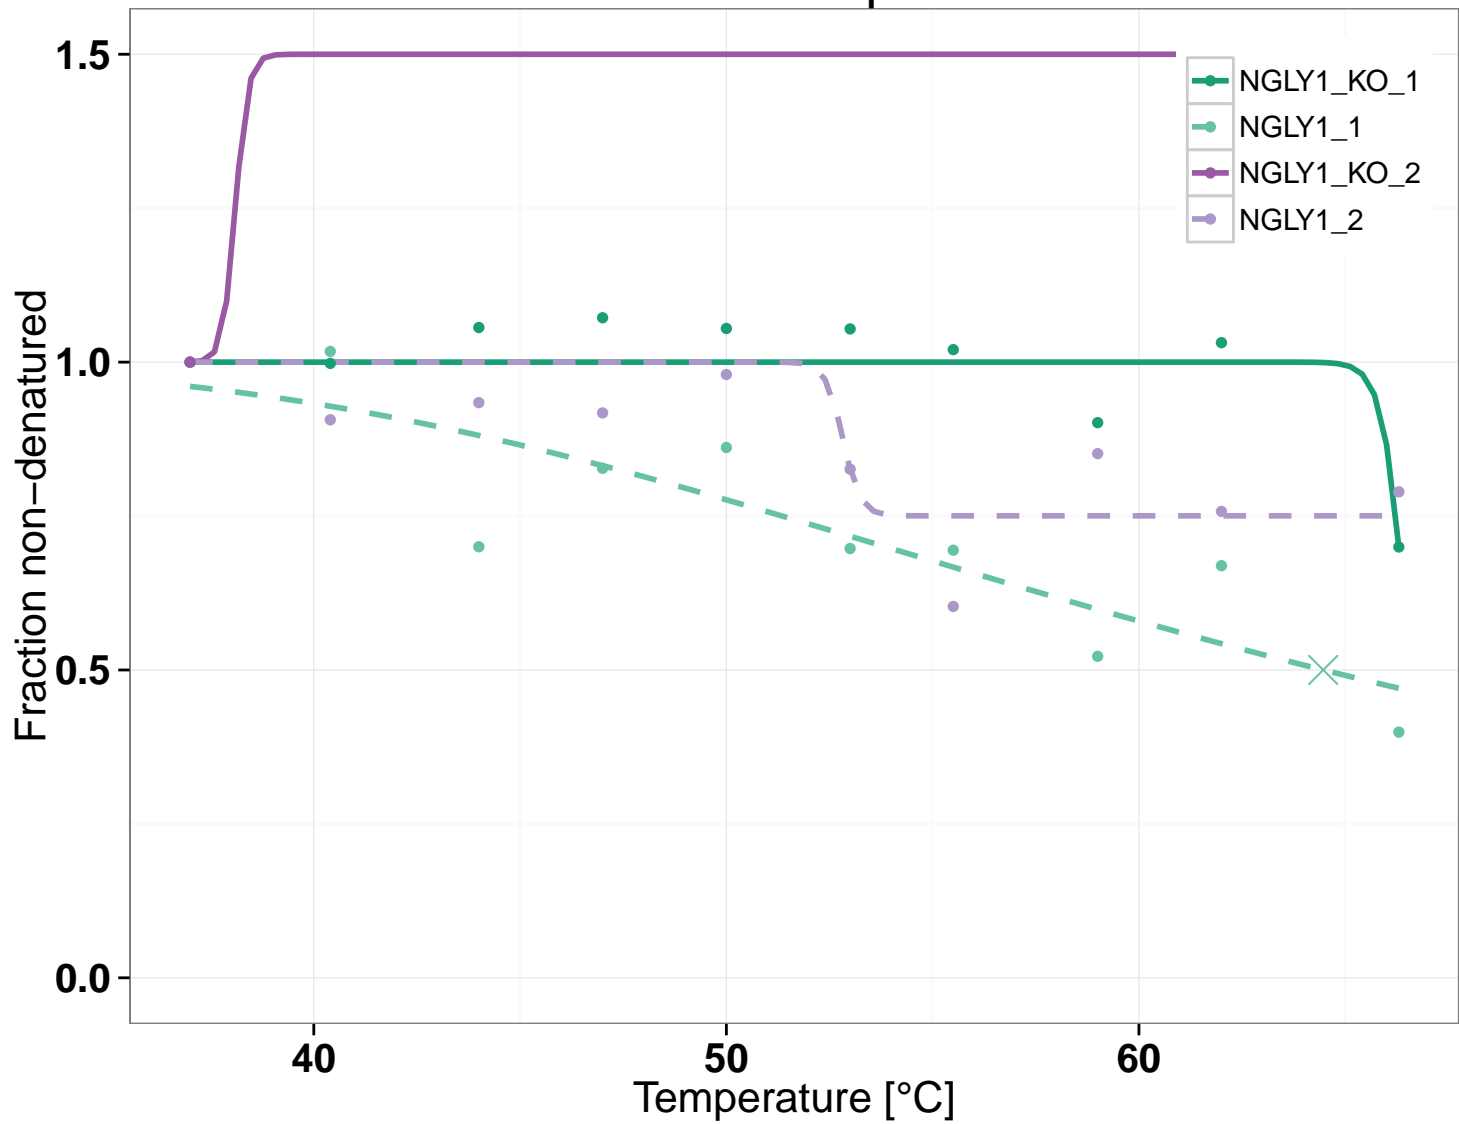

|            | meltPoint | slope | plateau | R2    |
|------------|-----------|-------|---------|-------|
| NGLY1_KO_1 | -         | -     | 0       | 0.78  |
| NGLY1_1    | 64.47     | -0.02 | 0       | 0.77  |
| NGLY1_KO_2 | -         | 0.82  | 1.5     | -0.76 |
| NGLY1_2    | -         | -0.3  | 0.75    | 0.58  |

Supplement: Supplementary file 4792 [file 1]

# IPI00377071.2|SSH2

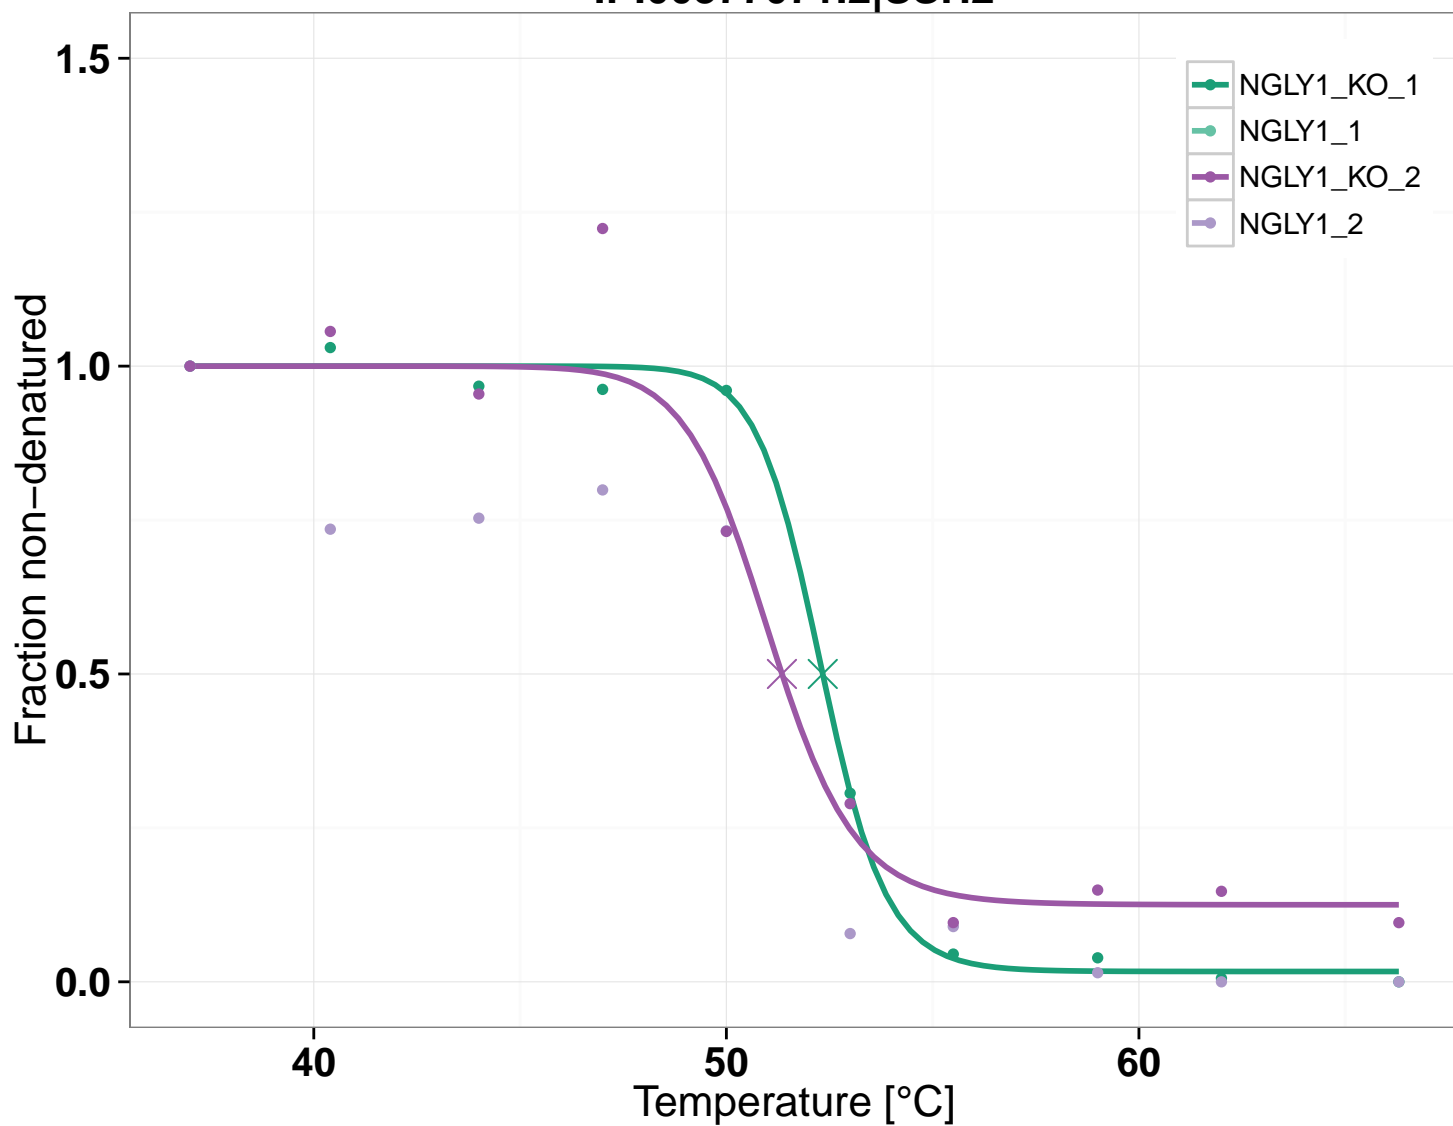

|            | meltPoint | slope | plateau | R2   |
|------------|-----------|-------|---------|------|
| NGLY1_KO_1 | 52.34     | -0.31 | 0.02    | 1    |
| NGLY1_1    | -         | -     | -       | -    |
| NGLY1_KO_2 | 51.35     | -0.21 | 0.13    | 0.96 |
| NGLY1_2    | -         | -     | -       | -    |

Supplement: Supplementary file 4793 [file 1]

# IPI00305423.6|CHMP6

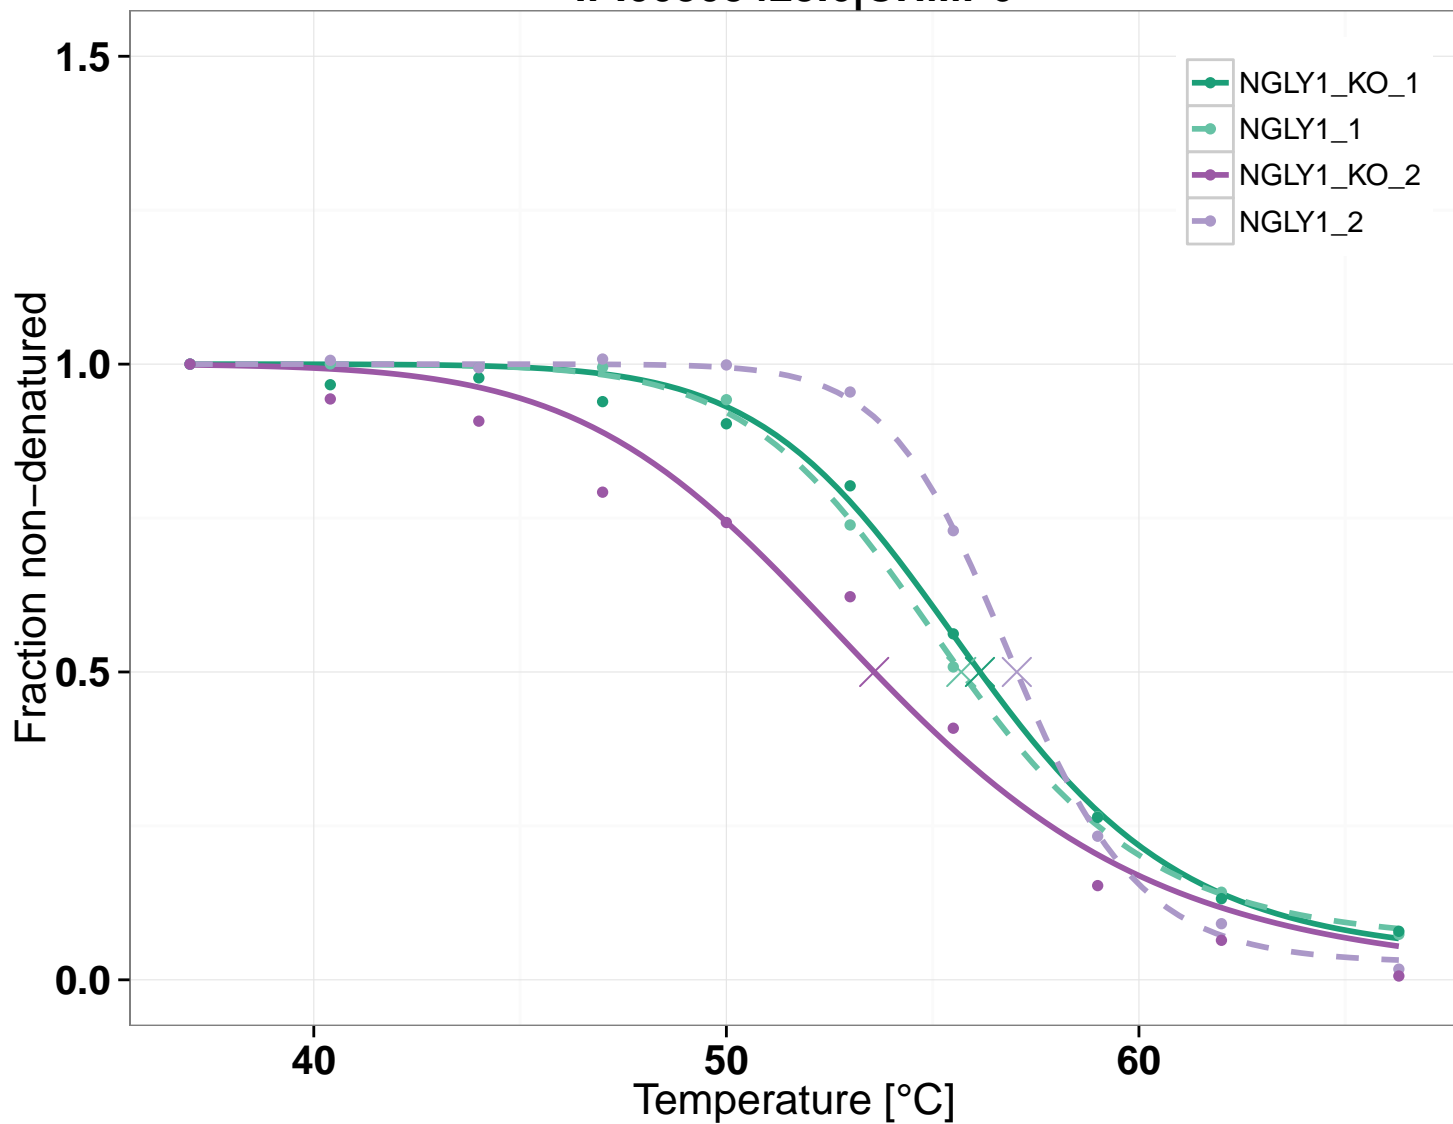

|            | meltPoint | slope  | plateau | R2   |
|------------|-----------|--------|---------|------|
| NGLY1_KO_1 | 56.15     | -0.094 | 0.03    | 1    |
| NGLY1_1    | 55.69     | -0.096 | 0.06    | 1    |
| NGLY1_KO_2 | 53.58     | -0.071 | 0       | 0.98 |
| NGLY1_2    | 57.04     | -0.16  | 0.03    | 1    |

Supplement: Supplementary file 4794 [file 1]

# IPI00328131.7|STIL

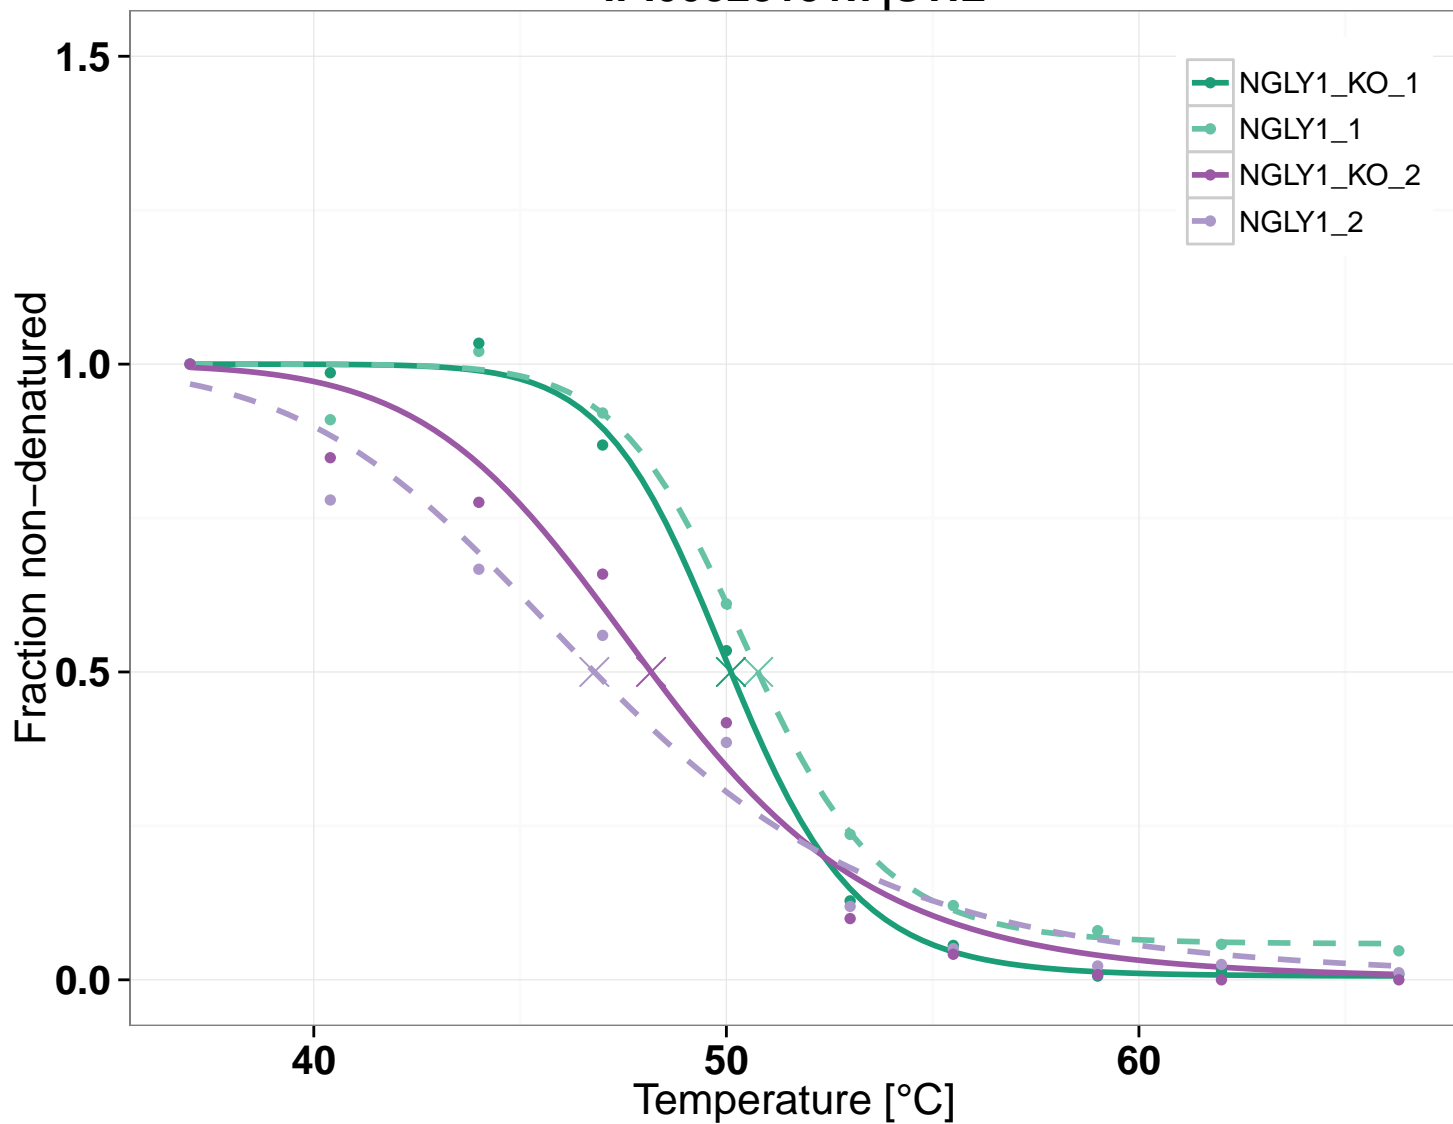

|            | meltPoint | slope  | plateau | R2   |
|------------|-----------|--------|---------|------|
| NGLY1_KO_1 | 50.11     | -0.16  | 0.01    | 1    |
| NGLY1_1    | 50.77     | -0.15  | 0.06    | 0.99 |
| NGLY1_KO_2 | 48.17     | -0.091 | 0       | 0.98 |
| NGLY1_2    | 46.8      | -0.07  | 0       | 0.97 |

Supplement: Supplementary file 4795 [file 1]

IPI00333067.3|HERC4

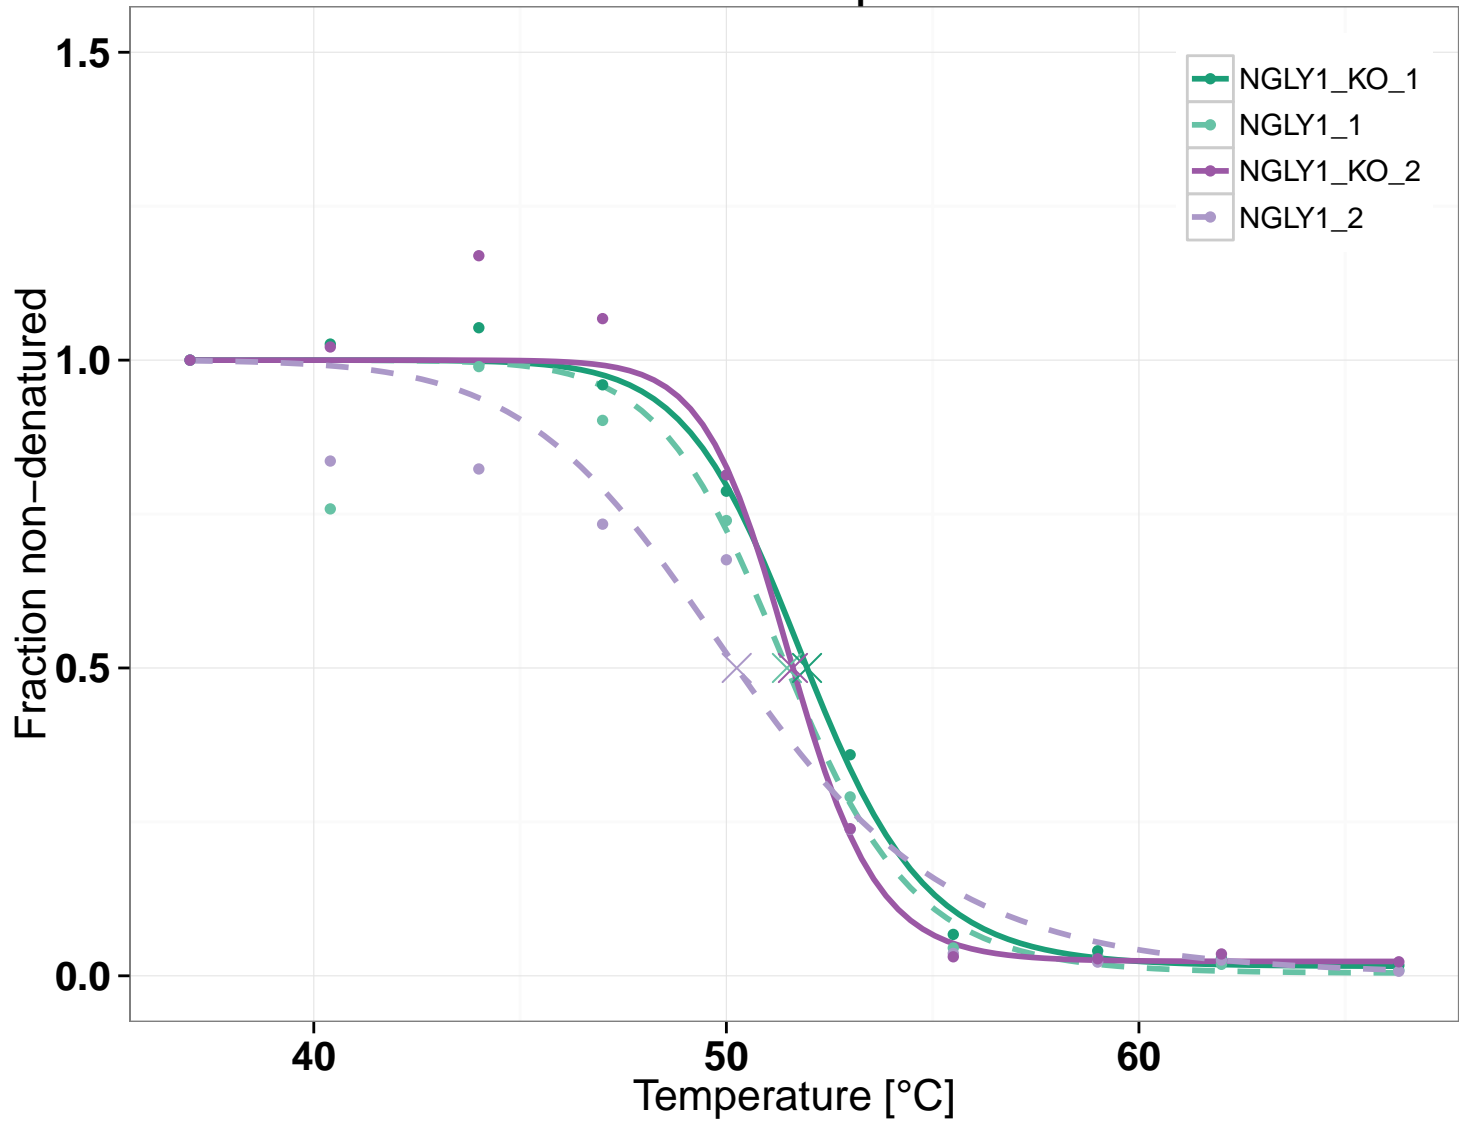

|            | meltPoint | slope  | plateau | R2   |
|------------|-----------|--------|---------|------|
| NGLY1_KO_1 | 51.96     | -0.17  | 0.02    | 1    |
| NGLY1_1    | 51.47     | -0.16  | 0       | 0.96 |
| NGLY1_KO_2 | 51.61     | -0.23  | 0.02    | 0.98 |
| NGLY1_2    | 50.25     | -0.097 | 0       | 0.95 |

Supplement: Supplementary file 4796 [file 1]

IPI00894346.1|C6ORF136

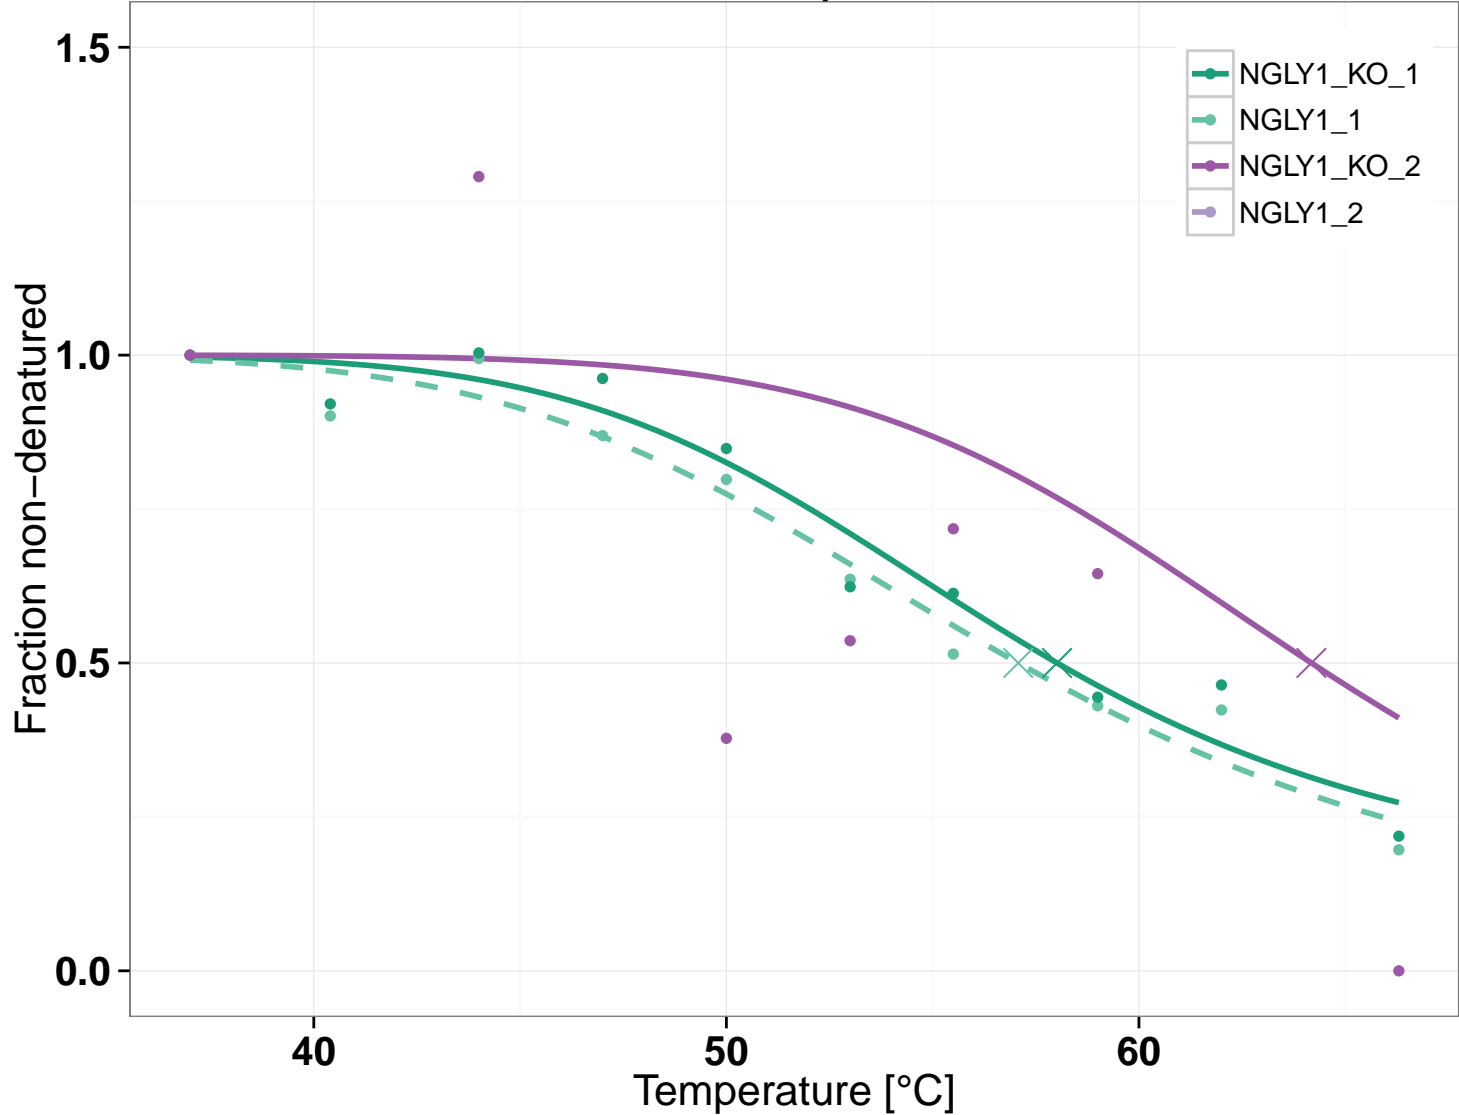

|            | meltPoint | slope  | plateau | R2   |
|------------|-----------|--------|---------|------|
| NGLY1_KO_1 | 58.02     | -0.043 | 0.13    | 0.96 |
| NGLY1_1    | 57.07     | -0.04  | 0.04    | 0.97 |
| NGLY1_KO_2 | 64.18     | -0.045 | 0       | 0.19 |
| NGLY1_2    | -         | -      | -       | -    |

Supplement: Supplementary file 4797 [file 1]

IPI00456363.1|ATXN2L

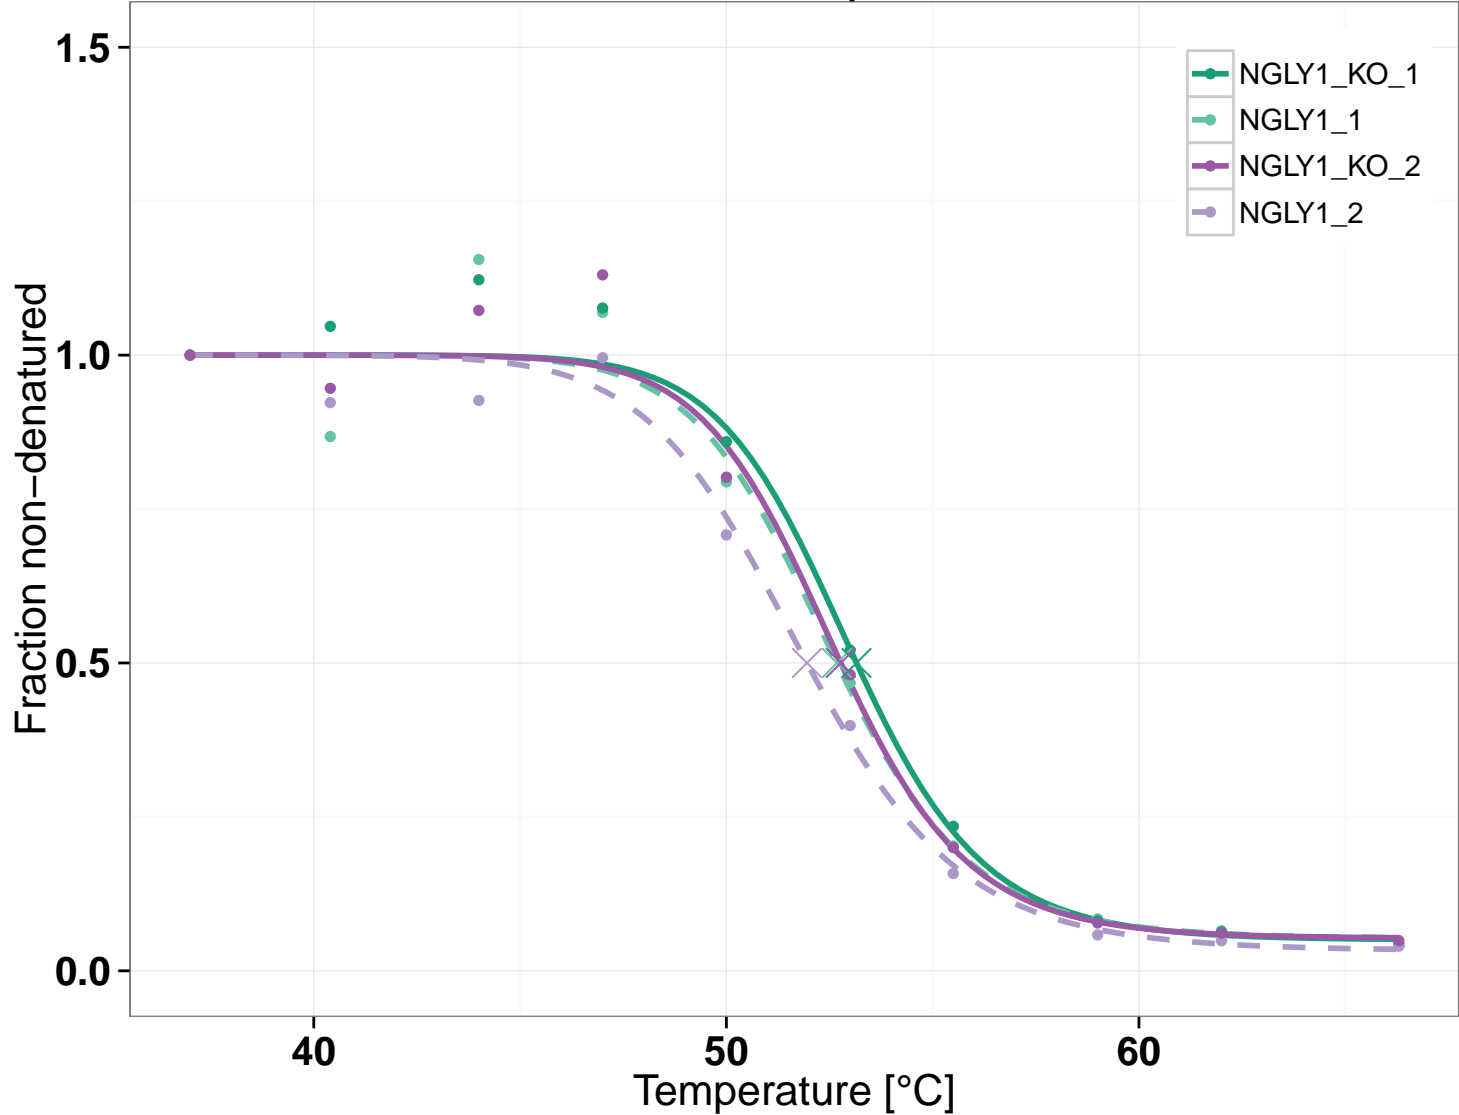

|            | meltPoint | slope | plateau | R2   |
|------------|-----------|-------|---------|------|
| NGLY1_KO_1 | 53.15     | -0.15 | 0.05    | 0.99 |
| NGLY1_1    | 52.68     | -0.14 | 0.05    | 0.97 |
| NGLY1_KO_2 | 52.77     | -0.15 | 0.05    | 0.98 |
| NGLY1_2    | 51.95     | -0.13 | 0.03    | 0.99 |

Supplement: Supplementary file 4798 [file 1]

IPI00032875.1|ETFDH

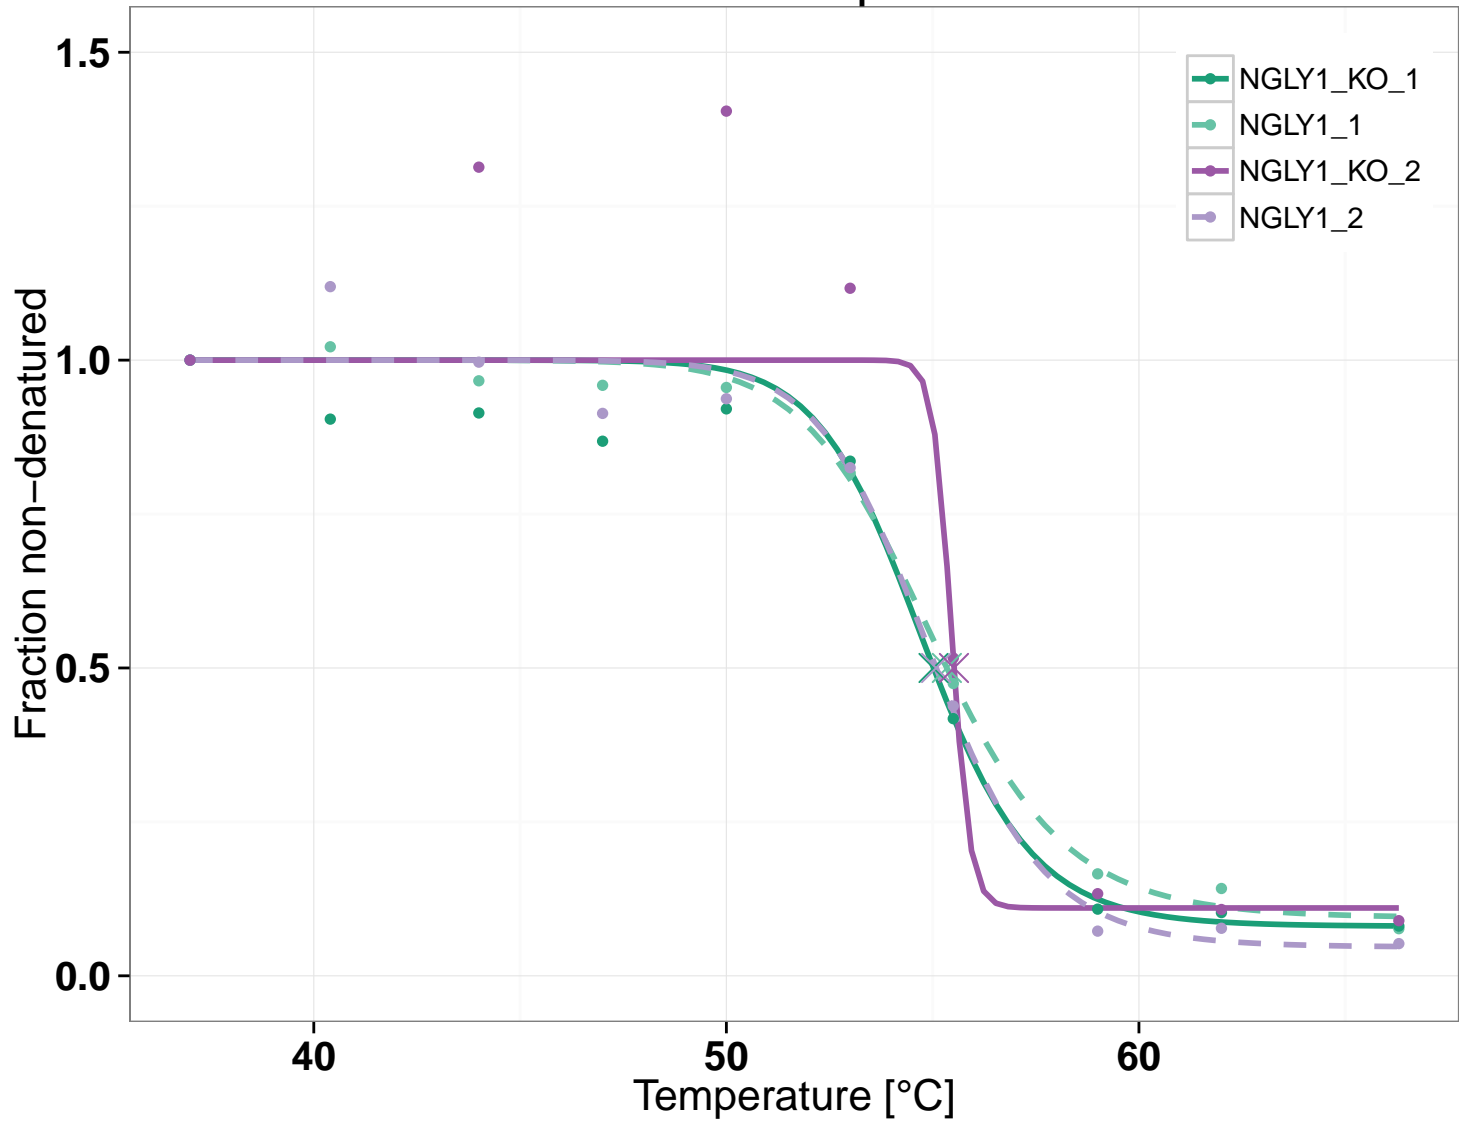

|            | meltPoint | slope | plateau | R2   |
|------------|-----------|-------|---------|------|
| NGLY1_KO_1 | 55.02     | -0.18 | 0.08    | 0.97 |
| NGLY1_1    | 55.34     | -0.14 | 0.09    | 1    |
| NGLY1_KO_2 | 55.52     | -1    | 0.11    | 0.74 |
| NGLY1_2    | 55.08     | -0.17 | 0.05    | 0.99 |

Supplement: Supplementary file 4799 [file 1]

# IPI00012490.1|ATP2B4

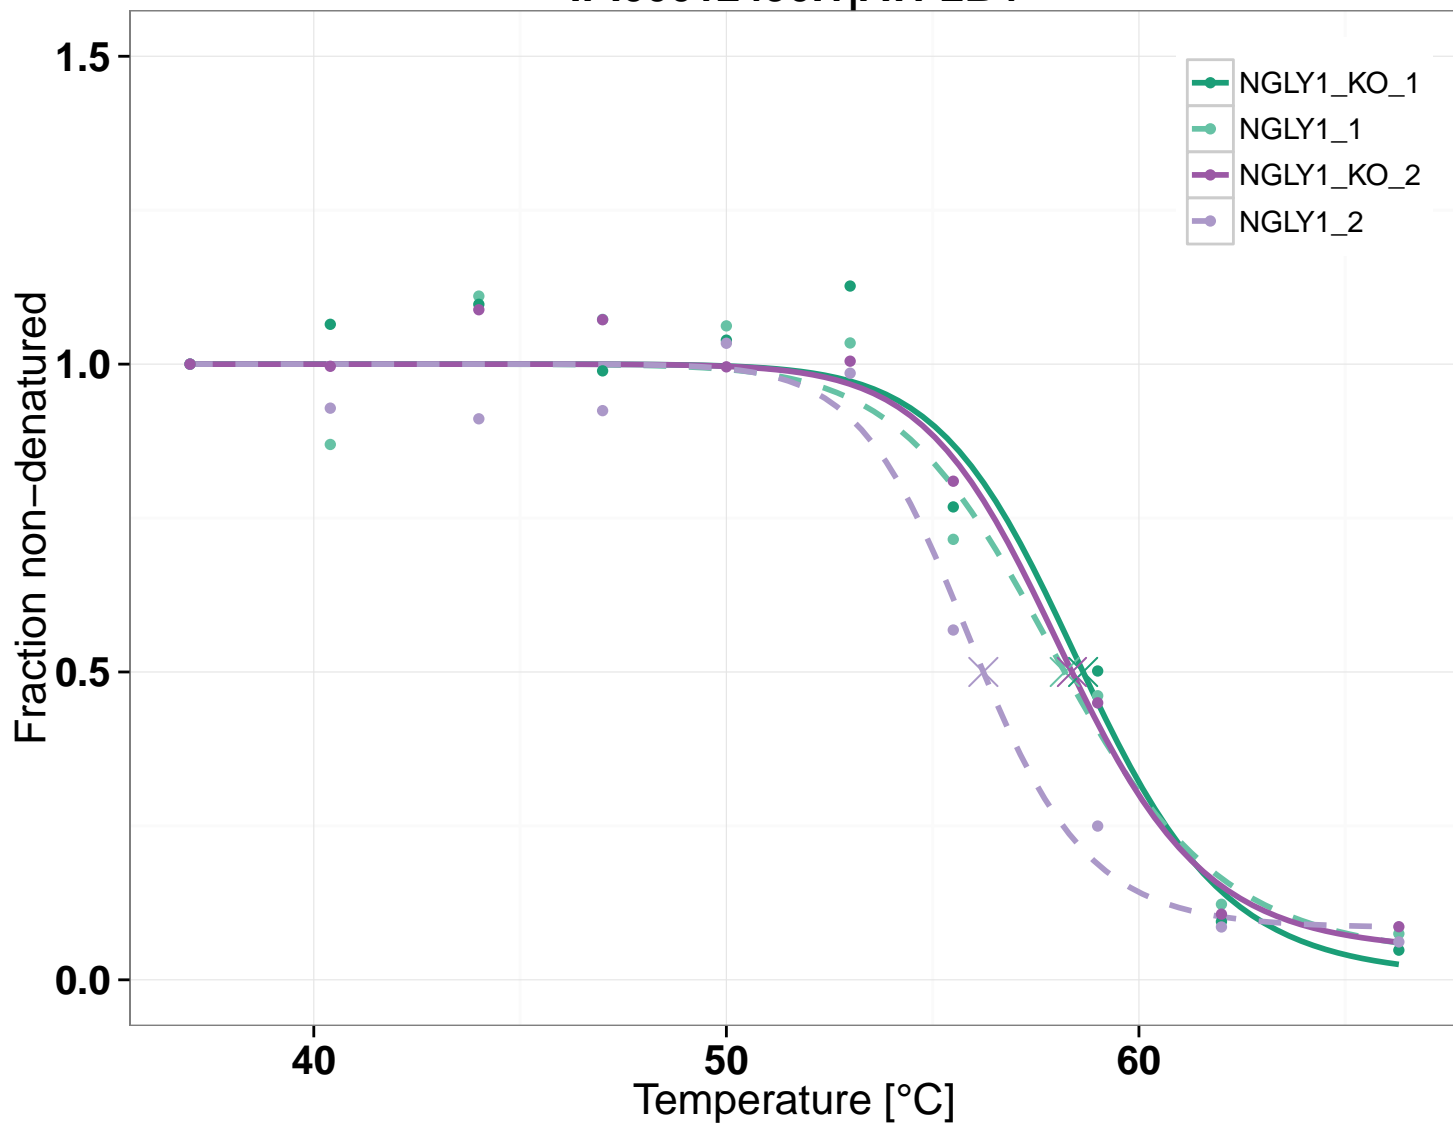

|            | meltPoint | slope | plateau | R2   |
|------------|-----------|-------|---------|------|
| NGLY1_KO_1 | 58.65     | -0.14 | 0       | 0.96 |
| NGLY1_1    | 58.2      | -0.12 | 0.04    | 0.96 |
| NGLY1_KO_2 | 58.38     | -0.14 | 0.05    | 0.99 |
| NGLY1_2    | 56.23     | -0.16 | 0.08    | 0.98 |

Supplement: Supplementary file 4800 [file 1]

IPI00289892.1|HIPK2

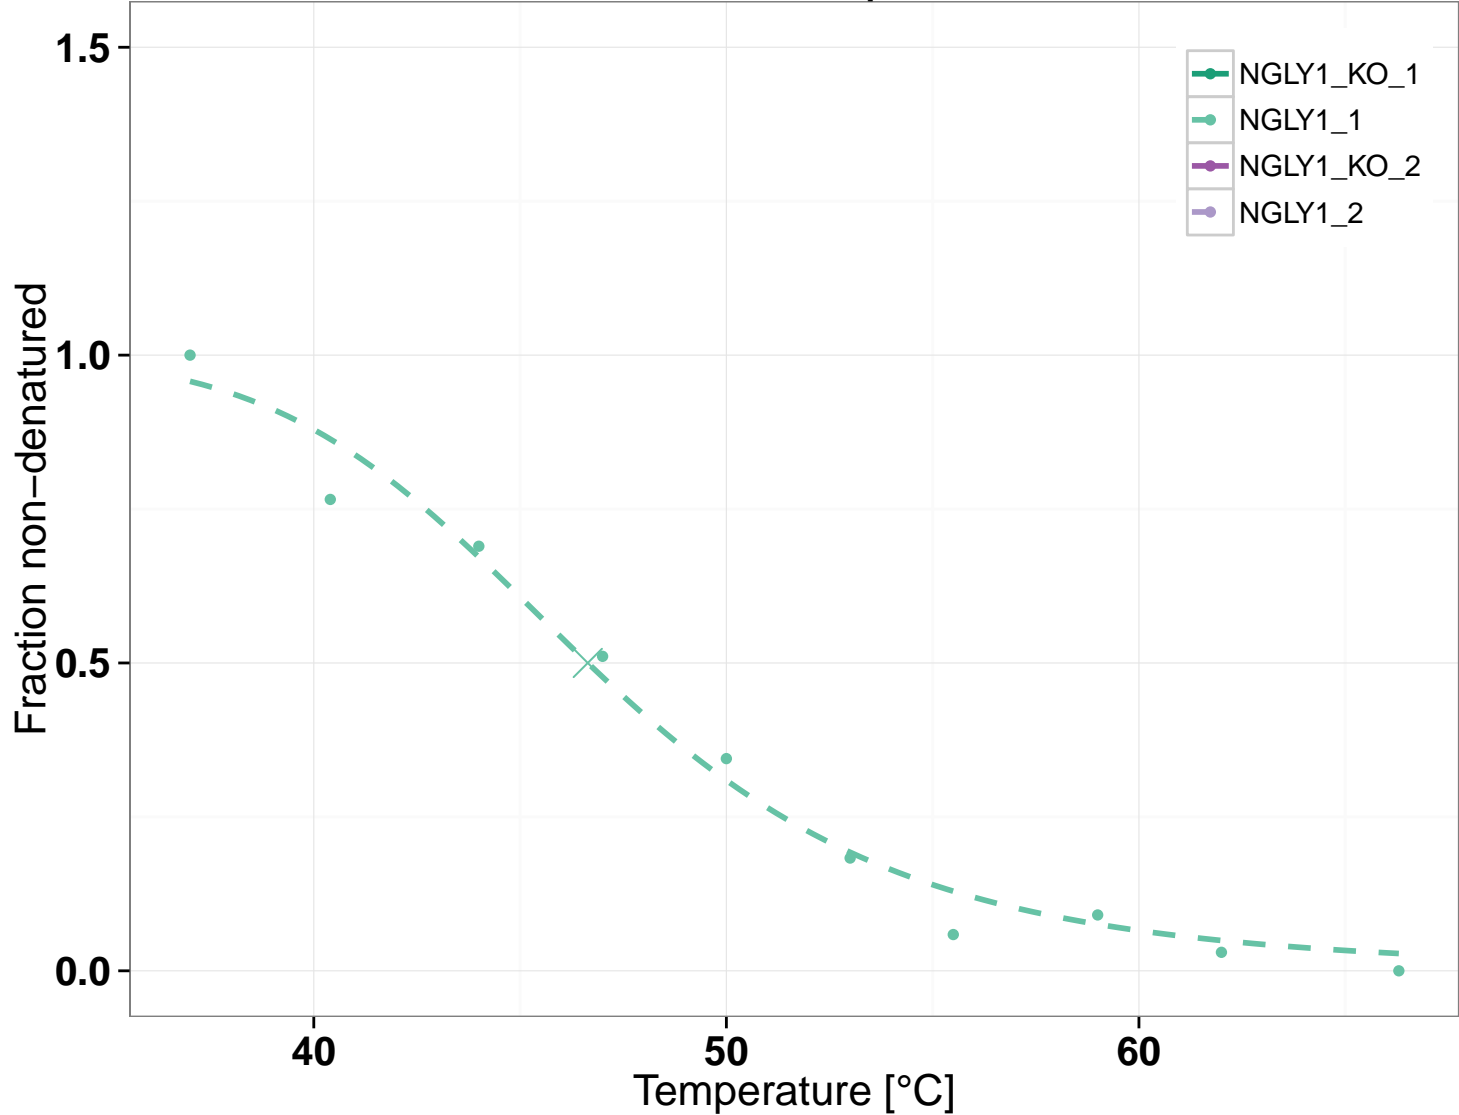

|            | meltPoint | slope  | plateau | R2   |
|------------|-----------|--------|---------|------|
| NGLY1_KO_1 | -         | -      | -       | -    |
| NGLY1_1    | 46.64     | -0.066 | 0       | 0.98 |
| NGLY1_KO_2 | -         | -      | -       | -    |
| NGLY1_2    | -         | -      | -       | -    |

Supplement: Supplementary file 4801 [file 1]

IPI00307430.5|IFT122

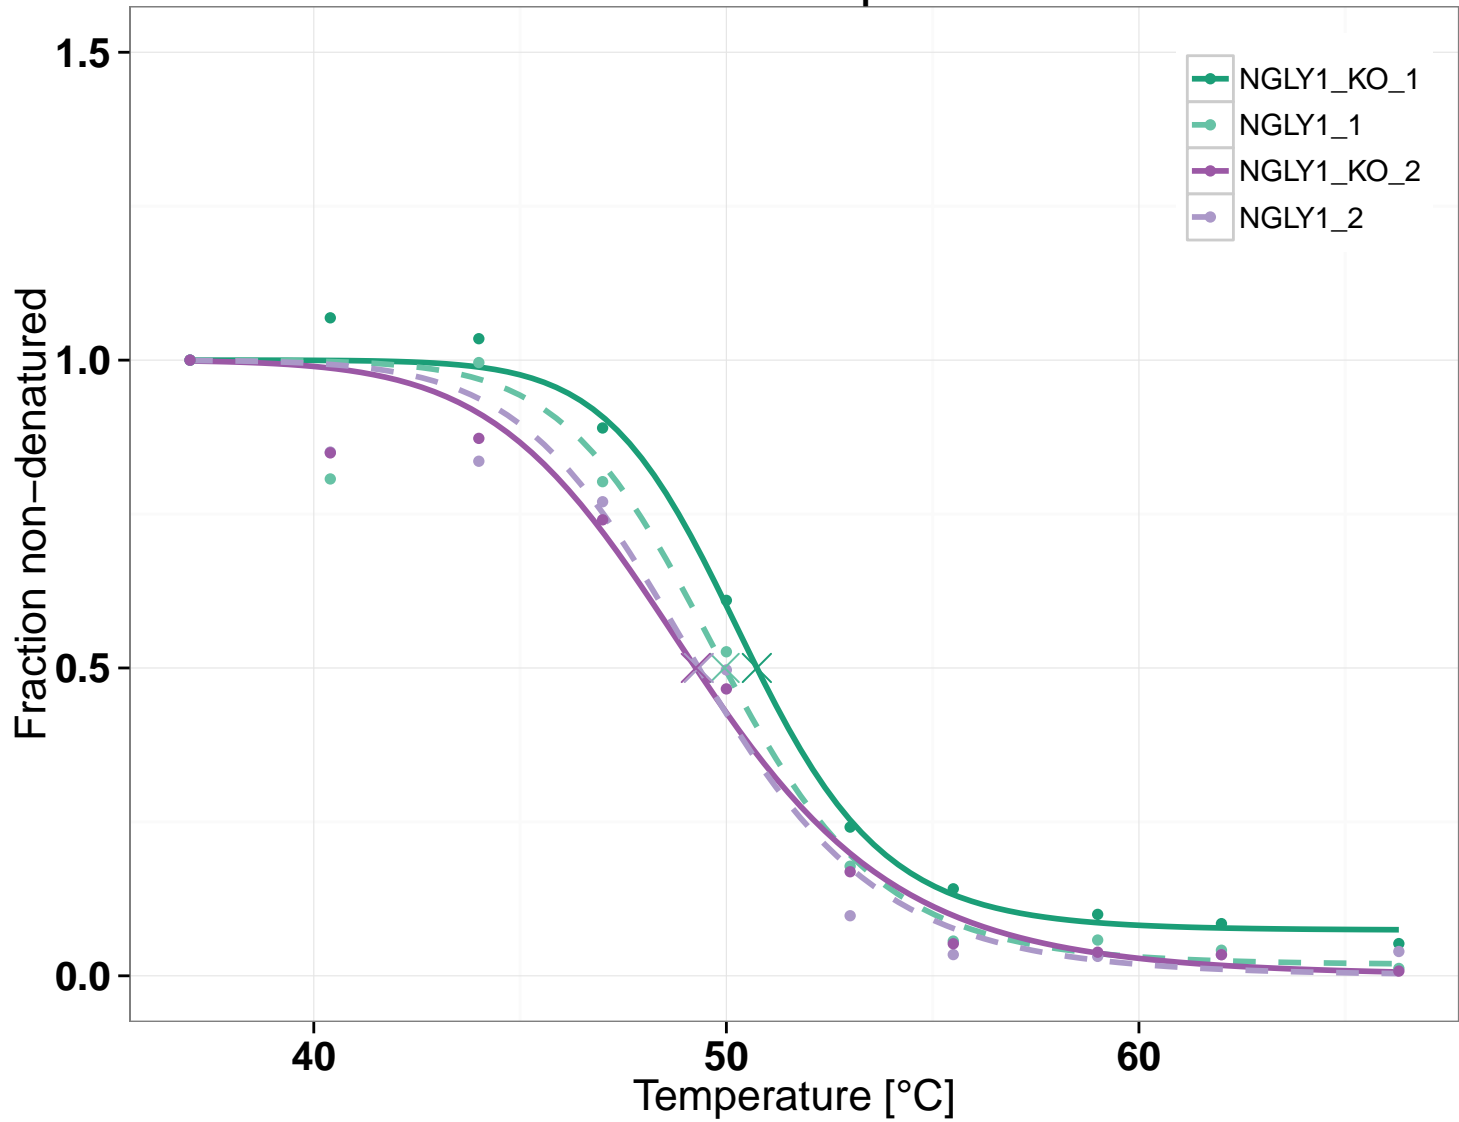

|            | meltPoint | slope | plateau | R2   |
|------------|-----------|-------|---------|------|
| NGLY1_KO_1 | 50.74     | -0.14 | 0.07    | 1    |
| NGLY1_1    | 49.96     | -0.13 | 0.02    | 0.97 |
| NGLY1_KO_2 | 49.26     | -0.1  | 0       | 0.98 |
| NGLY1_2    | 49.33     | -0.11 | 0       | 0.97 |

Supplement: Supplementary file 4802 [file 1]

# IPI00220424.6|PIAS1

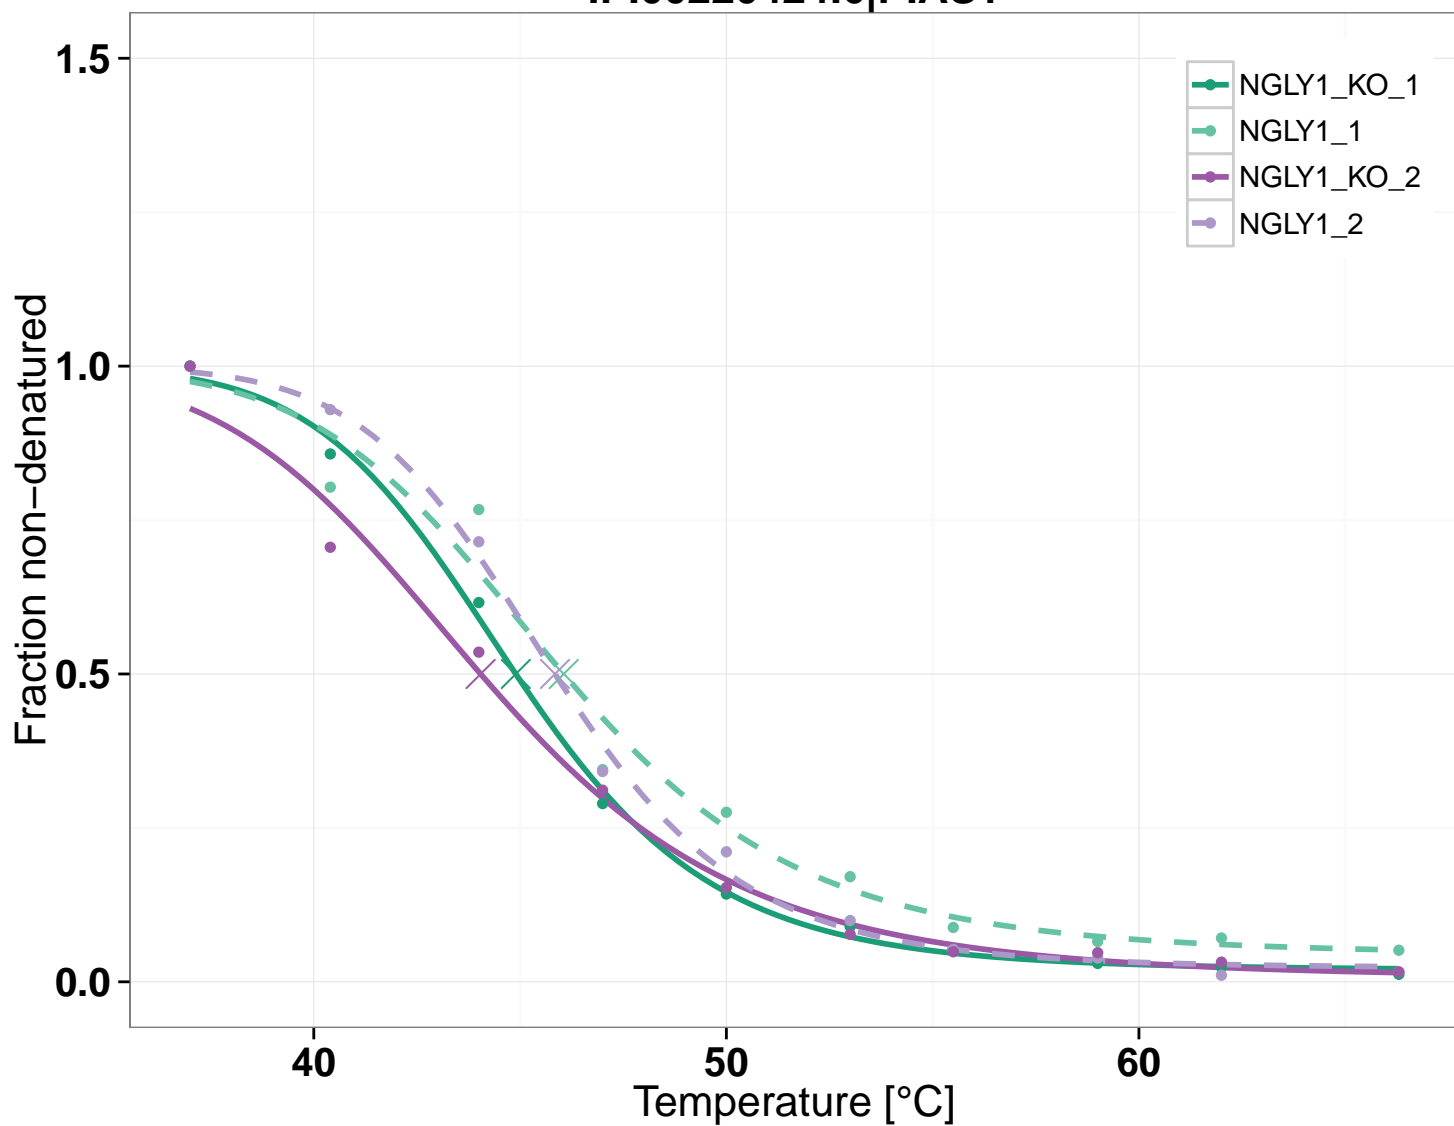

|            | meltPoint | slope  | plateau | R2   |
|------------|-----------|--------|---------|------|
| NGLY1_KO_1 | 44.9      | -0.1   | 0.02    | 1    |
| NGLY1_1    | 46.06     | -0.081 | 0.04    | 0.98 |
| NGLY1_KO_2 | 44.04     | -0.079 | 0.01    | 0.99 |
| NGLY1_2    | 45.85     | -0.11  | 0.02    | 1    |

Supplement: Supplementary file 4803 [file 1]

# IPI00789605.1|MYL6

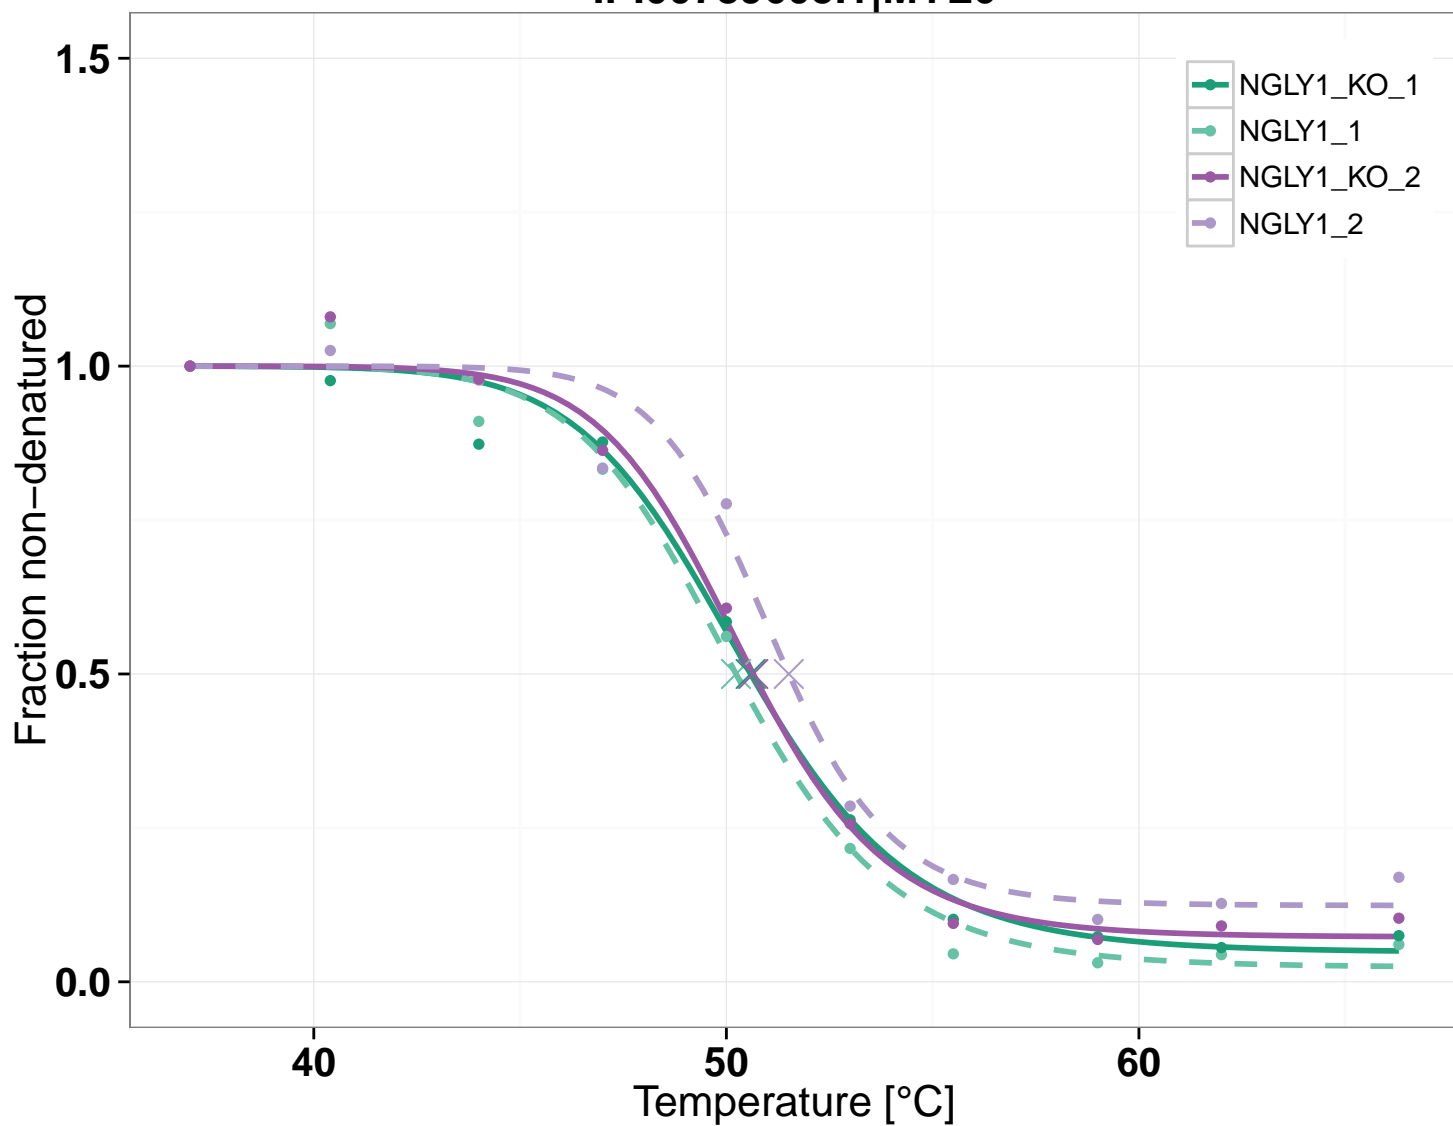

|            | meltPoint | slope | plateau | R2   |
|------------|-----------|-------|---------|------|
| NGLY1_KO_1 | 50.59     | -0.12 | 0.05    | 0.99 |
| NGLY1_1    | 50.23     | -0.13 | 0.02    | 0.99 |
| NGLY1_KO_2 | 50.65     | -0.13 | 0.07    | 0.99 |
| NGLY1_2    | 51.51     | -0.15 | 0.12    | 0.98 |

Supplement: Supplementary file 4804 [file 1]

# IPI00878985.1|INF2

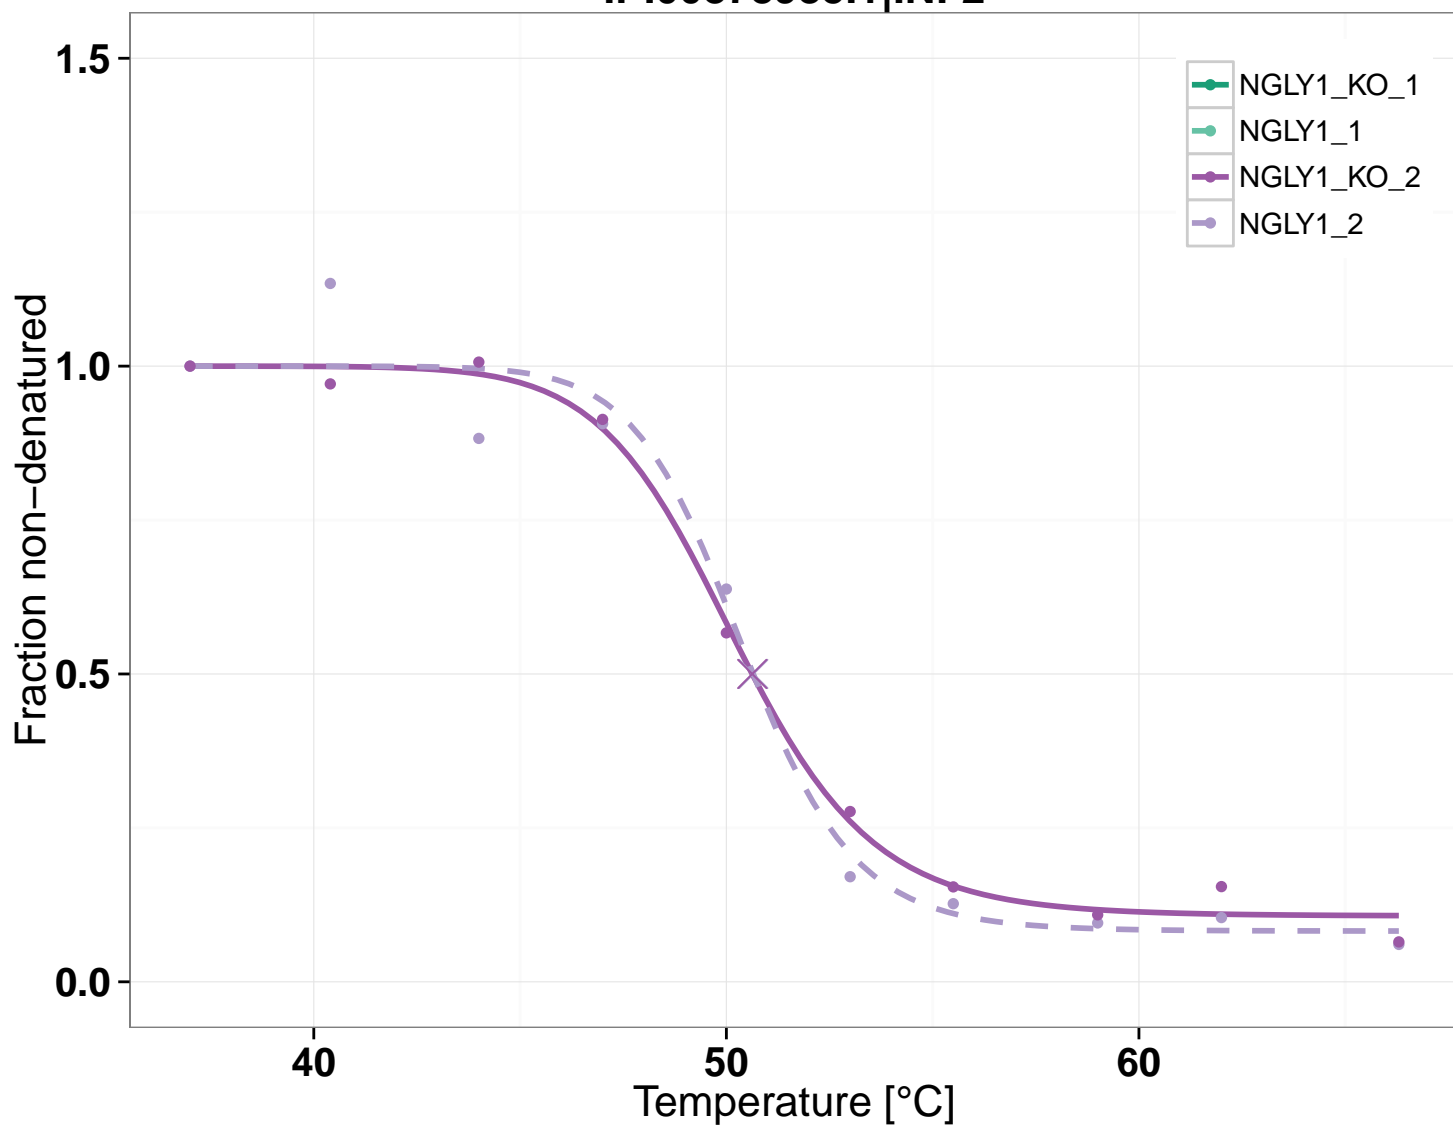

|            | meltPoint | slope | plateau | R2   |
|------------|-----------|-------|---------|------|
| NGLY1_KO_1 | —         | —     | —       | —    |
| NGLY1_1    | —         | —     | —       | —    |
| NGLY1_KO_2 | 50.63     | −0.13 | 0.11    | 1    |
| NGLY1_2    | 50.65     | −0.17 | 0.08    | 0.98 |

Supplement: Supplementary file 4805 [file 1]

# IPI00034049.1|UPF1

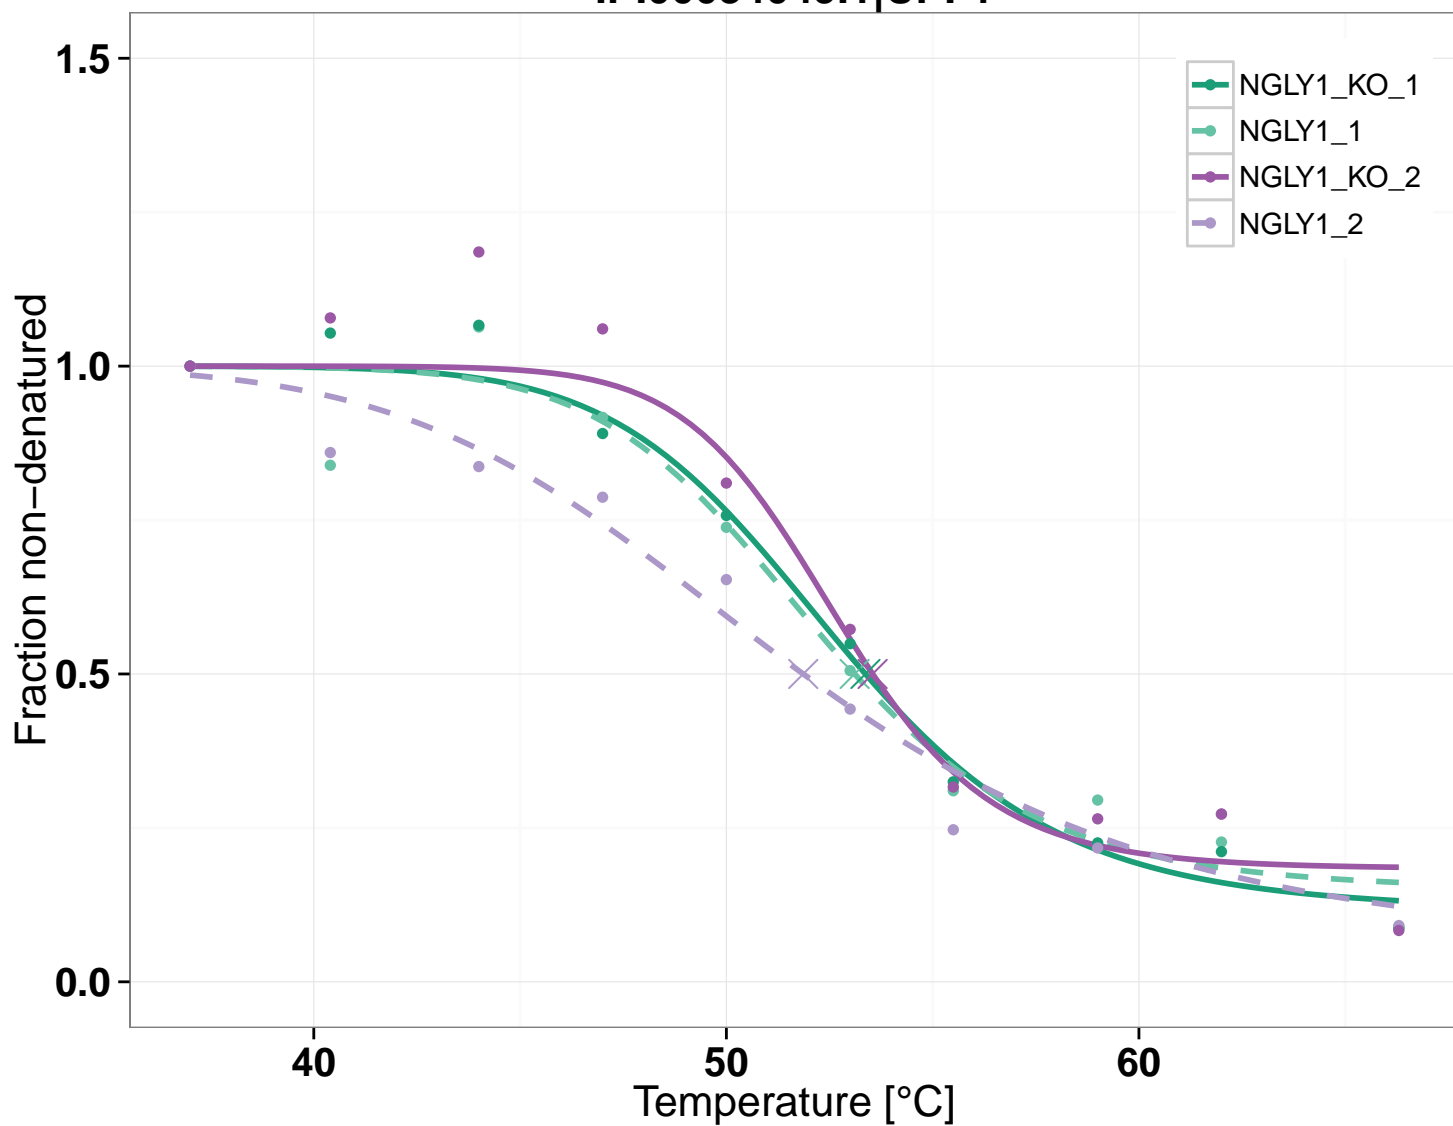

|            | meltPoint | slope  | plateau | R2   |
|------------|-----------|--------|---------|------|
| NGLY1_KO_1 | 53.37     | -0.082 | 0.12    | 0.99 |
| NGLY1_1    | 53.11     | -0.08  | 0.15    | 0.96 |
| NGLY1_KO_2 | 53.54     | -0.11  | 0.18    | 0.95 |
| NGLY1_2    | 51.86     | -0.051 | 0.04    | 0.96 |

Supplement: Supplementary file 4806 [file 1]

# IPI00644712.4|XRCC6

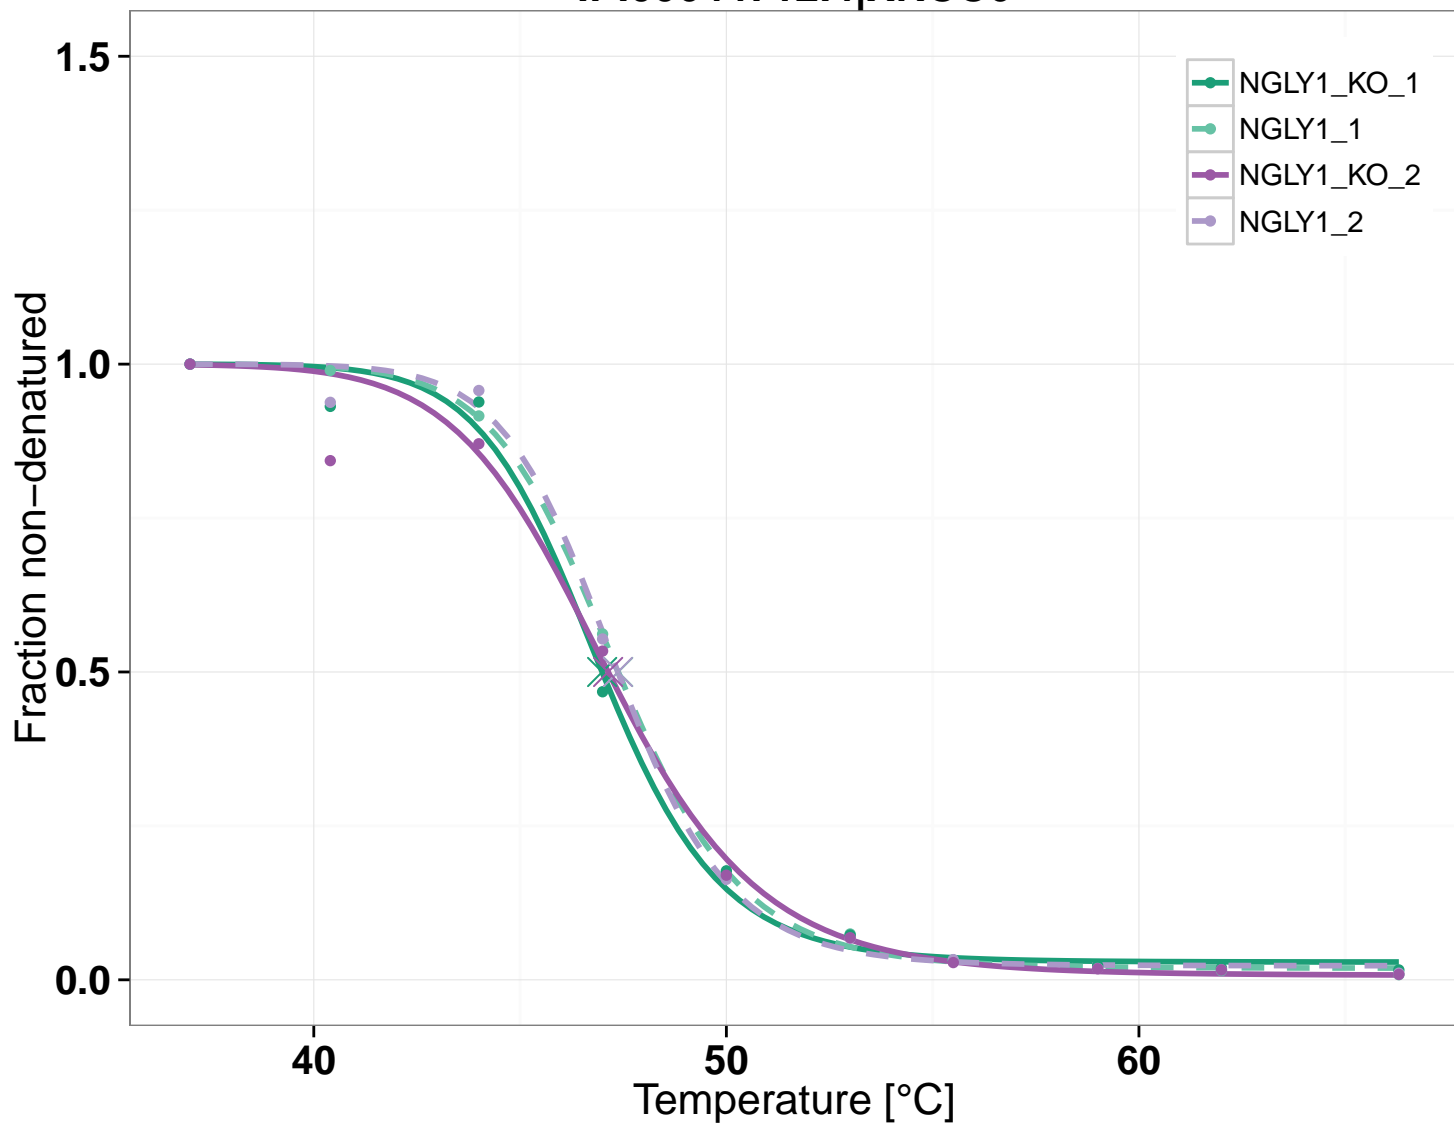

|            | meltPoint | slope | plateau | R2   |
|------------|-----------|-------|---------|------|
| NGLY1_KO_1 | 46.99     | -0.17 | 0.03    | 0.99 |
| NGLY1_1    | 47.38     | -0.16 | 0.02    | 1    |
| NGLY1_KO_2 | 47.13     | -0.13 | 0.01    | 0.99 |
| NGLY1_2    | 47.37     | -0.18 | 0.02    | 1    |

Supplement: Supplementary file 4807 [file 1]

IPI00387015.1|RIMS1

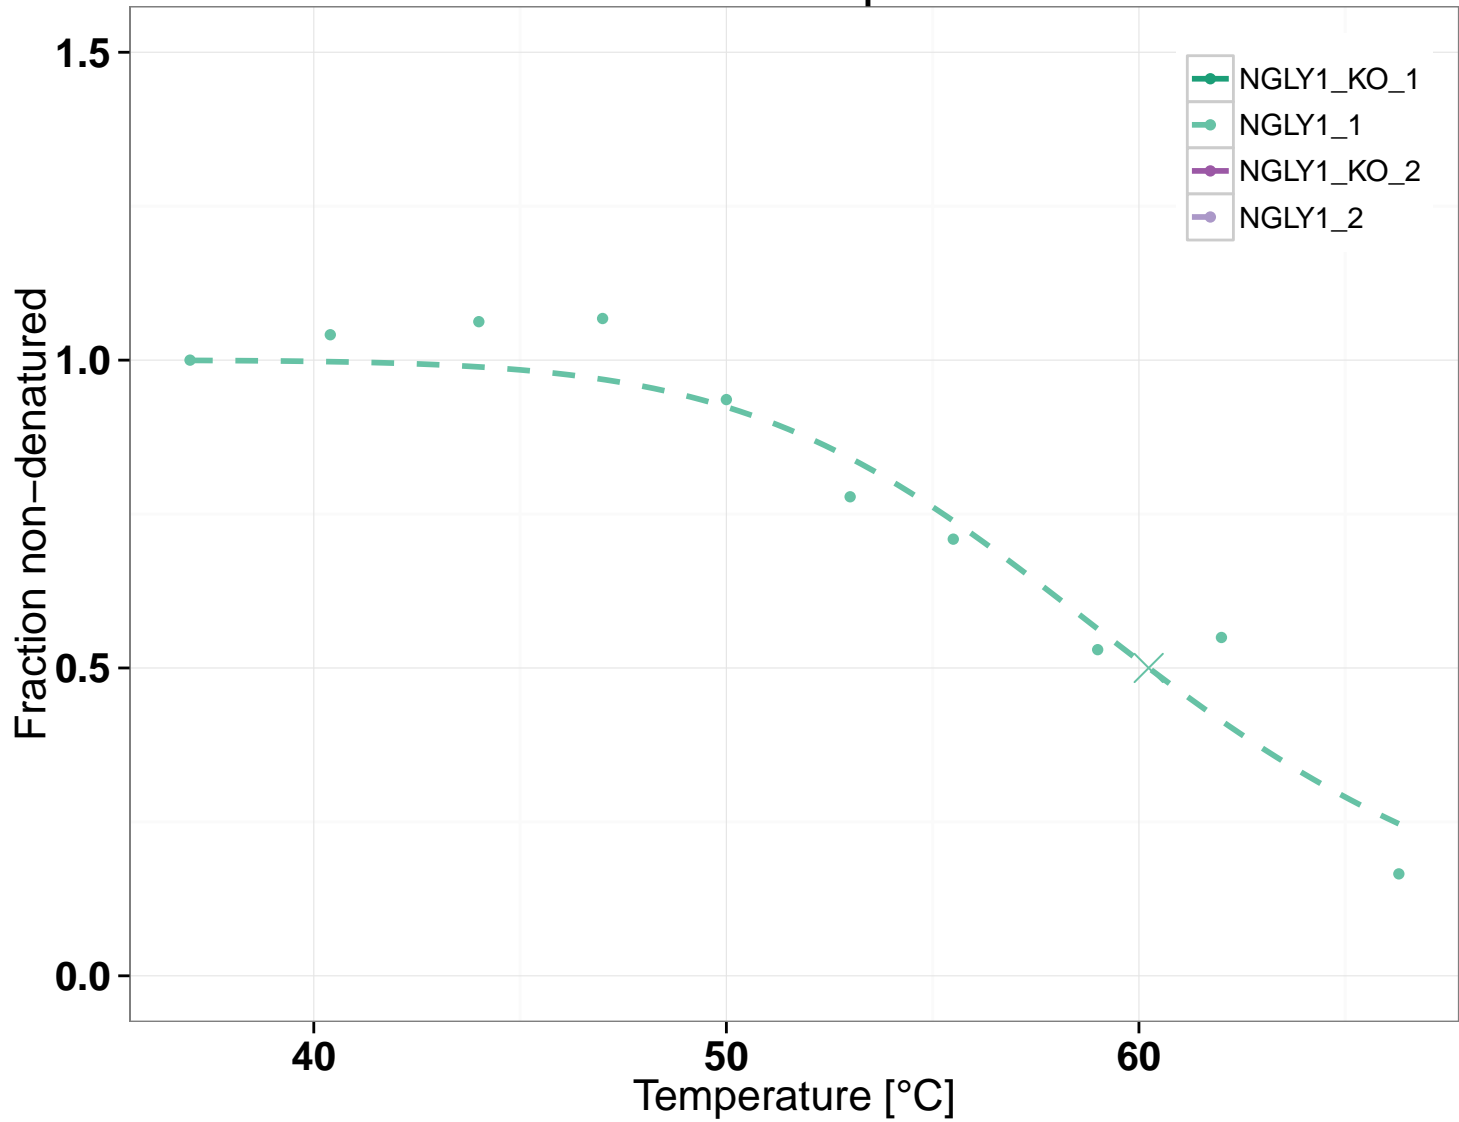

|            | meltPoint | slope  | plateau | R2   |
|------------|-----------|--------|---------|------|
| NGLY1_KO_1 | -         | -      | -       | -    |
| NGLY1_1    | 60.24     | -0.052 | 0       | 0.94 |
| NGLY1_KO_2 | -         | -      | -       | -    |
| NGLY1_2    | -         | -      | -       | -    |

Supplement: Supplementary file 4808 [file 1]

IPI00157375.3|DNAJC30

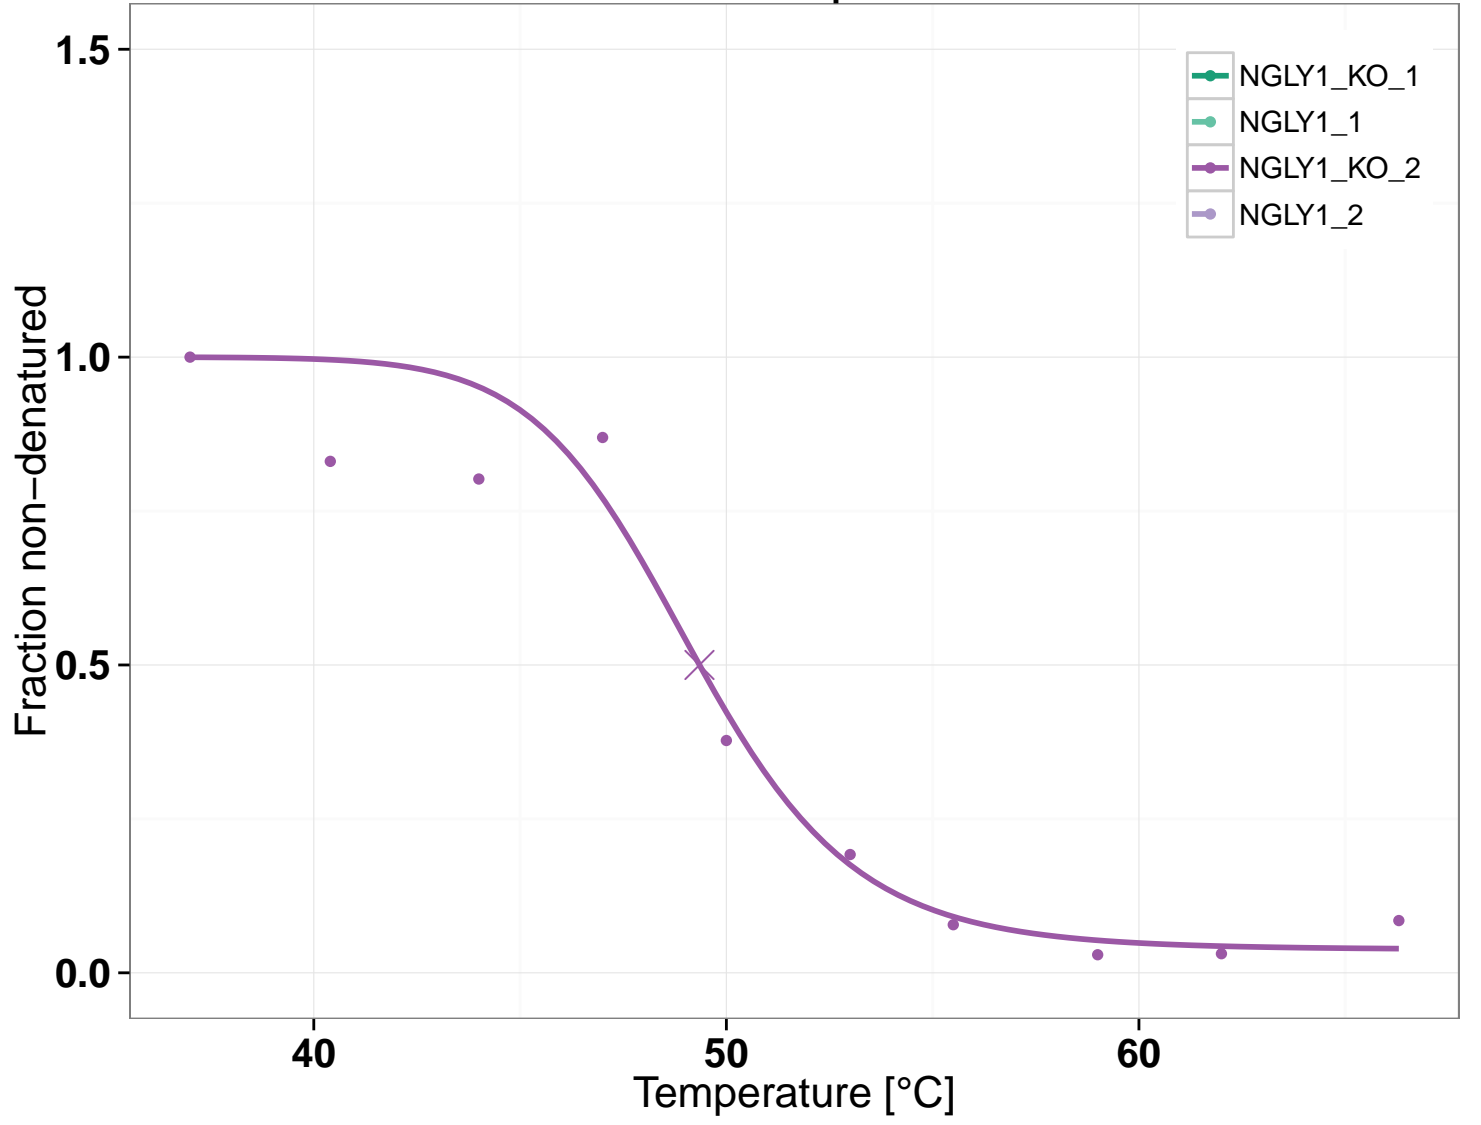

|            | meltPoint | slope | plateau | R2   |
|------------|-----------|-------|---------|------|
| NGLY1_KO_1 | —         | —     | —       | —    |
| NGLY1_1    | —         | —     | —       | —    |
| NGLY1_KO_2 | 49.35     | -0.12 | 0.04    | 0.95 |
| NGLY1_2    | —         | —     | —       | —    |

Supplement: Supplementary file 4809 [file 1]

IPI00217282.1|DCUN1D3

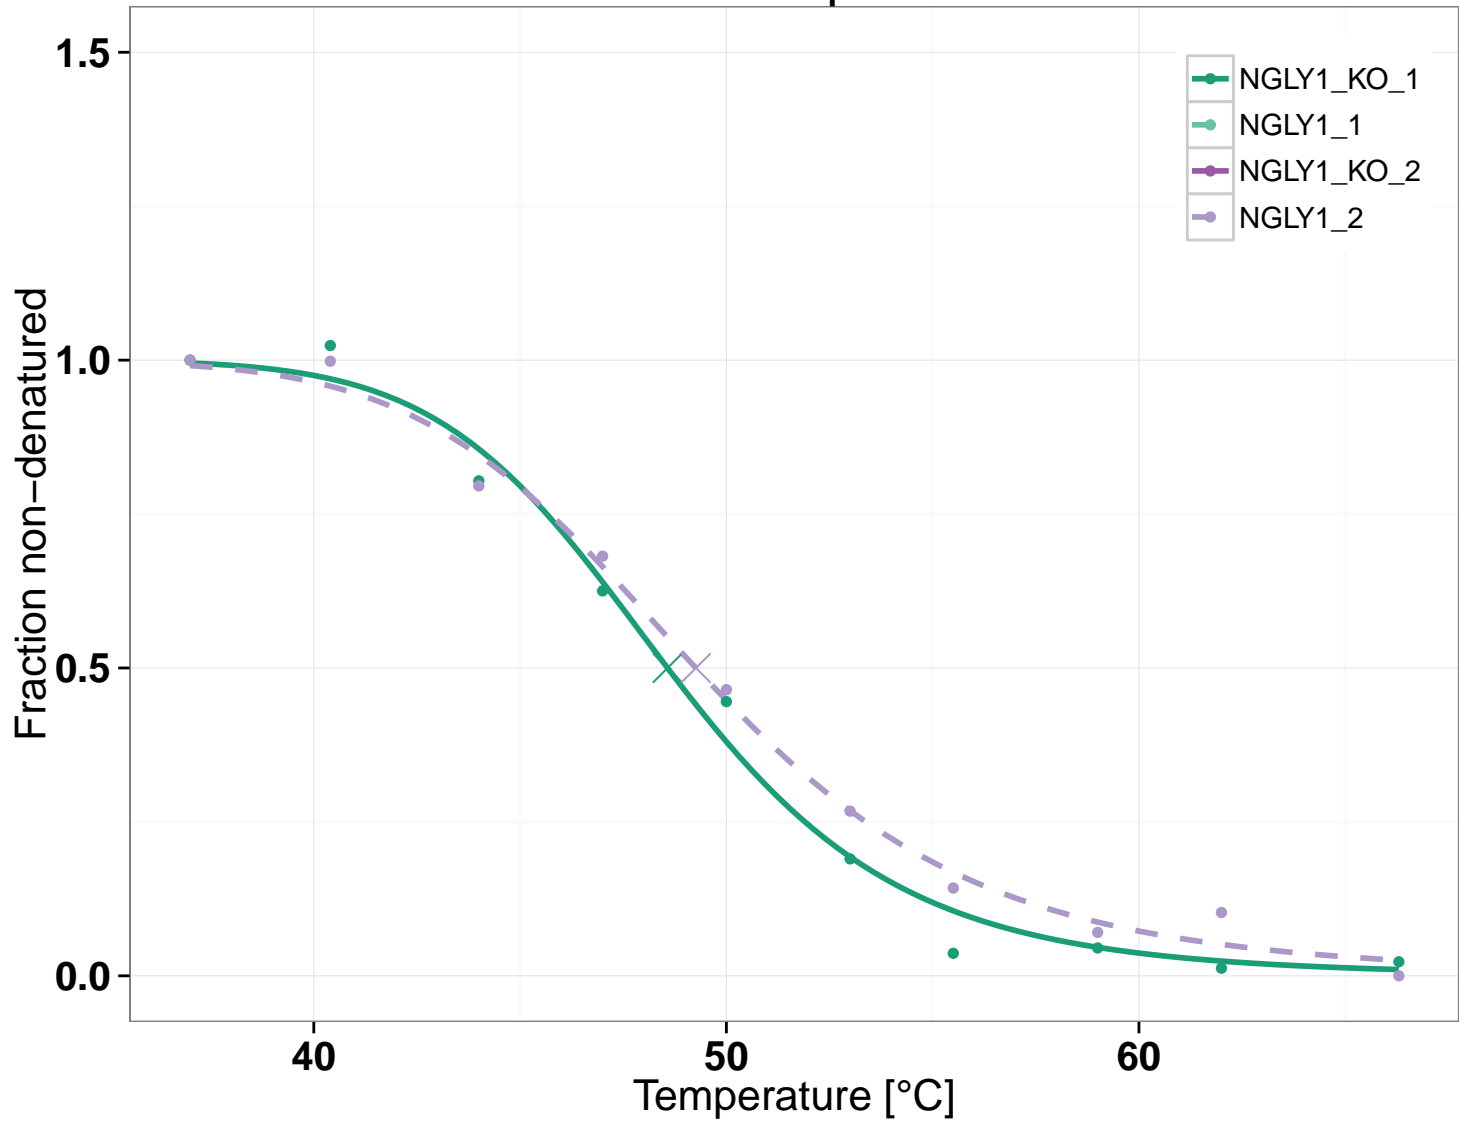

|            | meltPoint | slope  | plateau | R2   |
|------------|-----------|--------|---------|------|
| NGLY1_KO_1 | 48.57     | -0.089 | 0       | 0.99 |
| NGLY1_1    | -         | -      | -       | -    |
| NGLY1_KO_2 | -         | -      | -       | -    |
| NGLY1_2    | 49.26     | -0.074 | 0       | 0.99 |

Supplement: Supplementary file 4810 [file 1]

IPI00163644.2|OSBPL8

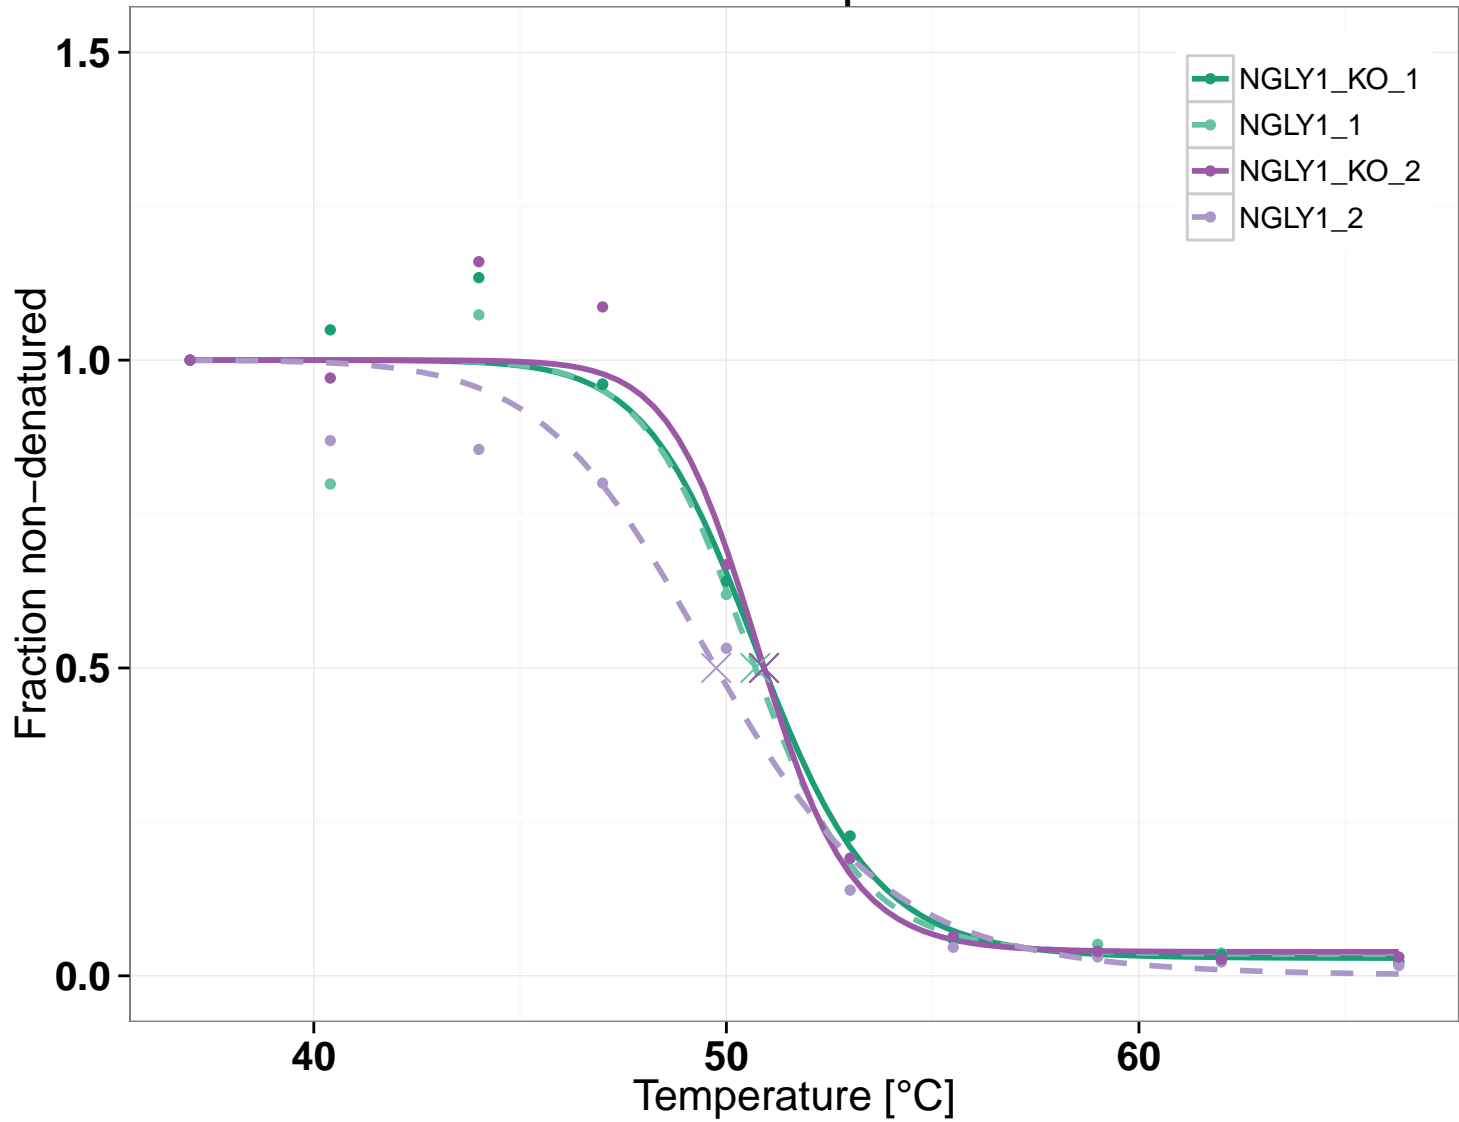

|            | meltPoint | slope | plateau | R2   |
|------------|-----------|-------|---------|------|
| NGLY1_KO_1 | 50.91     | -0.17 | 0.03    | 0.99 |
| NGLY1_1    | 50.7      | -0.18 | 0.03    | 0.97 |
| NGLY1_KO_2 | 50.92     | -0.22 | 0.04    | 0.98 |
| NGLY1_2    | 49.75     | -0.12 | 0       | 0.98 |

Supplement: Supplementary file 4811 [file 1]

IPI00012829.1|RAD51C

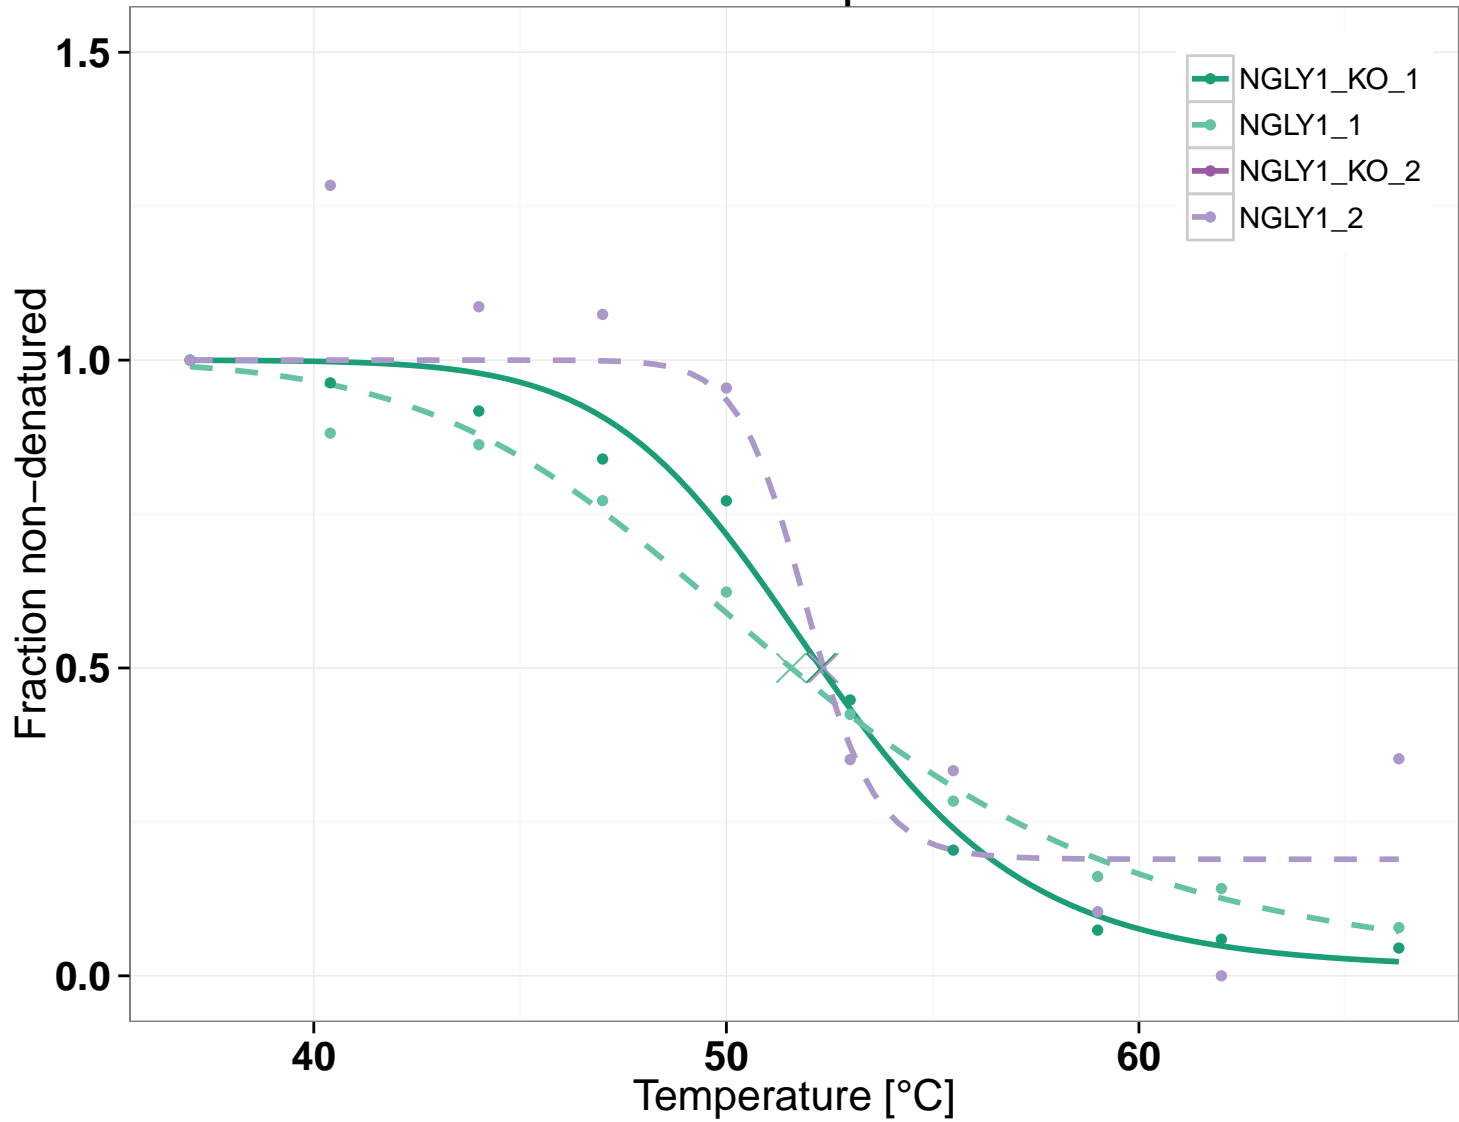

|            | meltPoint | slope  | plateau | R2   |
|------------|-----------|--------|---------|------|
| NGLY1_KO_1 | 52.3      | -0.097 | 0.01    | 0.99 |
| NGLY1_1    | 51.57     | -0.057 | 0       | 0.99 |
| NGLY1_KO_2 | -         | -      | -       | -    |
| NGLY1_2    | 52.36     | -0.24  | 0.19    | 0.91 |

Supplement: Supplementary file 4812 [file 1]

# IPI00298535.4|GDPD1

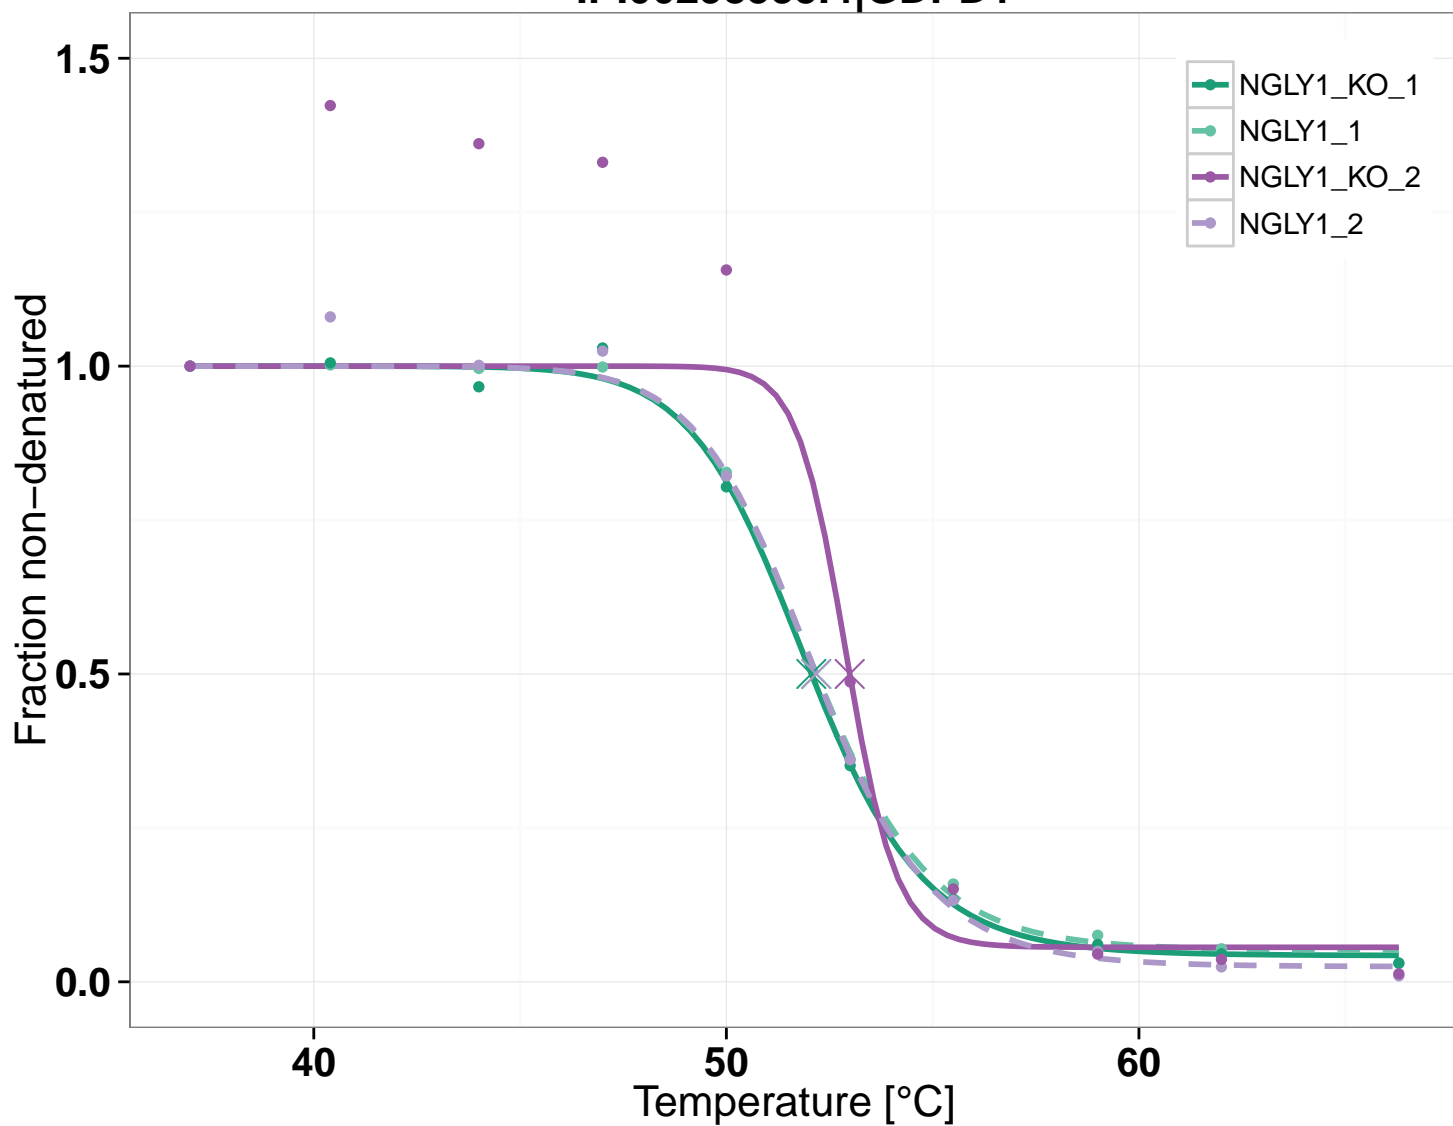

|            | meltPoint | slope | plateau | R2   |
|------------|-----------|-------|---------|------|
| NGLY1_KO_1 | 52.06     | -0.17 | 0.04    | 1    |
| NGLY1_1    | 52.18     | -0.17 | 0.05    | 1    |
| NGLY1_KO_2 | 52.99     | -0.39 | 0.06    | 0.86 |
| NGLY1_2    | 52.18     | -0.17 | 0.02    | 1    |

Supplement: Supplementary file 4813 [file 1]

IPI00003310.2|POLR2J2

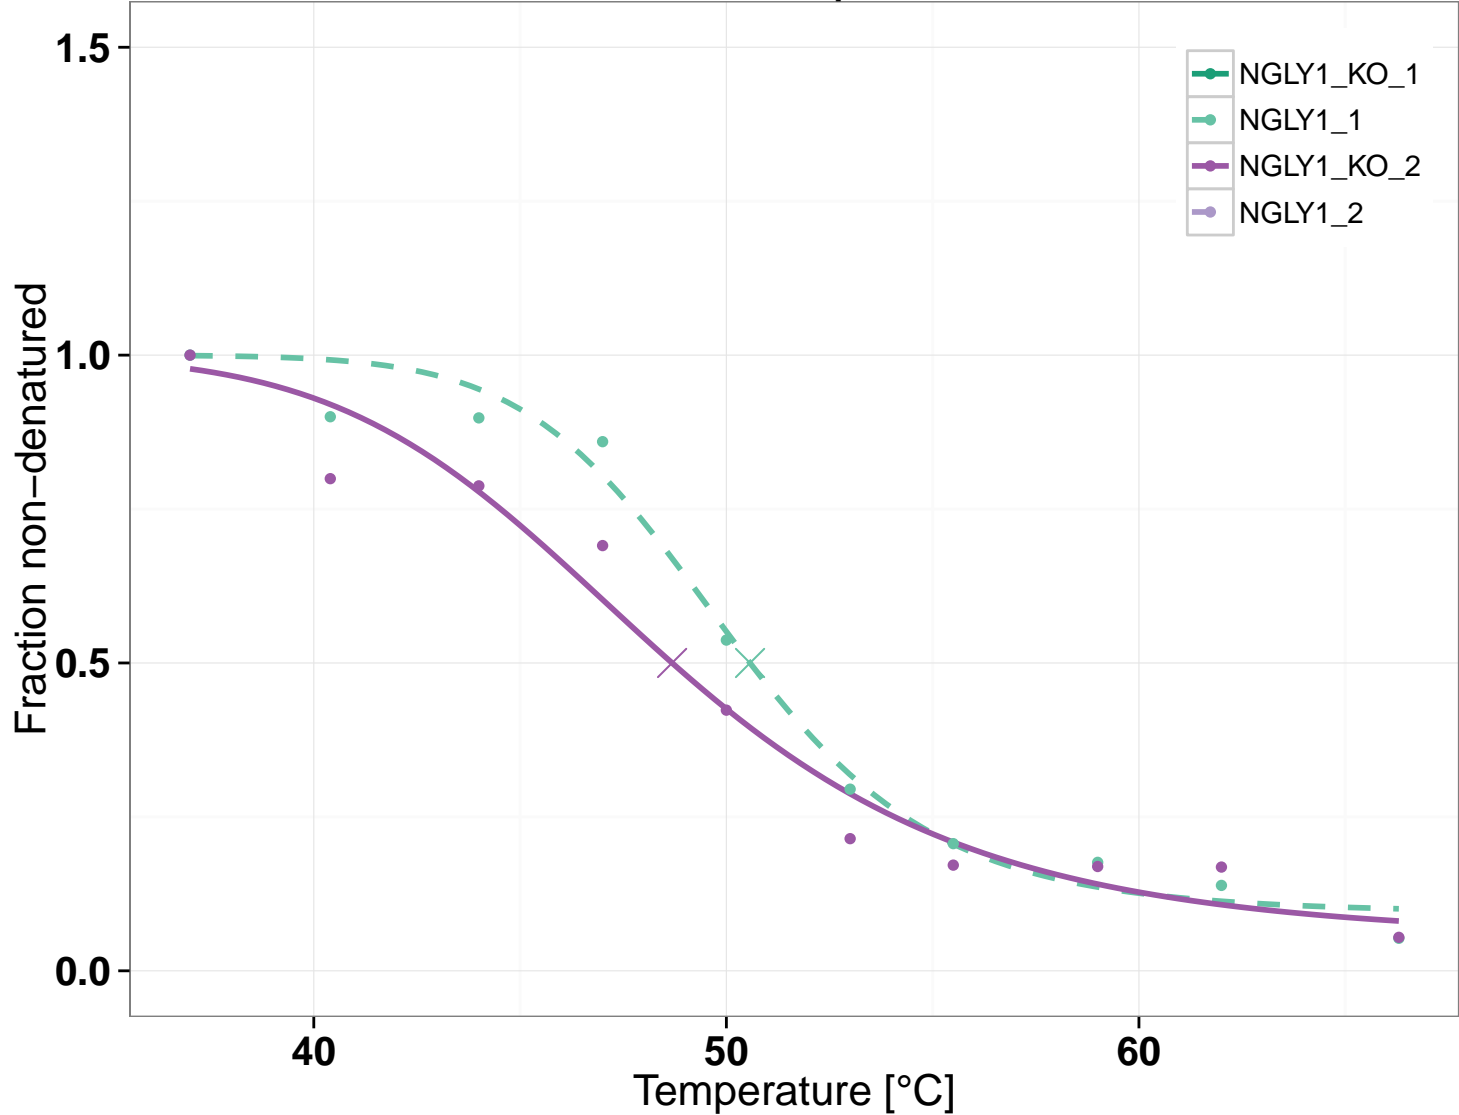

|            | meltPoint | slope  | plateau | R2   |
|------------|-----------|--------|---------|------|
| NGLY1_KO_1 | -         | -      | -       | -    |
| NGLY1_1    | 50.57     | -0.091 | 0.09    | 0.98 |
| NGLY1_KO_2 | 48.68     | -0.062 | 0.05    | 0.97 |
| NGLY1_2    | -         | -      | -       | -    |

Supplement: Supplementary file 4814 [file 1]

IPI00002852.1|PXMP3

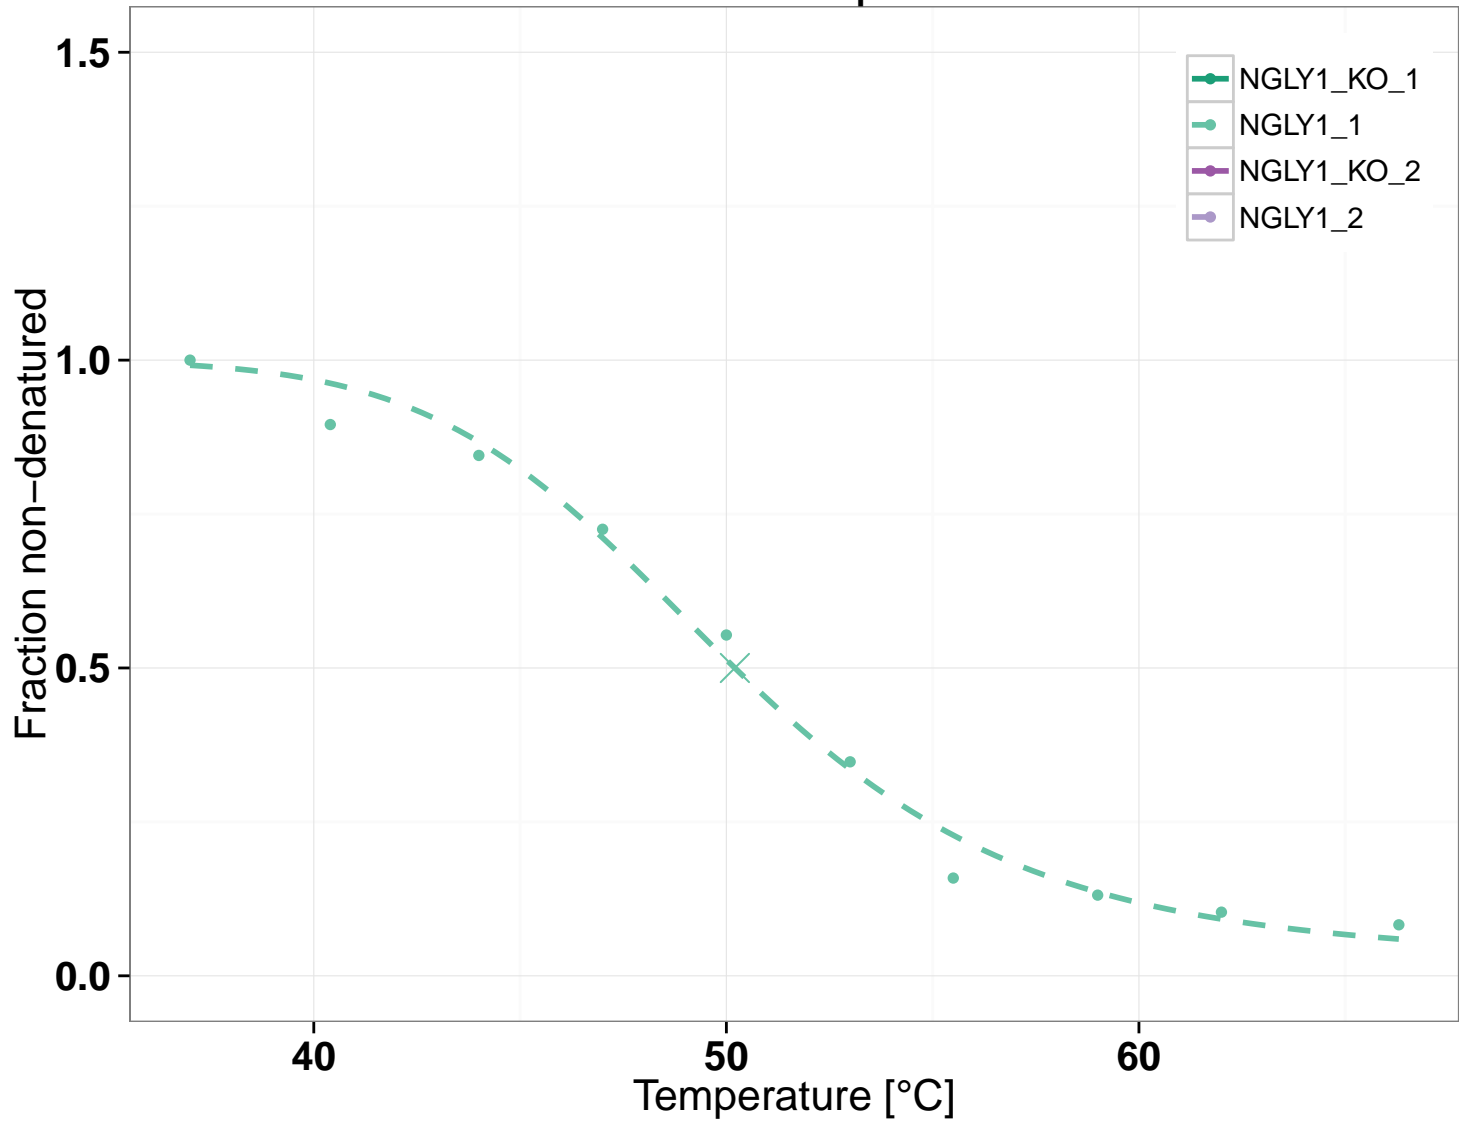

|            | meltPoint | slope  | plateau | R2   |
|------------|-----------|--------|---------|------|
| NGLY1_KO_1 | -         | -      | -       | -    |
| NGLY1_1    | 50.21     | -0.067 | 0.03    | 0.99 |
| NGLY1_KO_2 | -         | -      | -       | -    |
| NGLY1_2    | -         | -      | -       | -    |

Supplement: Supplementary file 4815 [file 1]

# IPI00021954.1|GBF1

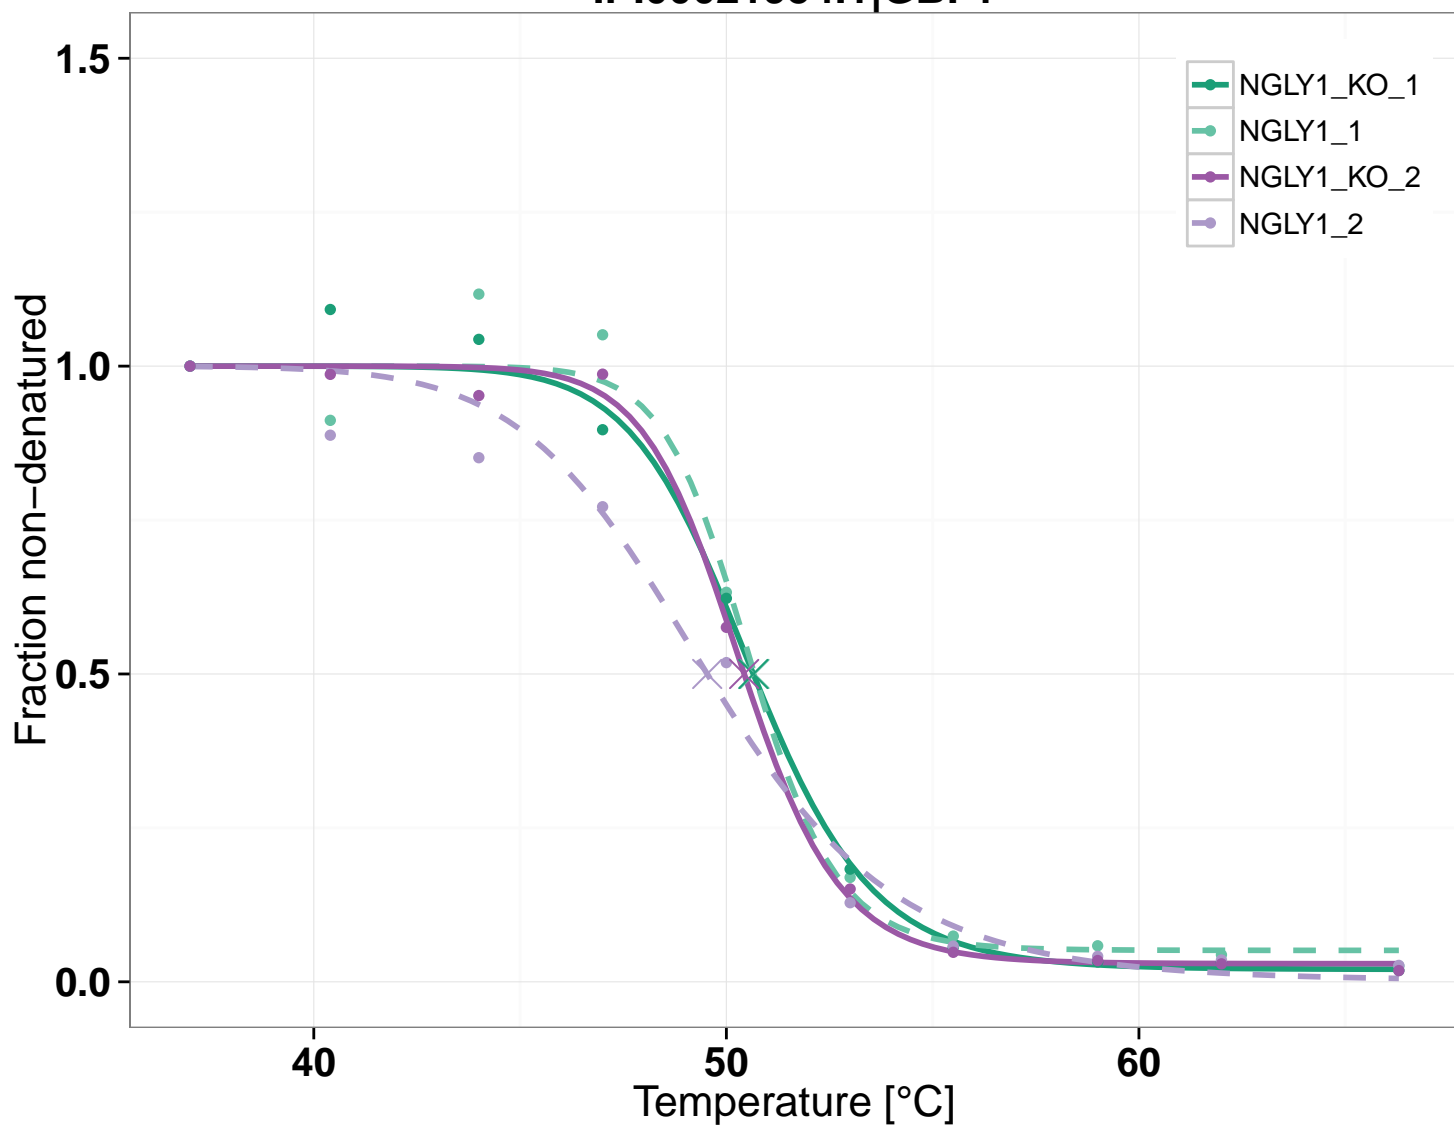

|            | meltPoint | slope | plateau | R2   |
|------------|-----------|-------|---------|------|
| NGLY1_KO_1 | 50.65     | -0.17 | 0.02    | 0.99 |
| NGLY1_1    | 50.68     | -0.22 | 0.05    | 0.99 |
| NGLY1_KO_2 | 50.43     | -0.2  | 0.03    | 1    |
| NGLY1_2    | 49.54     | -0.11 | 0       | 0.98 |

Supplement: Supplementary file 4816 [file 1]

IPI00025786.1|BCL7A

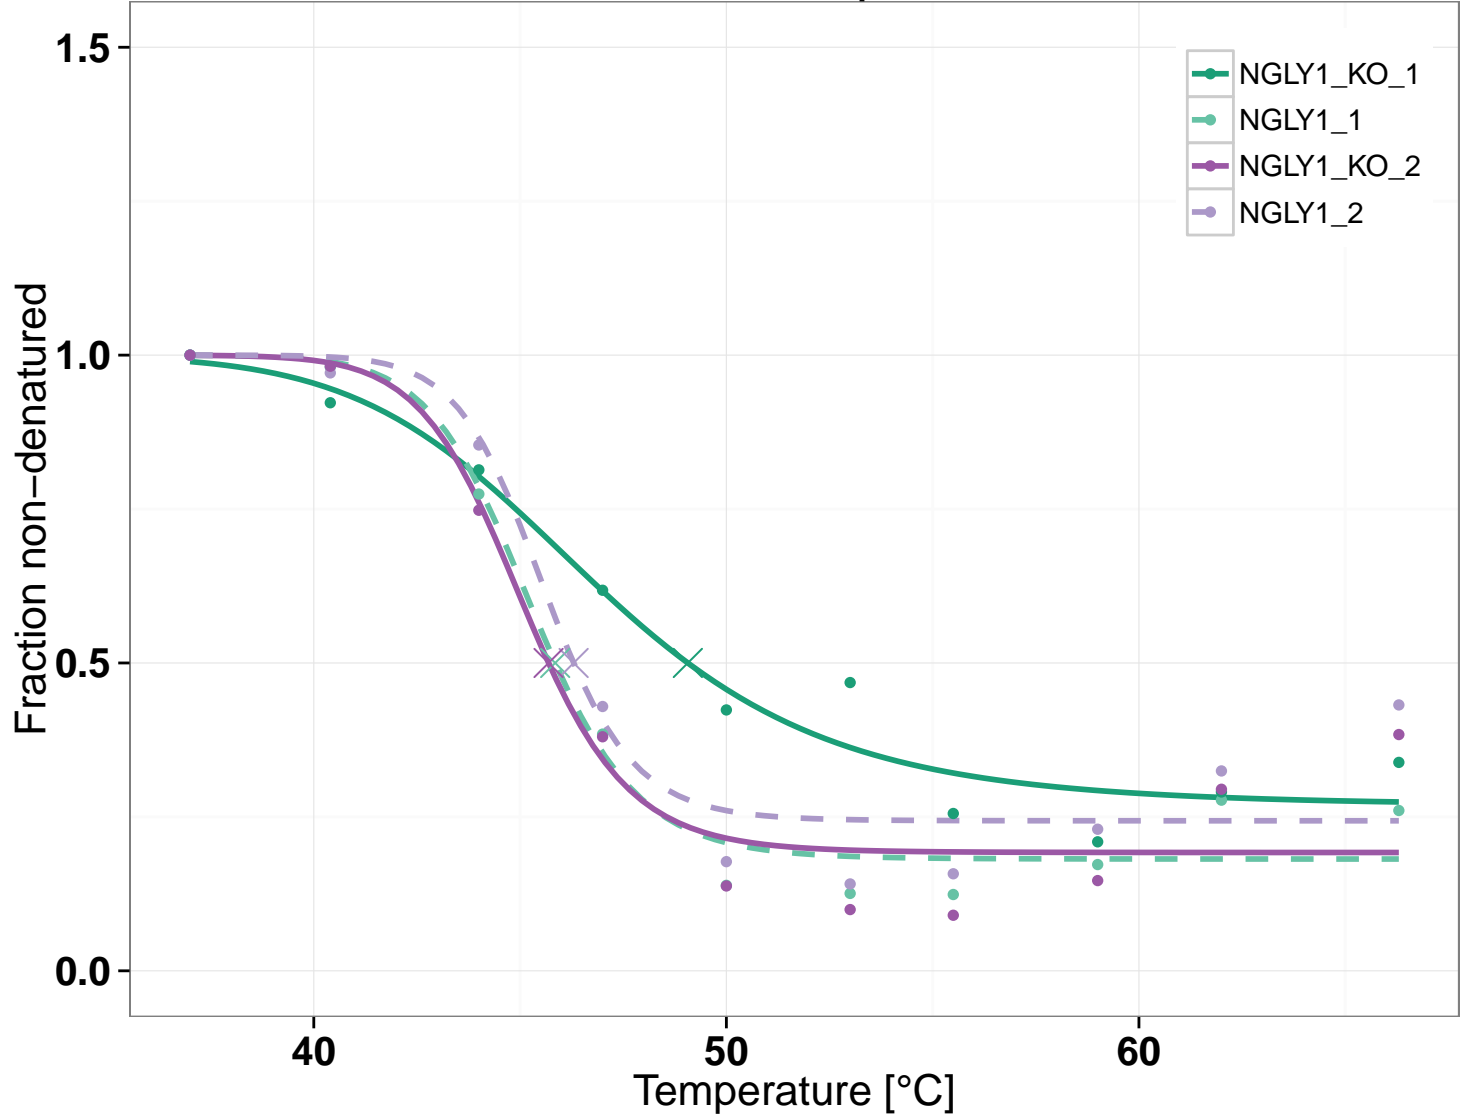

|            | meltPoint | slope  | plateau | R2   |
|------------|-----------|--------|---------|------|
| NGLY1_KO_1 | 49.07     | -0.064 | 0.27    | 0.96 |
| NGLY1_1    | 45.85     | -0.16  | 0.18    | 0.98 |
| NGLY1_KO_2 | 45.69     | -0.16  | 0.19    | 0.93 |
| NGLY1_2    | 46.3      | -0.18  | 0.24    | 0.93 |

Supplement: Supplementary file 4817 [file 1]

IPI00029731.8|RPL35A

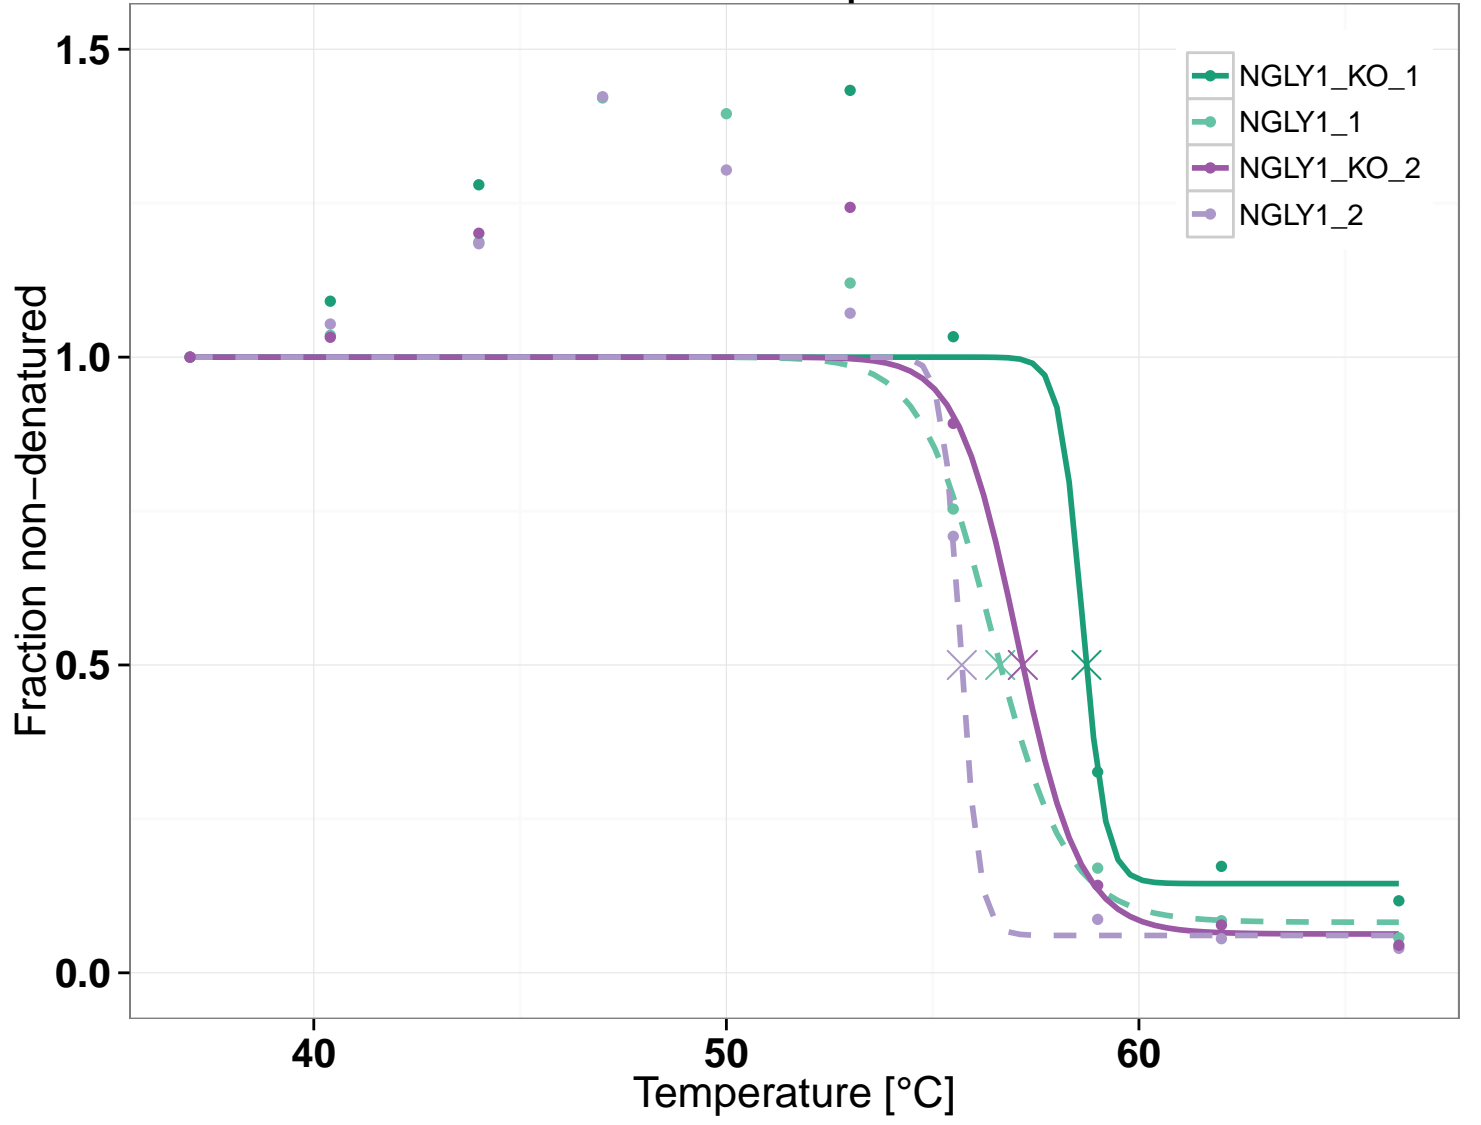

|            | meltPoint | slope | plateau | R2   |
|------------|-----------|-------|---------|------|
| NGLY1_KO_1 | 58.73     | -0.77 | 0.14    | 0.64 |
| NGLY1_1    | 56.64     | -0.26 | 0.08    | 0.85 |
| NGLY1_KO_2 | 57.19     | -0.31 | 0.06    | 0.75 |
| NGLY1_2    | 55.71     | -1.1  | 0.06    | 0.88 |

Supplement: Supplementary file 4818 [file 1]

IPI00749005.2|SYNE1

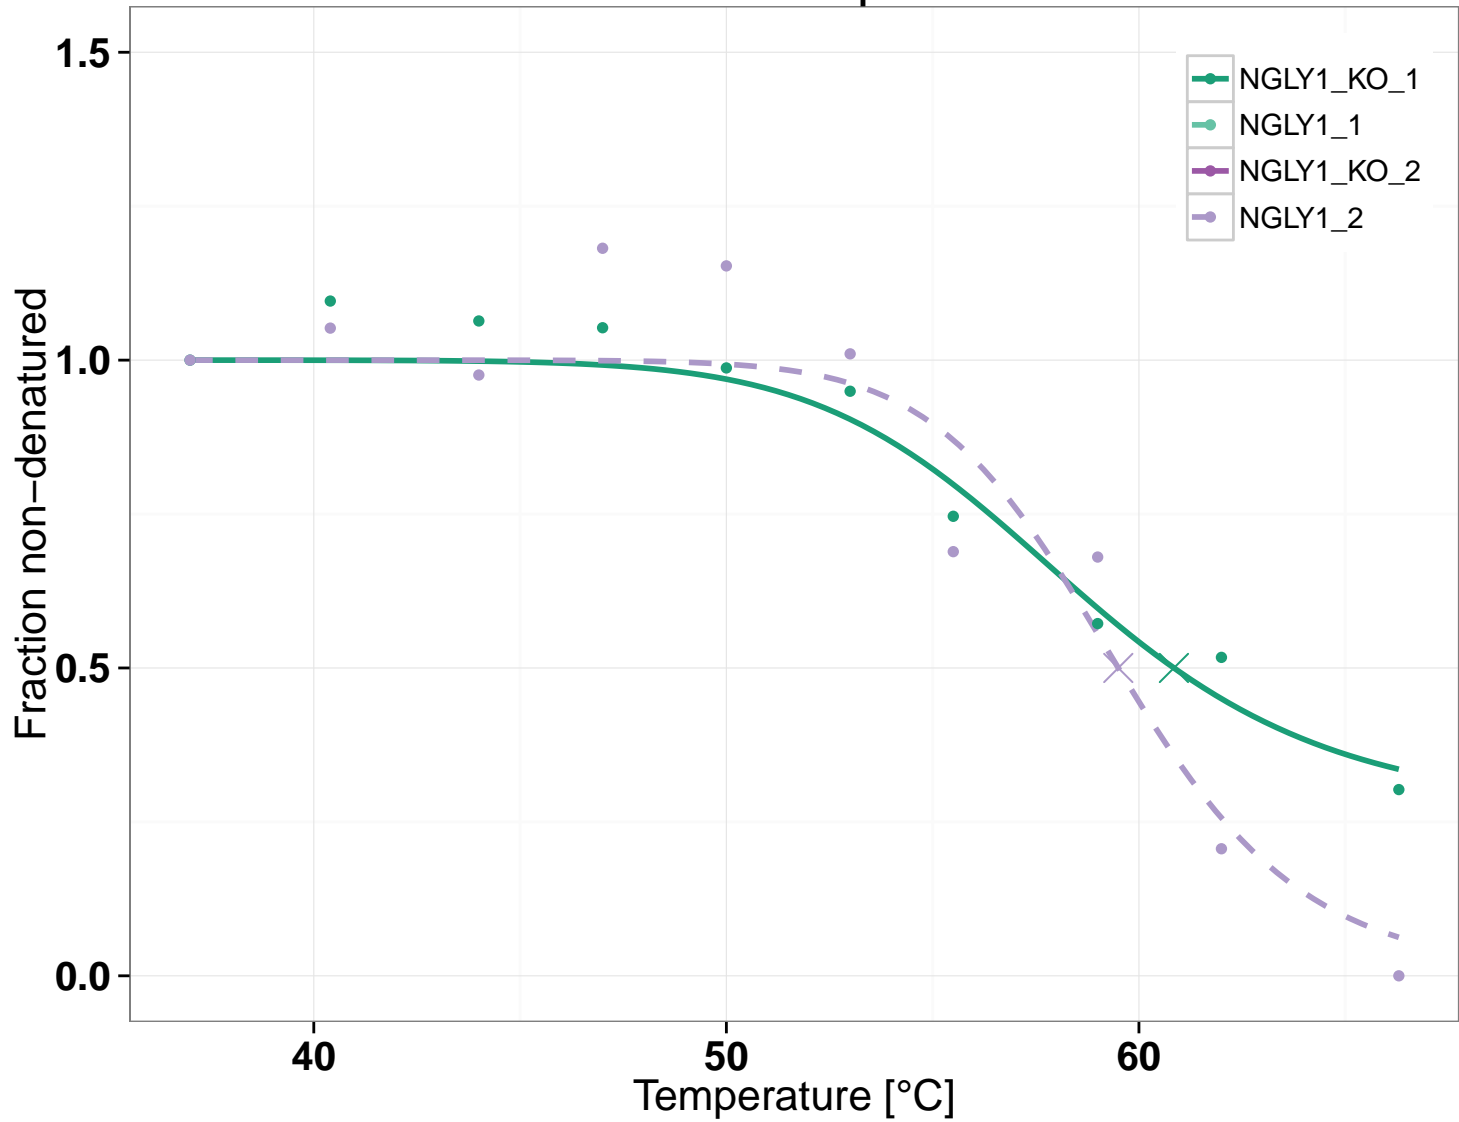

|            | meltPoint | slope  | plateau | R2   |
|------------|-----------|--------|---------|------|
| NGLY1_KO_1 | 60.85     | -0.059 | 0.26    | 0.96 |
| NGLY1_1    | -         | -      | -       | -    |
| NGLY1_KO_2 | -         | -      | -       | -    |
| NGLY1_2    | 59.5      | -0.11  | 0       | 0.92 |

Supplement: Supplementary file 4819 [file 1]

IPI00877788.1|MEIS1

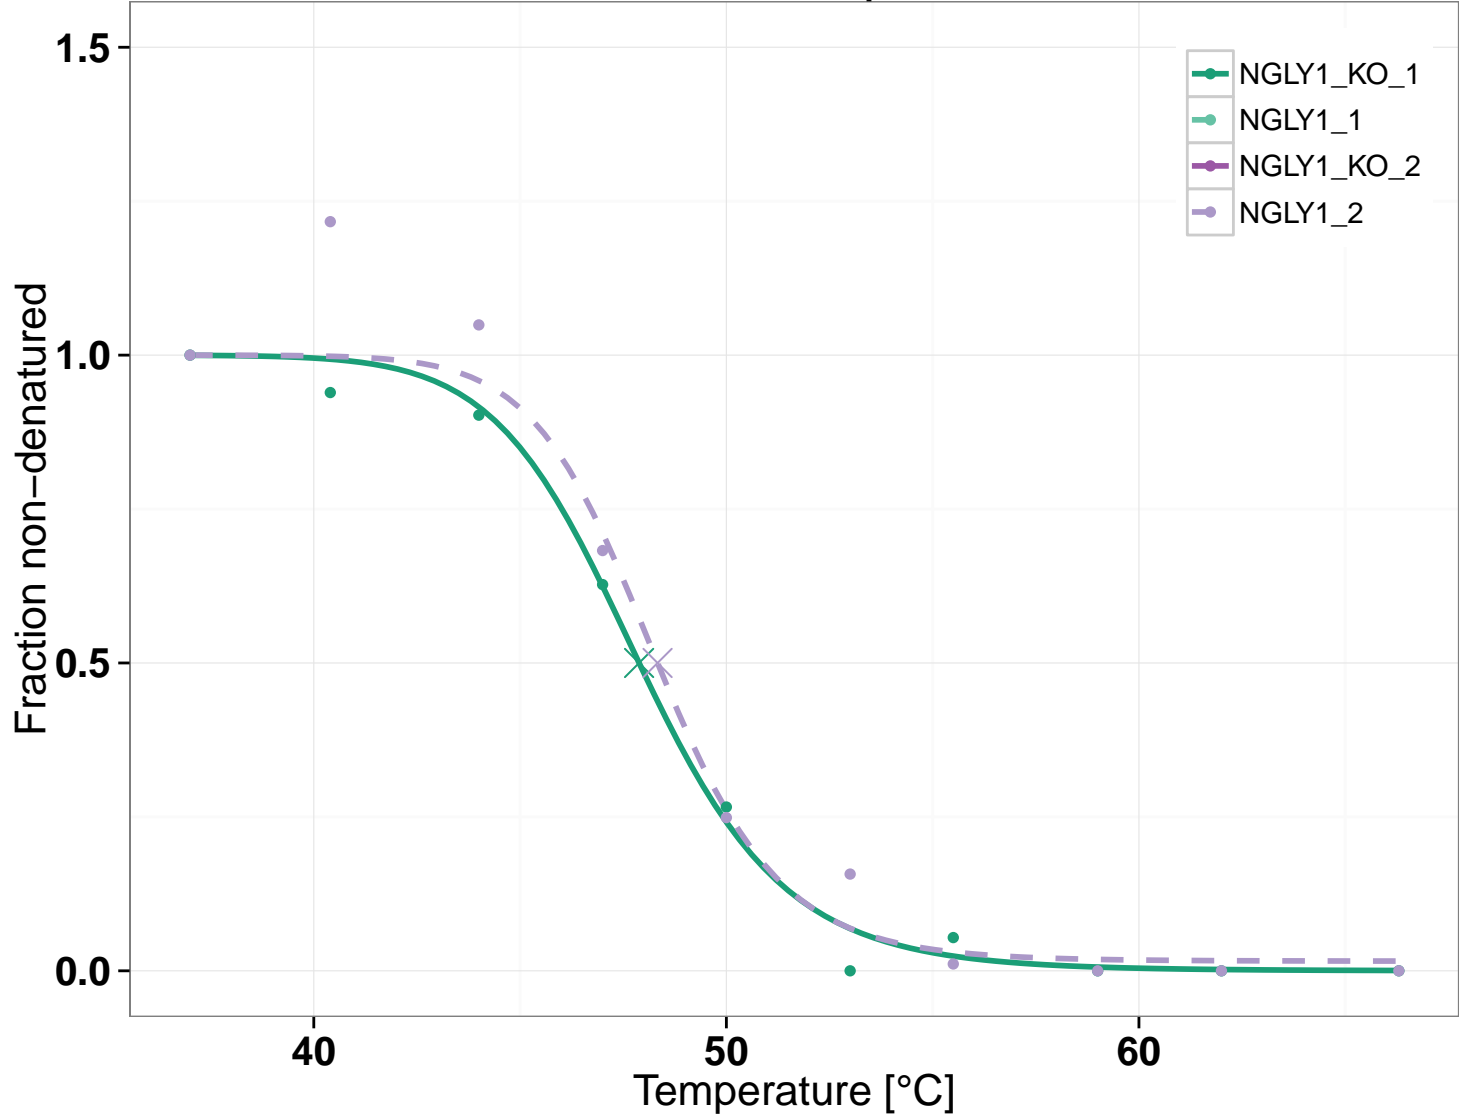

|            | meltPoint | slope | plateau | R2   |
|------------|-----------|-------|---------|------|
| NGLY1_KO_1 | 47.88     | -0.14 | 0       | 0.99 |
| NGLY1_1    | -         | -     | -       | -    |
| NGLY1_KO_2 | -         | -     | -       | -    |
| NGLY1_2    | 48.33     | -0.16 | 0.02    | 0.97 |

Supplement: Supplementary file 4820 [file 1]

IPI00783603.2|PFKFB1

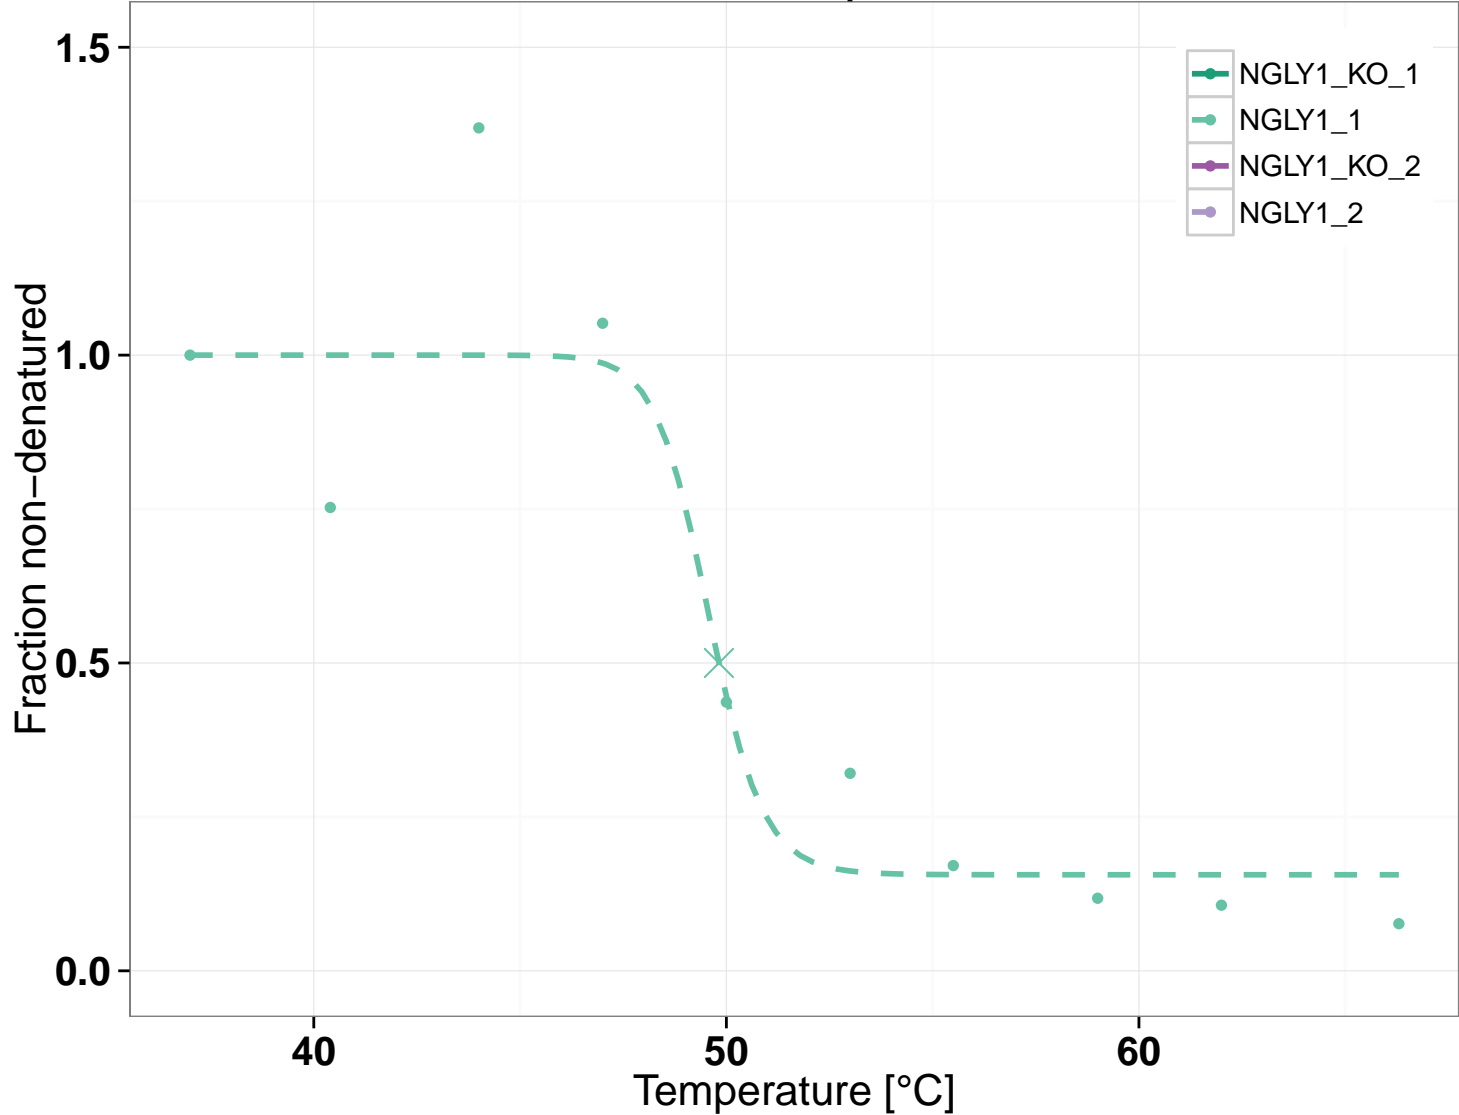

|            | meltPoint | slope | plateau | R2   |
|------------|-----------|-------|---------|------|
| NGLY1_KO_1 | -         | -     | -       | -    |
| NGLY1_1    | 49.82     | -0.32 | 0.16    | 0.88 |
| NGLY1_KO_2 | -         | -     | -       | -    |
| NGLY1_2    | -         | -     | -       | -    |

Supplement: Supplementary file 4821 [file 1]
