# Supplementary material (part 49 of 85)
Source: publisher figshare collection journal article supplement (https://gsajournals.figshare.com/articles/dataset/_/12014913)

IPI00107693.4|MED15

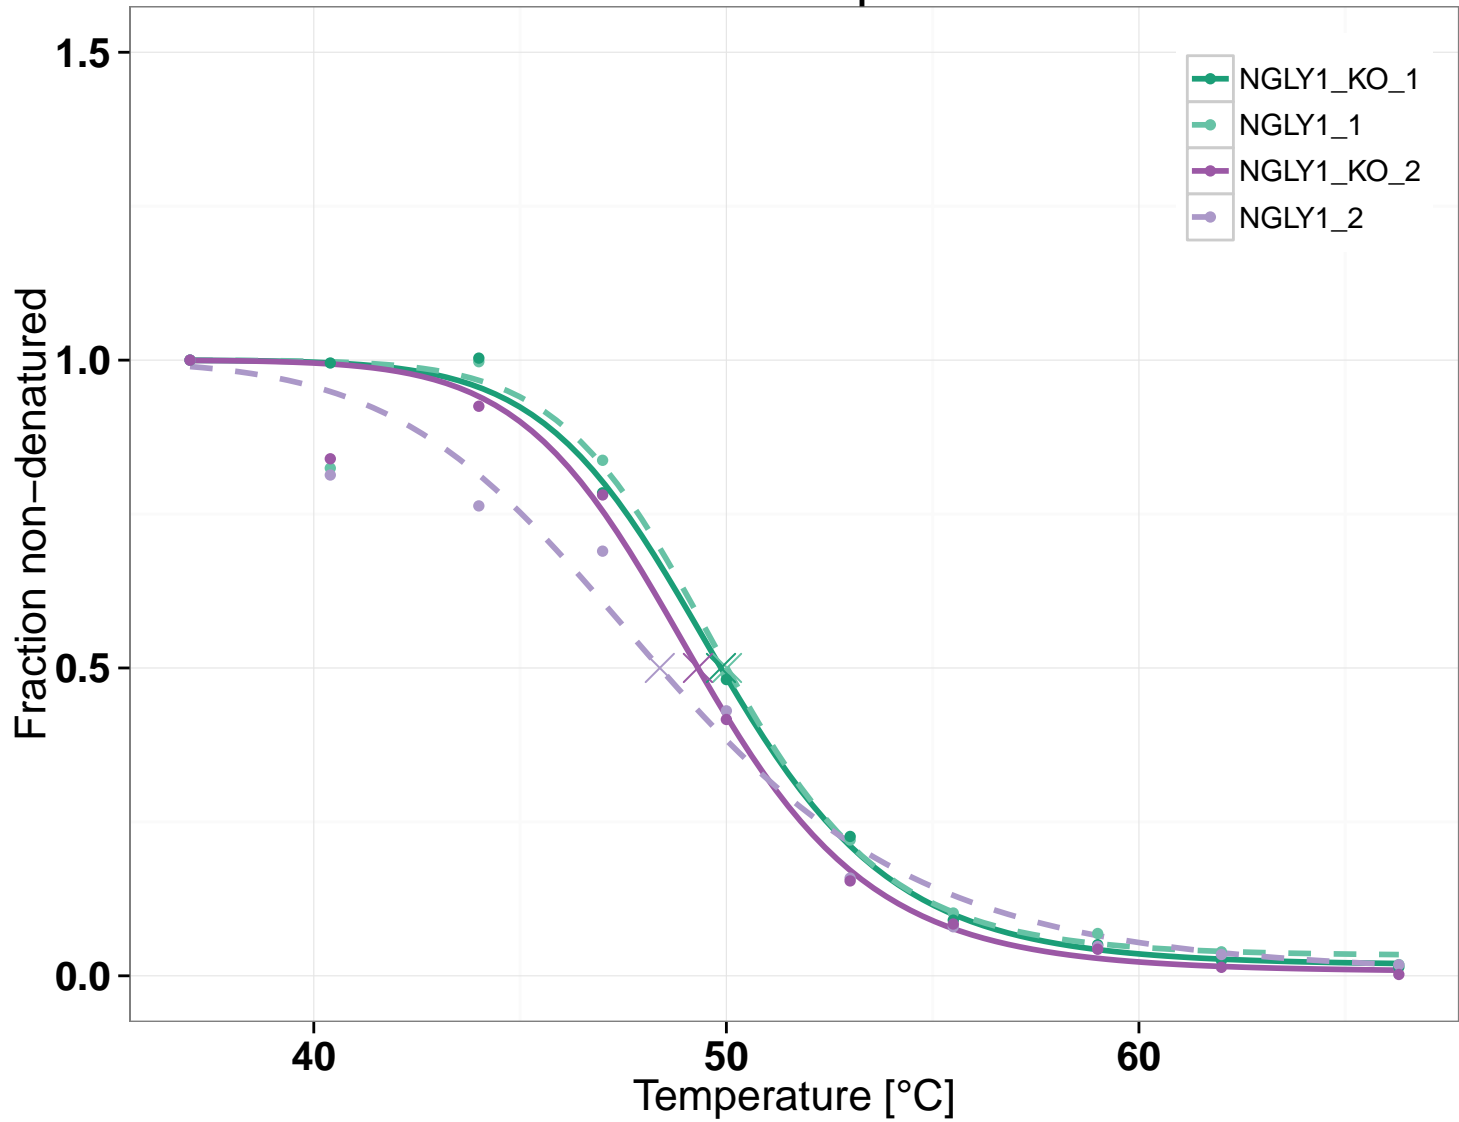

|            | meltPoint | slope  | plateau | R2   |
|------------|-----------|--------|---------|------|
| NGLY1_KO_1 | 49.87     | -0.12  | 0.02    | 1    |
| NGLY1_1    | 50.02     | -0.12  | 0.03    | 0.98 |
| NGLY1_KO_2 | 49.31     | -0.12  | 0.01    | 0.98 |
| NGLY1_2    | 48.39     | -0.078 | 0       | 0.97 |

Supplement: Supplementary file 4822 [file 1]

# IPI00220281.3|GNAO1

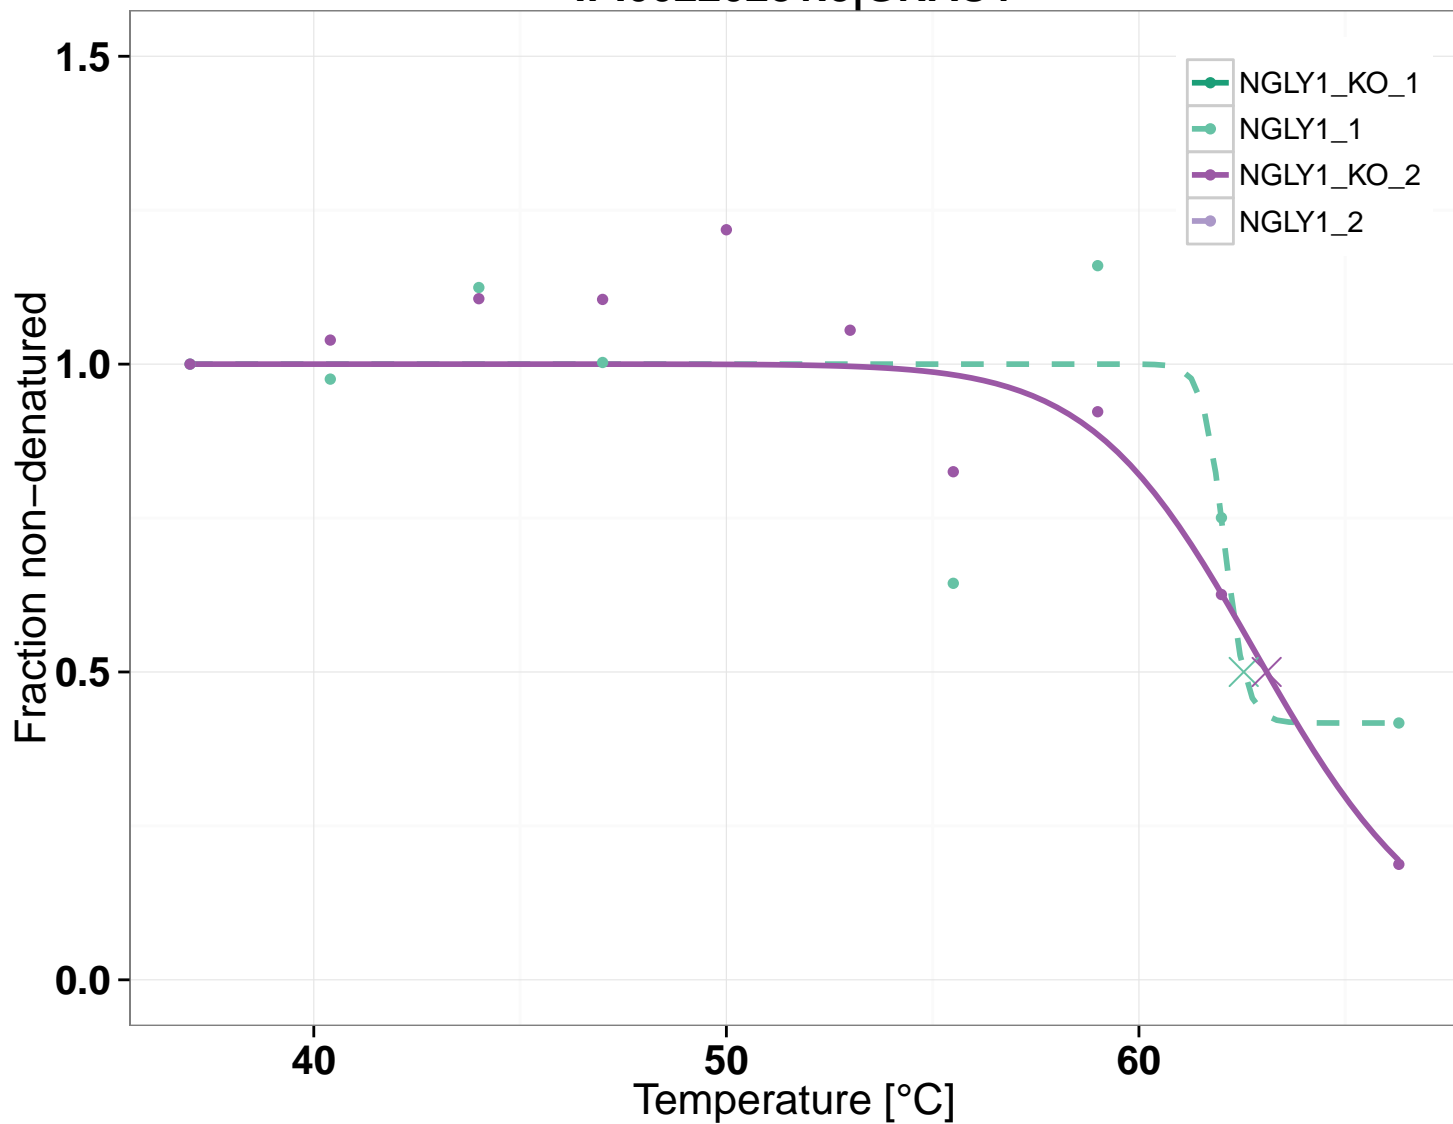

|            | meltPoint | slope | plateau | R2   |
|------------|-----------|-------|---------|------|
| NGLY1_KO_1 | –         | –     | –       | –    |
| NGLY1_1    | 62.54     | –0.57 | 0.42    | 0.3  |
| NGLY1_KO_2 | 63.1      | –0.12 | 0       | 0.88 |
| NGLY1_2    | –         | –     | –       | –    |

Supplement: Supplementary file 4823 [file 1]

IPI00232533.5|EIF1AP1

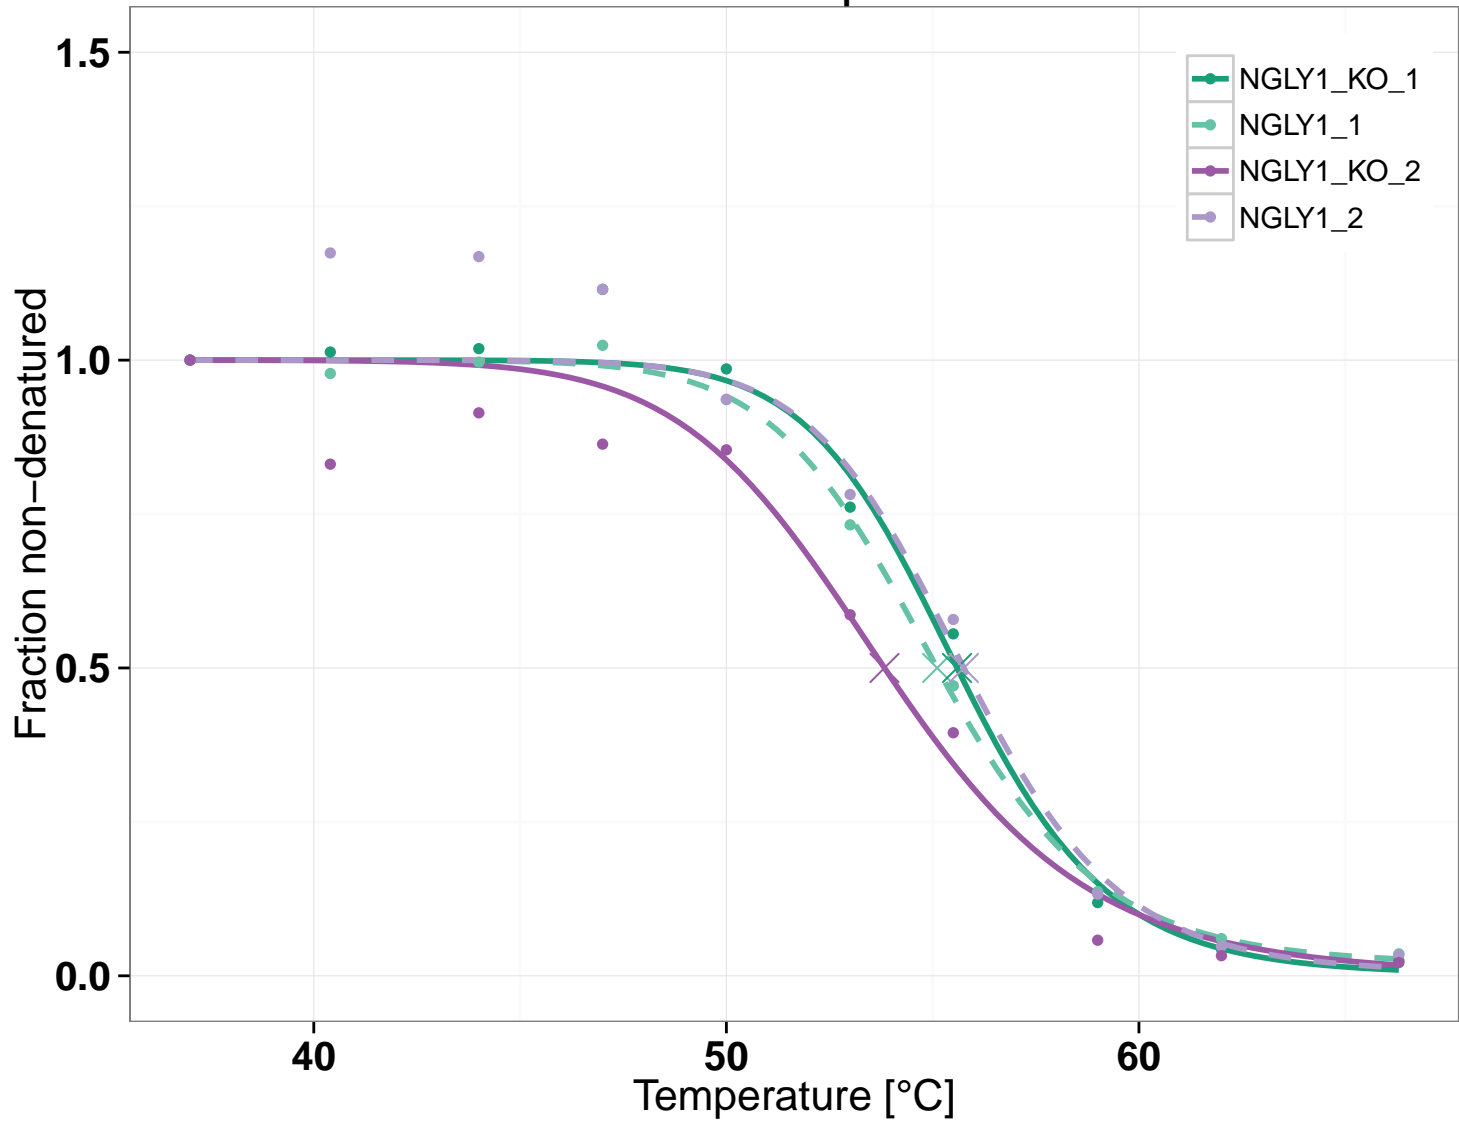

|            | meltPoint | slope | plateau | R2   |
|------------|-----------|-------|---------|------|
| NGLY1_KO_1 | 55.59     | -0.14 | 0       | 0.99 |
| NGLY1_1    | 55.11     | -0.12 | 0.02    | 1    |
| NGLY1_KO_2 | 53.83     | -0.1  | 0       | 0.96 |
| NGLY1_2    | 55.76     | -0.13 | 0       | 0.96 |

Supplement: Supplementary file 4824 [file 1]

IPI00021429.6|NR2F6

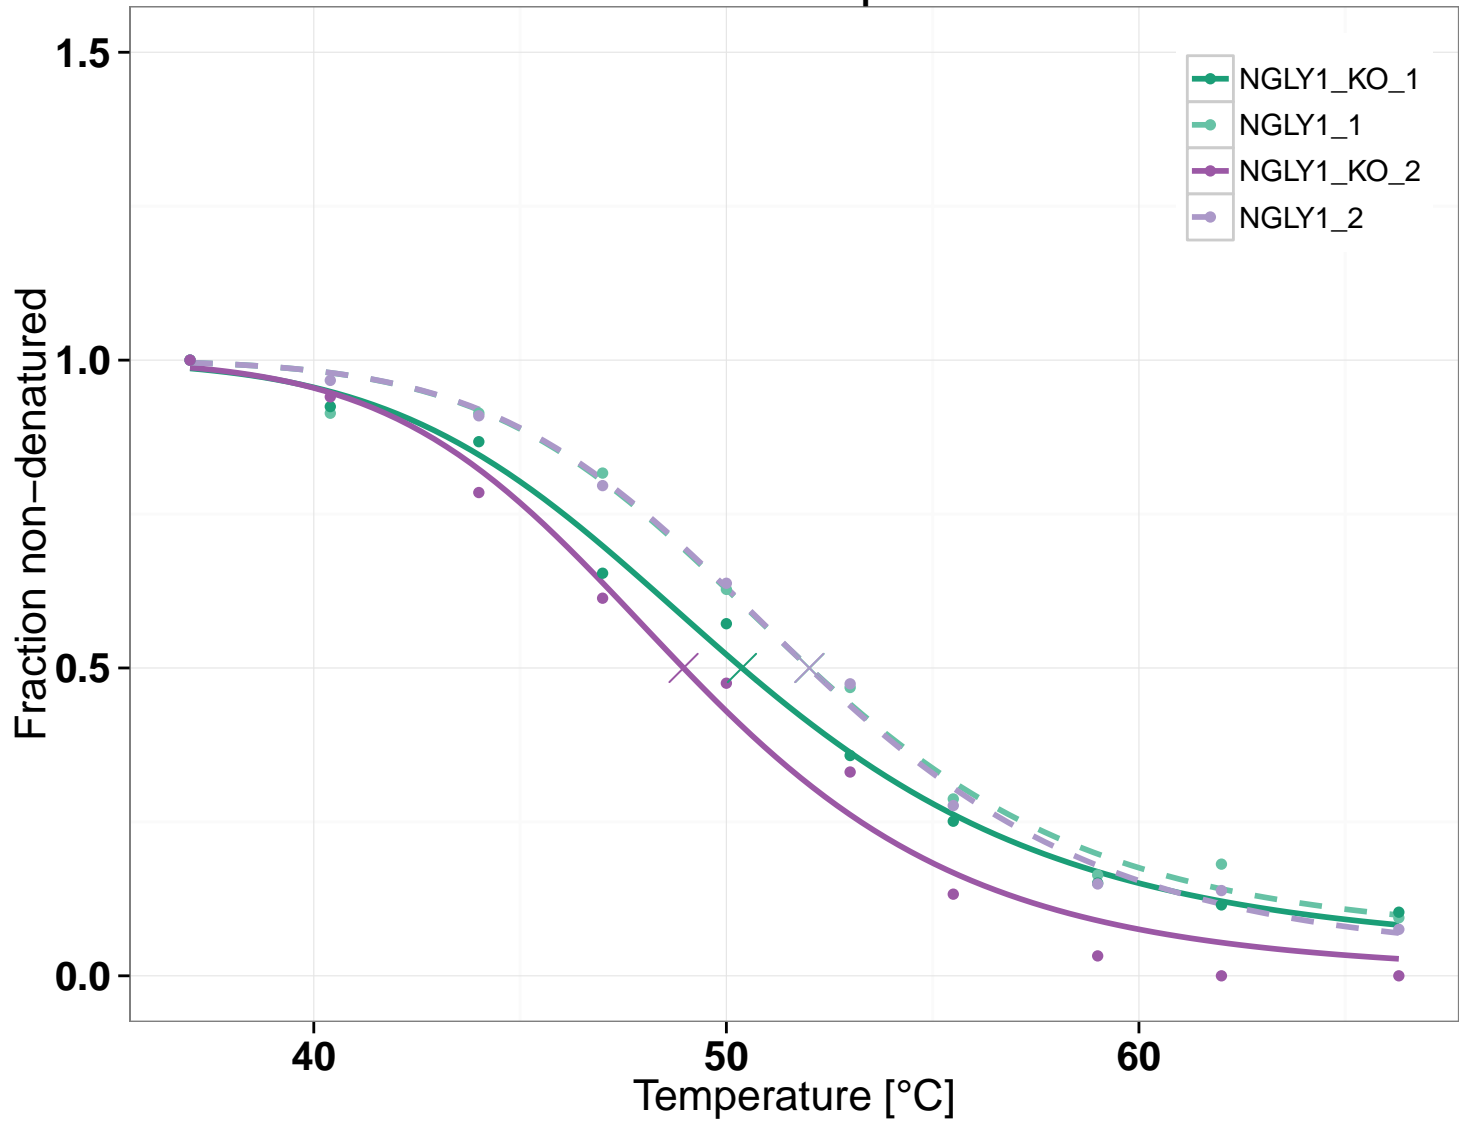

|            | meltPoint | slope  | plateau | R2   |
|------------|-----------|--------|---------|------|
| NGLY1_KO_1 | 50.38     | -0.06  | 0.03    | 0.99 |
| NGLY1_1    | 52.02     | -0.064 | 0.06    | 0.99 |
| NGLY1_KO_2 | 48.96     | -0.071 | 0       | 0.99 |
| NGLY1_2    | 52.01     | -0.066 | 0.02    | 1    |

Supplement: Supplementary file 4826 [file 1]

IPI00009777.3|ZNF581

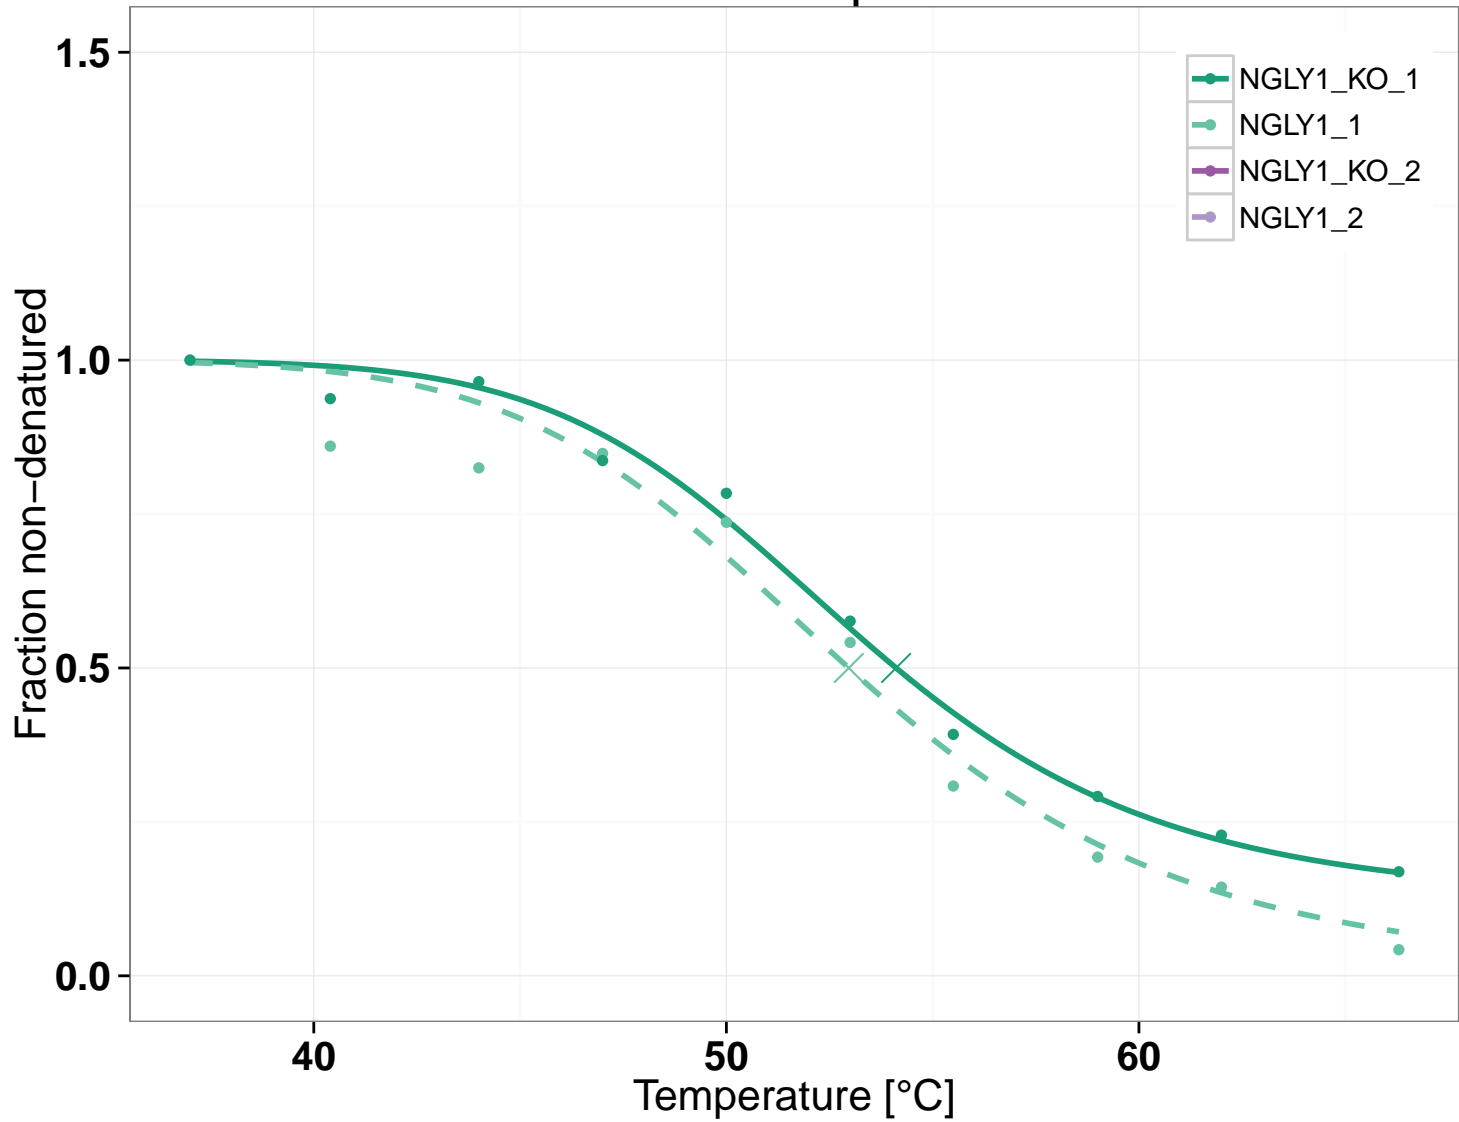

|            | meltPoint | slope  | plateau | R2   |
|------------|-----------|--------|---------|------|
| NGLY1_KO_1 | 54.11     | -0.06  | 0.12    | 0.99 |
| NGLY1_1    | 52.97     | -0.062 | 0       | 0.97 |
| NGLY1_KO_2 | -         | -      | -       | -    |
| NGLY1_2    | -         | -      | -       | -    |

Supplement: Supplementary file 4827 [file 1]

IPI00414779.1|ERCC6

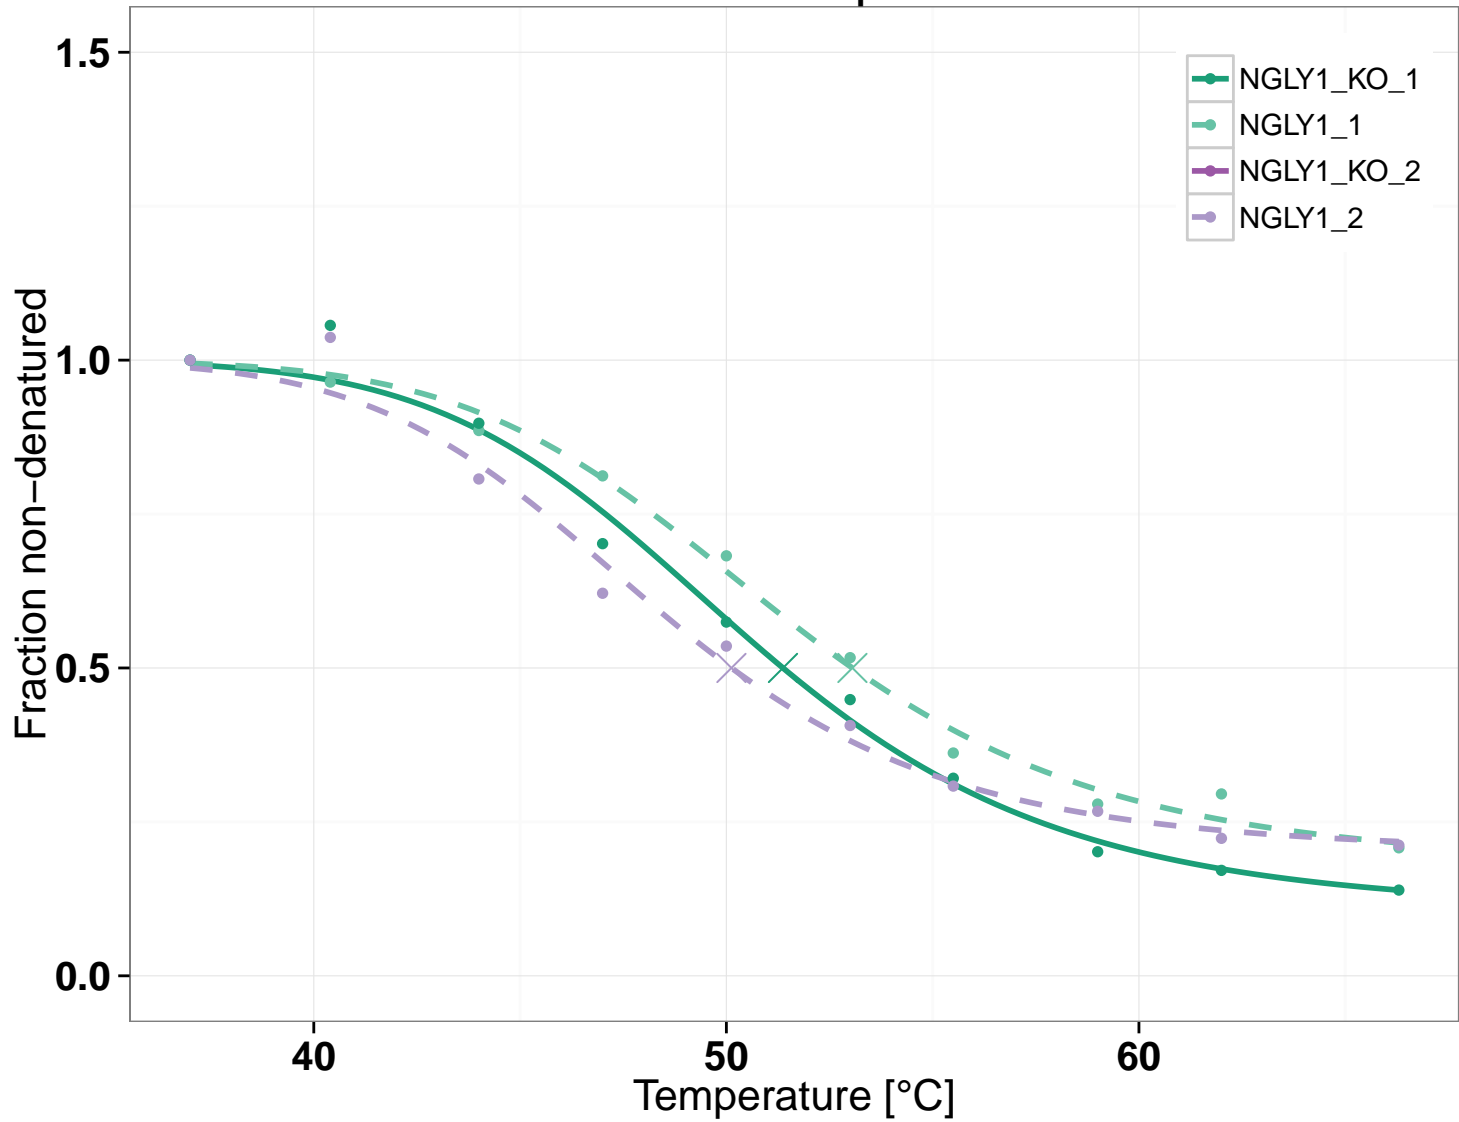

|            | meltPoint | slope  | plateau | R2   |
|------------|-----------|--------|---------|------|
| NGLY1_KO_1 | 51.37     | -0.06  | 0.1     | 0.99 |
| NGLY1_1    | 53.06     | -0.054 | 0.17    | 0.99 |
| NGLY1_KO_2 | -         | -      | -       | -    |
| NGLY1_2    | 50.12     | -0.058 | 0.2     | 0.99 |

Supplement: Supplementary file 4828 [file 1]

# IPI00785015.3|UBN2

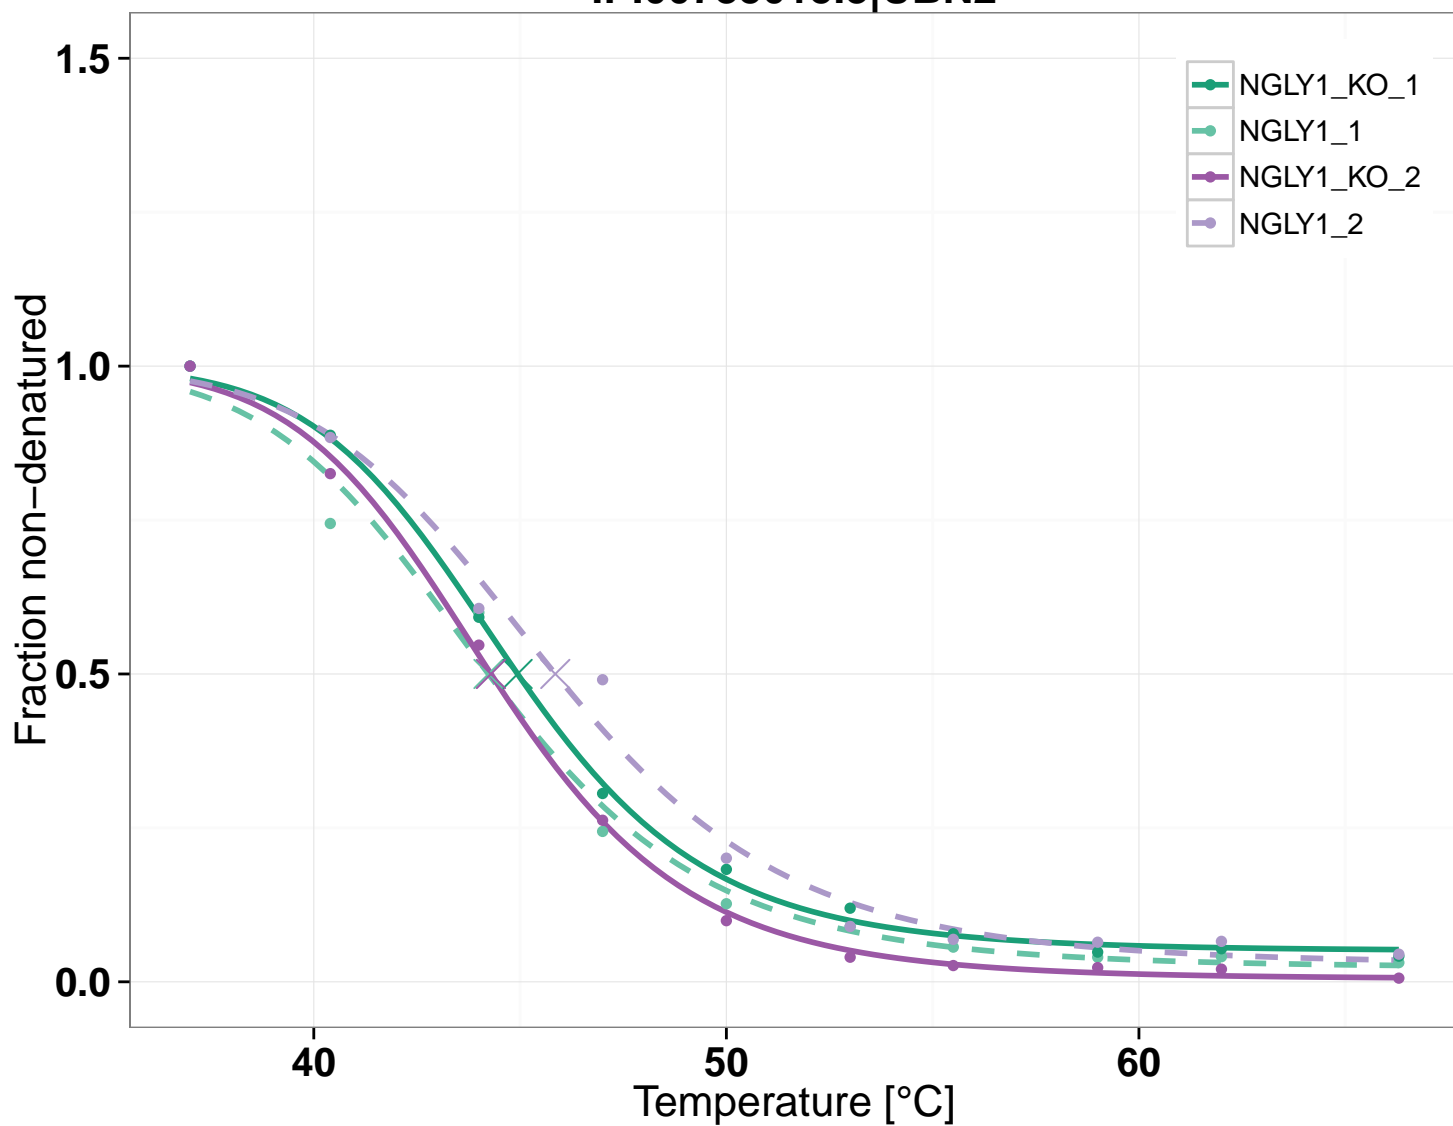

|            | meltPoint | slope  | plateau | R2   |
|------------|-----------|--------|---------|------|
| NGLY1_KO_1 | 44.94     | -0.099 | 0.05    | 1    |
| NGLY1_1    | 44.23     | -0.091 | 0.02    | 0.99 |
| NGLY1_KO_2 | 44.29     | -0.1   | 0       | 1    |
| NGLY1_2    | 45.85     | -0.084 | 0.03    | 0.99 |

Supplement: Supplementary file 4829 [file 1]

IPI00031629.1|PDCL3

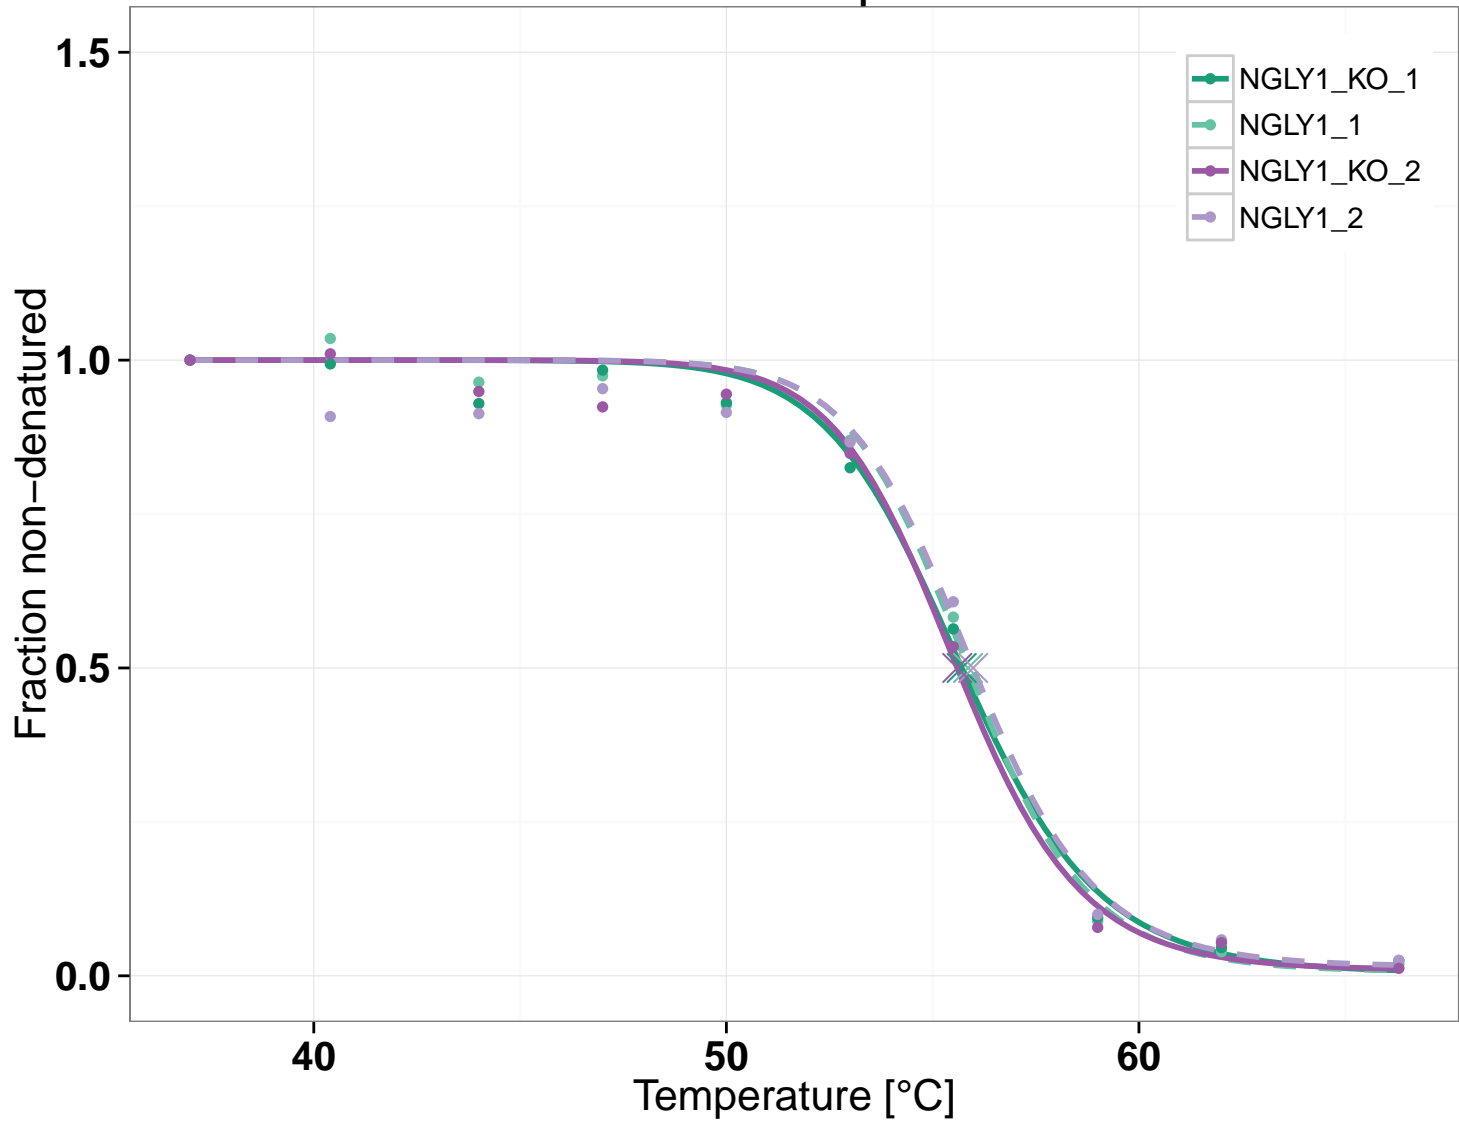

|            | meltPoint | slope | plateau | R2   |
|------------|-----------|-------|---------|------|
| NGLY1_KO_1 | 55.7      | -0.15 | 0       | 0.99 |
| NGLY1_1    | 55.86     | -0.17 | 0.01    | 0.99 |
| NGLY1_KO_2 | 55.6      | -0.16 | 0.01    | 0.99 |
| NGLY1_2    | 55.98     | -0.16 | 0.01    | 0.98 |

Supplement: Supplementary file 4830 [file 1]

# IPI00797572.1|IQSEC1

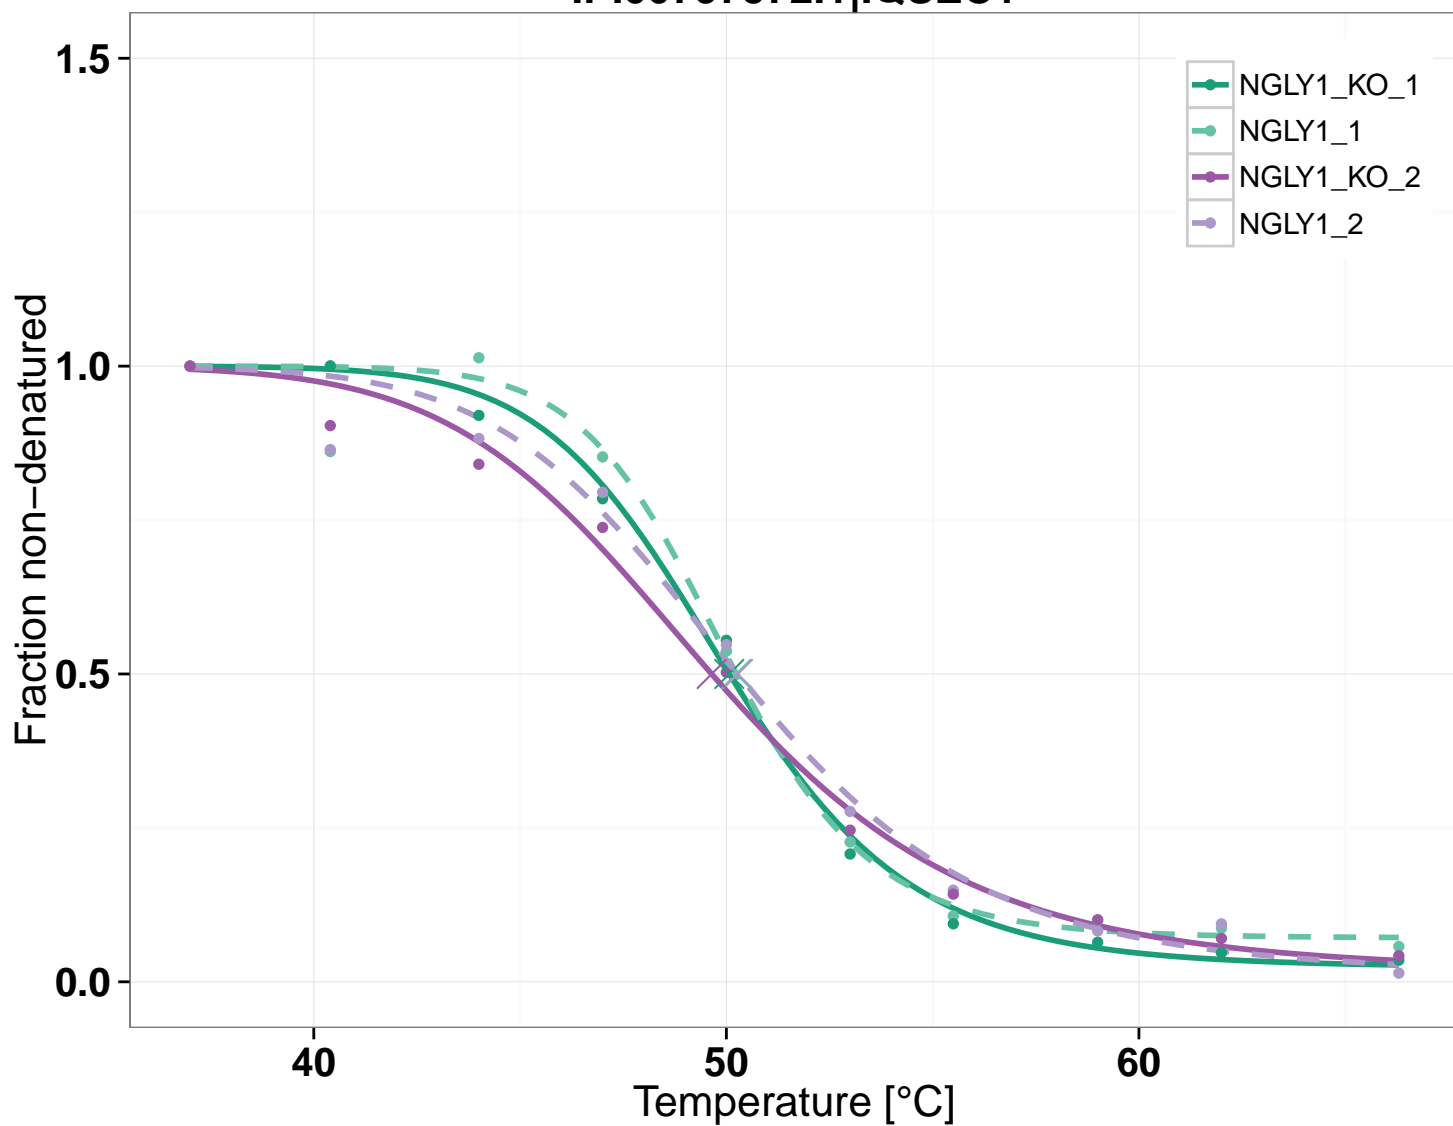

|            | meltPoint | slope  | plateau | R2   |
|------------|-----------|--------|---------|------|
| NGLY1_KO_1 | 50.07     | -0.11  | 0.02    | 1    |
| NGLY1_1    | 50.24     | -0.13  | 0.07    | 0.99 |
| NGLY1_KO_2 | 49.64     | -0.078 | 0.02    | 0.99 |
| NGLY1_2    | 50.28     | -0.084 | 0.01    | 0.98 |

Supplement: Supplementary file 4831 [file 1]

IPI00298016.2|PTPN22

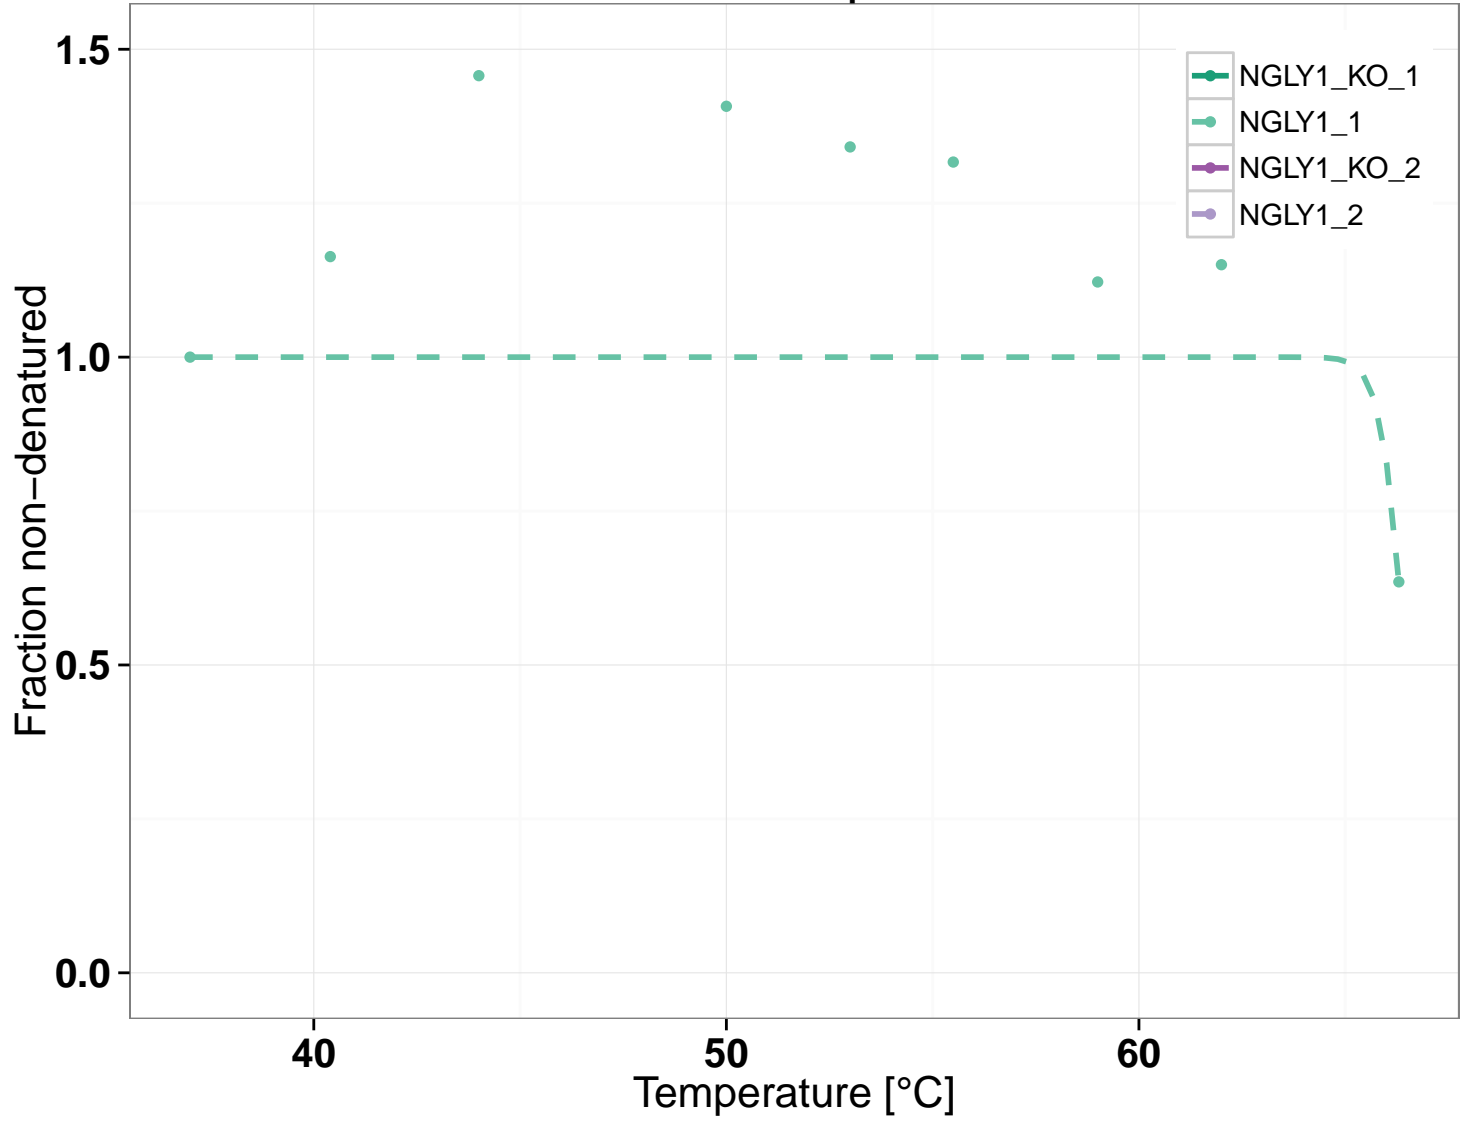

|            | meltPoint | slope | plateau | R2    |
|------------|-----------|-------|---------|-------|
| NGLY1_KO_1 | -         | -     | -       | -     |
| NGLY1_1    | -         | -     | 0       | -0.52 |
| NGLY1_KO_2 | -         | -     | -       | -     |
| NGLY1_2    | -         | -     | -       | -     |

Supplement: Supplementary file 4832 [file 1]

IPI00185018.7|MTMR3

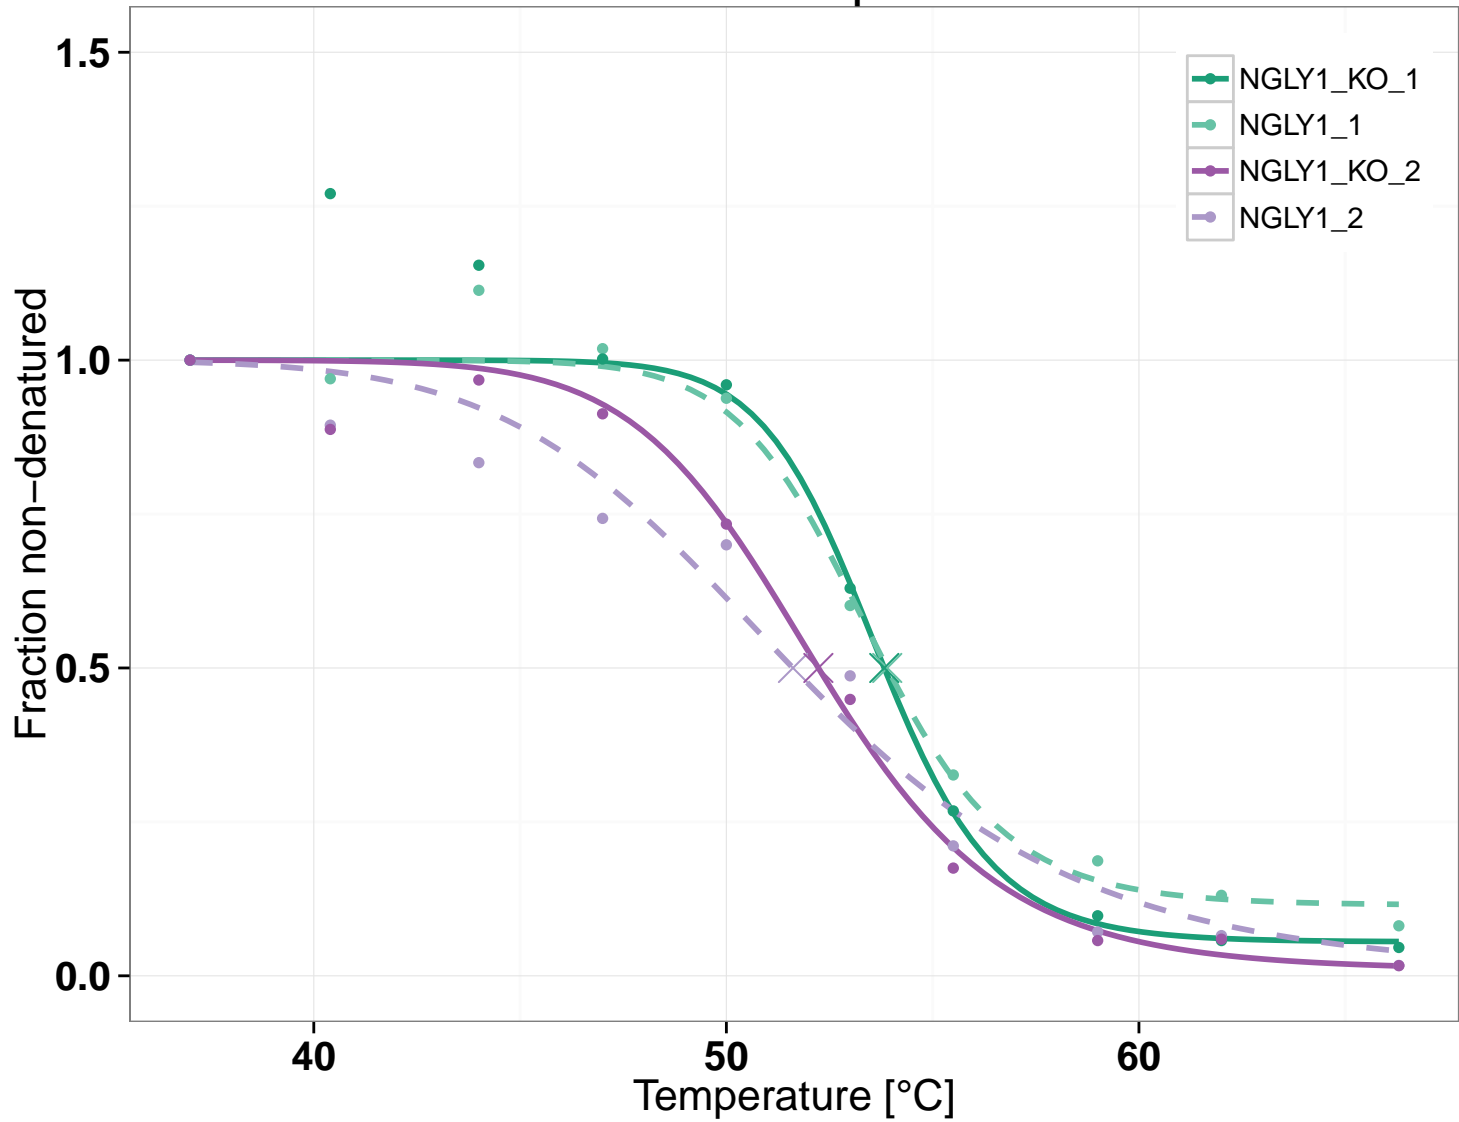

|            | meltPoint | slope  | plateau | R2   |
|------------|-----------|--------|---------|------|
| NGLY1_KO_1 | 53.83     | -0.17  | 0.06    | 0.95 |
| NGLY1_1    | 53.9      | -0.13  | 0.11    | 0.99 |
| NGLY1_KO_2 | 52.23     | -0.11  | 0.01    | 0.99 |
| NGLY1_2    | 51.61     | -0.071 | 0       | 0.97 |

Supplement: Supplementary file 4833 [file 1]

IPI00419932.5|RAB12

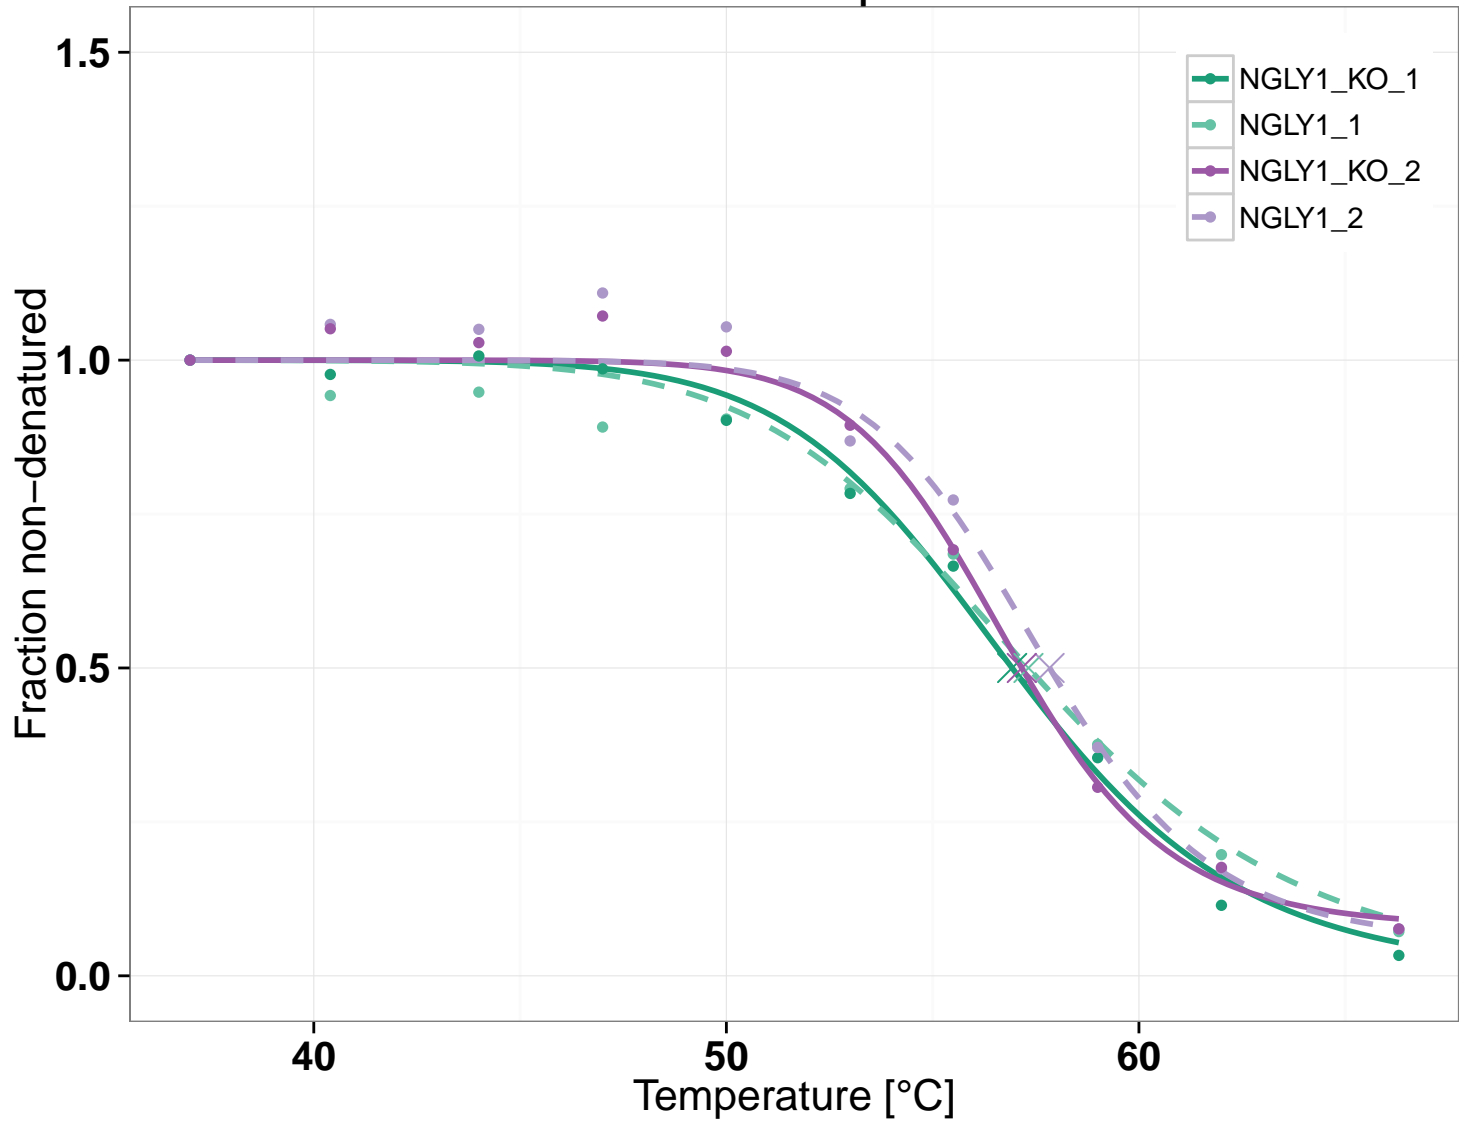

|            | meltPoint | slope  | plateau | R2   |
|------------|-----------|--------|---------|------|
| NGLY1_KO_1 | 56.93     | -0.09  | 0       | 0.99 |
| NGLY1_1    | 57.32     | -0.076 | 0       | 0.98 |
| NGLY1_KO_2 | 57.16     | -0.12  | 0.08    | 0.99 |
| NGLY1_2    | 57.83     | -0.11  | 0.05    | 0.98 |

Supplement: Supplementary file 4834 [file 1]

# IPI00018434.1|TSG101

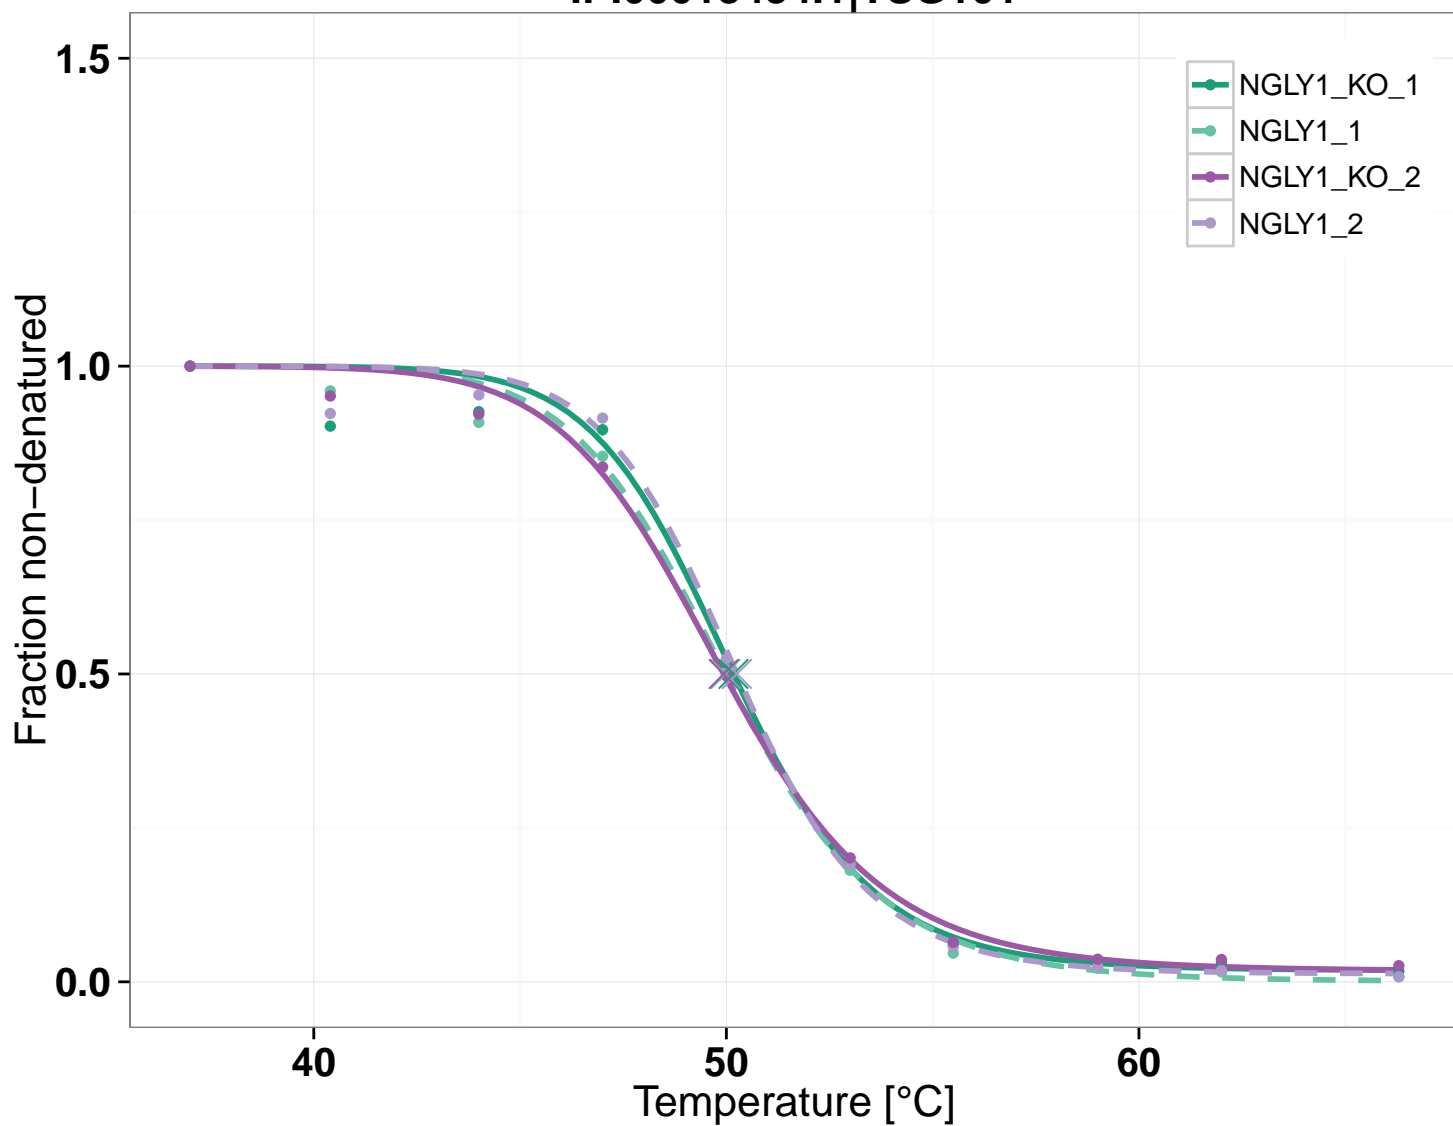

|            | meltPoint | slope | plateau | R2   |
|------------|-----------|-------|---------|------|
| NGLY1_KO_1 | 50.17     | -0.14 | 0.02    | 0.99 |
| NGLY1_1    | 49.98     | -0.13 | 0       | 1    |
| NGLY1_KO_2 | 49.94     | -0.12 | 0.02    | 1    |
| NGLY1_2    | 50.26     | -0.15 | 0.01    | 1    |

Supplement: Supplementary file 4835 [file 1]

# IPI00006113.1|POLR2I

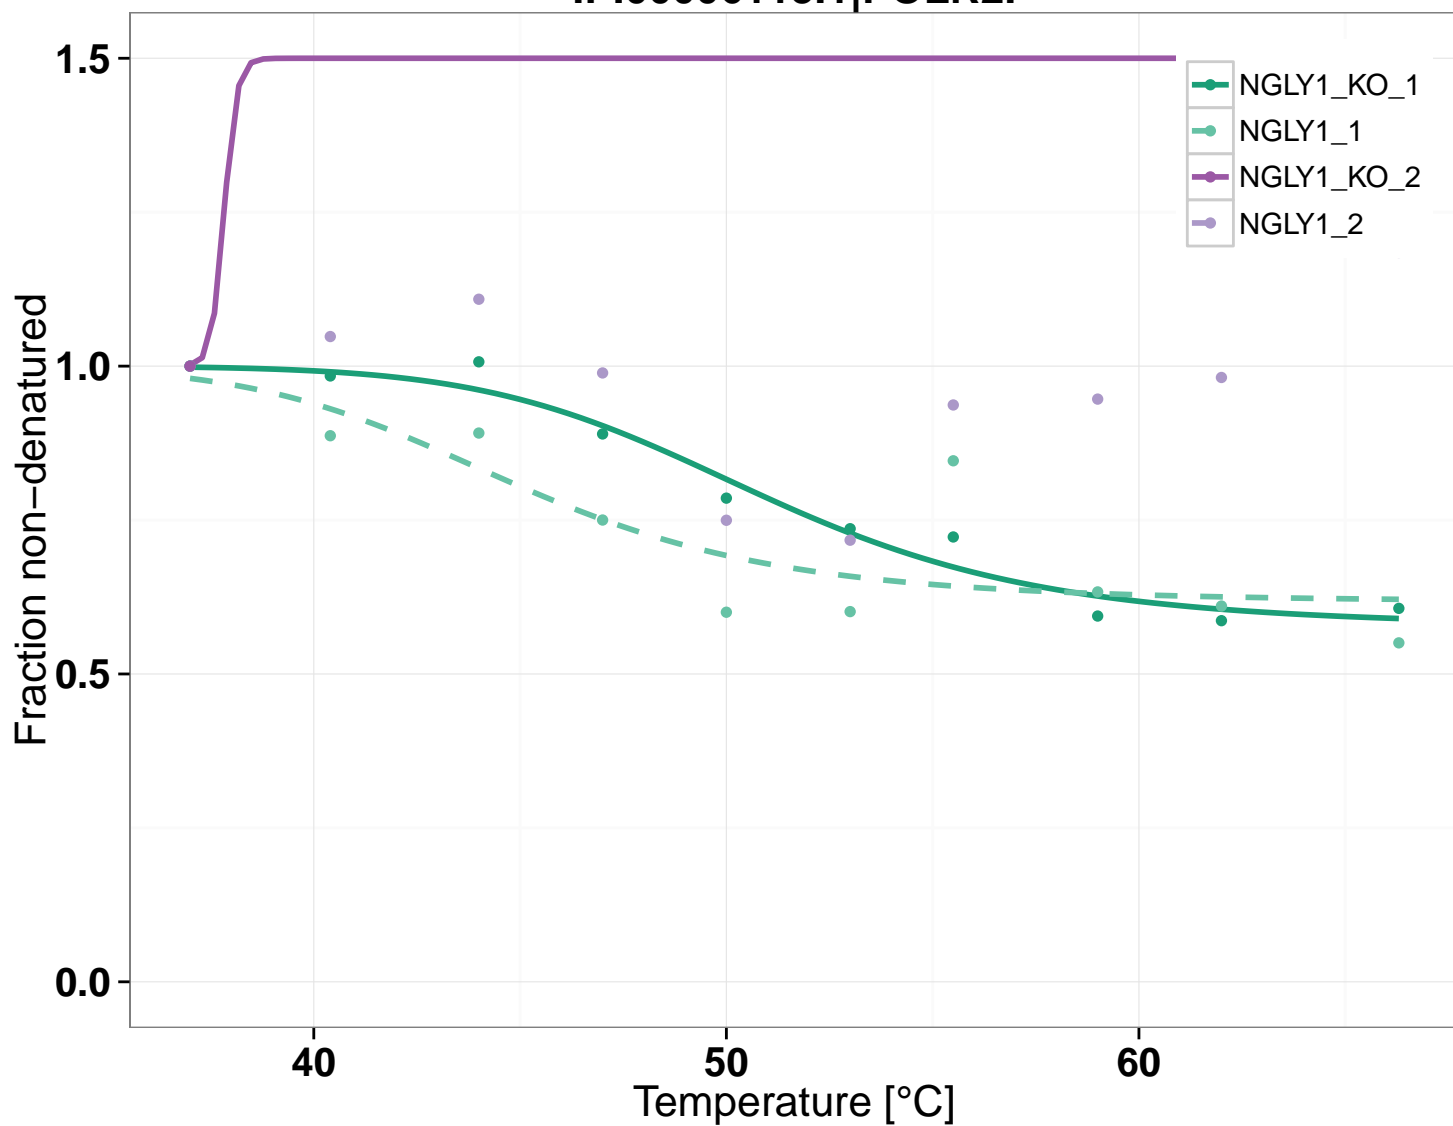

|            | meltPoint | slope  | plateau | R2    |
|------------|-----------|--------|---------|-------|
| NGLY1_KO_1 | —         | -0.031 | 0.58    | 0.97  |
| NGLY1_1    | —         | -0.03  | 0.62    | 0.72  |
| NGLY1_KO_2 | —         | 0.83   | 1.5     | -7.32 |
| NGLY1_2    | —         | —      | —       | —     |

Supplement: Supplementary file 4836 [file 1]

IPI00877923.1|7 KDA PROTEIN.

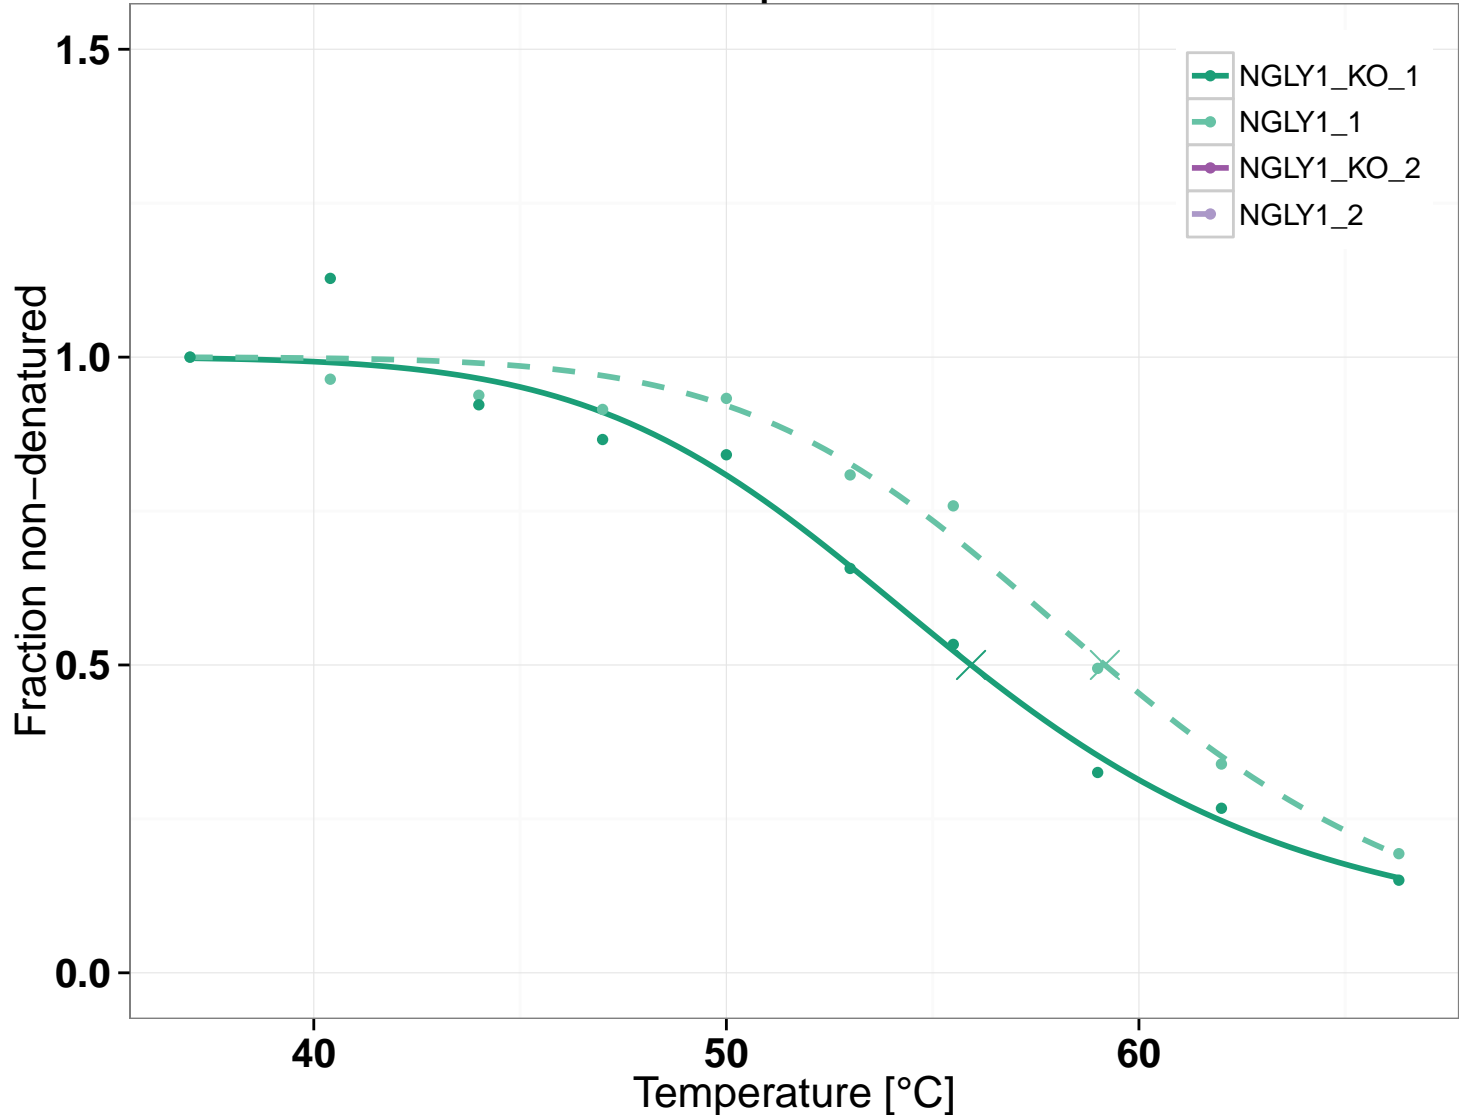

|            | meltPoint | slope  | plateau | R2   |
|------------|-----------|--------|---------|------|
| NGLY1_KO_1 | 55.93     | -0.055 | 0.04    | 0.98 |
| NGLY1_1    | 59.17     | -0.058 | 0       | 0.99 |
| NGLY1_KO_2 | -         | -      | -       | -    |
| NGLY1_2    | -         | -      | -       | -    |

Supplement: Supplementary file 4837 [file 1]

# IPI00025890.4|C12ORF30

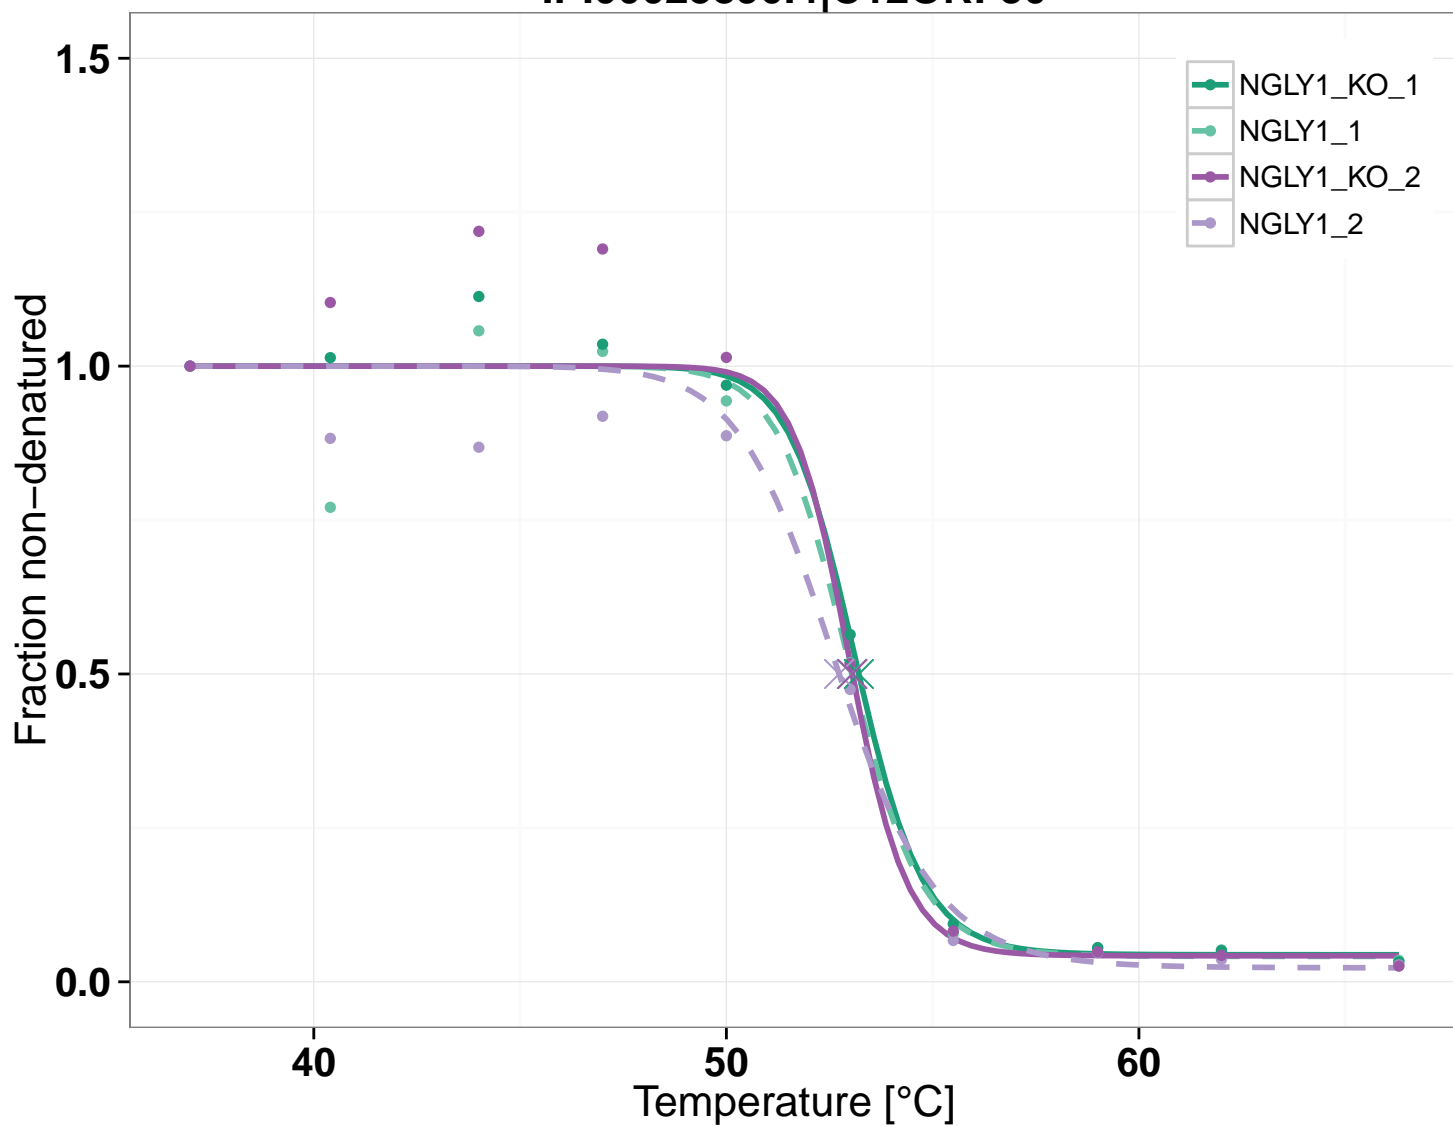

|            | meltPoint | slope | plateau | R2   |
|------------|-----------|-------|---------|------|
| NGLY1_KO_1 | 53.21     | -0.29 | 0.04    | 0.99 |
| NGLY1_1    | 53.04     | -0.27 | 0.04    | 0.97 |
| NGLY1_KO_2 | 53.05     | -0.35 | 0.04    | 0.96 |
| NGLY1_2    | 52.73     | -0.2  | 0.02    | 0.98 |

Supplement: Supplementary file 4838 [file 1]

IPI00005737.1|SURF4

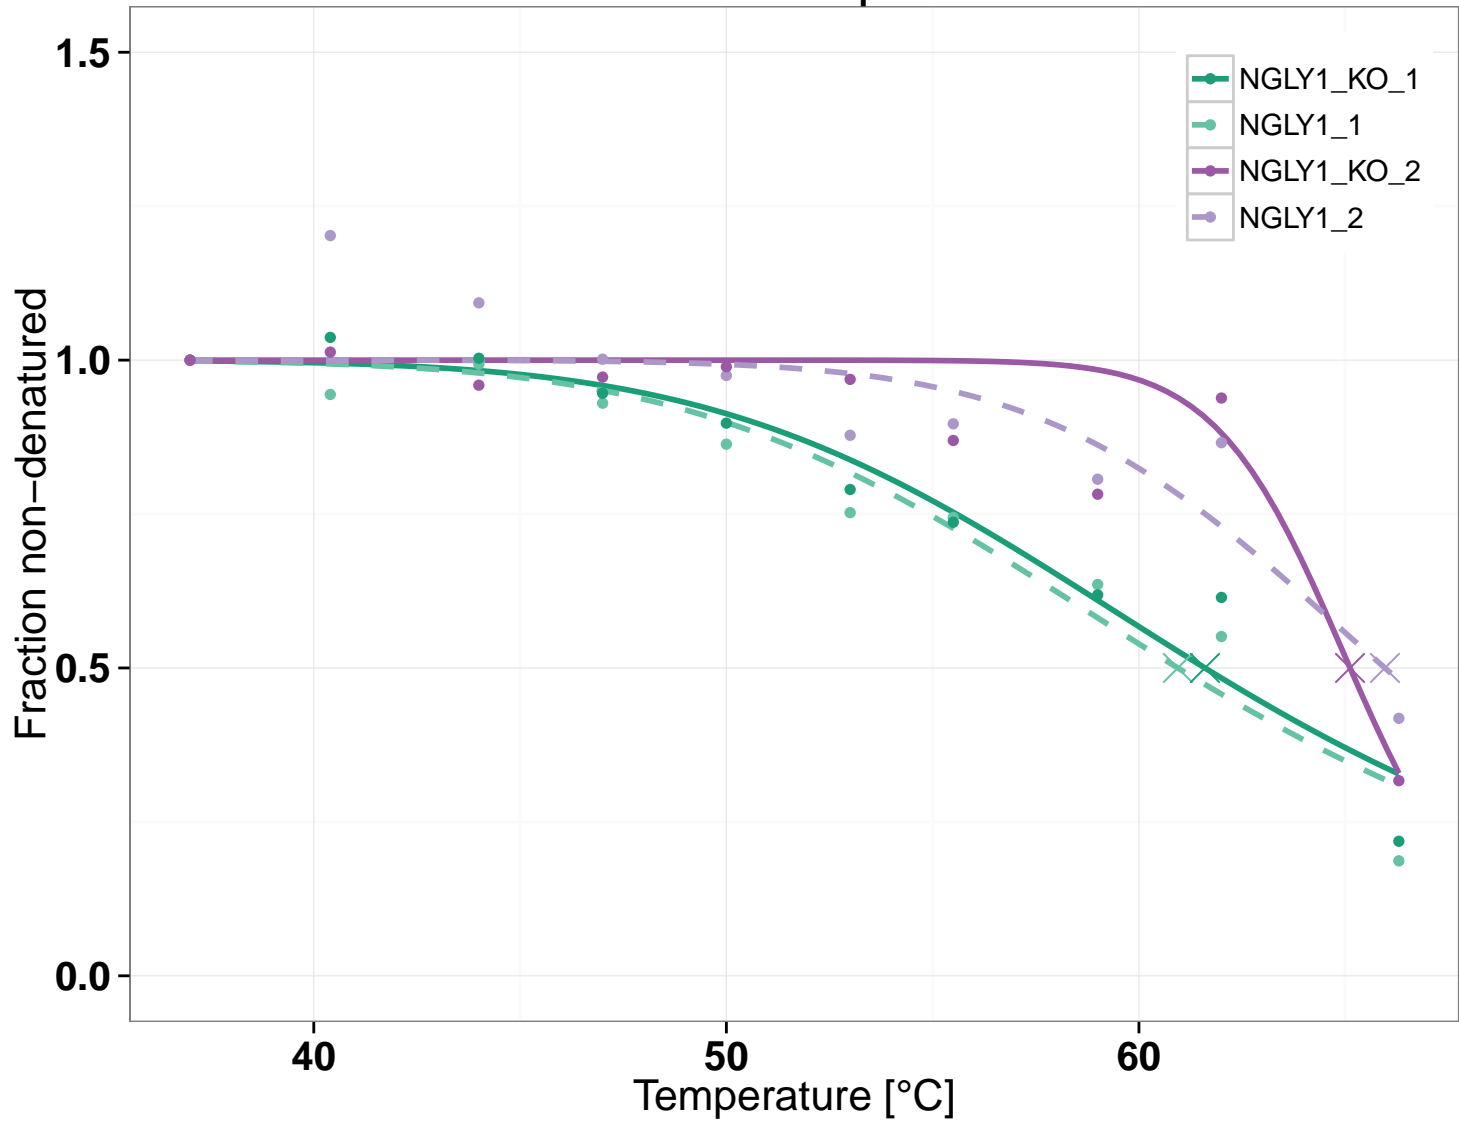

|            | meltPoint | slope  | plateau | R2   |
|------------|-----------|--------|---------|------|
| NGLY1_KO_1 | 61.6      | -0.043 | 0       | 0.94 |
| NGLY1_1    | 60.94     | -0.043 | 0       | 0.94 |
| NGLY1_KO_2 | 65.12     | -0.15  | 0       | 0.84 |
| NGLY1_2    | 65.96     | -0.06  | 0       | 0.78 |

Supplement: Supplementary file 4839 [file 1]

IPI00098827.1|HSPB11

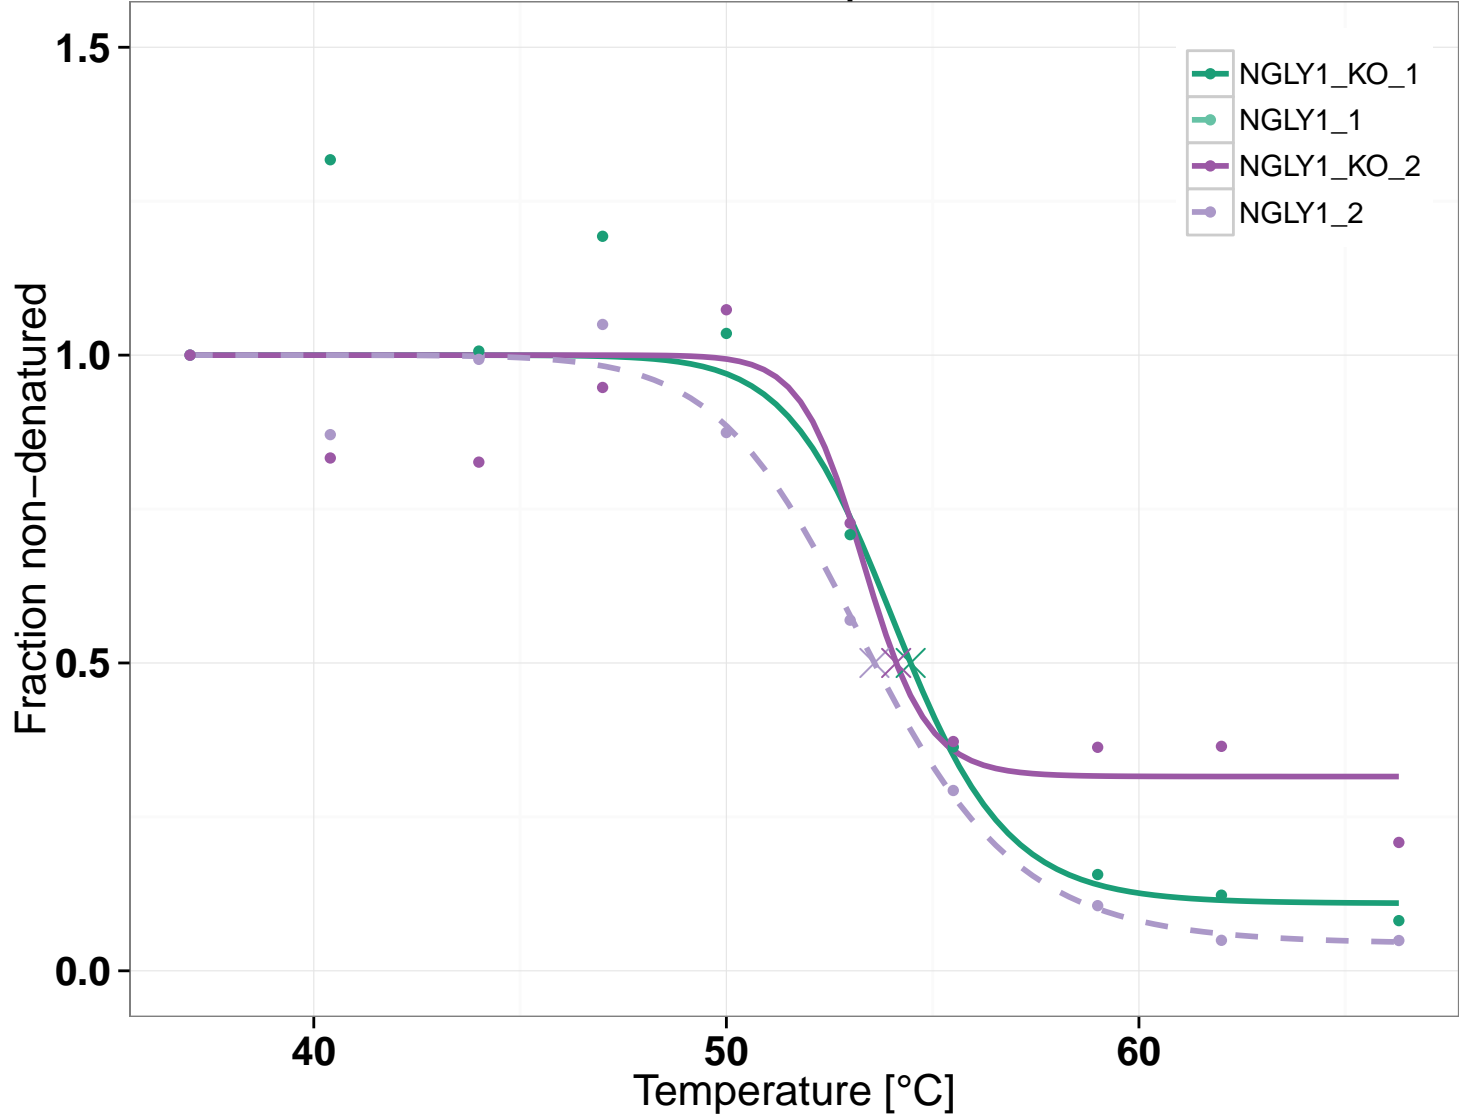

|            | meltPoint | slope | plateau | R2   |
|------------|-----------|-------|---------|------|
| NGLY1_KO_1 | 54.47     | -0.17 | 0.11    | 0.93 |
| NGLY1_1    | -         | -     | -       | -    |
| NGLY1_KO_2 | 54.12     | -0.22 | 0.32    | 0.91 |
| NGLY1_2    | 53.59     | -0.13 | 0.04    | 0.99 |

Supplement: Supplementary file 4840 [file 1]

IPI00290526.9|CCDC8

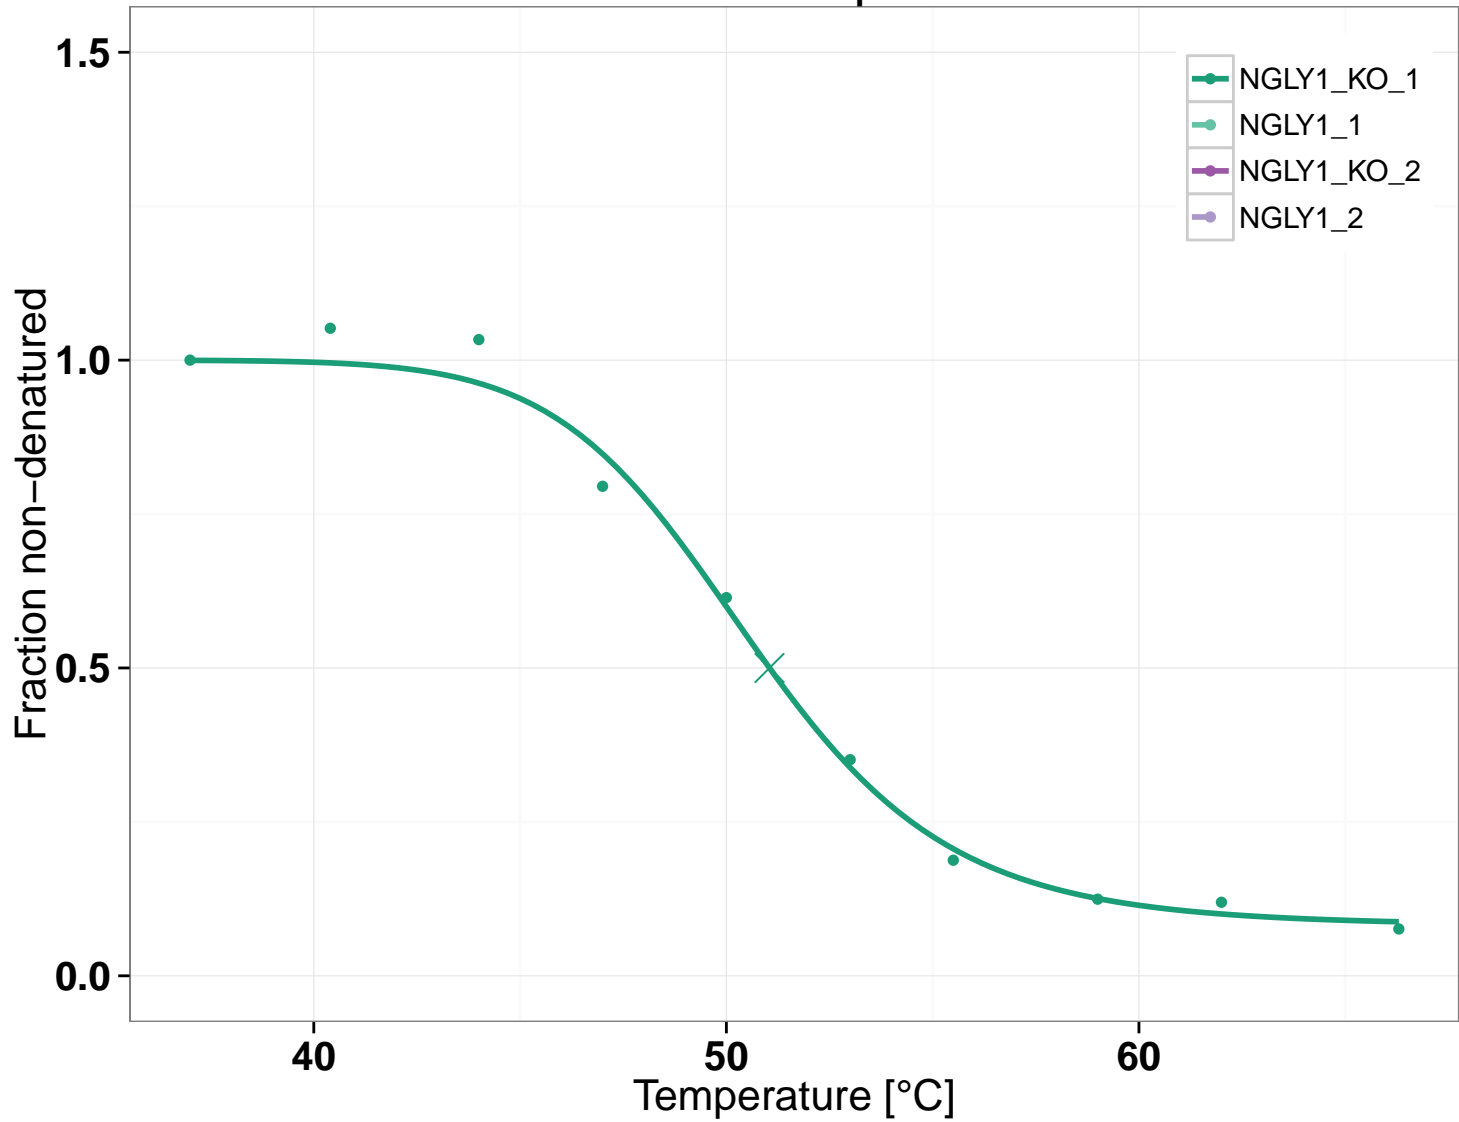

|            | meltPoint | slope  | plateau | R2   |
|------------|-----------|--------|---------|------|
| NGLY1_KO_1 | 51.05     | -0.096 | 0.08    | 0.99 |
| NGLY1_1    | -         | -      | -       | -    |
| NGLY1_KO_2 | -         | -      | -       | -    |
| NGLY1_2    | -         | -      | -       | -    |

Supplement: Supplementary file 4841 [file 1]

# IPI00787355.1|FBXW9

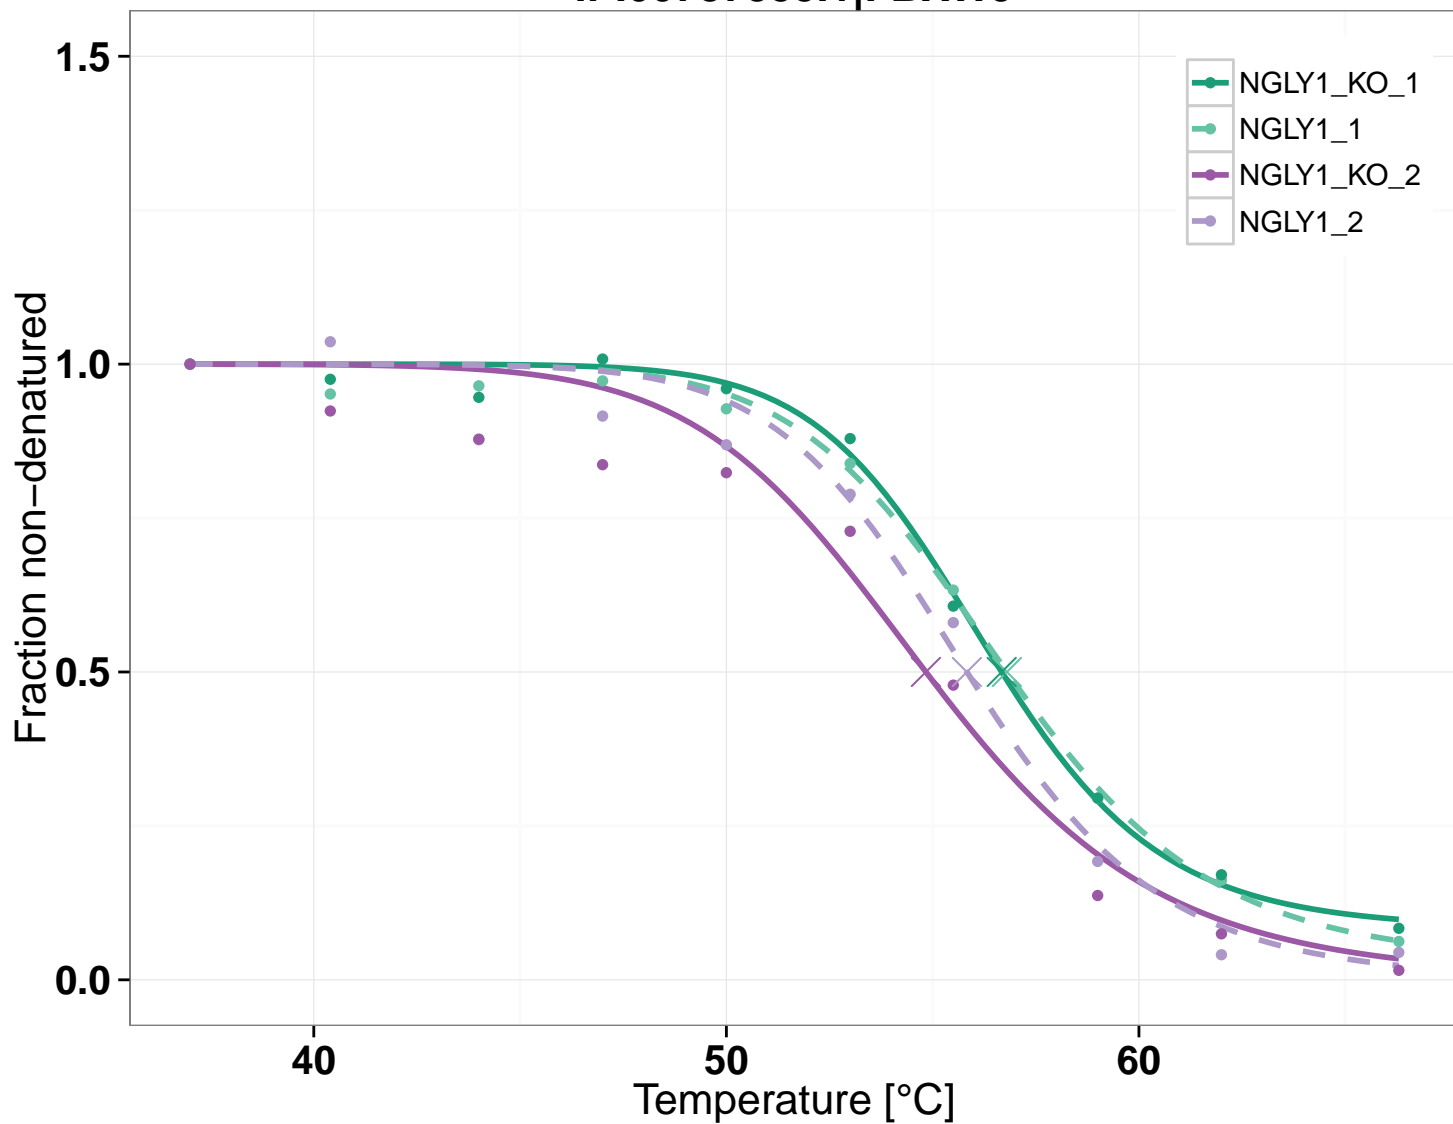

|            | meltPoint | slope  | plateau | R2   |
|------------|-----------|--------|---------|------|
| NGLY1_KO_1 | 56.67     | -0.11  | 0.08    | 1    |
| NGLY1_1    | 56.8      | -0.096 | 0.03    | 1    |
| NGLY1_KO_2 | 54.84     | -0.089 | 0       | 0.96 |
| NGLY1_2    | 55.83     | -0.11  | 0       | 0.98 |

Supplement: Supplementary file 4842 [file 1]

IPI00170914.1|ADSSL1

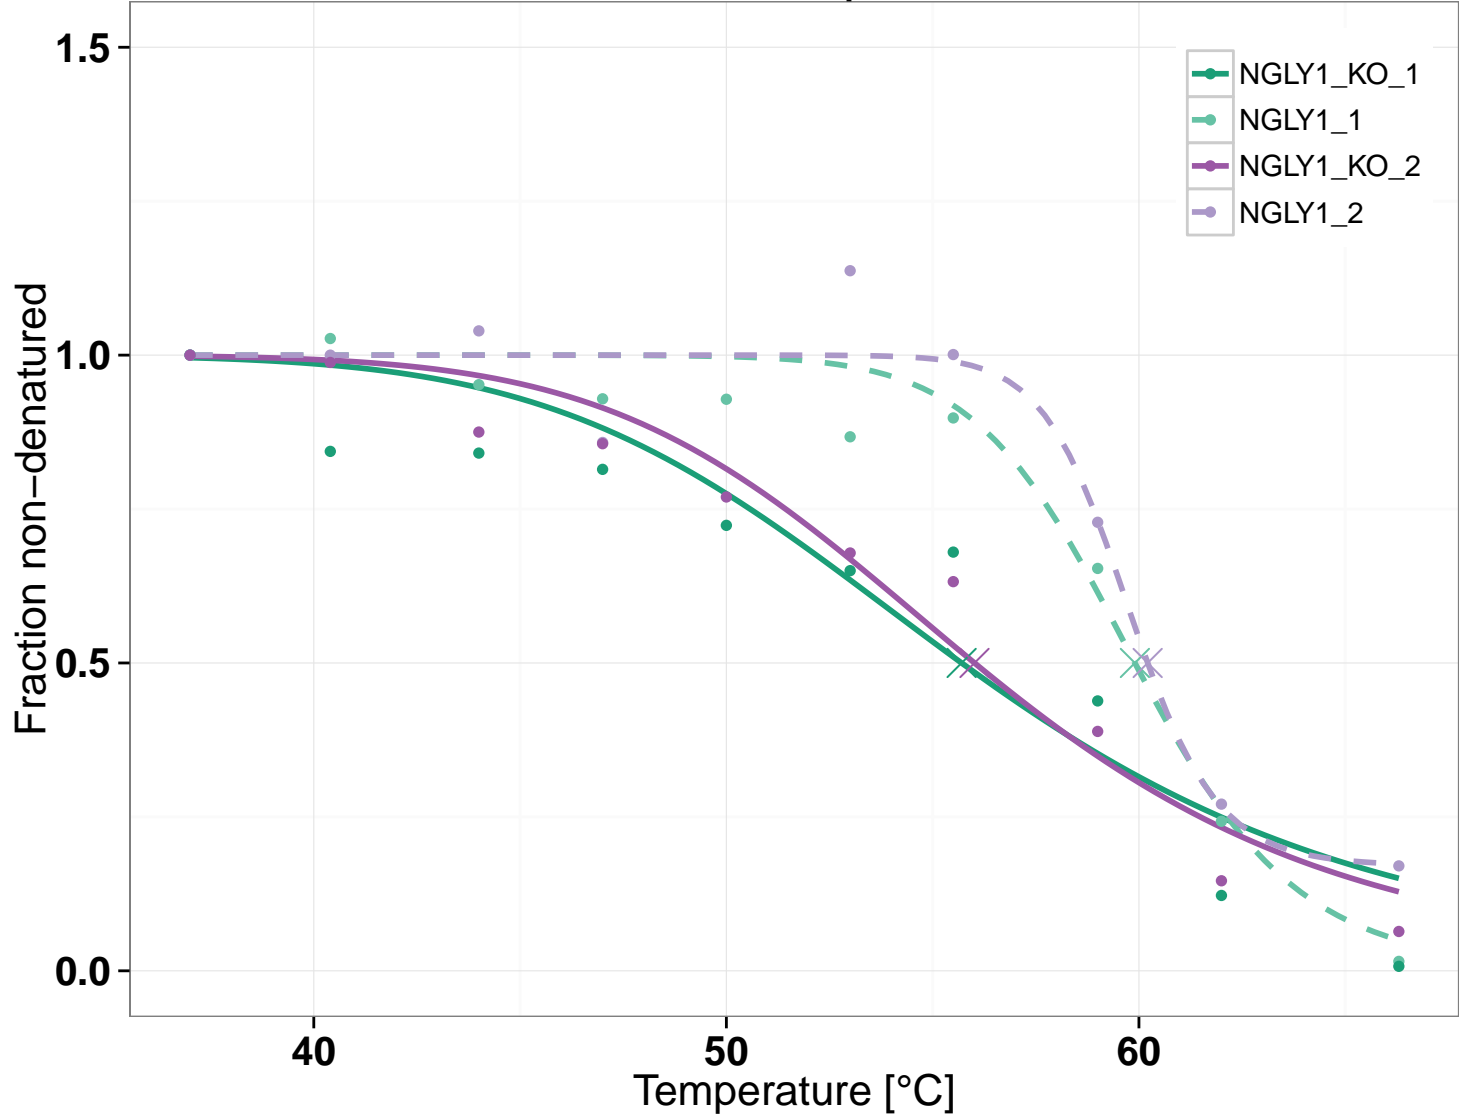

|            | meltPoint | slope  | plateau | R2   |
|------------|-----------|--------|---------|------|
| NGLY1_KO_1 | 55.7      | -0.05  | 0       | 0.88 |
| NGLY1_1    | 59.9      | -0.13  | 0       | 0.97 |
| NGLY1_KO_2 | 56.01     | -0.057 | 0       | 0.96 |
| NGLY1_2    | 60.21     | -0.2   | 0.17    | 0.79 |

Supplement: Supplementary file 4843 [file 1]

IPI00604759.1|FAHD1

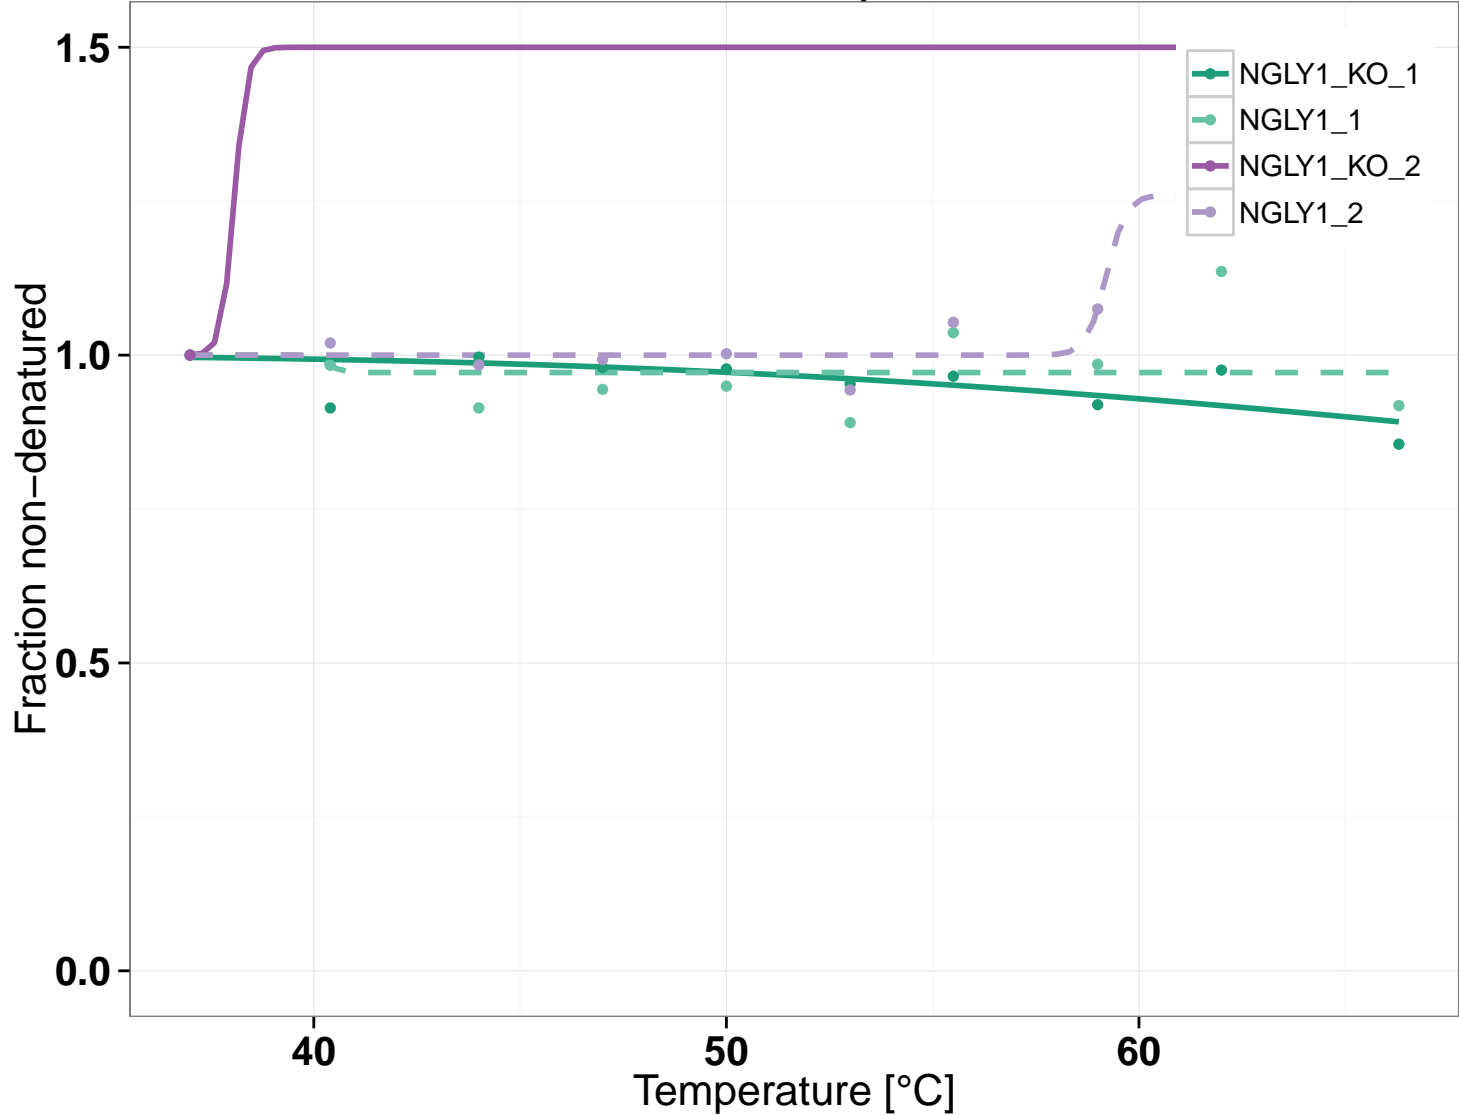

|            | meltPoint | slope  | plateau | R2    |
|------------|-----------|--------|---------|-------|
| NGLY1_KO_1 | -         | -      | 0       | 0.37  |
| NGLY1_1    | -         | -0.043 | 0.97    | 0.02  |
| NGLY1_KO_2 | -         | 0.82   | 1.5     | -0.97 |
| NGLY1_2    | -         | 0.28   | 1.26    | 0.86  |

Supplement: Supplementary file 4844 [file 1]

# IPI00396108.2|GPRC5C

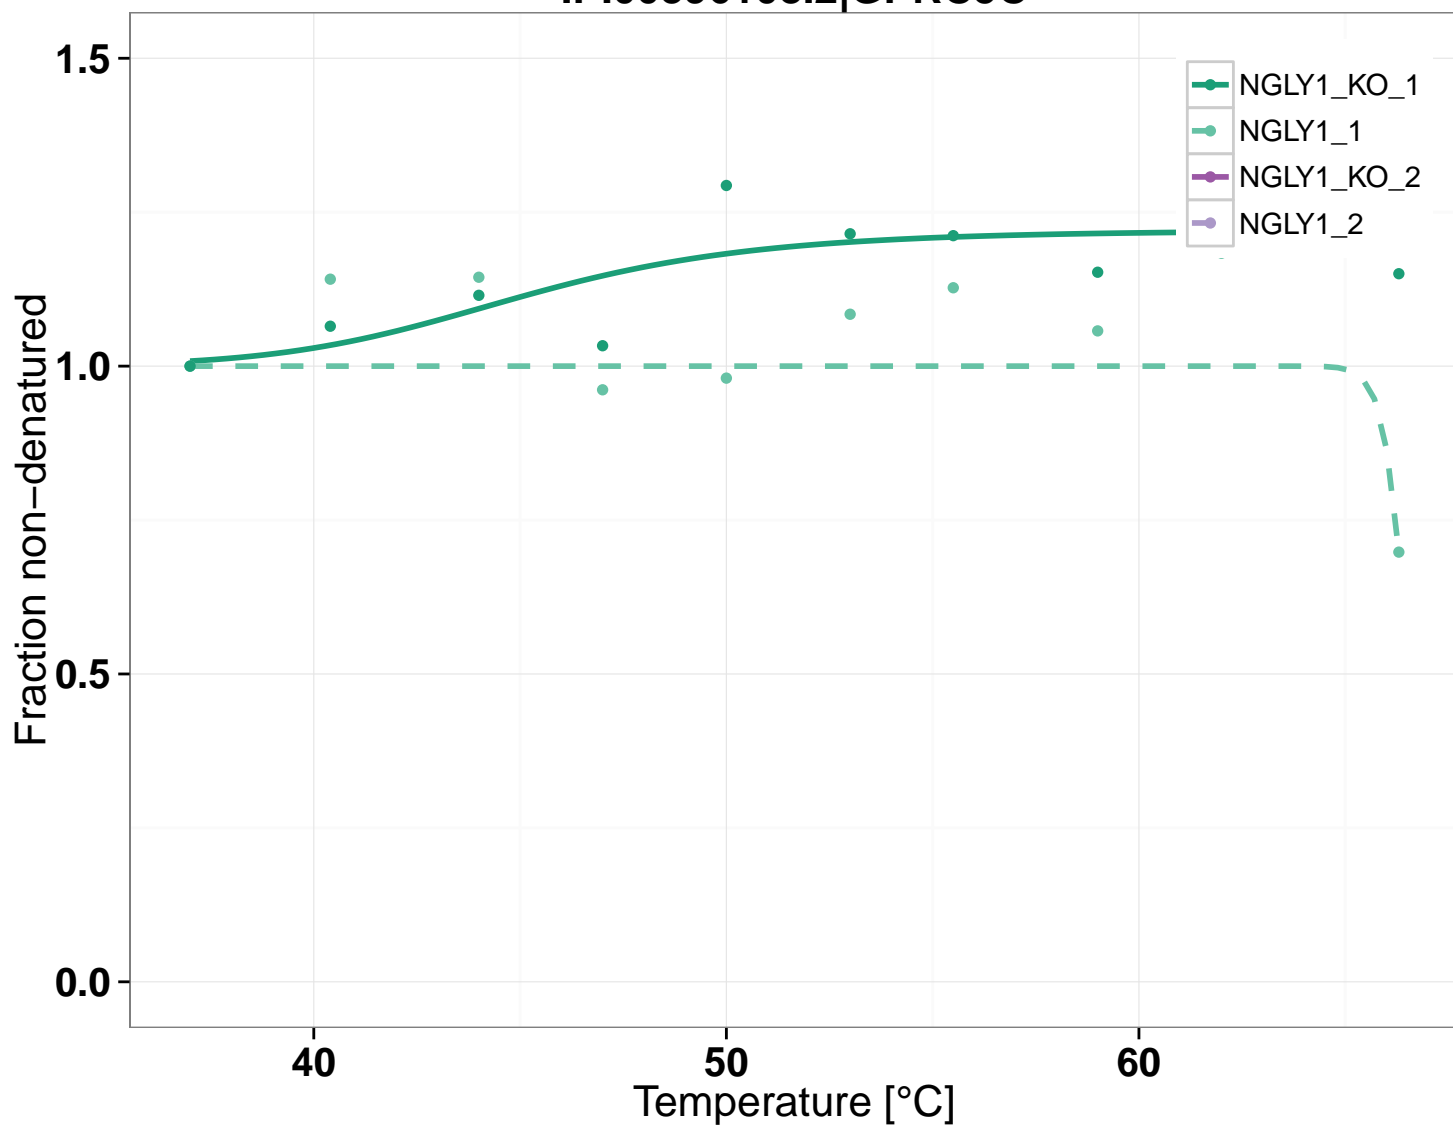

|            | meltPoint | slope | plateau | R2   |
|------------|-----------|-------|---------|------|
| NGLY1_KO_1 | —         | 0.019 | 1.22    | 0.55 |
| NGLY1_1    | —         | —     | 0       | 0.43 |
| NGLY1_KO_2 | —         | —     | —       | —    |
| NGLY1_2    | —         | —     | —       | —    |

Supplement: Supplementary file 4845 [file 1]

IPI00027415.2|DHX36

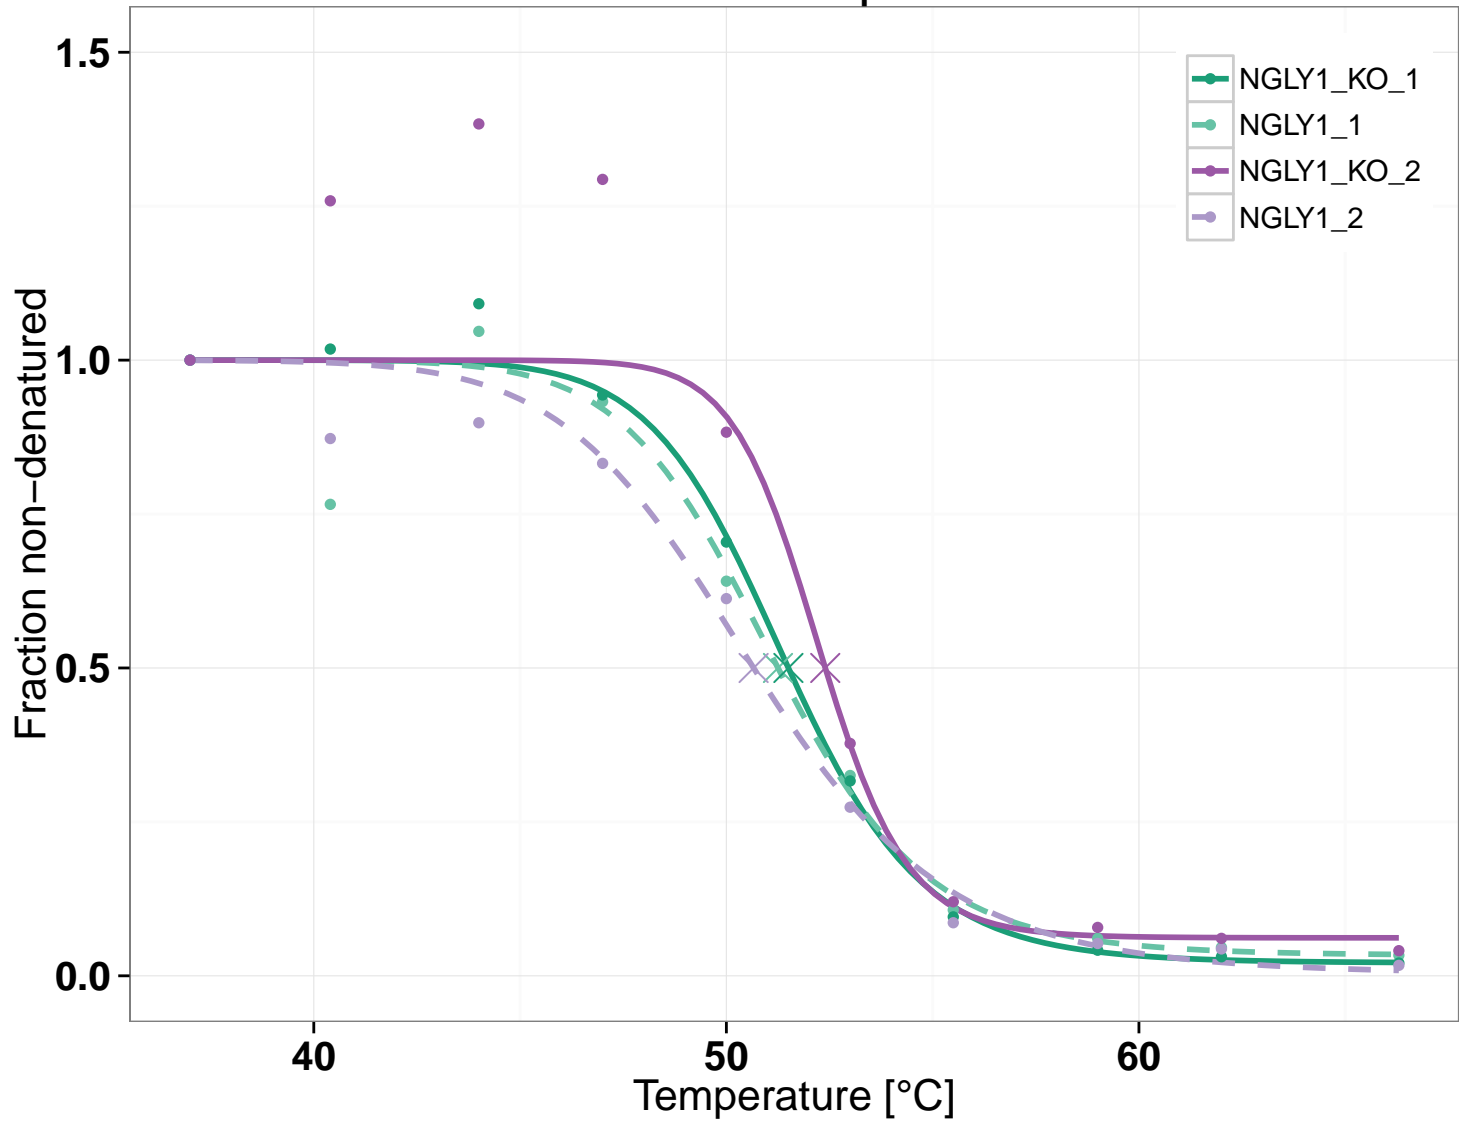

|            | meltPoint | slope | plateau | R2   |
|------------|-----------|-------|---------|------|
| NGLY1_KO_1 | 51.5      | -0.15 | 0.02    | 0.99 |
| NGLY1_1    | 51.25     | -0.13 | 0.03    | 0.96 |
| NGLY1_KO_2 | 52.4      | -0.22 | 0.06    | 0.9  |
| NGLY1_2    | 50.66     | -0.11 | 0       | 0.98 |

Supplement: Supplementary file 4846 [file 1]

# IPI00332097.3|BCAS3

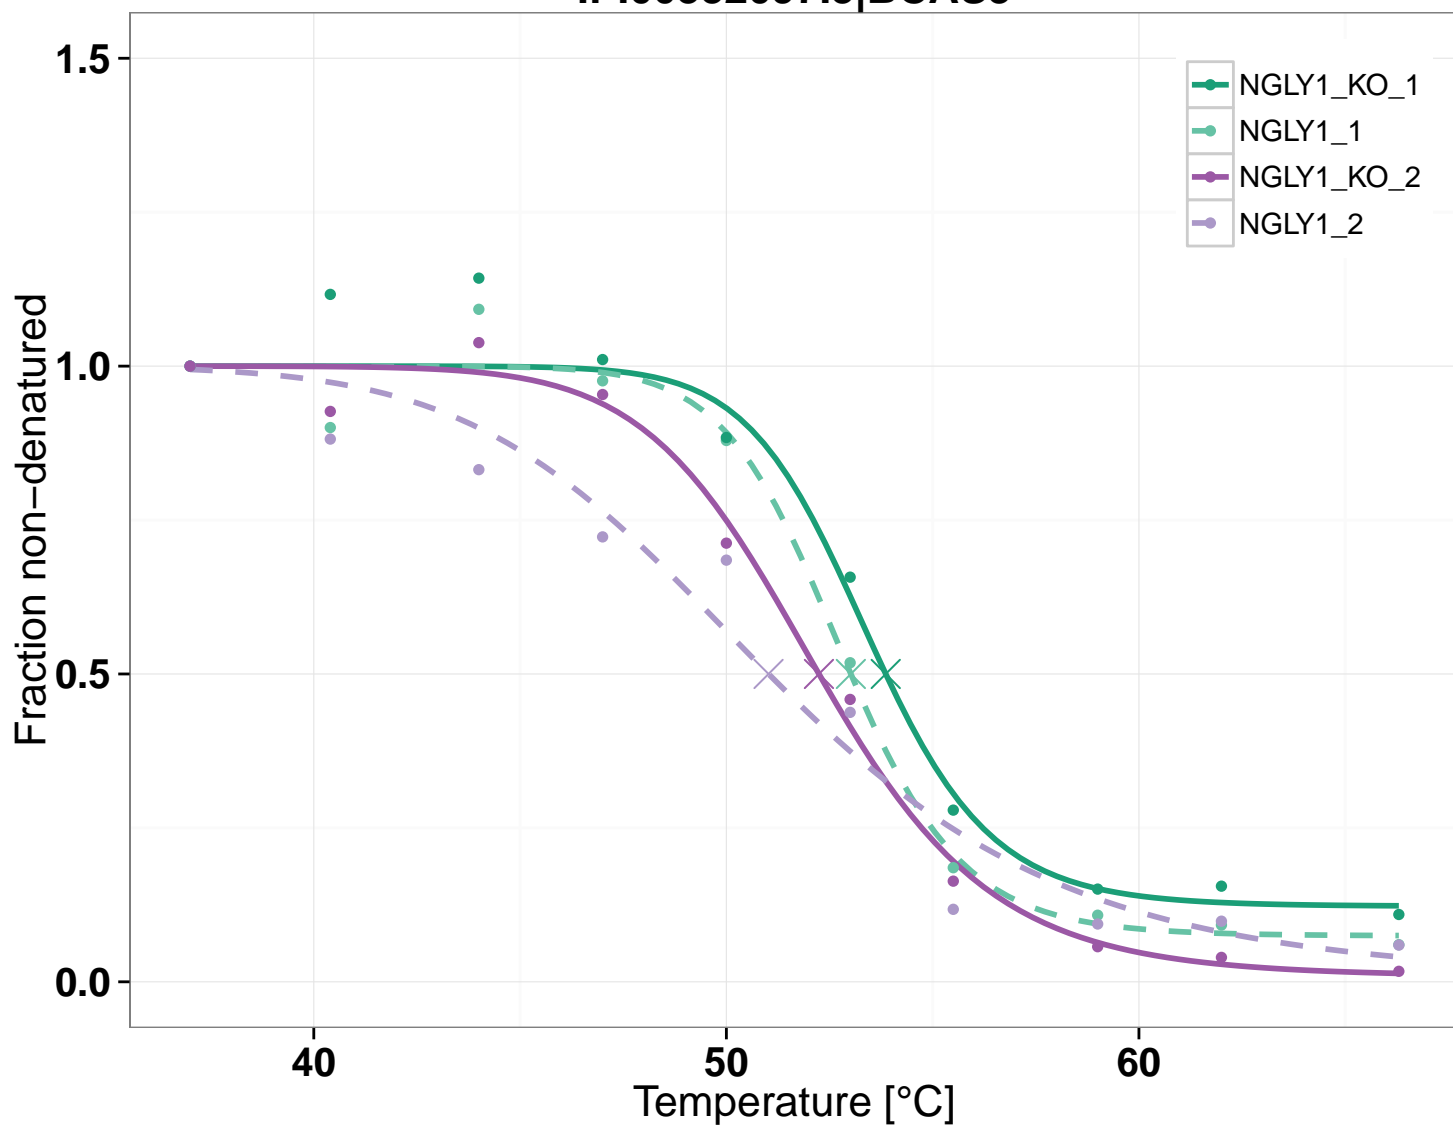

|            | meltPoint | slope  | plateau | R2   |
|------------|-----------|--------|---------|------|
| NGLY1_KO_1 | 53.86     | -0.15  | 0.12    | 0.98 |
| NGLY1_1    | 53.02     | -0.16  | 0.07    | 0.99 |
| NGLY1_KO_2 | 52.24     | -0.12  | 0.01    | 0.99 |
| NGLY1_2    | 51.02     | -0.069 | 0       | 0.96 |

Supplement: Supplementary file 4847 [file 1]

# IPI00005675.3|NKRF

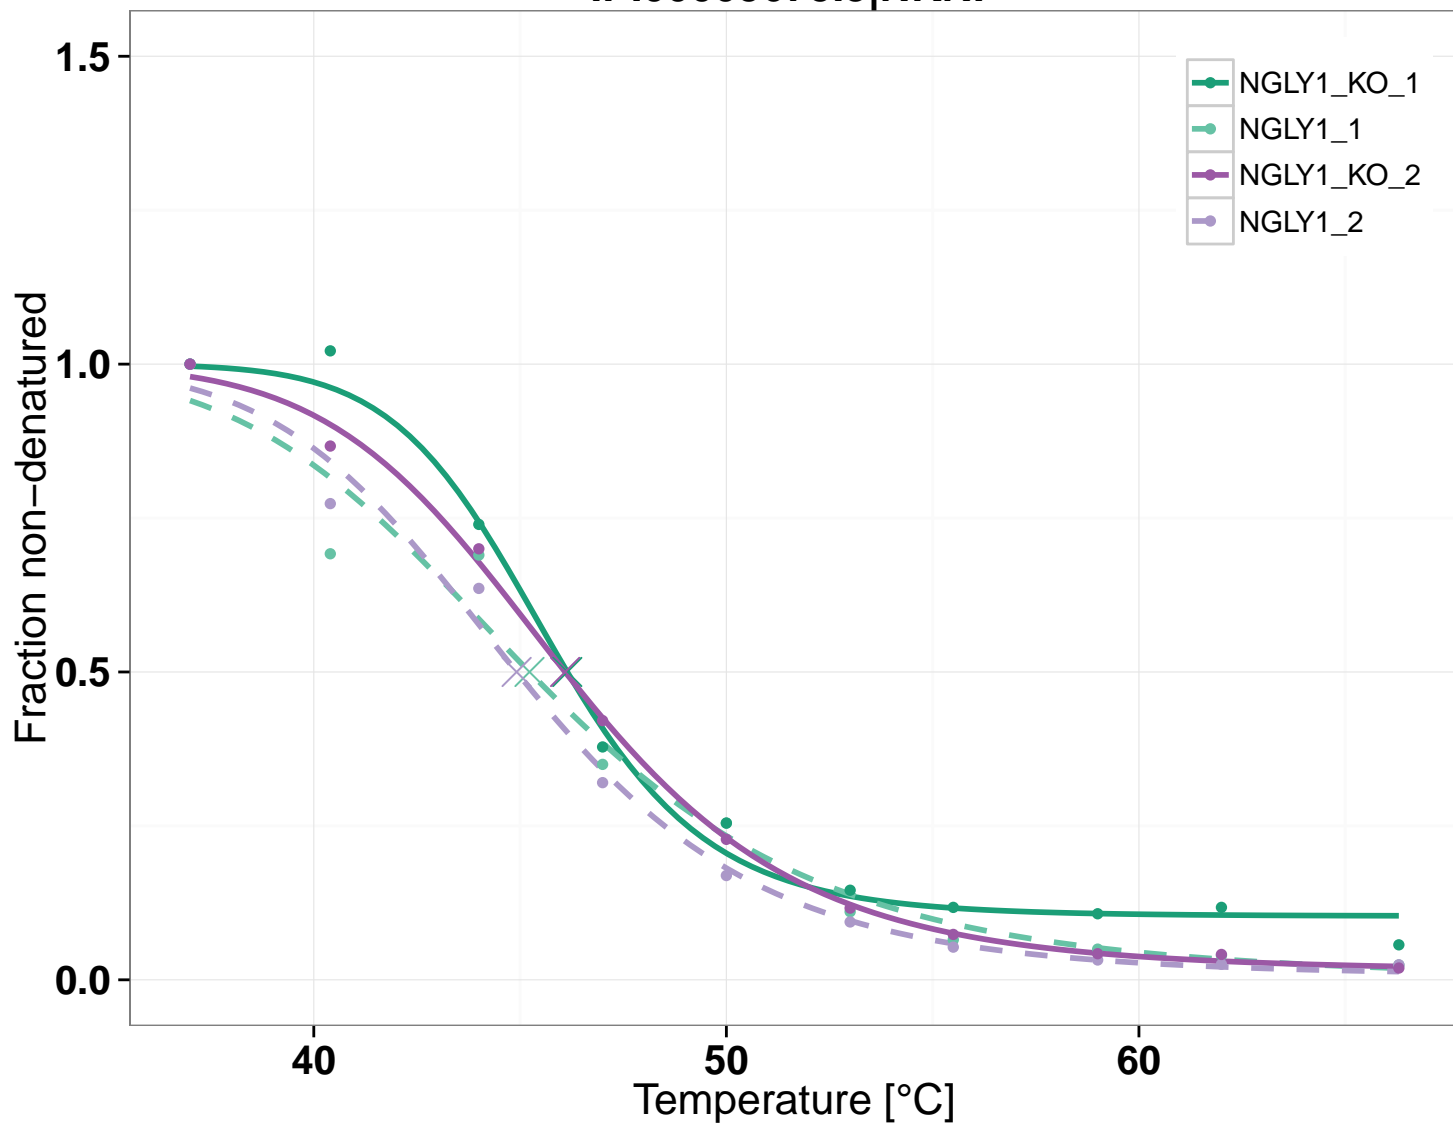

|            | meltPoint | slope  | plateau | R2   |
|------------|-----------|--------|---------|------|
| NGLY1_KO_1 | 46.14     | -0.12  | 0.1     | 0.99 |
| NGLY1_1    | 45.23     | -0.071 | 0       | 0.97 |
| NGLY1_KO_2 | 46.09     | -0.086 | 0.01    | 1    |
| NGLY1_2    | 44.92     | -0.085 | 0.01    | 0.99 |

Supplement: Supplementary file 4848 [file 1]

IPI00182728.2|VPS4B

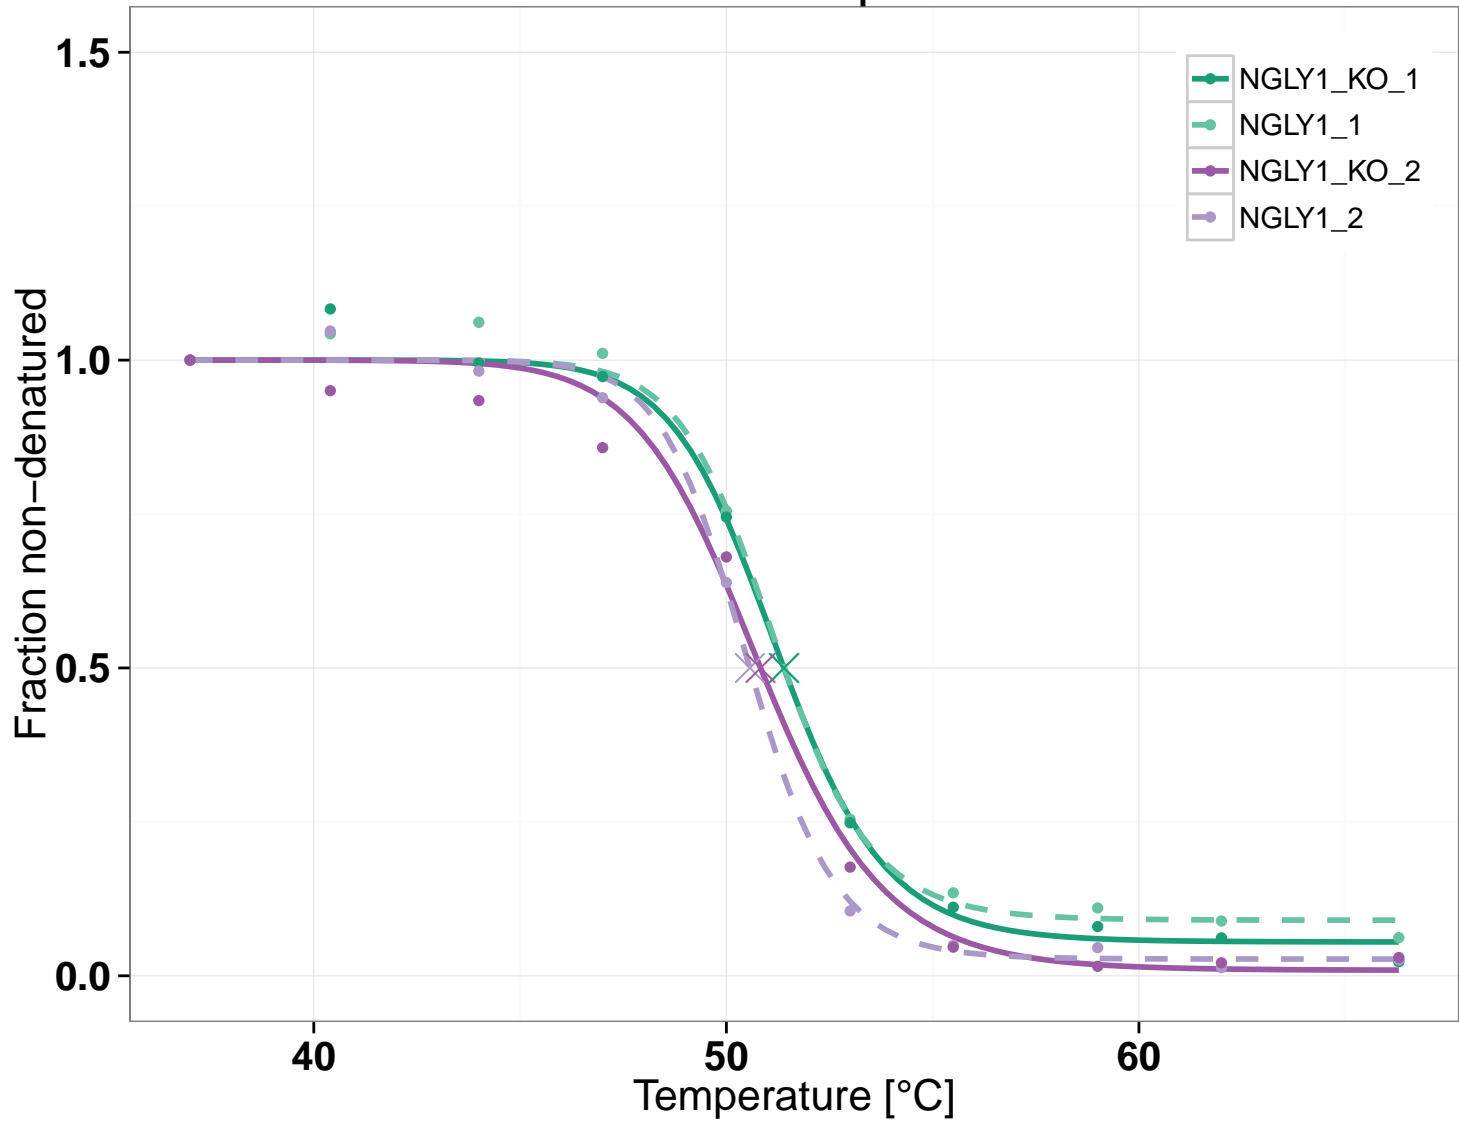

|            | meltPoint | slope | plateau | R2   |
|------------|-----------|-------|---------|------|
| NGLY1_KO_1 | 51.39     | -0.18 | 0.05    | 1    |
| NGLY1_1    | 51.41     | -0.19 | 0.09    | 1    |
| NGLY1_KO_2 | 50.83     | -0.16 | 0.01    | 0.99 |
| NGLY1_2    | 50.57     | -0.23 | 0.03    | 1    |

Supplement: Supplementary file 4849 [file 1]

IPI00045531.1|LYSMD1

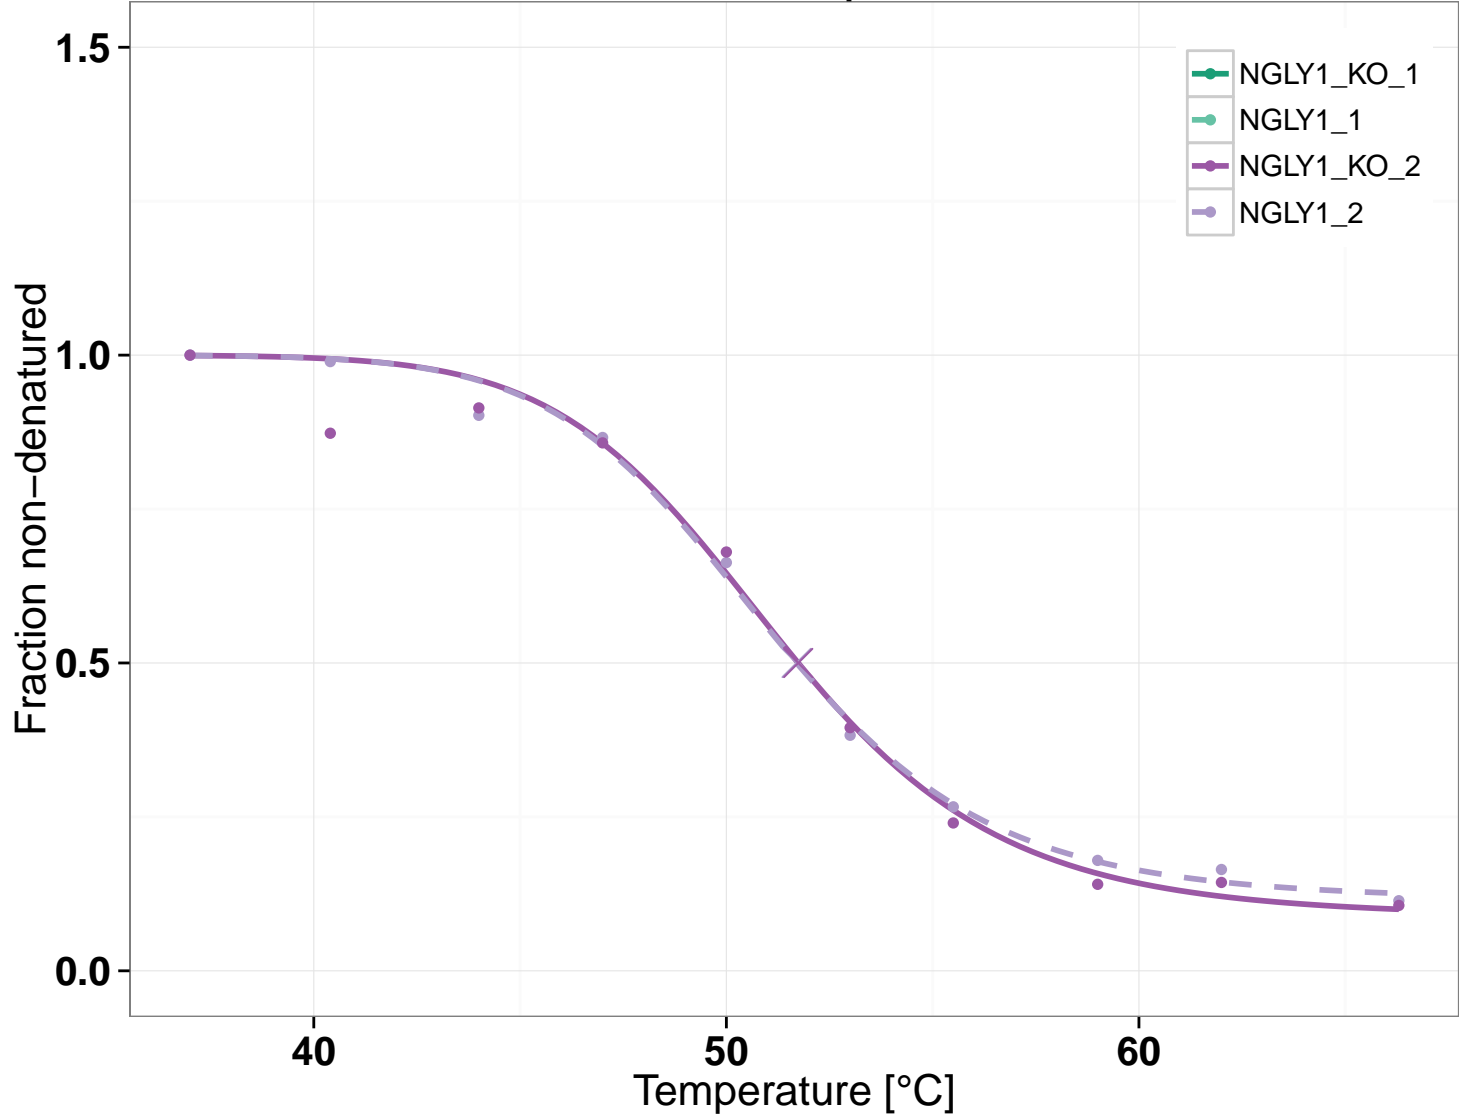

|            | meltPoint | slope  | plateau | R2   |
|------------|-----------|--------|---------|------|
| NGLY1_KO_1 | —         | —      | —       | —    |
| NGLY1_1    | —         | —      | —       | —    |
| NGLY1_KO_2 | 51.74     | -0.085 | 0.09    | 0.98 |
| NGLY1_2    | 51.7      | -0.083 | 0.11    | 1    |

Supplement: Supplementary file 4850 [file 1]

IPI00903296.1|CDC42BPA

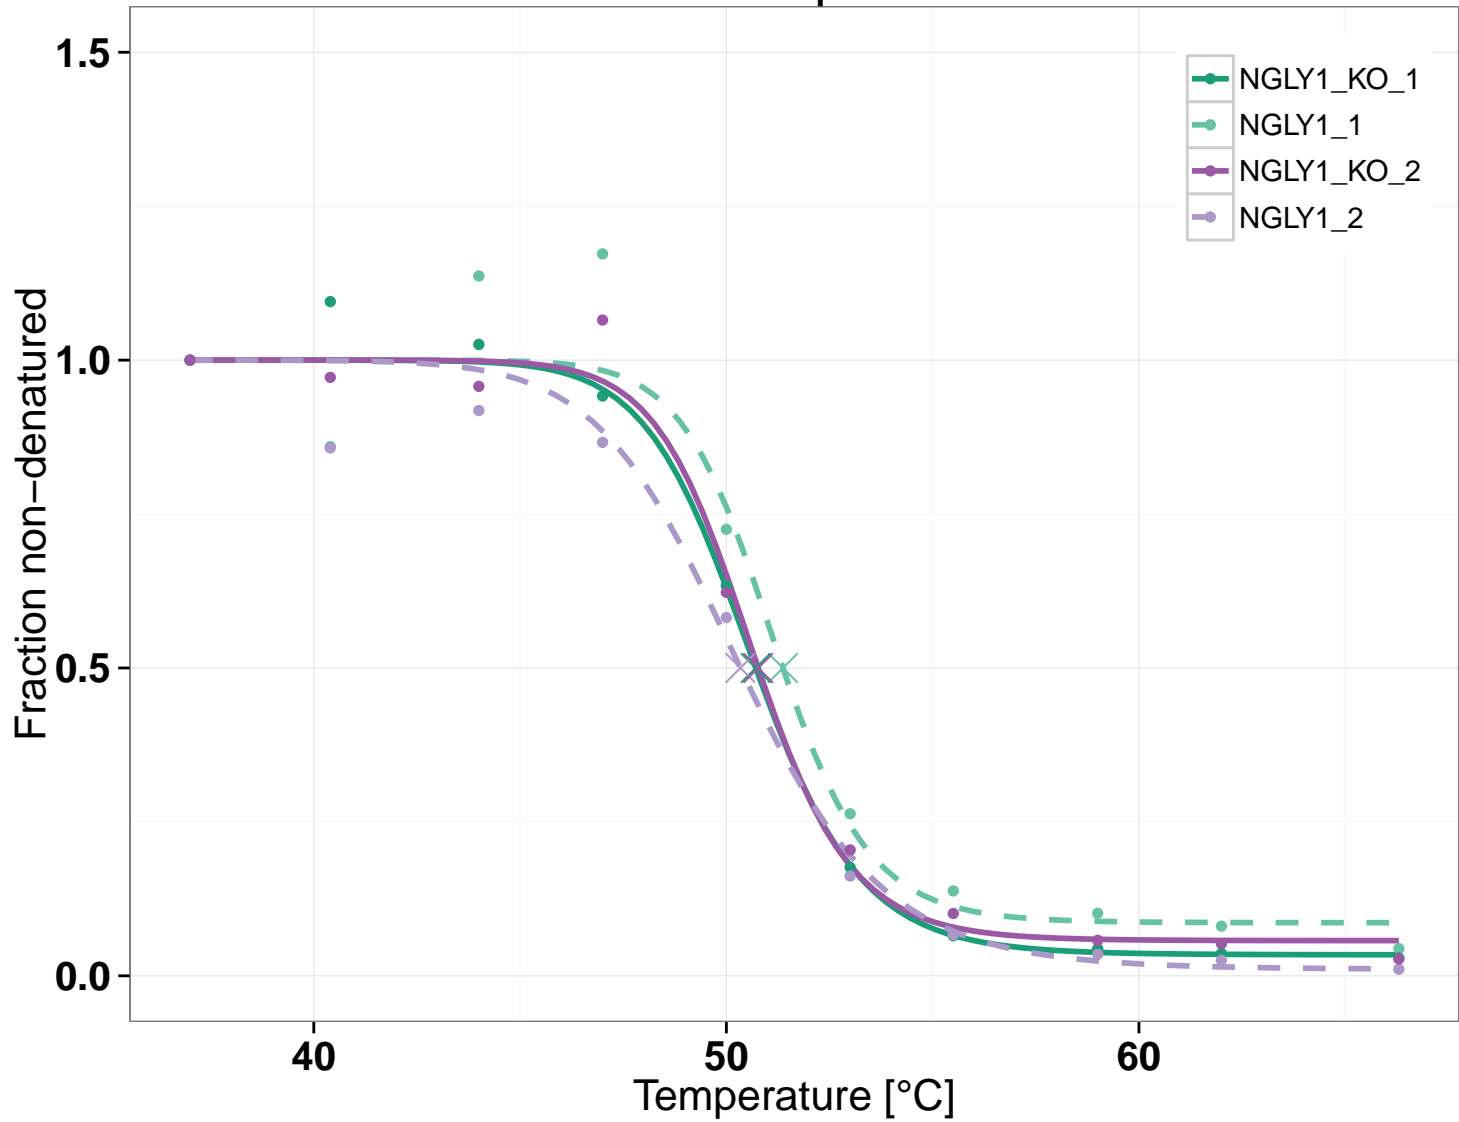

|            | meltPoint | slope | plateau | R2   |
|------------|-----------|-------|---------|------|
| NGLY1_KO_1 | 50.71     | -0.18 | 0.03    | 1    |
| NGLY1_1    | 51.37     | -0.2  | 0.09    | 0.96 |
| NGLY1_KO_2 | 50.77     | -0.2  | 0.06    | 0.99 |
| NGLY1_2    | 50.34     | -0.14 | 0.01    | 0.98 |

Supplement: Supplementary file 4851 [file 1]

# IPI00479946.3|STIP1

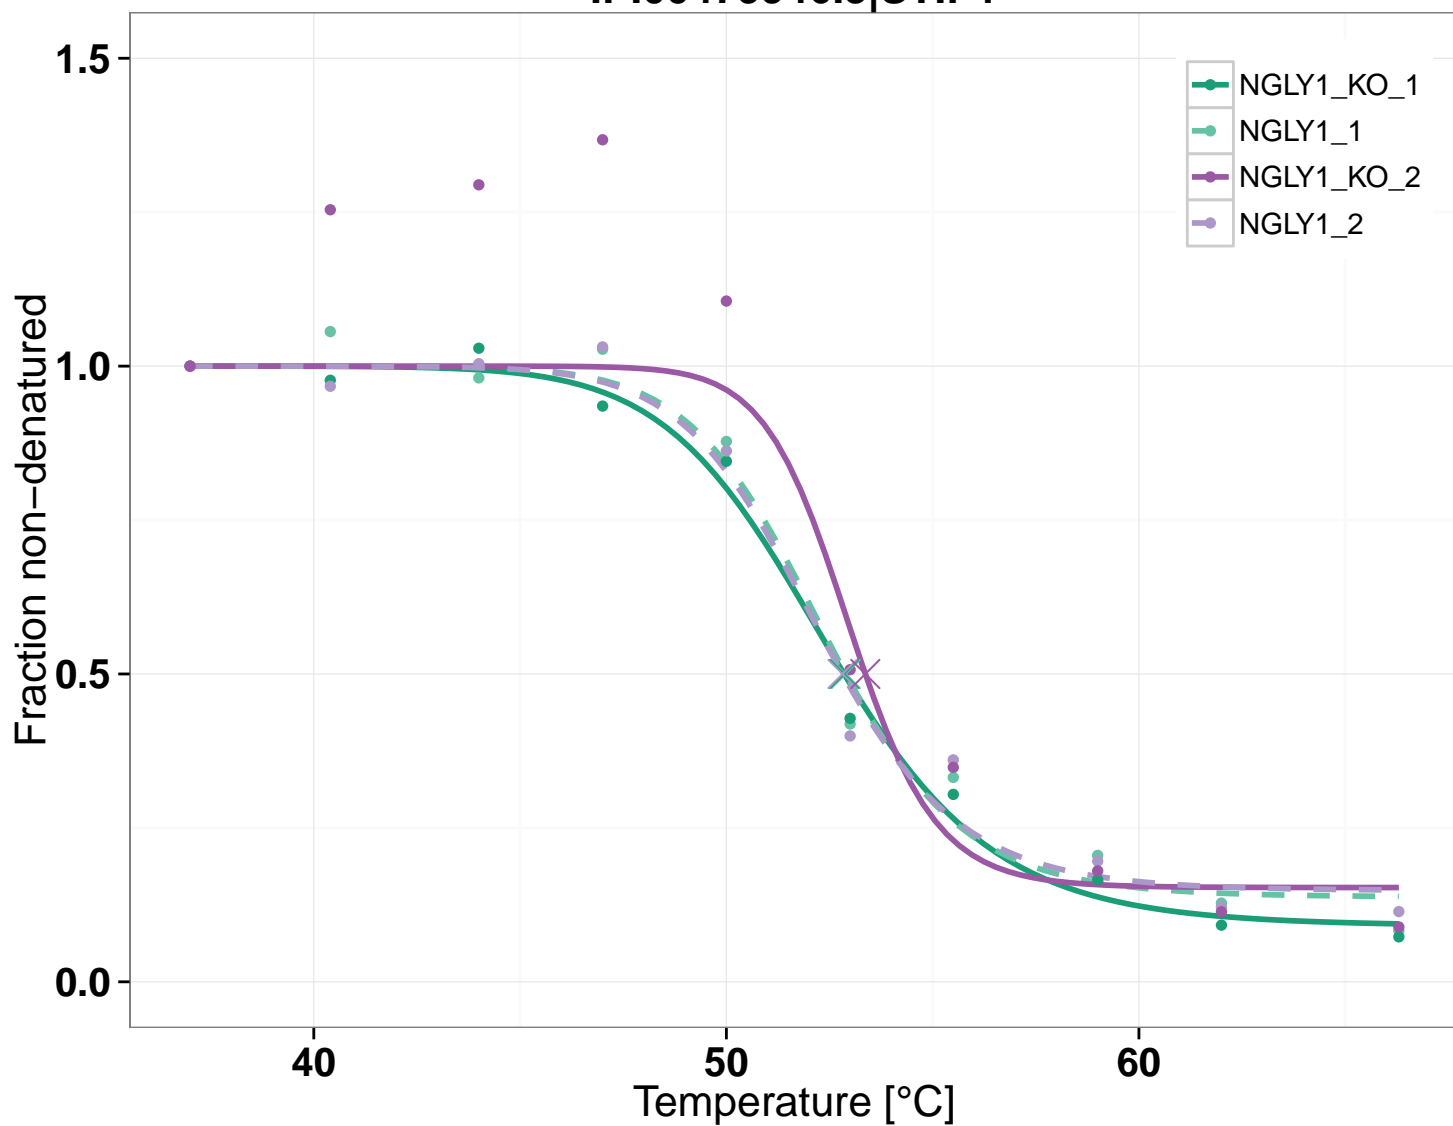

|            | meltPoint | slope | plateau | R2   |
|------------|-----------|-------|---------|------|
| NGLY1_KO_1 | 52.85     | -0.11 | 0.09    | 0.99 |
| NGLY1_1    | 52.89     | -0.13 | 0.14    | 0.99 |
| NGLY1_KO_2 | 53.37     | -0.2  | 0.15    | 0.87 |
| NGLY1_2    | 52.82     | -0.13 | 0.15    | 0.98 |

Supplement: Supplementary file 4852 [file 1]

IPI00909713.2|ZDHHC3

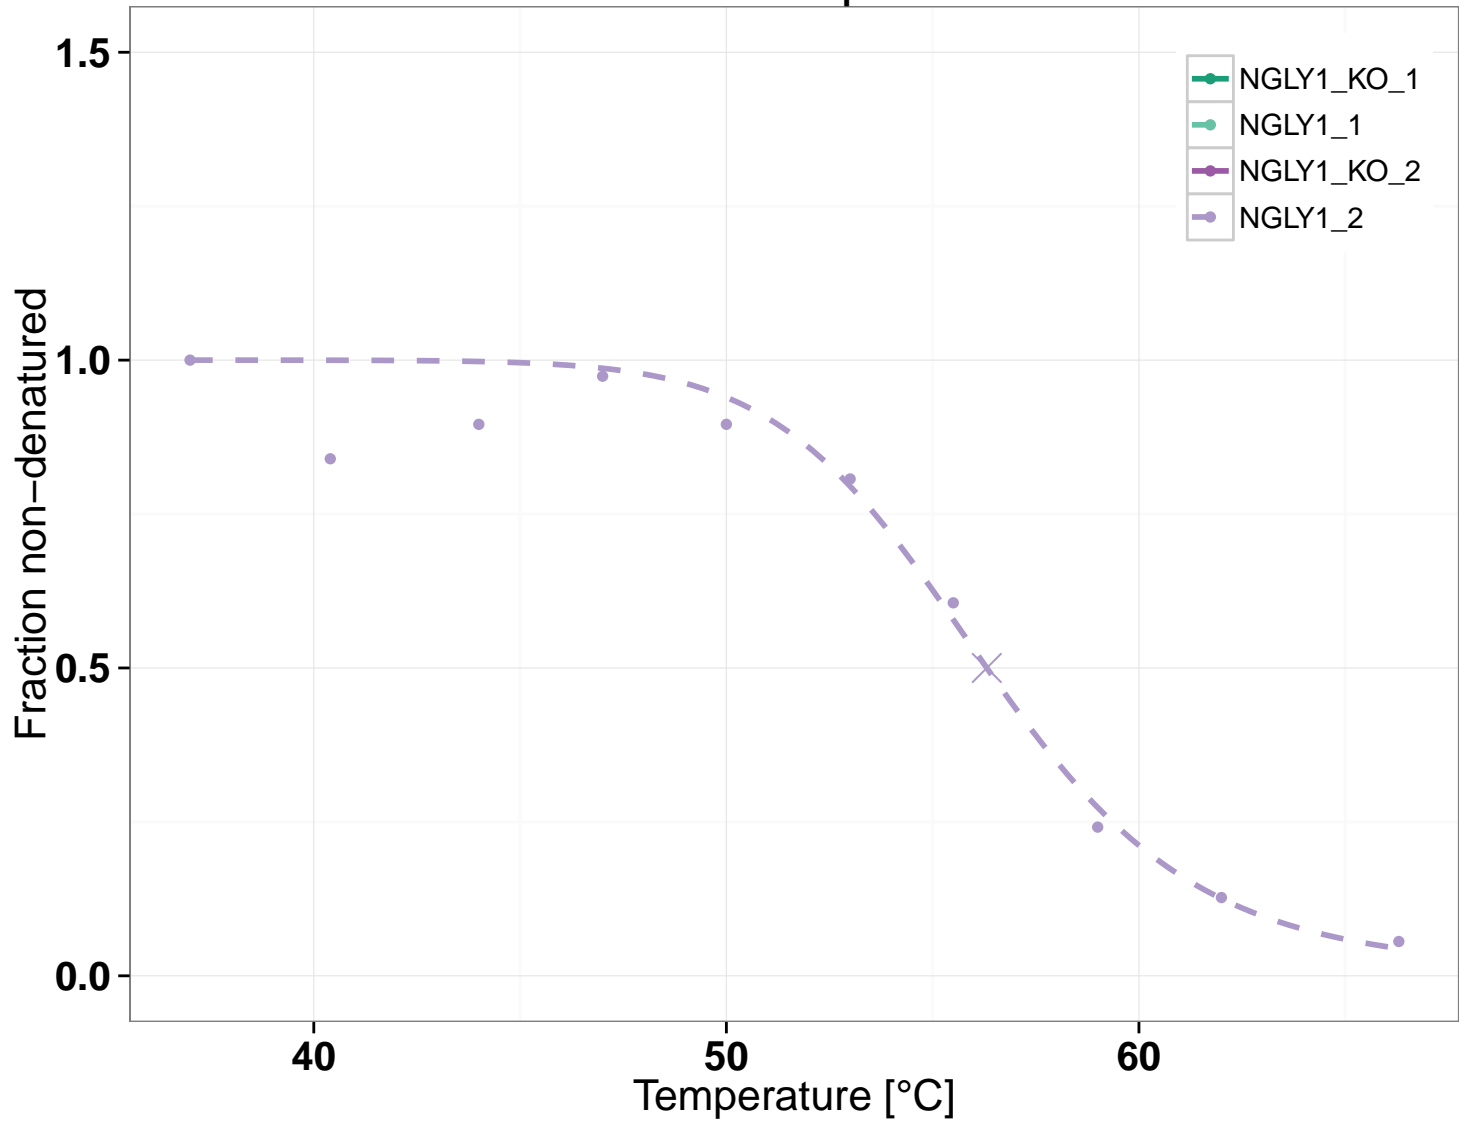

|            | meltPoint | slope  | plateau | R2   |
|------------|-----------|--------|---------|------|
| NGLY1_KO_1 | -         | -      | -       | -    |
| NGLY1_1    | -         | -      | -       | -    |
| NGLY1_KO_2 | -         | -      | -       | -    |
| NGLY1_2    | 56.31     | -0.097 | 0.01    | 0.97 |

Supplement: Supplementary file 4853 [file 1]

IPI00418394.2|RXRA

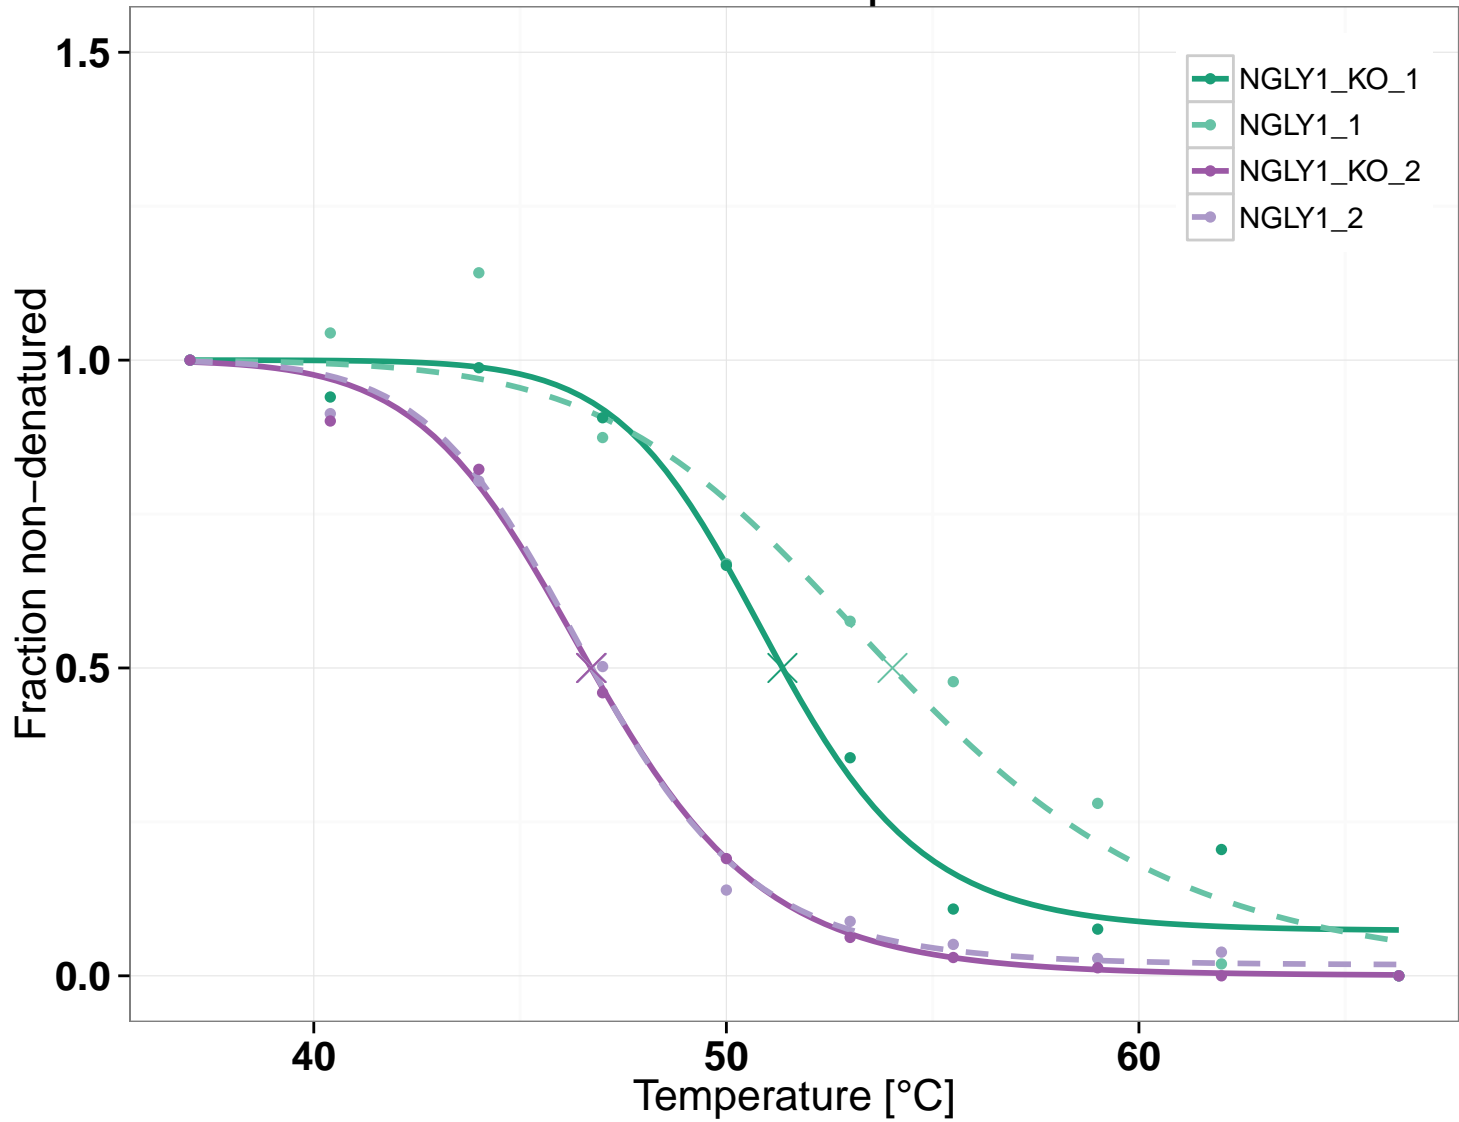

|            | meltPoint | slope  | plateau | R2   |
|------------|-----------|--------|---------|------|
| NGLY1_KO_1 | 51.36     | -0.12  | 0.07    | 0.98 |
| NGLY1_1    | 54.03     | -0.072 | 0       | 0.96 |
| NGLY1_KO_2 | 46.72     | -0.12  | 0       | 1    |
| NGLY1_2    | 46.74     | -0.12  | 0.02    | 0.99 |

Supplement: Supplementary file 4854 [file 1]

# IPI00024094.4|RHAG

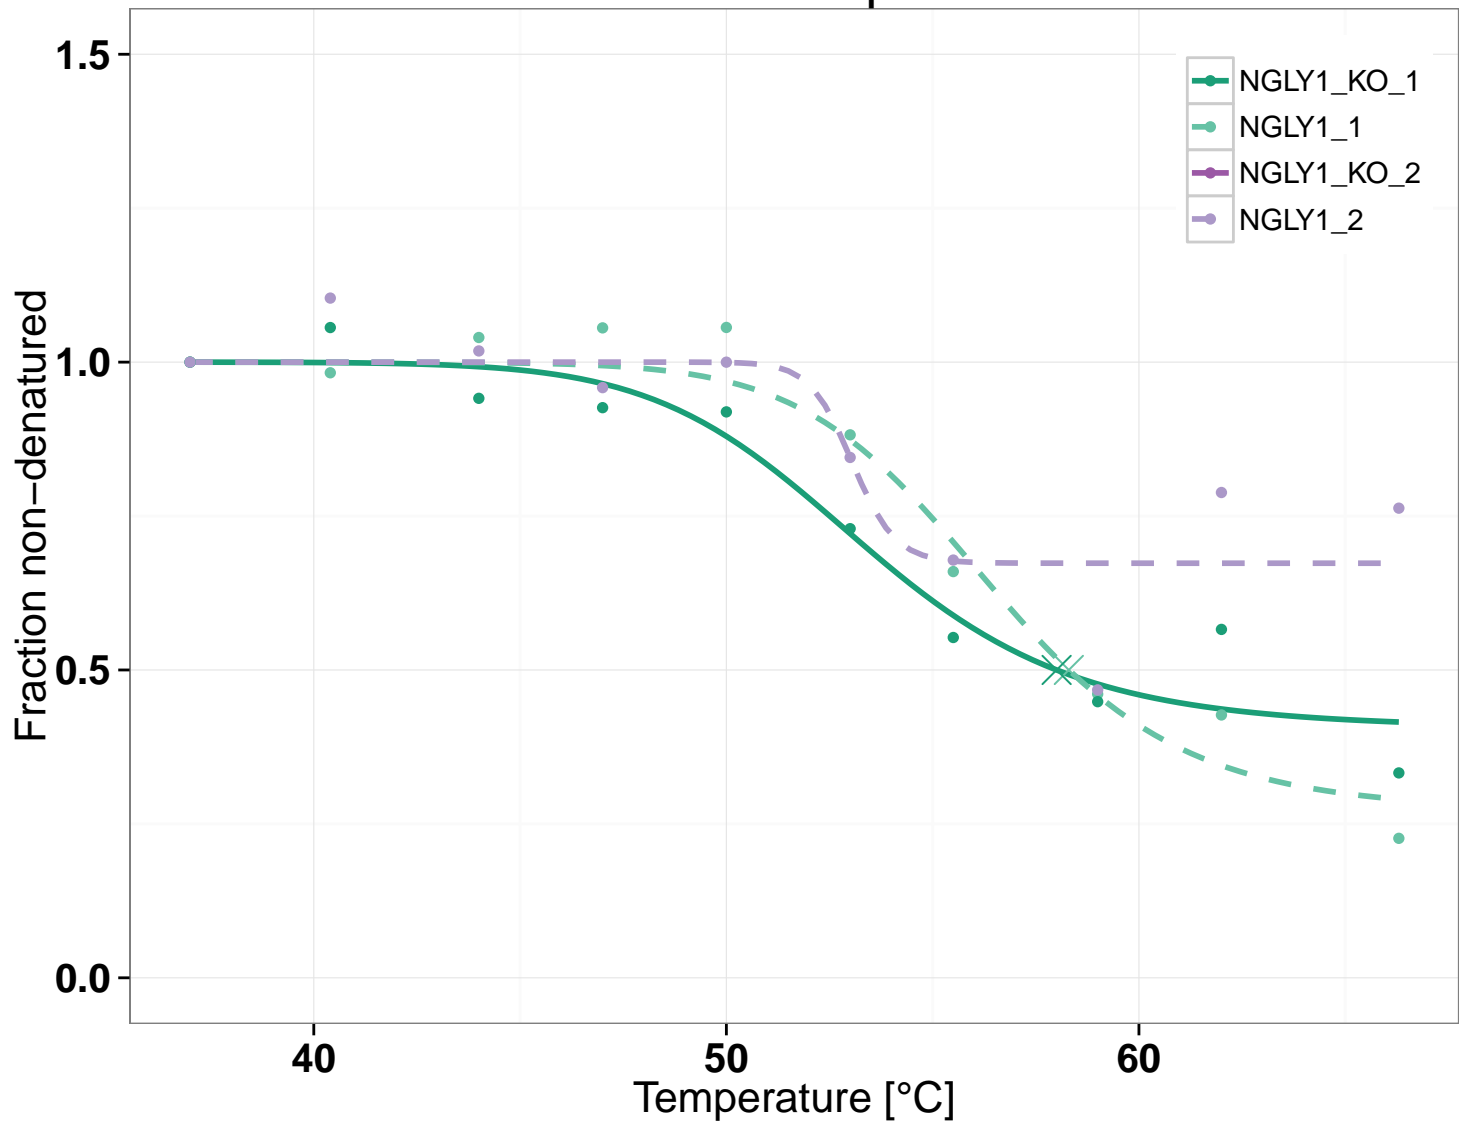

|            | meltPoint | slope  | plateau | R2   |
|------------|-----------|--------|---------|------|
| NGLY1_KO_1 | 58        | -0.058 | 0.41    | 0.94 |
| NGLY1_1    | 58.3      | -0.079 | 0.27    | 0.97 |
| NGLY1_KO_2 | -         | -      | -       | -    |
| NGLY1_2    | -         | -0.16  | 0.67    | 0.77 |

Supplement: Supplementary file 4855 [file 1]

# IPI00657935.1|RFESD

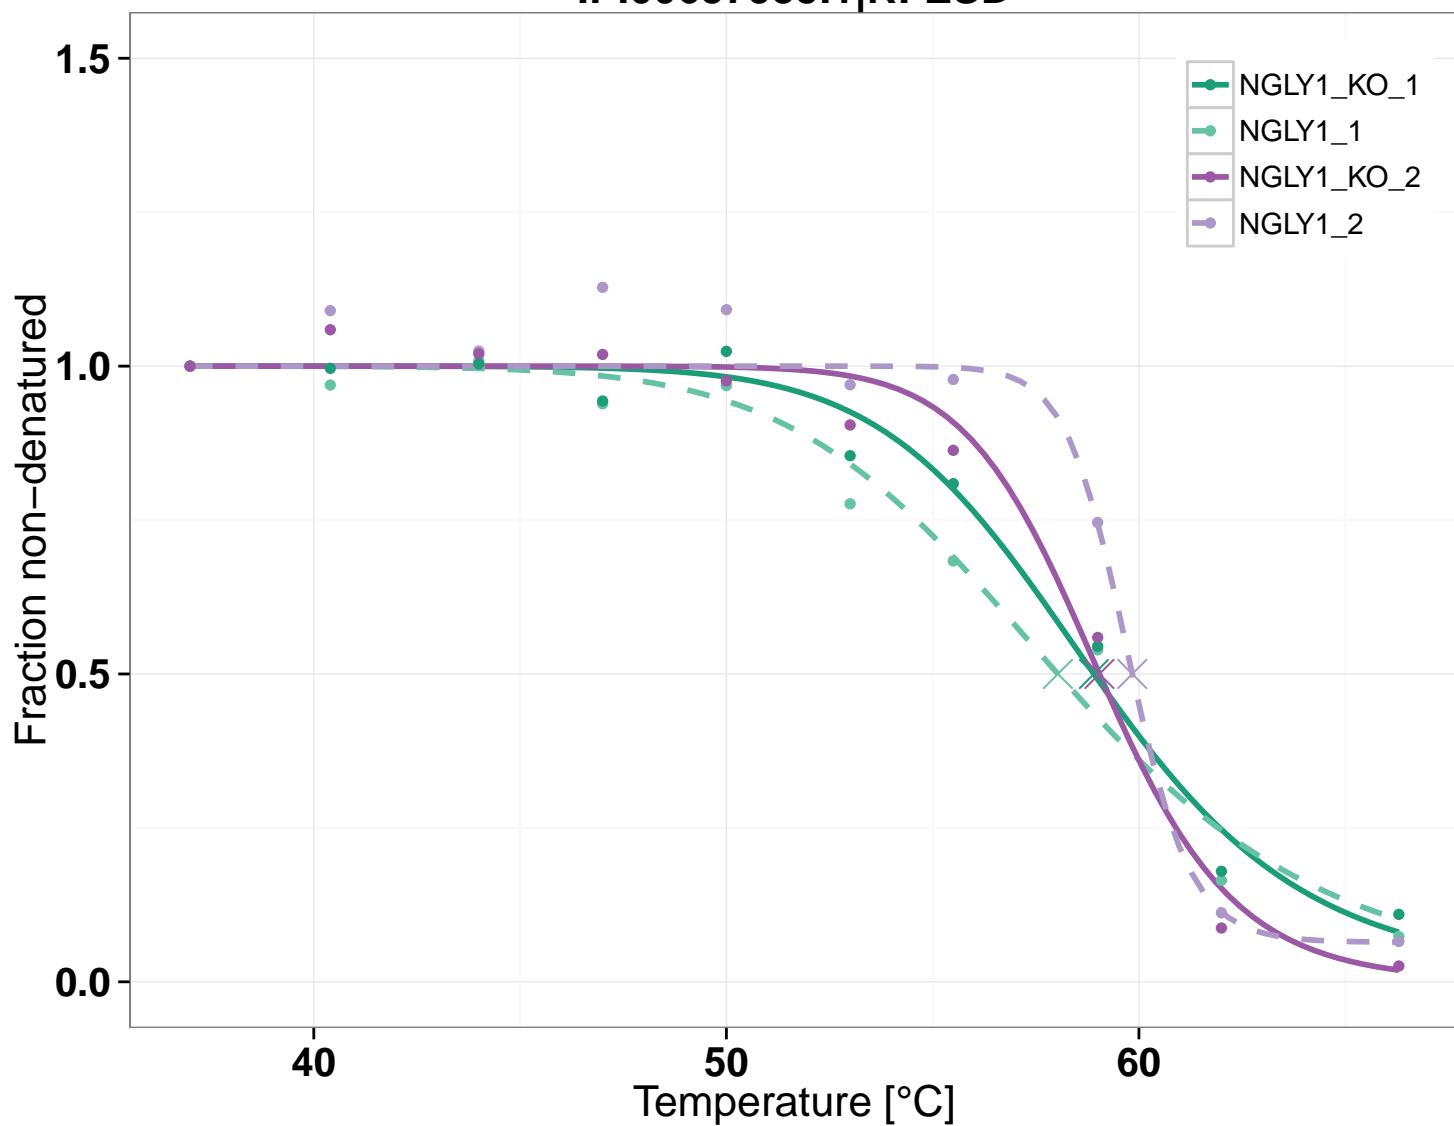

|            | meltPoint | slope  | plateau | R2   |
|------------|-----------|--------|---------|------|
| NGLY1_KO_1 | 58.91     | -0.096 | 0.01    | 0.98 |
| NGLY1_1    | 58.04     | -0.076 | 0       | 0.97 |
| NGLY1_KO_2 | 59.04     | -0.15  | 0       | 0.99 |
| NGLY1_2    | 59.84     | -0.31  | 0.06    | 0.98 |

Supplement: Supplementary file 4856 [file 1]

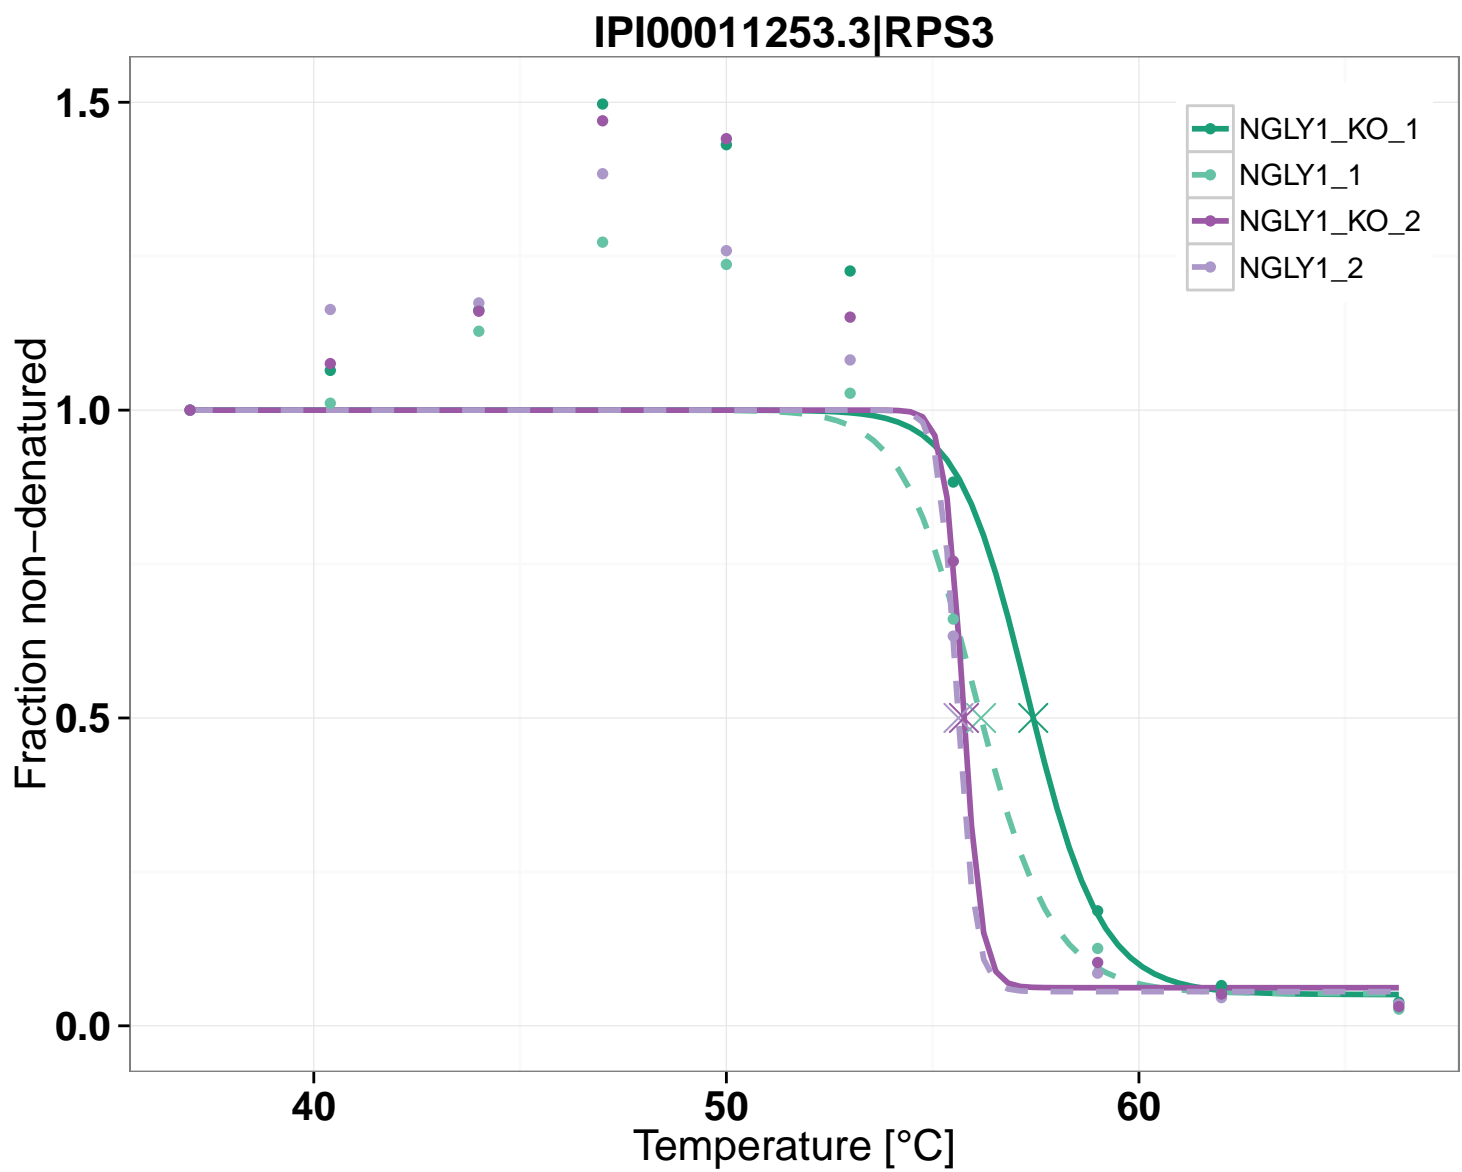

|            | meltPoint | slope | plateau | R2   |
|------------|-----------|-------|---------|------|
| NGLY1_KO_1 | 57.44     | -0.27 | 0.05    | 0.81 |
| NGLY1_1    | 56.17     | -0.26 | 0.05    | 0.93 |
| NGLY1_KO_2 | 55.76     | -1.1  | 0.06    | 0.84 |
| NGLY1_2    | 55.63     | -1.1  | 0.06    | 0.89 |

Supplement: Supplementary file 4857 [file 1]

# IPI00018009.2|EDC3

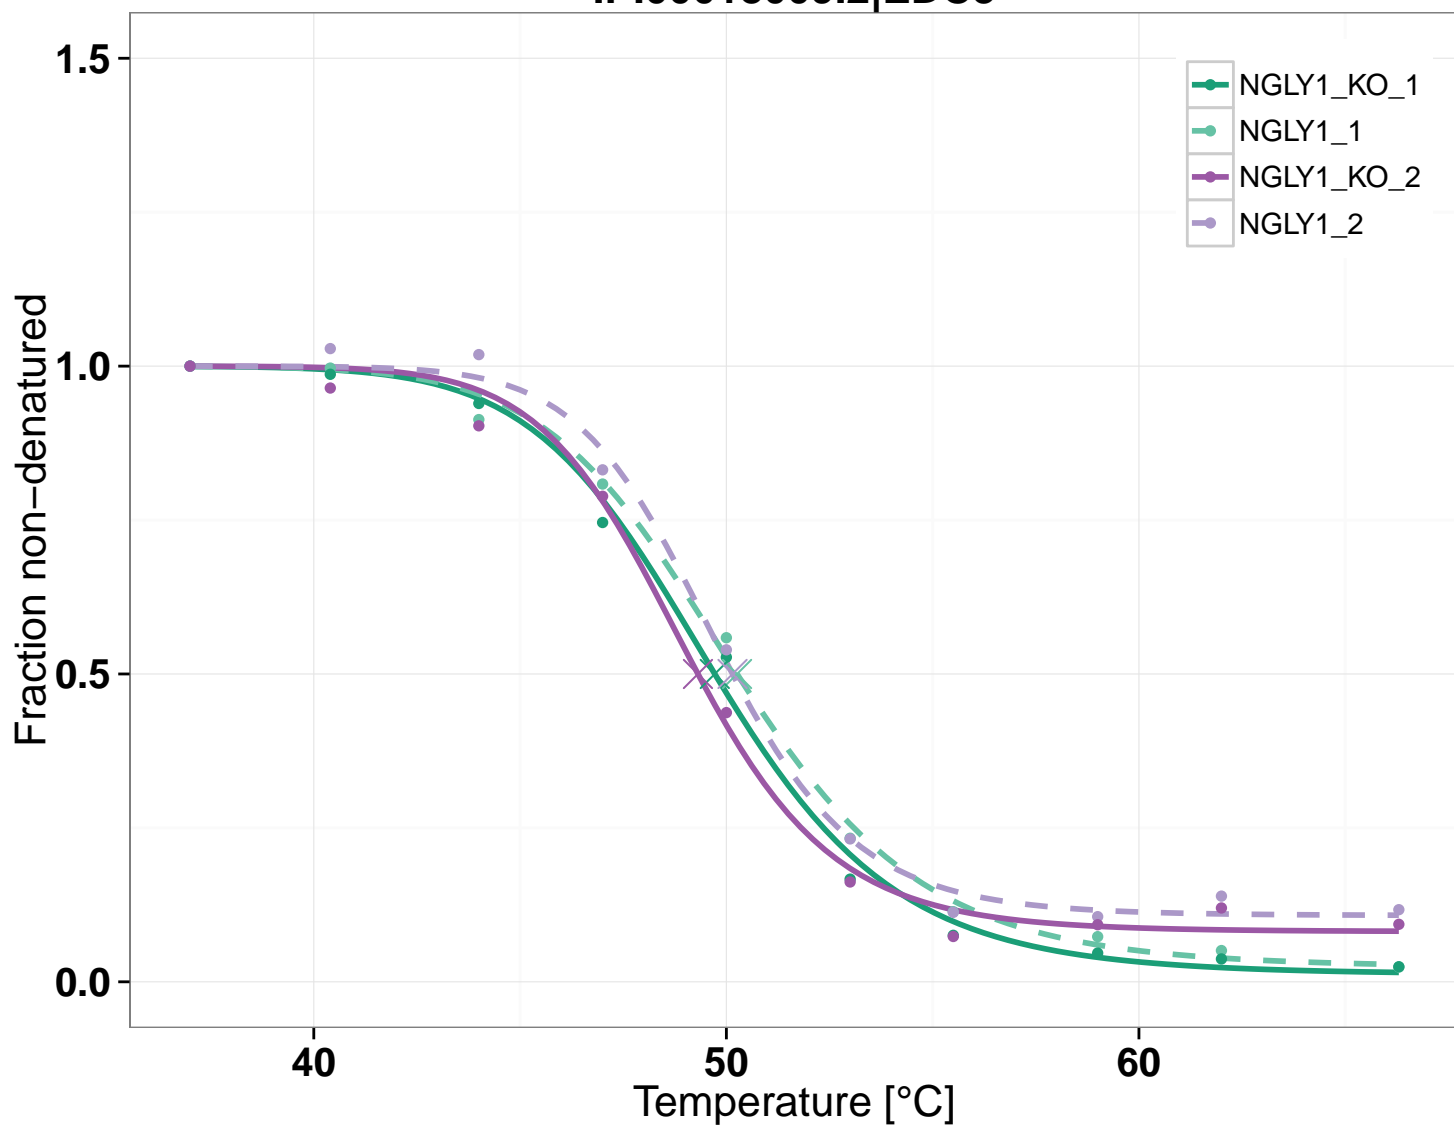

|            | meltPoint | slope | plateau | R2   |
|------------|-----------|-------|---------|------|
| NGLY1_KO_1 | 49.72     | -0.11 | 0.01    | 1    |
| NGLY1_1    | 50.26     | -0.11 | 0.02    | 1    |
| NGLY1_KO_2 | 49.31     | -0.13 | 0.08    | 0.99 |
| NGLY1_2    | 50.15     | -0.13 | 0.11    | 1    |

Supplement: Supplementary file 4858 [file 1]

IPI00021537.5|OGFR

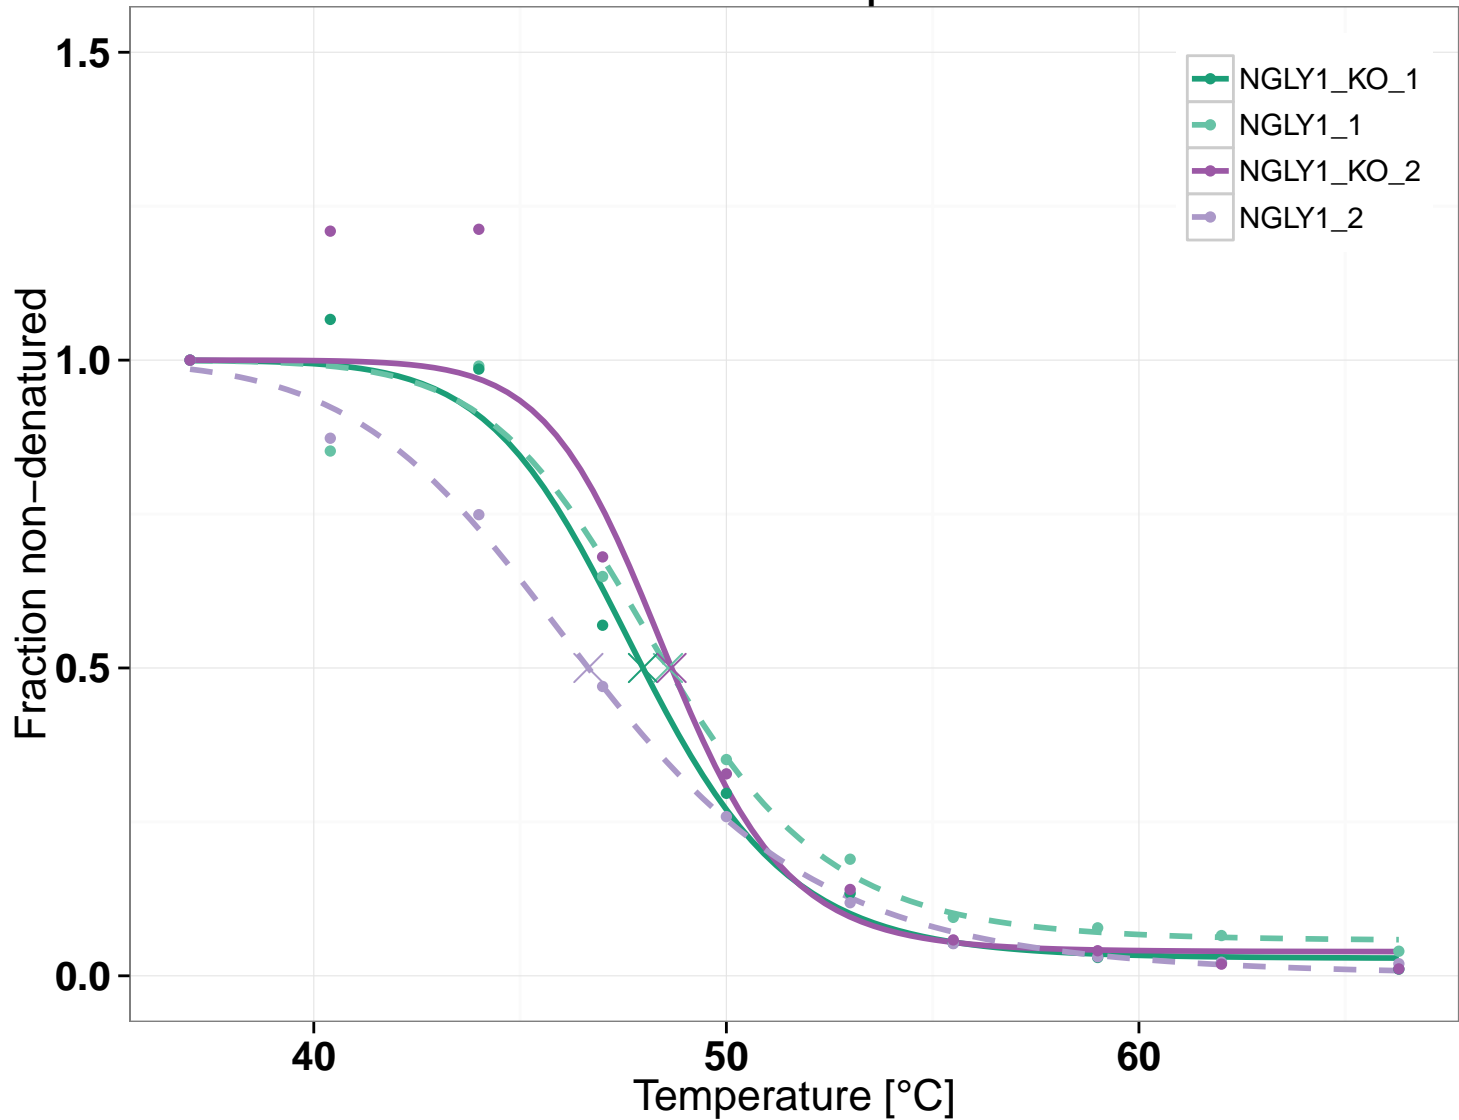

|            | meltPoint | slope  | plateau | R2   |
|------------|-----------|--------|---------|------|
| NGLY1_KO_1 | 47.98     | -0.13  | 0.03    | 0.99 |
| NGLY1_1    | 48.58     | -0.11  | 0.06    | 0.98 |
| NGLY1_KO_2 | 48.67     | -0.16  | 0.04    | 0.95 |
| NGLY1_2    | 46.66     | -0.088 | 0       | 1    |

Supplement: Supplementary file 4859 [file 1]

# IPI00411984.5|STK3

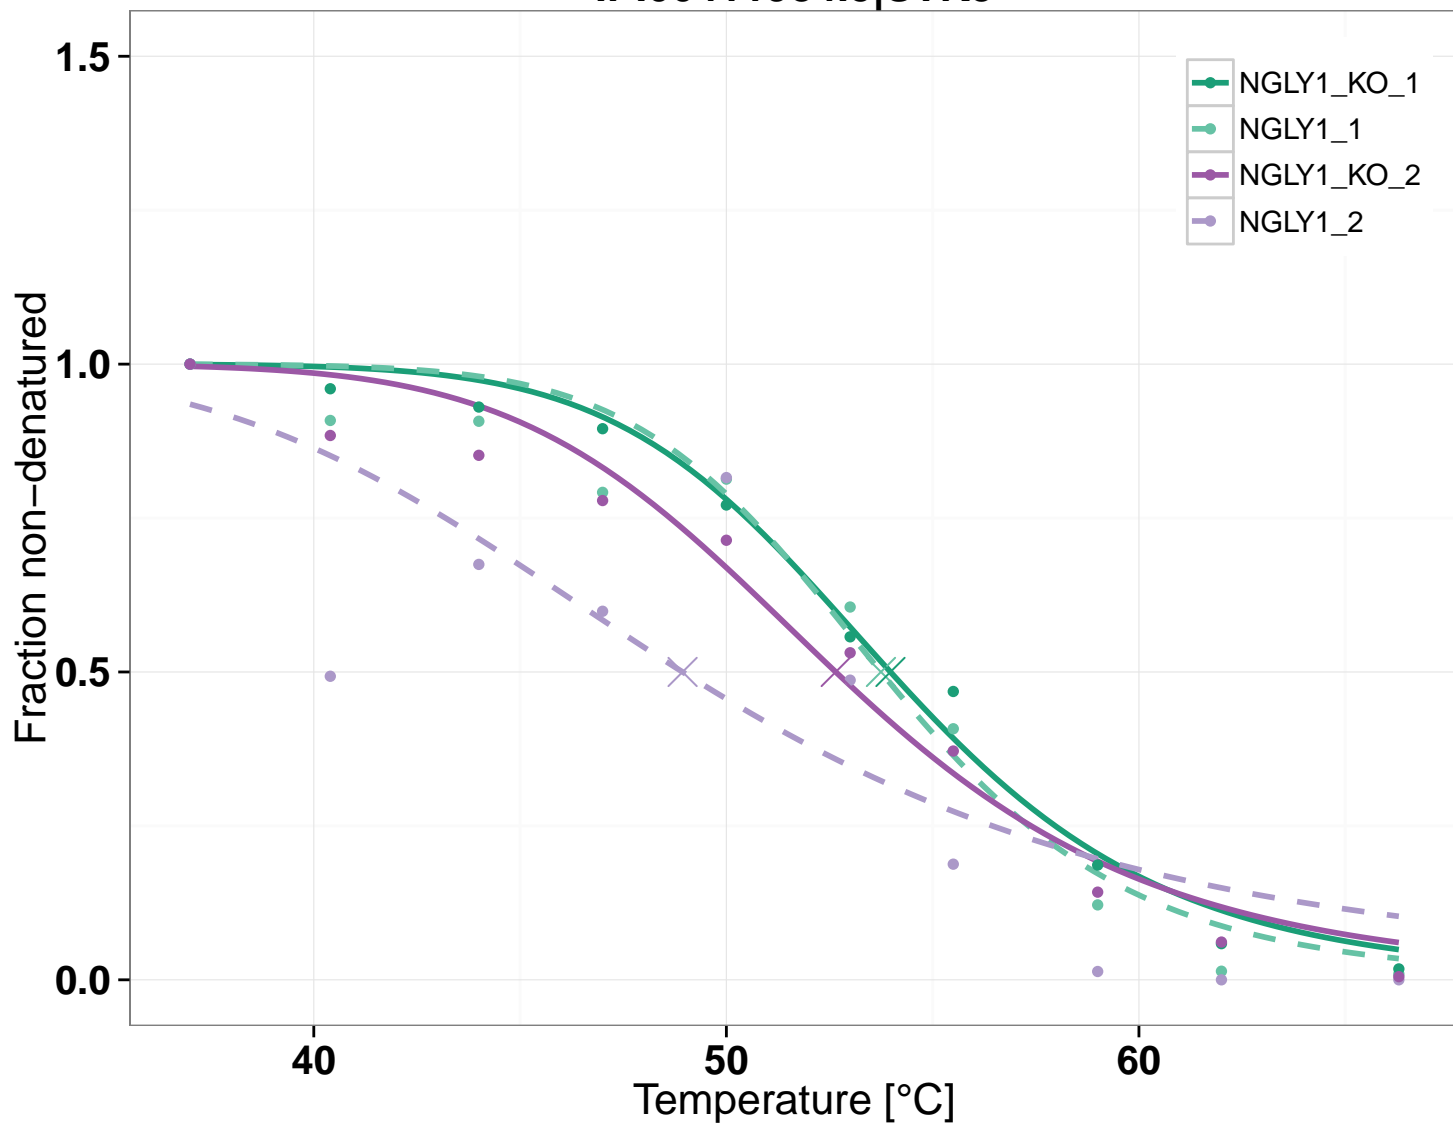

|            | meltPoint | slope  | plateau | R2   |
|------------|-----------|--------|---------|------|
| NGLY1_KO_1 | 53.98     | -0.075 | 0       | 0.99 |
| NGLY1_1    | 53.75     | -0.083 | 0       | 0.97 |
| NGLY1_KO_2 | 52.65     | -0.065 | 0       | 0.97 |
| NGLY1_2    | 48.94     | -0.045 | 0       | 0.7  |

Supplement: Supplementary file 4860 [file 1]

# IPI00298199.2|RIOK3

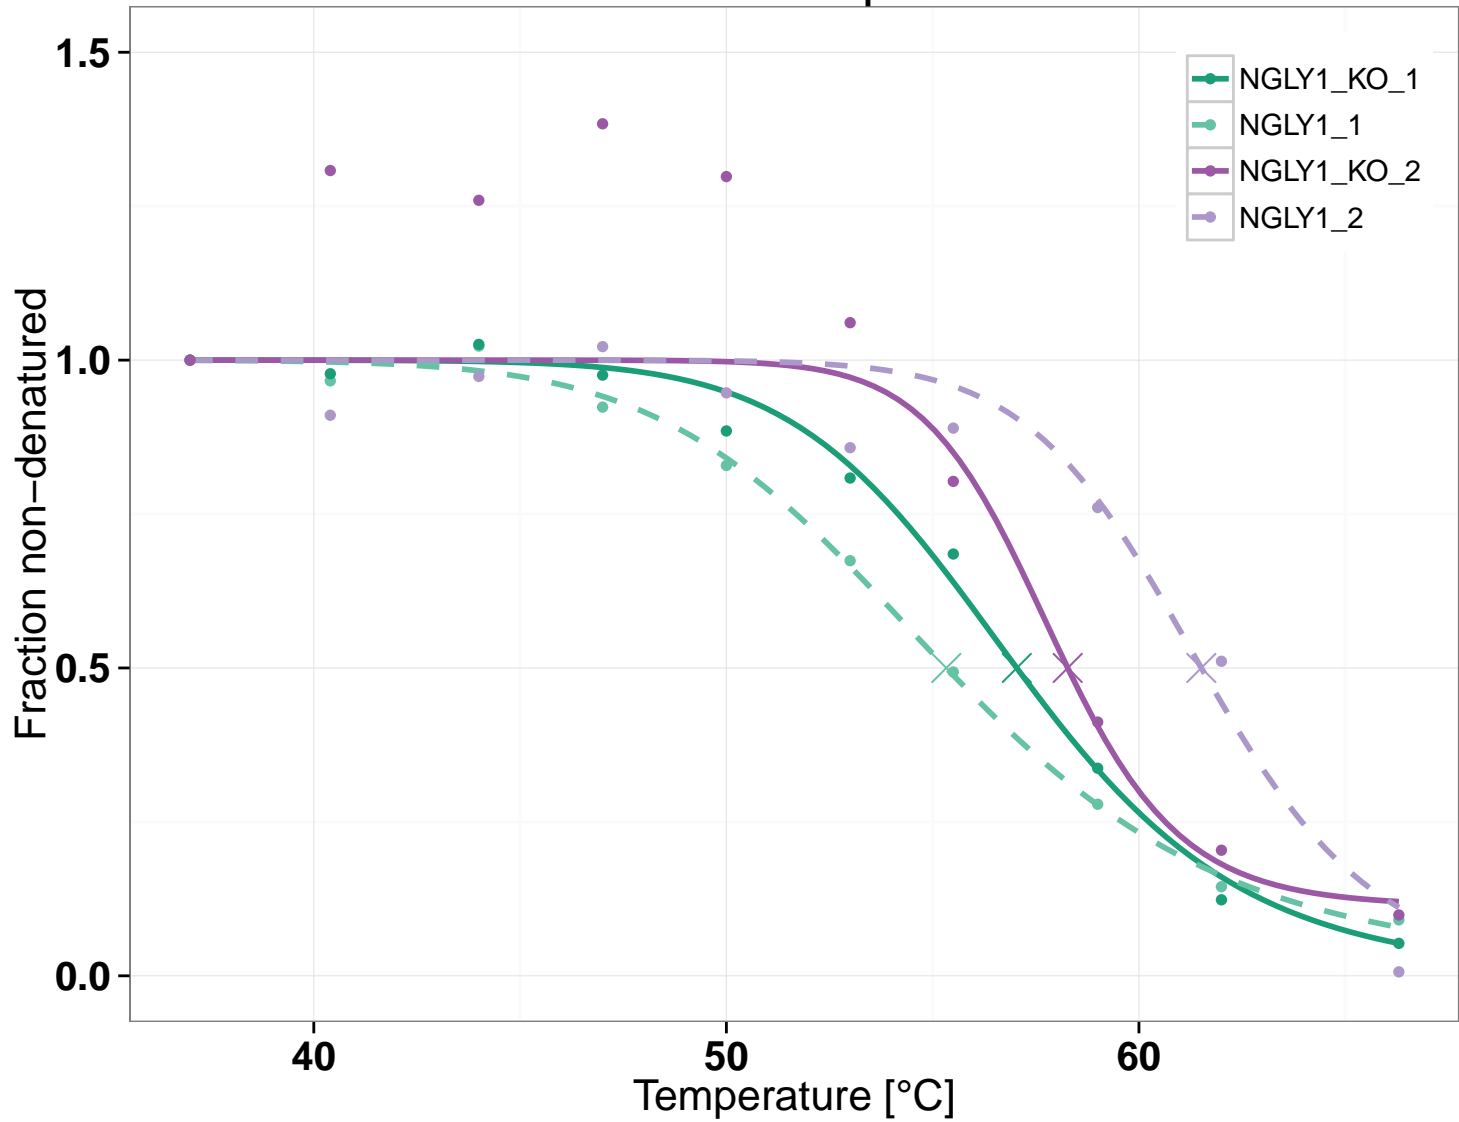

|            | meltPoint | slope  | plateau | R2   |
|------------|-----------|--------|---------|------|
| NGLY1_KO_1 | 57.04     | -0.091 | 0       | 0.99 |
| NGLY1_1    | 55.33     | -0.071 | 0.01    | 1    |
| NGLY1_KO_2 | 58.27     | -0.14  | 0.11    | 0.8  |
| NGLY1_2    | 61.51     | -0.12  | 0       | 0.94 |

Supplement: Supplementary file 4861 [file 1]

IPI00001145.1|AP4S1

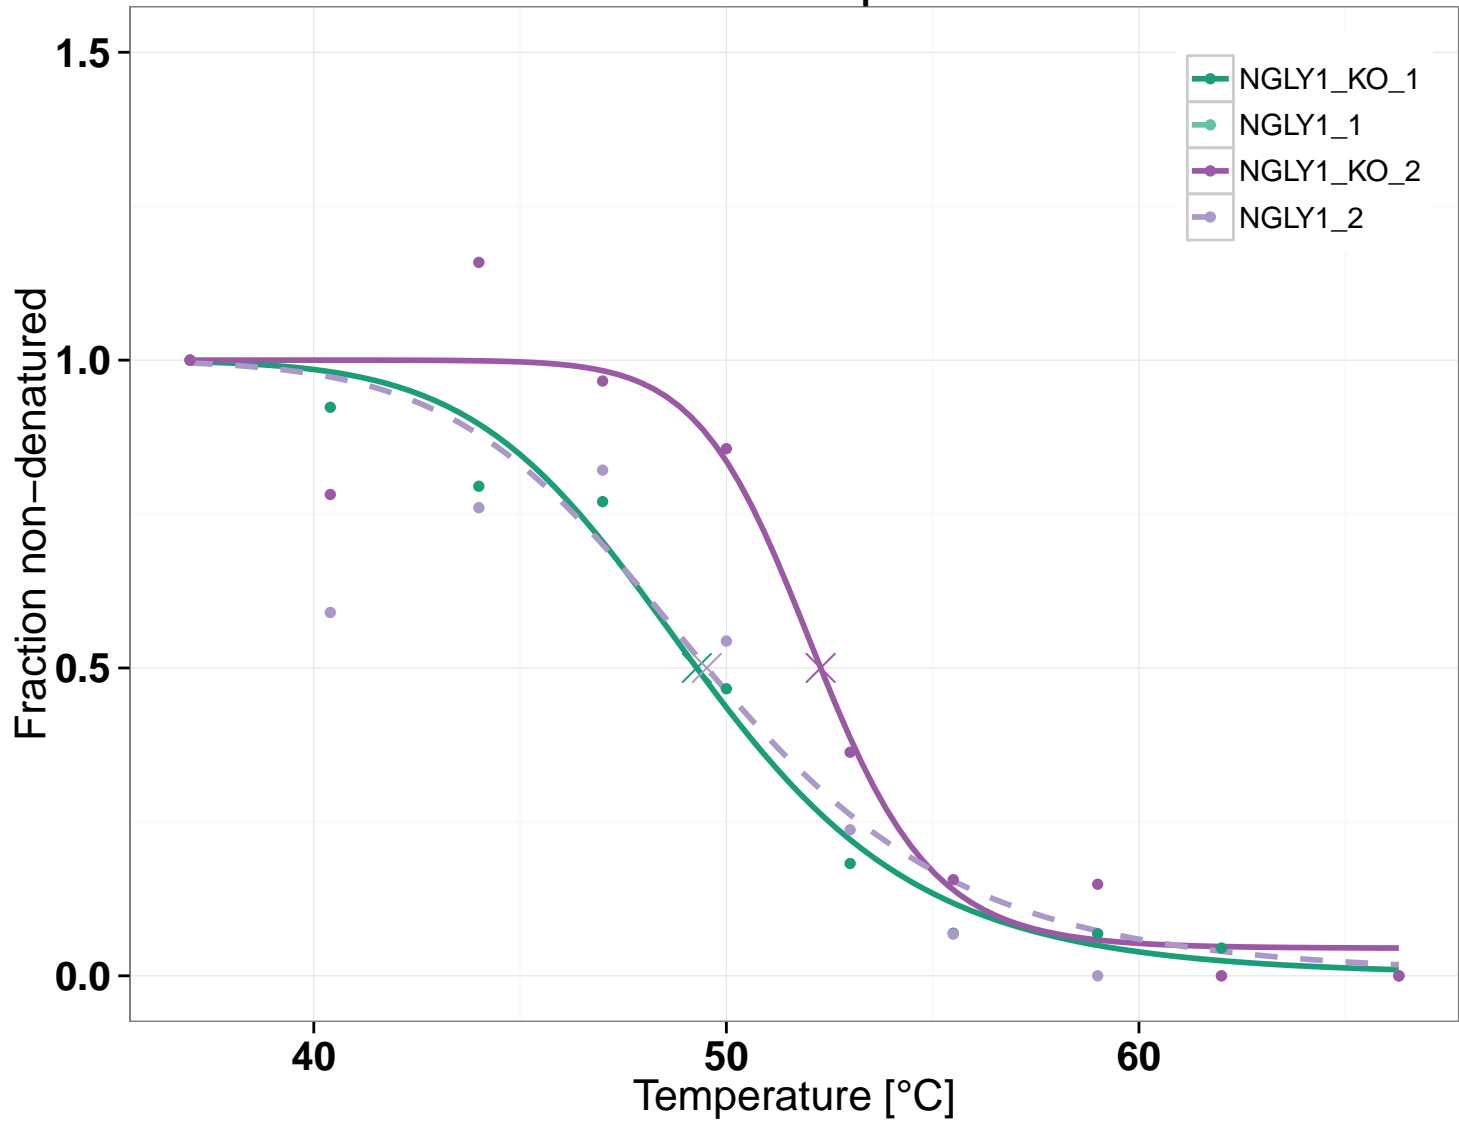

|            | meltPoint | slope  | plateau | R2   |
|------------|-----------|--------|---------|------|
| NGLY1_KO_1 | 49.28     | -0.092 | 0       | 0.98 |
| NGLY1_1    | -         | -      | -       | -    |
| NGLY1_KO_2 | 52.29     | -0.17  | 0.04    | 0.95 |
| NGLY1_2    | 49.52     | -0.081 | 0       | 0.85 |

Supplement: Supplementary file 4862 [file 1]

# IPI00140420.4|SND1

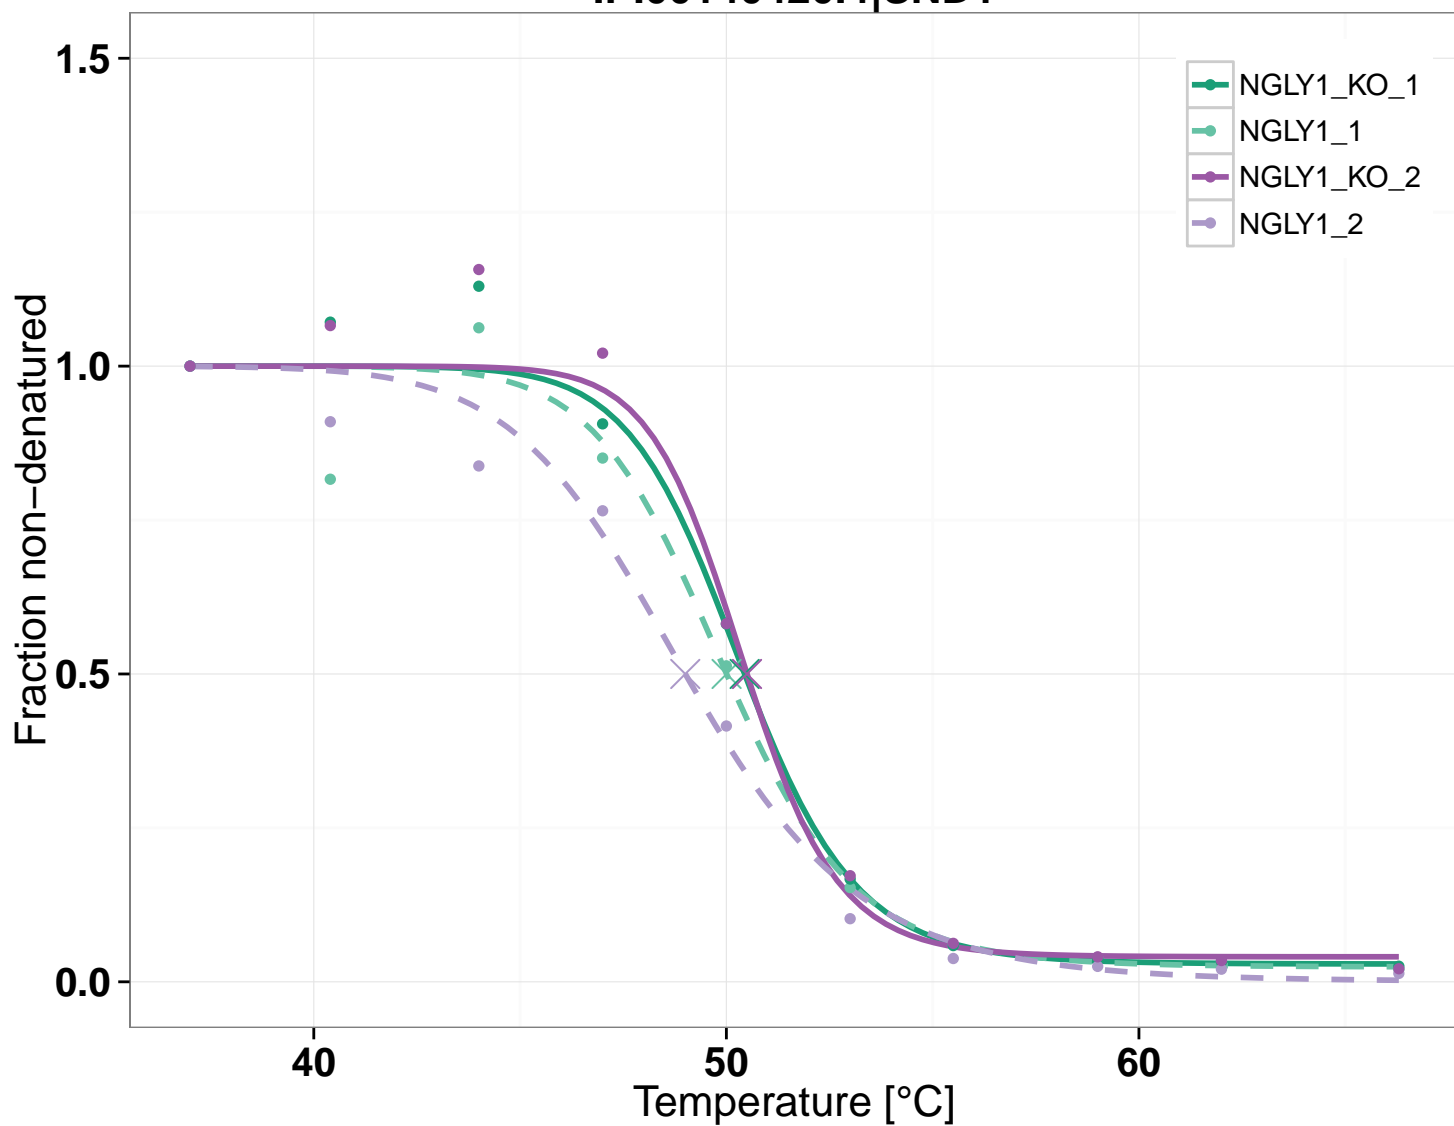

|            | meltPoint | slope | plateau | R2   |
|------------|-----------|-------|---------|------|
| NGLY1_KO_1 | 50.44     | -0.17 | 0.03    | 0.99 |
| NGLY1_1    | 50.01     | -0.15 | 0.02    | 0.98 |
| NGLY1_KO_2 | 50.5      | -0.21 | 0.04    | 0.98 |
| NGLY1_2    | 49        | -0.12 | 0       | 0.99 |

Supplement: Supplementary file 4863 [file 1]

CZY00002528.1|YGR254W

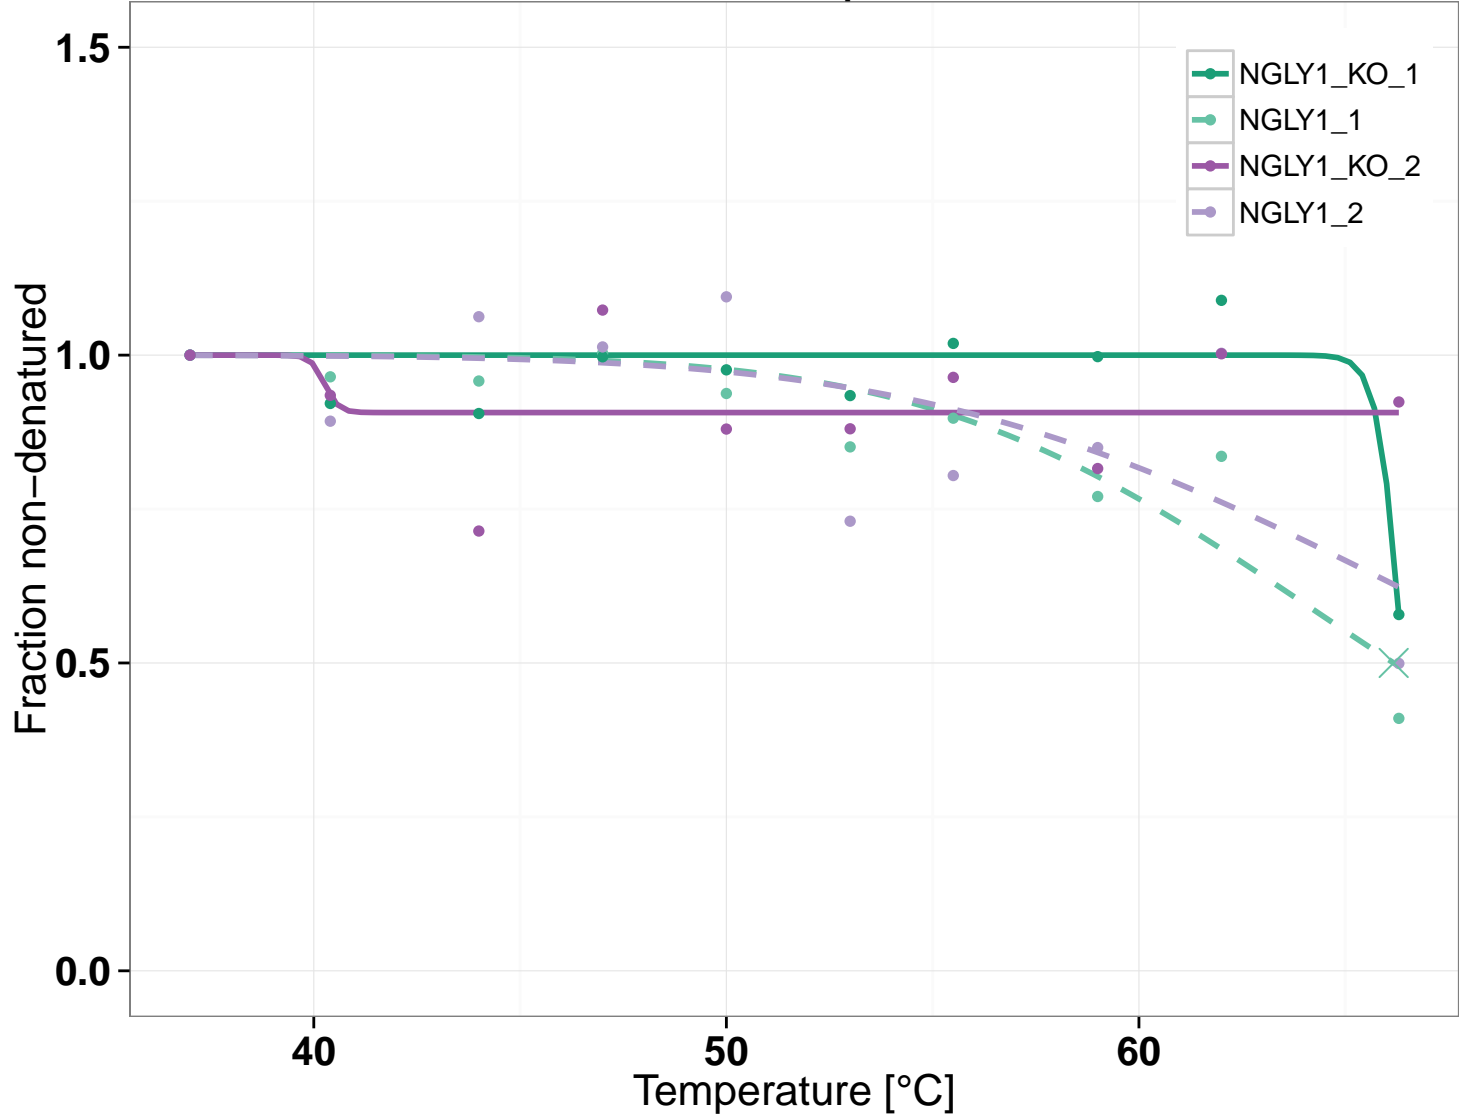

|            | meltPoint | slope  | plateau | R2   |
|------------|-----------|--------|---------|------|
| NGLY1_KO_1 | -         | -      | 0       | 0.84 |
| NGLY1_1    | 66.17     | -0.045 | 0       | 0.84 |
| NGLY1_KO_2 | -         | -0.14  | 0.91    | 0.08 |
| NGLY1_2    | -         | -      | 0       | 0.45 |

Supplement: Supplementary file 4864 [file 1]

IPI00221092.8|RPS16

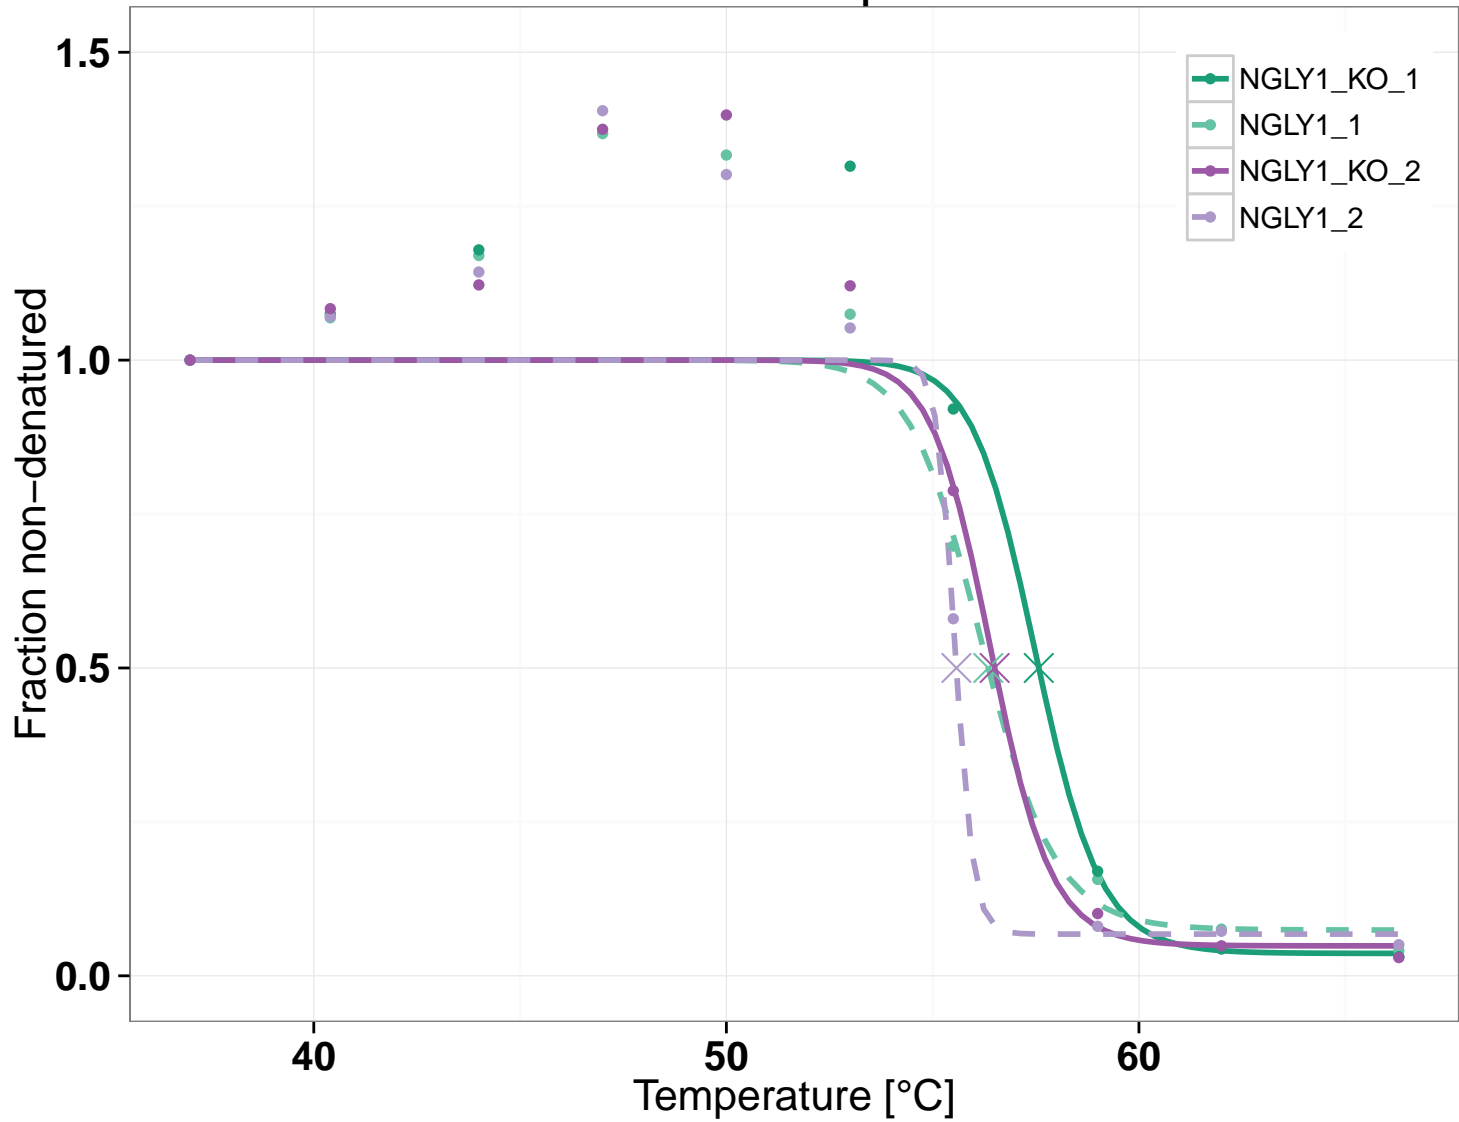

|            | meltPoint | slope | plateau | R2   |
|------------|-----------|-------|---------|------|
| NGLY1_KO_1 | 57.57     | -0.31 | 0.04    | 0.76 |
| NGLY1_1    | 56.35     | -0.26 | 0.07    | 0.88 |
| NGLY1_KO_2 | 56.5      | -0.33 | 0.05    | 0.87 |
| NGLY1_2    | 55.58     | -1    | 0.07    | 0.89 |

Supplement: Supplementary file 4865 [file 1]

# IPI00645078.1|UBA1

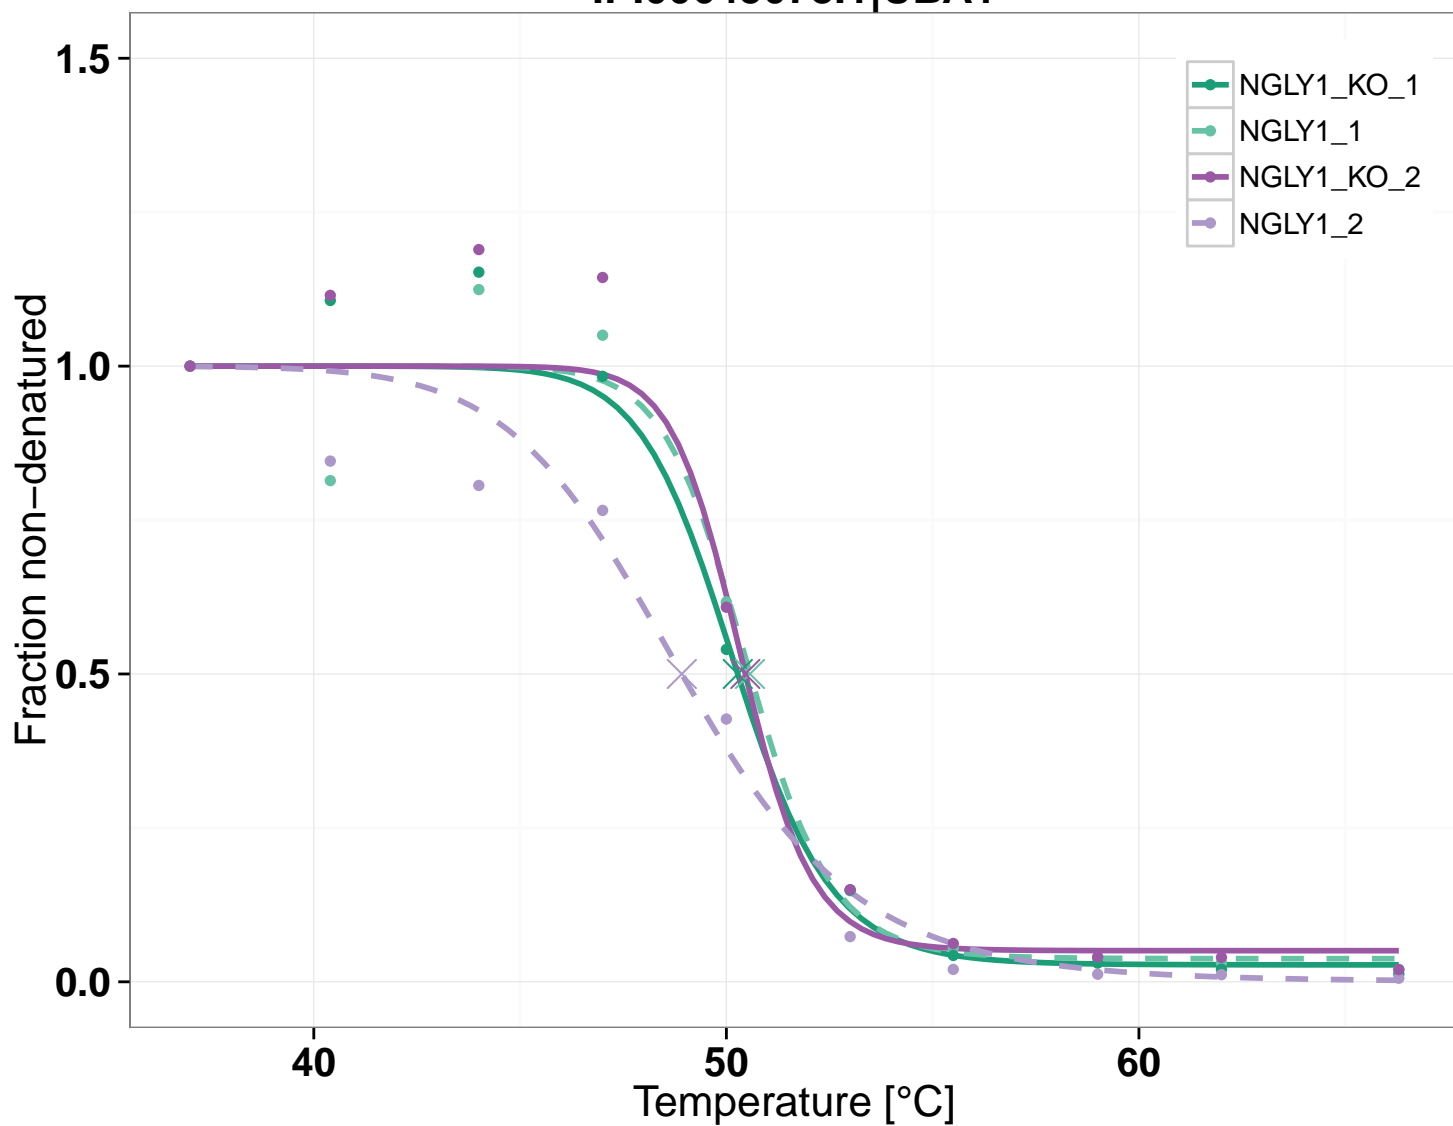

|            | meltPoint | slope | plateau | R2   |
|------------|-----------|-------|---------|------|
| NGLY1_KO_1 | 50.28     | -0.21 | 0.03    | 0.98 |
| NGLY1_1    | 50.57     | -0.24 | 0.04    | 0.97 |
| NGLY1_KO_2 | 50.46     | -0.28 | 0.05    | 0.97 |
| NGLY1_2    | 48.92     | -0.12 | 0       | 0.97 |

Supplement: Supplementary file 4866 [file 1]

# IPI00028911.1|DAG1

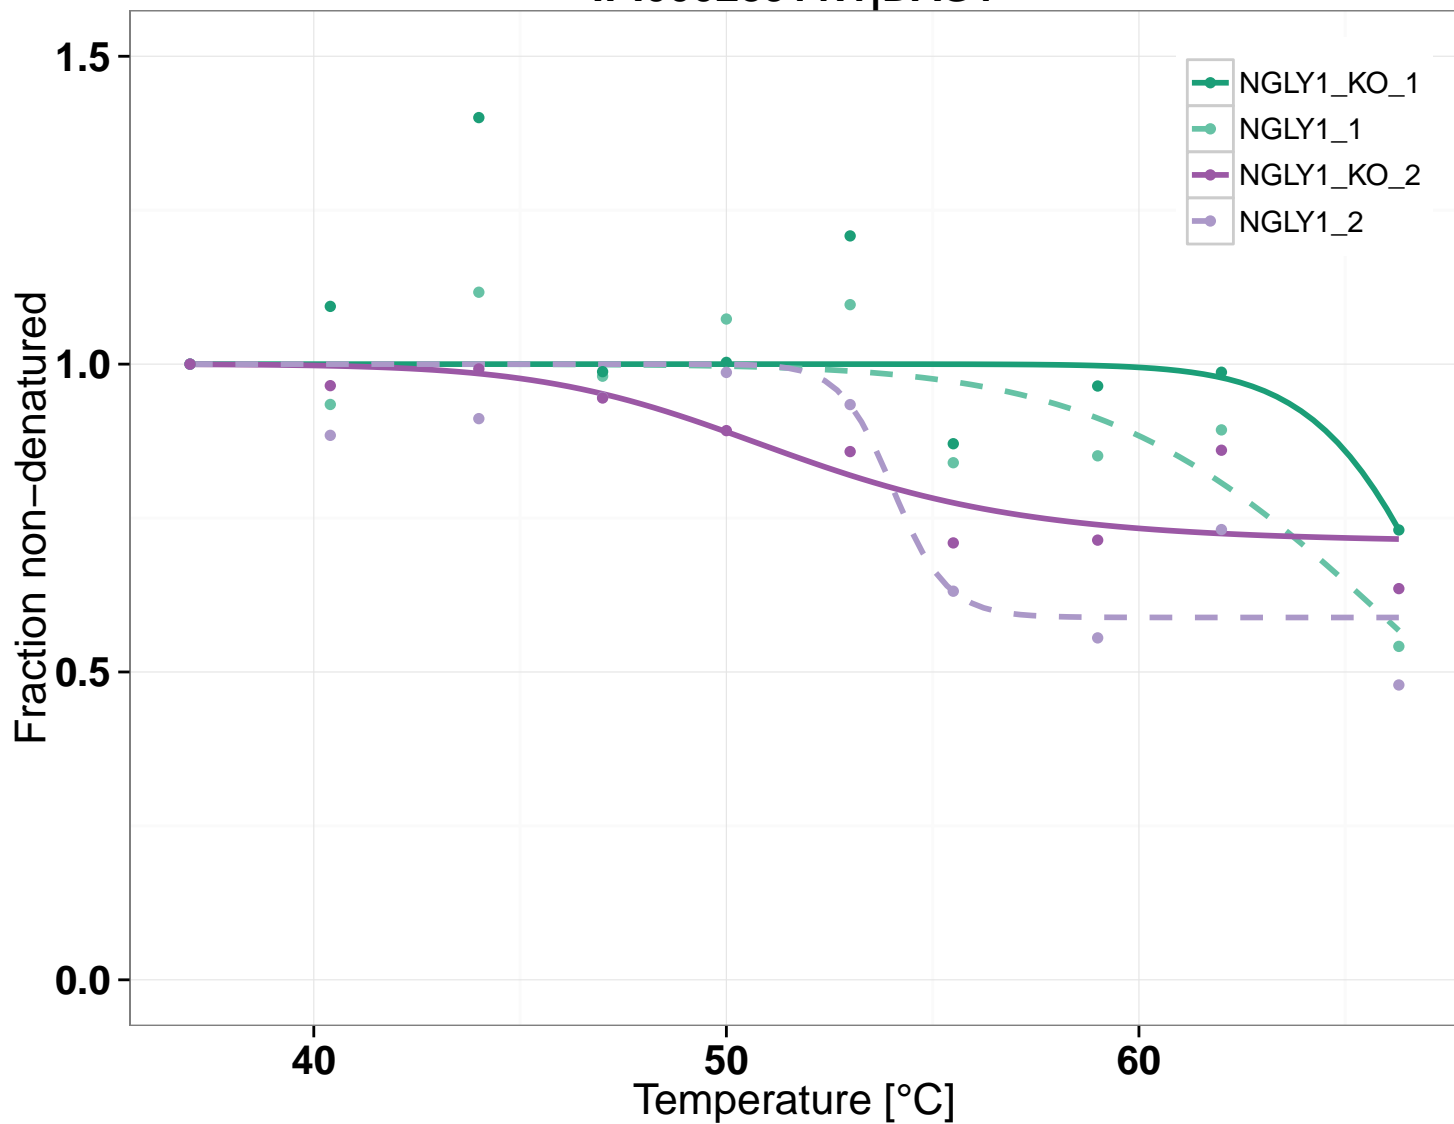

|            | meltPoint | slope  | plateau | R2   |
|------------|-----------|--------|---------|------|
| NGLY1_KO_1 | –         | –      | 0       | 0.22 |
| NGLY1_1    | –         | –      | 0       | 0.75 |
| NGLY1_KO_2 | –         | –0.024 | 0.71    | 0.79 |
| NGLY1_2    | –         | –0.16  | 0.59    | 0.82 |

Supplement: Supplementary file 4867 [file 1]

# IPI00012878.1|HSF2

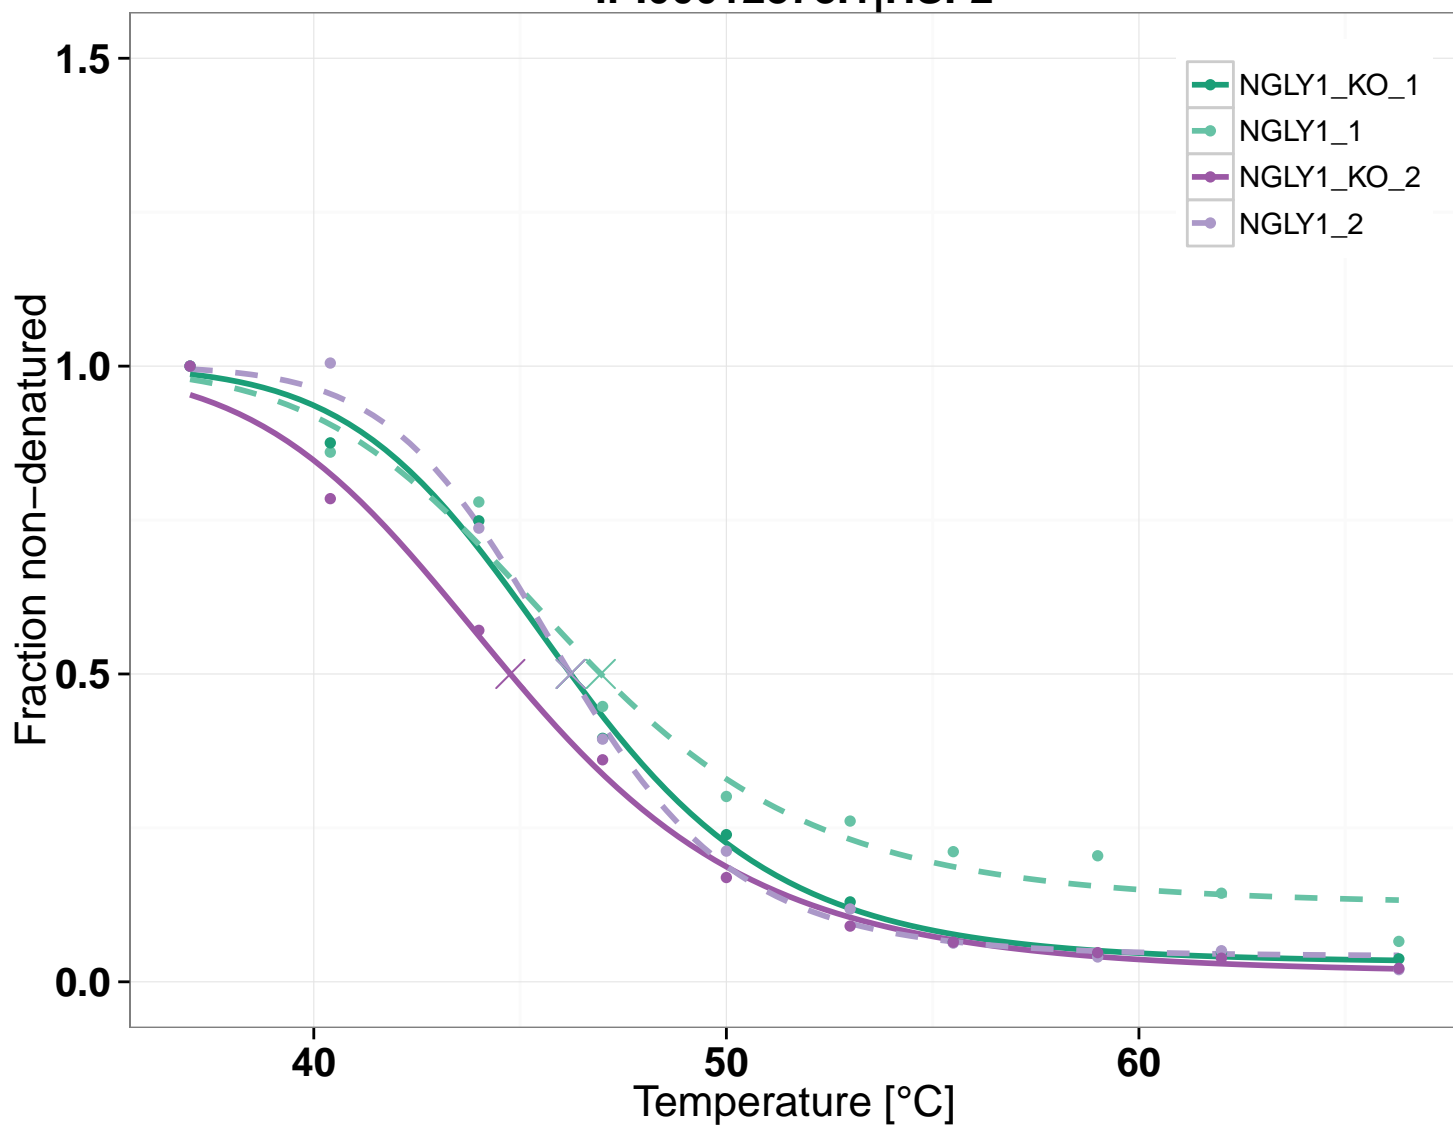

|            | meltPoint | slope  | plateau | R2   |
|------------|-----------|--------|---------|------|
| NGLY1_KO_1 | 46.23     | -0.093 | 0.03    | 1    |
| NGLY1_1    | 46.96     | -0.073 | 0.12    | 0.98 |
| NGLY1_KO_2 | 44.76     | -0.082 | 0.01    | 1    |
| NGLY1_2    | 46.22     | -0.11  | 0.04    | 1    |

Supplement: Supplementary file 4868 [file 1]

IPI00432462.2|TRIM59

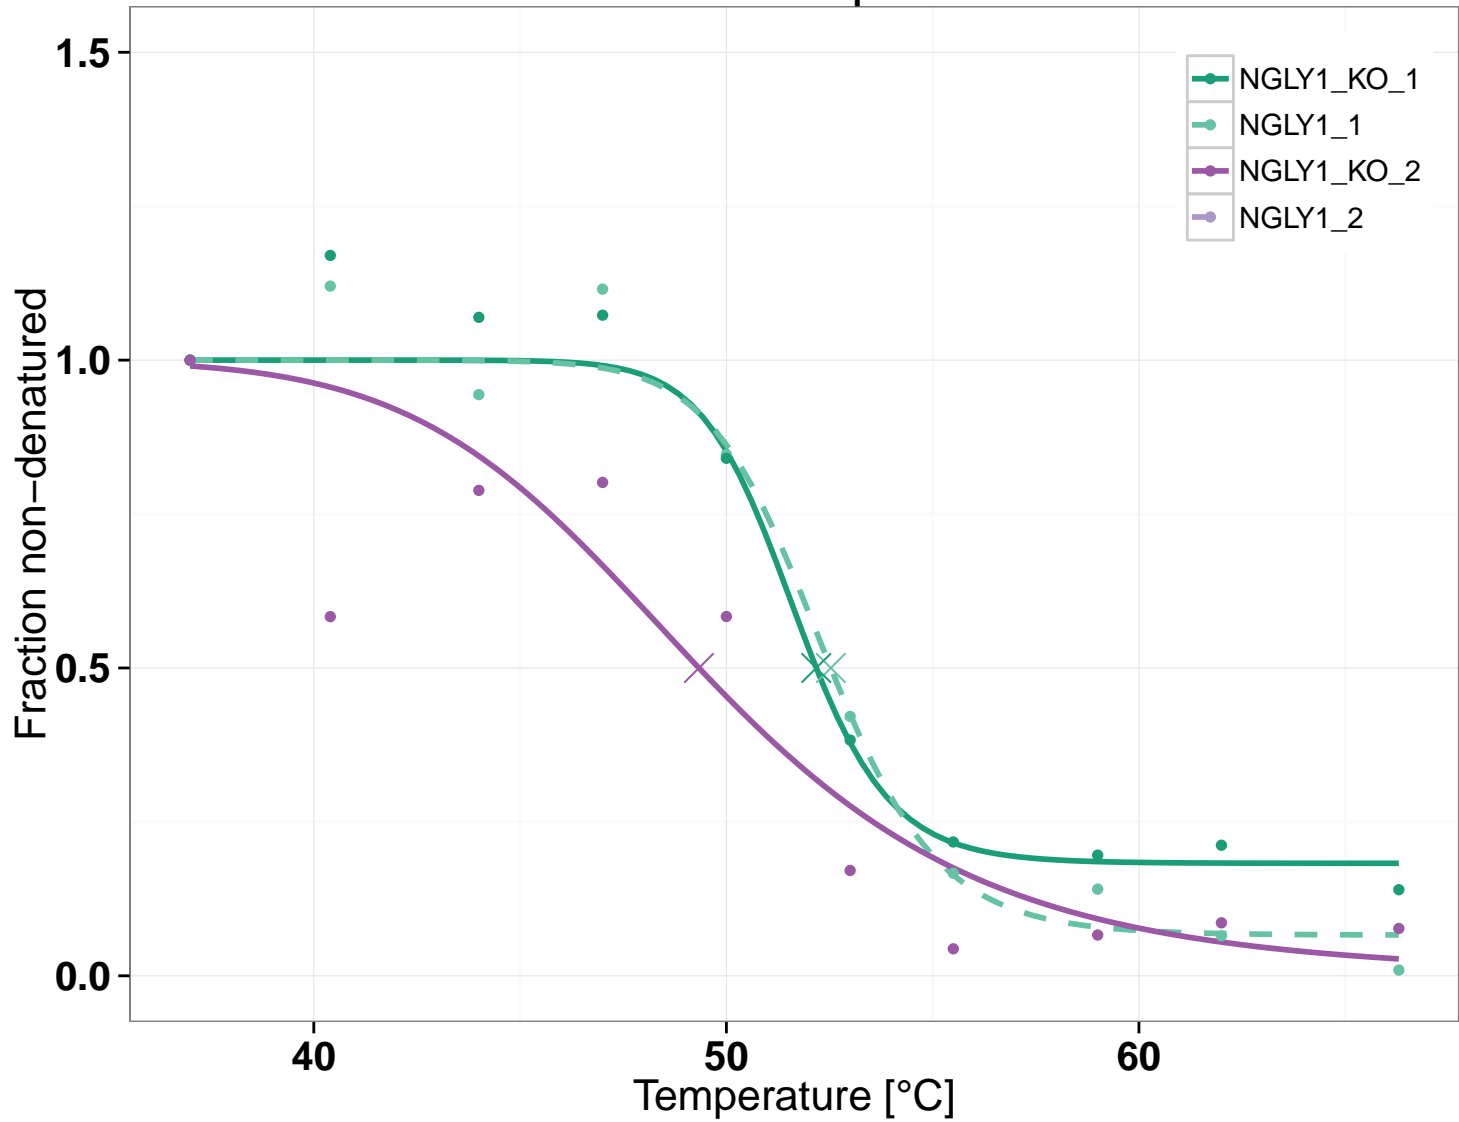

|            | meltPoint | slope  | plateau | R2   |
|------------|-----------|--------|---------|------|
| NGLY1_KO_1 | 52.18     | -0.18  | 0.18    | 0.97 |
| NGLY1_1    | 52.53     | -0.17  | 0.07    | 0.98 |
| NGLY1_KO_2 | 49.34     | -0.072 | 0       | 0.83 |
| NGLY1_2    | -         | -      | -       | -    |

Supplement: Supplementary file 4869 [file 1]

# IPI00556027.1|BAG5

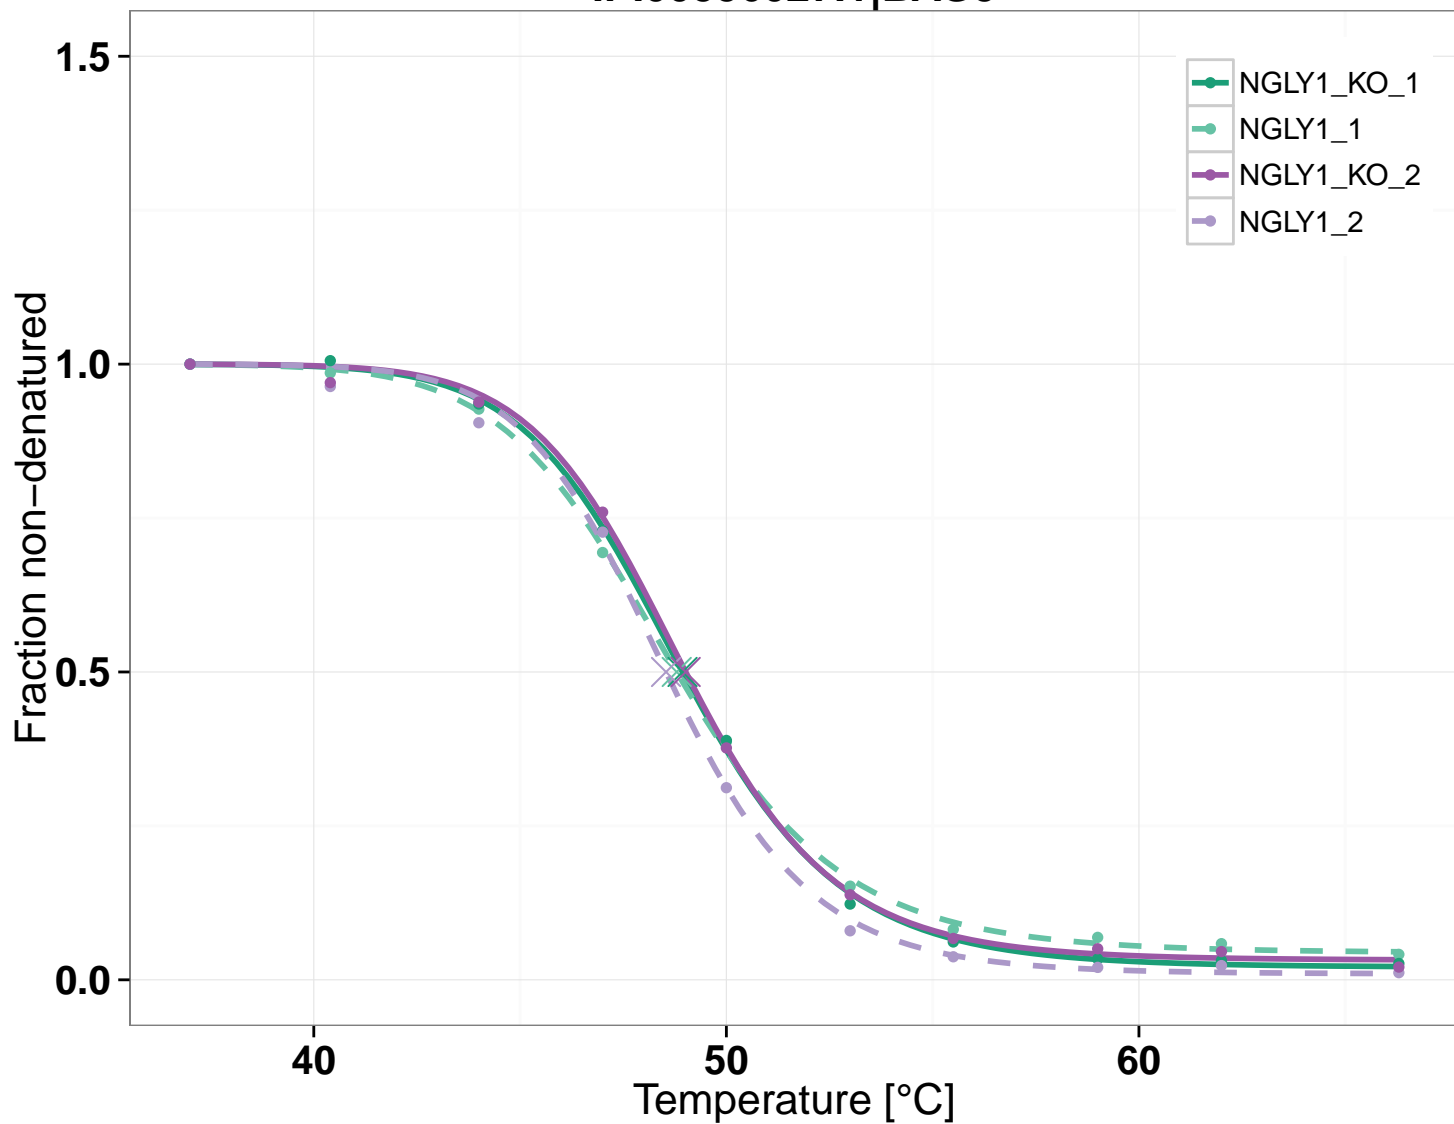

|            | meltPoint | slope | plateau | R2 |
|------------|-----------|-------|---------|----|
| NGLY1_KO_1 | 48.94     | -0.13 | 0.02    | 1  |
| NGLY1_1    | 48.8      | -0.12 | 0.04    | 1  |
| NGLY1_KO_2 | 49.01     | -0.13 | 0.03    | 1  |
| NGLY1_2    | 48.54     | -0.14 | 0.01    | 1  |

Supplement: Supplementary file 4870 [file 1]

IPI00329185.5|PLCG2

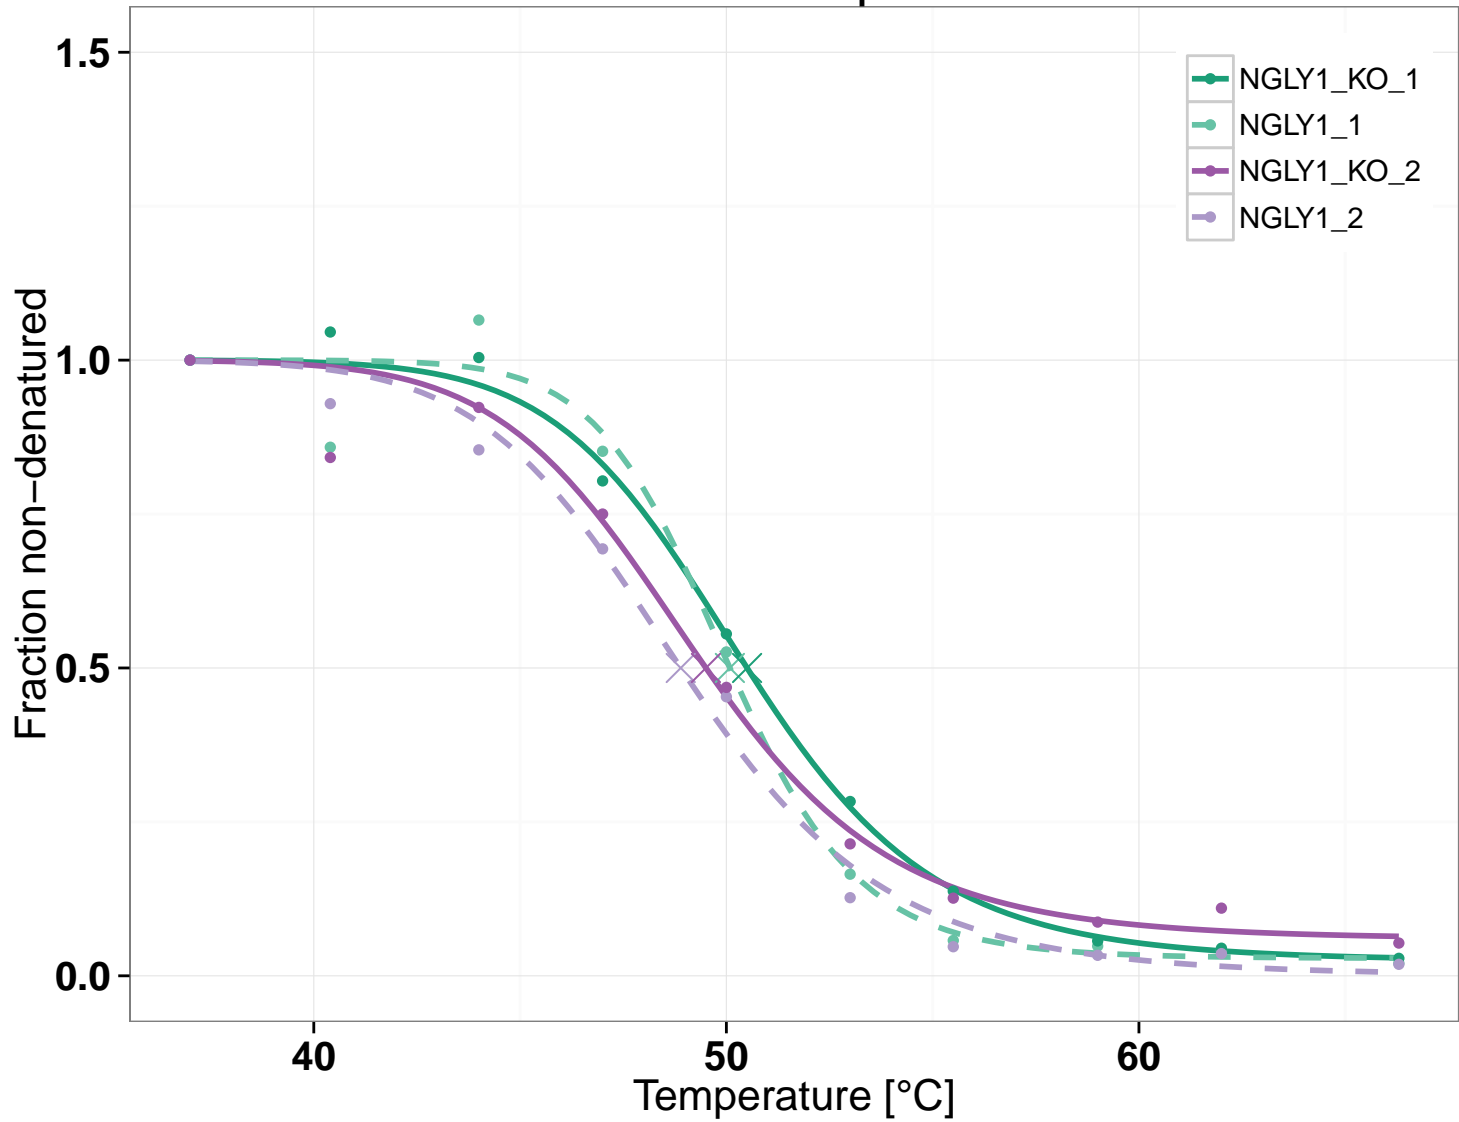

|            | meltPoint | slope  | plateau | R2   |
|------------|-----------|--------|---------|------|
| NGLY1_KO_1 | 50.5      | -0.11  | 0.02    | 1    |
| NGLY1_1    | 50.09     | -0.15  | 0.03    | 0.98 |
| NGLY1_KO_2 | 49.5      | -0.099 | 0.06    | 0.98 |
| NGLY1_2    | 48.89     | -0.1   | 0       | 0.99 |

Supplement: Supplementary file 4871 [file 1]

IPI00402231.1|DNAJC5

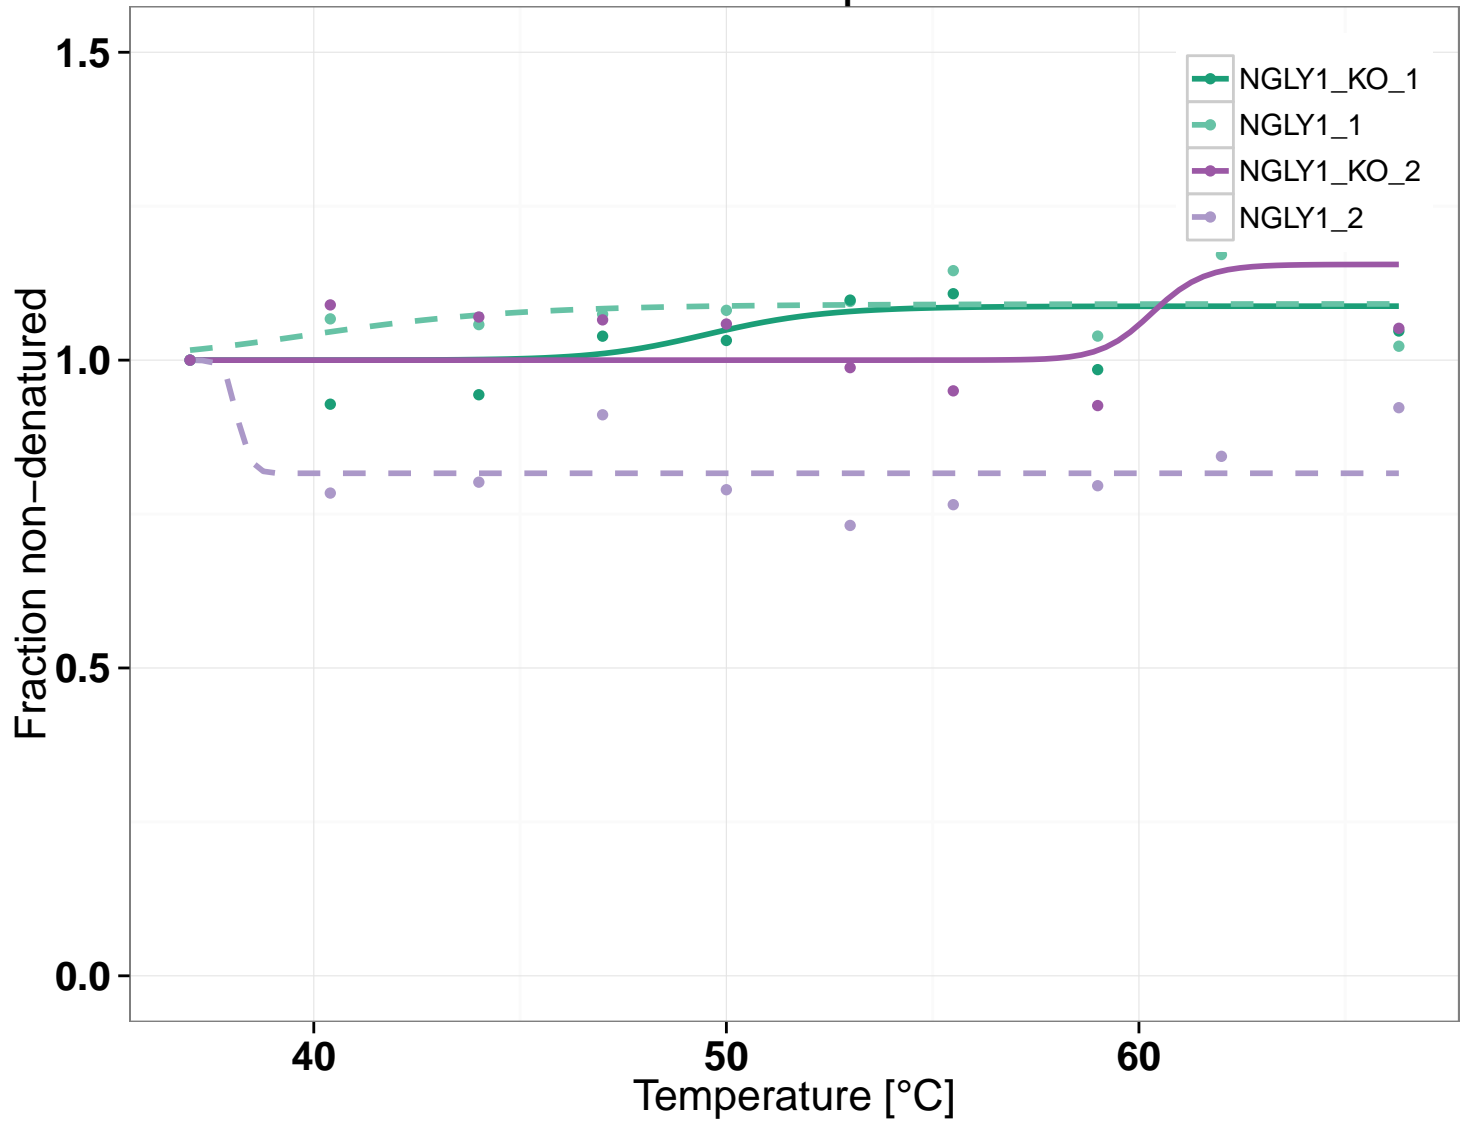

|            | meltPoint | slope  | plateau | R2   |
|------------|-----------|--------|---------|------|
| NGLY1_KO_1 | —         | 0.016  | 1.09    | 0.41 |
| NGLY1_1    | —         | 0.0097 | 1.09    | 0.27 |
| NGLY1_KO_2 | —         | 0.062  | 1.16    | 0.3  |
| NGLY1_2    | —         | -0.3   | 0.82    | 0.48 |

Supplement: Supplementary file 4872 [file 1]

IPI00017289.3|SNRNP27

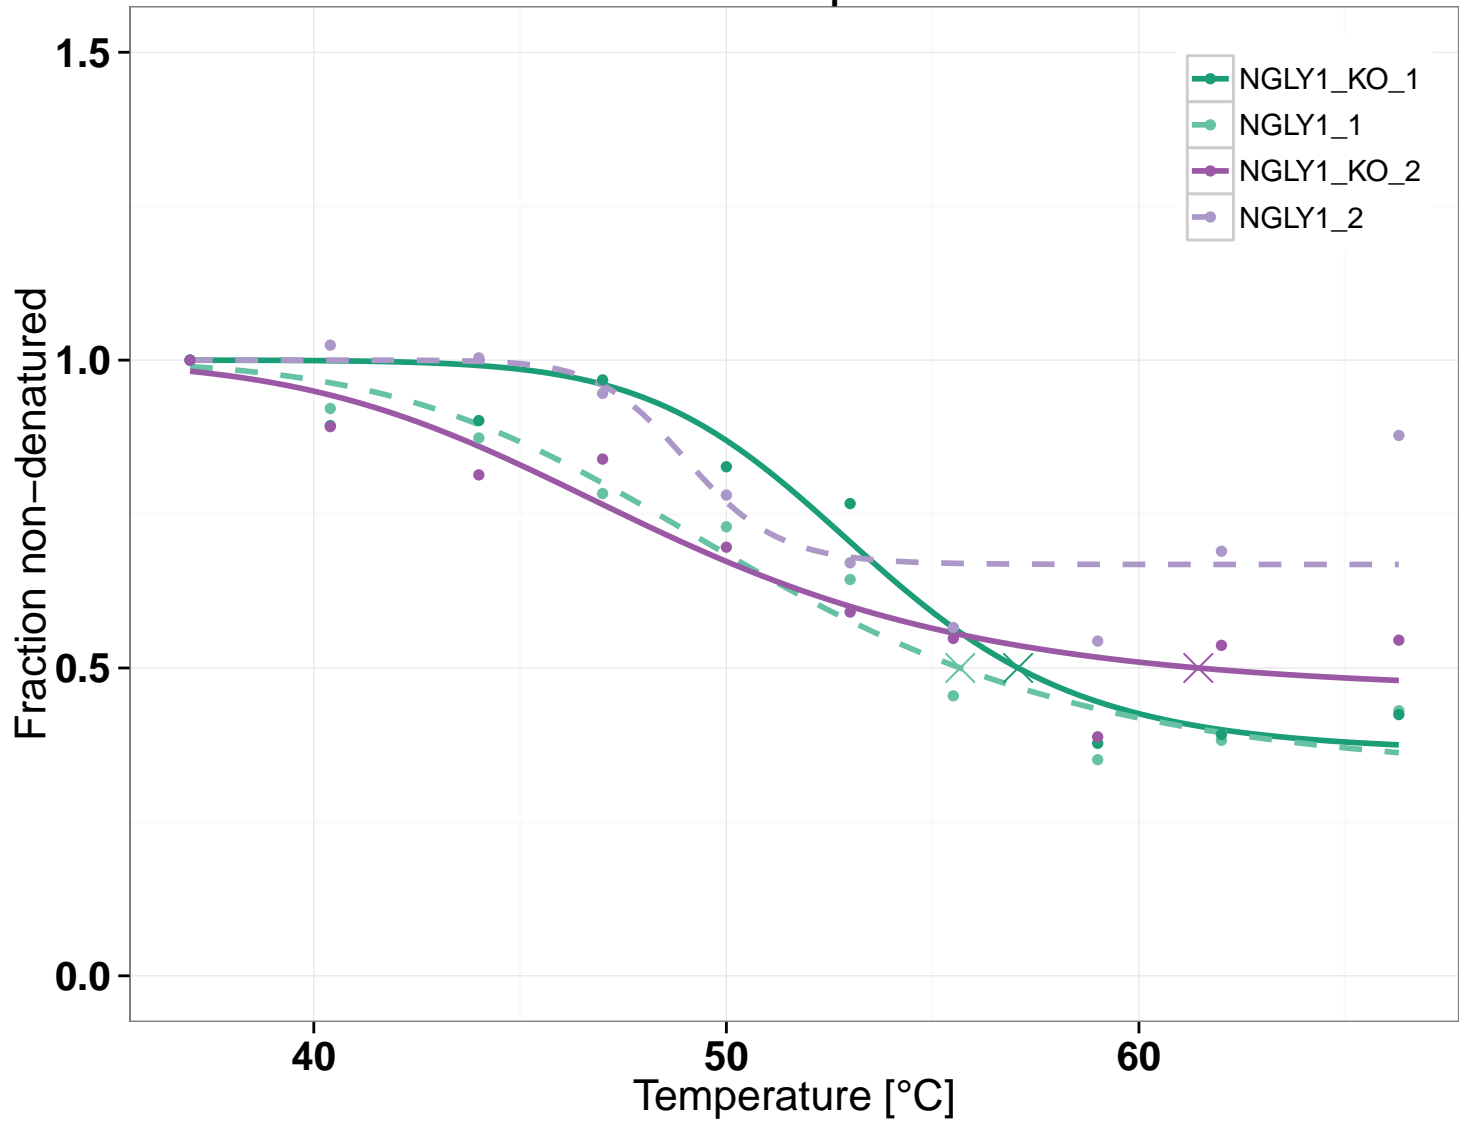

|            | meltPoint | slope  | plateau | R2   |
|------------|-----------|--------|---------|------|
| NGLY1_KO_1 | 57.07     | -0.06  | 0.36    | 0.94 |
| NGLY1_1    | 55.67     | -0.039 | 0.32    | 0.96 |
| NGLY1_KO_2 | 61.44     | -0.033 | 0.46    | 0.9  |
| NGLY1_2    | -         | -0.075 | 0.67    | 0.77 |

Supplement: Supplementary file 4873 [file 1]

# IPI00178431.12|RECQL

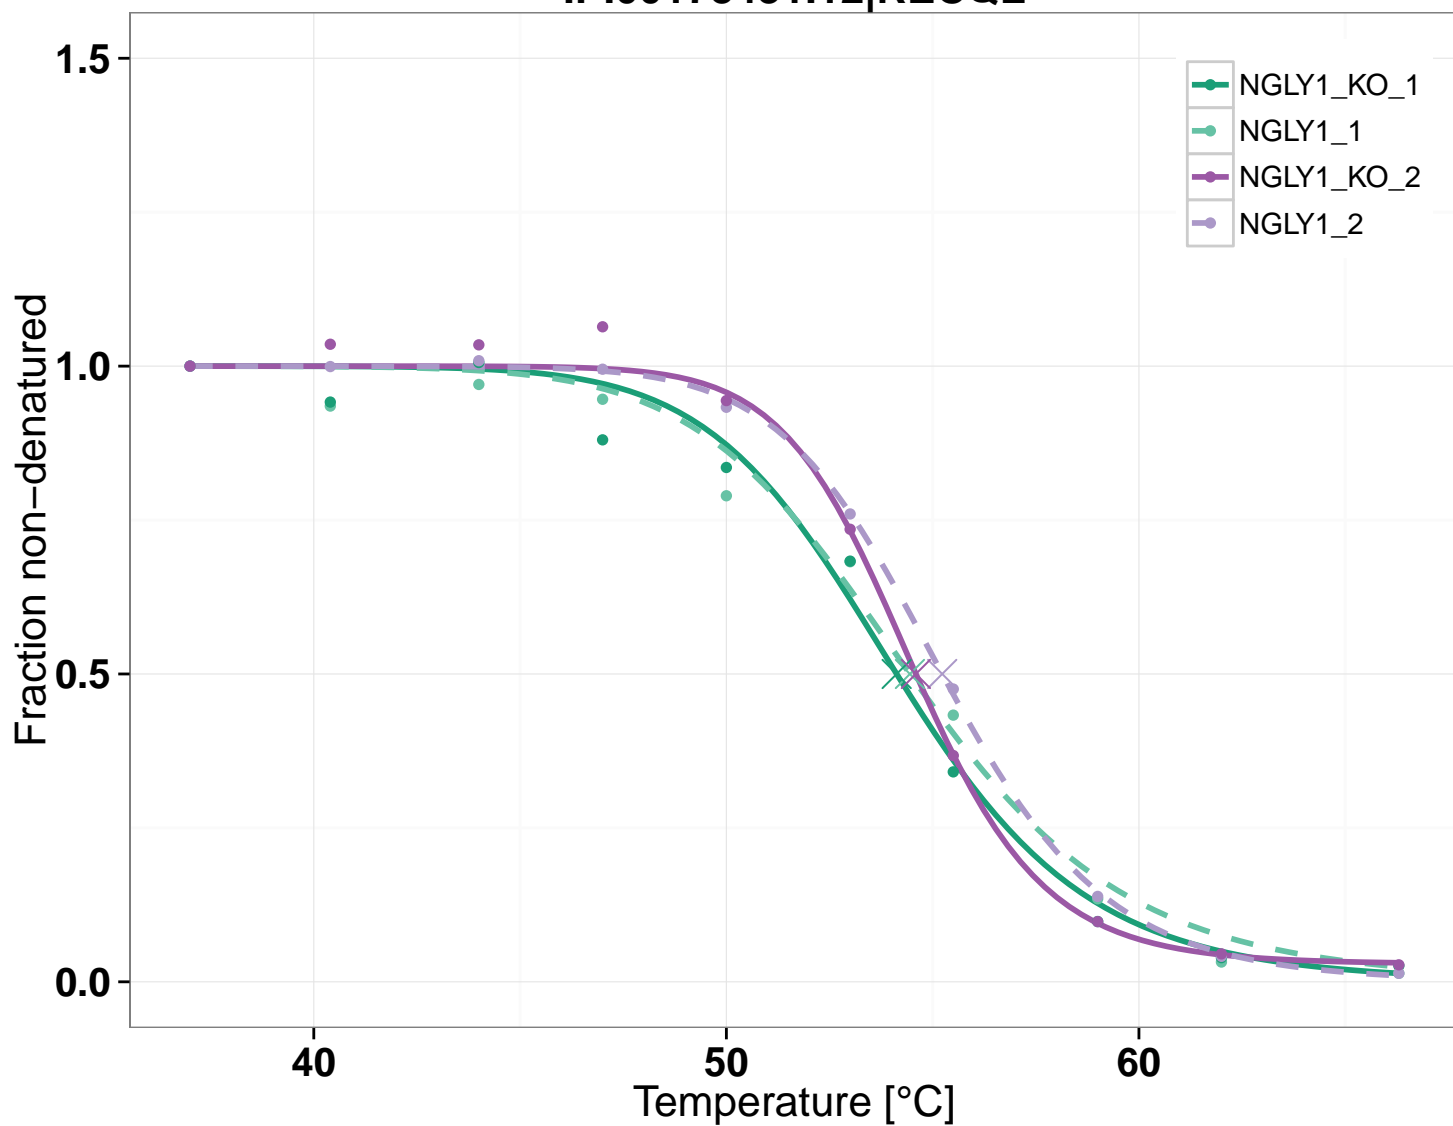

|            | meltPoint | slope  | plateau | R2   |
|------------|-----------|--------|---------|------|
| NGLY1_KO_1 | 54.13     | -0.11  | 0       | 0.99 |
| NGLY1_1    | 54.45     | -0.096 | 0       | 0.99 |
| NGLY1_KO_2 | 54.59     | -0.15  | 0.03    | 1    |
| NGLY1_2    | 55.23     | -0.13  | 0       | 1    |

Supplement: Supplementary file 4874 [file 1]

IPI00013723.3|PIN1

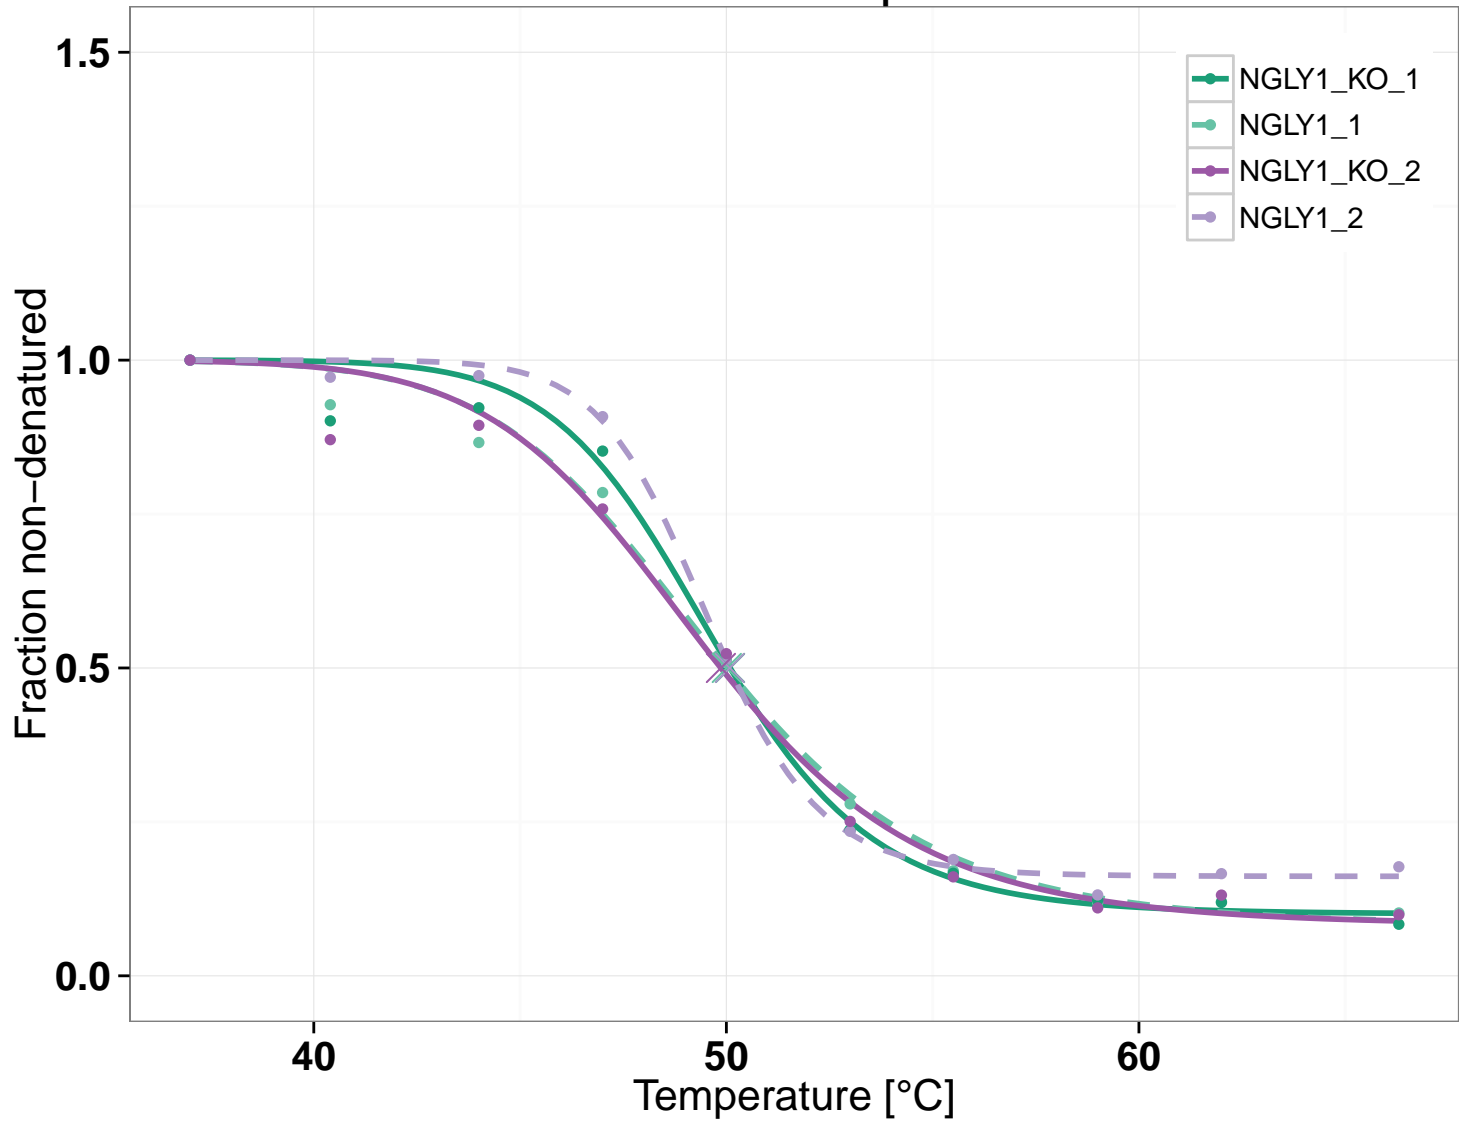

|            | meltPoint | slope  | plateau | R2   |
|------------|-----------|--------|---------|------|
| NGLY1_KO_1 | 50.09     | -0.12  | 0.1     | 0.99 |
| NGLY1_1    | 50.01     | -0.086 | 0.08    | 0.99 |
| NGLY1_KO_2 | 49.87     | -0.088 | 0.08    | 0.99 |
| NGLY1_2    | 50.08     | -0.16  | 0.16    | 1    |

Supplement: Supplementary file 4875 [file 1]

IPI00005132.3|GNL3L

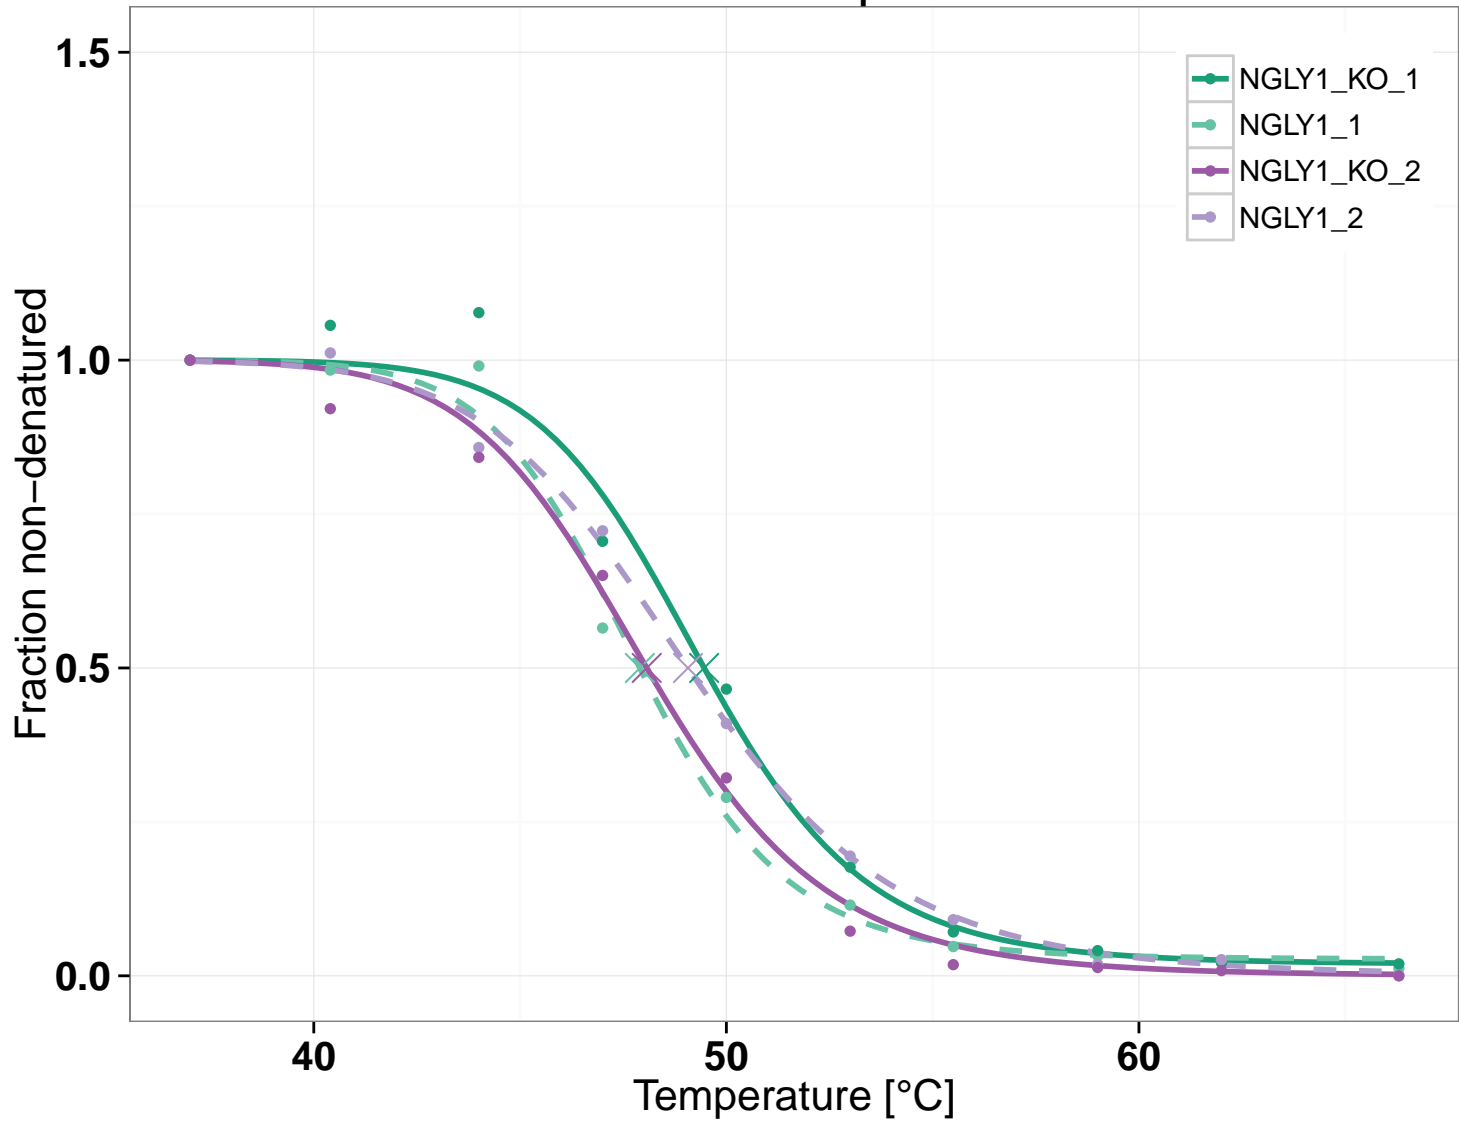

|            | meltPoint | slope  | plateau | R2   |
|------------|-----------|--------|---------|------|
| NGLY1_KO_1 | 49.46     | -0.12  | 0.02    | 0.99 |
| NGLY1_1    | 47.9      | -0.14  | 0.03    | 0.99 |
| NGLY1_KO_2 | 48.07     | -0.12  | 0       | 0.99 |
| NGLY1_2    | 49.07     | -0.099 | 0       | 1    |

Supplement: Supplementary file 4876 [file 1]

# IPI00022007.1|WASF1

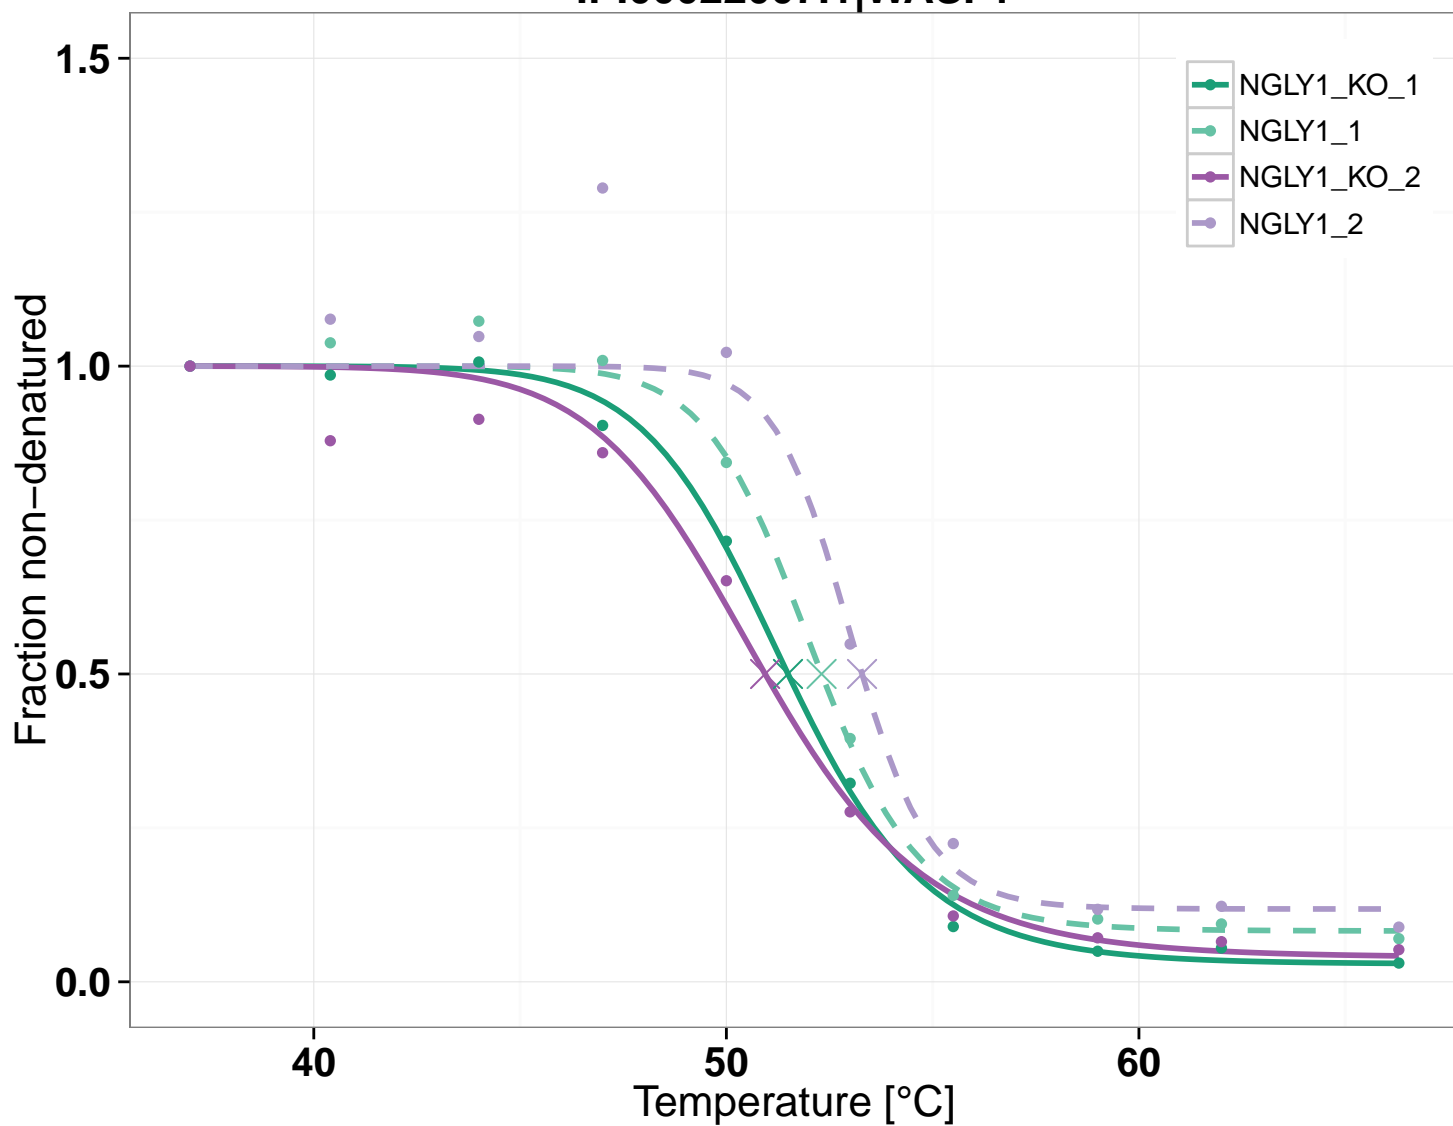

|            | meltPoint | slope | plateau | R2   |
|------------|-----------|-------|---------|------|
| NGLY1_KO_1 | 51.49     | -0.14 | 0.03    | 1    |
| NGLY1_1    | 52.31     | -0.18 | 0.08    | 1    |
| NGLY1_KO_2 | 50.94     | -0.12 | 0.04    | 0.98 |
| NGLY1_2    | 53.29     | -0.23 | 0.12    | 0.95 |

Supplement: Supplementary file 4877 [file 1]

# IPI00005264.1|PKP2

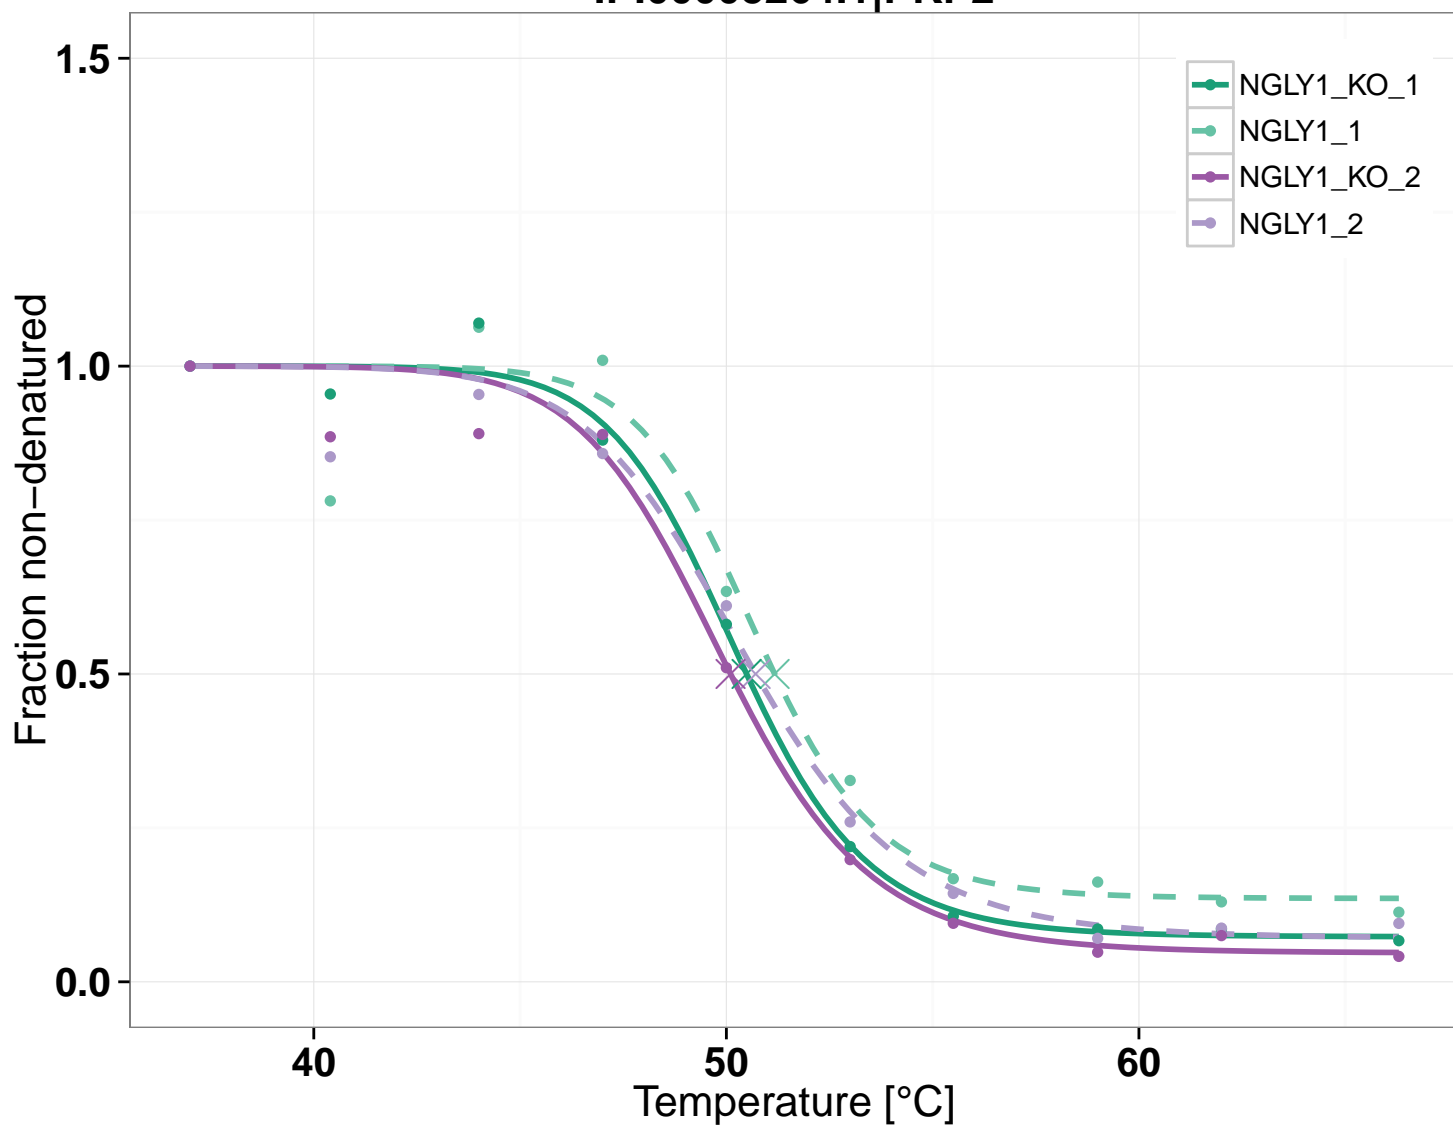

|            | meltPoint | slope | plateau | R2   |
|------------|-----------|-------|---------|------|
| NGLY1_KO_1 | 50.49     | -0.15 | 0.07    | 0.99 |
| NGLY1_1    | 51.17     | -0.15 | 0.14    | 0.96 |
| NGLY1_KO_2 | 50.1      | -0.14 | 0.05    | 0.99 |
| NGLY1_2    | 50.71     | -0.12 | 0.07    | 0.98 |

Supplement: Supplementary file 4878 [file 1]

IPI00430803.3|C2ORF79

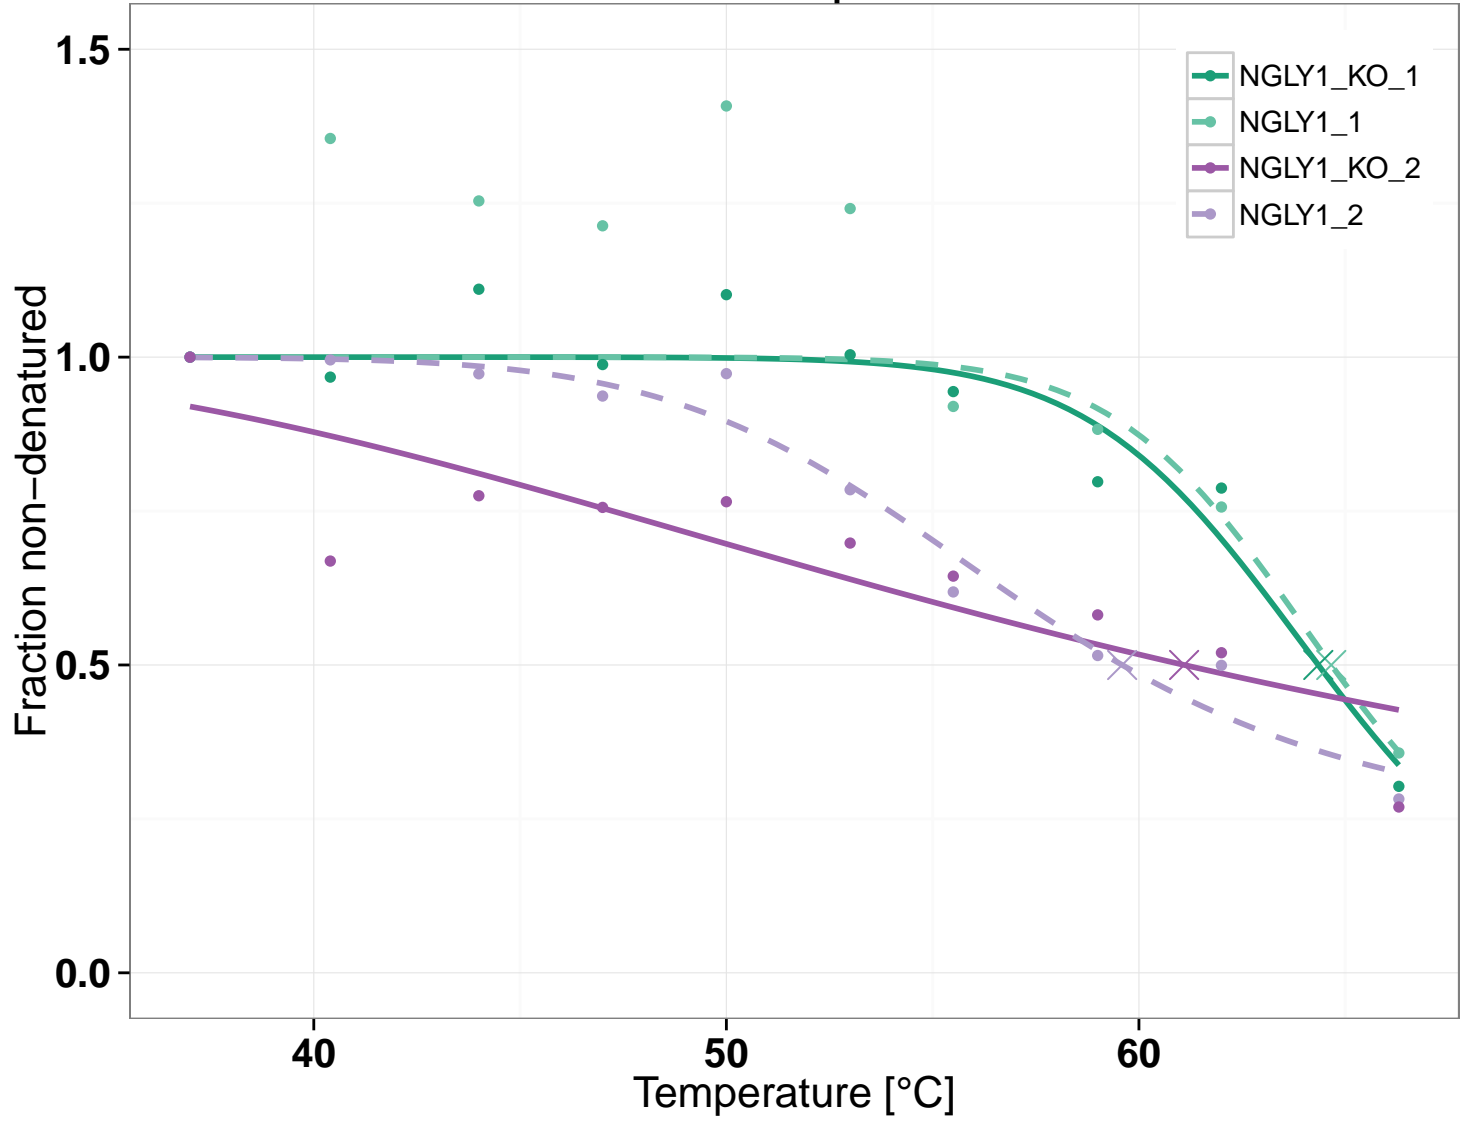

|            | meltPoint | slope  | plateau | R2   |
|------------|-----------|--------|---------|------|
| NGLY1_KO_1 | 64.35     | -0.09  | 0       | 0.92 |
| NGLY1_1    | 64.66     | -0.095 | 0.06    | 0.5  |
| NGLY1_KO_2 | 61.1      | -0.019 | 0       | 0.73 |
| NGLY1_2    | 59.59     | -0.047 | 0.22    | 0.97 |

Supplement: Supplementary file 4879 [file 1]

# IPI00019427.4|EXOC1

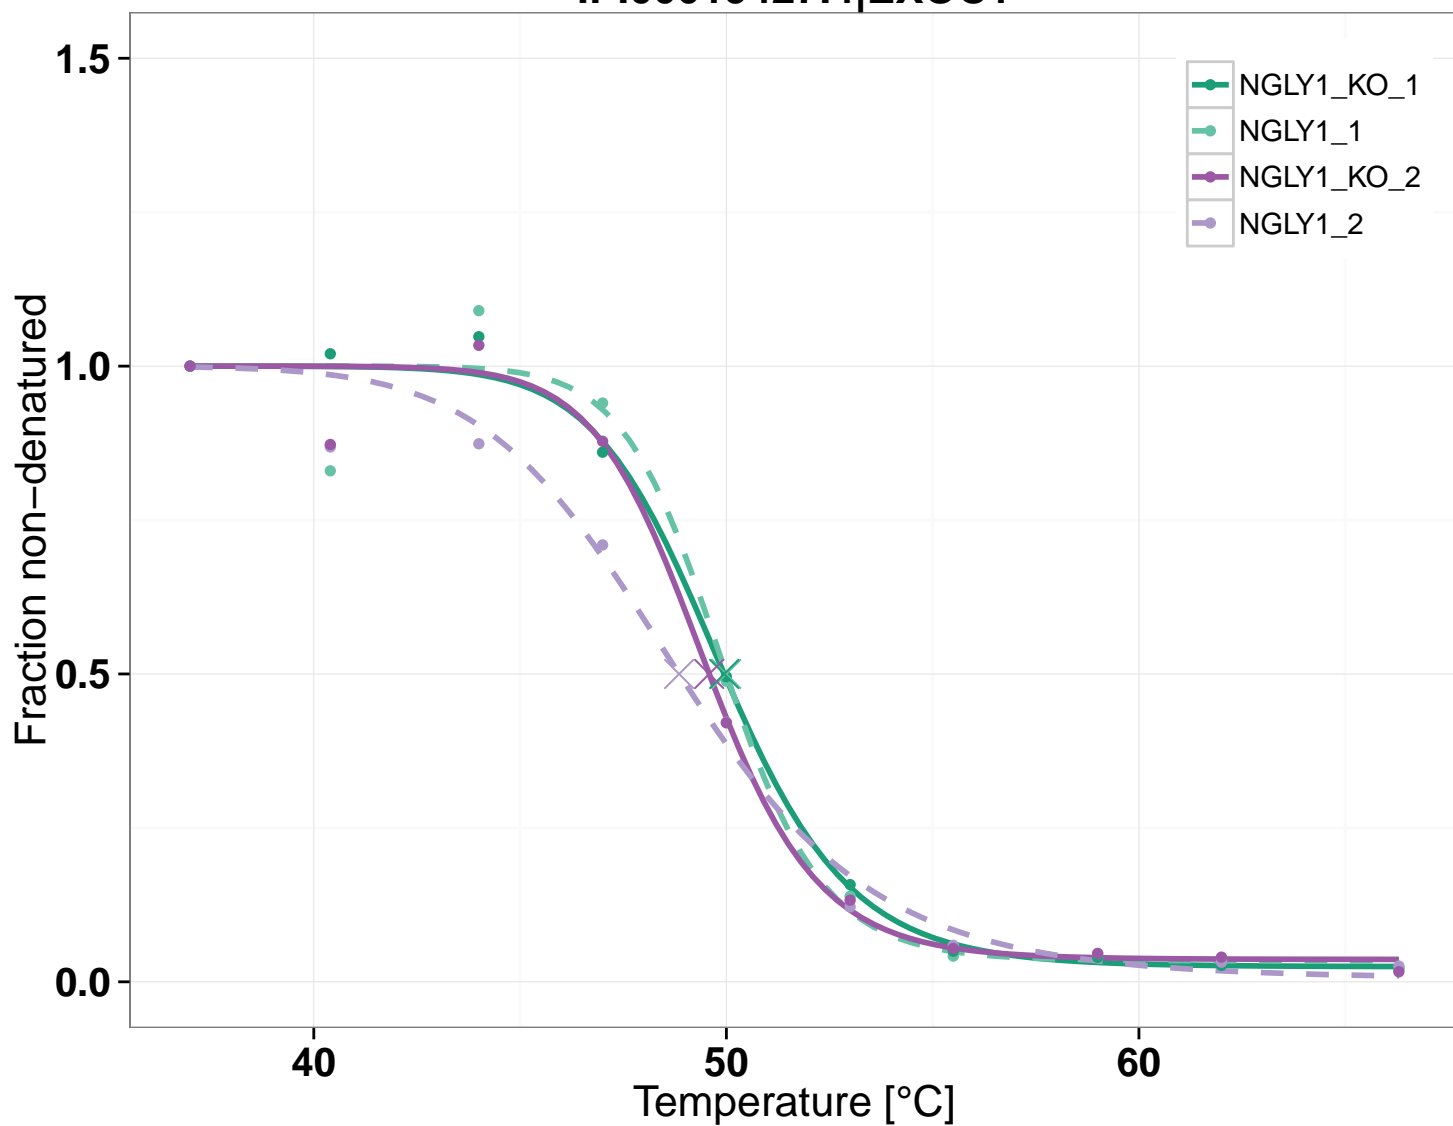

|            | meltPoint | slope | plateau | R2   |
|------------|-----------|-------|---------|------|
| NGLY1_KO_1 | 49.95     | -0.16 | 0.02    | 1    |
| NGLY1_1    | 50        | -0.2  | 0.03    | 0.98 |
| NGLY1_KO_2 | 49.58     | -0.18 | 0.04    | 0.99 |
| NGLY1_2    | 48.86     | -0.1  | 0       | 0.99 |

Supplement: Supplementary file 4880 [file 1]

# IPI00029591.1|SELPLG

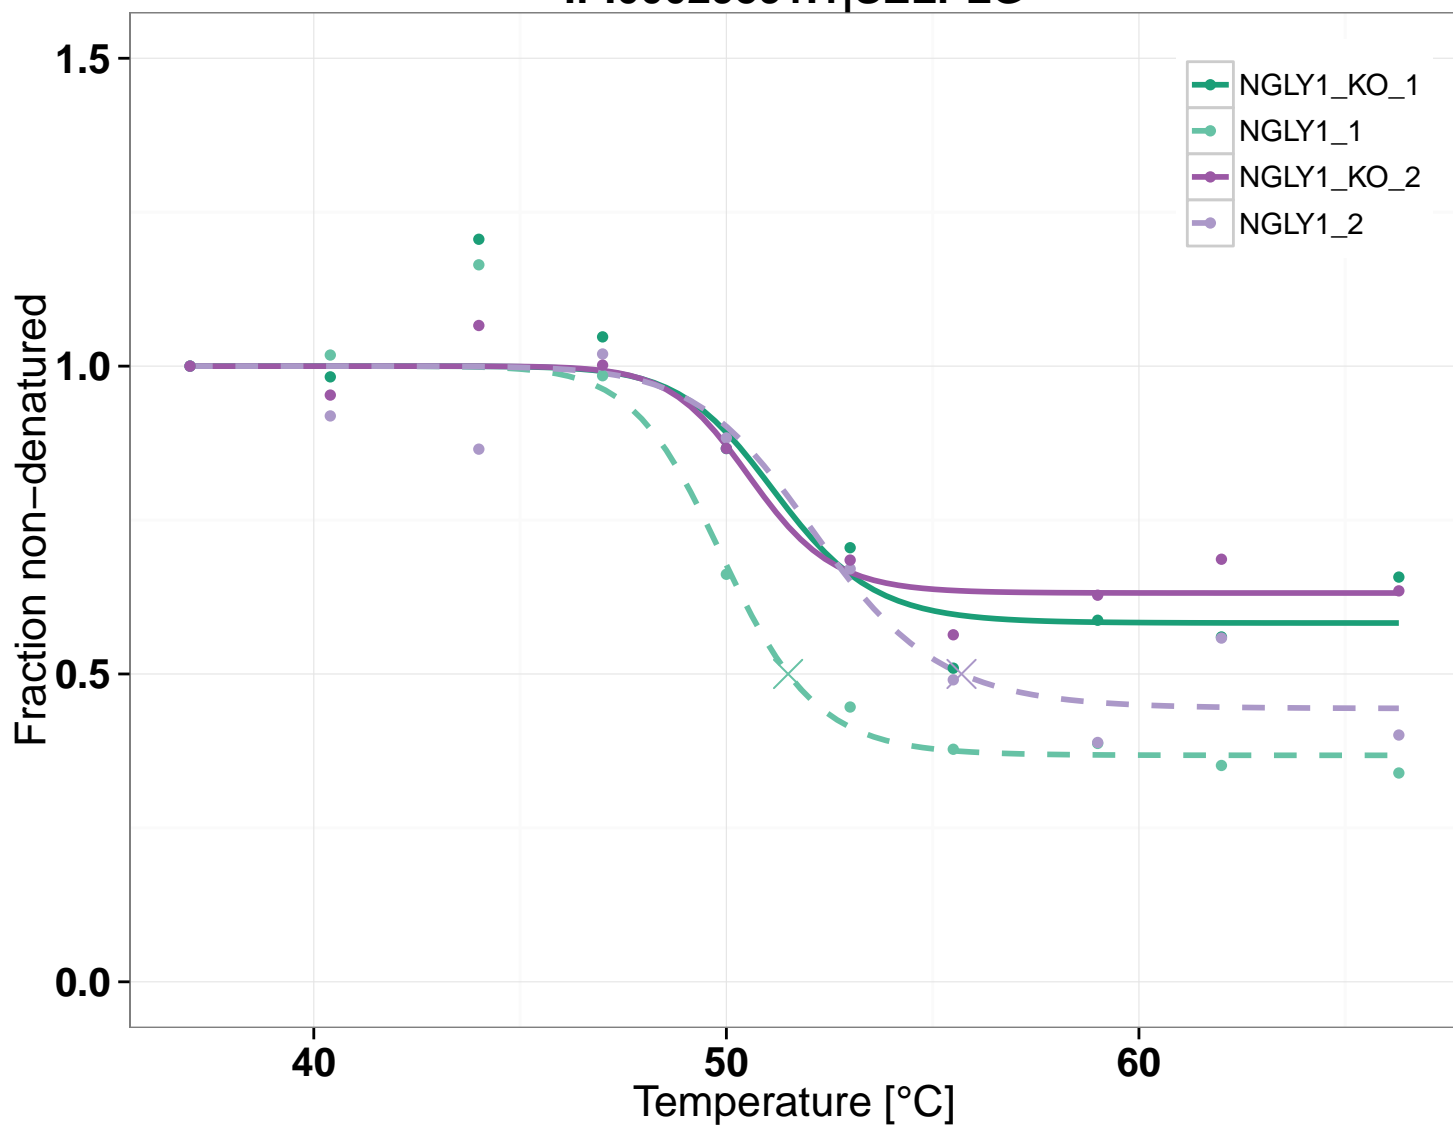

|            | meltPoint | slope  | plateau | R2   |
|------------|-----------|--------|---------|------|
| NGLY1_KO_1 | -         | -0.089 | 0.58    | 0.88 |
| NGLY1_1    | 51.5      | -0.14  | 0.37    | 0.97 |
| NGLY1_KO_2 | -         | -0.093 | 0.63    | 0.95 |
| NGLY1_2    | 55.7      | -0.093 | 0.44    | 0.92 |

Supplement: Supplementary file 4881 [file 1]

IPI00440580.3|MANEAL

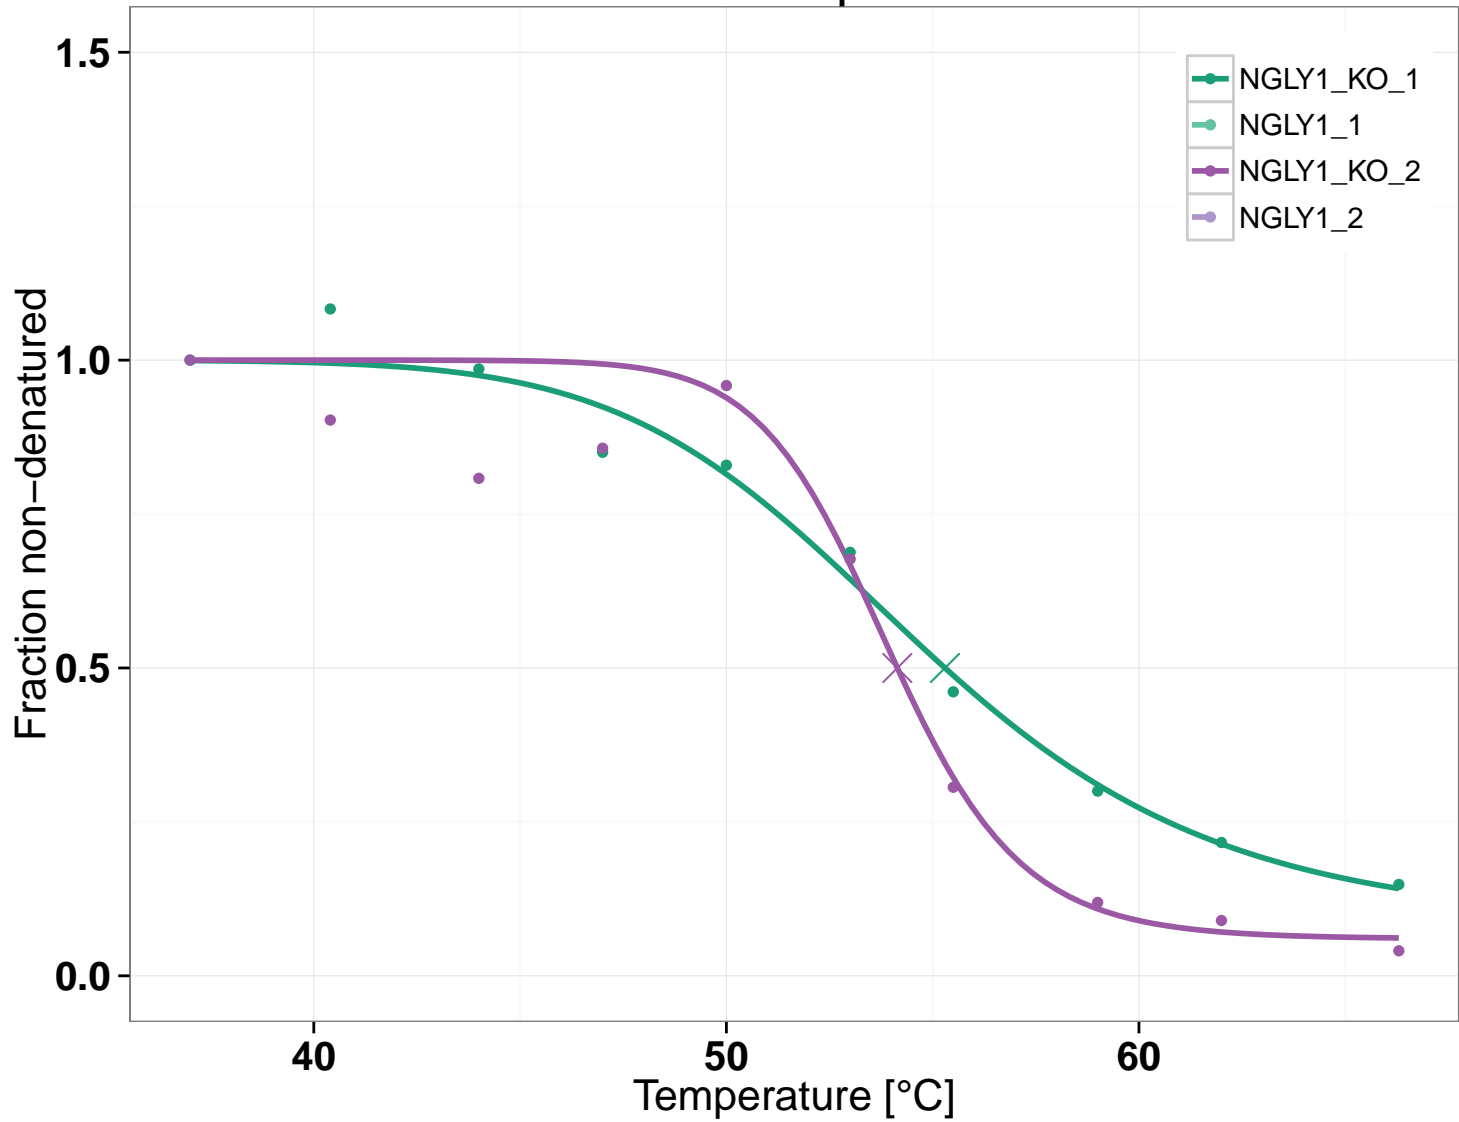

|            | meltPoint | slope  | plateau | R2   |
|------------|-----------|--------|---------|------|
| NGLY1_KO_1 | 55.3      | -0.064 | 0.08    | 0.99 |
| NGLY1_1    | -         | -      | -       | -    |
| NGLY1_KO_2 | 54.14     | -0.15  | 0.06    | 0.95 |
| NGLY1_2    | -         | -      | -       | -    |

Supplement: Supplementary file 4882 [file 1]

IPI00061780.1|ITCH

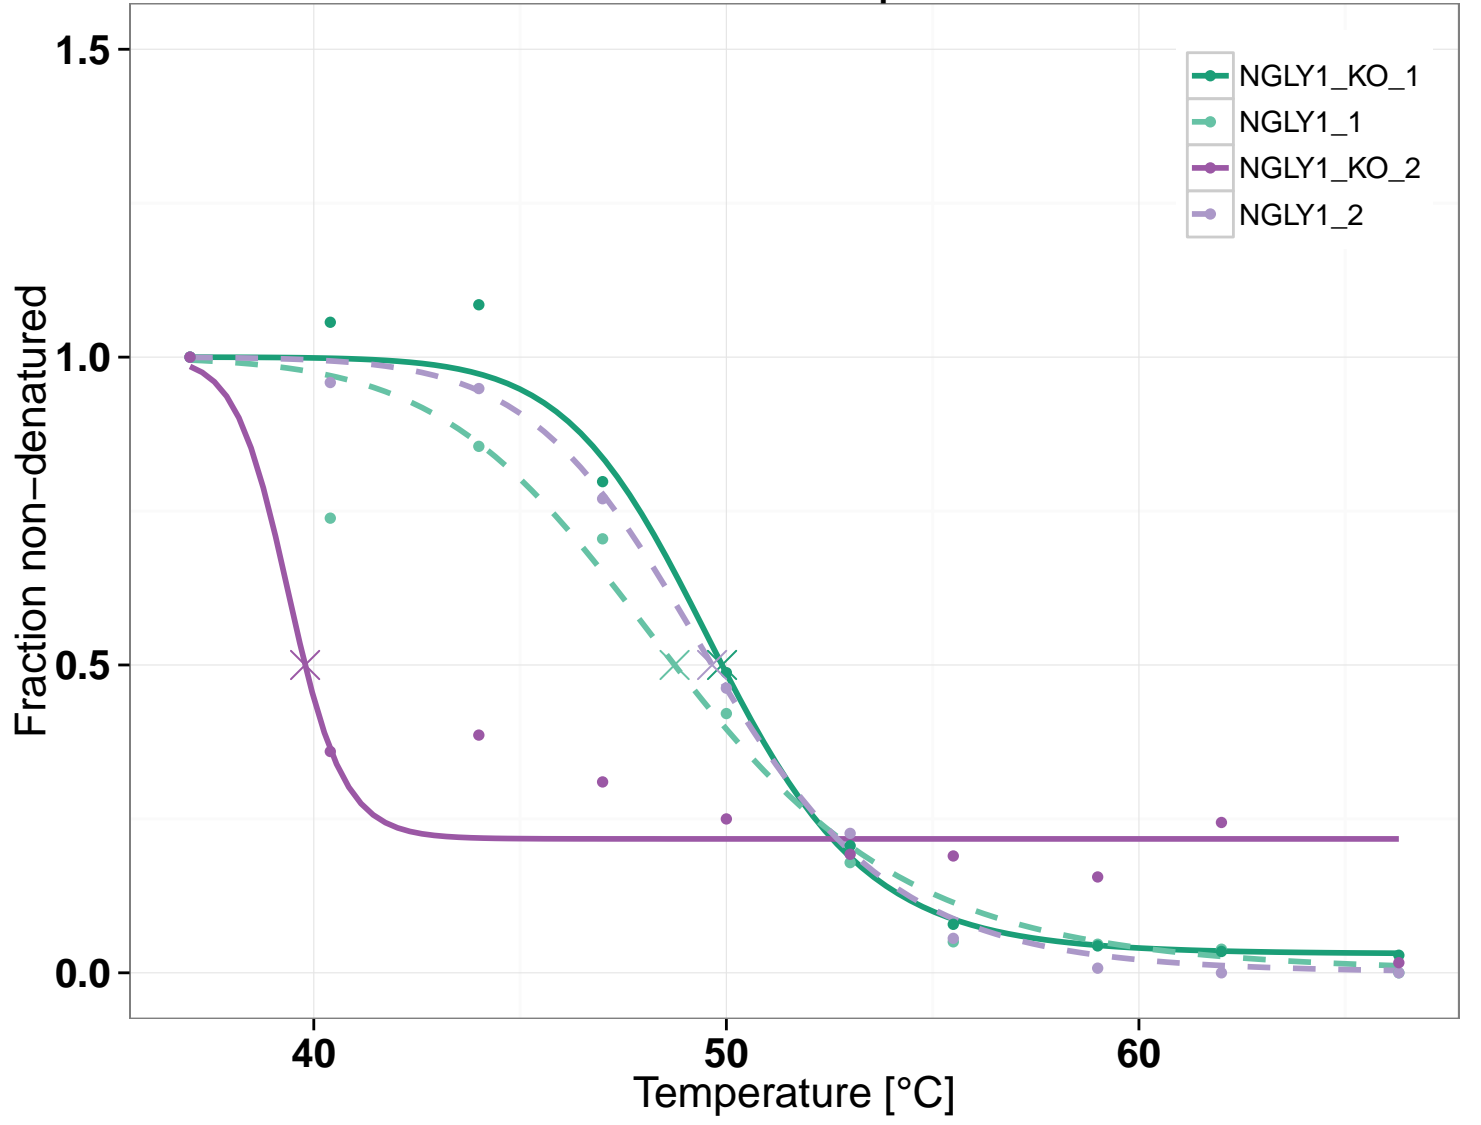

|            | meltPoint | slope  | plateau | R2   |
|------------|-----------|--------|---------|------|
| NGLY1_KO_1 | 49.9      | -0.13  | 0.03    | 0.99 |
| NGLY1_1    | 48.74     | -0.088 | 0       | 0.95 |
| NGLY1_KO_2 | 39.79     | -0.3   | 0.22    | 0.87 |
| NGLY1_2    | 49.65     | -0.11  | 0       | 1    |

Supplement: Supplementary file 4883 [file 1]

IPI00165995.6|SFRS18

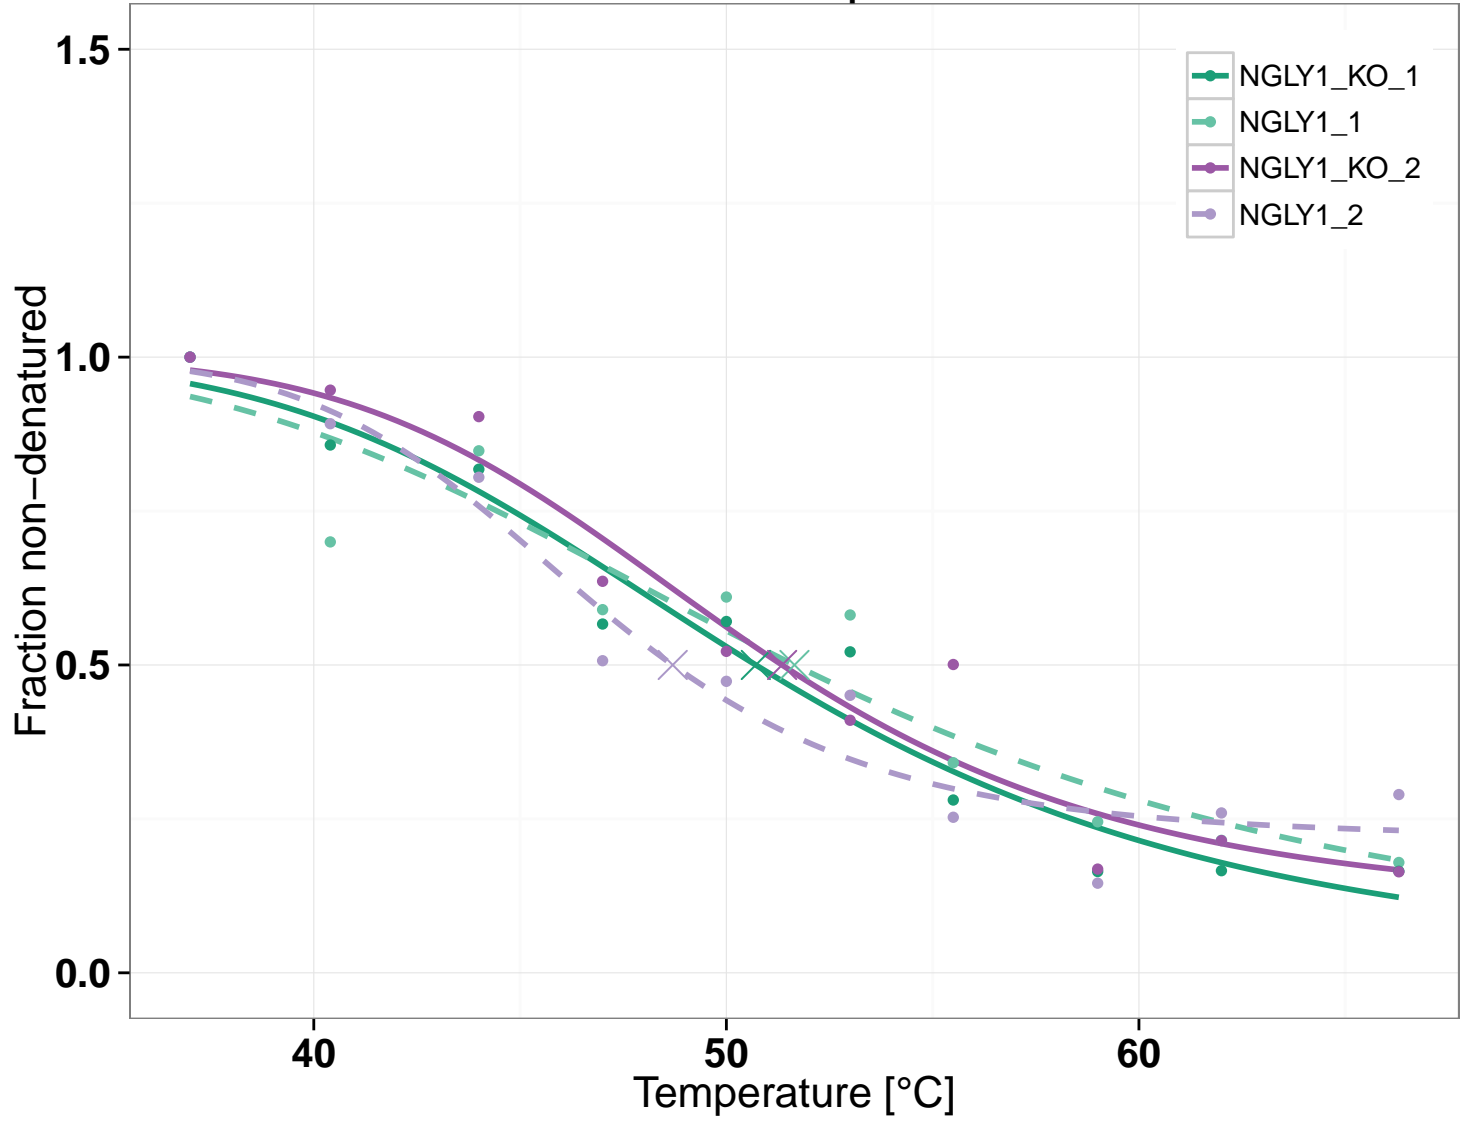

|            | meltPoint | slope  | plateau | R2   |
|------------|-----------|--------|---------|------|
| NGLY1_KO_1 | 50.71     | -0.044 | 0       | 0.96 |
| NGLY1_1    | 51.65     | -0.036 | 0       | 0.9  |
| NGLY1_KO_2 | 51.35     | -0.048 | 0.1     | 0.95 |
| NGLY1_2    | 48.7      | -0.058 | 0.22    | 0.95 |

Supplement: Supplementary file 4884 [file 1]

IPI00298860.5|LTF

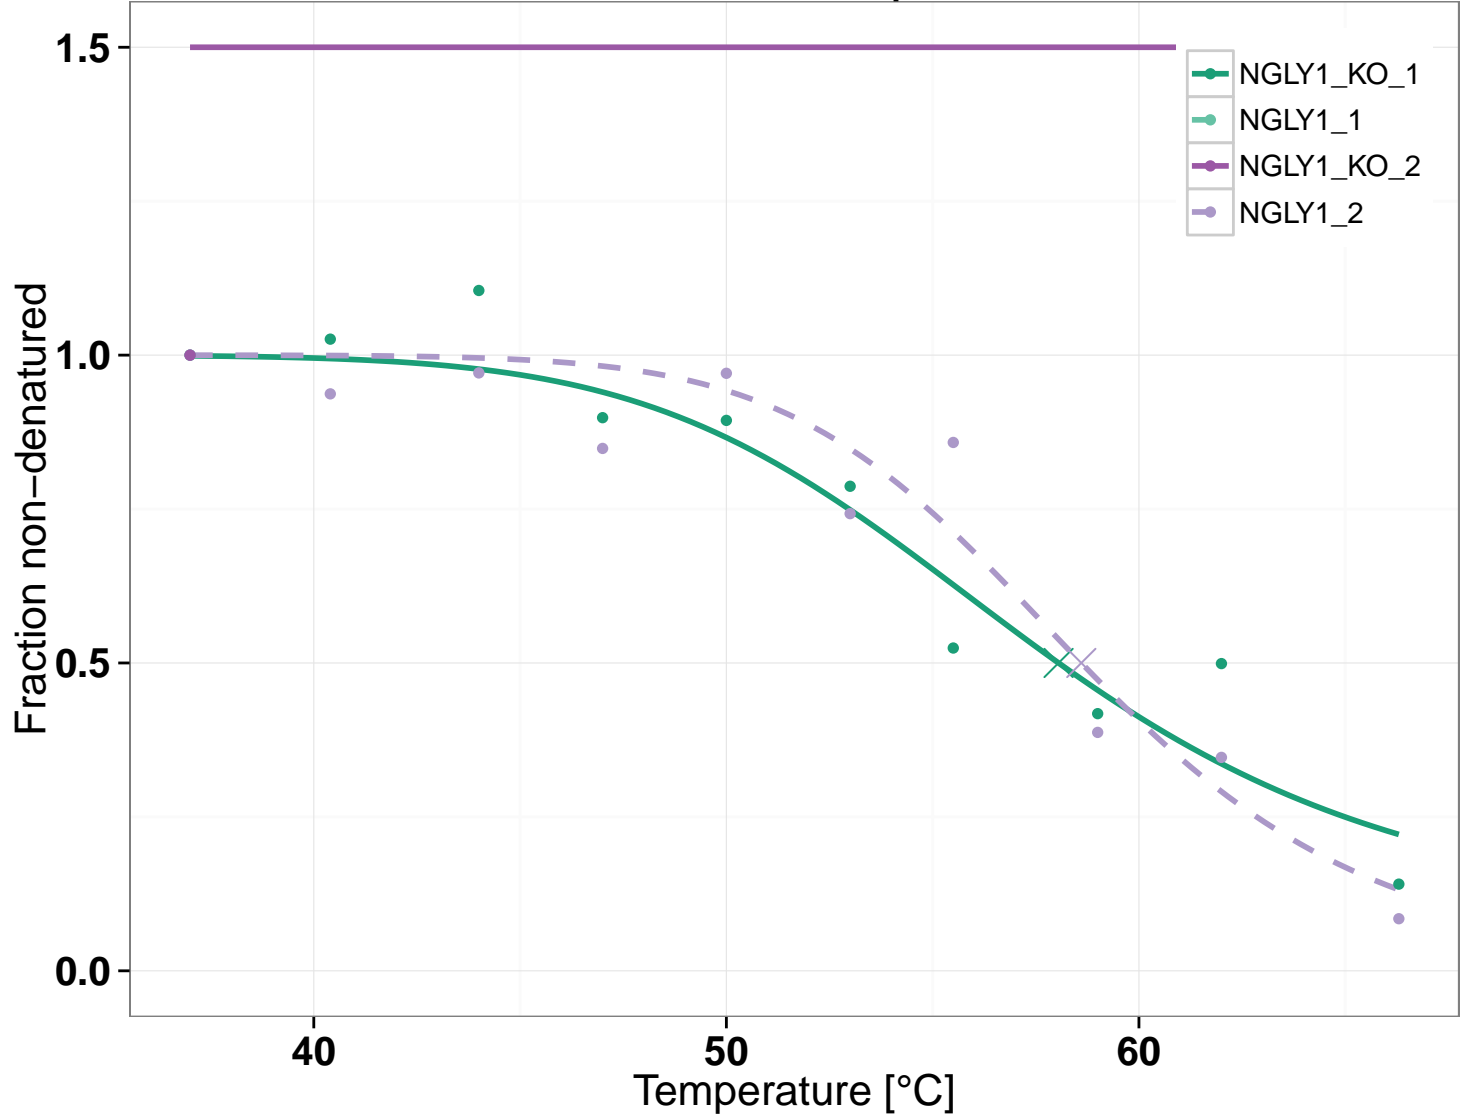

|            | meltPoint | slope  | plateau | R2   |
|------------|-----------|--------|---------|------|
| NGLY1_KO_1 | 58.05     | -0.051 | 0.07    | 0.93 |
| NGLY1_1    | -         | -      | -       | -    |
| NGLY1_KO_2 | -         | -      | 1.5     | -2.4 |
| NGLY1_2    | 58.6      | -0.07  | 0       | 0.93 |

Supplement: Supplementary file 4885 [file 1]

IPI00020508.1|TRMT1

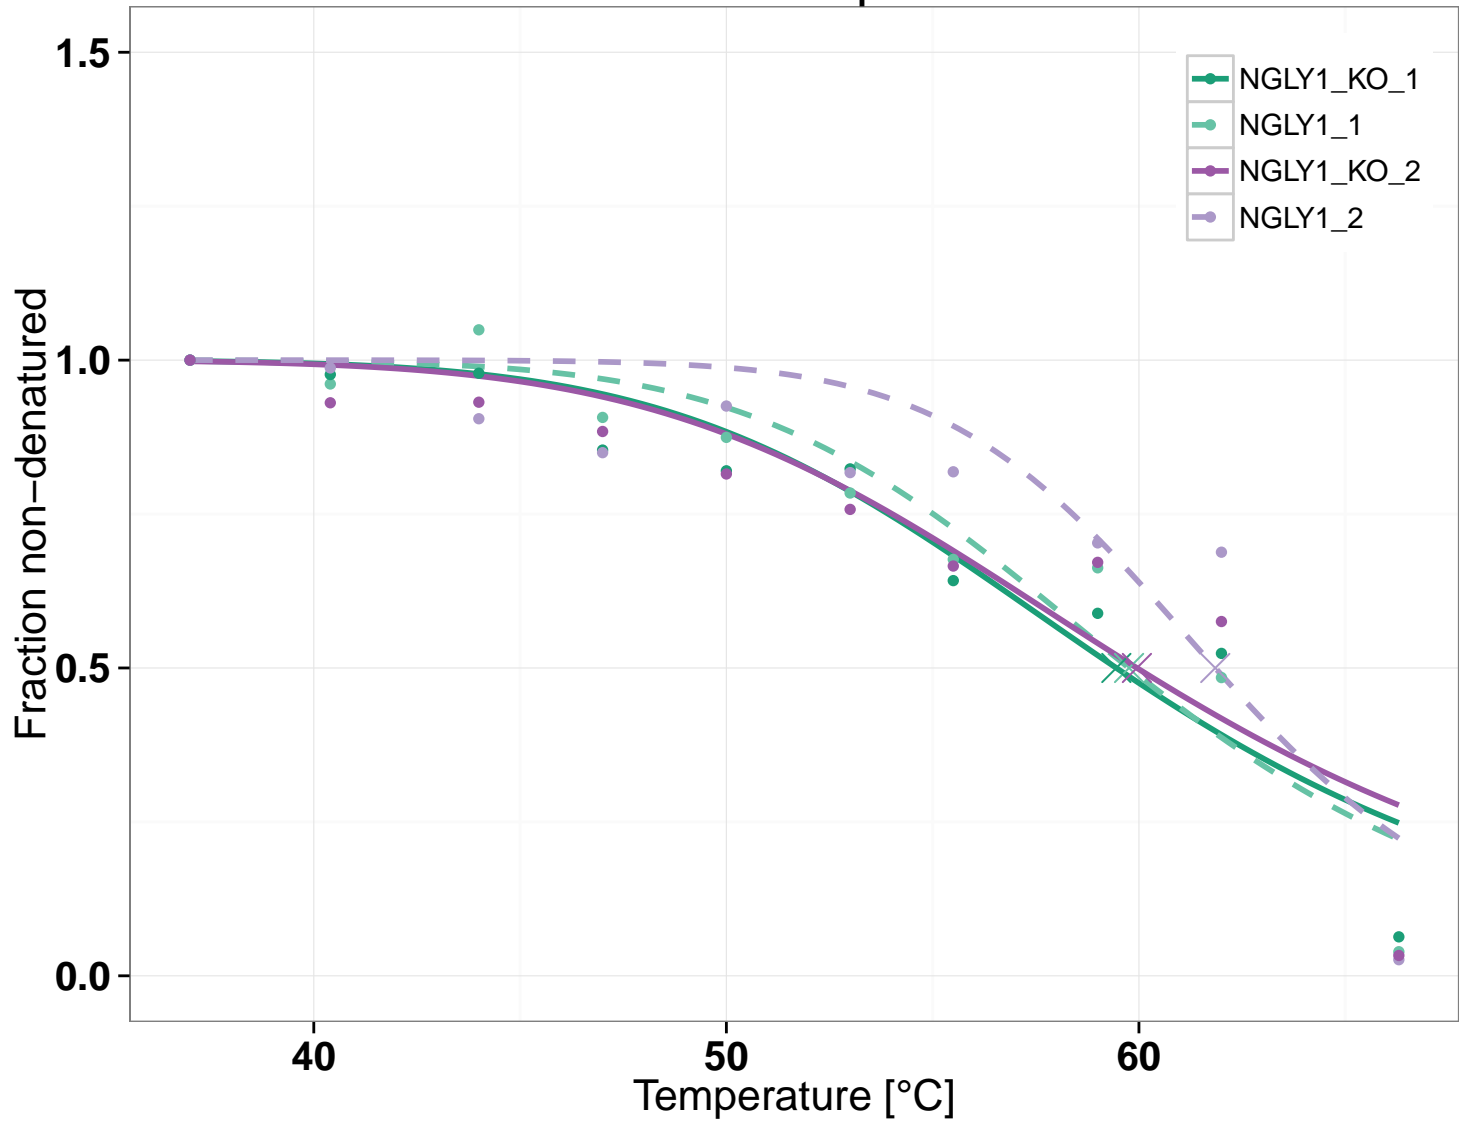

|            | meltPoint | slope  | plateau | R2   |
|------------|-----------|--------|---------|------|
| NGLY1_KO_1 | 59.45     | -0.047 | 0       | 0.9  |
| NGLY1_1    | 59.76     | -0.055 | 0       | 0.91 |
| NGLY1_KO_2 | 59.95     | -0.043 | 0       | 0.83 |
| NGLY1_2    | 61.85     | -0.076 | 0       | 0.81 |

Supplement: Supplementary file 4886 [file 1]

# IPI00025817.2|CCND3

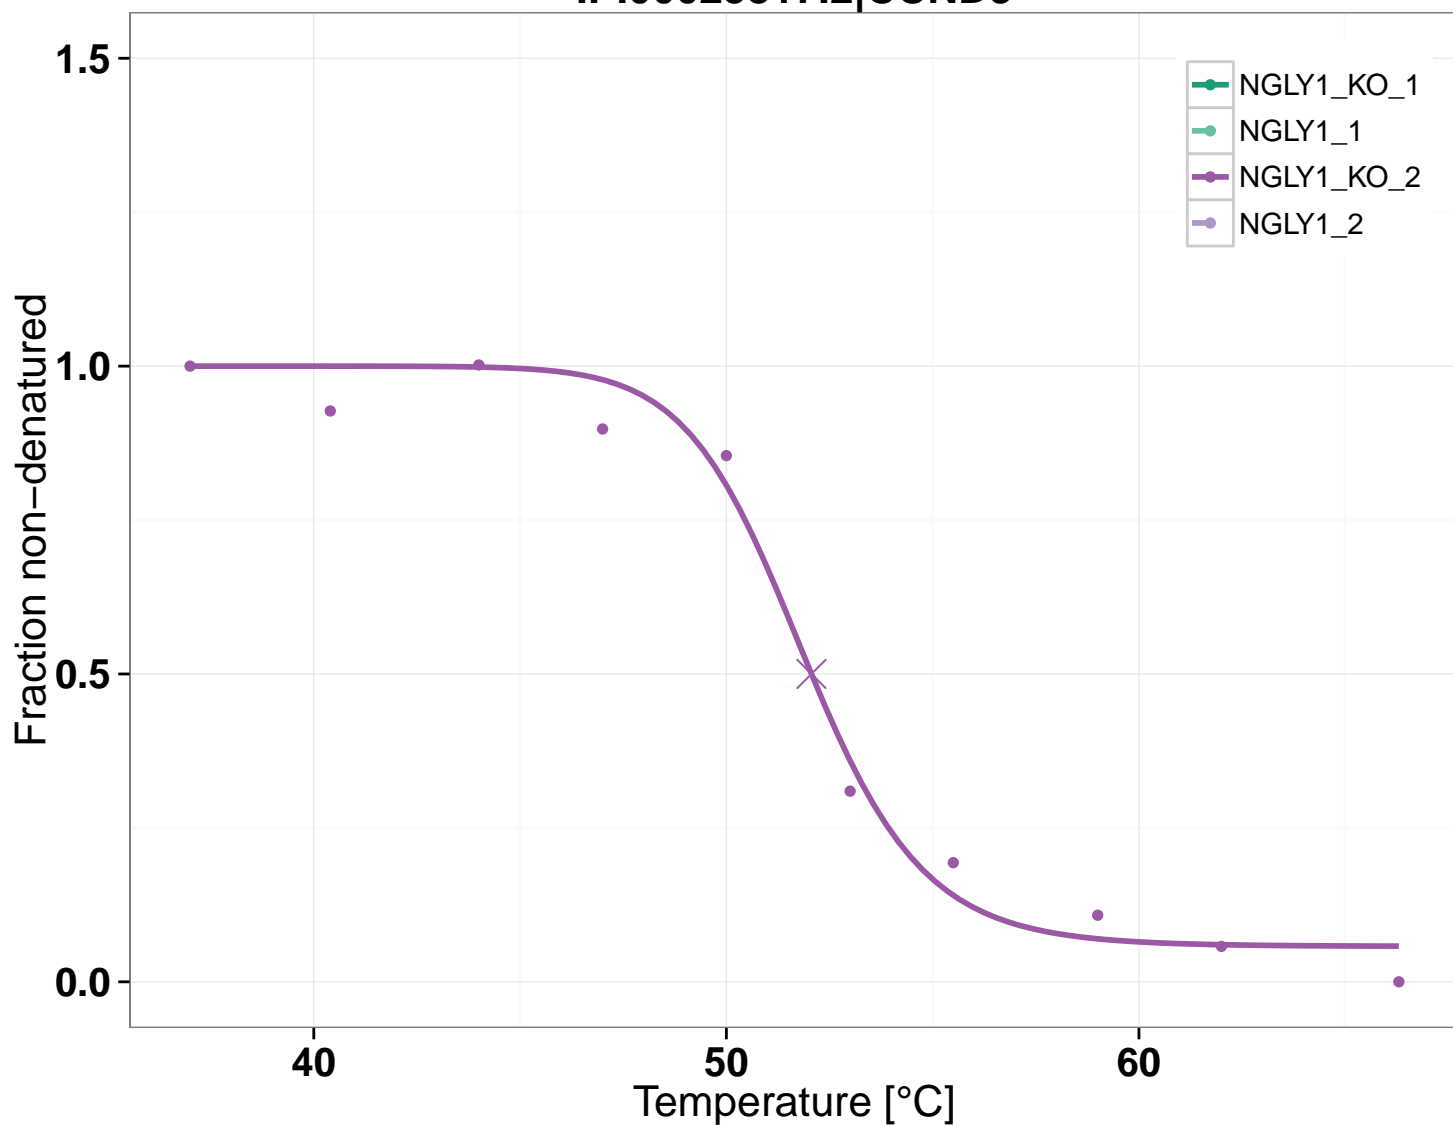

|            | meltPoint | slope | plateau | R2   |
|------------|-----------|-------|---------|------|
| NGLY1_KO_1 | —         | —     | —       | —    |
| NGLY1_1    | —         | —     | —       | —    |
| NGLY1_KO_2 | 52.06     | -0.16 | 0.06    | 0.99 |
| NGLY1_2    | —         | —     | —       | —    |

Supplement: Supplementary file 4887 [file 1]

# IPI00294472.3|TMED5

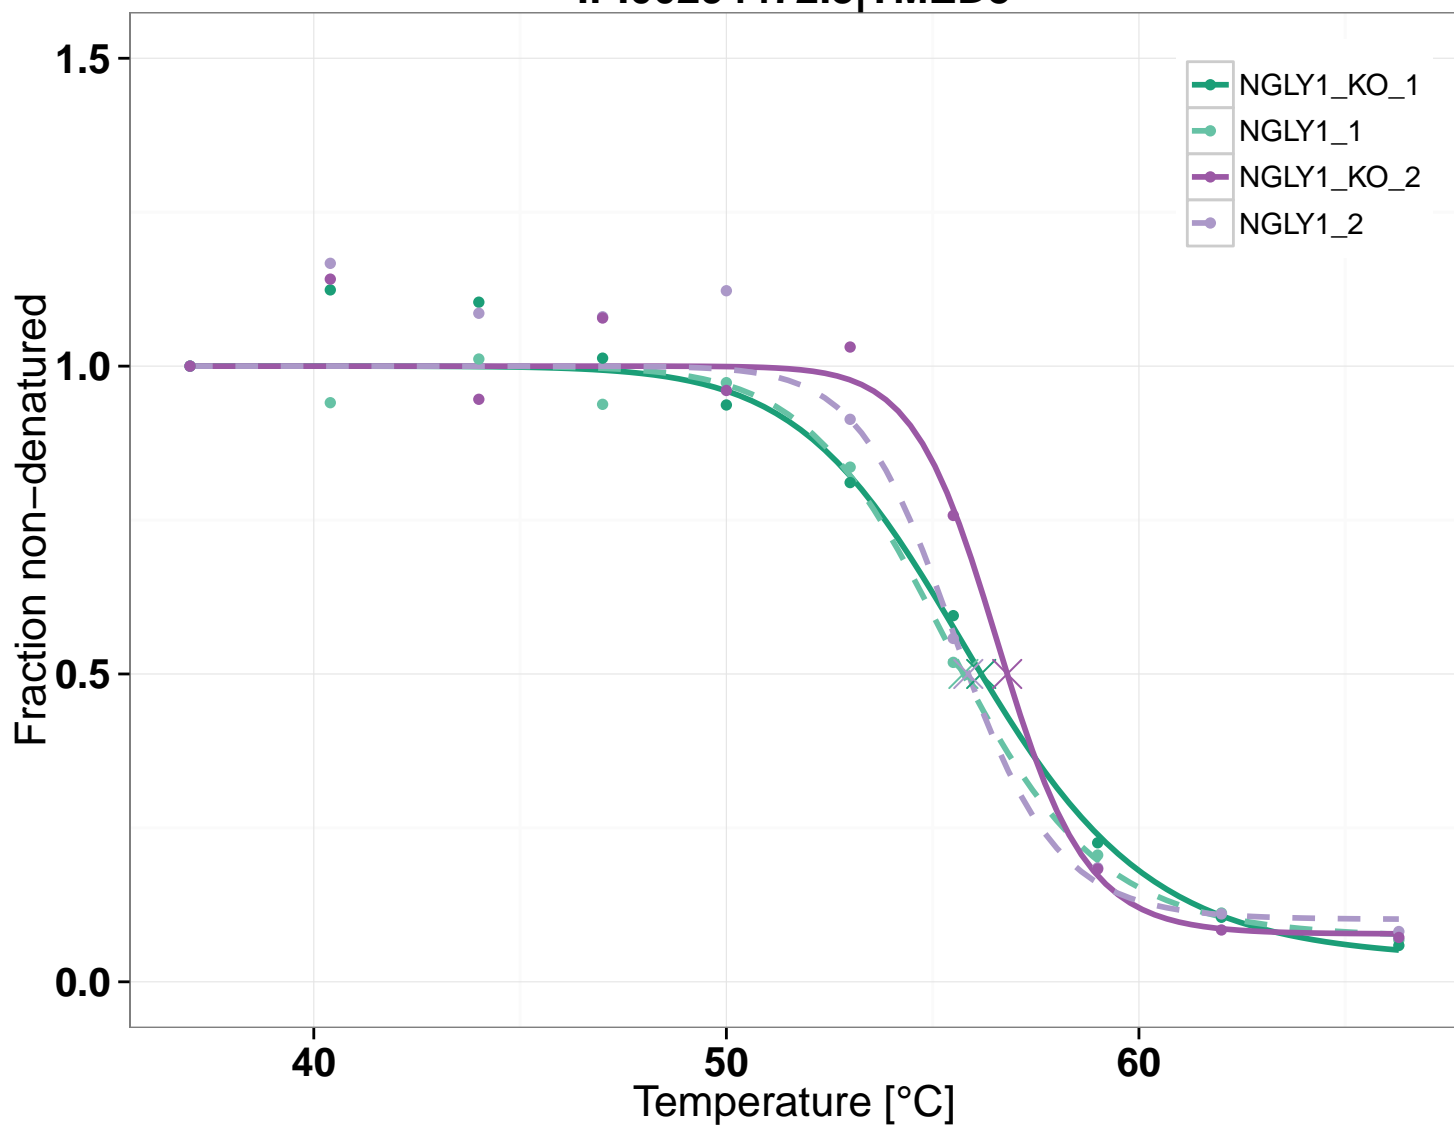

|            | meltPoint | slope | plateau | R2   |
|------------|-----------|-------|---------|------|
| NGLY1_KO_1 | 56.18     | -0.11 | 0.03    | 0.98 |
| NGLY1_1    | 55.75     | -0.13 | 0.07    | 0.99 |
| NGLY1_KO_2 | 56.81     | -0.22 | 0.08    | 0.98 |
| NGLY1_2    | 55.86     | -0.19 | 0.1     | 0.97 |

Supplement: Supplementary file 4888 [file 1]

IPI00450071.5|TSEN15

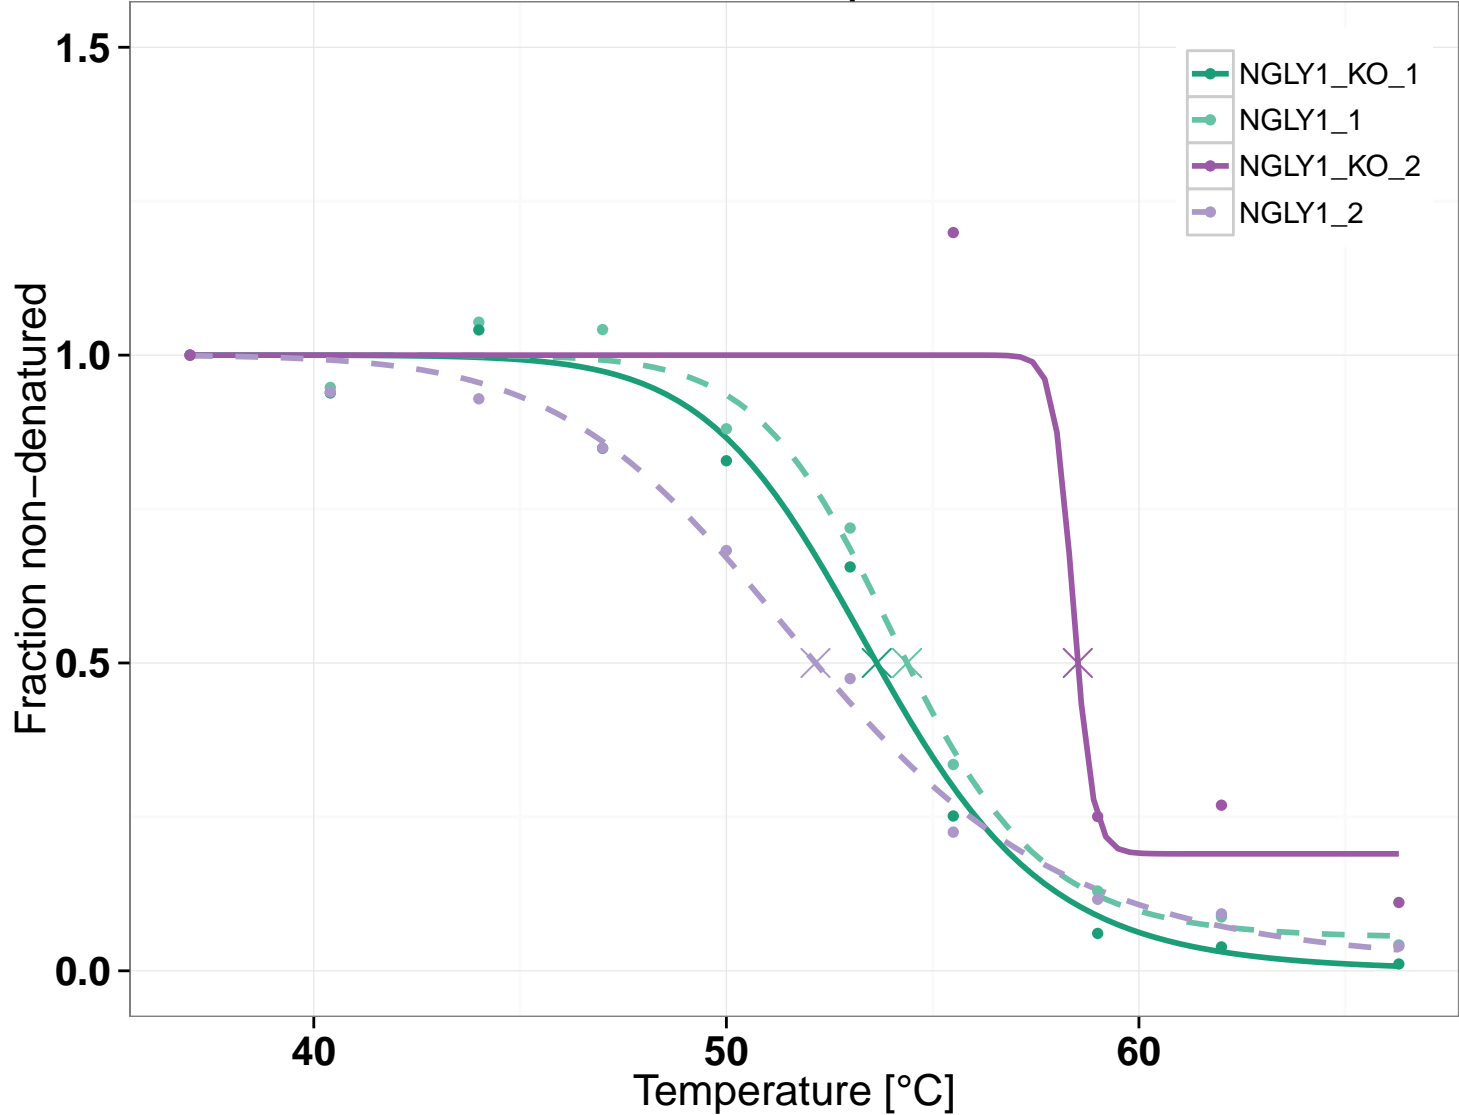

|            | meltPoint | slope | plateau | R2    |
|------------|-----------|-------|---------|-------|
| NGLY1_KO_1 | 53.64     | -0.12 | 0       | 0.98  |
| NGLY1_1    | 54.38     | -0.14 | 0.05    | 0.99  |
| NGLY1_KO_2 | 58.52     | -0.87 | 0.19    | -0.42 |
| NGLY1_2    | 52.16     | -0.08 | 0.01    | 0.99  |

Supplement: Supplementary file 4889 [file 1]

IPI00032439.1|POLR1D

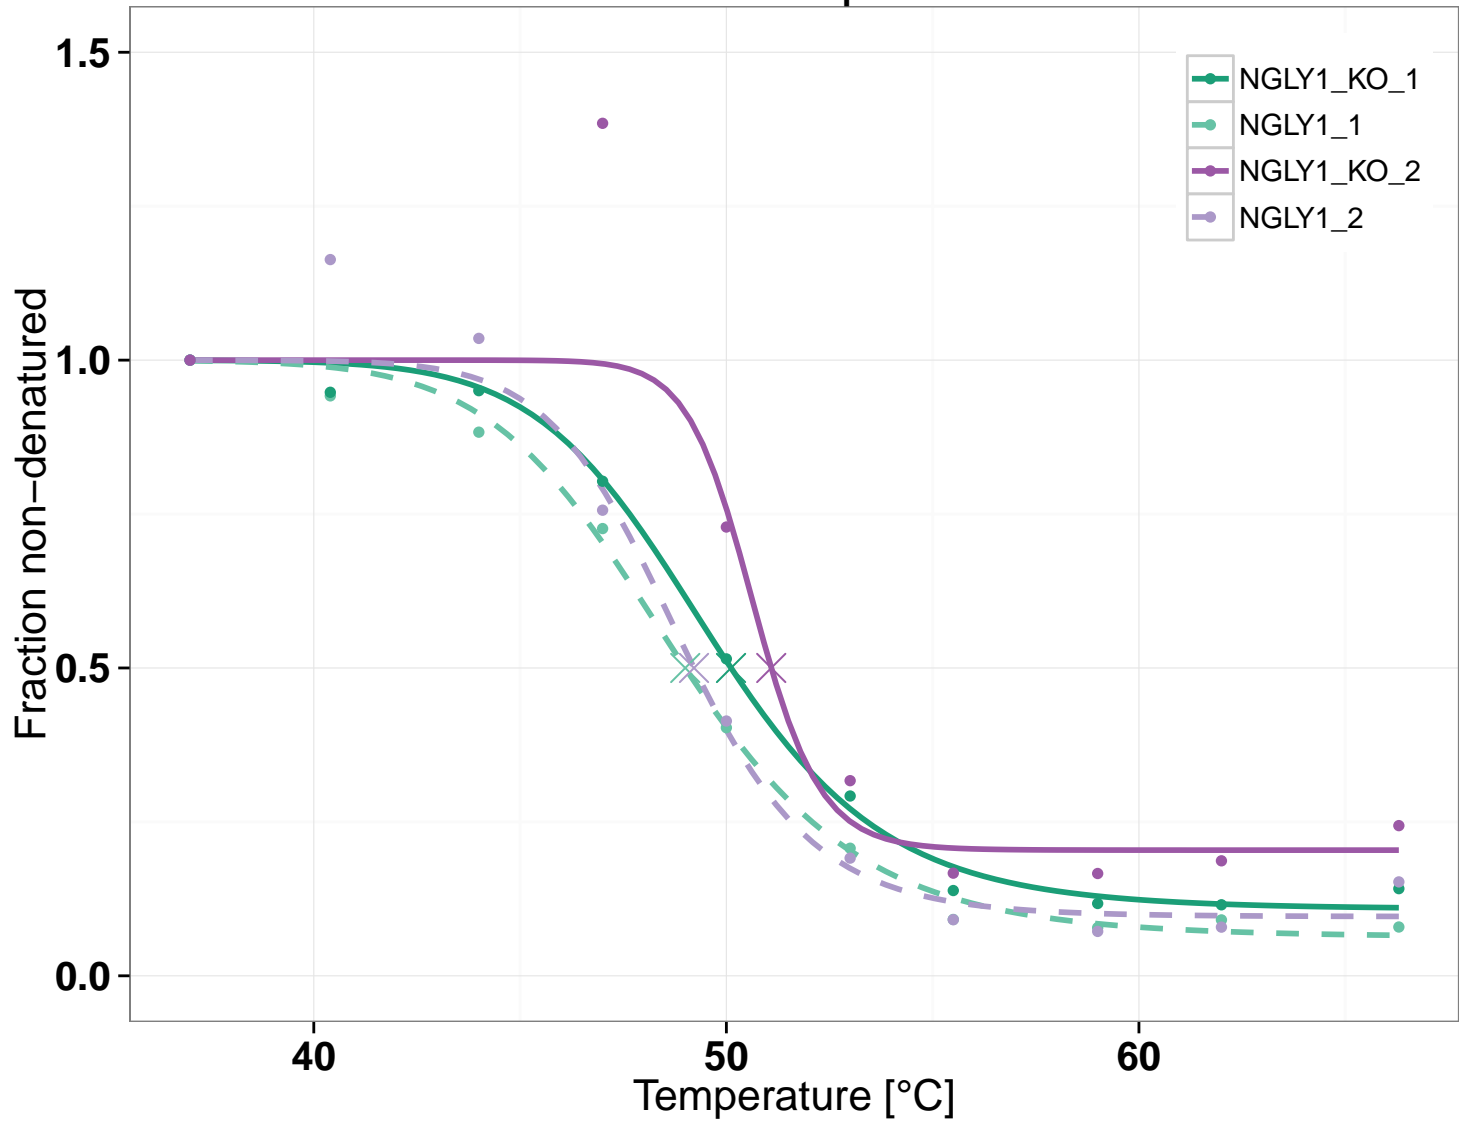

|            | meltPoint | slope | plateau | R2   |
|------------|-----------|-------|---------|------|
| NGLY1_KO_1 | 50.11     | -0.11 | 0.11    | 1    |
| NGLY1_1    | 49        | -0.1  | 0.06    | 1    |
| NGLY1_KO_2 | 51.09     | -0.25 | 0.2     | 0.54 |
| NGLY1_2    | 49.22     | -0.14 | 0.1     | 0.98 |

Supplement: Supplementary file 4890 [file 1]

IPI00465140.3|ZBTB33

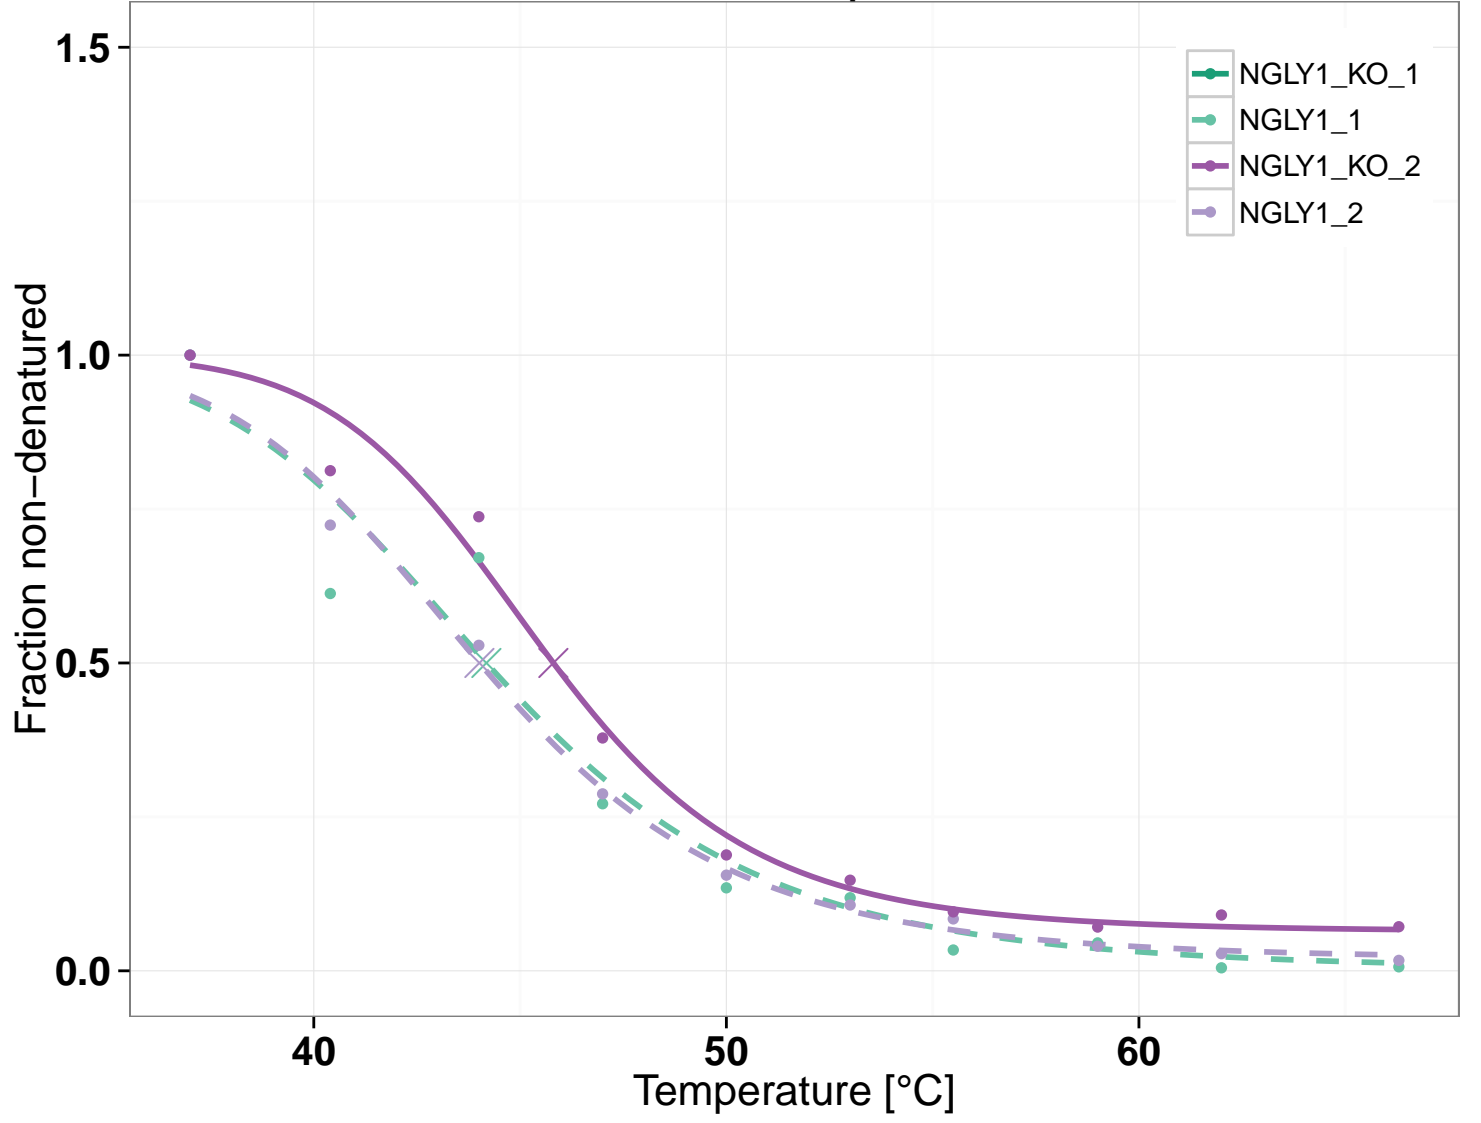

|            | meltPoint | slope  | plateau | R2   |
|------------|-----------|--------|---------|------|
| NGLY1_KO_1 | -         | -      | -       | -    |
| NGLY1_1    | 44.18     | -0.076 | 0       | 0.94 |
| NGLY1_KO_2 | 45.81     | -0.092 | 0.06    | 0.99 |
| NGLY1_2    | 44.01     | -0.081 | 0.02    | 0.99 |

Supplement: Supplementary file 4891 [file 1]

IPI00219774.3|PRKAR2A

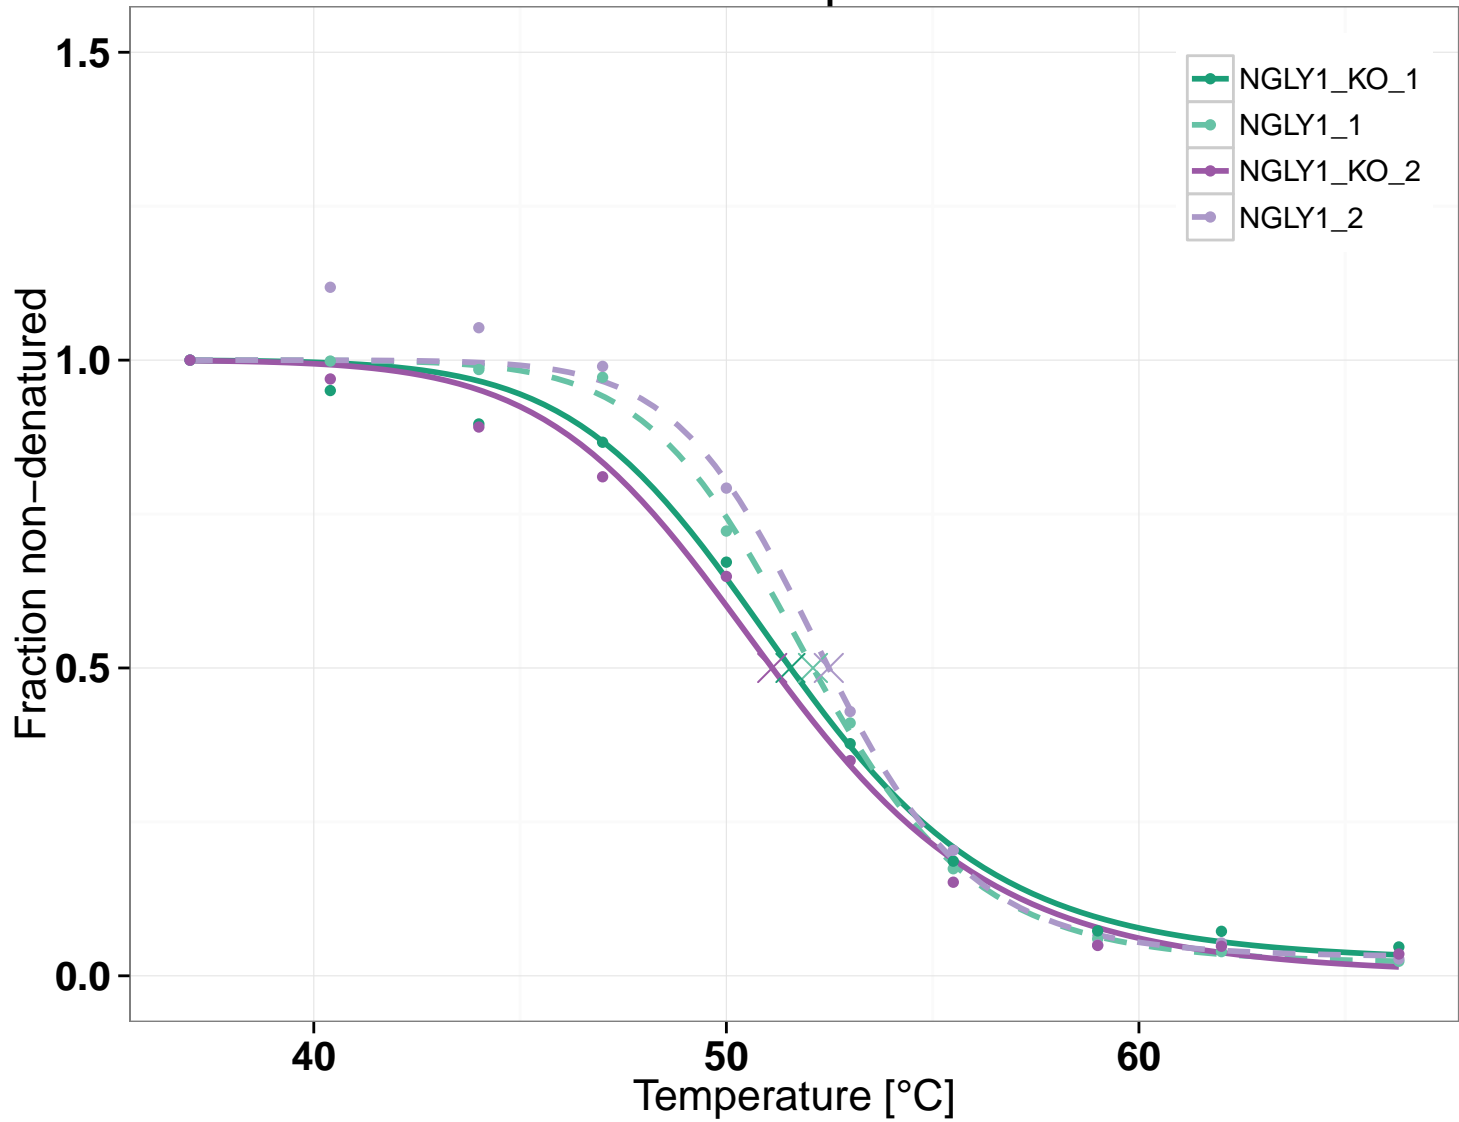

|            | meltPoint | slope  | plateau | R2   |
|------------|-----------|--------|---------|------|
| NGLY1_KO_1 | 51.55     | -0.095 | 0.02    | 0.99 |
| NGLY1_1    | 52.1      | -0.12  | 0.02    | 1    |
| NGLY1_KO_2 | 51.11     | -0.091 | 0       | 0.99 |
| NGLY1_2    | 52.48     | -0.13  | 0.03    | 0.99 |

Supplement: Supplementary file 4892 [file 1]

# IPI00028955.4|BOP1

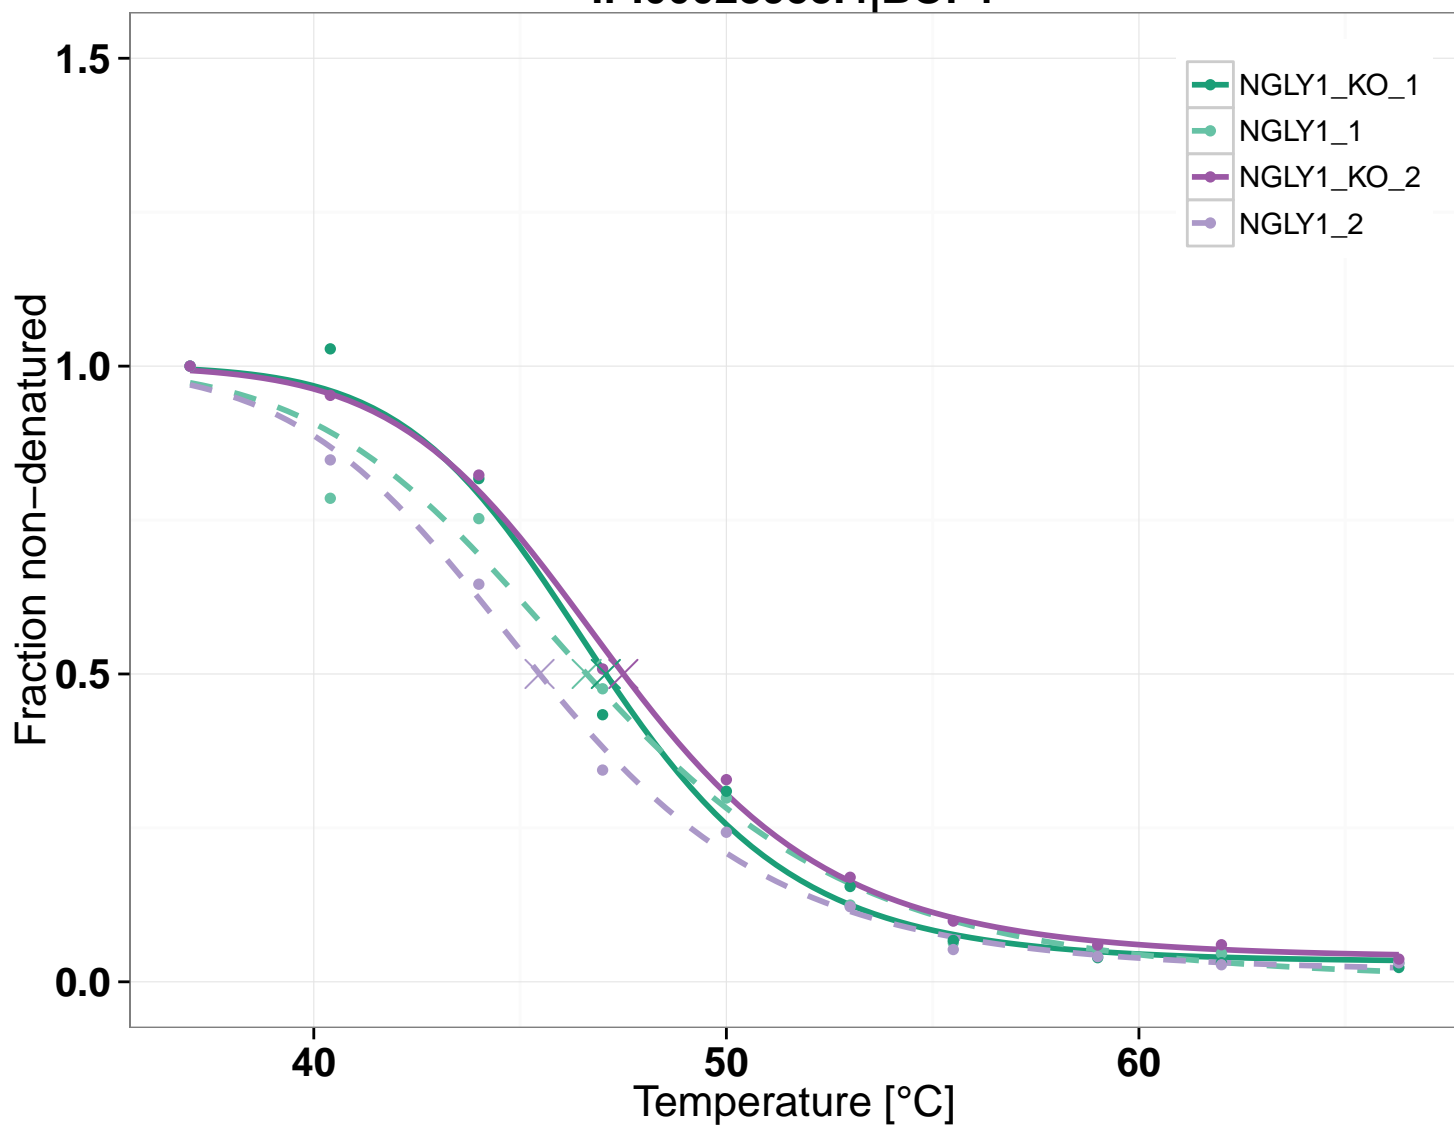

|            | meltPoint | slope  | plateau | R2   |
|------------|-----------|--------|---------|------|
| NGLY1_KO_1 | 47.08     | -0.1   | 0.03    | 0.99 |
| NGLY1_1    | 46.61     | -0.076 | 0       | 0.98 |
| NGLY1_KO_2 | 47.5      | -0.091 | 0.04    | 1    |
| NGLY1_2    | 45.47     | -0.084 | 0.01    | 1    |

Supplement: Supplementary file 4893 [file 1]

IPI00166680.1|MINK1

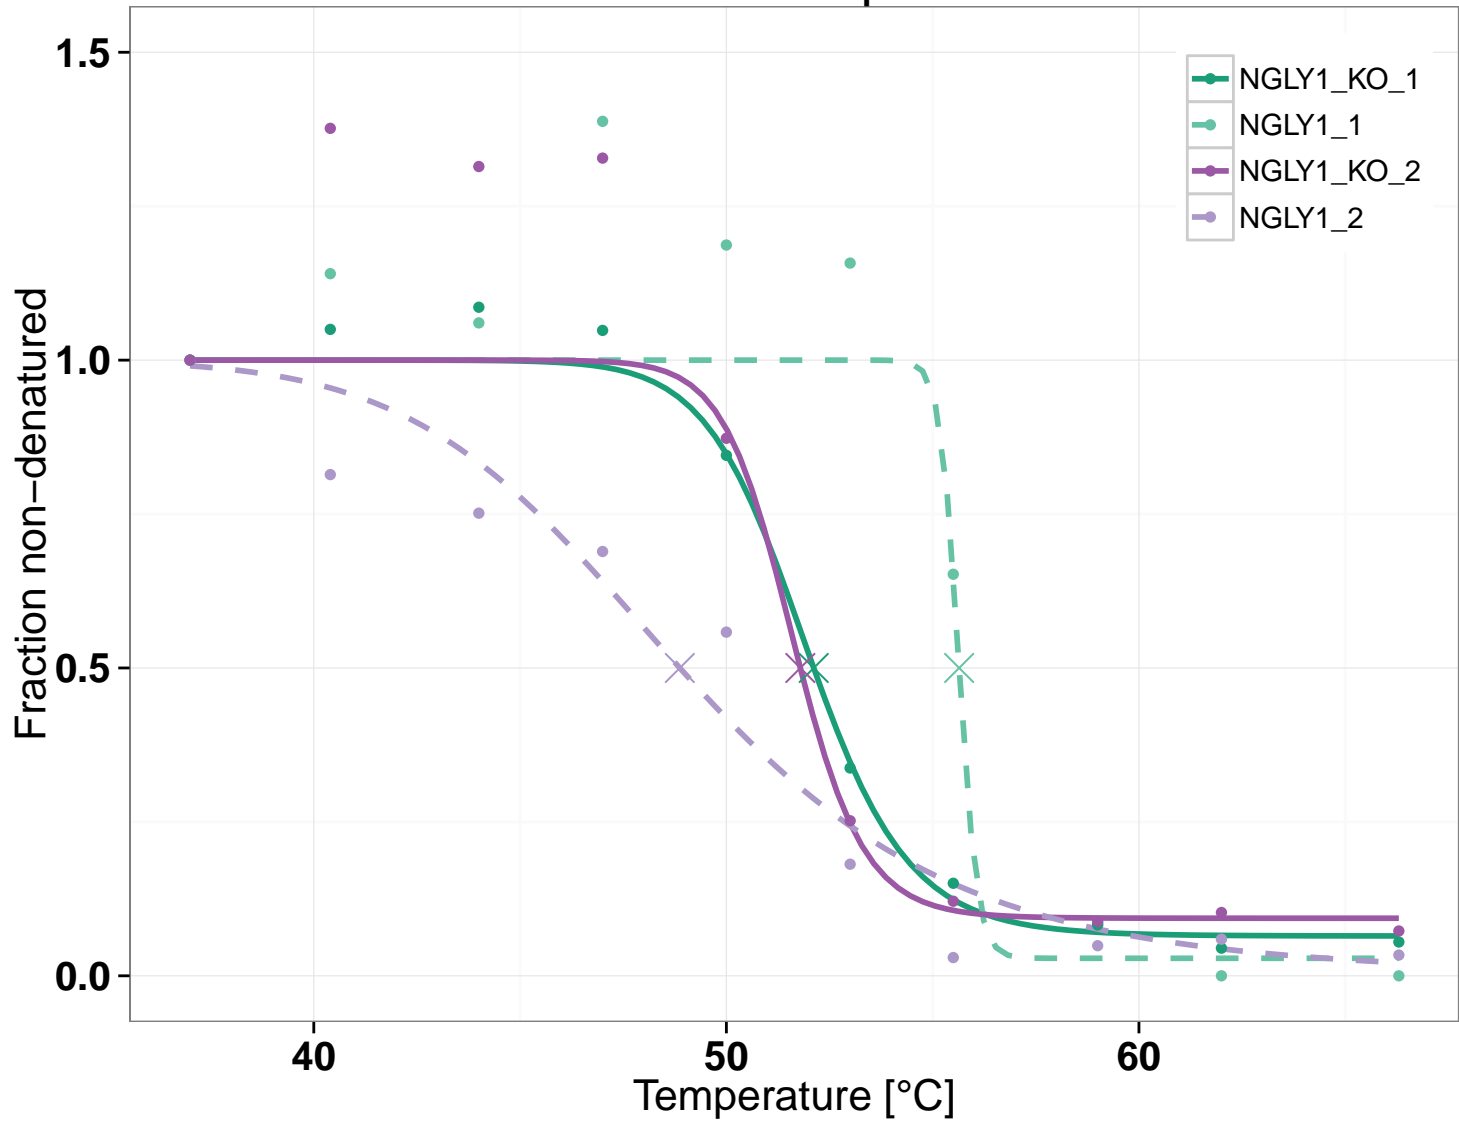

|            | meltPoint | slope  | plateau | R2   |
|------------|-----------|--------|---------|------|
| NGLY1_KO_1 | 52.12     | -0.19  | 0.06    | 0.99 |
| NGLY1_1    | 55.64     | -1.1   | 0.03    | 0.91 |
| NGLY1_KO_2 | 51.79     | -0.27  | 0.09    | 0.88 |
| NGLY1_2    | 48.87     | -0.076 | 0       | 0.95 |

Supplement: Supplementary file 4894 [file 1]

IPI00297151.3|PARP16

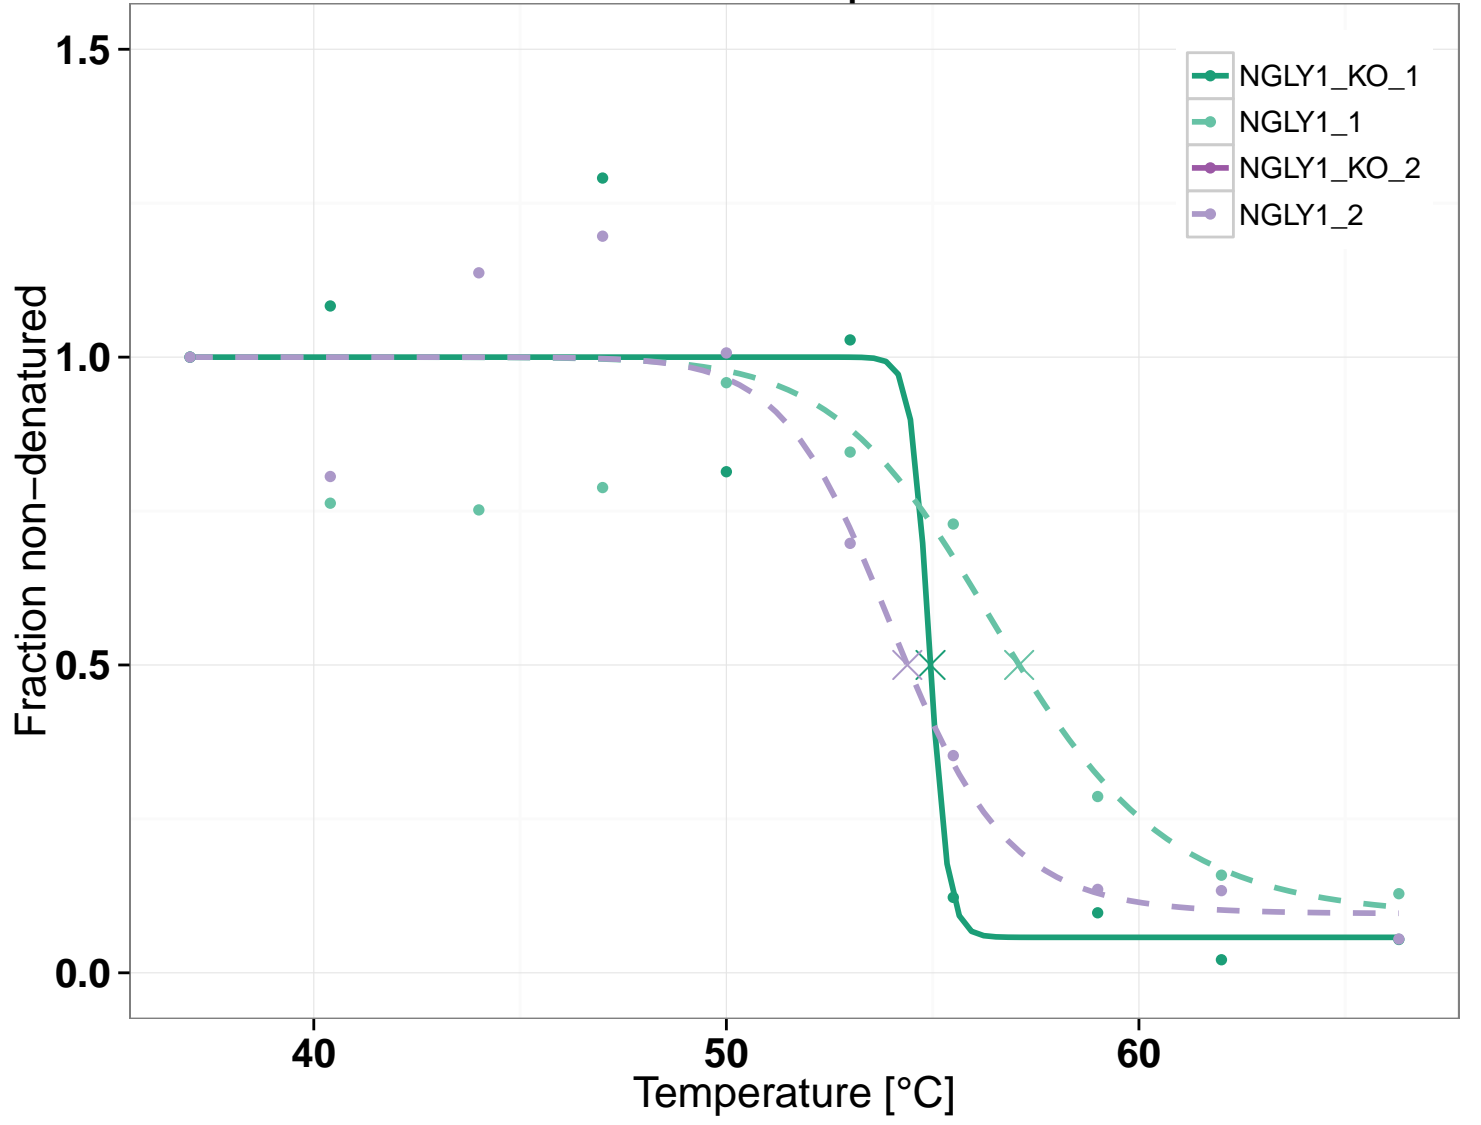

|            | meltPoint | slope | plateau | R2   |
|------------|-----------|-------|---------|------|
| NGLY1_KO_1 | 54.95     | -1.1  | 0.06    | 0.87 |
| NGLY1_1    | 57.1      | -0.11 | 0.09    | 0.82 |
| NGLY1_KO_2 | -         | -     | -       | -    |
| NGLY1_2    | 54.39     | -0.16 | 0.1     | 0.94 |

Supplement: Supplementary file 4895 [file 1]

IPI00219840.4|AP2S1

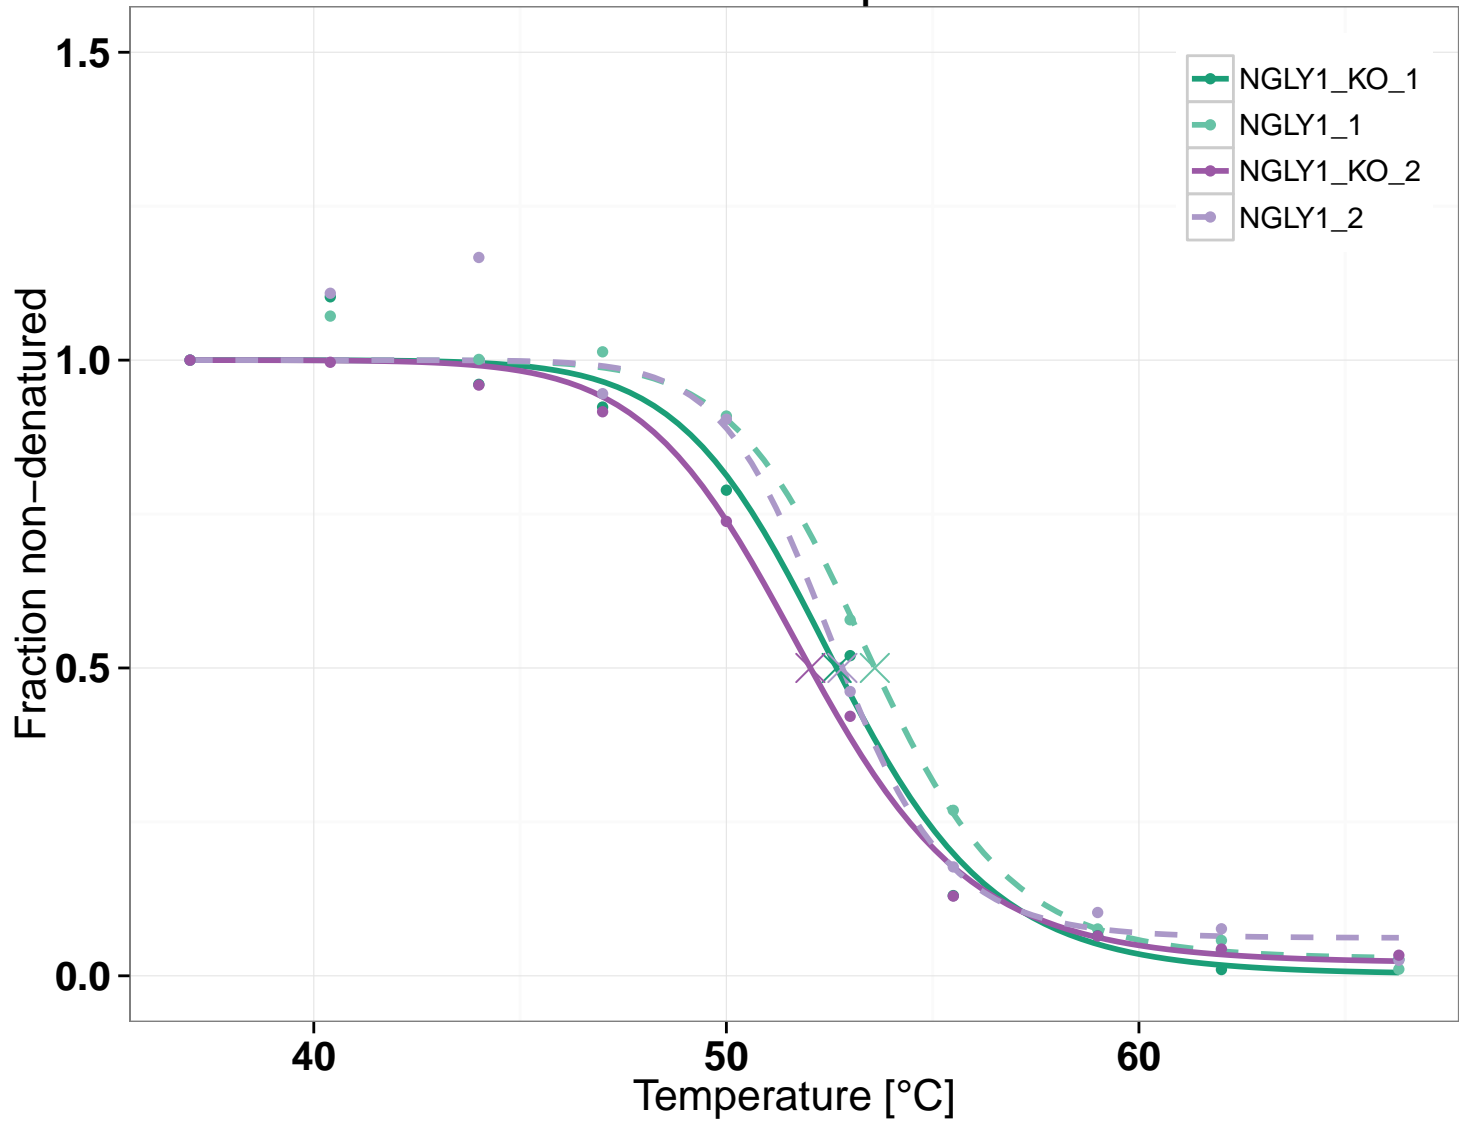

|            | meltPoint | slope | plateau | R2   |
|------------|-----------|-------|---------|------|
| NGLY1_KO_1 | 52.67     | -0.13 | 0       | 0.99 |
| NGLY1_1    | 53.6      | -0.14 | 0.03    | 1    |
| NGLY1_KO_2 | 52.04     | -0.12 | 0.02    | 1    |
| NGLY1_2    | 52.81     | -0.17 | 0.06    | 0.98 |

Supplement: Supplementary file 4896 [file 1]

IPI00103874.7|ZFYVE1

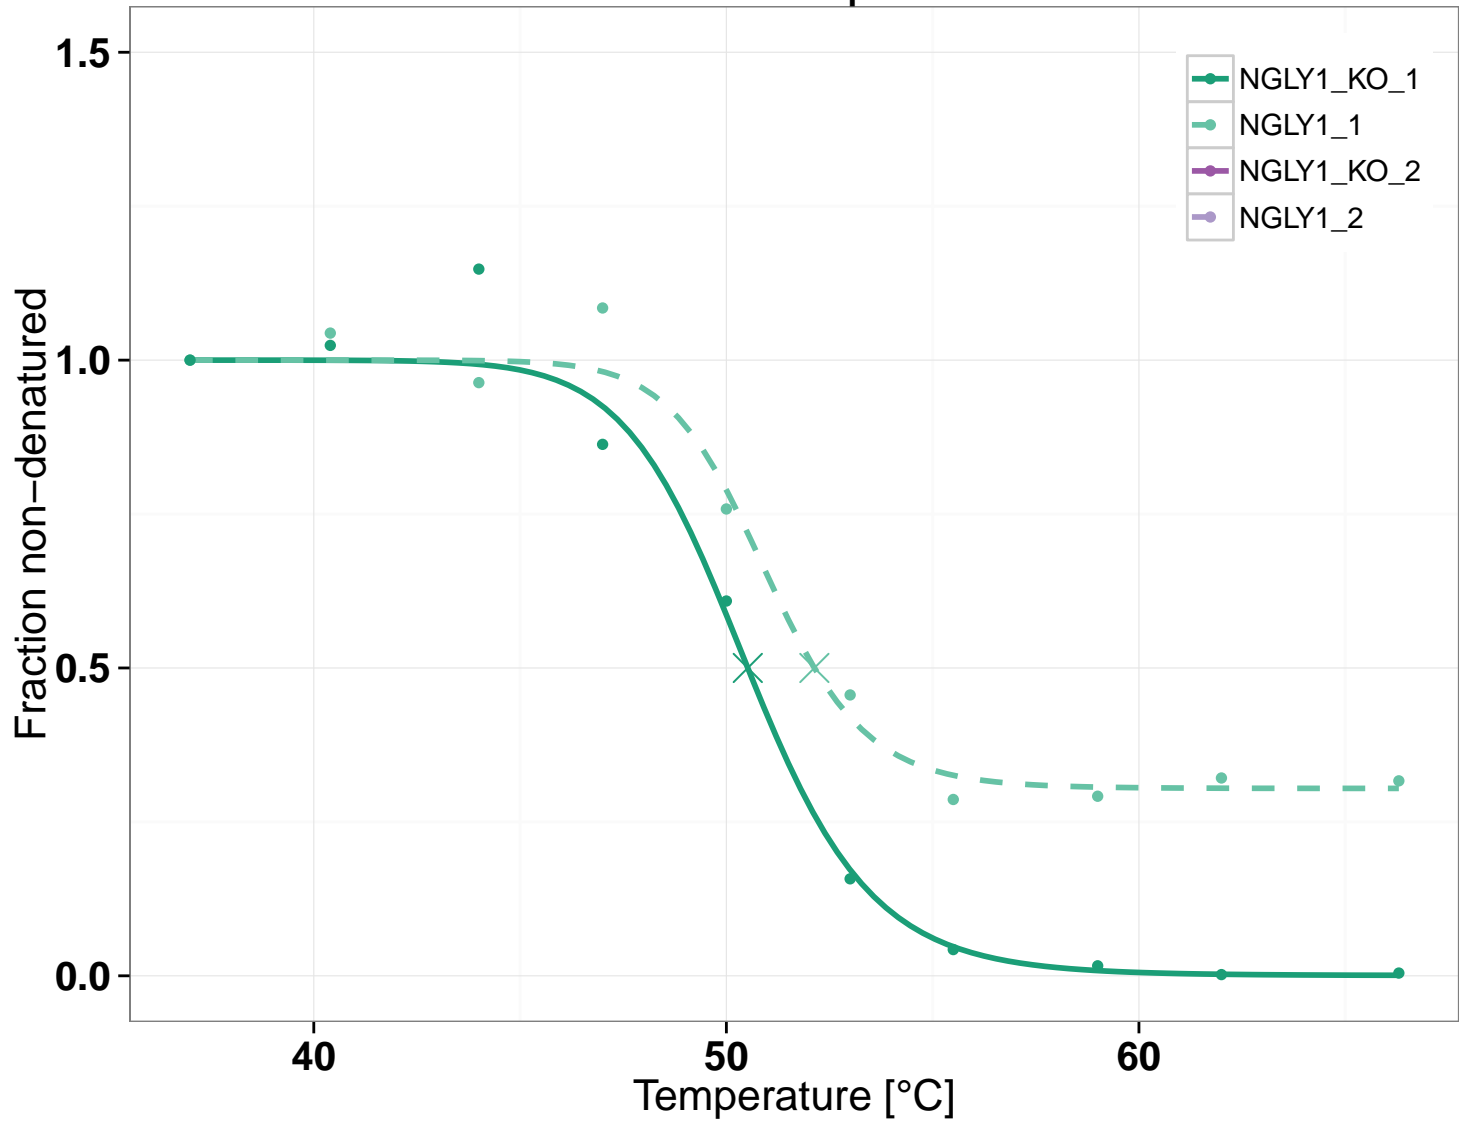

|            | meltPoint | slope | plateau | R2   |
|------------|-----------|-------|---------|------|
| NGLY1_KO_1 | 50.52     | -0.17 | 0       | 0.99 |
| NGLY1_1    | 52.13     | -0.15 | 0.3     | 0.98 |
| NGLY1_KO_2 | -         | -     | -       | -    |
| NGLY1_2    | -         | -     | -       | -    |

Supplement: Supplementary file 4897 [file 1]

# IPI00303158.3|CMAS

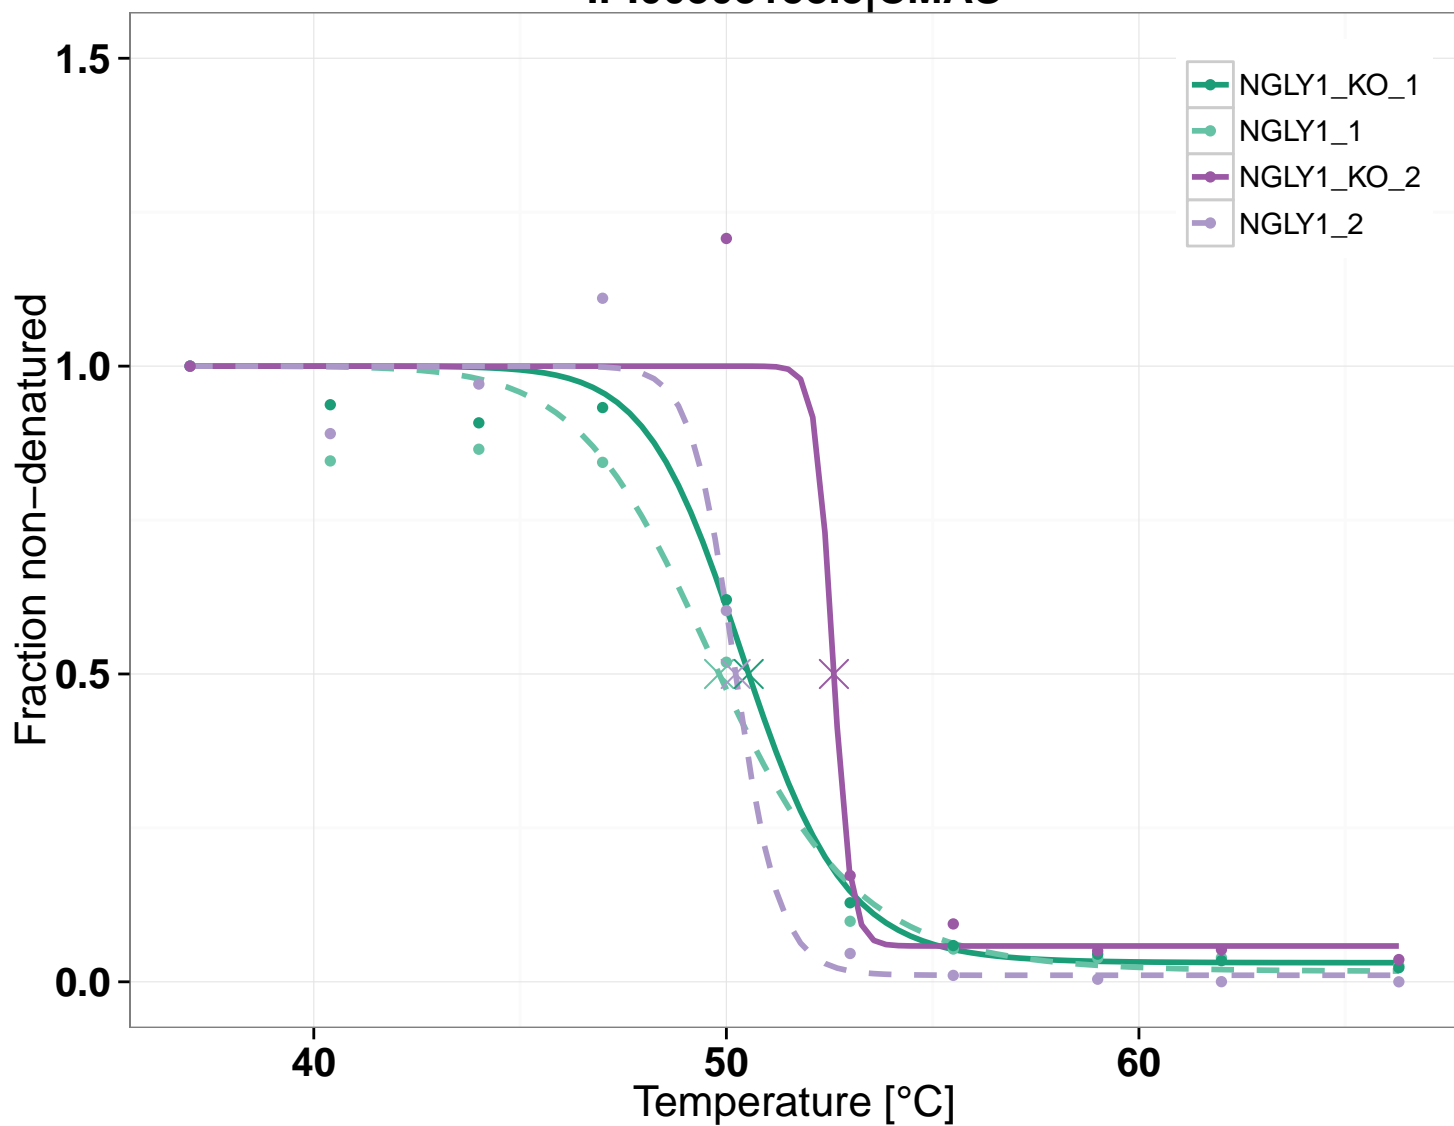

|            | meltPoint | slope | plateau | R2   |
|------------|-----------|-------|---------|------|
| NGLY1_KO_1 | 50.54     | -0.2  | 0.03    | 0.99 |
| NGLY1_1    | 49.82     | -0.15 | 0.02    | 0.97 |
| NGLY1_KO_2 | 52.61     | -1.1  | 0.06    | 0.61 |
| NGLY1_2    | 50.23     | -0.47 | 0.01    | 0.99 |

Supplement: Supplementary file 4898 [file 1]

IPI00465238.3|C16ORF62

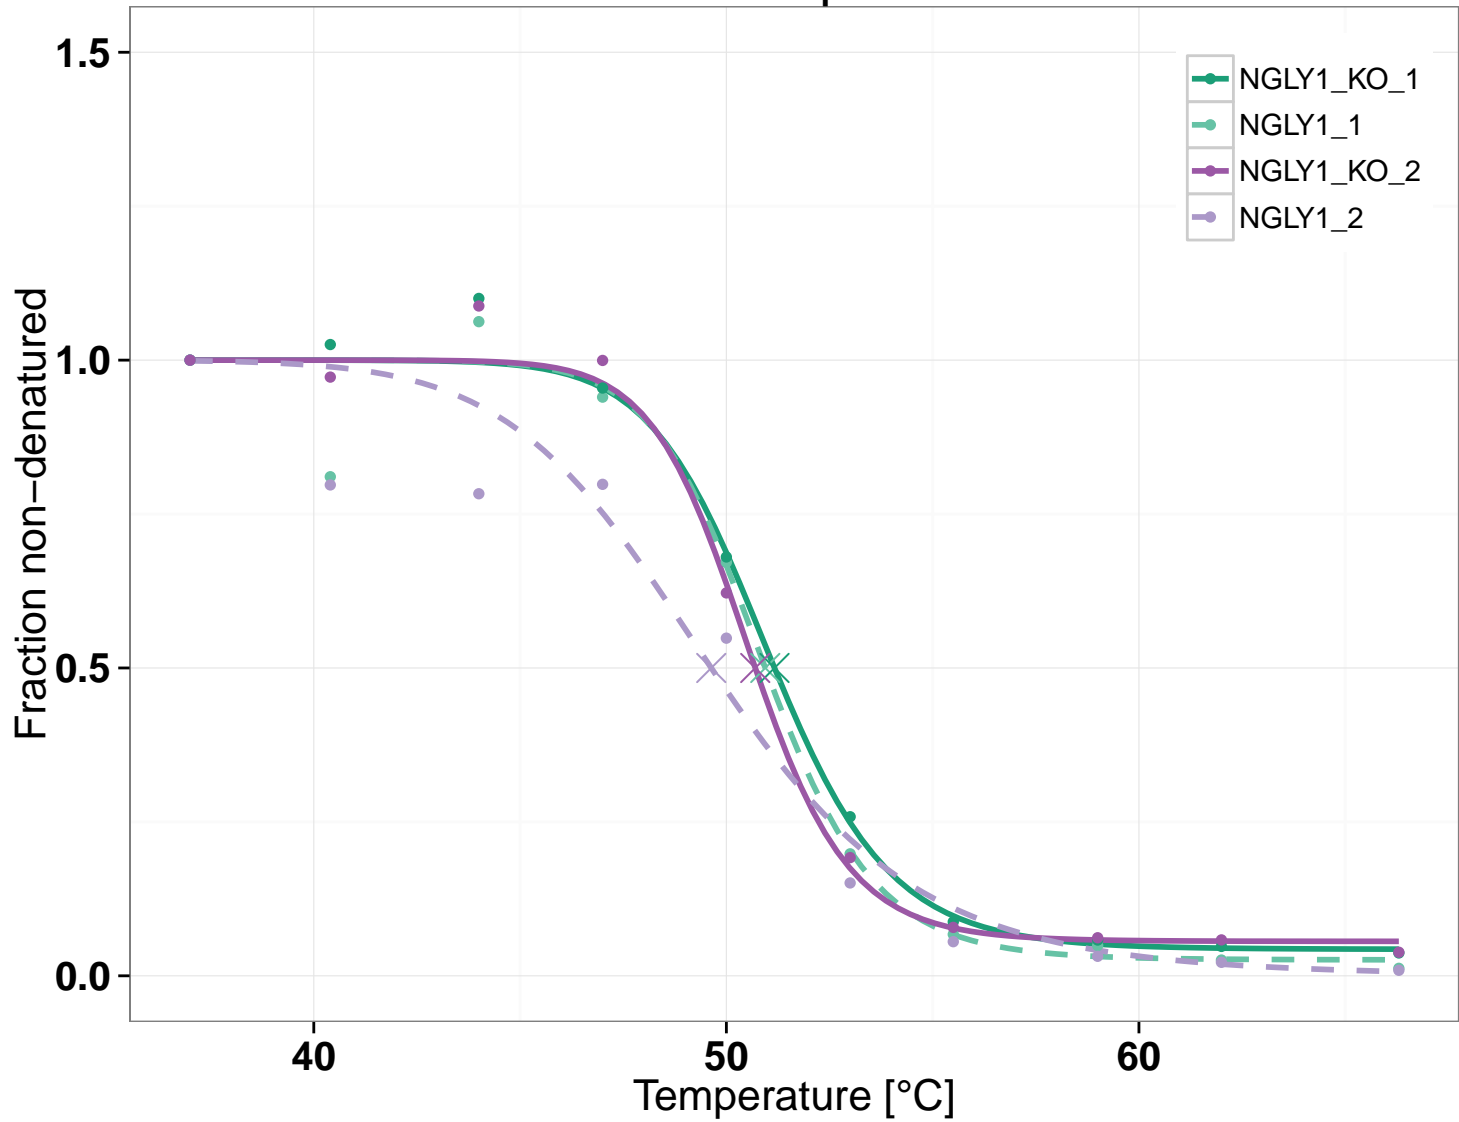

|            | meltPoint | slope | plateau | R2   |
|------------|-----------|-------|---------|------|
| NGLY1_KO_1 | 51.17     | -0.16 | 0.04    | 0.99 |
| NGLY1_1    | 50.94     | -0.18 | 0.03    | 0.98 |
| NGLY1_KO_2 | 50.7      | -0.2  | 0.06    | 0.99 |
| NGLY1_2    | 49.63     | -0.1  | 0       | 0.95 |

Supplement: Supplementary file 4899 [file 1]

# IPI00745343.2|LOC100130932

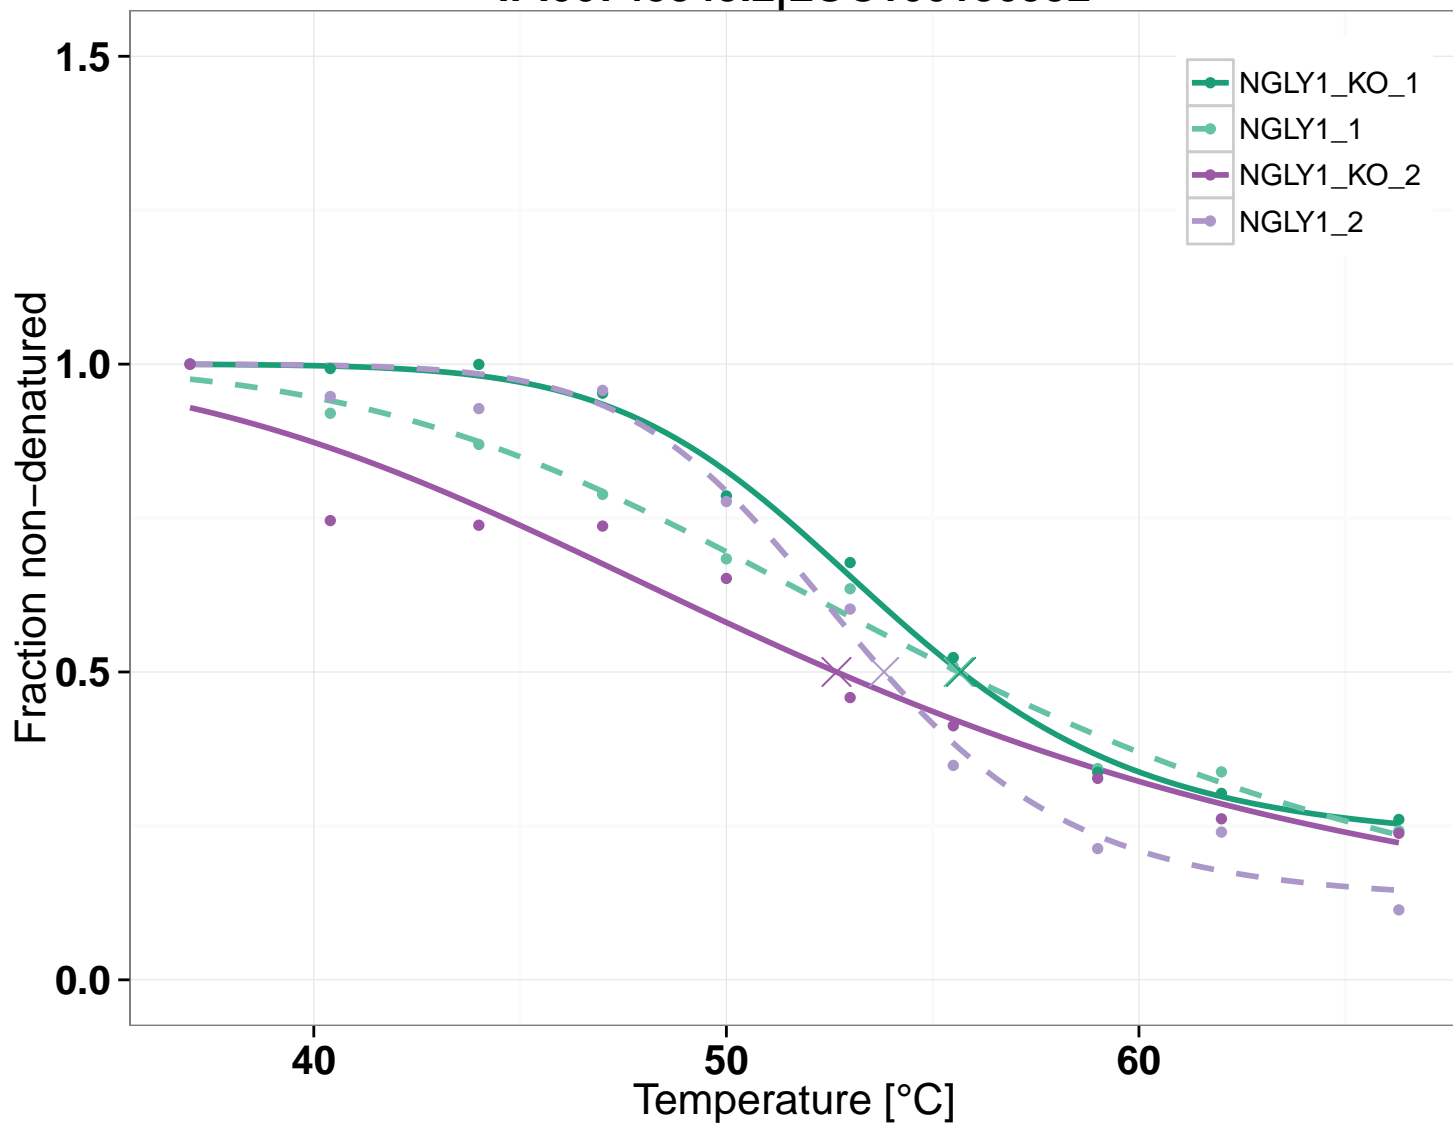

|            | meltPoint | slope  | plateau | R2   |
|------------|-----------|--------|---------|------|
| NGLY1_KO_1 | 55.69     | -0.061 | 0.22    | 1    |
| NGLY1_1    | 55.63     | -0.035 | 0       | 0.99 |
| NGLY1_KO_2 | 52.67     | -0.032 | 0       | 0.95 |
| NGLY1_2    | 53.82     | -0.081 | 0.13    | 0.99 |

Supplement: Supplementary file 4900 [file 1]

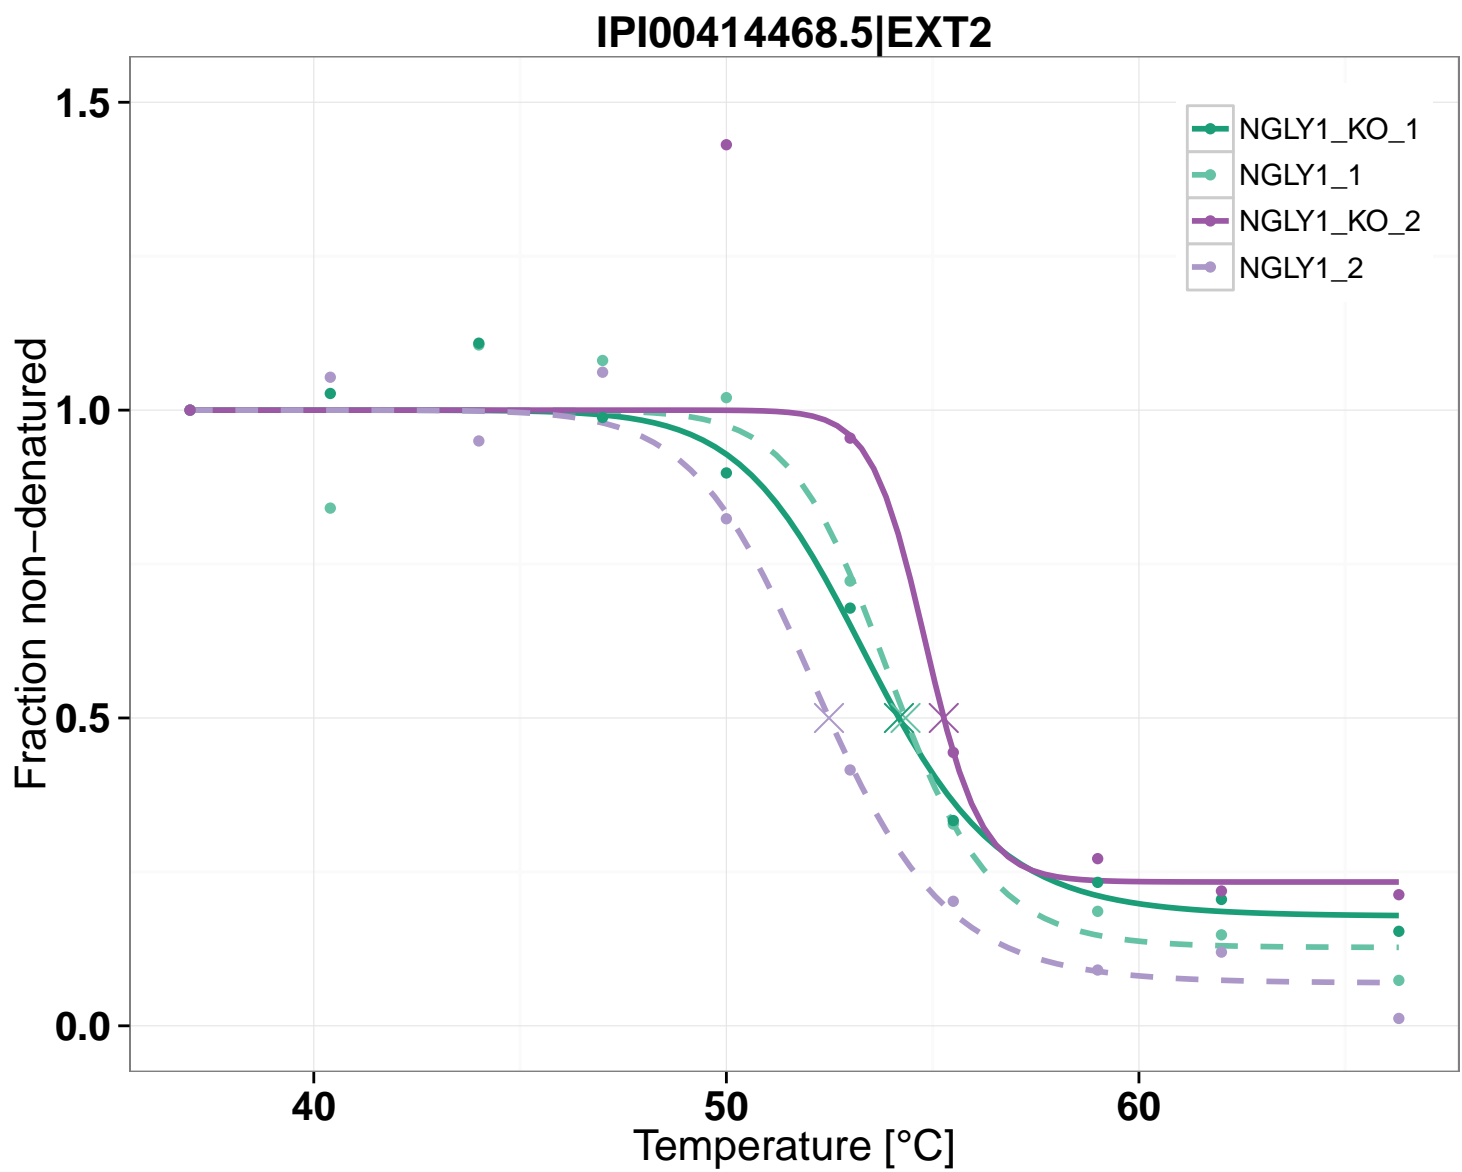

|            | meltPoint | slope | plateau | R2   |
|------------|-----------|-------|---------|------|
| NGLY1_KO_1 | 54.18     | -0.13 | 0.18    | 0.99 |
| NGLY1_1    | 54.34     | -0.18 | 0.13    | 0.97 |
| NGLY1_KO_2 | 55.27     | -0.29 | 0.23    | 0.61 |
| NGLY1_2    | 52.49     | -0.15 | 0.07    | 0.99 |

Supplement: Supplementary file 4901 [file 1]

IPI00744692.1|TALDO1

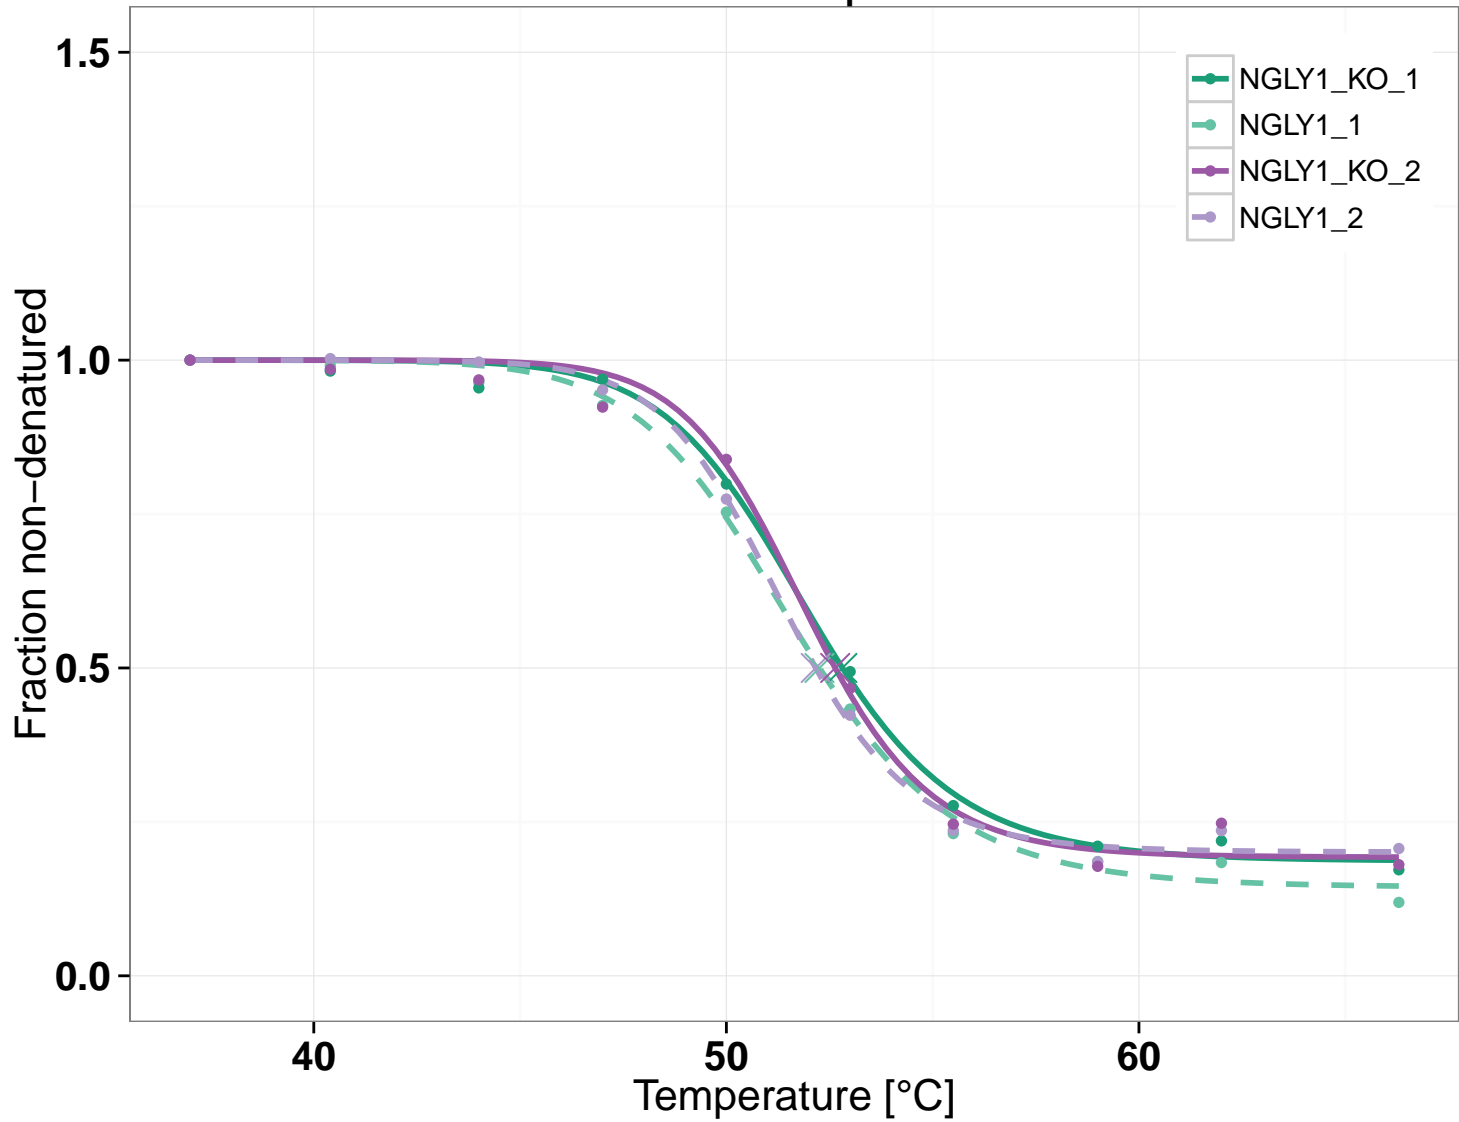

|            | meltPoint | slope | plateau | R2   |
|------------|-----------|-------|---------|------|
| NGLY1_KO_1 | 52.81     | -0.11 | 0.19    | 1    |
| NGLY1_1    | 52.26     | -0.11 | 0.14    | 1    |
| NGLY1_KO_2 | 52.64     | -0.14 | 0.19    | 0.99 |
| NGLY1_2    | 52.17     | -0.13 | 0.2     | 1    |

Supplement: Supplementary file 4902 [file 1]

IPI00828172.1|FAM114A2

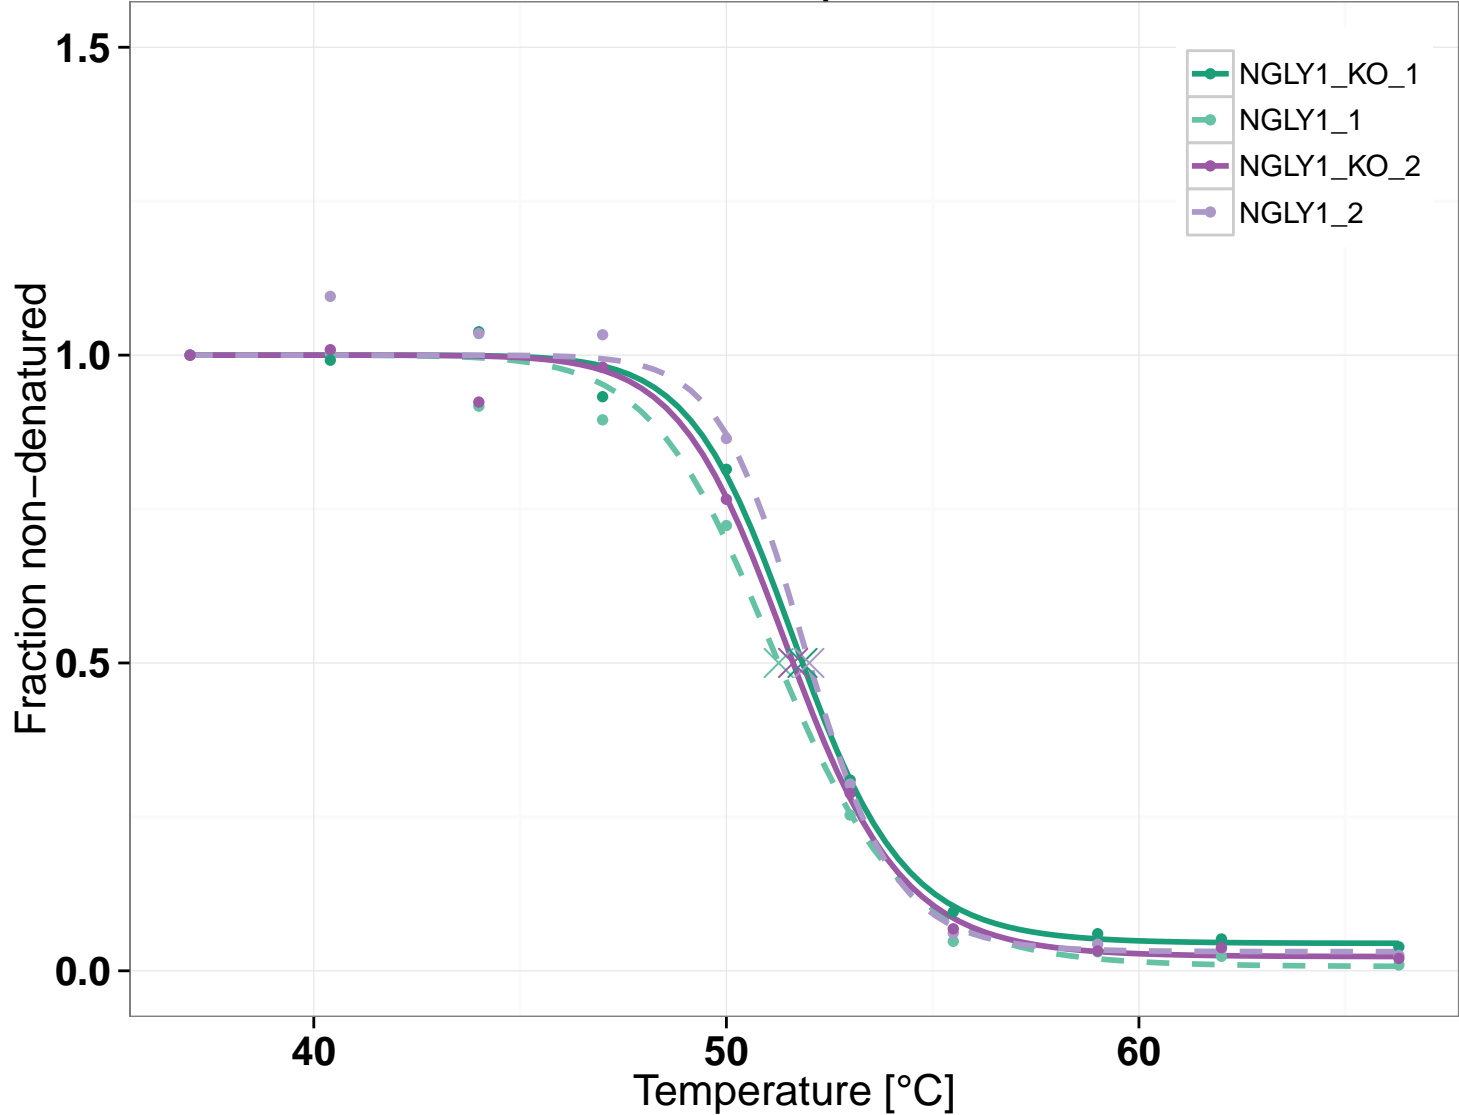

|            | meltPoint | slope | plateau | R2   |
|------------|-----------|-------|---------|------|
| NGLY1_KO_1 | 51.85     | -0.18 | 0.04    | 1    |
| NGLY1_1    | 51.27     | -0.16 | 0.01    | 0.99 |
| NGLY1_KO_2 | 51.62     | -0.18 | 0.02    | 1    |
| NGLY1_2    | 52.01     | -0.23 | 0.03    | 0.99 |

Supplement: Supplementary file 4903 [file 1]

IPI00872853.1|DDX11

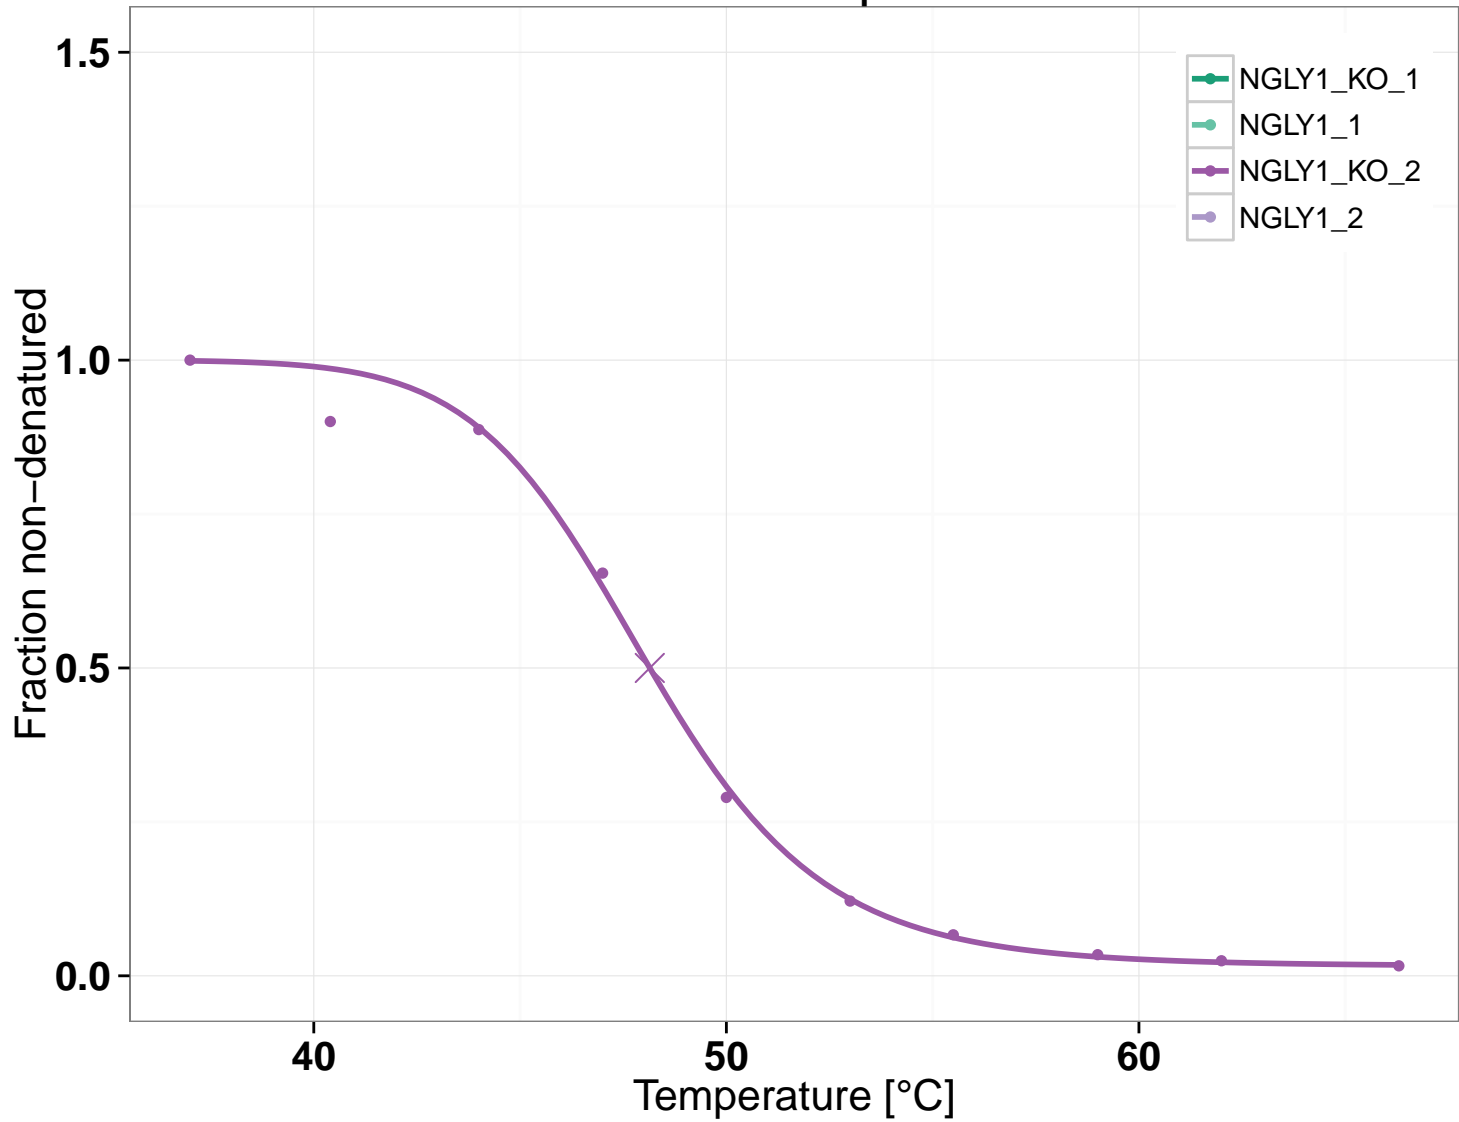

|            | meltPoint | slope | plateau | R2   |
|------------|-----------|-------|---------|------|
| NGLY1_KO_1 | -         | -     | -       | -    |
| NGLY1_1    | -         | -     | -       | -    |
| NGLY1_KO_2 | 48.14     | -0.12 | 0.02    | 0.99 |
| NGLY1_2    | -         | -     | -       | -    |

Supplement: Supplementary file 4904 [file 1]

IPI00641007.2|FGFR1OP

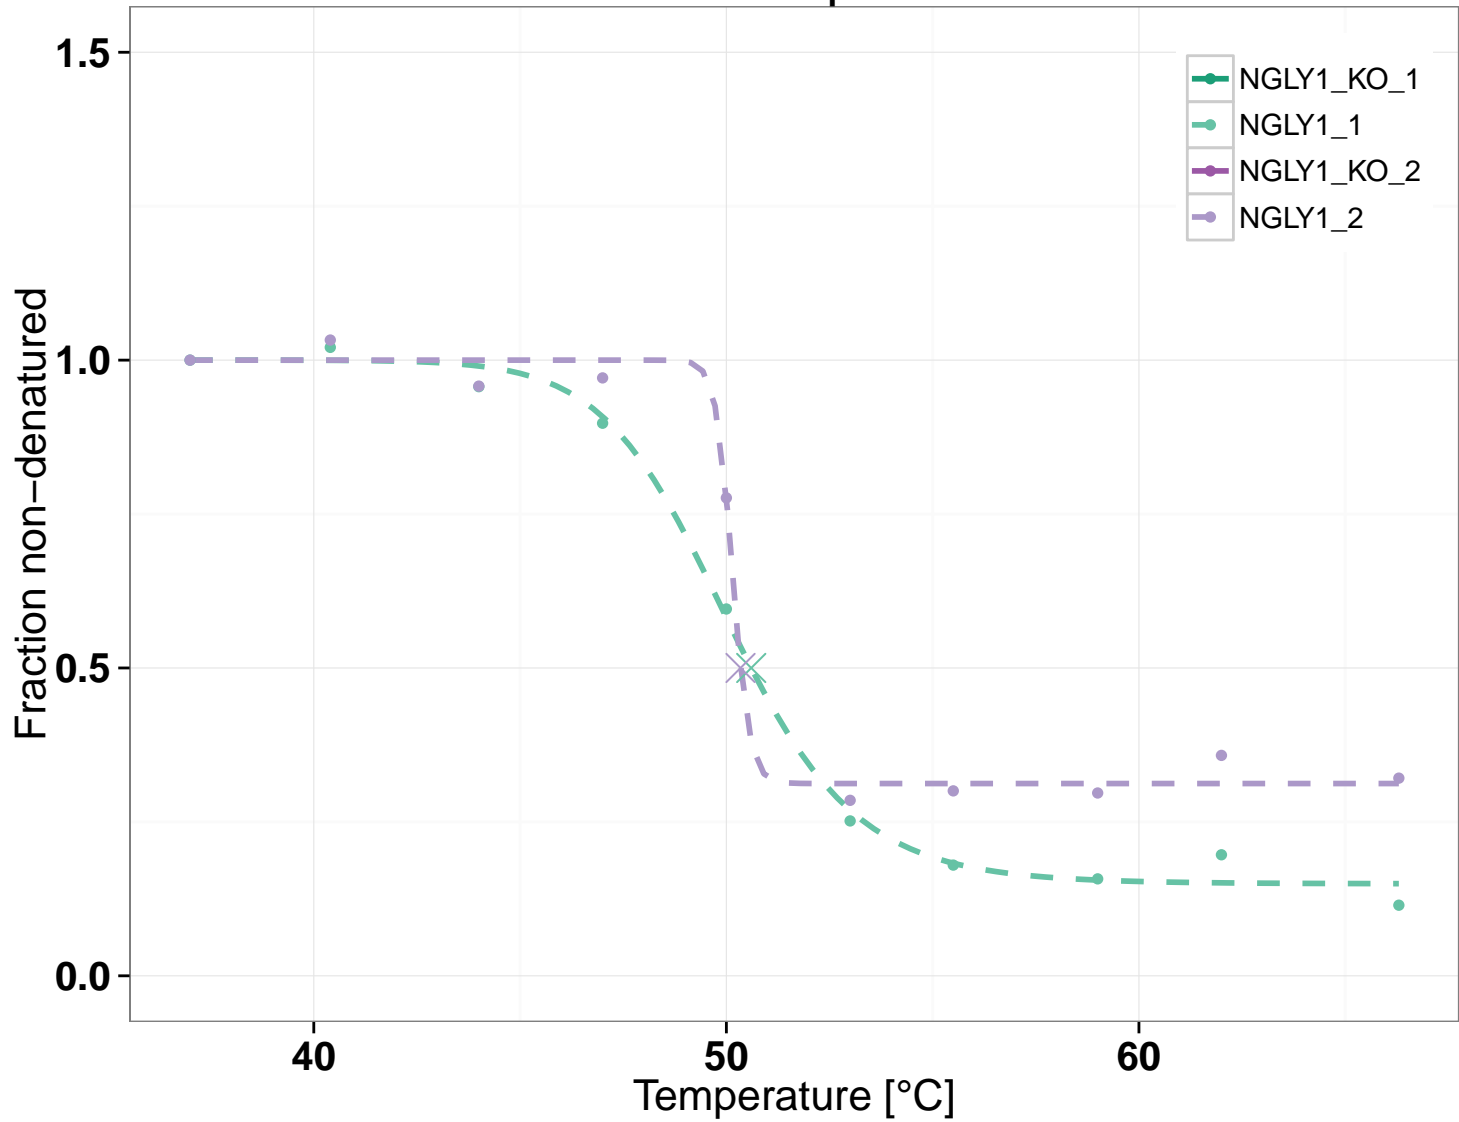

|            | meltPoint | slope | plateau | R2   |
|------------|-----------|-------|---------|------|
| NGLY1_KO_1 | –         | –     | –       | –    |
| NGLY1_1    | 50.6      | –0.14 | 0.15    | 1    |
| NGLY1_KO_2 | –         | –     | –       | –    |
| NGLY1_2    | 50.34     | –0.86 | 0.31    | 0.99 |

Supplement: Supplementary file 4905 [file 1]

IPI00871202.1|BAZ2A

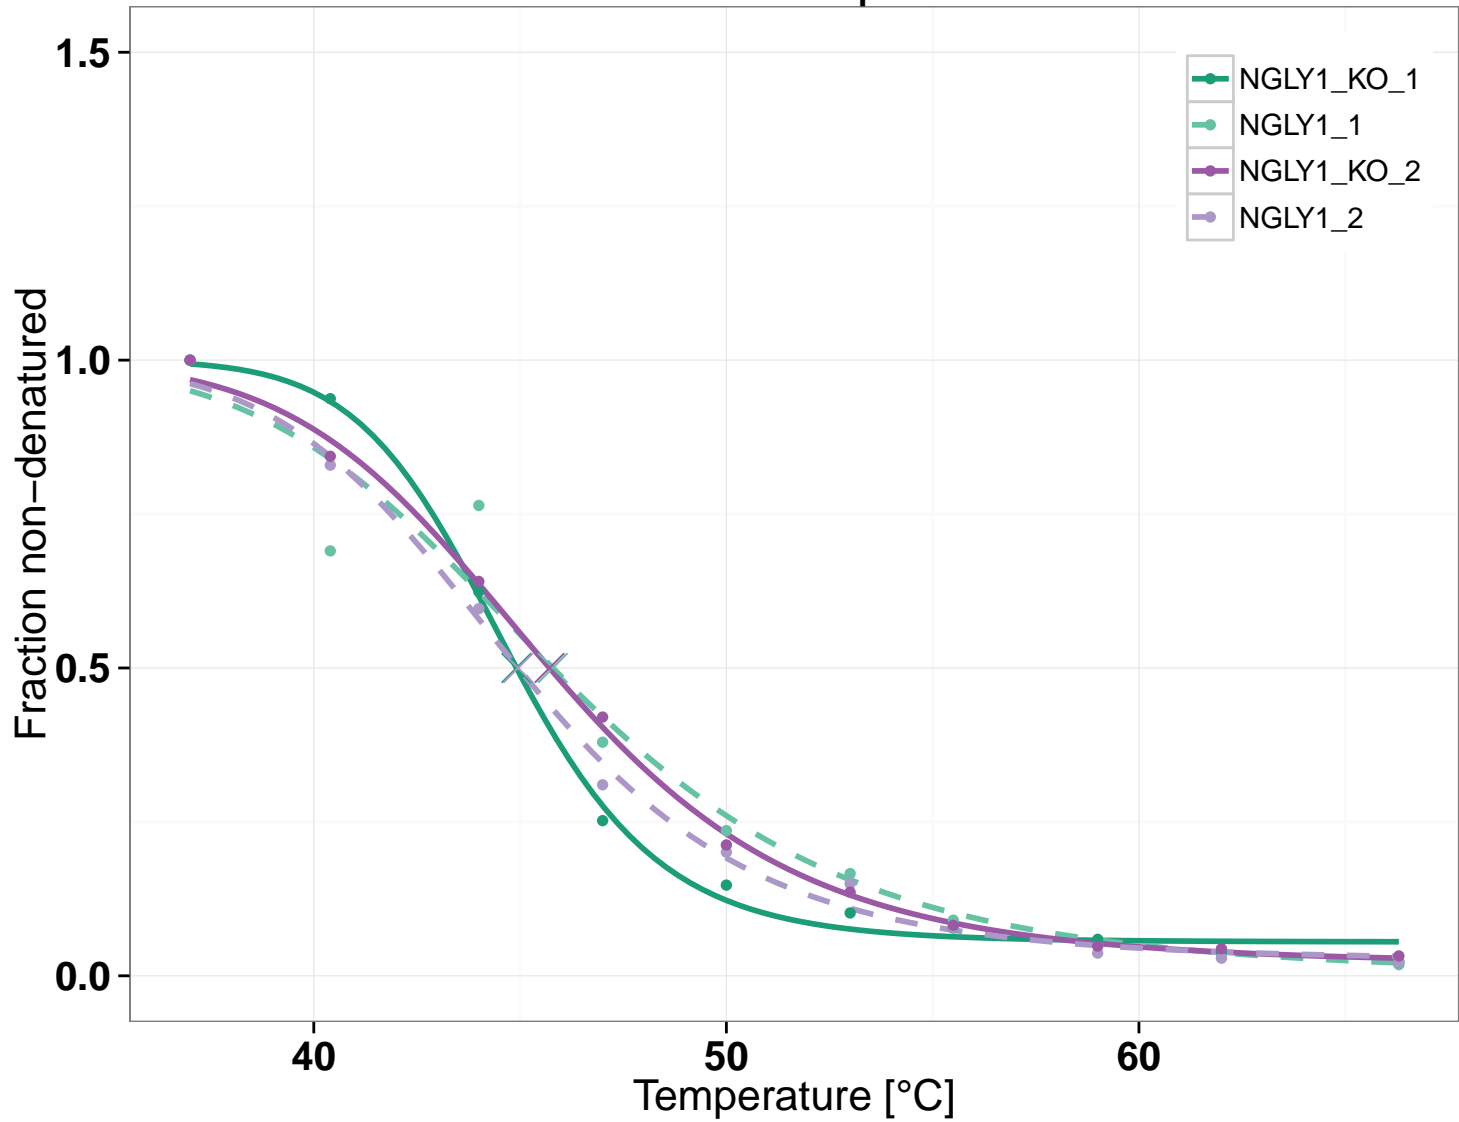

|            | meltPoint | slope  | plateau | R2   |
|------------|-----------|--------|---------|------|
| NGLY1_KO_1 | 44.91     | -0.13  | 0.05    | 1    |
| NGLY1_1    | 45.79     | -0.07  | 0       | 0.96 |
| NGLY1_KO_2 | 45.71     | -0.08  | 0.02    | 1    |
| NGLY1_2    | 44.95     | -0.084 | 0.02    | 1    |

Supplement: Supplementary file 4906 [file 1]

# IPI00782992.3|SRRM2

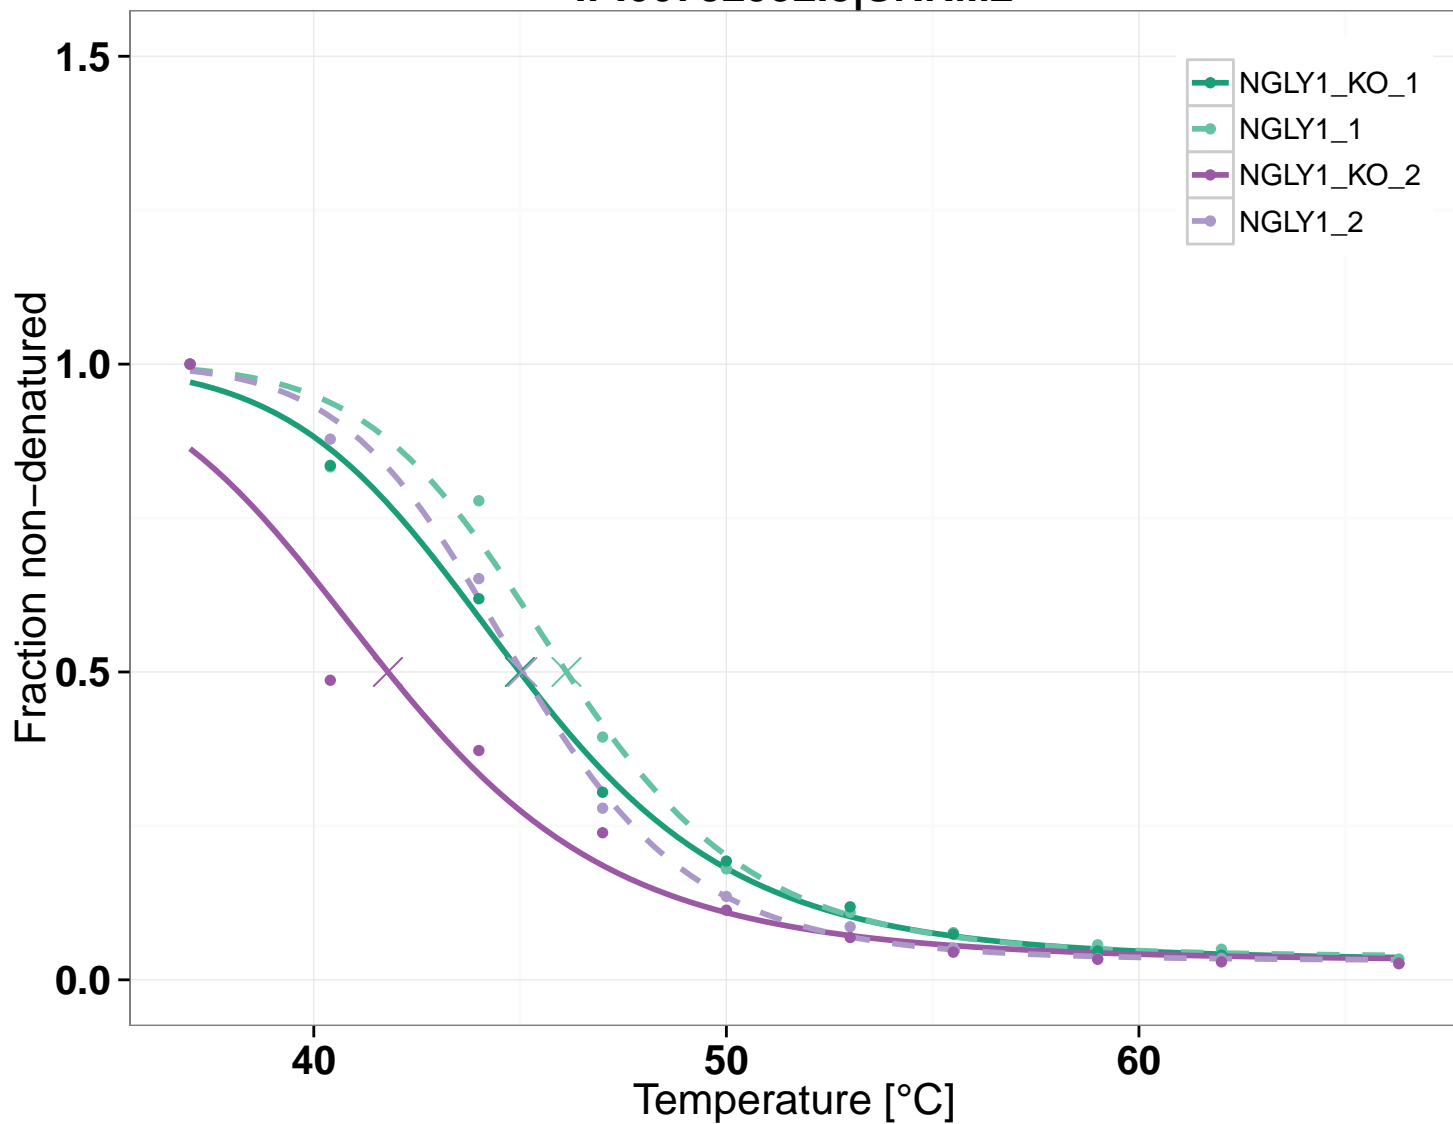

|            | meltPoint | slope  | plateau | R2   |
|------------|-----------|--------|---------|------|
| NGLY1_KO_1 | 44.99     | -0.09  | 0.03    | 1    |
| NGLY1_1    | 46.12     | -0.1   | 0.04    | 0.99 |
| NGLY1_KO_2 | 41.8      | -0.086 | 0.03    | 0.95 |
| NGLY1_2    | 45.06     | -0.11  | 0.03    | 1    |

Supplement: Supplementary file 4907 [file 1]

# IPI00873308.1|DOCK9

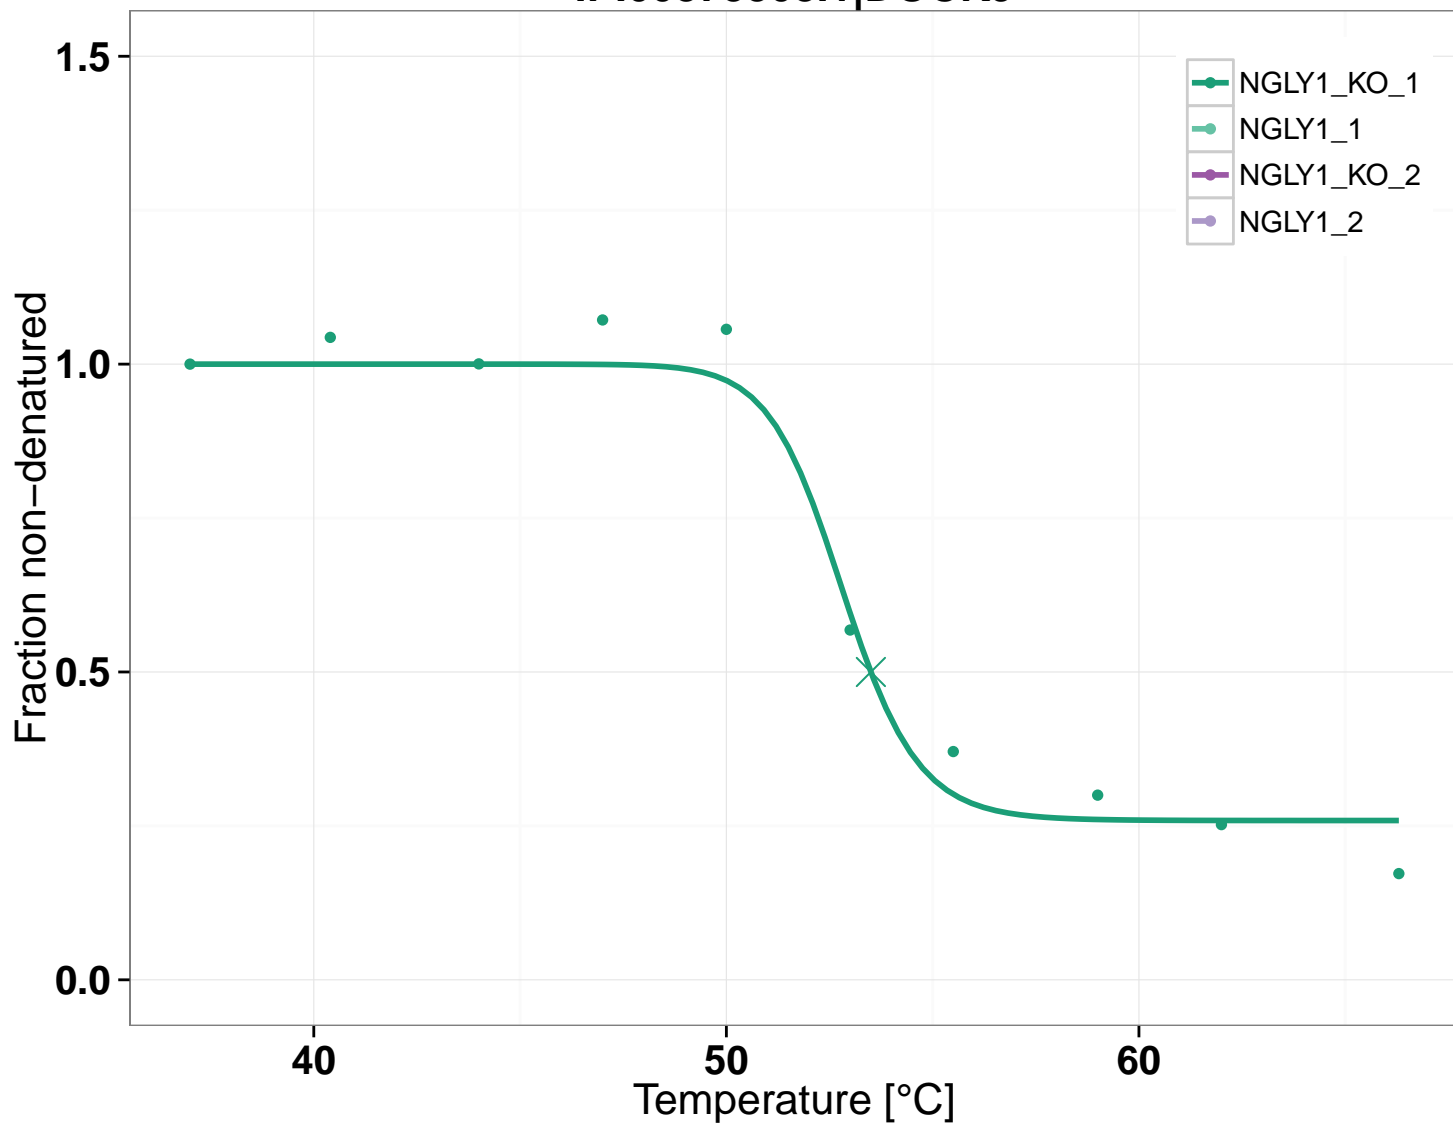

|            | meltPoint | slope | plateau | R2   |
|------------|-----------|-------|---------|------|
| NGLY1_KO_1 | 53.5      | -0.2  | 0.26    | 0.98 |
| NGLY1_1    | -         | -     | -       | -    |
| NGLY1_KO_2 | -         | -     | -       | -    |
| NGLY1_2    | -         | -     | -       | -    |

Supplement: Supplementary file 4908 [file 1]

IPI00296340.2|JMJD5

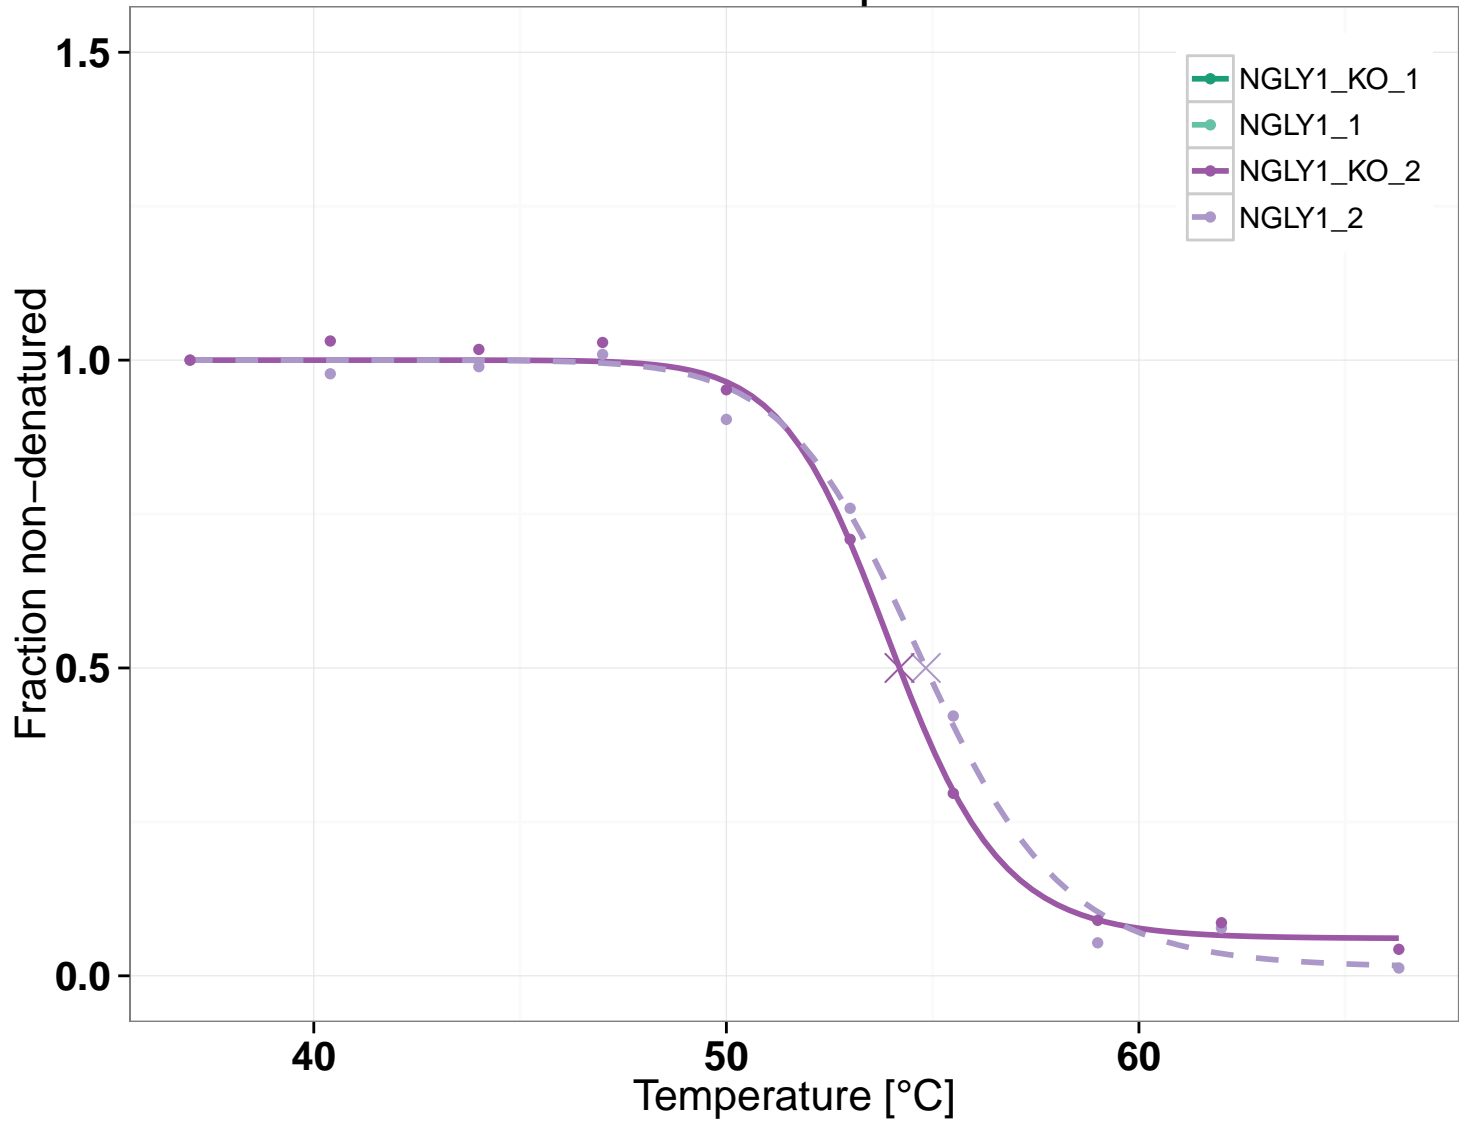

|            | meltPoint | slope | plateau | R2 |
|------------|-----------|-------|---------|----|
| NGLY1_KO_1 | —         | —     | —       | —  |
| NGLY1_1    | —         | —     | —       | —  |
| NGLY1_KO_2 | 54.2      | −0.18 | 0.06    | 1  |
| NGLY1_2    | 54.83     | −0.14 | 0.01    | 1  |

Supplement: Supplementary file 4909 [file 1]

# IPI00014319.5|IVNS1ABP

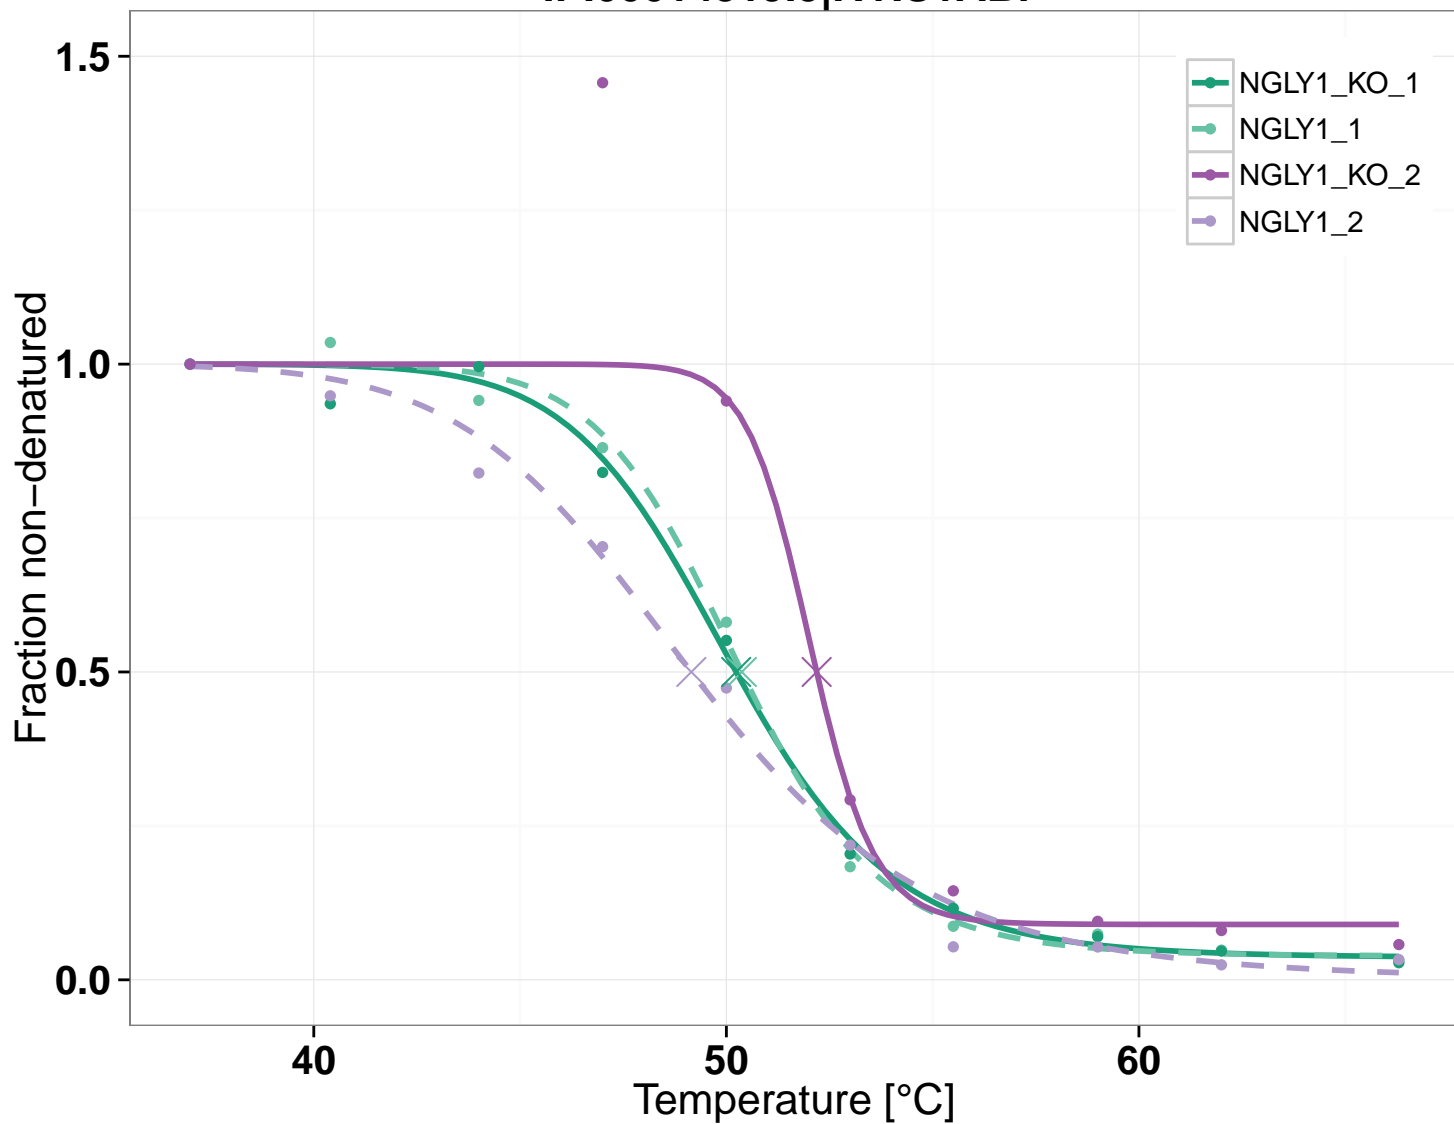

|            | meltPoint | slope  | plateau | R2   |
|------------|-----------|--------|---------|------|
| NGLY1_KO_1 | 50.24     | -0.12  | 0.04    | 1    |
| NGLY1_1    | 50.37     | -0.14  | 0.04    | 1    |
| NGLY1_KO_2 | 52.19     | -0.3   | 0.09    | 0.65 |
| NGLY1_2    | 49.15     | -0.088 | 0       | 0.99 |

Supplement: Supplementary file 4910 [file 1]

IPI00005775.3|CEPT1

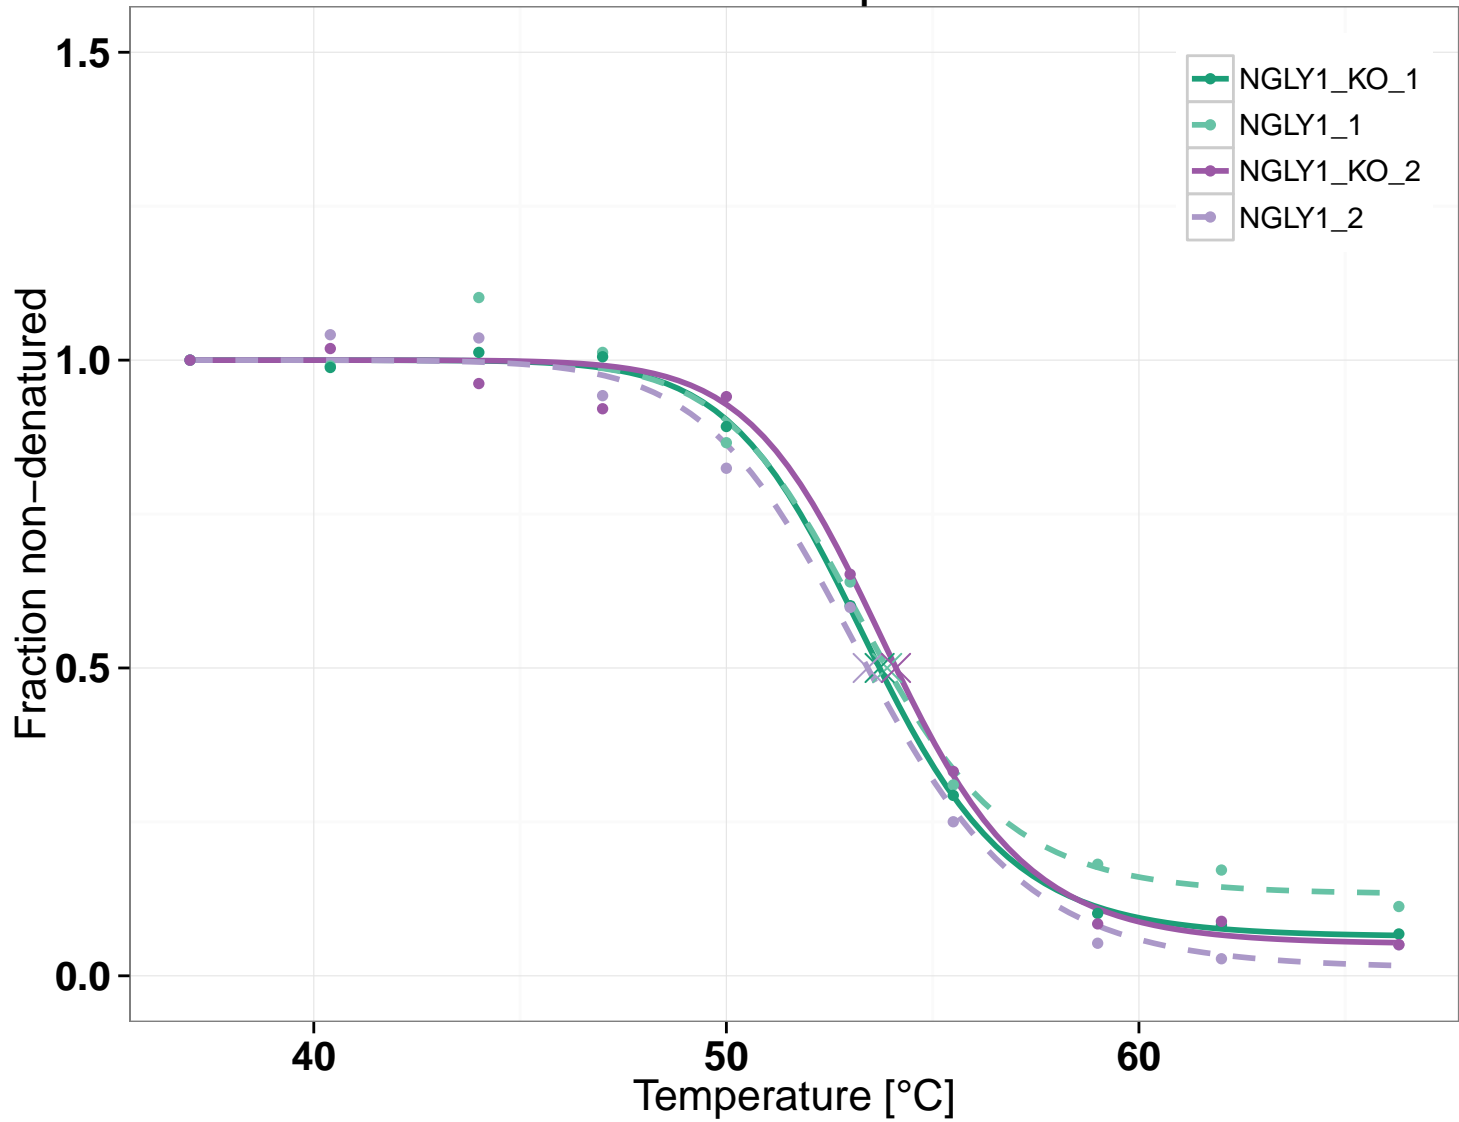

|            | meltPoint | slope | plateau | R2   |
|------------|-----------|-------|---------|------|
| NGLY1_KO_1 | 53.71     | -0.14 | 0.06    | 1    |
| NGLY1_1    | 53.9      | -0.13 | 0.13    | 0.99 |
| NGLY1_KO_2 | 54.11     | -0.14 | 0.05    | 0.99 |
| NGLY1_2    | 53.43     | -0.13 | 0.01    | 0.99 |

Supplement: Supplementary file 4911 [file 1]

# IPI00432065.1|C11ORF83

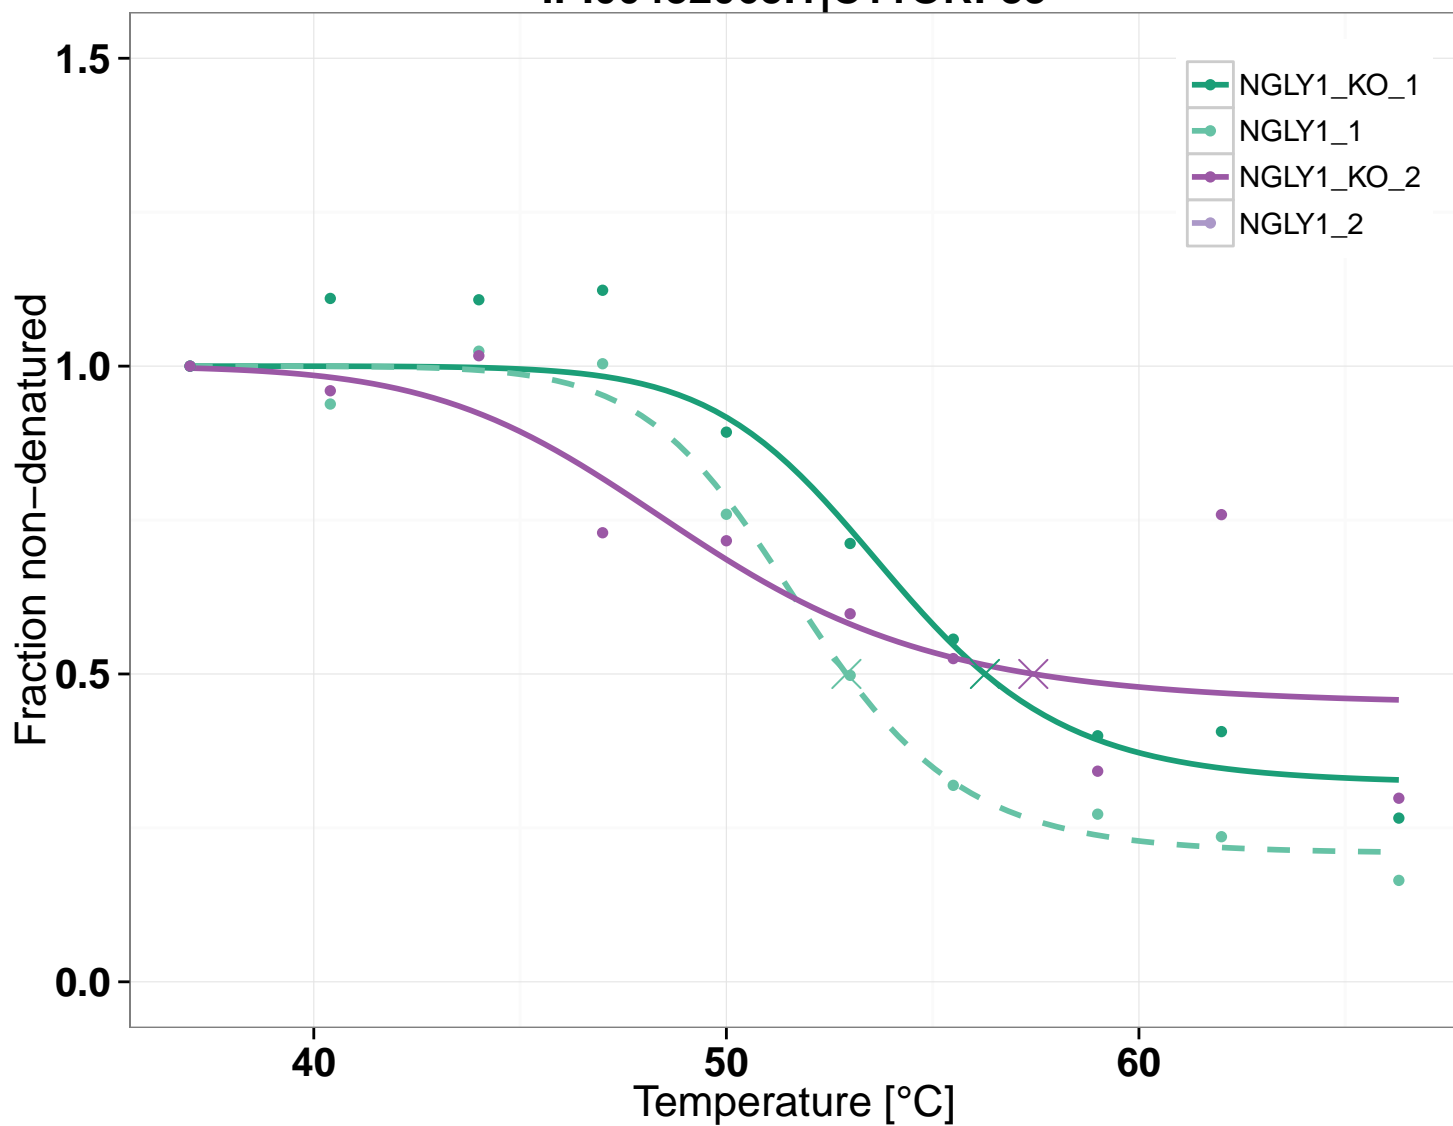

|            | meltPoint | slope  | plateau | R2   |
|------------|-----------|--------|---------|------|
| NGLY1_KO_1 | 56.27     | -0.079 | 0.32    | 0.95 |
| NGLY1_1    | 52.91     | -0.1   | 0.21    | 0.99 |
| NGLY1_KO_2 | 57.44     | -0.045 | 0.45    | 0.75 |
| NGLY1_2    | -         | -      | -       | -    |

Supplement: Supplementary file 4912 [file 1]

IPI00025310.1|ZNF217

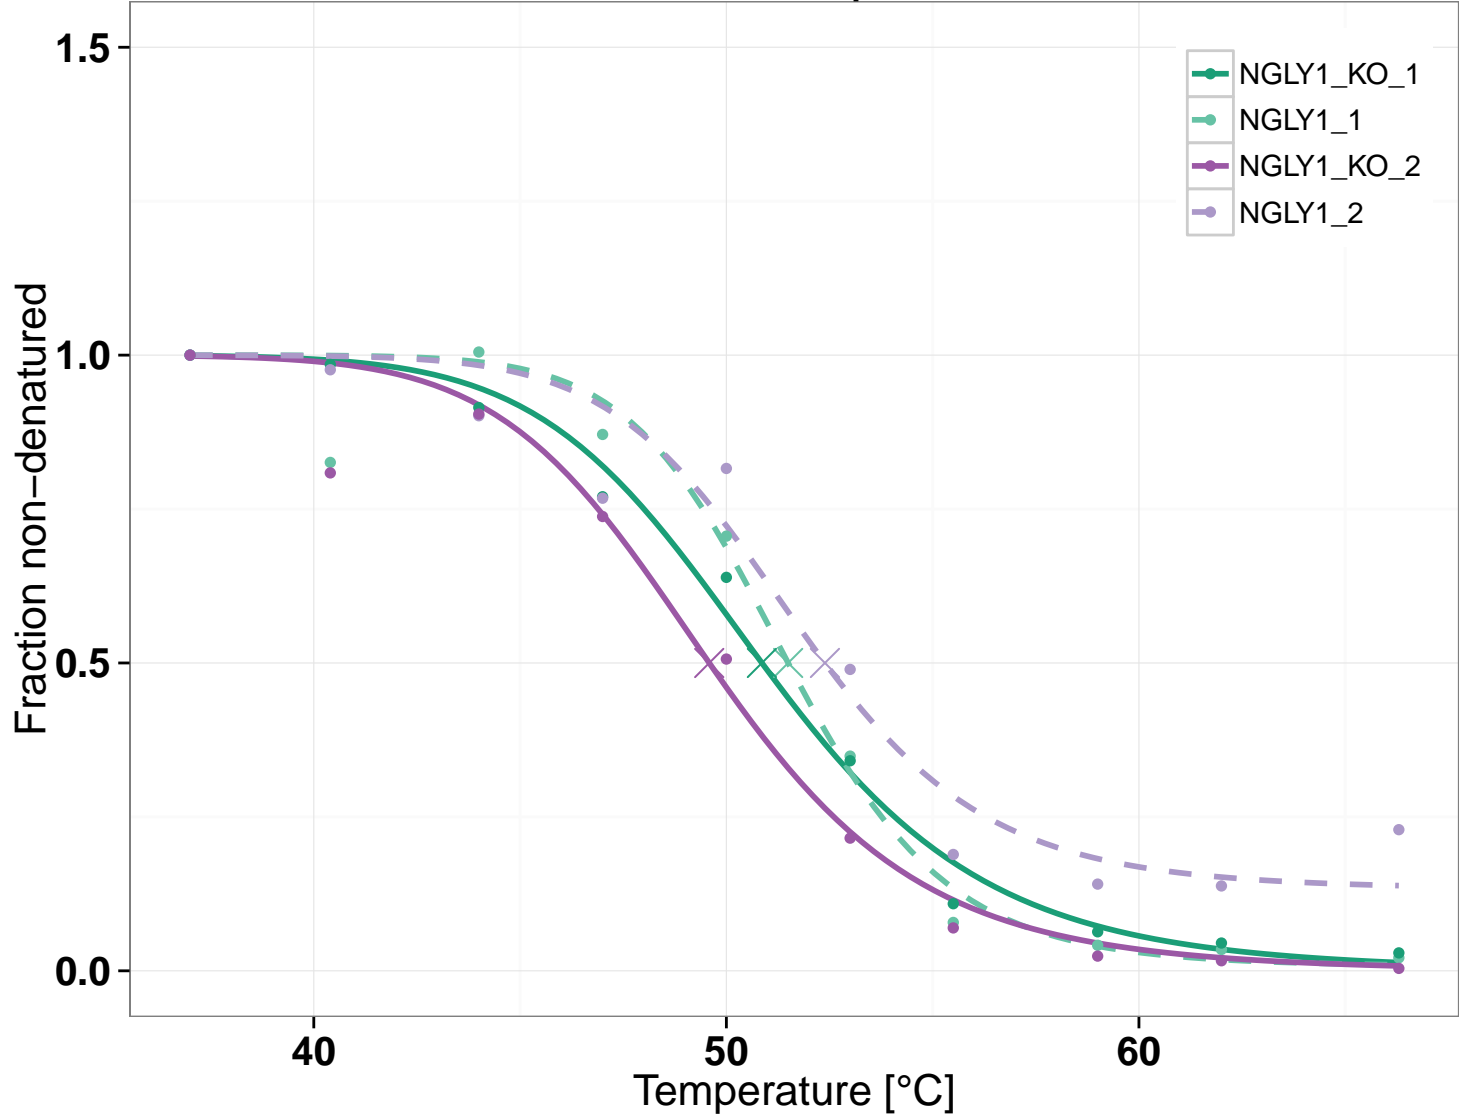

|            | meltPoint | slope  | plateau | R2   |
|------------|-----------|--------|---------|------|
| NGLY1_KO_1 | 50.86     | -0.092 | 0       | 0.99 |
| NGLY1_1    | 51.5      | -0.13  | 0.01    | 0.98 |
| NGLY1_KO_2 | 49.59     | -0.098 | 0       | 0.98 |
| NGLY1_2    | 52.39     | -0.095 | 0.13    | 0.95 |

Supplement: Supplementary file 4913 [file 1]

IPI00013808.1|ACTN4

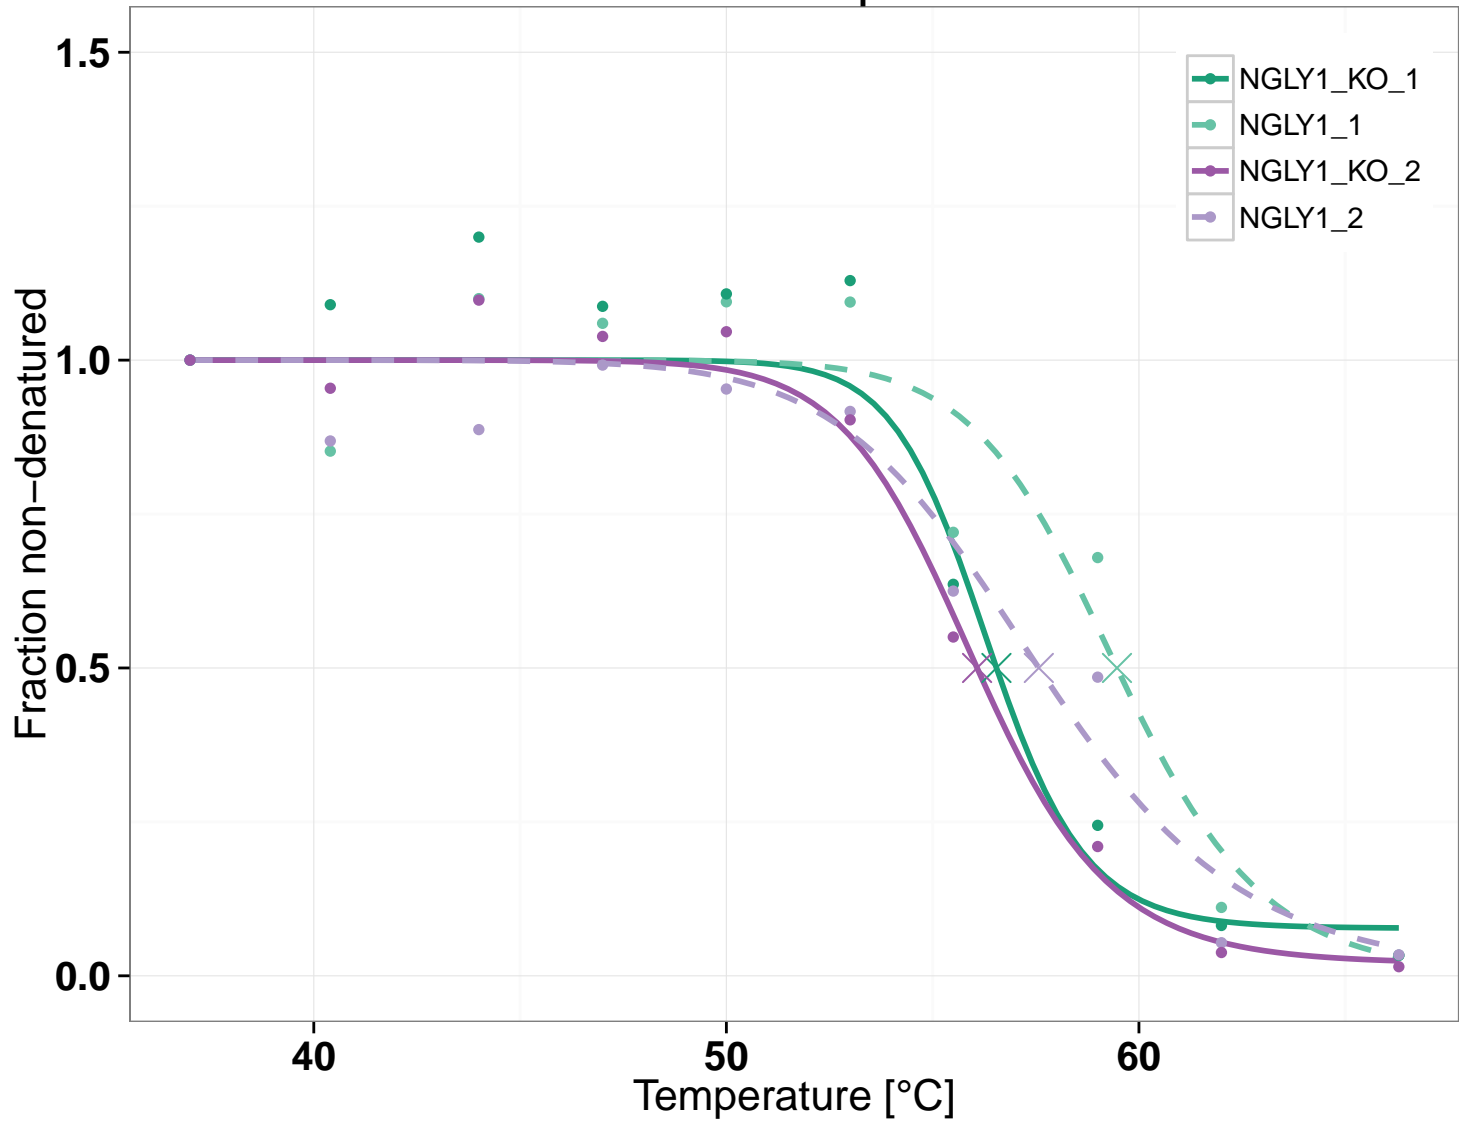

|            | meltPoint | slope | plateau | R2   |
|------------|-----------|-------|---------|------|
| NGLY1_KO_1 | 56.55     | -0.2  | 0.08    | 0.95 |
| NGLY1_1    | 59.47     | -0.14 | 0       | 0.92 |
| NGLY1_KO_2 | 56.08     | -0.15 | 0.02    | 0.99 |
| NGLY1_2    | 57.57     | -0.1  | 0       | 0.95 |

Supplement: Supplementary file 4914 [file 1]

IPI00433138.1|DCBLD2

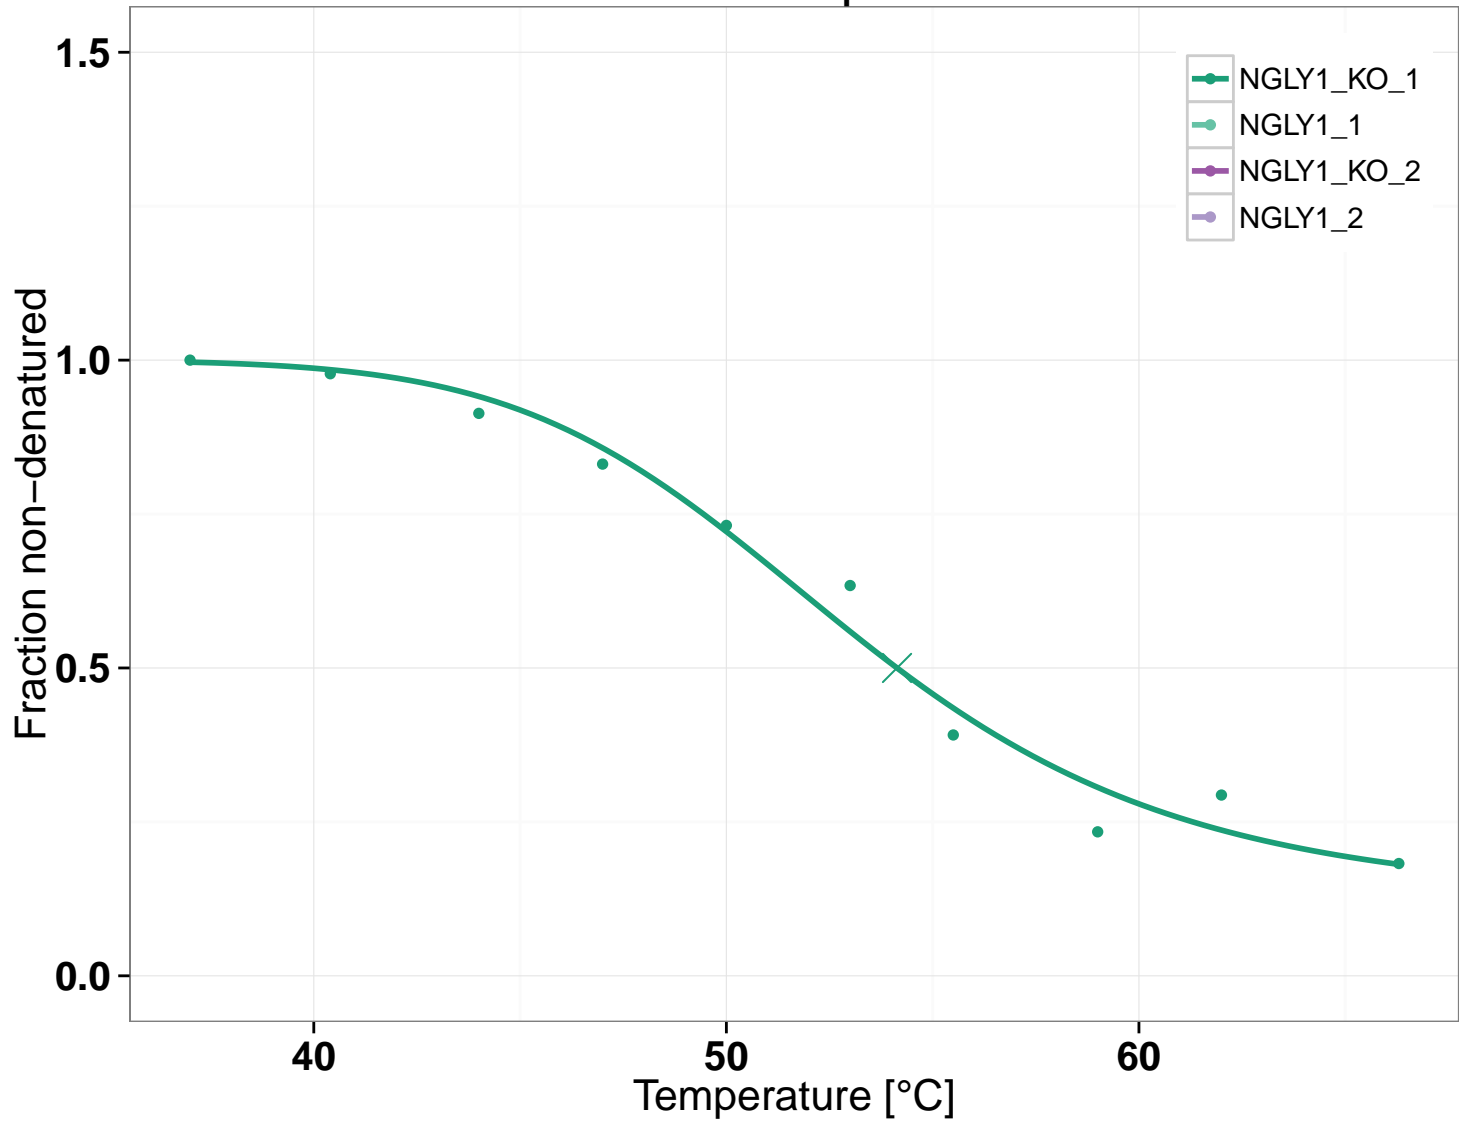

|            | meltPoint | slope  | plateau | R2   |
|------------|-----------|--------|---------|------|
| NGLY1_KO_1 | 54.14     | -0.055 | 0.12    | 0.98 |
| NGLY1_1    | -         | -      | -       | -    |
| NGLY1_KO_2 | -         | -      | -       | -    |
| NGLY1_2    | -         | -      | -       | -    |

Supplement: Supplementary file 4915 [file 1]

# IPI00293817.3|NAPG

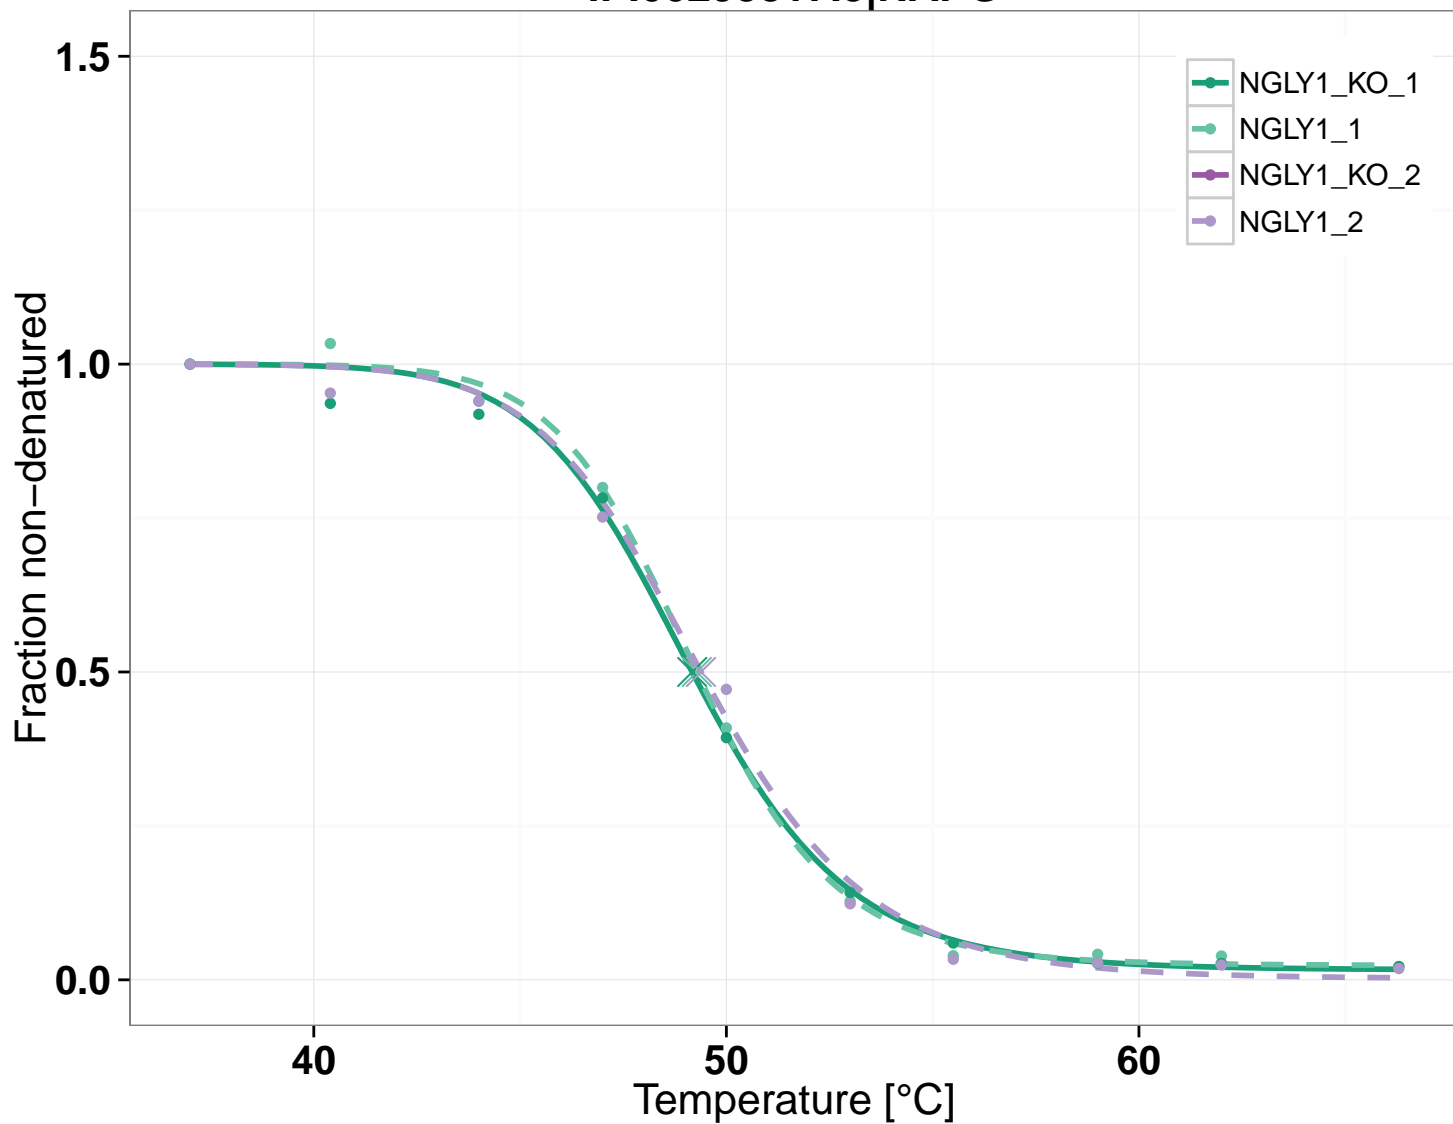

|            | meltPoint | slope | plateau | R2 |
|------------|-----------|-------|---------|----|
| NGLY1_KO_1 | 49.17     | -0.13 | 0.02    | 1  |
| NGLY1_1    | 49.28     | -0.14 | 0.02    | 1  |
| NGLY1_KO_2 | -         | -     | -       | -  |
| NGLY1_2    | 49.39     | -0.12 | 0       | 1  |

Supplement: Supplementary file 4916 [file 1]

IPI00019930.1|UBE2D1

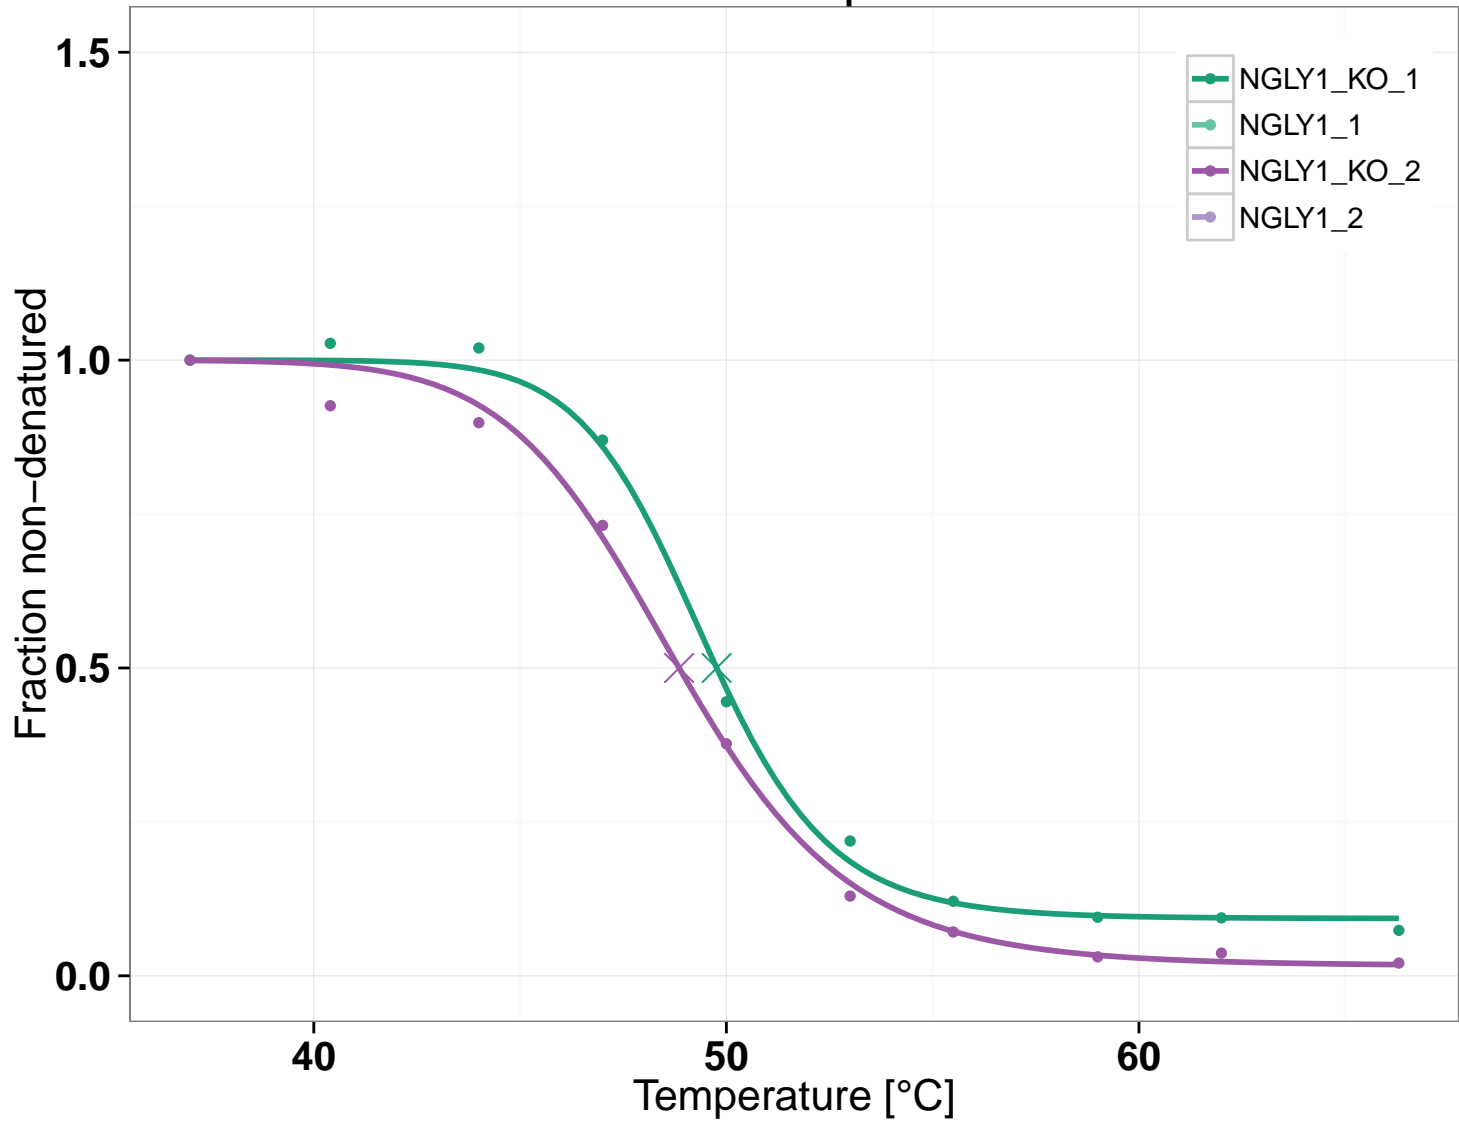

|            | meltPoint | slope | plateau | R2 |
|------------|-----------|-------|---------|----|
| NGLY1_KO_1 | 49.77     | -0.15 | 0.09    | 1  |
| NGLY1_1    | -         | -     | -       | -  |
| NGLY1_KO_2 | 48.86     | -0.12 | 0.02    | 1  |
| NGLY1_2    | -         | -     | -       | -  |

Supplement: Supplementary file 4917 [file 1]

IPI00034280.2|DHRS11

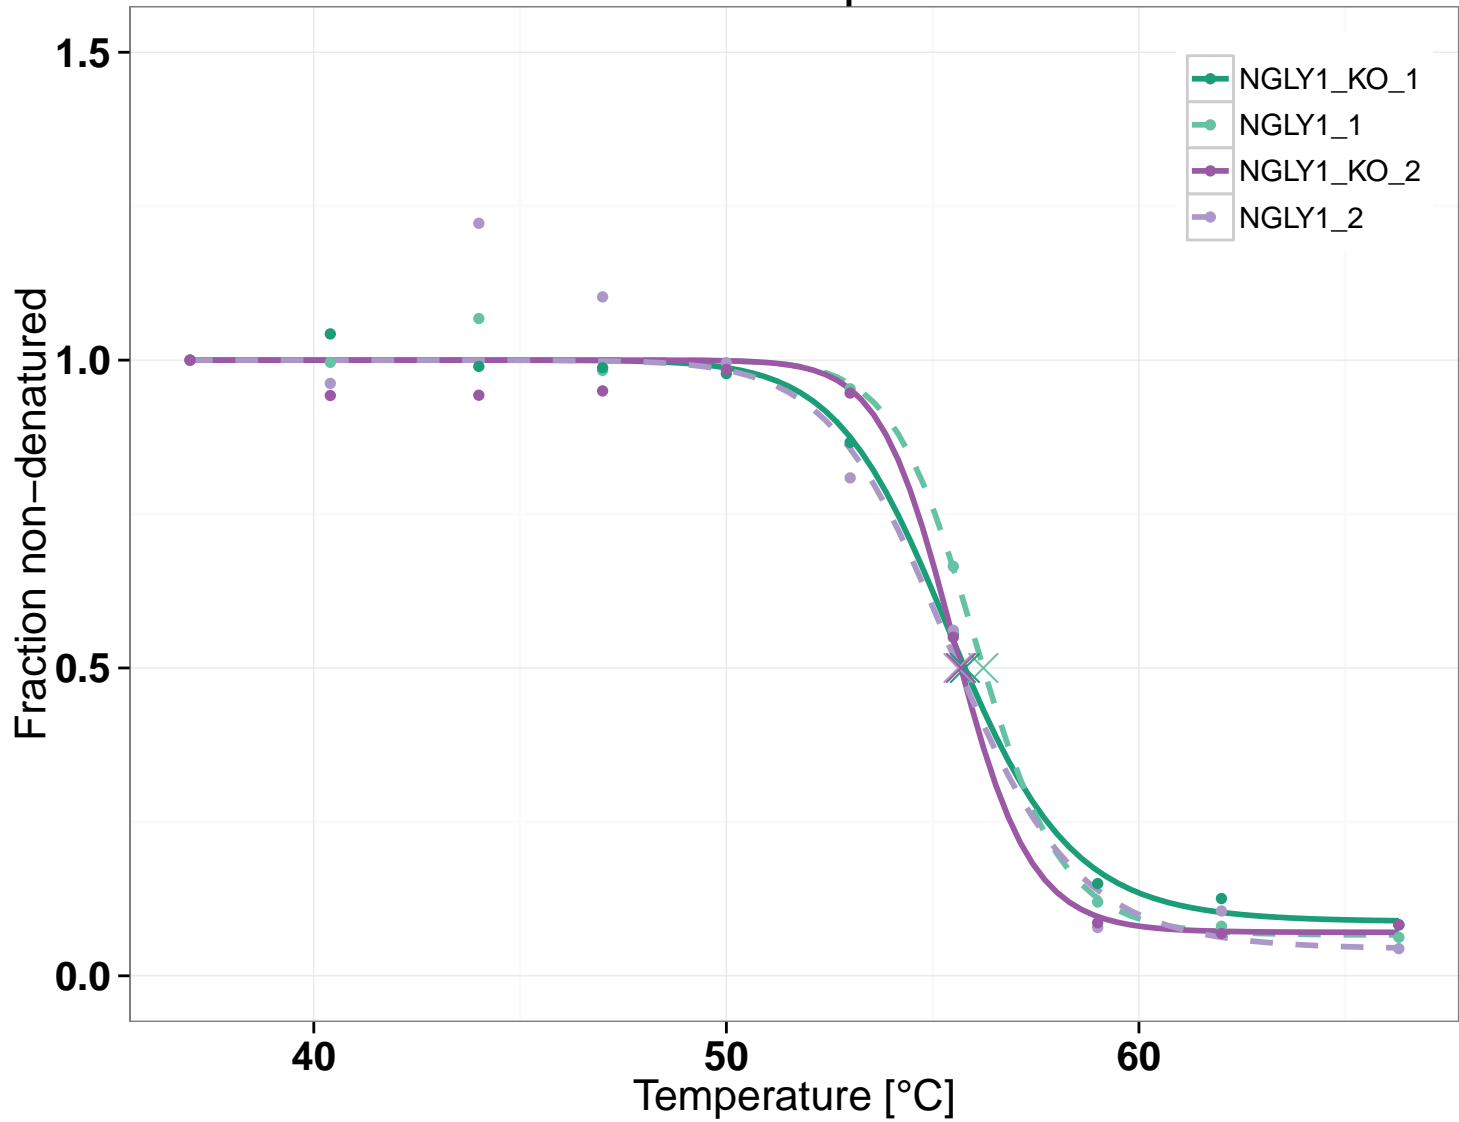

|            | meltPoint | slope | plateau | R2   |
|------------|-----------|-------|---------|------|
| NGLY1_KO_1 | 55.78     | -0.16 | 0.09    | 1    |
| NGLY1_1    | 56.23     | -0.23 | 0.07    | 1    |
| NGLY1_KO_2 | 55.69     | -0.26 | 0.07    | 0.99 |
| NGLY1_2    | 55.63     | -0.16 | 0.04    | 0.96 |

Supplement: Supplementary file 4918 [file 1]

IPI00029702.1|PTK2B

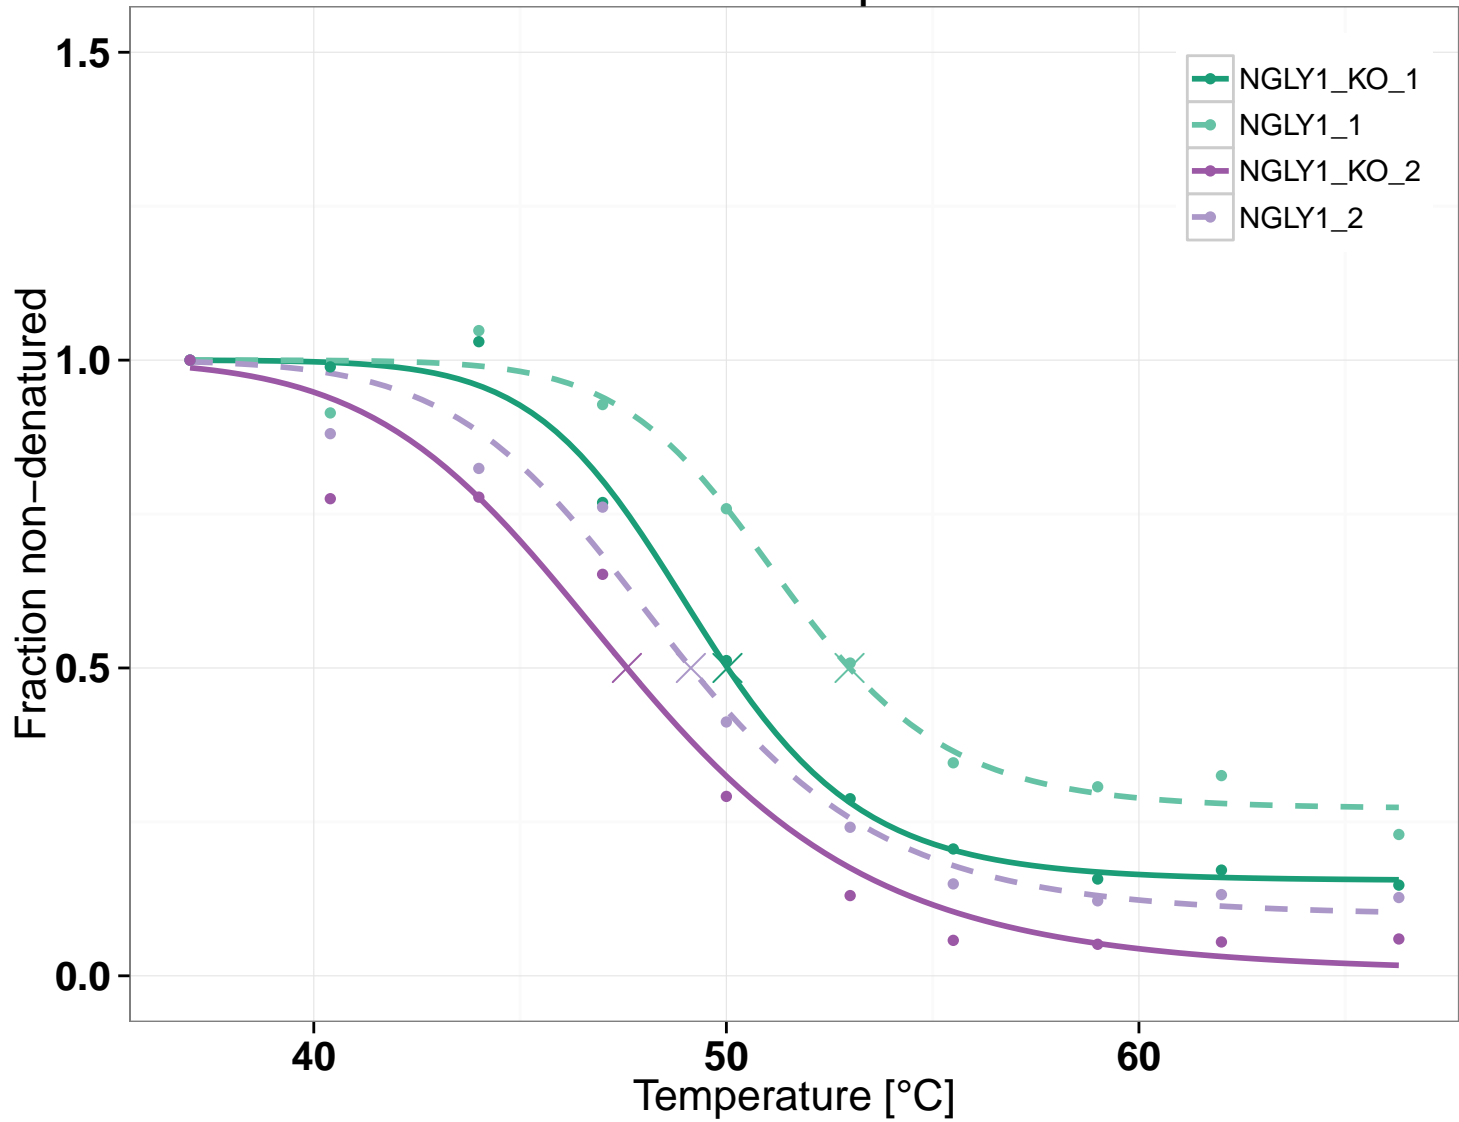

|            | meltPoint | slope  | plateau | R2   |
|------------|-----------|--------|---------|------|
| NGLY1_KO_1 | 50.03     | -0.11  | 0.15    | 0.99 |
| NGLY1_1    | 52.99     | -0.092 | 0.27    | 0.98 |
| NGLY1_KO_2 | 47.59     | -0.082 | 0       | 0.96 |
| NGLY1_2    | 49.14     | -0.087 | 0.1     | 0.98 |

Supplement: Supplementary file 4919 [file 1]

# IPI00026276.2|ZNF593

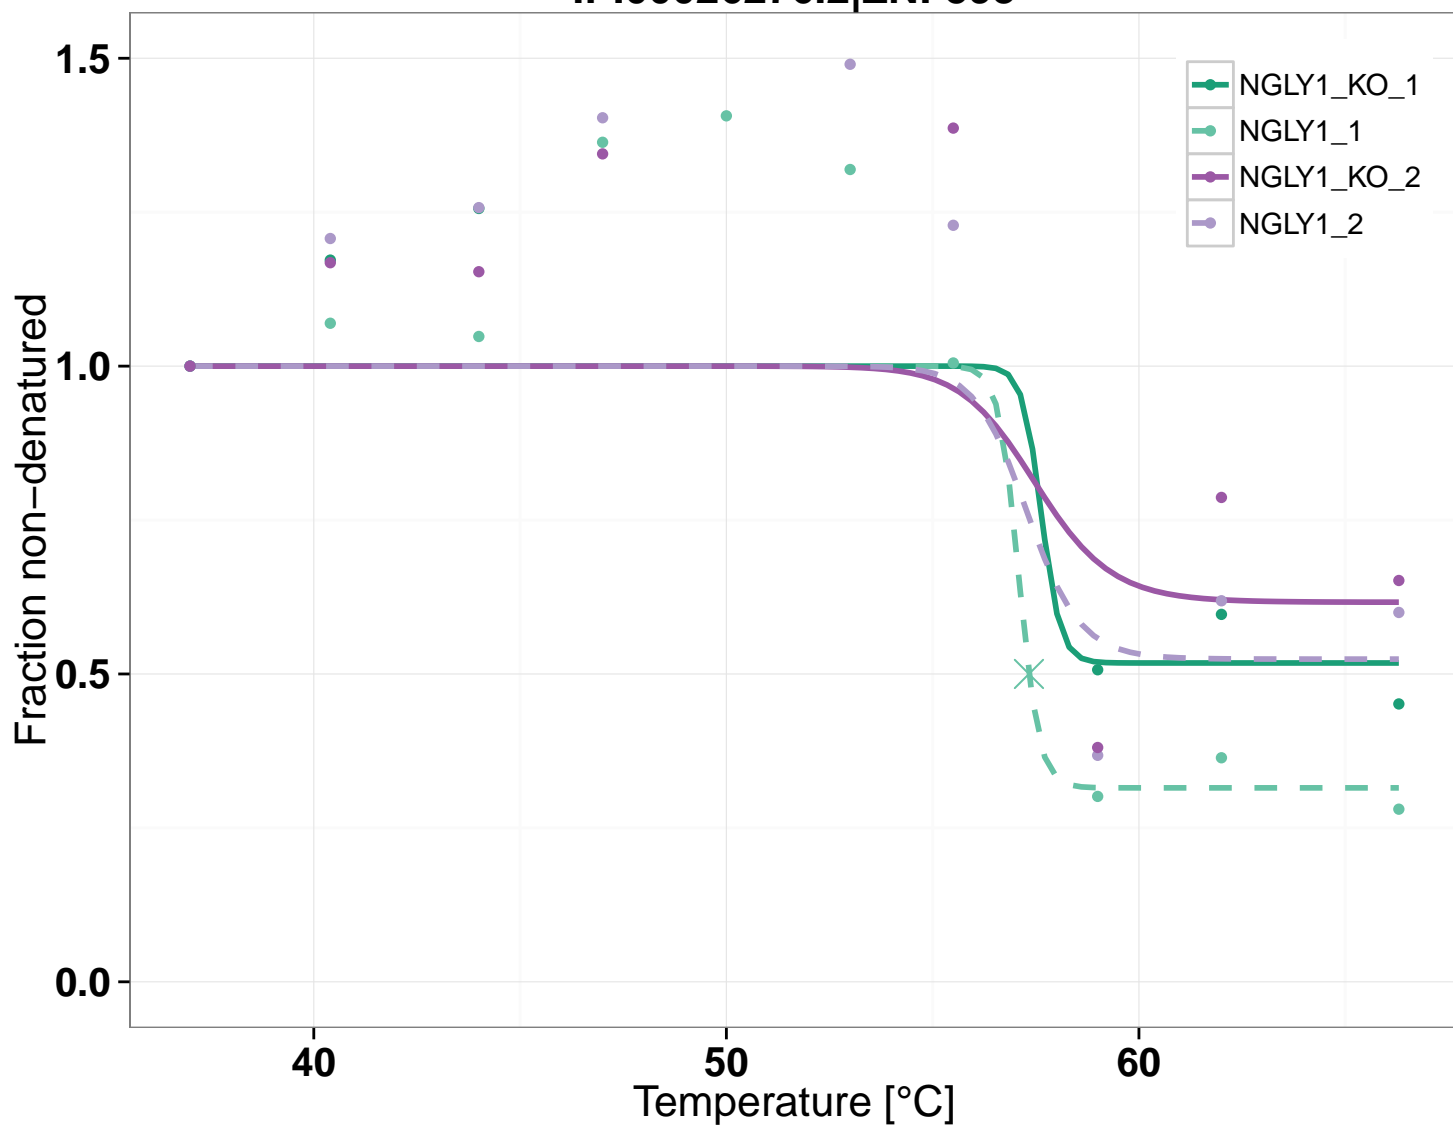

|            | meltPoint | slope | plateau | R2   |
|------------|-----------|-------|---------|------|
| NGLY1_KO_1 | –         | –0.52 | 0.52    | 0.16 |
| NGLY1_1    | 57.33     | –0.7  | 0.32    | 0.77 |
| NGLY1_KO_2 | –         | –0.1  | 0.62    | 0.21 |
| NGLY1_2    | –         | –0.19 | 0.52    | 0.4  |

Supplement: Supplementary file 4920 [file 1]

IPI00031558.3|NUDT9

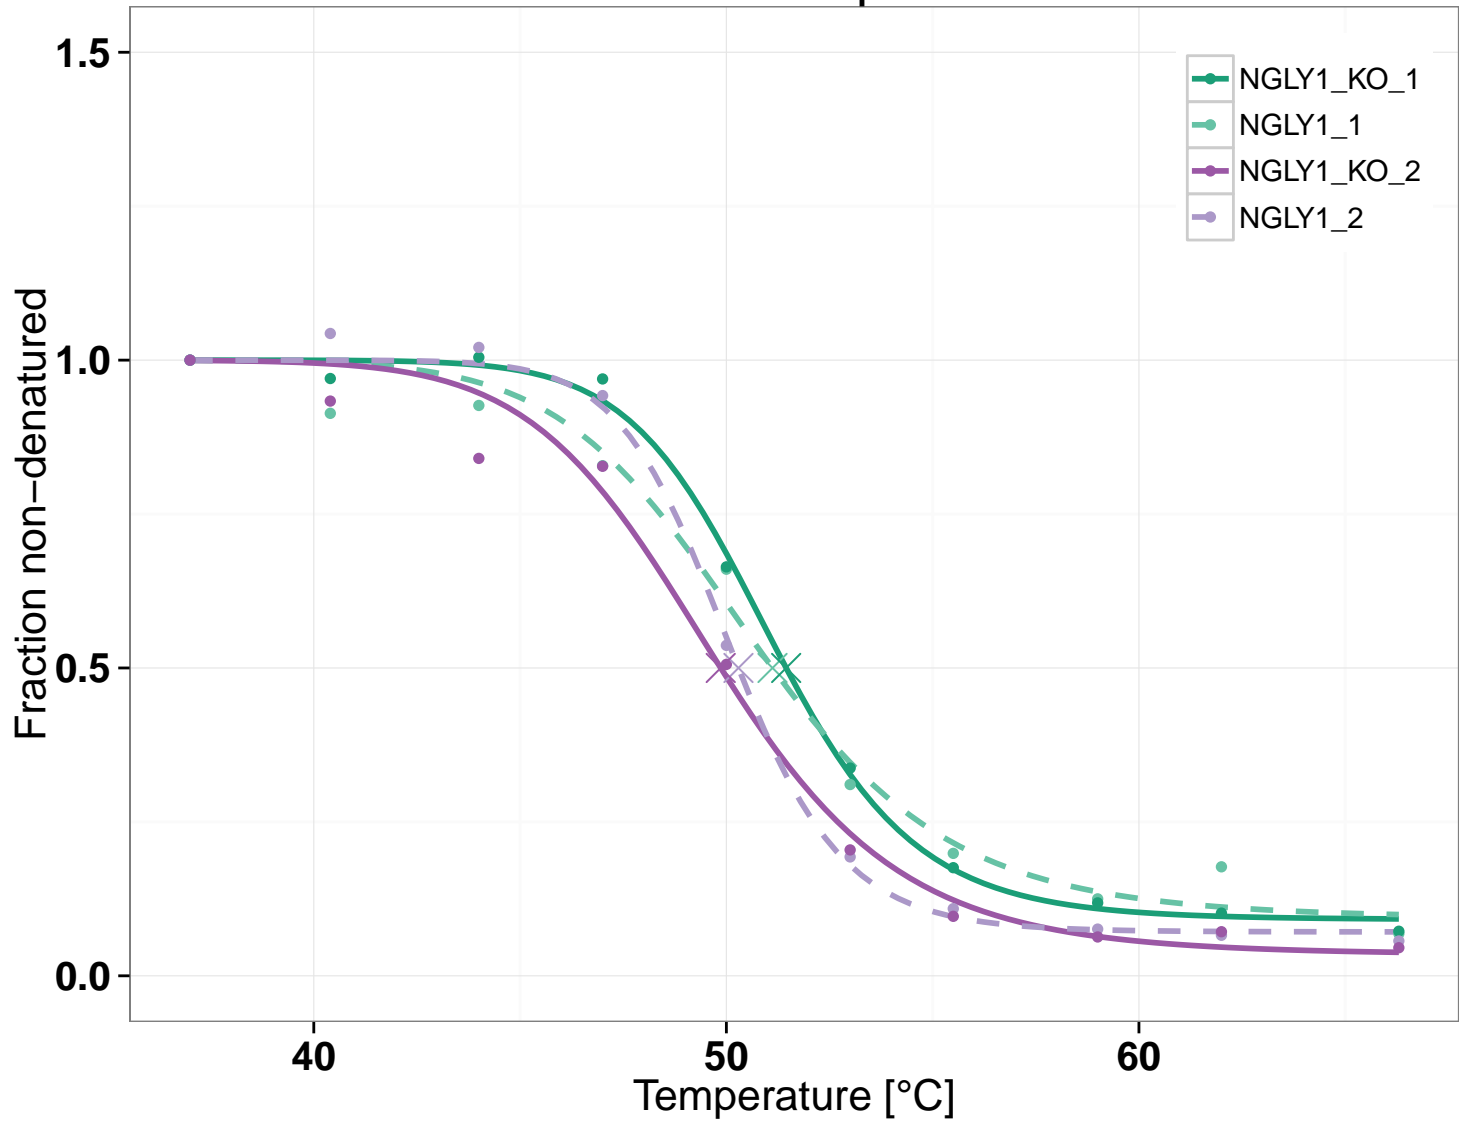

|            | meltPoint | slope  | plateau | R2   |
|------------|-----------|--------|---------|------|
| NGLY1_KO_1 | 51.45     | -0.13  | 0.09    | 1    |
| NGLY1_1    | 51.12     | -0.095 | 0.09    | 0.99 |
| NGLY1_KO_2 | 49.86     | -0.11  | 0.03    | 0.99 |
| NGLY1_2    | 50.29     | -0.17  | 0.07    | 1    |

Supplement: Supplementary file 4921 [file 1]

IPI00298949.1|GAK

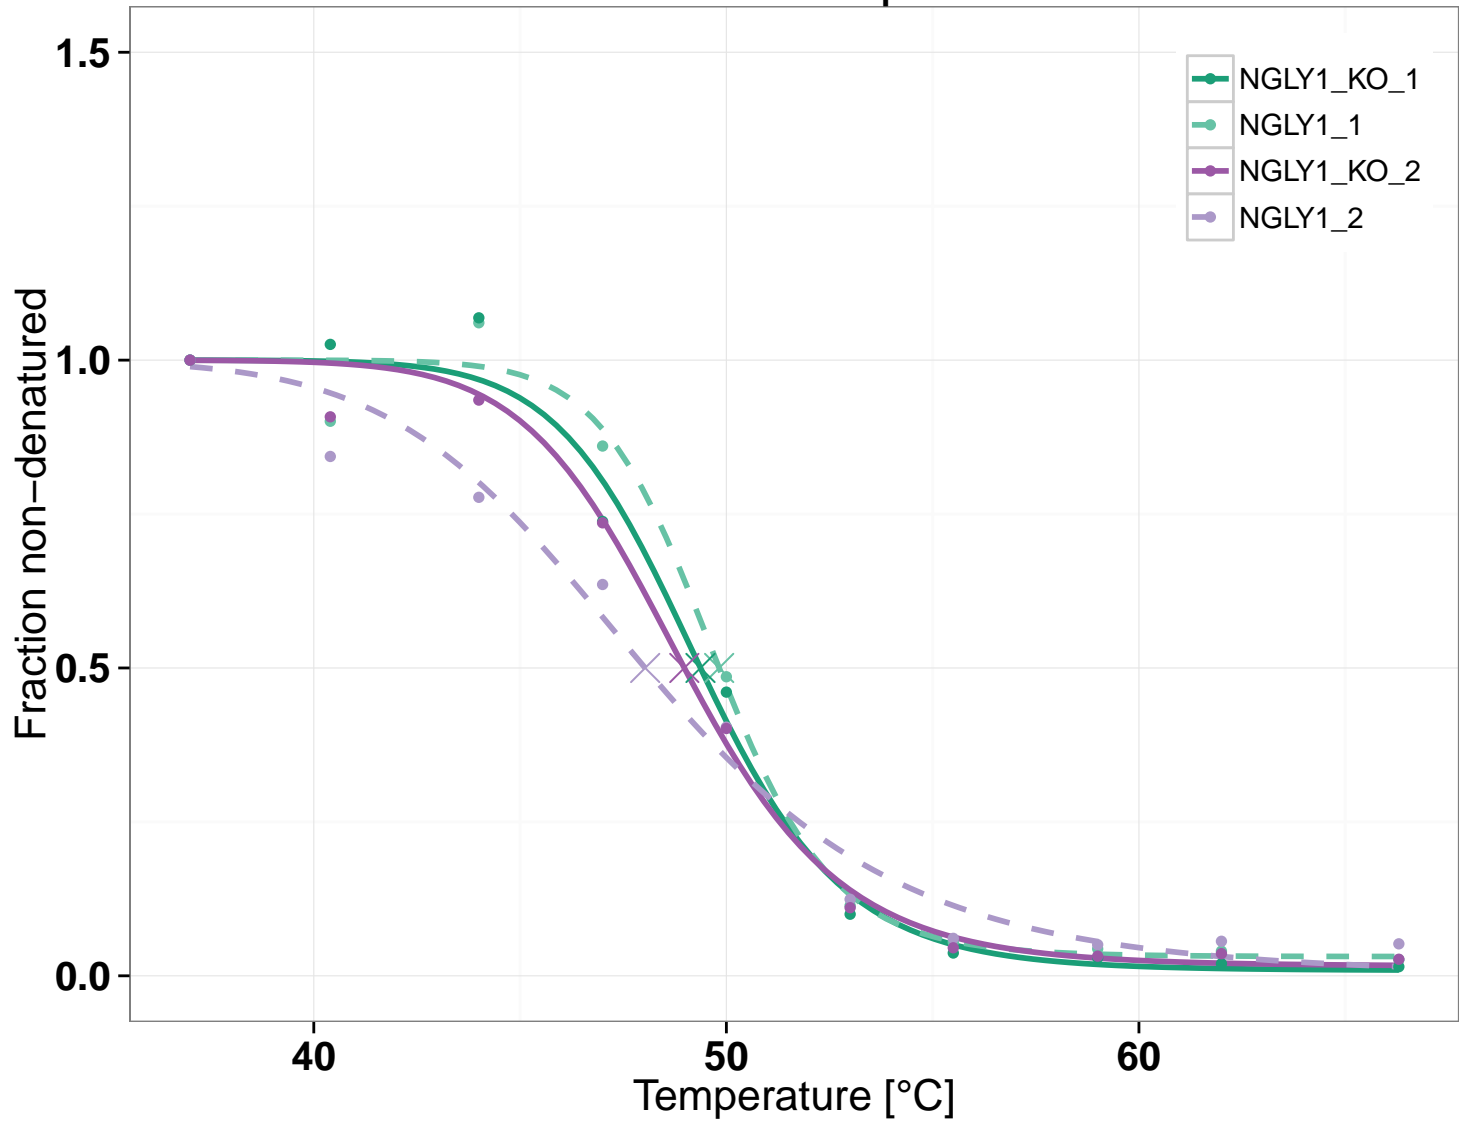

|            | meltPoint | slope  | plateau | R2   |
|------------|-----------|--------|---------|------|
| NGLY1_KO_1 | 49.37     | -0.14  | 0.01    | 0.99 |
| NGLY1_1    | 49.83     | -0.17  | 0.03    | 0.99 |
| NGLY1_KO_2 | 48.98     | -0.13  | 0.02    | 0.99 |
| NGLY1_2    | 48.03     | -0.081 | 0       | 0.98 |

Supplement: Supplementary file 4922 [file 1]
