# Supplementary material (part 50 of 85)
Source: publisher figshare collection journal article supplement (https://gsajournals.figshare.com/articles/dataset/_/12014913)

# IPI00791634.1|PHB

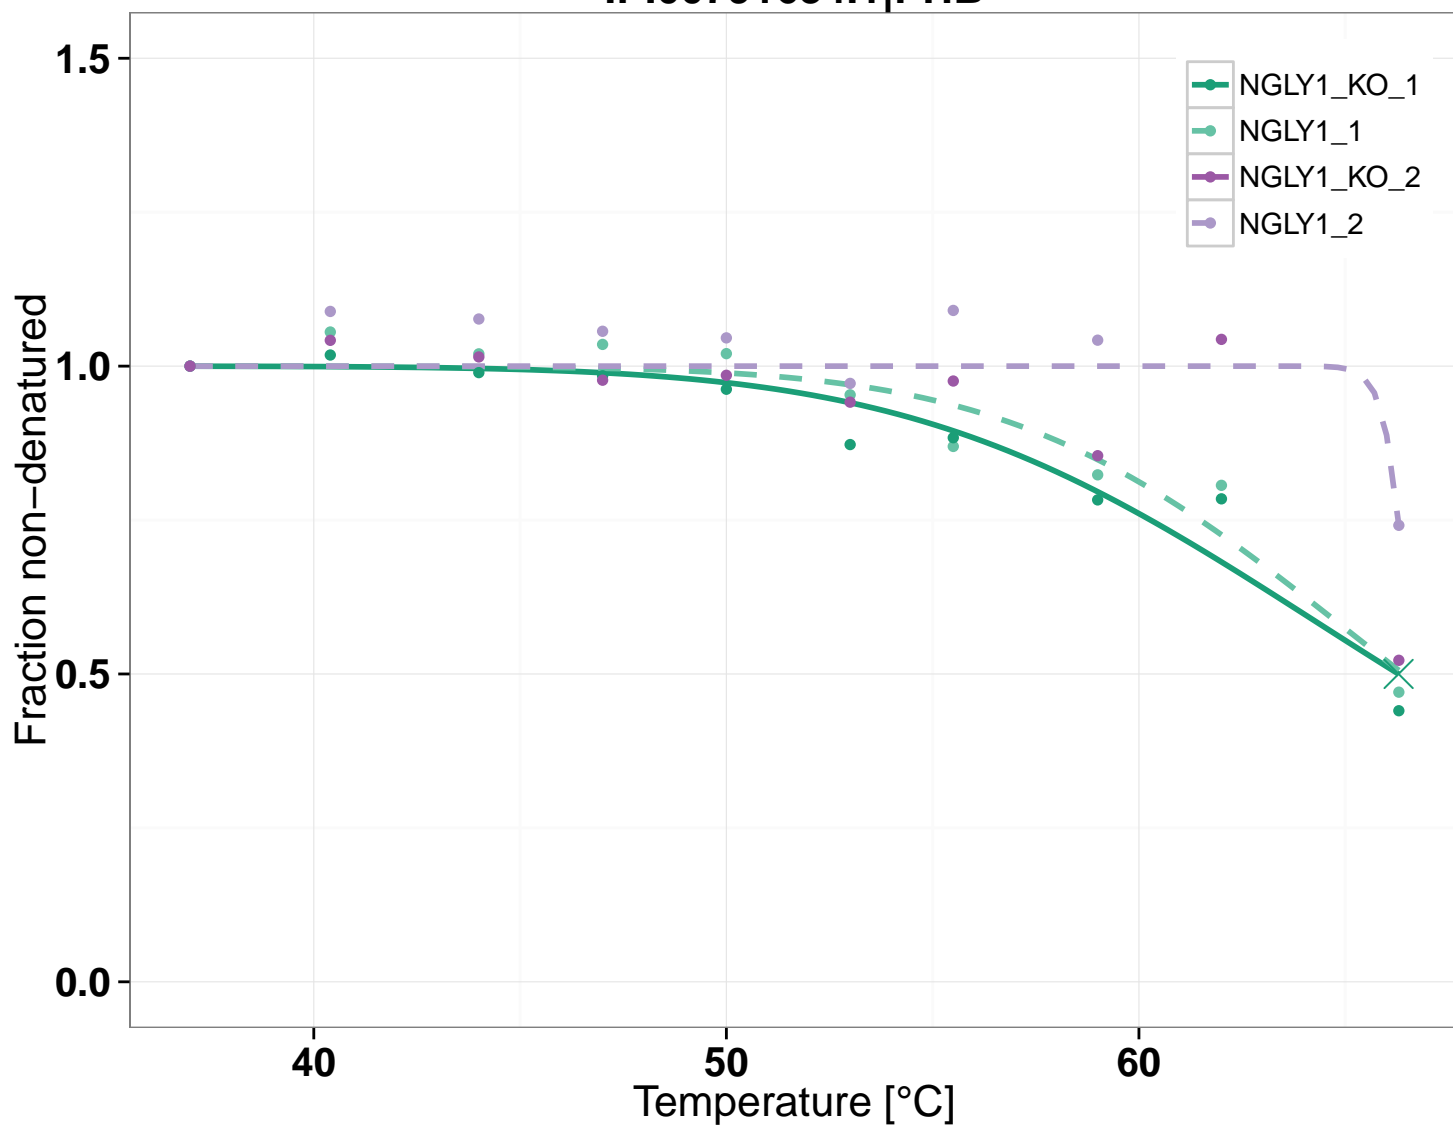

|            | meltPoint | slope  | plateau | R2   |
|------------|-----------|--------|---------|------|
| NGLY1_KO_1 | 66.29     | -0.043 | 0       | 0.93 |
| NGLY1_1    | -         | -0.053 | 0       | 0.93 |
| NGLY1_KO_2 | -         | -      | -       | -    |
| NGLY1_2    | -         | -      | 0       | 0.47 |

Supplement: Supplementary file 4923 [file 1]

# IPI00010872.3|CBX4

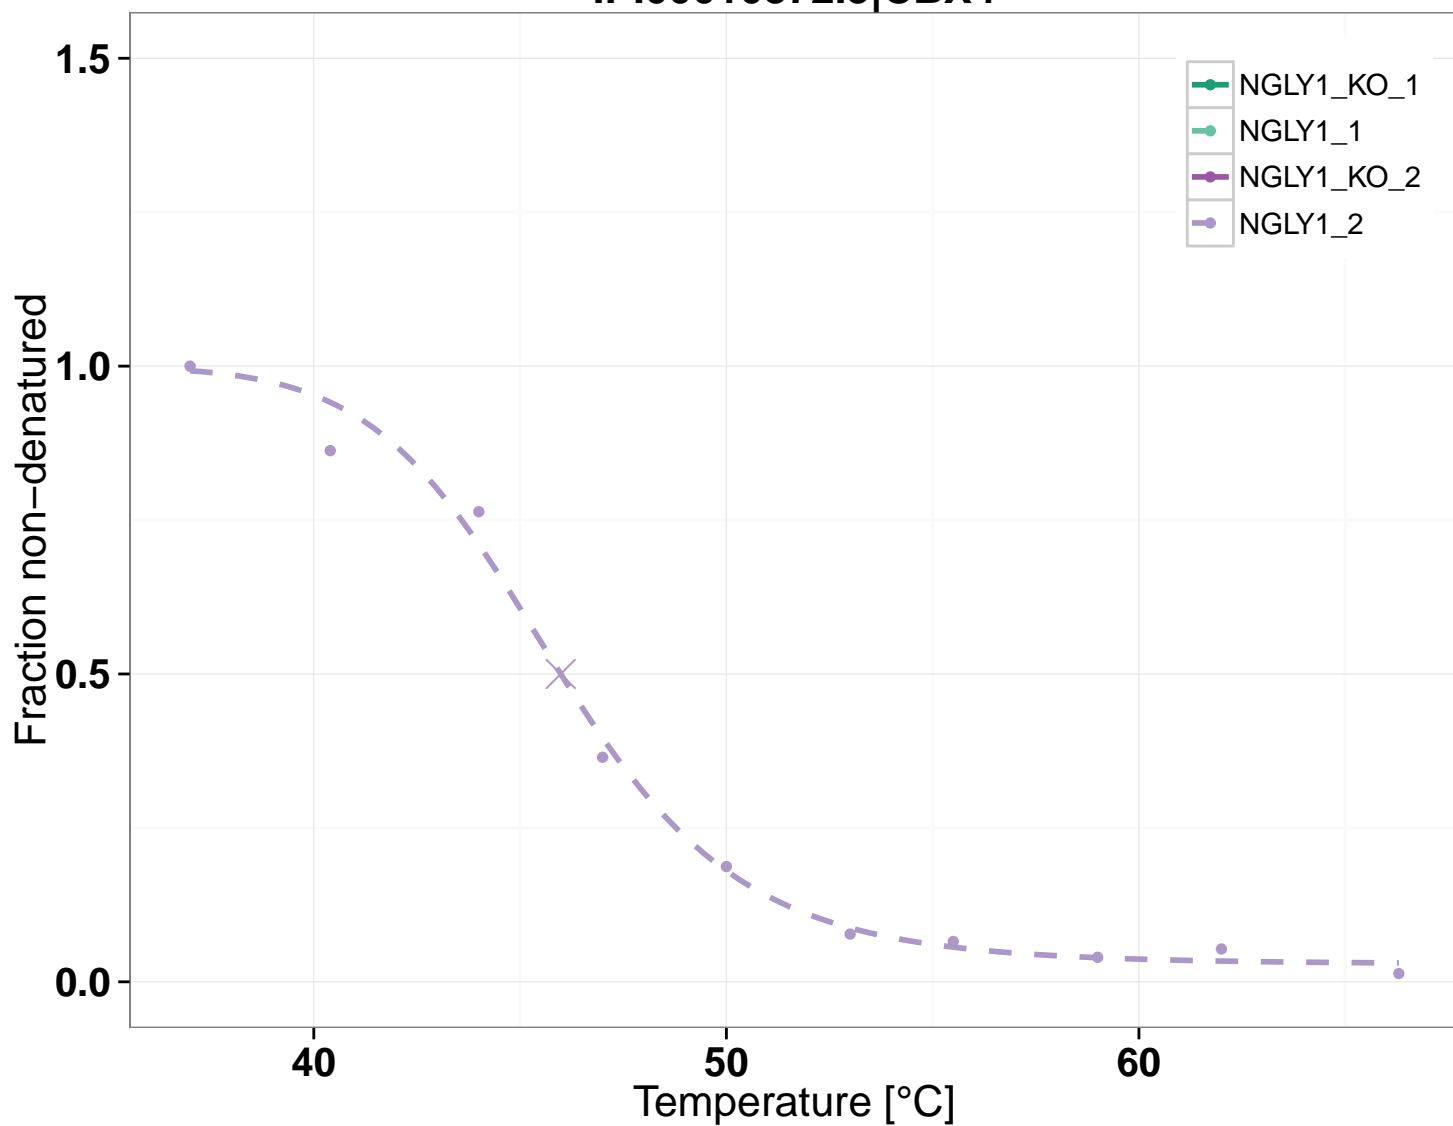

|            | meltPoint | slope | plateau | R2   |
|------------|-----------|-------|---------|------|
| NGLY1_KO_1 | —         | —     | —       | —    |
| NGLY1_1    | —         | —     | —       | —    |
| NGLY1_KO_2 | —         | —     | —       | —    |
| NGLY1_2    | 45.99     | -0.11 | 0.03    | 0.99 |

Supplement: Supplementary file 4924 [file 1]

IPI00551062.2|CNPY3

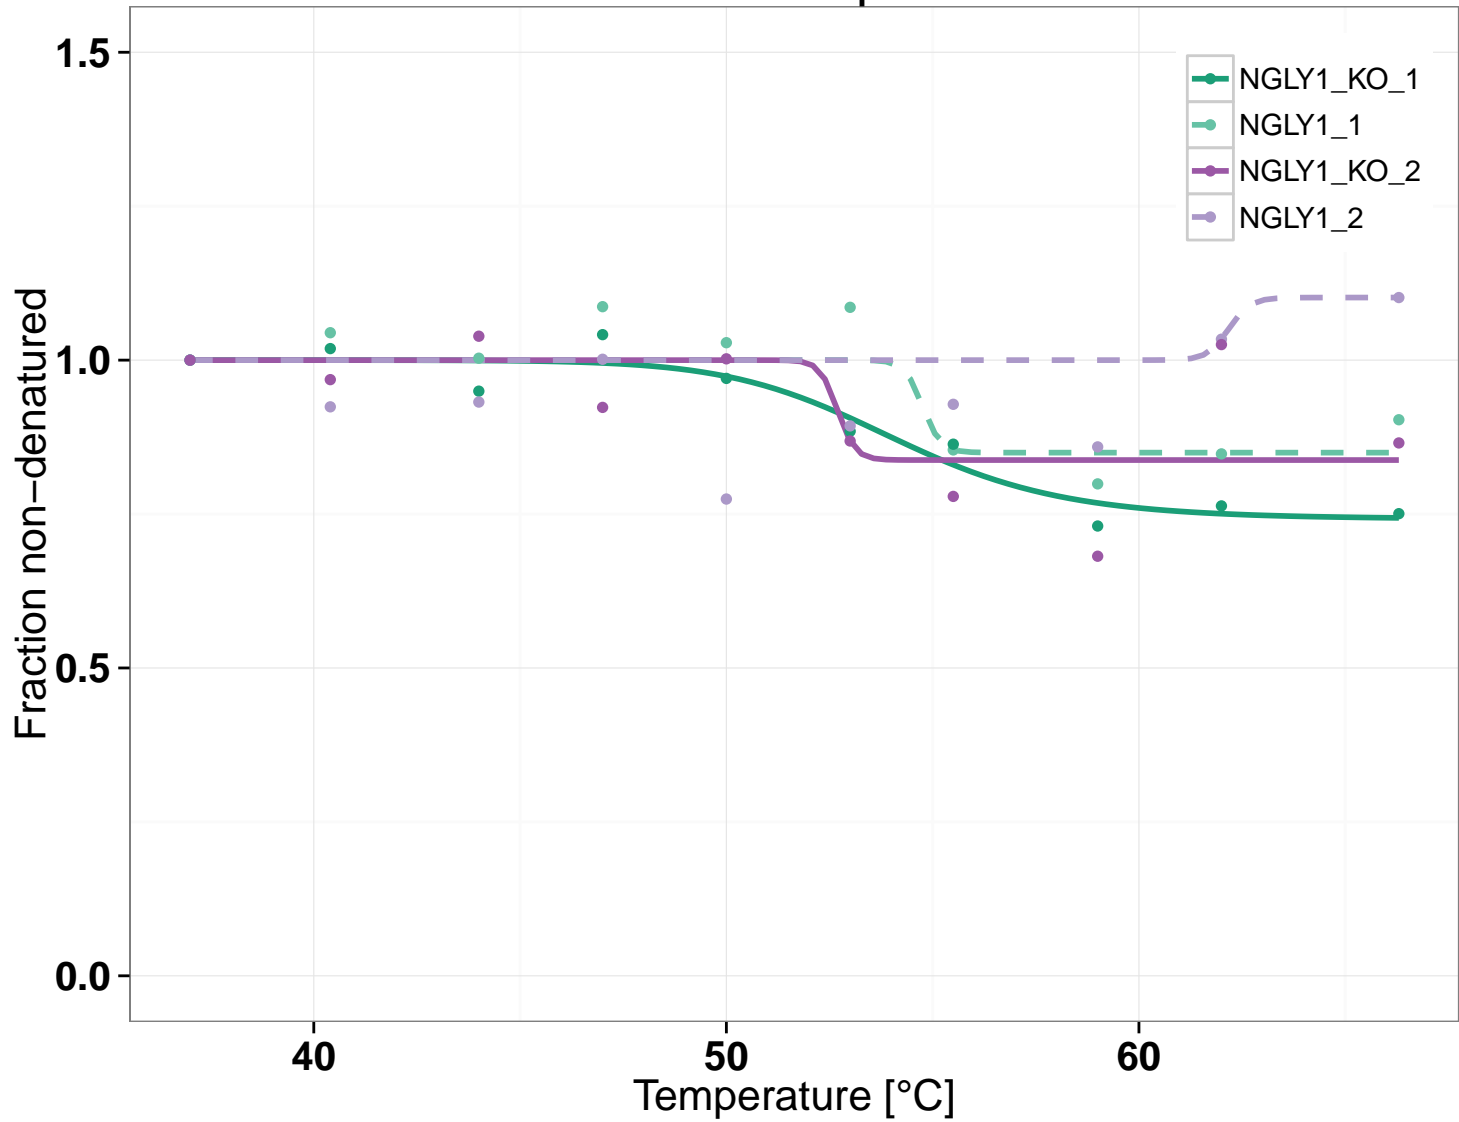

|            | meltPoint | slope  | plateau | R2    |
|------------|-----------|--------|---------|-------|
| NGLY1_KO_1 | –         | –0.032 | 0.74    | 0.93  |
| NGLY1_1    | –         | –0.17  | 0.85    | 0.77  |
| NGLY1_KO_2 | –         | –0.19  | 0.84    | 0.41  |
| NGLY1_2    | –         | 0.099  | 1.1     | –0.24 |

Supplement: Supplementary file 4925 [file 1]

# IPI00220289.7|CHD6

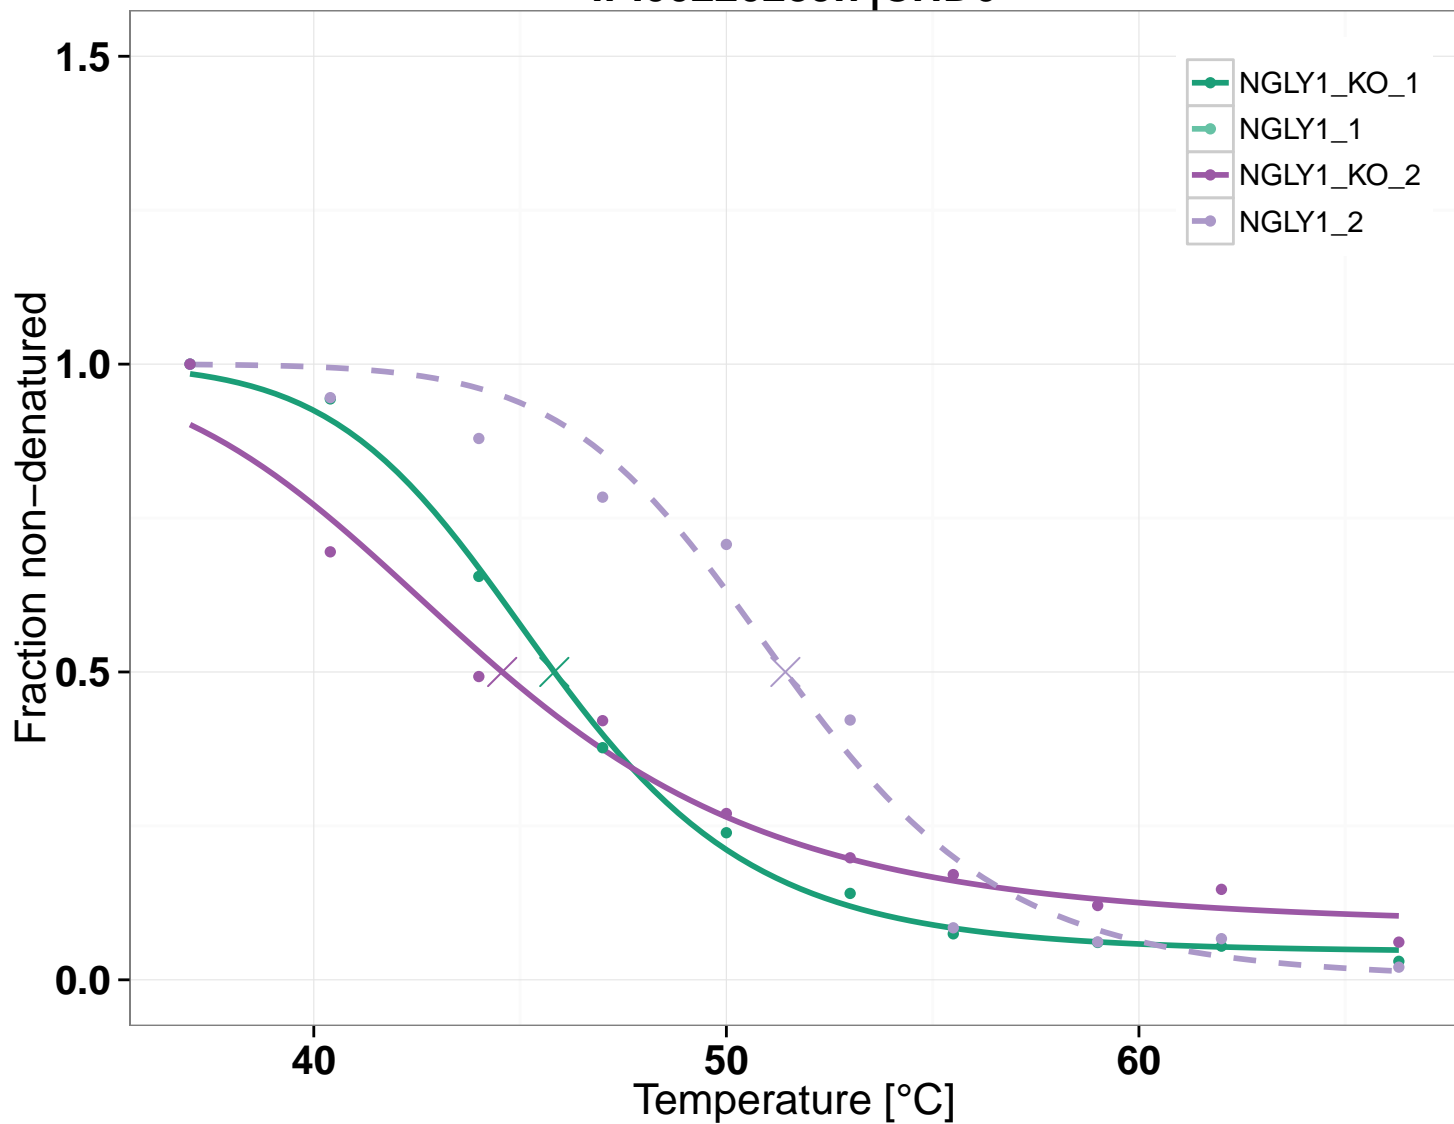

|            | meltPoint | slope  | plateau | R2   |
|------------|-----------|--------|---------|------|
| NGLY1_KO_1 | 45.83     | -0.093 | 0.04    | 1    |
| NGLY1_1    | -         | -      | -       | -    |
| NGLY1_KO_2 | 44.57     | -0.062 | 0.09    | 0.98 |
| NGLY1_2    | 51.43     | -0.093 | 0       | 0.97 |

Supplement: Supplementary file 4926 [file 1]

# IPI00410284.6|ZCCHC9

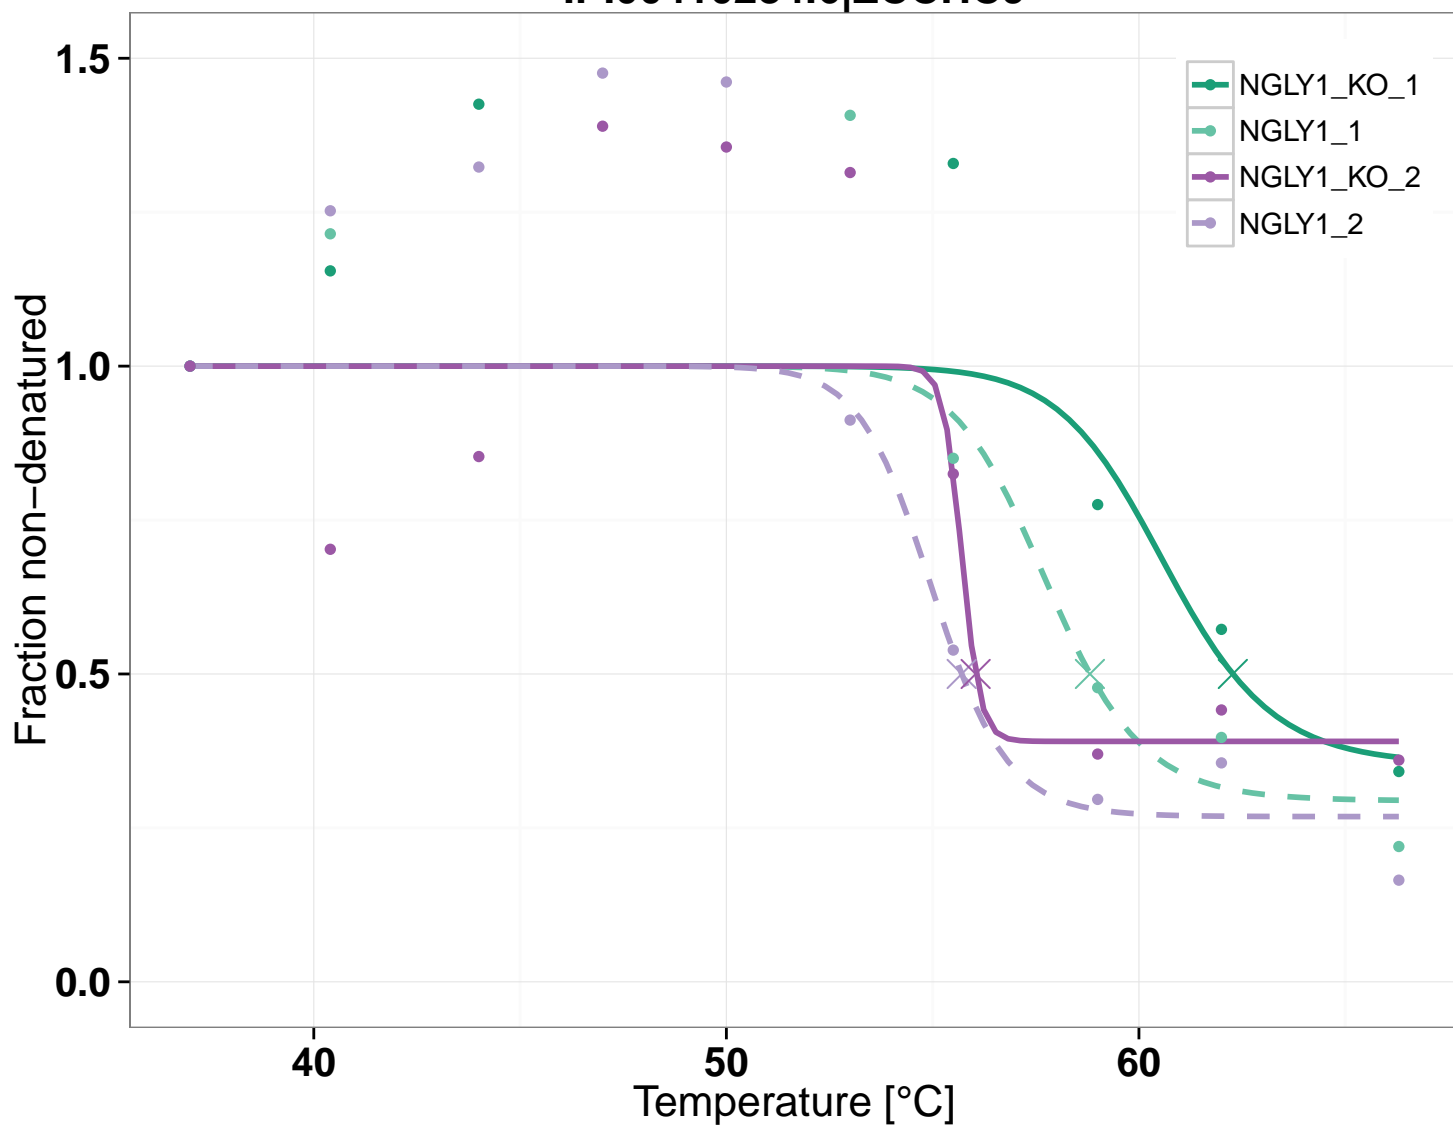

|            | meltPoint | slope | plateau | R2    |
|------------|-----------|-------|---------|-------|
| NGLY1_KO_1 | 62.28     | -0.12 | 0.35    | -0.07 |
| NGLY1_1    | 58.81     | -0.15 | 0.29    | 0.4   |
| NGLY1_KO_2 | 56.04     | -0.68 | 0.39    | 0.66  |
| NGLY1_2    | 55.7      | -0.2  | 0.27    | 0.73  |

Supplement: Supplementary file 4927 [file 1]

# IPI00032506.2|C14ORF142

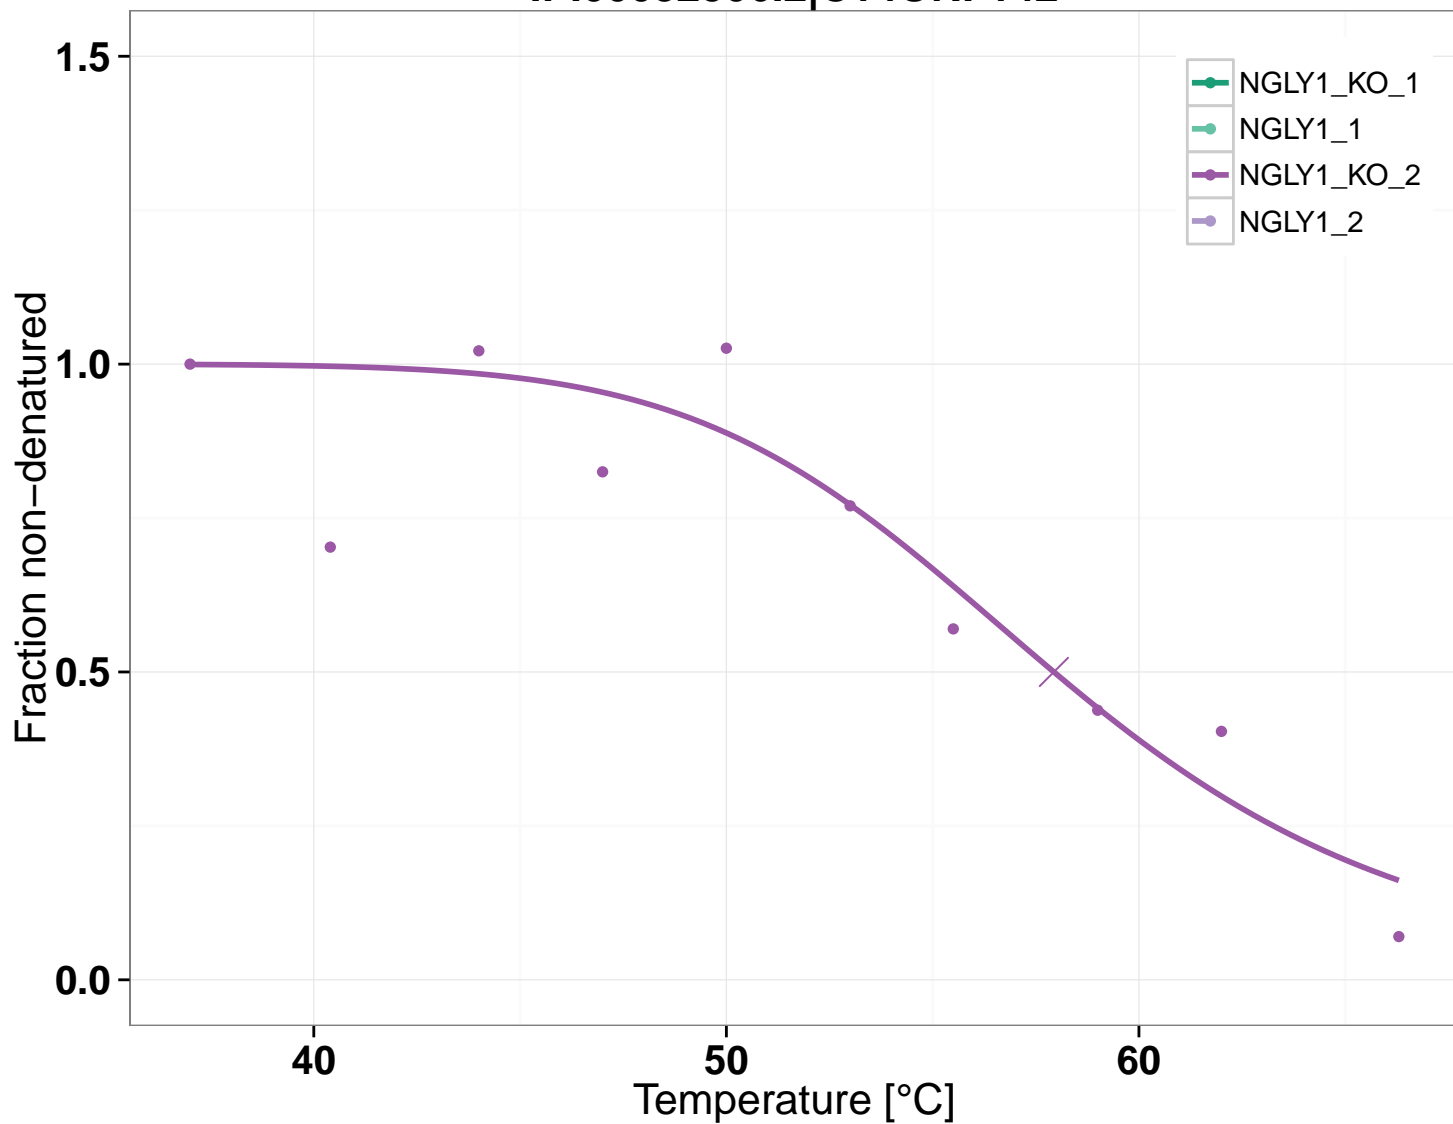

|            | meltPoint | slope  | plateau | R2   |
|------------|-----------|--------|---------|------|
| NGLY1_KO_1 | —         | —      | —       | —    |
| NGLY1_1    | —         | —      | —       | —    |
| NGLY1_KO_2 | 57.94     | -0.058 | 0       | 0.83 |
| NGLY1_2    | —         | —      | —       | —    |

Supplement: Supplementary file 4928 [file 1]

IPI00291016.8|NDUFV3

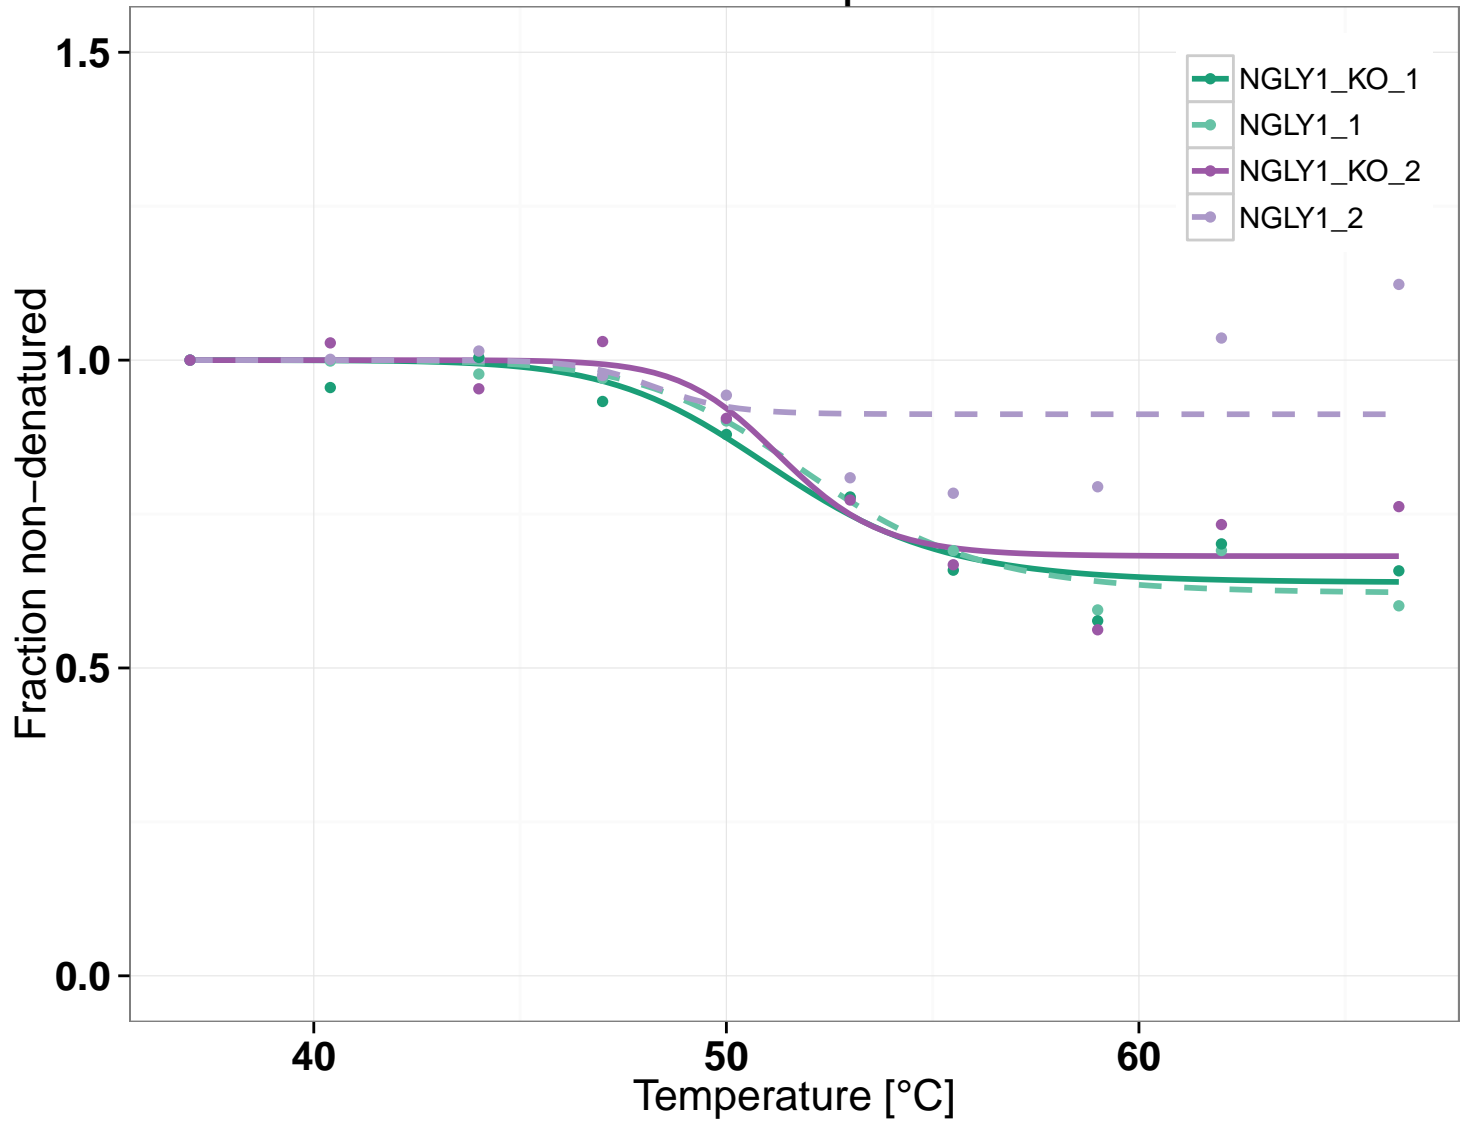

|            | meltPoint | slope  | plateau | R2   |
|------------|-----------|--------|---------|------|
| NGLY1_KO_1 | —         | −0.044 | 0.64    | 0.94 |
| NGLY1_1    | —         | −0.045 | 0.62    | 0.97 |
| NGLY1_KO_2 | —         | −0.065 | 0.68    | 0.88 |
| NGLY1_2    | —         | −0.024 | 0.91    | 0.15 |

Supplement: Supplementary file 4929 [file 1]

IPI00012208.1|ALG12

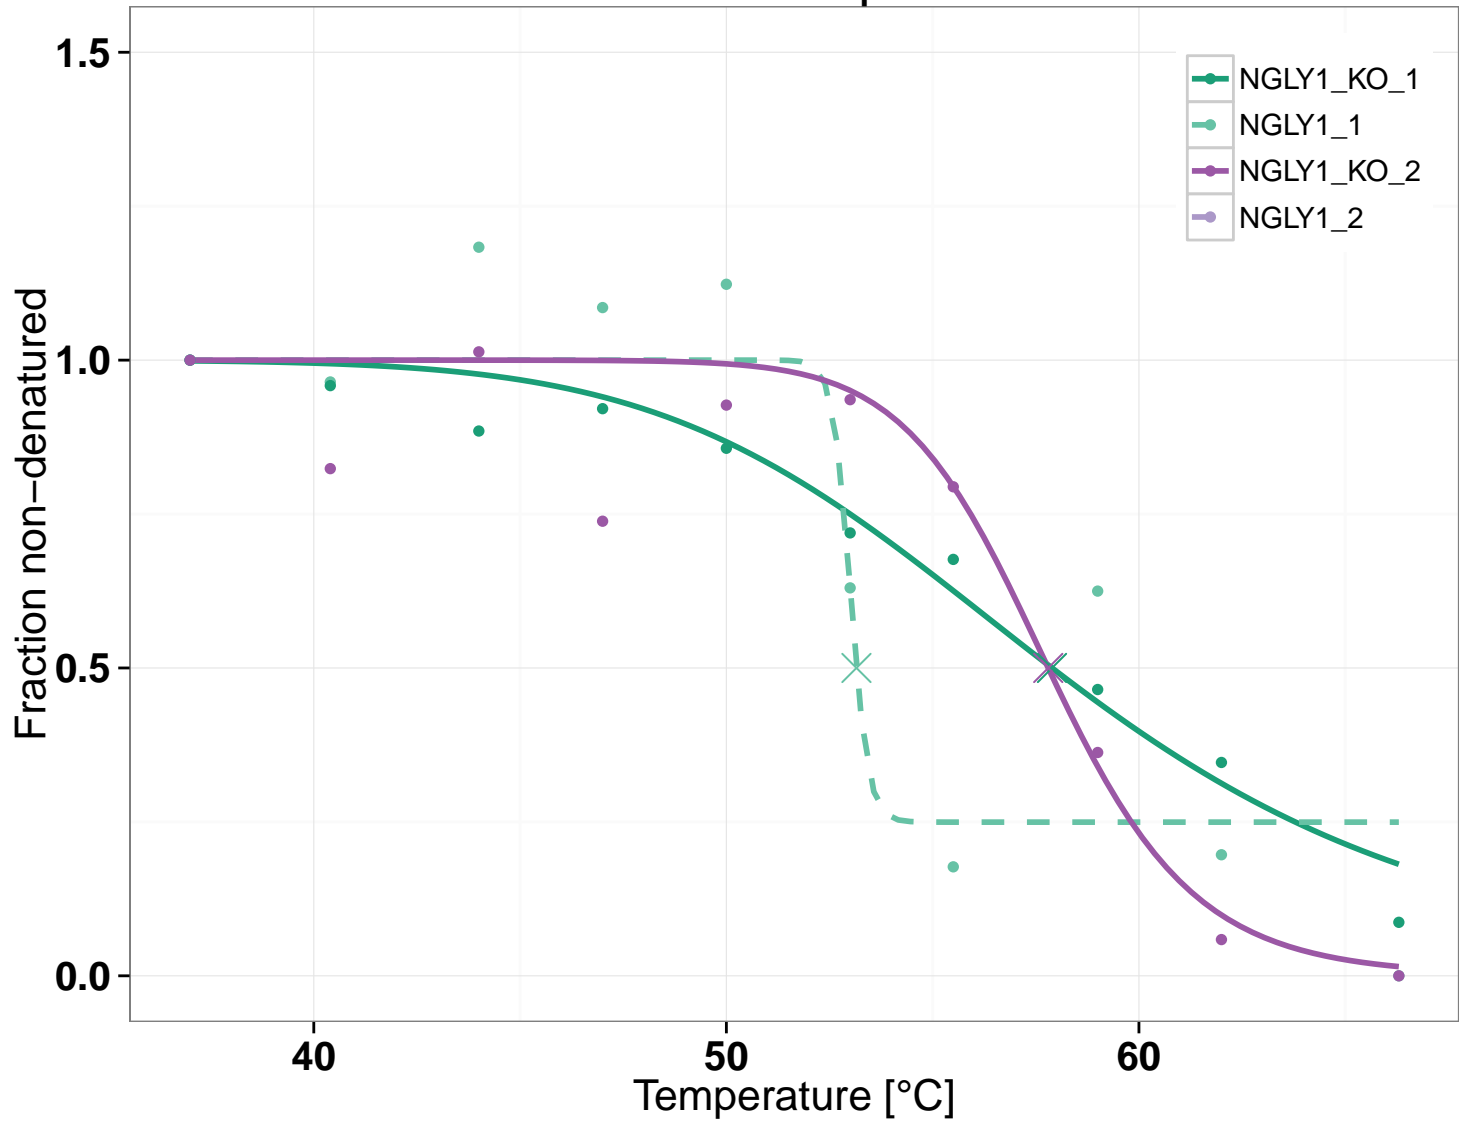

|            | meltPoint | slope  | plateau | R2   |
|------------|-----------|--------|---------|------|
| NGLY1_KO_1 | 57.89     | -0.053 | 0       | 0.97 |
| NGLY1_1    | 53.15     | -0.88  | 0.25    | 0.85 |
| NGLY1_KO_2 | 57.8      | -0.14  | 0       | 0.92 |
| NGLY1_2    | -         | -      | -       | -    |

Supplement: Supplementary file 4930 [file 1]

IPI00012235.3|NDFIP1

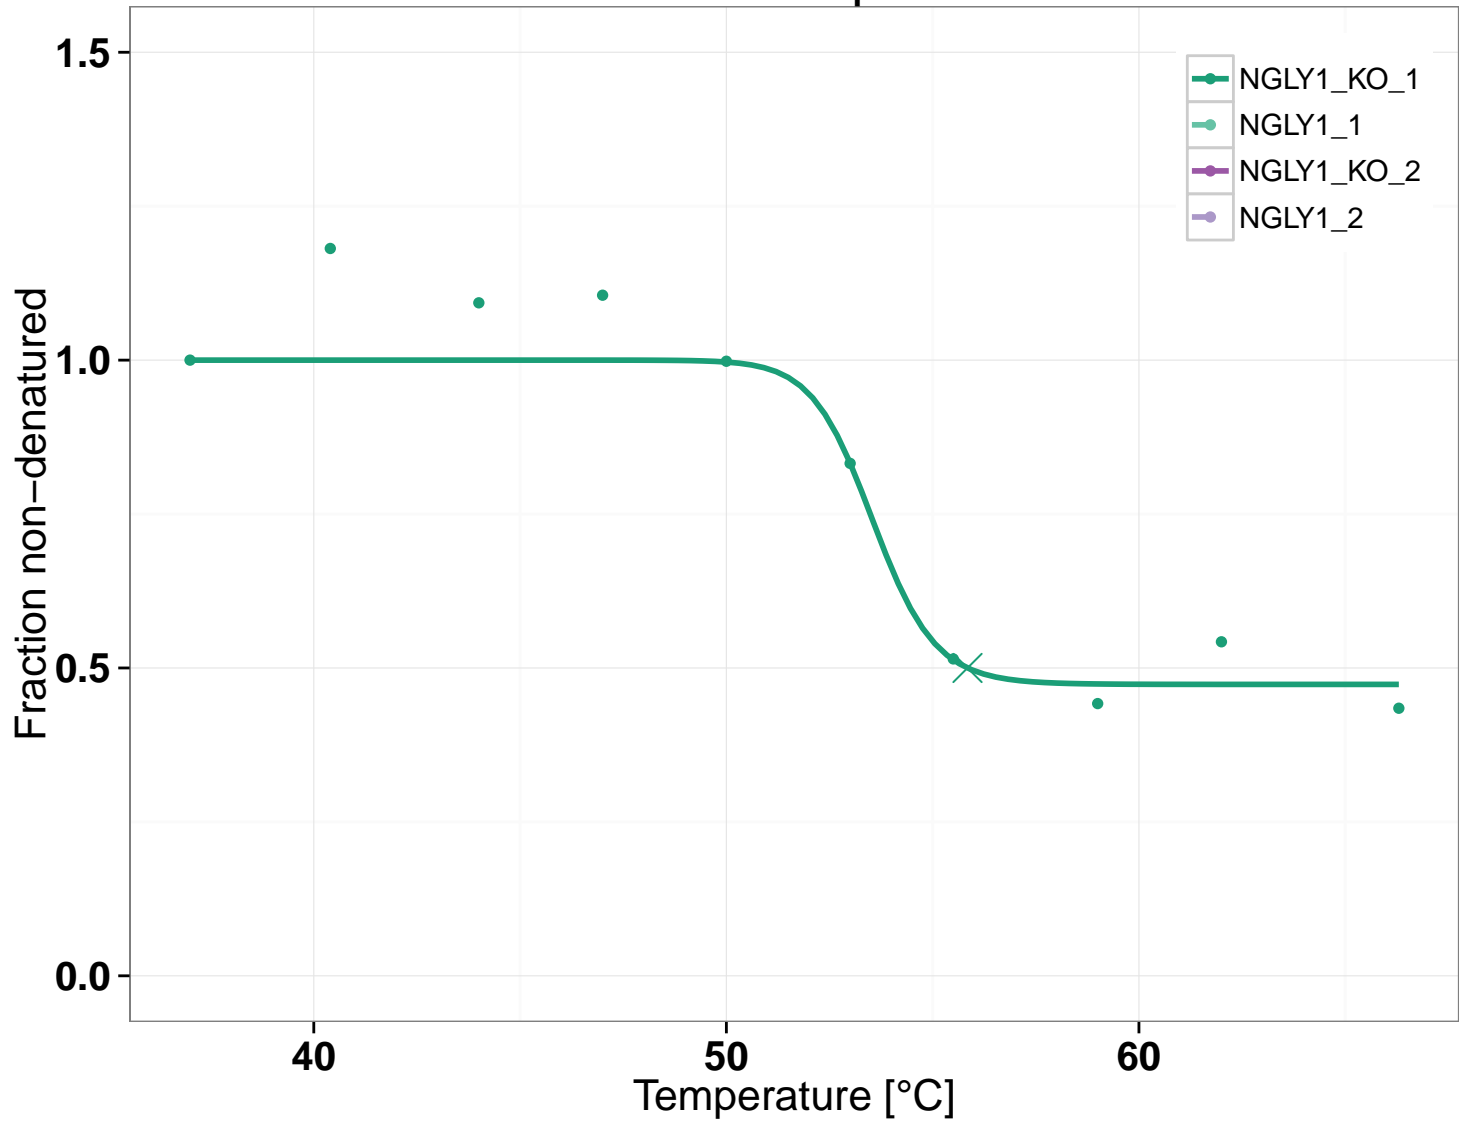

|            | meltPoint | slope | plateau | R2   |
|------------|-----------|-------|---------|------|
| NGLY1_KO_1 | 55.85     | -0.18 | 0.47    | 0.93 |
| NGLY1_1    | -         | -     | -       | -    |
| NGLY1_KO_2 | -         | -     | -       | -    |
| NGLY1_2    | -         | -     | -       | -    |

Supplement: Supplementary file 4931 [file 1]

IPI00011421.1|MLLT11

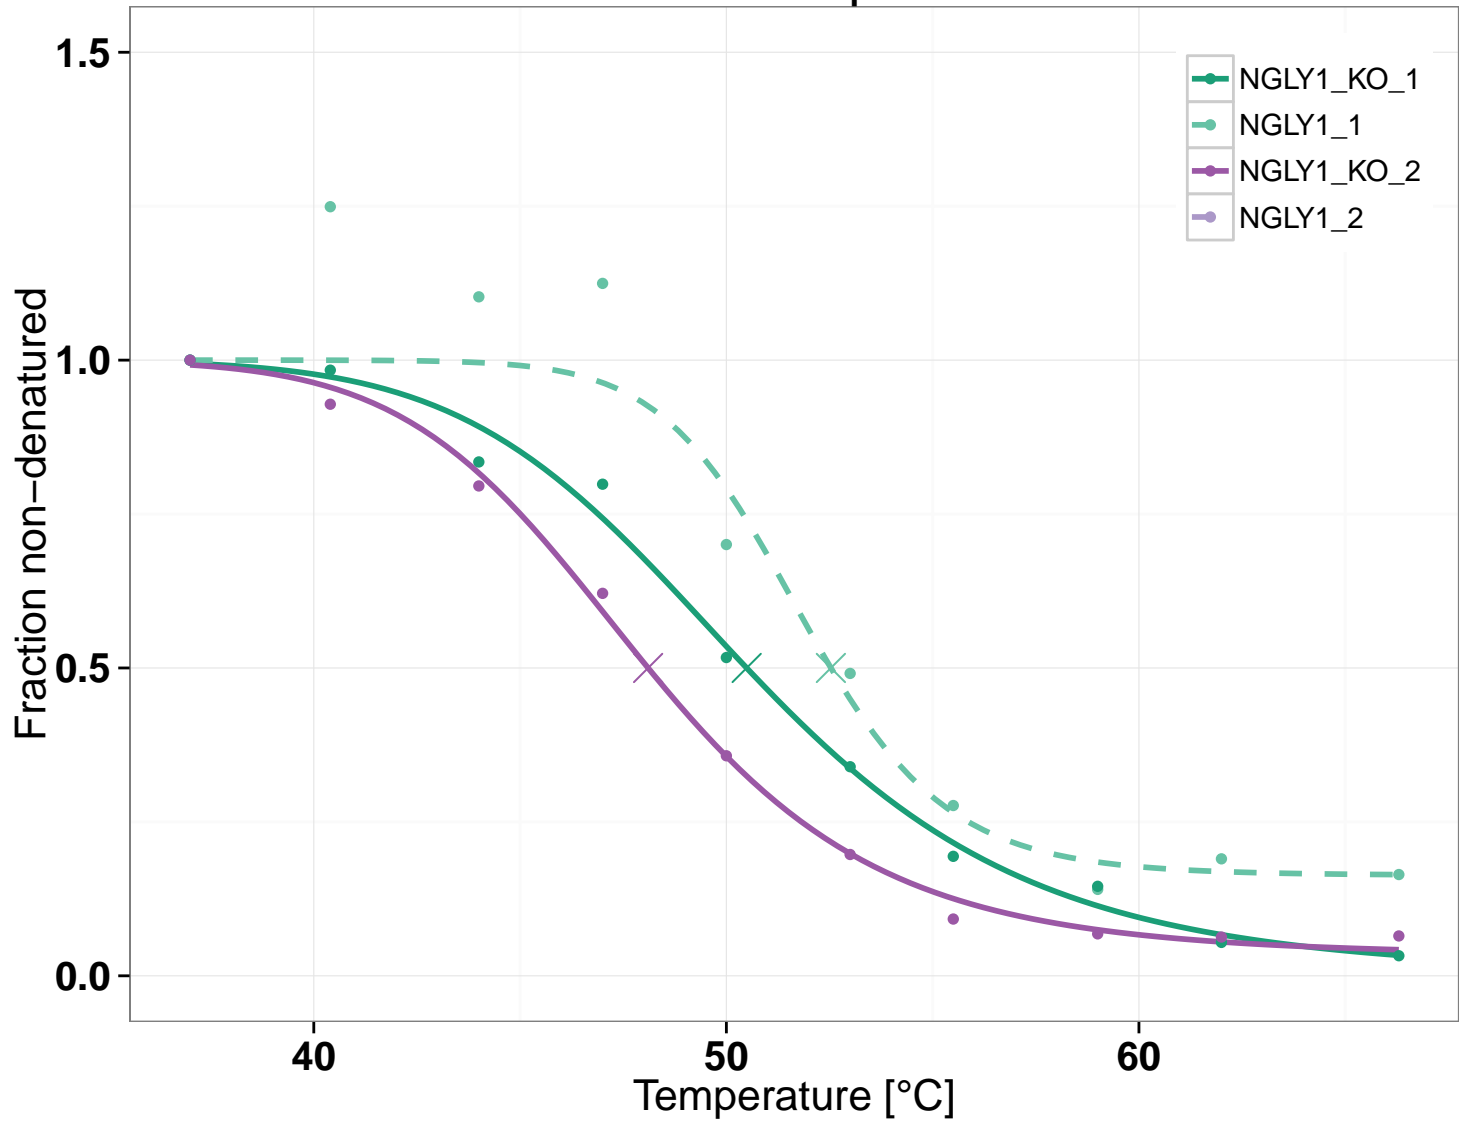

|            | meltPoint | slope  | plateau | R2   |
|------------|-----------|--------|---------|------|
| NGLY1_KO_1 | 50.49     | -0.072 | 0       | 0.99 |
| NGLY1_1    | 52.53     | -0.12  | 0.16    | 0.94 |
| NGLY1_KO_2 | 48.1      | -0.084 | 0.03    | 1    |
| NGLY1_2    | -         | -      | -       | -    |

Supplement: Supplementary file 4932 [file 1]

IPI00005055.4|CXORF56

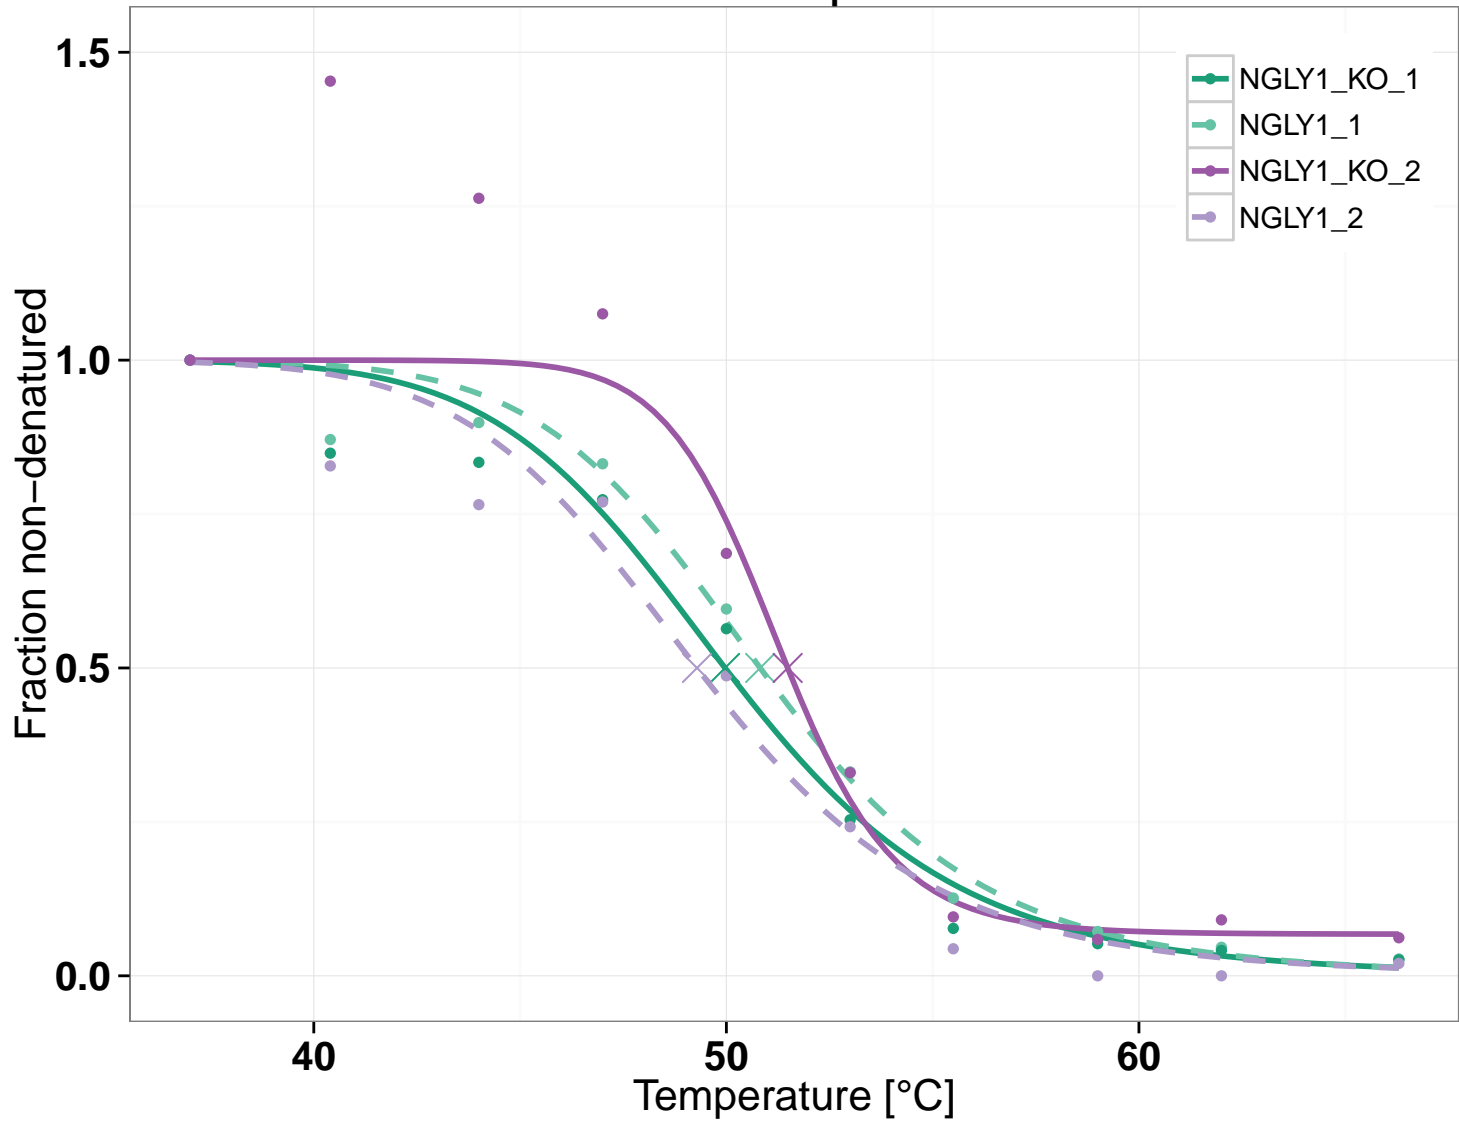

|            | meltPoint | slope  | plateau | R2   |
|------------|-----------|--------|---------|------|
| NGLY1_KO_1 | 49.97     | -0.089 | 0       | 0.97 |
| NGLY1_1    | 50.82     | -0.092 | 0       | 0.99 |
| NGLY1_KO_2 | 51.49     | -0.17  | 0.07    | 0.89 |
| NGLY1_2    | 49.29     | -0.088 | 0       | 0.96 |

Supplement: Supplementary file 4933 [file 1]

IPI00013404.1|SMAD4

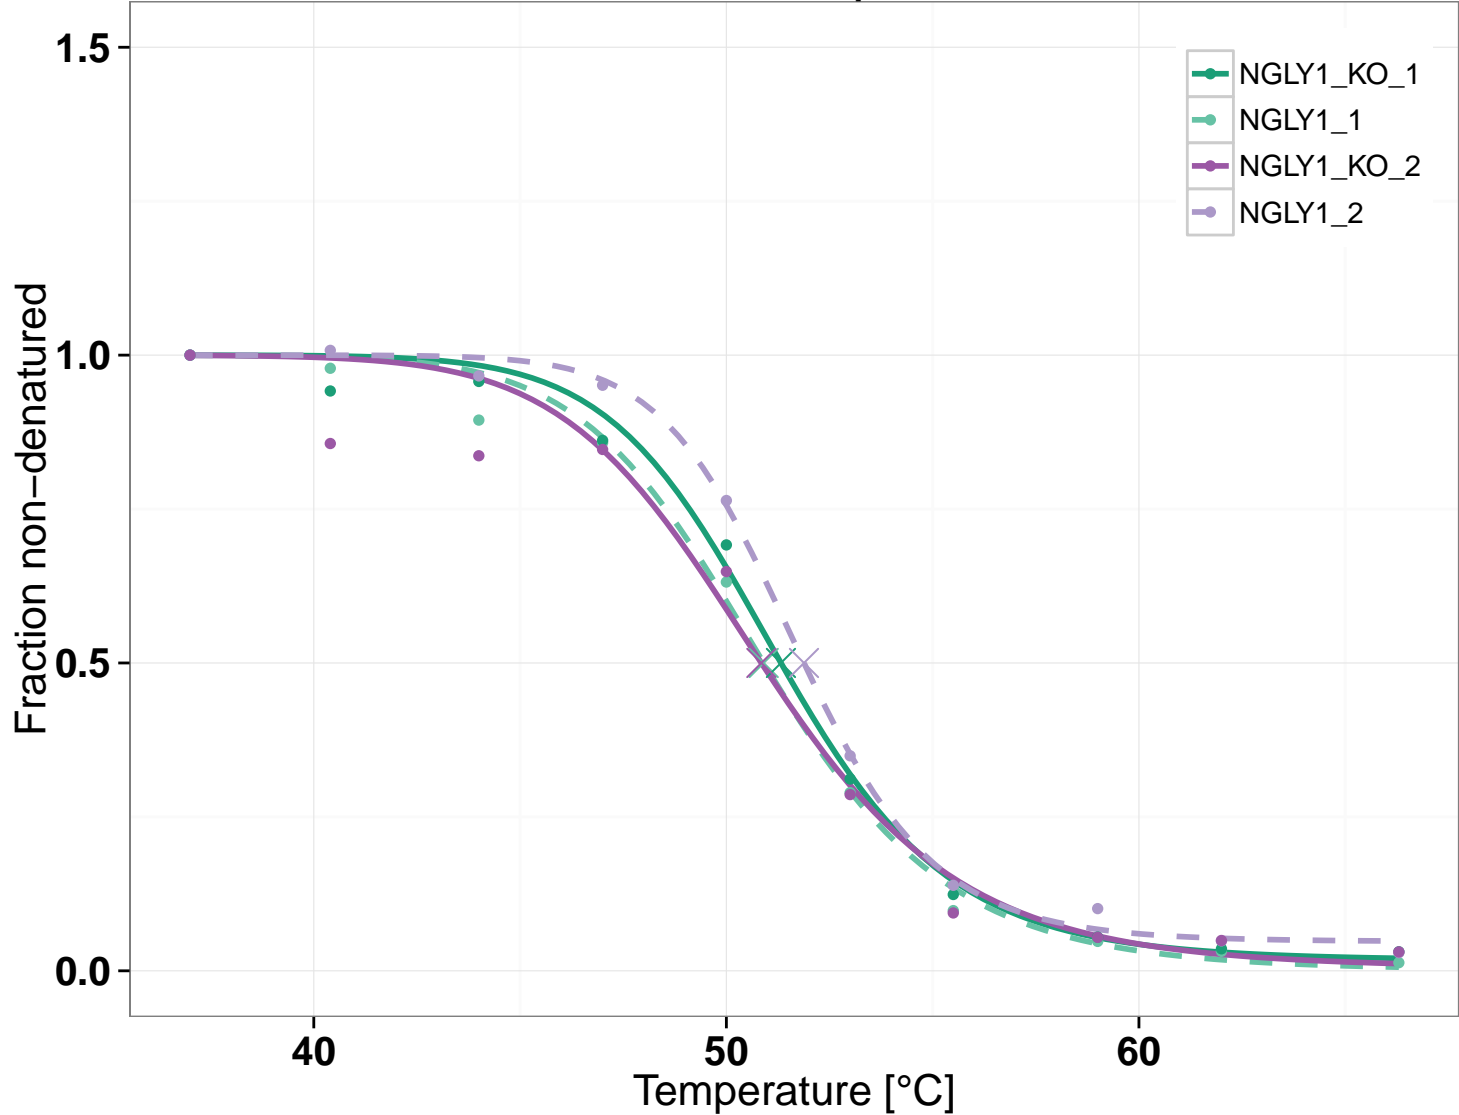

|            | meltPoint | slope | plateau | R2   |
|------------|-----------|-------|---------|------|
| NGLY1_KO_1 | 51.32     | -0.12 | 0.02    | 1    |
| NGLY1_1    | 50.91     | -0.11 | 0       | 0.99 |
| NGLY1_KO_2 | 50.85     | -0.1  | 0       | 0.97 |
| NGLY1_2    | 51.88     | -0.14 | 0.05    | 1    |

Supplement: Supplementary file 4934 [file 1]

IPI00159899.9|ANKFY1

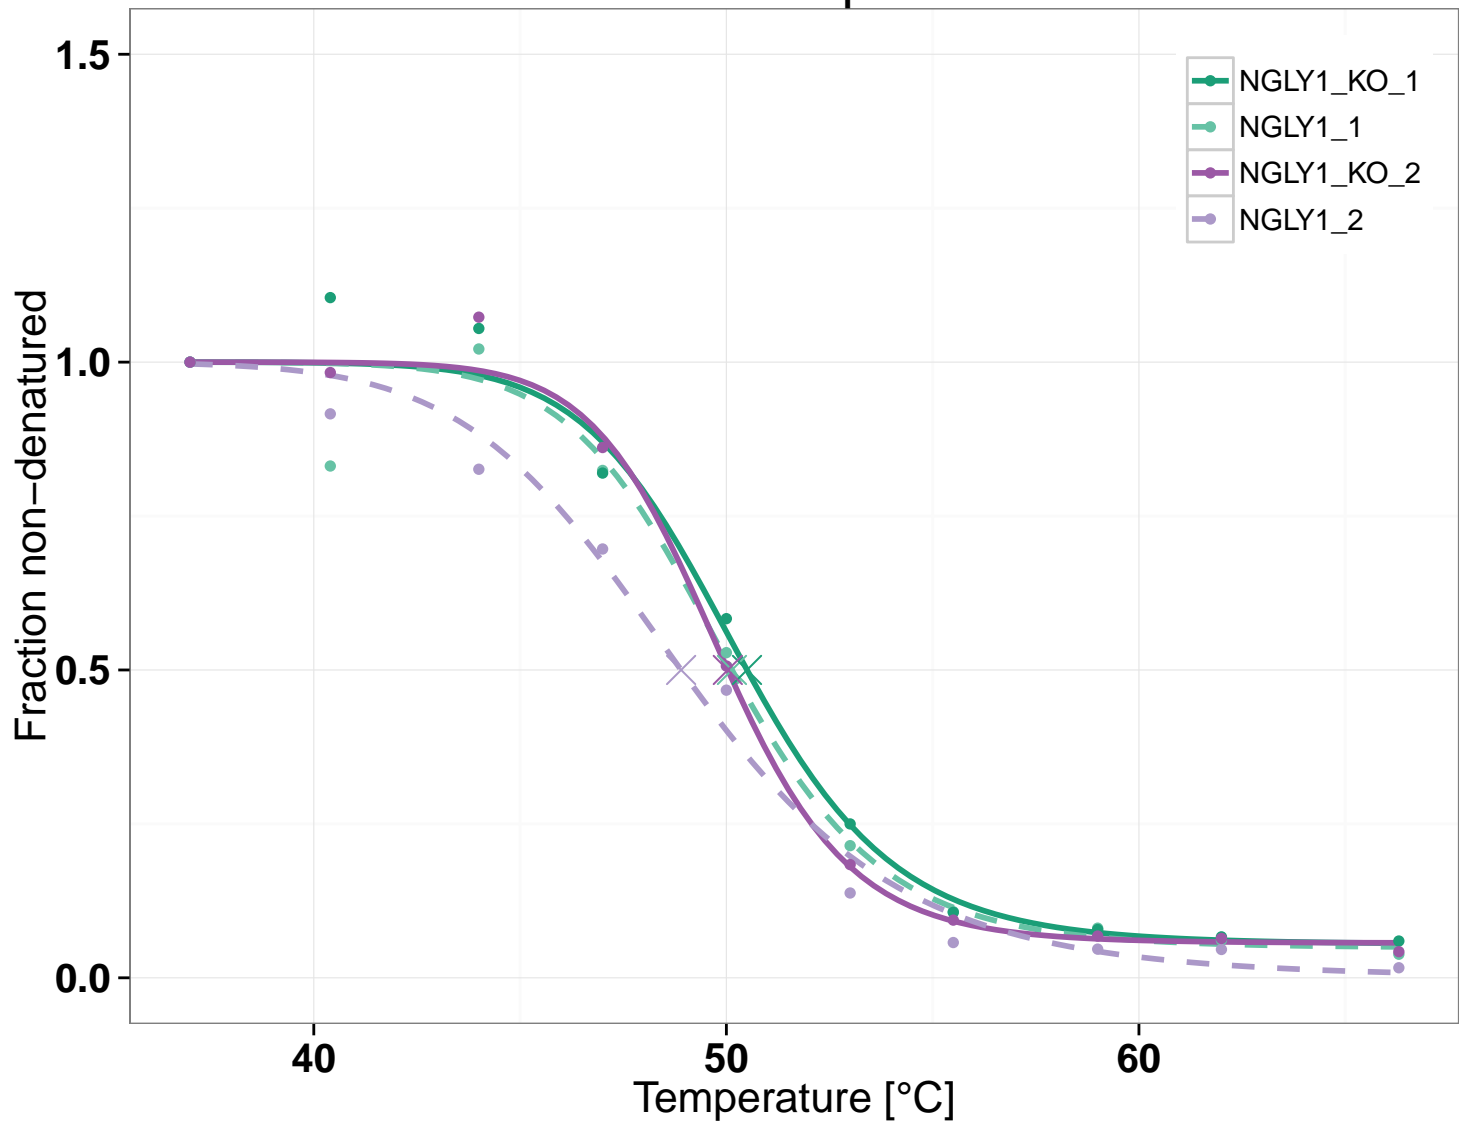

|            | meltPoint | slope  | plateau | R2   |
|------------|-----------|--------|---------|------|
| NGLY1_KO_1 | 50.5      | -0.12  | 0.05    | 0.99 |
| NGLY1_1    | 50.14     | -0.12  | 0.05    | 0.98 |
| NGLY1_KO_2 | 50.03     | -0.15  | 0.06    | 1    |
| NGLY1_2    | 48.9      | -0.094 | 0       | 0.99 |

Supplement: Supplementary file 4935 [file 1]

IPI00005677.1|GNPAT

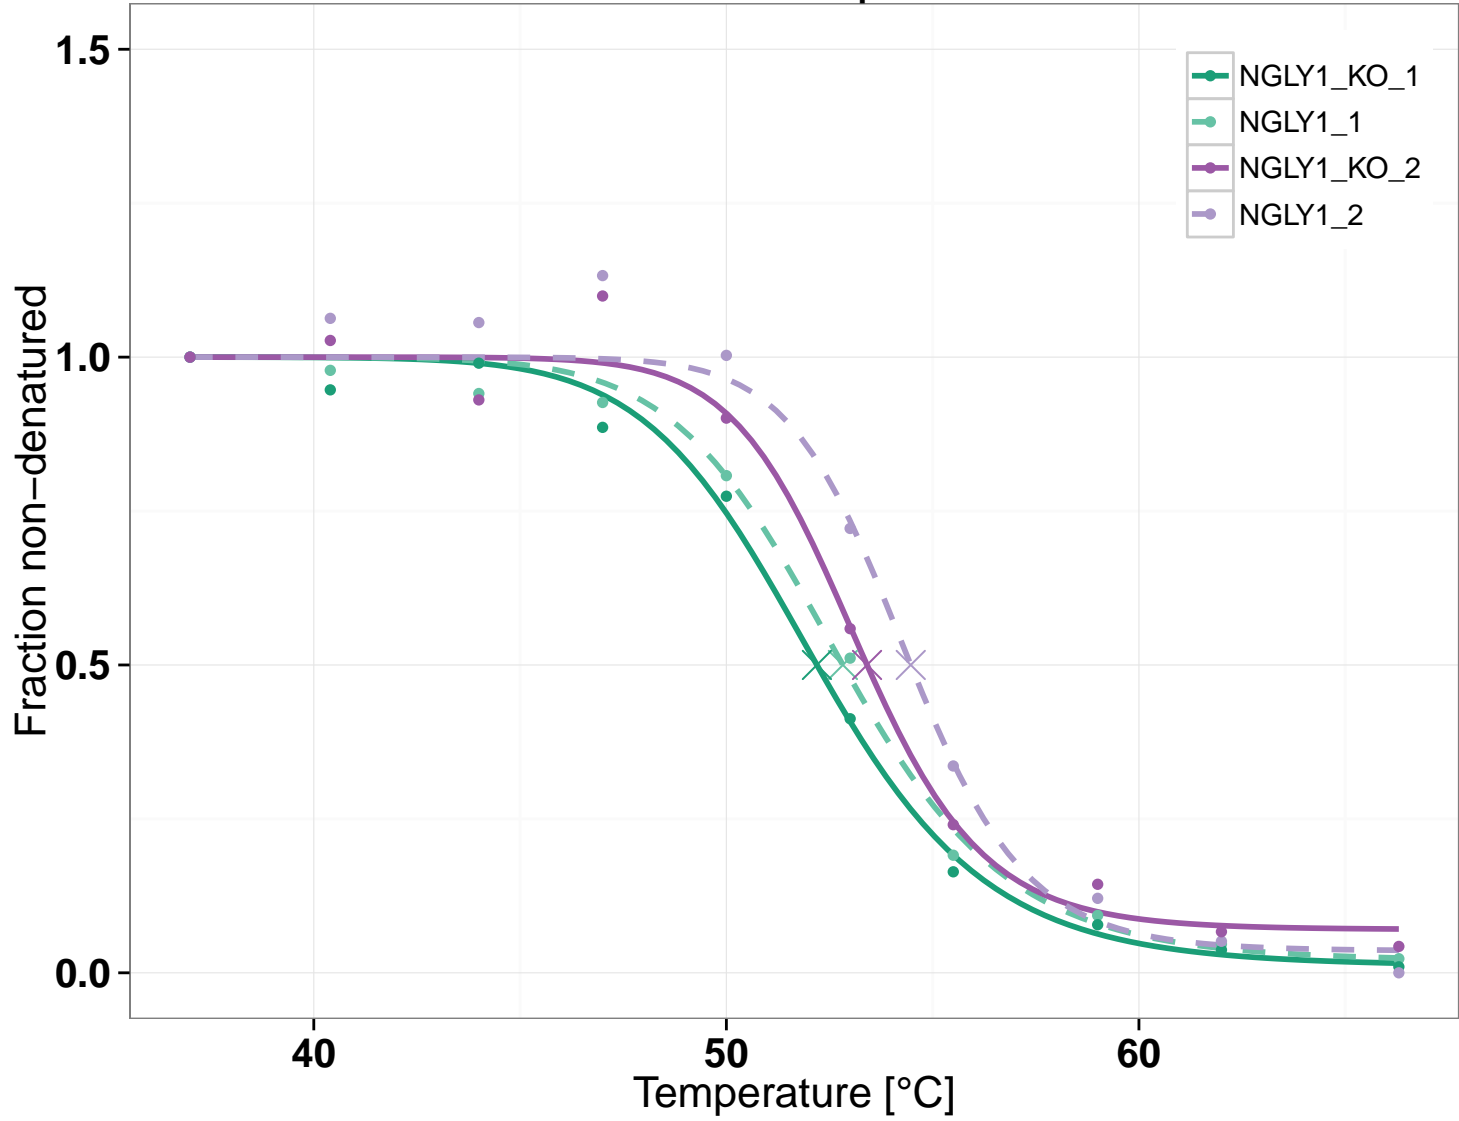

|            | meltPoint | slope | plateau | R2   |
|------------|-----------|-------|---------|------|
| NGLY1_KO_1 | 52.19     | -0.12 | 0.01    | 1    |
| NGLY1_1    | 52.82     | -0.12 | 0.02    | 1    |
| NGLY1_KO_2 | 53.41     | -0.15 | 0.07    | 0.99 |
| NGLY1_2    | 54.47     | -0.17 | 0.04    | 0.98 |

Supplement: Supplementary file 4936 [file 1]

# IPI00298702.2|SLC39A6

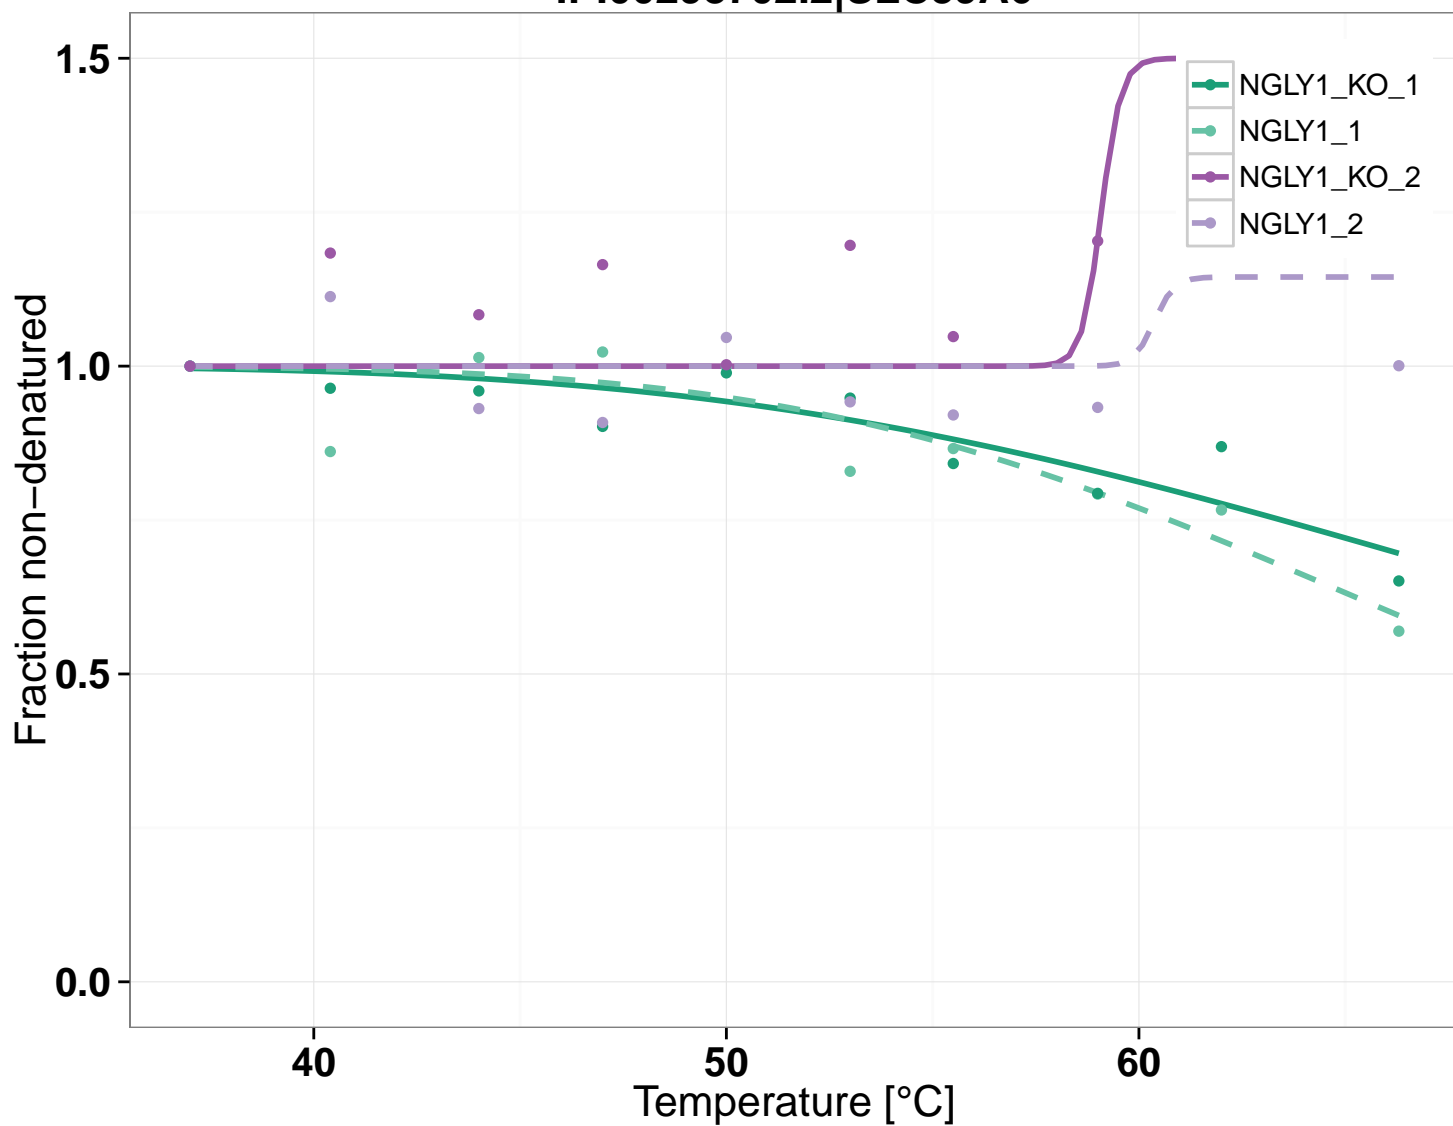

|            | meltPoint | slope  | plateau | R2   |
|------------|-----------|--------|---------|------|
| NGLY1_KO_1 | –         | –      | 0       | 0.79 |
| NGLY1_1    | –         | –0.029 | 0       | 0.82 |
| NGLY1_KO_2 | –         | 0.53   | 1.5     | 0.66 |
| NGLY1_2    | –         | 0.15   | 1.14    | 0.33 |

Supplement: Supplementary file 4937 [file 1]

IPI00477303.5|HOMEZ

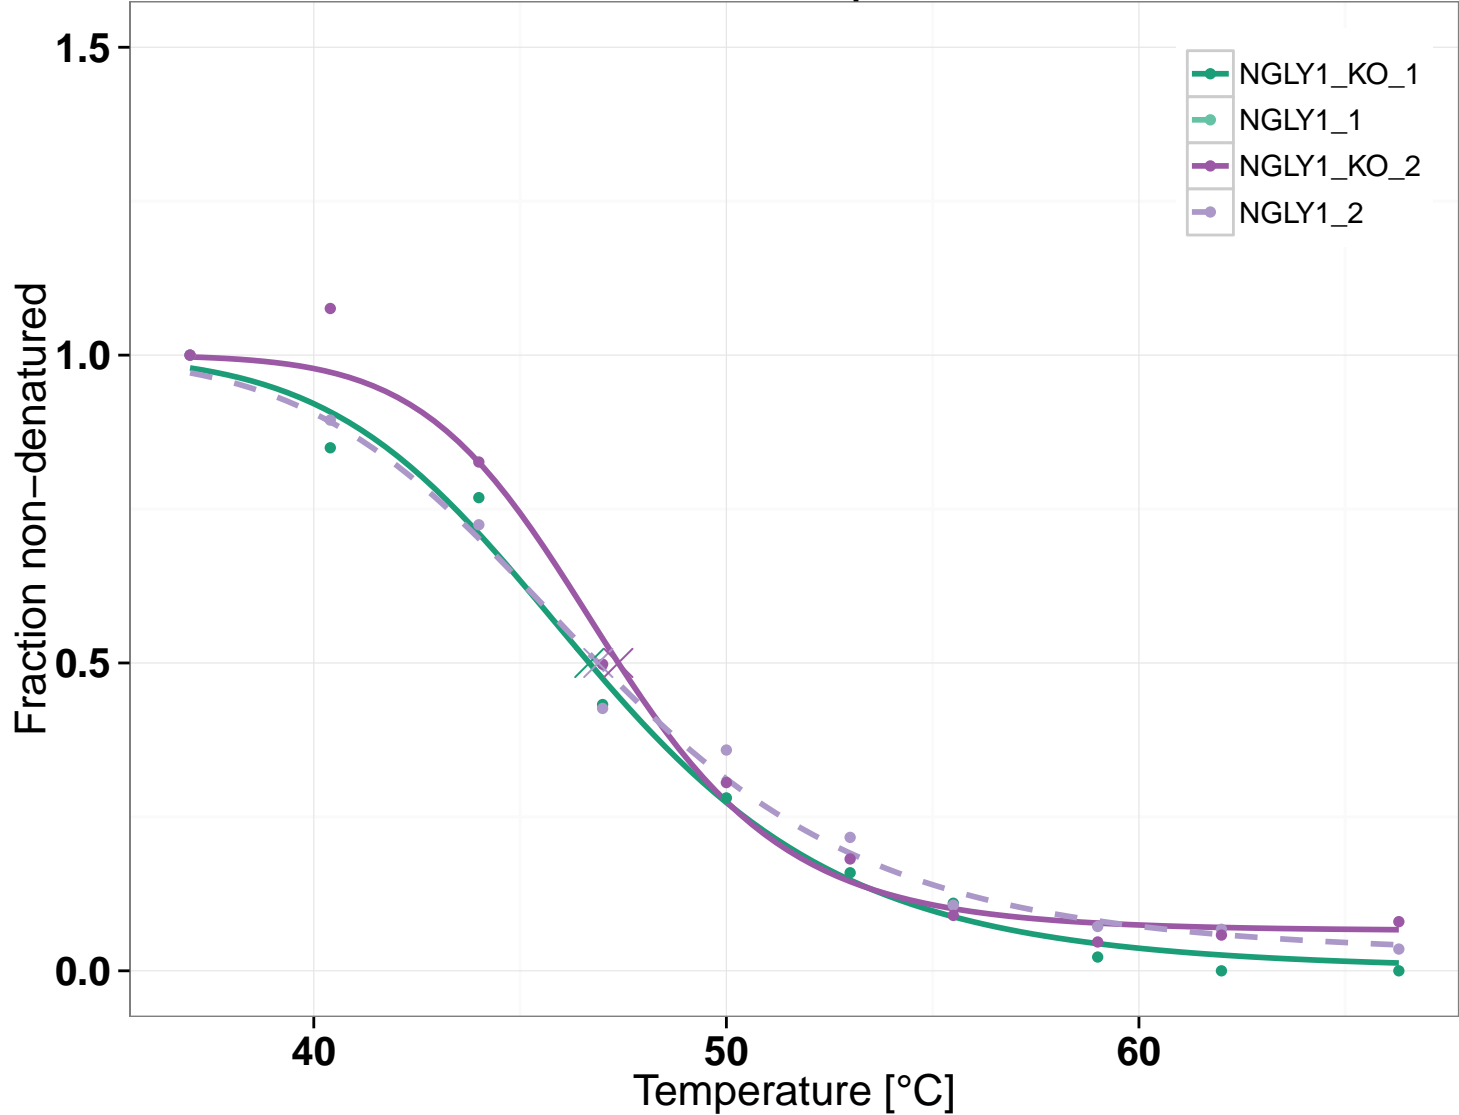

|            | meltPoint | slope  | plateau | R2   |
|------------|-----------|--------|---------|------|
| NGLY1_KO_1 | 46.68     | -0.08  | 0       | 0.99 |
| NGLY1_1    | -         | -      | -       | -    |
| NGLY1_KO_2 | 47.38     | -0.11  | 0.06    | 0.99 |
| NGLY1_2    | 46.9      | -0.071 | 0.02    | 0.99 |

Supplement: Supplementary file 4938 [file 1]

IPI00009342.1|IQGAP1

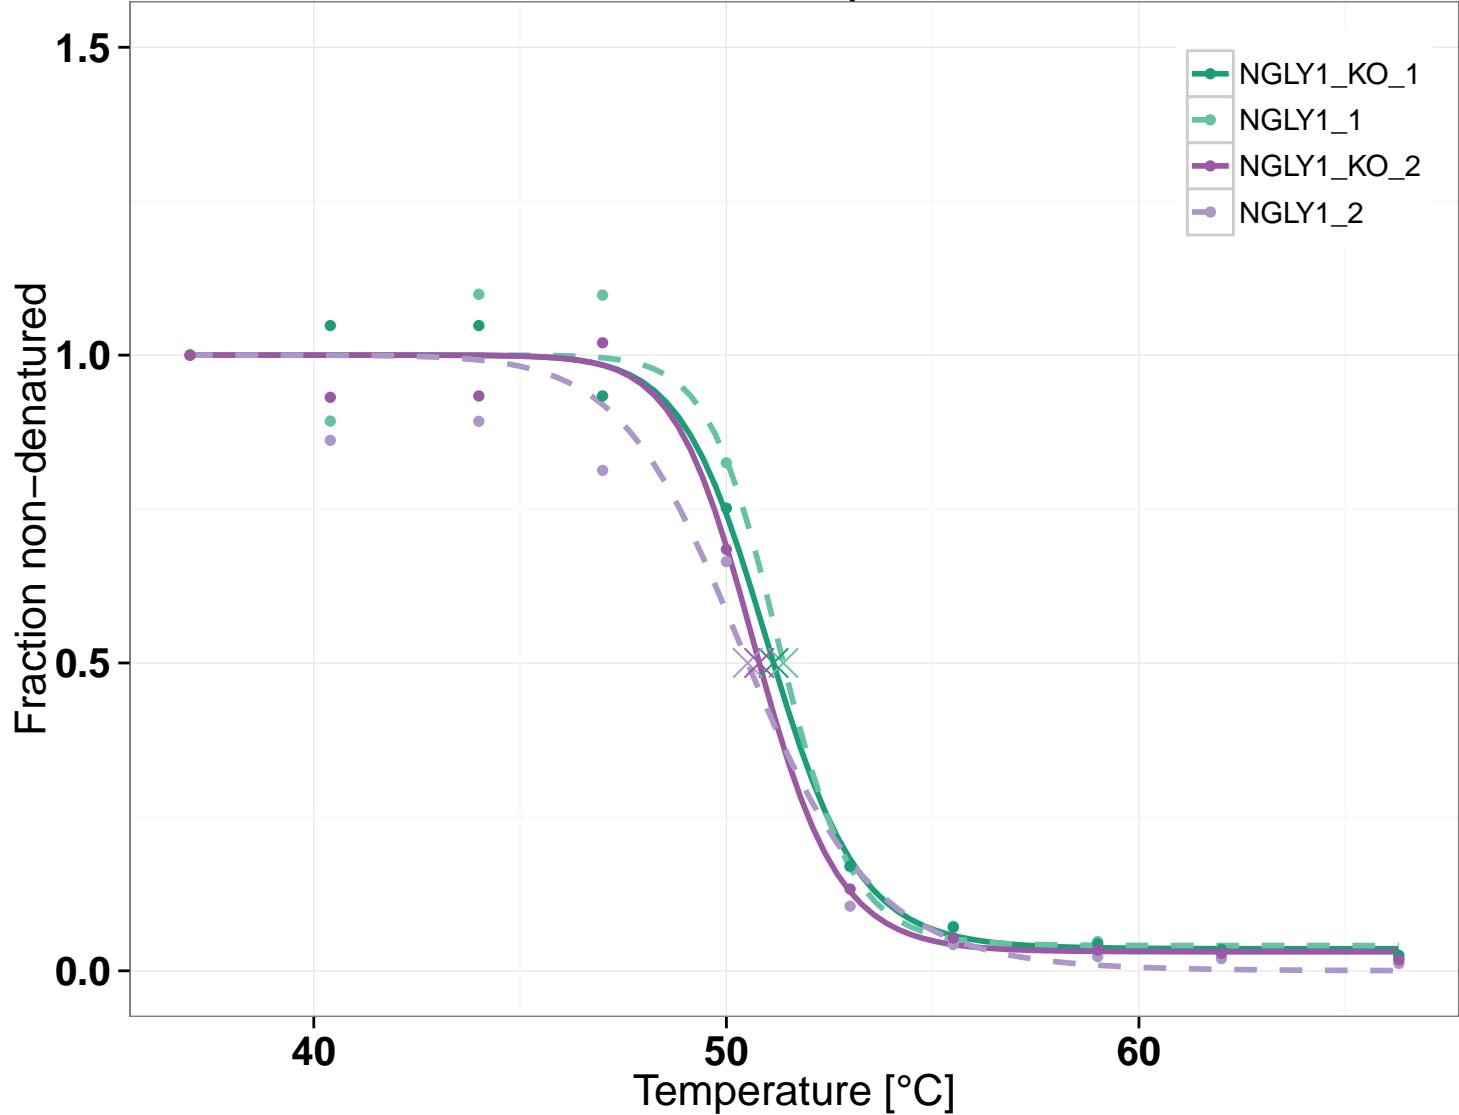

|            | meltPoint | slope | plateau | R2   |
|------------|-----------|-------|---------|------|
| NGLY1_KO_1 | 51.14     | -0.22 | 0.04    | 1    |
| NGLY1_1    | 51.38     | -0.28 | 0.04    | 0.98 |
| NGLY1_KO_2 | 50.8      | -0.24 | 0.03    | 0.99 |
| NGLY1_2    | 50.52     | -0.16 | 0       | 0.97 |

Supplement: Supplementary file 4939 [file 1]

IPI00550013.2|ZFAND3

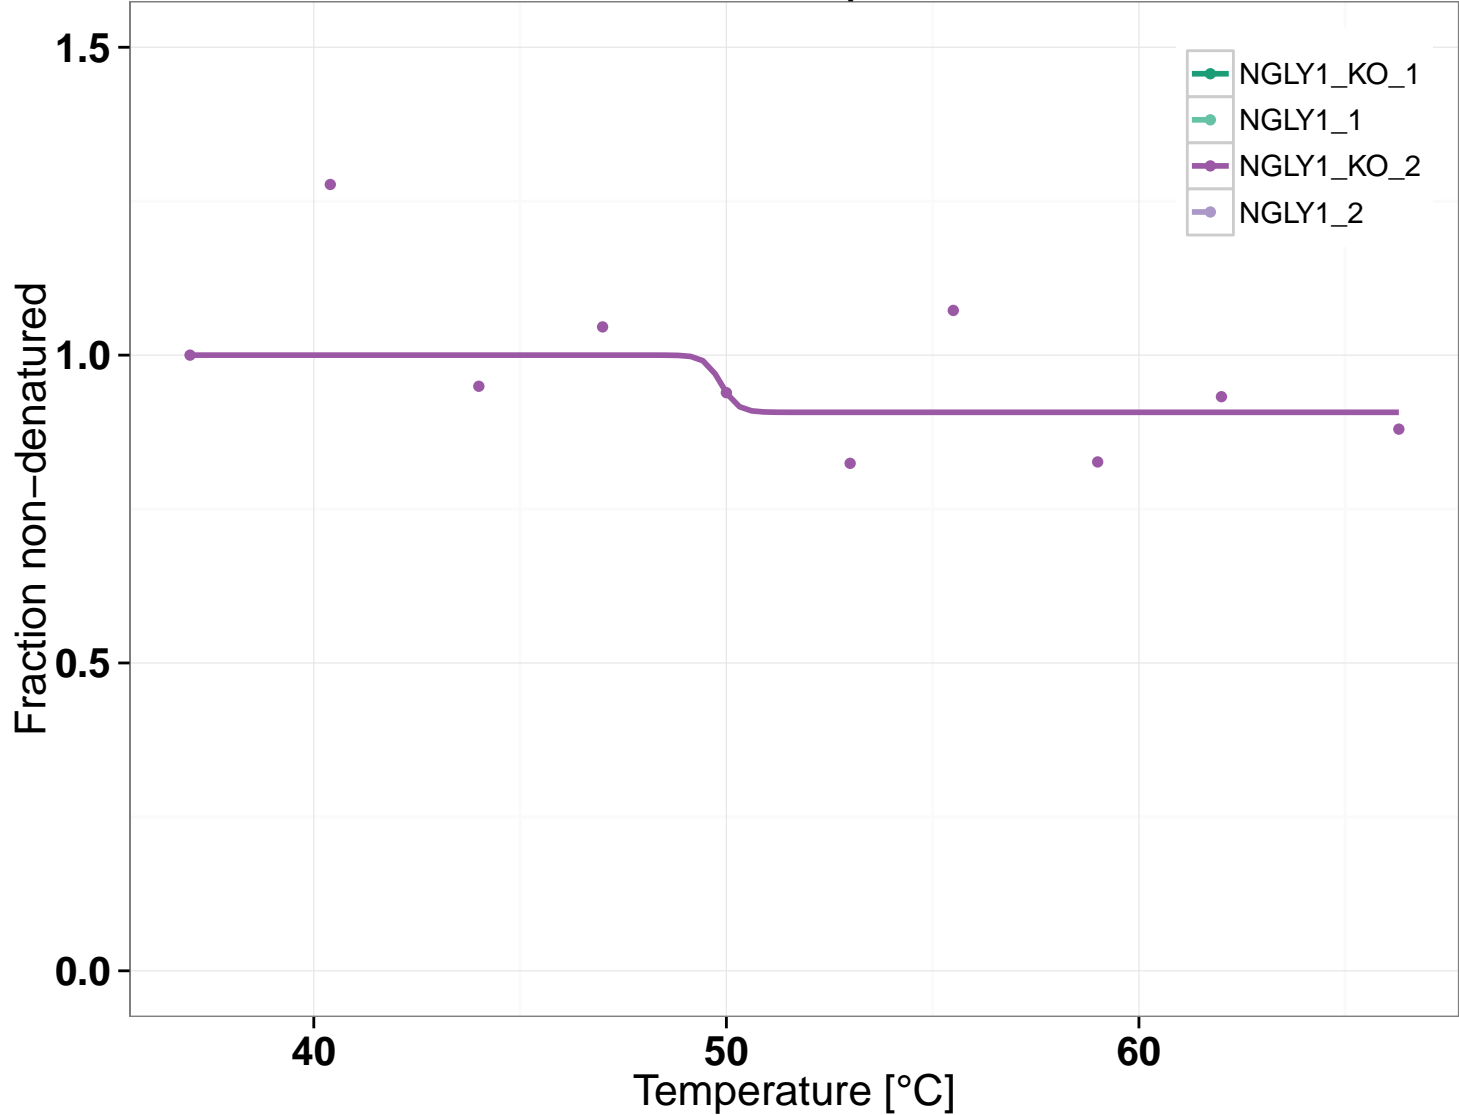

|            | meltPoint | slope | plateau | R2   |
|------------|-----------|-------|---------|------|
| NGLY1_KO_1 | —         | —     | —       | —    |
| NGLY1_1    | —         | —     | —       | —    |
| NGLY1_KO_2 | —         | -0.12 | 0.91    | 0.25 |
| NGLY1_2    | —         | —     | —       | —    |

Supplement: Supplementary file 4940 [file 1]

# IPI00337426.1|BMP2K

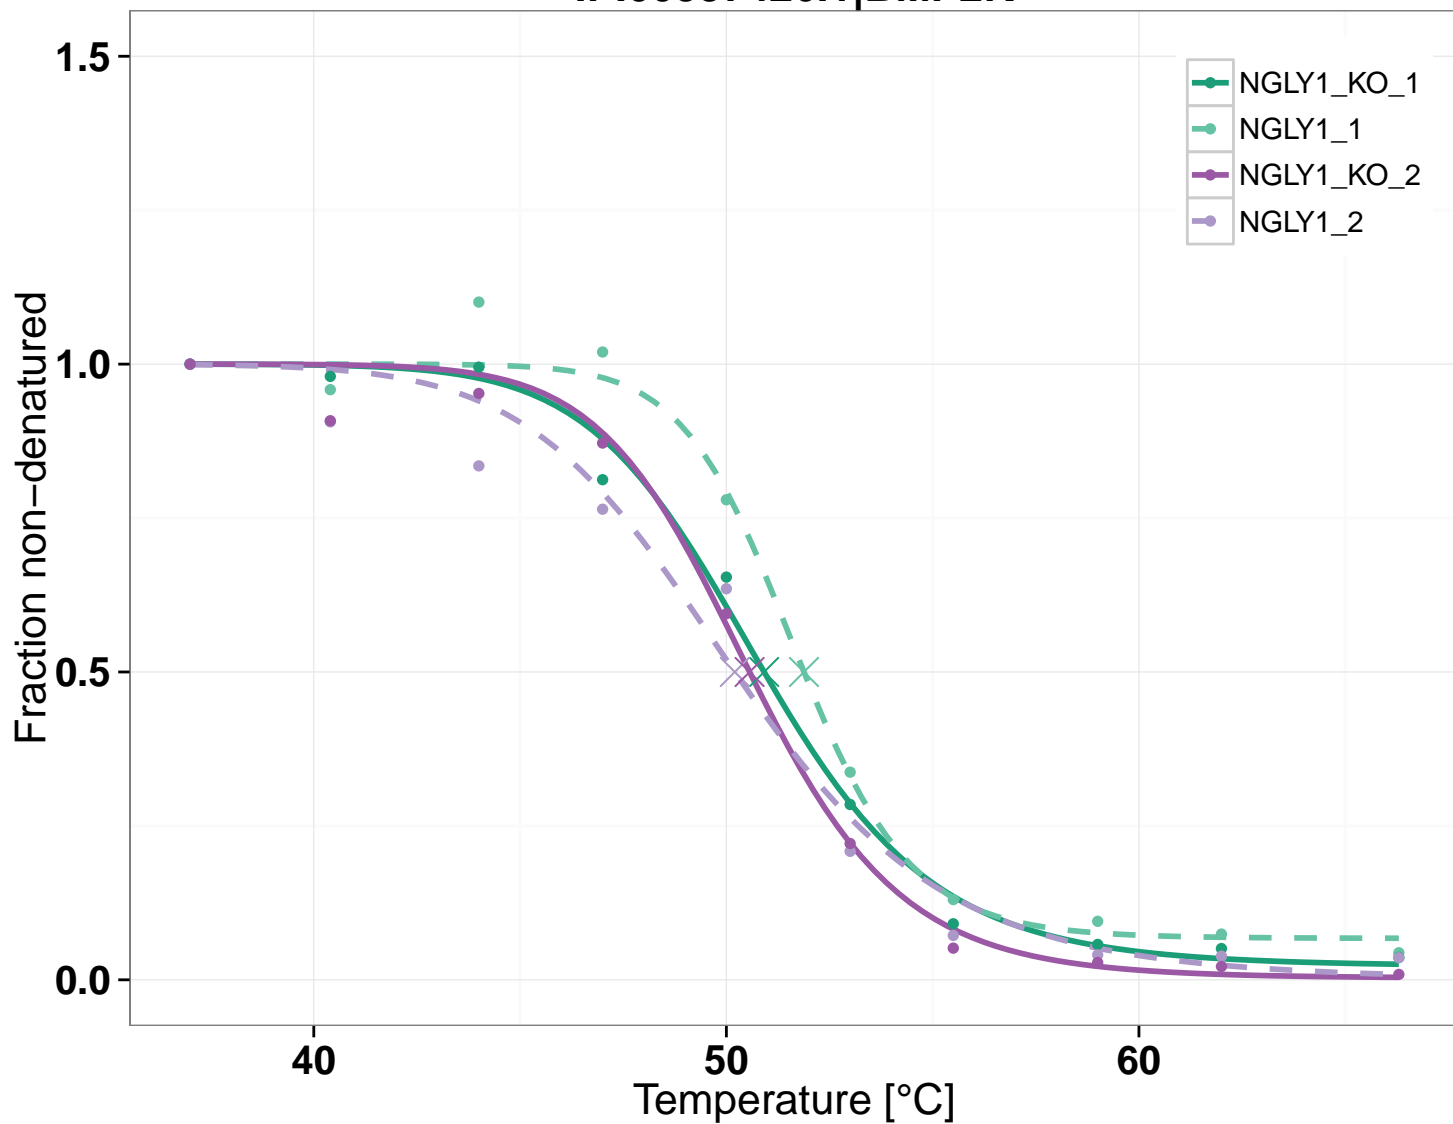

|            | meltPoint | slope  | plateau | R2   |
|------------|-----------|--------|---------|------|
| NGLY1_KO_1 | 50.91     | -0.12  | 0.02    | 0.99 |
| NGLY1_1    | 51.88     | -0.17  | 0.07    | 0.99 |
| NGLY1_KO_2 | 50.56     | -0.14  | 0       | 0.99 |
| NGLY1_2    | 50.2      | -0.098 | 0       | 0.97 |

Supplement: Supplementary file 4941 [file 1]

# IPI00293845.5|RIF1

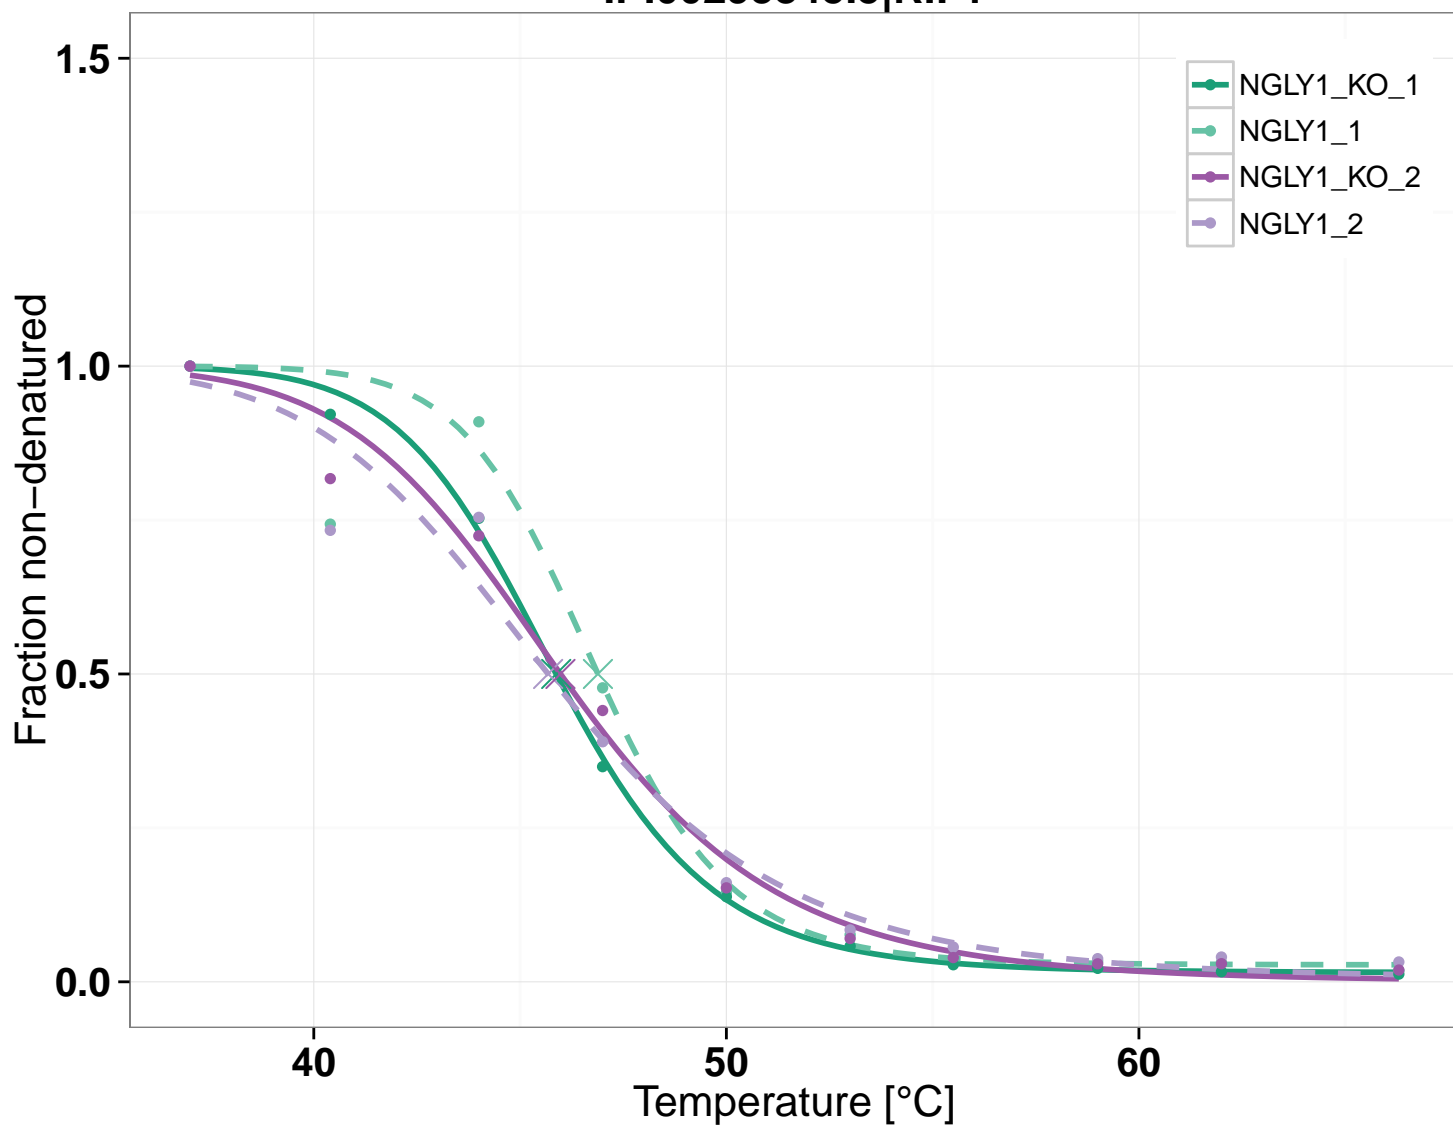

|            | meltPoint | slope  | plateau | R2   |
|------------|-----------|--------|---------|------|
| NGLY1_KO_1 | 45.88     | -0.13  | 0.01    | 1    |
| NGLY1_1    | 46.89     | -0.15  | 0.03    | 0.96 |
| NGLY1_KO_2 | 45.98     | -0.095 | 0       | 0.99 |
| NGLY1_2    | 45.68     | -0.086 | 0       | 0.97 |

Supplement: Supplementary file 4942 [file 1]

IPI00216046.2|SMARCA1

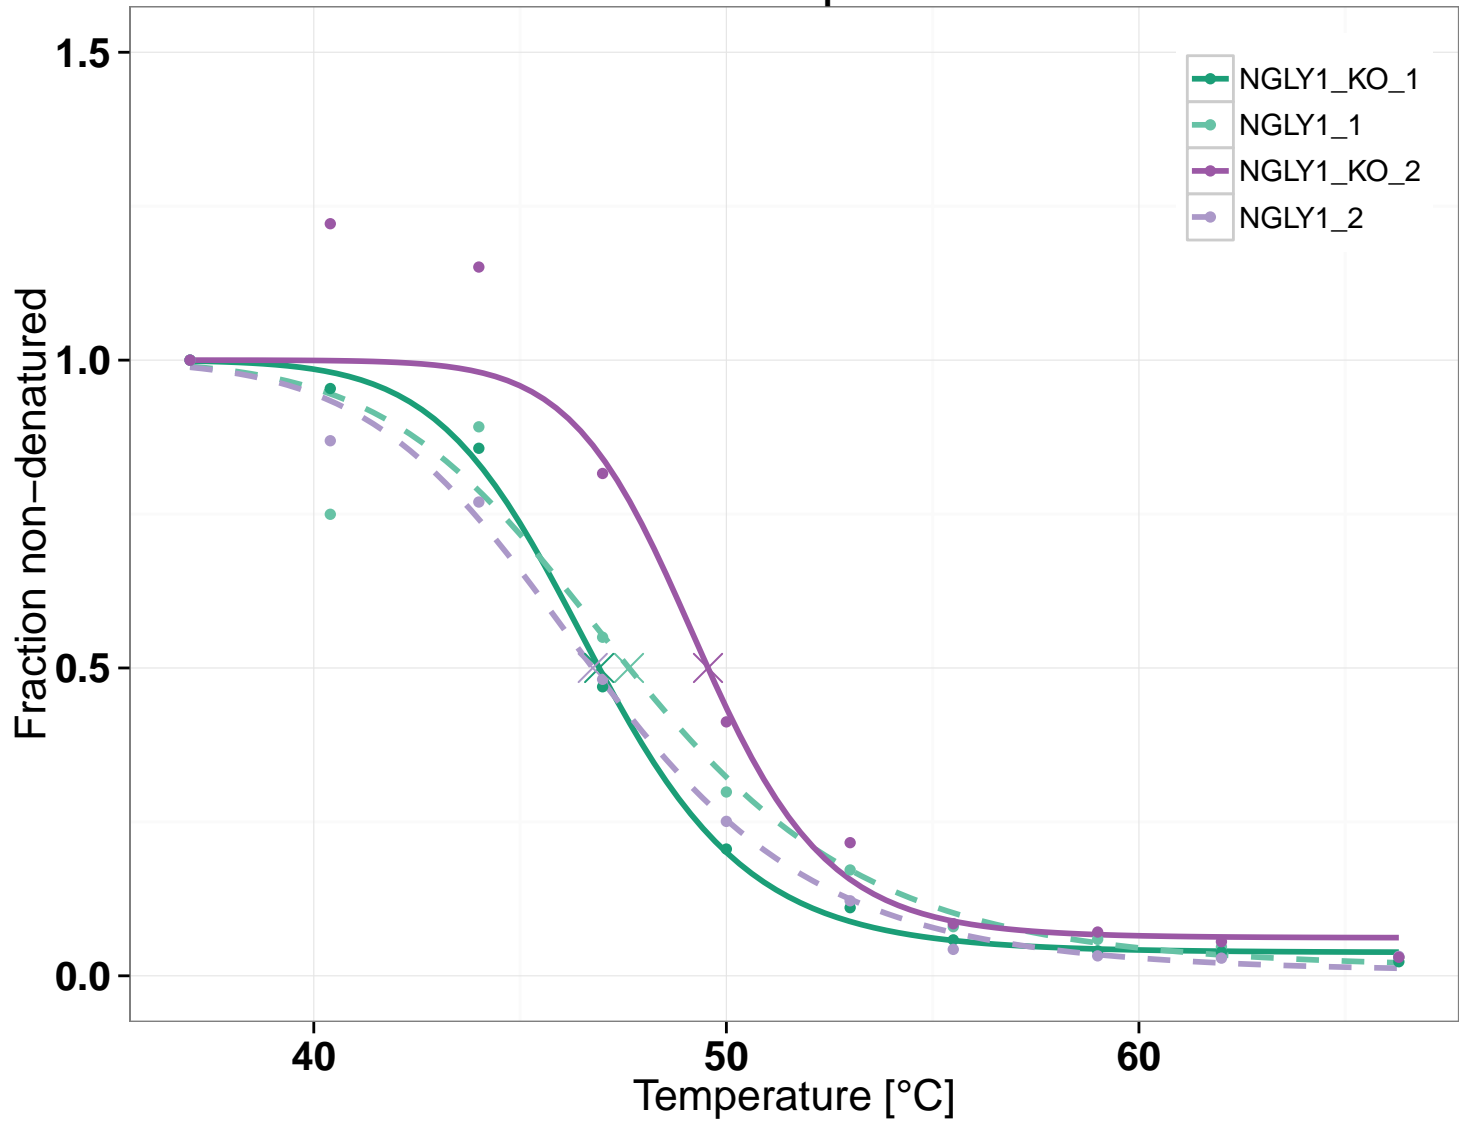

|            | meltPoint | slope  | plateau | R2   |
|------------|-----------|--------|---------|------|
| NGLY1_KO_1 | 46.92     | -0.13  | 0.04    | 1    |
| NGLY1_1    | 47.64     | -0.084 | 0.01    | 0.96 |
| NGLY1_KO_2 | 49.55     | -0.15  | 0.06    | 0.96 |
| NGLY1_2    | 46.76     | -0.091 | 0.01    | 1    |

Supplement: Supplementary file 4943 [file 1]

# IPI00002745.1|CTSZ

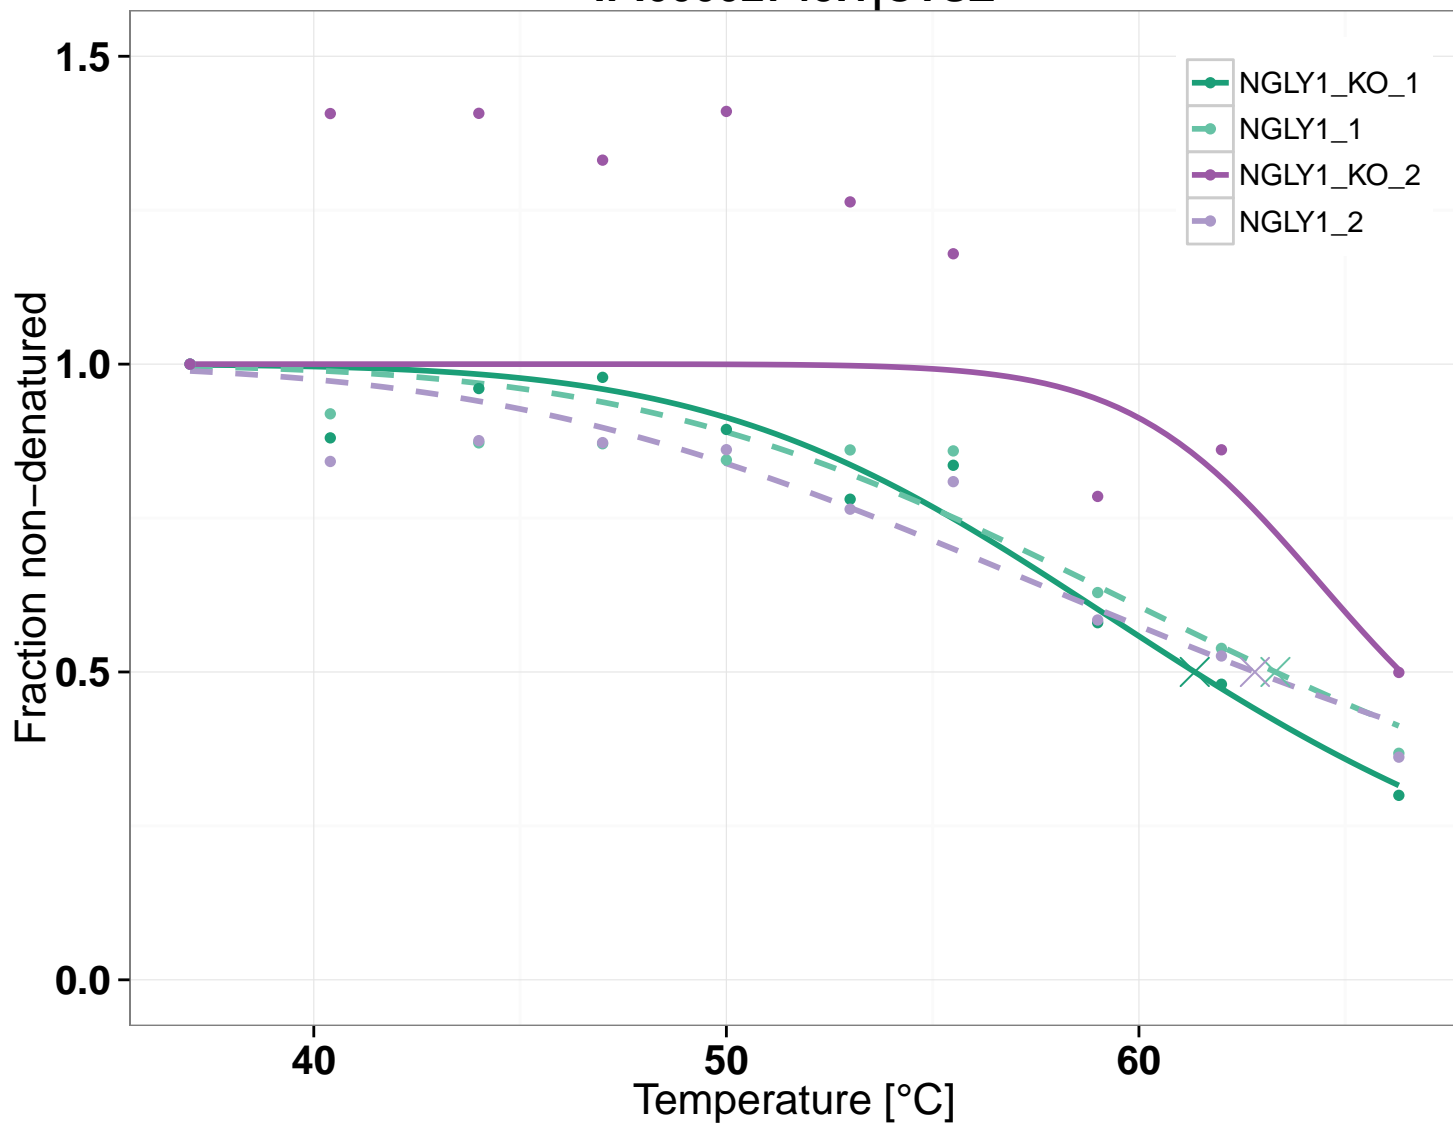

|            | meltPoint | slope  | plateau | R2   |
|------------|-----------|--------|---------|------|
| NGLY1_KO_1 | 61.35     | -0.044 | 0       | 0.95 |
| NGLY1_1    | 63.31     | -0.033 | 0       | 0.9  |
| NGLY1_KO_2 | -         | -0.077 | 0.23    | 0.17 |
| NGLY1_2    | 62.81     | -0.028 | 0       | 0.89 |

Supplement: Supplementary file 4944 [file 1]

IPI00020319.2|BLOC1S1

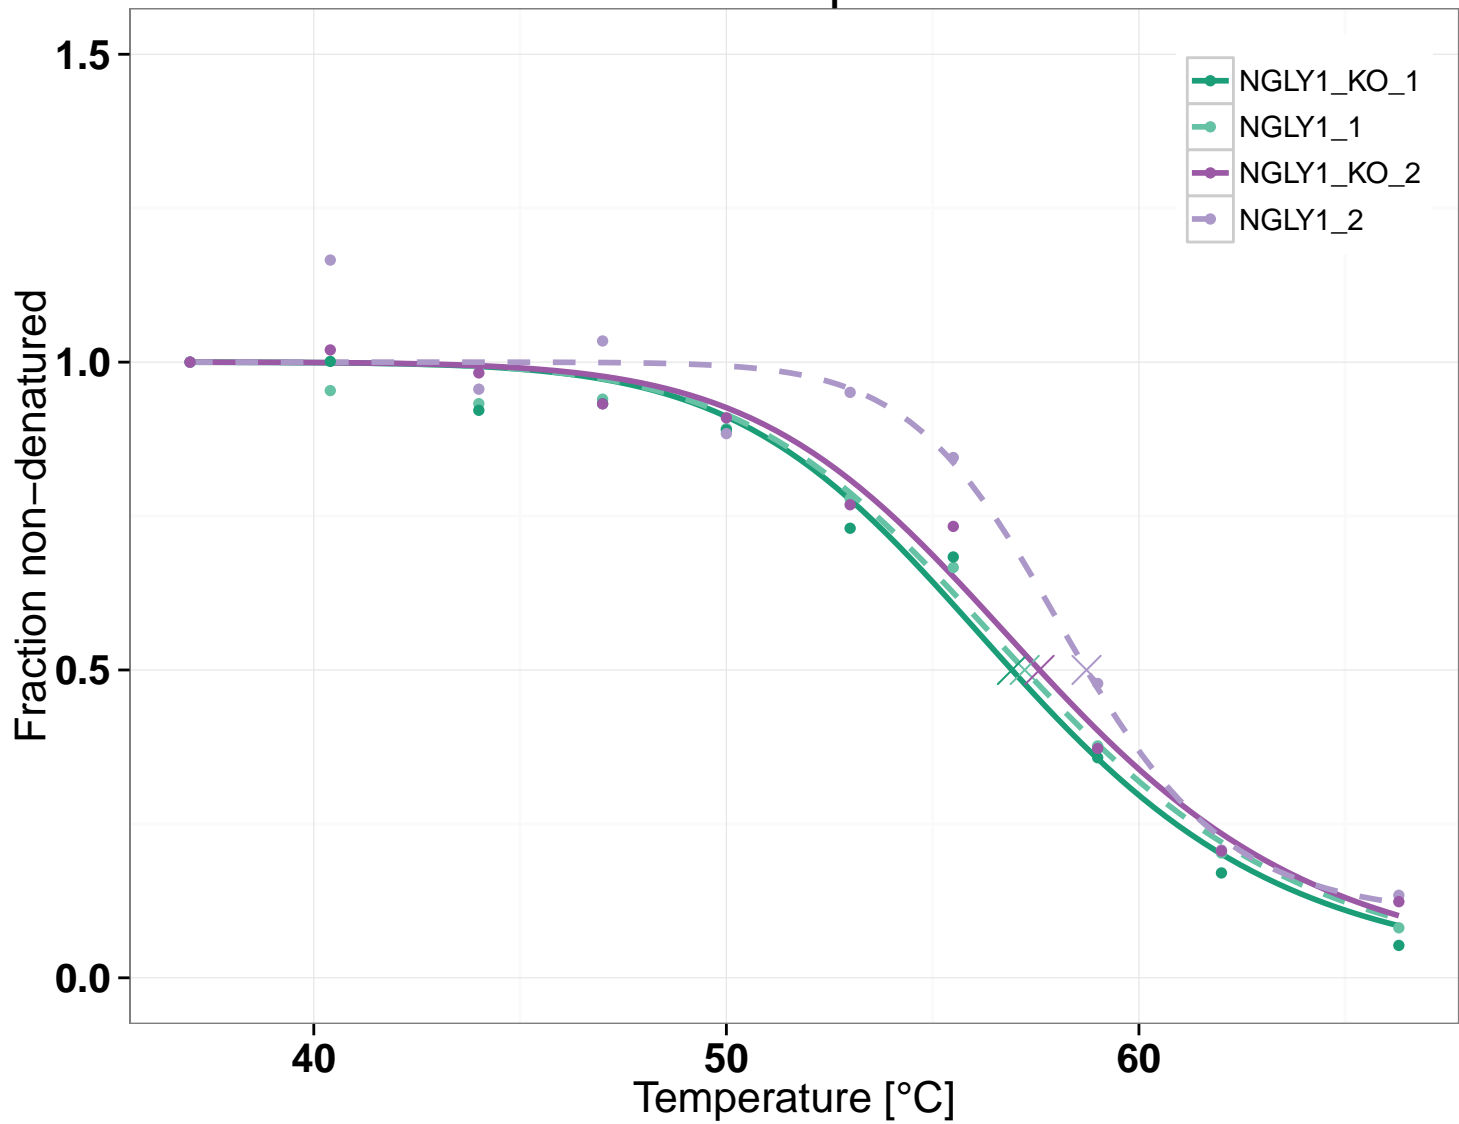

|            | meltPoint | slope  | plateau | R2   |
|------------|-----------|--------|---------|------|
| NGLY1_KO_1 | 56.92     | -0.075 | 0       | 0.98 |
| NGLY1_1    | 57.23     | -0.073 | 0       | 0.99 |
| NGLY1_KO_2 | 57.59     | -0.073 | 0       | 0.99 |
| NGLY1_2    | 58.73     | -0.12  | 0.1     | 0.96 |

Supplement: Supplementary file 4945 [file 1]

IPI00010187.1|ELOVL1

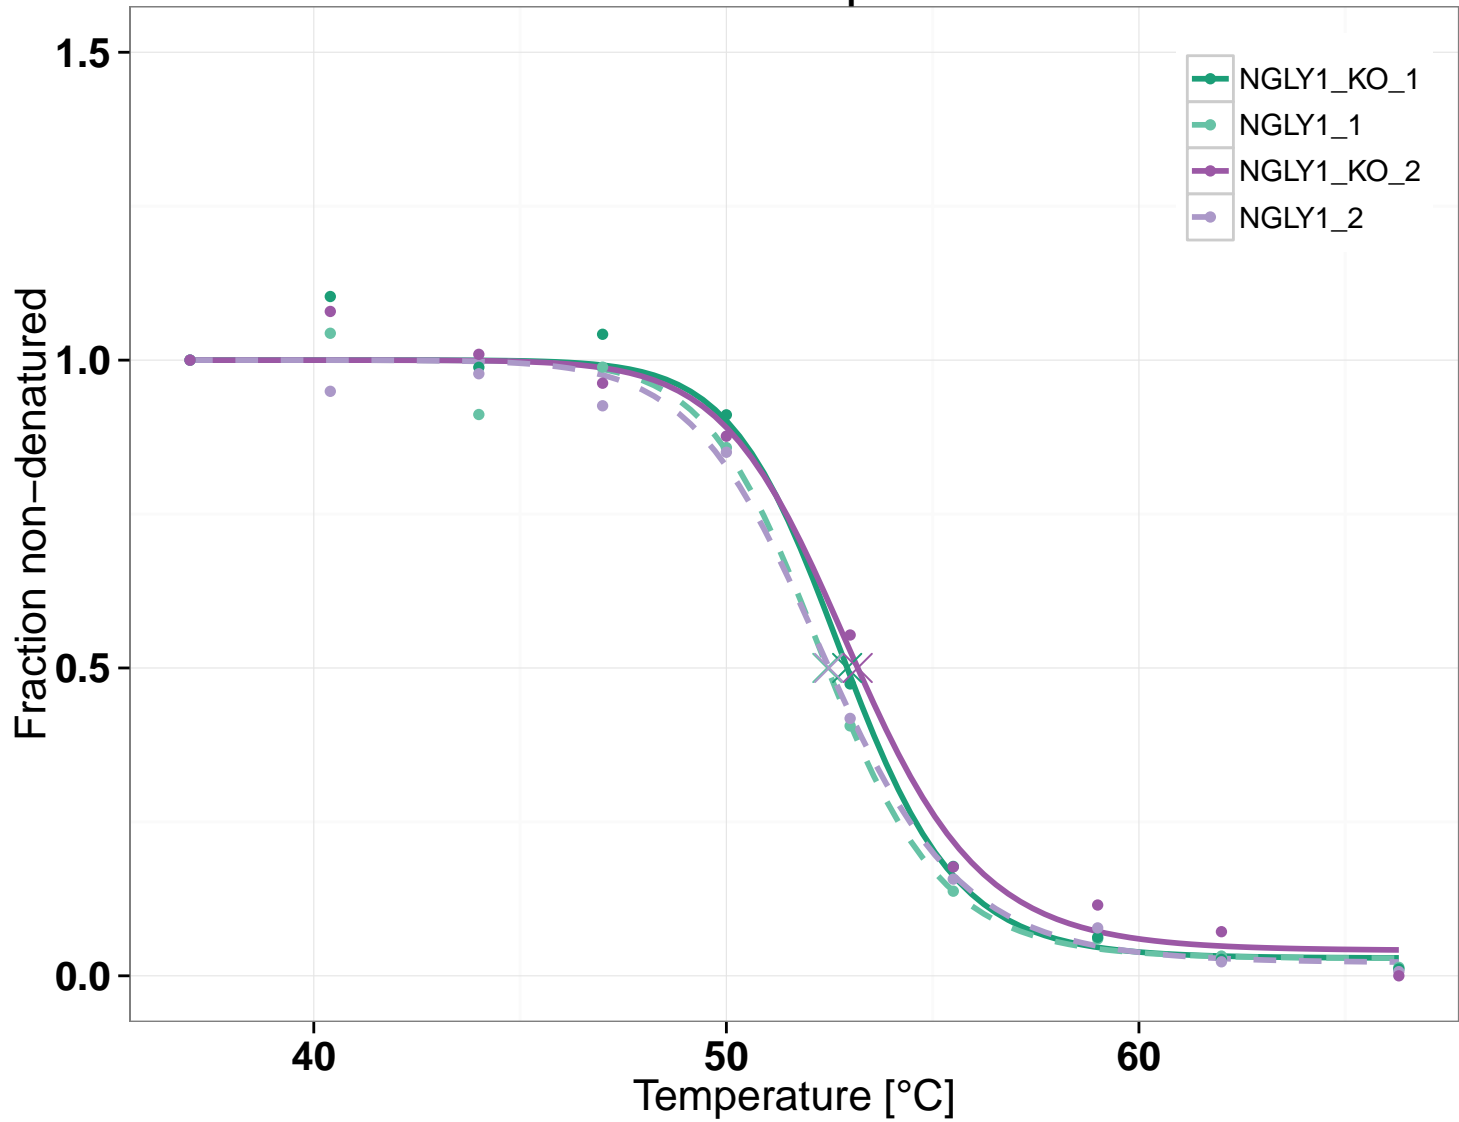

|            | meltPoint | slope | plateau | R2   |
|------------|-----------|-------|---------|------|
| NGLY1_KO_1 | 52.93     | -0.18 | 0.03    | 0.99 |
| NGLY1_1    | 52.45     | -0.17 | 0.03    | 0.99 |
| NGLY1_KO_2 | 53.18     | -0.15 | 0.04    | 0.99 |
| NGLY1_2    | 52.49     | -0.15 | 0.02    | 1    |

Supplement: Supplementary file 4946 [file 1]

# IPI00872352.1|HDDC2

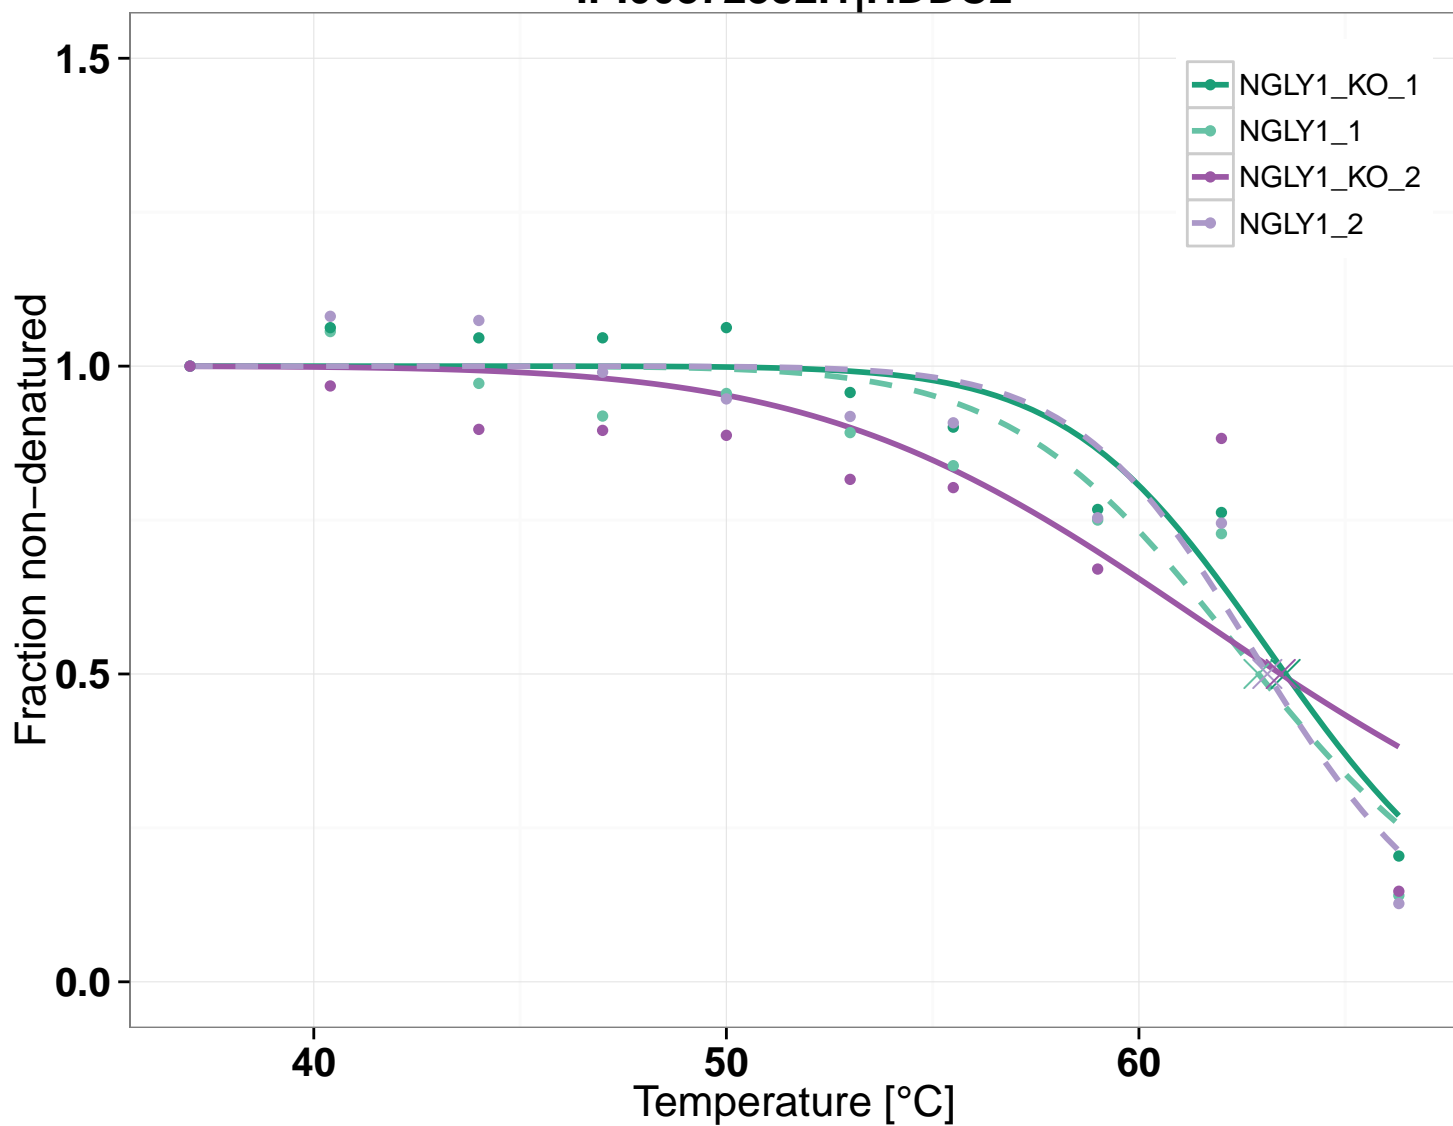

|            | meltPoint | slope  | plateau | R2   |
|------------|-----------|--------|---------|------|
| NGLY1_KO_1 | 63.55     | -0.095 | 0       | 0.93 |
| NGLY1_1    | 62.9      | -0.084 | 0       | 0.89 |
| NGLY1_KO_2 | 63.44     | -0.045 | 0       | 0.66 |
| NGLY1_2    | 63.11     | -0.11  | 0       | 0.91 |

Supplement: Supplementary file 4947 [file 1]

IPI00641948.2|FUBP1

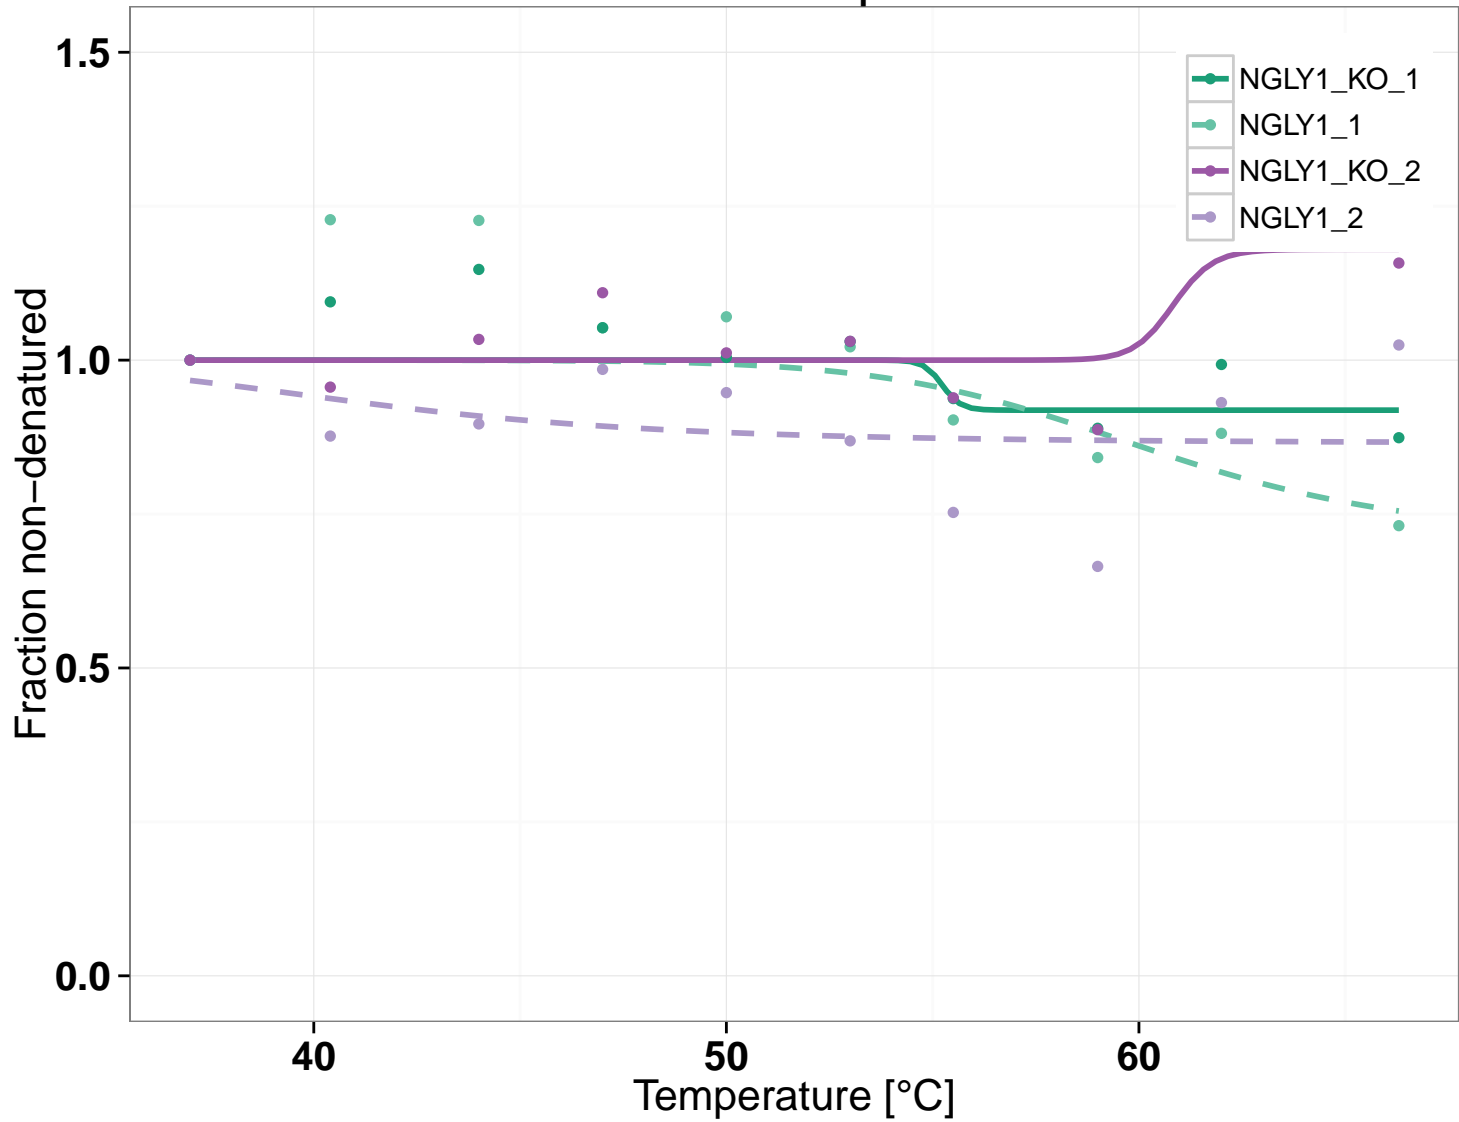

|            | meltPoint | slope   | plateau | R2   |
|------------|-----------|---------|---------|------|
| NGLY1_KO_1 | -         | -0.092  | 0.92    | 0.36 |
| NGLY1_1    | -         | -0.023  | 0.71    | 0.47 |
| NGLY1_KO_2 | -         | 0.094   | 1.18    | 0.59 |
| NGLY1_2    | -         | -0.0089 | 0.86    | 0.1  |

Supplement: Supplementary file 4948 [file 1]

IPI00889046.1|LOC400986

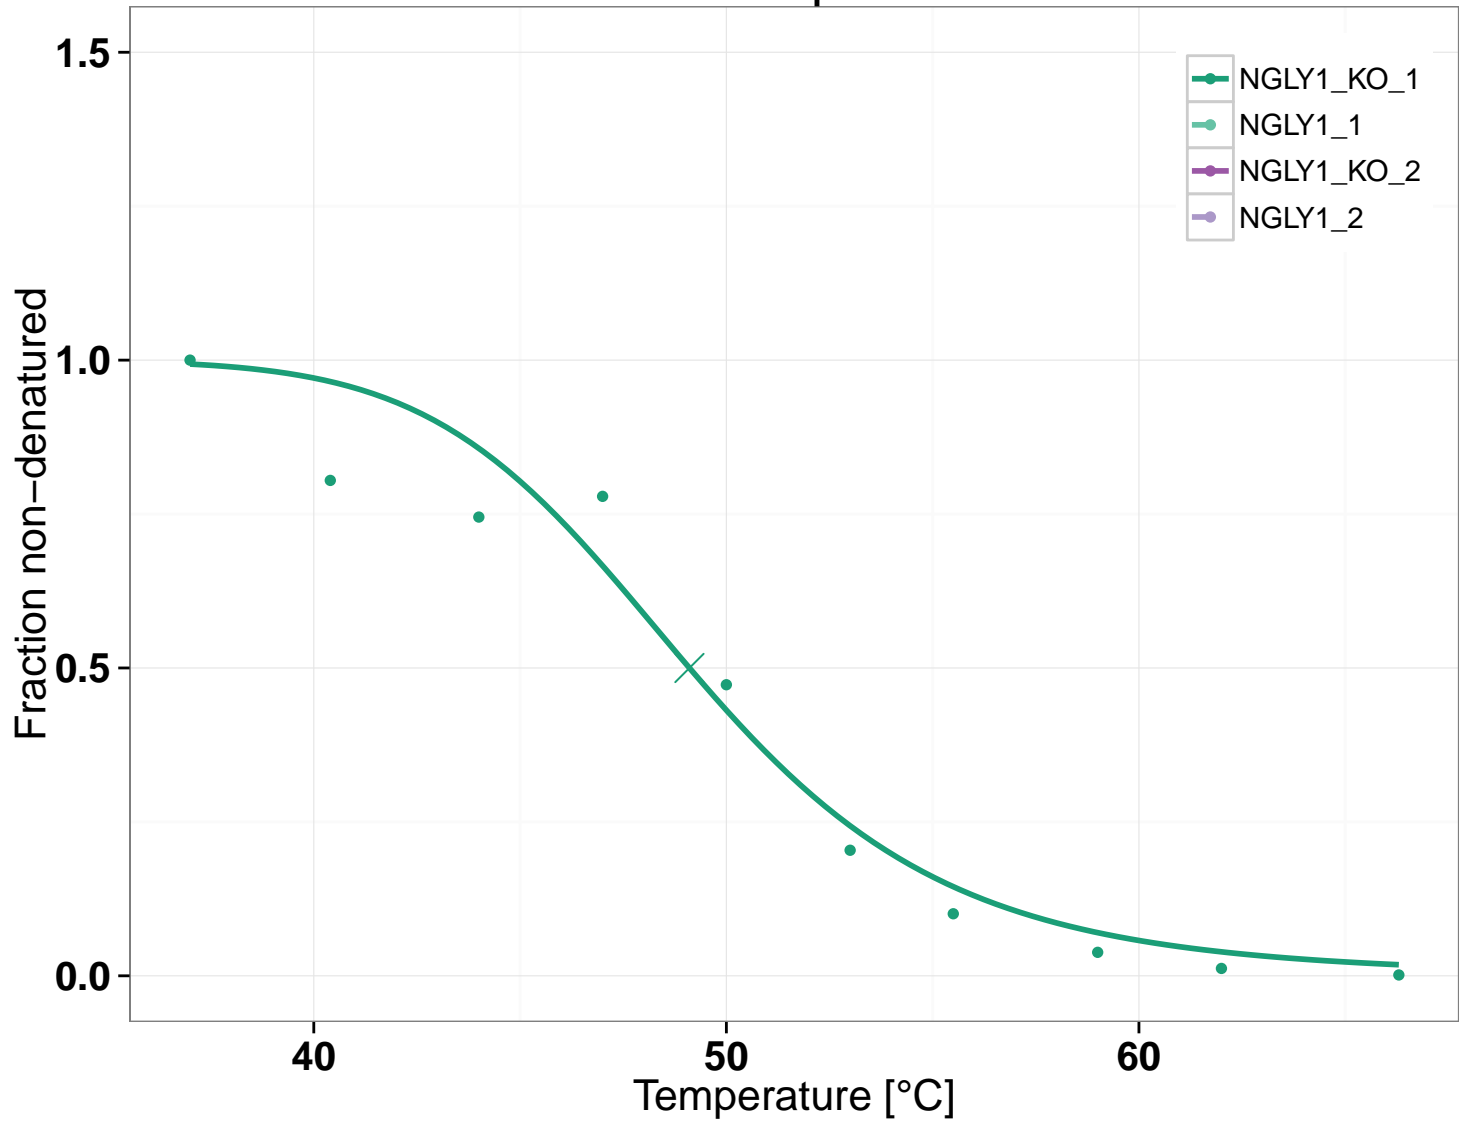

|            | meltPoint | slope | plateau | R2   |
|------------|-----------|-------|---------|------|
| NGLY1_KO_1 | 49.1      | -0.08 | 0       | 0.96 |
| NGLY1_1    | -         | -     | -       | -    |
| NGLY1_KO_2 | -         | -     | -       | -    |
| NGLY1_2    | -         | -     | -       | -    |

Supplement: Supplementary file 4949 [file 1]

IPI00006725.2|DDX23

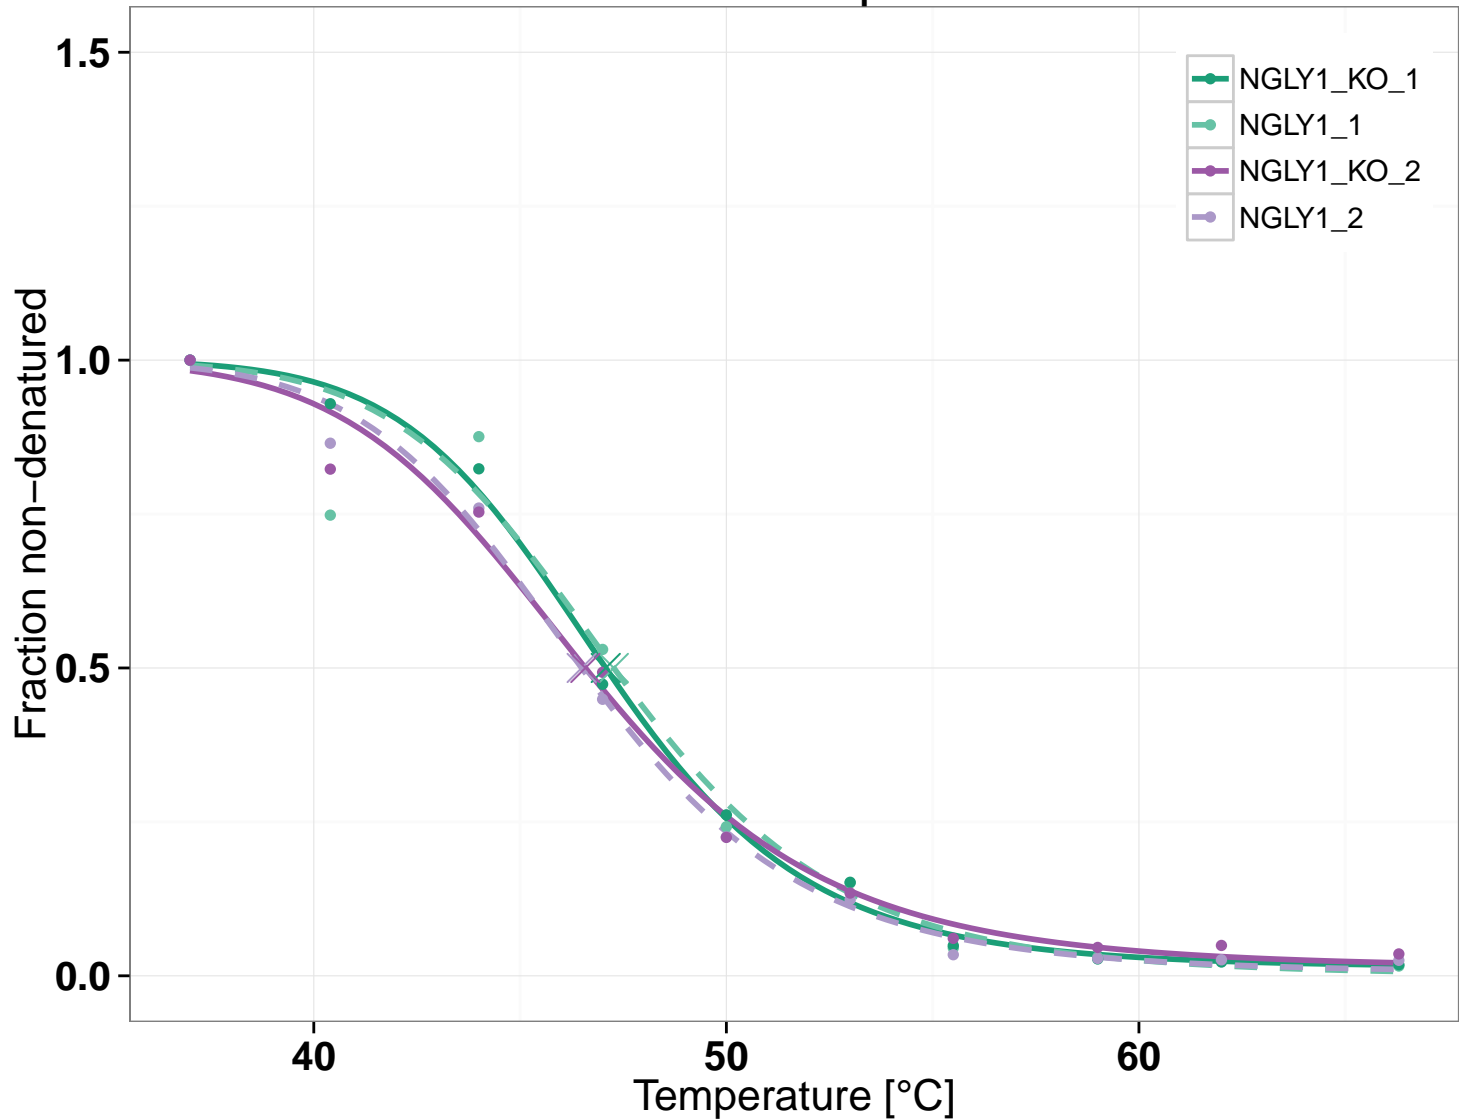

|            | meltPoint | slope  | plateau | R2   |
|------------|-----------|--------|---------|------|
| NGLY1_KO_1 | 47.08     | -0.1   | 0.01    | 1    |
| NGLY1_1    | 47.27     | -0.092 | 0       | 0.96 |
| NGLY1_KO_2 | 46.58     | -0.085 | 0.01    | 0.99 |
| NGLY1_2    | 46.49     | -0.093 | 0       | 0.99 |

Supplement: Supplementary file 4950 [file 1]

IPI00013257.1|SSBP4

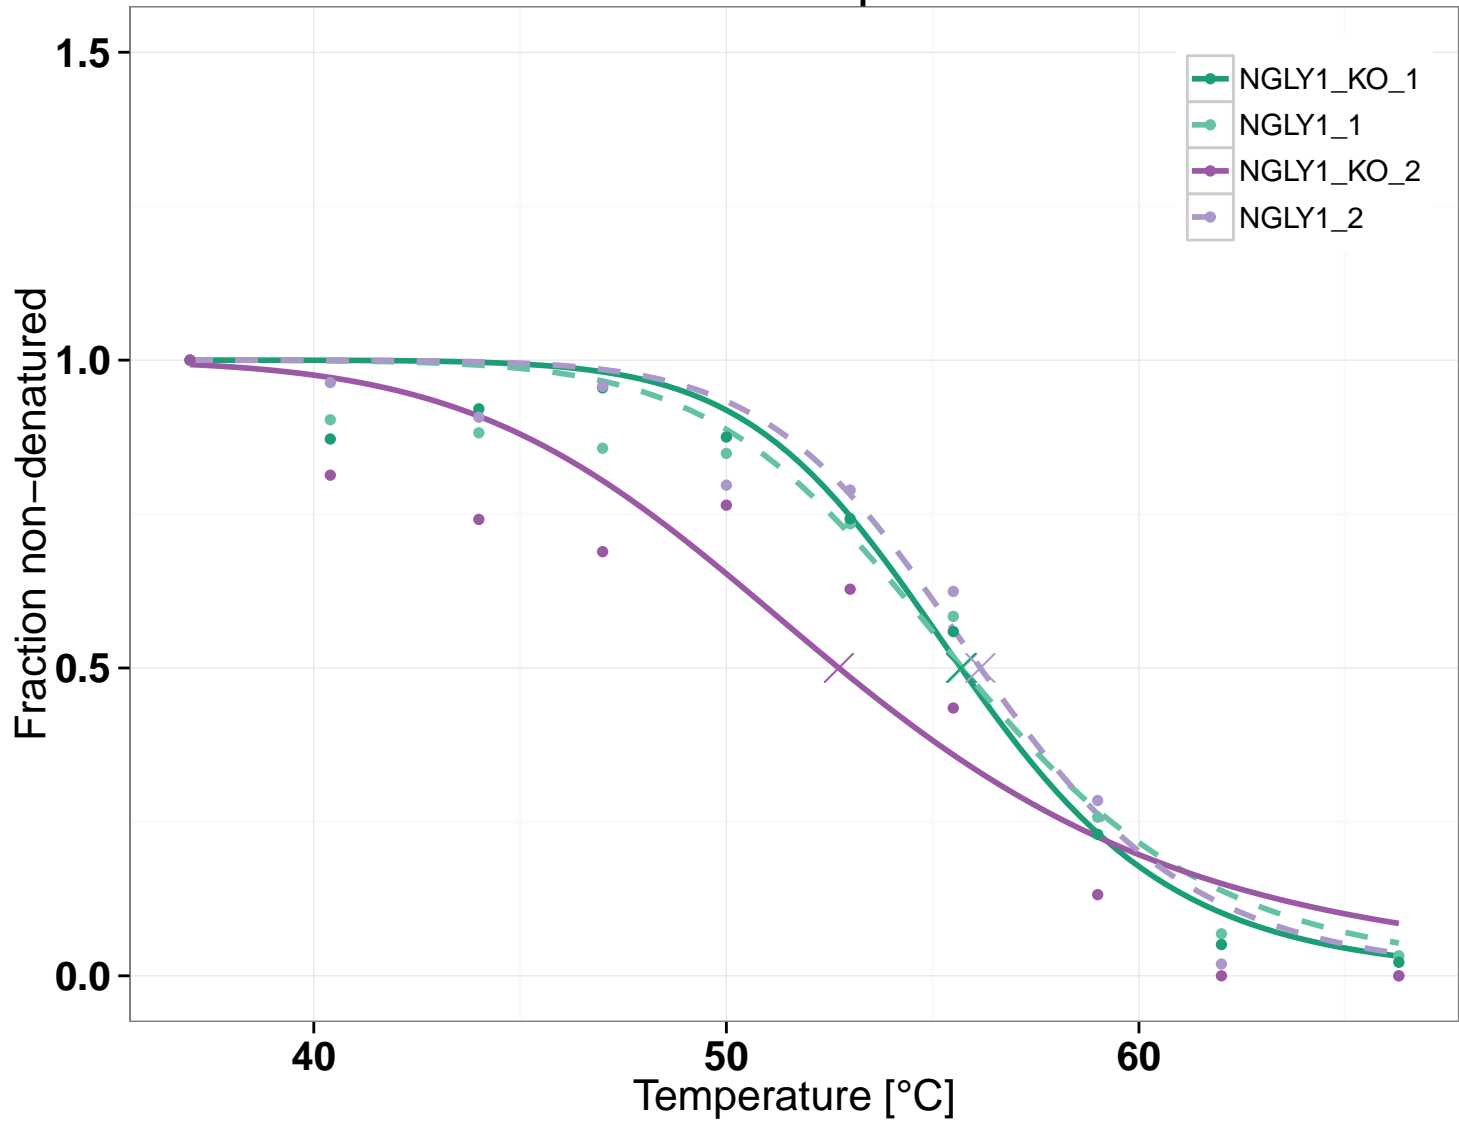

|            | meltPoint | slope  | plateau | R2   |
|------------|-----------|--------|---------|------|
| NGLY1_KO_1 | 55.69     | -0.097 | 0       | 0.98 |
| NGLY1_1    | 55.72     | -0.082 | 0       | 0.96 |
| NGLY1_KO_2 | 52.73     | -0.057 | 0       | 0.88 |
| NGLY1_2    | 56.16     | -0.096 | 0       | 0.97 |

Supplement: Supplementary file 4951 [file 1]

IPI00477161.1|TRIM13

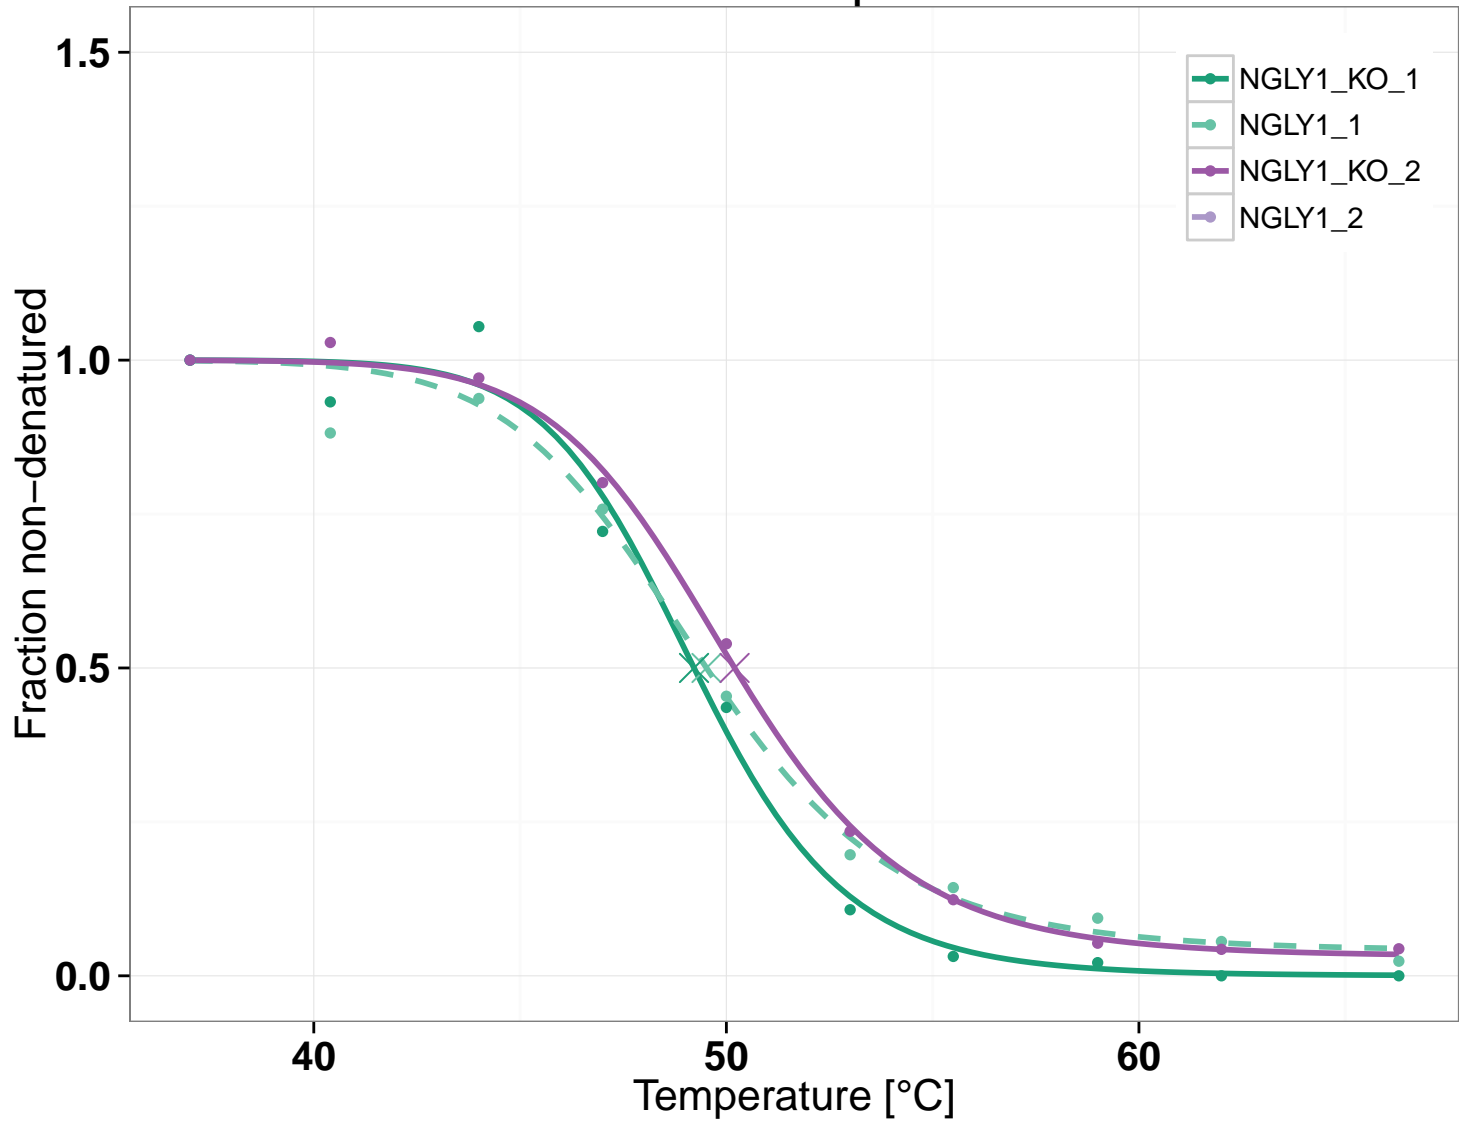

|            | meltPoint | slope | plateau | R2   |
|------------|-----------|-------|---------|------|
| NGLY1_KO_1 | 49.22     | -0.14 | 0       | 0.99 |
| NGLY1_1    | 49.52     | -0.1  | 0.04    | 0.99 |
| NGLY1_KO_2 | 50.2      | -0.11 | 0.03    | 1    |
| NGLY1_2    | -         | -     | -       | -    |

Supplement: Supplementary file 4952 [file 1]

IPI00023098.1|FOXP1

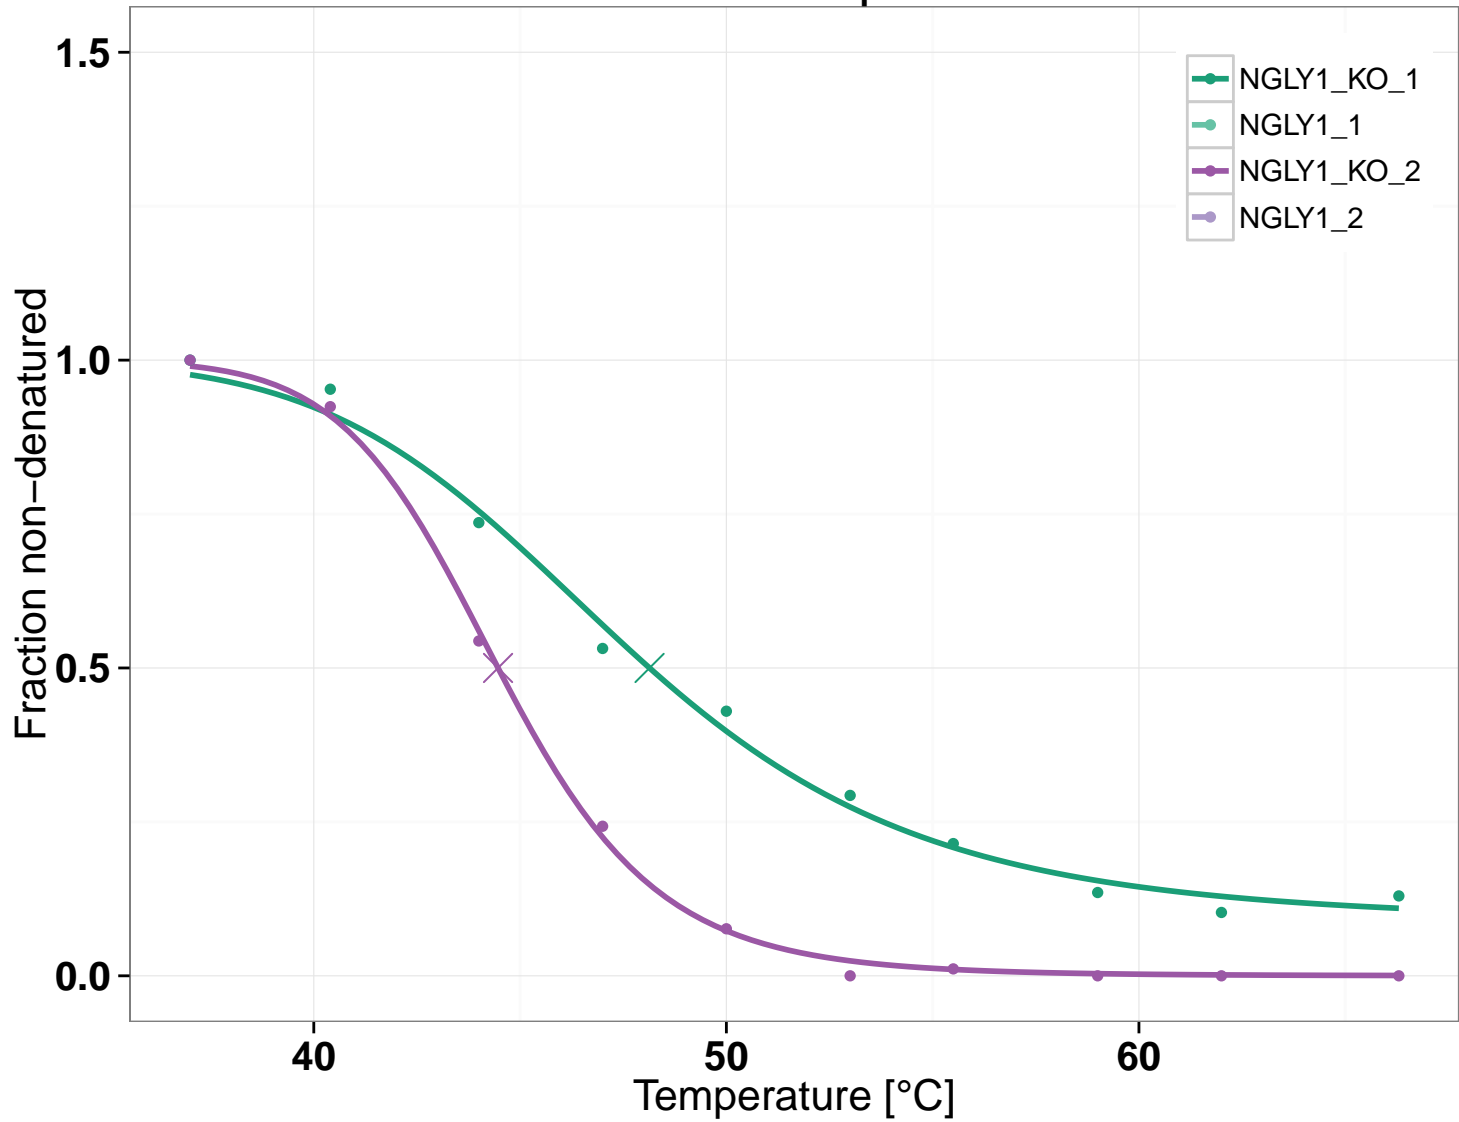

|            | meltPoint | slope  | plateau | R2   |
|------------|-----------|--------|---------|------|
| NGLY1_KO_1 | 48.14     | -0.063 | 0.09    | 0.99 |
| NGLY1_1    | -         | -      | -       | -    |
| NGLY1_KO_2 | 44.47     | -0.13  | 0       | 1    |
| NGLY1_2    | -         | -      | -       | -    |

Supplement: Supplementary file 4953 [file 1]

IPI00472858.9|GPR89A

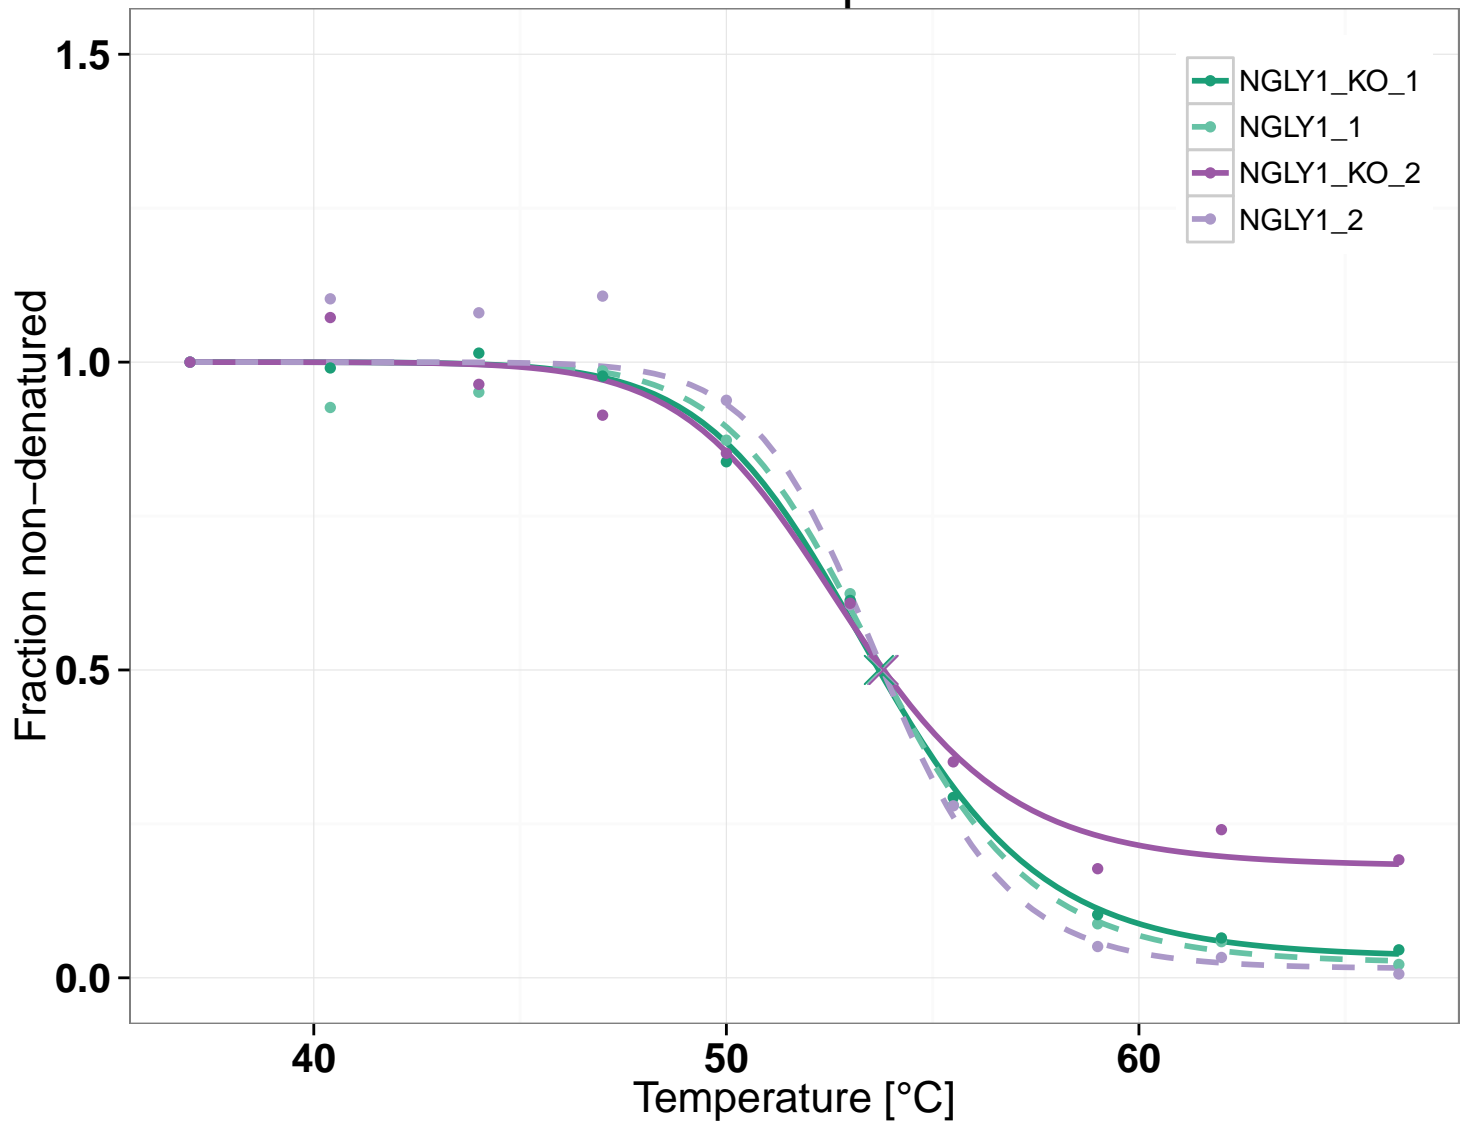

|            | meltPoint | slope | plateau | R2   |
|------------|-----------|-------|---------|------|
| NGLY1_KO_1 | 53.7      | -0.12 | 0.03    | 1    |
| NGLY1_1    | 53.77     | -0.13 | 0.02    | 0.99 |
| NGLY1_KO_2 | 53.81     | -0.1  | 0.18    | 0.99 |
| NGLY1_2    | 53.79     | -0.16 | 0.01    | 0.99 |

Supplement: Supplementary file 4954 [file 1]

IPI00168439.3|ZNRF1

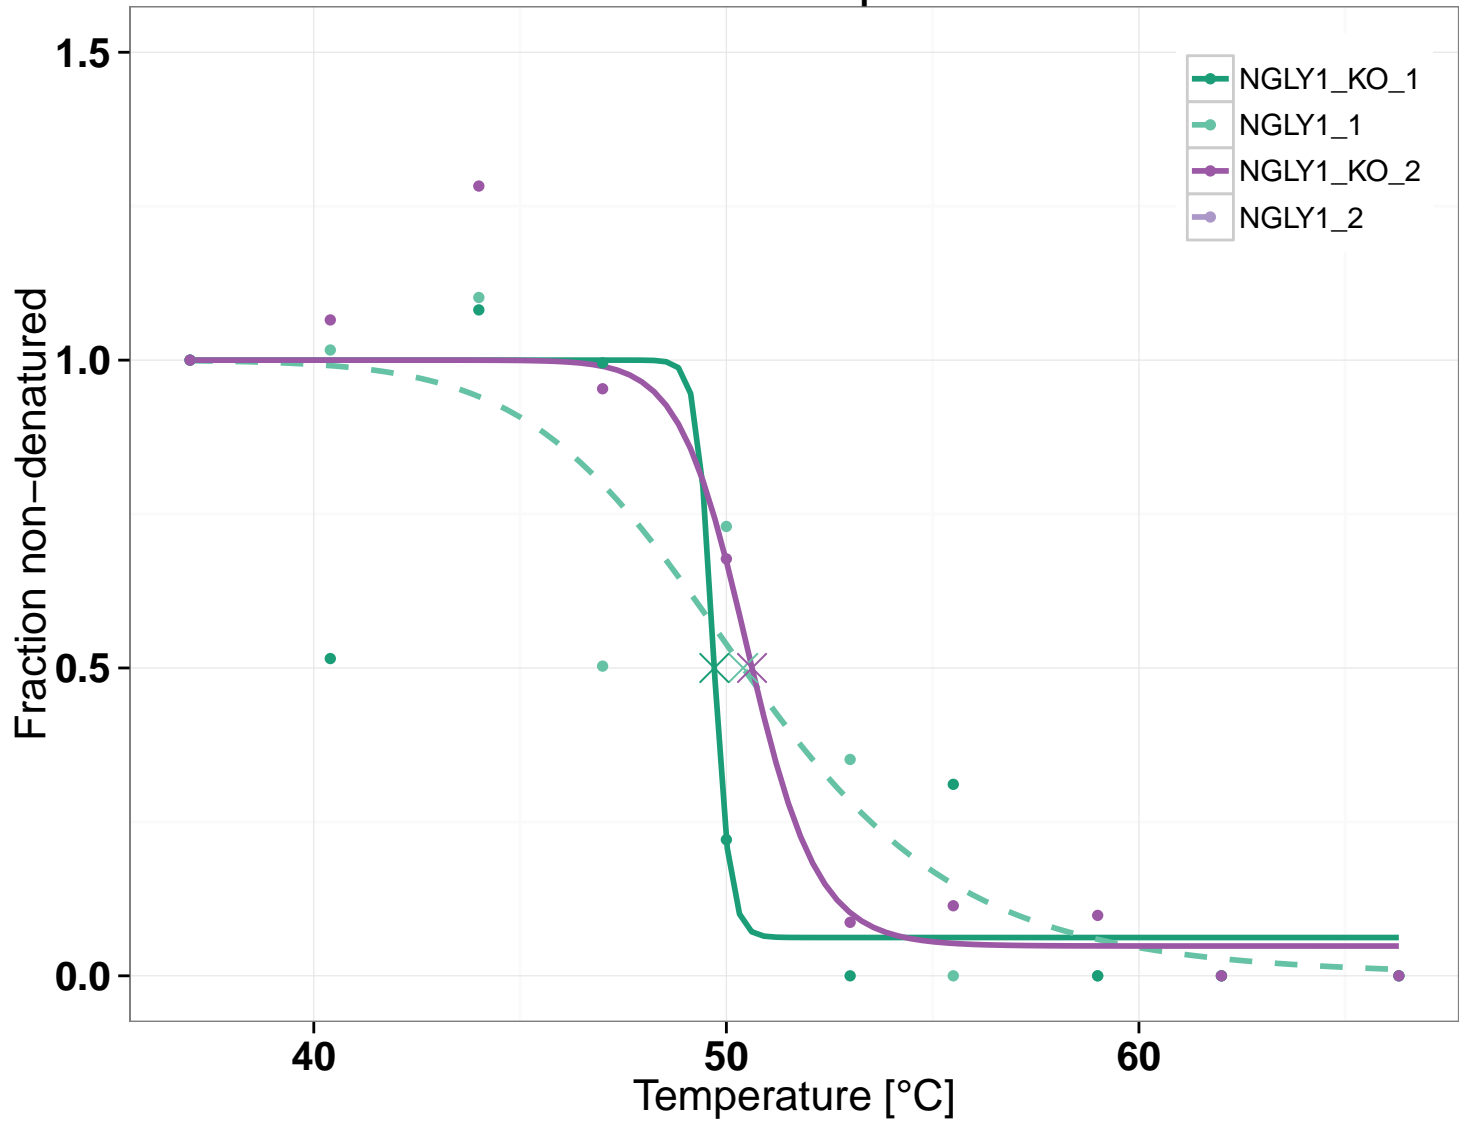

|            | meltPoint | slope  | plateau | R2   |
|------------|-----------|--------|---------|------|
| NGLY1_KO_1 | 49.71     | -1.2   | 0.06    | 0.83 |
| NGLY1_1    | 50.41     | -0.095 | 0       | 0.91 |
| NGLY1_KO_2 | 50.62     | -0.28  | 0.05    | 0.96 |
| NGLY1_2    | -         | -      | -       | -    |

Supplement: Supplementary file 4955 [file 1]

# IPI00103599.1|BRI3BP

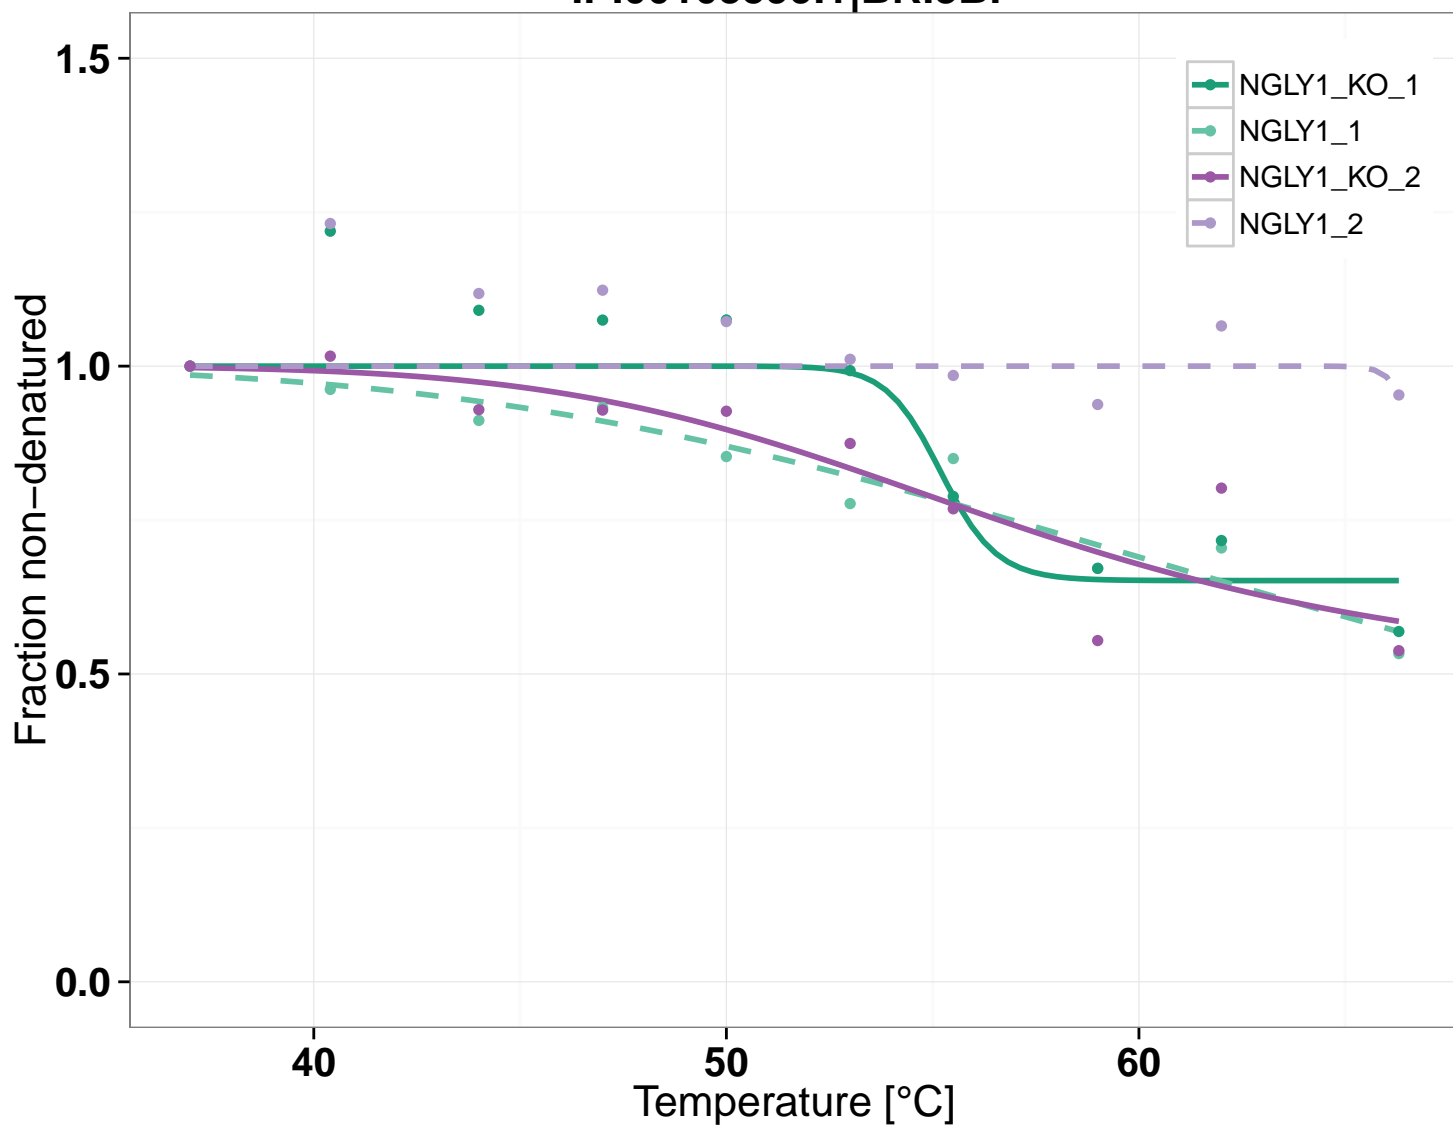

|            | meltPoint | slope  | plateau | R2   |
|------------|-----------|--------|---------|------|
| NGLY1_KO_1 | –         | –0.13  | 0.65    | 0.81 |
| NGLY1_1    | –         | –0.02  | 0       | 0.92 |
| NGLY1_KO_2 | –         | –0.023 | 0.48    | 0.79 |
| NGLY1_2    | –         | –      | 0       | –0.3 |

Supplement: Supplementary file 4956 [file 1]

# IPI00180386.5|GYG1

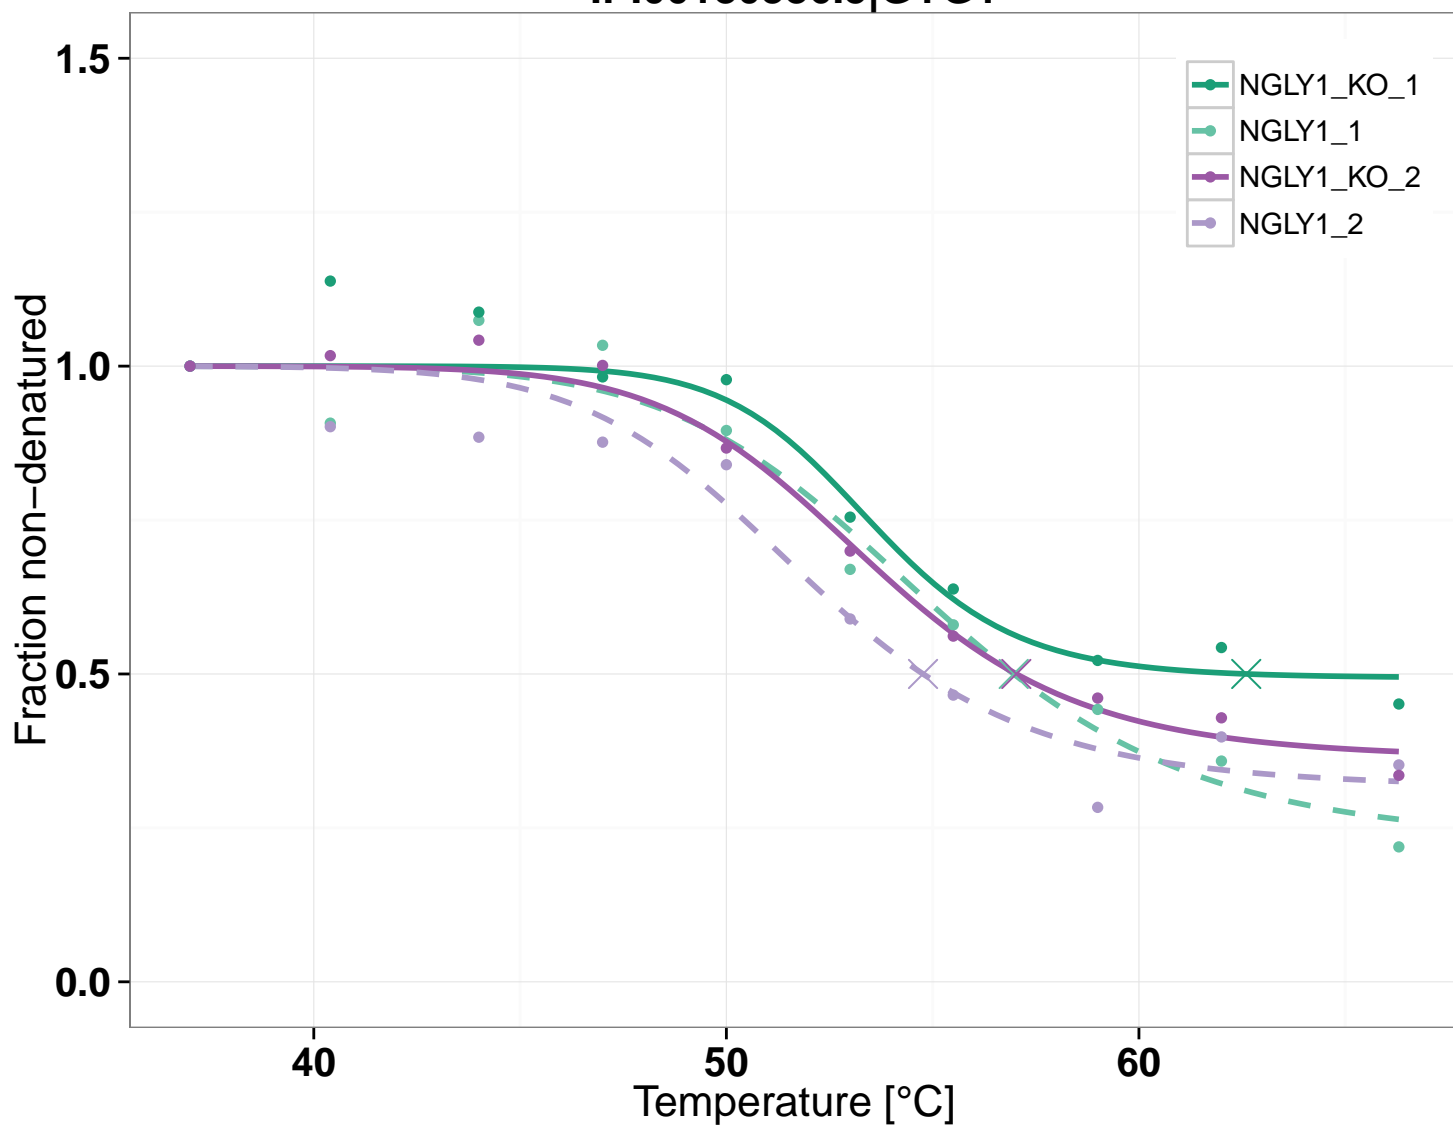

|            | meltPoint | slope  | plateau | R2   |
|------------|-----------|--------|---------|------|
| NGLY1_KO_1 | 62.6      | -0.071 | 0.49    | 0.94 |
| NGLY1_1    | 56.96     | -0.061 | 0.22    | 0.97 |
| NGLY1_KO_2 | 57.03     | -0.062 | 0.36    | 0.99 |
| NGLY1_2    | 54.77     | -0.063 | 0.31    | 0.94 |

Supplement: Supplementary file 4957 [file 1]

# IPI00171411.4|GOLM1

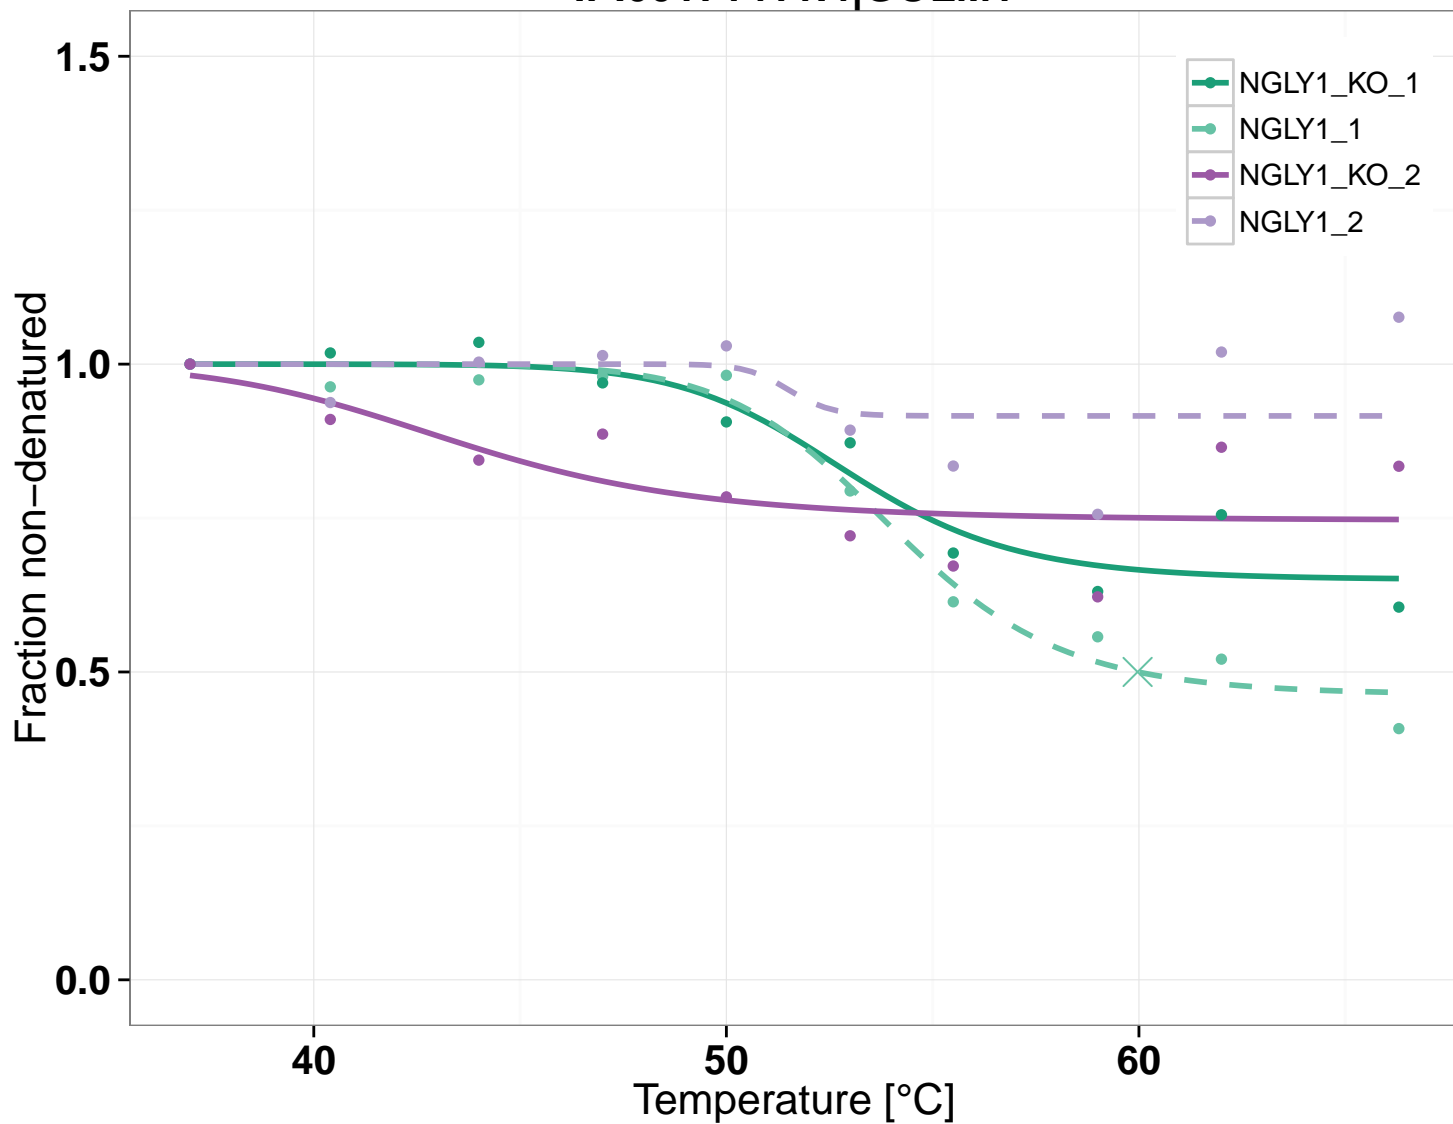

|            | meltPoint | slope  | plateau | R2   |
|------------|-----------|--------|---------|------|
| NGLY1_KO_1 | –         | –0.043 | 0.65    | 0.92 |
| NGLY1_1    | 59.97     | –0.066 | 0.46    | 0.98 |
| NGLY1_KO_2 | –         | –0.022 | 0.75    | 0.55 |
| NGLY1_2    | –         | –0.04  | 0.92    | 0.18 |

Supplement: Supplementary file 4958 [file 1]

IPI00029656.1|DFNA5

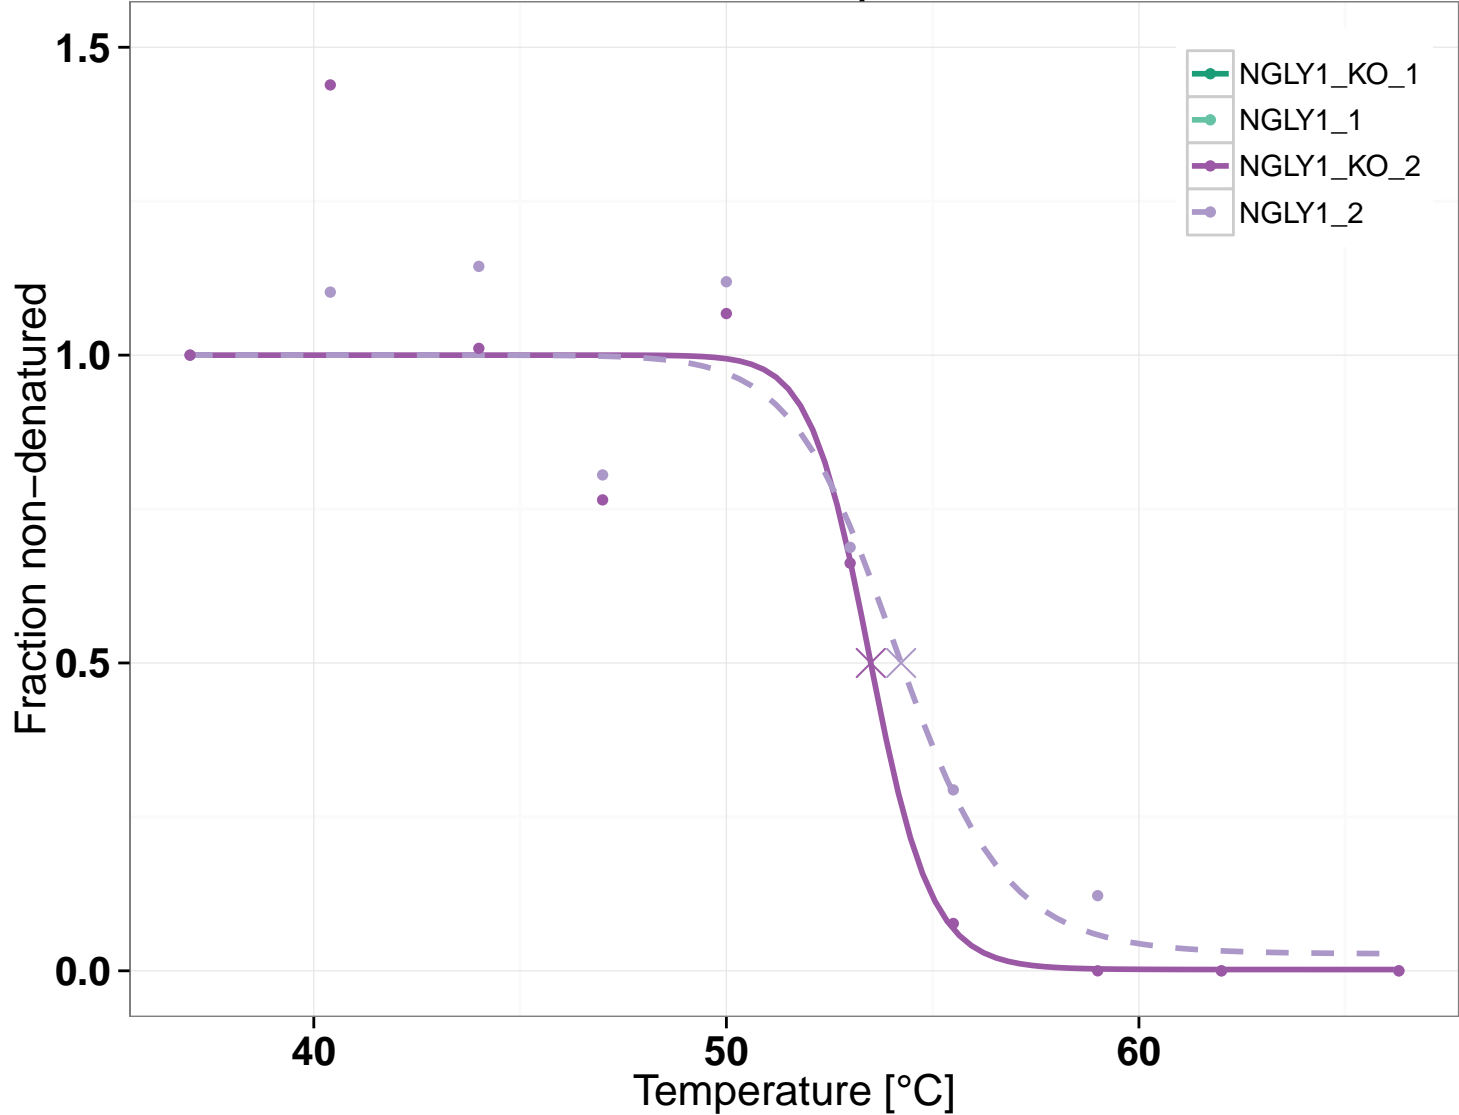

|            | meltPoint | slope | plateau | R2   |
|------------|-----------|-------|---------|------|
| NGLY1_KO_1 | —         | —     | —       | —    |
| NGLY1_1    | —         | —     | —       | —    |
| NGLY1_KO_2 | 53.5      | -0.34 | 0       | 0.9  |
| NGLY1_2    | 54.24     | -0.19 | 0.03    | 0.95 |

Supplement: Supplementary file 4959 [file 1]

IPI00916243.1|C1QTNF3

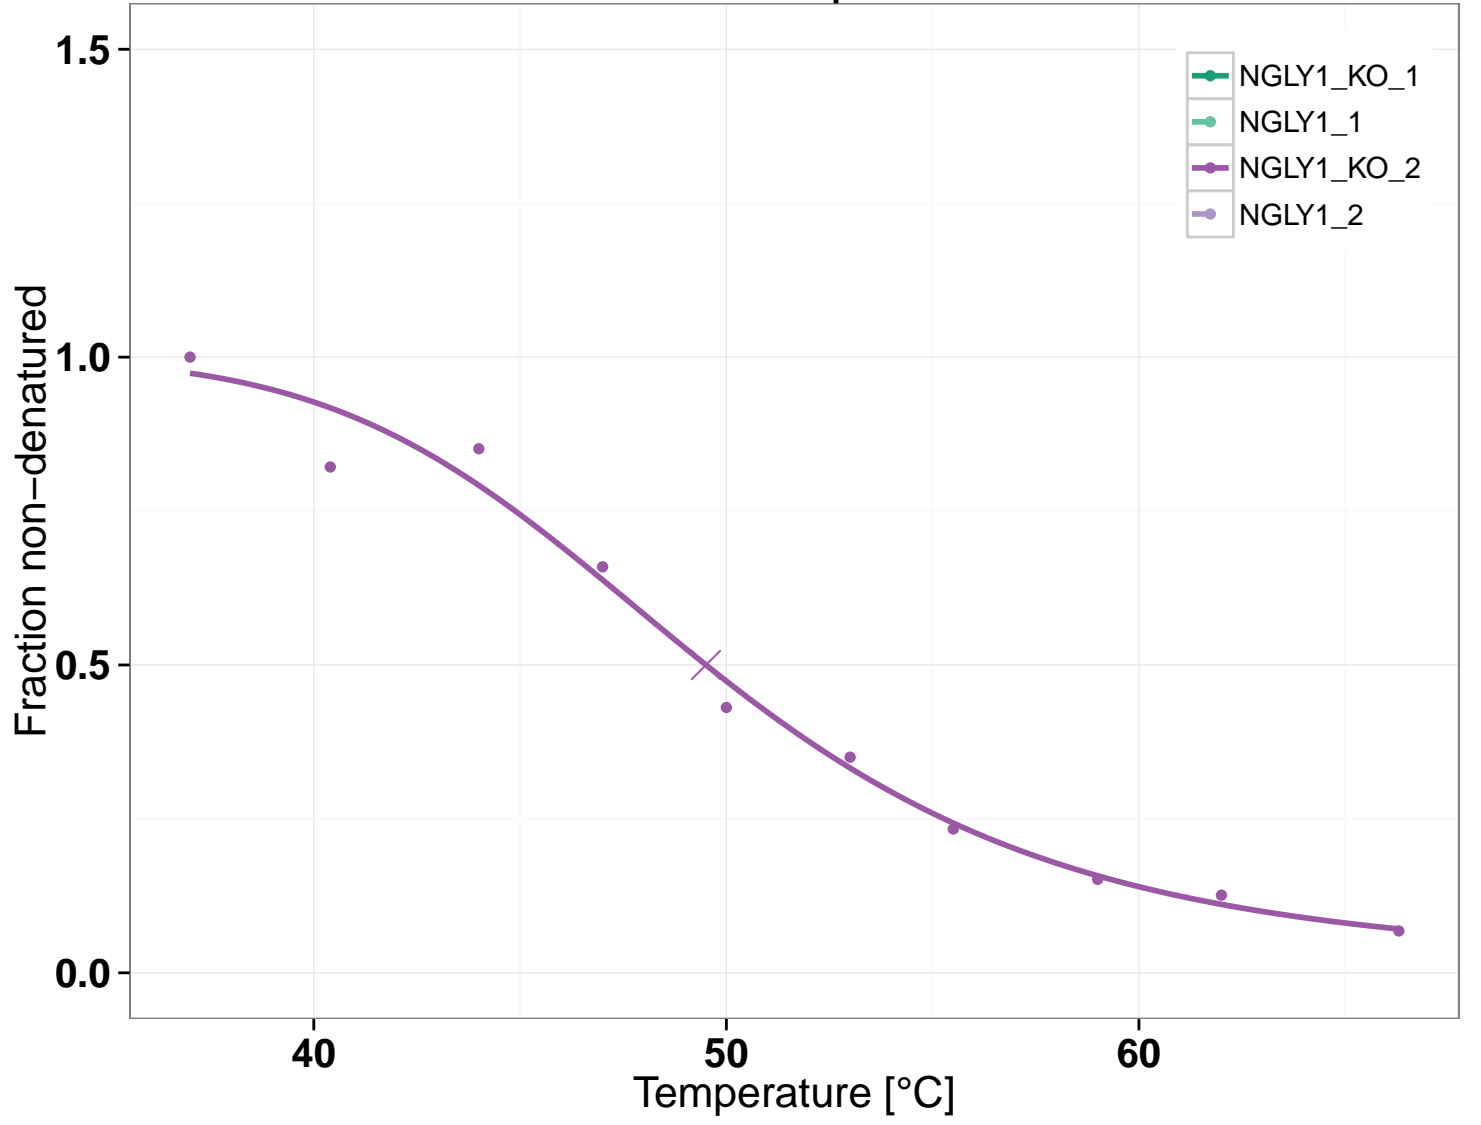

|            | meltPoint | slope  | plateau | R2   |
|------------|-----------|--------|---------|------|
| NGLY1_KO_1 | —         | —      | —       | —    |
| NGLY1_1    | —         | —      | —       | —    |
| NGLY1_KO_2 | 49.51     | -0.056 | 0.01    | 0.98 |
| NGLY1_2    | —         | —      | —       | —    |

Supplement: Supplementary file 4960 [file 1]

IPI00433826.1|TMEM185B

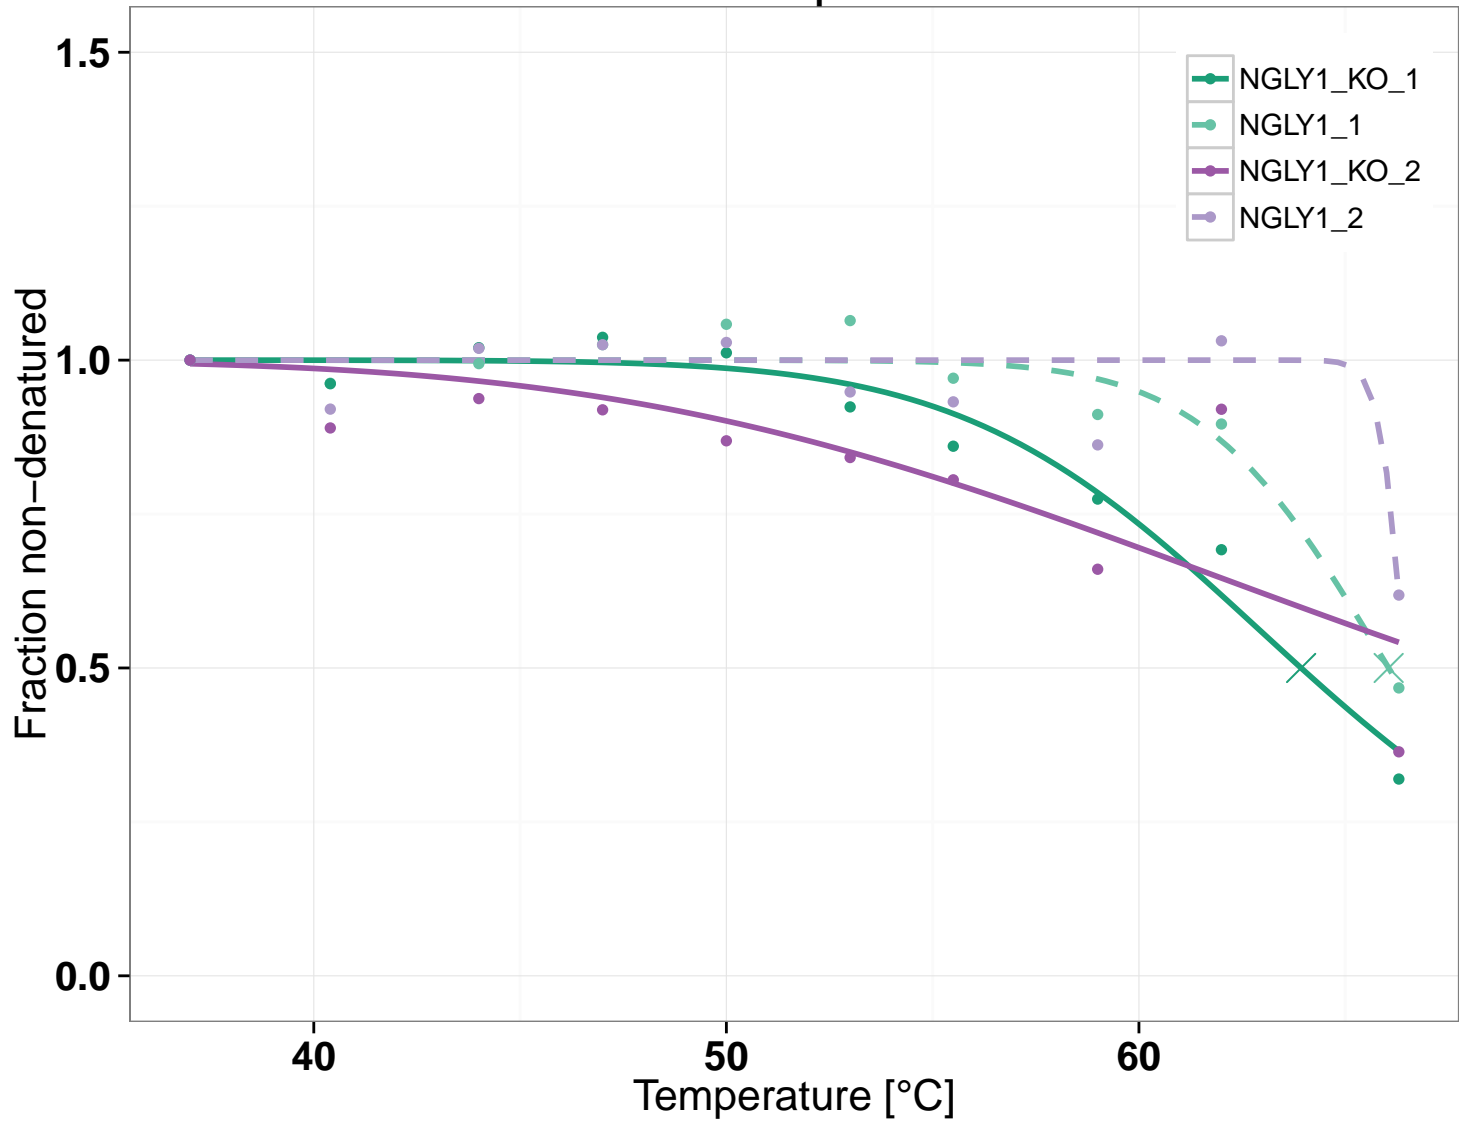

|            | meltPoint | slope  | plateau | R2   |
|------------|-----------|--------|---------|------|
| NGLY1_KO_1 | 63.93     | -0.062 | 0       | 0.96 |
| NGLY1_1    | 66.05     | -0.11  | 0       | 0.95 |
| NGLY1_KO_2 | -         | -0.025 | 0       | 0.6  |
| NGLY1_2    | -         | -      | 0       | 0.75 |

Supplement: Supplementary file 4961 [file 1]

# IPI00000138.1|MGAT1

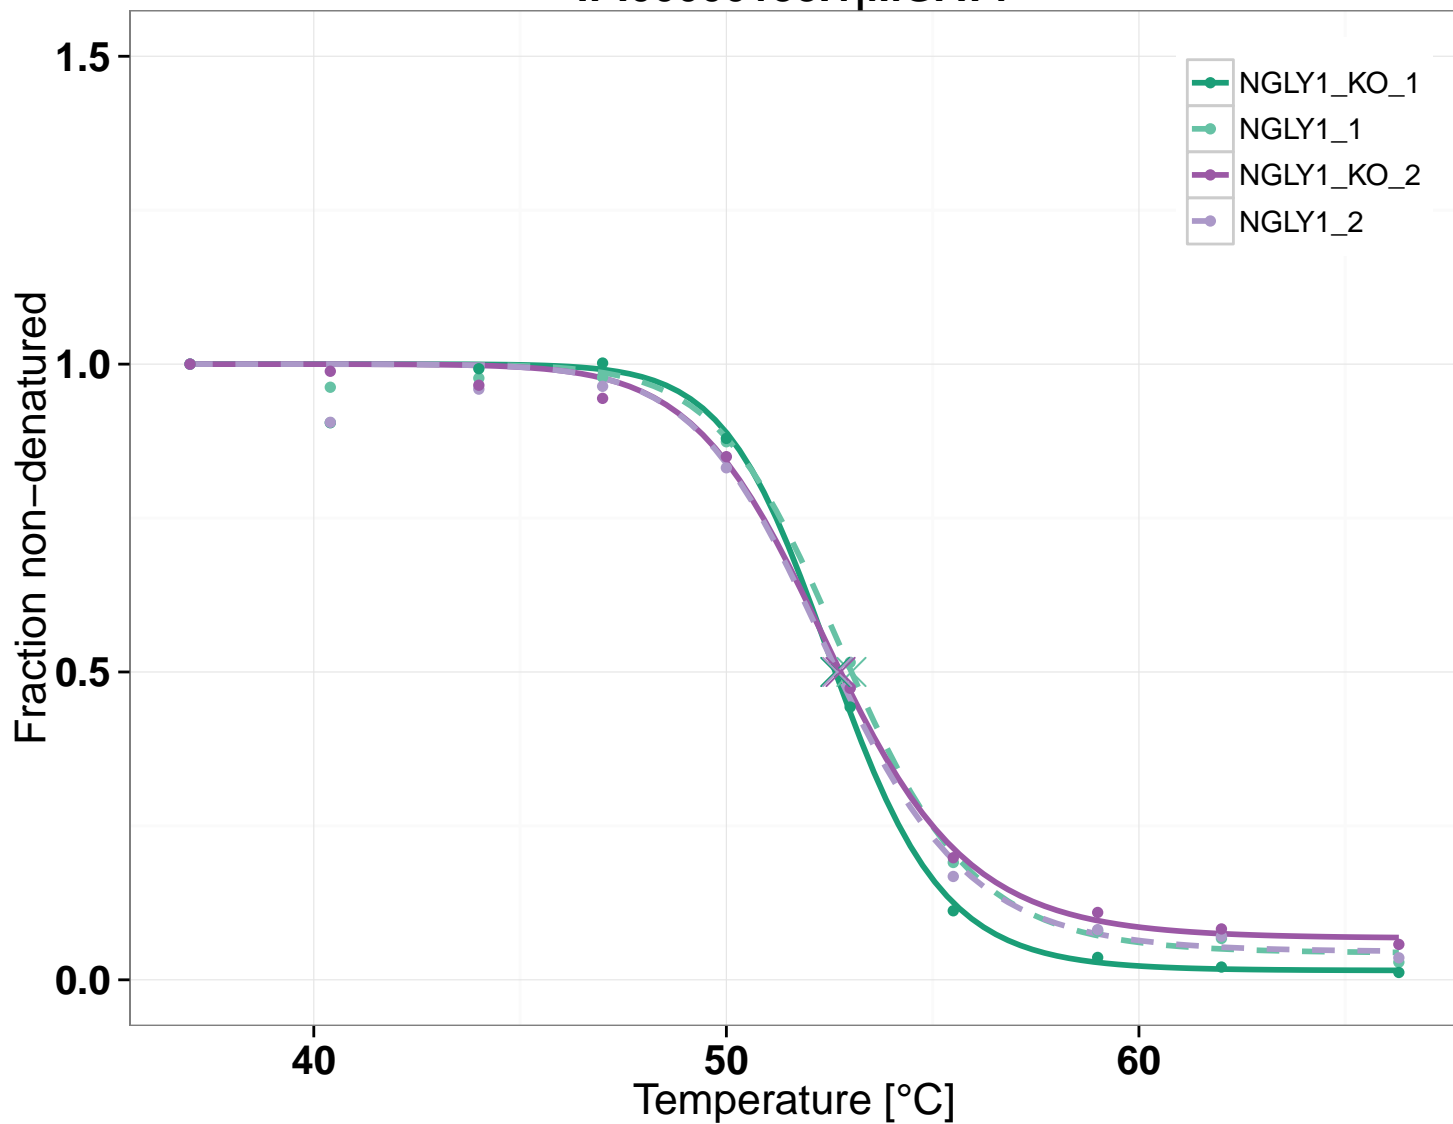

|            | meltPoint | slope | plateau | R2   |
|------------|-----------|-------|---------|------|
| NGLY1_KO_1 | 52.64     | -0.19 | 0.02    | 0.99 |
| NGLY1_1    | 53.03     | -0.15 | 0.04    | 1    |
| NGLY1_KO_2 | 52.77     | -0.14 | 0.07    | 1    |
| NGLY1_2    | 52.69     | -0.14 | 0.05    | 0.99 |

Supplement: Supplementary file 4962 [file 1]

IPI00152975.3|CCDC90A

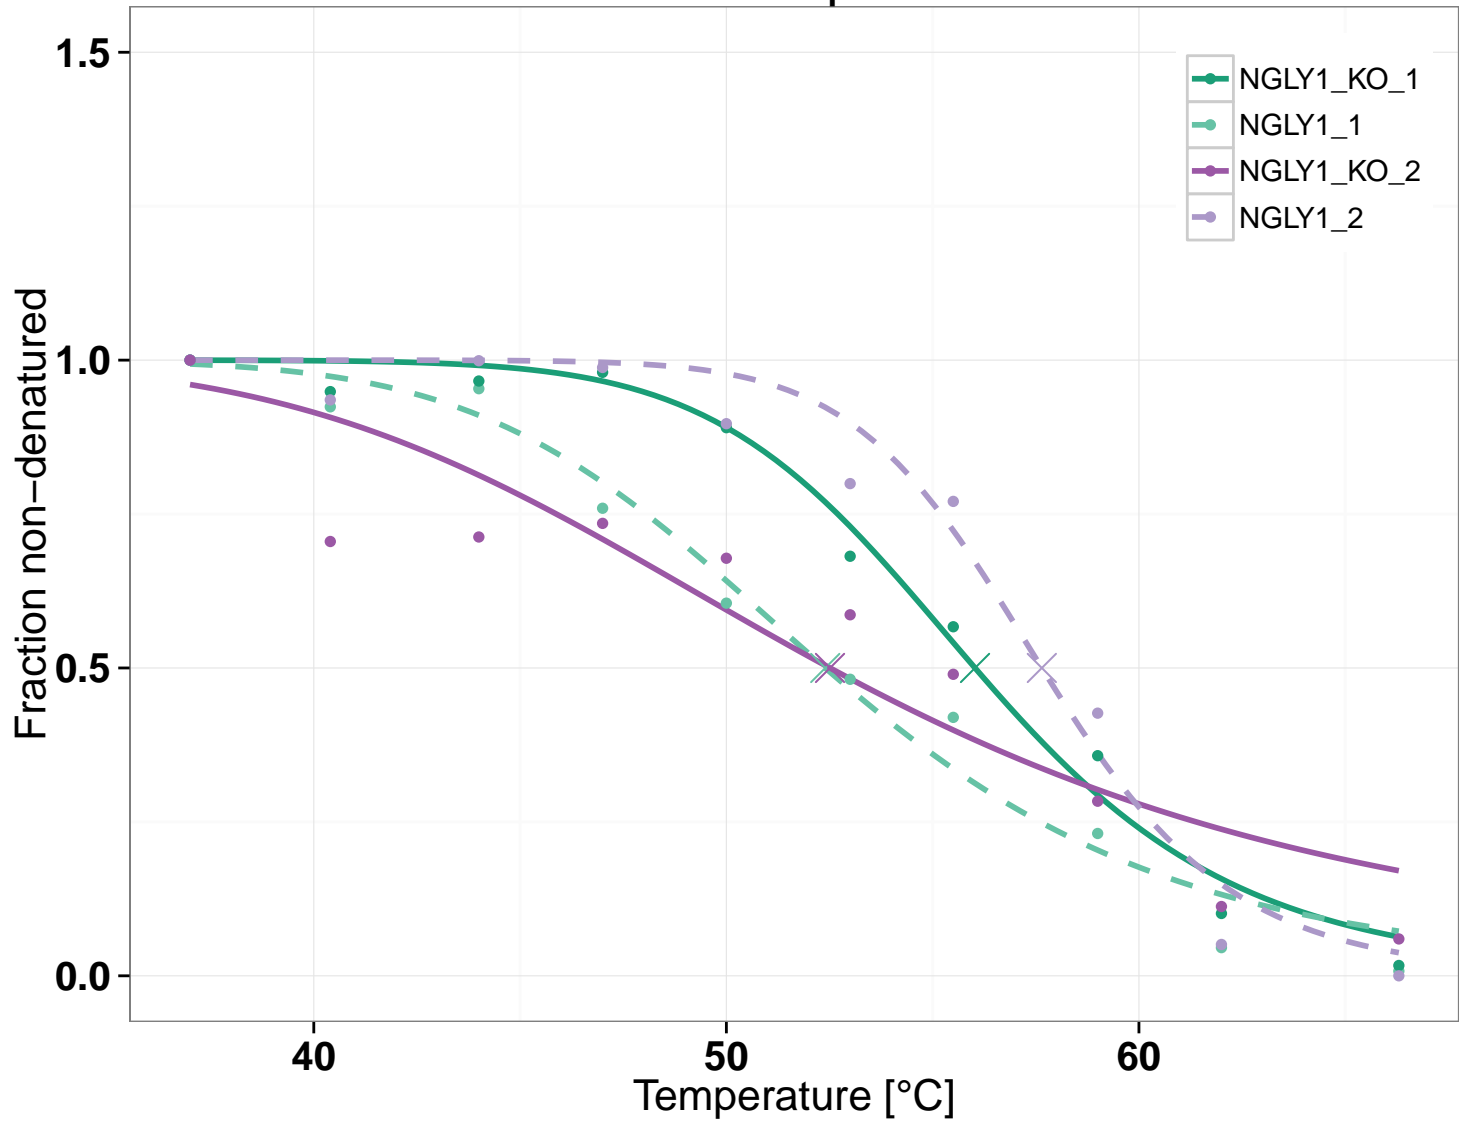

|            | meltPoint | slope  | plateau | R2   |
|------------|-----------|--------|---------|------|
| NGLY1_KO_1 | 56.03     | -0.079 | 0       | 0.99 |
| NGLY1_1    | 52.4      | -0.06  | 0       | 0.98 |
| NGLY1_KO_2 | 52.51     | -0.039 | 0       | 0.87 |
| NGLY1_2    | 57.65     | -0.11  | 0       | 0.97 |

Supplement: Supplementary file 4964 [file 1]

IPI00470537.2|ARID2

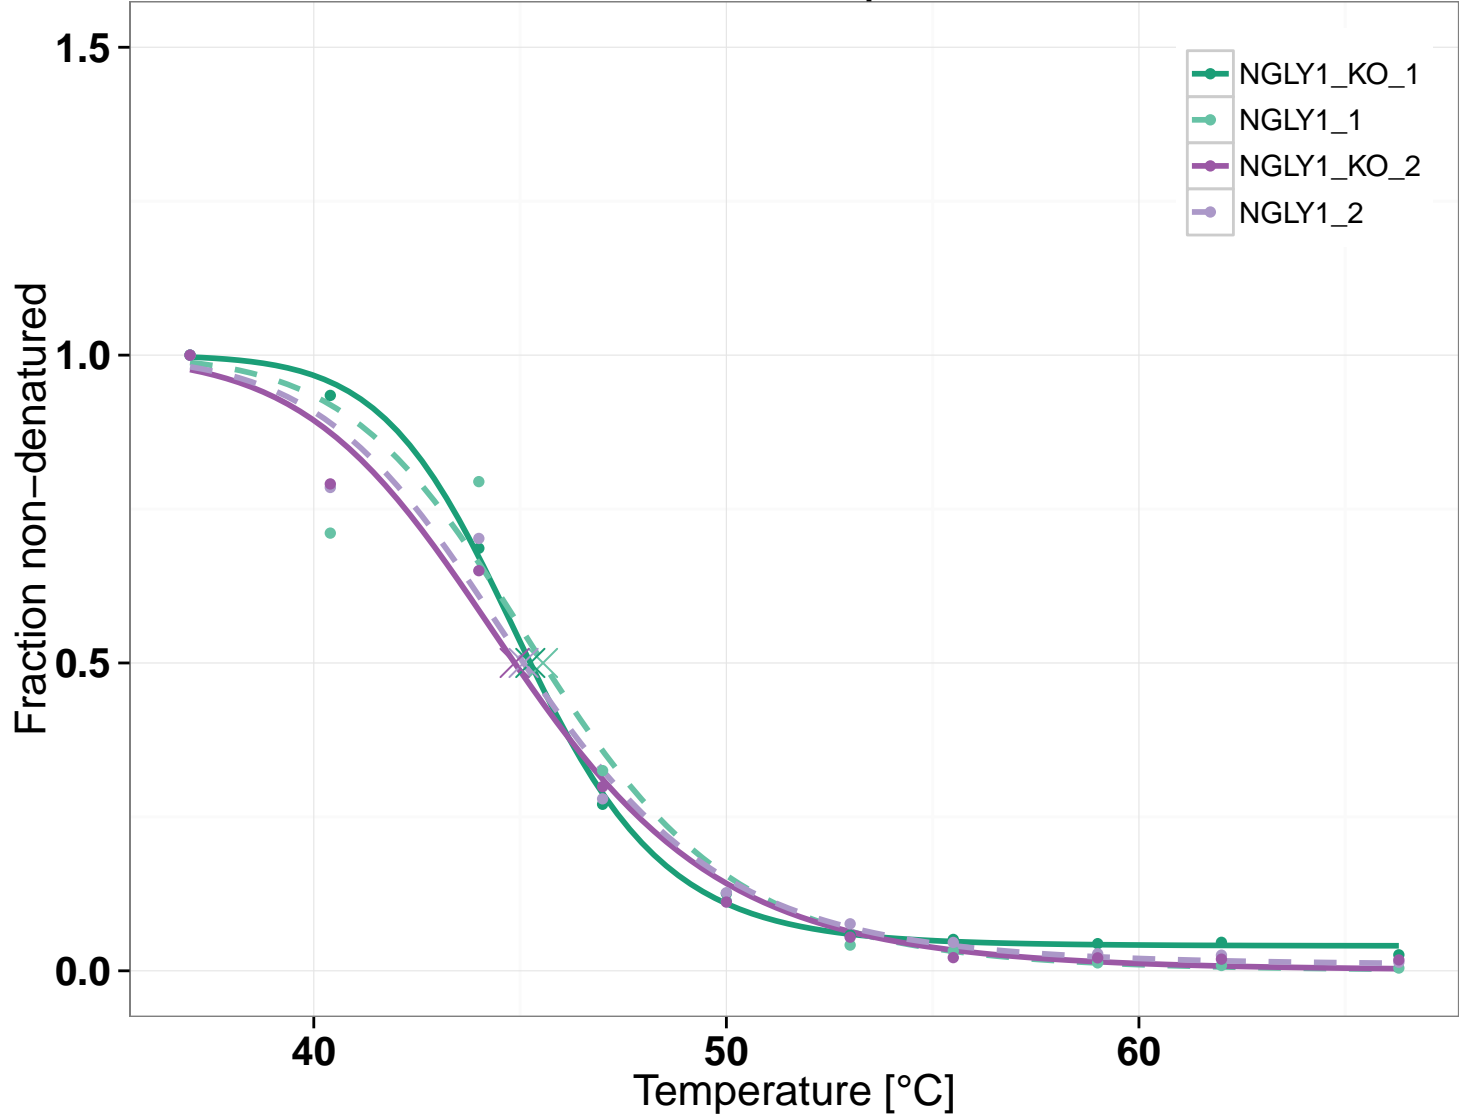

|            | meltPoint | slope  | plateau | R2   |
|------------|-----------|--------|---------|------|
| NGLY1_KO_1 | 45.25     | -0.14  | 0.04    | 1    |
| NGLY1_1    | 45.56     | -0.11  | 0       | 0.95 |
| NGLY1_KO_2 | 44.87     | -0.099 | 0       | 0.99 |
| NGLY1_2    | 45.08     | -0.1   | 0.01    | 0.98 |

Supplement: Supplementary file 4965 [file 1]

# IPI00032633.4|COQ6

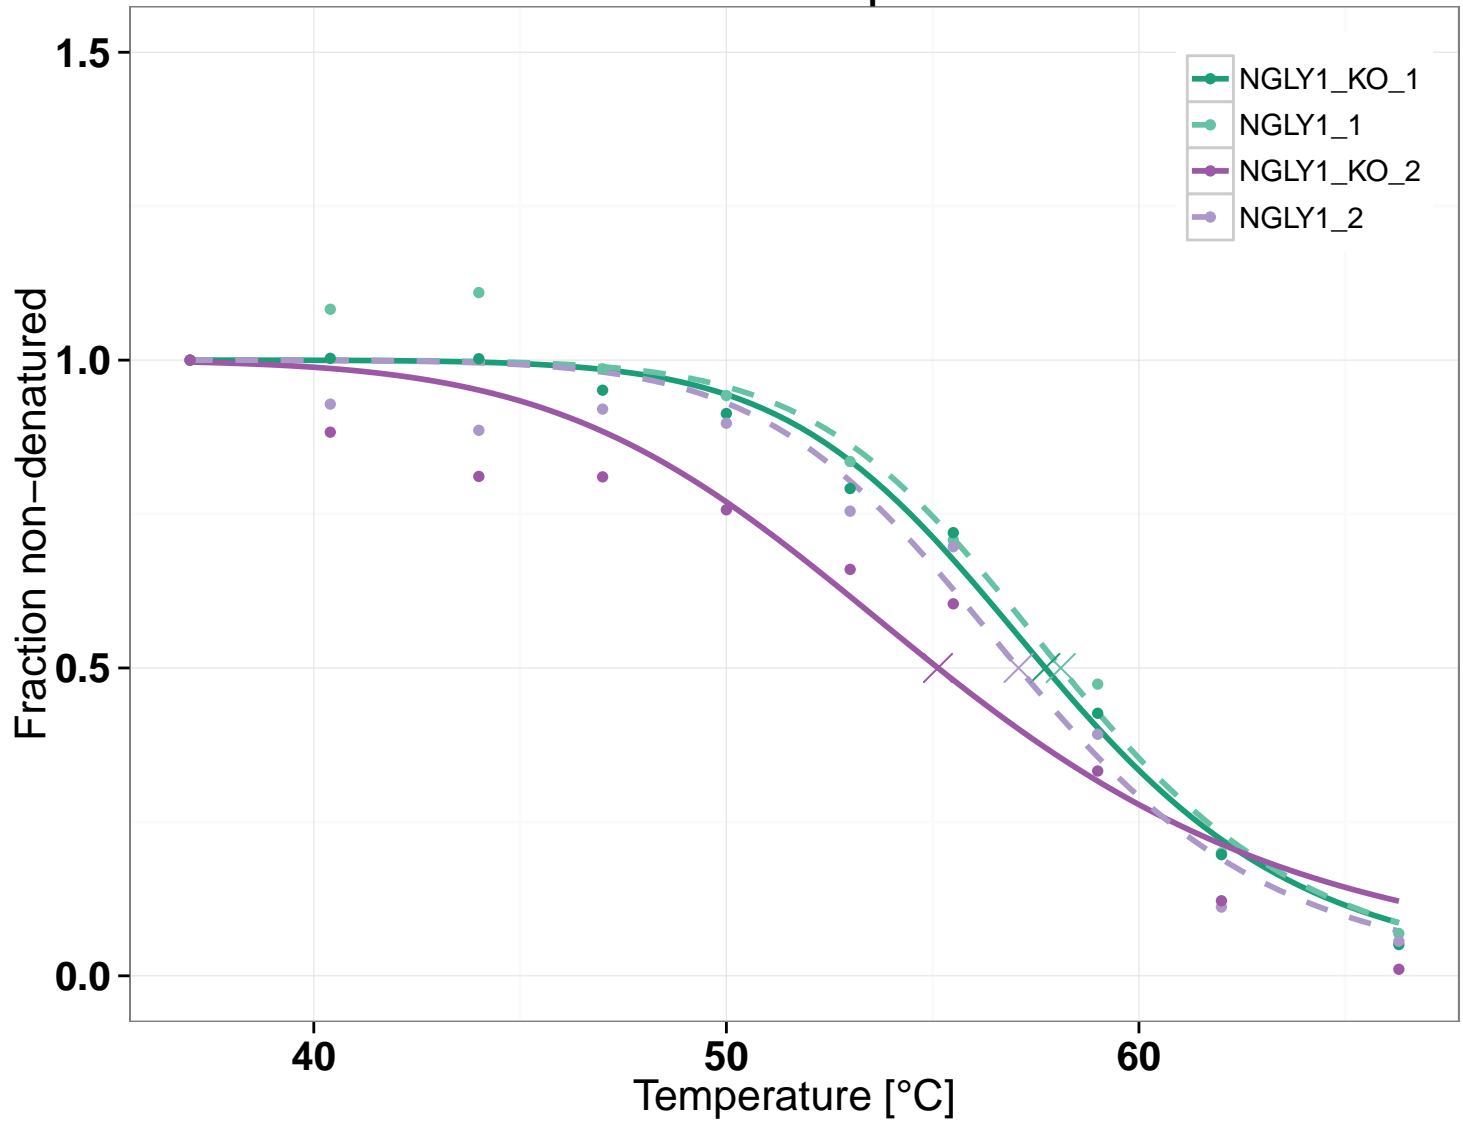

|            | meltPoint | slope  | plateau | R2   |
|------------|-----------|--------|---------|------|
| NGLY1_KO_1 | 57.73     | -0.08  | 0       | 0.99 |
| NGLY1_1    | 58.11     | -0.083 | 0       | 0.98 |
| NGLY1_KO_2 | 55.13     | -0.055 | 0       | 0.93 |
| NGLY1_2    | 57.08     | -0.081 | 0       | 0.97 |

Supplement: Supplementary file 4966 [file 1]

IPI00019205.1|C14ORF4

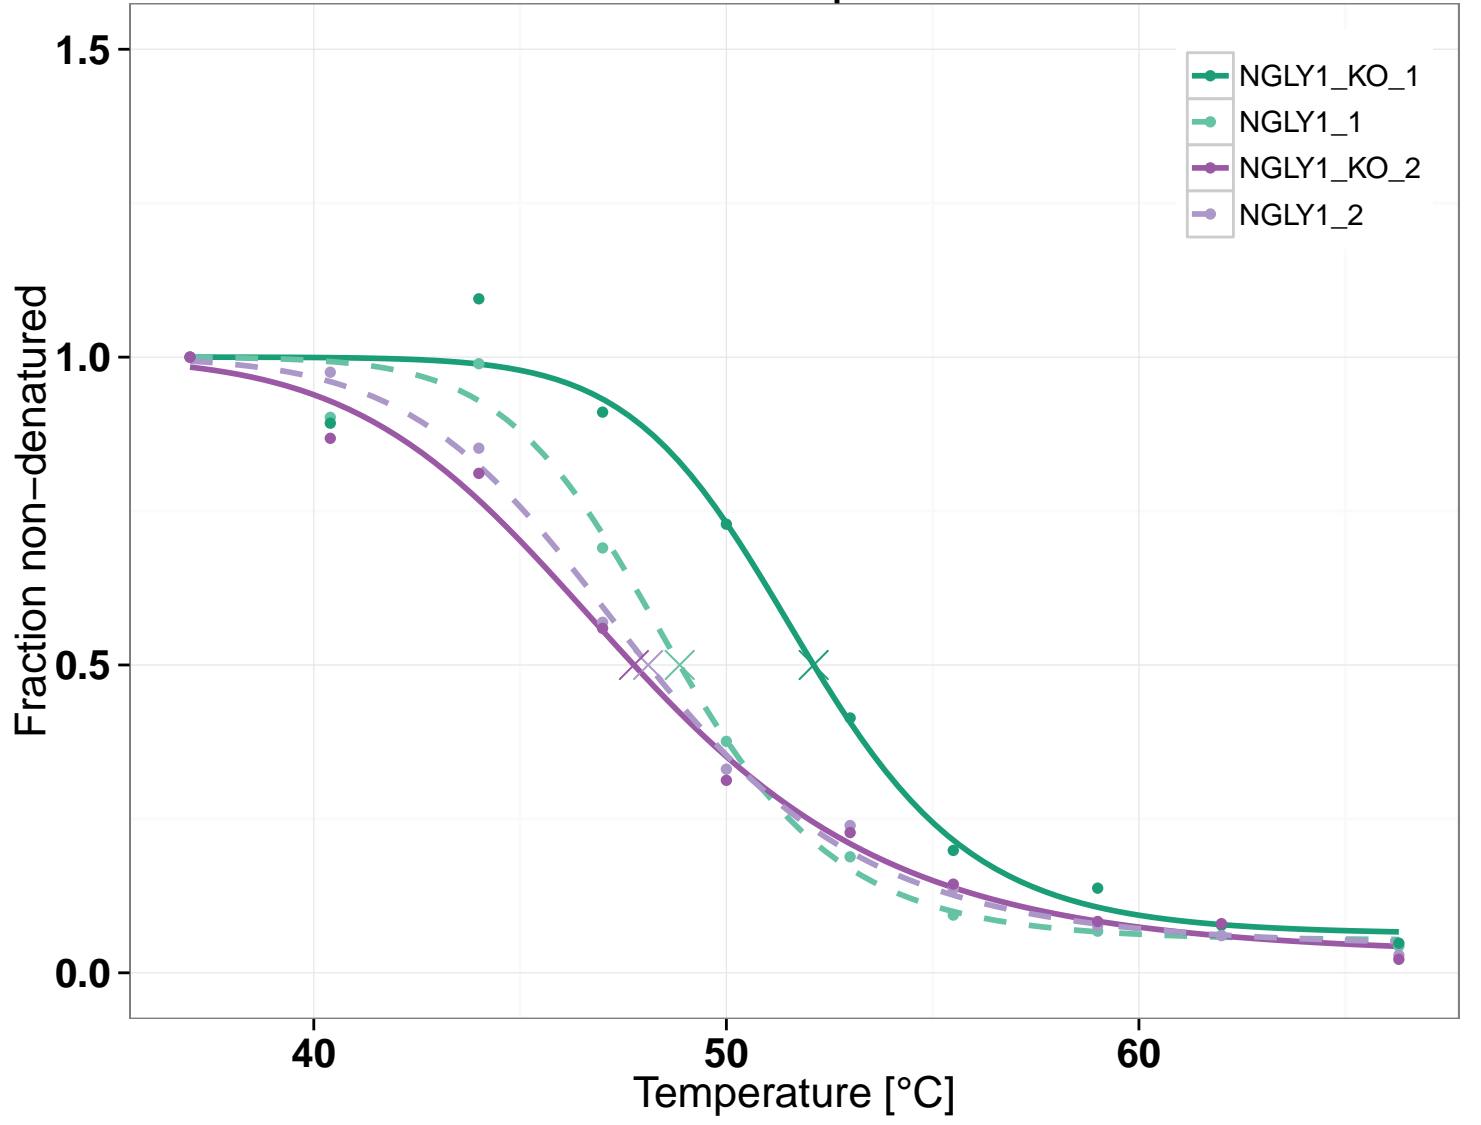

|            | meltPoint | slope  | plateau | R2   |
|------------|-----------|--------|---------|------|
| NGLY1_KO_1 | 52.12     | -0.11  | 0.06    | 0.98 |
| NGLY1_1    | 48.87     | -0.12  | 0.05    | 0.99 |
| NGLY1_KO_2 | 47.76     | -0.074 | 0.03    | 0.99 |
| NGLY1_2    | 48.1      | -0.086 | 0.04    | 1    |

Supplement: Supplementary file 4967 [file 1]

IPI00101298.2|FAM18B2

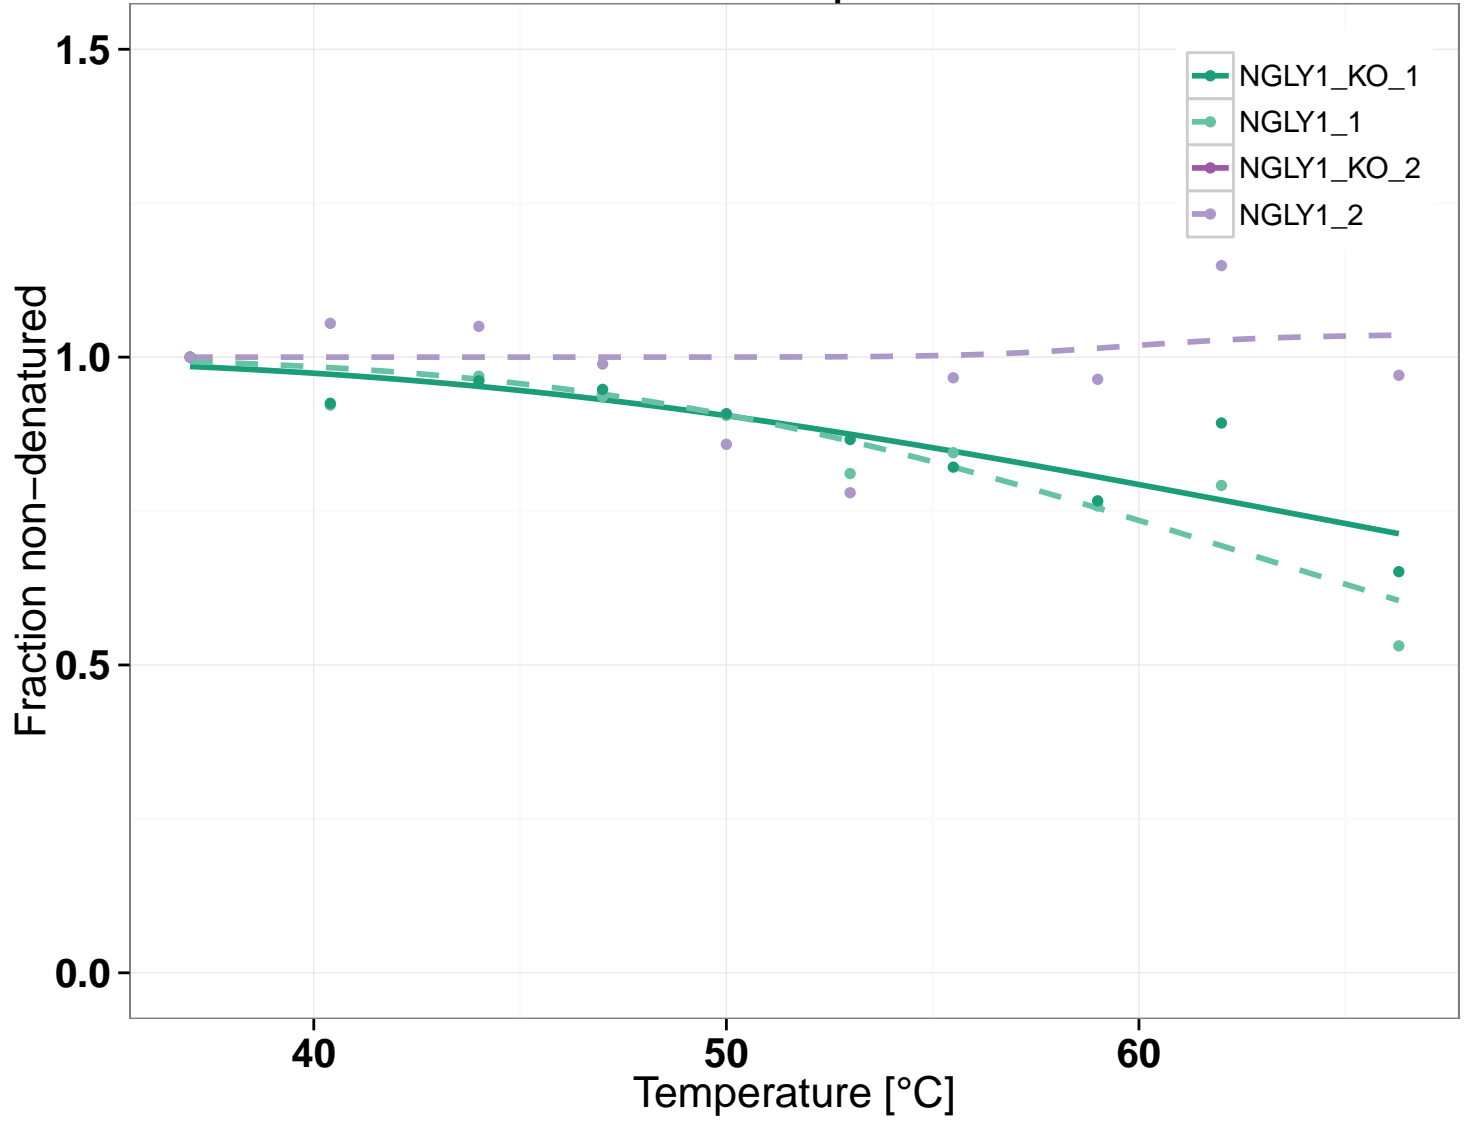

|            | meltPoint | slope  | plateau | R2    |
|------------|-----------|--------|---------|-------|
| NGLY1_KO_1 | -         | -0.013 | 0       | 0.75  |
| NGLY1_1    | -         | -0.021 | 0       | 0.87  |
| NGLY1_KO_2 | -         | -      | -       | -     |
| NGLY1_2    | -         | 0.0048 | 1.04    | -0.03 |

Supplement: Supplementary file 4968 [file 1]

IPI00011913.1|HNRNPA0

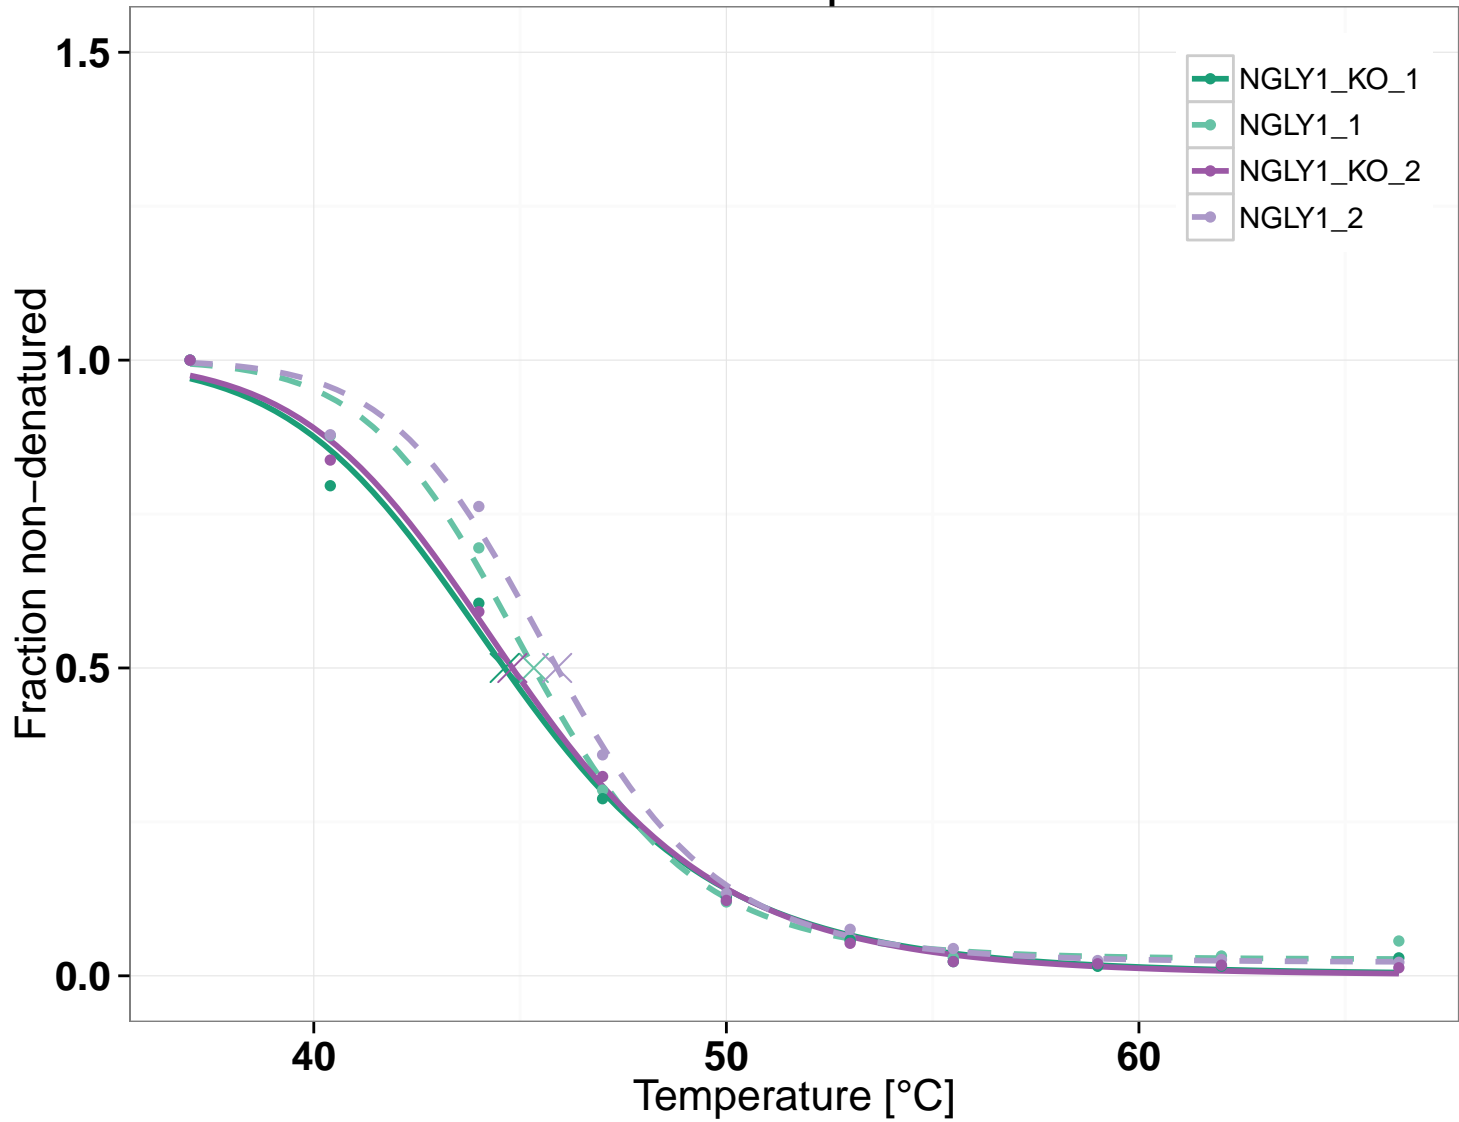

|            | meltPoint | slope  | plateau | R2   |
|------------|-----------|--------|---------|------|
| NGLY1_KO_1 | 44.63     | -0.096 | 0       | 0.99 |
| NGLY1_1    | 45.33     | -0.12  | 0.03    | 1    |
| NGLY1_KO_2 | 44.81     | -0.098 | 0       | 1    |
| NGLY1_2    | 45.9      | -0.12  | 0.02    | 0.99 |

Supplement: Supplementary file 4969 [file 1]

# IPI00015538.1|PRKD3

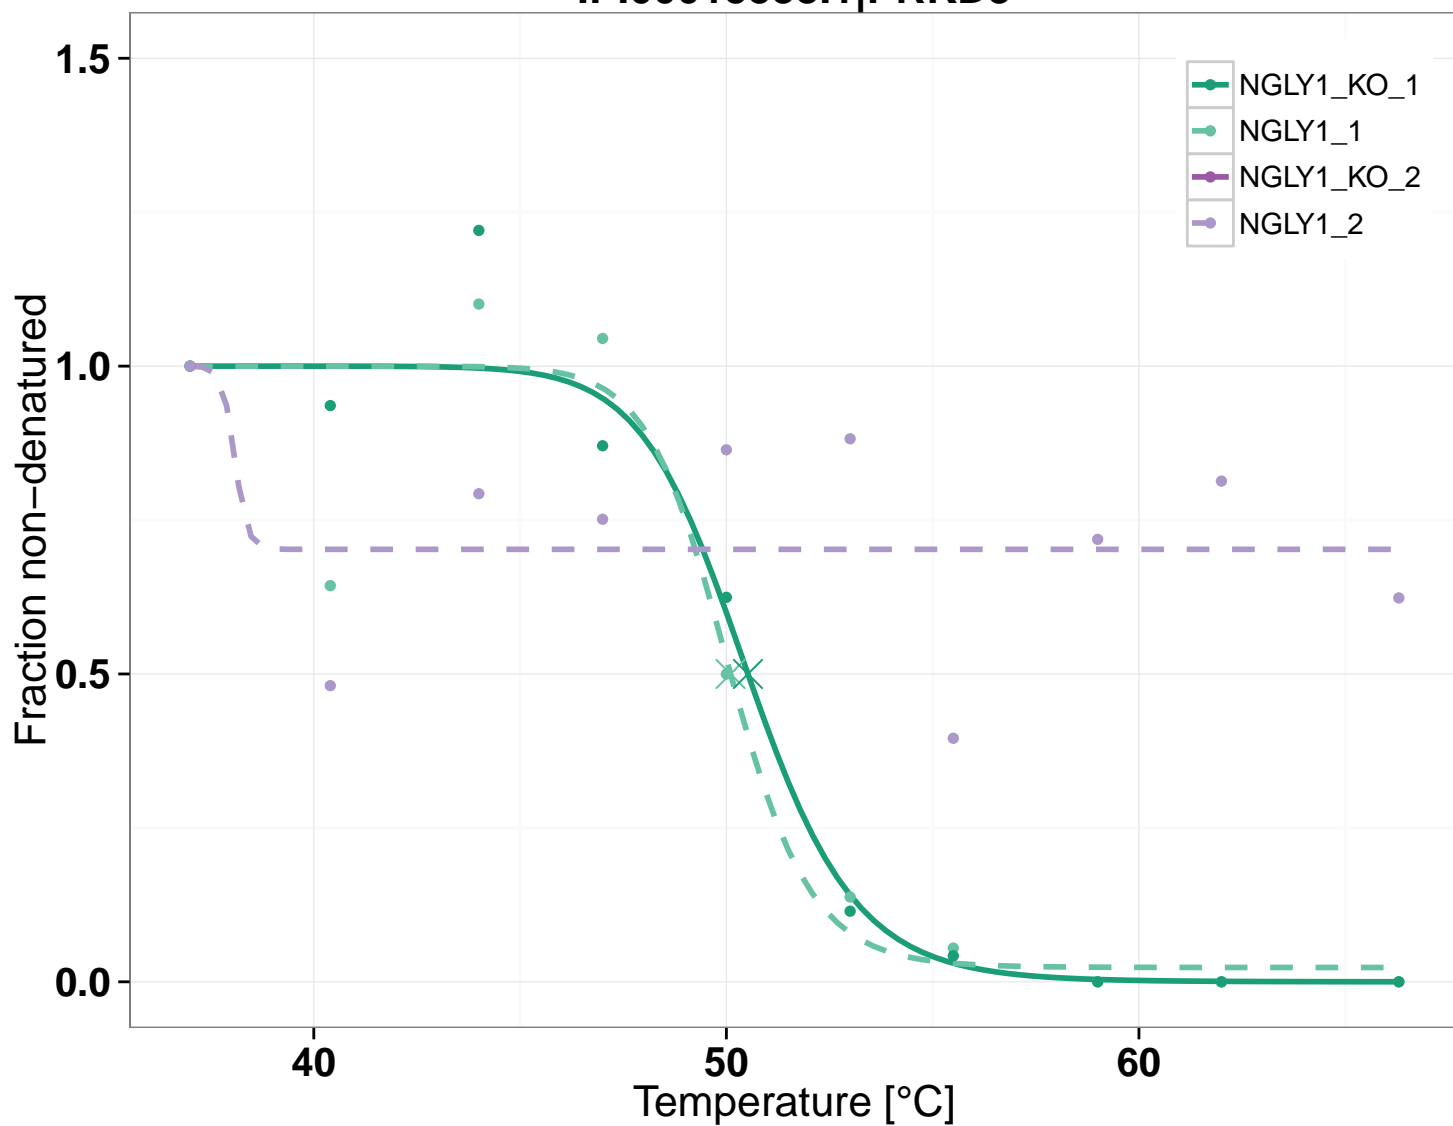

|            | meltPoint | slope | plateau | R2   |
|------------|-----------|-------|---------|------|
| NGLY1_KO_1 | 50.52     | -0.19 | 0       | 0.97 |
| NGLY1_1    | 50.1      | -0.25 | 0.02    | 0.92 |
| NGLY1_KO_2 | -         | -     | -       | -    |
| NGLY1_2    | -         | -0.49 | 0.7     | 0.26 |

Supplement: Supplementary file 4970 [file 1]

IPI00843910.2|FUCA1

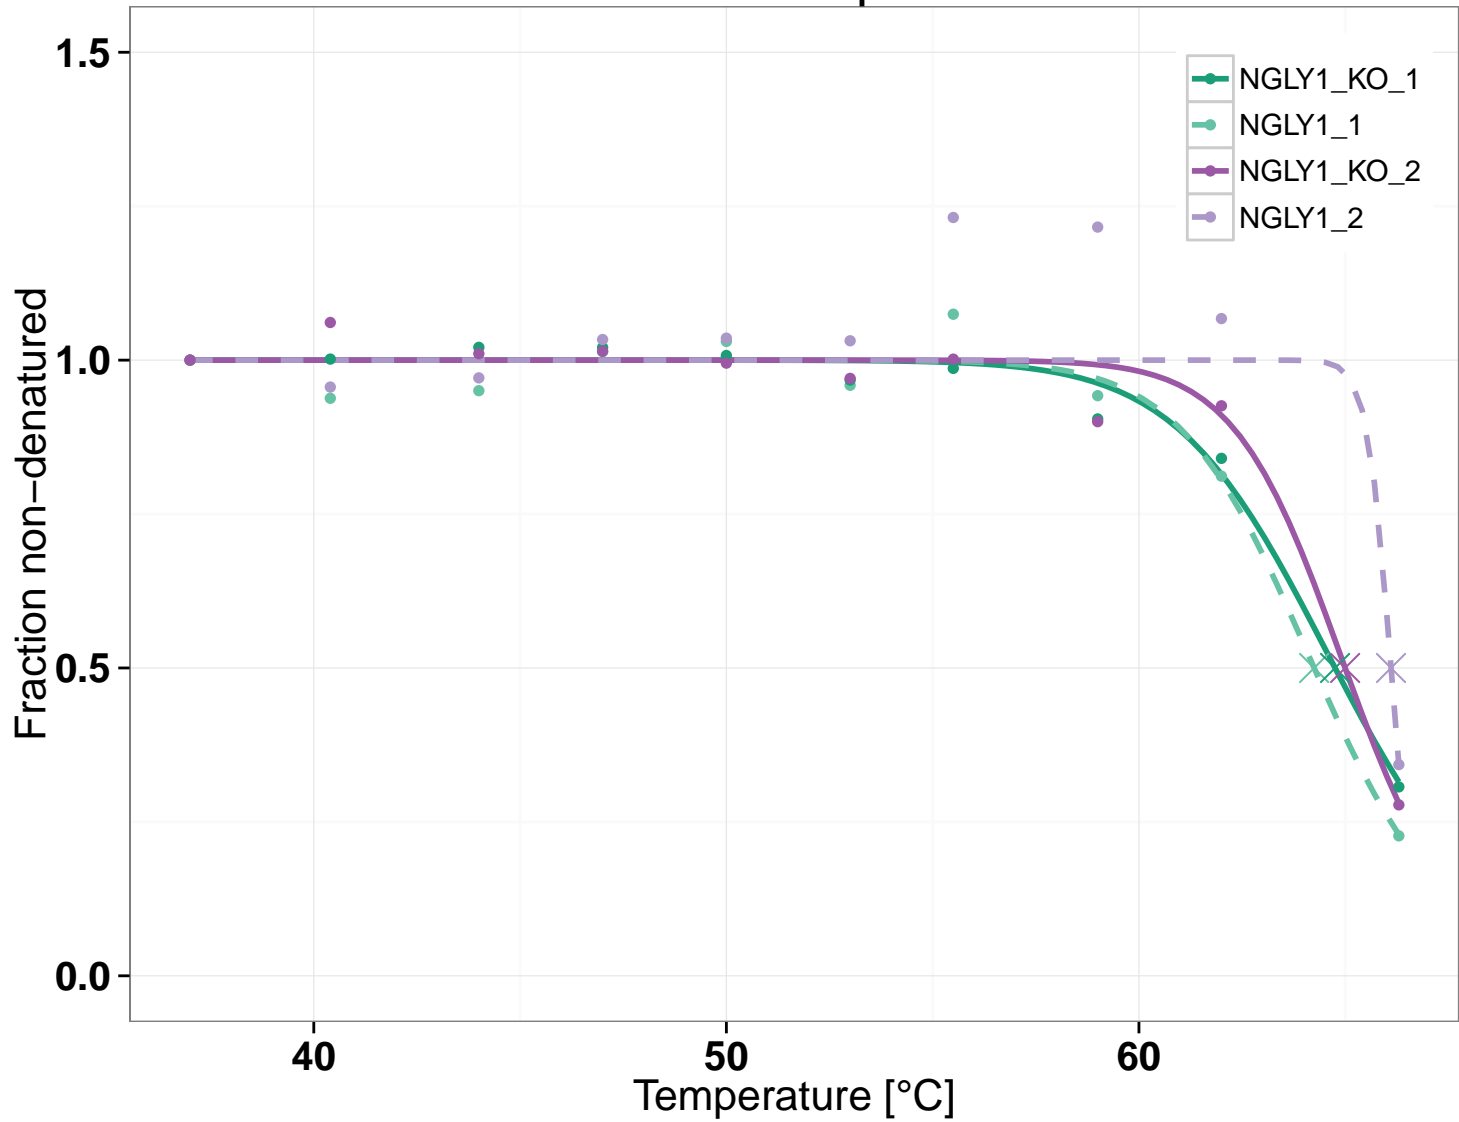

|            | meltPoint | slope | plateau | R2   |
|------------|-----------|-------|---------|------|
| NGLY1_KO_1 | 64.75     | -0.13 | 0       | 0.99 |
| NGLY1_1    | 64.25     | -0.15 | 0       | 0.97 |
| NGLY1_KO_2 | 65        | -0.18 | 0       | 0.97 |
| NGLY1_2    | 66.11     | -0.86 | 0       | 0.79 |

Supplement: Supplementary file 4971 [file 1]

IPI00006663.1|ALDH2

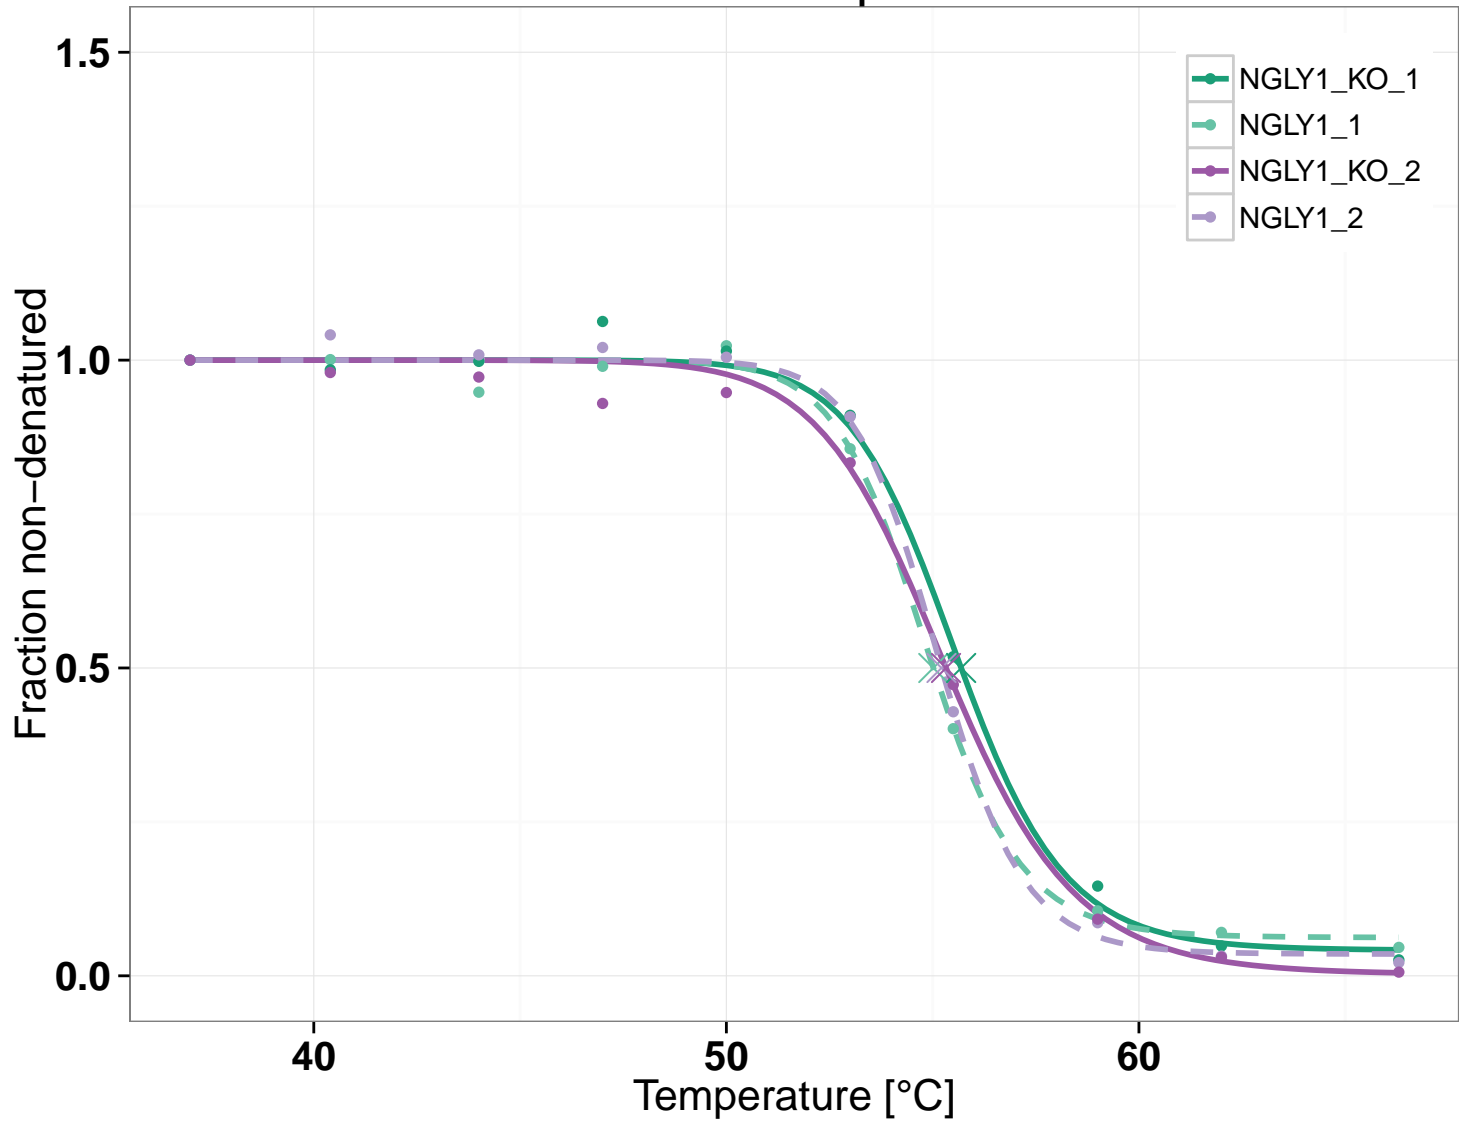

|            | meltPoint | slope | plateau | R2 |
|------------|-----------|-------|---------|----|
| NGLY1_KO_1 | 55.69     | -0.18 | 0.04    | 1  |
| NGLY1_1    | 55.02     | -0.21 | 0.06    | 1  |
| NGLY1_KO_2 | 55.32     | -0.16 | 0       | 1  |
| NGLY1_2    | 55.21     | -0.23 | 0.04    | 1  |

Supplement: Supplementary file 4972 [file 1]

# IPI00872475.1|RAB3IL1

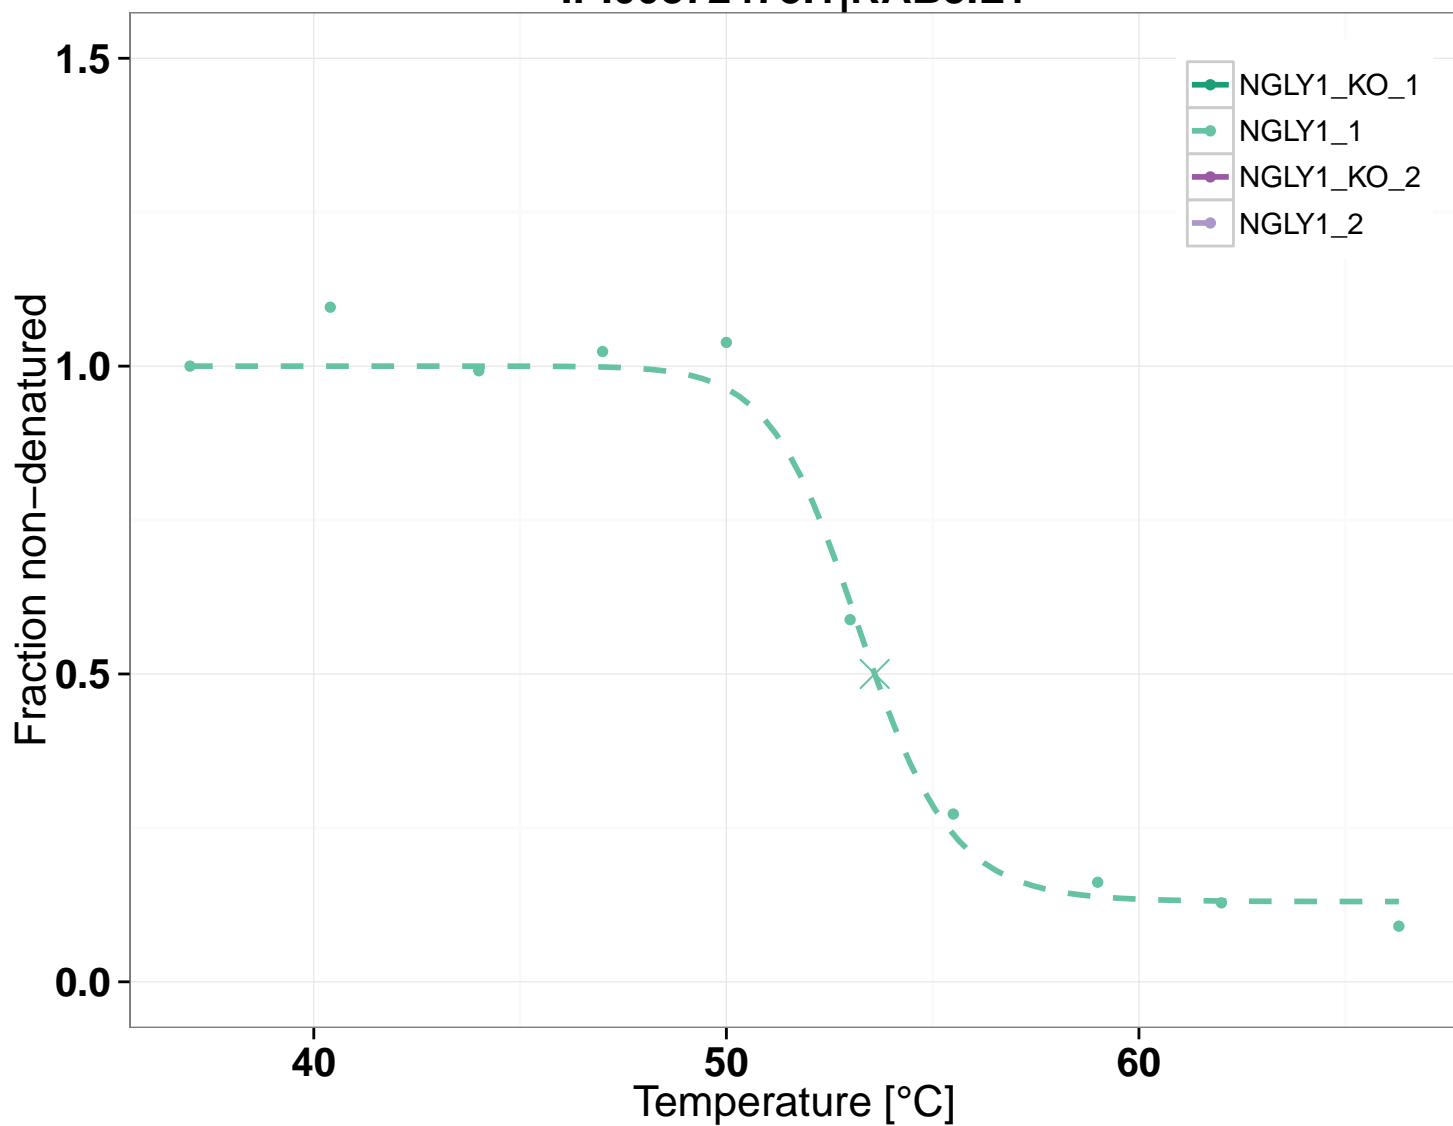

|            | meltPoint | slope | plateau | R2   |
|------------|-----------|-------|---------|------|
| NGLY1_KO_1 | –         | –     | –       | –    |
| NGLY1_1    | 53.6      | –0.2  | 0.13    | 0.99 |
| NGLY1_KO_2 | –         | –     | –       | –    |
| NGLY1_2    | –         | –     | –       | –    |

Supplement: Supplementary file 4973 [file 1]

IPI00872406.1|ZMAT1

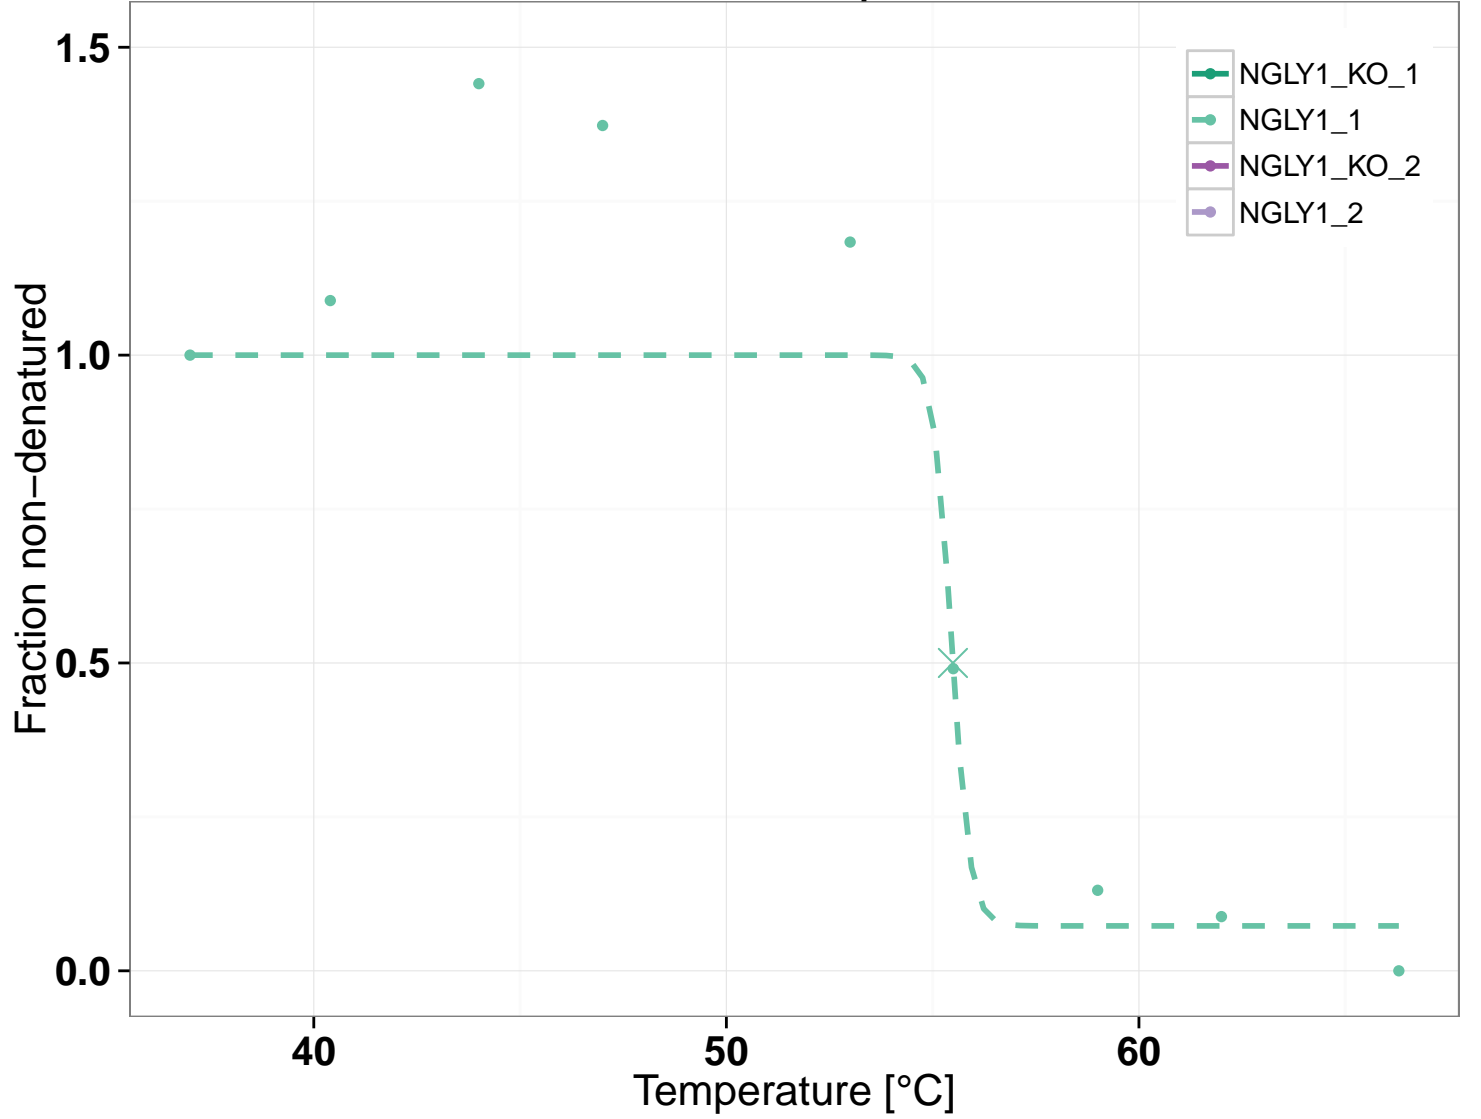

|            | meltPoint | slope | plateau | R2   |
|------------|-----------|-------|---------|------|
| NGLY1_KO_1 | -         | -     | -       | -    |
| NGLY1_1    | 55.49     | -1    | 0.07    | 0.79 |
| NGLY1_KO_2 | -         | -     | -       | -    |
| NGLY1_2    | -         | -     | -       | -    |

Supplement: Supplementary file 4974 [file 1]

IPI00410096.1|IFT172

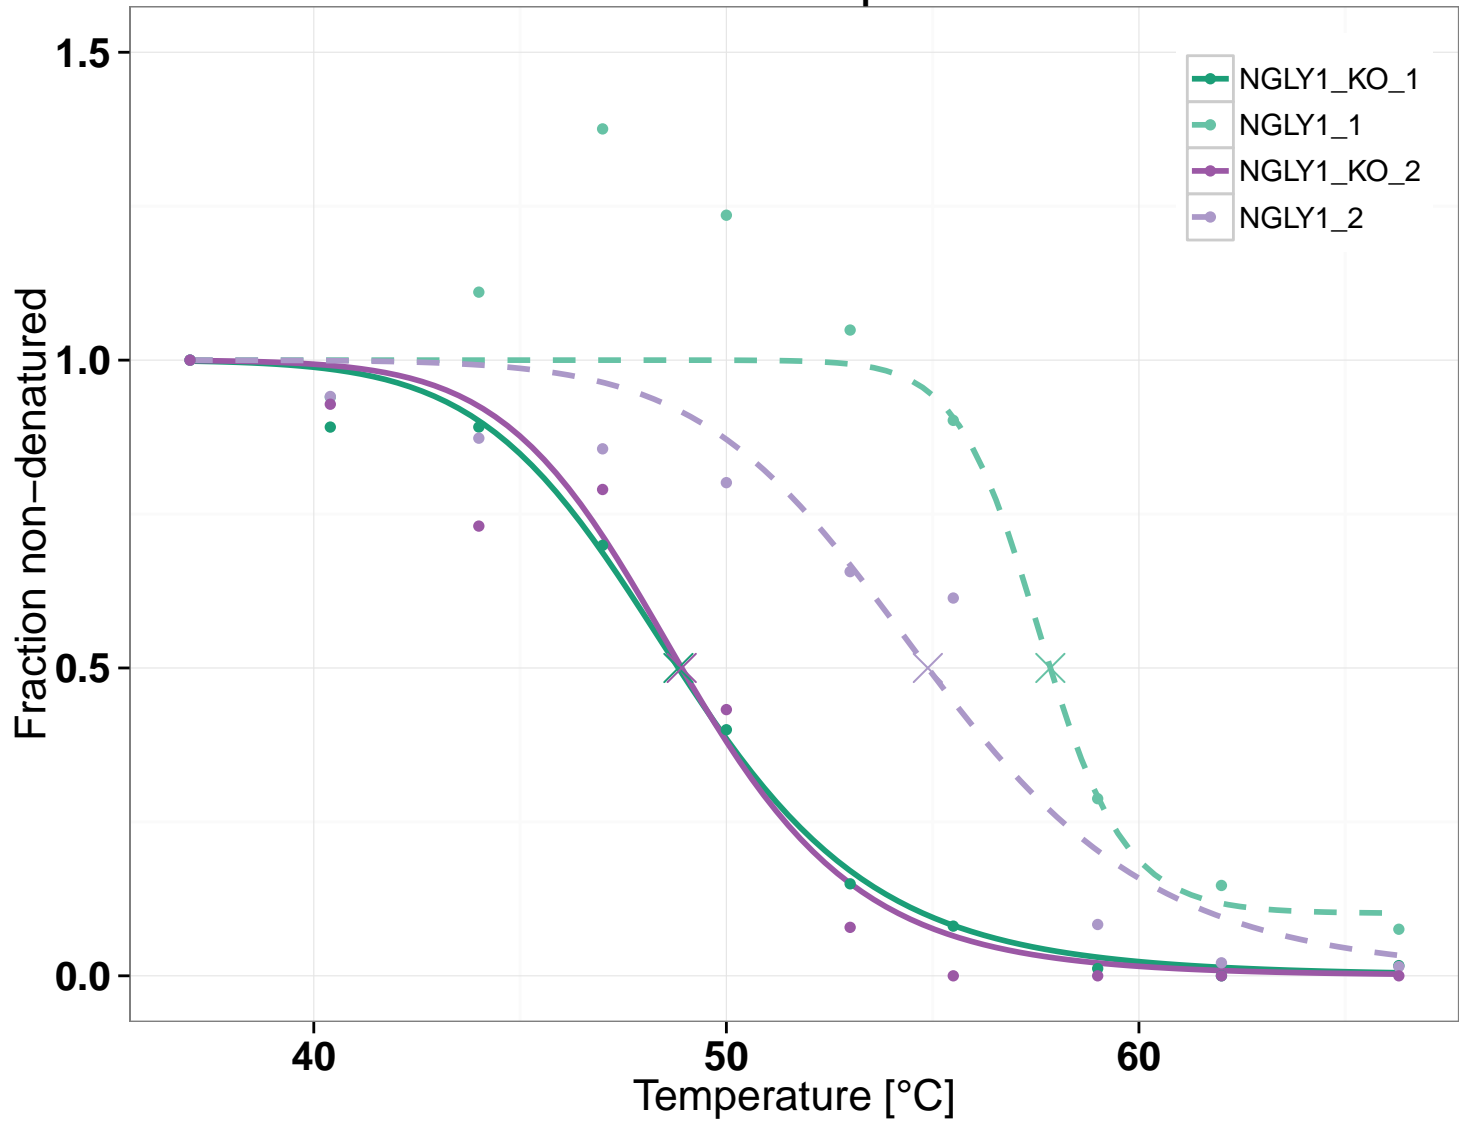

|            | meltPoint | slope | plateau | R2   |
|------------|-----------|-------|---------|------|
| NGLY1_KO_1 | 48.84     | -0.1  | 0       | 0.99 |
| NGLY1_1    | 57.85     | -0.22 | 0.1     | 0.89 |
| NGLY1_KO_2 | 48.92     | -0.12 | 0       | 0.96 |
| NGLY1_2    | 54.88     | -0.09 | 0       | 0.94 |

Supplement: Supplementary file 4975 [file 1]

# IPI00332991.1|CBFA2T2

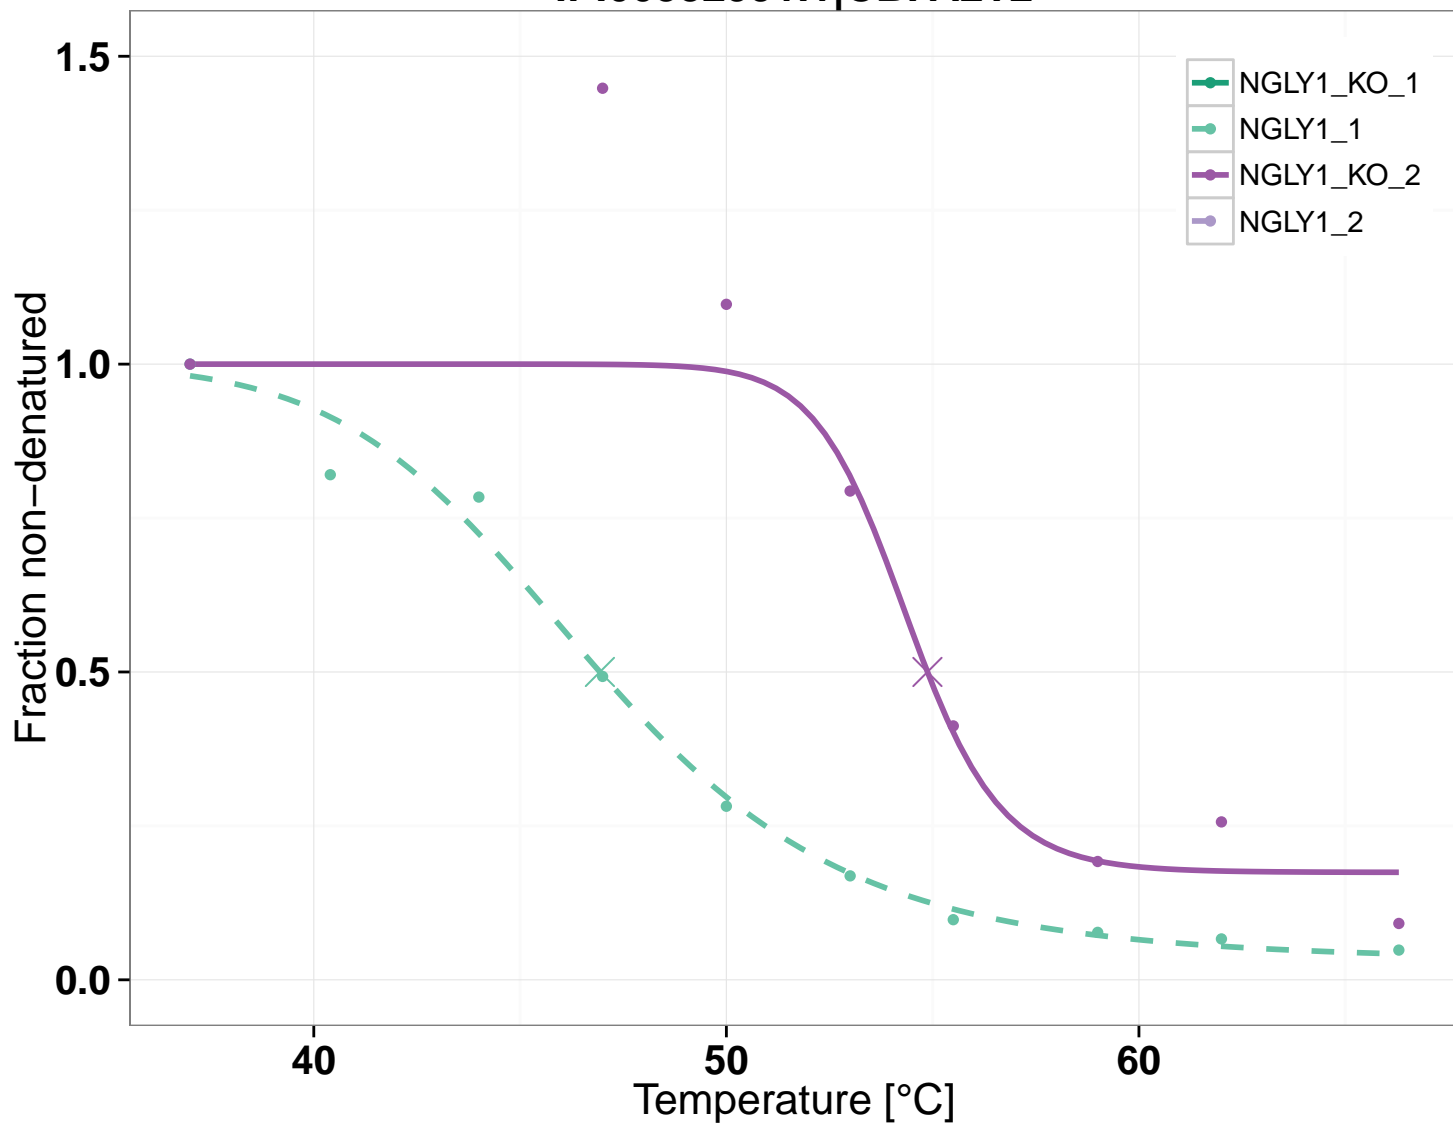

|            | meltPoint | slope  | plateau | R2   |
|------------|-----------|--------|---------|------|
| NGLY1_KO_1 | —         | —      | —       | —    |
| NGLY1_1    | 46.93     | -0.079 | 0.03    | 0.99 |
| NGLY1_KO_2 | 54.87     | -0.18  | 0.17    | 0.5  |
| NGLY1_2    | —         | —      | —       | —    |

Supplement: Supplementary file 4976 [file 1]

# IPI00013418.1|BIRC2

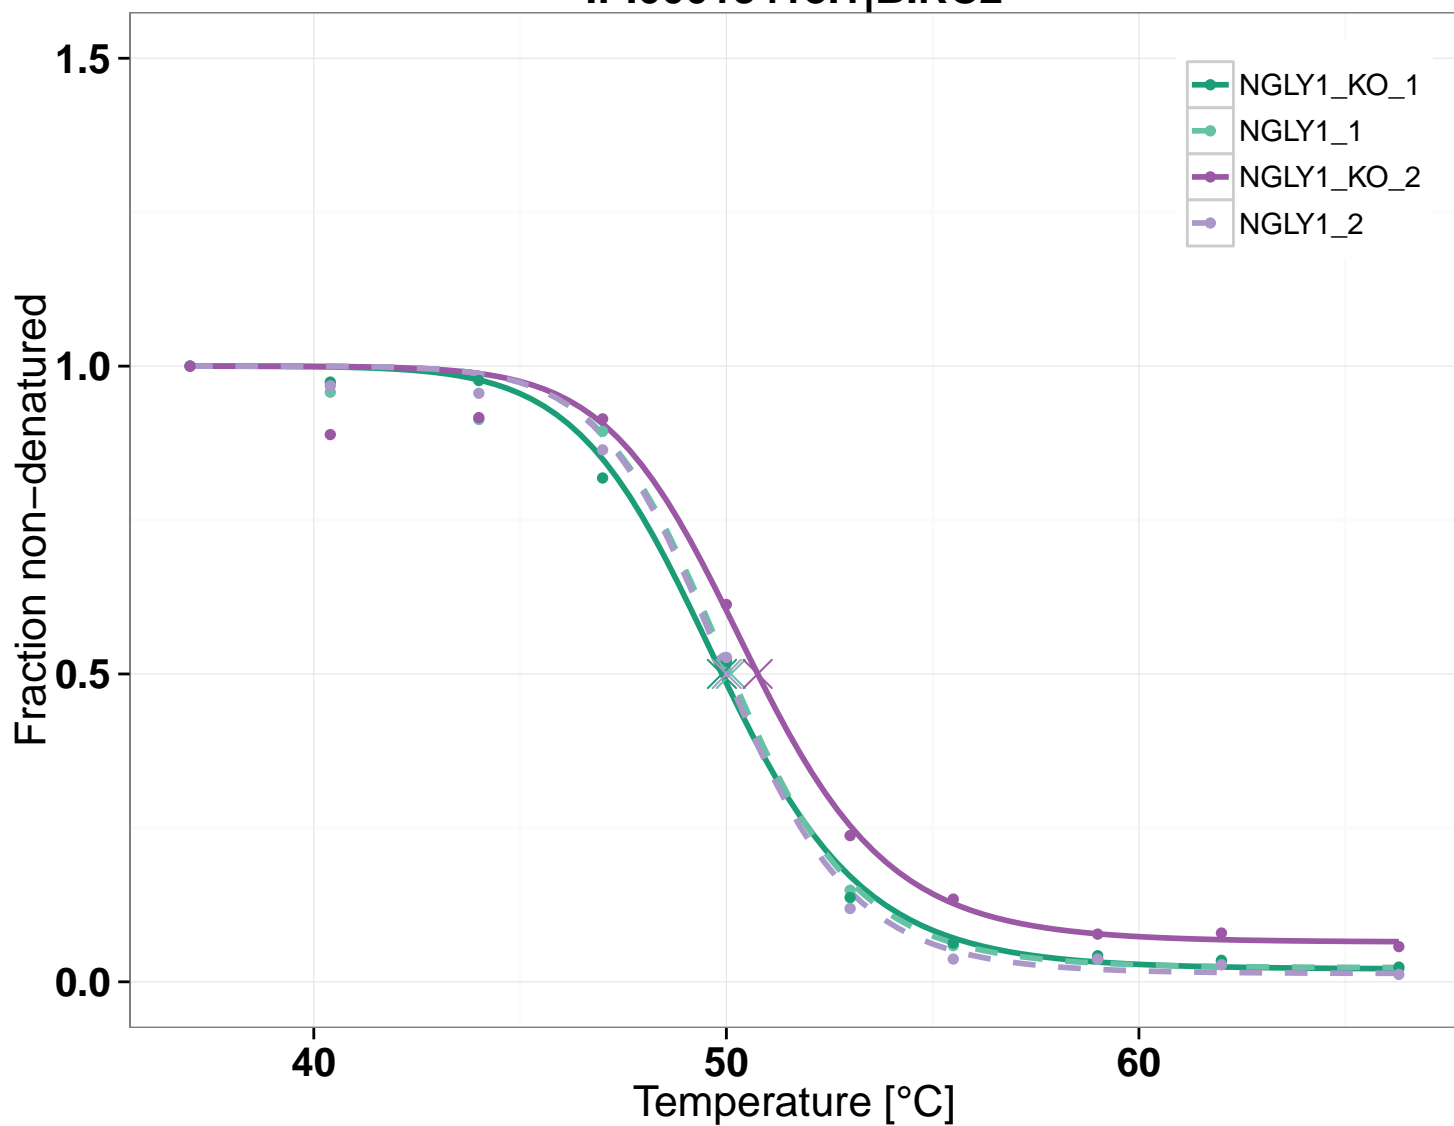

|            | meltPoint | slope | plateau | R2   |
|------------|-----------|-------|---------|------|
| NGLY1_KO_1 | 49.89     | -0.14 | 0.02    | 1    |
| NGLY1_1    | 50.11     | -0.16 | 0.02    | 1    |
| NGLY1_KO_2 | 50.76     | -0.14 | 0.06    | 0.99 |
| NGLY1_2    | 50.01     | -0.16 | 0.01    | 1    |

Supplement: Supplementary file 4977 [file 1]

IPI00007702.1|HSPA2

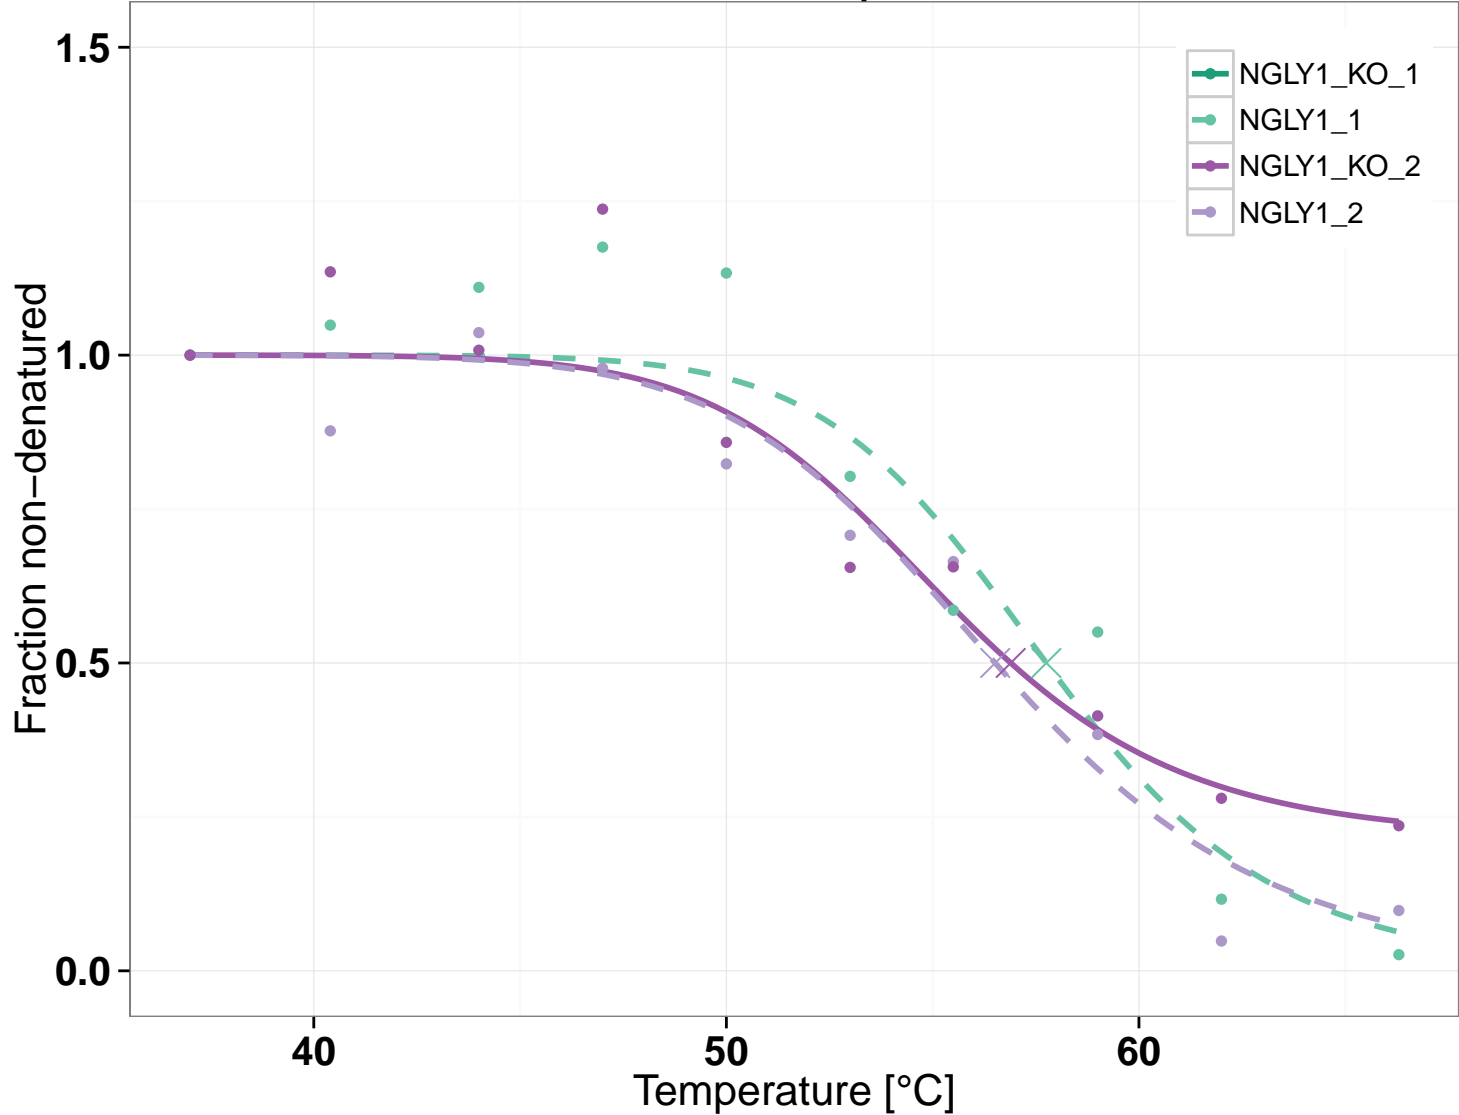

|            | meltPoint | slope  | plateau | R2   |
|------------|-----------|--------|---------|------|
| NGLY1_KO_1 | -         | -      | -       | -    |
| NGLY1_1    | 57.76     | -0.091 | 0       | 0.92 |
| NGLY1_KO_2 | 56.89     | -0.069 | 0.21    | 0.91 |
| NGLY1_2    | 56.52     | -0.076 | 0       | 0.95 |

Supplement: Supplementary file 4978 [file 1]

IPI00646963.2|REEP6

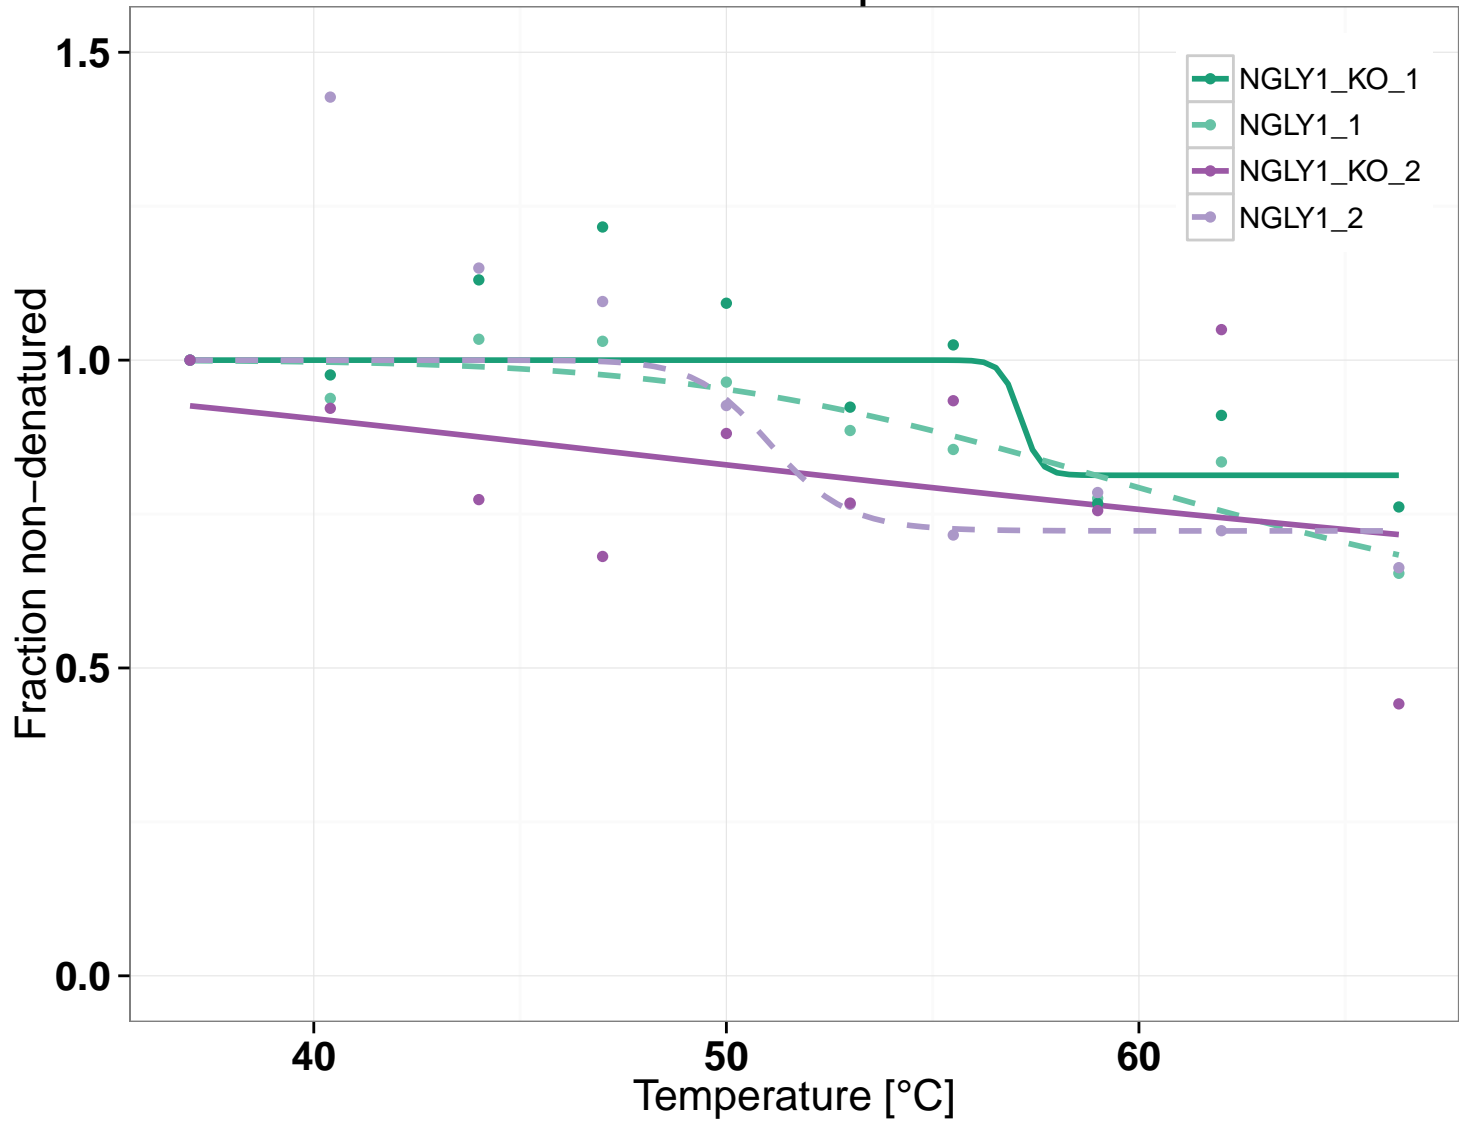

|            | meltPoint | slope   | plateau | R2   |
|------------|-----------|---------|---------|------|
| NGLY1_KO_1 | -         | -0.2    | 0.81    | 0.52 |
| NGLY1_1    | -         | -0.019  | 0.51    | 0.86 |
| NGLY1_KO_2 | -         | -0.0076 | 0       | 0.15 |
| NGLY1_2    | -         | -0.075  | 0.72    | 0.59 |

Supplement: Supplementary file 4979 [file 1]

IPI00100585.1|SLC39A1

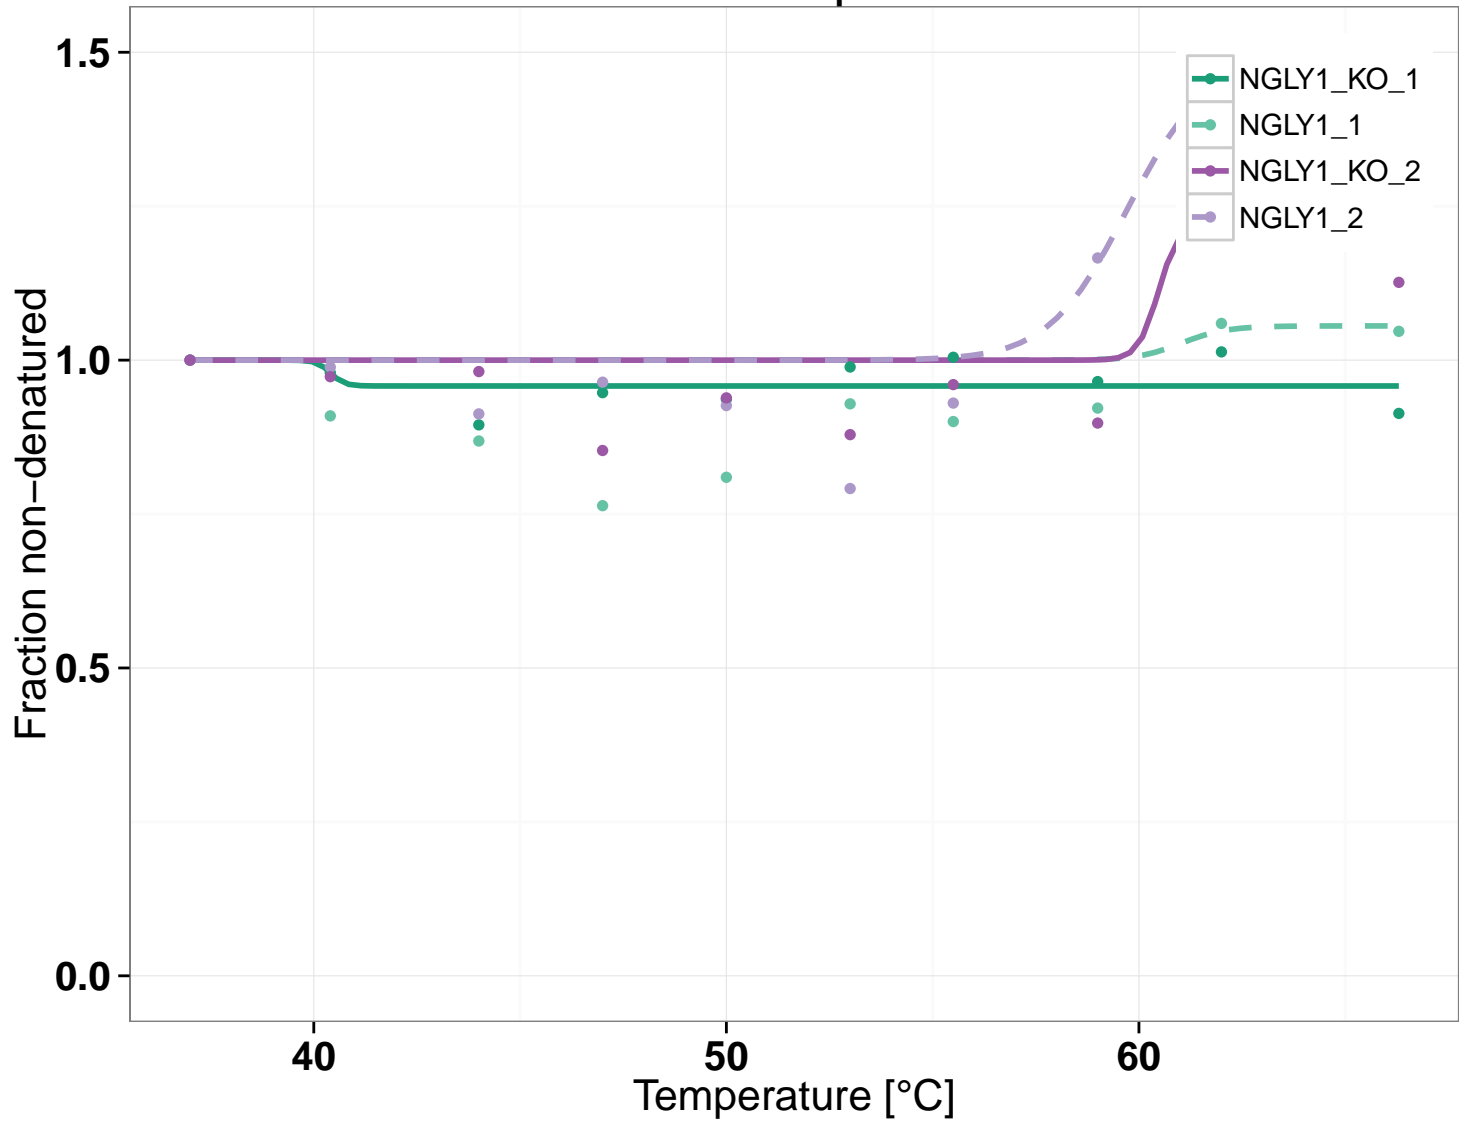

|            | meltPoint | slope  | plateau | R2   |
|------------|-----------|--------|---------|------|
| NGLY1_KO_1 | -         | -0.065 | 0.96    | 0.12 |
| NGLY1_1    | -         | 0.026  | 1.06    | -0.7 |
| NGLY1_KO_2 | -         | 0.23   | 1.22    | 0.58 |
| NGLY1_2    | -         | 0.13   | 1.5     | 0.88 |

Supplement: Supplementary file 4980 [file 1]

# IPI00883925.1|ABCB9

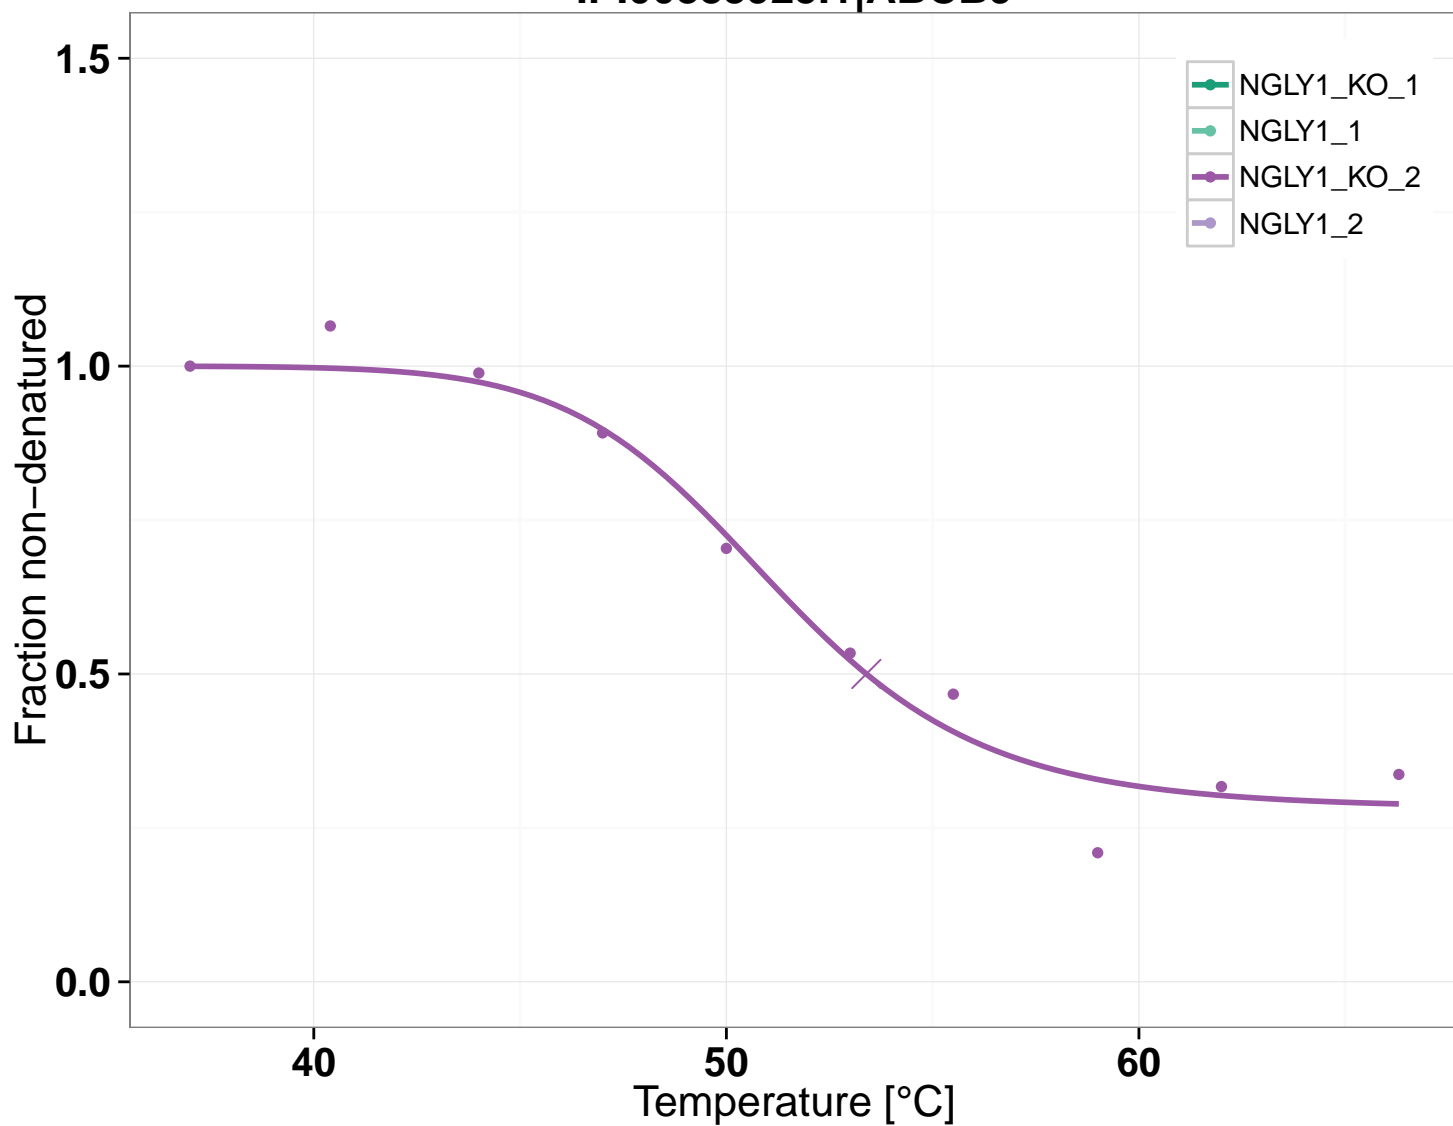

|            | meltPoint | slope  | plateau | R2   |
|------------|-----------|--------|---------|------|
| NGLY1_KO_1 | —         | —      | —       | —    |
| NGLY1_1    | —         | —      | —       | —    |
| NGLY1_KO_2 | 53.39     | -0.071 | 0.28    | 0.97 |
| NGLY1_2    | —         | —      | —       | —    |

Supplement: Supplementary file 4981 [file 1]

# IPI00032099.1|STRADB

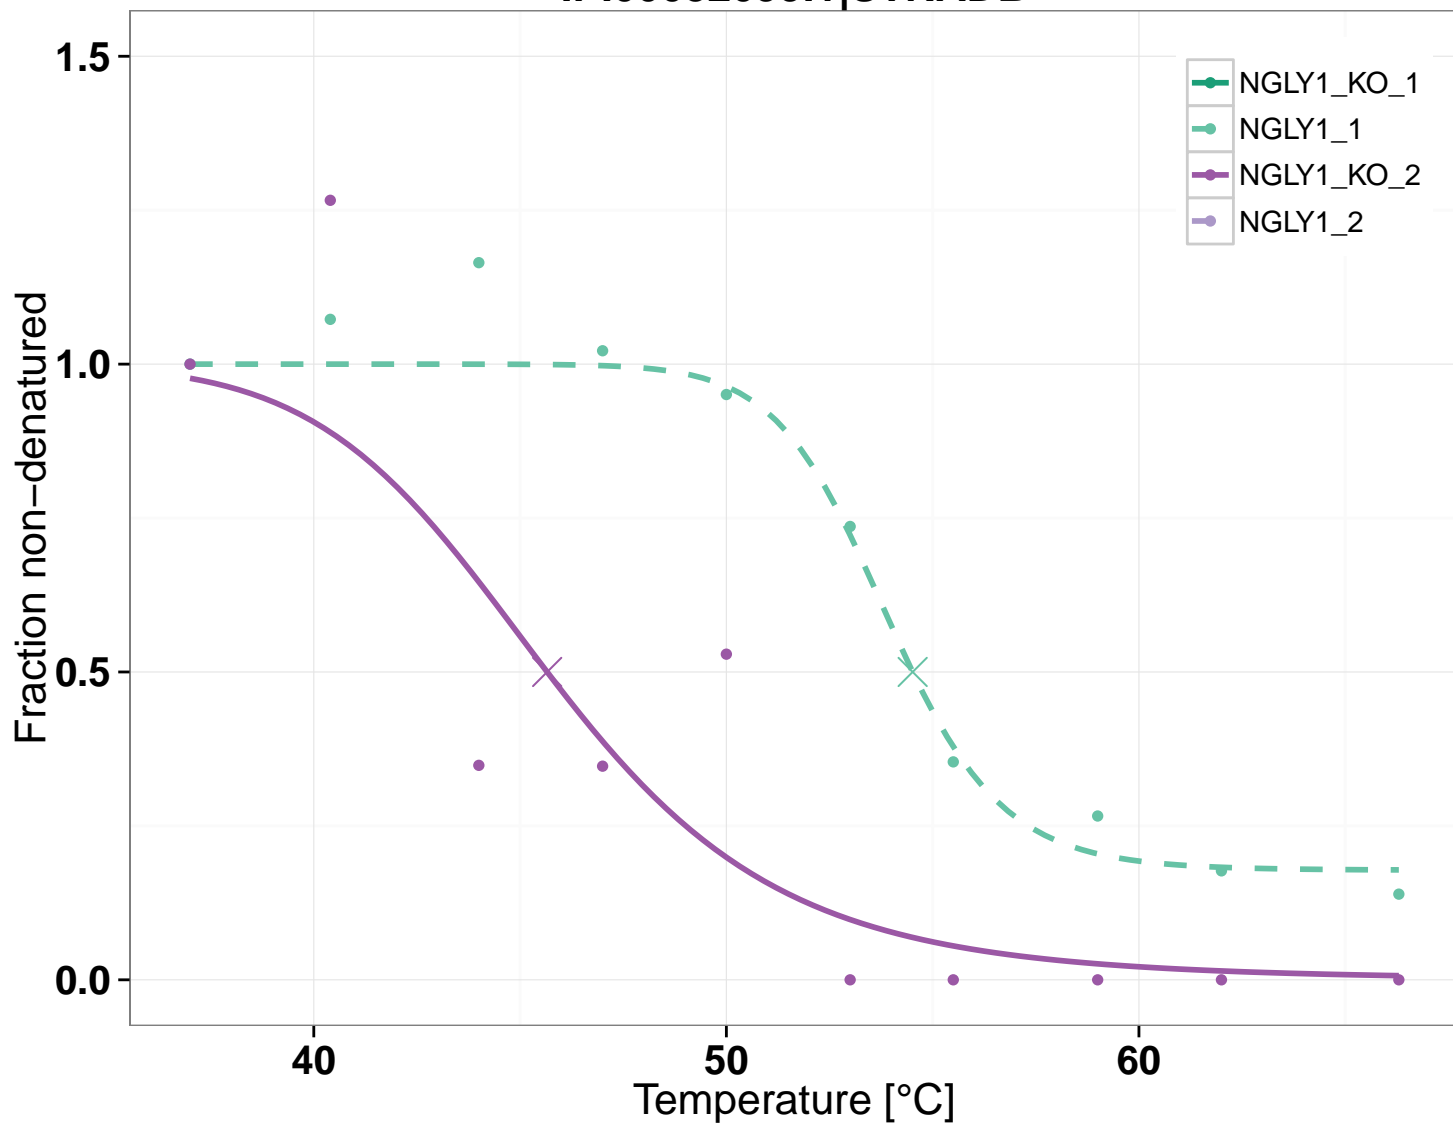

|            | meltPoint | slope  | plateau | R2   |
|------------|-----------|--------|---------|------|
| NGLY1_KO_1 | -         | -      | -       | -    |
| NGLY1_1    | 54.52     | -0.15  | 0.18    | 0.97 |
| NGLY1_KO_2 | 45.66     | -0.089 | 0       | 0.81 |
| NGLY1_2    | -         | -      | -       | -    |

Supplement: Supplementary file 4982 [file 1]

IPI00031228.3|PLEKHB2

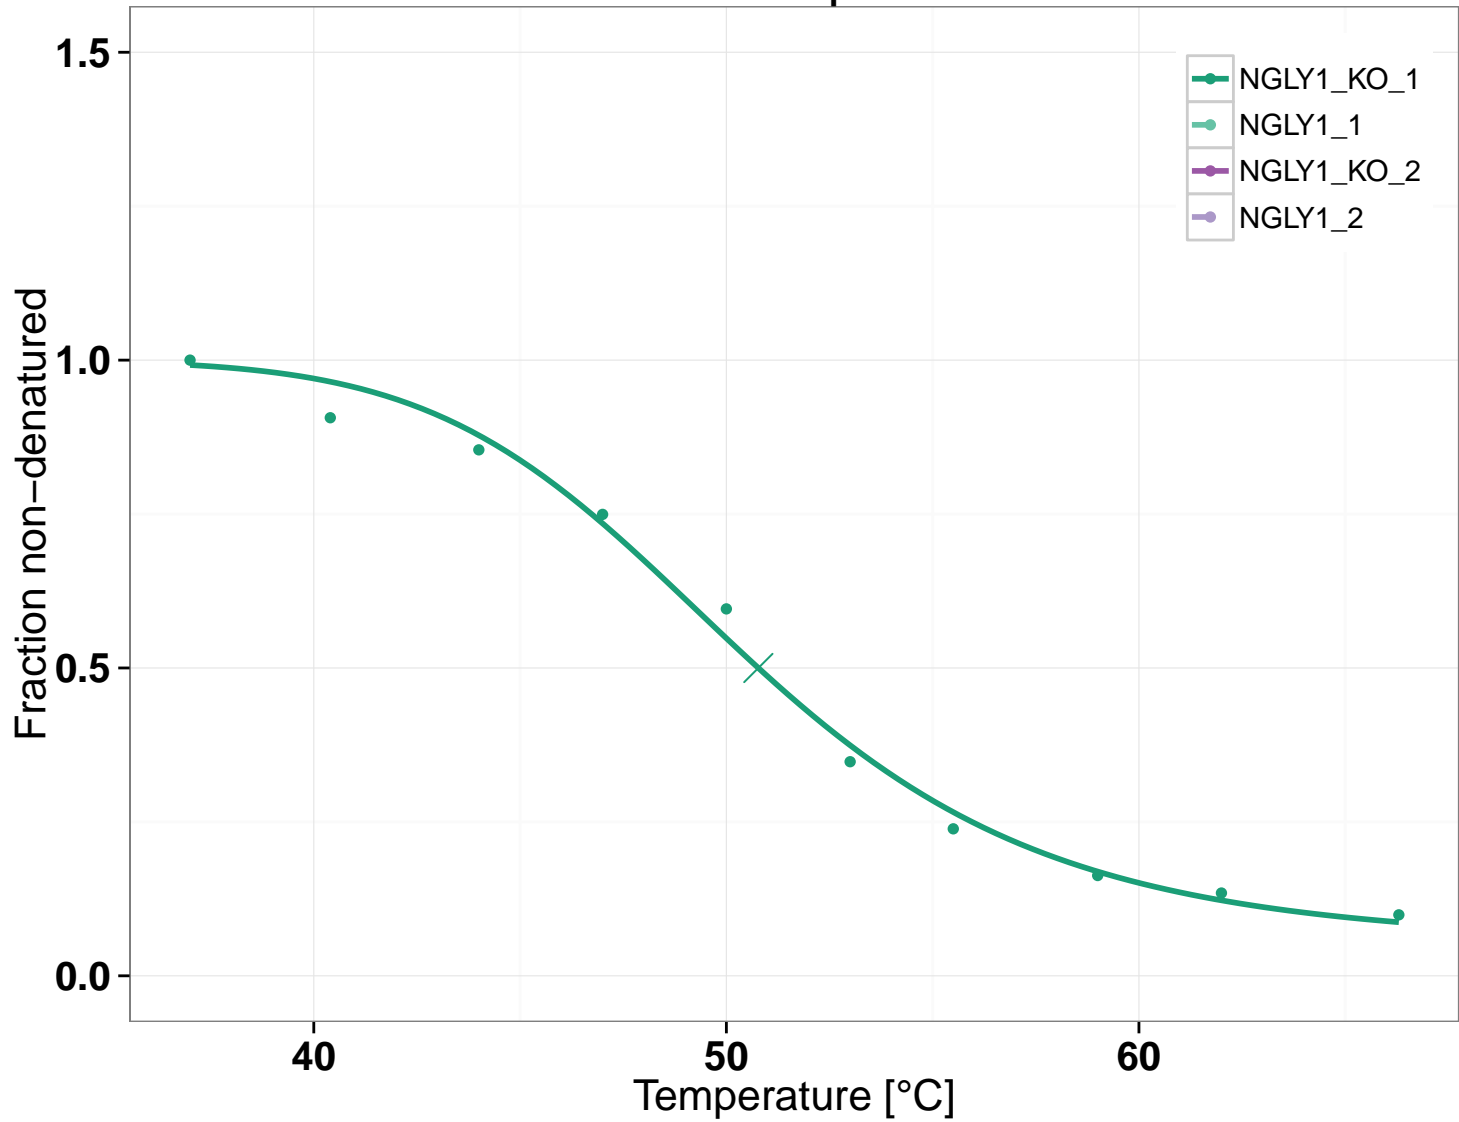

|            | meltPoint | slope  | plateau | R2   |
|------------|-----------|--------|---------|------|
| NGLY1_KO_1 | 50.78     | -0.064 | 0.05    | 0.99 |
| NGLY1_1    | -         | -      | -       | -    |
| NGLY1_KO_2 | -         | -      | -       | -    |
| NGLY1_2    | -         | -      | -       | -    |

Supplement: Supplementary file 4983 [file 1]

IPI00845461.2|ATL3

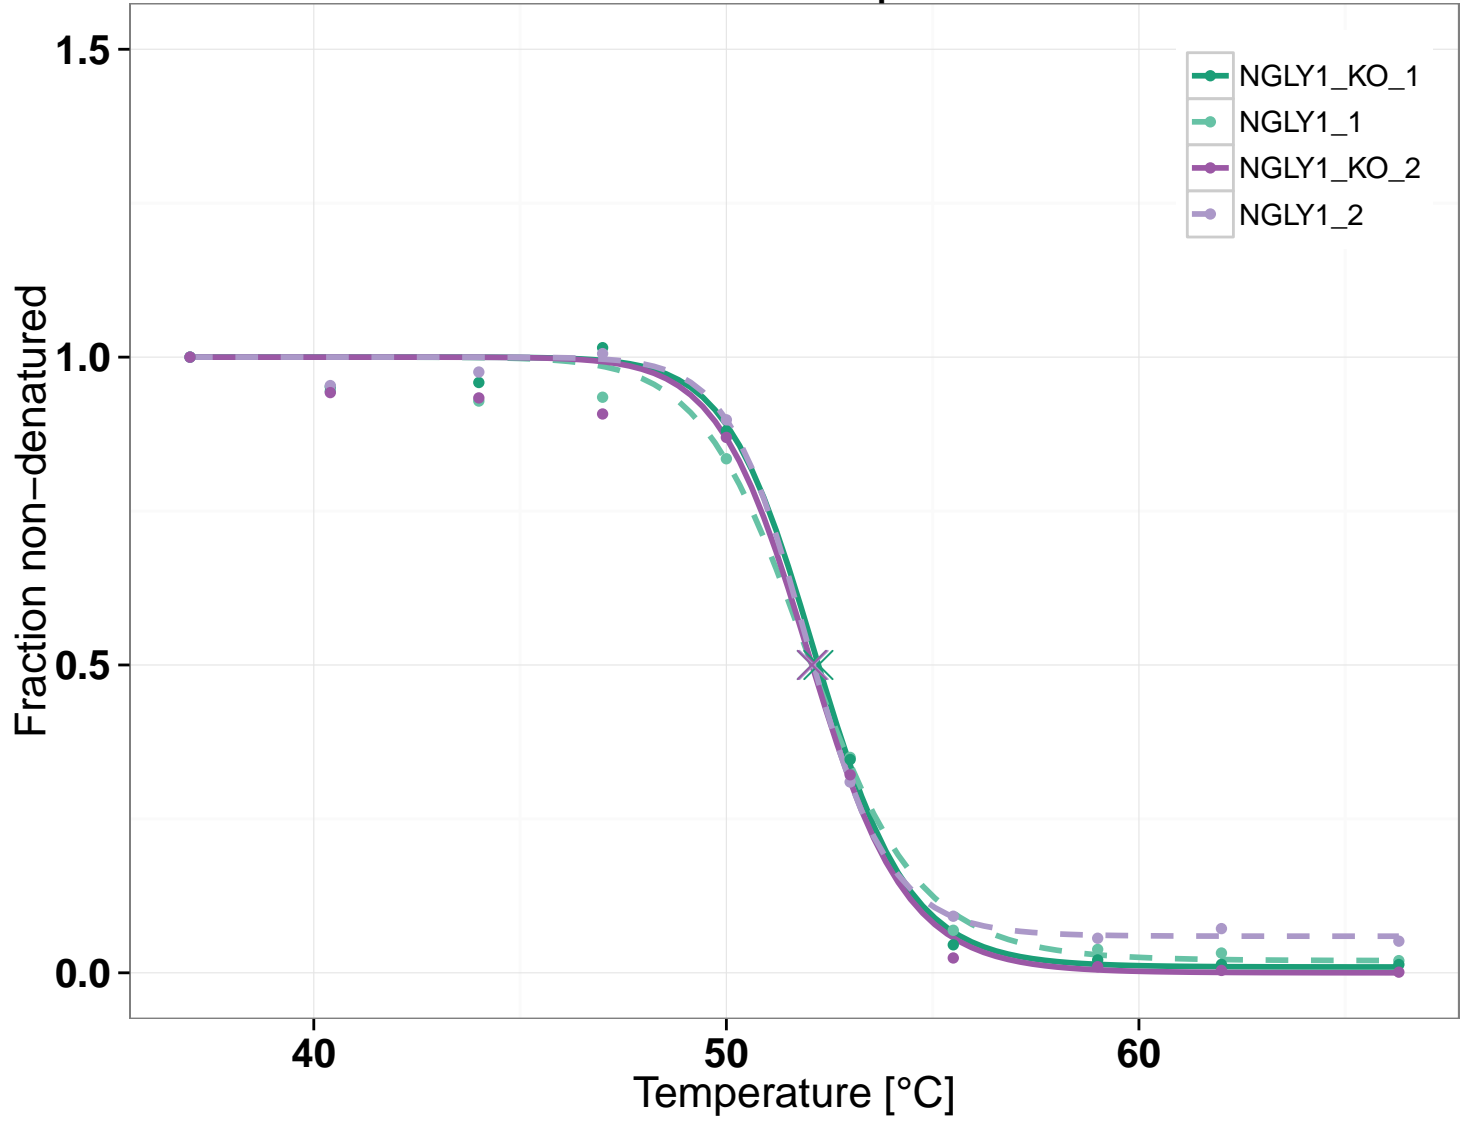

|            | meltPoint | slope | plateau | R2   |
|------------|-----------|-------|---------|------|
| NGLY1_KO_1 | 52.23     | -0.22 | 0.01    | 1    |
| NGLY1_1    | 52.07     | -0.18 | 0.02    | 0.99 |
| NGLY1_KO_2 | 52.07     | -0.22 | 0       | 0.99 |
| NGLY1_2    | 52.11     | -0.24 | 0.06    | 1    |

Supplement: Supplementary file 4984 [file 1]

# IPI00550364.8|PGM2

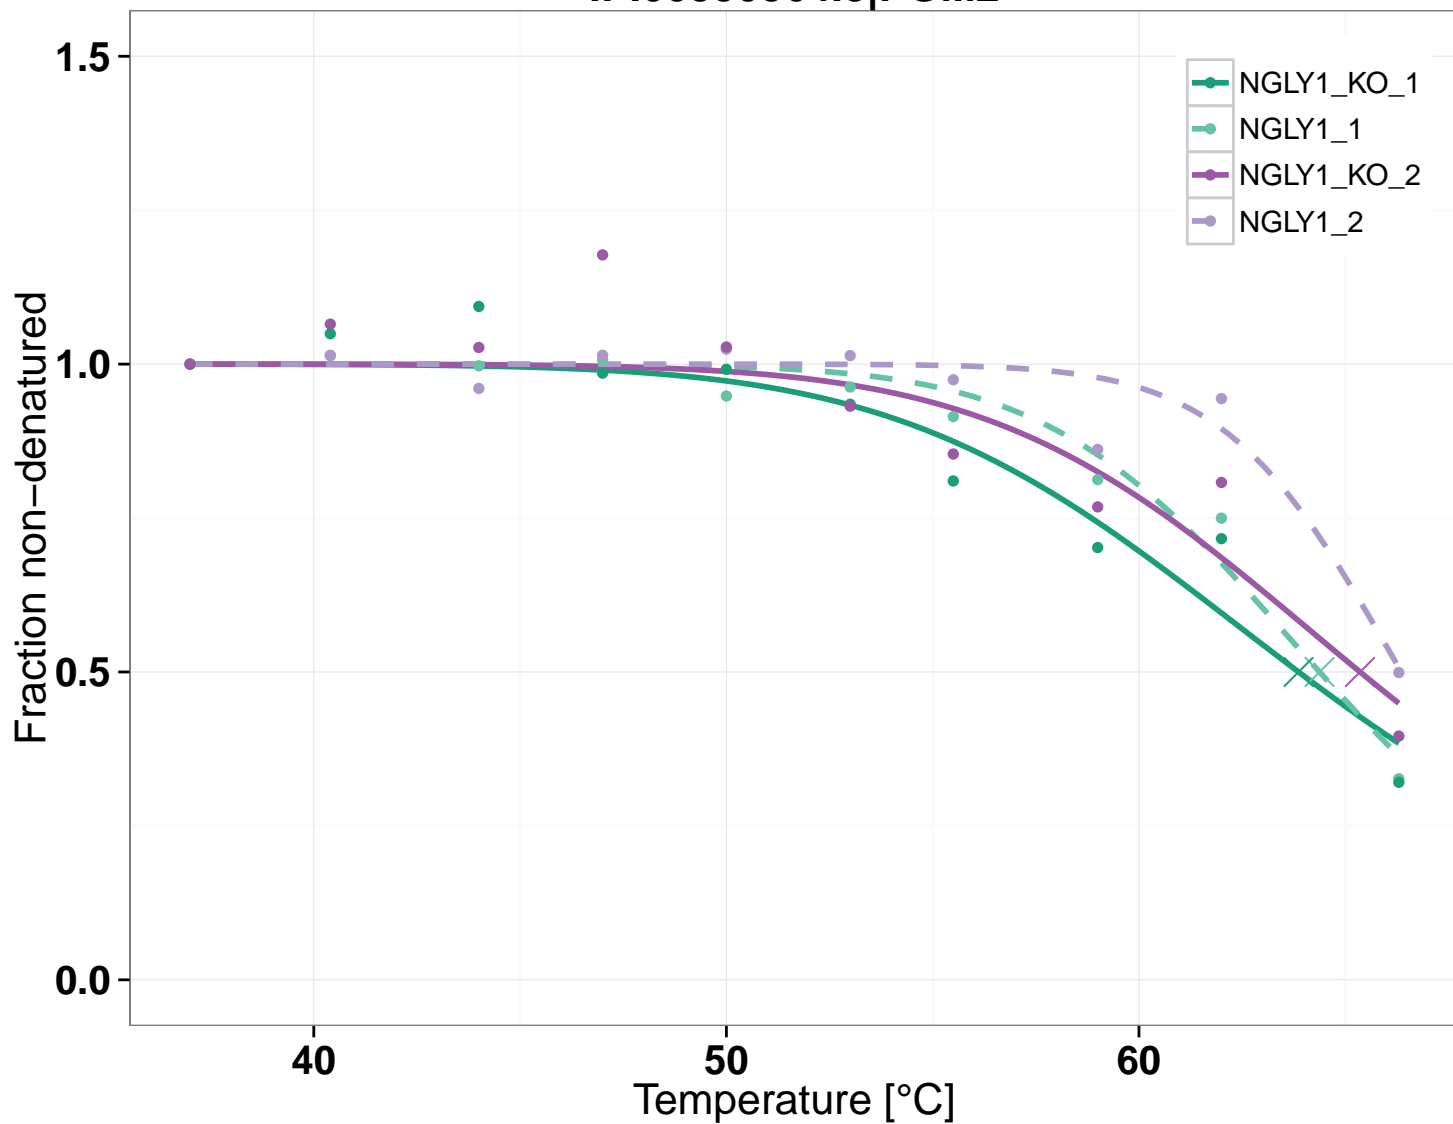

|            | meltPoint | slope  | plateau | R2   |
|------------|-----------|--------|---------|------|
| NGLY1_KO_1 | 63.87     | -0.052 | 0       | 0.92 |
| NGLY1_1    | 64.38     | -0.076 | 0       | 0.97 |
| NGLY1_KO_2 | 65.36     | -0.056 | 0       | 0.84 |
| NGLY1_2    | -         | -0.12  | 0       | 0.92 |

Supplement: Supplementary file 4985 [file 1]

IPI00014220.2|KIAA0841

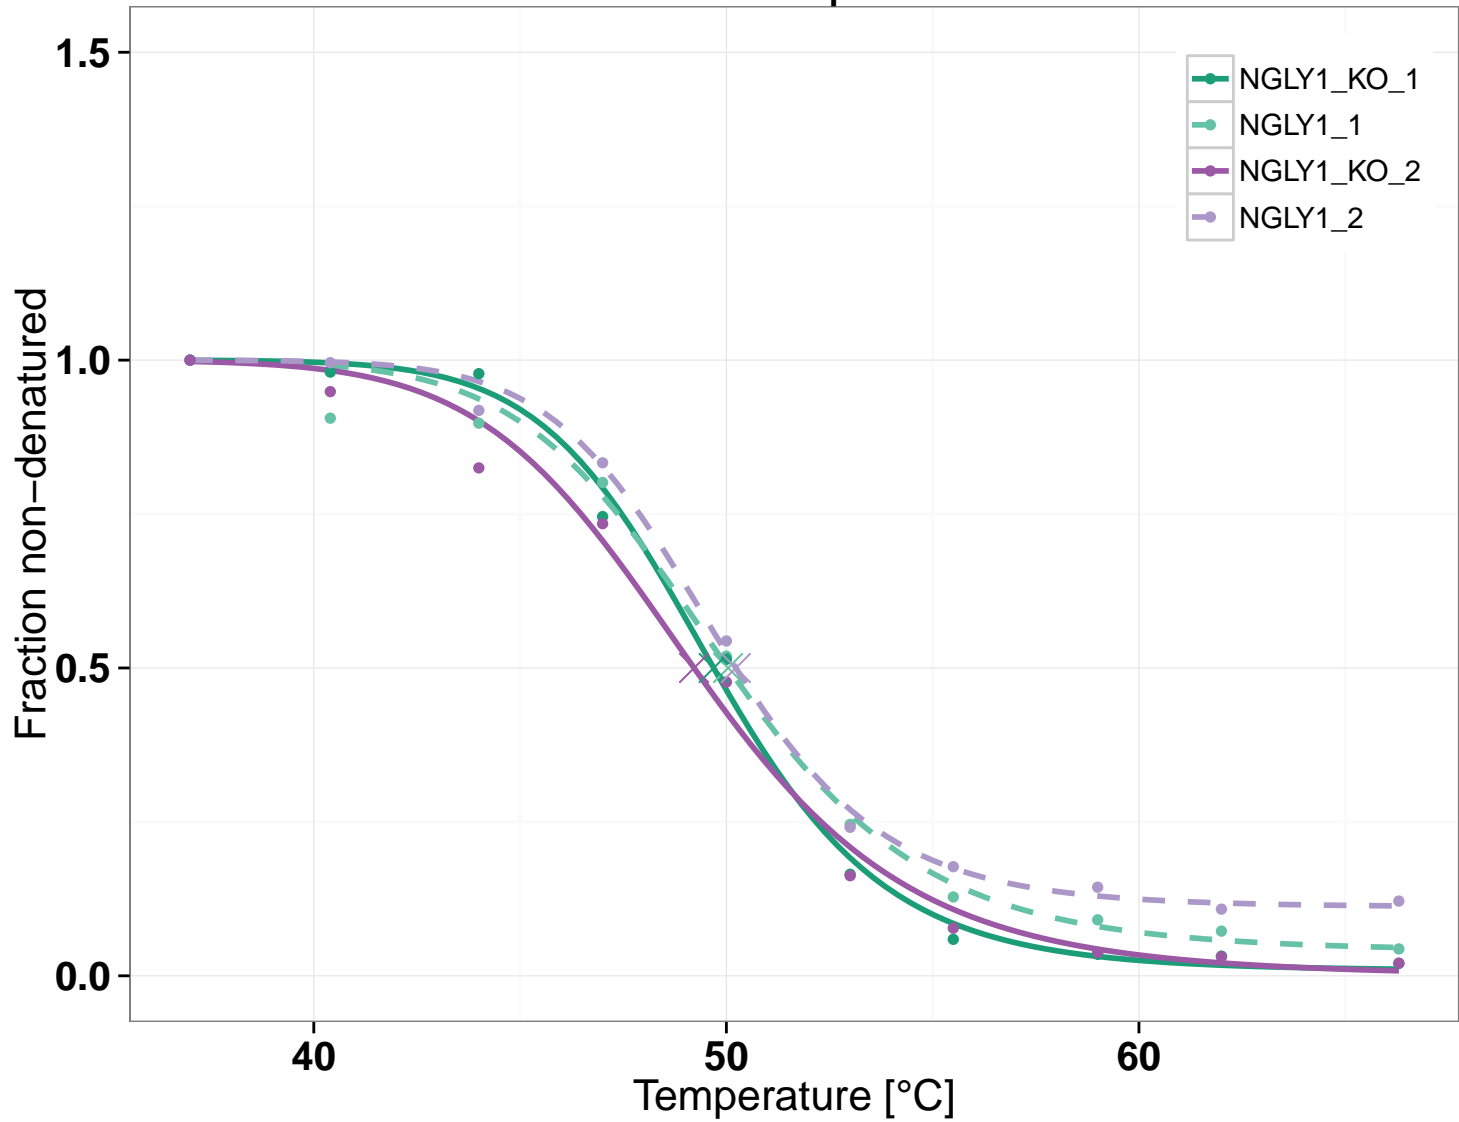

|            | meltPoint | slope  | plateau | R2   |
|------------|-----------|--------|---------|------|
| NGLY1_KO_1 | 49.69     | -0.12  | 0.01    | 1    |
| NGLY1_1    | 50.04     | -0.098 | 0.04    | 0.99 |
| NGLY1_KO_2 | 49.22     | -0.096 | 0       | 0.99 |
| NGLY1_2    | 50.23     | -0.11  | 0.11    | 1    |

Supplement: Supplementary file 4986 [file 1]

IPI00024386.2|FOXG1

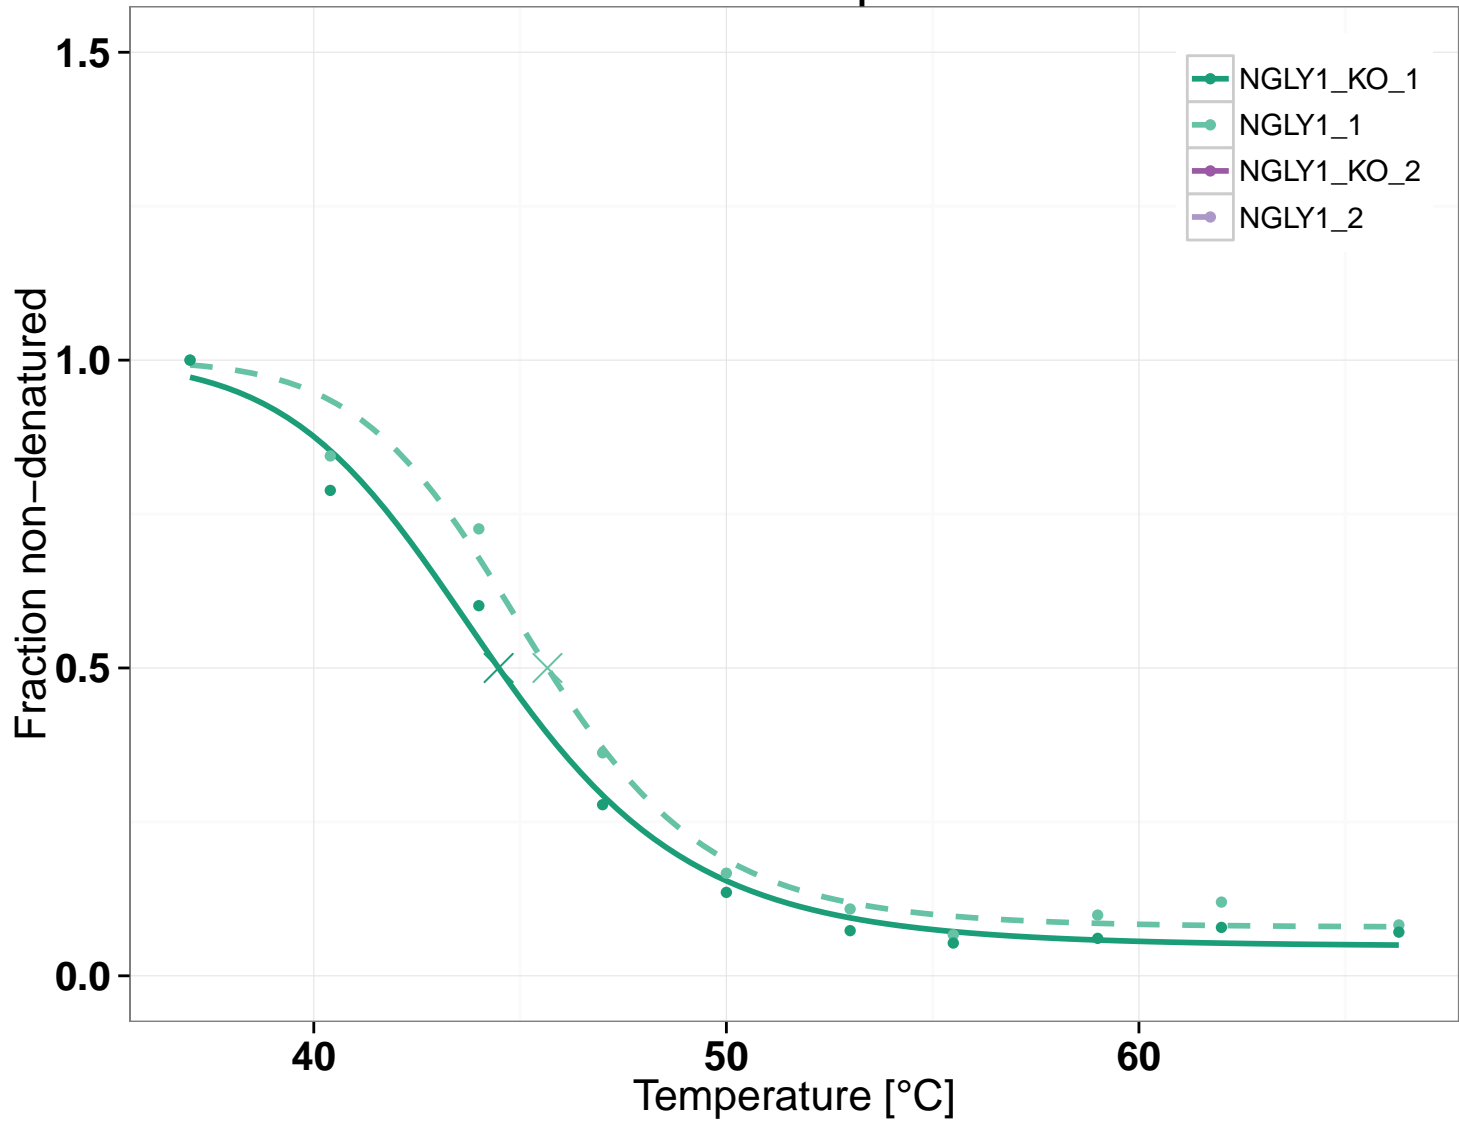

|            | meltPoint | slope  | plateau | R2   |
|------------|-----------|--------|---------|------|
| NGLY1_KO_1 | 44.48     | -0.098 | 0.05    | 0.99 |
| NGLY1_1    | 45.66     | -0.11  | 0.08    | 0.99 |
| NGLY1_KO_2 | -         | -      | -       | -    |
| NGLY1_2    | -         | -      | -       | -    |

Supplement: Supplementary file 4987 [file 1]

IPI00026219.4|CPSF1

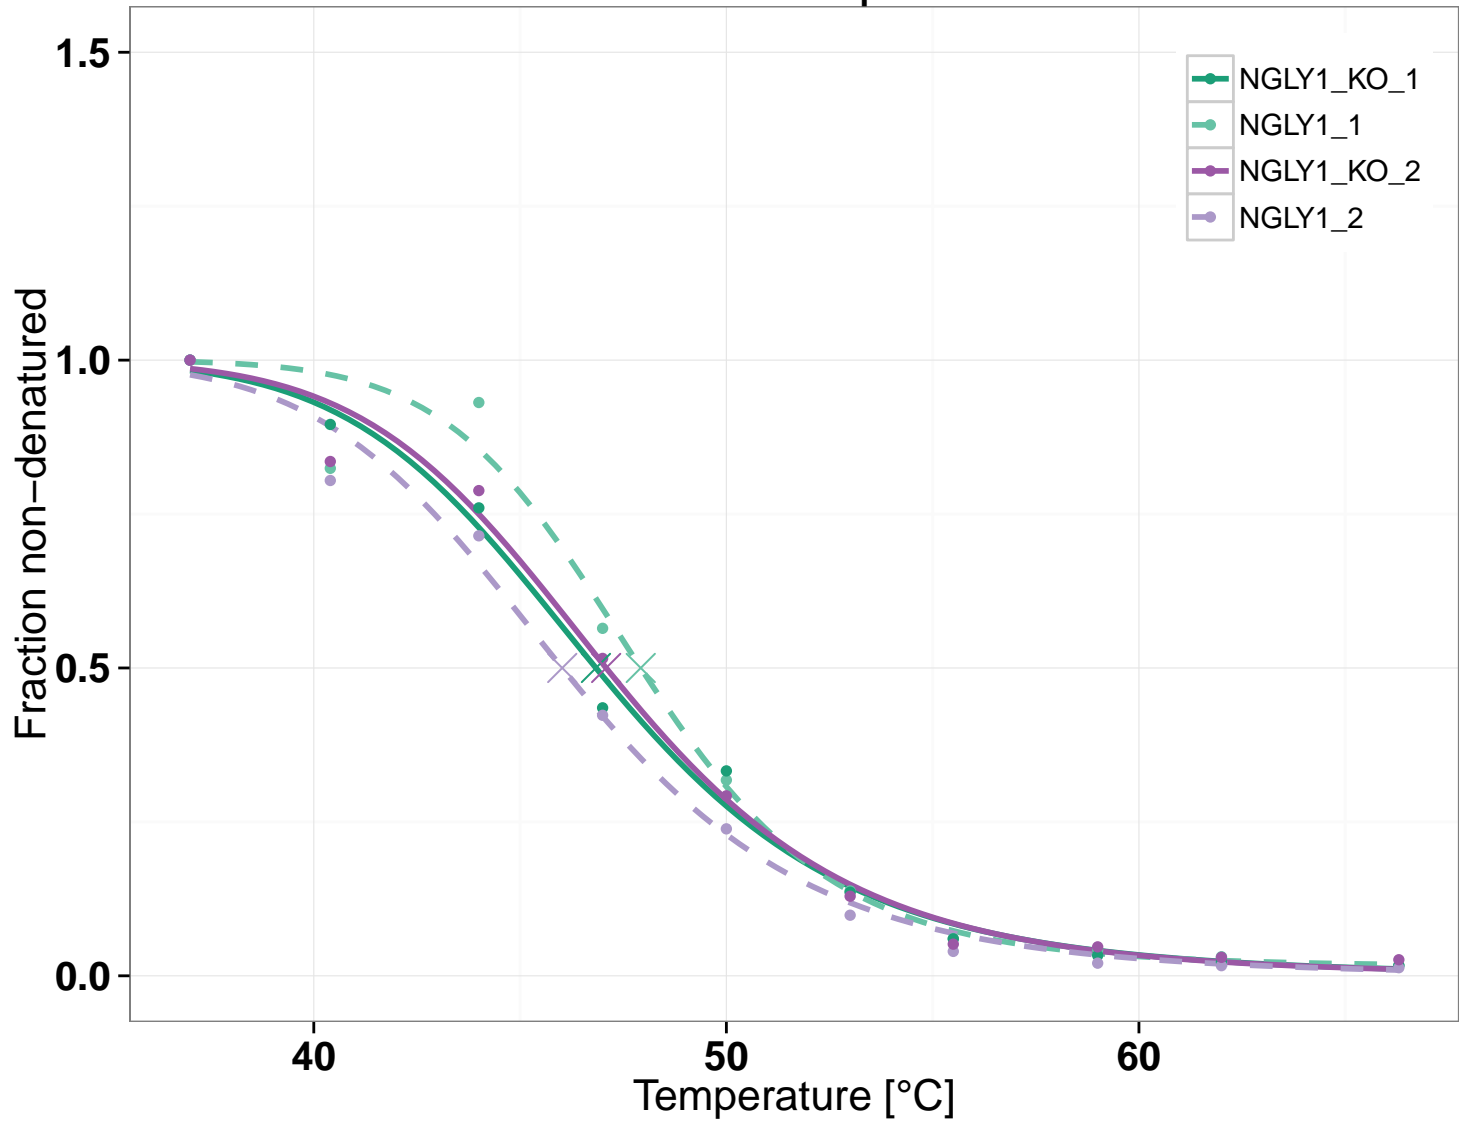

|            | meltPoint | slope  | plateau | R2   |
|------------|-----------|--------|---------|------|
| NGLY1_KO_1 | 46.84     | -0.083 | 0       | 0.99 |
| NGLY1_1    | 47.93     | -0.1   | 0.01    | 0.98 |
| NGLY1_KO_2 | 47.09     | -0.084 | 0       | 0.99 |
| NGLY1_2    | 46.02     | -0.084 | 0       | 0.99 |

Supplement: Supplementary file 4988 [file 1]

# IPI00514619.1|MEMO1

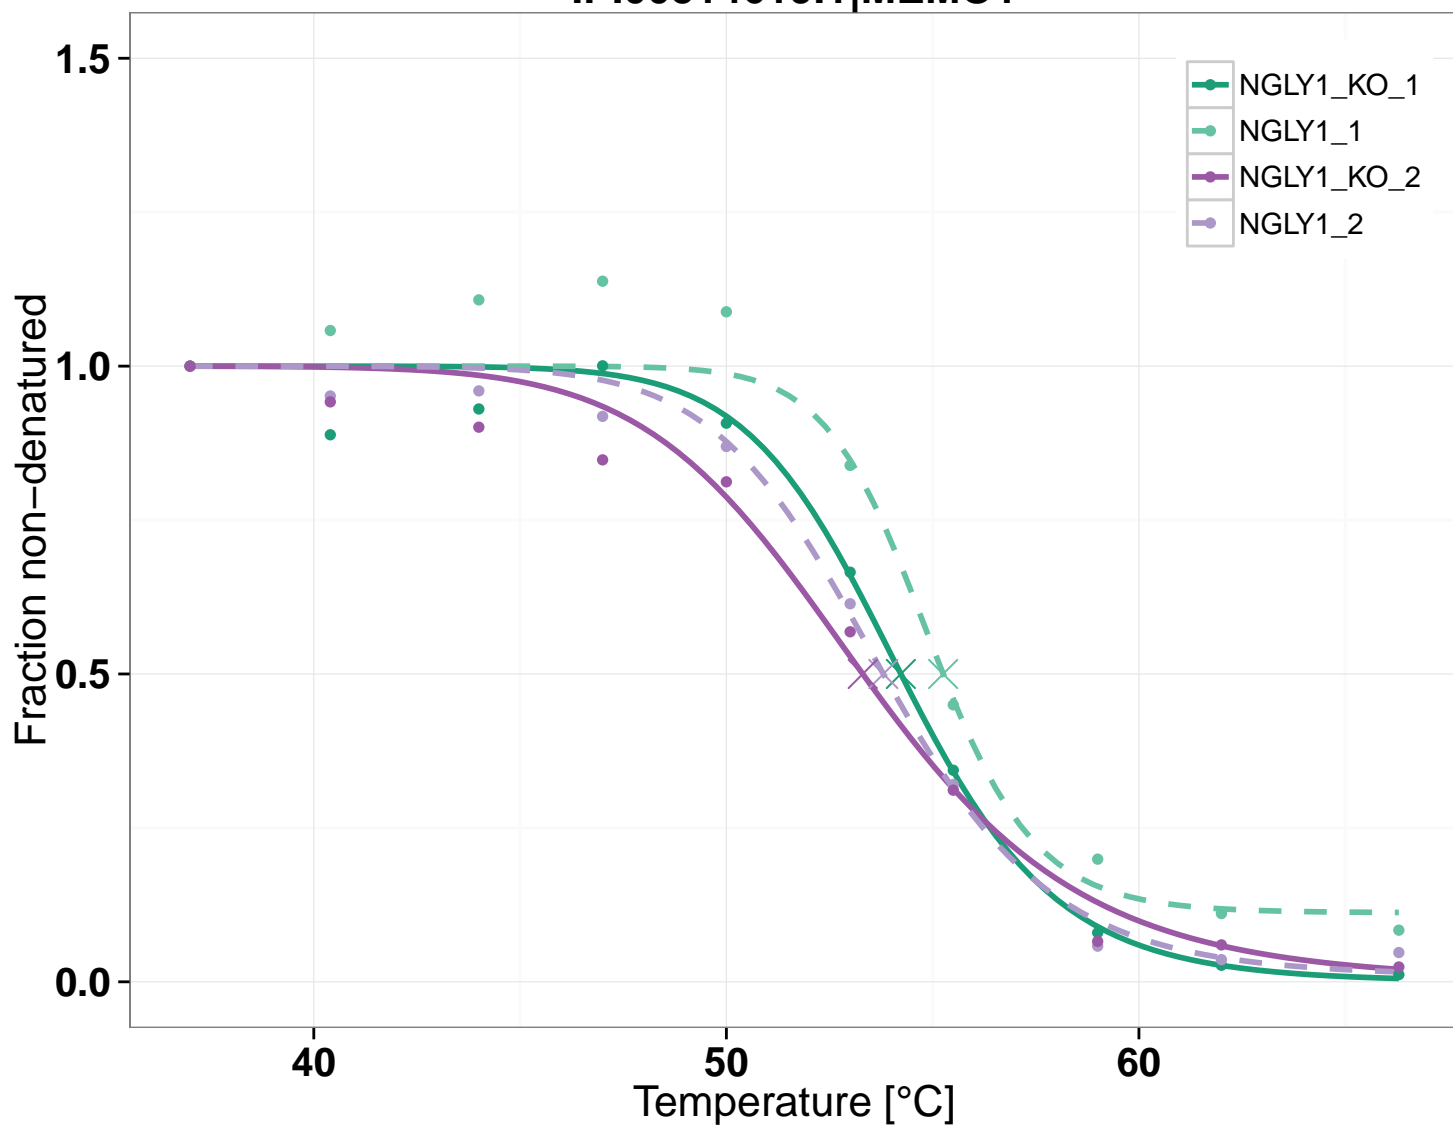

|            | meltPoint | slope  | plateau | R2   |
|------------|-----------|--------|---------|------|
| NGLY1_KO_1 | 54.23     | -0.13  | 0       | 0.99 |
| NGLY1_1    | 55.25     | -0.17  | 0.11    | 0.97 |
| NGLY1_KO_2 | 53.31     | -0.094 | 0       | 0.98 |
| NGLY1_2    | 53.81     | -0.12  | 0.01    | 0.99 |

Supplement: Supplementary file 4989 [file 1]

IPI00031118.3|ALKBH7

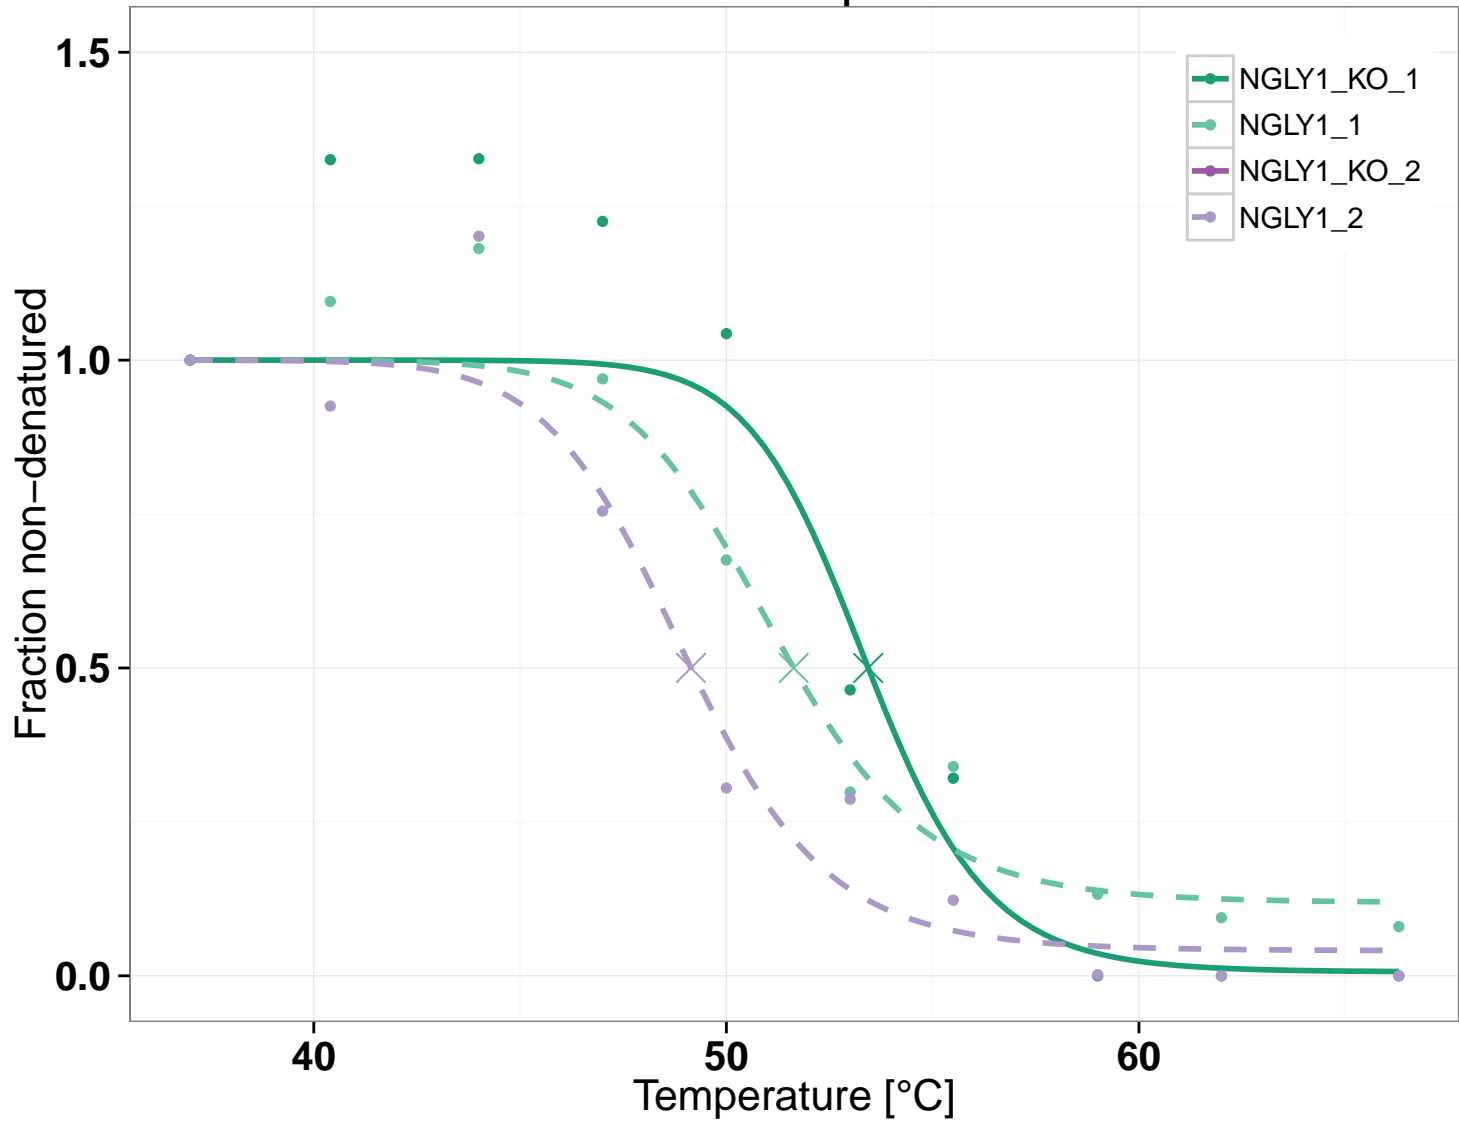

|            | meltPoint | slope | plateau | R2   |
|------------|-----------|-------|---------|------|
| NGLY1_KO_1 | 53.44     | -0.17 | 0.01    | 0.89 |
| NGLY1_1    | 51.63     | -0.12 | 0.12    | 0.96 |
| NGLY1_KO_2 | -         | -     | -       | -    |
| NGLY1_2    | 49.14     | -0.14 | 0.04    | 0.95 |

Supplement: Supplementary file 4990 [file 1]

IPI00293946.5|UBXN4

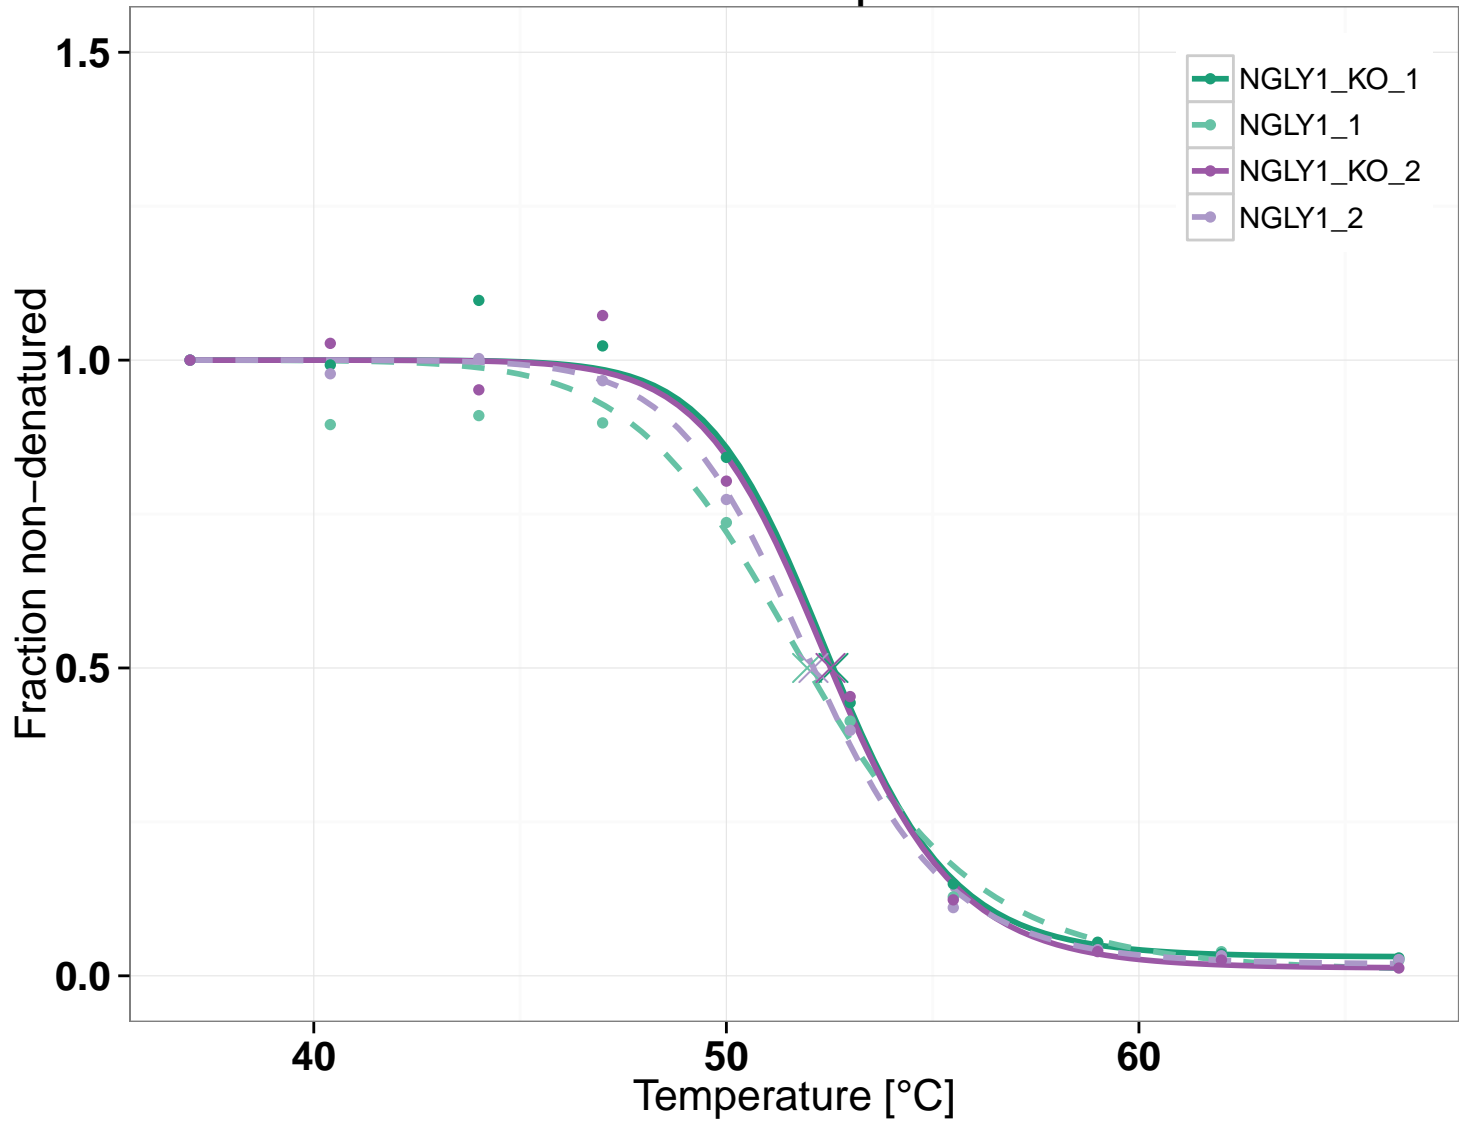

|            | meltPoint | slope | plateau | R2   |
|------------|-----------|-------|---------|------|
| NGLY1_KO_1 | 52.59     | -0.16 | 0.03    | 0.99 |
| NGLY1_1    | 51.96     | -0.12 | 0.01    | 0.99 |
| NGLY1_KO_2 | 52.52     | -0.16 | 0.01    | 0.99 |
| NGLY1_2    | 52.11     | -0.15 | 0.02    | 1    |

Supplement: Supplementary file 4991 [file 1]

IPI00657888.1|GMPPA

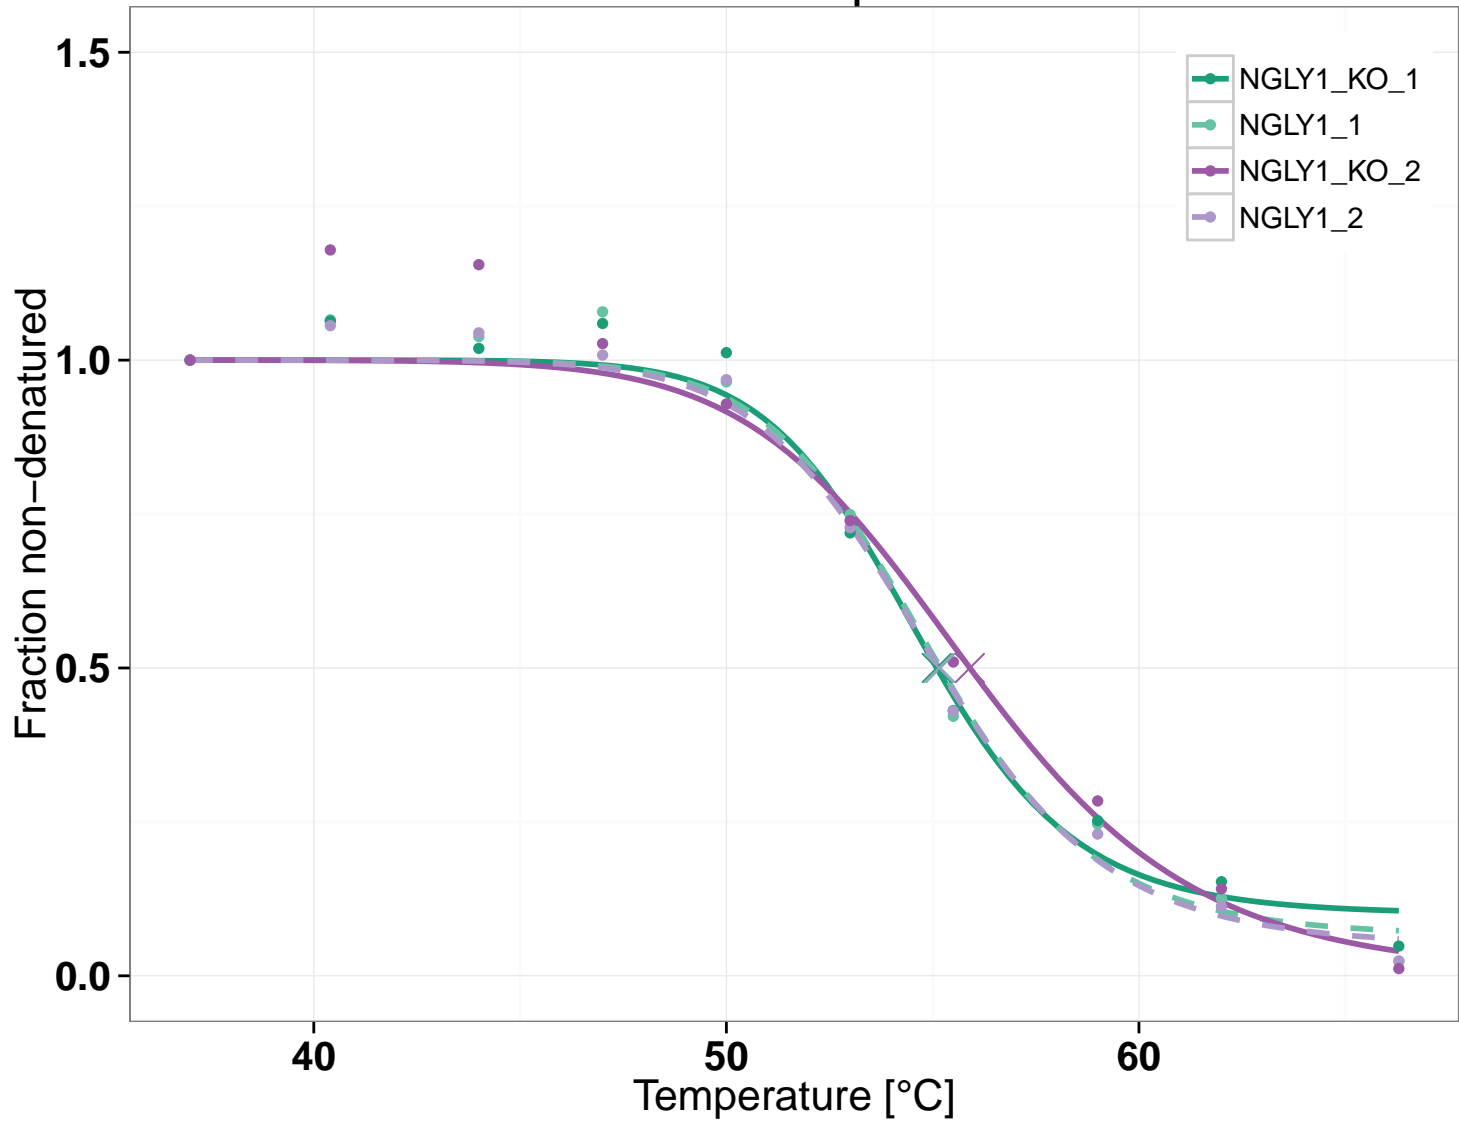

|            | meltPoint | slope  | plateau | R2   |
|------------|-----------|--------|---------|------|
| NGLY1_KO_1 | 55.1      | -0.12  | 0.1     | 0.99 |
| NGLY1_1    | 55.19     | -0.12  | 0.06    | 0.99 |
| NGLY1_KO_2 | 55.9      | -0.092 | 0       | 0.96 |
| NGLY1_2    | 55.15     | -0.11  | 0.05    | 0.99 |

Supplement: Supplementary file 4992 [file 1]

# IPI00100030.1|PIGT

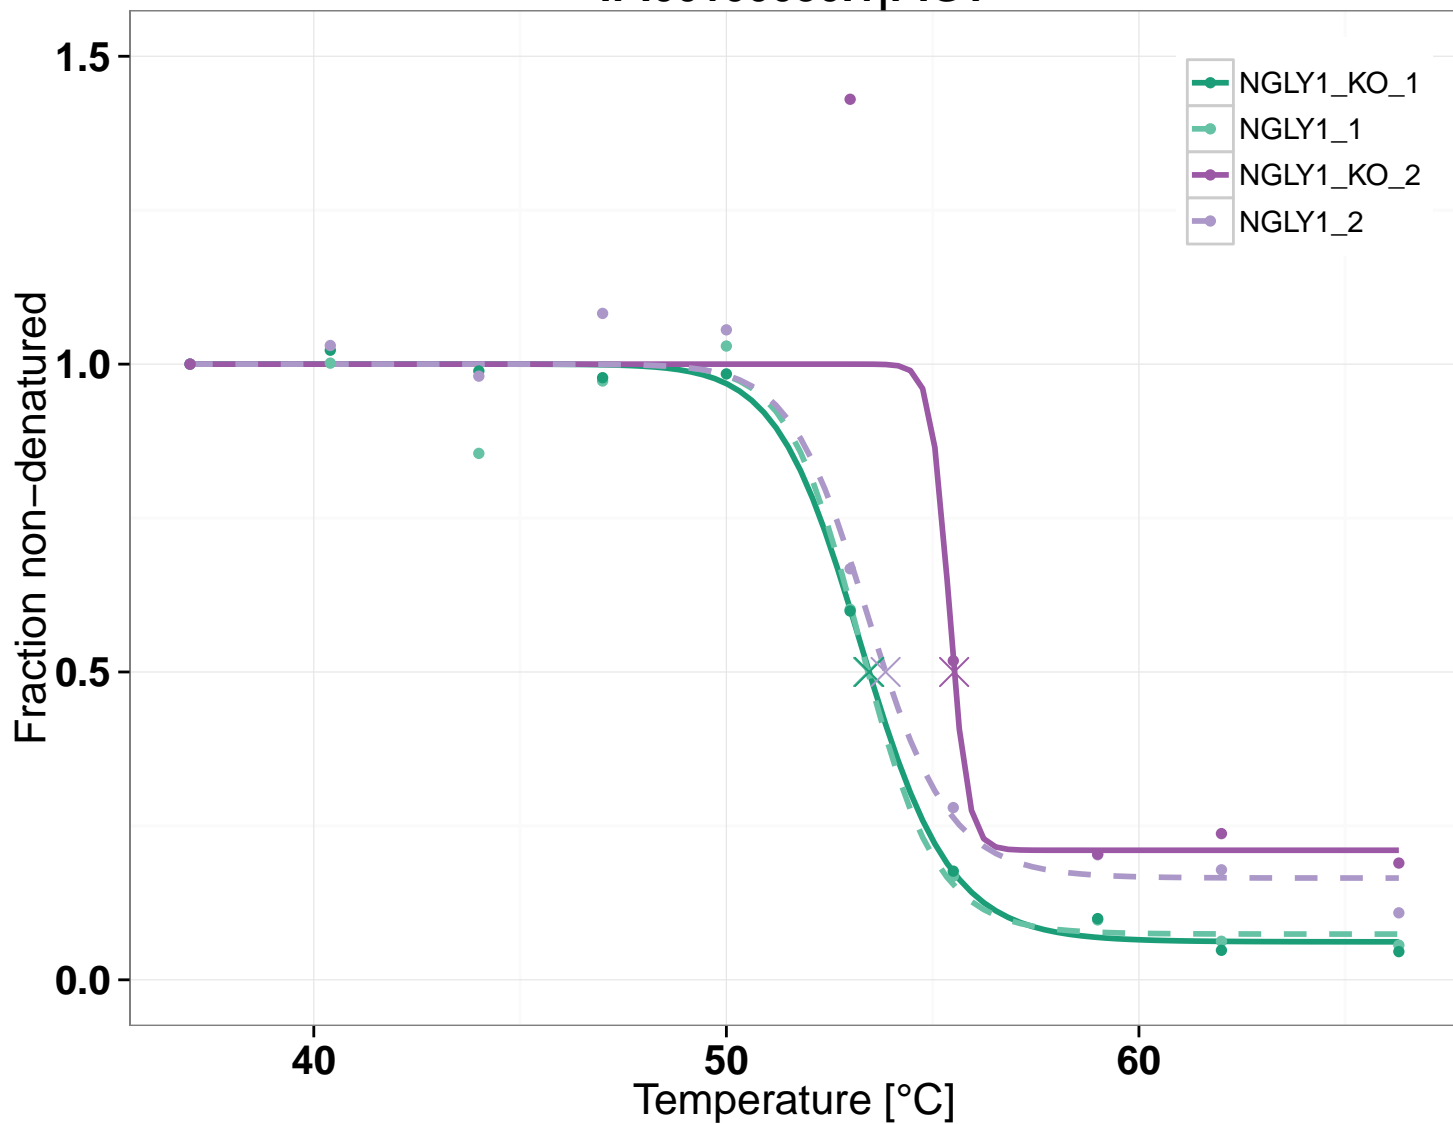

|            | meltPoint | slope | plateau | R2   |
|------------|-----------|-------|---------|------|
| NGLY1_KO_1 | 53.46     | -0.22 | 0.06    | 1    |
| NGLY1_1    | 53.43     | -0.26 | 0.07    | 0.99 |
| NGLY1_KO_2 | 55.52     | -0.89 | 0.21    | 0.21 |
| NGLY1_2    | 53.86     | -0.22 | 0.17    | 0.99 |

Supplement: Supplementary file 4993 [file 1]

# IPI00018110.1|TAF11

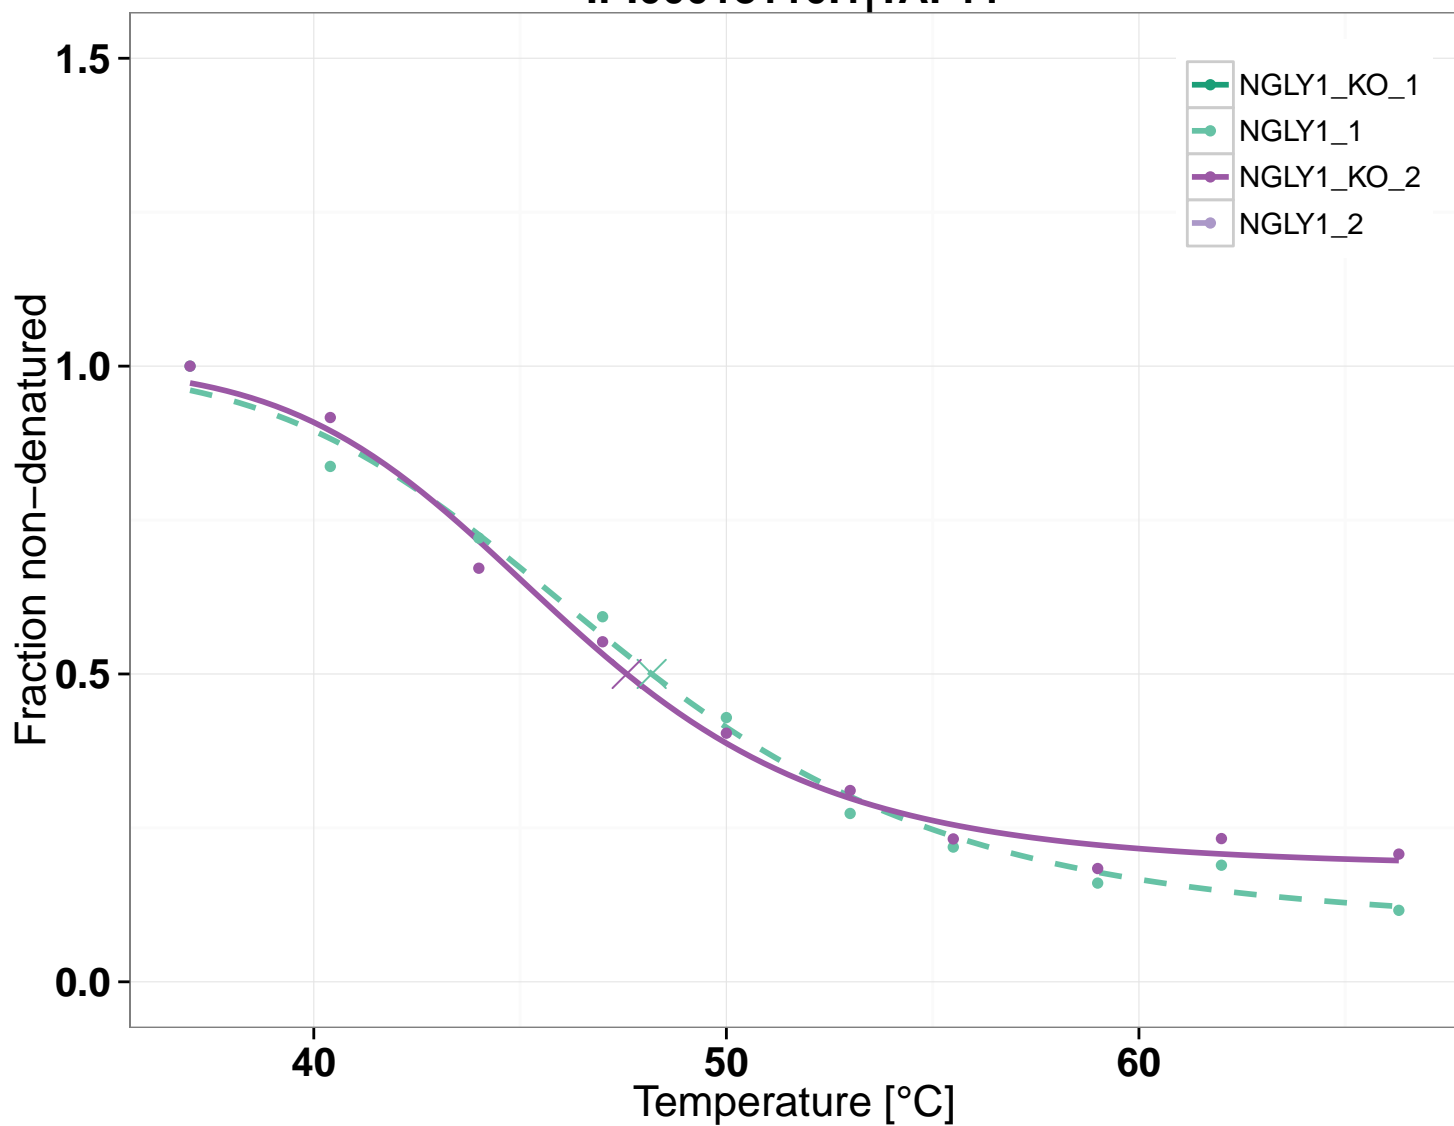

|            | meltPoint | slope  | plateau | R2   |
|------------|-----------|--------|---------|------|
| NGLY1_KO_1 | —         | —      | —       | —    |
| NGLY1_1    | 48.19     | -0.055 | 0.09    | 0.99 |
| NGLY1_KO_2 | 47.58     | -0.062 | 0.19    | 0.99 |
| NGLY1_2    | —         | —      | —       | —    |

Supplement: Supplementary file 4994 [file 1]

# IPI00472794.6|FCHO2

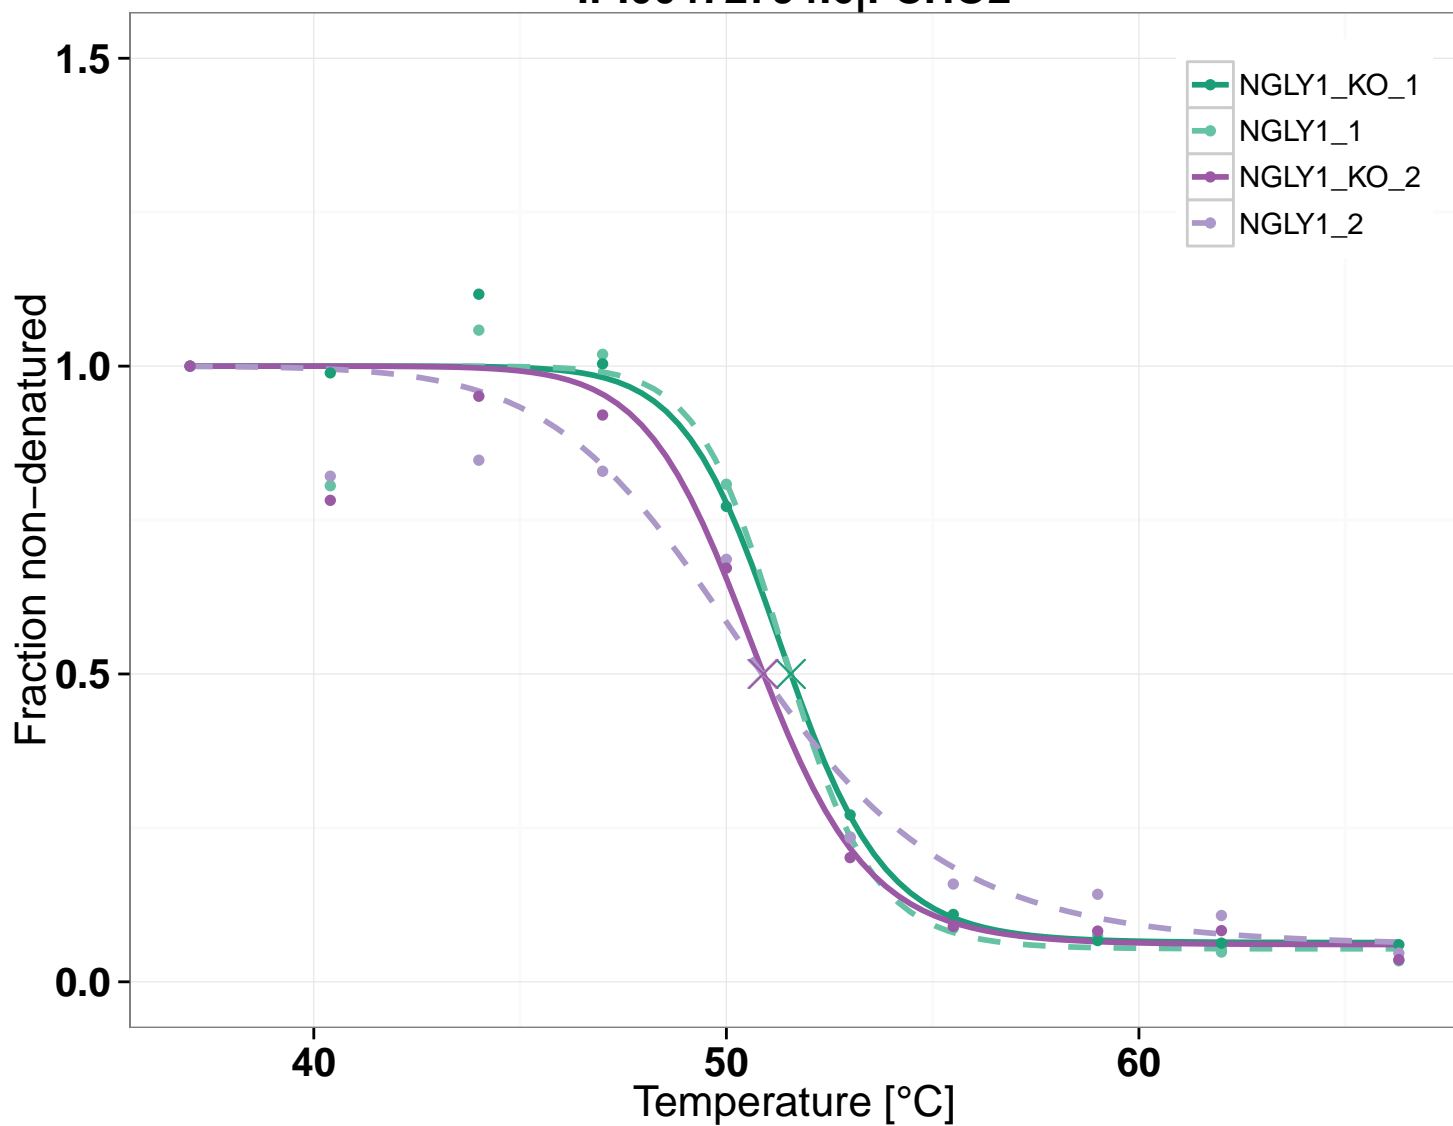

|            | meltPoint | slope  | plateau | R2   |
|------------|-----------|--------|---------|------|
| NGLY1_KO_1 | 51.56     | -0.19  | 0.06    | 0.99 |
| NGLY1_1    | 51.55     | -0.22  | 0.05    | 0.98 |
| NGLY1_KO_2 | 50.9      | -0.17  | 0.06    | 0.97 |
| NGLY1_2    | 50.87     | -0.098 | 0.06    | 0.95 |

Supplement: Supplementary file 4995 [file 1]

IPI00908632.1|B4E039\_HUMAN

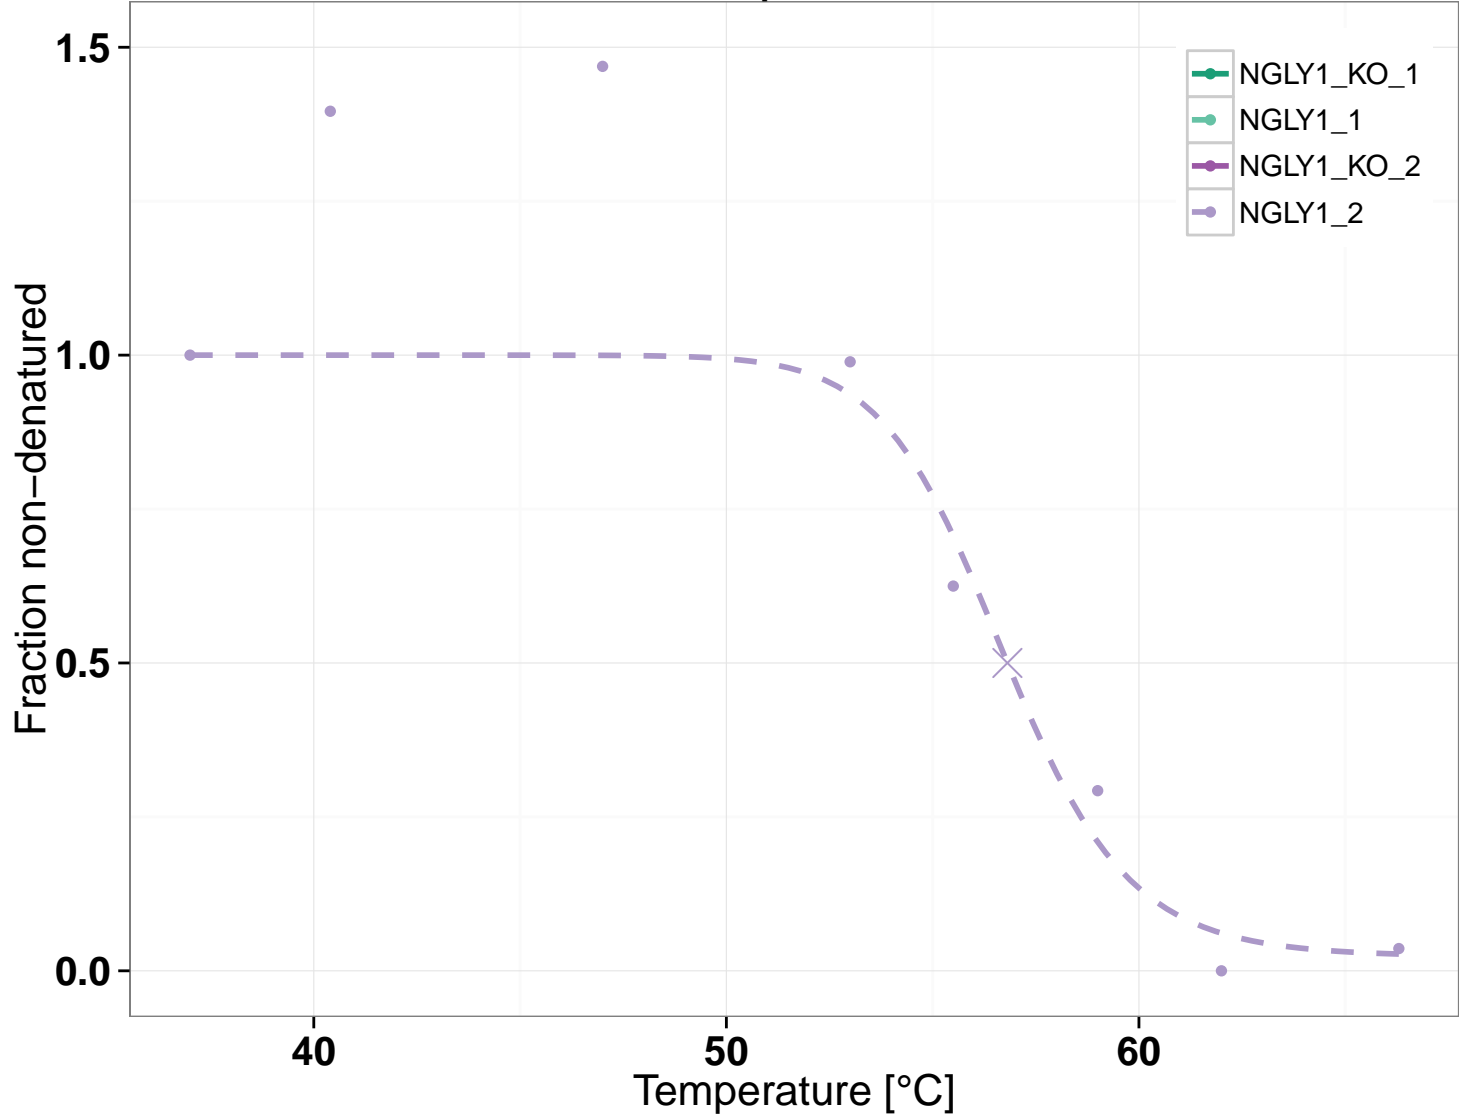

|            | meltPoint | slope | plateau | R2   |
|------------|-----------|-------|---------|------|
| NGLY1_KO_1 | -         | -     | -       | -    |
| NGLY1_1    | -         | -     | -       | -    |
| NGLY1_KO_2 | -         | -     | -       | -    |
| NGLY1_2    | 56.81     | -0.16 | 0.02    | 0.67 |

Supplement: Supplementary file 4996 [file 1]

IPI00023630.4|APAF1

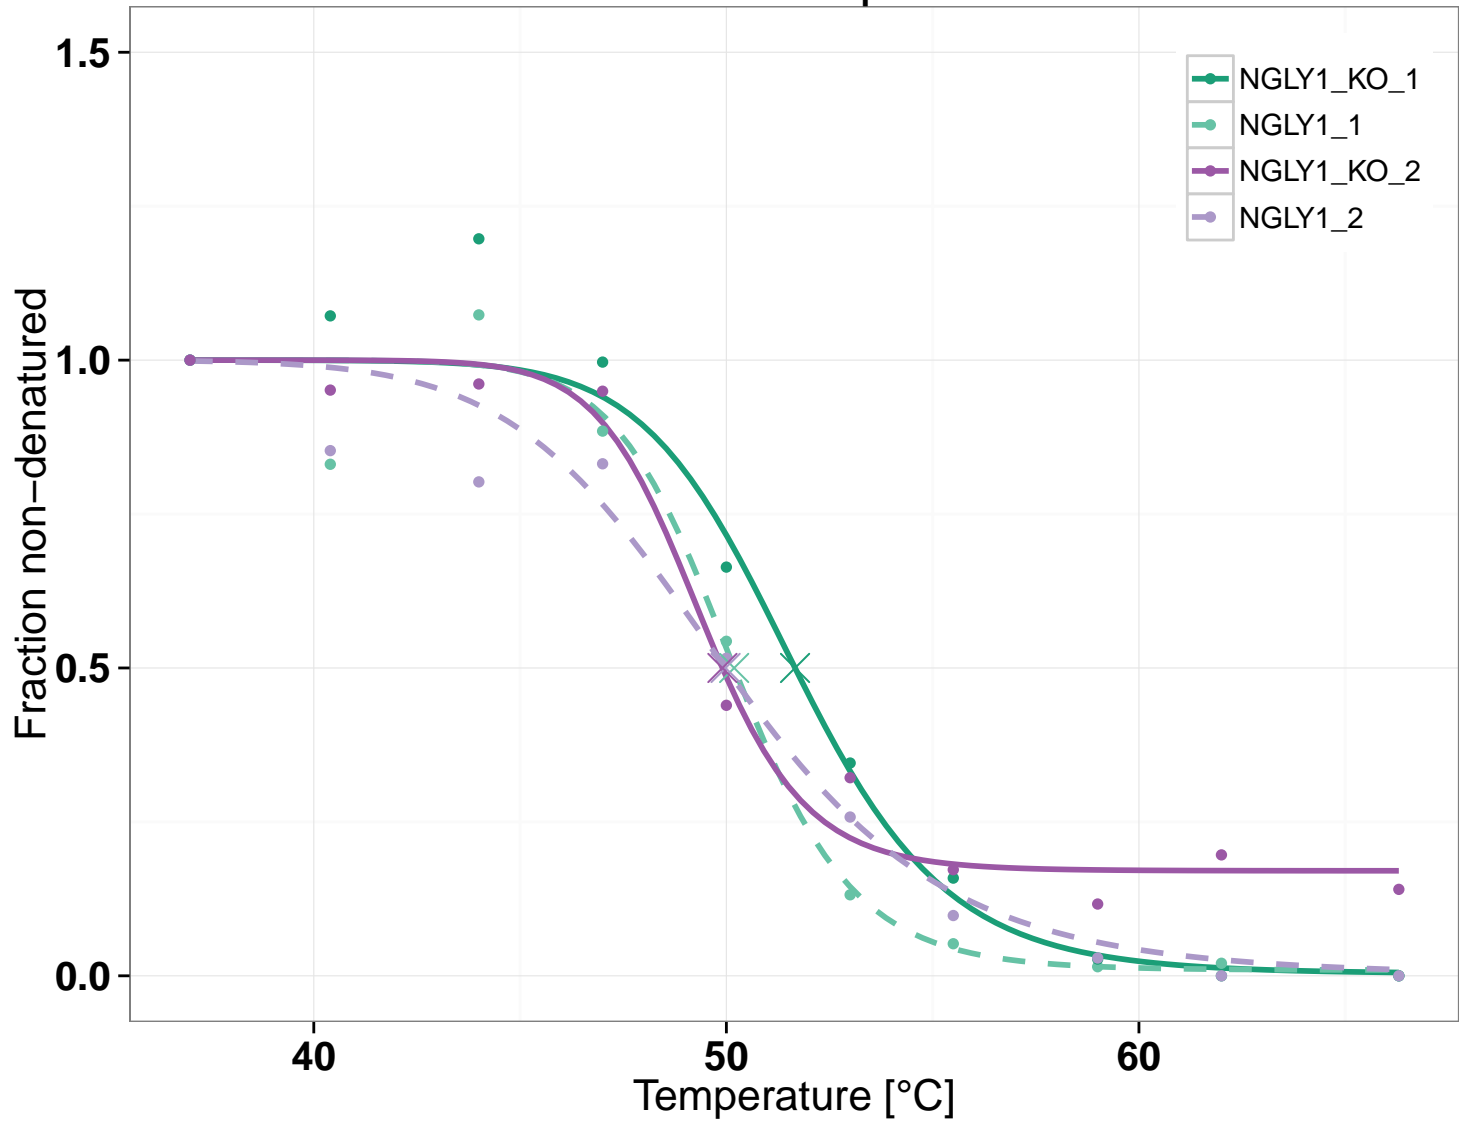

|            | meltPoint | slope  | plateau | R2   |
|------------|-----------|--------|---------|------|
| NGLY1_KO_1 | 51.66     | -0.13  | 0       | 0.98 |
| NGLY1_1    | 50.19     | -0.17  | 0.01    | 0.98 |
| NGLY1_KO_2 | 49.9      | -0.16  | 0.17    | 0.98 |
| NGLY1_2    | 49.98     | -0.094 | 0       | 0.97 |

Supplement: Supplementary file 4997 [file 1]

IPI00061178.1|CCBL2

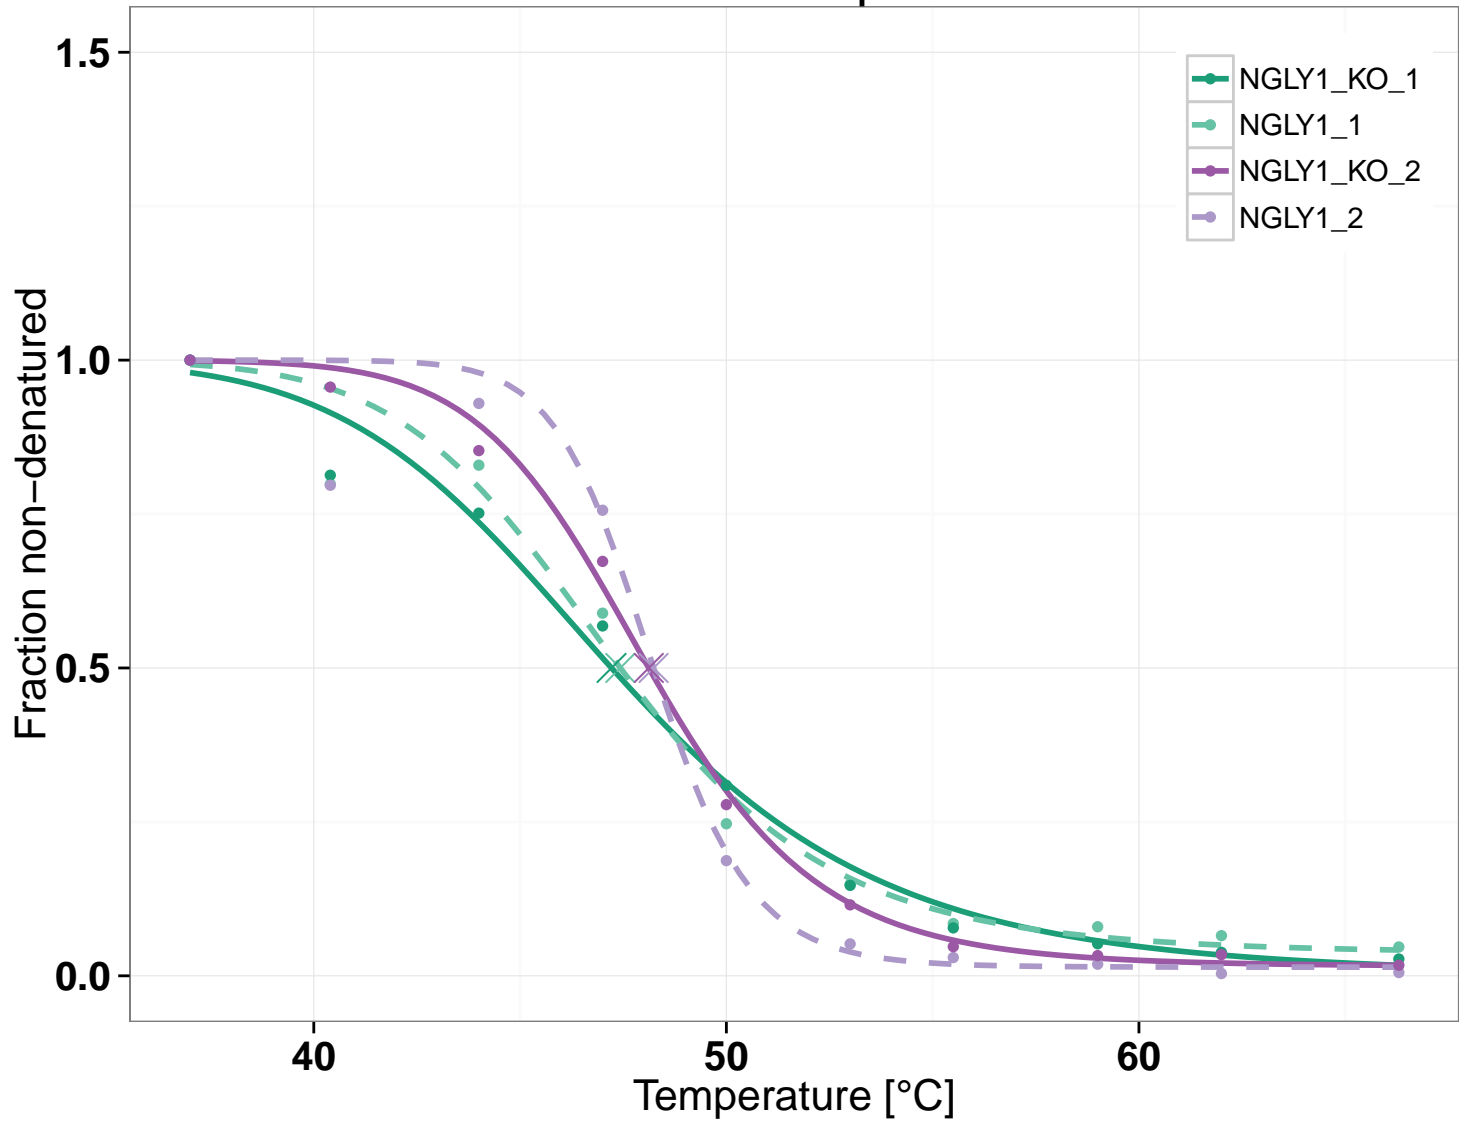

|            | meltPoint | slope  | plateau | R2   |
|------------|-----------|--------|---------|------|
| NGLY1_KO_1 | 47.22     | -0.076 | 0       | 0.99 |
| NGLY1_1    | 47.43     | -0.092 | 0.04    | 0.98 |
| NGLY1_KO_2 | 48.12     | -0.12  | 0.02    | 1    |
| NGLY1_2    | 48.24     | -0.21  | 0.01    | 0.97 |

Supplement: Supplementary file 4998 [file 1]

IPI00027438.2|FLOT1

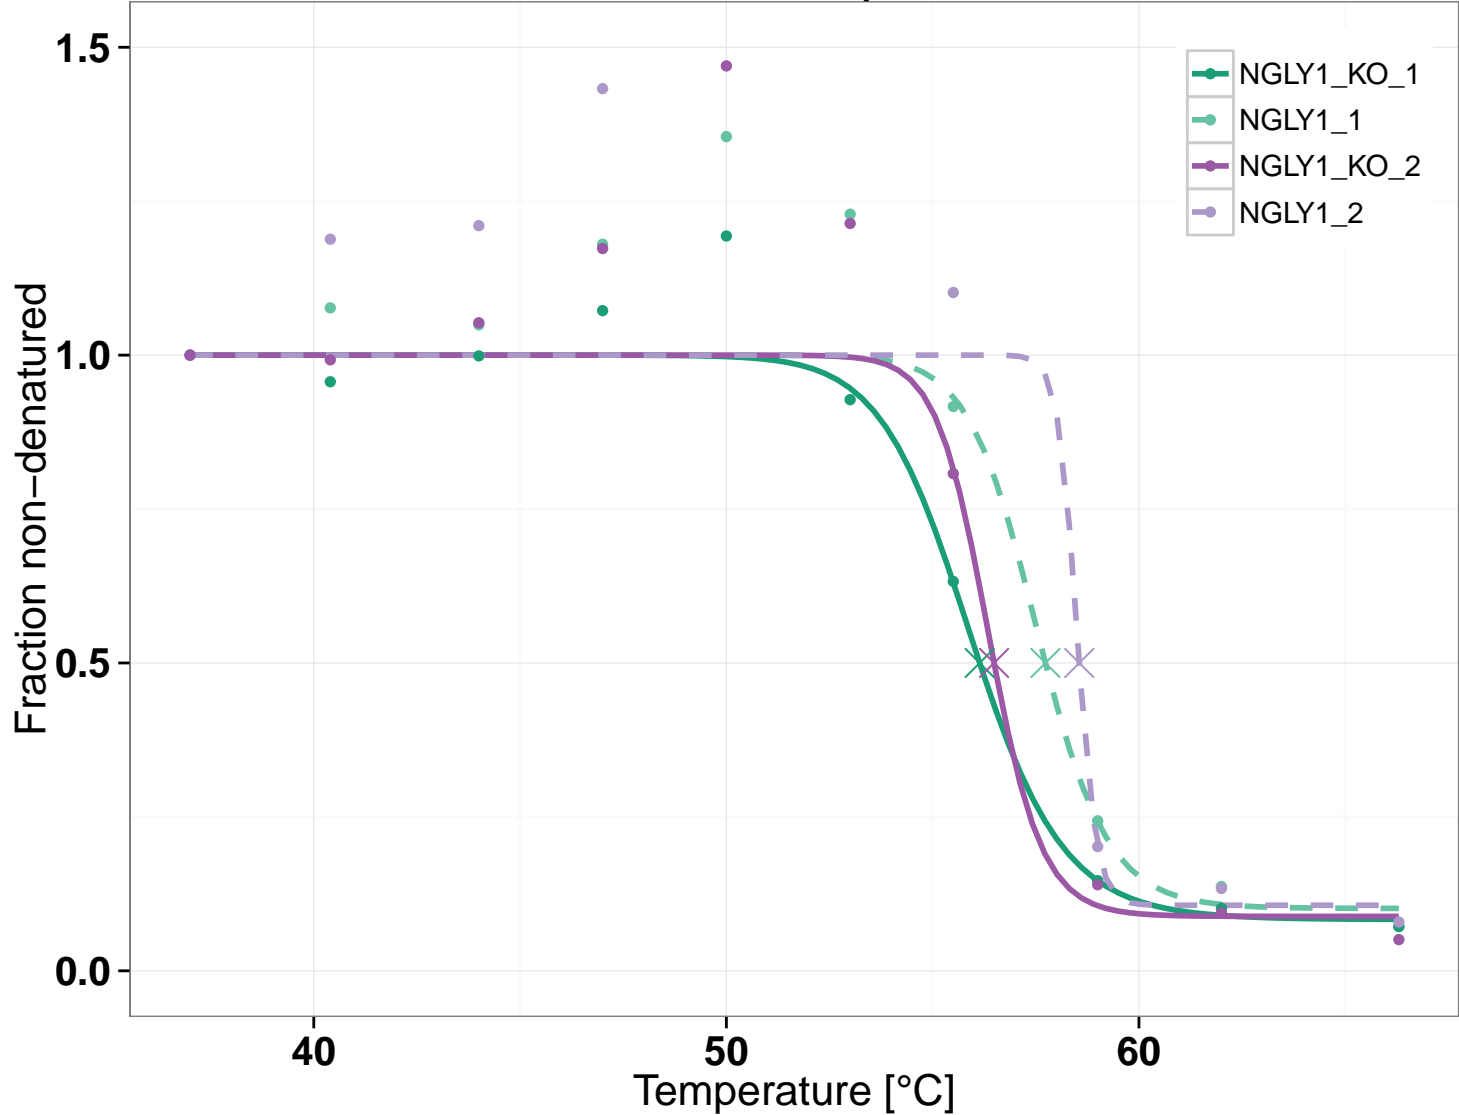

|            | meltPoint | slope | plateau | R2   |
|------------|-----------|-------|---------|------|
| NGLY1_KO_1 | 56.14     | -0.21 | 0.08    | 0.97 |
| NGLY1_1    | 57.73     | -0.27 | 0.1     | 0.89 |
| NGLY1_KO_2 | 56.49     | -0.36 | 0.09    | 0.87 |
| NGLY1_2    | 58.55     | -0.95 | 0.11    | 0.69 |

Supplement: Supplementary file 4999 [file 1]

IPI00174125.3|METTL6

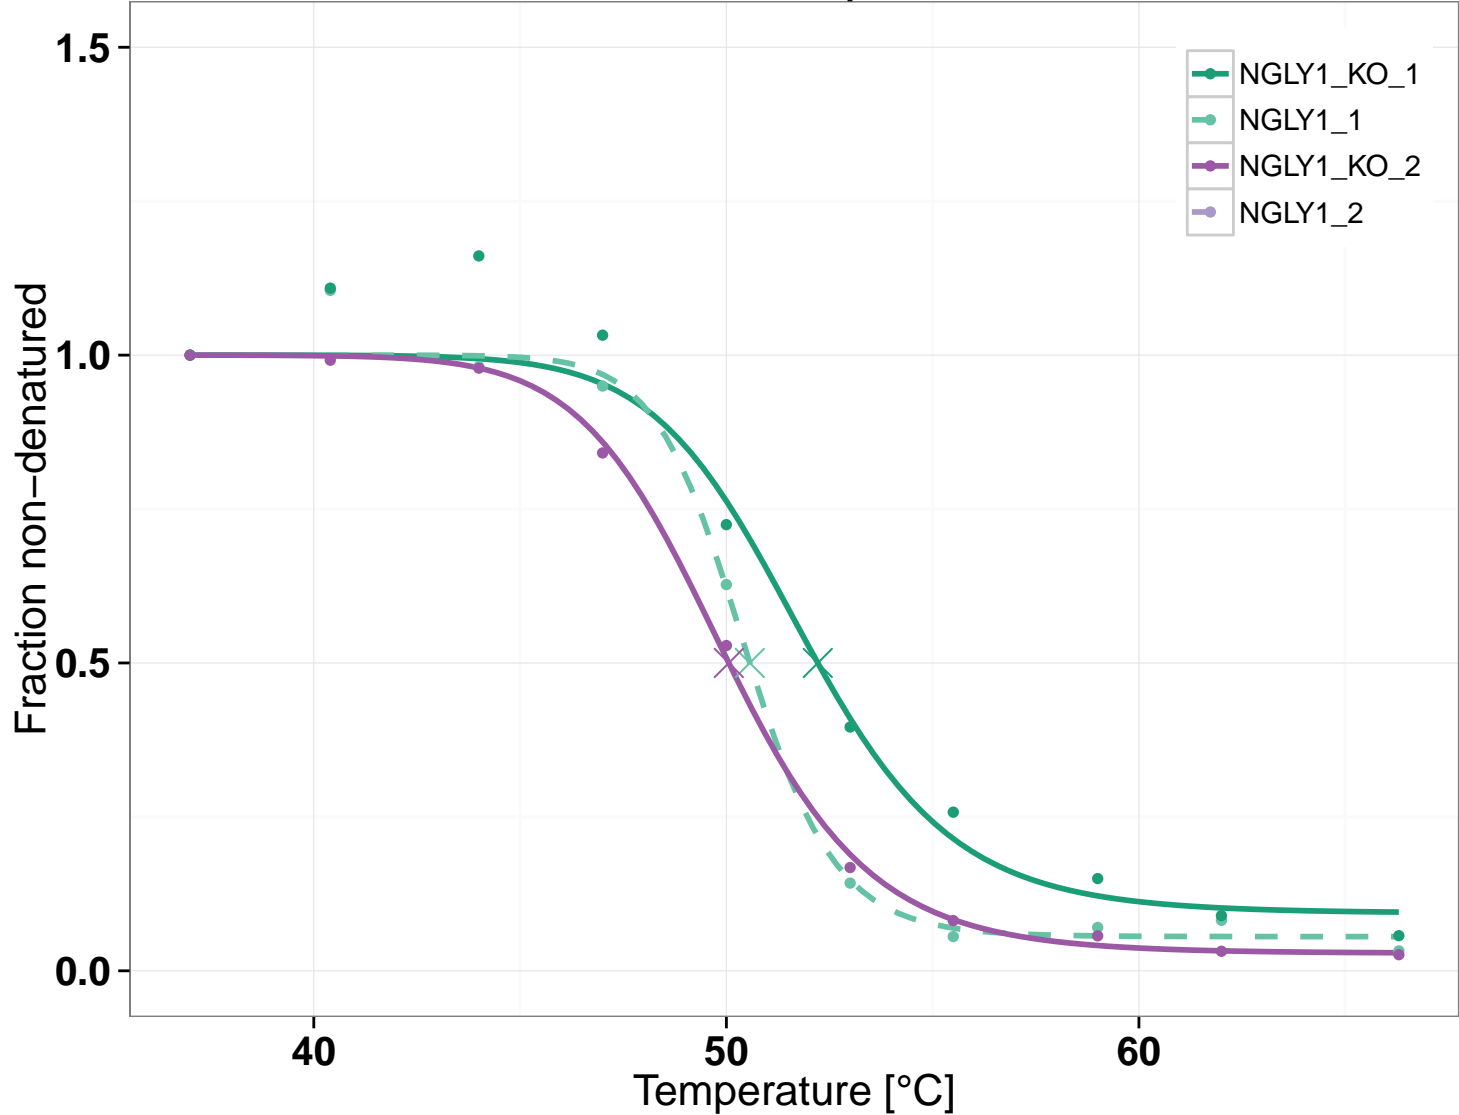

|            | meltPoint | slope | plateau | R2   |
|------------|-----------|-------|---------|------|
| NGLY1_KO_1 | 52.22     | -0.12 | 0.09    | 0.97 |
| NGLY1_1    | 50.57     | -0.22 | 0.06    | 0.99 |
| NGLY1_KO_2 | 50.06     | -0.14 | 0.03    | 1    |
| NGLY1_2    | -         | -     | -       | -    |

Supplement: Supplementary file 5000 [file 1]

# IPI00745792.1|NMRAL1

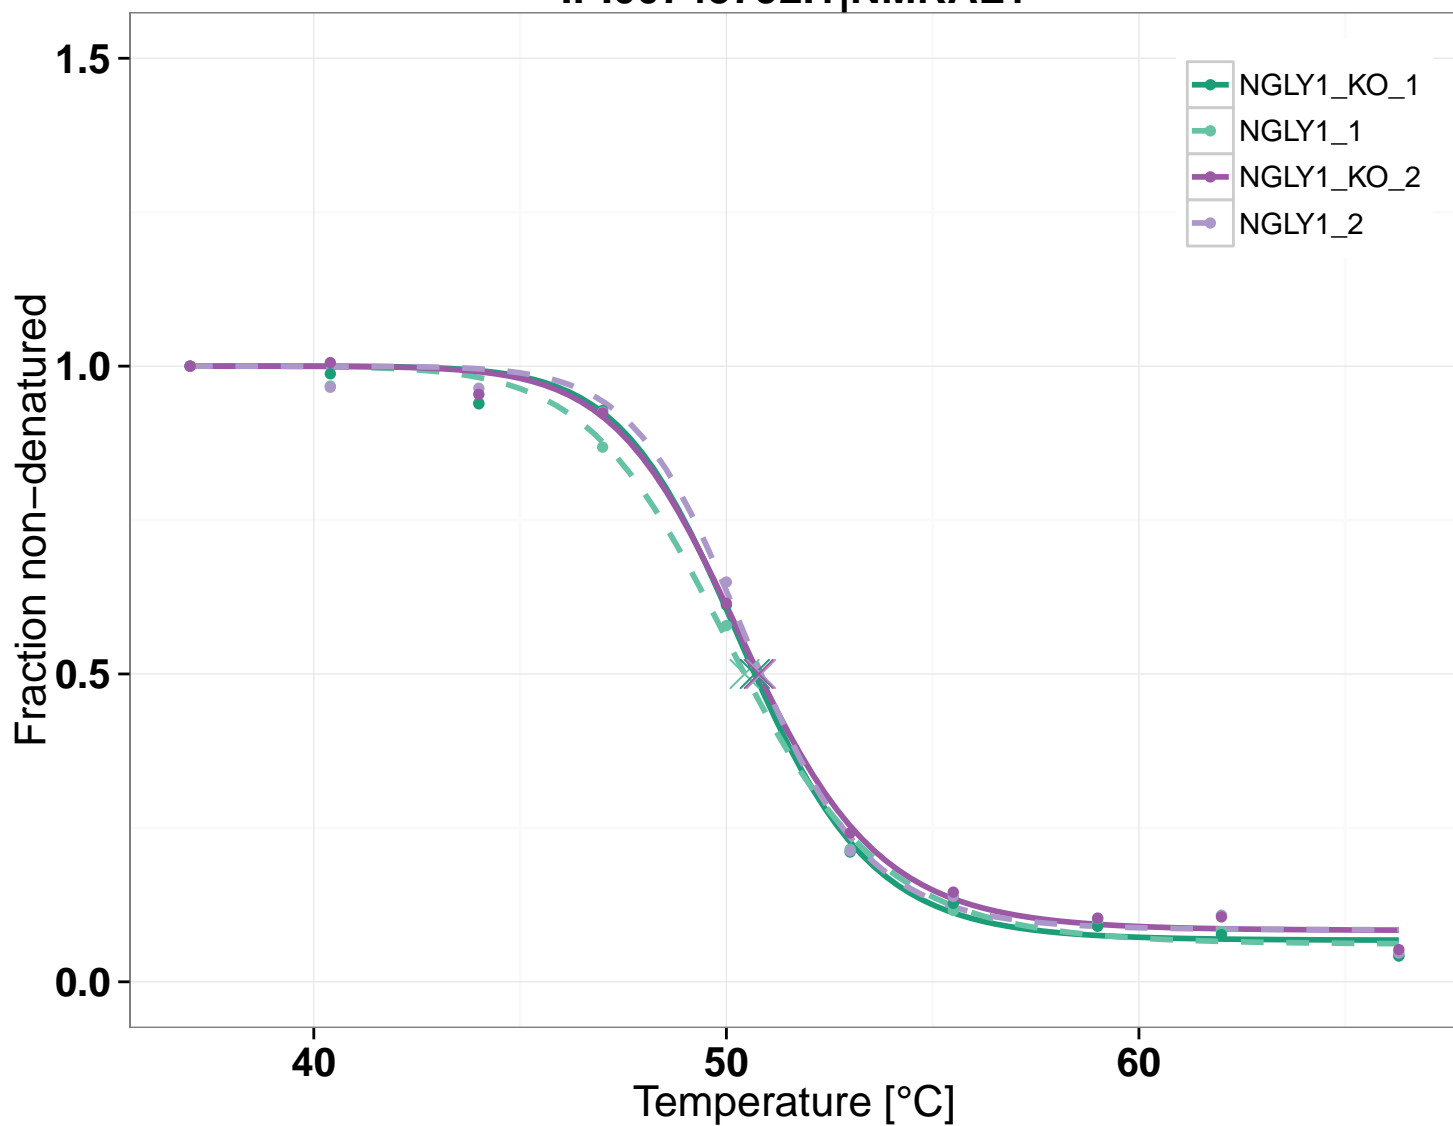

|            | meltPoint | slope | plateau | R2 |
|------------|-----------|-------|---------|----|
| NGLY1_KO_1 | 50.69     | -0.15 | 0.07    | 1  |
| NGLY1_1    | 50.44     | -0.13 | 0.06    | 1  |
| NGLY1_KO_2 | 50.78     | -0.14 | 0.08    | 1  |
| NGLY1_2    | 50.84     | -0.16 | 0.08    | 1  |

Supplement: Supplementary file 5001 [file 1]

# IPI00789941.2|LIN54

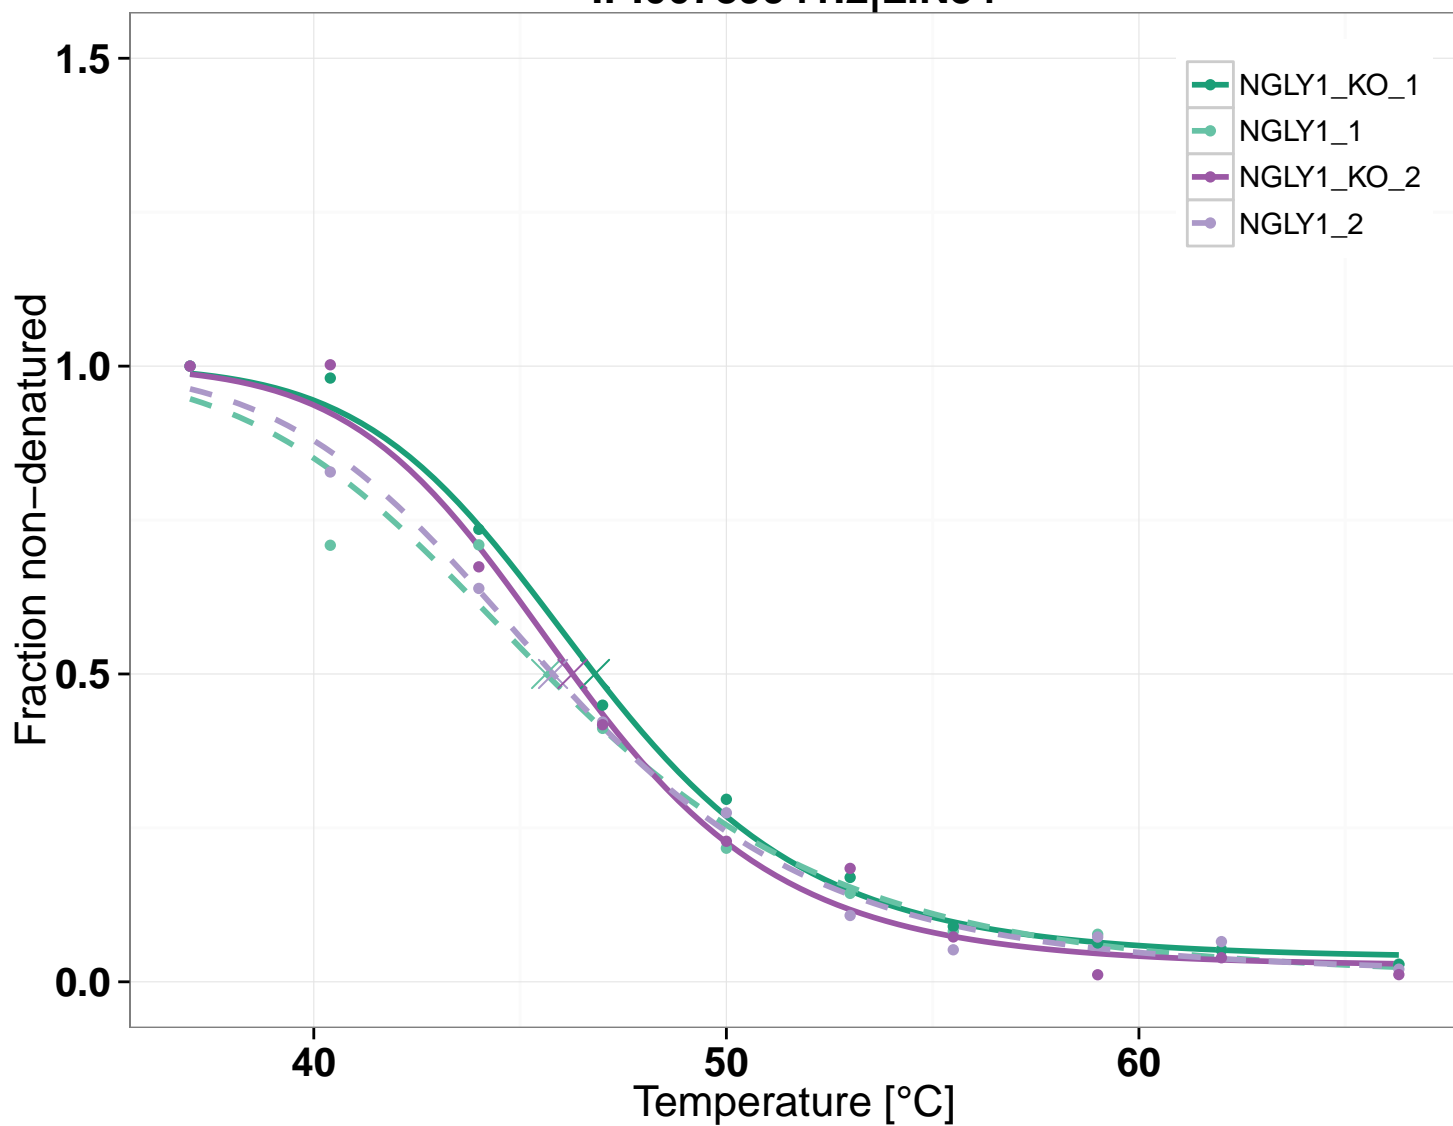

|            | meltPoint | slope  | plateau | R2   |
|------------|-----------|--------|---------|------|
| NGLY1_KO_1 | 46.82     | -0.089 | 0.04    | 1    |
| NGLY1_1    | 45.63     | -0.069 | 0       | 0.97 |
| NGLY1_KO_2 | 46.27     | -0.093 | 0.02    | 0.99 |
| NGLY1_2    | 45.8      | -0.076 | 0.01    | 0.99 |

Supplement: Supplementary file 5002 [file 1]

IPI00013897.1|ADAM10

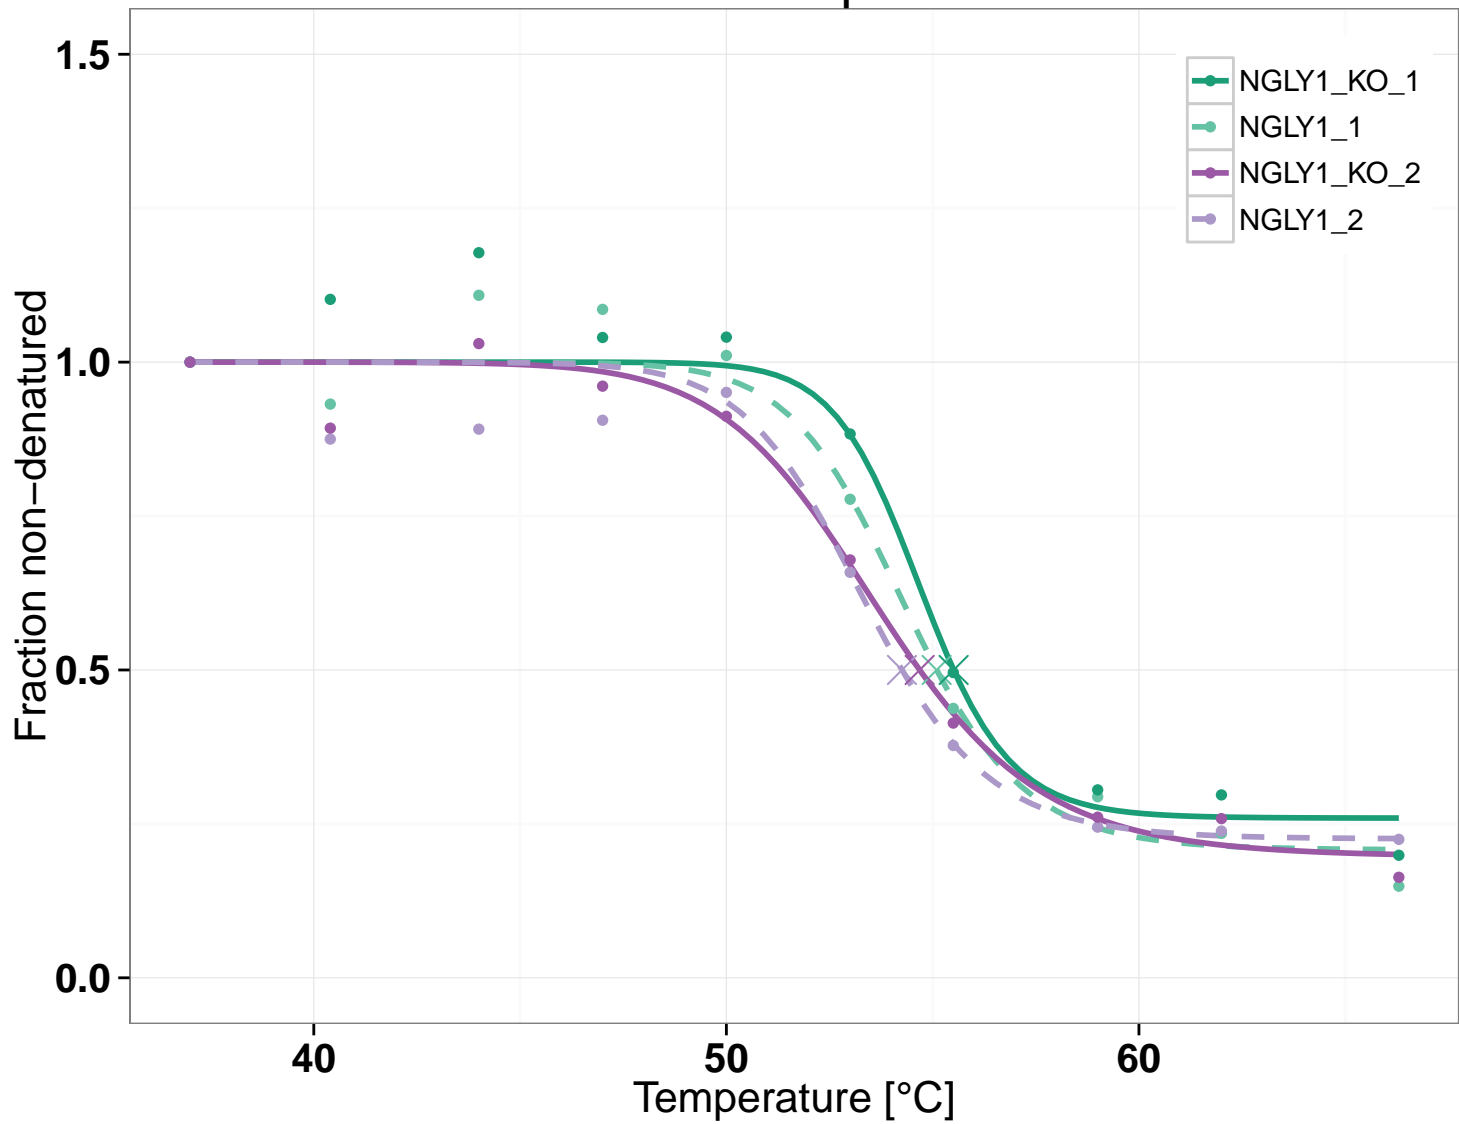

|            | meltPoint | slope | plateau | R2   |
|------------|-----------|-------|---------|------|
| NGLY1_KO_1 | 55.51     | -0.17 | 0.26    | 0.96 |
| NGLY1_1    | 55.1      | -0.14 | 0.21    | 0.98 |
| NGLY1_KO_2 | 54.68     | -0.1  | 0.2     | 0.98 |
| NGLY1_2    | 54.26     | -0.13 | 0.23    | 0.96 |

Supplement: Supplementary file 5003 [file 1]

IPI00442210.1|ABI2

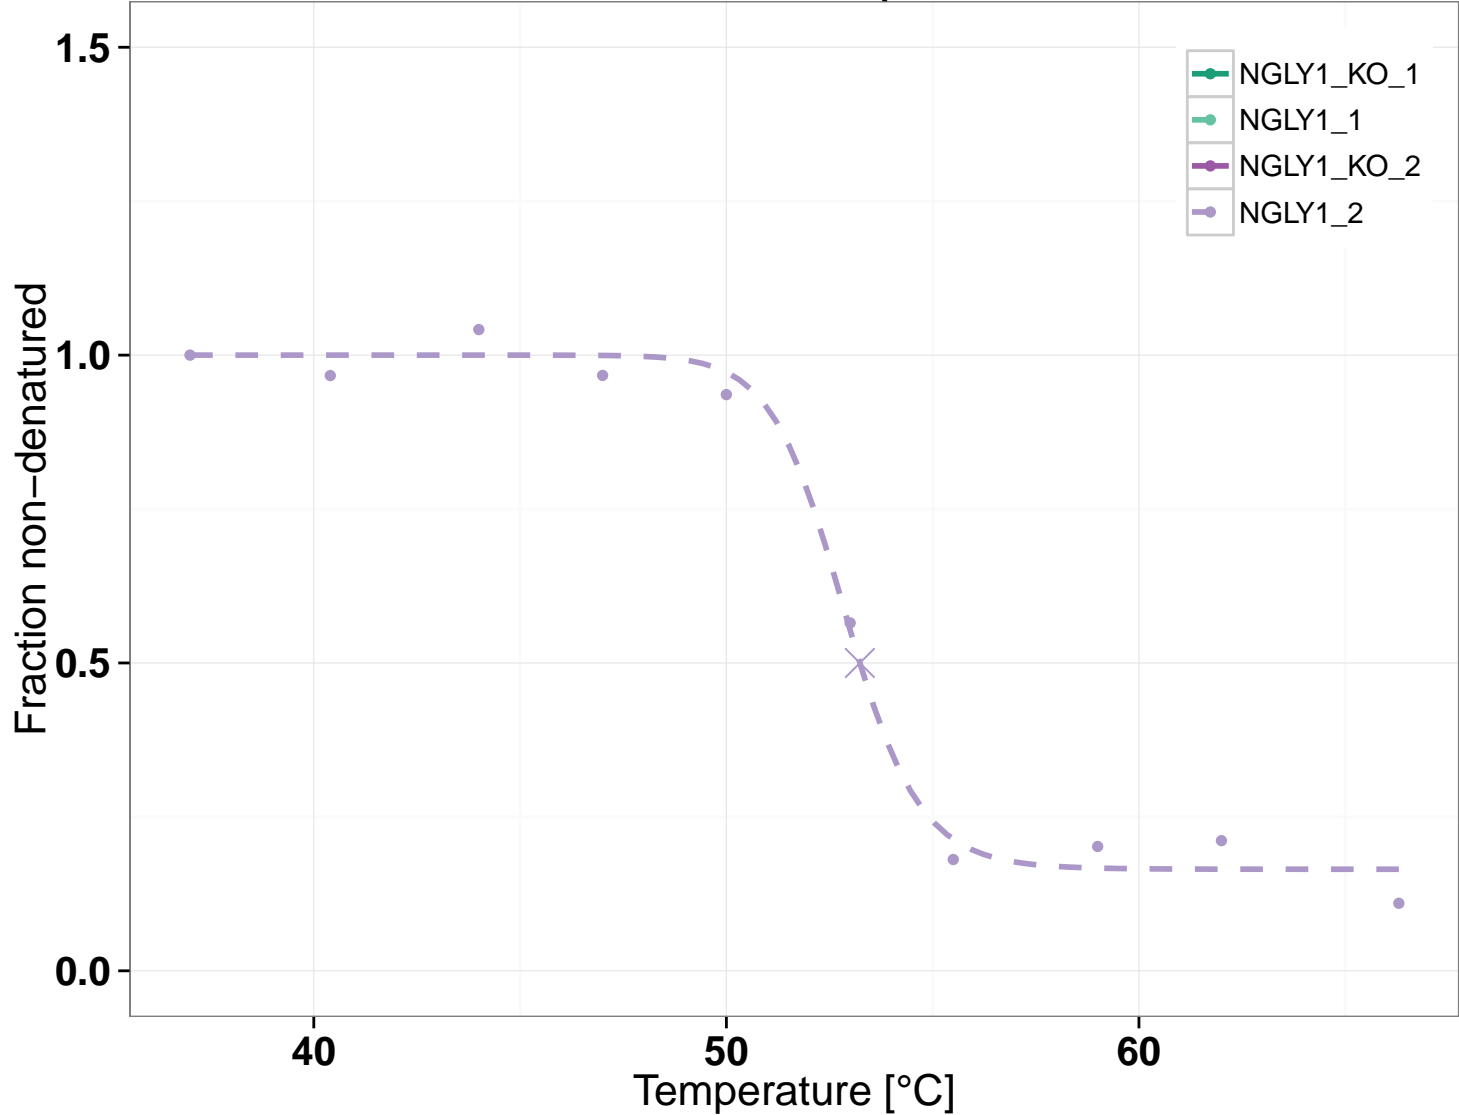

|            | meltPoint | slope | plateau | R2   |
|------------|-----------|-------|---------|------|
| NGLY1_KO_1 | -         | -     | -       | -    |
| NGLY1_1    | -         | -     | -       | -    |
| NGLY1_KO_2 | -         | -     | -       | -    |
| NGLY1_2    | 53.24     | -0.23 | 0.16    | 0.99 |

Supplement: Supplementary file 5004 [file 1]

IPI00796949.1|PNMT

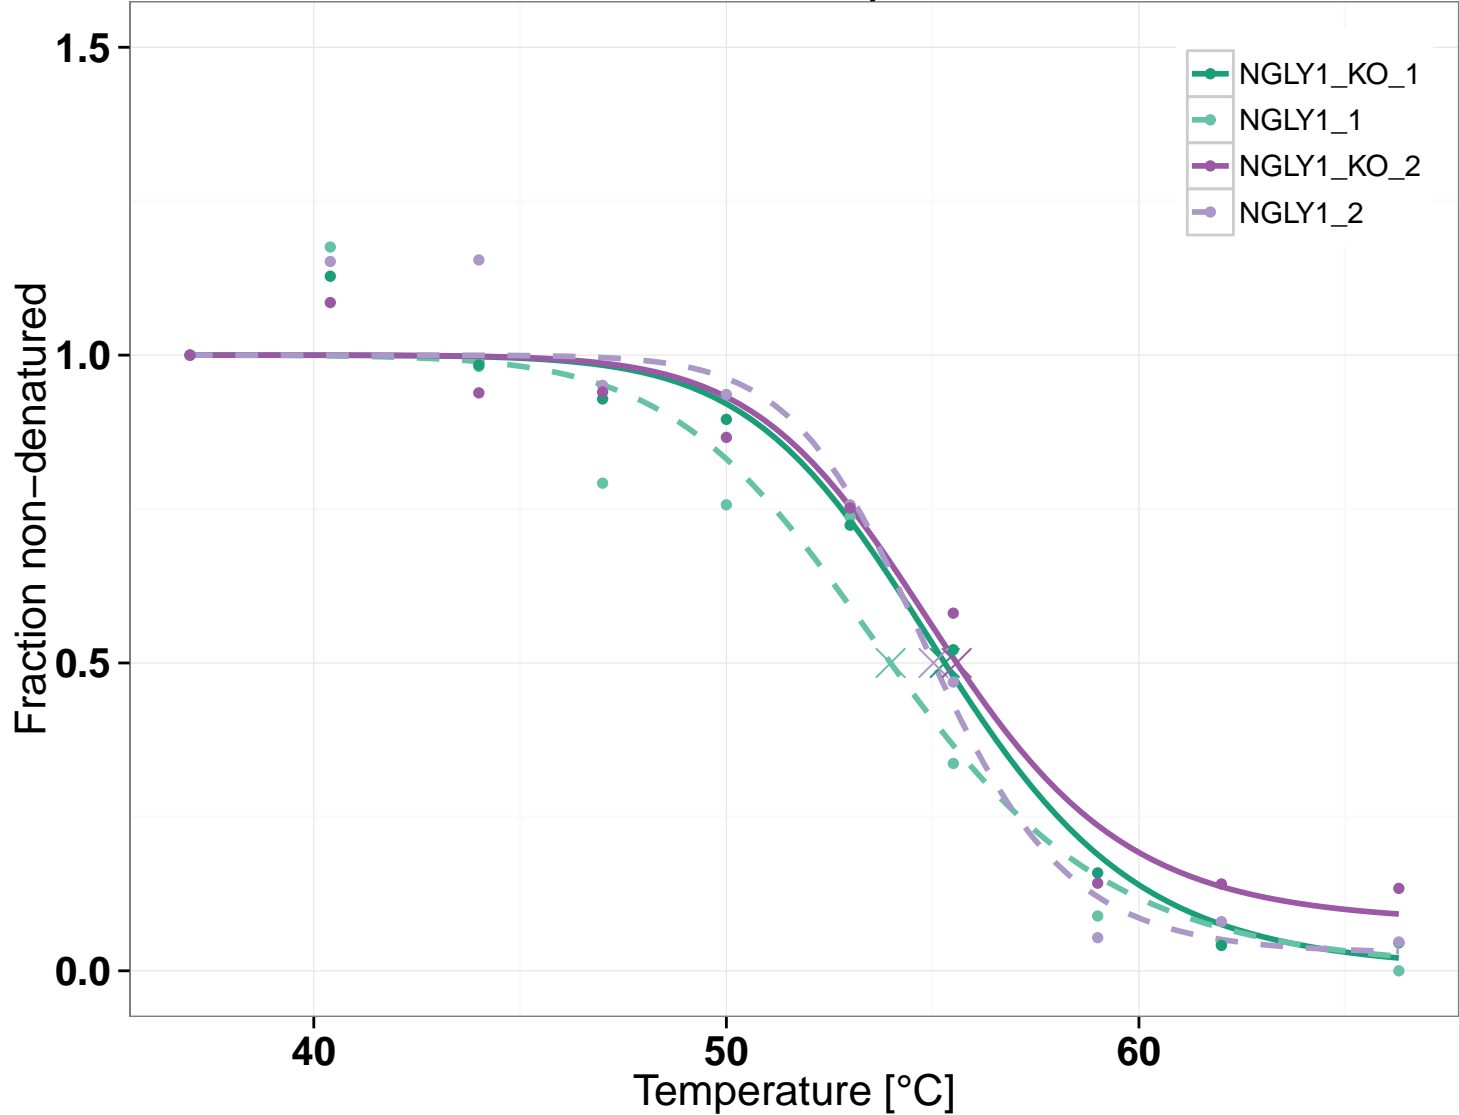

|            | meltPoint | slope  | plateau | R2   |
|------------|-----------|--------|---------|------|
| NGLY1_KO_1 | 55.29     | -0.11  | 0       | 0.98 |
| NGLY1_1    | 53.98     | -0.094 | 0       | 0.95 |
| NGLY1_KO_2 | 55.58     | -0.1   | 0.08    | 0.97 |
| NGLY1_2    | 55.02     | -0.14  | 0.03    | 0.97 |

Supplement: Supplementary file 5005 [file 1]

IPI00016441.3|SH2B1

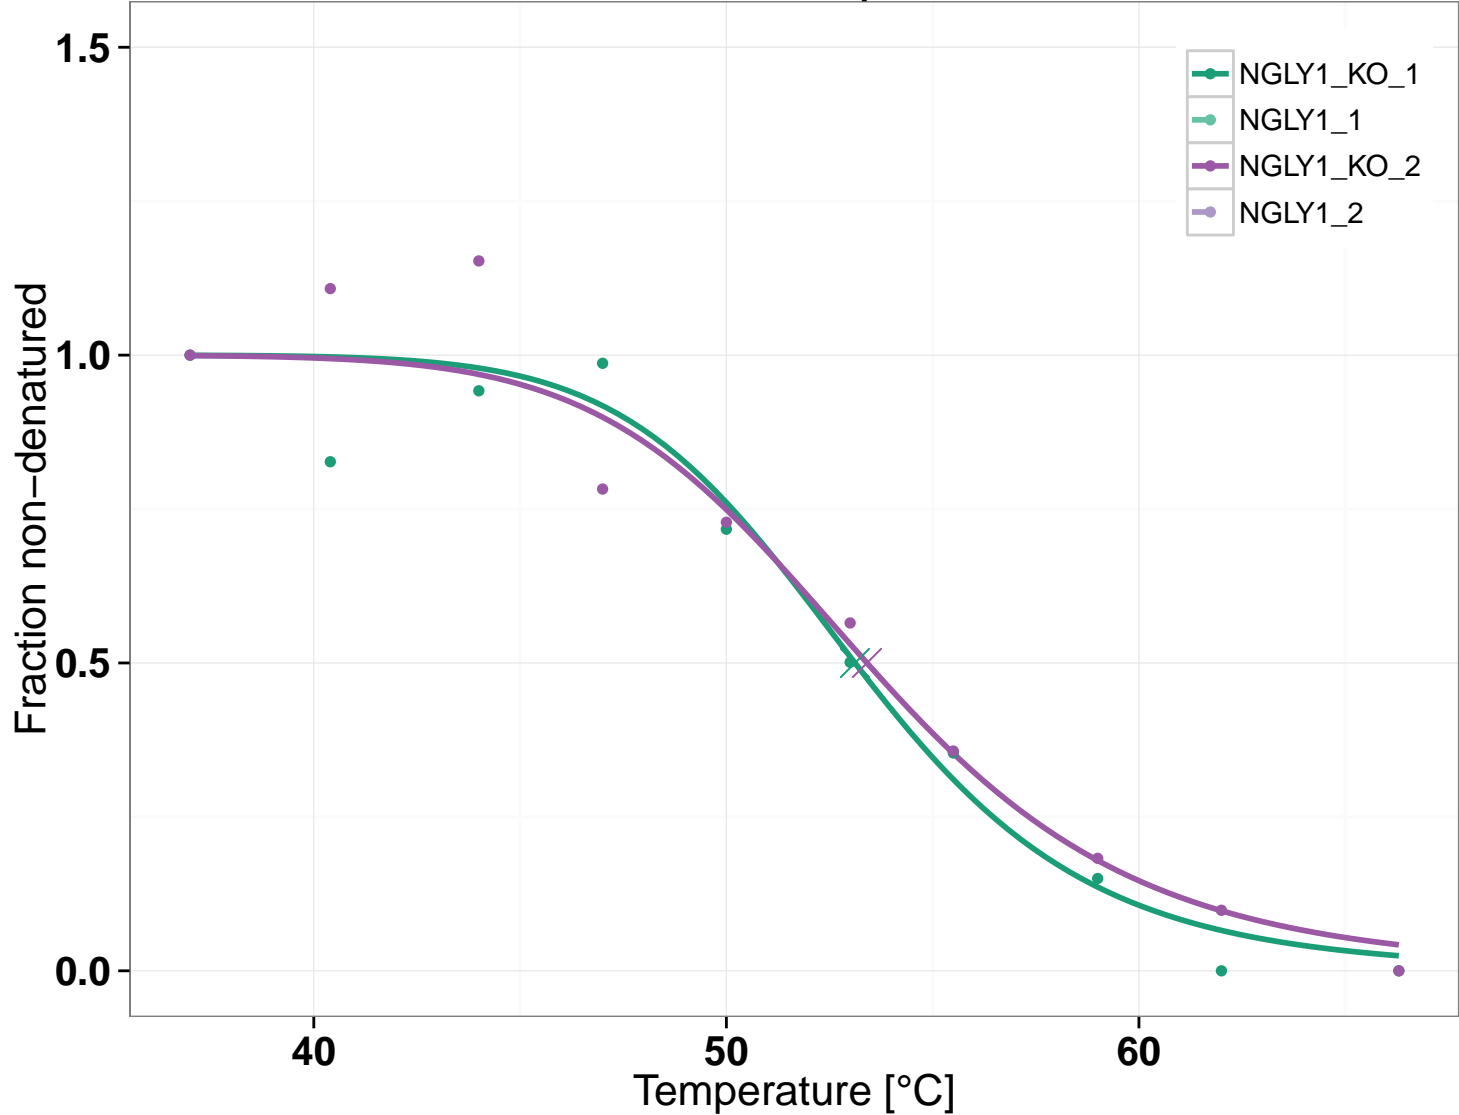

|            | meltPoint | slope  | plateau | R2   |
|------------|-----------|--------|---------|------|
| NGLY1_KO_1 | 53.12     | -0.088 | 0       | 0.97 |
| NGLY1_1    | -         | -      | -       | -    |
| NGLY1_KO_2 | 53.41     | -0.076 | 0       | 0.96 |
| NGLY1_2    | -         | -      | -       | -    |

Supplement: Supplementary file 5006 [file 1]

IPI00795857.1|RPP14

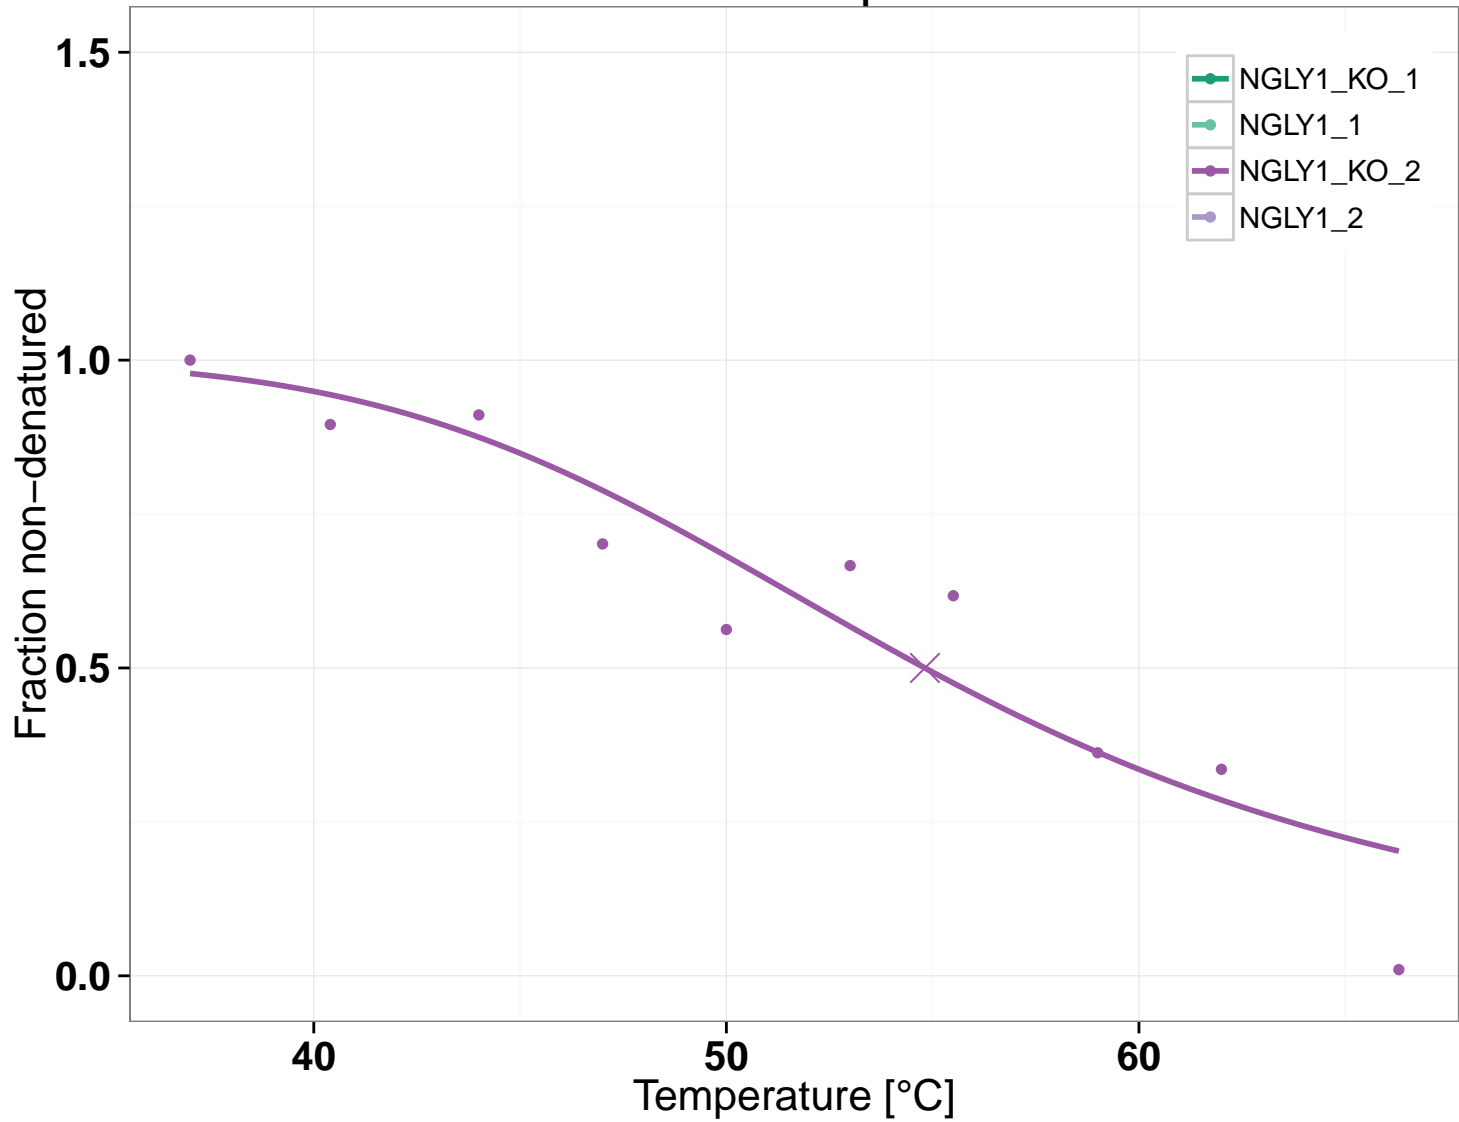

|            | meltPoint | slope  | plateau | R2   |
|------------|-----------|--------|---------|------|
| NGLY1_KO_1 | —         | —      | —       | —    |
| NGLY1_1    | —         | —      | —       | —    |
| NGLY1_KO_2 | 54.81     | -0.038 | 0       | 0.89 |
| NGLY1_2    | —         | —      | —       | —    |

Supplement: Supplementary file 5007 [file 1]

# IPI00299040.2|PKD2

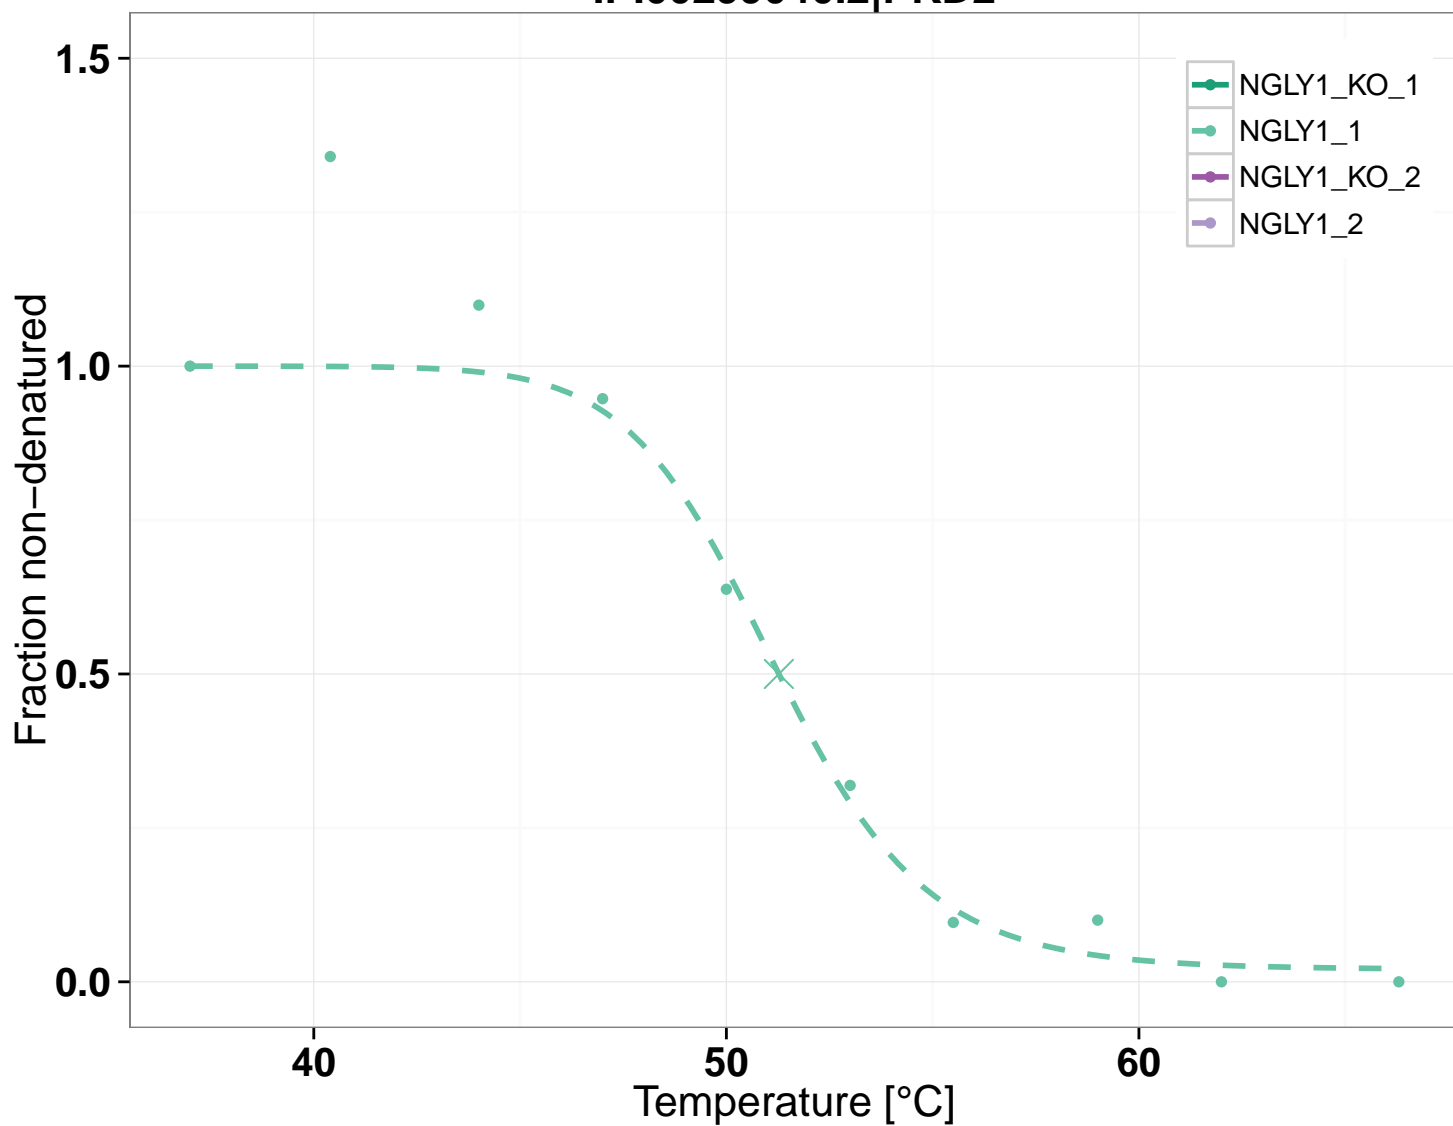

|            | meltPoint | slope | plateau | R2   |
|------------|-----------|-------|---------|------|
| NGLY1_KO_1 | —         | —     | —       | —    |
| NGLY1_1    | 51.27     | -0.14 | 0.02    | 0.94 |
| NGLY1_KO_2 | —         | —     | —       | —    |
| NGLY1_2    | —         | —     | —       | —    |

Supplement: Supplementary file 5008 [file 1]

# IPI00375731.1|RBM10

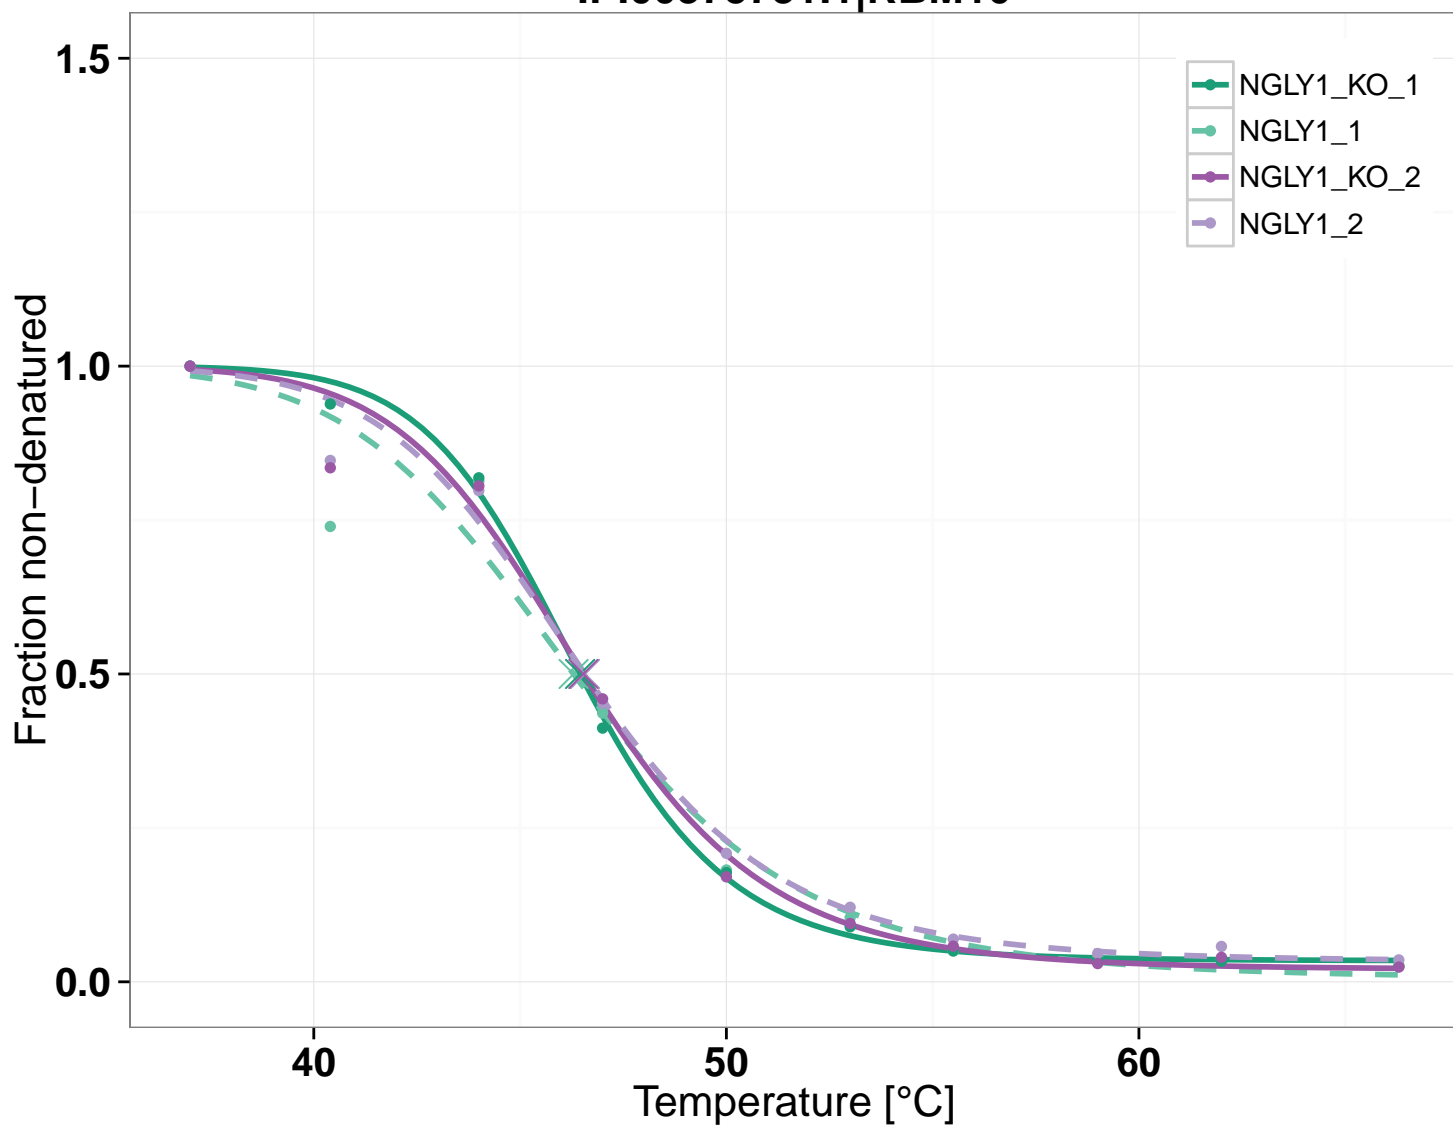

|            | meltPoint | slope  | plateau | R2   |
|------------|-----------|--------|---------|------|
| NGLY1_KO_1 | 46.46     | -0.13  | 0.03    | 1    |
| NGLY1_1    | 46.3      | -0.091 | 0       | 0.96 |
| NGLY1_KO_2 | 46.53     | -0.11  | 0.02    | 0.99 |
| NGLY1_2    | 46.57     | -0.1   | 0.03    | 0.99 |

Supplement: Supplementary file 5009 [file 1]

IPI00030384.4|FAM175A

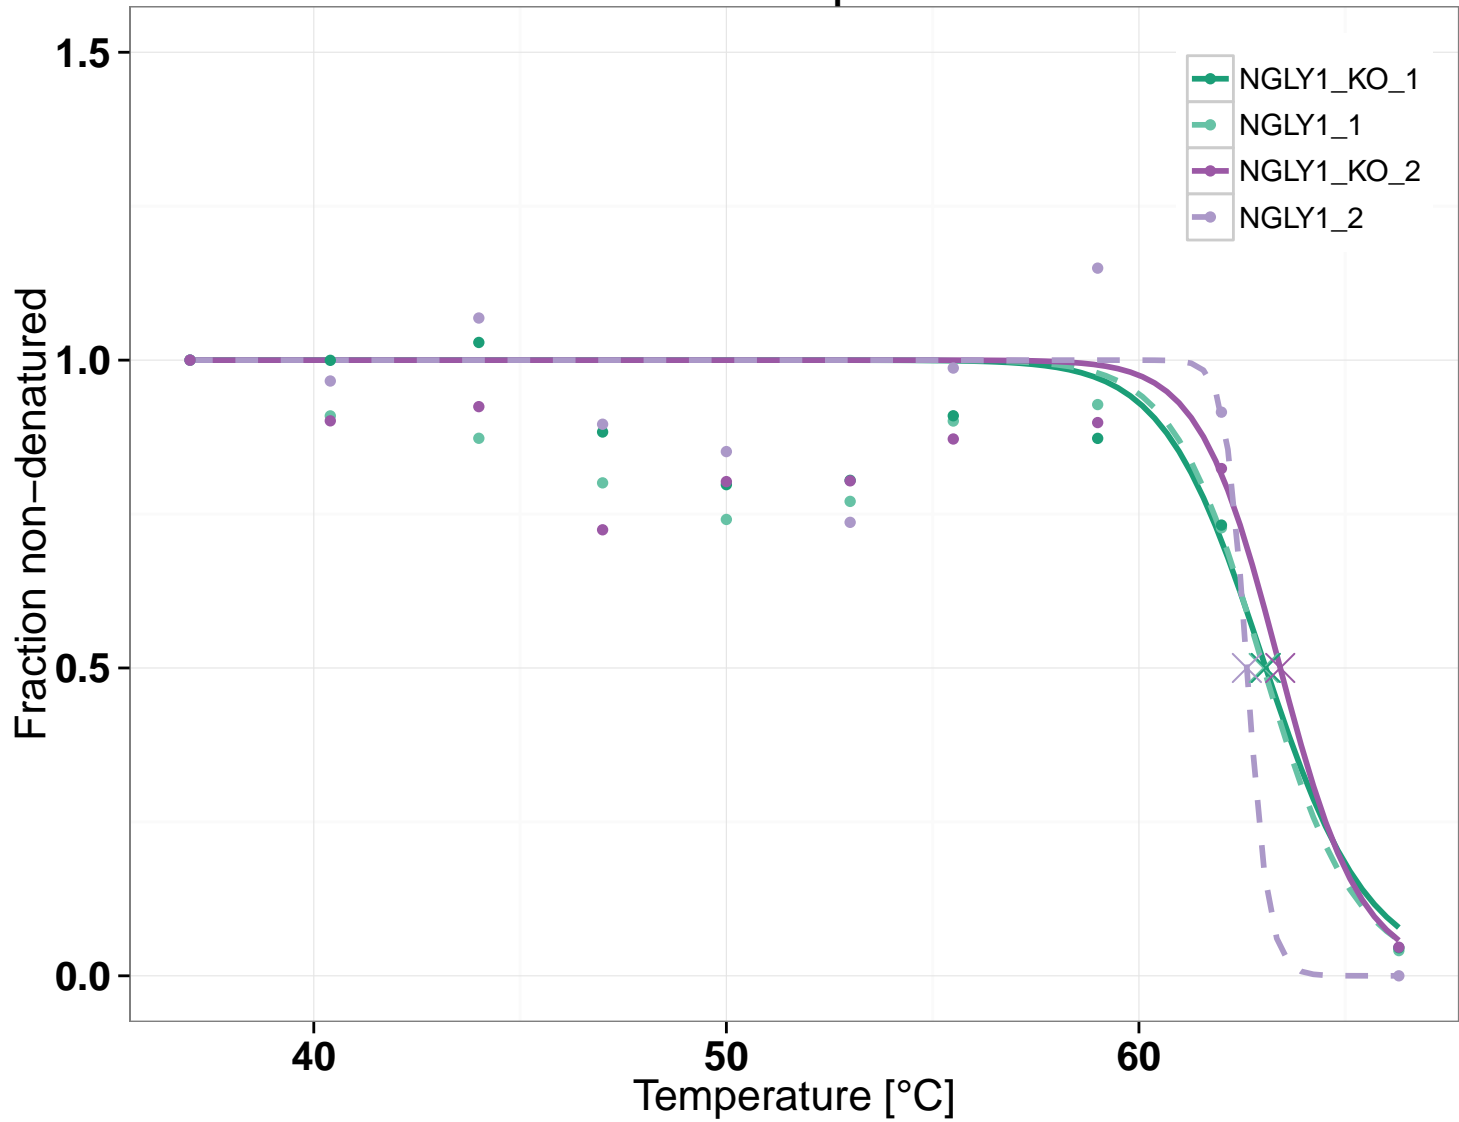

|            | meltPoint | slope | plateau | R2   |
|------------|-----------|-------|---------|------|
| NGLY1_KO_1 | 63.08     | -0.2  | 0       | 0.85 |
| NGLY1_1    | 63.02     | -0.22 | 0       | 0.7  |
| NGLY1_KO_2 | 63.43     | -0.25 | 0       | 0.7  |
| NGLY1_2    | 62.62     | -0.96 | 0       | 0.86 |

Supplement: Supplementary file 5010 [file 1]

# IPI00848334.1|KIF2A

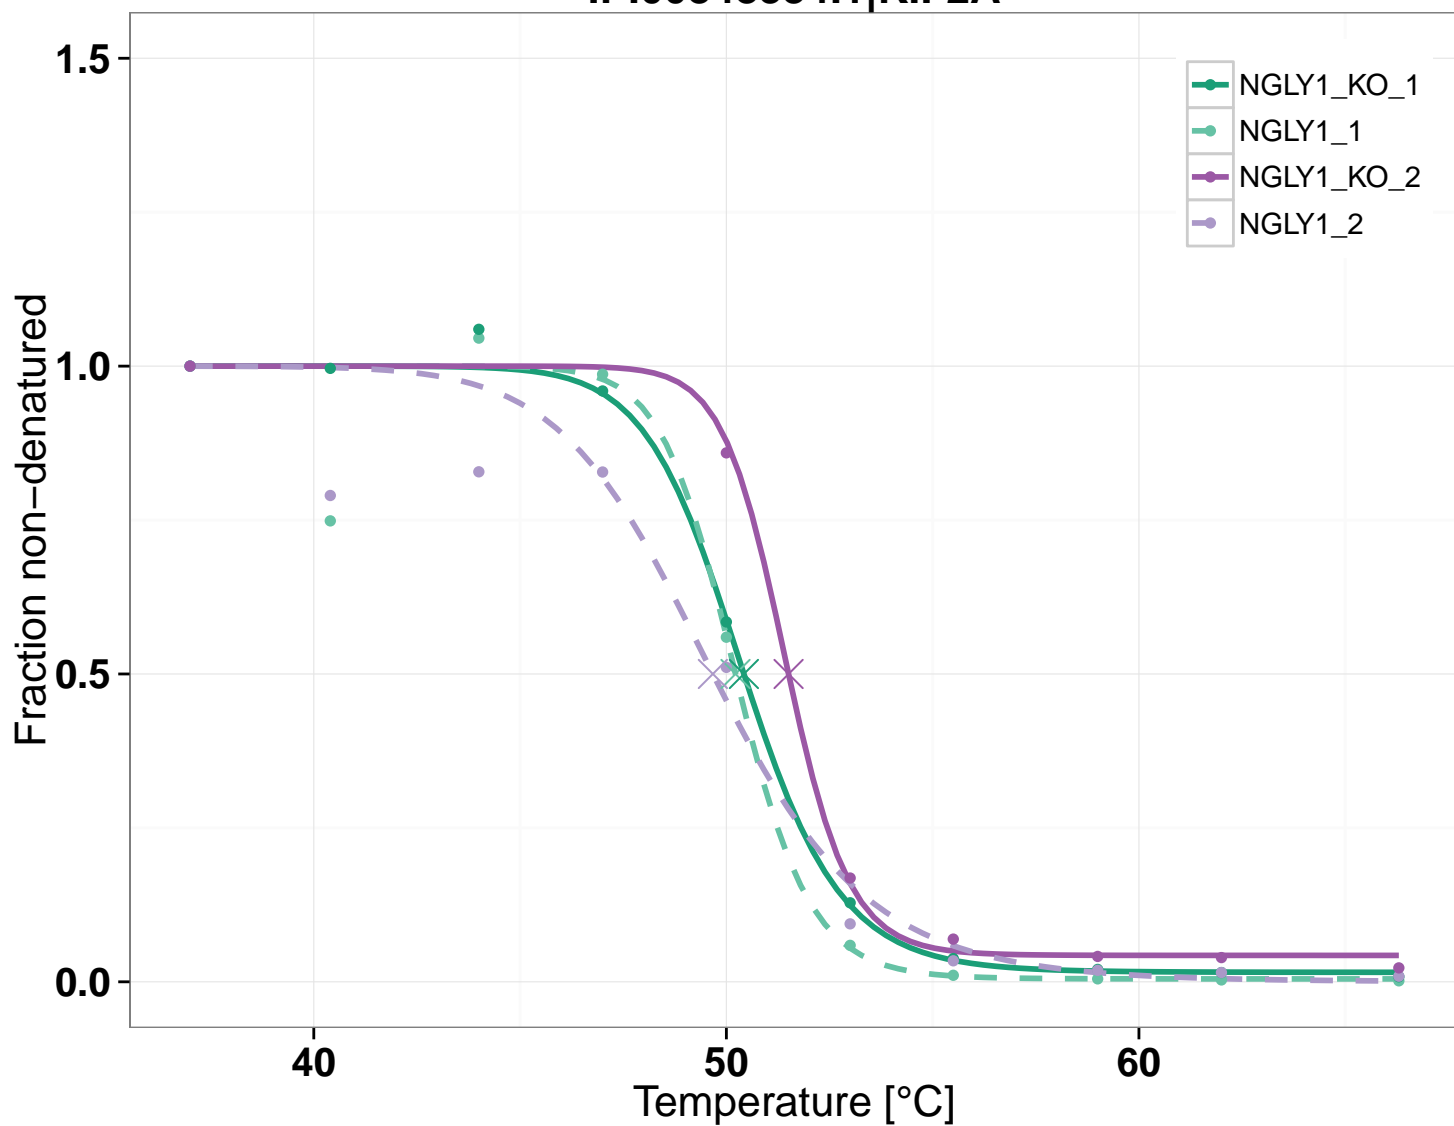

|            | meltPoint | slope | plateau | R2   |
|------------|-----------|-------|---------|------|
| NGLY1_KO_1 | 50.42     | -0.21 | 0.02    | 1    |
| NGLY1_1    | 50.22     | -0.28 | 0       | 0.97 |
| NGLY1_KO_2 | 51.51     | -0.31 | 0.04    | 0.77 |
| NGLY1_2    | 49.67     | -0.13 | 0       | 0.95 |

Supplement: Supplementary file 5011 [file 1]

# IPI00018600.1|OPA3

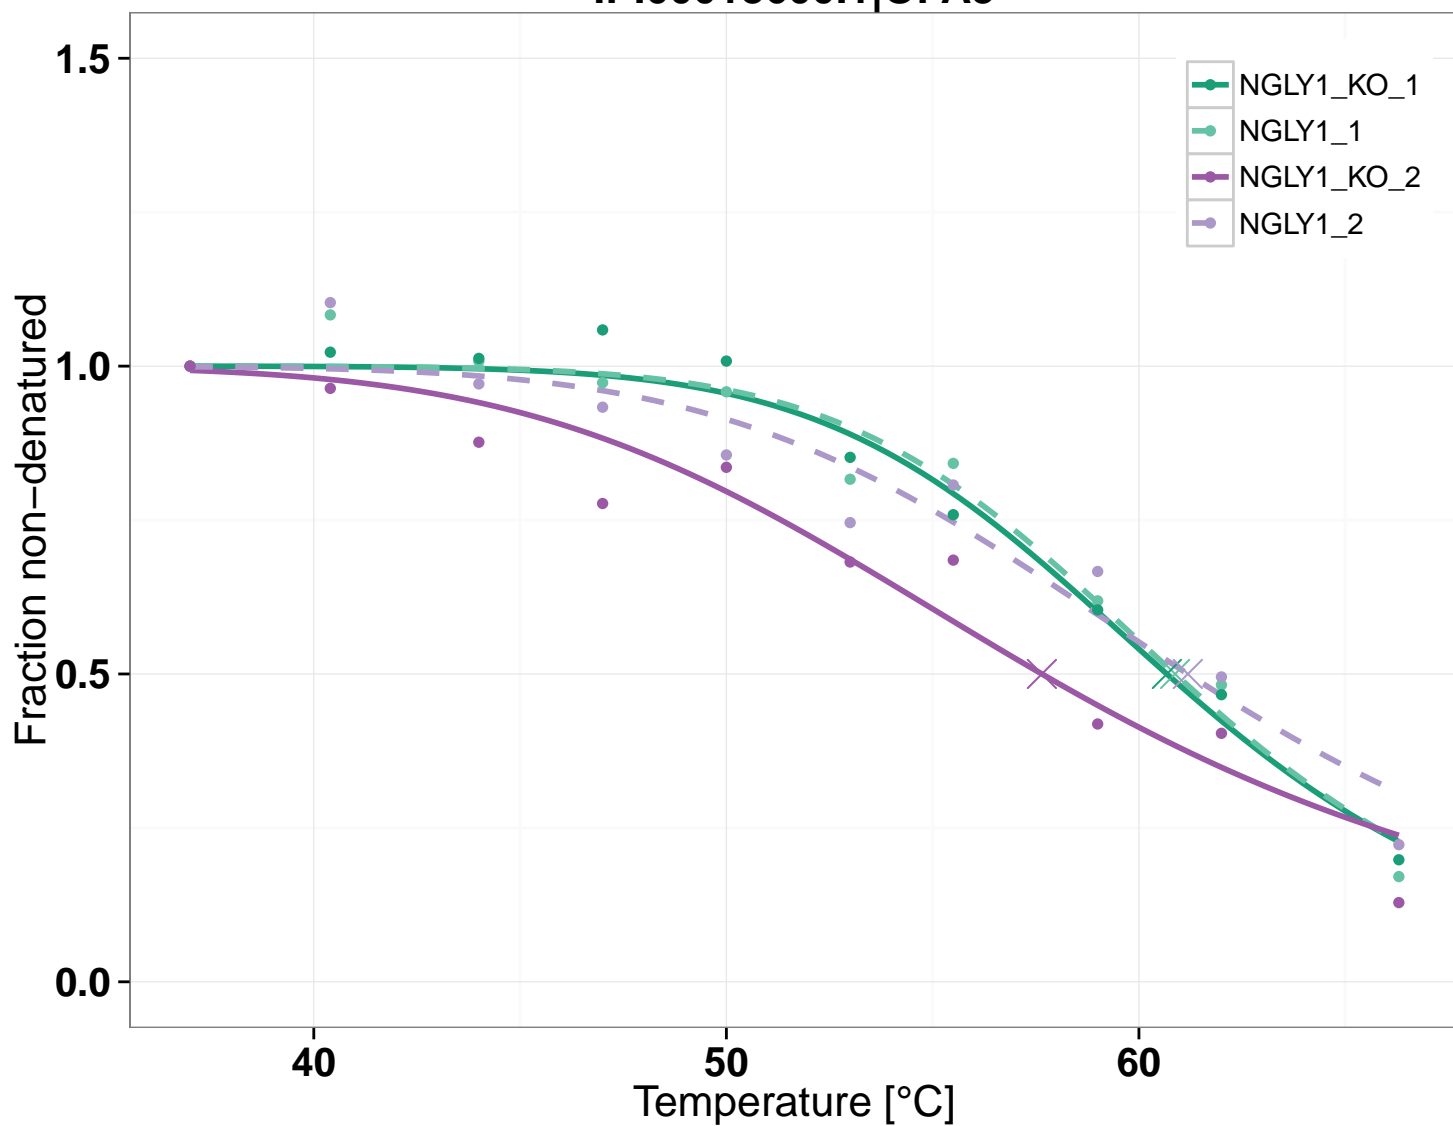

|            | meltPoint | slope  | plateau | R2   |
|------------|-----------|--------|---------|------|
| NGLY1_KO_1 | 60.68     | -0.06  | 0       | 0.98 |
| NGLY1_1    | 60.88     | -0.062 | 0       | 0.97 |
| NGLY1_KO_2 | 57.65     | -0.041 | 0       | 0.94 |
| NGLY1_2    | 61.19     | -0.045 | 0       | 0.94 |

Supplement: Supplementary file 5012 [file 1]

IPI00033016.2|MYC

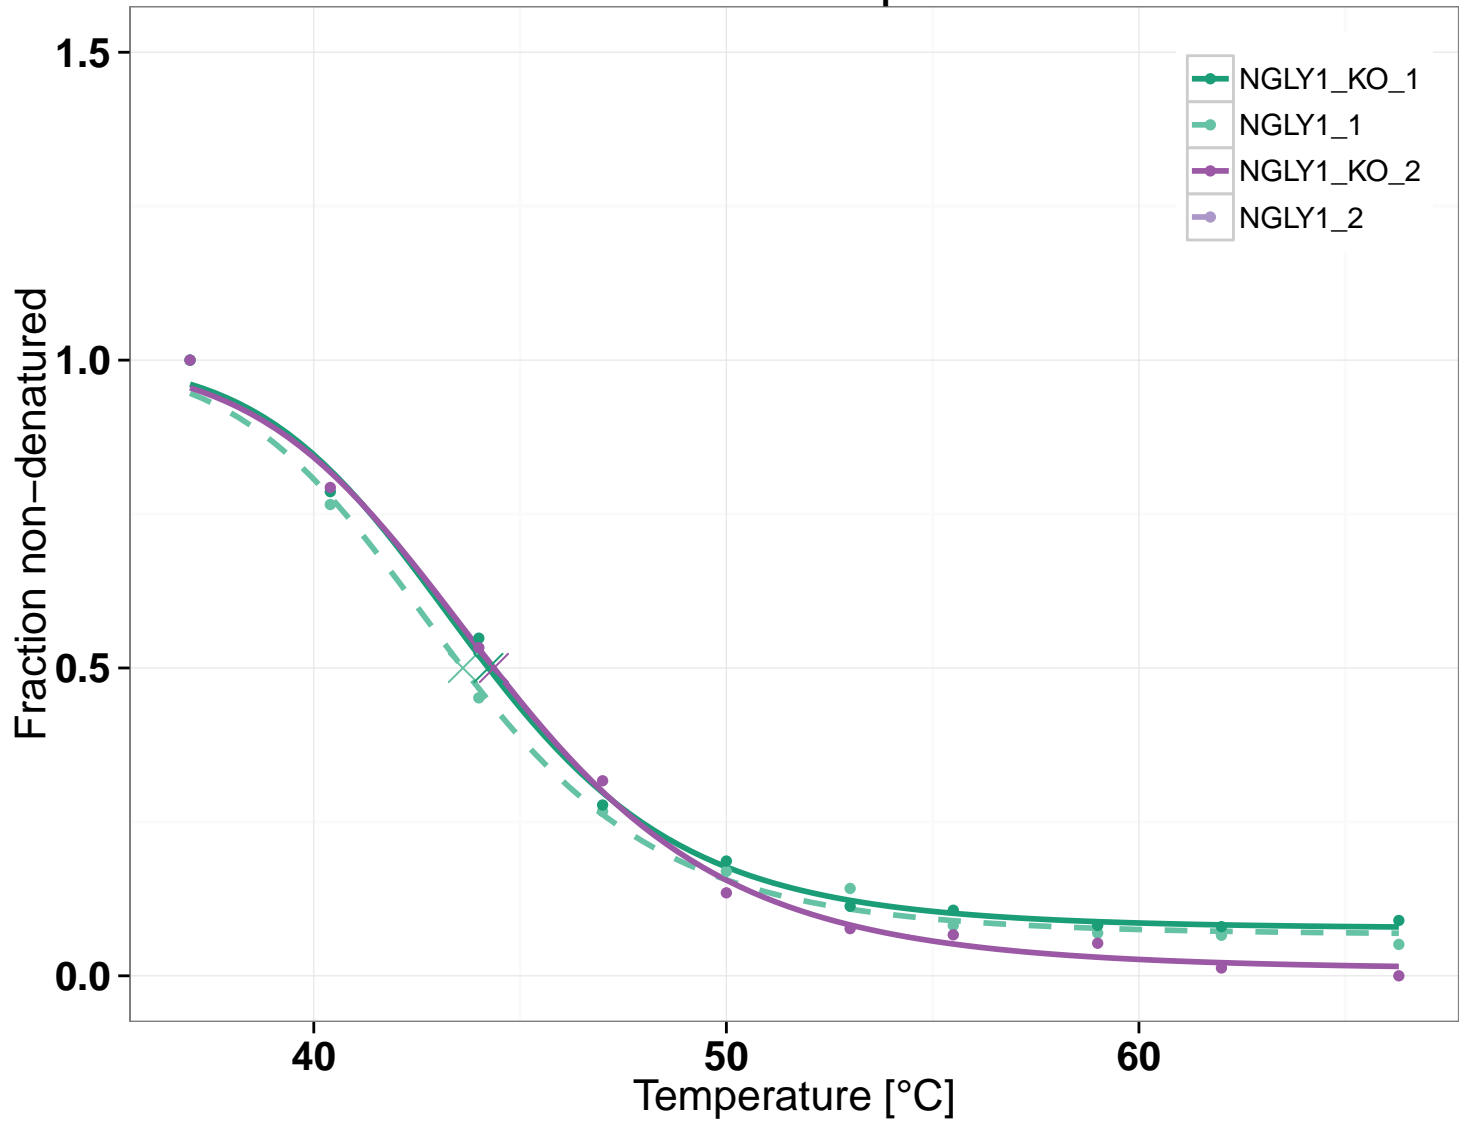

|            | meltPoint | slope  | plateau | R2   |
|------------|-----------|--------|---------|------|
| NGLY1_KO_1 | 44.23     | -0.091 | 0.08    | 1    |
| NGLY1_1    | 43.61     | -0.091 | 0.07    | 0.99 |
| NGLY1_KO_2 | 44.37     | -0.088 | 0.01    | 1    |
| NGLY1_2    | -         | -      | -       | -    |

Supplement: Supplementary file 5013 [file 1]

IPI00553189.2|SLC35A3

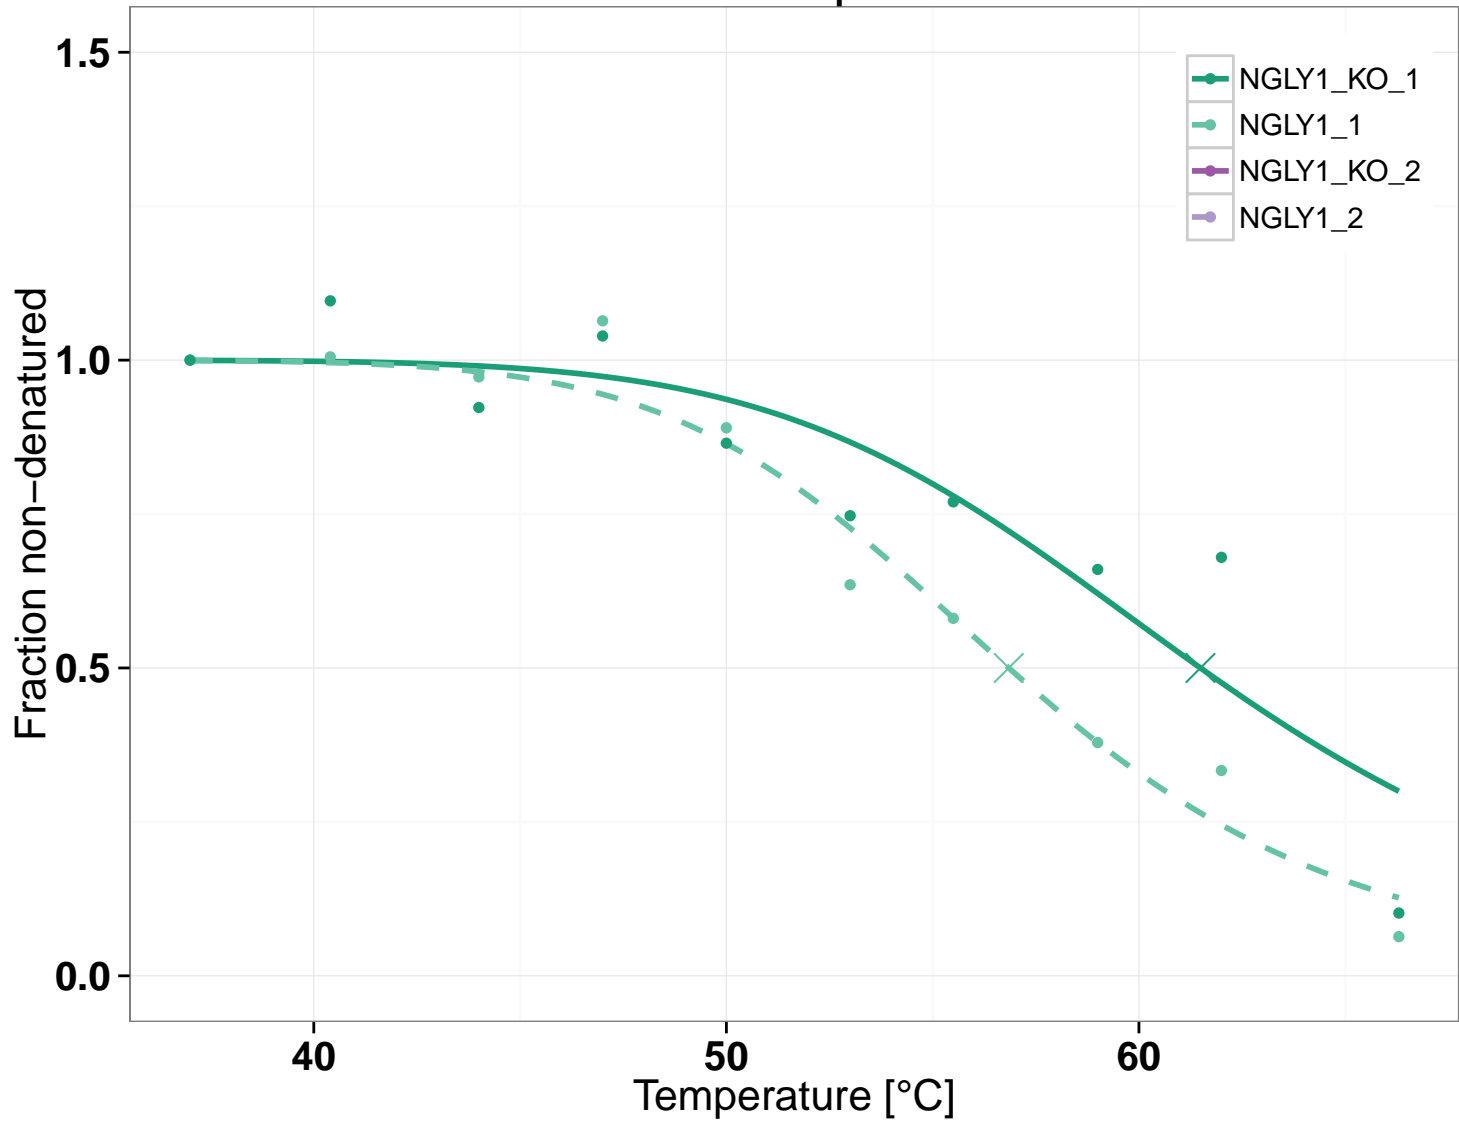

|            | meltPoint | slope  | plateau | R2   |
|------------|-----------|--------|---------|------|
| NGLY1_KO_1 | 61.49     | -0.049 | 0       | 0.83 |
| NGLY1_1    | 56.85     | -0.061 | 0       | 0.97 |
| NGLY1_KO_2 | -         | -      | -       | -    |
| NGLY1_2    | -         | -      | -       | -    |

Supplement: Supplementary file 5014 [file 1]

IPI00023736.2|CORO2A

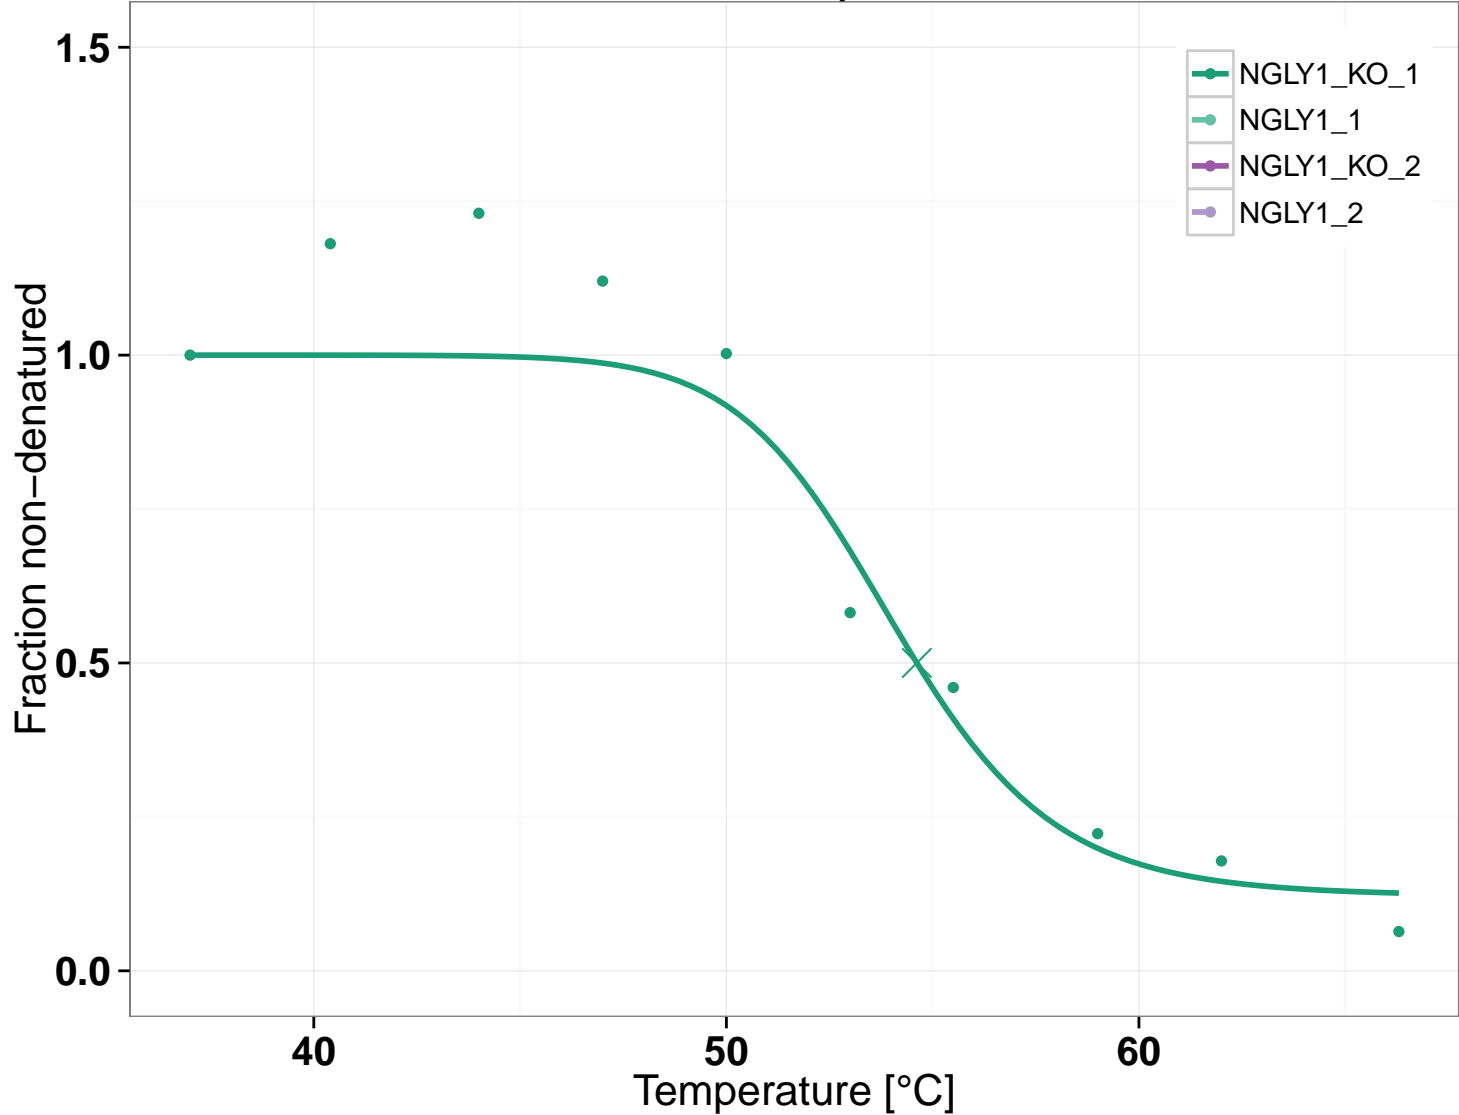

|            | meltPoint | slope | plateau | R2   |
|------------|-----------|-------|---------|------|
| NGLY1_KO_1 | 54.62     | -0.11 | 0.12    | 0.93 |
| NGLY1_1    | -         | -     | -       | -    |
| NGLY1_KO_2 | -         | -     | -       | -    |
| NGLY1_2    | -         | -     | -       | -    |

Supplement: Supplementary file 5015 [file 1]

IPI00219841.6|LIG1

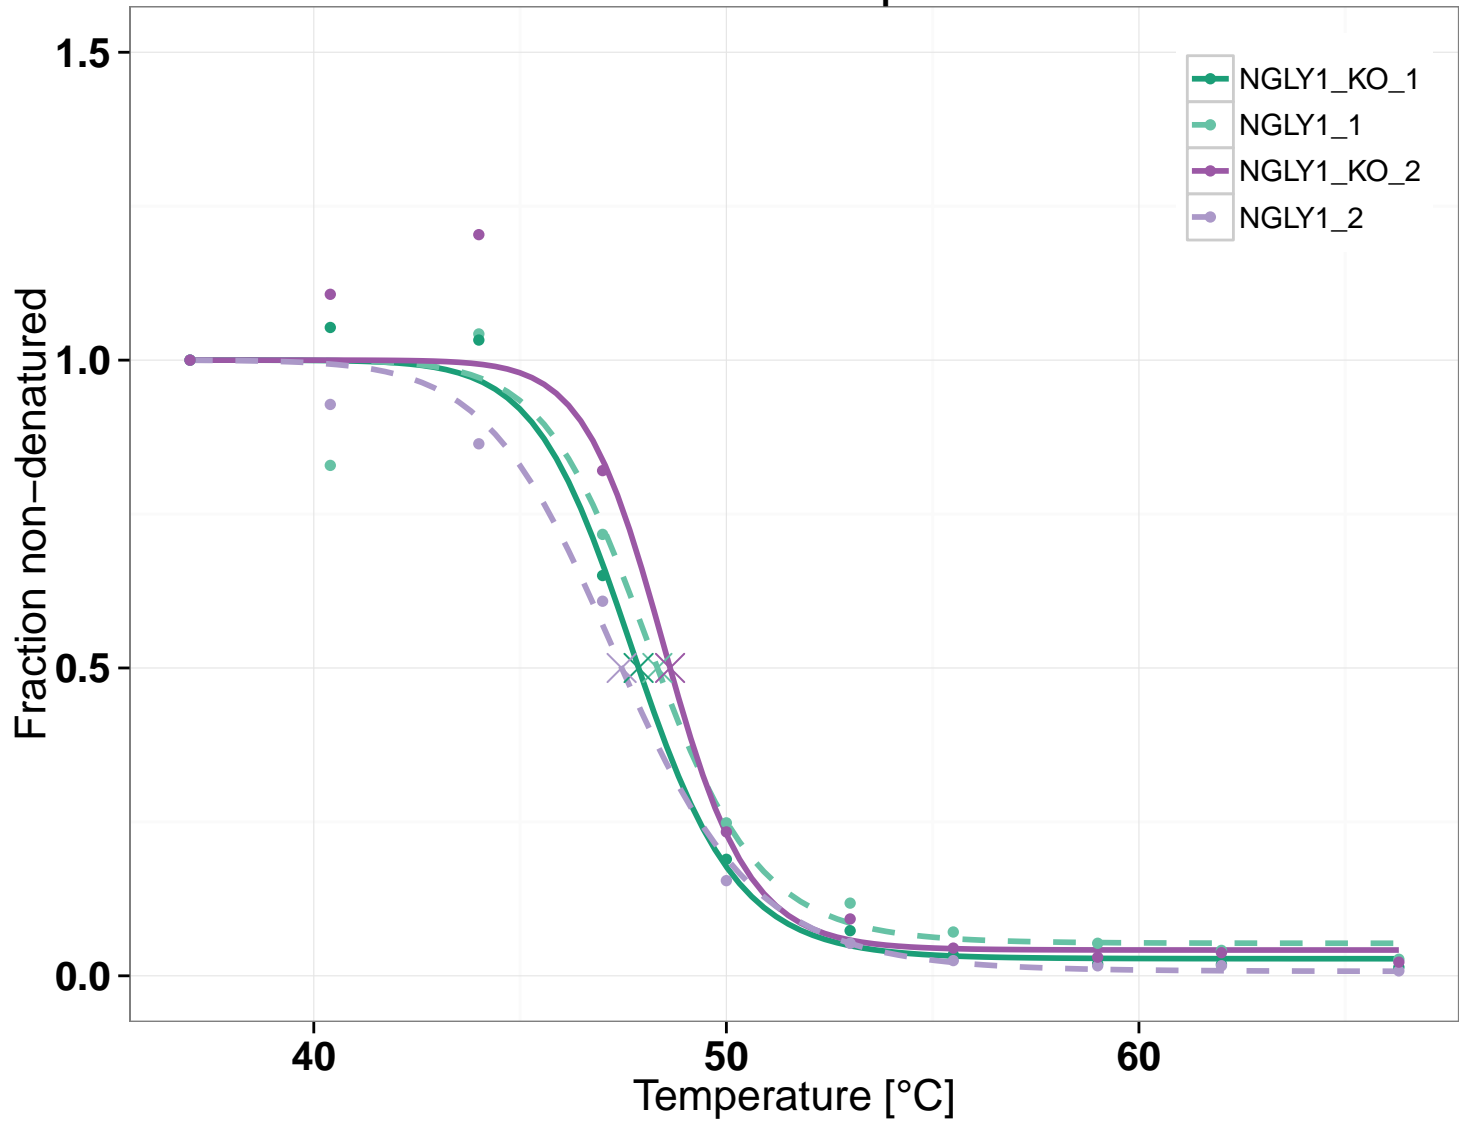

|            | meltPoint | slope | plateau | R2   |
|------------|-----------|-------|---------|------|
| NGLY1_KO_1 | 47.87     | -0.2  | 0.03    | 1    |
| NGLY1_1    | 48.33     | -0.18 | 0.05    | 0.98 |
| NGLY1_KO_2 | 48.64     | -0.24 | 0.04    | 0.97 |
| NGLY1_2    | 47.46     | -0.15 | 0.01    | 0.99 |

Supplement: Supplementary file 5016 [file 1]

IPI00903282.1|16 KDA PROTEIN.

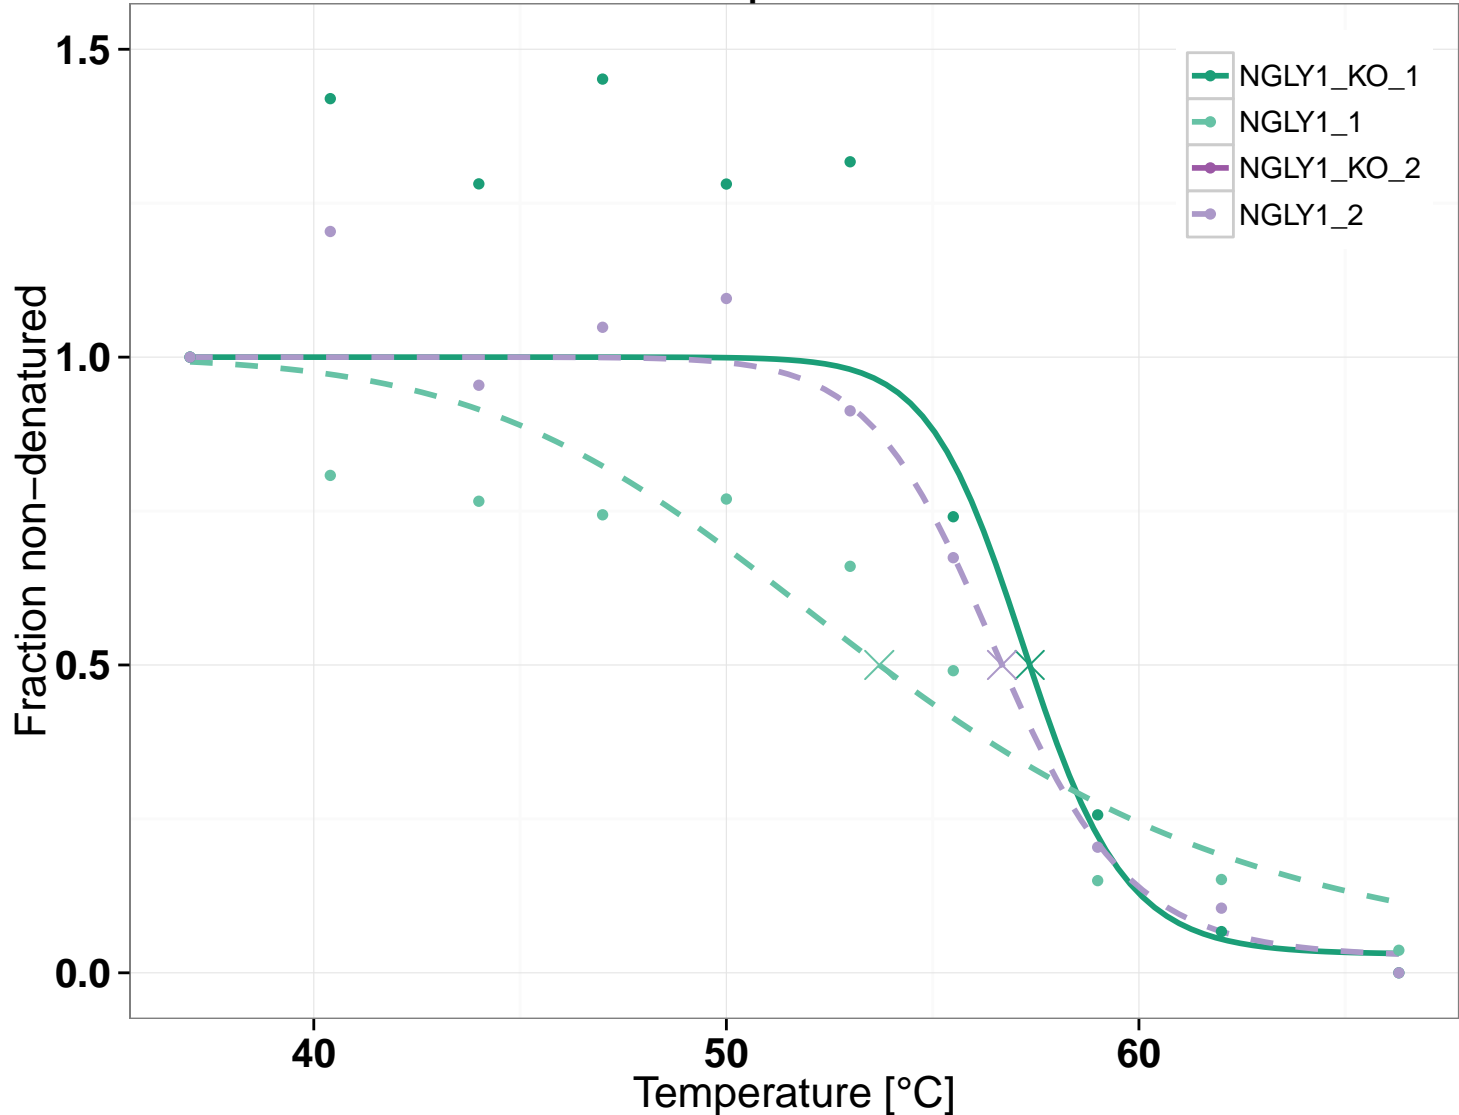

|            | meltPoint | slope  | plateau | R2   |
|------------|-----------|--------|---------|------|
| NGLY1_KO_1 | 57.35     | -0.2   | 0.03    | 0.78 |
| NGLY1_1    | 53.71     | -0.052 | 0       | 0.89 |
| NGLY1_KO_2 | -         | -      | -       | -    |
| NGLY1_2    | 56.68     | -0.15  | 0.03    | 0.97 |

Supplement: Supplementary file 5017 [file 1]

IPI00024539.1|PRKCE

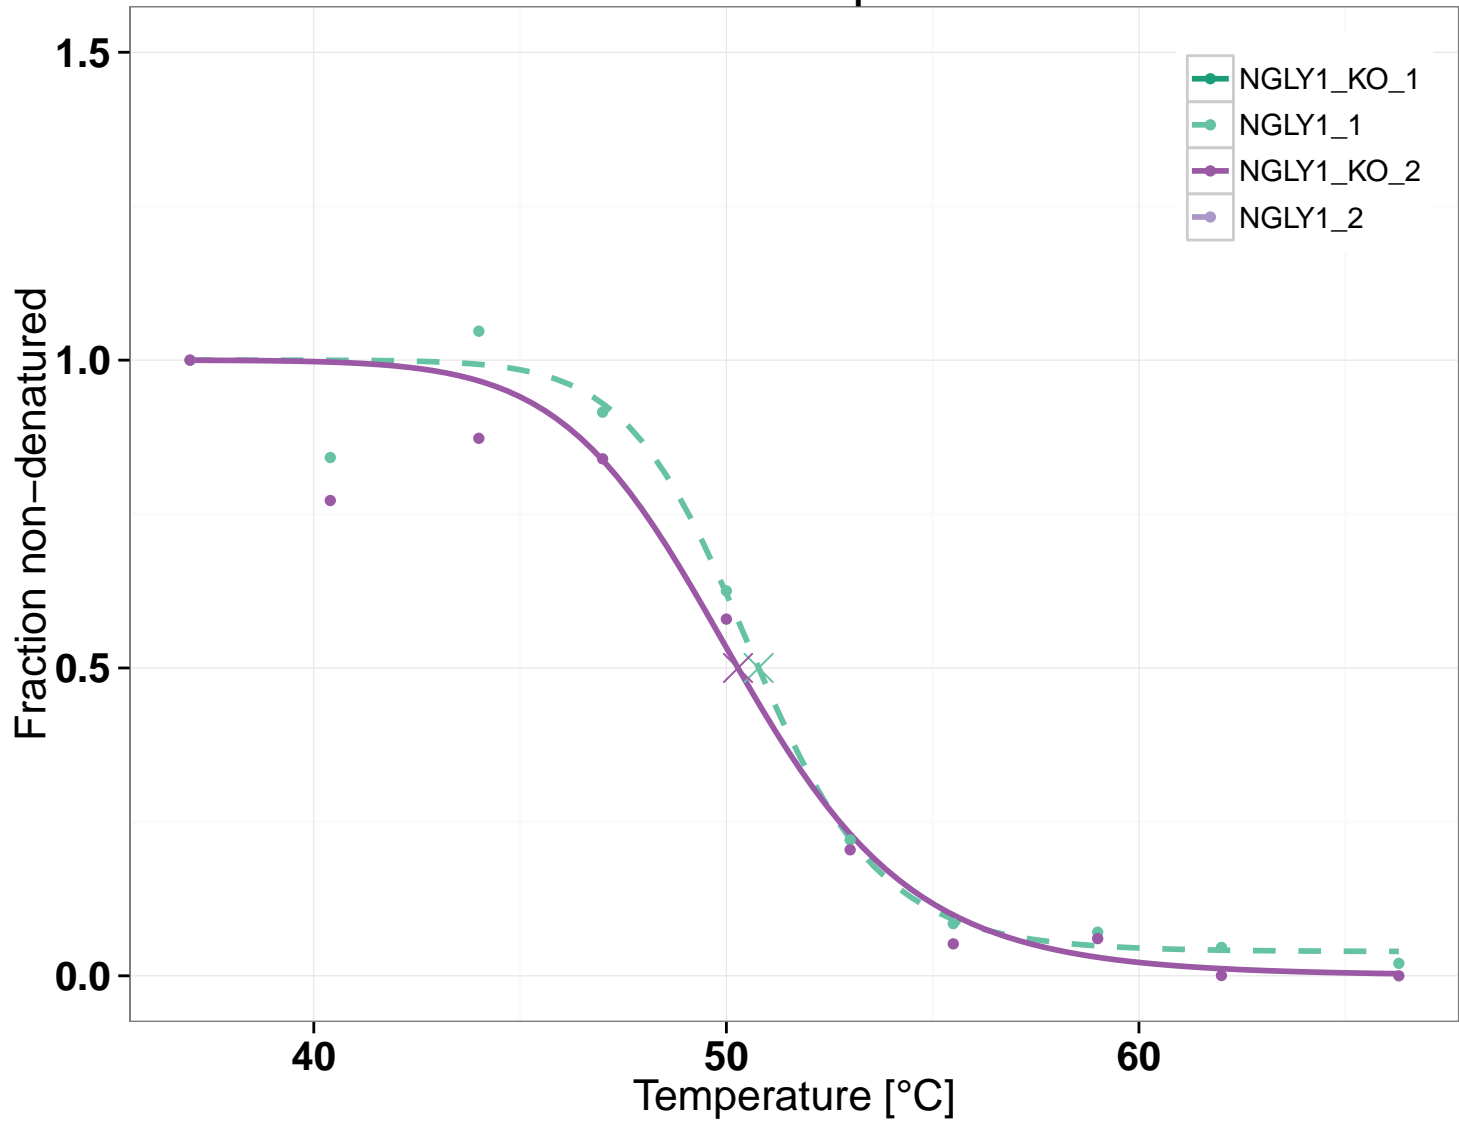

|            | meltPoint | slope | plateau | R2   |
|------------|-----------|-------|---------|------|
| NGLY1_KO_1 | —         | —     | —       | —    |
| NGLY1_1    | 50.78     | -0.16 | 0.04    | 0.98 |
| NGLY1_KO_2 | 50.28     | -0.12 | 0       | 0.96 |
| NGLY1_2    | —         | —     | —       | —    |

Supplement: Supplementary file 5018 [file 1]

IPI00028376.1|TIMM8A

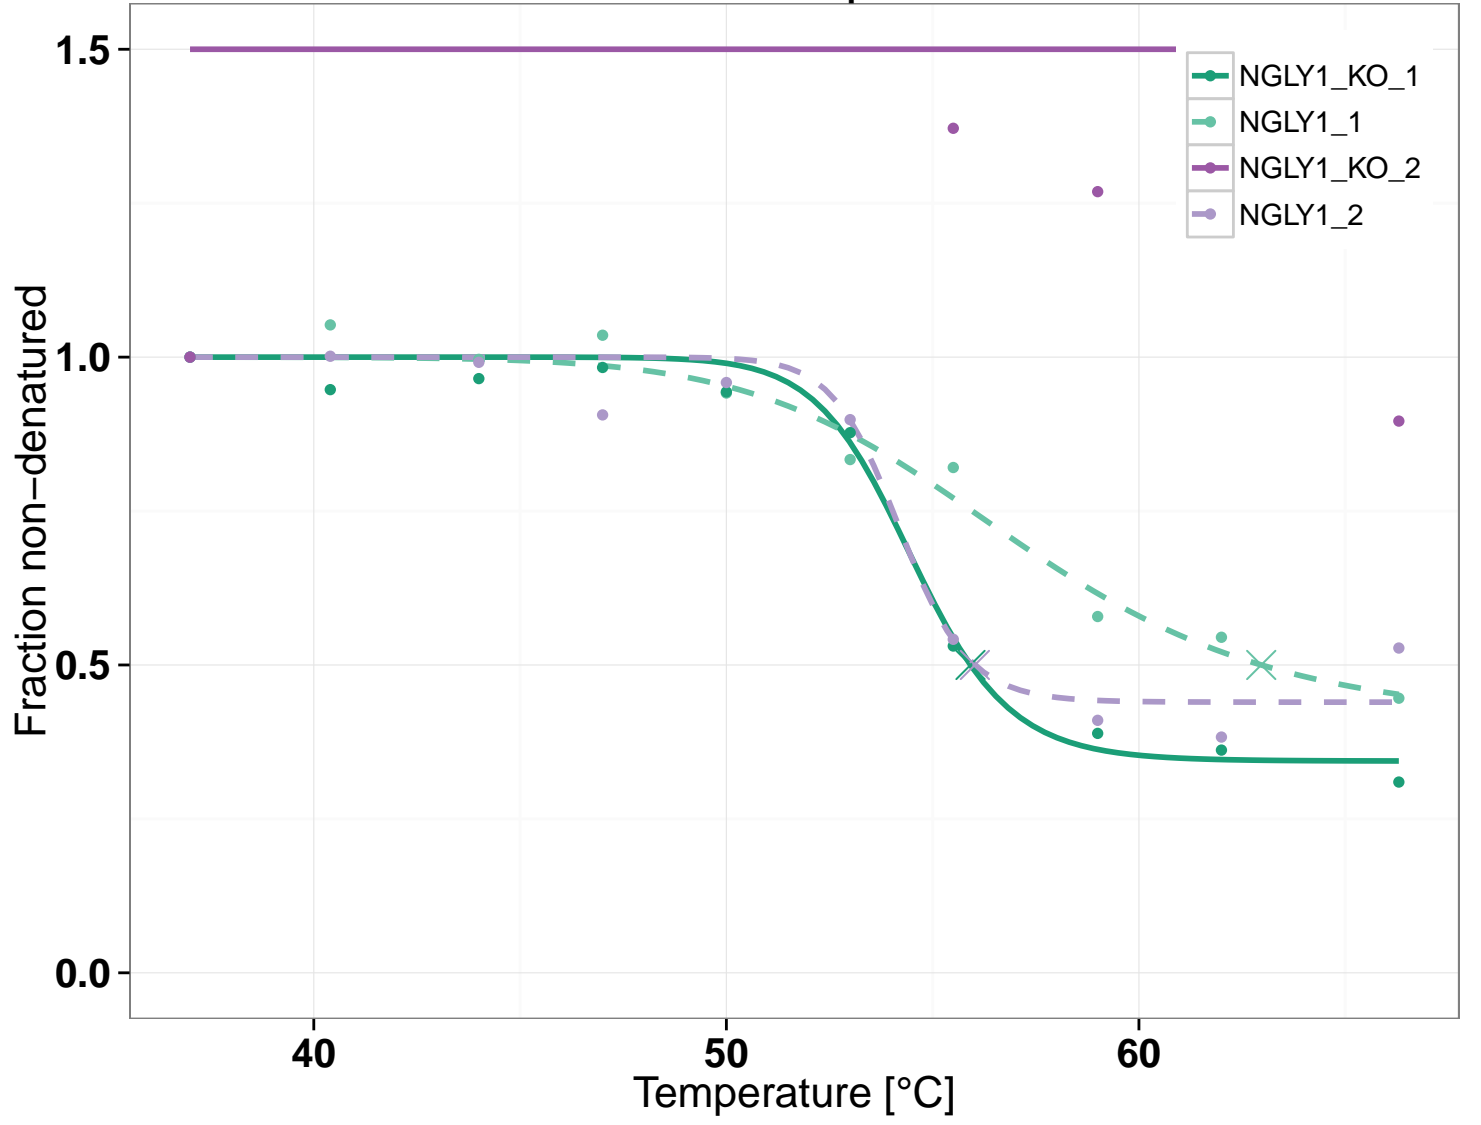

|            | meltPoint | slope  | plateau | R2    |
|------------|-----------|--------|---------|-------|
| NGLY1_KO_1 | 55.92     | -0.14  | 0.34    | 0.99  |
| NGLY1_1    | 62.96     | -0.046 | 0.41    | 0.97  |
| NGLY1_KO_2 | -         | -      | 1.5     | -0.16 |
| NGLY1_2    | 56.02     | -0.17  | 0.44    | 0.96  |

Supplement: Supplementary file 5019 [file 1]

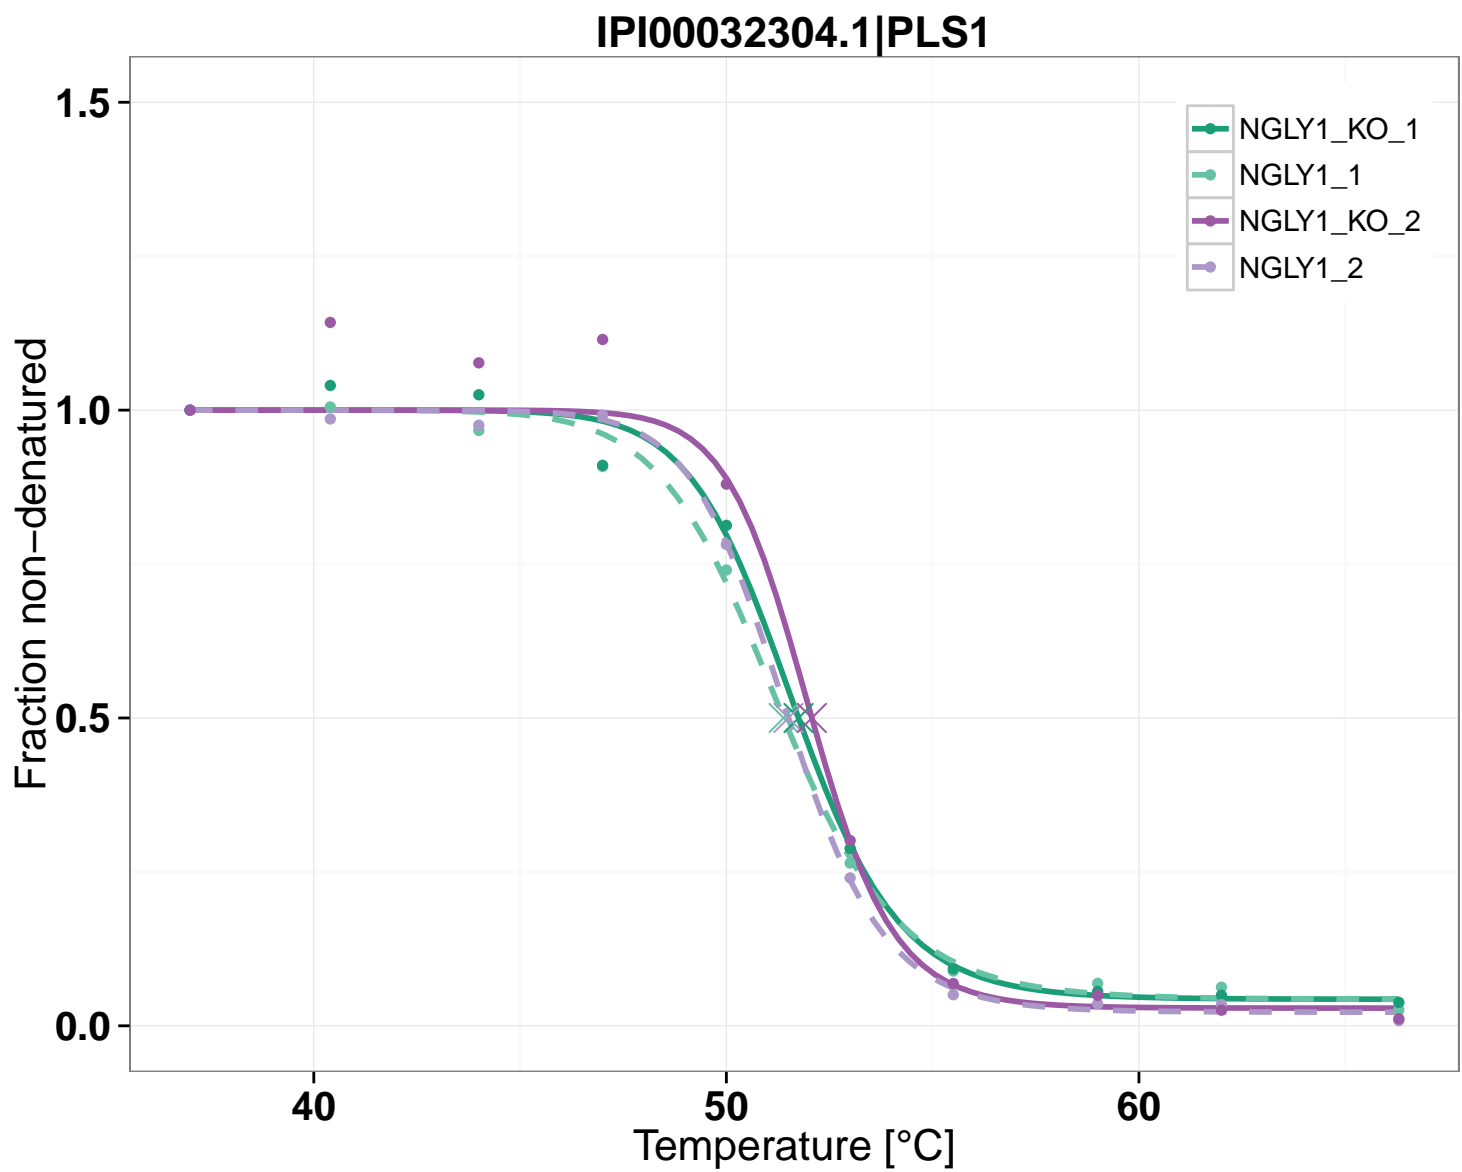

|            | meltPoint | slope | plateau | R2   |
|------------|-----------|-------|---------|------|
| NGLY1_KO_1 | 51.75     | -0.19 | 0.04    | 1    |
| NGLY1_1    | 51.39     | -0.16 | 0.04    | 1    |
| NGLY1_KO_2 | 52.07     | -0.24 | 0.03    | 0.98 |
| NGLY1_2    | 51.5      | -0.21 | 0.02    | 1    |

Supplement: Supplementary file 5020 [file 1]

IPI00887891.1|LOC100131368

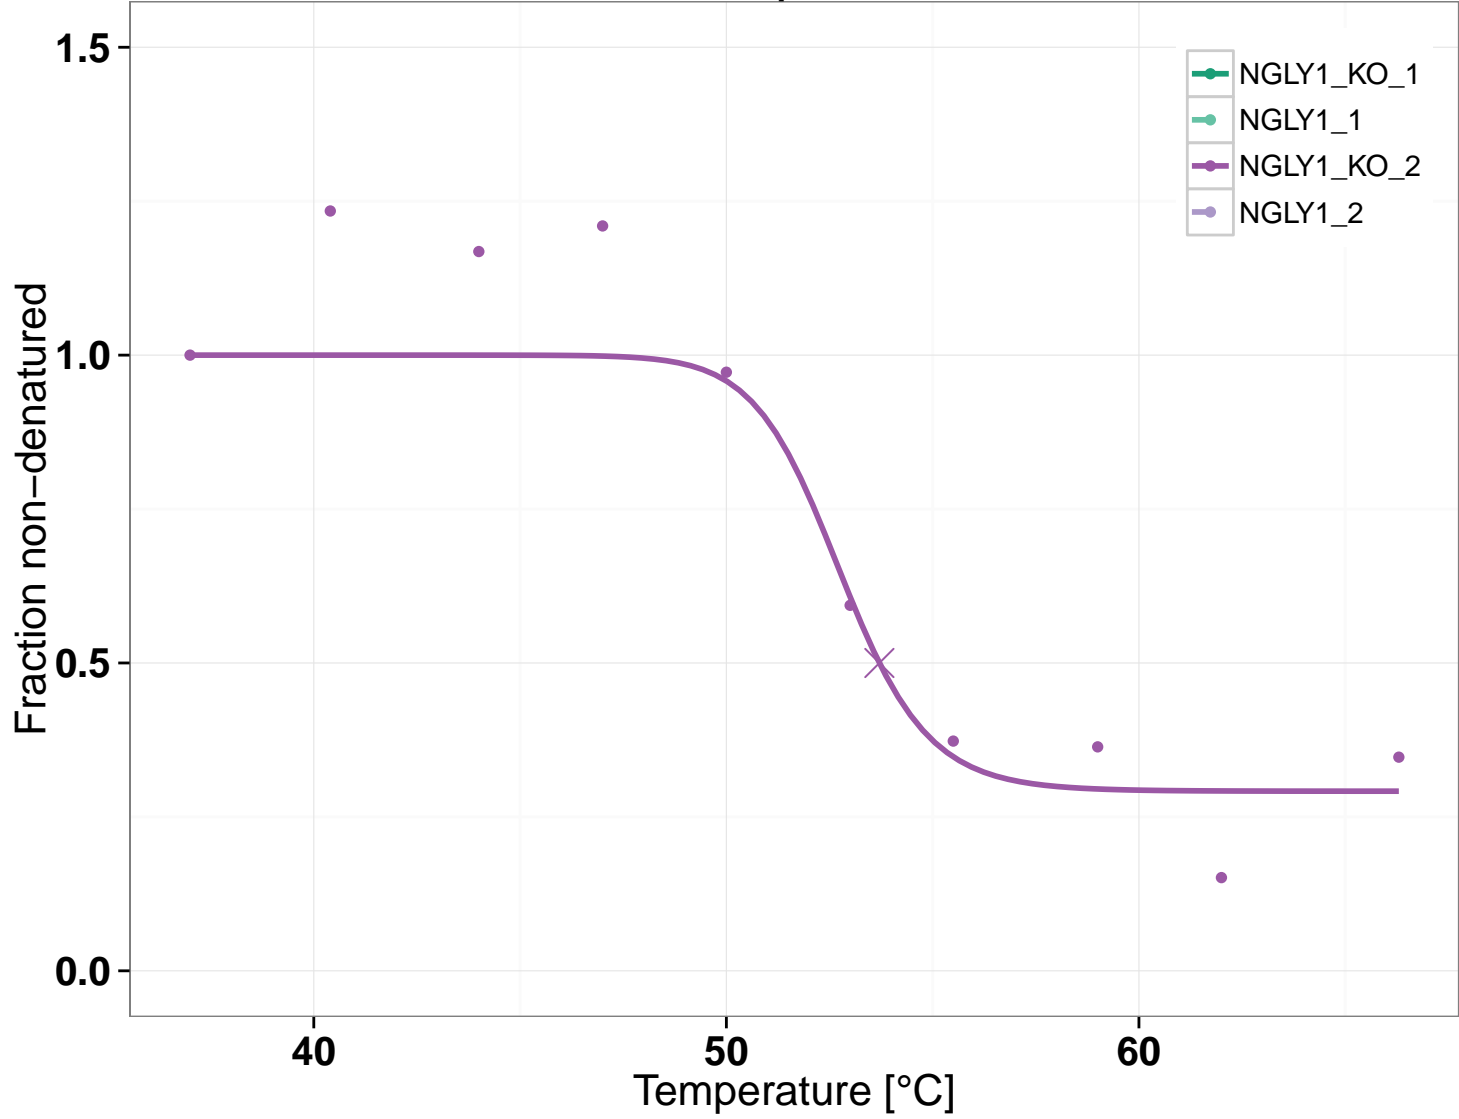

|            | meltPoint | slope | plateau | R2  |
|------------|-----------|-------|---------|-----|
| NGLY1_KO_1 | —         | —     | —       | —   |
| NGLY1_1    | —         | —     | —       | —   |
| NGLY1_KO_2 | 53.71     | -0.17 | 0.29    | 0.9 |
| NGLY1_2    | —         | —     | —       | —   |

Supplement: Supplementary file 5021 [file 1]

IPI00888355.1|LOC389217

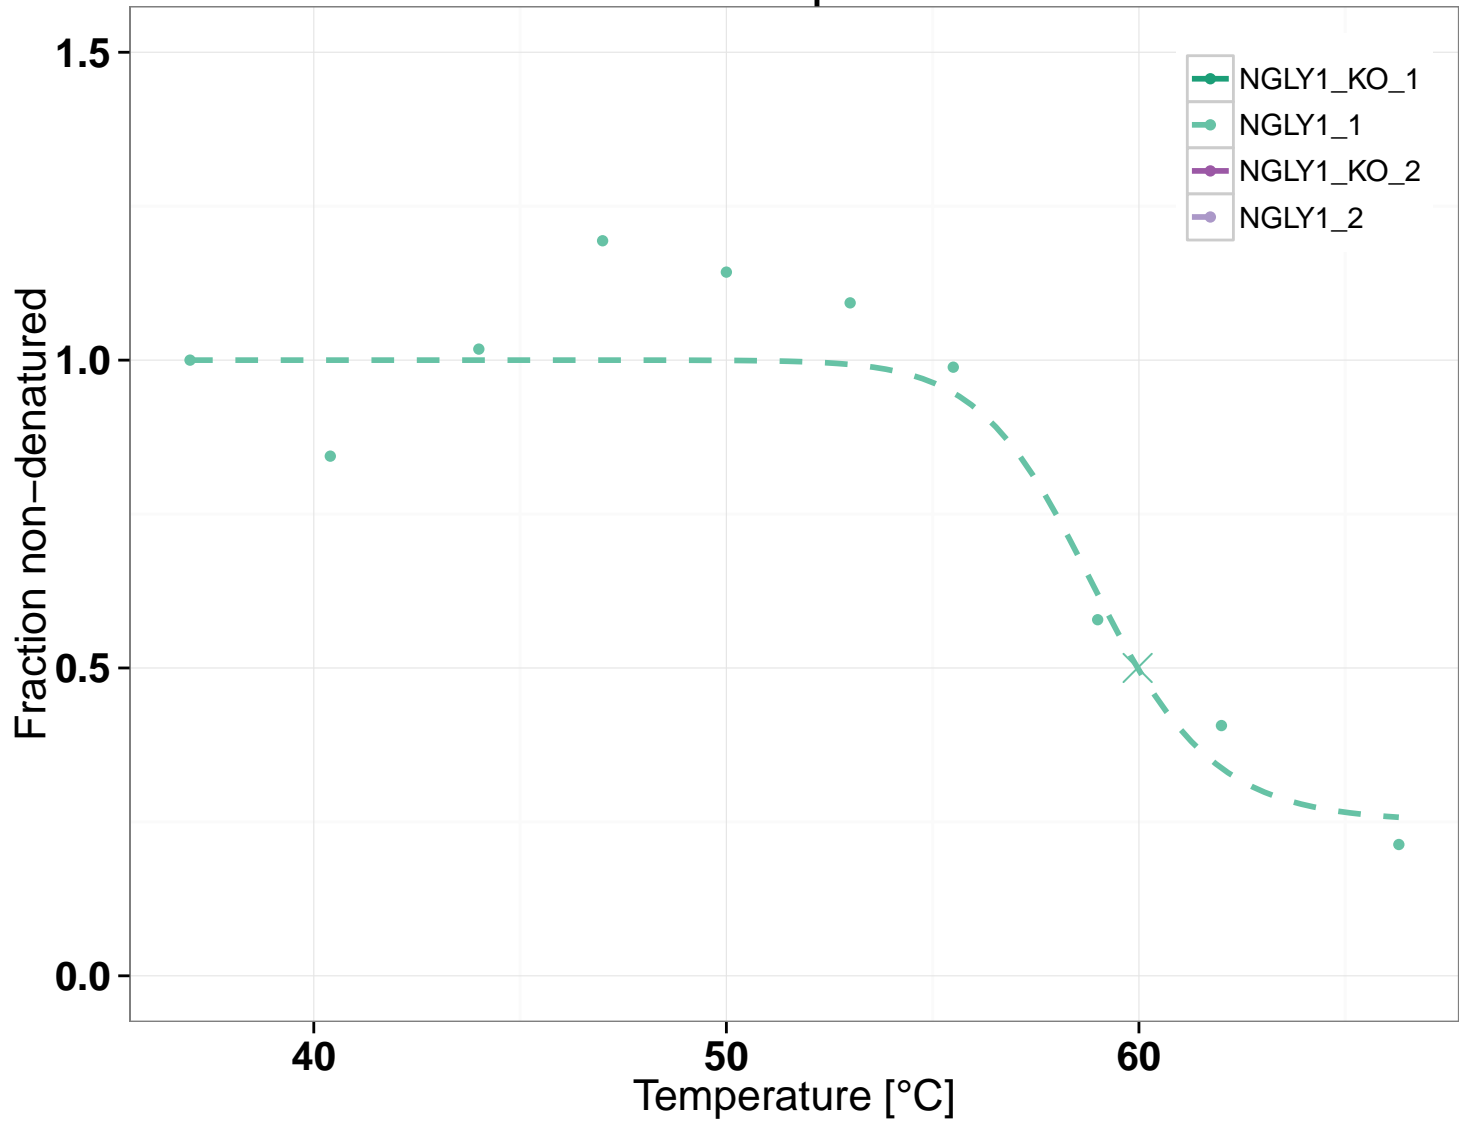

|            | meltPoint | slope | plateau | R2  |
|------------|-----------|-------|---------|-----|
| NGLY1_KO_1 | –         | –     | –       | –   |
| NGLY1_1    | 59.97     | –0.13 | 0.25    | 0.9 |
| NGLY1_KO_2 | –         | –     | –       | –   |
| NGLY1_2    | –         | –     | –       | –   |

Supplement: Supplementary file 5022 [file 1]

IPI00006205.1|SLC33A1

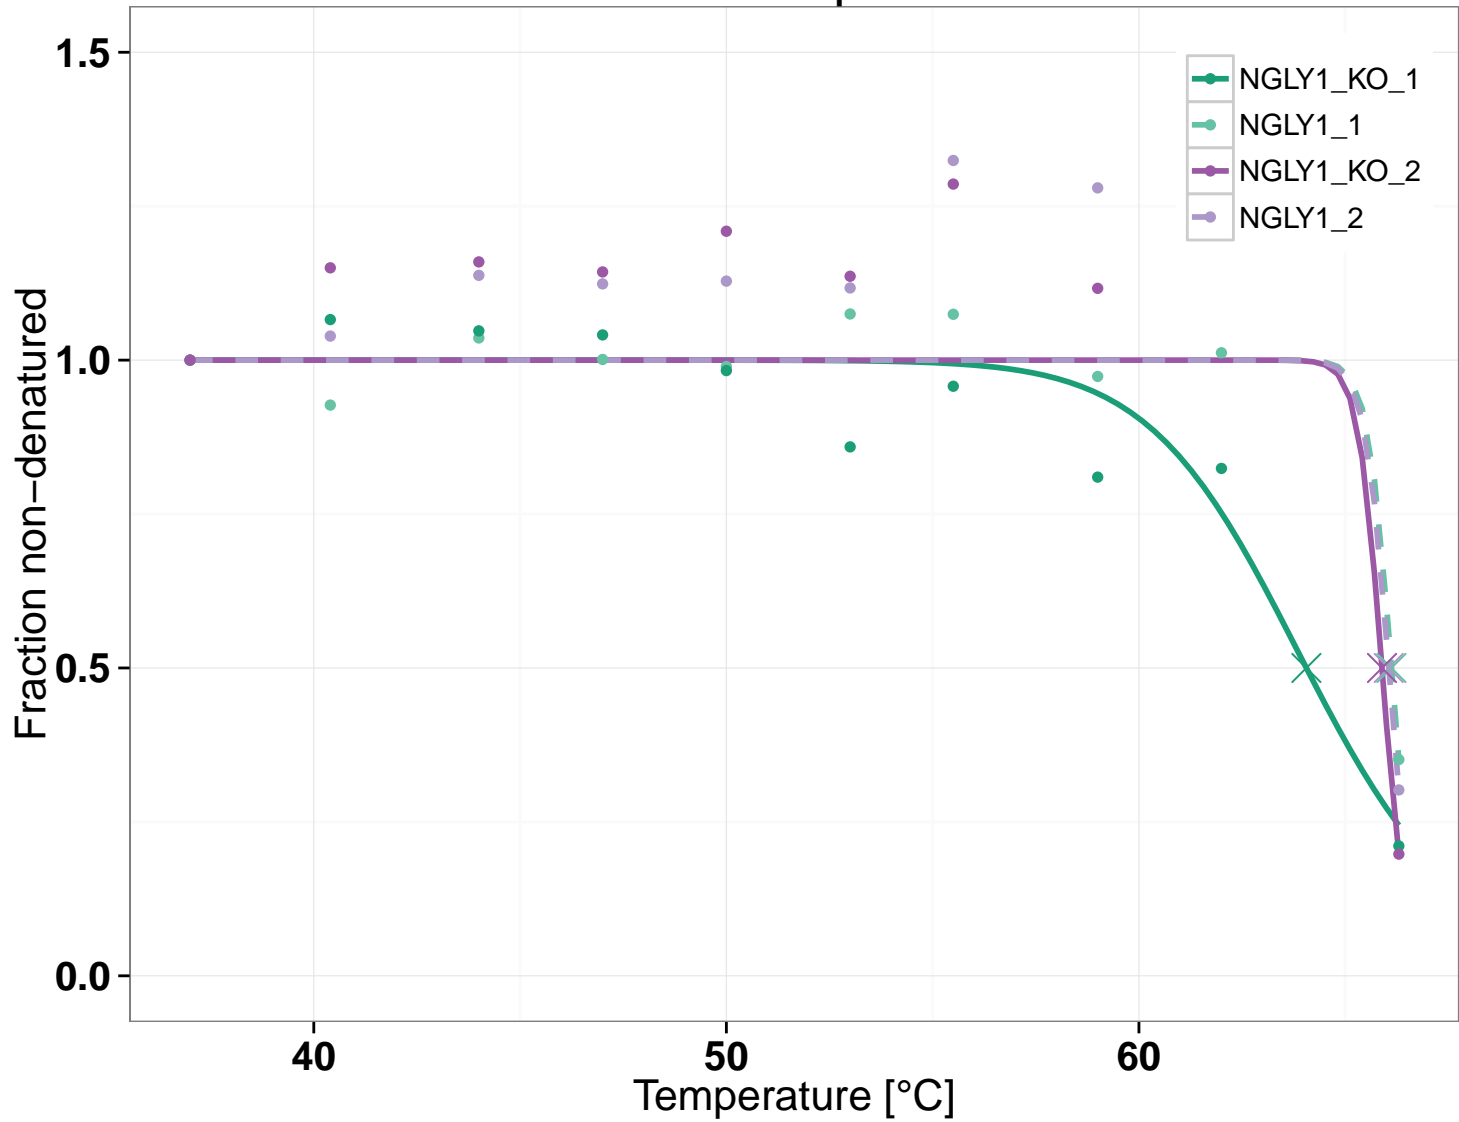

|            | meltPoint | slope | plateau | R2   |
|------------|-----------|-------|---------|------|
| NGLY1_KO_1 | 64.06     | -0.13 | 0       | 0.91 |
| NGLY1_1    | 66.12     | -0.86 | 0       | 0.95 |
| NGLY1_KO_2 | 65.89     | -0.86 | 0       | 0.65 |
| NGLY1_2    | 66.06     | -0.86 | 0       | 0.54 |

Supplement: Supplementary file 5023 [file 1]
