# Supplementary material (part 51 of 85)
Source: publisher figshare collection journal article supplement (https://gsajournals.figshare.com/articles/dataset/_/12014913)

# IPI00009950.1|LMAN2

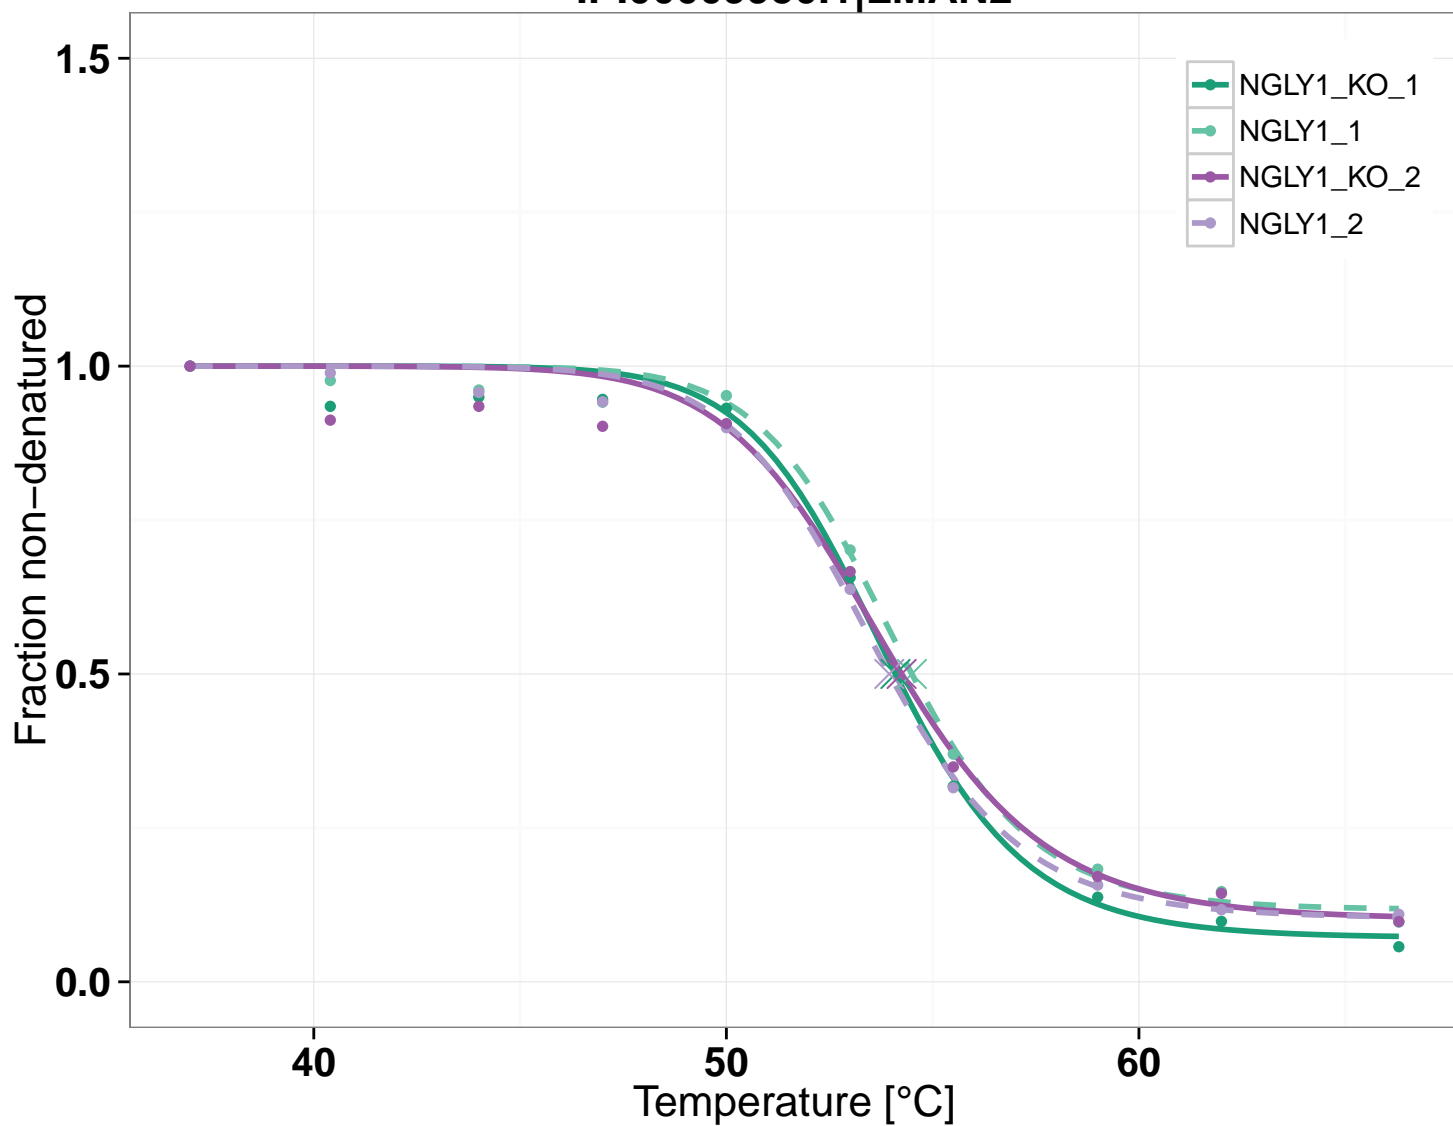

|            | meltPoint | slope | plateau | R2   |
|------------|-----------|-------|---------|------|
| NGLY1_KO_1 | 54.1      | -0.14 | 0.07    | 0.99 |
| NGLY1_1    | 54.5      | -0.13 | 0.12    | 1    |
| NGLY1_KO_2 | 54.25     | -0.12 | 0.1     | 0.98 |
| NGLY1_2    | 53.95     | -0.13 | 0.1     | 1    |

Supplement: Supplementary file 5024 [file 1]

# IPI00296563.3|GUF1

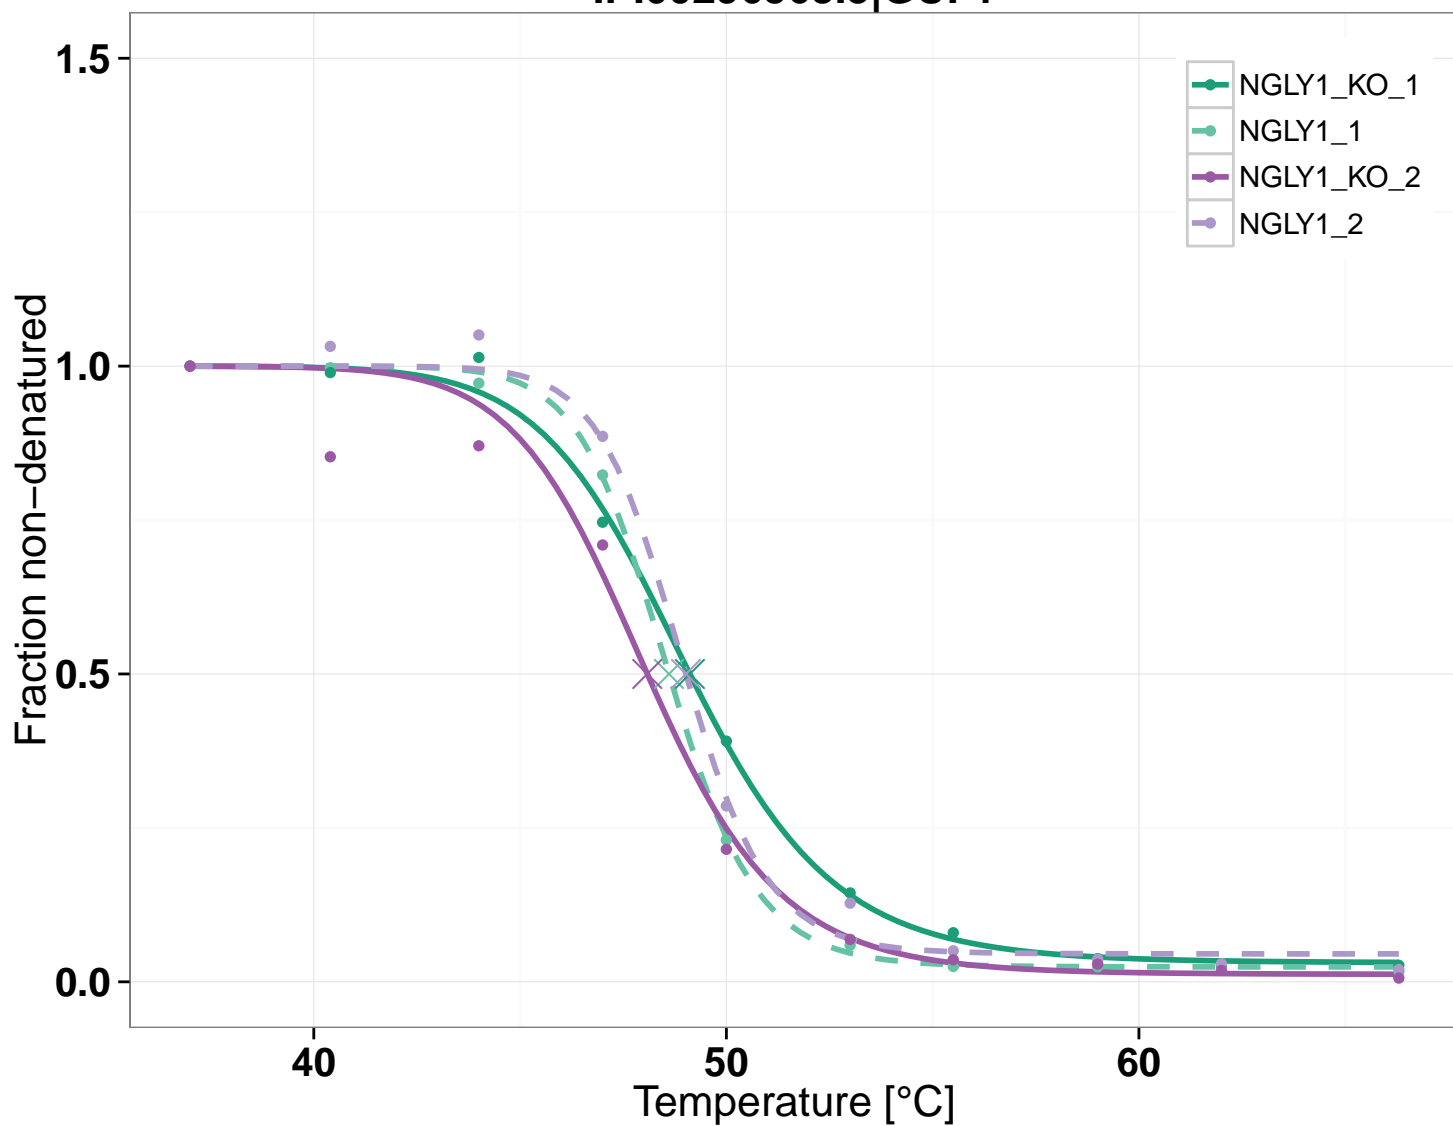

|            | meltPoint | slope | plateau | R2   |
|------------|-----------|-------|---------|------|
| NGLY1_KO_1 | 49.11     | -0.14 | 0.03    | 1    |
| NGLY1_1    | 48.61     | -0.23 | 0.02    | 1    |
| NGLY1_KO_2 | 48.08     | -0.15 | 0.01    | 0.98 |
| NGLY1_2    | 49.02     | -0.23 | 0.05    | 1    |

Supplement: Supplementary file 5025 [file 1]

# IPI00303797.3|BRAF

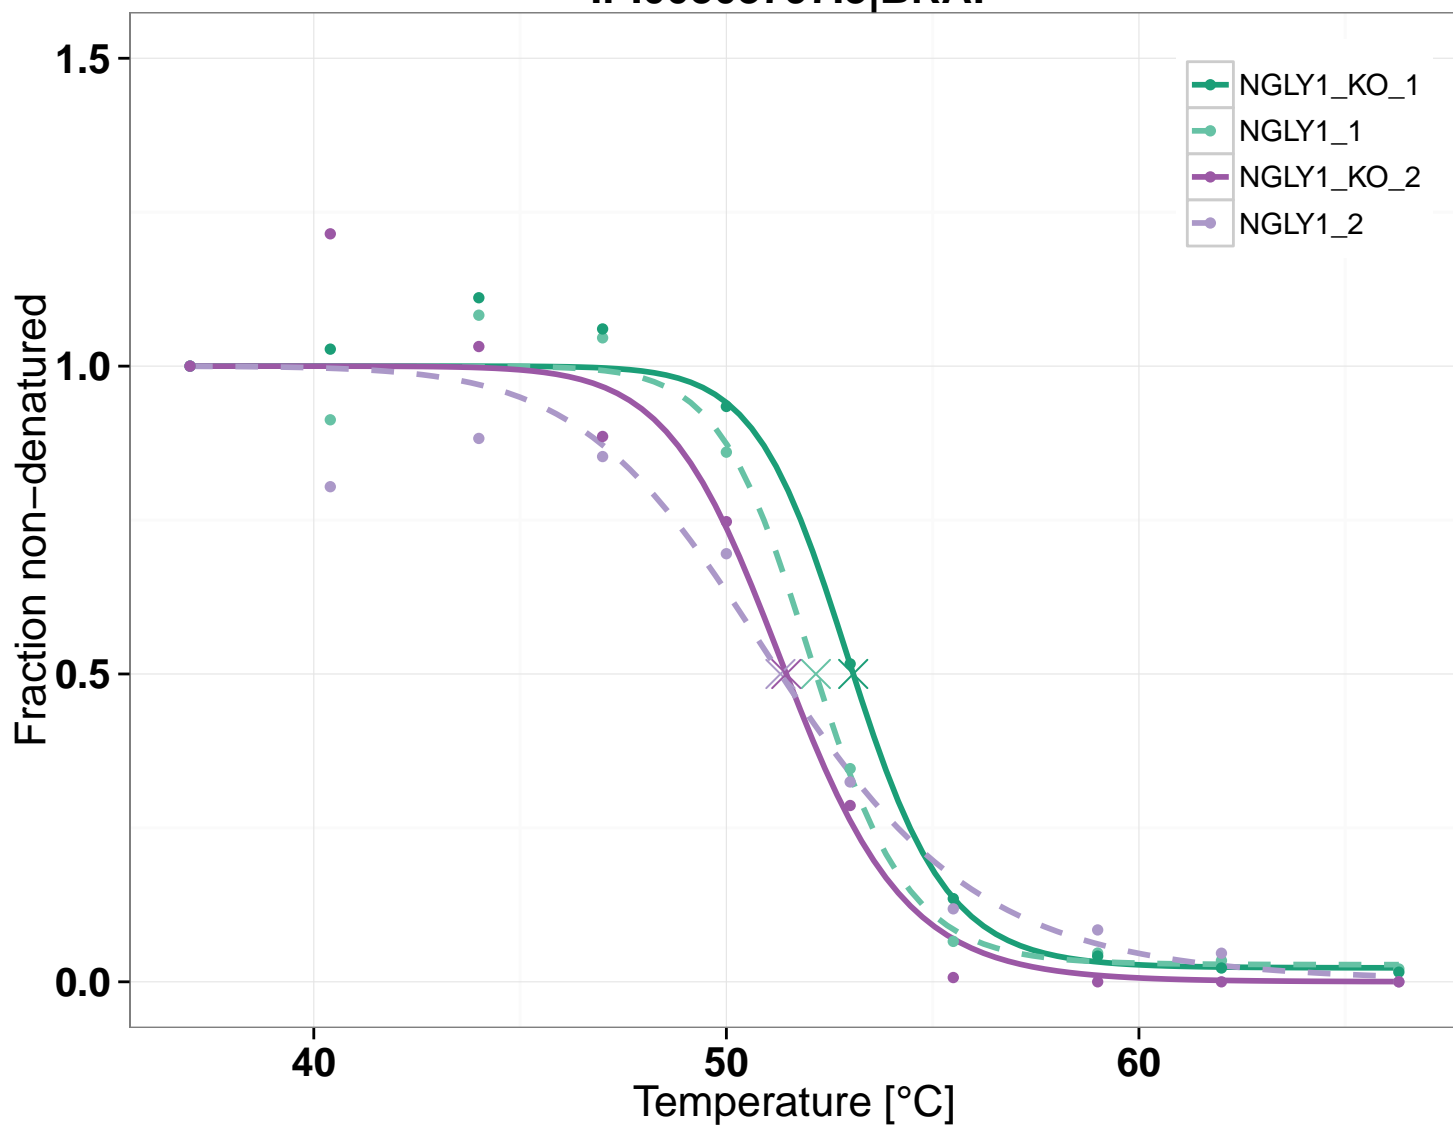

|            | meltPoint | slope | plateau | R2   |
|------------|-----------|-------|---------|------|
| NGLY1_KO_1 | 53.07     | -0.21 | 0.02    | 0.99 |
| NGLY1_1    | 52.17     | -0.21 | 0.03    | 0.99 |
| NGLY1_KO_2 | 51.45     | -0.17 | 0       | 0.97 |
| NGLY1_2    | 51.31     | -0.1  | 0       | 0.96 |

Supplement: Supplementary file 5026 [file 1]

# IPI00018026.3|BSDC1

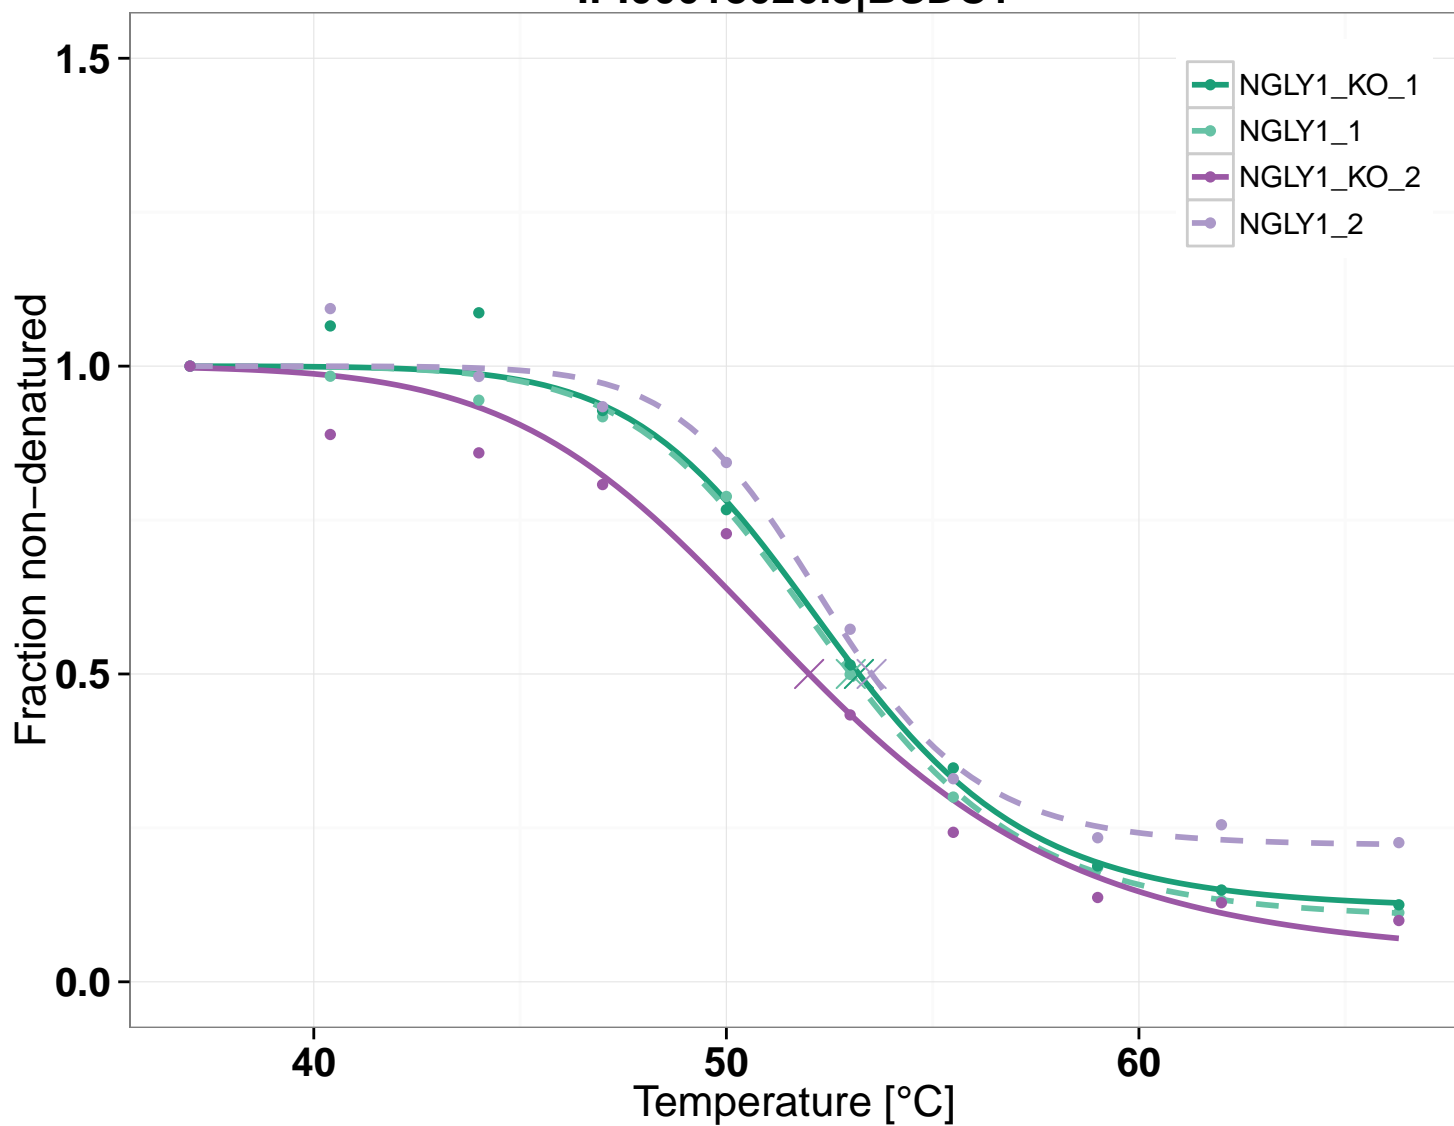

|            | meltPoint | slope  | plateau | R2   |
|------------|-----------|--------|---------|------|
| NGLY1_KO_1 | 53.21     | -0.092 | 0.12    | 0.99 |
| NGLY1_1    | 53.02     | -0.093 | 0.1     | 1    |
| NGLY1_KO_2 | 52.01     | -0.07  | 0.03    | 0.98 |
| NGLY1_2    | 53.52     | -0.11  | 0.22    | 0.99 |

Supplement: Supplementary file 5027 [file 1]

# IPI00007672.1|XRCC4

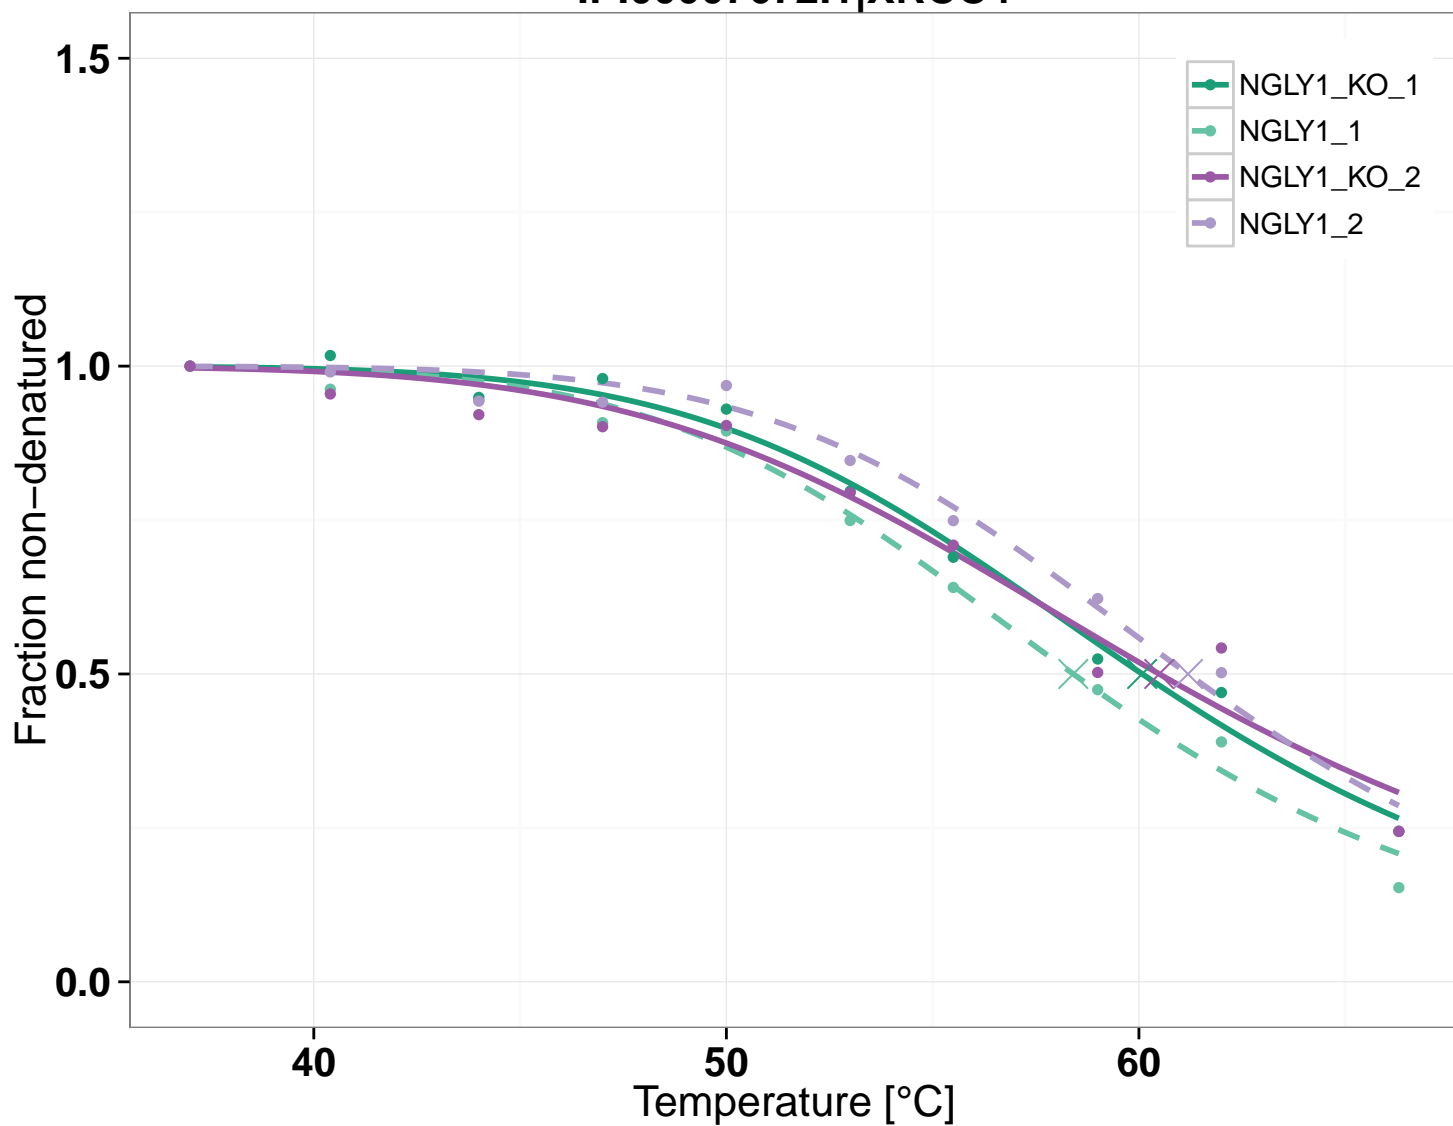

|            | meltPoint | slope  | plateau | R2   |
|------------|-----------|--------|---------|------|
| NGLY1_KO_1 | 60.08     | -0.047 | 0       | 0.99 |
| NGLY1_1    | 58.41     | -0.05  | 0       | 0.99 |
| NGLY1_KO_2 | 60.49     | -0.04  | 0       | 0.96 |
| NGLY1_2    | 61.19     | -0.05  | 0       | 0.98 |

Supplement: Supplementary file 5028 [file 1]

IPI00014903.2|FGFR1OP2

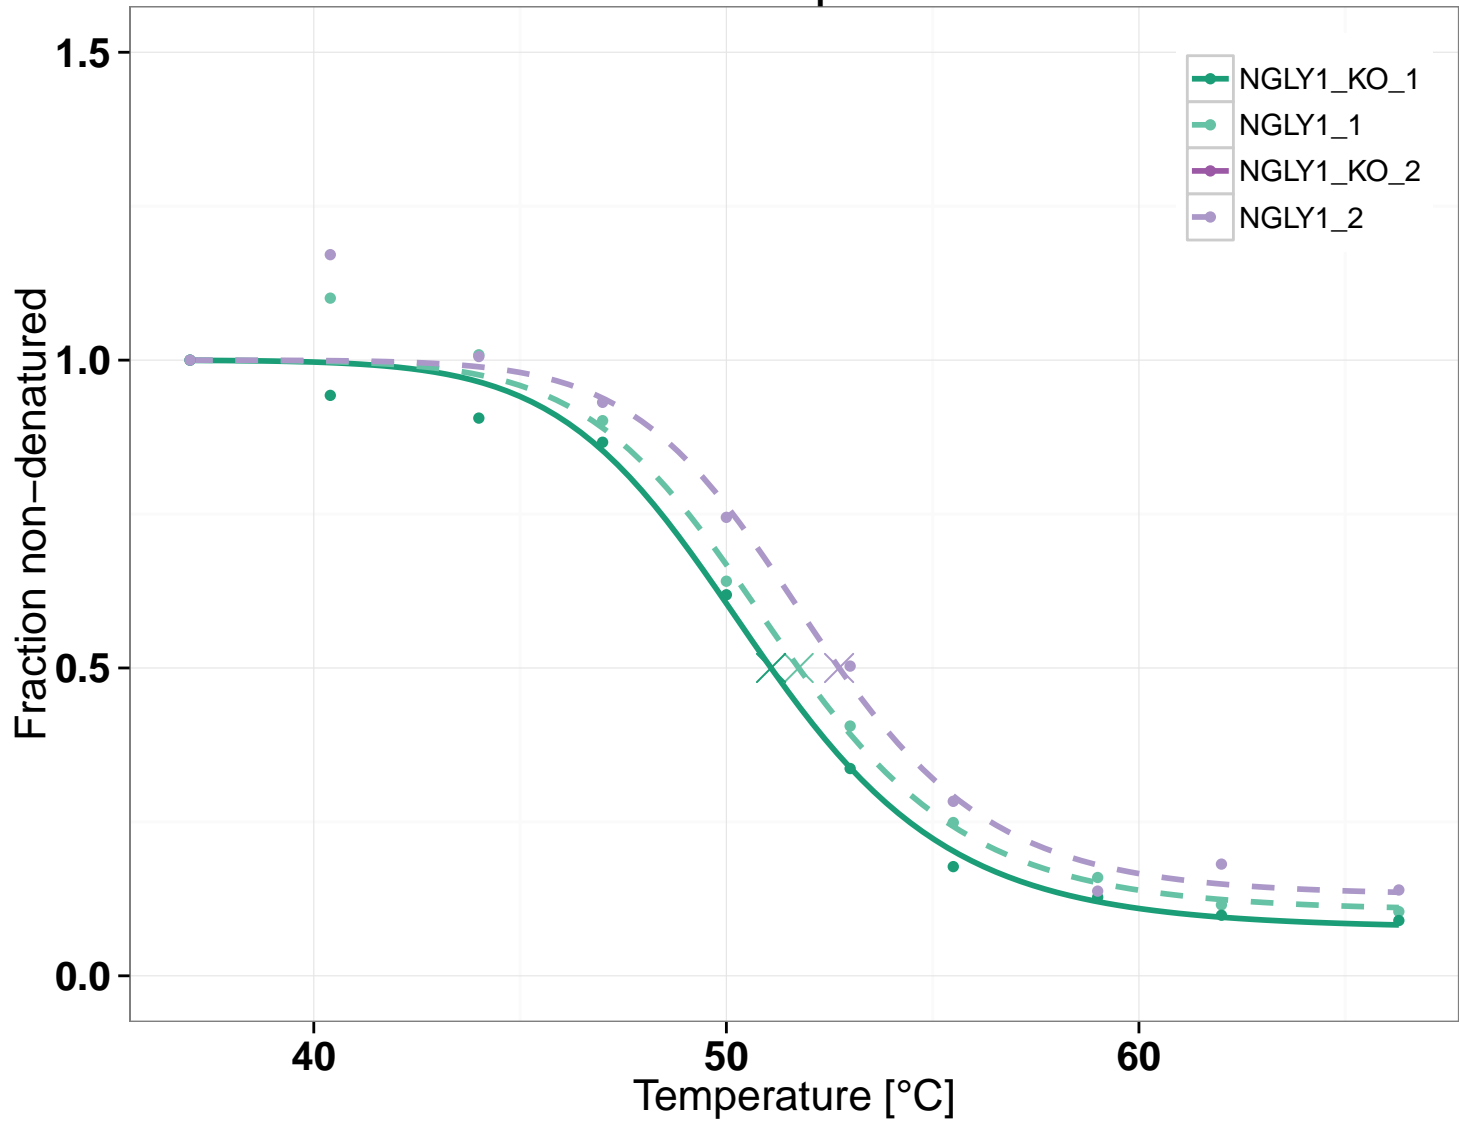

|            | meltPoint | slope  | plateau | R2   |
|------------|-----------|--------|---------|------|
| NGLY1_KO_1 | 51.08     | -0.098 | 0.08    | 0.99 |
| NGLY1_1    | 51.75     | -0.097 | 0.1     | 0.99 |
| NGLY1_KO_2 | -         | -      | -       | -    |
| NGLY1_2    | 52.73     | -0.1   | 0.13    | 0.98 |

Supplement: Supplementary file 5029 [file 1]

IPI00783285.1|RAB11FIP5

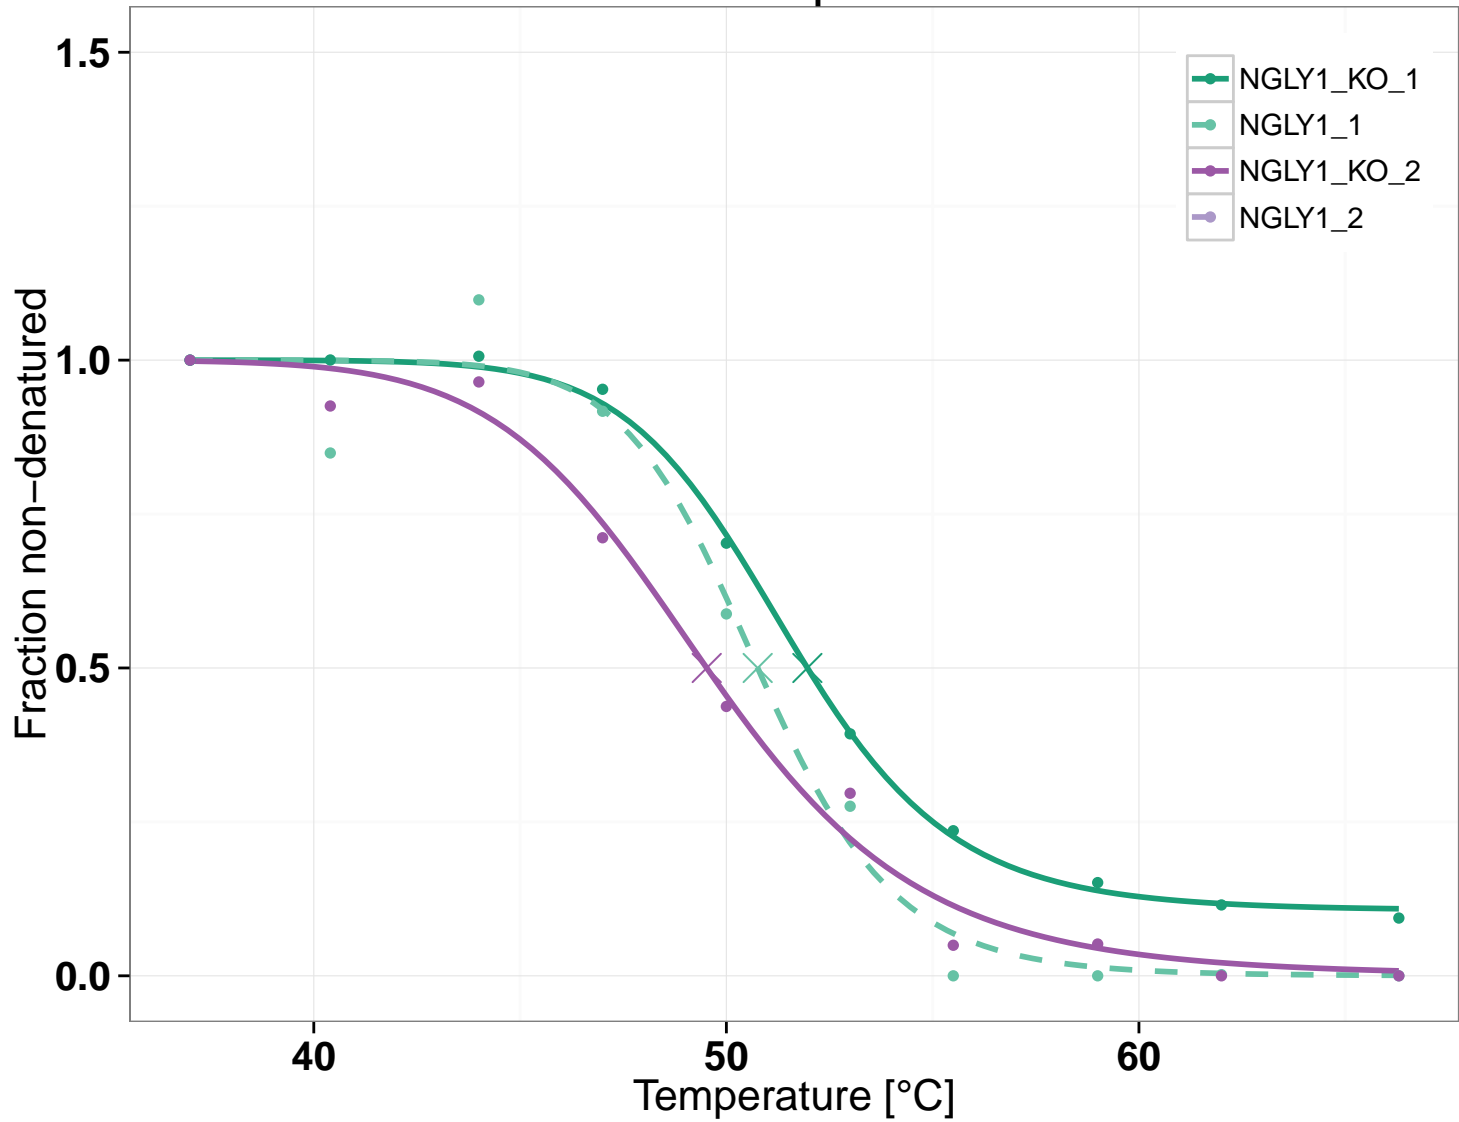

|            | meltPoint | slope  | plateau | R2   |
|------------|-----------|--------|---------|------|
| NGLY1_KO_1 | 51.96     | -0.11  | 0.11    | 1    |
| NGLY1_1    | 50.76     | -0.15  | 0       | 0.98 |
| NGLY1_KO_2 | 49.52     | -0.097 | 0       | 0.99 |
| NGLY1_2    | -         | -      | -       | -    |

Supplement: Supplementary file 5030 [file 1]

IPI00006153.3|BHLHE41

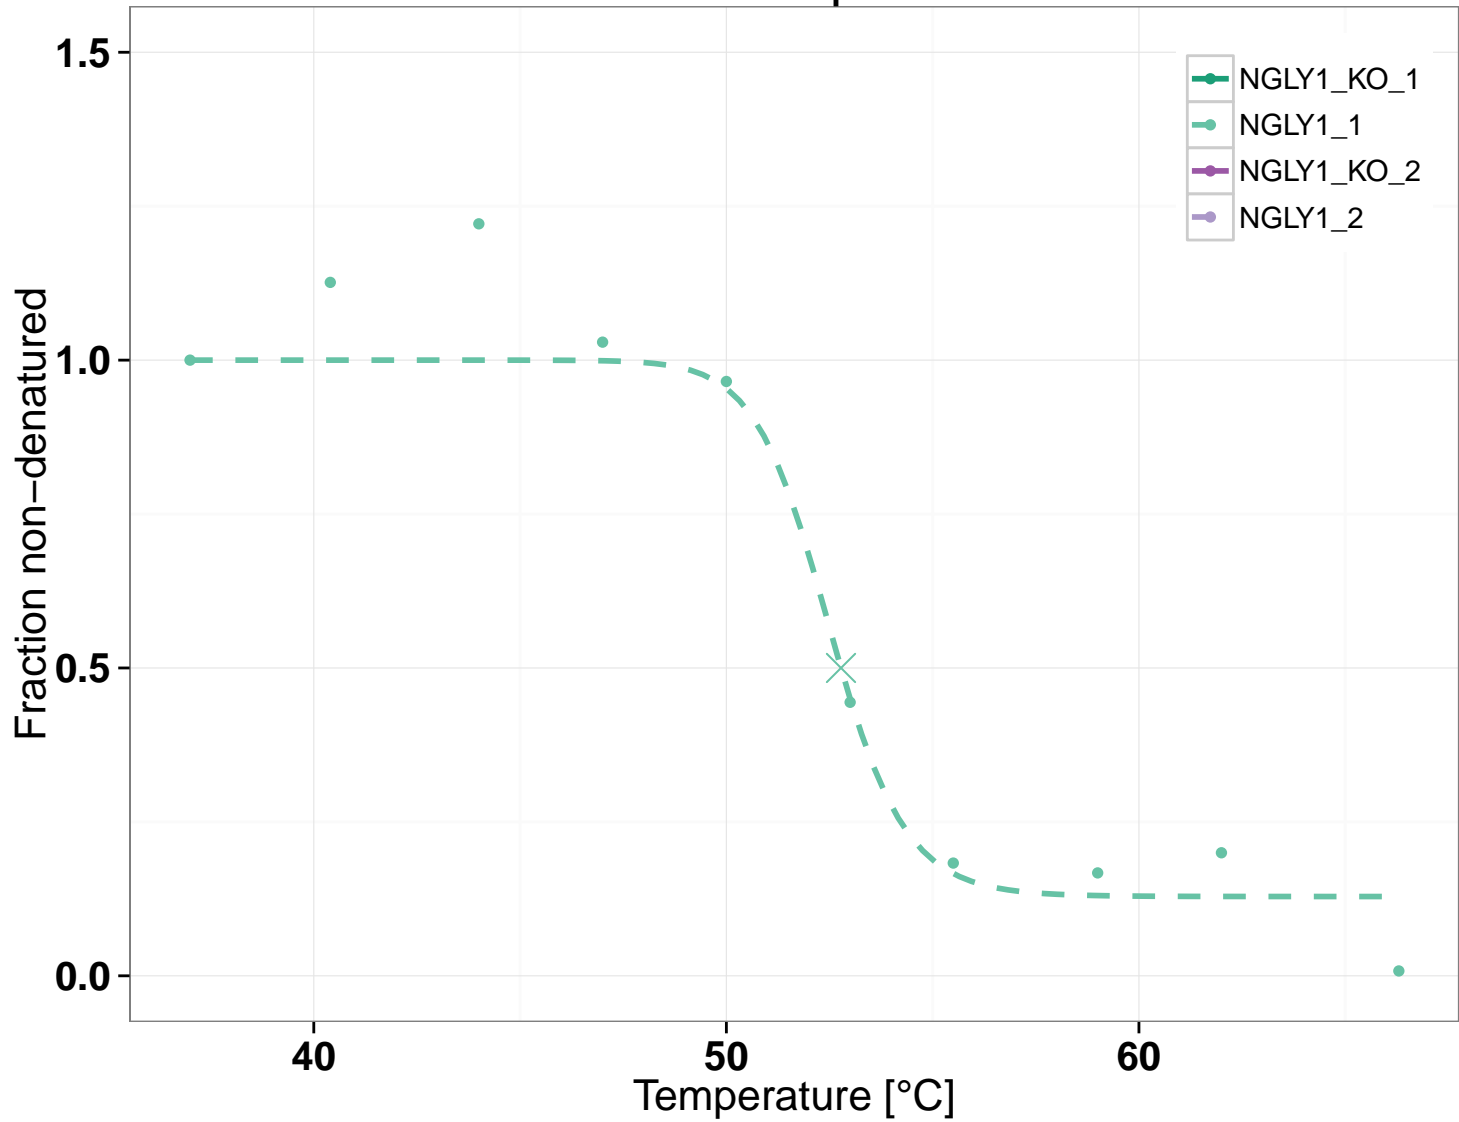

|            | meltPoint | slope | plateau | R2   |
|------------|-----------|-------|---------|------|
| NGLY1_KO_1 | -         | -     | -       | -    |
| NGLY1_1    | 52.78     | -0.24 | 0.13    | 0.96 |
| NGLY1_KO_2 | -         | -     | -       | -    |
| NGLY1_2    | -         | -     | -       | -    |

Supplement: Supplementary file 5031 [file 1]

# IPI00384051.6|PSME2

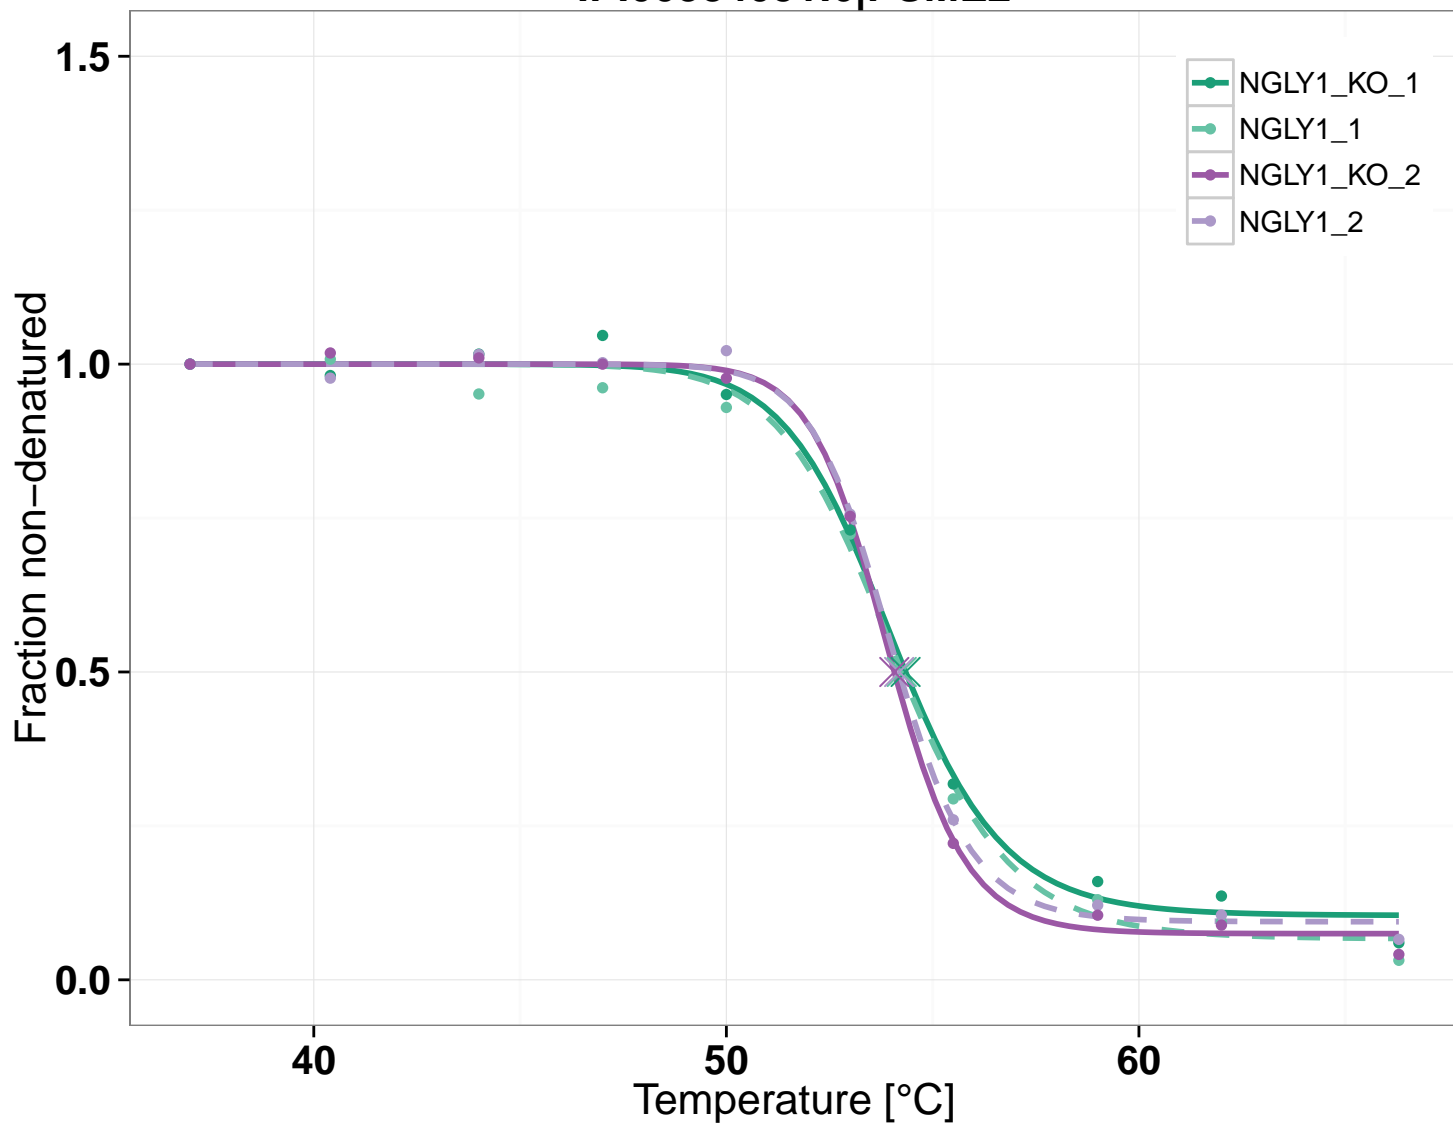

|            | meltPoint | slope | plateau | R2   |
|------------|-----------|-------|---------|------|
| NGLY1_KO_1 | 54.34     | -0.17 | 0.1     | 1    |
| NGLY1_1    | 54.25     | -0.17 | 0.07    | 0.99 |
| NGLY1_KO_2 | 54.07     | -0.25 | 0.07    | 1    |
| NGLY1_2    | 54.19     | -0.23 | 0.09    | 1    |

Supplement: Supplementary file 5032 [file 1]

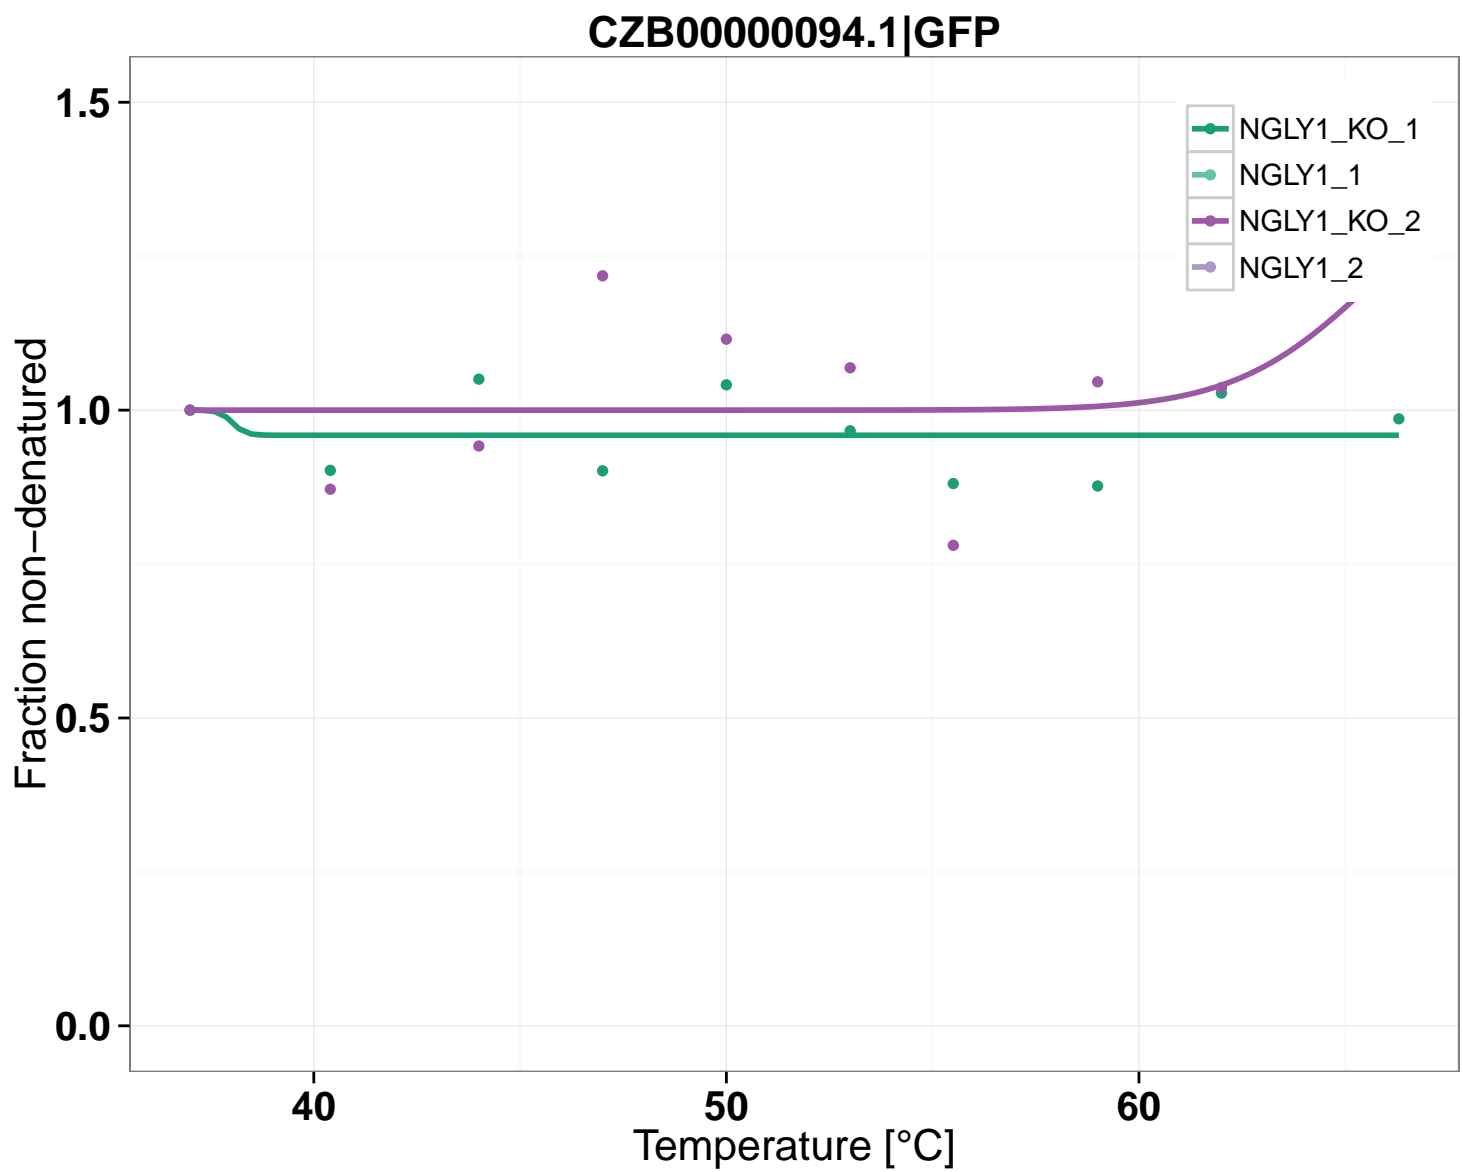

|            | meltPoint | slope  | plateau | R2   |
|------------|-----------|--------|---------|------|
| NGLY1_KO_1 | —         | −0.067 | 0.96    | 0.04 |
| NGLY1_1    | —         | —      | —       | —    |
| NGLY1_KO_2 | —         | 0.063  | 1.46    | 0.28 |
| NGLY1_2    | —         | —      | —       | —    |

Supplement: Supplementary file 5033 [file 1]

IPI00007273.3|ZBTB1

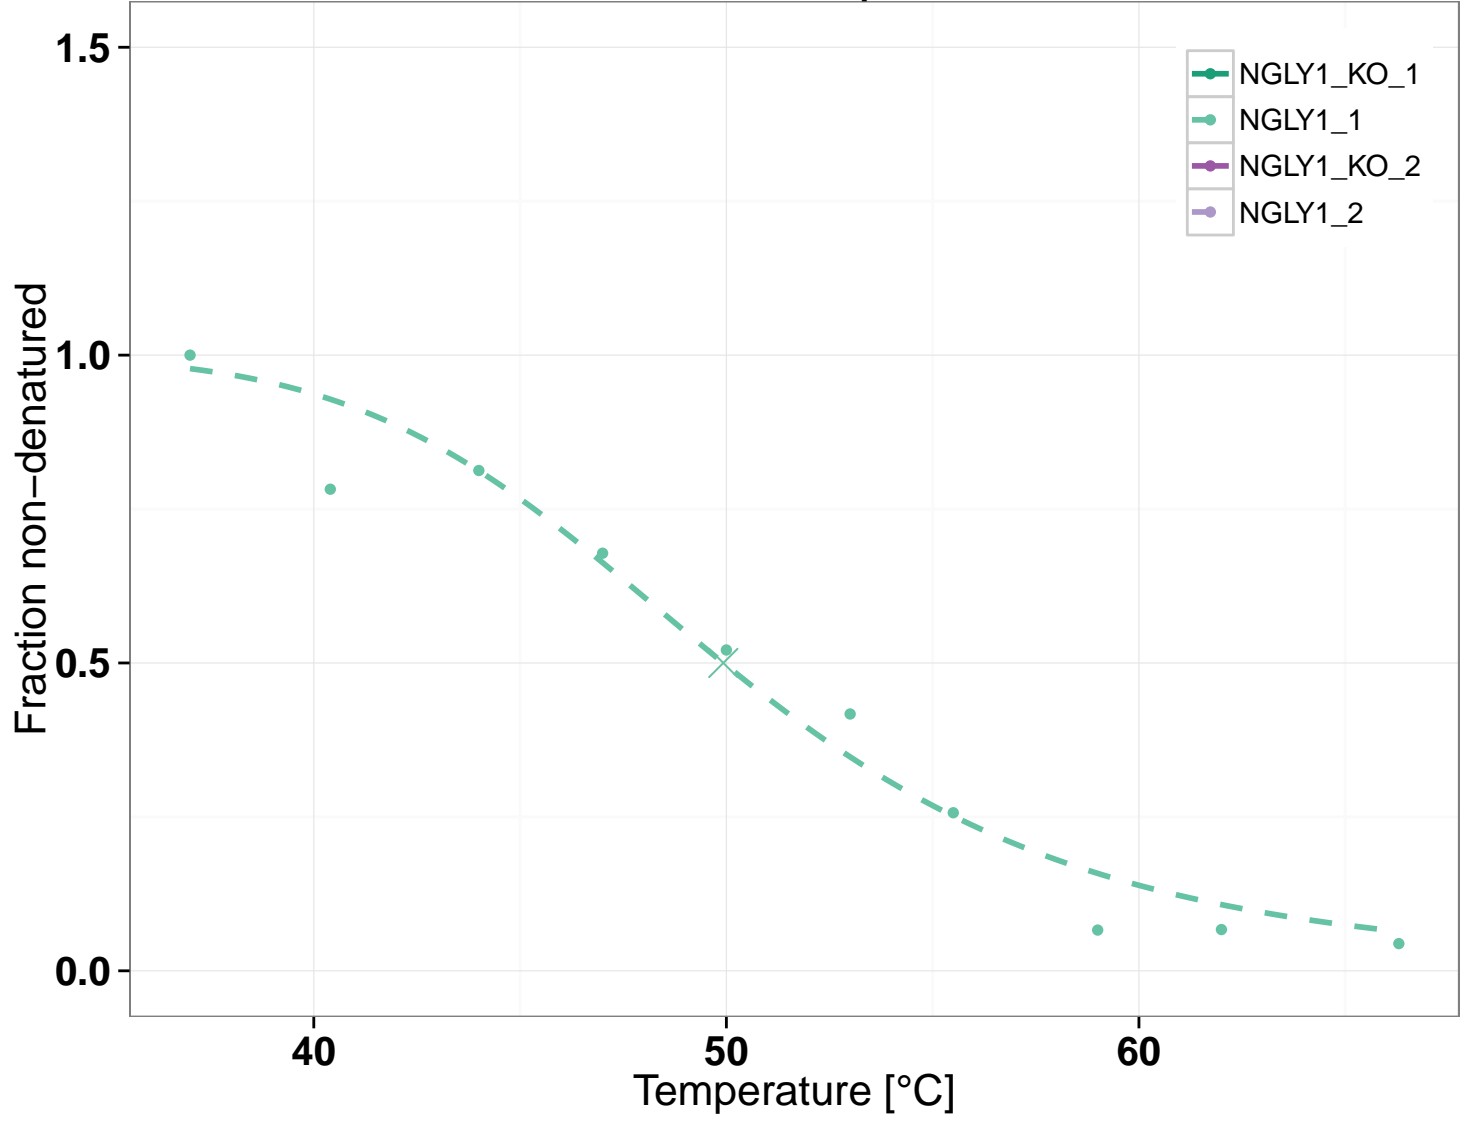

|            | meltPoint | slope  | plateau | R2   |
|------------|-----------|--------|---------|------|
| NGLY1_KO_1 | -         | -      | -       | -    |
| NGLY1_1    | 49.93     | -0.056 | 0       | 0.97 |
| NGLY1_KO_2 | -         | -      | -       | -    |
| NGLY1_2    | -         | -      | -       | -    |

Supplement: Supplementary file 5034 [file 1]

# IPI00218982.1|BRCA1

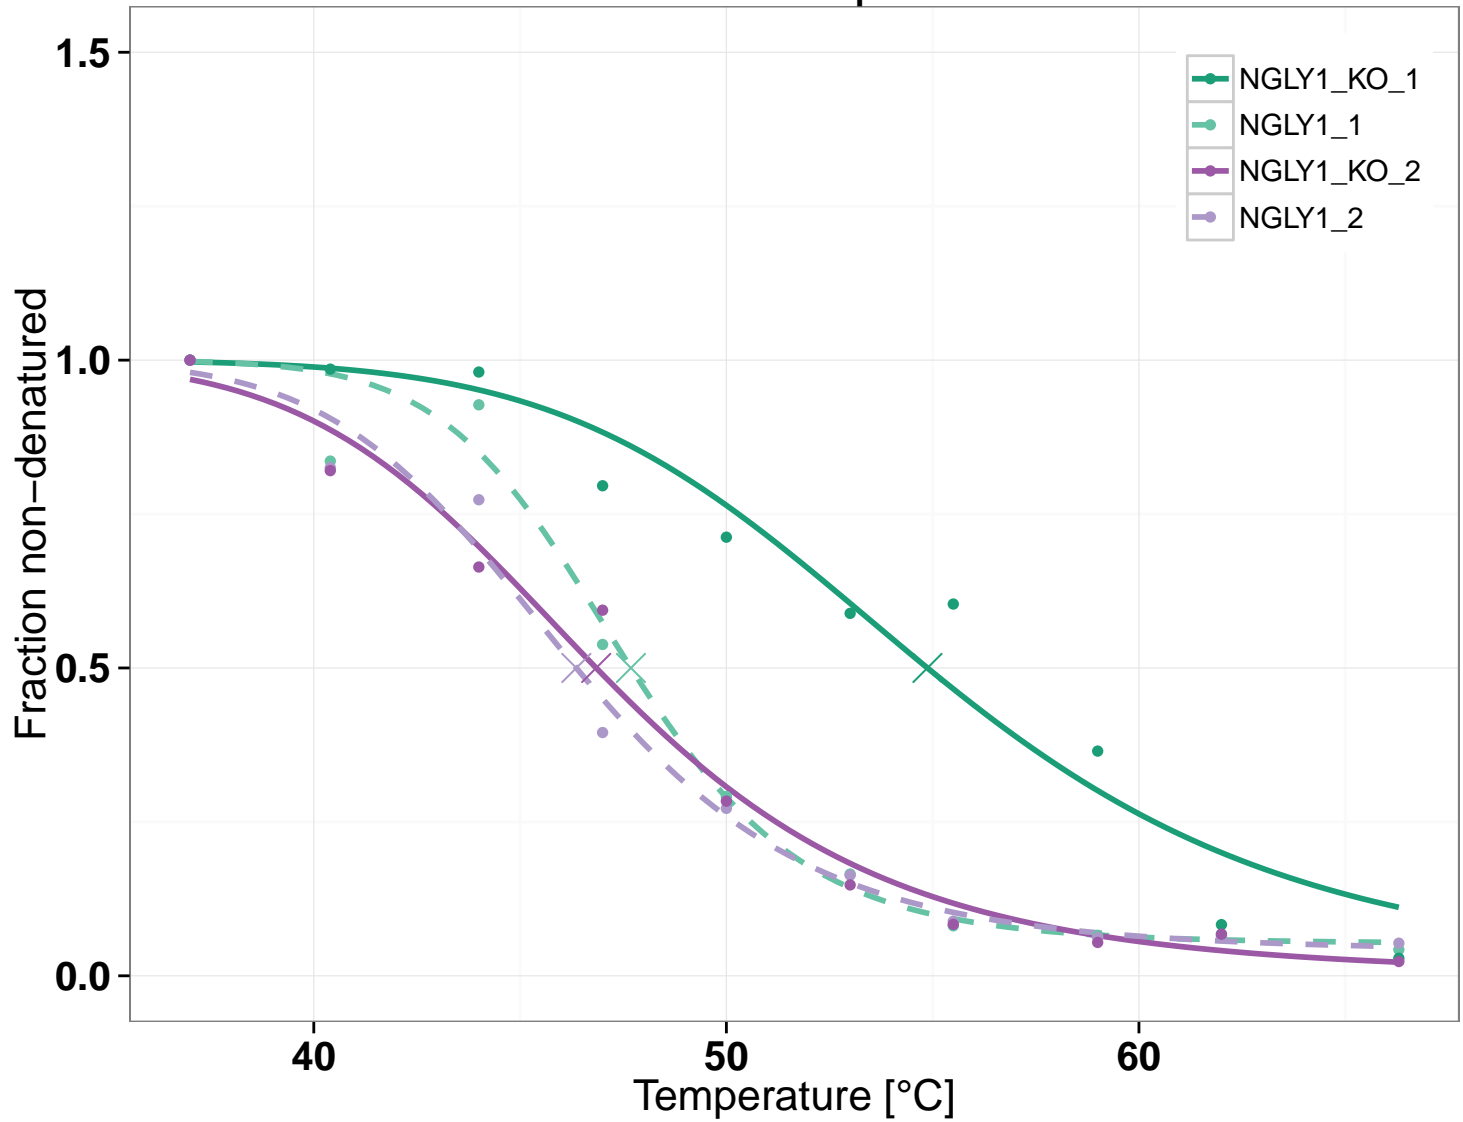

|            | meltPoint | slope  | plateau | R2   |
|------------|-----------|--------|---------|------|
| NGLY1_KO_1 | 54.87     | -0.056 | 0       | 0.95 |
| NGLY1_1    | 47.69     | -0.11  | 0.05    | 0.98 |
| NGLY1_KO_2 | 46.85     | -0.071 | 0       | 0.98 |
| NGLY1_2    | 46.36     | -0.083 | 0.04    | 0.99 |

Supplement: Supplementary file 5035 [file 1]

IPI00306400.9|KIFC1

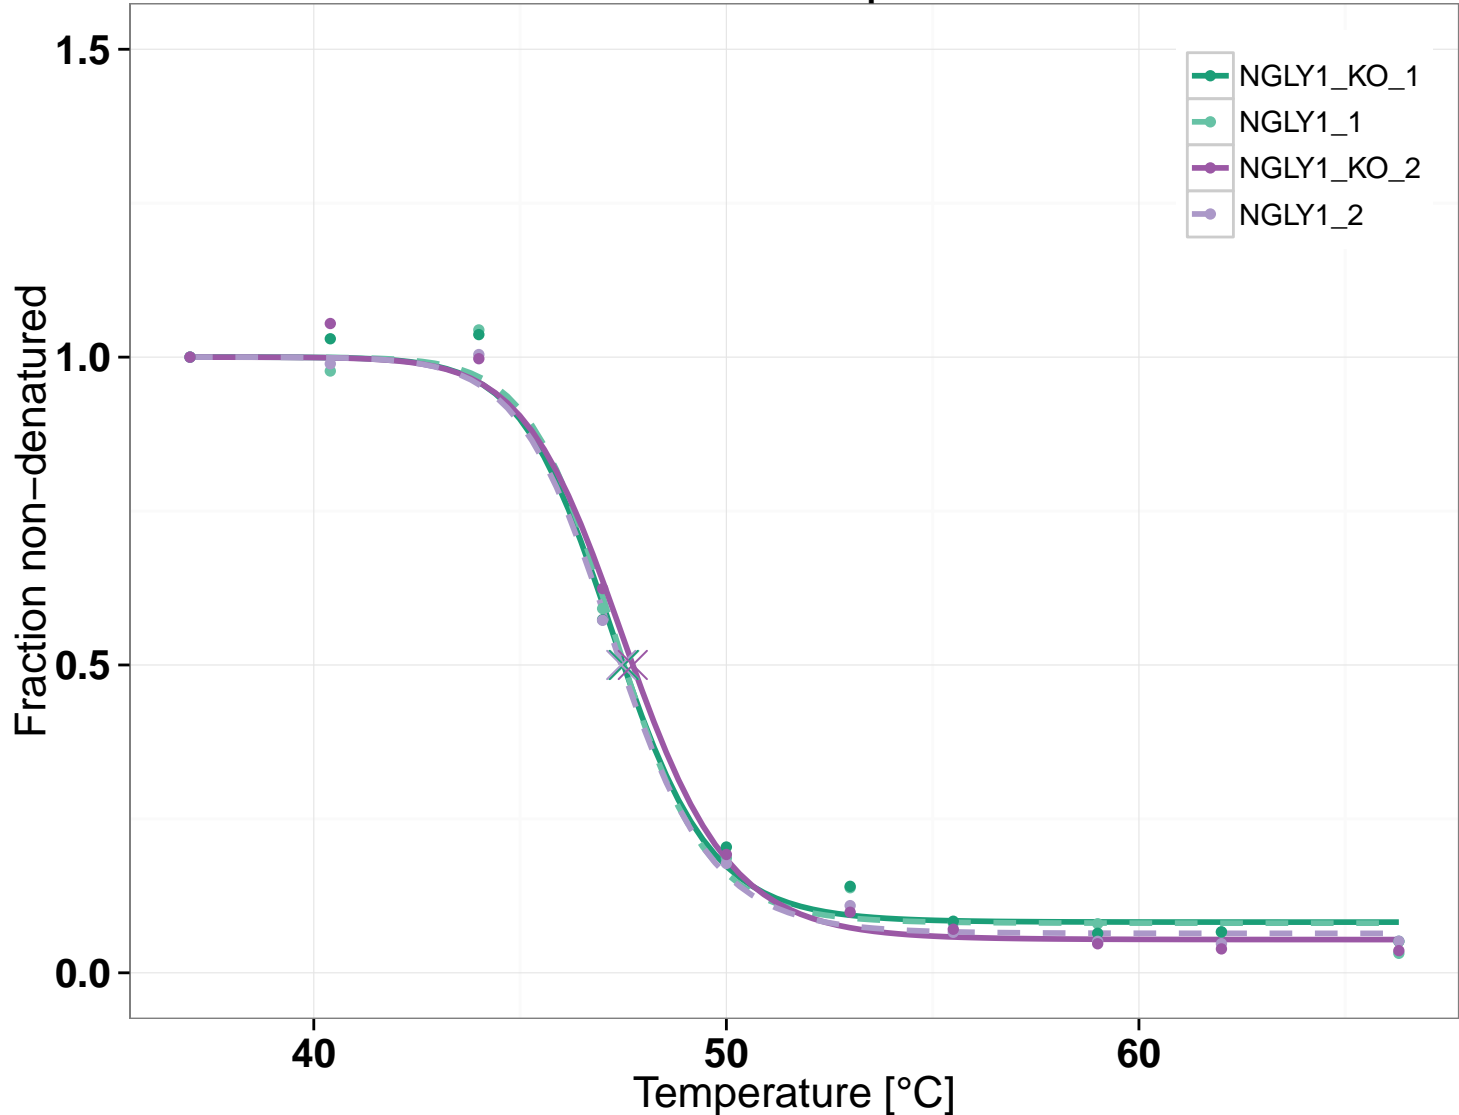

|            | meltPoint | slope | plateau | R2   |
|------------|-----------|-------|---------|------|
| NGLY1_KO_1 | 47.51     | -0.2  | 0.08    | 0.99 |
| NGLY1_1    | 47.53     | -0.21 | 0.08    | 0.99 |
| NGLY1_KO_2 | 47.73     | -0.19 | 0.05    | 1    |
| NGLY1_2    | 47.45     | -0.2  | 0.06    | 1    |

Supplement: Supplementary file 5036 [file 1]

# IPI00514336.1|BGLAP

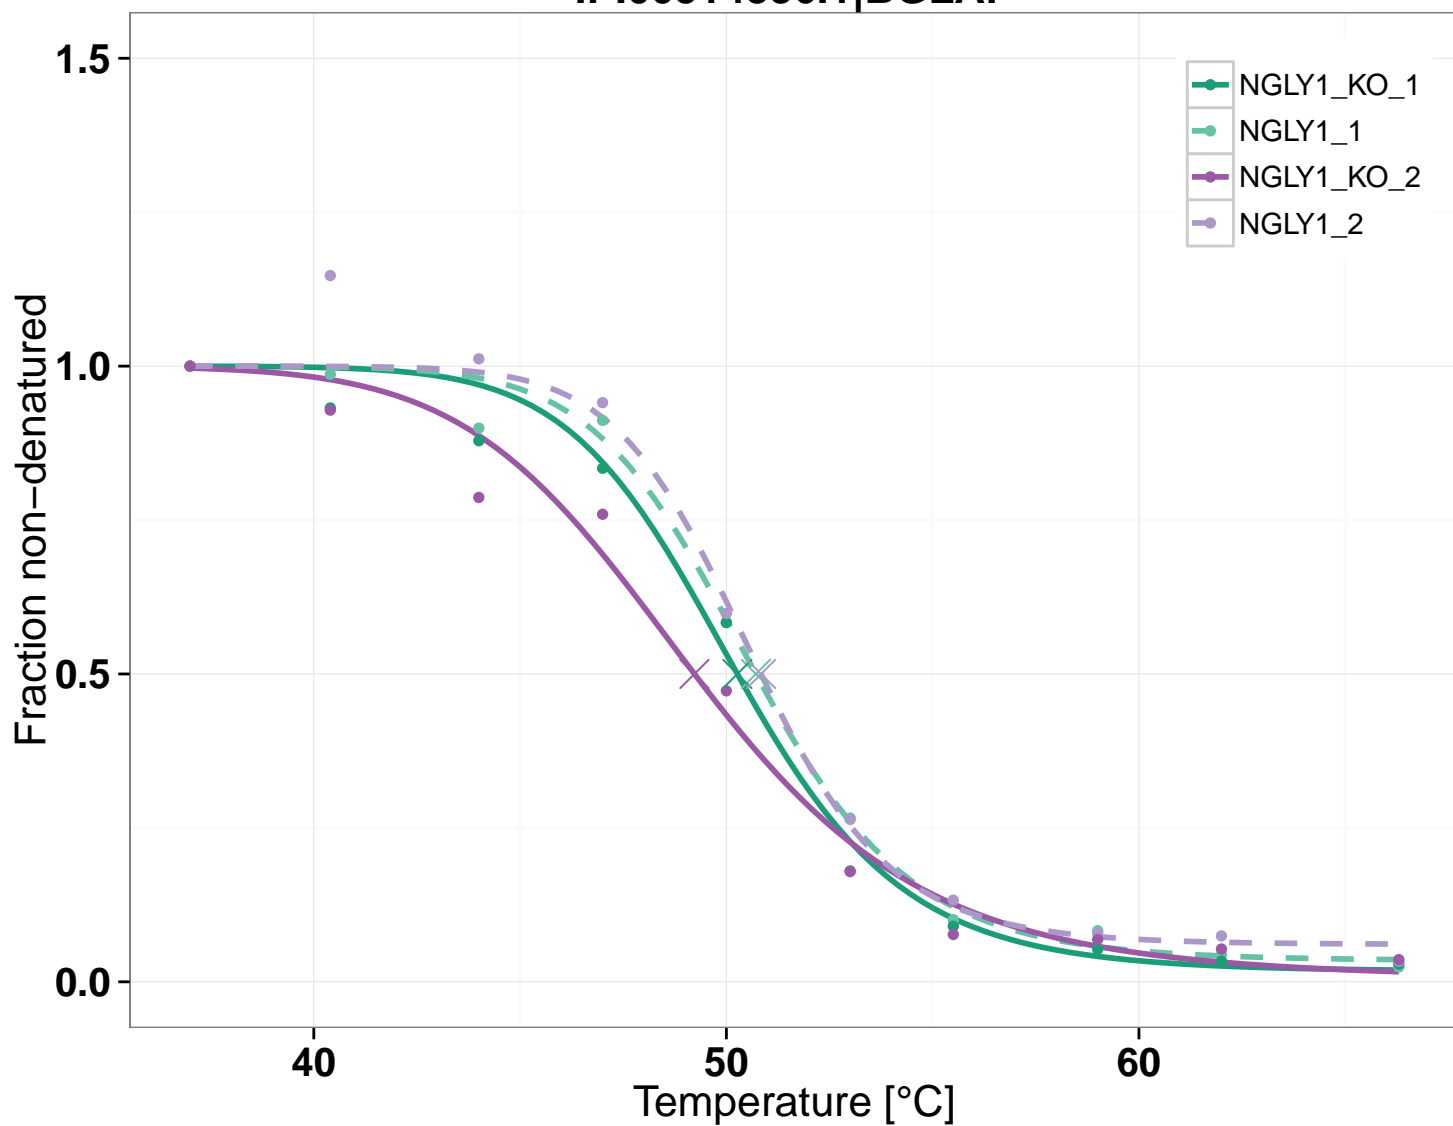

|            | meltPoint | slope  | plateau | R2   |
|------------|-----------|--------|---------|------|
| NGLY1_KO_1 | 50.27     | -0.12  | 0.02    | 0.99 |
| NGLY1_1    | 50.72     | -0.12  | 0.03    | 0.99 |
| NGLY1_KO_2 | 49.23     | -0.089 | 0.01    | 0.98 |
| NGLY1_2    | 50.84     | -0.14  | 0.06    | 0.99 |

Supplement: Supplementary file 5037 [file 1]

IPI00554737.3|PPP2R1A

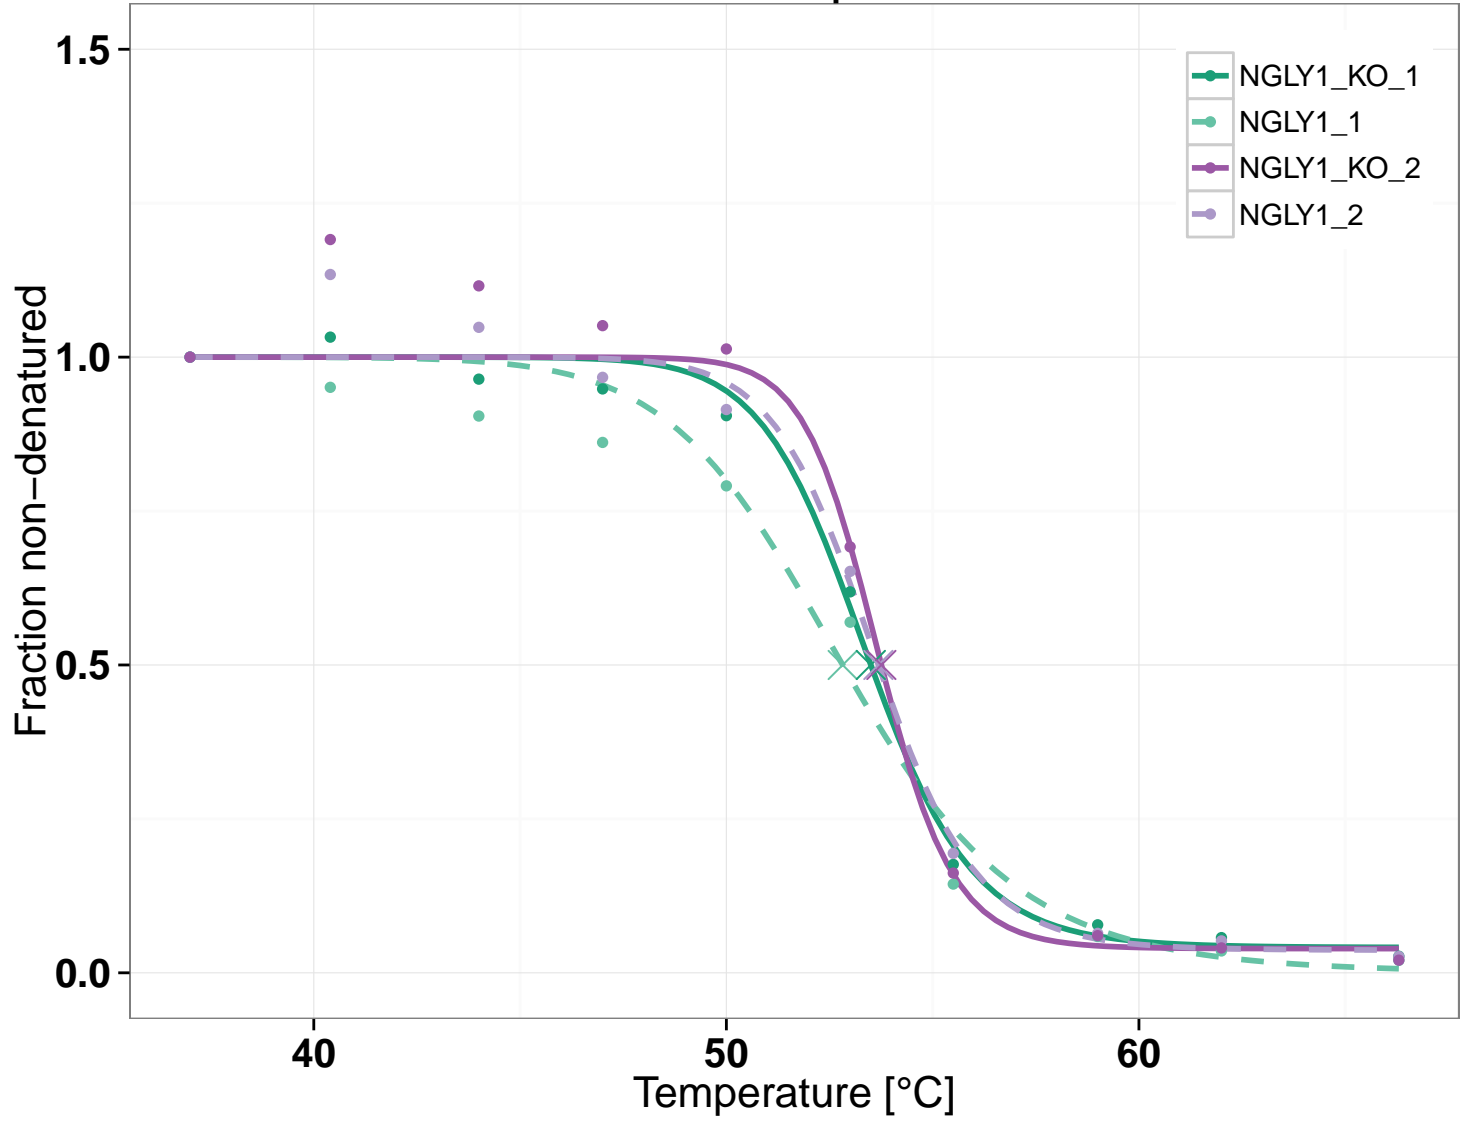

|            | meltPoint | slope | plateau | R2   |
|------------|-----------|-------|---------|------|
| NGLY1_KO_1 | 53.5      | -0.19 | 0.04    | 1    |
| NGLY1_1    | 52.82     | -0.12 | 0       | 0.98 |
| NGLY1_KO_2 | 53.76     | -0.27 | 0.04    | 0.98 |
| NGLY1_2    | 53.68     | -0.19 | 0.04    | 0.99 |

Supplement: Supplementary file 5038 [file 1]

# IPI00293402.3|STX10

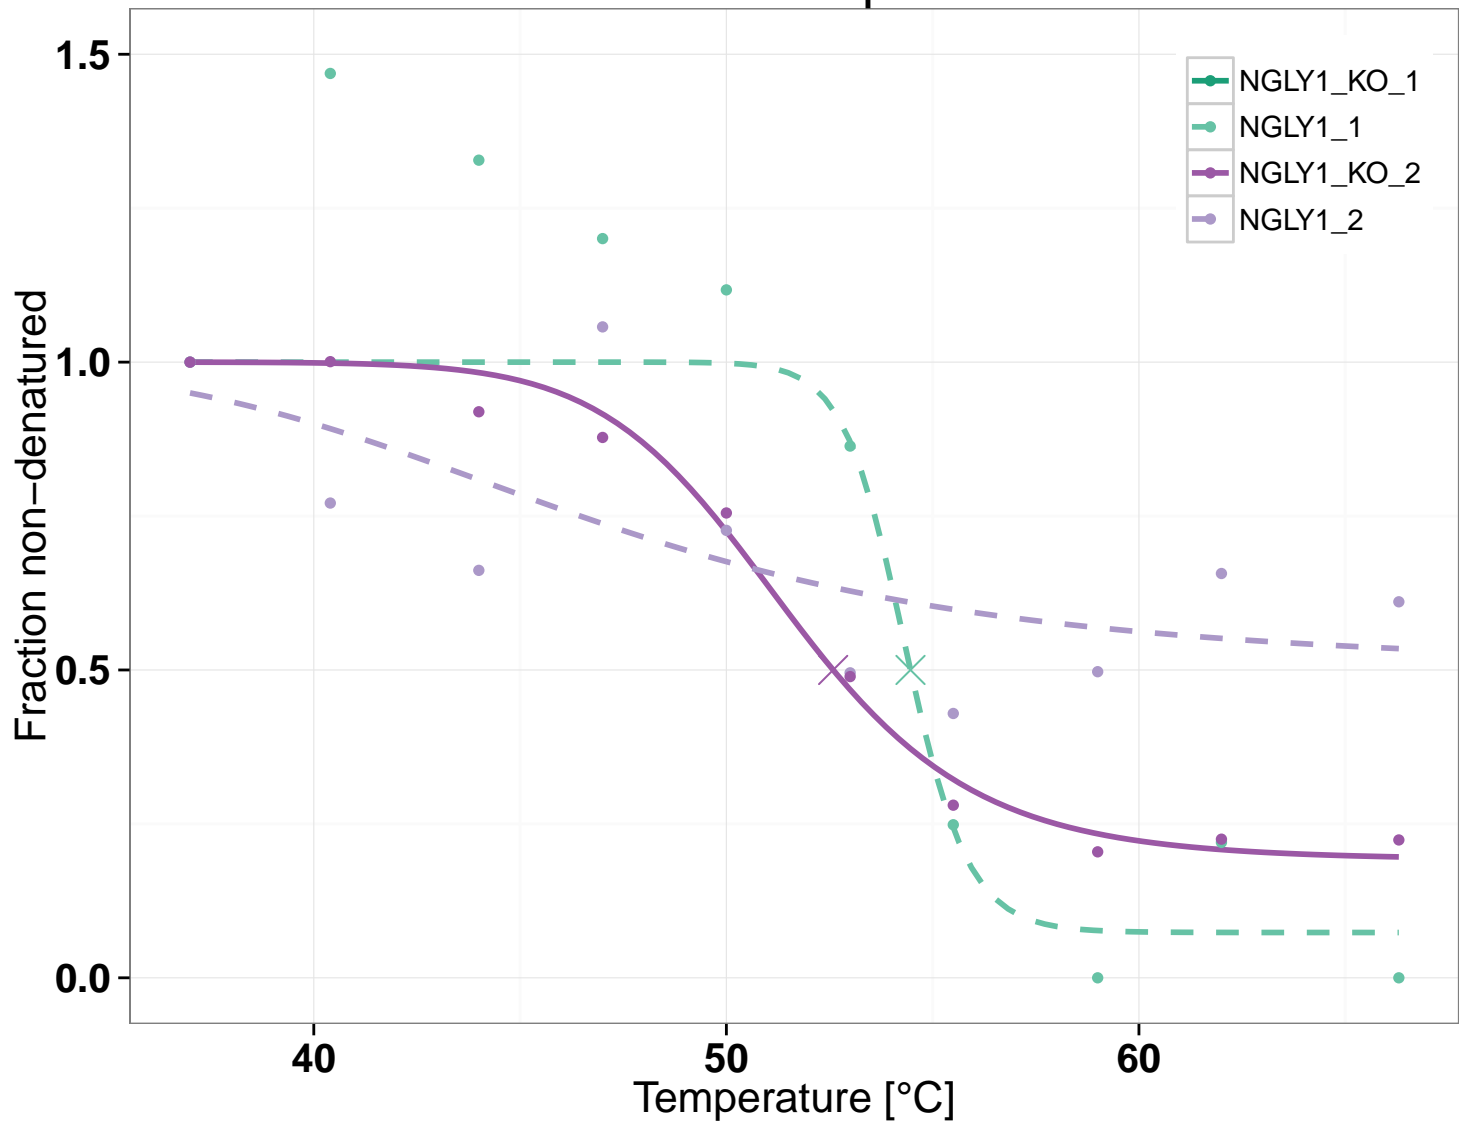

|            | meltPoint | slope  | plateau | R2   |
|------------|-----------|--------|---------|------|
| NGLY1_KO_1 | -         | -      | -       | -    |
| NGLY1_1    | 54.46     | -0.31  | 0.07    | 0.86 |
| NGLY1_KO_2 | 52.59     | -0.09  | 0.19    | 0.99 |
| NGLY1_2    | -         | -0.024 | 0.5     | 0.46 |

Supplement: Supplementary file 5039 [file 1]

# IPI00290110.5|PDCD4

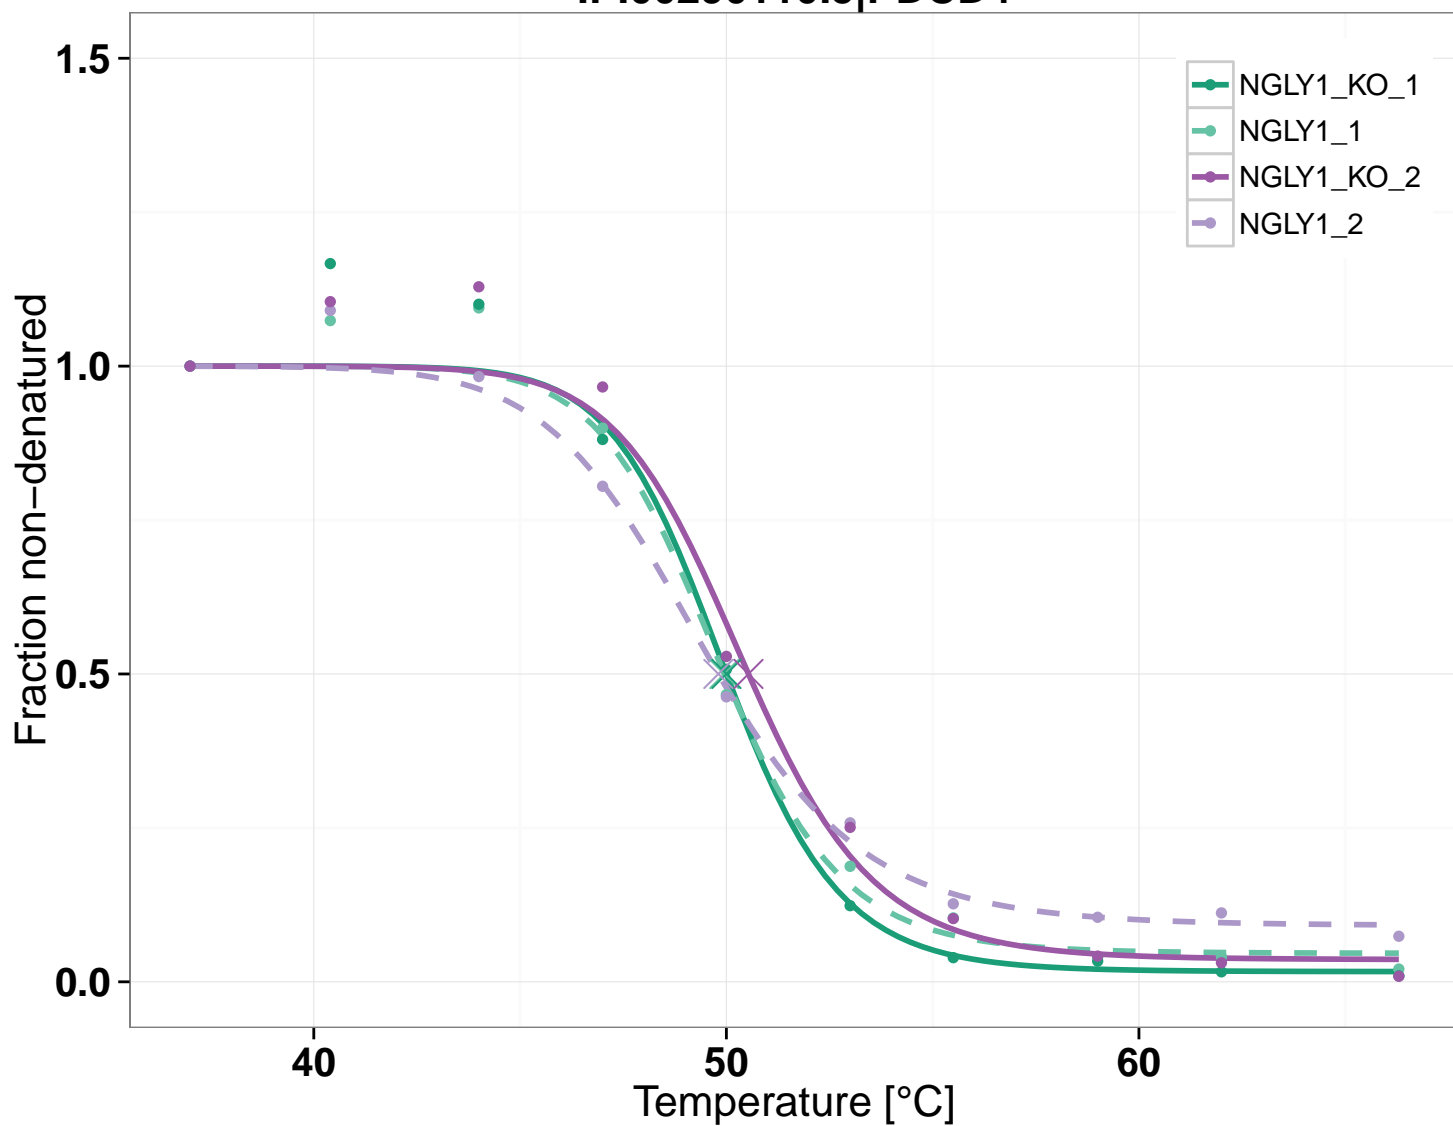

|            | meltPoint | slope | plateau | R2   |
|------------|-----------|-------|---------|------|
| NGLY1_KO_1 | 50        | -0.18 | 0.02    | 0.98 |
| NGLY1_1    | 49.95     | -0.16 | 0.05    | 0.99 |
| NGLY1_KO_2 | 50.54     | -0.15 | 0.04    | 0.98 |
| NGLY1_2    | 49.81     | -0.12 | 0.09    | 0.99 |

Supplement: Supplementary file 5040 [file 1]

IPI00101106.3|COMMD5

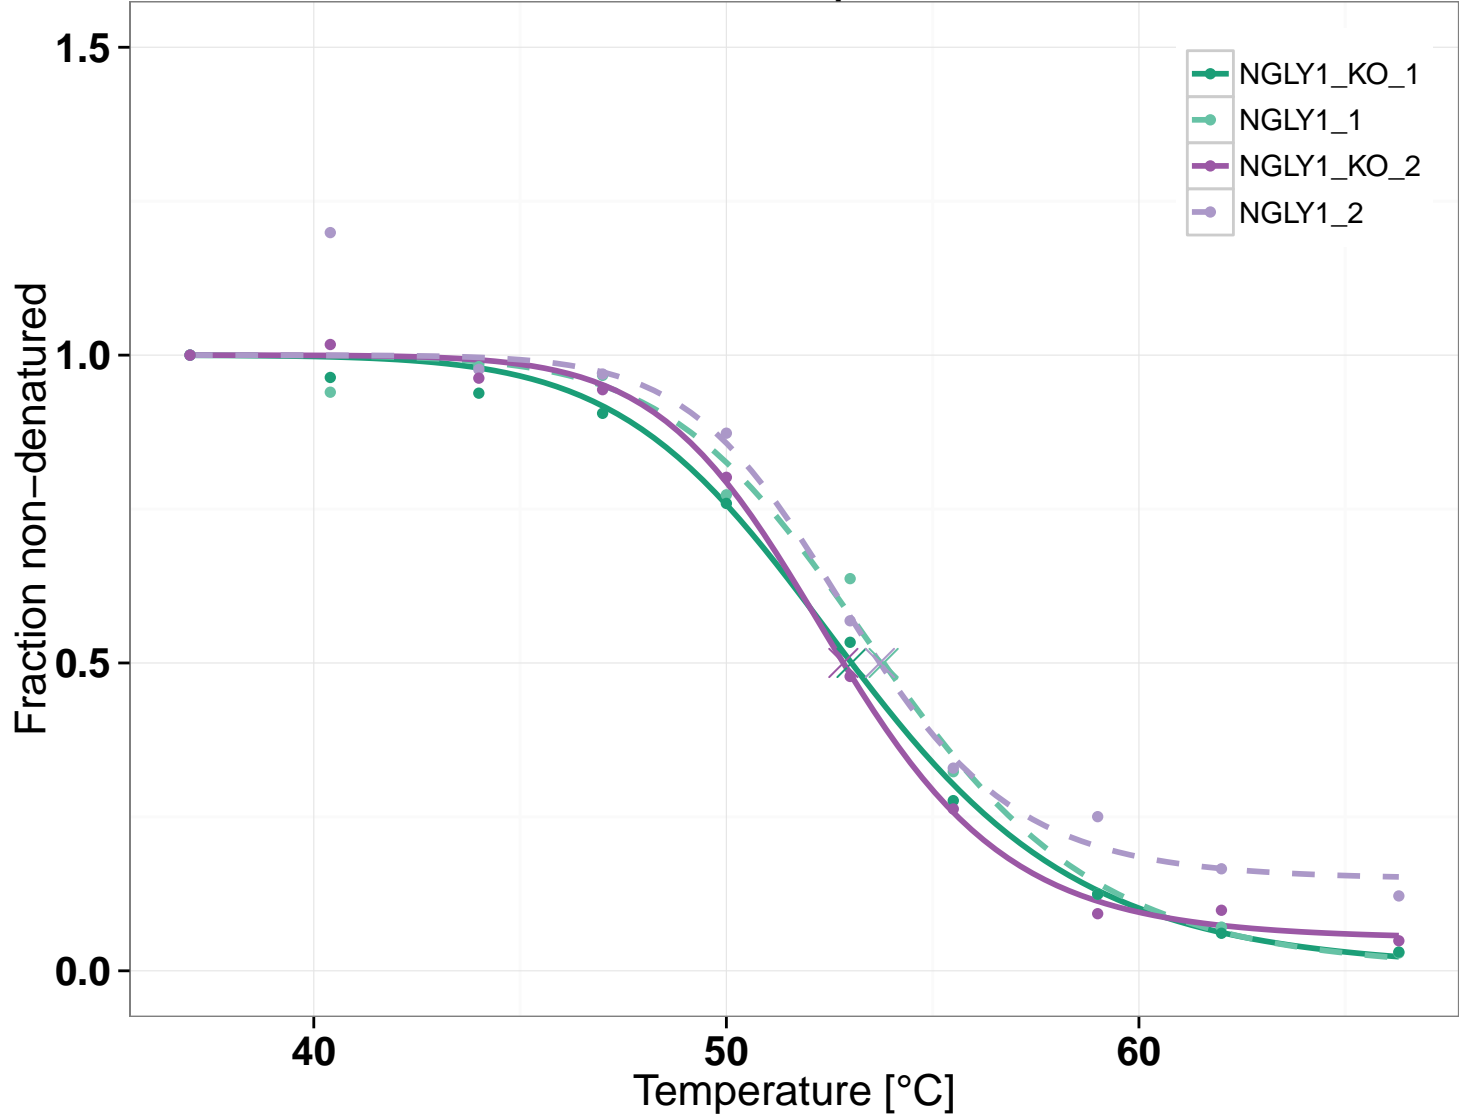

|            | meltPoint | slope  | plateau | R2   |
|------------|-----------|--------|---------|------|
| NGLY1_KO_1 | 53.03     | -0.089 | 0       | 1    |
| NGLY1_1    | 53.81     | -0.096 | 0       | 0.99 |
| NGLY1_KO_2 | 52.84     | -0.11  | 0.05    | 1    |
| NGLY1_2    | 53.72     | -0.11  | 0.15    | 0.97 |

Supplement: Supplementary file 5041 [file 1]

# IPI00902969.2|GFER

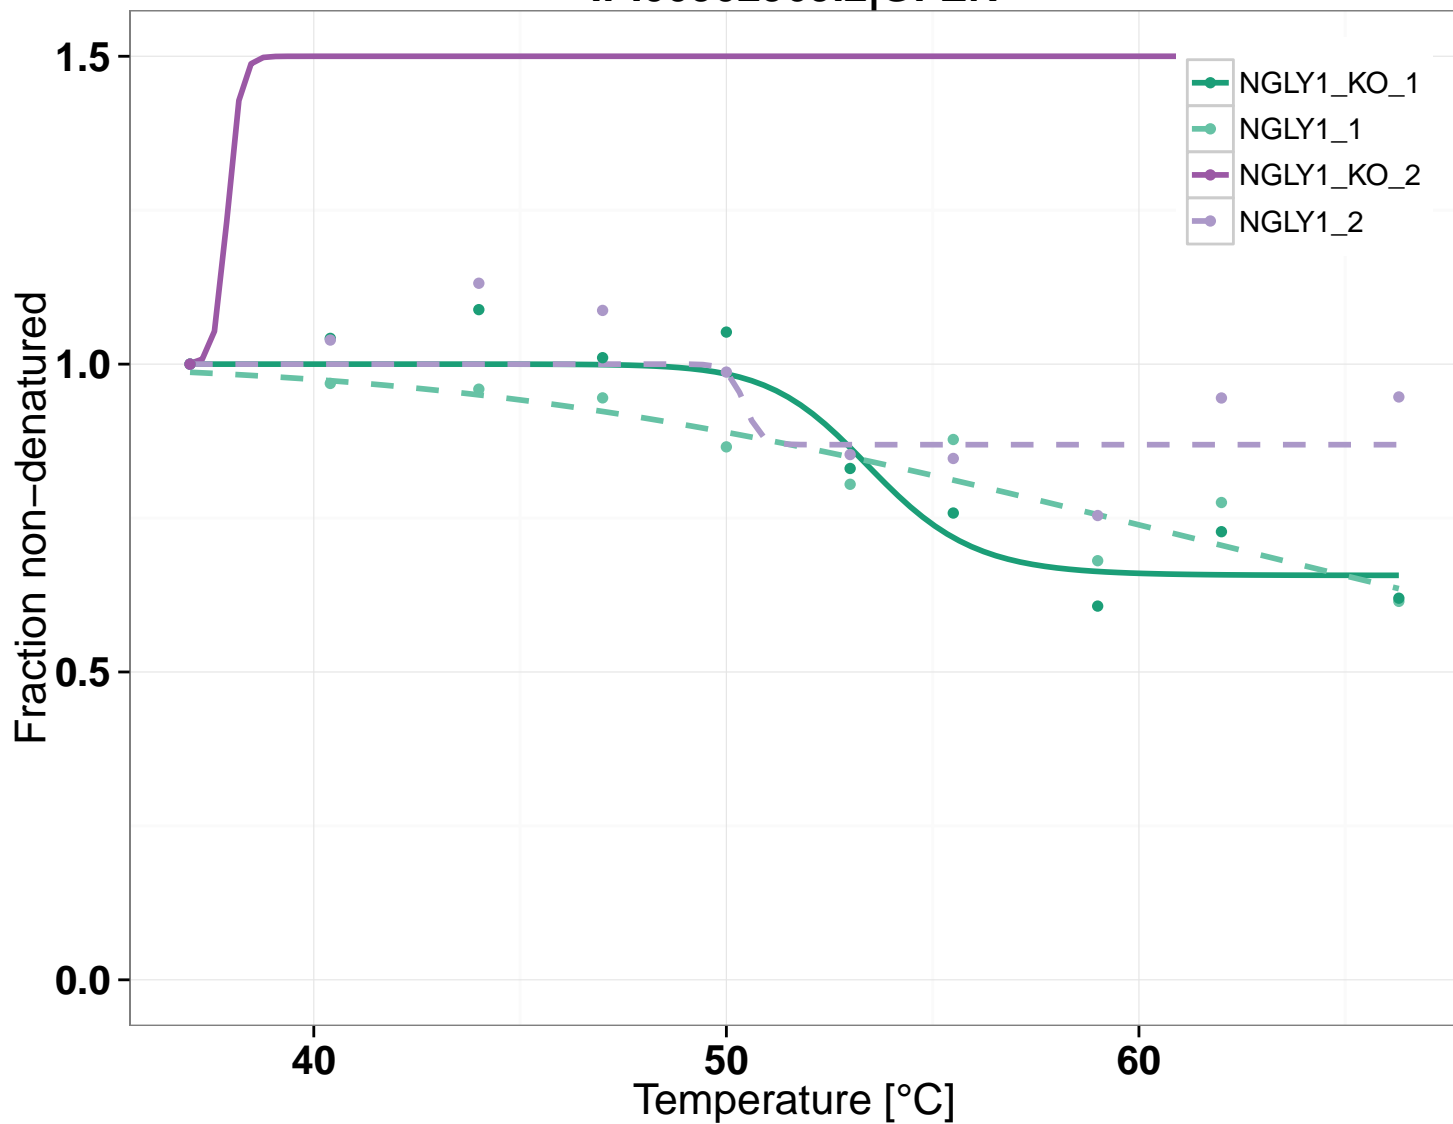

|            | meltPoint | slope  | plateau | R2    |
|------------|-----------|--------|---------|-------|
| NGLY1_KO_1 | -         | -0.069 | 0.66    | 0.92  |
| NGLY1_1    | -         | -0.017 | 0.08    | 0.88  |
| NGLY1_KO_2 | -         | 0.82   | 1.5     | -6.55 |
| NGLY1_2    | -         | -0.16  | 0.87    | 0.57  |

Supplement: Supplementary file 5042 [file 1]

IPI00185326.1|FBXL10

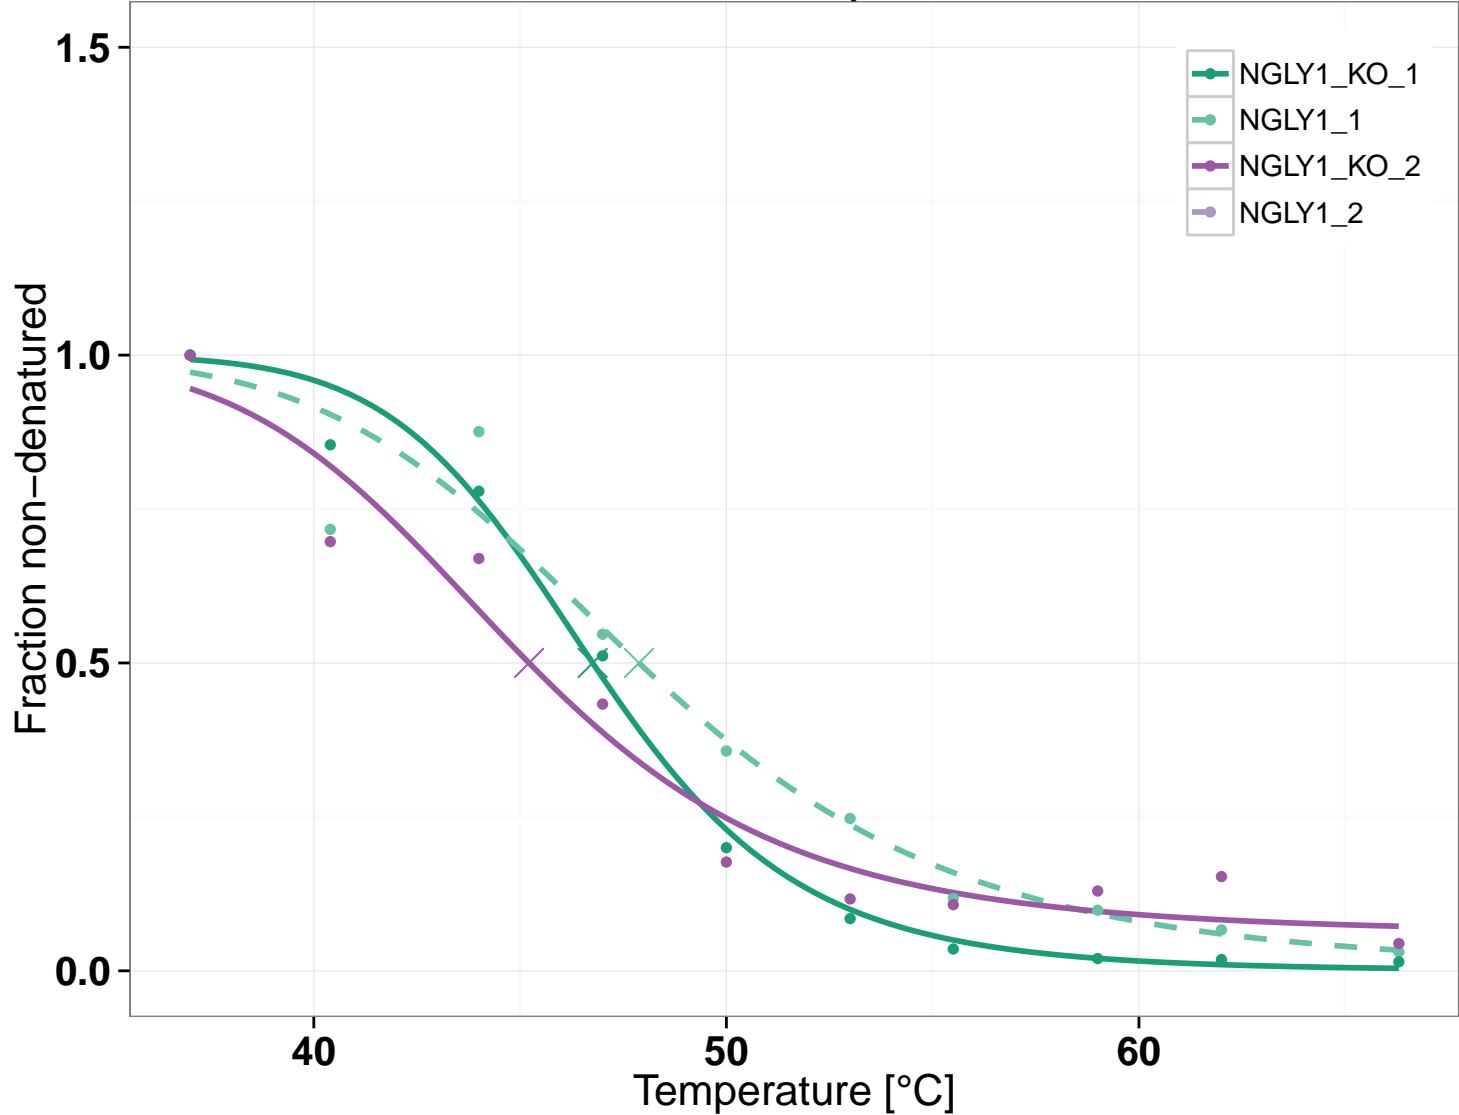

|            | meltPoint | slope  | plateau | R2   |
|------------|-----------|--------|---------|------|
| NGLY1_KO_1 | 46.76     | -0.1   | 0       | 0.99 |
| NGLY1_1    | 47.88     | -0.065 | 0       | 0.95 |
| NGLY1_KO_2 | 45.22     | -0.071 | 0.06    | 0.96 |
| NGLY1_2    | -         | -      | -       | -    |

Supplement: Supplementary file 5043 [file 1]

# IPI00100151.4|XRN2

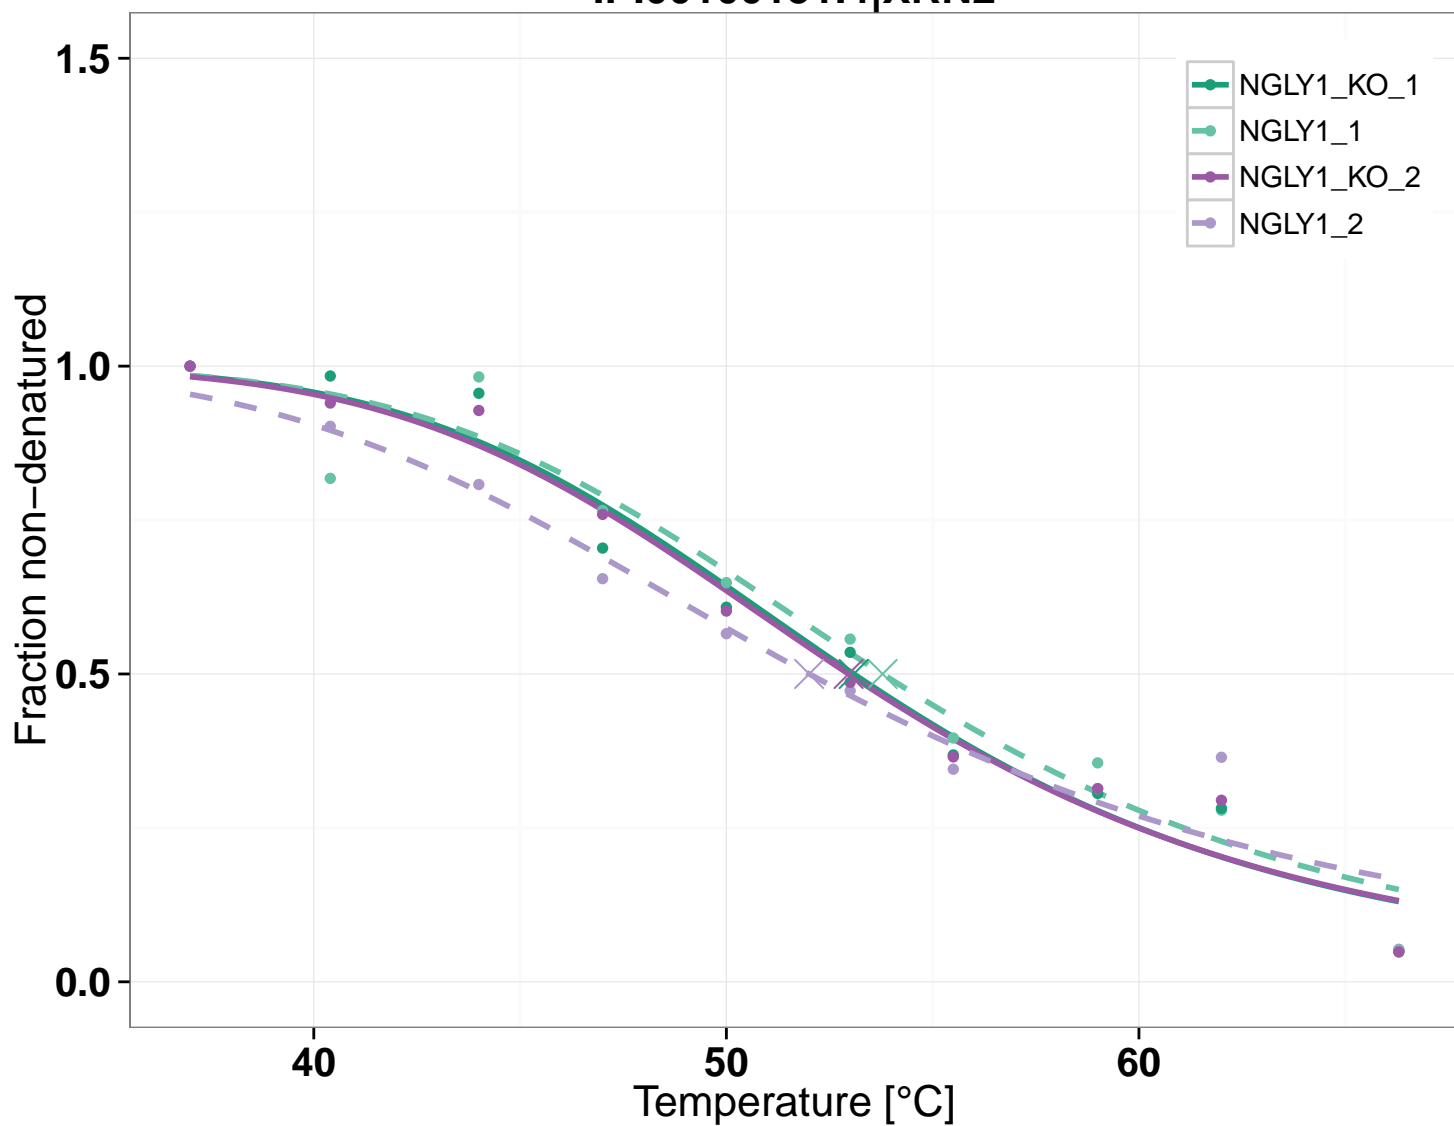

|            | meltPoint | slope  | plateau | R2   |
|------------|-----------|--------|---------|------|
| NGLY1_KO_1 | 53.09     | -0.047 | 0       | 0.97 |
| NGLY1_1    | 53.79     | -0.045 | 0       | 0.95 |
| NGLY1_KO_2 | 52.96     | -0.046 | 0       | 0.98 |
| NGLY1_2    | 52.01     | -0.039 | 0       | 0.95 |

Supplement: Supplementary file 5044 [file 1]

# IPI00894544.2|THADA

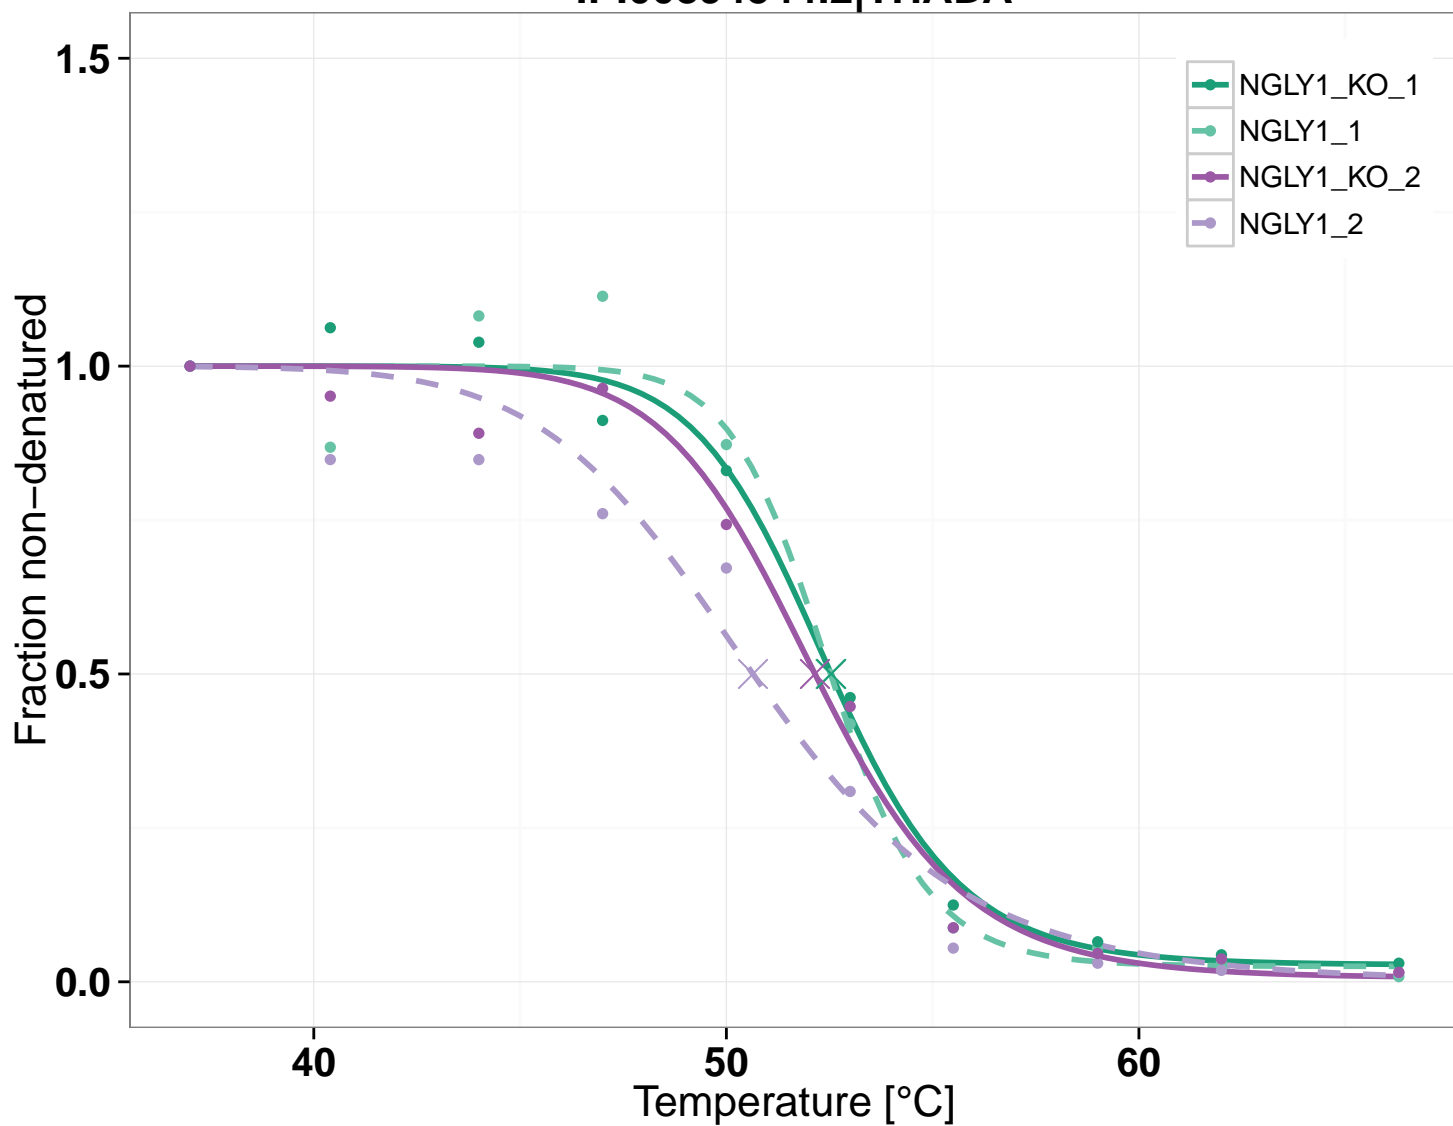

|            | meltPoint | slope  | plateau | R2   |
|------------|-----------|--------|---------|------|
| NGLY1_KO_1 | 52.54     | -0.15  | 0.03    | 0.99 |
| NGLY1_1    | 52.53     | -0.2   | 0.03    | 0.98 |
| NGLY1_KO_2 | 52.15     | -0.13  | 0.01    | 0.99 |
| NGLY1_2    | 50.64     | -0.097 | 0       | 0.96 |

Supplement: Supplementary file 5045 [file 1]

IPI00182126.3|FKBP9

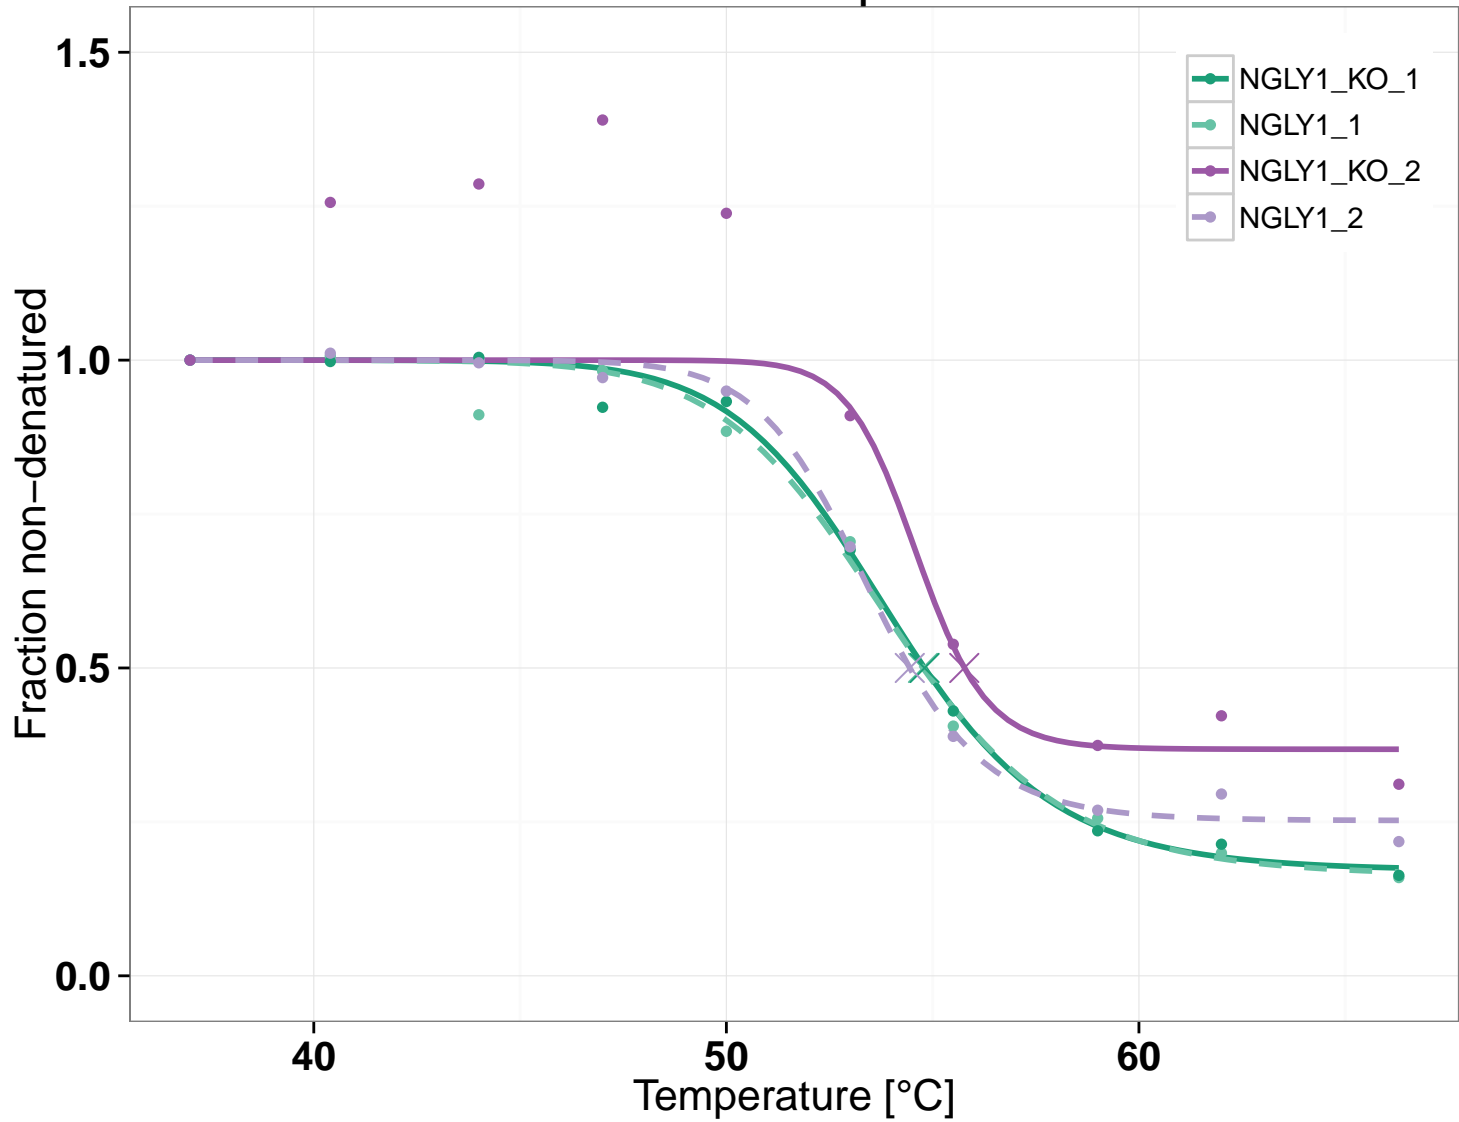

|            | meltPoint | slope | plateau | R2   |
|------------|-----------|-------|---------|------|
| NGLY1_KO_1 | 54.8      | -0.11 | 0.17    | 1    |
| NGLY1_1    | 54.77     | -0.1  | 0.16    | 0.99 |
| NGLY1_KO_2 | 55.77     | -0.19 | 0.37    | 0.77 |
| NGLY1_2    | 54.45     | -0.14 | 0.25    | 1    |

Supplement: Supplementary file 5046 [file 1]

IPI00171134.5|CCDC88A

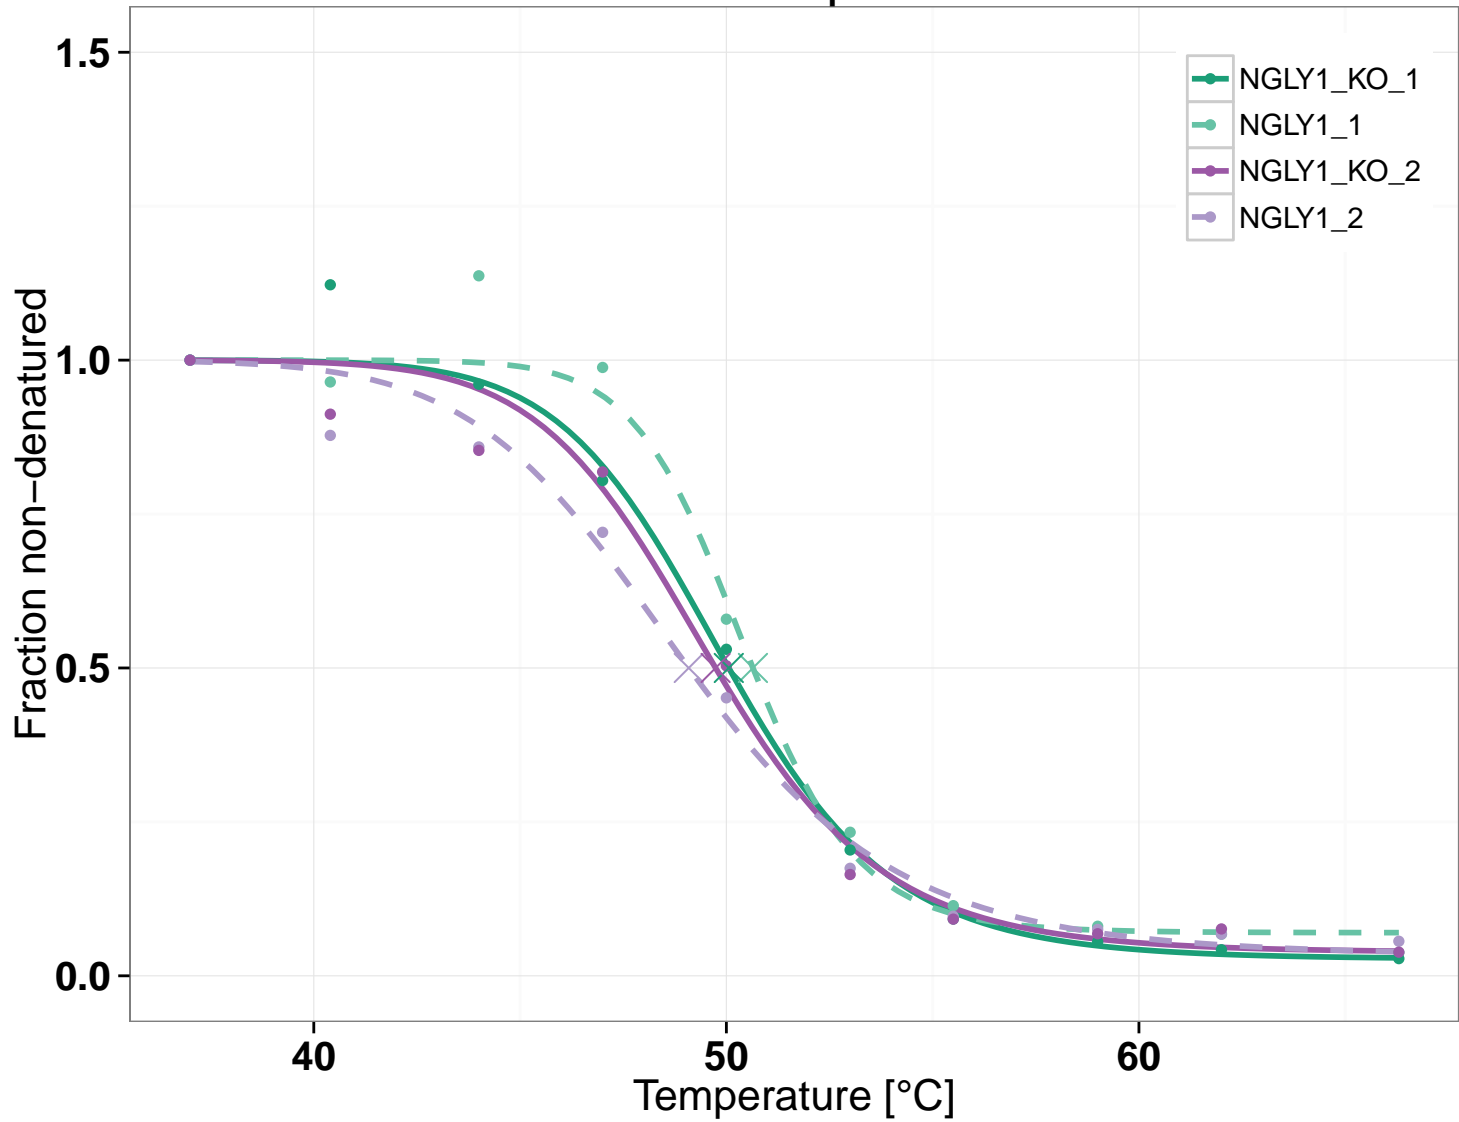

|            | meltPoint | slope  | plateau | R2   |
|------------|-----------|--------|---------|------|
| NGLY1_KO_1 | 50.06     | -0.12  | 0.03    | 0.99 |
| NGLY1_1    | 50.64     | -0.17  | 0.07    | 0.99 |
| NGLY1_KO_2 | 49.74     | -0.11  | 0.04    | 0.99 |
| NGLY1_2    | 49.09     | -0.093 | 0.03    | 0.99 |

Supplement: Supplementary file 5047 [file 1]

IPI00297492.2|STT3A

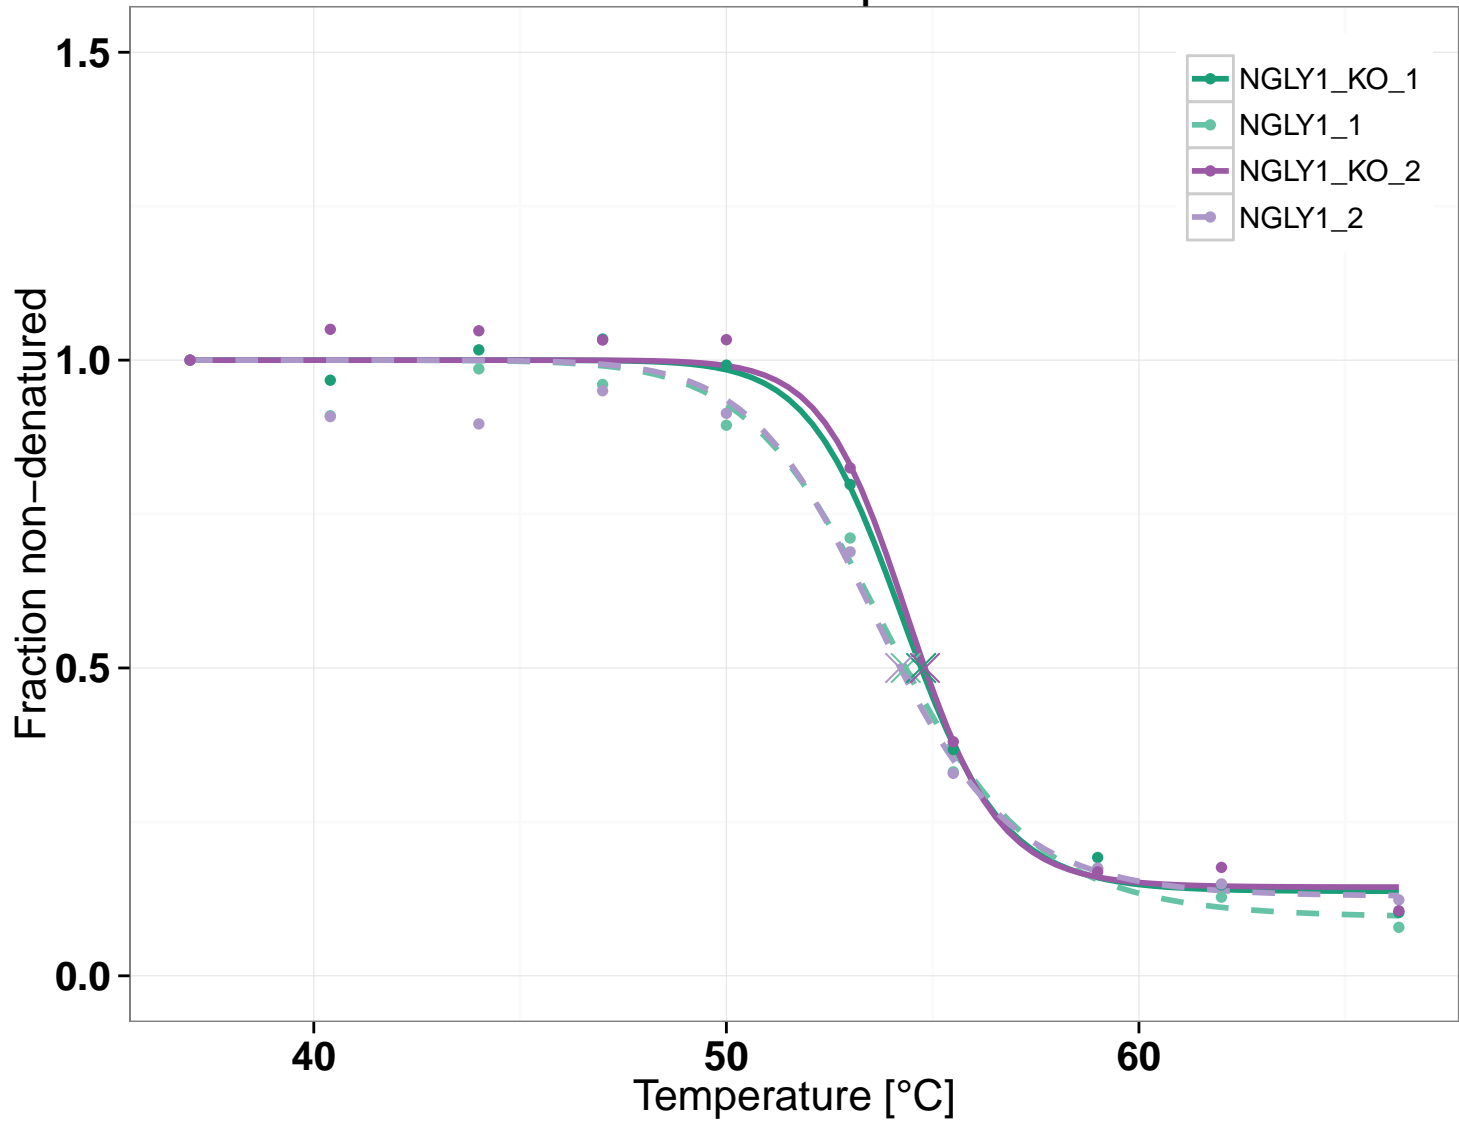

|            | meltPoint | slope | plateau | R2   |
|------------|-----------|-------|---------|------|
| NGLY1_KO_1 | 54.72     | -0.18 | 0.14    | 1    |
| NGLY1_1    | 54.35     | -0.13 | 0.09    | 0.99 |
| NGLY1_KO_2 | 54.81     | -0.2  | 0.14    | 0.99 |
| NGLY1_2    | 54.21     | -0.14 | 0.13    | 0.98 |

Supplement: Supplementary file 5048 [file 1]

IPI00159322.4|TCF20

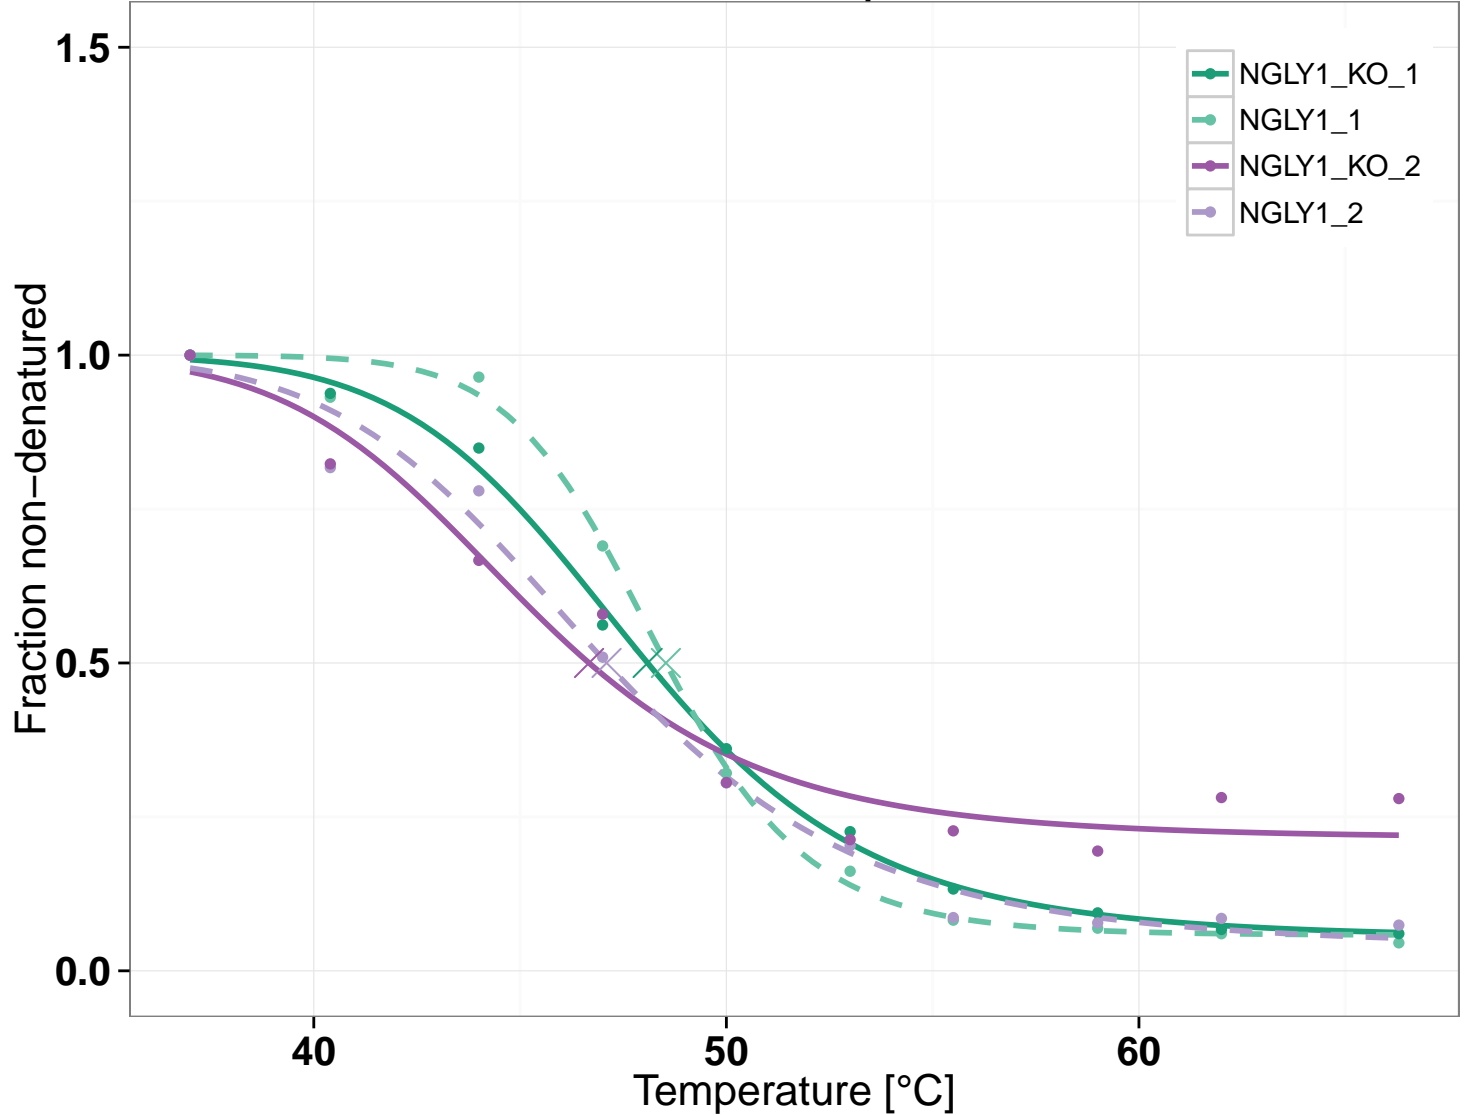

|            | meltPoint | slope  | plateau | R2   |
|------------|-----------|--------|---------|------|
| NGLY1_KO_1 | 48.09     | -0.084 | 0.05    | 1    |
| NGLY1_1    | 48.53     | -0.13  | 0.06    | 1    |
| NGLY1_KO_2 | 46.67     | -0.069 | 0.21    | 0.96 |
| NGLY1_2    | 47.1      | -0.075 | 0.04    | 0.99 |

Supplement: Supplementary file 5049 [file 1]

IPI00010474.1|SLC7A11

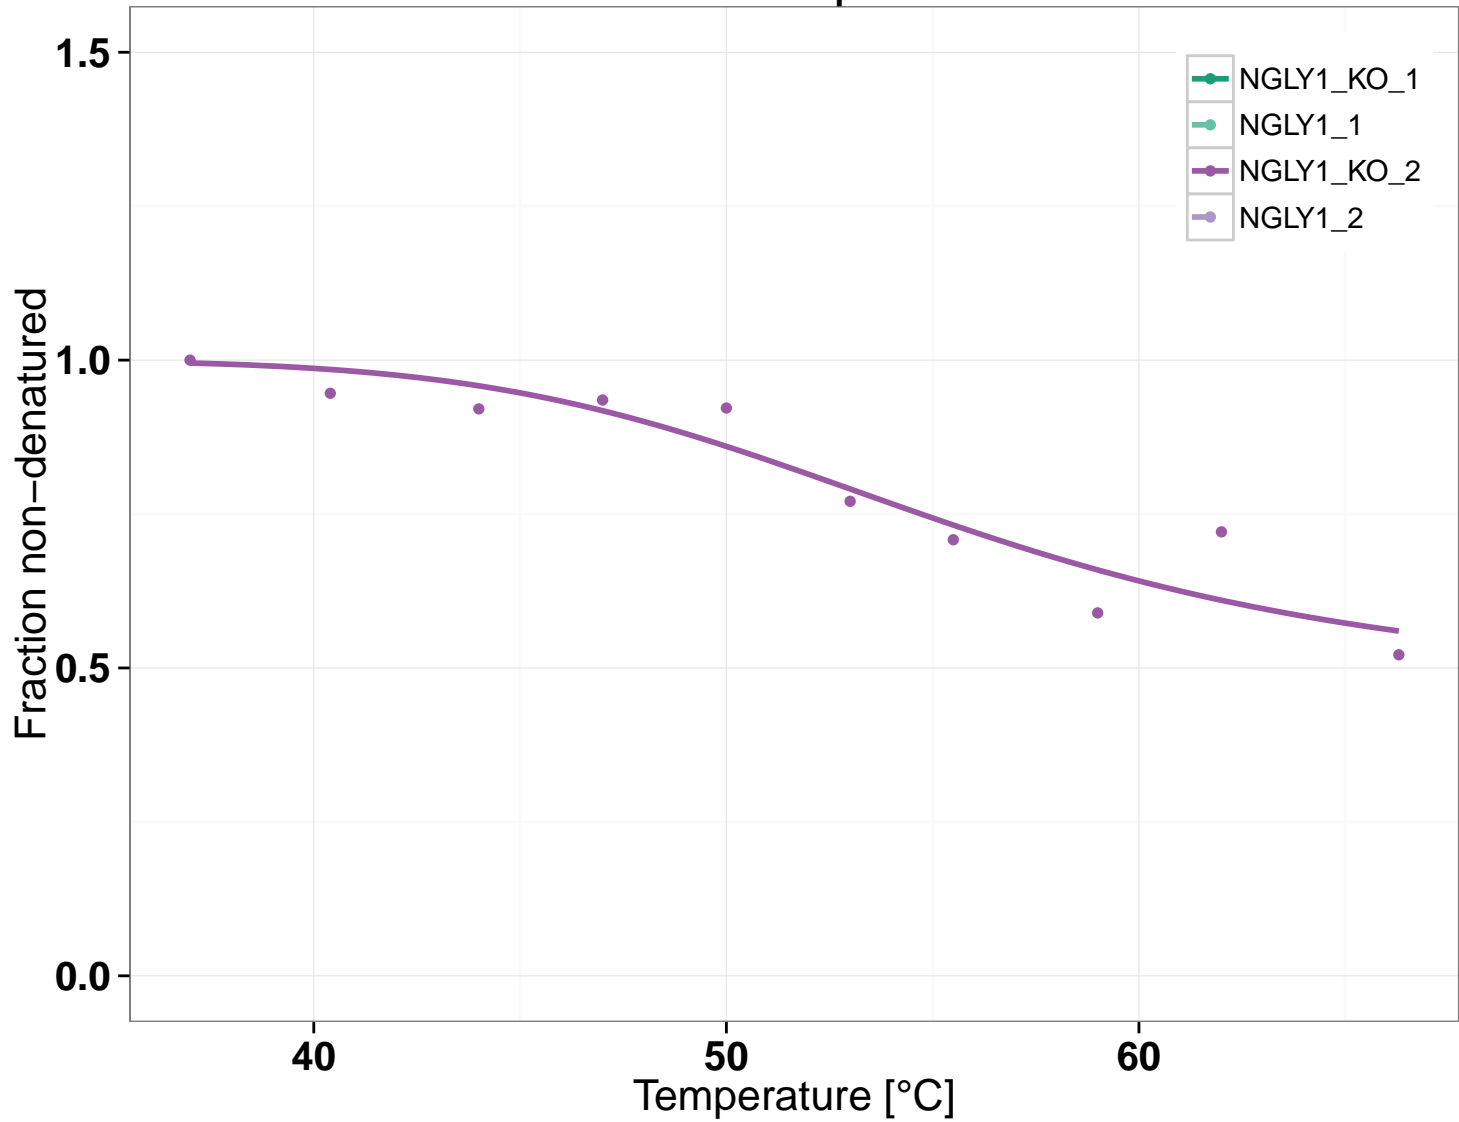

|            | meltPoint | slope  | plateau | R2   |
|------------|-----------|--------|---------|------|
| NGLY1_KO_1 | —         | —      | —       | —    |
| NGLY1_1    | —         | —      | —       | —    |
| NGLY1_KO_2 | —         | -0.024 | 0.47    | 0.89 |
| NGLY1_2    | —         | —      | —       | —    |

Supplement: Supplementary file 5050 [file 1]

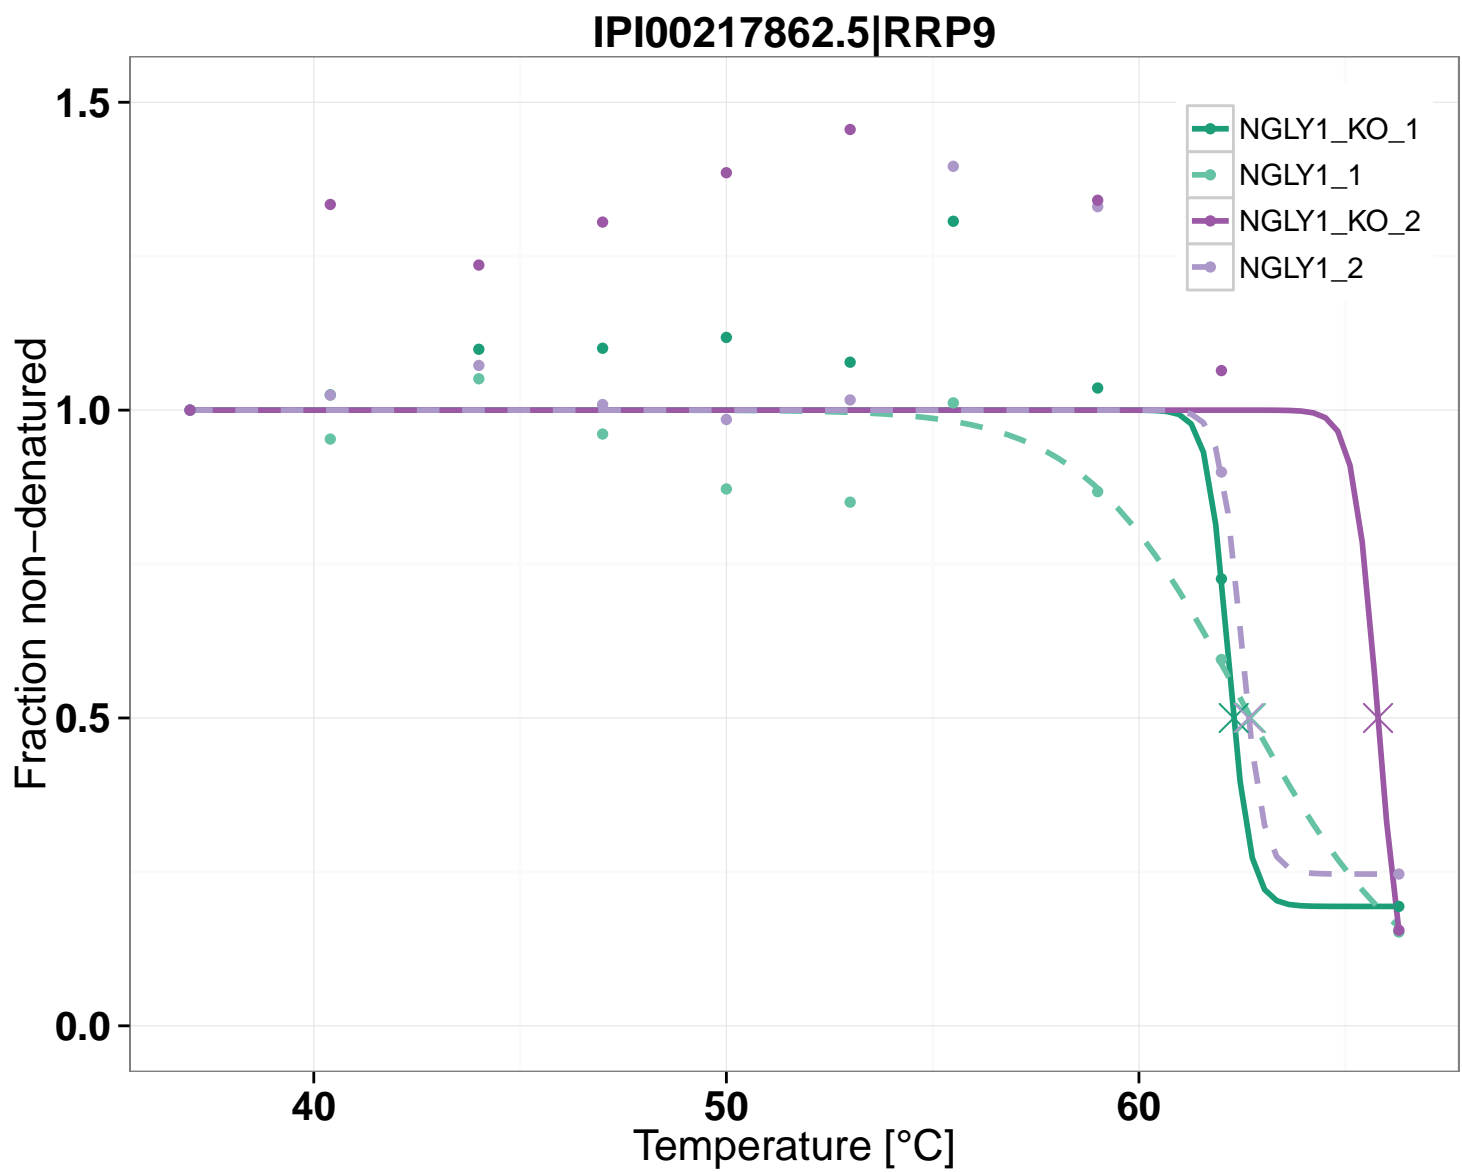

|            | meltPoint | slope | plateau | R2   |
|------------|-----------|-------|---------|------|
| NGLY1_KO_1 | 62.3      | -0.78 | 0.19    | 0.84 |
| NGLY1_1    | 62.72     | -0.12 | 0       | 0.93 |
| NGLY1_KO_2 | 65.79     | -0.84 | 0       | 0.22 |
| NGLY1_2    | 62.66     | -0.72 | 0.25    | 0.68 |

Supplement: Supplementary file 5051 [file 1]

IPI00396063.4|DENND4A

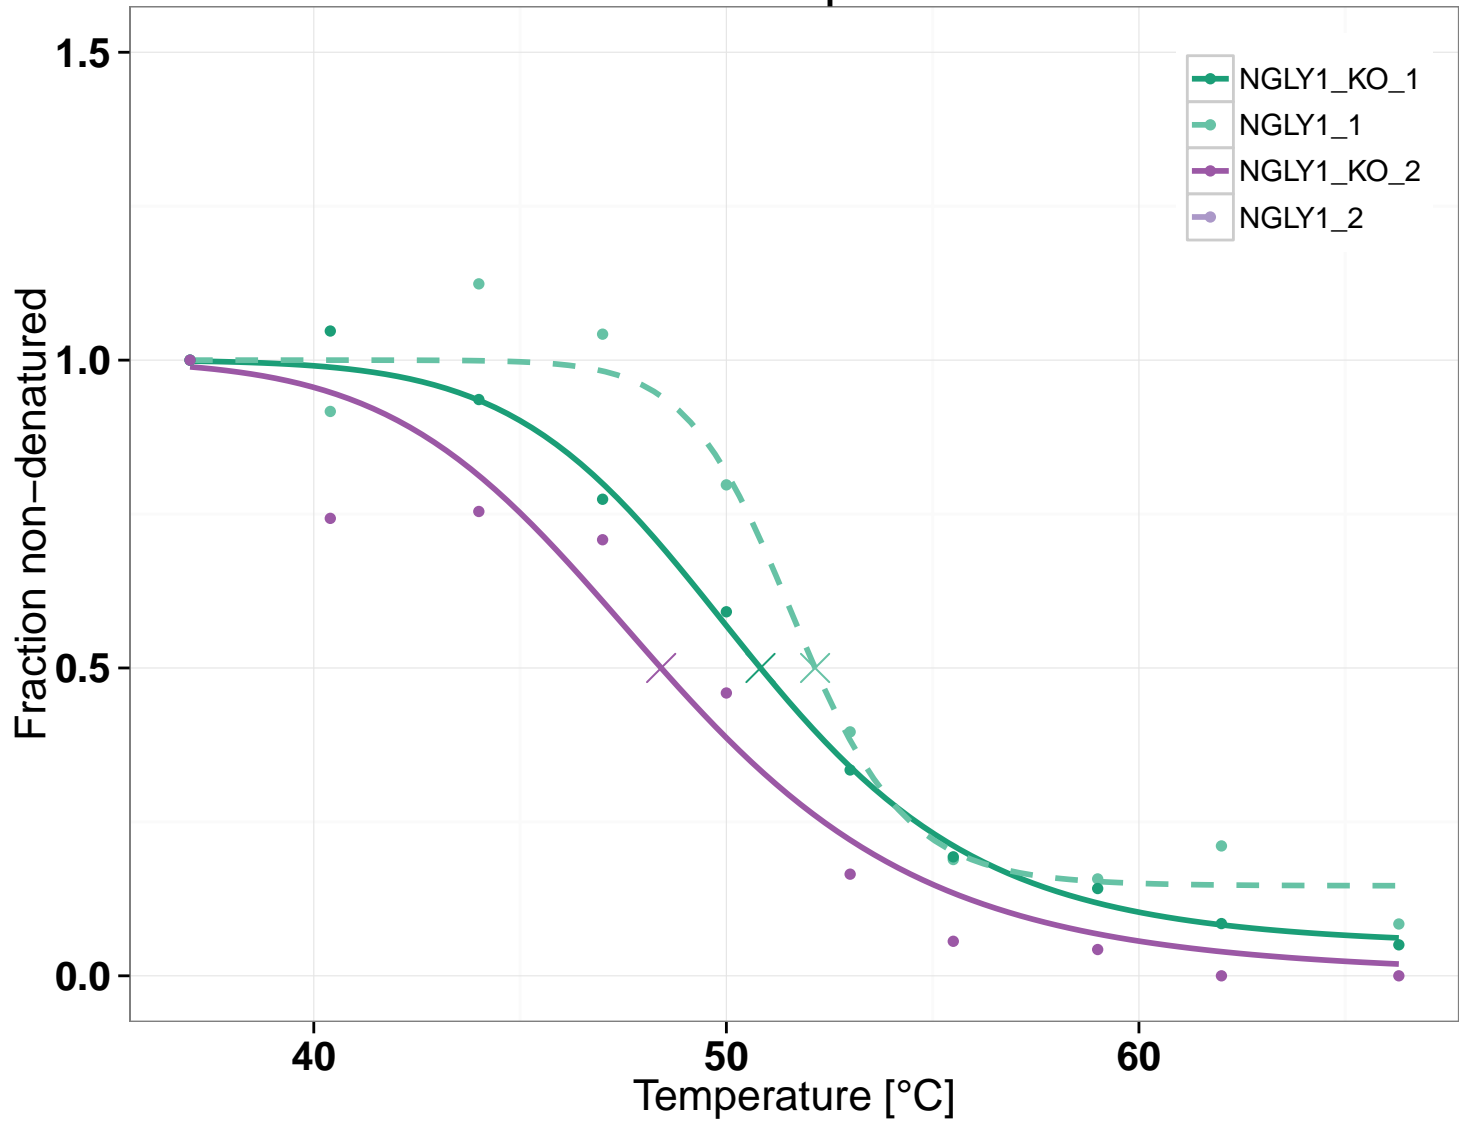

|            | meltPoint | slope  | plateau | R2   |
|------------|-----------|--------|---------|------|
| NGLY1_KO_1 | 50.83     | -0.084 | 0.05    | 1    |
| NGLY1_1    | 52.15     | -0.16  | 0.15    | 0.98 |
| NGLY1_KO_2 | 48.42     | -0.077 | 0       | 0.95 |
| NGLY1_2    | -         | -      | -       | -    |

Supplement: Supplementary file 5052 [file 1]

# IPI00029954.2|VEZT

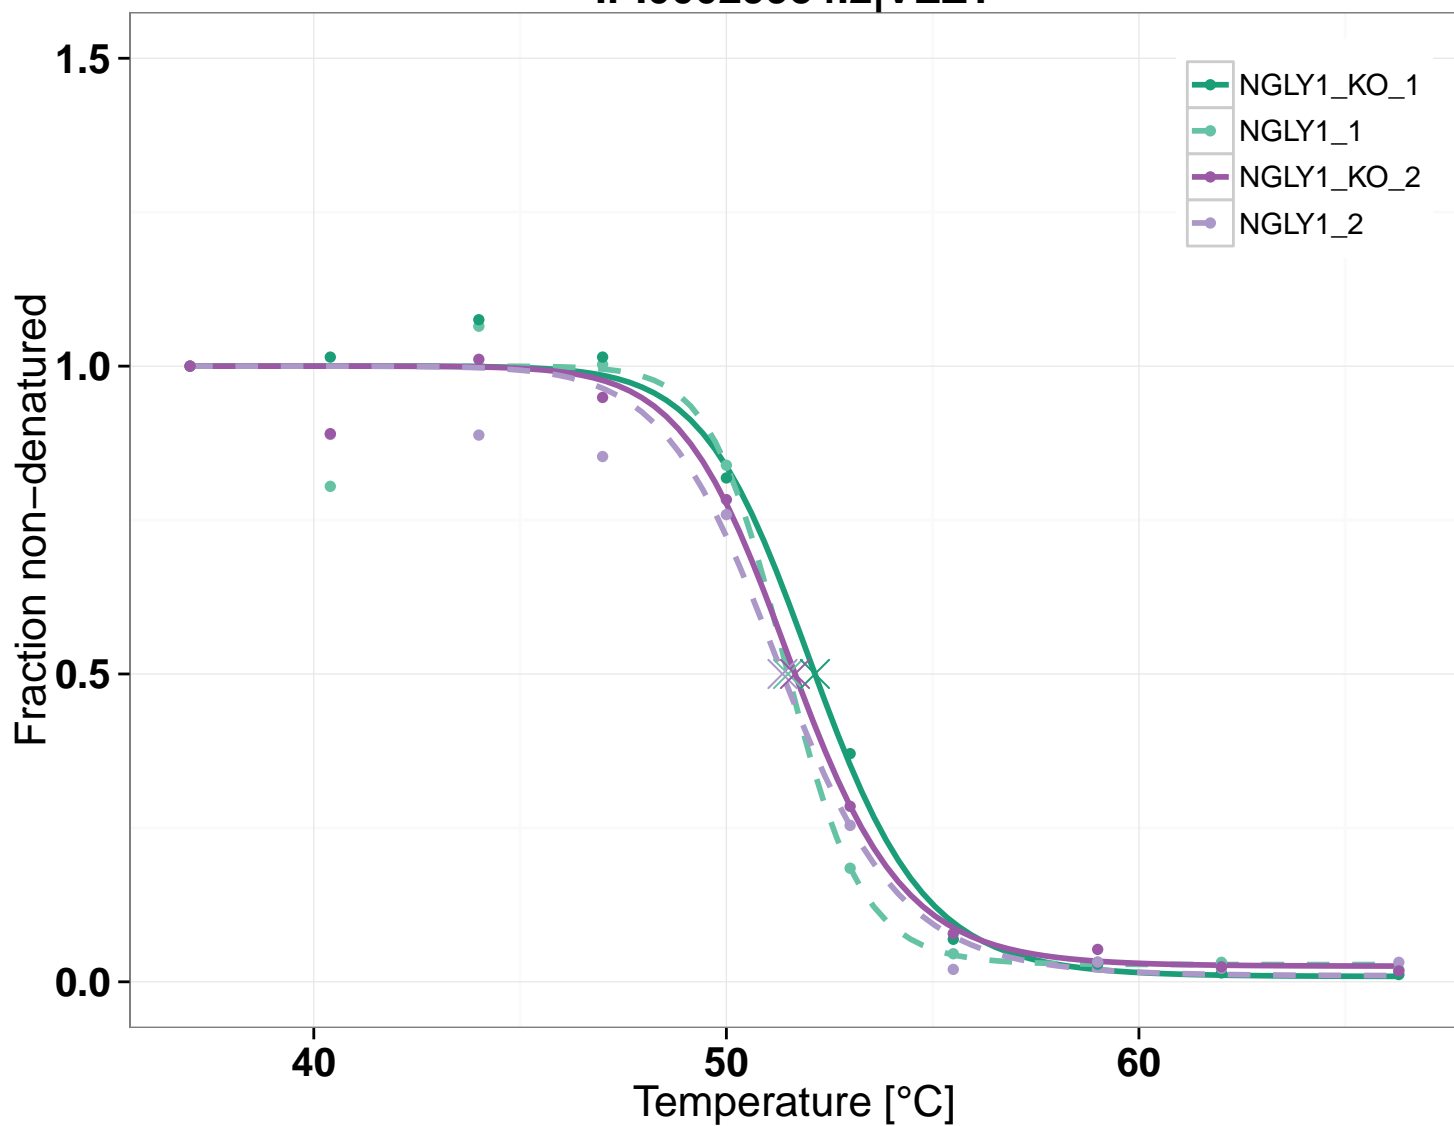

|            | meltPoint | slope | plateau | R2   |
|------------|-----------|-------|---------|------|
| NGLY1_KO_1 | 52.15     | -0.18 | 0.01    | 1    |
| NGLY1_1    | 51.5      | -0.27 | 0.03    | 0.98 |
| NGLY1_KO_2 | 51.66     | -0.18 | 0.03    | 0.99 |
| NGLY1_2    | 51.36     | -0.17 | 0.01    | 0.98 |

Supplement: Supplementary file 5053 [file 1]

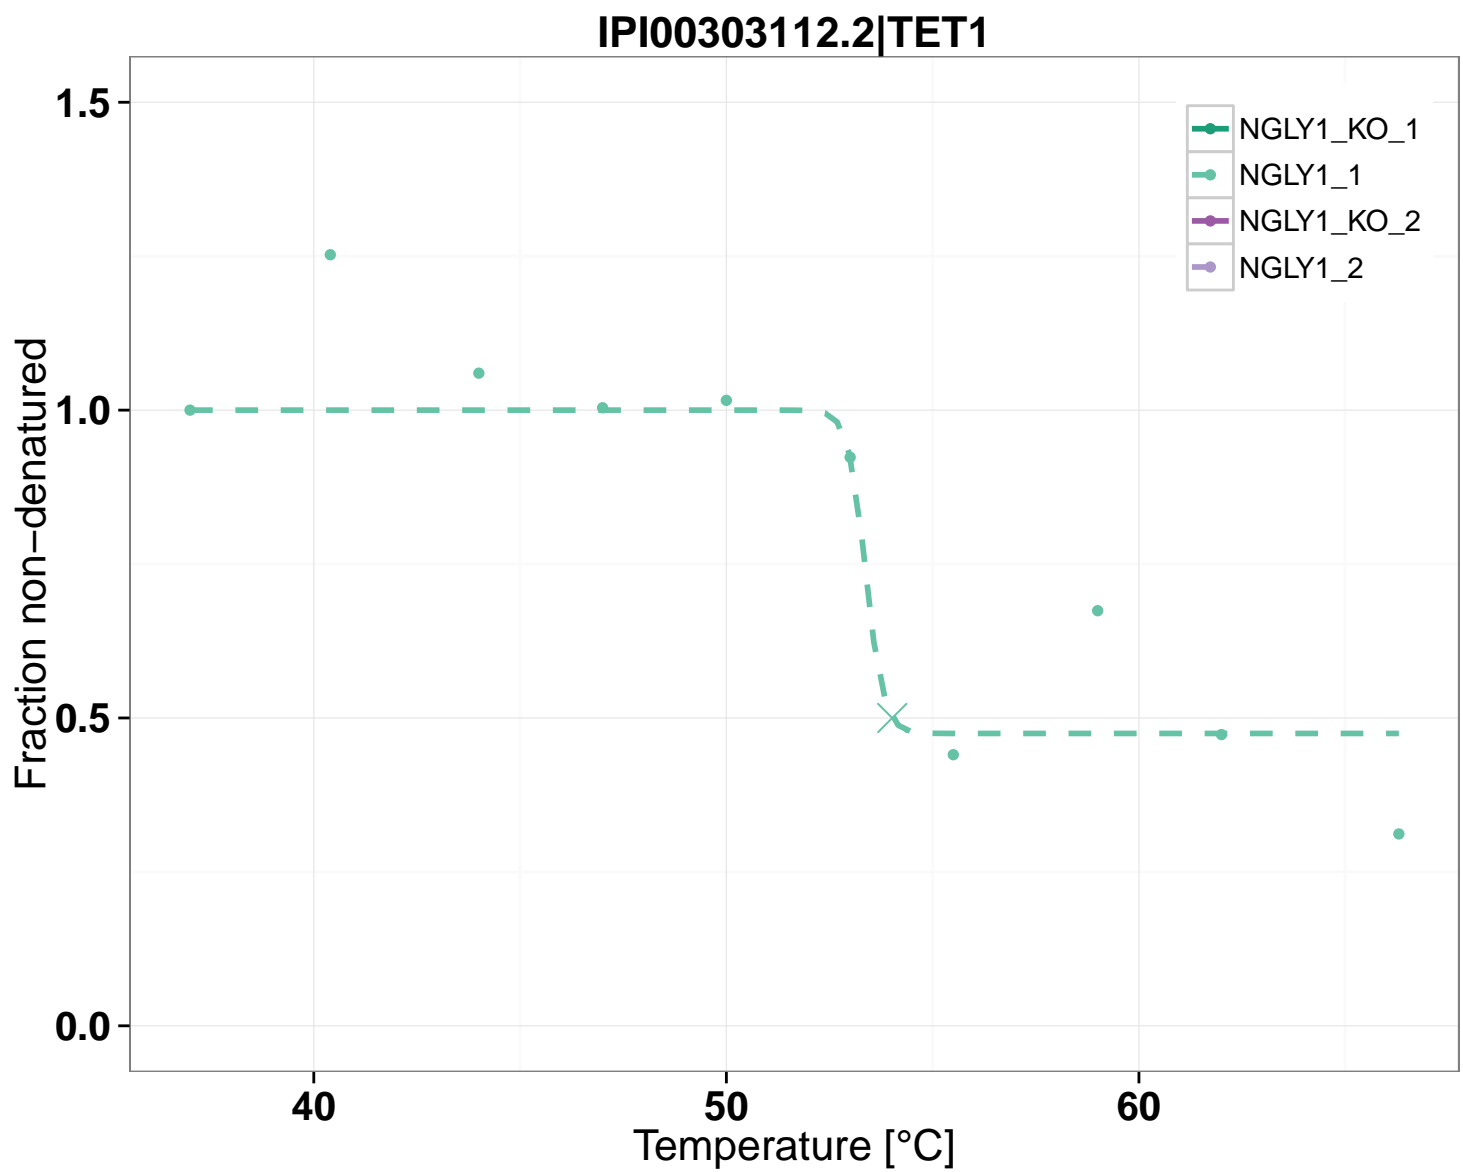

|            | meltPoint | slope | plateau | R2   |
|------------|-----------|-------|---------|------|
| NGLY1_KO_1 | -         | -     | -       | -    |
| NGLY1_1    | 54.02     | -0.62 | 0.47    | 0.85 |
| NGLY1_KO_2 | -         | -     | -       | -    |
| NGLY1_2    | -         | -     | -       | -    |

Supplement: Supplementary file 5054 [file 1]

IPI00414597.4|ALG10

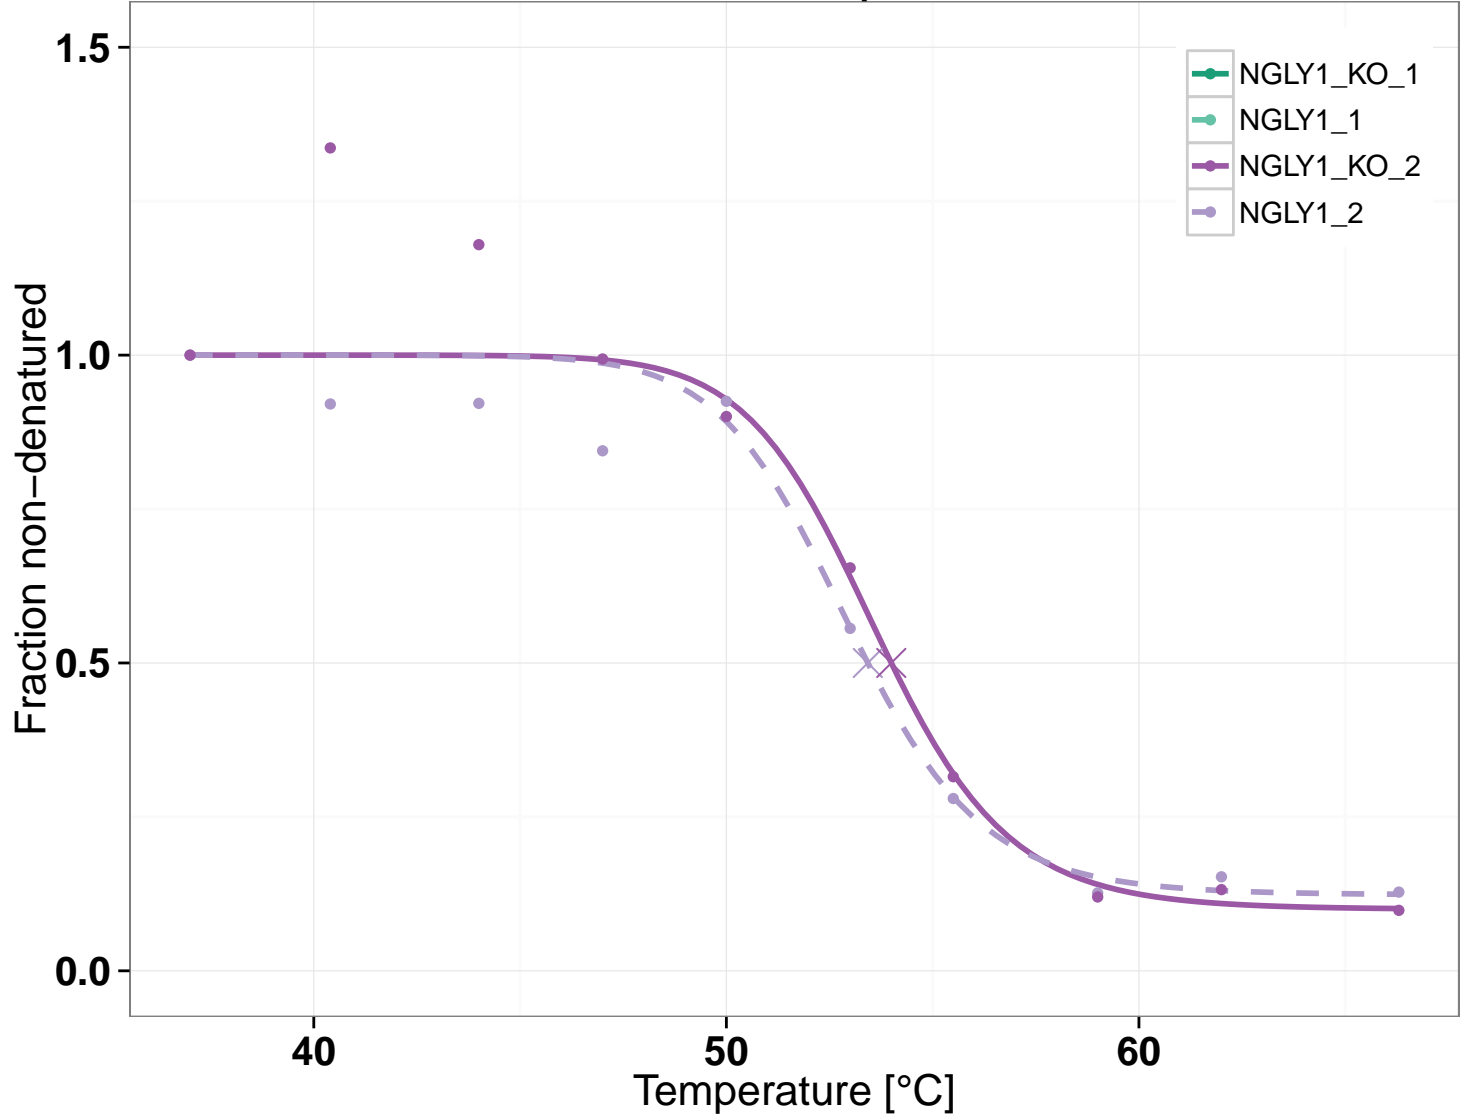

|            | meltPoint | slope | plateau | R2   |
|------------|-----------|-------|---------|------|
| NGLY1_KO_1 | —         | —     | —       | —    |
| NGLY1_1    | —         | —     | —       | —    |
| NGLY1_KO_2 | 54        | -0.14 | 0.1     | 0.93 |
| NGLY1_2    | 53.43     | -0.14 | 0.12    | 0.97 |

Supplement: Supplementary file 5055 [file 1]

# IPI00828189.1|PCMT1

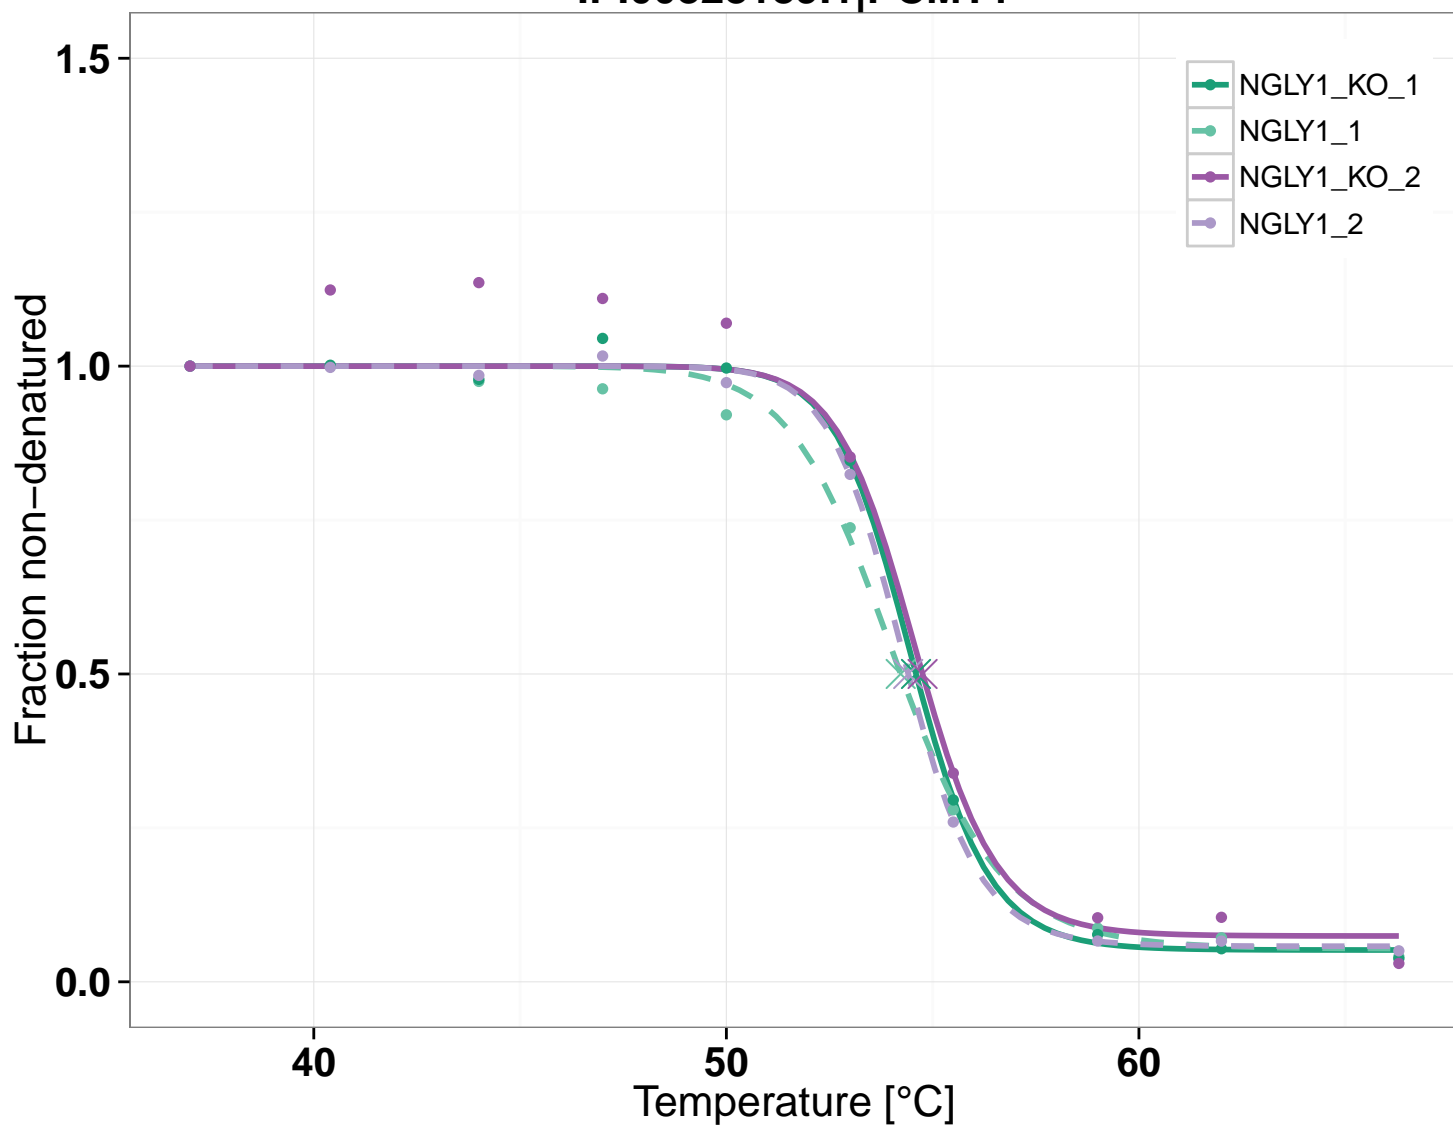

|            | meltPoint | slope | plateau | R2   |
|------------|-----------|-------|---------|------|
| NGLY1_KO_1 | 54.6      | -0.25 | 0.05    | 1    |
| NGLY1_1    | 54.23     | -0.18 | 0.05    | 1    |
| NGLY1_KO_2 | 54.76     | -0.24 | 0.07    | 0.97 |
| NGLY1_2    | 54.41     | -0.26 | 0.06    | 1    |

Supplement: Supplementary file 5056 [file 1]

# IPI00299911.6|ITFG2

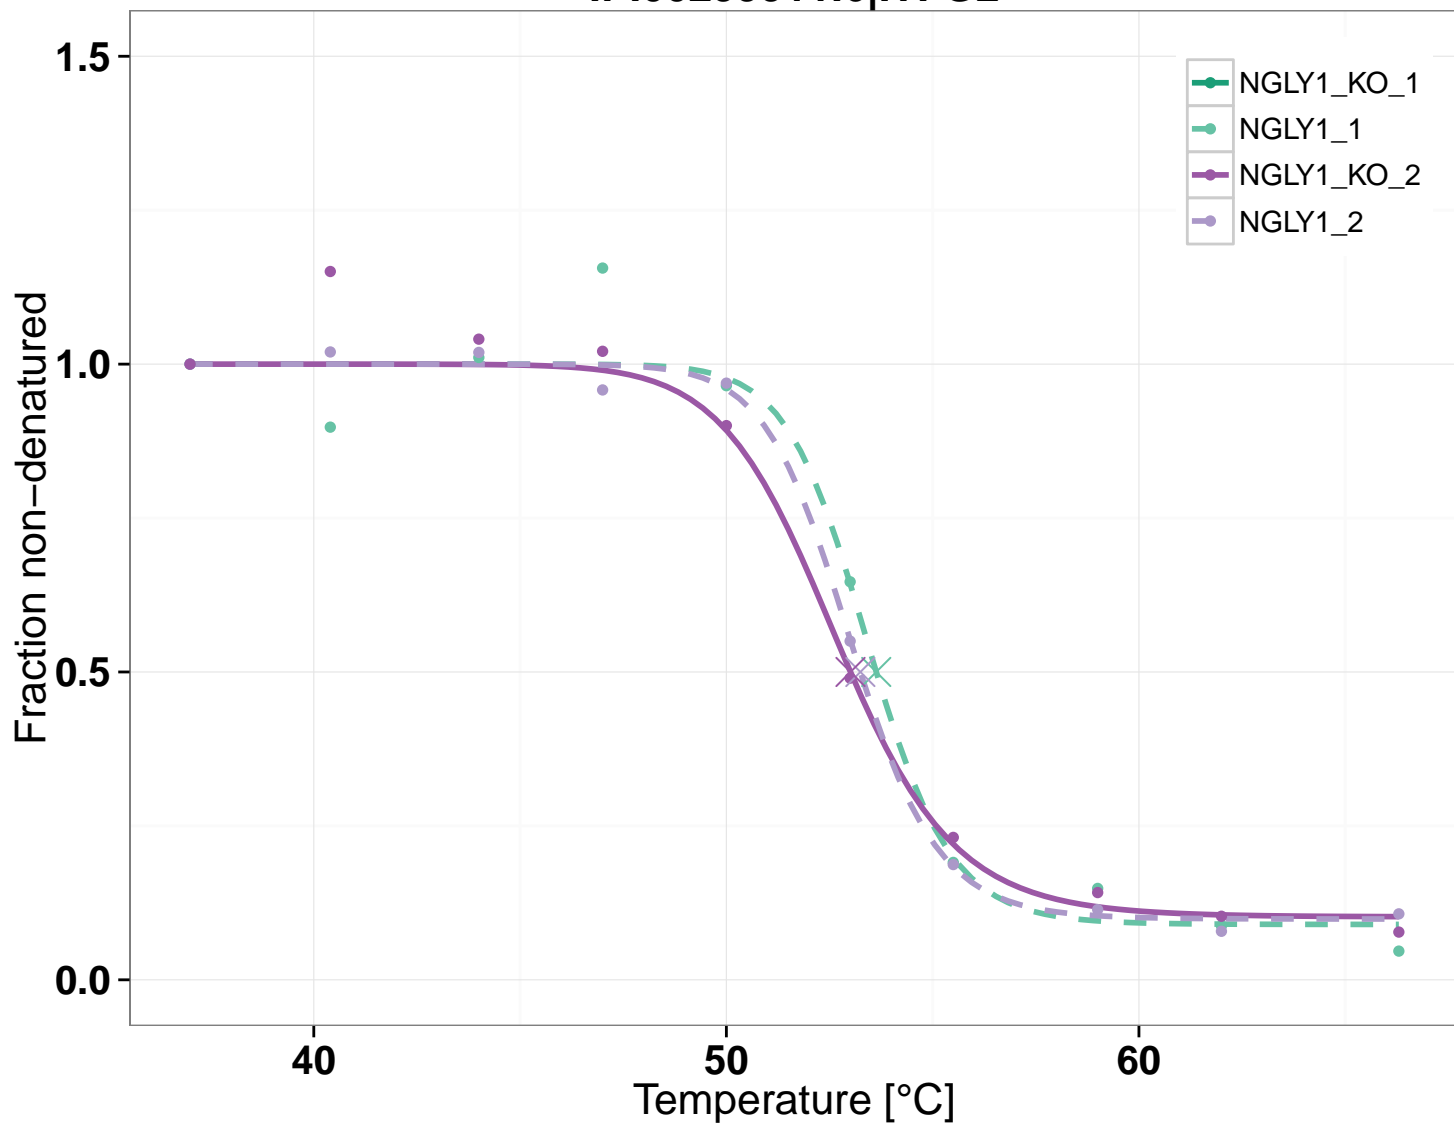

|            | meltPoint | slope | plateau | R2   |
|------------|-----------|-------|---------|------|
| NGLY1_KO_1 | –         | –     | –       | –    |
| NGLY1_1    | 53.63     | –0.23 | 0.09    | 0.98 |
| NGLY1_KO_2 | 53.01     | –0.16 | 0.1     | 0.99 |
| NGLY1_2    | 53.25     | –0.22 | 0.1     | 1    |

Supplement: Supplementary file 5057 [file 1]

IPI00395667.3|IFRD2

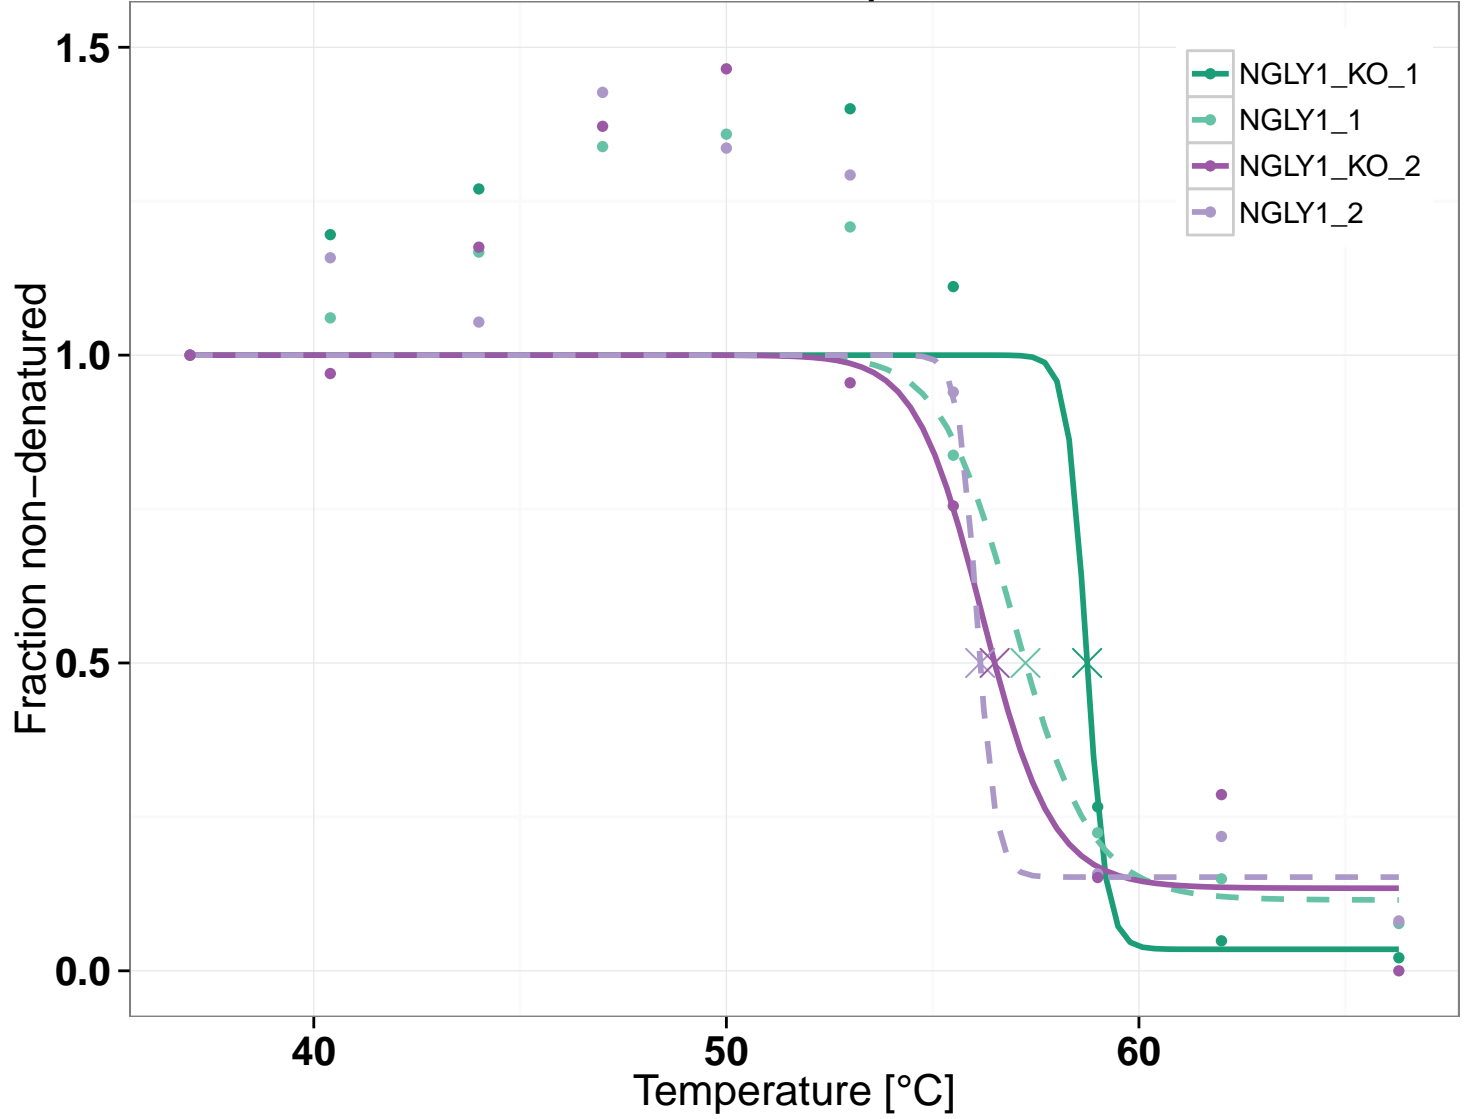

|            | meltPoint | slope | plateau | R2   |
|------------|-----------|-------|---------|------|
| NGLY1_KO_1 | 58.74     | -1    | 0.03    | 0.71 |
| NGLY1_1    | 57.25     | -0.24 | 0.11    | 0.86 |
| NGLY1_KO_2 | 56.5      | -0.26 | 0.13    | 0.82 |
| NGLY1_2    | 56.15     | -0.95 | 0.15    | 0.83 |

Supplement: Supplementary file 5058 [file 1]

IPI00024214.1|TERF2

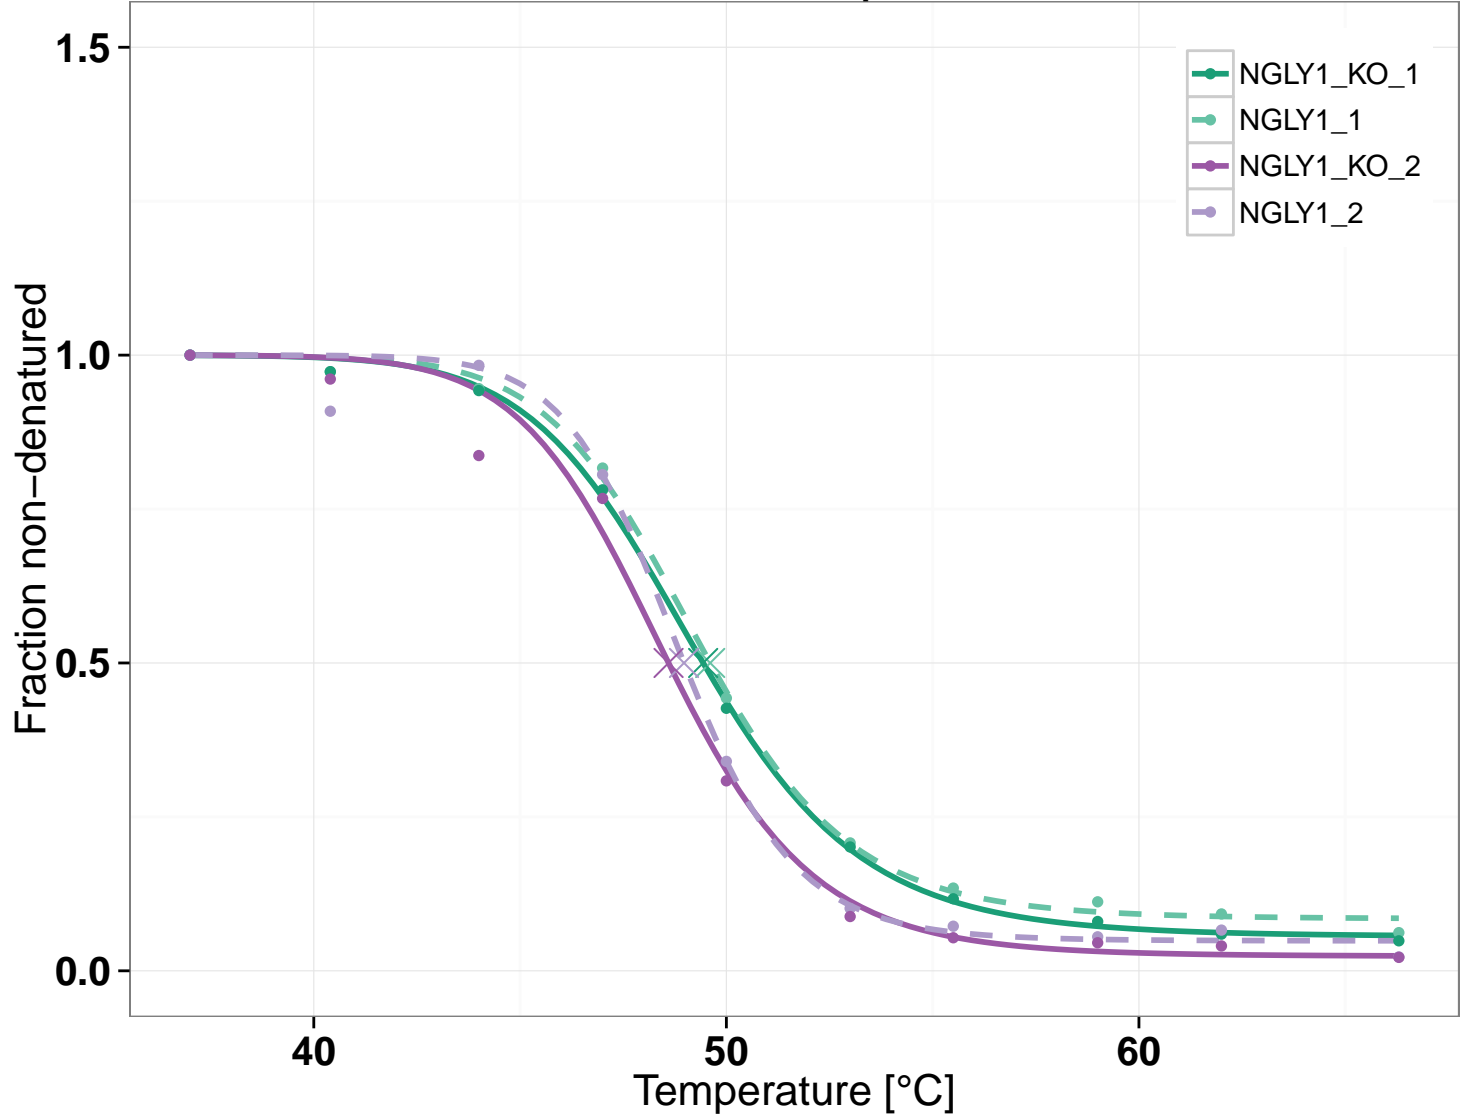

|            | meltPoint | slope | plateau | R2   |
|------------|-----------|-------|---------|------|
| NGLY1_KO_1 | 49.44     | -0.12 | 0.06    | 1    |
| NGLY1_1    | 49.61     | -0.12 | 0.08    | 1    |
| NGLY1_KO_2 | 48.6      | -0.14 | 0.02    | 0.99 |
| NGLY1_2    | 48.97     | -0.17 | 0.05    | 0.99 |

Supplement: Supplementary file 5059 [file 1]

# IPI00219097.4|HMGB2

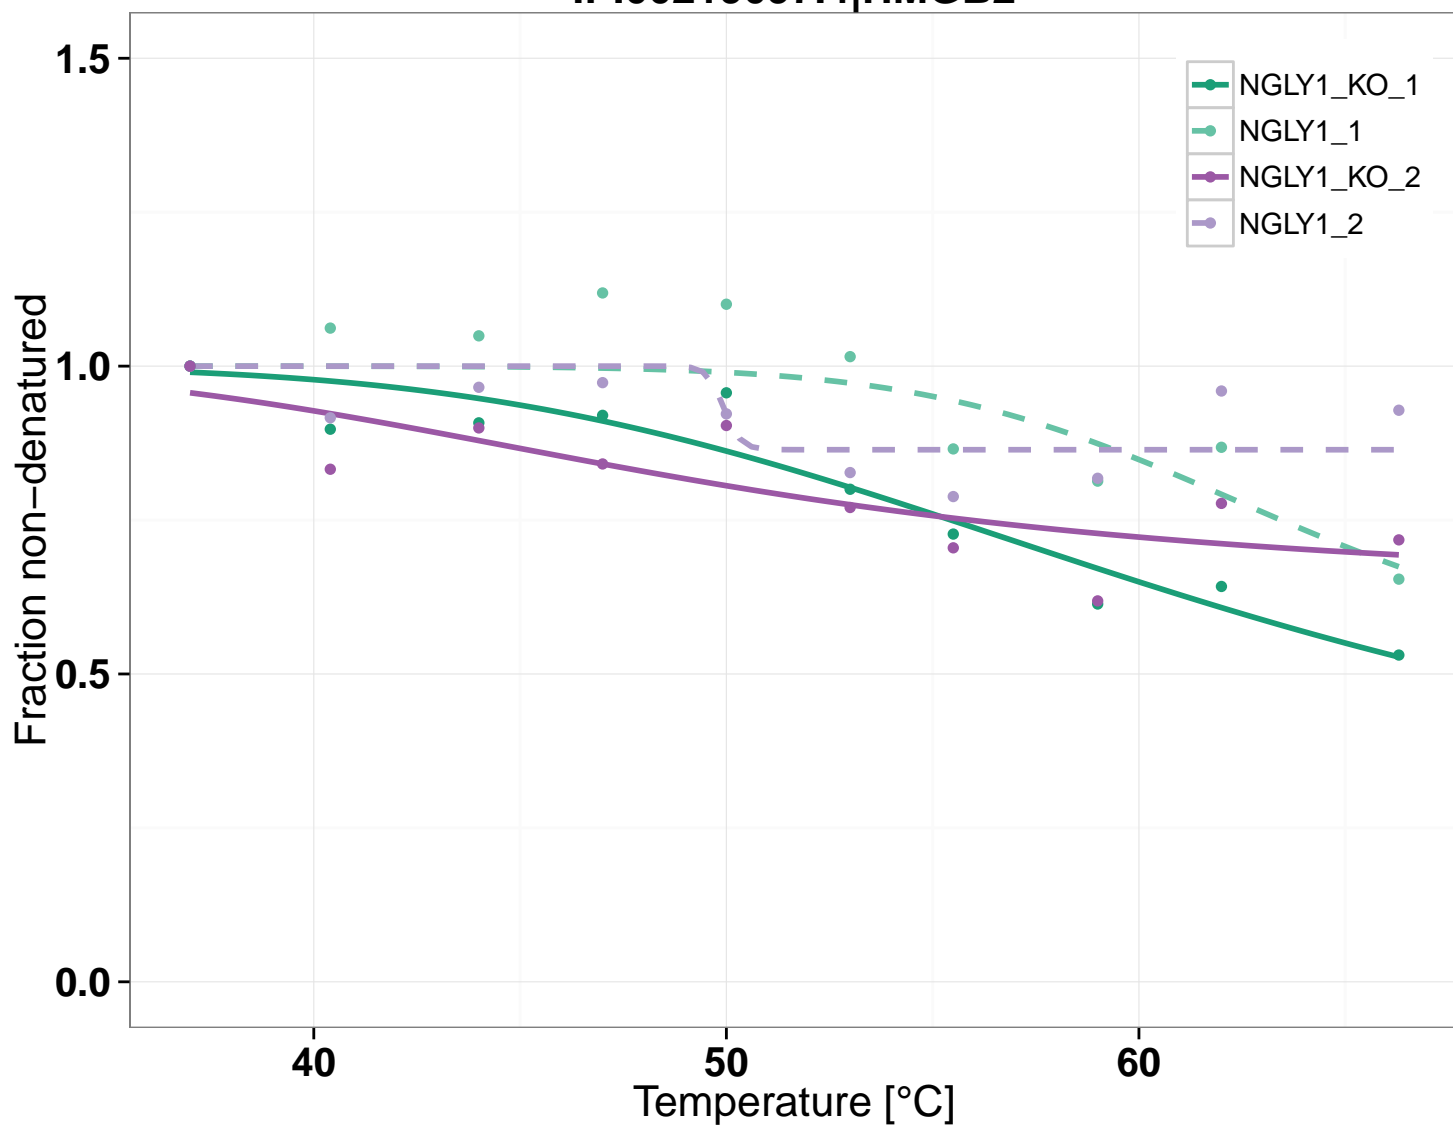

|            | meltPoint | slope  | plateau | R2   |
|------------|-----------|--------|---------|------|
| NGLY1_KO_1 | —         | -0.022 | 0.22    | 0.91 |
| NGLY1_1    | —         | -0.029 | 0.5     | 0.74 |
| NGLY1_KO_2 | —         | -0.013 | 0.63    | 0.65 |
| NGLY1_2    | —         | -0.17  | 0.86    | 0.35 |

Supplement: Supplementary file 5060 [file 1]

IPI00395014.1|RSRC1

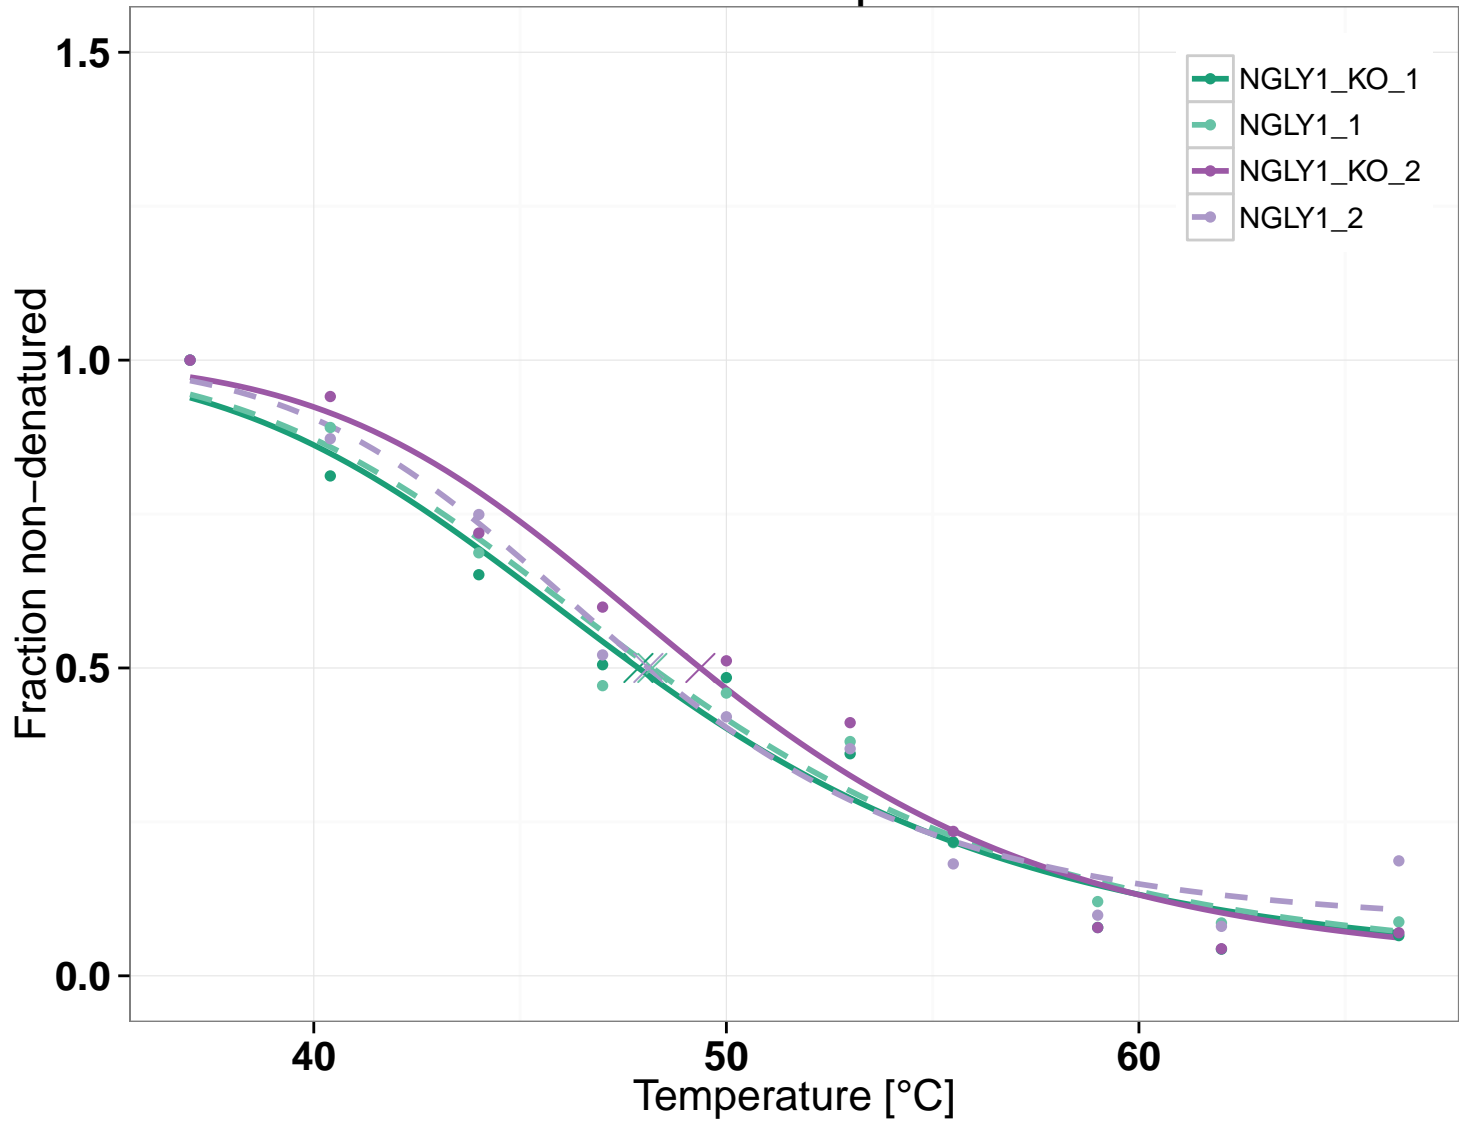

|            | meltPoint | slope  | plateau | R2   |
|------------|-----------|--------|---------|------|
| NGLY1_KO_1 | 47.87     | -0.051 | 0       | 0.97 |
| NGLY1_1    | 48.21     | -0.051 | 0       | 0.98 |
| NGLY1_KO_2 | 49.37     | -0.056 | 0       | 0.98 |
| NGLY1_2    | 48.11     | -0.058 | 0.08    | 0.97 |

Supplement: Supplementary file 5061 [file 1]

# IPI00013269.1|C6ORF106

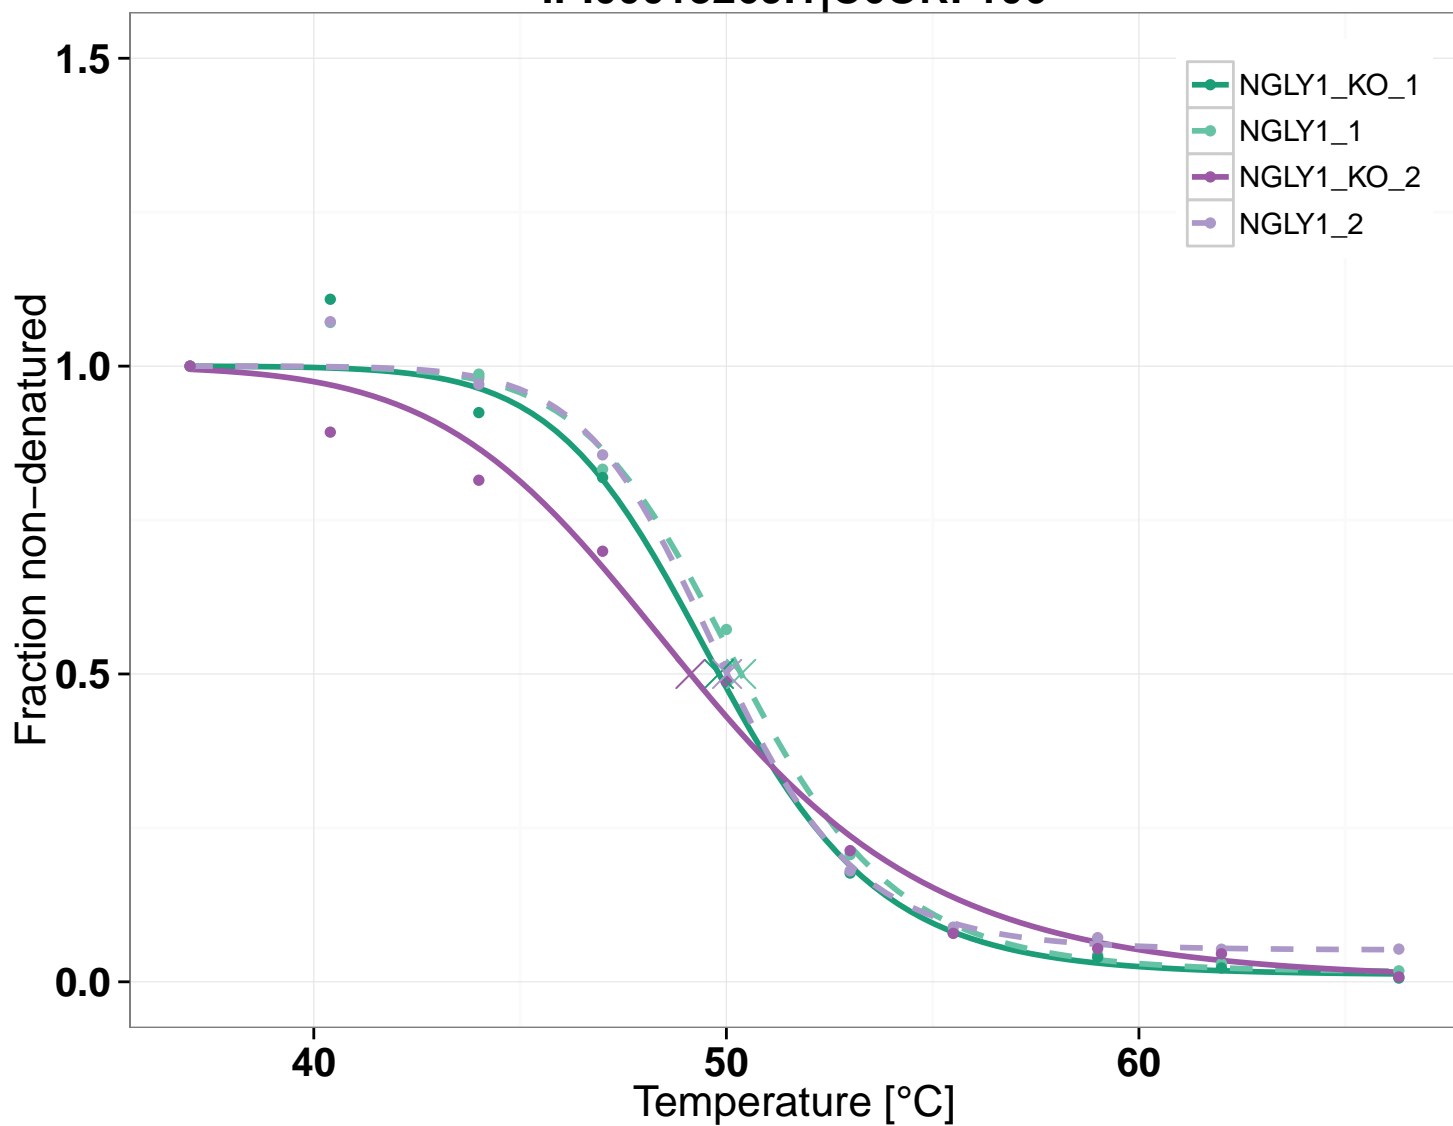

|            | meltPoint | slope  | plateau | R2   |
|------------|-----------|--------|---------|------|
| NGLY1_KO_1 | 49.82     | -0.12  | 0.01    | 0.99 |
| NGLY1_1    | 50.36     | -0.13  | 0.02    | 1    |
| NGLY1_KO_2 | 49.13     | -0.083 | 0       | 0.99 |
| NGLY1_2    | 50.02     | -0.14  | 0.05    | 1    |

Supplement: Supplementary file 5062 [file 1]

IPI00396023.1|CPLX1

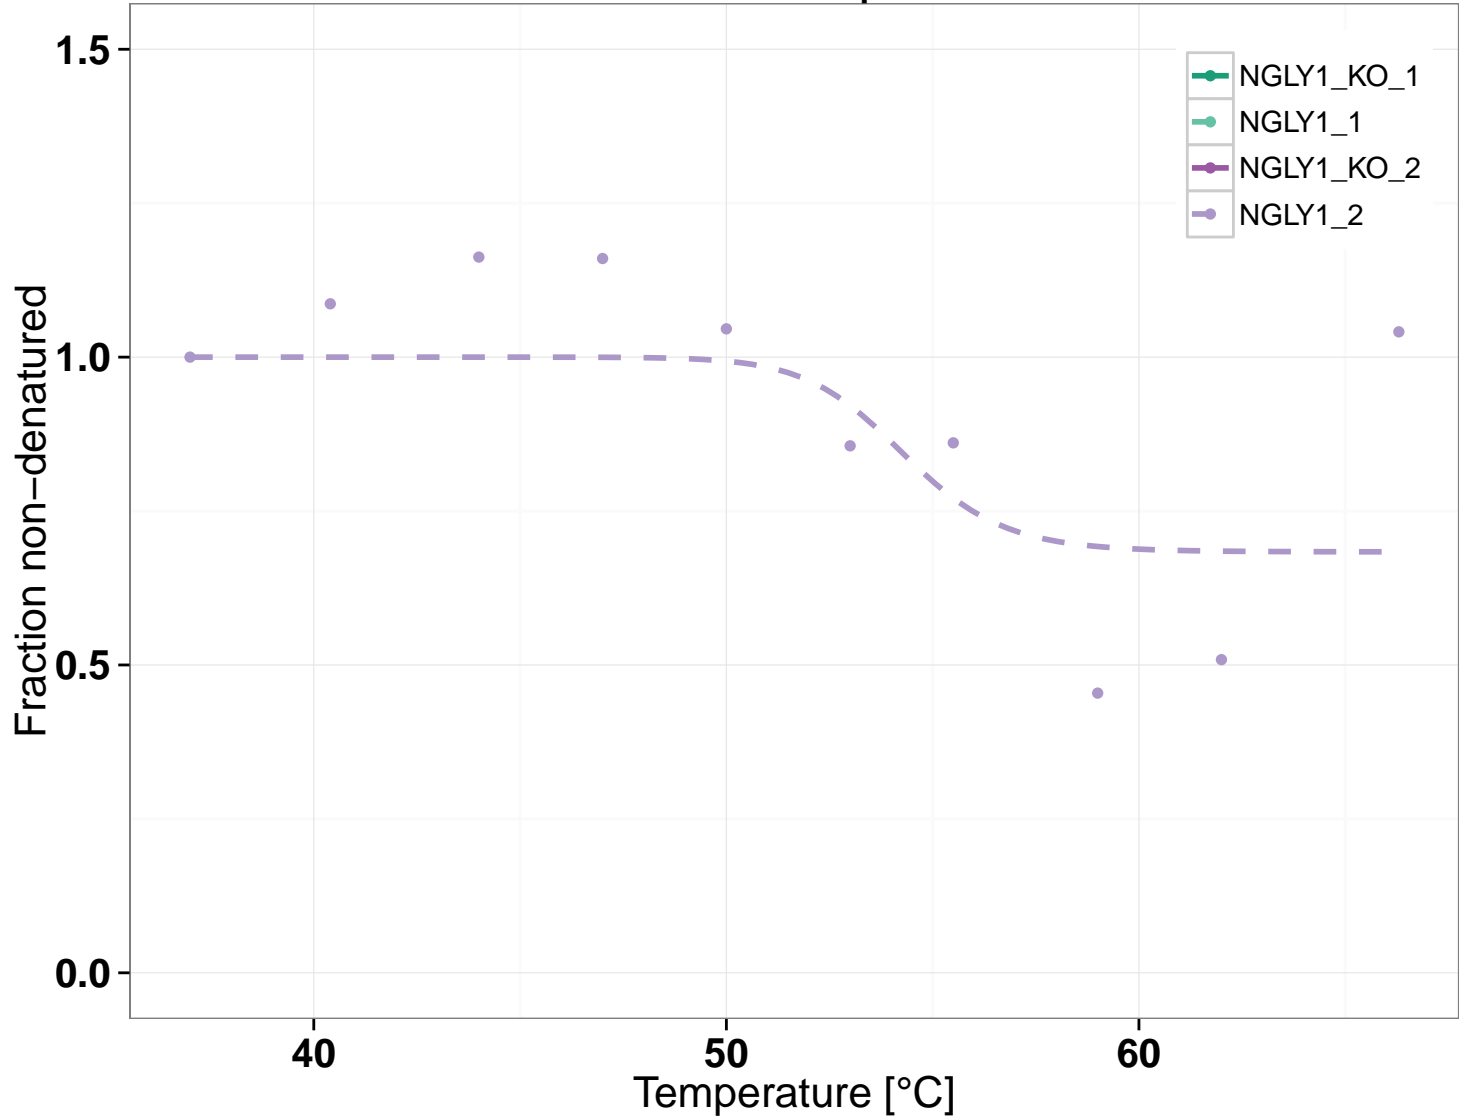

|            | meltPoint | slope  | plateau | R2  |
|------------|-----------|--------|---------|-----|
| NGLY1_KO_1 | —         | —      | —       | —   |
| NGLY1_1    | —         | —      | —       | —   |
| NGLY1_KO_2 | —         | —      | —       | —   |
| NGLY1_2    | —         | -0.065 | 0.68    | 0.5 |

Supplement: Supplementary file 5063 [file 1]

IPI00328744.6|GNA12

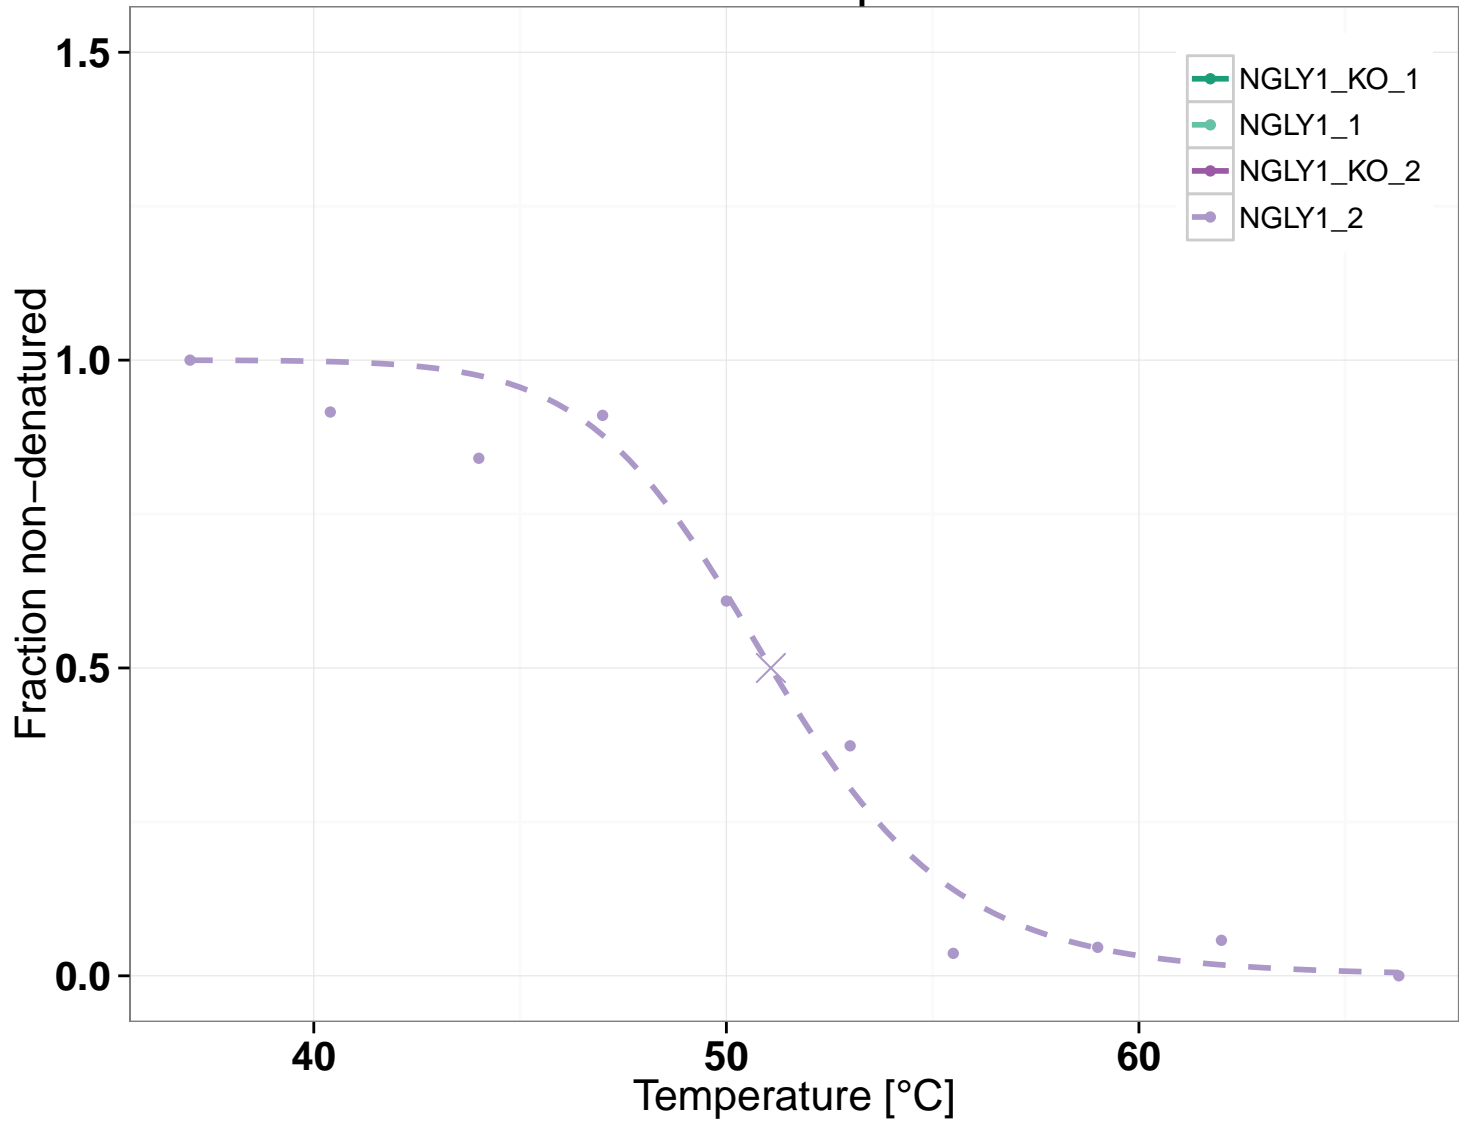

|            | meltPoint | slope | plateau | R2   |
|------------|-----------|-------|---------|------|
| NGLY1_KO_1 | -         | -     | -       | -    |
| NGLY1_1    | -         | -     | -       | -    |
| NGLY1_KO_2 | -         | -     | -       | -    |
| NGLY1_2    | 51.08     | -0.11 | 0       | 0.97 |

Supplement: Supplementary file 5064 [file 1]

# IPI00871961.2|PALM

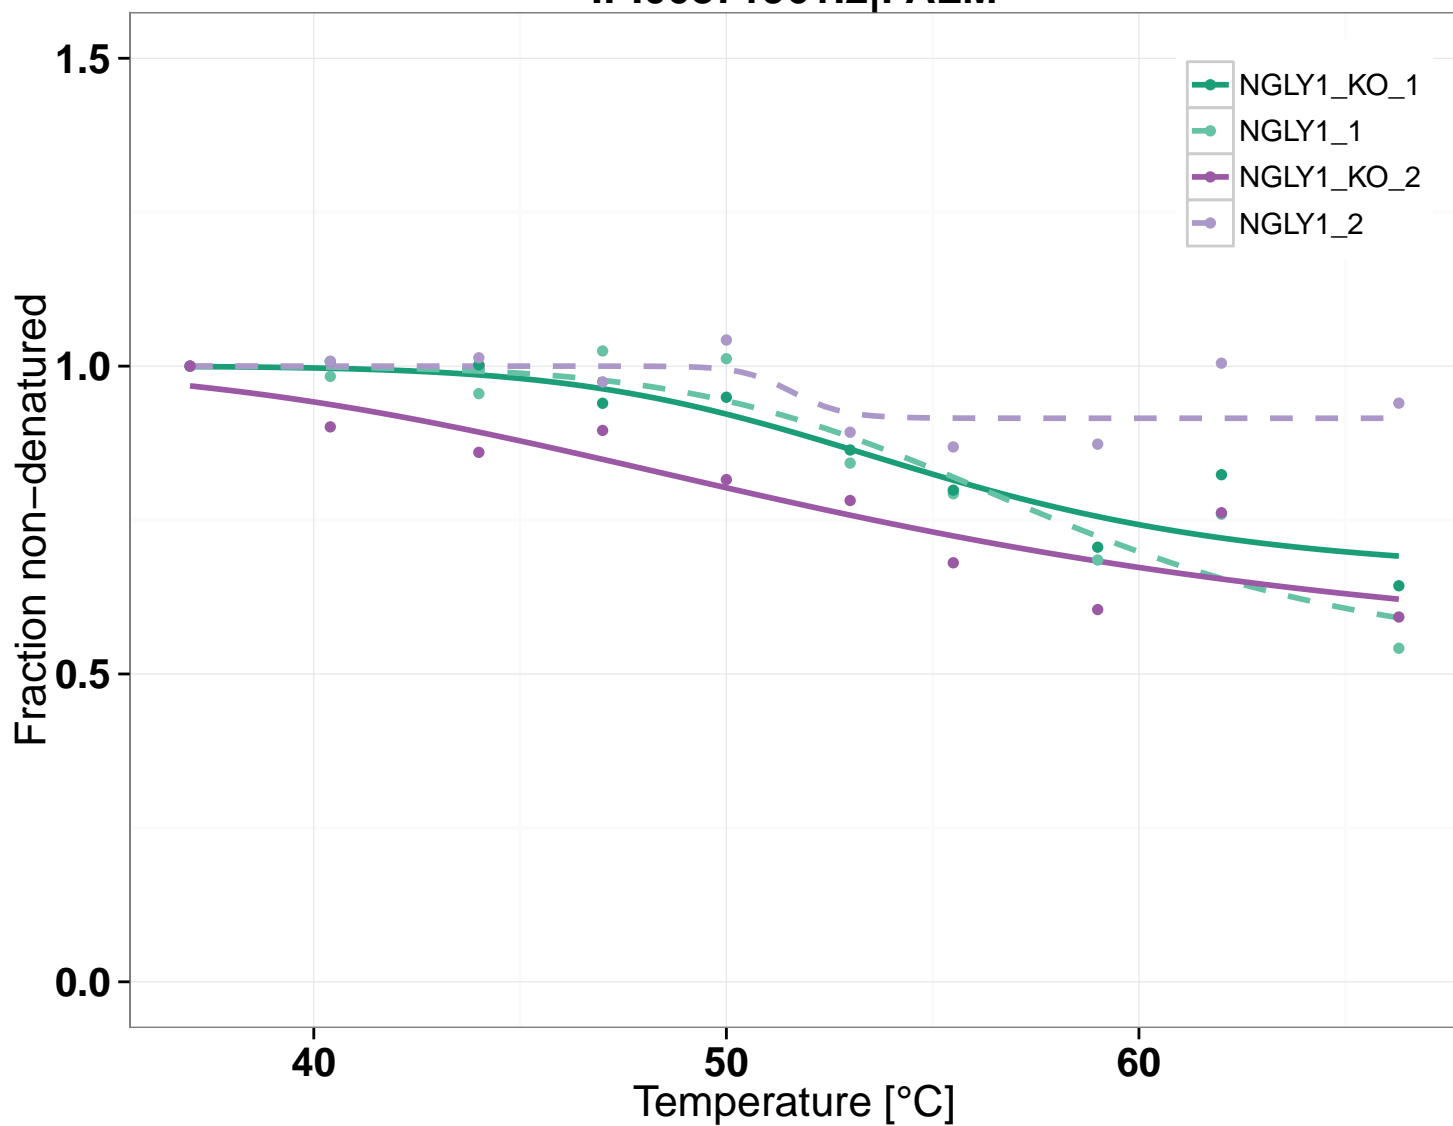

|            | meltPoint | slope  | plateau | R2   |
|------------|-----------|--------|---------|------|
| NGLY1_KO_1 | —         | −0.02  | 0.66    | 0.88 |
| NGLY1_1    | —         | −0.028 | 0.52    | 0.89 |
| NGLY1_KO_2 | —         | −0.015 | 0.5     | 0.83 |
| NGLY1_2    | —         | −0.034 | 0.92    | 0.54 |

Supplement: Supplementary file 5065 [file 1]

IPI00171692.3|ABHD11

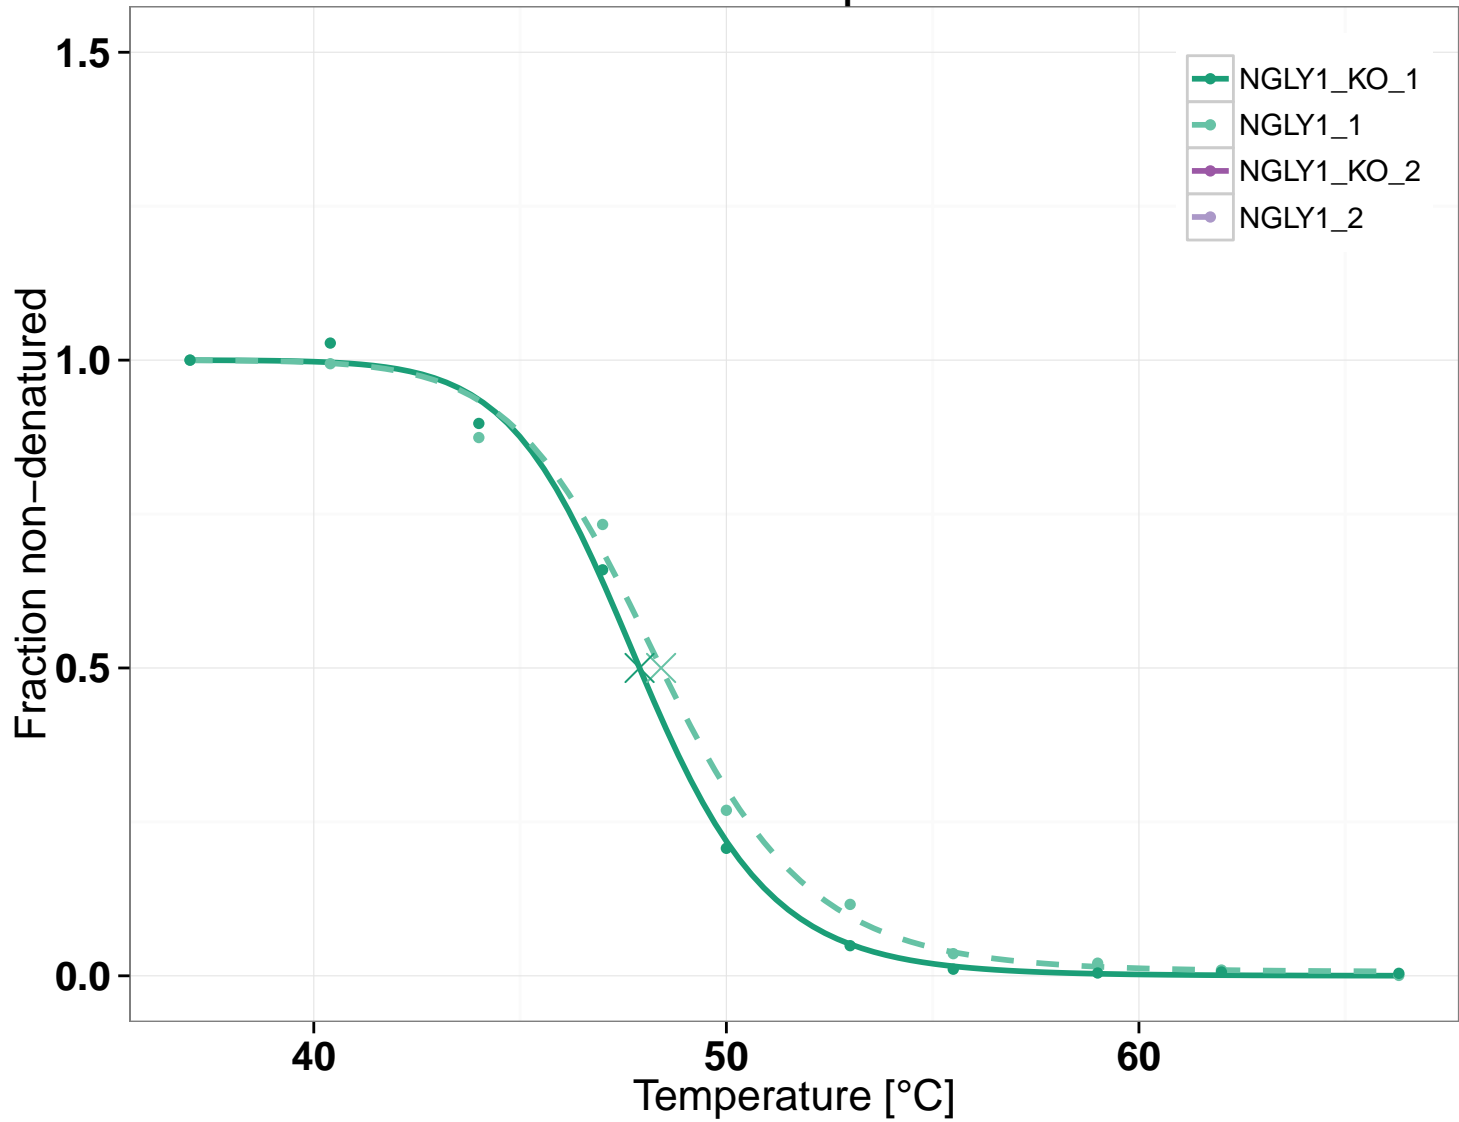

|            | meltPoint | slope | plateau | R2 |
|------------|-----------|-------|---------|----|
| NGLY1_KO_1 | 47.9      | -0.16 | 0       | 1  |
| NGLY1_1    | 48.42     | -0.14 | 0.01    | 1  |
| NGLY1_KO_2 | -         | -     | -       | -  |
| NGLY1_2    | -         | -     | -       | -  |

Supplement: Supplementary file 5066 [file 1]

IPI00099831.1|CHST11

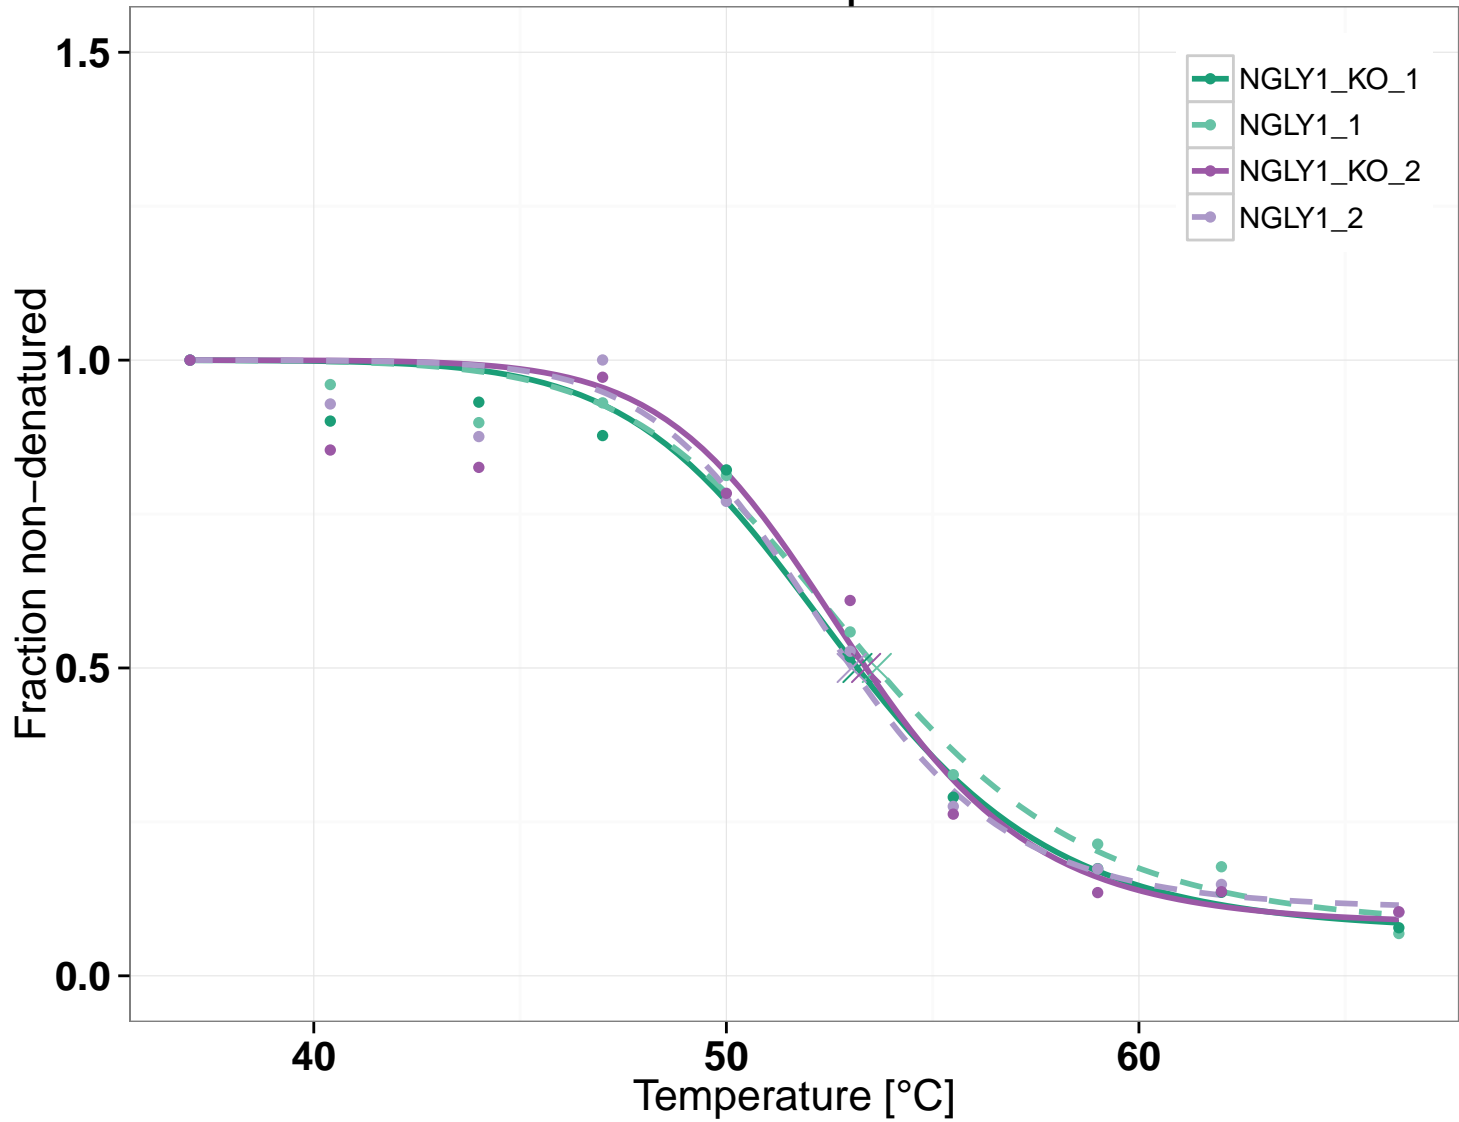

|            | meltPoint | slope  | plateau | R2   |
|------------|-----------|--------|---------|------|
| NGLY1_KO_1 | 53.18     | -0.09  | 0.07    | 0.98 |
| NGLY1_1    | 53.65     | -0.082 | 0.08    | 0.99 |
| NGLY1_KO_2 | 53.39     | -0.1   | 0.08    | 0.95 |
| NGLY1_2    | 53.04     | -0.1   | 0.11    | 0.98 |

Supplement: Supplementary file 5067 [file 1]

IPI00003494.1|PTTG1

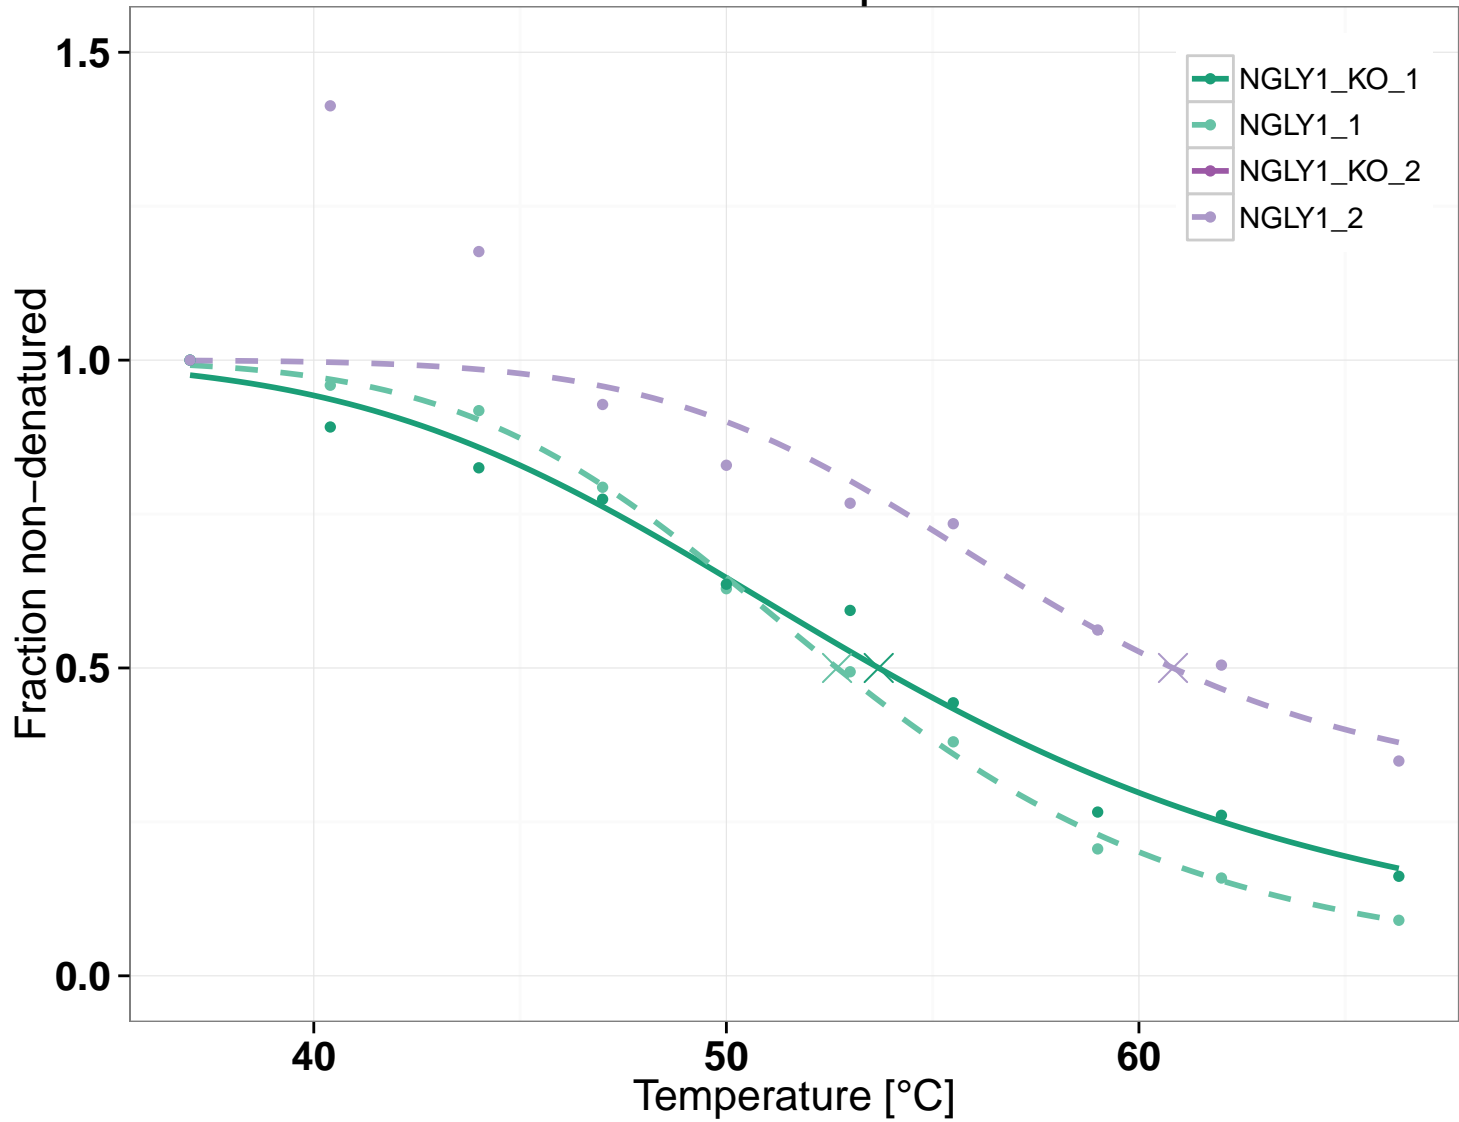

|            | meltPoint | slope  | plateau | R2   |
|------------|-----------|--------|---------|------|
| NGLY1_KO_1 | 53.69     | -0.04  | 0       | 0.98 |
| NGLY1_1    | 52.68     | -0.055 | 0       | 1    |
| NGLY1_KO_2 | -         | -      | -       | -    |
| NGLY1_2    | 60.83     | -0.042 | 0.28    | 0.76 |

Supplement: Supplementary file 5068 [file 1]

IPI00654682.1|CCNL1

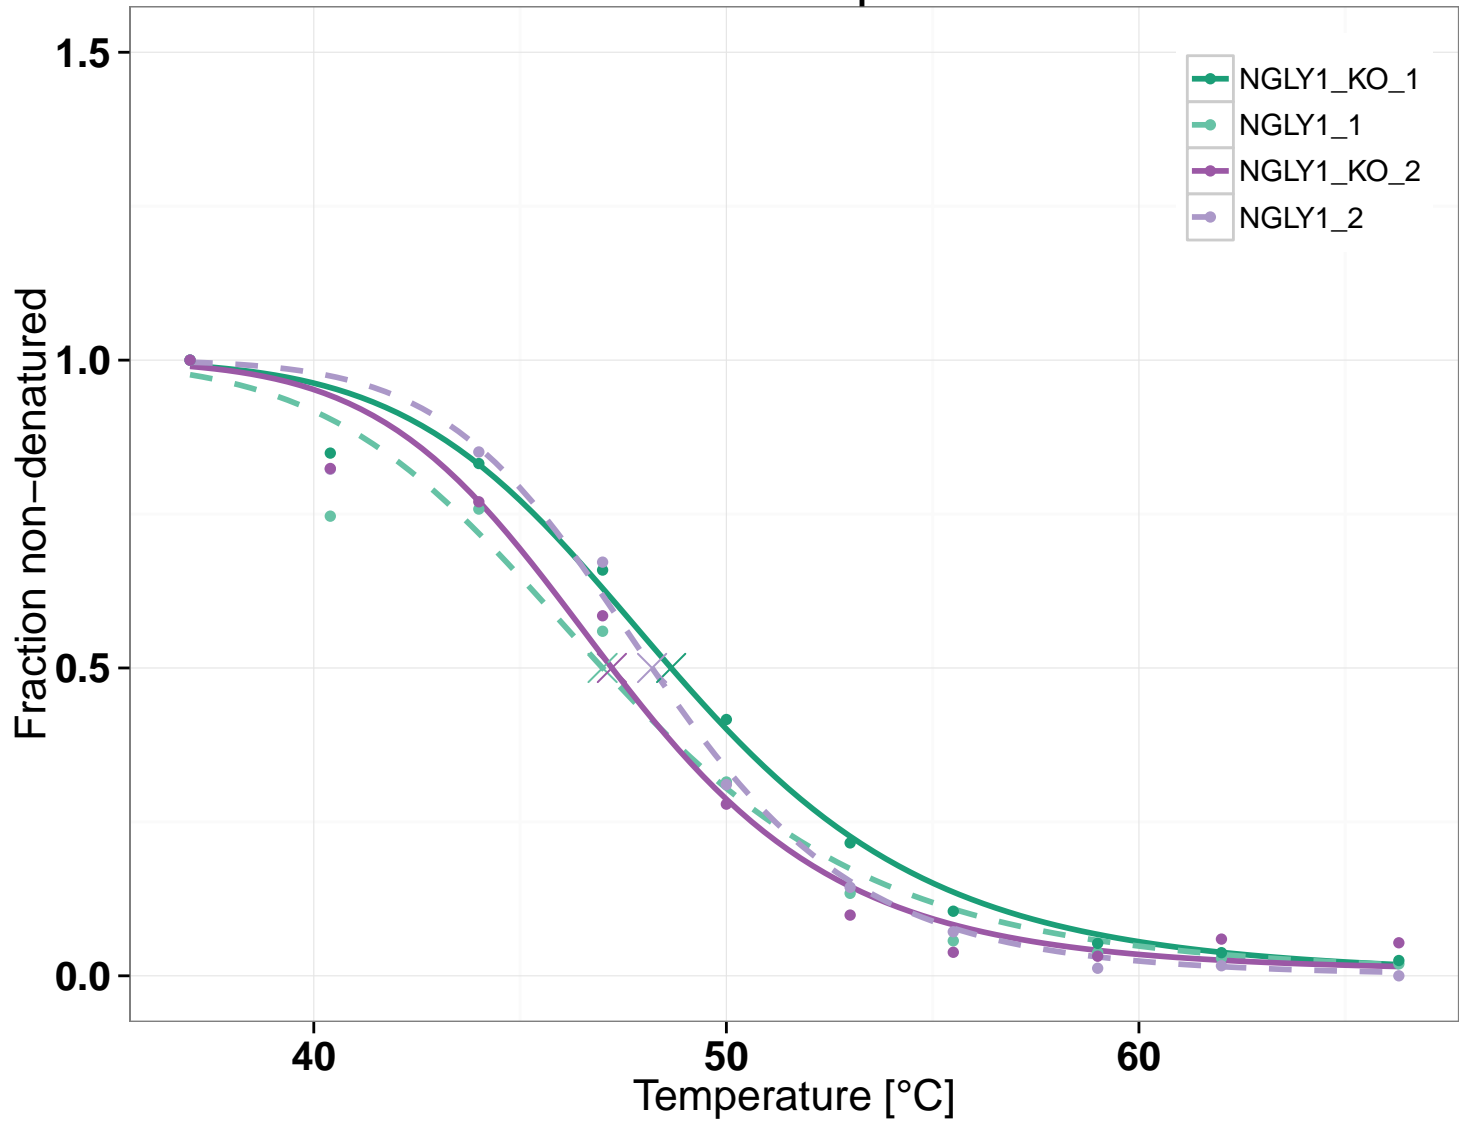

|            | meltPoint | slope  | plateau | R2   |
|------------|-----------|--------|---------|------|
| NGLY1_KO_1 | 48.66     | -0.078 | 0       | 0.99 |
| NGLY1_1    | 47        | -0.075 | 0       | 0.97 |
| NGLY1_KO_2 | 47.23     | -0.089 | 0.01    | 0.98 |
| NGLY1_2    | 48.2      | -0.099 | 0       | 0.98 |

Supplement: Supplementary file 5069 [file 1]

# IPI00788737.1|GAPDH

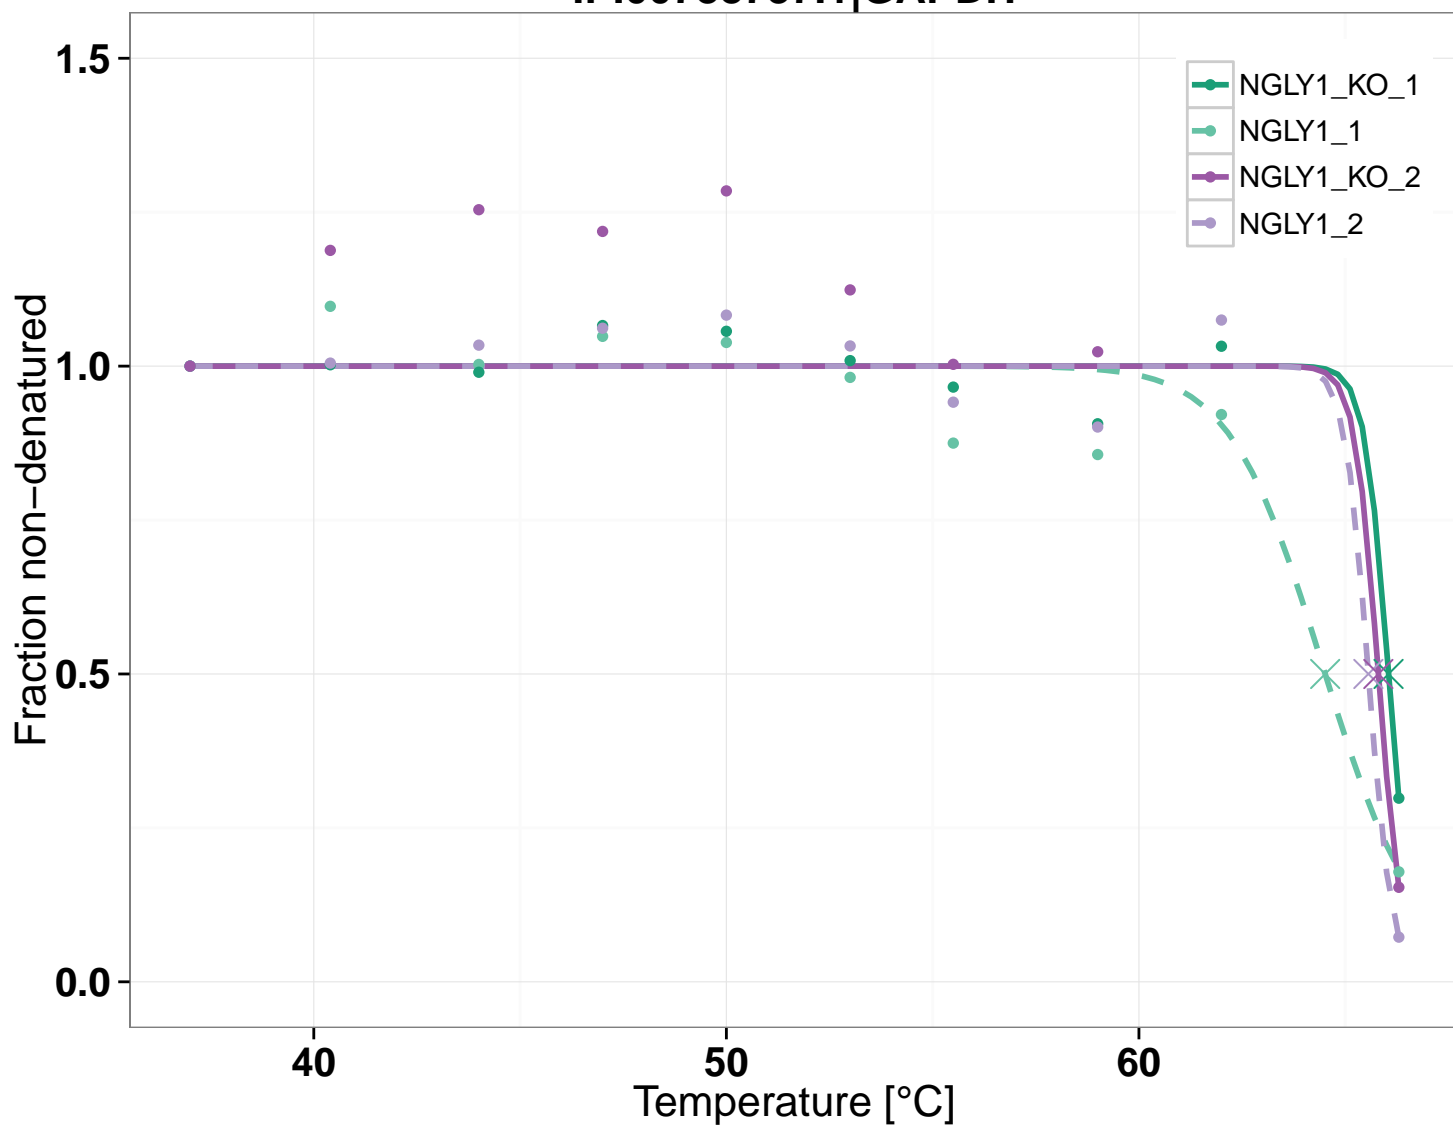

|            | meltPoint | slope | plateau | R2   |
|------------|-----------|-------|---------|------|
| NGLY1_KO_1 | 66.05     | -0.86 | 0       | 0.96 |
| NGLY1_1    | 64.51     | -0.22 | 0       | 0.92 |
| NGLY1_KO_2 | 65.8      | -0.87 | 0       | 0.6  |
| NGLY1_2    | 65.56     | -0.87 | 0       | 0.96 |

Supplement: Supplementary file 5070 [file 1]

IPI00030887.1|TYRO3

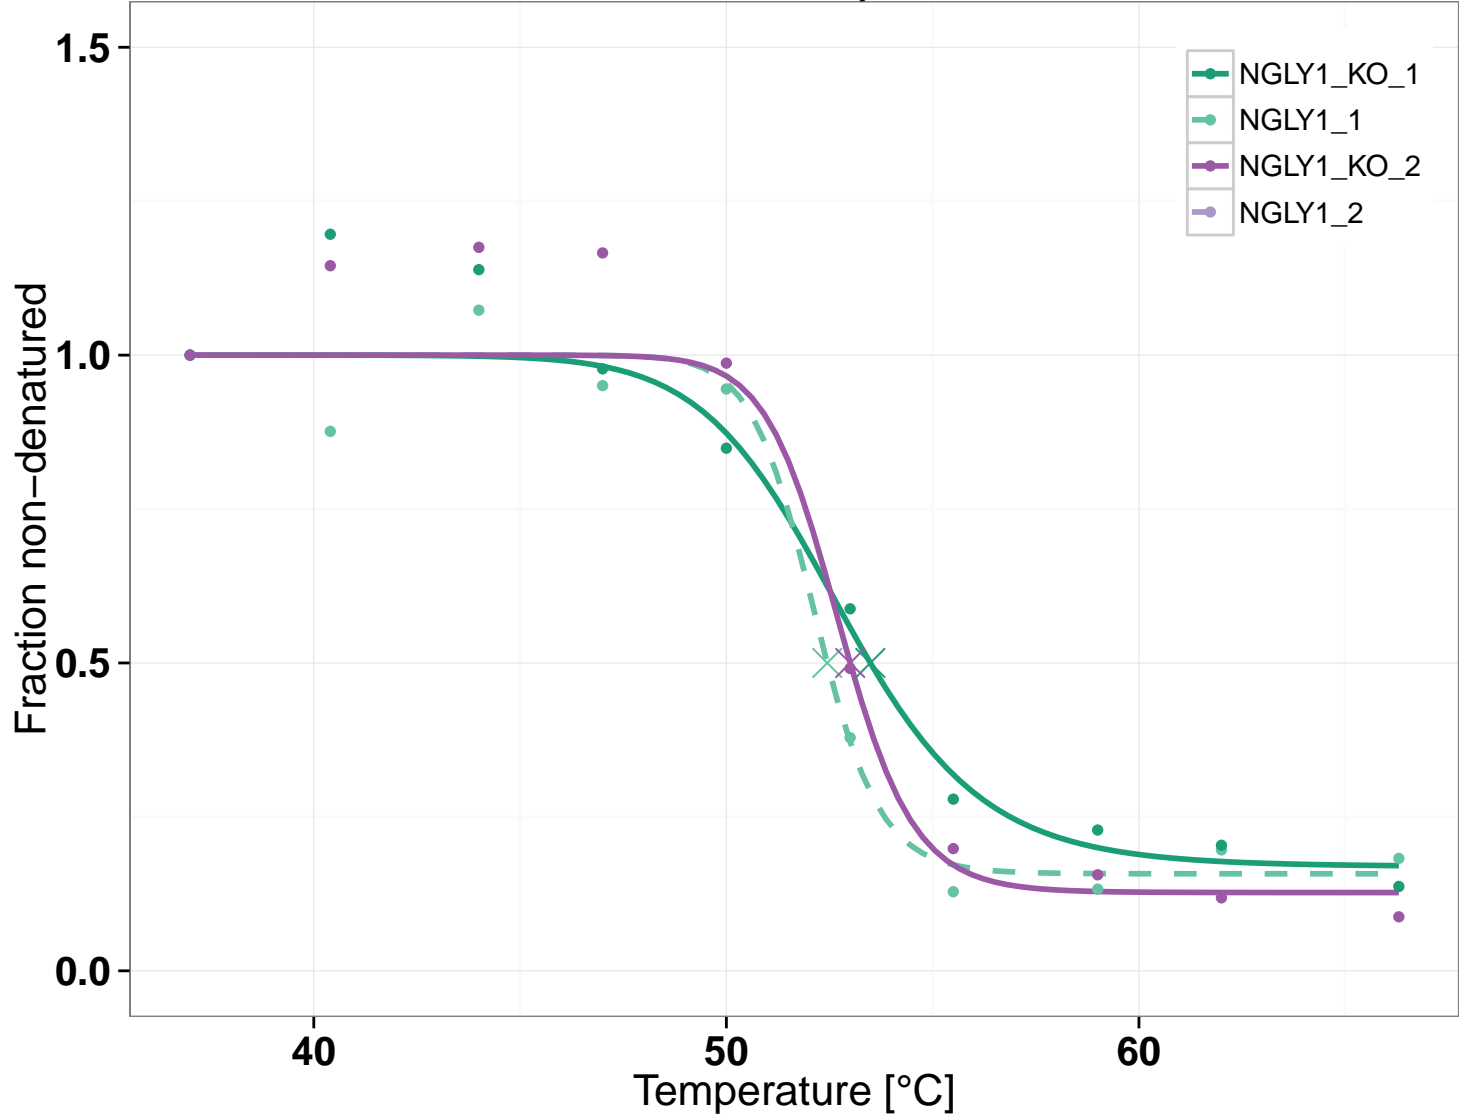

|            | meltPoint | slope | plateau | R2   |
|------------|-----------|-------|---------|------|
| NGLY1_KO_1 | 53.49     | -0.12 | 0.17    | 0.96 |
| NGLY1_1    | 52.44     | -0.27 | 0.16    | 0.98 |
| NGLY1_KO_2 | 53        | -0.24 | 0.13    | 0.96 |
| NGLY1_2    | -         | -     | -       | -    |

Supplement: Supplementary file 5071 [file 1]

IPI00218775.2|FKBP5

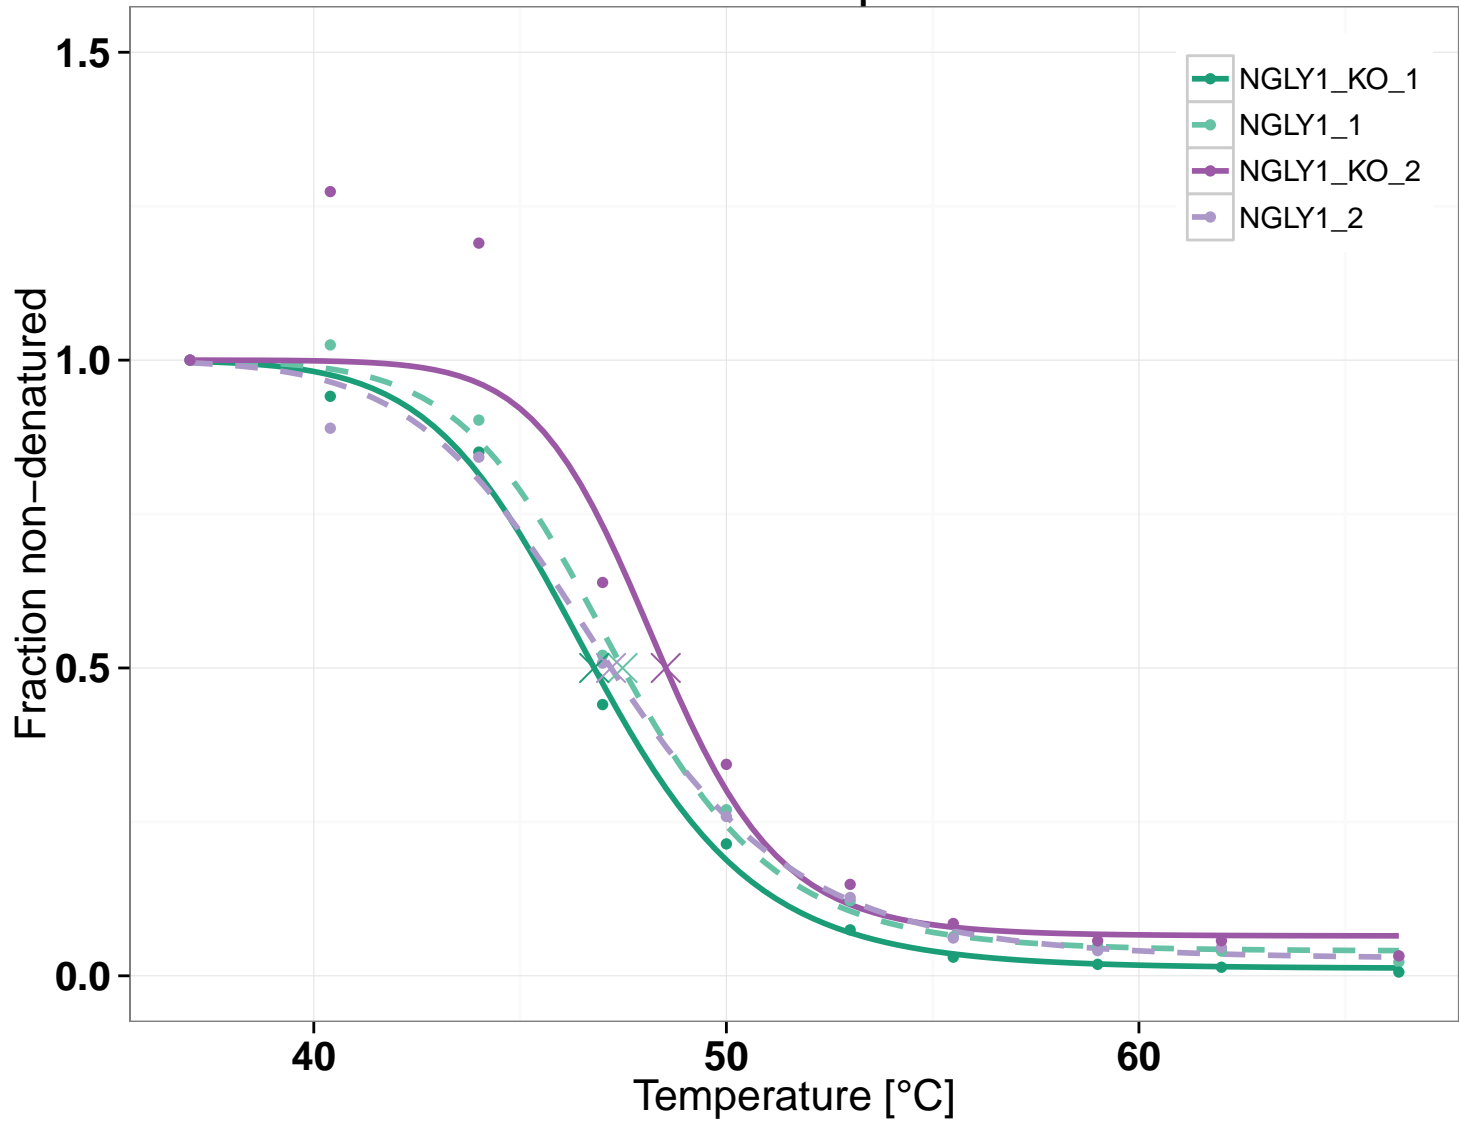

|            | meltPoint | slope | plateau | R2   |
|------------|-----------|-------|---------|------|
| NGLY1_KO_1 | 46.8      | -0.13 | 0.01    | 1    |
| NGLY1_1    | 47.48     | -0.12 | 0.04    | 1    |
| NGLY1_KO_2 | 48.53     | -0.16 | 0.06    | 0.94 |
| NGLY1_2    | 47.2      | -0.1  | 0.03    | 0.99 |

Supplement: Supplementary file 5072 [file 1]

IPI00026044.3|PIGU

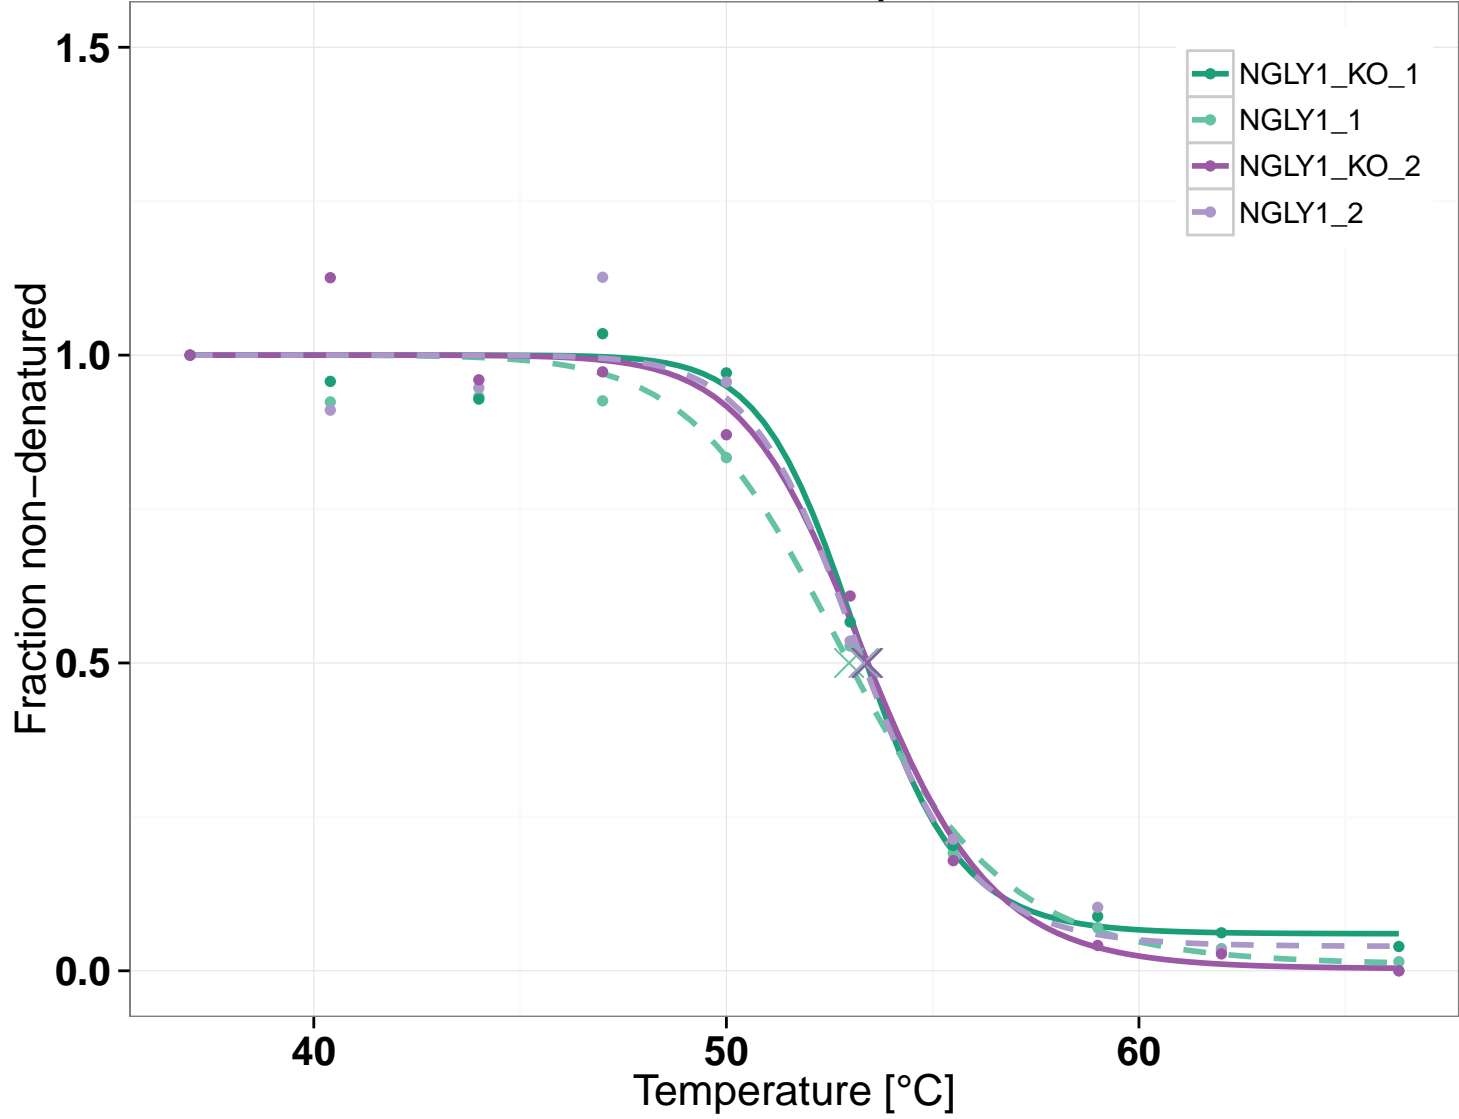

|            | meltPoint | slope | plateau | R2   |
|------------|-----------|-------|---------|------|
| NGLY1_KO_1 | 53.4      | -0.2  | 0.06    | 0.99 |
| NGLY1_1    | 52.98     | -0.13 | 0.01    | 0.99 |
| NGLY1_KO_2 | 53.43     | -0.16 | 0       | 0.99 |
| NGLY1_2    | 53.32     | -0.18 | 0.04    | 0.98 |

Supplement: Supplementary file 5073 [file 1]

# IPI00028006.1|PSMB2

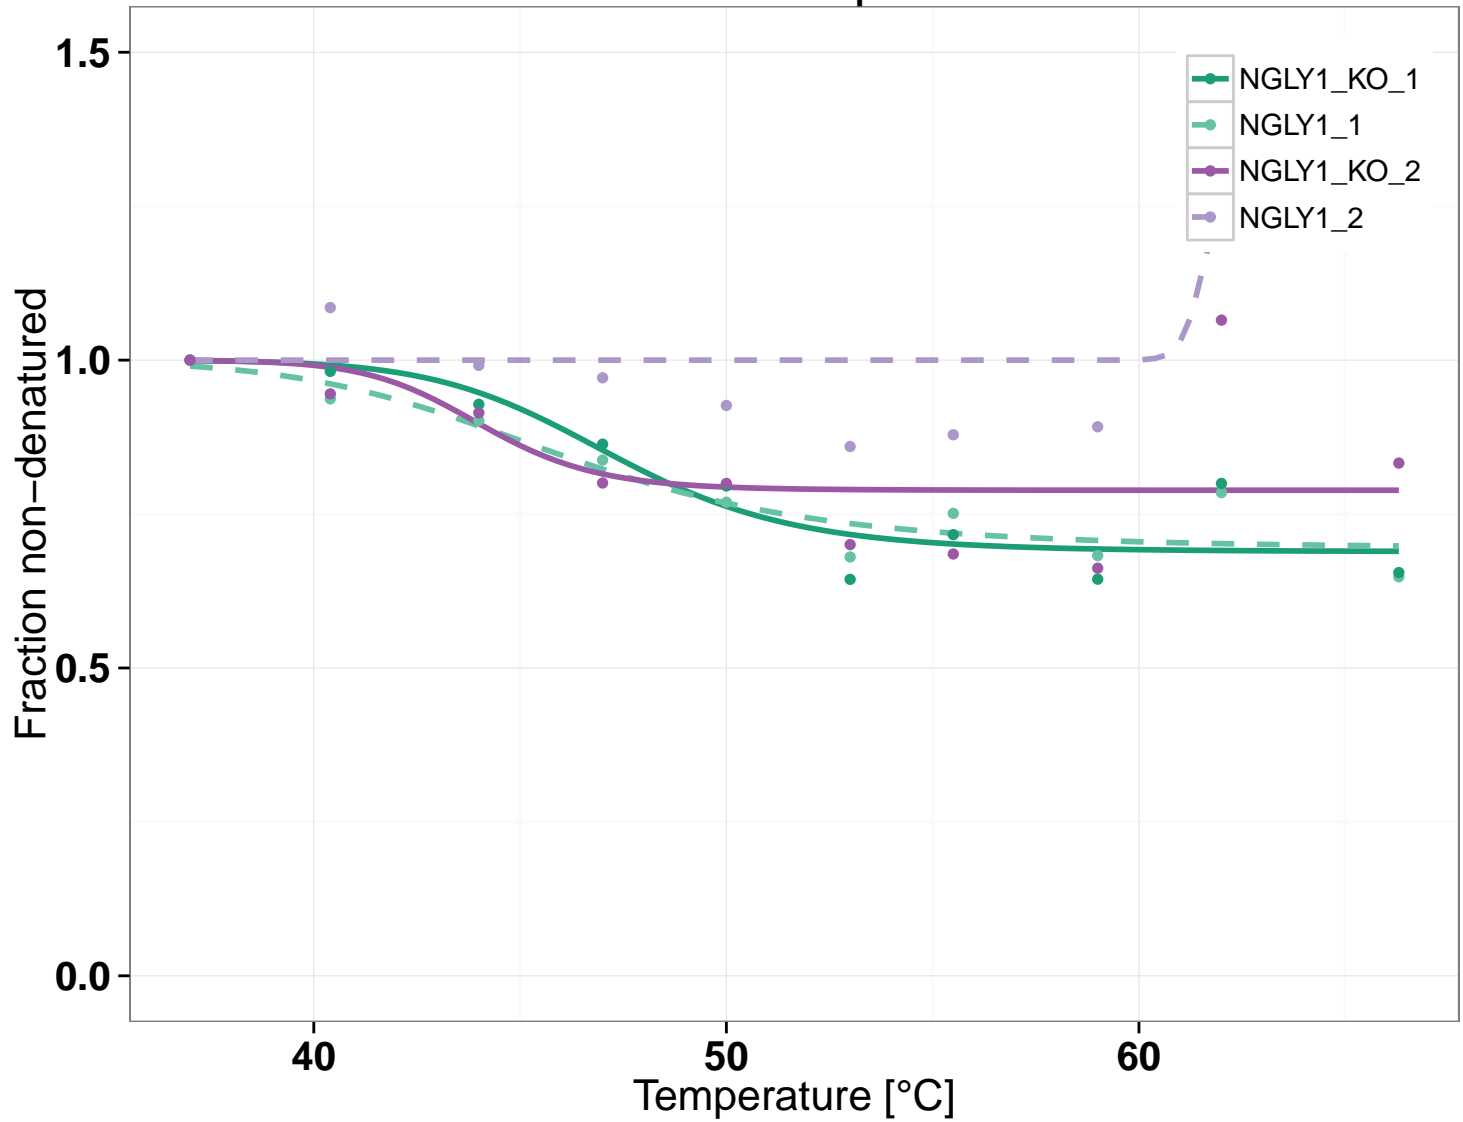

|            | meltPoint | slope  | plateau | R2   |
|------------|-----------|--------|---------|------|
| NGLY1_KO_1 | —         | −0.036 | 0.69    | 0.87 |
| NGLY1_1    | —         | −0.024 | 0.69    | 0.88 |
| NGLY1_KO_2 | —         | −0.038 | 0.79    | 0.33 |
| NGLY1_2    | —         | 0.3    | 1.3     | 0.72 |

Supplement: Supplementary file 5074 [file 1]

# IPI00916600.1|CALM1

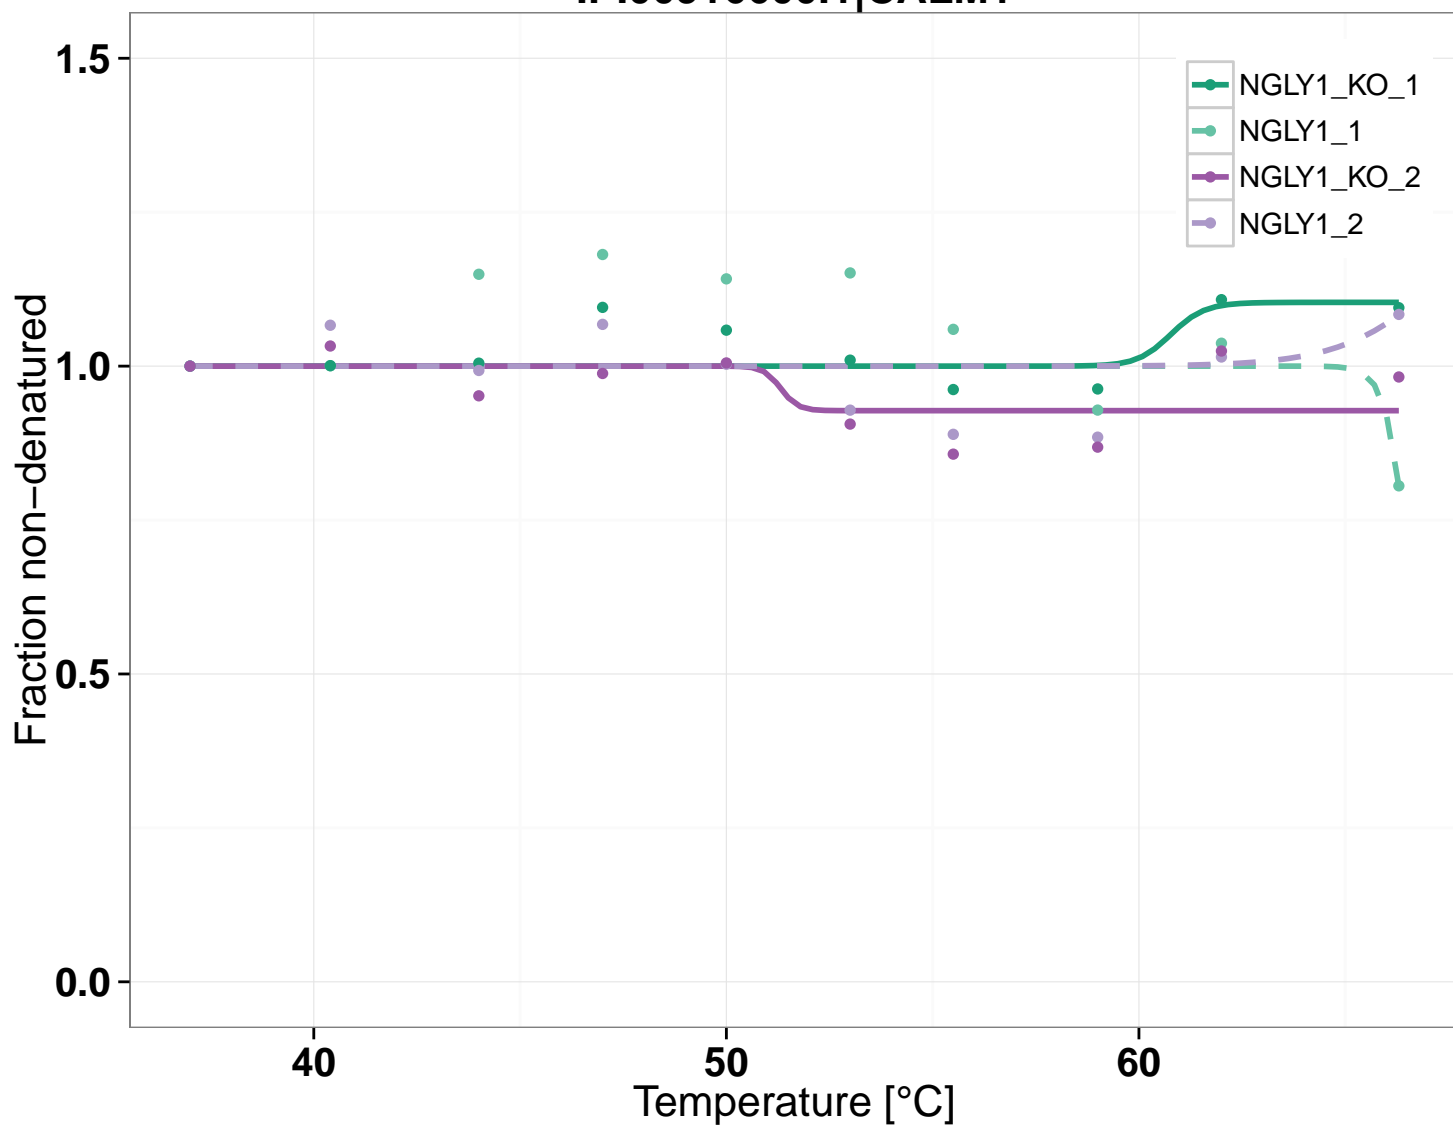

|            | meltPoint | slope  | plateau | R2   |
|------------|-----------|--------|---------|------|
| NGLY1_KO_1 | –         | 0.064  | 1.1     | 0.42 |
| NGLY1_1    | –         | –      | 0       | 0.14 |
| NGLY1_KO_2 | –         | –0.088 | 0.93    | 0.31 |
| NGLY1_2    | –         | –      | 1.41    | 0.14 |

Supplement: Supplementary file 5075 [file 1]

IPI00394816.2|C6ORF167

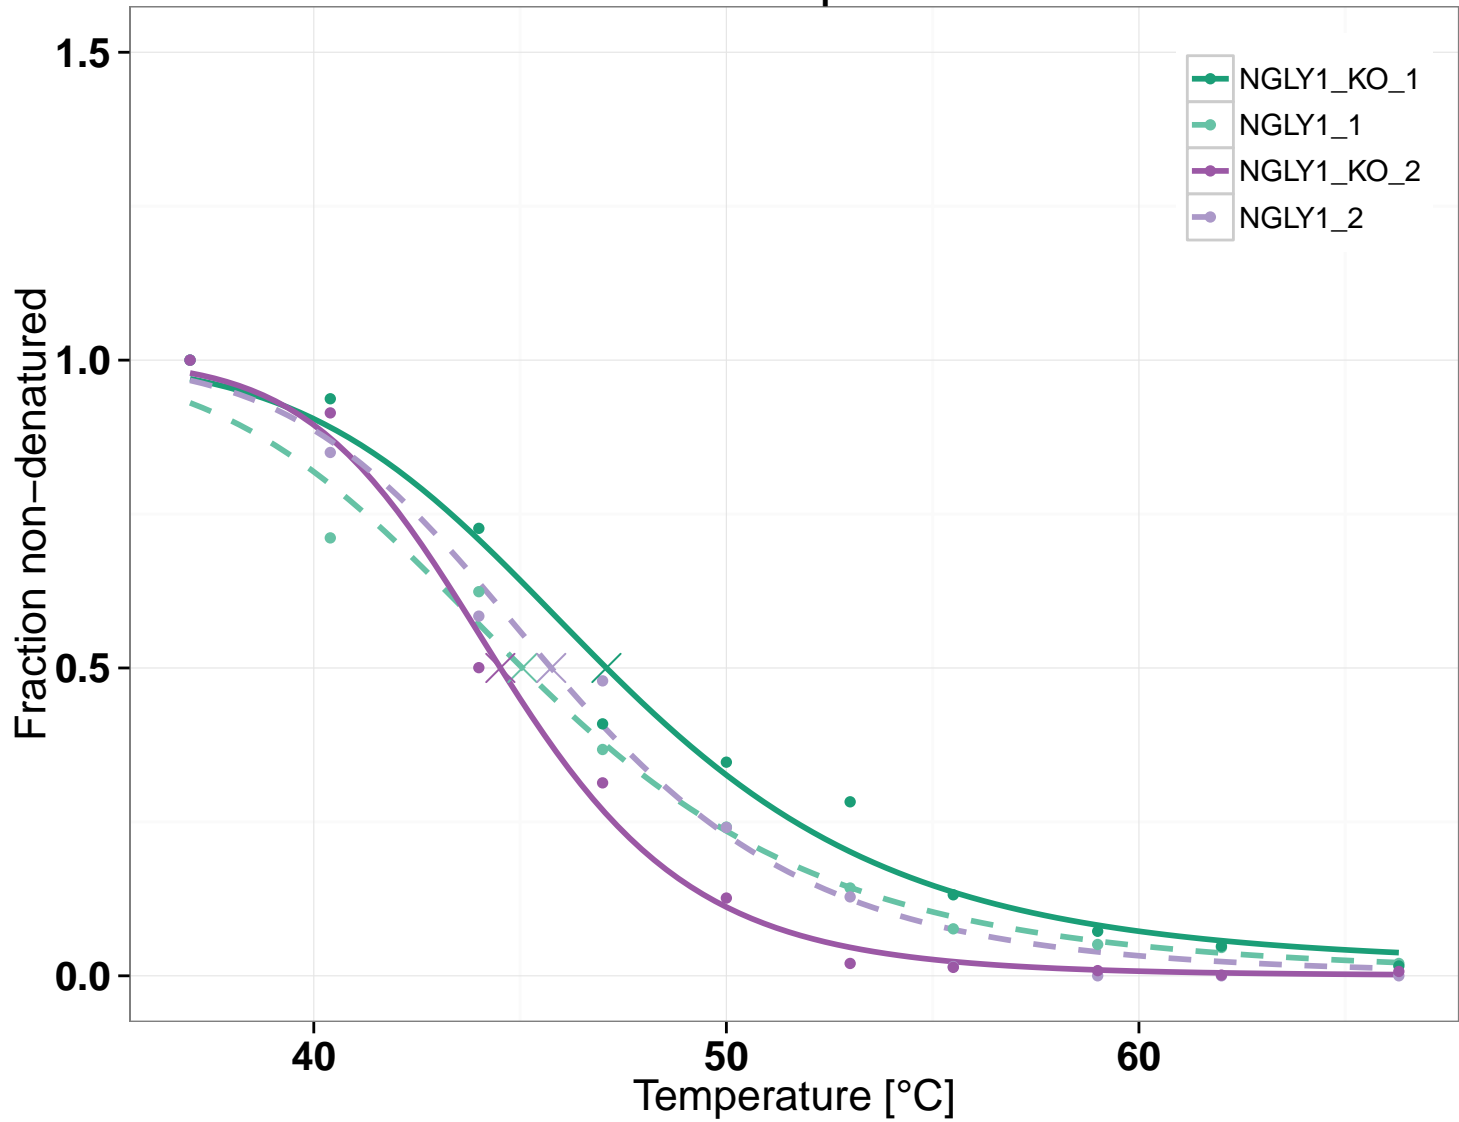

|            | meltPoint | slope  | plateau | R2   |
|------------|-----------|--------|---------|------|
| NGLY1_KO_1 | 47.09     | -0.069 | 0.01    | 0.98 |
| NGLY1_1    | 45.06     | -0.068 | 0       | 0.98 |
| NGLY1_KO_2 | 44.52     | -0.11  | 0       | 0.99 |
| NGLY1_2    | 45.75     | -0.08  | 0       | 0.99 |

Supplement: Supplementary file 5076 [file 1]

IPI00014890.2|ANKRD10

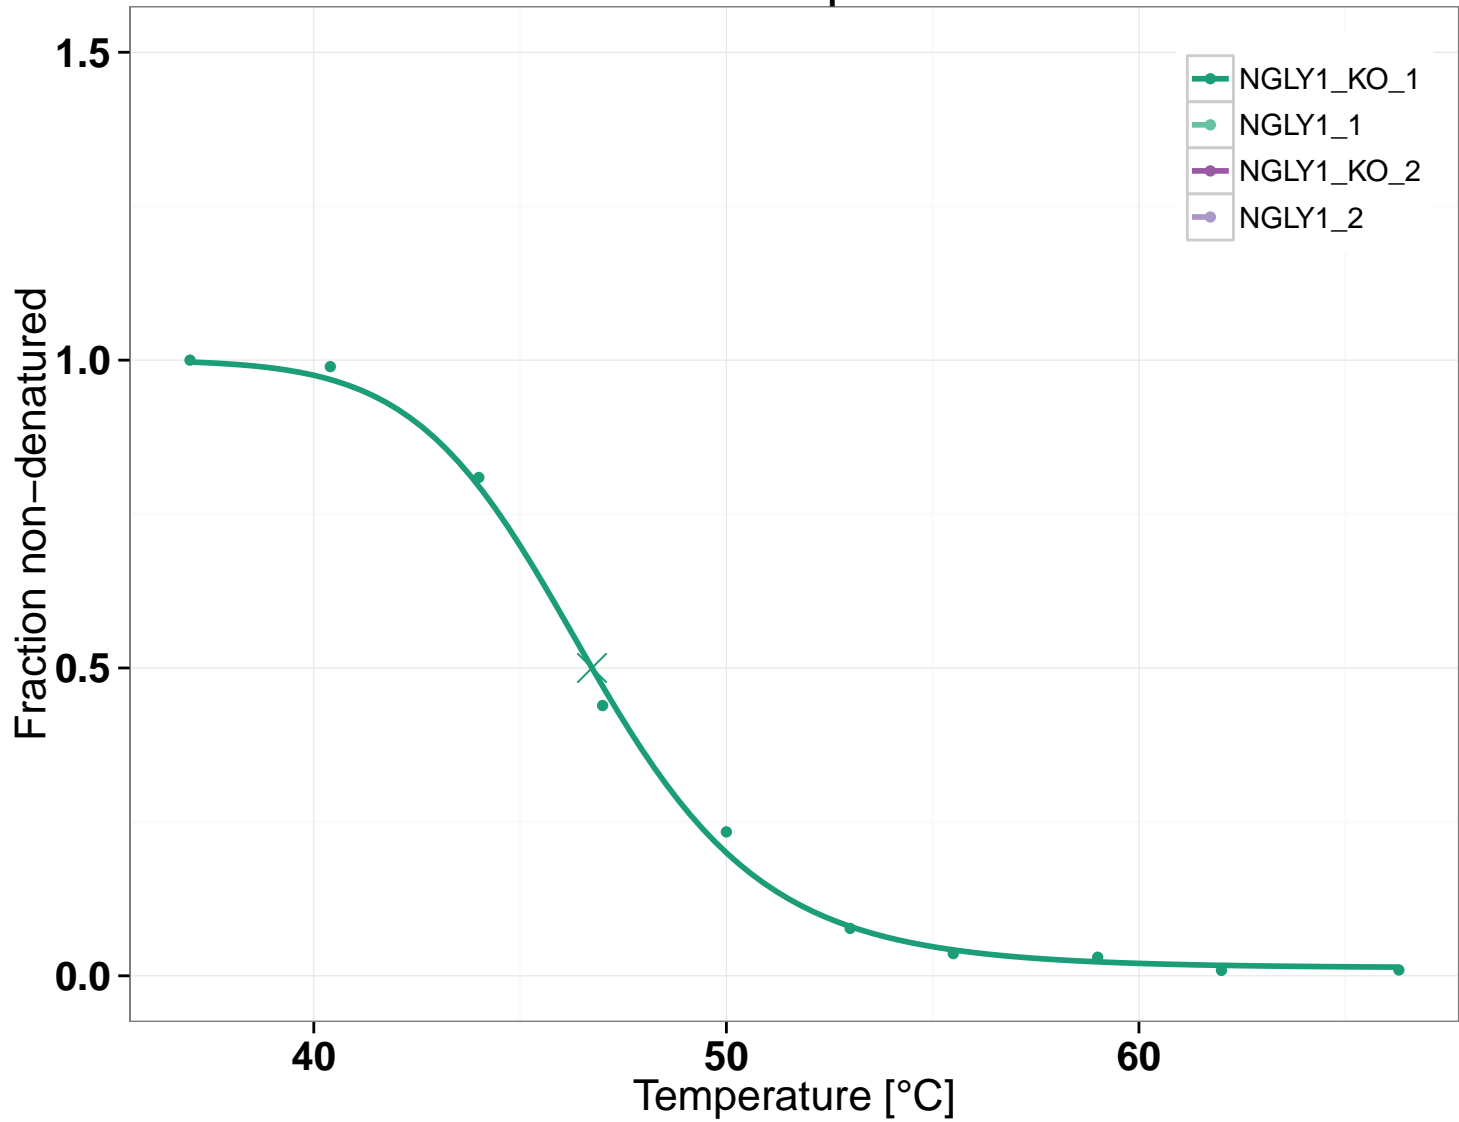

|            | meltPoint | slope | plateau | R2 |
|------------|-----------|-------|---------|----|
| NGLY1_KO_1 | 46.74     | -0.12 | 0.01    | 1  |
| NGLY1_1    | -         | -     | -       | -  |
| NGLY1_KO_2 | -         | -     | -       | -  |
| NGLY1_2    | -         | -     | -       | -  |

Supplement: Supplementary file 5077 [file 1]

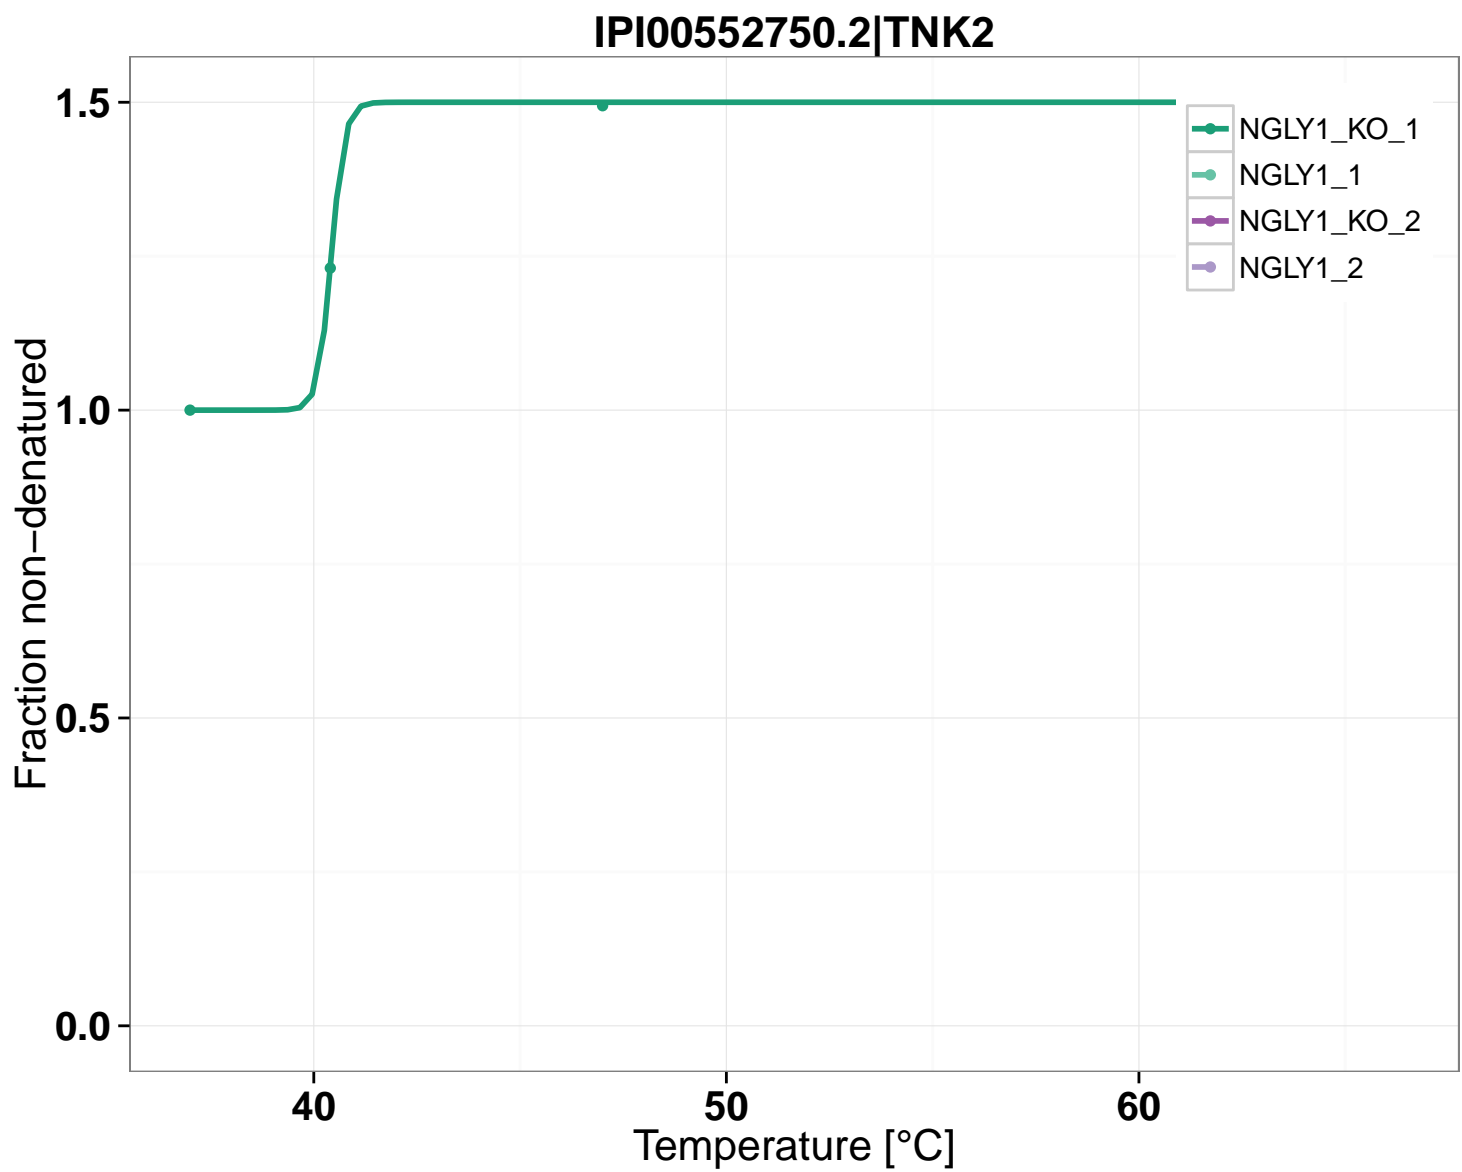

|            | meltPoint | slope | plateau | R2   |
|------------|-----------|-------|---------|------|
| NGLY1_KO_1 | —         | 0.77  | 1.5     | 0.46 |
| NGLY1_1    | —         | —     | —       | —    |
| NGLY1_KO_2 | —         | —     | —       | —    |
| NGLY1_2    | —         | —     | —       | —    |

Supplement: Supplementary file 5078 [file 1]

# IPI00006092.1|PMM2

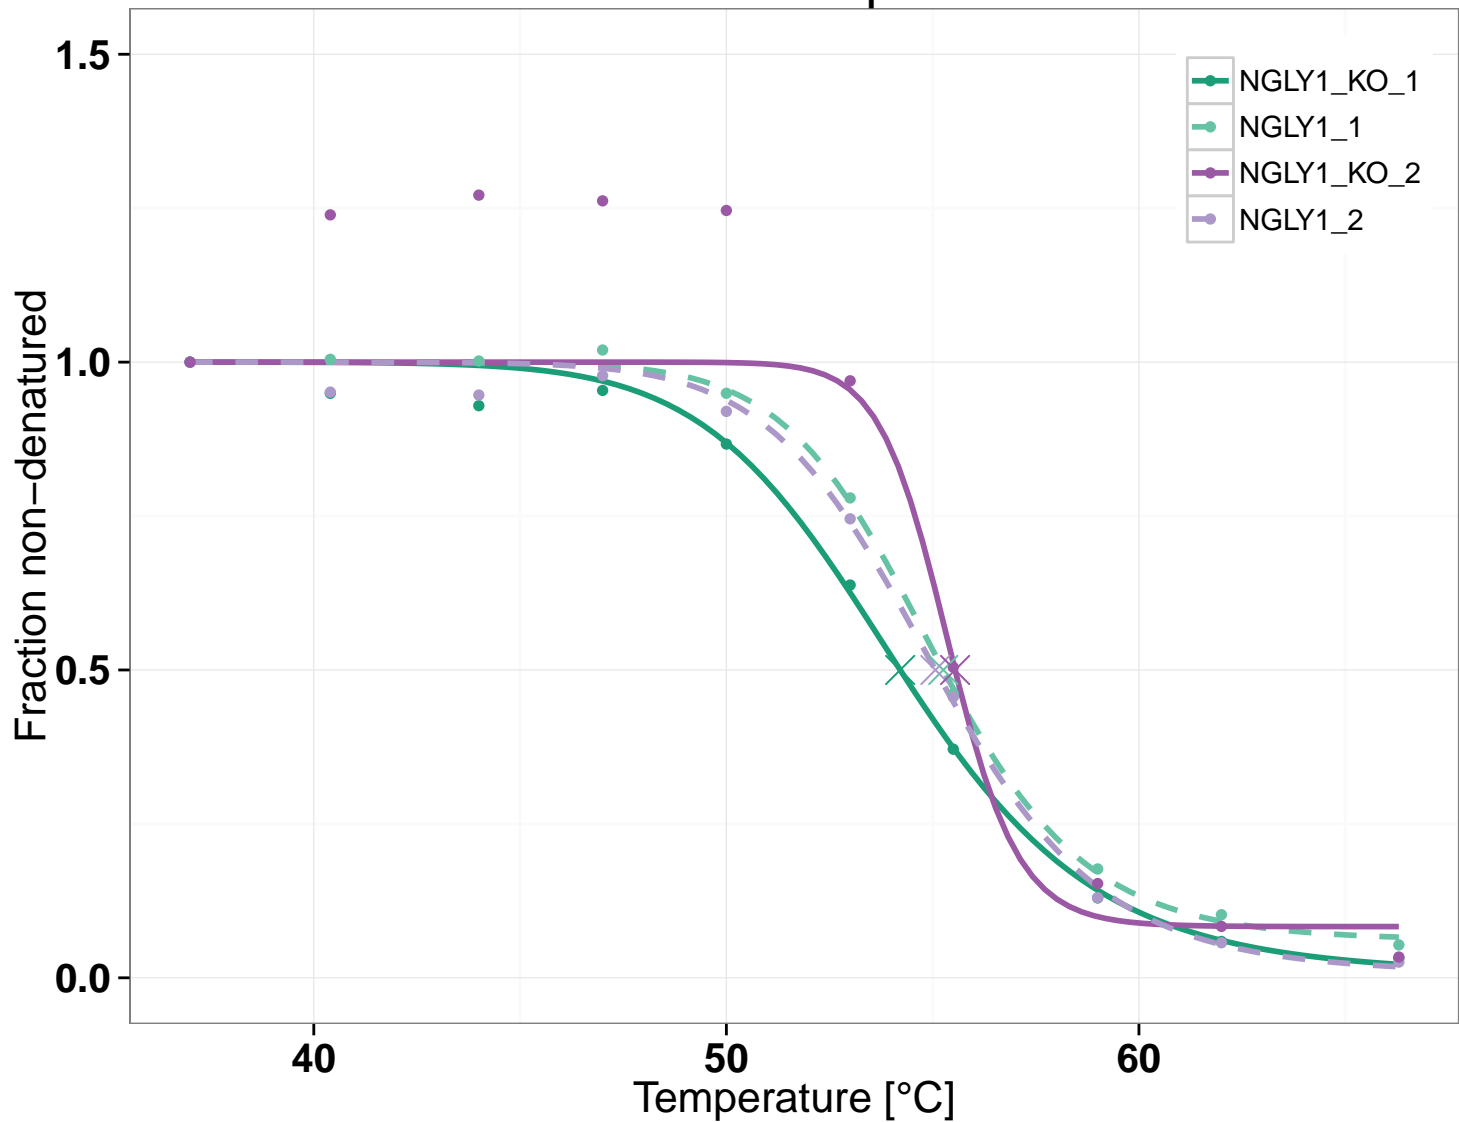

|            | meltPoint | slope | plateau | R2   |
|------------|-----------|-------|---------|------|
| NGLY1_KO_1 | 54.21     | -0.1  | 0.01    | 0.99 |
| NGLY1_1    | 55.26     | -0.13 | 0.06    | 1    |
| NGLY1_KO_2 | 55.54     | -0.27 | 0.08    | 0.89 |
| NGLY1_2    | 55.07     | -0.12 | 0.01    | 1    |

Supplement: Supplementary file 5079 [file 1]

# IPI00000684.4|UAP1

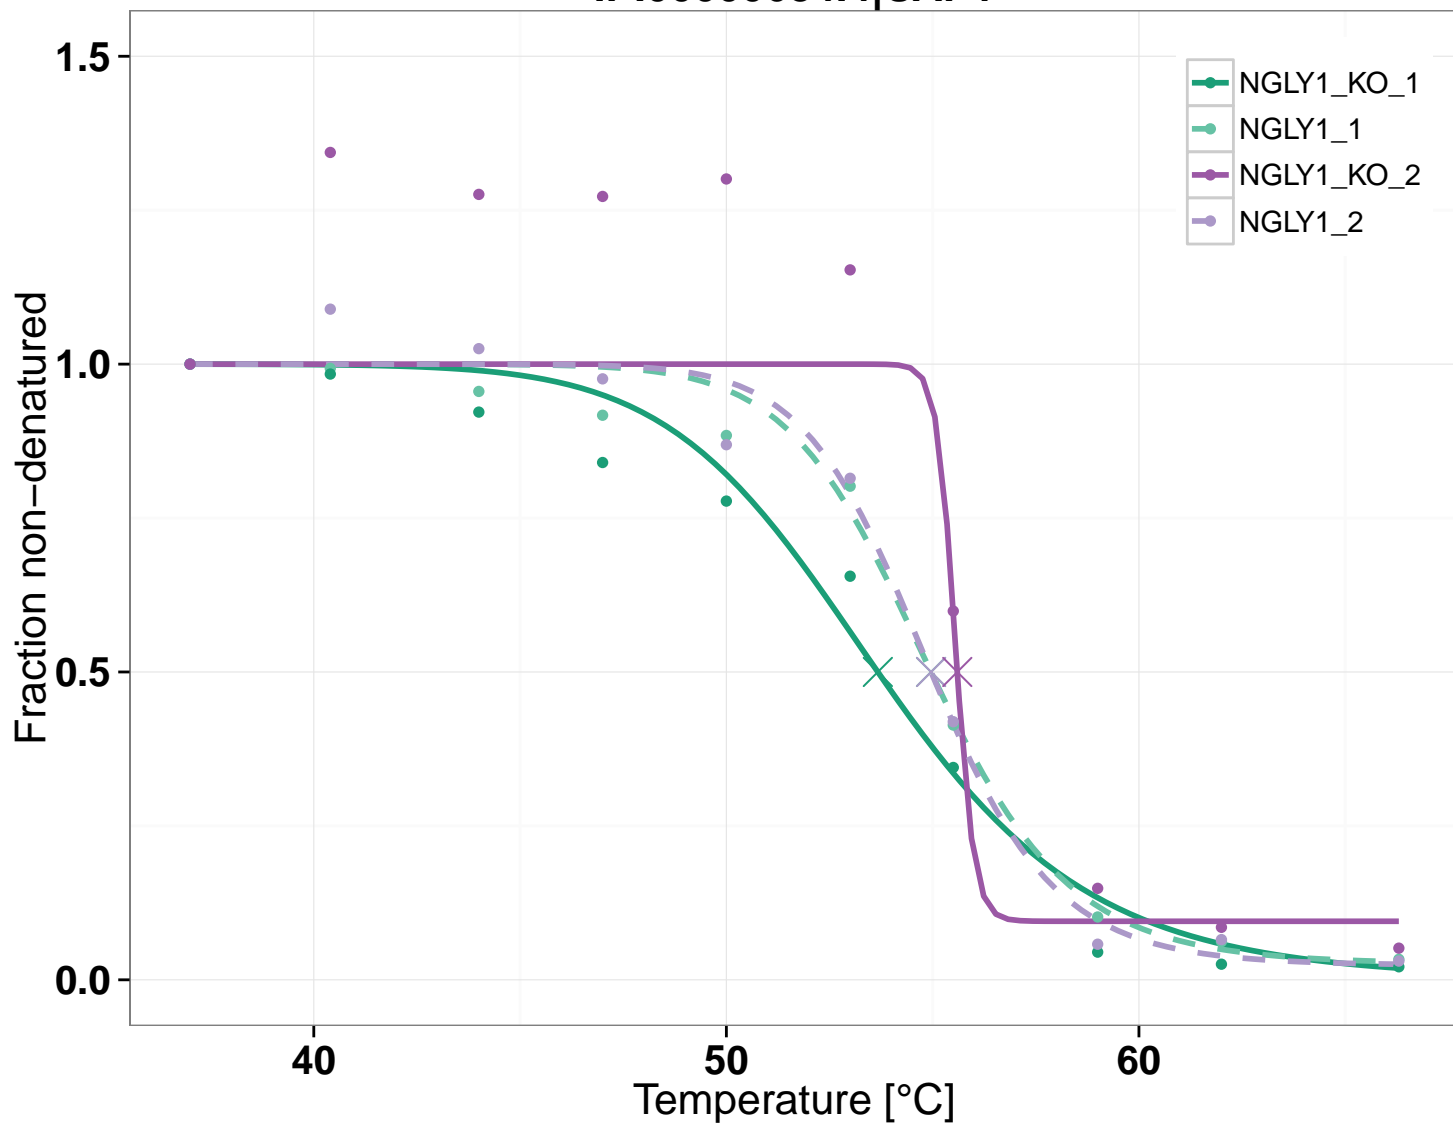

|            | meltPoint | slope  | plateau | R2   |
|------------|-----------|--------|---------|------|
| NGLY1_KO_1 | 53.67     | -0.097 | 0       | 0.98 |
| NGLY1_1    | 54.96     | -0.14  | 0.03    | 0.99 |
| NGLY1_KO_2 | 55.6      | -1     | 0.1     | 0.86 |
| NGLY1_2    | 54.96     | -0.16  | 0.02    | 0.99 |

Supplement: Supplementary file 5080 [file 1]

# IPI00852851.1|TRABD

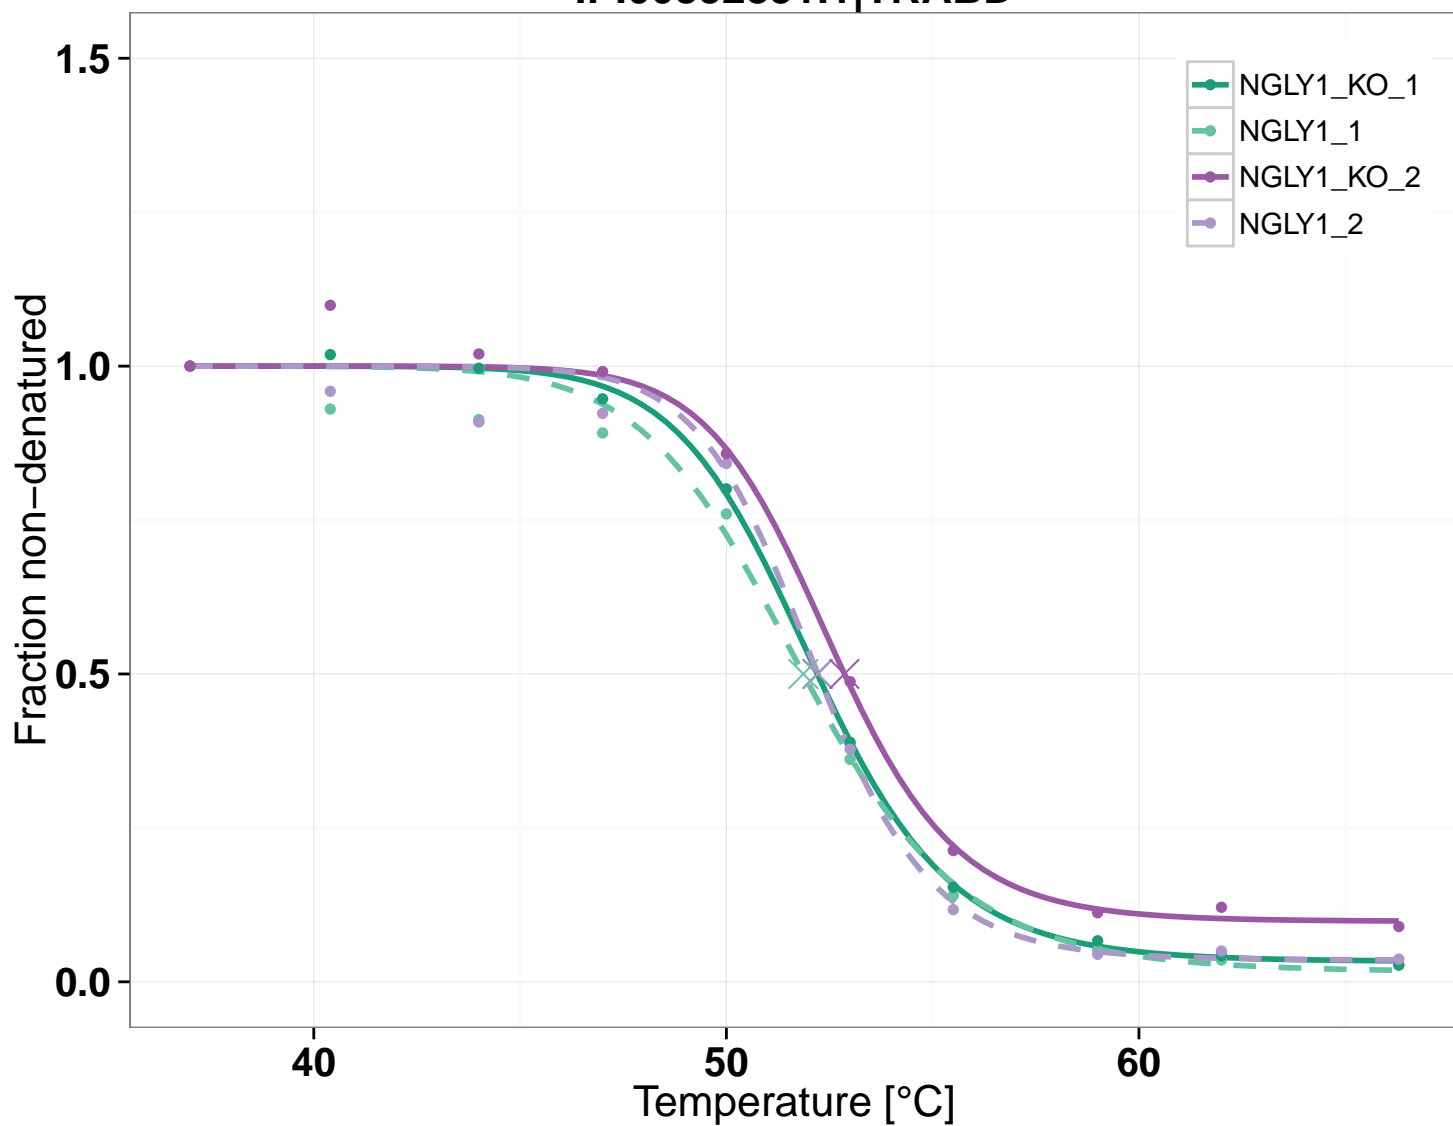

|            | meltPoint | slope | plateau | R2   |
|------------|-----------|-------|---------|------|
| NGLY1_KO_1 | 52.21     | -0.14 | 0.03    | 1    |
| NGLY1_1    | 51.87     | -0.13 | 0.02    | 0.99 |
| NGLY1_KO_2 | 52.86     | -0.15 | 0.1     | 0.99 |
| NGLY1_2    | 52.22     | -0.17 | 0.04    | 0.99 |

Supplement: Supplementary file 5081 [file 1]

# IPI00735681.3|KIF18B

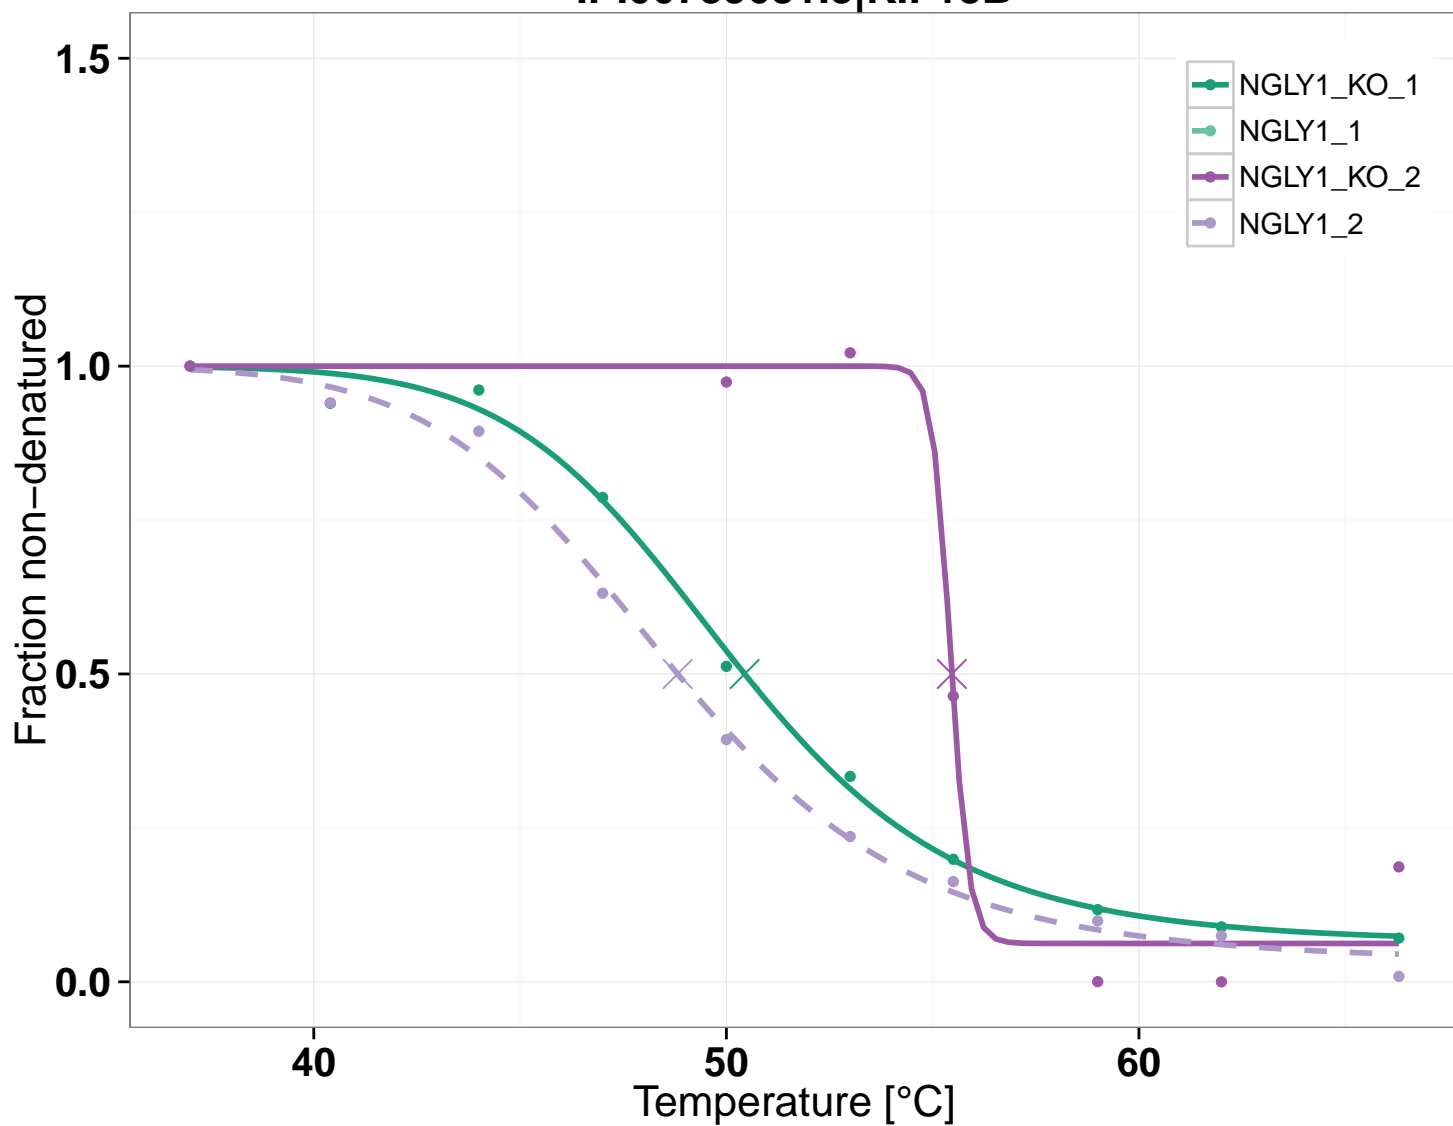

|            | meltPoint | slope  | plateau | R2   |
|------------|-----------|--------|---------|------|
| NGLY1_KO_1 | 50.44     | -0.086 | 0.06    | 1    |
| NGLY1_1    | -         | -      | -       | -    |
| NGLY1_KO_2 | 55.47     | -1.1   | 0.06    | 0.46 |
| NGLY1_2    | 48.82     | -0.082 | 0.03    | 1    |

Supplement: Supplementary file 5082 [file 1]

# IPI00005277.4|RAD9A

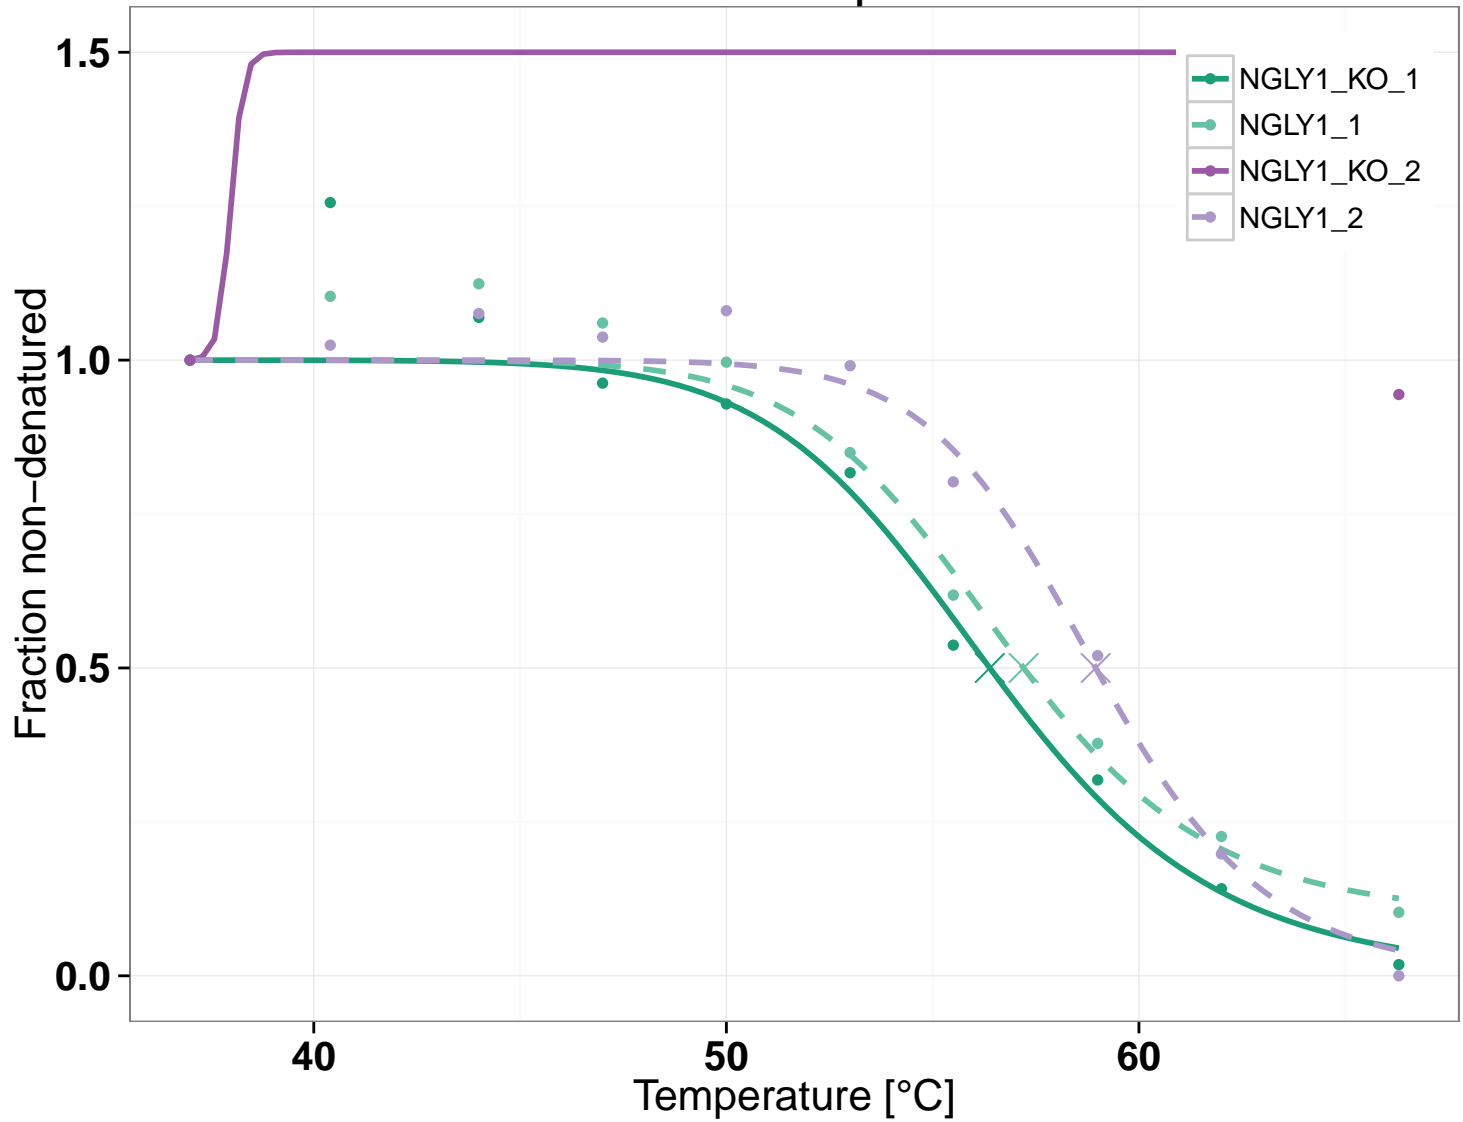

|            | meltPoint | slope  | plateau | R2    |
|------------|-----------|--------|---------|-------|
| NGLY1_KO_1 | 56.38     | -0.091 | 0       | 0.95  |
| NGLY1_1    | 57.21     | -0.092 | 0.09    | 0.97  |
| NGLY1_KO_2 | -         | 0.82   | 1.5     | -1.31 |
| NGLY1_2    | 58.95     | -0.12  | 0       | 0.98  |

Supplement: Supplementary file 5083 [file 1]

# IPI00301579.4|NPC2

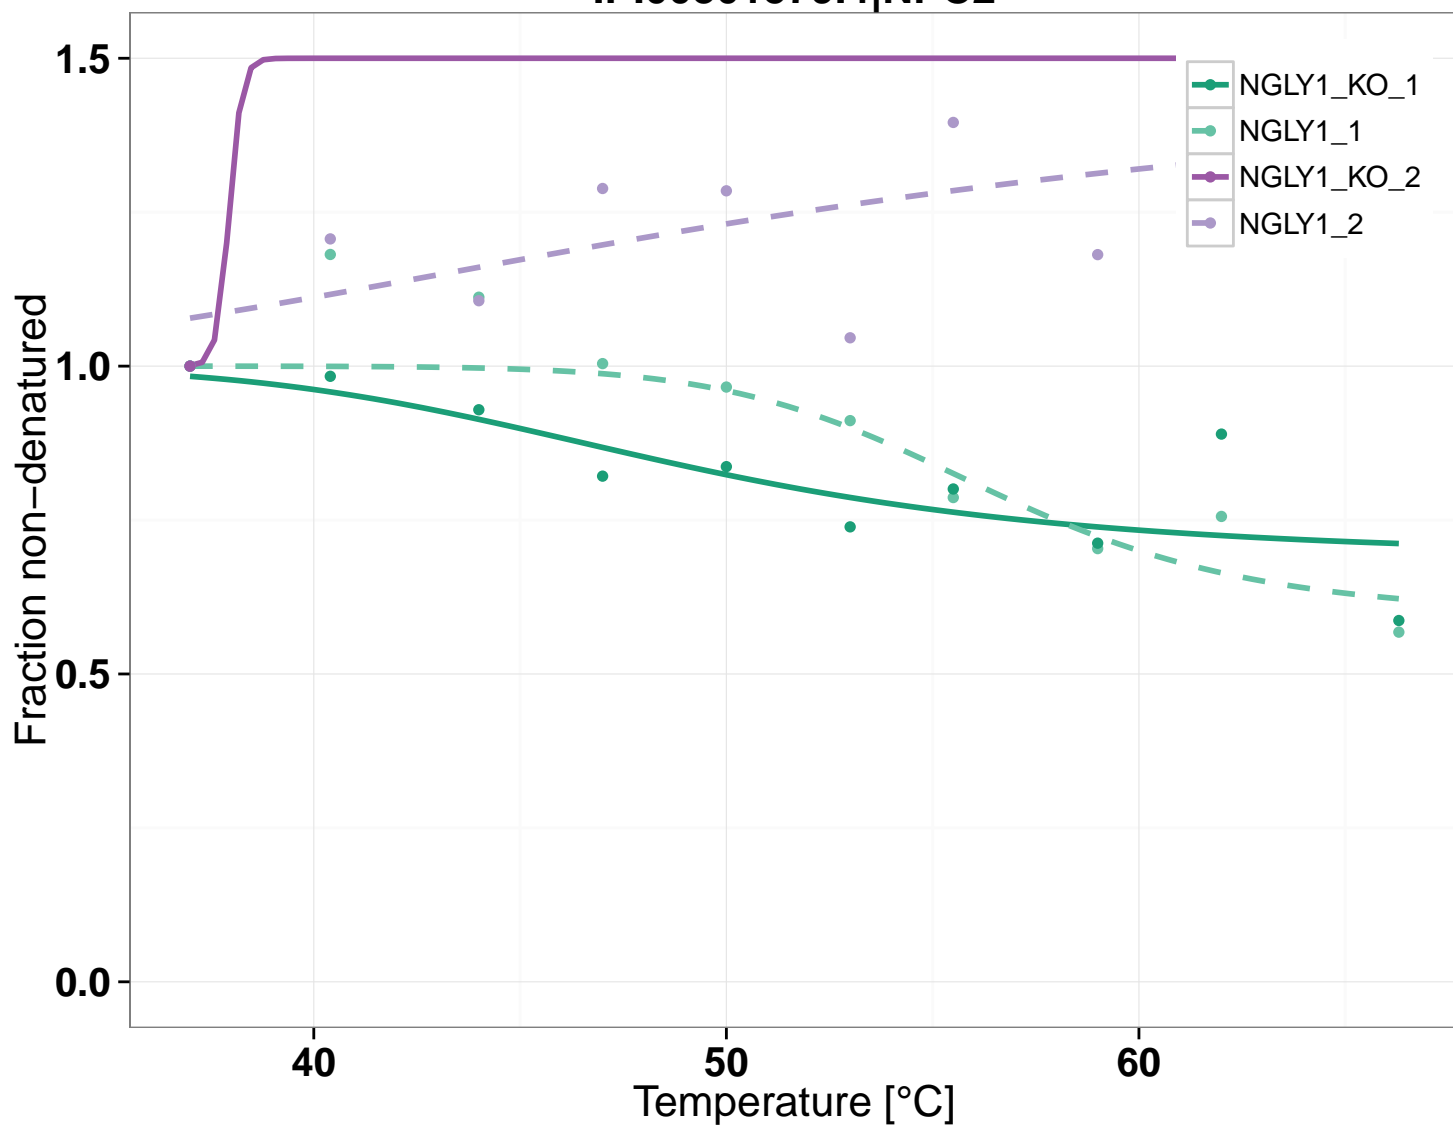

|            | meltPoint | slope  | plateau | R2    |
|------------|-----------|--------|---------|-------|
| NGLY1_KO_1 | –         | –0.015 | 0.69    | 0.66  |
| NGLY1_1    | –         | –0.032 | 0.59    | 0.82  |
| NGLY1_KO_2 | –         | 0.82   | 1.5     | –6.37 |
| NGLY1_2    | –         | 0.012  | 1.5     | 0.39  |

Supplement: Supplementary file 5084 [file 1]

IPI00411515.4|ZBTB41

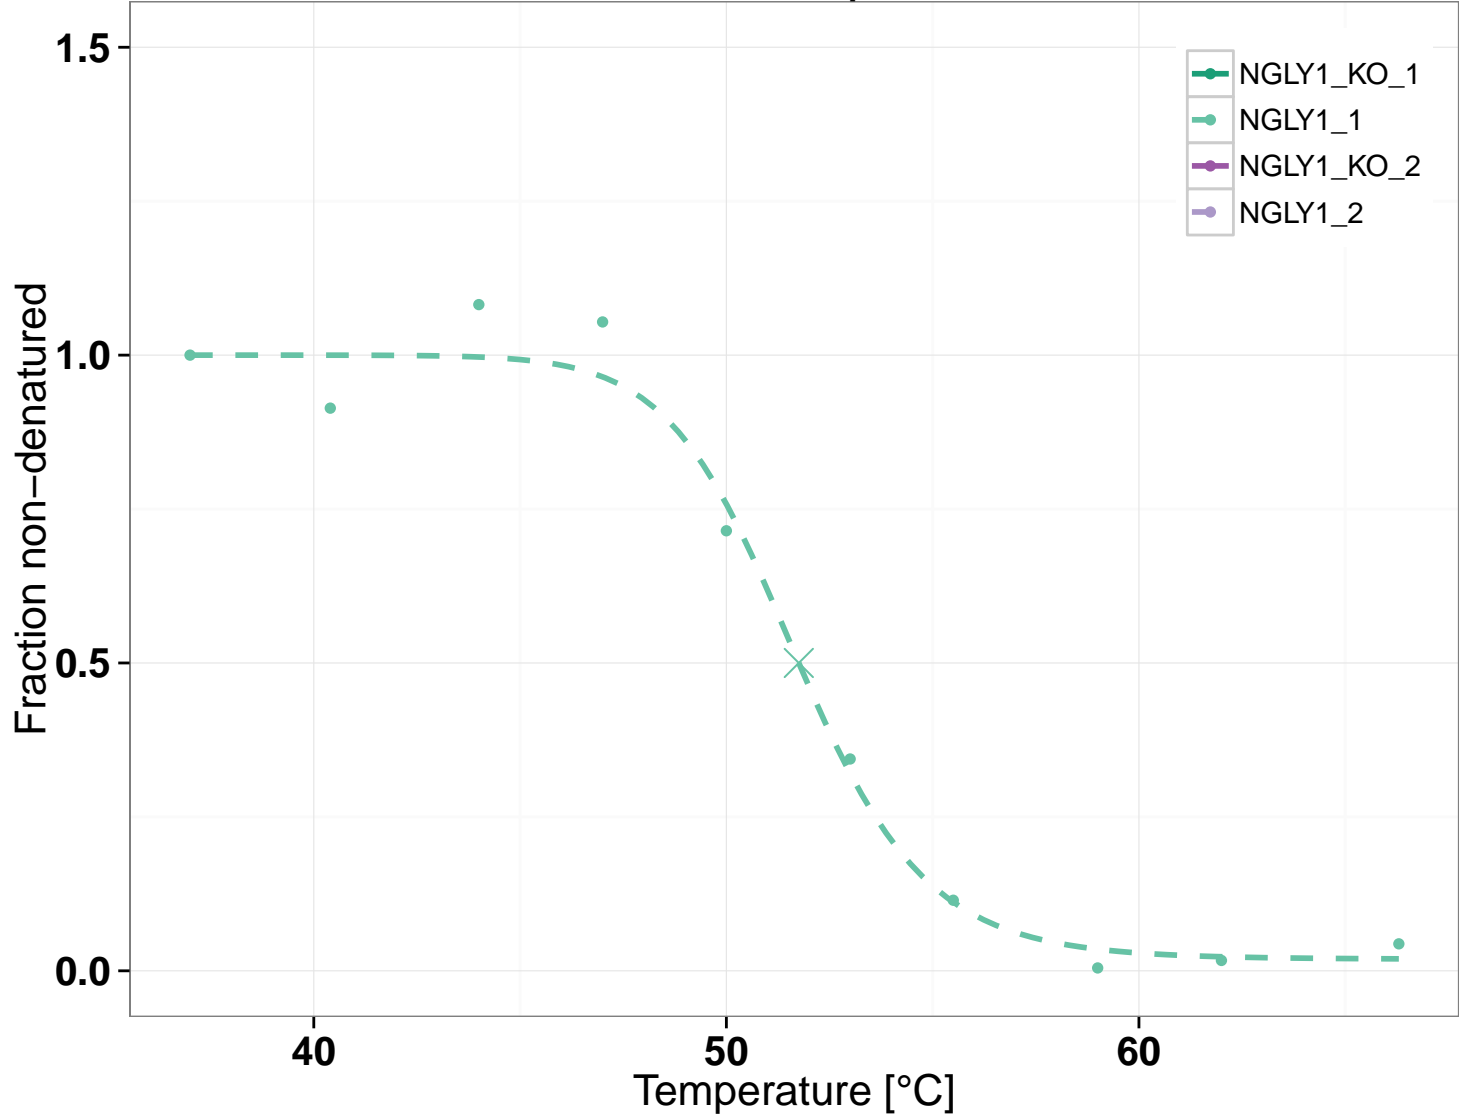

|            | meltPoint | slope | plateau | R2   |
|------------|-----------|-------|---------|------|
| NGLY1_KO_1 | -         | -     | -       | -    |
| NGLY1_1    | 51.76     | -0.16 | 0.02    | 0.99 |
| NGLY1_KO_2 | -         | -     | -       | -    |
| NGLY1_2    | -         | -     | -       | -    |

Supplement: Supplementary file 5085 [file 1]

IPI00215767.1|B4GALT1

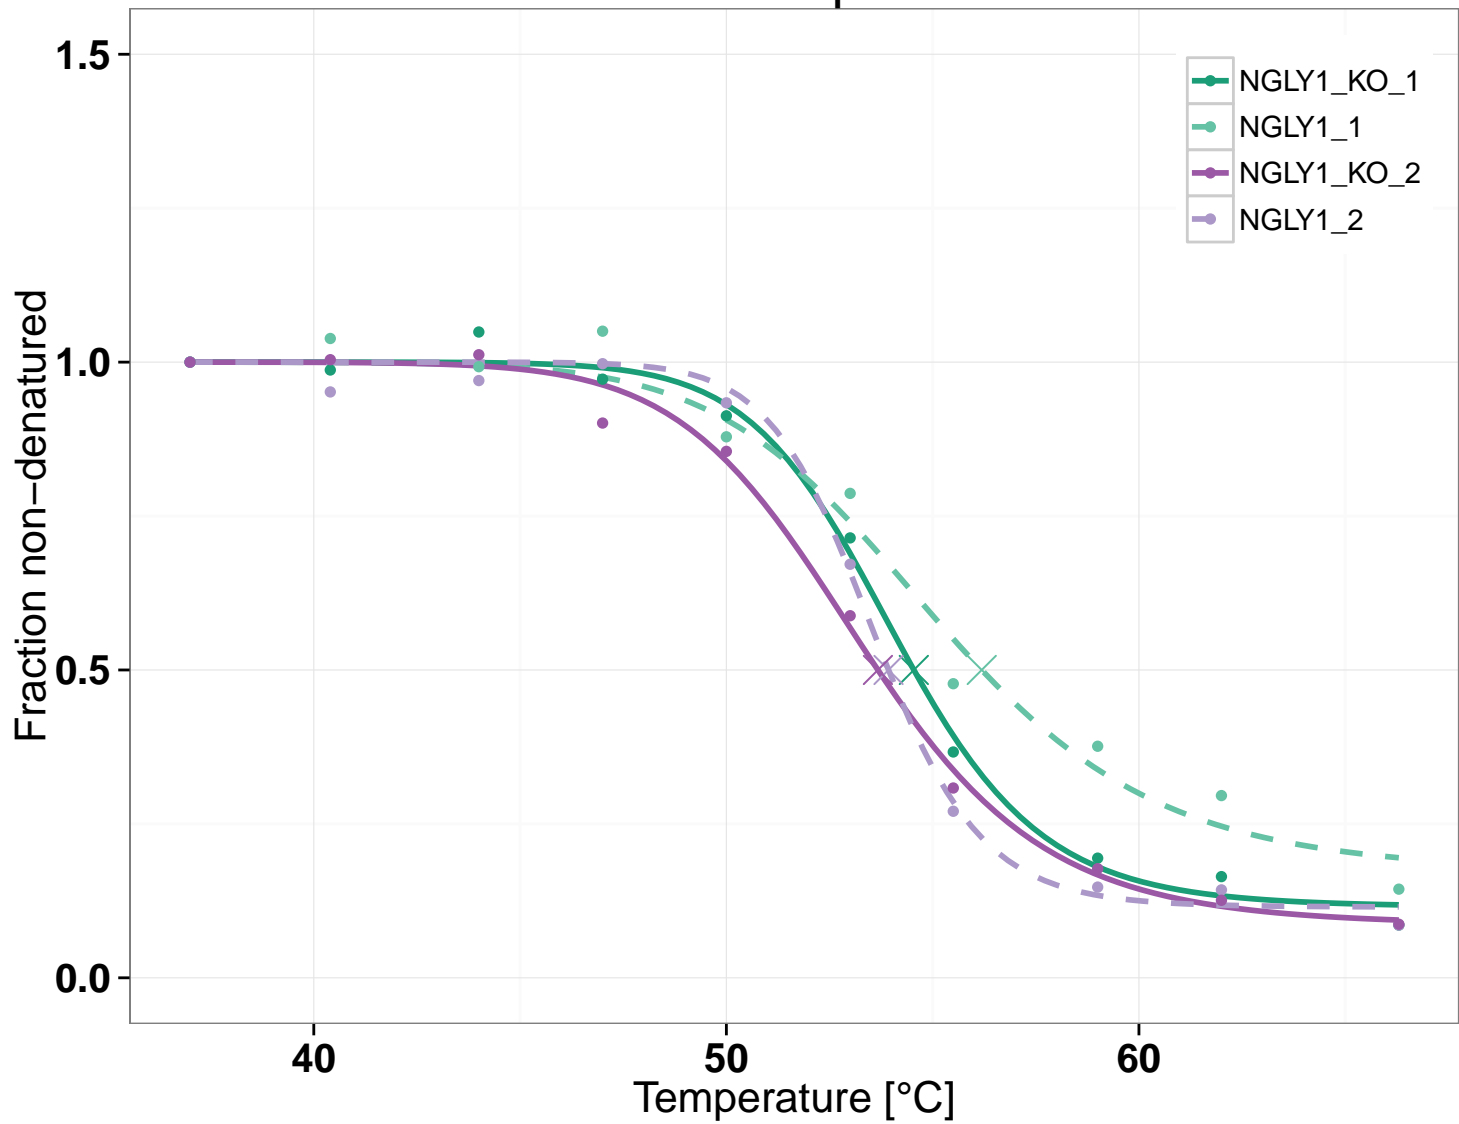

|            | meltPoint | slope  | plateau | R2   |
|------------|-----------|--------|---------|------|
| NGLY1_KO_1 | 54.54     | -0.12  | 0.12    | 1    |
| NGLY1_1    | 56.19     | -0.078 | 0.17    | 0.98 |
| NGLY1_KO_2 | 53.67     | -0.1   | 0.09    | 1    |
| NGLY1_2    | 53.93     | -0.17  | 0.11    | 1    |

Supplement: Supplementary file 5086 [file 1]

IPI00552191.1|PSMD13

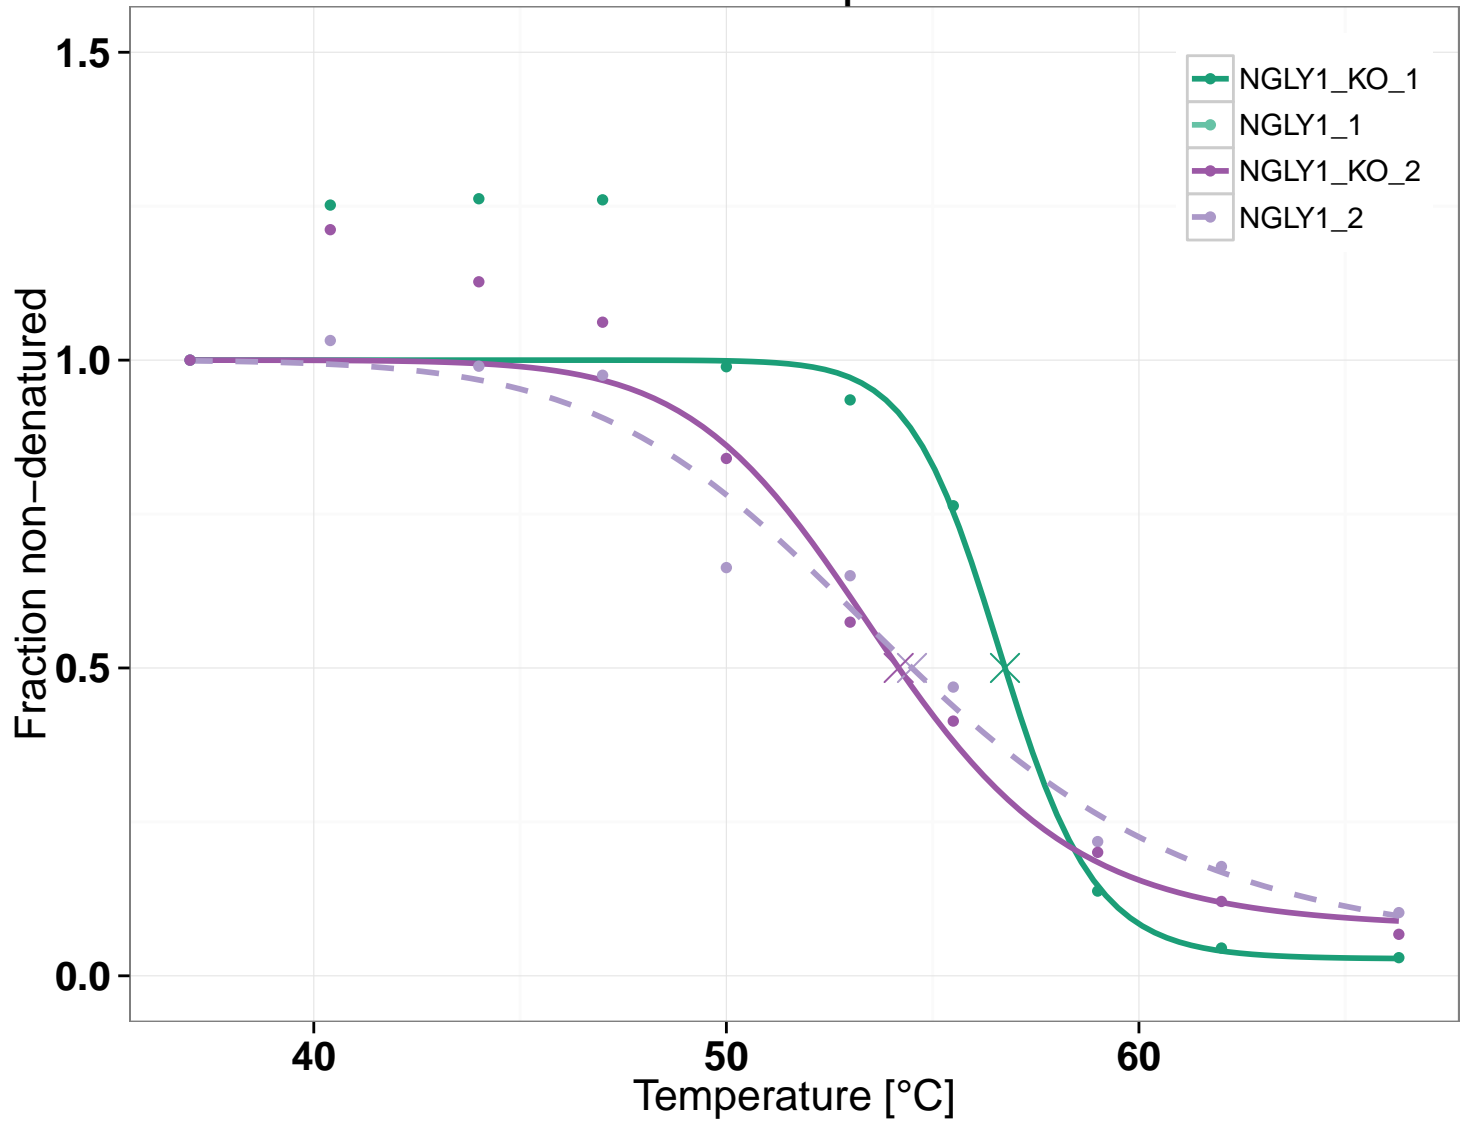

|            | meltPoint | slope  | plateau | R2   |
|------------|-----------|--------|---------|------|
| NGLY1_KO_1 | 56.75     | -0.22  | 0.03    | 0.91 |
| NGLY1_1    | -         | -      | -       | -    |
| NGLY1_KO_2 | 54.18     | -0.099 | 0.08    | 0.96 |
| NGLY1_2    | 54.5      | -0.066 | 0.03    | 0.98 |

Supplement: Supplementary file 5087 [file 1]

IPI00102752.2|RBM15

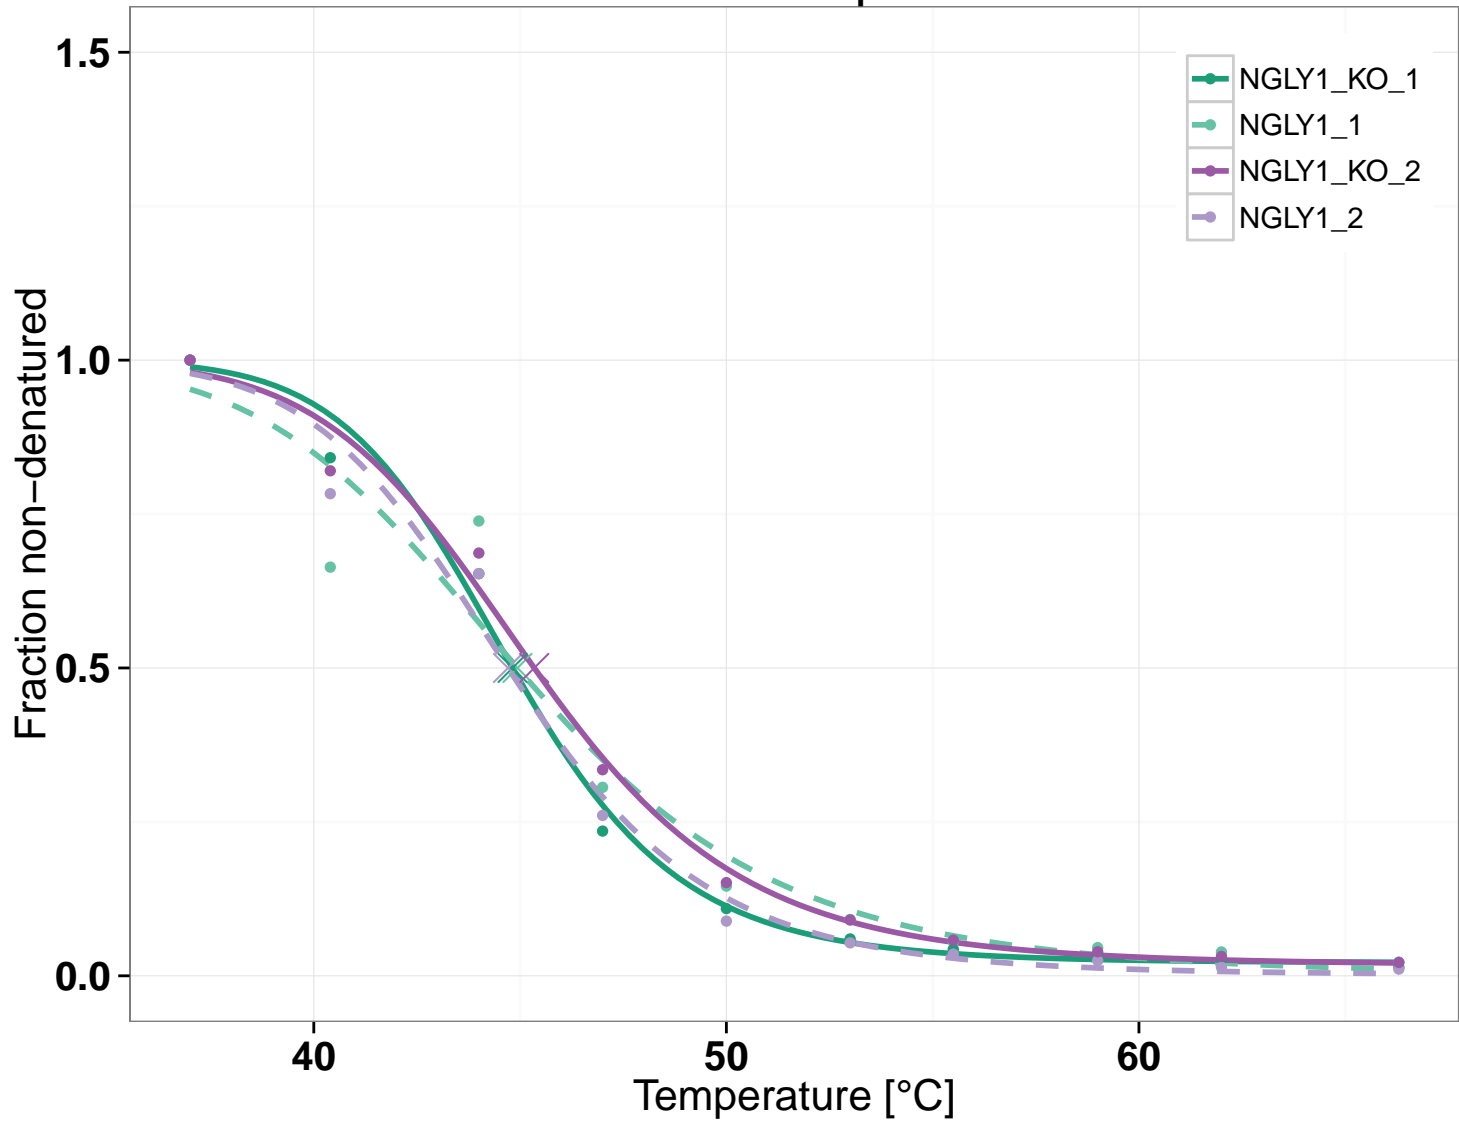

|            | meltPoint | slope  | plateau | R2   |
|------------|-----------|--------|---------|------|
| NGLY1_KO_1 | 44.82     | -0.12  | 0.02    | 0.99 |
| NGLY1_1    | 44.94     | -0.08  | 0       | 0.95 |
| NGLY1_KO_2 | 45.34     | -0.096 | 0.02    | 0.99 |
| NGLY1_2    | 44.71     | -0.1   | 0       | 0.99 |

Supplement: Supplementary file 5088 [file 1]

# IPI00157358.1|CDCA4

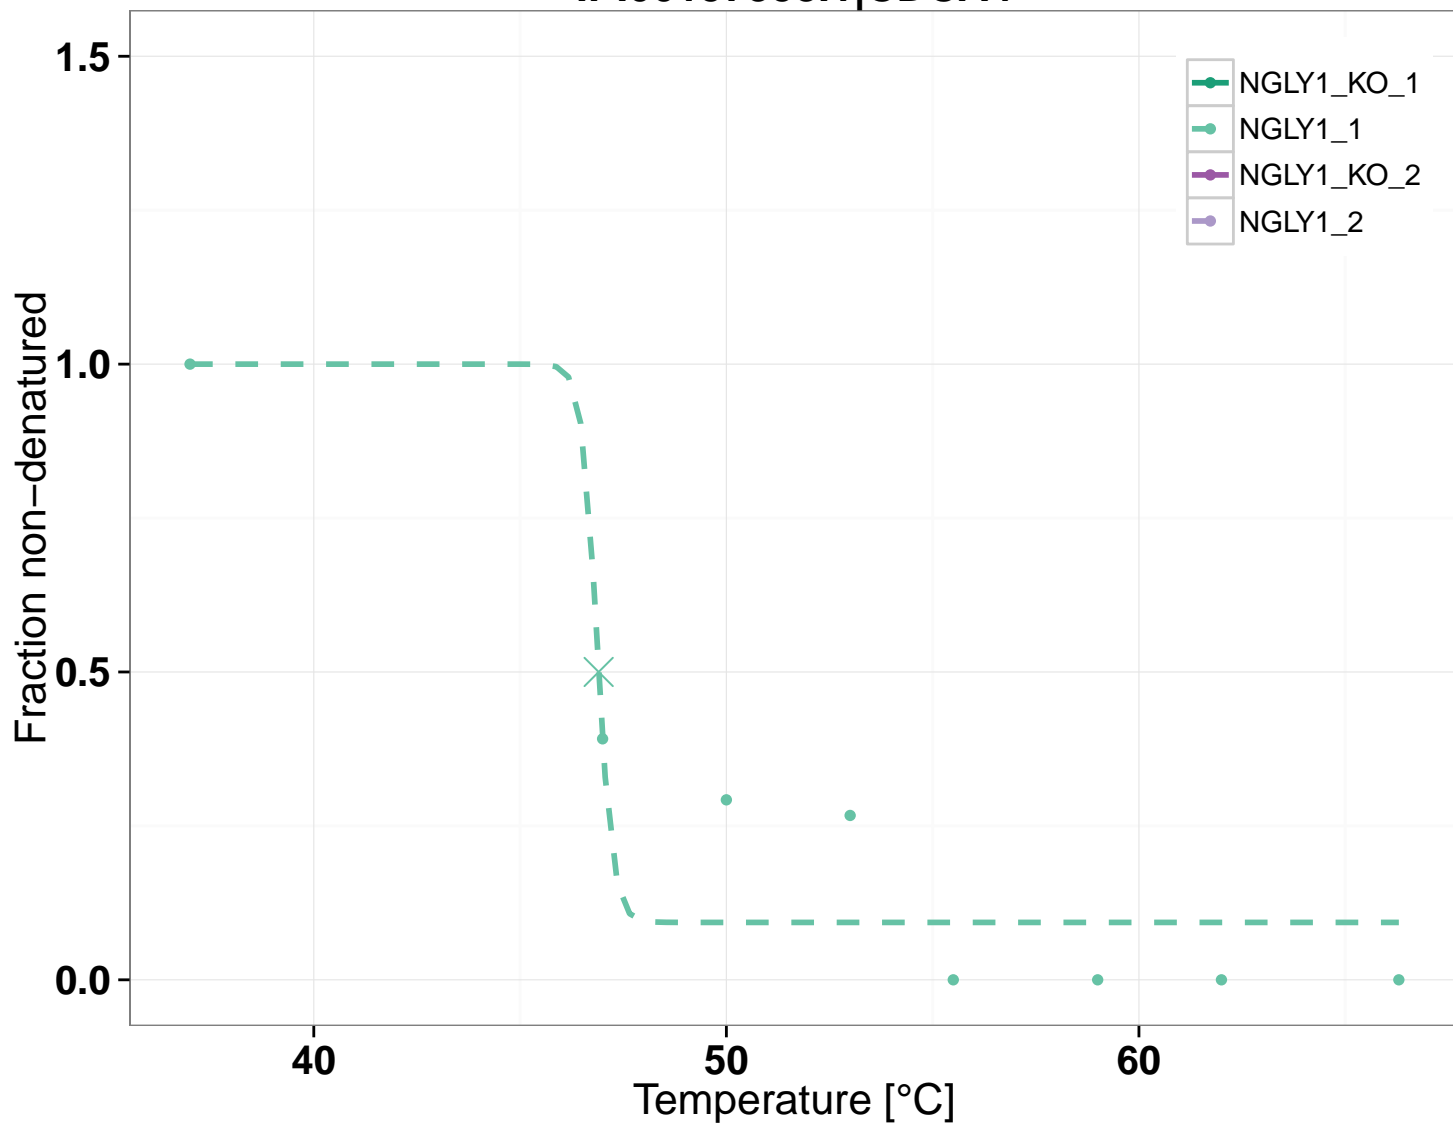

|            | meltPoint | slope | plateau | R2  |
|------------|-----------|-------|---------|-----|
| NGLY1_KO_1 | —         | —     | —       | —   |
| NGLY1_1    | 46.9      | -1.2  | 0.09    | 0.8 |
| NGLY1_KO_2 | —         | —     | —       | —   |
| NGLY1_2    | —         | —     | —       | —   |

Supplement: Supplementary file 5089 [file 1]

IPI00016906.2|SEPHS2

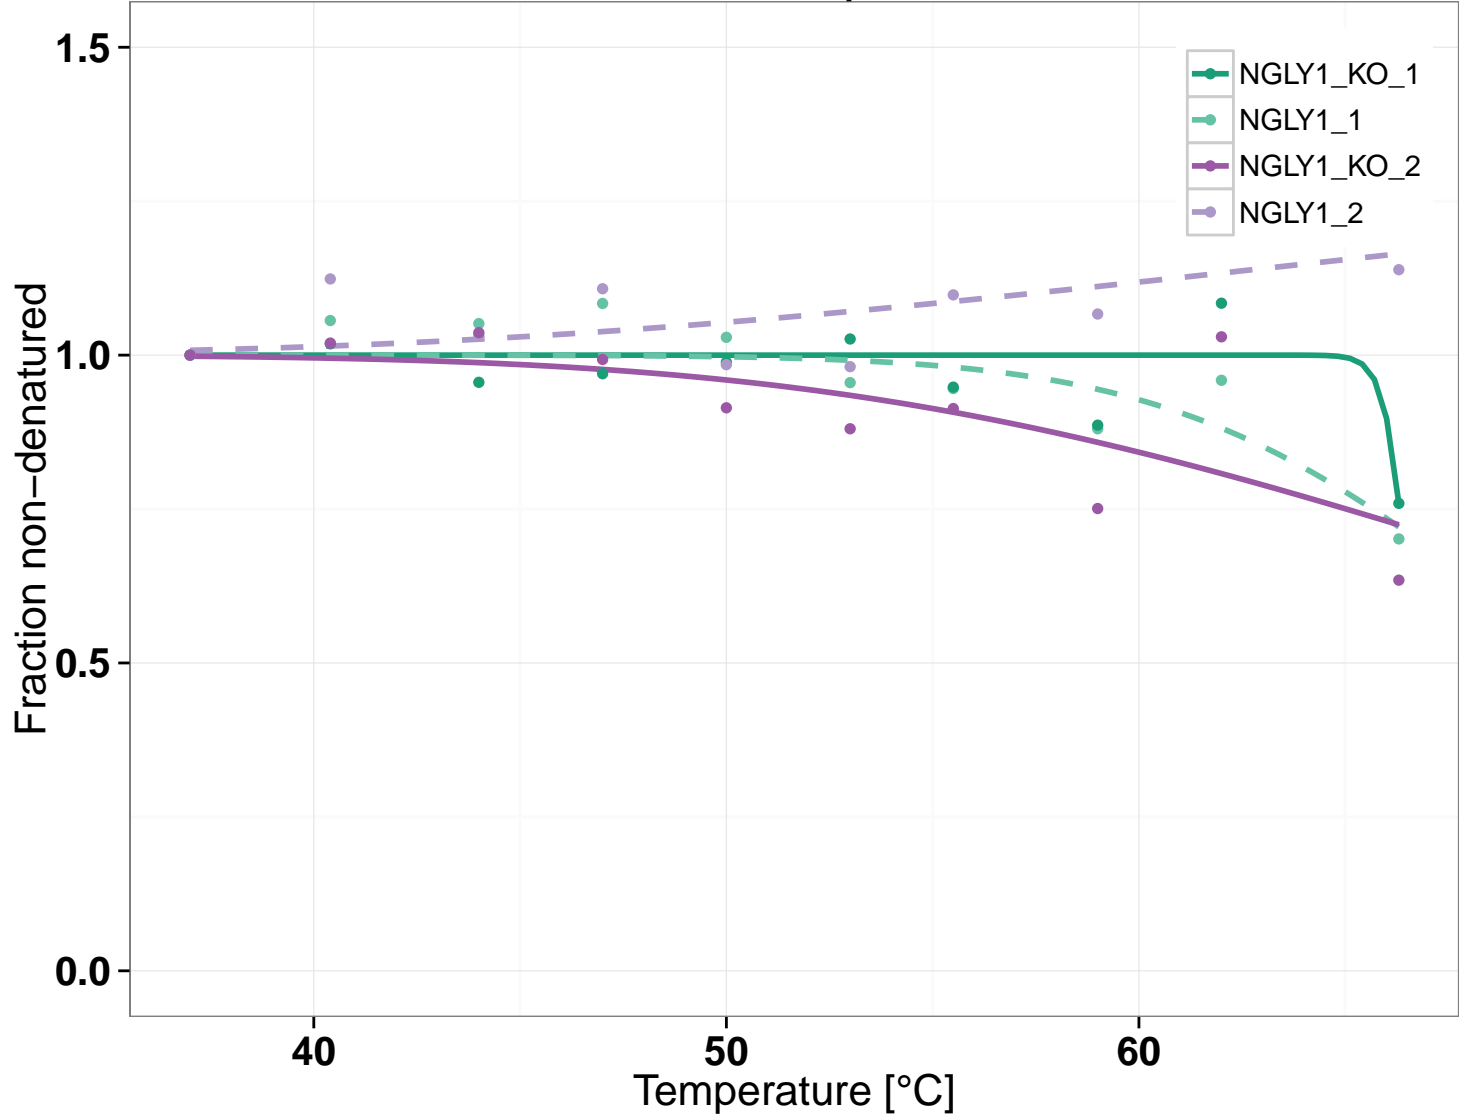

|            | meltPoint | slope  | plateau | R2   |
|------------|-----------|--------|---------|------|
| NGLY1_KO_1 | -         | -      | 0       | 0.63 |
| NGLY1_1    | -         | -      | 0       | 0.76 |
| NGLY1_KO_2 | -         | -      | 0       | 0.51 |
| NGLY1_2    | -         | 0.0073 | 1.5     | 0.27 |

Supplement: Supplementary file 5090 [file 1]

# IPI00001638.1|PRELID1

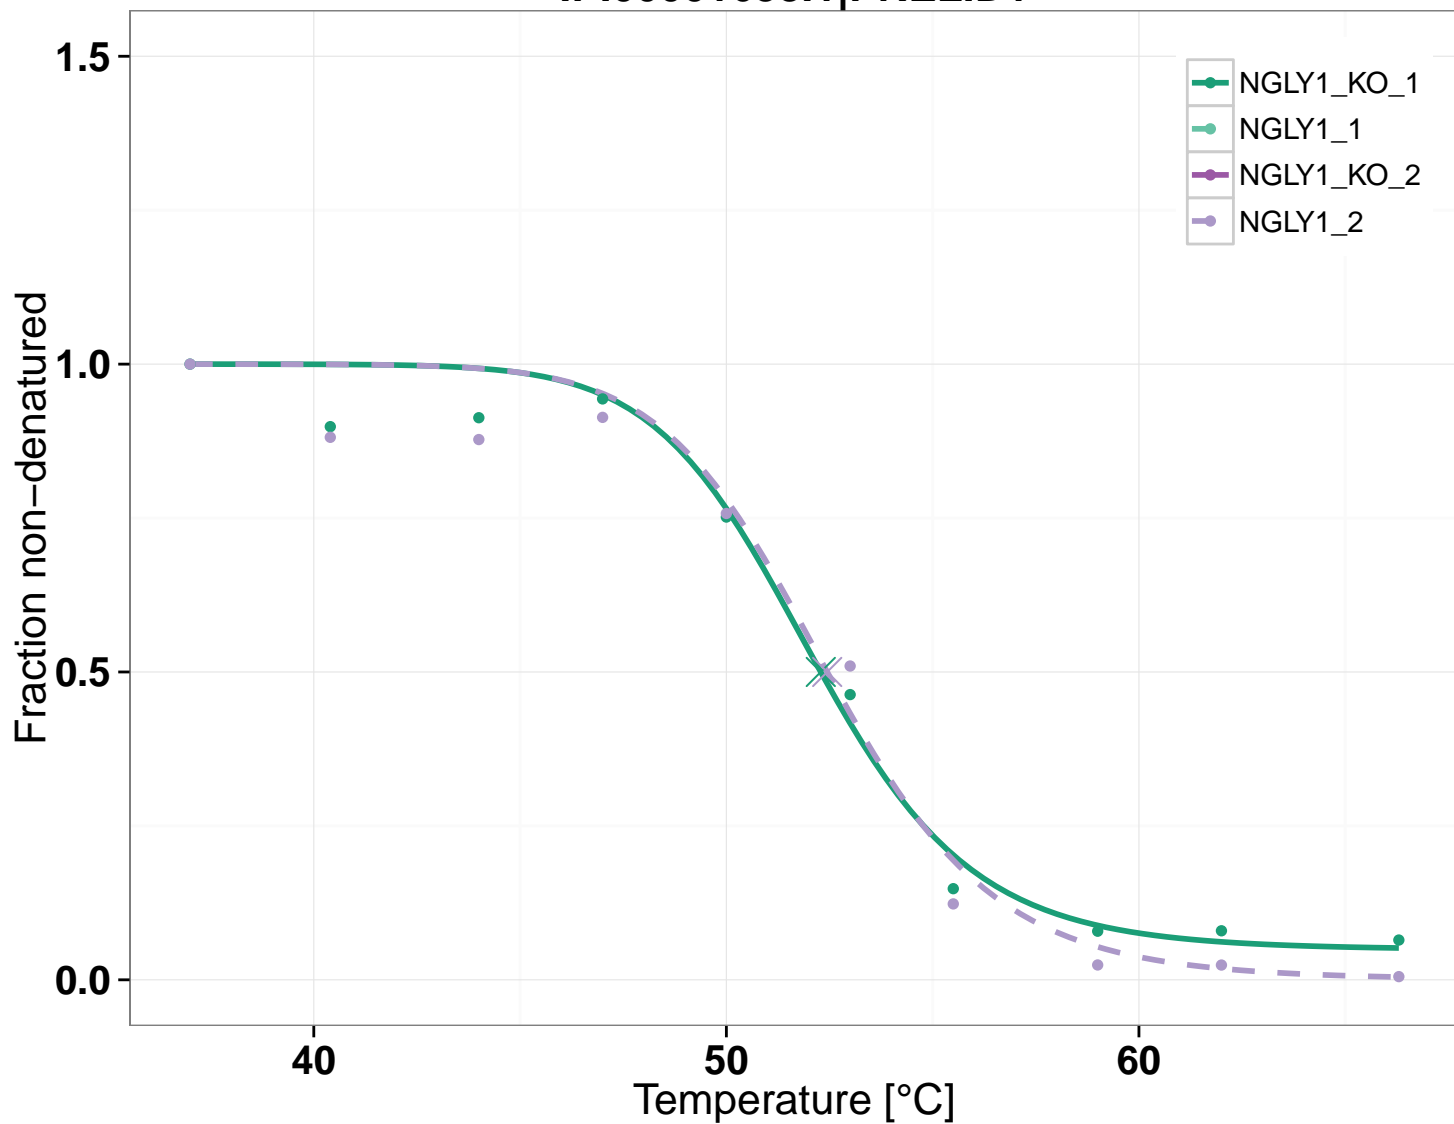

|            | meltPoint | slope | plateau | R2   |
|------------|-----------|-------|---------|------|
| NGLY1_KO_1 | 52.29     | -0.12 | 0.05    | 0.98 |
| NGLY1_1    | -         | -     | -       | -    |
| NGLY1_KO_2 | -         | -     | -       | -    |
| NGLY1_2    | 52.44     | -0.12 | 0       | 0.97 |

Supplement: Supplementary file 5091 [file 1]

IPI00161196.3|FBXL8

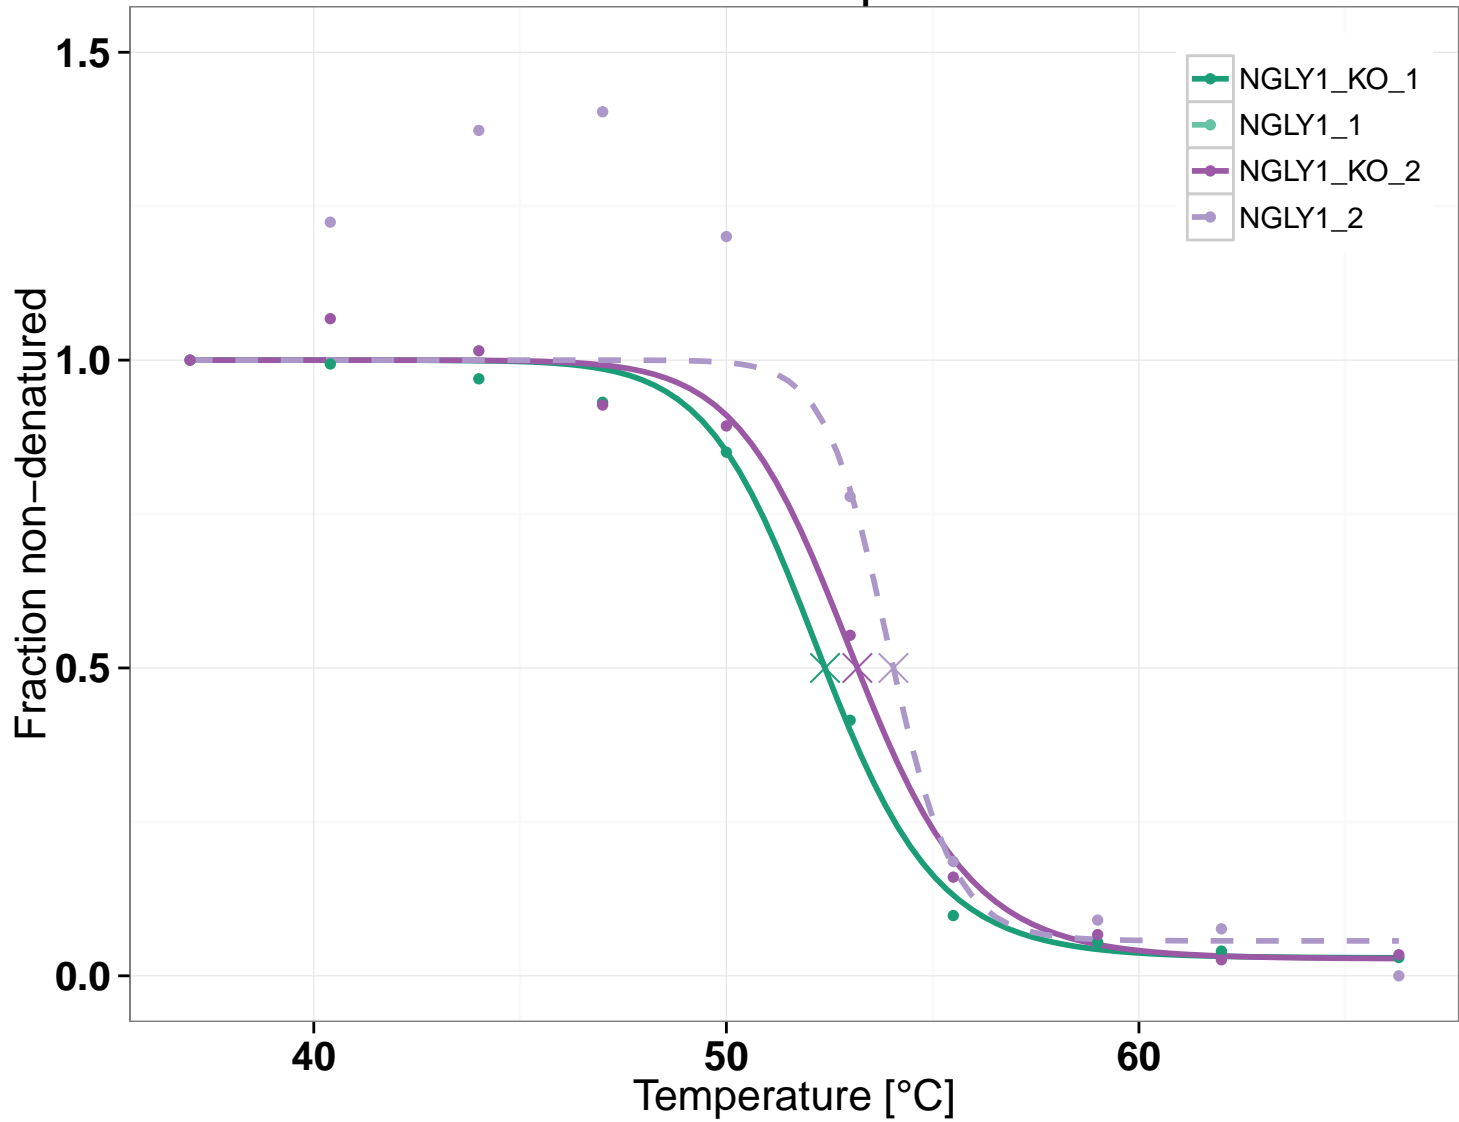

|            | meltPoint | slope | plateau | R2   |
|------------|-----------|-------|---------|------|
| NGLY1_KO_1 | 52.39     | -0.17 | 0.03    | 1    |
| NGLY1_1    | -         | -     | -       | -    |
| NGLY1_KO_2 | 53.18     | -0.17 | 0.03    | 0.99 |
| NGLY1_2    | 54.05     | -0.3  | 0.06    | 0.87 |

Supplement: Supplementary file 5092 [file 1]

# IPI00515131.4|C1ORF159

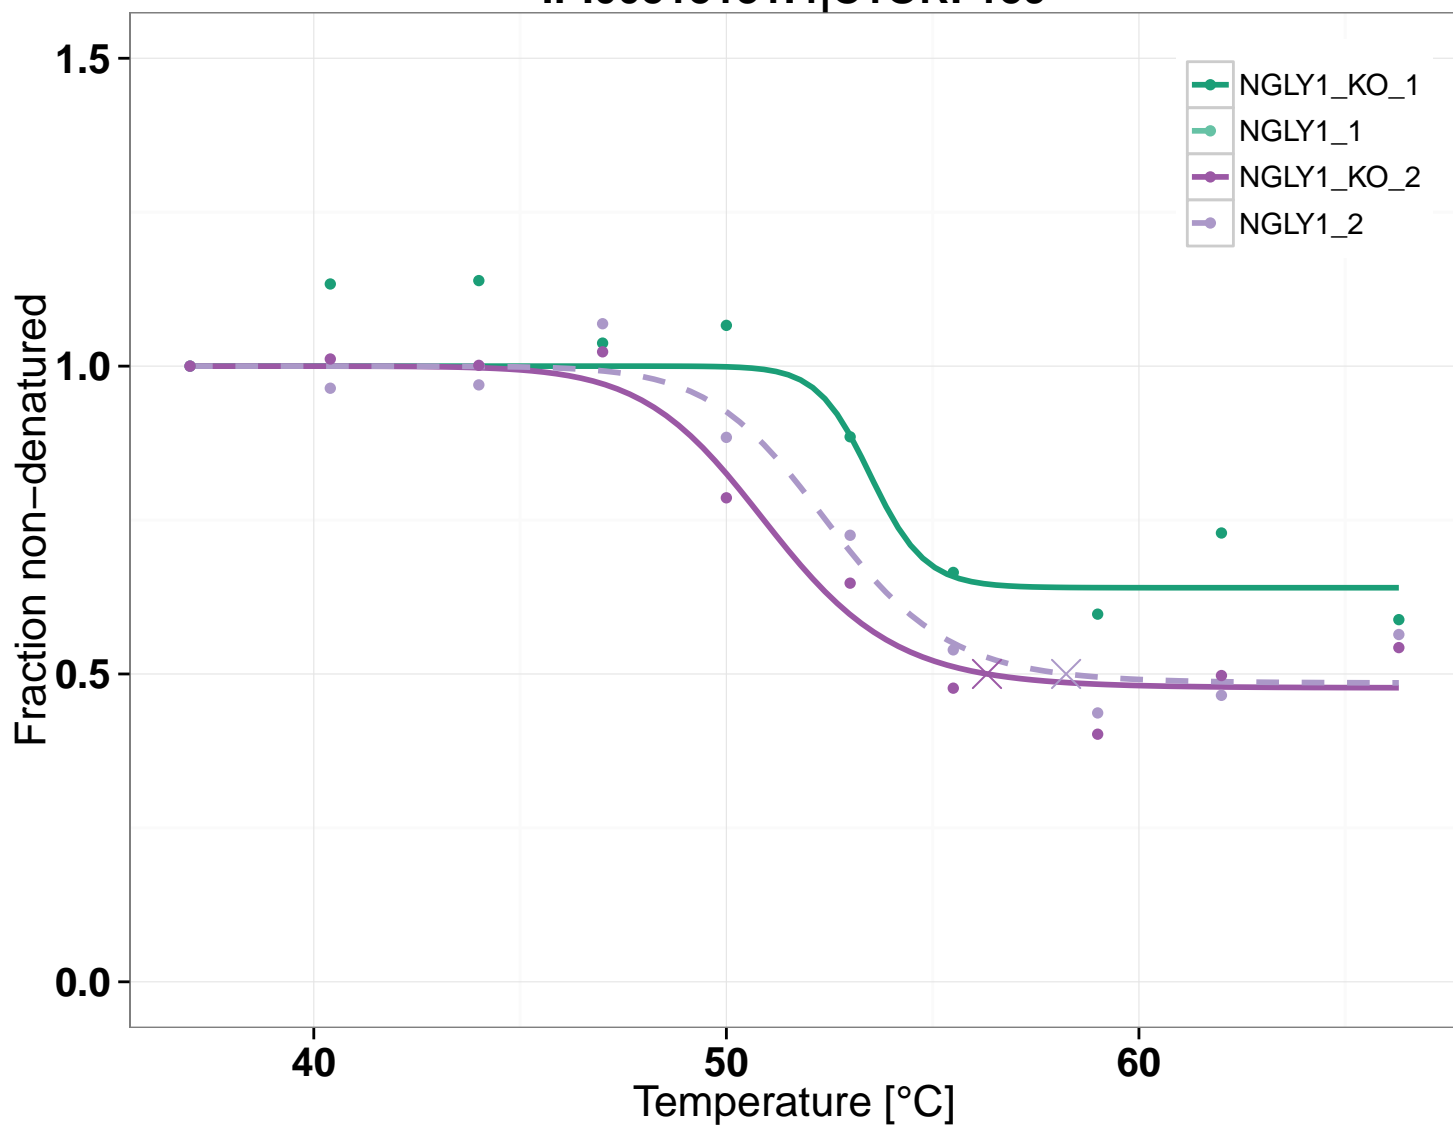

|            | meltPoint | slope  | plateau | R2   |
|------------|-----------|--------|---------|------|
| NGLY1_KO_1 | –         | –0.14  | 0.64    | 0.87 |
| NGLY1_1    | –         | –      | –       | –    |
| NGLY1_KO_2 | 56.32     | –0.085 | 0.48    | 0.97 |
| NGLY1_2    | 58.23     | –0.088 | 0.49    | 0.96 |

Supplement: Supplementary file 5093 [file 1]

IPI00022826.1|BTBD2

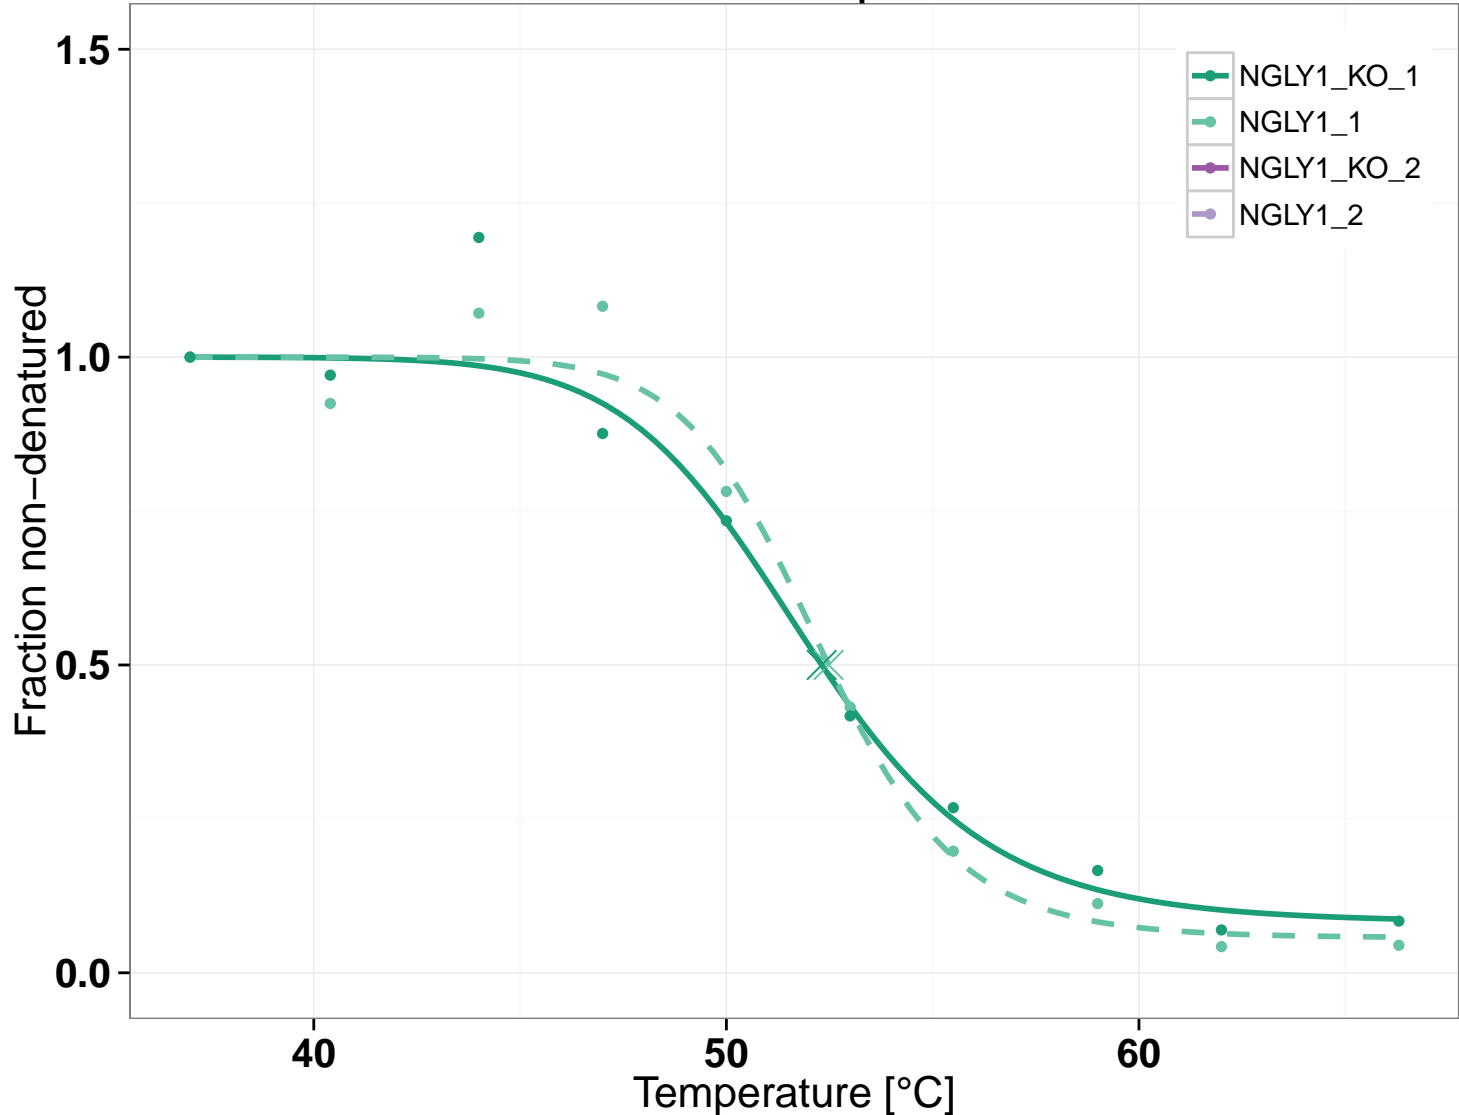

|            | meltPoint | slope | plateau | R2   |
|------------|-----------|-------|---------|------|
| NGLY1_KO_1 | 52.31     | -0.1  | 0.08    | 0.97 |
| NGLY1_1    | 52.48     | -0.14 | 0.06    | 0.99 |
| NGLY1_KO_2 | -         | -     | -       | -    |
| NGLY1_2    | -         | -     | -       | -    |

Supplement: Supplementary file 5094 [file 1]

IPI00643591.5|AP1G1

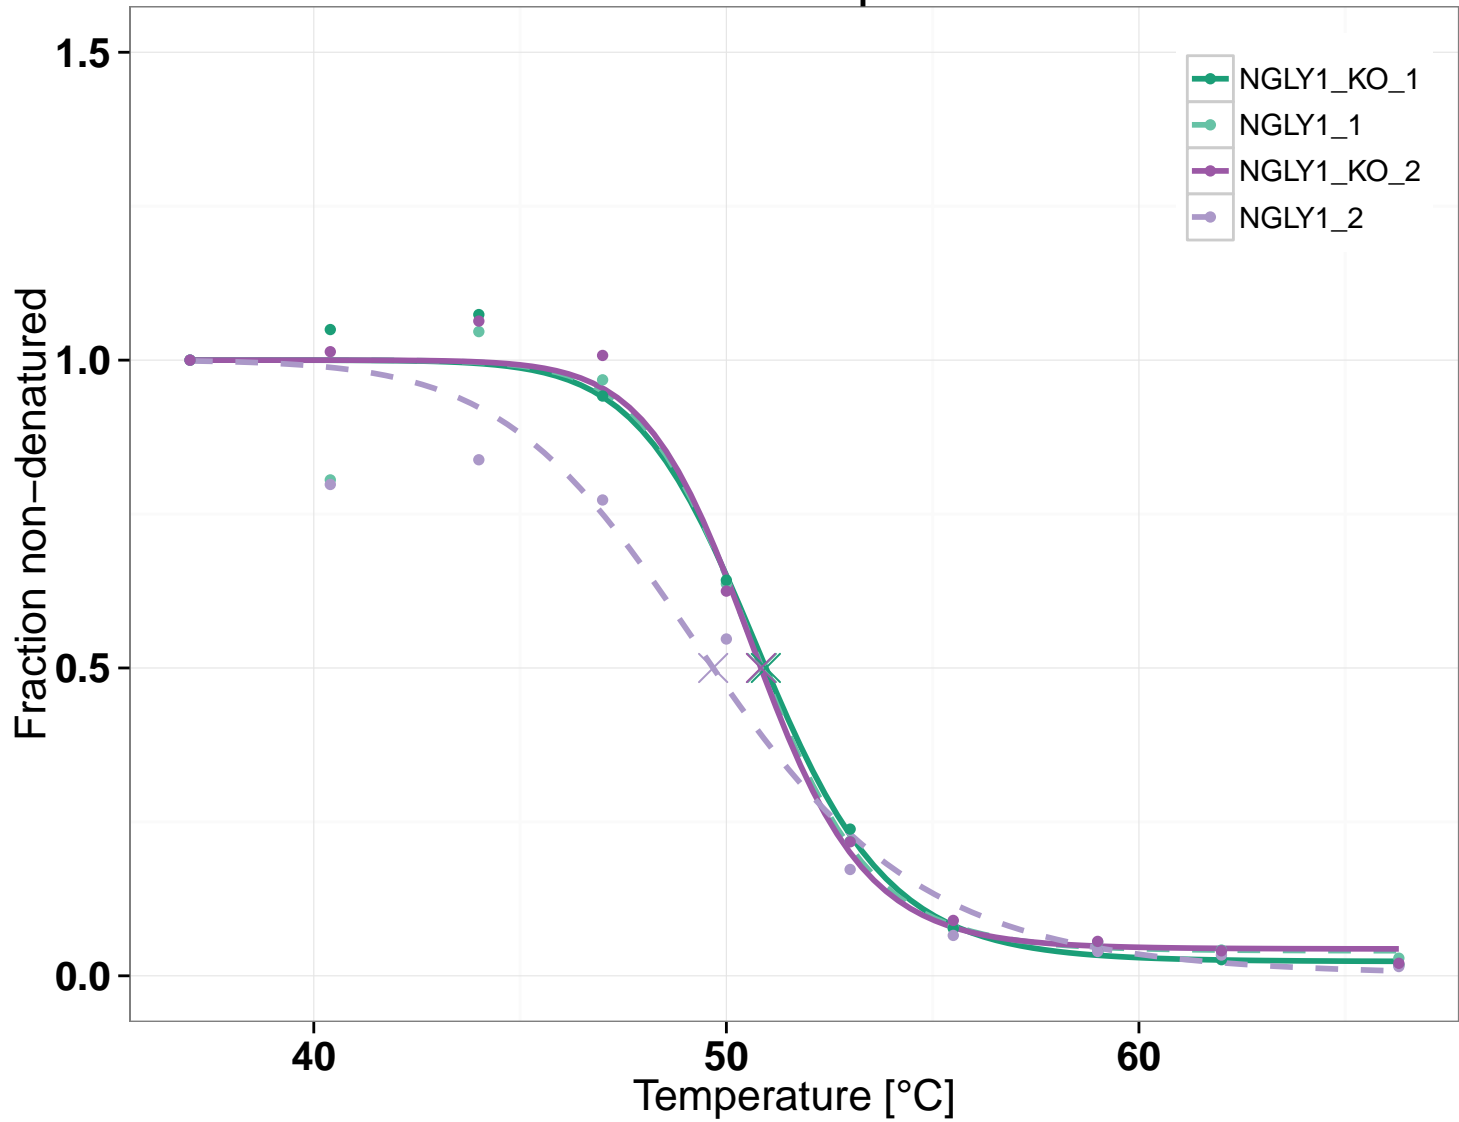

|            | meltPoint | slope  | plateau | R2   |
|------------|-----------|--------|---------|------|
| NGLY1_KO_1 | 50.96     | -0.16  | 0.02    | 1    |
| NGLY1_1    | 50.86     | -0.17  | 0.04    | 0.98 |
| NGLY1_KO_2 | 50.84     | -0.18  | 0.04    | 1    |
| NGLY1_2    | 49.68     | -0.098 | 0       | 0.96 |

Supplement: Supplementary file 5095 [file 1]

IPI00000049.3|TNFSF10

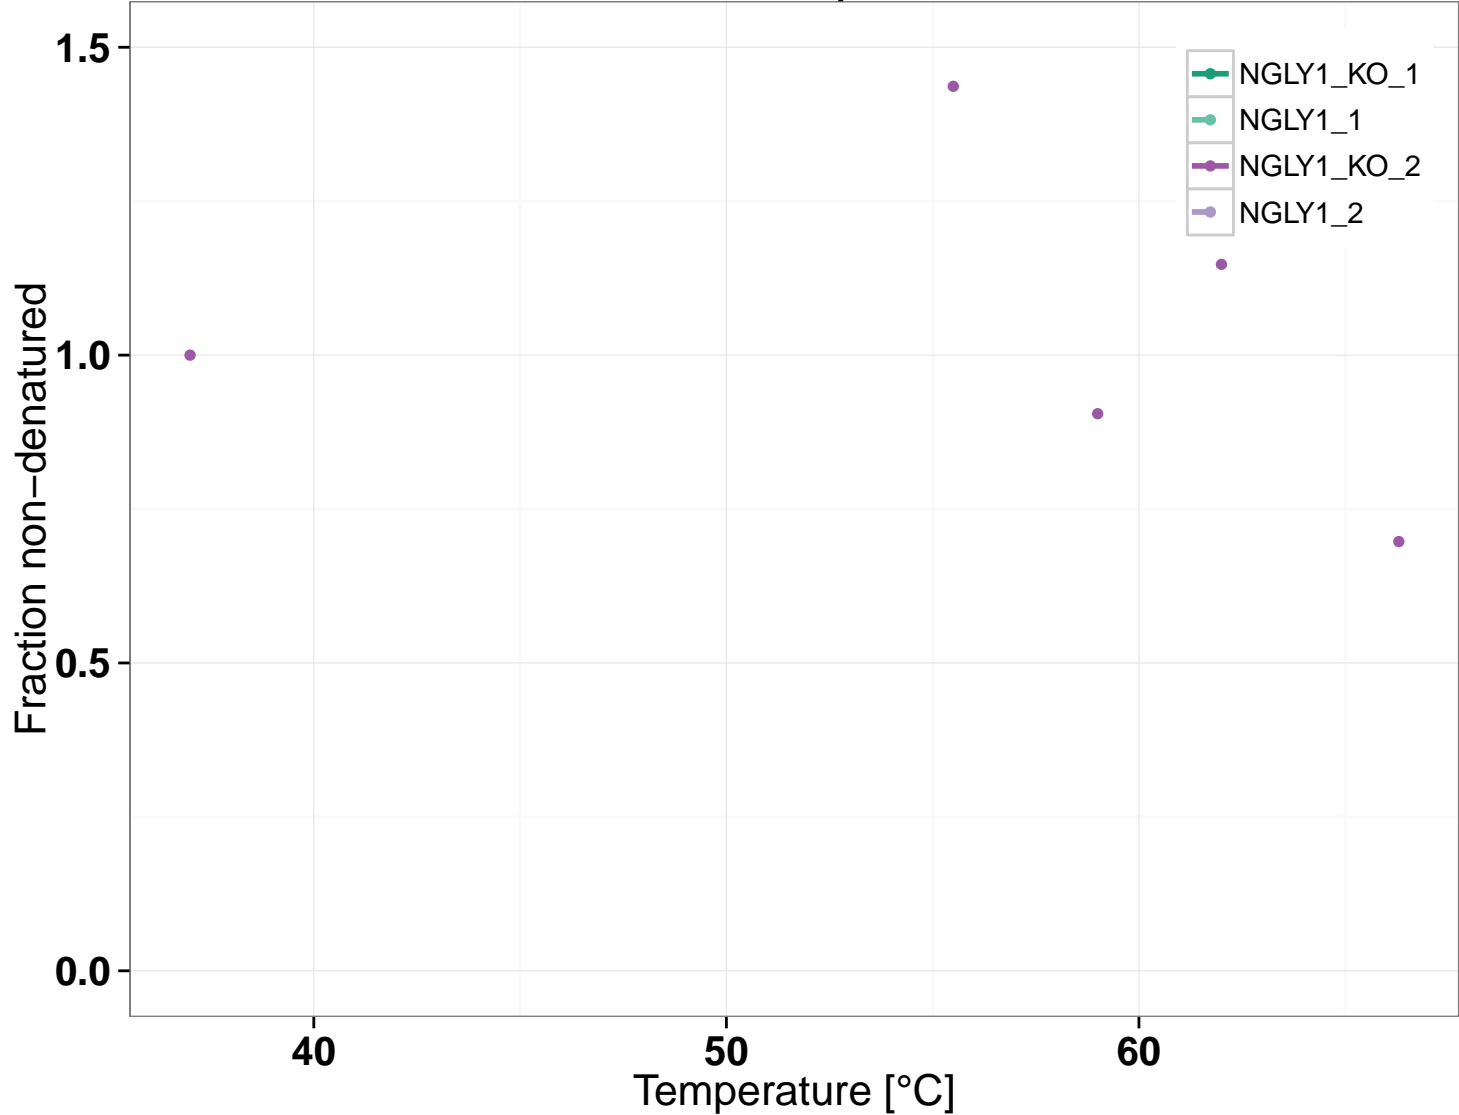

|            | meltPoint | slope | plateau | R2 |
|------------|-----------|-------|---------|----|
| NGLY1_KO_1 | -         | -     | -       | -  |
| NGLY1_1    | -         | -     | -       | -  |
| NGLY1_KO_2 | -         | -     | -       | -  |
| NGLY1_2    | -         | -     | -       | -  |

Supplement: Supplementary file 5096 [file 1]

IPI00024401.4|USP13

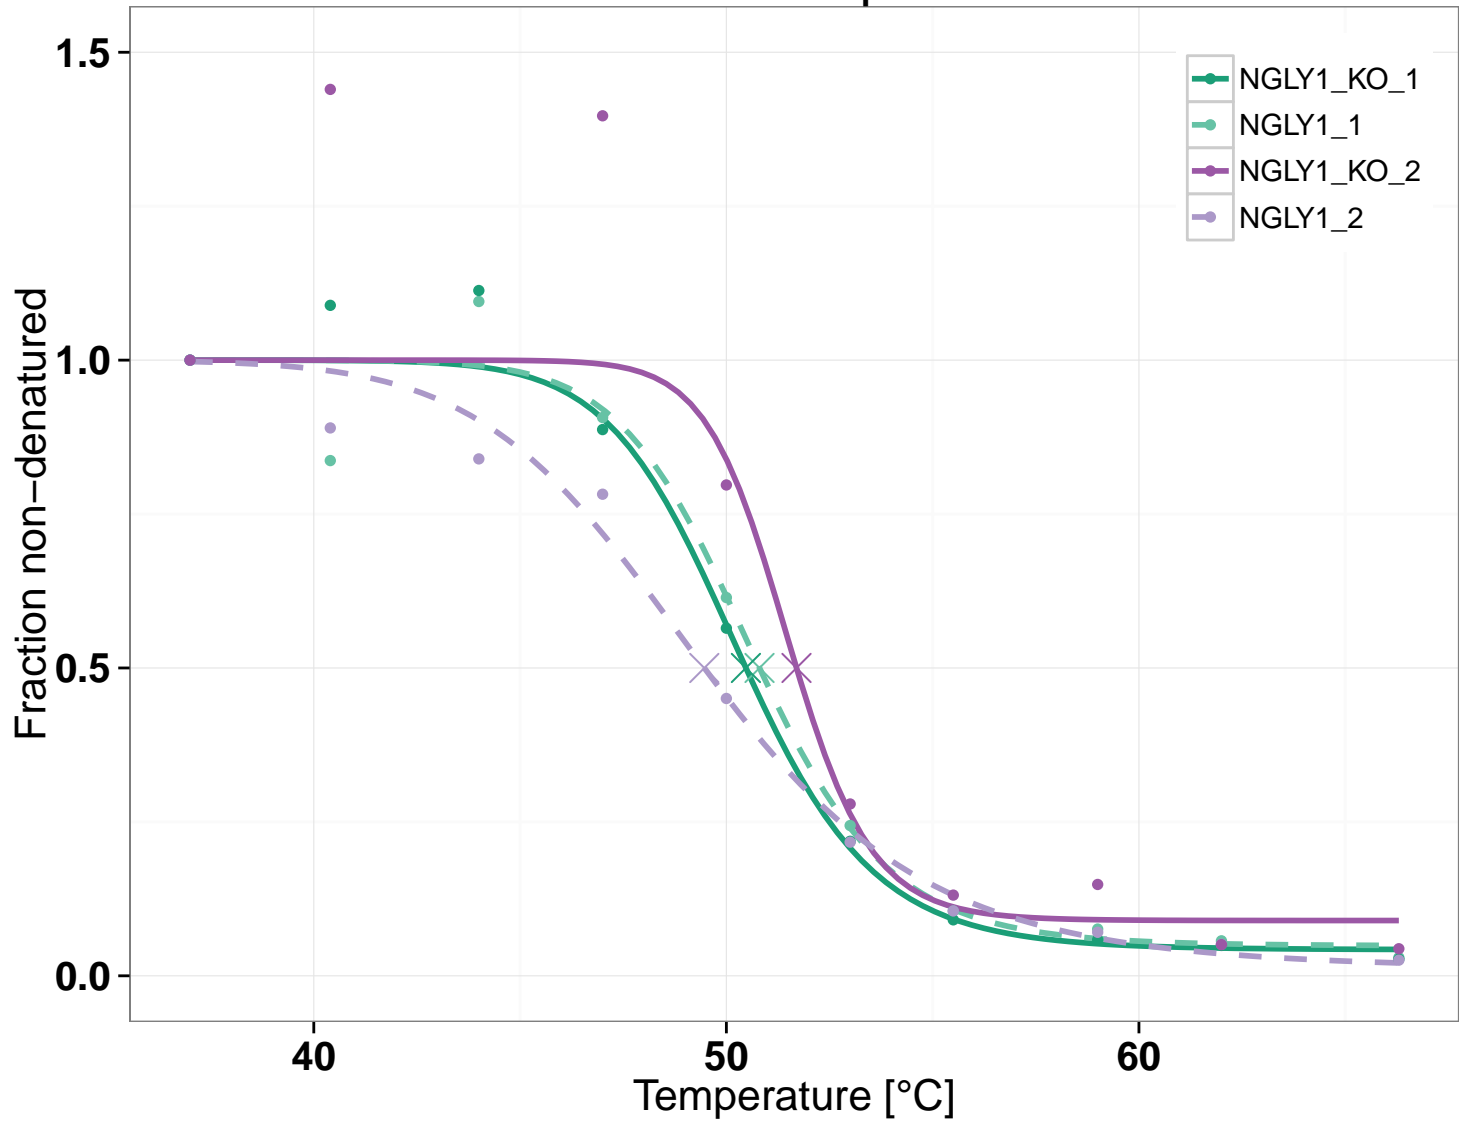

|            | meltPoint | slope  | plateau | R2   |
|------------|-----------|--------|---------|------|
| NGLY1_KO_1 | 50.47     | -0.15  | 0.04    | 0.99 |
| NGLY1_1    | 50.8      | -0.15  | 0.05    | 0.98 |
| NGLY1_KO_2 | 51.7      | -0.23  | 0.09    | 0.79 |
| NGLY1_2    | 49.47     | -0.091 | 0.01    | 0.99 |

Supplement: Supplementary file 5097 [file 1]

IPI00291755.6|NUP210

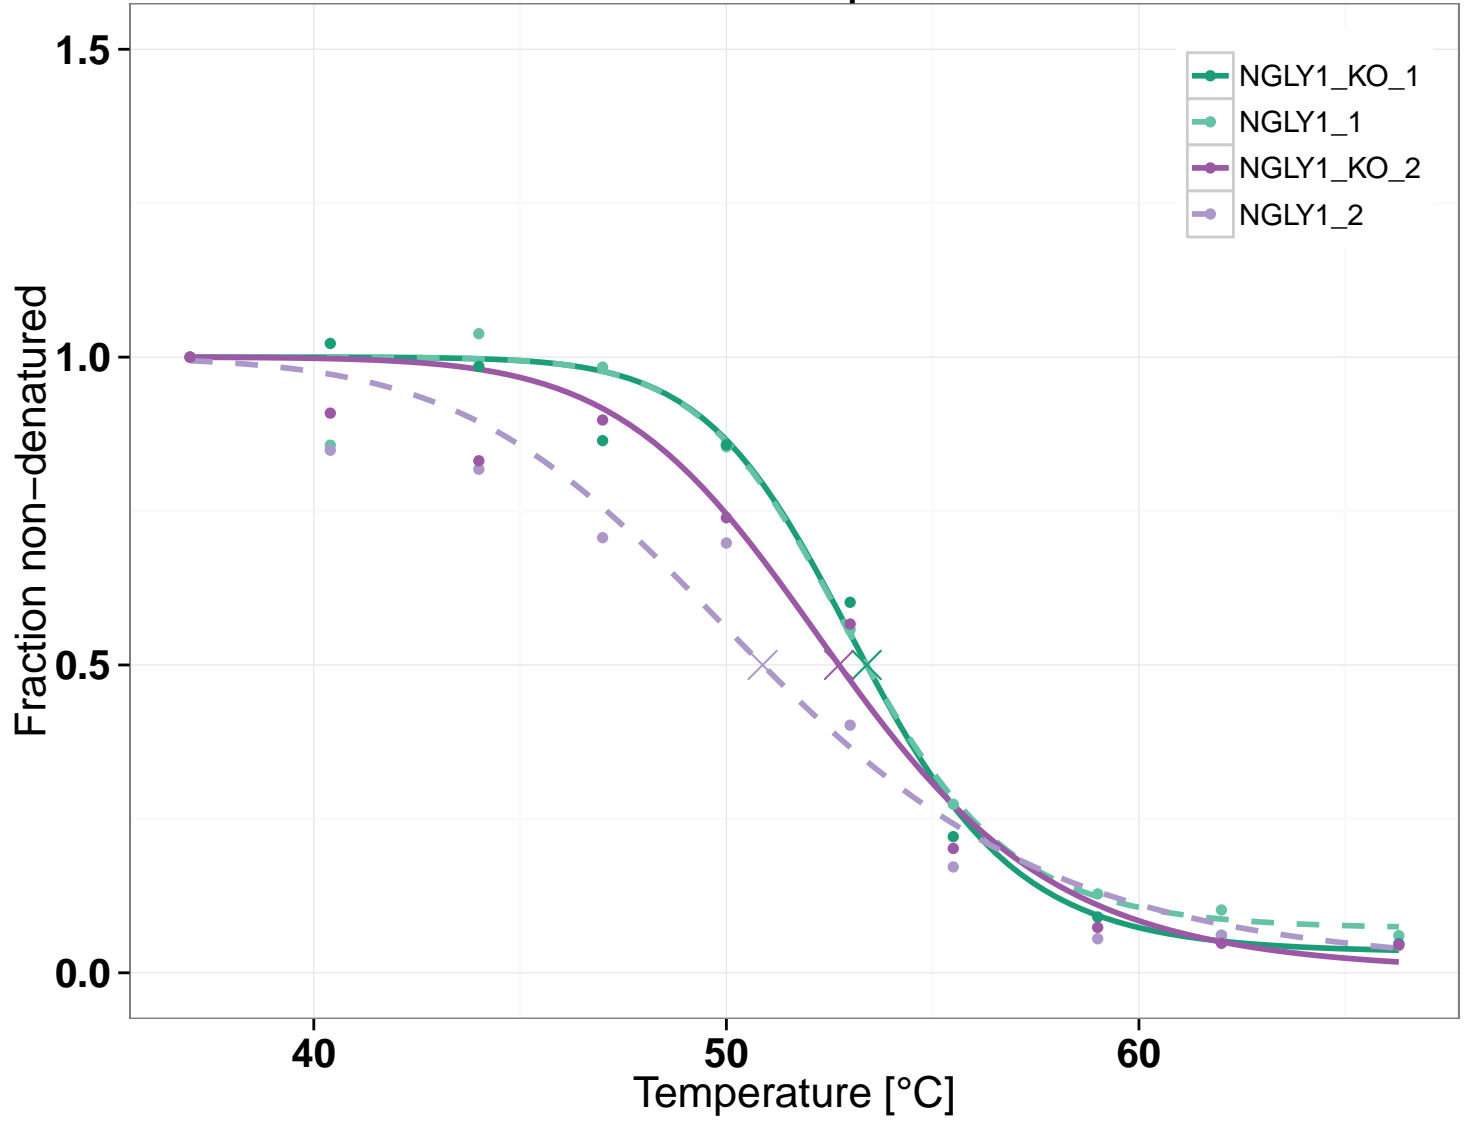

|            | meltPoint | slope  | plateau | R2   |
|------------|-----------|--------|---------|------|
| NGLY1_KO_1 | 53.4      | -0.13  | 0.03    | 0.99 |
| NGLY1_1    | 53.4      | -0.12  | 0.07    | 0.98 |
| NGLY1_KO_2 | 52.73     | -0.094 | 0       | 0.97 |
| NGLY1_2    | 50.88     | -0.069 | 0       | 0.96 |

Supplement: Supplementary file 5098 [file 1]

# IPI00890773.1|MTO1

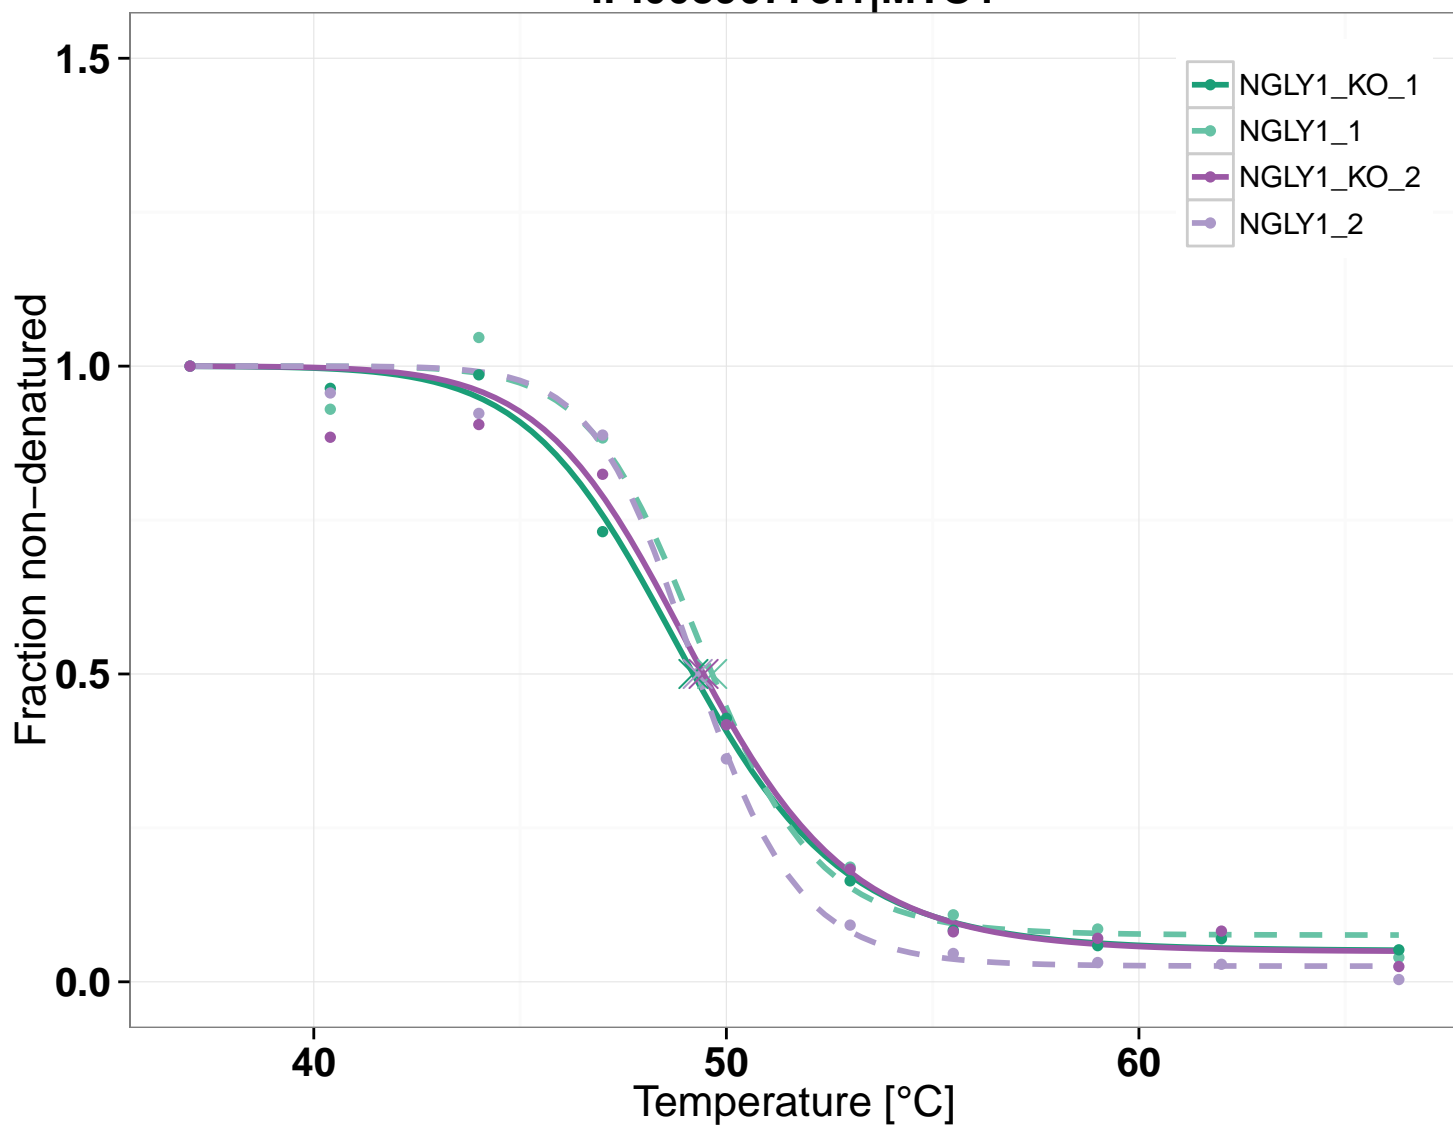

|            | meltPoint | slope | plateau | R2   |
|------------|-----------|-------|---------|------|
| NGLY1_KO_1 | 49.2      | -0.12 | 0.05    | 1    |
| NGLY1_1    | 49.66     | -0.17 | 0.08    | 0.99 |
| NGLY1_KO_2 | 49.45     | -0.13 | 0.05    | 0.99 |
| NGLY1_2    | 49.31     | -0.2  | 0.03    | 1    |

Supplement: Supplementary file 5099 [file 1]

# IPI00641364.1|P2RY11

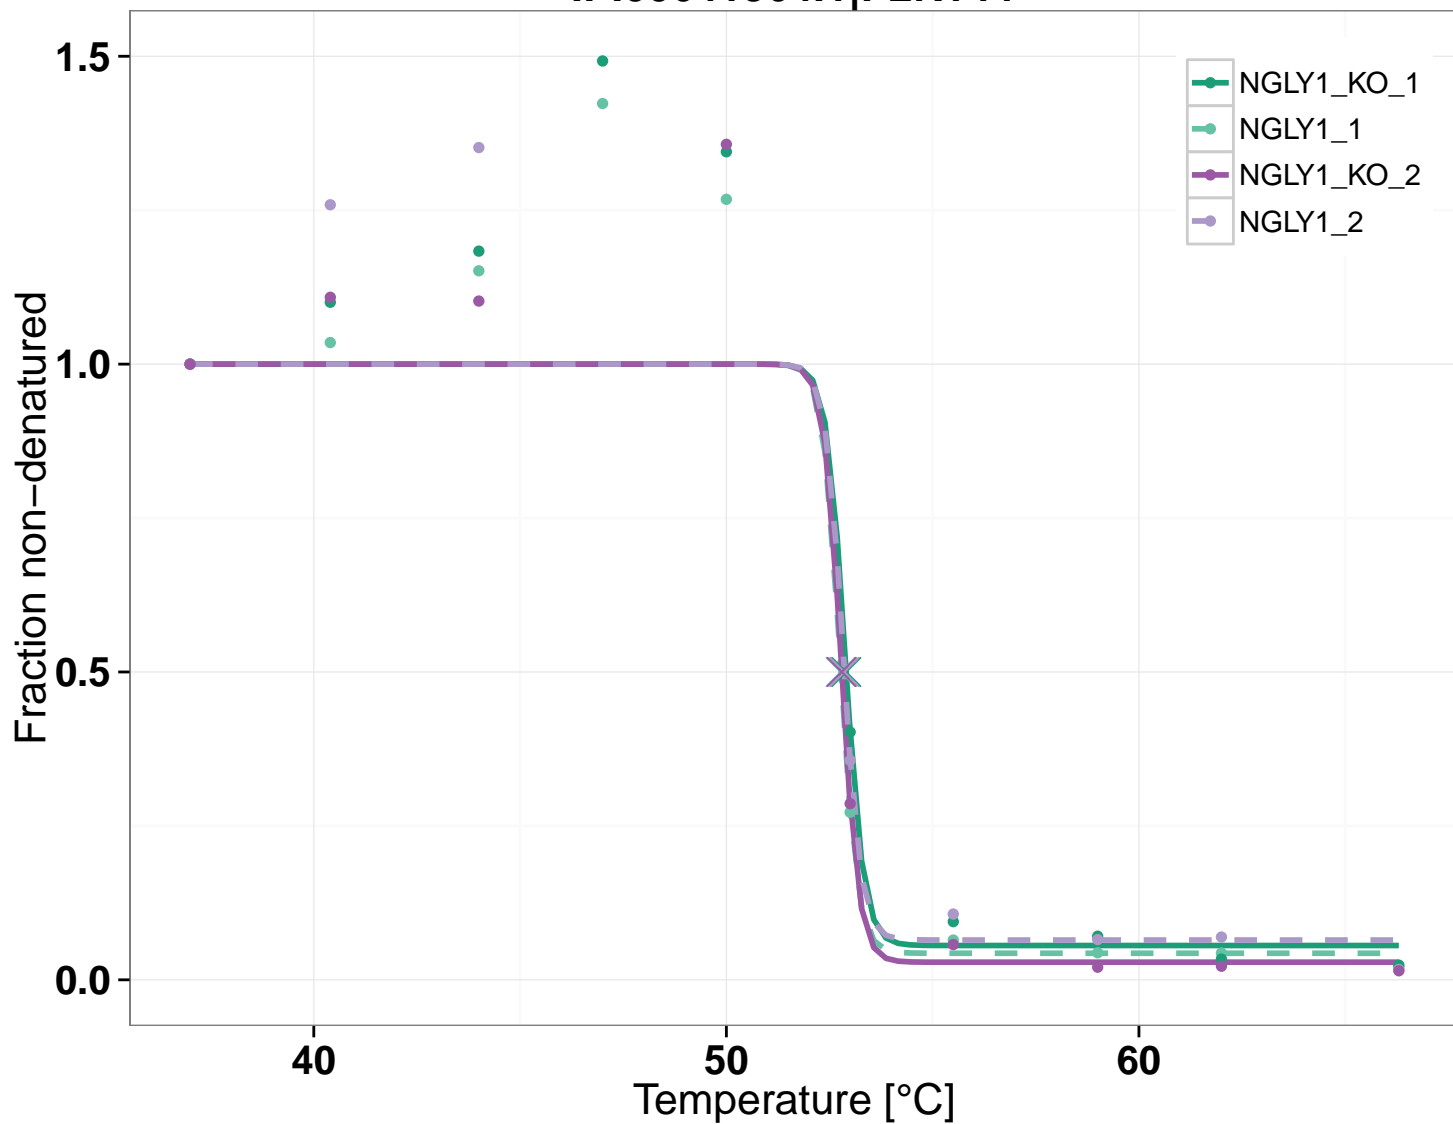

|            | meltPoint | slope | plateau | R2   |
|------------|-----------|-------|---------|------|
| NGLY1_KO_1 | 52.9      | -1.1  | 0.06    | 0.88 |
| NGLY1_1    | 52.77     | -1.1  | 0.04    | 0.91 |
| NGLY1_KO_2 | 52.8      | -1.2  | 0.03    | 0.87 |
| NGLY1_2    | 52.86     | -1.1  | 0.06    | 0.79 |

Supplement: Supplementary file 5100 [file 1]

# IPI00375631.6|ISG15

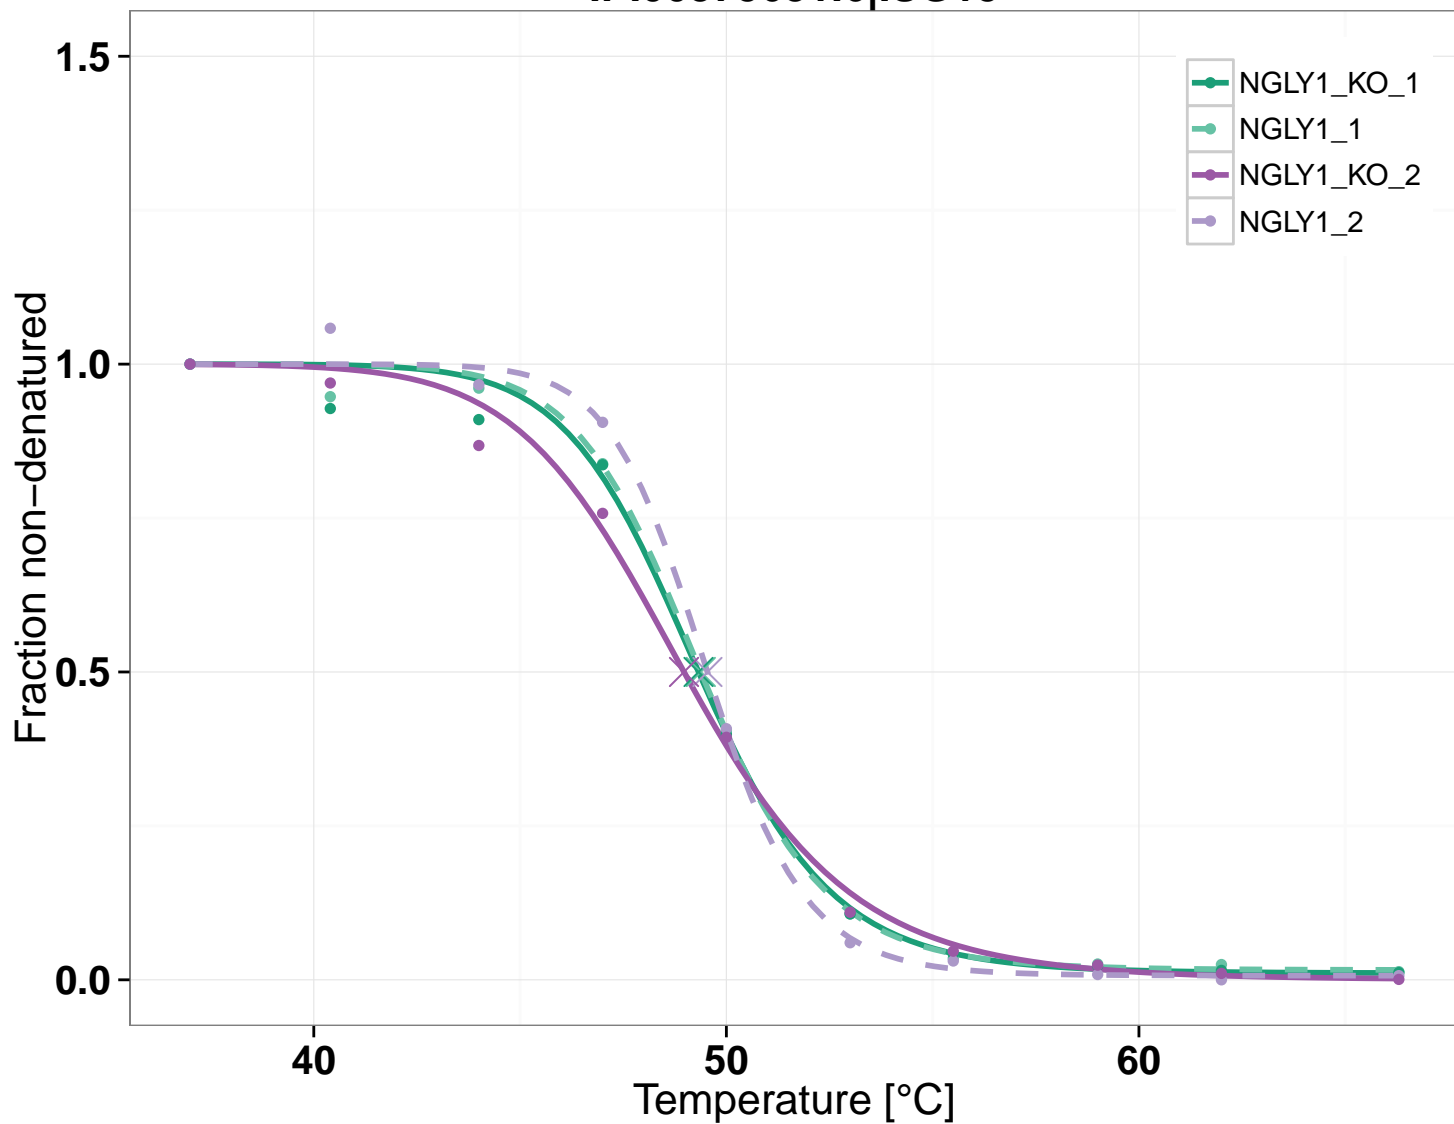

|            | meltPoint | slope | plateau | R2   |
|------------|-----------|-------|---------|------|
| NGLY1_KO_1 | 49.33     | -0.15 | 0.01    | 0.99 |
| NGLY1_1    | 49.38     | -0.16 | 0.02    | 1    |
| NGLY1_KO_2 | 48.97     | -0.12 | 0       | 1    |
| NGLY1_2    | 49.54     | -0.21 | 0.01    | 1    |

Supplement: Supplementary file 5101 [file 1]

IPI00744442.1|USP37

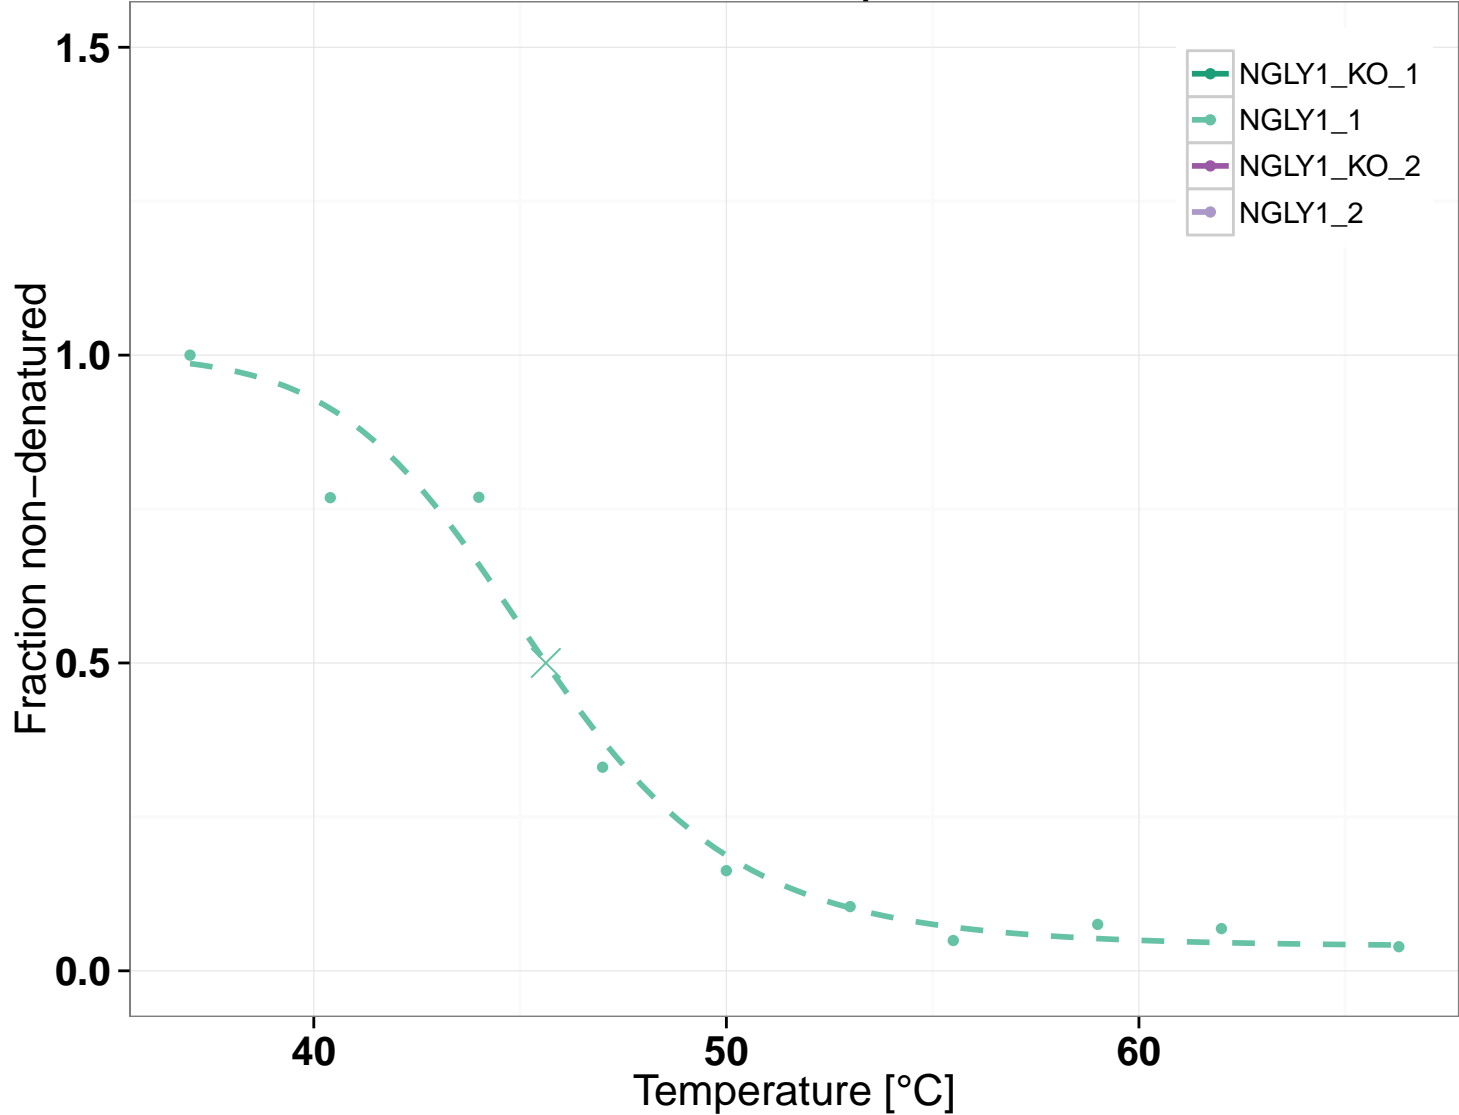

|            | meltPoint | slope  | plateau | R2   |
|------------|-----------|--------|---------|------|
| NGLY1_KO_1 | -         | -      | -       | -    |
| NGLY1_1    | 45.62     | -0.099 | 0.04    | 0.97 |
| NGLY1_KO_2 | -         | -      | -       | -    |
| NGLY1_2    | -         | -      | -       | -    |

Supplement: Supplementary file 5102 [file 1]

# IPI00009253.2|NAPA

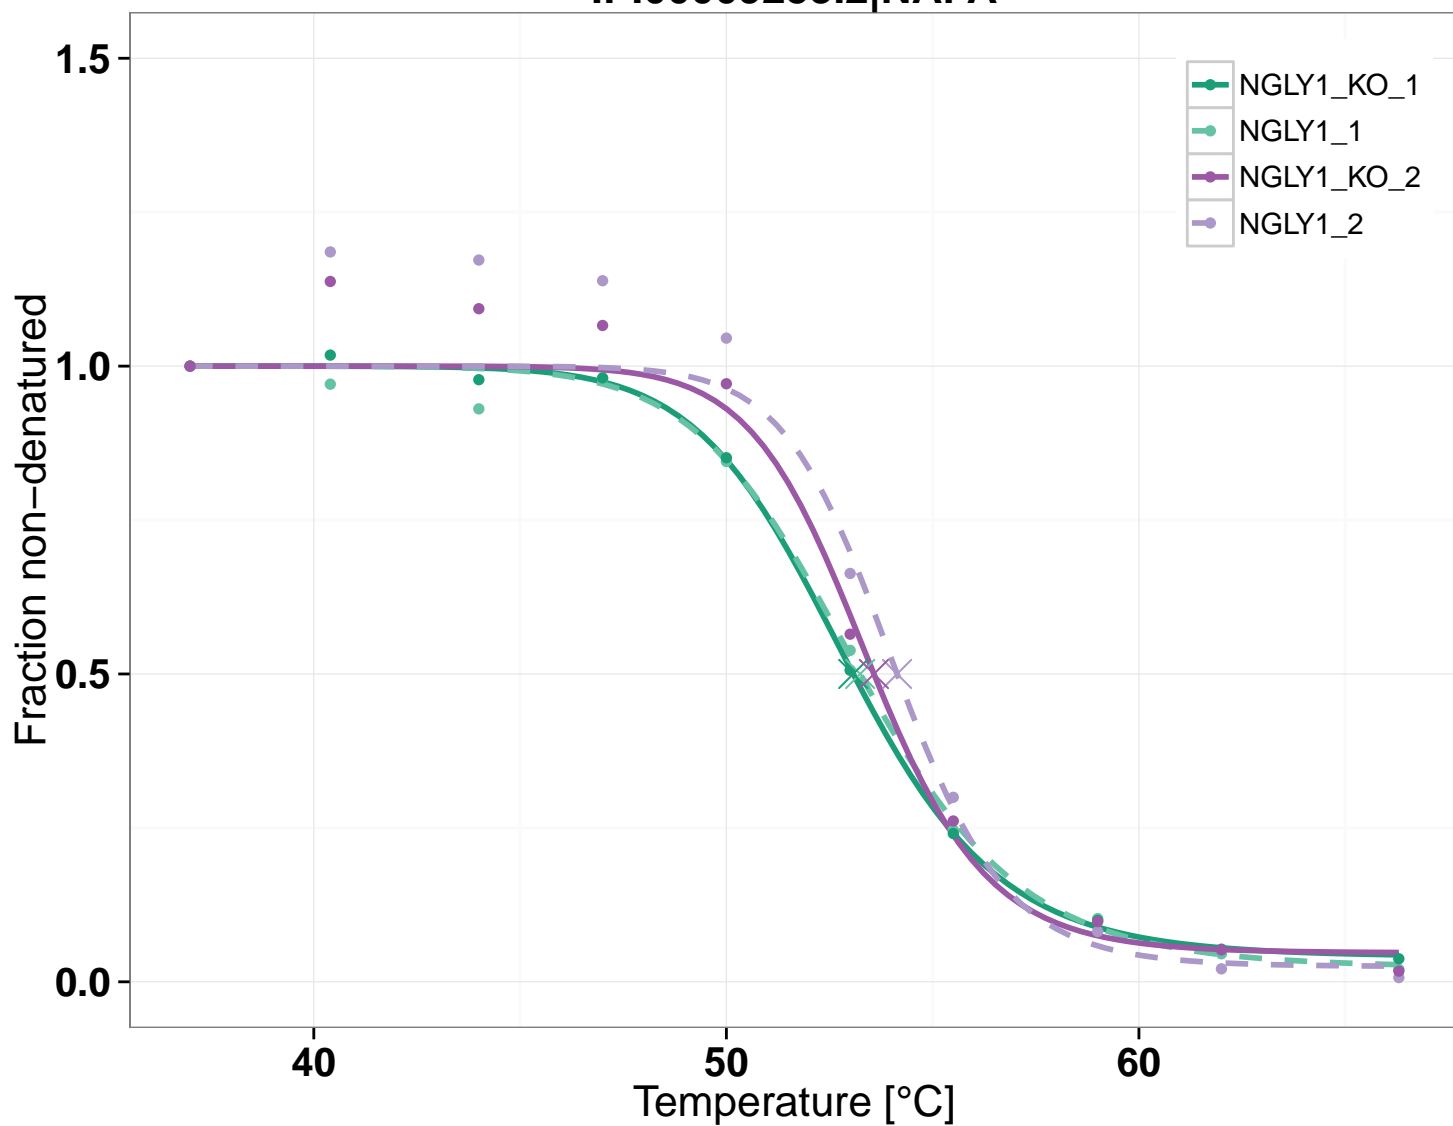

|            | meltPoint | slope | plateau | R2   |
|------------|-----------|-------|---------|------|
| NGLY1_KO_1 | 53.08     | -0.13 | 0.04    | 1    |
| NGLY1_1    | 53.24     | -0.12 | 0.02    | 1    |
| NGLY1_KO_2 | 53.58     | -0.17 | 0.05    | 0.98 |
| NGLY1_2    | 54.14     | -0.18 | 0.02    | 0.96 |

Supplement: Supplementary file 5103 [file 1]

# IPI00176469.2|CABC1

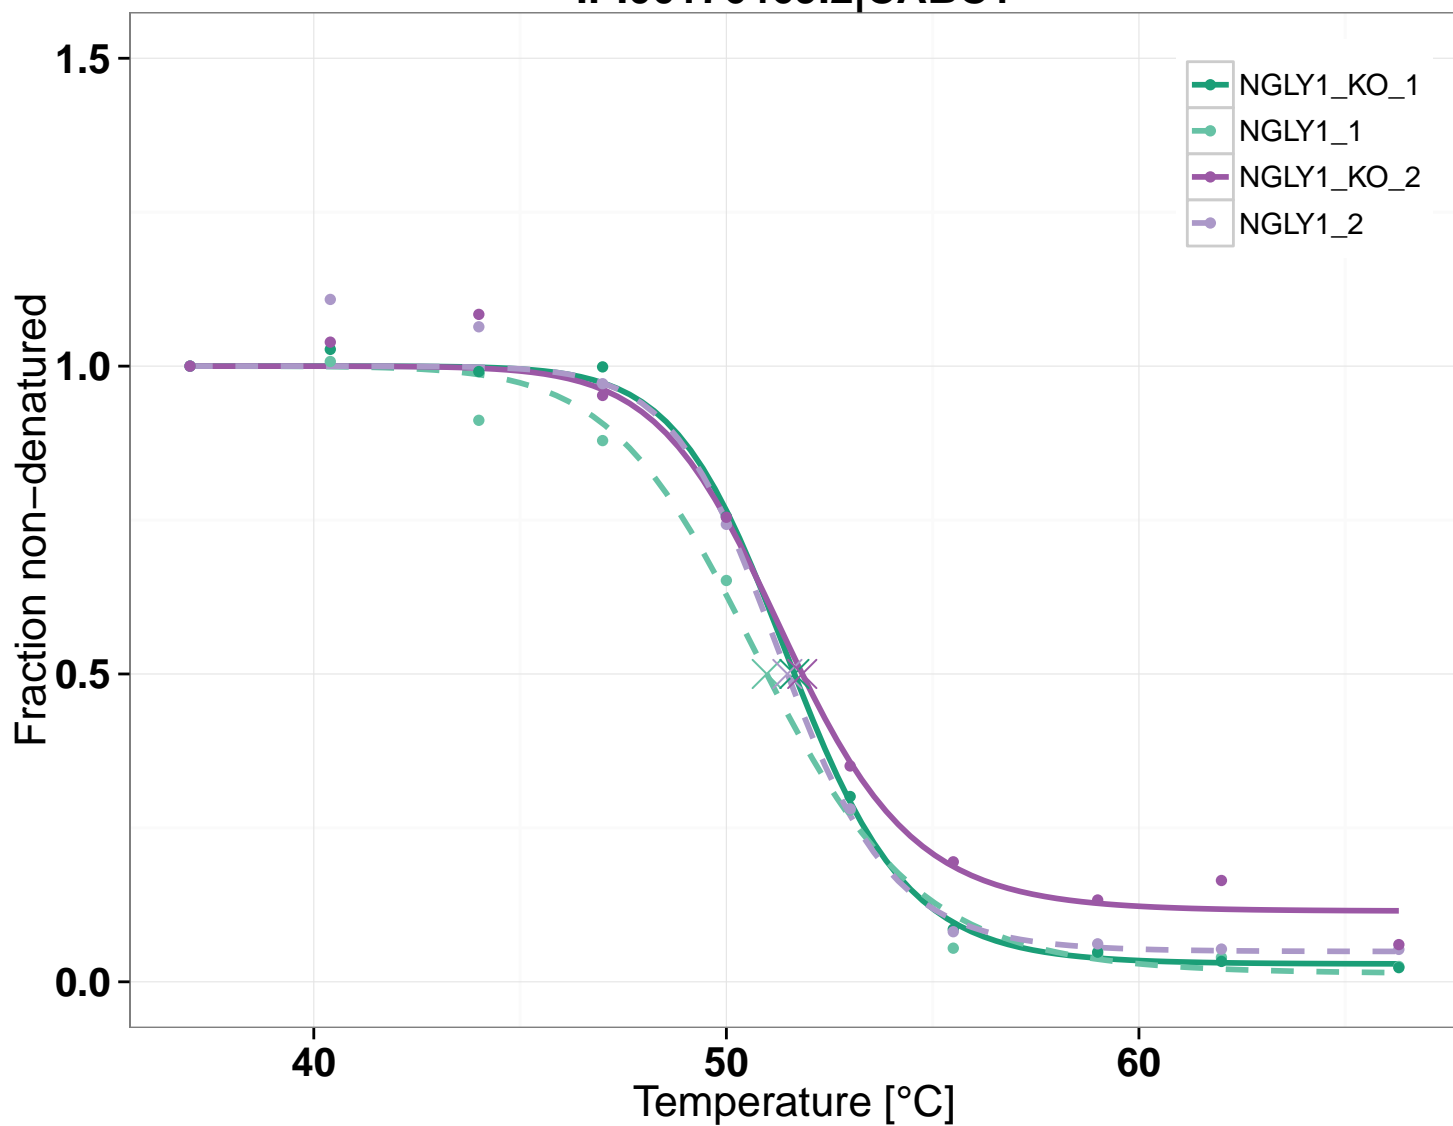

|            | meltPoint | slope | plateau | R2   |
|------------|-----------|-------|---------|------|
| NGLY1_KO_1 | 51.65     | -0.17 | 0.03    | 1    |
| NGLY1_1    | 50.98     | -0.13 | 0.01    | 0.99 |
| NGLY1_KO_2 | 51.84     | -0.14 | 0.11    | 0.99 |
| NGLY1_2    | 51.48     | -0.18 | 0.05    | 0.99 |

Supplement: Supplementary file 5104 [file 1]

# IPI00043883.3|SLC46A1

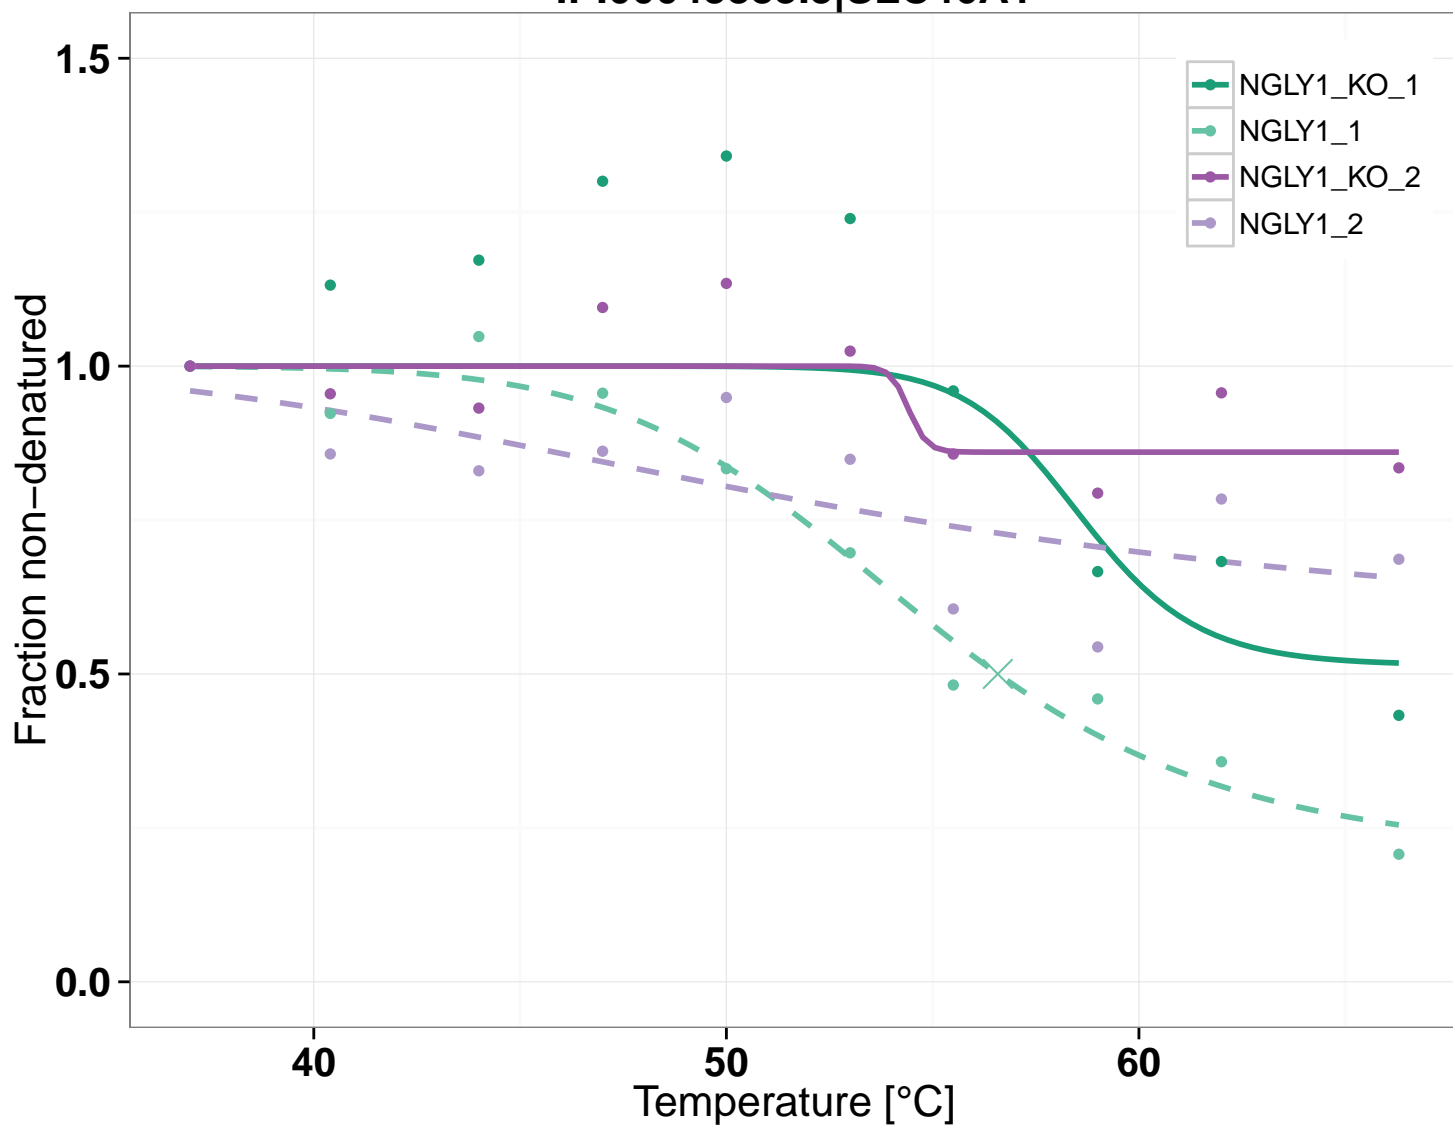

|            | meltPoint | slope  | plateau | R2   |
|------------|-----------|--------|---------|------|
| NGLY1_KO_1 | –         | –0.086 | 0.51    | 0.6  |
| NGLY1_1    | 56.58     | –0.055 | 0.2     | 0.97 |
| NGLY1_KO_2 | –         | –0.16  | 0.86    | 0.55 |
| NGLY1_2    | –         | –0.013 | 0.55    | 0.51 |

Supplement: Supplementary file 5105 [file 1]

# IPI00719178.1|ABCC1

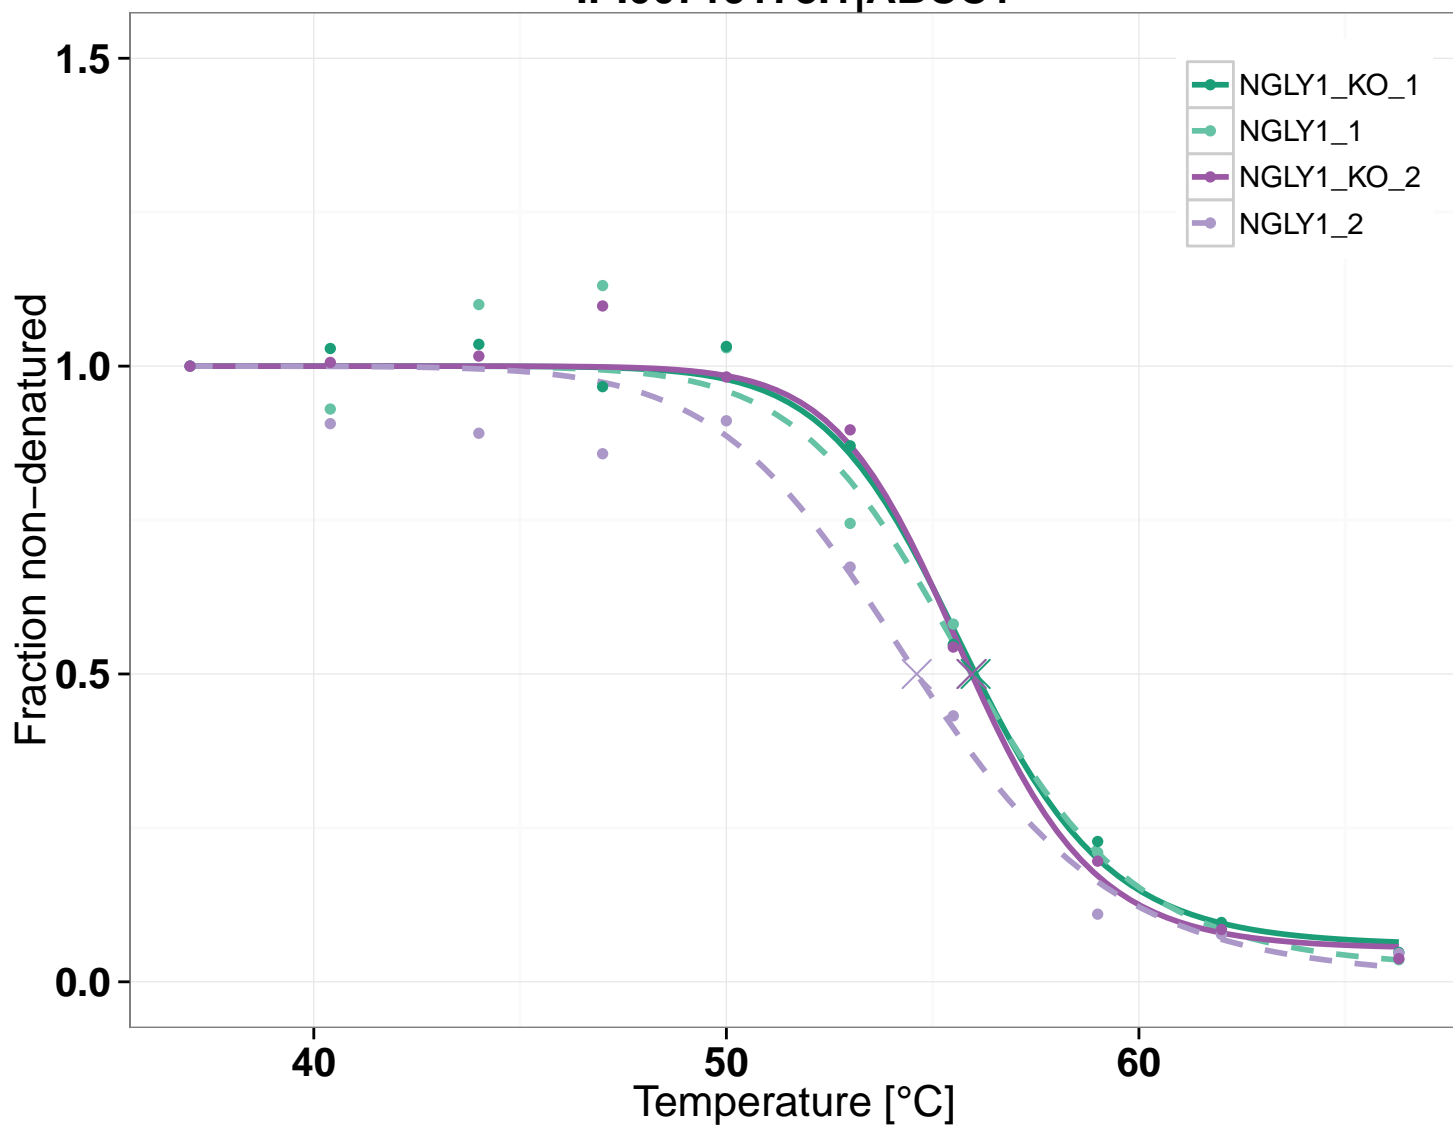

|            | meltPoint | slope | plateau | R2   |
|------------|-----------|-------|---------|------|
| NGLY1_KO_1 | 56.04     | -0.14 | 0.06    | 0.99 |
| NGLY1_1    | 55.94     | -0.12 | 0.02    | 0.97 |
| NGLY1_KO_2 | 55.94     | -0.15 | 0.05    | 0.99 |
| NGLY1_2    | 54.61     | -0.1  | 0       | 0.97 |

Supplement: Supplementary file 5106 [file 1]

IPI00413788.2|GPR107

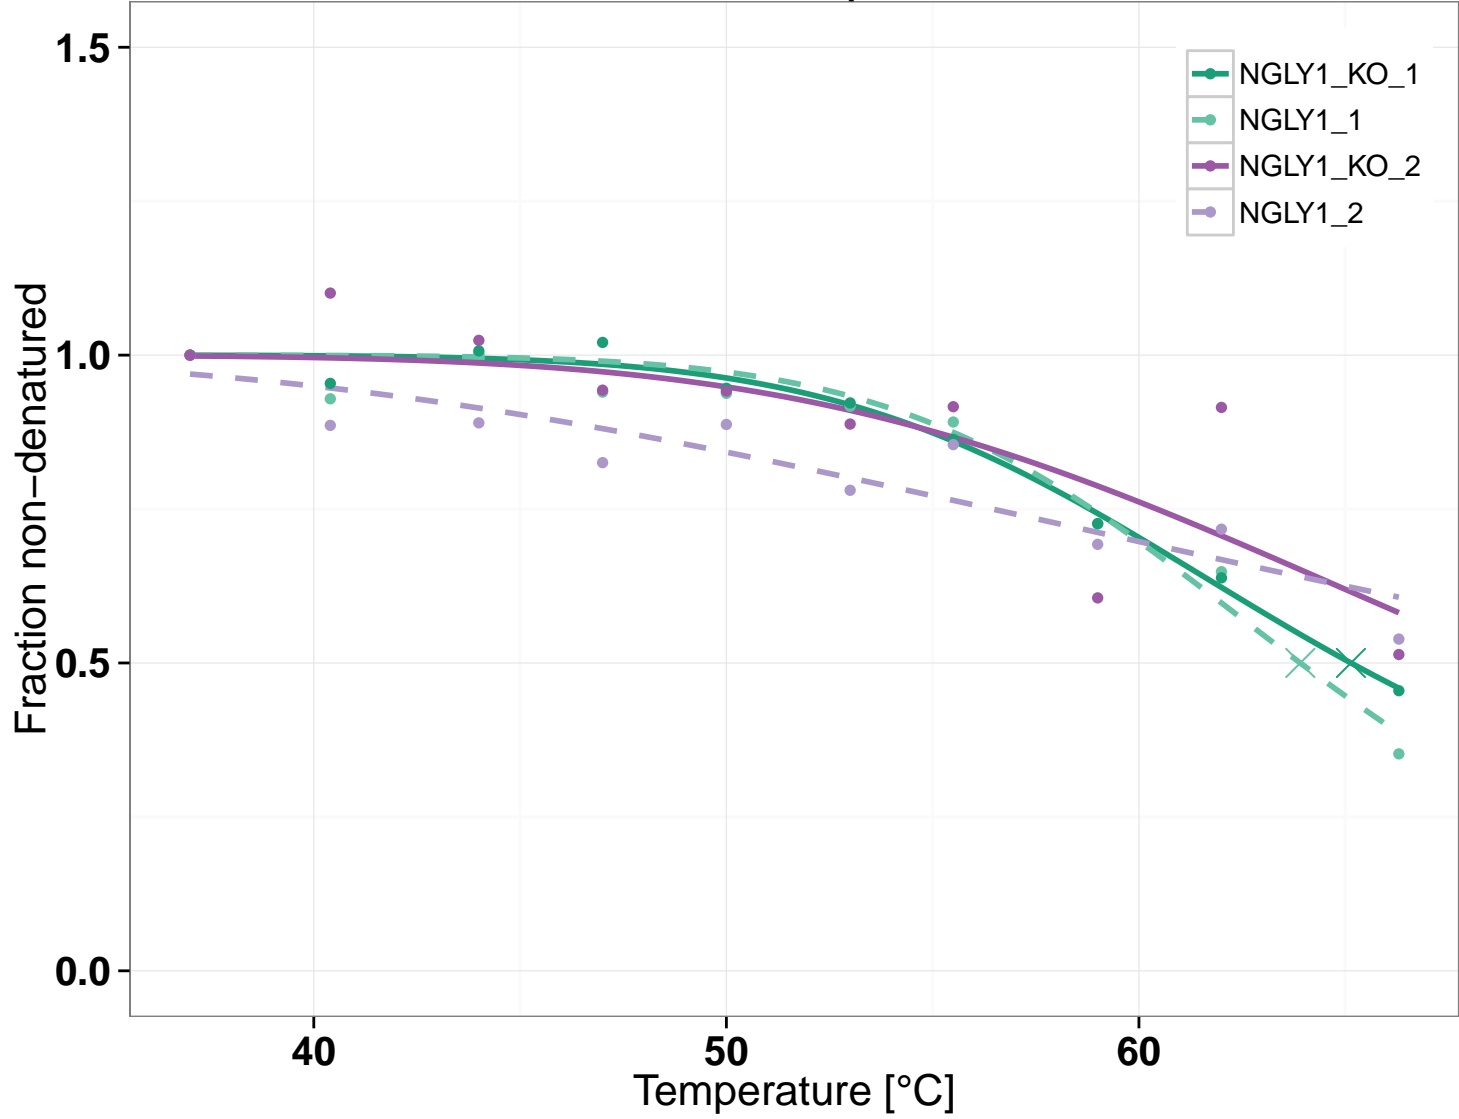

|            | meltPoint | slope  | plateau | R2   |
|------------|-----------|--------|---------|------|
| NGLY1_KO_1 | 65.14     | -0.041 | 0.13    | 0.99 |
| NGLY1_1    | 63.91     | -0.051 | 0       | 0.96 |
| NGLY1_KO_2 | -         | -0.029 | 0       | 0.68 |
| NGLY1_2    | -         | -0.015 | 0       | 0.83 |

Supplement: Supplementary file 5107 [file 1]

IPI00025084.3|CAPNS1

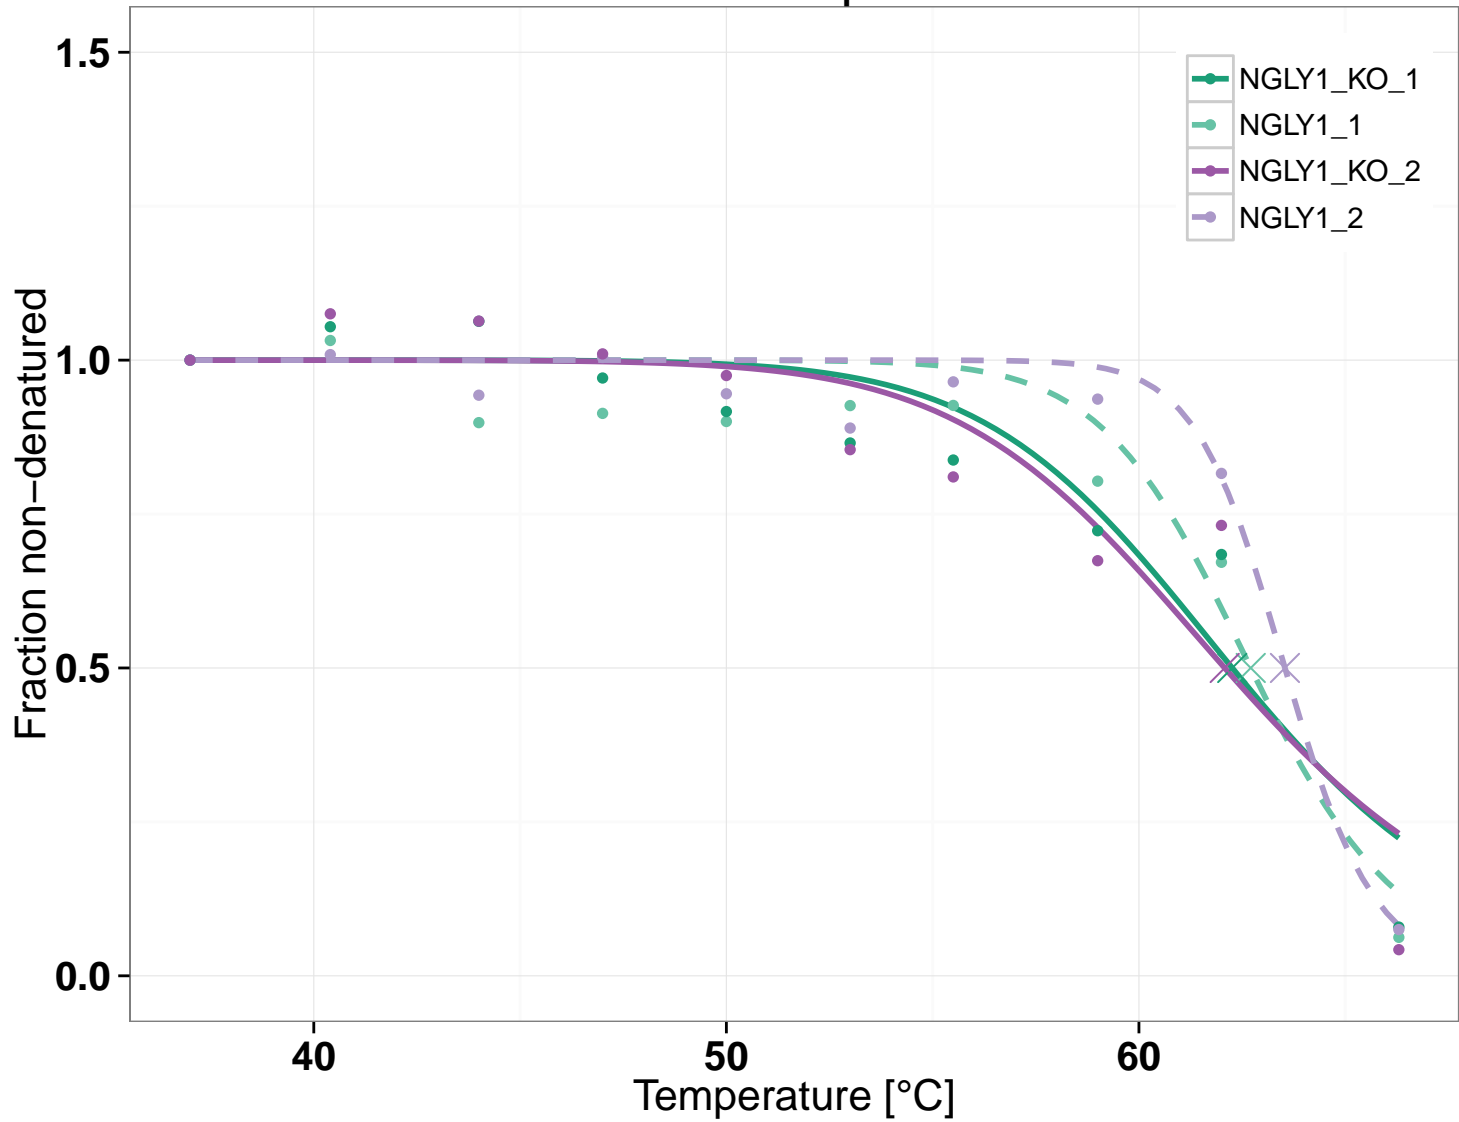

|            | meltPoint | slope  | plateau | R2   |
|------------|-----------|--------|---------|------|
| NGLY1_KO_1 | 62.26     | -0.083 | 0       | 0.89 |
| NGLY1_1    | 62.71     | -0.14  | 0       | 0.92 |
| NGLY1_KO_2 | 62.08     | -0.077 | 0       | 0.86 |
| NGLY1_2    | 63.54     | -0.23  | 0       | 0.97 |

Supplement: Supplementary file 5108 [file 1]

# IPI00333063.1|TMCC1

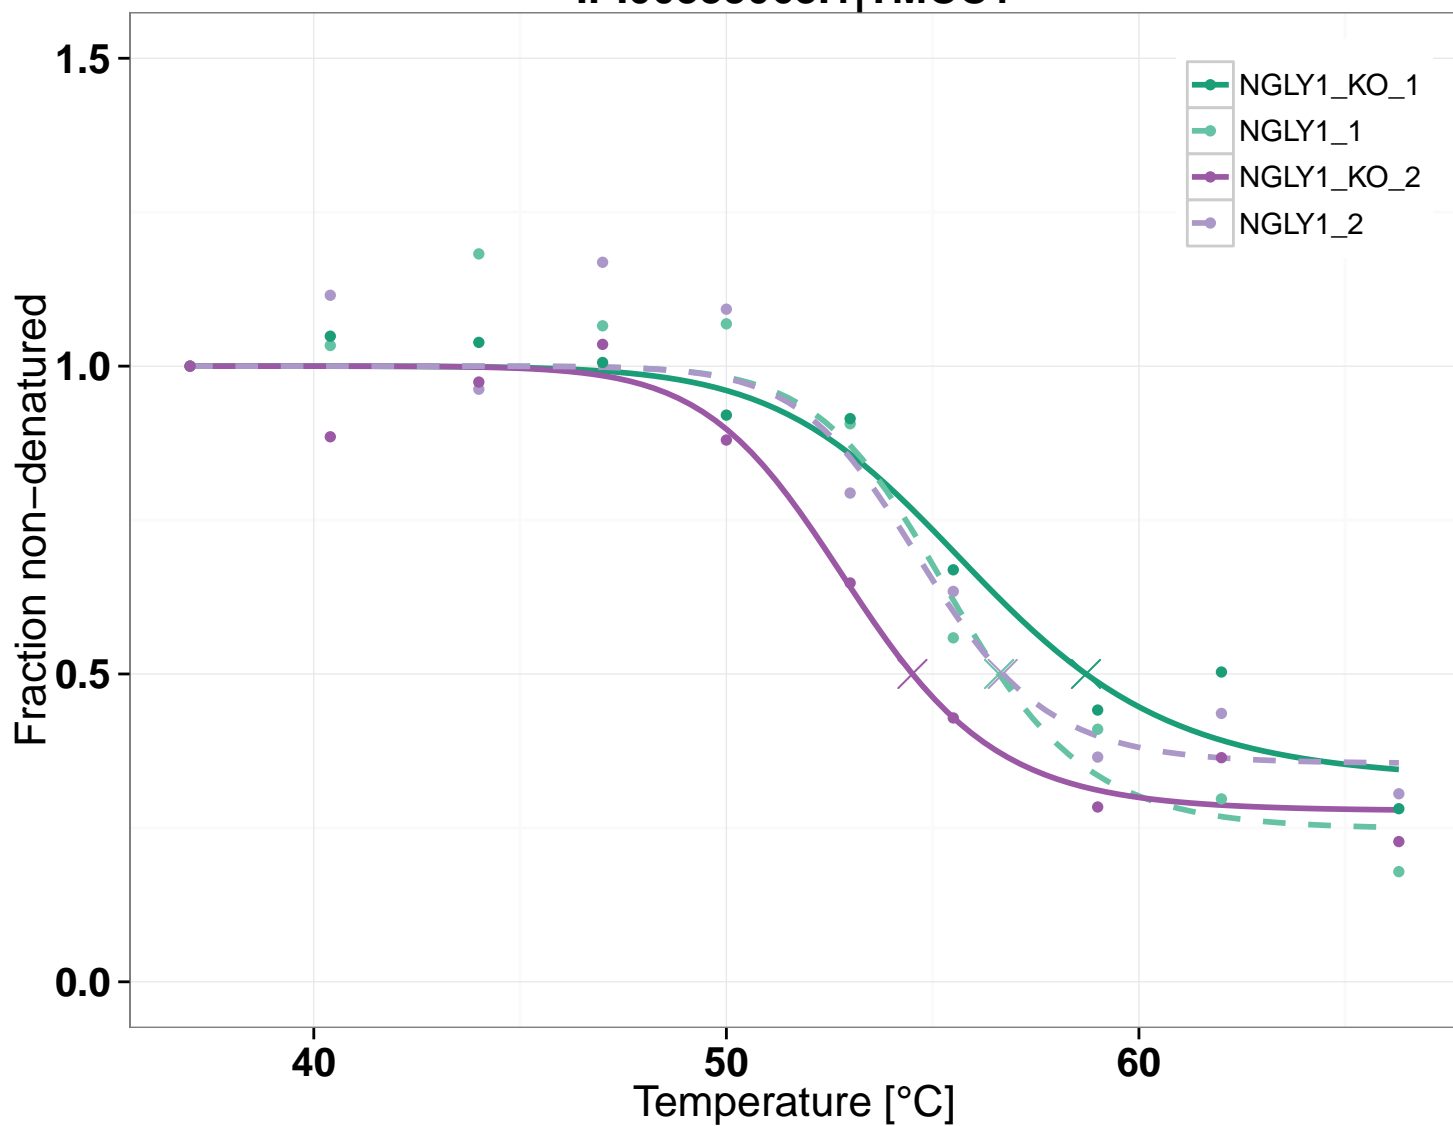

|            | meltPoint | slope | plateau | R2   |
|------------|-----------|-------|---------|------|
| NGLY1_KO_1 | 58.72     | -0.07 | 0.33    | 0.96 |
| NGLY1_1    | 56.61     | -0.12 | 0.25    | 0.95 |
| NGLY1_KO_2 | 54.51     | -0.1  | 0.28    | 0.97 |
| NGLY1_2    | 56.7      | -0.11 | 0.35    | 0.93 |

Supplement: Supplementary file 5109 [file 1]

# IPI00894310.1|DOM3Z

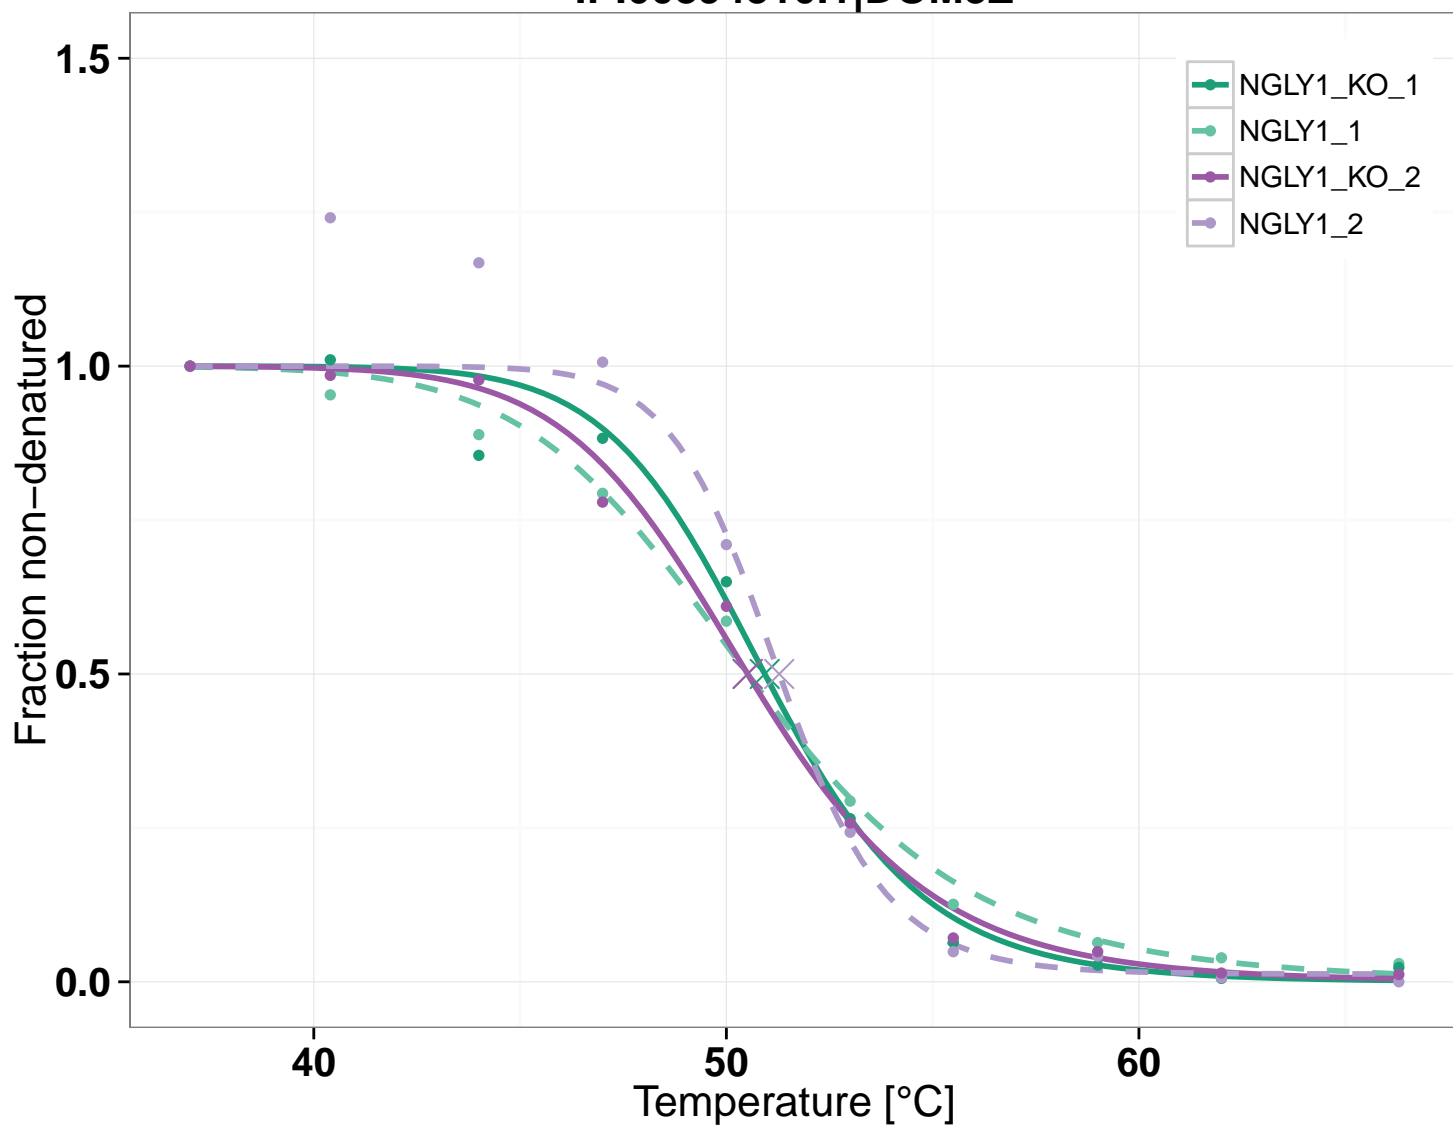

|            | meltPoint | slope  | plateau | R2   |
|------------|-----------|--------|---------|------|
| NGLY1_KO_1 | 50.93     | -0.13  | 0       | 0.99 |
| NGLY1_1    | 50.52     | -0.091 | 0       | 1    |
| NGLY1_KO_2 | 50.52     | -0.11  | 0       | 0.99 |
| NGLY1_2    | 51.28     | -0.19  | 0.01    | 0.96 |

Supplement: Supplementary file 5110 [file 1]

# IPI00295209.5|SNX5

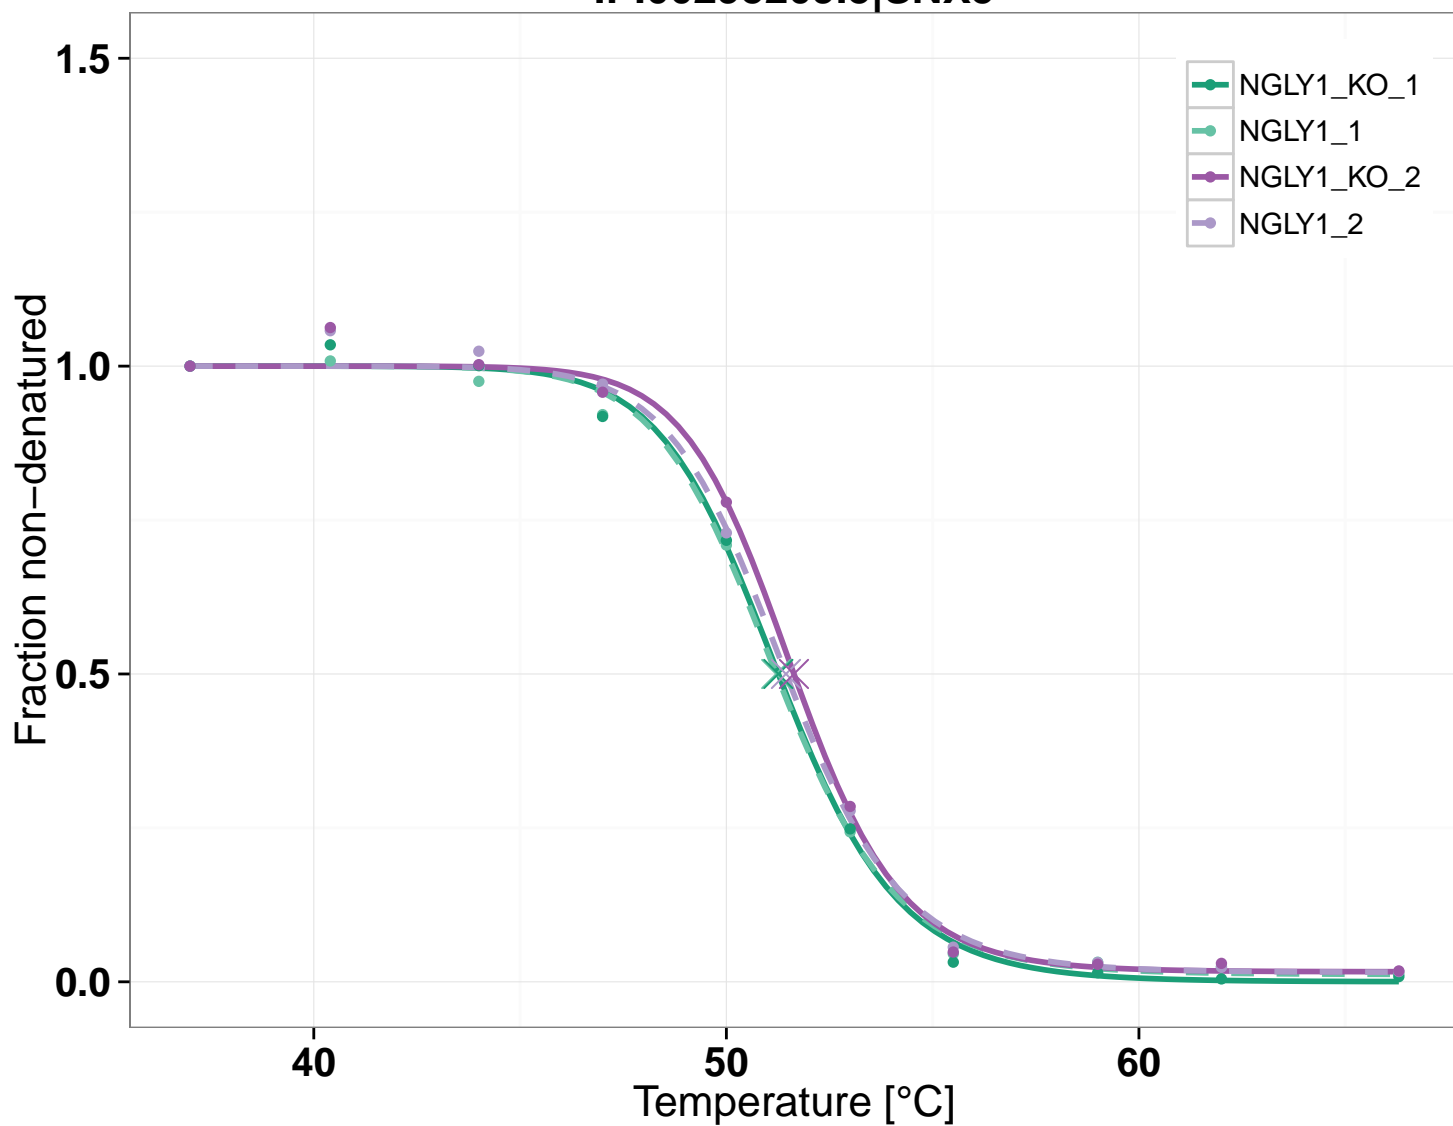

|            | meltPoint | slope | plateau | R2 |
|------------|-----------|-------|---------|----|
| NGLY1_KO_1 | 51.26     | -0.17 | 0       | 1  |
| NGLY1_1    | 51.21     | -0.17 | 0.01    | 1  |
| NGLY1_KO_2 | 51.64     | -0.19 | 0.02    | 1  |
| NGLY1_2    | 51.44     | -0.17 | 0.02    | 1  |

Supplement: Supplementary file 5111 [file 1]

IPI00027178.1|AP1G2

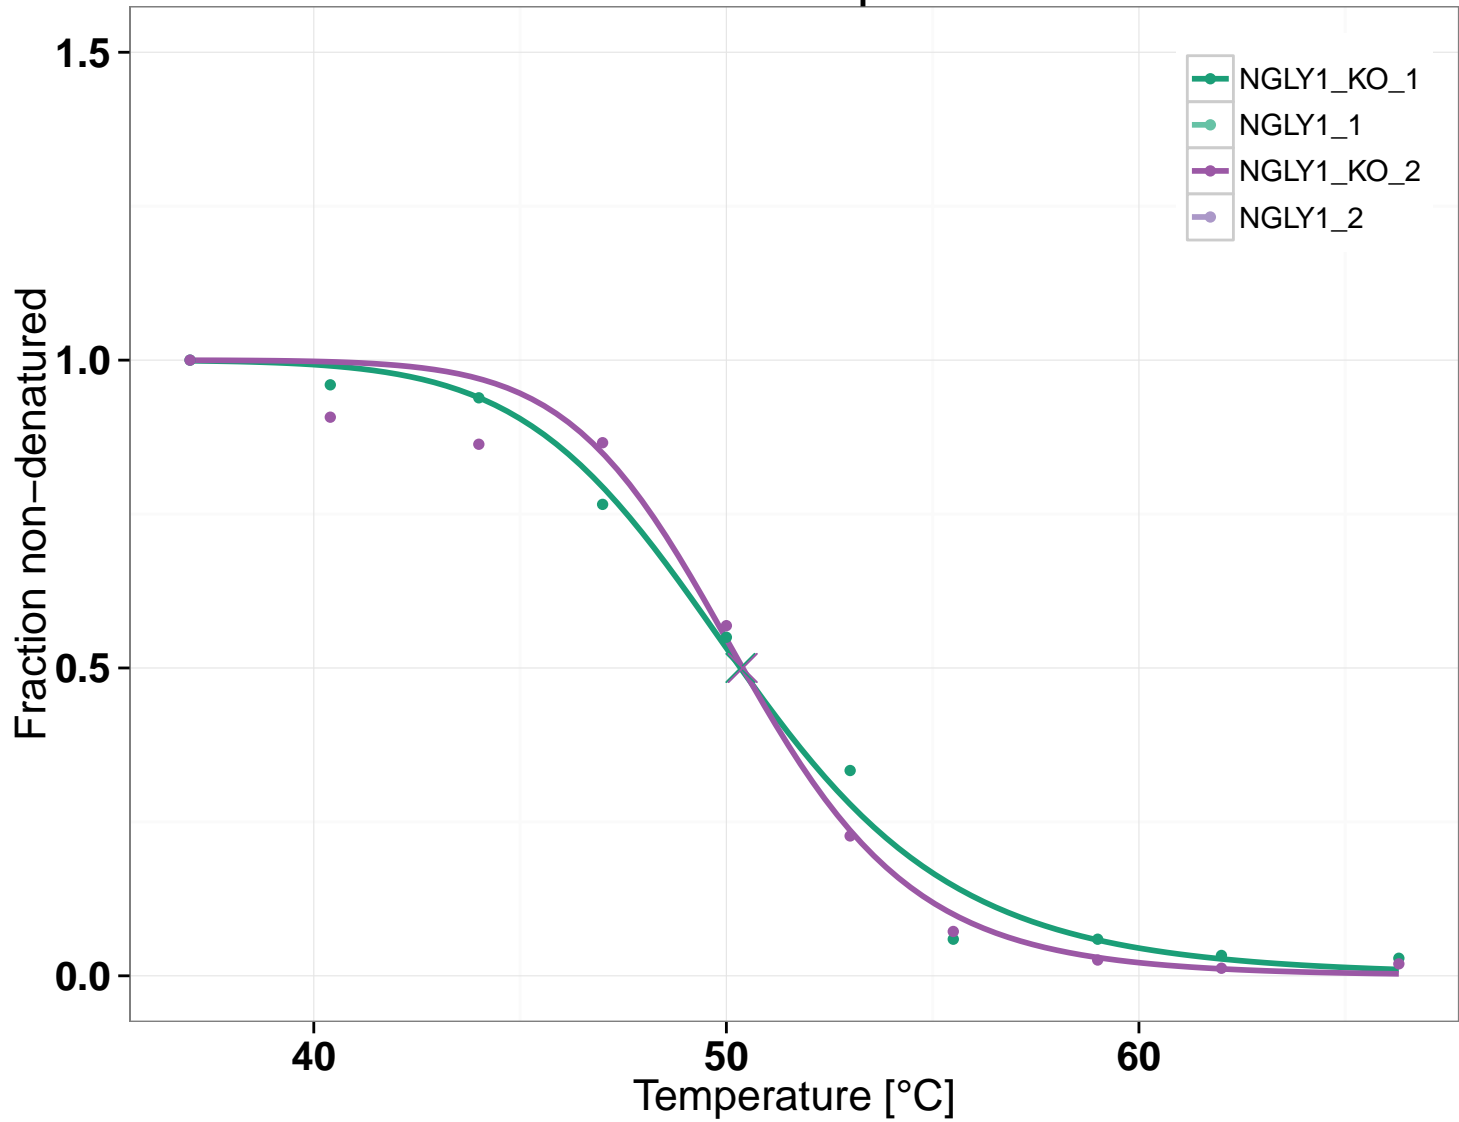

|            | meltPoint | slope  | plateau | R2   |
|------------|-----------|--------|---------|------|
| NGLY1_KO_1 | 50.34     | -0.095 | 0       | 0.99 |
| NGLY1_1    | -         | -      | -       | -    |
| NGLY1_KO_2 | 50.4      | -0.12  | 0       | 0.99 |
| NGLY1_2    | -         | -      | -       | -    |

Supplement: Supplementary file 5112 [file 1]

# IPI00479367.2|RNF220

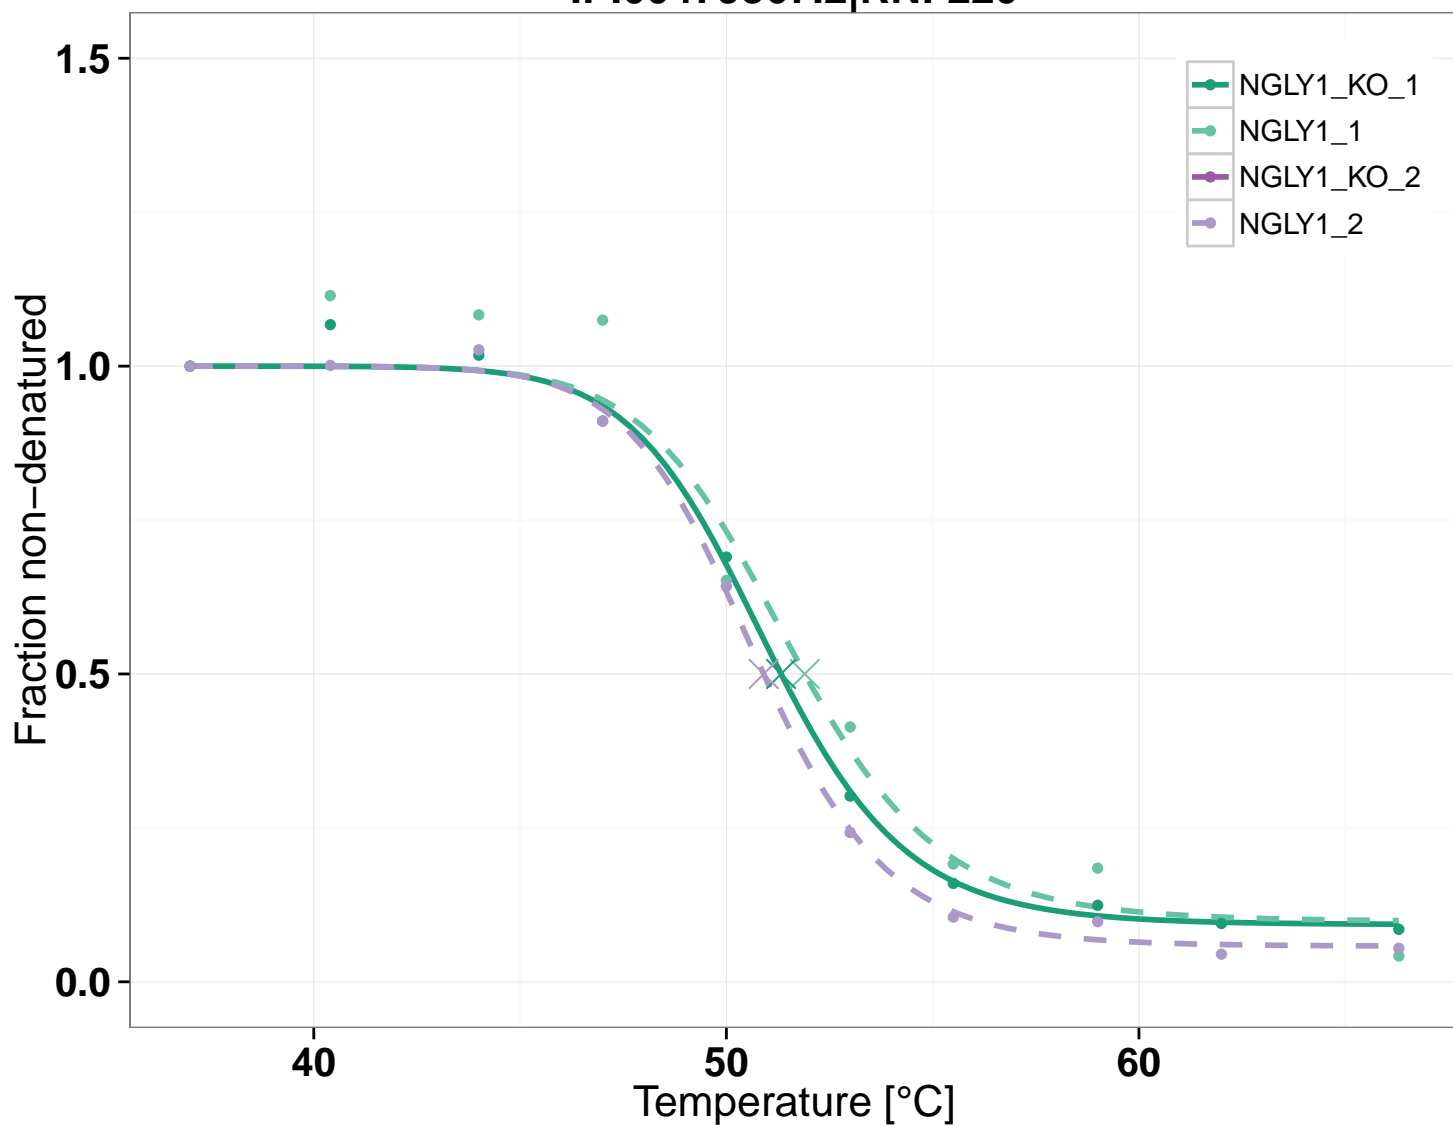

|            | meltPoint | slope | plateau | R2   |
|------------|-----------|-------|---------|------|
| NGLY1_KO_1 | 51.33     | -0.14 | 0.09    | 1    |
| NGLY1_1    | 51.9      | -0.13 | 0.1     | 0.97 |
| NGLY1_KO_2 | -         | -     | -       | -    |
| NGLY1_2    | 50.9      | -0.15 | 0.06    | 1    |

Supplement: Supplementary file 5113 [file 1]

# IPI00789041.2|PNN

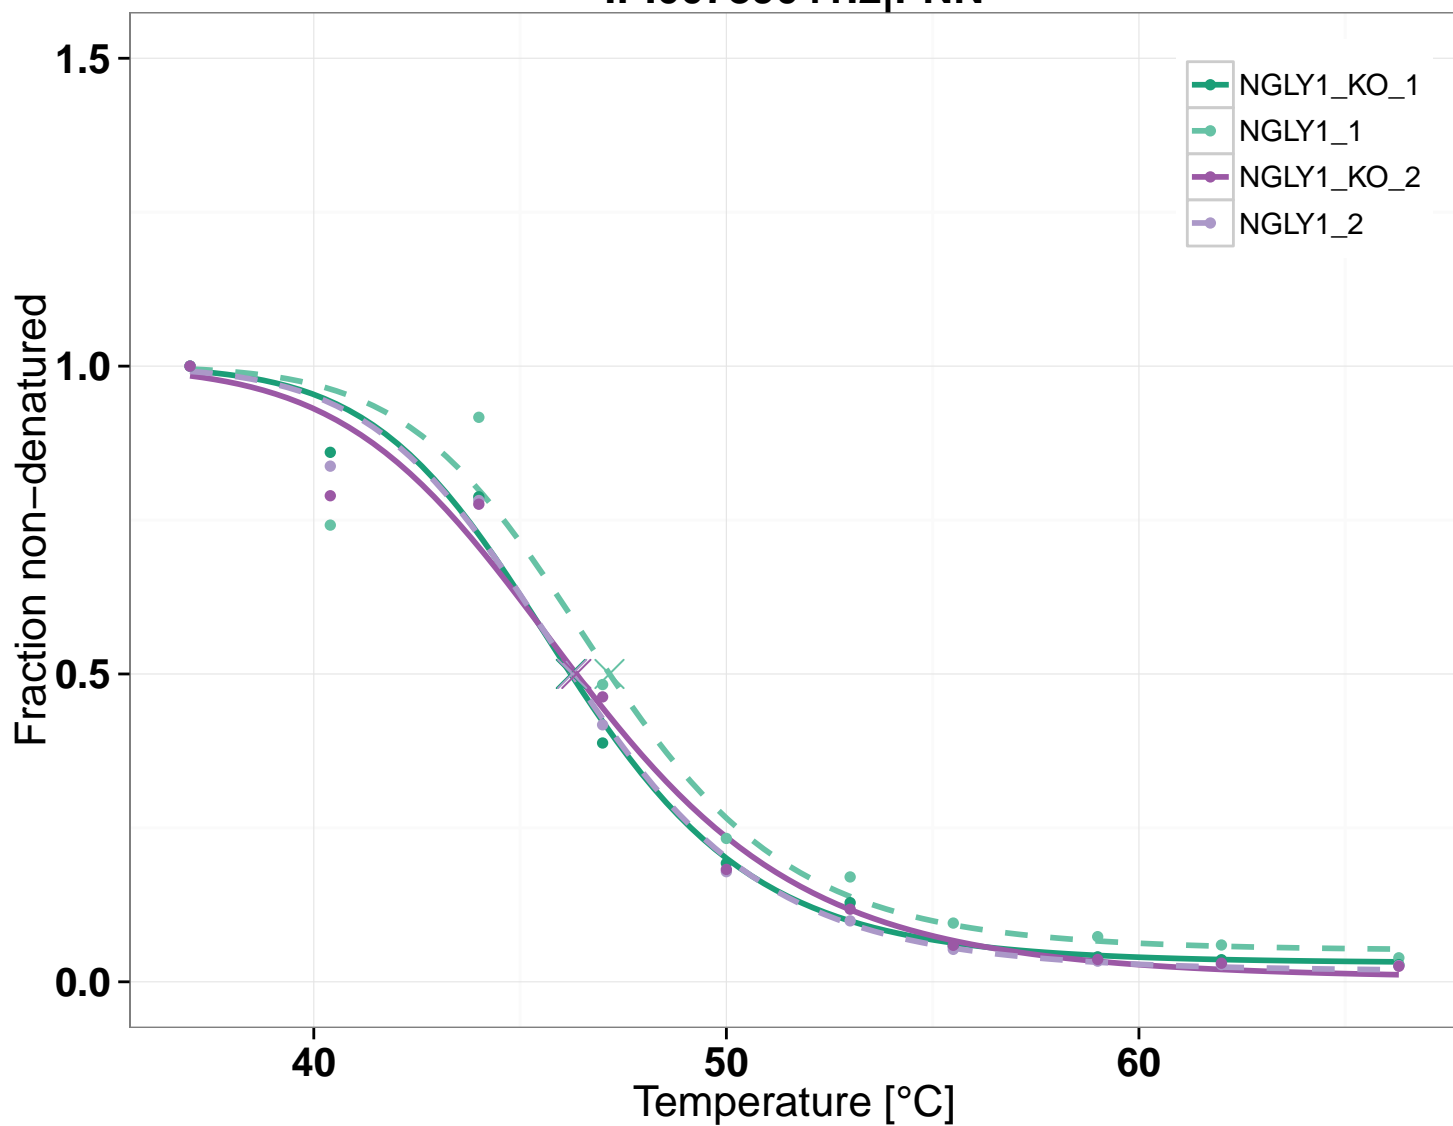

|            | meltPoint | slope  | plateau | R2   |
|------------|-----------|--------|---------|------|
| NGLY1_KO_1 | 46.23     | -0.1   | 0.03    | 0.99 |
| NGLY1_1    | 47.17     | -0.1   | 0.05    | 0.95 |
| NGLY1_KO_2 | 46.36     | -0.089 | 0       | 0.98 |
| NGLY1_2    | 46.26     | -0.1   | 0.02    | 0.99 |

Supplement: Supplementary file 5114 [file 1]

# IPI00294749.1|KIF27

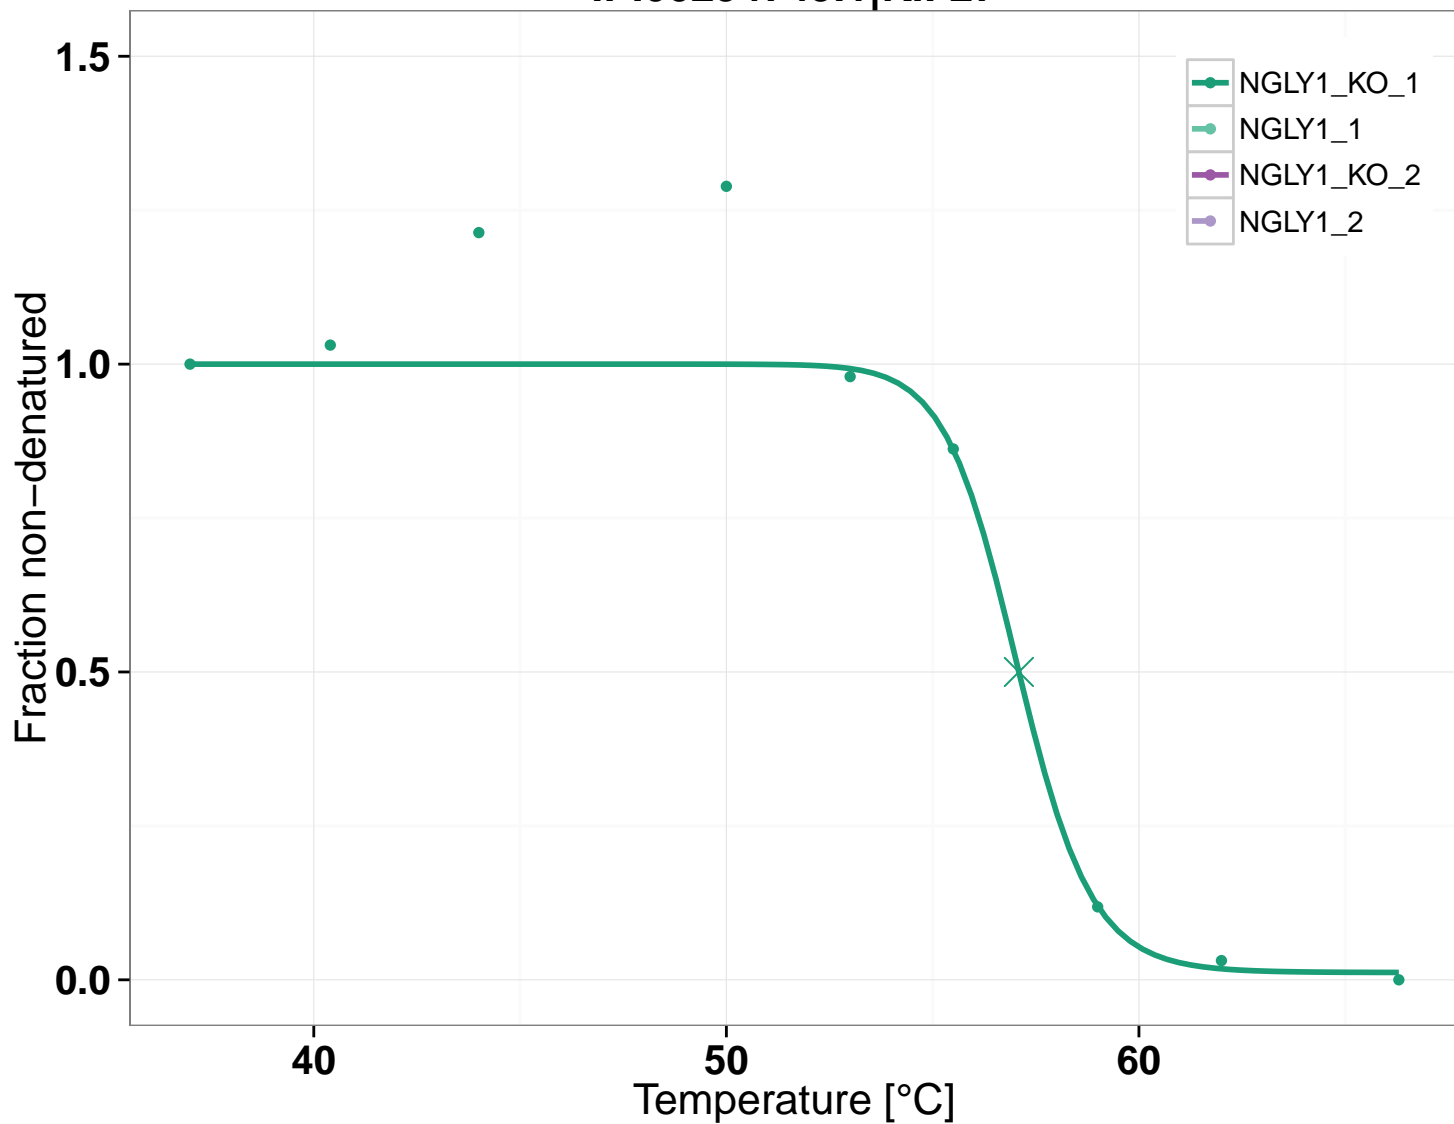

|            | meltPoint | slope | plateau | R2   |
|------------|-----------|-------|---------|------|
| NGLY1_KO_1 | 57.09     | -0.28 | 0.01    | 0.85 |
| NGLY1_1    | -         | -     | -       | -    |
| NGLY1_KO_2 | -         | -     | -       | -    |
| NGLY1_2    | -         | -     | -       | -    |

Supplement: Supplementary file 5115 [file 1]

IPI00878384.1|FRRS1

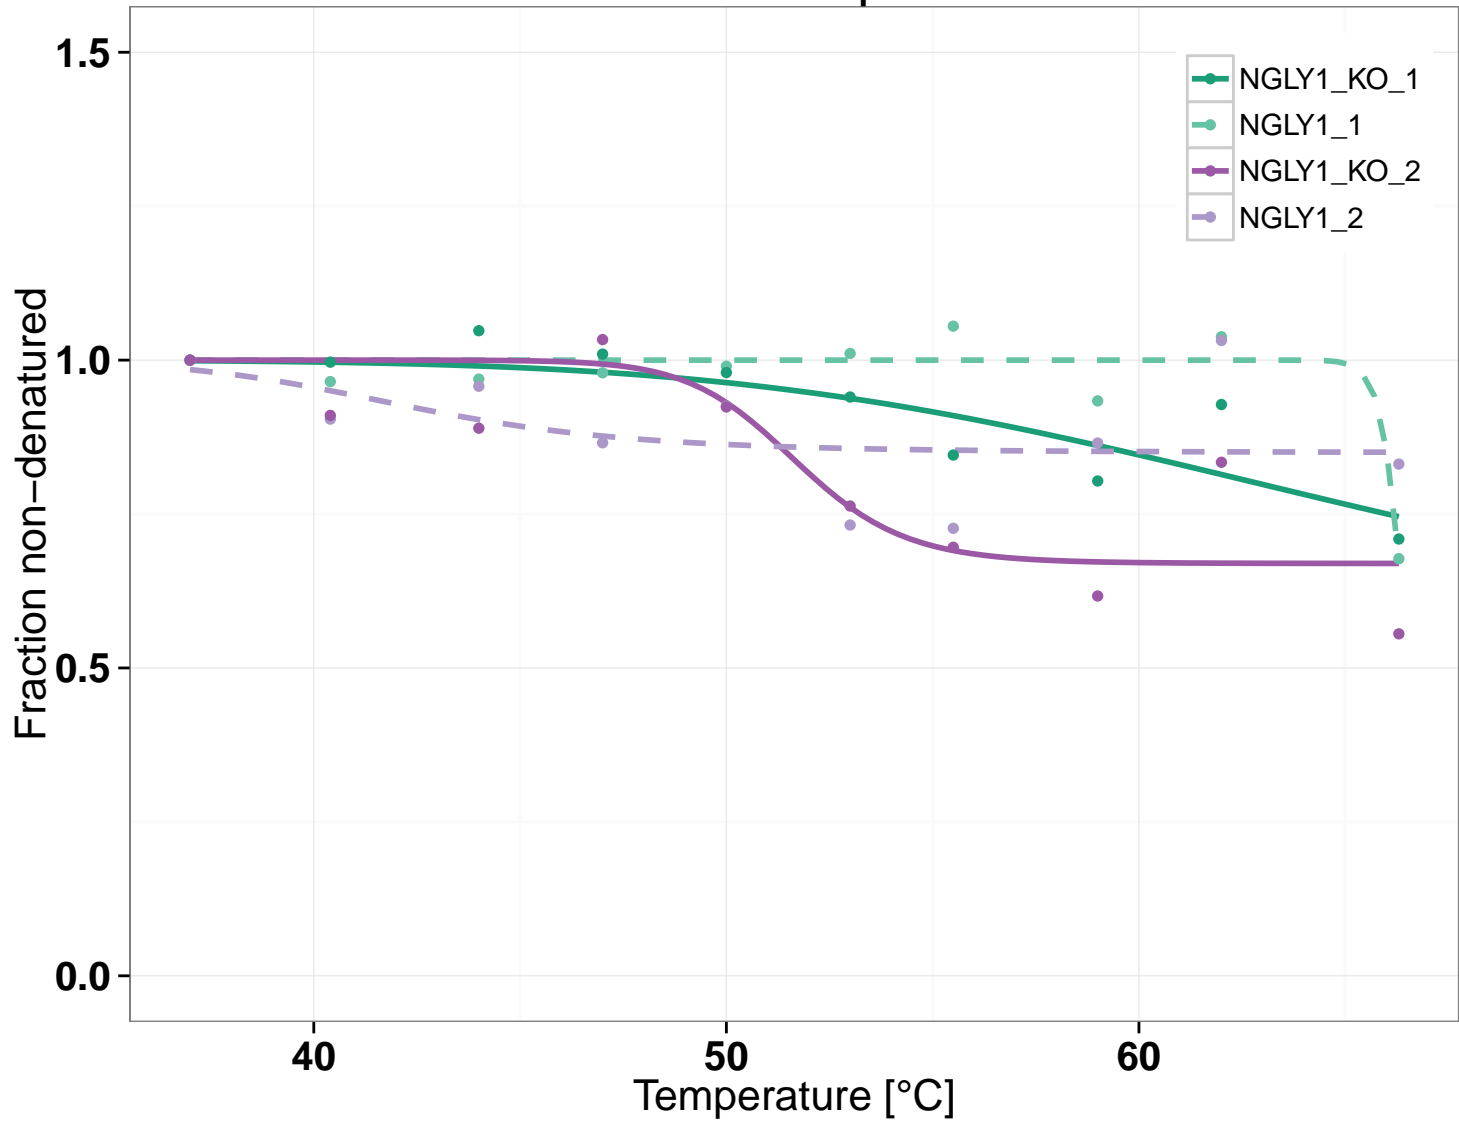

|            | meltPoint | slope  | plateau | R2   |
|------------|-----------|--------|---------|------|
| NGLY1_KO_1 | -         | -0.016 | 0.47    | 0.75 |
| NGLY1_1    | -         | -      | 0       | 0.88 |
| NGLY1_KO_2 | -         | -0.063 | 0.67    | 0.72 |
| NGLY1_2    | -         | -0.014 | 0.85    | 0.21 |

Supplement: Supplementary file 5116 [file 1]

IPI00449735.1|Q6PN88\_HUMAN

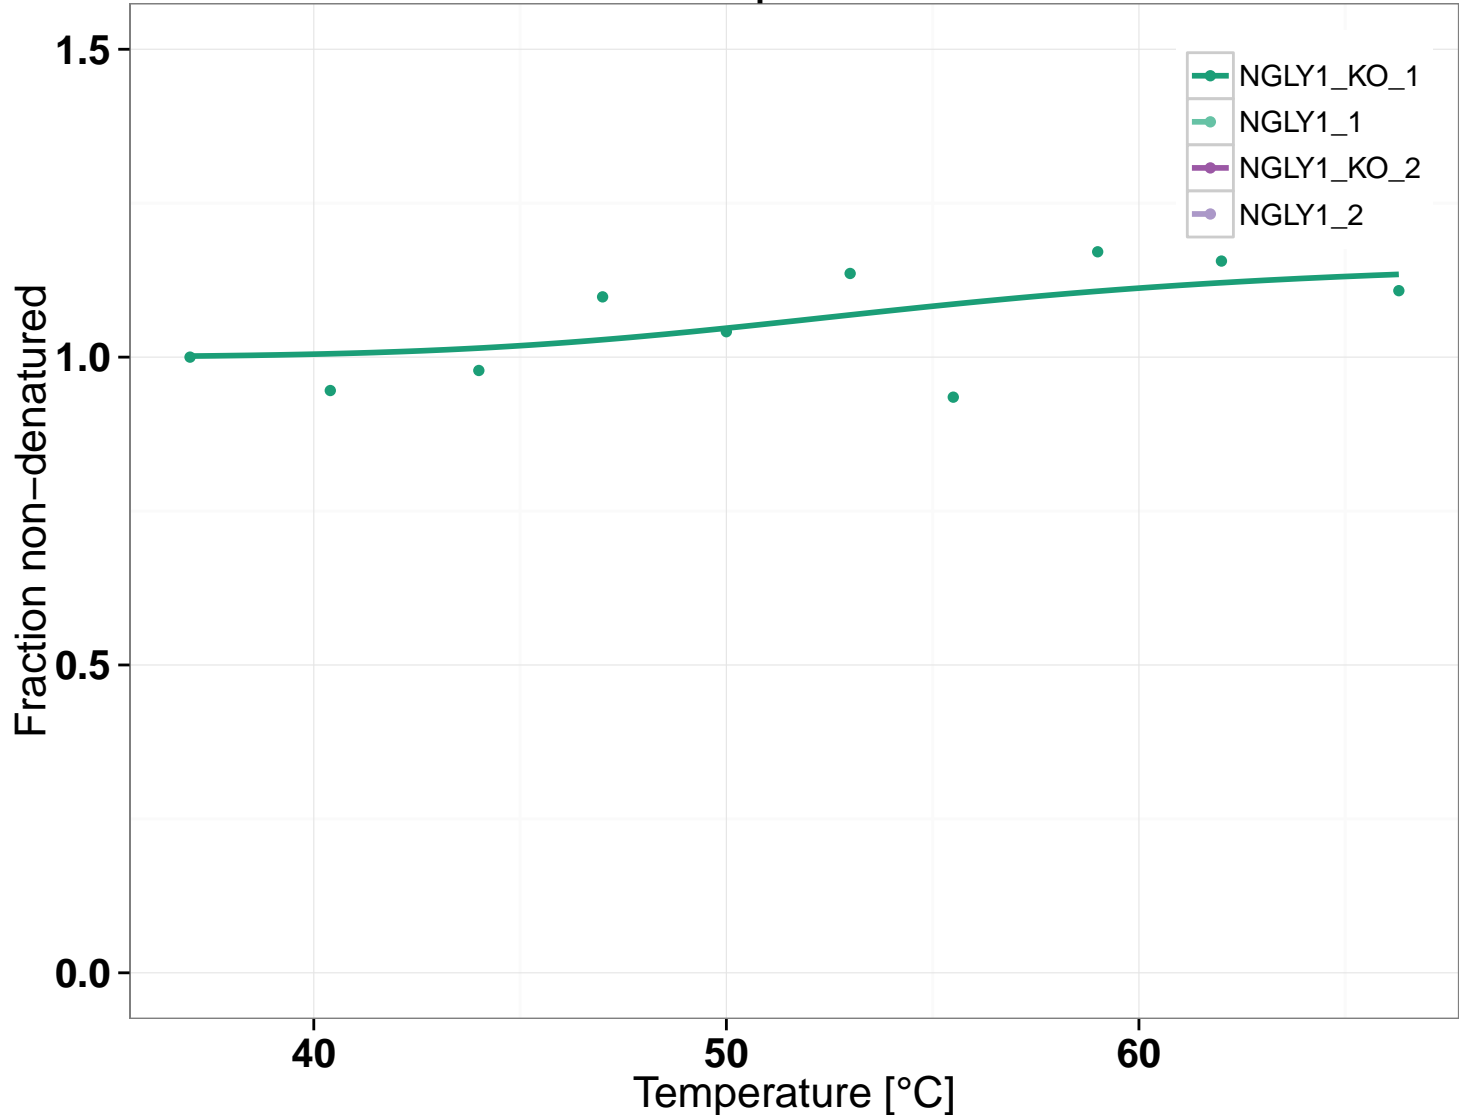

|            | meltPoint | slope  | plateau | R2   |
|------------|-----------|--------|---------|------|
| NGLY1_KO_1 | —         | 0.0073 | 1.16    | 0.39 |
| NGLY1_1    | —         | —      | —       | —    |
| NGLY1_KO_2 | —         | —      | —       | —    |
| NGLY1_2    | —         | —      | —       | —    |

Supplement: Supplementary file 5117 [file 1]

IPI00101923.7|SPG11

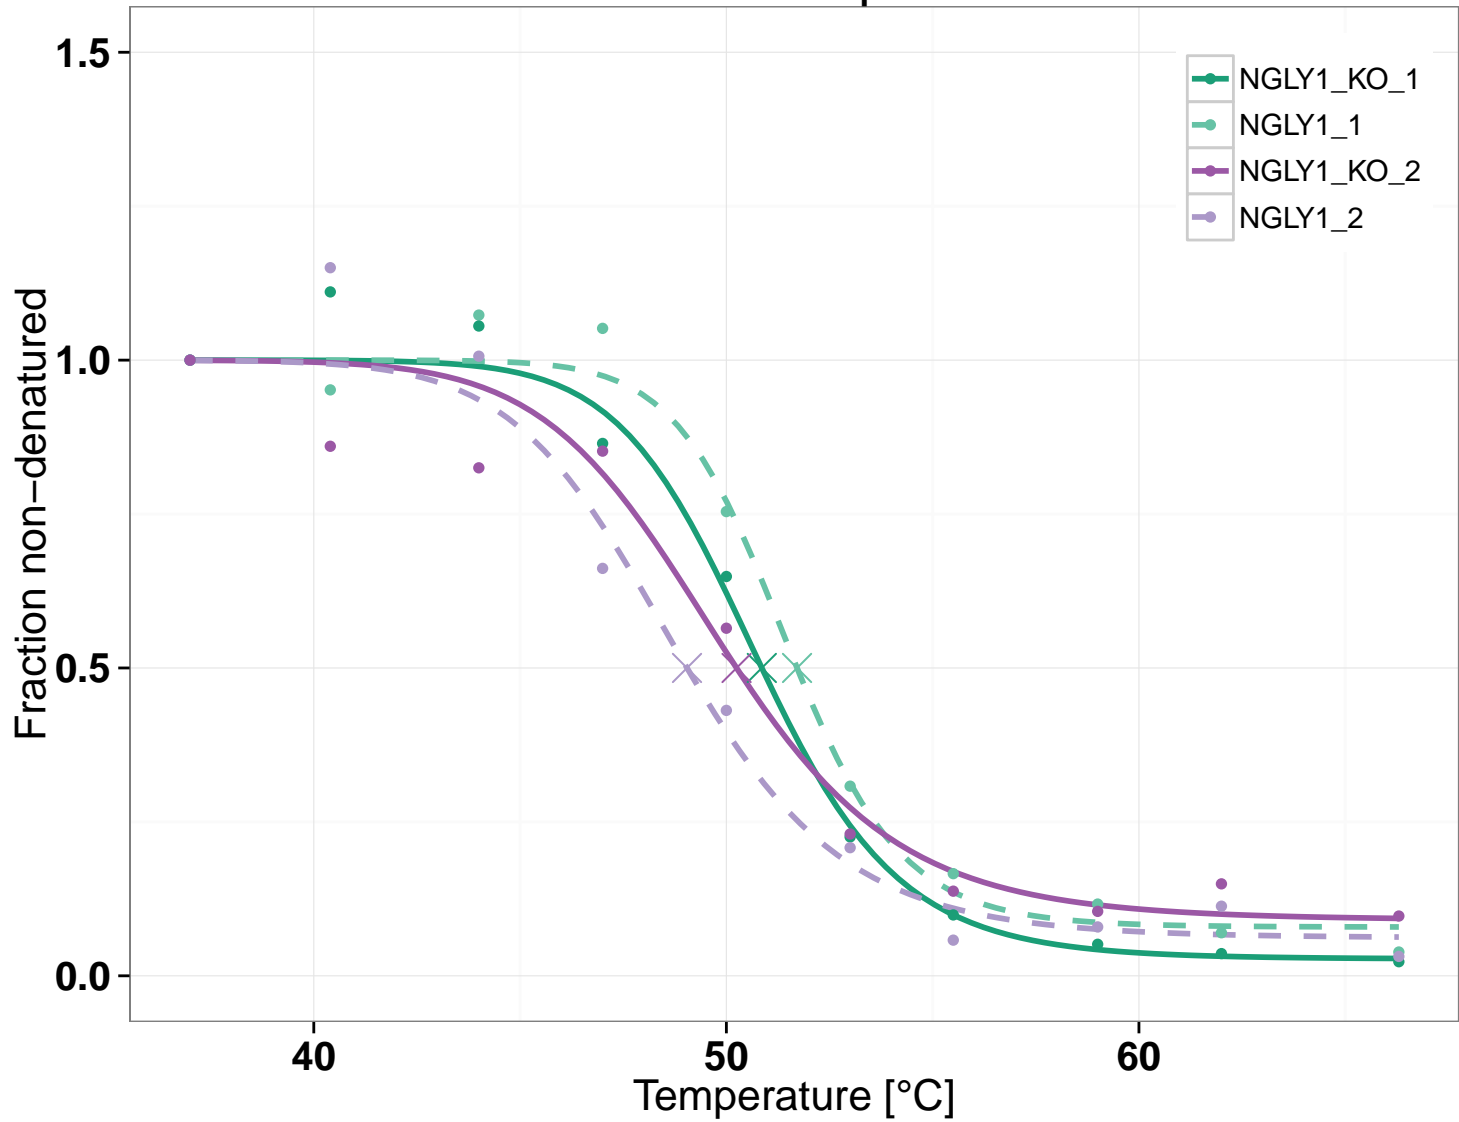

|            | meltPoint | slope | plateau | R2   |
|------------|-----------|-------|---------|------|
| NGLY1_KO_1 | 50.86     | -0.14 | 0.03    | 0.99 |
| NGLY1_1    | 51.71     | -0.17 | 0.08    | 0.99 |
| NGLY1_KO_2 | 50.25     | -0.11 | 0.09    | 0.96 |
| NGLY1_2    | 49.05     | -0.12 | 0.06    | 0.98 |

Supplement: Supplementary file 5118 [file 1]

# IPI00400824.1|RP9

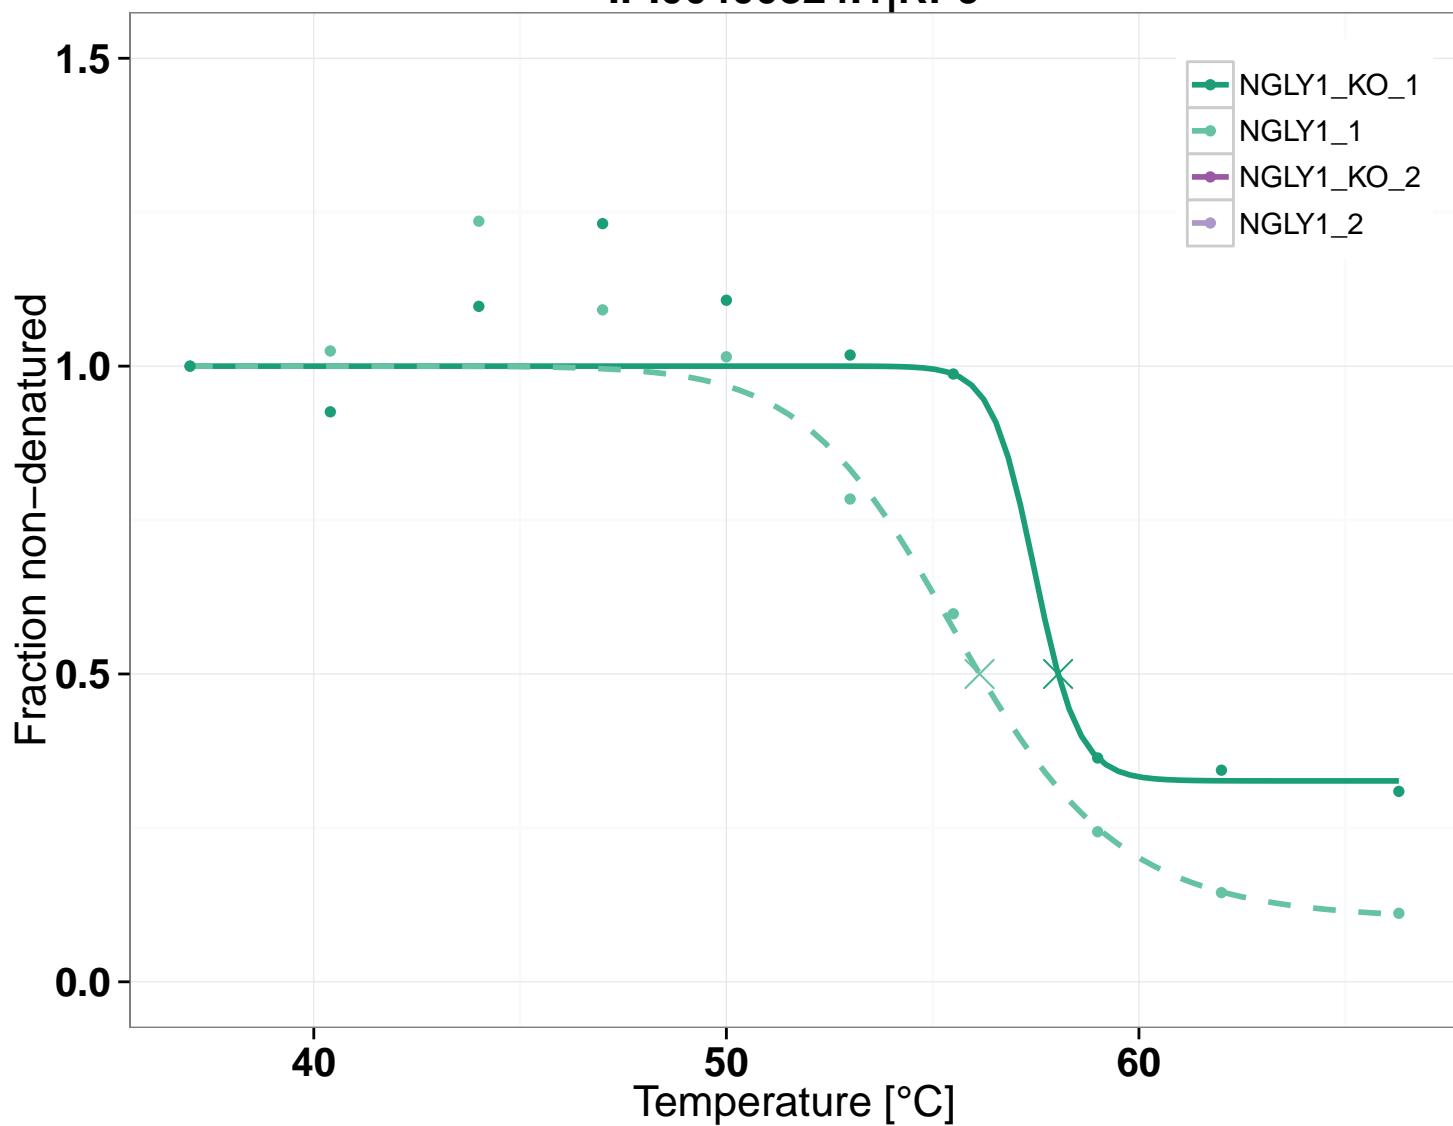

|            | meltPoint | slope | plateau | R2   |
|------------|-----------|-------|---------|------|
| NGLY1_KO_1 | 58.04     | -0.32 | 0.33    | 0.93 |
| NGLY1_1    | 56.14     | -0.12 | 0.1     | 0.96 |
| NGLY1_KO_2 | -         | -     | -       | -    |
| NGLY1_2    | -         | -     | -       | -    |

Supplement: Supplementary file 5119 [file 1]

IPI00430622.1|SPG20

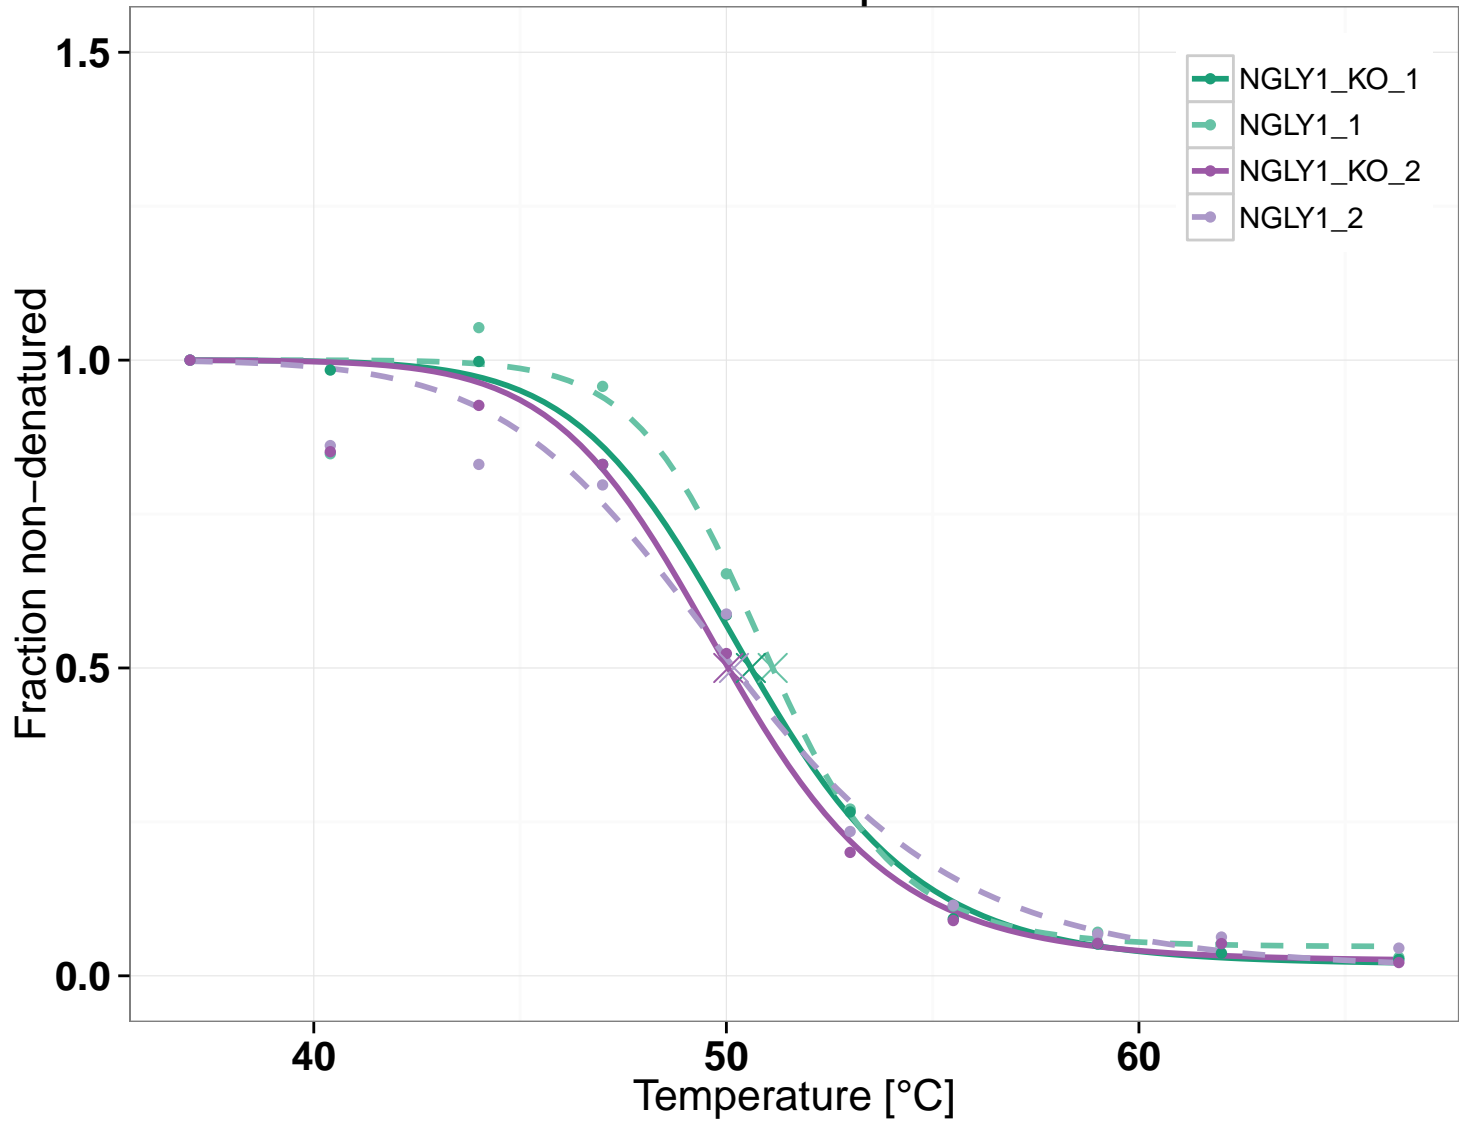

|            | meltPoint | slope  | plateau | R2   |
|------------|-----------|--------|---------|------|
| NGLY1_KO_1 | 50.59     | -0.12  | 0.02    | 1    |
| NGLY1_1    | 51.12     | -0.15  | 0.05    | 0.98 |
| NGLY1_KO_2 | 50.05     | -0.12  | 0.02    | 0.98 |
| NGLY1_2    | 50.18     | -0.089 | 0.01    | 0.97 |

Supplement: Supplementary file 5120 [file 1]

IPI00296353.8|ARHGAP18

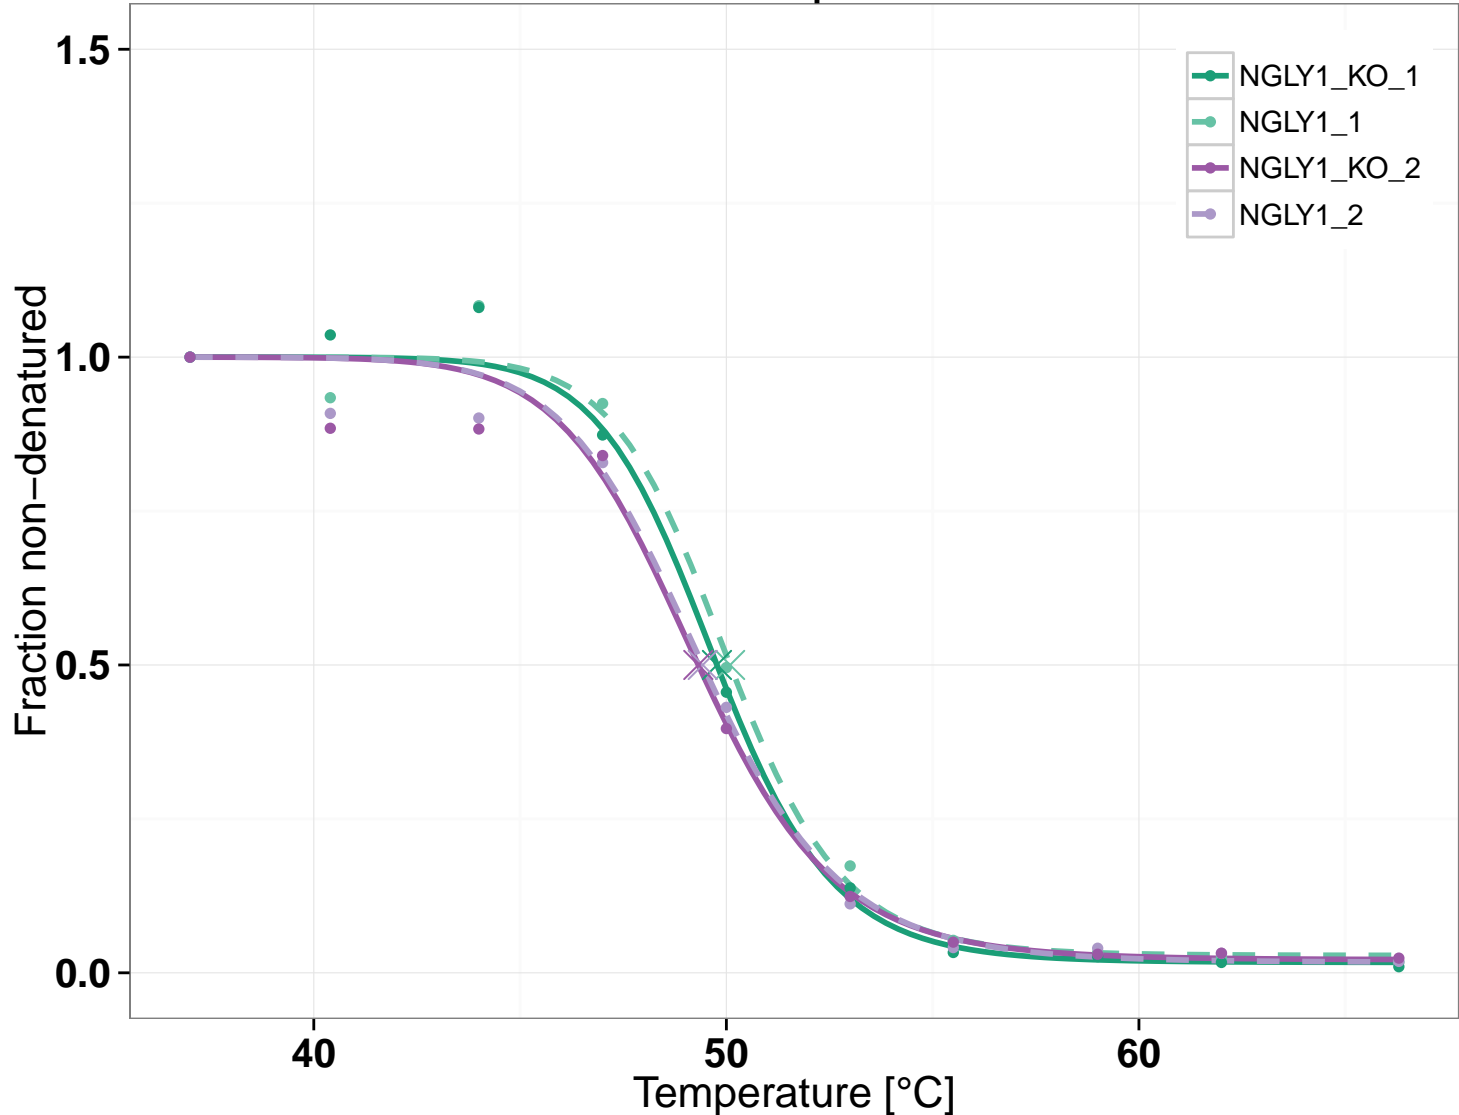

|            | meltPoint | slope | plateau | R2   |
|------------|-----------|-------|---------|------|
| NGLY1_KO_1 | 49.77     | -0.17 | 0.02    | 0.99 |
| NGLY1_1    | 50.09     | -0.17 | 0.03    | 0.99 |
| NGLY1_KO_2 | 49.32     | -0.15 | 0.02    | 0.99 |
| NGLY1_2    | 49.43     | -0.15 | 0.02    | 0.99 |

Supplement: Supplementary file 5121 [file 1]

IPI00337494.7|SLC25A24

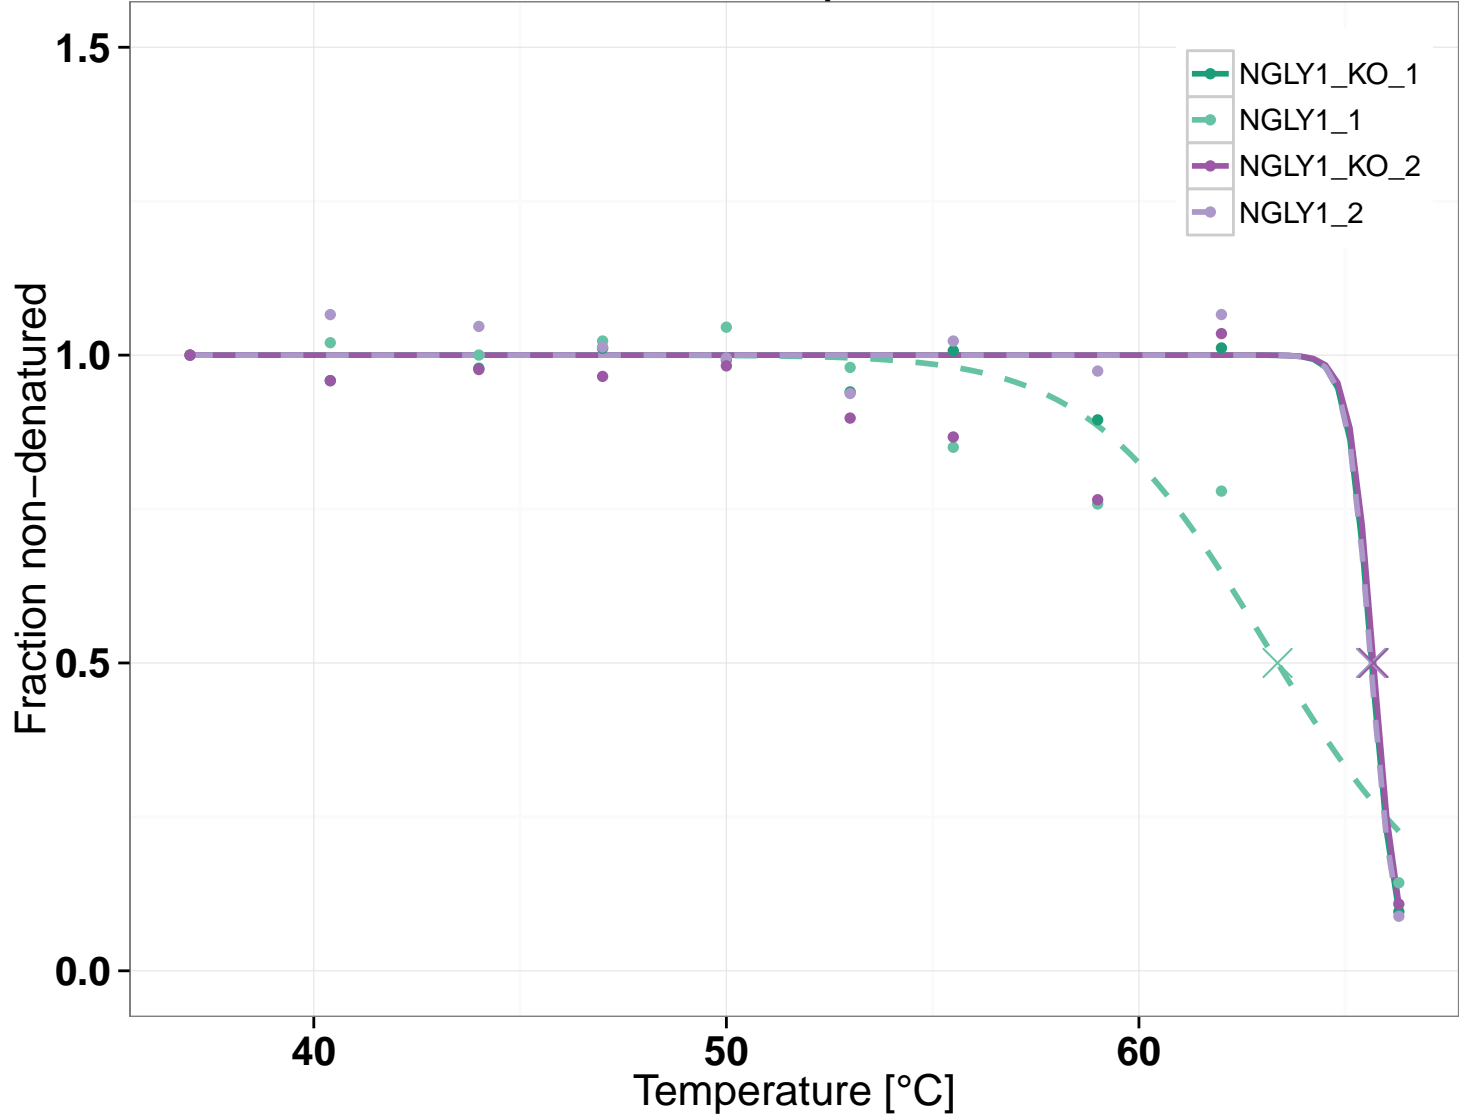

|            | meltPoint | slope | plateau | R2   |
|------------|-----------|-------|---------|------|
| NGLY1_KO_1 | 65.64     | -0.86 | 0       | 0.98 |
| NGLY1_1    | 63.36     | -0.11 | 0       | 0.91 |
| NGLY1_KO_2 | 65.69     | -0.87 | 0       | 0.87 |
| NGLY1_2    | 65.62     | -0.87 | 0       | 0.98 |

Supplement: Supplementary file 5122 [file 1]

IPI00166956.5|TBCEL

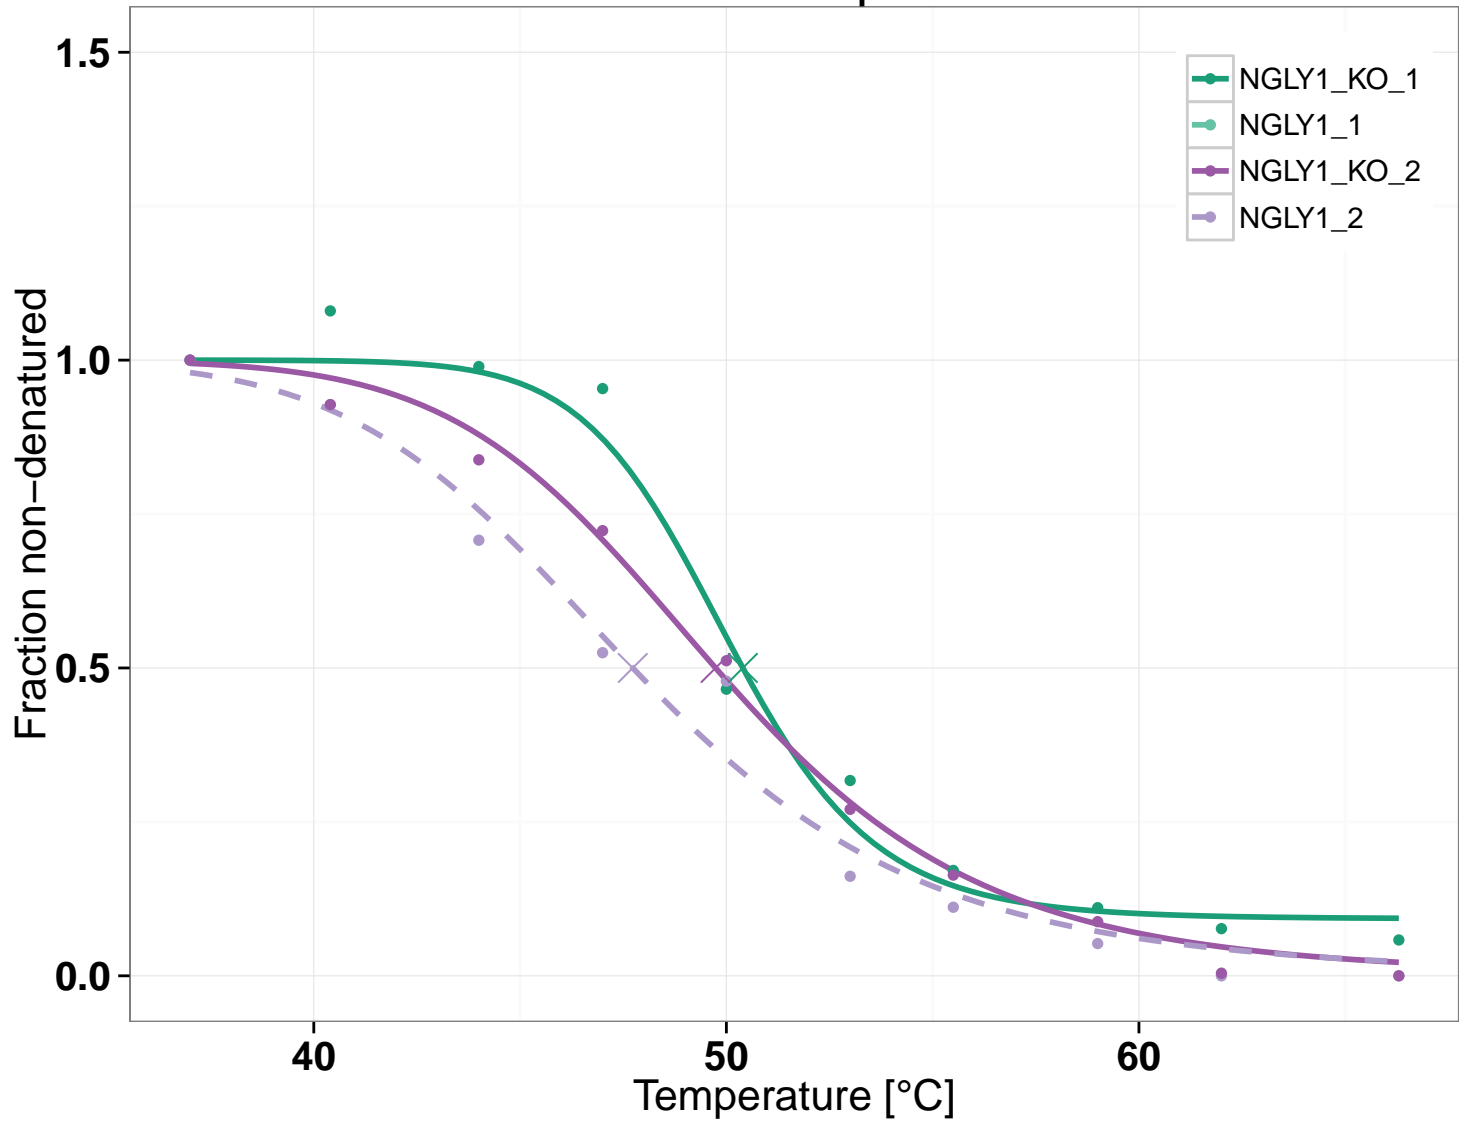

|            | meltPoint | slope  | plateau | R2   |
|------------|-----------|--------|---------|------|
| NGLY1_KO_1 | 50.4      | -0.13  | 0.09    | 0.98 |
| NGLY1_1    | -         | -      | -       | -    |
| NGLY1_KO_2 | 49.74     | -0.078 | 0       | 0.99 |
| NGLY1_2    | 47.73     | -0.072 | 0       | 0.98 |

Supplement: Supplementary file 5123 [file 1]
