# Supplementary material (part 52 of 85)
Source: publisher figshare collection journal article supplement (https://gsajournals.figshare.com/articles/dataset/_/12014913)

IPI00412024.5|ZNF485

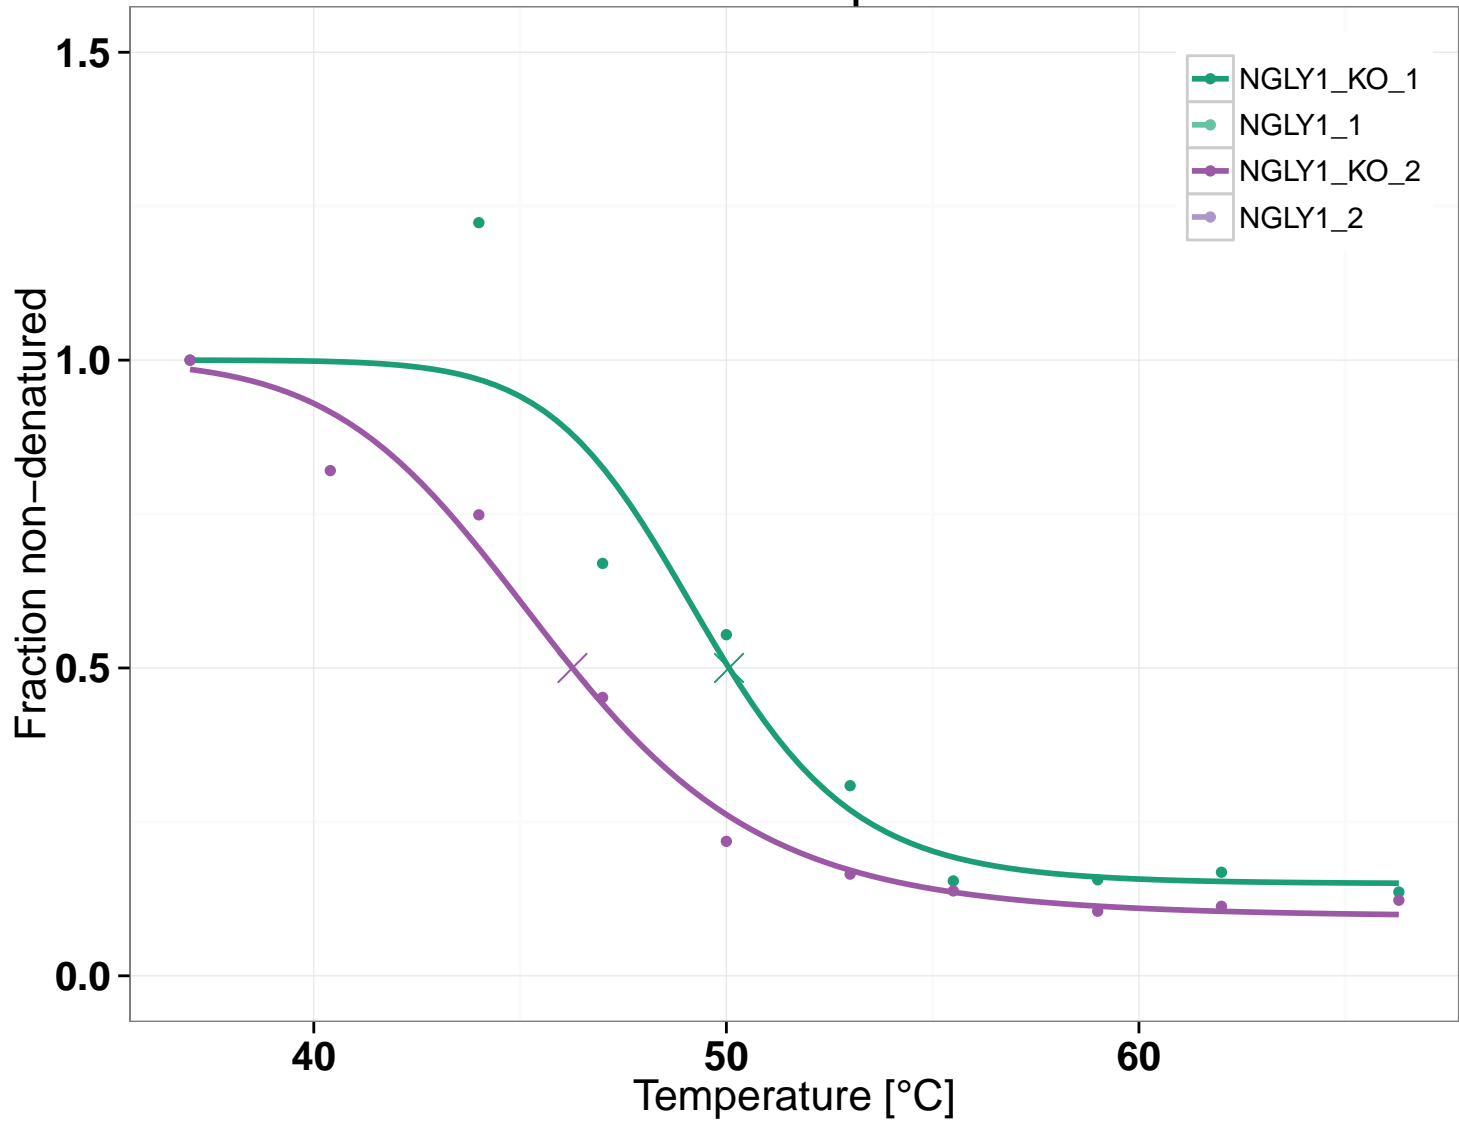

|            | meltPoint | slope  | plateau | R2   |
|------------|-----------|--------|---------|------|
| NGLY1_KO_1 | 50.06     | -0.12  | 0.15    | 0.76 |
| NGLY1_1    | -         | -      | -       | -    |
| NGLY1_KO_2 | 46.27     | -0.087 | 0.1     | 0.99 |
| NGLY1_2    | -         | -      | -       | -    |

Supplement: Supplementary file 5124 [file 1]

IPI00644697.2|HEBP2

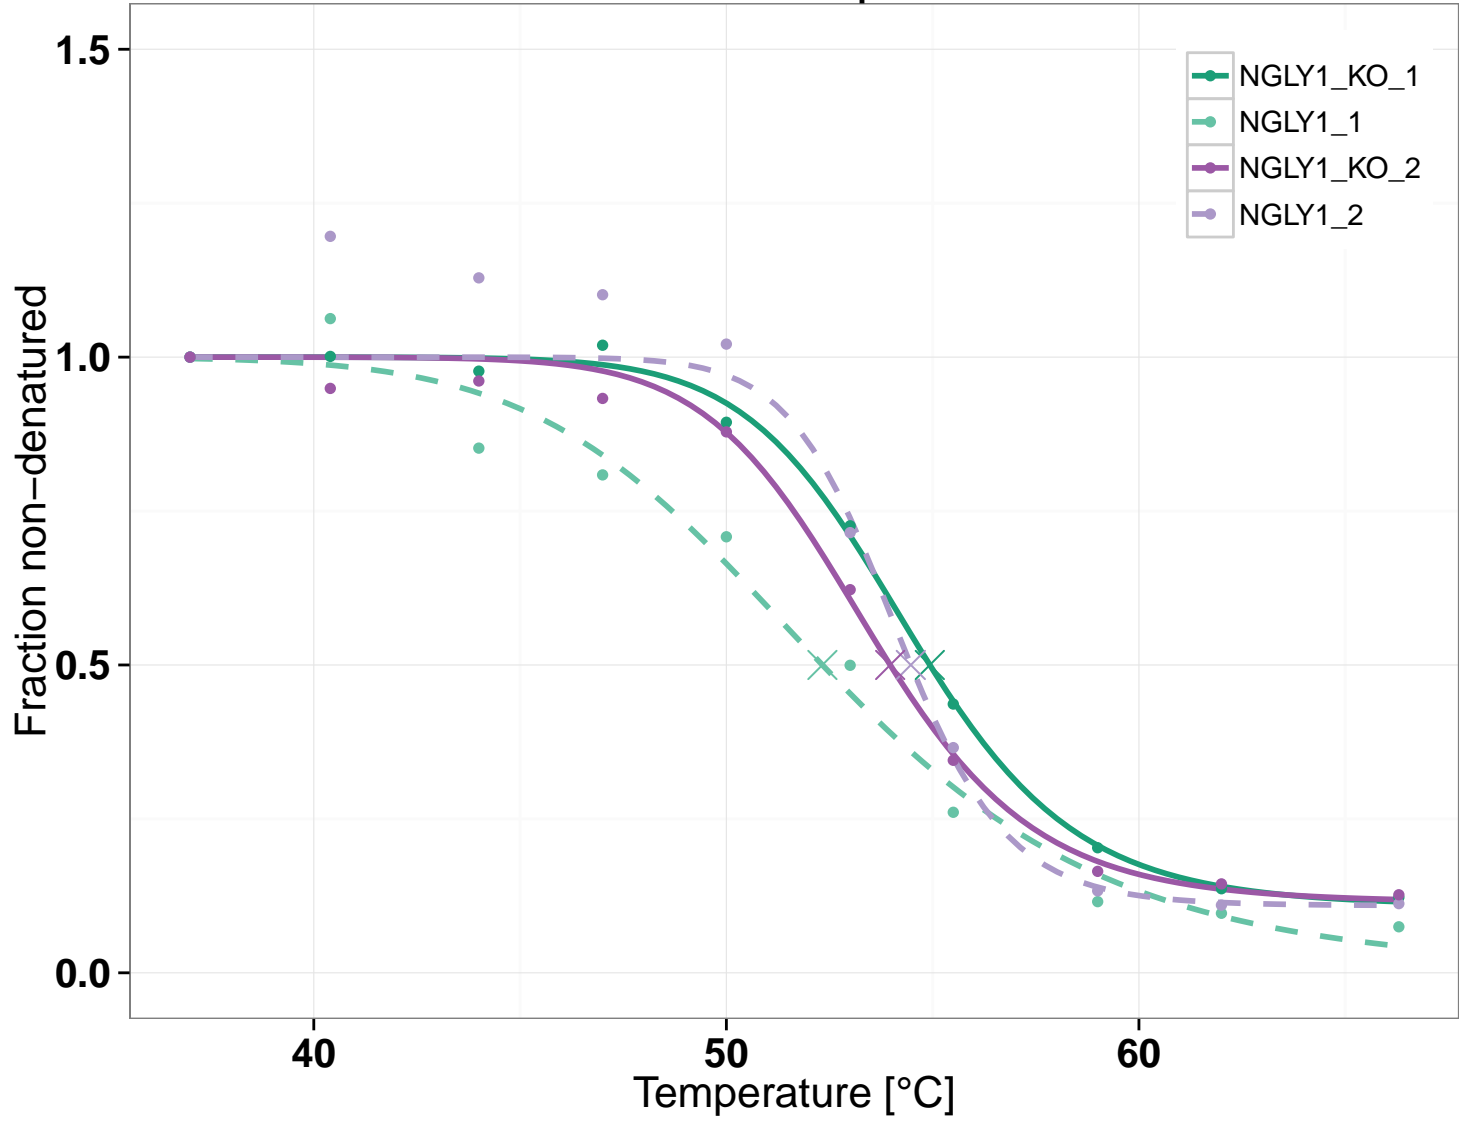

|            | meltPoint | slope  | plateau | R2   |
|------------|-----------|--------|---------|------|
| NGLY1_KO_1 | 54.93     | -0.11  | 0.11    | 1    |
| NGLY1_1    | 52.33     | -0.071 | 0       | 0.98 |
| NGLY1_KO_2 | 53.97     | -0.11  | 0.11    | 0.99 |
| NGLY1_2    | 54.47     | -0.17  | 0.11    | 0.96 |

Supplement: Supplementary file 5125 [file 1]

IPI00163496.12|PPFIA1

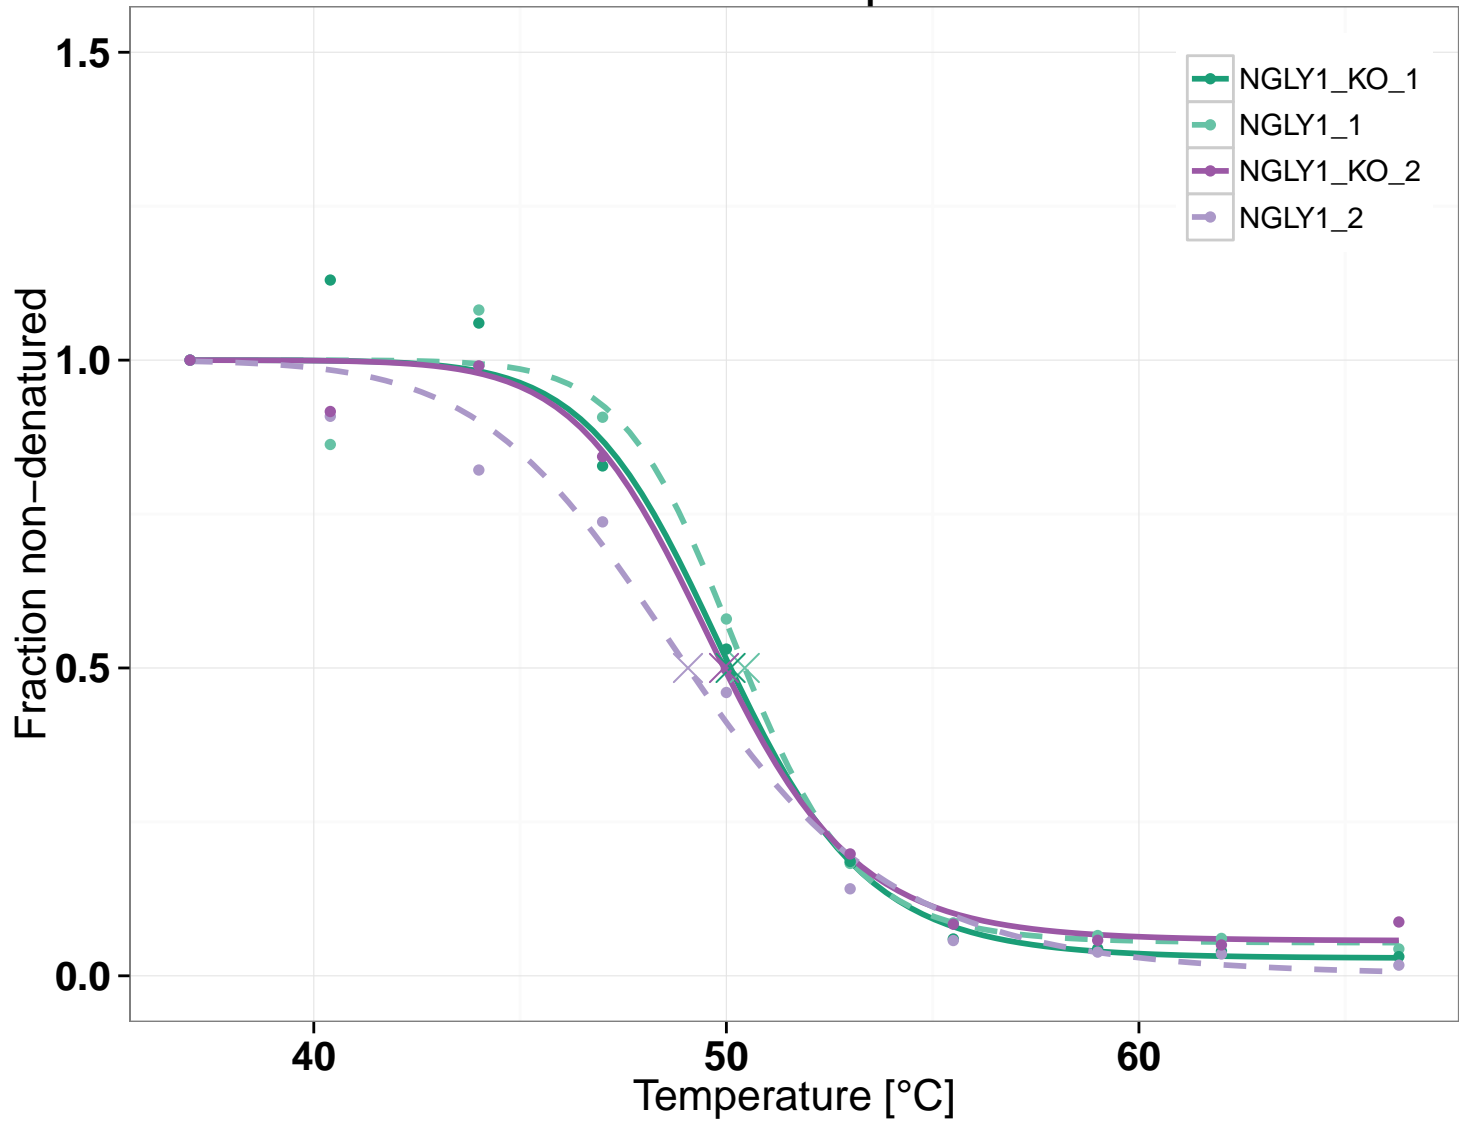

|            | meltPoint | slope  | plateau | R2   |
|------------|-----------|--------|---------|------|
| NGLY1_KO_1 | 50.1      | -0.14  | 0.03    | 0.99 |
| NGLY1_1    | 50.45     | -0.17  | 0.05    | 0.98 |
| NGLY1_KO_2 | 49.94     | -0.14  | 0.06    | 0.99 |
| NGLY1_2    | 49.07     | -0.099 | 0       | 0.99 |

Supplement: Supplementary file 5126 [file 1]

# IPI00217223.1|PAICS

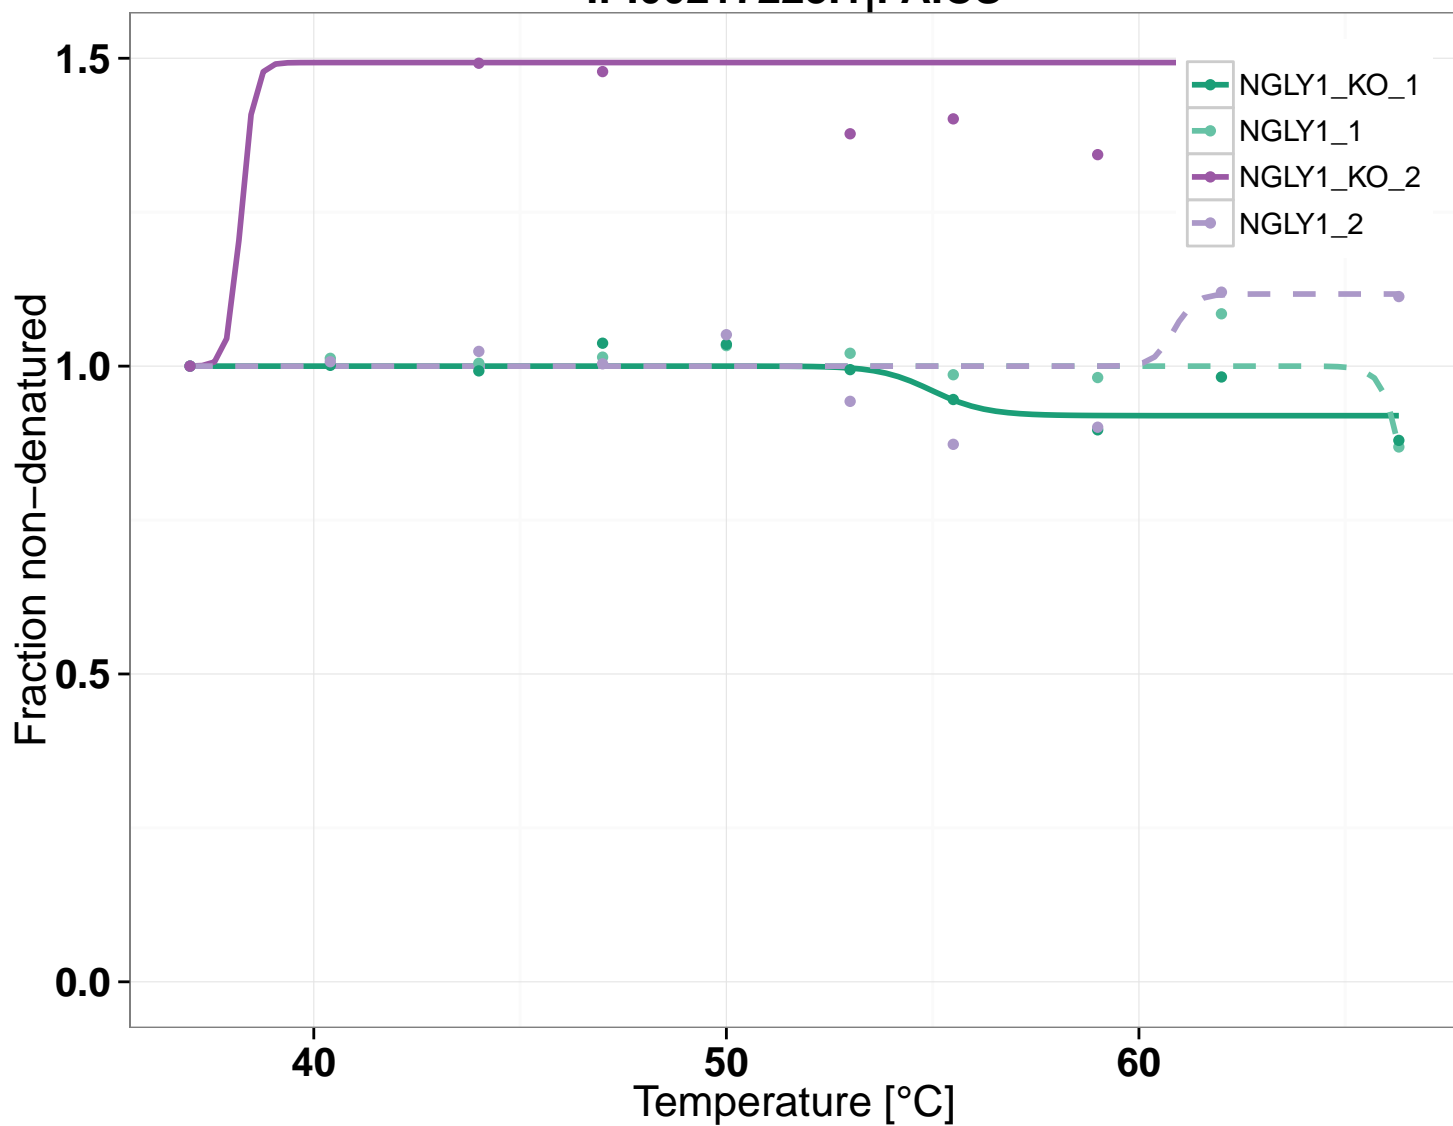

|            | meltPoint | slope  | plateau | R2   |
|------------|-----------|--------|---------|------|
| NGLY1_KO_1 | -         | -0.031 | 0.92    | 0.66 |
| NGLY1_1    | -         | -      | 0       | 0.64 |
| NGLY1_KO_2 | -         | 0.81   | 1.49    | 0.55 |
| NGLY1_2    | -         | 0.12   | 1.12    | 0.45 |

Supplement: Supplementary file 5127 [file 1]

# IPI00465211.1|WDR92

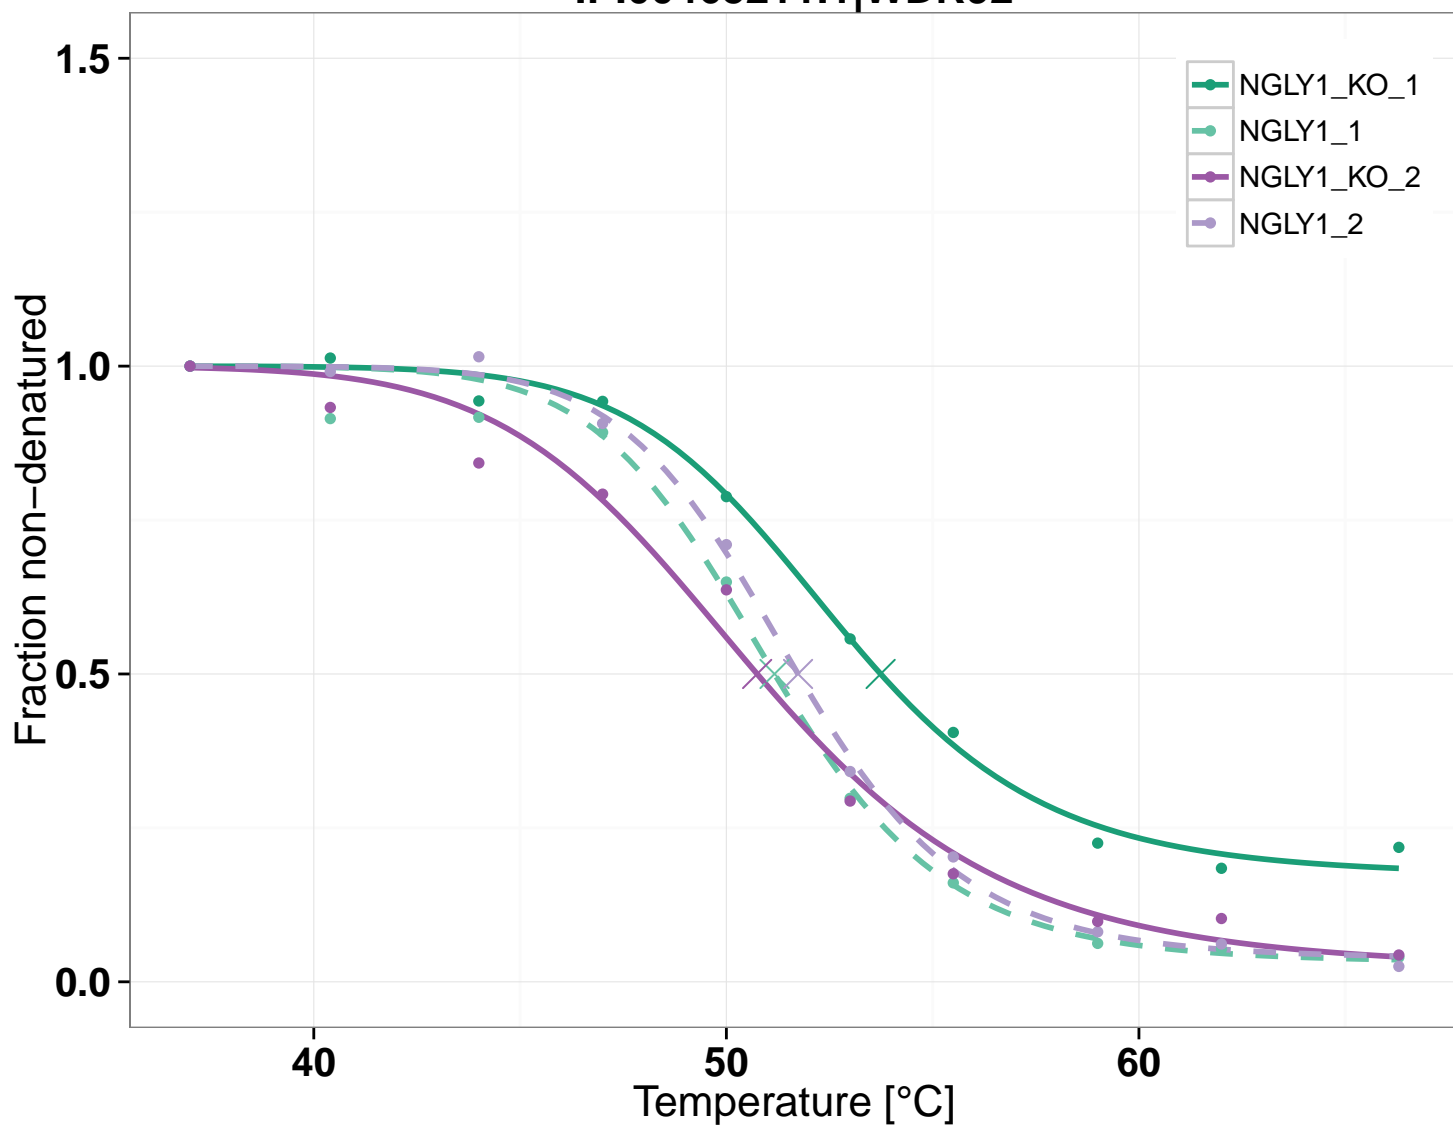

|            | meltPoint | slope  | plateau | R2   |
|------------|-----------|--------|---------|------|
| NGLY1_KO_1 | 53.74     | -0.082 | 0.17    | 1    |
| NGLY1_1    | 51.17     | -0.11  | 0.03    | 0.99 |
| NGLY1_KO_2 | 50.75     | -0.08  | 0.02    | 0.99 |
| NGLY1_2    | 51.74     | -0.12  | 0.04    | 1    |

Supplement: Supplementary file 5128 [file 1]

IPI00019549.1|SMAD1

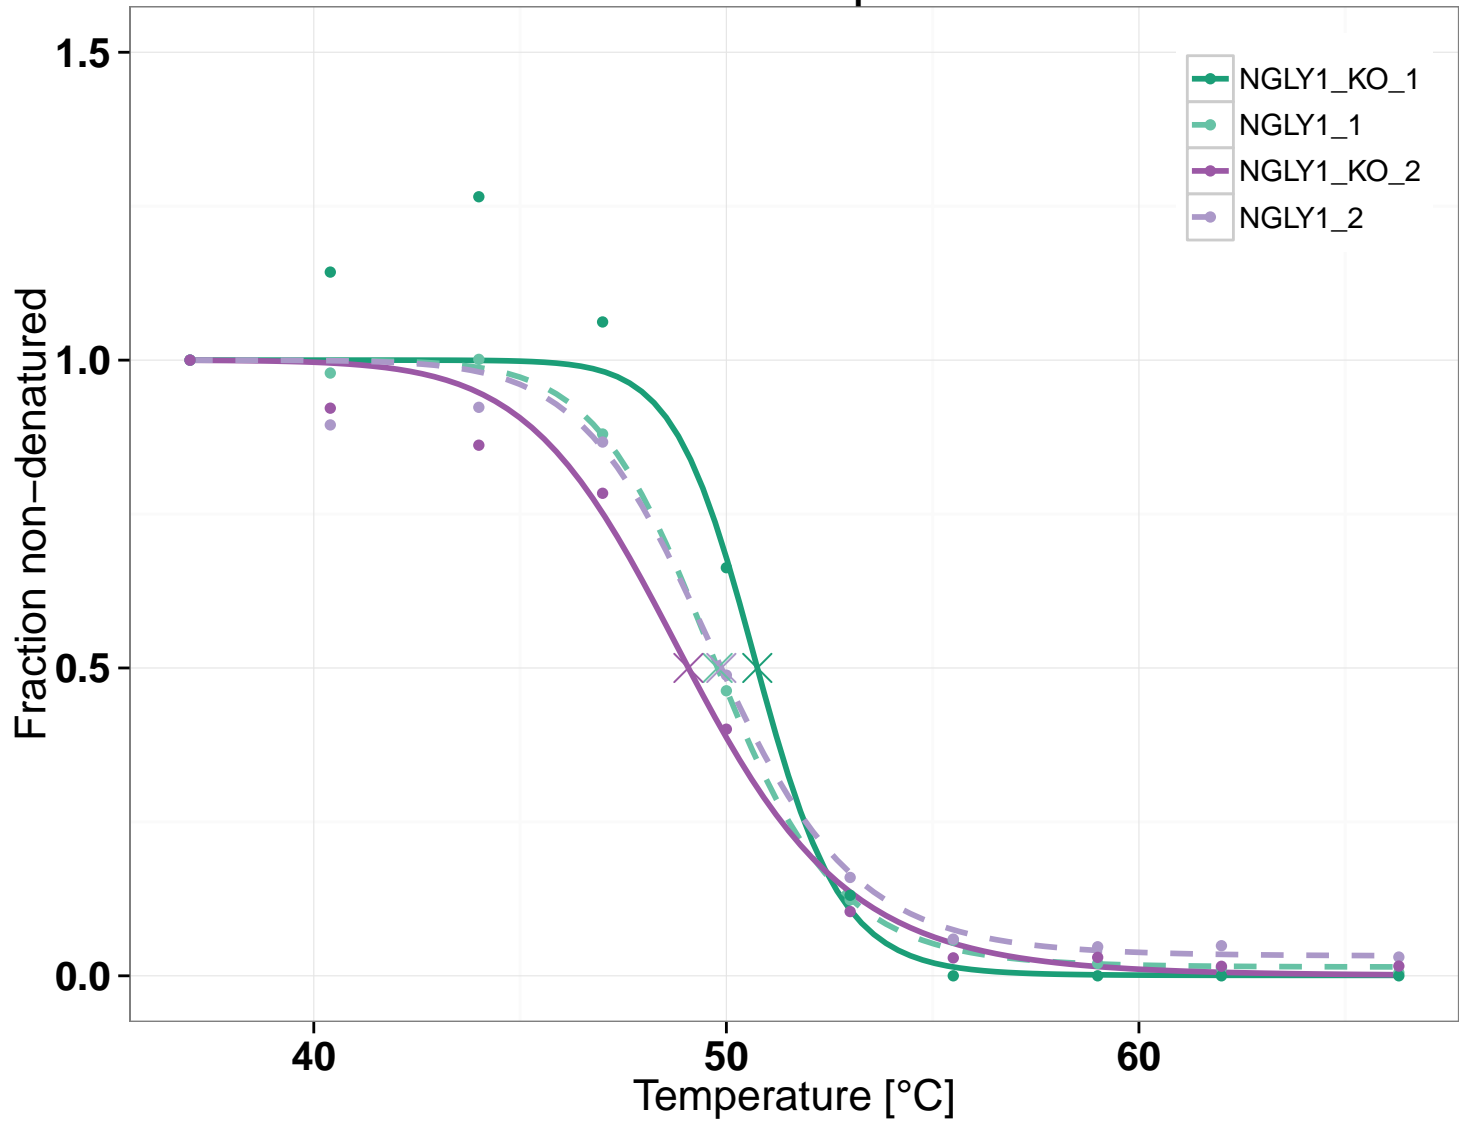

|            | meltPoint | slope | plateau | R2   |
|------------|-----------|-------|---------|------|
| NGLY1_KO_1 | 50.75     | -0.25 | 0       | 0.96 |
| NGLY1_1    | 49.79     | -0.17 | 0.01    | 1    |
| NGLY1_KO_2 | 49.08     | -0.13 | 0       | 0.99 |
| NGLY1_2    | 49.88     | -0.15 | 0.03    | 0.99 |

Supplement: Supplementary file 5129 [file 1]

IPI00065458.6|LRRC50

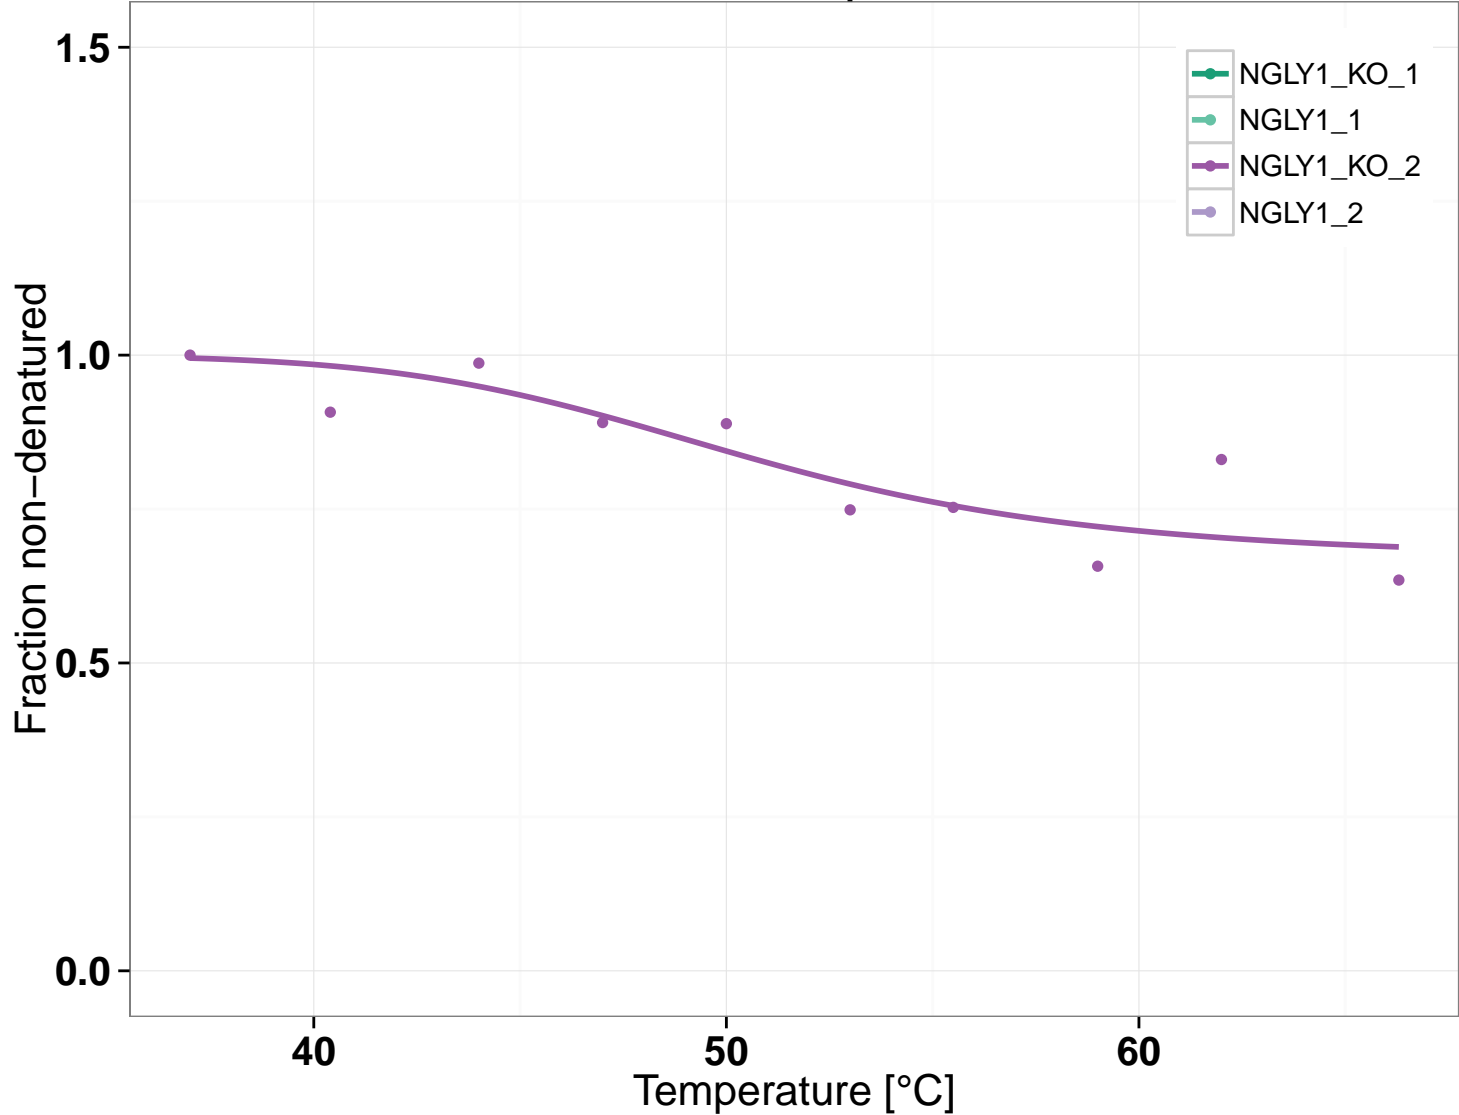

|            | meltPoint | slope | plateau | R2   |
|------------|-----------|-------|---------|------|
| NGLY1_KO_1 | —         | —     | —       | —    |
| NGLY1_1    | —         | —     | —       | —    |
| NGLY1_KO_2 | —         | -0.02 | 0.67    | 0.77 |
| NGLY1_2    | —         | —     | —       | —    |

Supplement: Supplementary file 5130 [file 1]

IPI00746004.2|RPS27L

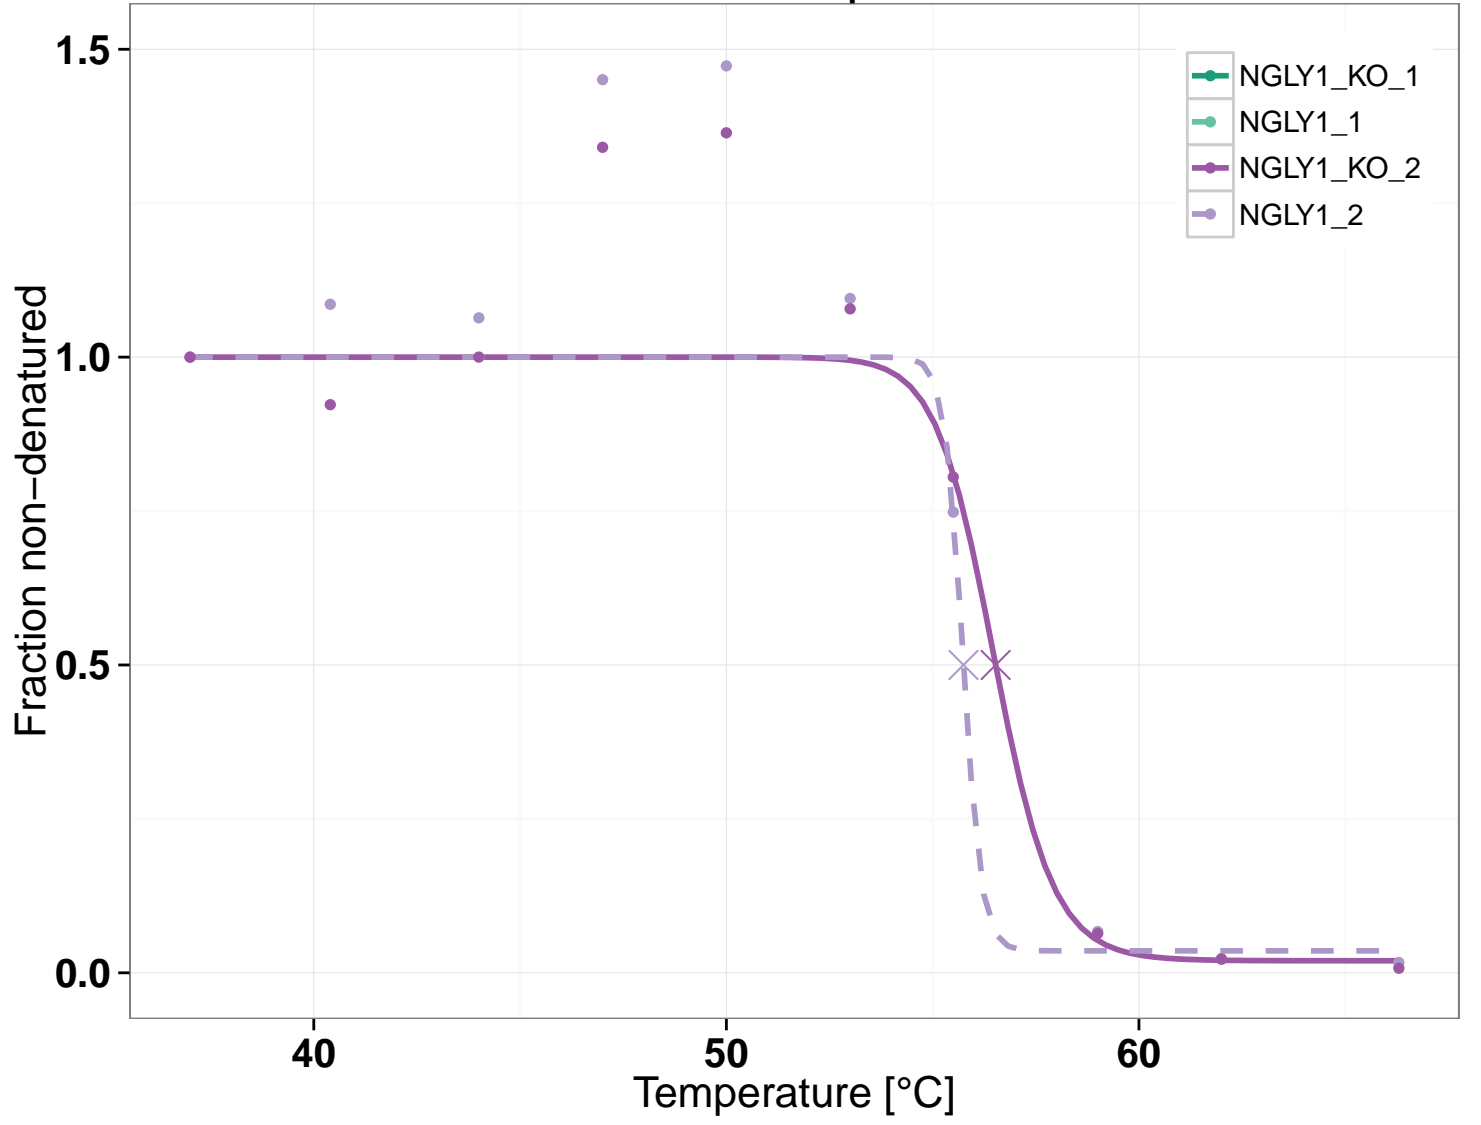

|            | meltPoint | slope | plateau | R2   |
|------------|-----------|-------|---------|------|
| NGLY1_KO_1 | -         | -     | -       | -    |
| NGLY1_1    | -         | -     | -       | -    |
| NGLY1_KO_2 | 56.53     | -0.34 | 0.02    | 0.9  |
| NGLY1_2    | 55.75     | -1.1  | 0.04    | 0.85 |

Supplement: Supplementary file 5131 [file 1]

IPI00009057.2|G3BP2

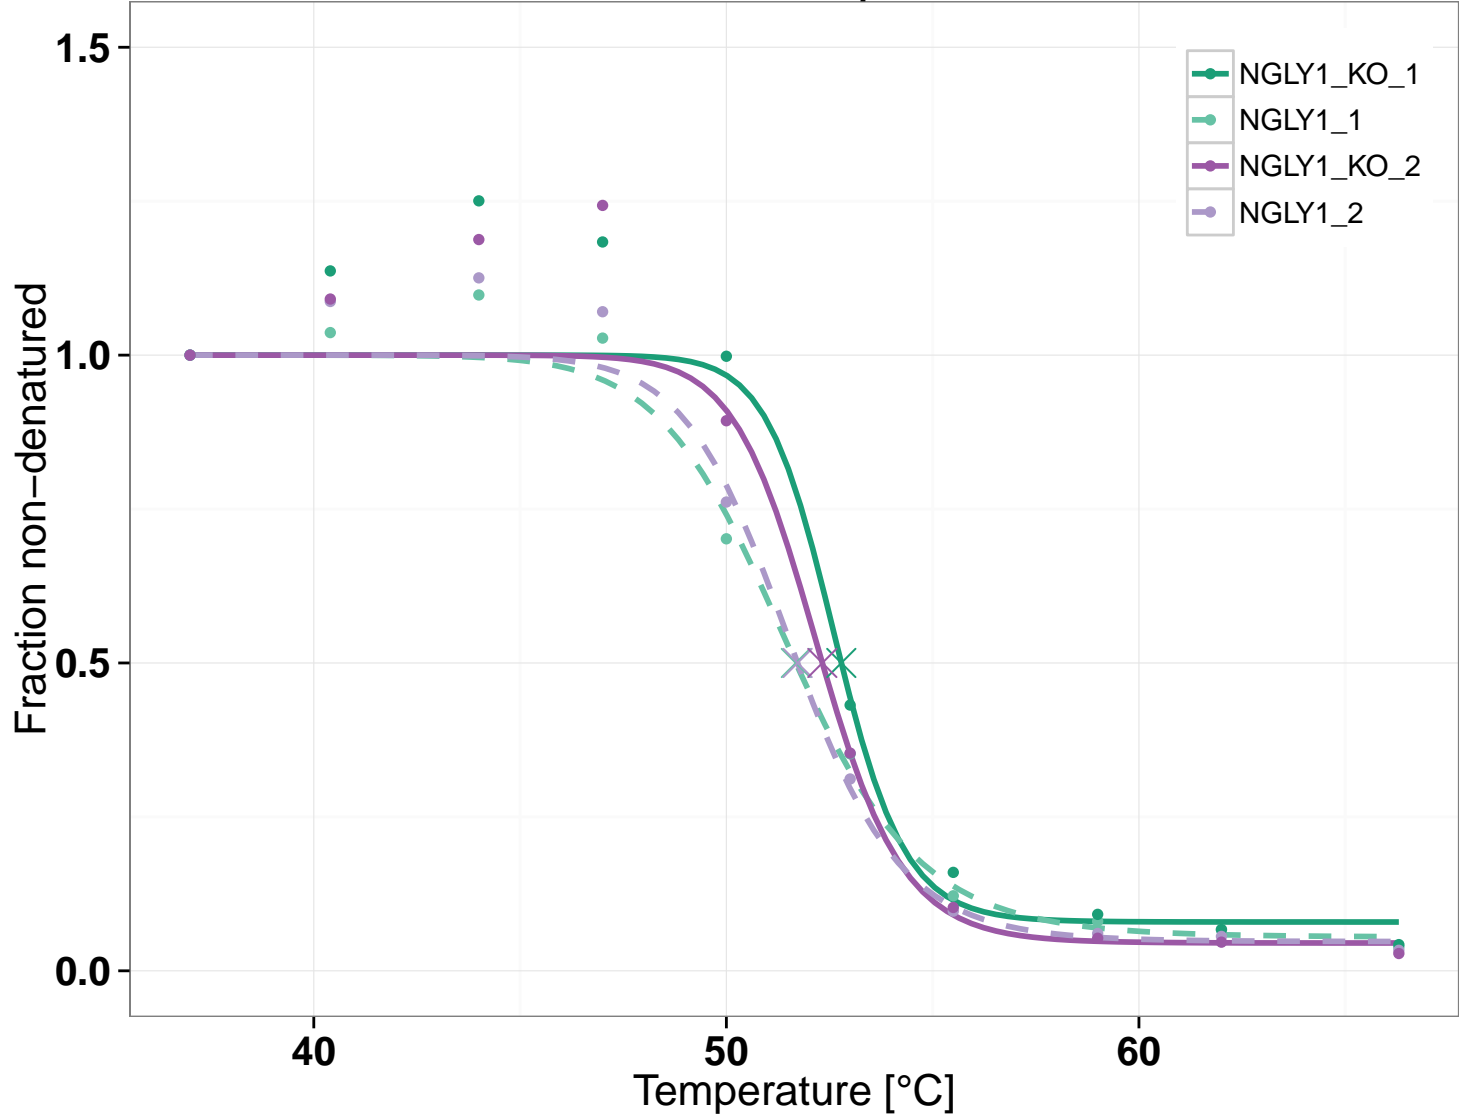

|            | meltPoint | slope | plateau | R2   |
|------------|-----------|-------|---------|------|
| NGLY1_KO_1 | 52.79     | -0.27 | 0.08    | 0.95 |
| NGLY1_1    | 51.68     | -0.15 | 0.05    | 0.99 |
| NGLY1_KO_2 | 52.33     | -0.23 | 0.05    | 0.96 |
| NGLY1_2    | 51.73     | -0.18 | 0.05    | 0.98 |

Supplement: Supplementary file 5132 [file 1]

IPI00101645.3|AHCYL2

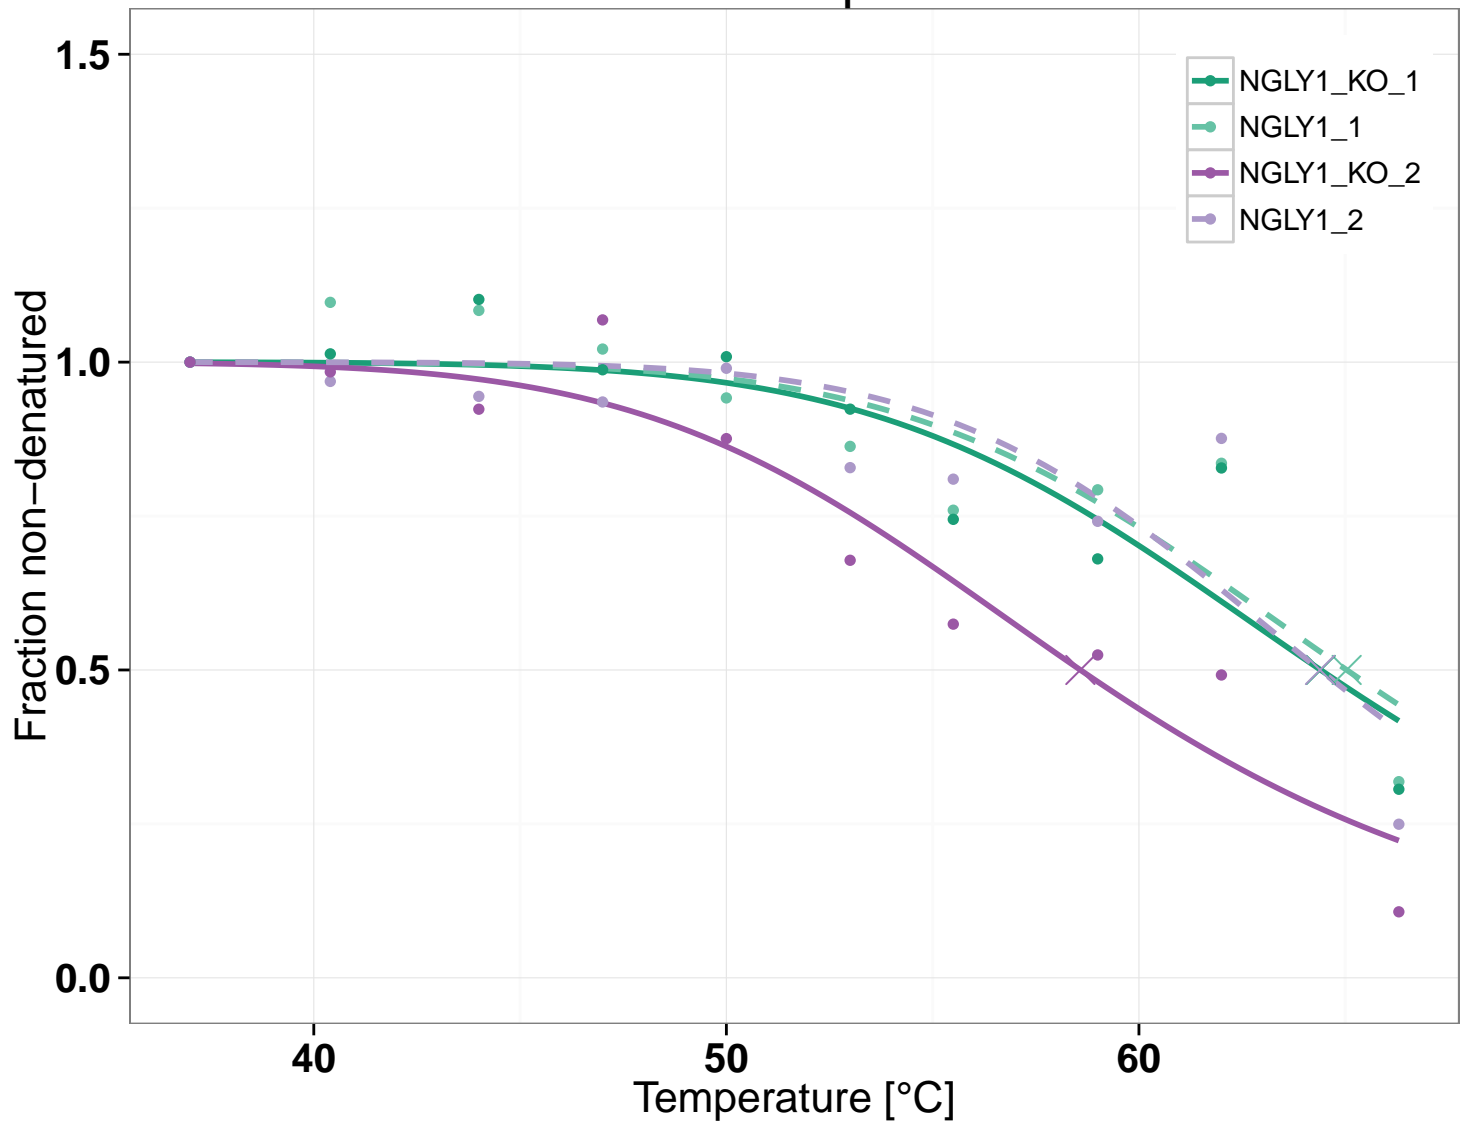

|            | meltPoint | slope  | plateau | R2   |
|------------|-----------|--------|---------|------|
| NGLY1_KO_1 | 64.41     | -0.047 | 0       | 0.82 |
| NGLY1_1    | 65.04     | -0.047 | 0       | 0.8  |
| NGLY1_KO_2 | 58.58     | -0.047 | 0       | 0.92 |
| NGLY1_2    | 64.39     | -0.055 | 0       | 0.74 |

Supplement: Supplementary file 5133 [file 1]

IPI00064462.2|ABHD13

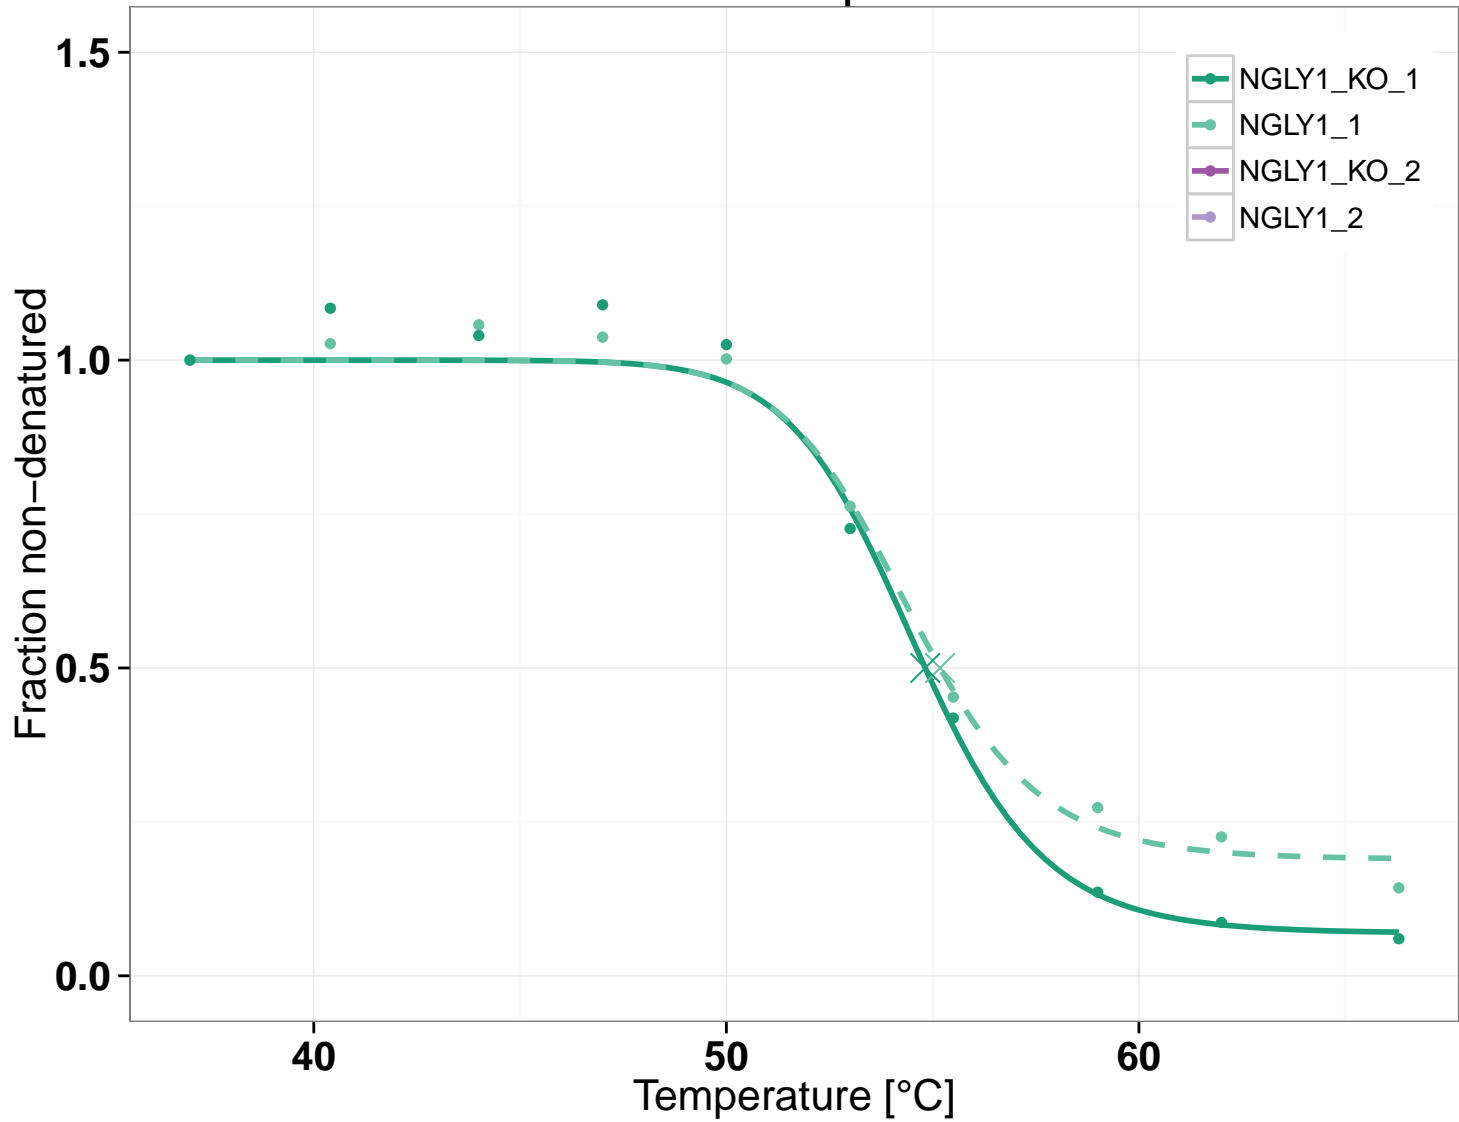

|            | meltPoint | slope | plateau | R2   |
|------------|-----------|-------|---------|------|
| NGLY1_KO_1 | 54.82     | -0.15 | 0.07    | 0.99 |
| NGLY1_1    | 55.18     | -0.13 | 0.19    | 0.99 |
| NGLY1_KO_2 | -         | -     | -       | -    |
| NGLY1_2    | -         | -     | -       | -    |

Supplement: Supplementary file 5134 [file 1]

IPI00455432.2|EVI5

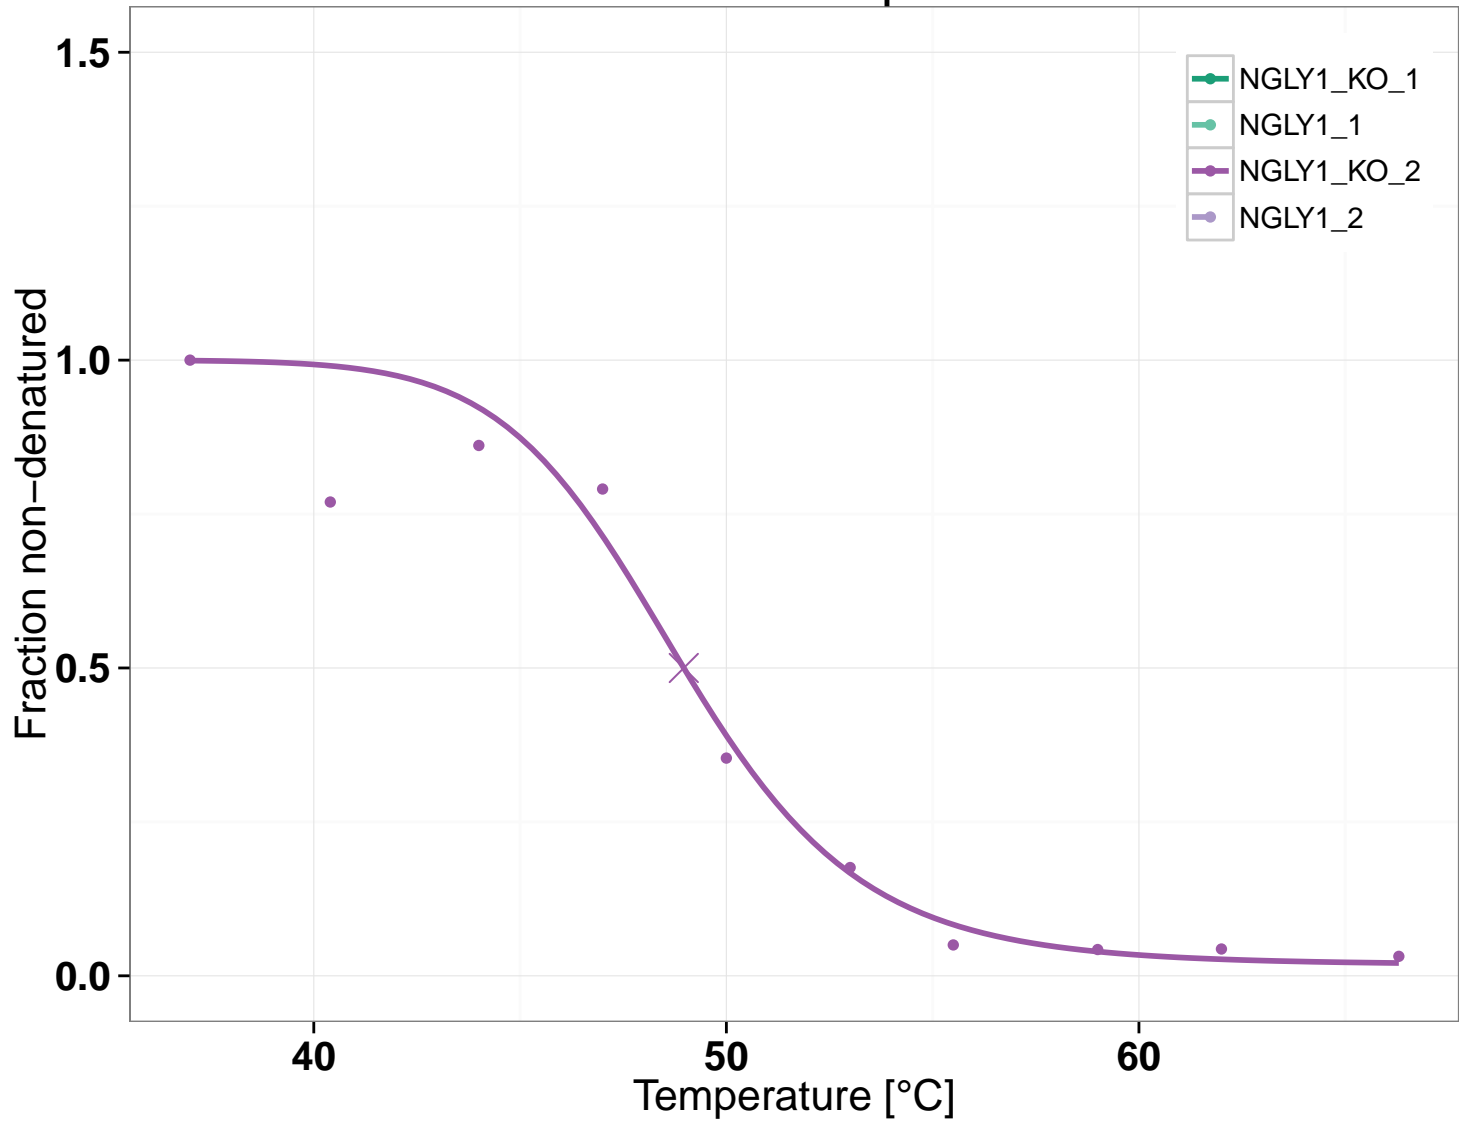

|            | meltPoint | slope | plateau | R2   |
|------------|-----------|-------|---------|------|
| NGLY1_KO_1 | —         | —     | —       | —    |
| NGLY1_1    | —         | —     | —       | —    |
| NGLY1_KO_2 | 48.97     | -0.11 | 0.02    | 0.96 |
| NGLY1_2    | —         | —     | —       | —    |

Supplement: Supplementary file 5135 [file 1]

IPI00410103.2|KCTD3

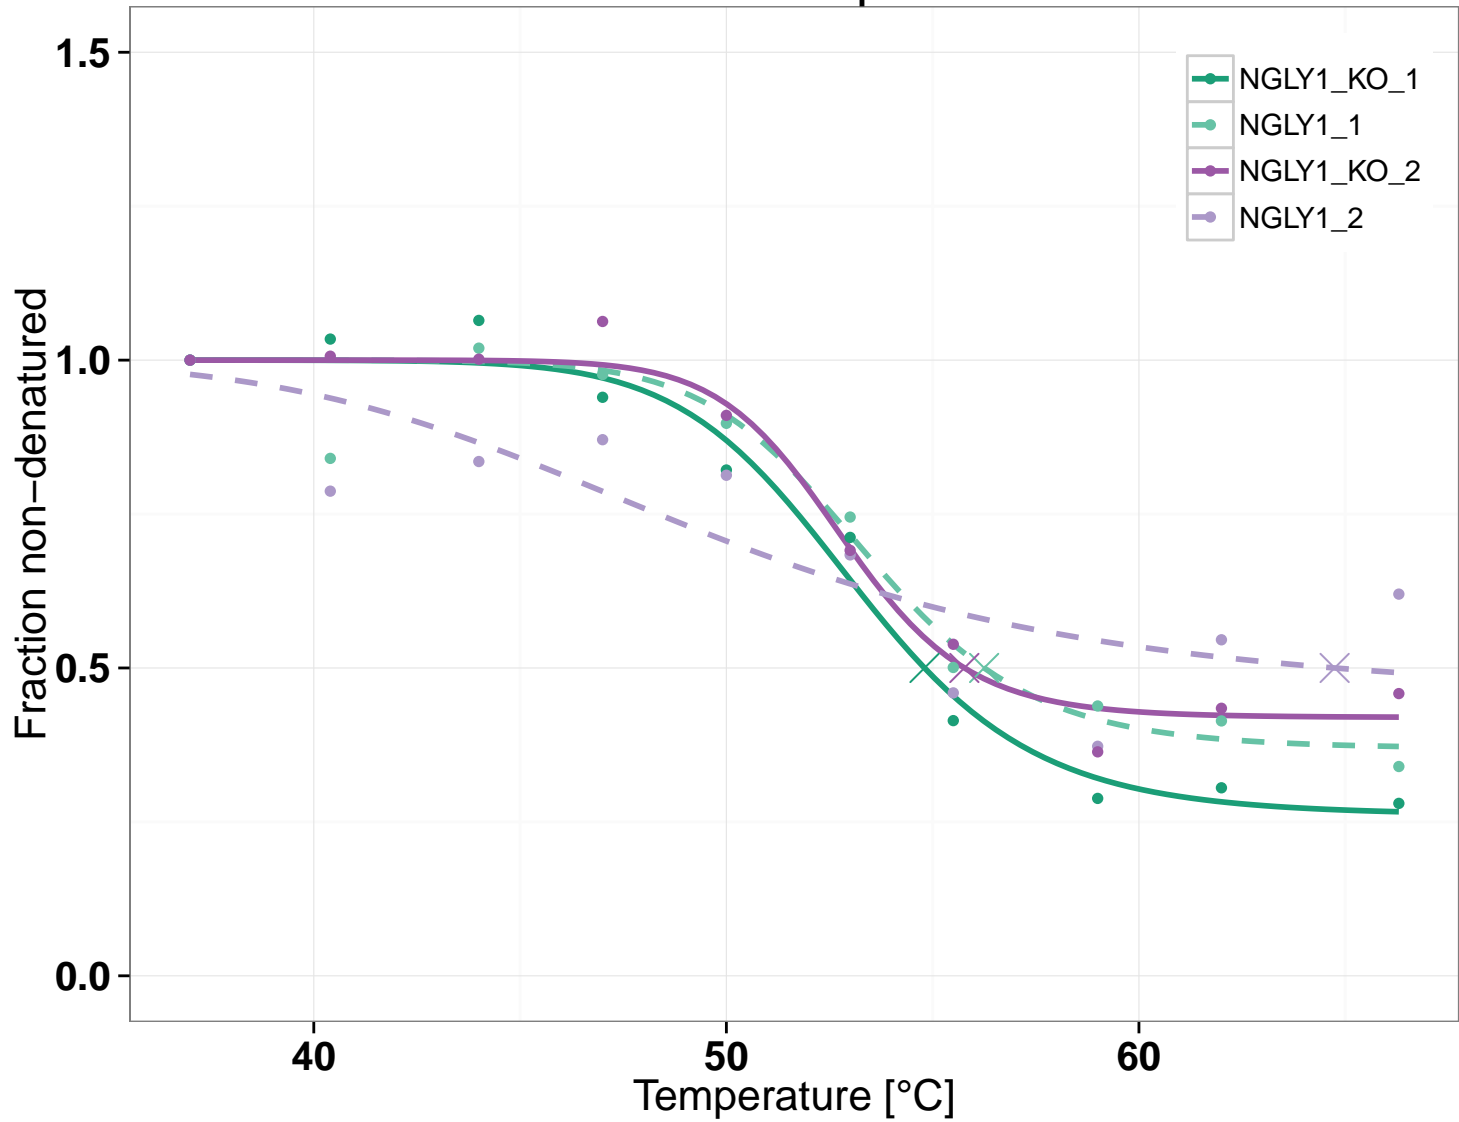

|            | meltPoint | slope  | plateau | R2   |
|------------|-----------|--------|---------|------|
| NGLY1_KO_1 | 54.8      | -0.086 | 0.26    | 0.98 |
| NGLY1_1    | 56.25     | -0.079 | 0.37    | 0.95 |
| NGLY1_KO_2 | 55.77     | -0.096 | 0.42    | 0.98 |
| NGLY1_2    | 64.74     | -0.027 | 0.45    | 0.69 |

Supplement: Supplementary file 5136 [file 1]

IPI00025050.1|WARS2

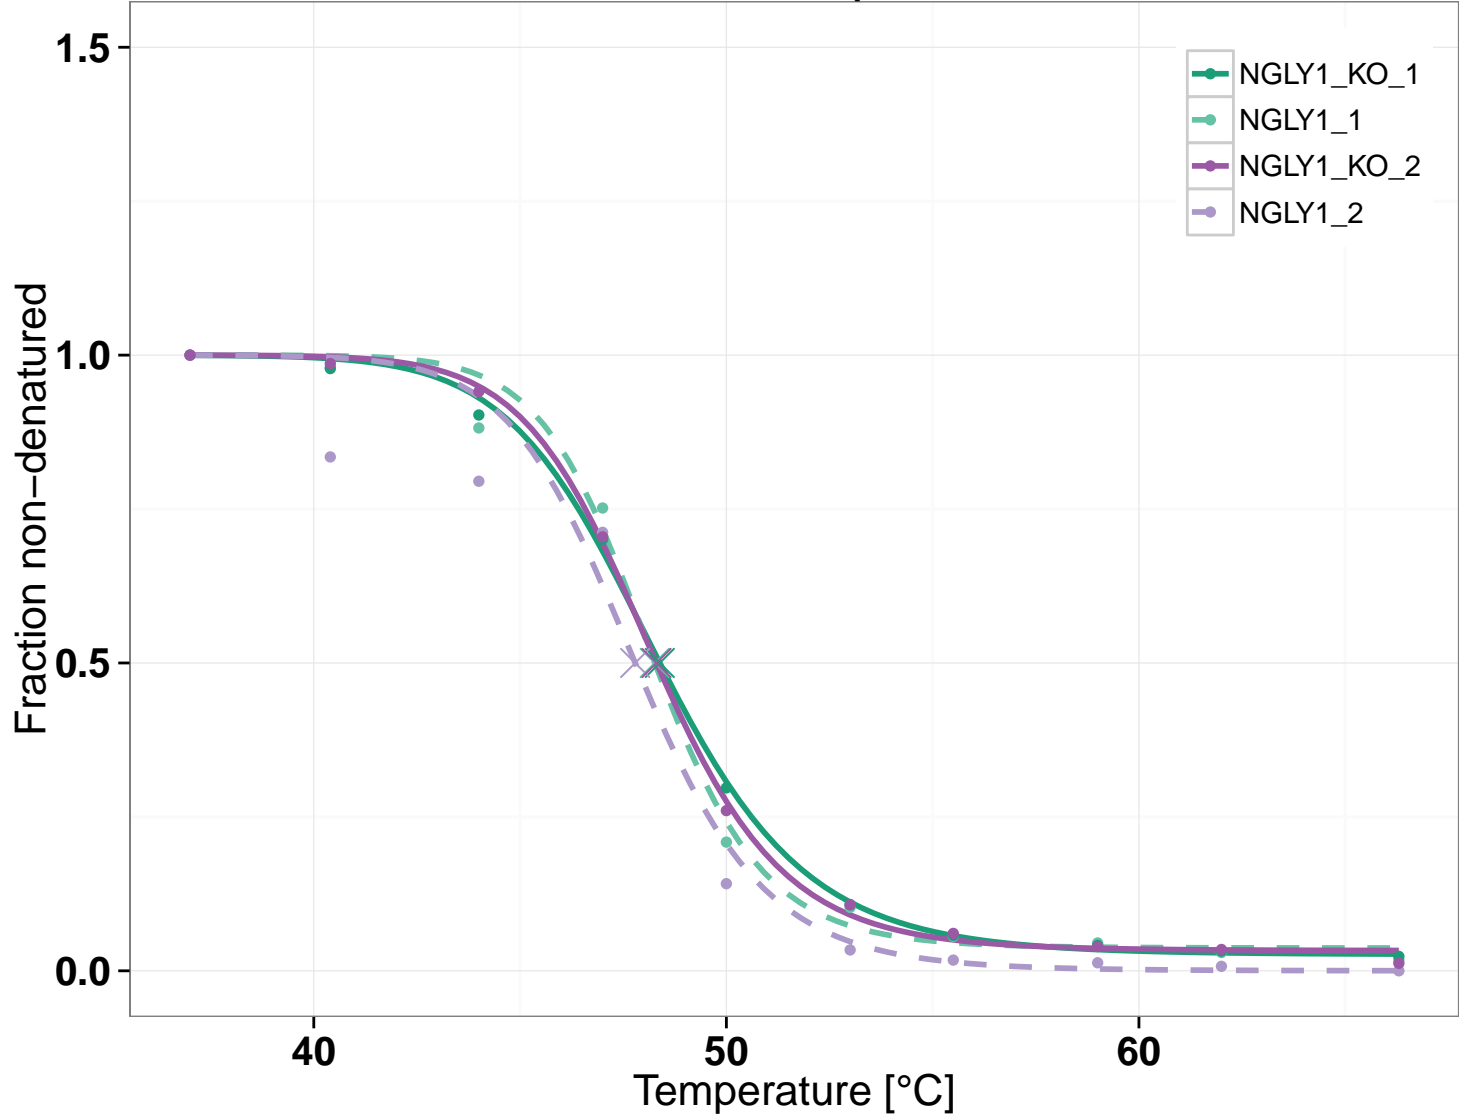

|            | meltPoint | slope | plateau | R2   |
|------------|-----------|-------|---------|------|
| NGLY1_KO_1 | 48.39     | -0.13 | 0.03    | 1    |
| NGLY1_1    | 48.26     | -0.18 | 0.04    | 0.99 |
| NGLY1_KO_2 | 48.31     | -0.15 | 0.03    | 1    |
| NGLY1_2    | 47.79     | -0.16 | 0       | 0.96 |

Supplement: Supplementary file 5137 [file 1]

IPI00028412.1|SSSCA1

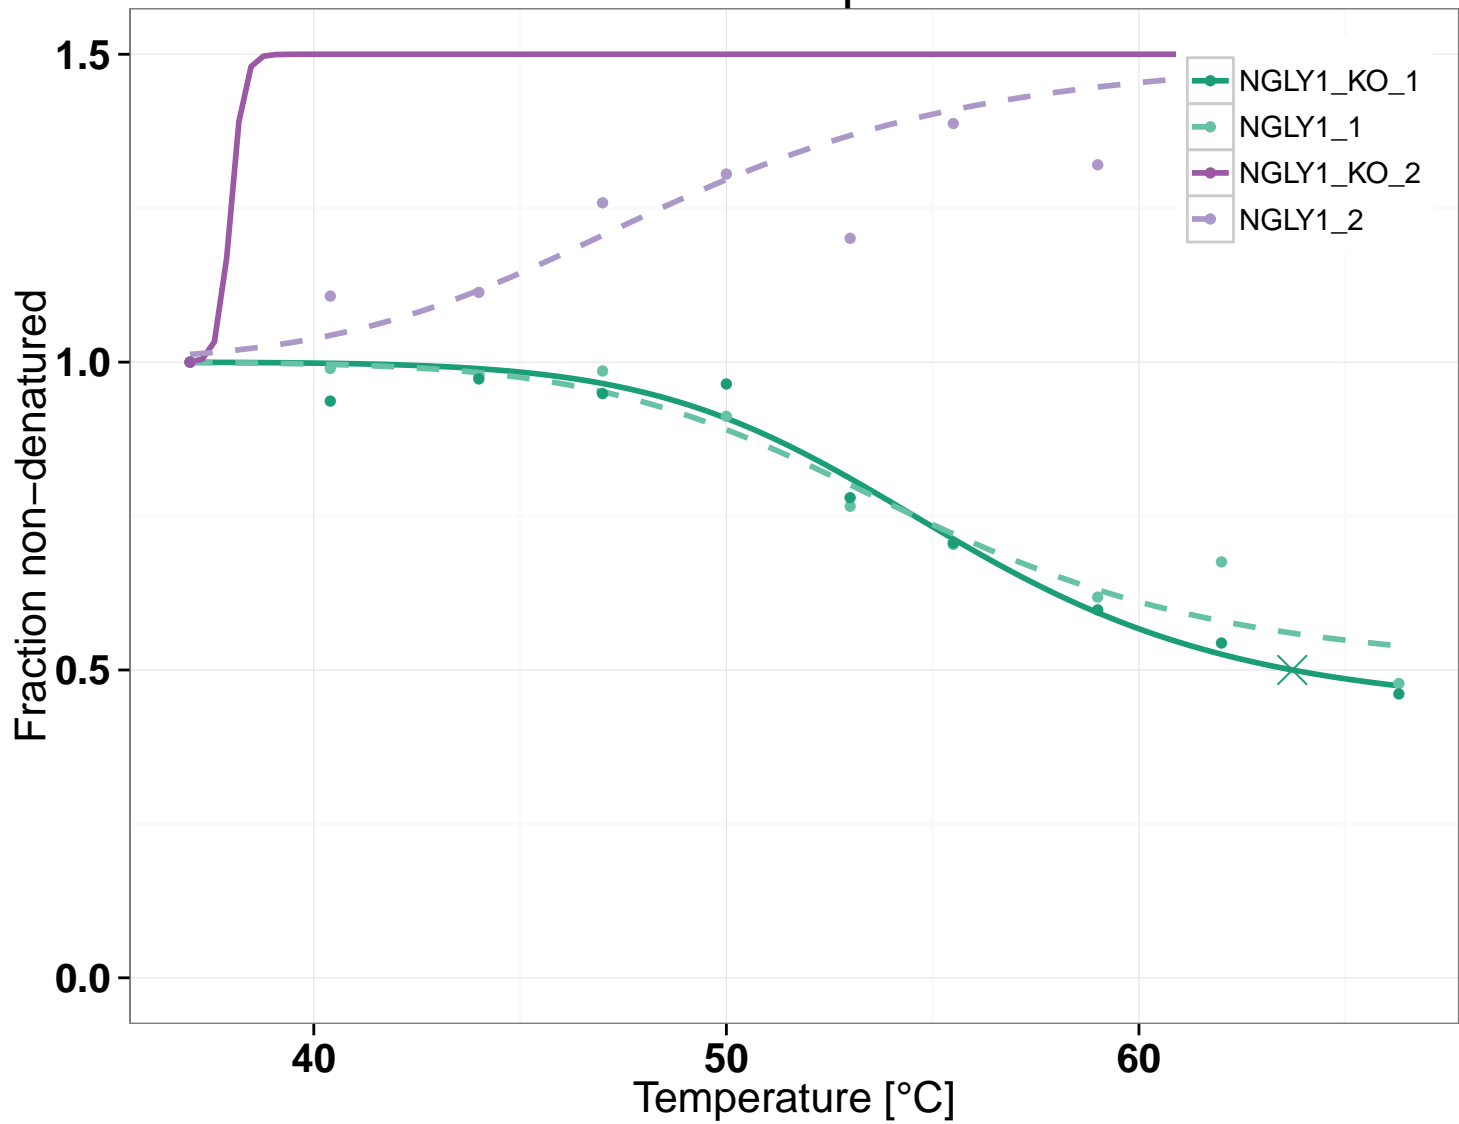

|            | meltPoint | slope  | plateau | R2    |
|------------|-----------|--------|---------|-------|
| NGLY1_KO_1 | 63.72     | -0.04  | 0.43    | 0.98  |
| NGLY1_1    | -         | -0.032 | 0.5     | 0.95  |
| NGLY1_KO_2 | -         | 0.82   | 1.5     | -4.25 |
| NGLY1_2    | -         | 0.031  | 1.5     | 0.64  |

Supplement: Supplementary file 5138 [file 1]

IPI00008240.2|MARS

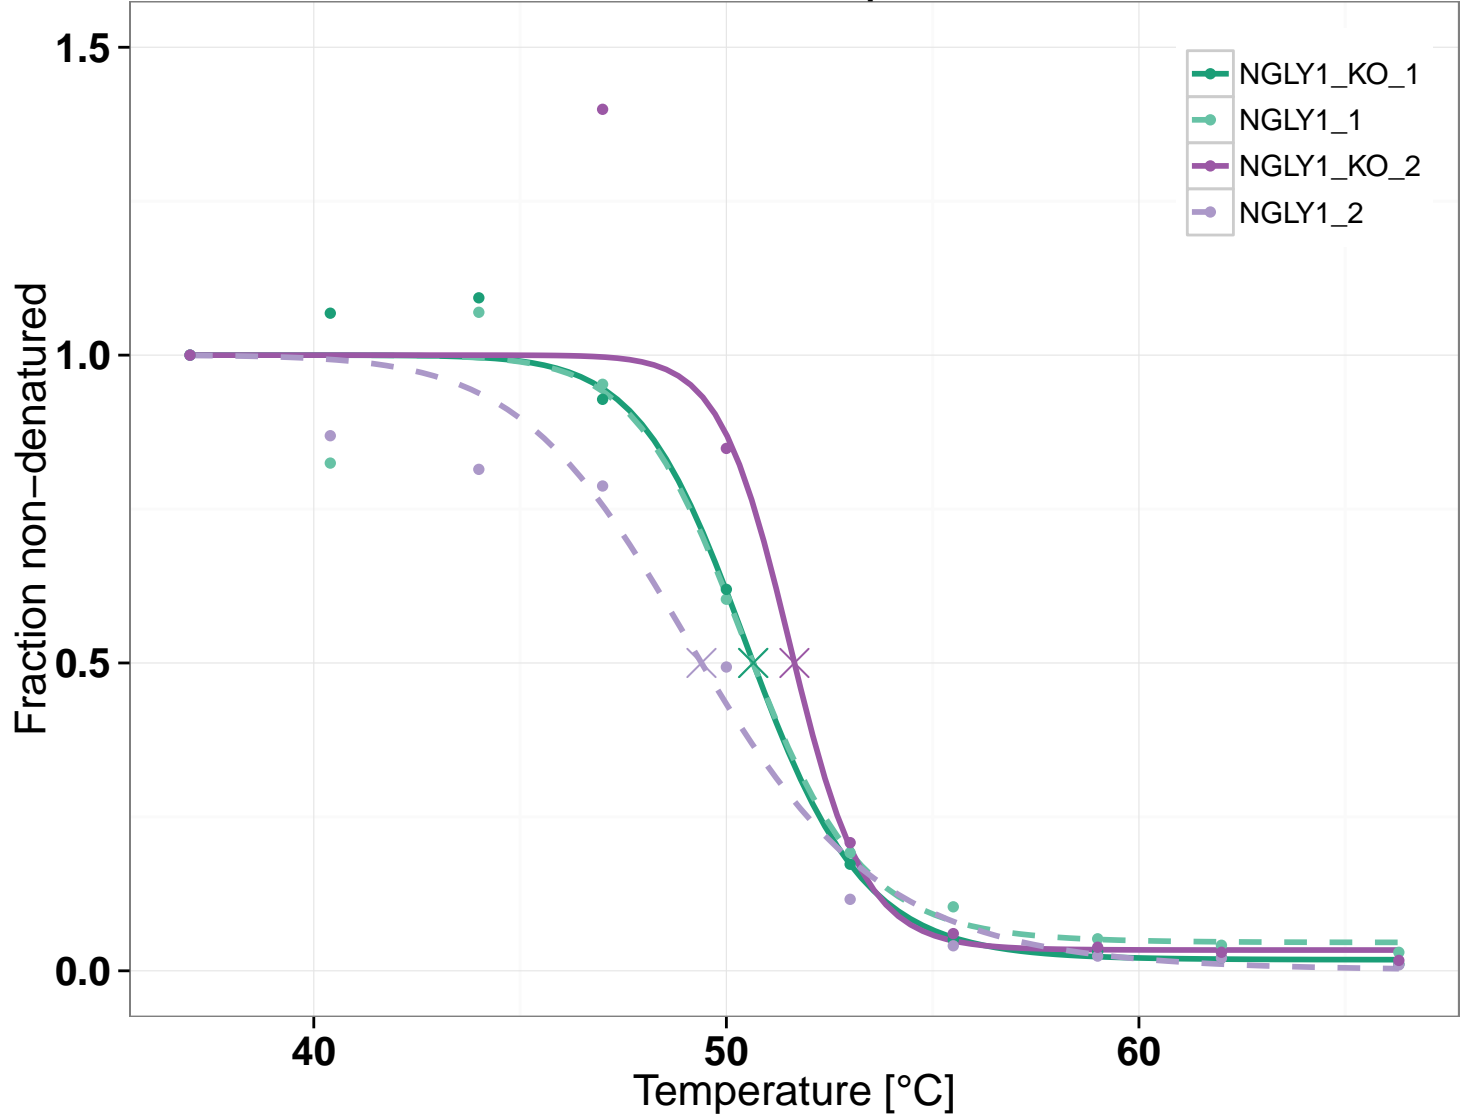

|            | meltPoint | slope | plateau | R2   |
|------------|-----------|-------|---------|------|
| NGLY1_KO_1 | 50.65     | -0.18 | 0.02    | 0.99 |
| NGLY1_1    | 50.65     | -0.17 | 0.05    | 0.98 |
| NGLY1_KO_2 | 51.65     | -0.28 | 0.03    | 0.82 |
| NGLY1_2    | 49.4      | -0.11 | 0       | 0.97 |

Supplement: Supplementary file 5139 [file 1]

# IPI00029623.1|PSMA6

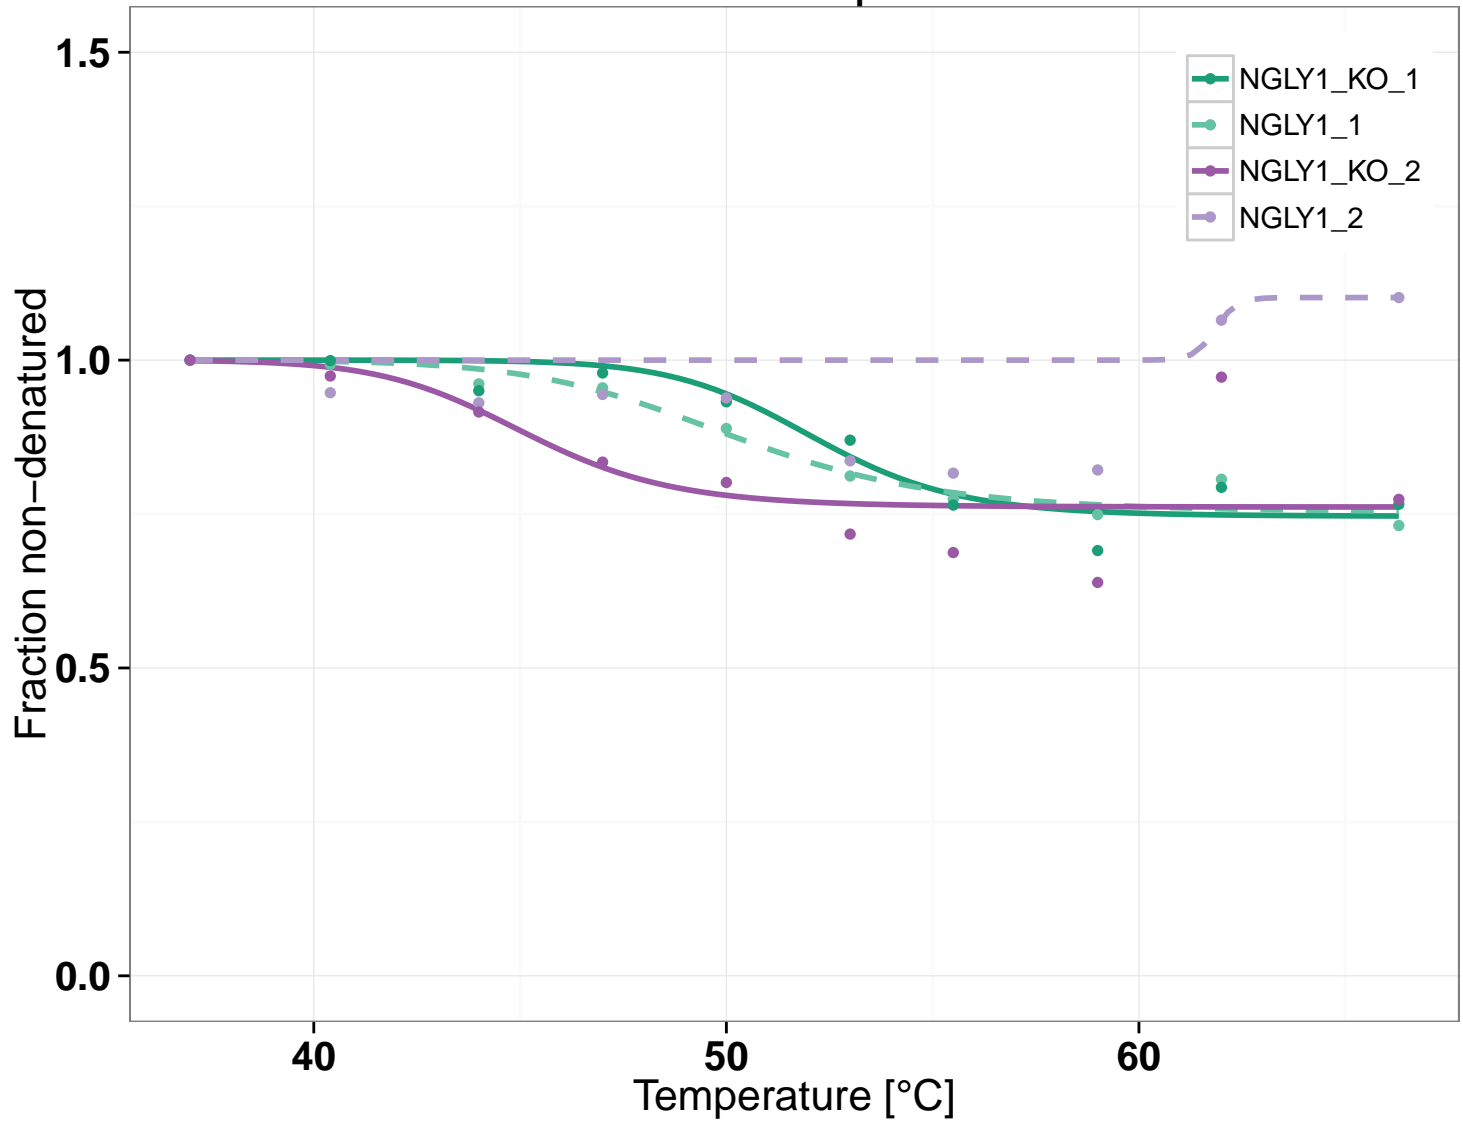

|            | meltPoint | slope  | plateau | R2    |
|------------|-----------|--------|---------|-------|
| NGLY1_KO_1 | —         | -0.037 | 0.75    | 0.91  |
| NGLY1_1    | —         | -0.025 | 0.75    | 0.96  |
| NGLY1_KO_2 | —         | -0.034 | 0.76    | 0.54  |
| NGLY1_2    | —         | 0.1    | 1.1     | -0.25 |

Supplement: Supplementary file 5140 [file 1]

IPI00411356.5|VPS4A

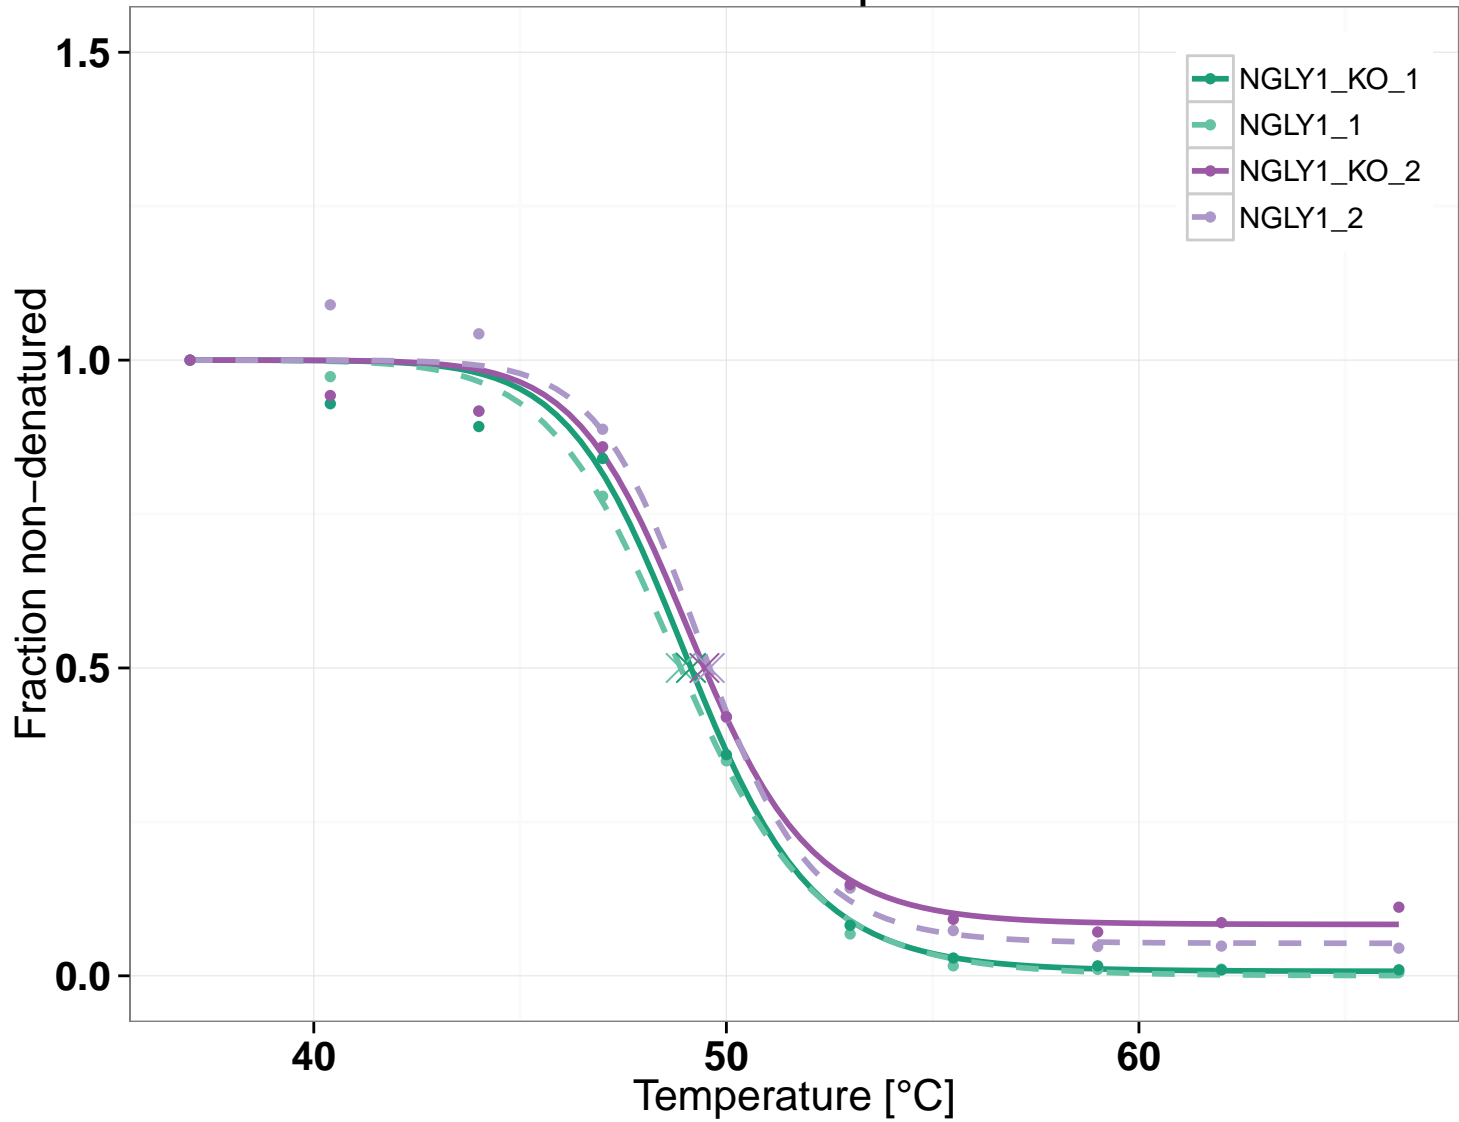

|            | meltPoint | slope | plateau | R2   |
|------------|-----------|-------|---------|------|
| NGLY1_KO_1 | 49.14     | -0.17 | 0.01    | 0.99 |
| NGLY1_1    | 48.89     | -0.15 | 0       | 1    |
| NGLY1_KO_2 | 49.47     | -0.16 | 0.08    | 0.99 |
| NGLY1_2    | 49.6      | -0.18 | 0.05    | 0.99 |

Supplement: Supplementary file 5141 [file 1]

# IPI00295447.2|XPR1

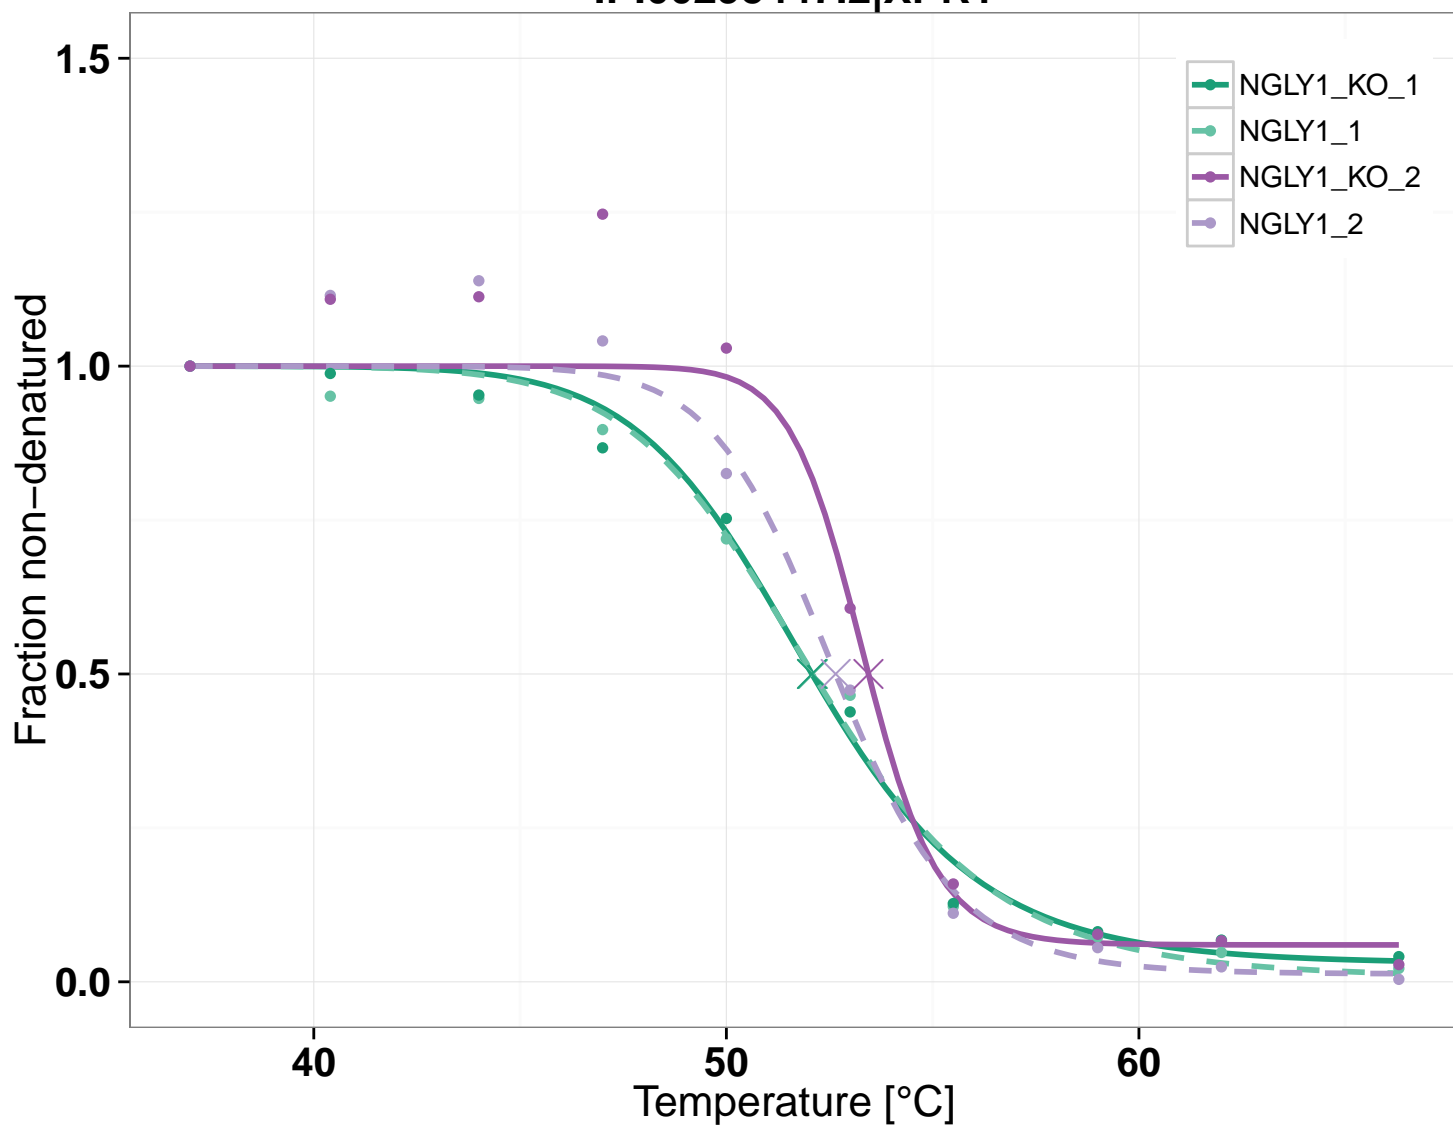

|            | meltPoint | slope | plateau | R2   |
|------------|-----------|-------|---------|------|
| NGLY1_KO_1 | 52.07     | -0.12 | 0.03    | 0.99 |
| NGLY1_1    | 52.1      | -0.11 | 0.01    | 0.99 |
| NGLY1_KO_2 | 53.44     | -0.26 | 0.06    | 0.96 |
| NGLY1_2    | 52.65     | -0.17 | 0.01    | 0.98 |

Supplement: Supplementary file 5142 [file 1]

# IPI00167985.5|ZNF579

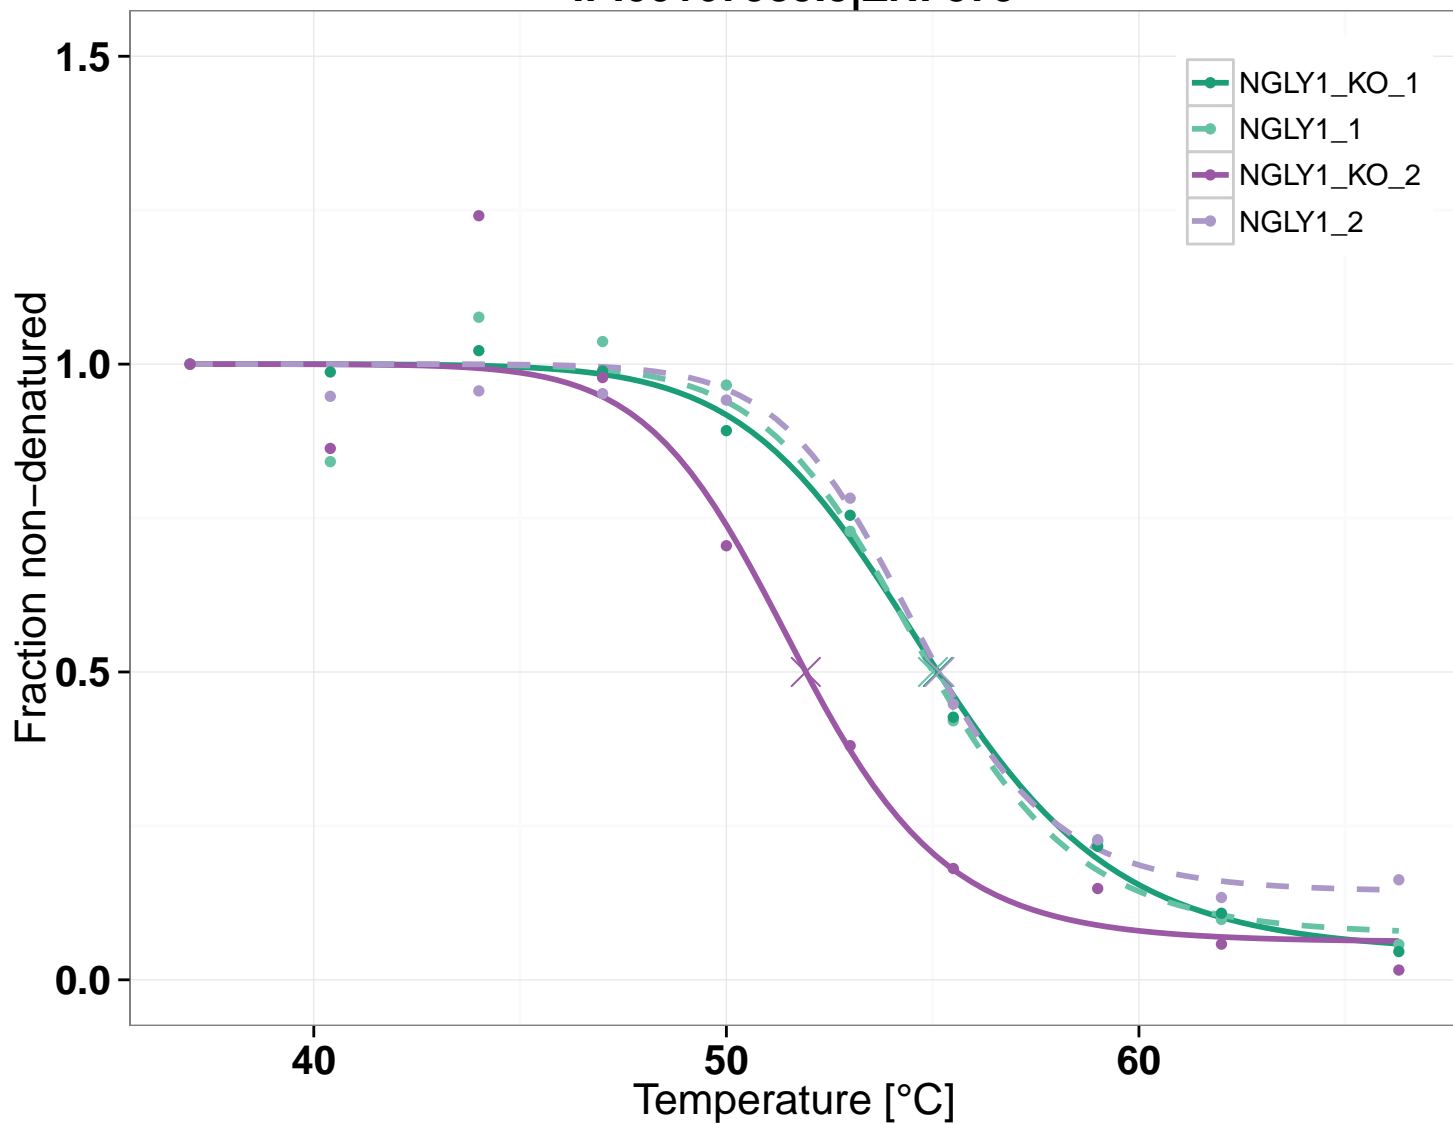

|            | meltPoint | slope | plateau | R2   |
|------------|-----------|-------|---------|------|
| NGLY1_KO_1 | 55.13     | -0.11 | 0.04    | 1    |
| NGLY1_1    | 55.01     | -0.12 | 0.07    | 0.98 |
| NGLY1_KO_2 | 51.93     | -0.13 | 0.06    | 0.95 |
| NGLY1_2    | 55.16     | -0.13 | 0.14    | 0.99 |

Supplement: Supplementary file 5143 [file 1]

# IPI00010232.1|PEX3

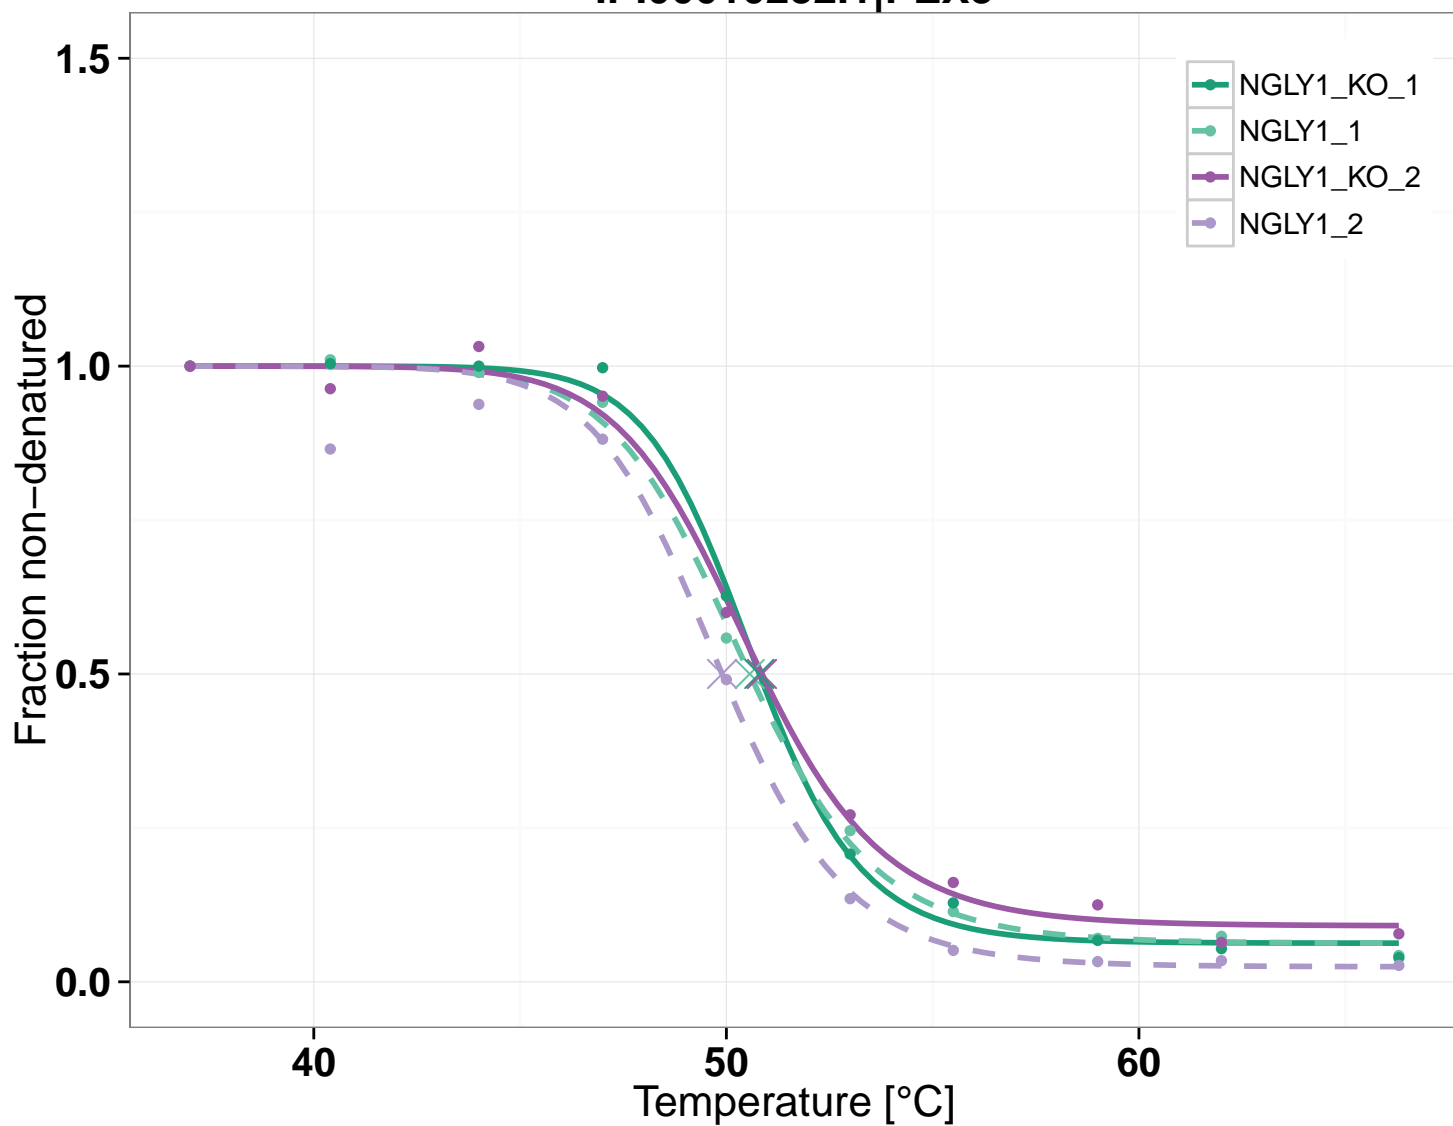

|            | meltPoint | slope | plateau | R2   |
|------------|-----------|-------|---------|------|
| NGLY1_KO_1 | 50.8      | -0.18 | 0.06    | 1    |
| NGLY1_1    | 50.57     | -0.15 | 0.06    | 1    |
| NGLY1_KO_2 | 50.86     | -0.14 | 0.09    | 1    |
| NGLY1_2    | 49.9      | -0.16 | 0.02    | 0.99 |

Supplement: Supplementary file 5144 [file 1]

# IPI00477661.1|ZFP91

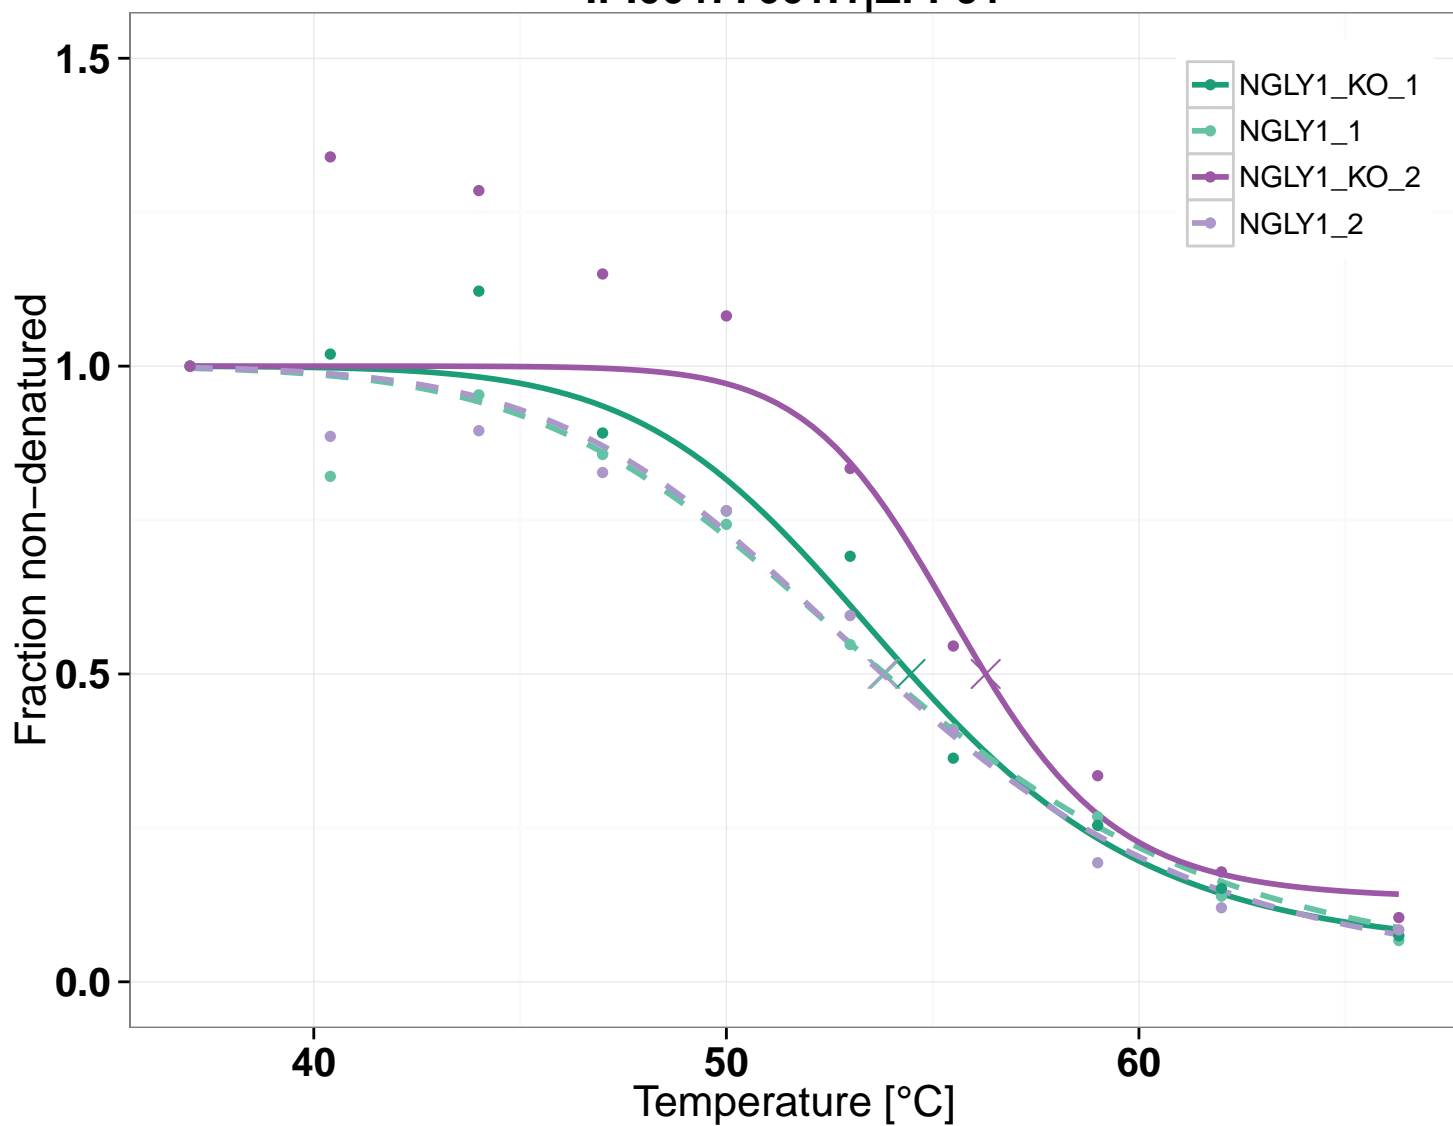

|            | meltPoint | slope  | plateau | R2   |
|------------|-----------|--------|---------|------|
| NGLY1_KO_1 | 54.46     | -0.077 | 0.05    | 0.97 |
| NGLY1_1    | 53.85     | -0.059 | 0       | 0.97 |
| NGLY1_KO_2 | 56.29     | -0.12  | 0.13    | 0.87 |
| NGLY1_2    | 53.79     | -0.063 | 0       | 0.98 |

Supplement: Supplementary file 5145 [file 1]

IPI00477763.4|CDC42BPB

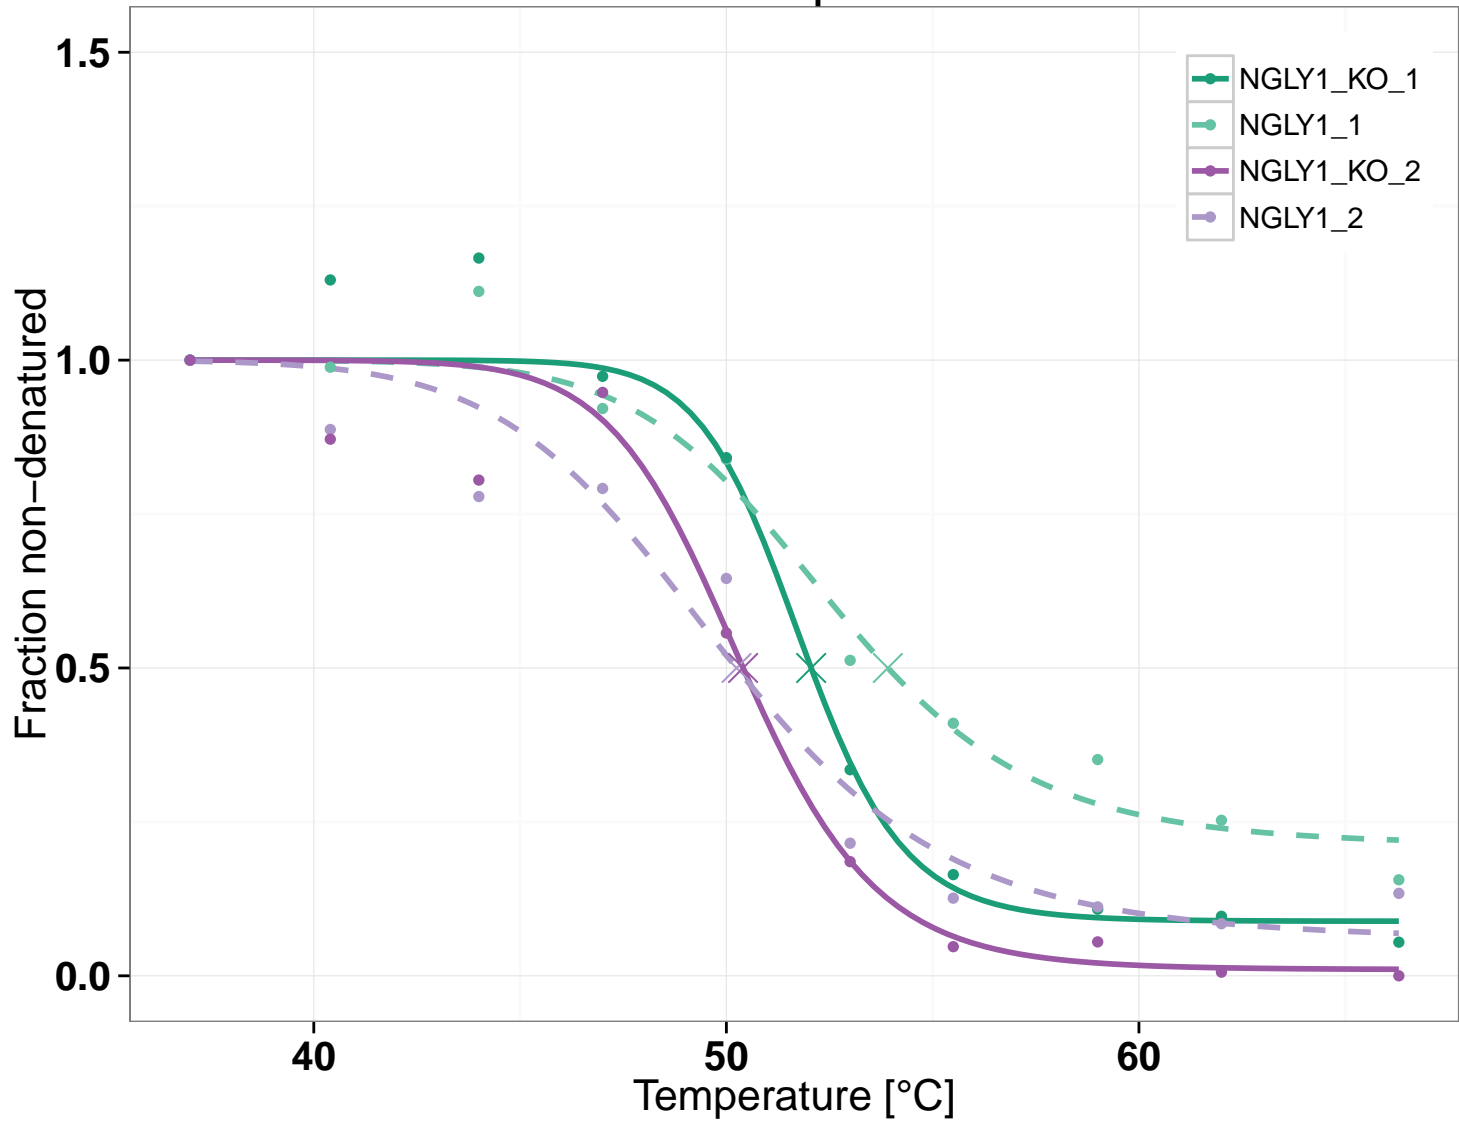

|            | meltPoint | slope  | plateau | R2   |
|------------|-----------|--------|---------|------|
| NGLY1_KO_1 | 52.05     | -0.18  | 0.09    | 0.98 |
| NGLY1_1    | 53.91     | -0.082 | 0.21    | 0.97 |
| NGLY1_KO_2 | 50.41     | -0.15  | 0.01    | 0.97 |
| NGLY1_2    | 50.25     | -0.086 | 0.06    | 0.95 |

Supplement: Supplementary file 5146 [file 1]

# IPI00745433.2|EIF2C2

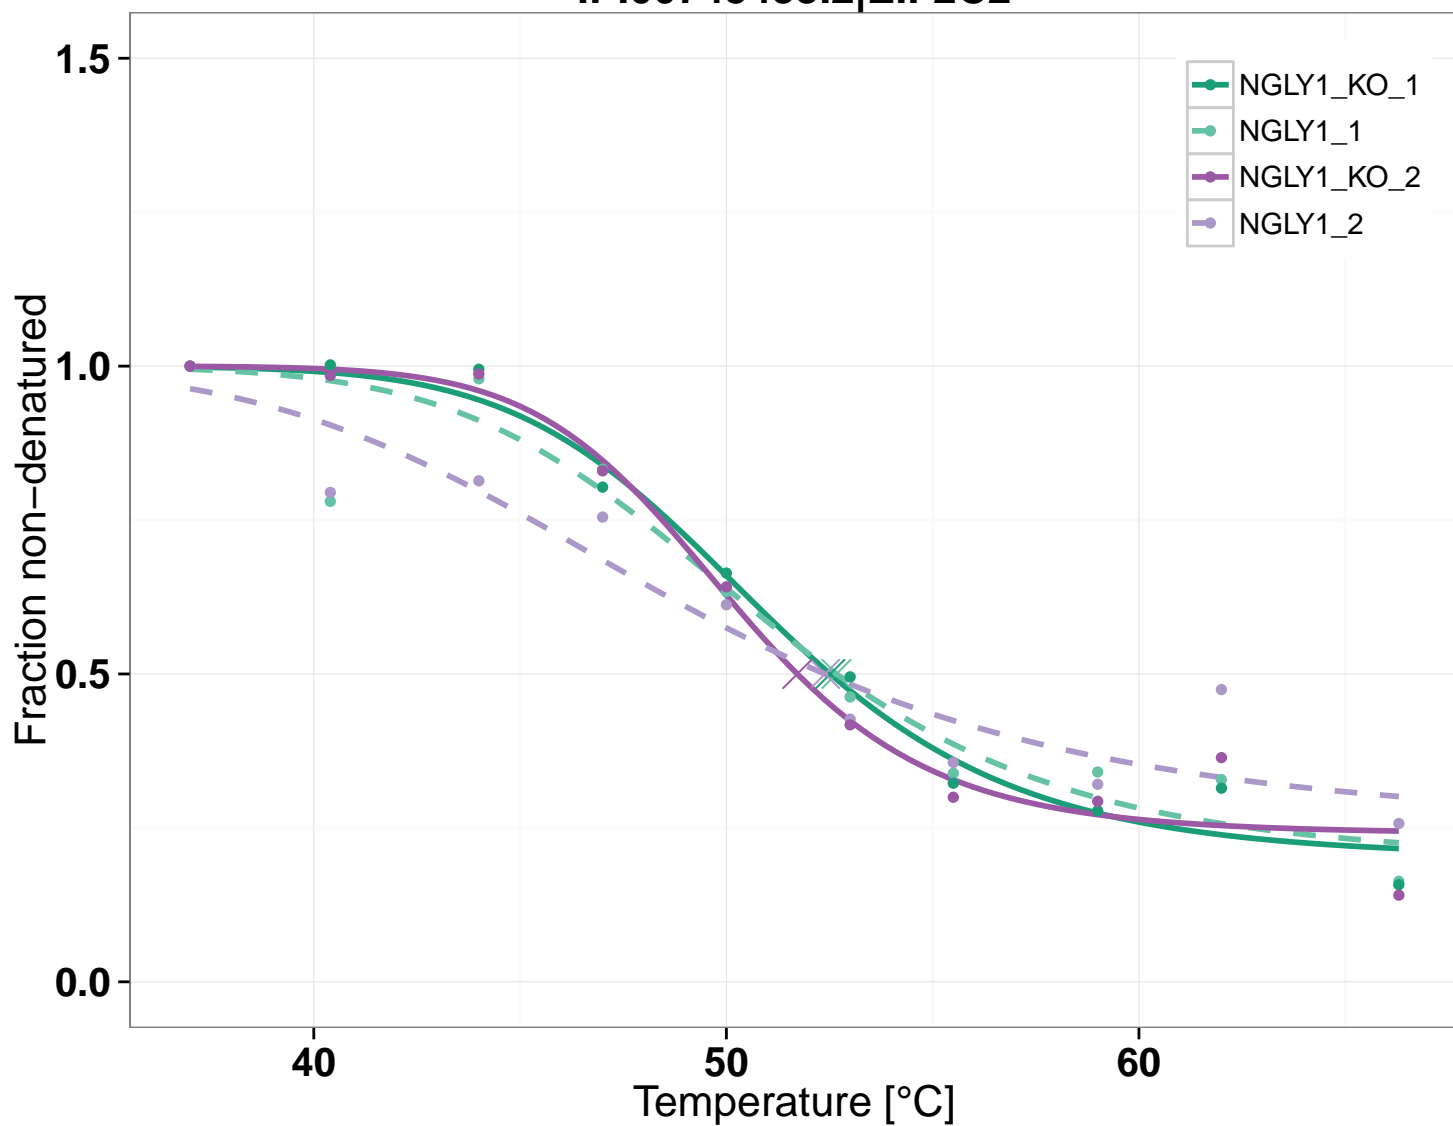

|            | meltPoint | slope  | plateau | R2   |
|------------|-----------|--------|---------|------|
| NGLY1_KO_1 | 52.52     | -0.066 | 0.2     | 0.98 |
| NGLY1_1    | 52.67     | -0.055 | 0.19    | 0.93 |
| NGLY1_KO_2 | 51.72     | -0.08  | 0.24    | 0.97 |
| NGLY1_2    | 52.39     | -0.038 | 0.24    | 0.91 |

Supplement: Supplementary file 5147 [file 1]

# IPI00184772.6|DOCK6

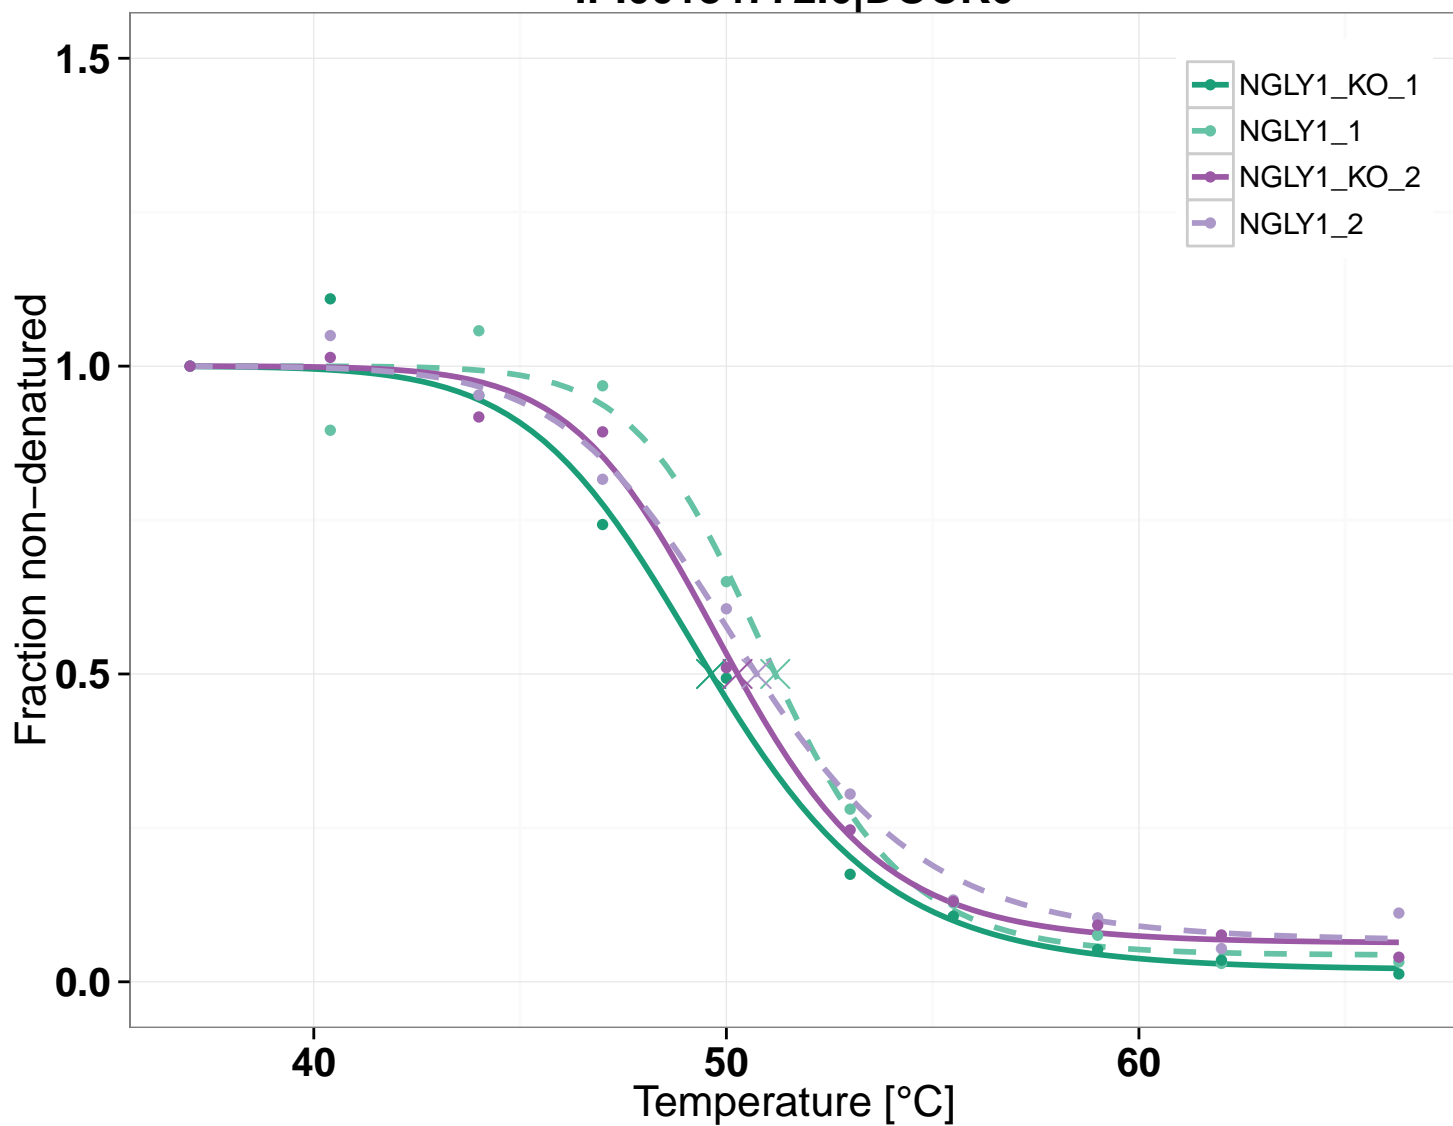

|            | meltPoint | slope | plateau | R2   |
|------------|-----------|-------|---------|------|
| NGLY1_KO_1 | 49.63     | -0.11 | 0.02    | 0.99 |
| NGLY1_1    | 51.19     | -0.15 | 0.04    | 0.99 |
| NGLY1_KO_2 | 50.27     | -0.12 | 0.06    | 1    |
| NGLY1_2    | 50.73     | -0.11 | 0.07    | 0.99 |

Supplement: Supplementary file 5148 [file 1]

IPI00290562.4|NFIL3

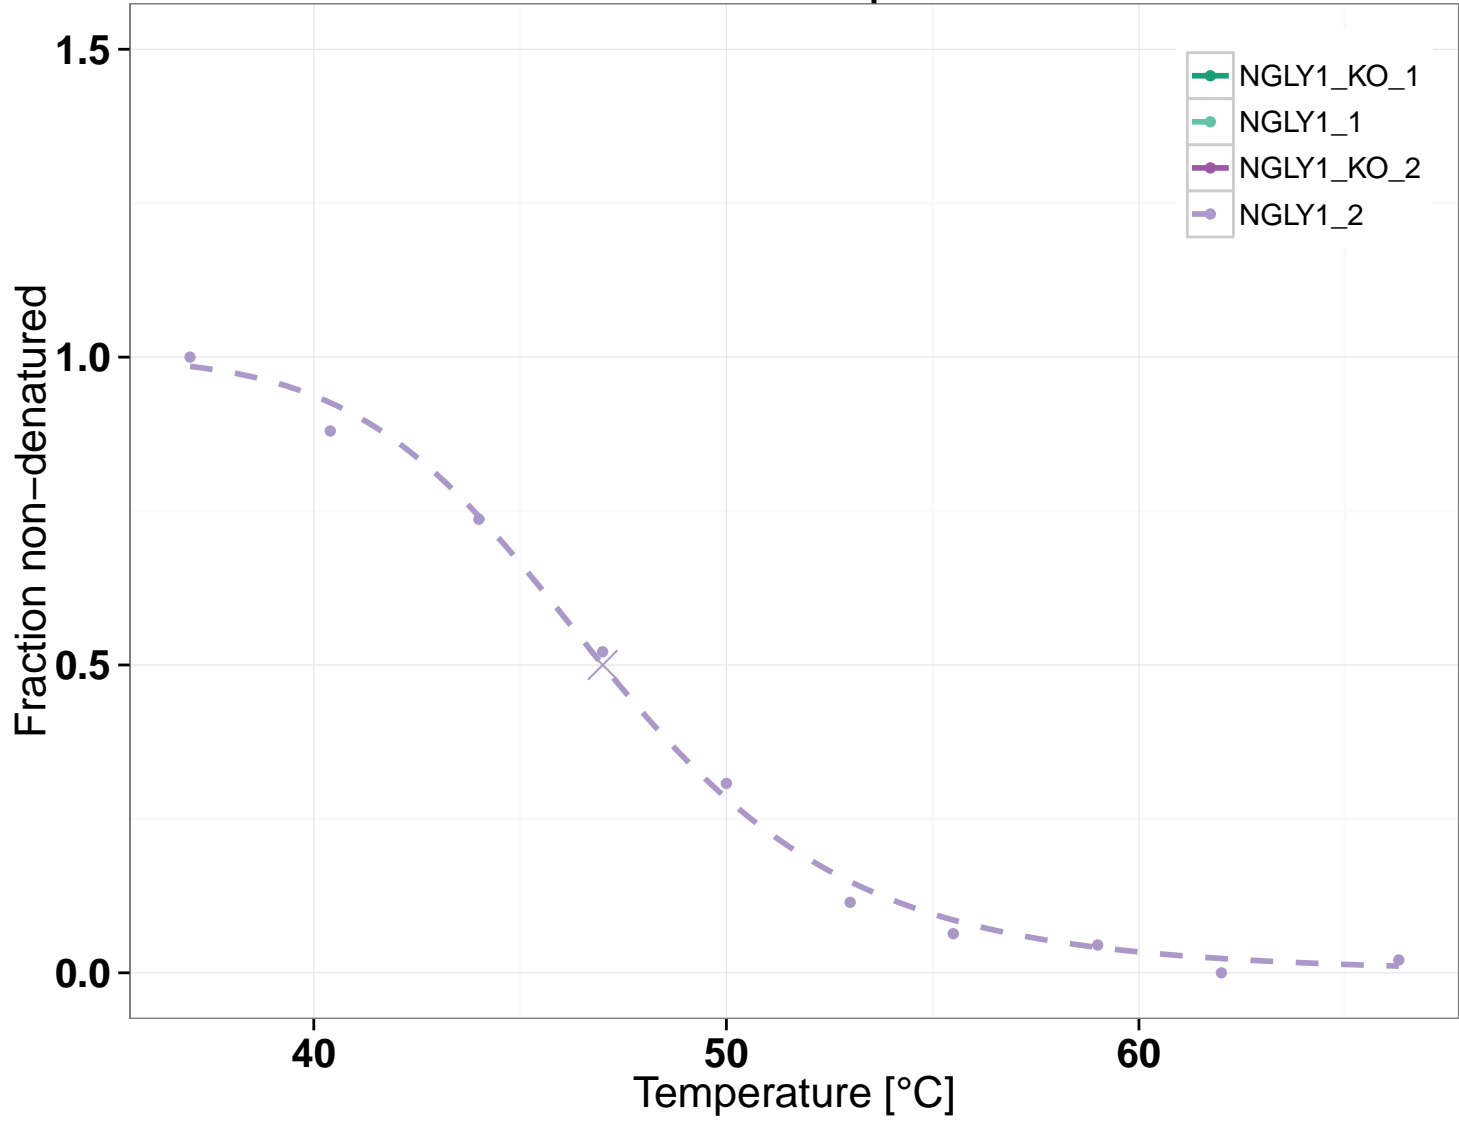

|            | meltPoint | slope  | plateau | R2 |
|------------|-----------|--------|---------|----|
| NGLY1_KO_1 | —         | —      | —       | —  |
| NGLY1_1    | —         | —      | —       | —  |
| NGLY1_KO_2 | —         | —      | —       | —  |
| NGLY1_2    | 47        | −0.084 | 0       | 1  |

Supplement: Supplementary file 5149 [file 1]

# IPI00024305.1|SMAD3

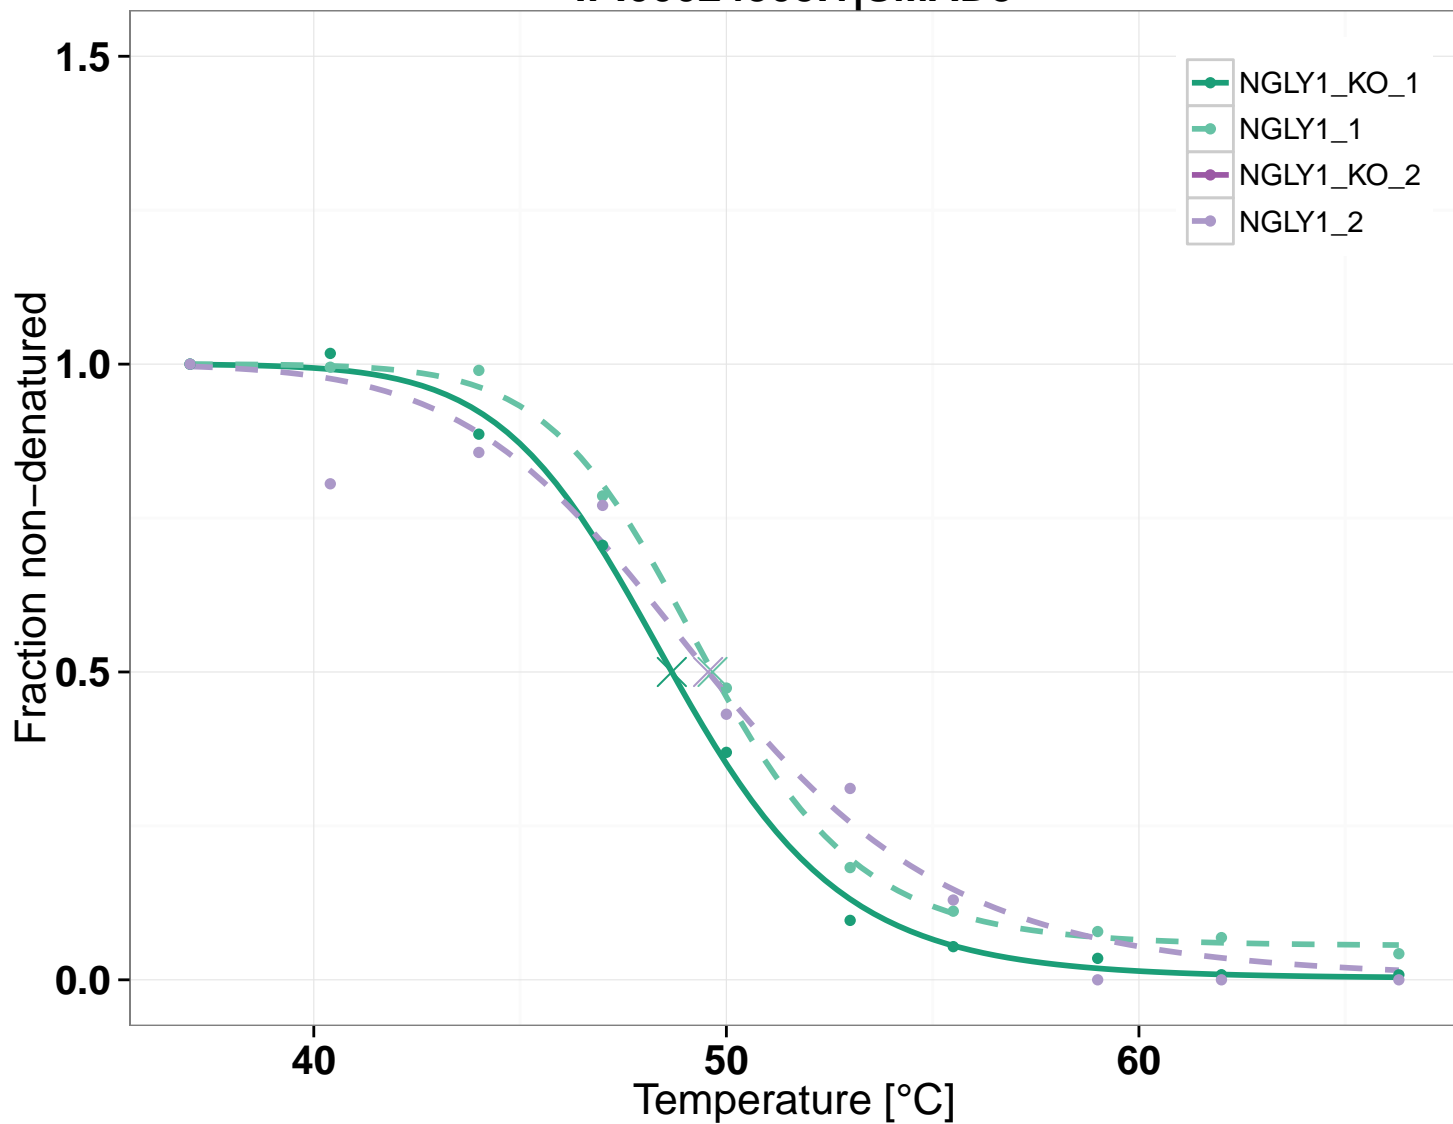

Supplement: Supplementary file 5150 [file 1]

# IPI00783058.1|RBCK1

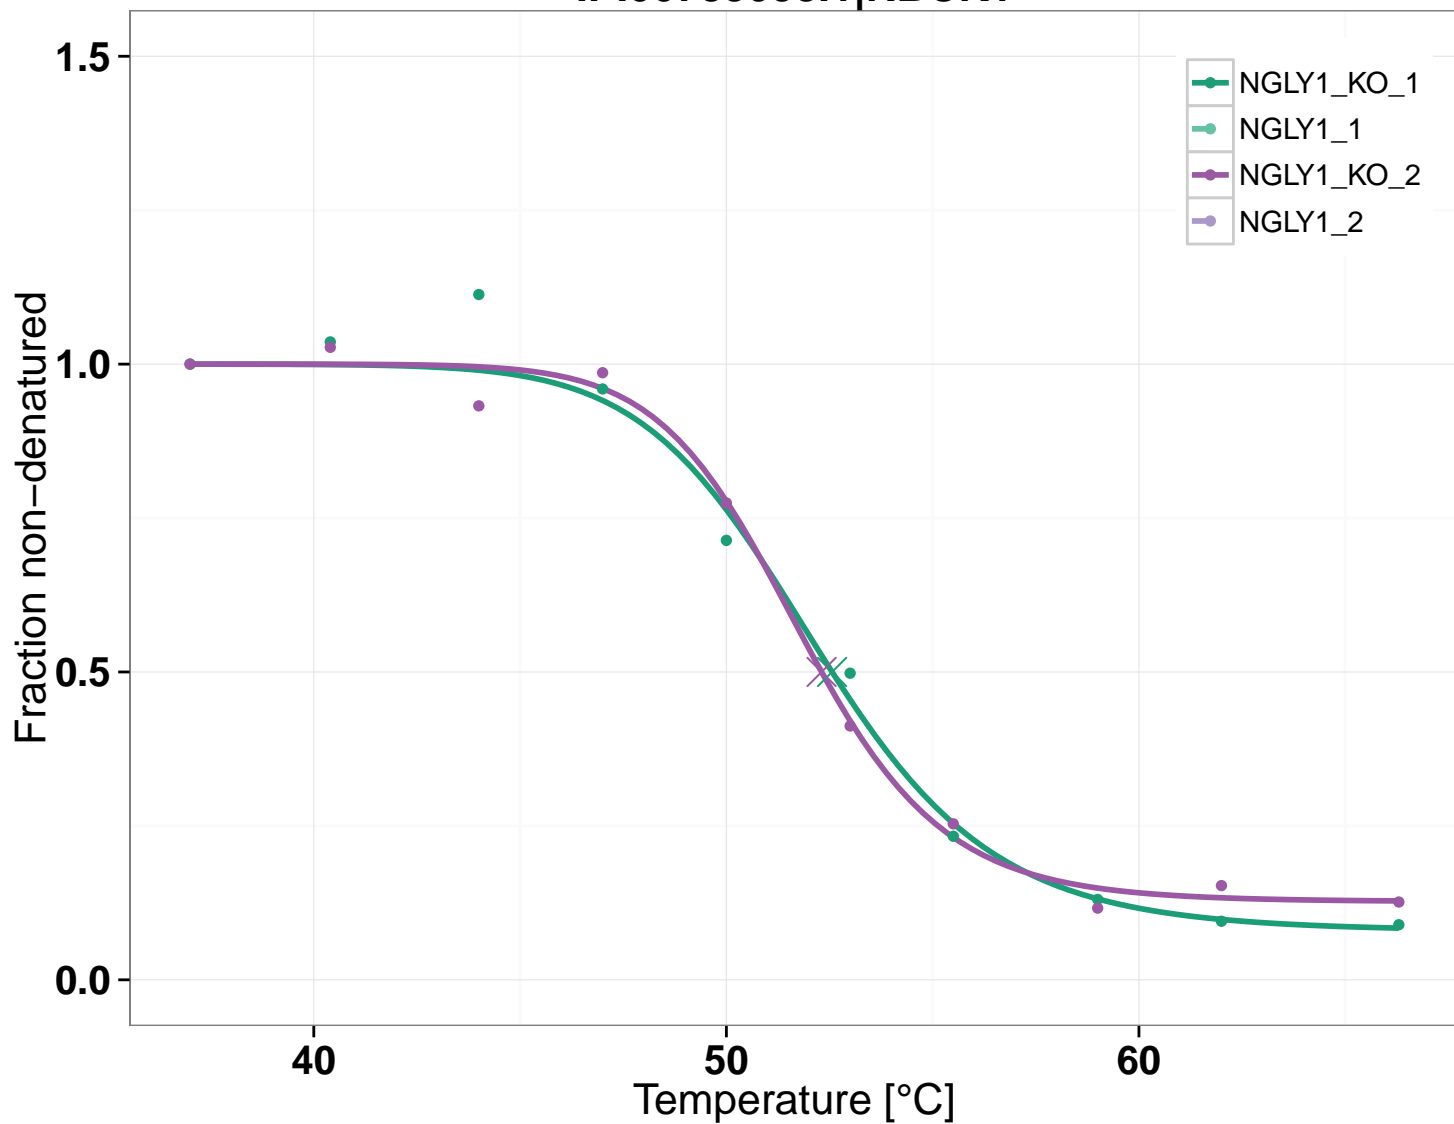

|            | meltPoint | slope | plateau | R2   |
|------------|-----------|-------|---------|------|
| NGLY1_KO_1 | 52.56     | -0.11 | 0.08    | 0.99 |
| NGLY1_1    | -         | -     | -       | -    |
| NGLY1_KO_2 | 52.31     | -0.13 | 0.13    | 0.99 |
| NGLY1_2    | -         | -     | -       | -    |

Supplement: Supplementary file 5151 [file 1]

IPI00060314.3|TBC1D20

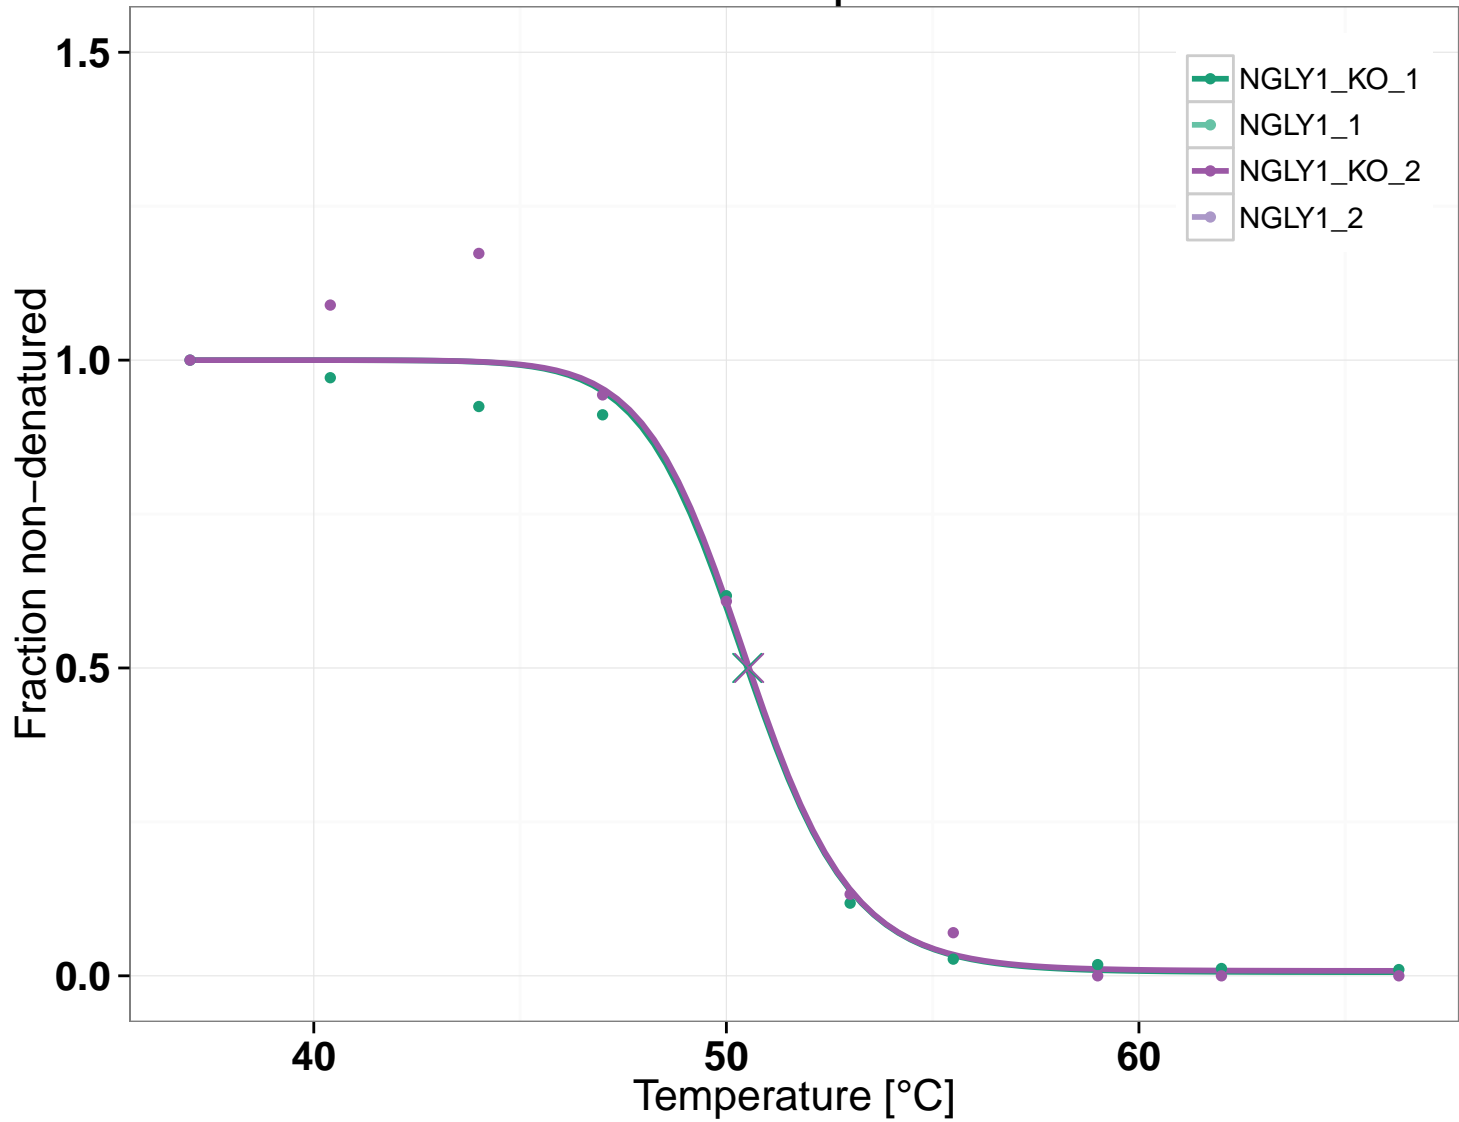

|            | meltPoint | slope | plateau | R2   |
|------------|-----------|-------|---------|------|
| NGLY1_KO_1 | 50.51     | -0.19 | 0.01    | 1    |
| NGLY1_1    | -         | -     | -       | -    |
| NGLY1_KO_2 | 50.55     | -0.2  | 0.01    | 0.98 |
| NGLY1_2    | -         | -     | -       | -    |

Supplement: Supplementary file 5152 [file 1]

IPI00026060.3|9 KDA PROTEIN.

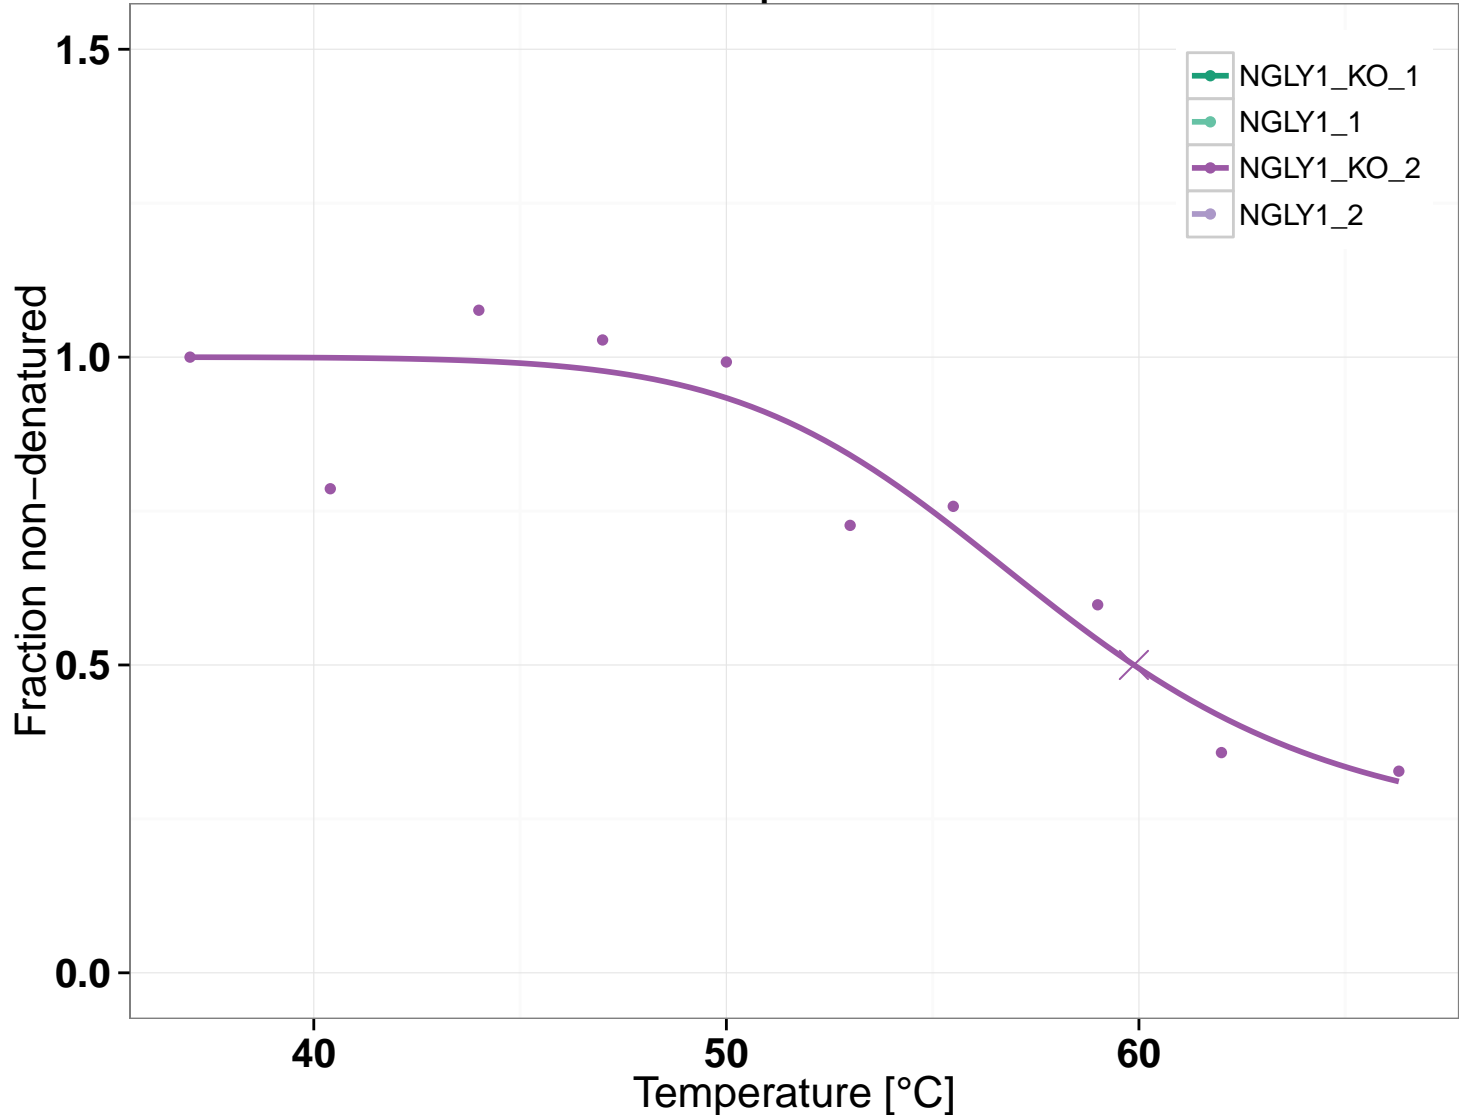

|            | meltPoint | slope  | plateau | R2   |
|------------|-----------|--------|---------|------|
| NGLY1_KO_1 | -         | -      | -       | -    |
| NGLY1_1    | -         | -      | -       | -    |
| NGLY1_KO_2 | 59.88     | -0.053 | 0.22    | 0.88 |
| NGLY1_2    | -         | -      | -       | -    |

Supplement: Supplementary file 5153 [file 1]

IPI00794900.1|MTHFD1

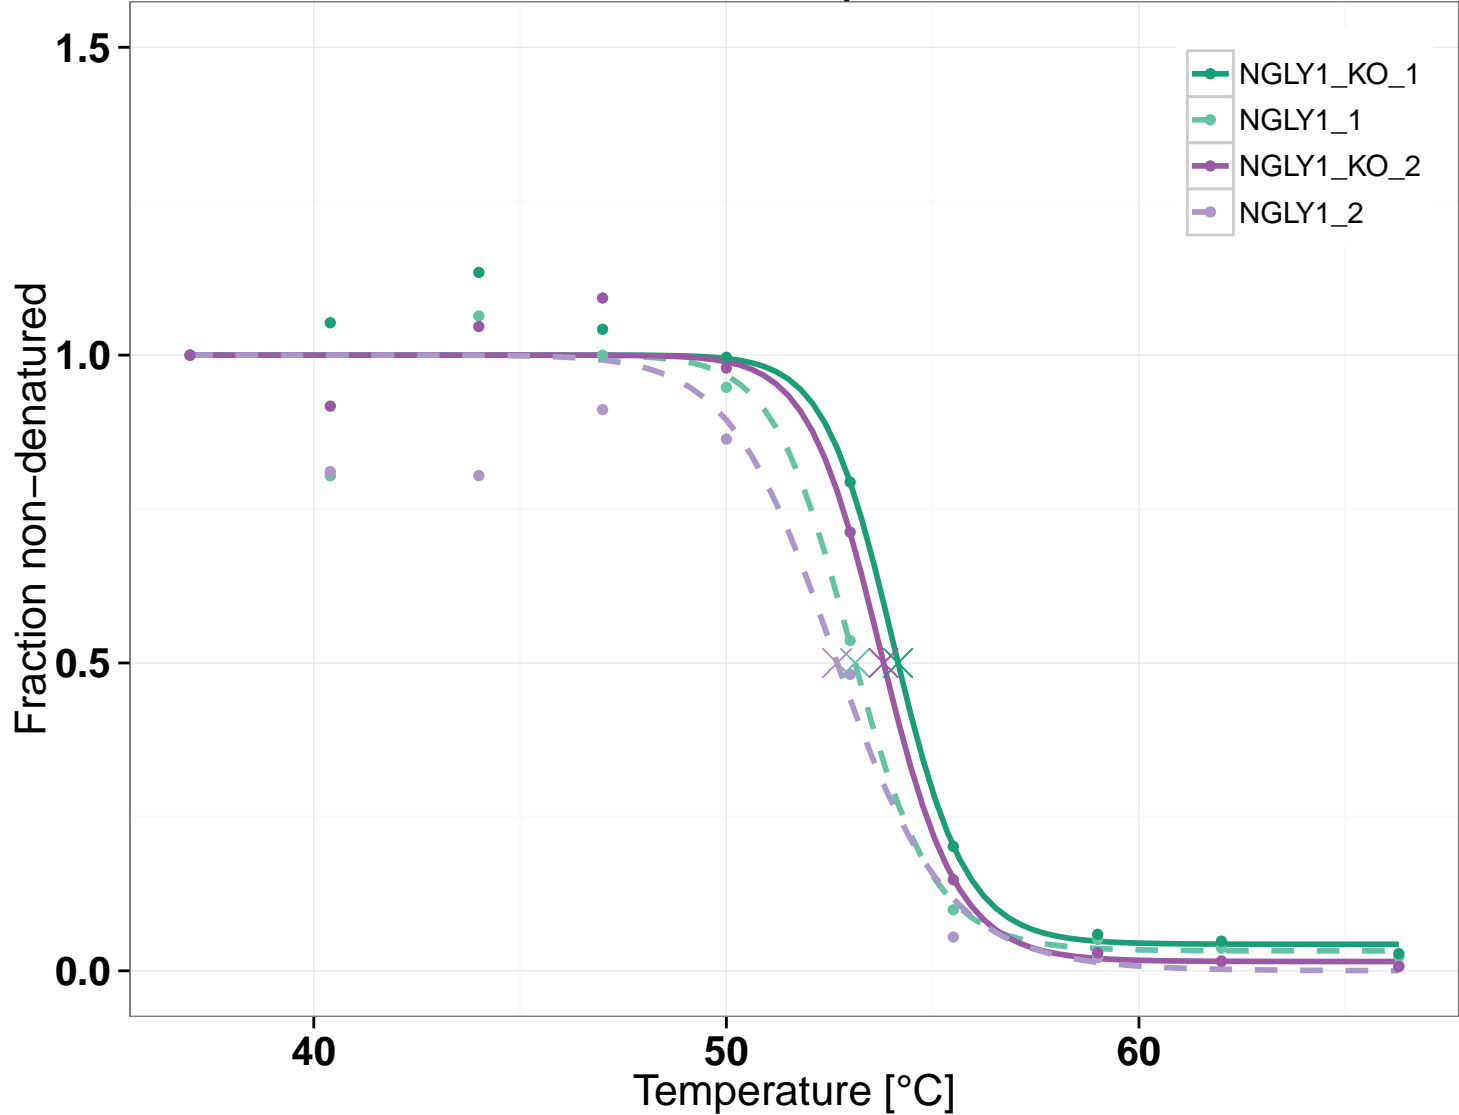

|            | meltPoint | slope | plateau | R2   |
|------------|-----------|-------|---------|------|
| NGLY1_KO_1 | 54.16     | -0.28 | 0.04    | 0.99 |
| NGLY1_1    | 53.12     | -0.25 | 0.03    | 0.98 |
| NGLY1_KO_2 | 53.81     | -0.27 | 0.02    | 0.99 |
| NGLY1_2    | 52.69     | -0.19 | 0       | 0.95 |

Supplement: Supplementary file 5154 [file 1]

IPI00007730.1|C14ORF1

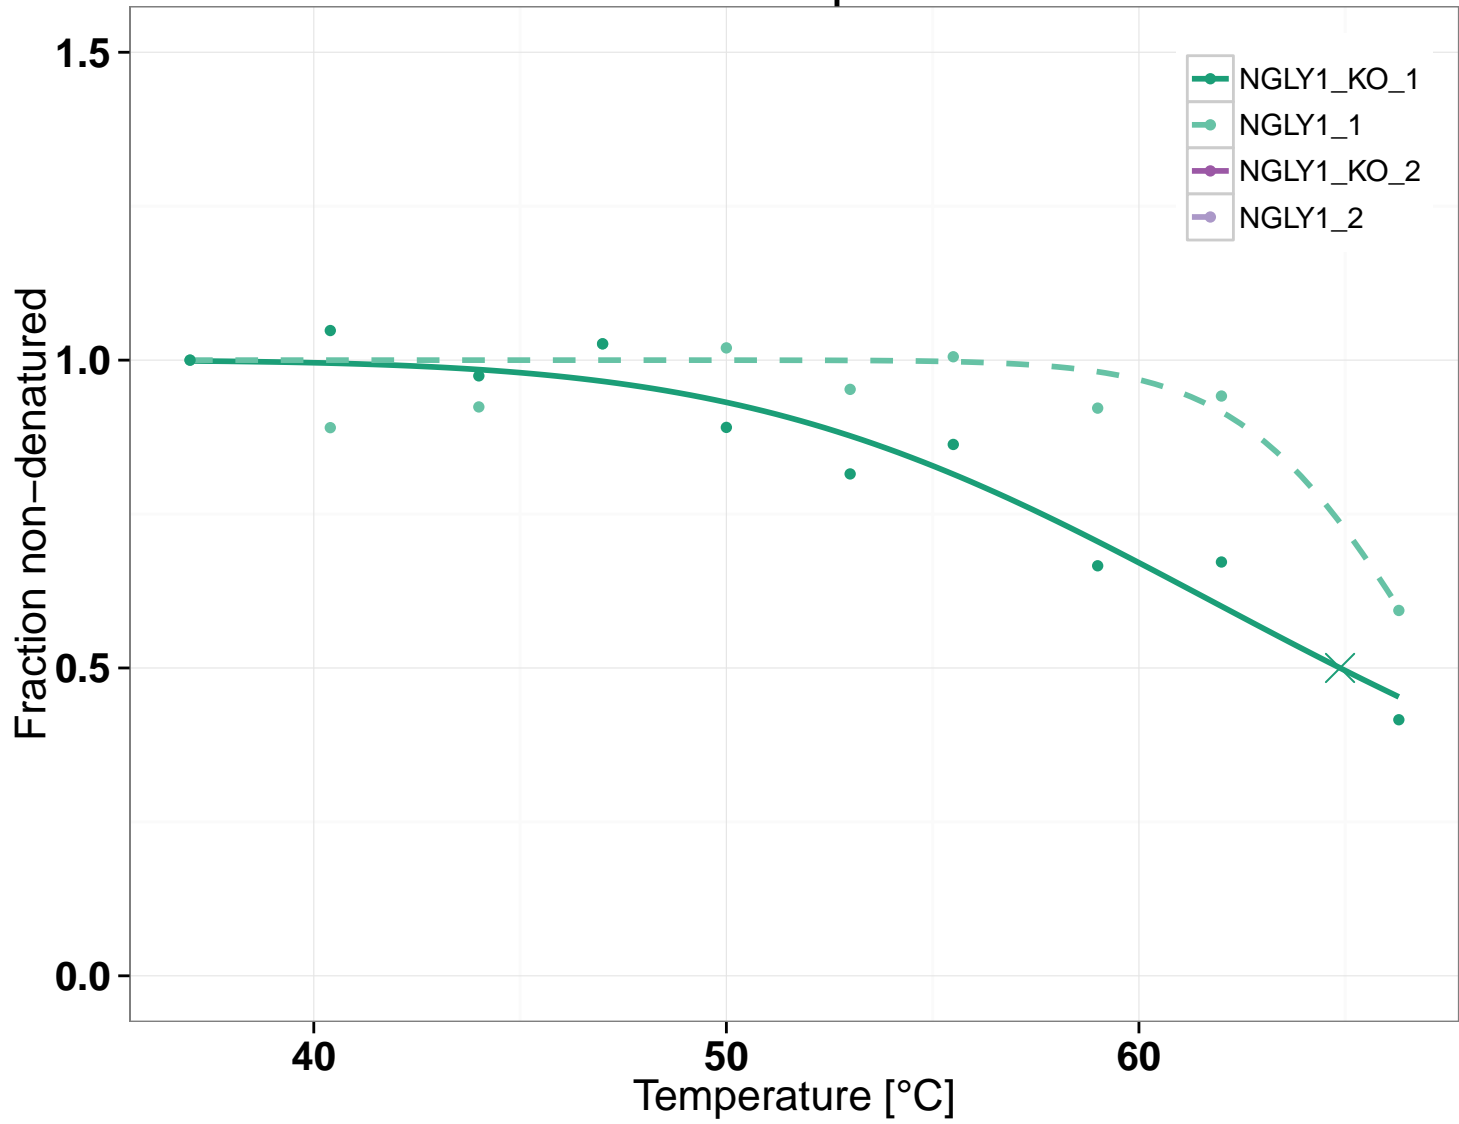

|            | meltPoint | slope  | plateau | R2   |
|------------|-----------|--------|---------|------|
| NGLY1_KO_1 | 64.87     | -0.036 | 0       | 0.94 |
| NGLY1_1    | -         | -      | 0       | 0.82 |
| NGLY1_KO_2 | -         | -      | -       | -    |
| NGLY1_2    | -         | -      | -       | -    |

Supplement: Supplementary file 5155 [file 1]

# IPI00743879.1|KLC4

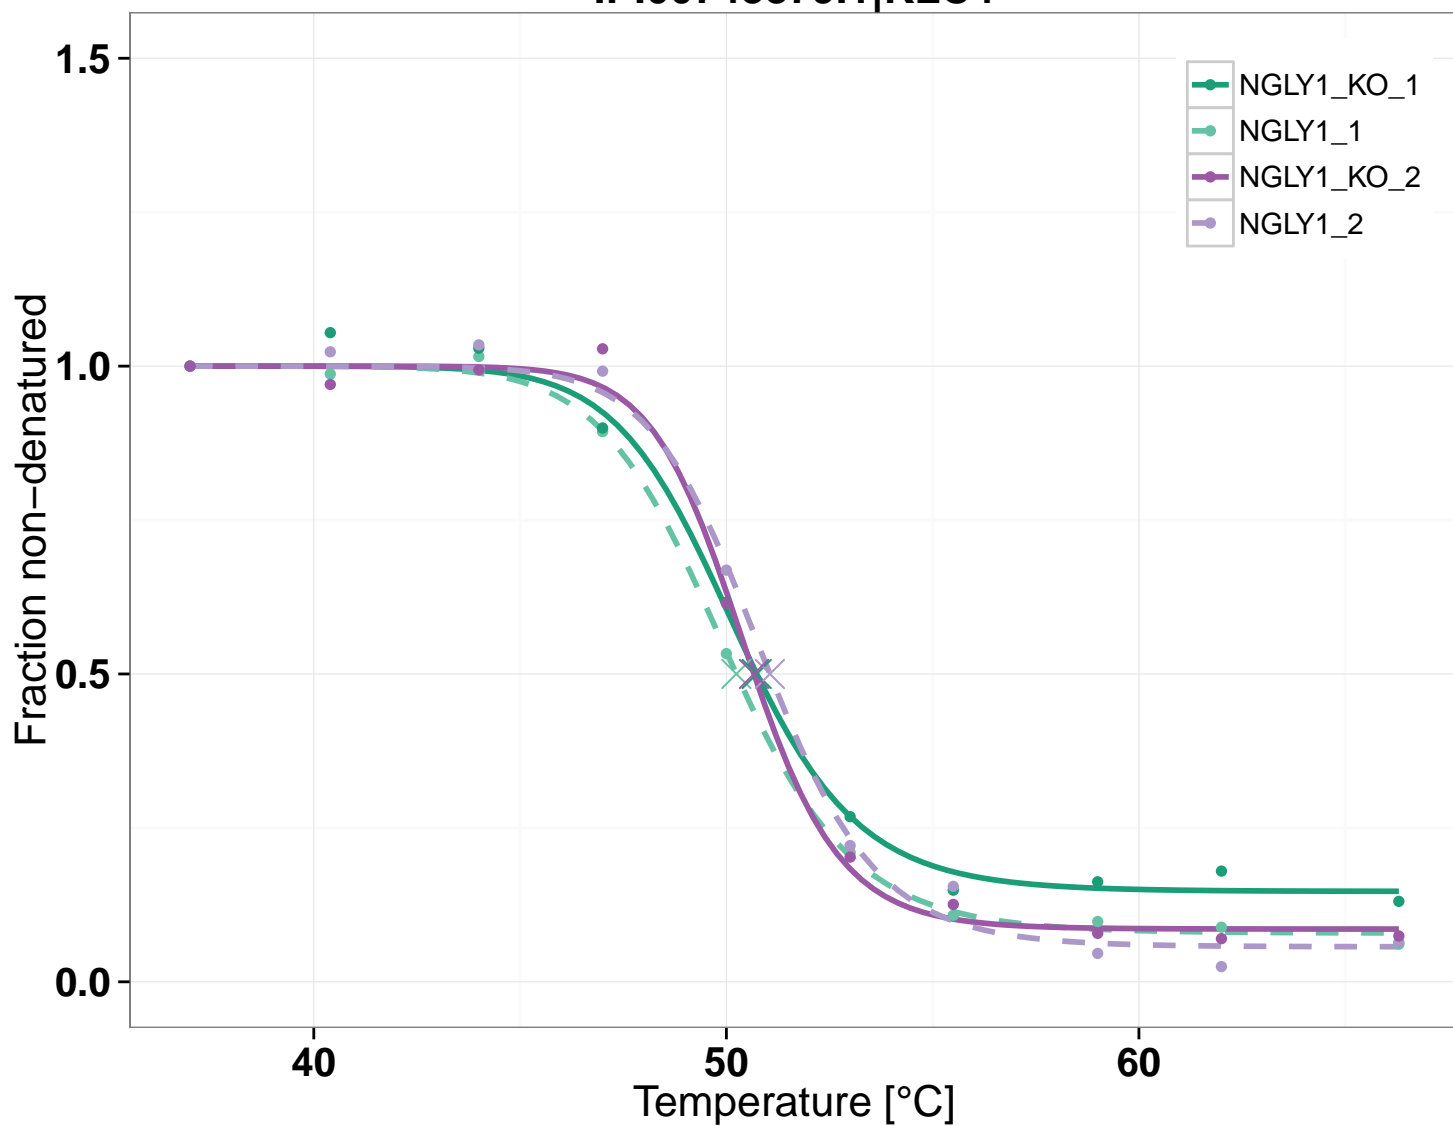

|            | meltPoint | slope | plateau | R2 |
|------------|-----------|-------|---------|----|
| NGLY1_KO_1 | 50.74     | -0.15 | 0.15    | 1  |
| NGLY1_1    | 50.24     | -0.15 | 0.08    | 1  |
| NGLY1_KO_2 | 50.67     | -0.2  | 0.09    | 1  |
| NGLY1_2    | 51.06     | -0.17 | 0.06    | 1  |

Supplement: Supplementary file 5156 [file 1]

IPI00451941.6|TSEN34

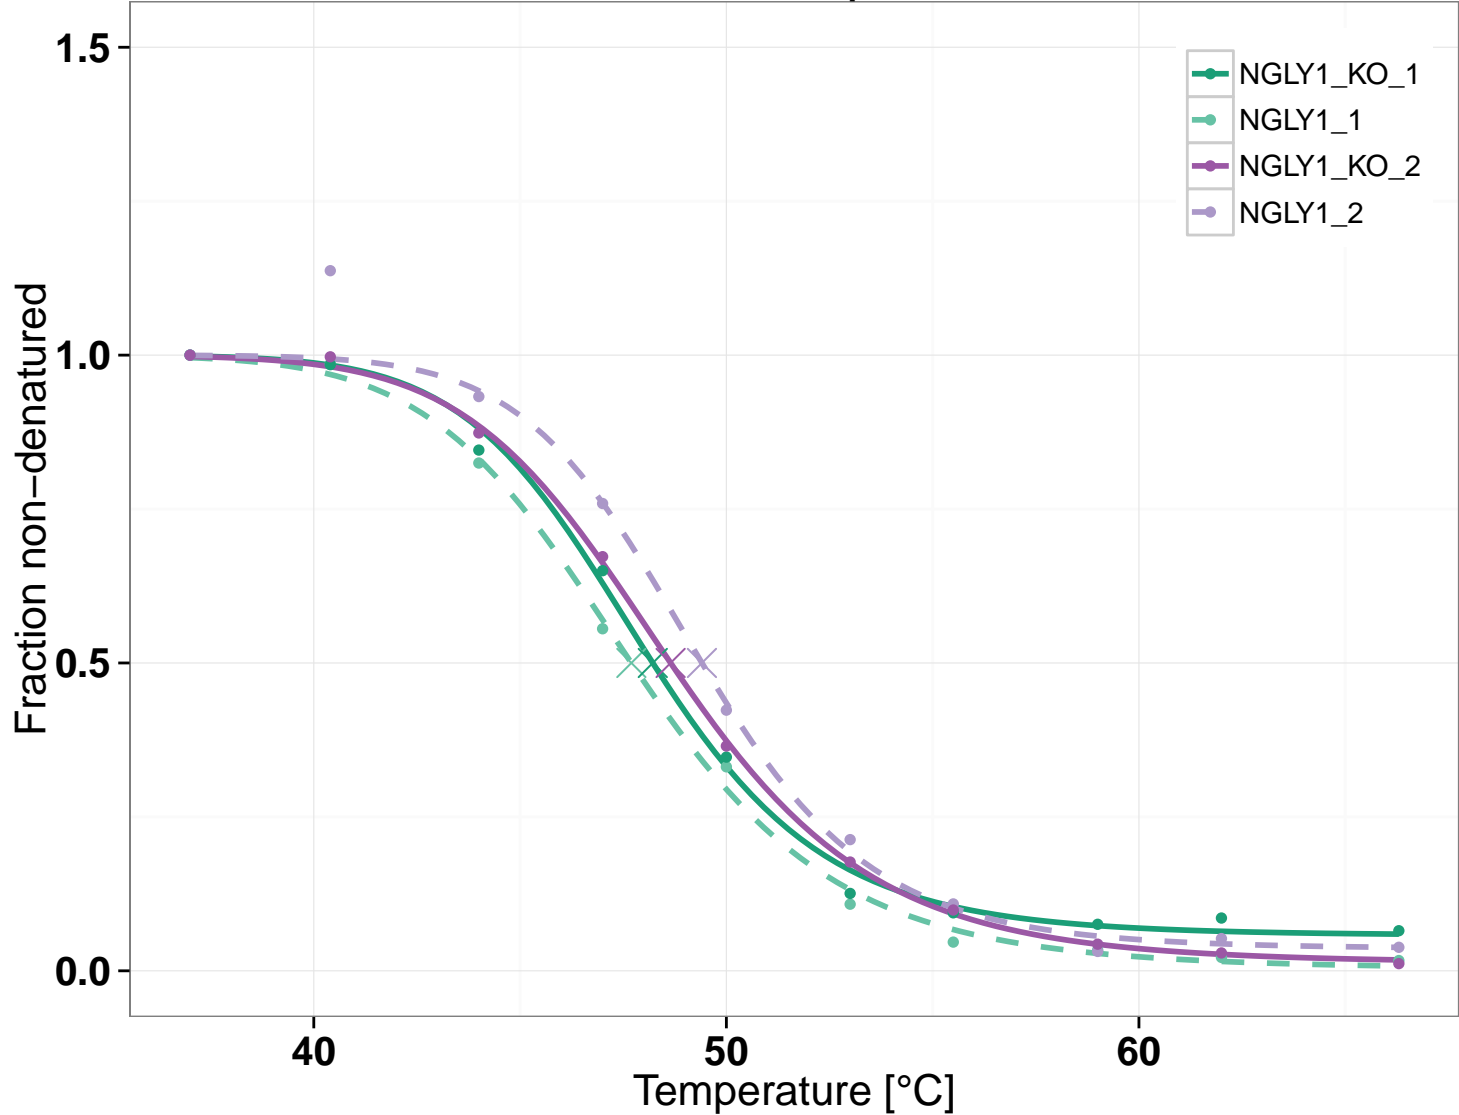

|            | meltPoint | slope | plateau | R2   |
|------------|-----------|-------|---------|------|
| NGLY1_KO_1 | 48.22     | -0.11 | 0.06    | 1    |
| NGLY1_1    | 47.7      | -0.1  | 0       | 1    |
| NGLY1_KO_2 | 48.65     | -0.1  | 0.01    | 1    |
| NGLY1_2    | 49.41     | -0.11 | 0.04    | 0.99 |

Supplement: Supplementary file 5157 [file 1]

IPI00412740.5|MAP3K15

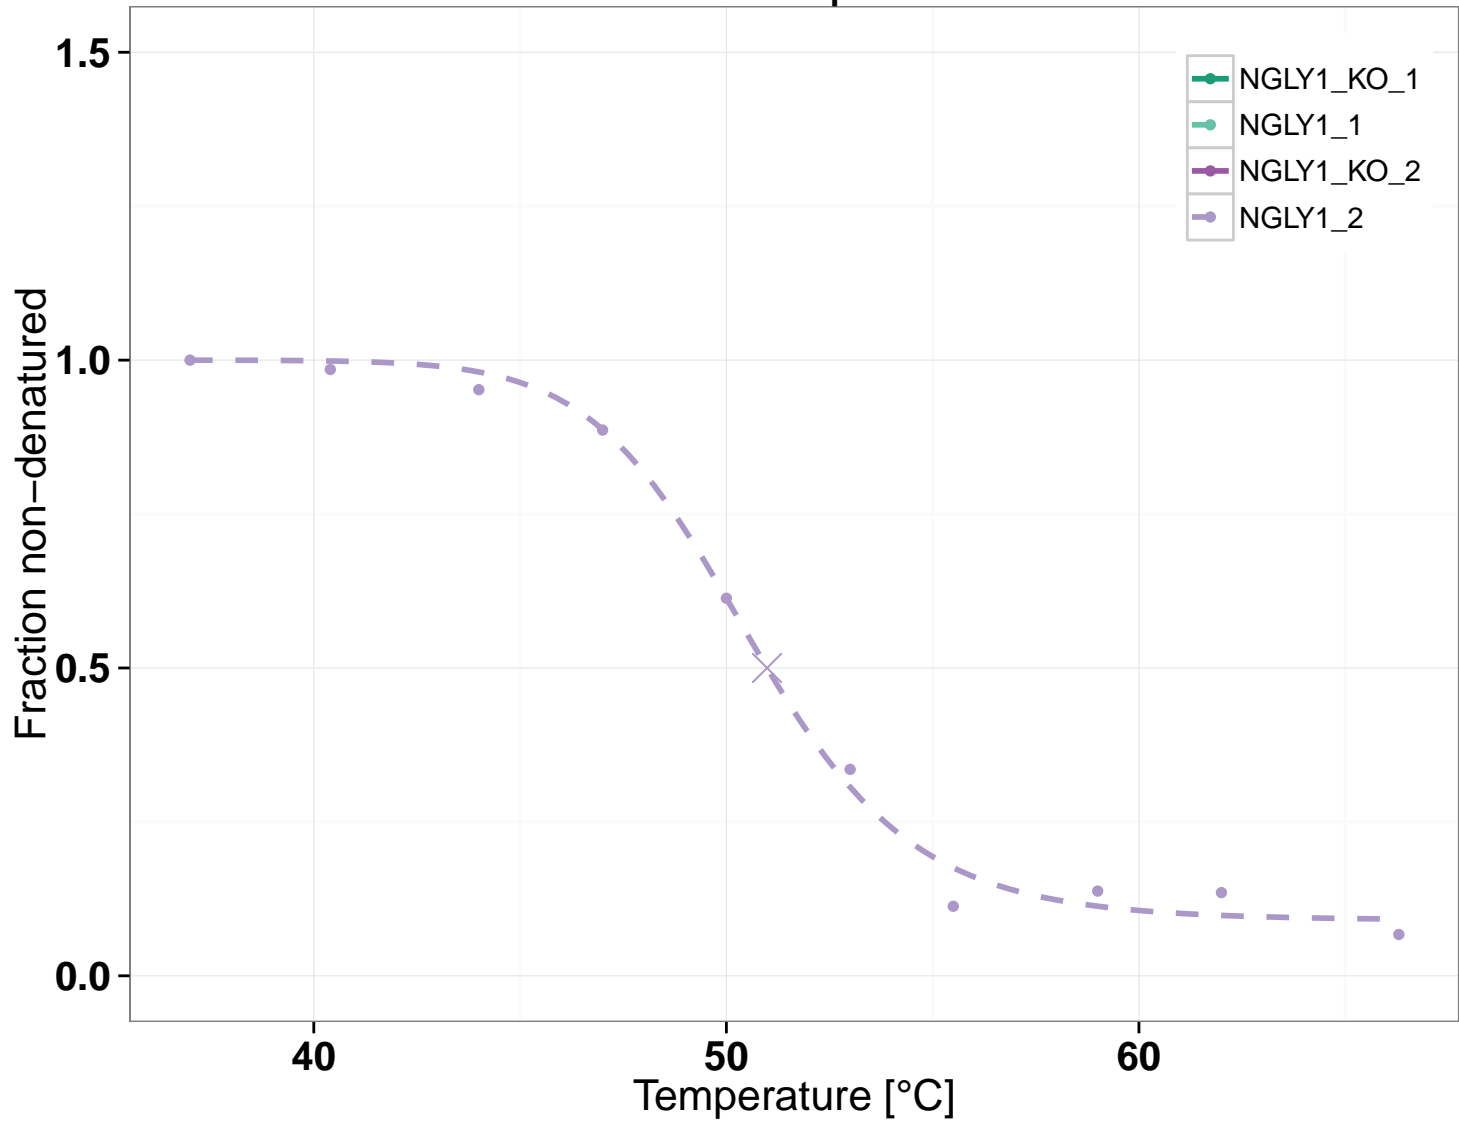

|            | meltPoint | slope | plateau | R2   |
|------------|-----------|-------|---------|------|
| NGLY1_KO_1 | —         | —     | —       | —    |
| NGLY1_1    | —         | —     | —       | —    |
| NGLY1_KO_2 | —         | —     | —       | —    |
| NGLY1_2    | 50.99     | -0.12 | 0.09    | 0.99 |

Supplement: Supplementary file 5158 [file 1]

IPI00797568.2|WHDC1

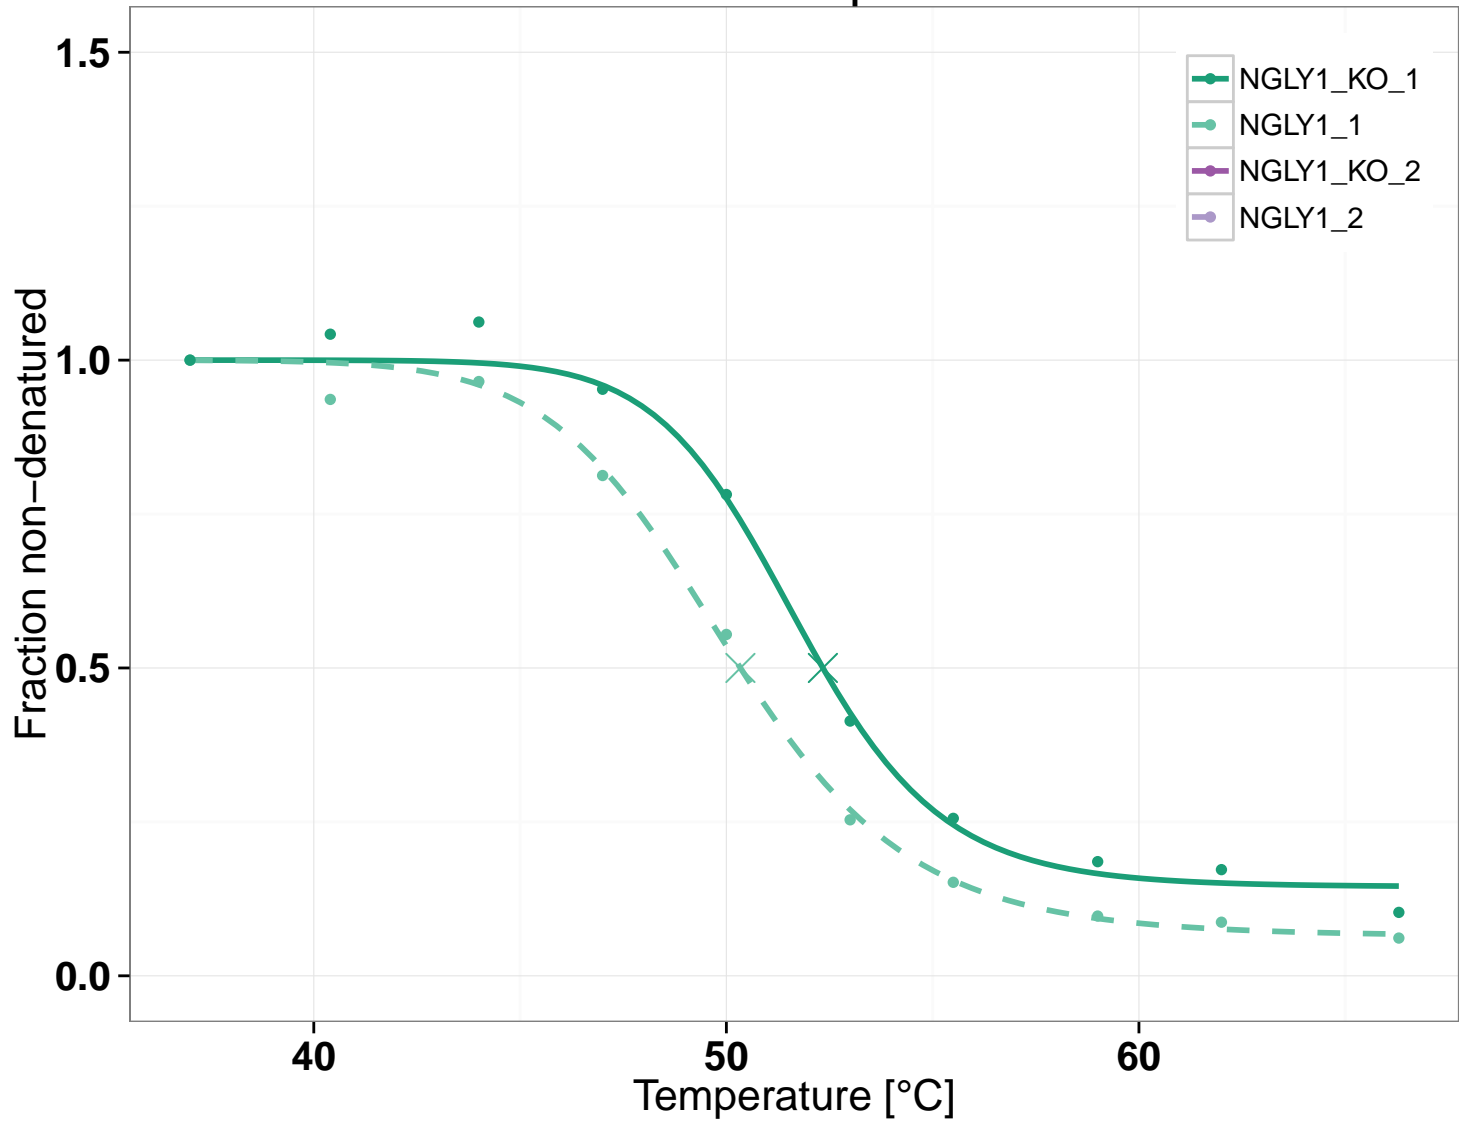

|            | meltPoint | slope | plateau | R2   |
|------------|-----------|-------|---------|------|
| NGLY1_KO_1 | 52.34     | -0.12 | 0.14    | 0.99 |
| NGLY1_1    | 50.34     | -0.11 | 0.06    | 1    |
| NGLY1_KO_2 | -         | -     | -       | -    |
| NGLY1_2    | -         | -     | -       | -    |

Supplement: Supplementary file 5159 [file 1]

IPI00741005.5|MGA

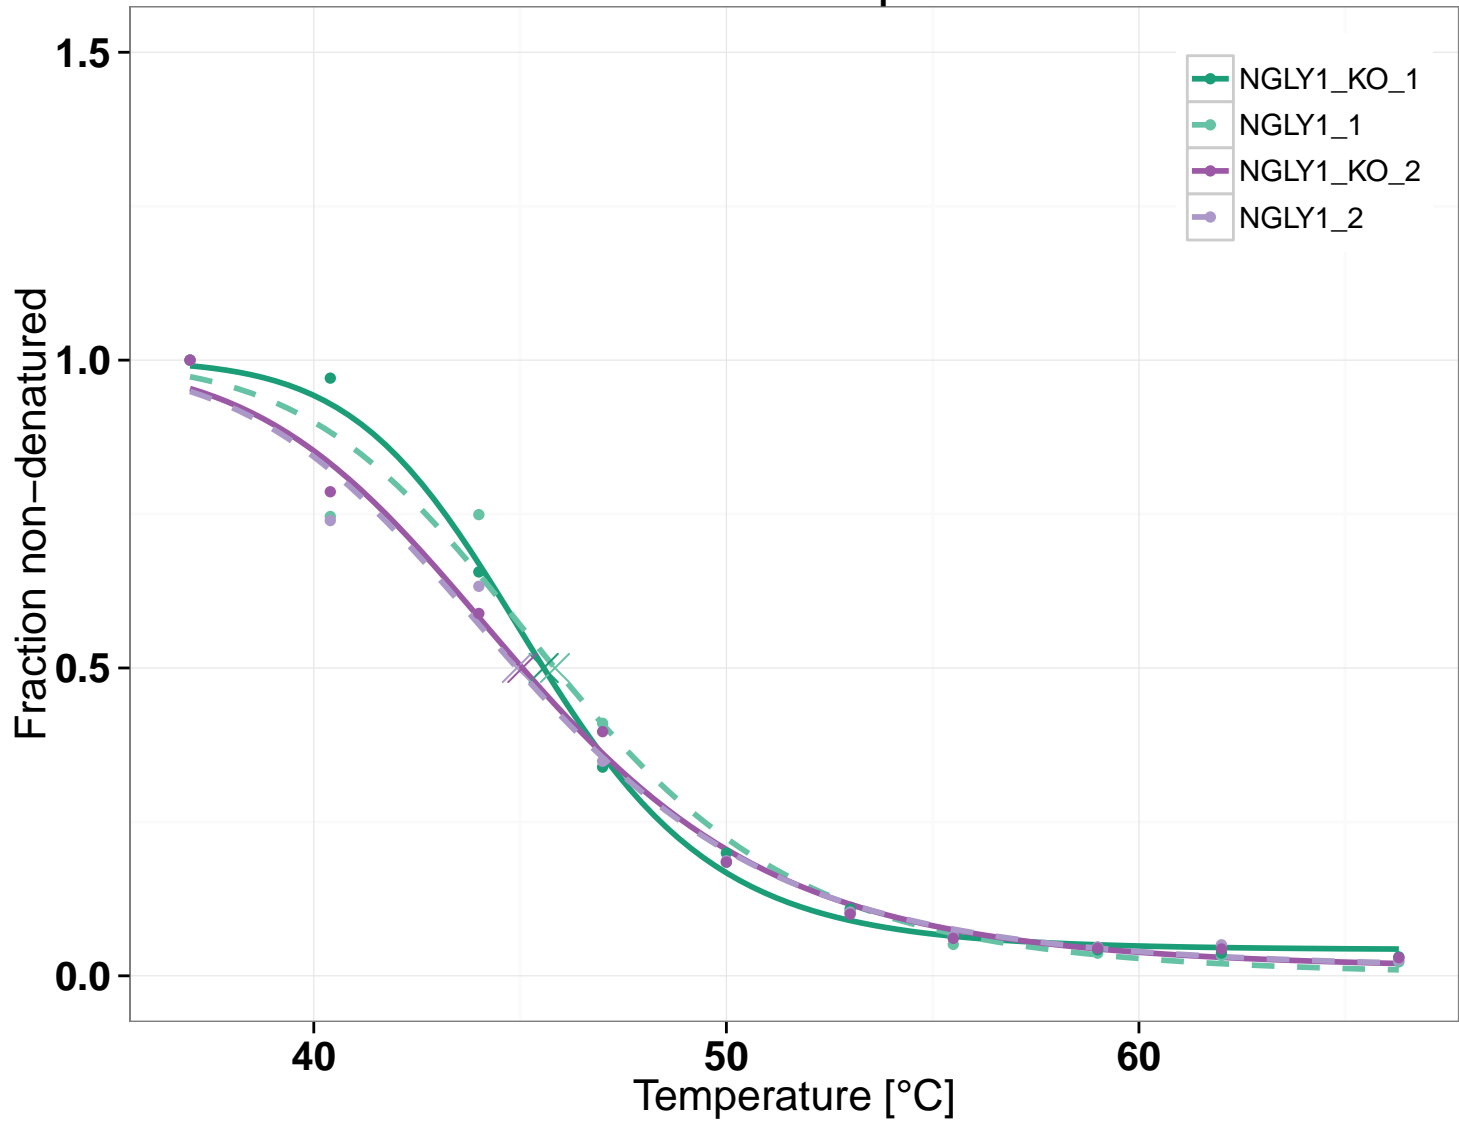

|            | meltPoint | slope  | plateau | R2   |
|------------|-----------|--------|---------|------|
| NGLY1_KO_1 | 45.57     | -0.11  | 0.04    | 1    |
| NGLY1_1    | 45.84     | -0.083 | 0       | 0.97 |
| NGLY1_KO_2 | 45.05     | -0.078 | 0.01    | 0.99 |
| NGLY1_2    | 44.92     | -0.077 | 0.01    | 0.99 |

Supplement: Supplementary file 5160 [file 1]

# IPI00016676.1|TOMM20

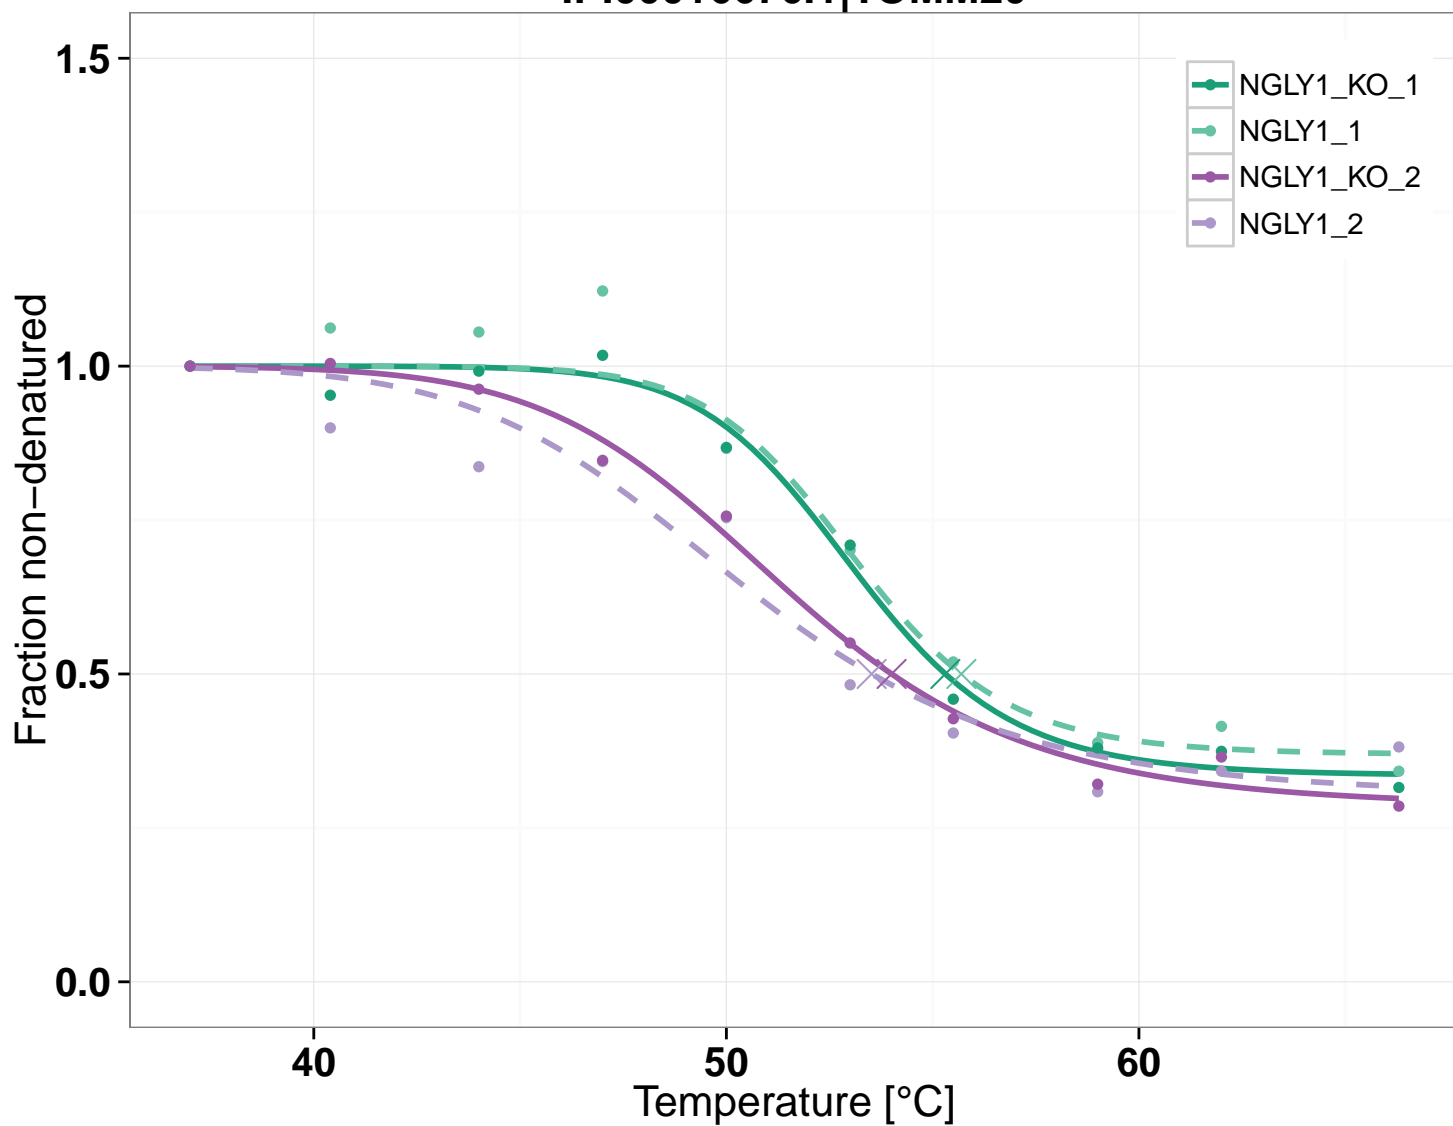

|            | meltPoint | slope  | plateau | R2   |
|------------|-----------|--------|---------|------|
| NGLY1_KO_1 | 55.31     | -0.088 | 0.33    | 0.99 |
| NGLY1_1    | 55.7      | -0.087 | 0.37    | 0.97 |
| NGLY1_KO_2 | 54        | -0.061 | 0.28    | 0.99 |
| NGLY1_2    | 53.52     | -0.054 | 0.3     | 0.95 |

Supplement: Supplementary file 5161 [file 1]

# IPI00552526.4|UCK1

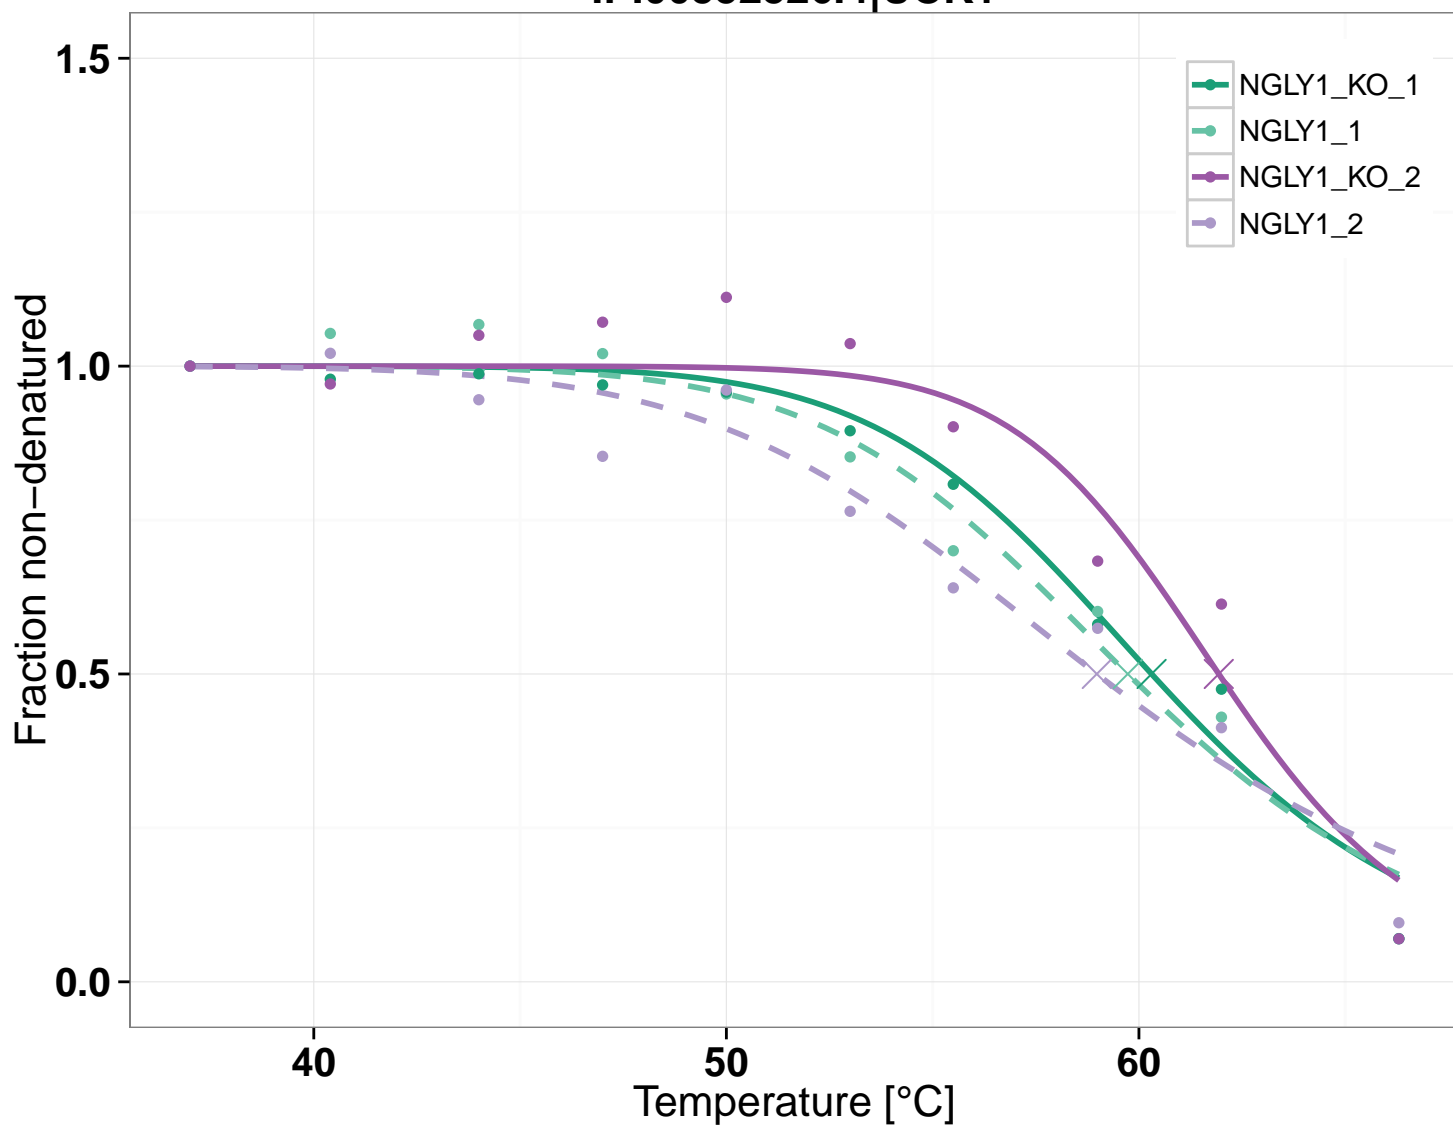

|            | meltPoint | slope  | plateau | R2   |
|------------|-----------|--------|---------|------|
| NGLY1_KO_1 | 60.31     | -0.074 | 0       | 0.98 |
| NGLY1_1    | 59.73     | -0.067 | 0       | 0.97 |
| NGLY1_KO_2 | 61.94     | -0.1   | 0       | 0.94 |
| NGLY1_2    | 58.98     | -0.053 | 0       | 0.95 |

Supplement: Supplementary file 5162 [file 1]

# IPI00293303.1|LGMN

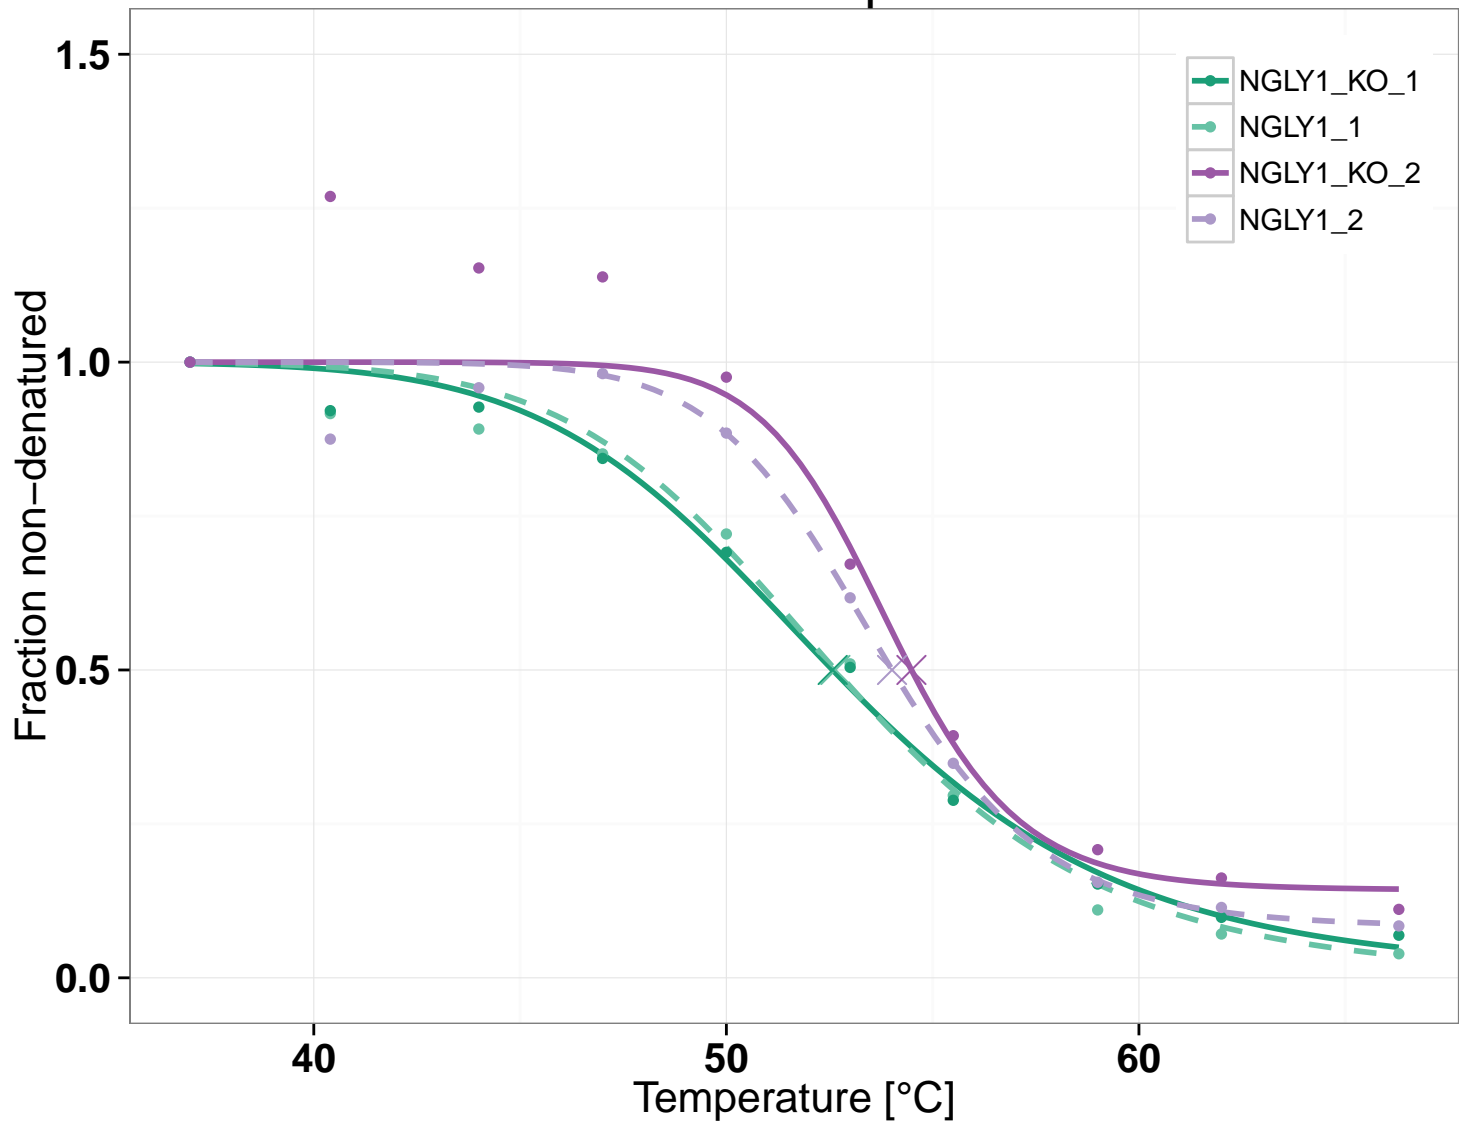

|            | meltPoint | slope  | plateau | R2   |
|------------|-----------|--------|---------|------|
| NGLY1_KO_1 | 52.58     | -0.071 | 0       | 0.99 |
| NGLY1_1    | 52.64     | -0.077 | 0       | 0.99 |
| NGLY1_KO_2 | 54.49     | -0.14  | 0.14    | 0.94 |
| NGLY1_2    | 54.02     | -0.11  | 0.08    | 0.99 |

Supplement: Supplementary file 5163 [file 1]

# IPI00015199.1|CD7

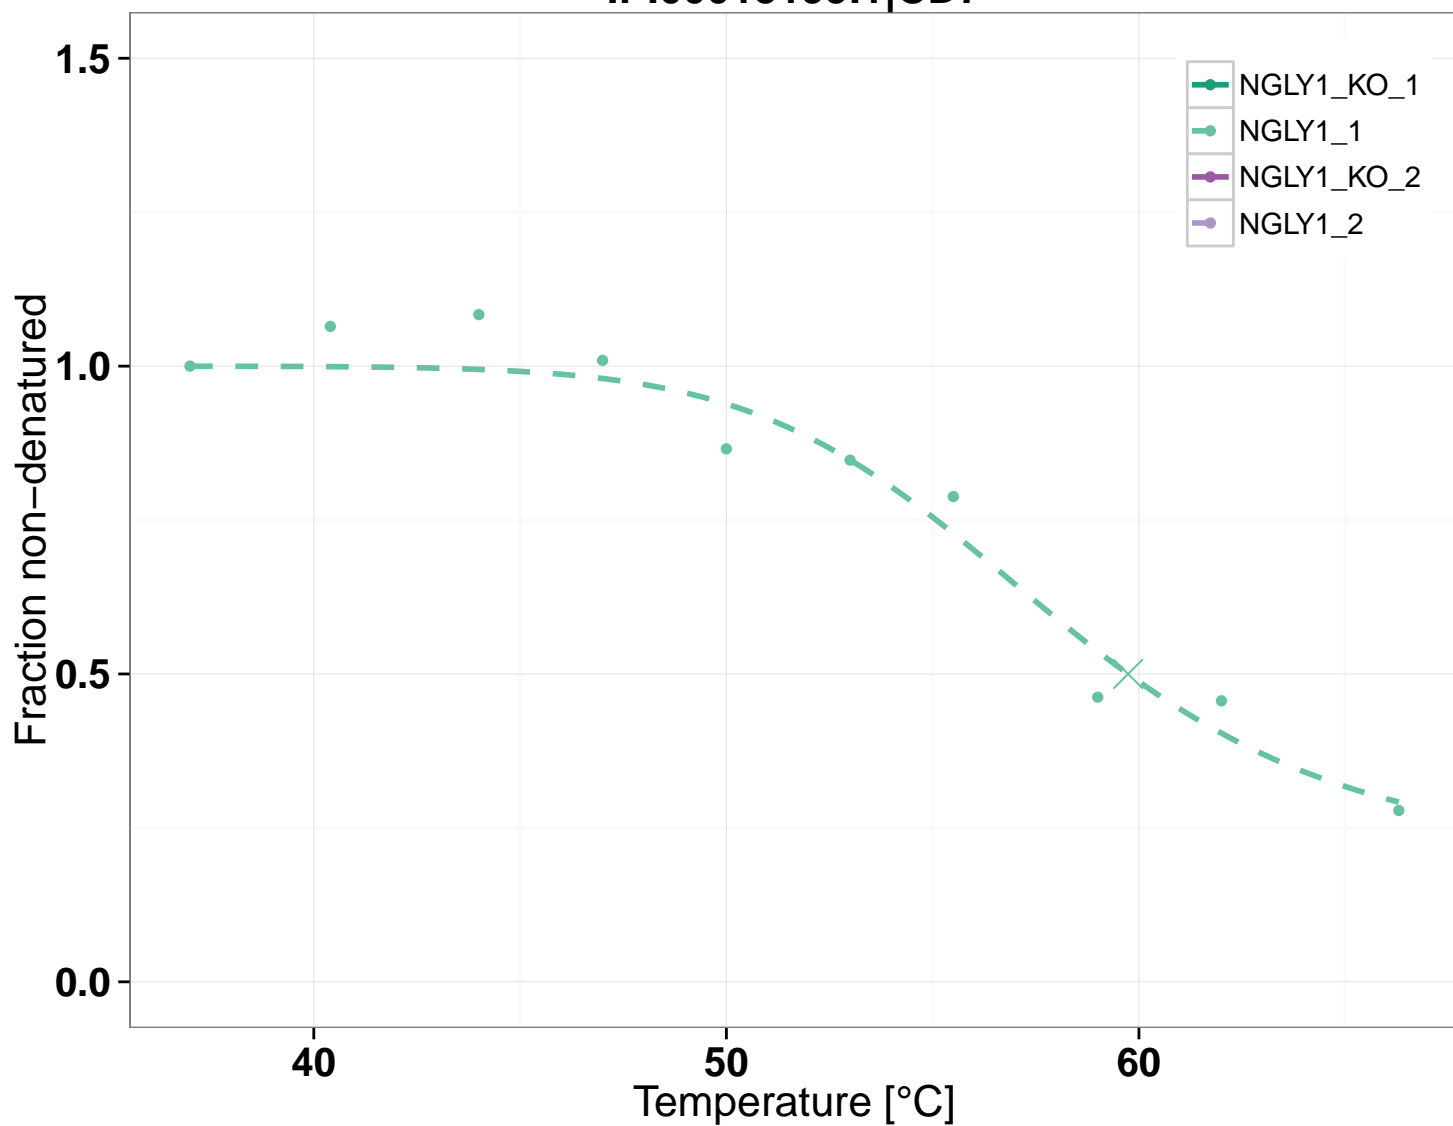

|            | meltPoint | slope  | plateau | R2   |
|------------|-----------|--------|---------|------|
| NGLY1_KO_1 | –         | –      | –       | –    |
| NGLY1_1    | 59.74     | –0.056 | 0.2     | 0.96 |
| NGLY1_KO_2 | –         | –      | –       | –    |
| NGLY1_2    | –         | –      | –       | –    |

Supplement: Supplementary file 5164 [file 1]

IPI00795267.1|GTSF1

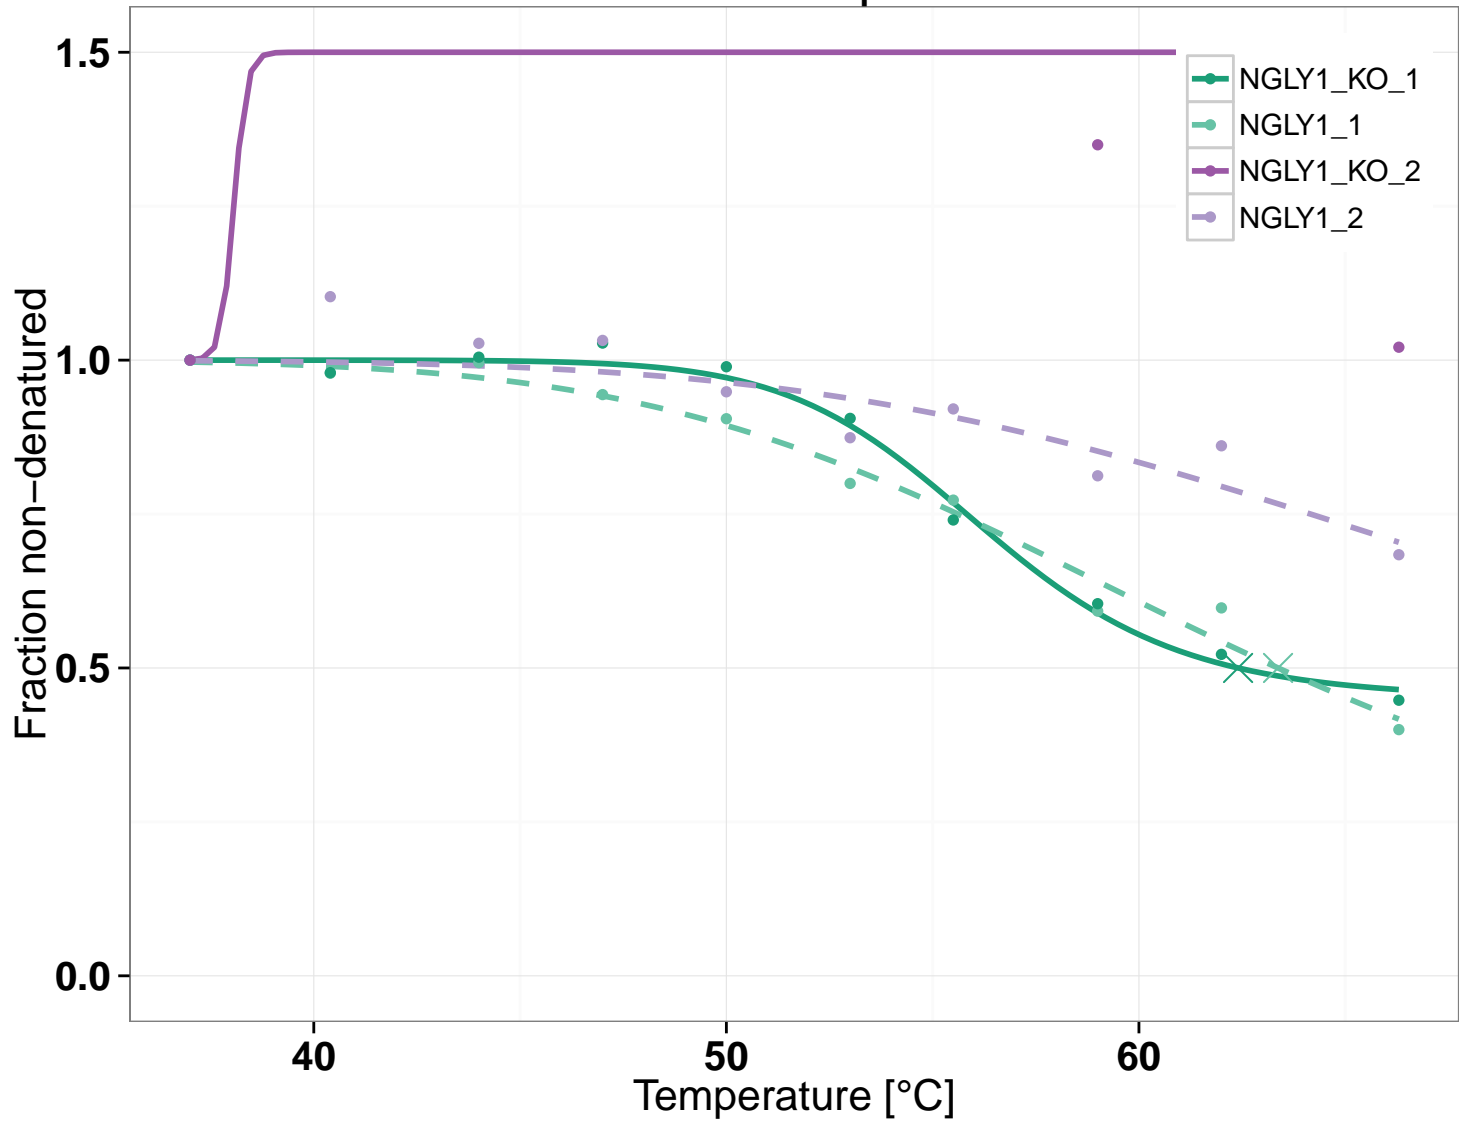

|            | meltPoint | slope  | plateau | R2   |
|------------|-----------|--------|---------|------|
| NGLY1_KO_1 | 62.4      | -0.057 | 0.45    | 0.99 |
| NGLY1_1    | 63.37     | -0.033 | 0.05    | 0.98 |
| NGLY1_KO_2 | -         | 0.82   | 1.5     | 0.03 |
| NGLY1_2    | -         | -0.021 | 0.23    | 0.81 |

Supplement: Supplementary file 5165 [file 1]

# IPI00030695.1|BAG4

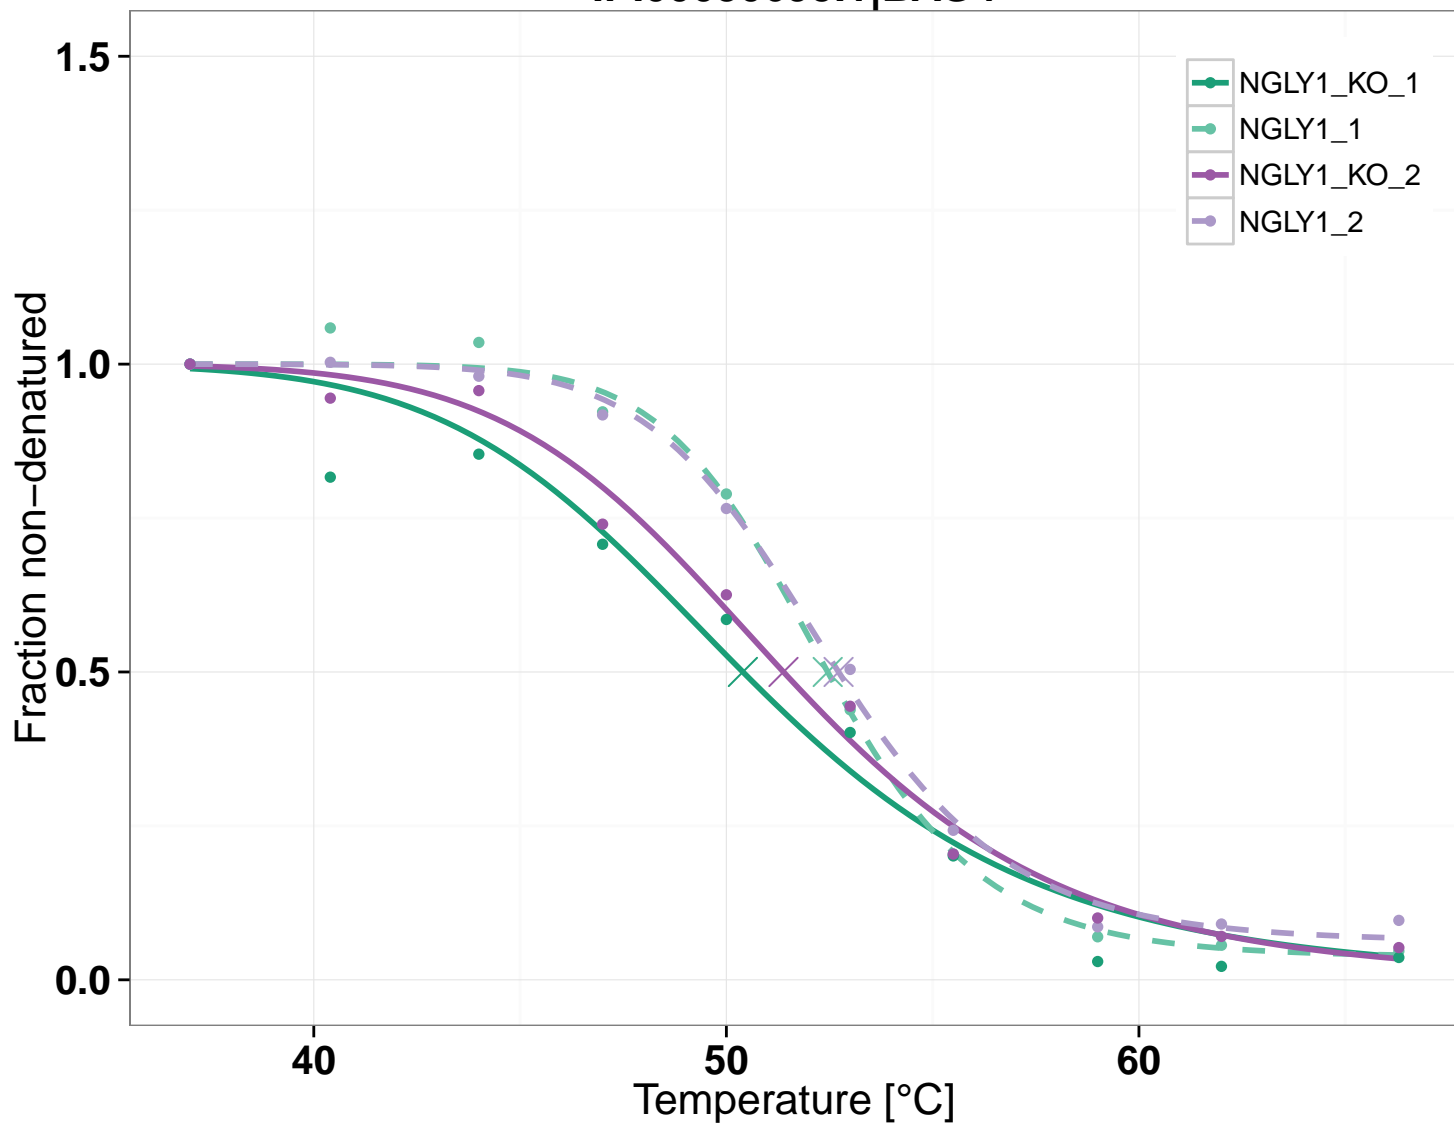

|            | meltPoint | slope  | plateau | R2   |
|------------|-----------|--------|---------|------|
| NGLY1_KO_1 | 50.4      | -0.069 | 0       | 0.97 |
| NGLY1_1    | 52.46     | -0.12  | 0.04    | 1    |
| NGLY1_KO_2 | 51.38     | -0.074 | 0       | 0.99 |
| NGLY1_2    | 52.72     | -0.11  | 0.06    | 1    |

Supplement: Supplementary file 5166 [file 1]

IPI00337397.1|NUP98

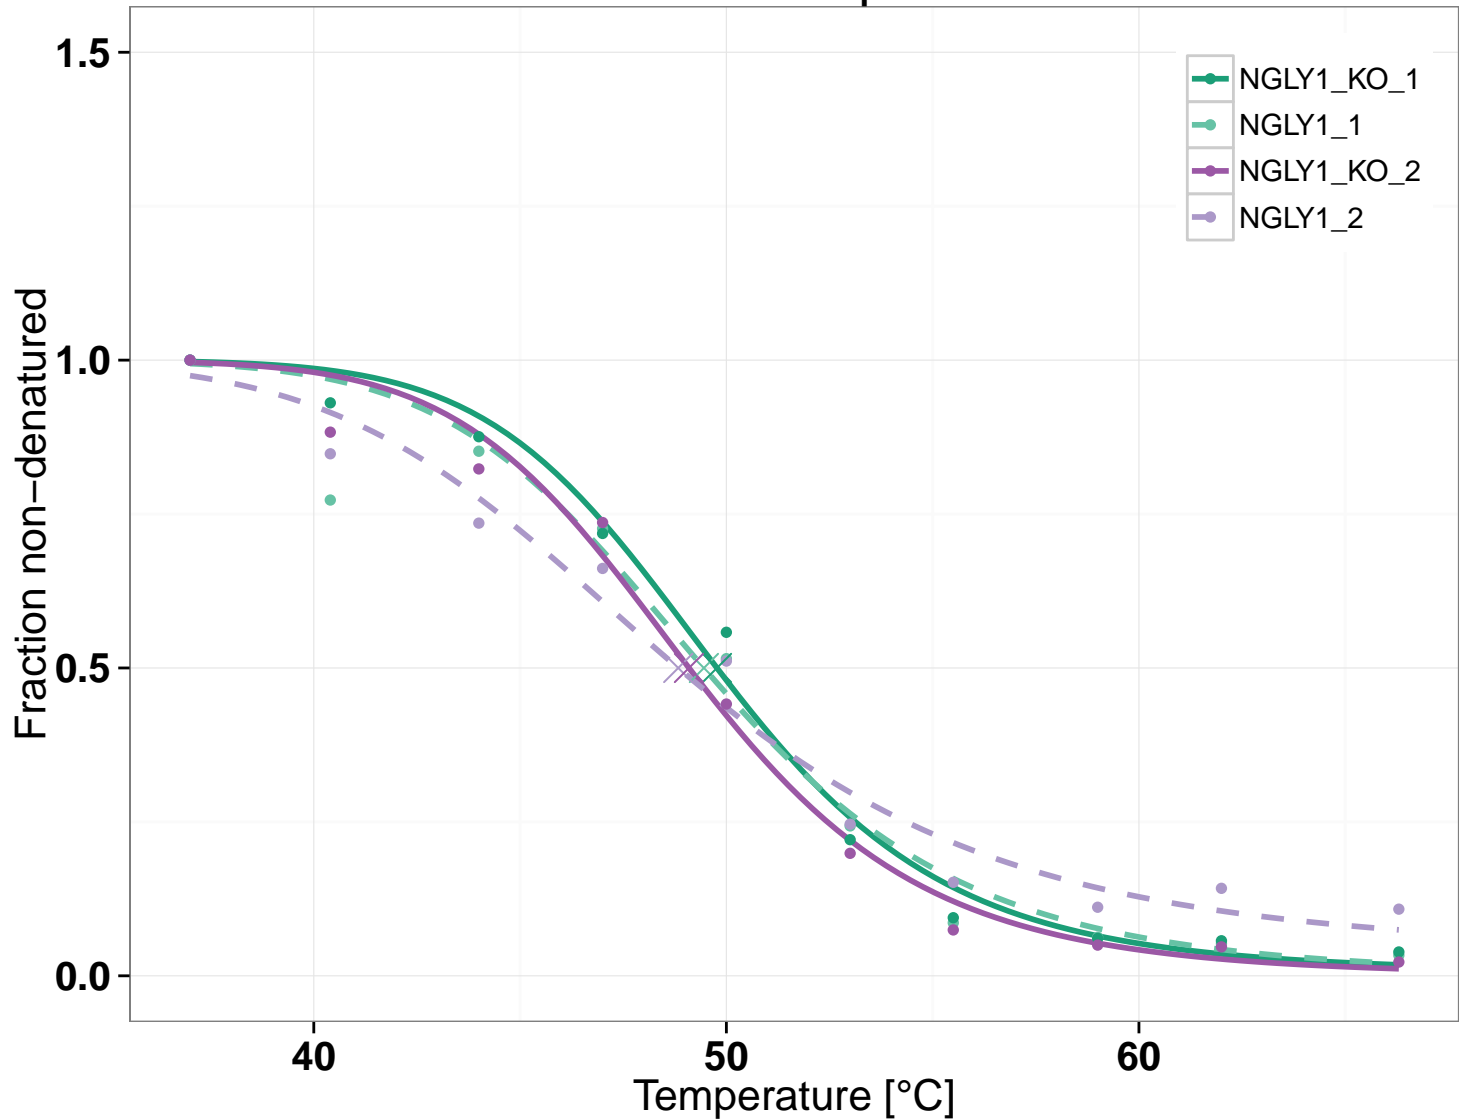

|            | meltPoint | slope  | plateau | R2   |
|------------|-----------|--------|---------|------|
| NGLY1_KO_1 | 49.77     | -0.089 | 0.01    | 0.99 |
| NGLY1_1    | 49.46     | -0.079 | 0       | 0.96 |
| NGLY1_KO_2 | 49.09     | -0.089 | 0       | 0.99 |
| NGLY1_2    | 48.83     | -0.059 | 0.03    | 0.98 |

Supplement: Supplementary file 5167 [file 1]

# IPI00168378.4|MTMR14

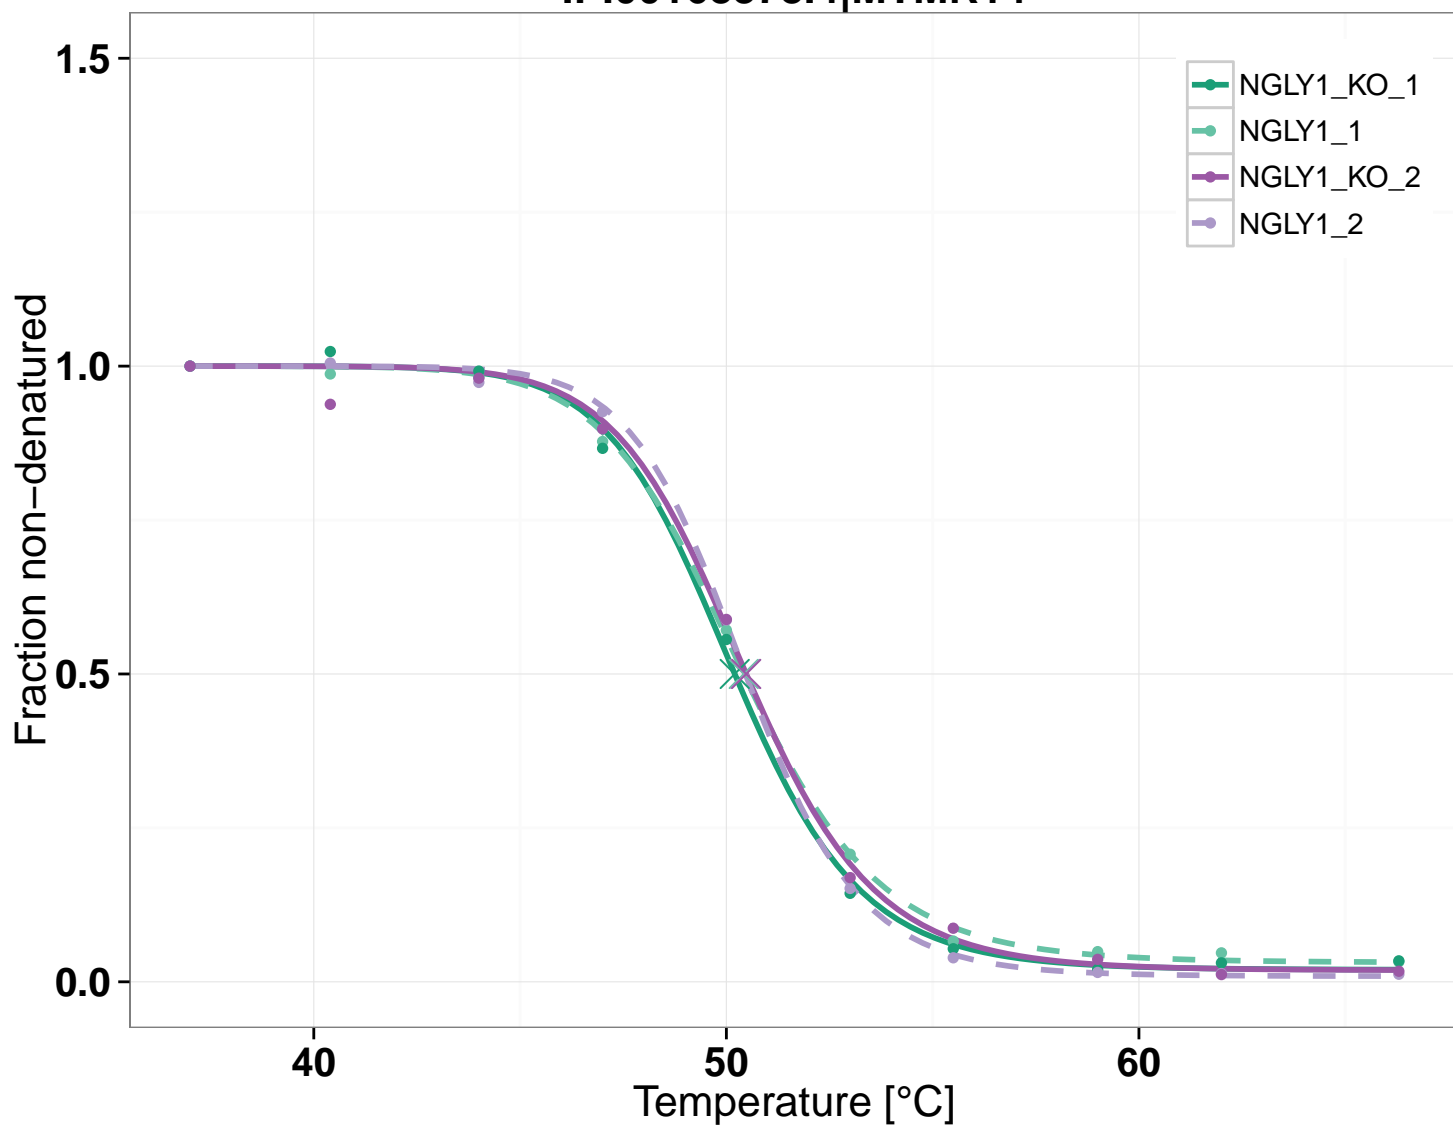

|            | meltPoint | slope | plateau | R2 |
|------------|-----------|-------|---------|----|
| NGLY1_KO_1 | 50.2      | -0.16 | 0.02    | 1  |
| NGLY1_1    | 50.42     | -0.14 | 0.03    | 1  |
| NGLY1_KO_2 | 50.48     | -0.16 | 0.02    | 1  |
| NGLY1_2    | 50.46     | -0.18 | 0.01    | 1  |

Supplement: Supplementary file 5168 [file 1]

# IPI00001762.1|OPHN1

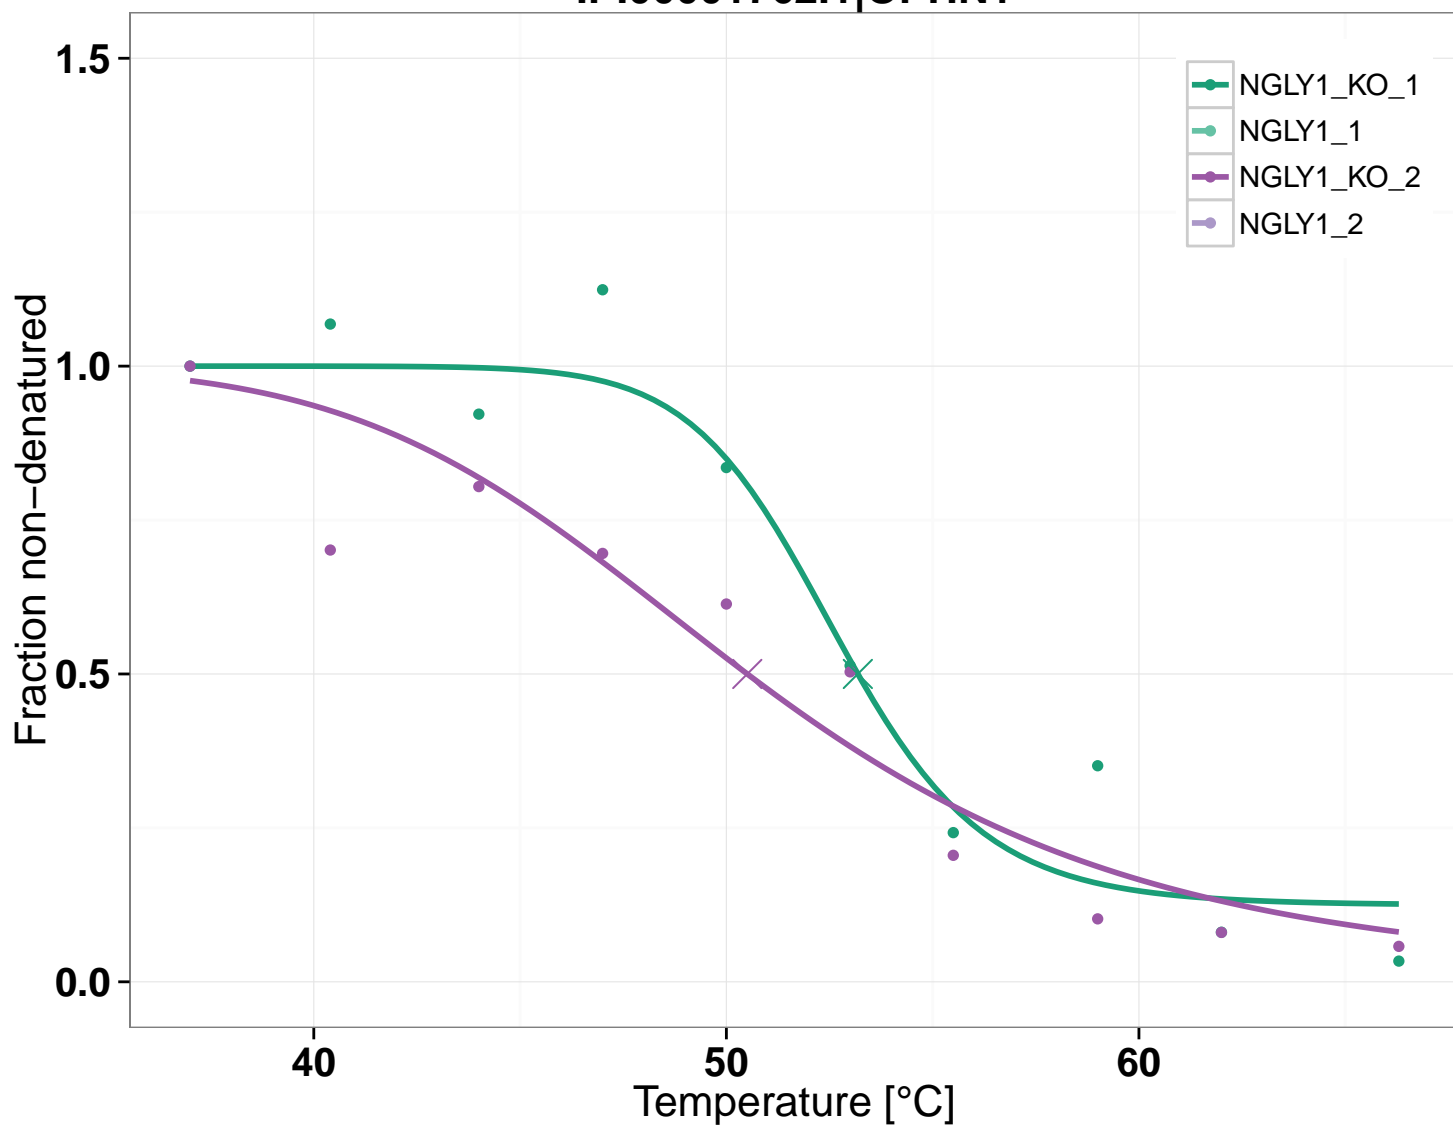

|            | meltPoint | slope  | plateau | R2   |
|------------|-----------|--------|---------|------|
| NGLY1_KO_1 | 53.19     | -0.12  | 0.12    | 0.95 |
| NGLY1_1    | -         | -      | -       | -    |
| NGLY1_KO_2 | 50.51     | -0.052 | 0       | 0.91 |
| NGLY1_2    | -         | -      | -       | -    |

Supplement: Supplementary file 5169 [file 1]

IPI00221089.5|RPS13

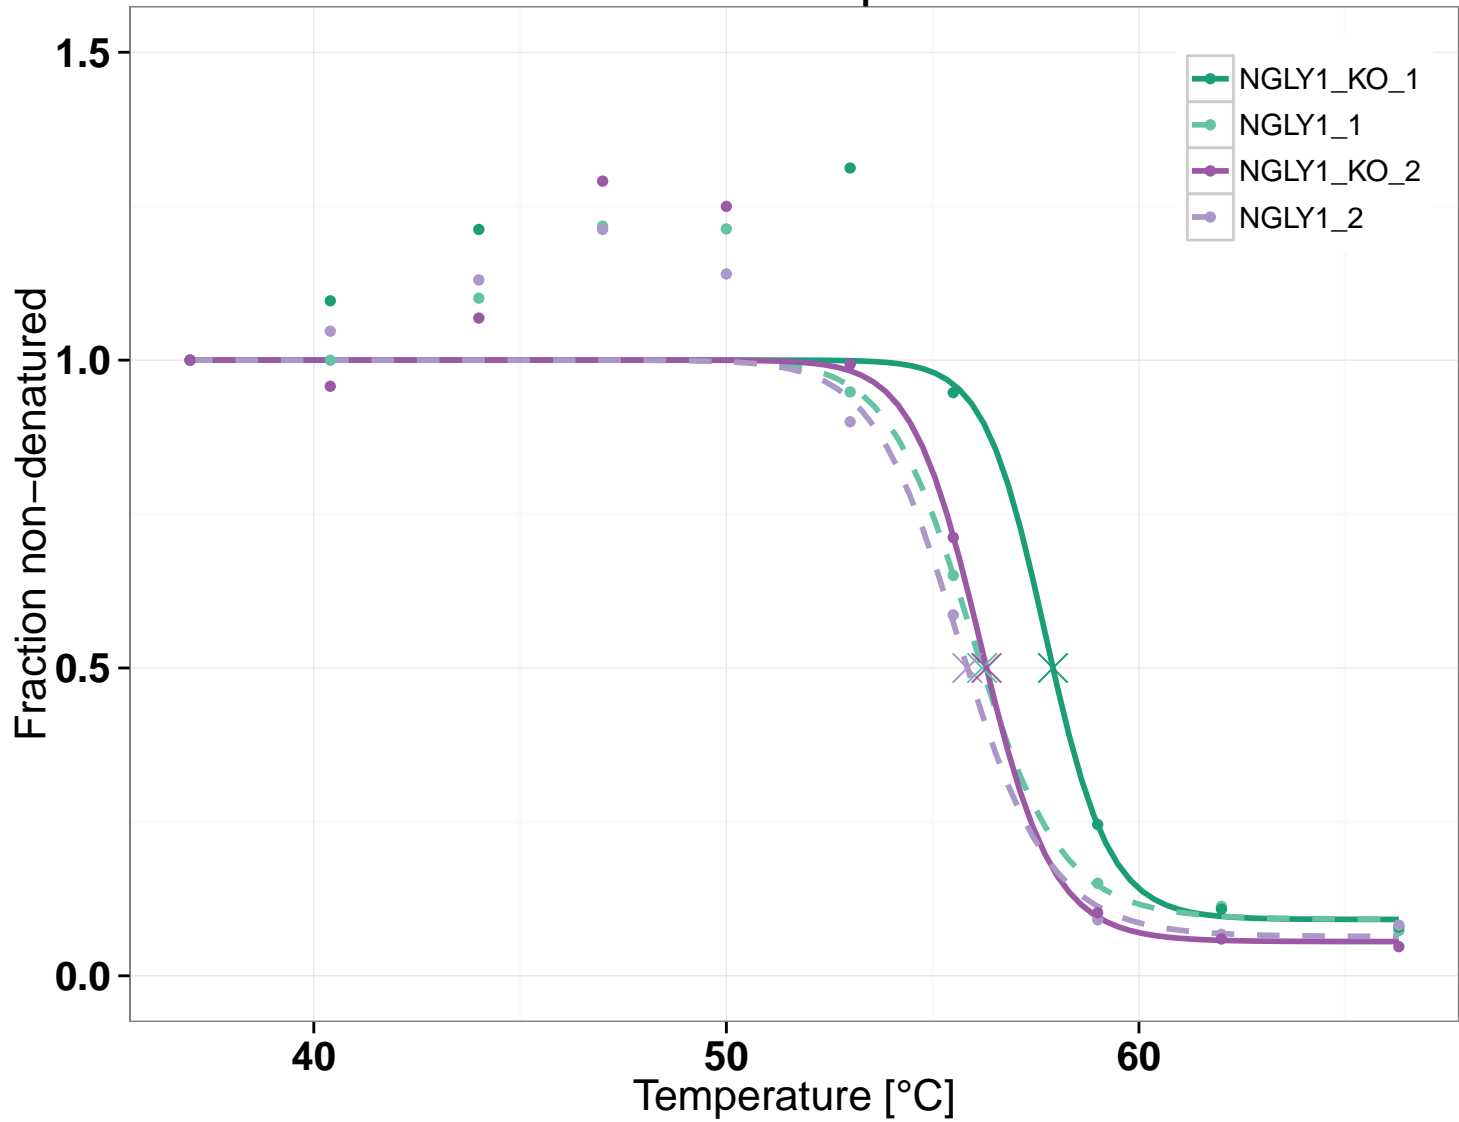

|            | meltPoint | slope | plateau | R2   |
|------------|-----------|-------|---------|------|
| NGLY1_KO_1 | 57.92     | -0.3  | 0.09    | 0.74 |
| NGLY1_1    | 56.2      | -0.22 | 0.09    | 0.95 |
| NGLY1_KO_2 | 56.31     | -0.28 | 0.06    | 0.93 |
| NGLY1_2    | 55.84     | -0.22 | 0.06    | 0.96 |

Supplement: Supplementary file 5170 [file 1]

# IPI00001564.1|CDKN2C

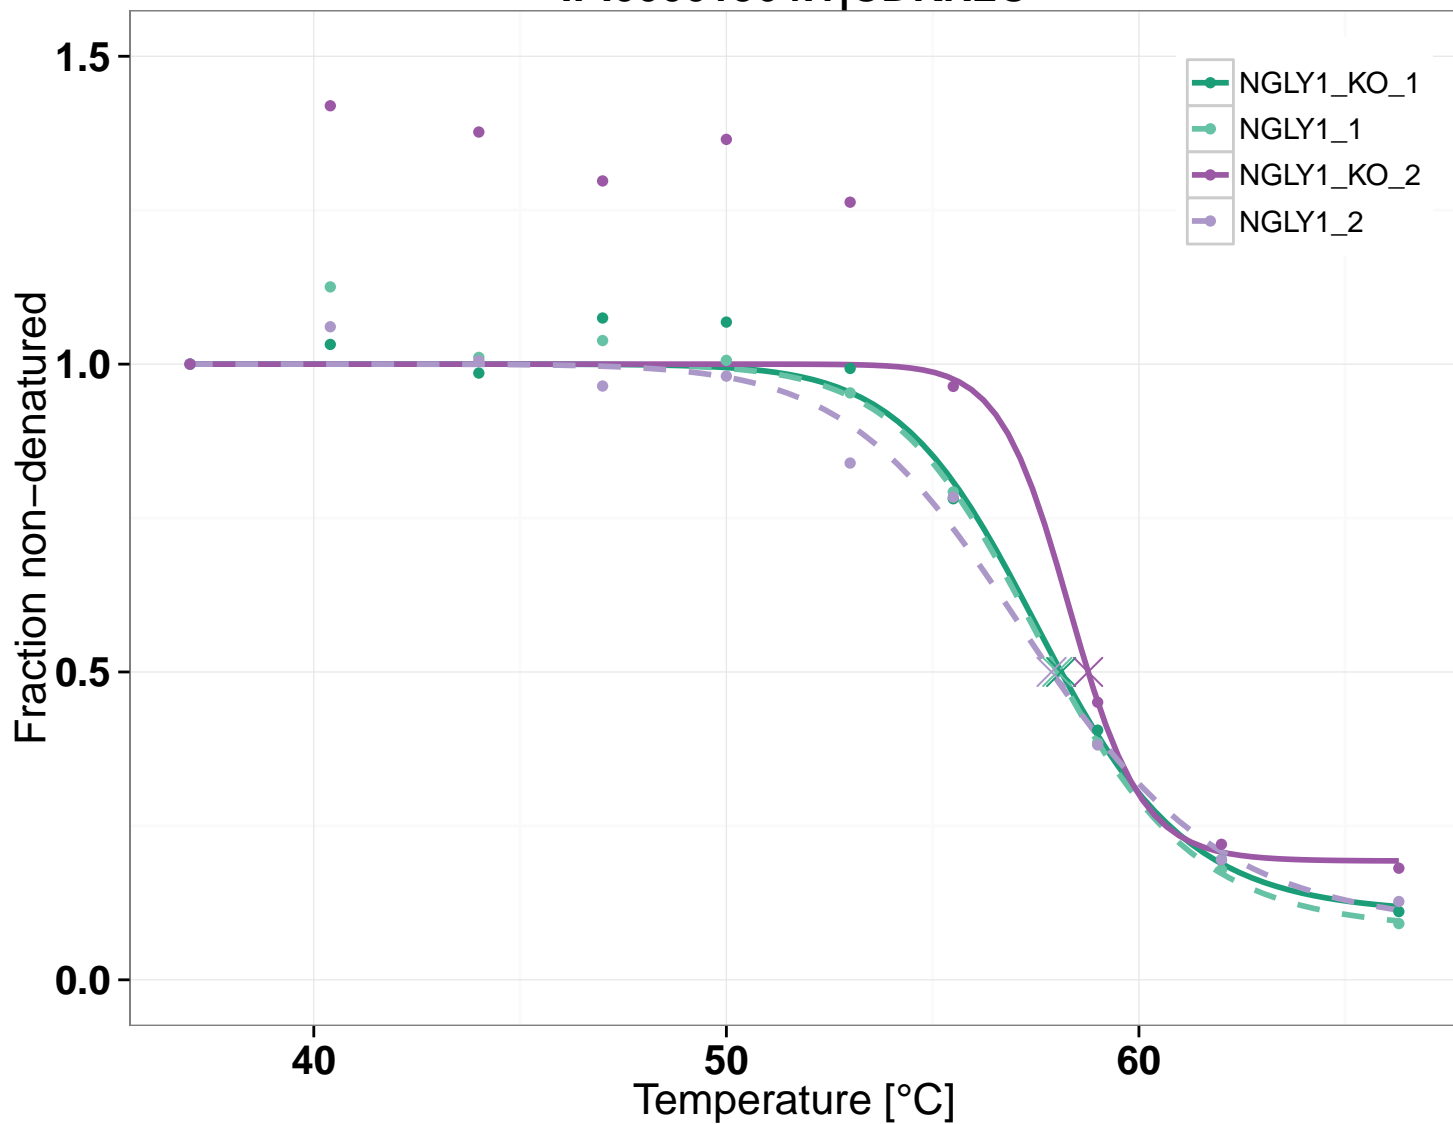

|            | meltPoint | slope | plateau | R2   |
|------------|-----------|-------|---------|------|
| NGLY1_KO_1 | 58.12     | -0.13 | 0.11    | 0.99 |
| NGLY1_1    | 58.02     | -0.13 | 0.08    | 0.99 |
| NGLY1_KO_2 | 58.77     | -0.23 | 0.19    | 0.72 |
| NGLY1_2    | 57.88     | -0.1  | 0.08    | 0.99 |

Supplement: Supplementary file 5171 [file 1]

# IPI00142882.2|TMEM69

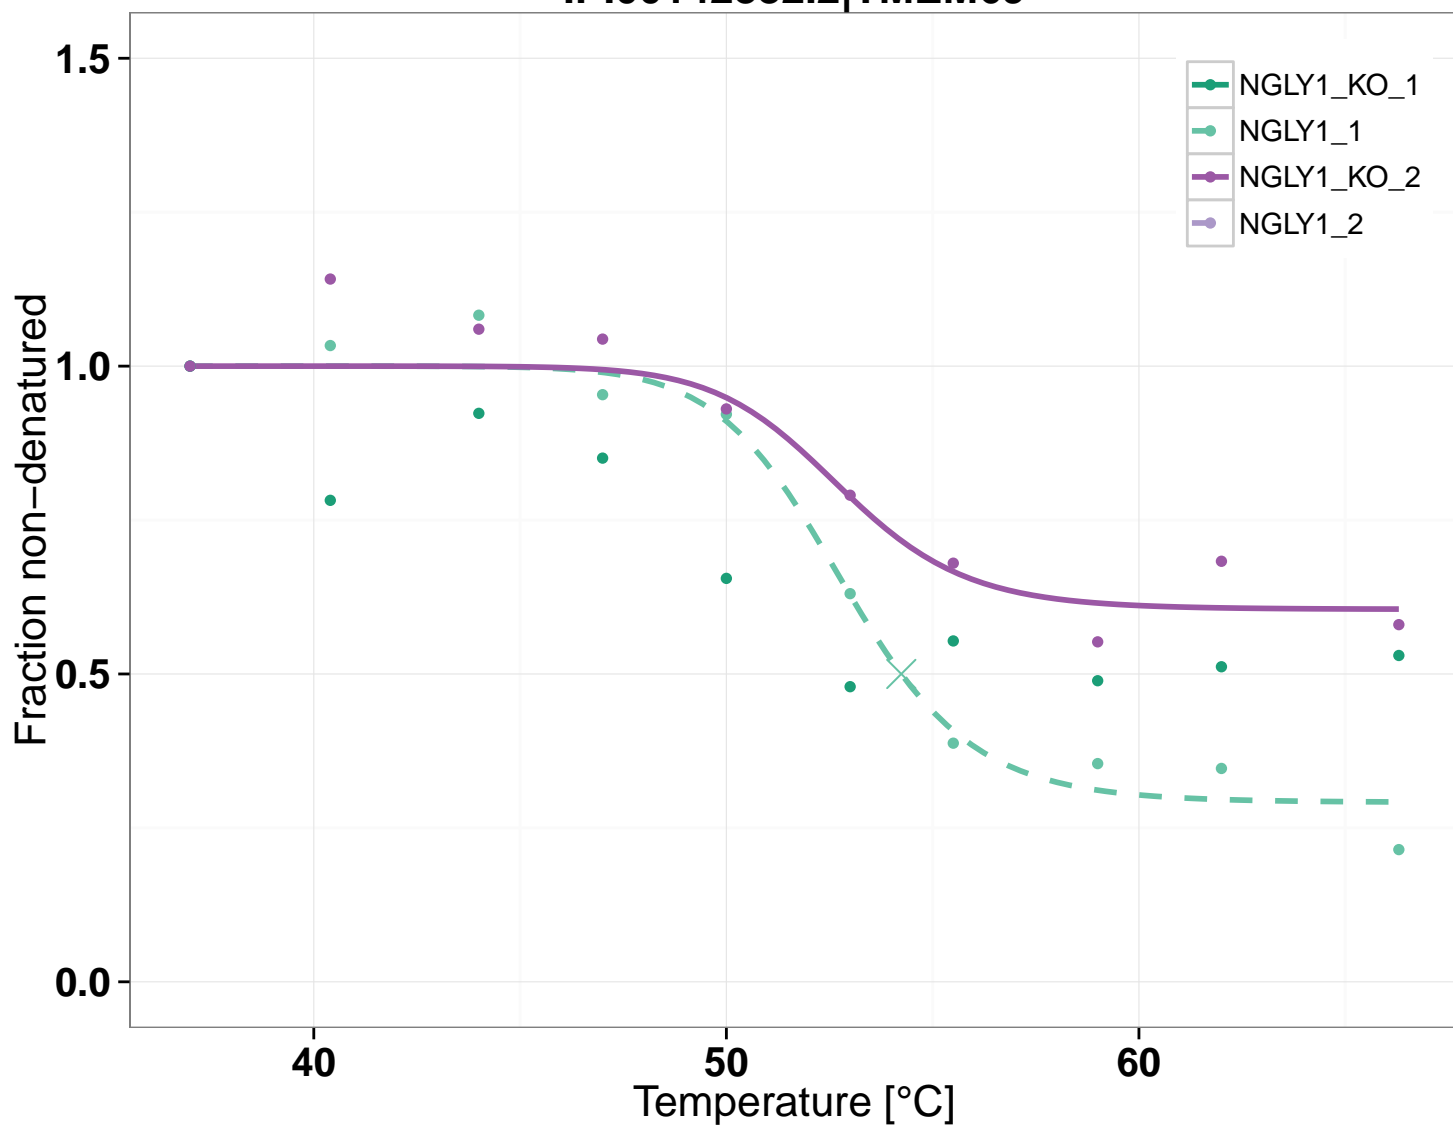

|            | meltPoint | slope  | plateau | R2   |
|------------|-----------|--------|---------|------|
| NGLY1_KO_1 | –         | –      | –       | –    |
| NGLY1_1    | 54.24     | –0.11  | 0.29    | 0.98 |
| NGLY1_KO_2 | –         | –0.065 | 0.61    | 0.91 |
| NGLY1_2    | –         | –      | –       | –    |

Supplement: Supplementary file 5172 [file 1]

IPI00412404.1|SUPV3L1

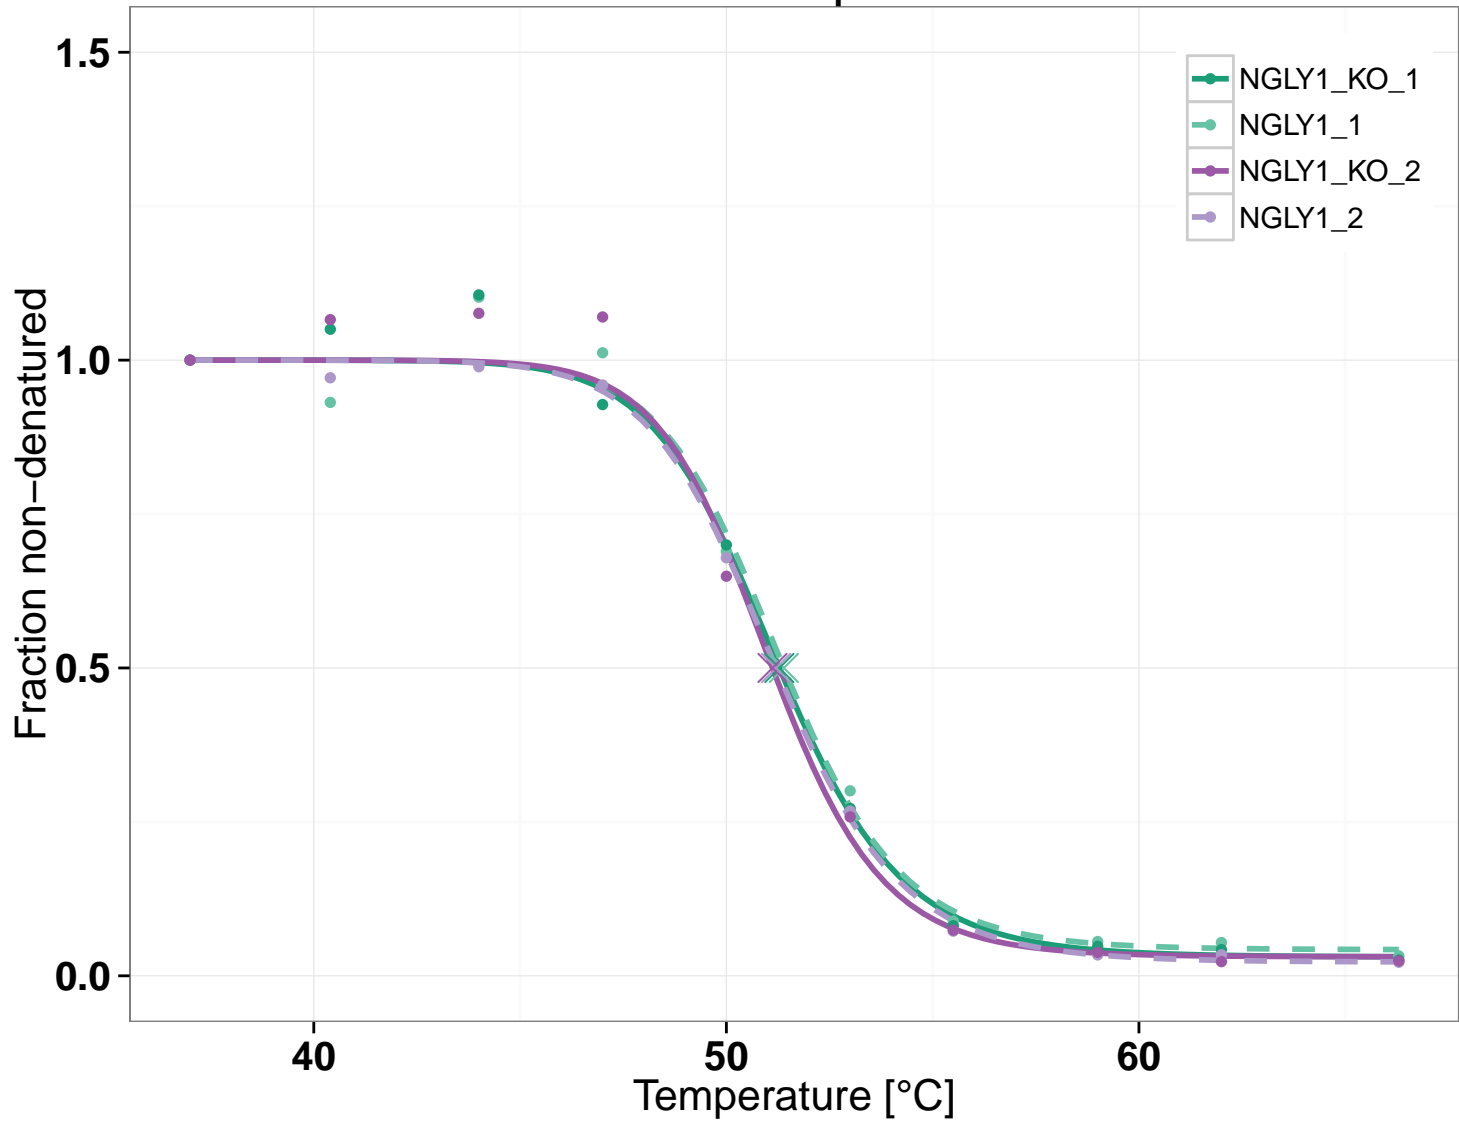

|            | meltPoint | slope | plateau | R2   |
|------------|-----------|-------|---------|------|
| NGLY1_KO_1 | 51.28     | -0.16 | 0.03    | 0.99 |
| NGLY1_1    | 51.39     | -0.16 | 0.04    | 0.99 |
| NGLY1_KO_2 | 51.12     | -0.18 | 0.03    | 0.99 |
| NGLY1_2    | 51.21     | -0.16 | 0.02    | 1    |

Supplement: Supplementary file 5173 [file 1]

# IPI00021739.2|GIGYF1

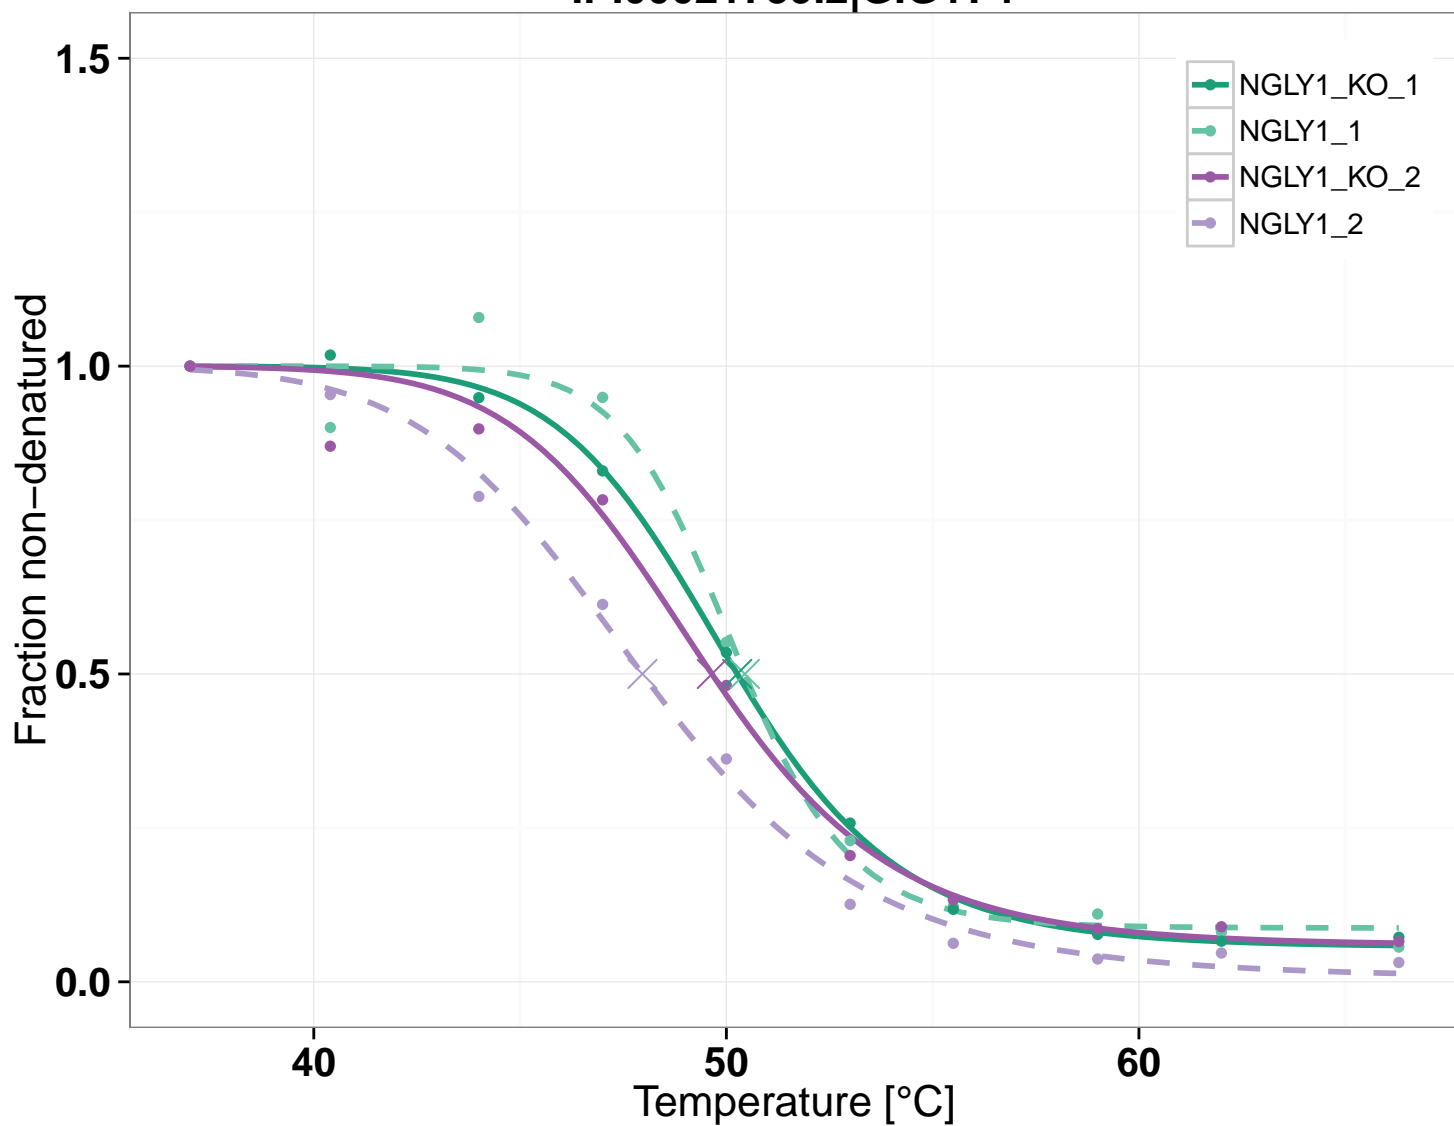

|            | meltPoint | slope  | plateau | R2   |
|------------|-----------|--------|---------|------|
| NGLY1_KO_1 | 50.26     | -0.11  | 0.06    | 1    |
| NGLY1_1    | 50.45     | -0.16  | 0.09    | 0.99 |
| NGLY1_KO_2 | 49.65     | -0.1   | 0.06    | 0.99 |
| NGLY1_2    | 47.97     | -0.091 | 0.01    | 1    |

Supplement: Supplementary file 5174 [file 1]

IPI00012251.5|TMEM177

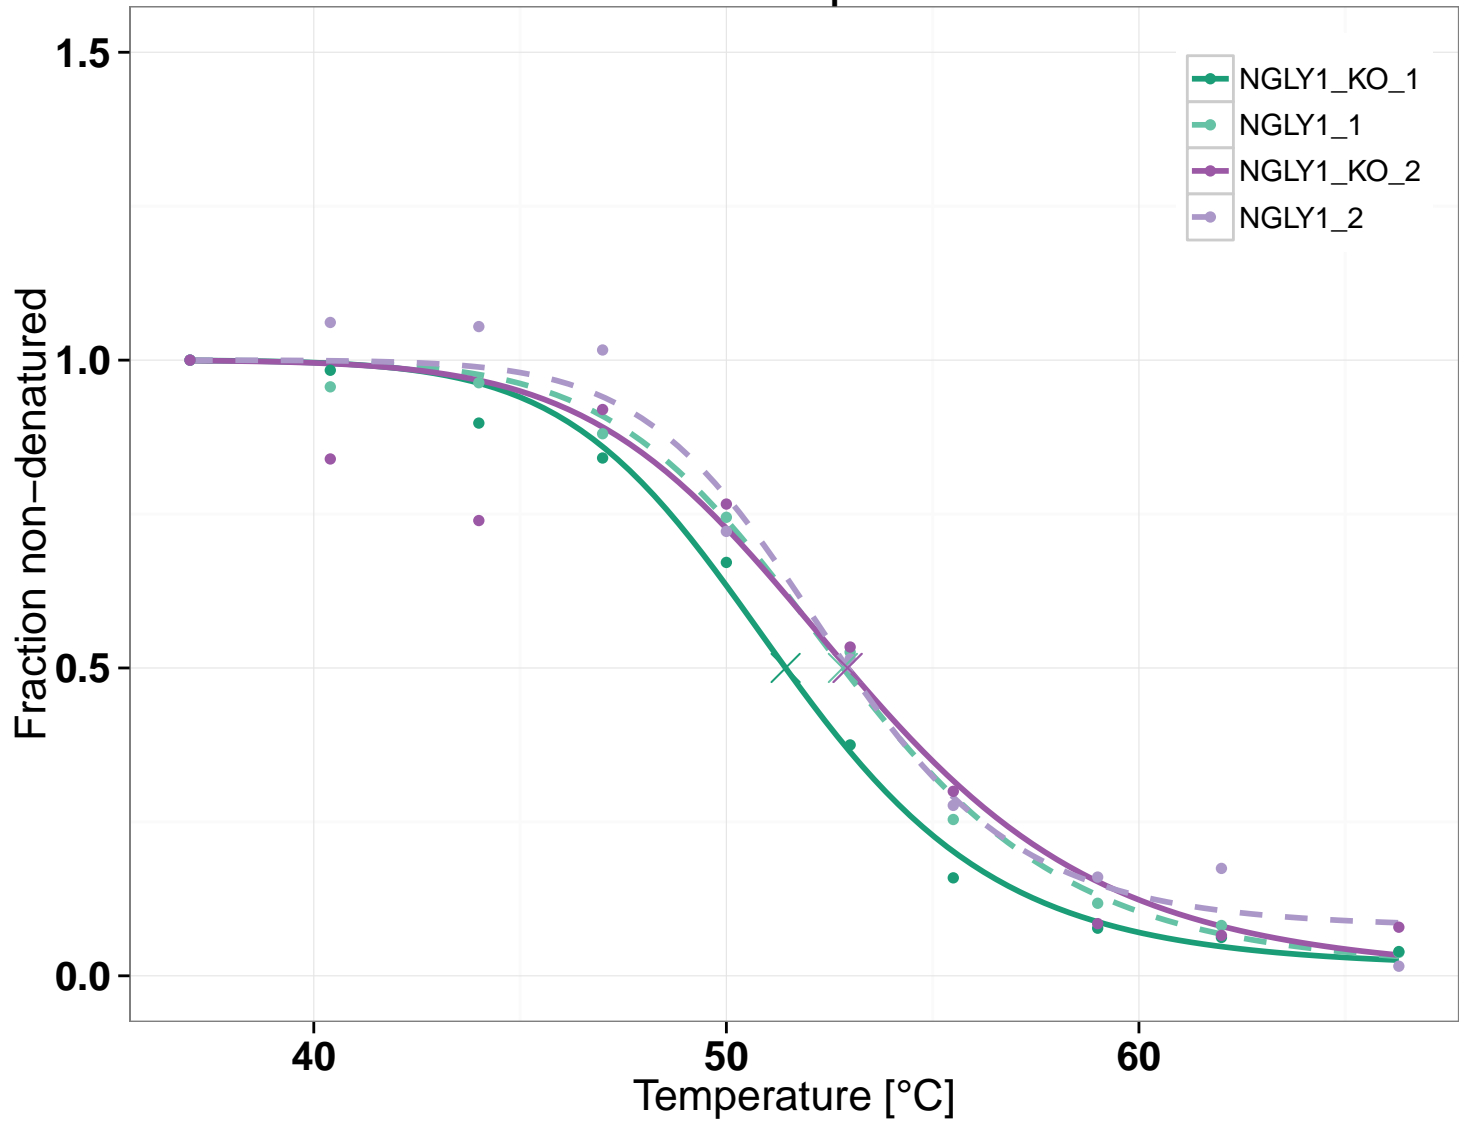

|            | meltPoint | slope  | plateau | R2   |
|------------|-----------|--------|---------|------|
| NGLY1_KO_1 | 51.44     | -0.094 | 0.01    | 0.99 |
| NGLY1_1    | 52.82     | -0.089 | 0.01    | 1    |
| NGLY1_KO_2 | 52.94     | -0.08  | 0       | 0.93 |
| NGLY1_2    | 52.94     | -0.1   | 0.08    | 0.98 |

Supplement: Supplementary file 5175 [file 1]

# IPI00026904.2|ADSL

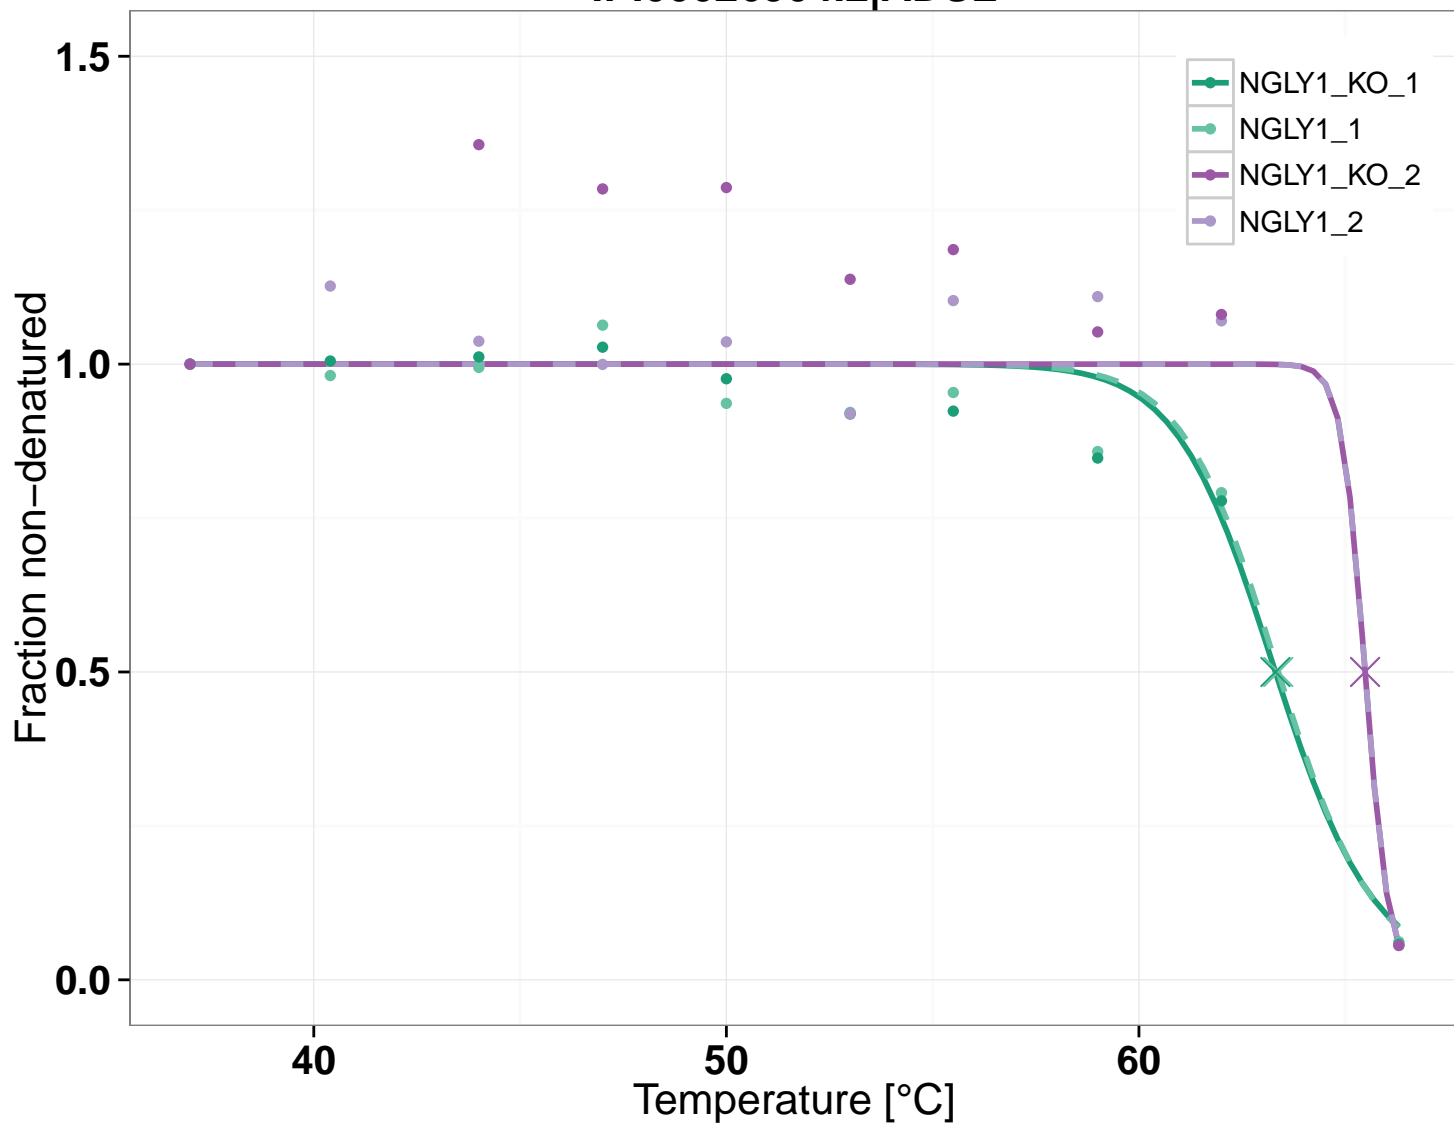

|            | meltPoint | slope | plateau | R2   |
|------------|-----------|-------|---------|------|
| NGLY1_KO_1 | 63.31     | -0.21 | 0       | 0.96 |
| NGLY1_1    | 63.38     | -0.21 | 0       | 0.96 |
| NGLY1_KO_2 | 65.48     | -0.87 | 0       | 0.57 |
| NGLY1_2    | 65.48     | -0.87 | 0       | 0.94 |

Supplement: Supplementary file 5176 [file 1]

IPI00170554.3|PSTPIP2

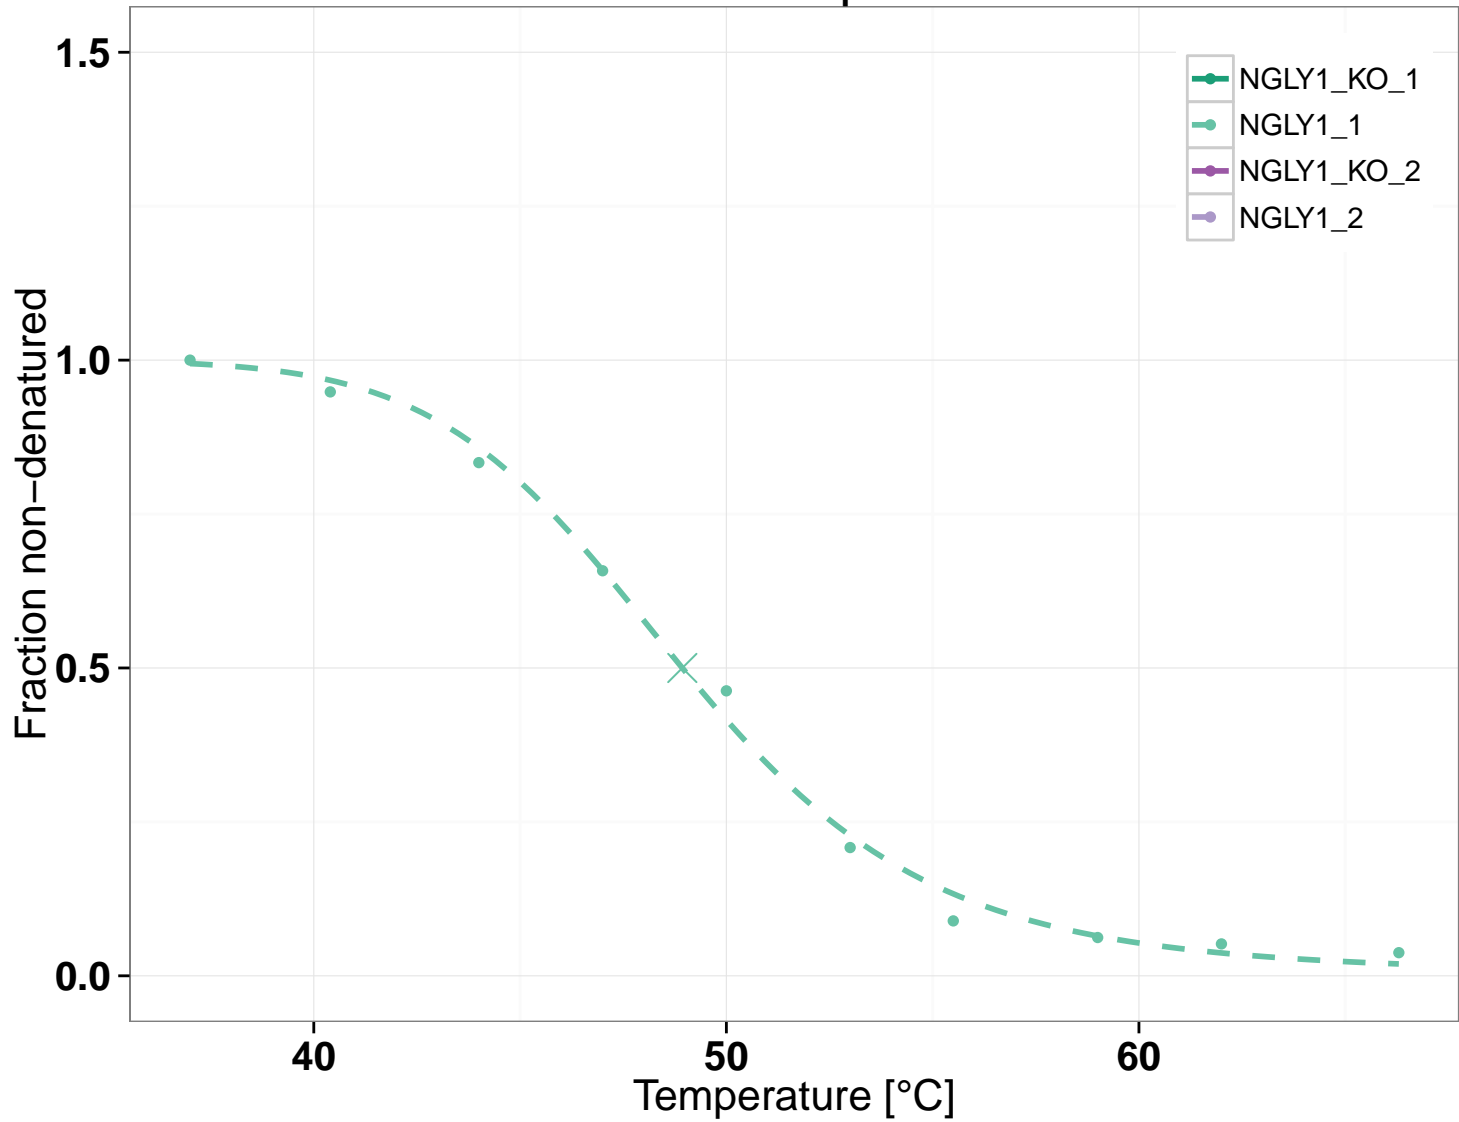

|            | meltPoint | slope  | plateau | R2 |
|------------|-----------|--------|---------|----|
| NGLY1_KO_1 | -         | -      | -       | -  |
| NGLY1_1    | 48.93     | -0.083 | 0       | 1  |
| NGLY1_KO_2 | -         | -      | -       | -  |
| NGLY1_2    | -         | -      | -       | -  |

Supplement: Supplementary file 5177 [file 1]

# IPI00018901.2|GGT1

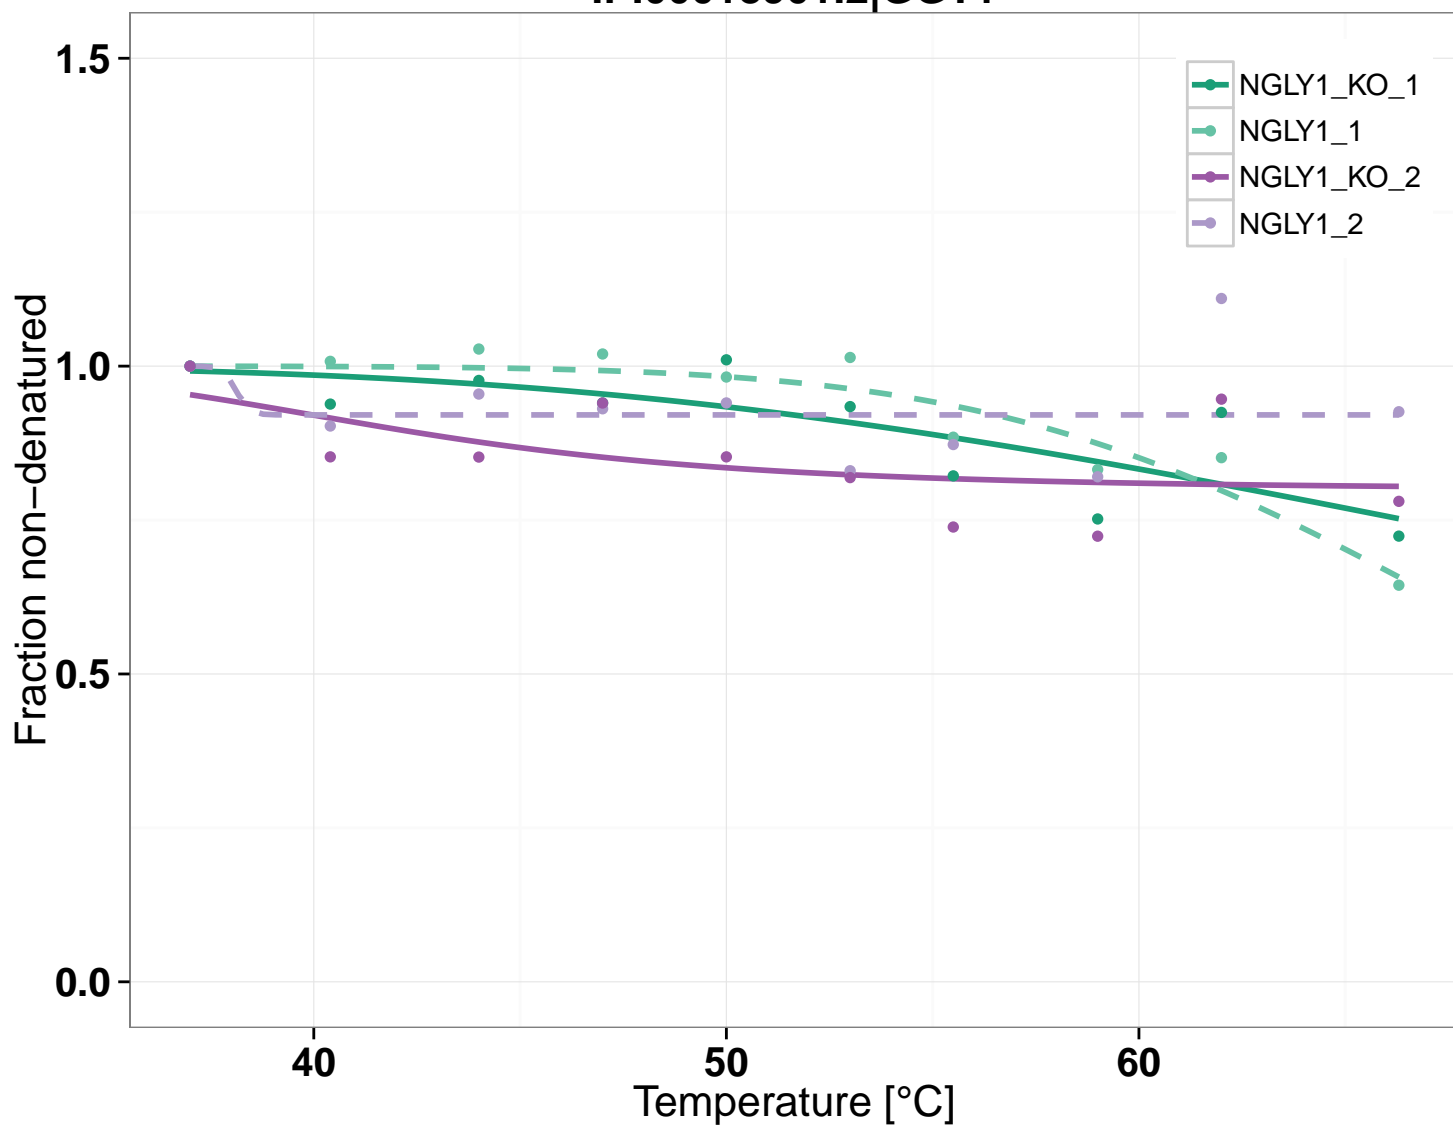

|            | meltPoint | slope  | plateau | R2   |
|------------|-----------|--------|---------|------|
| NGLY1_KO_1 | -         | -      | 0       | 0.61 |
| NGLY1_1    | -         | -      | 0       | 0.91 |
| NGLY1_KO_2 | -         | -0.012 | 0.8     | 0.35 |
| NGLY1_2    | -         | -0.13  | 0.92    | 0.09 |

Supplement: Supplementary file 5178 [file 1]

# IPI00045472.1|WDR24

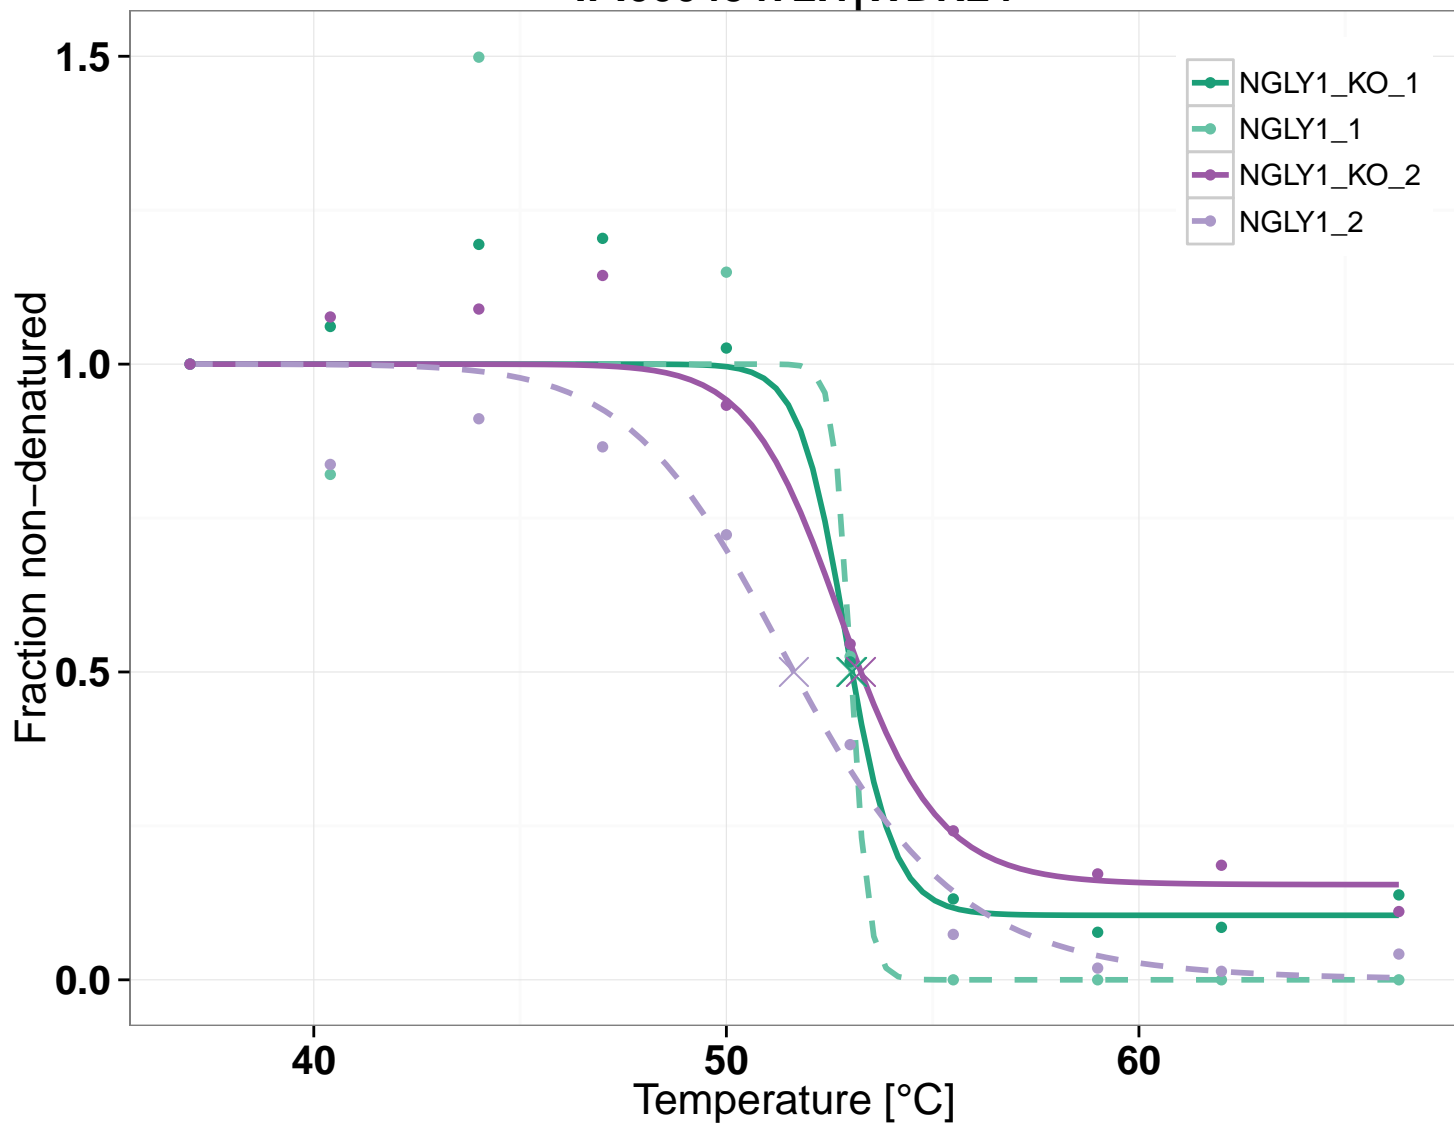

|            | meltPoint | slope | plateau | R2   |
|------------|-----------|-------|---------|------|
| NGLY1_KO_1 | 53.05     | -0.39 | 0.1     | 0.96 |
| NGLY1_1    | 53.02     | -1.2  | 0       | 0.83 |
| NGLY1_KO_2 | 53.26     | -0.18 | 0.15    | 0.98 |
| NGLY1_2    | 51.64     | -0.12 | 0       | 0.97 |

Supplement: Supplementary file 5179 [file 1]

IPI00017456.2|ATG10

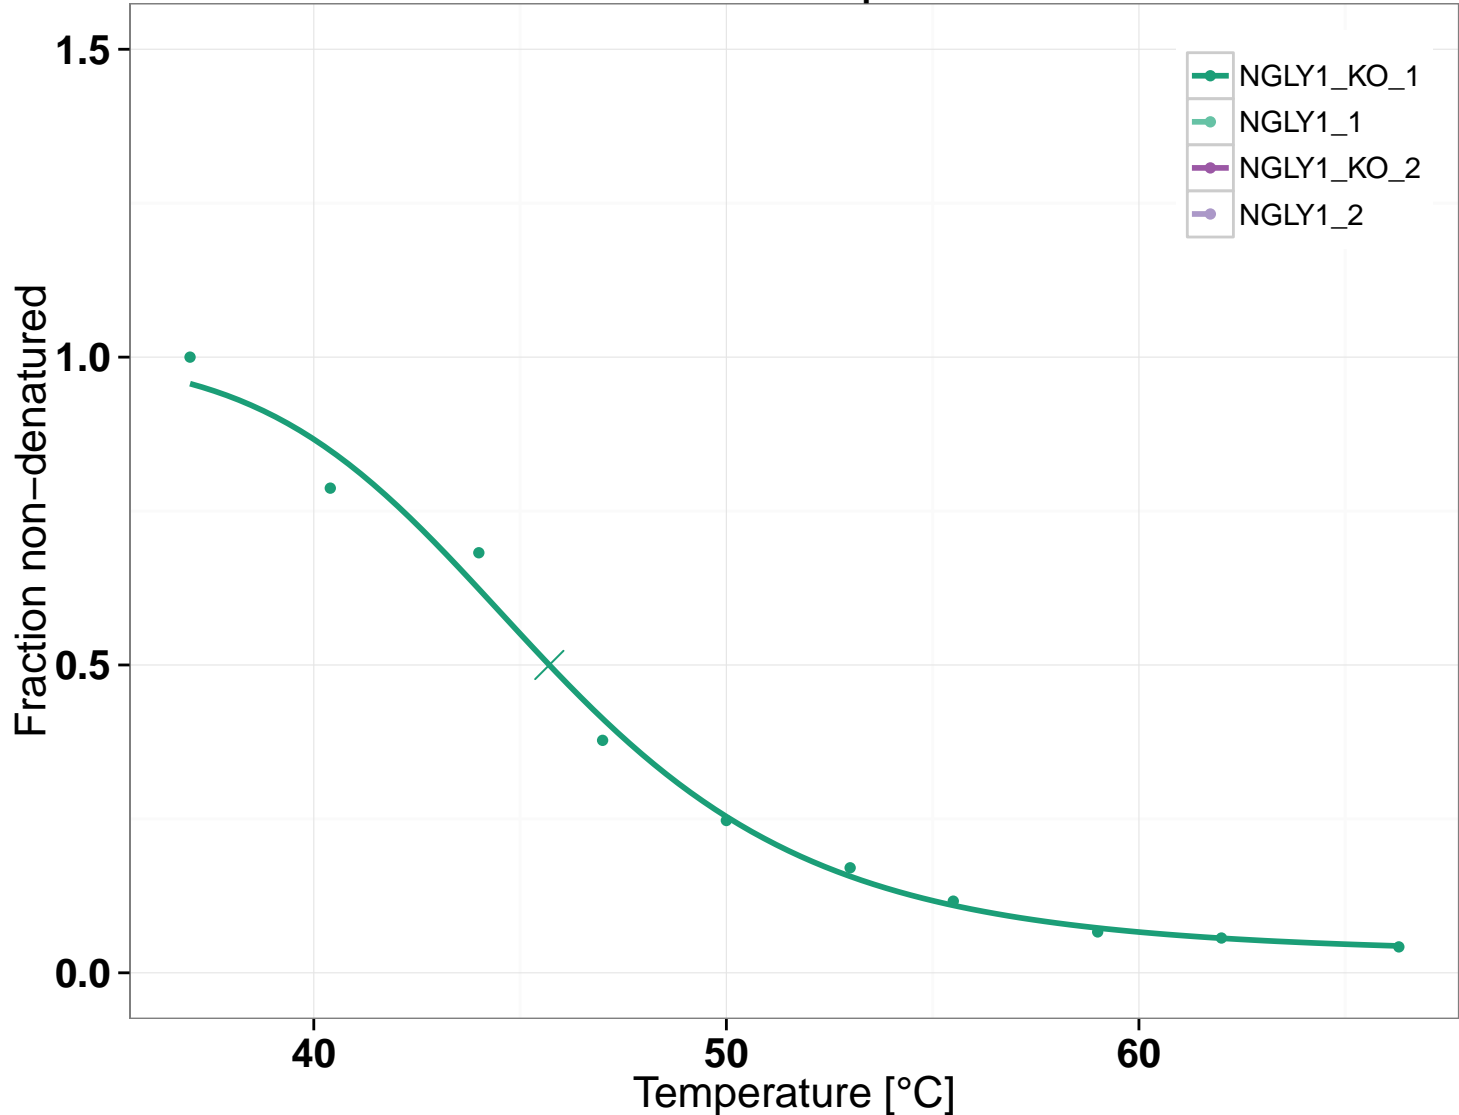

|            | meltPoint | slope  | plateau | R2   |
|------------|-----------|--------|---------|------|
| NGLY1_KO_1 | 45.71     | -0.073 | 0.03    | 0.99 |
| NGLY1_1    | -         | -      | -       | -    |
| NGLY1_KO_2 | -         | -      | -       | -    |
| NGLY1_2    | -         | -      | -       | -    |

Supplement: Supplementary file 5180 [file 1]

IPI00410079.3|FAM82A2

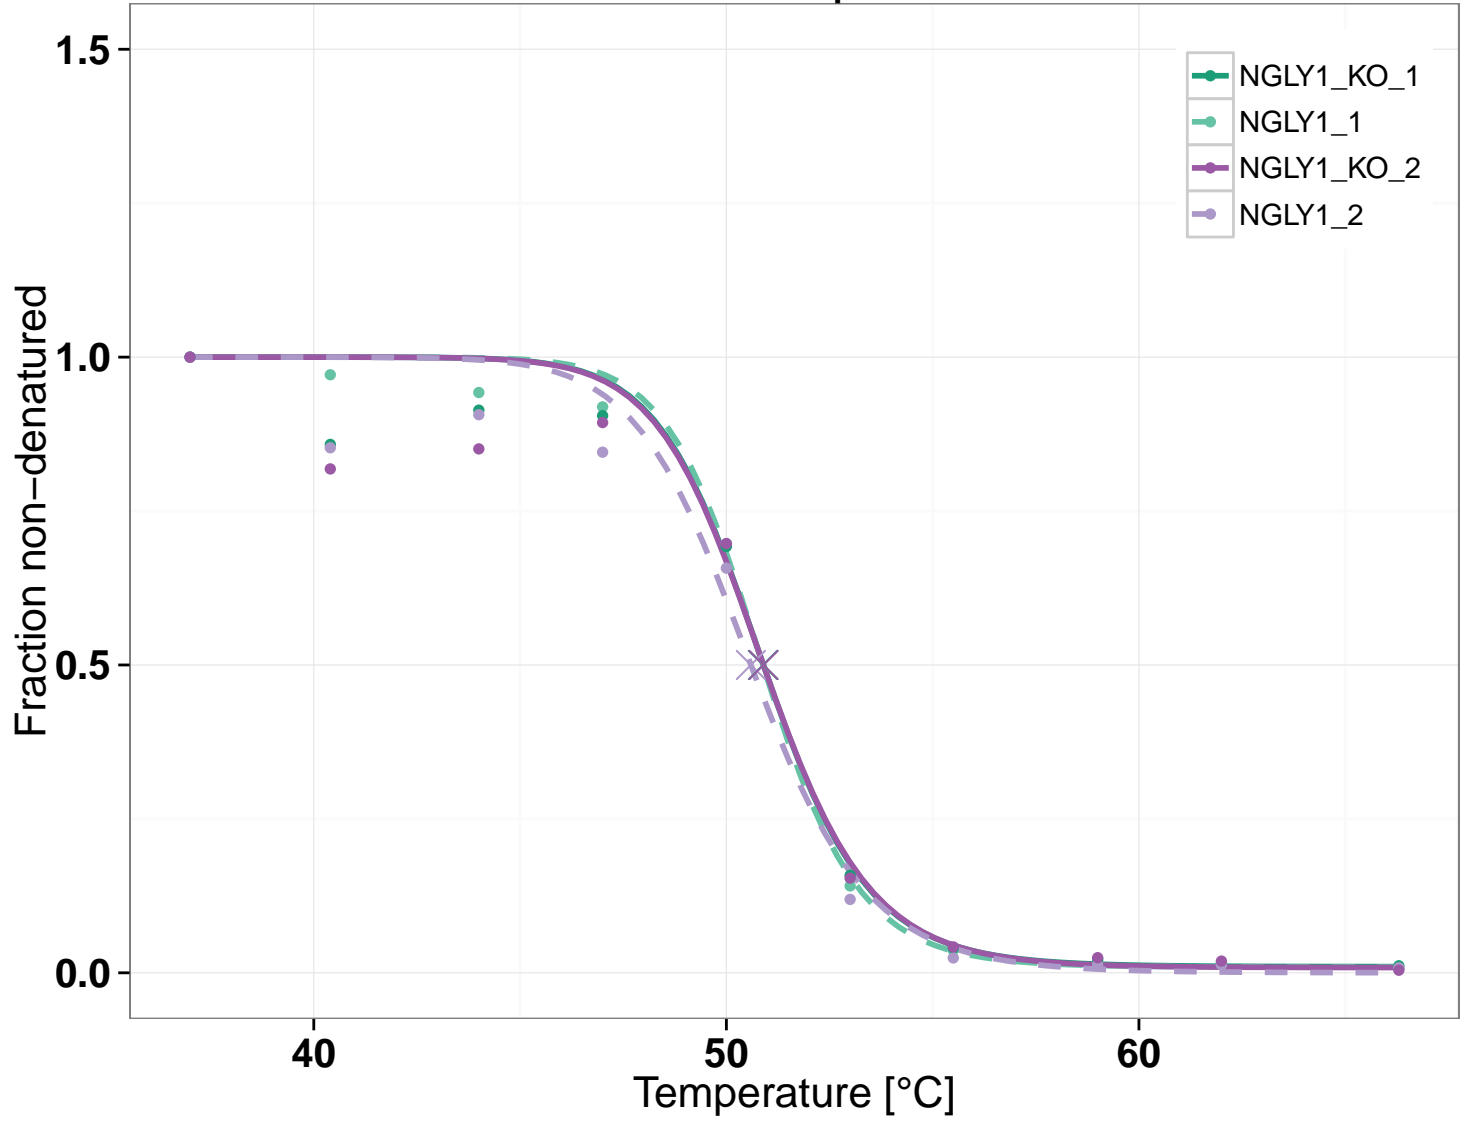

|            | meltPoint | slope | plateau | R2   |
|------------|-----------|-------|---------|------|
| NGLY1_KO_1 | 50.9      | -0.19 | 0.01    | 0.98 |
| NGLY1_1    | 50.88     | -0.21 | 0.01    | 1    |
| NGLY1_KO_2 | 50.9      | -0.19 | 0.01    | 0.96 |
| NGLY1_2    | 50.59     | -0.18 | 0       | 0.97 |

Supplement: Supplementary file 5181 [file 1]

# IPI00305545.2|DBR1

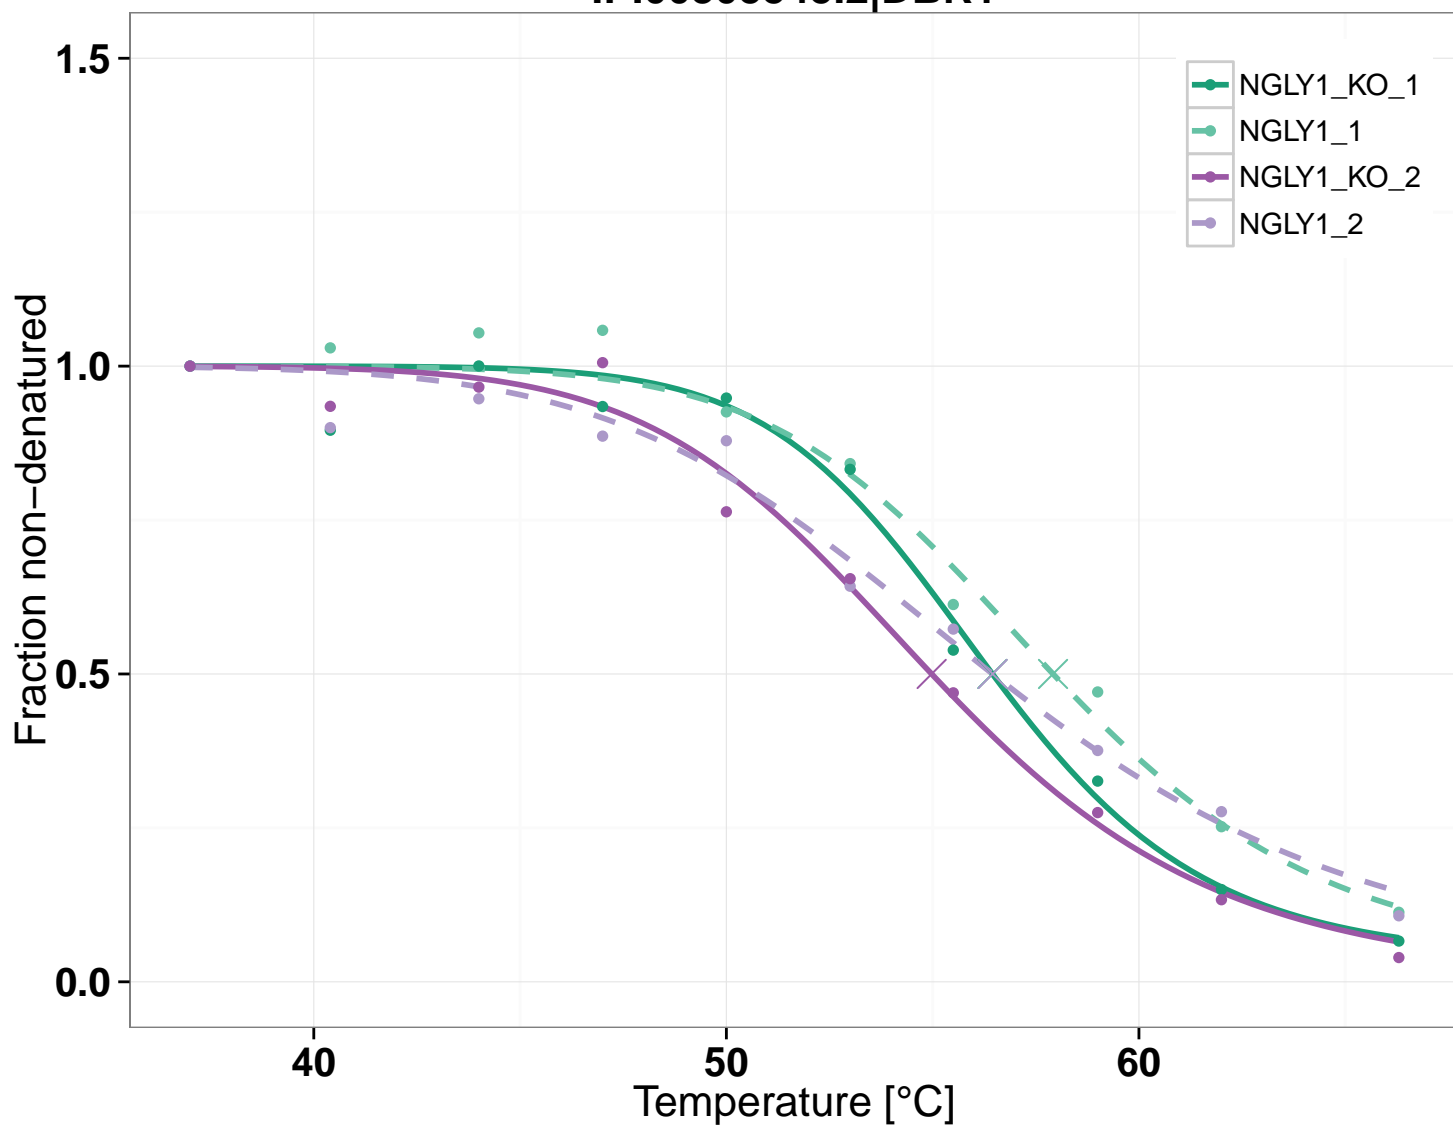

|            | meltPoint | slope  | plateau | R2   |
|------------|-----------|--------|---------|------|
| NGLY1_KO_1 | 56.45     | -0.091 | 0.03    | 0.98 |
| NGLY1_1    | 57.92     | -0.072 | 0.02    | 0.99 |
| NGLY1_KO_2 | 54.98     | -0.072 | 0       | 0.99 |
| NGLY1_2    | 56.45     | -0.054 | 0       | 0.98 |

Supplement: Supplementary file 5182 [file 1]

IPI00023177.4|CHAF1A

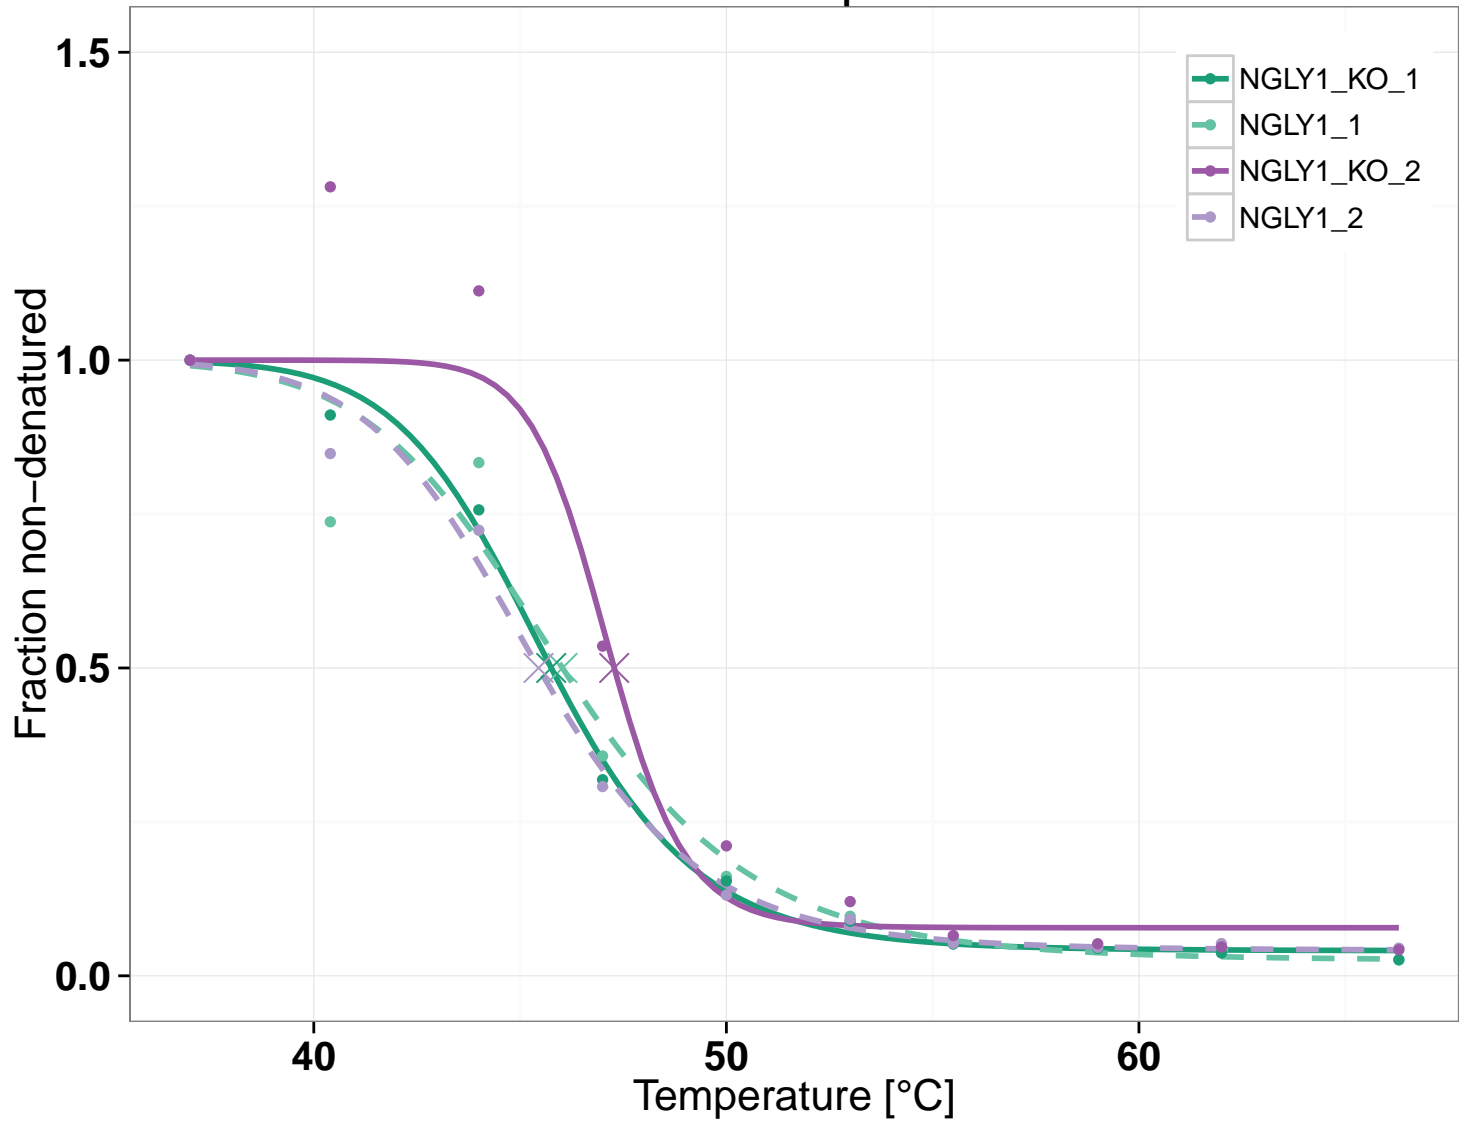

|            | meltPoint | slope | plateau | R2   |
|------------|-----------|-------|---------|------|
| NGLY1_KO_1 | 45.76     | -0.13 | 0.04    | 1    |
| NGLY1_1    | 46.03     | -0.1  | 0.02    | 0.95 |
| NGLY1_KO_2 | 47.28     | -0.24 | 0.08    | 0.95 |
| NGLY1_2    | 45.45     | -0.12 | 0.04    | 0.99 |

Supplement: Supplementary file 5183 [file 1]

IPI00301051.3|NHLRC2

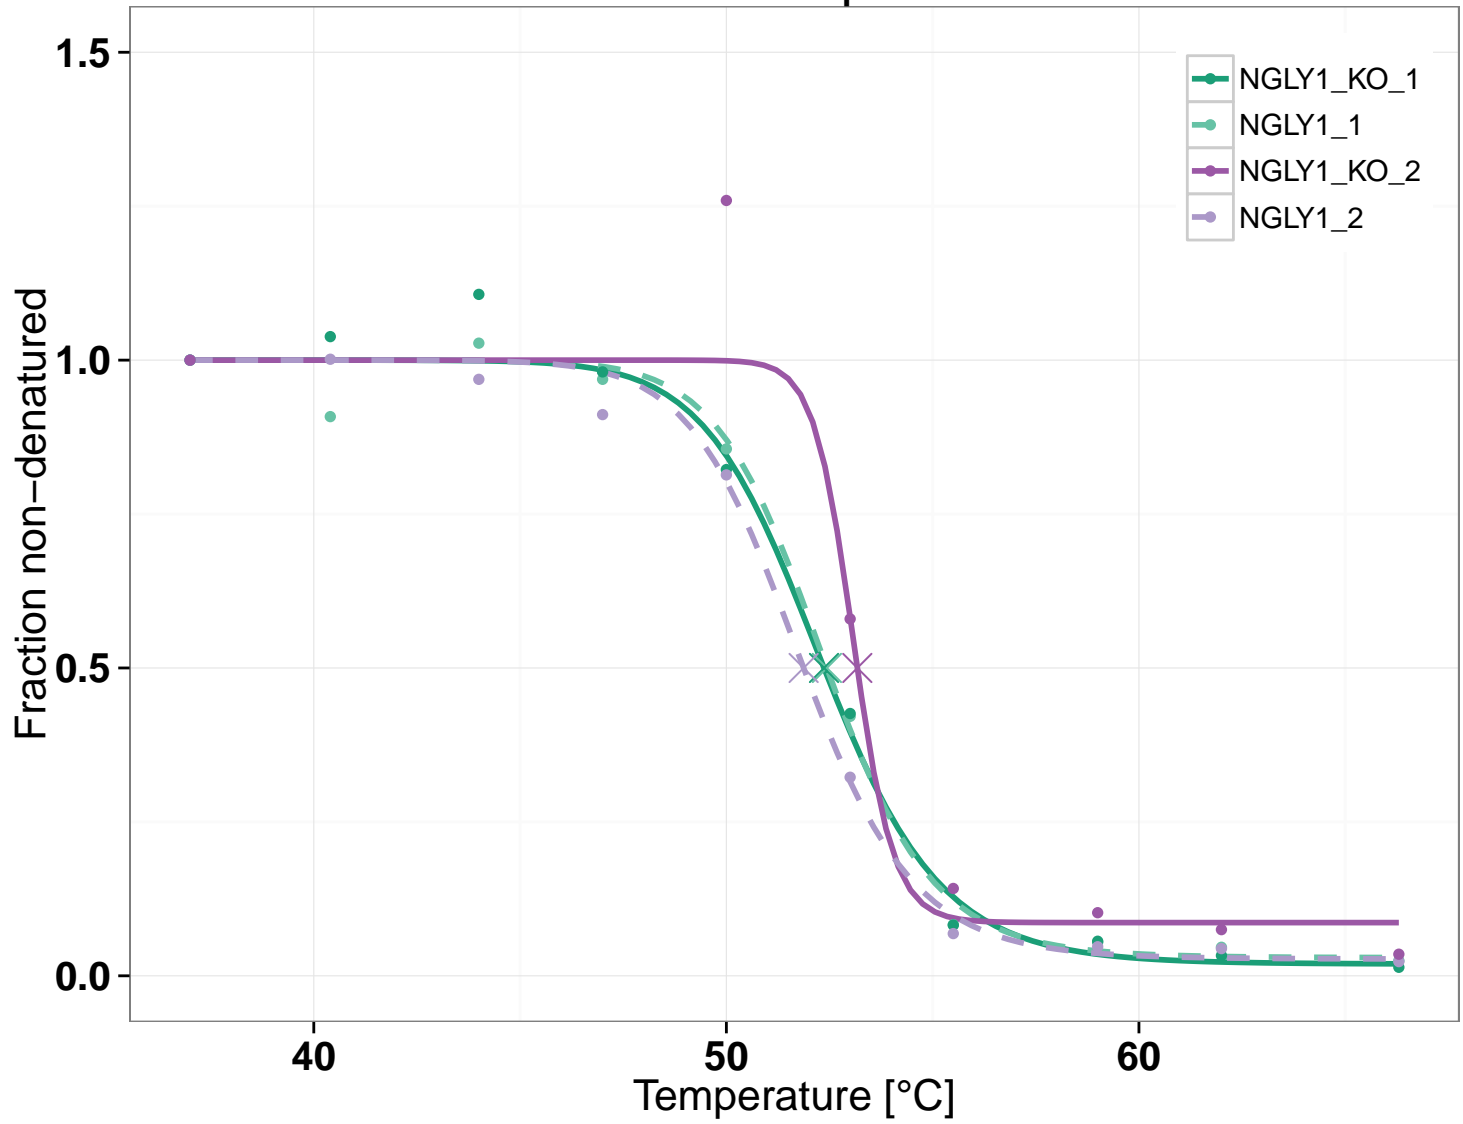

|            | meltPoint | slope | plateau | R2   |
|------------|-----------|-------|---------|------|
| NGLY1_KO_1 | 52.37     | -0.17 | 0.02    | 0.99 |
| NGLY1_1    | 52.44     | -0.18 | 0.03    | 0.99 |
| NGLY1_KO_2 | 53.17     | -0.47 | 0.09    | 0.75 |
| NGLY1_2    | 51.87     | -0.18 | 0.03    | 1    |

Supplement: Supplementary file 5184 [file 1]

# IPI00011268.2|RALY

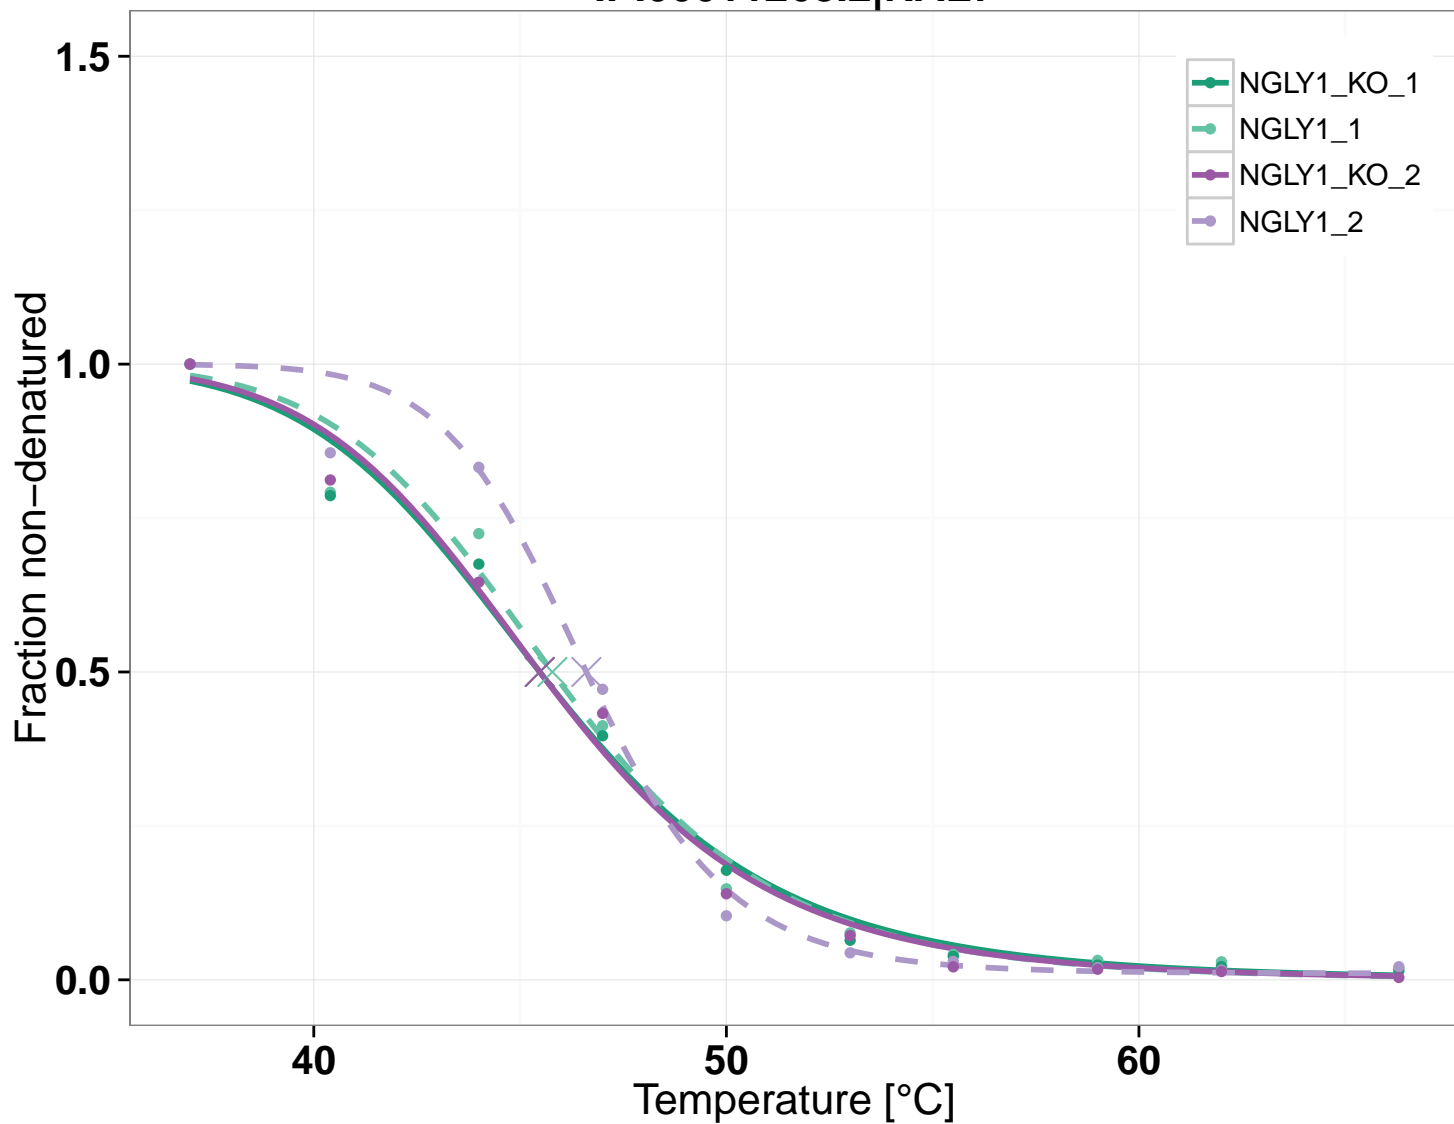

|            | meltPoint | slope  | plateau | R2   |
|------------|-----------|--------|---------|------|
| NGLY1_KO_1 | 45.48     | -0.087 | 0       | 0.99 |
| NGLY1_1    | 45.78     | -0.093 | 0       | 0.98 |
| NGLY1_KO_2 | 45.48     | -0.091 | 0       | 0.99 |
| NGLY1_2    | 46.61     | -0.14  | 0.01    | 0.99 |

Supplement: Supplementary file 5185 [file 1]

IPI00856096.2|TMEM181

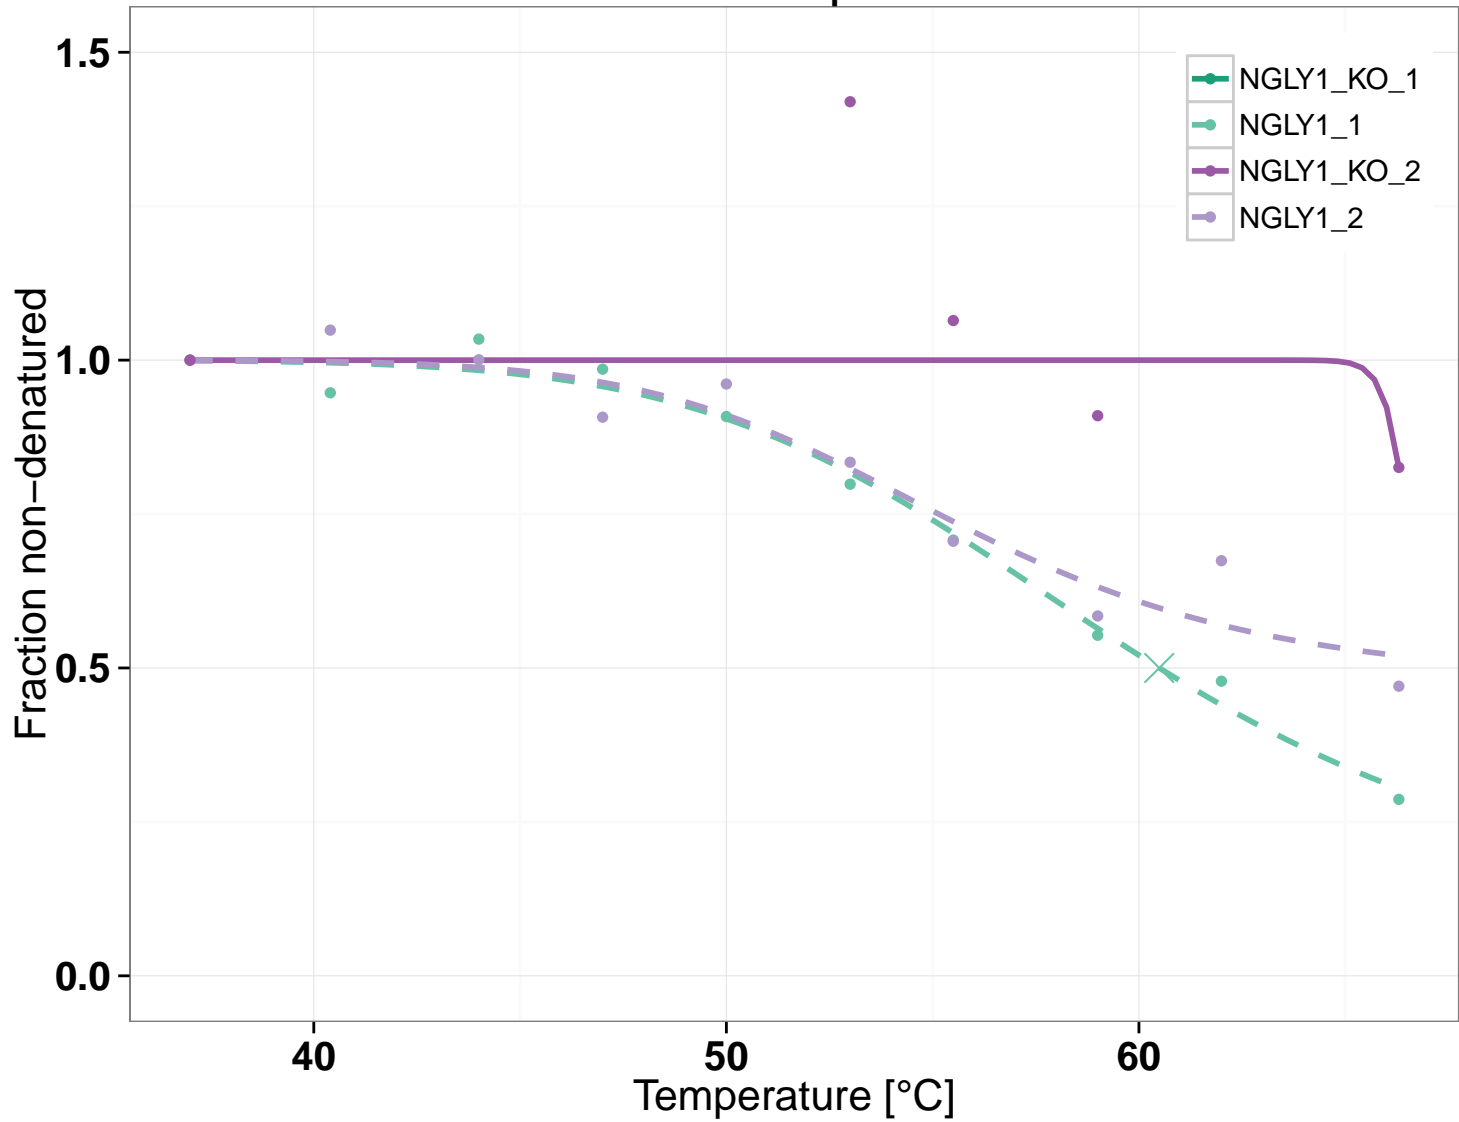

|            | meltPoint | slope  | plateau | R2   |
|------------|-----------|--------|---------|------|
| NGLY1_KO_1 | -         | -      | -       | -    |
| NGLY1_1    | 60.49     | -0.045 | 0.09    | 0.99 |
| NGLY1_KO_2 | -         | -      | 0       | -0.9 |
| NGLY1_2    | -         | -0.035 | 0.47    | 0.93 |

Supplement: Supplementary file 5186 [file 1]

IPI00028912.2|VEZF1

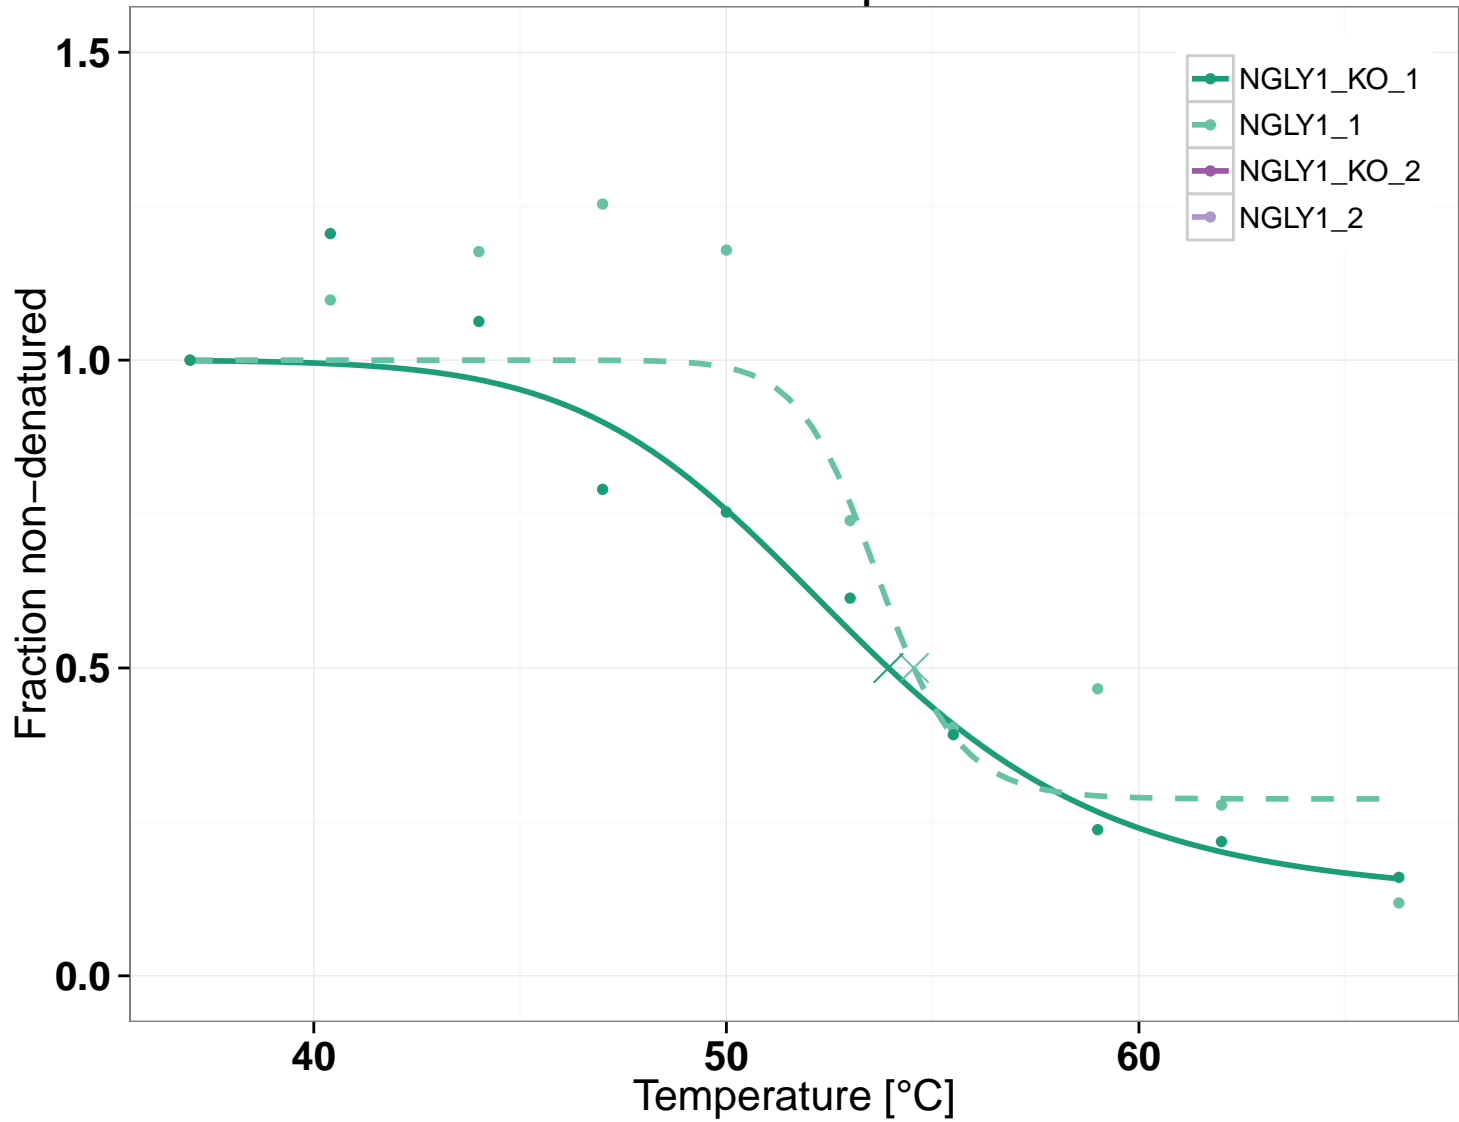

|            | meltPoint | slope  | plateau | R2   |
|------------|-----------|--------|---------|------|
| NGLY1_KO_1 | 53.93     | -0.068 | 0.12    | 0.95 |
| NGLY1_1    | 54.54     | -0.18  | 0.29    | 0.88 |
| NGLY1_KO_2 | -         | -      | -       | -    |
| NGLY1_2    | -         | -      | -       | -    |

Supplement: Supplementary file 5187 [file 1]

# IPI00063334.3|TMEM41A

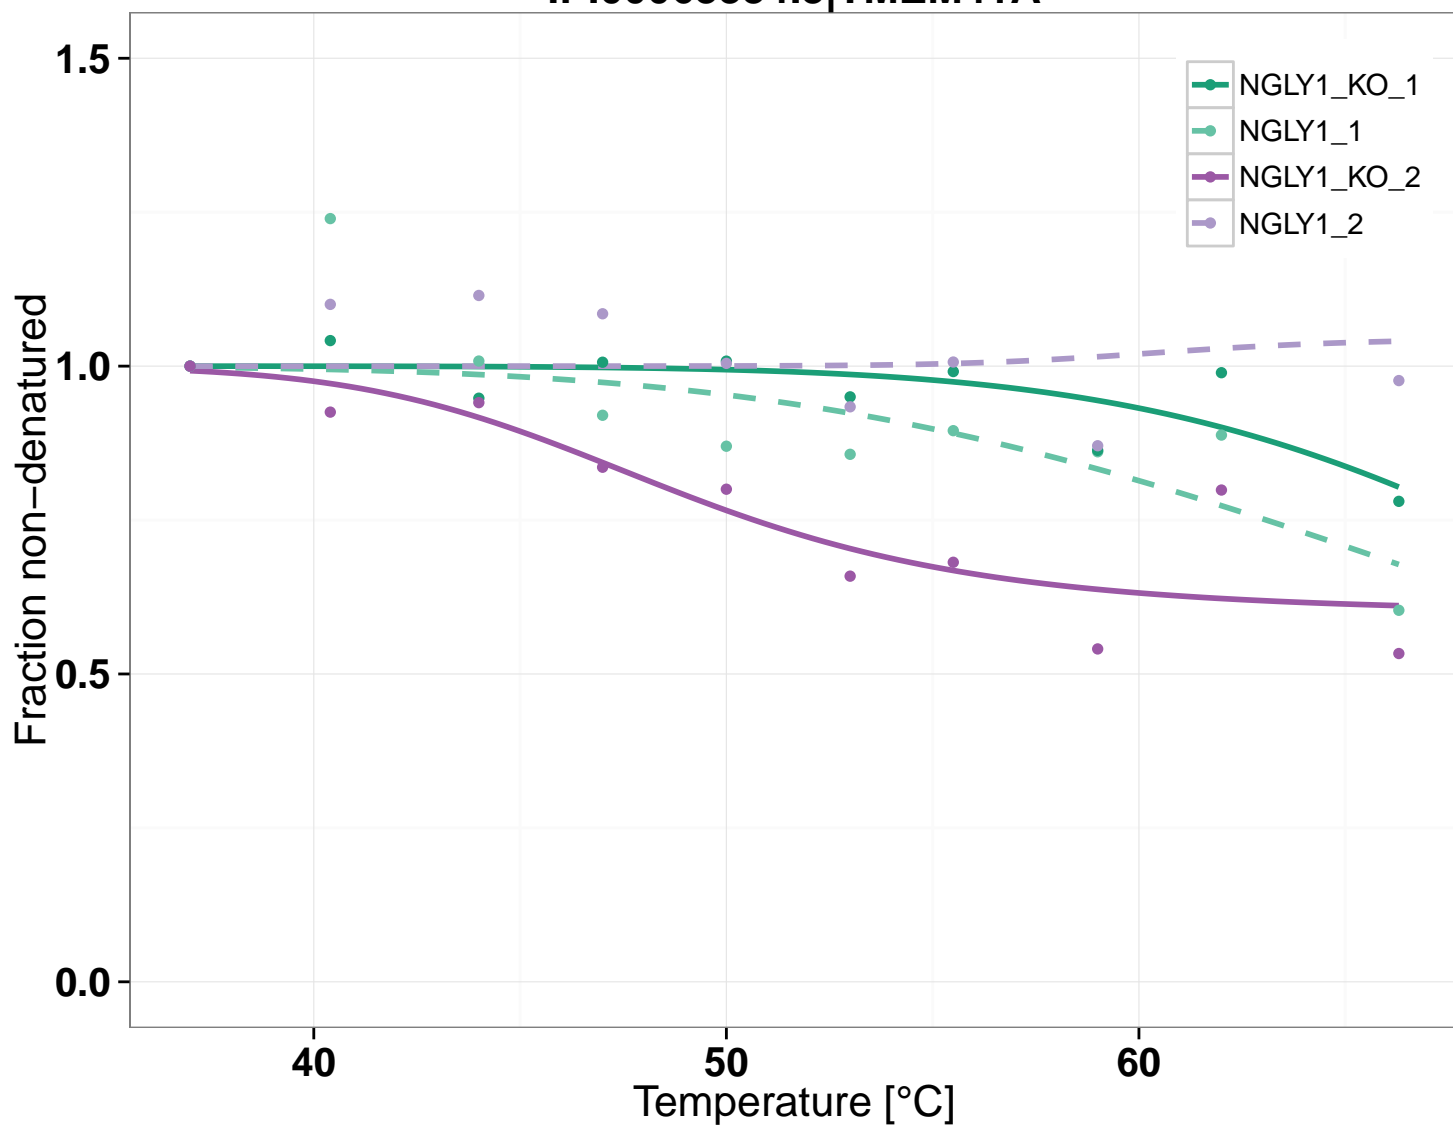

|            | meltPoint | slope  | plateau | R2    |
|------------|-----------|--------|---------|-------|
| NGLY1_KO_1 | —         | —      | 0       | 0.62  |
| NGLY1_1    | —         | —      | 0       | 0.59  |
| NGLY1_KO_2 | —         | -0.027 | 0.6     | 0.78  |
| NGLY1_2    | —         | 0.0046 | 1.05    | -0.07 |

Supplement: Supplementary file 5188 [file 1]

# IPI00009726.4|NMNAT1

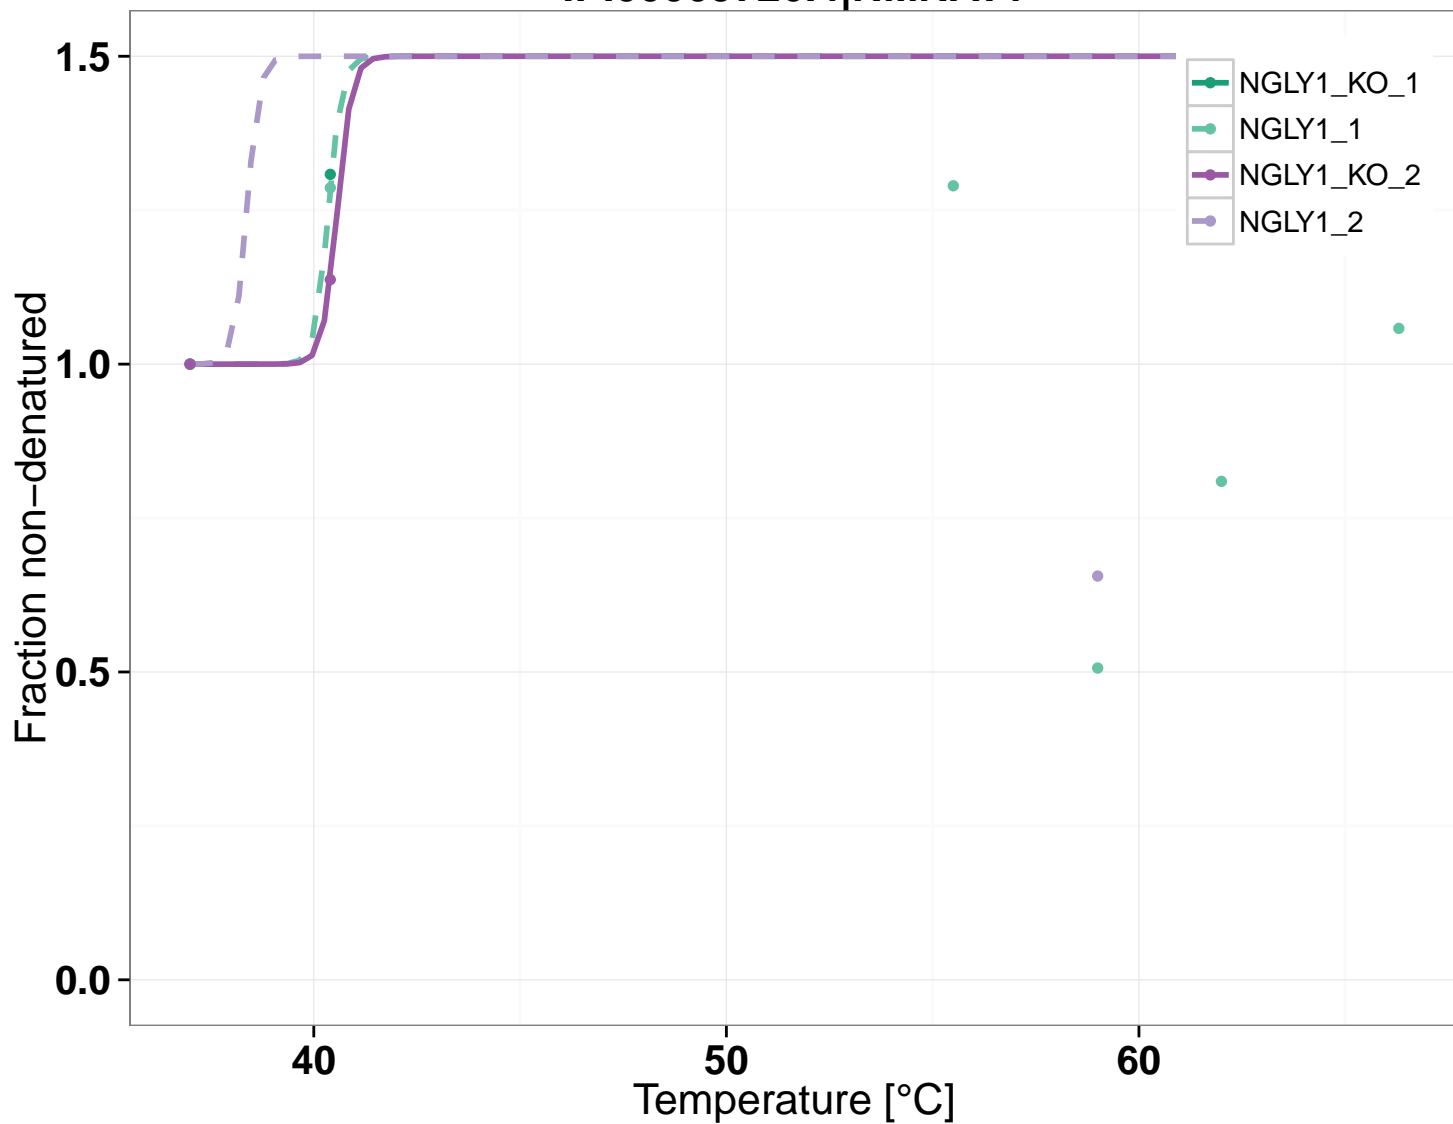

|            | meltPoint | slope | plateau | R2    |
|------------|-----------|-------|---------|-------|
| NGLY1_KO_1 | –         | –     | –       | –     |
| NGLY1_1    | –         | 0.77  | 1.5     | 0.06  |
| NGLY1_KO_2 | –         | 0.71  | 1.5     | –0.54 |
| NGLY1_2    | –         | 0.81  | 1.5     | –0.54 |

Supplement: Supplementary file 5189 [file 1]

IPI00383598.1|COX6A1

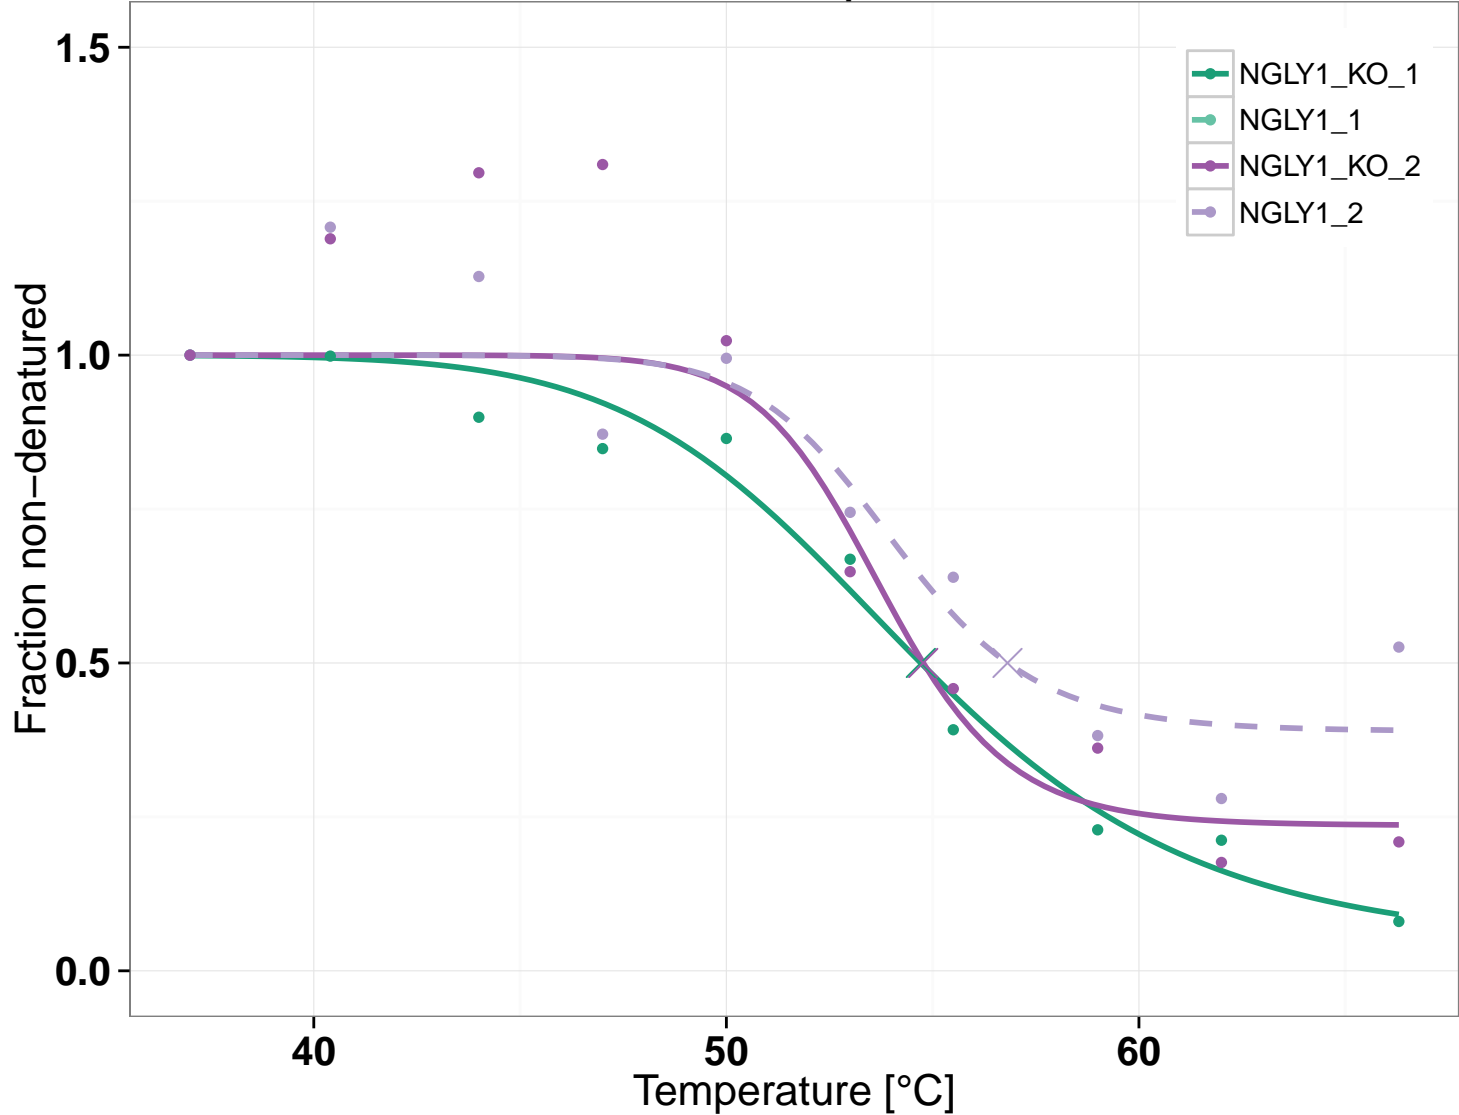

|            | meltPoint | slope  | plateau | R2   |
|------------|-----------|--------|---------|------|
| NGLY1_KO_1 | 54.71     | -0.069 | 0.03    | 0.98 |
| NGLY1_1    | —         | —      | —       | —    |
| NGLY1_KO_2 | 54.77     | -0.13  | 0.24    | 0.86 |
| NGLY1_2    | 56.81     | -0.089 | 0.39    | 0.87 |

Supplement: Supplementary file 5190 [file 1]

# IPI00376971.1|NFE2L1

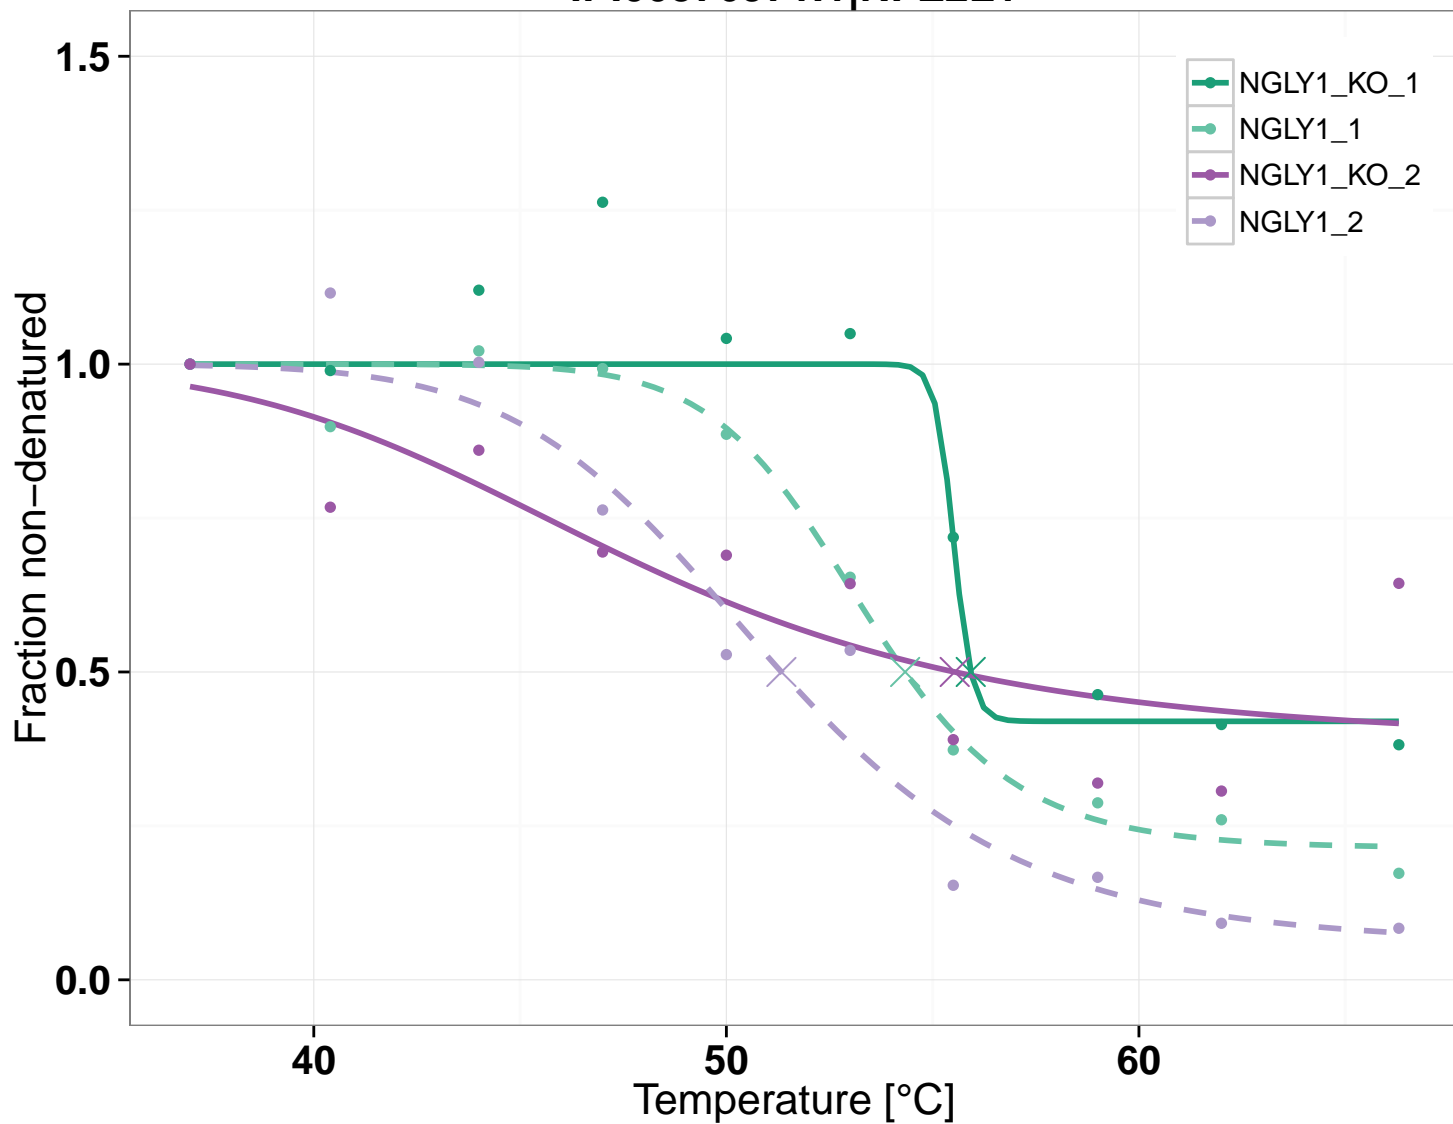

|            | meltPoint | slope  | plateau | R2   |
|------------|-----------|--------|---------|------|
| NGLY1_KO_1 | 55.92     | -0.65  | 0.42    | 0.9  |
| NGLY1_1    | 54.33     | -0.11  | 0.21    | 0.99 |
| NGLY1_KO_2 | 55.53     | -0.033 | 0.38    | 0.71 |
| NGLY1_2    | 51.33     | -0.077 | 0.06    | 0.96 |

Supplement: Supplementary file 5191 [file 1]

# IPI00011074.2|GORASP1

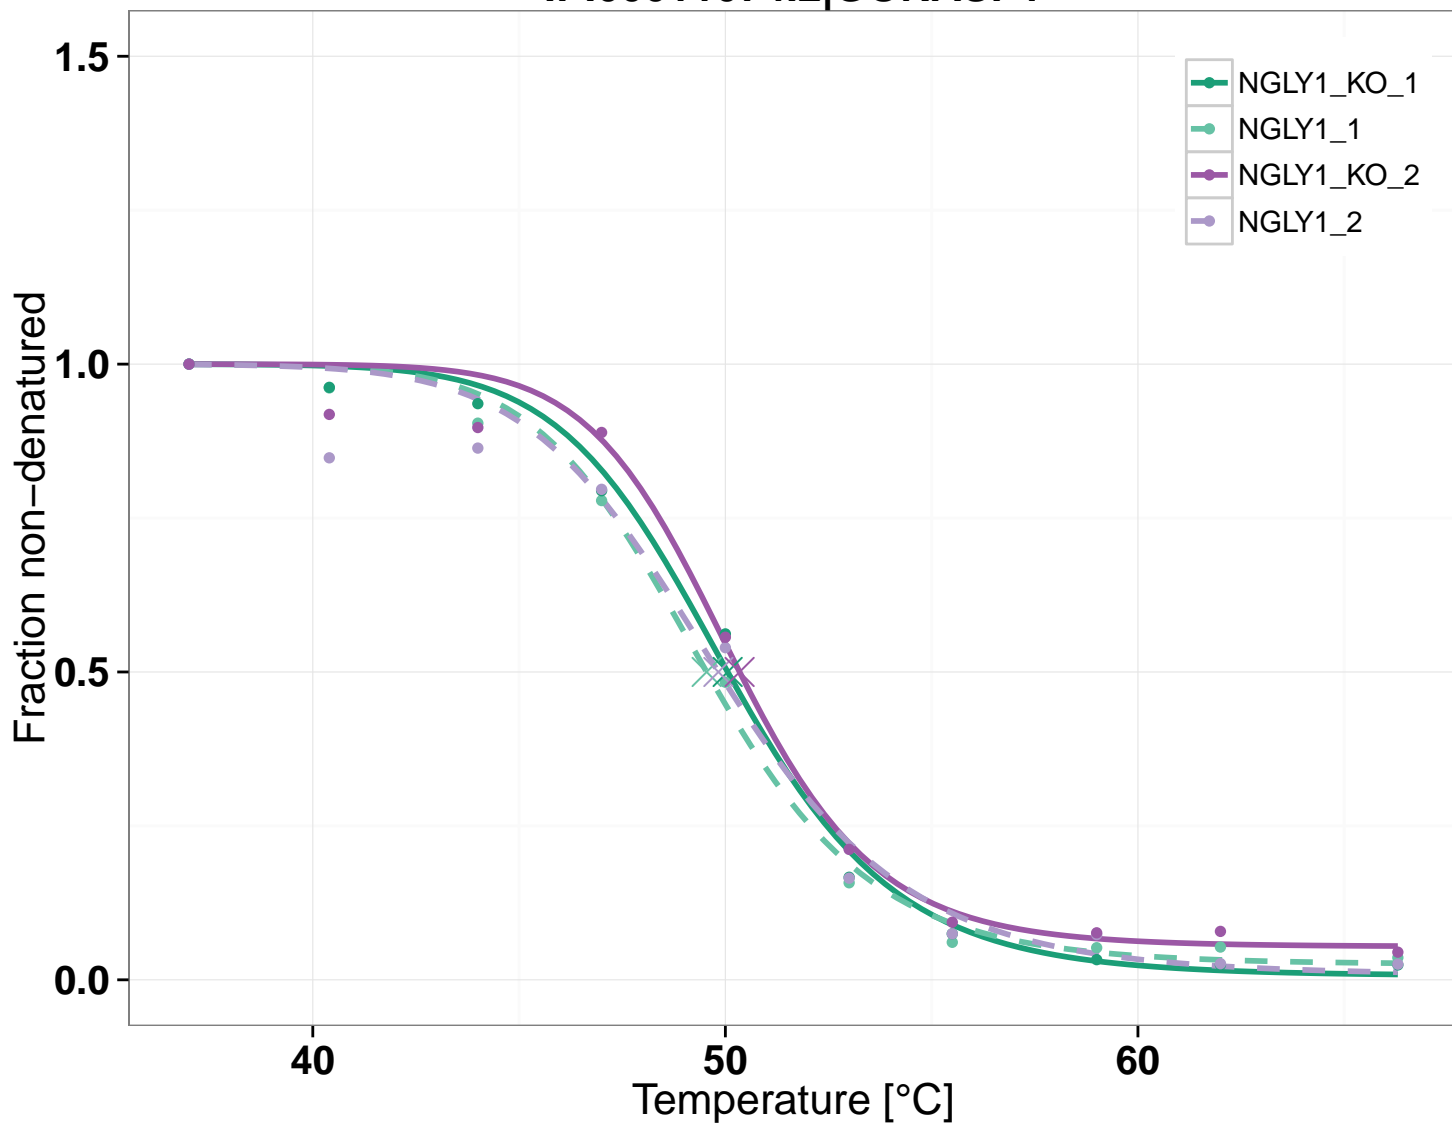

|            | meltPoint | slope | plateau | R2   |
|------------|-----------|-------|---------|------|
| NGLY1_KO_1 | 50.06     | -0.12 | 0.01    | 0.99 |
| NGLY1_1    | 49.55     | -0.12 | 0.02    | 1    |
| NGLY1_KO_2 | 50.35     | -0.13 | 0.05    | 0.99 |
| NGLY1_2    | 49.83     | -0.11 | 0.01    | 0.98 |

Supplement: Supplementary file 5192 [file 1]

IPI00304885.1|CENPC1

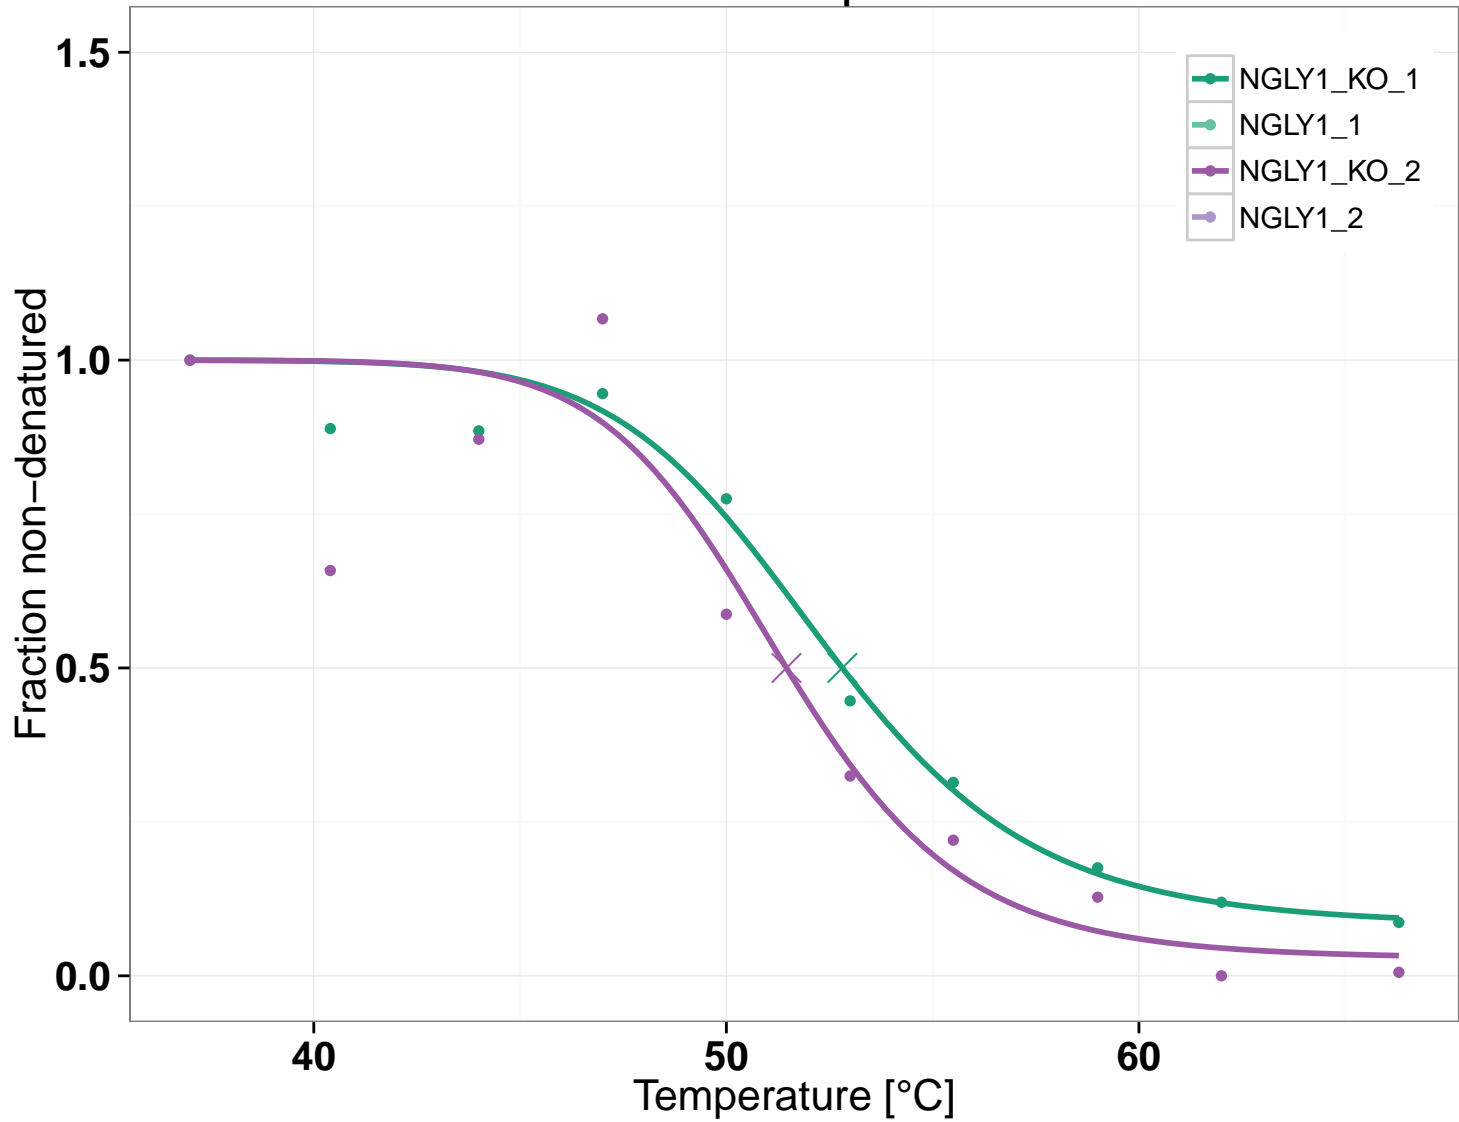

|            | meltPoint | slope | plateau | R2   |
|------------|-----------|-------|---------|------|
| NGLY1_KO_1 | 52.81     | -0.09 | 0.08    | 0.98 |
| NGLY1_1    | -         | -     | -       | -    |
| NGLY1_KO_2 | 51.46     | -0.11 | 0.03    | 0.89 |
| NGLY1_2    | -         | -     | -       | -    |

Supplement: Supplementary file 5193 [file 1]

IPI00332552.2|ZBTB40

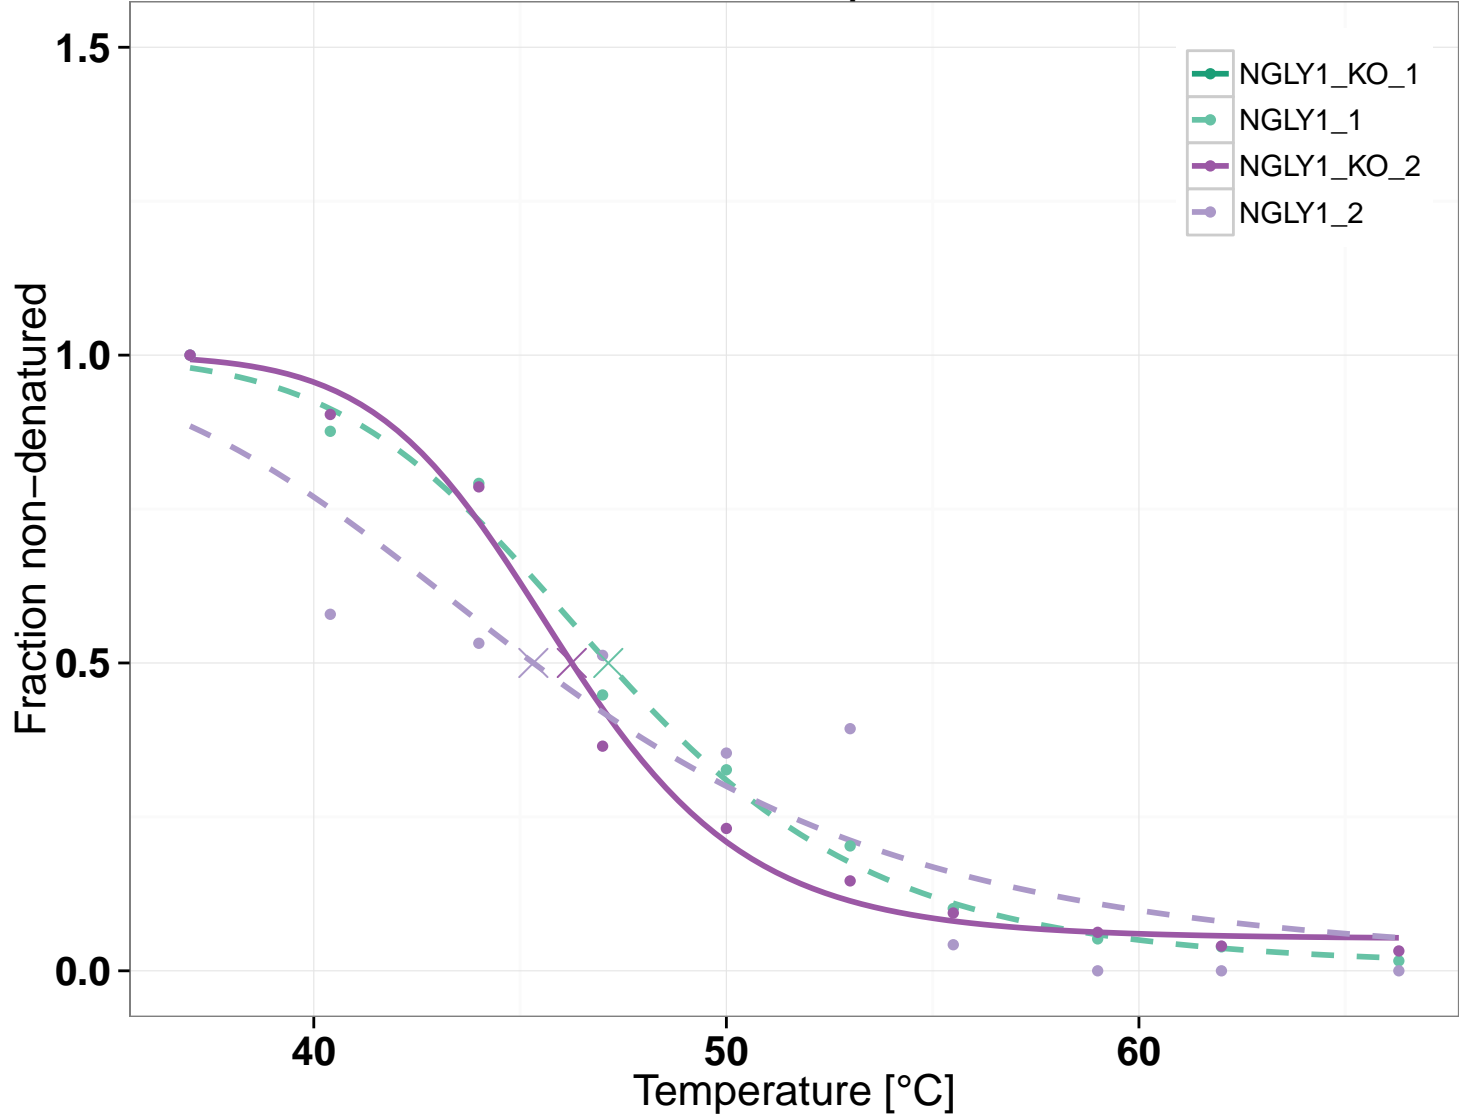

|            | meltPoint | slope  | plateau | R2   |
|------------|-----------|--------|---------|------|
| NGLY1_KO_1 | -         | -      | -       | -    |
| NGLY1_1    | 47.14     | -0.076 | 0       | 0.99 |
| NGLY1_KO_2 | 46.25     | -0.1   | 0.05    | 0.99 |
| NGLY1_2    | 45.32     | -0.052 | 0       | 0.88 |

Supplement: Supplementary file 5194 [file 1]

# IPI00005541.1|PMS1

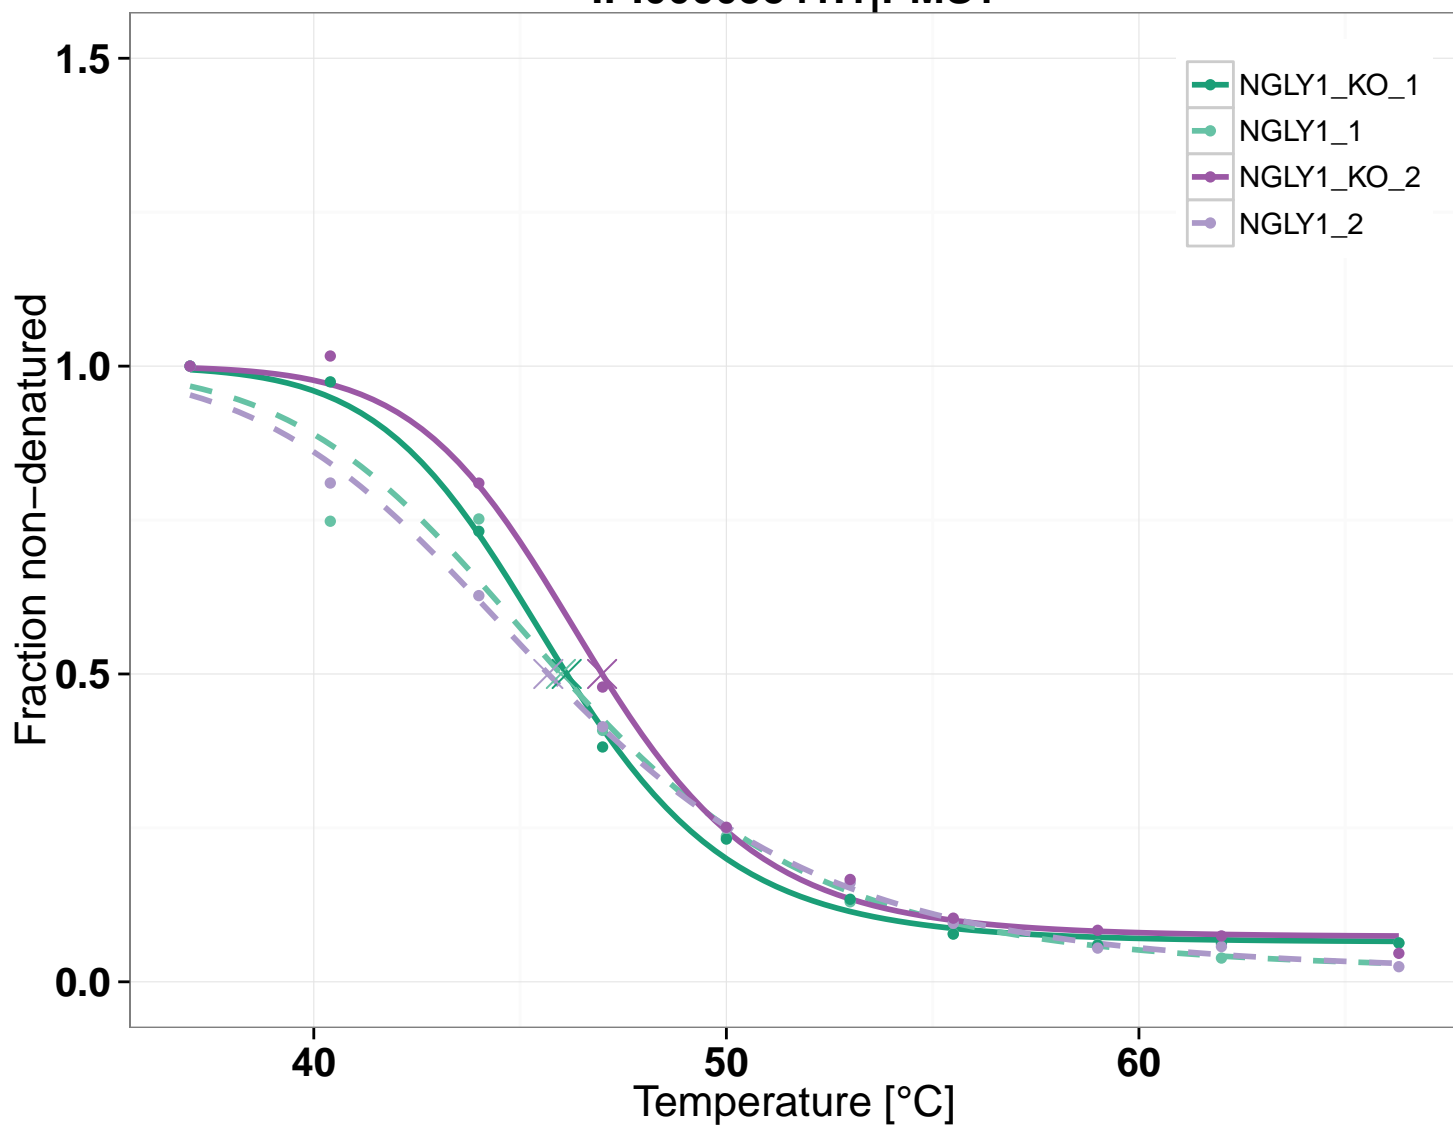

|            | meltPoint | slope  | plateau | R2   |
|------------|-----------|--------|---------|------|
| NGLY1_KO_1 | 46.13     | -0.11  | 0.06    | 1    |
| NGLY1_1    | 45.99     | -0.077 | 0.02    | 0.97 |
| NGLY1_KO_2 | 46.99     | -0.11  | 0.07    | 1    |
| NGLY1_2    | 45.68     | -0.072 | 0.01    | 1    |

Supplement: Supplementary file 5195 [file 1]

# IPI00329719.1|MYO1D

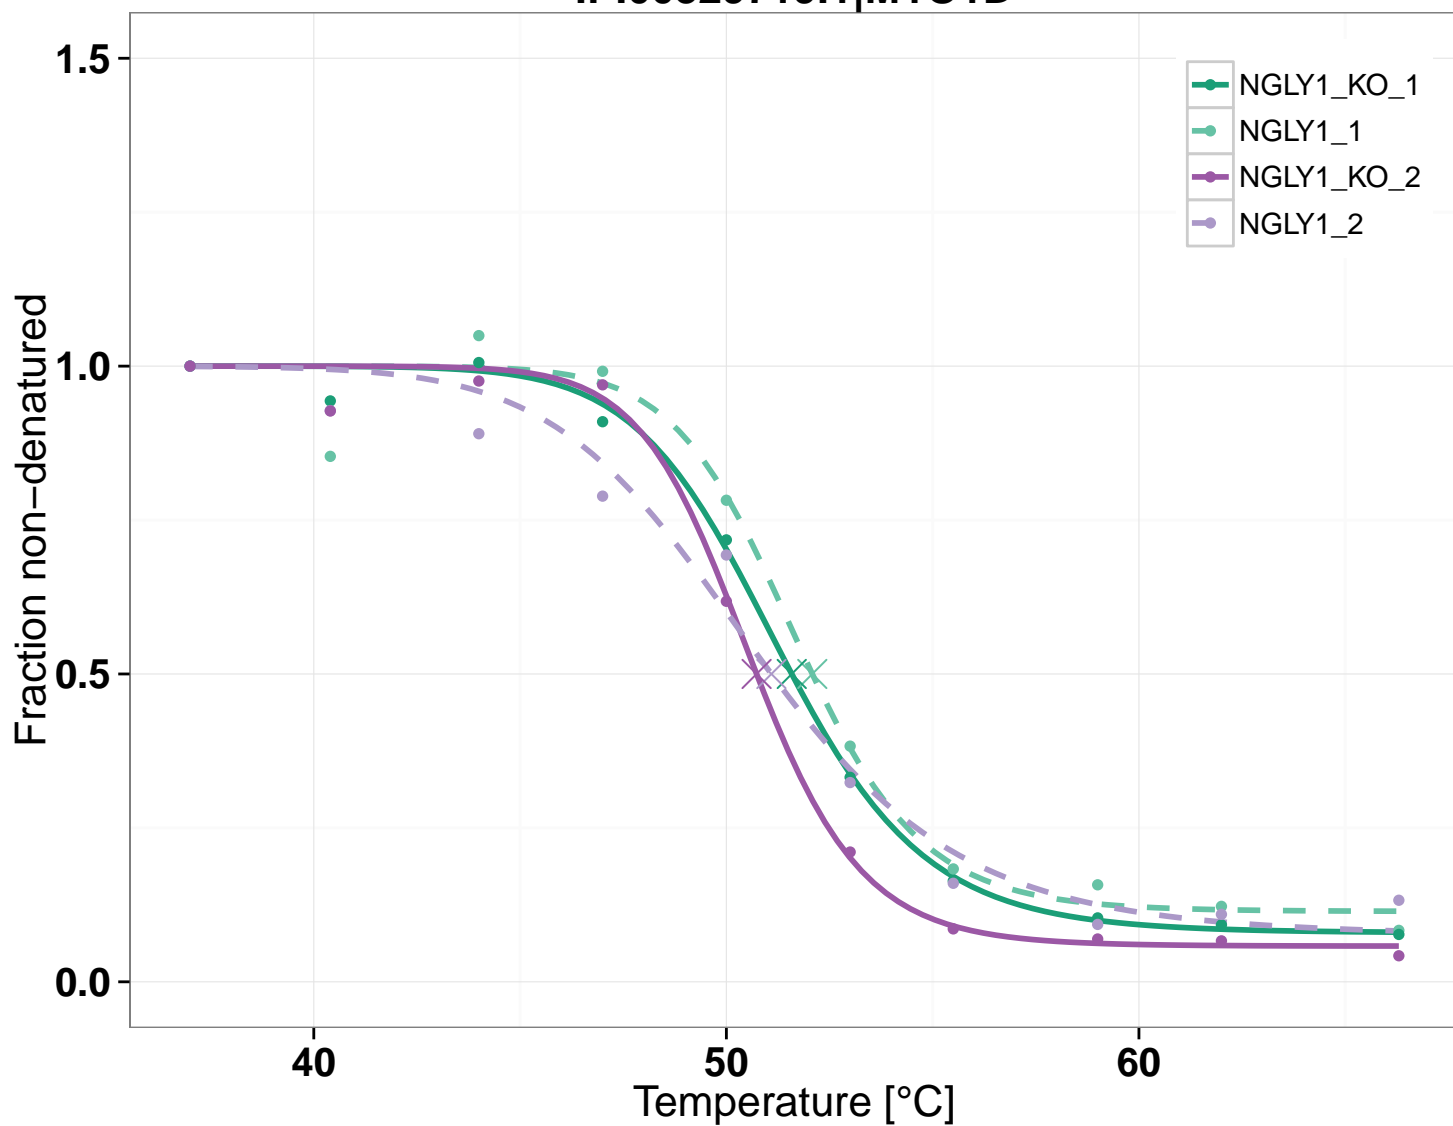

|            | meltPoint | slope  | plateau | R2   |
|------------|-----------|--------|---------|------|
| NGLY1_KO_1 | 51.58     | -0.13  | 0.08    | 1    |
| NGLY1_1    | 52.08     | -0.15  | 0.11    | 0.98 |
| NGLY1_KO_2 | 50.73     | -0.17  | 0.06    | 1    |
| NGLY1_2    | 51.09     | -0.093 | 0.07    | 0.98 |

Supplement: Supplementary file 5196 [file 1]

IPI00550977.1|CCDC21

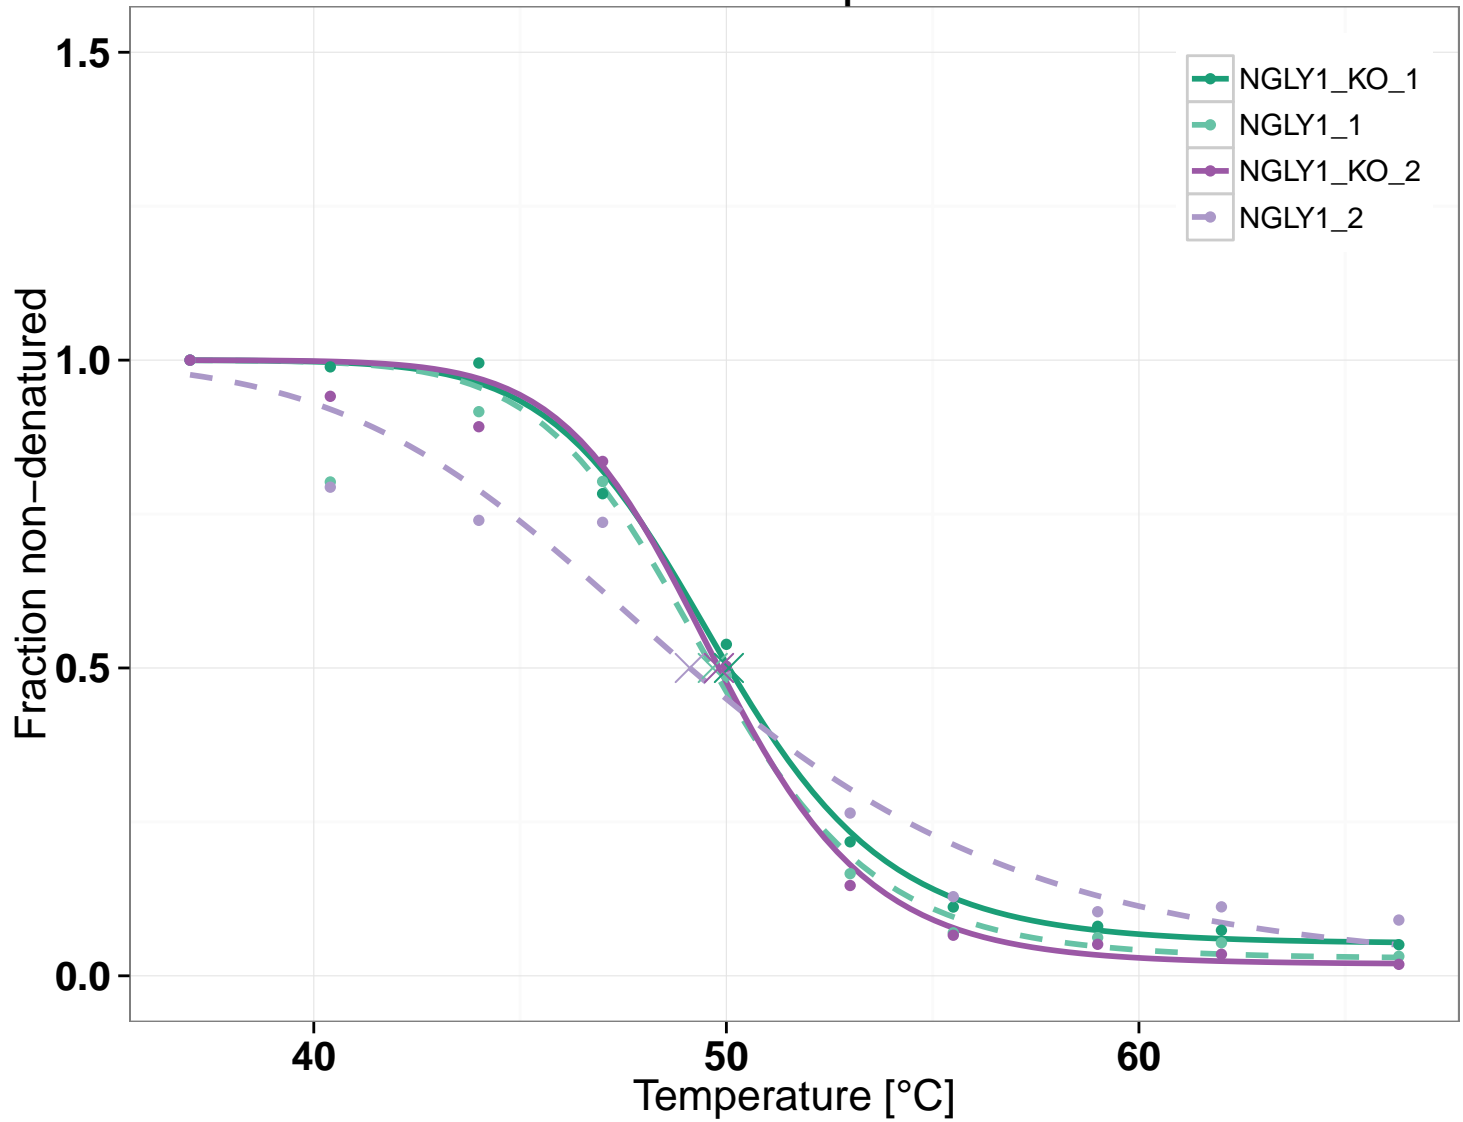

|            | meltPoint | slope | plateau | R2   |
|------------|-----------|-------|---------|------|
| NGLY1_KO_1 | 50.06     | -0.12 | 0.05    | 1    |
| NGLY1_1    | 49.67     | -0.12 | 0.03    | 0.97 |
| NGLY1_KO_2 | 49.82     | -0.13 | 0.02    | 0.99 |
| NGLY1_2    | 49.11     | -0.06 | 0       | 0.96 |

Supplement: Supplementary file 5197 [file 1]

IPI00788782.1|ATP1A3

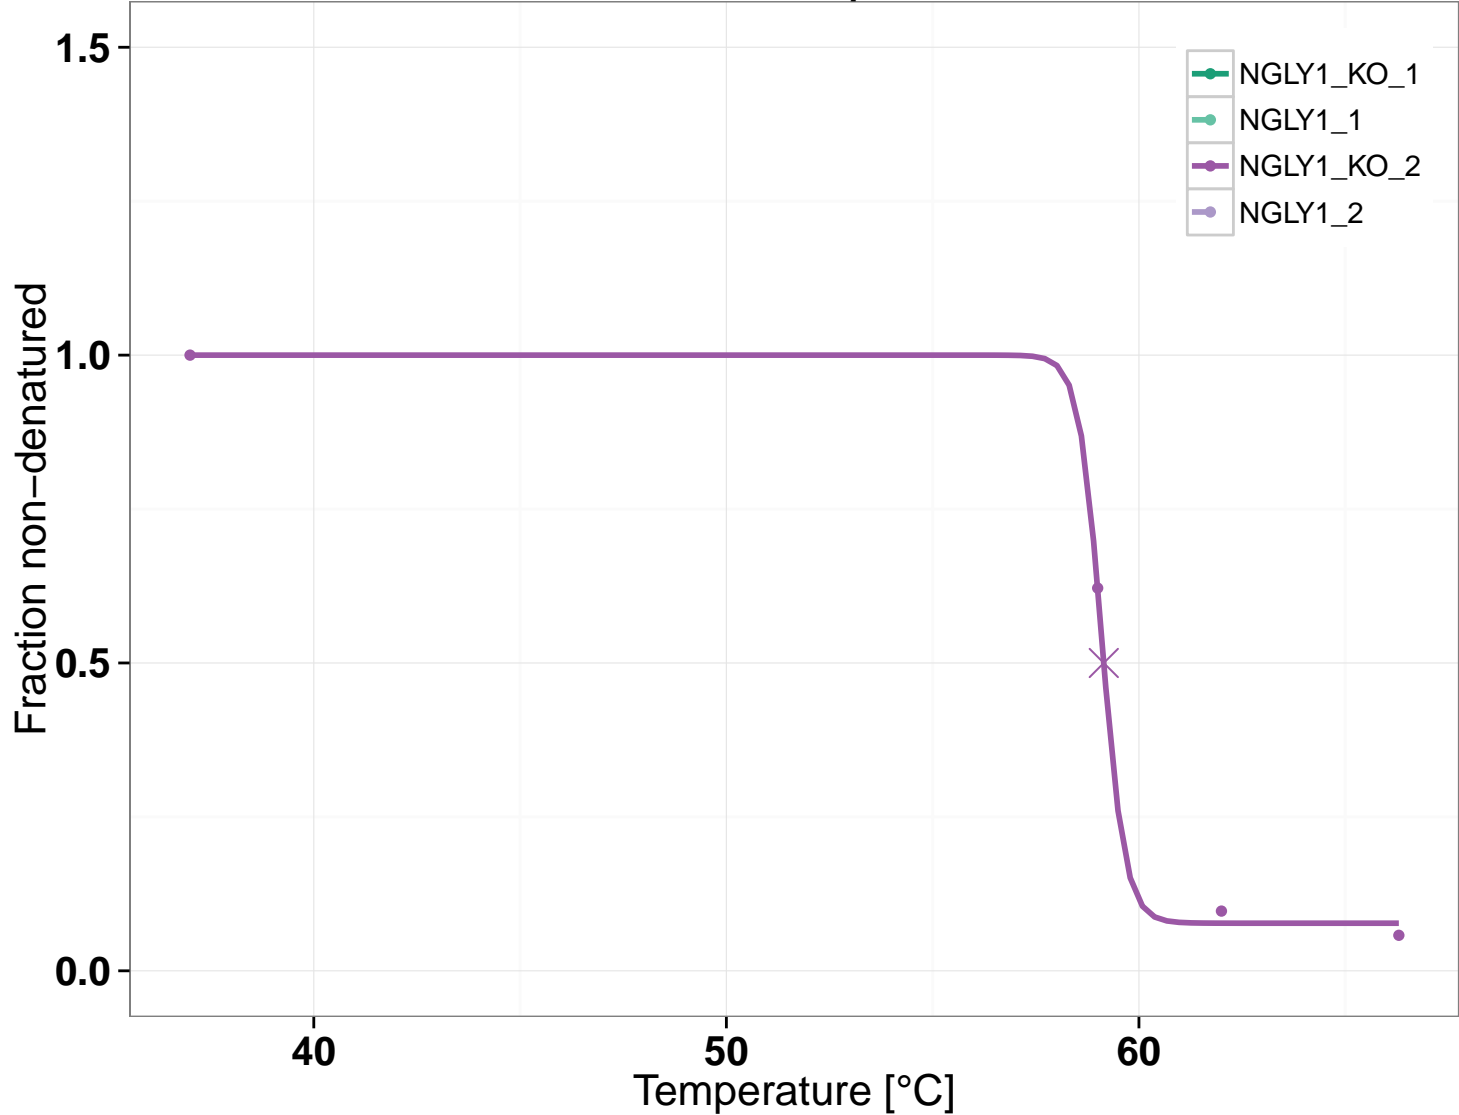

|            | meltPoint | slope | plateau | R2    |
|------------|-----------|-------|---------|-------|
| NGLY1_KO_1 | —         | —     | —       | —     |
| NGLY1_1    | —         | —     | —       | —     |
| NGLY1_KO_2 | 59.15     | -0.83 | 0.08    | -0.67 |
| NGLY1_2    | —         | —     | —       | —     |

Supplement: Supplementary file 5198 [file 1]

IPI00792080.1|C16ORF35

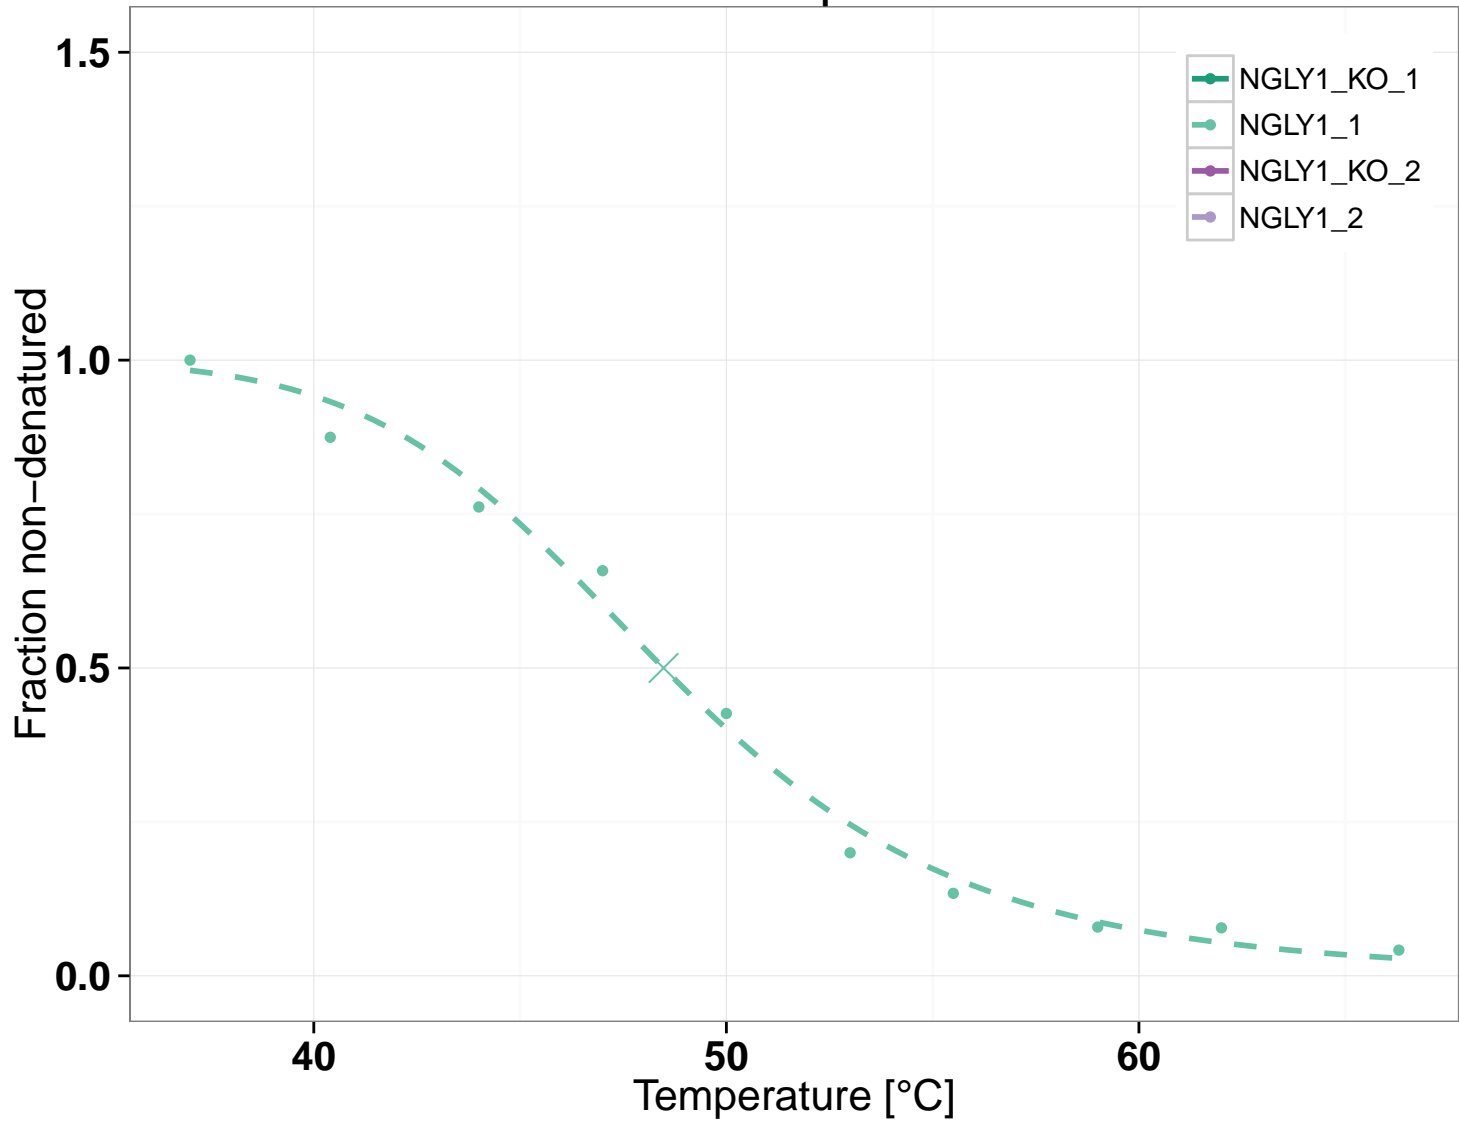

|            | meltPoint | slope  | plateau | R2   |
|------------|-----------|--------|---------|------|
| NGLY1_KO_1 | -         | -      | -       | -    |
| NGLY1_1    | 48.48     | -0.069 | 0       | 0.99 |
| NGLY1_KO_2 | -         | -      | -       | -    |
| NGLY1_2    | -         | -      | -       | -    |

Supplement: Supplementary file 5199 [file 1]

# IPI00787827.1|PITRM1

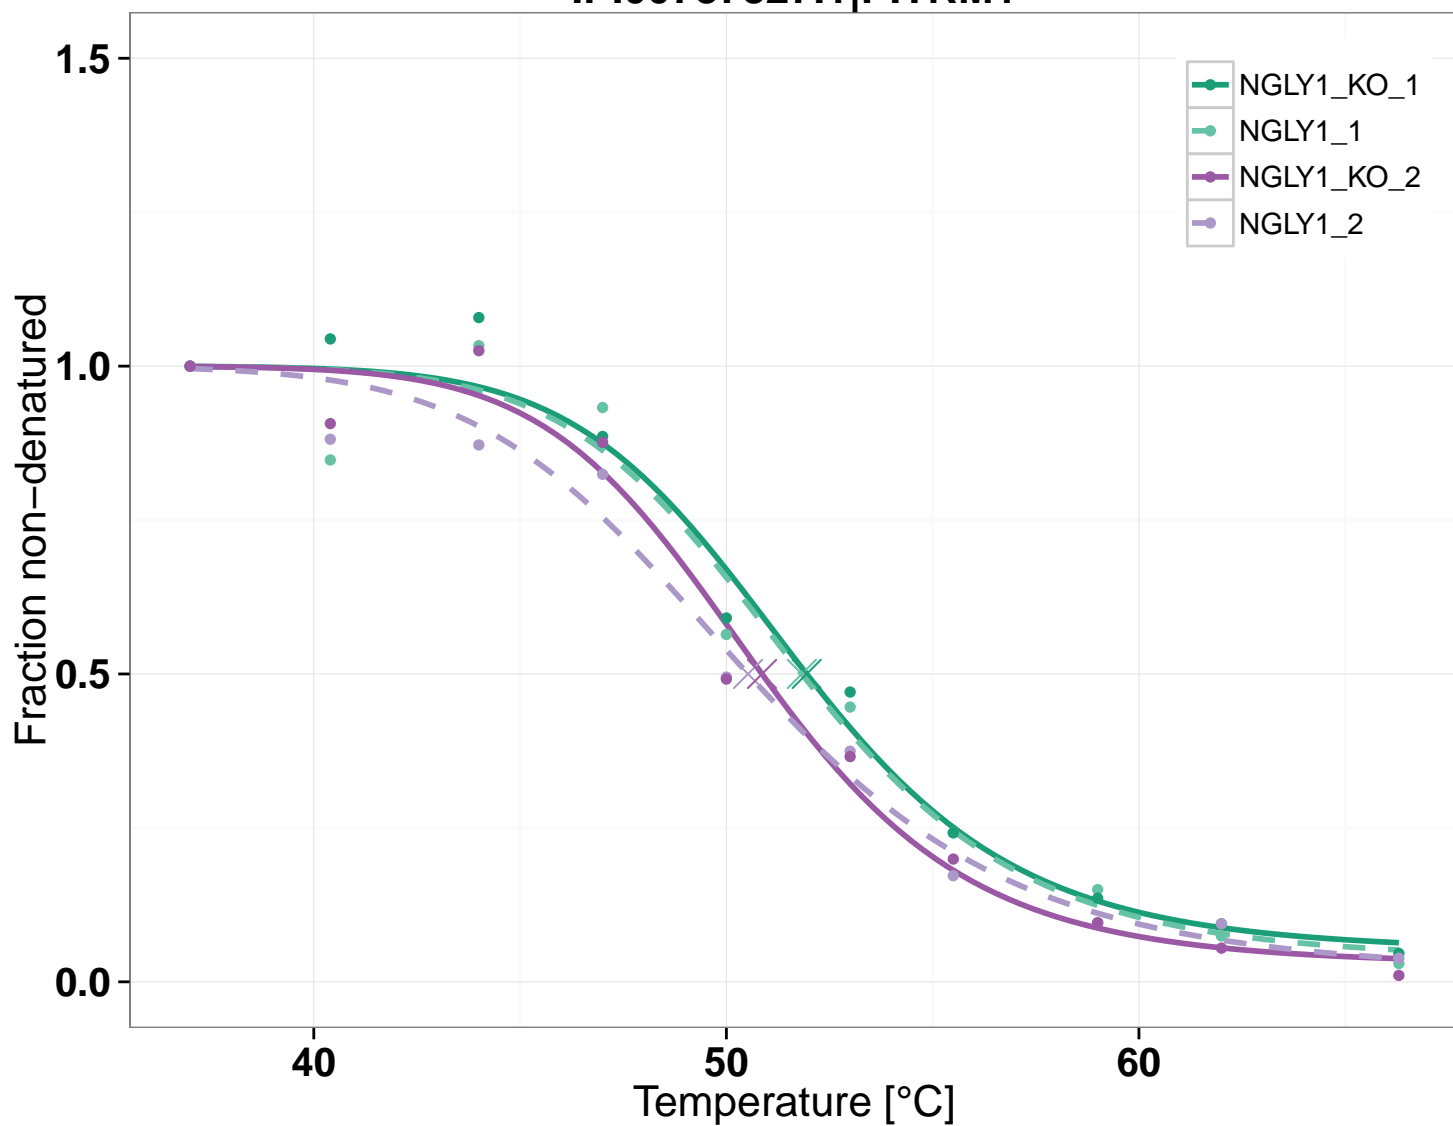

|            | meltPoint | slope  | plateau | R2   |
|------------|-----------|--------|---------|------|
| NGLY1_KO_1 | 51.95     | -0.088 | 0.05    | 0.98 |
| NGLY1_1    | 51.83     | -0.087 | 0.04    | 0.97 |
| NGLY1_KO_2 | 50.86     | -0.094 | 0.03    | 0.98 |
| NGLY1_2    | 50.52     | -0.075 | 0.01    | 0.98 |

Supplement: Supplementary file 5200 [file 1]

IPI00334190.4|STOML2

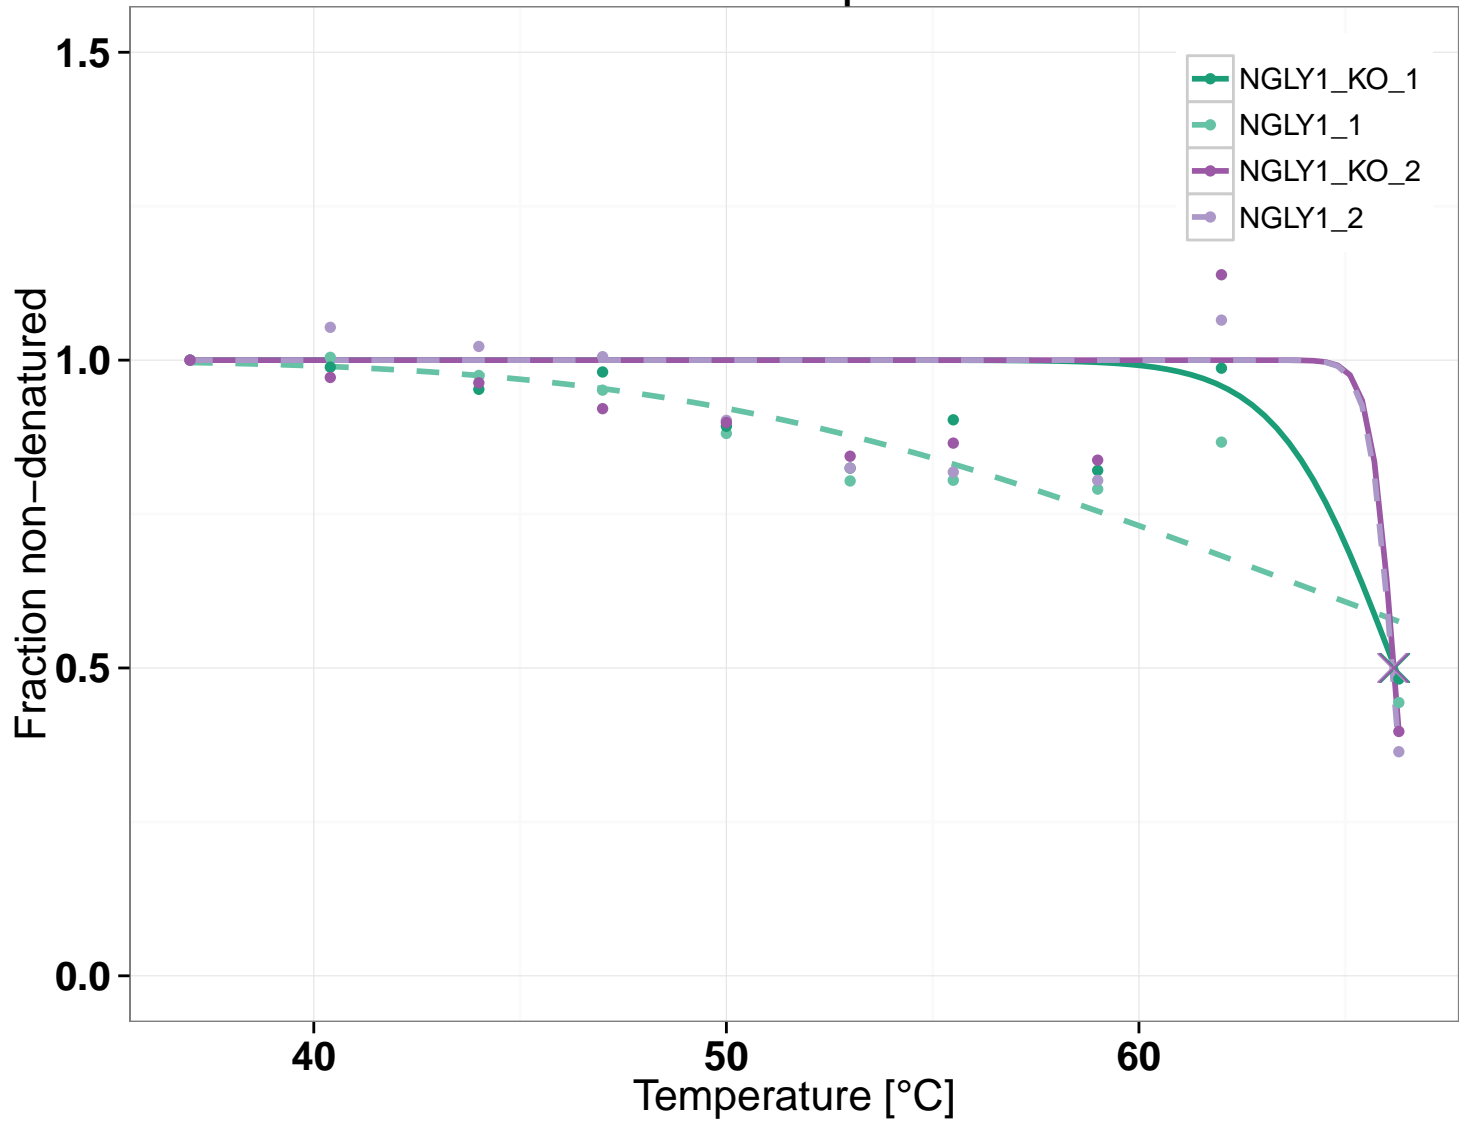

|            | meltPoint | slope  | plateau | R2   |
|------------|-----------|--------|---------|------|
| NGLY1_KO_1 | 66.21     | -0.17  | 0       | 0.61 |
| NGLY1_1    | -         | -0.025 | 0       | 0.75 |
| NGLY1_KO_2 | 66.18     | -0.86  | 0       | 0.68 |
| NGLY1_2    | 66.14     | -0.86  | 0       | 0.7  |

Supplement: Supplementary file 5201 [file 1]

# IPI00397015.2|AHDC1

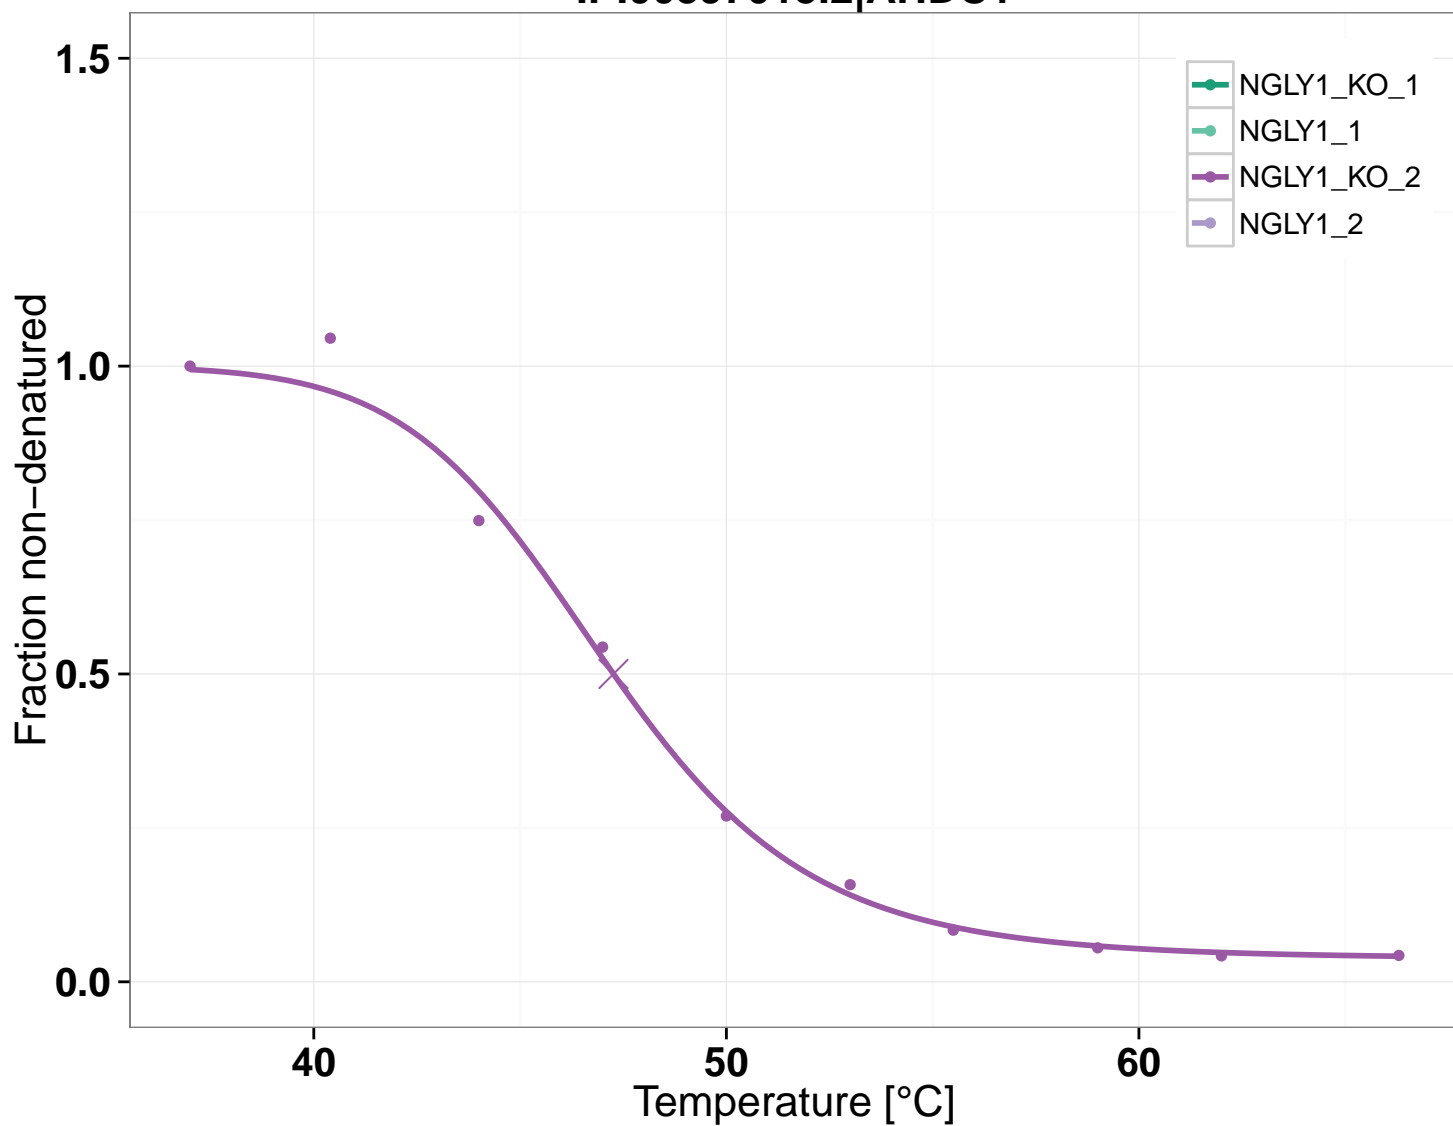

|            | meltPoint | slope  | plateau | R2   |
|------------|-----------|--------|---------|------|
| NGLY1_KO_1 | —         | —      | —       | —    |
| NGLY1_1    | —         | —      | —       | —    |
| NGLY1_KO_2 | 47.26     | -0.098 | 0.04    | 0.99 |
| NGLY1_2    | —         | —      | —       | —    |

Supplement: Supplementary file 5202 [file 1]

IPI00782966.1|ZFP106

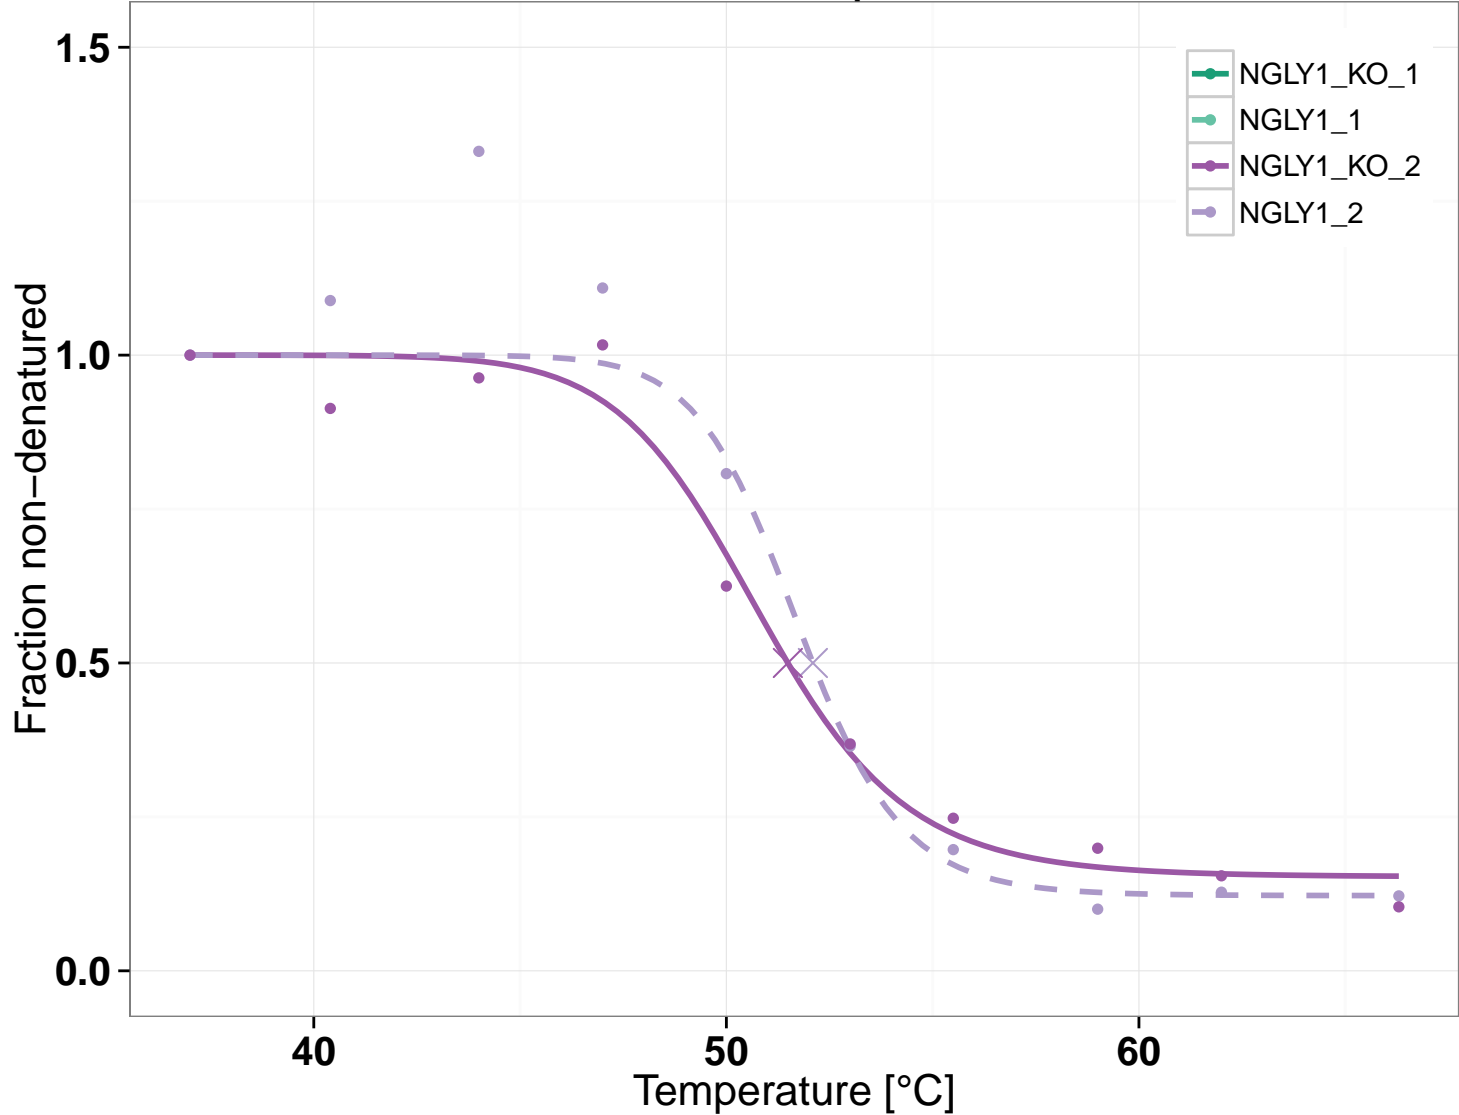

|            | meltPoint | slope | plateau | R2   |
|------------|-----------|-------|---------|------|
| NGLY1_KO_1 | —         | —     | —       | —    |
| NGLY1_1    | —         | —     | —       | —    |
| NGLY1_KO_2 | 51.49     | -0.12 | 0.15    | 0.98 |
| NGLY1_2    | 52.1      | -0.18 | 0.12    | 0.94 |

Supplement: Supplementary file 5203 [file 1]

IPI00783502.1|CRTC2

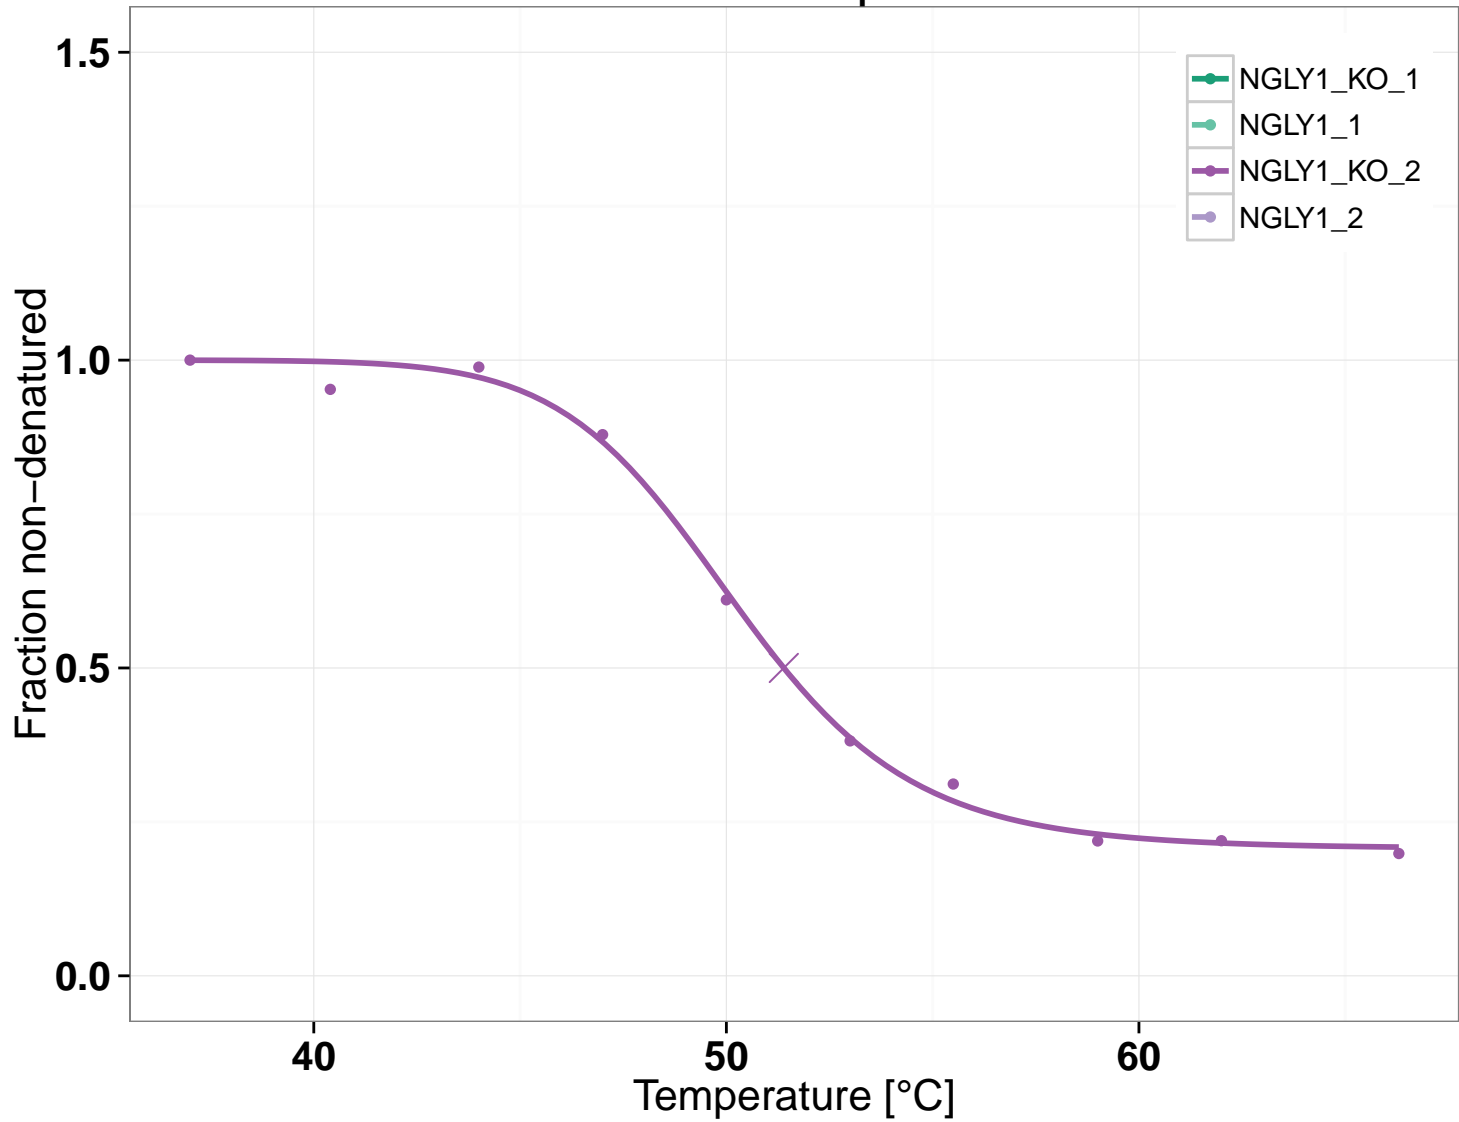

|            | meltPoint | slope  | plateau | R2 |
|------------|-----------|--------|---------|----|
| NGLY1_KO_1 | —         | —      | —       | —  |
| NGLY1_1    | —         | —      | —       | —  |
| NGLY1_KO_2 | 51.39     | −0.093 | 0.21    | 1  |
| NGLY1_2    | —         | —      | —       | —  |

Supplement: Supplementary file 5204 [file 1]

IPI00025830.1|WEE1

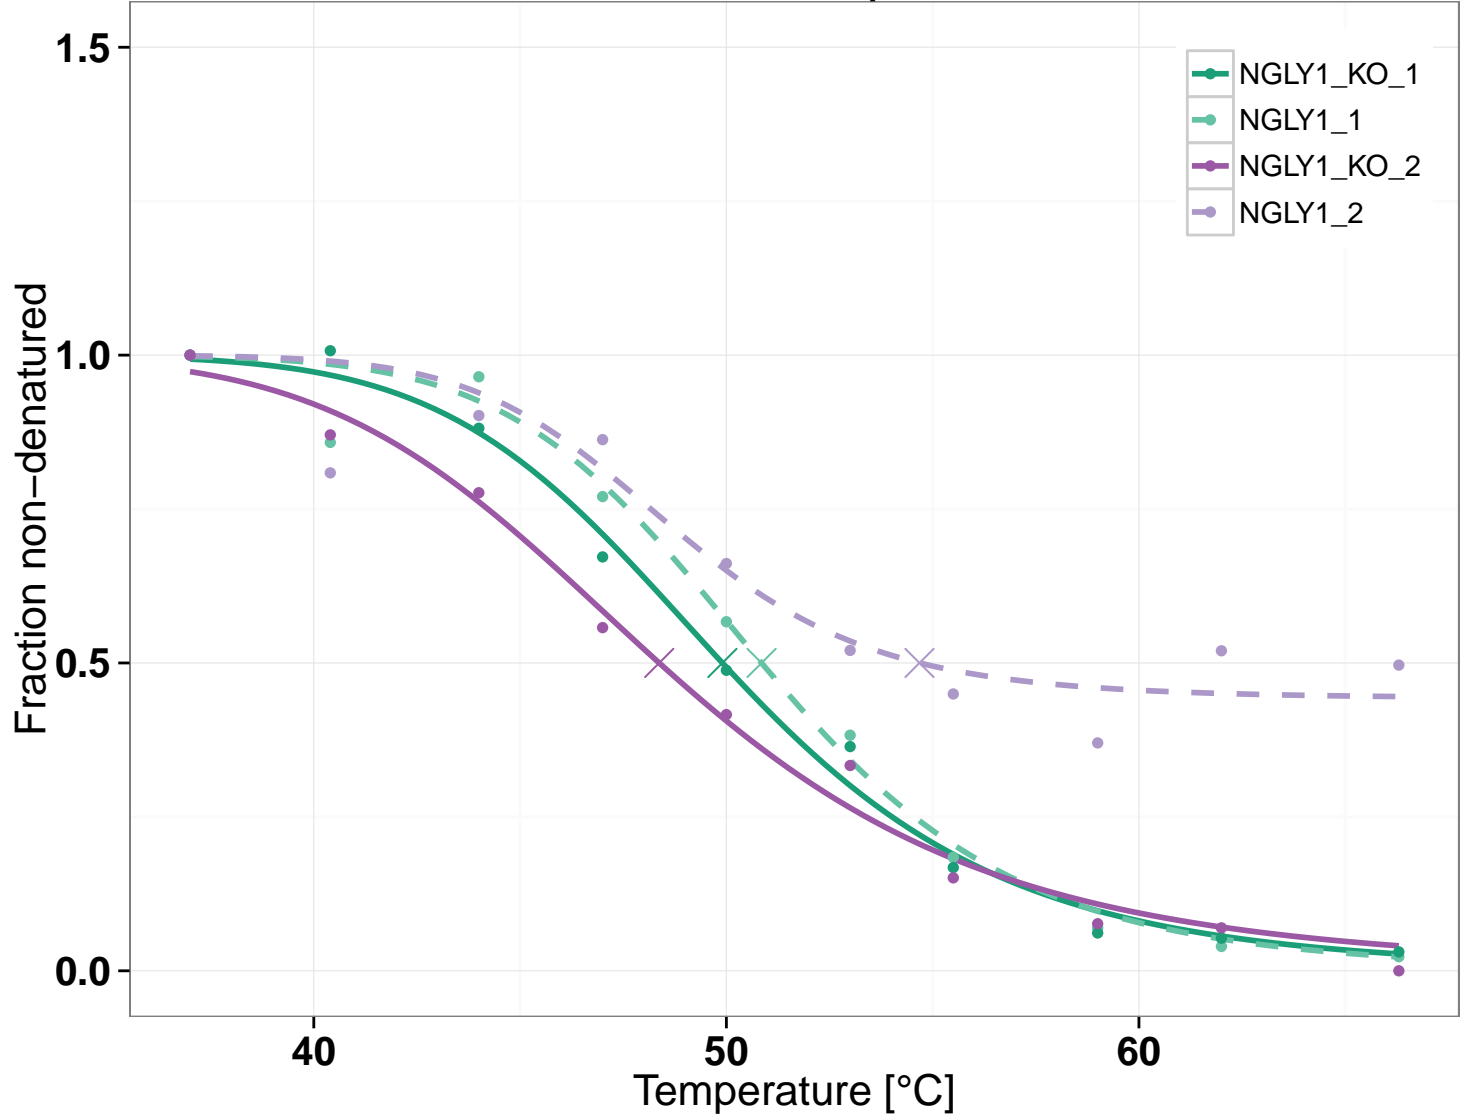

|            | meltPoint | slope  | plateau | R2   |
|------------|-----------|--------|---------|------|
| NGLY1_KO_1 | 49.9      | -0.074 | 0       | 0.99 |
| NGLY1_1    | 50.85     | -0.081 | 0       | 0.99 |
| NGLY1_KO_2 | 48.37     | -0.062 | 0       | 0.99 |
| NGLY1_2    | 54.68     | -0.057 | 0.44    | 0.88 |

Supplement: Supplementary file 5205 [file 1]

IPI00217982.1|SLC22A15

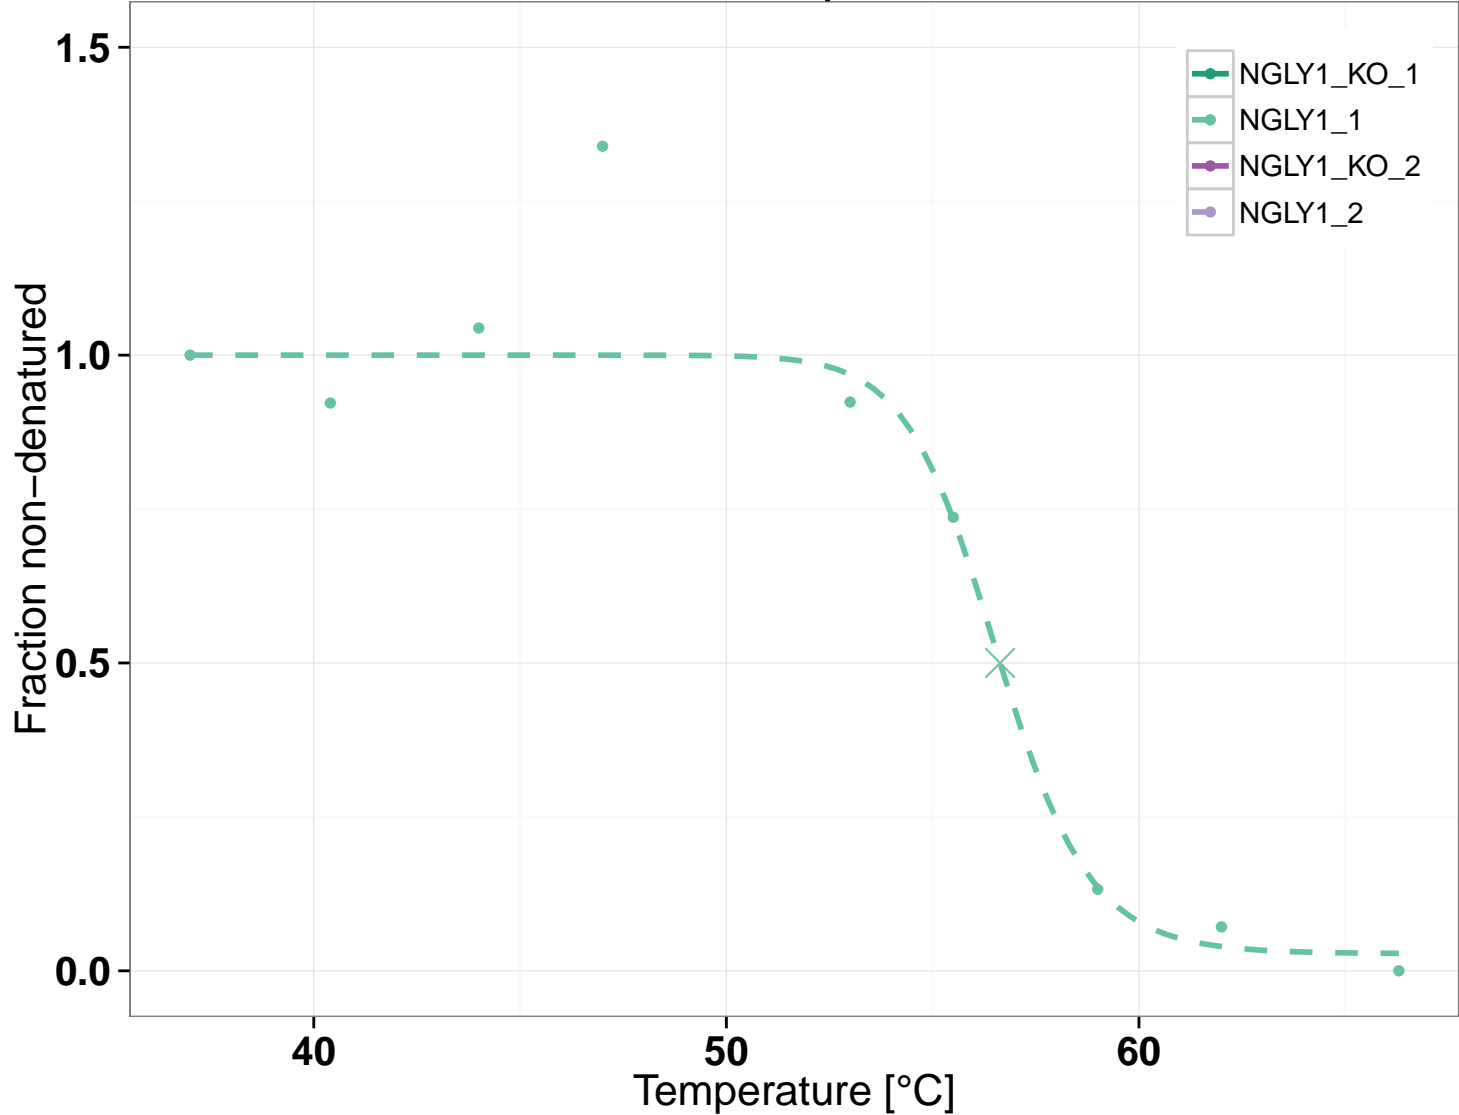

|            | meltPoint | slope | plateau | R2   |
|------------|-----------|-------|---------|------|
| NGLY1_KO_1 | -         | -     | -       | -    |
| NGLY1_1    | 56.64     | -0.22 | 0.03    | 0.84 |
| NGLY1_KO_2 | -         | -     | -       | -    |
| NGLY1_2    | -         | -     | -       | -    |

Supplement: Supplementary file 5206 [file 1]

IPI00477470.1|B3GAT3

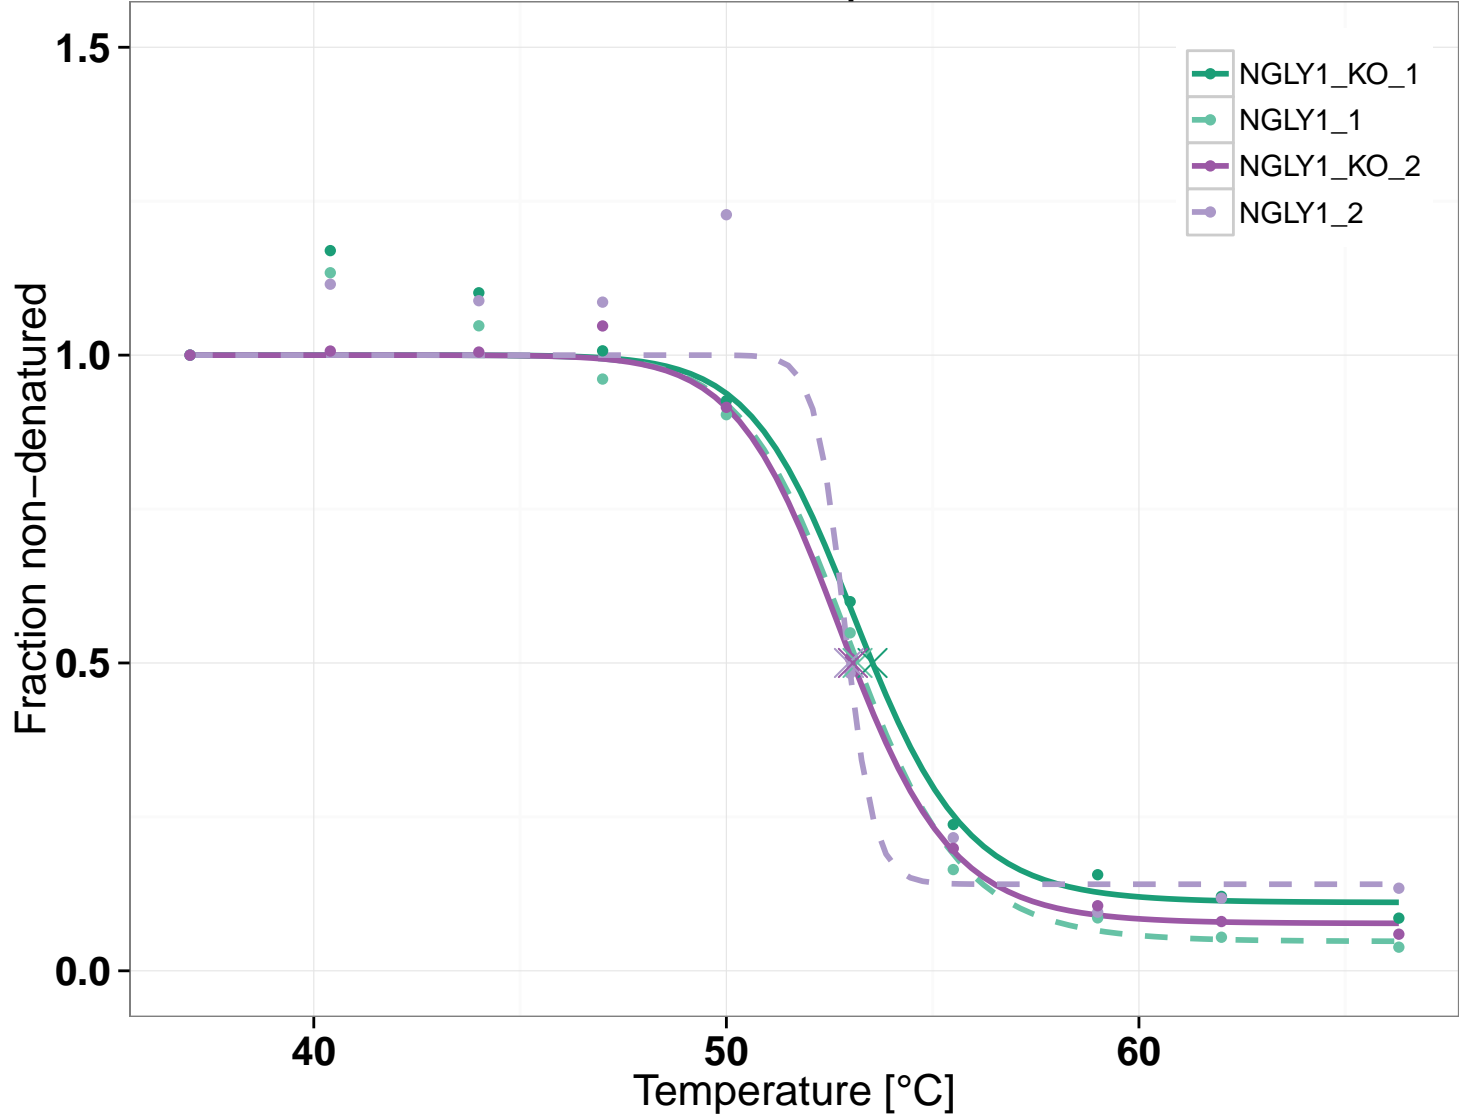

|            | meltPoint | slope | plateau | R2   |
|------------|-----------|-------|---------|------|
| NGLY1_KO_1 | 53.54     | -0.17 | 0.11    | 0.98 |
| NGLY1_1    | 53.18     | -0.18 | 0.05    | 0.99 |
| NGLY1_KO_2 | 53.07     | -0.18 | 0.08    | 1    |
| NGLY1_2    | 52.97     | -0.61 | 0.14    | 0.96 |

Supplement: Supplementary file 5207 [file 1]

# IPI00023511.1|RNF167

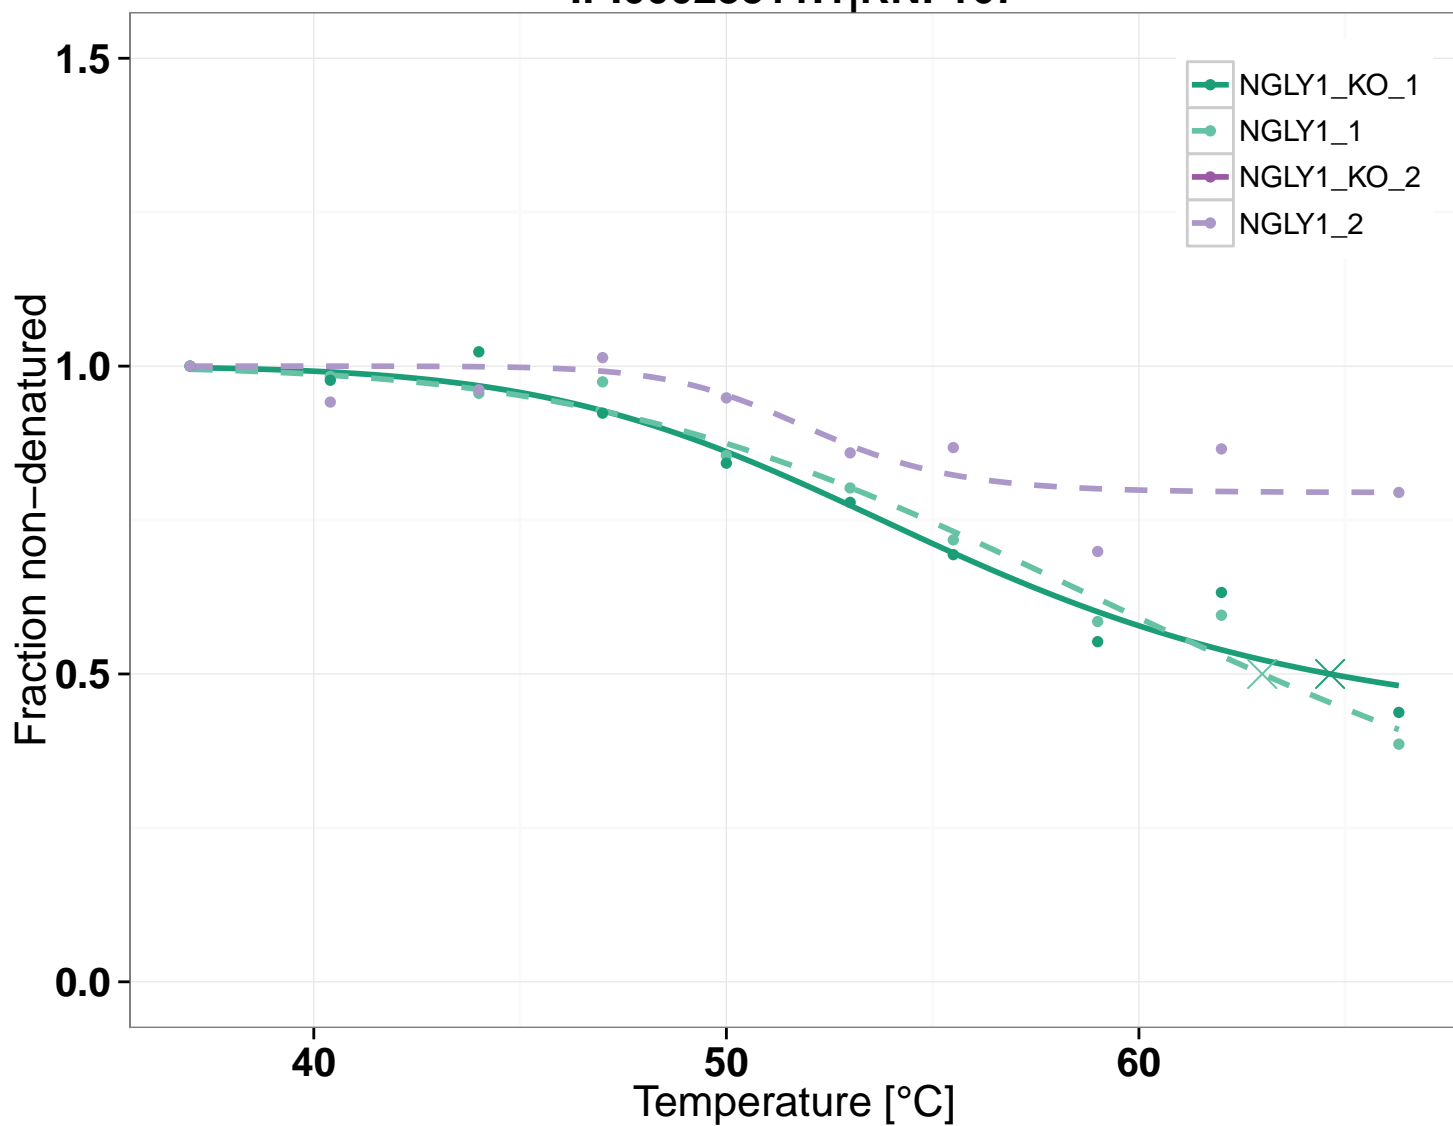

|            | meltPoint | slope  | plateau | R2   |
|------------|-----------|--------|---------|------|
| NGLY1_KO_1 | 64.63     | -0.031 | 0.4     | 0.96 |
| NGLY1_1    | 62.99     | -0.032 | 0.03    | 0.98 |
| NGLY1_KO_2 | -         | -      | -       | -    |
| NGLY1_2    | -         | -0.029 | 0.79    | 0.74 |

Supplement: Supplementary file 5208 [file 1]

# IPI00302927.6|CCT4

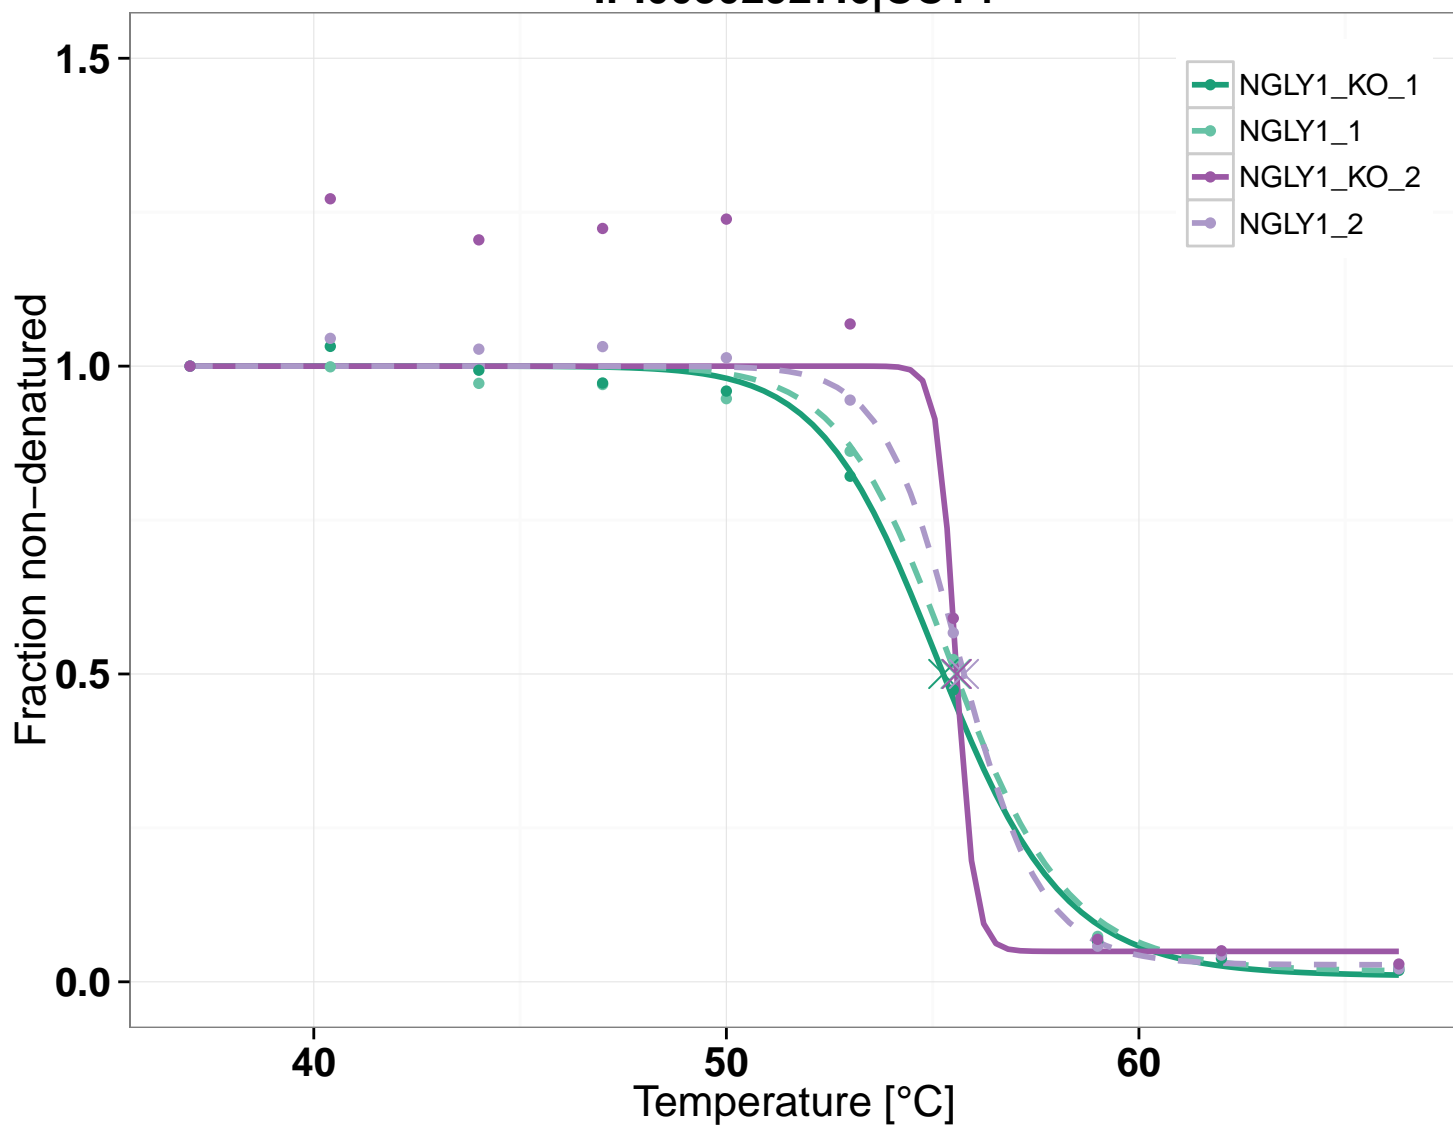

|            | meltPoint | slope | plateau | R2   |
|------------|-----------|-------|---------|------|
| NGLY1_KO_1 | 55.26     | -0.17 | 0.01    | 1    |
| NGLY1_1    | 55.55     | -0.18 | 0.02    | 1    |
| NGLY1_KO_2 | 55.58     | -1.1  | 0.05    | 0.91 |
| NGLY1_2    | 55.76     | -0.25 | 0.03    | 1    |

Supplement: Supplementary file 5209 [file 1]

IPI00183657.3|ZNF706

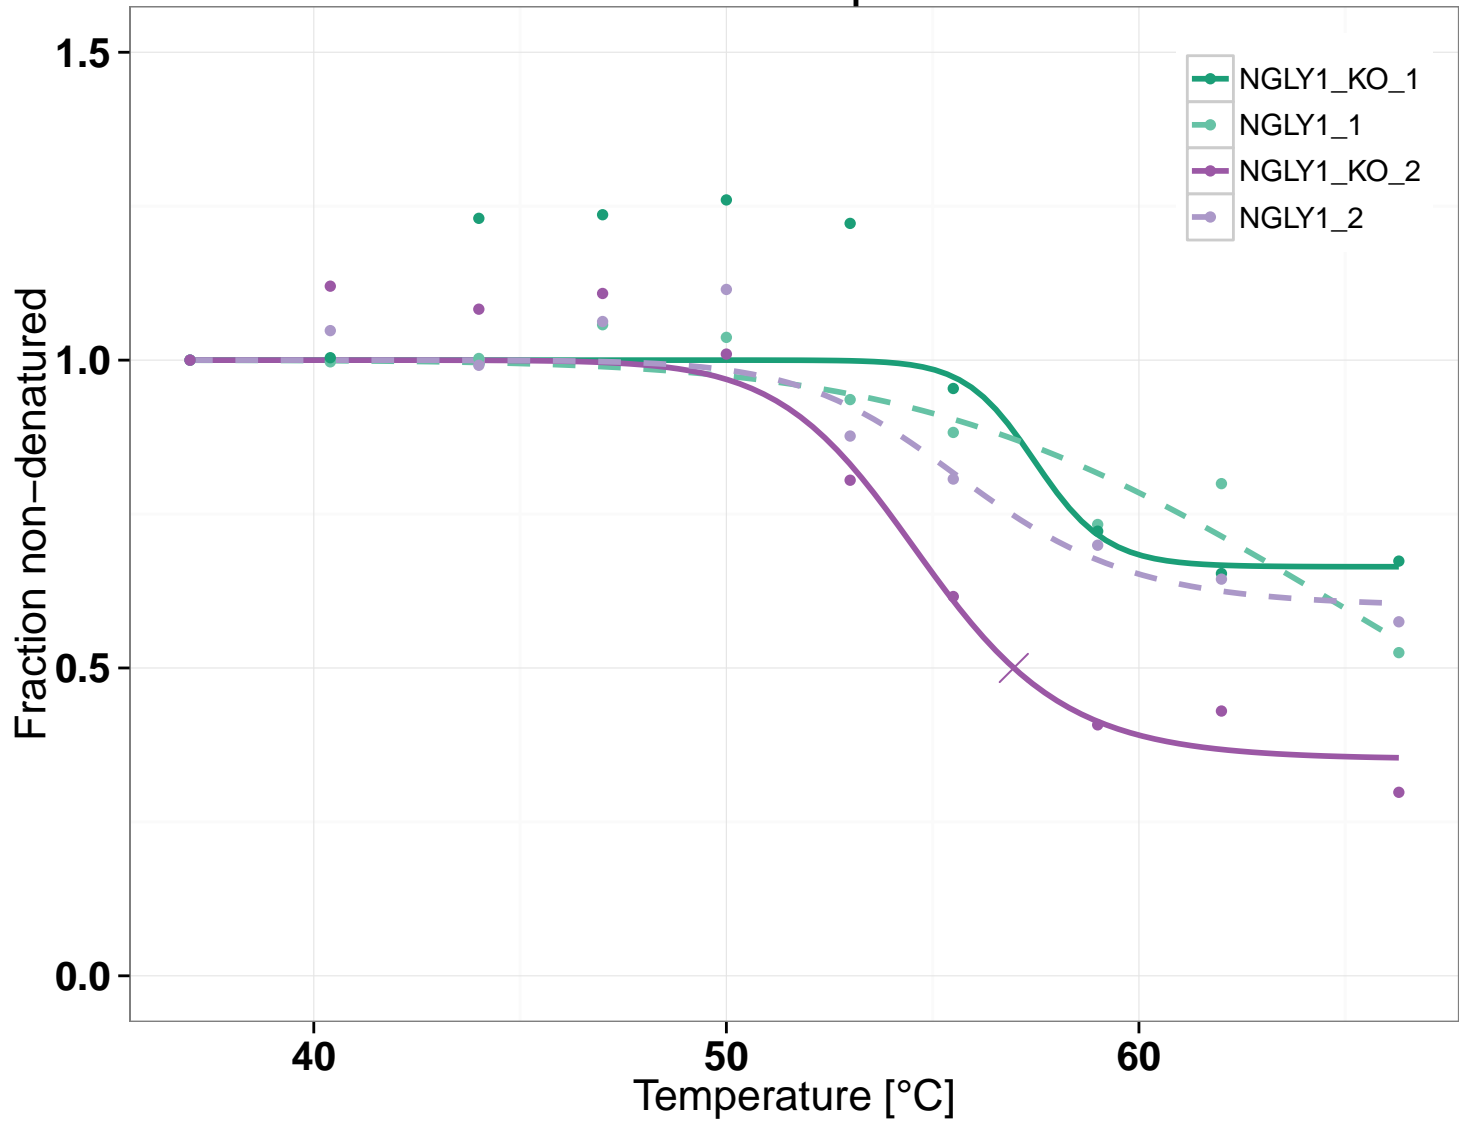

|            | meltPoint | slope  | plateau | R2   |
|------------|-----------|--------|---------|------|
| NGLY1_KO_1 | -         | -0.098 | 0.66    | 0.57 |
| NGLY1_1    | -         | -0.04  | 0       | 0.91 |
| NGLY1_KO_2 | 56.97     | -0.093 | 0.35    | 0.95 |
| NGLY1_2    | -         | -0.049 | 0.6     | 0.92 |

Supplement: Supplementary file 5210 [file 1]

IPI00658115.1|C2ORF43

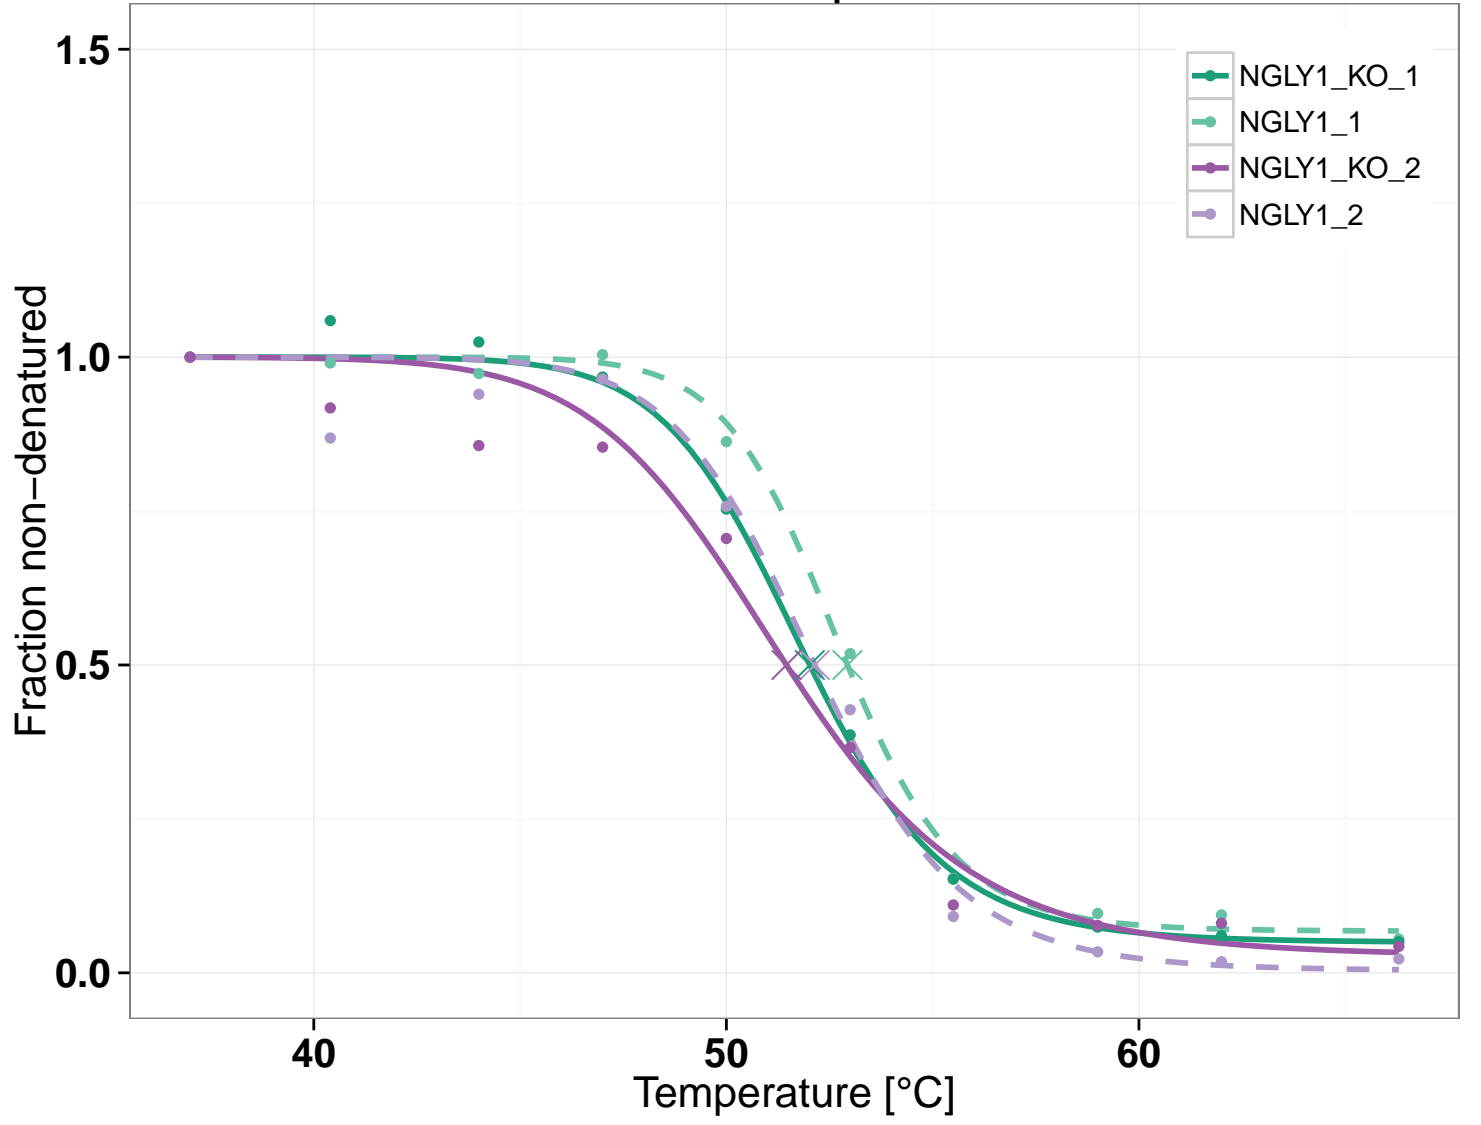

Supplement: Supplementary file 5211 [file 1]

IPI00452731.6|NDUFA7

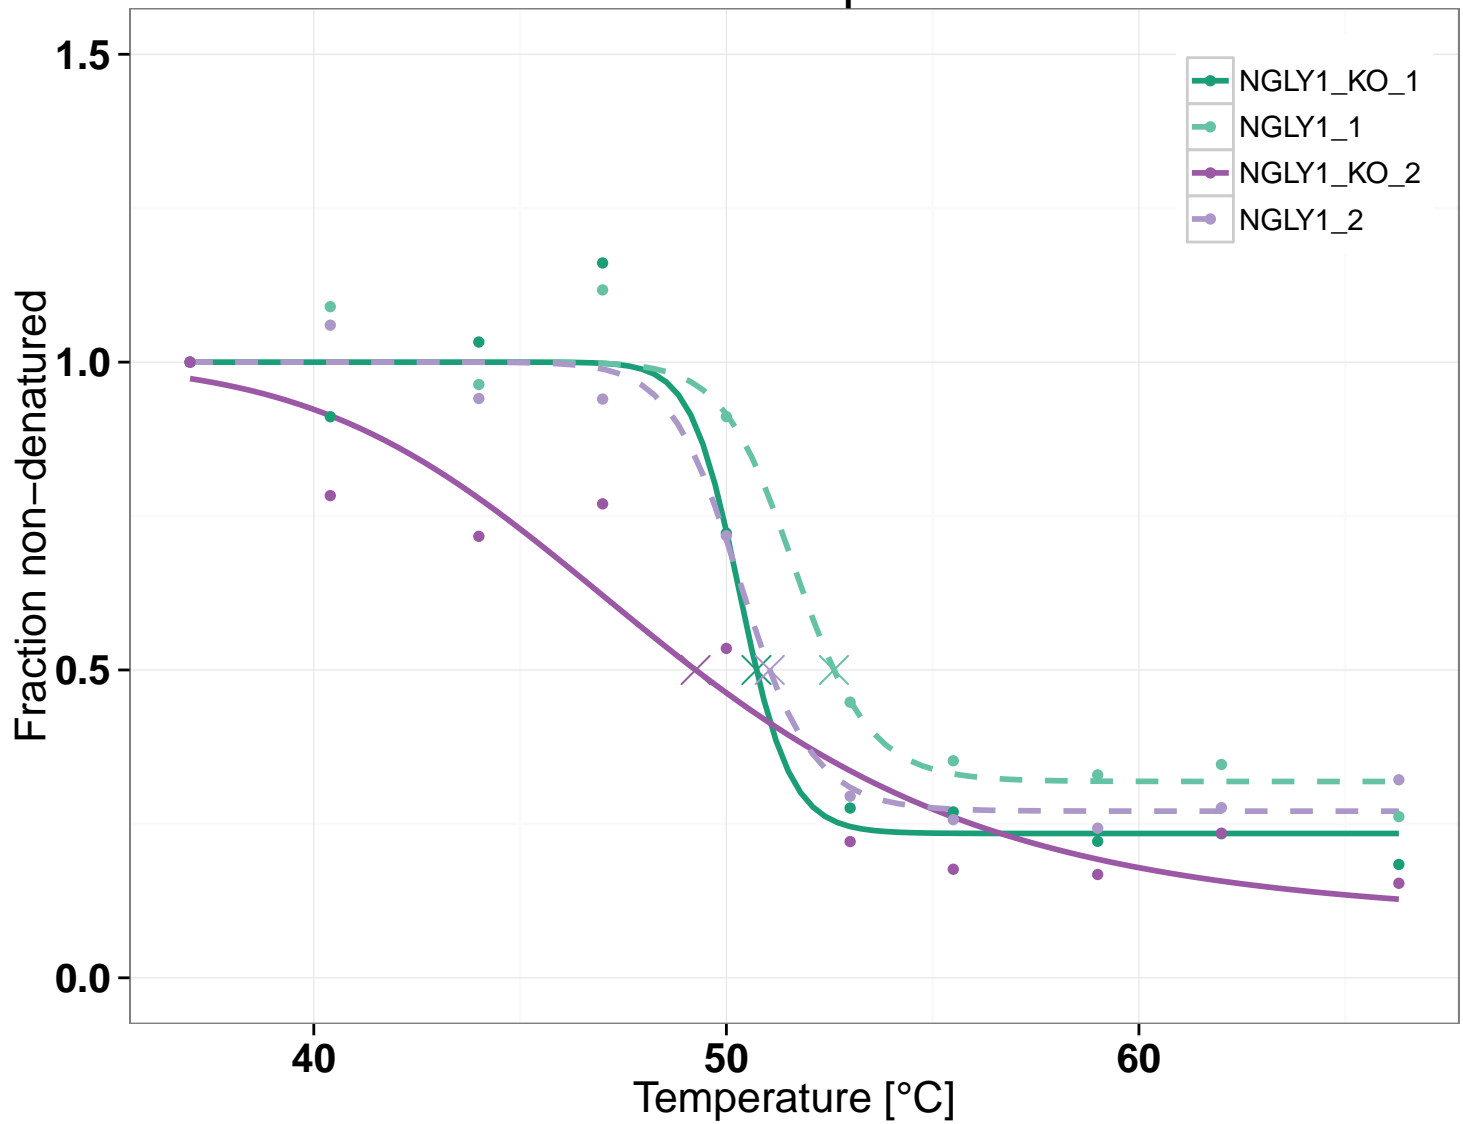

|            | meltPoint | slope  | plateau | R2   |
|------------|-----------|--------|---------|------|
| NGLY1_KO_1 | 50.73     | -0.32  | 0.23    | 0.97 |
| NGLY1_1    | 52.61     | -0.19  | 0.32    | 0.98 |
| NGLY1_KO_2 | 49.25     | -0.055 | 0.09    | 0.92 |
| NGLY1_2    | 51.05     | -0.21  | 0.27    | 0.99 |

Supplement: Supplementary file 5212 [file 1]

# IPI00152303.7|PIP4K2C

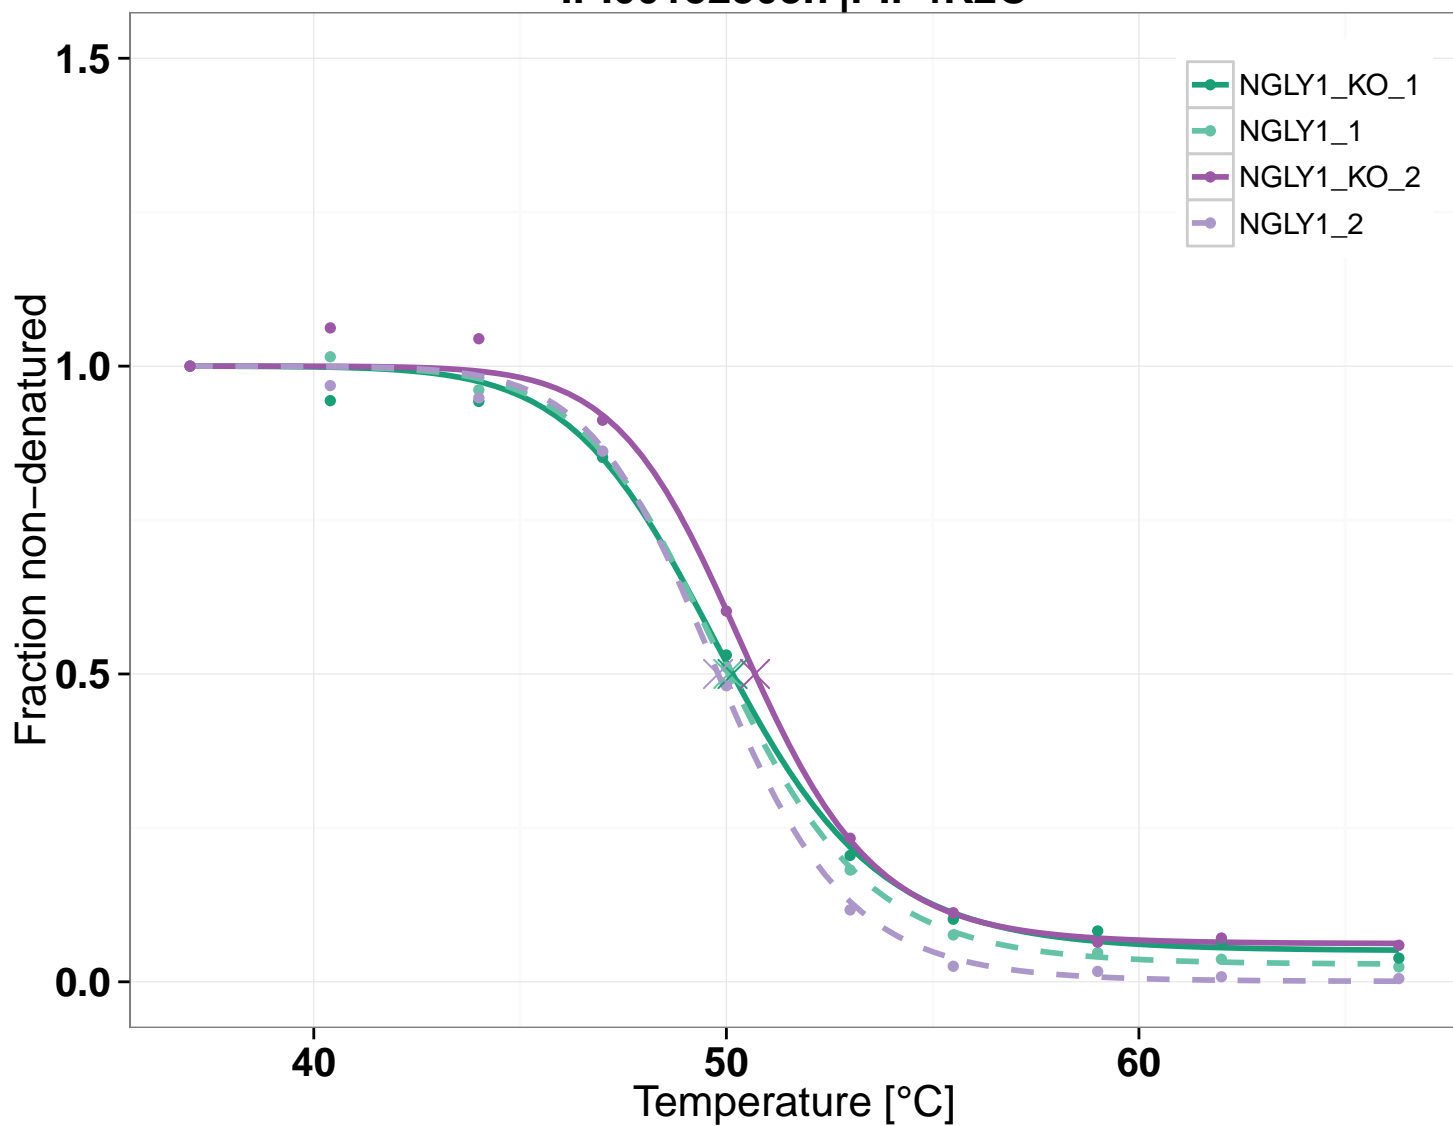

|            | meltPoint | slope | plateau | R2 |
|------------|-----------|-------|---------|----|
| NGLY1_KO_1 | 50.15     | -0.13 | 0.05    | 1  |
| NGLY1_1    | 50.05     | -0.14 | 0.03    | 1  |
| NGLY1_KO_2 | 50.69     | -0.15 | 0.06    | 1  |
| NGLY1_2    | 49.8      | -0.16 | 0       | 1  |

Supplement: Supplementary file 5213 [file 1]

IPI00103171.5|TNFAIP8L1

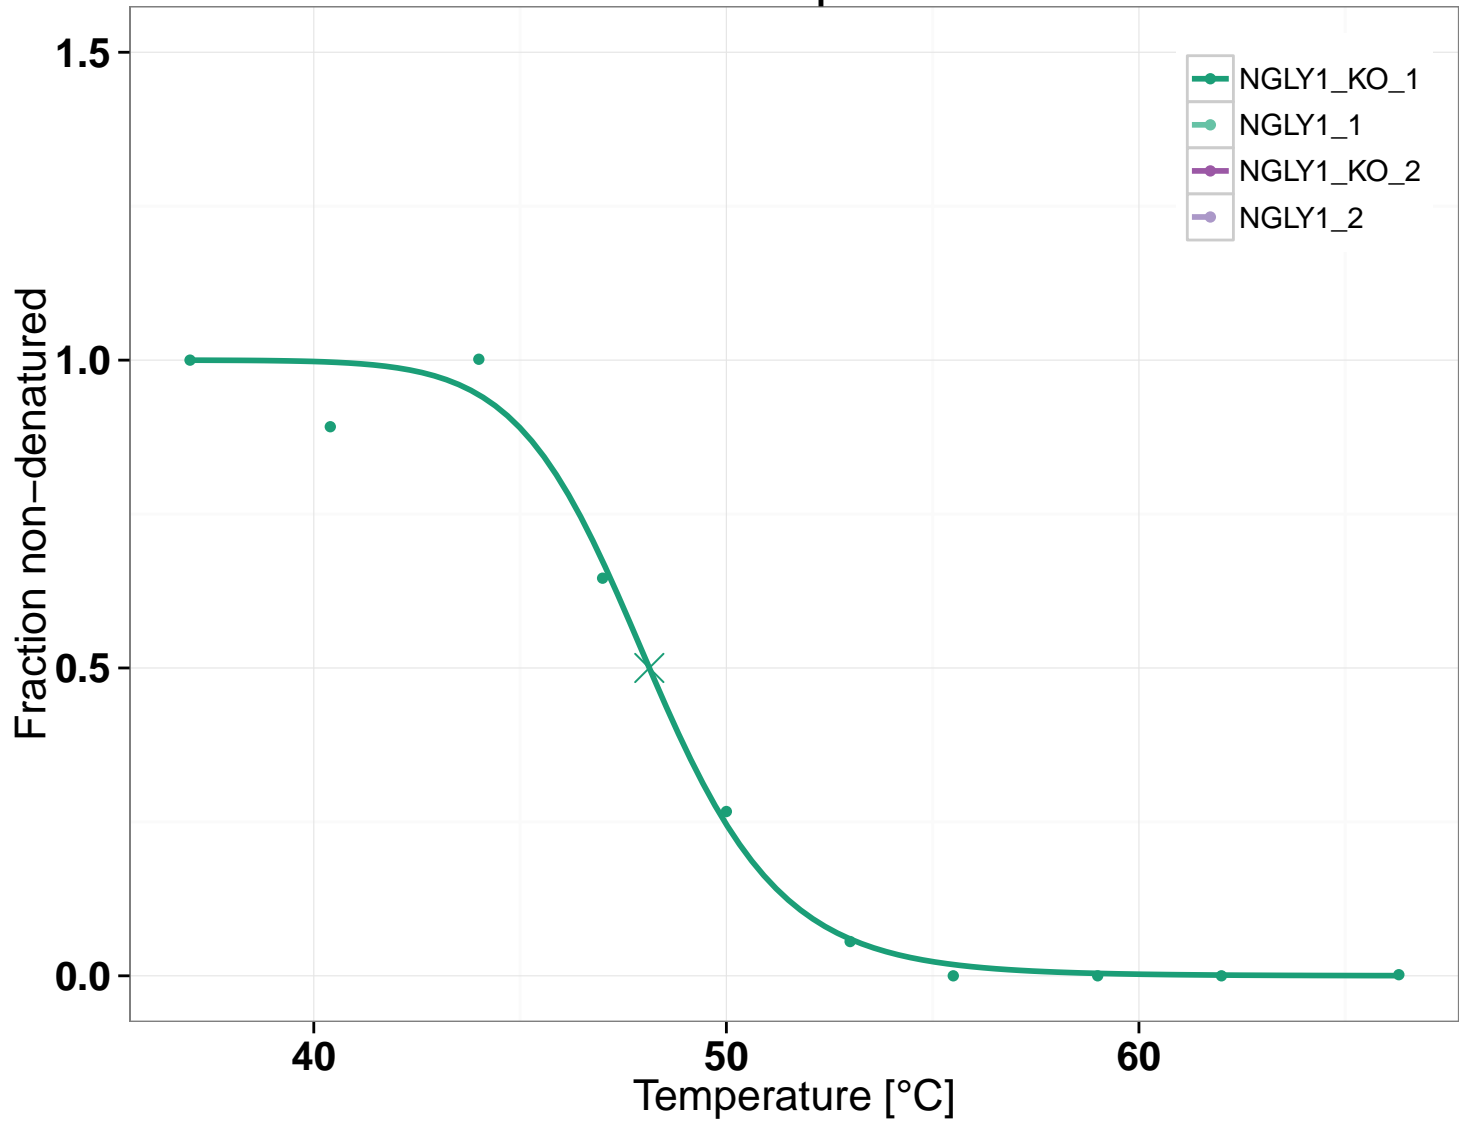

|            | meltPoint | slope | plateau | R2   |
|------------|-----------|-------|---------|------|
| NGLY1_KO_1 | 48.13     | -0.16 | 0       | 0.99 |
| NGLY1_1    | -         | -     | -       | -    |
| NGLY1_KO_2 | -         | -     | -       | -    |
| NGLY1_2    | -         | -     | -       | -    |

Supplement: Supplementary file 5214 [file 1]

# IPI00152960.2|RRN3

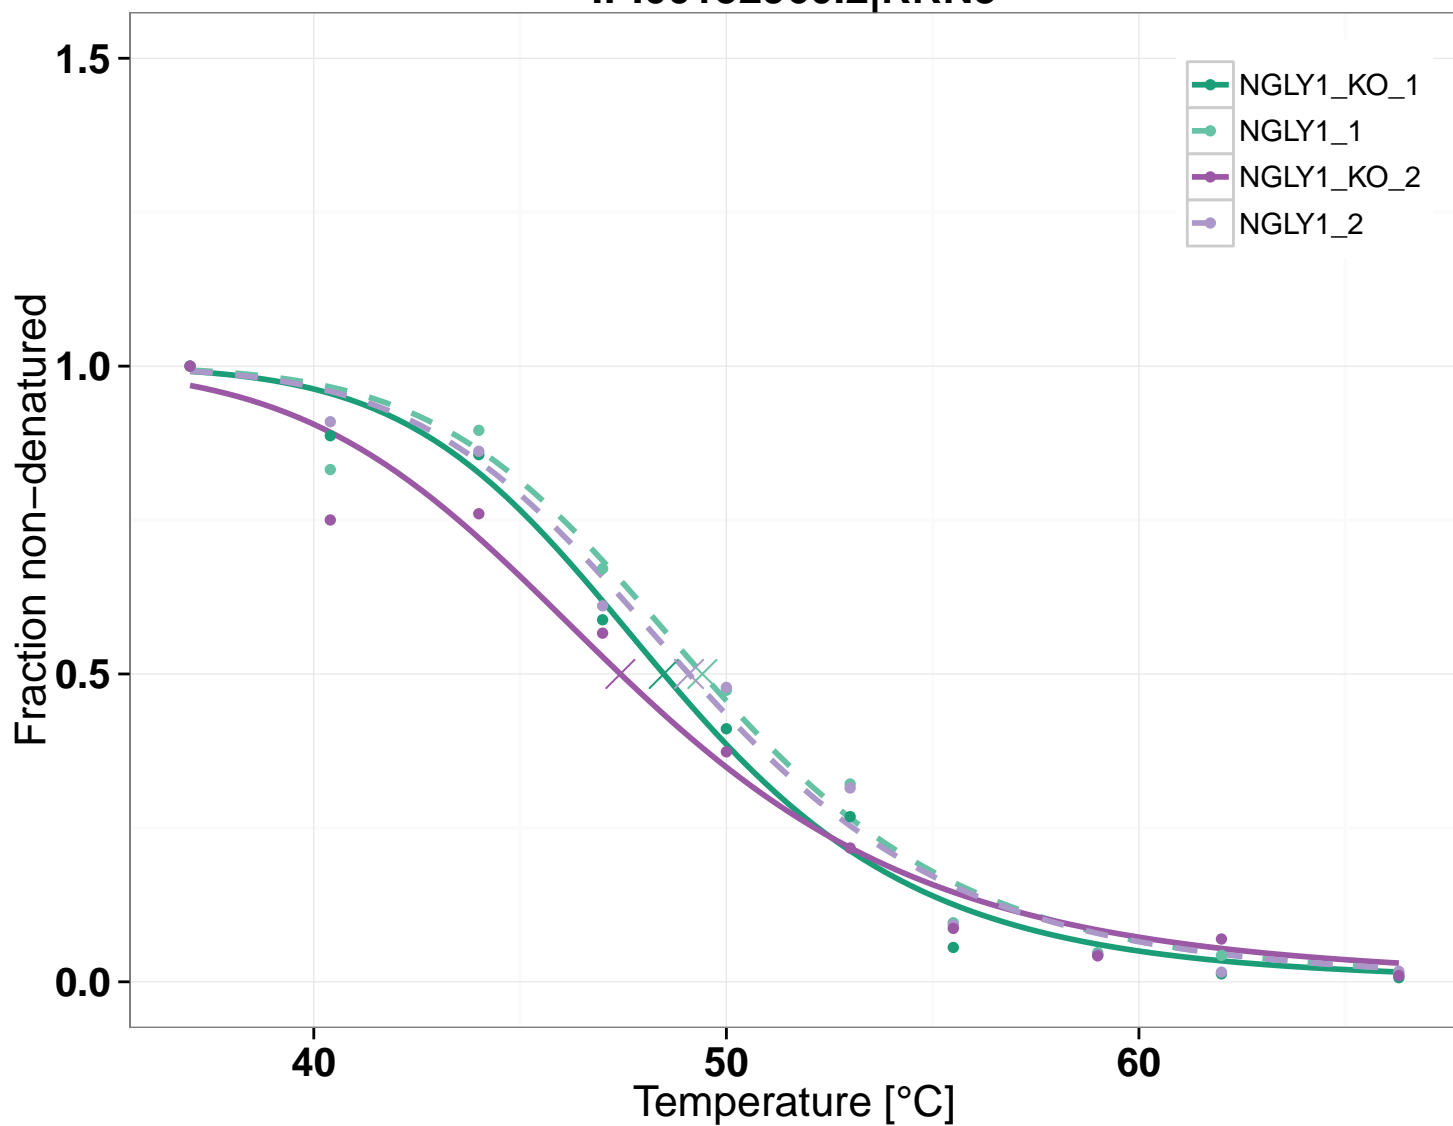

|            | meltPoint | slope  | plateau | R2   |
|------------|-----------|--------|---------|------|
| NGLY1_KO_1 | 48.48     | -0.08  | 0       | 0.99 |
| NGLY1_1    | 49.42     | -0.077 | 0       | 0.98 |
| NGLY1_KO_2 | 47.43     | -0.066 | 0       | 0.97 |
| NGLY1_2    | 49.09     | -0.076 | 0       | 0.99 |

Supplement: Supplementary file 5215 [file 1]

IPI00013075.1|KATNA1

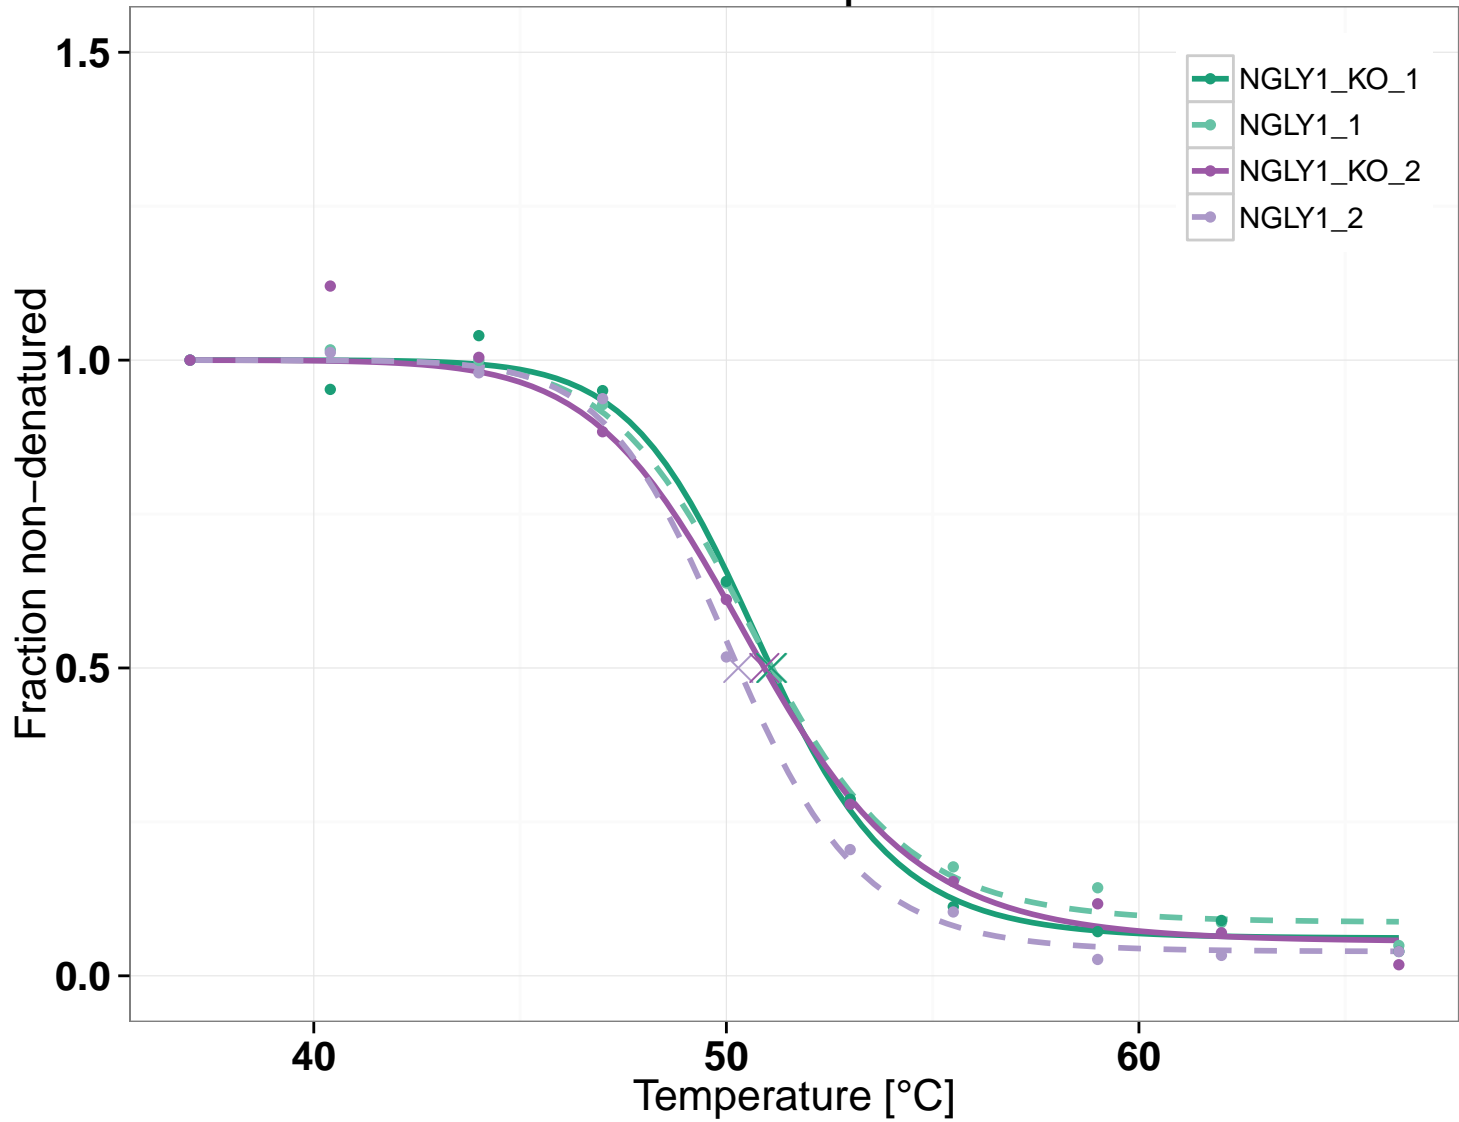

|            | meltPoint | slope | plateau | R2   |
|------------|-----------|-------|---------|------|
| NGLY1_KO_1 | 51.09     | -0.15 | 0.06    | 1    |
| NGLY1_1    | 51.11     | -0.13 | 0.09    | 1    |
| NGLY1_KO_2 | 50.92     | -0.12 | 0.06    | 0.99 |
| NGLY1_2    | 50.29     | -0.15 | 0.04    | 1    |

Supplement: Supplementary file 5216 [file 1]

# IPI00873055.1|TES

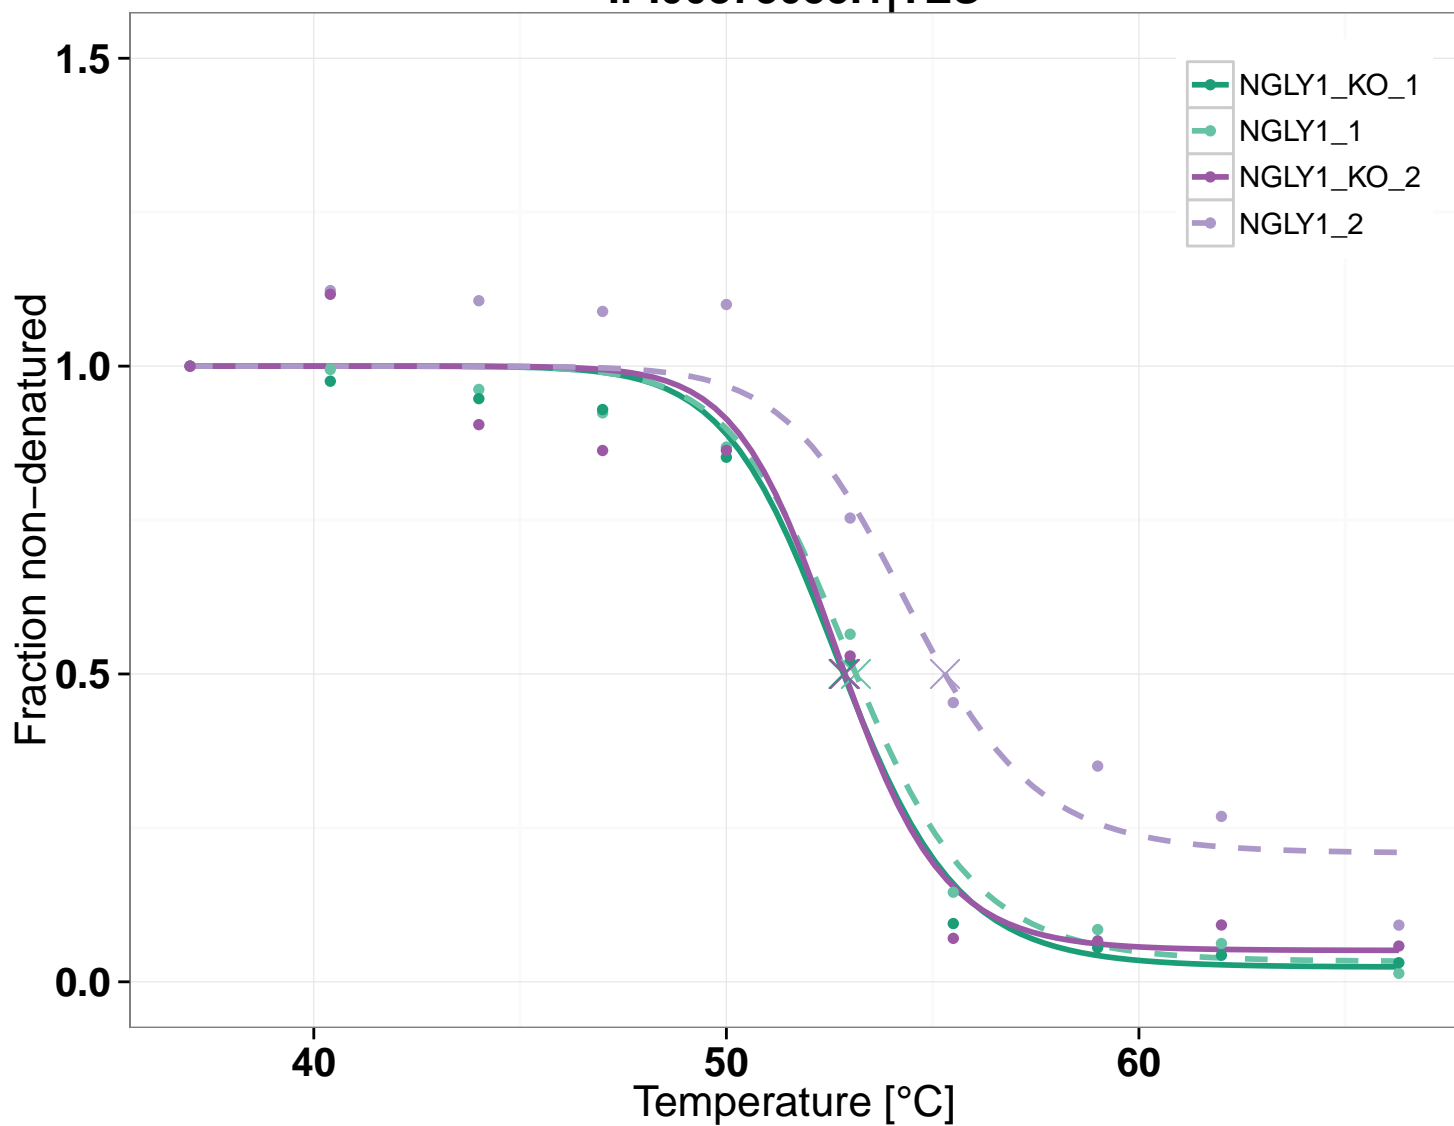

|            | meltPoint | slope | plateau | R2   |
|------------|-----------|-------|---------|------|
| NGLY1_KO_1 | 52.84     | -0.17 | 0.02    | 0.99 |
| NGLY1_1    | 53.14     | -0.16 | 0.03    | 0.99 |
| NGLY1_KO_2 | 52.87     | -0.19 | 0.05    | 0.97 |
| NGLY1_2    | 55.3      | -0.13 | 0.21    | 0.95 |

Supplement: Supplementary file 5217 [file 1]

# IPI00329615.5|ISCA1

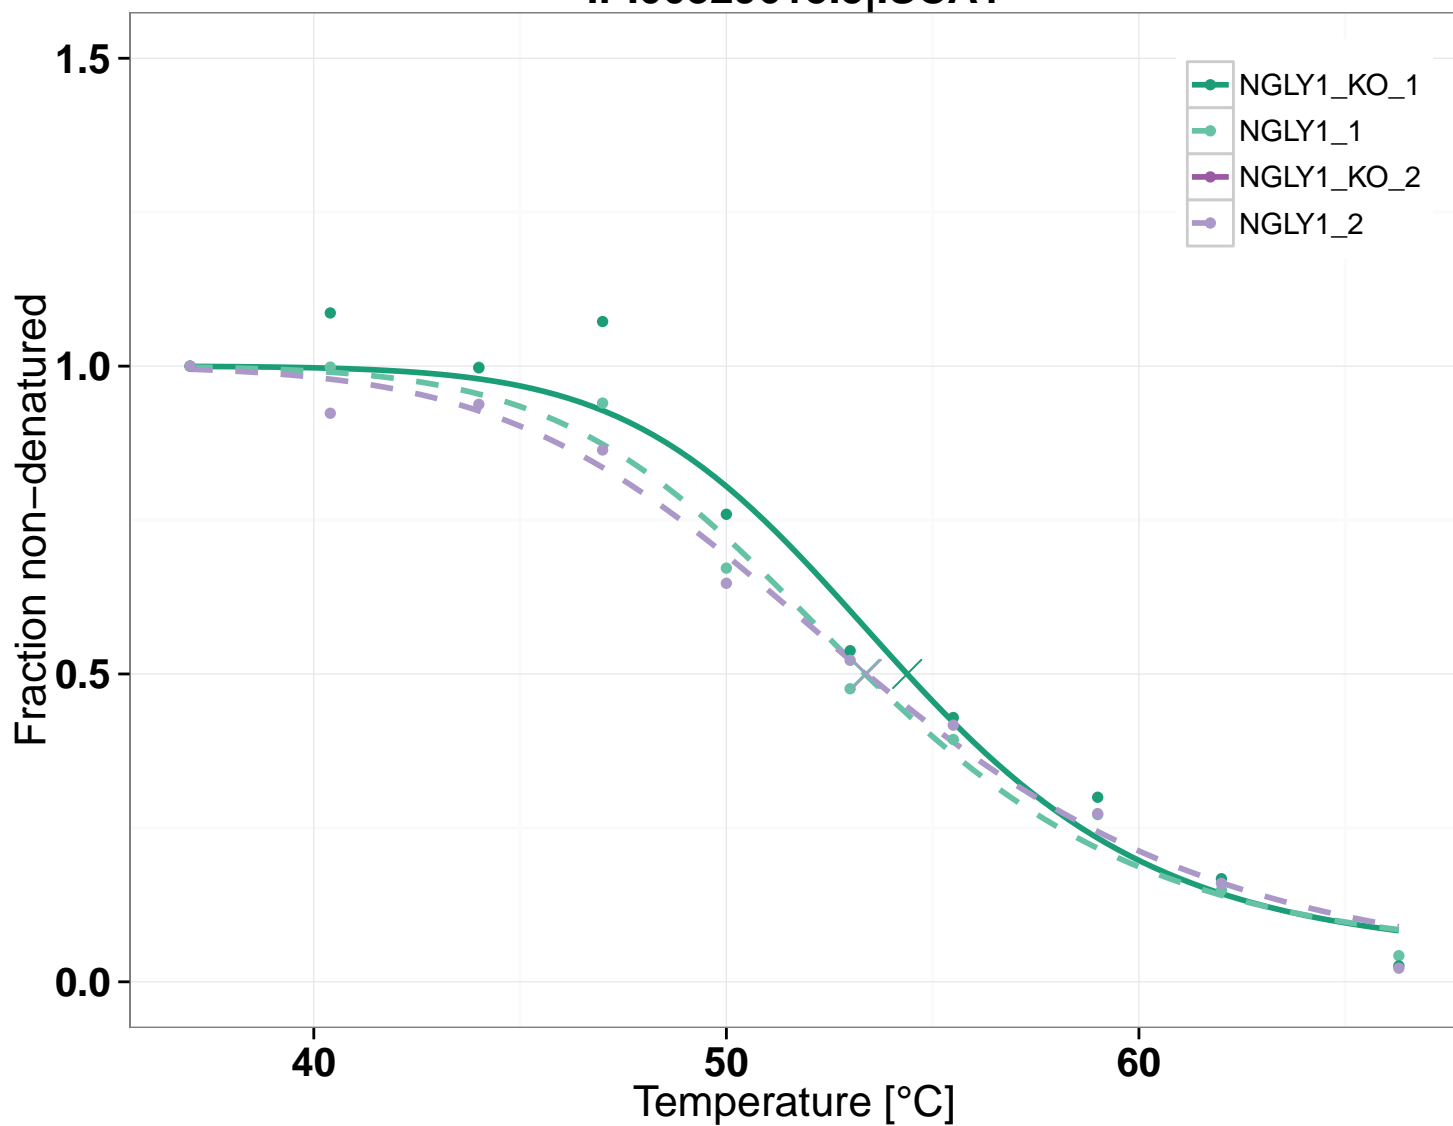

|            | meltPoint | slope  | plateau | R2   |
|------------|-----------|--------|---------|------|
| NGLY1_KO_1 | 54.38     | -0.075 | 0.04    | 0.97 |
| NGLY1_1    | 53.36     | -0.067 | 0.03    | 0.99 |
| NGLY1_KO_2 | -         | -      | -       | -    |
| NGLY1_2    | 53.41     | -0.057 | 0       | 0.99 |

Supplement: Supplementary file 5218 [file 1]

IPI00877716.1|TBC1D10A

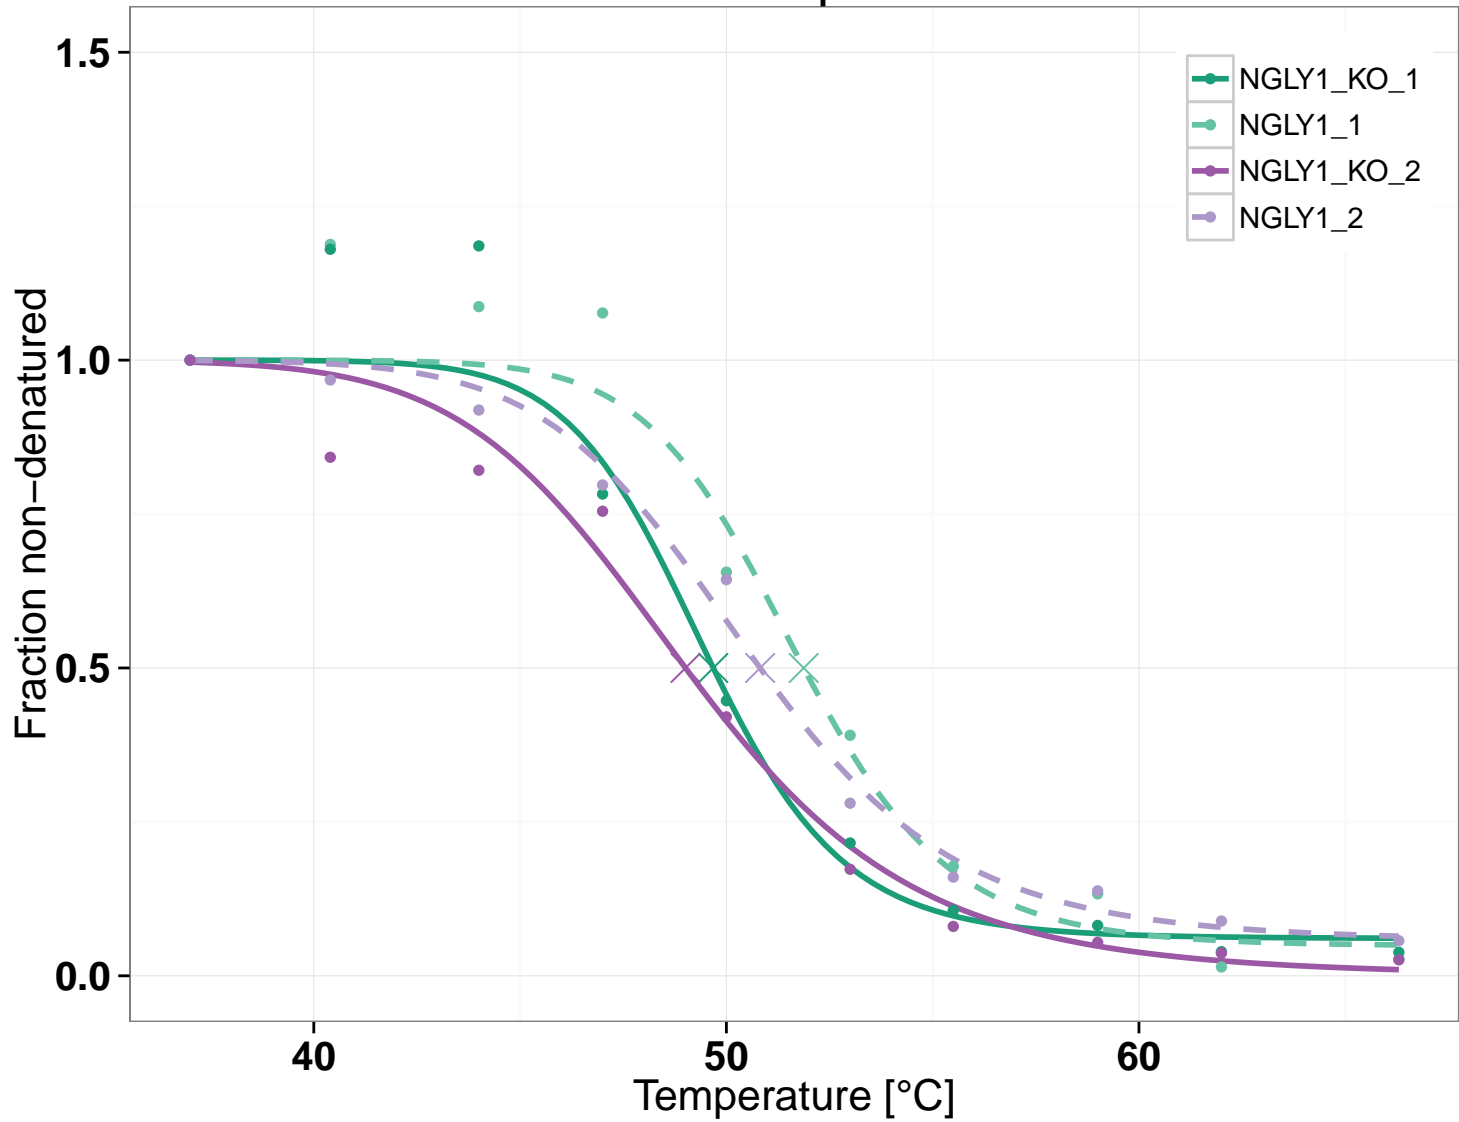

|            | meltPoint | slope  | plateau | R2   |
|------------|-----------|--------|---------|------|
| NGLY1_KO_1 | 49.68     | -0.14  | 0.06    | 0.96 |
| NGLY1_1    | 51.87     | -0.13  | 0.05    | 0.96 |
| NGLY1_KO_2 | 49.01     | -0.091 | 0       | 0.98 |
| NGLY1_2    | 50.82     | -0.095 | 0.06    | 0.99 |

Supplement: Supplementary file 5219 [file 1]

# IPI00291373.2|ABCD1

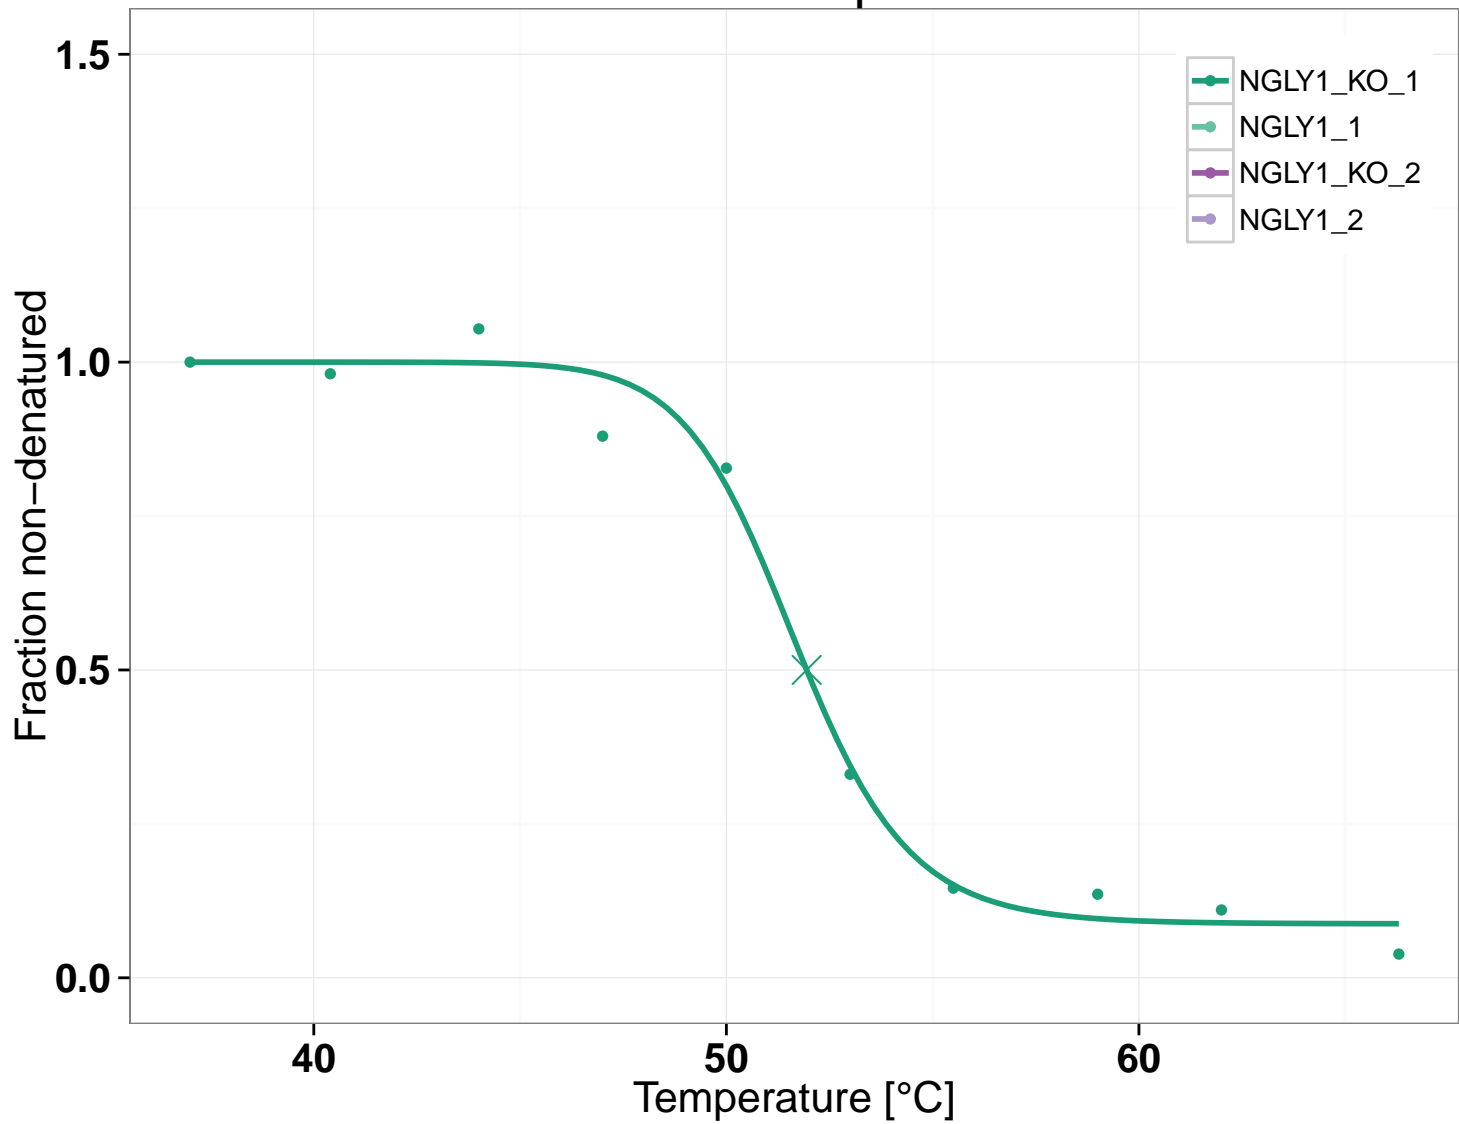

|            | meltPoint | slope | plateau | R2   |
|------------|-----------|-------|---------|------|
| NGLY1_KO_1 | 51.95     | -0.17 | 0.09    | 0.99 |
| NGLY1_1    | -         | -     | -       | -    |
| NGLY1_KO_2 | -         | -     | -       | -    |
| NGLY1_2    | -         | -     | -       | -    |

Supplement: Supplementary file 5220 [file 1]

IPI00384417.2|CDK5RAP2

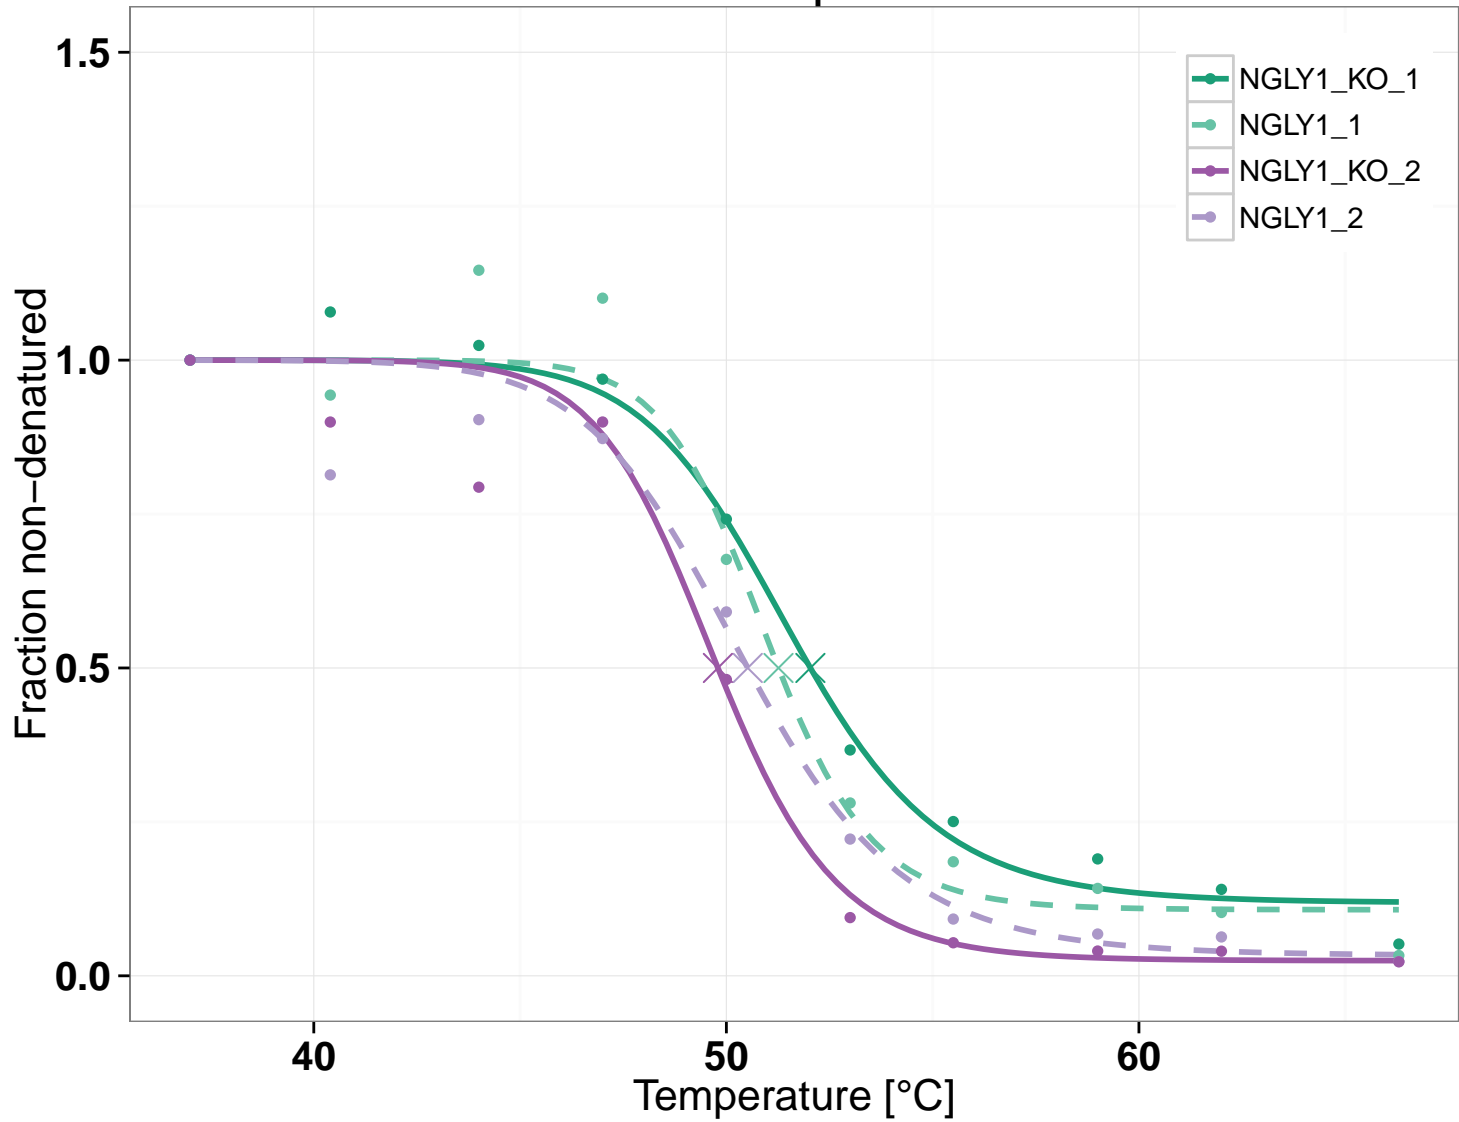

|            | meltPoint | slope | plateau | R2   |
|------------|-----------|-------|---------|------|
| NGLY1_KO_1 | 52.04     | -0.12 | 0.12    | 0.99 |
| NGLY1_1    | 51.26     | -0.18 | 0.11    | 0.97 |
| NGLY1_KO_2 | 49.79     | -0.17 | 0.02    | 0.97 |
| NGLY1_2    | 50.52     | -0.13 | 0.03    | 0.97 |

Supplement: Supplementary file 5221 [file 1]

# IPI00902514.1|HIST1H2AD

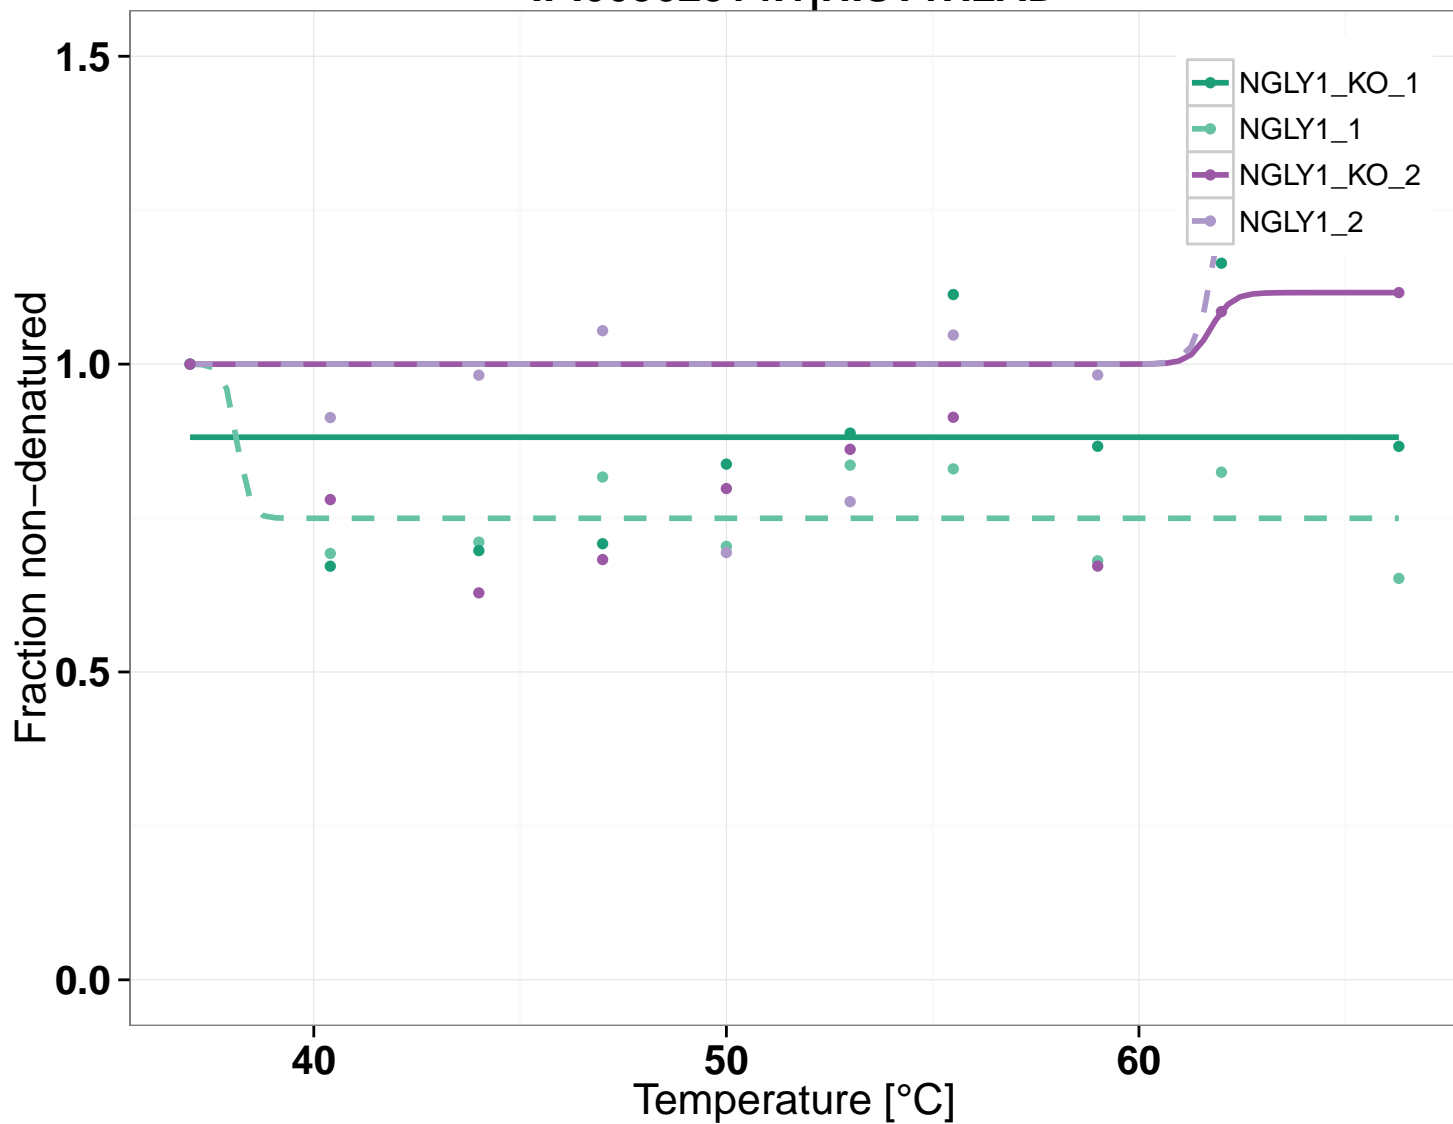

|            | meltPoint | slope | plateau | R2    |
|------------|-----------|-------|---------|-------|
| NGLY1_KO_1 | -         | -     | 0.76    | 0     |
| NGLY1_1    | -         | -0.41 | 0.75    | 0.56  |
| NGLY1_KO_2 | -         | 0.11  | 1.12    | -0.72 |
| NGLY1_2    | -         | 0.45  | 1.46    | 0.63  |

Supplement: Supplementary file 5222 [file 1]

IPI00827738.1|SPI1

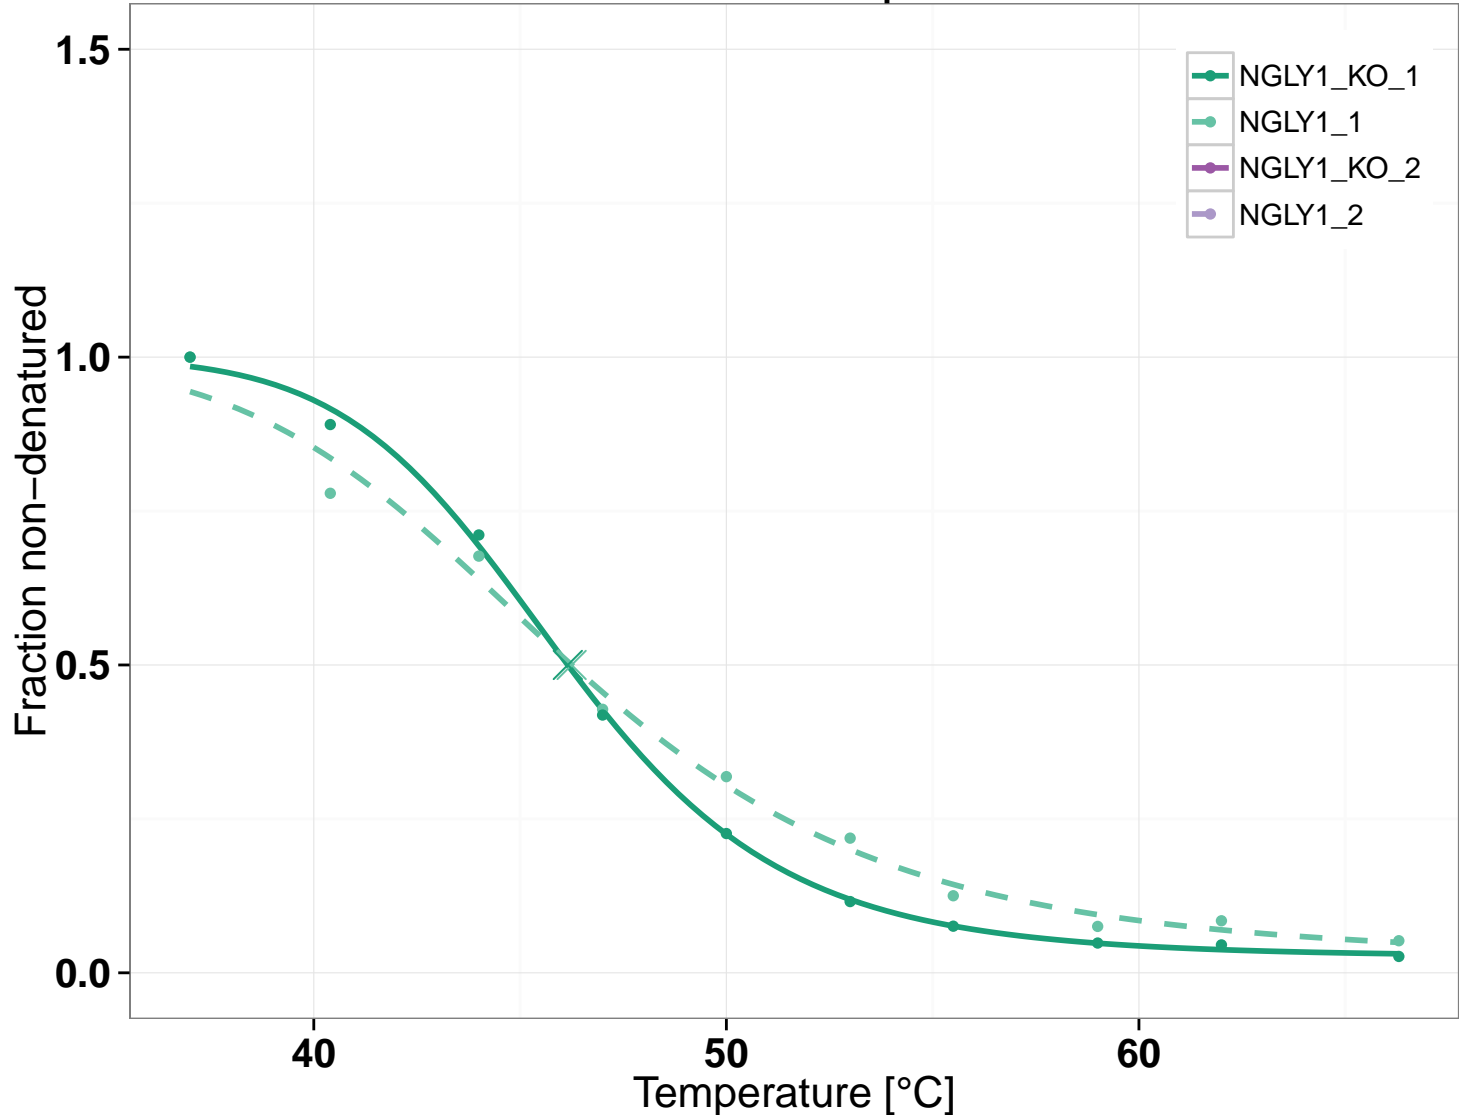

|            | meltPoint | slope  | plateau | R2   |
|------------|-----------|--------|---------|------|
| NGLY1_KO_1 | 46.16     | -0.091 | 0.03    | 1    |
| NGLY1_1    | 46.25     | -0.063 | 0.02    | 0.99 |
| NGLY1_KO_2 | -         | -      | -       | -    |
| NGLY1_2    | -         | -      | -       | -    |

Supplement: Supplementary file 5223 [file 1]
