# Supplementary material (part 53 of 85)
Source: publisher figshare collection journal article supplement (https://gsajournals.figshare.com/articles/dataset/_/12014913)

IPI00304666.4|SLC25A38

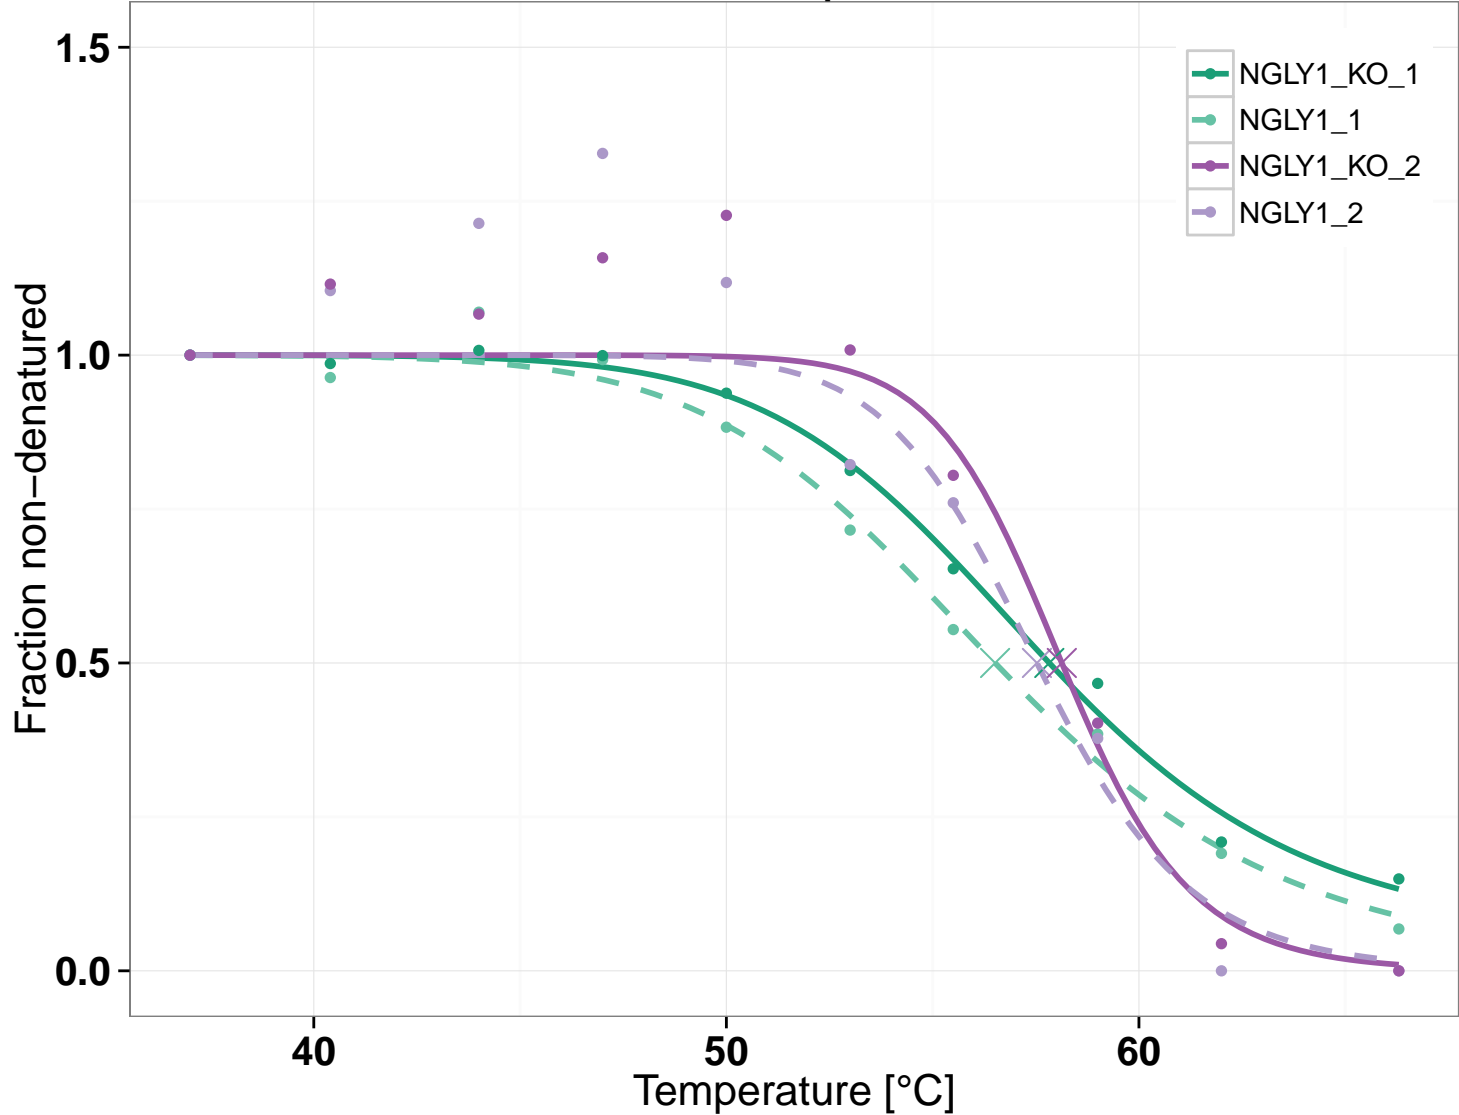

|            | meltPoint | slope  | plateau | R2   |
|------------|-----------|--------|---------|------|
| NGLY1_KO_1 | 57.83     | -0.073 | 0.05    | 0.99 |
| NGLY1_1    | 56.51     | -0.071 | 0       | 0.99 |
| NGLY1_KO_2 | 58.13     | -0.16  | 0       | 0.95 |
| NGLY1_2    | 57.53     | -0.14  | 0       | 0.9  |

Supplement: Supplementary file 5224 [file 1]

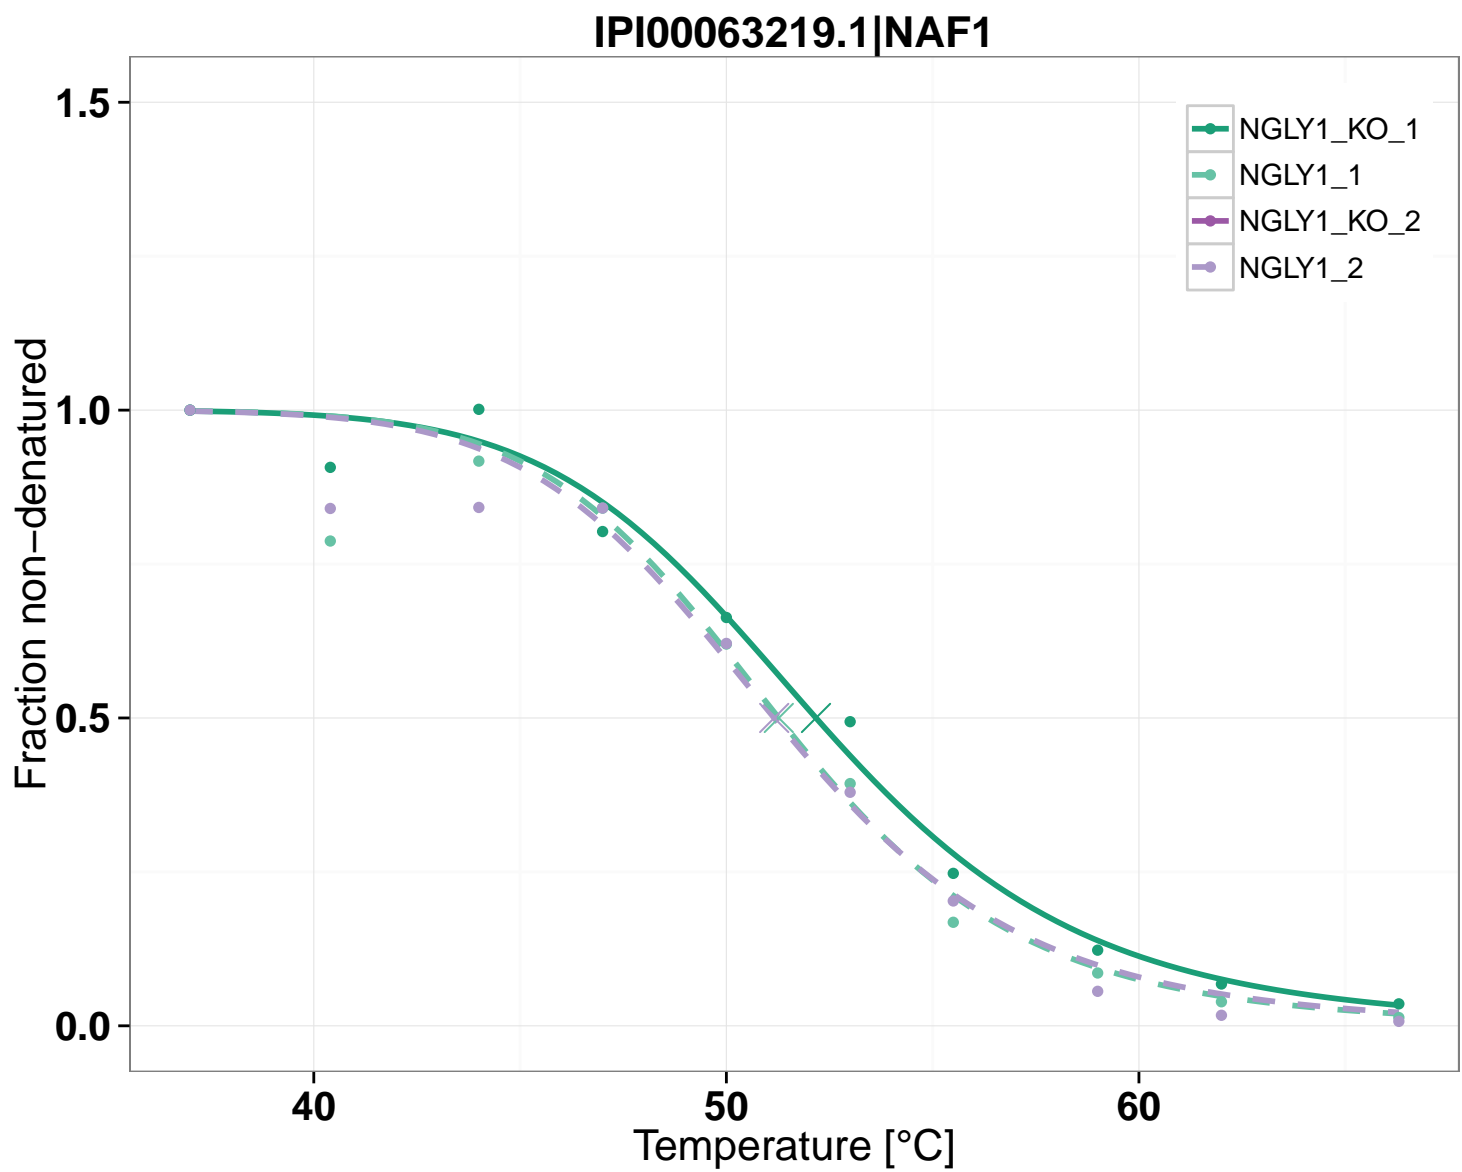

|            | meltPoint | slope  | plateau | R2   |
|------------|-----------|--------|---------|------|
| NGLY1_KO_1 | 52.17     | -0.077 | 0       | 0.99 |
| NGLY1_1    | 51.27     | -0.085 | 0       | 0.97 |
| NGLY1_KO_2 | -         | -      | -       | -    |
| NGLY1_2    | 51.16     | -0.083 | 0       | 0.97 |

Supplement: Supplementary file 5225 [file 1]

IPI00006651.1|SUPT7L

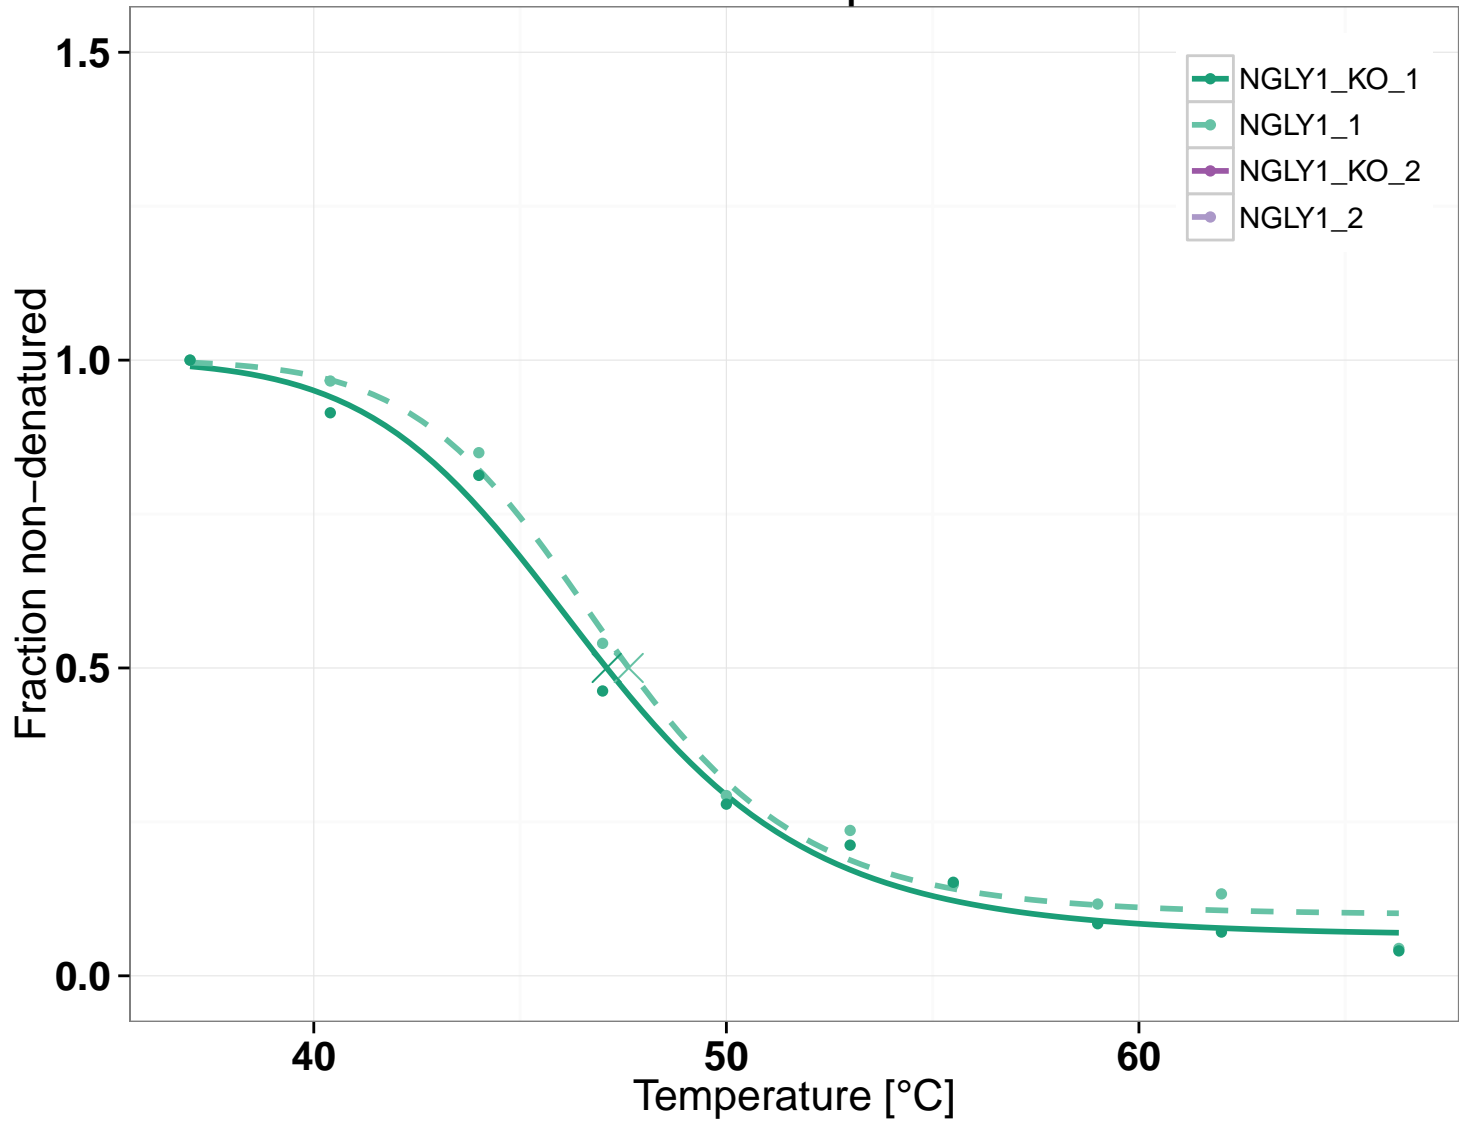

|            | meltPoint | slope  | plateau | R2   |
|------------|-----------|--------|---------|------|
| NGLY1_KO_1 | 47.1      | -0.087 | 0.06    | 0.99 |
| NGLY1_1    | 47.63     | -0.096 | 0.1     | 0.99 |
| NGLY1_KO_2 | -         | -      | -       | -    |
| NGLY1_2    | -         | -      | -       | -    |

Supplement: Supplementary file 5226 [file 1]

# IPI00001891.1|AUP1

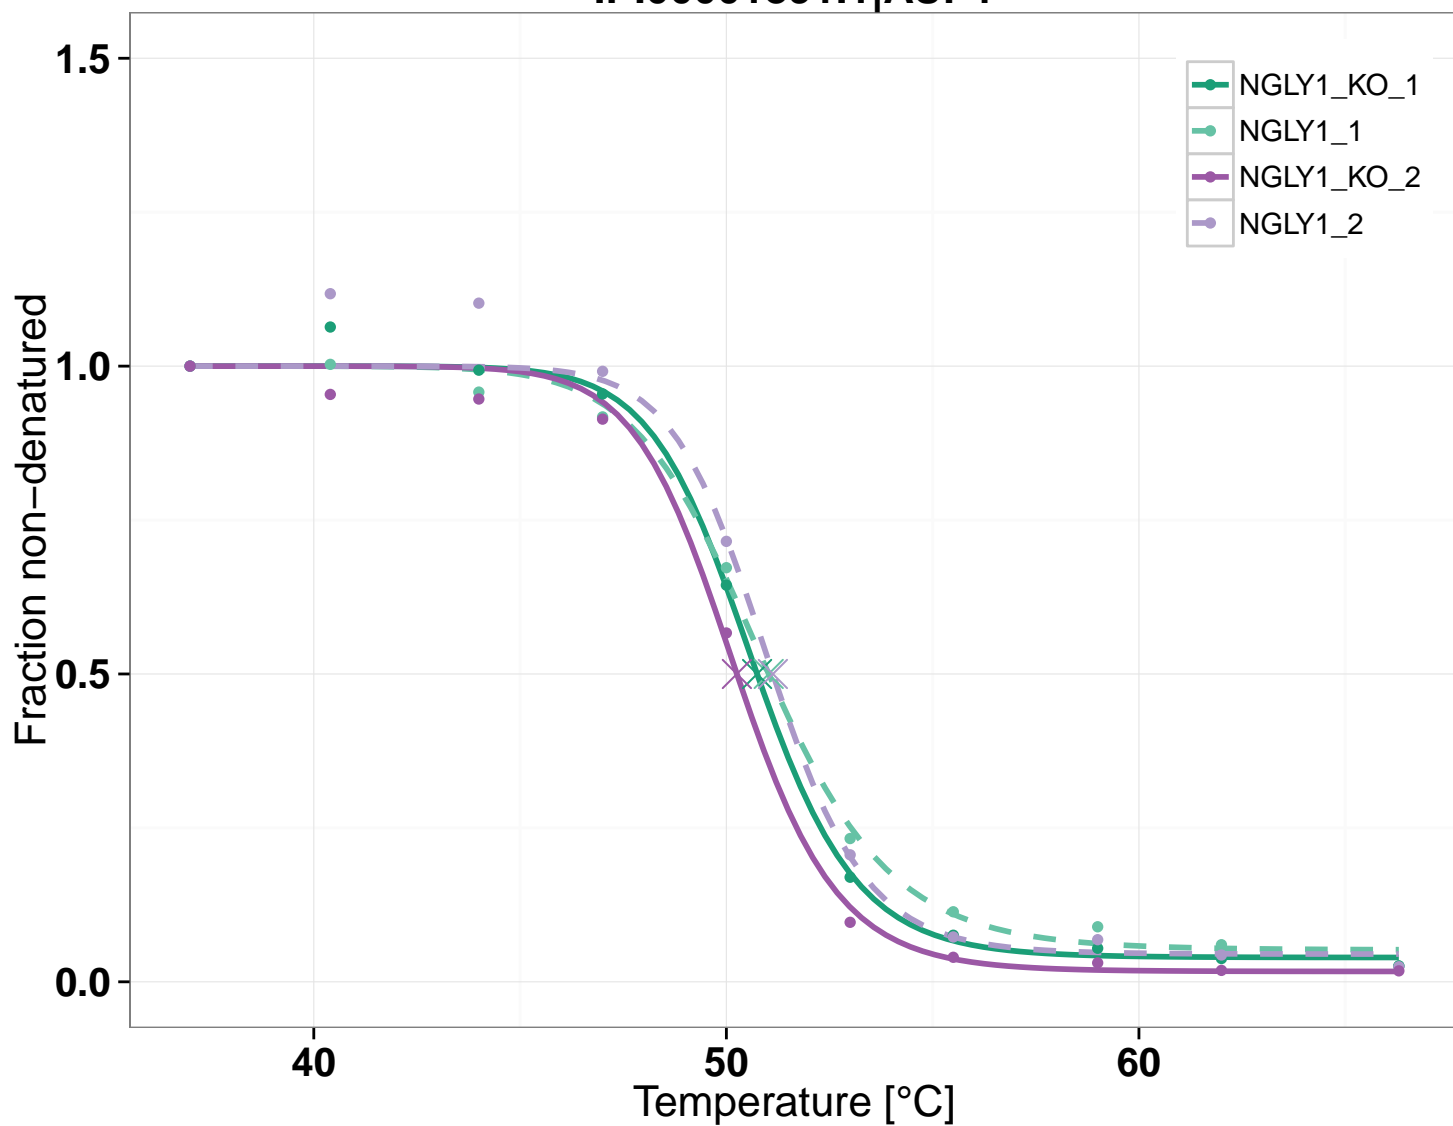

|            | meltPoint | slope | plateau | R2   |
|------------|-----------|-------|---------|------|
| NGLY1_KO_1 | 50.74     | -0.19 | 0.04    | 1    |
| NGLY1_1    | 51.03     | -0.15 | 0.05    | 1    |
| NGLY1_KO_2 | 50.25     | -0.2  | 0.02    | 1    |
| NGLY1_2    | 51.13     | -0.2  | 0.05    | 0.99 |

Supplement: Supplementary file 5227 [file 1]

IPI00749452.2|CIR

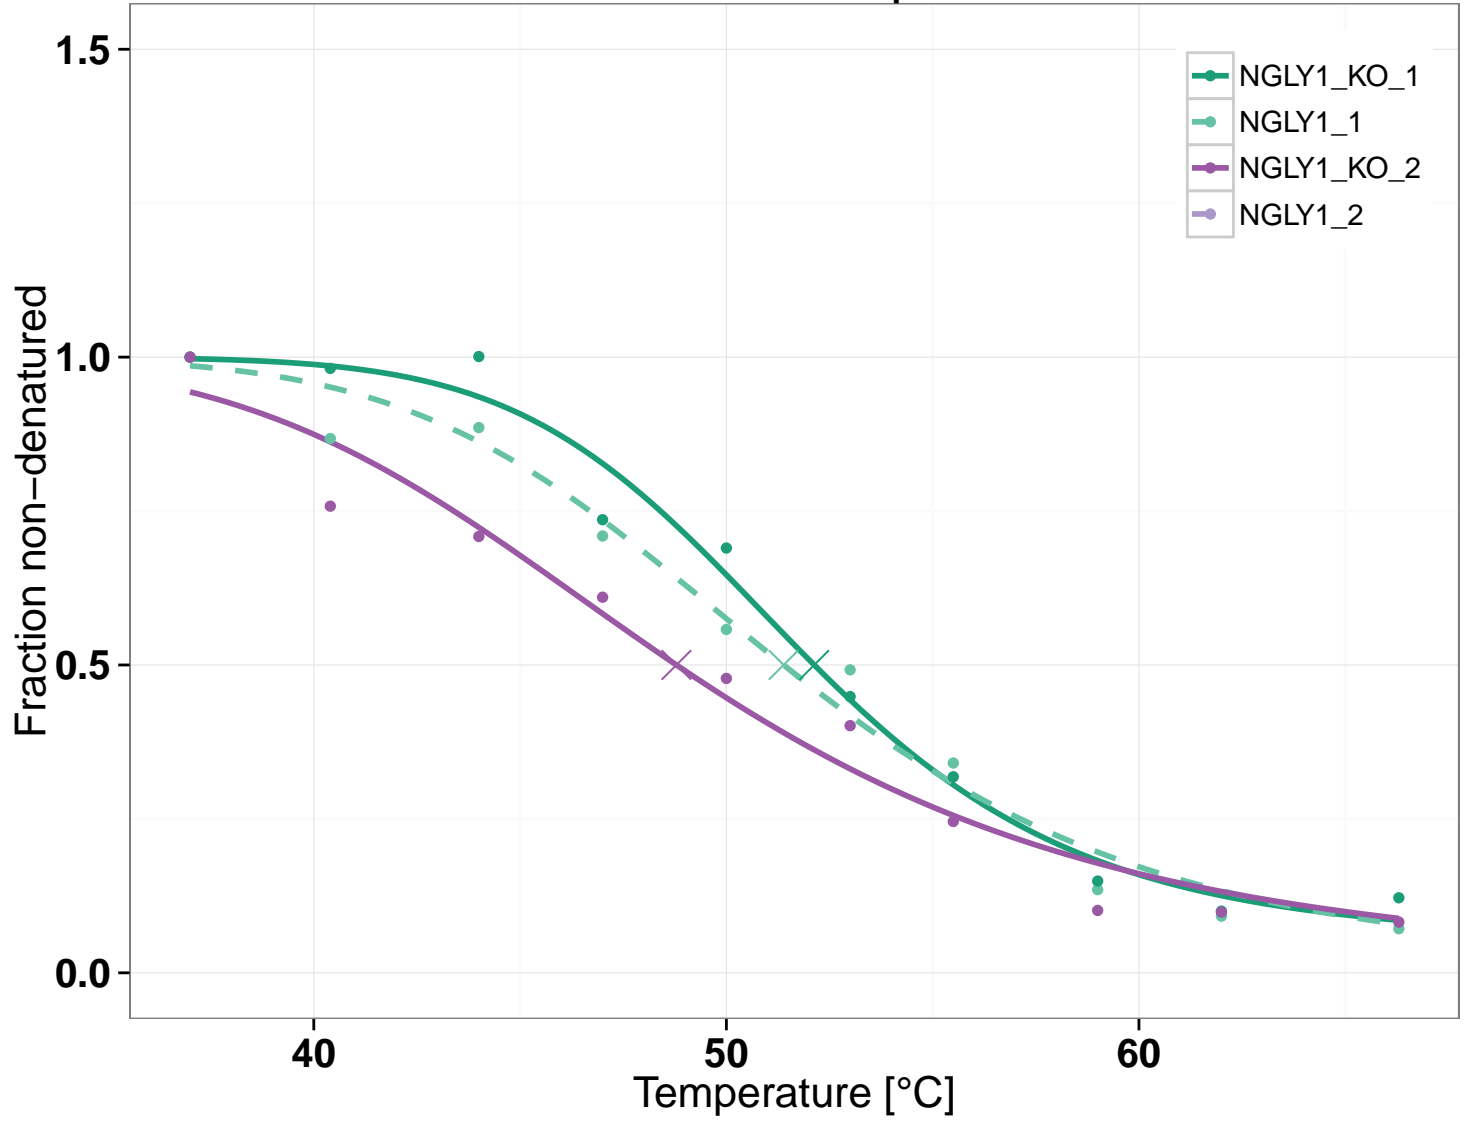

|            | meltPoint | slope  | plateau | R2   |
|------------|-----------|--------|---------|------|
| NGLY1_KO_1 | 52.13     | -0.069 | 0.05    | 0.99 |
| NGLY1_1    | 51.39     | -0.055 | 0       | 0.98 |
| NGLY1_KO_2 | 48.79     | -0.048 | 0       | 0.97 |
| NGLY1_2    | -         | -      | -       | -    |

Supplement: Supplementary file 5228 [file 1]

# IPI00014456.4|STRN

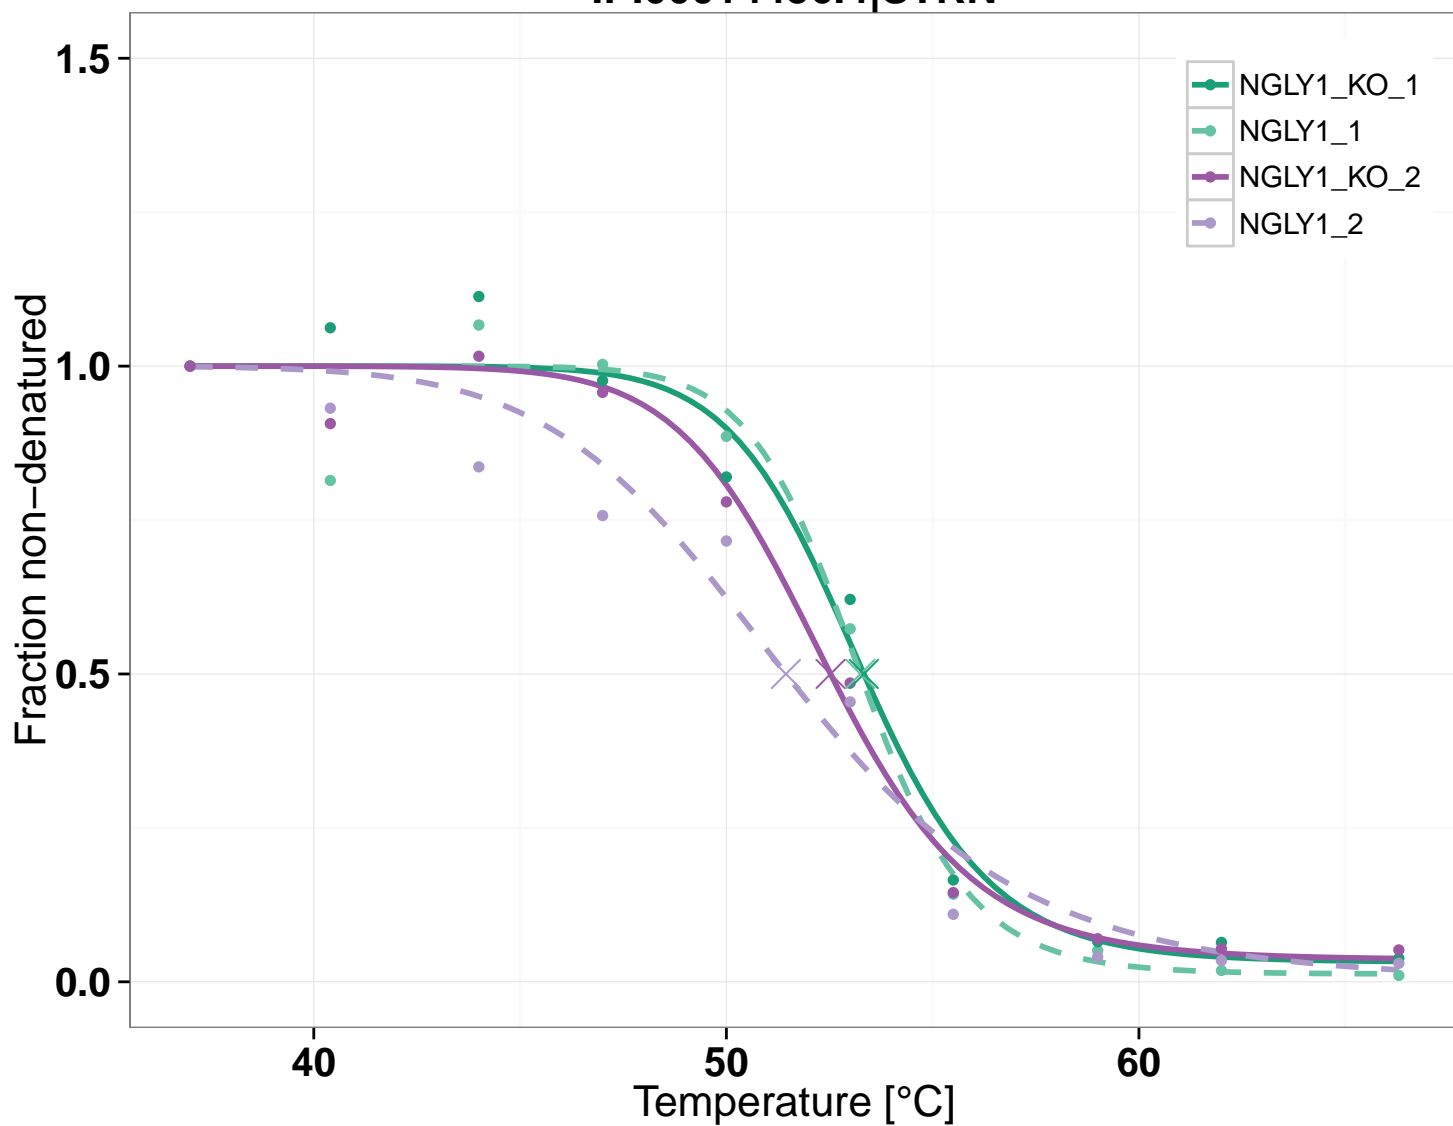

|            | meltPoint | slope  | plateau | R2   |
|------------|-----------|--------|---------|------|
| NGLY1_KO_1 | 53.33     | -0.15  | 0.03    | 0.98 |
| NGLY1_1    | 53.25     | -0.18  | 0.01    | 0.98 |
| NGLY1_KO_2 | 52.53     | -0.13  | 0.04    | 0.99 |
| NGLY1_2    | 51.44     | -0.086 | 0       | 0.96 |

Supplement: Supplementary file 5229 [file 1]

# IPI00252153.3|FRMD5

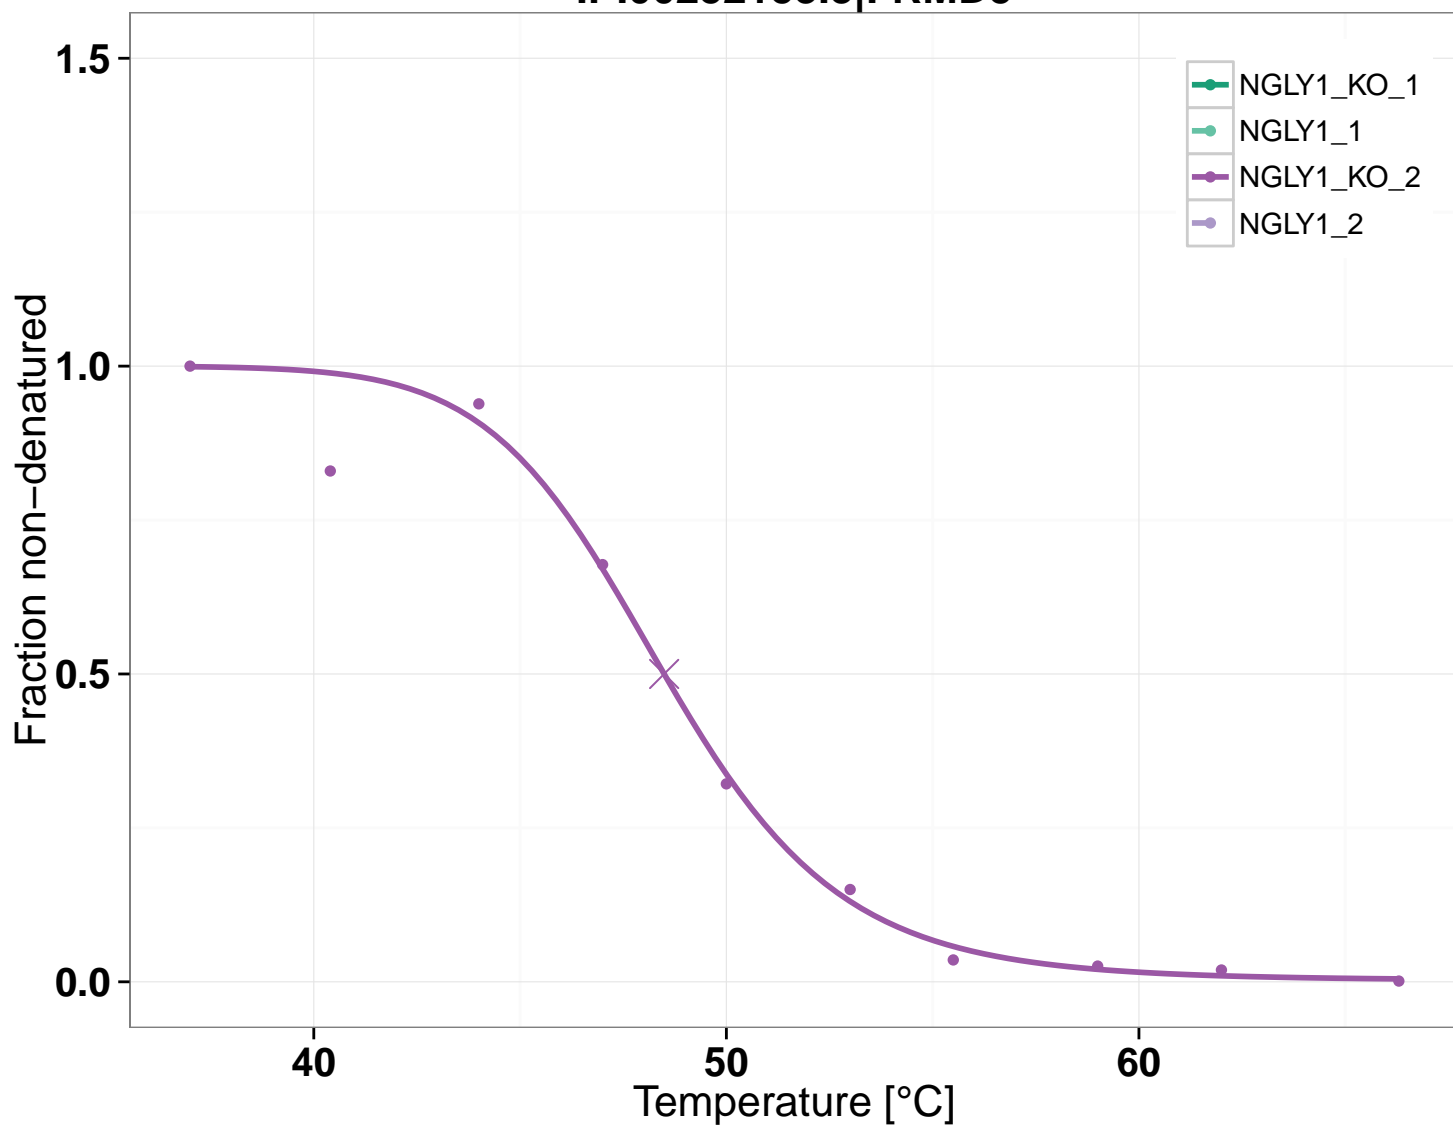

|            | meltPoint | slope | plateau | R2   |
|------------|-----------|-------|---------|------|
| NGLY1_KO_1 | —         | —     | —       | —    |
| NGLY1_1    | —         | —     | —       | —    |
| NGLY1_KO_2 | 48.49     | -0.12 | 0       | 0.98 |
| NGLY1_2    | —         | —     | —       | —    |

Supplement: Supplementary file 5230 [file 1]

IPI00465426.1|DYNC2LI1

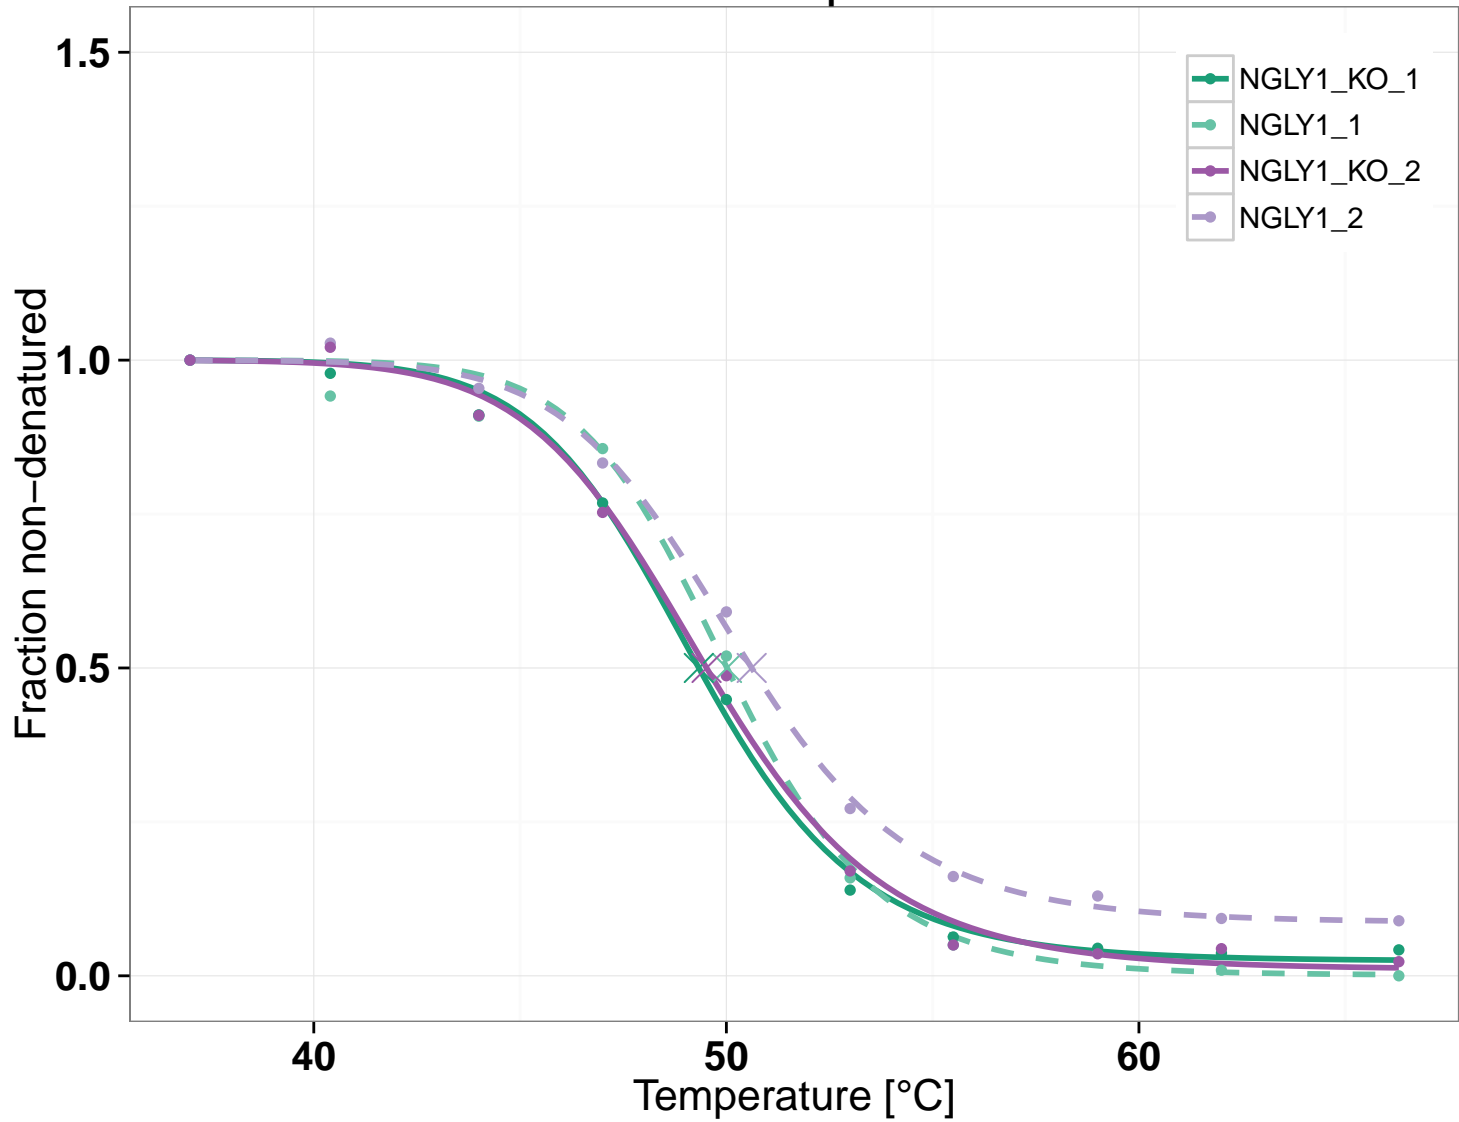

|            | meltPoint | slope | plateau | R2   |
|------------|-----------|-------|---------|------|
| NGLY1_KO_1 | 49.33     | -0.12 | 0.02    | 1    |
| NGLY1_1    | 50.02     | -0.14 | 0       | 0.99 |
| NGLY1_KO_2 | 49.52     | -0.11 | 0.01    | 1    |
| NGLY1_2    | 50.61     | -0.11 | 0.09    | 1    |

Supplement: Supplementary file 5231 [file 1]

# IPI00872985.1|GAR1

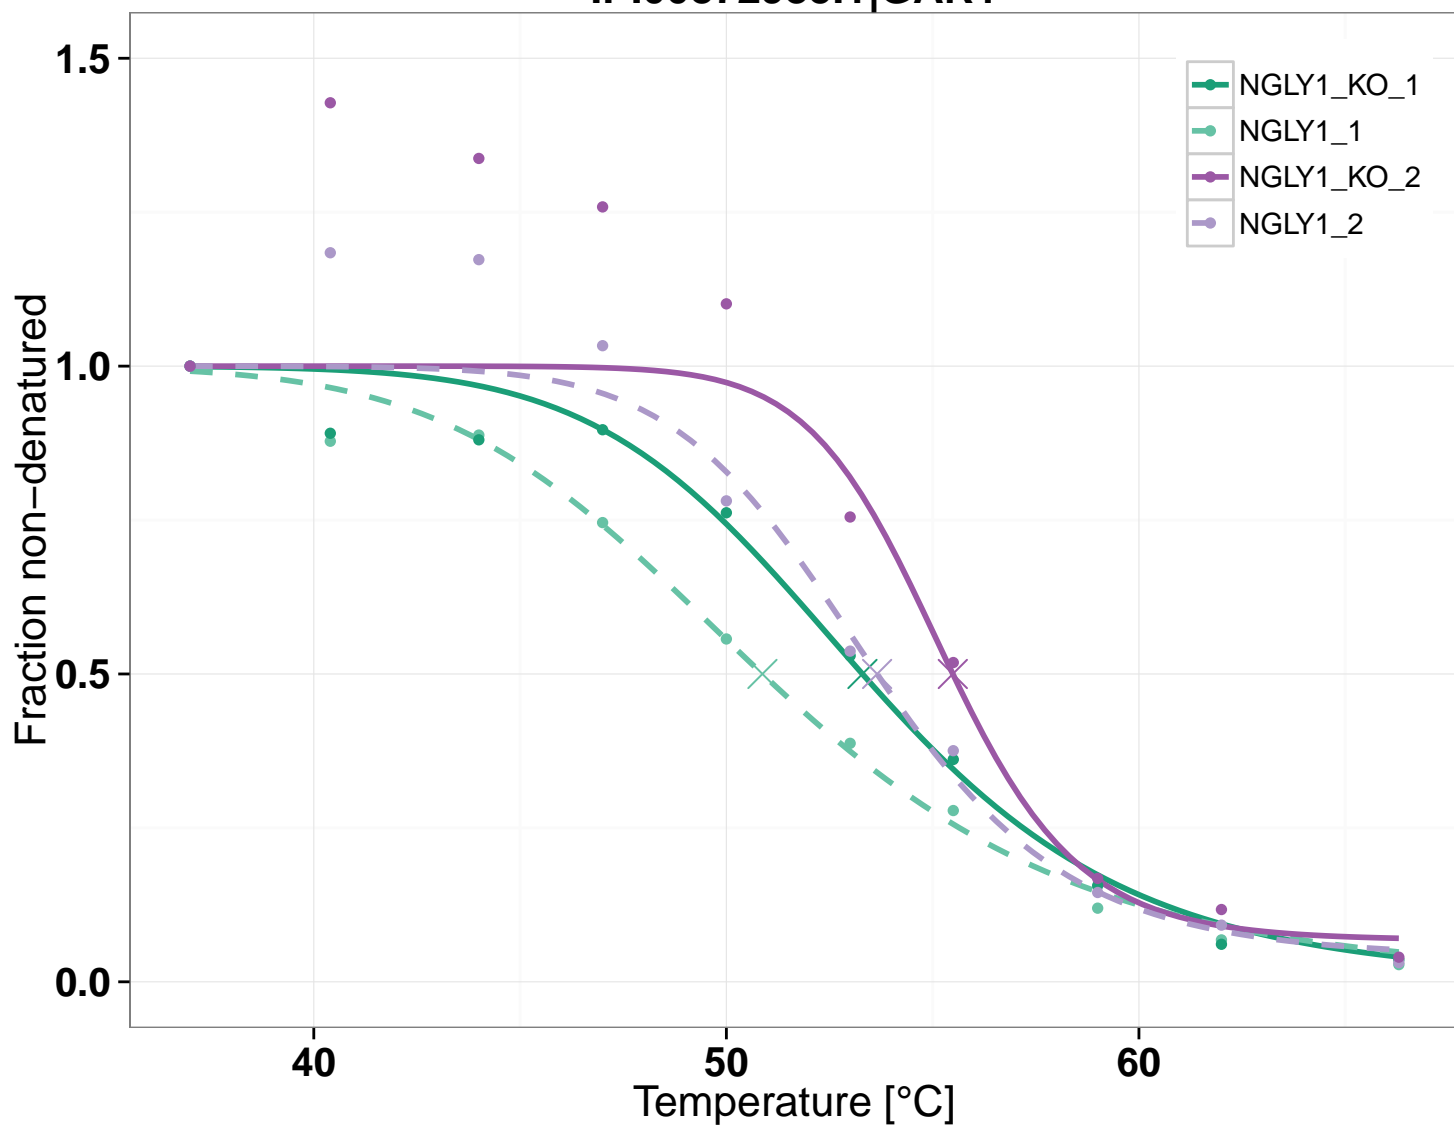

|            | meltPoint | slope  | plateau | R2   |
|------------|-----------|--------|---------|------|
| NGLY1_KO_1 | 53.3      | -0.077 | 0       | 0.98 |
| NGLY1_1    | 50.87     | -0.064 | 0       | 0.99 |
| NGLY1_KO_2 | 55.49     | -0.14  | 0.07    | 0.85 |
| NGLY1_2    | 53.65     | -0.1   | 0.04    | 0.96 |

Supplement: Supplementary file 5232 [file 1]

# IPI00166153.3|FTSJD2

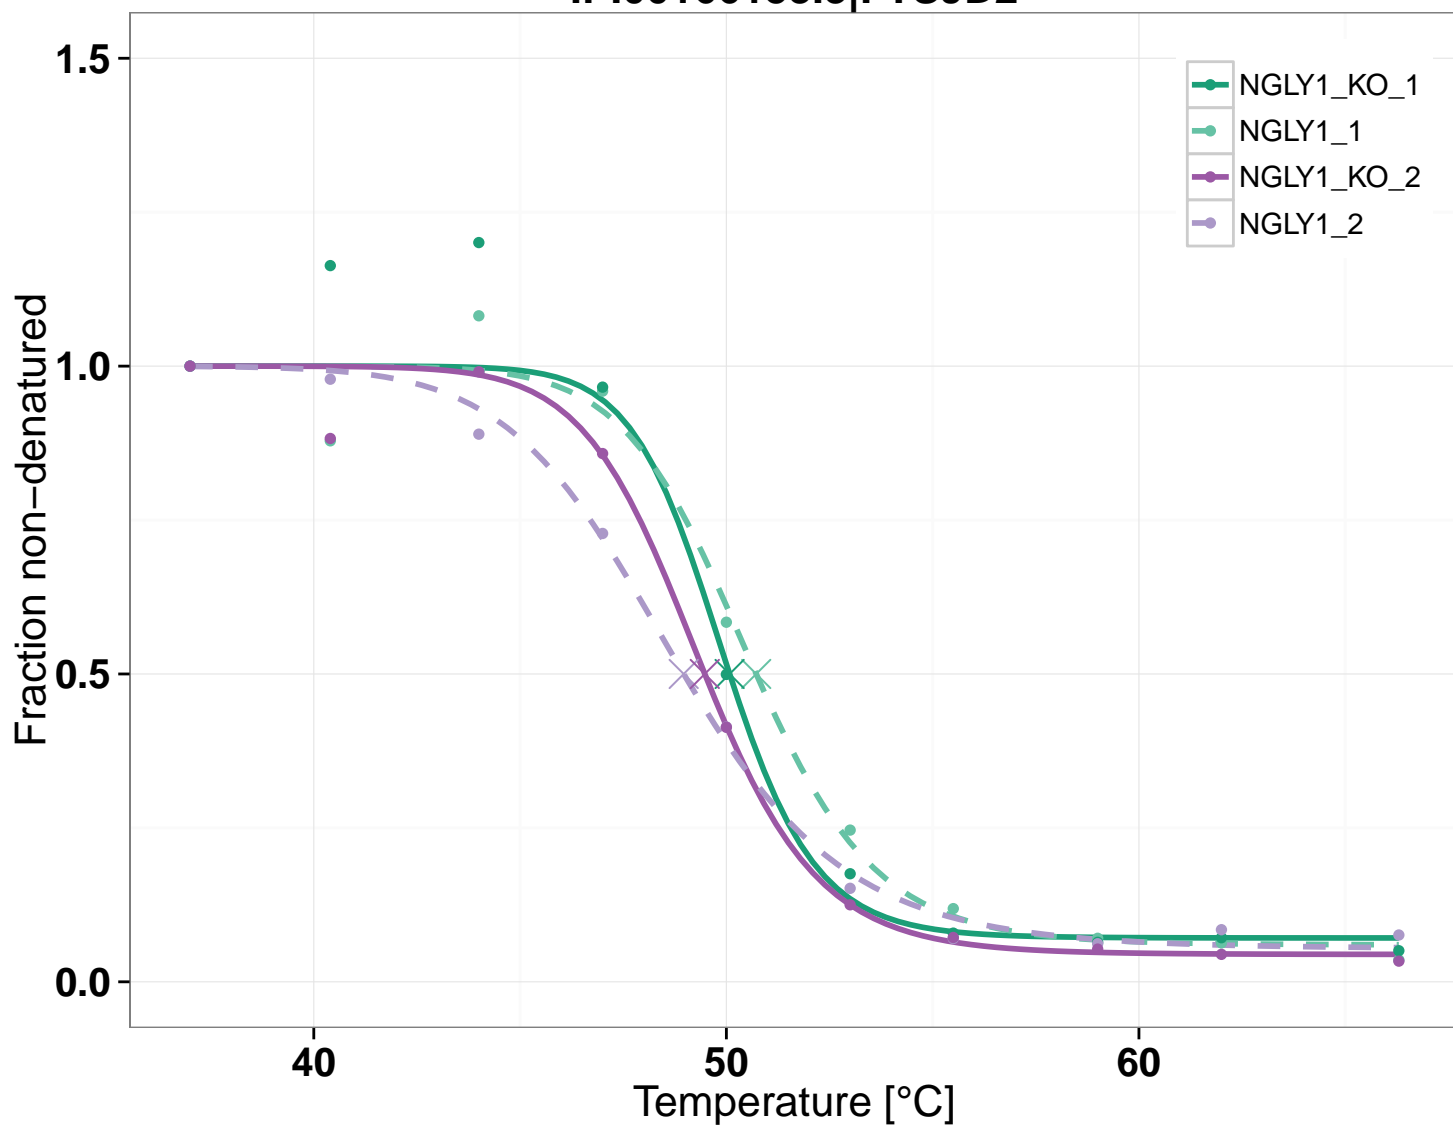

|            | meltPoint | slope | plateau | R2   |
|------------|-----------|-------|---------|------|
| NGLY1_KO_1 | 50.08     | -0.21 | 0.07    | 0.97 |
| NGLY1_1    | 50.72     | -0.15 | 0.06    | 0.99 |
| NGLY1_KO_2 | 49.48     | -0.17 | 0.04    | 0.99 |
| NGLY1_2    | 48.97     | -0.12 | 0.05    | 1    |

Supplement: Supplementary file 5233 [file 1]

IPI00398957.5|ANKRD52

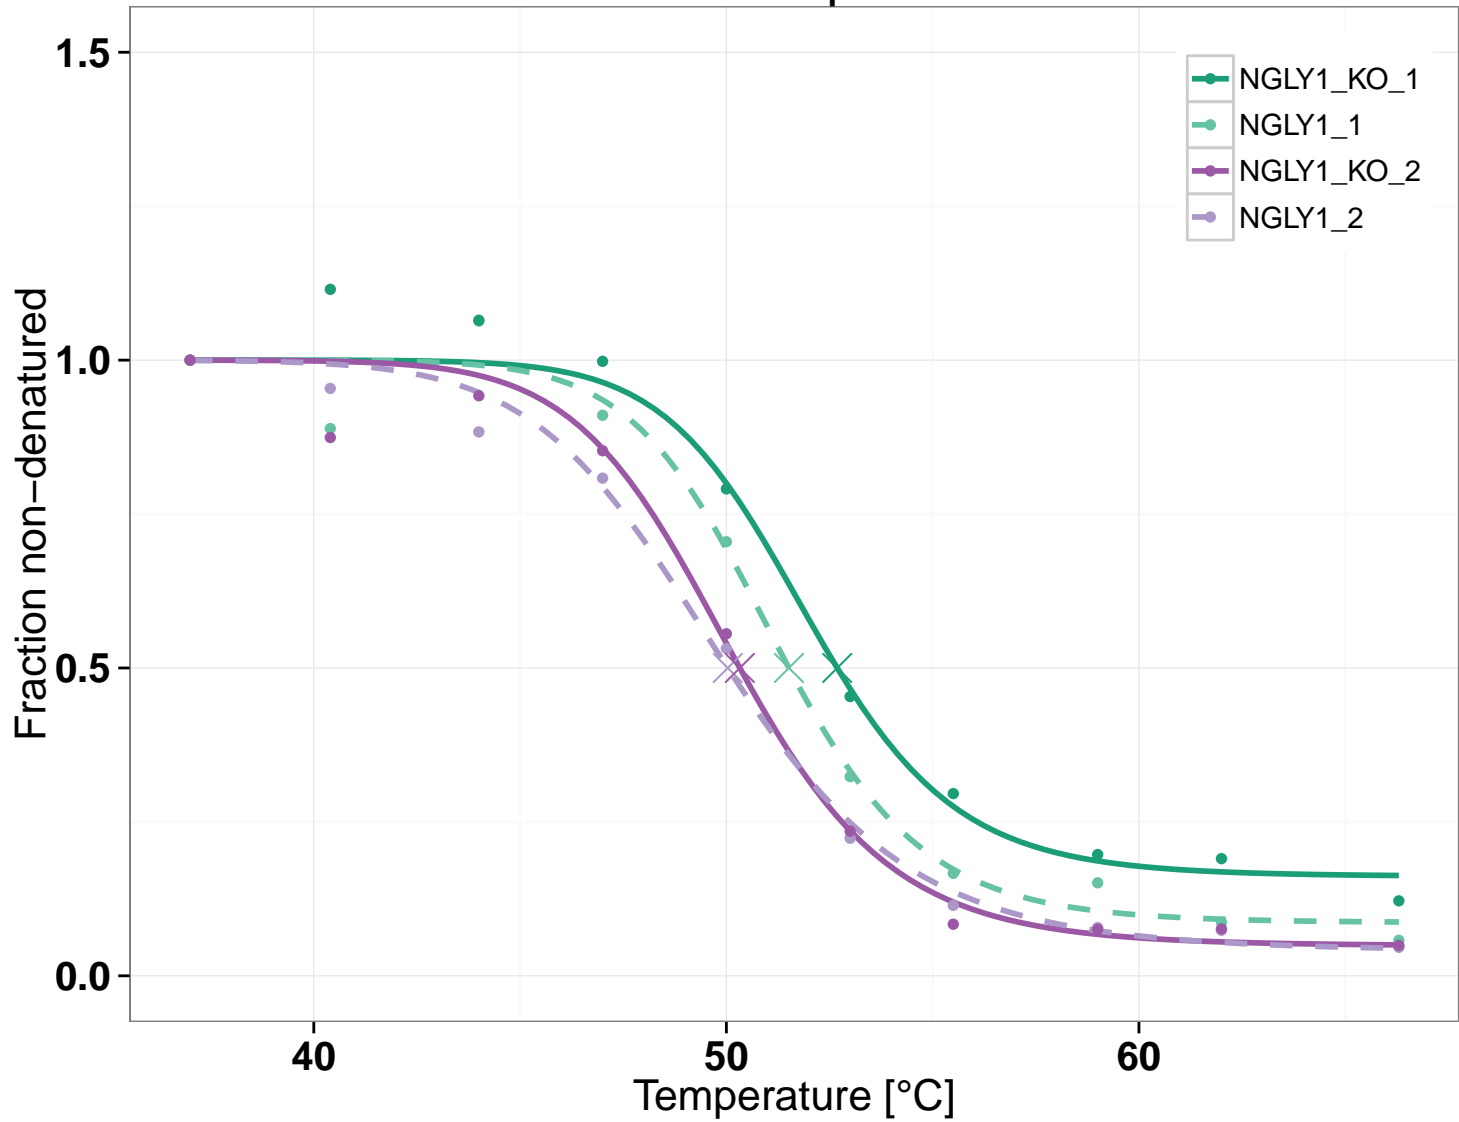

|            | meltPoint | slope | plateau | R2   |
|------------|-----------|-------|---------|------|
| NGLY1_KO_1 | 52.69     | -0.12 | 0.16    | 0.99 |
| NGLY1_1    | 51.52     | -0.13 | 0.09    | 0.99 |
| NGLY1_KO_2 | 50.33     | -0.12 | 0.05    | 0.99 |
| NGLY1_2    | 50.03     | -0.1  | 0.04    | 0.99 |

Supplement: Supplementary file 5234 [file 1]

IPI00409671.3|DDX42

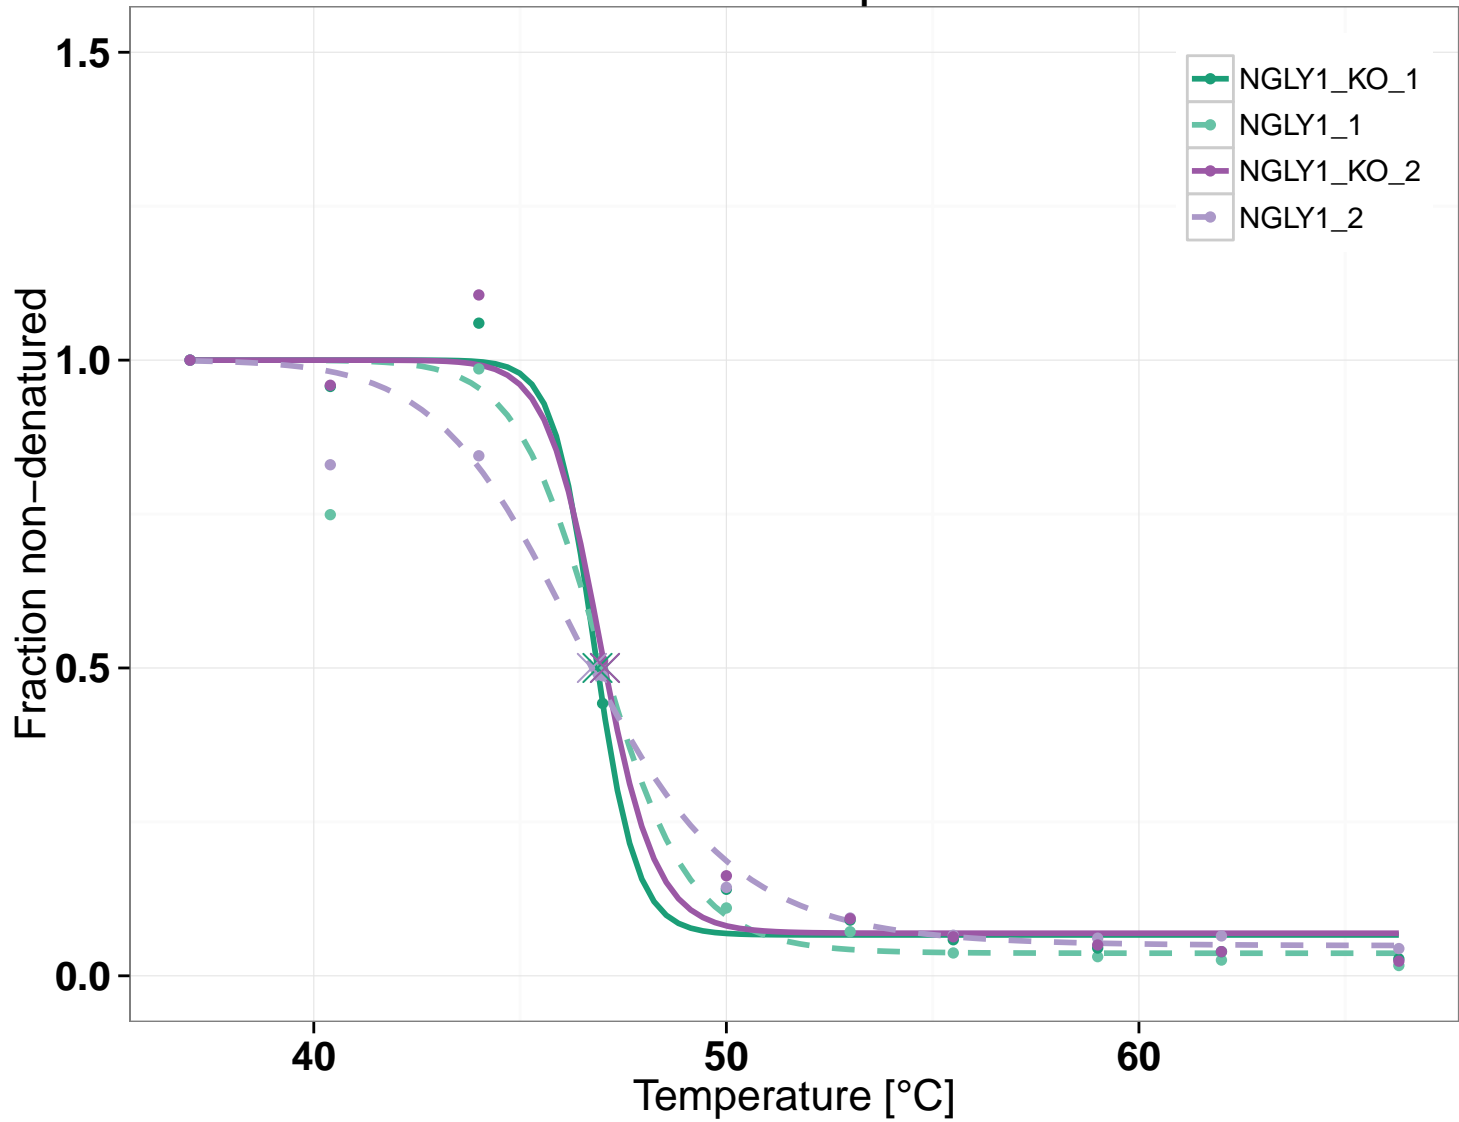

|            | meltPoint | slope | plateau | R2   |
|------------|-----------|-------|---------|------|
| NGLY1_KO_1 | 46.88     | -0.46 | 0.07    | 0.99 |
| NGLY1_1    | 47.06     | -0.23 | 0.04    | 0.96 |
| NGLY1_KO_2 | 47.06     | -0.35 | 0.07    | 0.99 |
| NGLY1_2    | 46.74     | -0.13 | 0.05    | 0.98 |

Supplement: Supplementary file 5235 [file 1]

# IPI00410625.5|RUNDC1

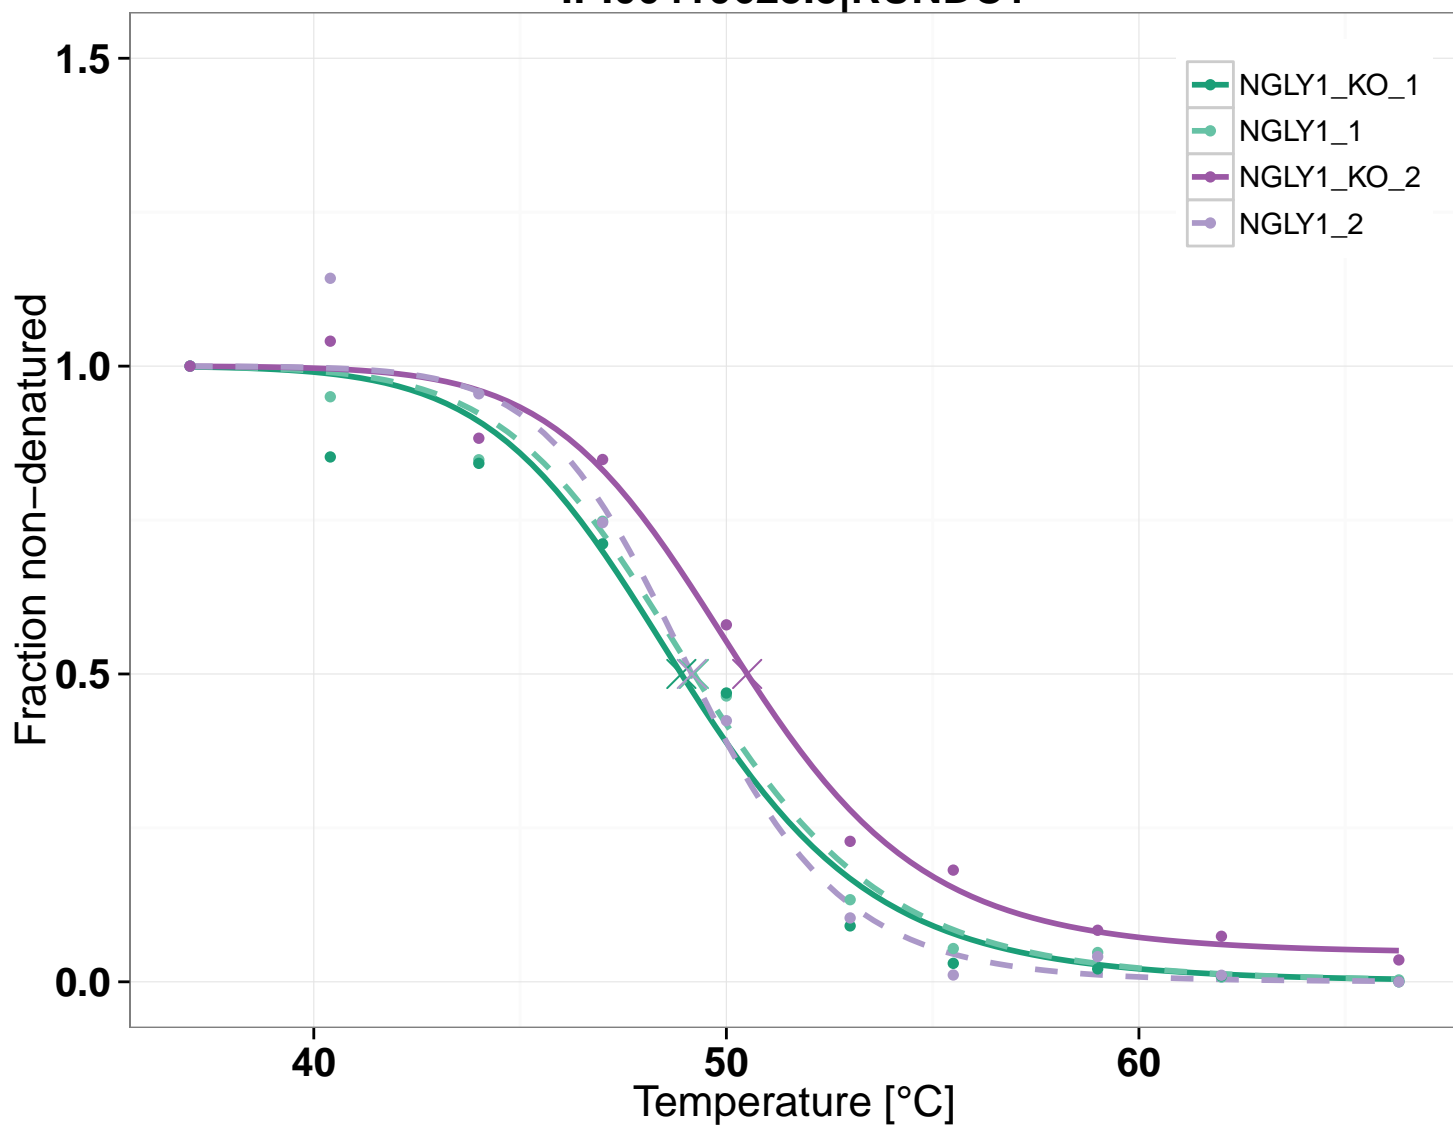

|            | meltPoint | slope | plateau | R2   |
|------------|-----------|-------|---------|------|
| NGLY1_KO_1 | 48.91     | -0.11 | 0       | 0.98 |
| NGLY1_1    | 49.21     | -0.11 | 0       | 0.99 |
| NGLY1_KO_2 | 50.5      | -0.11 | 0.05    | 0.99 |
| NGLY1_2    | 49.16     | -0.14 | 0       | 0.99 |

Supplement: Supplementary file 5236 [file 1]

IPI00883768.1|KIAA0467

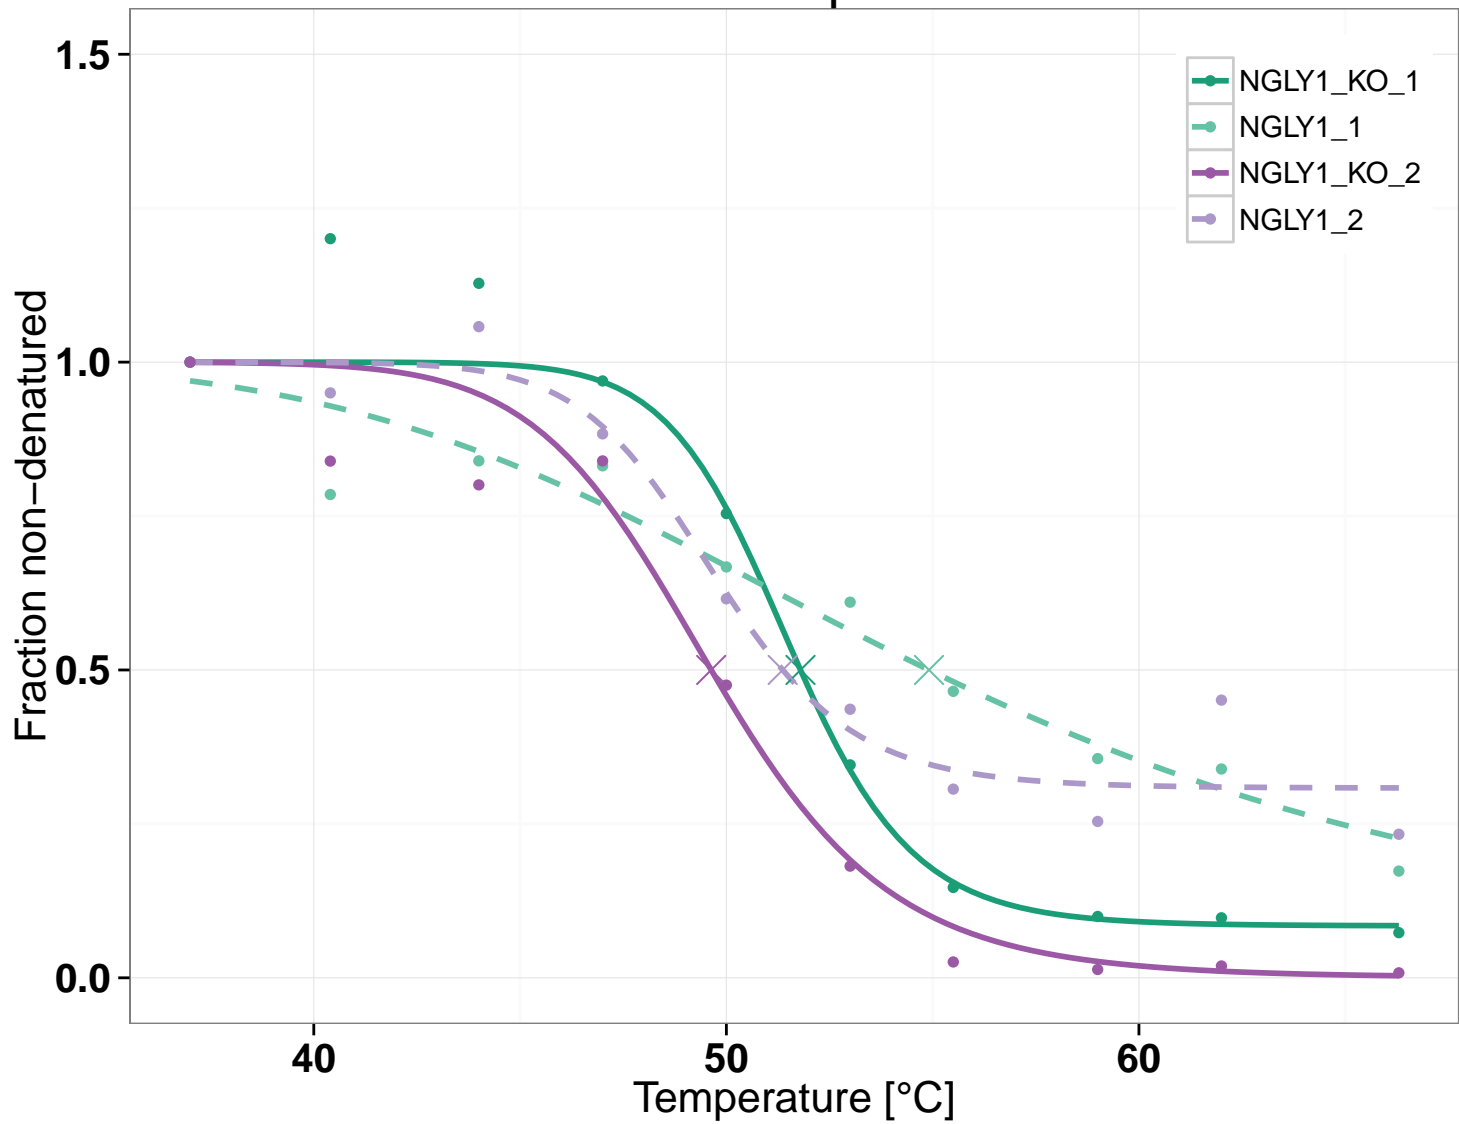

|            | meltPoint | slope  | plateau | R2   |
|------------|-----------|--------|---------|------|
| NGLY1_KO_1 | 51.8      | -0.15  | 0.08    | 0.97 |
| NGLY1_1    | 54.91     | -0.035 | 0       | 0.95 |
| NGLY1_KO_2 | 49.63     | -0.12  | 0       | 0.97 |
| NGLY1_2    | 51.36     | -0.1   | 0.31    | 0.96 |

Supplement: Supplementary file 5237 [file 1]

IPI00418644.3|C15ORF58

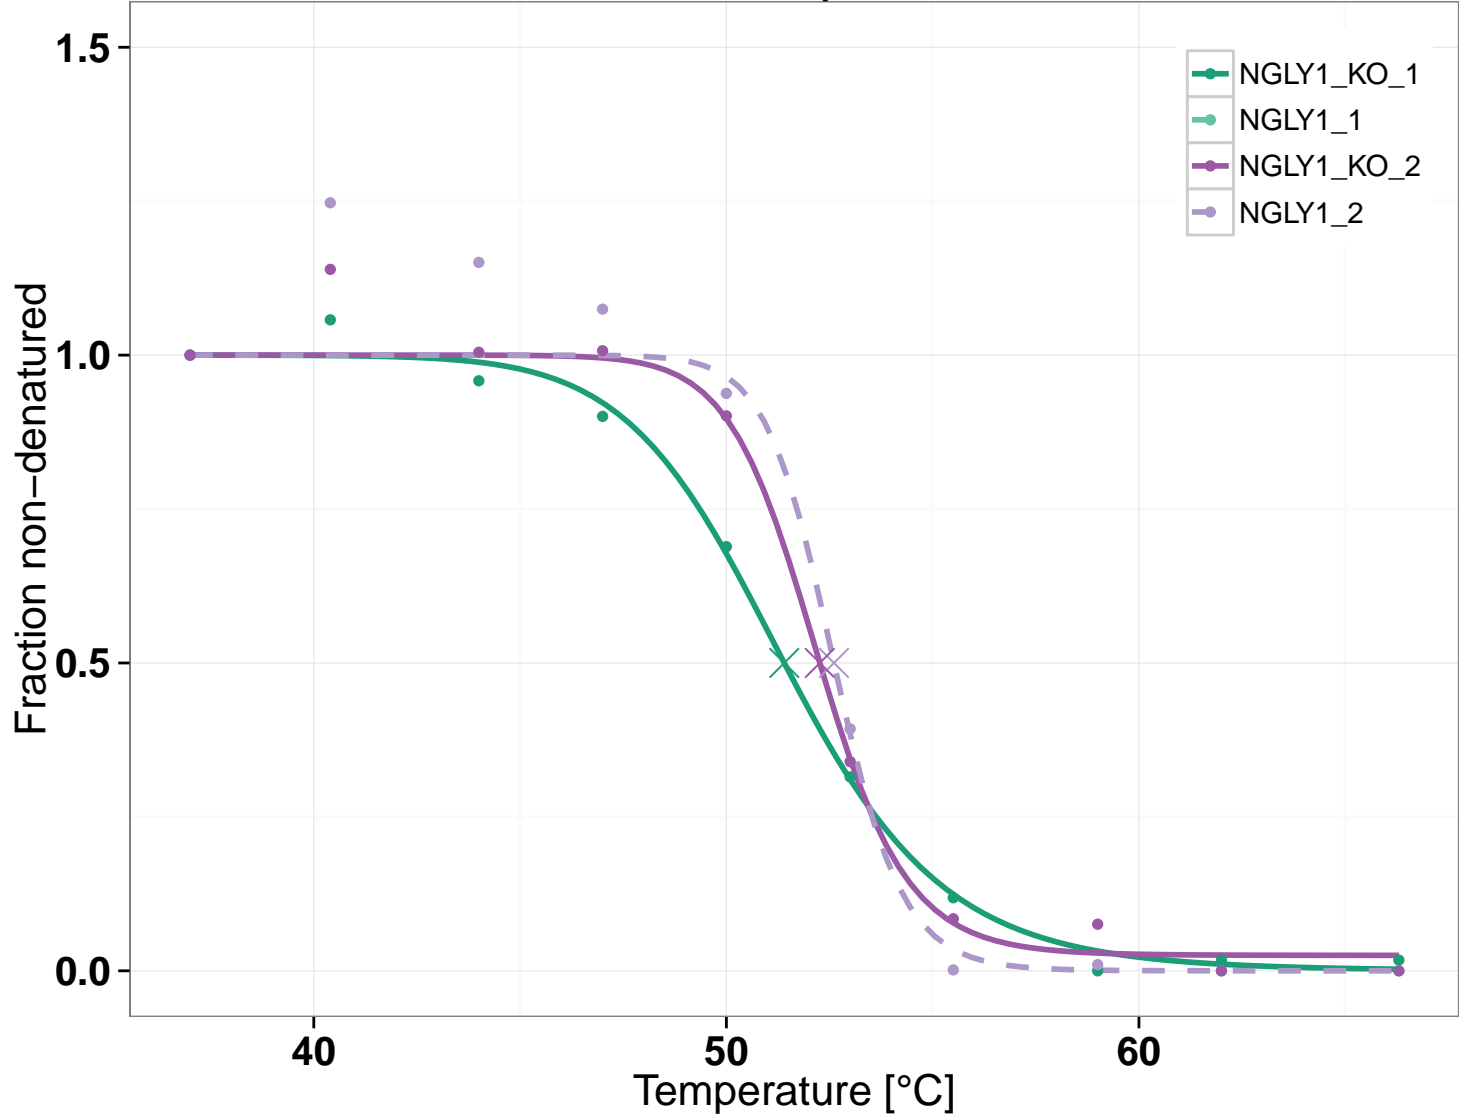

|            | meltPoint | slope | plateau | R2   |
|------------|-----------|-------|---------|------|
| NGLY1_KO_1 | 51.4      | -0.13 | 0       | 1    |
| NGLY1_1    | -         | -     | -       | -    |
| NGLY1_KO_2 | 52.27     | -0.23 | 0.03    | 0.99 |
| NGLY1_2    | 52.61     | -0.3  | 0       | 0.97 |

Supplement: Supplementary file 5238 [file 1]

IPI00032853.1|NOP10

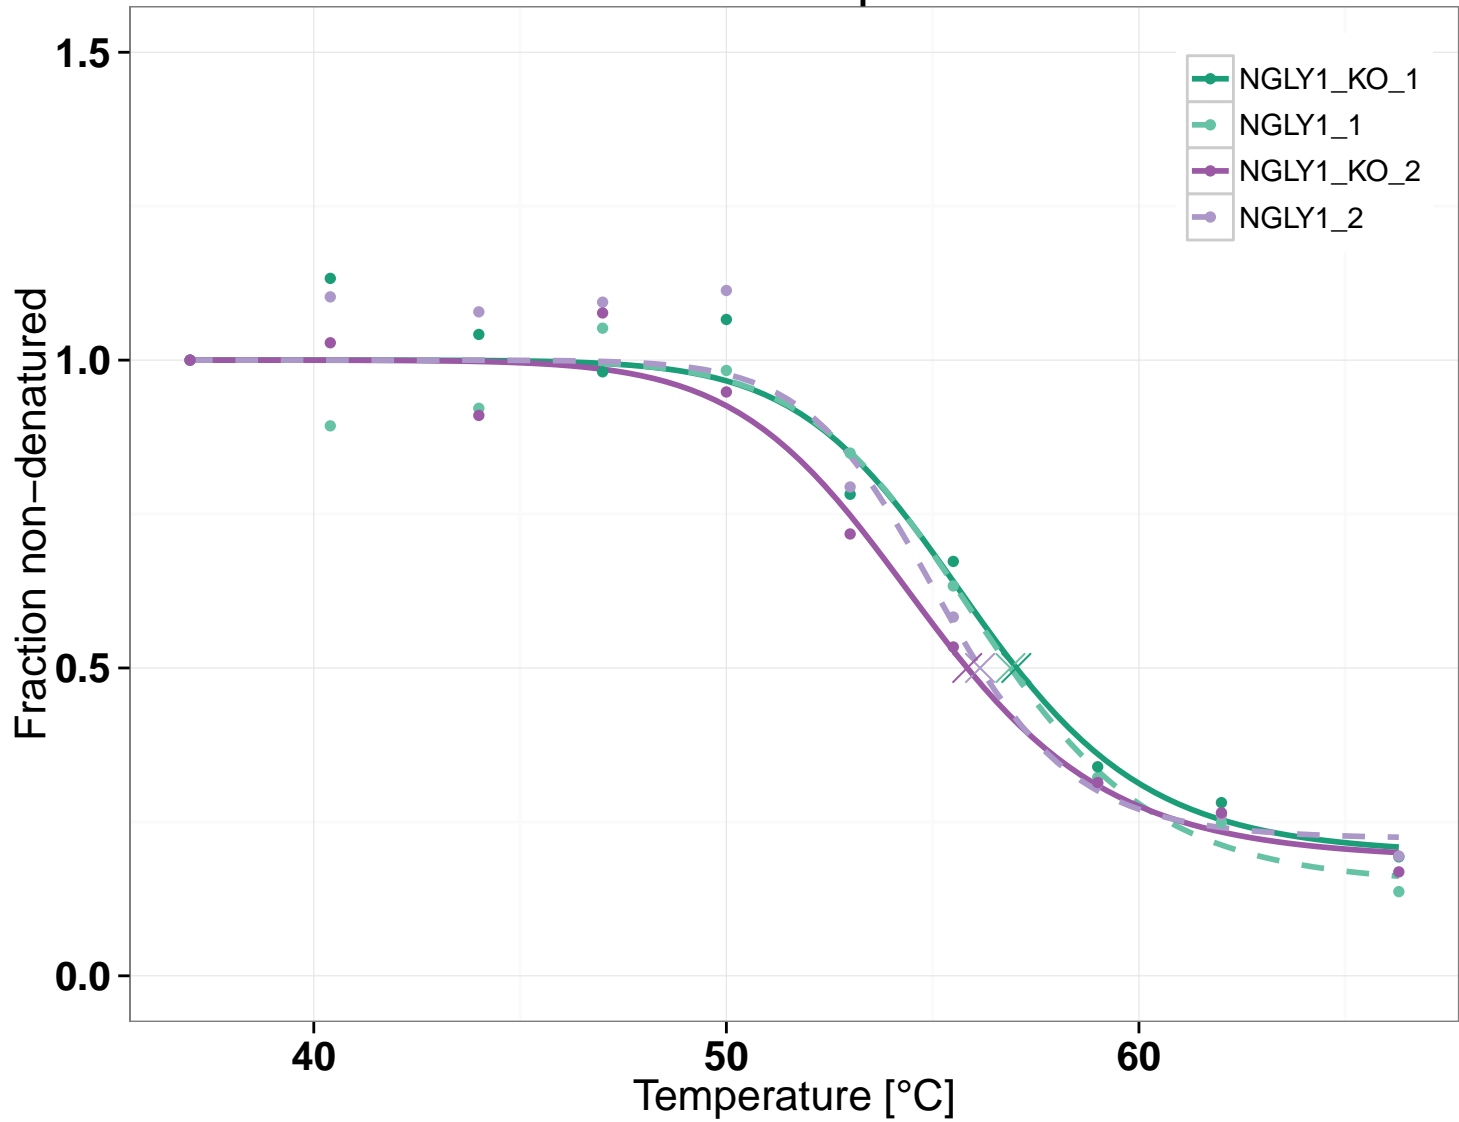

|            | meltPoint | slope  | plateau | R2   |
|------------|-----------|--------|---------|------|
| NGLY1_KO_1 | 57.03     | -0.095 | 0.2     | 0.97 |
| NGLY1_1    | 56.89     | -0.1   | 0.15    | 0.98 |
| NGLY1_KO_2 | 55.84     | -0.09  | 0.19    | 0.98 |
| NGLY1_2    | 56.15     | -0.12  | 0.22    | 0.96 |

Supplement: Supplementary file 5239 [file 1]

IPI00412492.3|PLXND1

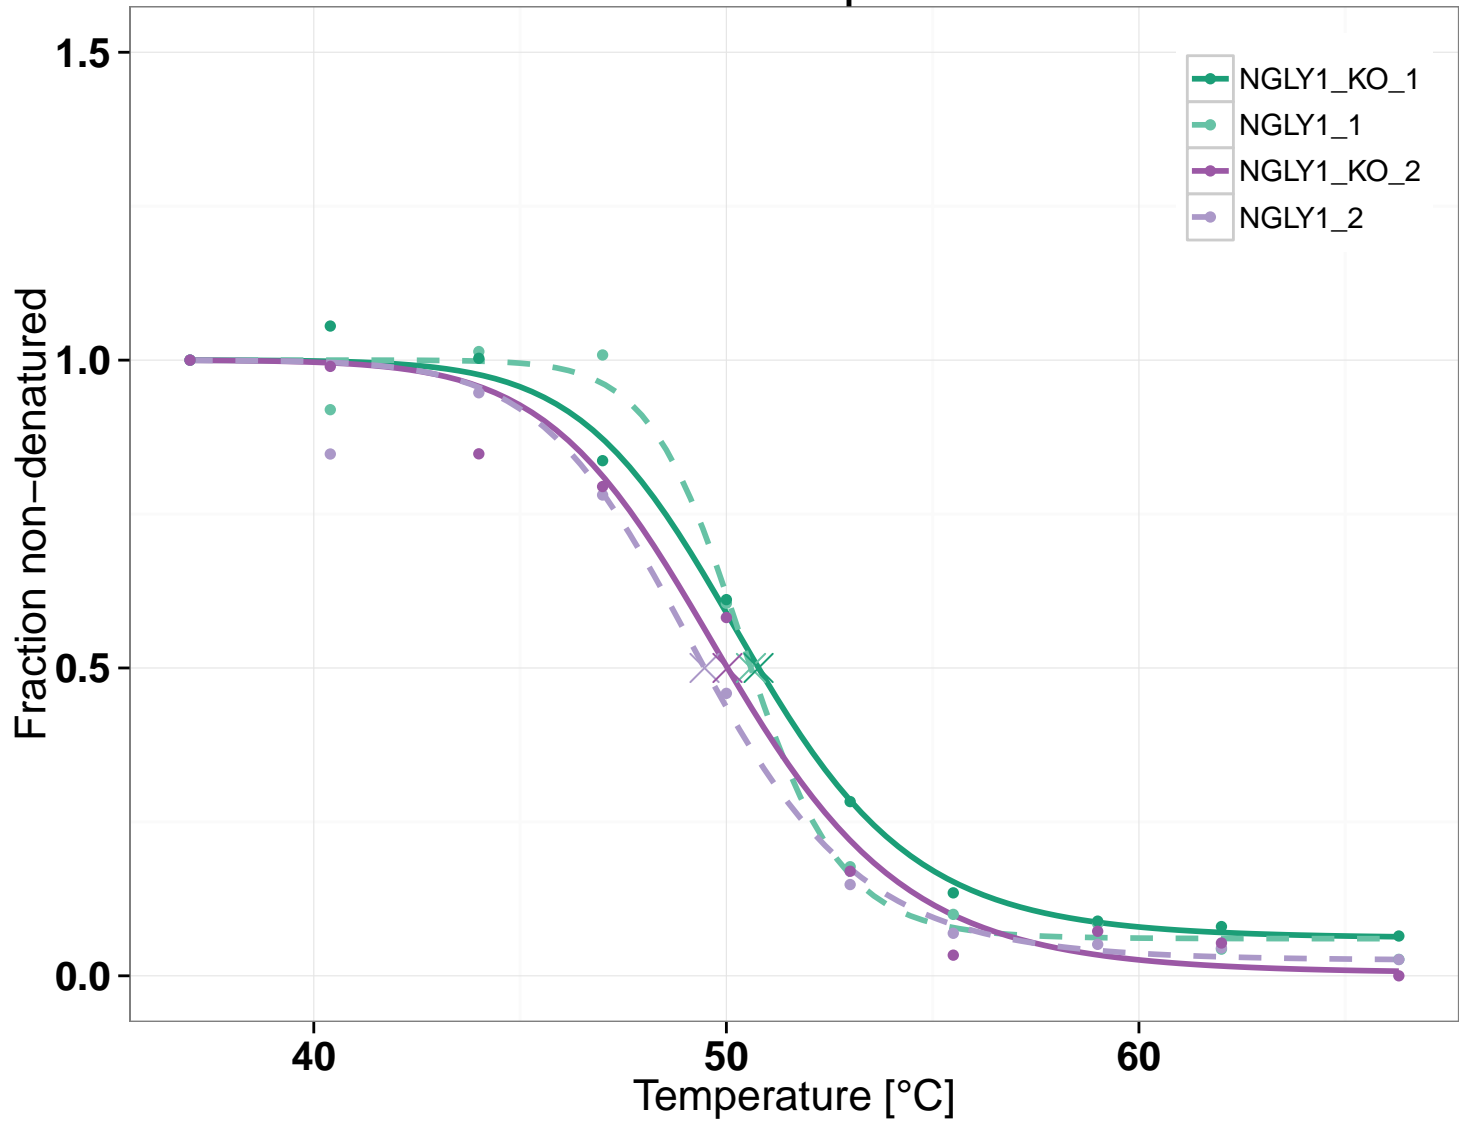

|            | meltPoint | slope | plateau | R2   |
|------------|-----------|-------|---------|------|
| NGLY1_KO_1 | 50.78     | -0.12 | 0.06    | 1    |
| NGLY1_1    | 50.6      | -0.2  | 0.06    | 0.99 |
| NGLY1_KO_2 | 50.03     | -0.11 | 0       | 0.98 |
| NGLY1_2    | 49.47     | -0.12 | 0.02    | 0.98 |

Supplement: Supplementary file 5240 [file 1]

IPI00306471.1|CCDC94

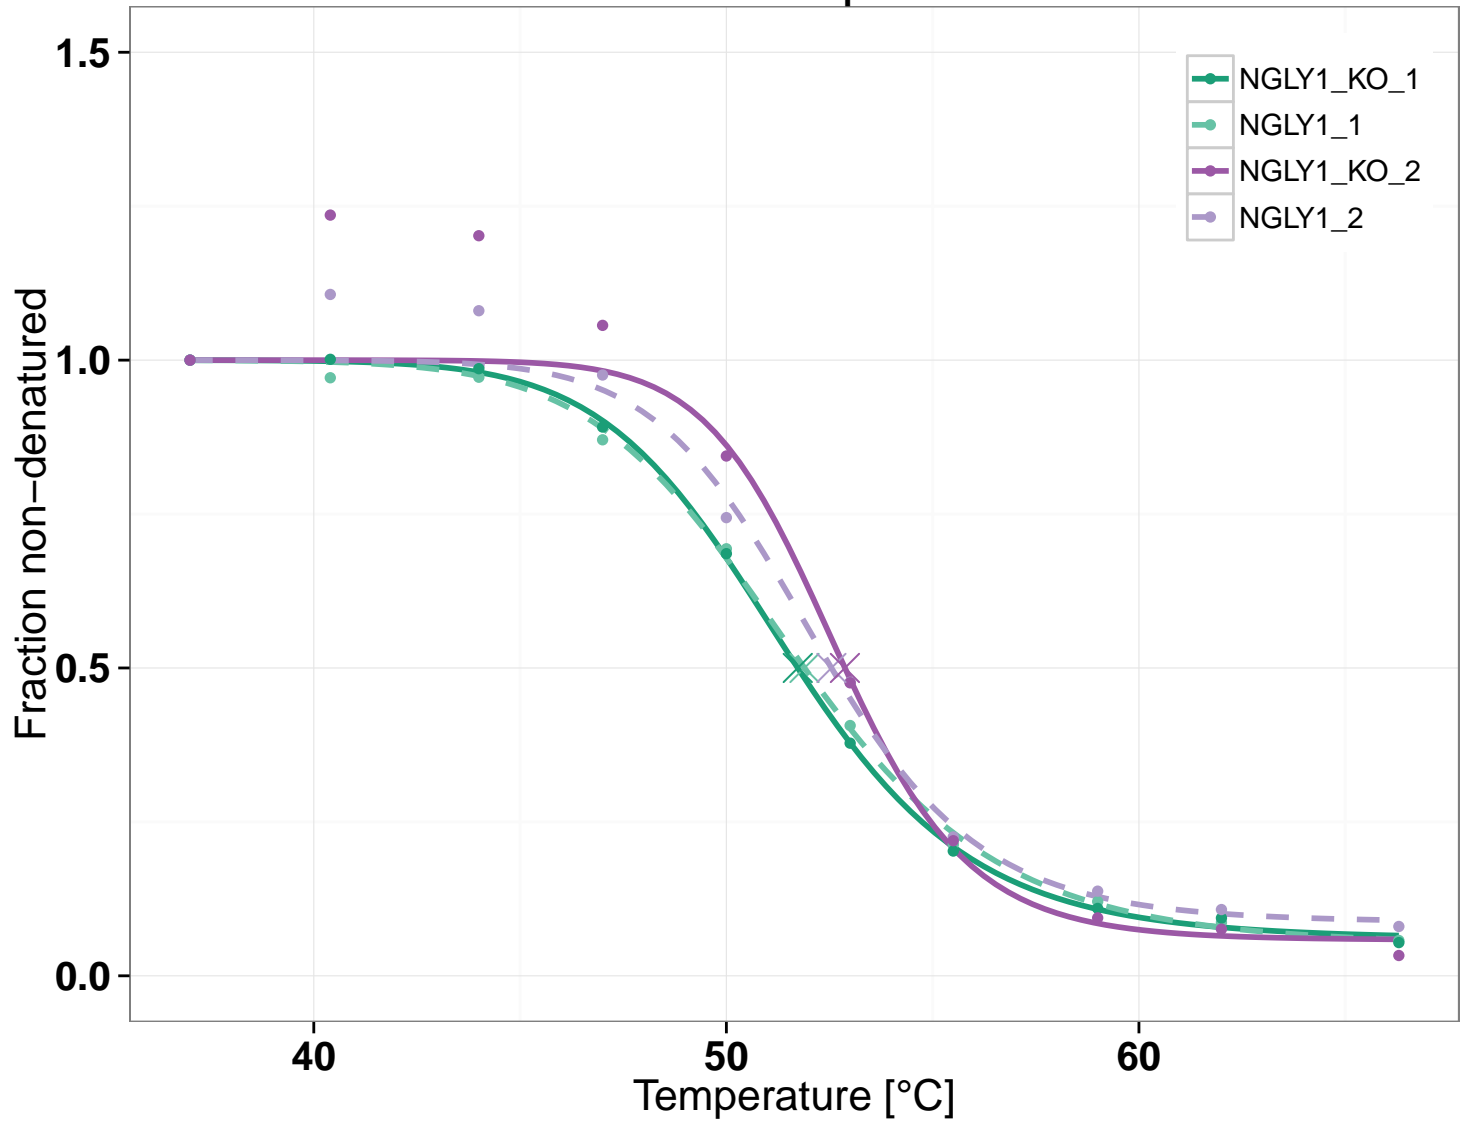

|            | meltPoint | slope  | plateau | R2   |
|------------|-----------|--------|---------|------|
| NGLY1_KO_1 | 51.73     | -0.1   | 0.06    | 1    |
| NGLY1_1    | 51.89     | -0.096 | 0.05    | 1    |
| NGLY1_KO_2 | 52.87     | -0.15  | 0.06    | 0.95 |
| NGLY1_2    | 52.55     | -0.12  | 0.09    | 0.99 |

Supplement: Supplementary file 5241 [file 1]

IPI00376888.9|PDE4DIP

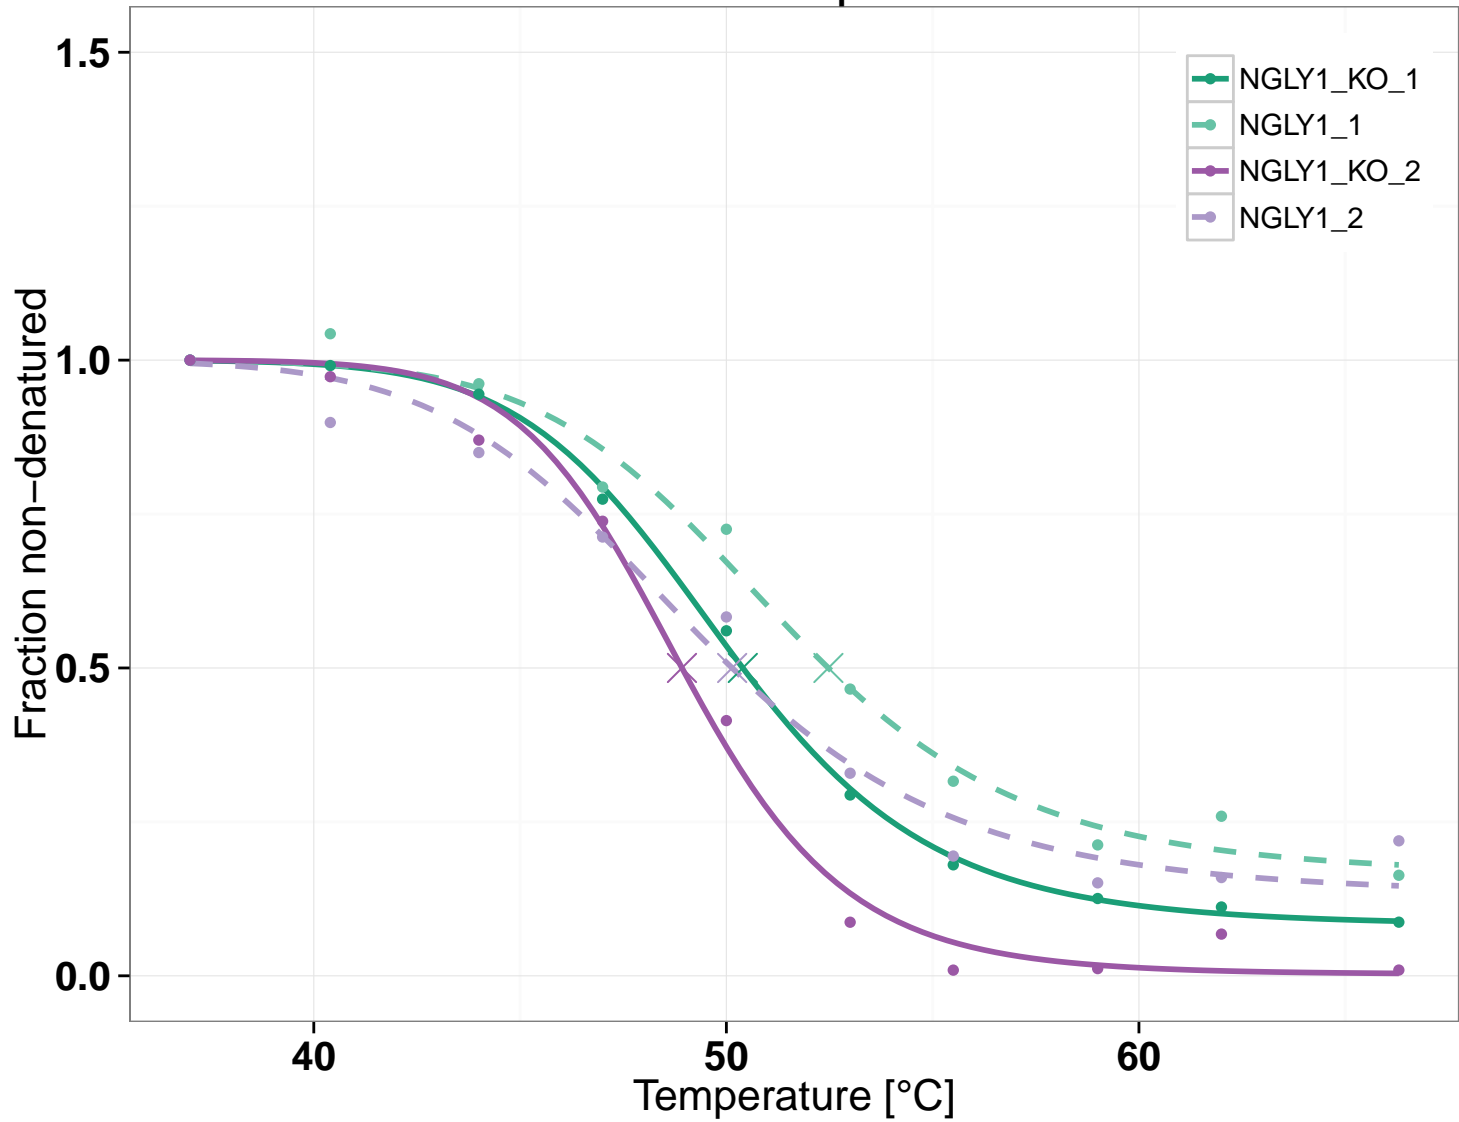

|            | meltPoint | slope  | plateau | R2   |
|------------|-----------|--------|---------|------|
| NGLY1_KO_1 | 50.4      | -0.092 | 0.08    | 1    |
| NGLY1_1    | 52.47     | -0.071 | 0.16    | 0.99 |
| NGLY1_KO_2 | 48.92     | -0.13  | 0       | 0.99 |
| NGLY1_2    | 50.14     | -0.07  | 0.13    | 0.98 |

Supplement: Supplementary file 5242 [file 1]

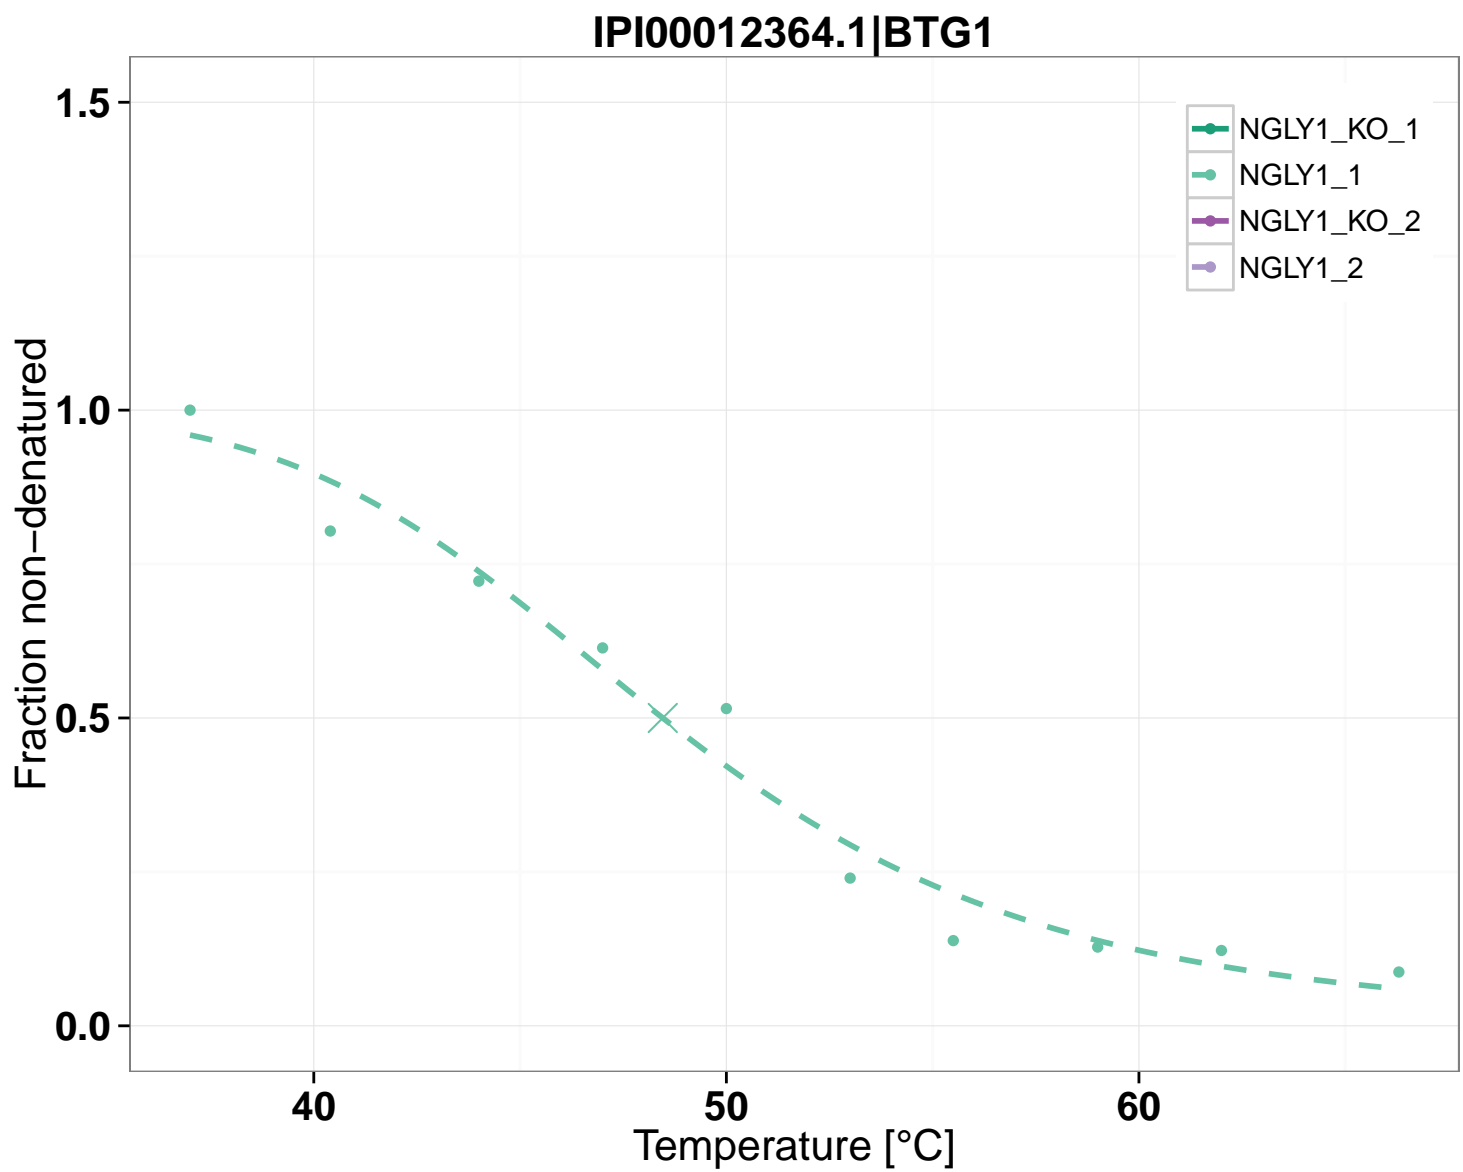

|            | meltPoint | slope  | plateau | R2   |
|------------|-----------|--------|---------|------|
| NGLY1_KO_1 | —         | —      | —       | —    |
| NGLY1_1    | 48.46     | -0.055 | 0       | 0.97 |
| NGLY1_KO_2 | —         | —      | —       | —    |
| NGLY1_2    | —         | —      | —       | —    |

Supplement: Supplementary file 5243 [file 1]

IPI00003606.3|RNF14

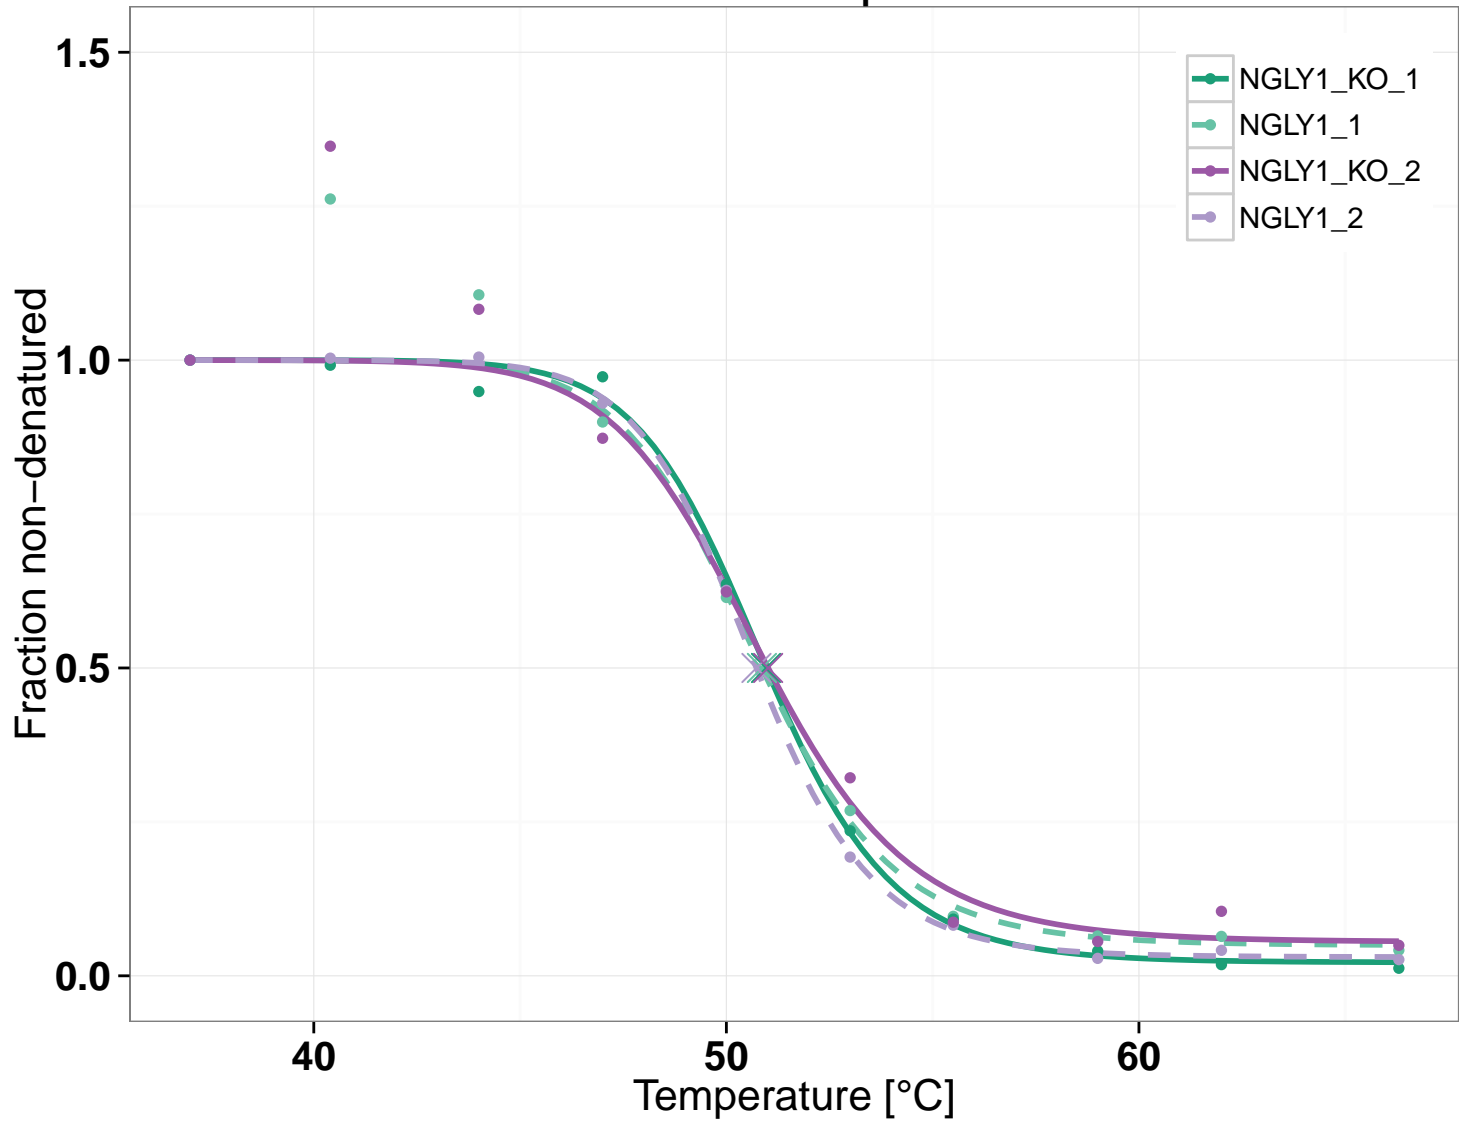

|            | meltPoint | slope | plateau | R2   |
|------------|-----------|-------|---------|------|
| NGLY1_KO_1 | 50.96     | -0.16 | 0.02    | 1    |
| NGLY1_1    | 50.86     | -0.14 | 0.05    | 0.96 |
| NGLY1_KO_2 | 51.01     | -0.13 | 0.05    | 0.94 |
| NGLY1_2    | 50.73     | -0.17 | 0.03    | 1    |

Supplement: Supplementary file 5244 [file 1]

IPI00873708.1|INADL

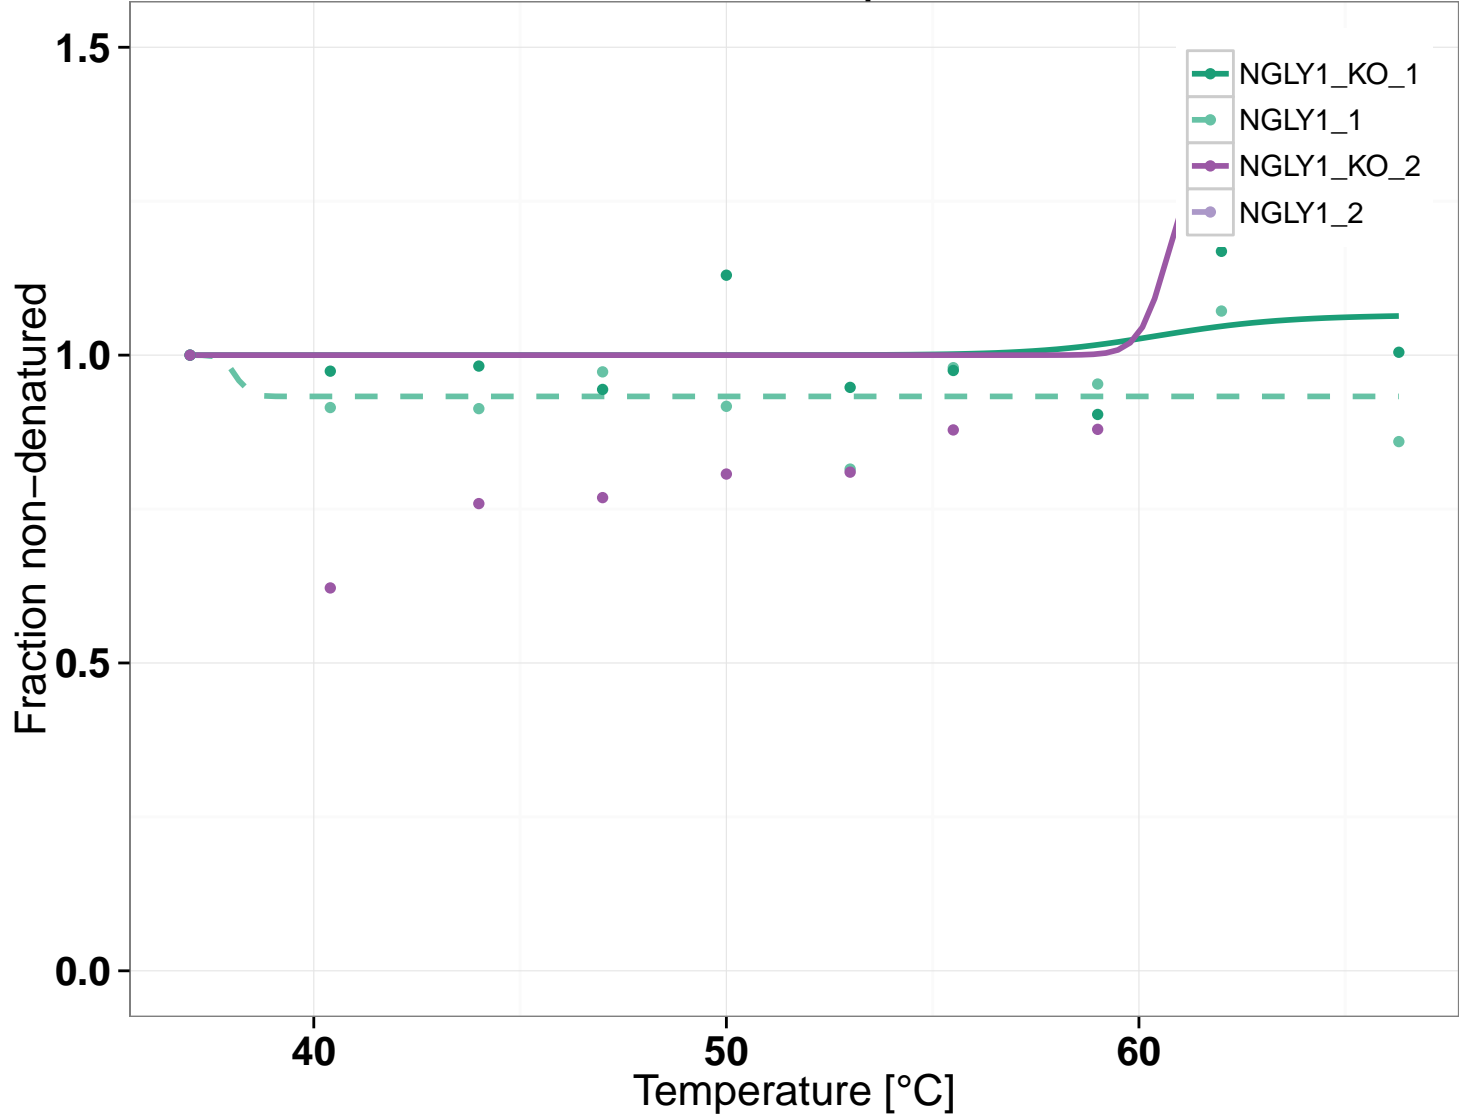

|            | meltPoint | slope | plateau | R2   |
|------------|-----------|-------|---------|------|
| NGLY1_KO_1 | —         | 0.011 | 1.07    | 0.1  |
| NGLY1_1    | —         | -0.11 | 0.93    | 0.08 |
| NGLY1_KO_2 | —         | 0.24  | 1.32    | 0.26 |
| NGLY1_2    | —         | —     | —       | —    |

Supplement: Supplementary file 5245 [file 1]

# IPI00607799.5|BDH2

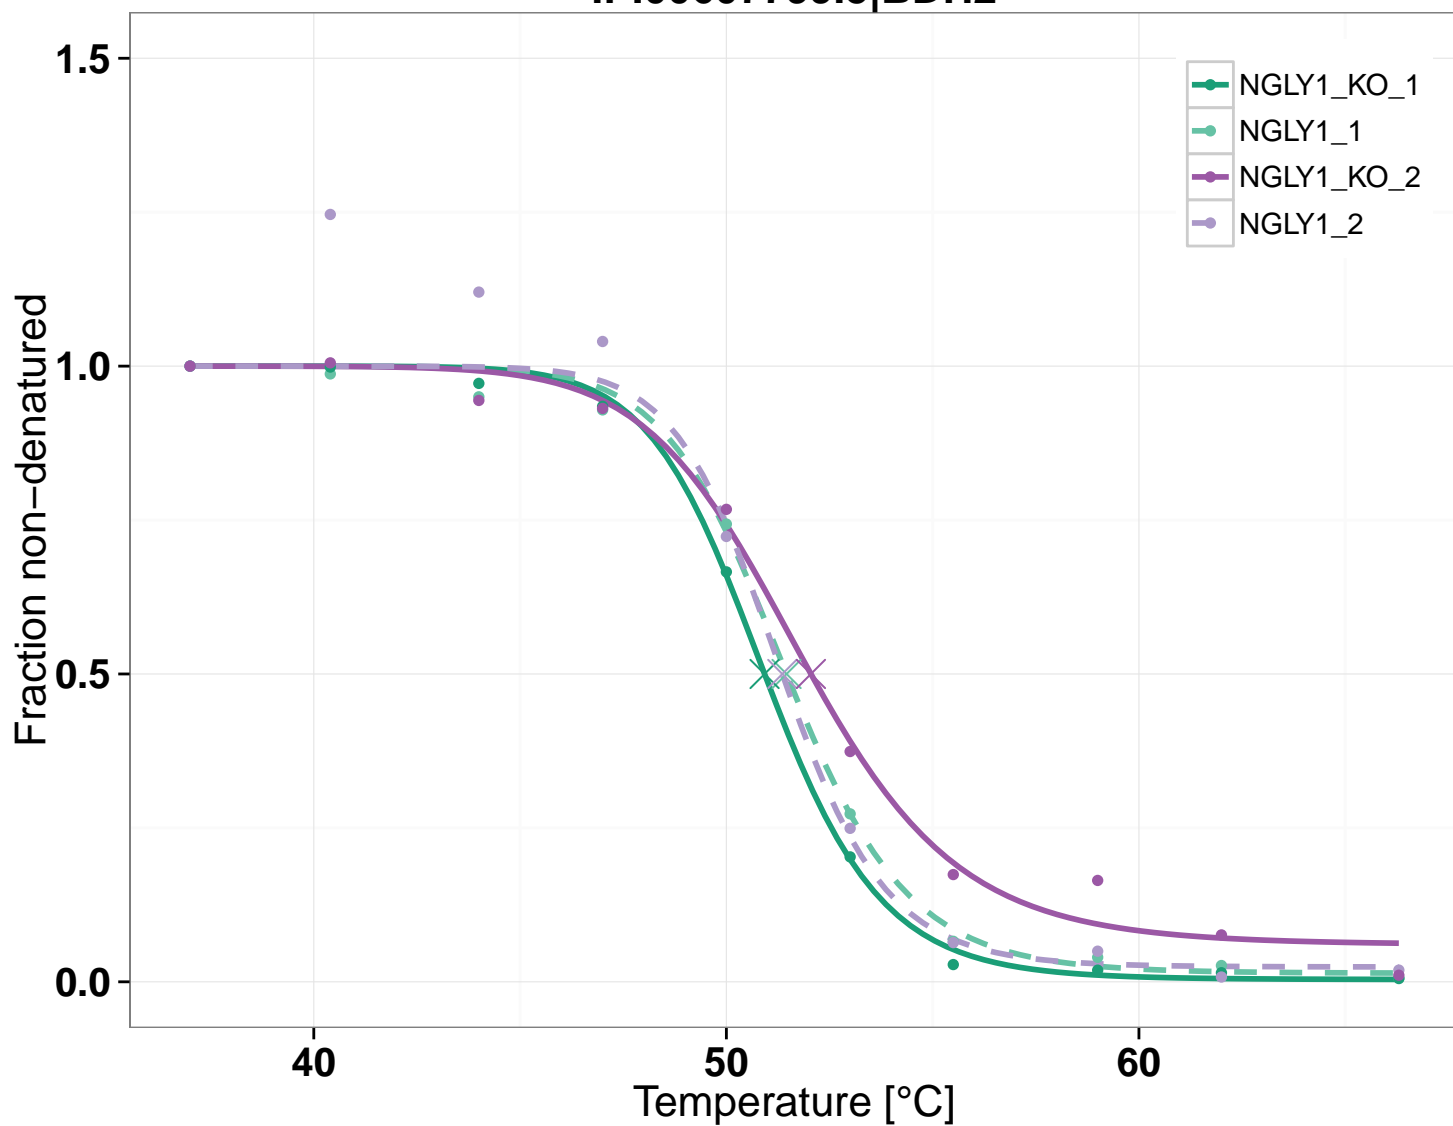

|            | meltPoint | slope | plateau | R2   |
|------------|-----------|-------|---------|------|
| NGLY1_KO_1 | 50.93     | -0.18 | 0       | 1    |
| NGLY1_1    | 51.46     | -0.17 | 0.01    | 1    |
| NGLY1_KO_2 | 52.05     | -0.12 | 0.06    | 0.99 |
| NGLY1_2    | 51.36     | -0.19 | 0.02    | 0.97 |

Supplement: Supplementary file 5246 [file 1]

# IPI00619952.3|CCM2

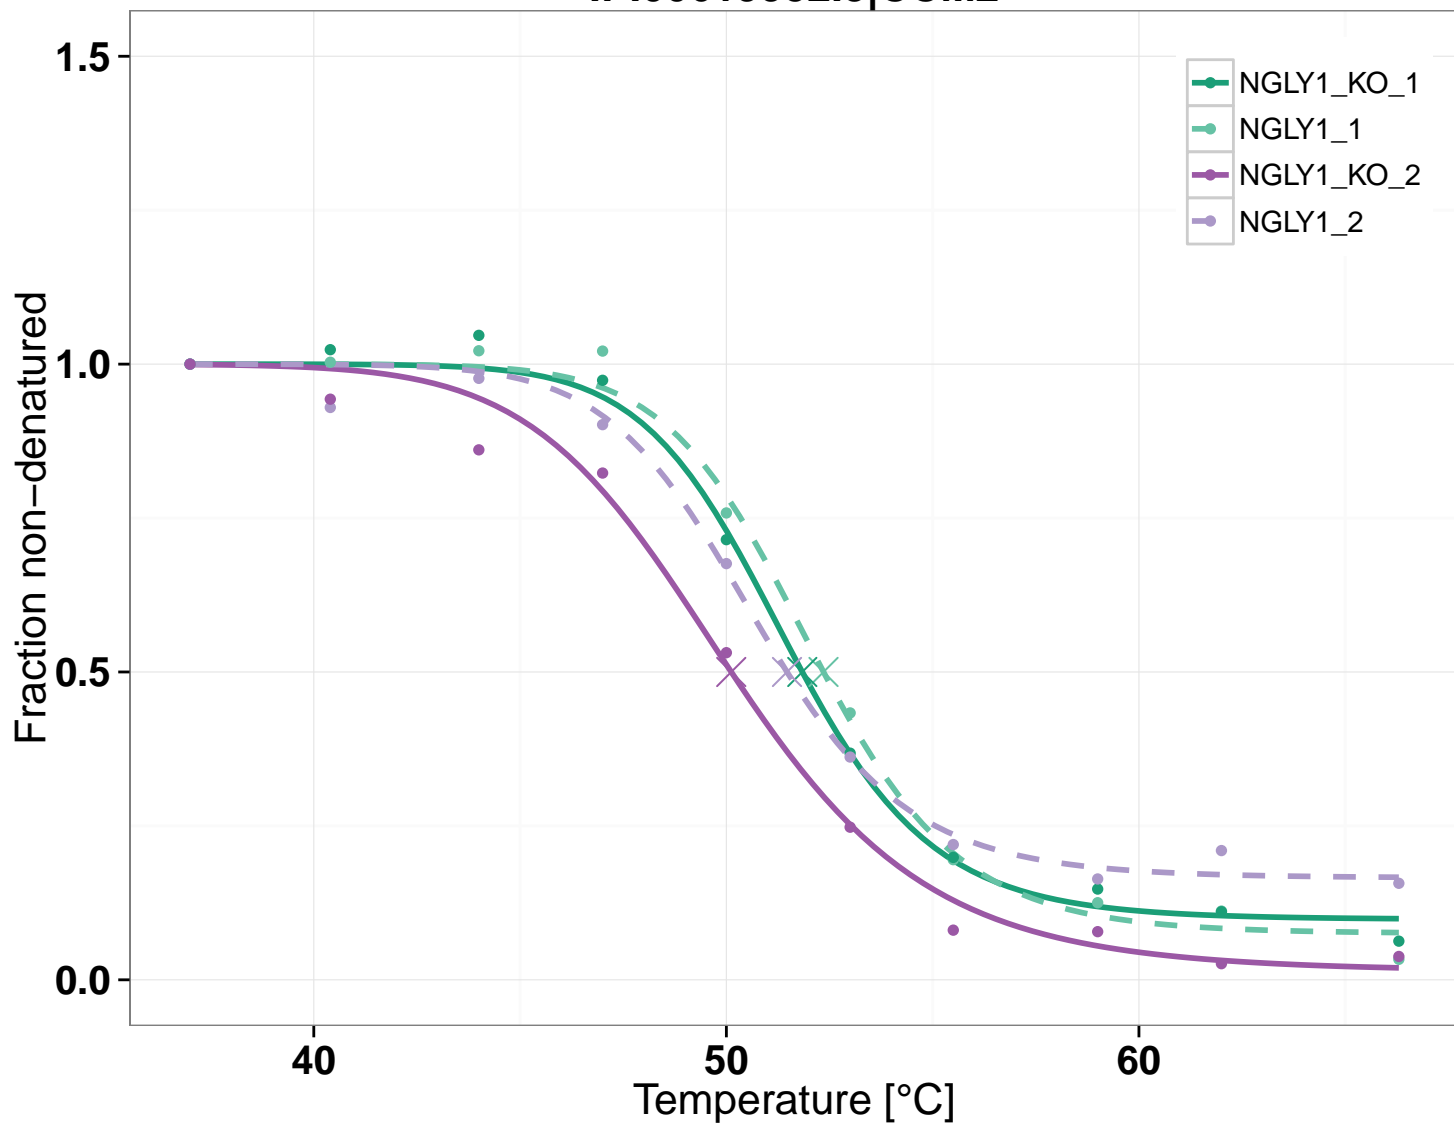

|            | meltPoint | slope | plateau | R2   |
|------------|-----------|-------|---------|------|
| NGLY1_KO_1 | 51.84     | -0.13 | 0.1     | 1    |
| NGLY1_1    | 52.36     | -0.13 | 0.07    | 0.99 |
| NGLY1_KO_2 | 50.12     | -0.1  | 0.01    | 0.99 |
| NGLY1_2    | 51.47     | -0.11 | 0.17    | 0.99 |

Supplement: Supplementary file 5247 [file 1]

IPI00296191.1|ATP6V1H

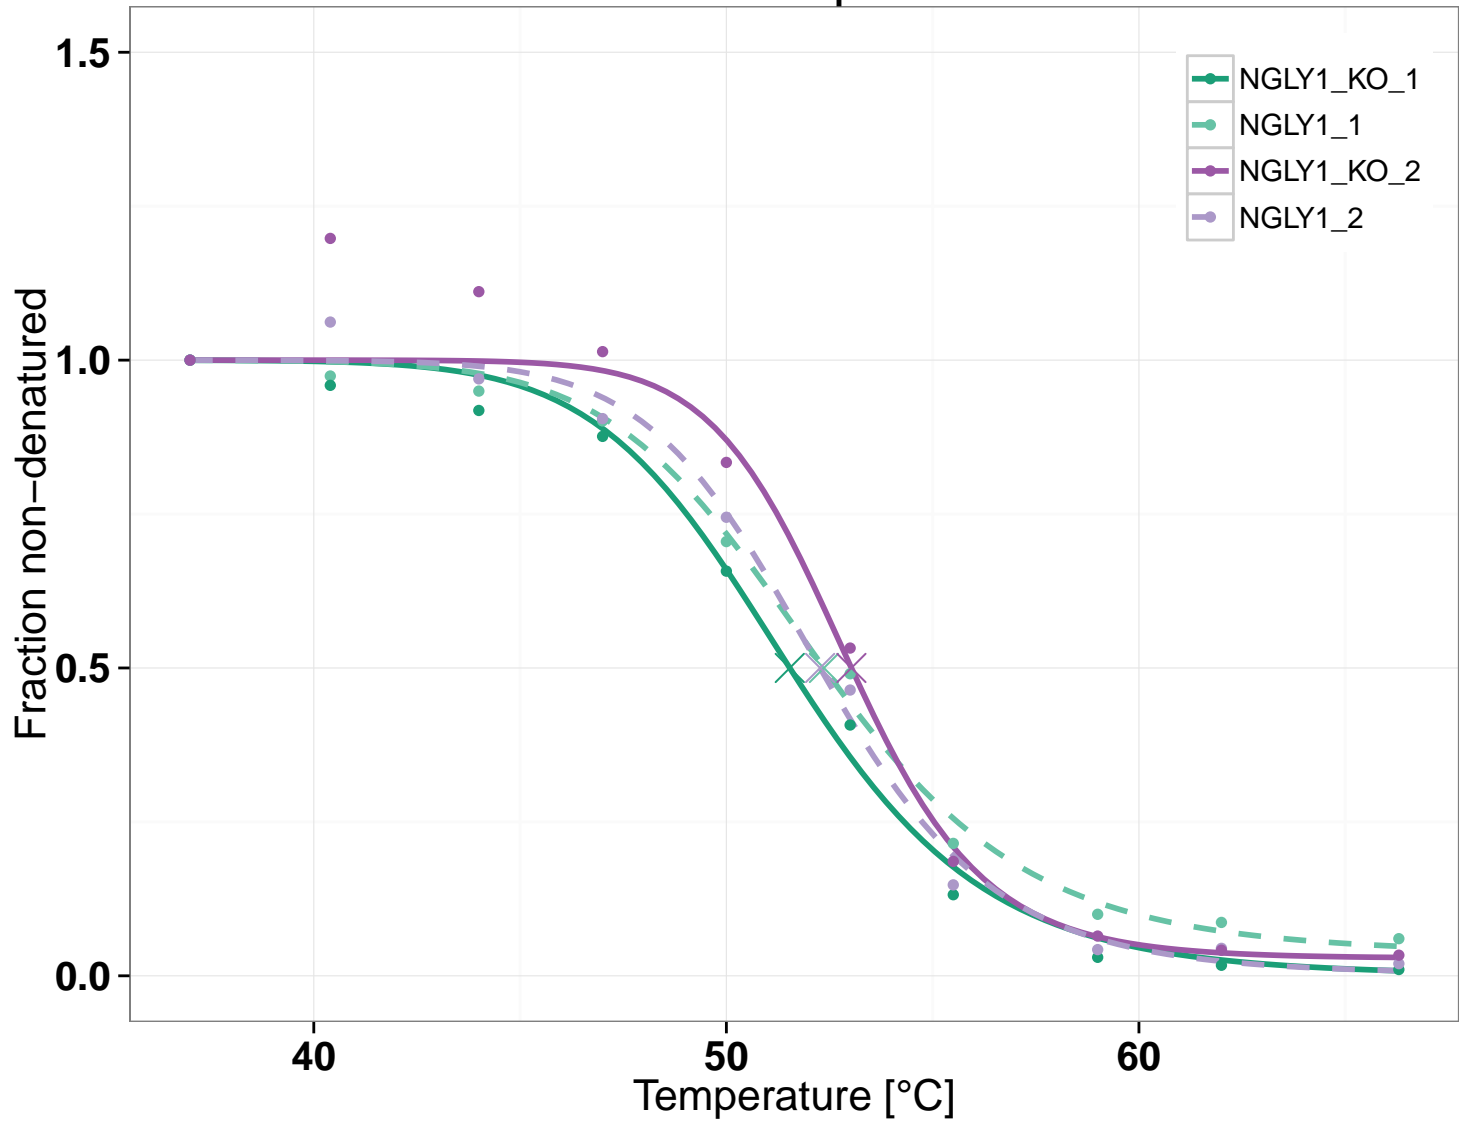

|            | meltPoint | slope  | plateau | R2   |
|------------|-----------|--------|---------|------|
| NGLY1_KO_1 | 51.54     | -0.11  | 0       | 0.99 |
| NGLY1_1    | 52.36     | -0.095 | 0.04    | 1    |
| NGLY1_KO_2 | 53.03     | -0.15  | 0.03    | 0.97 |
| NGLY1_2    | 52.27     | -0.12  | 0       | 0.99 |

Supplement: Supplementary file 5248 [file 1]

IPI00872292.1|RABL4

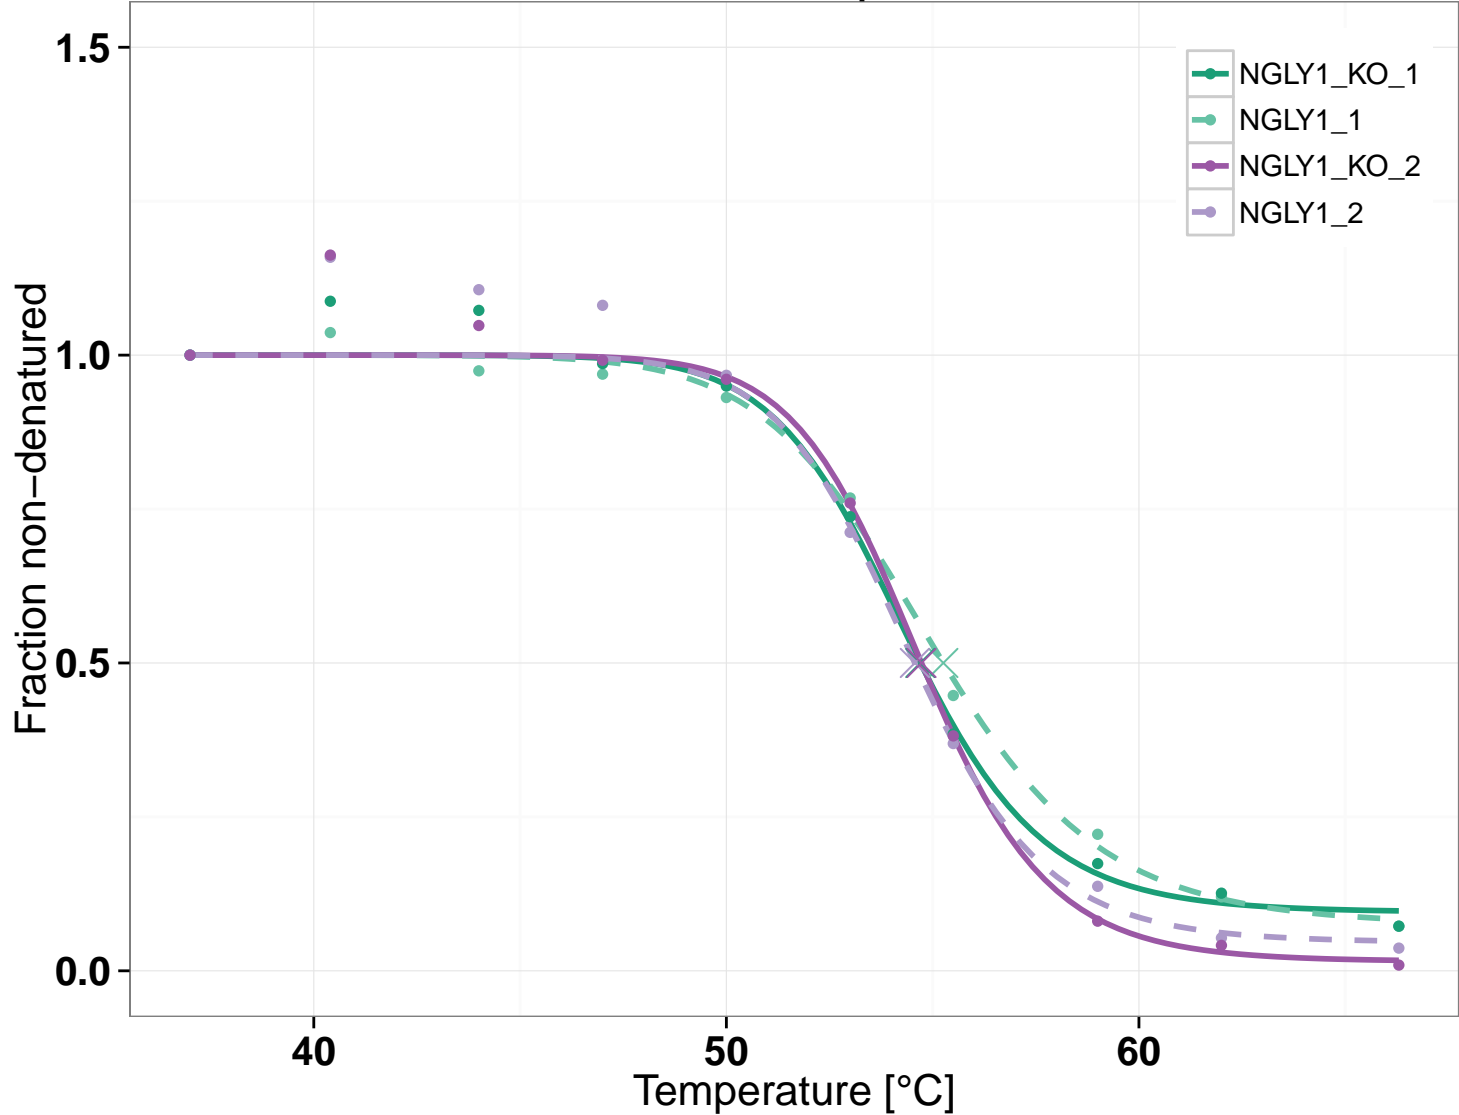

|            | meltPoint | slope | plateau | R2   |
|------------|-----------|-------|---------|------|
| NGLY1_KO_1 | 54.7      | -0.14 | 0.1     | 0.99 |
| NGLY1_1    | 55.26     | -0.11 | 0.07    | 1    |
| NGLY1_KO_2 | 54.73     | -0.16 | 0.02    | 0.99 |
| NGLY1_2    | 54.57     | -0.15 | 0.05    | 0.98 |

Supplement: Supplementary file 5249 [file 1]

IPI00419111.2|C2ORF68

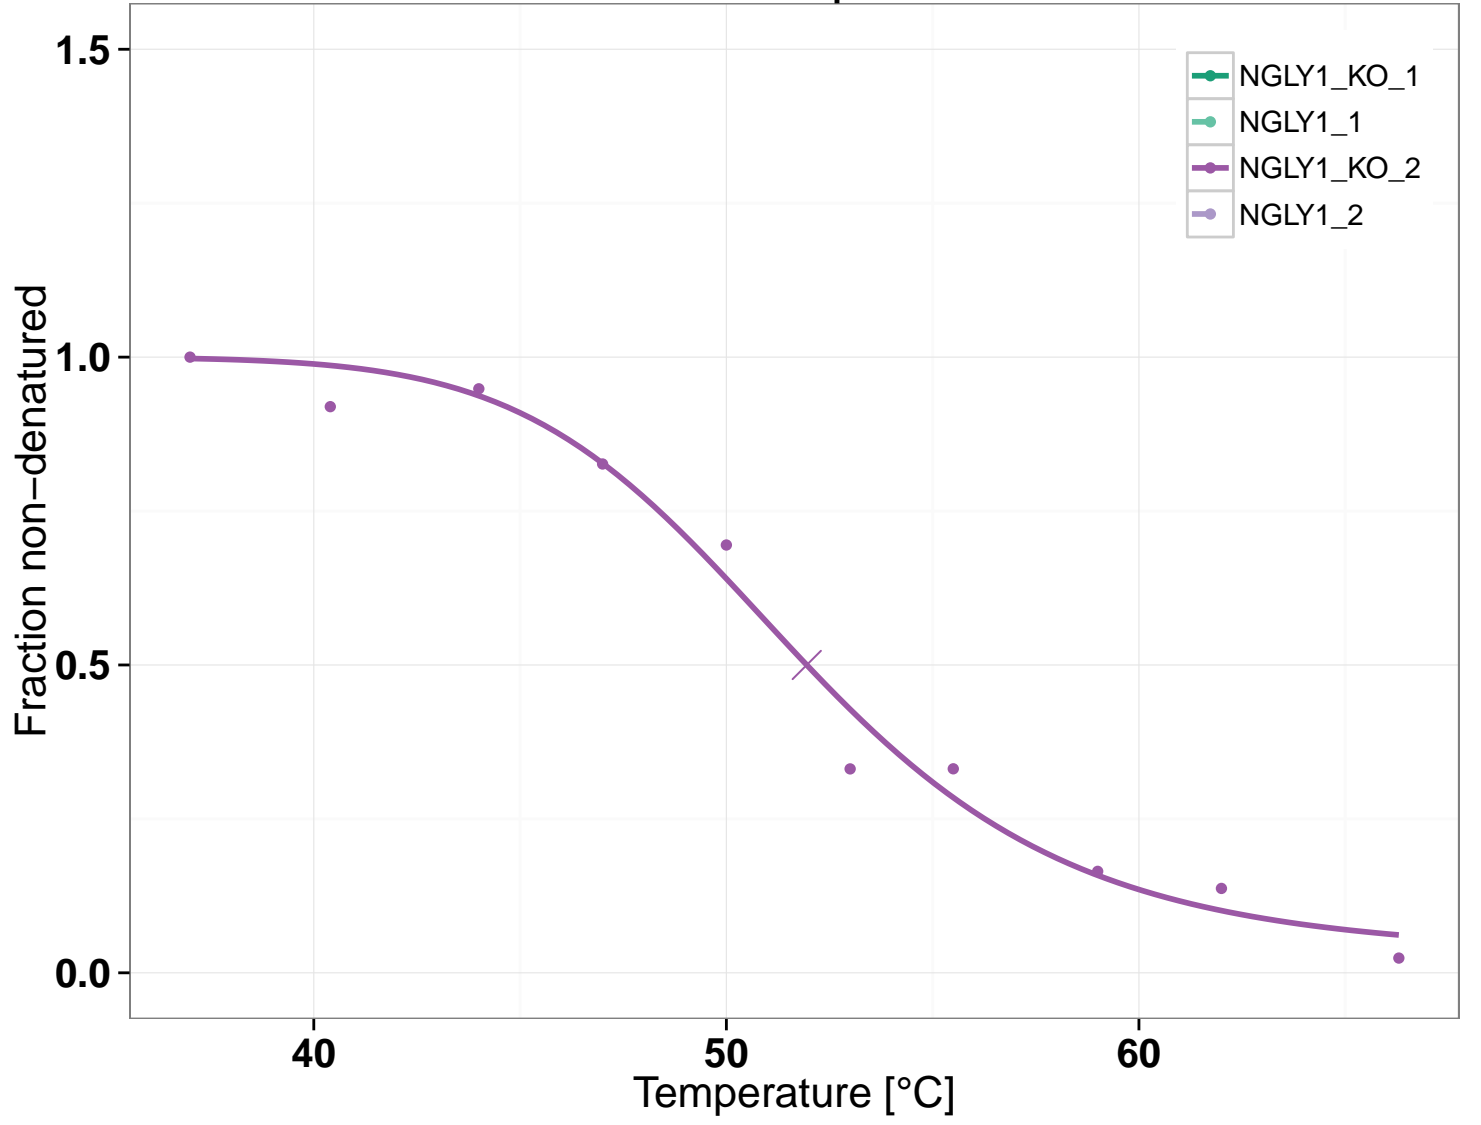

|            | meltPoint | slope  | plateau | R2   |
|------------|-----------|--------|---------|------|
| NGLY1_KO_1 | —         | —      | —       | —    |
| NGLY1_1    | —         | —      | —       | —    |
| NGLY1_KO_2 | 51.95     | −0.072 | 0.03    | 0.98 |
| NGLY1_2    | —         | —      | —       | —    |

Supplement: Supplementary file 5250 [file 1]

# IPI00168479.3|APOA1BP

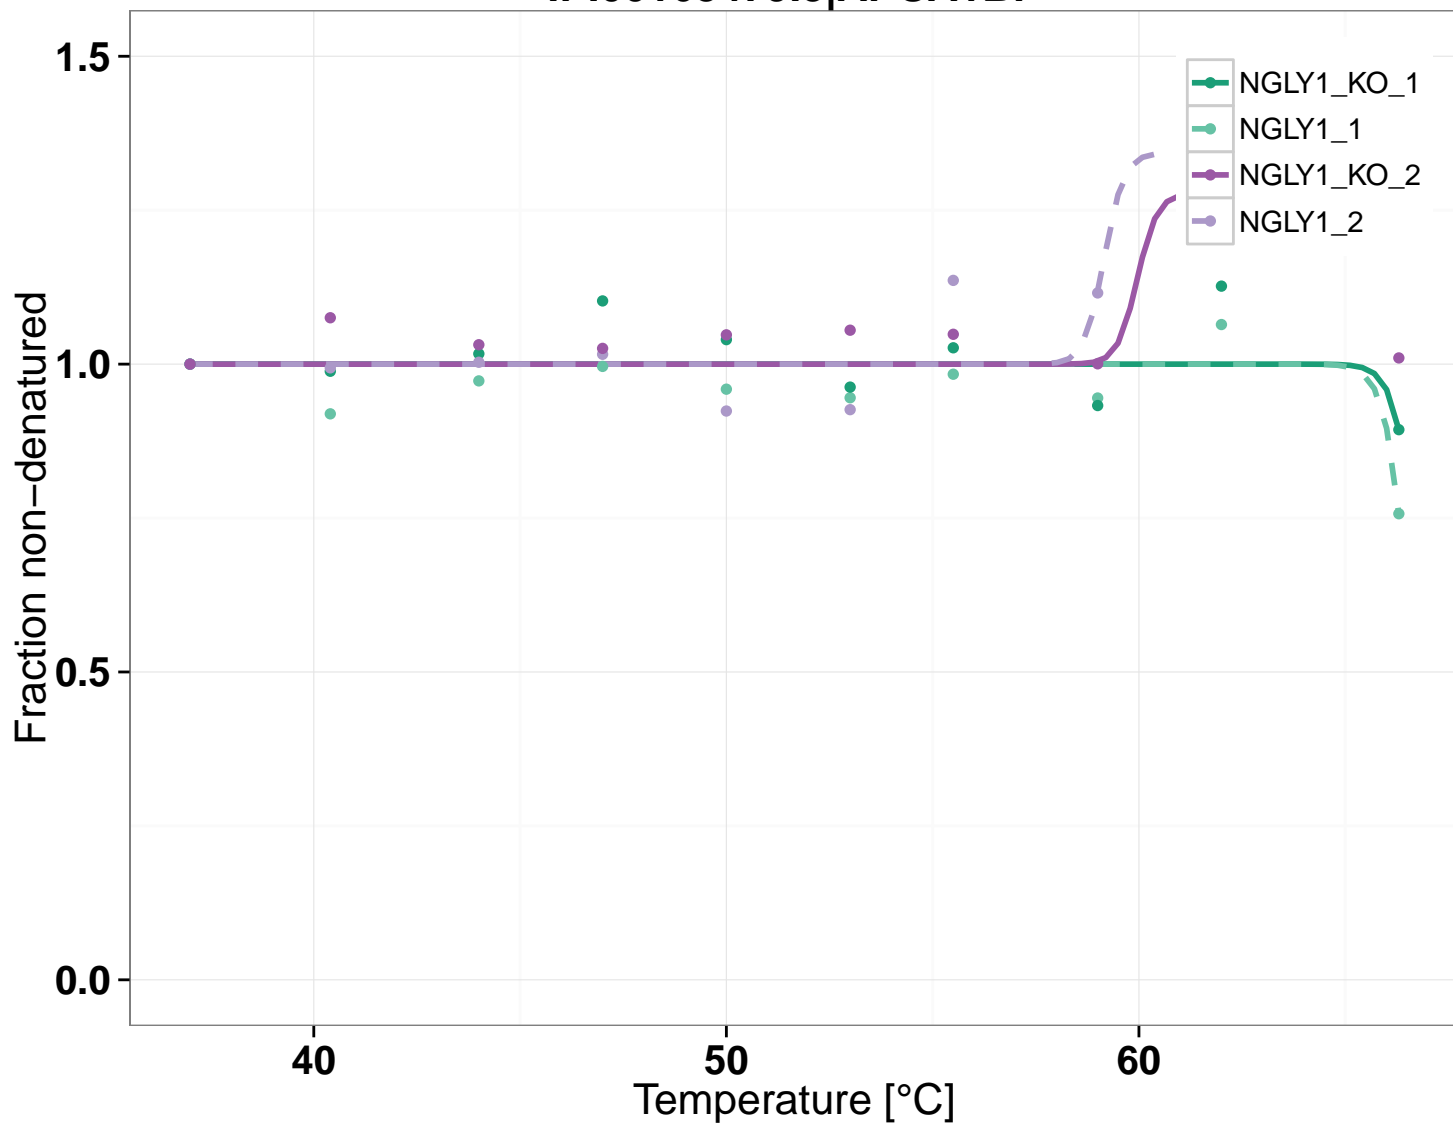

|            | meltPoint | slope | plateau | R2   |
|------------|-----------|-------|---------|------|
| NGLY1_KO_1 | —         | —     | 0       | 0.23 |
| NGLY1_1    | —         | —     | 0       | 0.66 |
| NGLY1_KO_2 | —         | 0.29  | 1.28    | 0.35 |
| NGLY1_2    | —         | 0.36  | 1.34    | 0.74 |

Supplement: Supplementary file 5251 [file 1]

IPI00024644.5|PRTFDC1

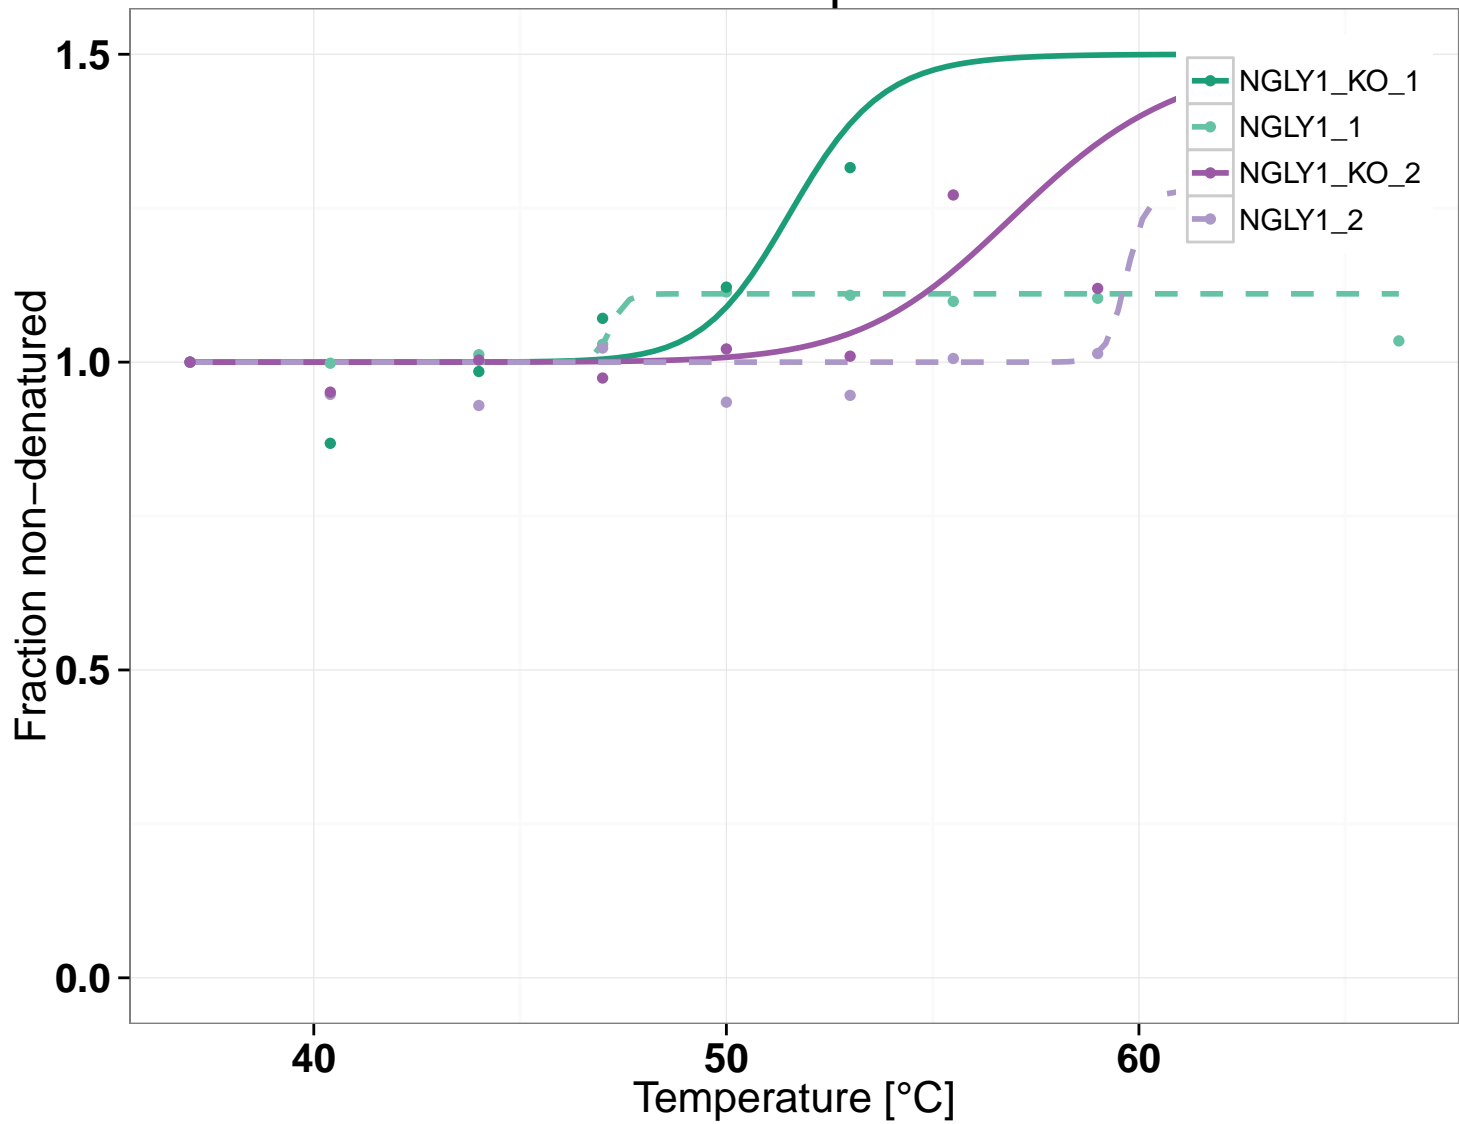

|            | meltPoint | slope | plateau | R2   |
|------------|-----------|-------|---------|------|
| NGLY1_KO_1 | —         | 0.11  | 1.5     | 0.7  |
| NGLY1_1    | —         | 0.15  | 1.11    | 0.62 |
| NGLY1_KO_2 | —         | 0.064 | 1.5     | 0.76 |
| NGLY1_2    | —         | 0.29  | 1.28    | 0.9  |

Supplement: Supplementary file 5252 [file 1]

IPI00869107.1|NUDT19

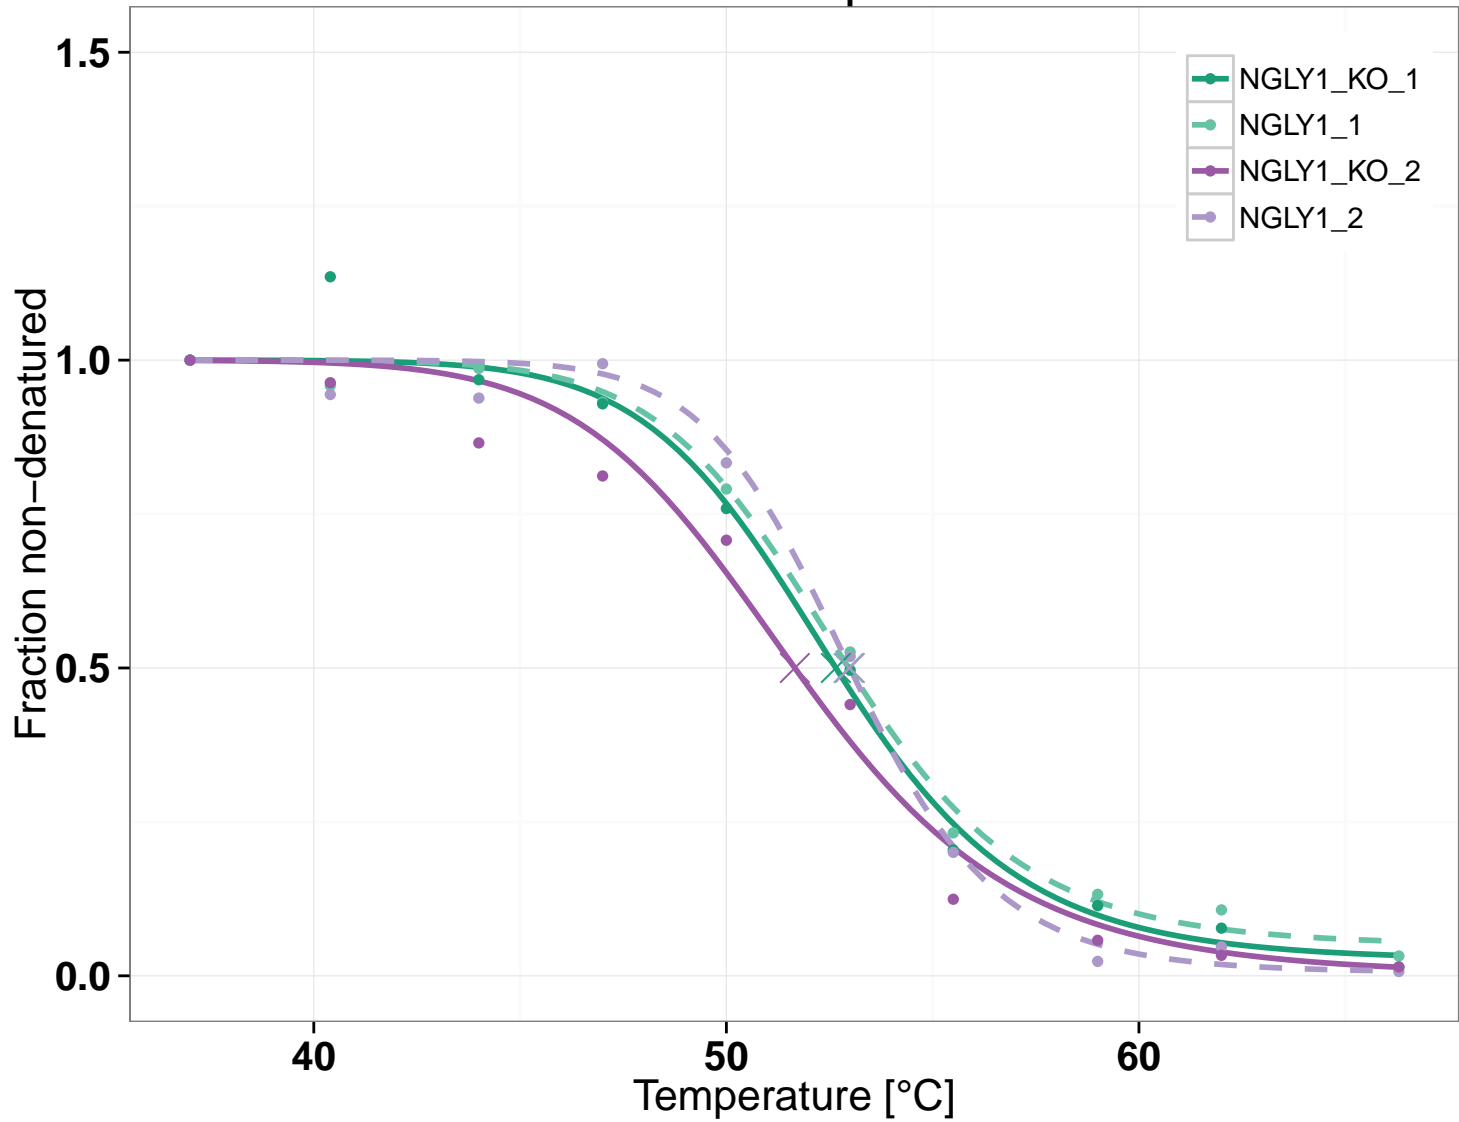

|            | meltPoint | slope  | plateau | R2   |
|------------|-----------|--------|---------|------|
| NGLY1_KO_1 | 52.65     | -0.11  | 0.02    | 0.99 |
| NGLY1_1    | 52.96     | -0.11  | 0.05    | 1    |
| NGLY1_KO_2 | 51.66     | -0.094 | 0       | 0.98 |
| NGLY1_2    | 52.99     | -0.14  | 0.01    | 0.99 |

Supplement: Supplementary file 5253 [file 1]

IPI00219160.3|RPL34

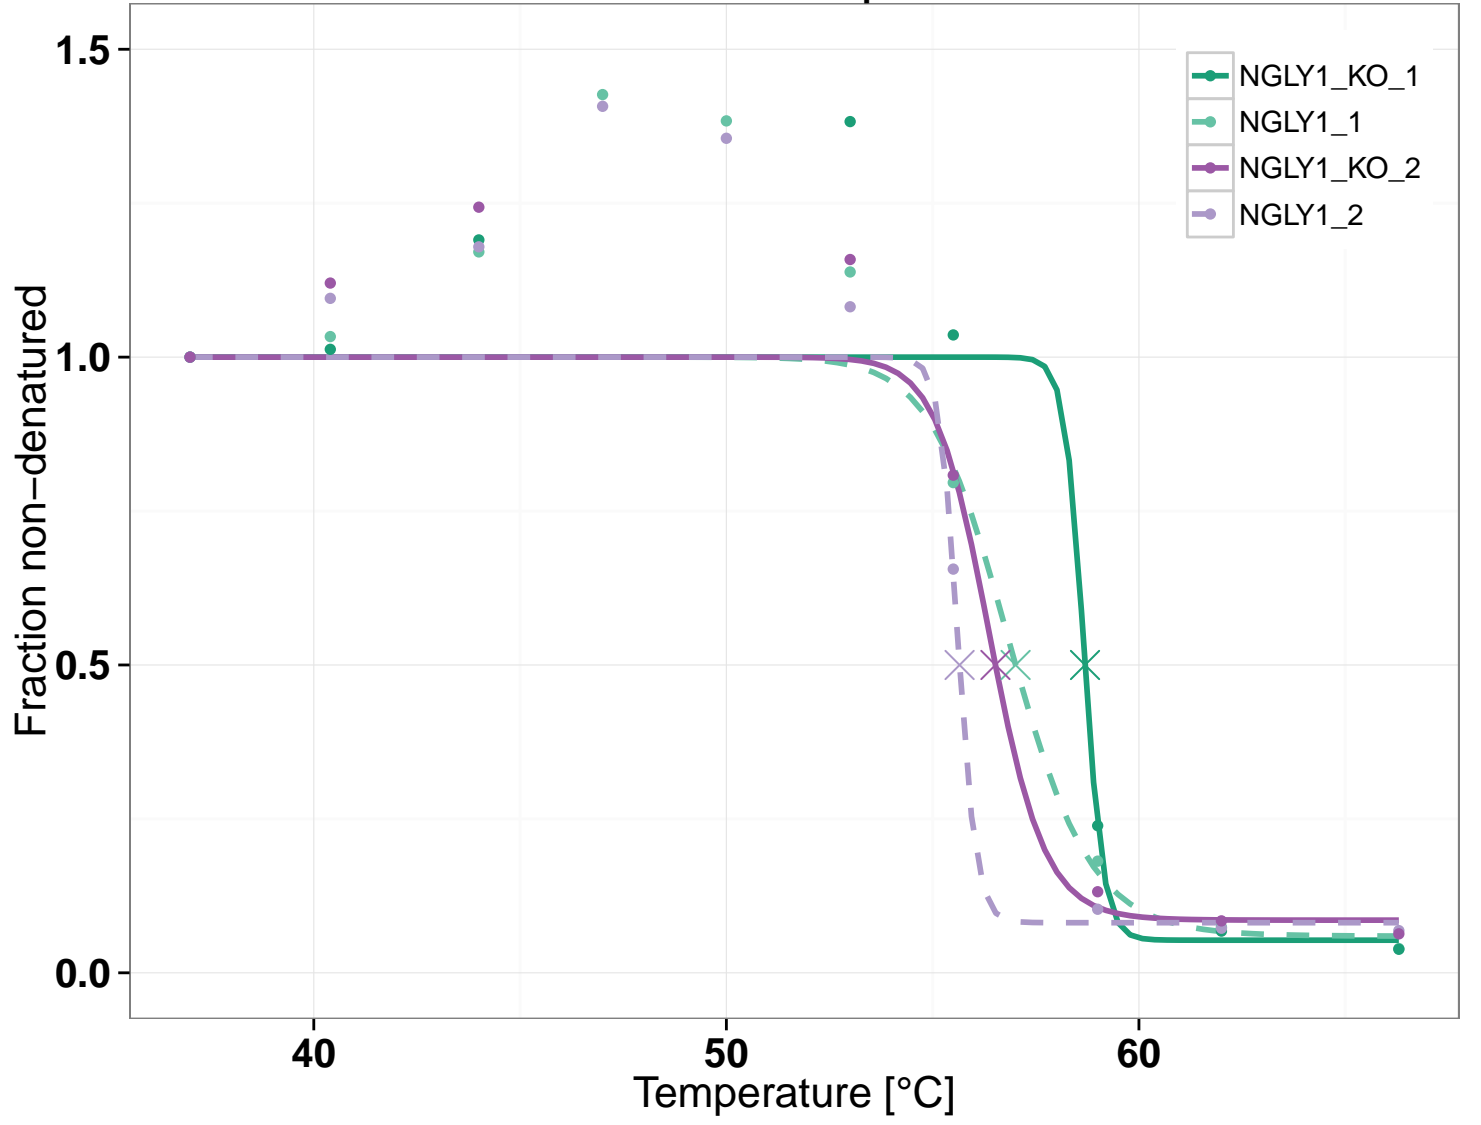

|            | meltPoint | slope | plateau | R2   |
|------------|-----------|-------|---------|------|
| NGLY1_KO_1 | 58.69     | -1    | 0.05    | 0.72 |
| NGLY1_1    | 57.01     | -0.24 | 0.06    | 0.85 |
| NGLY1_KO_2 | 56.52     | -0.35 | 0.09    | 0.75 |
| NGLY1_2    | 55.65     | -1    | 0.08    | 0.87 |

Supplement: Supplementary file 5254 [file 1]

IPI00021890.1|HSD17B8

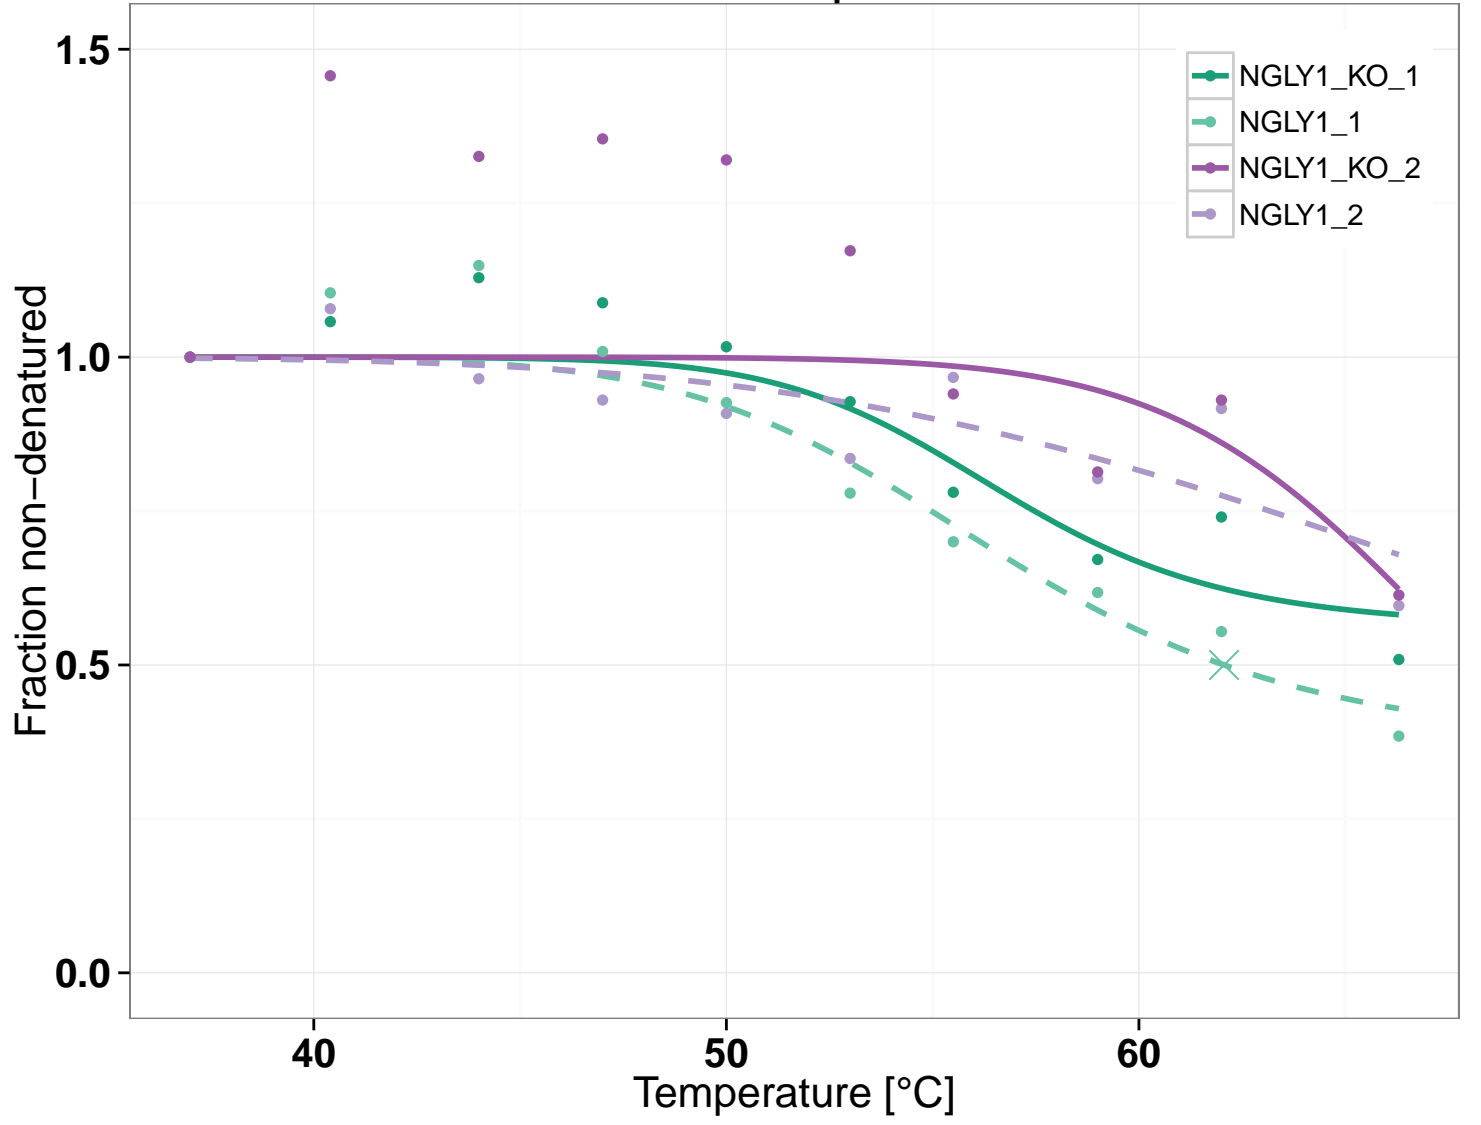

|            | meltPoint | slope  | plateau | R2   |
|------------|-----------|--------|---------|------|
| NGLY1_KO_1 | -         | -0.041 | 0.56    | 0.86 |
| NGLY1_1    | 62.06     | -0.042 | 0.36    | 0.92 |
| NGLY1_KO_2 | -         | -      | 0       | 0.12 |
| NGLY1_2    | -         | -      | 0       | 0.66 |

Supplement: Supplementary file 5255 [file 1]

IPI00790250.2|LPIN1

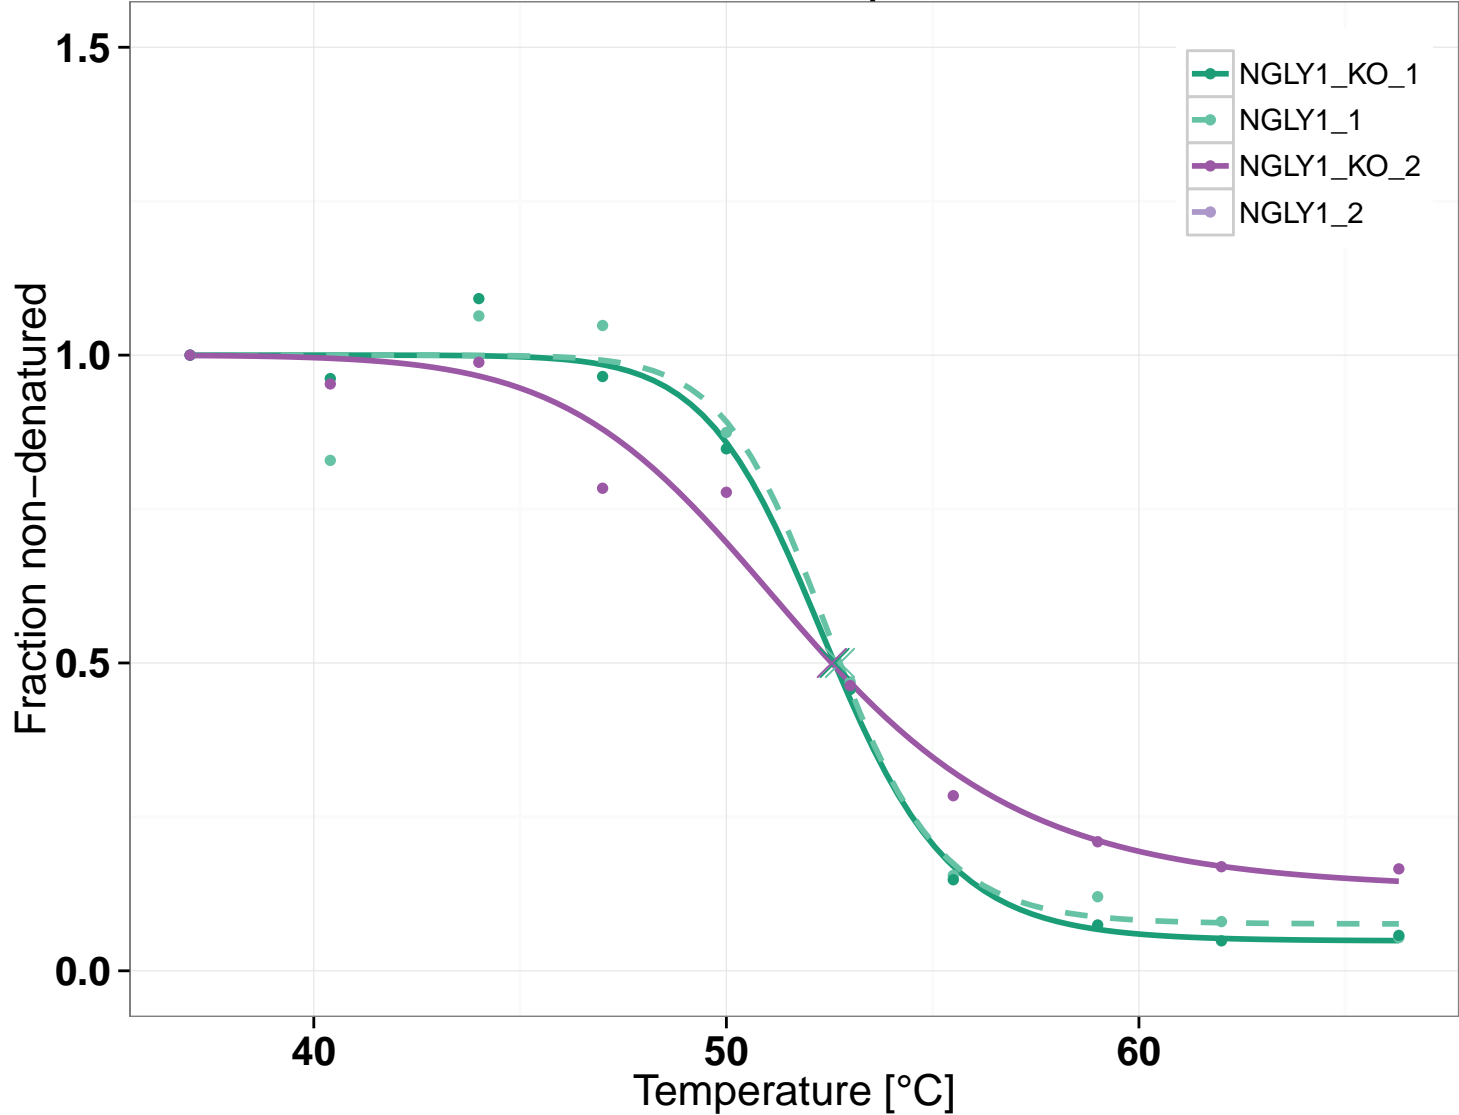

|            | meltPoint | slope  | plateau | R2   |
|------------|-----------|--------|---------|------|
| NGLY1_KO_1 | 52.62     | -0.16  | 0.05    | 0.99 |
| NGLY1_1    | 52.75     | -0.18  | 0.08    | 0.98 |
| NGLY1_KO_2 | 52.56     | -0.078 | 0.13    | 0.98 |
| NGLY1_2    | -         | -      | -       | -    |

Supplement: Supplementary file 5256 [file 1]

IPI00872817.1|GLIPR2

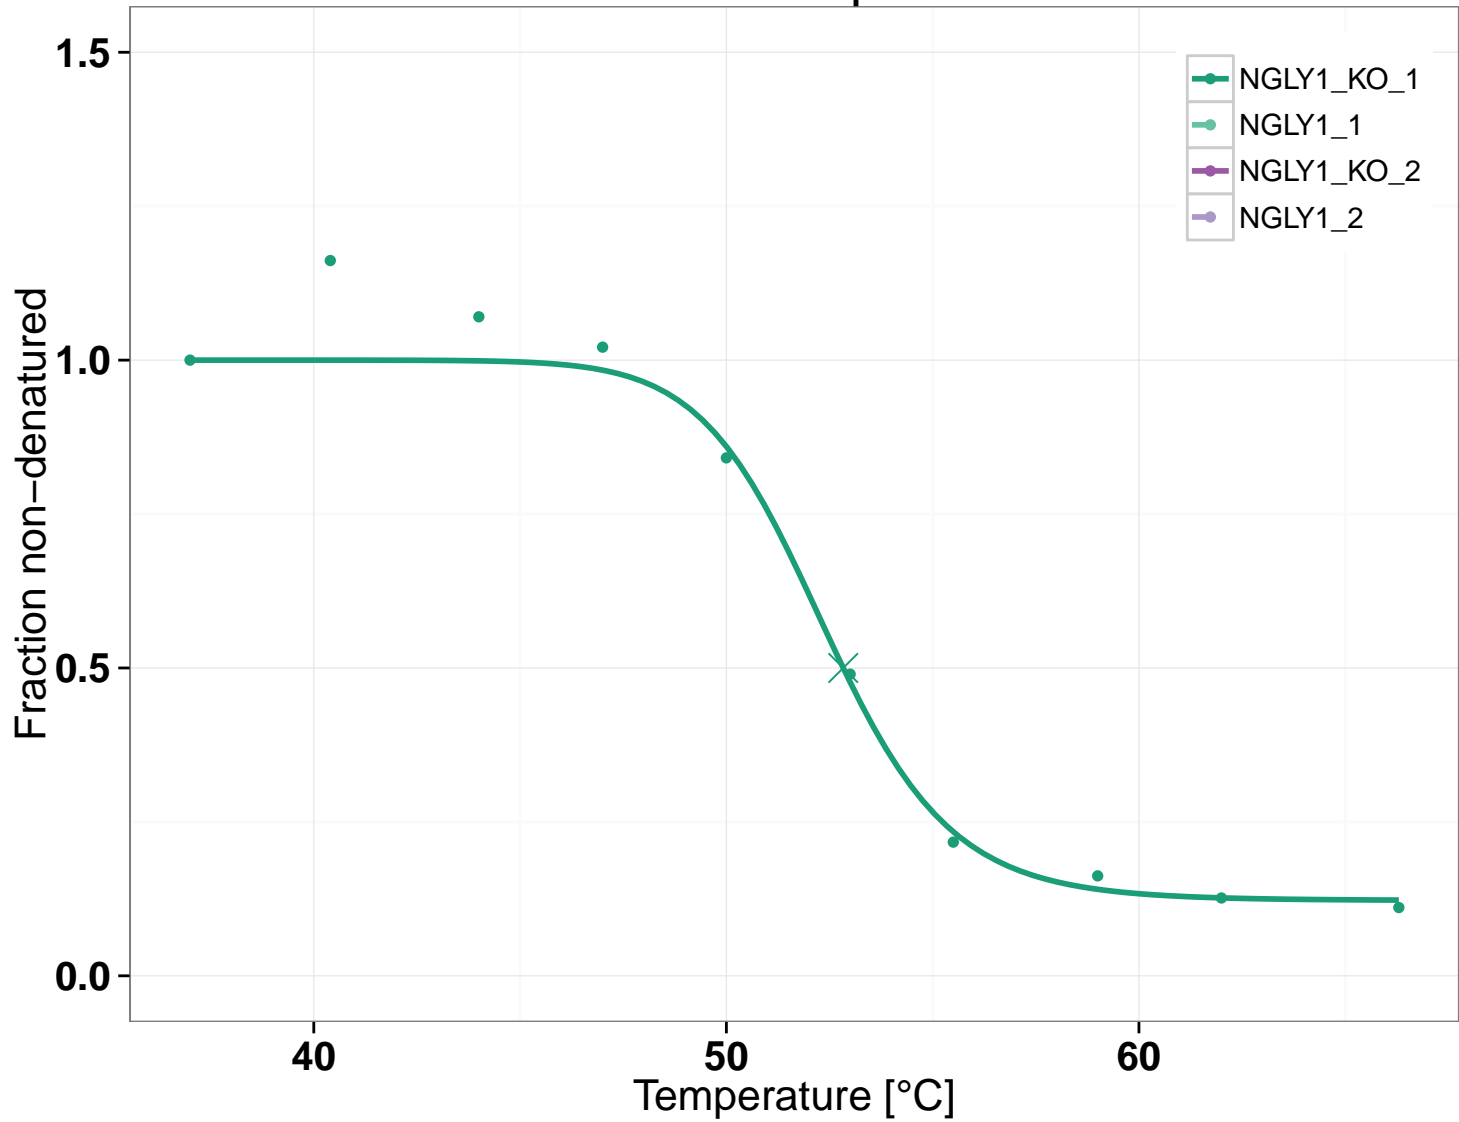

|            | meltPoint | slope | plateau | R2   |
|------------|-----------|-------|---------|------|
| NGLY1_KO_1 | 52.83     | -0.15 | 0.12    | 0.98 |
| NGLY1_1    | -         | -     | -       | -    |
| NGLY1_KO_2 | -         | -     | -       | -    |
| NGLY1_2    | -         | -     | -       | -    |

Supplement: Supplementary file 5257 [file 1]

IPI00816419.1|C1ORF151

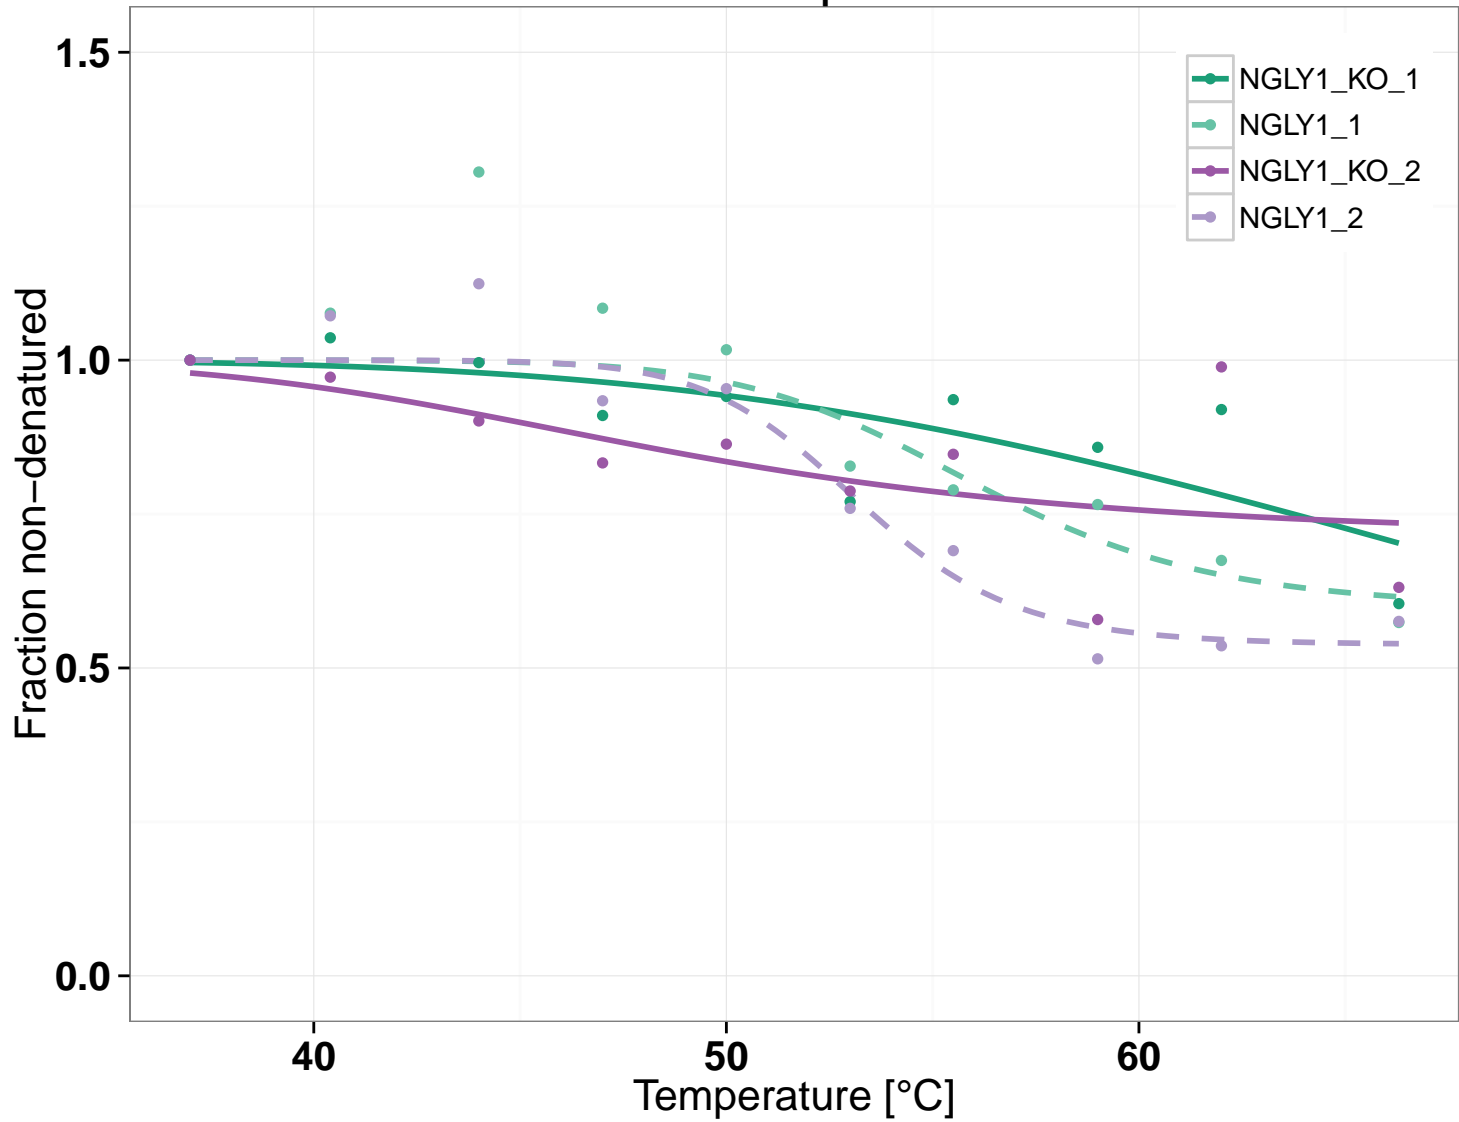

|            | meltPoint | slope  | plateau | R2   |
|------------|-----------|--------|---------|------|
| NGLY1_KO_1 | -         | -      | 0       | 0.6  |
| NGLY1_1    | -         | -0.035 | 0.6     | 0.72 |
| NGLY1_KO_2 | -         | -0.013 | 0.71    | 0.4  |
| NGLY1_2    | -         | -0.061 | 0.54    | 0.94 |

Supplement: Supplementary file 5258 [file 1]

# IPI00006164.4|ILKAP

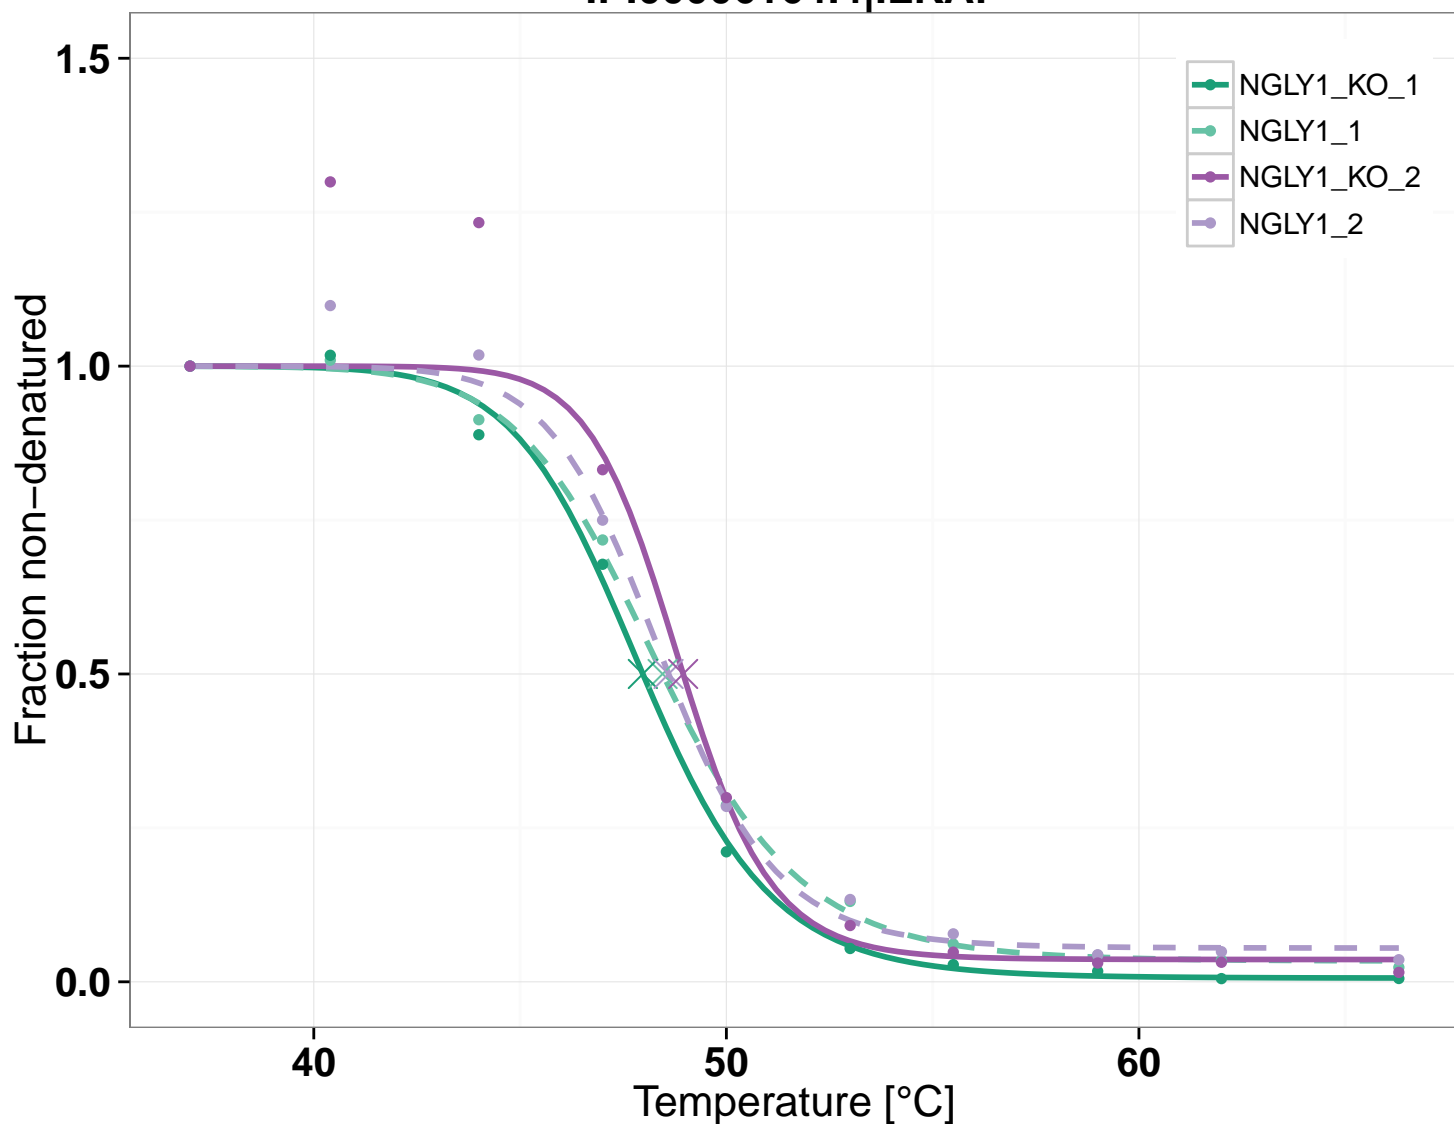

|            | meltPoint | slope | plateau | R2   |
|------------|-----------|-------|---------|------|
| NGLY1_KO_1 | 47.98     | -0.16 | 0.01    | 1    |
| NGLY1_1    | 48.45     | -0.14 | 0.03    | 1    |
| NGLY1_KO_2 | 48.95     | -0.22 | 0.04    | 0.94 |
| NGLY1_2    | 48.6      | -0.17 | 0.05    | 0.99 |

Supplement: Supplementary file 5259 [file 1]

# IPI00030877.2|SEP15

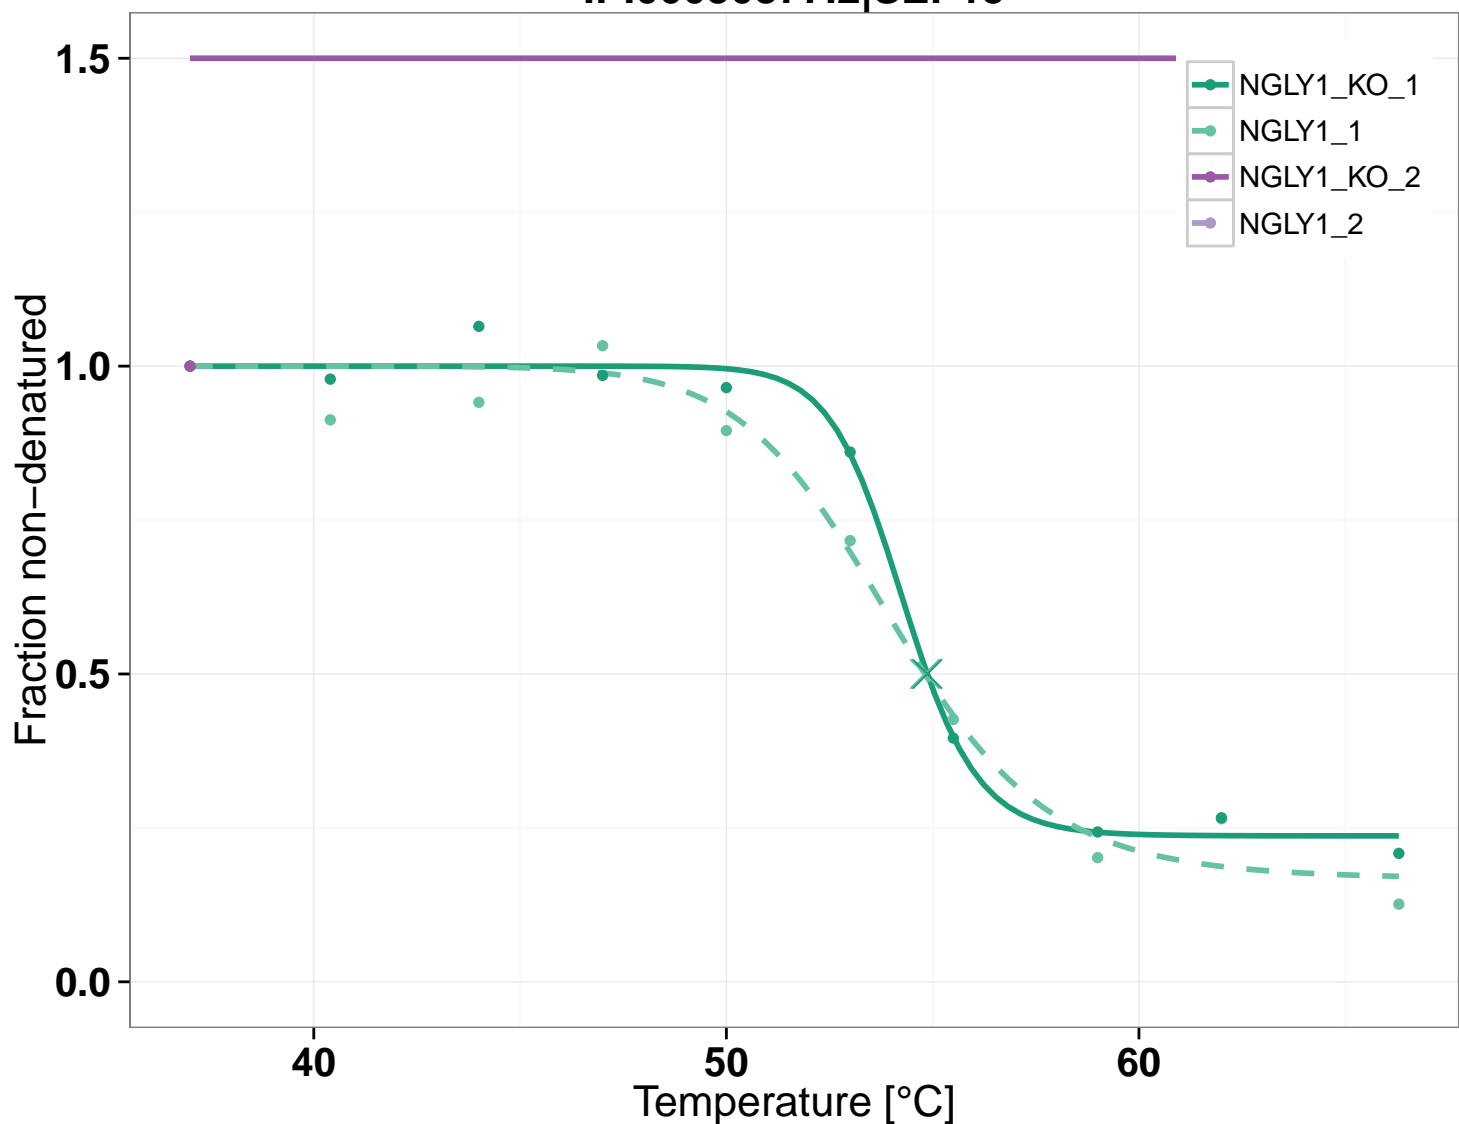

|            | meltPoint | slope | plateau | R2    |
|------------|-----------|-------|---------|-------|
| NGLY1_KO_1 | 54.87     | -0.21 | 0.24    | 0.99  |
| NGLY1_1    | 54.81     | -0.11 | 0.17    | 0.98  |
| NGLY1_KO_2 | -         | -     | 1.5     | -1.65 |
| NGLY1_2    | -         | -     | -       | -     |

Supplement: Supplementary file 5260 [file 1]

IPI00099521.1|C6ORF47

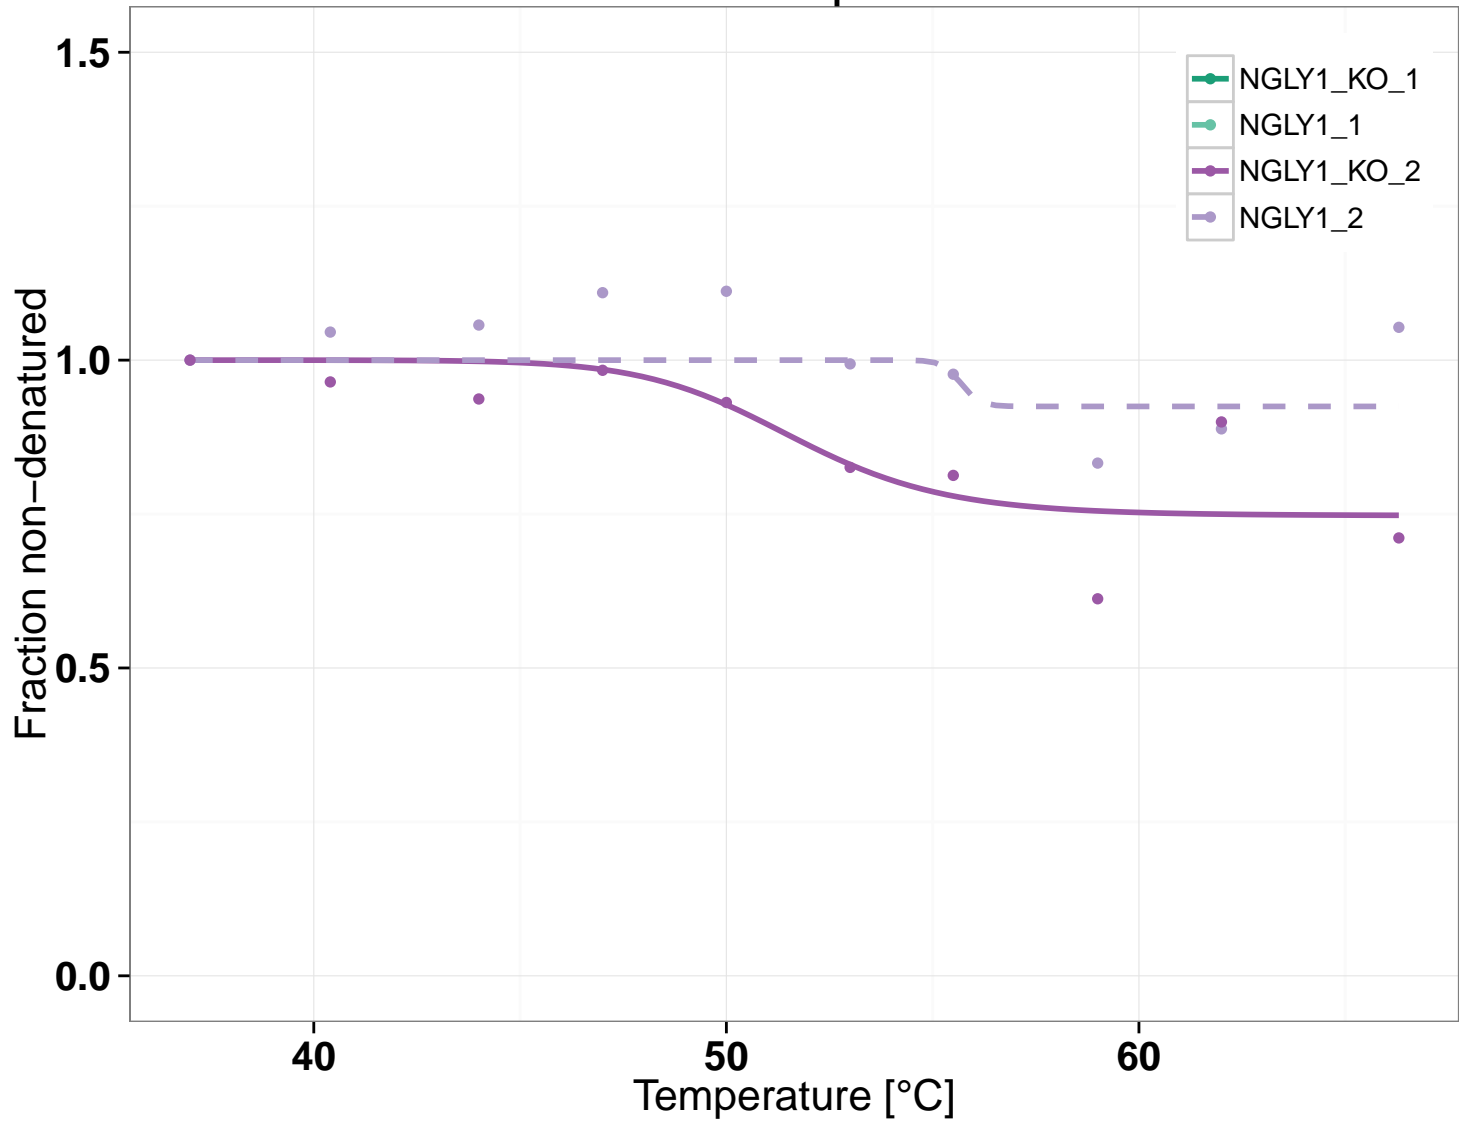

|            | meltPoint | slope  | plateau | R2   |
|------------|-----------|--------|---------|------|
| NGLY1_KO_1 | —         | —      | —       | —    |
| NGLY1_1    | —         | —      | —       | —    |
| NGLY1_KO_2 | —         | -0.034 | 0.75    | 0.65 |
| NGLY1_2    | —         | -0.084 | 0.92    | 0.23 |

Supplement: Supplementary file 5261 [file 1]

# IPI00219953.5|CMPK1

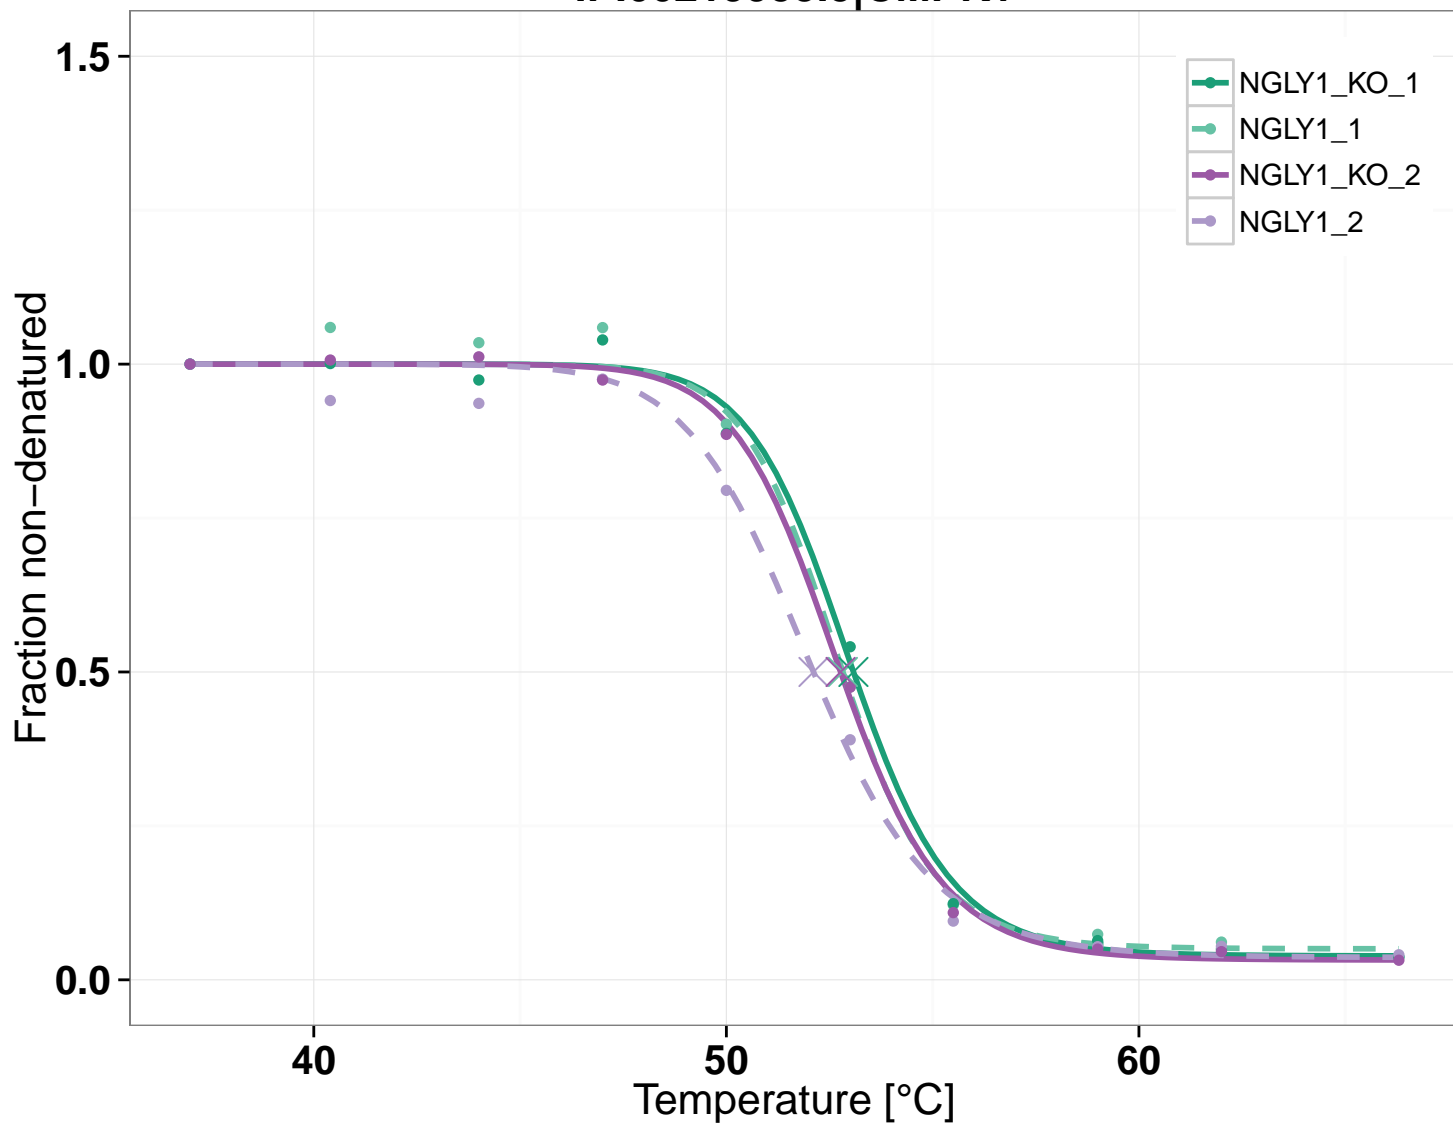

|            | meltPoint | slope | plateau | R2   |
|------------|-----------|-------|---------|------|
| NGLY1_KO_1 | 53.08     | -0.2  | 0.04    | 1    |
| NGLY1_1    | 52.82     | -0.2  | 0.05    | 0.99 |
| NGLY1_KO_2 | 52.77     | -0.19 | 0.03    | 1    |
| NGLY1_2    | 52.11     | -0.16 | 0.04    | 0.99 |

Supplement: Supplementary file 5262 [file 1]

IPI00657953.2|TRIO

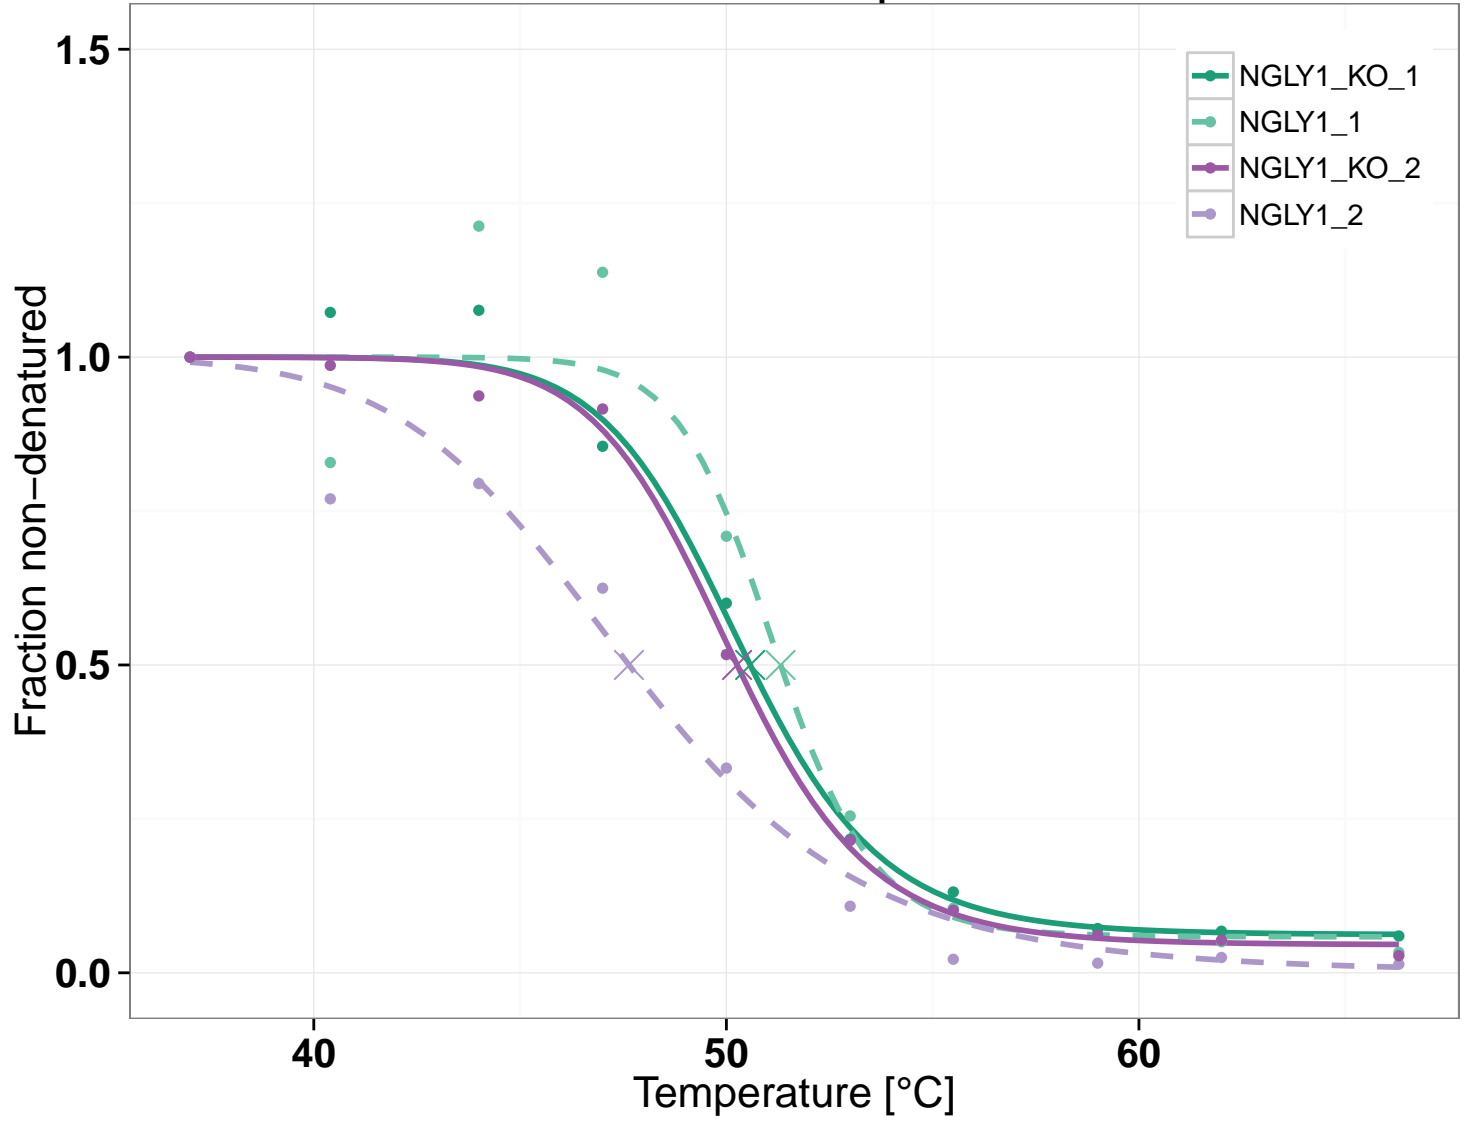

|            | meltPoint | slope  | plateau | R2   |
|------------|-----------|--------|---------|------|
| NGLY1_KO_1 | 50.58     | -0.14  | 0.06    | 0.99 |
| NGLY1_1    | 51.31     | -0.2   | 0.06    | 0.95 |
| NGLY1_KO_2 | 50.26     | -0.14  | 0.05    | 1    |
| NGLY1_2    | 47.64     | -0.089 | 0       | 0.97 |

Supplement: Supplementary file 5263 [file 1]

# IPI00295497.2|MPG

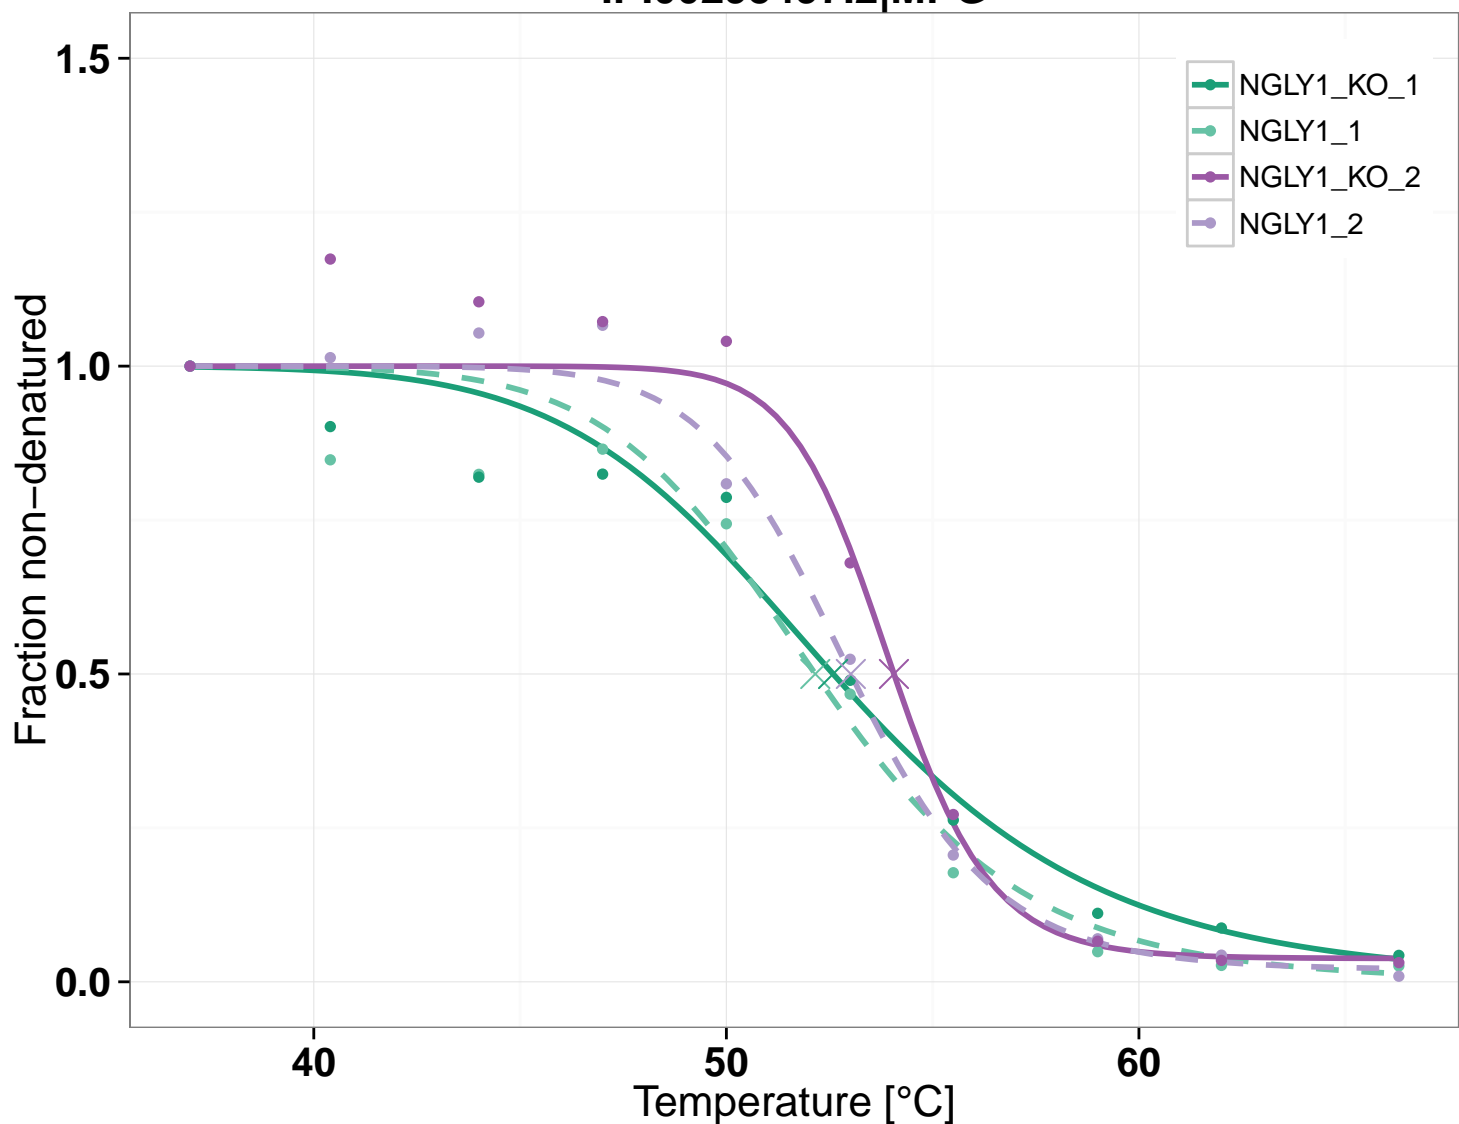

|            | meltPoint | slope  | plateau | R2   |
|------------|-----------|--------|---------|------|
| NGLY1_KO_1 | 52.59     | -0.076 | 0       | 0.97 |
| NGLY1_1    | 52.16     | -0.098 | 0       | 0.96 |
| NGLY1_KO_2 | 54.06     | -0.2   | 0.04    | 0.98 |
| NGLY1_2    | 53.02     | -0.14  | 0.02    | 0.99 |

Supplement: Supplementary file 5264 [file 1]

IPI00011550.1|ZCCHC3

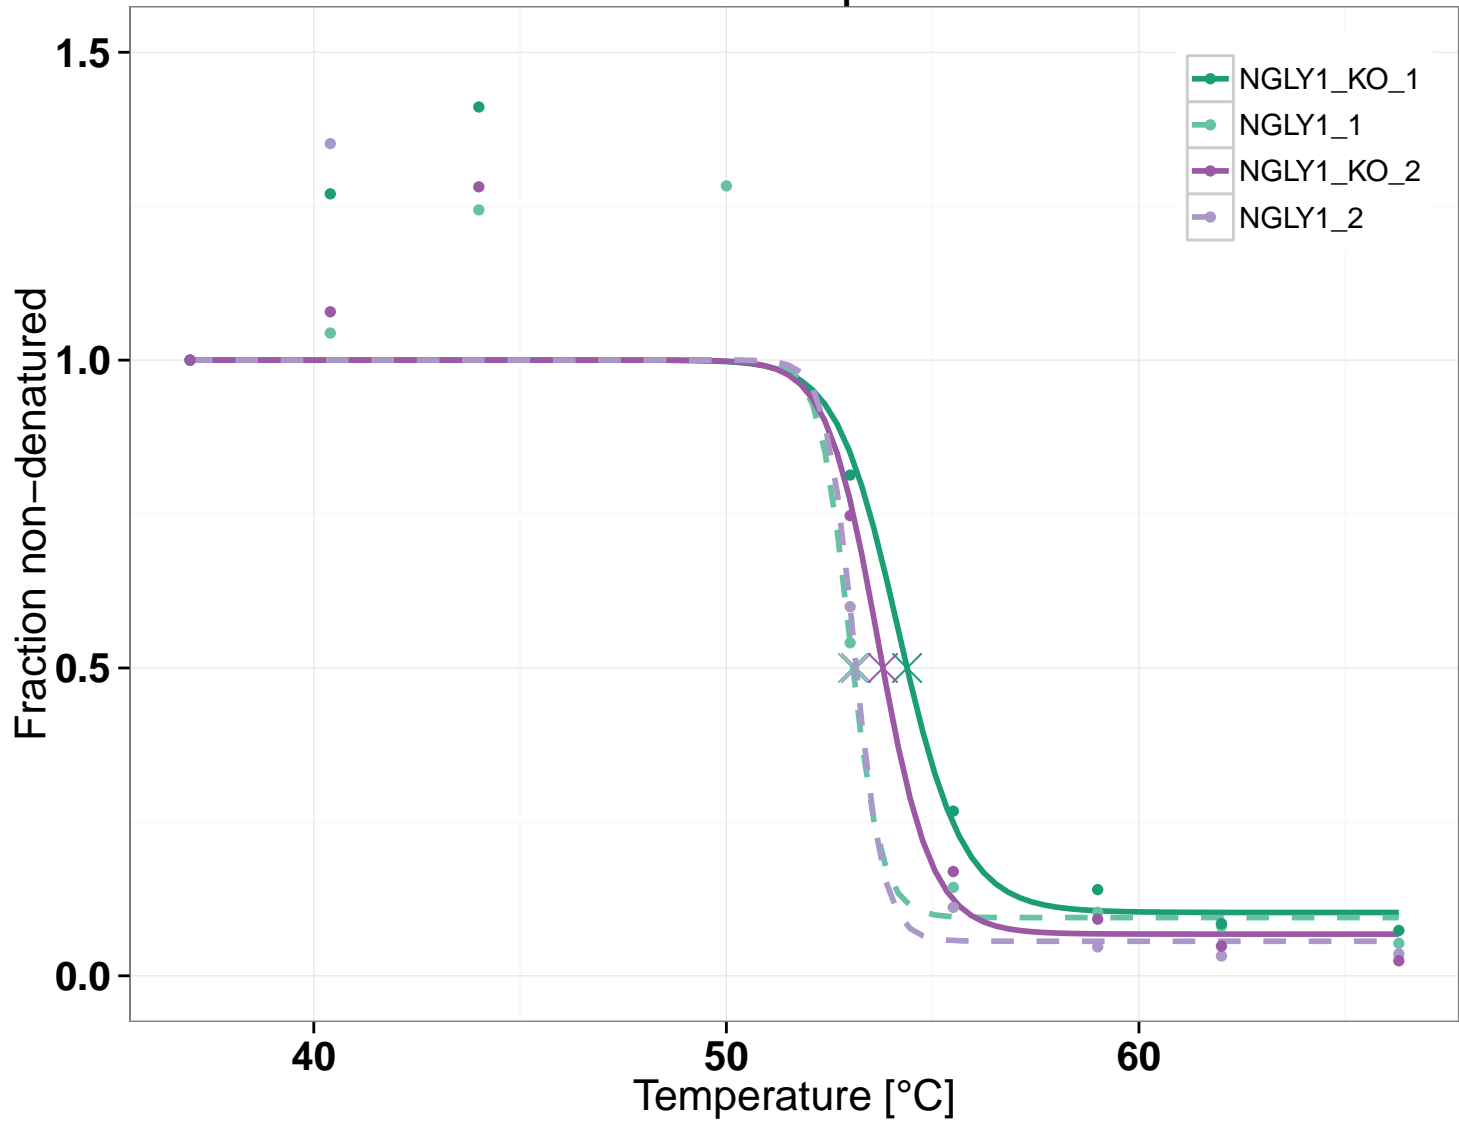

|            | meltPoint | slope | plateau | R2   |
|------------|-----------|-------|---------|------|
| NGLY1_KO_1 | 54.38     | -0.29 | 0.1     | 0.57 |
| NGLY1_1    | 53.07     | -0.61 | 0.09    | 0.85 |
| NGLY1_KO_2 | 53.8      | -0.37 | 0.07    | 0.54 |
| NGLY1_2    | 53.15     | -0.68 | 0.06    | 0.5  |

Supplement: Supplementary file 5265 [file 1]

IPI00012535.1|DNAJA1

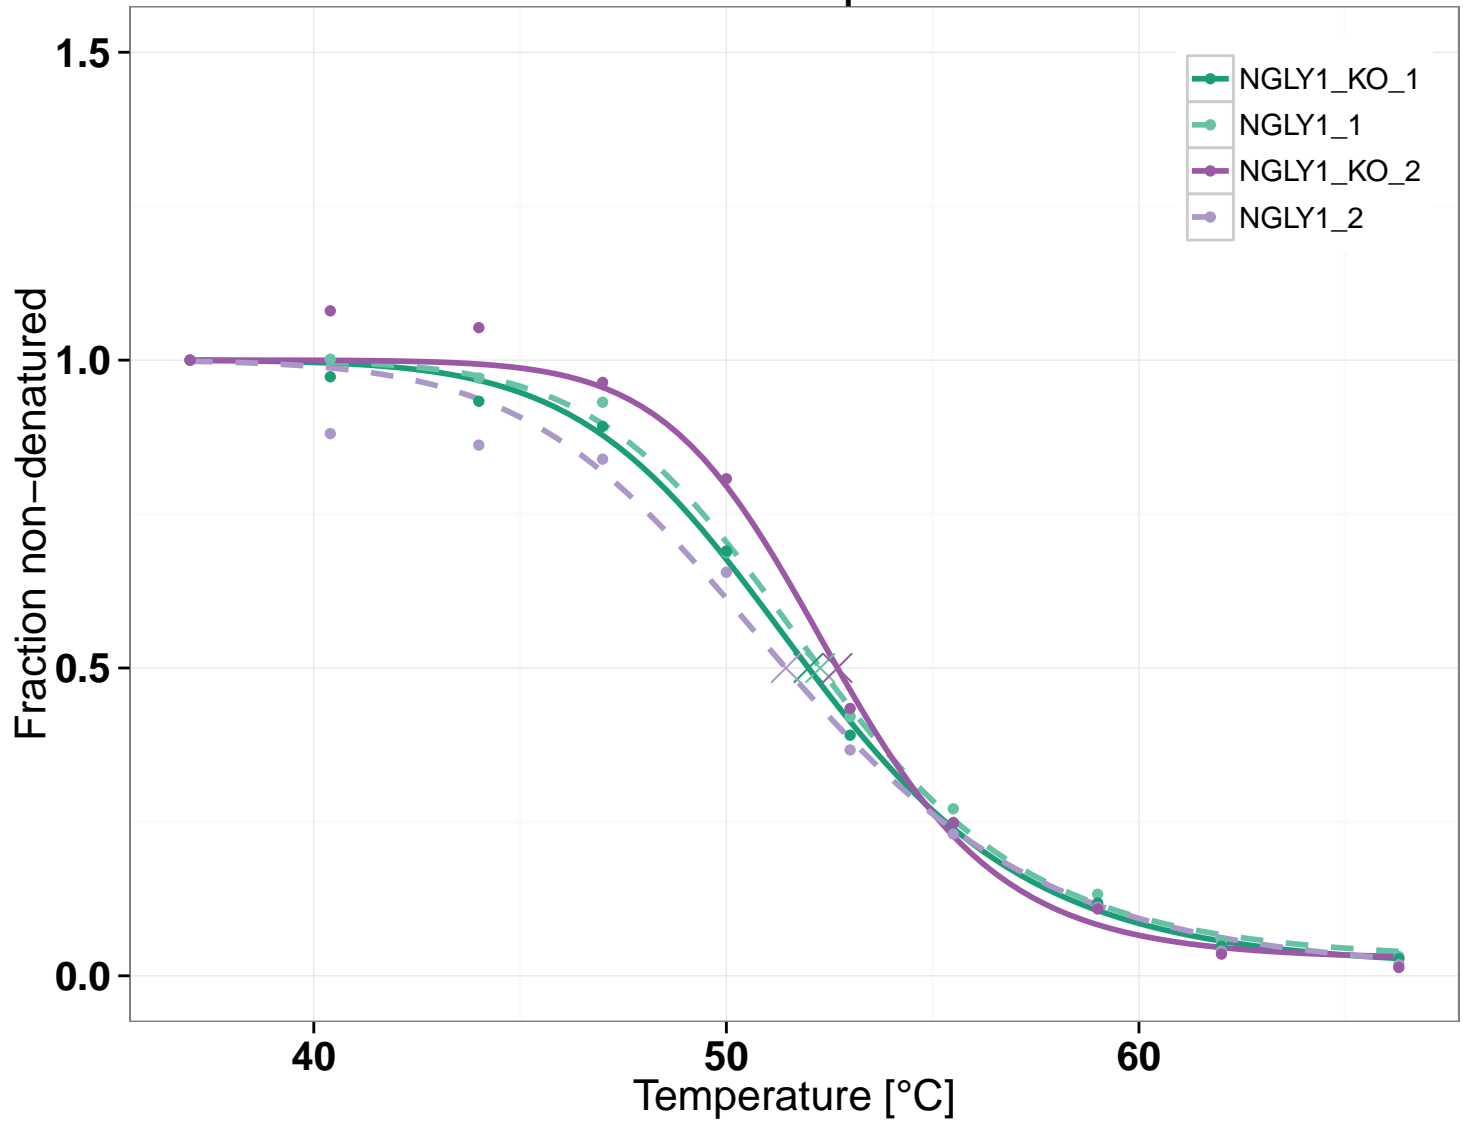

|            | meltPoint | slope  | plateau | R2   |
|------------|-----------|--------|---------|------|
| NGLY1_KO_1 | 51.99     | -0.09  | 0.01    | 1    |
| NGLY1_1    | 52.27     | -0.092 | 0.02    | 1    |
| NGLY1_KO_2 | 52.69     | -0.12  | 0.03    | 0.99 |
| NGLY1_2    | 51.44     | -0.079 | 0       | 0.99 |

Supplement: Supplementary file 5266 [file 1]

IPI00879798.1|TAF8

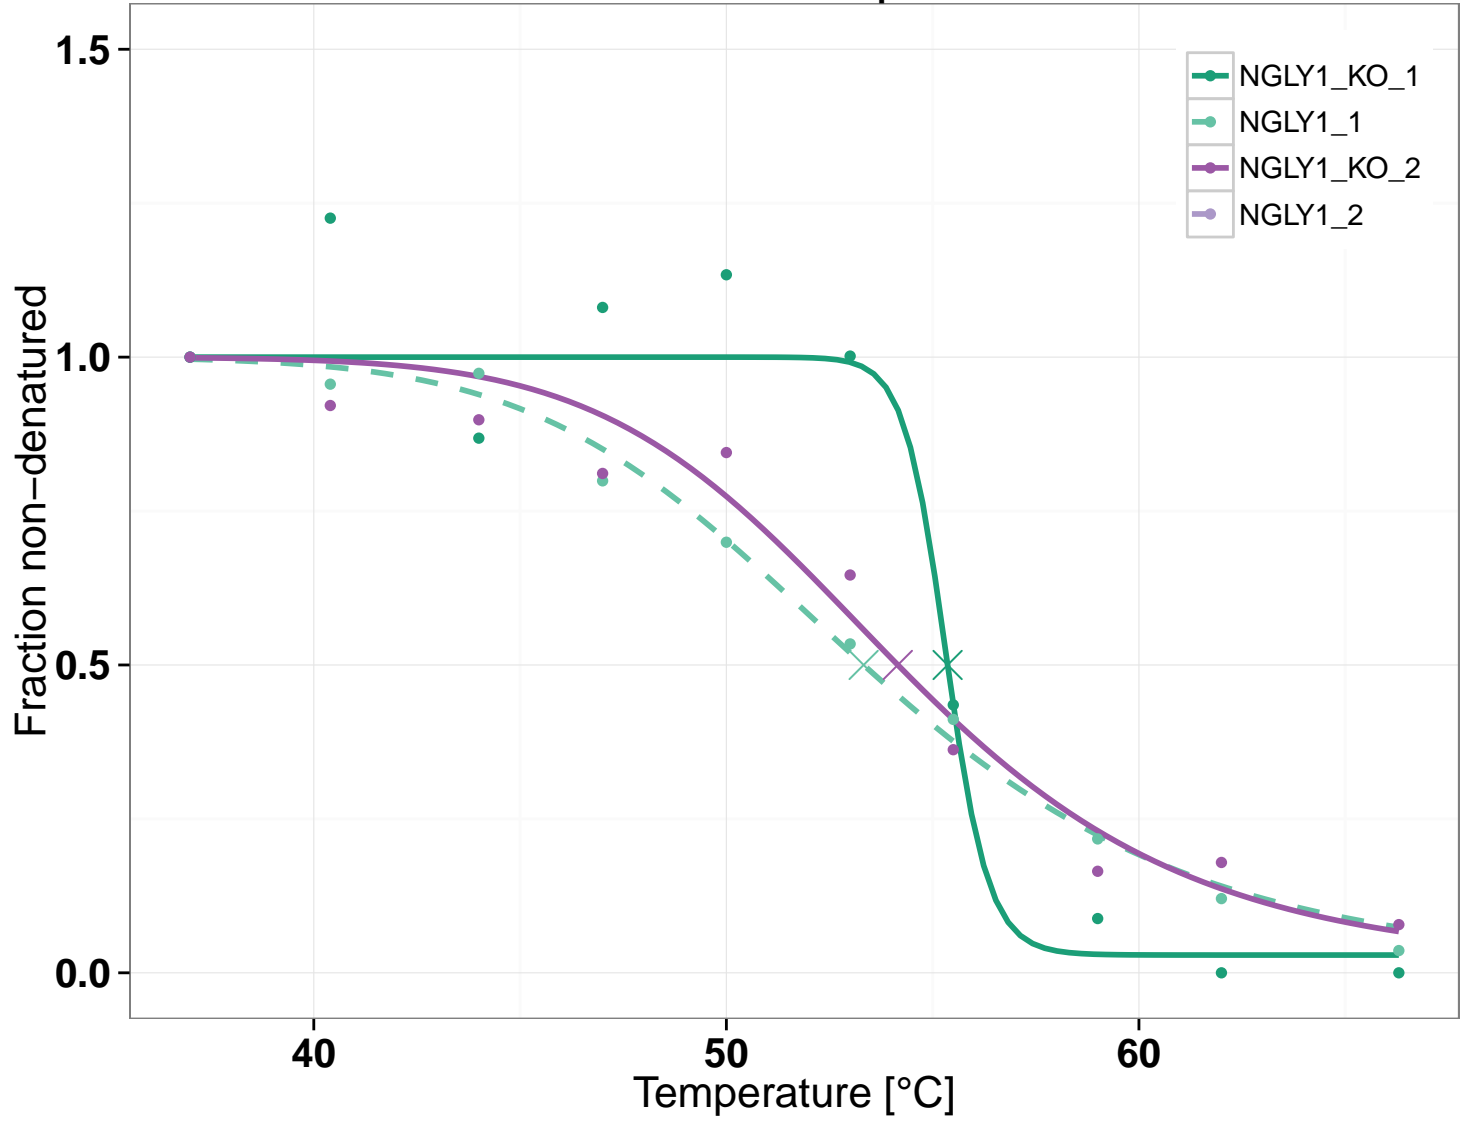

|            | meltPoint | slope  | plateau | R2   |
|------------|-----------|--------|---------|------|
| NGLY1_KO_1 | 55.36     | -0.47  | 0.03    | 0.96 |
| NGLY1_1    | 53.33     | -0.062 | 0       | 0.99 |
| NGLY1_KO_2 | 54.16     | -0.069 | 0.01    | 0.97 |
| NGLY1_2    | -         | -      | -       | -    |

Supplement: Supplementary file 5267 [file 1]

# IPI00297487.1|CTSH

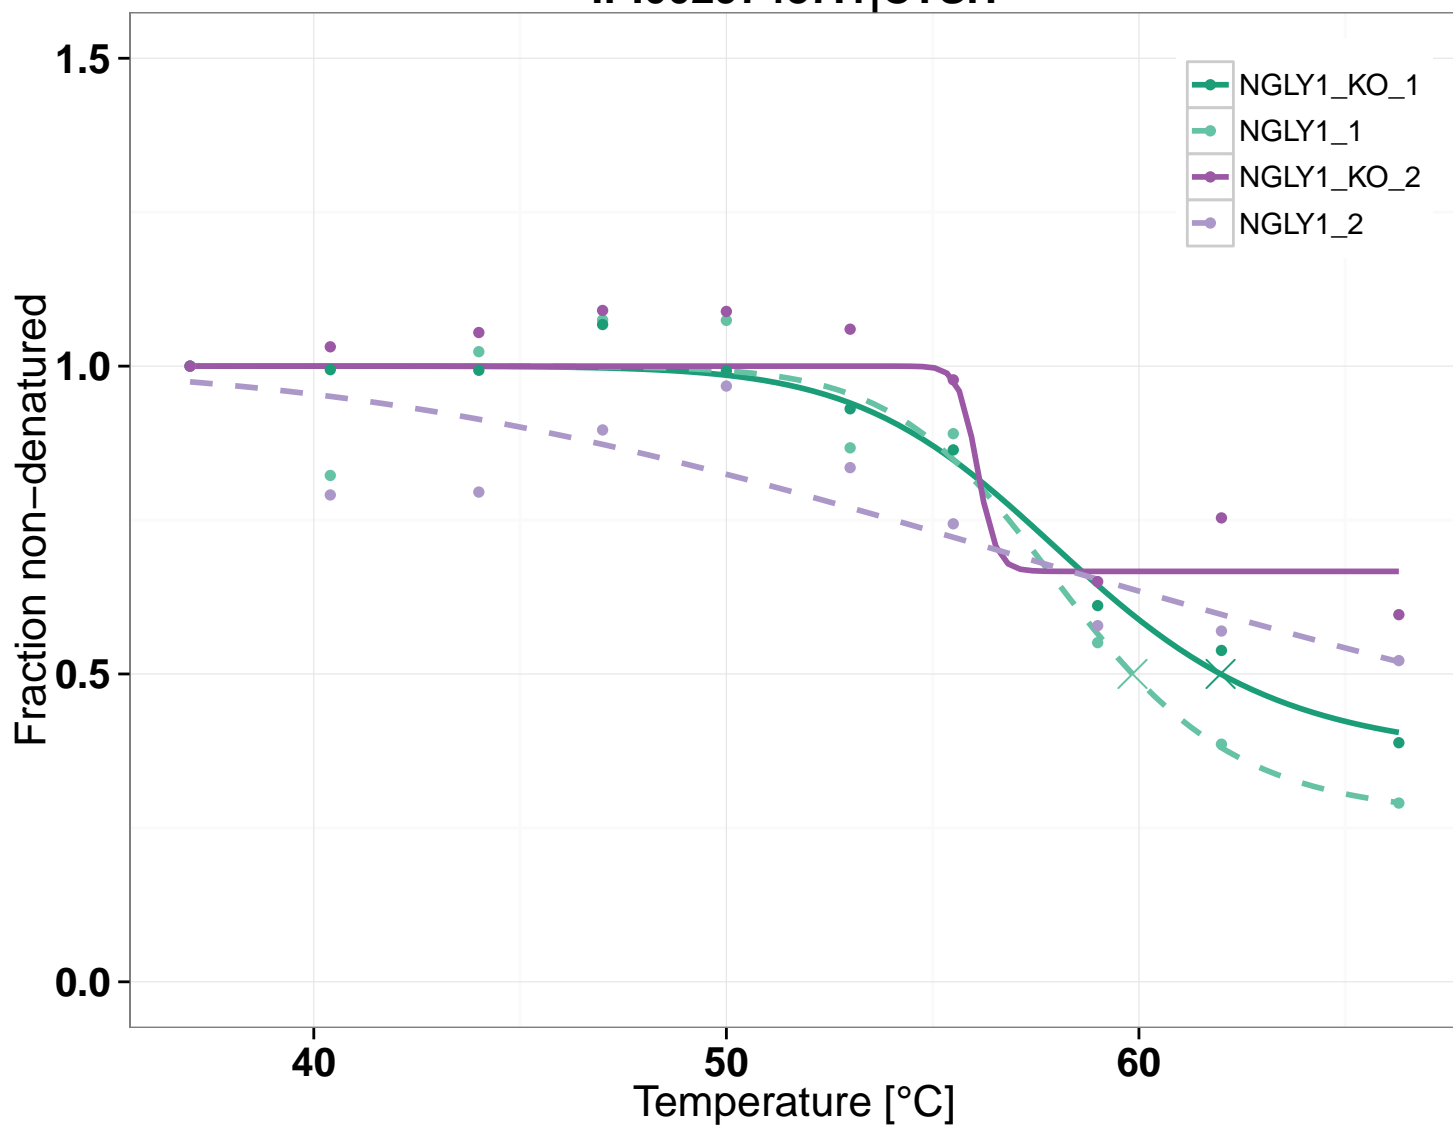

|            | meltPoint | slope  | plateau | R2   |
|------------|-----------|--------|---------|------|
| NGLY1_KO_1 | 61.98     | -0.061 | 0.36    | 0.98 |
| NGLY1_1    | 59.84     | -0.088 | 0.27    | 0.93 |
| NGLY1_KO_2 | -         | -0.37  | 0.67    | 0.89 |
| NGLY1_2    | -         | -0.02  | 0       | 0.71 |

Supplement: Supplementary file 5268 [file 1]

IPI00514275.2|TNIK

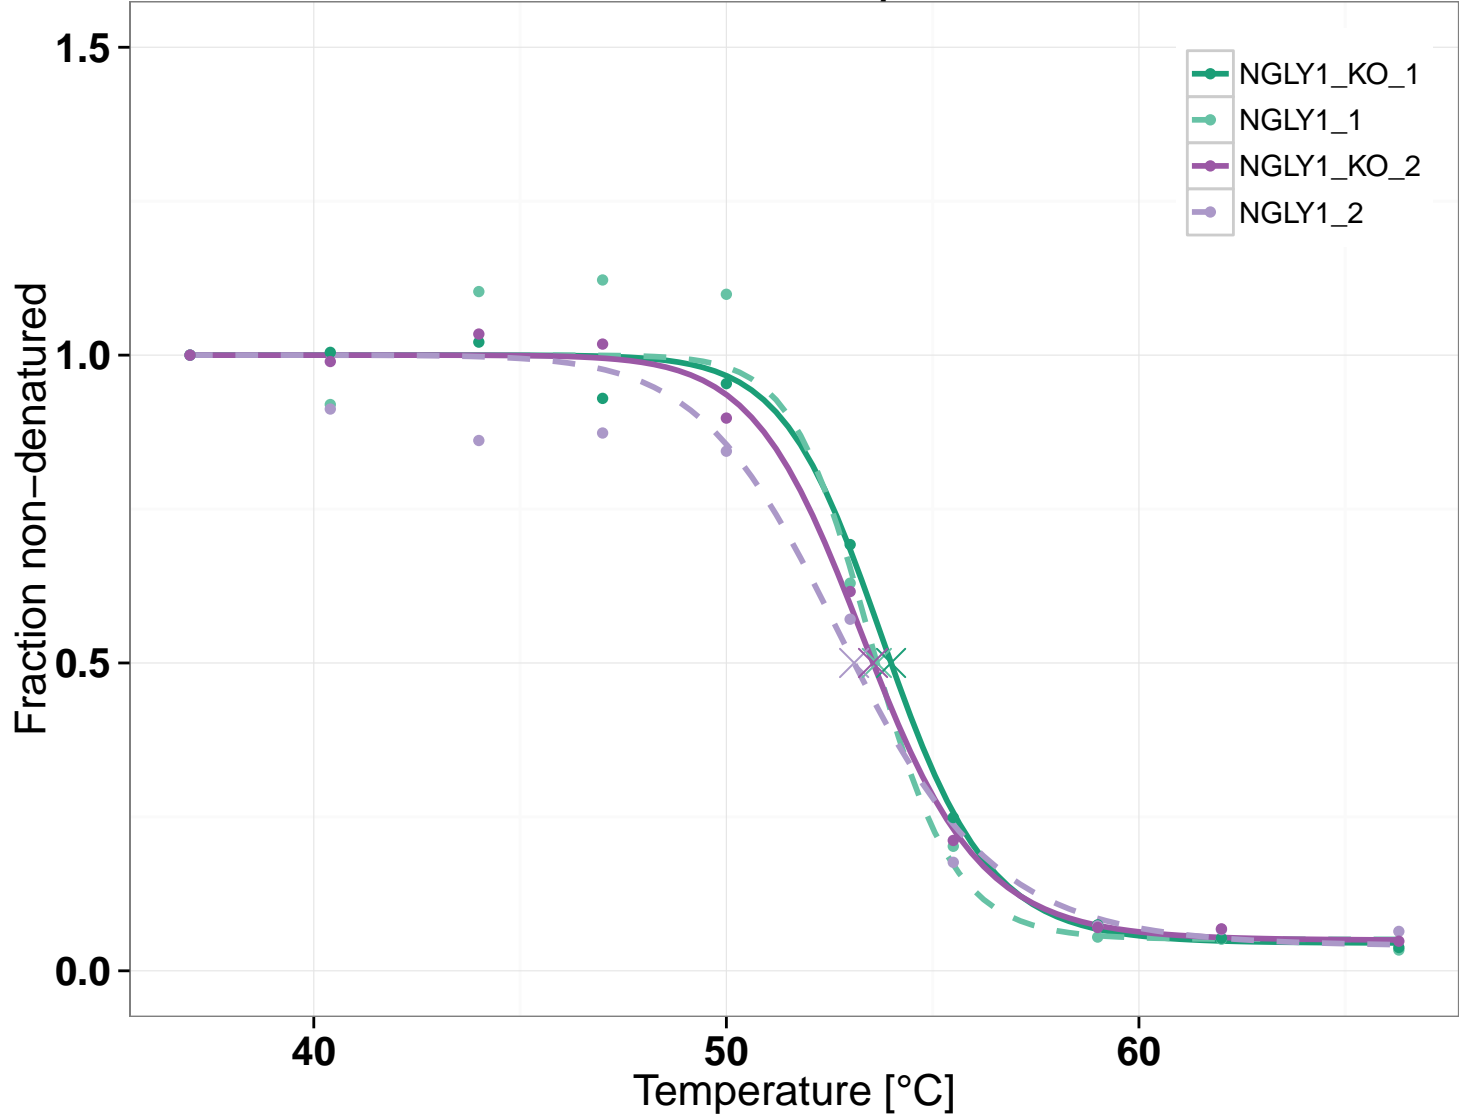

|            | meltPoint | slope | plateau | R2   |
|------------|-----------|-------|---------|------|
| NGLY1_KO_1 | 53.99     | -0.19 | 0.05    | 1    |
| NGLY1_1    | 53.65     | -0.24 | 0.05    | 0.98 |
| NGLY1_KO_2 | 53.56     | -0.17 | 0.05    | 1    |
| NGLY1_2    | 53.1      | -0.13 | 0.04    | 0.97 |

Supplement: Supplementary file 5269 [file 1]

IPI00029449.6|VANGL2

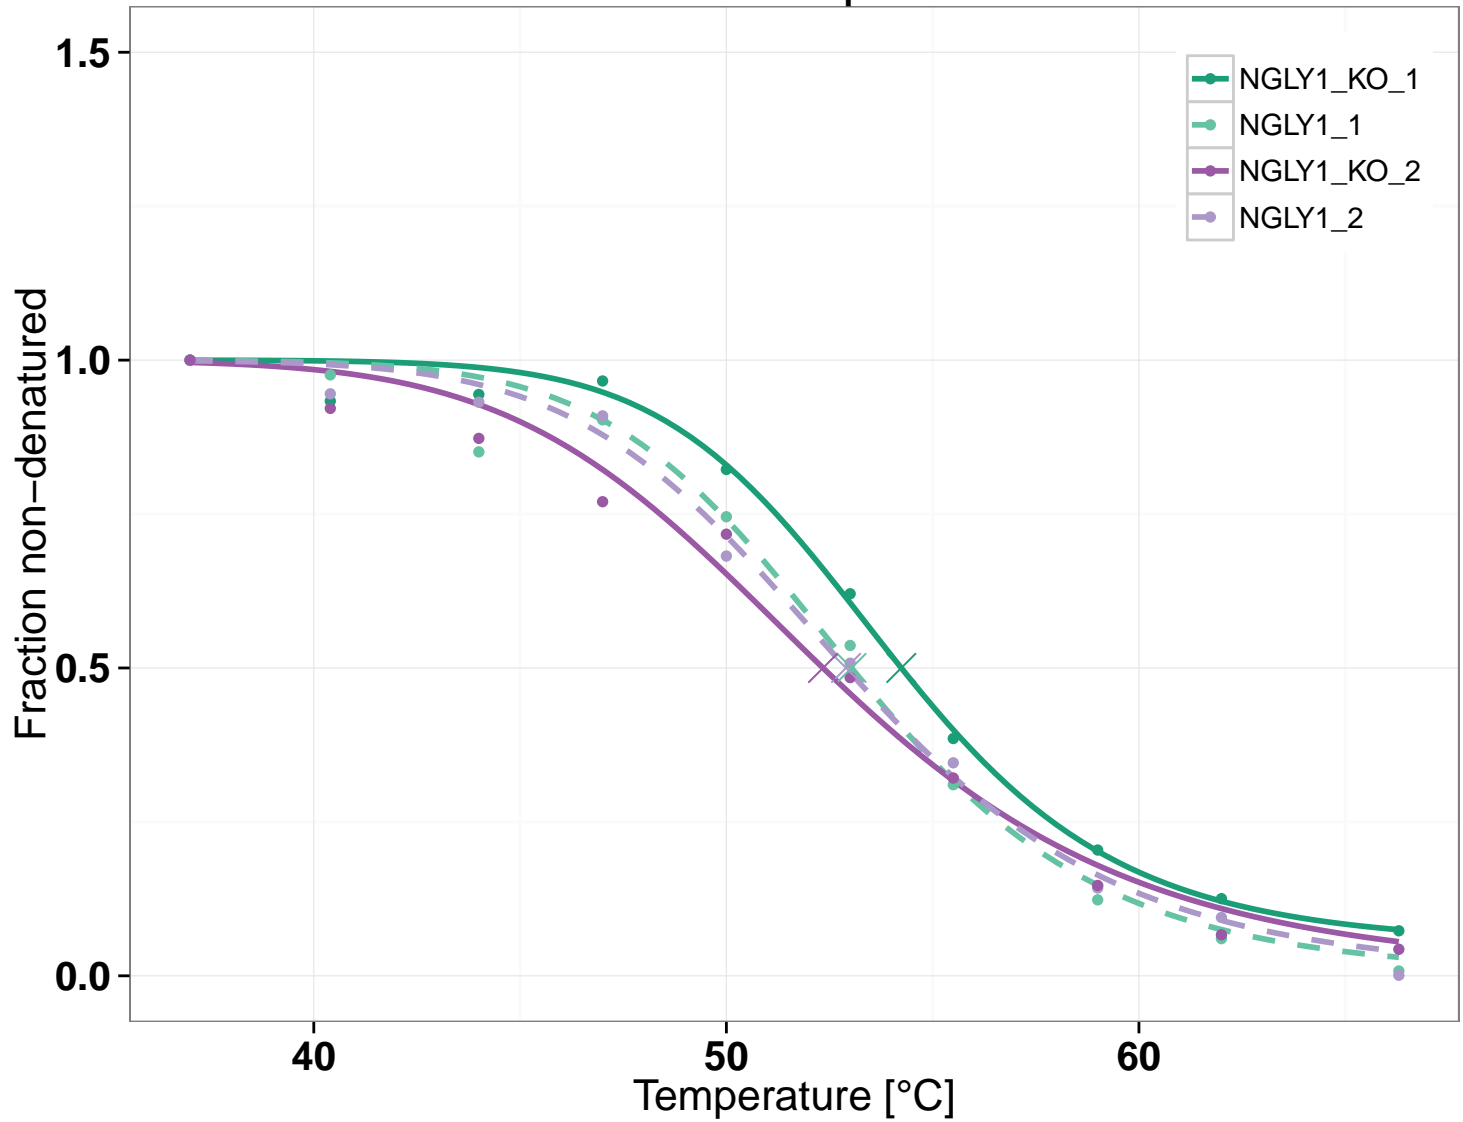

|            | meltPoint | slope  | plateau | R2   |
|------------|-----------|--------|---------|------|
| NGLY1_KO_1 | 54.24     | -0.086 | 0.05    | 0.99 |
| NGLY1_1    | 53.03     | -0.083 | 0       | 0.99 |
| NGLY1_KO_2 | 52.34     | -0.066 | 0       | 0.99 |
| NGLY1_2    | 52.9      | -0.076 | 0       | 0.99 |

Supplement: Supplementary file 5270 [file 1]

IPI00305986.4|LOC100133916

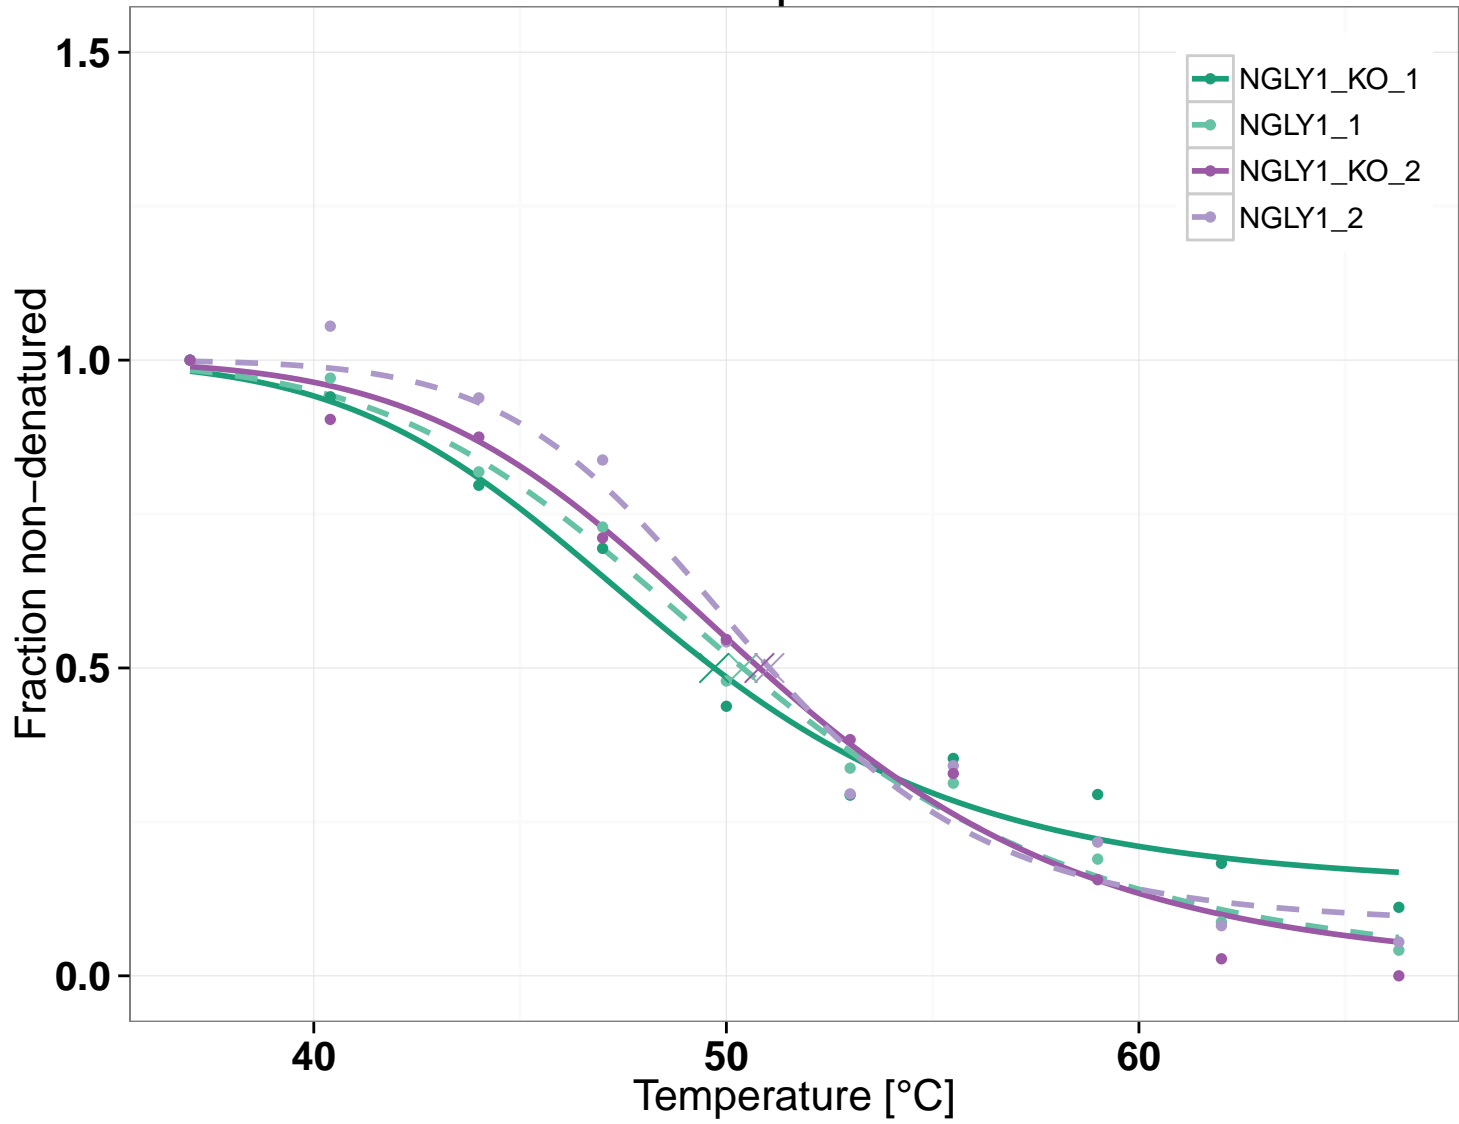

|            | meltPoint | slope  | plateau | R2   |
|------------|-----------|--------|---------|------|
| NGLY1_KO_1 | 49.7      | -0.057 | 0.14    | 0.98 |
| NGLY1_1    | 50.4      | -0.058 | 0       | 0.99 |
| NGLY1_KO_2 | 50.8      | -0.062 | 0       | 0.99 |
| NGLY1_2    | 51.04     | -0.078 | 0.08    | 0.98 |

Supplement: Supplementary file 5271 [file 1]

IPI00025202.5|FMNL1

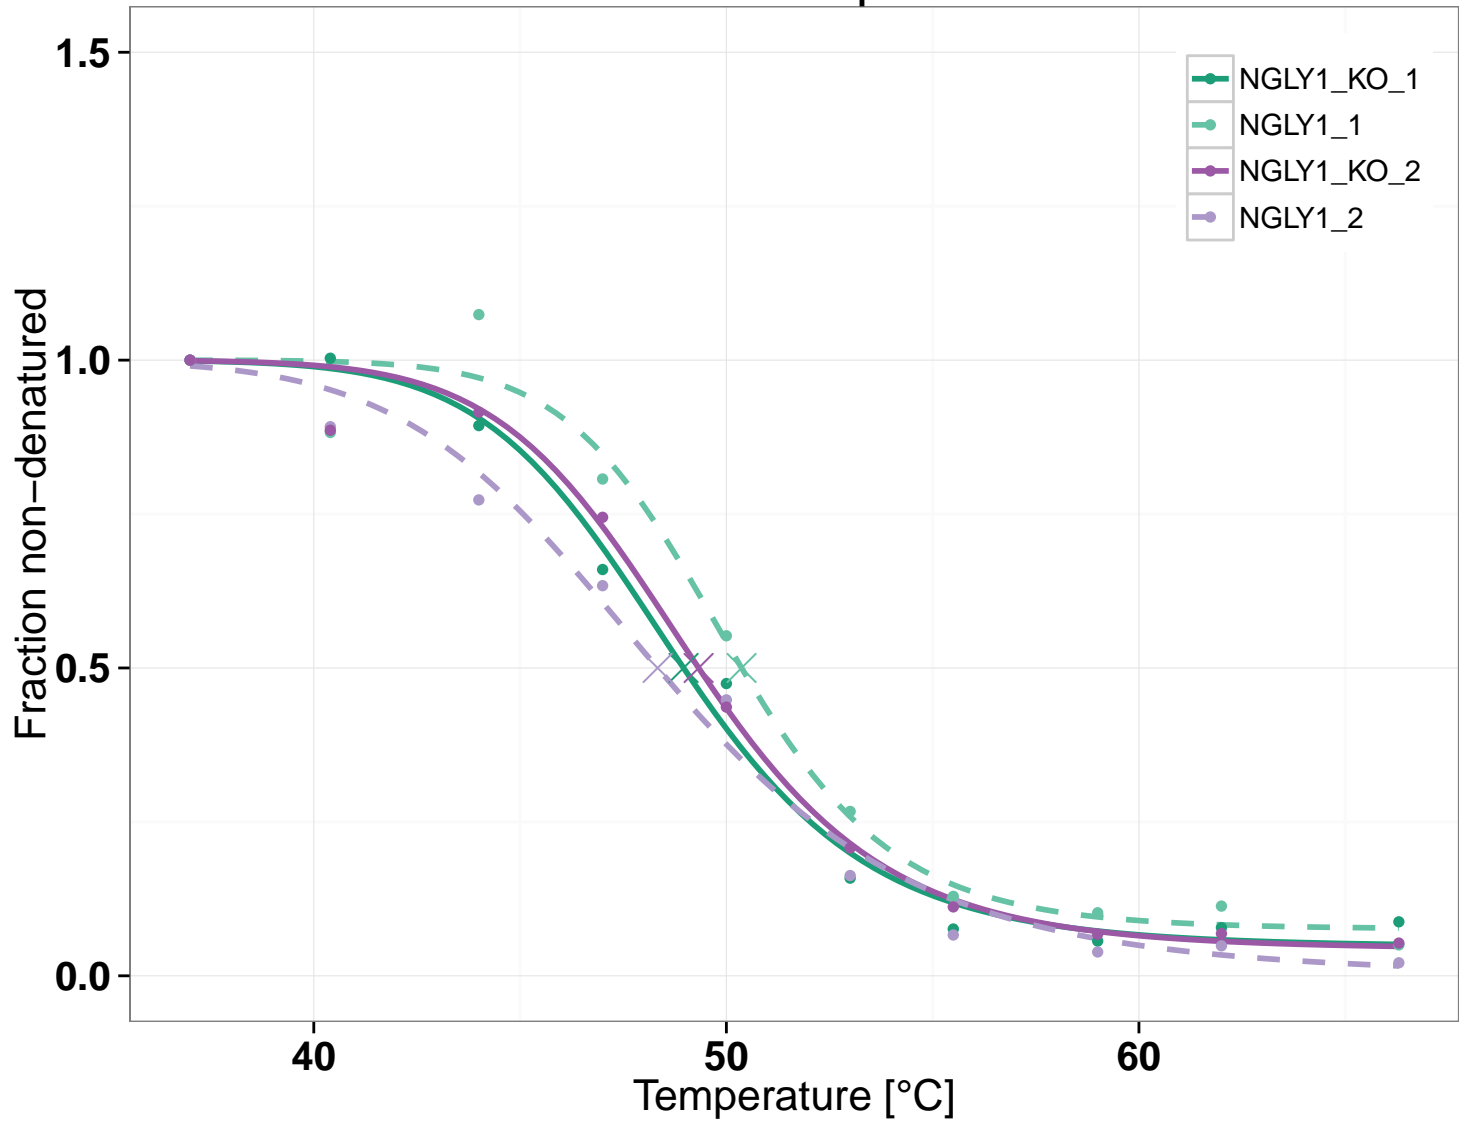

|            | meltPoint | slope | plateau | R2   |
|------------|-----------|-------|---------|------|
| NGLY1_KO_1 | 48.96     | -0.1  | 0.05    | 0.99 |
| NGLY1_1    | 50.37     | -0.12 | 0.08    | 0.98 |
| NGLY1_KO_2 | 49.33     | -0.1  | 0.04    | 0.99 |
| NGLY1_2    | 48.33     | -0.08 | 0       | 0.99 |

Supplement: Supplementary file 5272 [file 1]

IPI00874172.1|EFCAB2

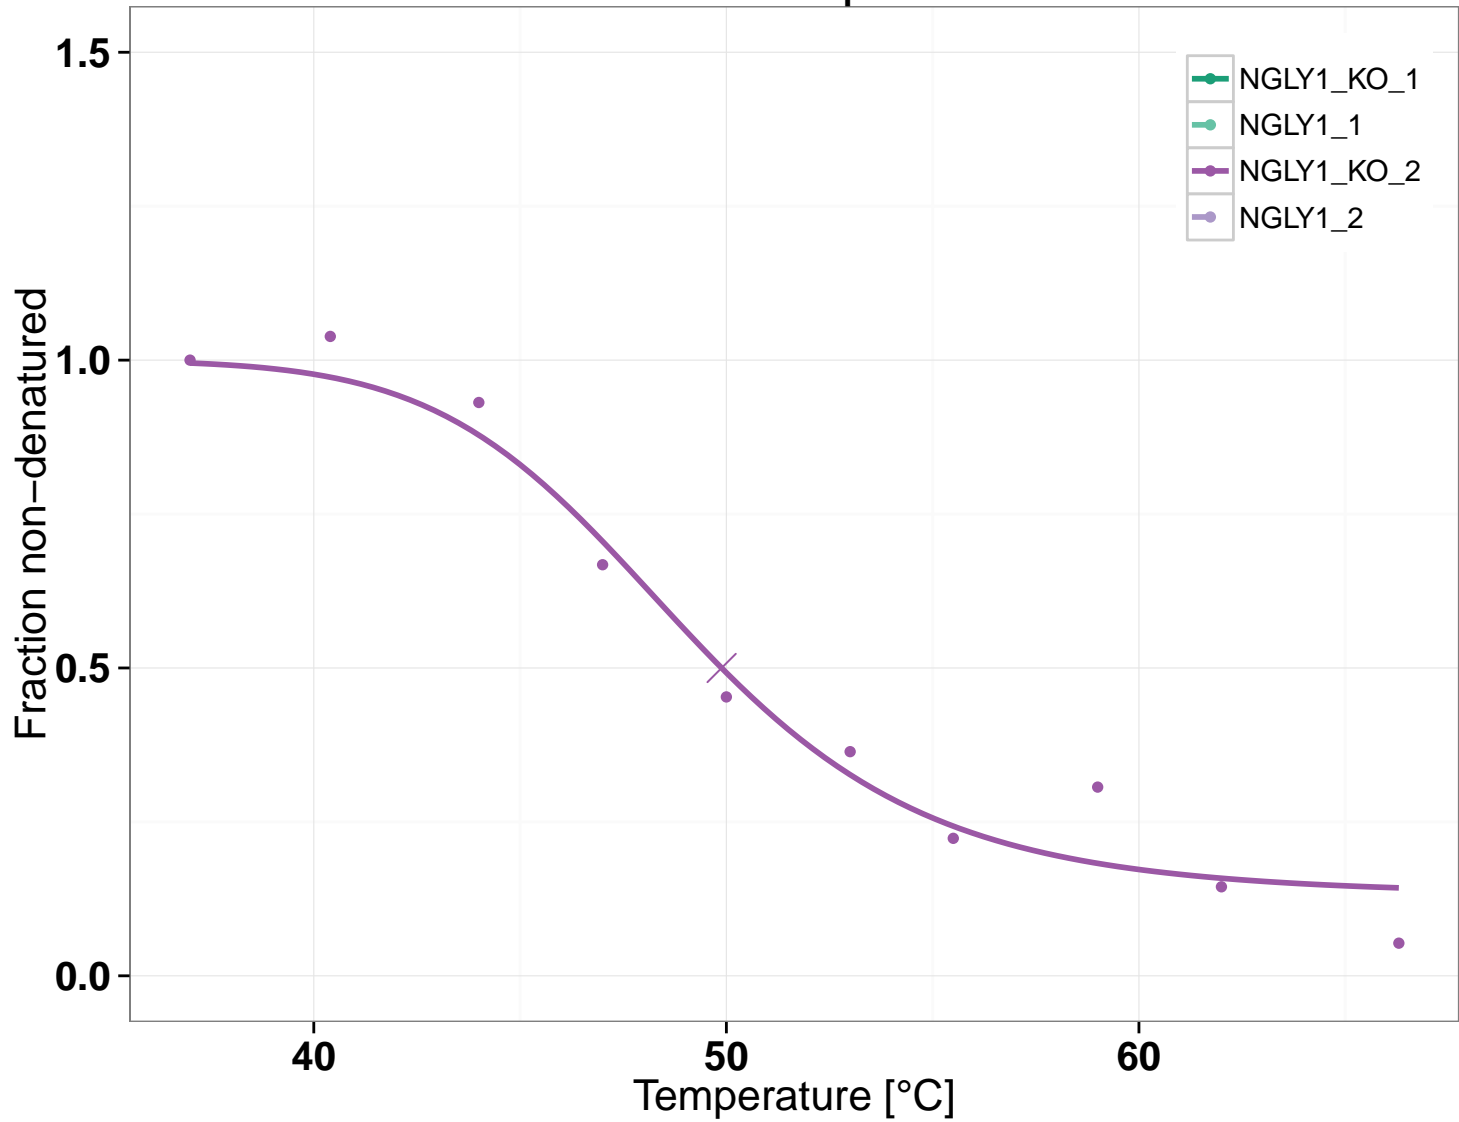

|            | meltPoint | slope  | plateau | R2   |
|------------|-----------|--------|---------|------|
| NGLY1_KO_1 | —         | —      | —       | —    |
| NGLY1_1    | —         | —      | —       | —    |
| NGLY1_KO_2 | 49.88     | -0.073 | 0.13    | 0.97 |
| NGLY1_2    | —         | —      | —       | —    |

Supplement: Supplementary file 5273 [file 1]

IPI00396126.2|C5ORF24

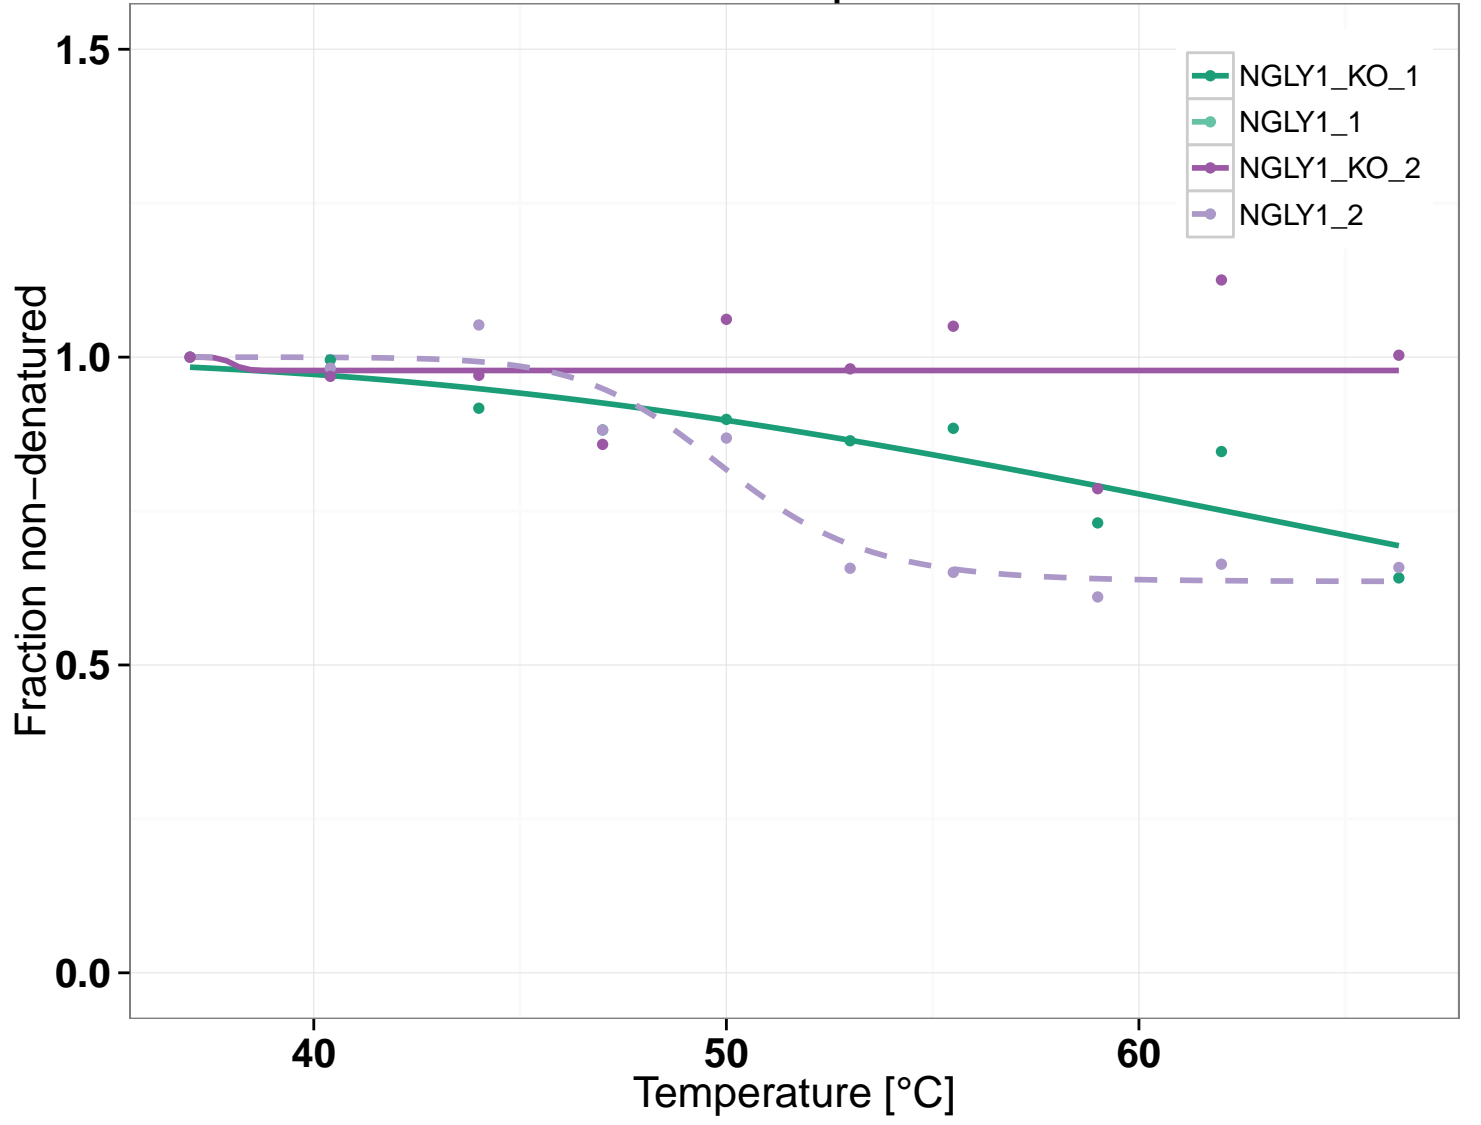

|            | meltPoint | slope  | plateau | R2   |
|------------|-----------|--------|---------|------|
| NGLY1_KO_1 | -         | -0.013 | 0       | 0.8  |
| NGLY1_1    | -         | -      | -       | -    |
| NGLY1_KO_2 | -         | -0.036 | 0.98    | 0    |
| NGLY1_2    | -         | -0.052 | 0.64    | 0.94 |

Supplement: Supplementary file 5274 [file 1]

# IPI00001651.4|POGK

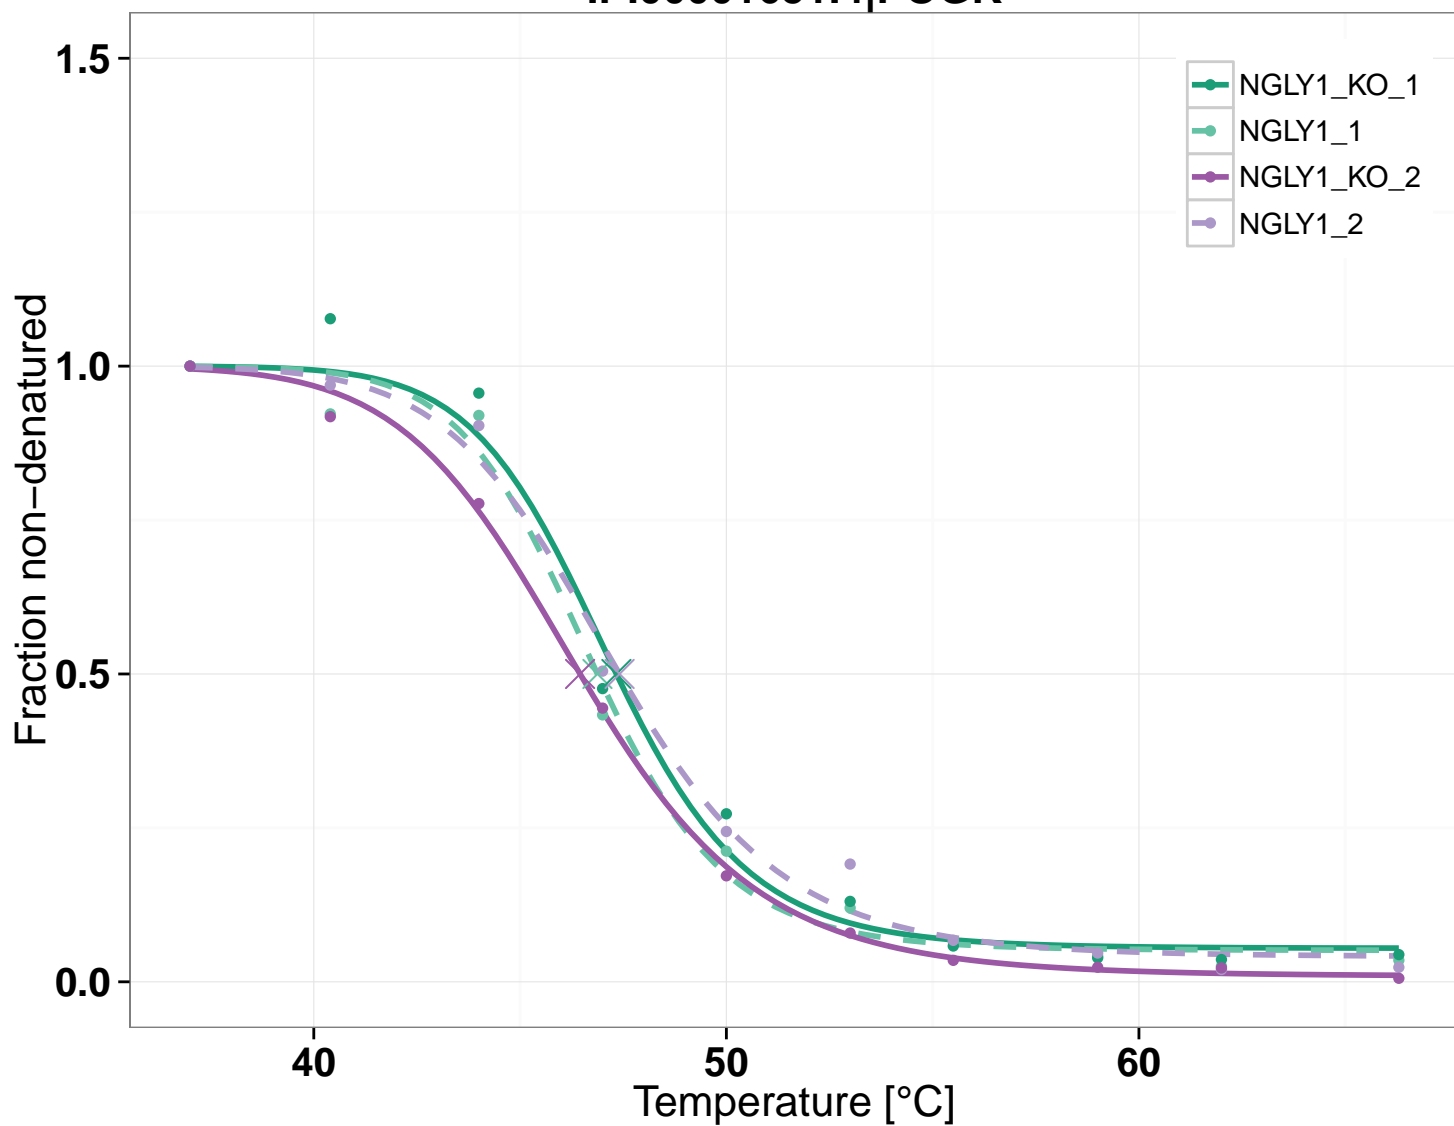

|            | meltPoint | slope | plateau | R2   |
|------------|-----------|-------|---------|------|
| NGLY1_KO_1 | 47.33     | -0.14 | 0.05    | 0.99 |
| NGLY1_1    | 46.88     | -0.15 | 0.05    | 0.99 |
| NGLY1_KO_2 | 46.45     | -0.11 | 0.01    | 1    |
| NGLY1_2    | 47.41     | -0.12 | 0.04    | 0.99 |

Supplement: Supplementary file 5275 [file 1]

IPI00289082.2|PTPN12

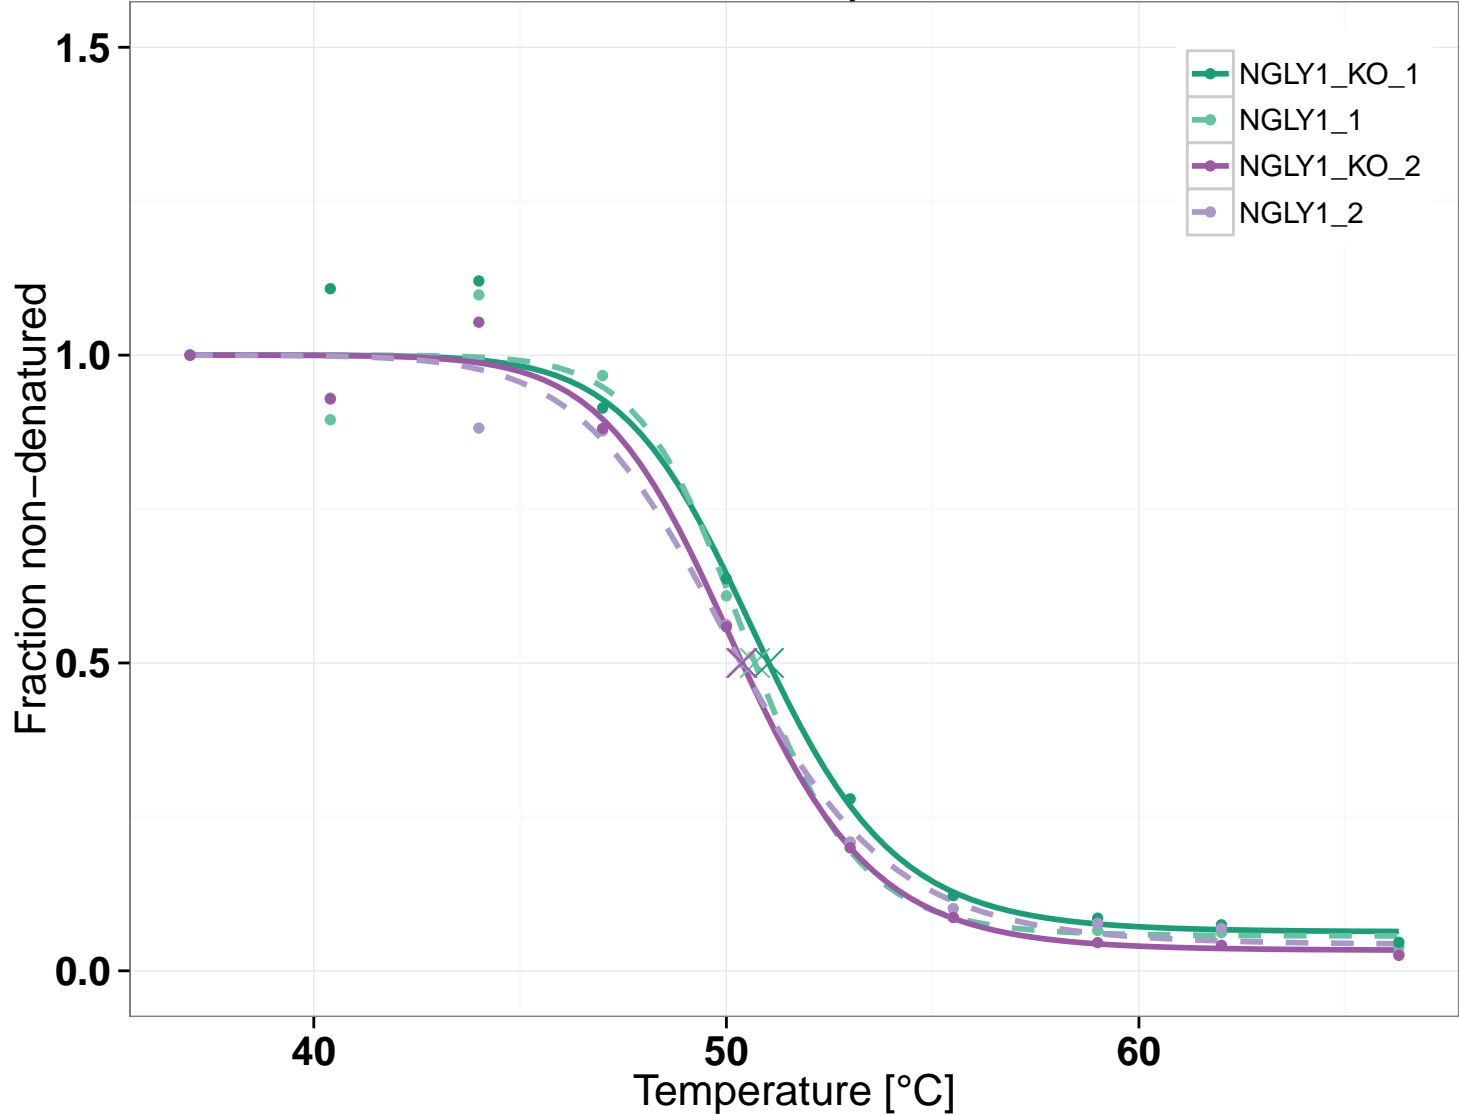

|            | meltPoint | slope | plateau | R2   |
|------------|-----------|-------|---------|------|
| NGLY1_KO_1 | 51.03     | -0.14 | 0.06    | 0.98 |
| NGLY1_1    | 50.69     | -0.18 | 0.06    | 0.99 |
| NGLY1_KO_2 | 50.38     | -0.15 | 0.03    | 0.99 |
| NGLY1_2    | 50.35     | -0.13 | 0.04    | 0.99 |

Supplement: Supplementary file 5276 [file 1]

IPI00876920.1|KIAA0913

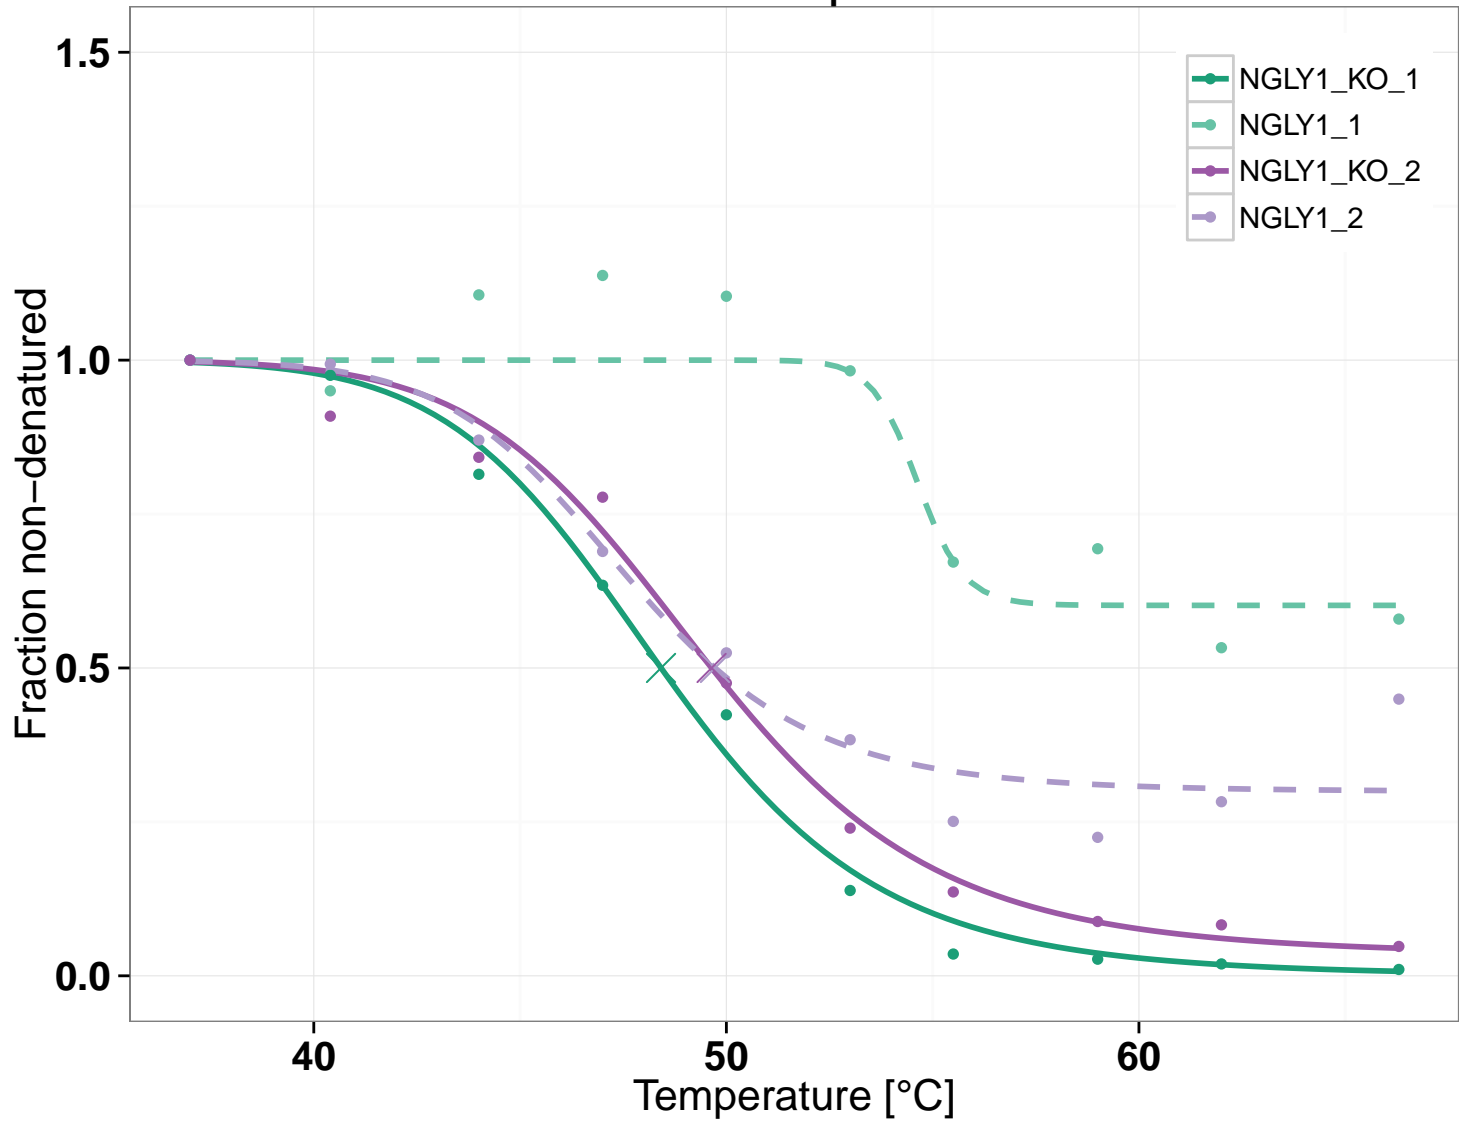

|            | meltPoint | slope  | plateau | R2   |
|------------|-----------|--------|---------|------|
| NGLY1_KO_1 | 48.42     | -0.095 | 0       | 0.99 |
| NGLY1_1    | -         | -0.18  | 0.6     | 0.88 |
| NGLY1_KO_2 | 49.64     | -0.087 | 0.03    | 0.99 |
| NGLY1_2    | 49.72     | -0.079 | 0.3     | 0.95 |

Supplement: Supplementary file 5277 [file 1]

# IPI00374747.5|ORC3L

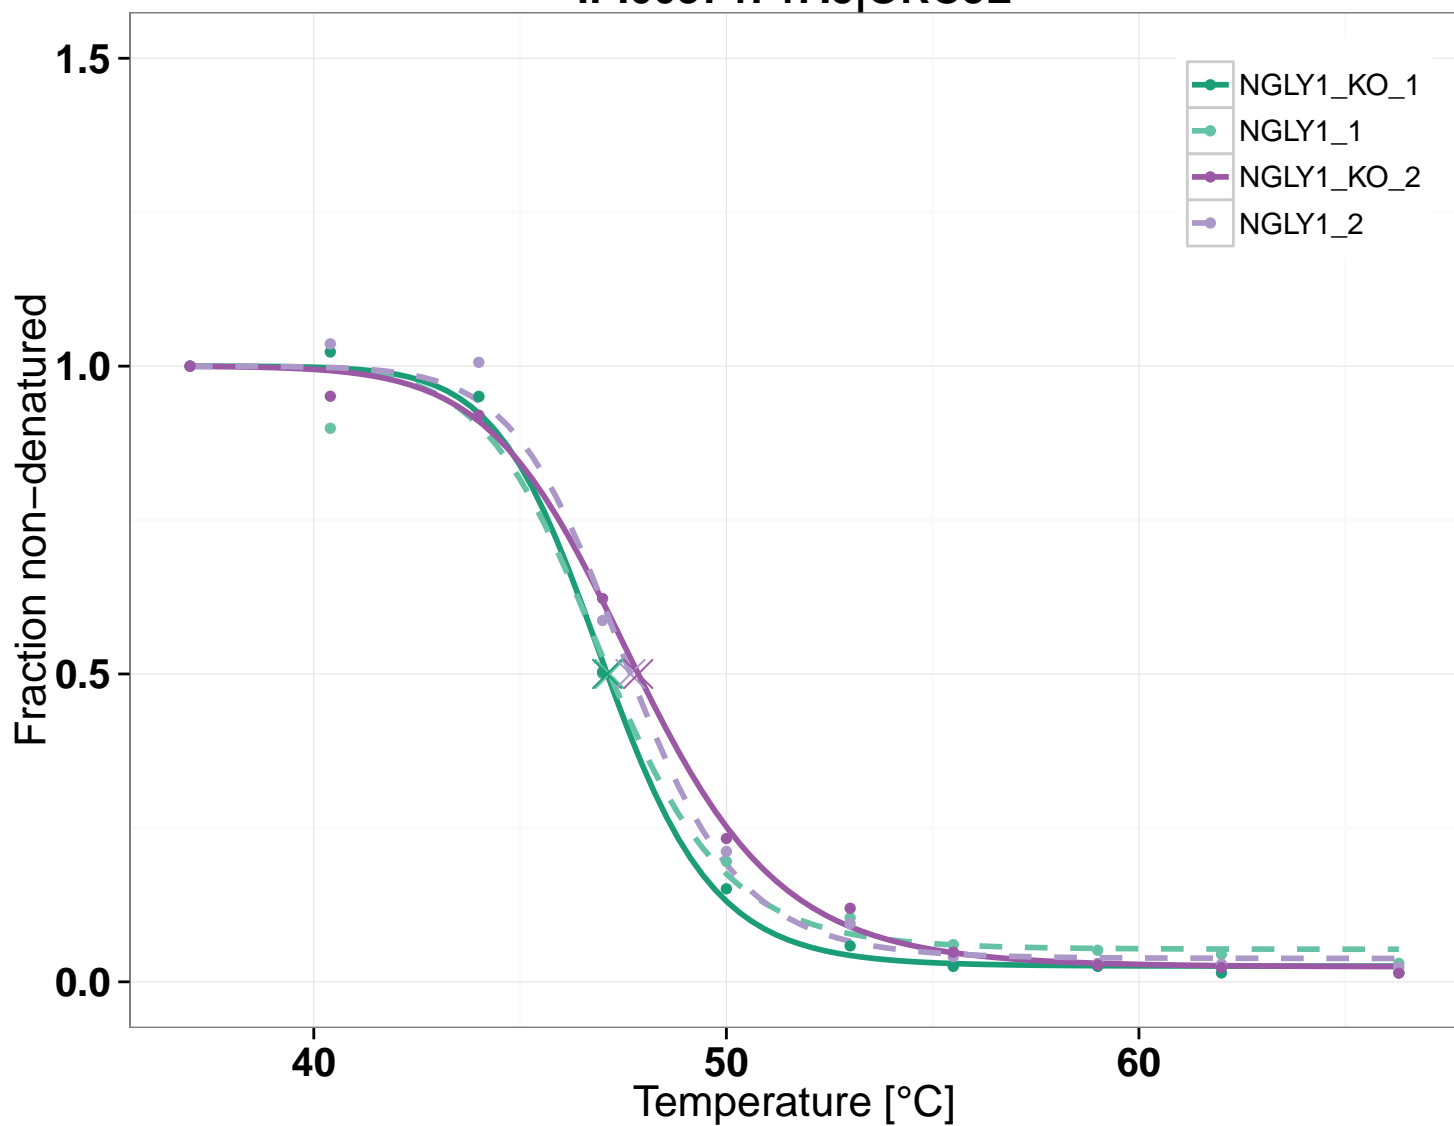

|            | meltPoint | slope | plateau | R2   |
|------------|-----------|-------|---------|------|
| NGLY1_KO_1 | 47.11     | -0.19 | 0.03    | 1    |
| NGLY1_1    | 47.17     | -0.16 | 0.05    | 0.99 |
| NGLY1_KO_2 | 47.86     | -0.14 | 0.02    | 1    |
| NGLY1_2    | 47.67     | -0.17 | 0.04    | 1    |

Supplement: Supplementary file 5278 [file 1]

# IPI00014458.1|SCO2

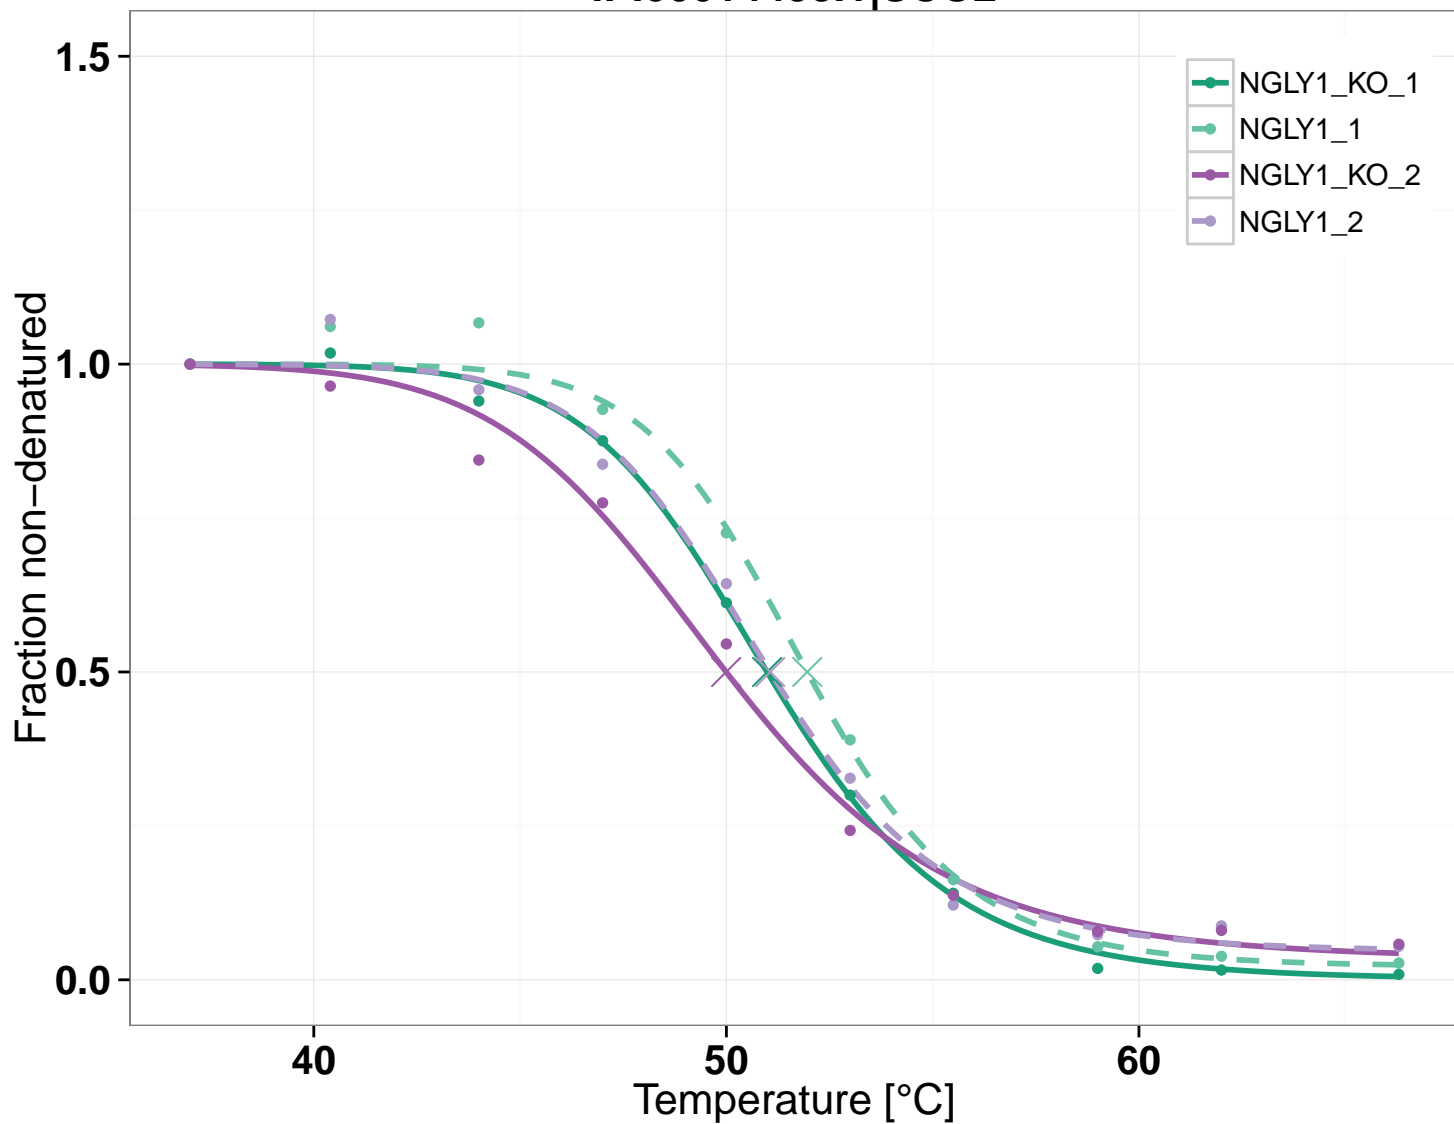

|            | meltPoint | slope  | plateau | R2   |
|------------|-----------|--------|---------|------|
| NGLY1_KO_1 | 50.99     | -0.11  | 0       | 1    |
| NGLY1_1    | 51.96     | -0.13  | 0.02    | 0.99 |
| NGLY1_KO_2 | 49.99     | -0.089 | 0.03    | 0.99 |
| NGLY1_2    | 51.06     | -0.11  | 0.05    | 0.99 |

Supplement: Supplementary file 5279 [file 1]

IPI00028438.4|CMIP

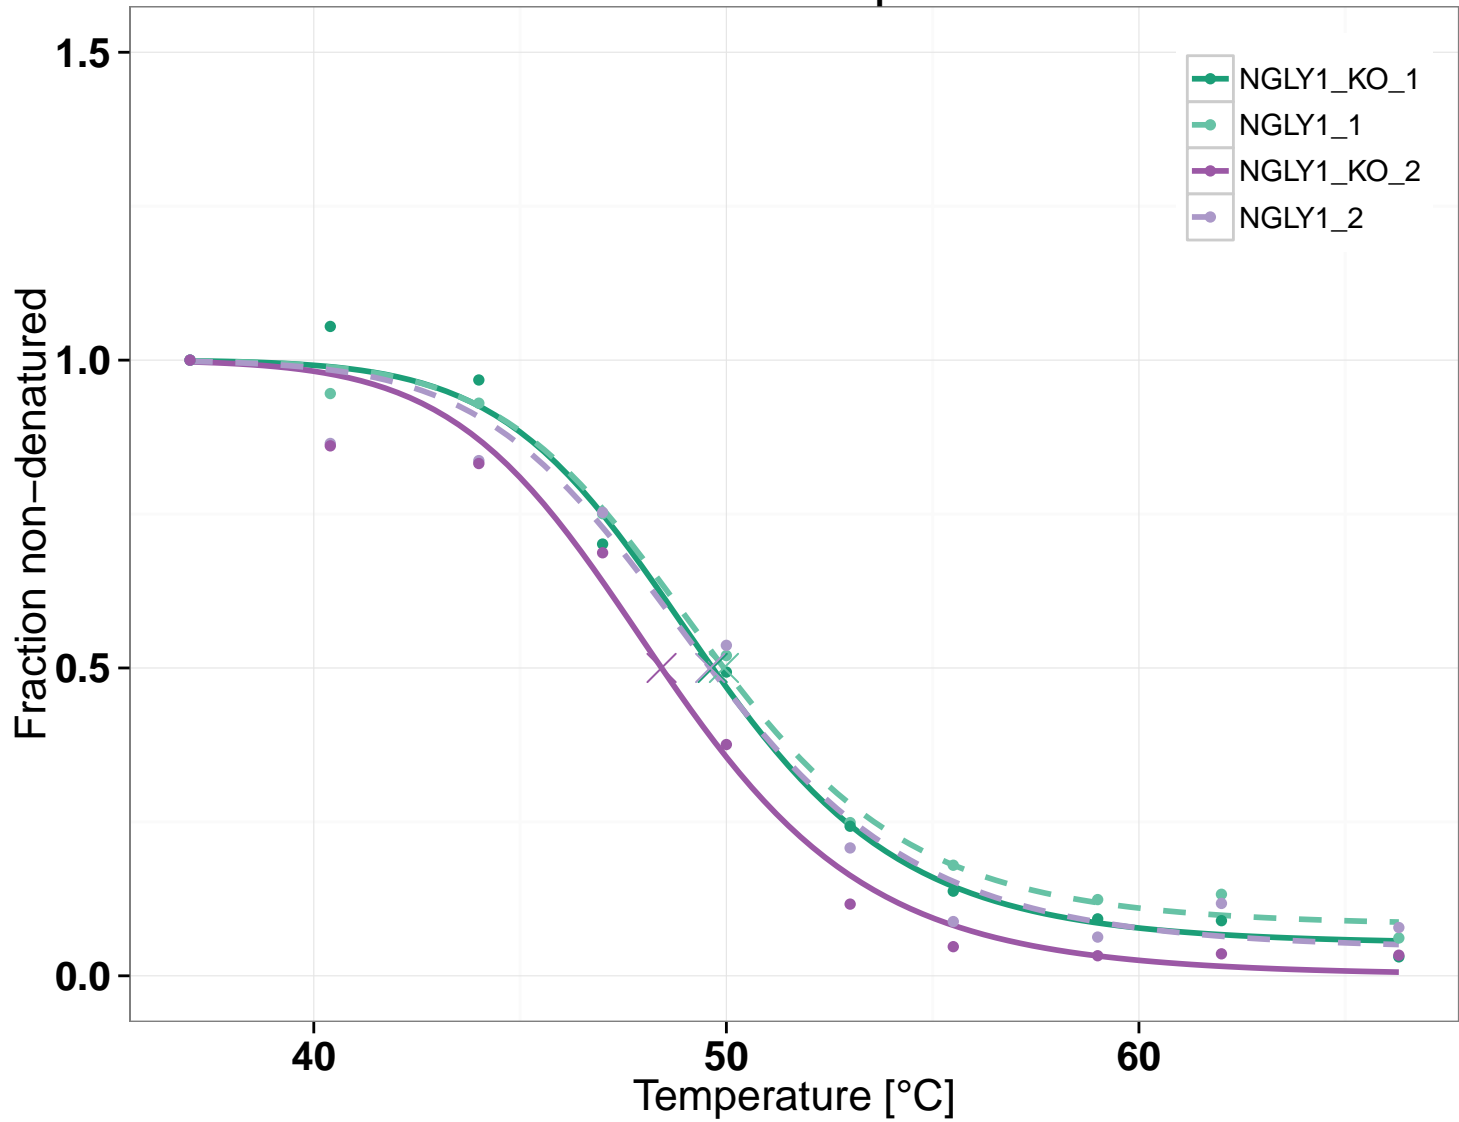

|            | meltPoint | slope  | plateau | R2   |
|------------|-----------|--------|---------|------|
| NGLY1_KO_1 | 49.67     | -0.097 | 0.05    | 0.99 |
| NGLY1_1    | 49.94     | -0.092 | 0.08    | 1    |
| NGLY1_KO_2 | 48.43     | -0.099 | 0       | 0.98 |
| NGLY1_2    | 49.61     | -0.09  | 0.04    | 0.97 |

Supplement: Supplementary file 5280 [file 1]

# IPI00398998.3|LIN52

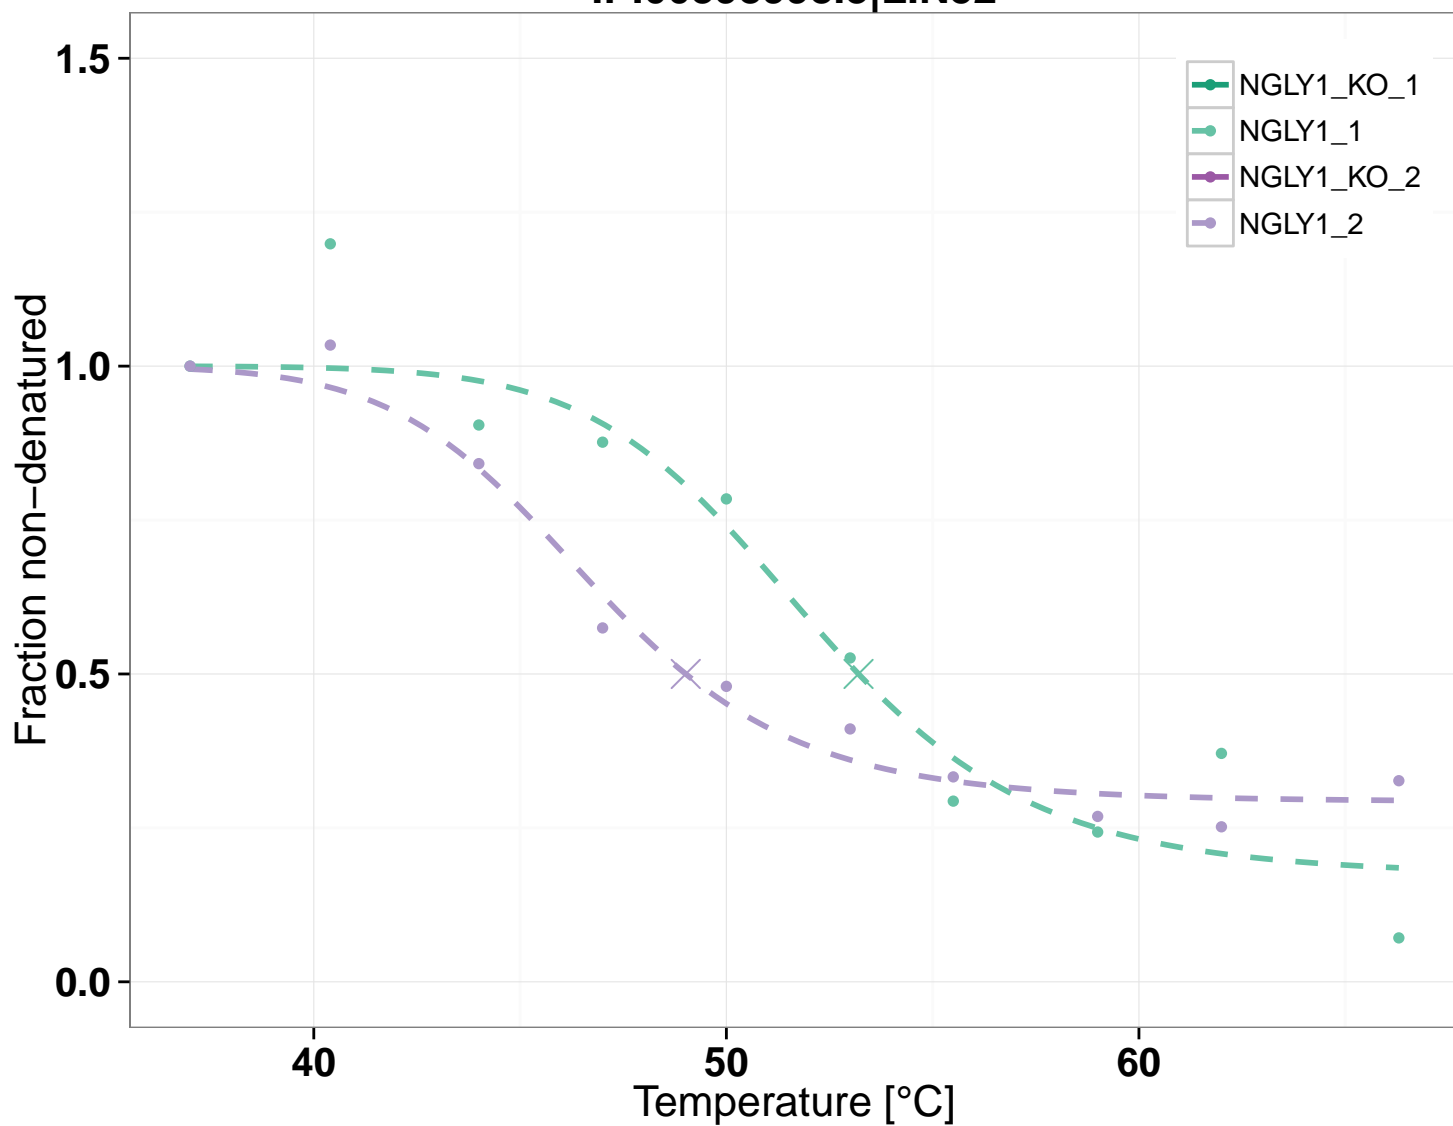

|            | meltPoint | slope  | plateau | R2   |
|------------|-----------|--------|---------|------|
| NGLY1_KO_1 | -         | -      | -       | -    |
| NGLY1_1    | 53.2      | -0.077 | 0.17    | 0.93 |
| NGLY1_KO_2 | -         | -      | -       | -    |
| NGLY1_2    | 49.02     | -0.072 | 0.29    | 0.98 |

Supplement: Supplementary file 5281 [file 1]

IPI00019922.5|ZNF444

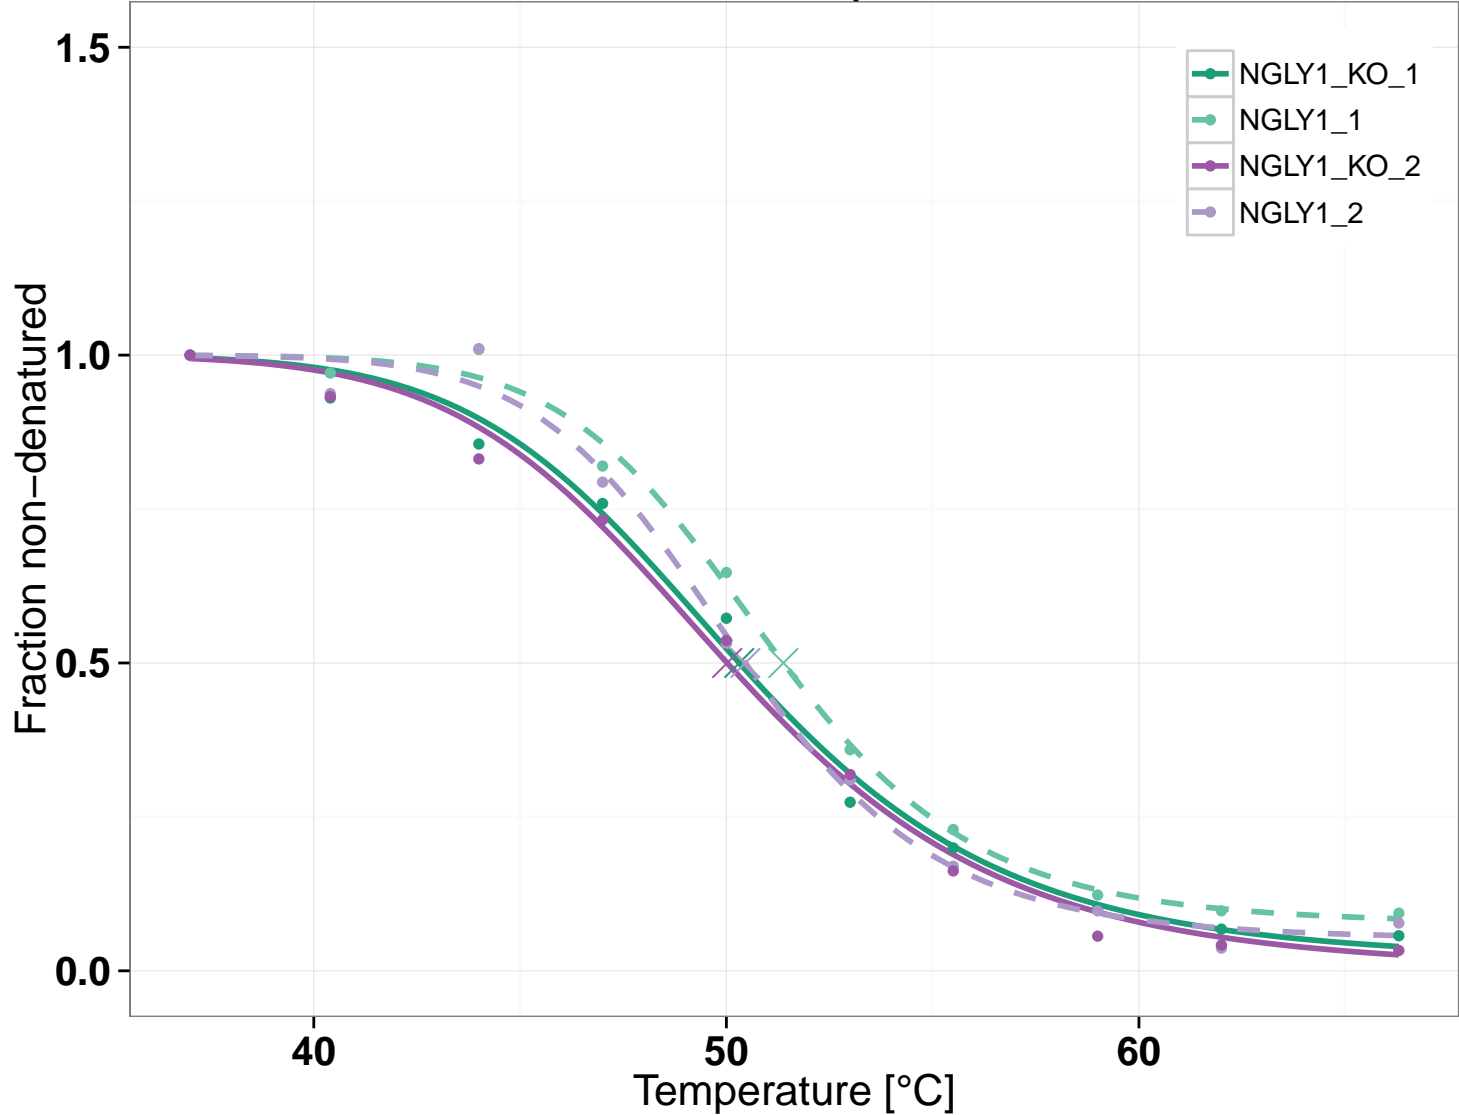

|            | meltPoint | slope  | plateau | R2   |
|------------|-----------|--------|---------|------|
| NGLY1_KO_1 | 50.31     | -0.076 | 0.02    | 0.99 |
| NGLY1_1    | 51.38     | -0.092 | 0.08    | 1    |
| NGLY1_KO_2 | 50.02     | -0.075 | 0       | 0.99 |
| NGLY1_2    | 50.46     | -0.098 | 0.05    | 0.99 |

Supplement: Supplementary file 5282 [file 1]

IPI00218571.1|PHKB

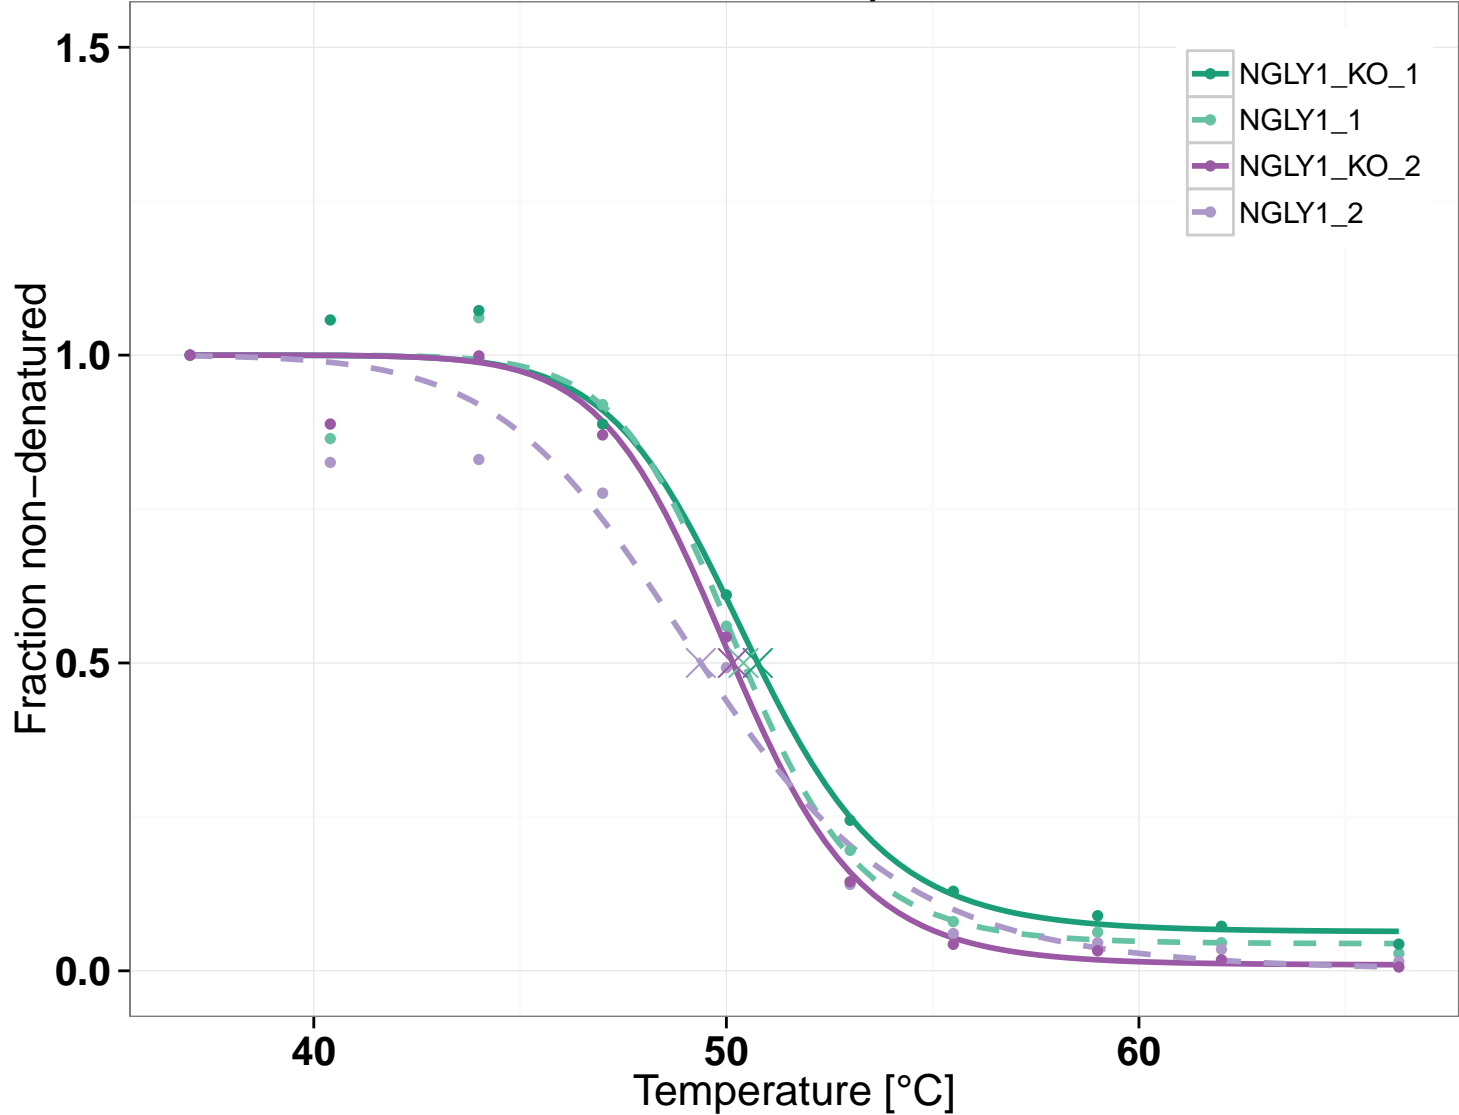

|            | meltPoint | slope | plateau | R2   |
|------------|-----------|-------|---------|------|
| NGLY1_KO_1 | 50.76     | -0.14 | 0.06    | 0.99 |
| NGLY1_1    | 50.41     | -0.16 | 0.04    | 0.99 |
| NGLY1_KO_2 | 50.16     | -0.16 | 0.01    | 0.99 |
| NGLY1_2    | 49.38     | -0.1  | 0       | 0.97 |

Supplement: Supplementary file 5283 [file 1]

IPI00741958.1|BEND3

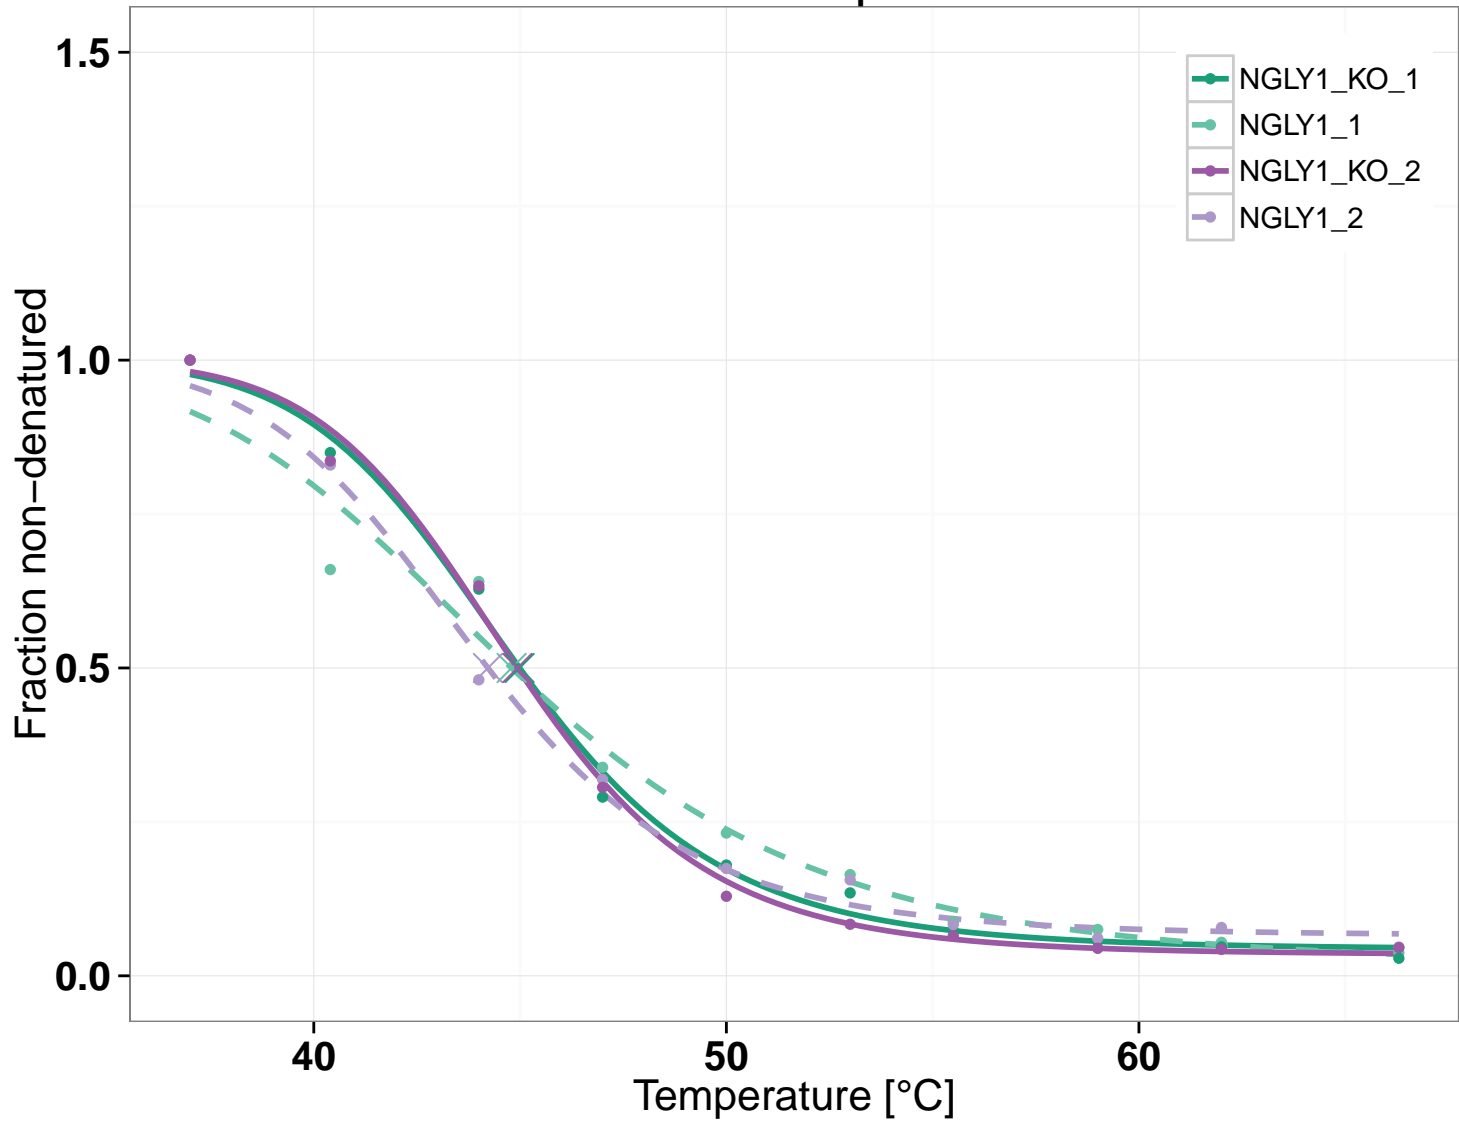

|            | meltPoint | slope  | plateau | R2   |
|------------|-----------|--------|---------|------|
| NGLY1_KO_1 | 44.99     | -0.095 | 0.04    | 1    |
| NGLY1_1    | 44.8      | -0.065 | 0.01    | 0.97 |
| NGLY1_KO_2 | 44.94     | -0.1   | 0.03    | 1    |
| NGLY1_2    | 44.22     | -0.09  | 0.06    | 0.99 |

Supplement: Supplementary file 5284 [file 1]

# IPI00218992.4|BRCC3

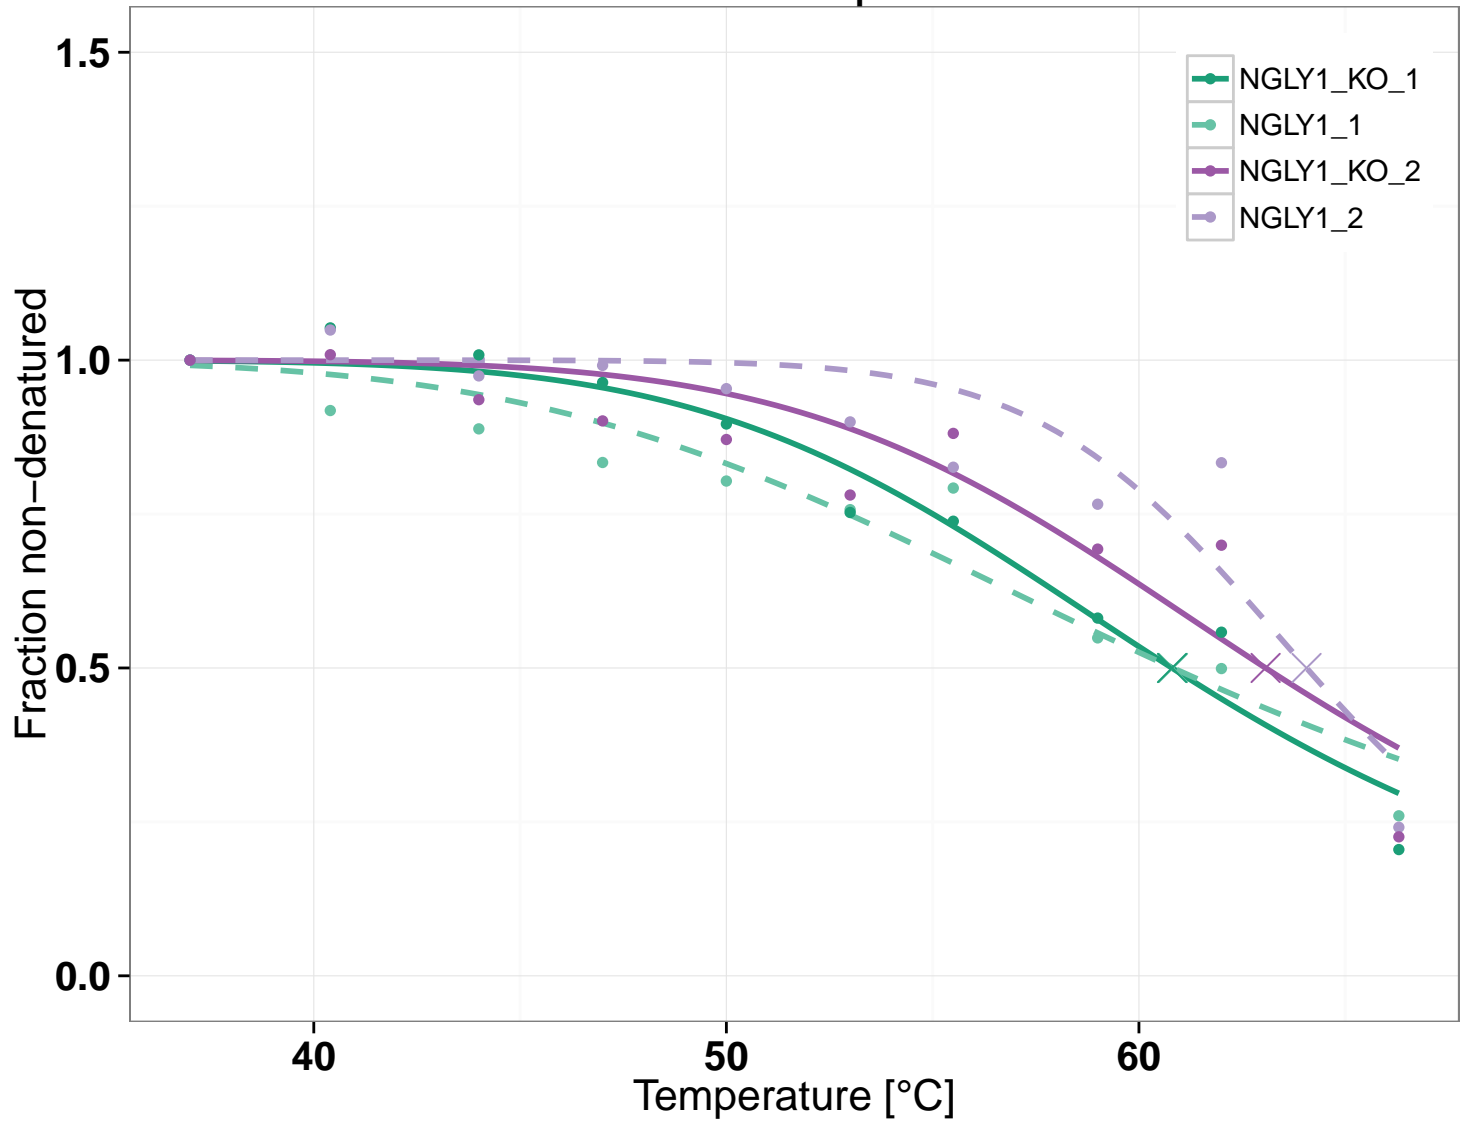

|            | meltPoint | slope  | plateau | R2   |
|------------|-----------|--------|---------|------|
| NGLY1_KO_1 | 60.8      | -0.044 | 0       | 0.95 |
| NGLY1_1    | 60.83     | -0.033 | 0       | 0.92 |
| NGLY1_KO_2 | 63.07     | -0.045 | 0       | 0.84 |
| NGLY1_2    | 64.06     | -0.077 | 0       | 0.85 |

Supplement: Supplementary file 5285 [file 1]

IPI00027180.1|ZMPSTE24

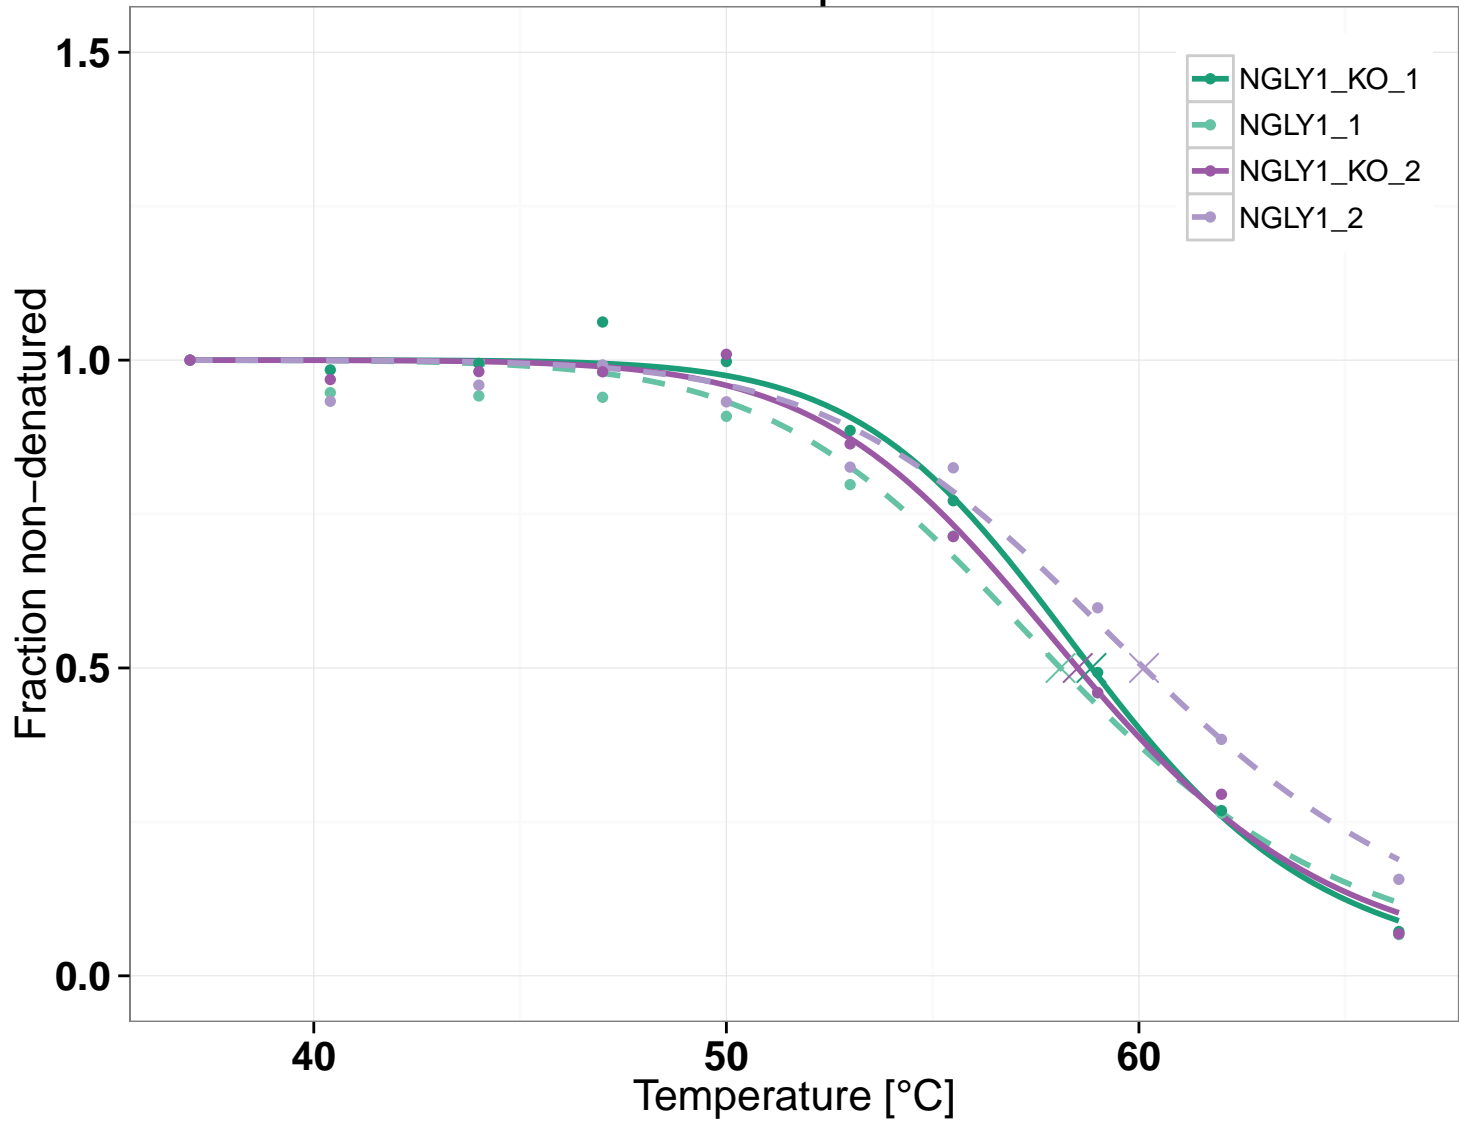

|            | meltPoint | slope  | plateau | R2   |
|------------|-----------|--------|---------|------|
| NGLY1_KO_1 | 58.85     | -0.089 | 0       | 0.99 |
| NGLY1_1    | 58.1      | -0.071 | 0       | 0.99 |
| NGLY1_KO_2 | 58.52     | -0.08  | 0       | 0.99 |
| NGLY1_2    | 60.12     | -0.066 | 0       | 0.98 |

Supplement: Supplementary file 5286 [file 1]

IPI00900332.1|A2LD1

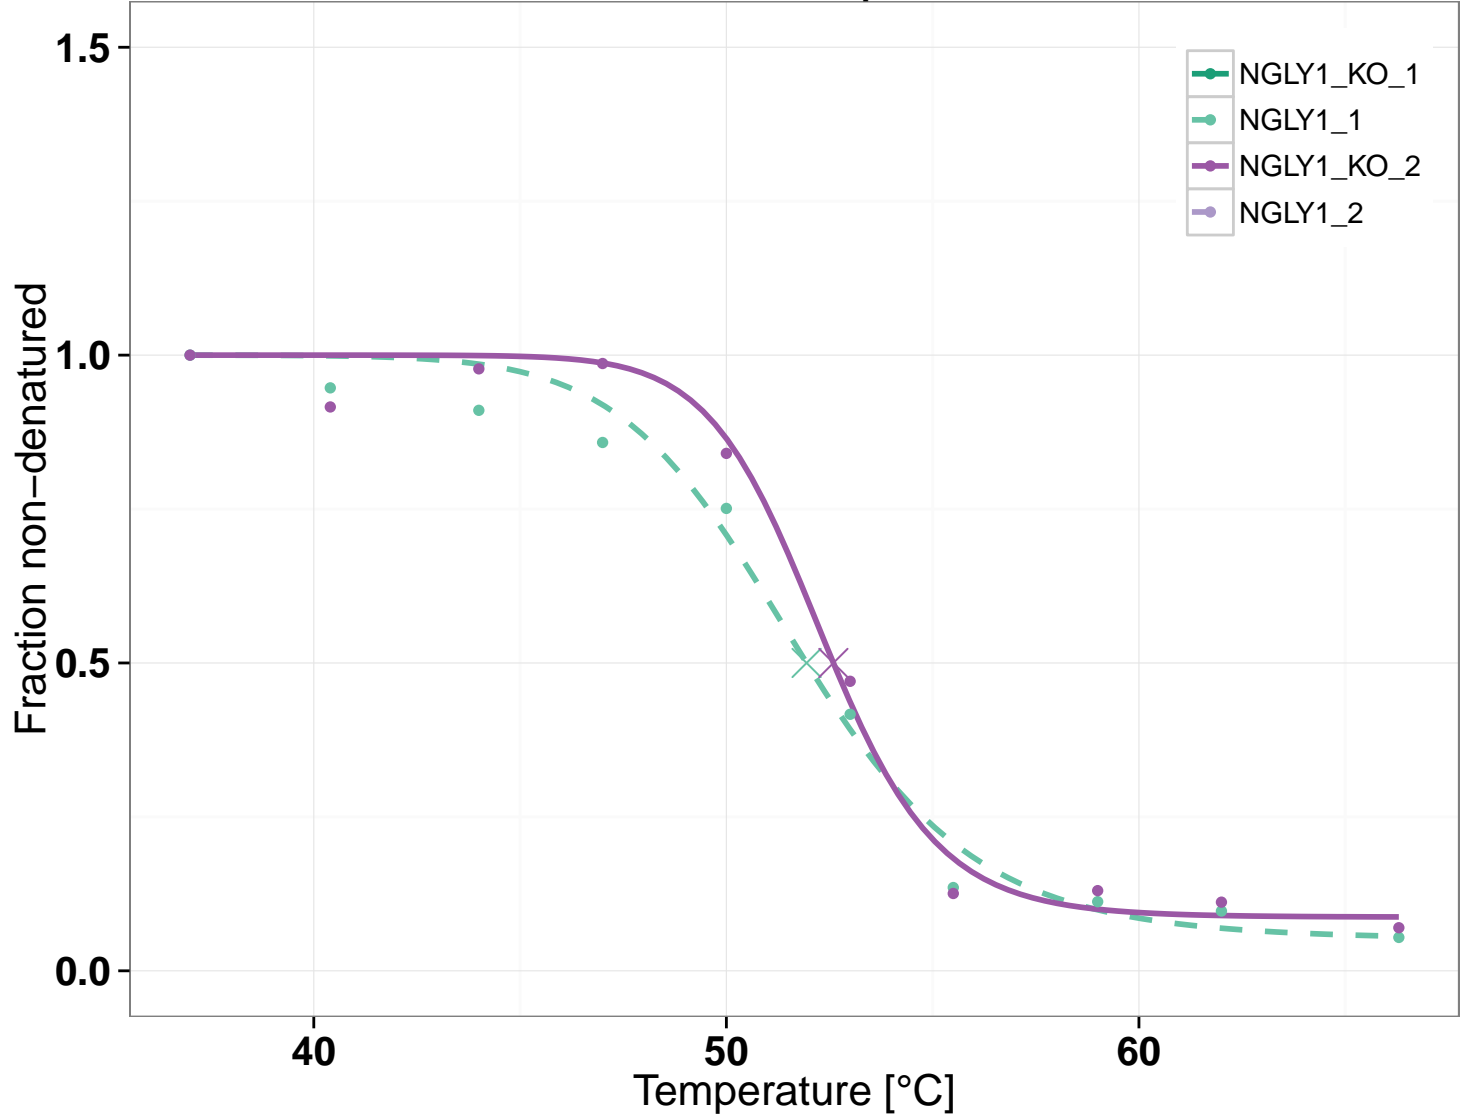

|            | meltPoint | slope | plateau | R2   |
|------------|-----------|-------|---------|------|
| NGLY1_KO_1 | -         | -     | -       | -    |
| NGLY1_1    | 51.94     | -0.11 | 0.05    | 0.99 |
| NGLY1_KO_2 | 52.59     | -0.16 | 0.09    | 0.99 |
| NGLY1_2    | -         | -     | -       | -    |

Supplement: Supplementary file 5287 [file 1]

# IPI00747849.2|ATP1B1

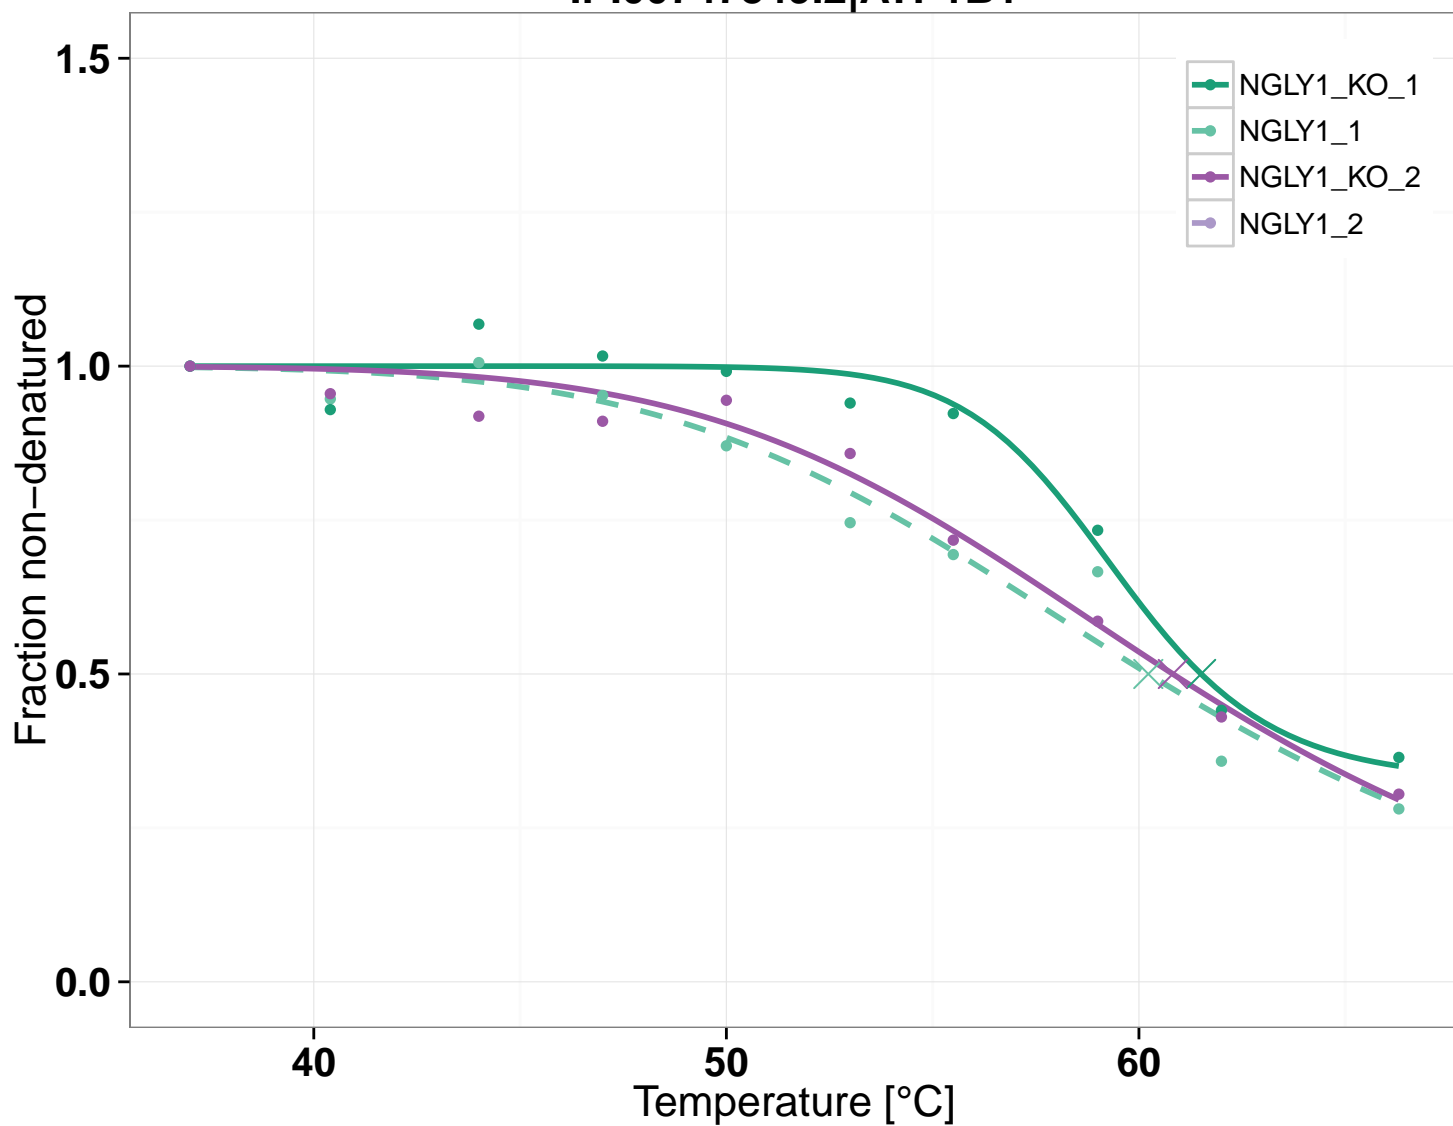

|            | meltPoint | slope  | plateau | R2   |
|------------|-----------|--------|---------|------|
| NGLY1_KO_1 | 61.51     | -0.091 | 0.33    | 0.97 |
| NGLY1_1    | 60.23     | -0.043 | 0       | 0.96 |
| NGLY1_KO_2 | 60.82     | -0.045 | 0       | 0.98 |
| NGLY1_2    | -         | -      | -       | -    |

Supplement: Supplementary file 5288 [file 1]

# IPI00384857.3|HN1

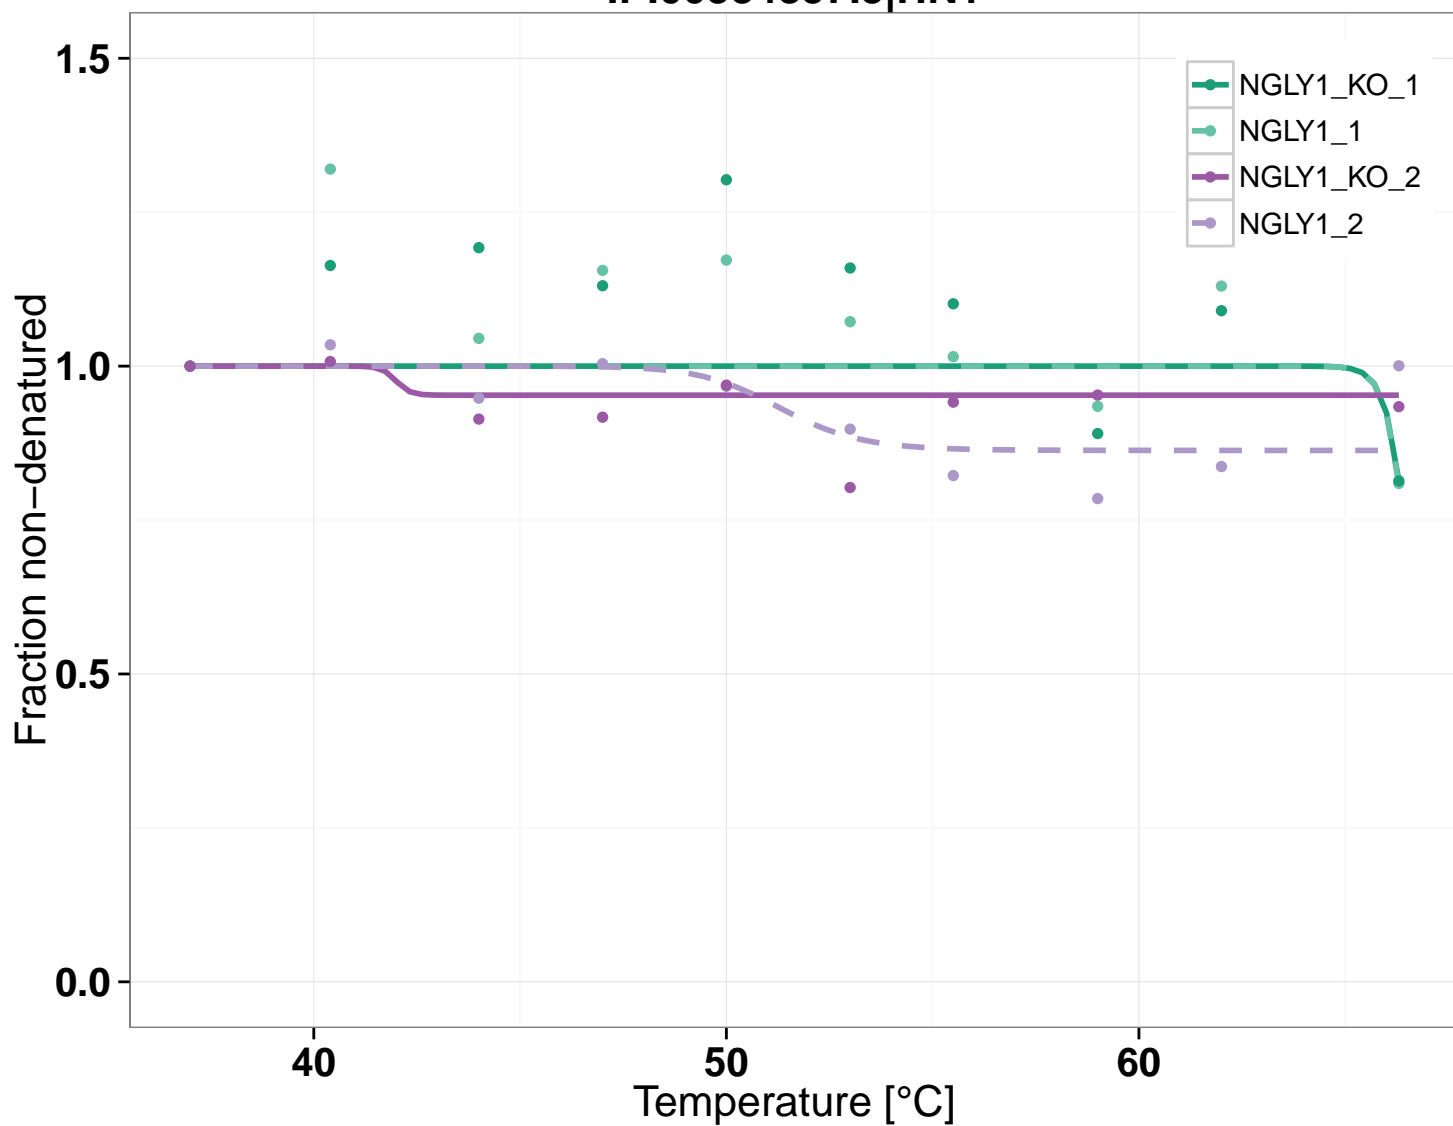

|            | meltPoint | slope  | plateau | R2    |
|------------|-----------|--------|---------|-------|
| NGLY1_KO_1 | -         | -      | 0       | -0.19 |
| NGLY1_1    | -         | -      | 0       | -0.04 |
| NGLY1_KO_2 | -         | -0.07  | 0.95    | 0.05  |
| NGLY1_2    | -         | -0.035 | 0.86    | 0.55  |

Supplement: Supplementary file 5289 [file 1]

# IPI00177578.2|CD99L2

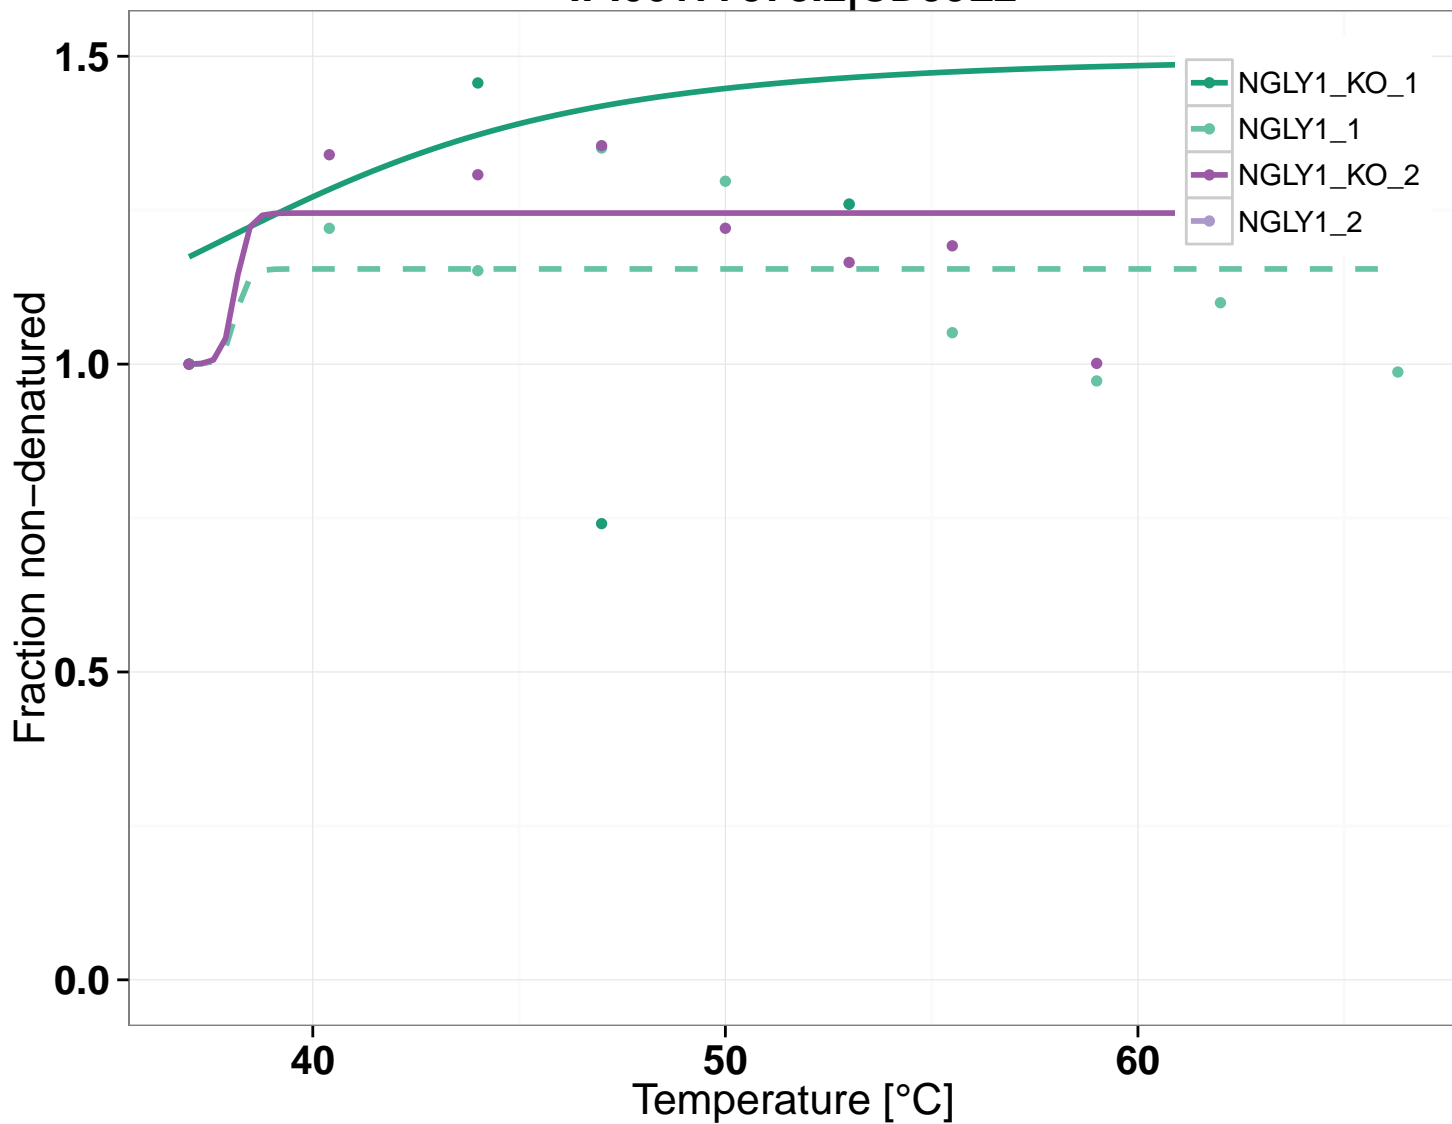

|            | meltPoint | slope | plateau | R2   |
|------------|-----------|-------|---------|------|
| NGLY1_KO_1 | —         | 0.033 | 1.5     | 0.16 |
| NGLY1_1    | —         | 0.25  | 1.15    | 0.13 |
| NGLY1_KO_2 | —         | 0.4   | 1.25    | 0.31 |
| NGLY1_2    | —         | —     | —       | —    |

Supplement: Supplementary file 5290 [file 1]

# IPI00439194.1|MBD3

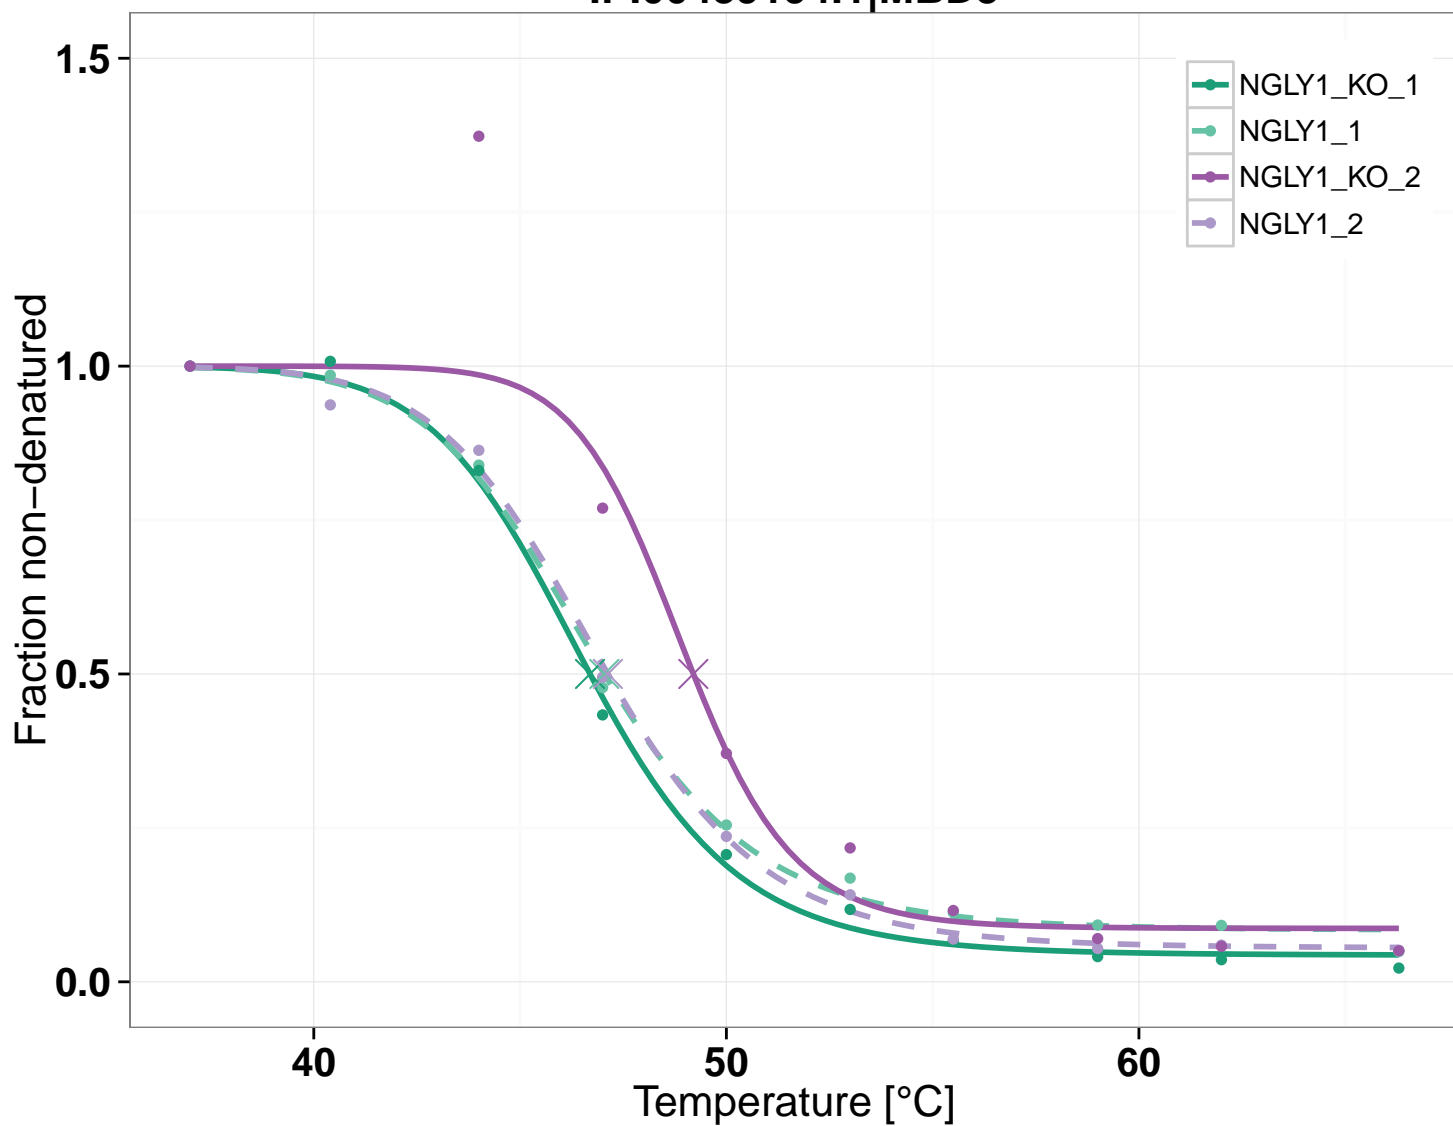

|            | meltPoint | slope | plateau | R2   |
|------------|-----------|-------|---------|------|
| NGLY1_KO_1 | 46.69     | -0.13 | 0.04    | 1    |
| NGLY1_1    | 47.04     | -0.11 | 0.08    | 1    |
| NGLY1_KO_2 | 49.2      | -0.17 | 0.09    | 0.79 |
| NGLY1_2    | 47.13     | -0.12 | 0.05    | 1    |

Supplement: Supplementary file 5291 [file 1]

IPI00009464.1|EXOSC10

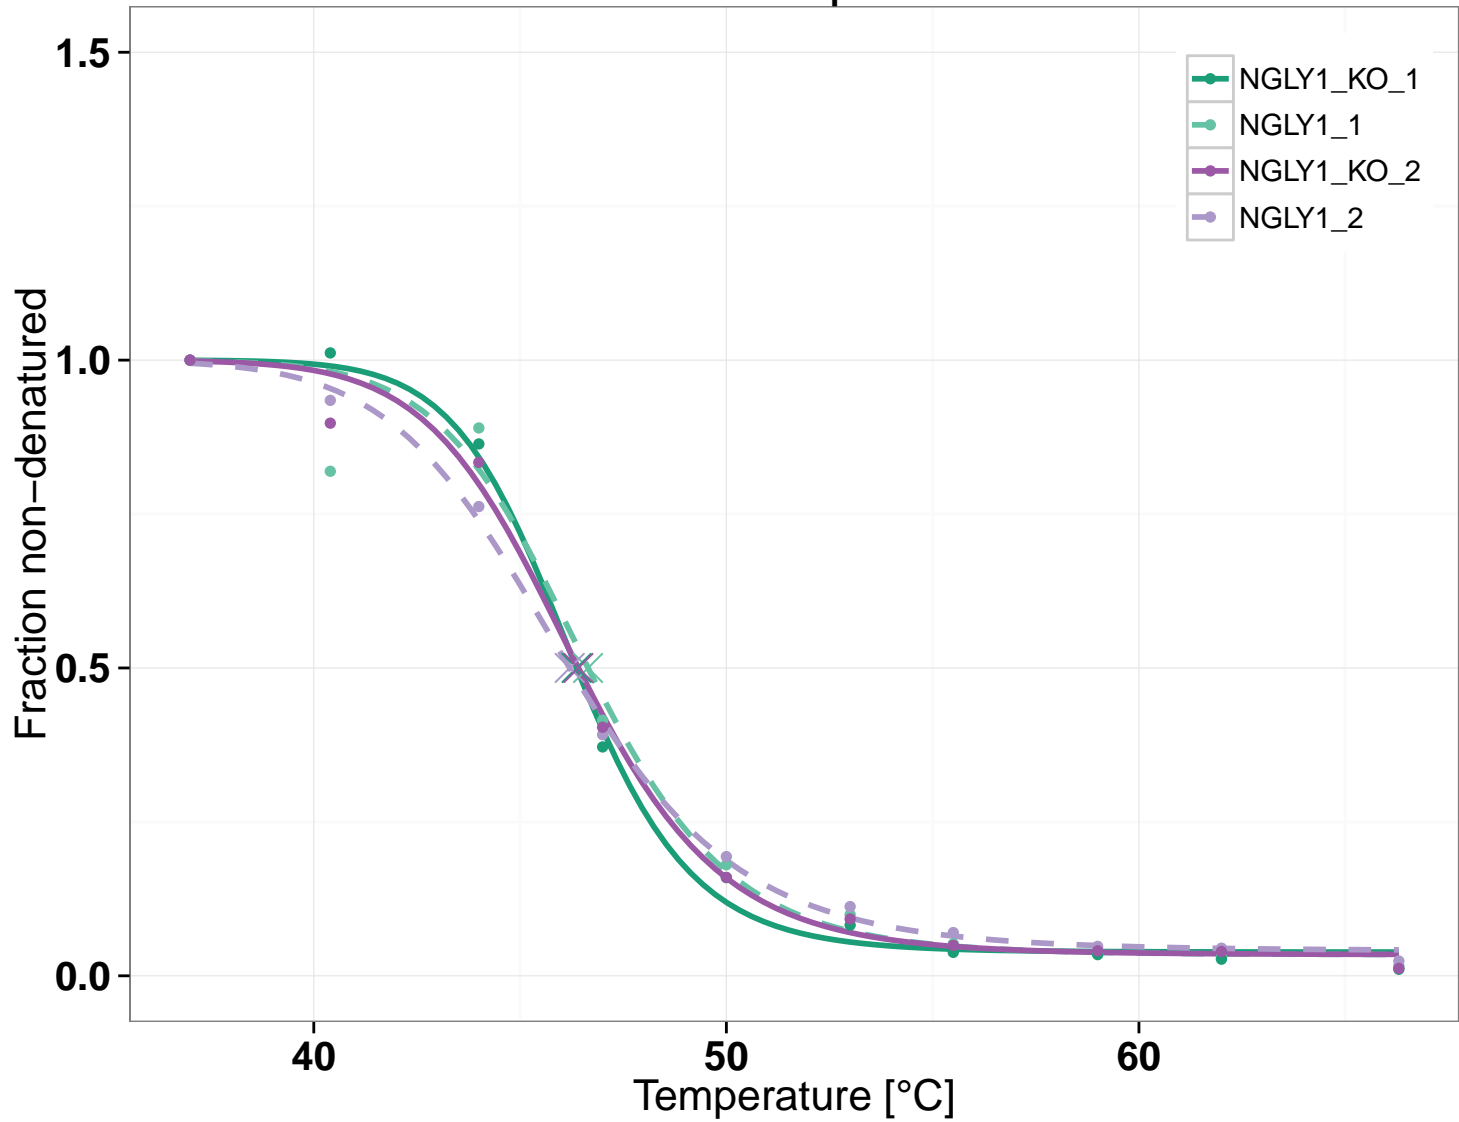

|            | meltPoint | slope | plateau | R2   |
|------------|-----------|-------|---------|------|
| NGLY1_KO_1 | 46.37     | -0.17 | 0.04    | 1    |
| NGLY1_1    | 46.65     | -0.14 | 0.03    | 0.98 |
| NGLY1_KO_2 | 46.41     | -0.13 | 0.03    | 0.99 |
| NGLY1_2    | 46.2      | -0.11 | 0.04    | 1    |

Supplement: Supplementary file 5292 [file 1]

# IPI00470610.4|PYCR2

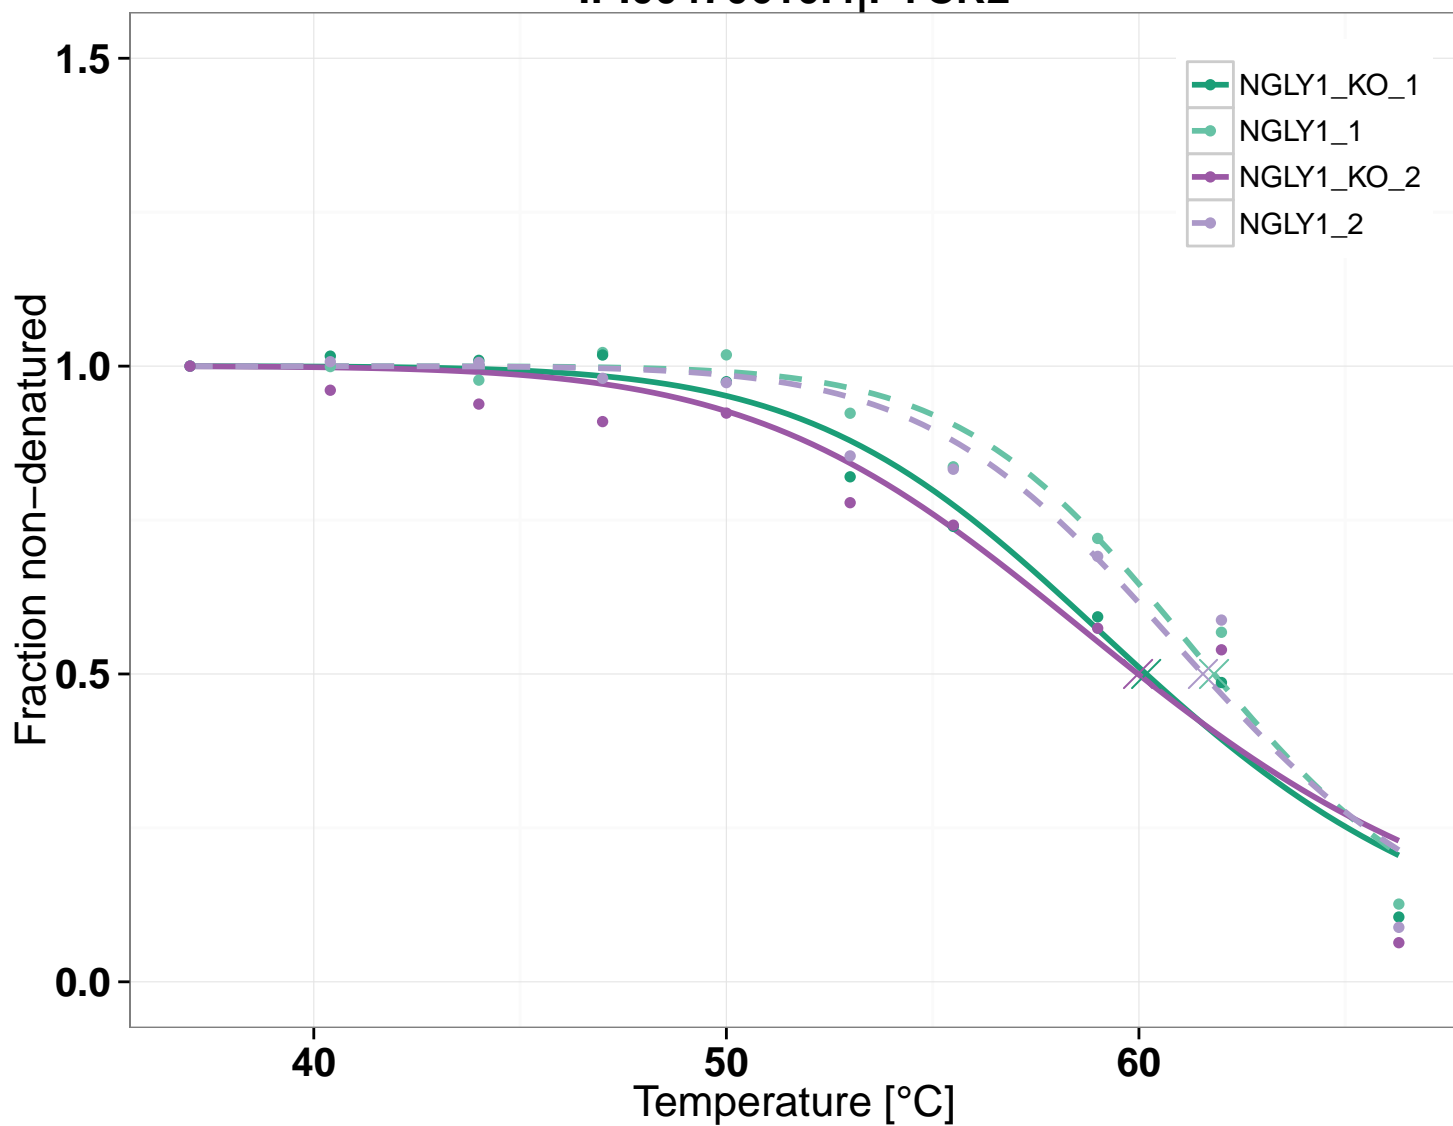

|            | meltPoint | slope  | plateau | R2   |
|------------|-----------|--------|---------|------|
| NGLY1_KO_1 | 60.18     | -0.062 | 0       | 0.97 |
| NGLY1_1    | 61.82     | -0.081 | 0       | 0.97 |
| NGLY1_KO_2 | 59.98     | -0.054 | 0       | 0.92 |
| NGLY1_2    | 61.55     | -0.075 | 0       | 0.94 |

Supplement: Supplementary file 5293 [file 1]

IPI00028366.2|SETD7

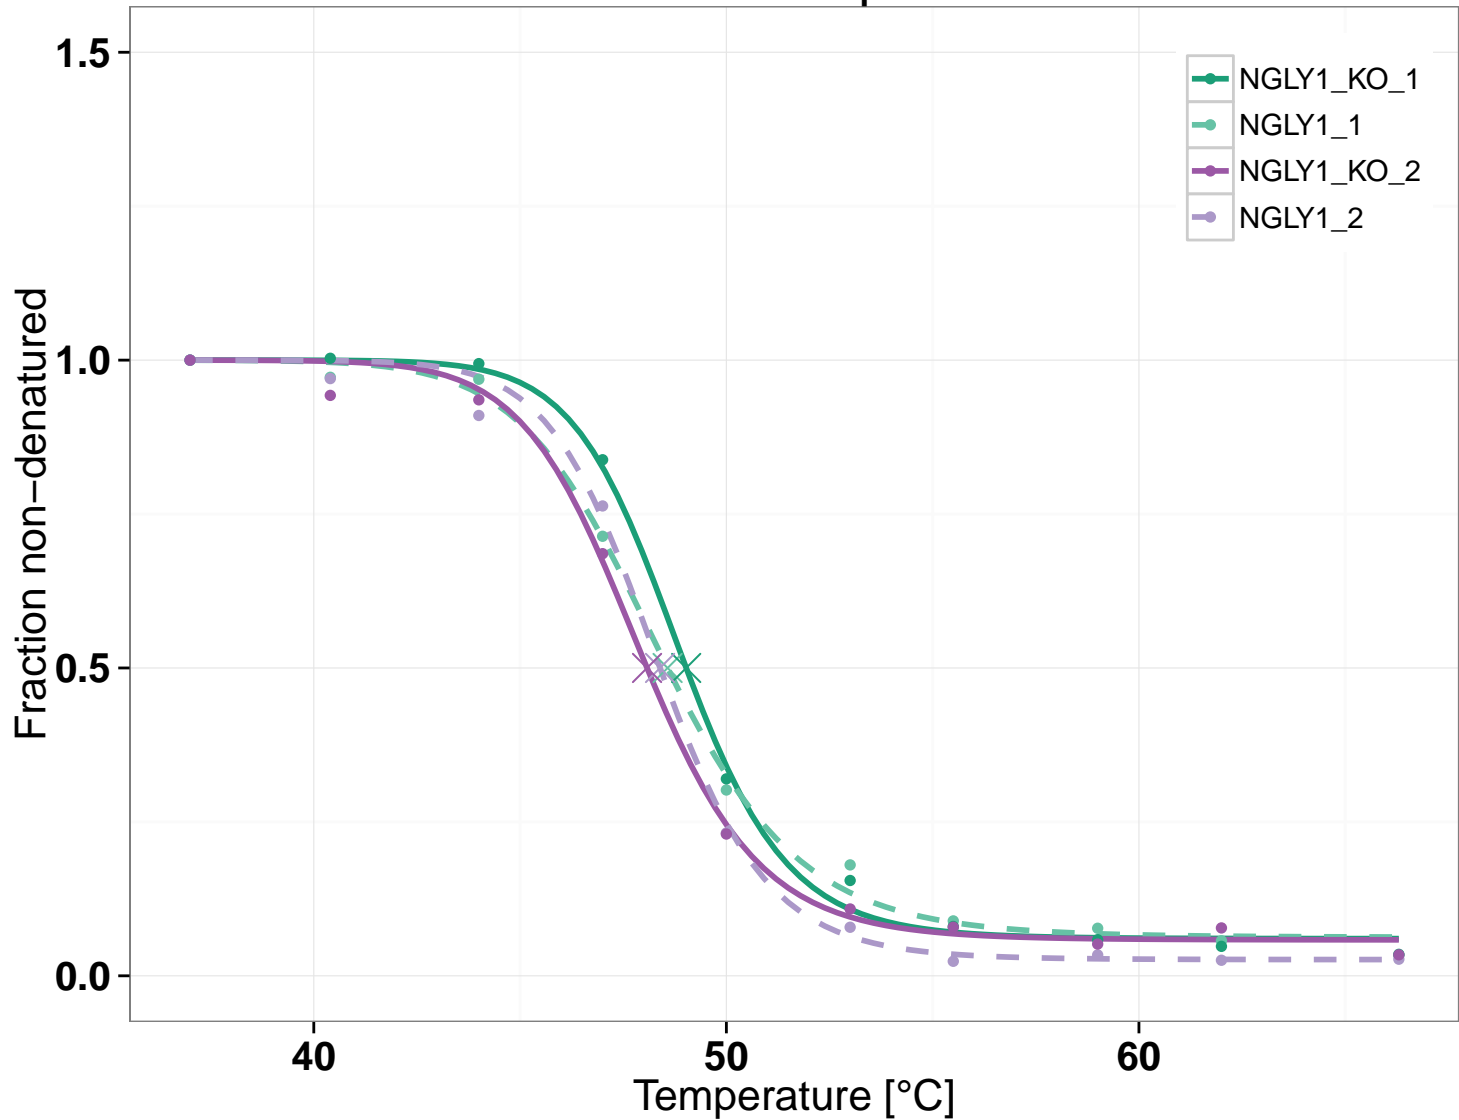

|            | meltPoint | slope | plateau | R2 |
|------------|-----------|-------|---------|----|
| NGLY1_KO_1 | 49.03     | -0.18 | 0.06    | 1  |
| NGLY1_1    | 48.58     | -0.14 | 0.06    | 1  |
| NGLY1_KO_2 | 48.08     | -0.16 | 0.06    | 1  |
| NGLY1_2    | 48.39     | -0.18 | 0.03    | 1  |

Supplement: Supplementary file 5294 [file 1]

# IPI00303699.6|ORAI1

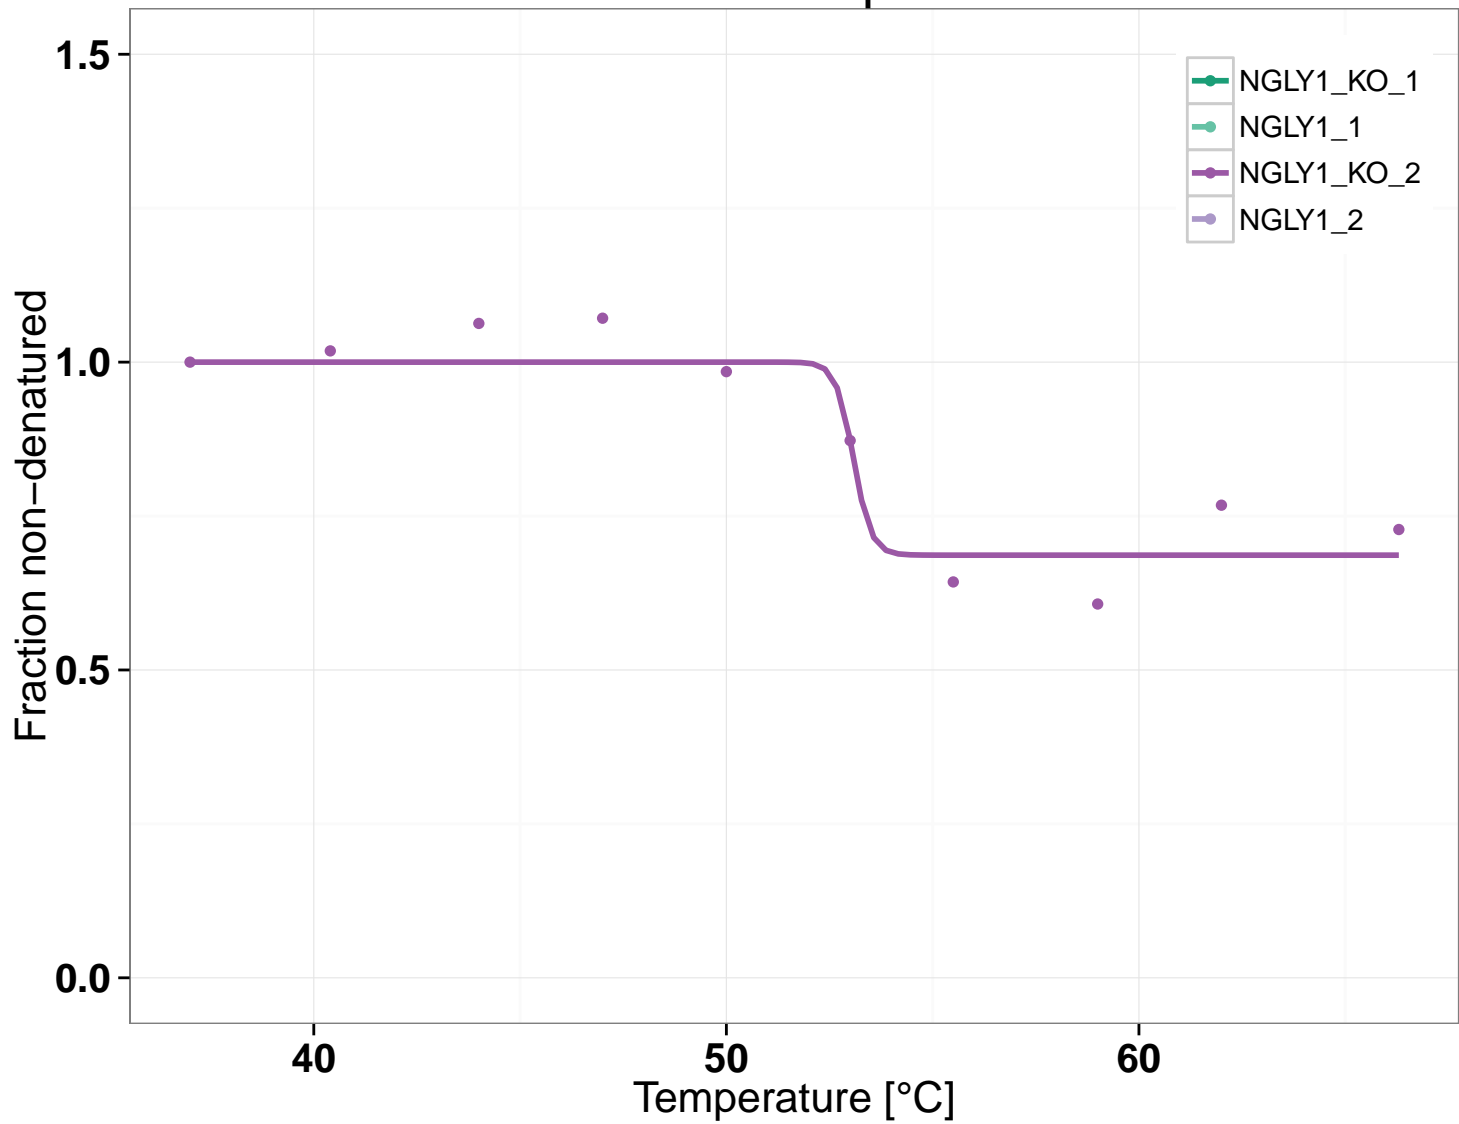

|            | meltPoint | slope | plateau | R2   |
|------------|-----------|-------|---------|------|
| NGLY1_KO_1 | —         | —     | —       | —    |
| NGLY1_1    | —         | —     | —       | —    |
| NGLY1_KO_2 | —         | -0.37 | 0.69    | 0.91 |
| NGLY1_2    | —         | —     | —       | —    |

Supplement: Supplementary file 5295 [file 1]

# IPI00646839.1|EIF3C

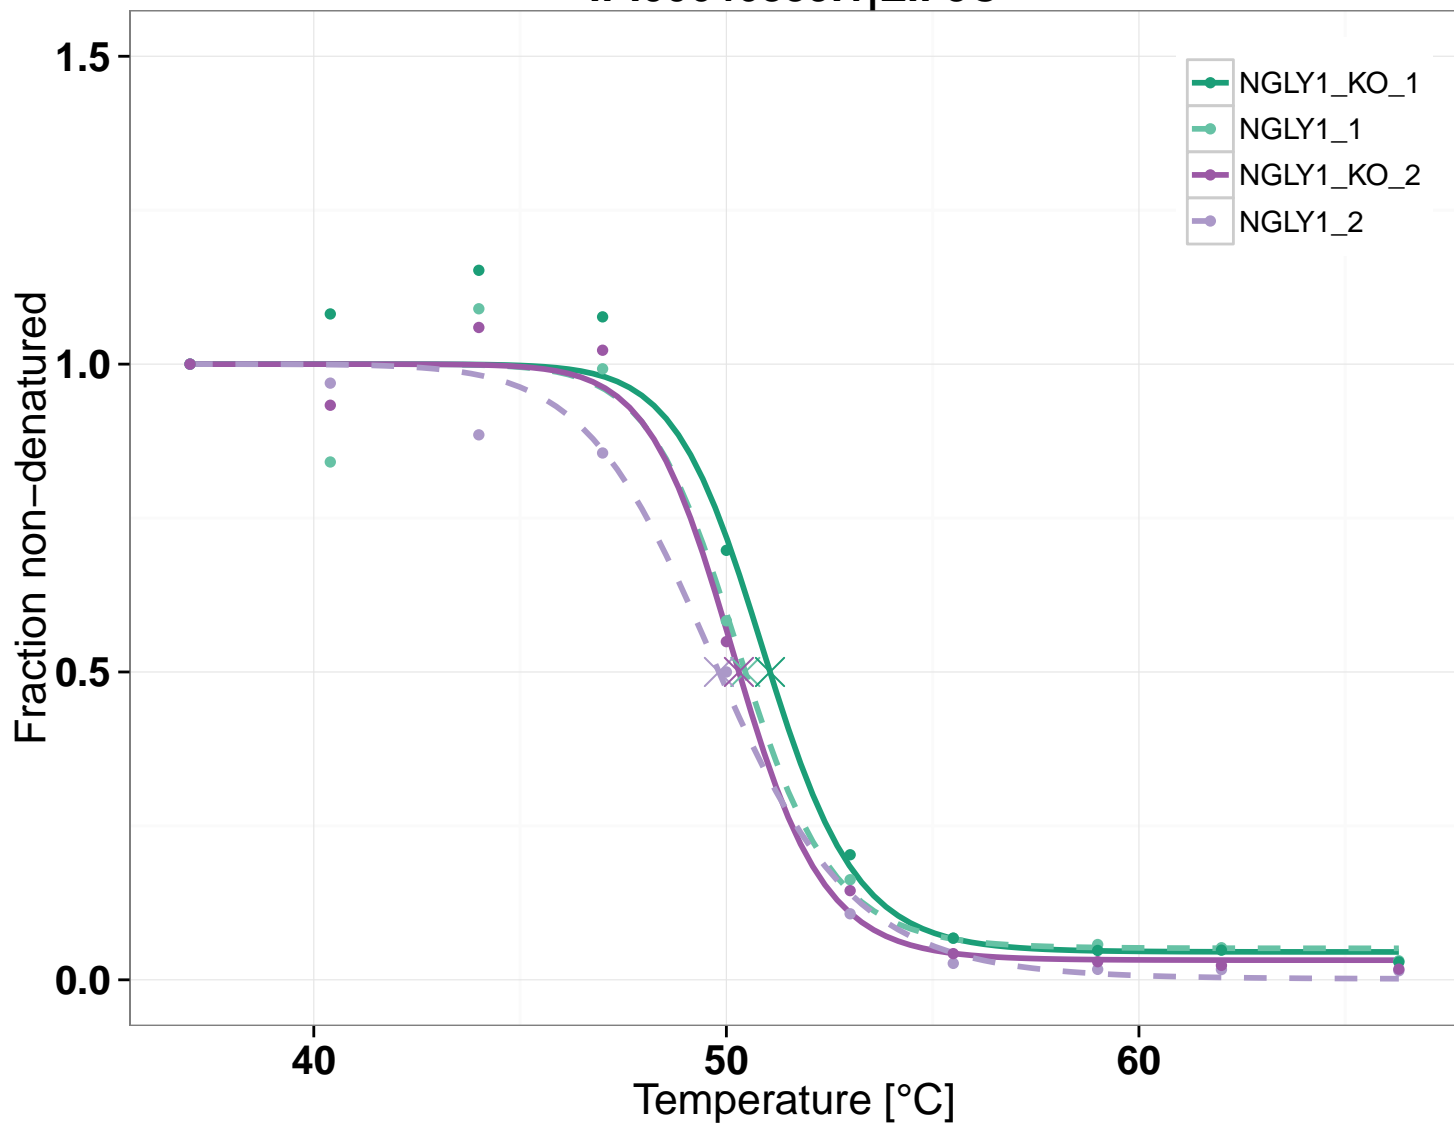

|            | meltPoint | slope | plateau | R2   |
|------------|-----------|-------|---------|------|
| NGLY1_KO_1 | 51.06     | -0.22 | 0.05    | 0.98 |
| NGLY1_1    | 50.46     | -0.21 | 0.05    | 0.98 |
| NGLY1_KO_2 | 50.3      | -0.23 | 0.03    | 0.99 |
| NGLY1_2    | 49.82     | -0.15 | 0       | 0.99 |

Supplement: Supplementary file 5296 [file 1]

# IPI00165454.5|WDR60

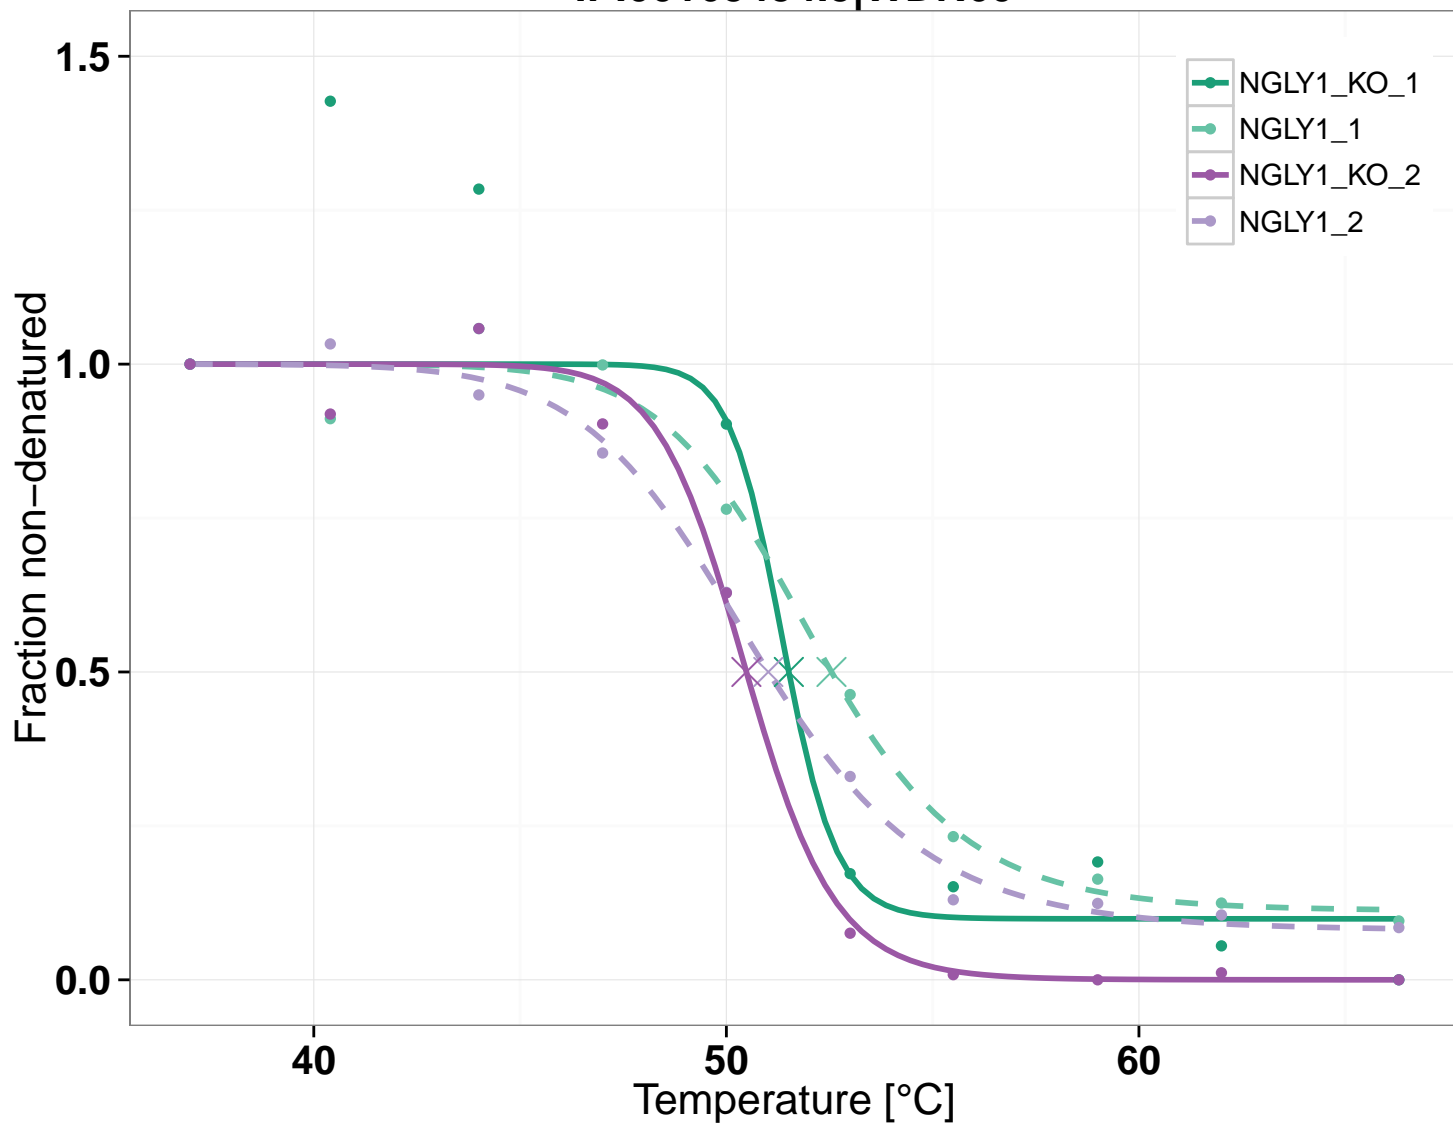

|            | meltPoint | slope | plateau | R2   |
|------------|-----------|-------|---------|------|
| NGLY1_KO_1 | 51.51     | -0.35 | 0.1     | 0.84 |
| NGLY1_1    | 52.55     | -0.12 | 0.11    | 0.99 |
| NGLY1_KO_2 | 50.49     | -0.23 | 0       | 0.99 |
| NGLY1_2    | 51.02     | -0.11 | 0.08    | 1    |

Supplement: Supplementary file 5297 [file 1]

IPI00029159.5|MRE11A

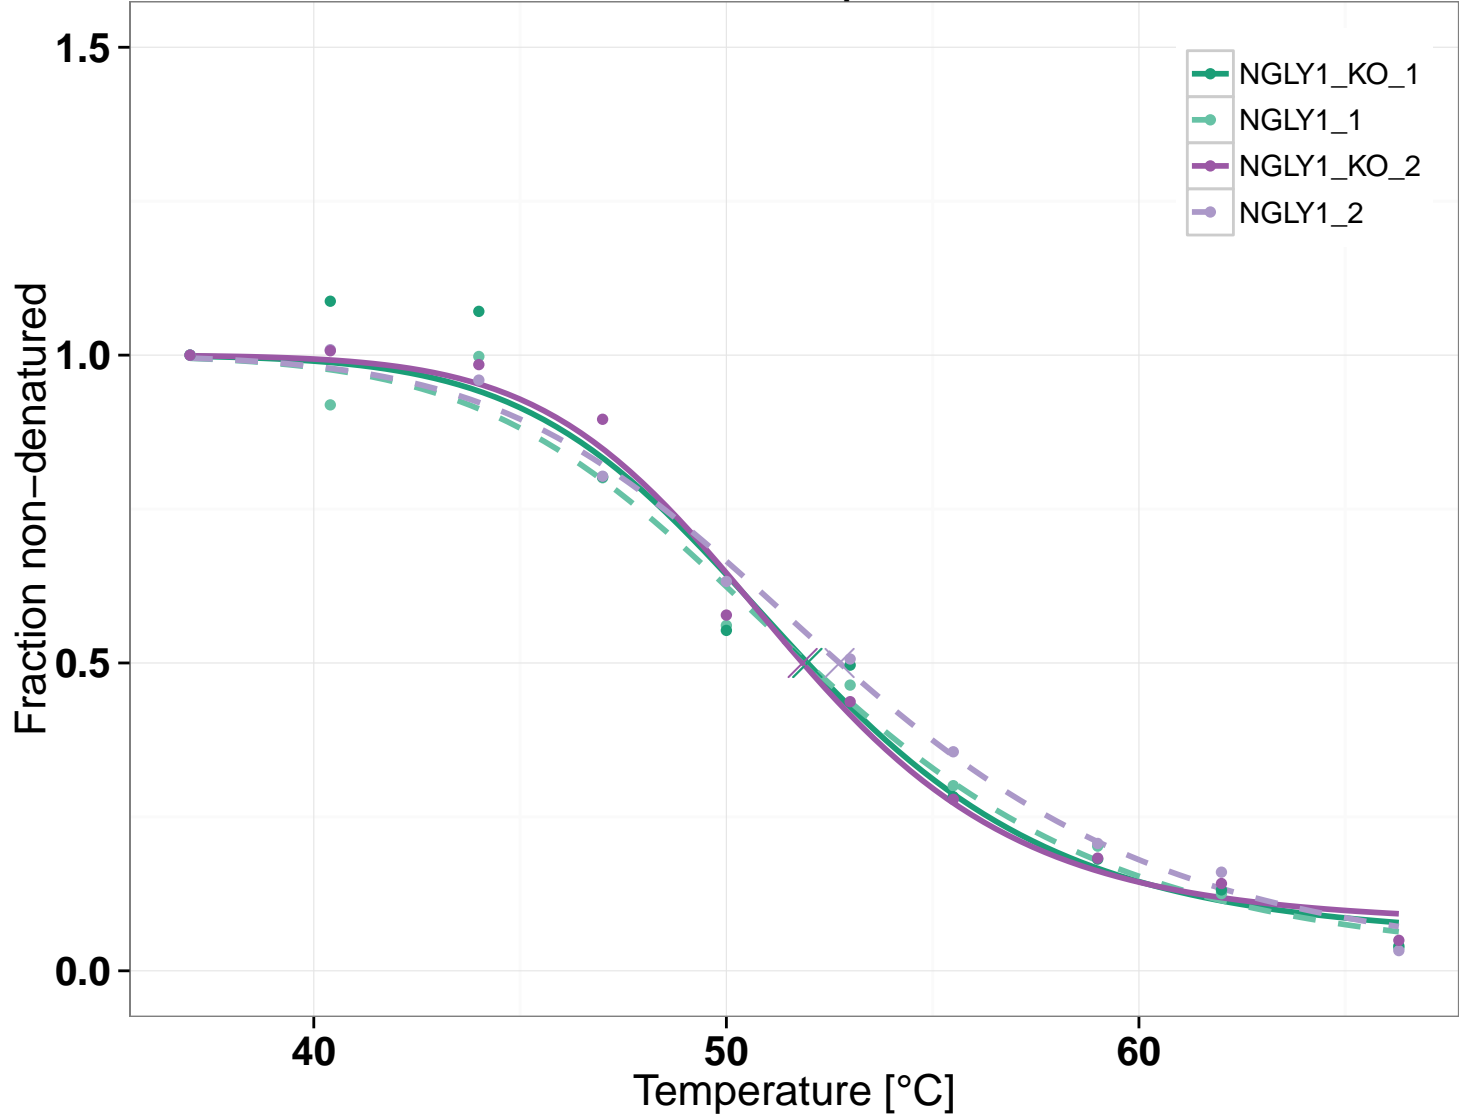

|            | meltPoint | slope  | plateau | R2   |
|------------|-----------|--------|---------|------|
| NGLY1_KO_1 | 51.97     | -0.074 | 0.05    | 0.97 |
| NGLY1_1    | 51.96     | -0.064 | 0.01    | 0.99 |
| NGLY1_KO_2 | 51.85     | -0.08  | 0.08    | 0.99 |
| NGLY1_2    | 52.74     | -0.061 | 0       | 0.99 |

Supplement: Supplementary file 5298 [file 1]

# IPI00170706.2|TMEM2

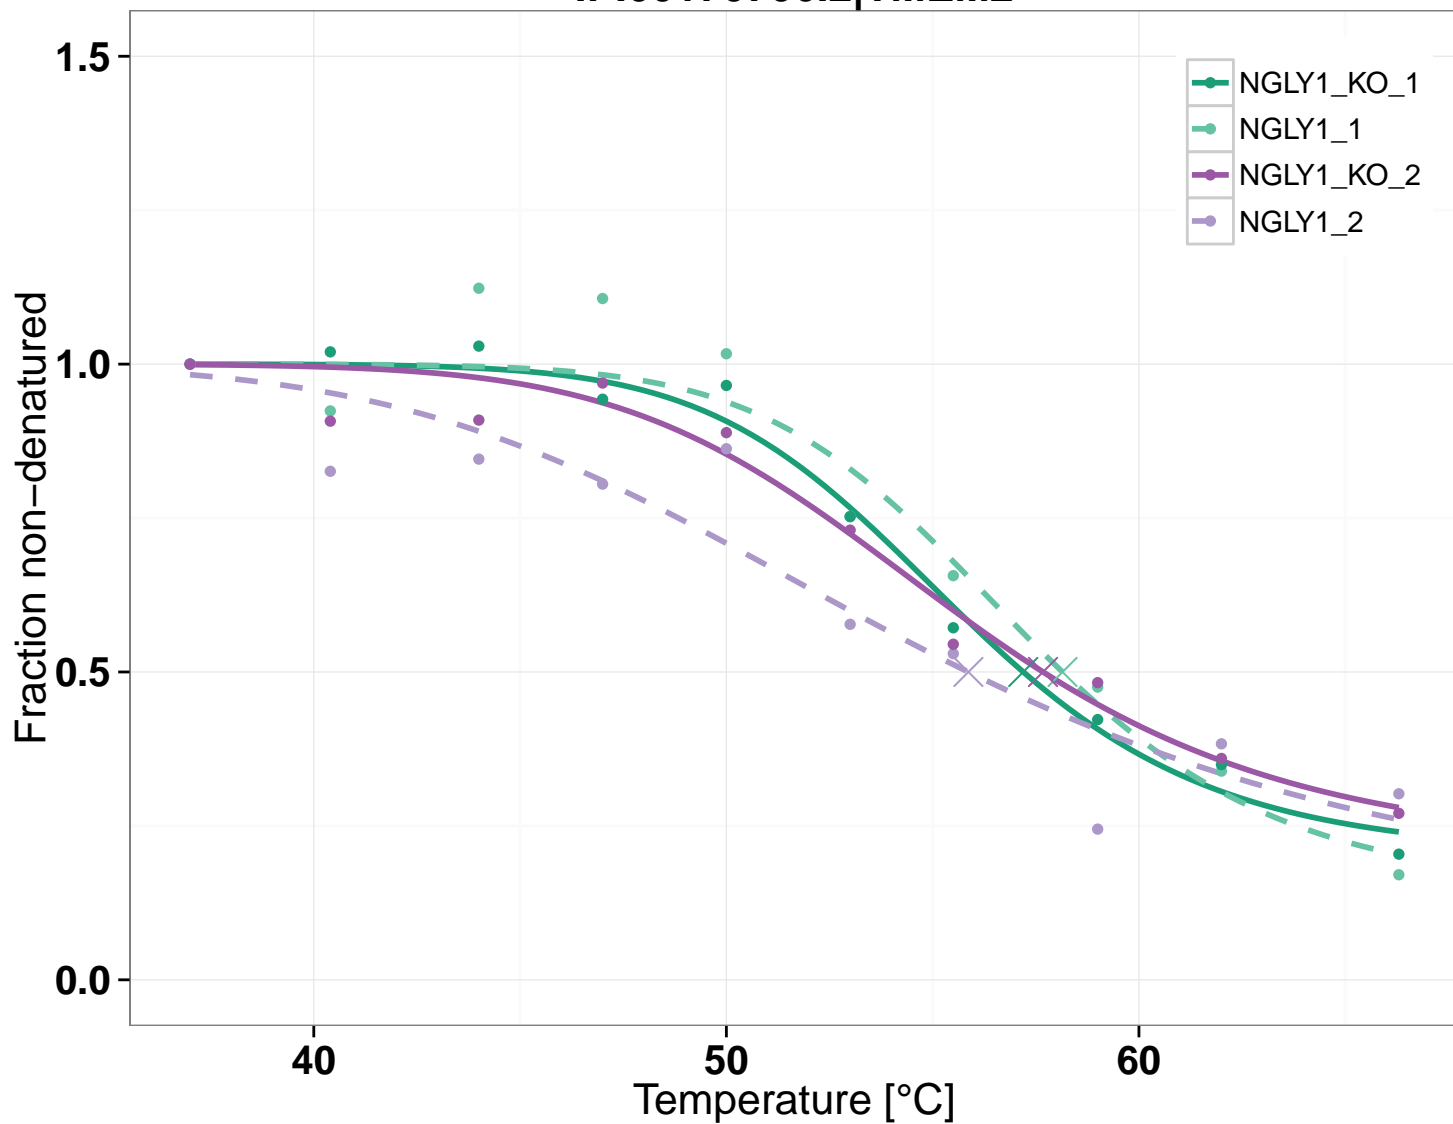

|            | meltPoint | slope  | plateau | R2   |
|------------|-----------|--------|---------|------|
| NGLY1_KO_1 | 57.2      | -0.066 | 0.2     | 0.99 |
| NGLY1_1    | 58.15     | -0.069 | 0.14    | 0.95 |
| NGLY1_KO_2 | 57.68     | -0.05  | 0.2     | 0.97 |
| NGLY1_2    | 55.87     | -0.037 | 0.09    | 0.88 |

Supplement: Supplementary file 5299 [file 1]

# IPI00329054.1|OSTM1

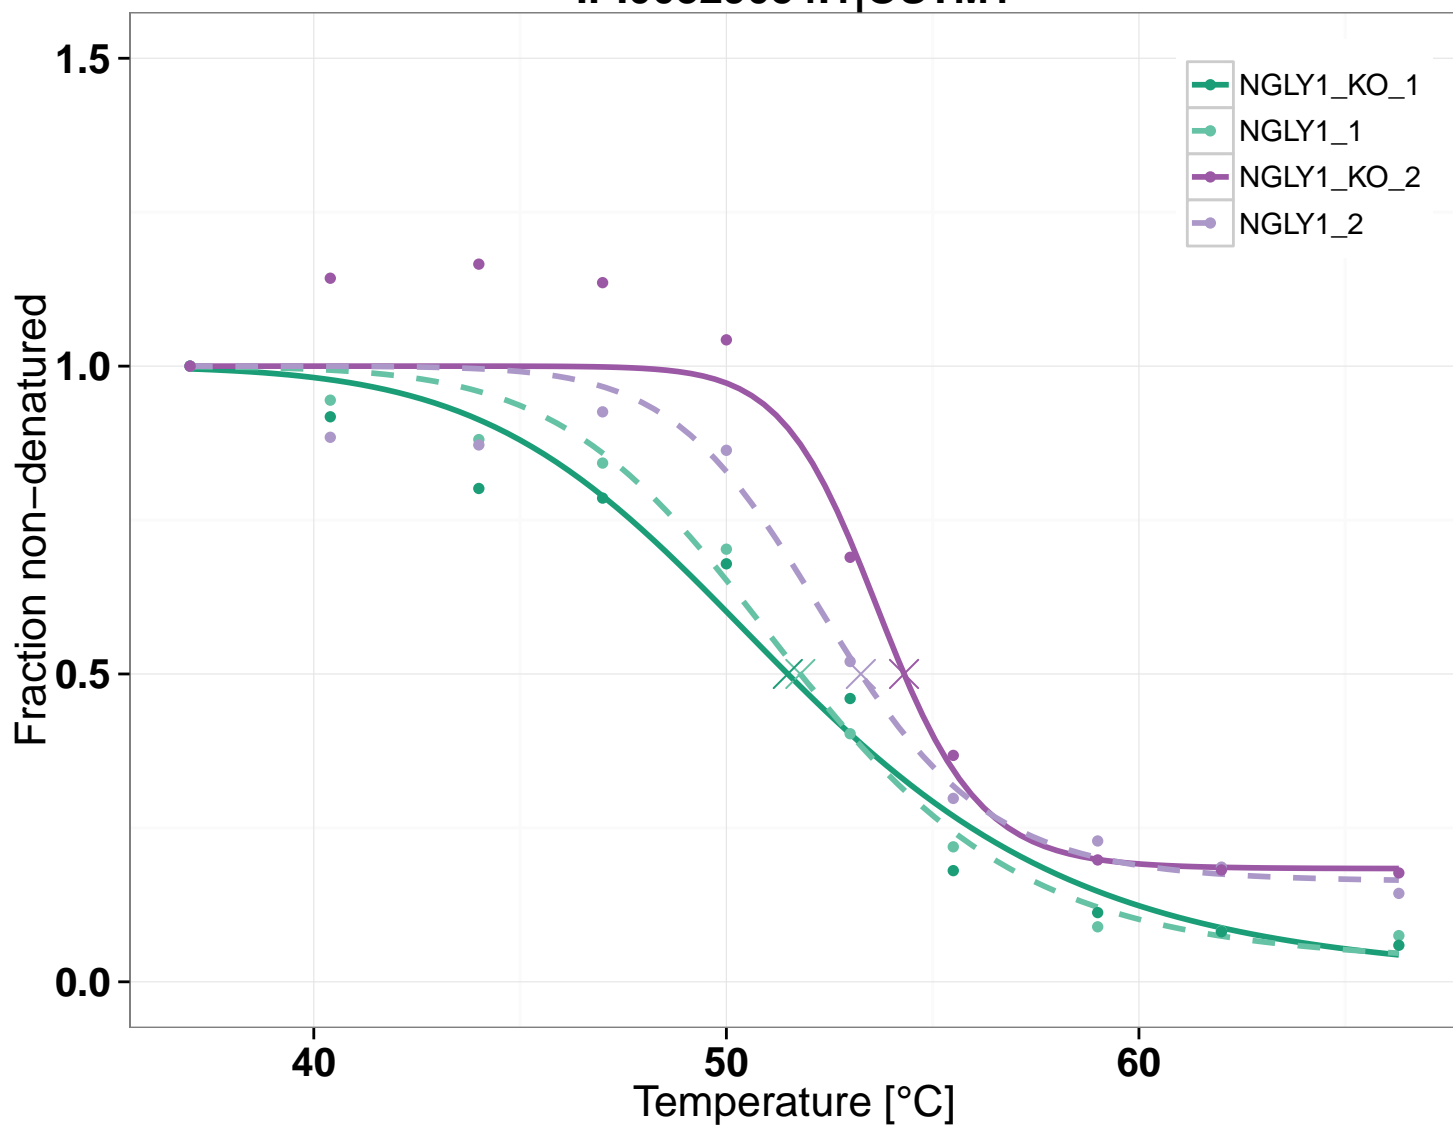

|            | meltPoint | slope  | plateau | R2   |
|------------|-----------|--------|---------|------|
| NGLY1_KO_1 | 51.49     | -0.068 | 0       | 0.97 |
| NGLY1_1    | 51.79     | -0.086 | 0.03    | 0.99 |
| NGLY1_KO_2 | 54.31     | -0.17  | 0.18    | 0.96 |
| NGLY1_2    | 53.26     | -0.11  | 0.16    | 0.97 |

Supplement: Supplementary file 5300 [file 1]

IPI00217660.3|MYST1

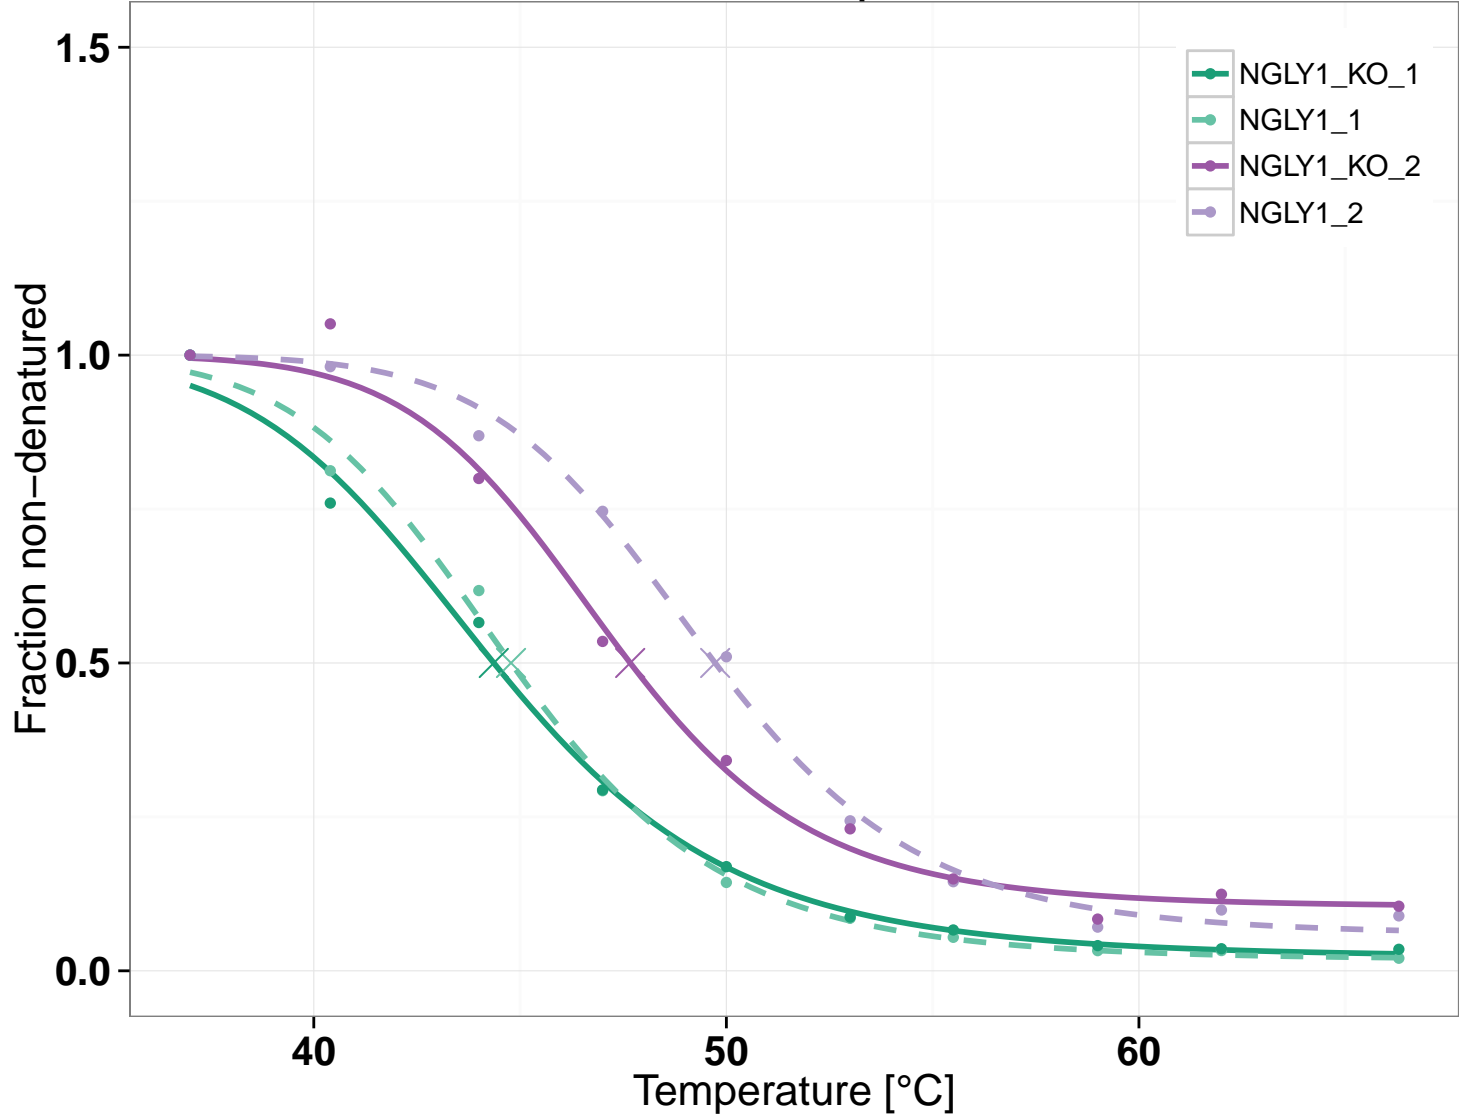

|            | meltPoint | slope  | plateau | R2   |
|------------|-----------|--------|---------|------|
| NGLY1_KO_1 | 44.36     | -0.085 | 0.02    | 0.99 |
| NGLY1_1    | 44.78     | -0.095 | 0.02    | 1    |
| NGLY1_KO_2 | 47.67     | -0.092 | 0.1     | 0.99 |
| NGLY1_2    | 49.73     | -0.091 | 0.06    | 1    |

Supplement: Supplementary file 5301 [file 1]

IPI00018330.1|NFKBIA

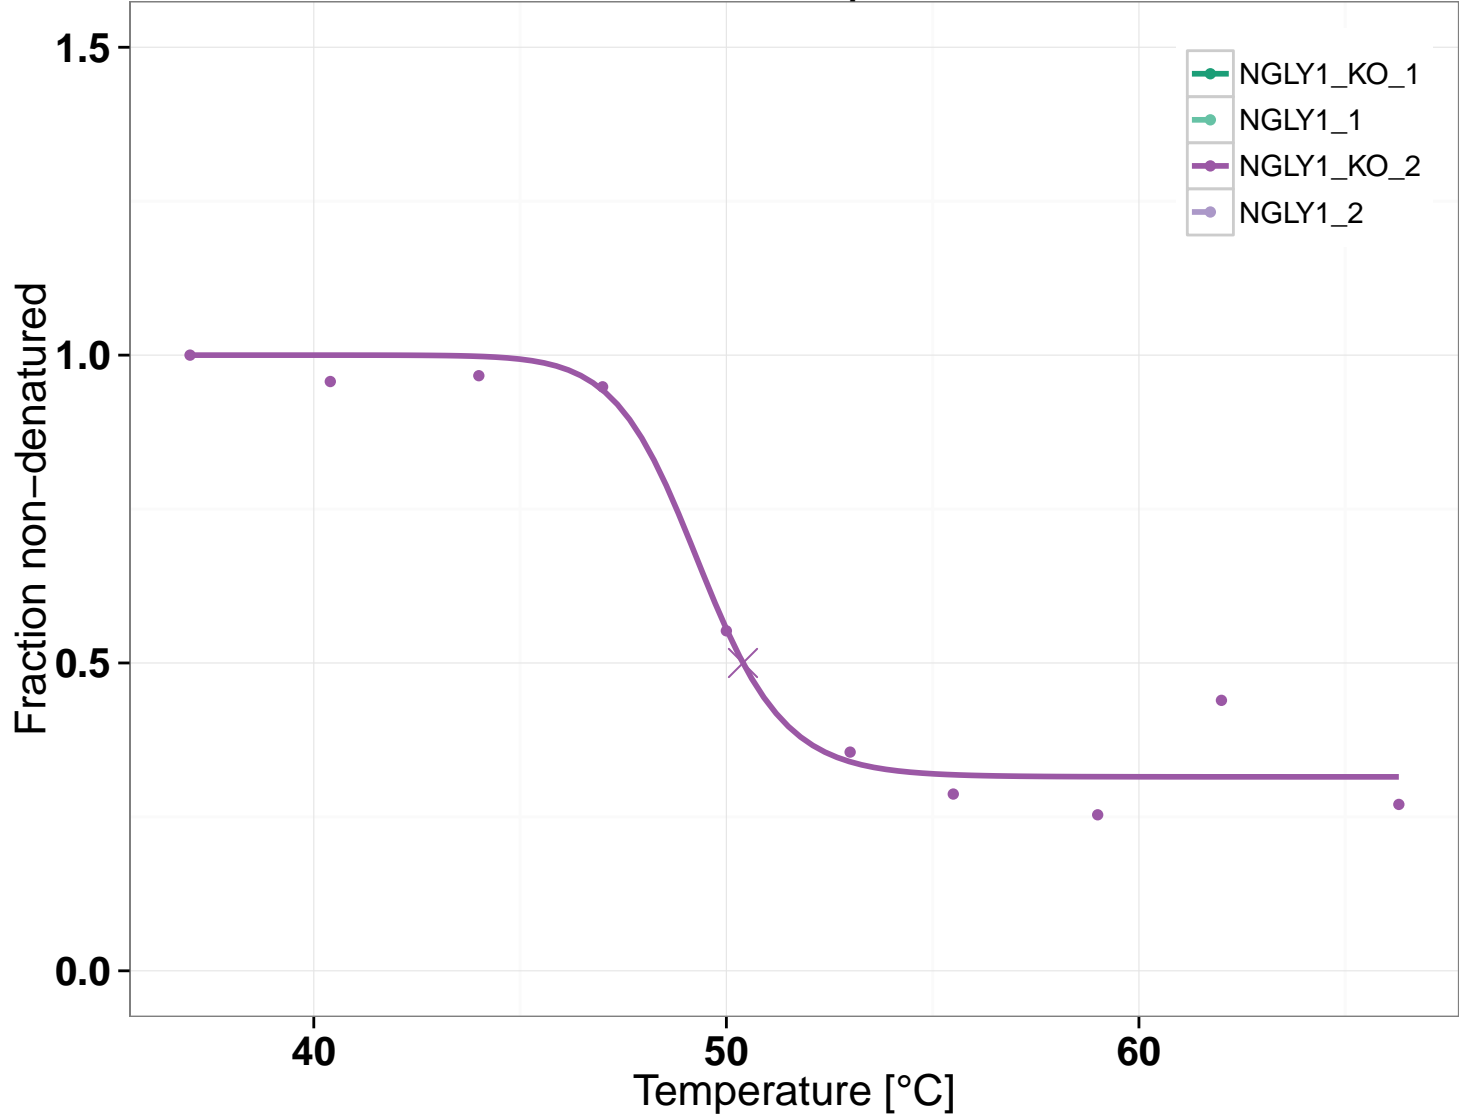

|            | meltPoint | slope | plateau | R2   |
|------------|-----------|-------|---------|------|
| NGLY1_KO_1 | —         | —     | —       | —    |
| NGLY1_1    | —         | —     | —       | —    |
| NGLY1_KO_2 | 50.4      | -0.17 | 0.32    | 0.97 |
| NGLY1_2    | —         | —     | —       | —    |

Supplement: Supplementary file 5302 [file 1]

IPI00217630.1|DHX37

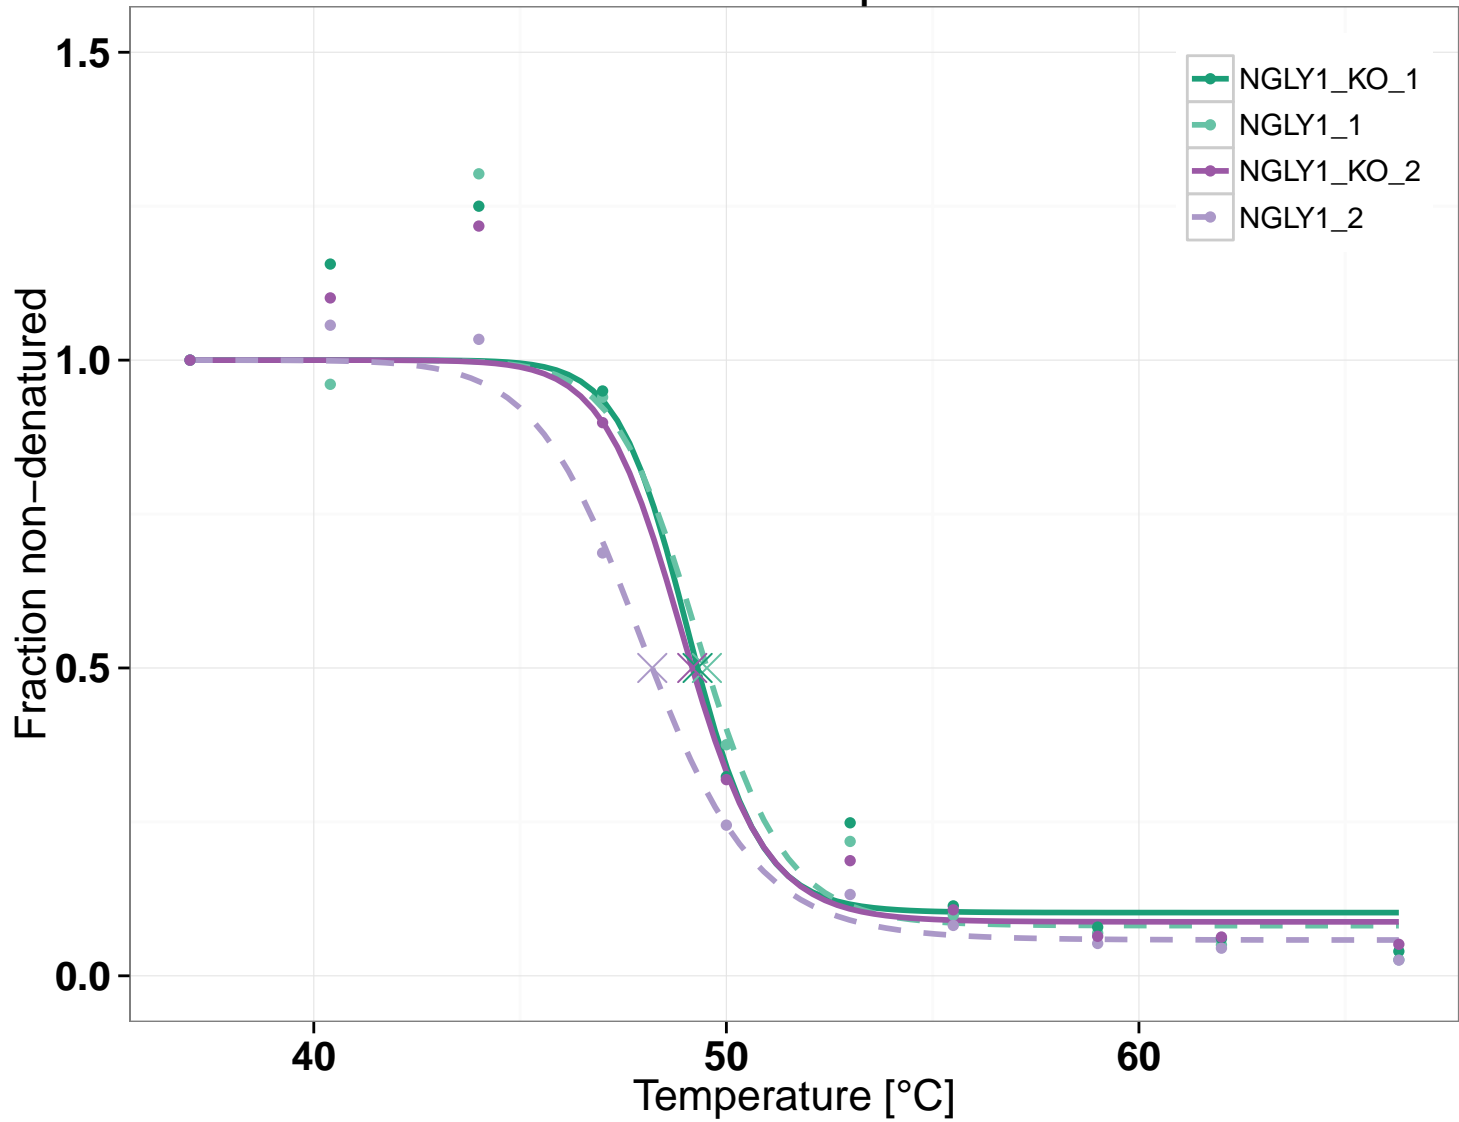

|            | meltPoint | slope | plateau | R2   |
|------------|-----------|-------|---------|------|
| NGLY1_KO_1 | 49.3      | -0.26 | 0.1     | 0.95 |
| NGLY1_1    | 49.53     | -0.22 | 0.08    | 0.95 |
| NGLY1_KO_2 | 49.17     | -0.23 | 0.09    | 0.97 |
| NGLY1_2    | 48.2      | -0.18 | 0.06    | 0.99 |

Supplement: Supplementary file 5303 [file 1]

# IPI00002804.1|PKN2

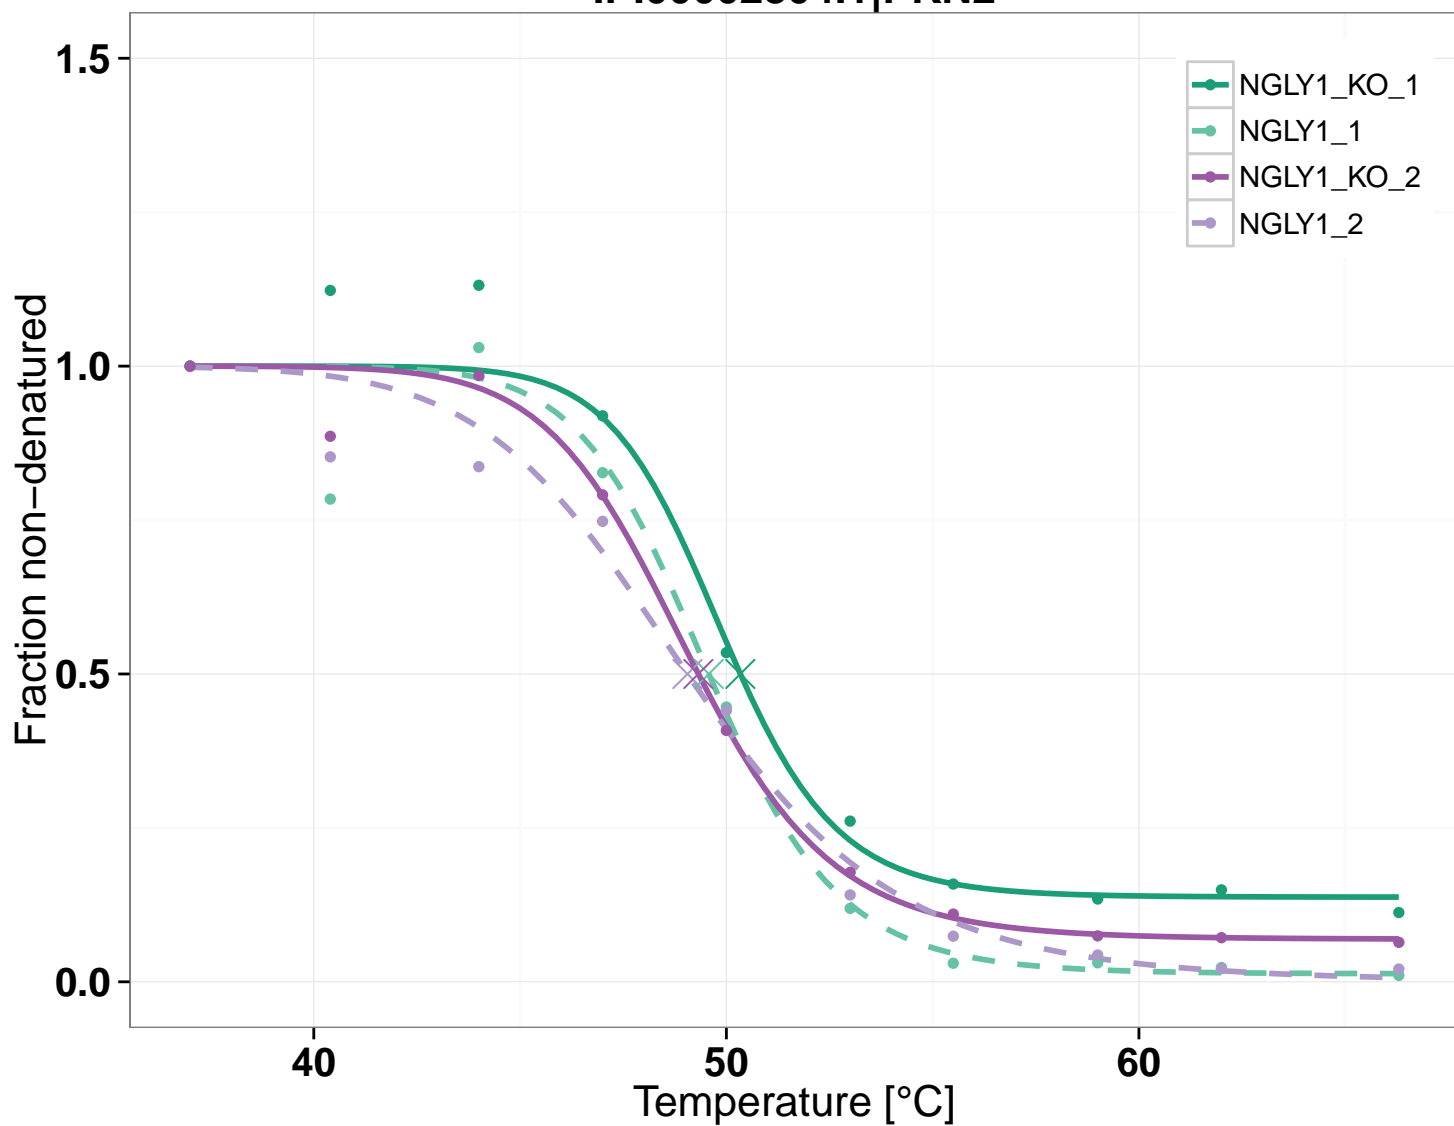

|            | meltPoint | slope  | plateau | R2   |
|------------|-----------|--------|---------|------|
| NGLY1_KO_1 | 50.34     | -0.16  | 0.14    | 0.98 |
| NGLY1_1    | 49.57     | -0.16  | 0.01    | 0.97 |
| NGLY1_KO_2 | 49.32     | -0.13  | 0.07    | 0.99 |
| NGLY1_2    | 49.06     | -0.099 | 0       | 0.98 |

Supplement: Supplementary file 5304 [file 1]

IPI00031485.1|MRP63

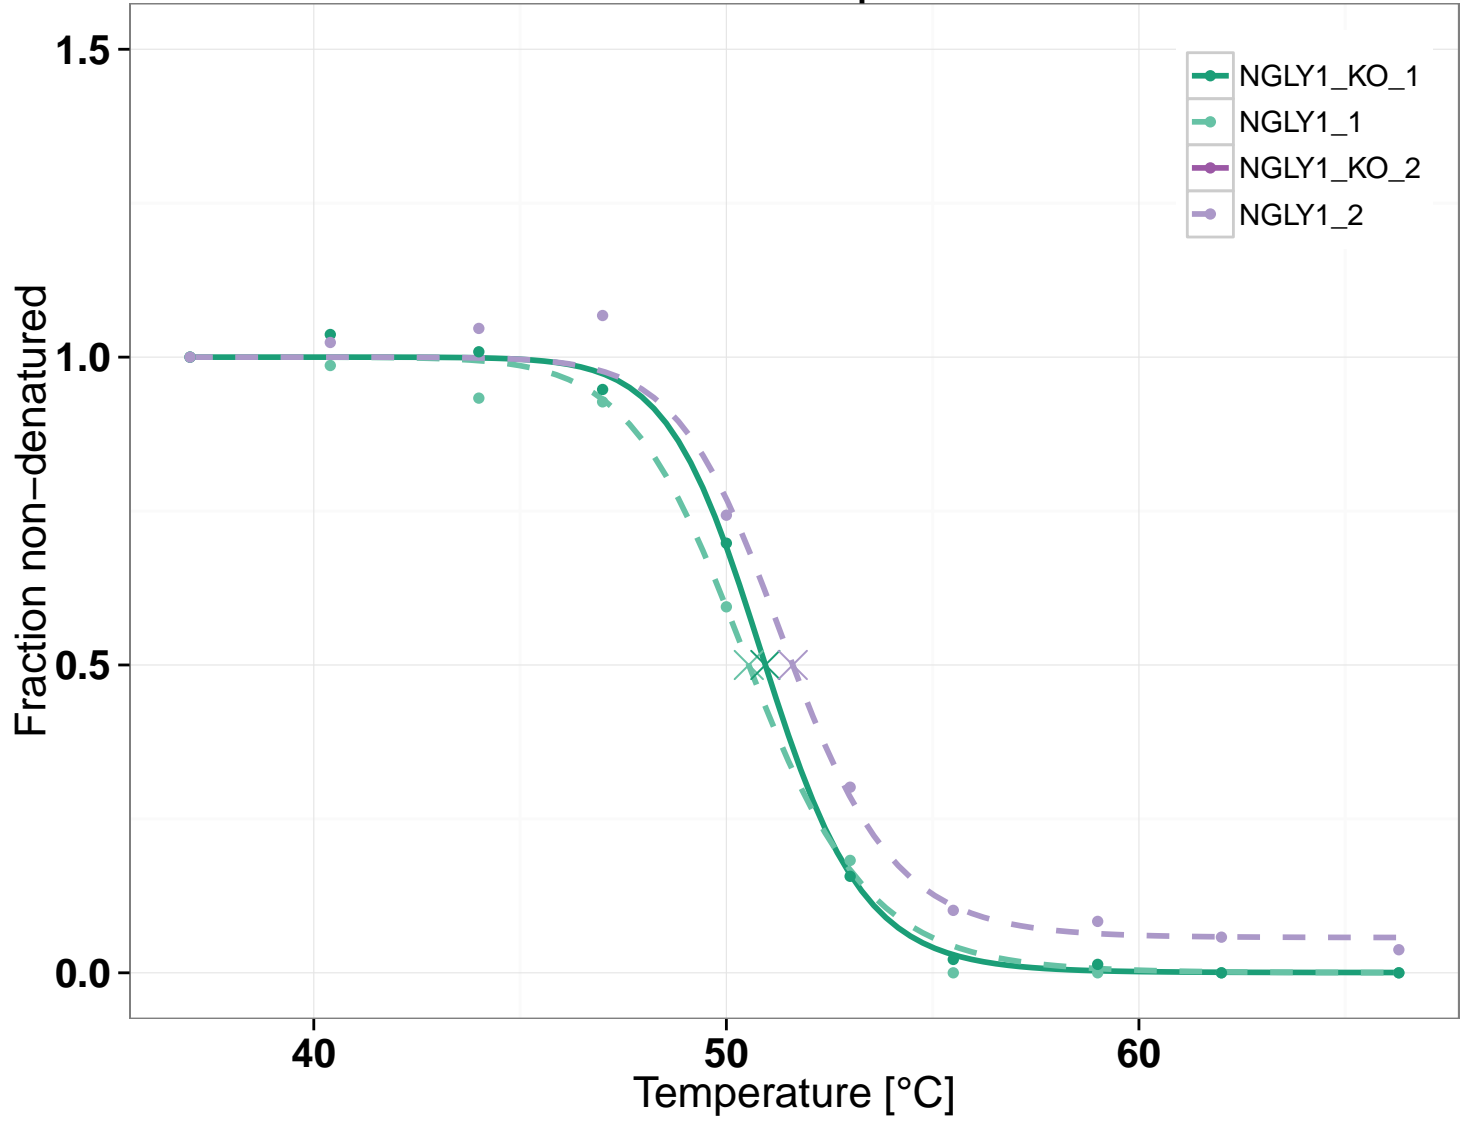

|            | meltPoint | slope | plateau | R2   |
|------------|-----------|-------|---------|------|
| NGLY1_KO_1 | 50.94     | -0.21 | 0       | 1    |
| NGLY1_1    | 50.54     | -0.17 | 0       | 1    |
| NGLY1_KO_2 | -         | -     | -       | -    |
| NGLY1_2    | 51.61     | -0.18 | 0.06    | 0.99 |

Supplement: Supplementary file 5305 [file 1]

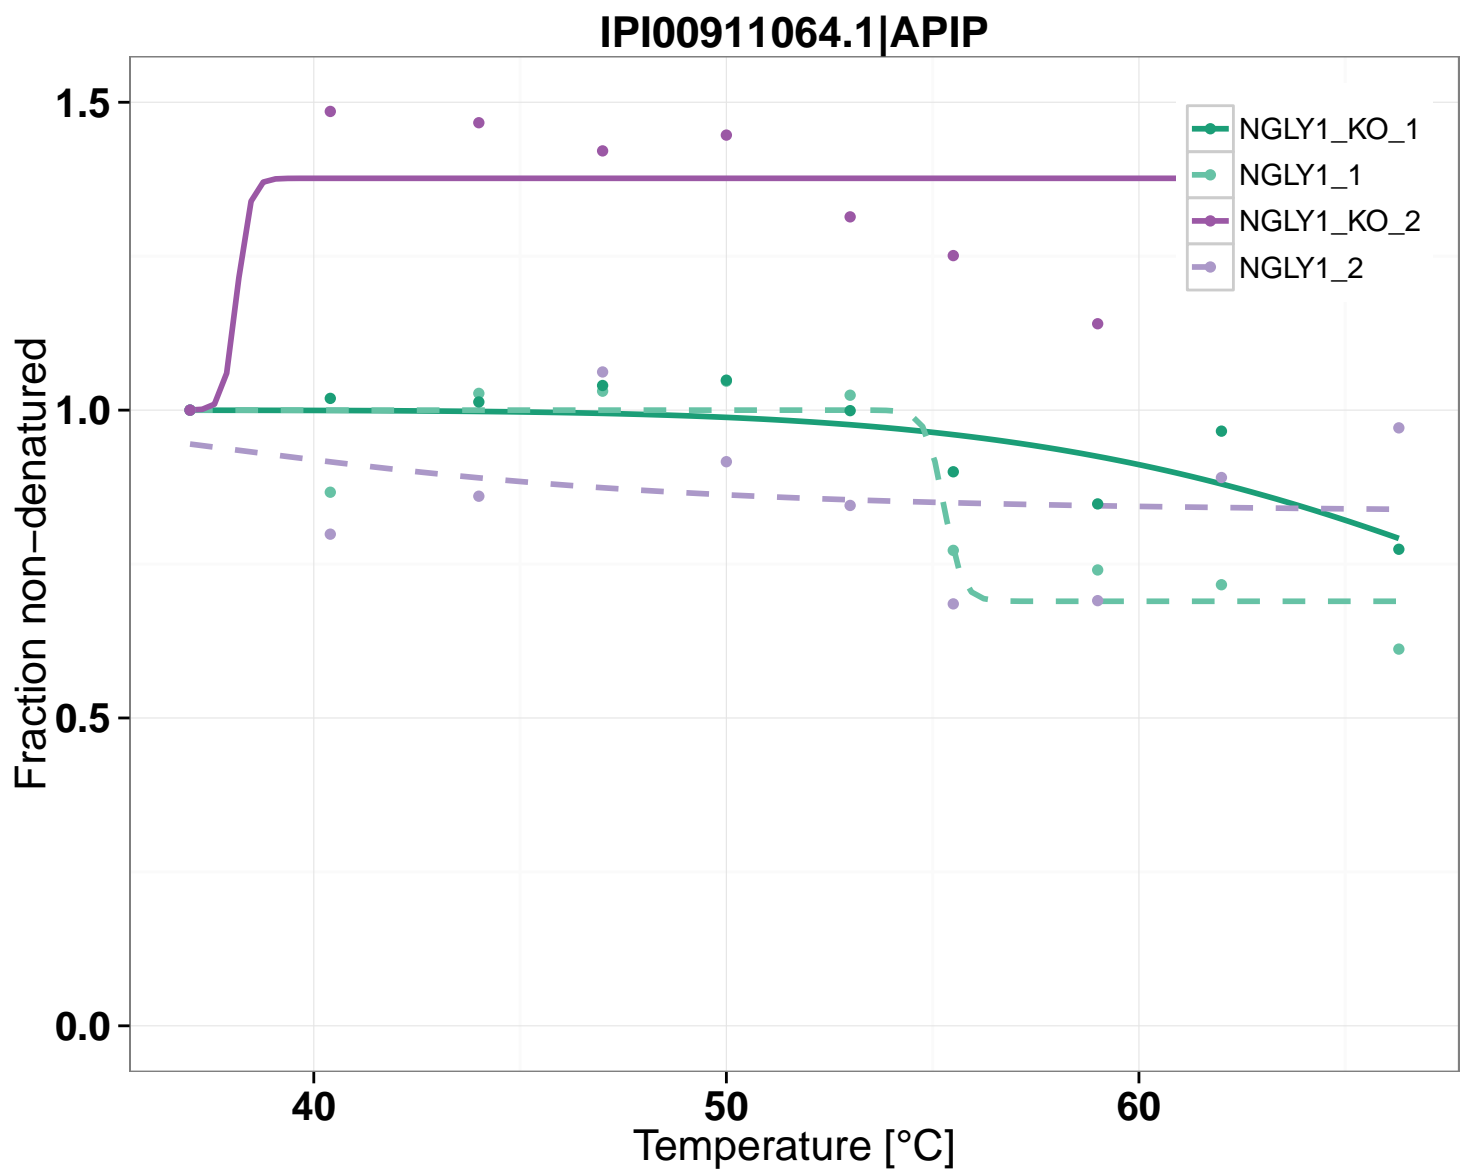

|            | meltPoint | slope   | plateau | R2   |
|------------|-----------|---------|---------|------|
| NGLY1_KO_1 | —         | —       | 0       | 0.68 |
| NGLY1_1    | —         | -0.35   | 0.69    | 0.87 |
| NGLY1_KO_2 | —         | 0.62    | 1.38    | 0.37 |
| NGLY1_2    | —         | -0.0086 | 0.83    | 0.09 |

Supplement: Supplementary file 5306 [file 1]

# IPI00290461.3|EIF3J

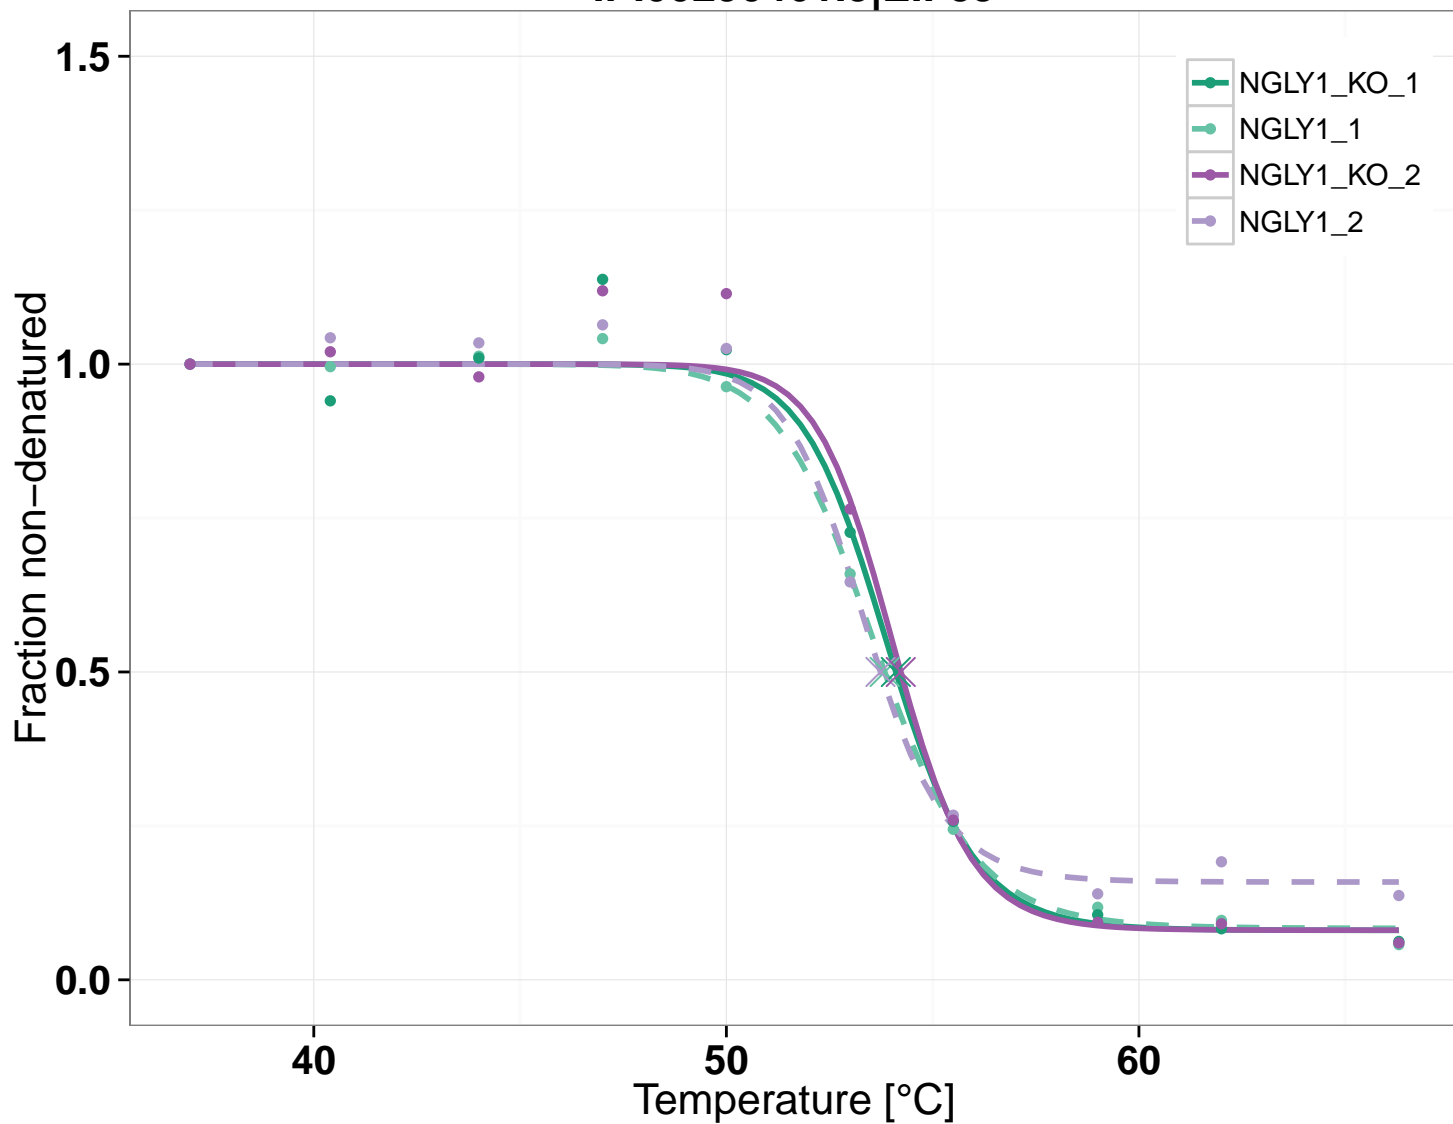

|            | meltPoint | slope | plateau | R2   |
|------------|-----------|-------|---------|------|
| NGLY1_KO_1 | 54.11     | -0.22 | 0.08    | 0.99 |
| NGLY1_1    | 53.84     | -0.19 | 0.08    | 1    |
| NGLY1_KO_2 | 54.23     | -0.24 | 0.08    | 0.98 |
| NGLY1_2    | 53.74     | -0.22 | 0.16    | 0.99 |

Supplement: Supplementary file 5307 [file 1]

IPI00869011.2|CARD11

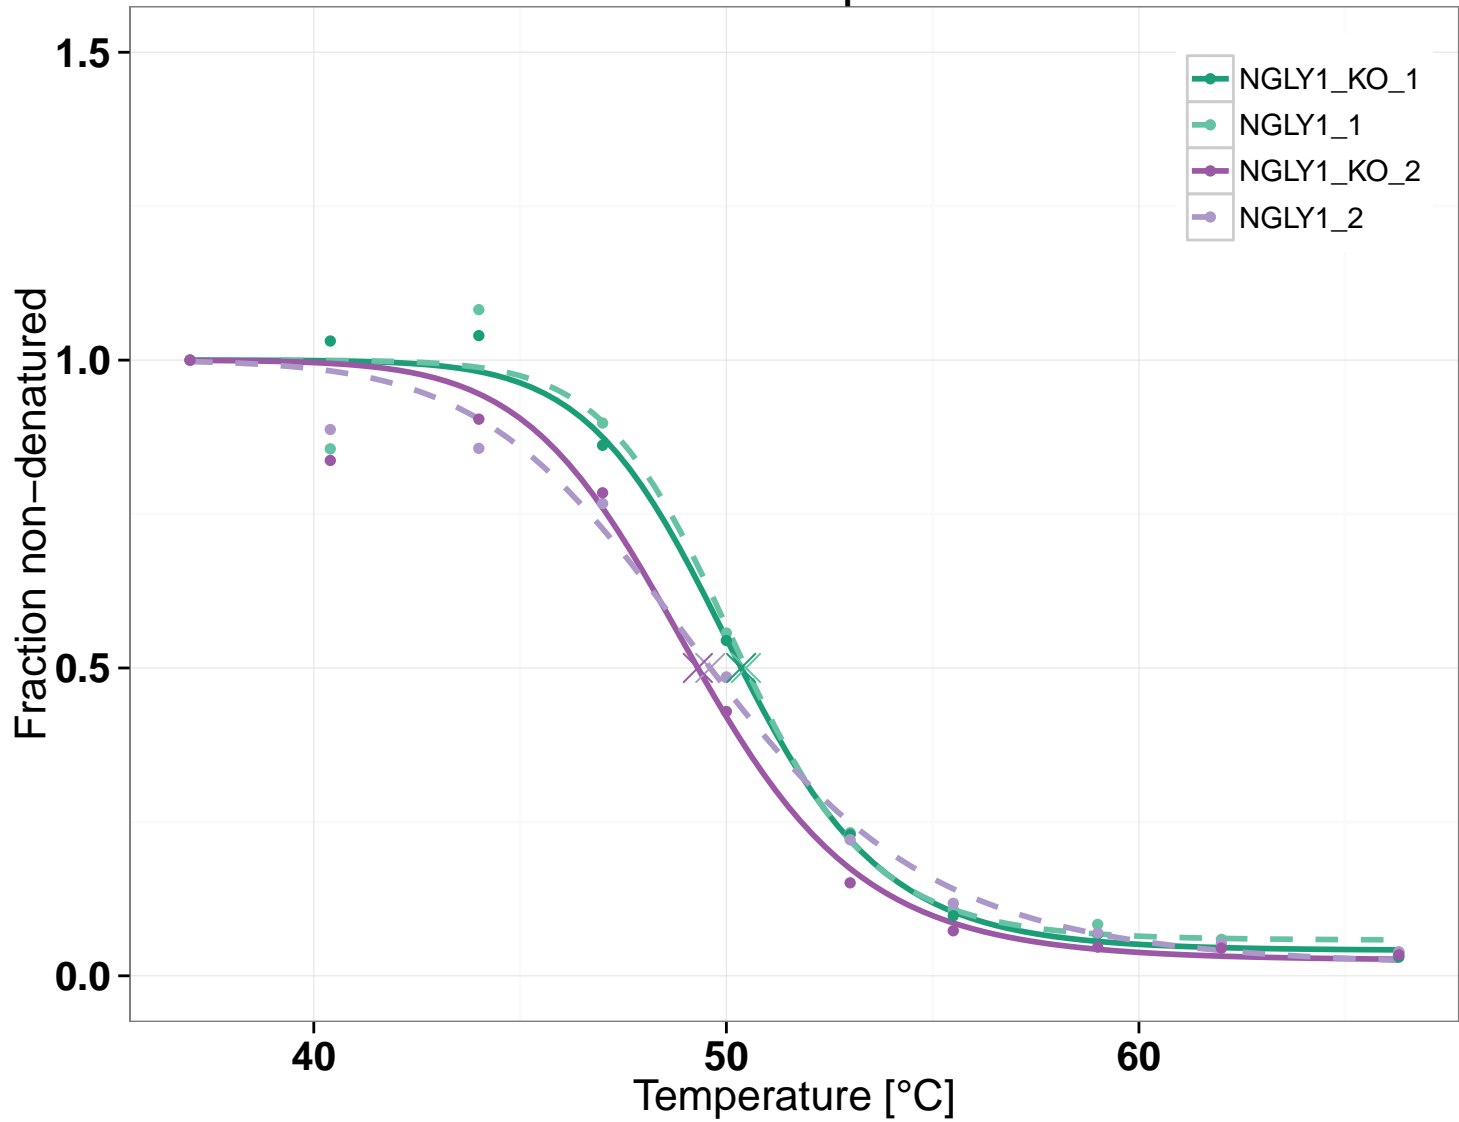

|            | meltPoint | slope | plateau | R2   |
|------------|-----------|-------|---------|------|
| NGLY1_KO_1 | 50.36     | -0.13 | 0.04    | 1    |
| NGLY1_1    | 50.48     | -0.14 | 0.06    | 0.98 |
| NGLY1_KO_2 | 49.31     | -0.12 | 0.02    | 0.98 |
| NGLY1_2    | 49.61     | -0.09 | 0.01    | 0.99 |

Supplement: Supplementary file 5308 [file 1]

IPI00031572.2|TMEM175

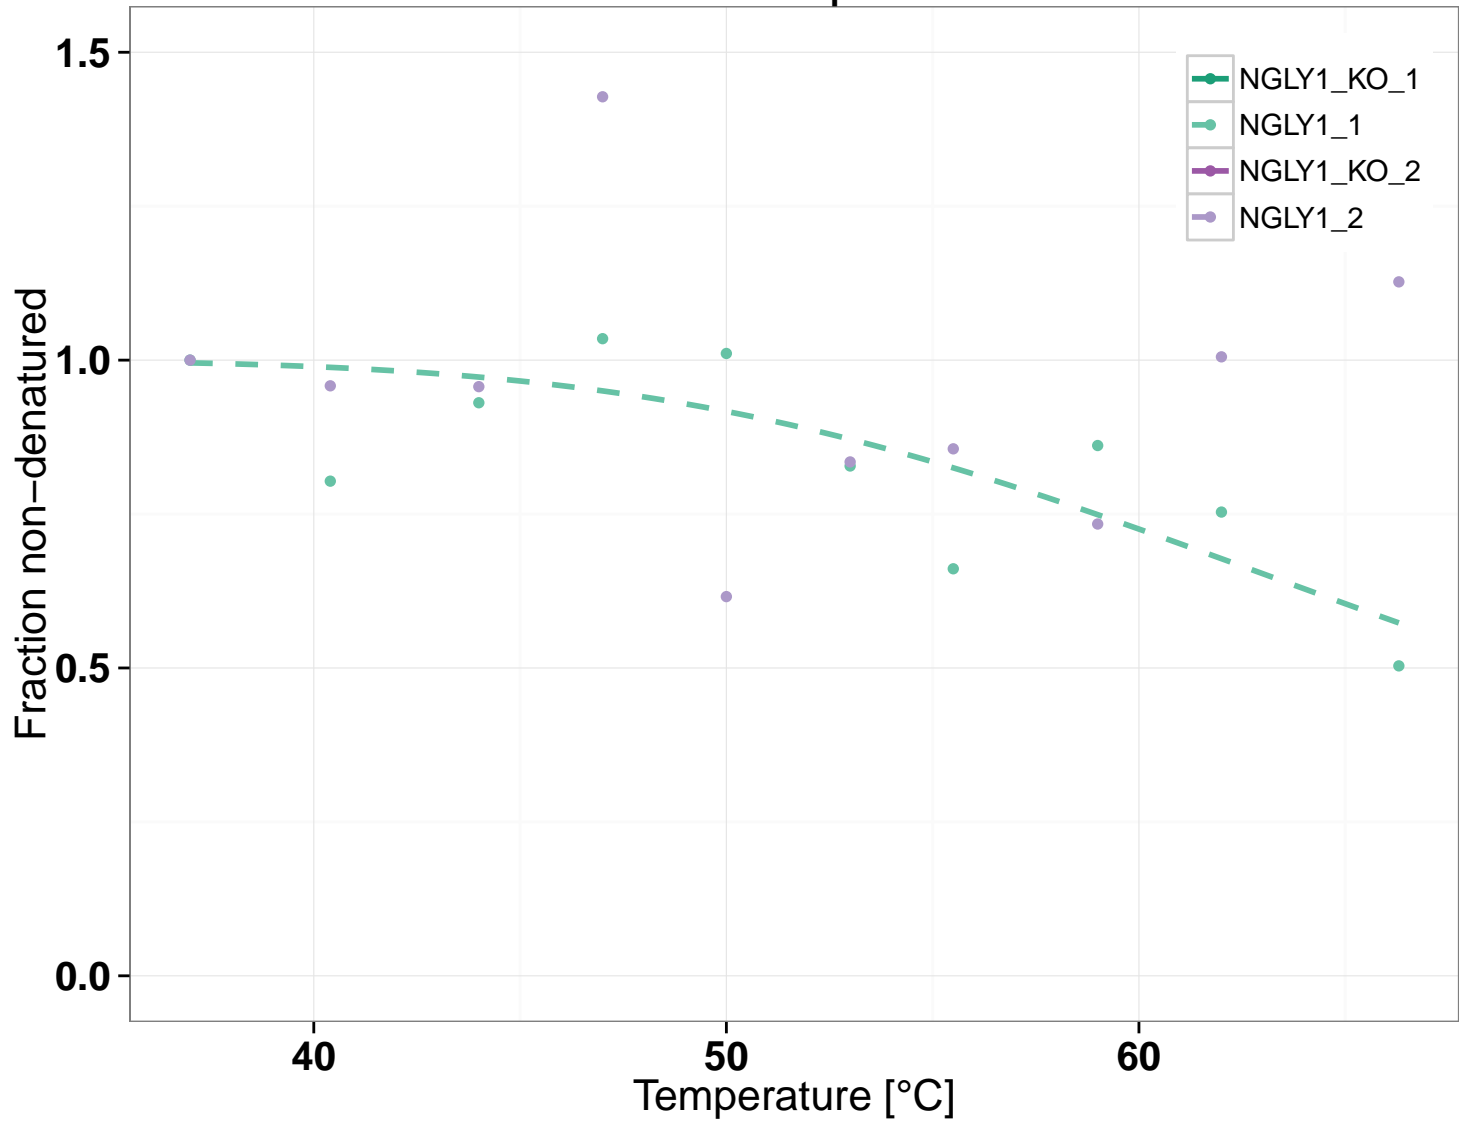

|            | meltPoint | slope  | plateau | R2   |
|------------|-----------|--------|---------|------|
| NGLY1_KO_1 | —         | —      | —       | —    |
| NGLY1_1    | —         | -0.024 | 0       | 0.59 |
| NGLY1_KO_2 | —         | —      | —       | —    |
| NGLY1_2    | —         | —      | —       | —    |

Supplement: Supplementary file 5309 [file 1]

IPI00643747.1|C22ORF30

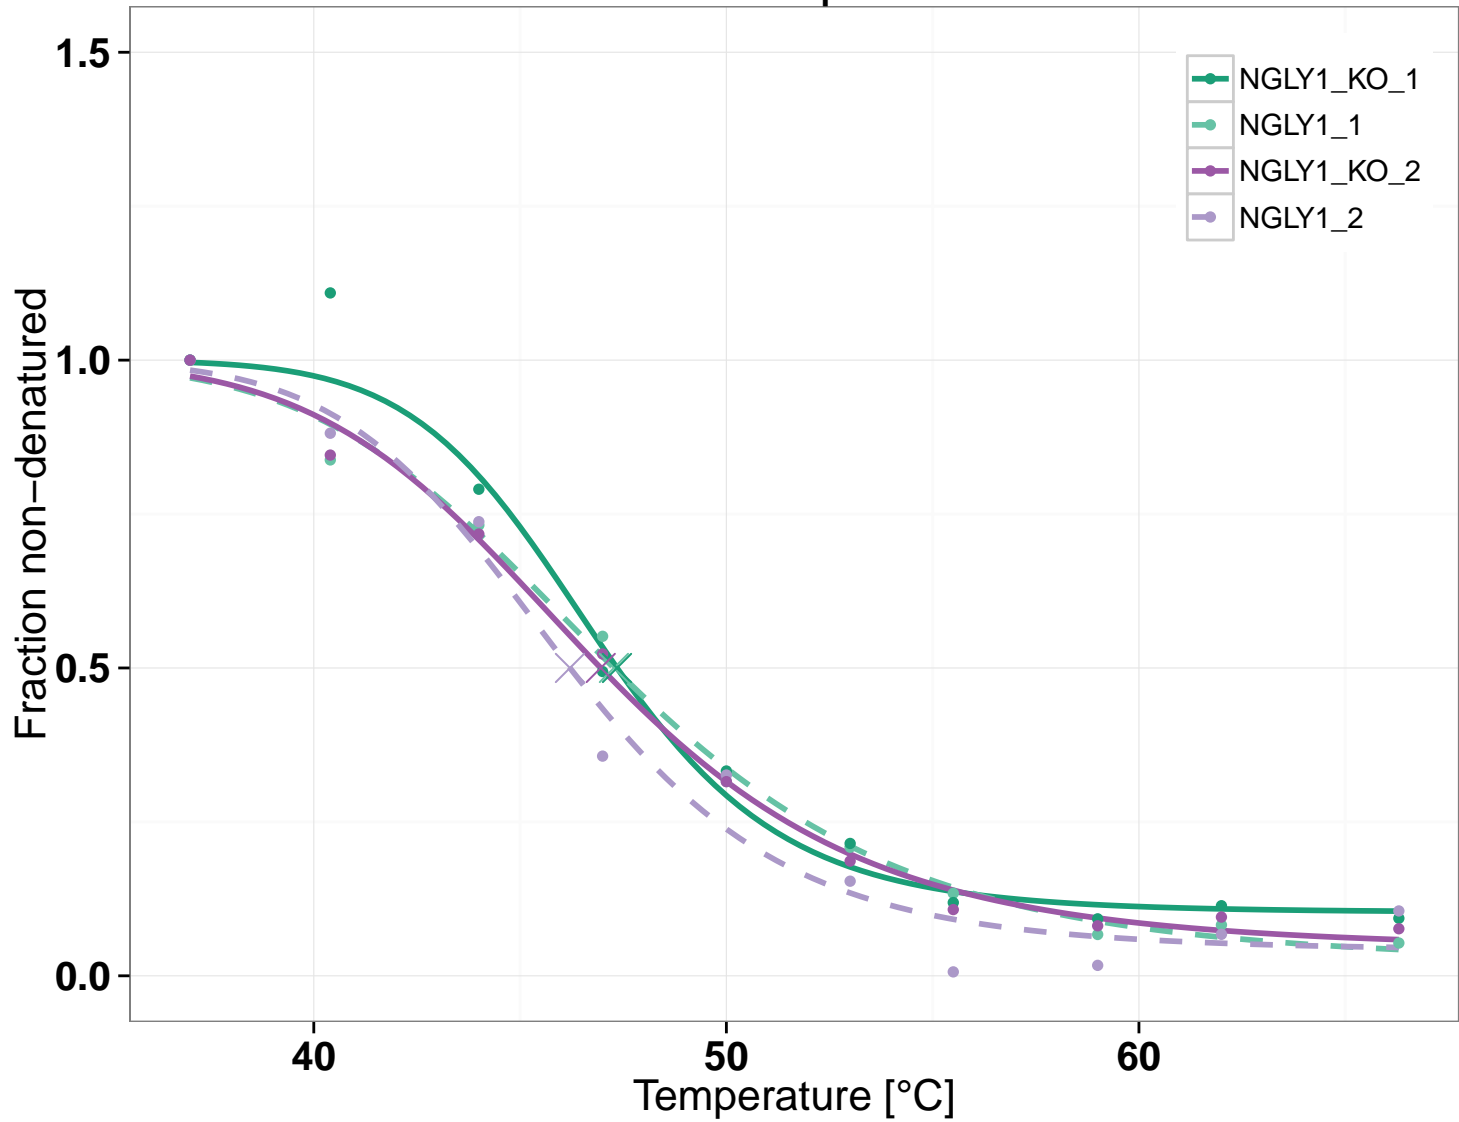

|            | meltPoint | slope  | plateau | R2   |
|------------|-----------|--------|---------|------|
| NGLY1_KO_1 | 47.35     | -0.1   | 0.1     | 0.98 |
| NGLY1_1    | 47.27     | -0.068 | 0.02    | 0.99 |
| NGLY1_KO_2 | 46.95     | -0.072 | 0.04    | 0.99 |
| NGLY1_2    | 46.21     | -0.089 | 0.04    | 0.98 |

Supplement: Supplementary file 5310 [file 1]

IPI00871385.3|FAM50A

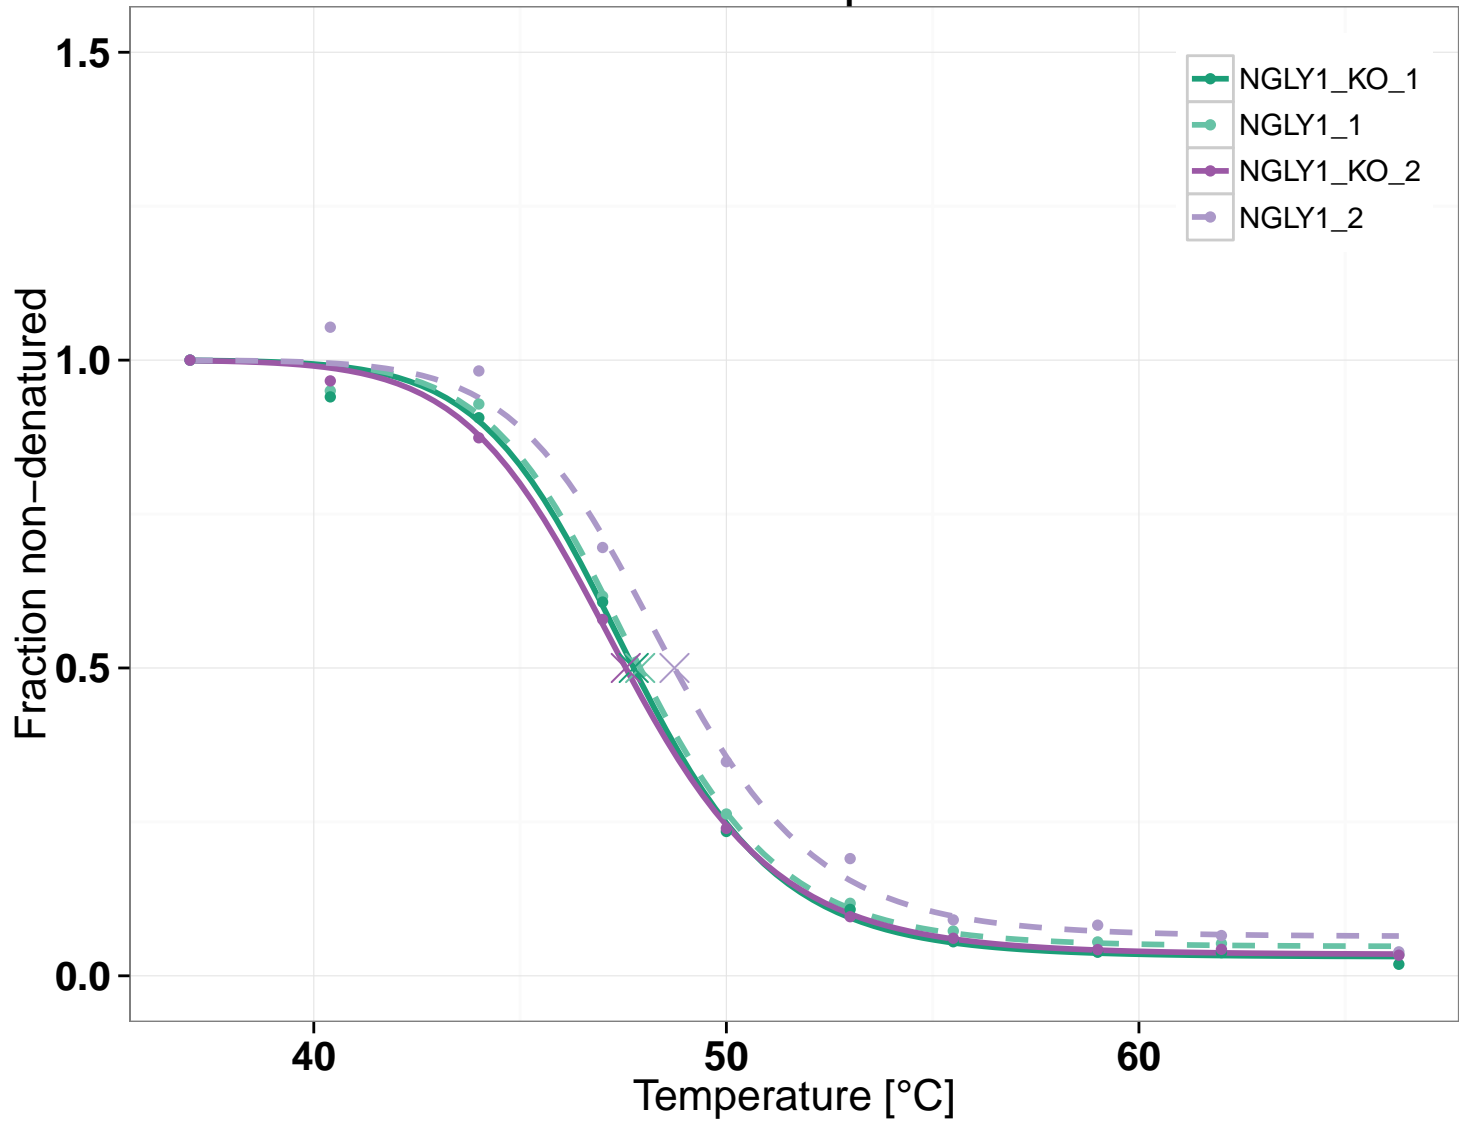

|            | meltPoint | slope | plateau | R2 |
|------------|-----------|-------|---------|----|
| NGLY1_KO_1 | 47.75     | -0.13 | 0.03    | 1  |
| NGLY1_1    | 47.91     | -0.13 | 0.05    | 1  |
| NGLY1_KO_2 | 47.56     | -0.13 | 0.03    | 1  |
| NGLY1_2    | 48.74     | -0.13 | 0.06    | 1  |

Supplement: Supplementary file 5311 [file 1]

IPI00304409.3|CARHSP1

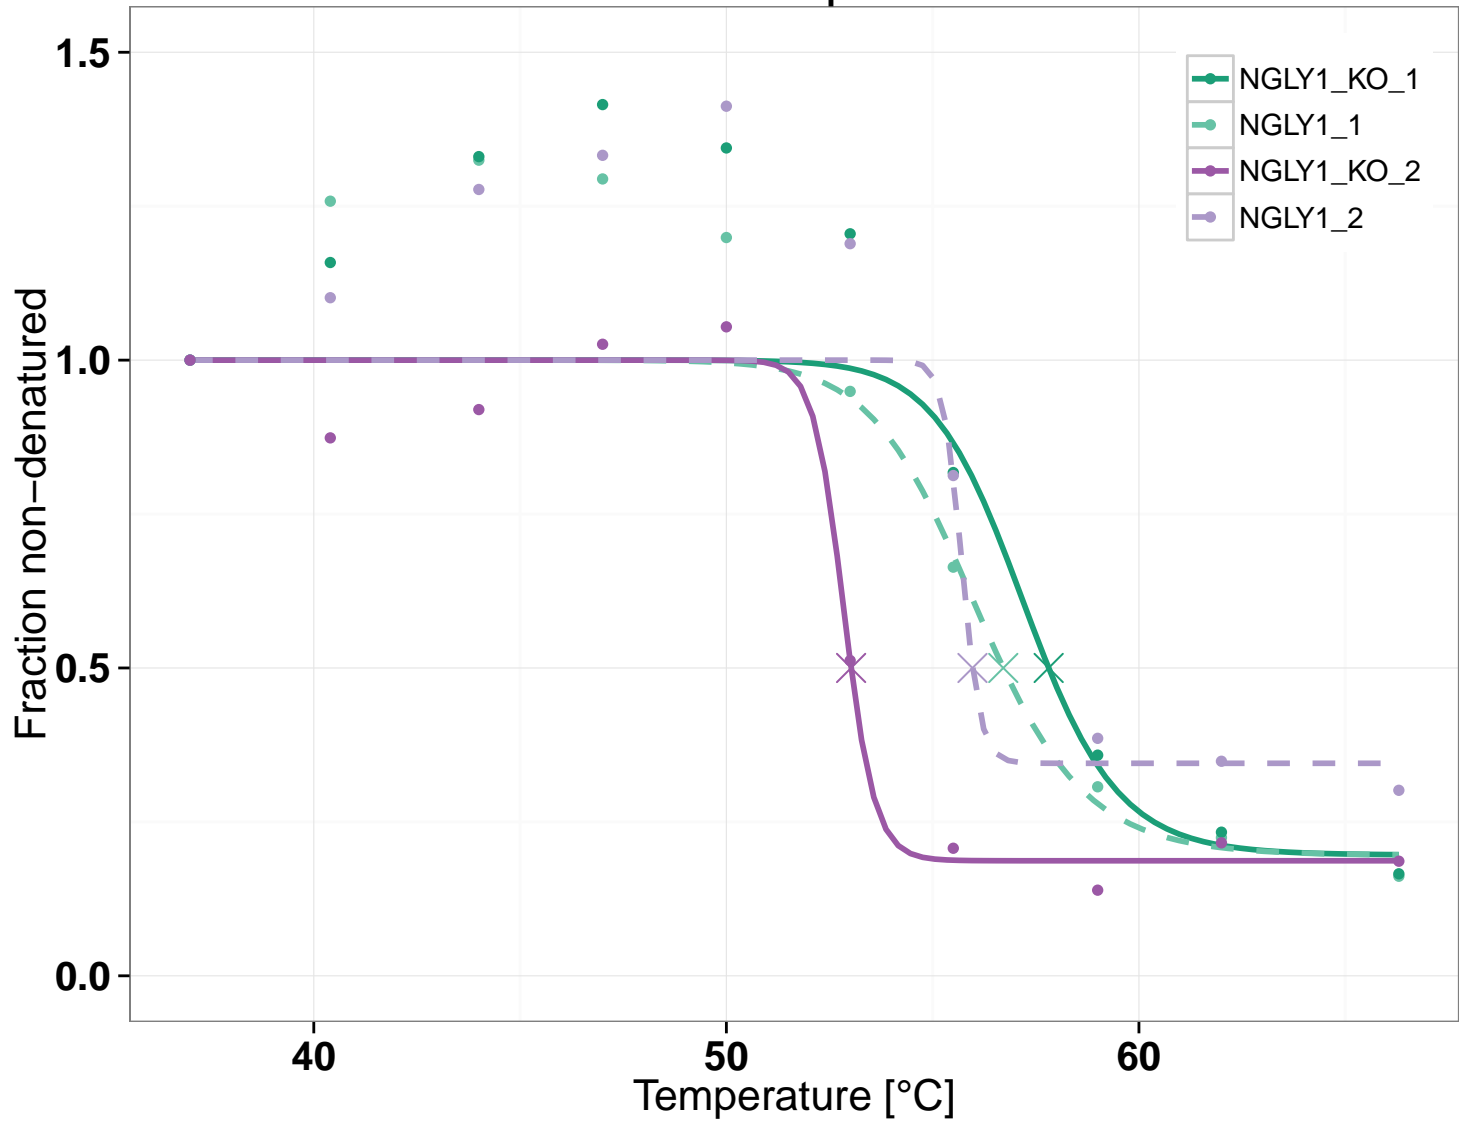

|            | meltPoint | slope | plateau | R2   |
|------------|-----------|-------|---------|------|
| NGLY1_KO_1 | 57.81     | -0.18 | 0.2     | 0.77 |
| NGLY1_1    | 56.71     | -0.15 | 0.2     | 0.84 |
| NGLY1_KO_2 | 53.02     | -0.55 | 0.19    | 0.98 |
| NGLY1_2    | 55.97     | -0.73 | 0.35    | 0.75 |

Supplement: Supplementary file 5312 [file 1]

IPI00745313.1|AEBP1

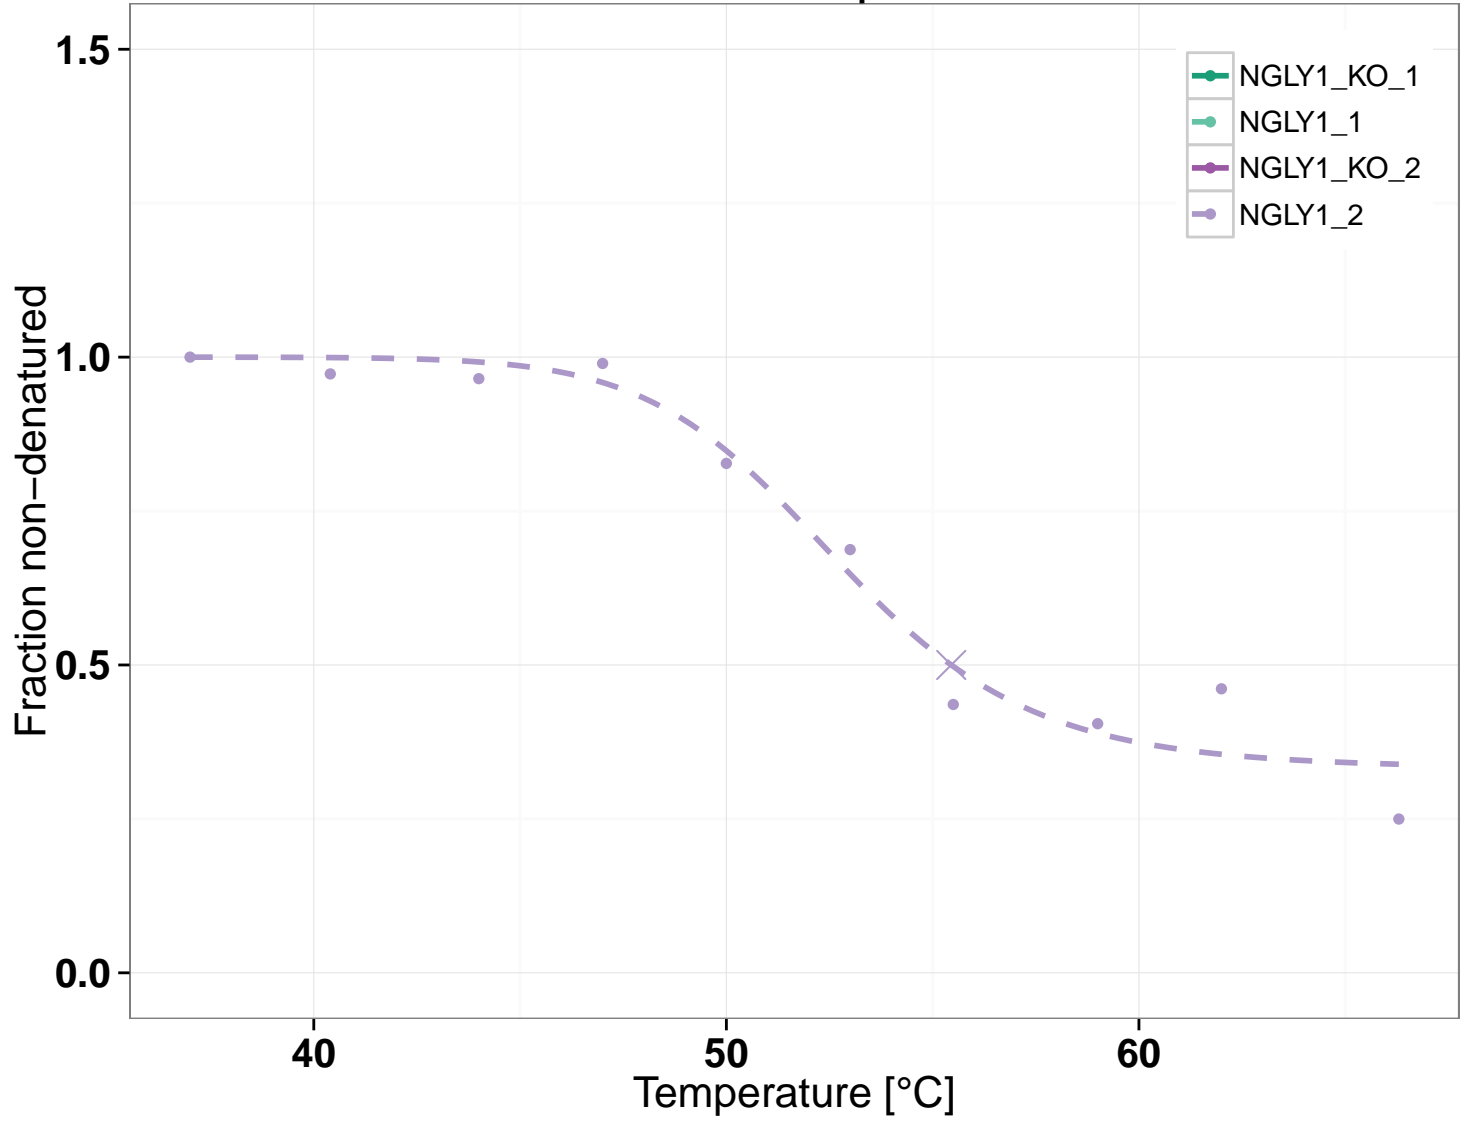

|            | meltPoint | slope  | plateau | R2   |
|------------|-----------|--------|---------|------|
| NGLY1_KO_1 | -         | -      | -       | -    |
| NGLY1_1    | -         | -      | -       | -    |
| NGLY1_KO_2 | -         | -      | -       | -    |
| NGLY1_2    | 55.45     | -0.071 | 0.33    | 0.96 |

Supplement: Supplementary file 5313 [file 1]

# IPI00479912.3|P XK

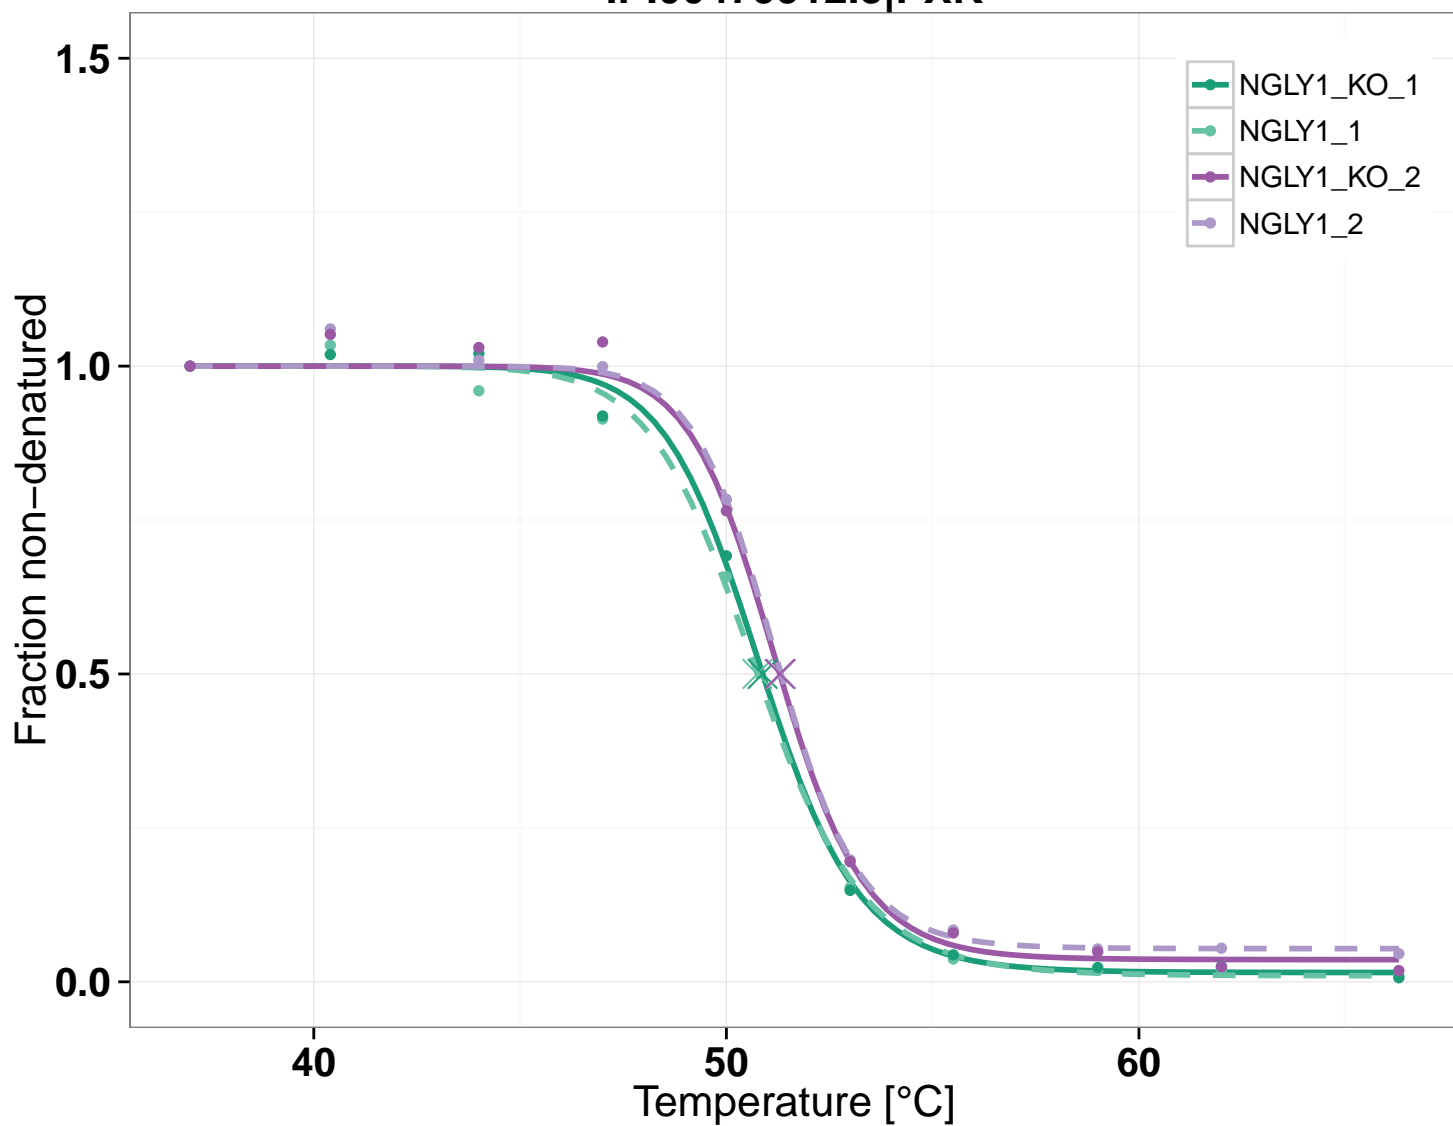

|            | meltPoint | slope | plateau | R2 |
|------------|-----------|-------|---------|----|
| NGLY1_KO_1 | 50.88     | -0.21 | 0.02    | 1  |
| NGLY1_1    | 50.75     | -0.19 | 0.01    | 1  |
| NGLY1_KO_2 | 51.29     | -0.23 | 0.04    | 1  |
| NGLY1_2    | 51.33     | -0.23 | 0.05    | 1  |

Supplement: Supplementary file 5314 [file 1]

# IPI00642723.1|FAM3A

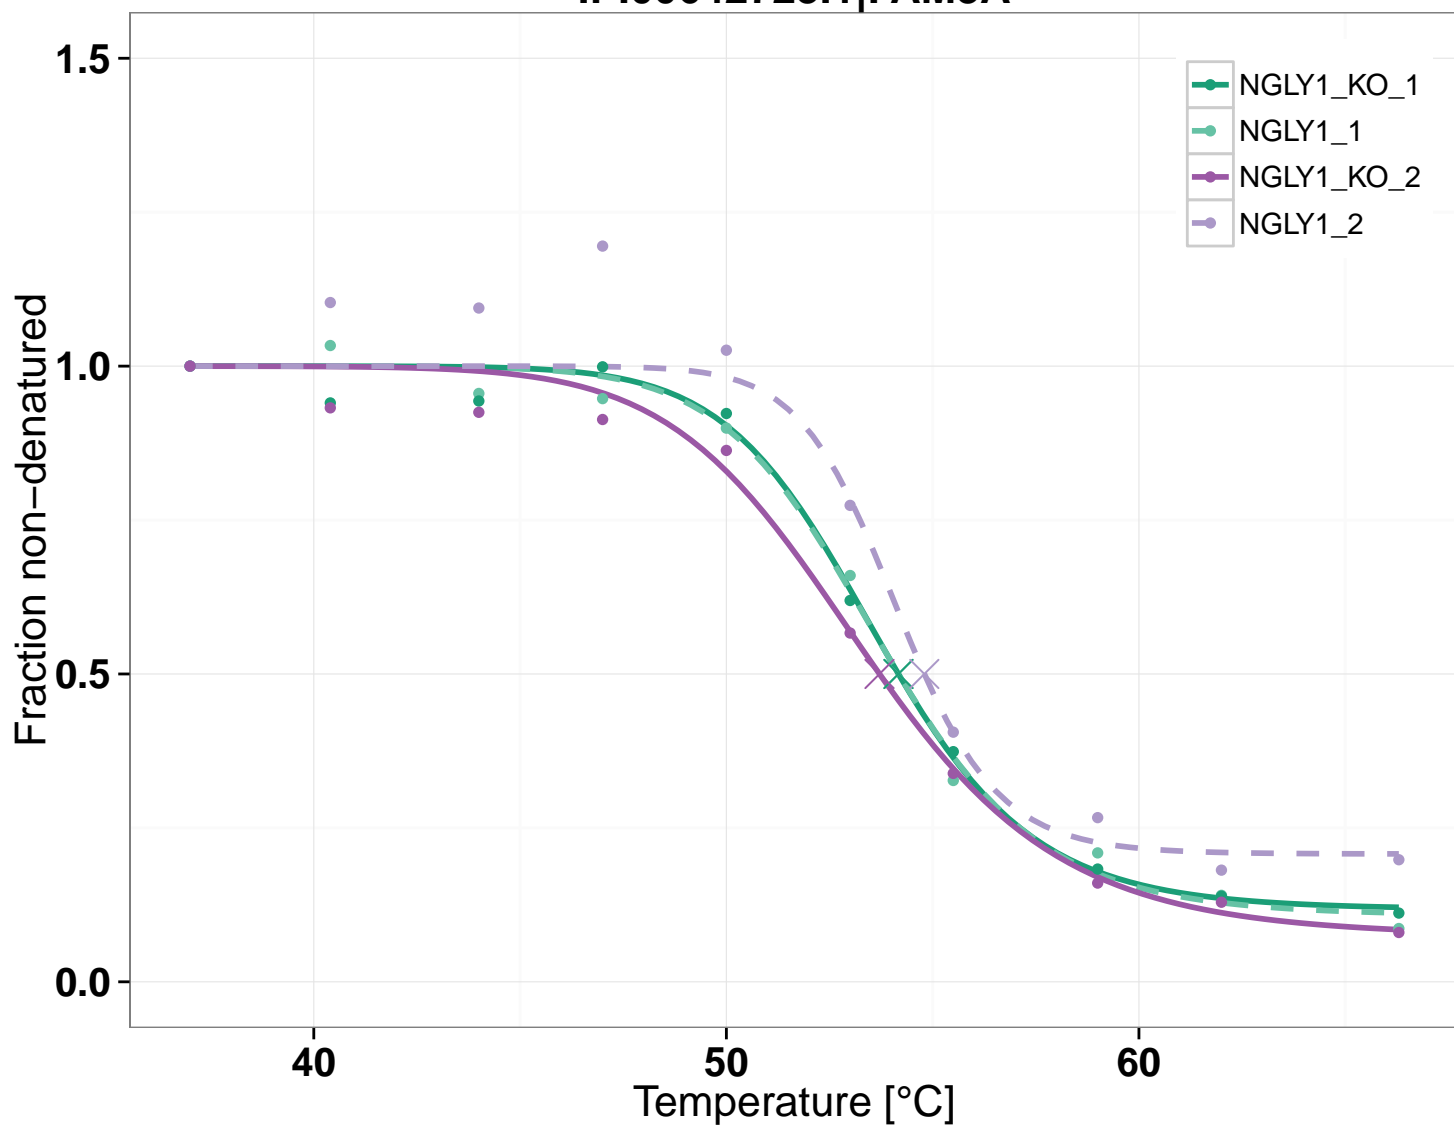

|            | meltPoint | slope  | plateau | R2   |
|------------|-----------|--------|---------|------|
| NGLY1_KO_1 | 54.17     | -0.12  | 0.12    | 0.99 |
| NGLY1_1    | 54.17     | -0.12  | 0.11    | 0.99 |
| NGLY1_KO_2 | 53.71     | -0.098 | 0.07    | 0.99 |
| NGLY1_2    | 54.8      | -0.17  | 0.21    | 0.96 |

Supplement: Supplementary file 5315 [file 1]

IPI00748490.1|AARSD1

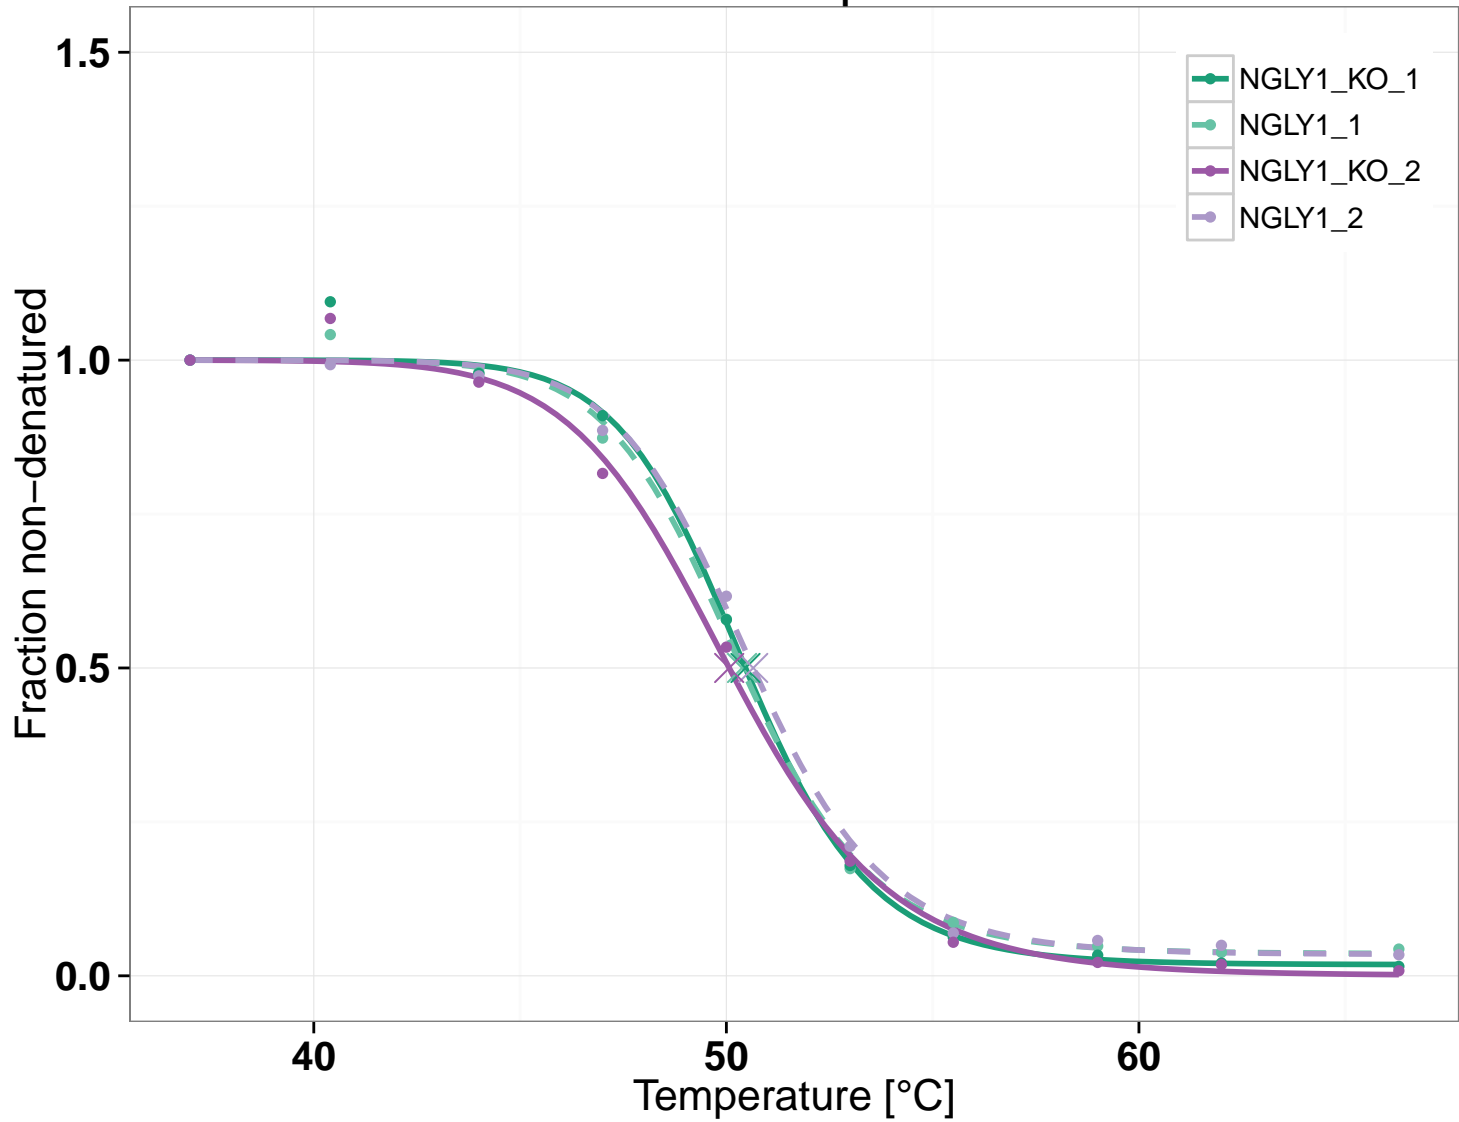

|            | meltPoint | slope | plateau | R2 |
|------------|-----------|-------|---------|----|
| NGLY1_KO_1 | 50.46     | -0.16 | 0.02    | 1  |
| NGLY1_1    | 50.38     | -0.15 | 0.04    | 1  |
| NGLY1_KO_2 | 50.07     | -0.13 | 0       | 1  |
| NGLY1_2    | 50.65     | -0.15 | 0.03    | 1  |

Supplement: Supplementary file 5316 [file 1]

IPI00877863.1|CCNC

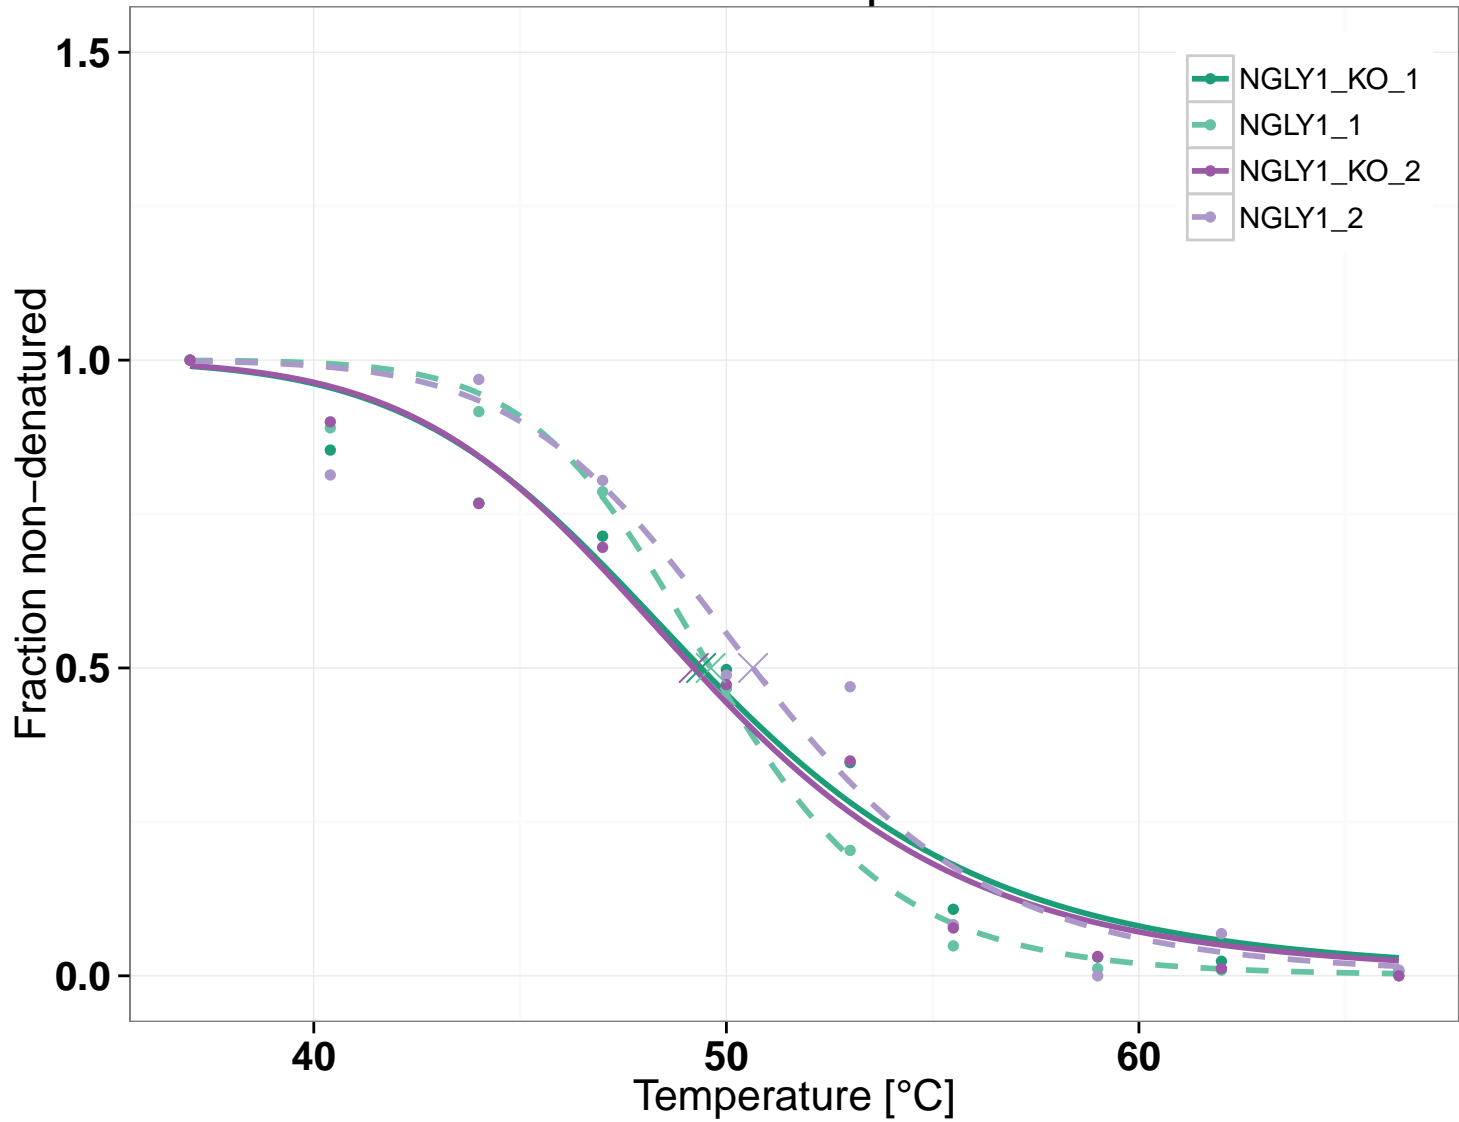

|            | meltPoint | slope  | plateau | R2   |
|------------|-----------|--------|---------|------|
| NGLY1_KO_1 | 49.39     | -0.071 | 0       | 0.97 |
| NGLY1_1    | 49.62     | -0.11  | 0       | 0.99 |
| NGLY1_KO_2 | 49.21     | -0.074 | 0       | 0.98 |
| NGLY1_2    | 50.65     | -0.088 | 0       | 0.95 |

Supplement: Supplementary file 5317 [file 1]

IPI00103415.1|STAT5B

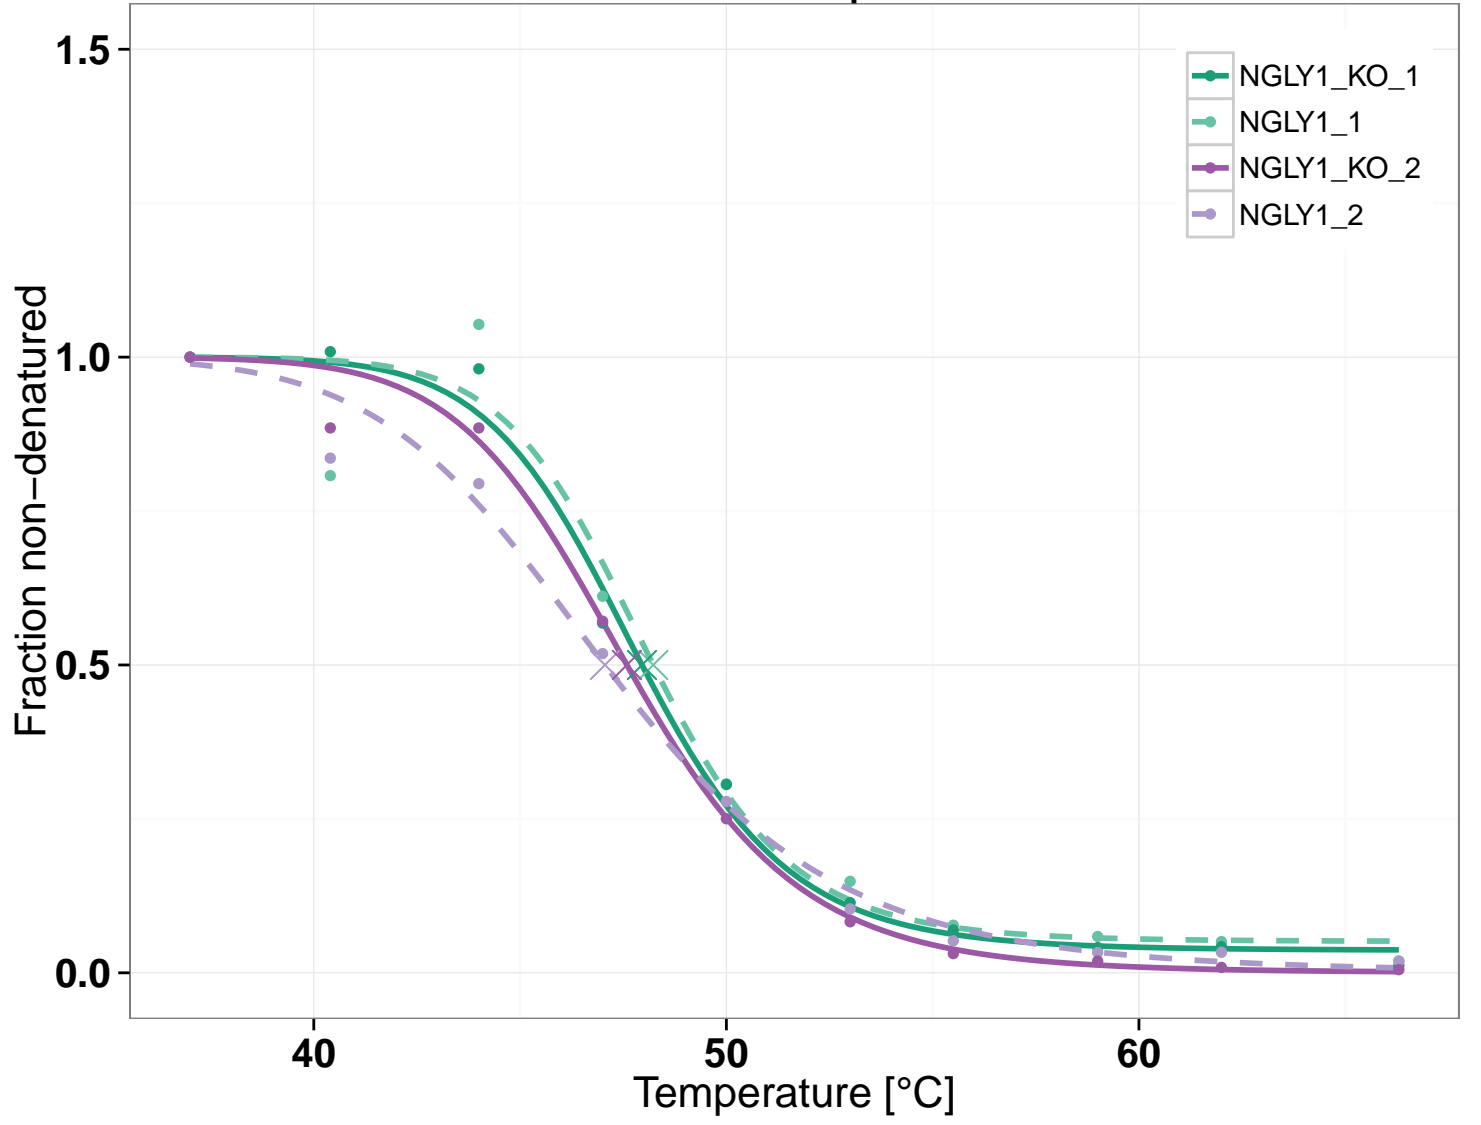

|            | meltPoint | slope  | plateau | R2   |
|------------|-----------|--------|---------|------|
| NGLY1_KO_1 | 47.95     | -0.13  | 0.04    | 0.99 |
| NGLY1_1    | 48.23     | -0.14  | 0.05    | 0.96 |
| NGLY1_KO_2 | 47.59     | -0.12  | 0       | 0.99 |
| NGLY1_2    | 47.06     | -0.089 | 0       | 0.99 |

Supplement: Supplementary file 5318 [file 1]

IPI00902677.1|B3KU14\_HUMAN

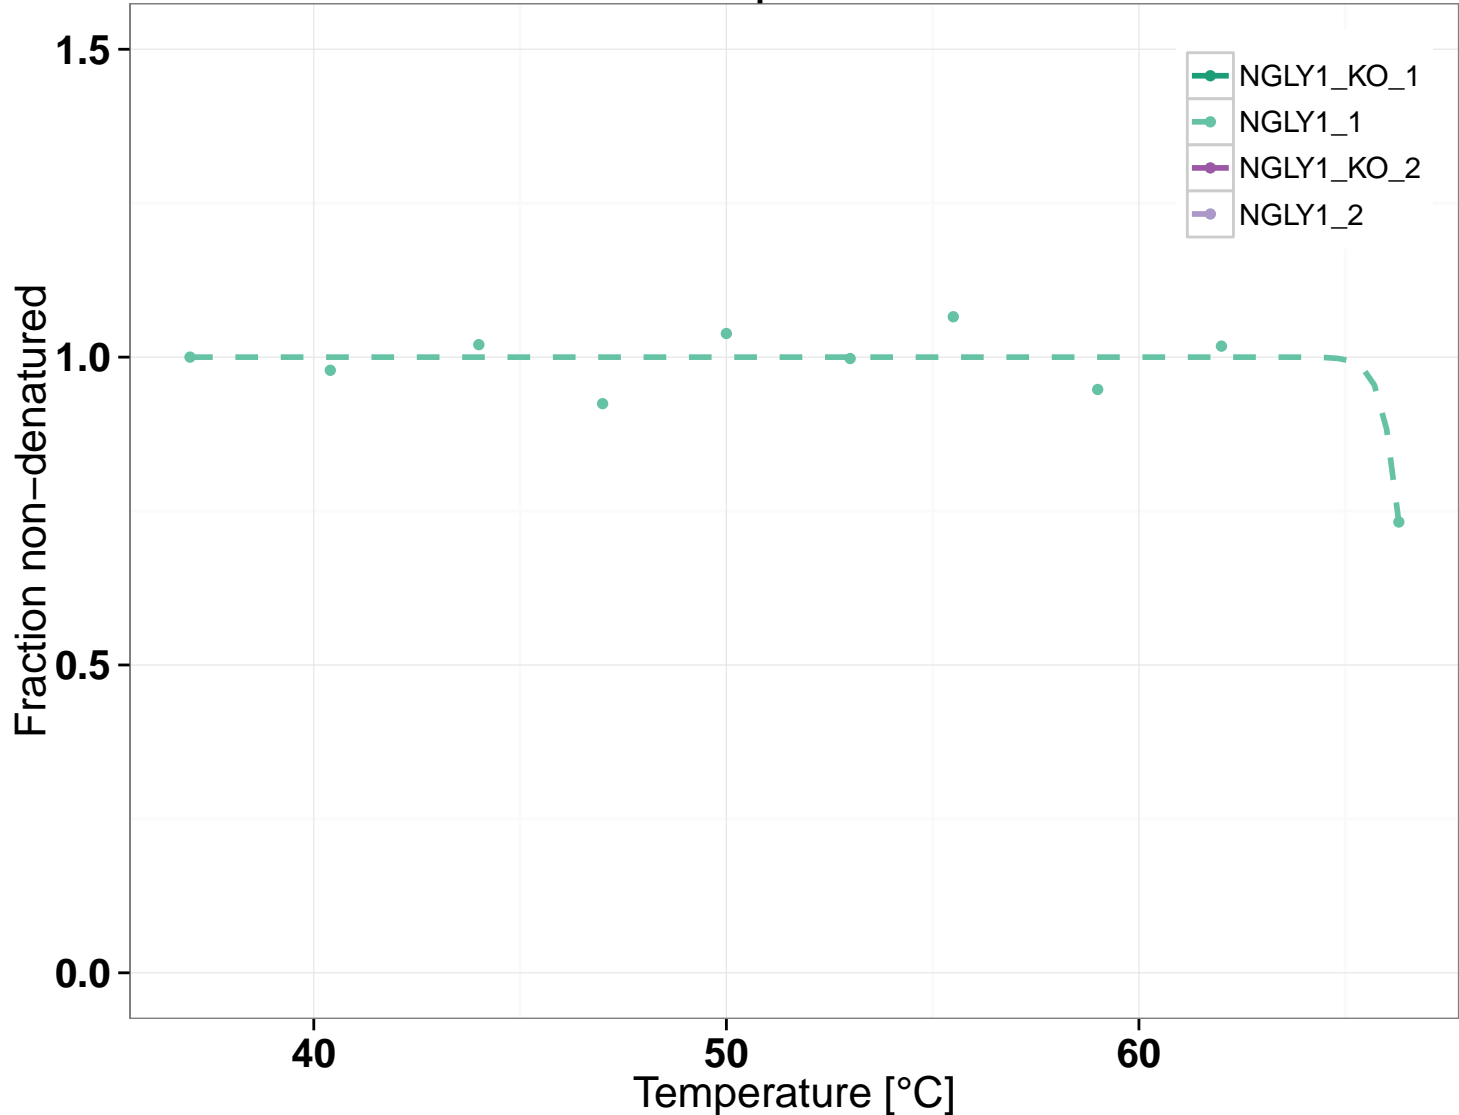

|            | meltPoint | slope | plateau | R2   |
|------------|-----------|-------|---------|------|
| NGLY1_KO_1 | -         | -     | -       | -    |
| NGLY1_1    | -         | -     | 0       | 0.81 |
| NGLY1_KO_2 | -         | -     | -       | -    |
| NGLY1_2    | -         | -     | -       | -    |

Supplement: Supplementary file 5319 [file 1]

IPI00000264.4|R3HCC1

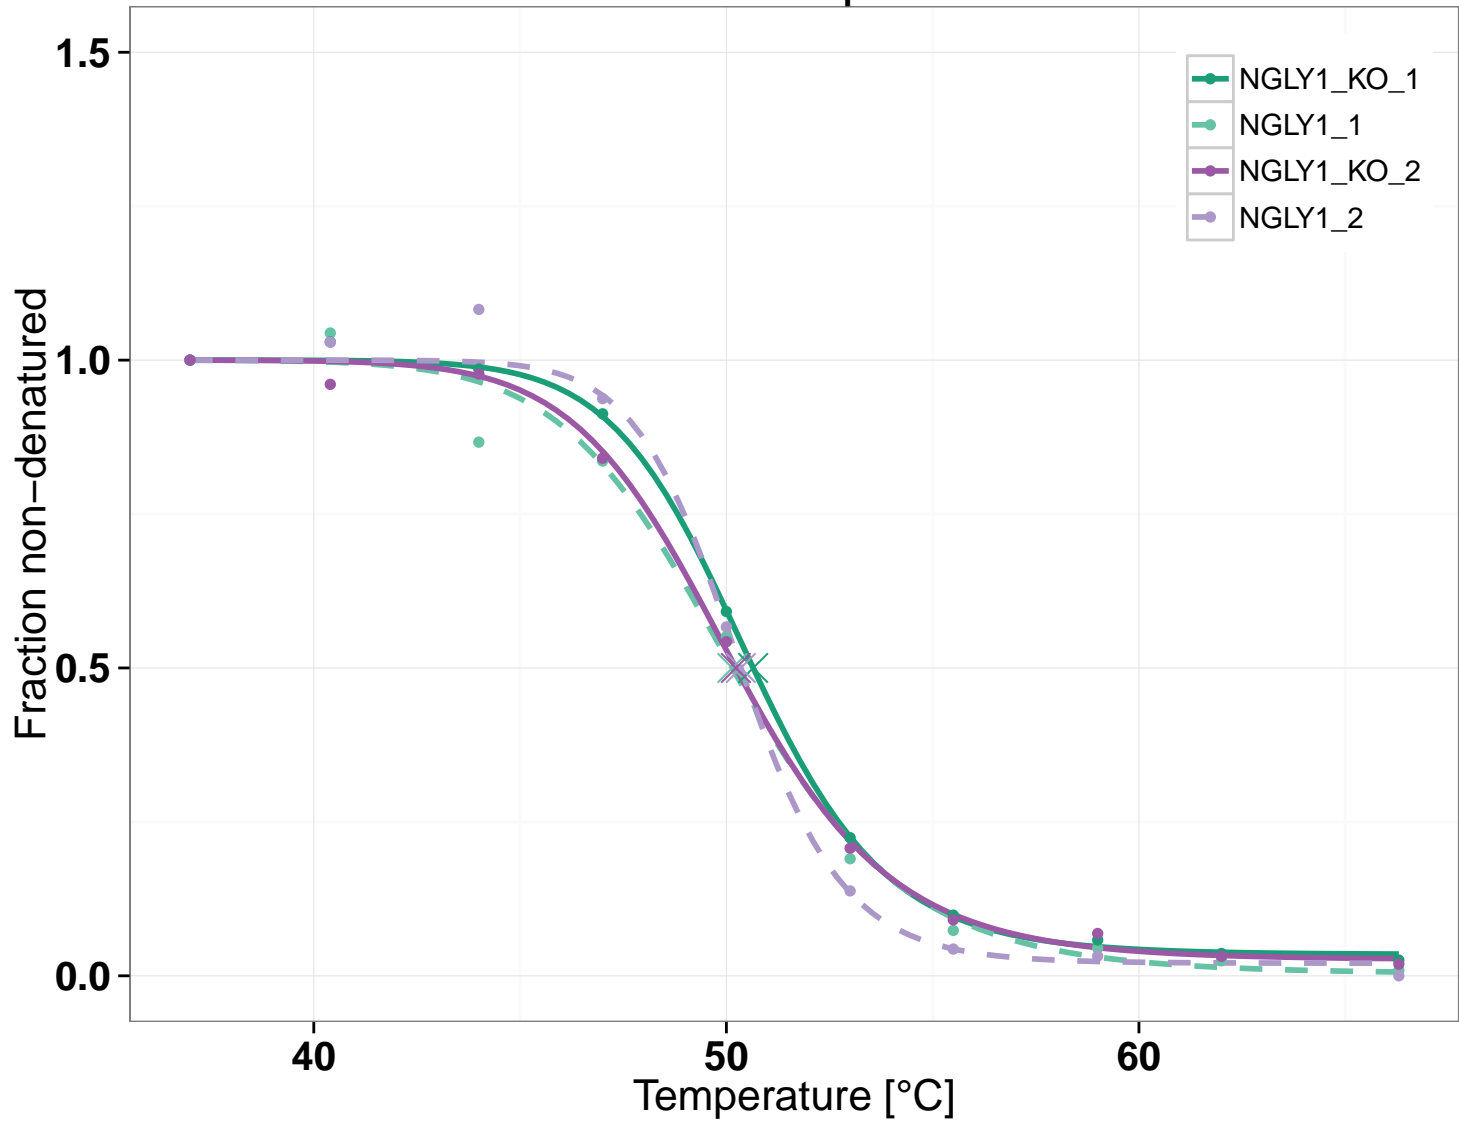

|            | meltPoint | slope | plateau | R2   |
|------------|-----------|-------|---------|------|
| NGLY1_KO_1 | 50.65     | -0.14 | 0.03    | 1    |
| NGLY1_1    | 50.14     | -0.12 | 0       | 0.99 |
| NGLY1_KO_2 | 50.23     | -0.13 | 0.03    | 1    |
| NGLY1_2    | 50.35     | -0.19 | 0.02    | 1    |

Supplement: Supplementary file 5320 [file 1]

# IPI00166044.1|RPTOR

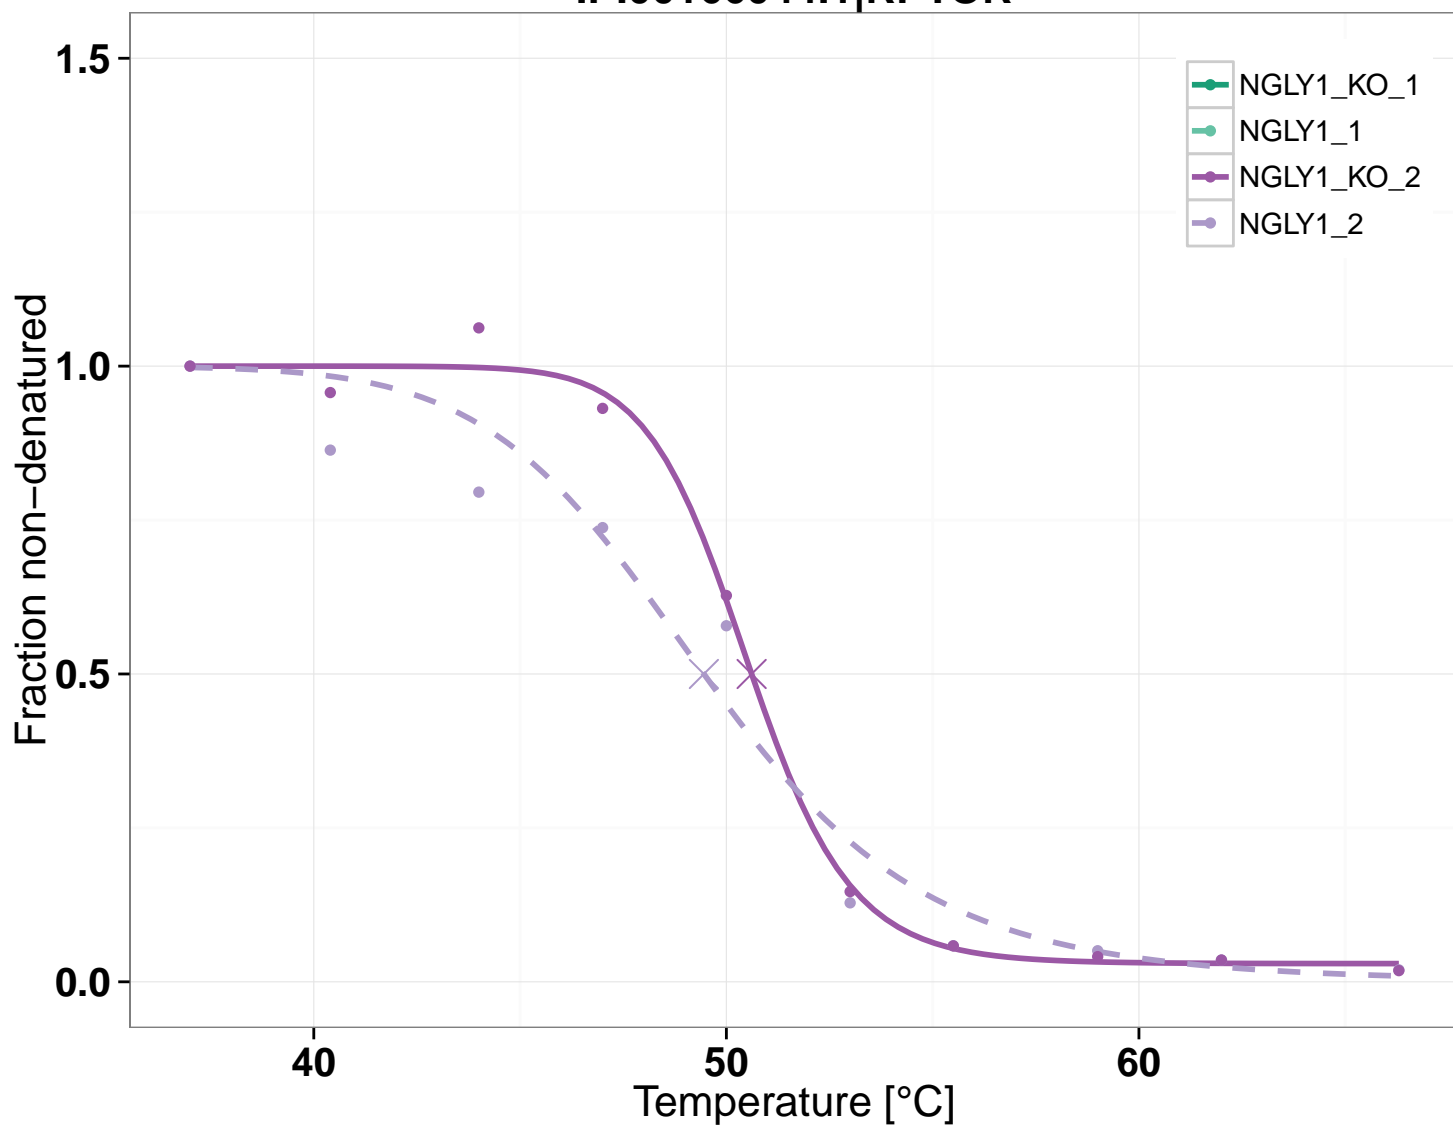

|            | meltPoint | slope  | plateau | R2   |
|------------|-----------|--------|---------|------|
| NGLY1_KO_1 | —         | —      | —       | —    |
| NGLY1_1    | —         | —      | —       | —    |
| NGLY1_KO_2 | 50.61     | -0.2   | 0.03    | 1    |
| NGLY1_2    | 49.45     | -0.094 | 0       | 0.96 |

Supplement: Supplementary file 5321 [file 1]

# IPI00290409.3|BNIP3

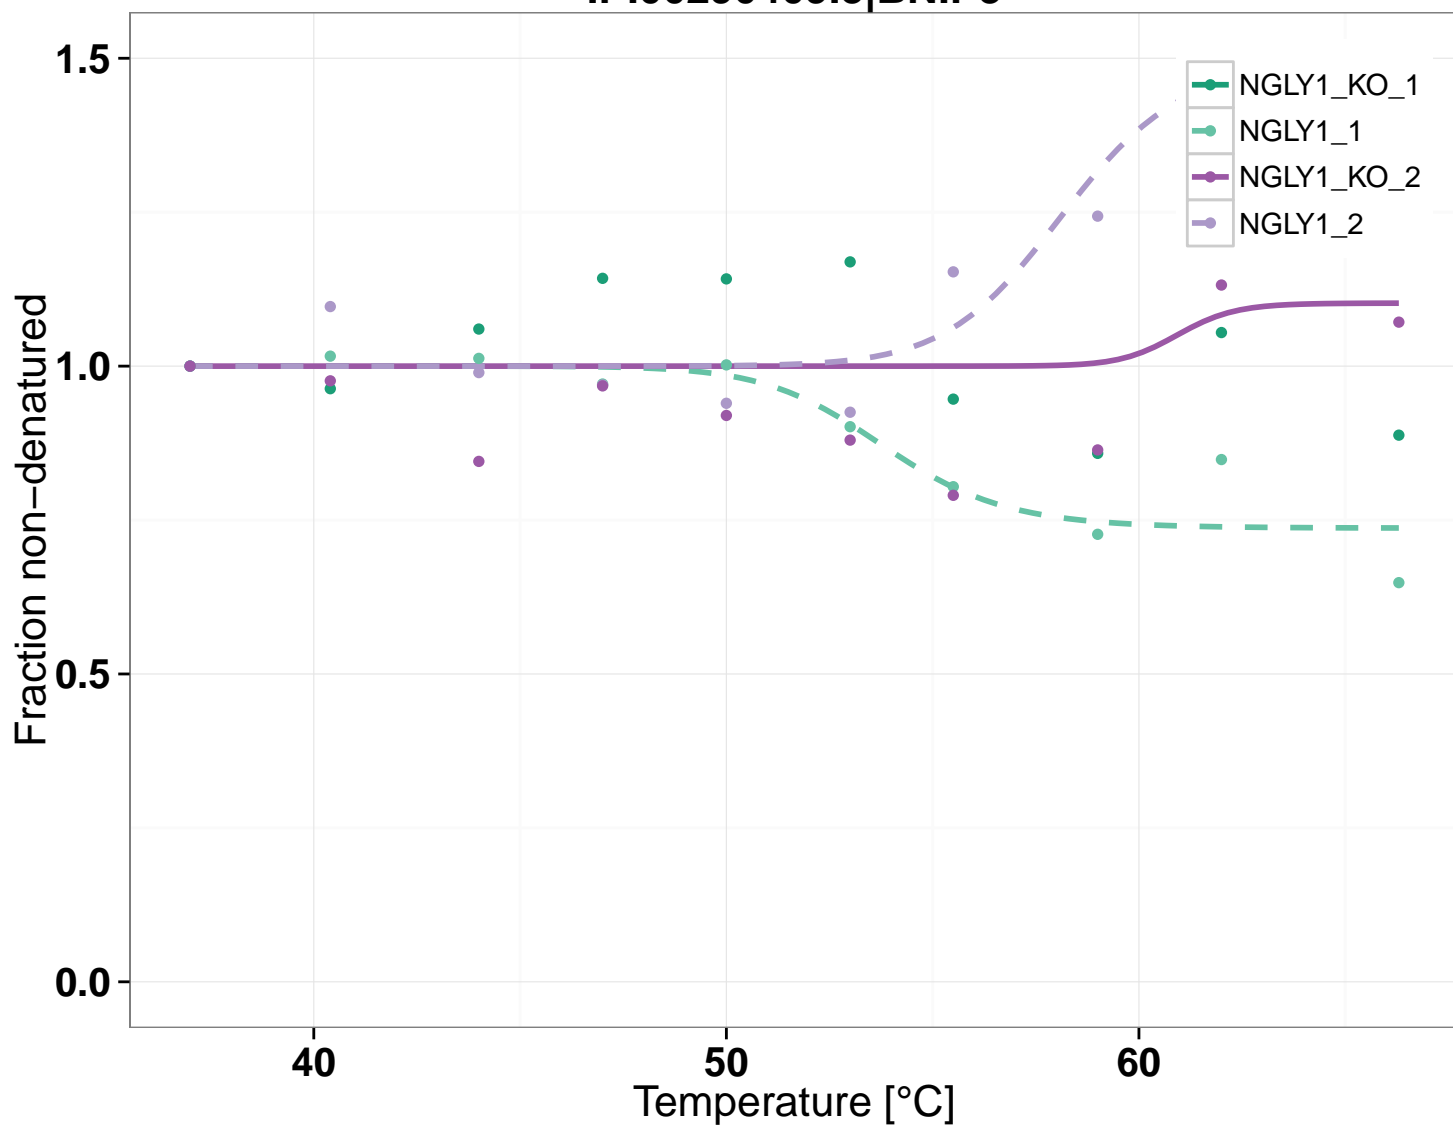

|            | meltPoint | slope  | plateau | R2    |
|------------|-----------|--------|---------|-------|
| NGLY1_KO_1 | —         | —      | —       | —     |
| NGLY1_1    | —         | -0.045 | 0.74    | 0.86  |
| NGLY1_KO_2 | —         | 0.037  | 1.1     | -0.13 |
| NGLY1_2    | —         | 0.086  | 1.5     | 0.9   |

Supplement: Supplementary file 5322 [file 1]

IPI00009747.1|LSS

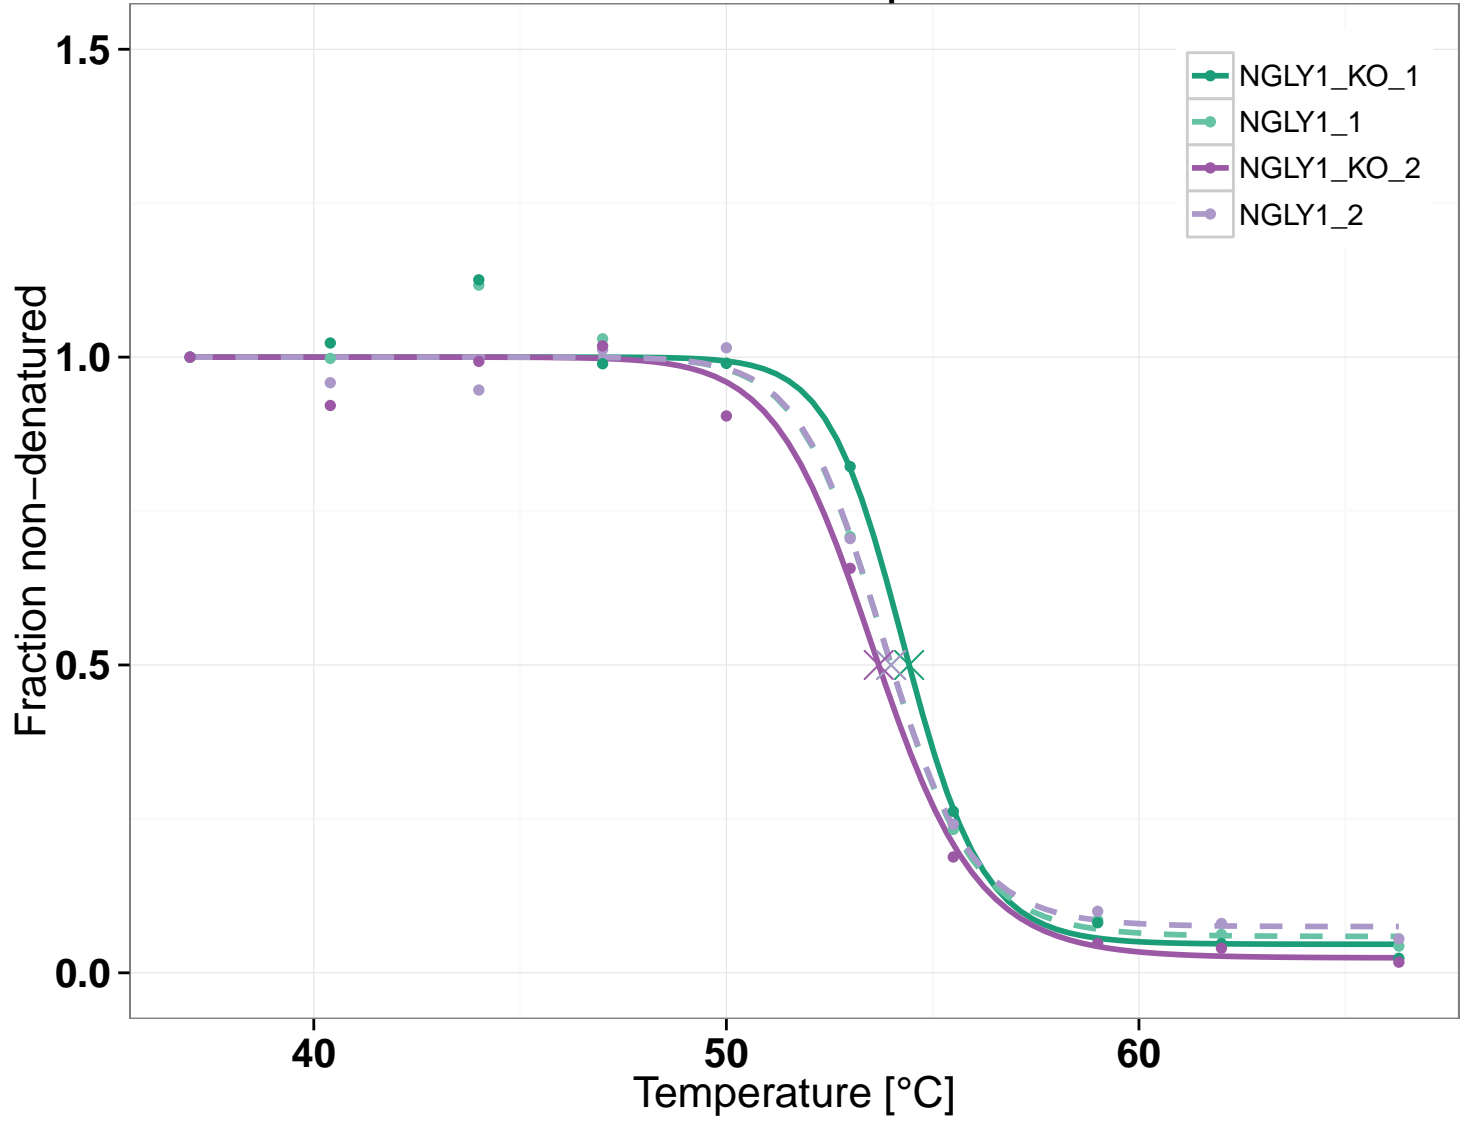

|            | meltPoint | slope | plateau | R2   |
|------------|-----------|-------|---------|------|
| NGLY1_KO_1 | 54.43     | -0.25 | 0.05    | 0.99 |
| NGLY1_1    | 53.99     | -0.22 | 0.06    | 0.99 |
| NGLY1_KO_2 | 53.69     | -0.2  | 0.02    | 0.99 |
| NGLY1_2    | 53.99     | -0.22 | 0.08    | 1    |

Supplement: Supplementary file 5323 [file 1]
