# Supplementary material (part 54 of 85)
Source: publisher figshare collection journal article supplement (https://gsajournals.figshare.com/articles/dataset/_/12014913)

IPI00477131.1|SYPL2

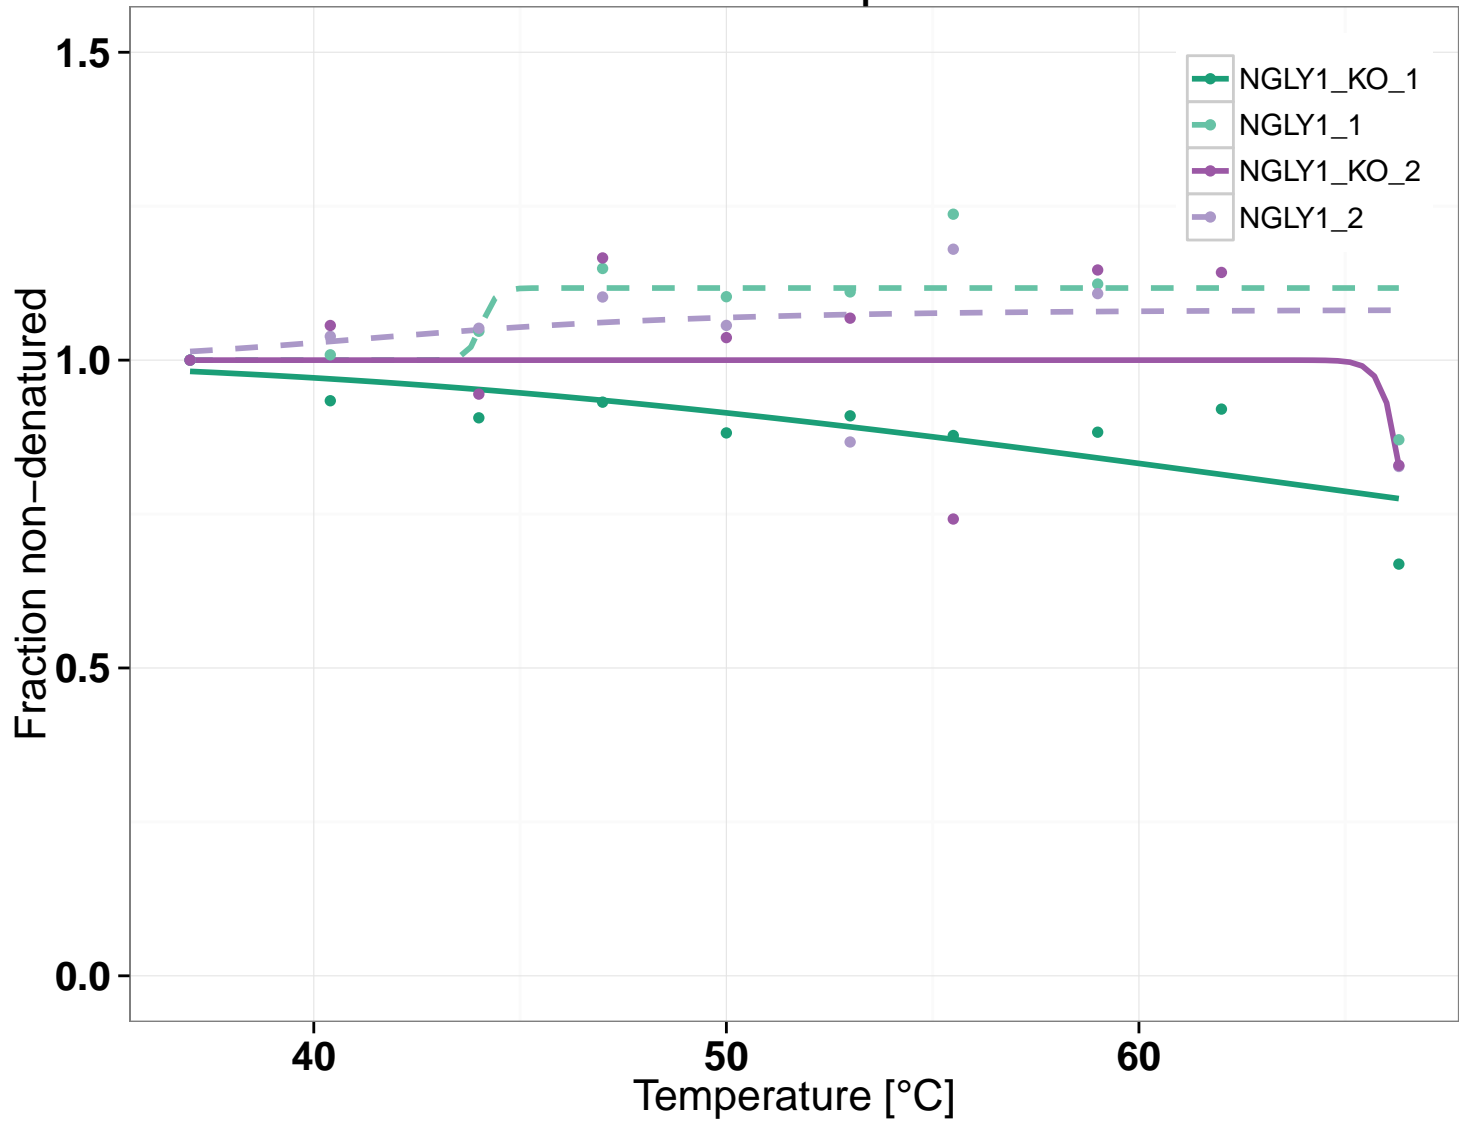

|            | meltPoint | slope   | plateau | R2   |
|------------|-----------|---------|---------|------|
| NGLY1_KO_1 | -         | -0.0091 | 0       | 0.56 |
| NGLY1_1    | -         | 0.17    | 1.12    | 0.2  |
| NGLY1_KO_2 | -         | -       | 0       | 0.16 |
| NGLY1_2    | -         | 0.0054  | 1.08    | 0.03 |

Supplement: Supplementary file 5324 [file 1]

IPI00830120.2|C12ORF48

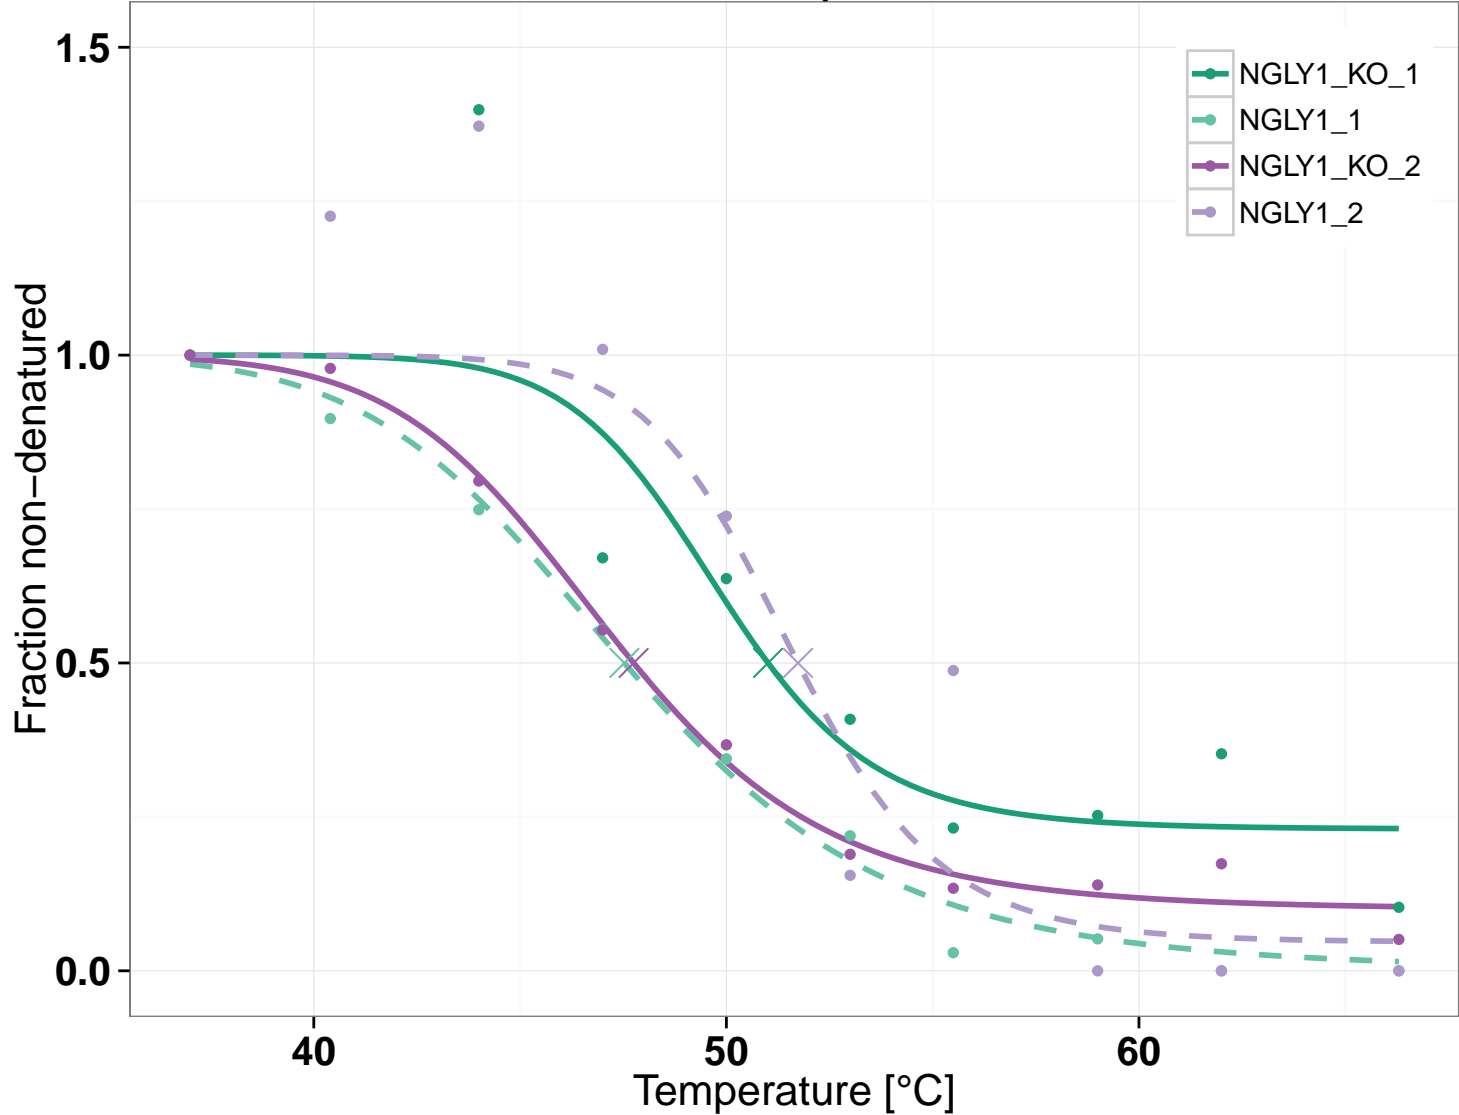

|            | meltPoint | slope  | plateau | R2   |
|------------|-----------|--------|---------|------|
| NGLY1_KO_1 | 51.01     | -0.1   | 0.23    | 0.59 |
| NGLY1_1    | 47.53     | -0.079 | 0       | 0.99 |
| NGLY1_KO_2 | 47.75     | -0.086 | 0.1     | 0.99 |
| NGLY1_2    | 51.74     | -0.13  | 0.05    | 0.86 |

Supplement: Supplementary file 5325 [file 1]

# IPI00554752.3|PRKAR2B

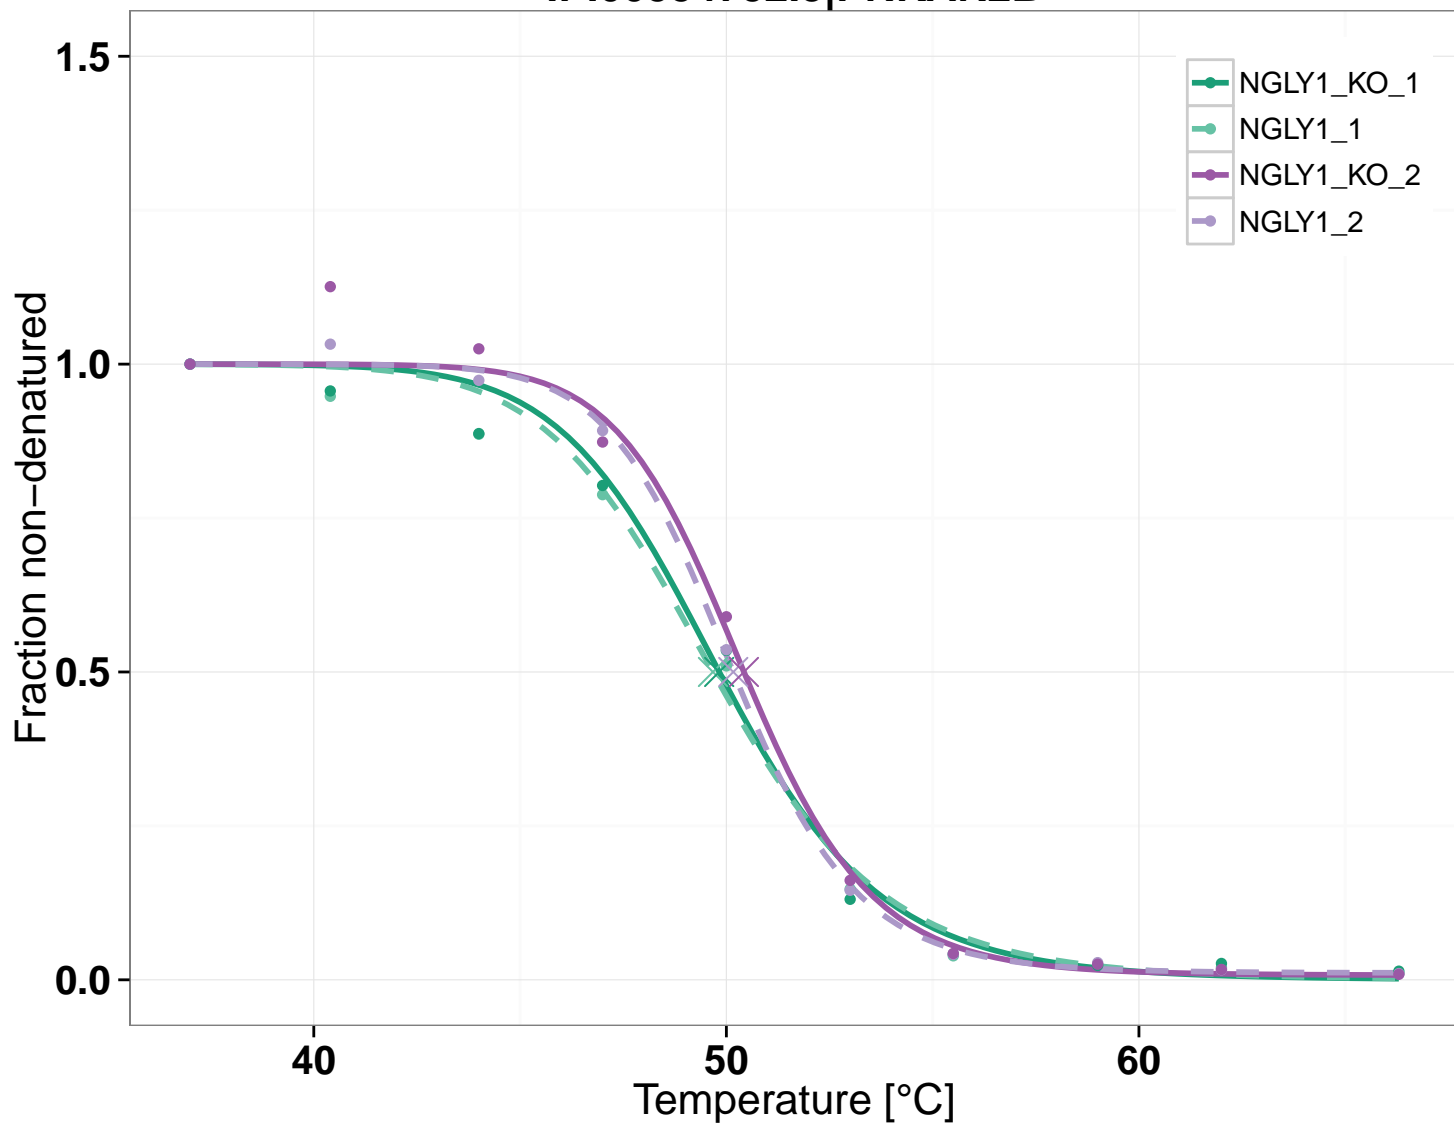

|            | meltPoint | slope | plateau | R2   |
|------------|-----------|-------|---------|------|
| NGLY1_KO_1 | 49.83     | -0.13 | 0       | 0.99 |
| NGLY1_1    | 49.67     | -0.12 | 0       | 0.99 |
| NGLY1_KO_2 | 50.43     | -0.16 | 0.01    | 0.99 |
| NGLY1_2    | 50.17     | -0.16 | 0.01    | 1    |

Supplement: Supplementary file 5326 [file 1]

IPI00009290.3|FANCF

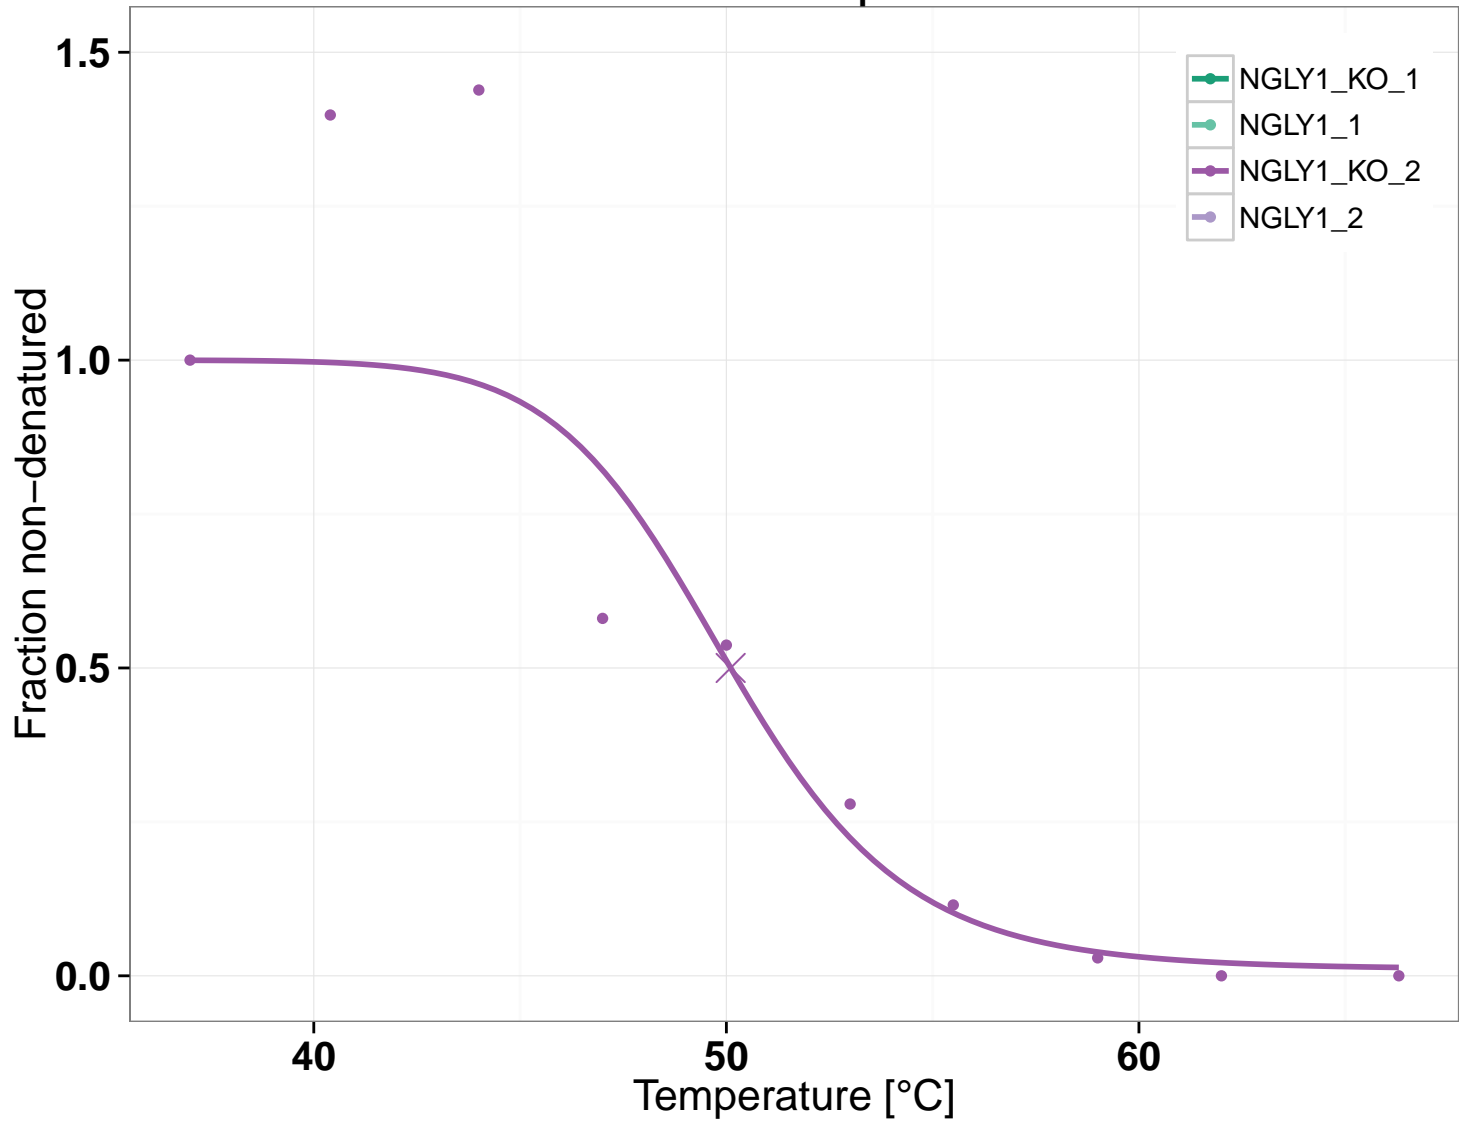

|            | meltPoint | slope | plateau | R2   |
|------------|-----------|-------|---------|------|
| NGLY1_KO_1 | -         | -     | -       | -    |
| NGLY1_1    | -         | -     | -       | -    |
| NGLY1_KO_2 | 50.1      | -0.12 | 0.01    | 0.84 |
| NGLY1_2    | -         | -     | -       | -    |

Supplement: Supplementary file 5327 [file 1]

# IPI00304181.4|EIF2C3

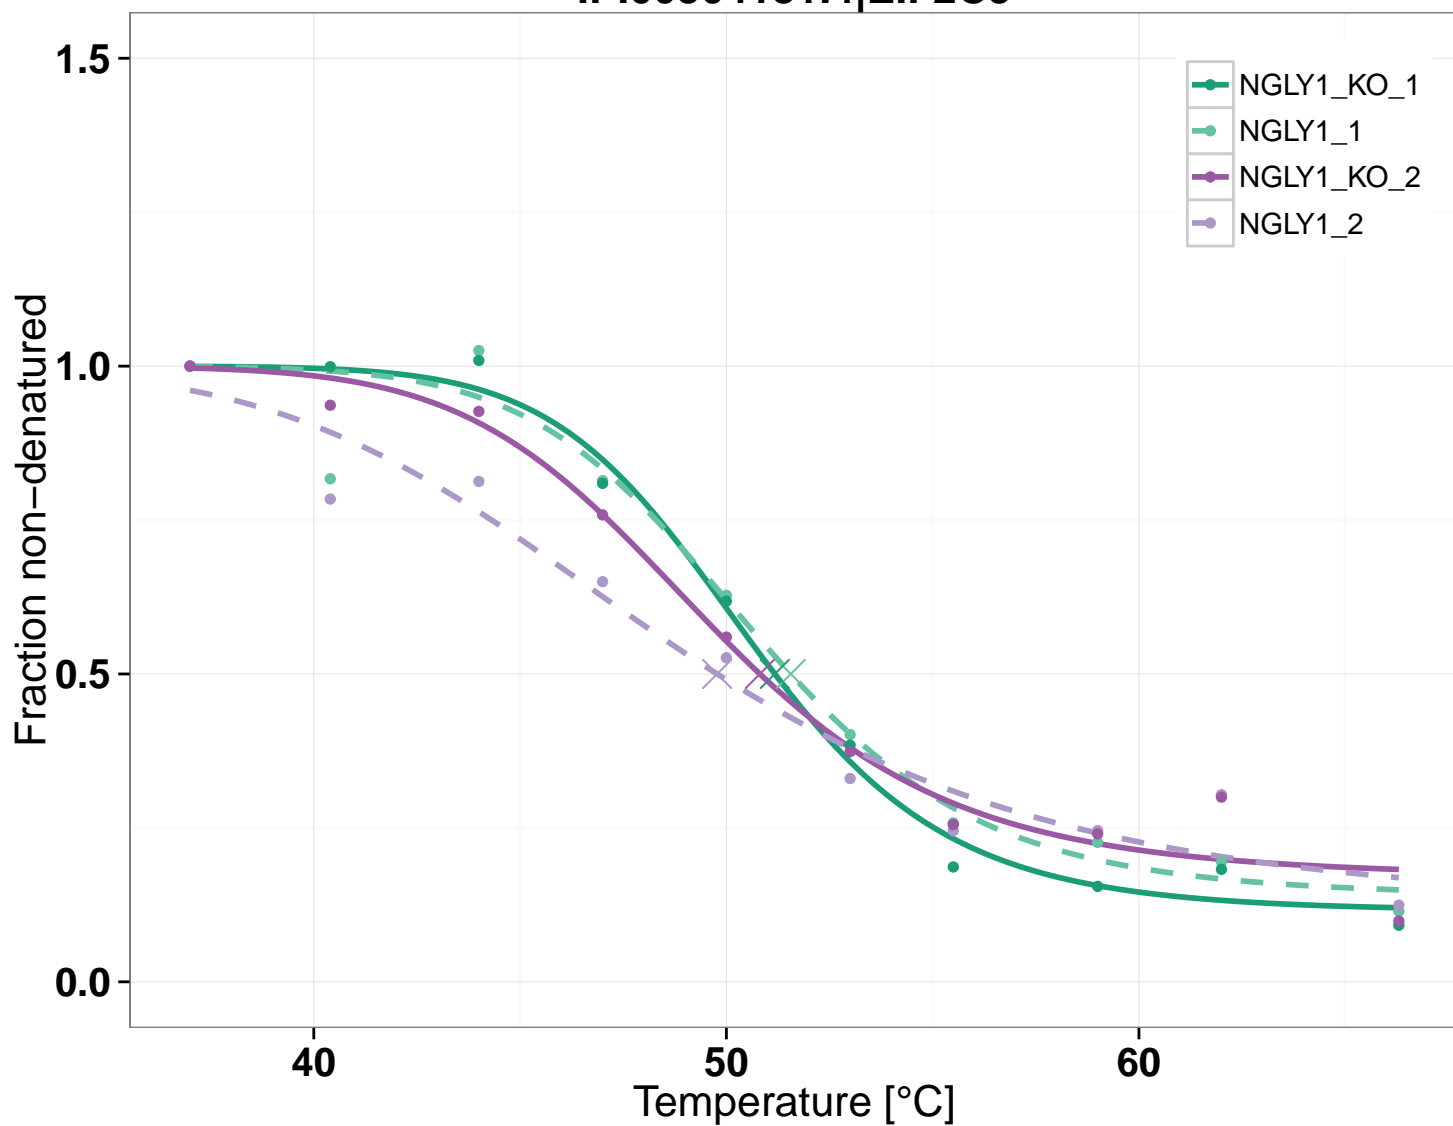

|            | meltPoint | slope  | plateau | R2   |
|------------|-----------|--------|---------|------|
| NGLY1_KO_1 | 51.17     | -0.093 | 0.11    | 0.99 |
| NGLY1_1    | 51.56     | -0.079 | 0.14    | 0.96 |
| NGLY1_KO_2 | 50.81     | -0.07  | 0.17    | 0.98 |
| NGLY1_2    | 49.78     | -0.047 | 0.11    | 0.95 |

Supplement: Supplementary file 5328 [file 1]

# IPI00604777.5|DPP9

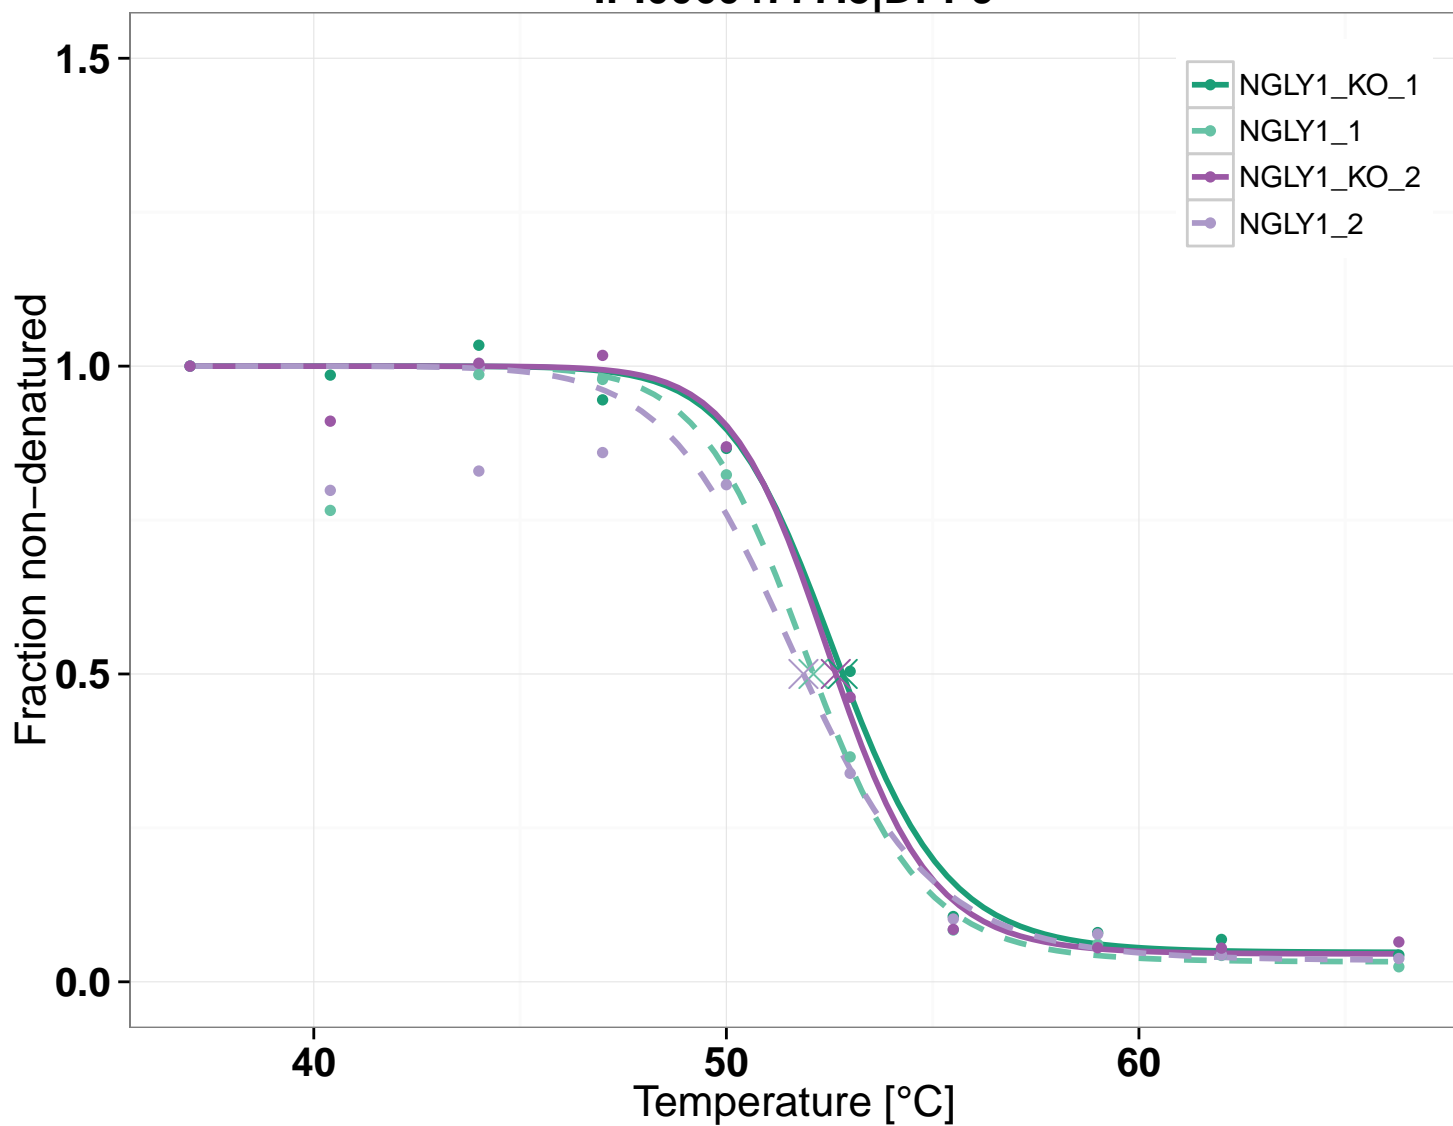

|            | meltPoint | slope | plateau | R2   |
|------------|-----------|-------|---------|------|
| NGLY1_KO_1 | 52.82     | -0.18 | 0.05    | 0.99 |
| NGLY1_1    | 52.11     | -0.18 | 0.03    | 0.97 |
| NGLY1_KO_2 | 52.65     | -0.2  | 0.05    | 0.99 |
| NGLY1_2    | 51.87     | -0.15 | 0.03    | 0.94 |

Supplement: Supplementary file 5329 [file 1]

# IPI00639824.1|RIT1

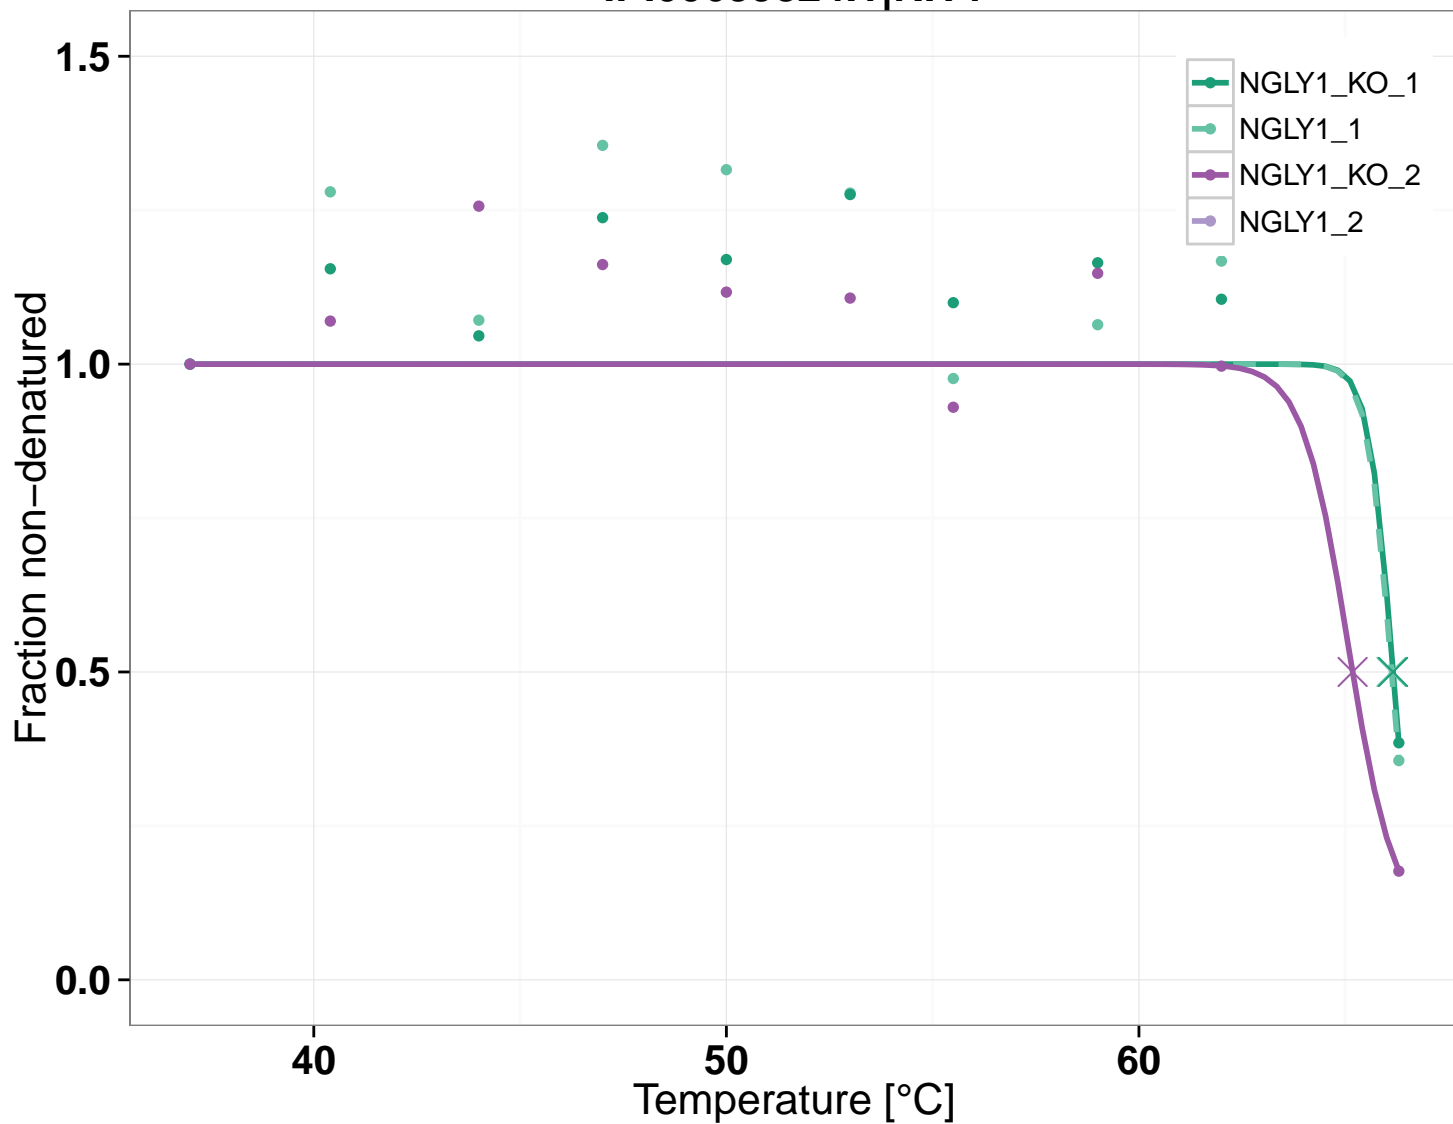

|            | meltPoint | slope | plateau | R2   |
|------------|-----------|-------|---------|------|
| NGLY1_KO_1 | 66.16     | -0.84 | 0       | 0.59 |
| NGLY1_1    | 66.12     | -0.84 | 0       | 0.45 |
| NGLY1_KO_2 | 65.18     | -0.41 | 0.08    | 0.82 |
| NGLY1_2    | -         | -     | -       | -    |

Supplement: Supplementary file 5330 [file 1]

IPI00065521.5|PUS10

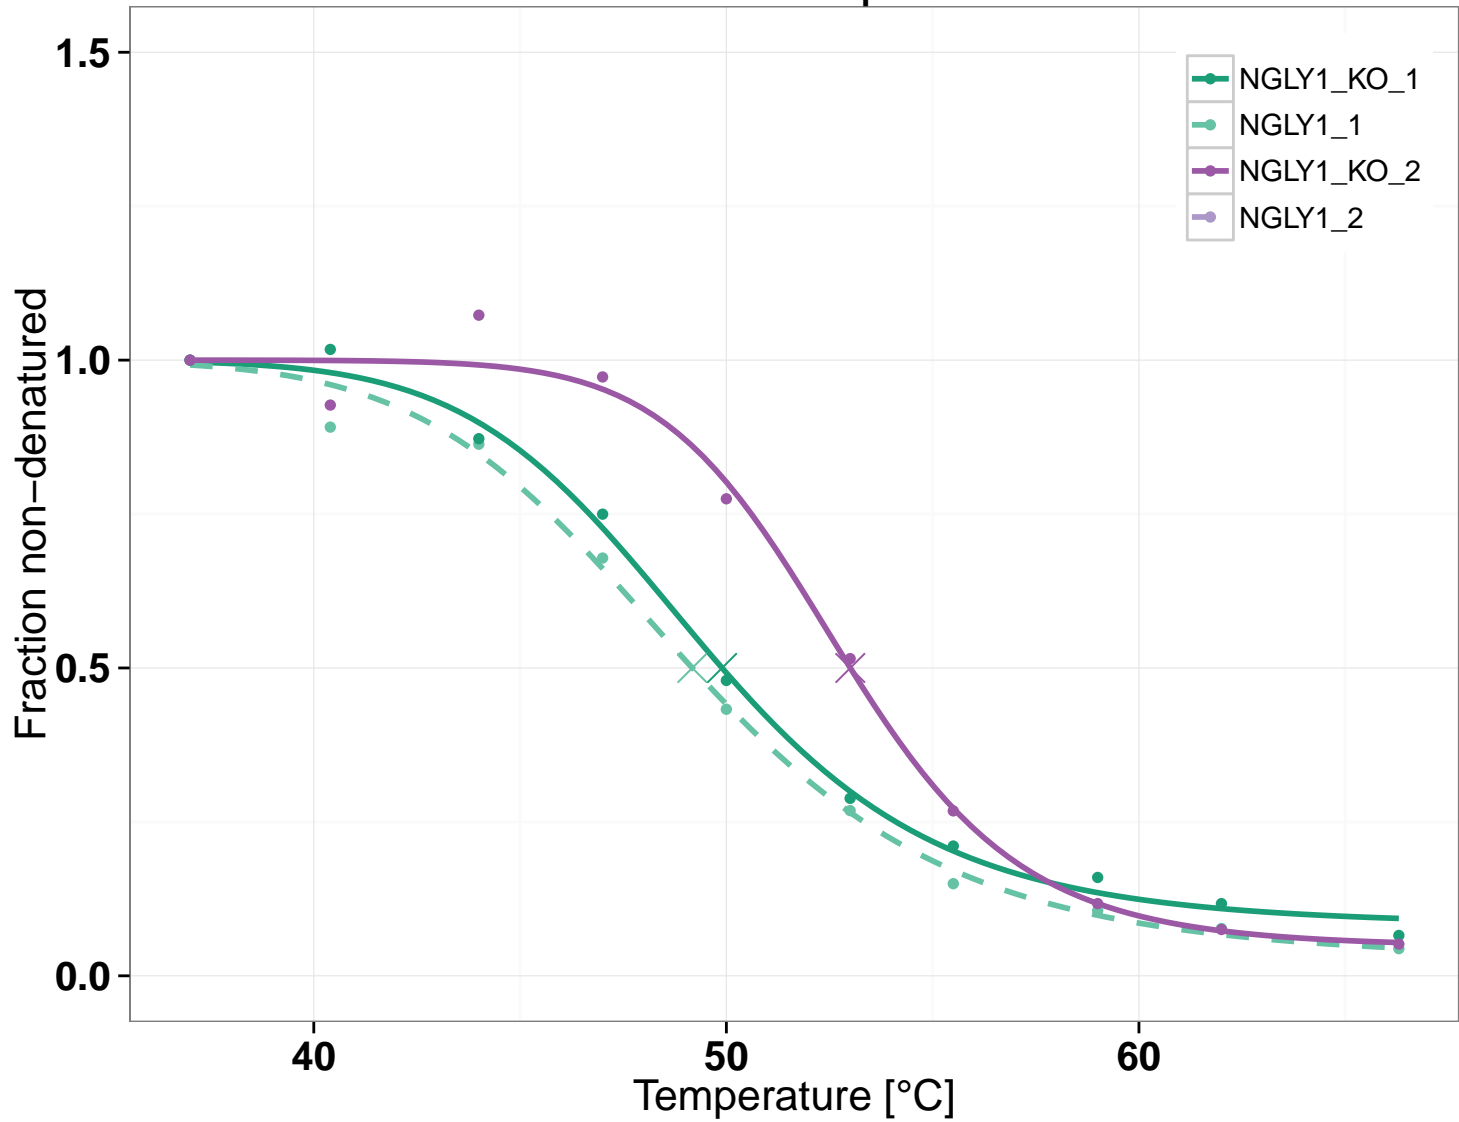

|            | meltPoint | slope  | plateau | R2   |
|------------|-----------|--------|---------|------|
| NGLY1_KO_1 | 49.9      | -0.08  | 0.08    | 1    |
| NGLY1_1    | 49.17     | -0.075 | 0.03    | 1    |
| NGLY1_KO_2 | 53        | -0.11  | 0.05    | 0.99 |
| NGLY1_2    | -         | -      | -       | -    |

Supplement: Supplementary file 5331 [file 1]

# IPI00021831.1|PRKAR1A

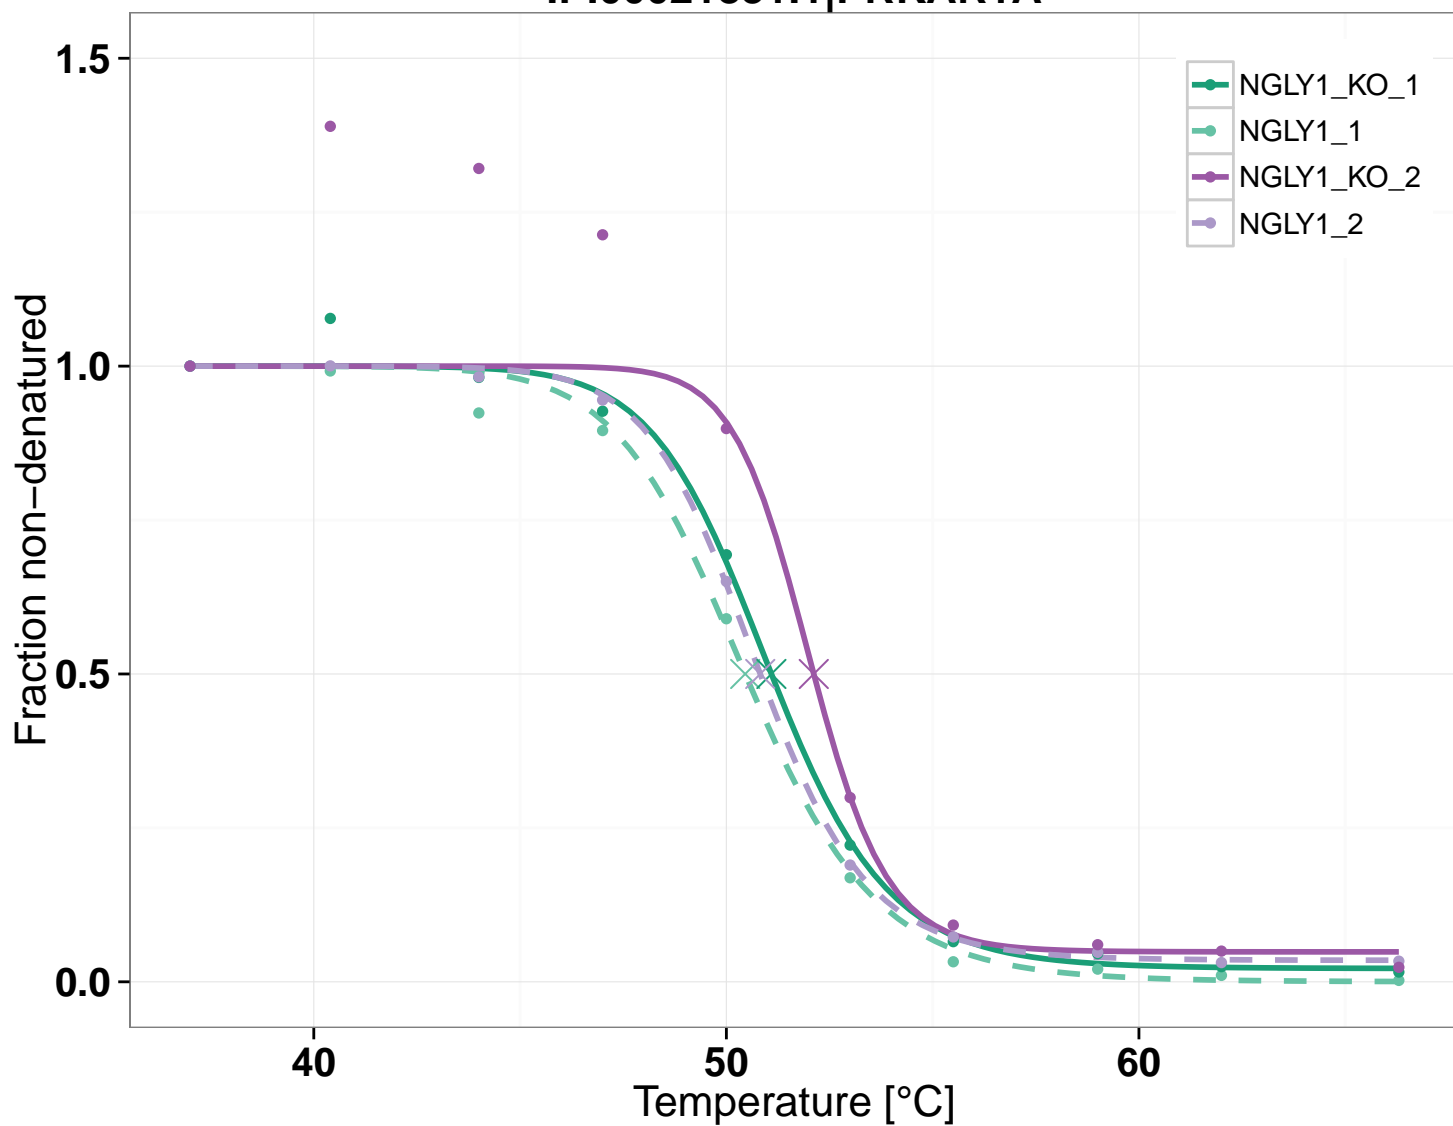

|            | meltPoint | slope | plateau | R2  |
|------------|-----------|-------|---------|-----|
| NGLY1_KO_1 | 51.09     | -0.17 | 0.02    | 1   |
| NGLY1_1    | 50.46     | -0.16 | 0       | 1   |
| NGLY1_KO_2 | 52.12     | -0.25 | 0.05    | 0.9 |
| NGLY1_2    | 50.82     | -0.18 | 0.03    | 1   |

Supplement: Supplementary file 5332 [file 1]

IPI00029267.1|SNRPB2

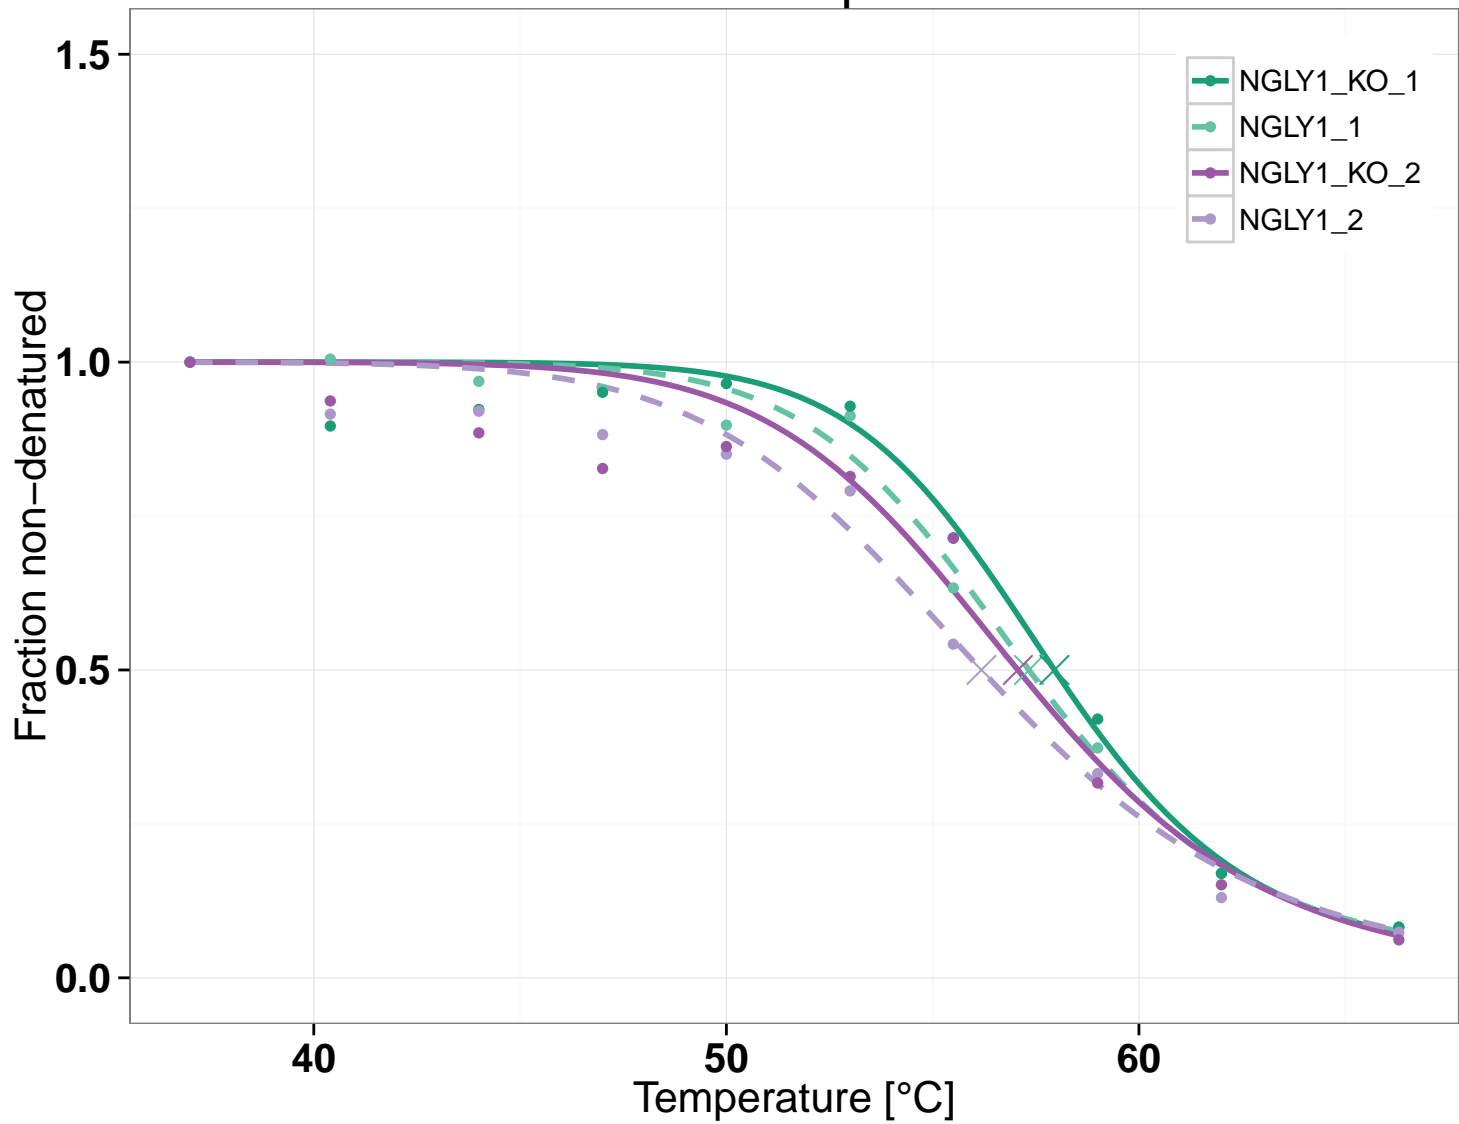

|            | meltPoint | slope  | plateau | R2   |
|------------|-----------|--------|---------|------|
| NGLY1_KO_1 | 57.95     | -0.1   | 0.03    | 0.98 |
| NGLY1_1    | 57.33     | -0.092 | 0.03    | 0.99 |
| NGLY1_KO_2 | 57.07     | -0.083 | 0       | 0.95 |
| NGLY1_2    | 56.18     | -0.074 | 0       | 0.98 |

Supplement: Supplementary file 5333 [file 1]

IPI00641645.1|NFIA

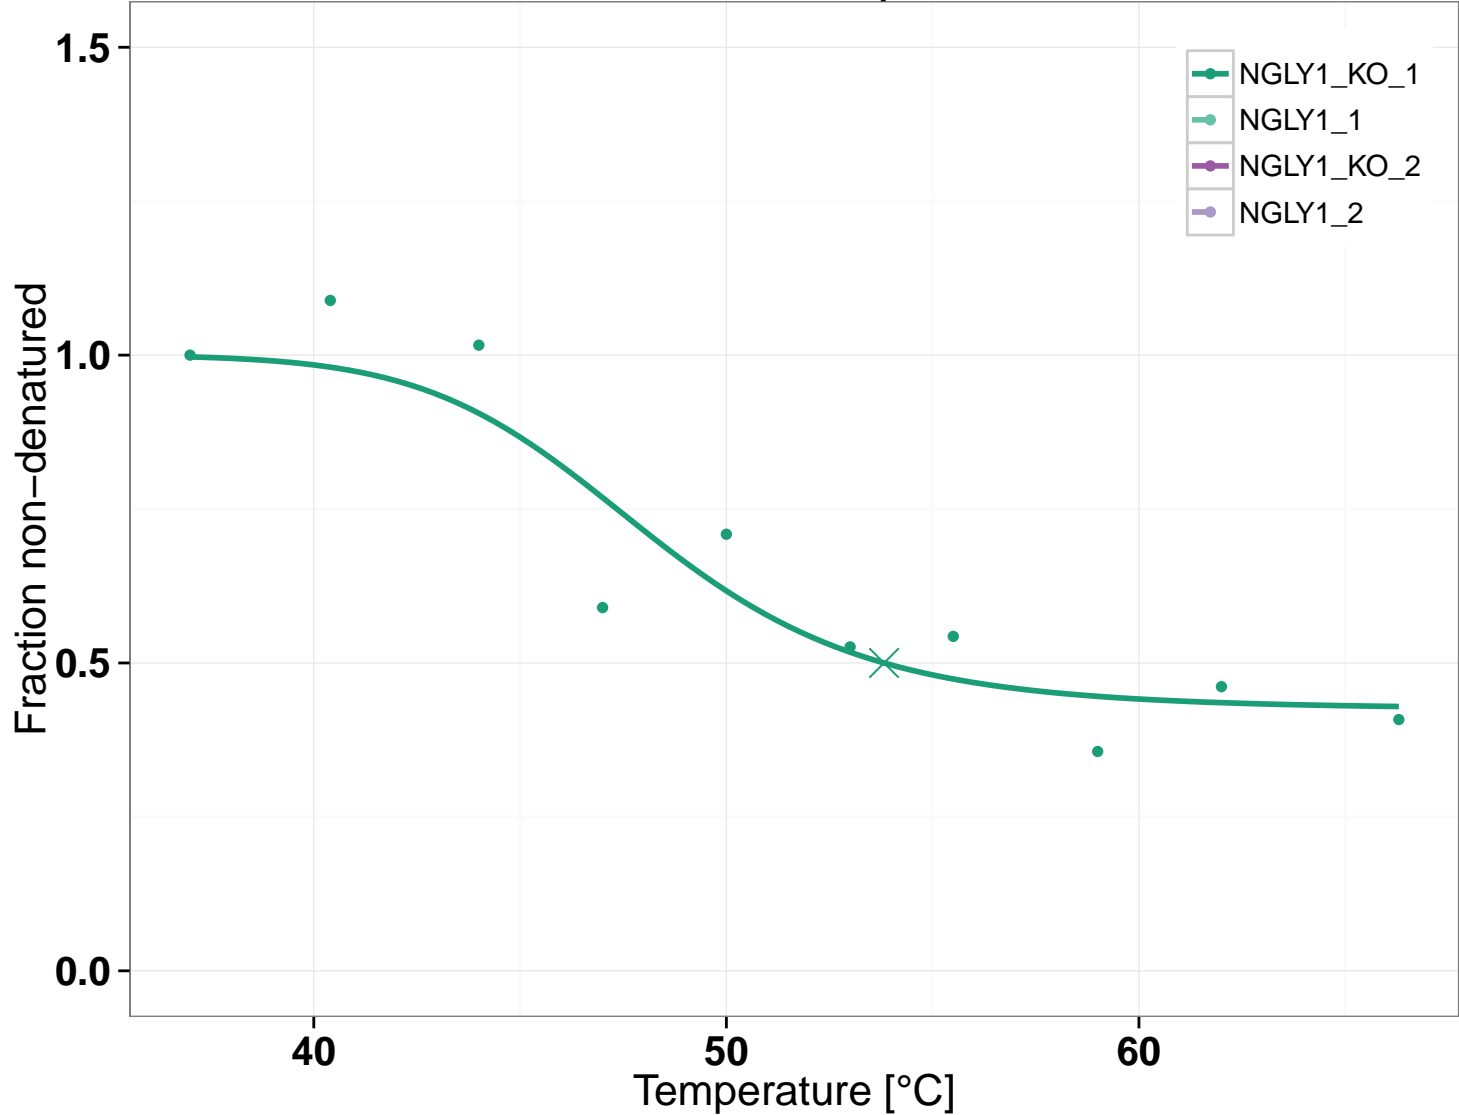

|            | meltPoint | slope  | plateau | R2   |
|------------|-----------|--------|---------|------|
| NGLY1_KO_1 | 53.82     | -0.054 | 0.42    | 0.88 |
| NGLY1_1    | -         | -      | -       | -    |
| NGLY1_KO_2 | -         | -      | -       | -    |
| NGLY1_2    | -         | -      | -       | -    |

Supplement: Supplementary file 5334 [file 1]

IPI00306439.1|C18ORF55

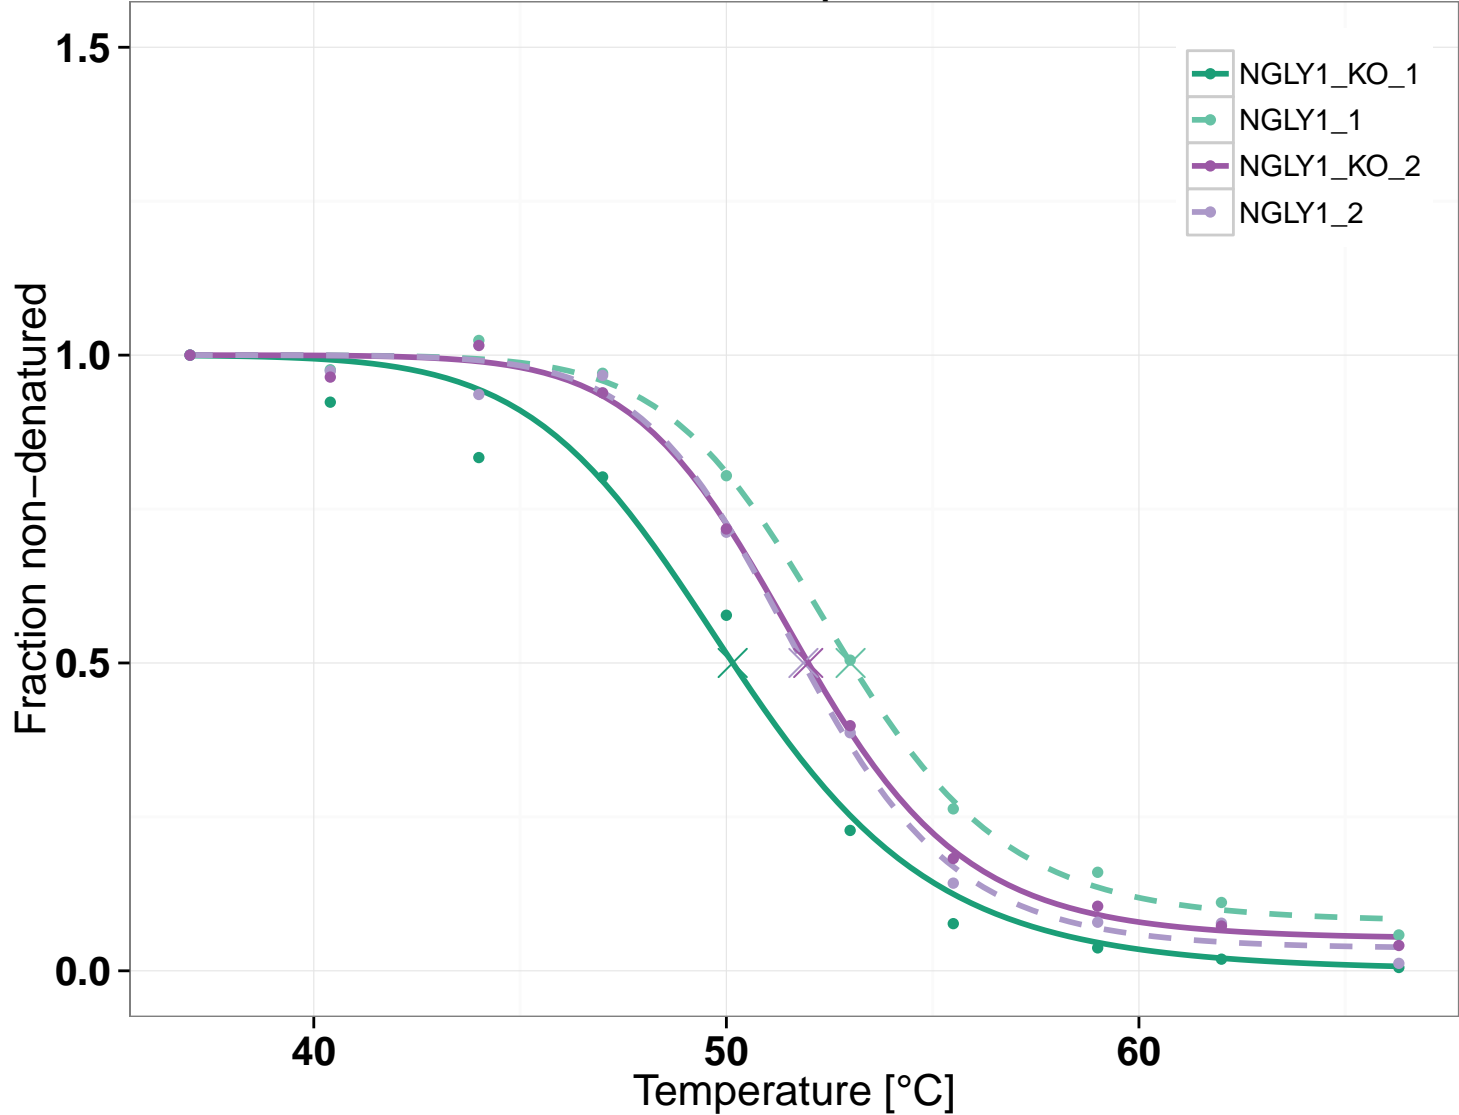

|            | meltPoint | slope | plateau | R2   |
|------------|-----------|-------|---------|------|
| NGLY1_KO_1 | 50.15     | -0.1  | 0       | 0.98 |
| NGLY1_1    | 53.01     | -0.11 | 0.08    | 1    |
| NGLY1_KO_2 | 51.98     | -0.12 | 0.05    | 1    |
| NGLY1_2    | 51.87     | -0.13 | 0.04    | 1    |

Supplement: Supplementary file 5335 [file 1]

IPI00455004.5|FDPSL2A

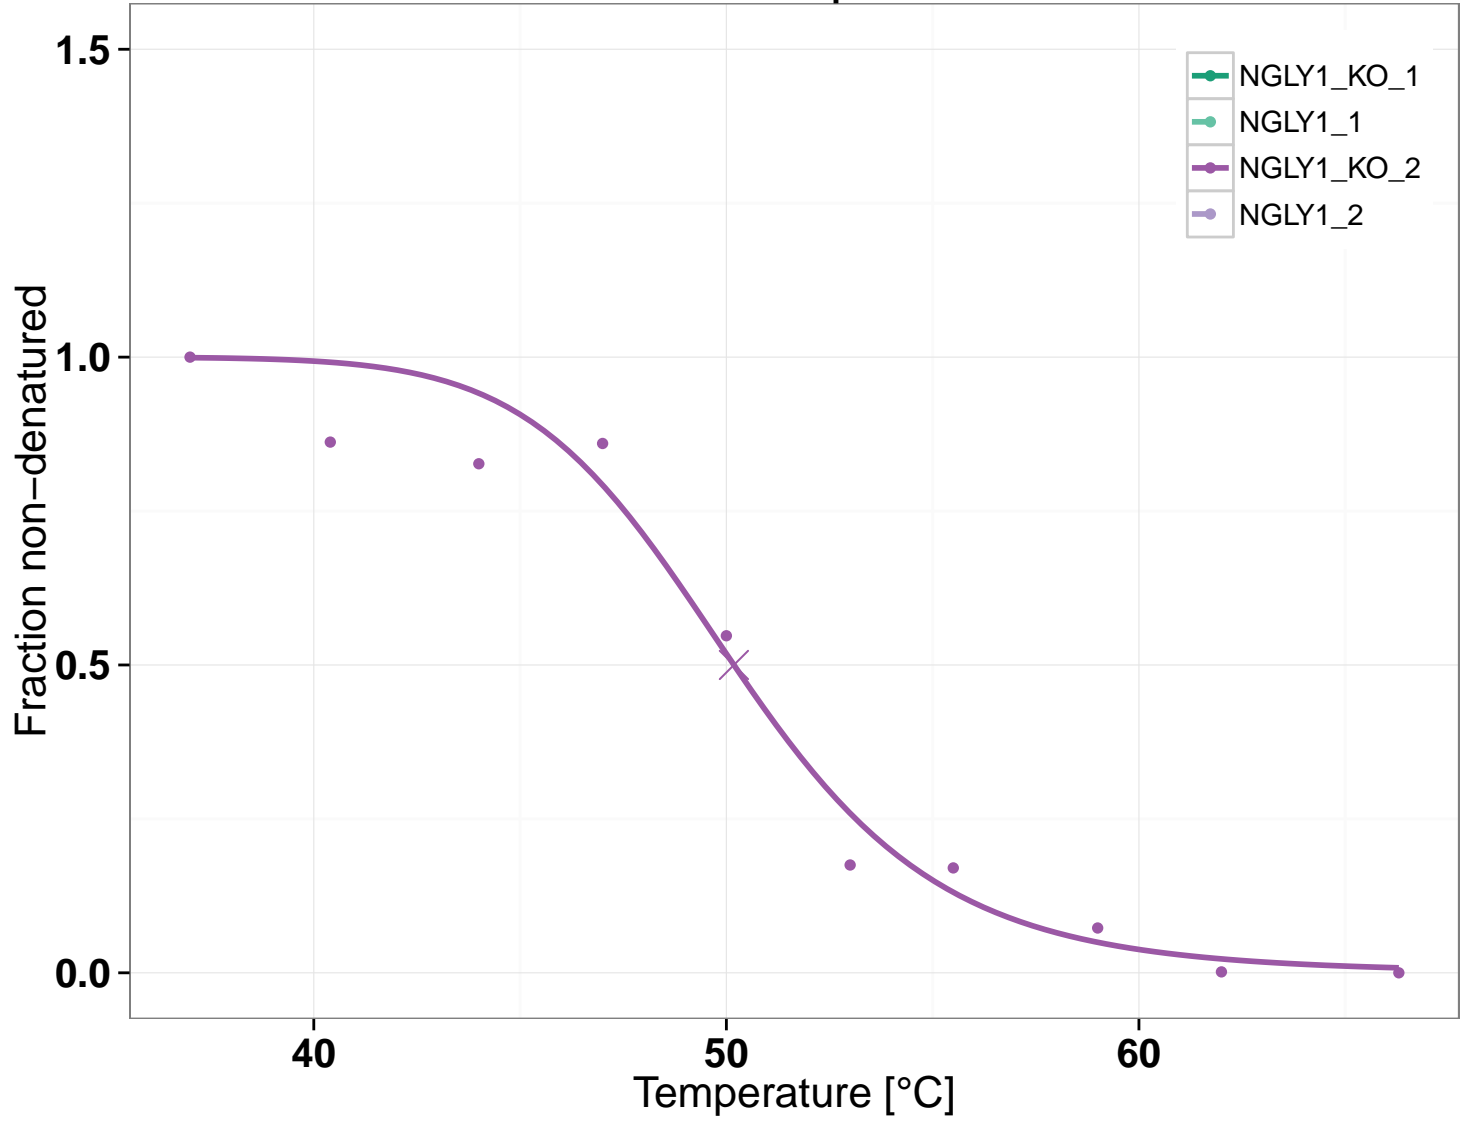

|            | meltPoint | slope  | plateau | R2   |
|------------|-----------|--------|---------|------|
| NGLY1_KO_1 | —         | —      | —       | —    |
| NGLY1_1    | —         | —      | —       | —    |
| NGLY1_KO_2 | 50.18     | -0.099 | 0       | 0.97 |
| NGLY1_2    | —         | —      | —       | —    |

Supplement: Supplementary file 5336 [file 1]

IPI00412376.2|C2ORF28

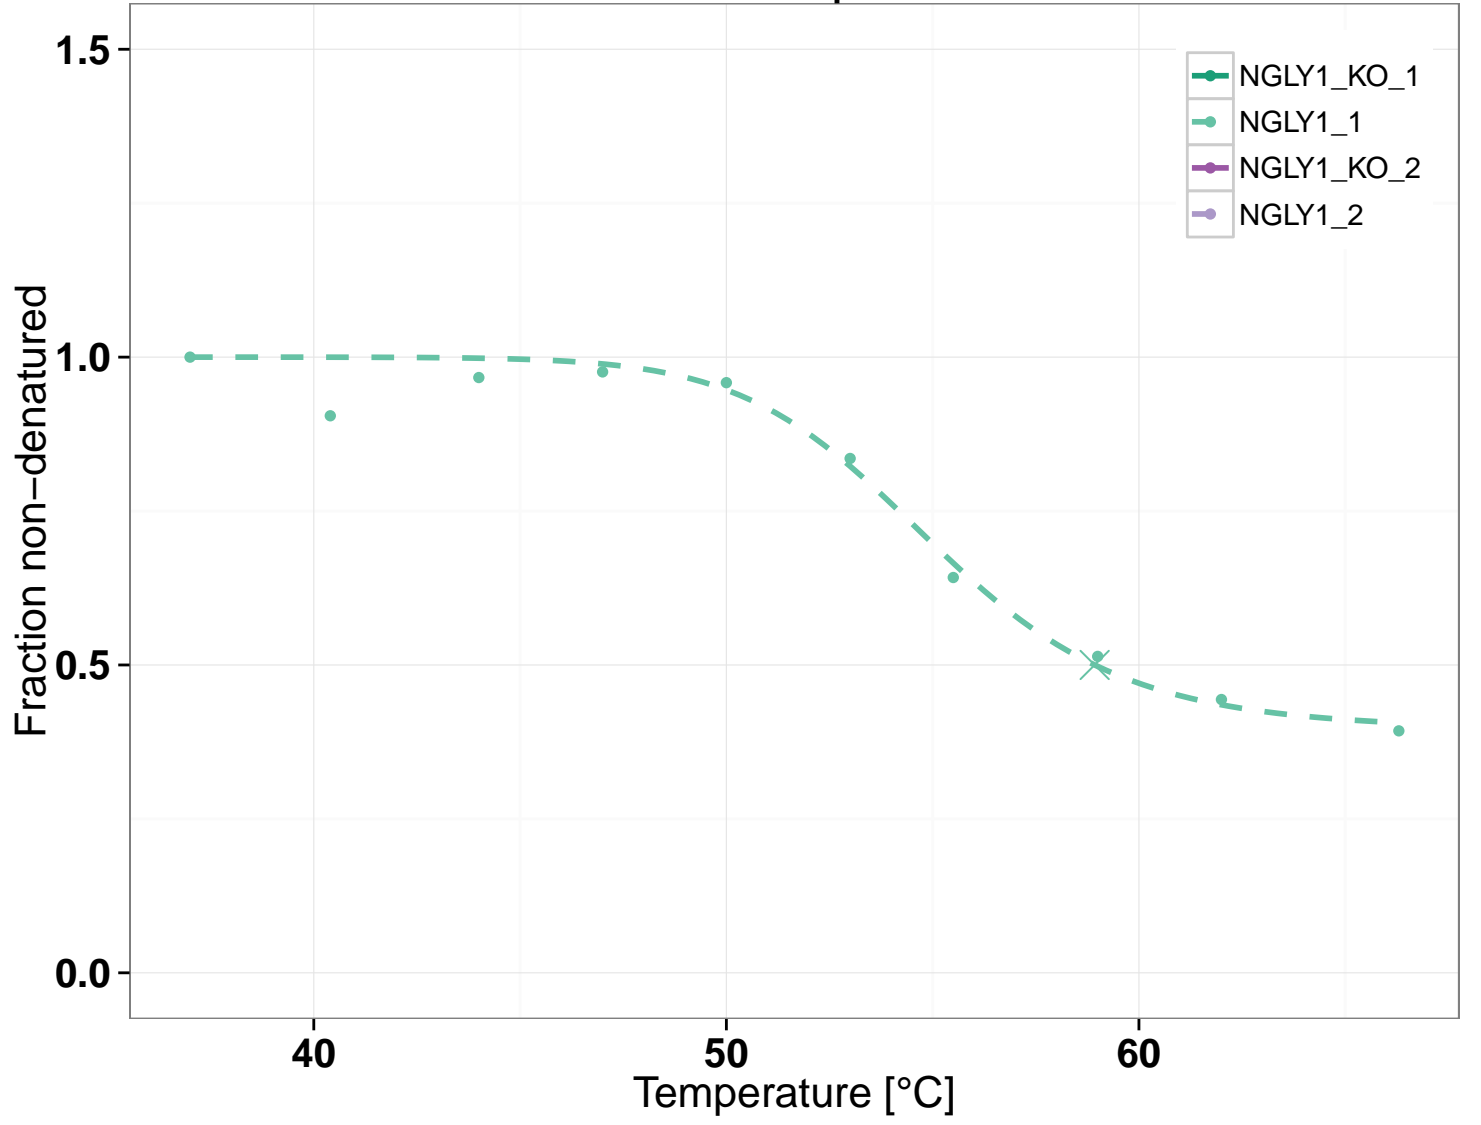

|            | meltPoint | slope  | plateau | R2   |
|------------|-----------|--------|---------|------|
| NGLY1_KO_1 | –         | –      | –       | –    |
| NGLY1_1    | 58.93     | –0.065 | 0.4     | 0.98 |
| NGLY1_KO_2 | –         | –      | –       | –    |
| NGLY1_2    | –         | –      | –       | –    |

Supplement: Supplementary file 5337 [file 1]

IPI00645403.3|KIAA1217

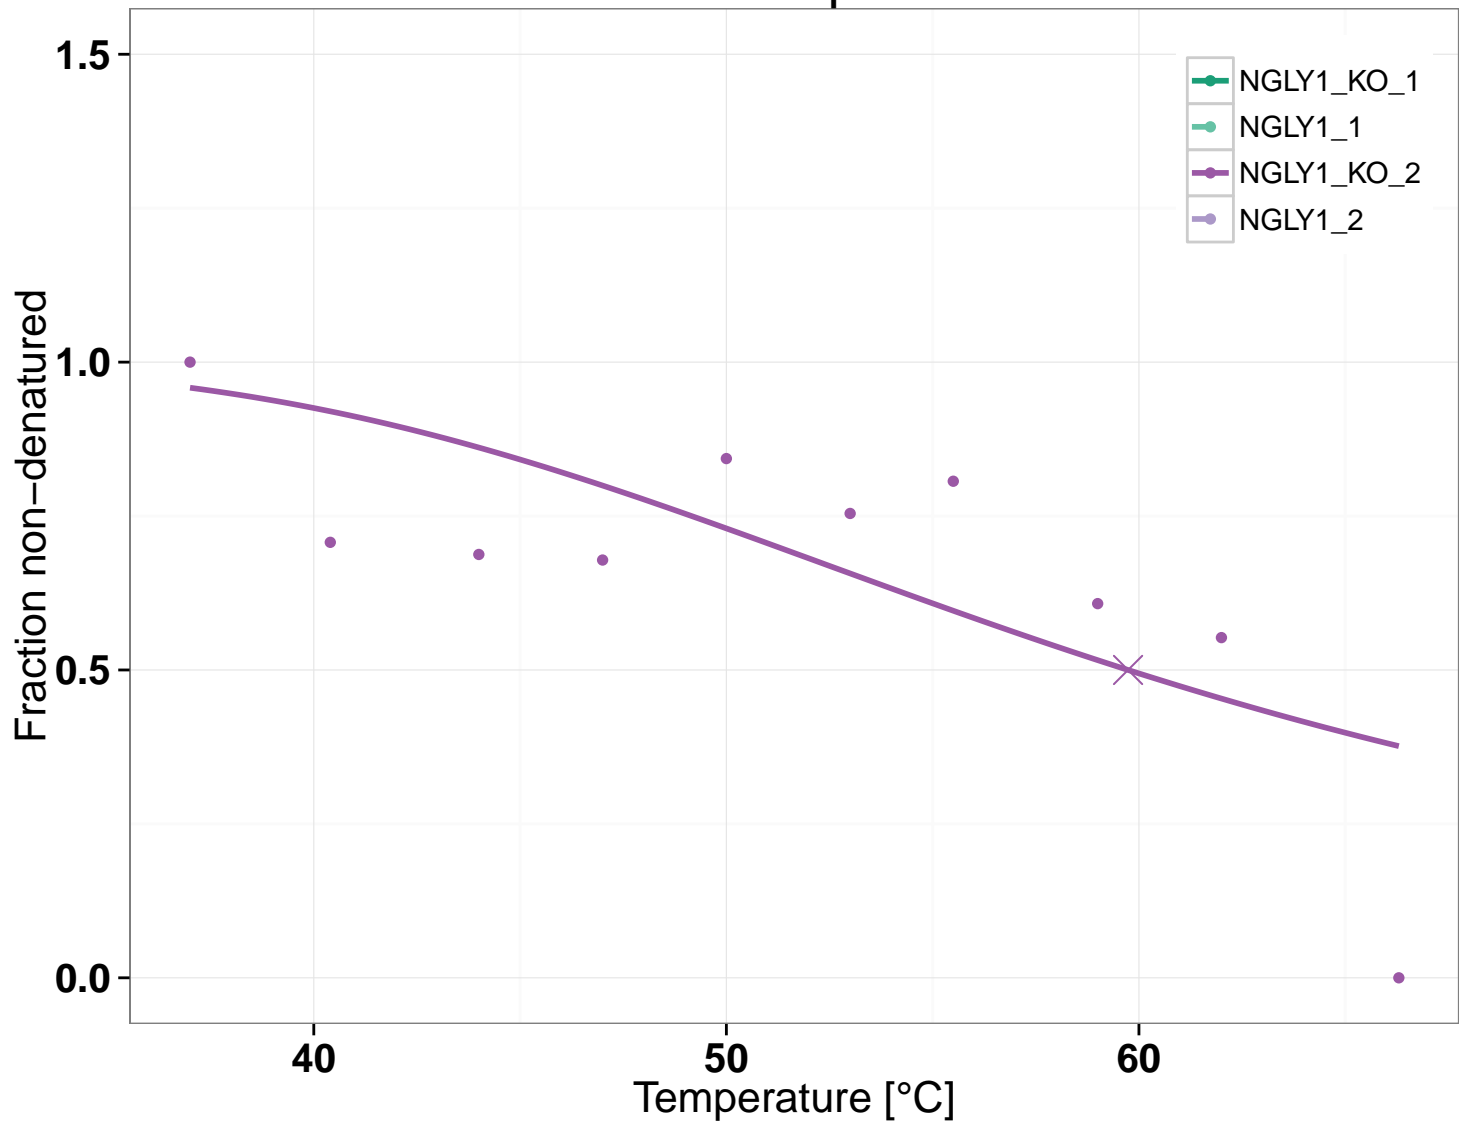

|            | meltPoint | slope  | plateau | R2  |
|------------|-----------|--------|---------|-----|
| NGLY1_KO_1 | -         | -      | -       | -   |
| NGLY1_1    | -         | -      | -       | -   |
| NGLY1_KO_2 | 59.74     | -0.025 | 0       | 0.5 |
| NGLY1_2    | -         | -      | -       | -   |

Supplement: Supplementary file 5338 [file 1]

# IPI00009407.8|DAD1

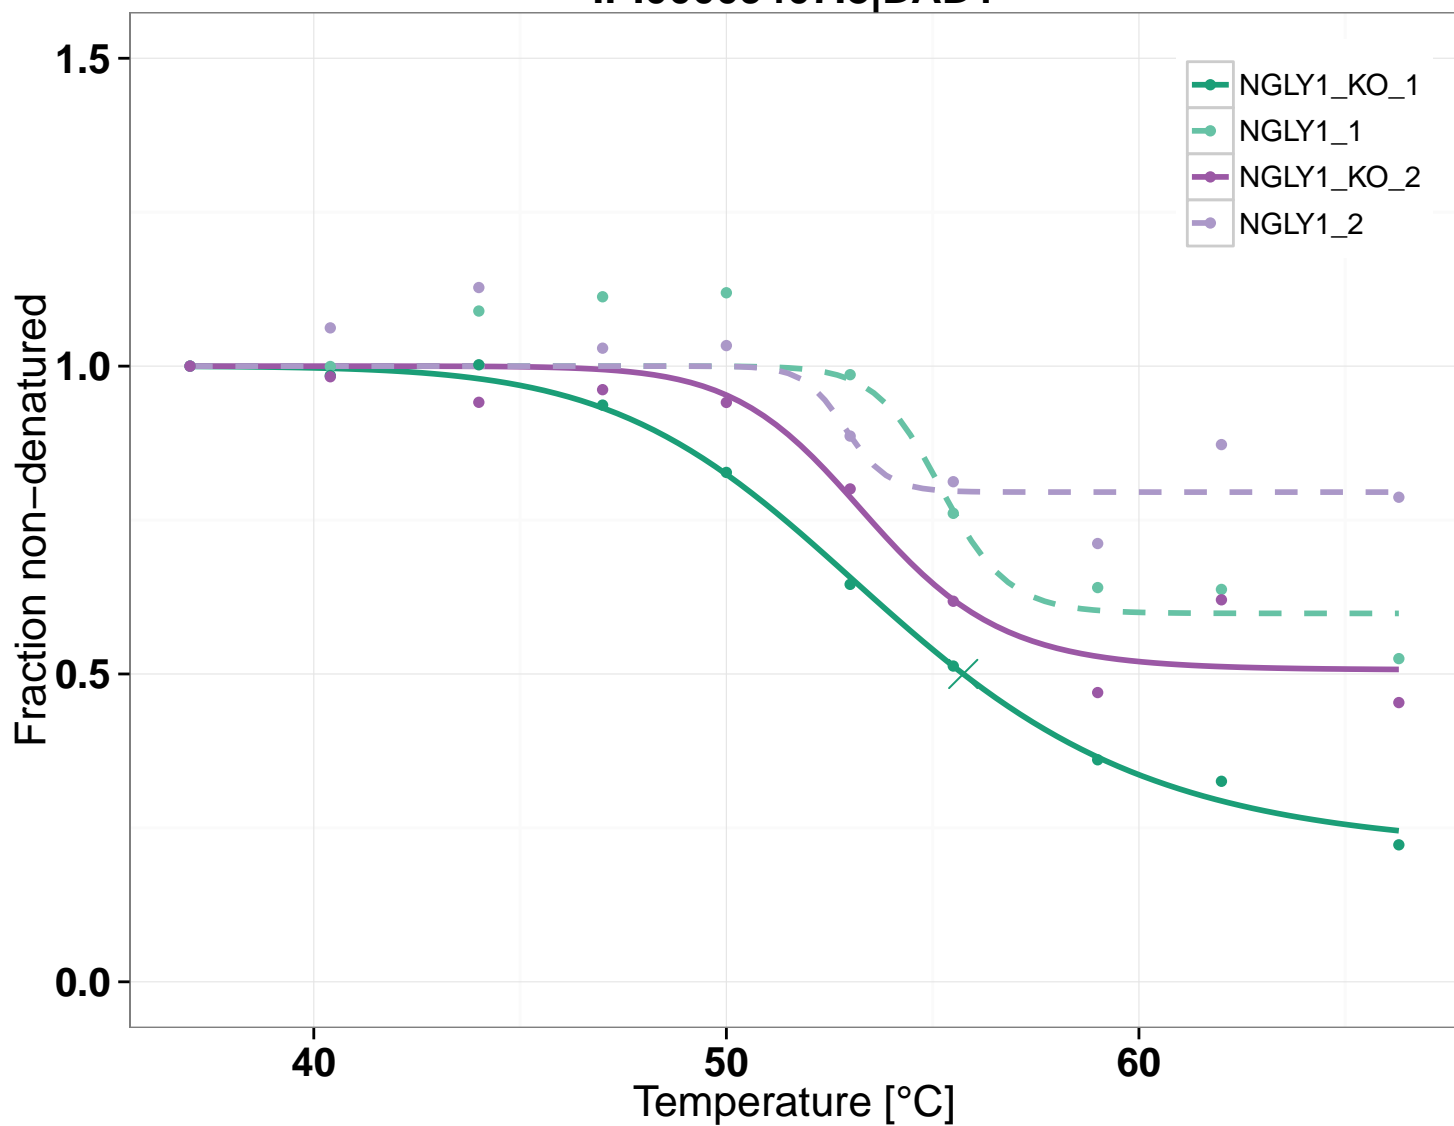

|            | meltPoint | slope  | plateau | R2   |
|------------|-----------|--------|---------|------|
| NGLY1_KO_1 | 55.74     | -0.06  | 0.21    | 1    |
| NGLY1_1    | -         | -0.12  | 0.6     | 0.9  |
| NGLY1_KO_2 | -         | -0.076 | 0.51    | 0.95 |
| NGLY1_2    | -         | -0.1   | 0.8     | 0.79 |

Supplement: Supplementary file 5339 [file 1]

# IPI00414656.3|NFKBIE

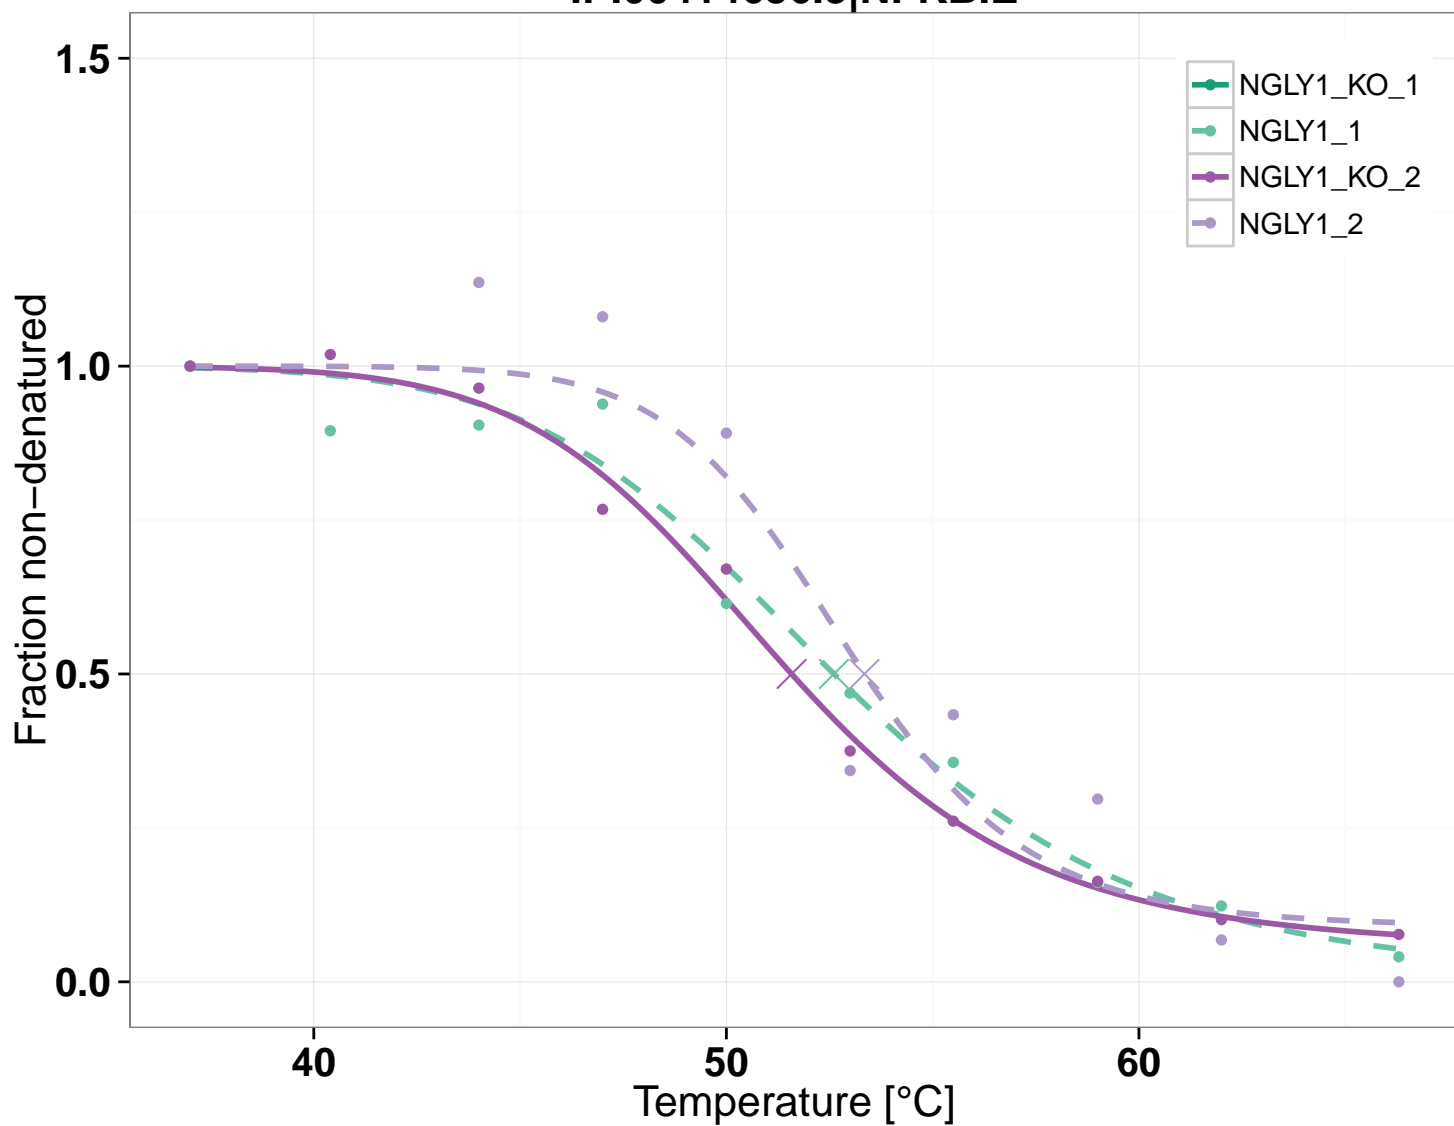

|            | meltPoint | slope  | plateau | R2   |
|------------|-----------|--------|---------|------|
| NGLY1_KO_1 | –         | –      | –       | –    |
| NGLY1_1    | 52.61     | –0.068 | 0       | 0.98 |
| NGLY1_KO_2 | 51.58     | –0.077 | 0.05    | 0.99 |
| NGLY1_2    | 53.35     | –0.1   | 0.09    | 0.84 |

Supplement: Supplementary file 5340 [file 1]

IPI00909930.1|CDC45L

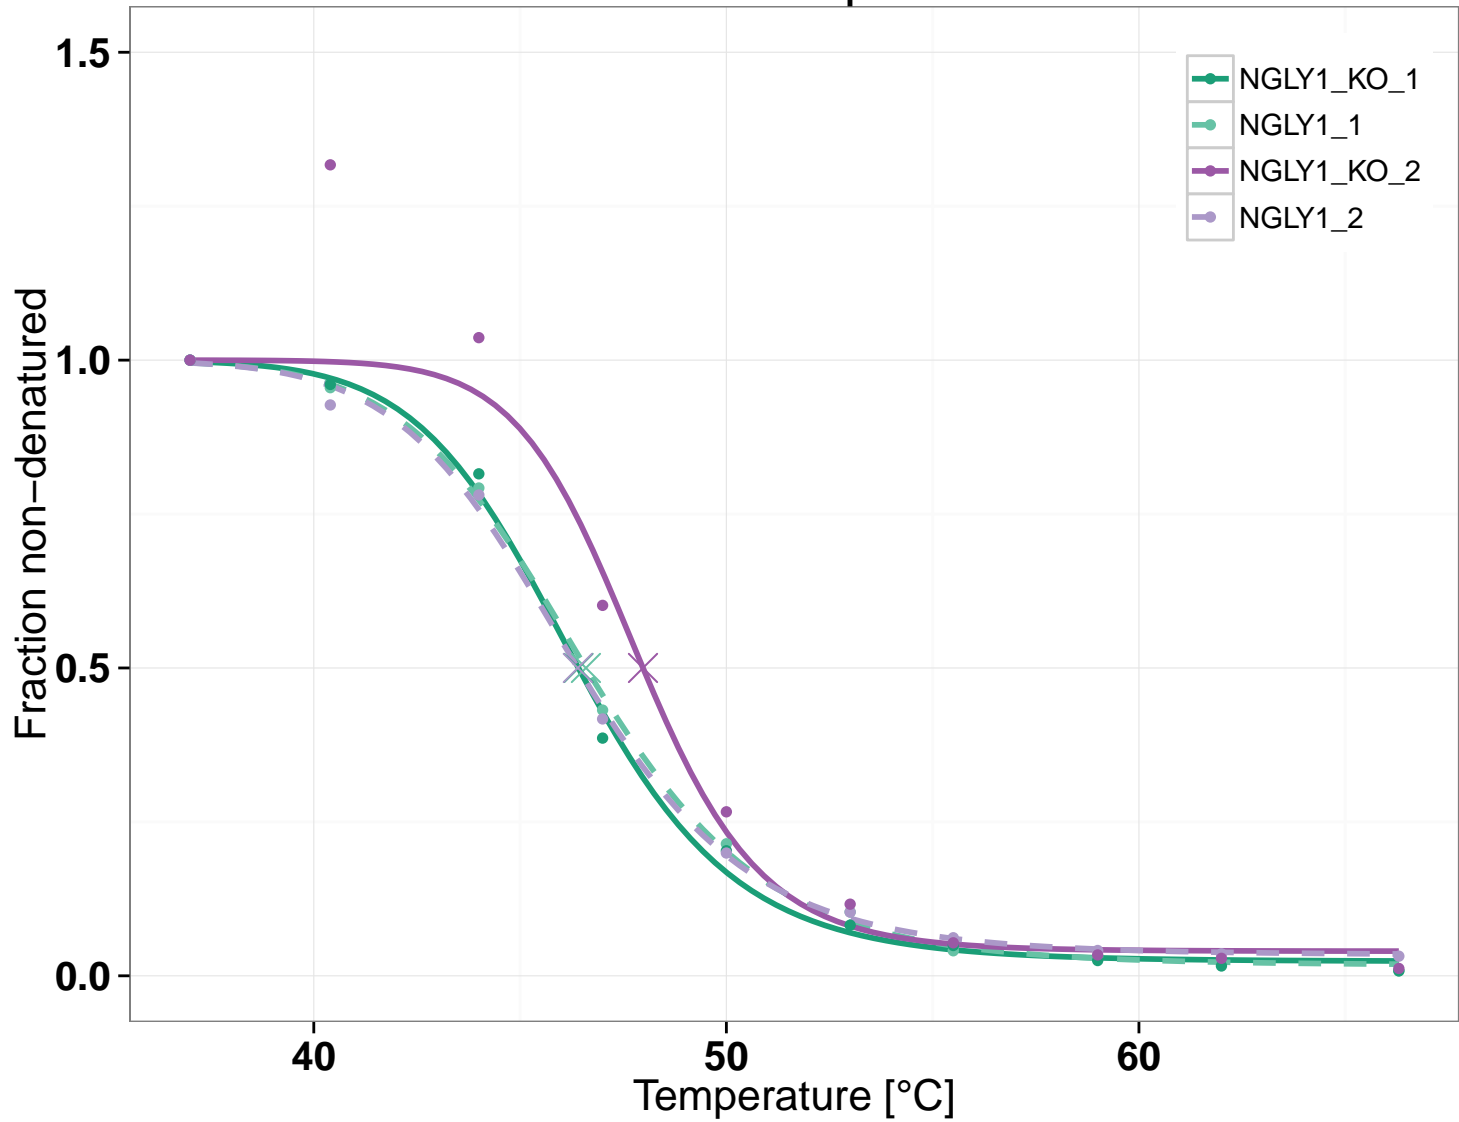

|            | meltPoint | slope | plateau | R2   |
|------------|-----------|-------|---------|------|
| NGLY1_KO_1 | 46.41     | -0.13 | 0.02    | 1    |
| NGLY1_1    | 46.6      | -0.11 | 0.02    | 1    |
| NGLY1_KO_2 | 47.98     | -0.16 | 0.04    | 0.95 |
| NGLY1_2    | 46.4      | -0.11 | 0.03    | 1    |

Supplement: Supplementary file 5341 [file 1]

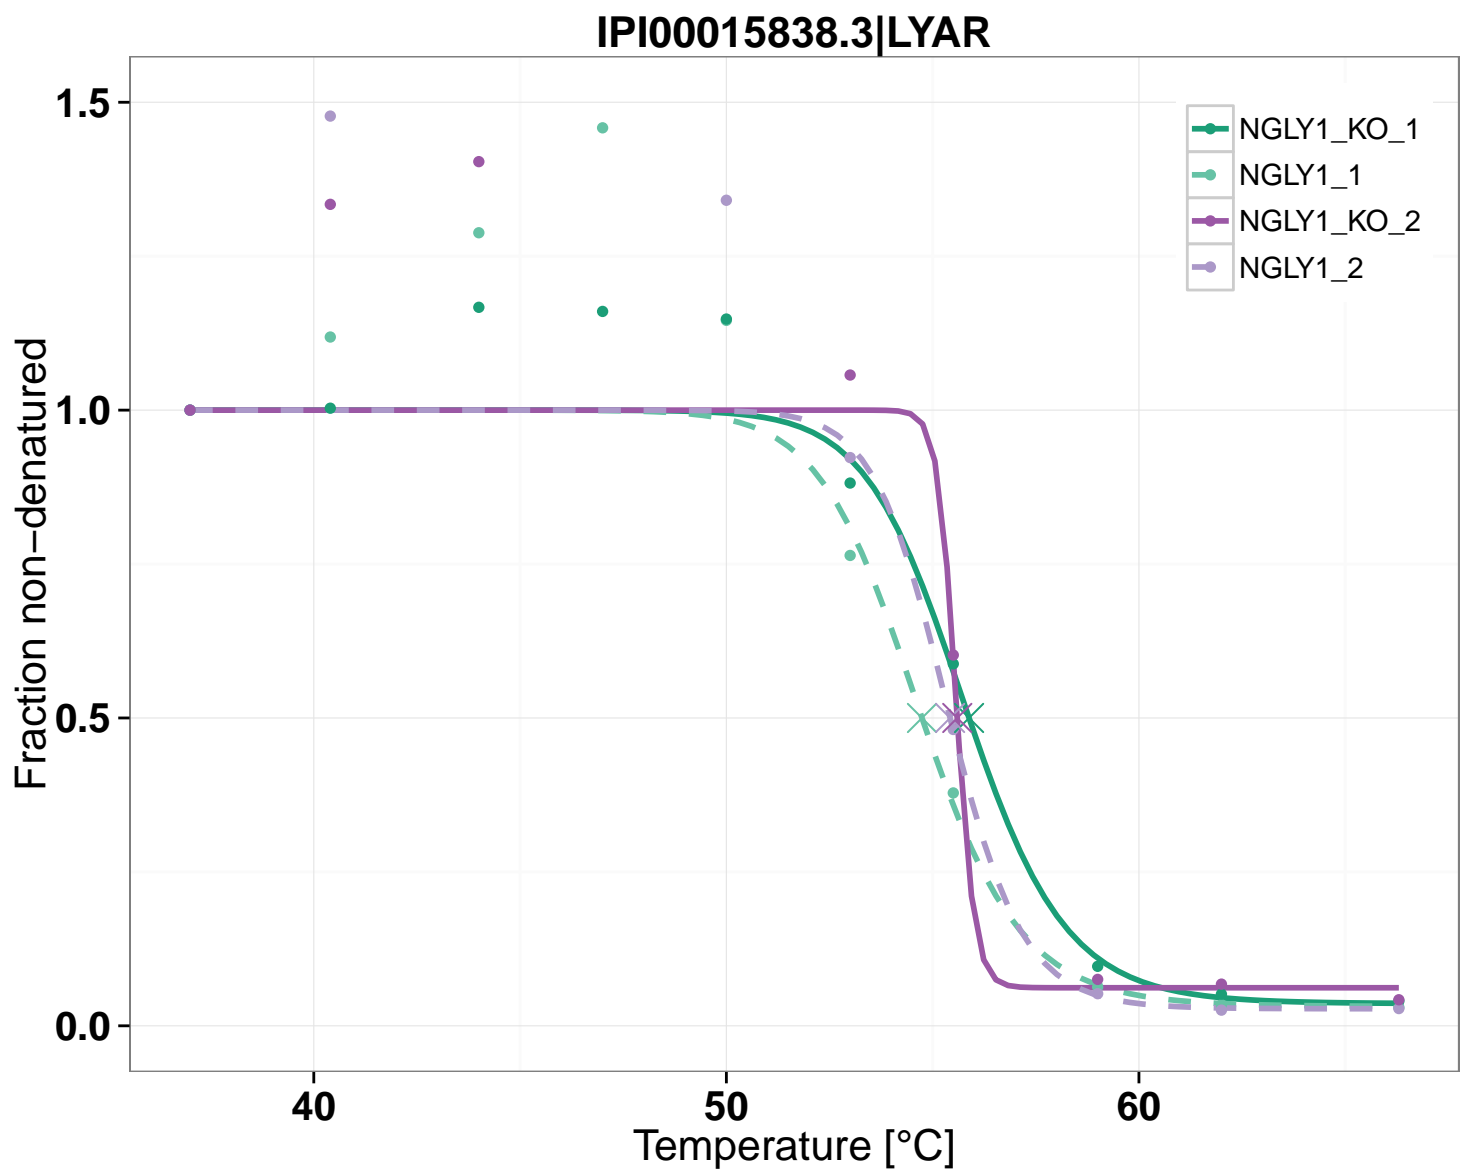

|            | meltPoint | slope | plateau | R2   |
|------------|-----------|-------|---------|------|
| NGLY1_KO_1 | 55.88     | -0.2  | 0.04    | 0.96 |
| NGLY1_1    | 54.74     | -0.2  | 0.03    | 0.88 |
| NGLY1_KO_2 | 55.6      | -1.1  | 0.06    | 0.74 |
| NGLY1_2    | 55.42     | -0.27 | 0.03    | 0.7  |

Supplement: Supplementary file 5342 [file 1]

IPI00234337.4|ATP13A3

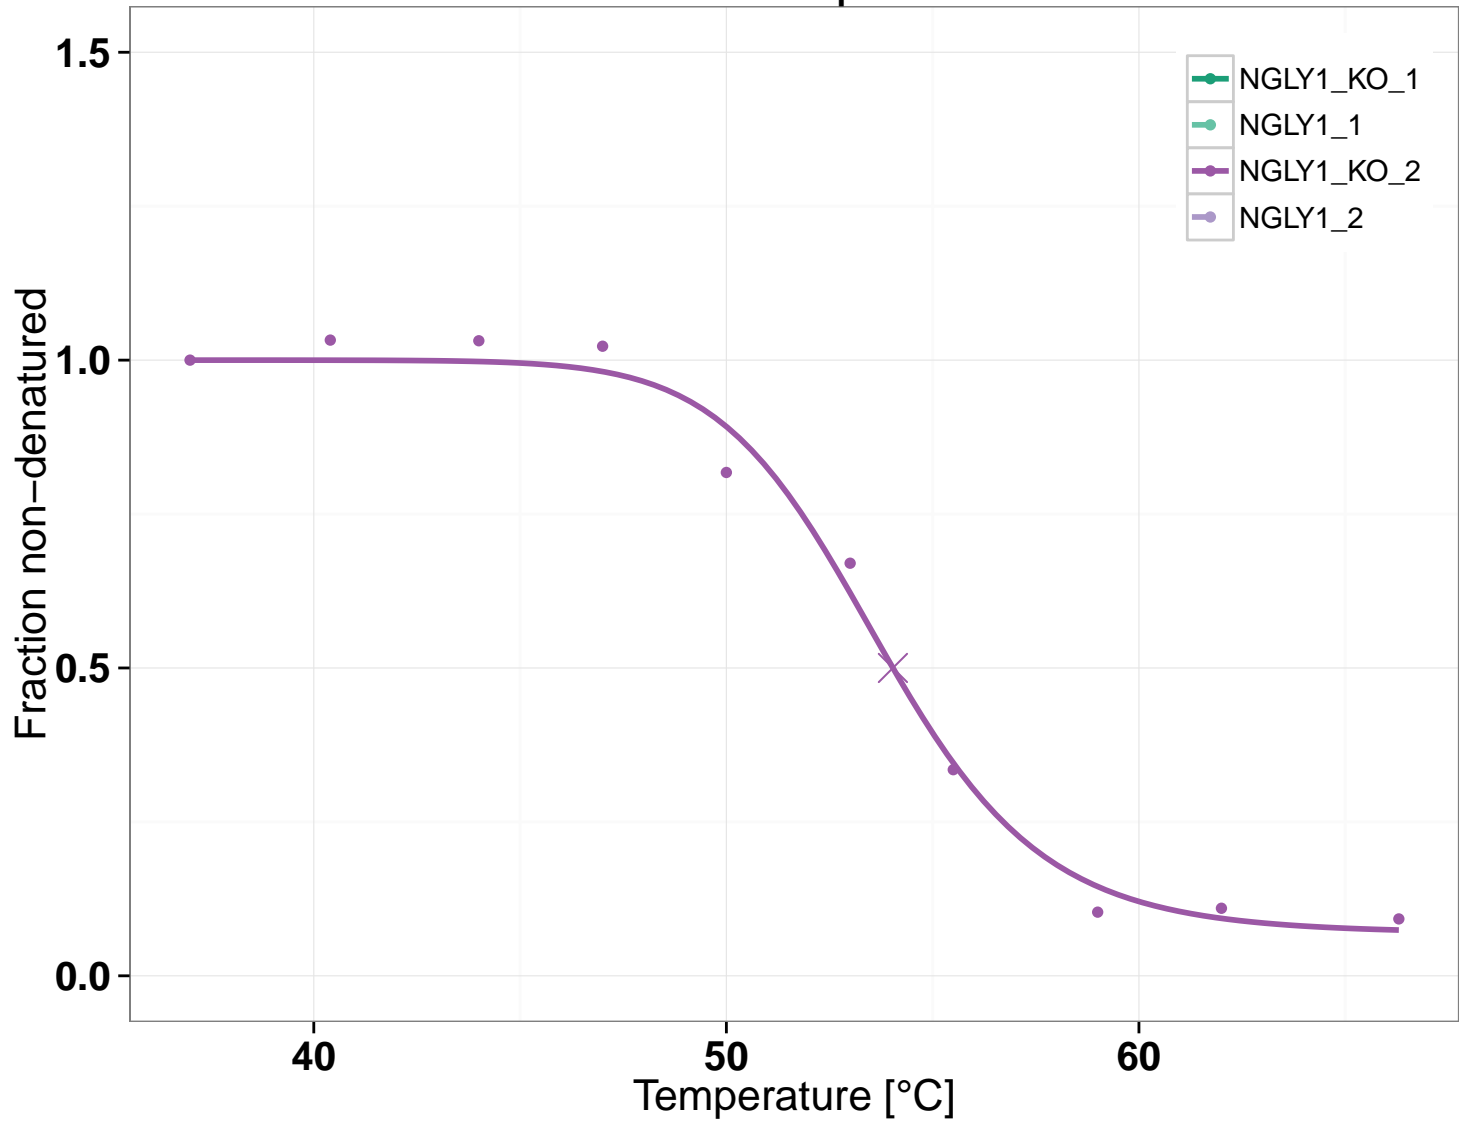

|            | meltPoint | slope | plateau | R2   |
|------------|-----------|-------|---------|------|
| NGLY1_KO_1 | -         | -     | -       | -    |
| NGLY1_1    | -         | -     | -       | -    |
| NGLY1_KO_2 | 54.04     | -0.12 | 0.07    | 0.99 |
| NGLY1_2    | -         | -     | -       | -    |

Supplement: Supplementary file 5343 [file 1]

# IPI00003923.1|UMPS

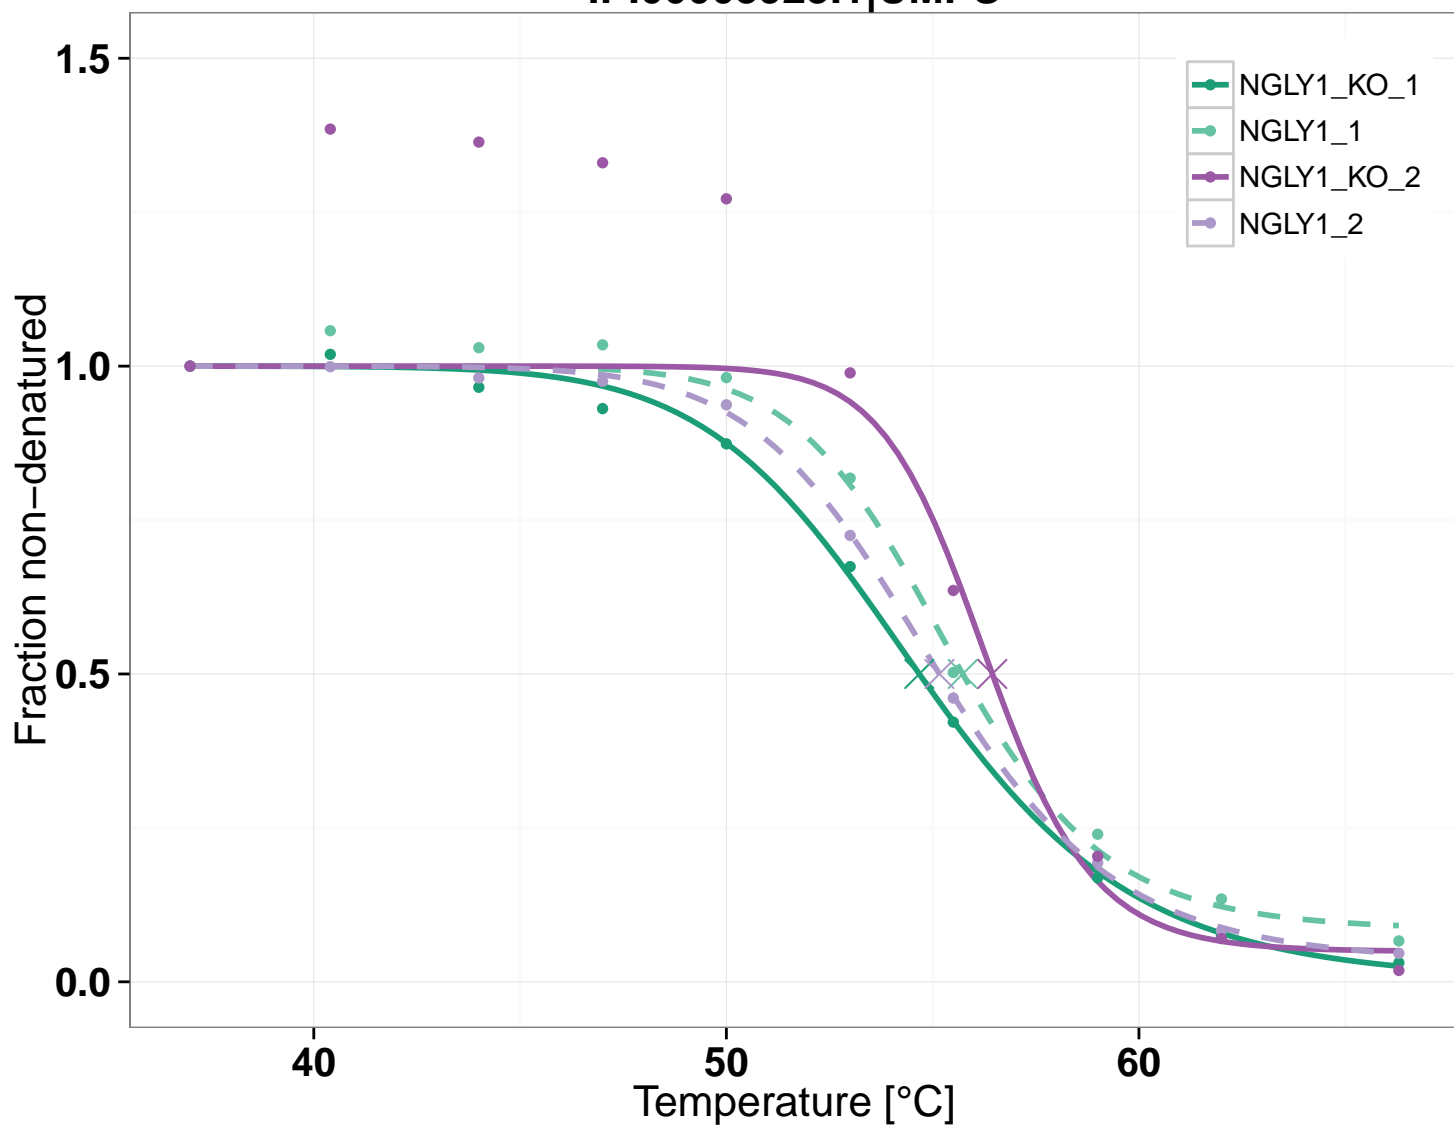

|            | meltPoint | slope  | plateau | R2   |
|------------|-----------|--------|---------|------|
| NGLY1_KO_1 | 54.68     | -0.096 | 0       | 1    |
| NGLY1_1    | 55.73     | -0.12  | 0.08    | 0.99 |
| NGLY1_KO_2 | 56.45     | -0.19  | 0.05    | 0.83 |
| NGLY1_2    | 55.16     | -0.11  | 0.03    | 1    |

Supplement: Supplementary file 5344 [file 1]

# IPI00414323.5|SMEK2

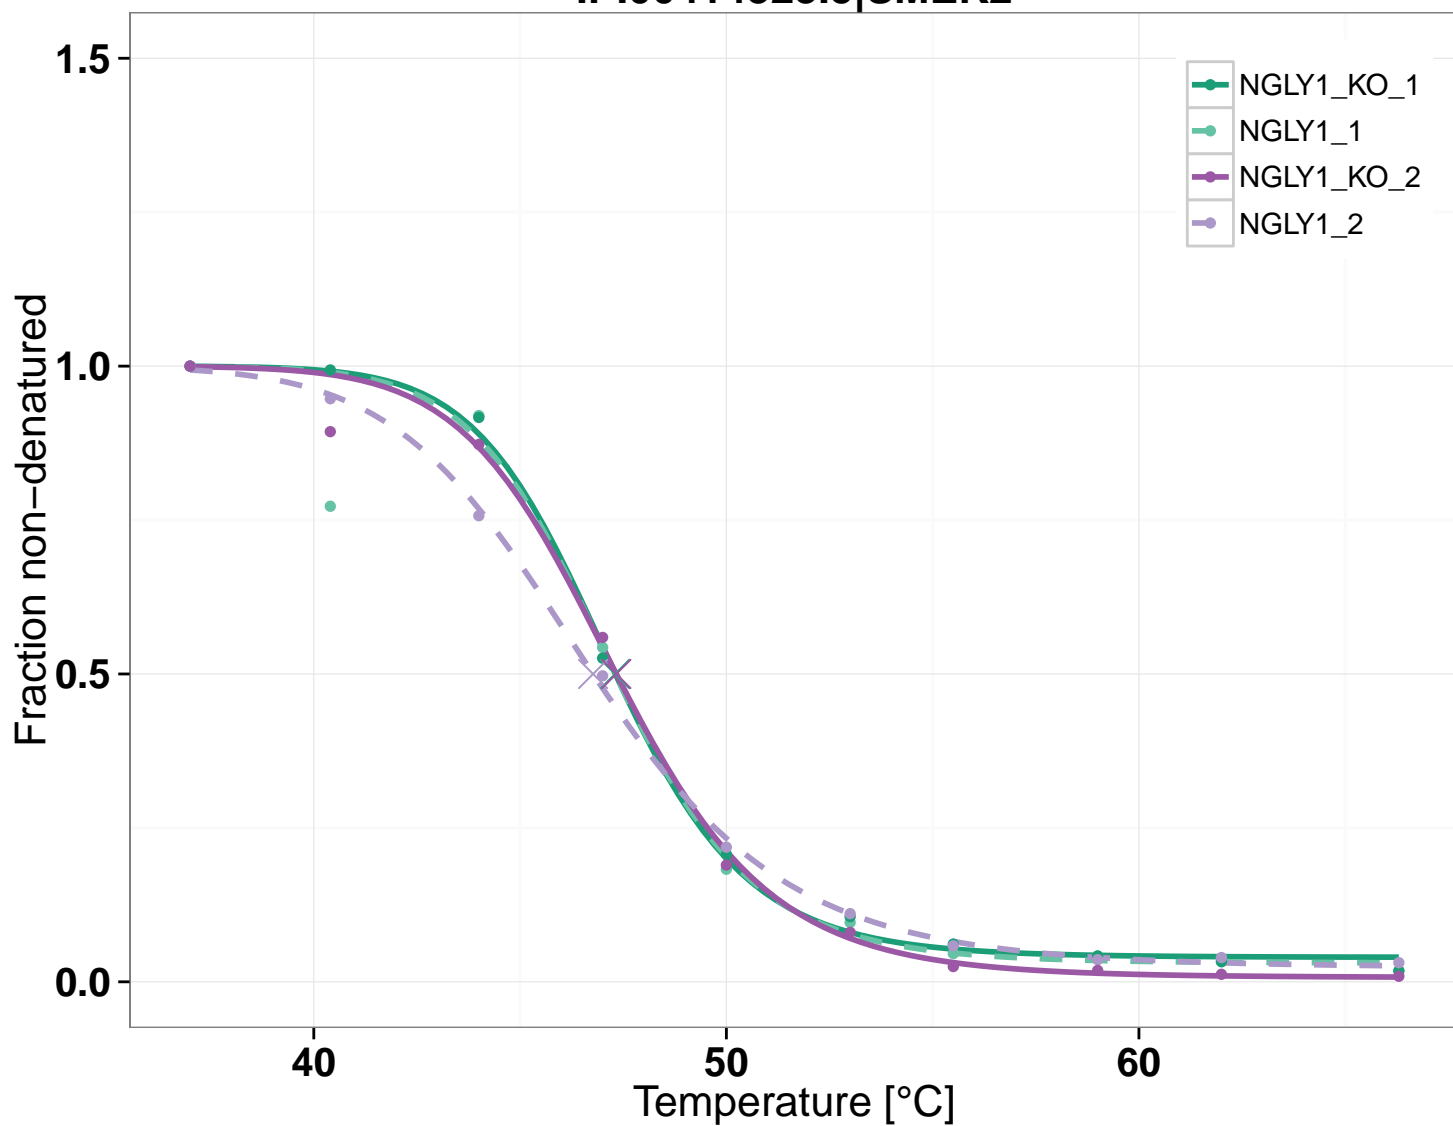

|            | meltPoint | slope | plateau | R2   |
|------------|-----------|-------|---------|------|
| NGLY1_KO_1 | 47.31     | -0.15 | 0.04    | 1    |
| NGLY1_1    | 47.3      | -0.14 | 0.03    | 0.97 |
| NGLY1_KO_2 | 47.33     | -0.13 | 0.01    | 0.99 |
| NGLY1_2    | 46.77     | -0.1  | 0.02    | 1    |

Supplement: Supplementary file 5345 [file 1]

IPI00020578.2|ARAF

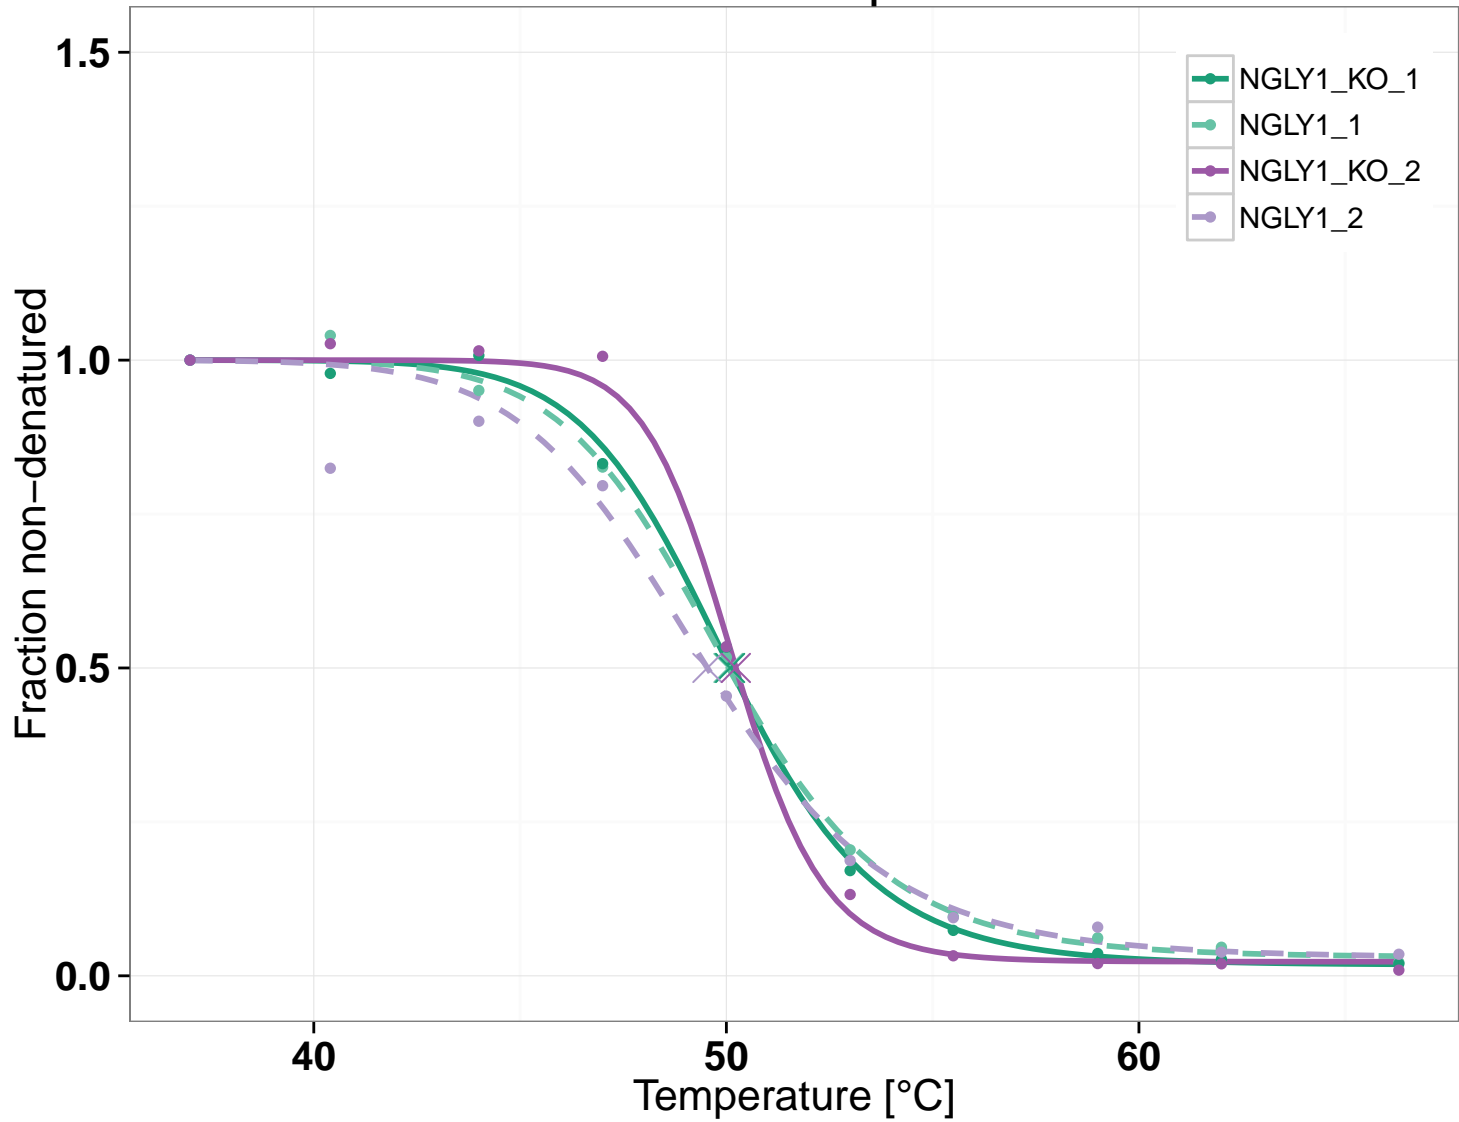

|            | meltPoint | slope | plateau | R2   |
|------------|-----------|-------|---------|------|
| NGLY1_KO_1 | 50.09     | -0.14 | 0.02    | 1    |
| NGLY1_1    | 50.05     | -0.12 | 0.03    | 1    |
| NGLY1_KO_2 | 50.23     | -0.22 | 0.02    | 1    |
| NGLY1_2    | 49.54     | -0.11 | 0.03    | 0.98 |

Supplement: Supplementary file 5346 [file 1]

# IPI00902832.1|EVL

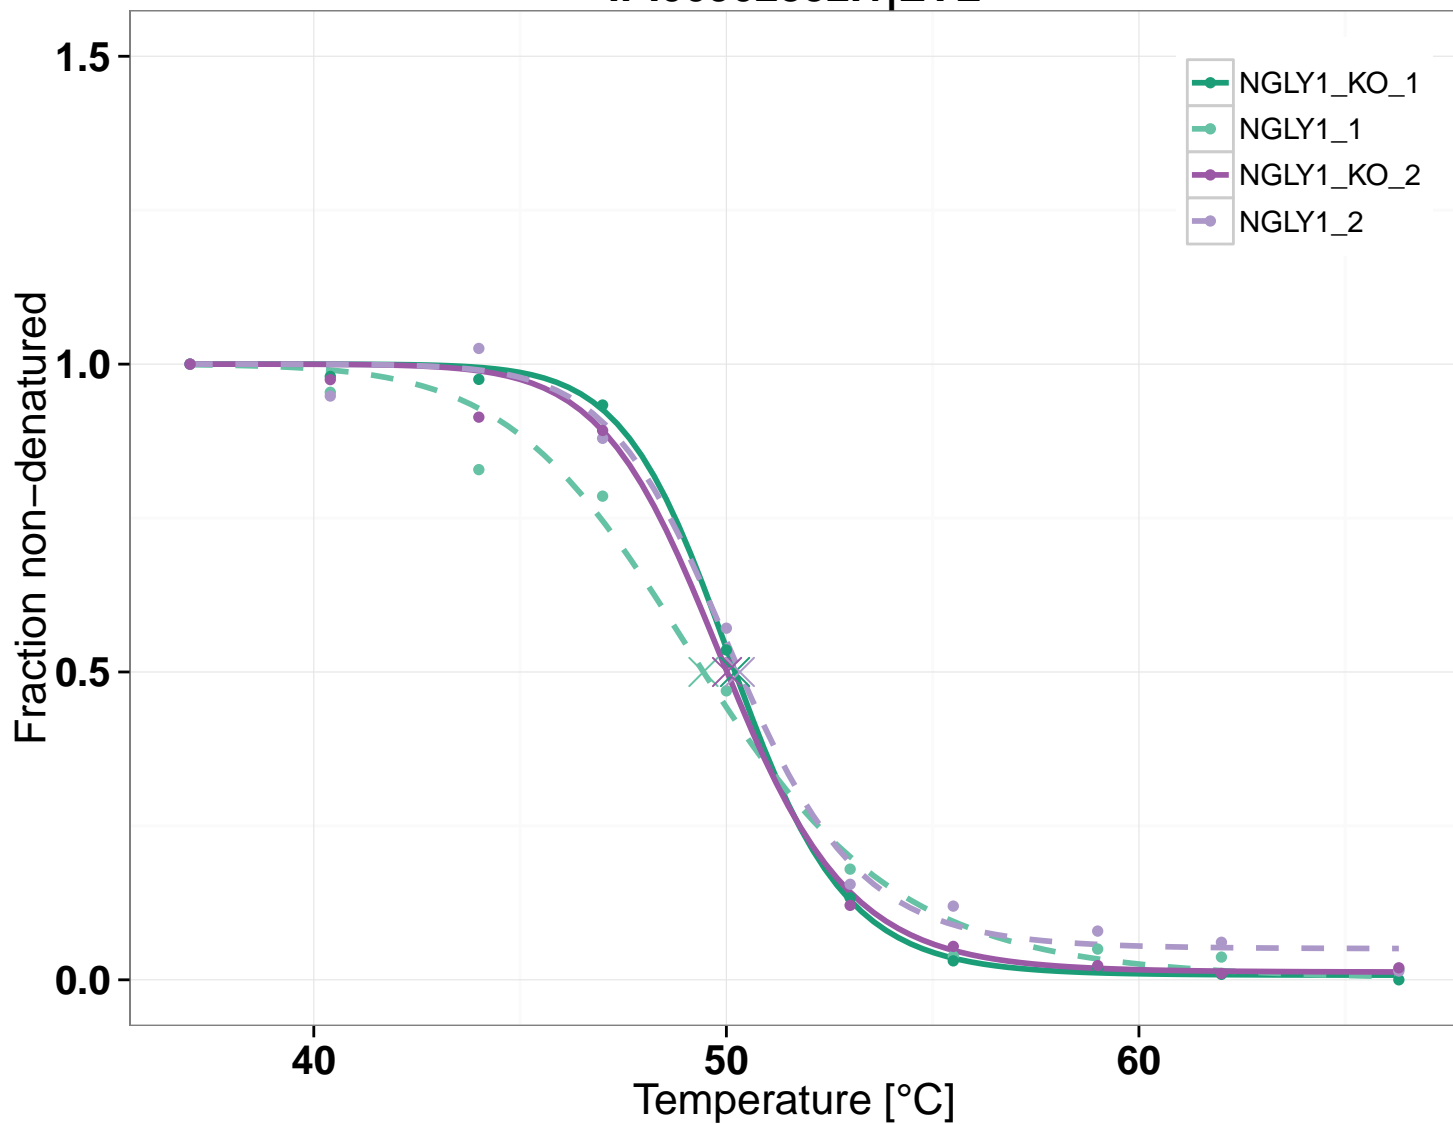

|            | meltPoint | slope | plateau | R2   |
|------------|-----------|-------|---------|------|
| NGLY1_KO_1 | 50.21     | -0.18 | 0.01    | 1    |
| NGLY1_1    | 49.44     | -0.11 | 0       | 0.99 |
| NGLY1_KO_2 | 50.02     | -0.16 | 0.01    | 1    |
| NGLY1_2    | 50.33     | -0.16 | 0.05    | 0.99 |

Supplement: Supplementary file 5347 [file 1]

# IPI00297450.3|C12ORF26

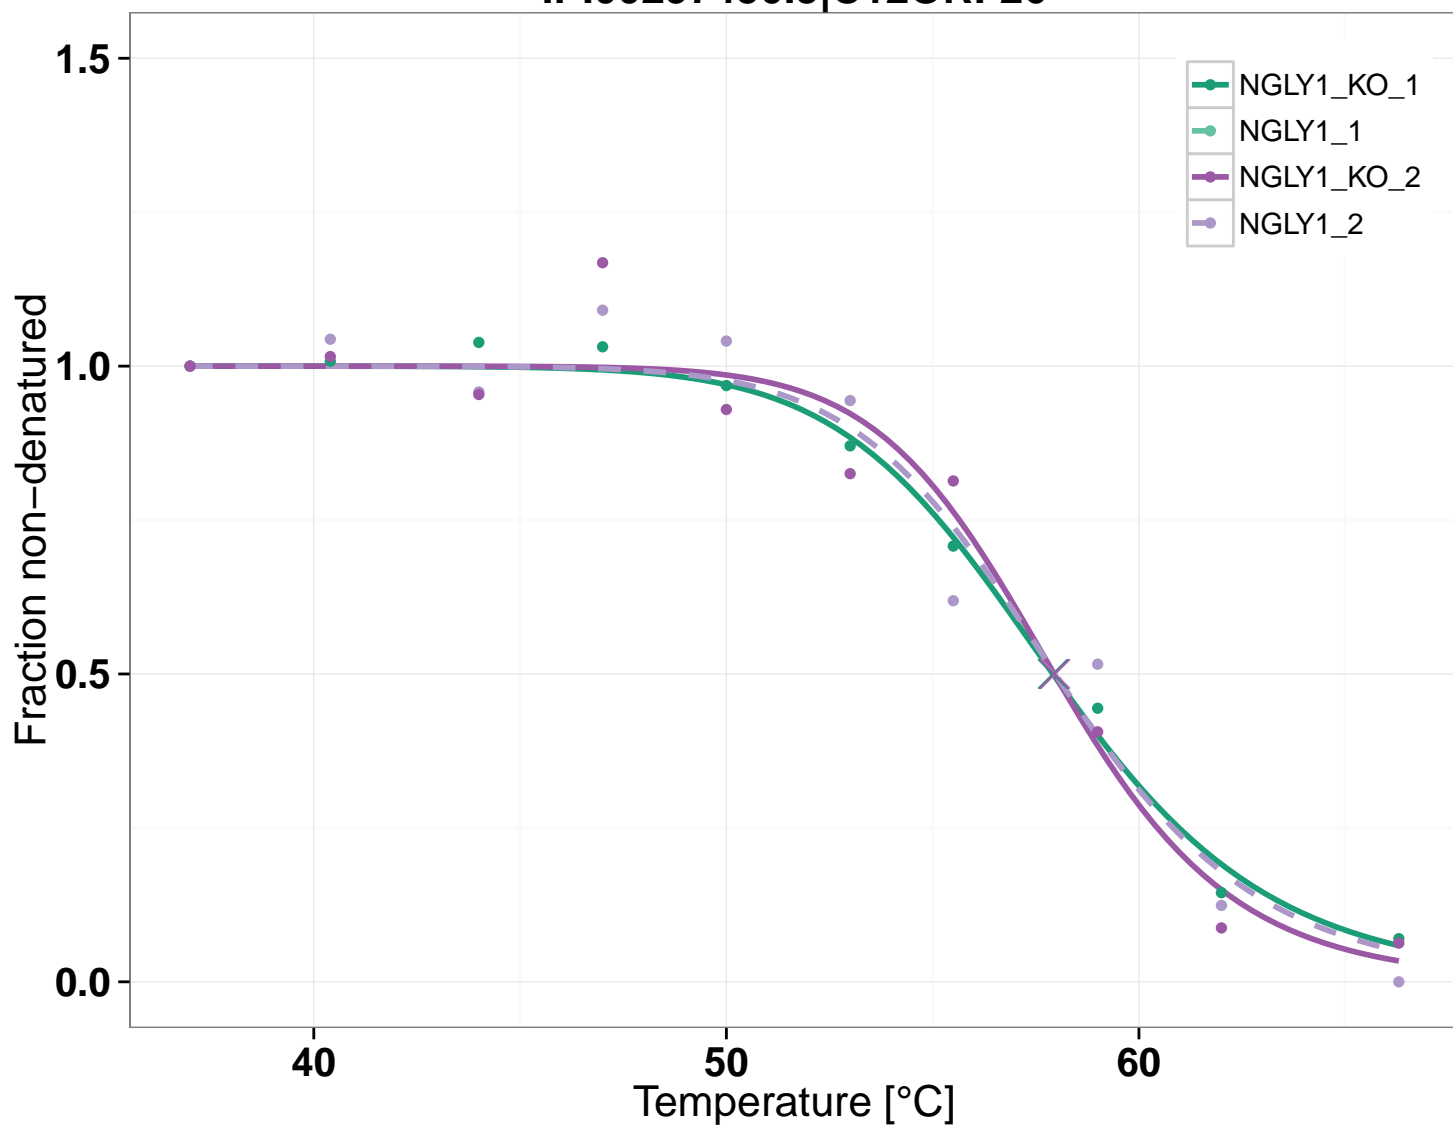

|            | meltPoint | slope  | plateau | R2   |
|------------|-----------|--------|---------|------|
| NGLY1_KO_1 | 57.91     | -0.095 | 0       | 0.99 |
| NGLY1_1    | -         | -      | -       | -    |
| NGLY1_KO_2 | 57.95     | -0.12  | 0       | 0.96 |
| NGLY1_2    | 57.97     | -0.1   | 0       | 0.96 |

Supplement: Supplementary file 5348 [file 1]

IPI00001730.3|FHOD1

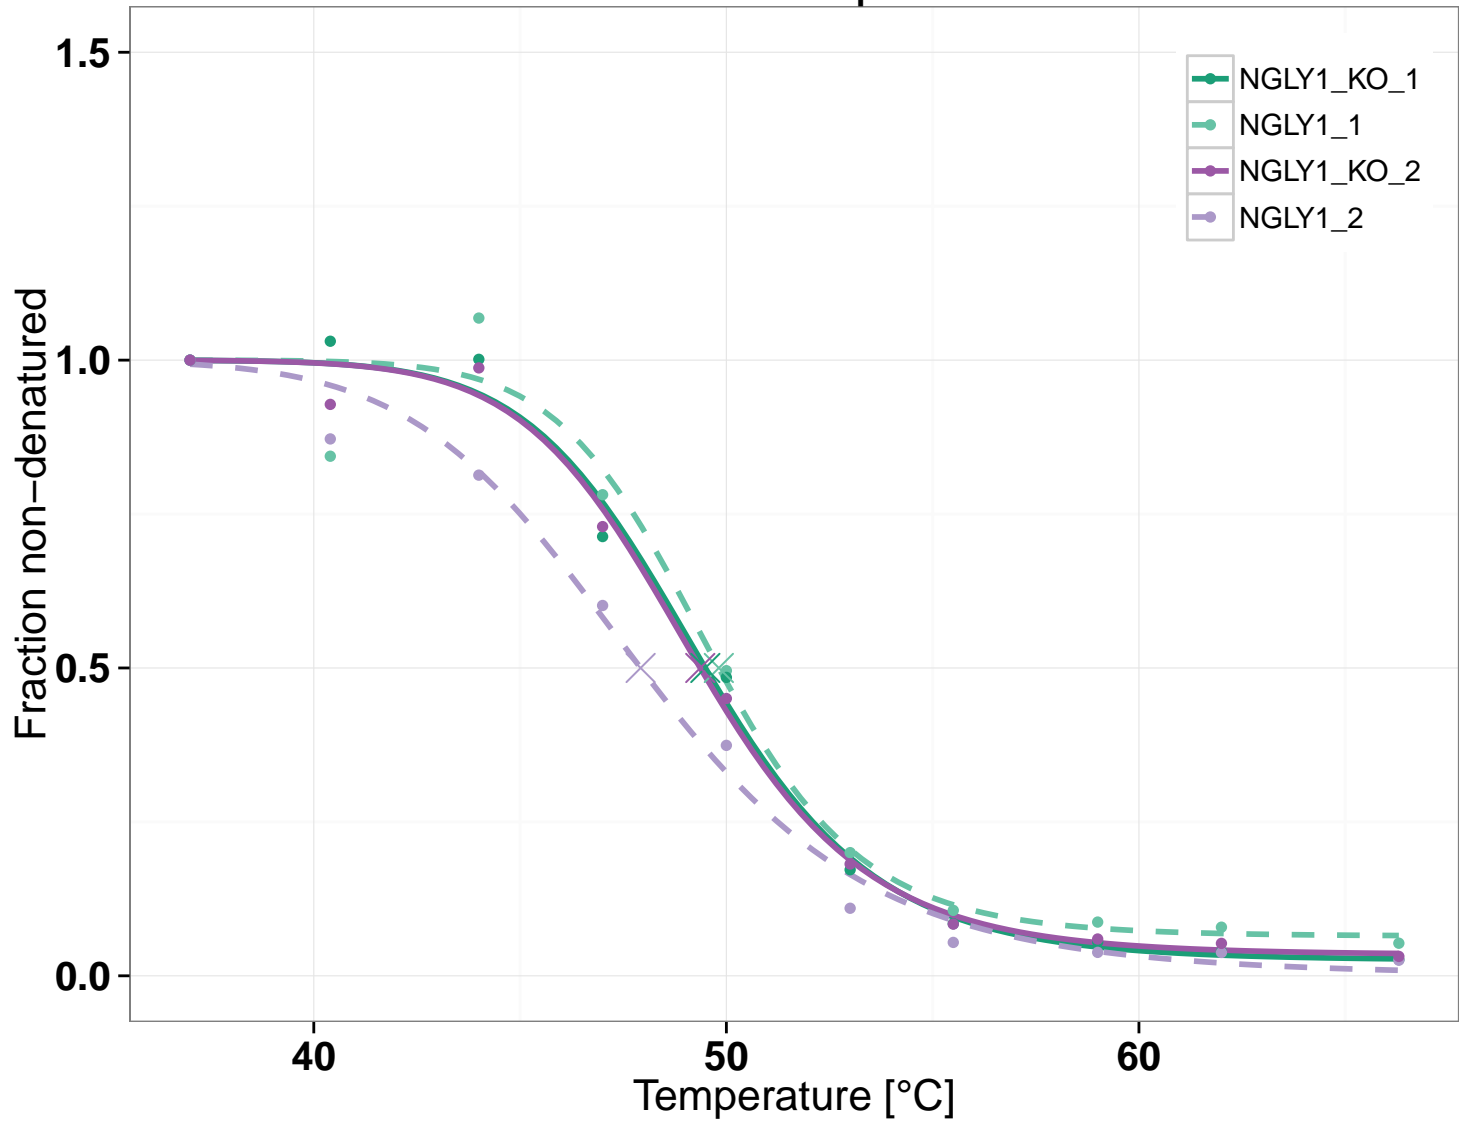

|            | meltPoint | slope | plateau | R2   |
|------------|-----------|-------|---------|------|
| NGLY1_KO_1 | 49.49     | -0.11 | 0.02    | 0.99 |
| NGLY1_1    | 49.82     | -0.13 | 0.06    | 0.98 |
| NGLY1_KO_2 | 49.37     | -0.12 | 0.03    | 0.99 |
| NGLY1_2    | 47.92     | -0.09 | 0       | 0.99 |

Supplement: Supplementary file 5349 [file 1]

IPI00027704.5|PRIM1

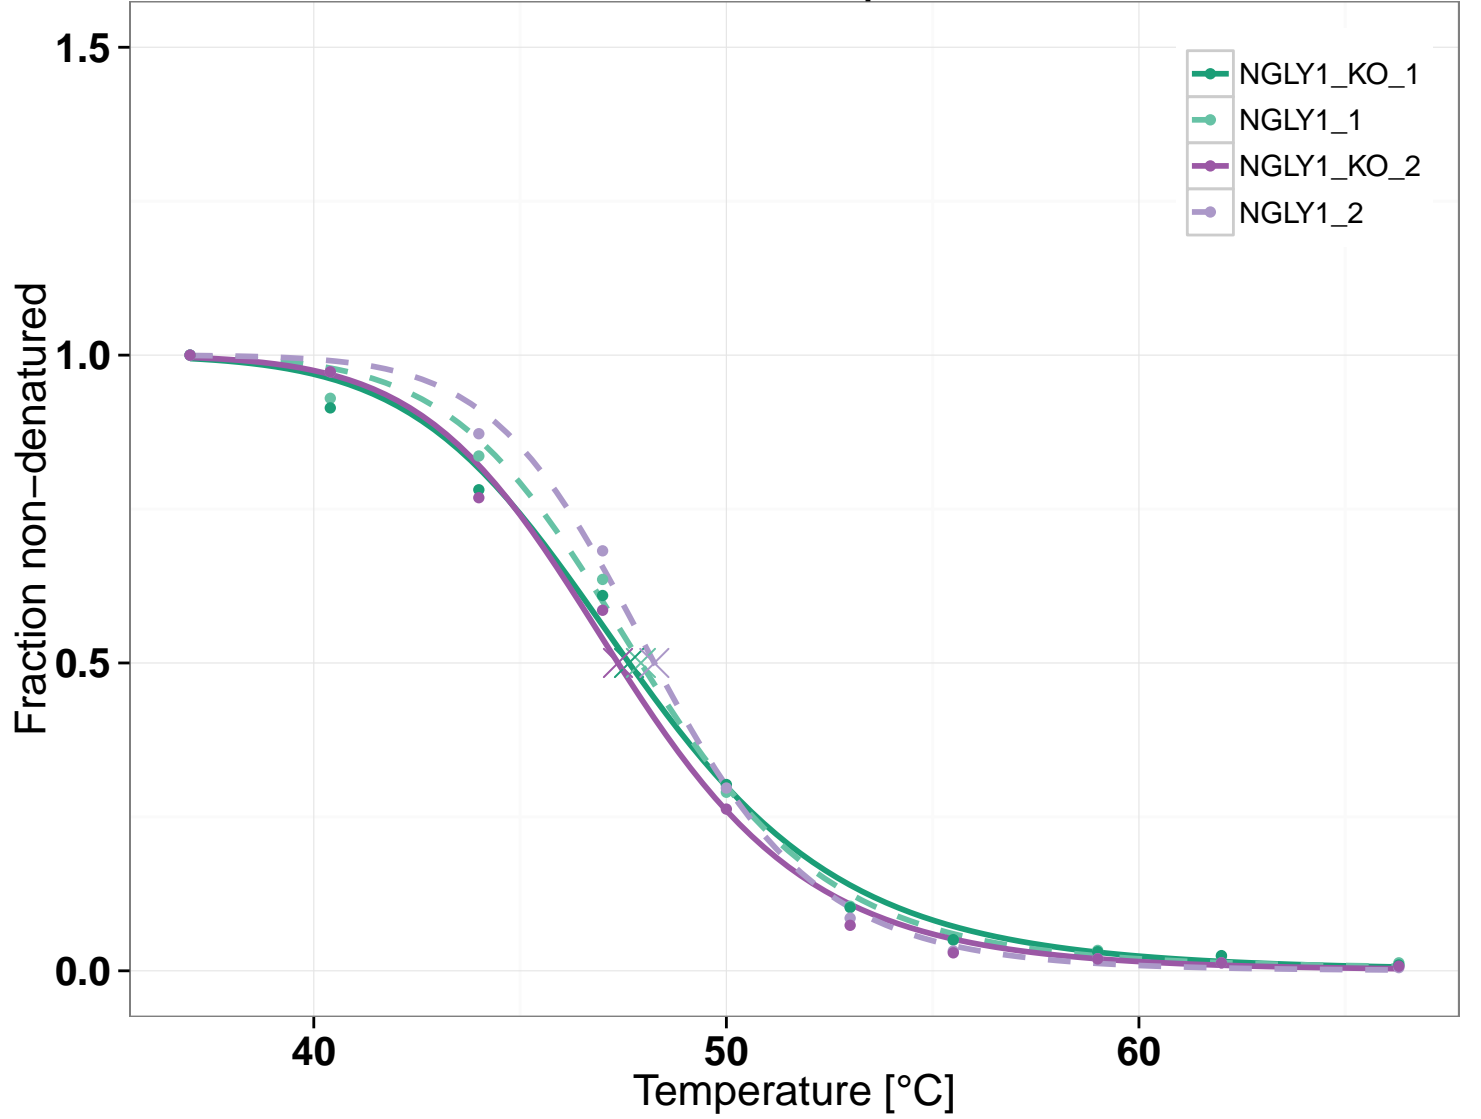

|            | meltPoint | slope  | plateau | R2   |
|------------|-----------|--------|---------|------|
| NGLY1_KO_1 | 47.64     | -0.096 | 0       | 0.99 |
| NGLY1_1    | 47.93     | -0.11  | 0       | 1    |
| NGLY1_KO_2 | 47.37     | -0.11  | 0       | 1    |
| NGLY1_2    | 48.25     | -0.13  | 0       | 1    |

Supplement: Supplementary file 5350 [file 1]

# IPI00299095.2|SNX2

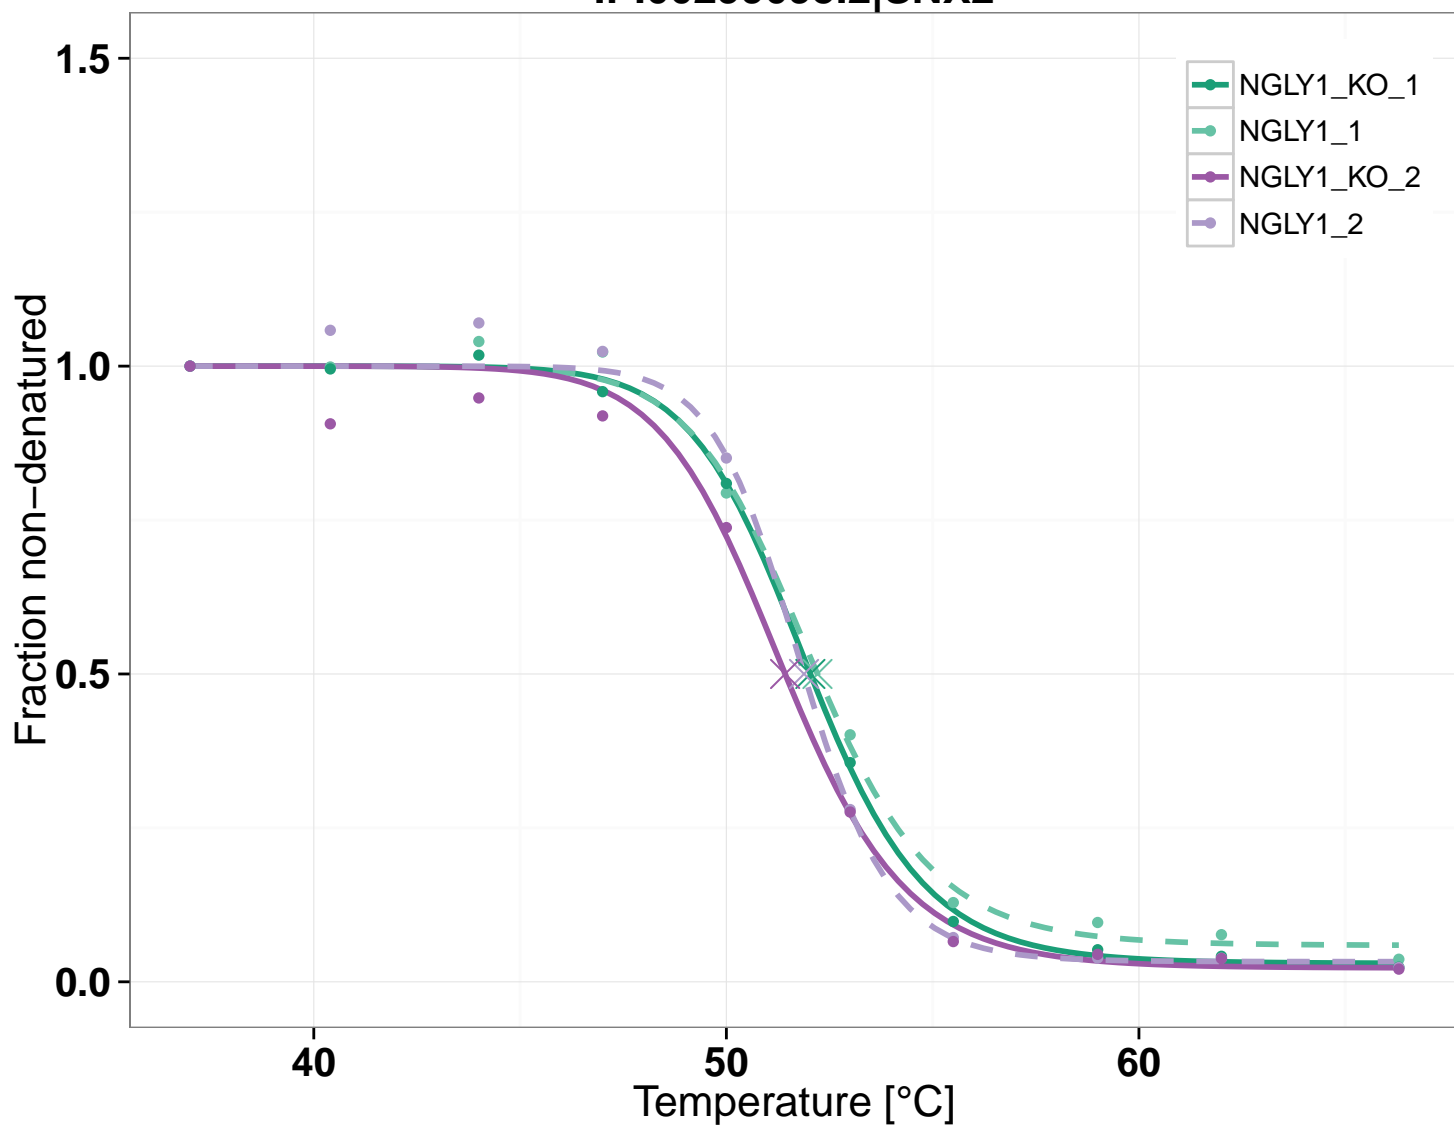

|            | meltPoint | slope | plateau | R2   |
|------------|-----------|-------|---------|------|
| NGLY1_KO_1 | 52.04     | -0.17 | 0.03    | 1    |
| NGLY1_1    | 52.21     | -0.16 | 0.06    | 1    |
| NGLY1_KO_2 | 51.42     | -0.16 | 0.02    | 0.99 |
| NGLY1_2    | 51.88     | -0.22 | 0.03    | 1    |

Supplement: Supplementary file 5351 [file 1]

IPI00024417.1|HIP1R

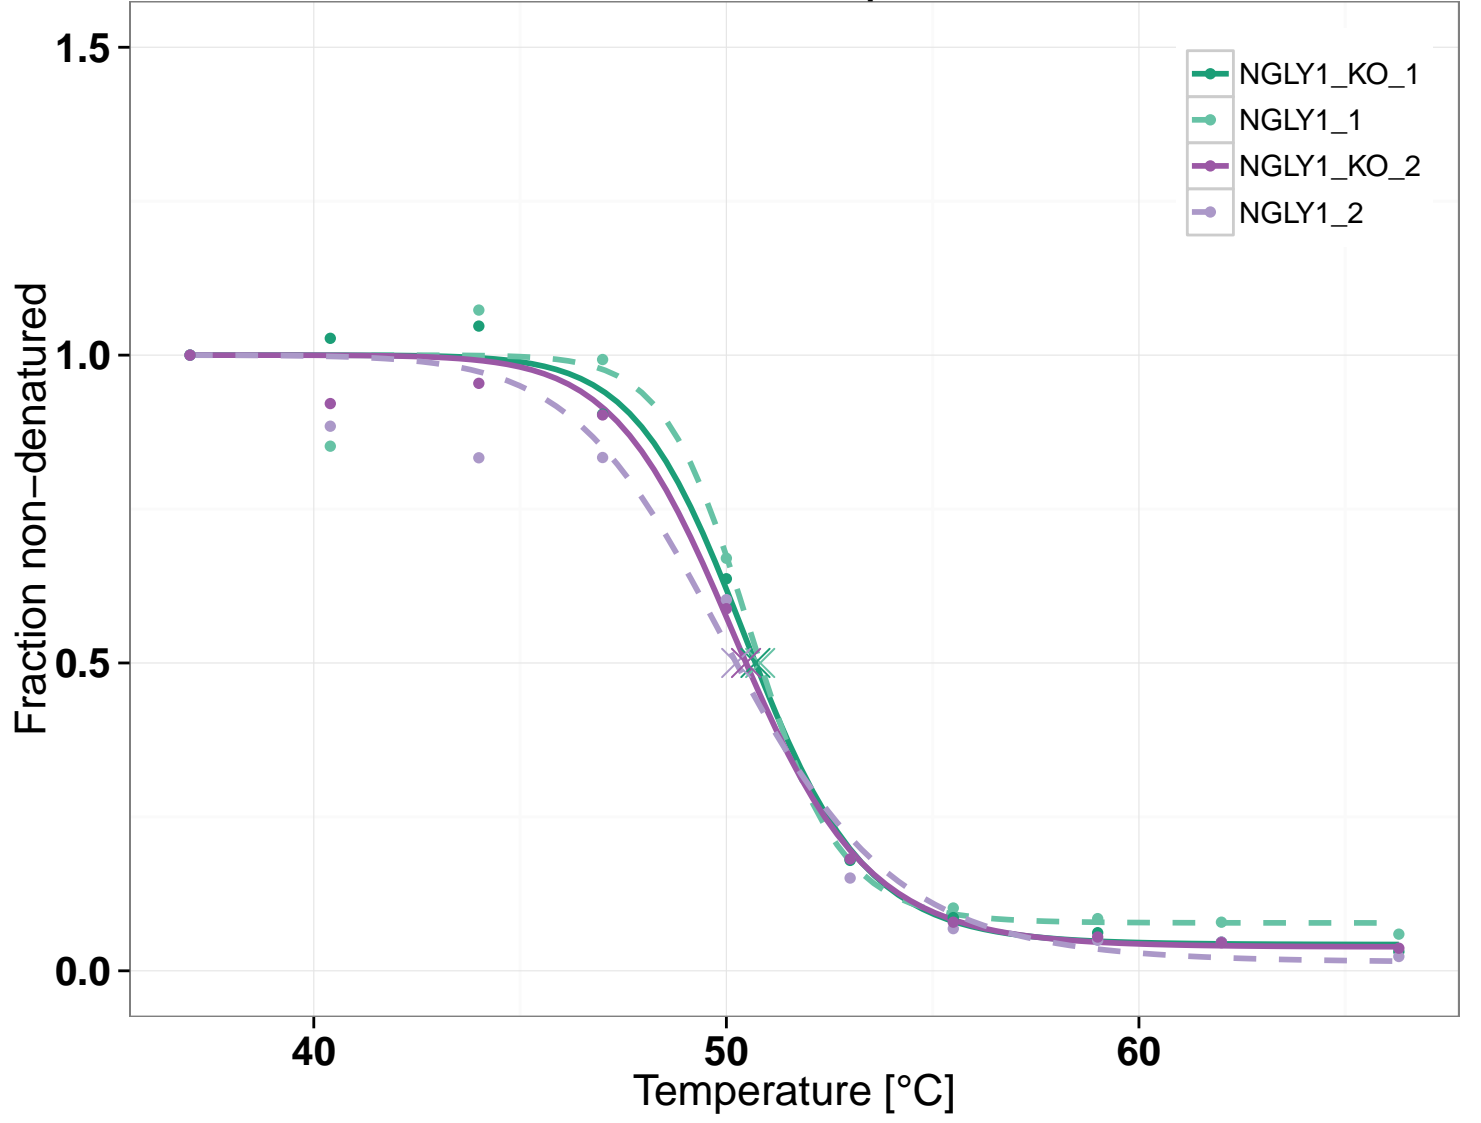

|            | meltPoint | slope | plateau | R2   |
|------------|-----------|-------|---------|------|
| NGLY1_KO_1 | 50.7      | -0.17 | 0.04    | 1    |
| NGLY1_1    | 50.82     | -0.22 | 0.08    | 0.98 |
| NGLY1_KO_2 | 50.48     | -0.16 | 0.04    | 1    |
| NGLY1_2    | 50.24     | -0.13 | 0.01    | 0.97 |

Supplement: Supplementary file 5352 [file 1]

IPI00382470.3|HSP90AA1

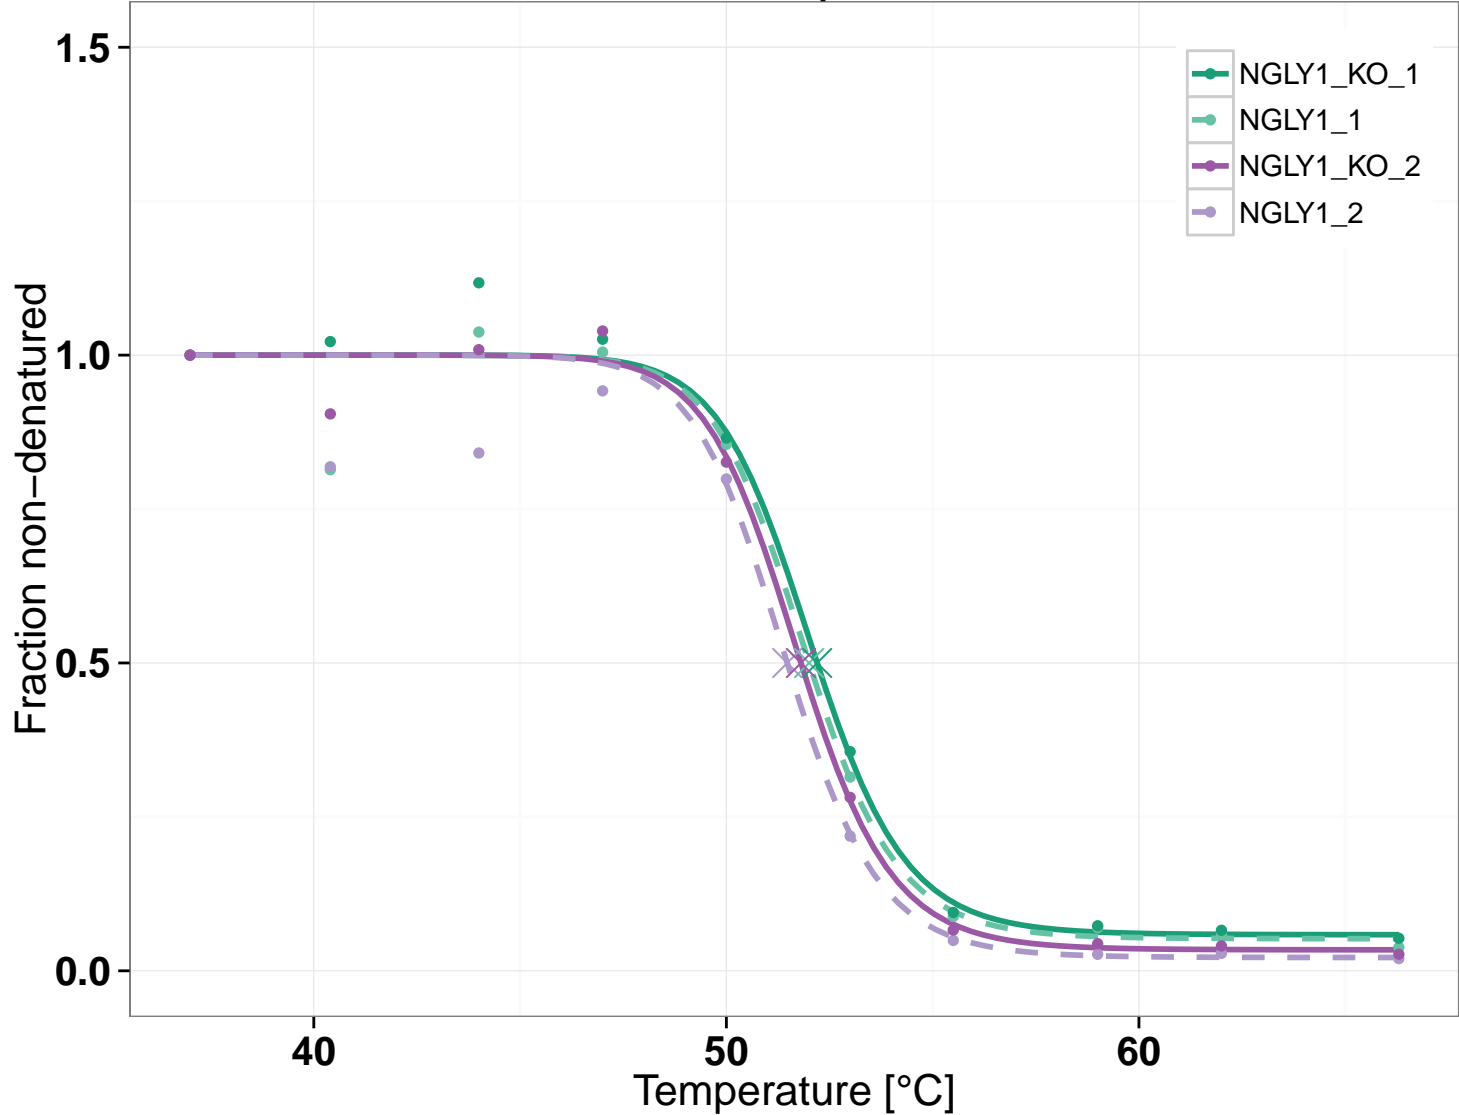

|            | meltPoint | slope | plateau | R2   |
|------------|-----------|-------|---------|------|
| NGLY1_KO_1 | 52.2      | -0.21 | 0.06    | 0.99 |
| NGLY1_1    | 52.01     | -0.21 | 0.05    | 0.98 |
| NGLY1_KO_2 | 51.81     | -0.21 | 0.03    | 0.99 |
| NGLY1_2    | 51.48     | -0.22 | 0.02    | 0.96 |

Supplement: Supplementary file 5353 [file 1]

IPI00291419.5|ACAT2

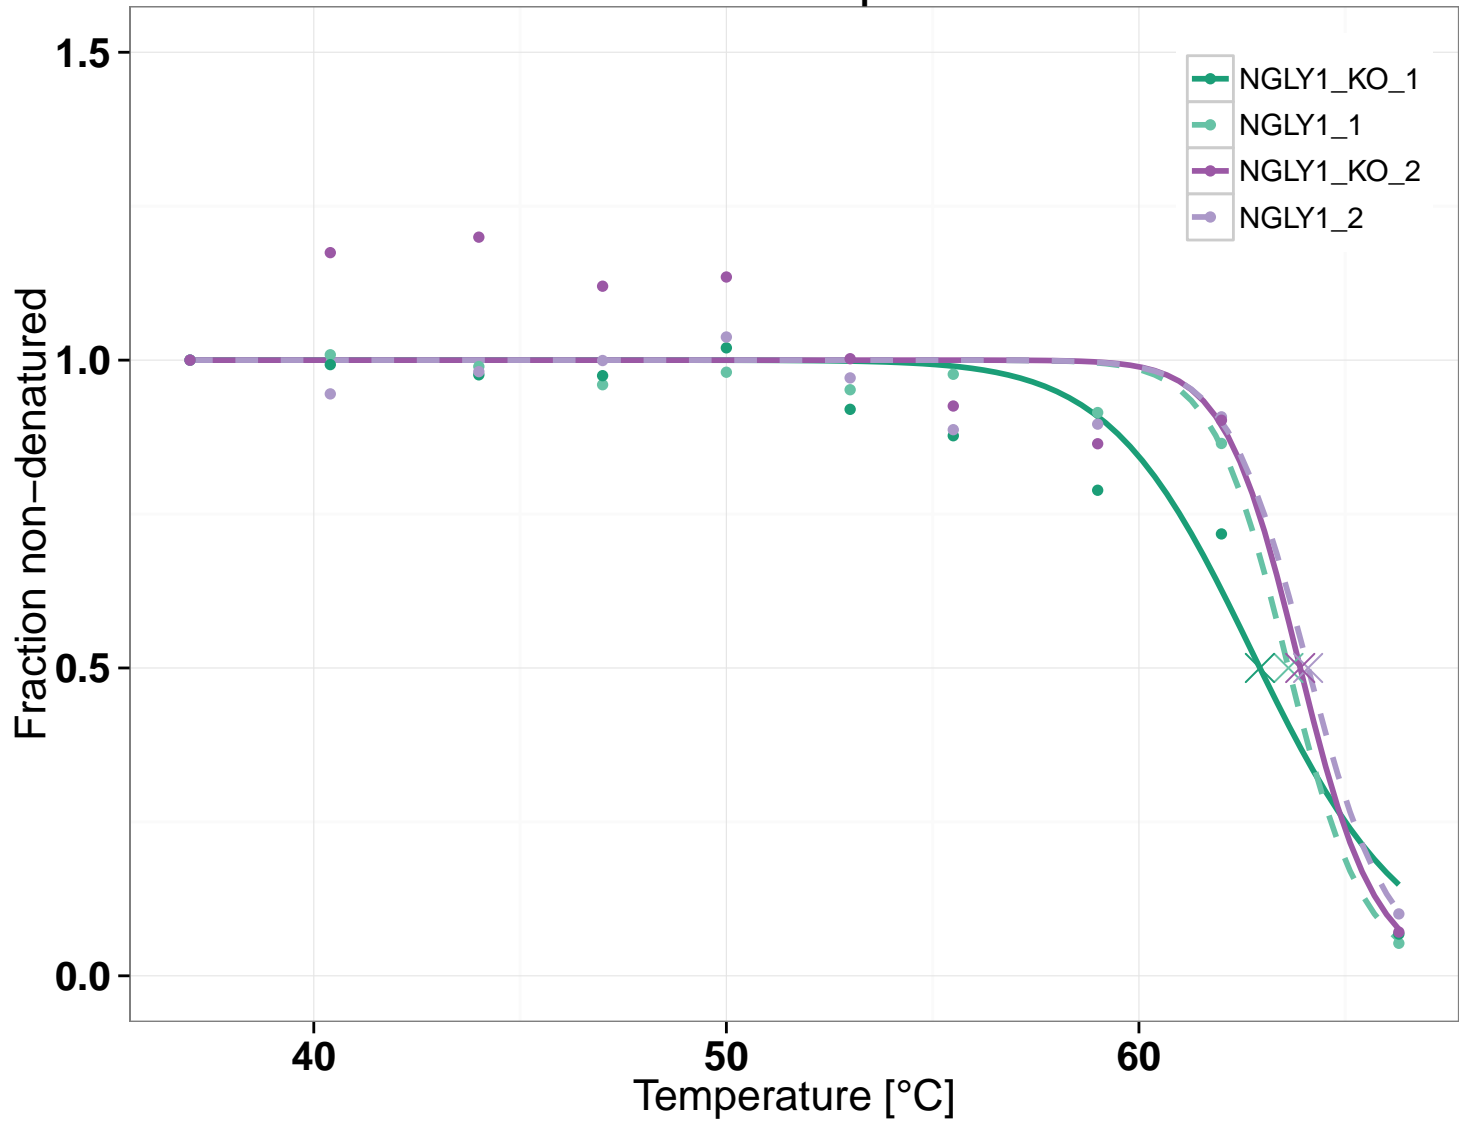

|            | meltPoint | slope | plateau | R2   |
|------------|-----------|-------|---------|------|
| NGLY1_KO_1 | 62.93     | -0.14 | 0       | 0.93 |
| NGLY1_1    | 63.62     | -0.27 | 0       | 0.98 |
| NGLY1_KO_2 | 63.91     | -0.27 | 0       | 0.87 |
| NGLY1_2    | 64.1      | -0.25 | 0       | 0.96 |

Supplement: Supplementary file 5354 [file 1]

IPI00025702.3|PRDM15

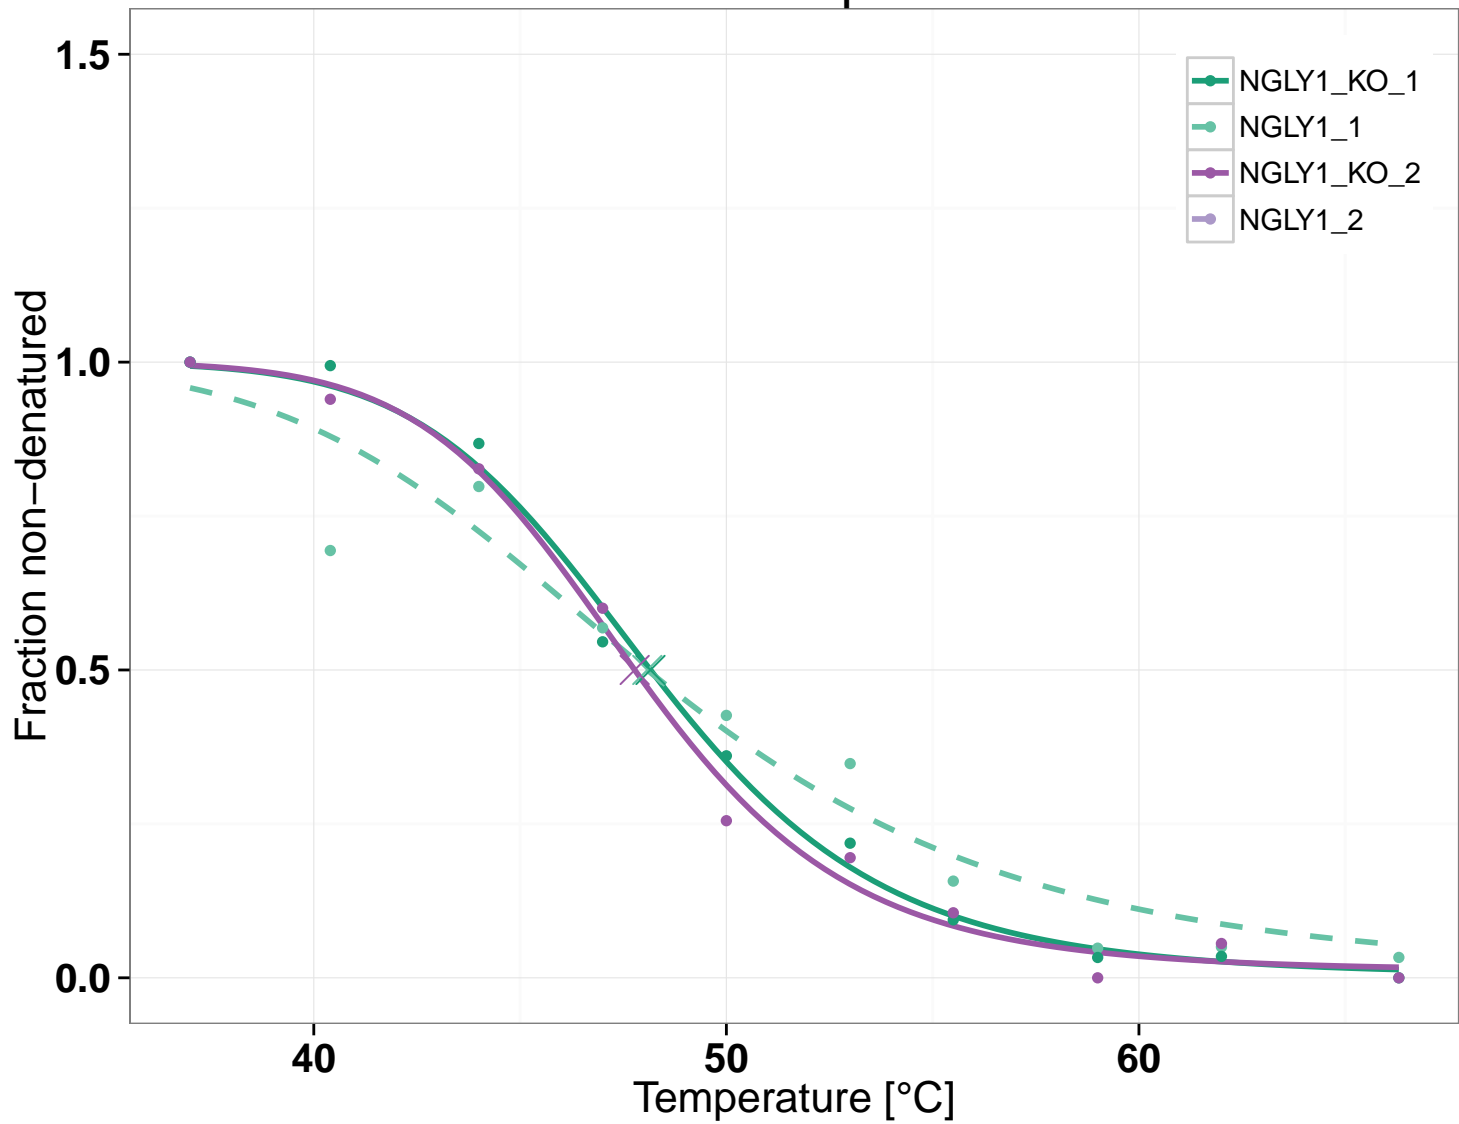

|            | meltPoint | slope  | plateau | R2   |
|------------|-----------|--------|---------|------|
| NGLY1_KO_1 | 48.16     | -0.088 | 0       | 0.99 |
| NGLY1_1    | 48.08     | -0.056 | 0       | 0.95 |
| NGLY1_KO_2 | 47.78     | -0.094 | 0.01    | 0.99 |
| NGLY1_2    | -         | -      | -       | -    |

Supplement: Supplementary file 5355 [file 1]

IPI00031115.4|GOLGA1

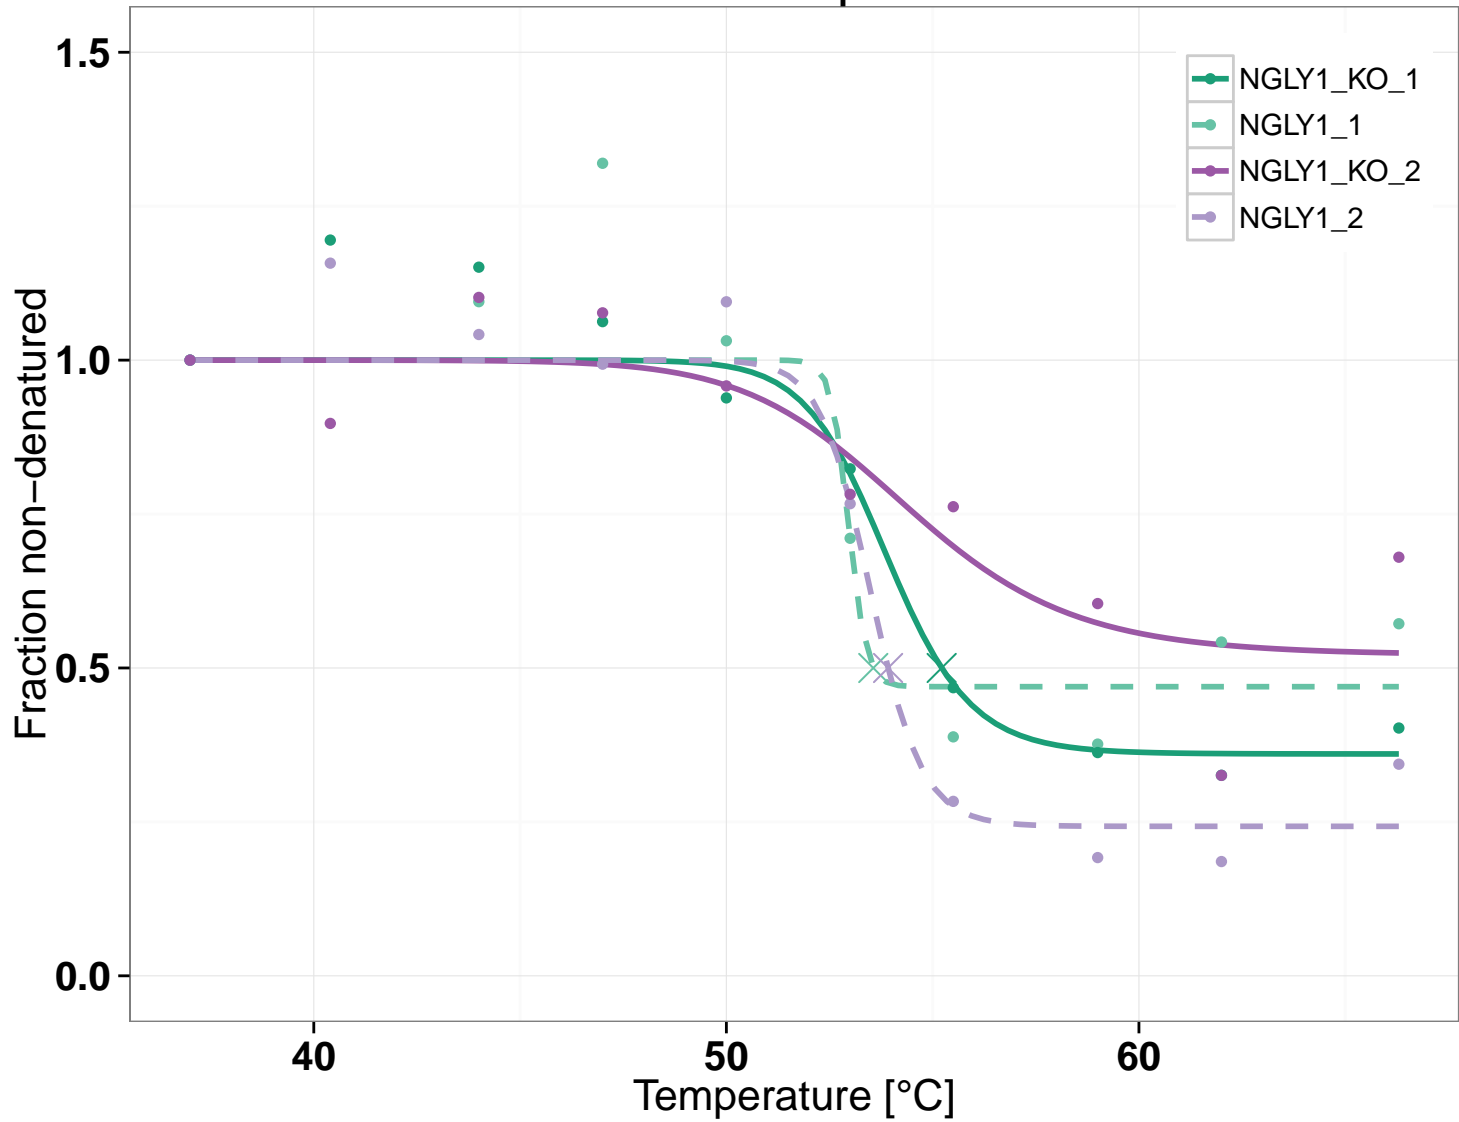

|            | meltPoint | slope | plateau | R2   |
|------------|-----------|-------|---------|------|
| NGLY1_KO_1 | 55.22     | -0.16 | 0.36    | 0.94 |
| NGLY1_1    | 53.56     | -0.63 | 0.47    | 0.61 |
| NGLY1_KO_2 | -         | -0.06 | 0.52    | 0.8  |
| NGLY1_2    | 53.92     | -0.31 | 0.24    | 0.96 |

Supplement: Supplementary file 5356 [file 1]

# IPI00217362.2|TPRKB

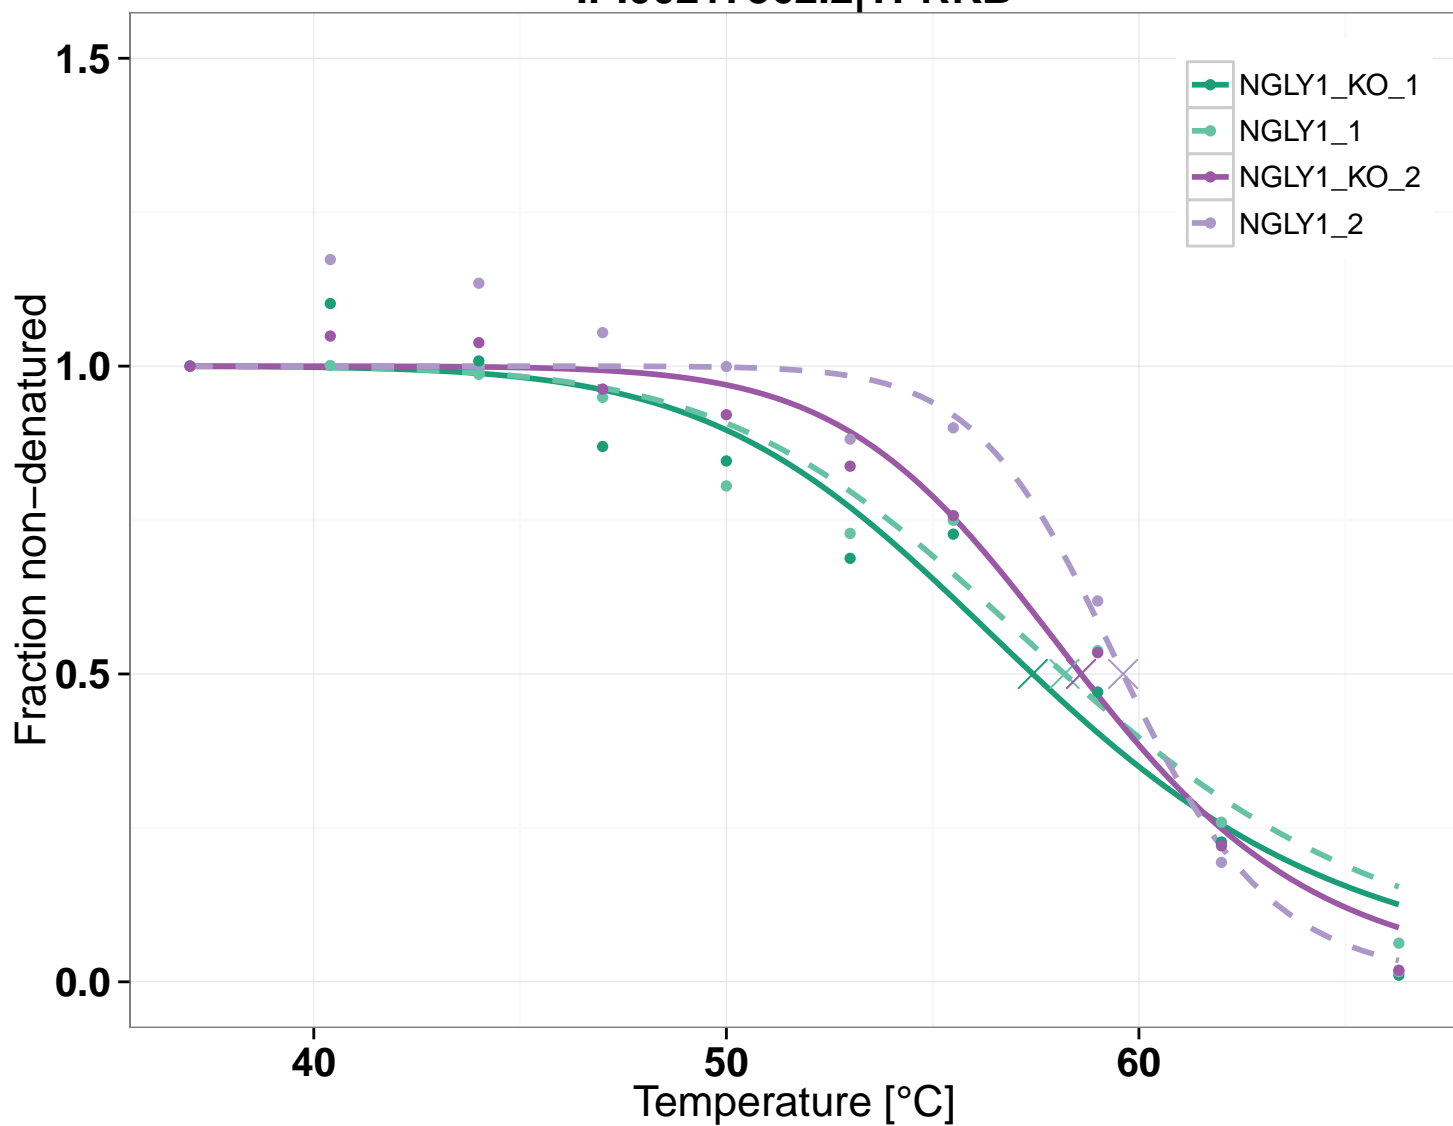

|            | meltPoint | slope  | plateau | R2   |
|------------|-----------|--------|---------|------|
| NGLY1_KO_1 | 57.43     | -0.064 | 0       | 0.95 |
| NGLY1_1    | 58.2      | -0.061 | 0       | 0.96 |
| NGLY1_KO_2 | 58.6      | -0.087 | 0       | 0.98 |
| NGLY1_2    | 59.62     | -0.14  | 0       | 0.96 |

Supplement: Supplementary file 5357 [file 1]

# IPI00748256.2|PSME1

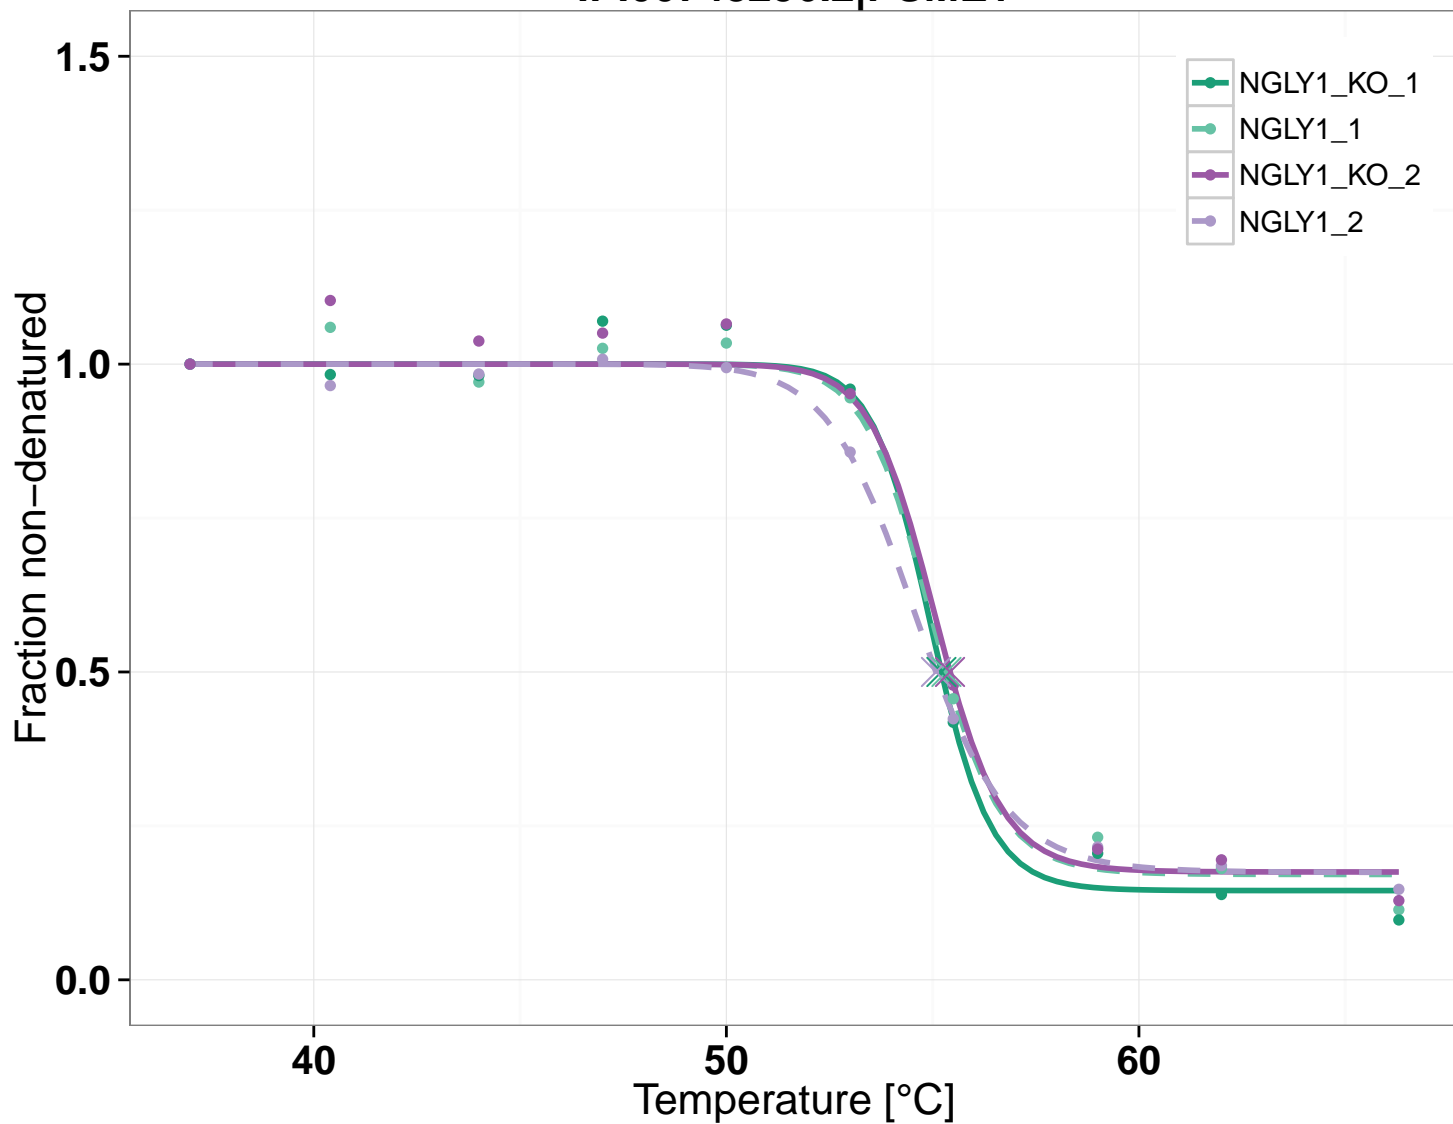

|            | meltPoint | slope | plateau | R2   |
|------------|-----------|-------|---------|------|
| NGLY1_KO_1 | 55.21     | -0.3  | 0.14    | 0.99 |
| NGLY1_1    | 55.33     | -0.25 | 0.17    | 0.99 |
| NGLY1_KO_2 | 55.42     | -0.26 | 0.18    | 0.99 |
| NGLY1_2    | 55.08     | -0.19 | 0.17    | 1    |

Supplement: Supplementary file 5358 [file 1]

# IPI00001952.5|ENDOD1

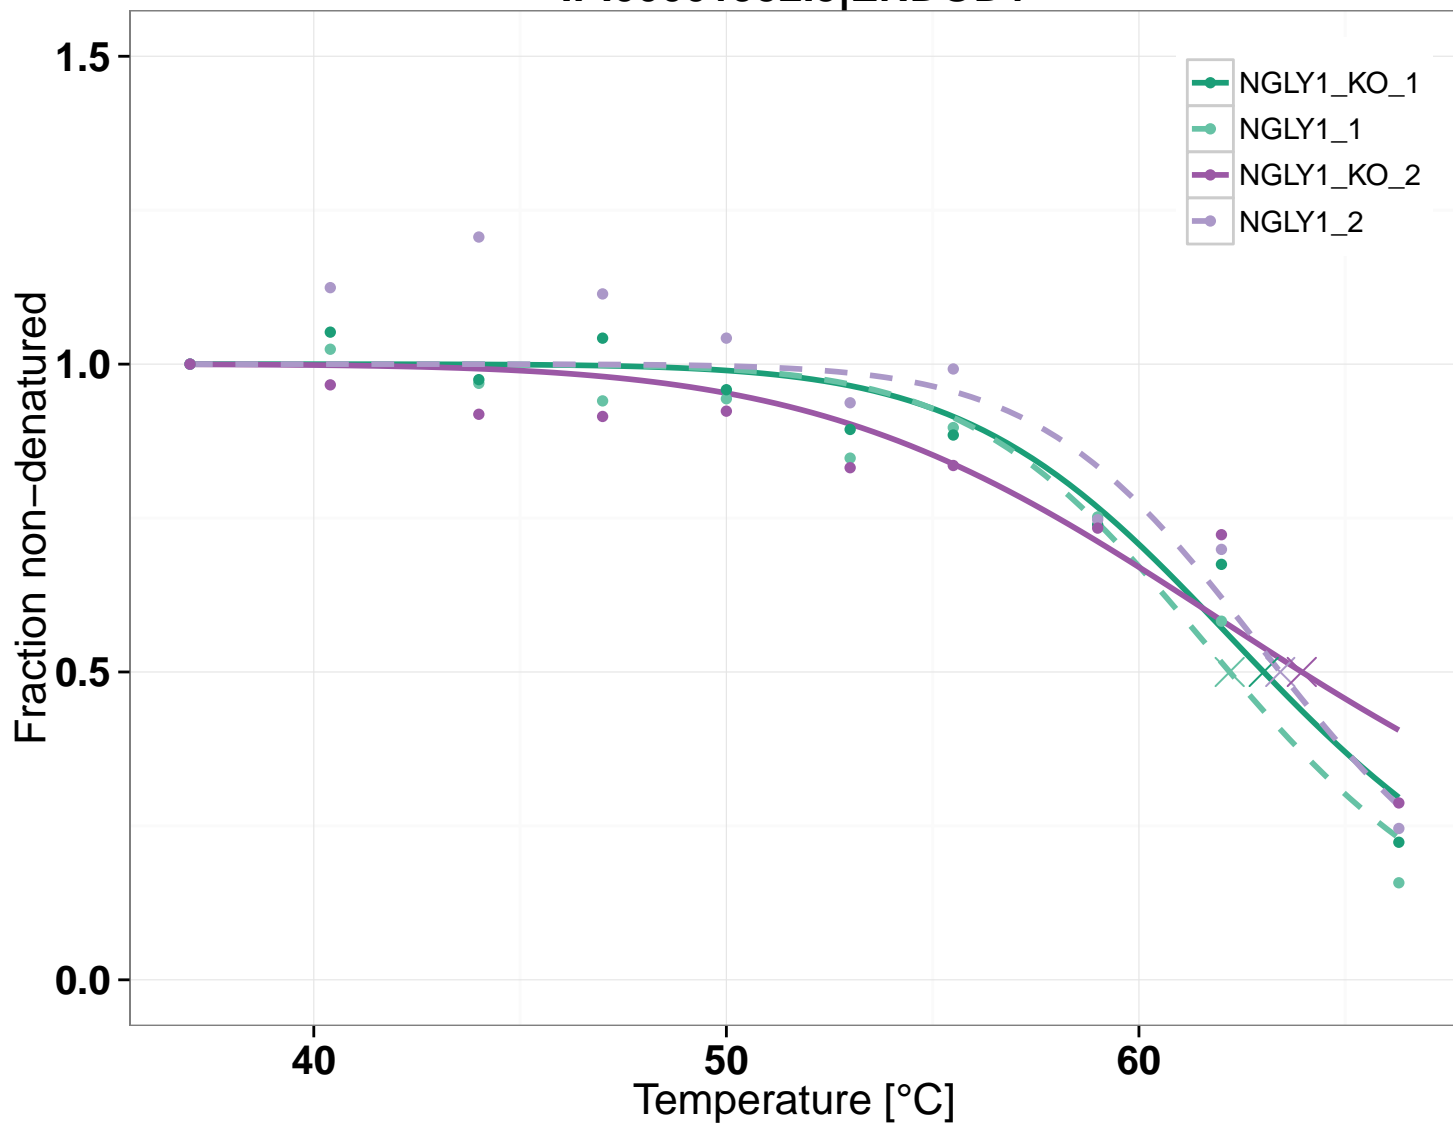

|            | meltPoint | slope  | plateau | R2   |
|------------|-----------|--------|---------|------|
| NGLY1_KO_1 | 63.02     | -0.07  | 0       | 0.95 |
| NGLY1_1    | 62.2      | -0.079 | 0       | 0.95 |
| NGLY1_KO_2 | 63.95     | -0.044 | 0       | 0.87 |
| NGLY1_2    | 63.43     | -0.085 | 0       | 0.87 |

Supplement: Supplementary file 5359 [file 1]

IPI00030288.2|DHX35

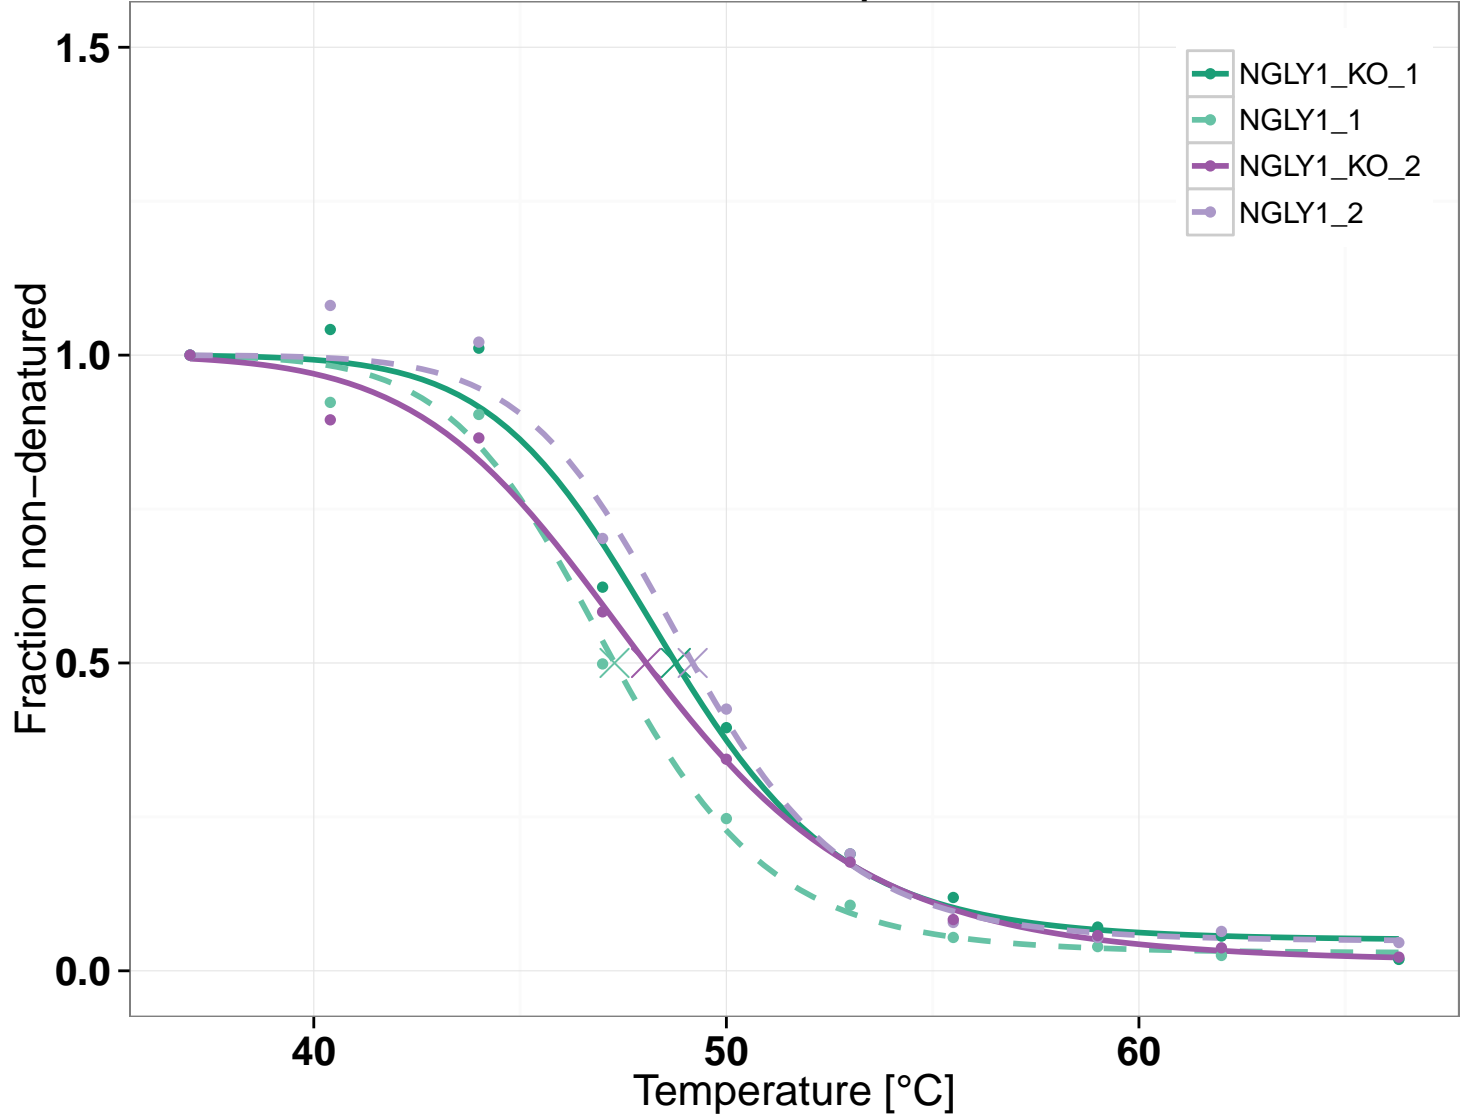

|            | meltPoint | slope | plateau | R2   |
|------------|-----------|-------|---------|------|
| NGLY1_KO_1 | 48.78     | -0.11 | 0.05    | 0.99 |
| NGLY1_1    | 47.29     | -0.12 | 0.03    | 0.99 |
| NGLY1_KO_2 | 48.05     | -0.09 | 0.01    | 1    |
| NGLY1_2    | 49.18     | -0.12 | 0.05    | 0.99 |

Supplement: Supplementary file 5360 [file 1]

# IPI00425902.4|SSR2

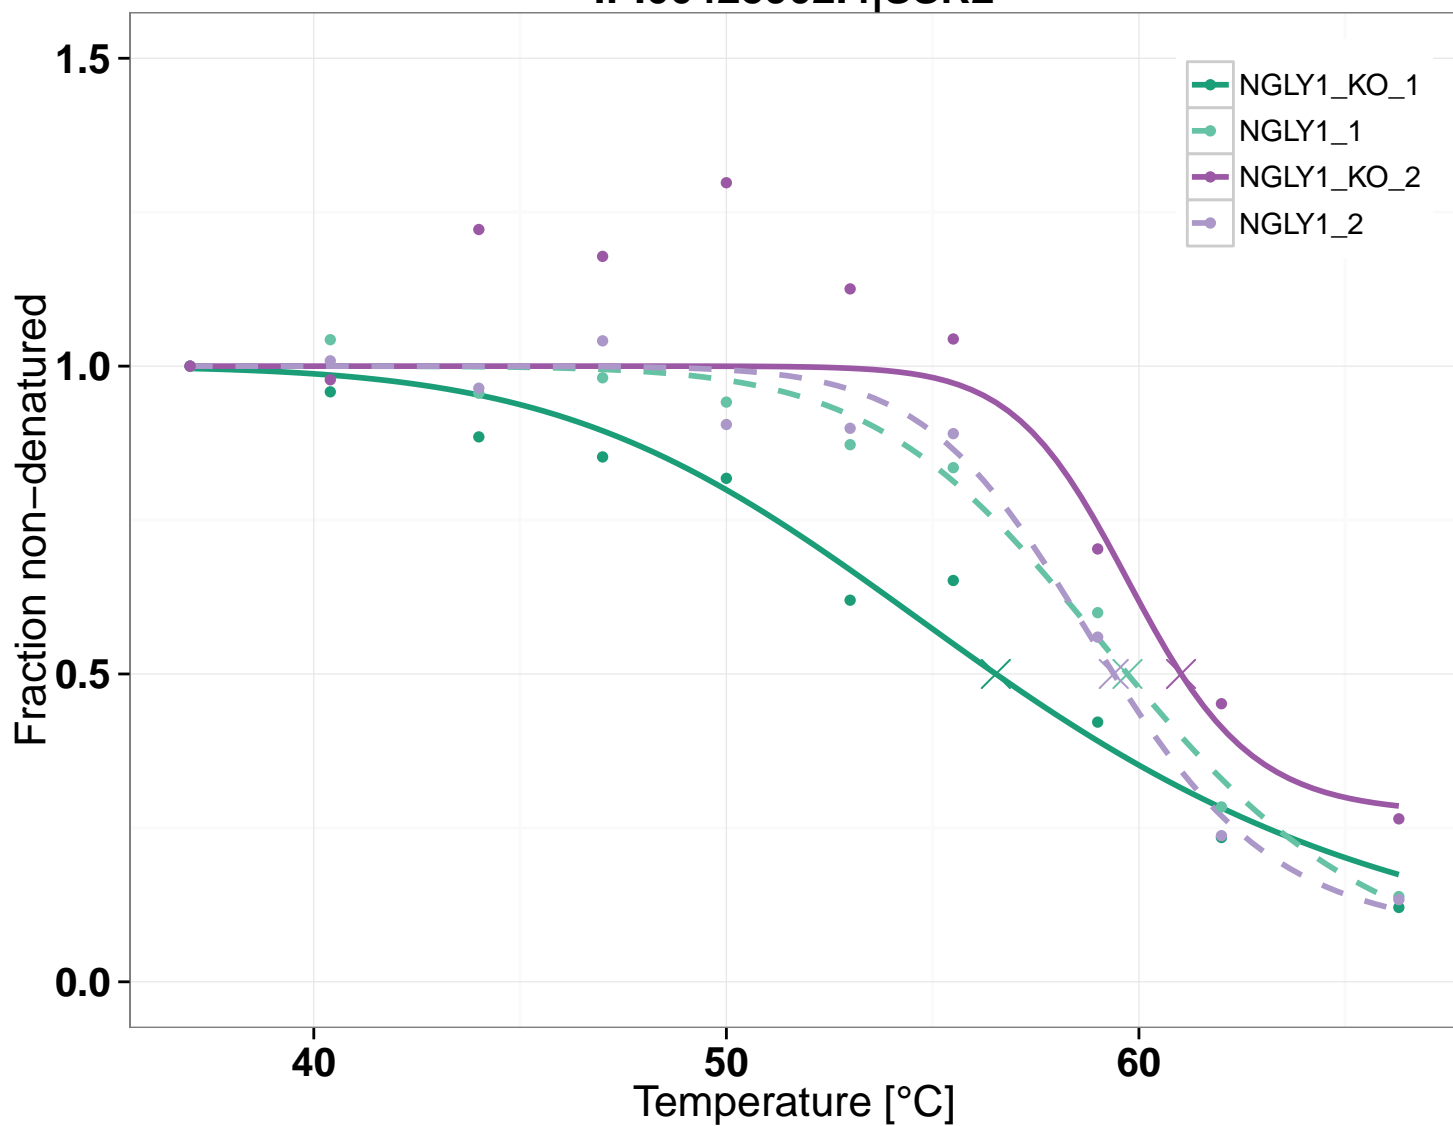

|            | meltPoint | slope  | plateau | R2   |
|------------|-----------|--------|---------|------|
| NGLY1_KO_1 | 56.53     | -0.048 | 0       | 0.97 |
| NGLY1_1    | 59.72     | -0.082 | 0       | 0.99 |
| NGLY1_KO_2 | 61.02     | -0.13  | 0.27    | 0.82 |
| NGLY1_2    | 59.39     | -0.11  | 0.07    | 0.98 |

Supplement: Supplementary file 5361 [file 1]

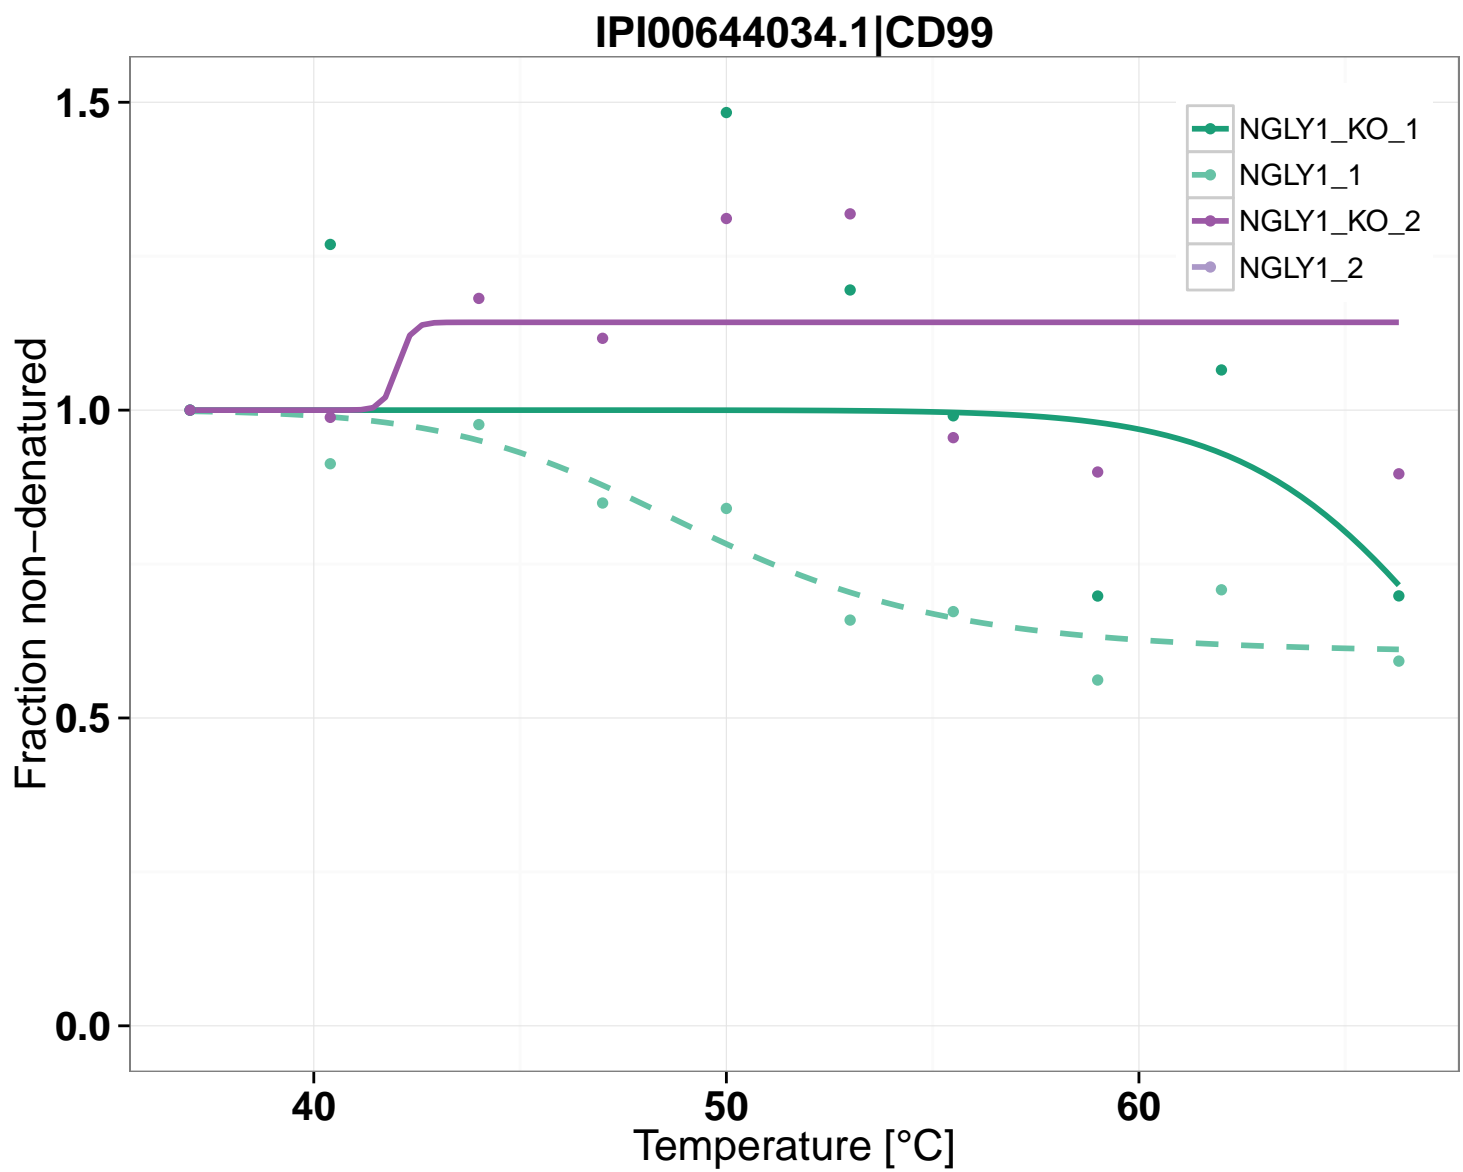

|            | meltPoint | slope  | plateau | R2    |
|------------|-----------|--------|---------|-------|
| NGLY1_KO_1 | —         | —      | 0       | −0.14 |
| NGLY1_1    | —         | −0.032 | 0.6     | 0.89  |
| NGLY1_KO_2 | —         | 0.21   | 1.14    | 0.1   |
| NGLY1_2    | —         | —      | —       | —     |

Supplement: Supplementary file 5362 [file 1]

IPI00005760.2|TRAF5

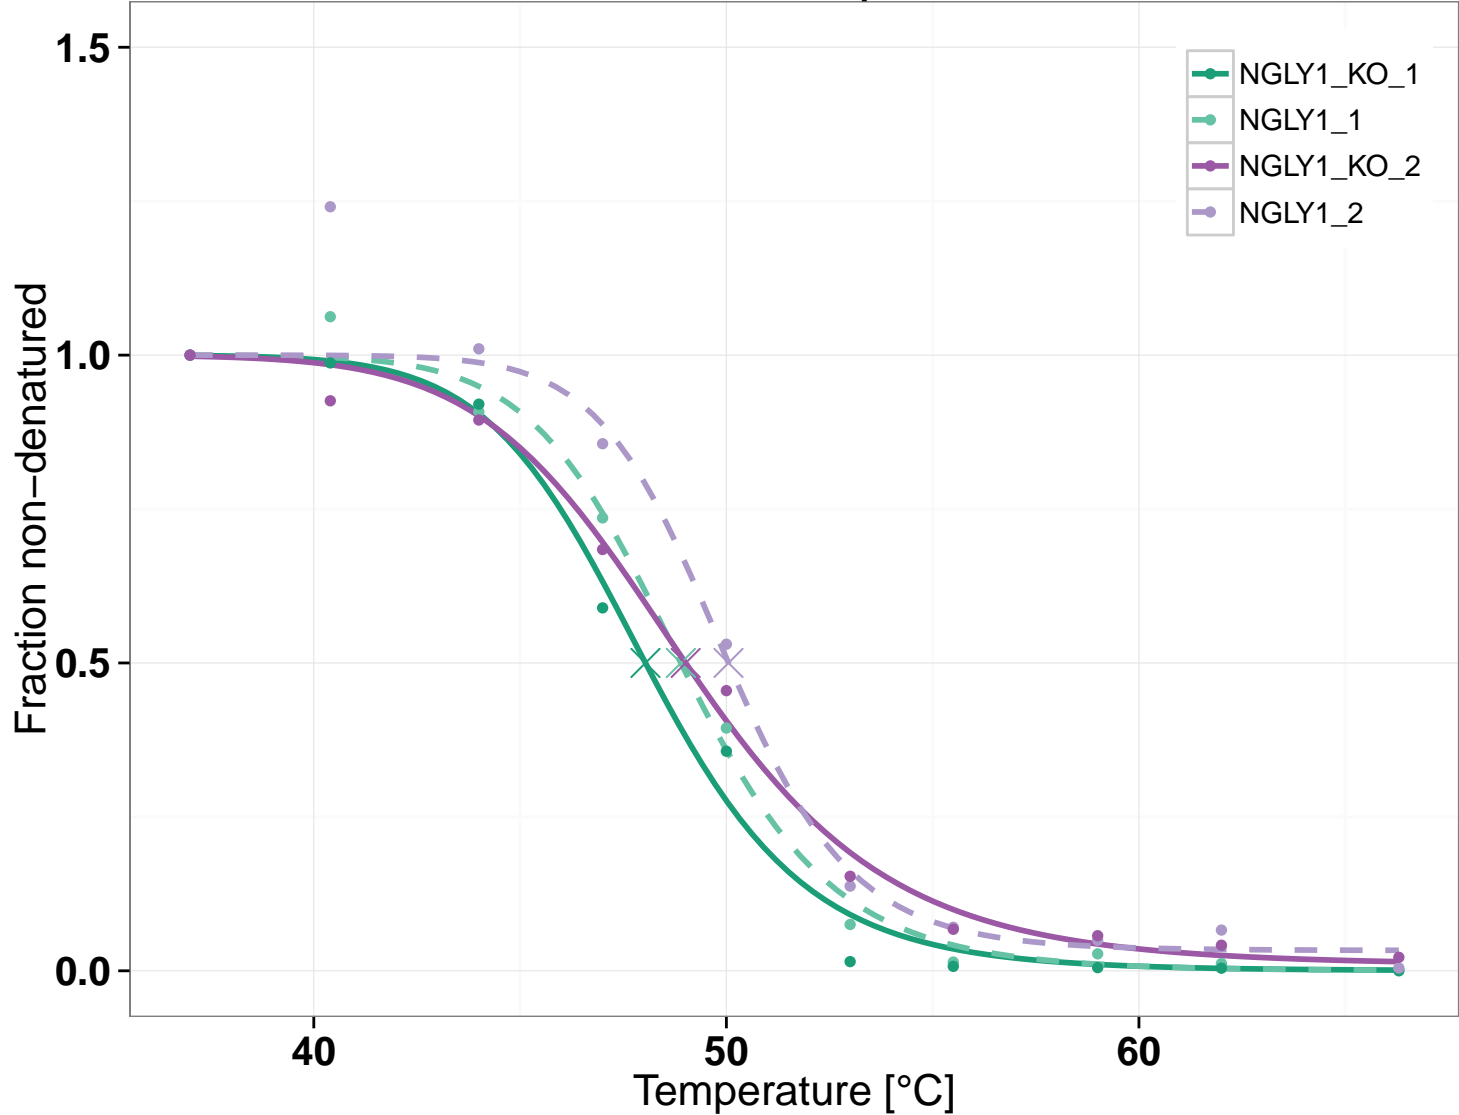

|            | meltPoint | slope | plateau | R2   |
|------------|-----------|-------|---------|------|
| NGLY1_KO_1 | 48.04     | -0.13 | 0       | 0.99 |
| NGLY1_1    | 48.9      | -0.14 | 0       | 0.99 |
| NGLY1_KO_2 | 49.01     | -0.1  | 0.01    | 0.99 |
| NGLY1_2    | 50.05     | -0.16 | 0.03    | 0.97 |

Supplement: Supplementary file 5363 [file 1]

IPI00646294.2|RPUSD3

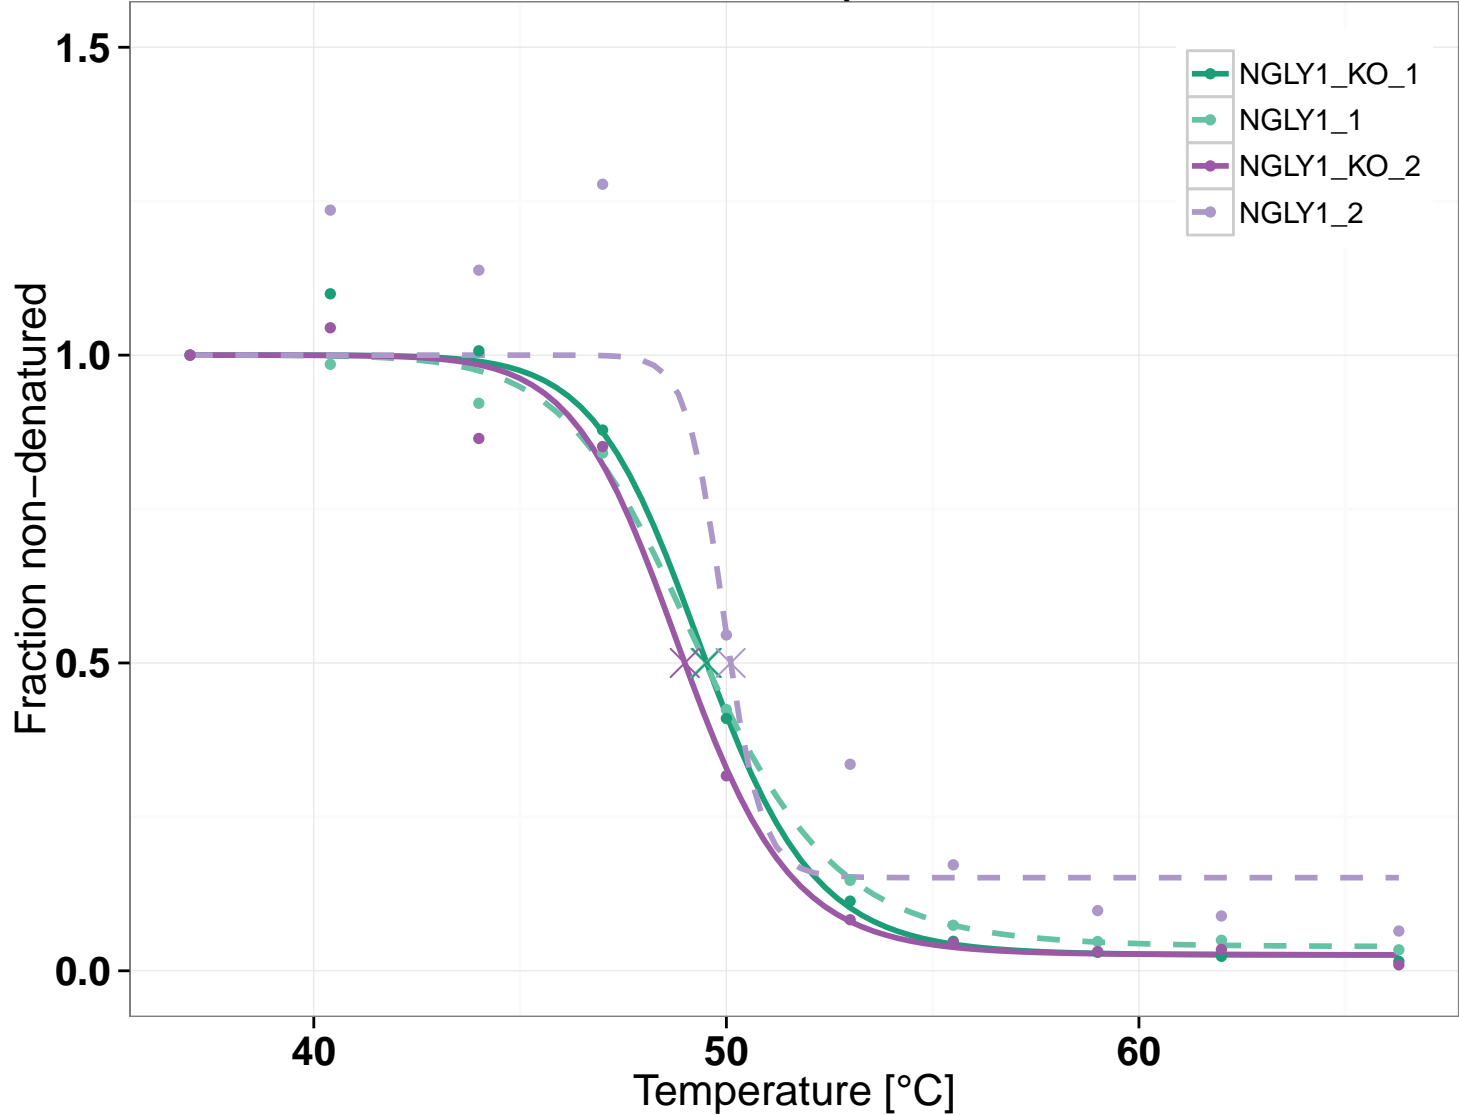

|            | meltPoint | slope | plateau | R2   |
|------------|-----------|-------|---------|------|
| NGLY1_KO_1 | 49.52     | -0.18 | 0.03    | 0.99 |
| NGLY1_1    | 49.49     | -0.14 | 0.04    | 1    |
| NGLY1_KO_2 | 48.99     | -0.18 | 0.03    | 0.99 |
| NGLY1_2    | 50.1      | -0.47 | 0.15    | 0.92 |

Supplement: Supplementary file 5364 [file 1]

IPI00180764.3|MYST2

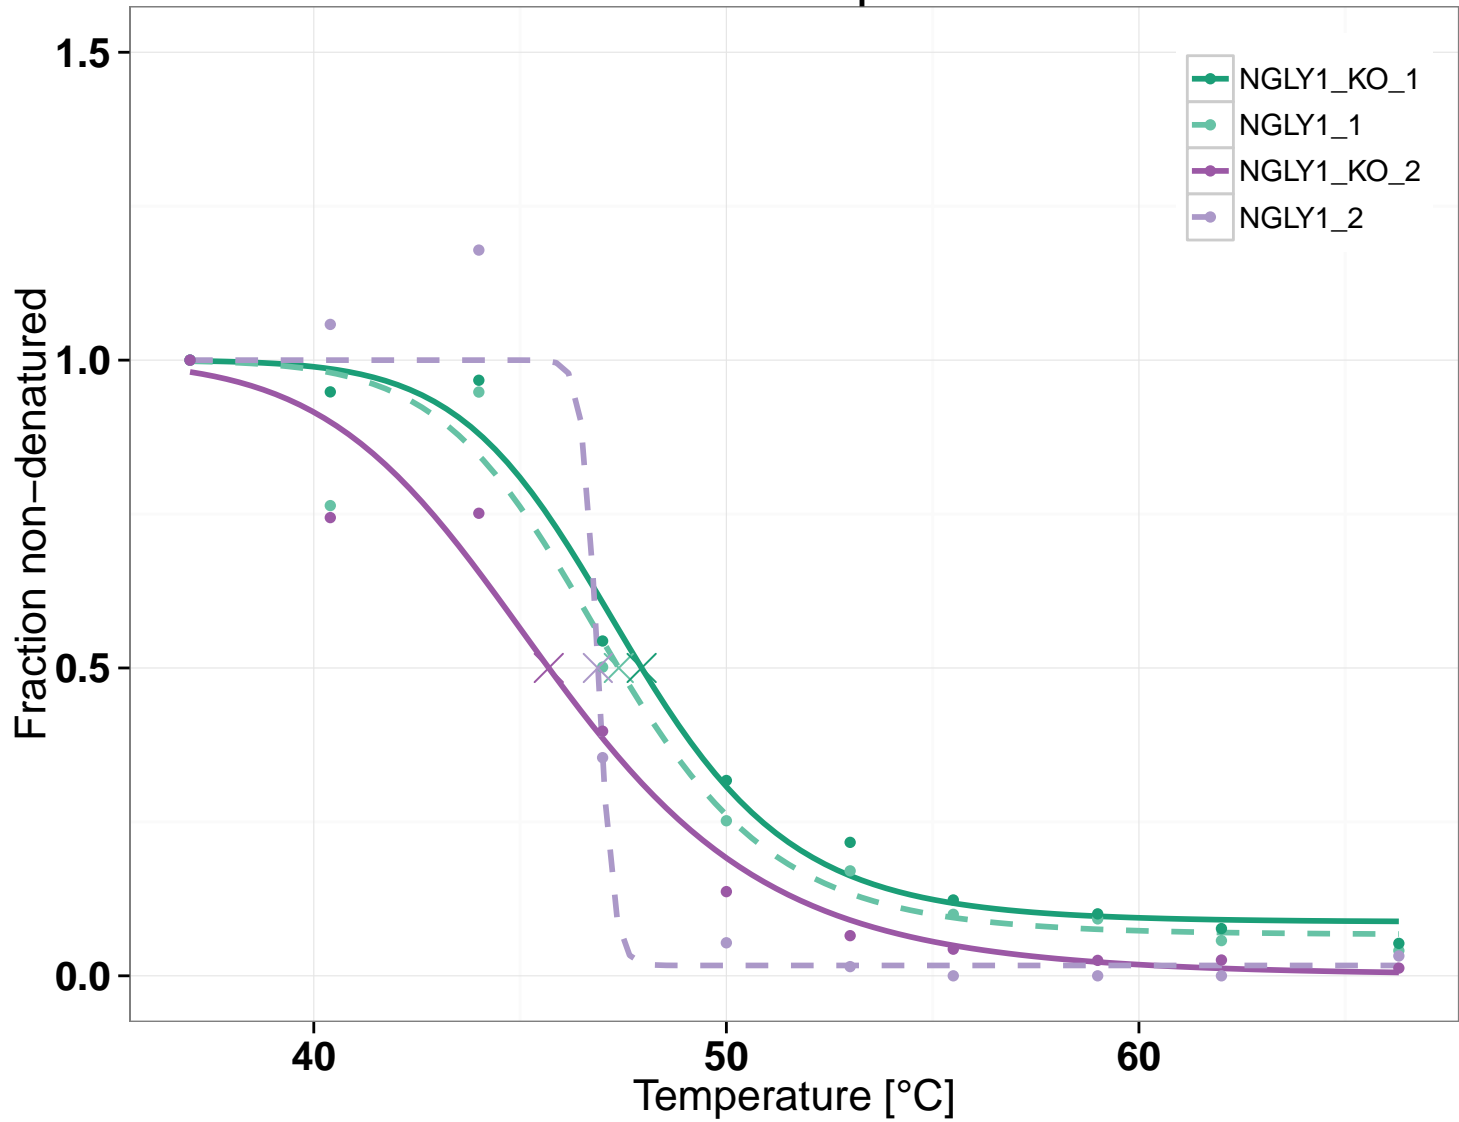

|            | meltPoint | slope  | plateau | R2   |
|------------|-----------|--------|---------|------|
| NGLY1_KO_1 | 47.95     | -0.11  | 0.09    | 0.99 |
| NGLY1_1    | 47.39     | -0.11  | 0.07    | 0.95 |
| NGLY1_KO_2 | 45.7      | -0.093 | 0       | 0.97 |
| NGLY1_2    | 46.88     | -1.3   | 0.02    | 0.98 |

Supplement: Supplementary file 5365 [file 1]

IPI00216237.5|RPL36

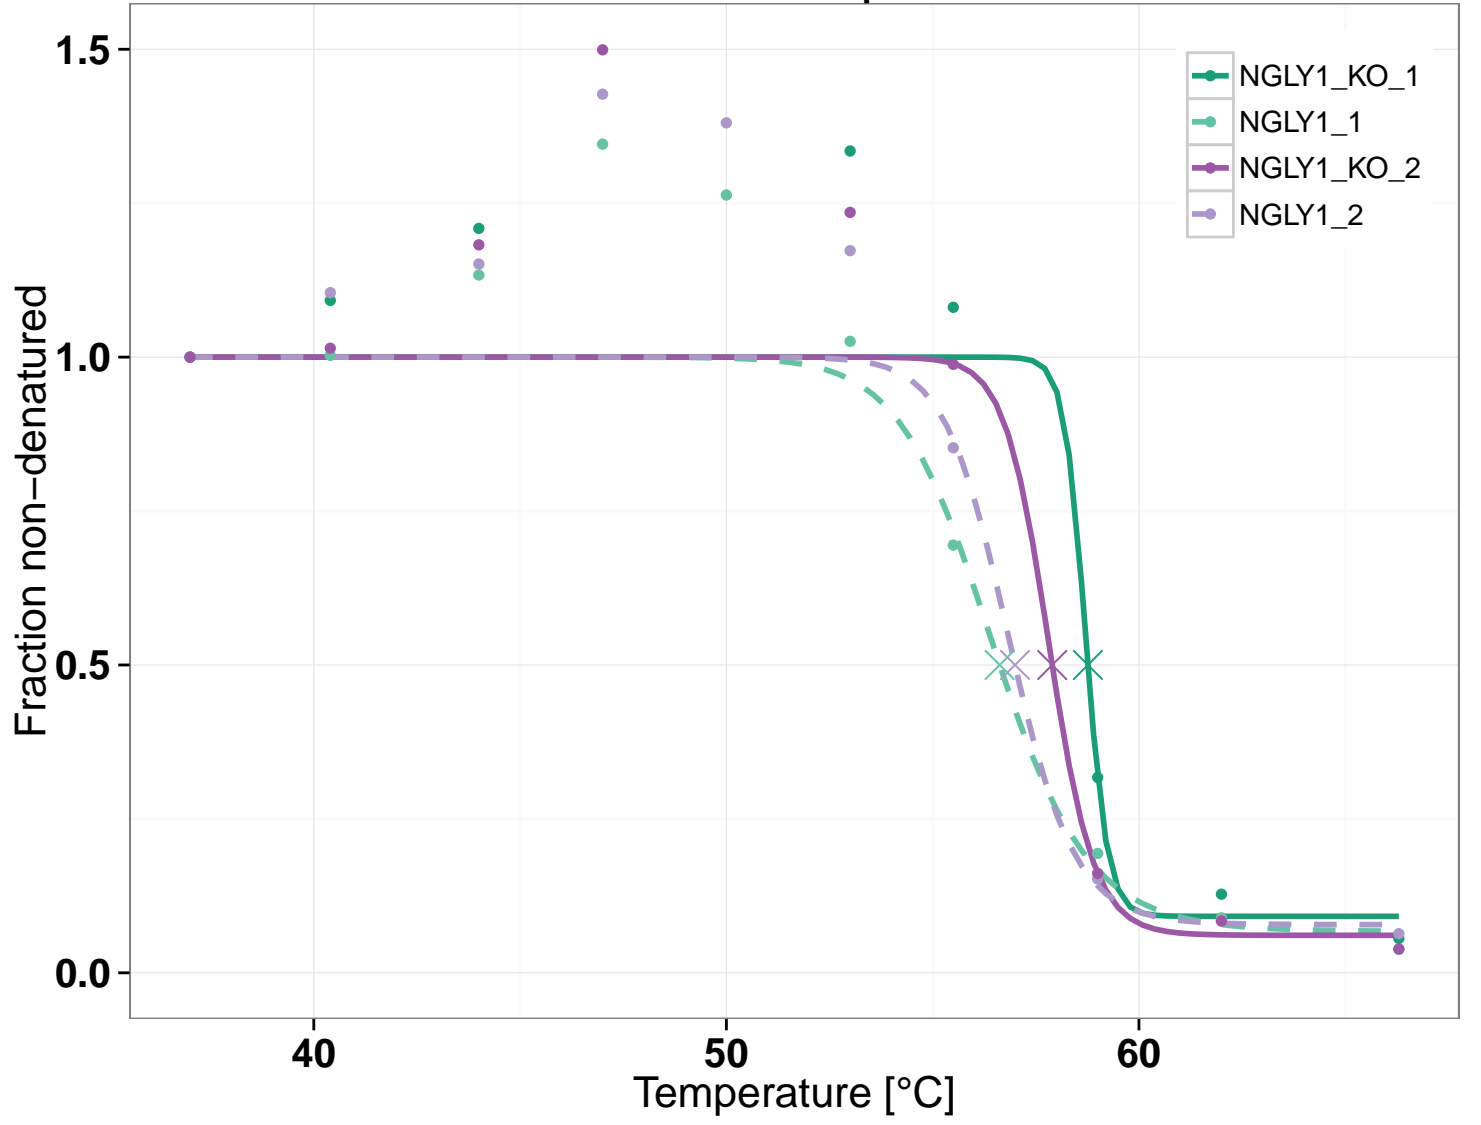

|            | meltPoint | slope | plateau | R2   |
|------------|-----------|-------|---------|------|
| NGLY1_KO_1 | 58.76     | -0.87 | 0.09    | 0.69 |
| NGLY1_1    | 56.62     | -0.2  | 0.07    | 0.9  |
| NGLY1_KO_2 | 57.9      | -0.43 | 0.06    | 0.77 |
| NGLY1_2    | 57        | -0.29 | 0.08    | 0.85 |

Supplement: Supplementary file 5366 [file 1]

IPI00007682.2|ATP6V1A

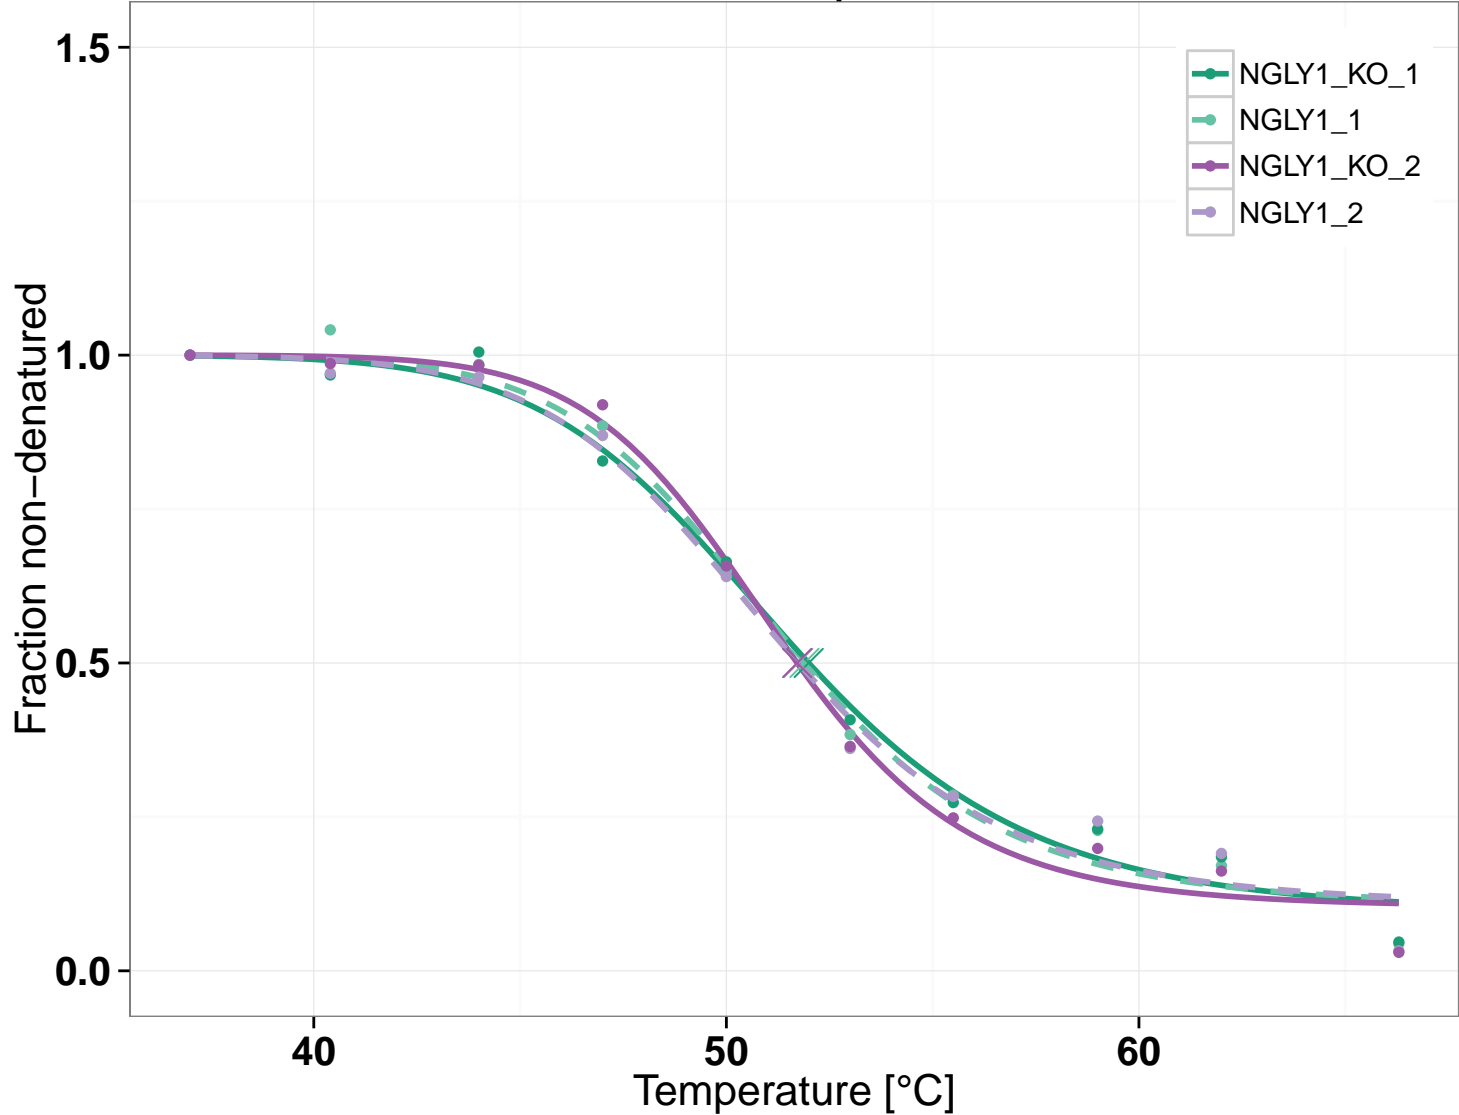

|            | meltPoint | slope  | plateau | R2   |
|------------|-----------|--------|---------|------|
| NGLY1_KO_1 | 51.99     | -0.077 | 0.09    | 0.99 |
| NGLY1_1    | 51.89     | -0.084 | 0.11    | 0.99 |
| NGLY1_KO_2 | 51.72     | -0.098 | 0.1     | 0.99 |
| NGLY1_2    | 51.74     | -0.08  | 0.11    | 0.99 |

Supplement: Supplementary file 5367 [file 1]

IPI00026259.1|AGA

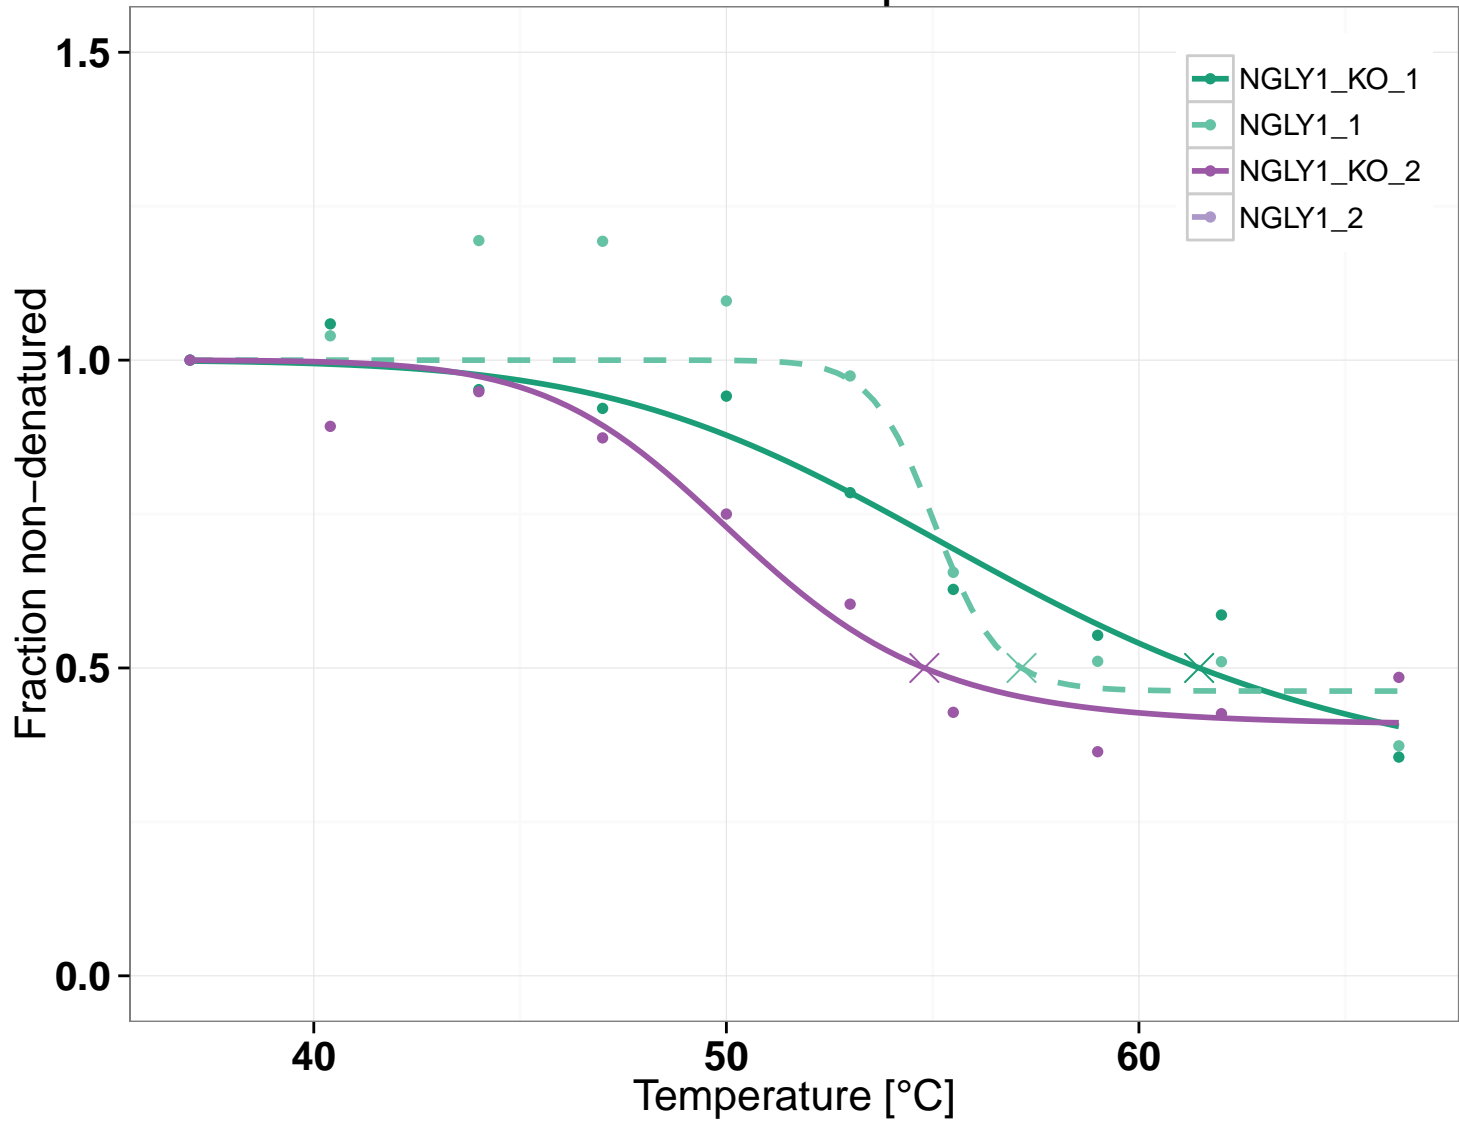

|            | meltPoint | slope  | plateau | R2   |
|------------|-----------|--------|---------|------|
| NGLY1_KO_1 | 61.46     | -0.037 | 0.29    | 0.95 |
| NGLY1_1    | 57.15     | -0.17  | 0.46    | 0.89 |
| NGLY1_KO_2 | 54.8      | -0.062 | 0.41    | 0.95 |
| NGLY1_2    | -         | -      | -       | -    |

Supplement: Supplementary file 5368 [file 1]

# IPI00009904.1|PDIA4

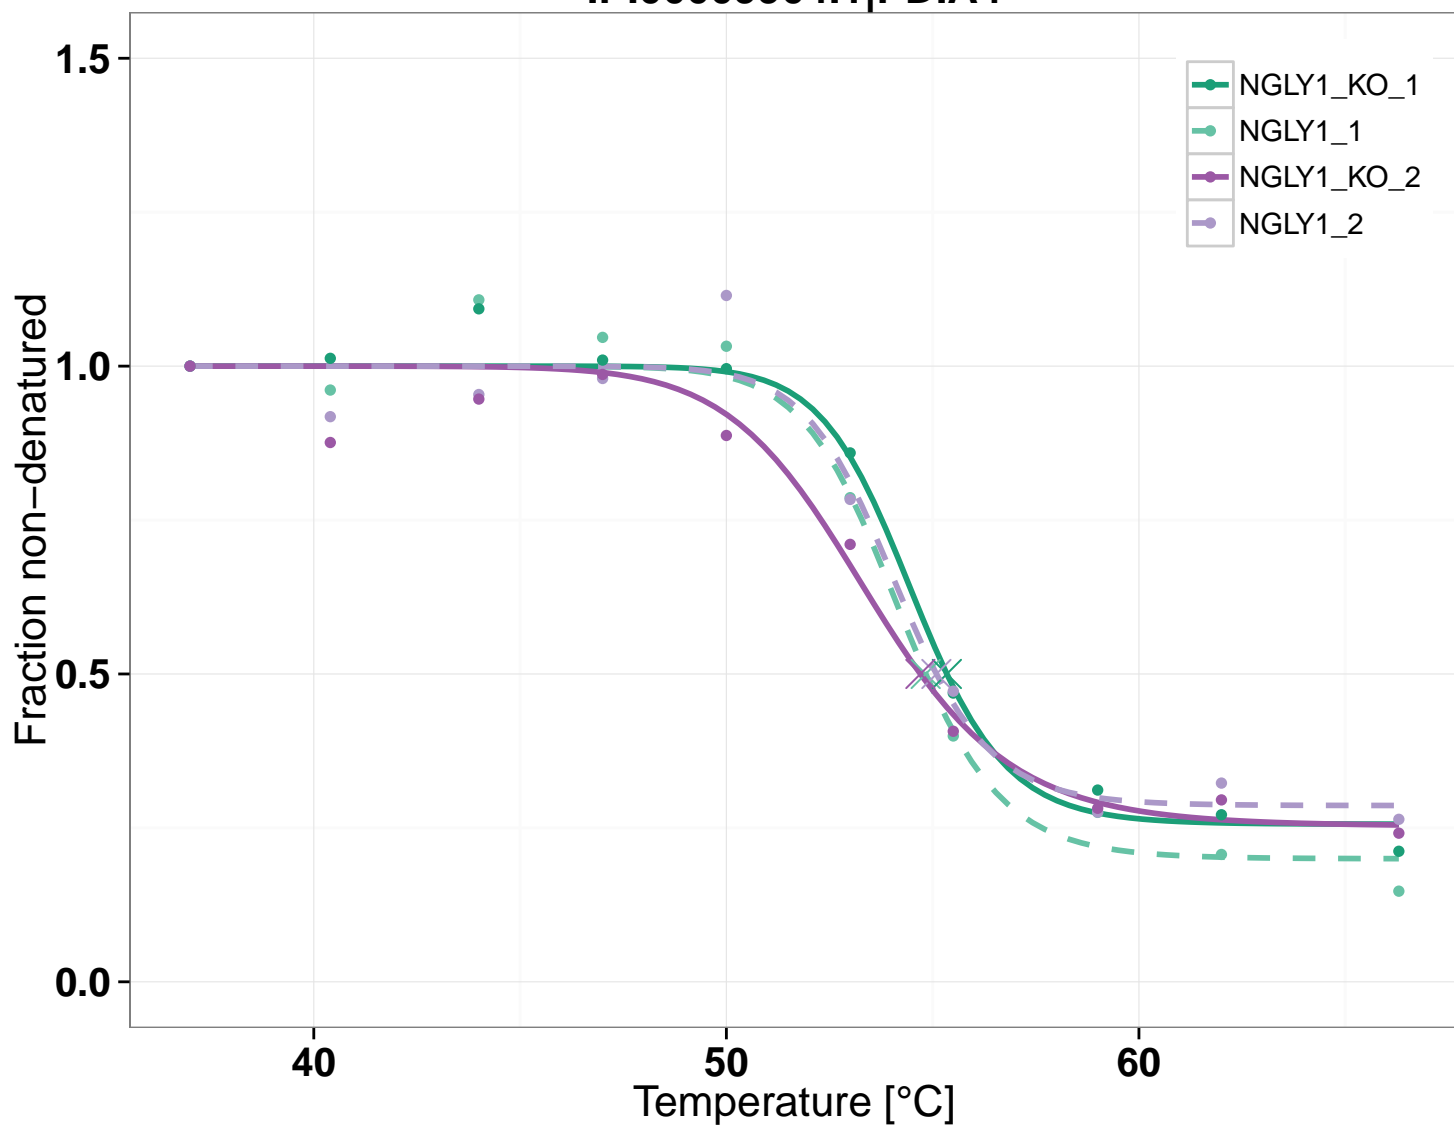

|            | meltPoint | slope | plateau | R2   |
|------------|-----------|-------|---------|------|
| NGLY1_KO_1 | 55.34     | -0.17 | 0.26    | 0.99 |
| NGLY1_1    | 54.83     | -0.17 | 0.2     | 0.98 |
| NGLY1_KO_2 | 54.7      | -0.11 | 0.25    | 0.98 |
| NGLY1_2    | 55.09     | -0.16 | 0.29    | 0.97 |

Supplement: Supplementary file 5369 [file 1]

IPI00478371.3|LCOR

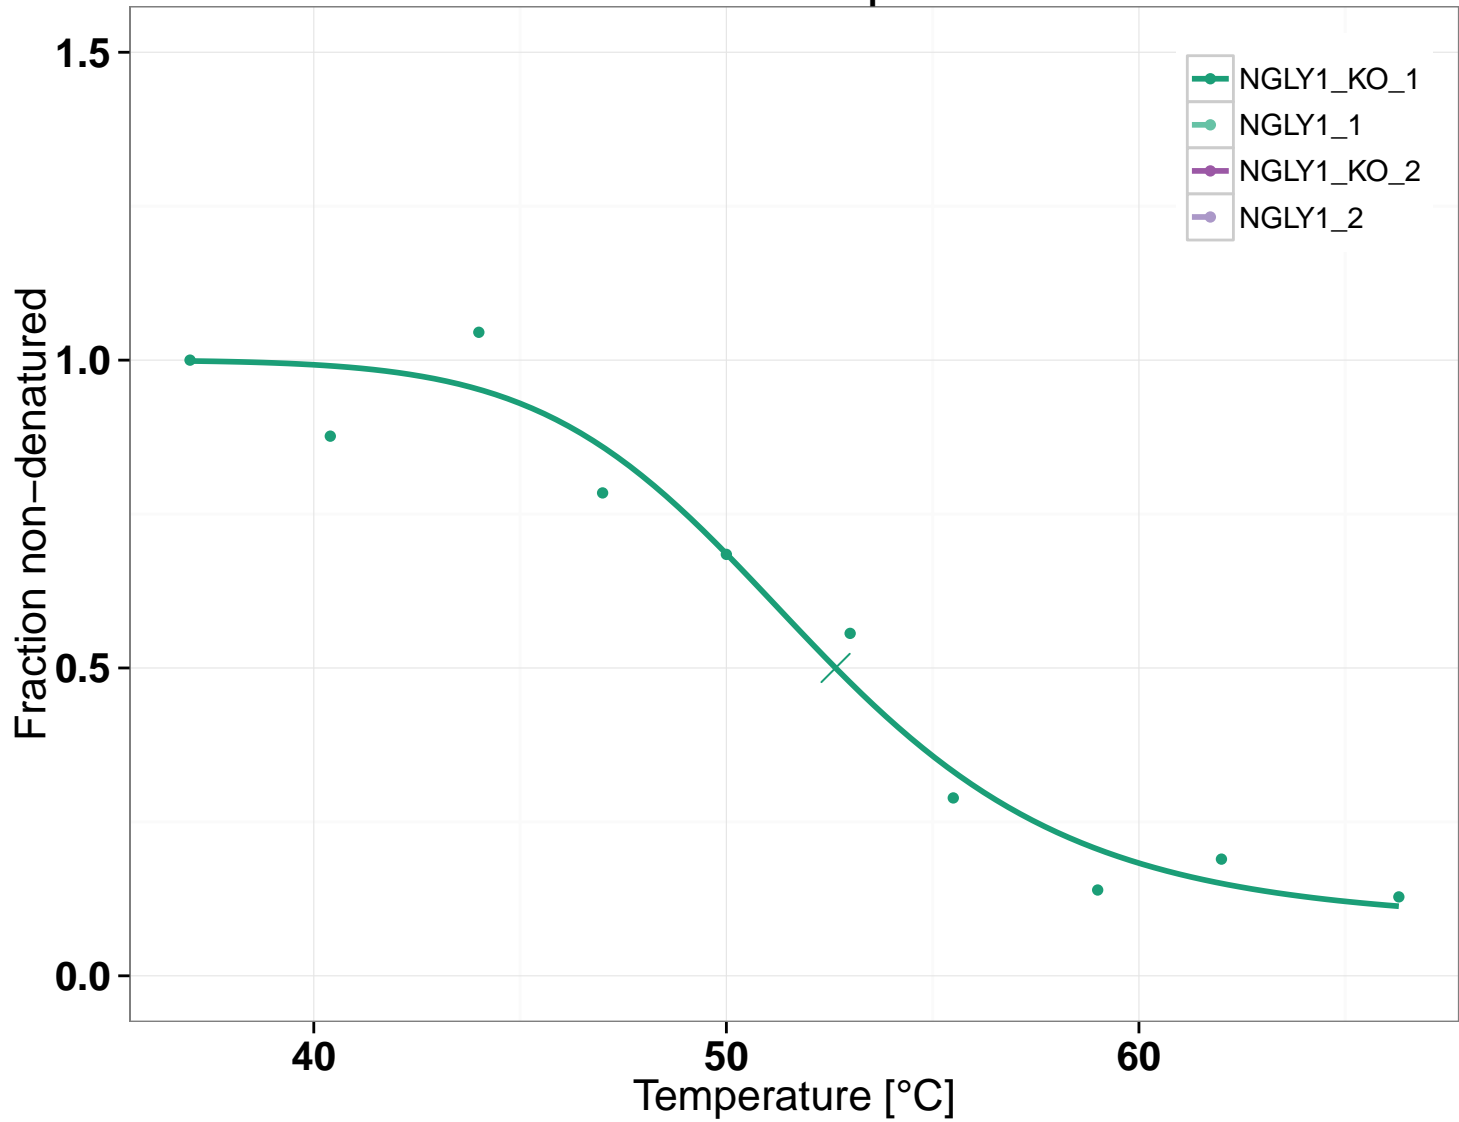

|            | meltPoint | slope  | plateau | R2   |
|------------|-----------|--------|---------|------|
| NGLY1_KO_1 | 52.65     | -0.071 | 0.08    | 0.96 |
| NGLY1_1    | -         | -      | -       | -    |
| NGLY1_KO_2 | -         | -      | -       | -    |
| NGLY1_2    | -         | -      | -       | -    |

Supplement: Supplementary file 5370 [file 1]

IPI00549296.4|SAP30BP

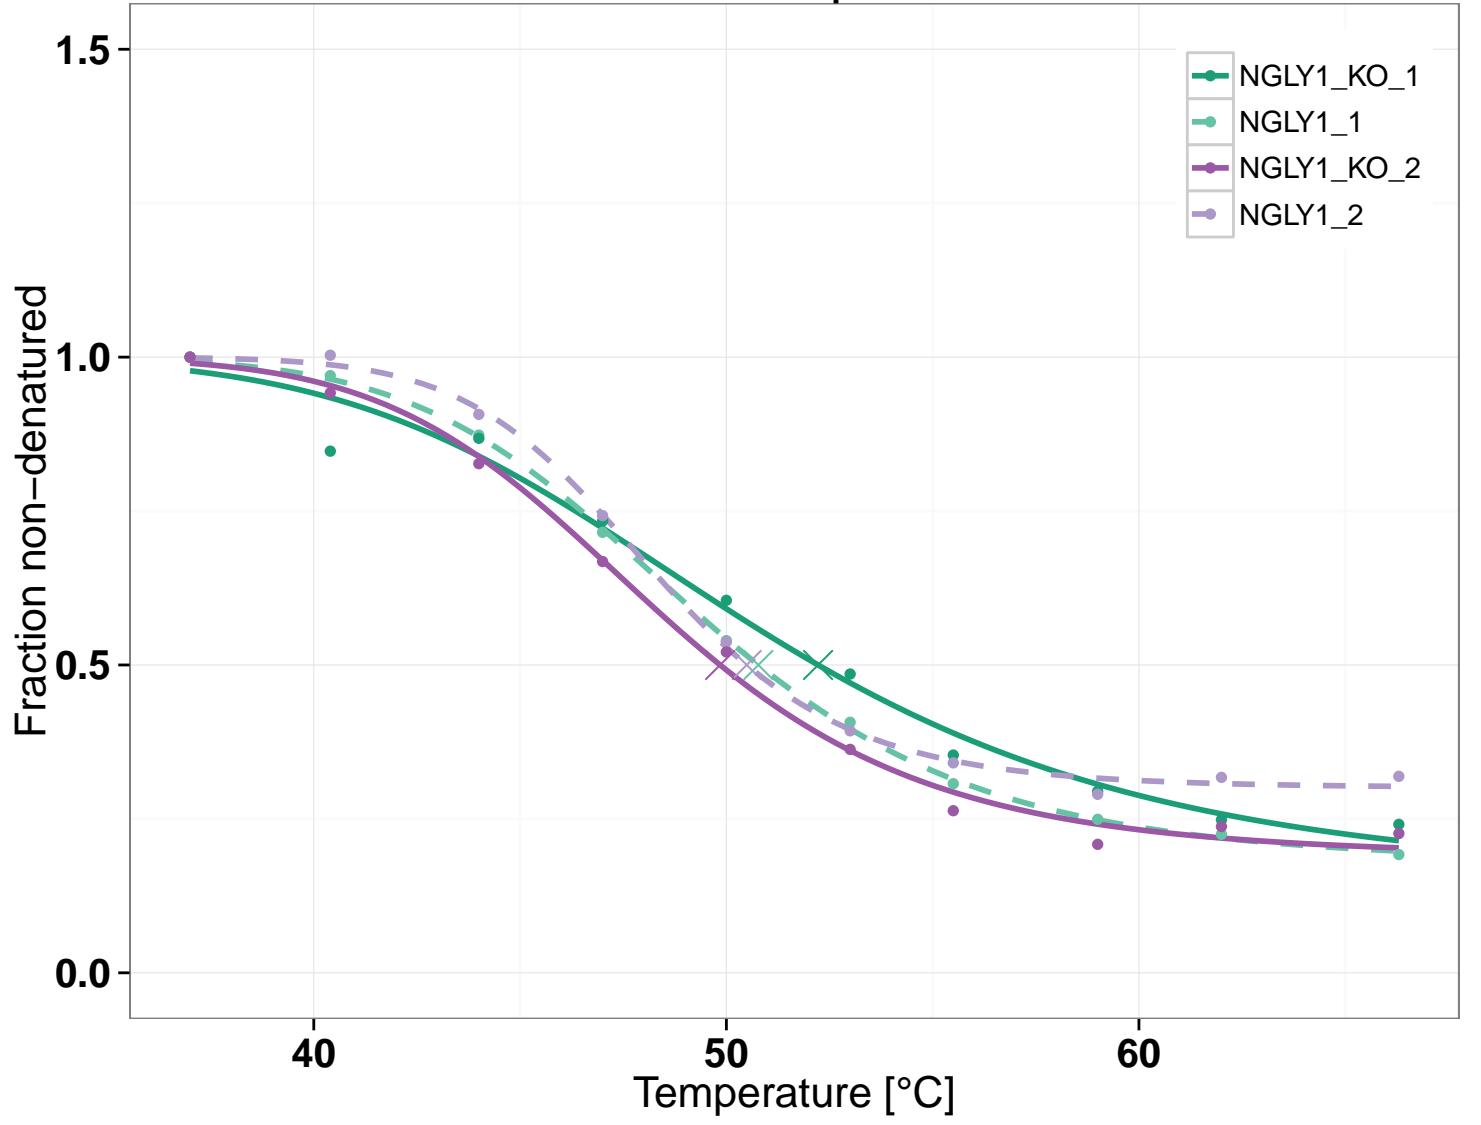

|            | meltPoint | slope  | plateau | R2   |
|------------|-----------|--------|---------|------|
| NGLY1_KO_1 | 52.22     | -0.044 | 0.14    | 0.98 |
| NGLY1_1    | 50.77     | -0.06  | 0.18    | 1    |
| NGLY1_KO_2 | 49.85     | -0.062 | 0.19    | 1    |
| NGLY1_2    | 50.49     | -0.076 | 0.3     | 1    |

Supplement: Supplementary file 5371 [file 1]

# IPI00789314.2|P2RY13

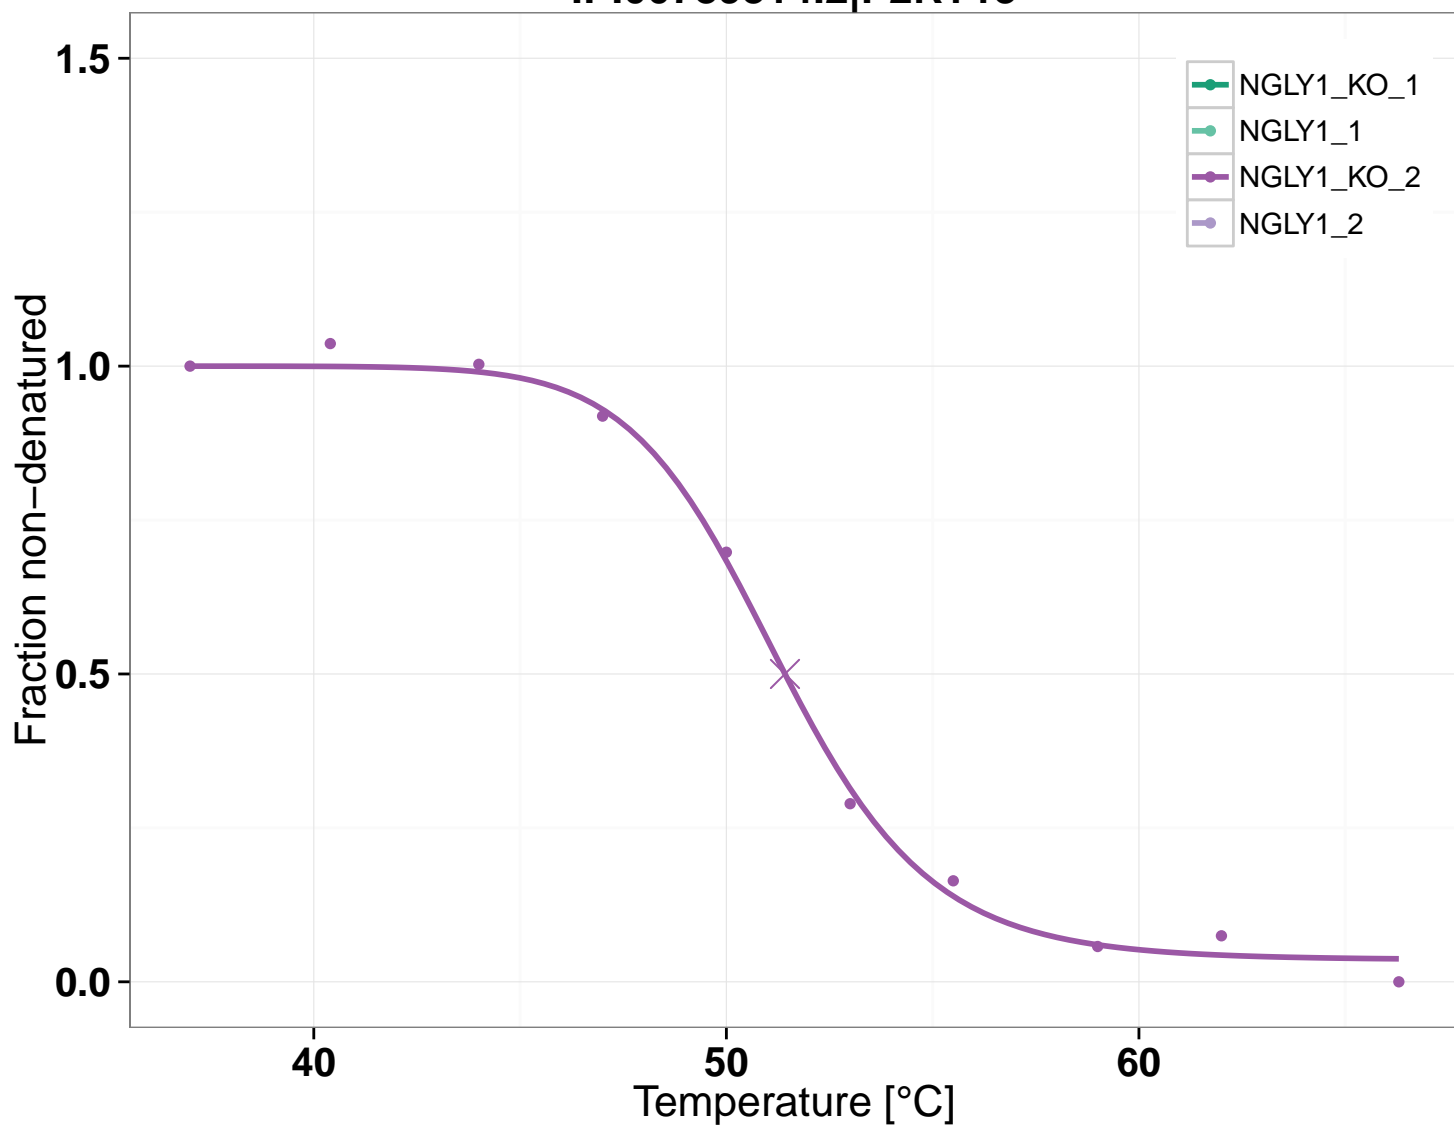

|            | meltPoint | slope | plateau | R2 |
|------------|-----------|-------|---------|----|
| NGLY1_KO_1 | —         | —     | —       | —  |
| NGLY1_1    | —         | —     | —       | —  |
| NGLY1_KO_2 | 51.42     | -0.13 | 0.04    | 1  |
| NGLY1_2    | —         | —     | —       | —  |

Supplement: Supplementary file 5372 [file 1]

IPI00180131.7|TMEM167B

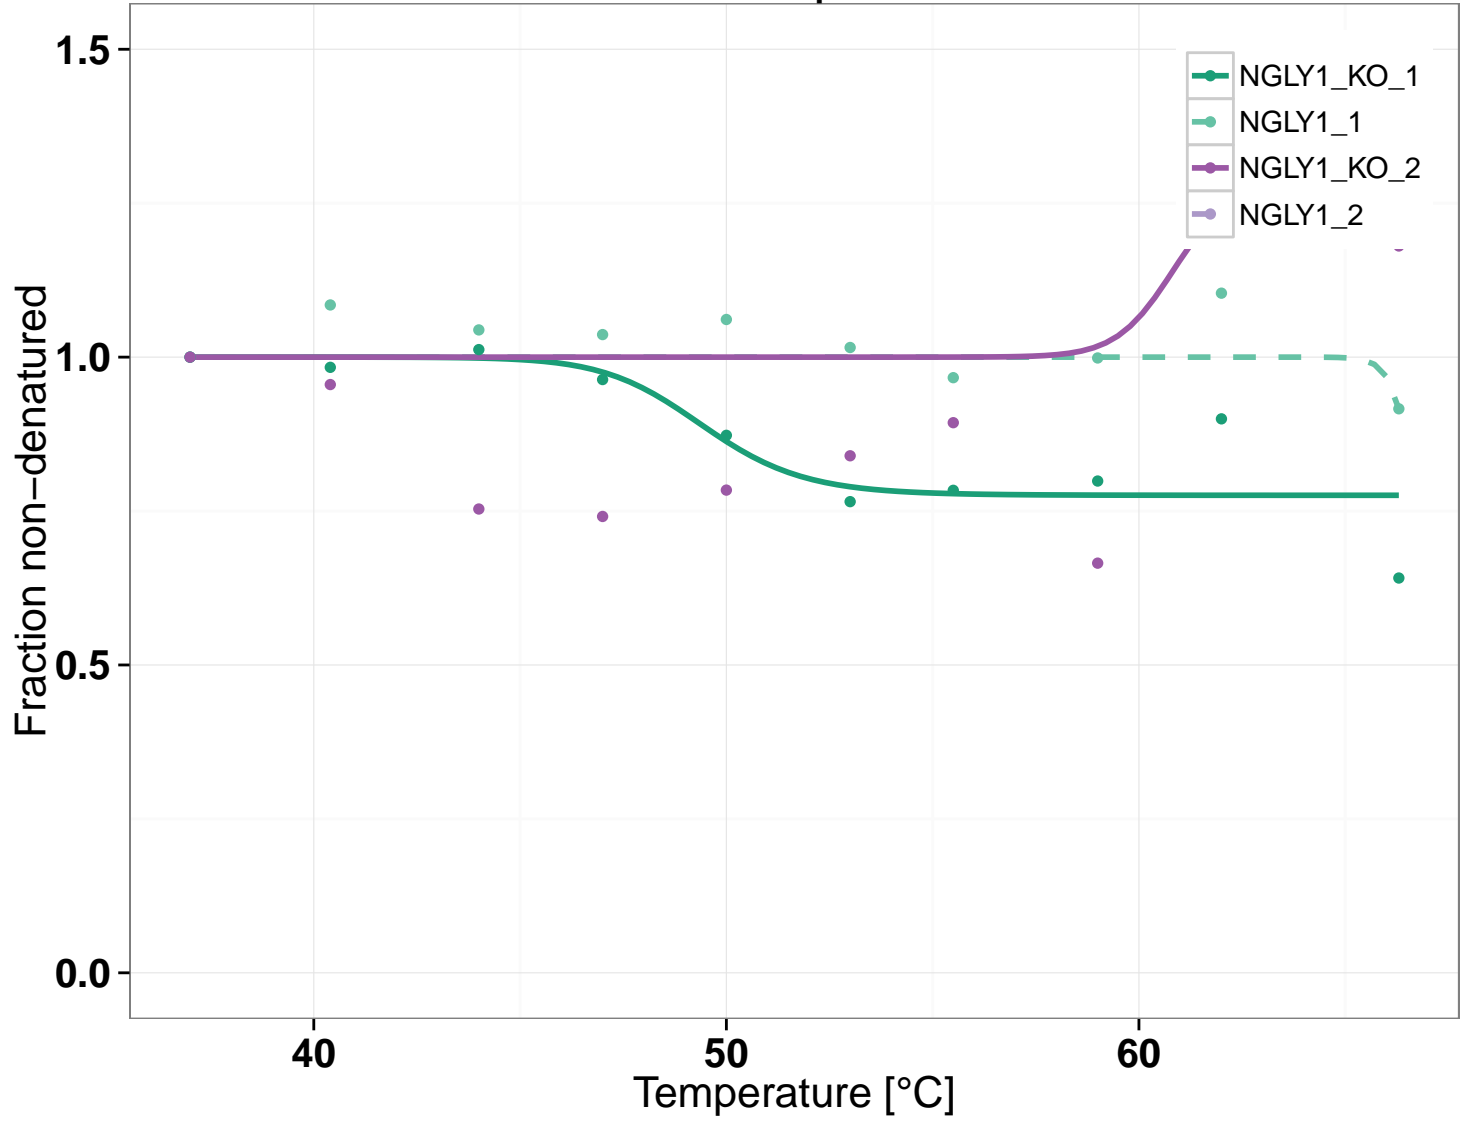

|            | meltPoint | slope  | plateau | R2   |
|------------|-----------|--------|---------|------|
| NGLY1_KO_1 | -         | -0.046 | 0.78    | 0.74 |
| NGLY1_1    | -         | -      | 0       | 0.07 |
| NGLY1_KO_2 | -         | 0.1    | 1.29    | 0.17 |
| NGLY1_2    | -         | -      | -       | -    |

Supplement: Supplementary file 5373 [file 1]

# IPI00021695.1|ATP2B1

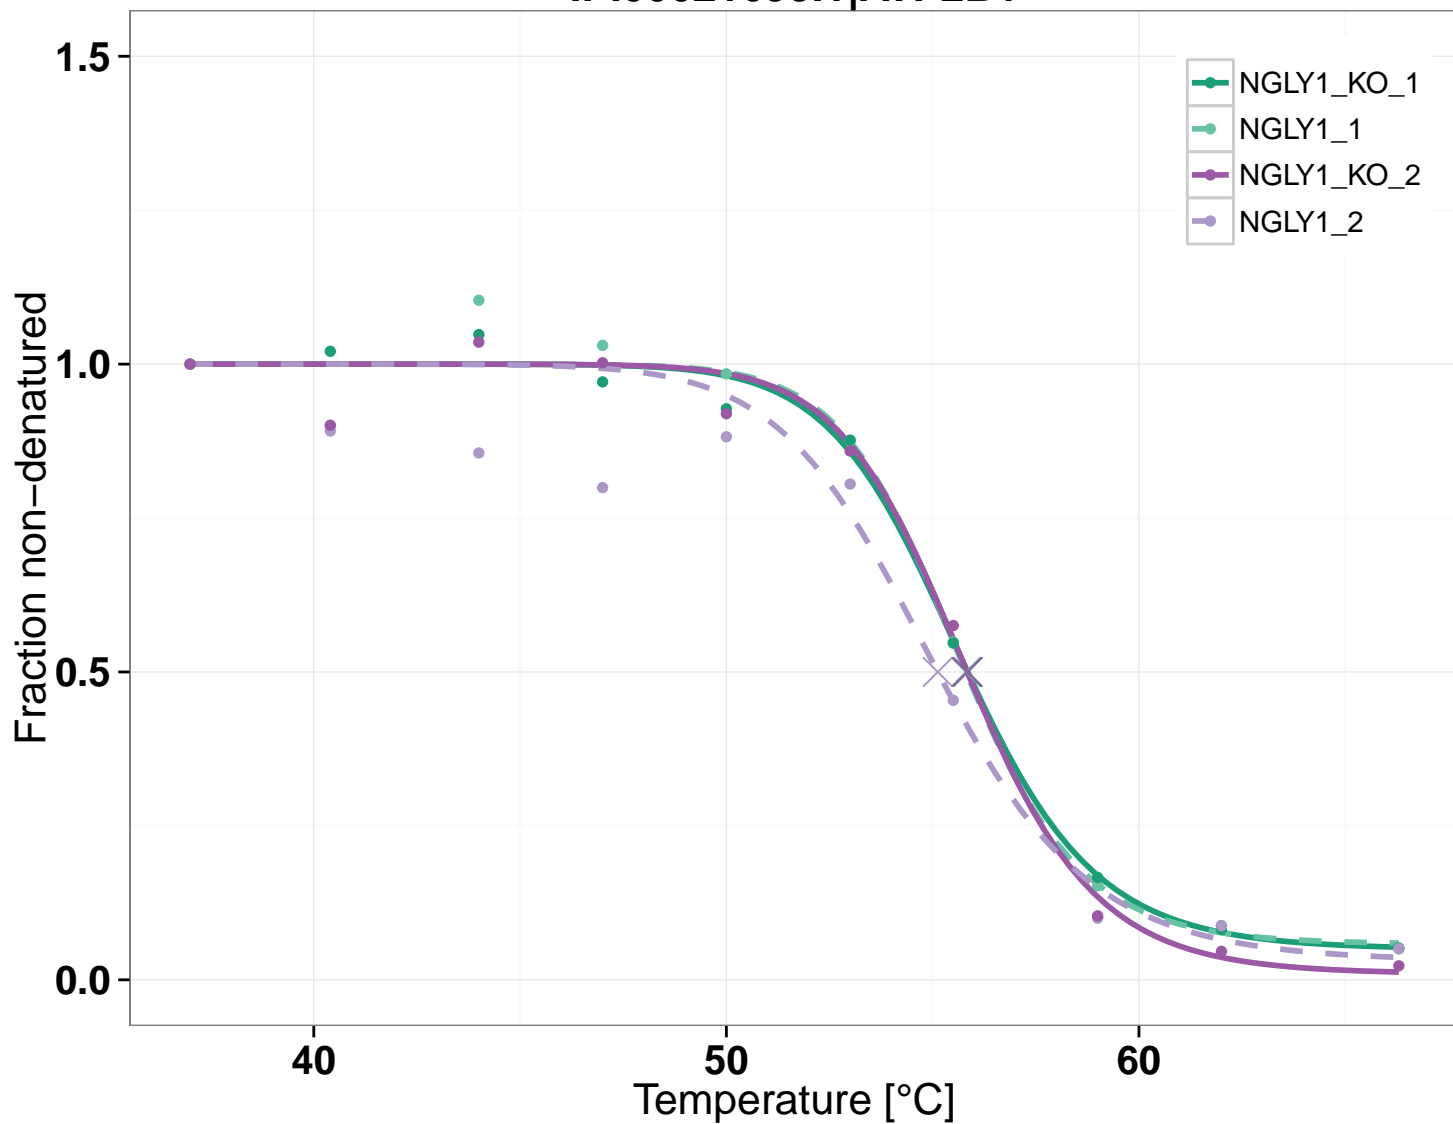

|            | meltPoint | slope | plateau | R2   |
|------------|-----------|-------|---------|------|
| NGLY1_KO_1 | 55.85     | -0.15 | 0.05    | 1    |
| NGLY1_1    | 55.81     | -0.16 | 0.06    | 0.99 |
| NGLY1_KO_2 | 55.84     | -0.16 | 0.01    | 0.99 |
| NGLY1_2    | 55.12     | -0.13 | 0.03    | 0.94 |

Supplement: Supplementary file 5374 [file 1]

# IPI00871234.1|NAV2

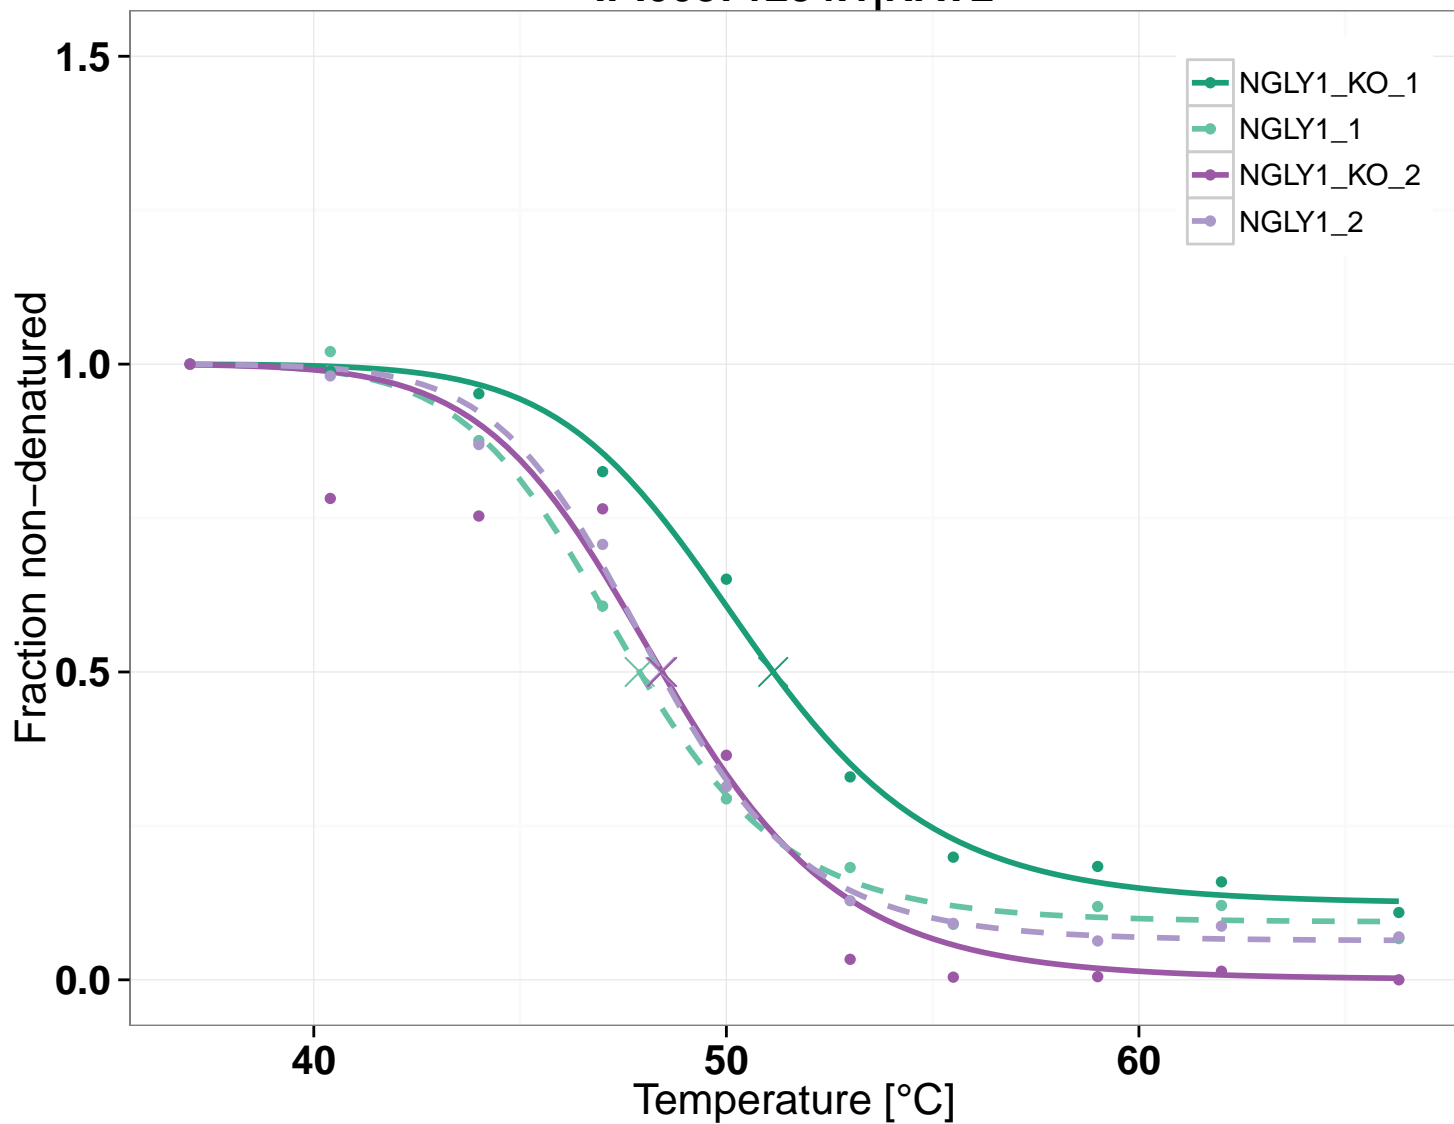

|            | meltPoint | slope  | plateau | R2   |
|------------|-----------|--------|---------|------|
| NGLY1_KO_1 | 51.13     | -0.096 | 0.12    | 1    |
| NGLY1_1    | 47.9      | -0.12  | 0.09    | 1    |
| NGLY1_KO_2 | 48.44     | -0.12  | 0       | 0.94 |
| NGLY1_2    | 48.4      | -0.13  | 0.06    | 1    |

Supplement: Supplementary file 5375 [file 1]

# IPI00797373.4|DOCK8

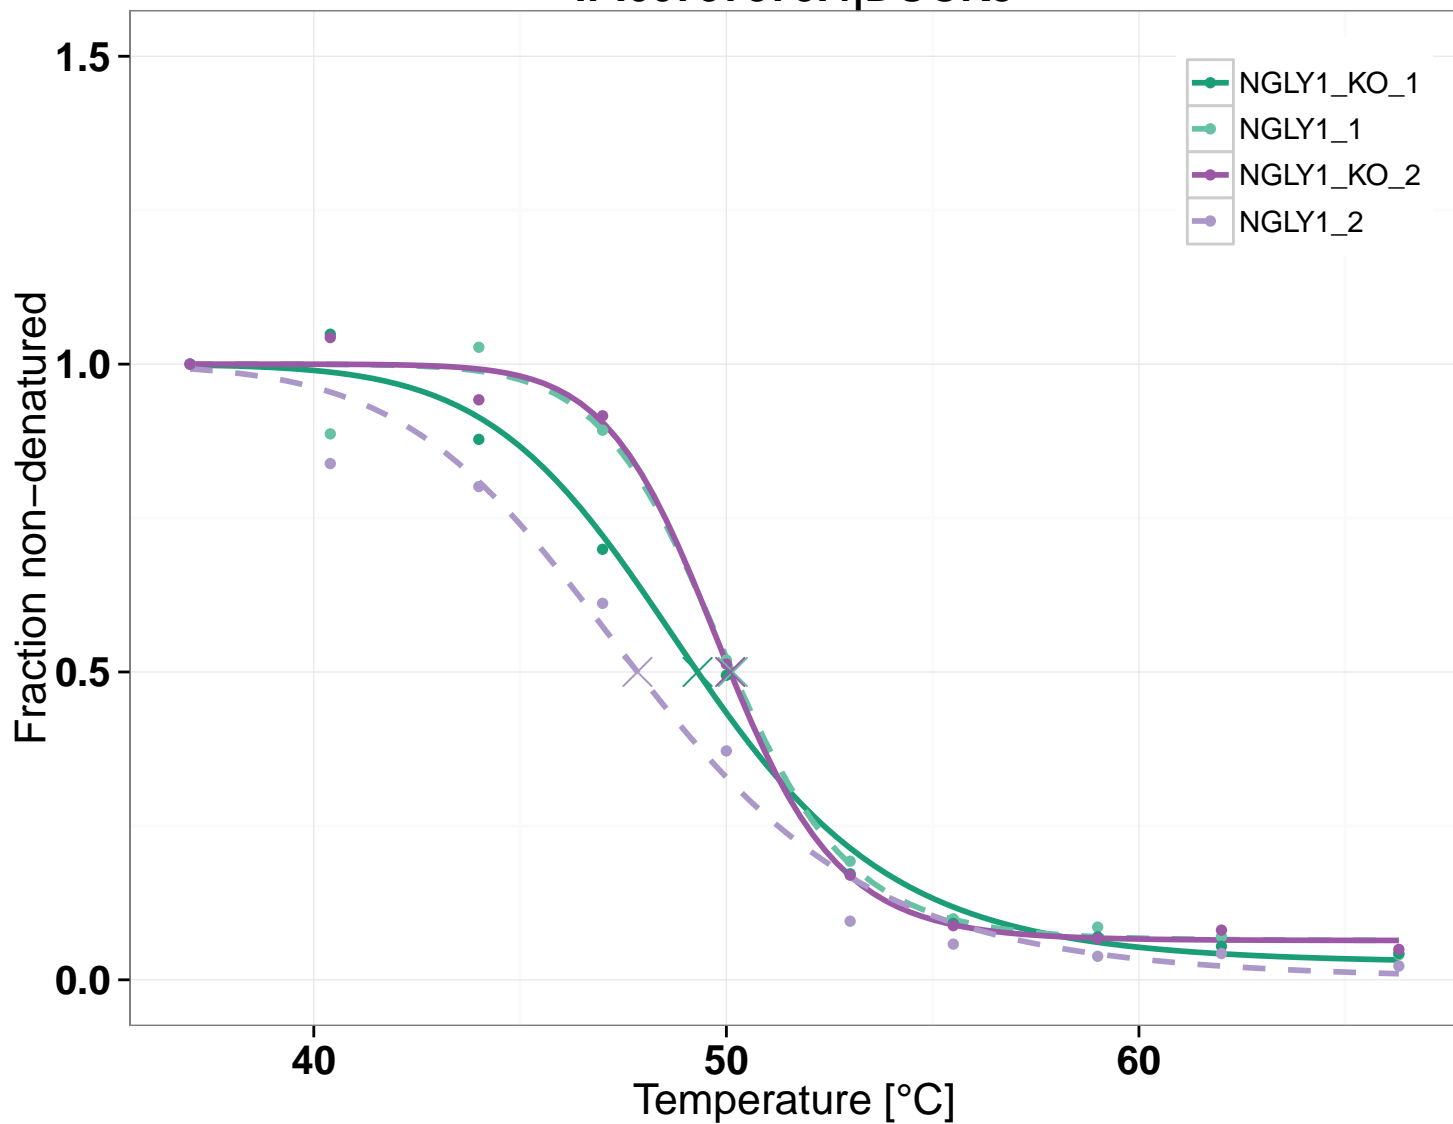

|            | meltPoint | slope  | plateau | R2   |
|------------|-----------|--------|---------|------|
| NGLY1_KO_1 | 49.3      | -0.099 | 0.03    | 0.99 |
| NGLY1_1    | 50.16     | -0.15  | 0.06    | 0.99 |
| NGLY1_KO_2 | 50.09     | -0.17  | 0.06    | 1    |
| NGLY1_2    | 47.84     | -0.088 | 0       | 0.98 |

Supplement: Supplementary file 5376 [file 1]

IPI00782965.2|HIP1

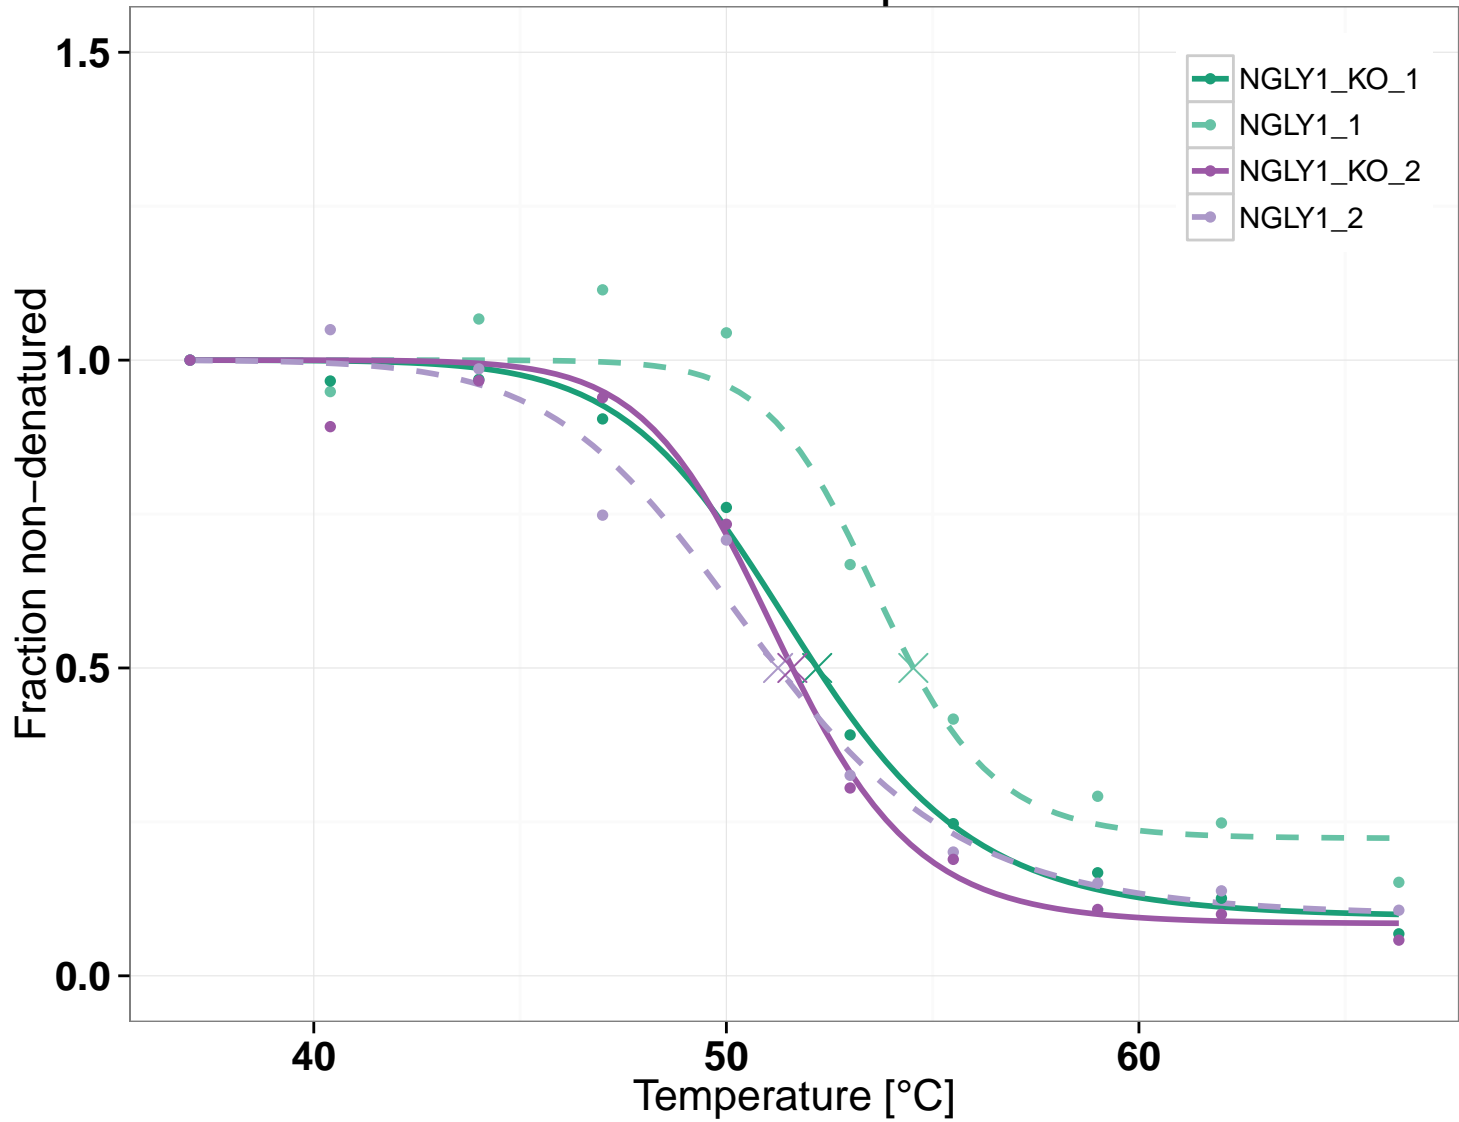

|            | meltPoint | slope  | plateau | R2   |
|------------|-----------|--------|---------|------|
| NGLY1_KO_1 | 52.2      | -0.11  | 0.1     | 1    |
| NGLY1_1    | 54.53     | -0.14  | 0.22    | 0.97 |
| NGLY1_KO_2 | 51.6      | -0.14  | 0.08    | 0.99 |
| NGLY1_2    | 51.25     | -0.091 | 0.1     | 0.98 |

Supplement: Supplementary file 5377 [file 1]

IPI00470811.4|SNRK

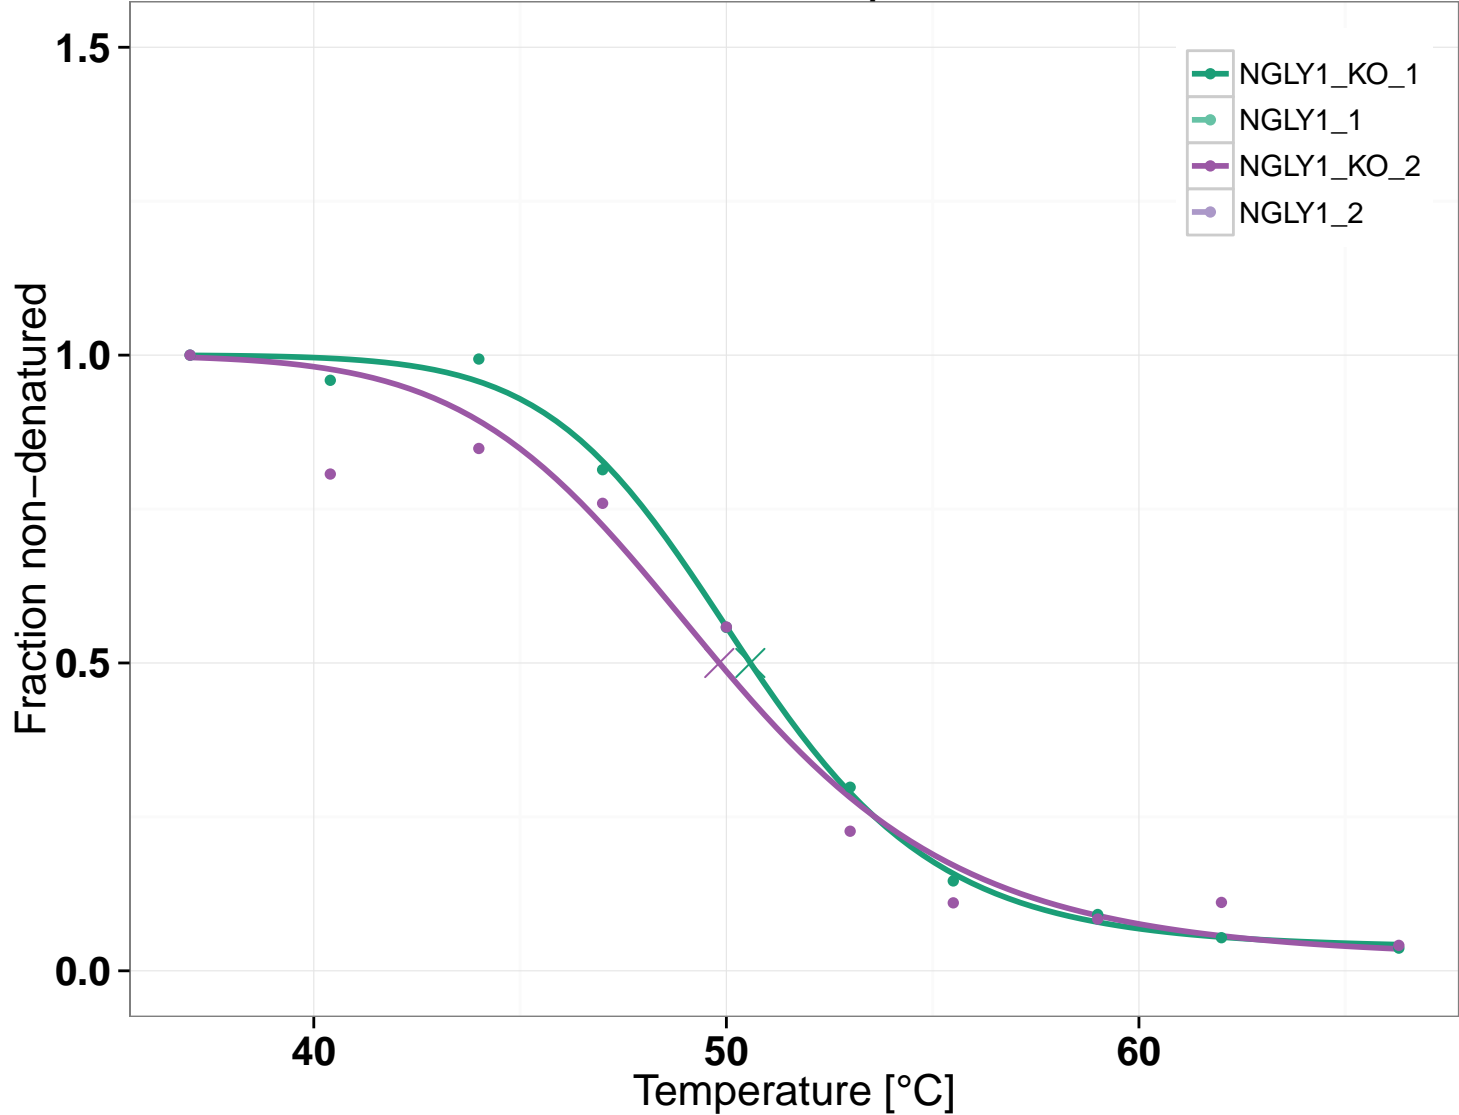

|            | meltPoint | slope  | plateau | R2   |
|------------|-----------|--------|---------|------|
| NGLY1_KO_1 | 50.58     | -0.1   | 0.04    | 1    |
| NGLY1_1    | -         | -      | -       | -    |
| NGLY1_KO_2 | 49.83     | -0.081 | 0.02    | 0.96 |
| NGLY1_2    | -         | -      | -       | -    |

Supplement: Supplementary file 5378 [file 1]

IPI00013788.1|HTATSF1

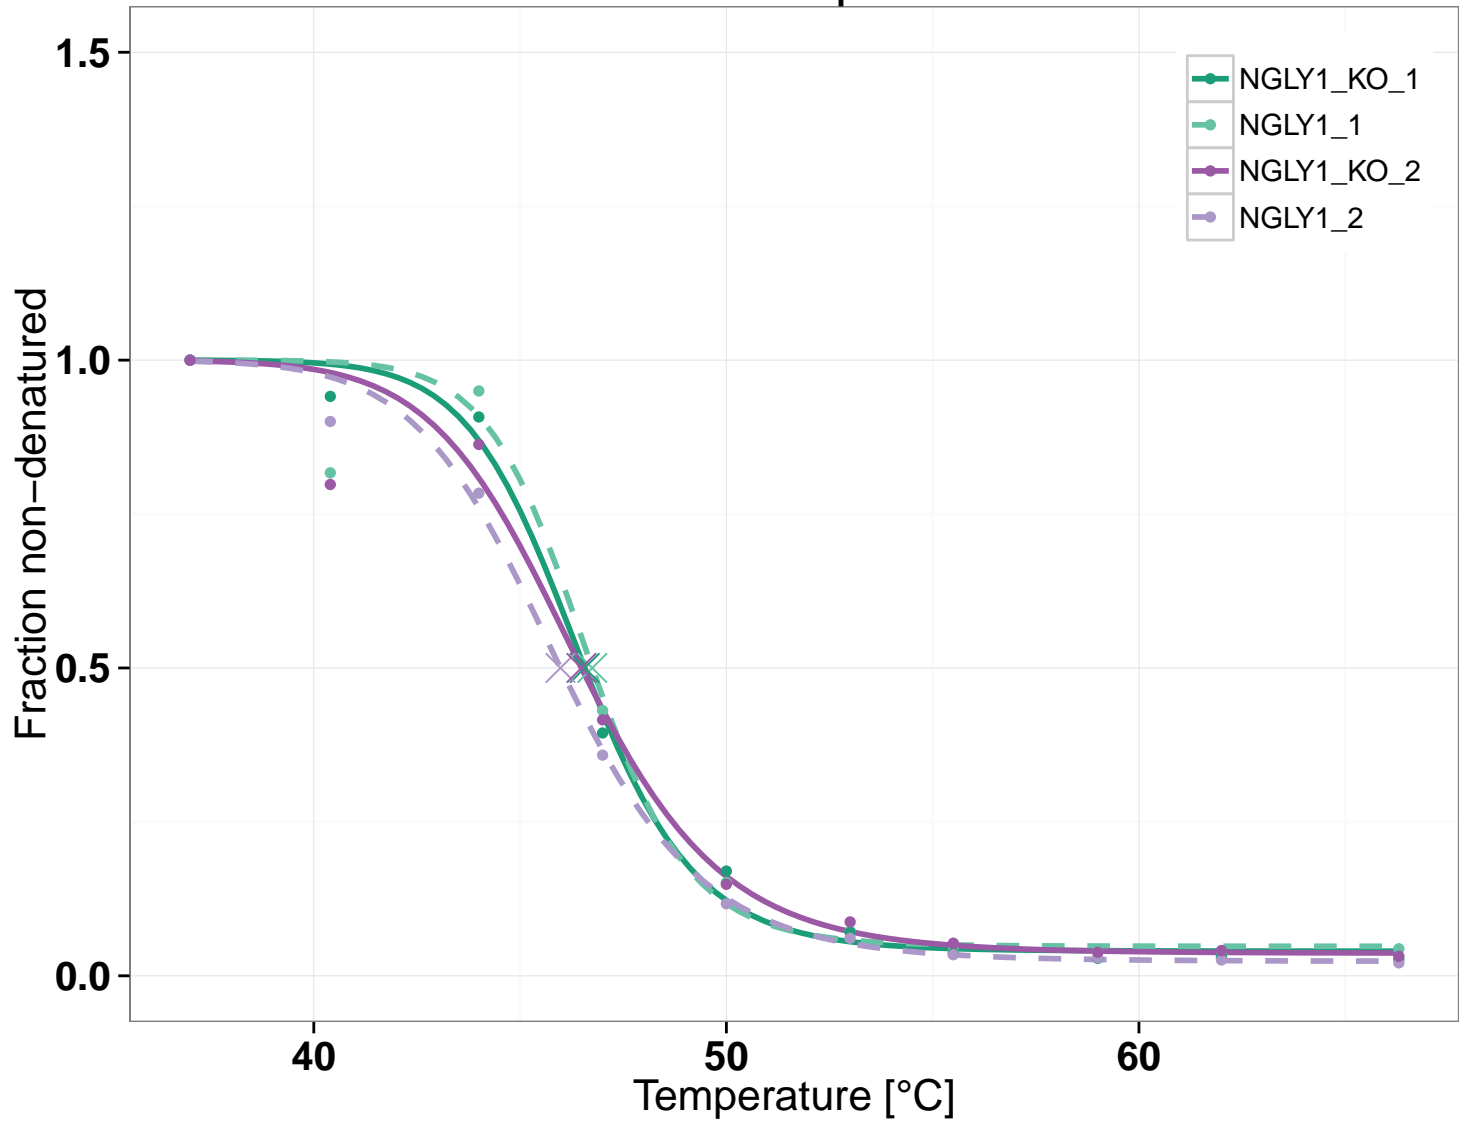

|            | meltPoint | slope | plateau | R2   |
|------------|-----------|-------|---------|------|
| NGLY1_KO_1 | 46.57     | -0.17 | 0.04    | 0.99 |
| NGLY1_1    | 46.75     | -0.19 | 0.05    | 0.98 |
| NGLY1_KO_2 | 46.49     | -0.14 | 0.04    | 0.97 |
| NGLY1_2    | 45.98     | -0.14 | 0.02    | 1    |

Supplement: Supplementary file 5379 [file 1]

IPI00456888.3|MGC3196

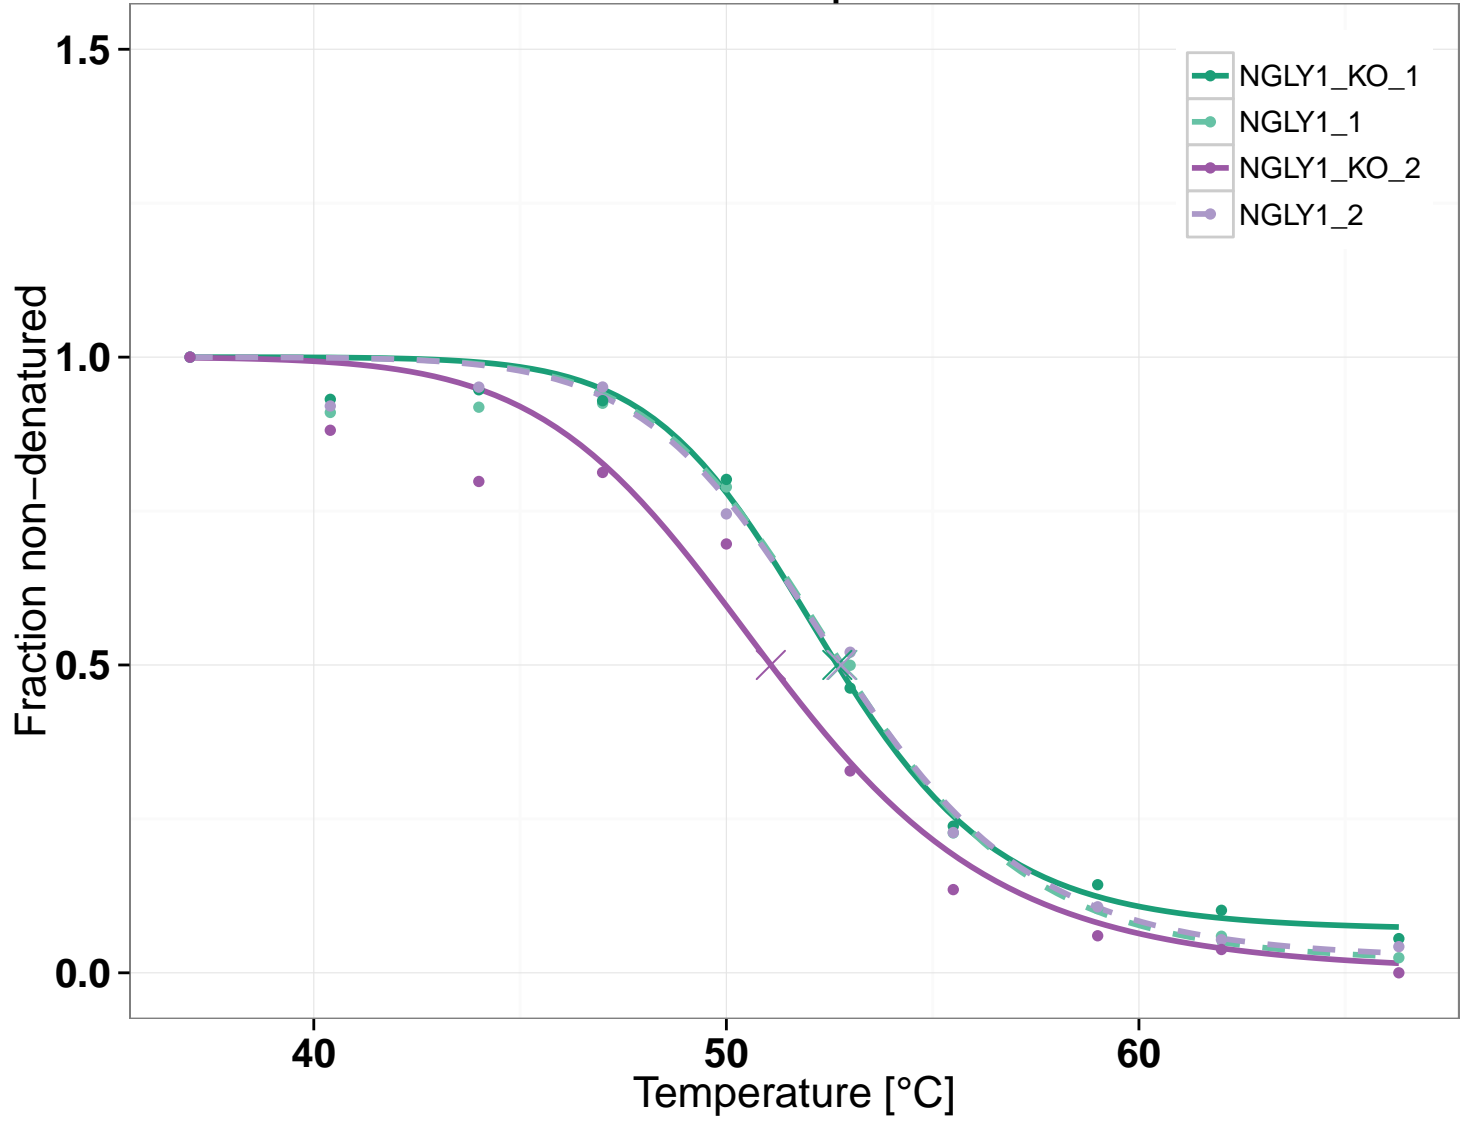

|            | meltPoint | slope  | plateau | R2   |
|------------|-----------|--------|---------|------|
| NGLY1_KO_1 | 52.69     | -0.11  | 0.07    | 0.99 |
| NGLY1_1    | 52.81     | -0.11  | 0.02    | 0.99 |
| NGLY1_KO_2 | 51.08     | -0.089 | 0       | 0.97 |
| NGLY1_2    | 52.79     | -0.1   | 0.02    | 0.99 |

Supplement: Supplementary file 5380 [file 1]

# IPI00297145.3|MSL3

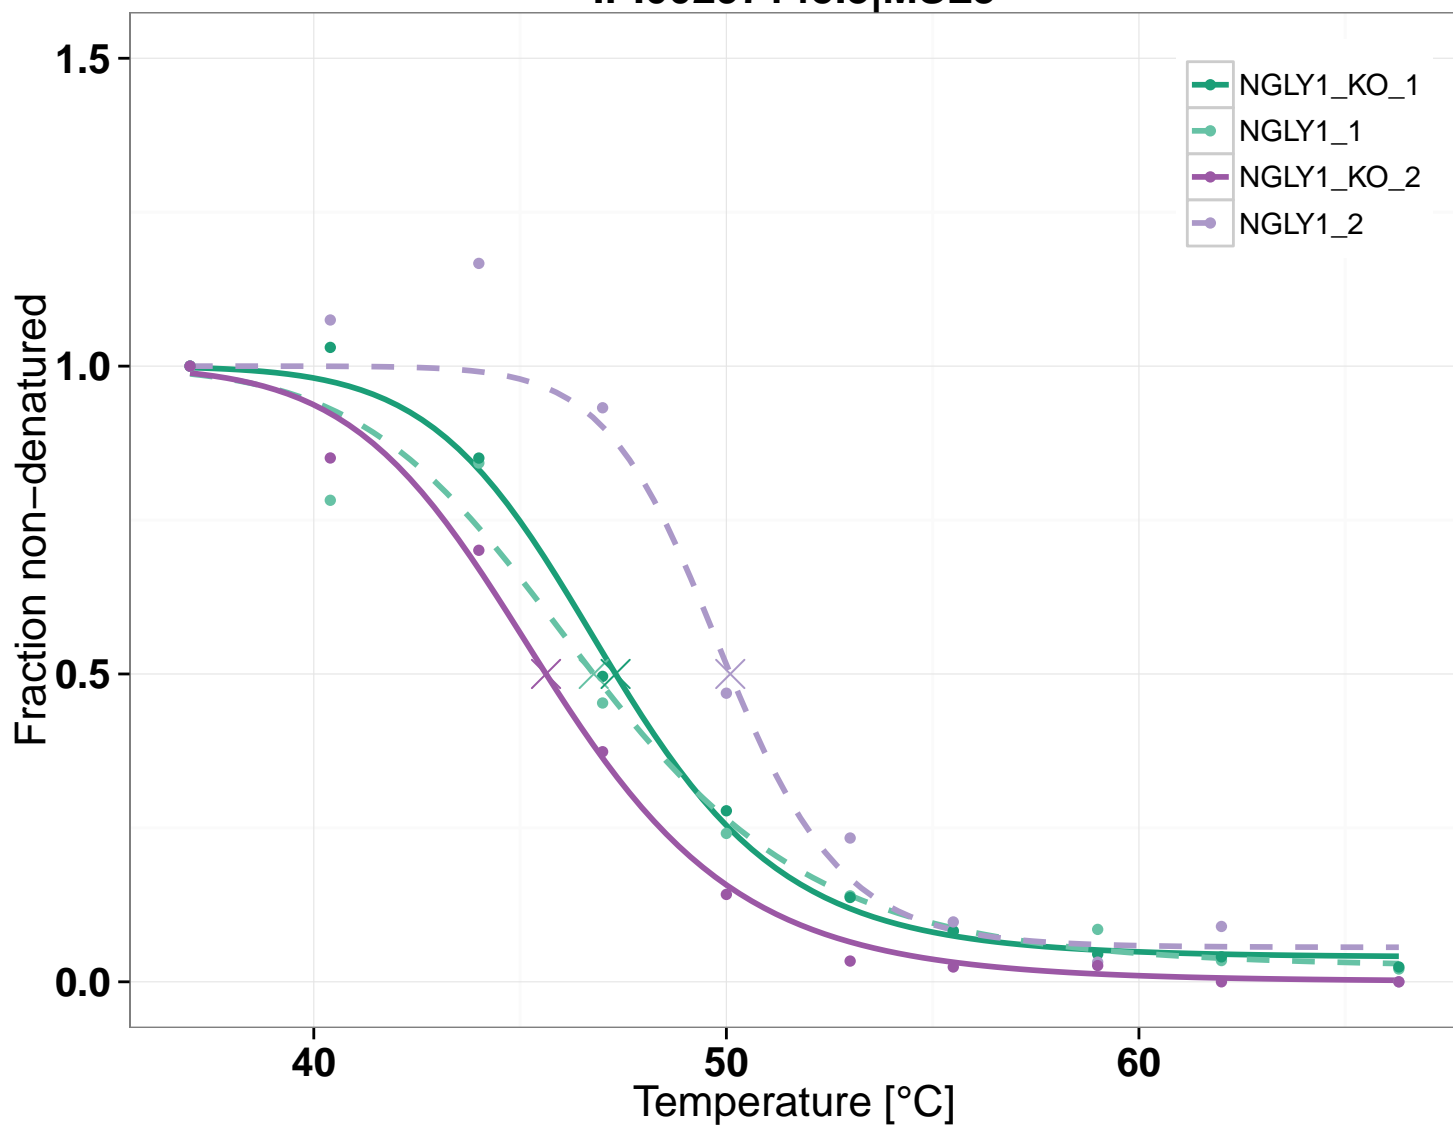

|            | meltPoint | slope  | plateau | R2   |
|------------|-----------|--------|---------|------|
| NGLY1_KO_1 | 47.32     | -0.11  | 0.04    | 1    |
| NGLY1_1    | 46.78     | -0.088 | 0.02    | 0.97 |
| NGLY1_KO_2 | 45.63     | -0.11  | 0       | 0.99 |
| NGLY1_2    | 50.1      | -0.16  | 0.06    | 0.98 |

Supplement: Supplementary file 5381 [file 1]

IPI00019560.3|C6ORF64

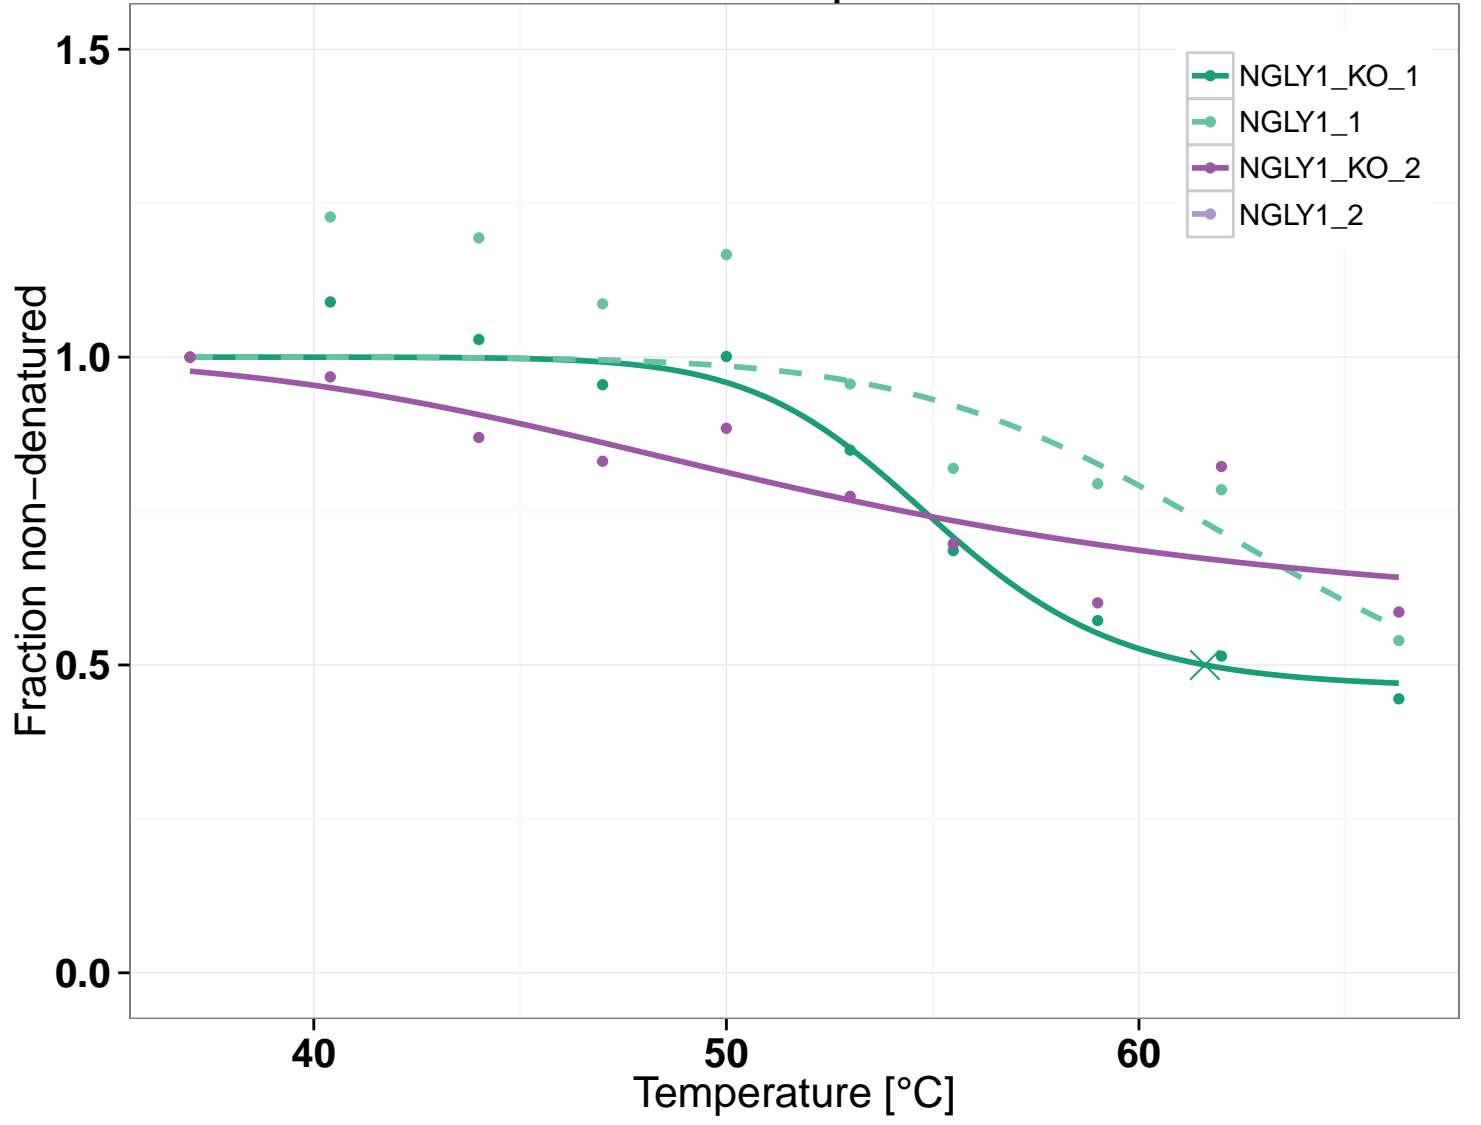

|            | meltPoint | slope  | plateau | R2   |
|------------|-----------|--------|---------|------|
| NGLY1_KO_1 | 61.6      | -0.06  | 0.46    | 0.97 |
| NGLY1_1    | -         | -0.039 | 0.33    | 0.67 |
| NGLY1_KO_2 | -         | -0.016 | 0.57    | 0.75 |
| NGLY1_2    | -         | -      | -       | -    |

Supplement: Supplementary file 5382 [file 1]

# IPI00169383.3|PGK1

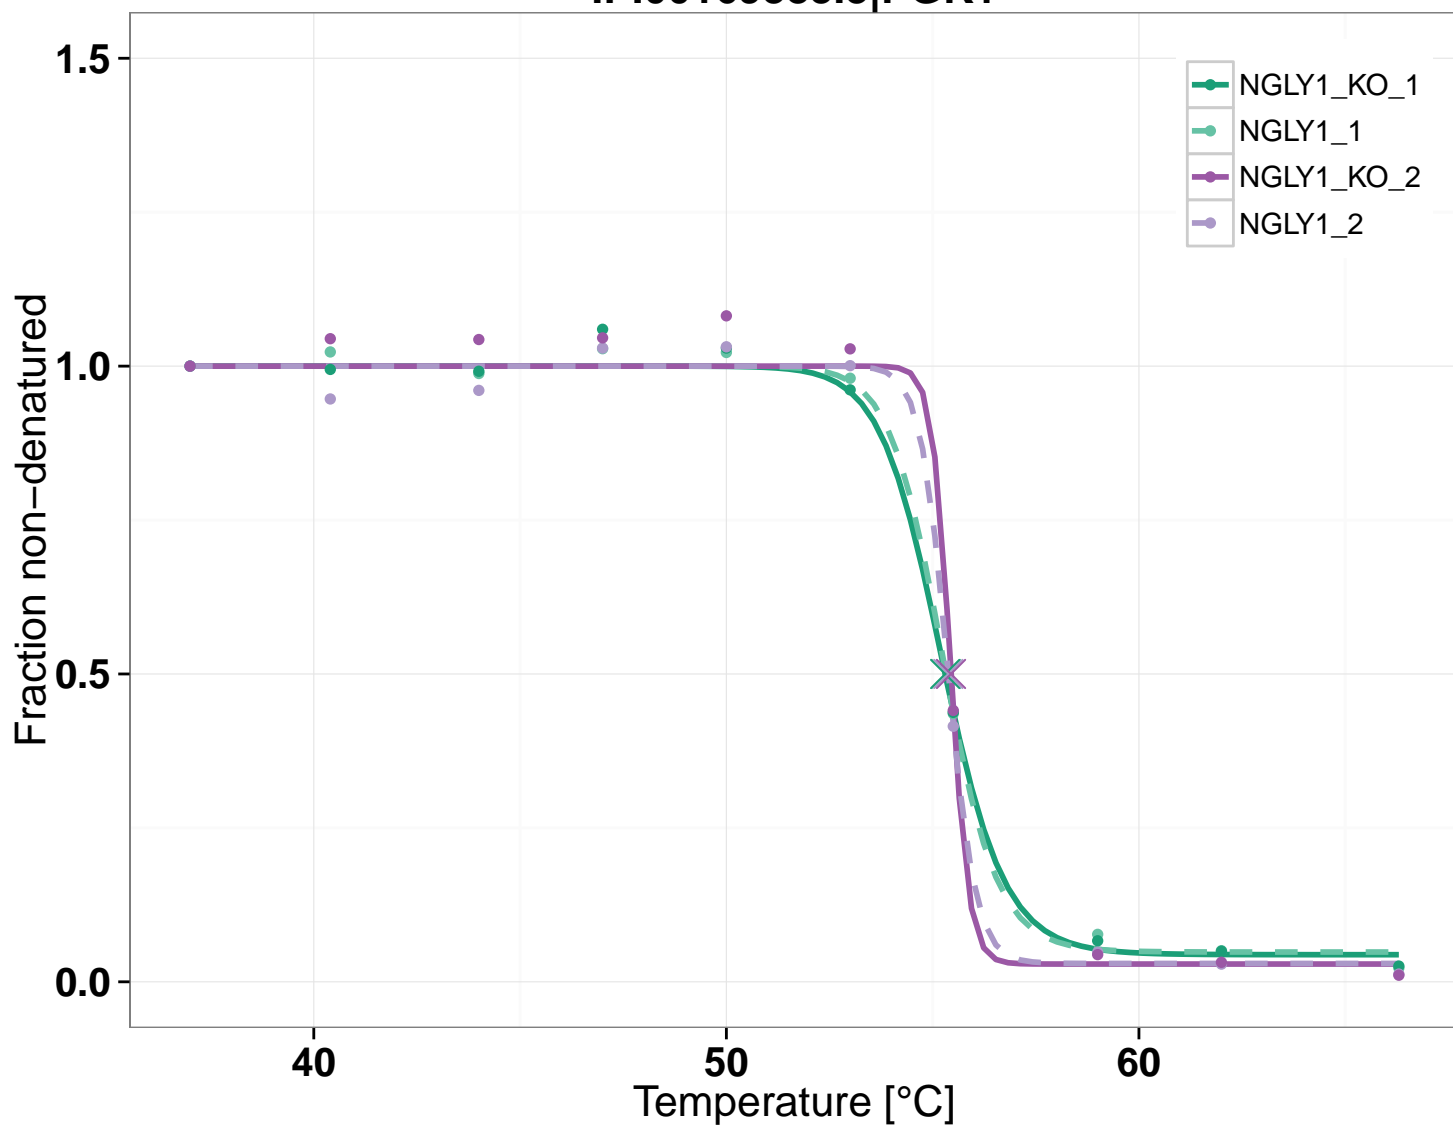

|            | meltPoint | slope | plateau | R2   |
|------------|-----------|-------|---------|------|
| NGLY1_KO_1 | 55.3      | -0.32 | 0.04    | 1    |
| NGLY1_1    | 55.32     | -0.37 | 0.05    | 1    |
| NGLY1_KO_2 | 55.45     | -1.1  | 0.03    | 0.99 |
| NGLY1_2    | 55.38     | -0.73 | 0.03    | 1    |

Supplement: Supplementary file 5383 [file 1]

IPI00735540.1|LOC440563

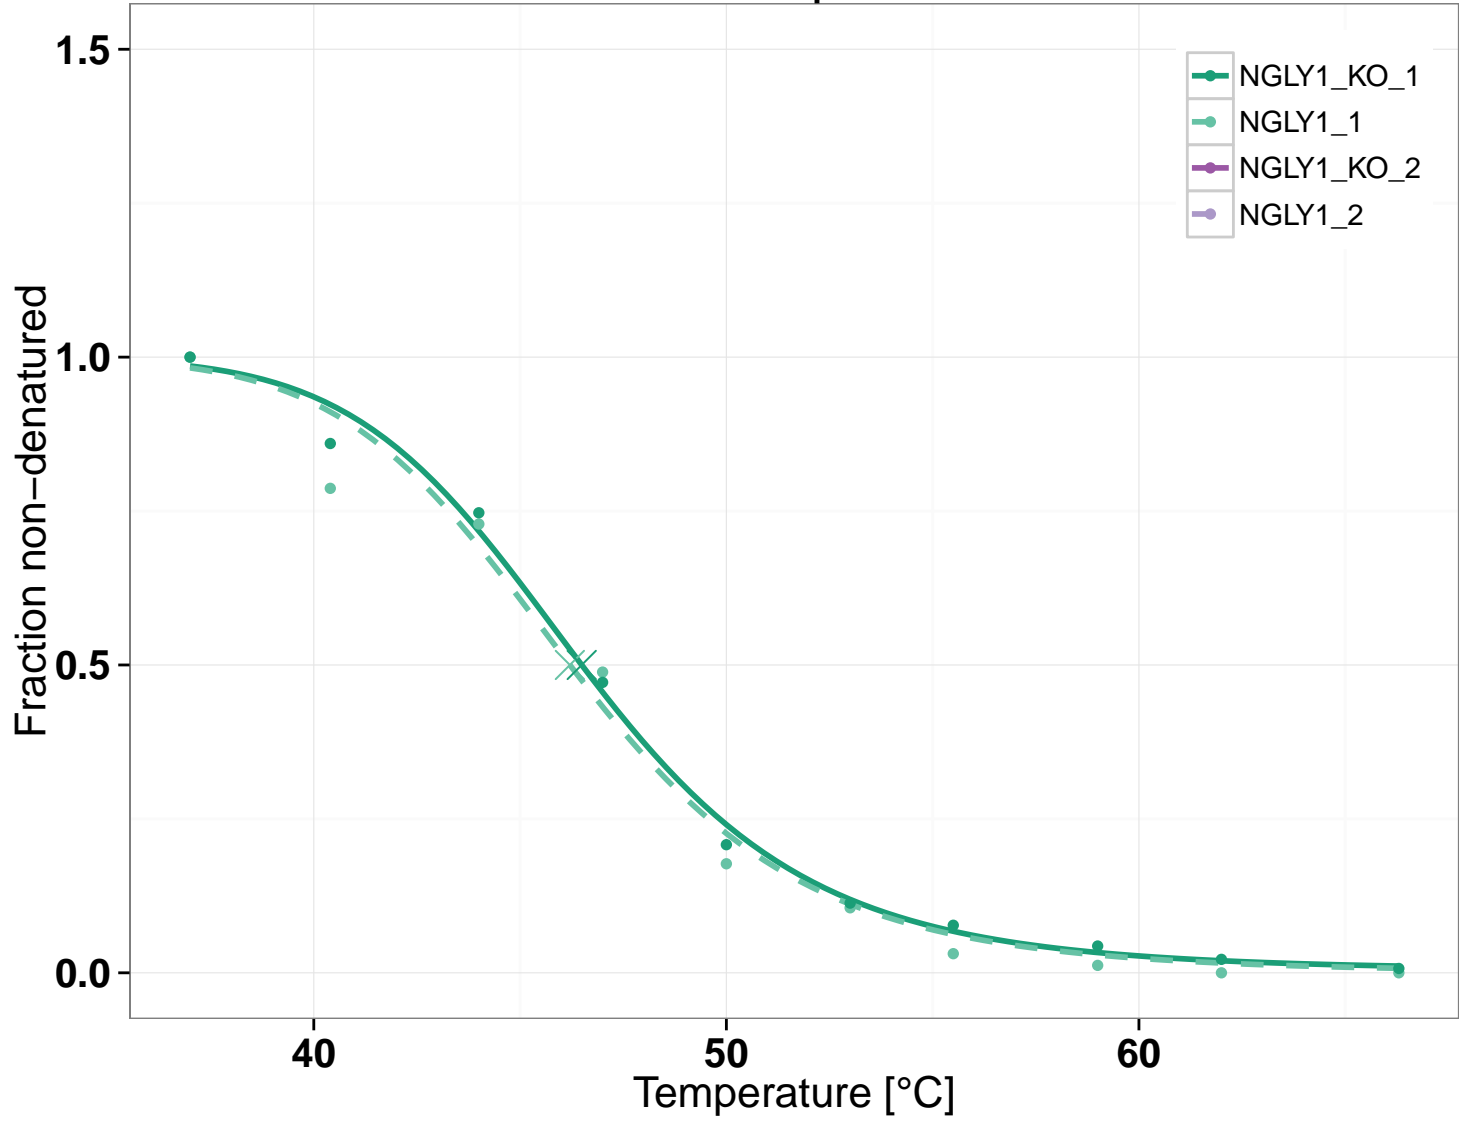

|            | meltPoint | slope  | plateau | R2   |
|------------|-----------|--------|---------|------|
| NGLY1_KO_1 | 46.49     | -0.09  | 0       | 0.99 |
| NGLY1_1    | 46.21     | -0.089 | 0       | 0.98 |
| NGLY1_KO_2 | -         | -      | -       | -    |
| NGLY1_2    | -         | -      | -       | -    |

Supplement: Supplementary file 5384 [file 1]

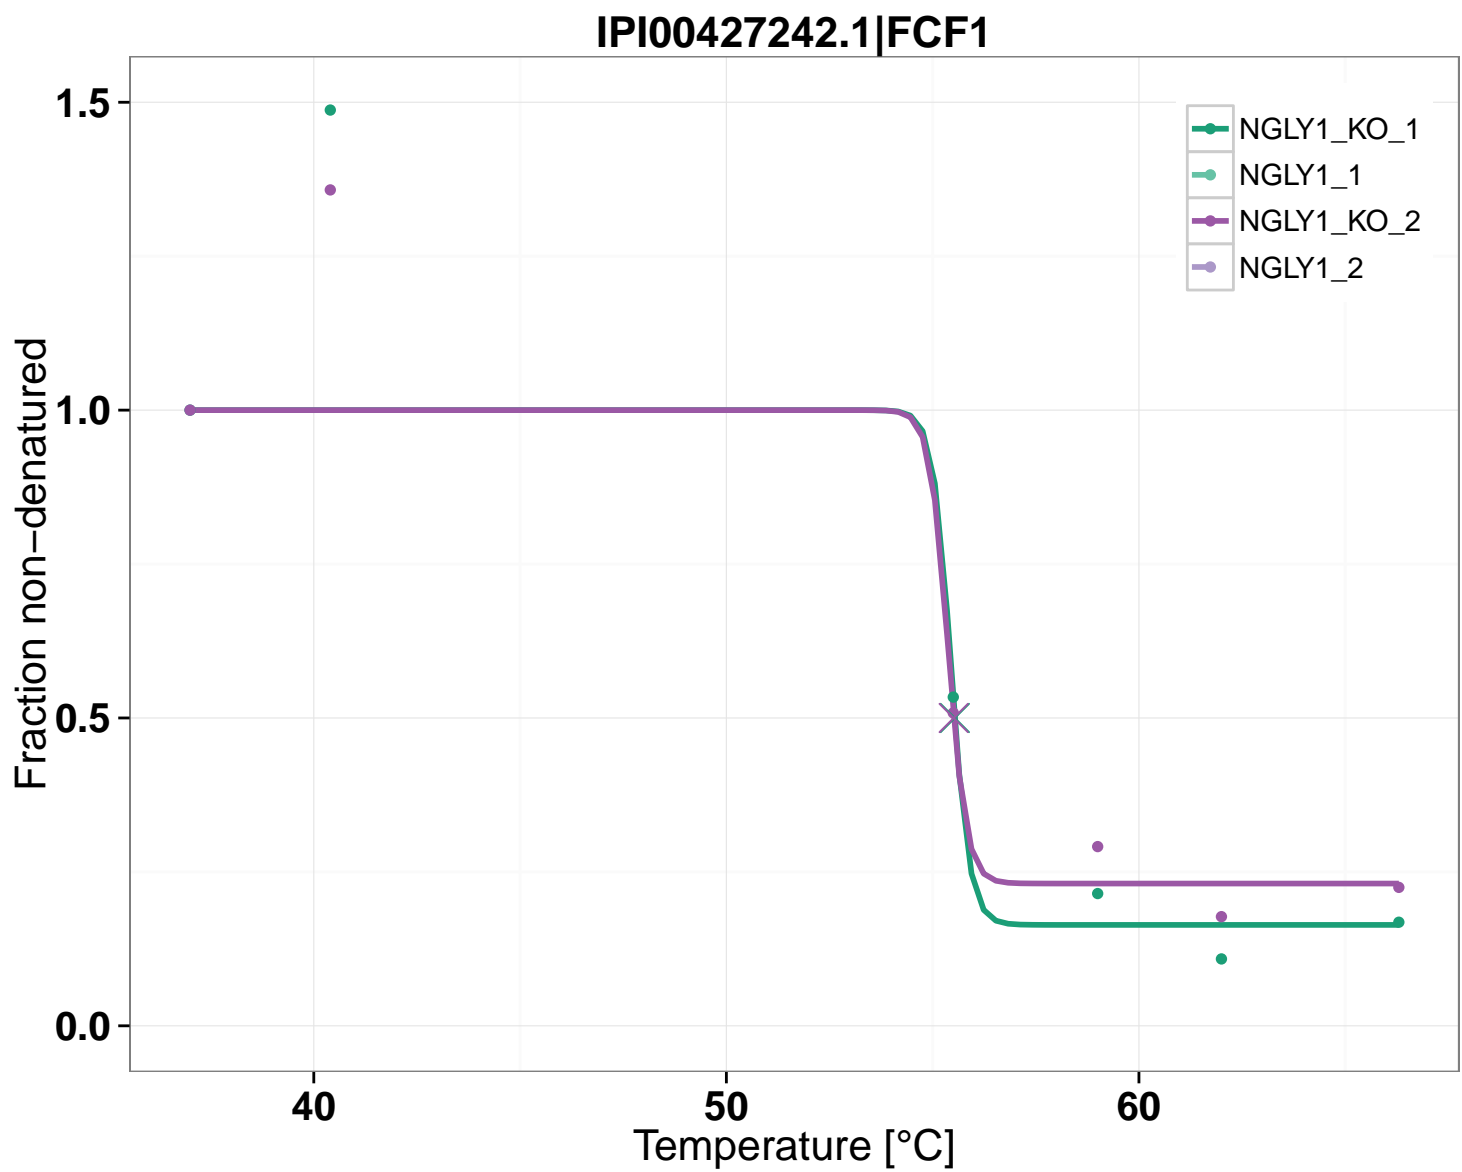

|            | meltPoint | slope | plateau | R2    |
|------------|-----------|-------|---------|-------|
| NGLY1_KO_1 | 55.54     | -0.94 | 0.16    | -0.13 |
| NGLY1_1    | -         | -     | -       | -     |
| NGLY1_KO_2 | 55.51     | -0.87 | 0.23    | -0.07 |
| NGLY1_2    | -         | -     | -       | -     |

Supplement: Supplementary file 5385 [file 1]

IPI00789159.1|RPL23A

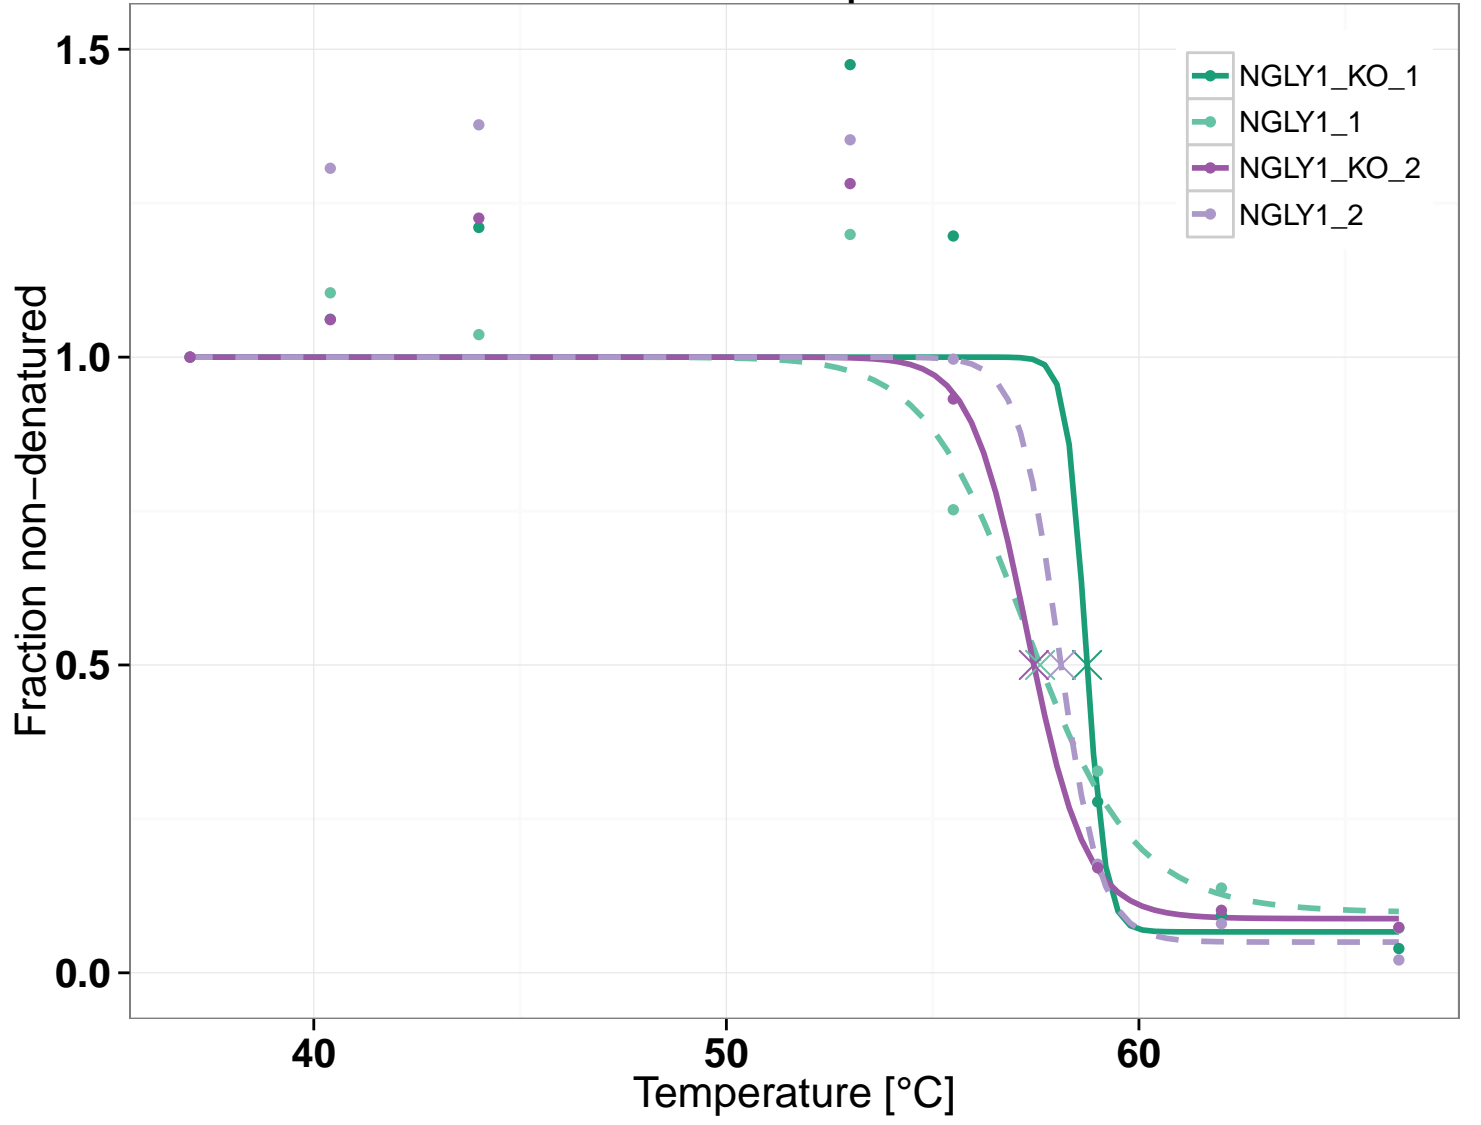

|            | meltPoint | slope | plateau | R2   |
|------------|-----------|-------|---------|------|
| NGLY1_KO_1 | 58.74     | -0.99 | 0.07    | 0.62 |
| NGLY1_1    | 57.61     | -0.18 | 0.1     | 0.71 |
| NGLY1_KO_2 | 57.45     | -0.33 | 0.09    | 0.75 |
| NGLY1_2    | 58.11     | -0.48 | 0.05    | 0.68 |

Supplement: Supplementary file 5386 [file 1]

# IPI00002406.2|BCAM

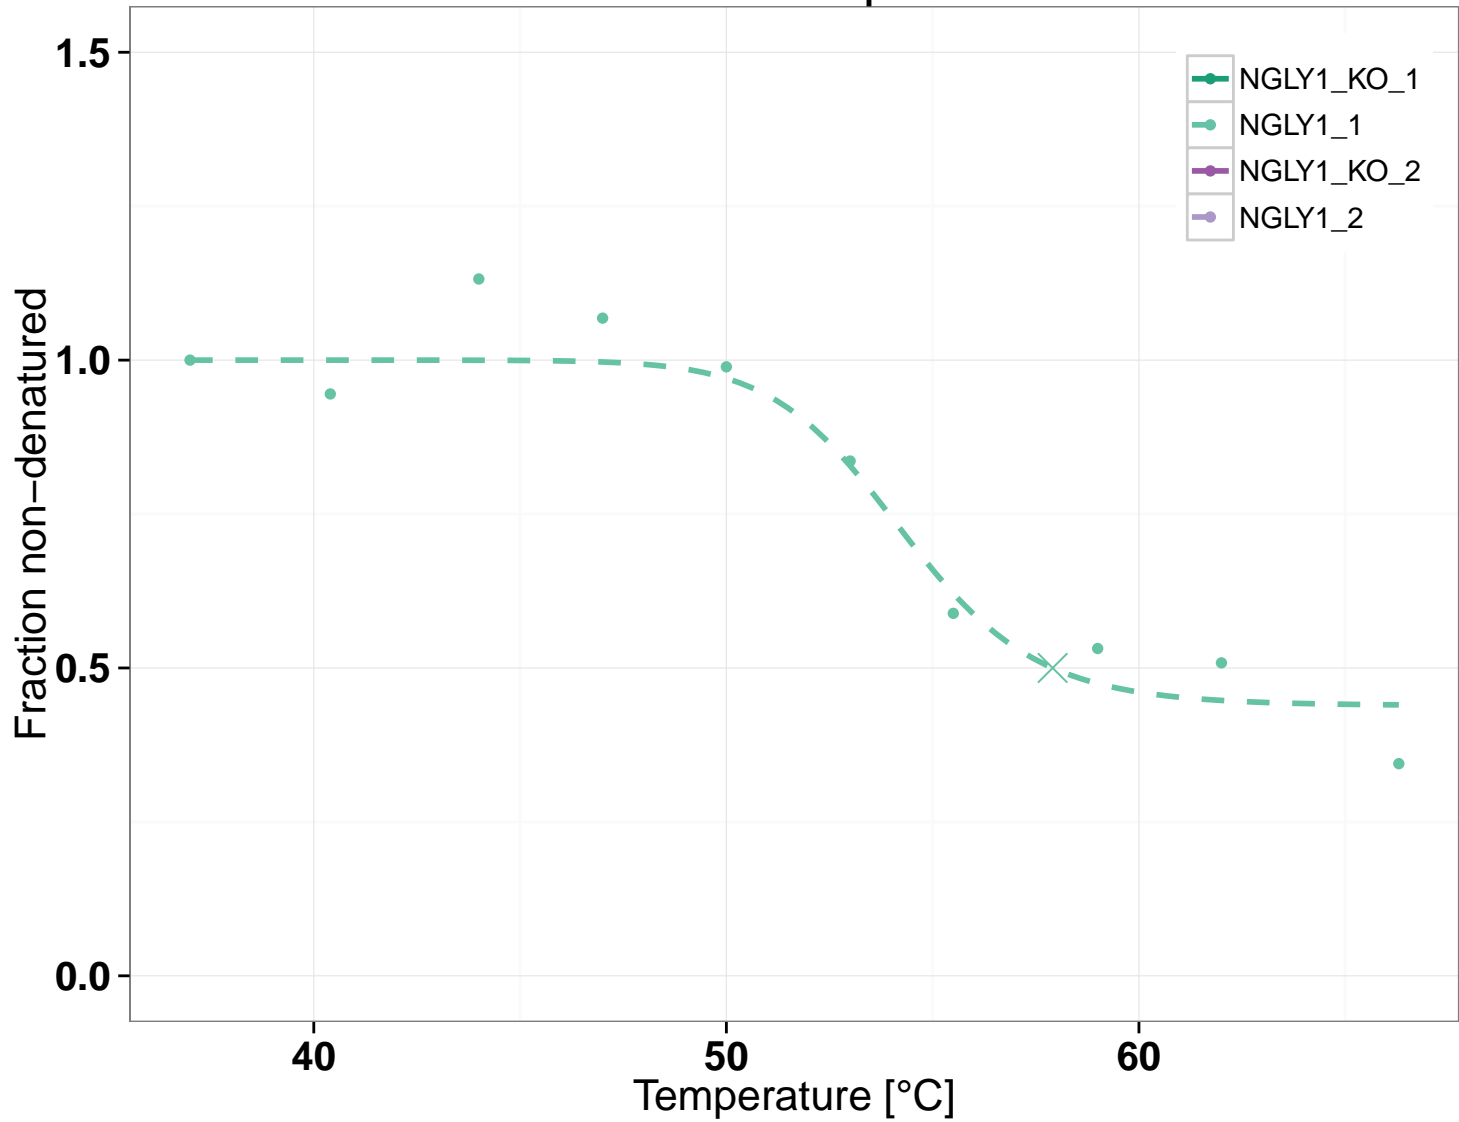

|            | meltPoint | slope  | plateau | R2   |
|------------|-----------|--------|---------|------|
| NGLY1_KO_1 | -         | -      | -       | -    |
| NGLY1_1    | 57.91     | -0.087 | 0.44    | 0.94 |
| NGLY1_KO_2 | -         | -      | -       | -    |
| NGLY1_2    | -         | -      | -       | -    |

Supplement: Supplementary file 5387 [file 1]

IPI00867507.1|C1ORF167

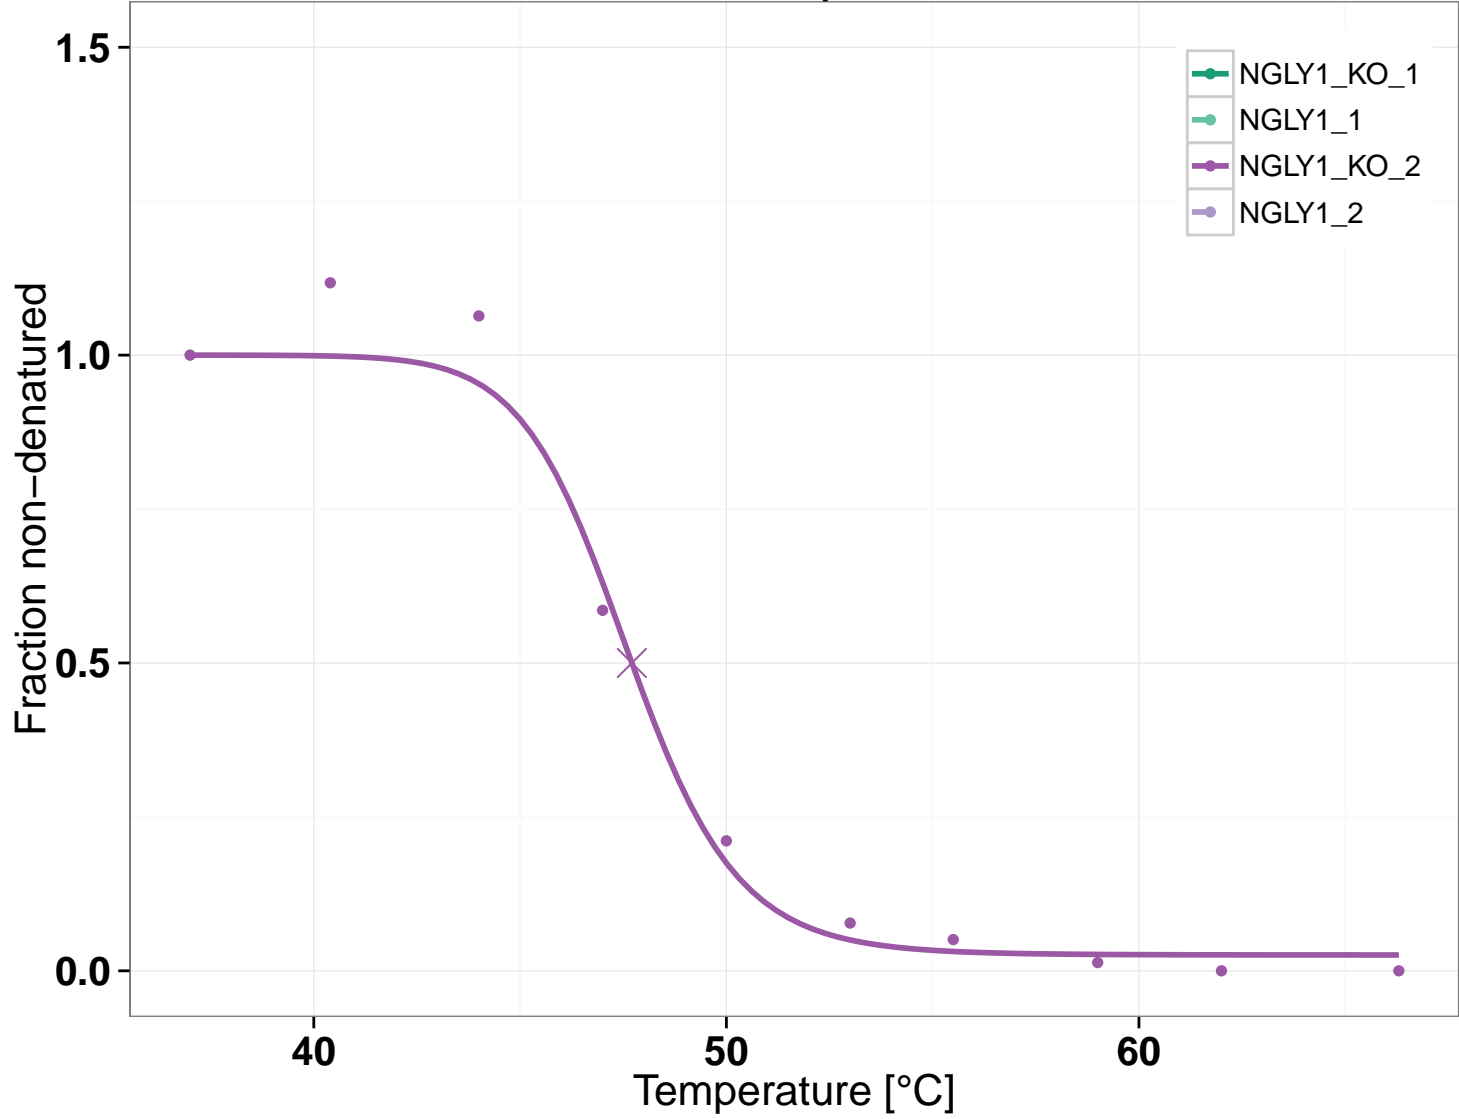

|            | meltPoint | slope | plateau | R2   |
|------------|-----------|-------|---------|------|
| NGLY1_KO_1 | -         | -     | -       | -    |
| NGLY1_1    | -         | -     | -       | -    |
| NGLY1_KO_2 | 47.71     | -0.19 | 0.03    | 0.98 |
| NGLY1_2    | -         | -     | -       | -    |

Supplement: Supplementary file 5388 [file 1]

# IPI00018923.2|IKZF3

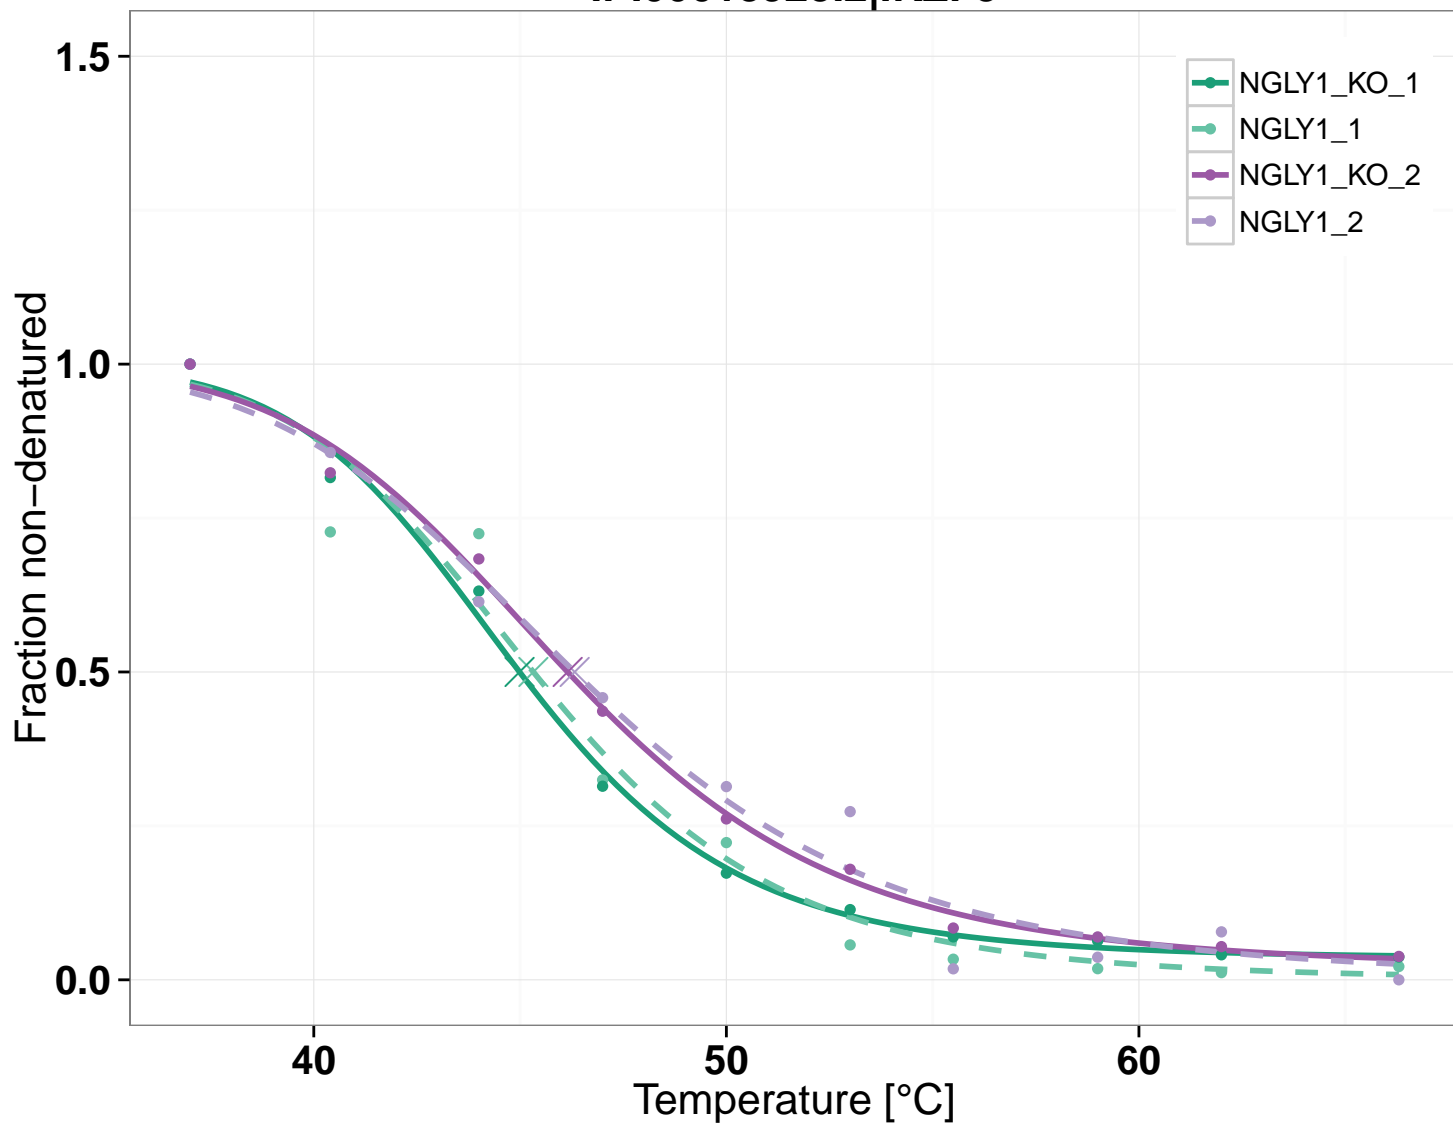

|            | meltPoint | slope  | plateau | R2   |
|------------|-----------|--------|---------|------|
| NGLY1_KO_1 | 44.99     | -0.09  | 0.03    | 1    |
| NGLY1_1    | 45.32     | -0.084 | 0       | 0.97 |
| NGLY1_KO_2 | 46.15     | -0.073 | 0.02    | 1    |
| NGLY1_2    | 46.32     | -0.067 | 0       | 0.98 |

Supplement: Supplementary file 5389 [file 1]

IPI00642206.2|CCDC18

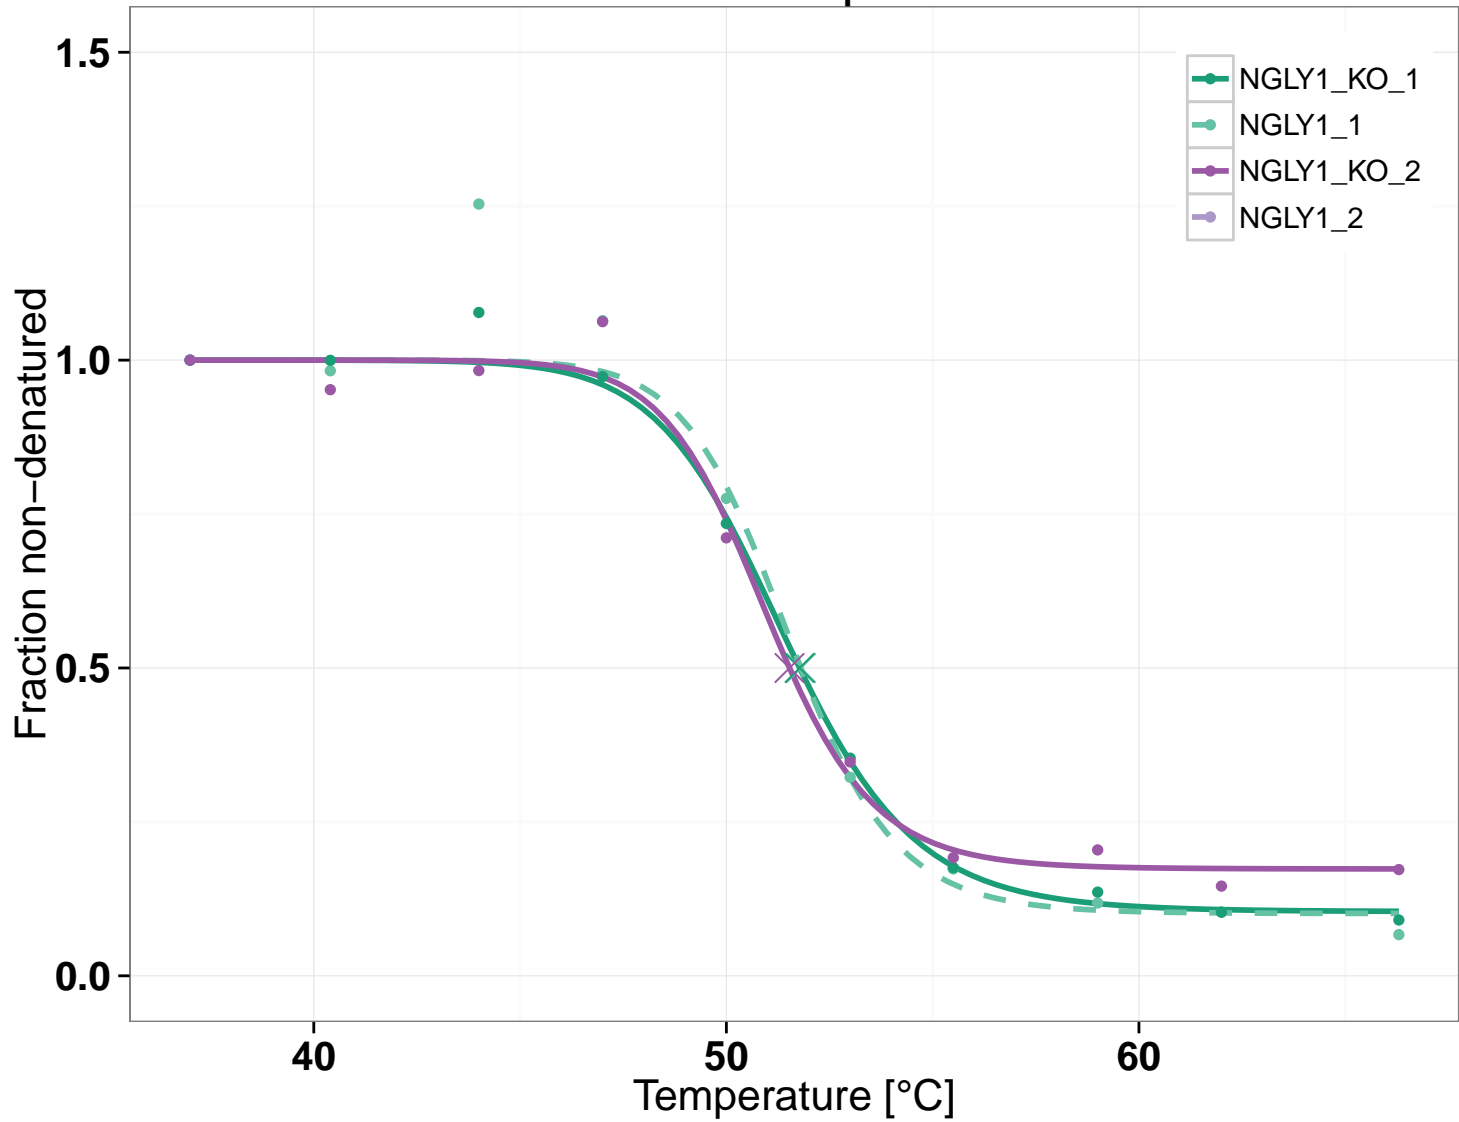

|            | meltPoint | slope | plateau | R2   |
|------------|-----------|-------|---------|------|
| NGLY1_KO_1 | 51.78     | -0.14 | 0.1     | 1    |
| NGLY1_1    | 51.81     | -0.18 | 0.1     | 0.96 |
| NGLY1_KO_2 | 51.53     | -0.16 | 0.17    | 0.99 |
| NGLY1_2    | -         | -     | -       | -    |

Supplement: Supplementary file 5390 [file 1]

IPI00153036.5|TMEM19

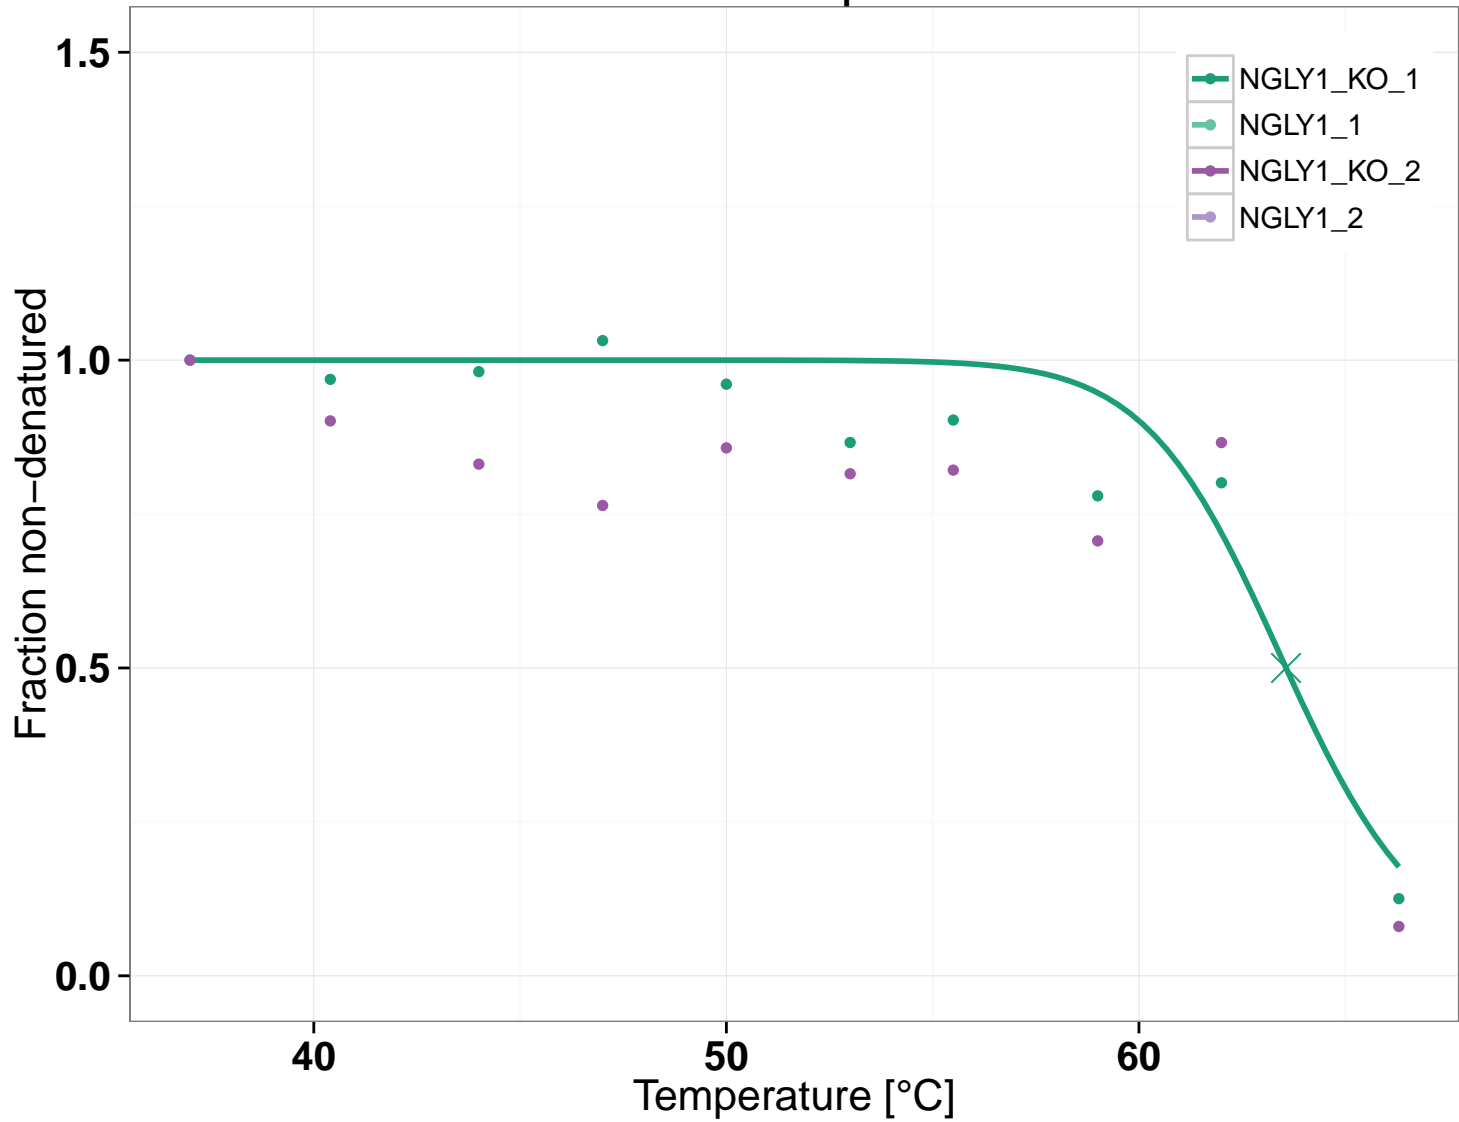

|            | meltPoint | slope | plateau | R2   |
|------------|-----------|-------|---------|------|
| NGLY1_KO_1 | 63.57     | -0.15 | 0       | 0.89 |
| NGLY1_1    | -         | -     | -       | -    |
| NGLY1_KO_2 | -         | -     | -       | -    |
| NGLY1_2    | -         | -     | -       | -    |

Supplement: Supplementary file 5391 [file 1]

IPI00022661.3|PVRL2

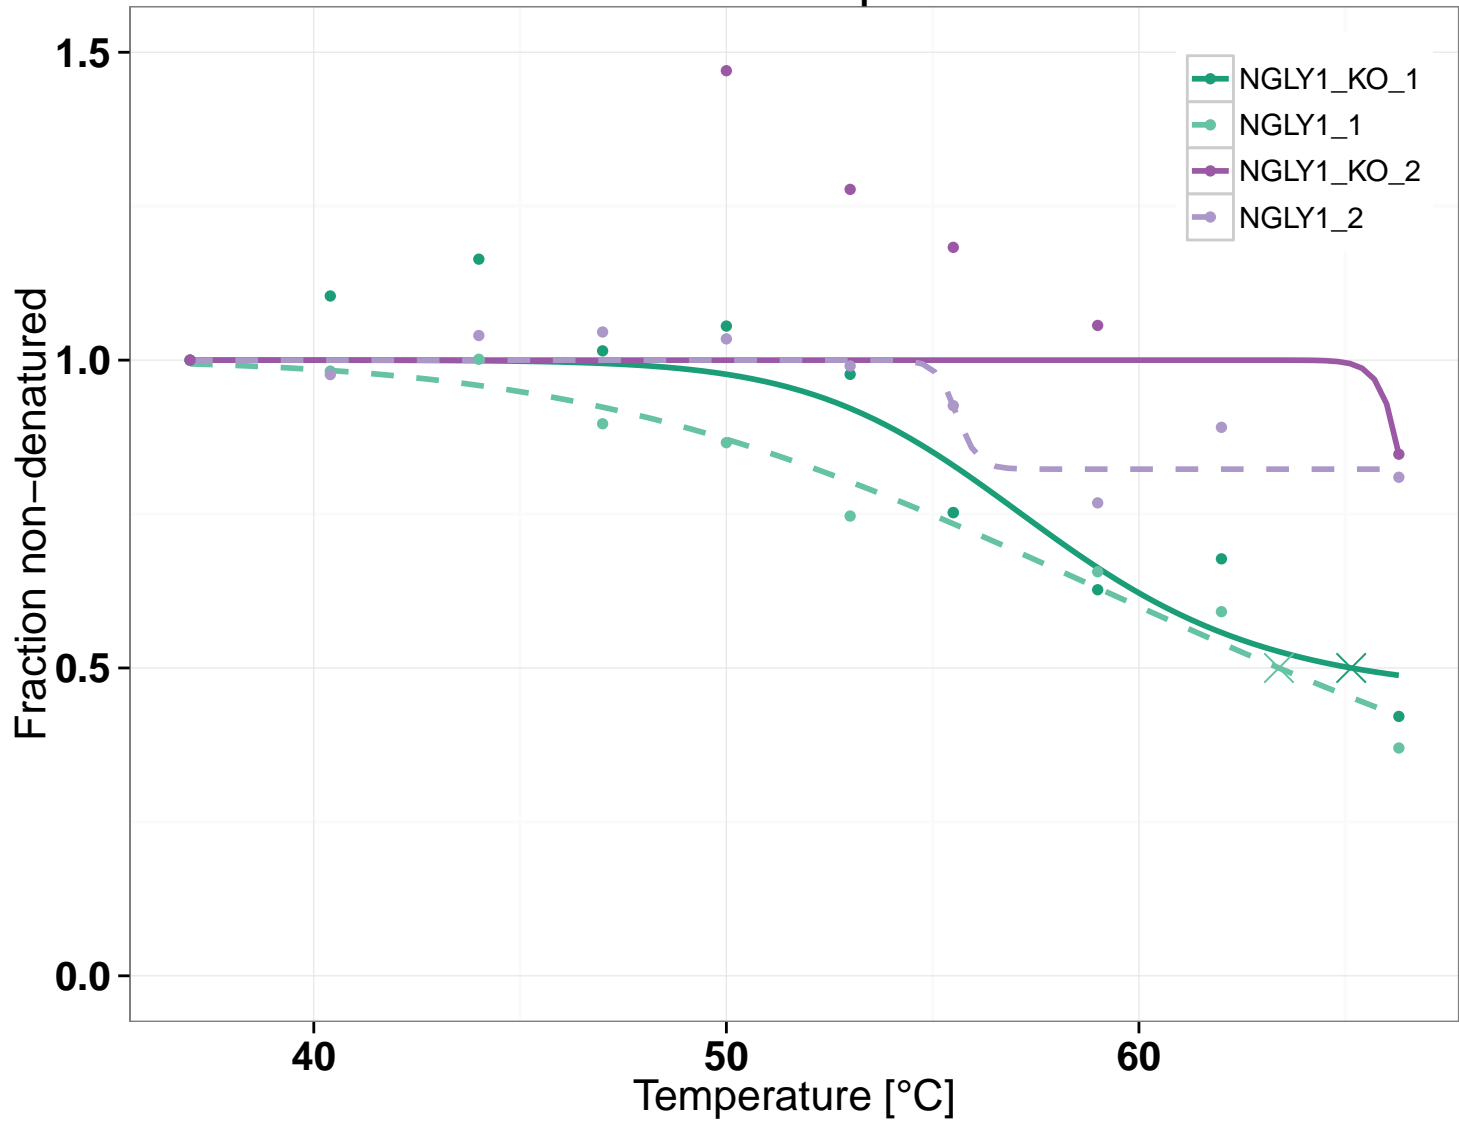

|            | meltPoint | slope  | plateau | R2    |
|------------|-----------|--------|---------|-------|
| NGLY1_KO_1 | 65.15     | -0.049 | 0.45    | 0.86  |
| NGLY1_1    | 63.39     | -0.03  | 0       | 0.97  |
| NGLY1_KO_2 | -         | -      | 0       | -1.23 |
| NGLY1_2    | -         | -0.17  | 0.82    | 0.85  |

Supplement: Supplementary file 5392 [file 1]

IPI00643628.1|ZMYM1

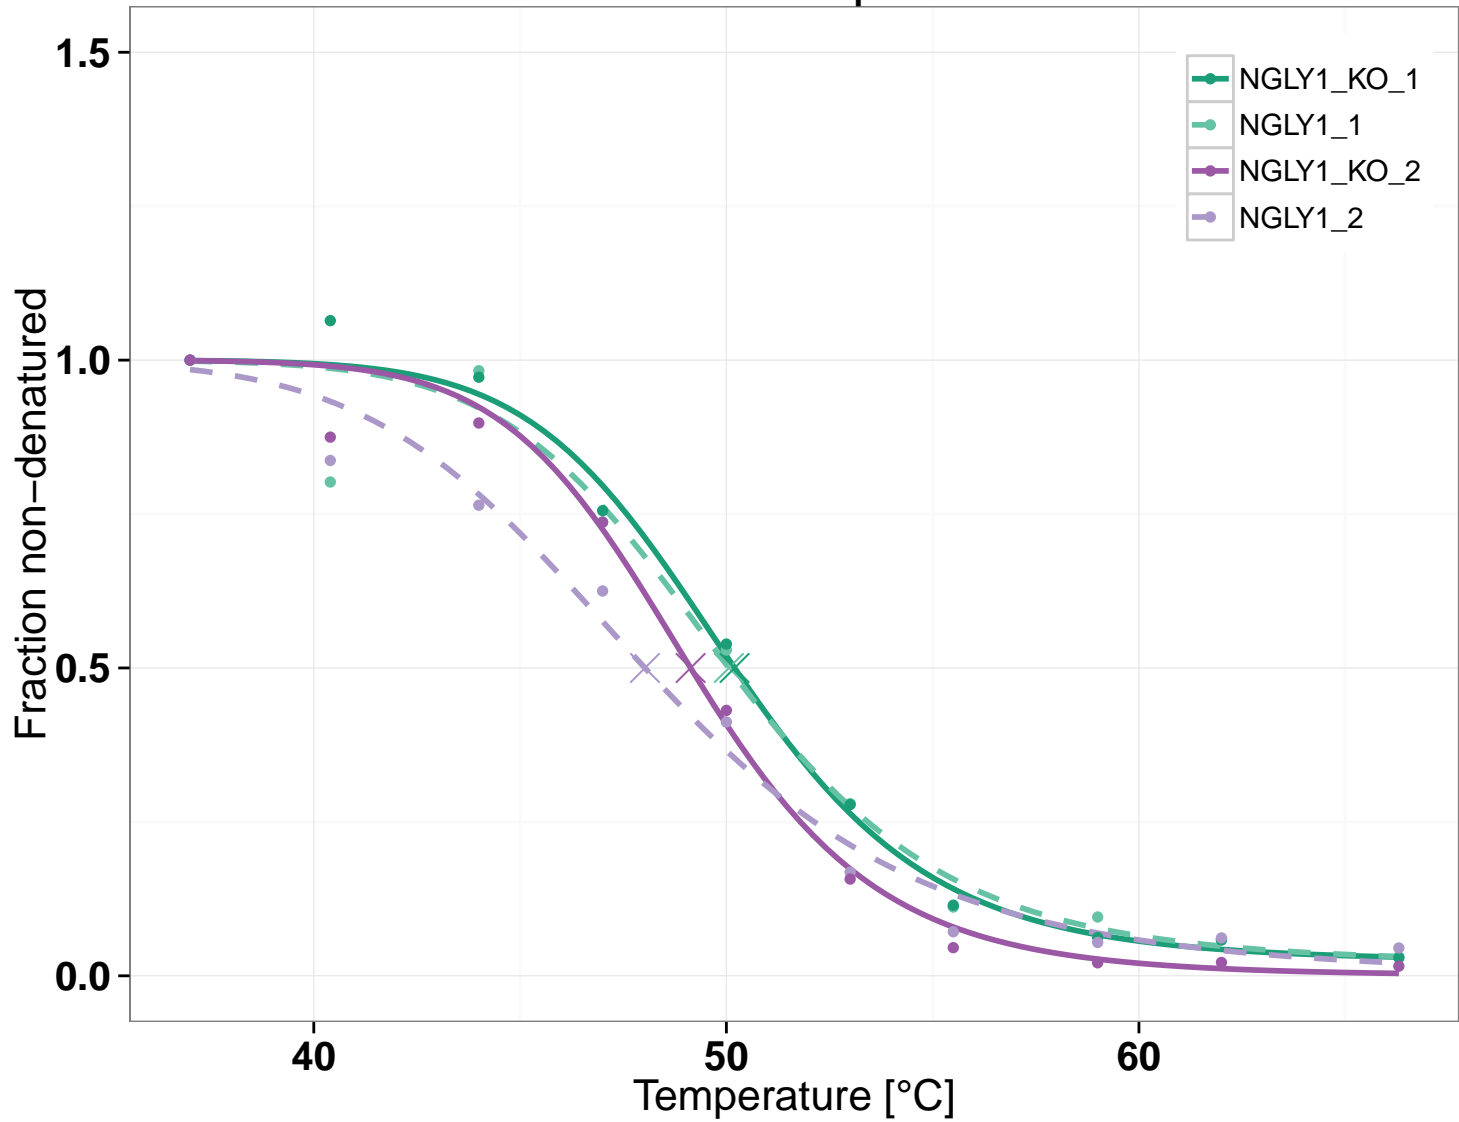

|            | meltPoint | slope  | plateau | R2   |
|------------|-----------|--------|---------|------|
| NGLY1_KO_1 | 50.2      | -0.1   | 0.02    | 0.99 |
| NGLY1_1    | 50.06     | -0.09  | 0.02    | 0.97 |
| NGLY1_KO_2 | 49.13     | -0.11  | 0       | 0.99 |
| NGLY1_2    | 48.03     | -0.074 | 0       | 0.98 |

Supplement: Supplementary file 5393 [file 1]

IPI00428447.1|MTUS1

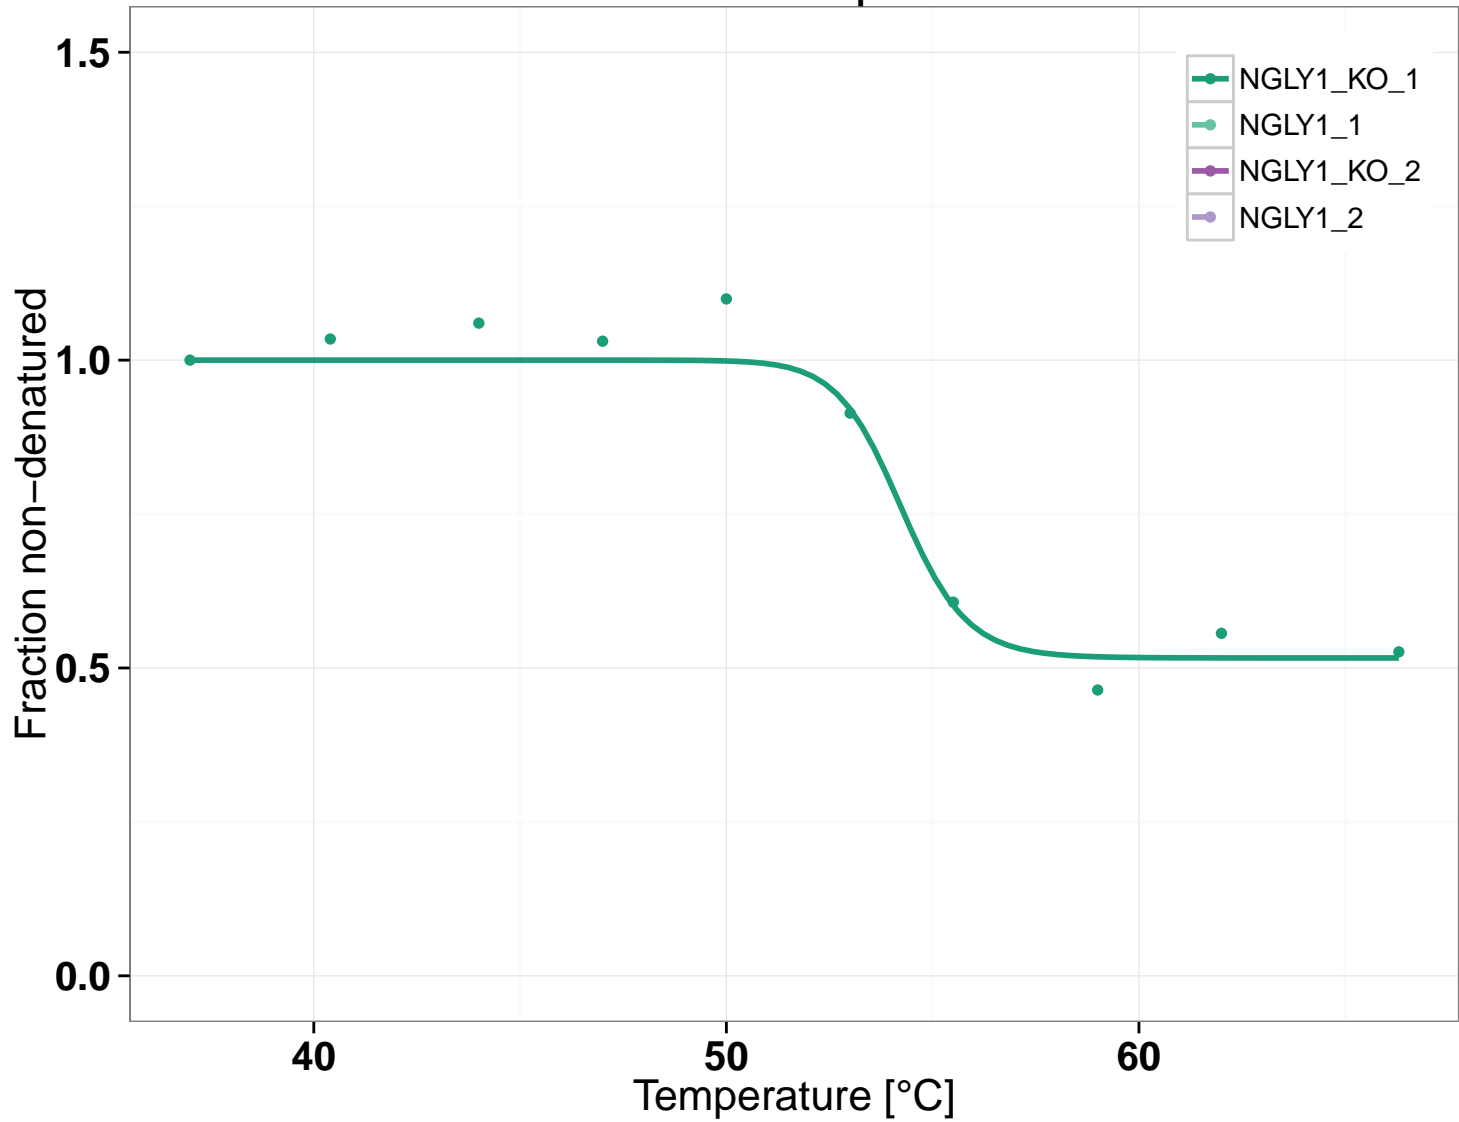

|            | meltPoint | slope | plateau | R2   |
|------------|-----------|-------|---------|------|
| NGLY1_KO_1 | —         | -0.15 | 0.52    | 0.97 |
| NGLY1_1    | —         | —     | —       | —    |
| NGLY1_KO_2 | —         | —     | —       | —    |
| NGLY1_2    | —         | —     | —       | —    |

Supplement: Supplementary file 5394 [file 1]

IPI00175416.8|PLCH1

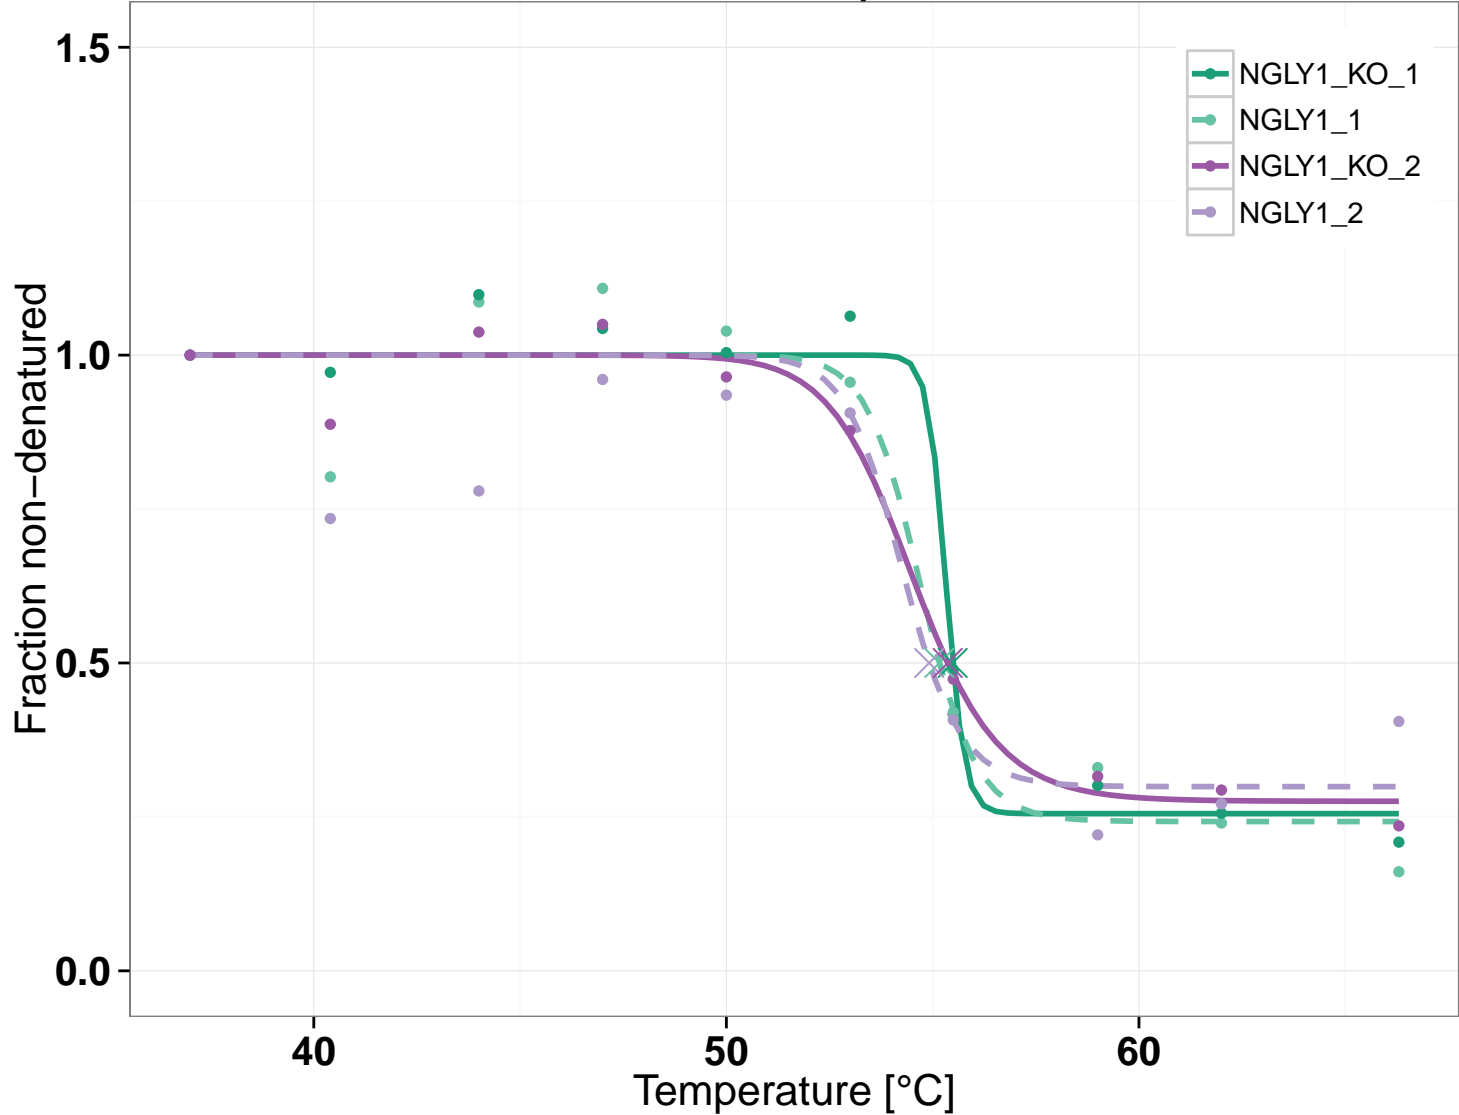

|            | meltPoint | slope | plateau | R2   |
|------------|-----------|-------|---------|------|
| NGLY1_KO_1 | 55.49     | -0.84 | 0.26    | 0.98 |
| NGLY1_1    | 55.16     | -0.29 | 0.24    | 0.94 |
| NGLY1_KO_2 | 55.37     | -0.18 | 0.28    | 0.98 |
| NGLY1_2    | 54.92     | -0.25 | 0.3     | 0.83 |

Supplement: Supplementary file 5395 [file 1]

# IPI00783835.2|RNF160

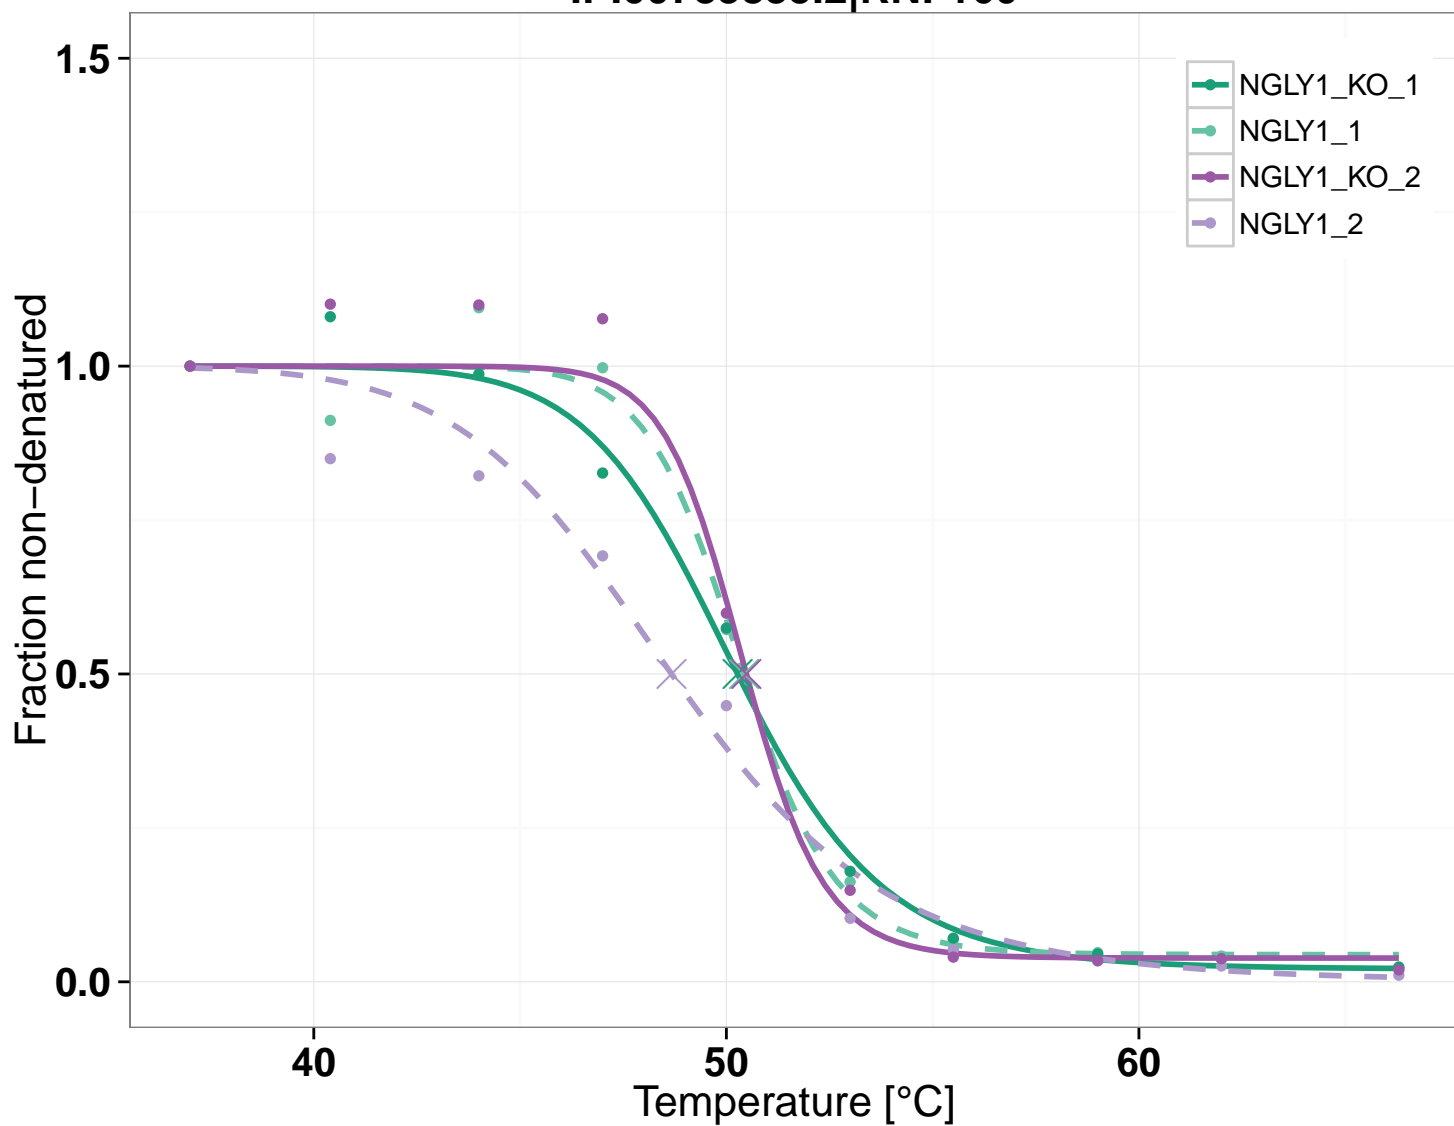

|            | meltPoint | slope  | plateau | R2   |
|------------|-----------|--------|---------|------|
| NGLY1_KO_1 | 50.27     | -0.14  | 0.02    | 0.99 |
| NGLY1_1    | 50.43     | -0.21  | 0.04    | 0.99 |
| NGLY1_KO_2 | 50.48     | -0.25  | 0.04    | 0.99 |
| NGLY1_2    | 48.67     | -0.096 | 0       | 0.98 |

Supplement: Supplementary file 5396 [file 1]

# IPI00217975.4|LMNB1

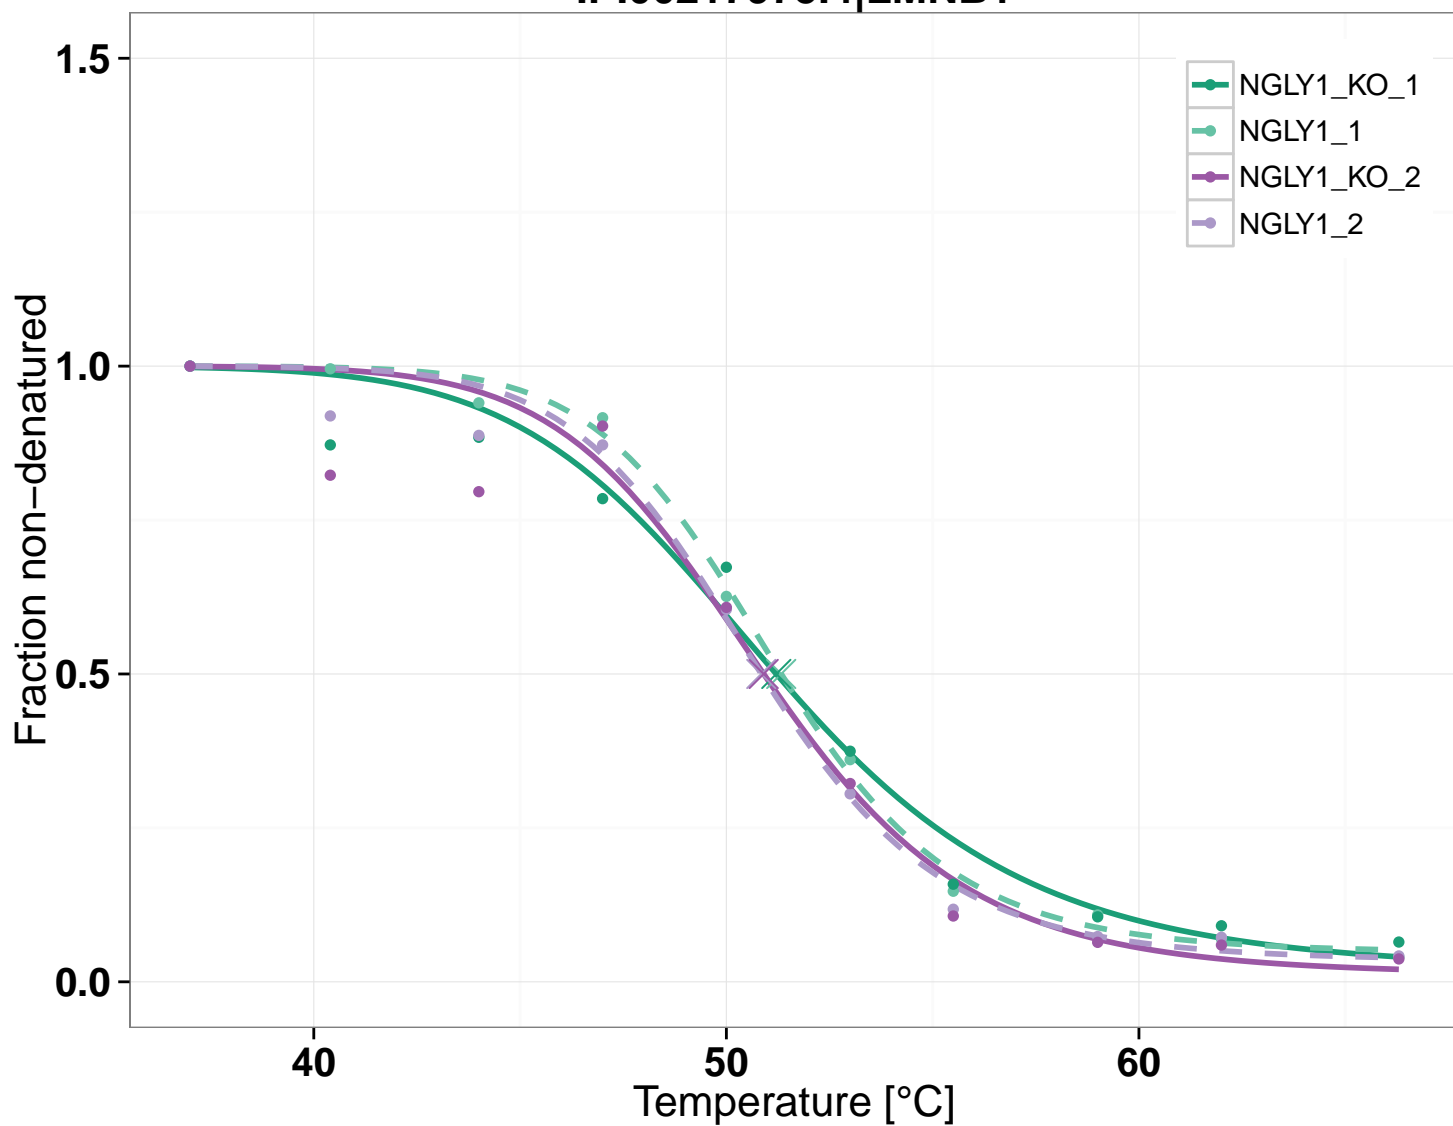

|            | meltPoint | slope  | plateau | R2   |
|------------|-----------|--------|---------|------|
| NGLY1_KO_1 | 51.21     | -0.079 | 0.02    | 0.98 |
| NGLY1_1    | 51.33     | -0.11  | 0.05    | 1    |
| NGLY1_KO_2 | 50.9      | -0.099 | 0.01    | 0.95 |
| NGLY1_2    | 50.85     | -0.11  | 0.03    | 0.99 |

Supplement: Supplementary file 5397 [file 1]

# IPI00385811.8|WDR33

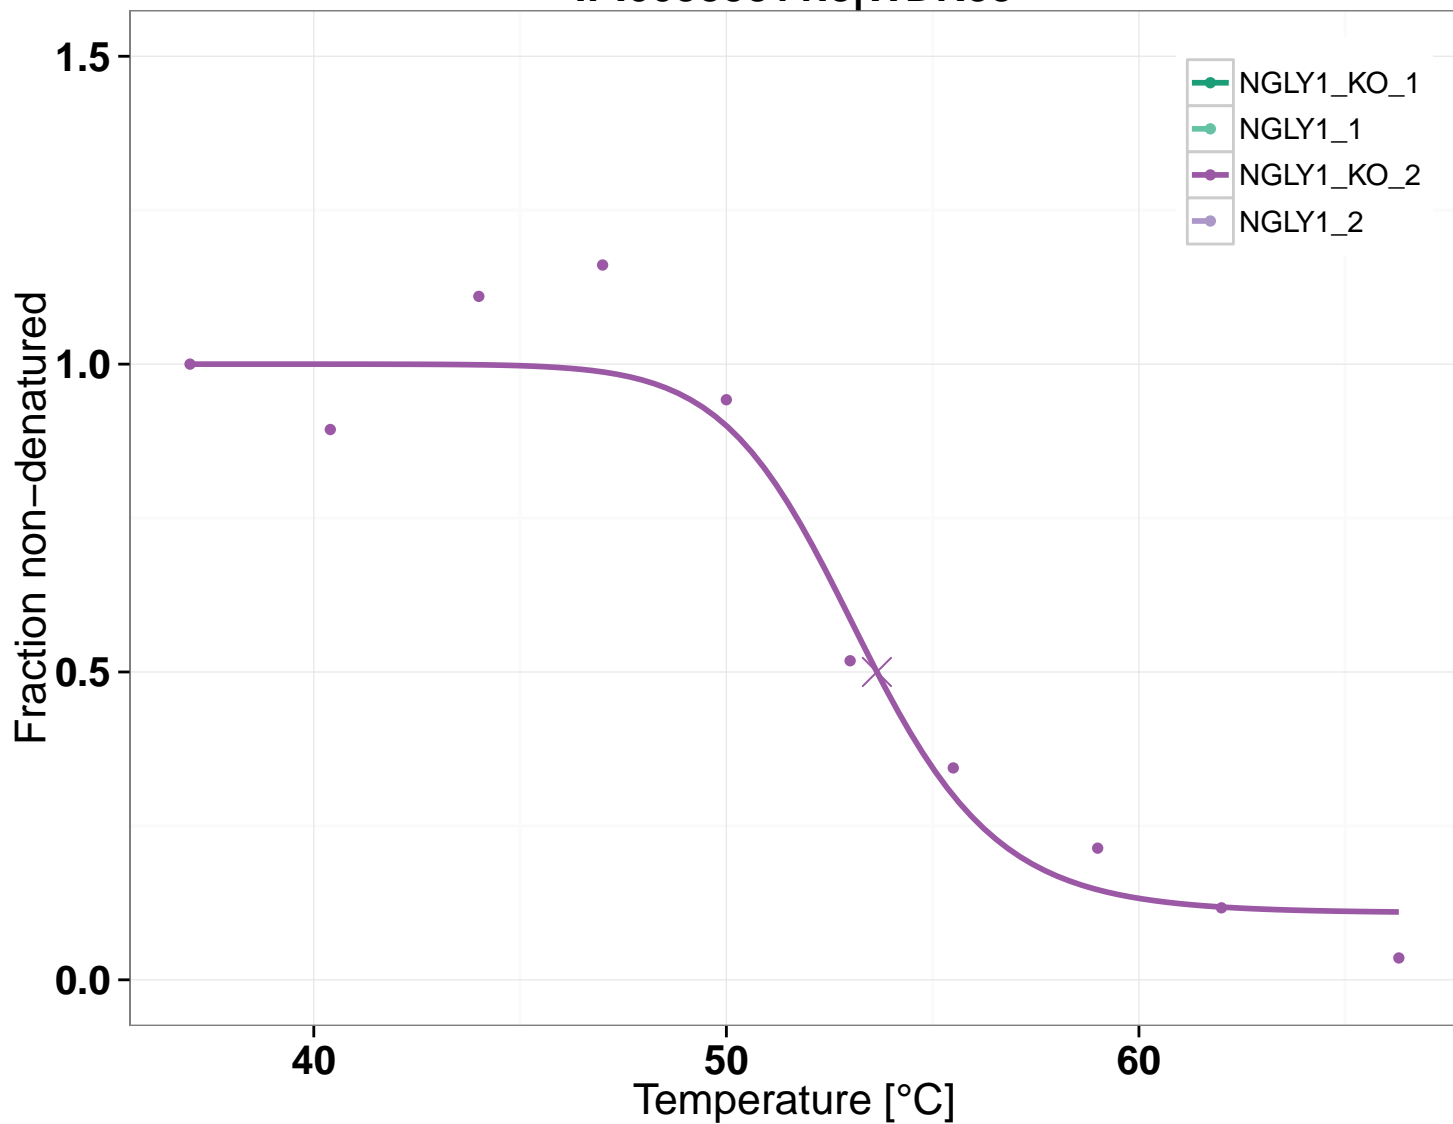

|            | meltPoint | slope | plateau | R2   |
|------------|-----------|-------|---------|------|
| NGLY1_KO_1 | —         | —     | —       | —    |
| NGLY1_1    | —         | —     | —       | —    |
| NGLY1_KO_2 | 53.65     | -0.13 | 0.11    | 0.96 |
| NGLY1_2    | —         | —     | —       | —    |

Supplement: Supplementary file 5398 [file 1]

# IPI00062040.1|WDR89

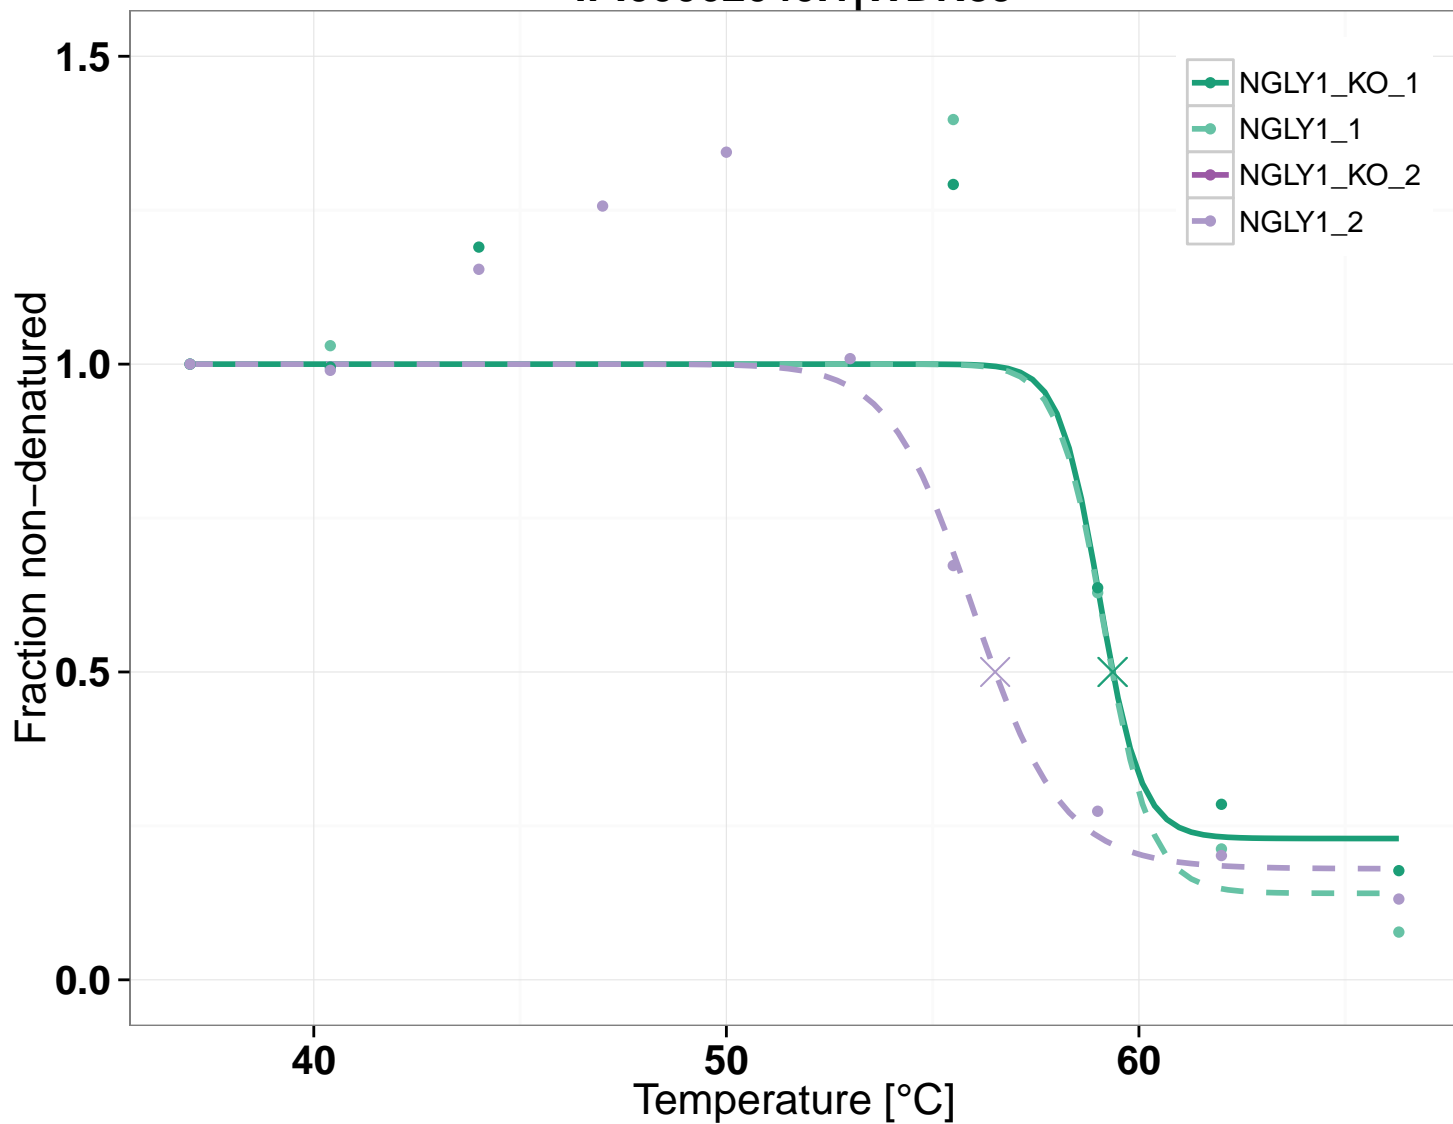

|            | meltPoint | slope | plateau | R2   |
|------------|-----------|-------|---------|------|
| NGLY1_KO_1 | 59.37     | -0.39 | 0.23    | 0.35 |
| NGLY1_1    | 59.35     | -0.38 | 0.14    | 0.29 |
| NGLY1_KO_2 | -         | -     | -       | -    |
| NGLY1_2    | 56.51     | -0.2  | 0.18    | 0.88 |

Supplement: Supplementary file 5399 [file 1]

IPI00793201.1|SCYE1

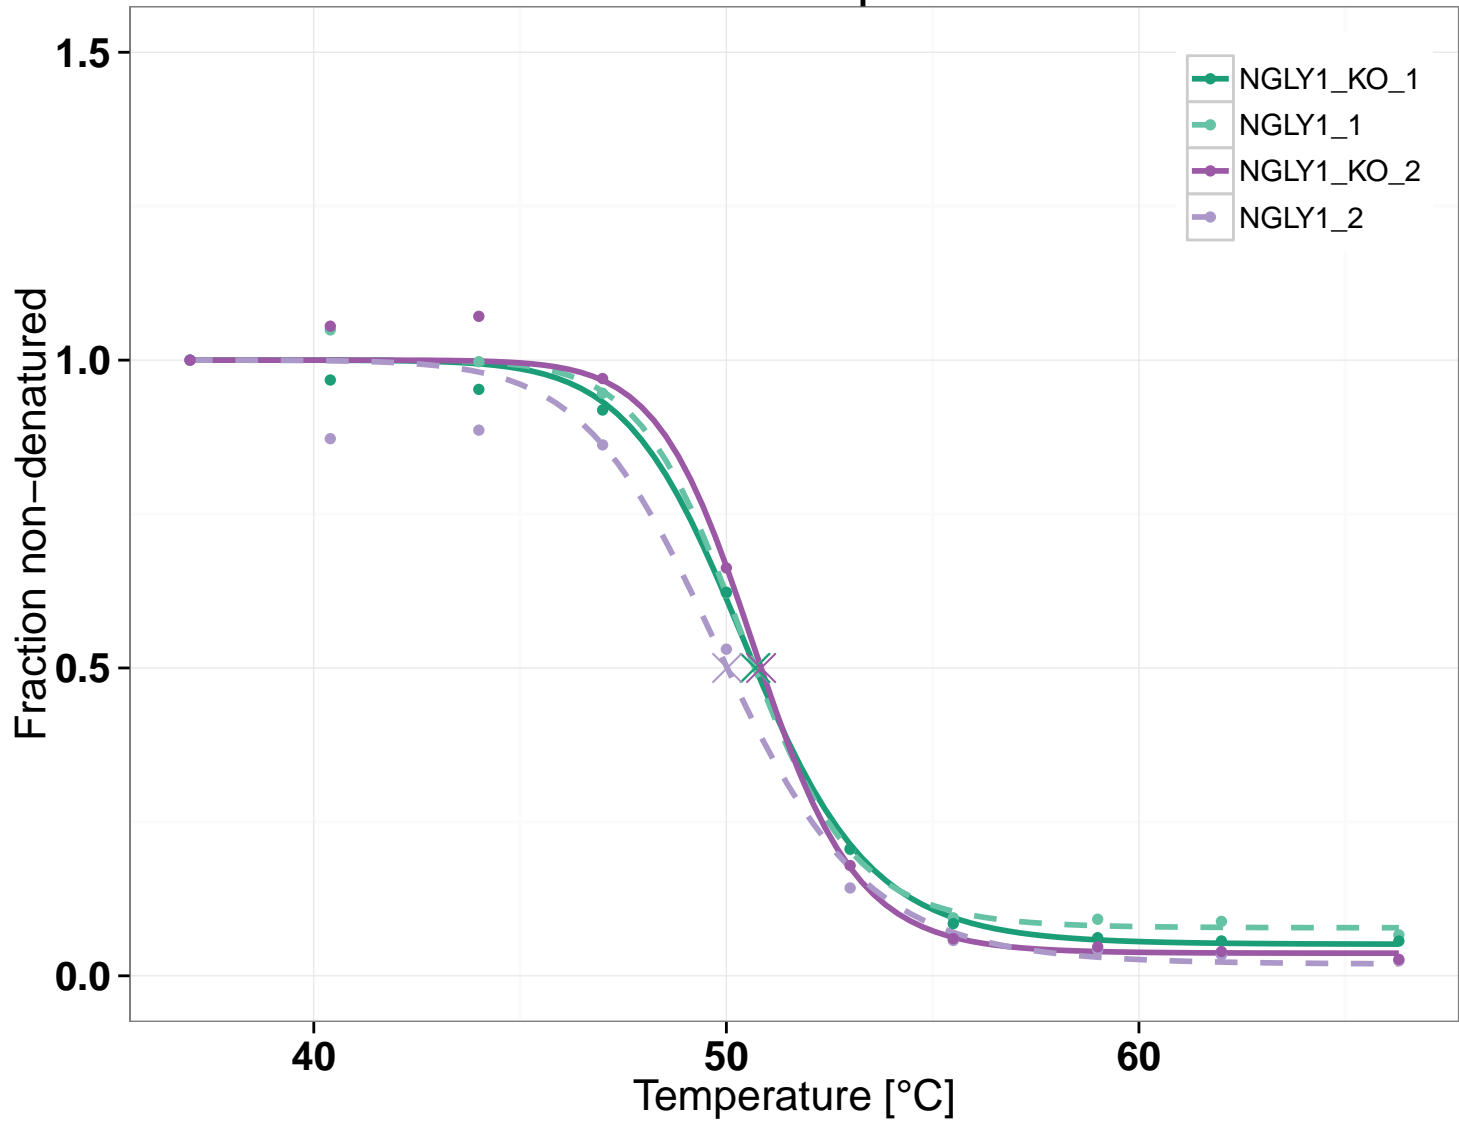

|            | meltPoint | slope | plateau | R2   |
|------------|-----------|-------|---------|------|
| NGLY1_KO_1 | 50.7      | -0.16 | 0.05    | 1    |
| NGLY1_1    | 50.69     | -0.18 | 0.08    | 1    |
| NGLY1_KO_2 | 50.84     | -0.2  | 0.04    | 1    |
| NGLY1_2    | 50.02     | -0.14 | 0.02    | 0.98 |

Supplement: Supplementary file 5400 [file 1]

IPI00219153.4|RPL22

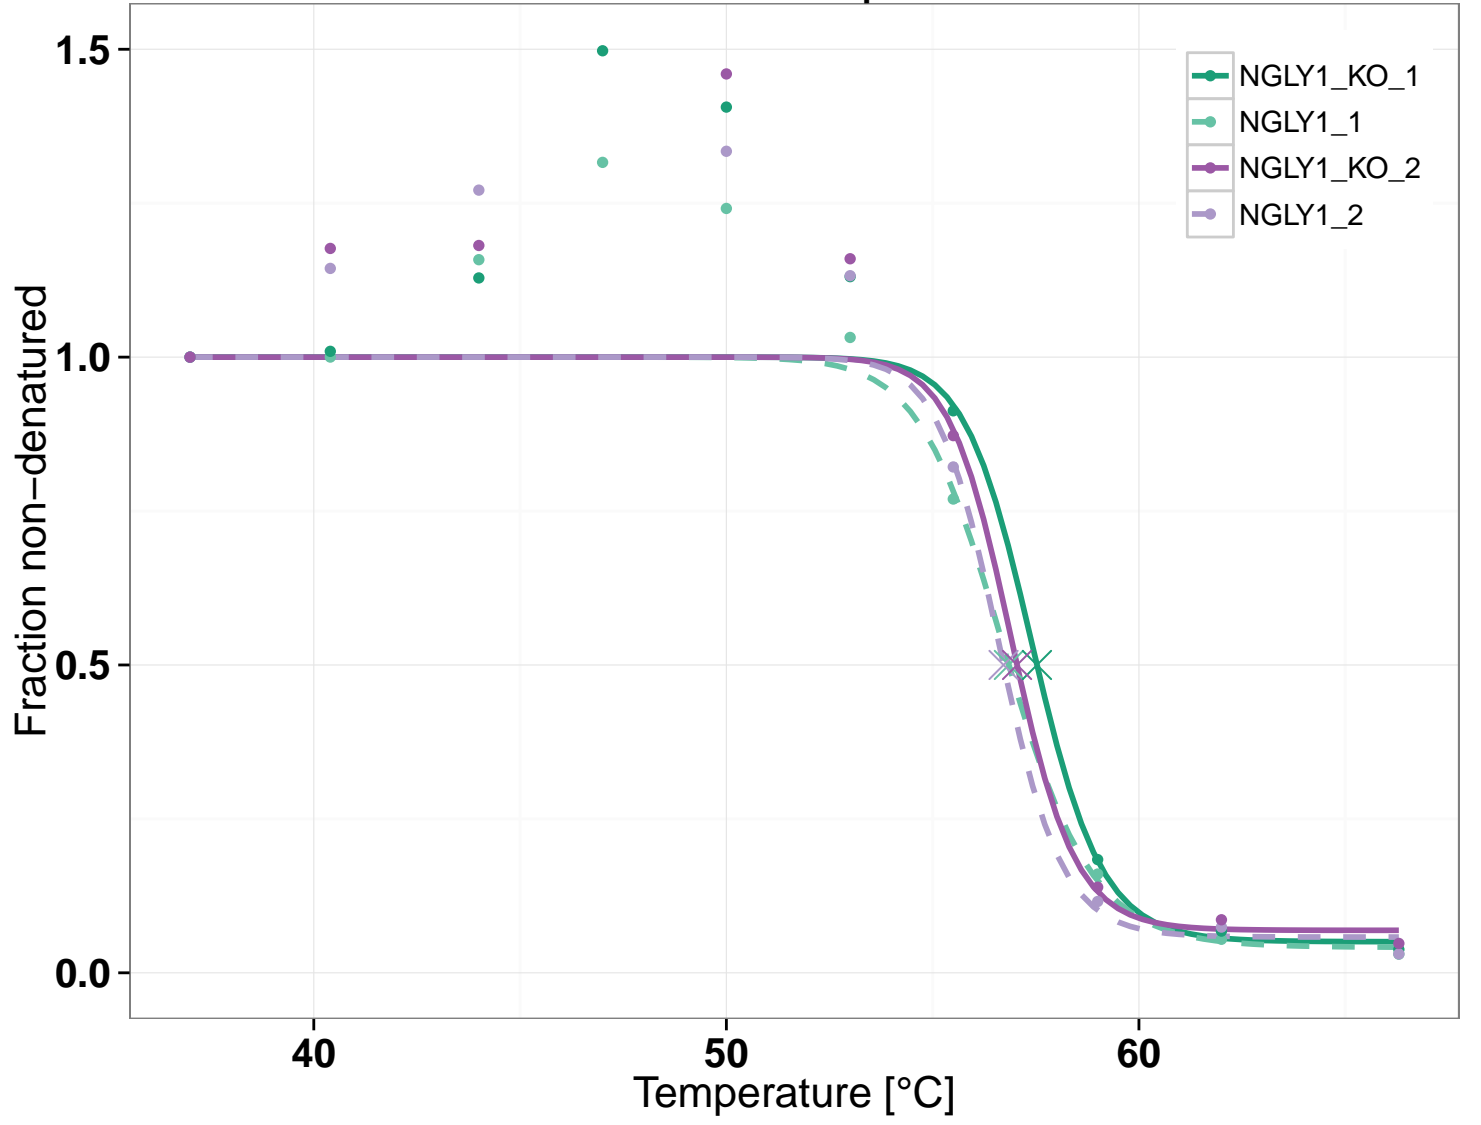

|            | meltPoint | slope | plateau | R2   |
|------------|-----------|-------|---------|------|
| NGLY1_KO_1 | 57.53     | -0.29 | 0.05    | 0.83 |
| NGLY1_1    | 56.85     | -0.23 | 0.04    | 0.92 |
| NGLY1_KO_2 | 57.05     | -0.31 | 0.07    | 0.8  |
| NGLY1_2    | 56.72     | -0.31 | 0.06    | 0.82 |

Supplement: Supplementary file 5401 [file 1]

IPI00909773.1|UBE2L3

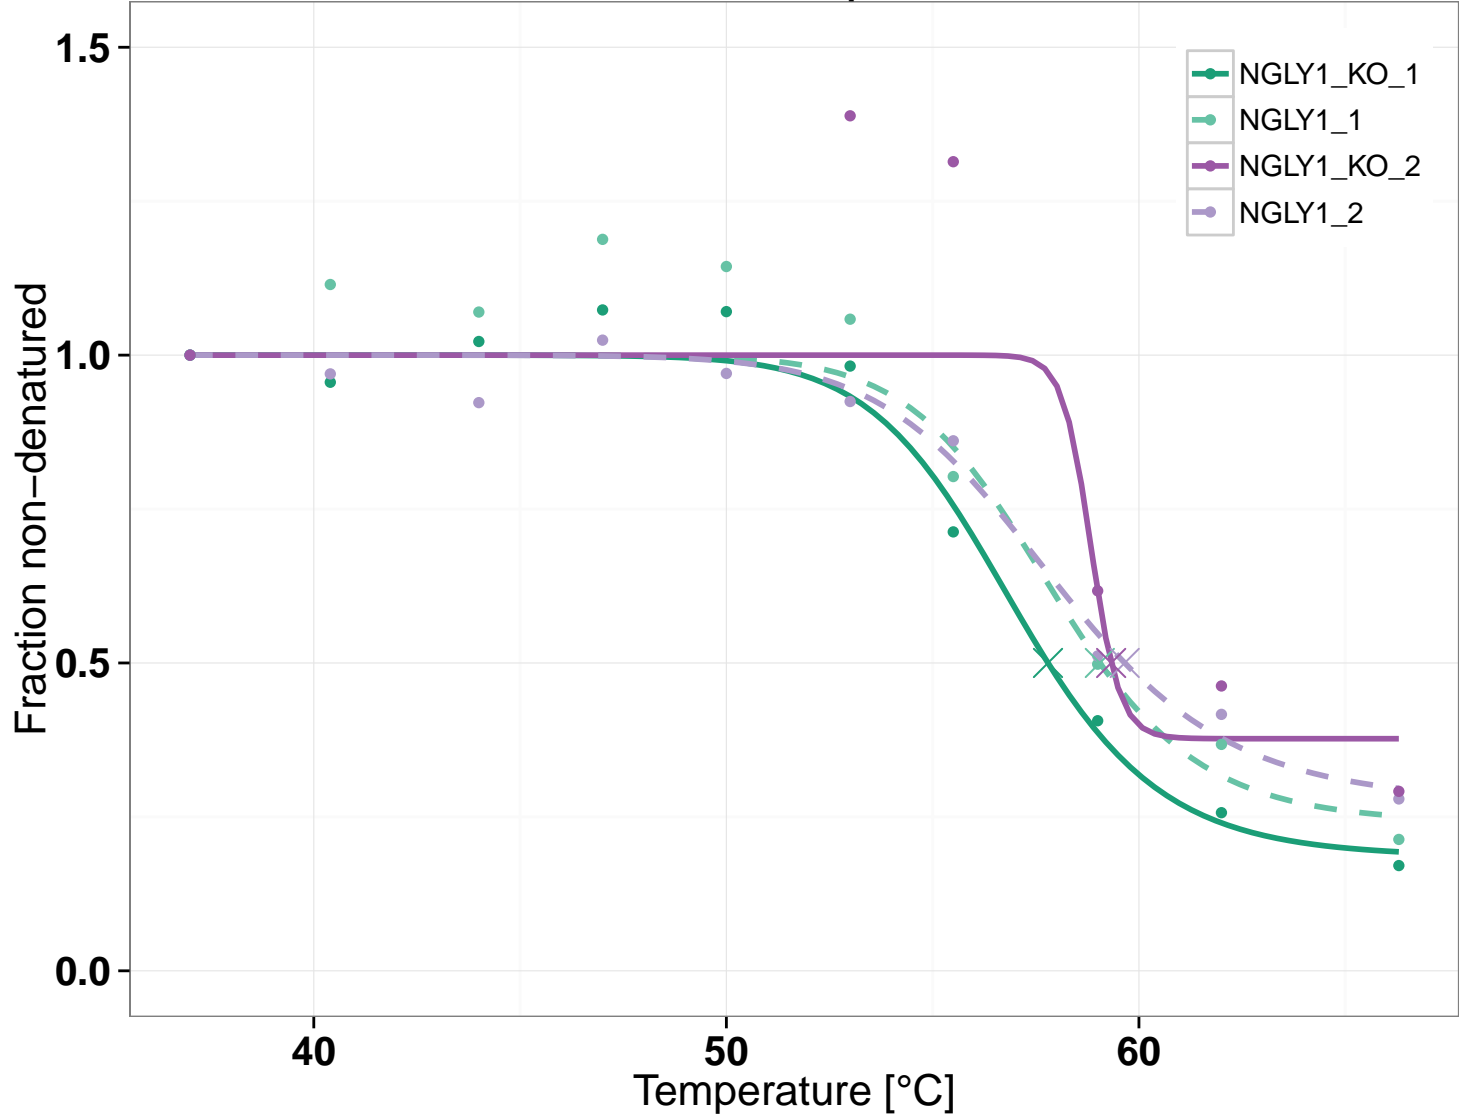

|            | meltPoint | slope  | plateau | R2   |
|------------|-----------|--------|---------|------|
| NGLY1_KO_1 | 57.8      | -0.12  | 0.18    | 0.98 |
| NGLY1_1    | 59.05     | -0.11  | 0.24    | 0.92 |
| NGLY1_KO_2 | 59.33     | -0.45  | 0.38    | 0.34 |
| NGLY1_2    | 59.66     | -0.085 | 0.27    | 0.98 |

Supplement: Supplementary file 5402 [file 1]

IPI00014377.3|RAB32

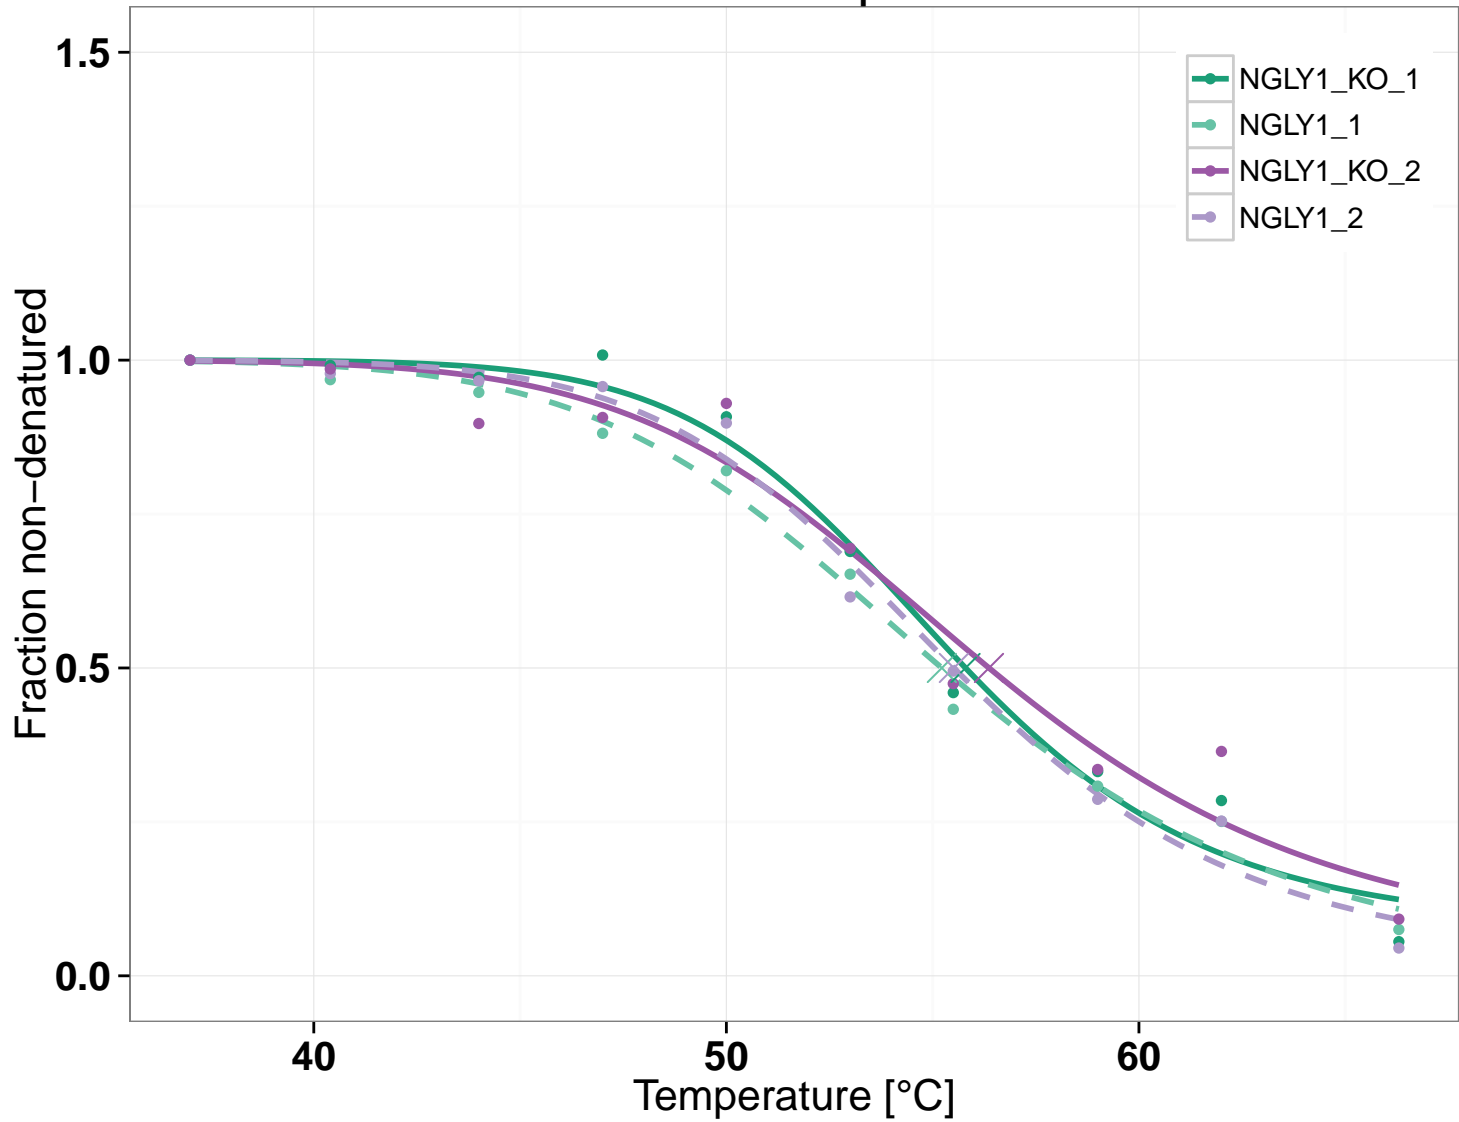

|            | meltPoint | slope  | plateau | R2   |
|------------|-----------|--------|---------|------|
| NGLY1_KO_1 | 55.8      | -0.073 | 0.07    | 0.98 |
| NGLY1_1    | 55.22     | -0.059 | 0       | 0.99 |
| NGLY1_KO_2 | 56.37     | -0.057 | 0.03    | 0.96 |
| NGLY1_2    | 55.51     | -0.068 | 0.02    | 0.99 |

Supplement: Supplementary file 5403 [file 1]

IPI00418421.4|ZNF783

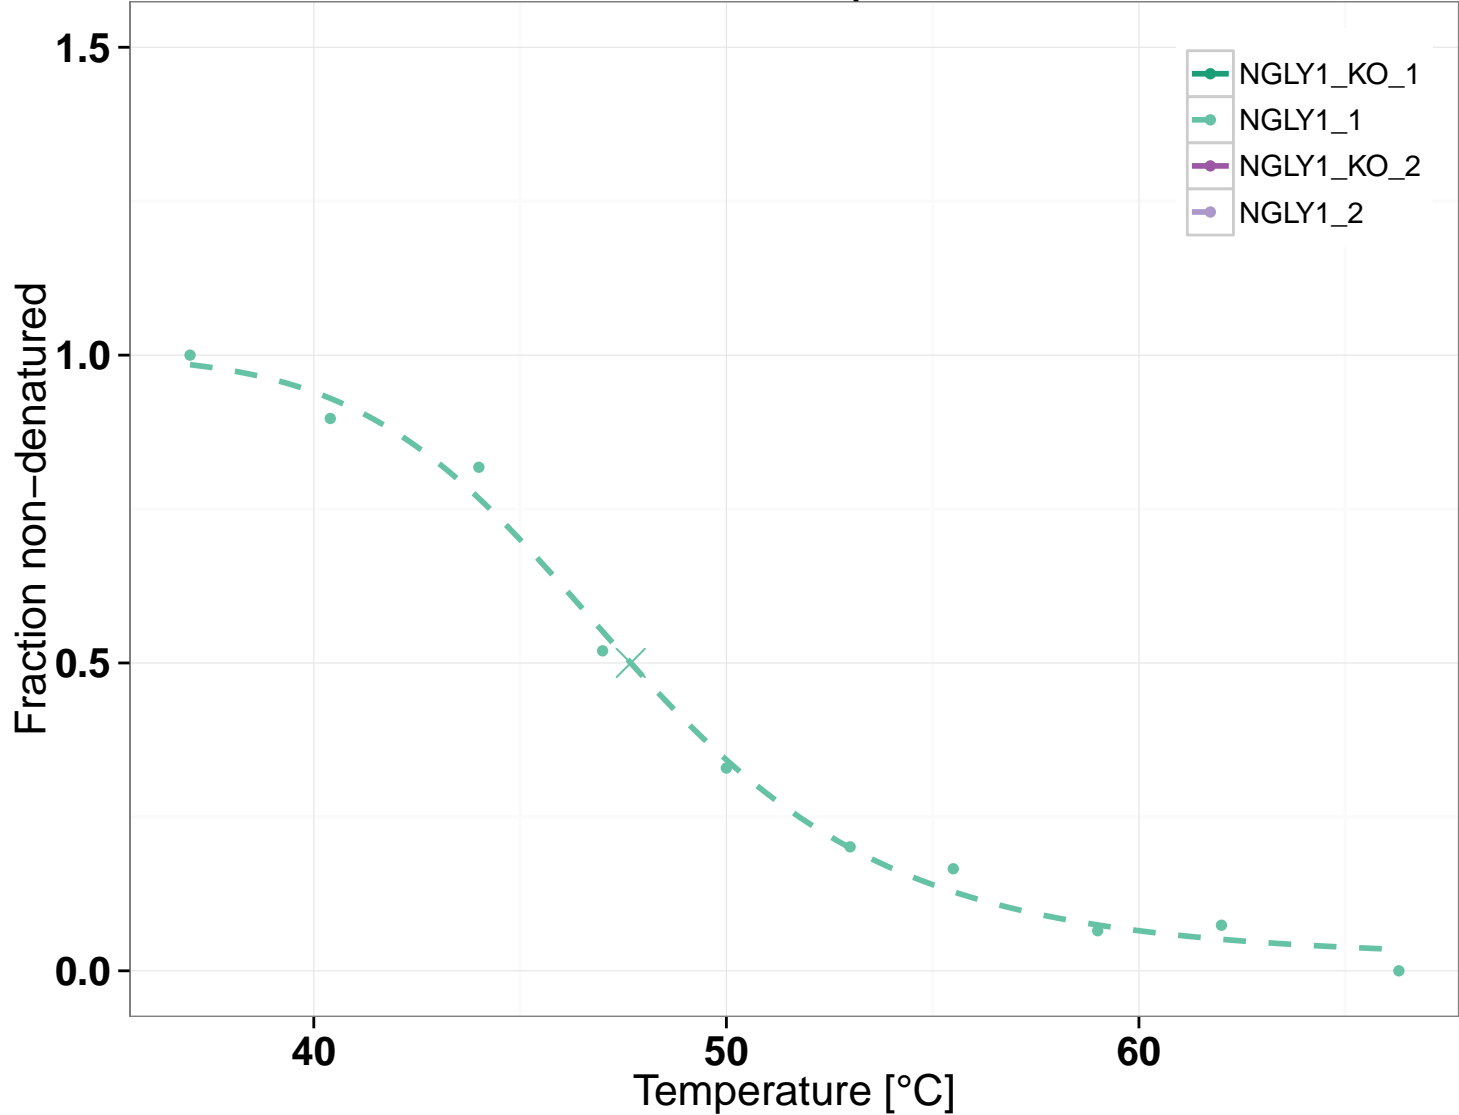

|            | meltPoint | slope  | plateau | R2   |
|------------|-----------|--------|---------|------|
| NGLY1_KO_1 | -         | -      | -       | -    |
| NGLY1_1    | 47.68     | -0.076 | 0.02    | 0.99 |
| NGLY1_KO_2 | -         | -      | -       | -    |
| NGLY1_2    | -         | -      | -       | -    |

Supplement: Supplementary file 5404 [file 1]

IPI00289649.3|PTPN3

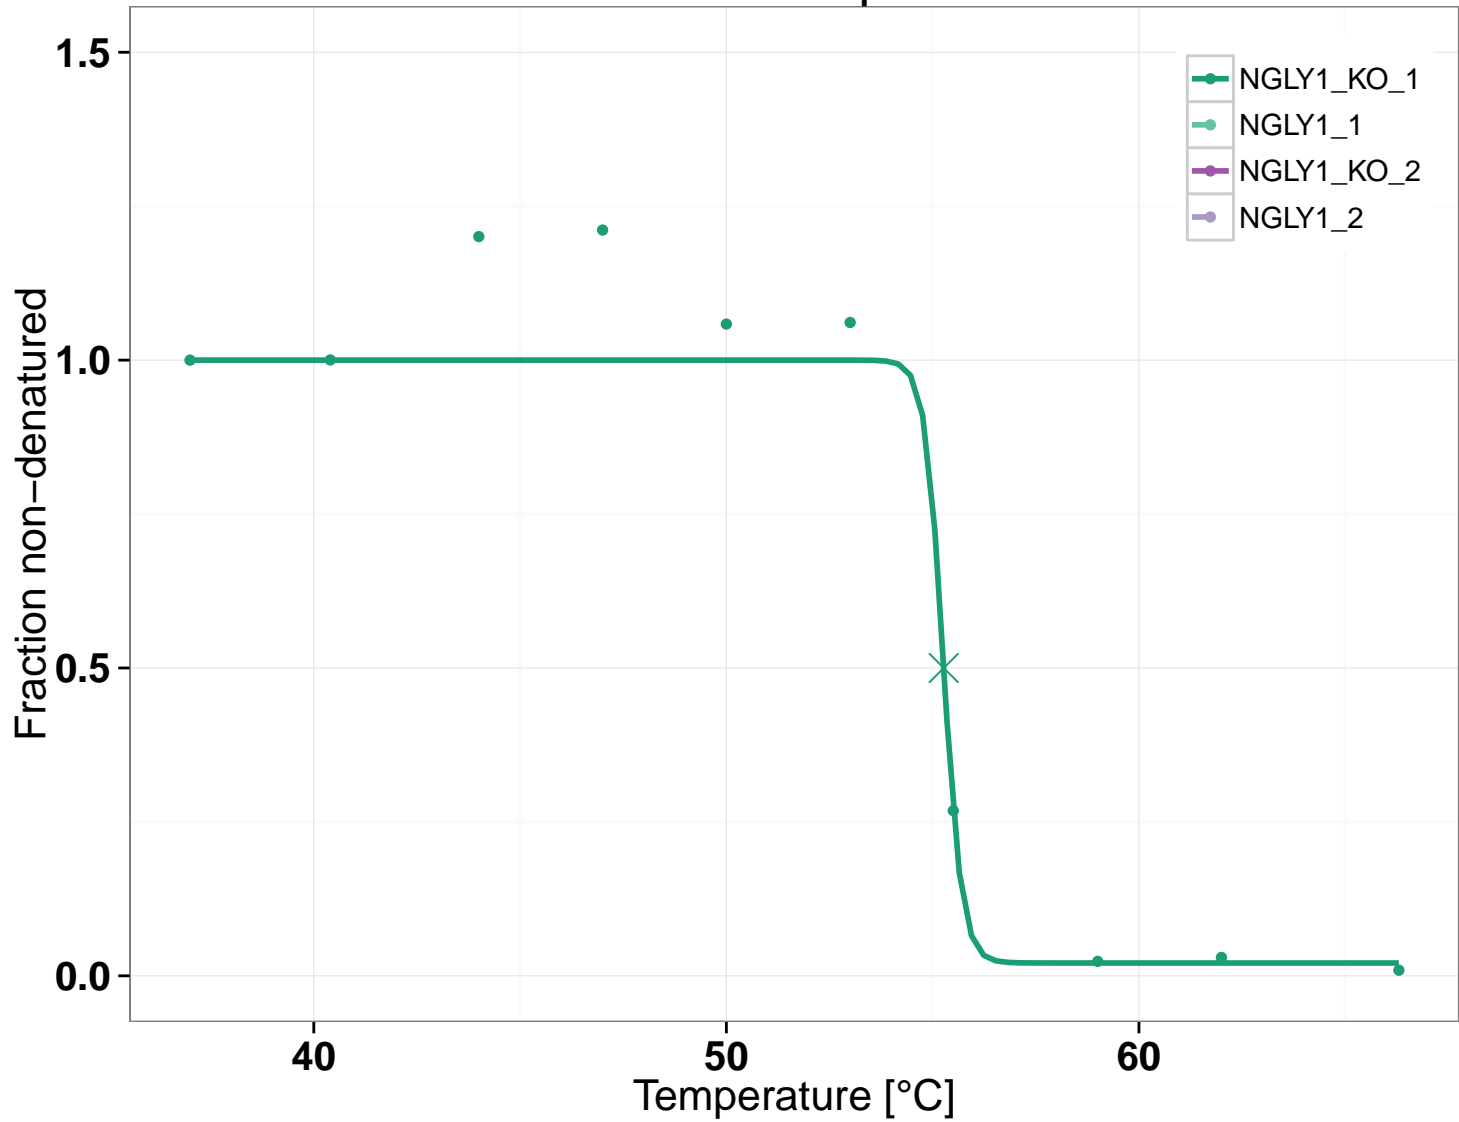

|            | meltPoint | slope | plateau | R2   |
|------------|-----------|-------|---------|------|
| NGLY1_KO_1 | 55.27     | -1.1  | 0.02    | 0.96 |
| NGLY1_1    | -         | -     | -       | -    |
| NGLY1_KO_2 | -         | -     | -       | -    |
| NGLY1_2    | -         | -     | -       | -    |

Supplement: Supplementary file 5405 [file 1]

# IPI00413265.4|SMC5

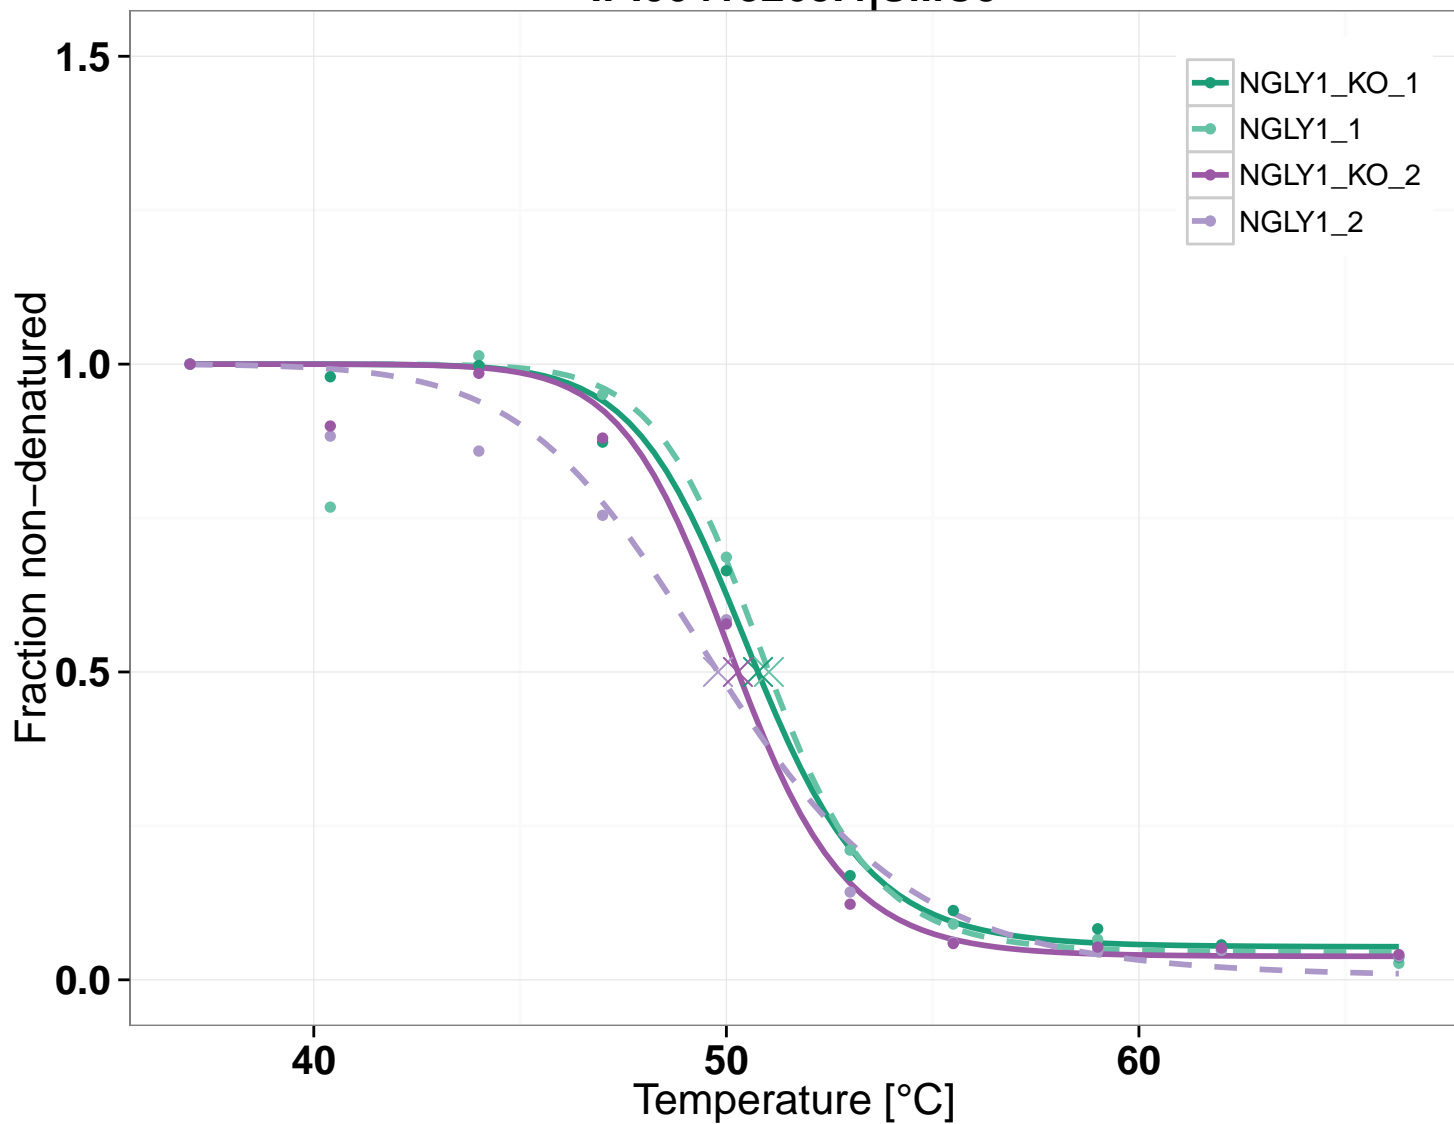

|            | meltPoint | slope | plateau | R2   |
|------------|-----------|-------|---------|------|
| NGLY1_KO_1 | 50.77     | -0.17 | 0.05    | 0.99 |
| NGLY1_1    | 51.03     | -0.18 | 0.05    | 0.97 |
| NGLY1_KO_2 | 50.28     | -0.18 | 0.04    | 0.99 |
| NGLY1_2    | 49.8      | -0.11 | 0       | 0.97 |

Supplement: Supplementary file 5406 [file 1]

IPI00011933.3|CP110

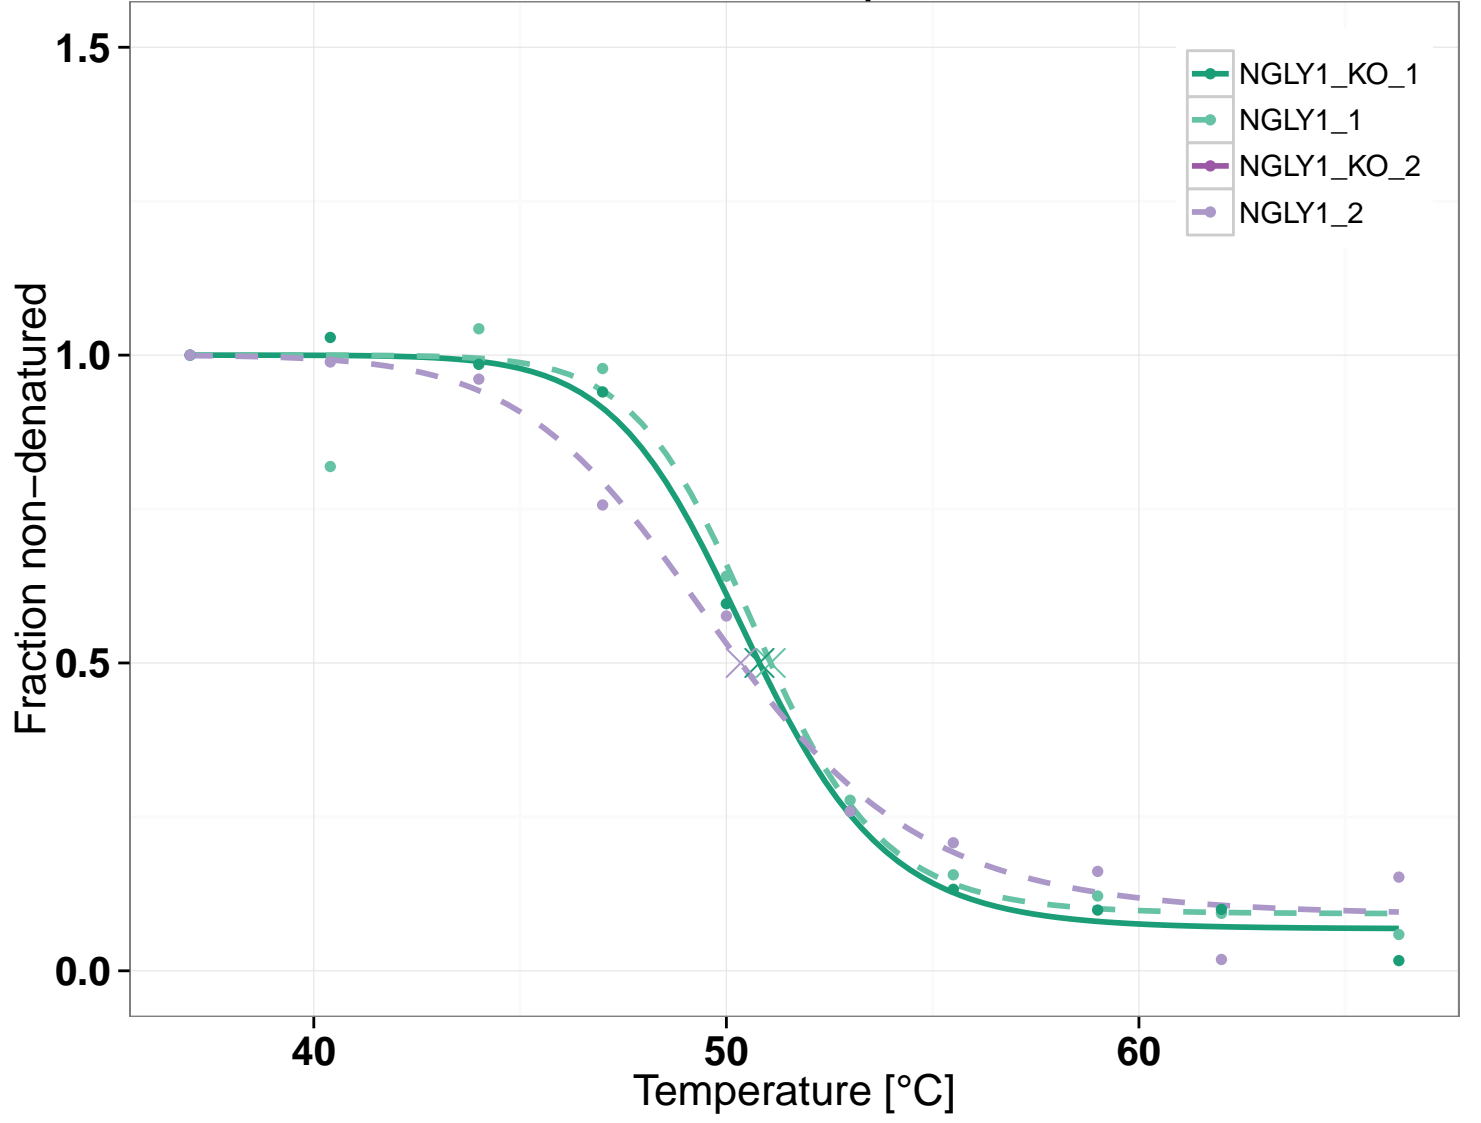

|            | meltPoint | slope  | plateau | R2   |
|------------|-----------|--------|---------|------|
| NGLY1_KO_1 | 50.8      | -0.14  | 0.07    | 1    |
| NGLY1_1    | 51.07     | -0.15  | 0.09    | 0.98 |
| NGLY1_KO_2 | -         | -      | -       | -    |
| NGLY1_2    | 50.35     | -0.093 | 0.09    | 0.99 |

Supplement: Supplementary file 5407 [file 1]

IPI00032358.4|POM121C

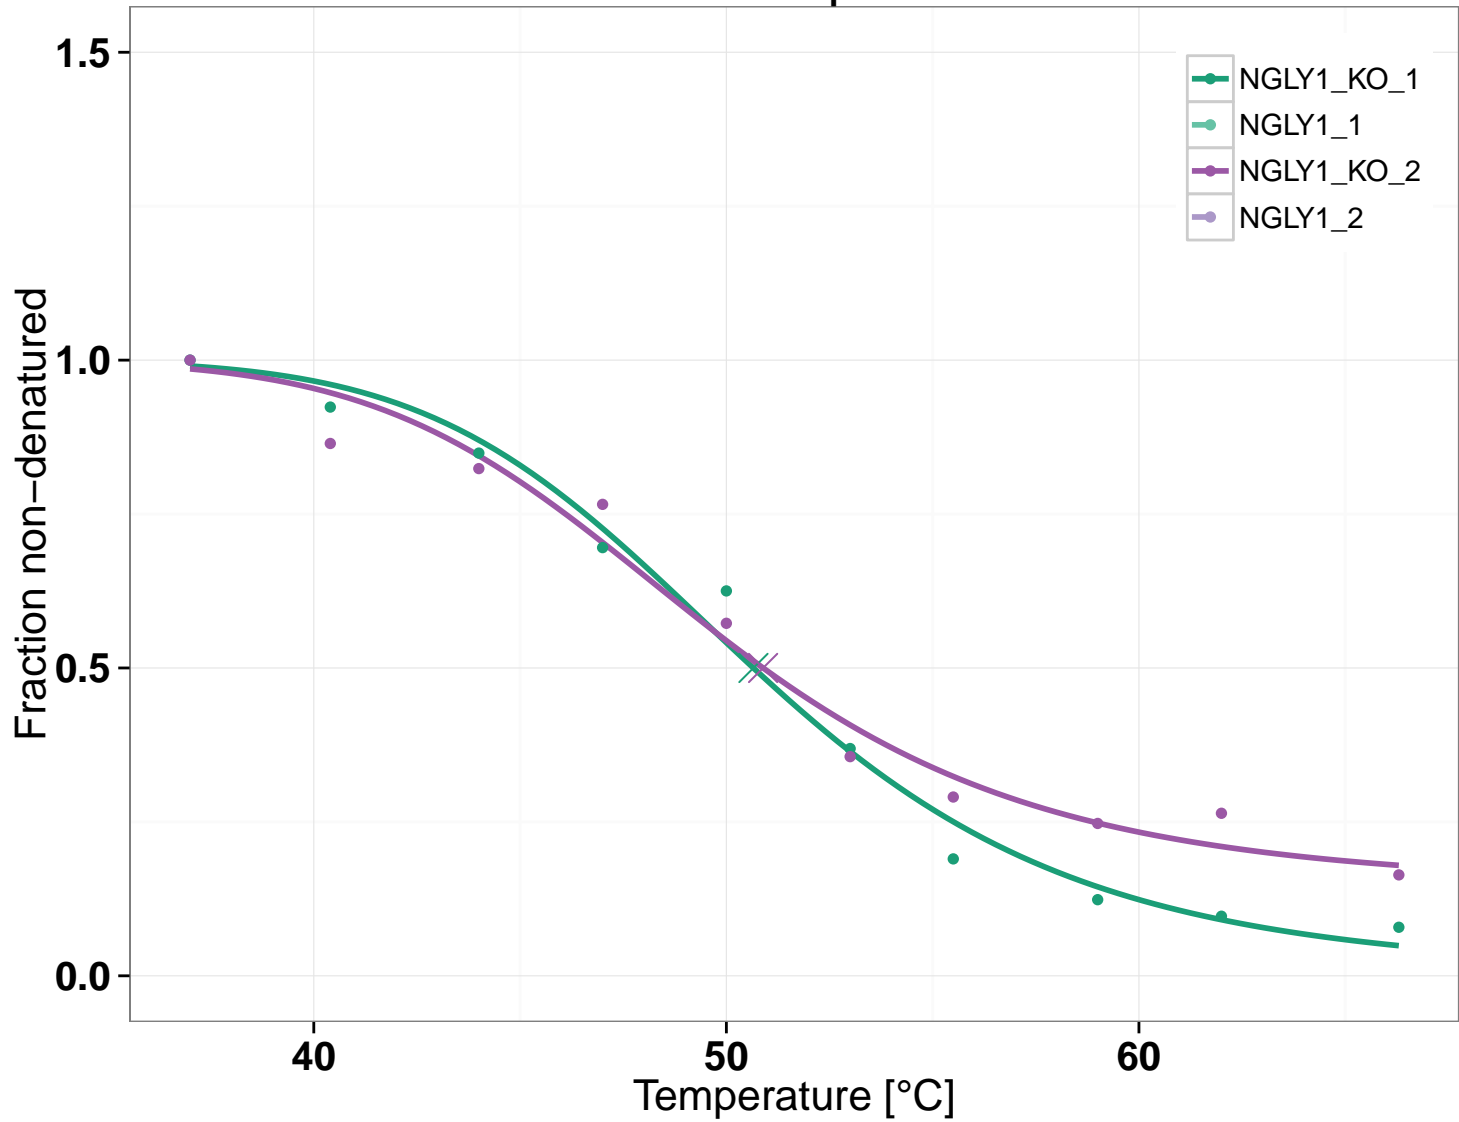

|            | meltPoint | slope  | plateau | R2   |
|------------|-----------|--------|---------|------|
| NGLY1_KO_1 | 50.66     | -0.064 | 0       | 0.99 |
| NGLY1_1    | -         | -      | -       | -    |
| NGLY1_KO_2 | 50.89     | -0.054 | 0.14    | 0.98 |
| NGLY1_2    | -         | -      | -       | -    |

Supplement: Supplementary file 5408 [file 1]

IPI00021388.2|MED13

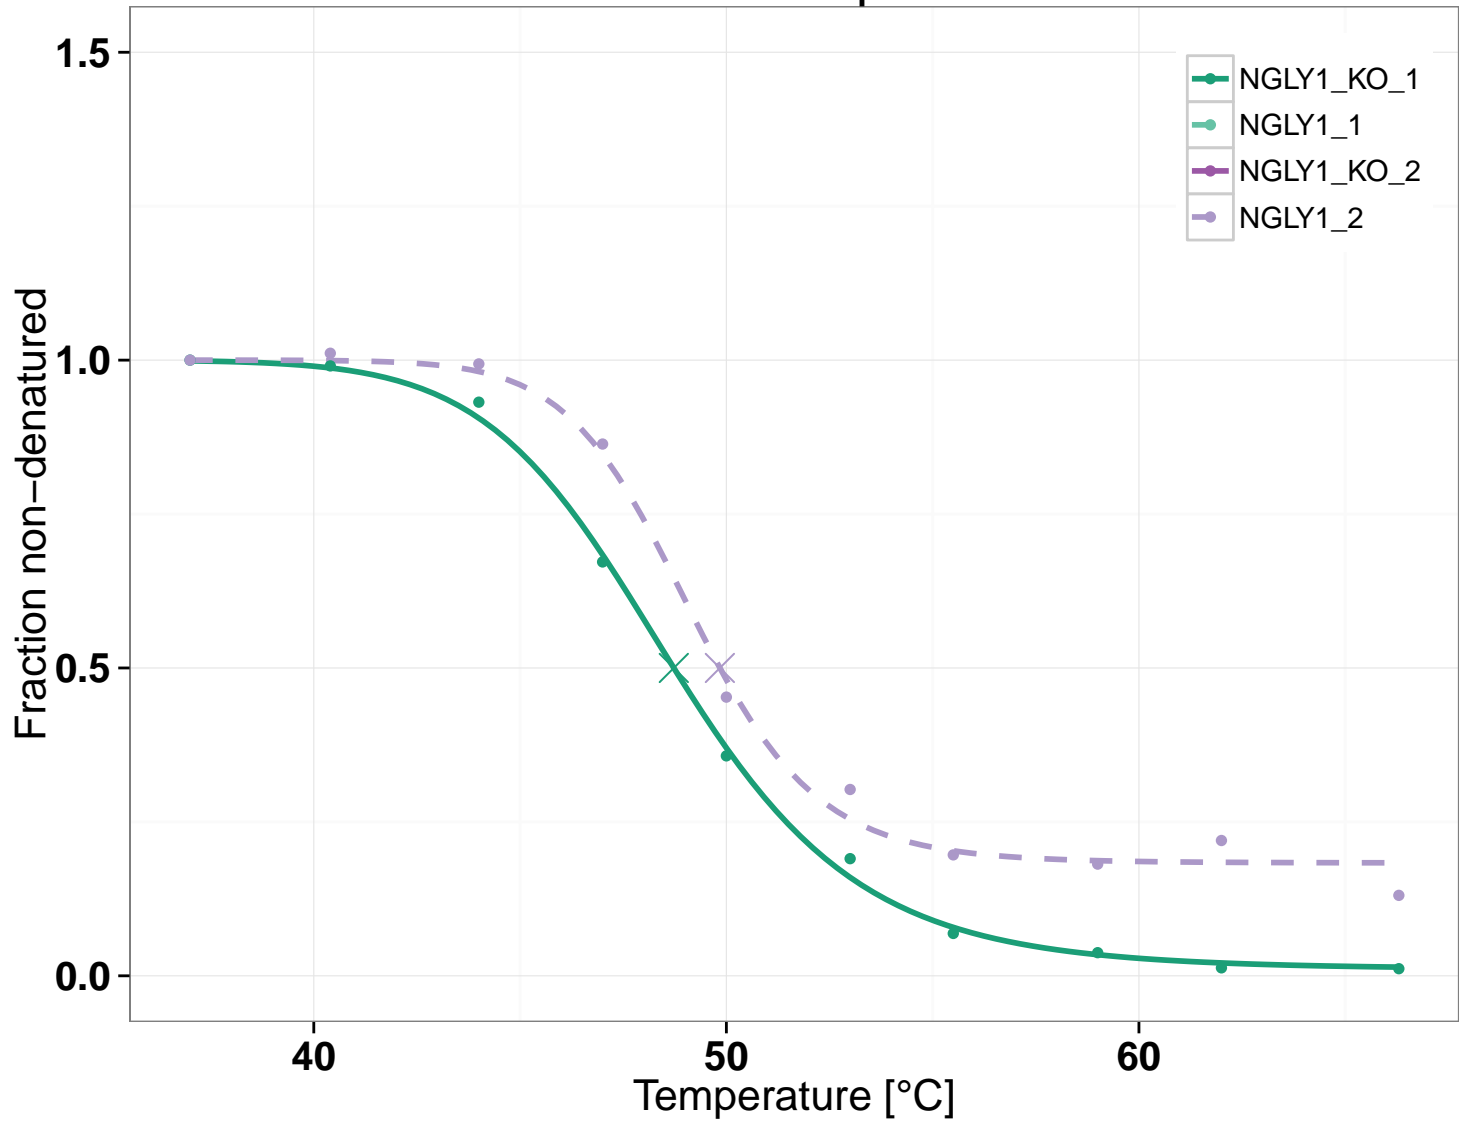

|            | meltPoint | slope | plateau | R2   |
|------------|-----------|-------|---------|------|
| NGLY1_KO_1 | 48.73     | -0.11 | 0.01    | 1    |
| NGLY1_1    | -         | -     | -       | -    |
| NGLY1_KO_2 | -         | -     | -       | -    |
| NGLY1_2    | 49.84     | -0.13 | 0.18    | 0.99 |

Supplement: Supplementary file 5409 [file 1]

IPI00465310.2|SLC30A5

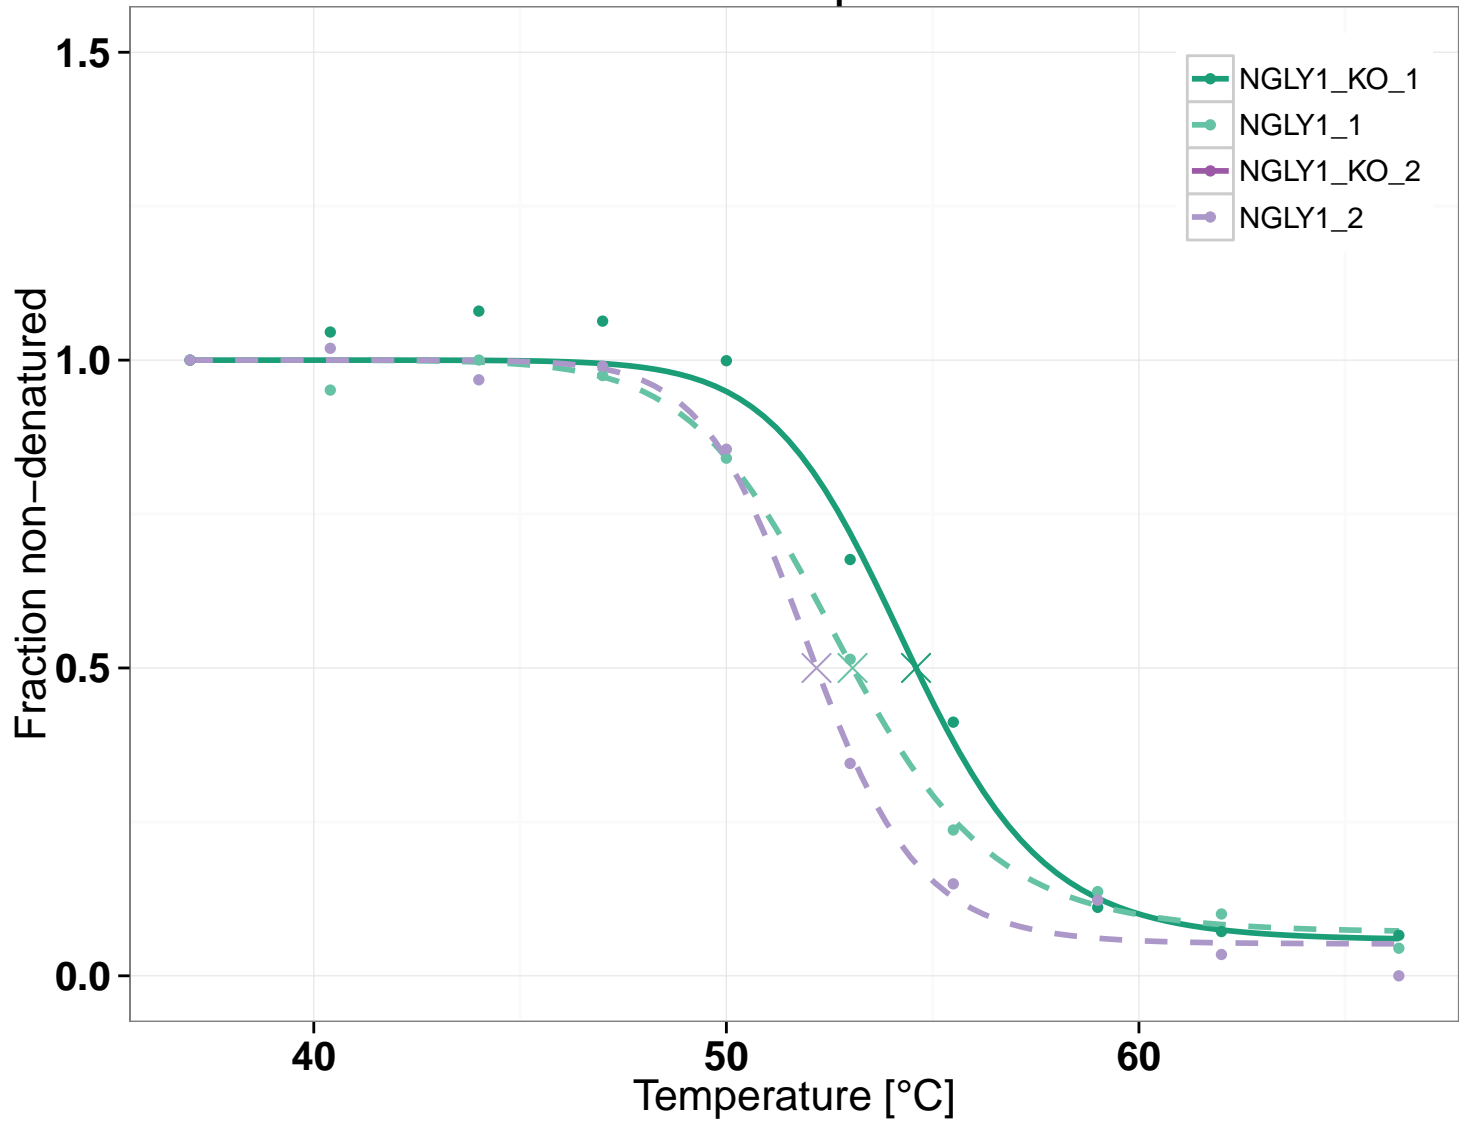

|            | meltPoint | slope | plateau | R2   |
|------------|-----------|-------|---------|------|
| NGLY1_KO_1 | 54.6      | -0.14 | 0.06    | 0.99 |
| NGLY1_1    | 53.06     | -0.13 | 0.07    | 1    |
| NGLY1_KO_2 | -         | -     | -       | -    |
| NGLY1_2    | 52.18     | -0.18 | 0.05    | 0.99 |

Supplement: Supplementary file 5410 [file 1]

# IPI00014539.2|HOXB9

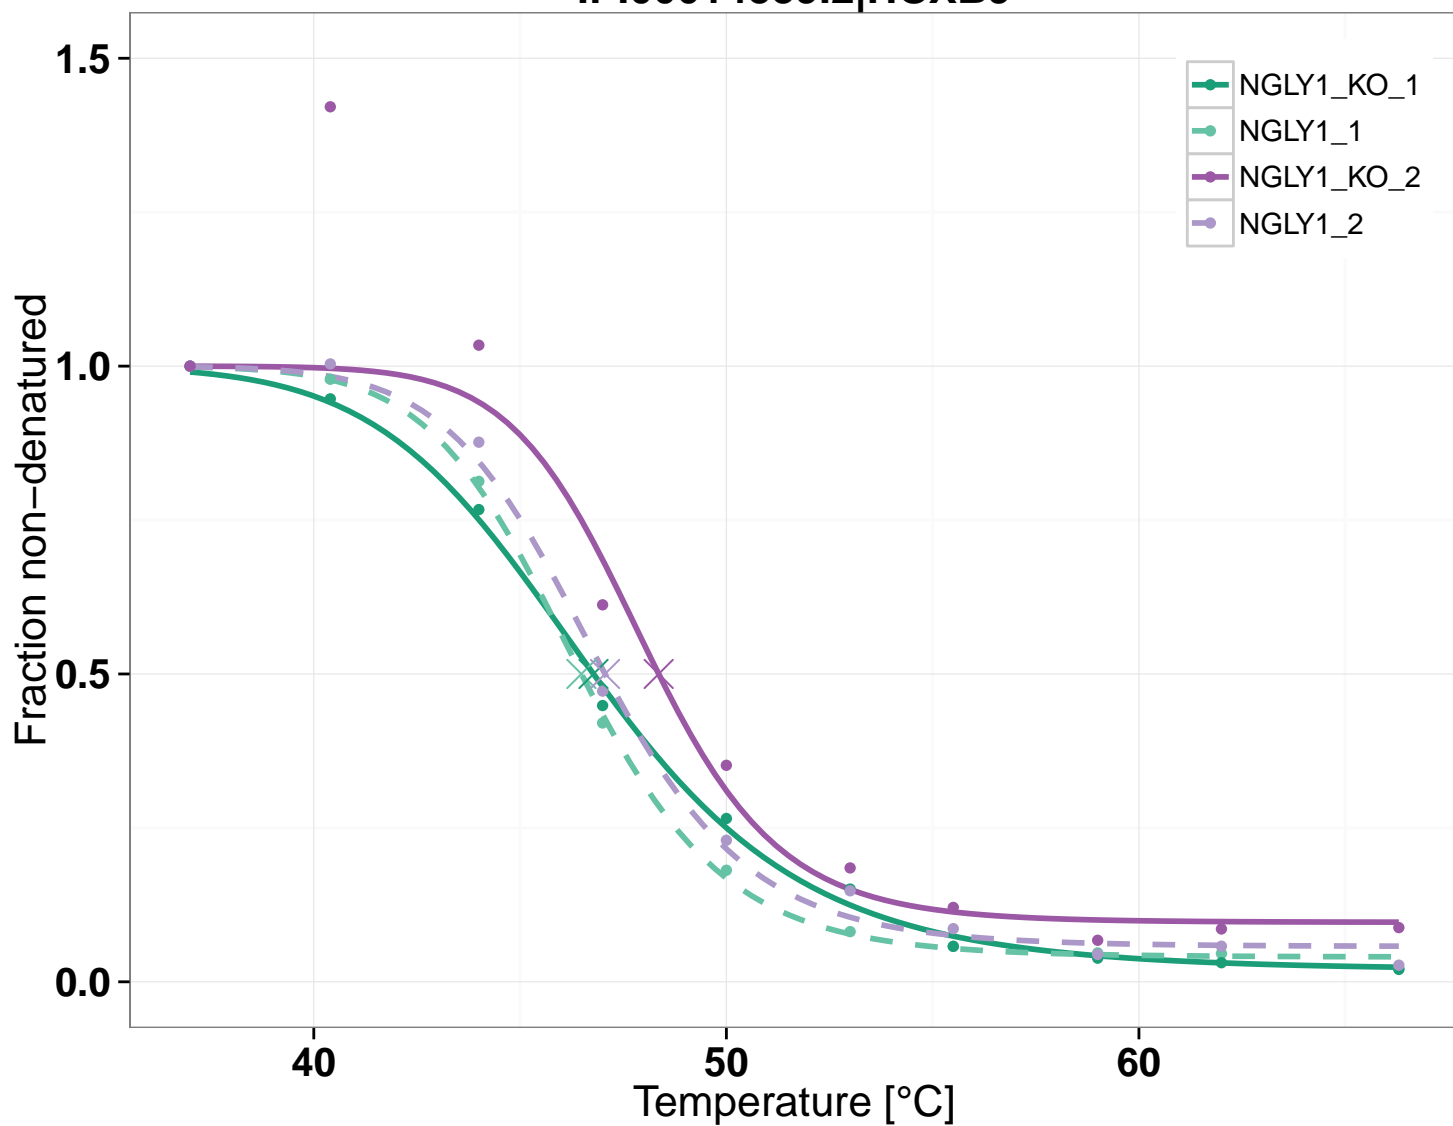

|            | meltPoint | slope  | plateau | R2   |
|------------|-----------|--------|---------|------|
| NGLY1_KO_1 | 46.78     | -0.094 | 0.02    | 1    |
| NGLY1_1    | 46.49     | -0.13  | 0.04    | 1    |
| NGLY1_KO_2 | 48.36     | -0.14  | 0.1     | 0.91 |
| NGLY1_2    | 47.06     | -0.13  | 0.06    | 1    |

Supplement: Supplementary file 5411 [file 1]

IPI00024579.1|RAD18

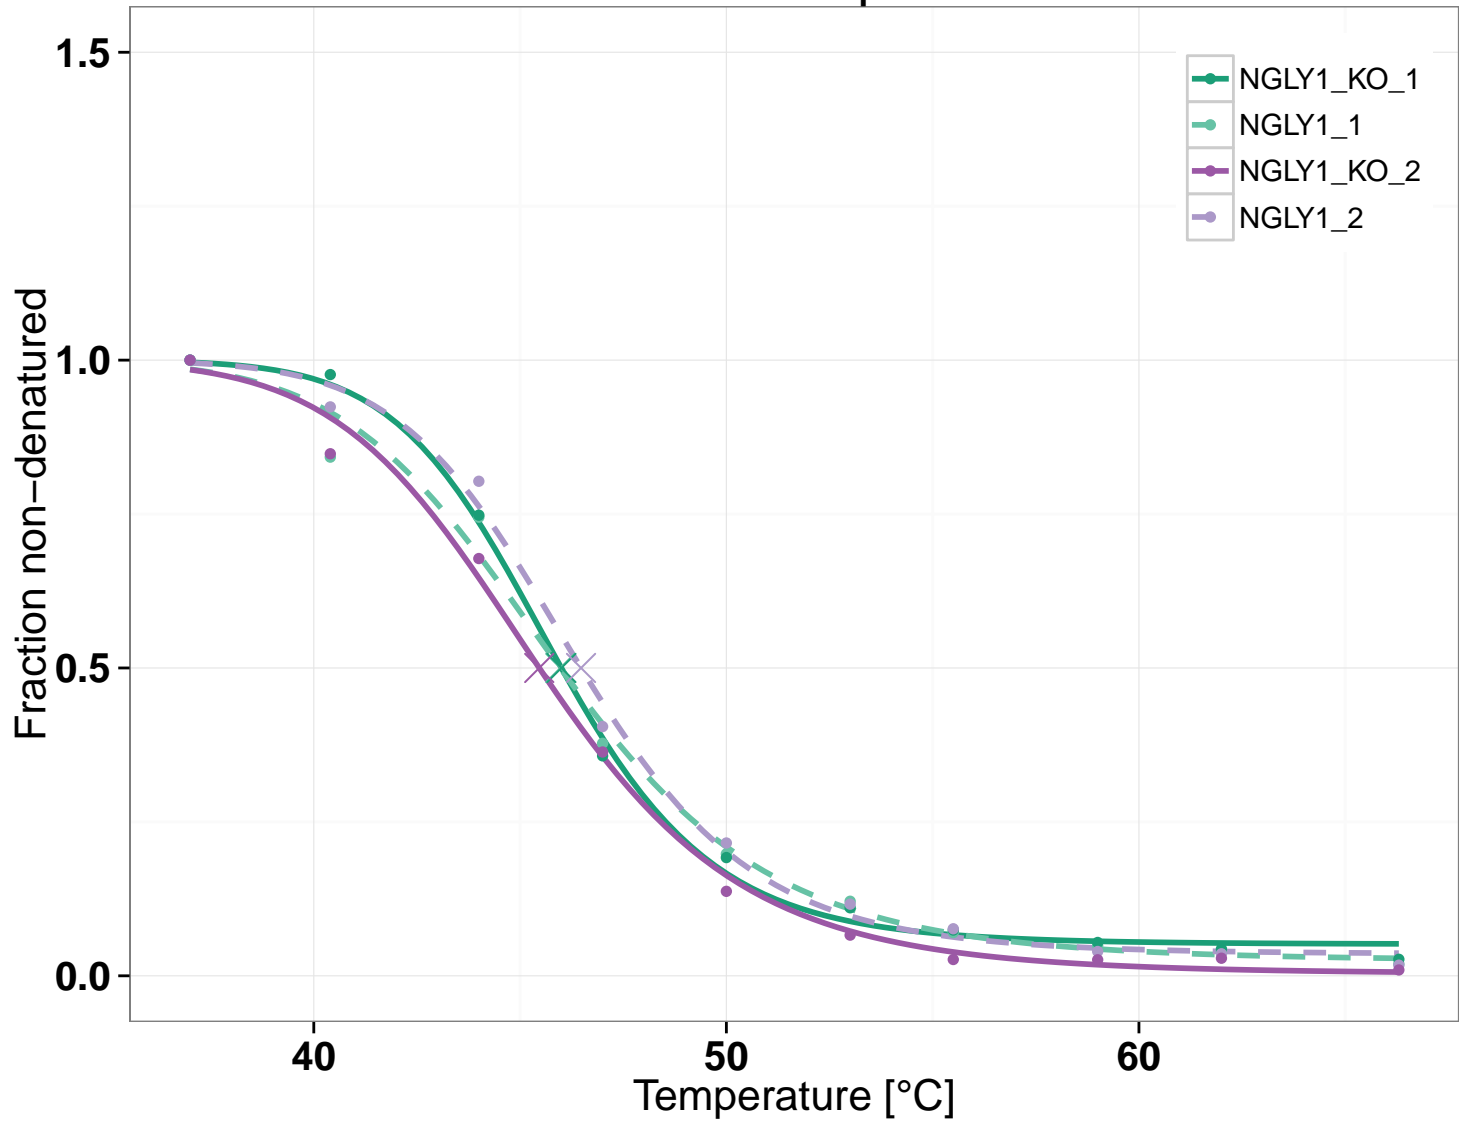

|            | meltPoint | slope  | plateau | R2   |
|------------|-----------|--------|---------|------|
| NGLY1_KO_1 | 46        | -0.12  | 0.05    | 1    |
| NGLY1_1    | 45.97     | -0.094 | 0.02    | 0.99 |
| NGLY1_KO_2 | 45.46     | -0.1   | 0       | 1    |
| NGLY1_2    | 46.48     | -0.11  | 0.04    | 1    |

Supplement: Supplementary file 5412 [file 1]

# IPI00787836.1|ADCK1

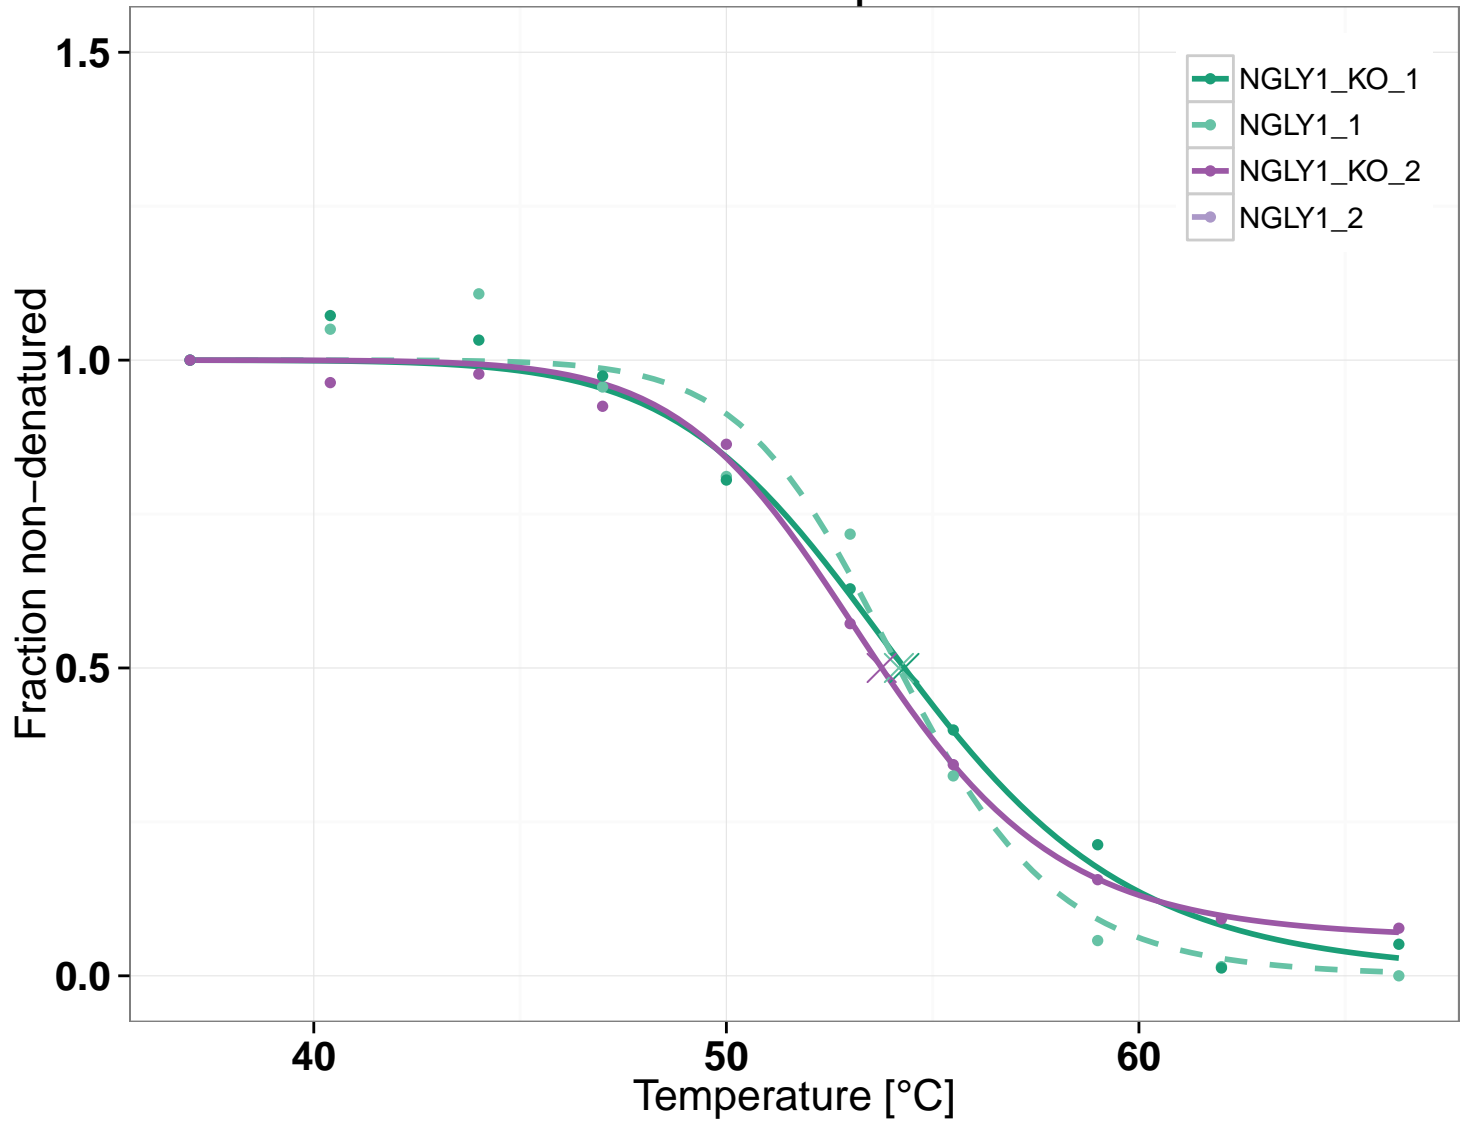

|            | meltPoint | slope  | plateau | R2   |
|------------|-----------|--------|---------|------|
| NGLY1_KO_1 | 54.31     | -0.091 | 0       | 0.99 |
| NGLY1_1    | 54.18     | -0.13  | 0       | 0.98 |
| NGLY1_KO_2 | 53.76     | -0.1   | 0.06    | 1    |
| NGLY1_2    | -         | -      | -       | -    |

Supplement: Supplementary file 5413 [file 1]

IPI00163727.8|MOBKL2A

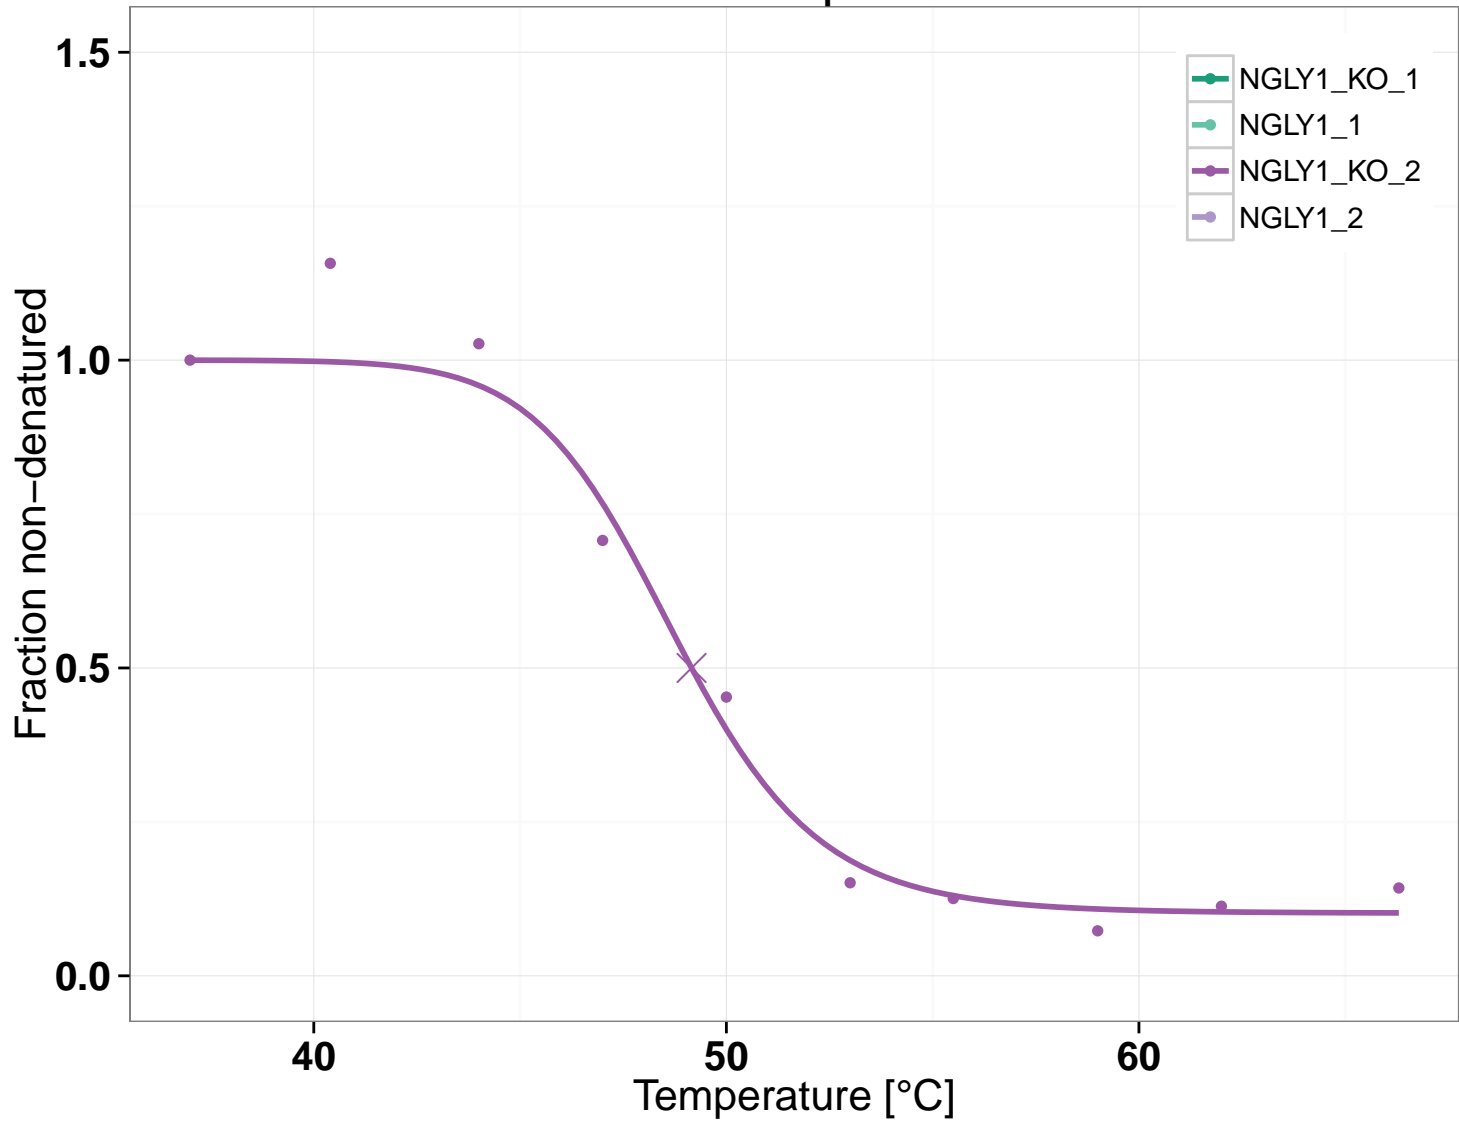

|            | meltPoint | slope | plateau | R2   |
|------------|-----------|-------|---------|------|
| NGLY1_KO_1 | —         | —     | —       | —    |
| NGLY1_1    | —         | —     | —       | —    |
| NGLY1_KO_2 | 49.16     | -0.13 | 0.1     | 0.98 |
| NGLY1_2    | —         | —     | —       | —    |

Supplement: Supplementary file 5414 [file 1]

IPI00880124.1|PARVB

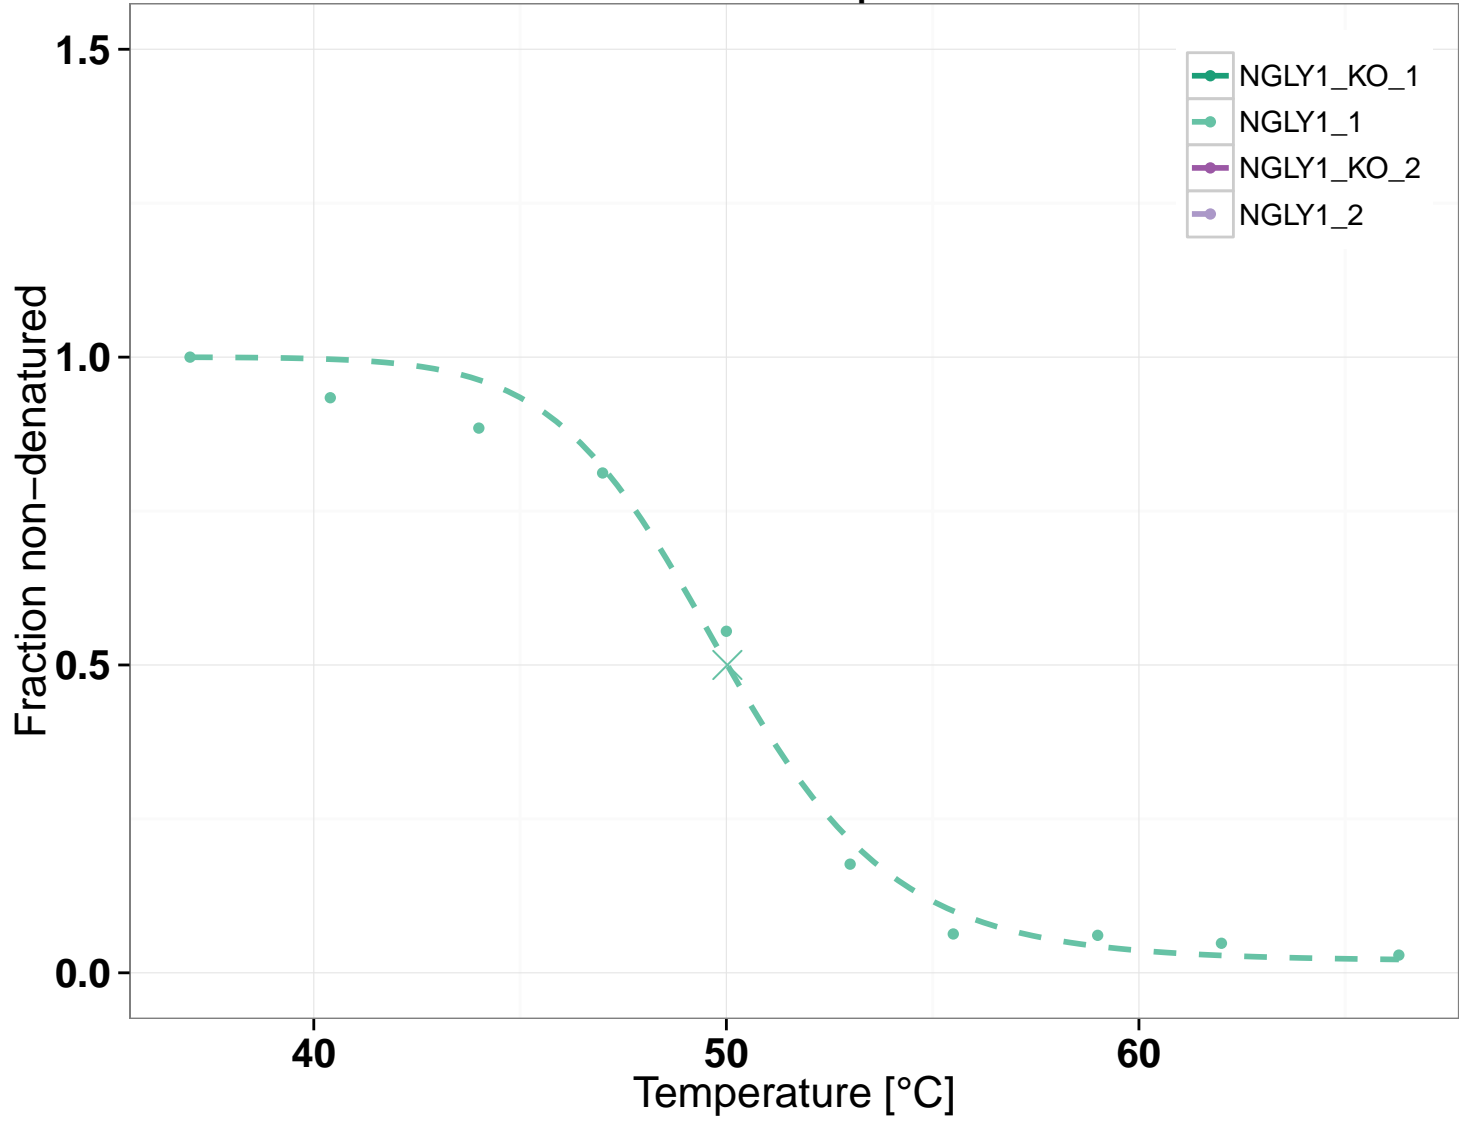

|            | meltPoint | slope | plateau | R2   |
|------------|-----------|-------|---------|------|
| NGLY1_KO_1 | -         | -     | -       | -    |
| NGLY1_1    | 50.02     | -0.12 | 0.02    | 0.99 |
| NGLY1_KO_2 | -         | -     | -       | -    |
| NGLY1_2    | -         | -     | -       | -    |

Supplement: Supplementary file 5415 [file 1]

IPI00556590.2|LOC349114

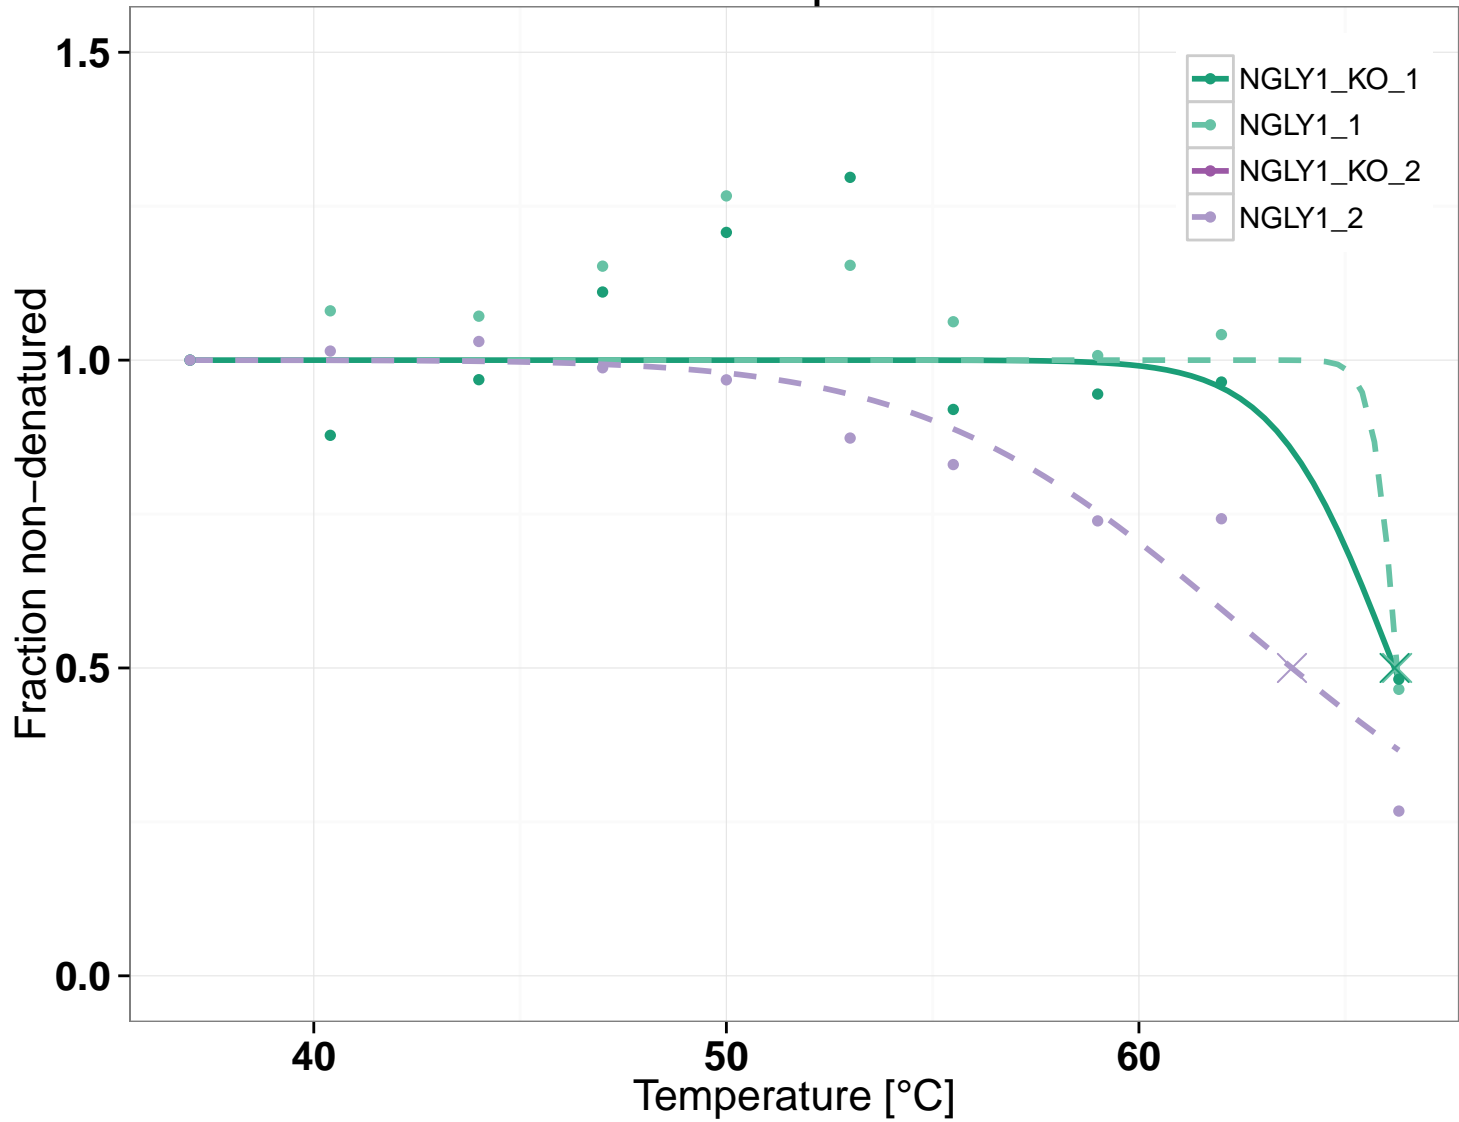

|            | meltPoint | slope  | plateau | R2   |
|------------|-----------|--------|---------|------|
| NGLY1_KO_1 | 66.2      | -0.17  | 0       | 0.61 |
| NGLY1_1    | 66.26     | -0.84  | 0       | 0.67 |
| NGLY1_KO_2 | -         | -      | -       | -    |
| NGLY1_2    | 63.71     | -0.056 | 0       | 0.91 |

Supplement: Supplementary file 5416 [file 1]

# IPI00010896.3|CLIC1

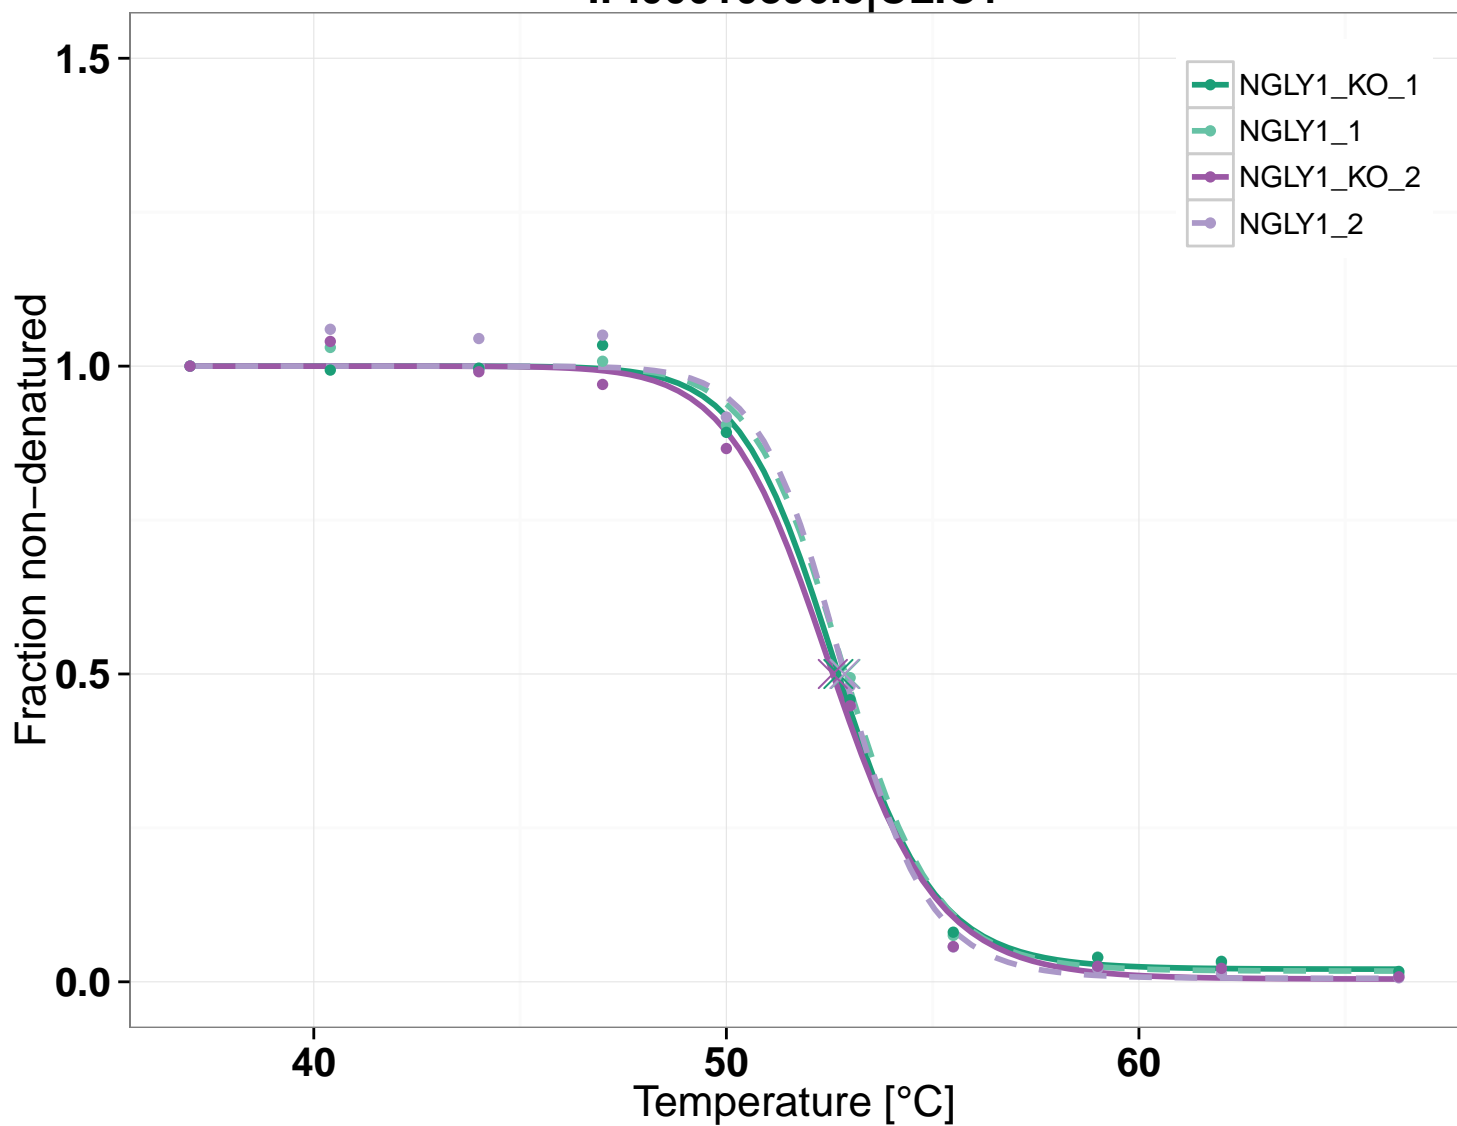

|            | meltPoint | slope | plateau | R2 |
|------------|-----------|-------|---------|----|
| NGLY1_KO_1 | 52.72     | -0.21 | 0.02    | 1  |
| NGLY1_1    | 52.89     | -0.22 | 0.02    | 1  |
| NGLY1_KO_2 | 52.58     | -0.2  | 0       | 1  |
| NGLY1_2    | 52.86     | -0.24 | 0.01    | 1  |

Supplement: Supplementary file 5417 [file 1]

# IPI00030355.1|PPP1R11

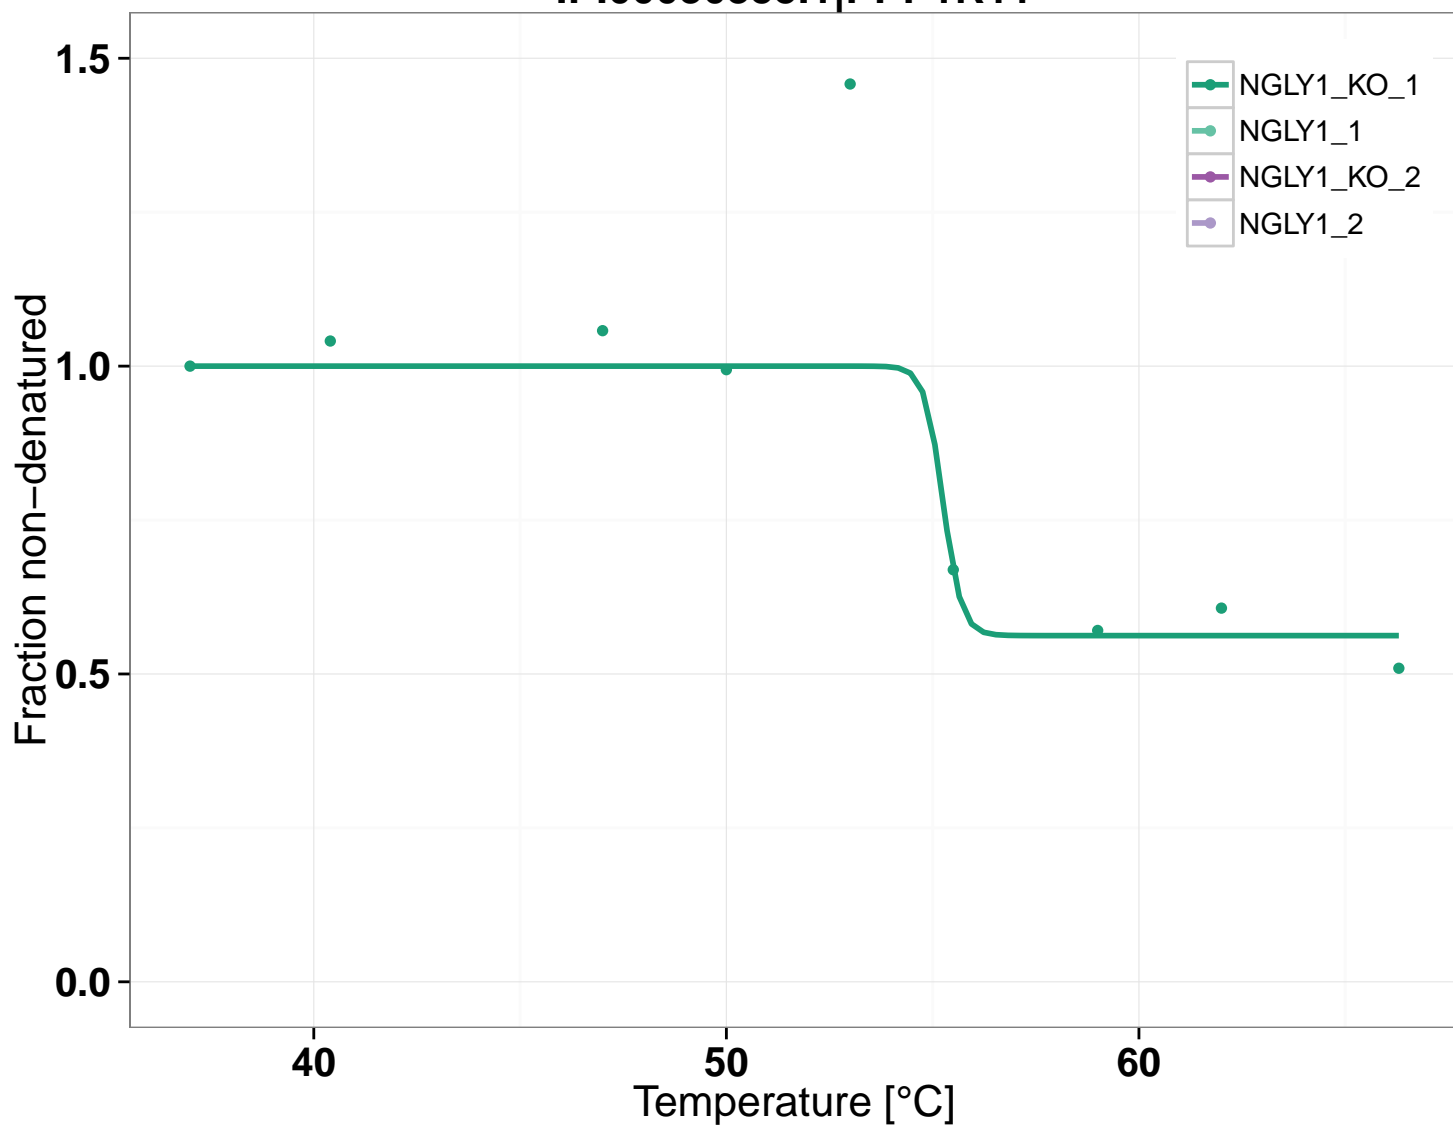

|            | meltPoint | slope | plateau | R2   |
|------------|-----------|-------|---------|------|
| NGLY1_KO_1 | –         | –0.5  | 0.56    | 0.46 |
| NGLY1_1    | –         | –     | –       | –    |
| NGLY1_KO_2 | –         | –     | –       | –    |
| NGLY1_2    | –         | –     | –       | –    |

Supplement: Supplementary file 5418 [file 1]

# IPI00021466.5|PAIP1

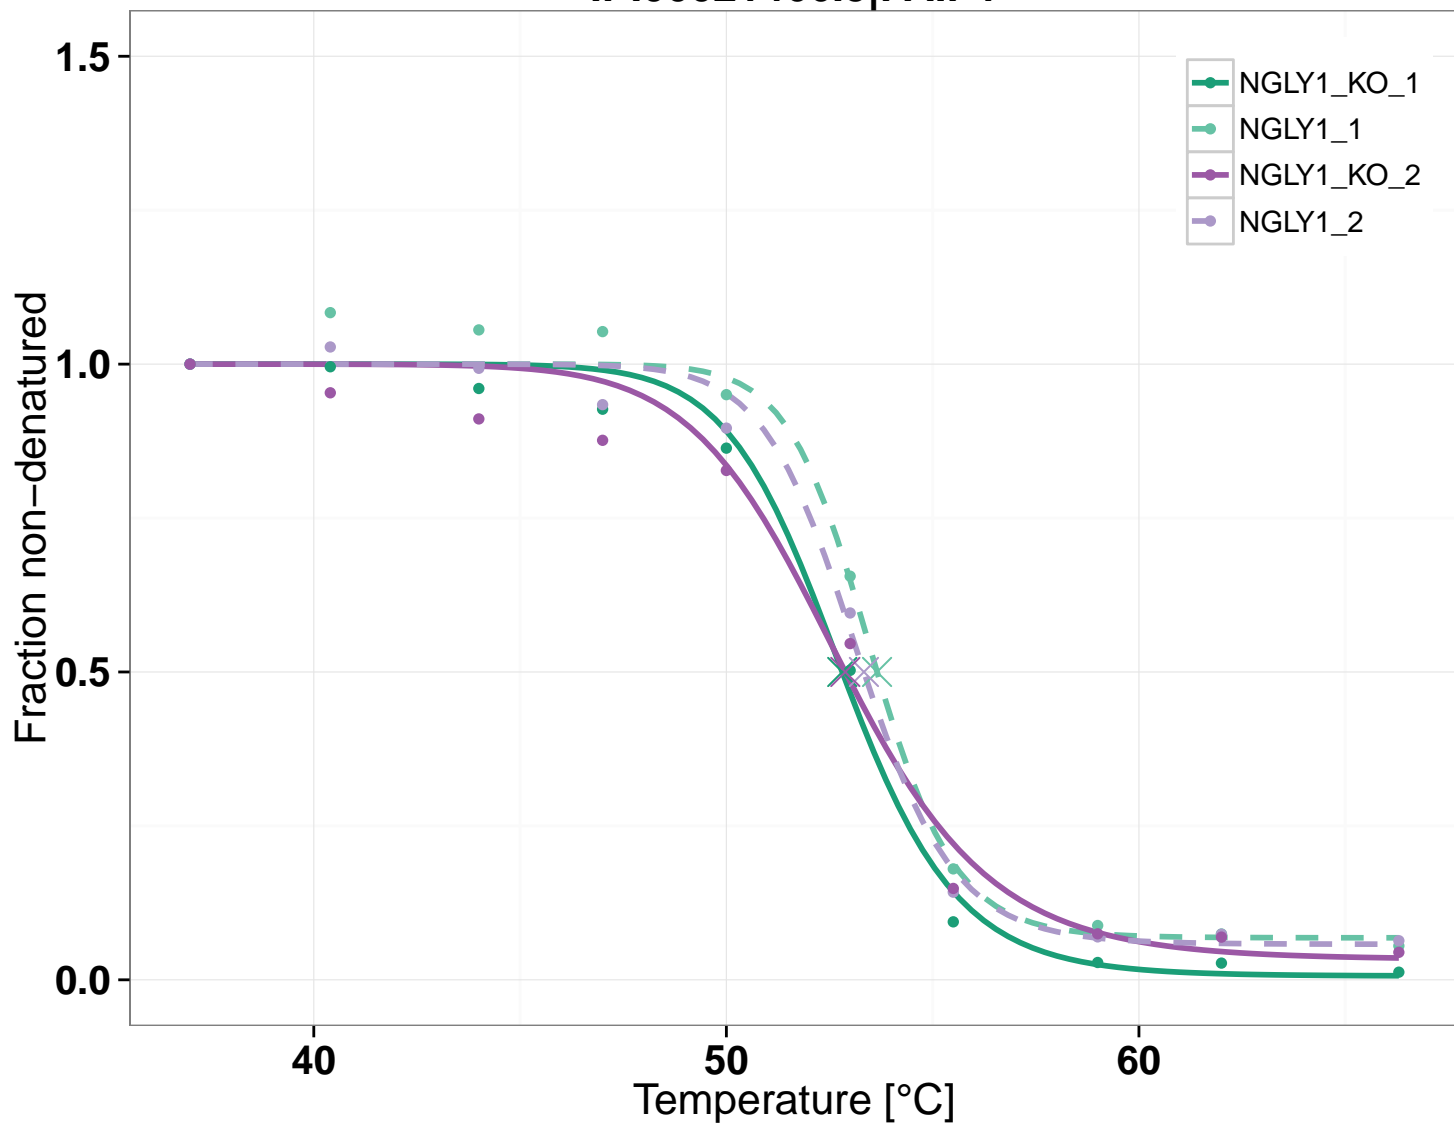

|            | meltPoint | slope | plateau | R2   |
|------------|-----------|-------|---------|------|
| NGLY1_KO_1 | 52.81     | -0.18 | 0.01    | 0.99 |
| NGLY1_1    | 53.65     | -0.23 | 0.07    | 0.99 |
| NGLY1_KO_2 | 52.88     | -0.13 | 0.03    | 0.98 |
| NGLY1_2    | 53.33     | -0.2  | 0.06    | 0.99 |

Supplement: Supplementary file 5419 [file 1]

IPI00022744.5|CSE1L

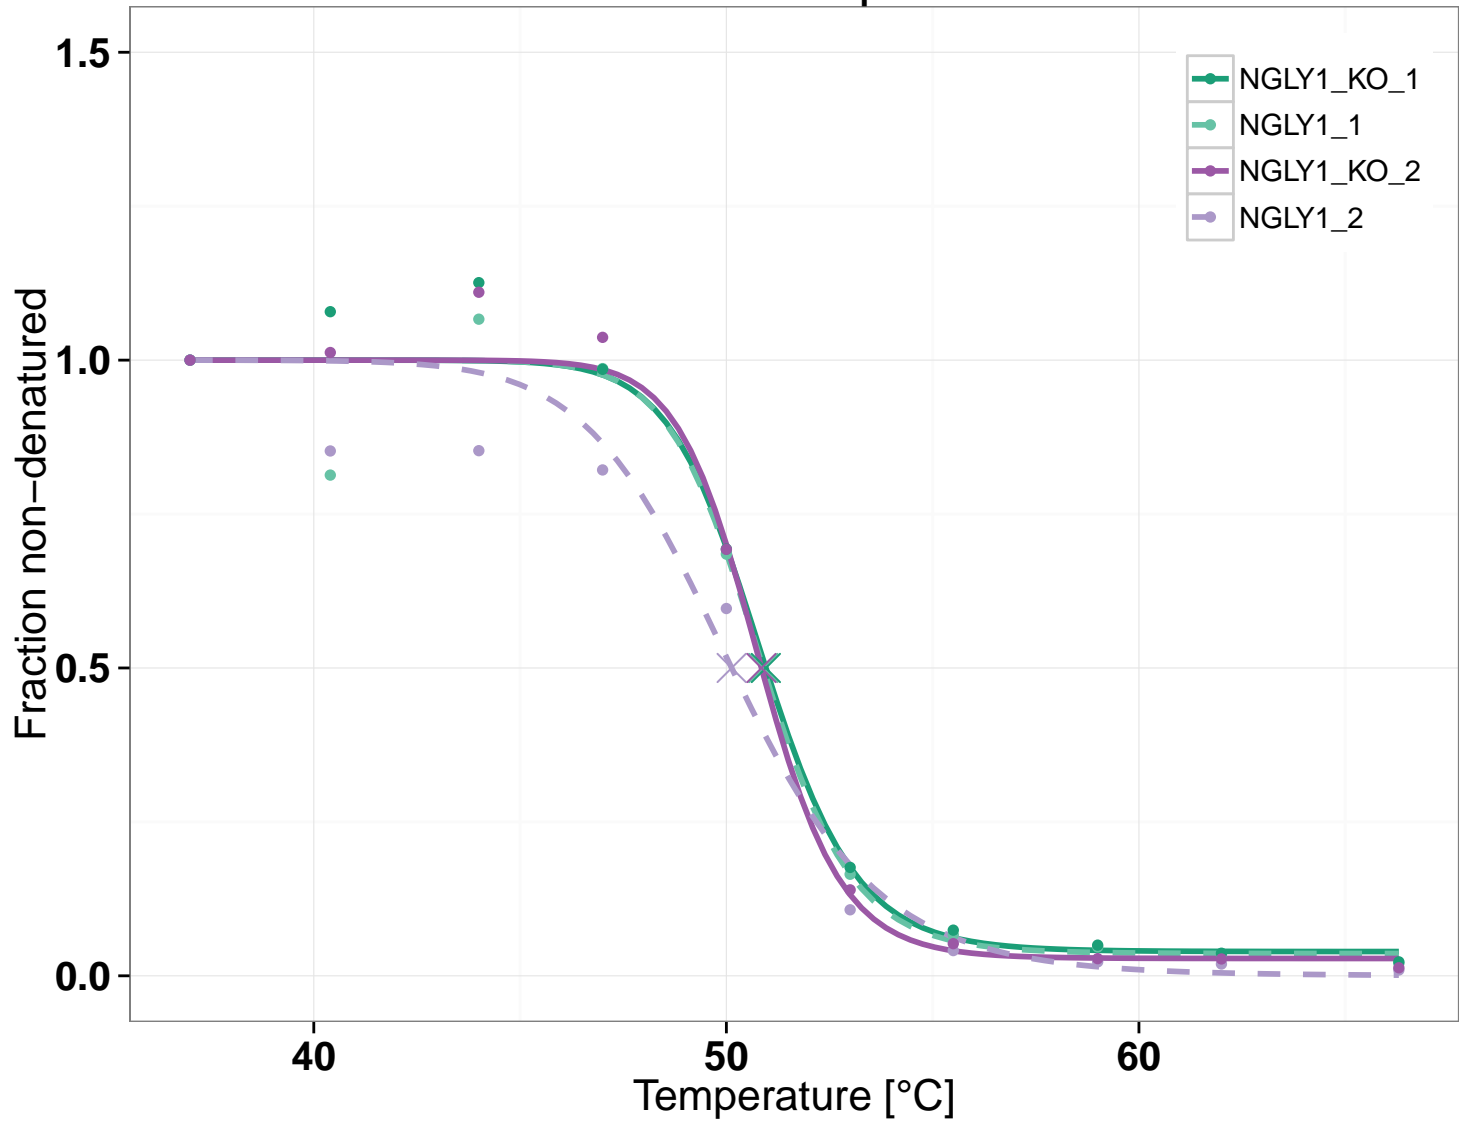

|            | meltPoint | slope | plateau | R2   |
|------------|-----------|-------|---------|------|
| NGLY1_KO_1 | 50.96     | -0.21 | 0.04    | 0.99 |
| NGLY1_1    | 50.89     | -0.22 | 0.04    | 0.98 |
| NGLY1_KO_2 | 50.85     | -0.24 | 0.03    | 0.99 |
| NGLY1_2    | 50.13     | -0.14 | 0       | 0.97 |

Supplement: Supplementary file 5420 [file 1]

IPI00000352.1|DYRK1B

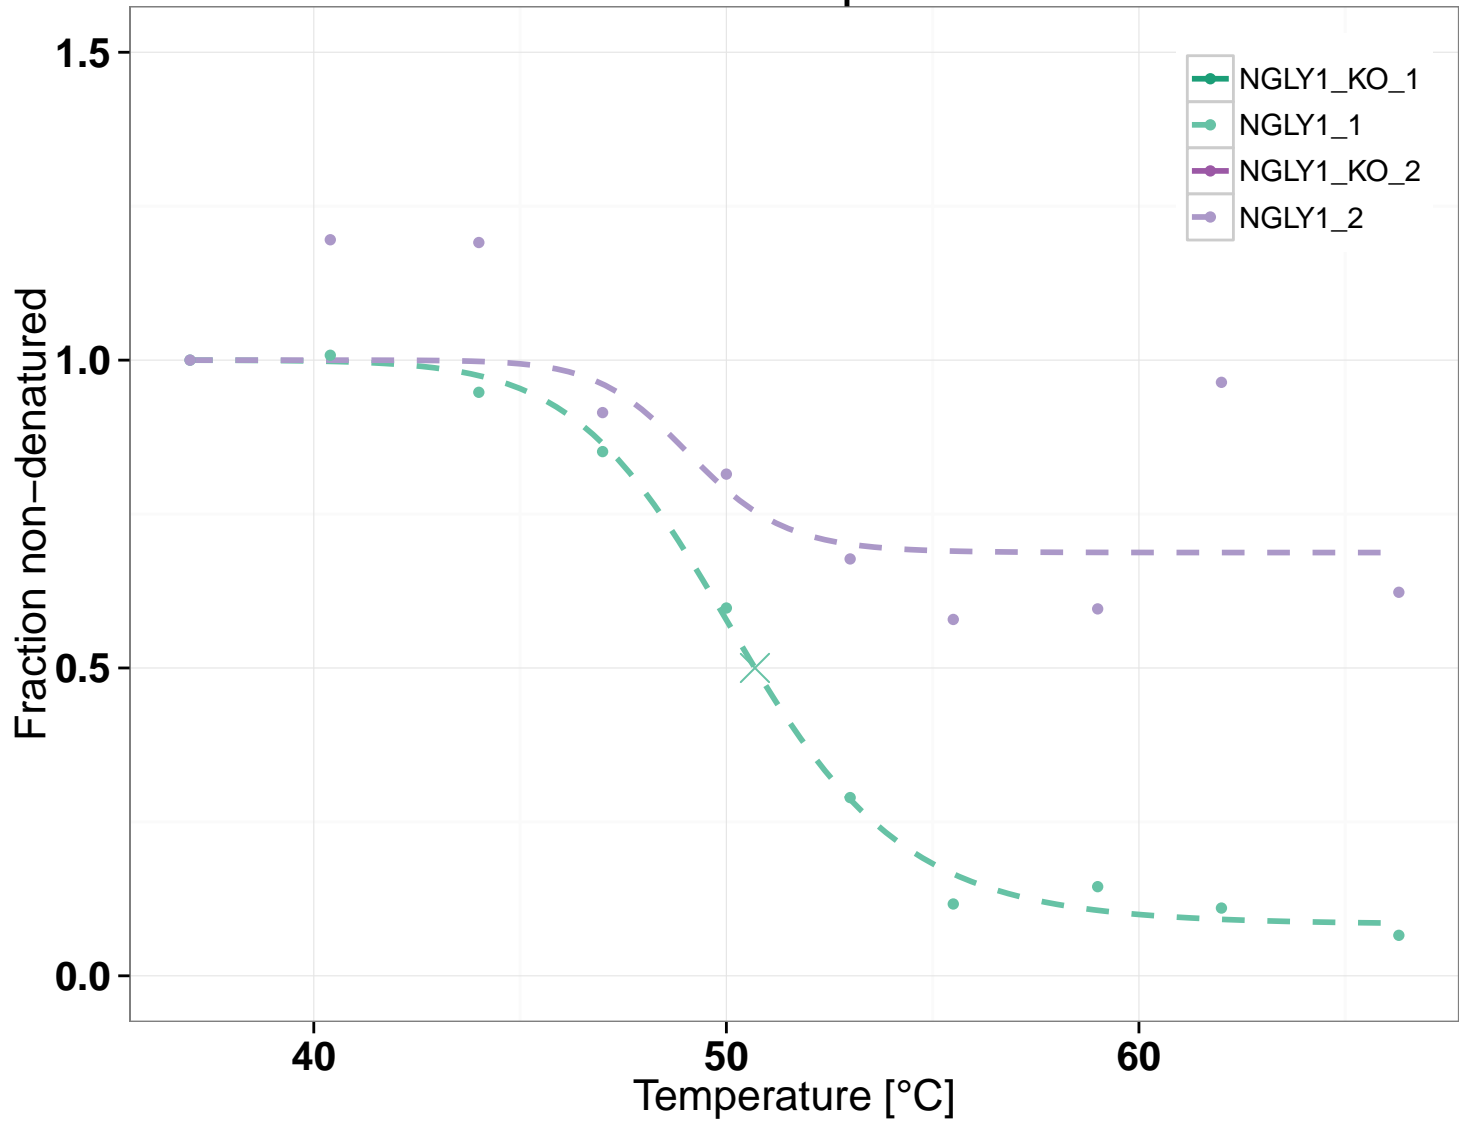

|            | meltPoint | slope  | plateau | R2   |
|------------|-----------|--------|---------|------|
| NGLY1_KO_1 | —         | —      | —       | —    |
| NGLY1_1    | 50.69     | -0.11  | 0.08    | 1    |
| NGLY1_KO_2 | —         | —      | —       | —    |
| NGLY1_2    | —         | -0.068 | 0.69    | 0.64 |

Supplement: Supplementary file 5421 [file 1]

IPI00329213.2|INPP5D

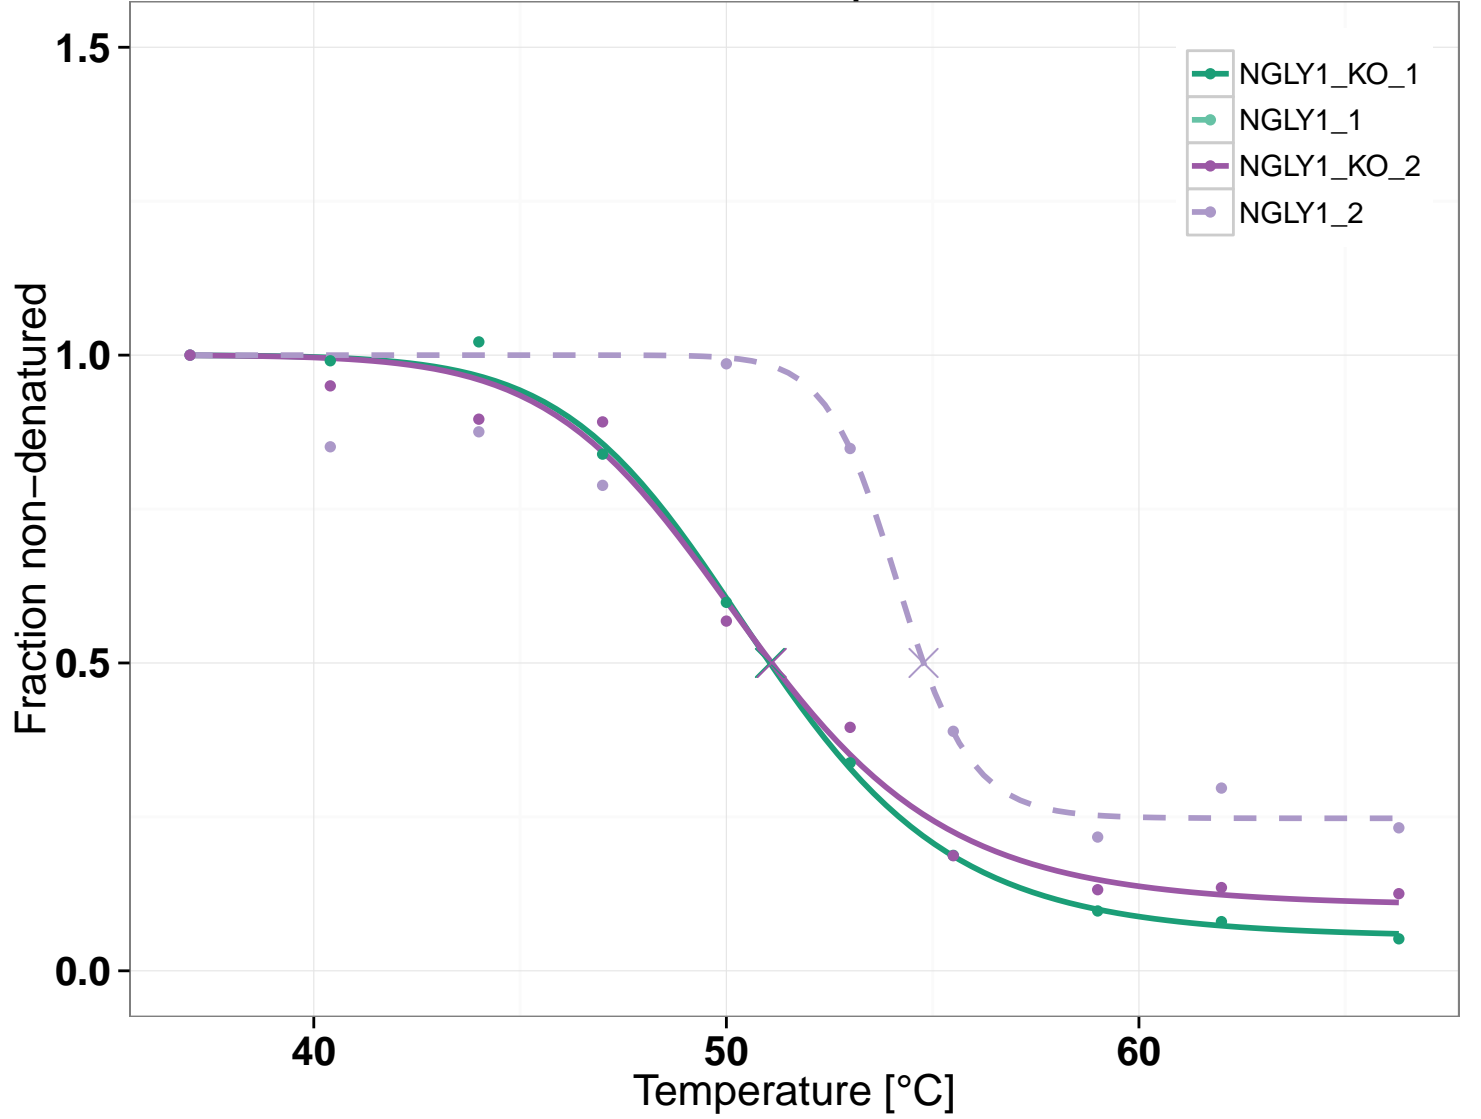

|            | meltPoint | slope  | plateau | R2   |
|------------|-----------|--------|---------|------|
| NGLY1_KO_1 | 51.06     | -0.1   | 0.05    | 1    |
| NGLY1_1    | -         | -      | -       | -    |
| NGLY1_KO_2 | 51.1      | -0.093 | 0.1     | 0.99 |
| NGLY1_2    | 54.78     | -0.22  | 0.25    | 0.91 |

Supplement: Supplementary file 5422 [file 1]

IPI00011528.1|CSTF1

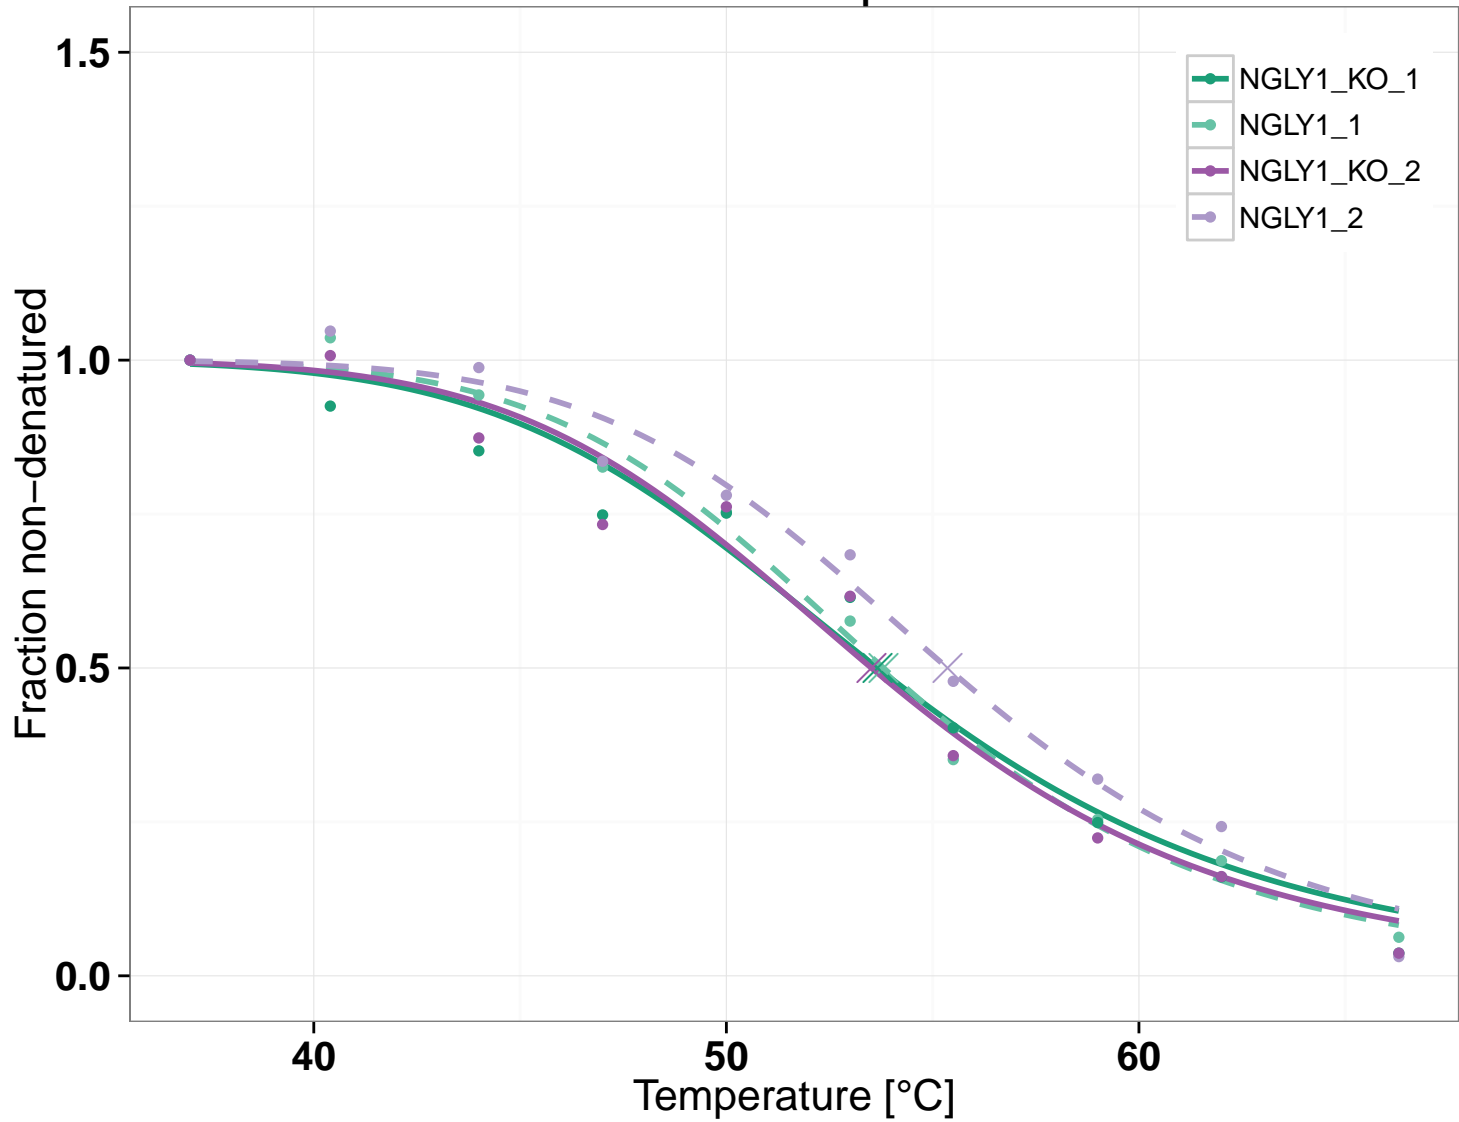

|            | meltPoint | slope  | plateau | R2   |
|------------|-----------|--------|---------|------|
| NGLY1_KO_1 | 53.66     | -0.054 | 0       | 0.97 |
| NGLY1_1    | 53.81     | -0.061 | 0       | 0.99 |
| NGLY1_KO_2 | 53.52     | -0.058 | 0       | 0.97 |
| NGLY1_2    | 55.36     | -0.059 | 0       | 0.98 |

Supplement: Supplementary file 5423 [file 1]
