# Supplementary material (part 55 of 85)
Source: publisher figshare collection journal article supplement (https://gsajournals.figshare.com/articles/dataset/_/12014913)

IPI00008522.4|SCN10A

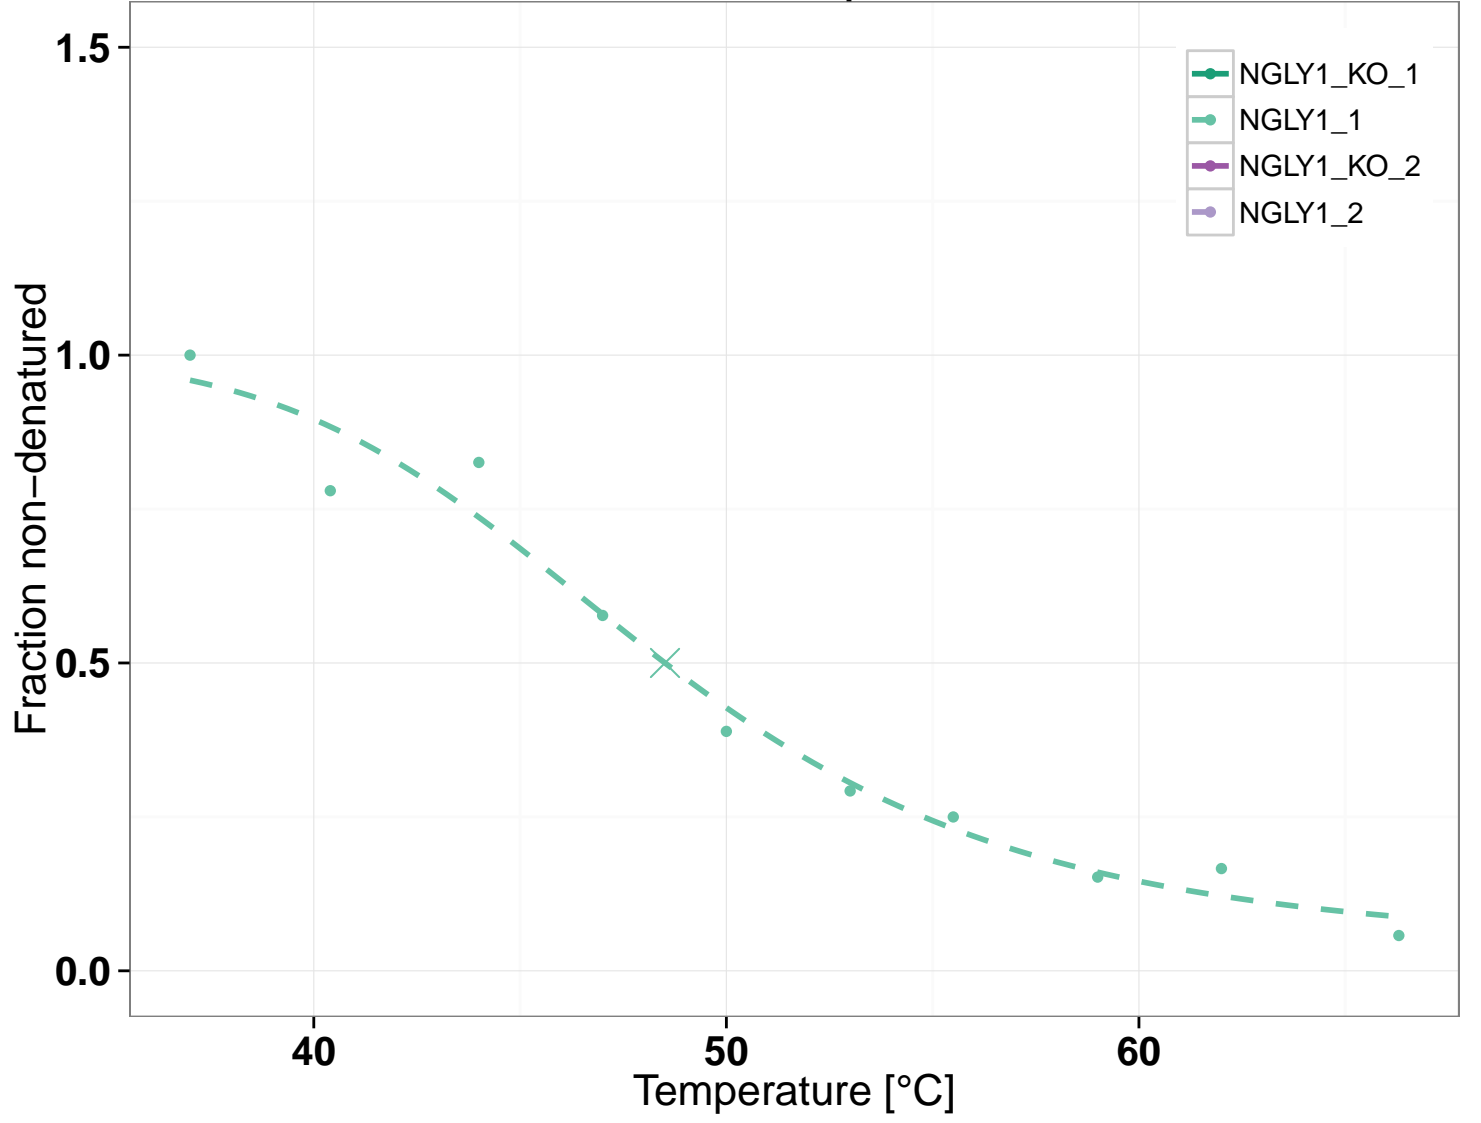

|            | meltPoint | slope  | plateau | R2   |
|------------|-----------|--------|---------|------|
| NGLY1_KO_1 | -         | -      | -       | -    |
| NGLY1_1    | 48.51     | -0.054 | 0.03    | 0.97 |
| NGLY1_KO_2 | -         | -      | -       | -    |
| NGLY1_2    | -         | -      | -       | -    |

Supplement: Supplementary file 5424 [file 1]

IPI00009104.7|RUVBL2

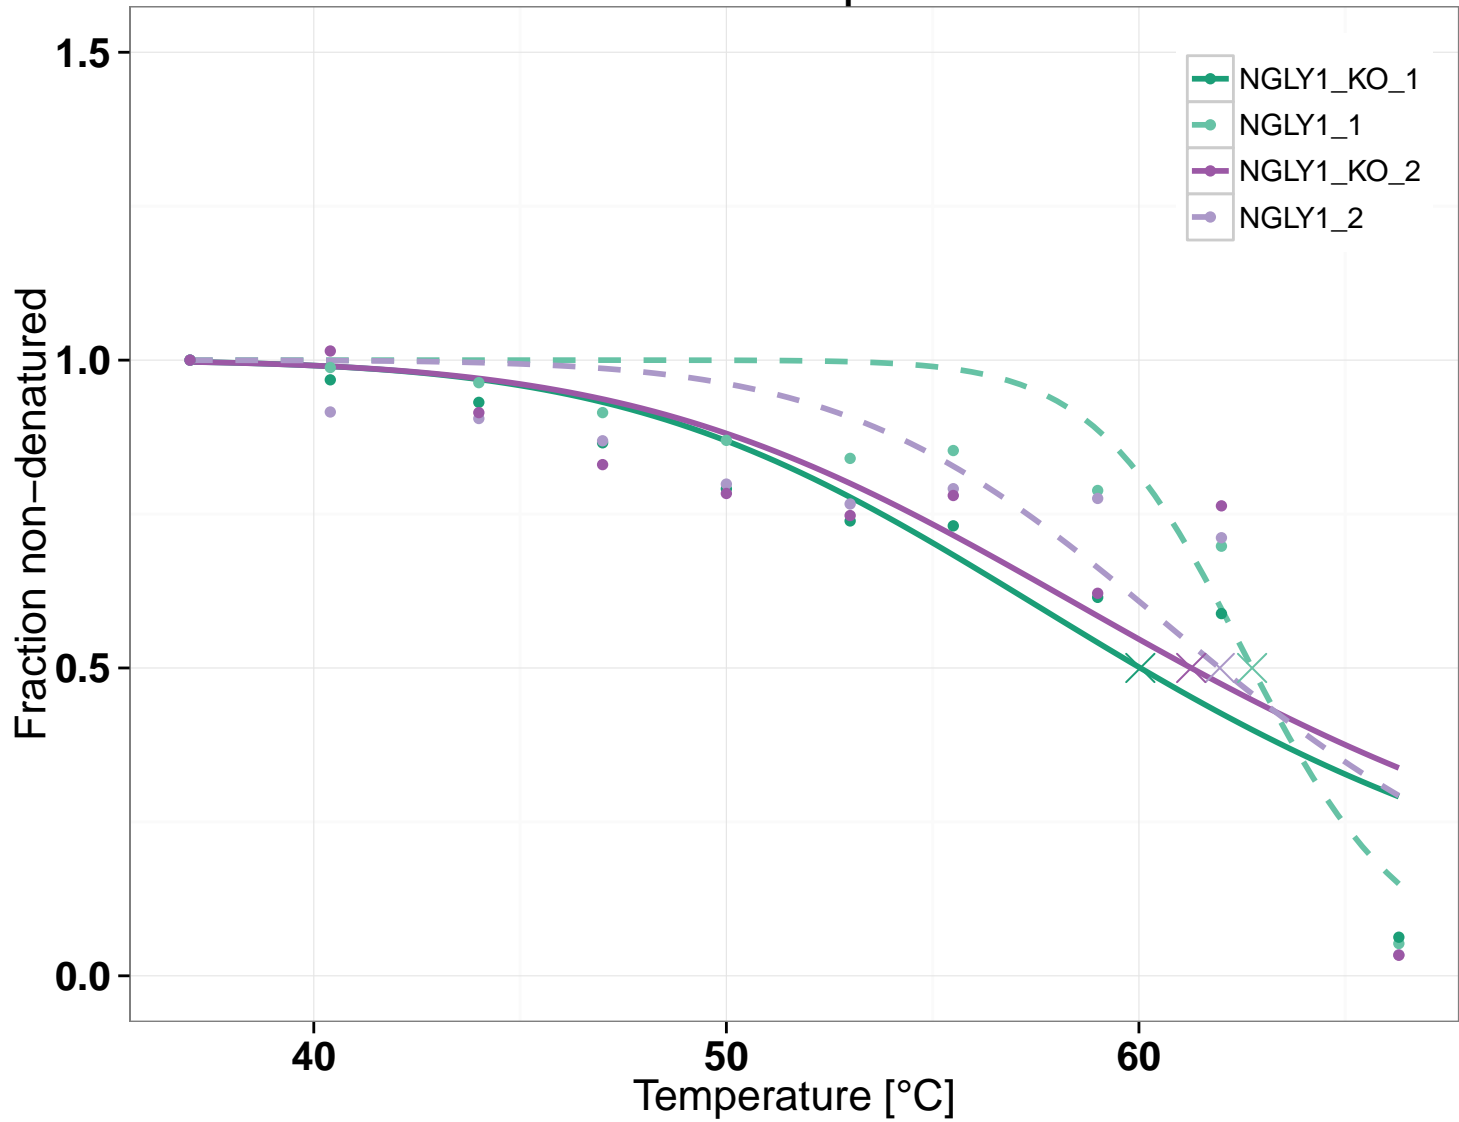

|            | meltPoint | slope  | plateau | R2   |
|------------|-----------|--------|---------|------|
| NGLY1_KO_1 | 60.03     | -0.041 | 0       | 0.85 |
| NGLY1_1    | 62.74     | -0.13  | 0       | 0.86 |
| NGLY1_KO_2 | 61.27     | -0.038 | 0       | 0.7  |
| NGLY1_2    | 61.96     | -0.056 | 0       | 0.69 |

Supplement: Supplementary file 5425 [file 1]

IPI00292056.4|PIK3C2B

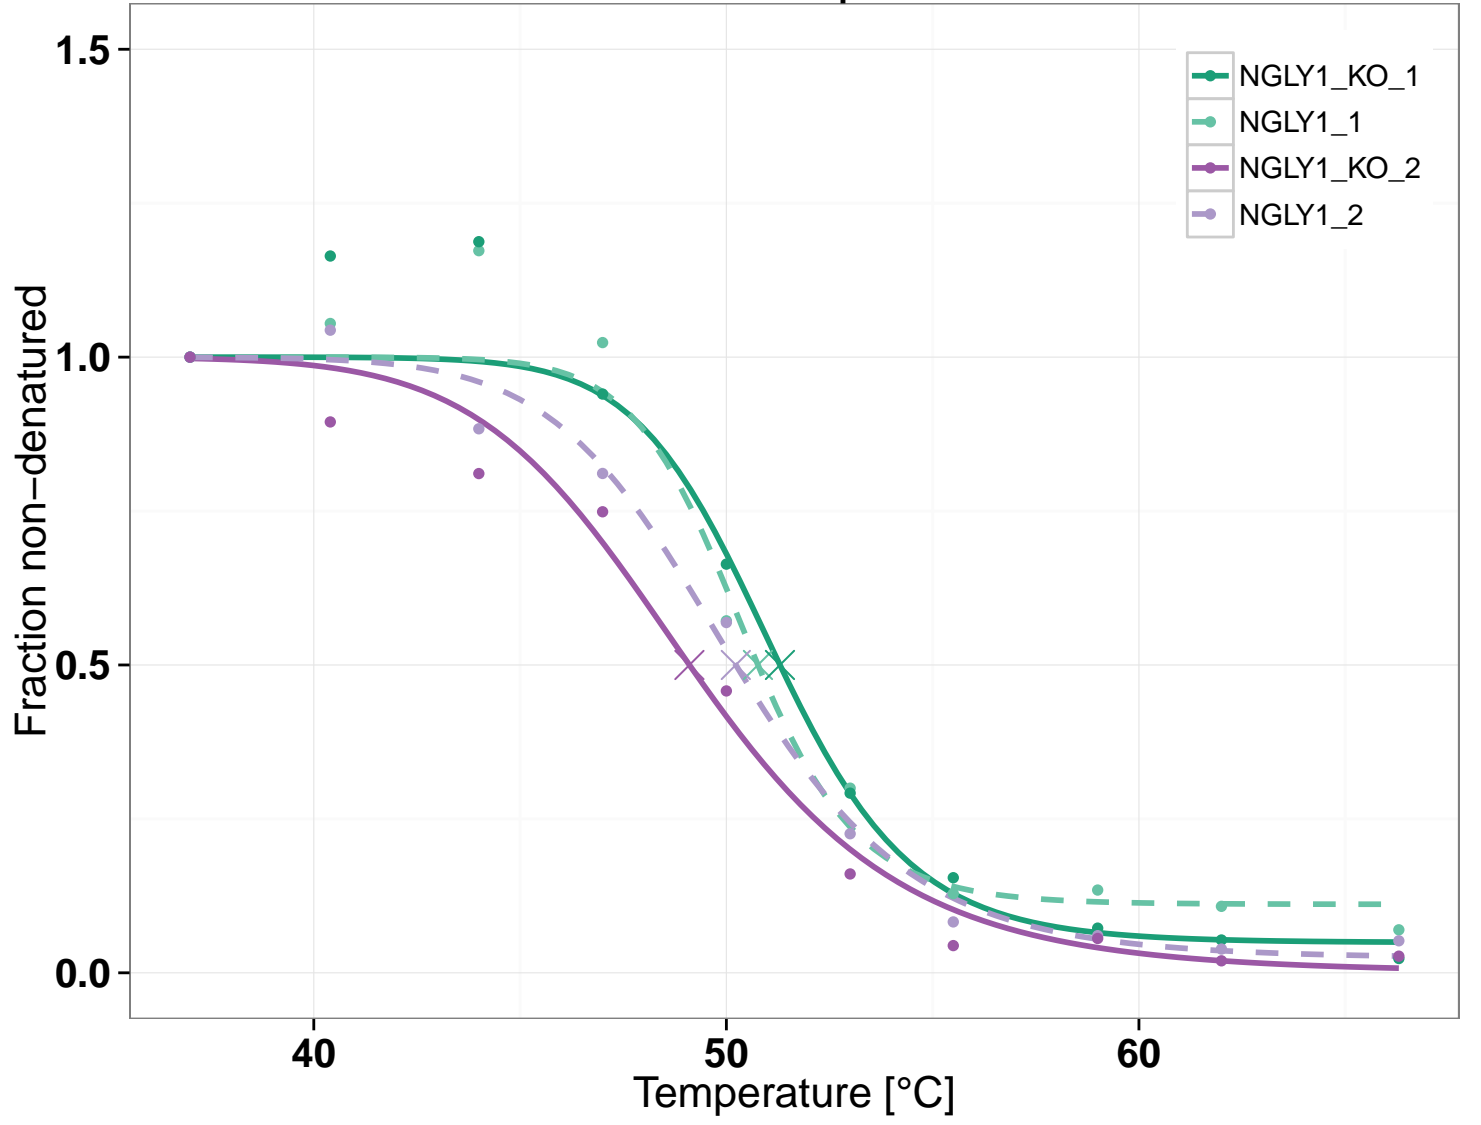

|            | meltPoint | slope  | plateau | R2   |
|------------|-----------|--------|---------|------|
| NGLY1_KO_1 | 51.3      | -0.14  | 0.05    | 0.97 |
| NGLY1_1    | 50.77     | -0.16  | 0.11    | 0.97 |
| NGLY1_KO_2 | 49.1      | -0.097 | 0       | 0.98 |
| NGLY1_2    | 50.23     | -0.11  | 0.02    | 0.99 |

Supplement: Supplementary file 5426 [file 1]

# IPI00221084.1|SLC25A14

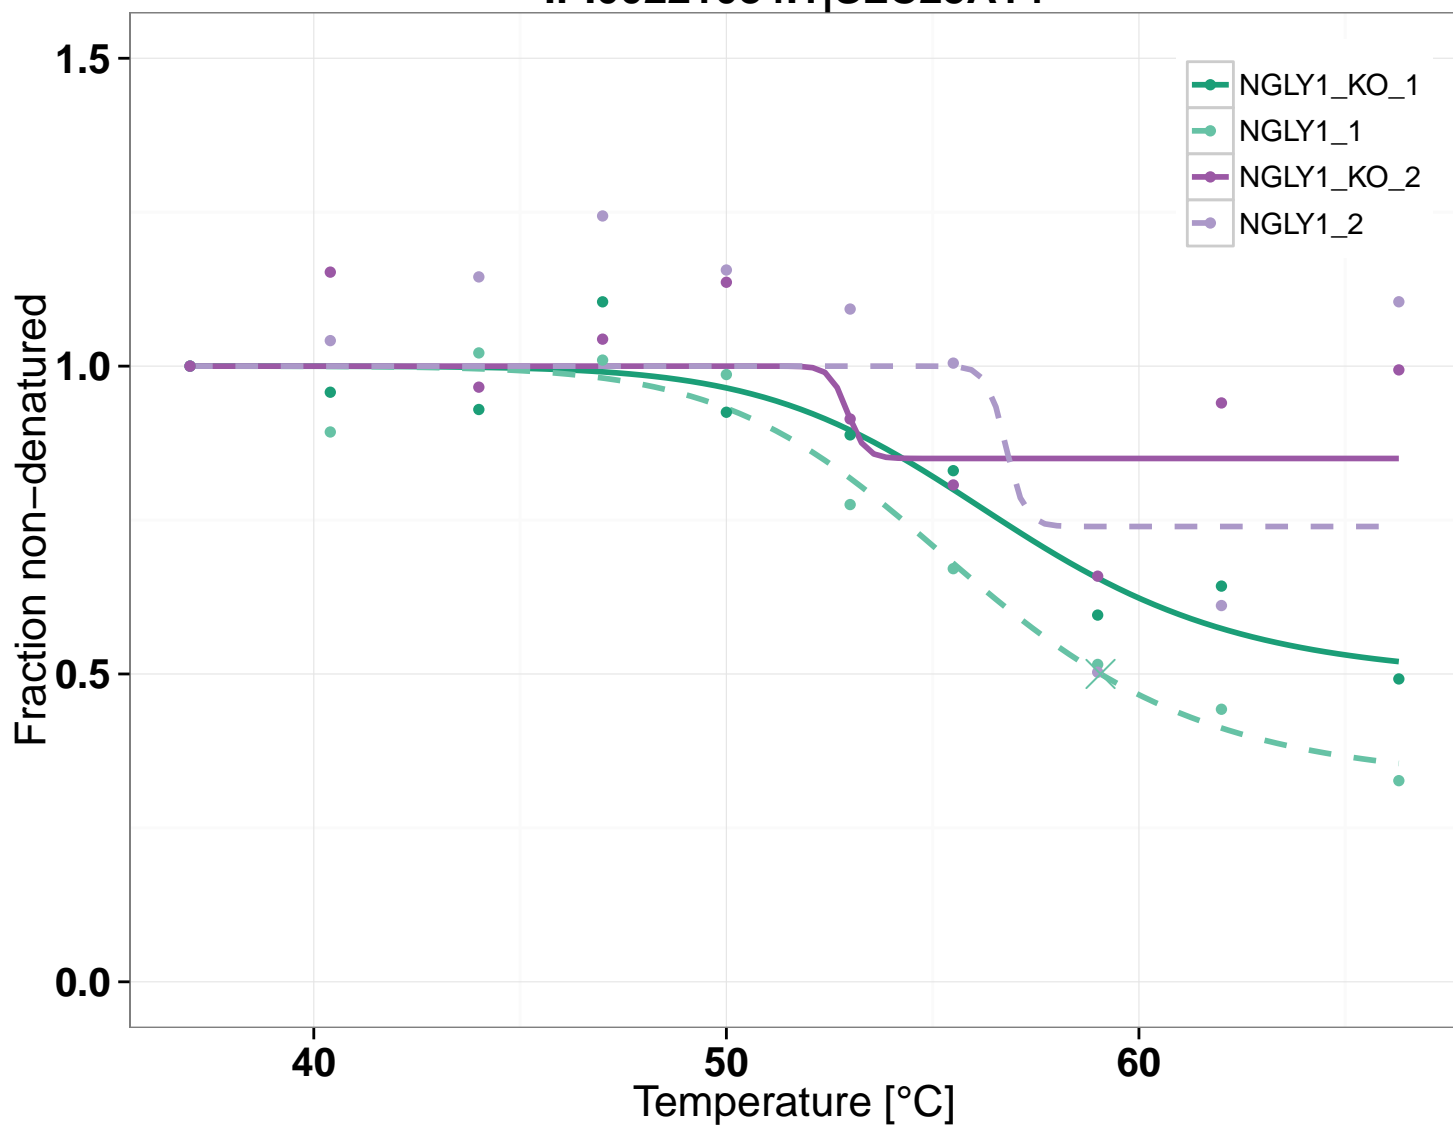

|            | meltPoint | slope  | plateau | R2   |
|------------|-----------|--------|---------|------|
| NGLY1_KO_1 | –         | –0.044 | 0.49    | 0.91 |
| NGLY1_1    | 59.07     | –0.058 | 0.32    | 0.97 |
| NGLY1_KO_2 | –         | –0.18  | 0.85    | 0.42 |
| NGLY1_2    | –         | –0.29  | 0.74    | 0.39 |

Supplement: Supplementary file 5427 [file 1]

IPI00868990.1|SLC22A23

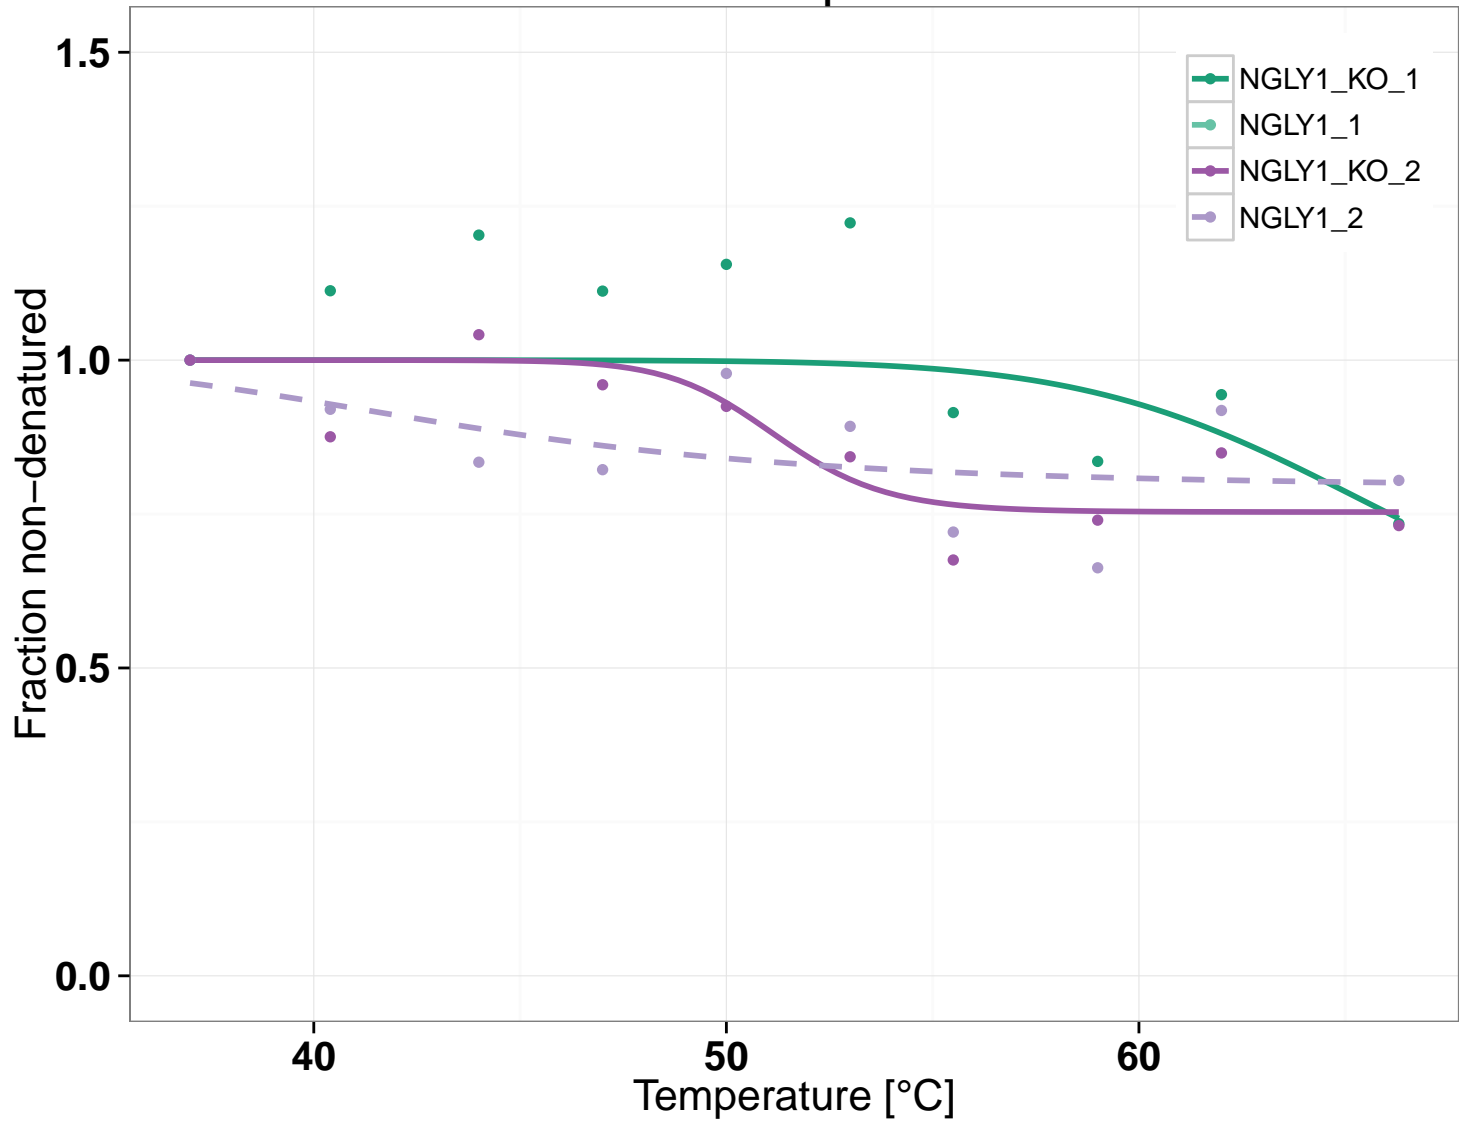

|            | meltPoint | slope  | plateau | R2   |
|------------|-----------|--------|---------|------|
| NGLY1_KO_1 | –         | –0.034 | 0.5     | 0.32 |
| NGLY1_1    | –         | –      | –       | –    |
| NGLY1_KO_2 | –         | –0.047 | 0.75    | 0.72 |
| NGLY1_2    | –         | –0.011 | 0.79    | 0.3  |

Supplement: Supplementary file 5428 [file 1]

IPI00216683.6|CDC25C

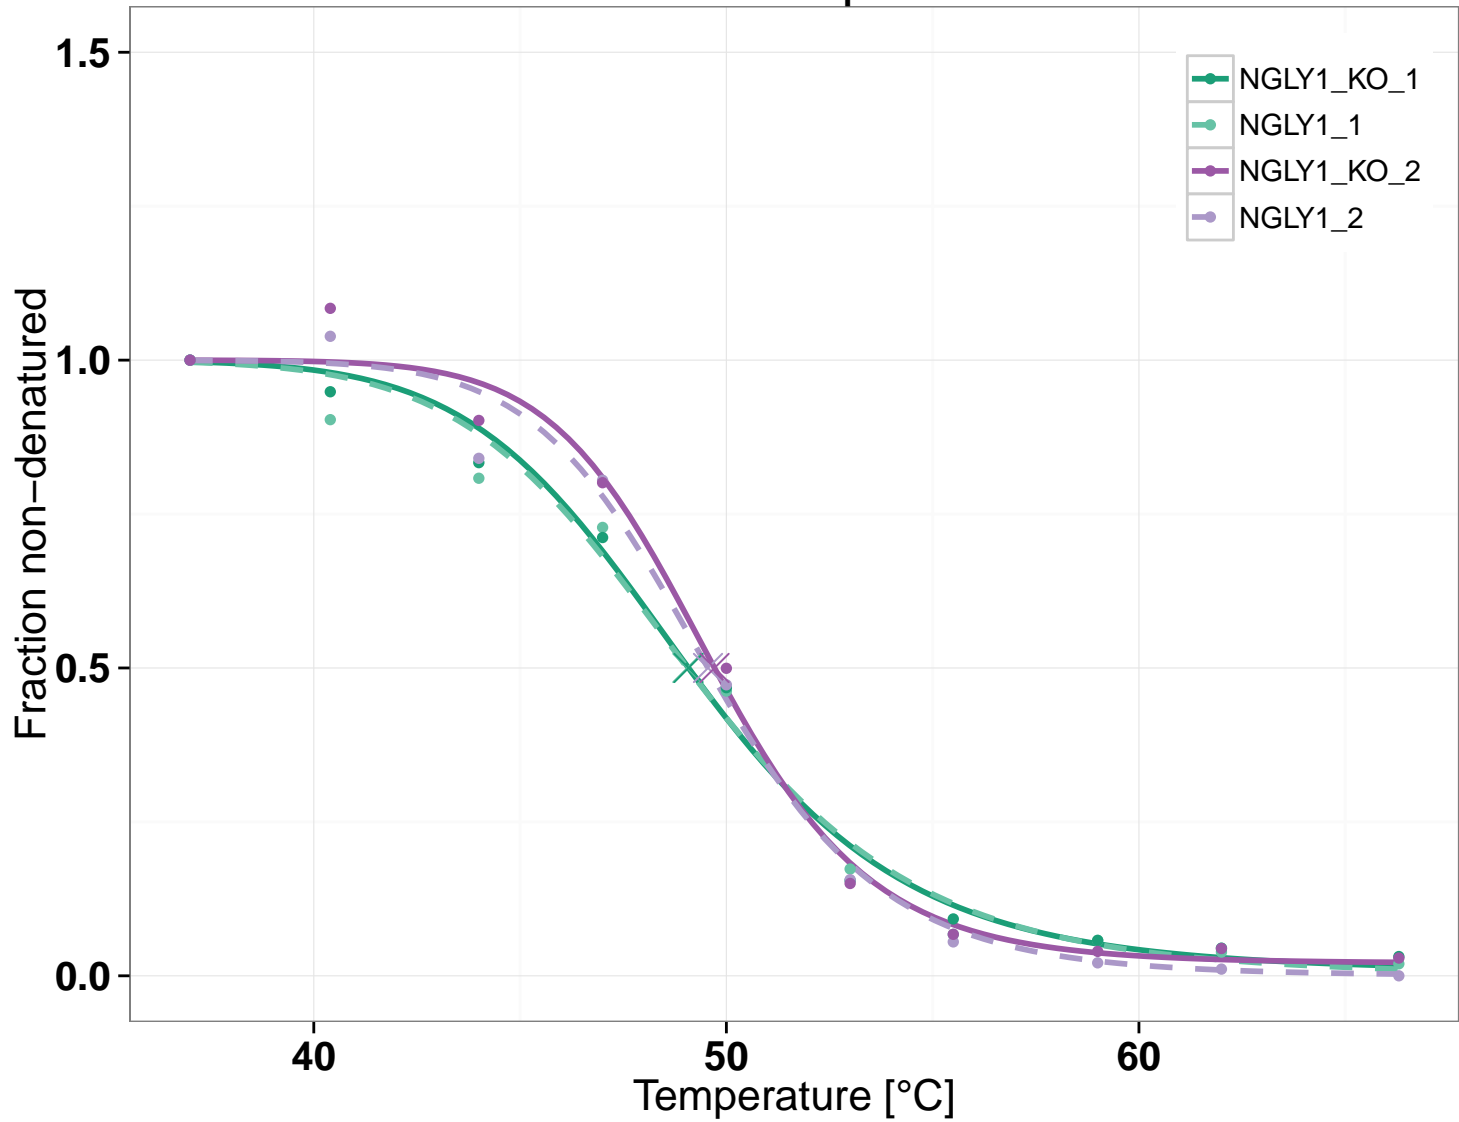

|            | meltPoint | slope  | plateau | R2   |
|------------|-----------|--------|---------|------|
| NGLY1_KO_1 | 49.08     | -0.093 | 0.01    | 0.99 |
| NGLY1_1    | 49.06     | -0.09  | 0       | 0.99 |
| NGLY1_KO_2 | 49.71     | -0.13  | 0.02    | 0.99 |
| NGLY1_2    | 49.55     | -0.12  | 0       | 0.99 |

Supplement: Supplementary file 5429 [file 1]

IPI00046682.6|C2ORF76

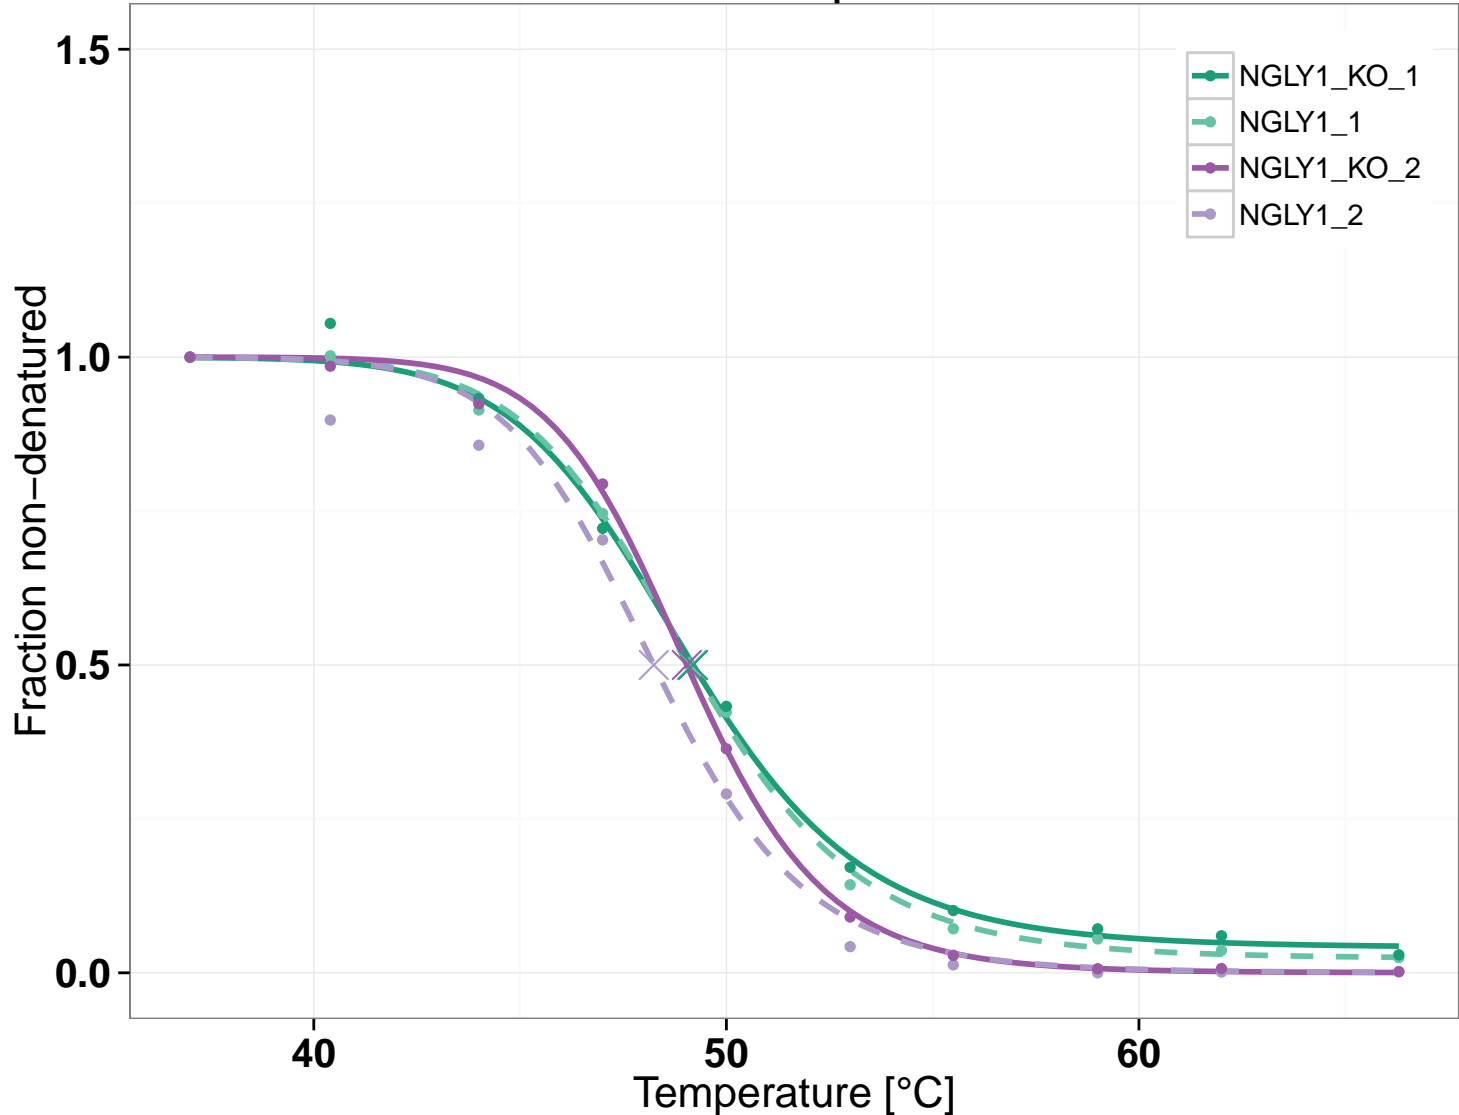

|            | meltPoint | slope | plateau | R2   |
|------------|-----------|-------|---------|------|
| NGLY1_KO_1 | 49.19     | -0.11 | 0.04    | 1    |
| NGLY1_1    | 49.16     | -0.12 | 0.02    | 1    |
| NGLY1_KO_2 | 49.04     | -0.15 | 0       | 1    |
| NGLY1_2    | 48.24     | -0.14 | 0       | 0.99 |

Supplement: Supplementary file 5430 [file 1]

# IPI00007961.4|ND1

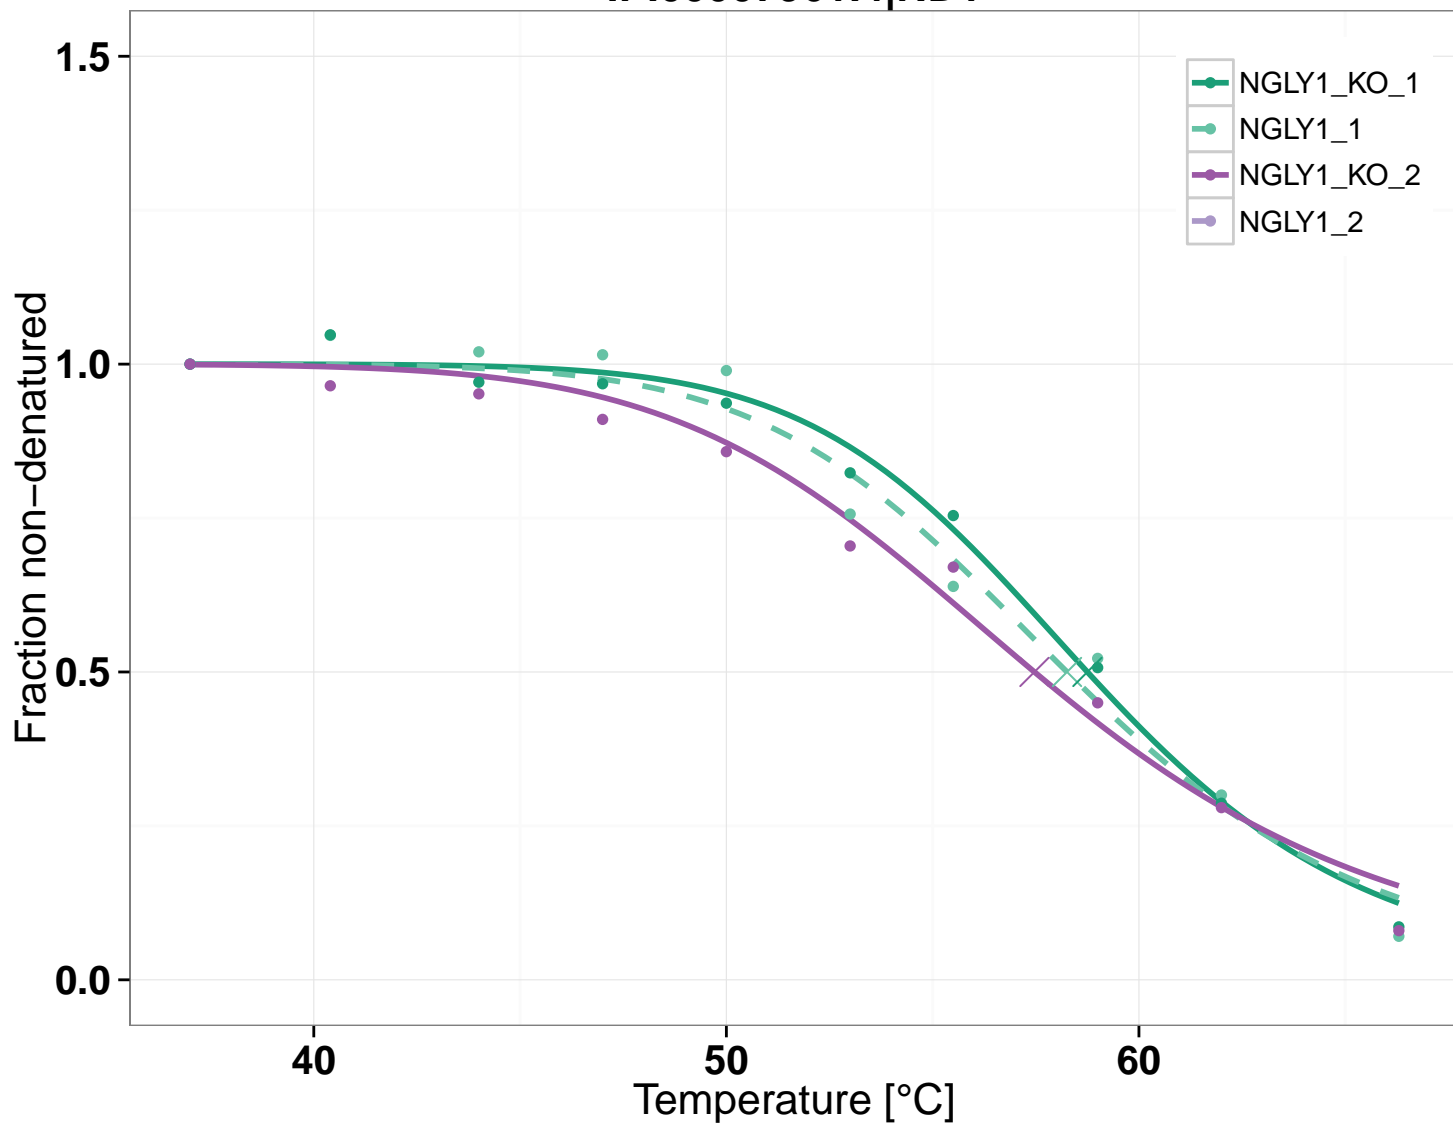

|            | meltPoint | slope  | plateau | R2   |
|------------|-----------|--------|---------|------|
| NGLY1_KO_1 | 58.75     | -0.074 | 0       | 0.99 |
| NGLY1_1    | 58.26     | -0.067 | 0       | 0.98 |
| NGLY1_KO_2 | 57.47     | -0.057 | 0       | 0.98 |
| NGLY1_2    | -         | -      | -       | -    |

Supplement: Supplementary file 5431 [file 1]

# IPI00074045.3|C6ORF192

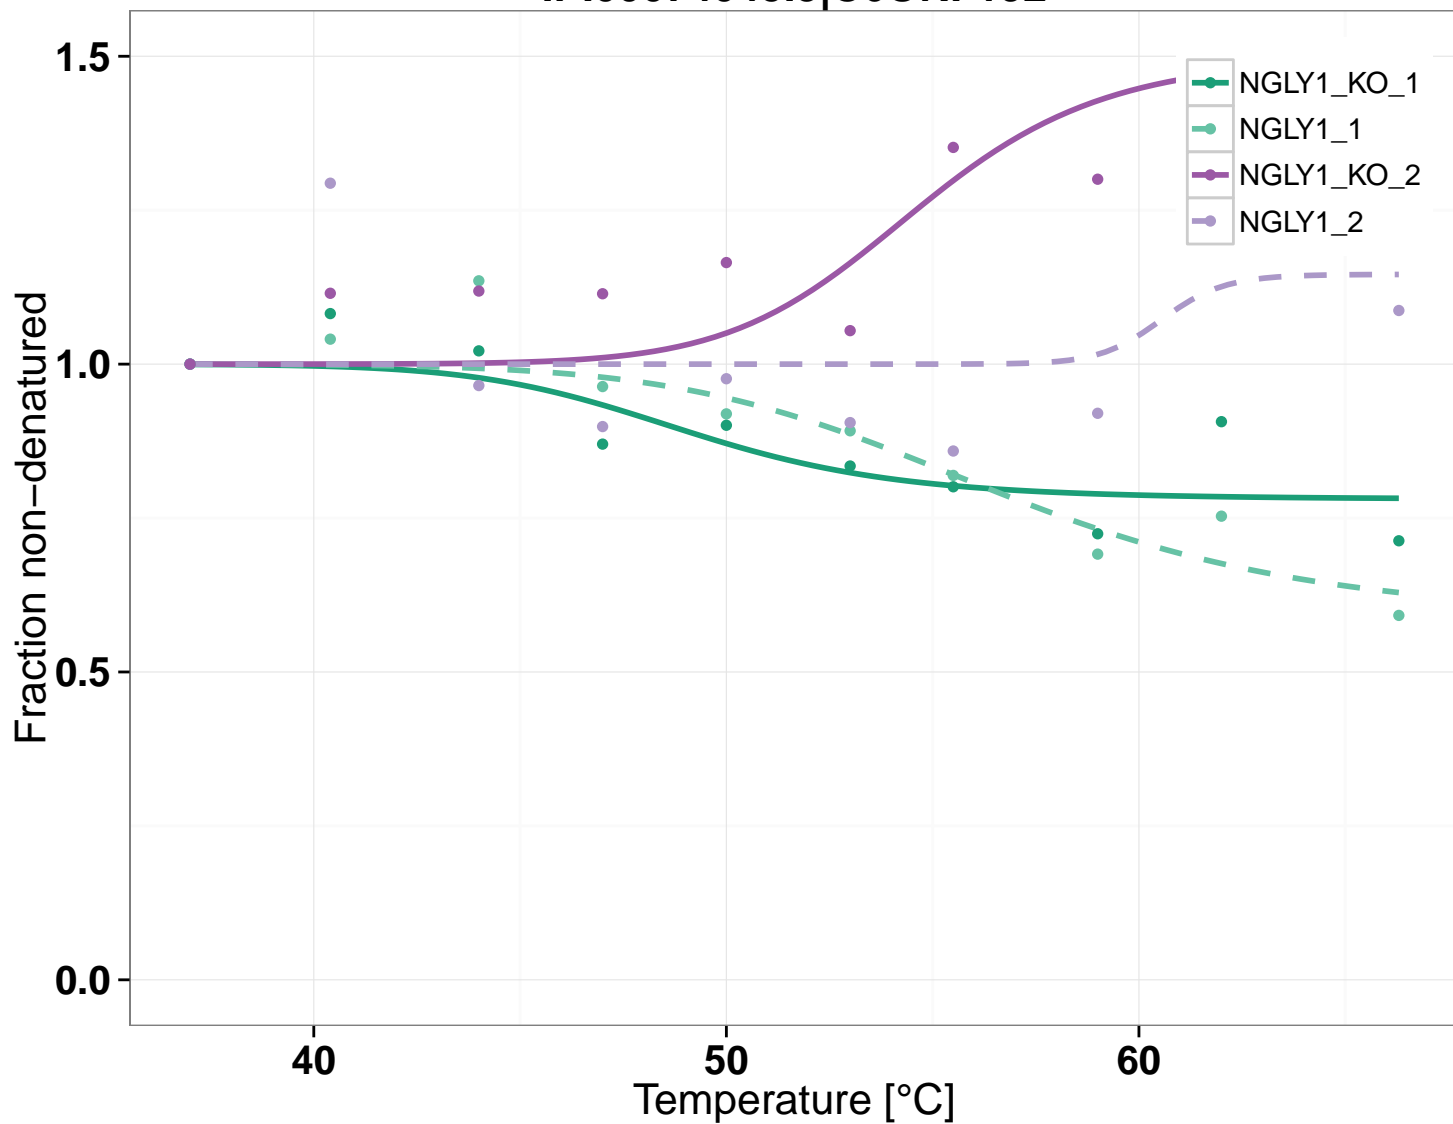

|            | meltPoint | slope  | plateau | R2   |
|------------|-----------|--------|---------|------|
| NGLY1_KO_1 | –         | –0.021 | 0.78    | 0.72 |
| NGLY1_1    | –         | –0.027 | 0.58    | 0.87 |
| NGLY1_KO_2 | –         | 0.055  | 1.5     | 0.64 |
| NGLY1_2    | –         | 0.048  | 1.15    | 0.2  |

Supplement: Supplementary file 5432 [file 1]

IPI00289092.1|MEF2C

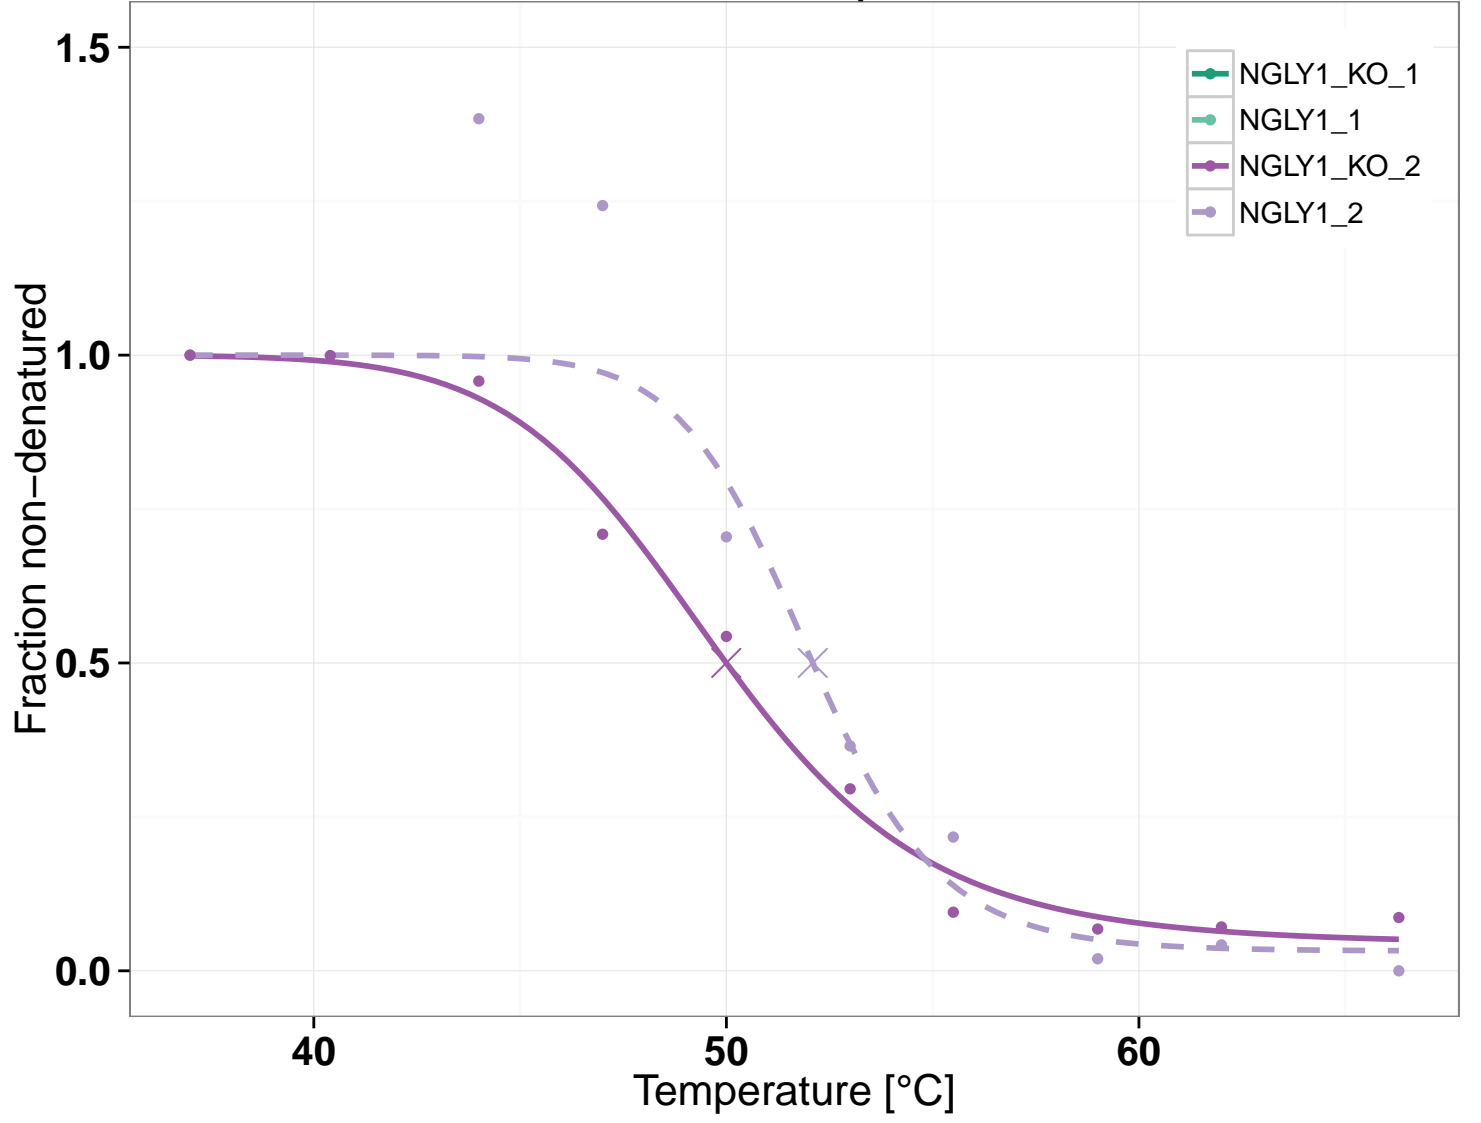

|            | meltPoint | slope  | plateau | R2   |
|------------|-----------|--------|---------|------|
| NGLY1_KO_1 | -         | -      | -       | -    |
| NGLY1_1    | -         | -      | -       | -    |
| NGLY1_KO_2 | 50        | -0.094 | 0.04    | 0.99 |
| NGLY1_2    | 52.09     | -0.15  | 0.03    | 0.82 |

Supplement: Supplementary file 5433 [file 1]

IPI00014376.5|RAB31

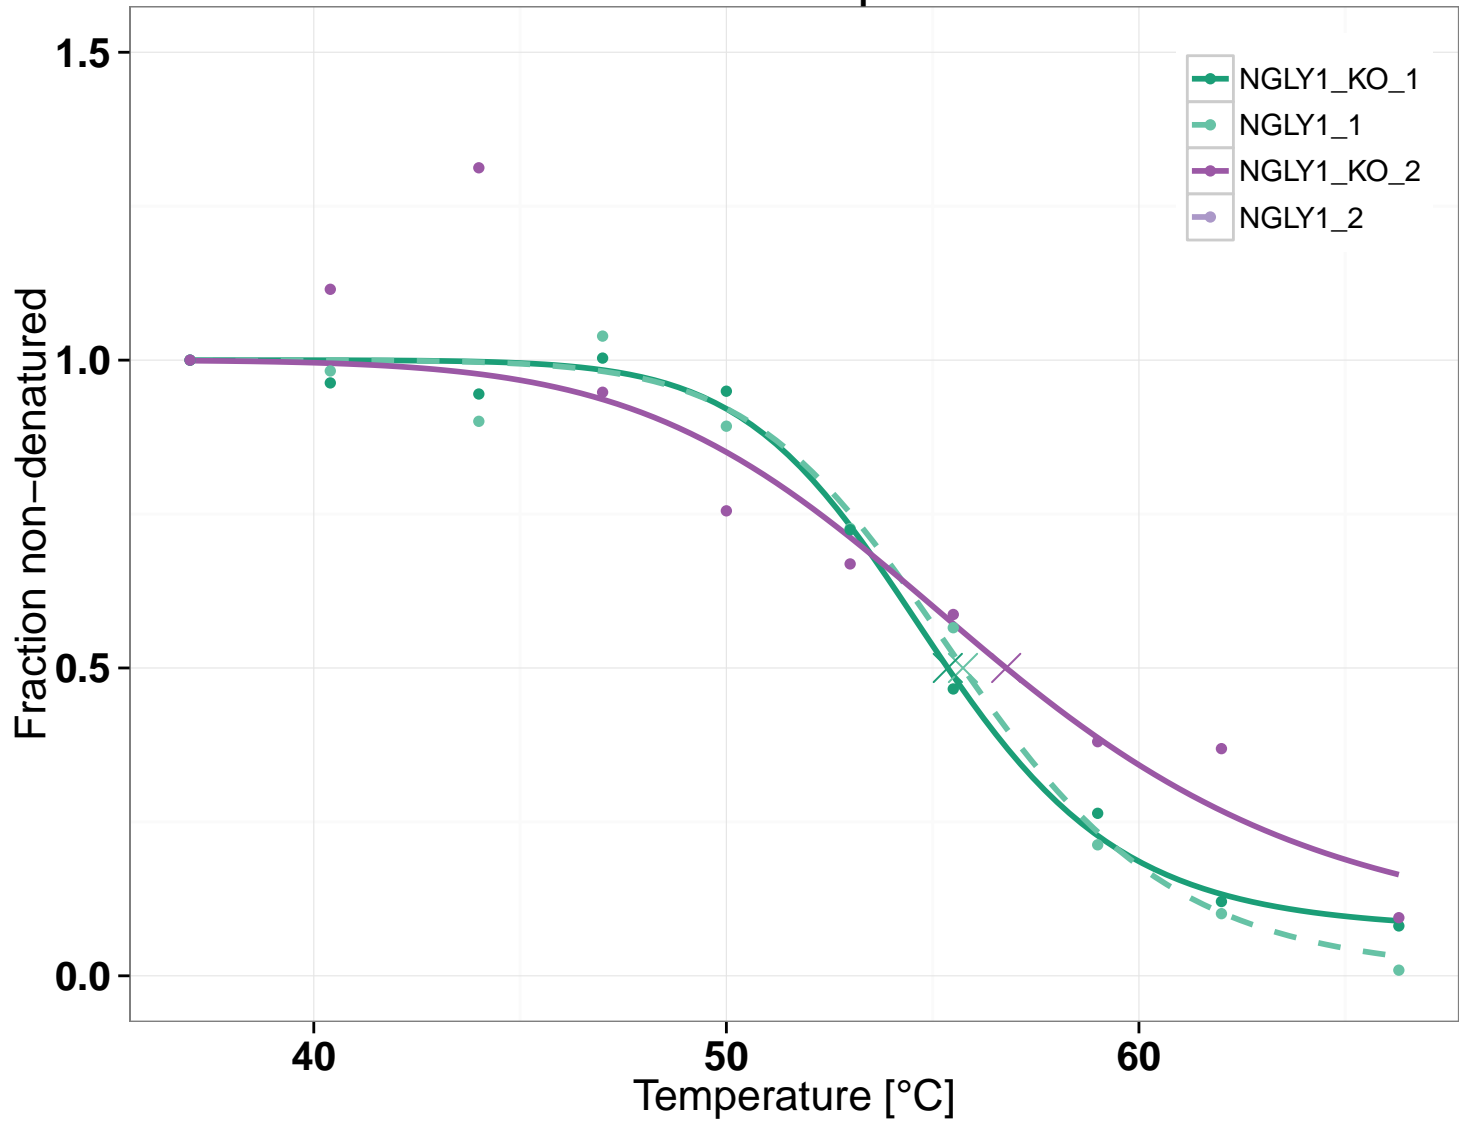

|            | meltPoint | slope  | plateau | R2   |
|------------|-----------|--------|---------|------|
| NGLY1_KO_1 | 55.37     | -0.1   | 0.07    | 0.99 |
| NGLY1_1    | 55.73     | -0.097 | 0       | 0.99 |
| NGLY1_KO_2 | 56.78     | -0.057 | 0.05    | 0.88 |
| NGLY1_2    | -         | -      | -       | -    |

Supplement: Supplementary file 5434 [file 1]

IPI00007096.1|IFRG15

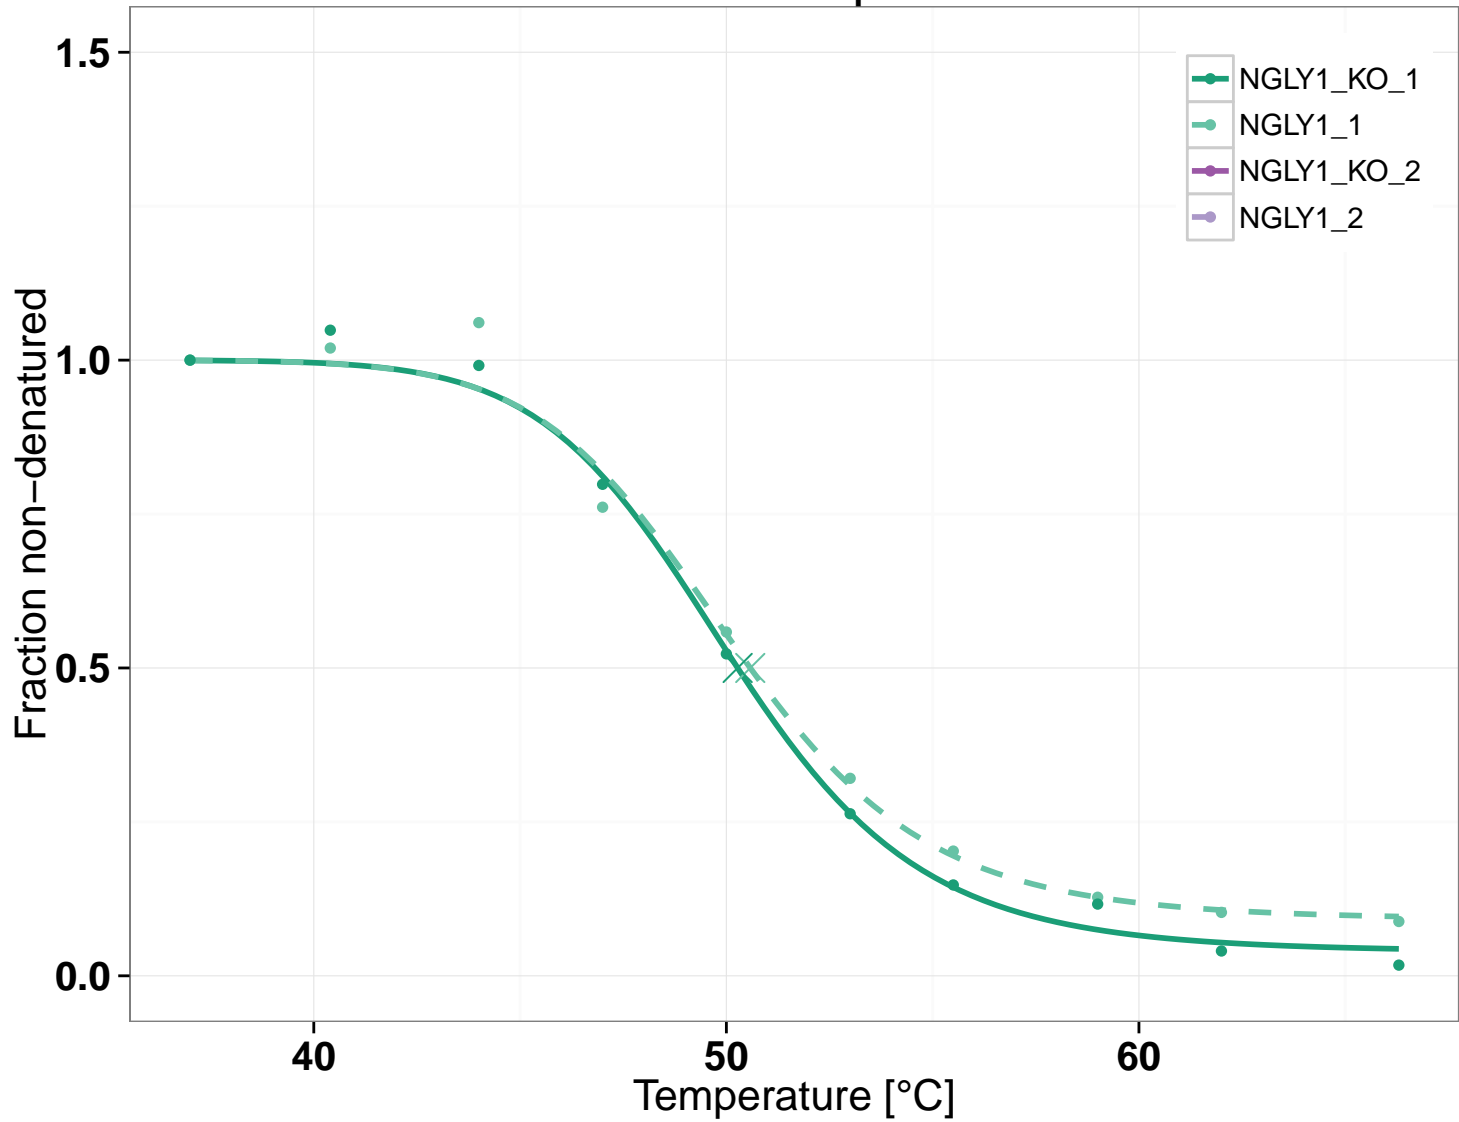

|            | meltPoint | slope  | plateau | R2   |
|------------|-----------|--------|---------|------|
| NGLY1_KO_1 | 50.27     | -0.1   | 0.04    | 1    |
| NGLY1_1    | 50.58     | -0.096 | 0.09    | 0.99 |
| NGLY1_KO_2 | -         | -      | -       | -    |
| NGLY1_2    | -         | -      | -       | -    |

Supplement: Supplementary file 5435 [file 1]

IPI00252570.2|GMCL1L

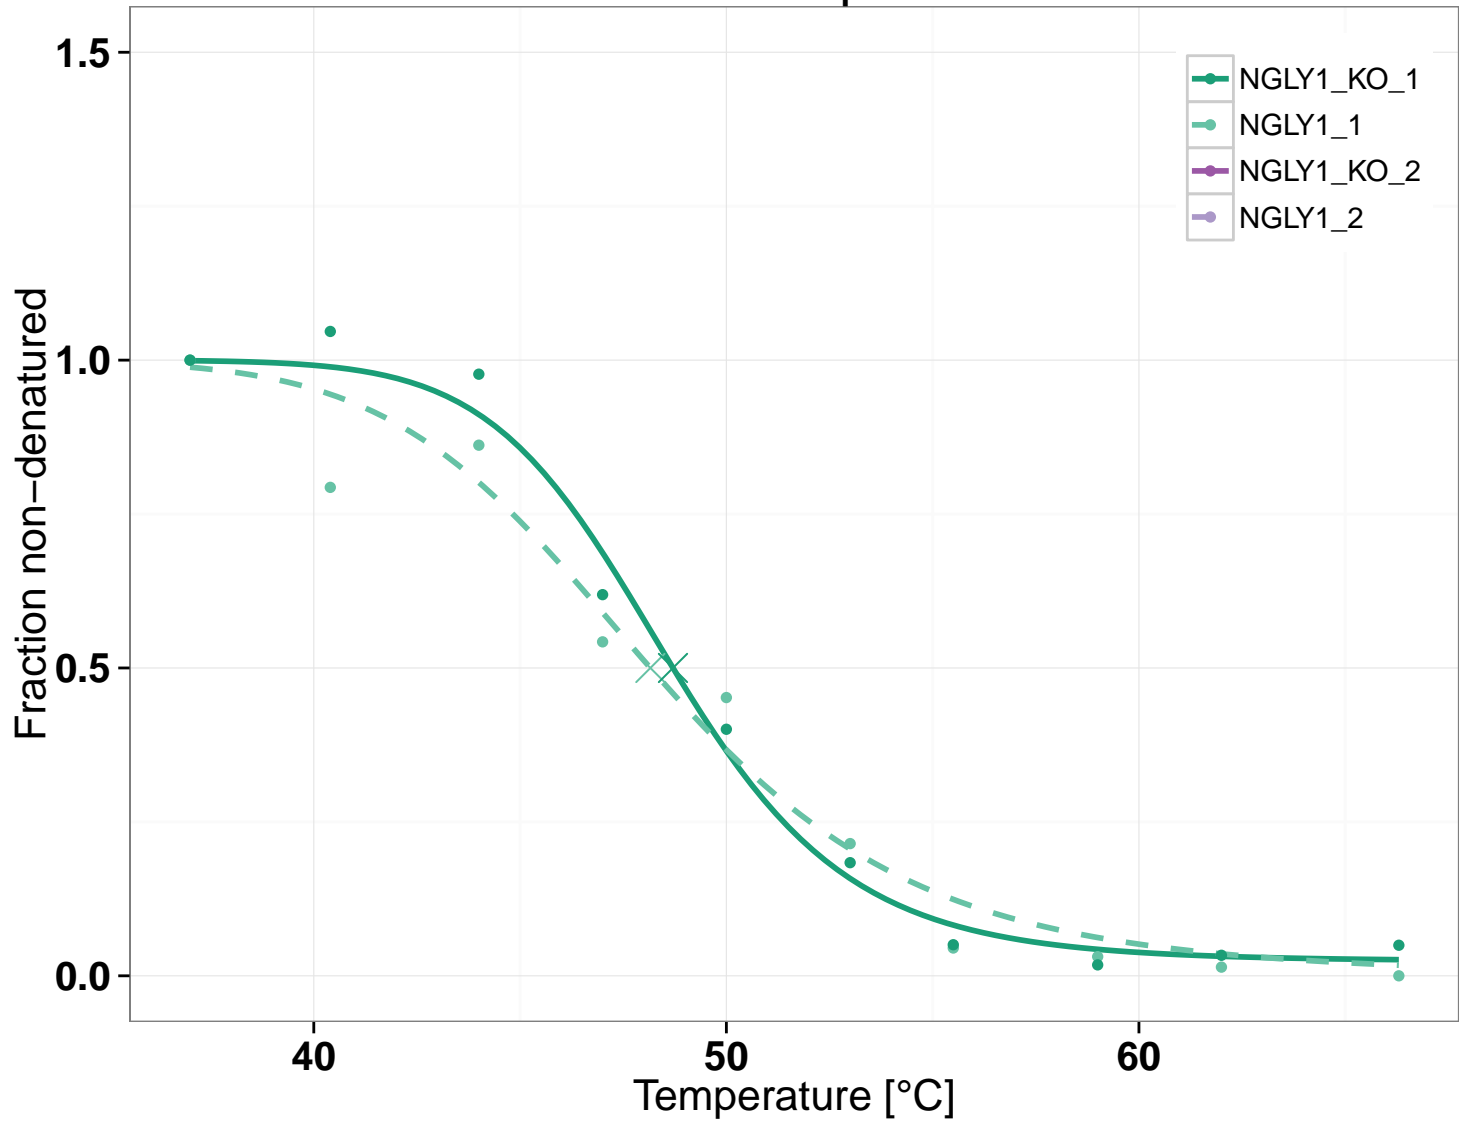

|            | meltPoint | slope  | plateau | R2   |
|------------|-----------|--------|---------|------|
| NGLY1_KO_1 | 48.71     | -0.11  | 0.02    | 0.99 |
| NGLY1_1    | 48.16     | -0.078 | 0       | 0.97 |
| NGLY1_KO_2 | -         | -      | -       | -    |
| NGLY1_2    | -         | -      | -       | -    |

Supplement: Supplementary file 5436 [file 1]

IPI00299387.3|C3ORF1

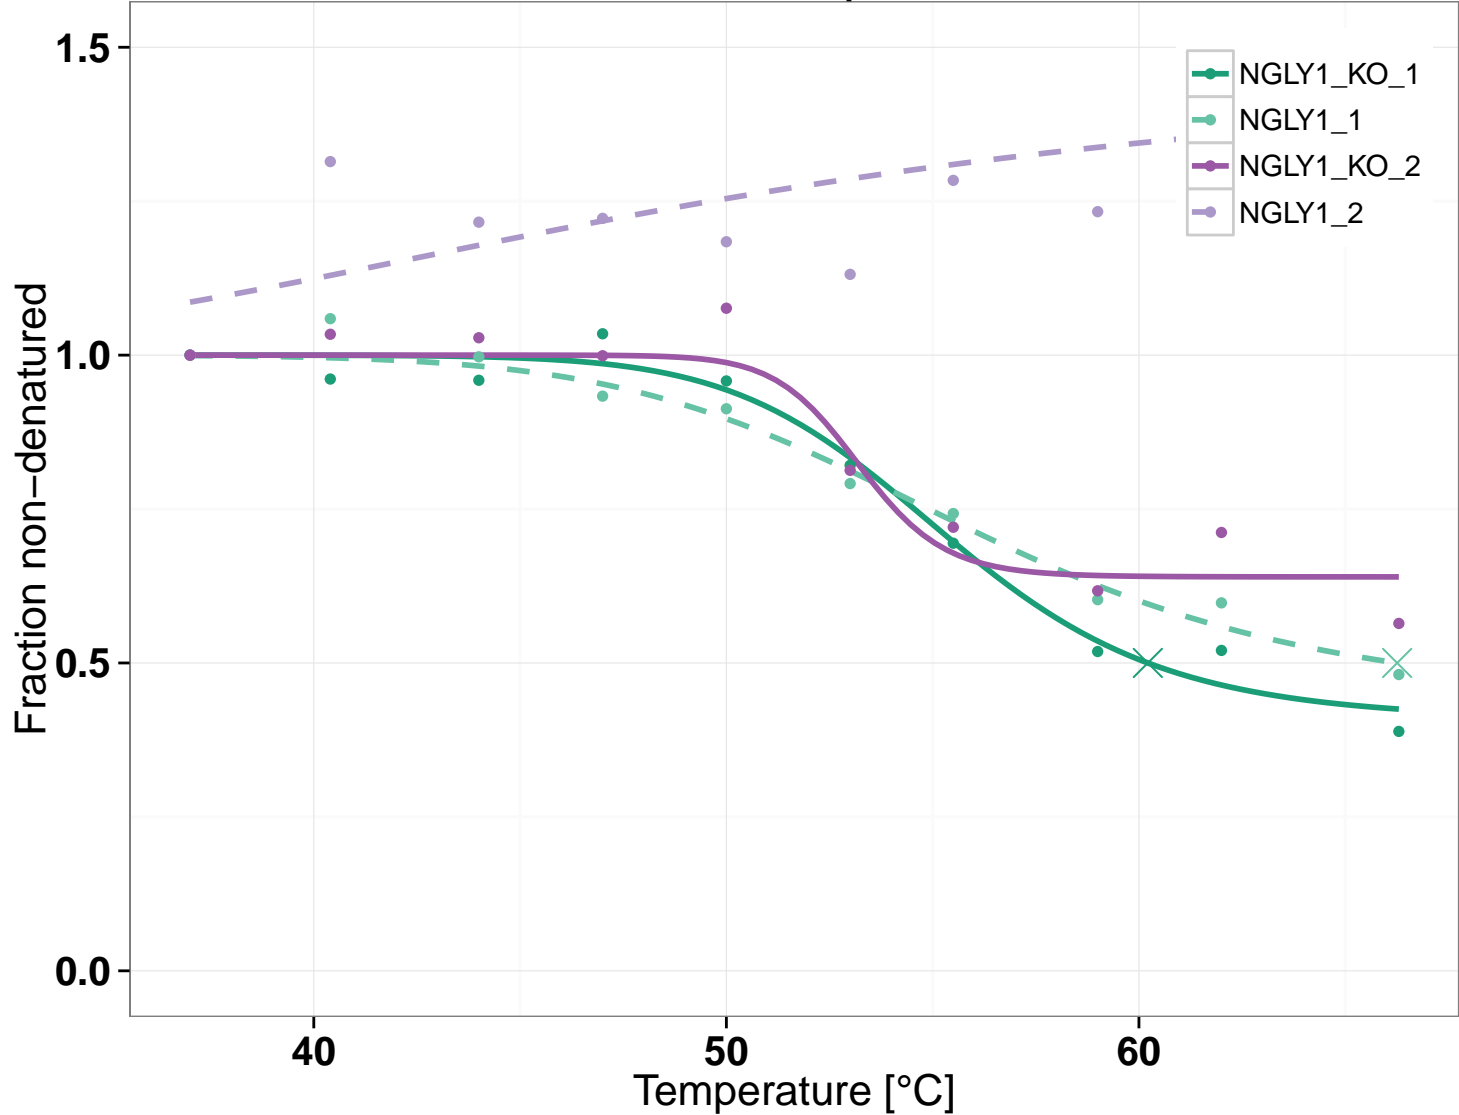

|            | meltPoint | slope  | plateau | R2   |
|------------|-----------|--------|---------|------|
| NGLY1_KO_1 | 60.22     | -0.057 | 0.41    | 0.98 |
| NGLY1_1    | 66.26     | -0.033 | 0.43    | 0.98 |
| NGLY1_KO_2 | -         | -0.088 | 0.64    | 0.93 |
| NGLY1_2    | -         | 0.014  | 1.5     | 0.45 |

Supplement: Supplementary file 5437 [file 1]

IPI00063903.5|USMG5

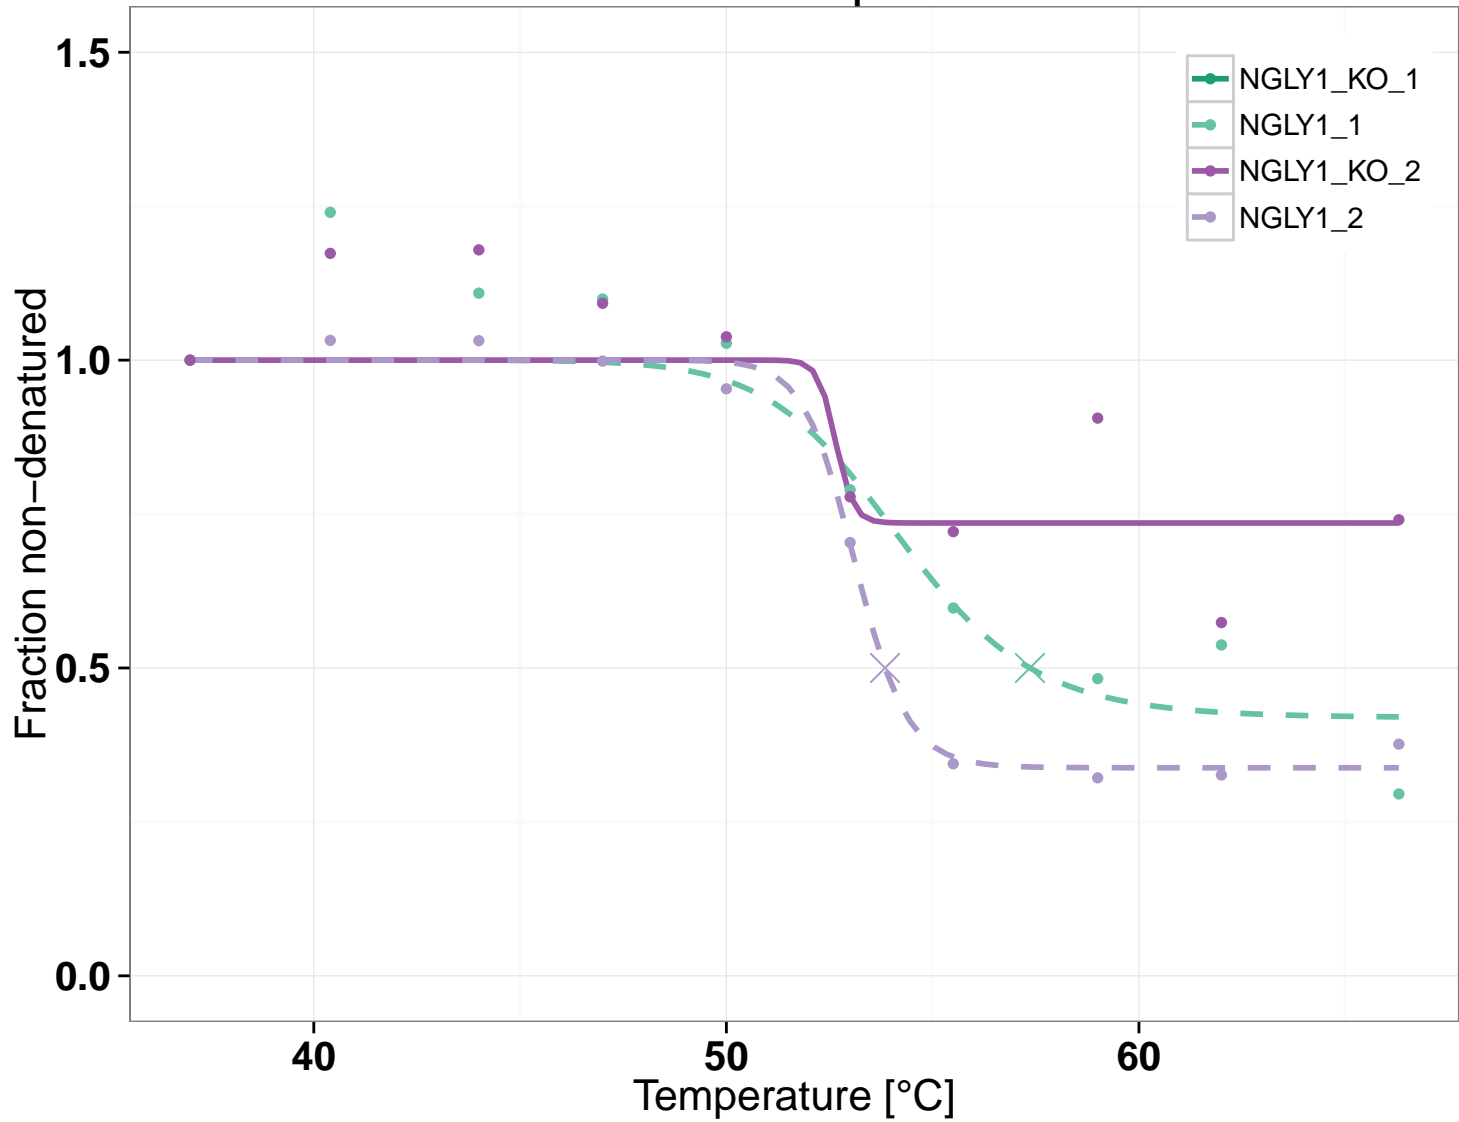

|            | meltPoint | slope  | plateau | R2   |
|------------|-----------|--------|---------|------|
| NGLY1_KO_1 | -         | -      | -       | -    |
| NGLY1_1    | 57.36     | -0.089 | 0.42    | 0.88 |
| NGLY1_KO_2 | -         | -0.31  | 0.74    | 0.68 |
| NGLY1_2    | 53.85     | -0.26  | 0.34    | 0.99 |

Supplement: Supplementary file 5438 [file 1]

IPI00019314.1|C6ORF25

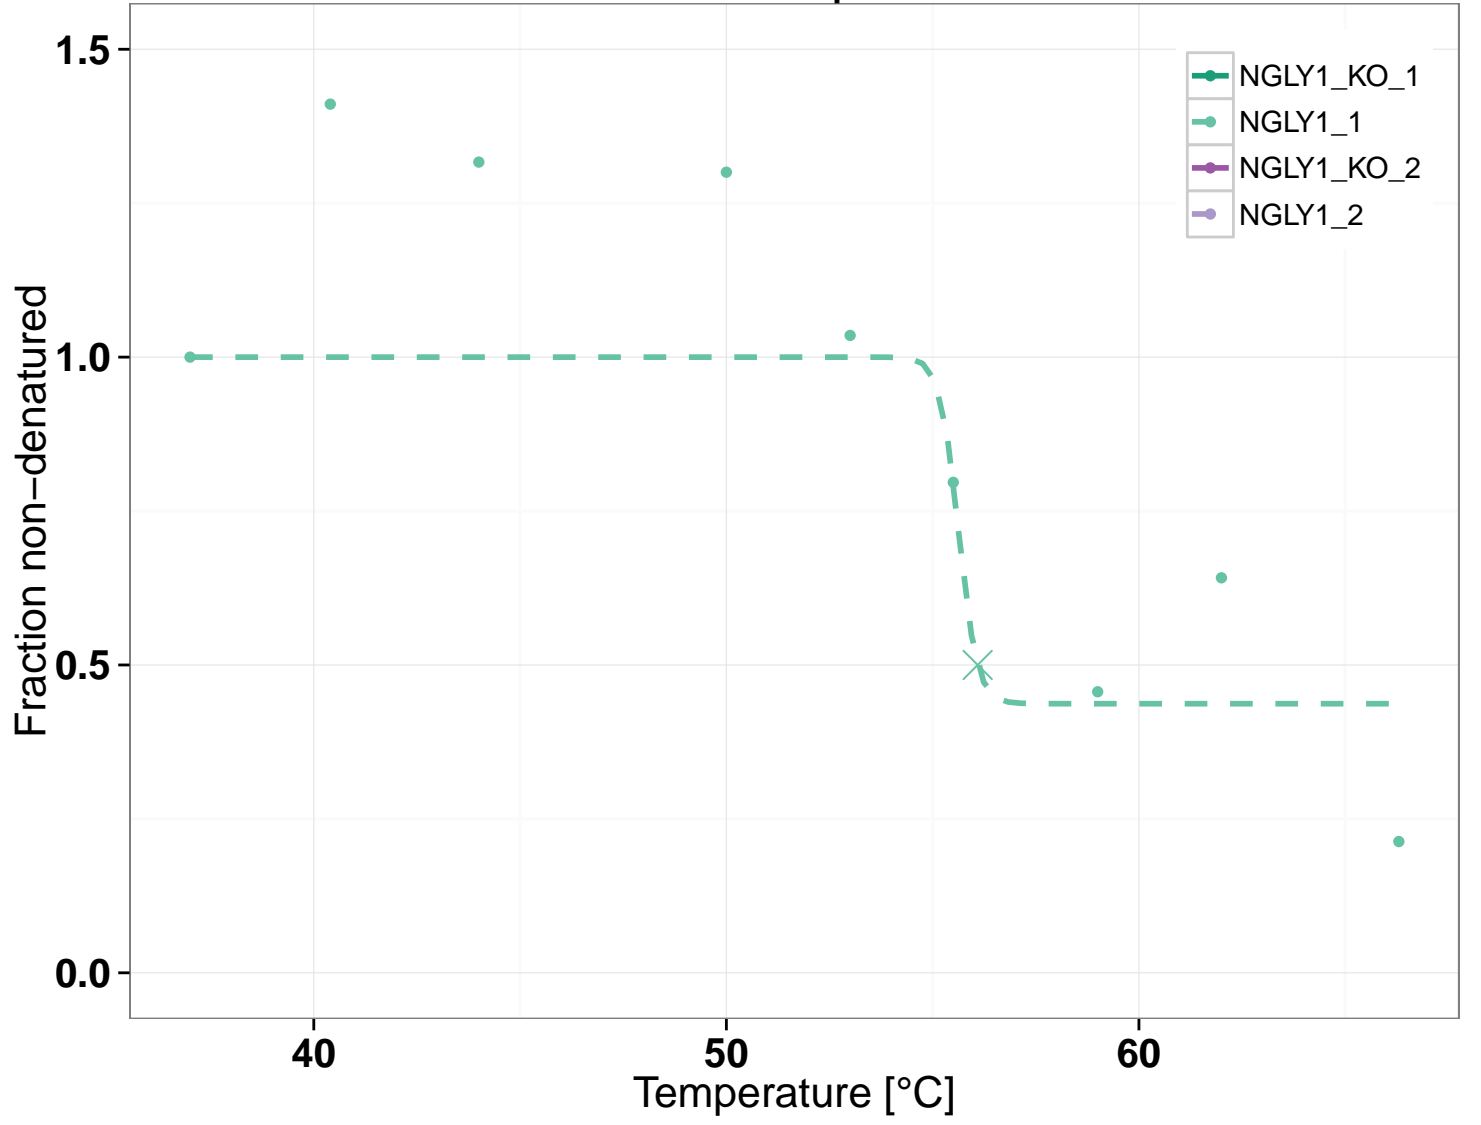

|            | meltPoint | slope | plateau | R2   |
|------------|-----------|-------|---------|------|
| NGLY1_KO_1 | -         | -     | -       | -    |
| NGLY1_1    | 56.09     | -0.63 | 0.44    | 0.58 |
| NGLY1_KO_2 | -         | -     | -       | -    |
| NGLY1_2    | -         | -     | -       | -    |

Supplement: Supplementary file 5439 [file 1]

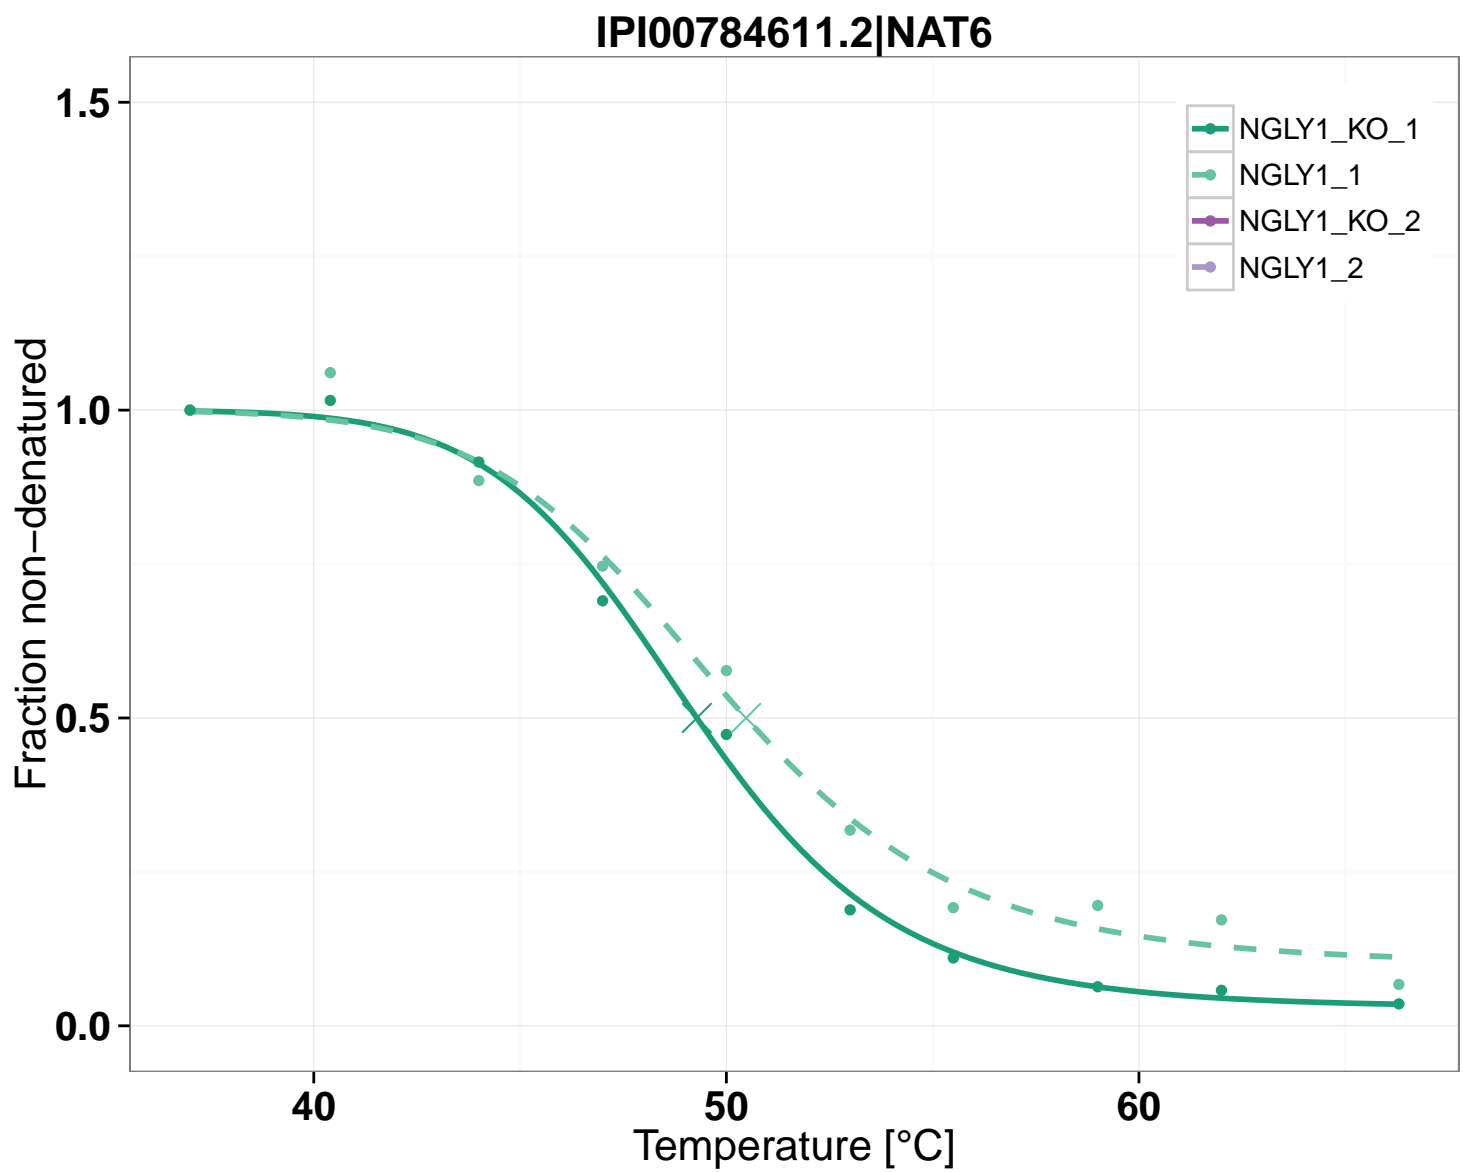

|            | meltPoint | slope  | plateau | R2   |
|------------|-----------|--------|---------|------|
| NGLY1_KO_1 | 49.28     | -0.099 | 0.03    | 1    |
| NGLY1_1    | 50.48     | -0.079 | 0.1     | 0.99 |
| NGLY1_KO_2 | -         | -      | -       | -    |
| NGLY1_2    | -         | -      | -       | -    |

Supplement: Supplementary file 5440 [file 1]

IPI00032201.1|RAD51

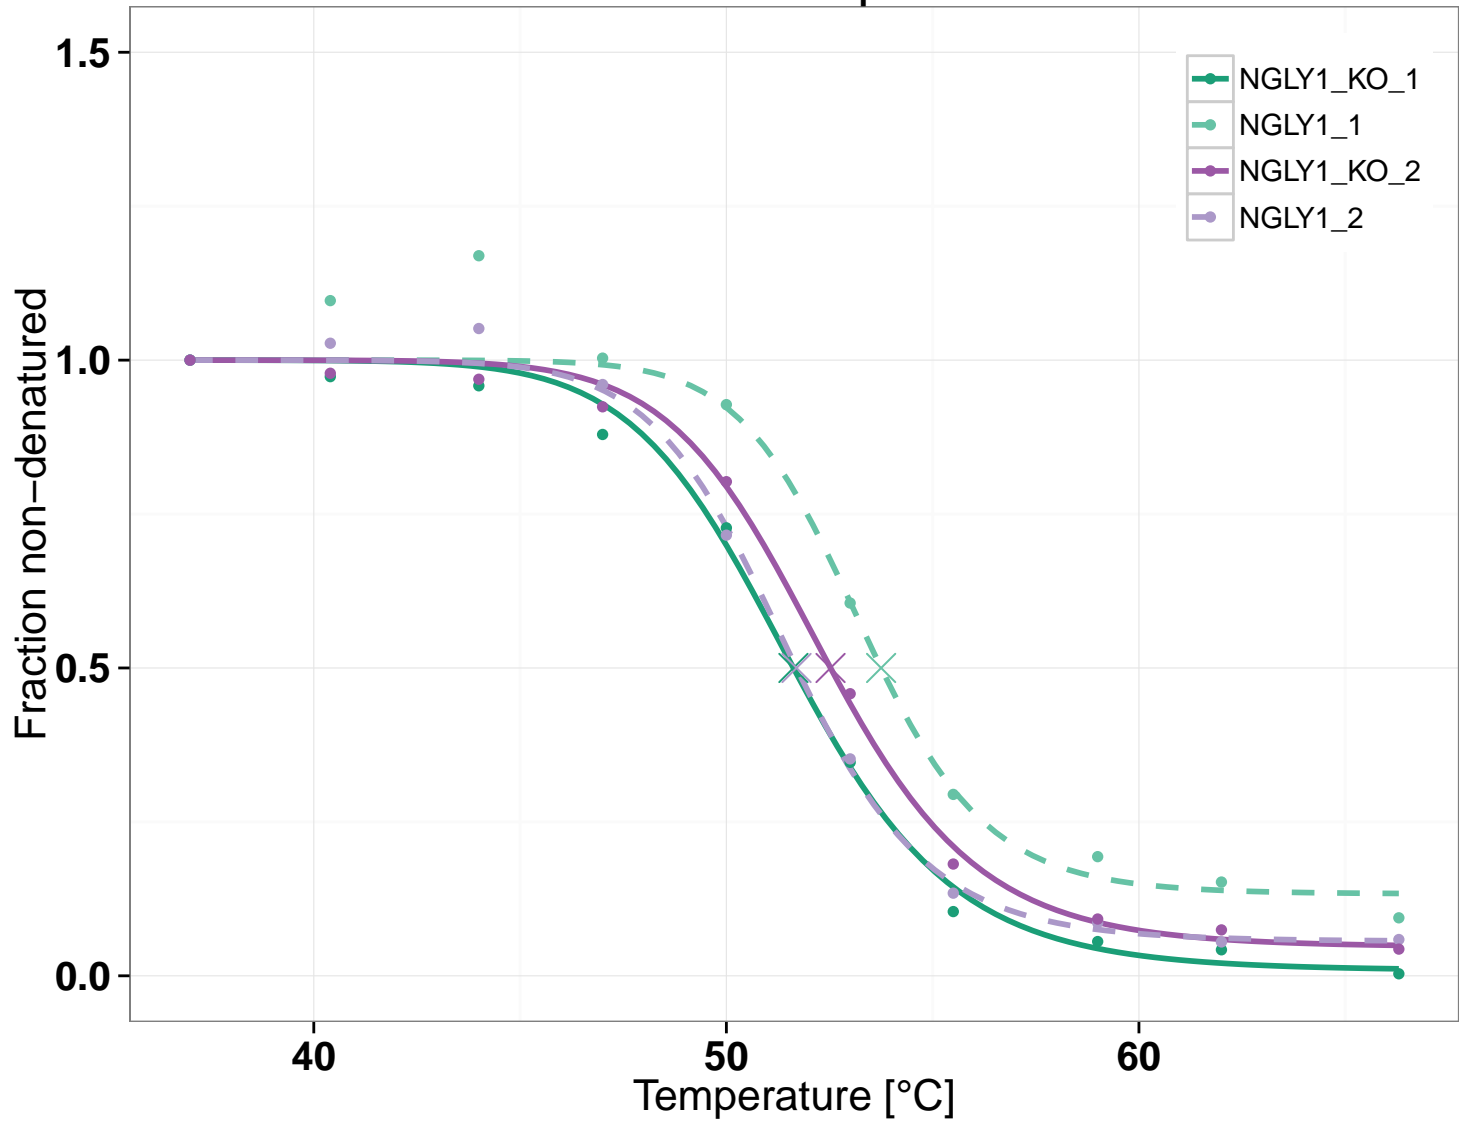

|            | meltPoint | slope | plateau | R2   |
|------------|-----------|-------|---------|------|
| NGLY1_KO_1 | 51.63     | -0.13 | 0.01    | 1    |
| NGLY1_1    | 53.75     | -0.14 | 0.13    | 0.98 |
| NGLY1_KO_2 | 52.52     | -0.13 | 0.05    | 1    |
| NGLY1_2    | 51.7      | -0.14 | 0.06    | 1    |

Supplement: Supplementary file 5441 [file 1]

IPI00000731.1|AOAH

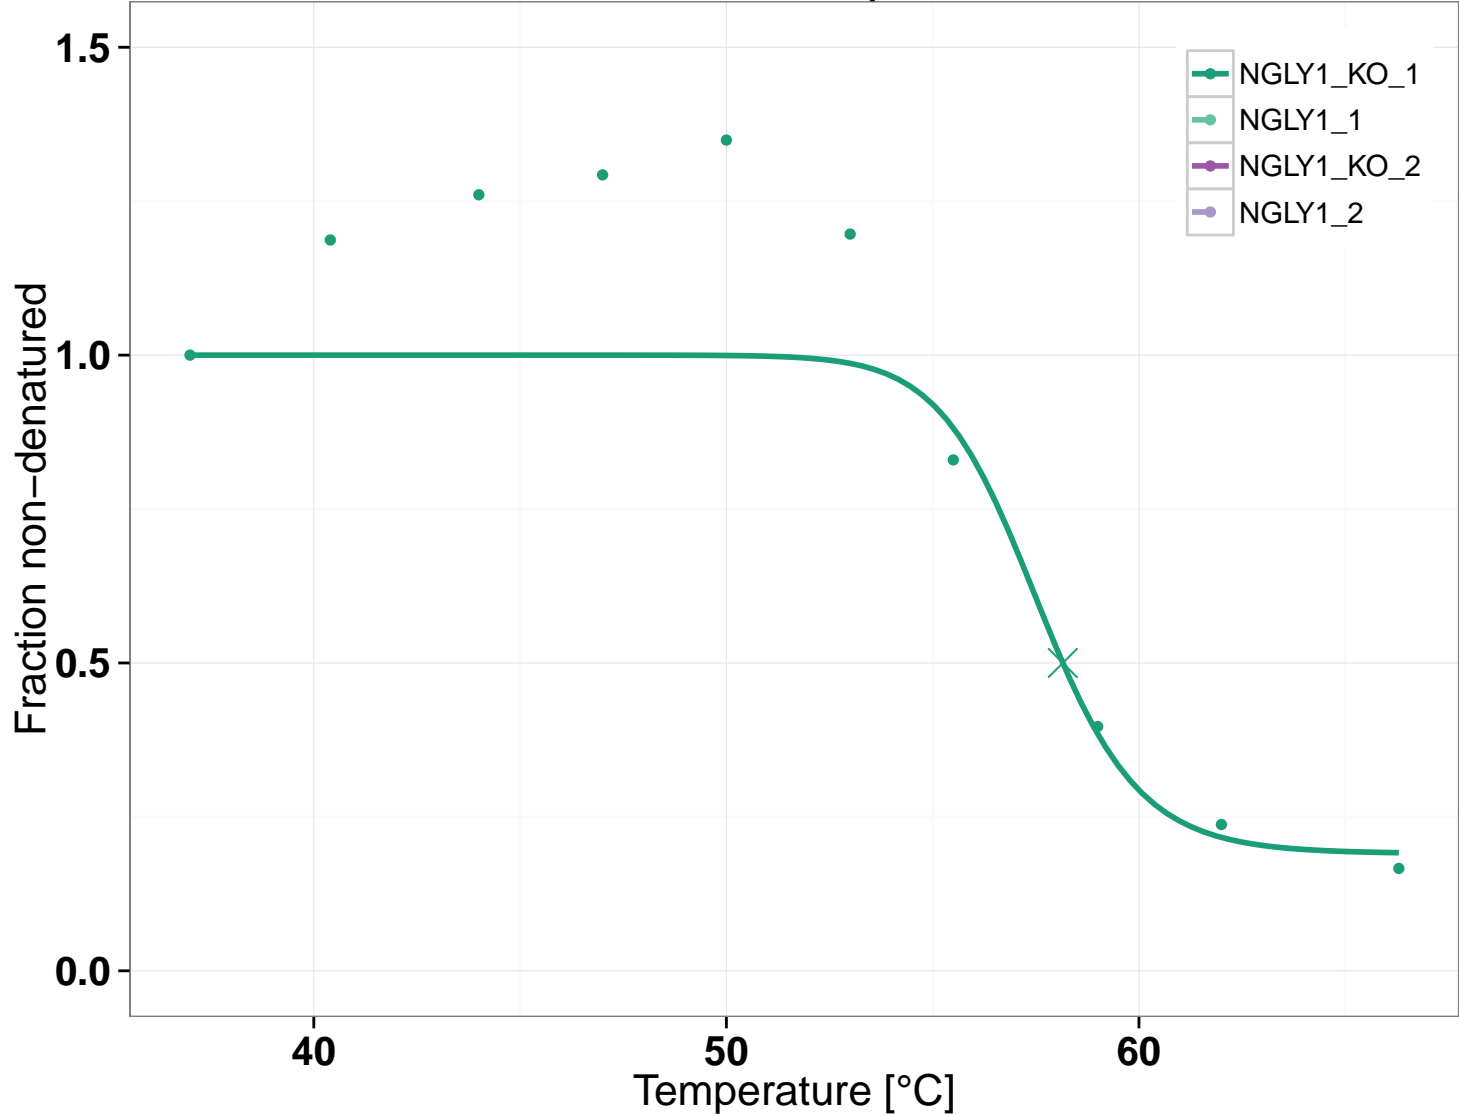

|            | meltPoint | slope | plateau | R2   |
|------------|-----------|-------|---------|------|
| NGLY1_KO_1 | 58.16     | -0.17 | 0.19    | 0.81 |
| NGLY1_1    | -         | -     | -       | -    |
| NGLY1_KO_2 | -         | -     | -       | -    |
| NGLY1_2    | -         | -     | -       | -    |

Supplement: Supplementary file 5442 [file 1]

IPI00868860.1|CASP10

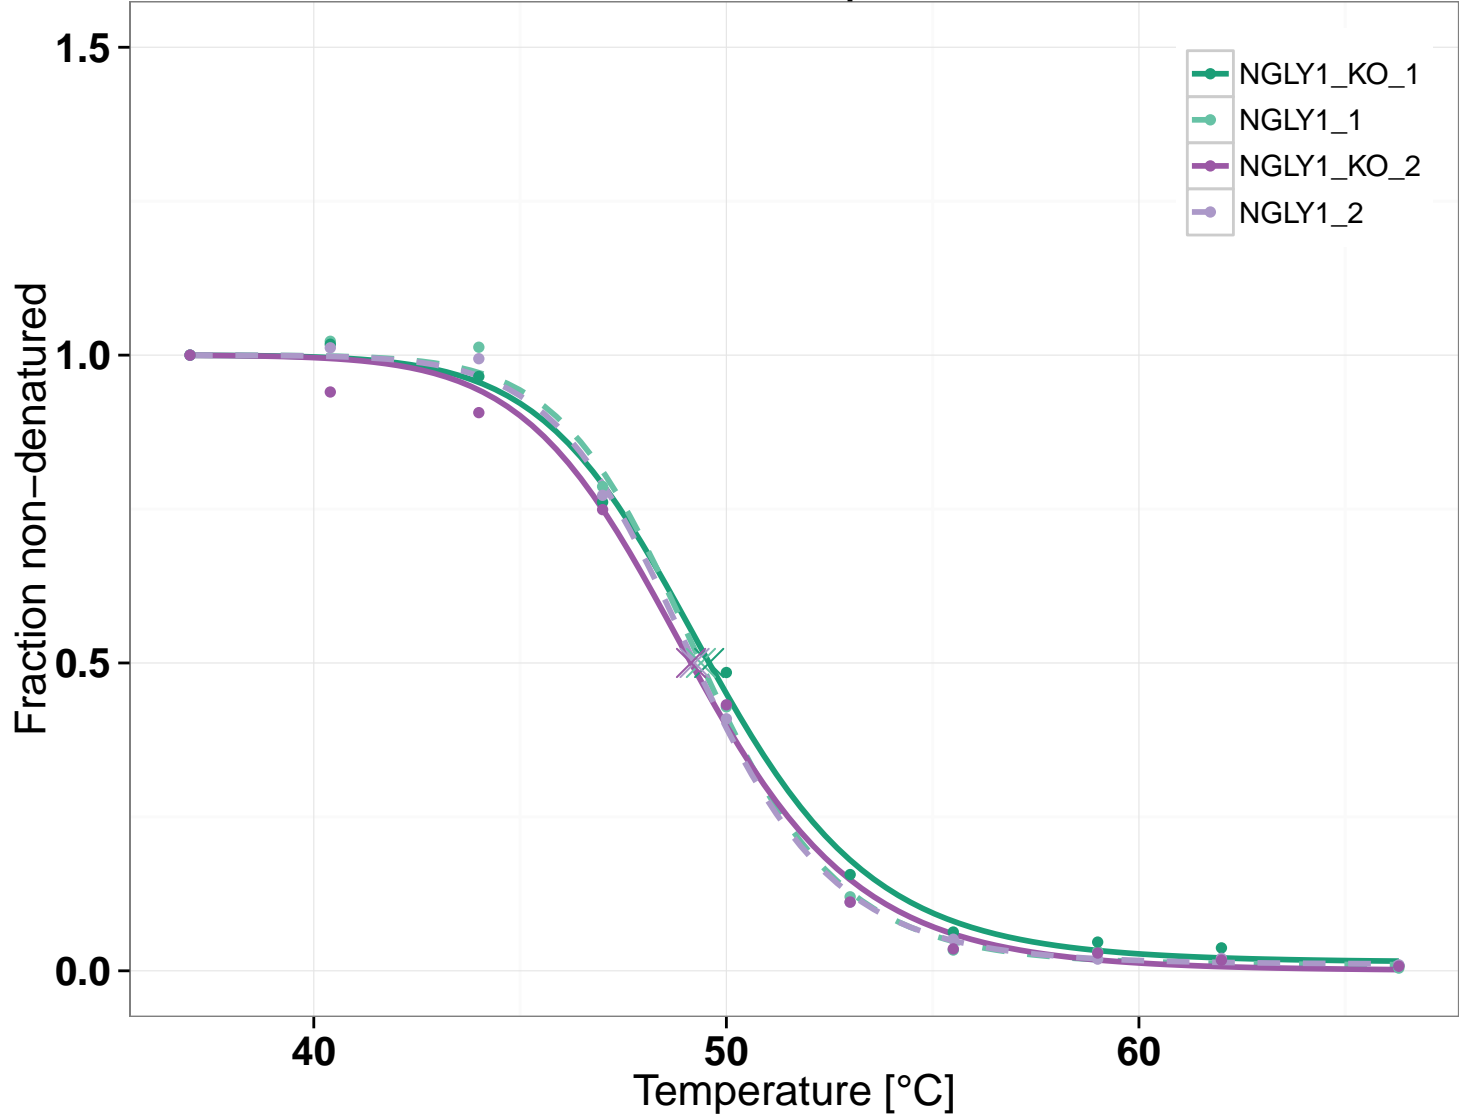

|            | meltPoint | slope | plateau | R2 |
|------------|-----------|-------|---------|----|
| NGLY1_KO_1 | 49.58     | -0.12 | 0.01    | 1  |
| NGLY1_1    | 49.38     | -0.15 | 0.01    | 1  |
| NGLY1_KO_2 | 49.14     | -0.12 | 0       | 1  |
| NGLY1_2    | 49.23     | -0.14 | 0.01    | 1  |

Supplement: Supplementary file 5443 [file 1]

# IPI00032293.1|CST3

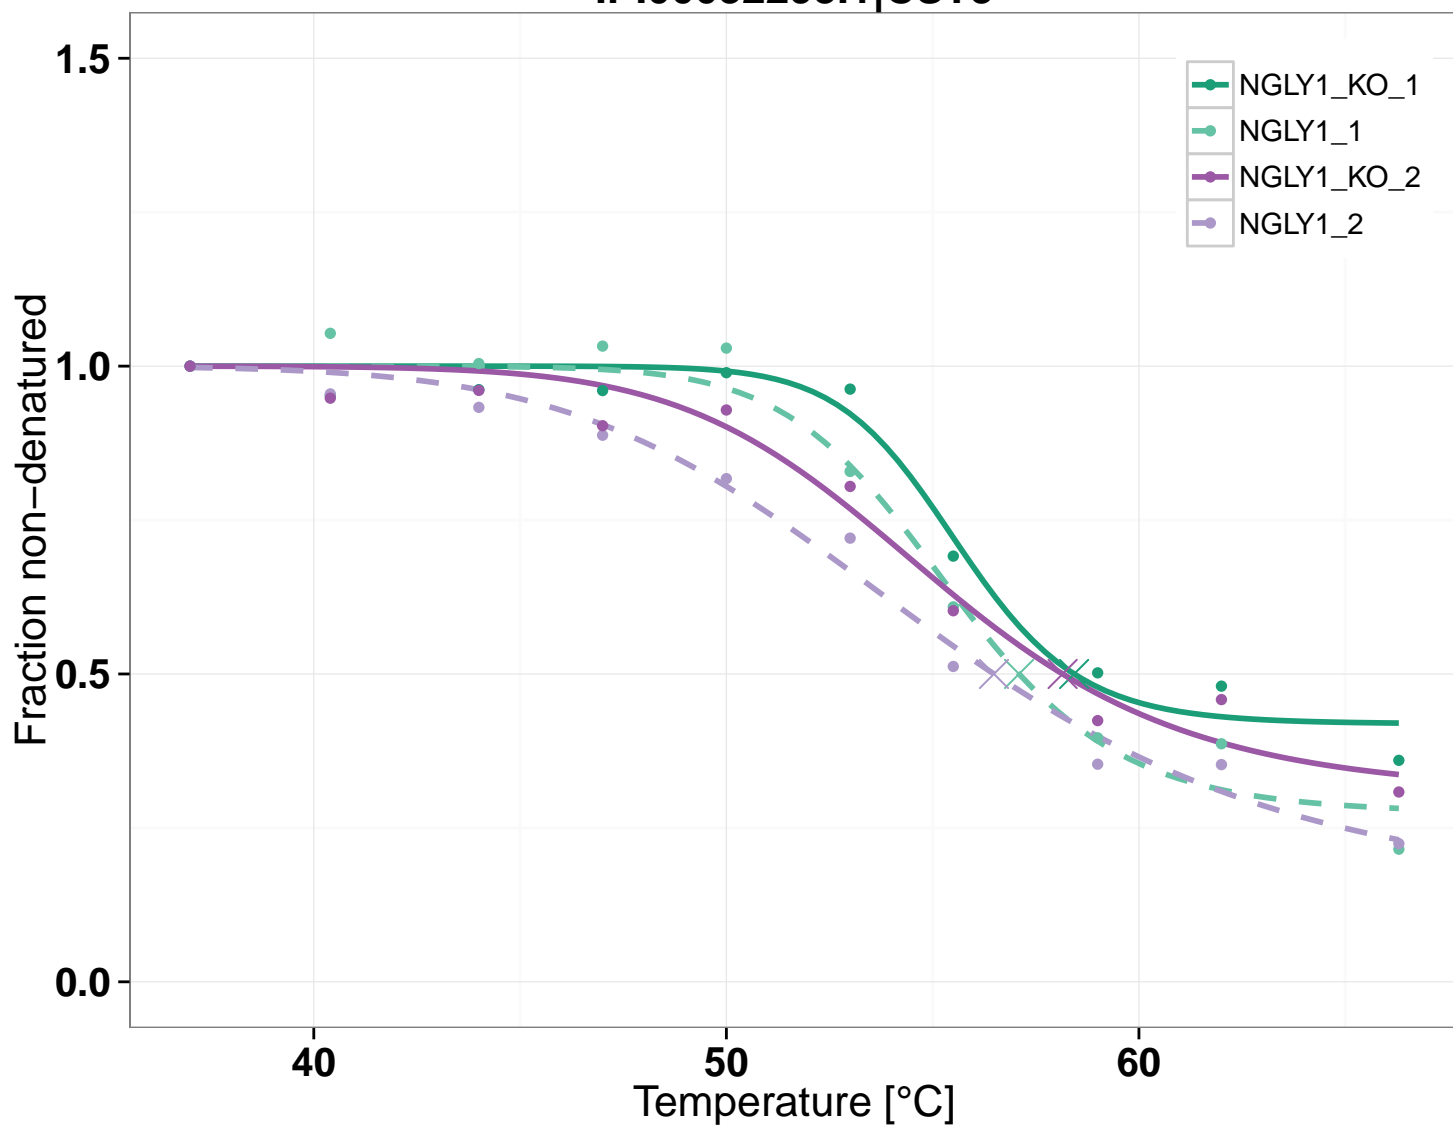

|            | meltPoint | slope  | plateau | R2   |
|------------|-----------|--------|---------|------|
| NGLY1_KO_1 | 58.43     | -0.099 | 0.42    | 0.97 |
| NGLY1_1    | 57.09     | -0.09  | 0.27    | 0.98 |
| NGLY1_KO_2 | 58.15     | -0.057 | 0.3     | 0.97 |
| NGLY1_2    | 56.49     | -0.049 | 0.13    | 0.99 |

Supplement: Supplementary file 5444 [file 1]

IPI00793723.1|MNAT1

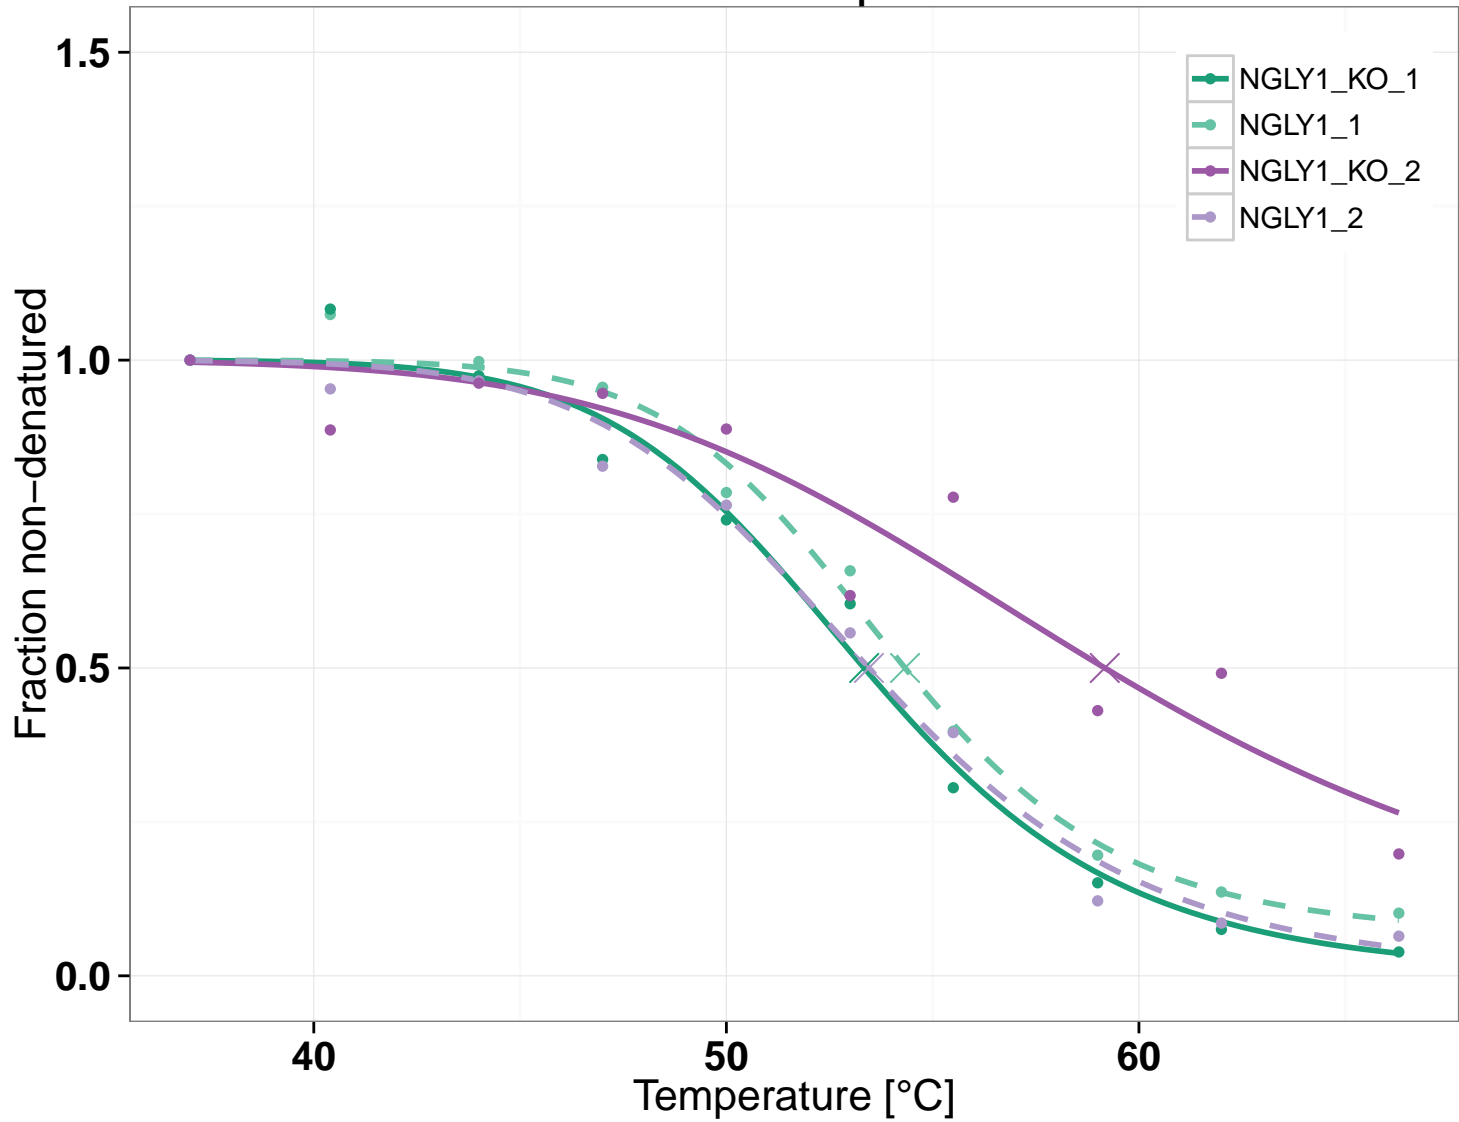

|            | meltPoint | slope  | plateau | R2   |
|------------|-----------|--------|---------|------|
| NGLY1_KO_1 | 53.34     | -0.08  | 0       | 0.99 |
| NGLY1_1    | 54.33     | -0.085 | 0.07    | 0.99 |
| NGLY1_KO_2 | 59.17     | -0.042 | 0       | 0.9  |
| NGLY1_2    | 53.46     | -0.075 | 0       | 0.99 |

Supplement: Supplementary file 5445 [file 1]

# IPI00856078.1|LDB1

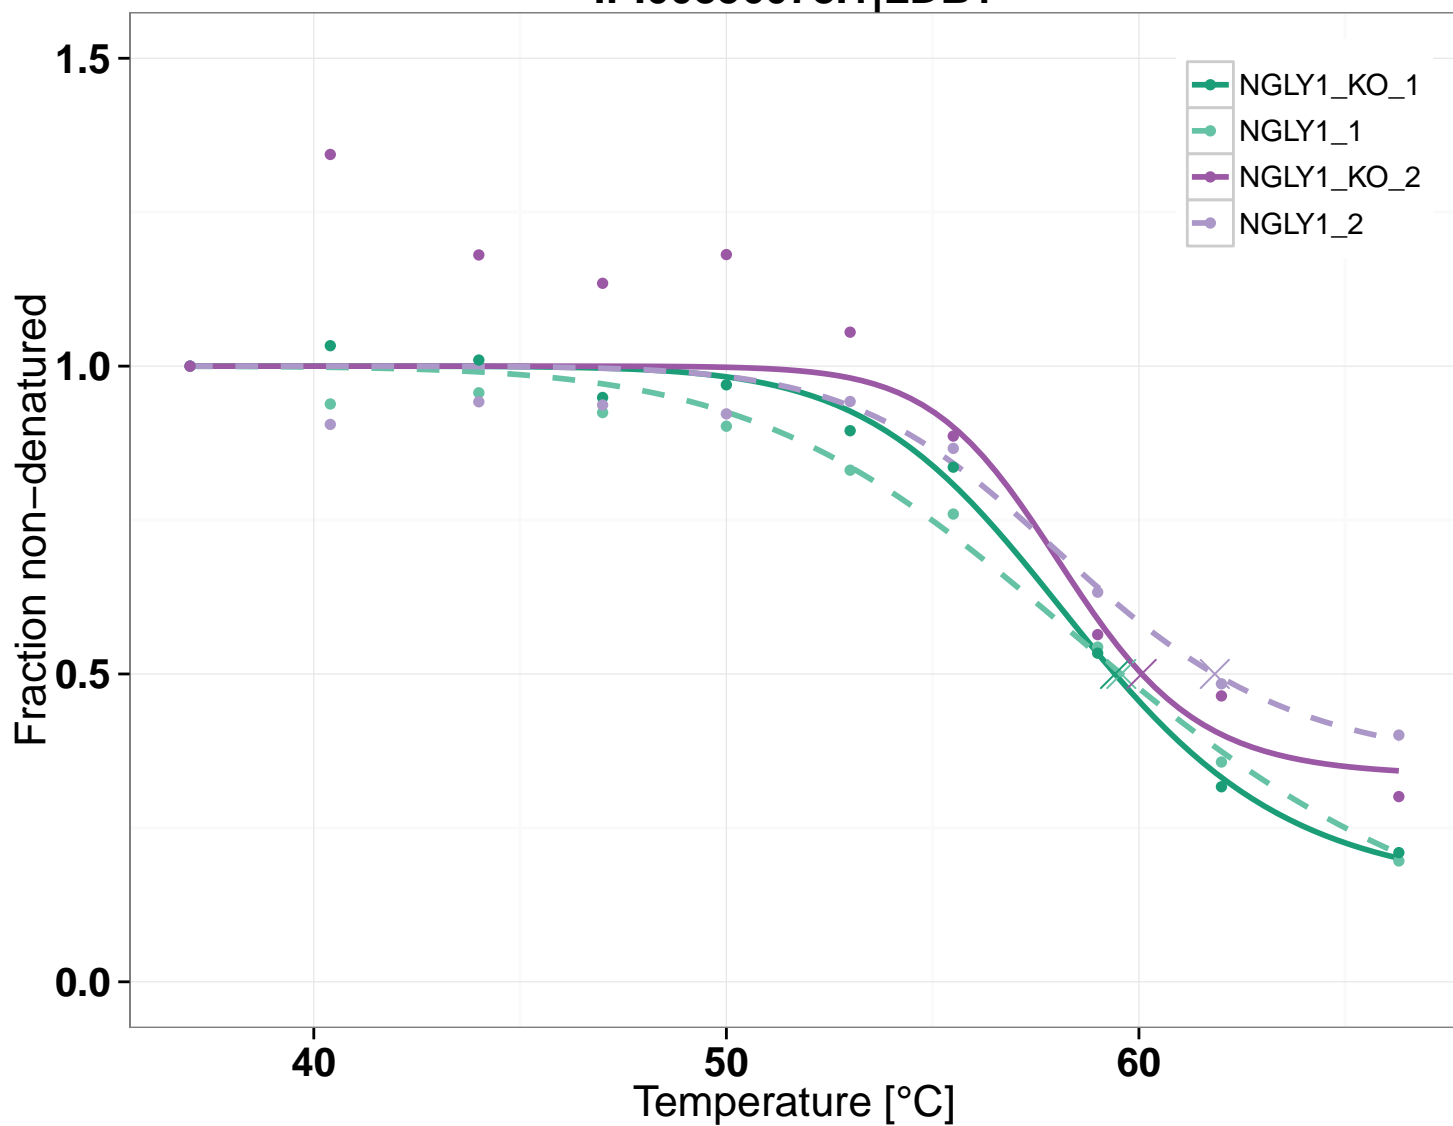

|            | meltPoint | slope  | plateau | R2   |
|------------|-----------|--------|---------|------|
| NGLY1_KO_1 | 59.42     | -0.084 | 0.15    | 0.99 |
| NGLY1_1    | 59.57     | -0.056 | 0       | 0.99 |
| NGLY1_KO_2 | 60.07     | -0.1   | 0.33    | 0.81 |
| NGLY1_2    | 61.84     | -0.061 | 0.34    | 0.95 |

Supplement: Supplementary file 5446 [file 1]

IPI00009654.1|TRAPPC1

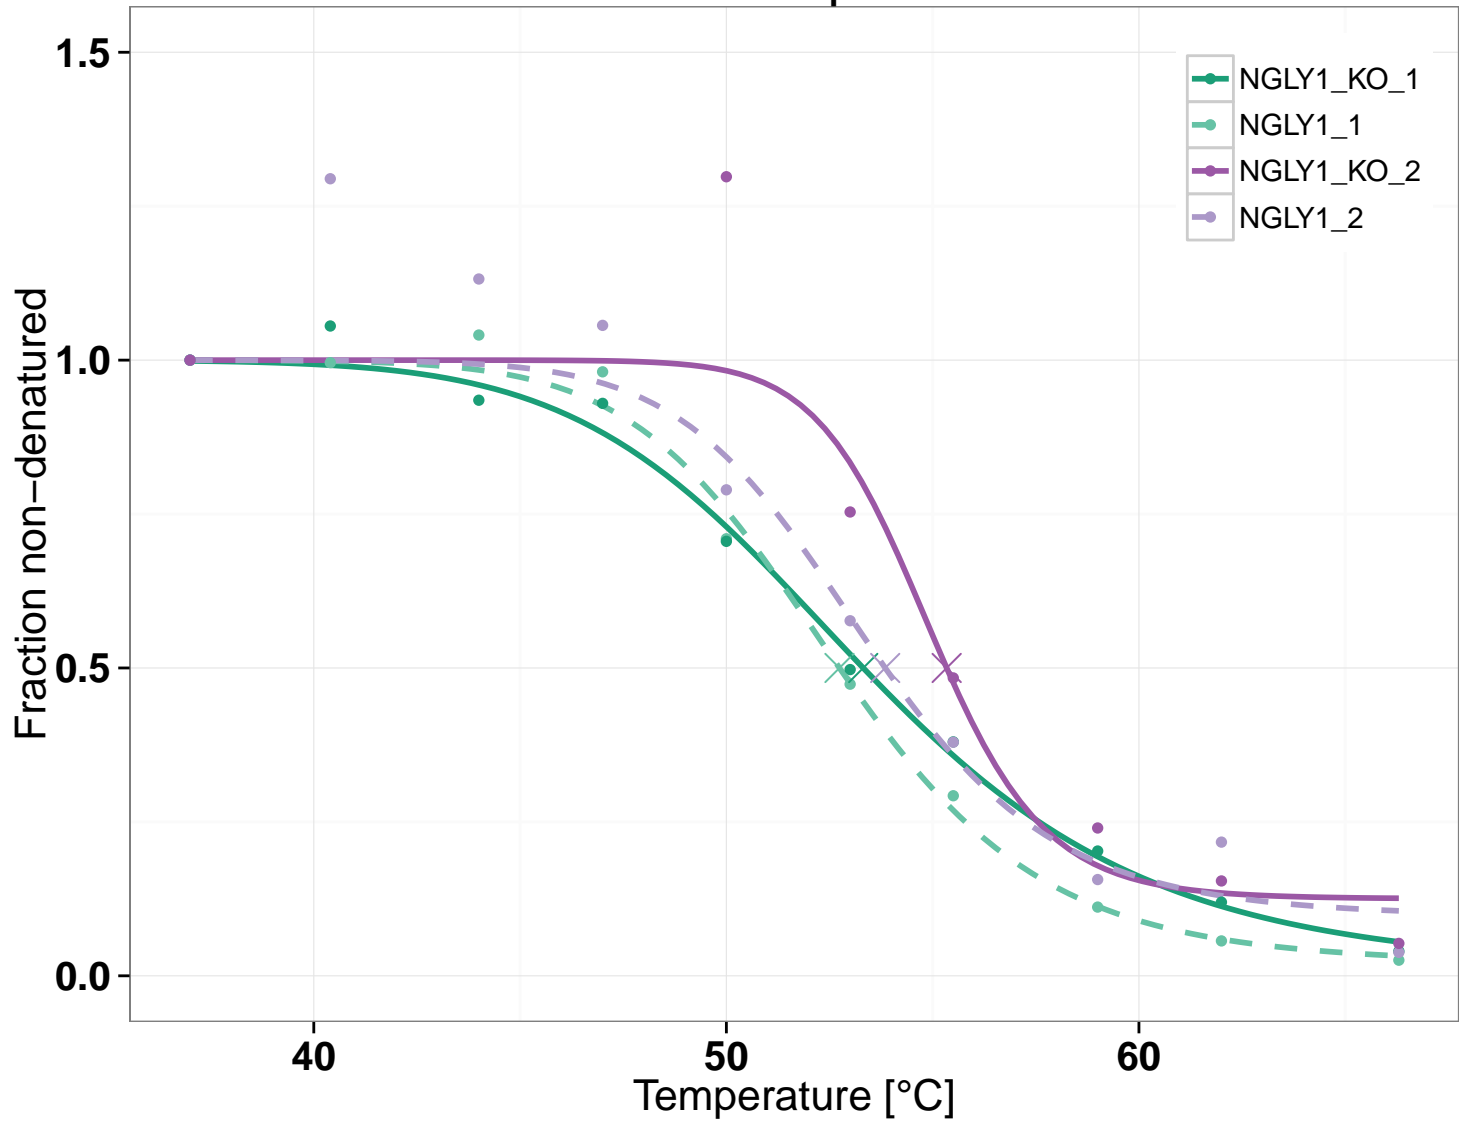

|            | meltPoint | slope  | plateau | R2   |
|------------|-----------|--------|---------|------|
| NGLY1_KO_1 | 53.32     | -0.071 | 0.01    | 0.99 |
| NGLY1_1    | 52.74     | -0.098 | 0.02    | 0.99 |
| NGLY1_KO_2 | 55.34     | -0.16  | 0.12    | 0.6  |
| NGLY1_2    | 53.85     | -0.099 | 0.1     | 0.93 |

Supplement: Supplementary file 5447 [file 1]

IPI00513879.3|FBXO7

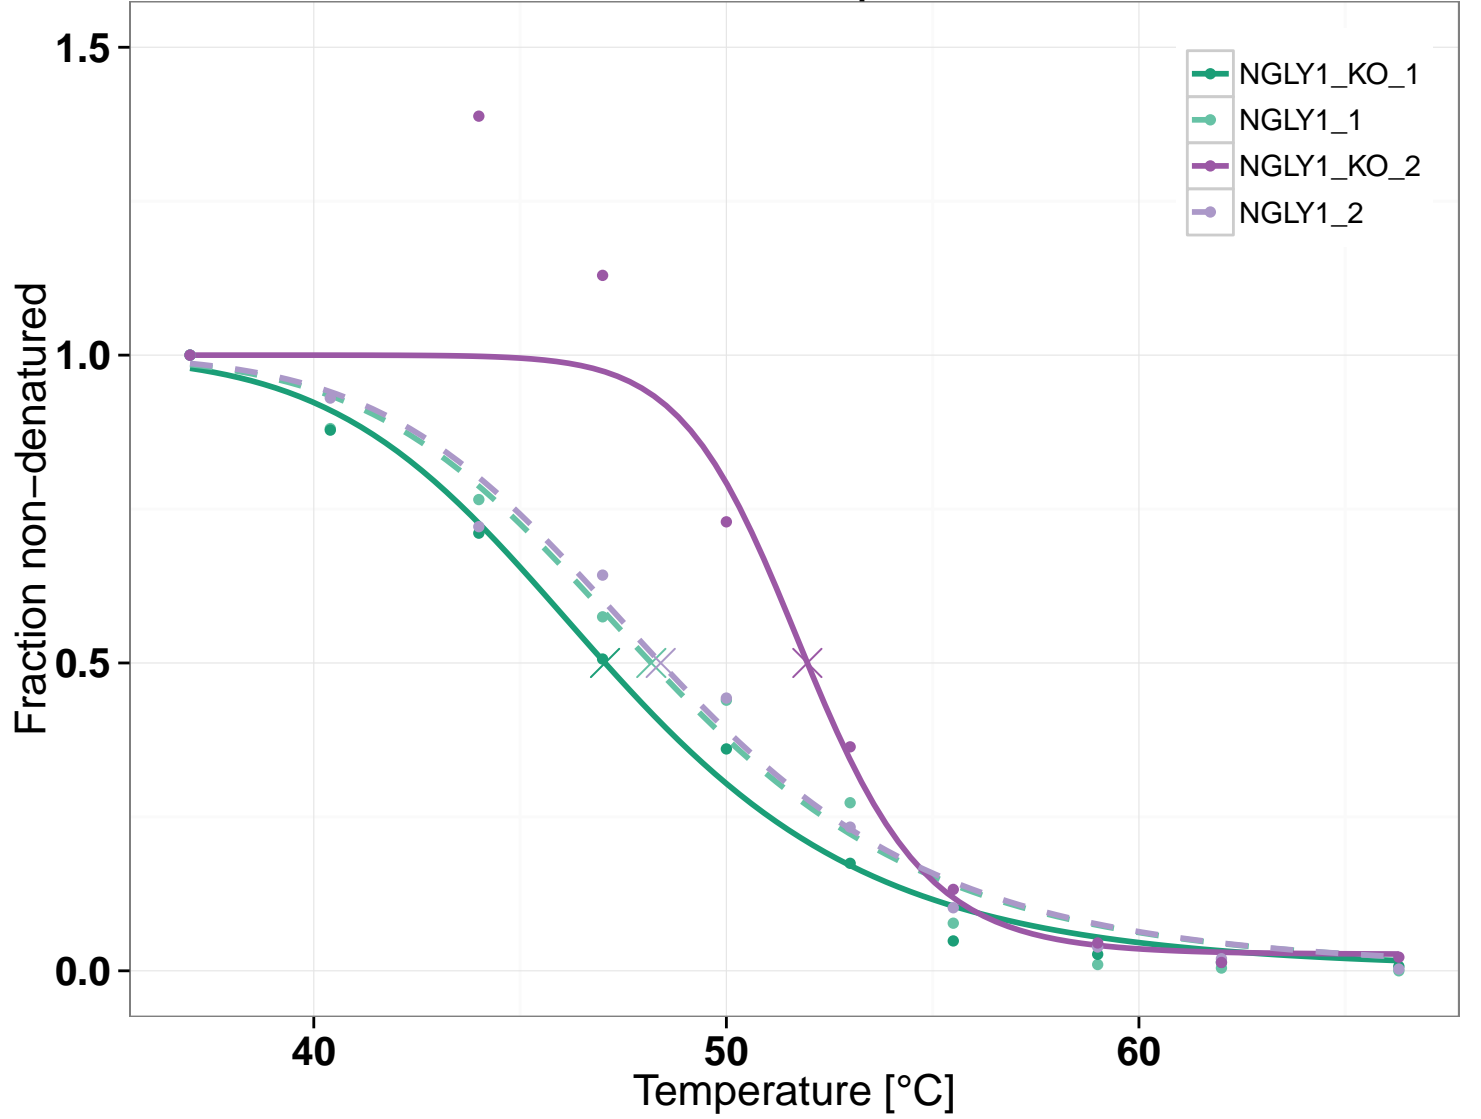

|            | meltPoint | slope  | plateau | R2   |
|------------|-----------|--------|---------|------|
| NGLY1_KO_1 | 47.06     | -0.076 | 0       | 0.99 |
| NGLY1_1    | 48.18     | -0.073 | 0       | 0.98 |
| NGLY1_KO_2 | 51.96     | -0.16  | 0.03    | 0.82 |
| NGLY1_2    | 48.41     | -0.073 | 0       | 0.99 |

Supplement: Supplementary file 5448 [file 1]

IPI00025178.3|DENND2C

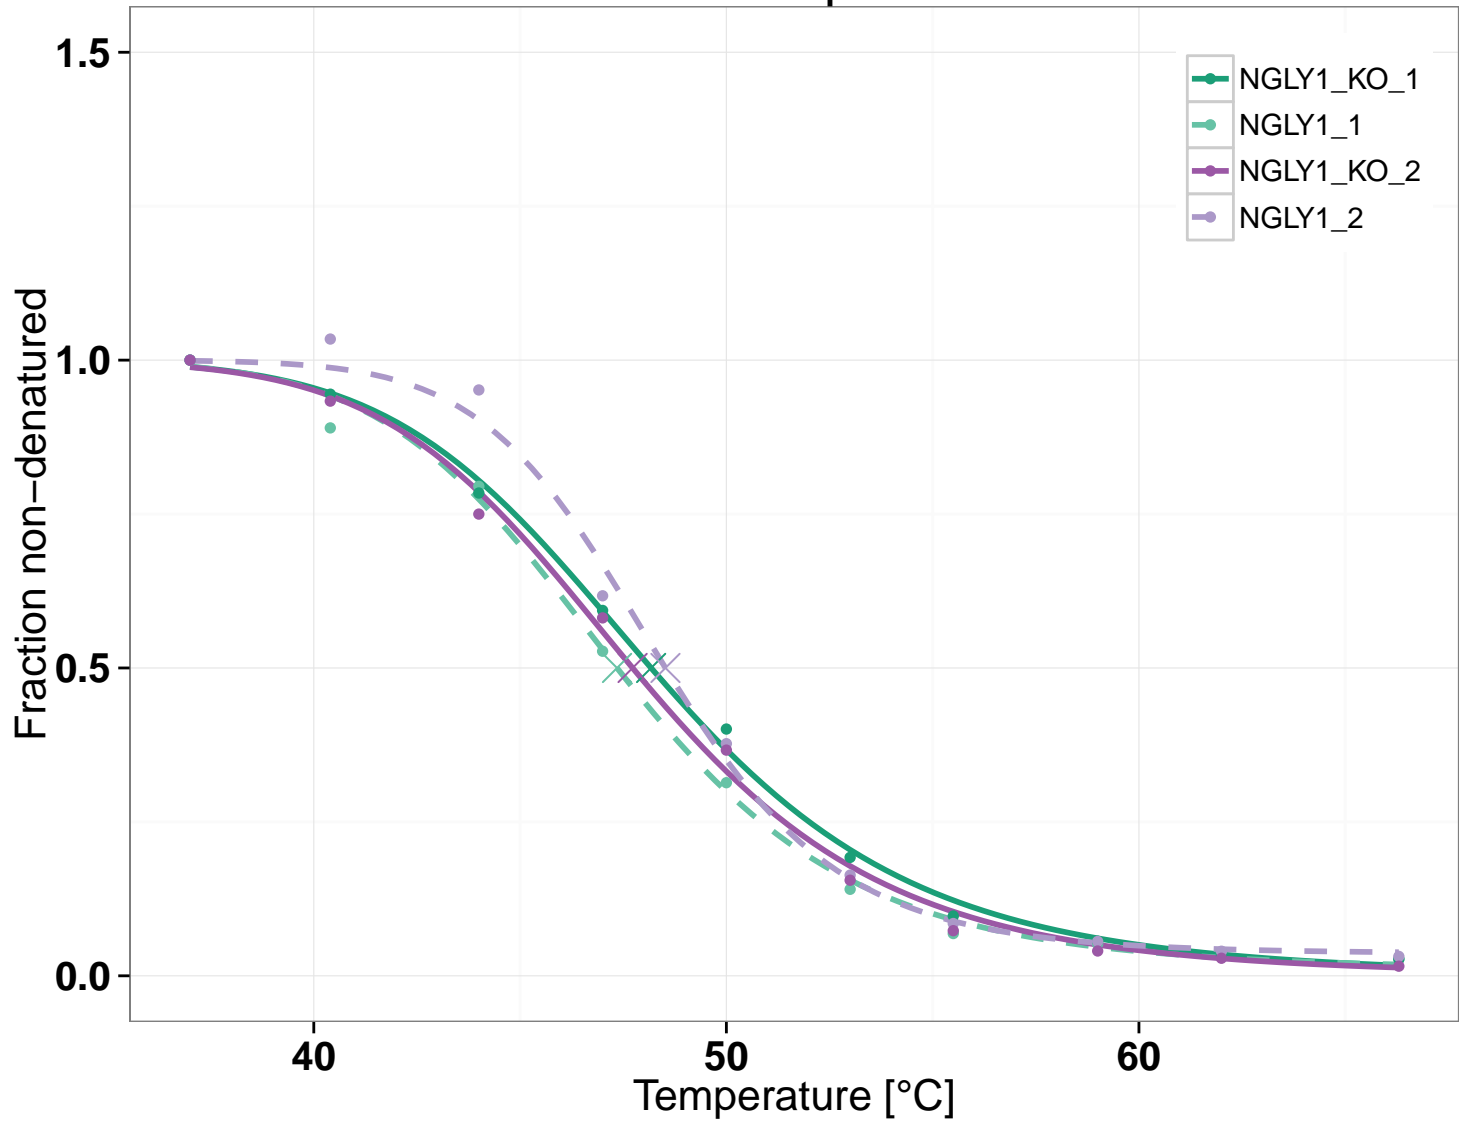

|            | meltPoint | slope  | plateau | R2 |
|------------|-----------|--------|---------|----|
| NGLY1_KO_1 | 48.18     | -0.079 | 0       | 1  |
| NGLY1_1    | 47.35     | -0.087 | 0.01    | 1  |
| NGLY1_KO_2 | 47.73     | -0.082 | 0       | 1  |
| NGLY1_2    | 48.52     | -0.11  | 0.04    | 1  |

Supplement: Supplementary file 5449 [file 1]

IPI00412415.2|BAZ1A

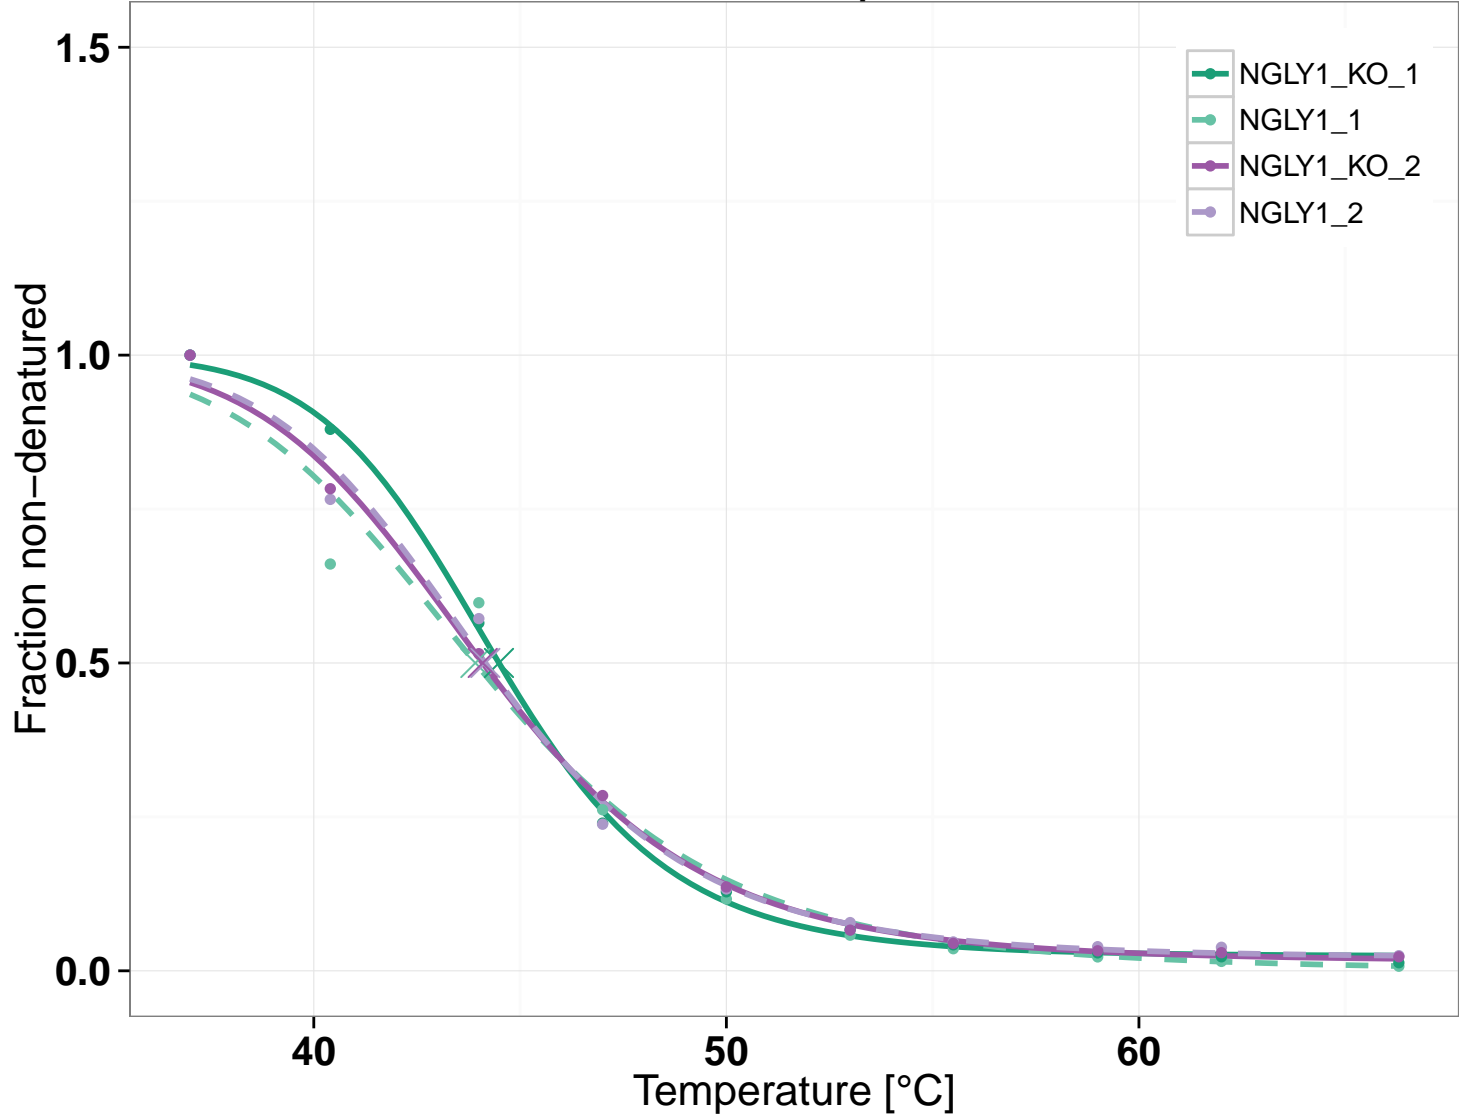

|            | meltPoint | slope  | plateau | R2   |
|------------|-----------|--------|---------|------|
| NGLY1_KO_1 | 44.49     | -0.11  | 0.02    | 1    |
| NGLY1_1    | 43.92     | -0.083 | 0       | 0.97 |
| NGLY1_KO_2 | 44.09     | -0.092 | 0.02    | 1    |
| NGLY1_2    | 44.16     | -0.094 | 0.02    | 0.99 |

Supplement: Supplementary file 5450 [file 1]

IPI00306749.8|SLC4A1AP

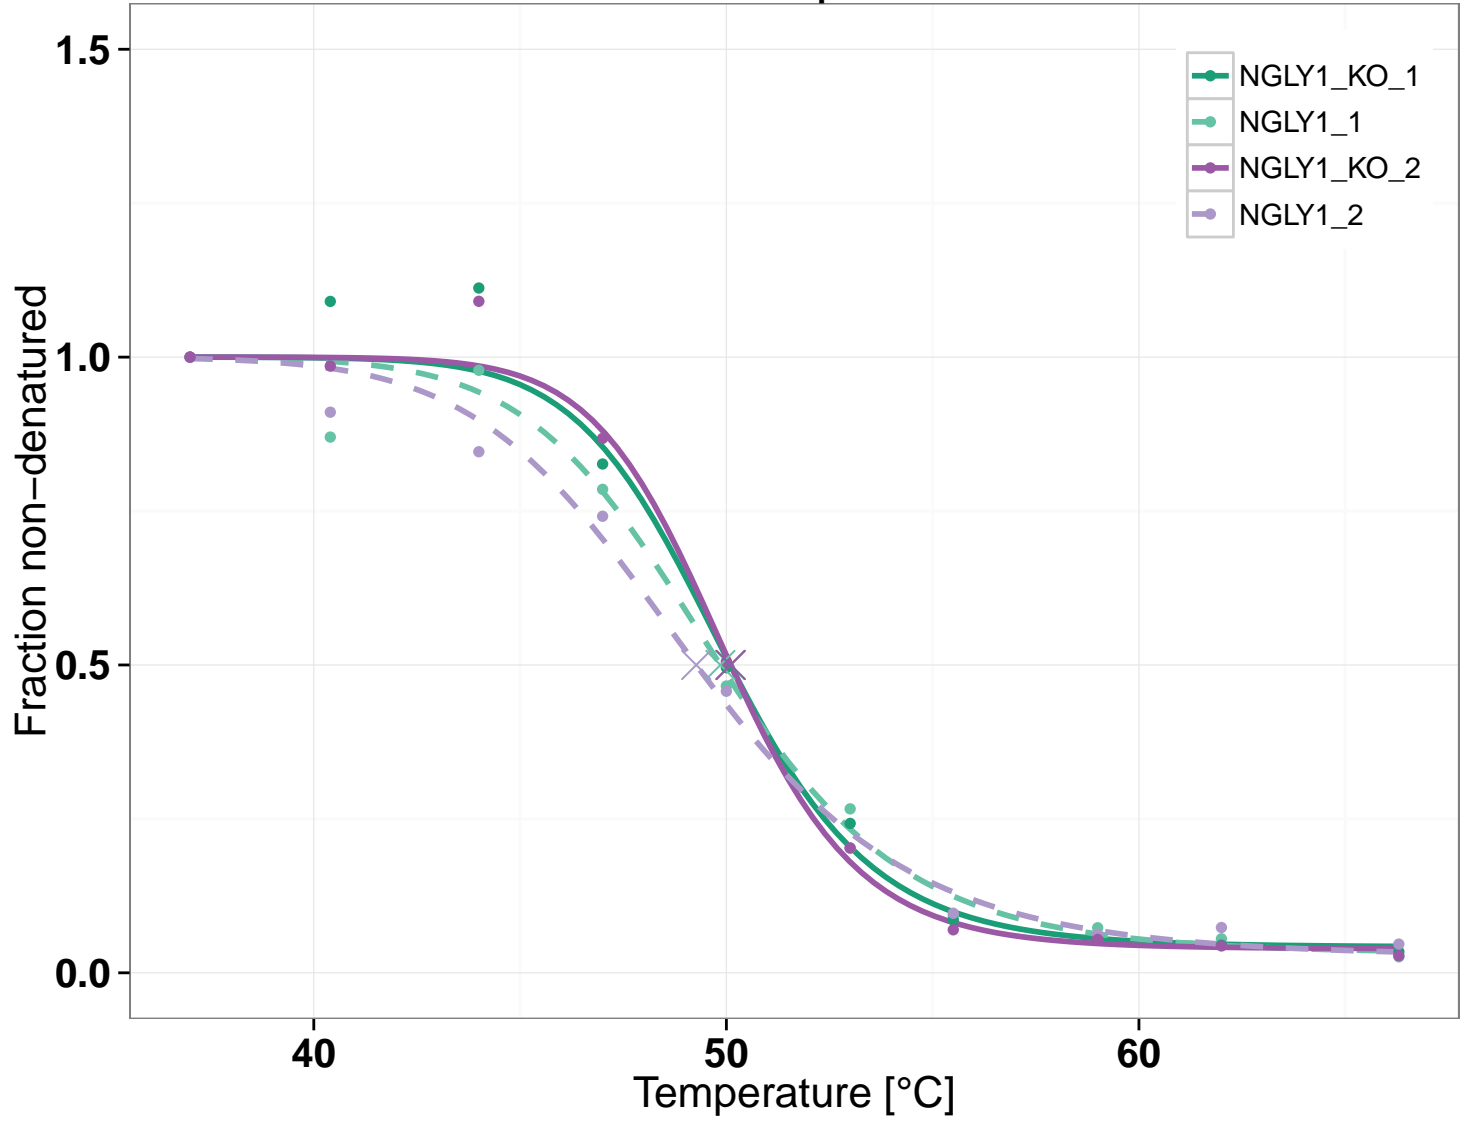

|            | meltPoint | slope  | plateau | R2   |
|------------|-----------|--------|---------|------|
| NGLY1_KO_1 | 50.1      | -0.13  | 0.04    | 0.98 |
| NGLY1_1    | 49.86     | -0.11  | 0.03    | 0.99 |
| NGLY1_KO_2 | 50.11     | -0.15  | 0.04    | 0.99 |
| NGLY1_2    | 49.27     | -0.092 | 0.03    | 0.99 |

Supplement: Supplementary file 5451 [file 1]

IPI00399183.5|APOB48R

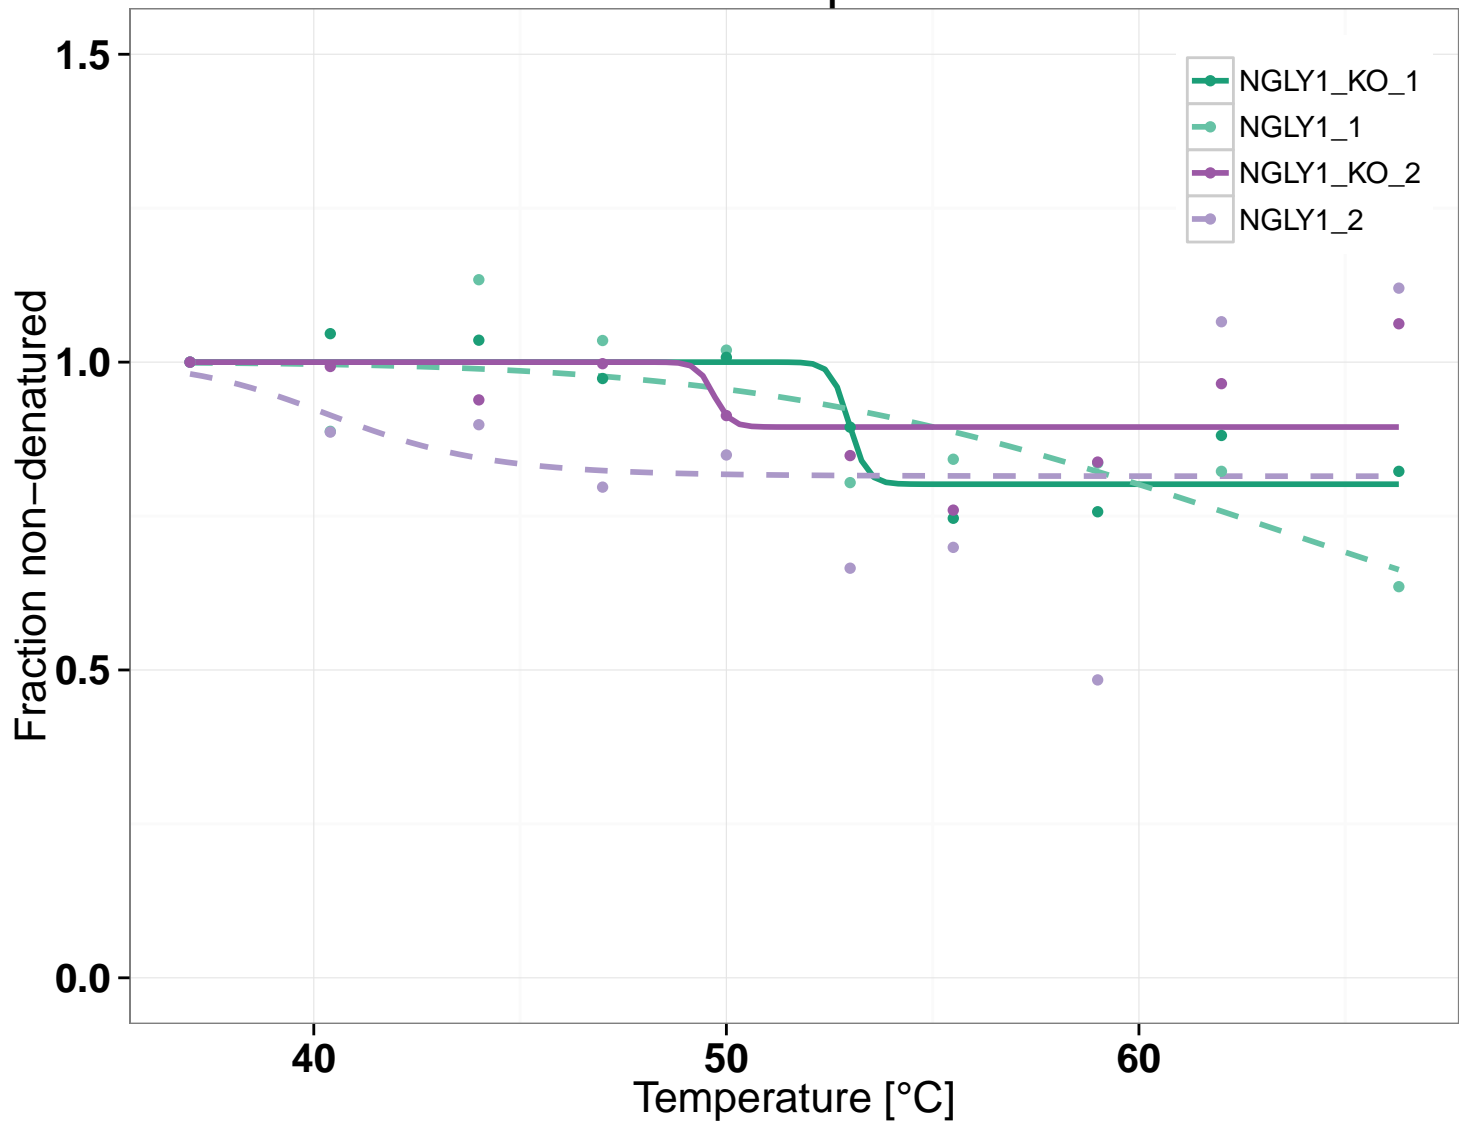

|            | meltPoint | slope  | plateau | R2   |
|------------|-----------|--------|---------|------|
| NGLY1_KO_1 | —         | -0.23  | 0.8     | 0.86 |
| NGLY1_1    | —         | -0.022 | 0.28    | 0.68 |
| NGLY1_KO_2 | —         | -0.13  | 0.89    | 0.21 |
| NGLY1_2    | —         | -0.025 | 0.81    | 0.09 |

Supplement: Supplementary file 5452 [file 1]

# IPI00184523.1|ARNT

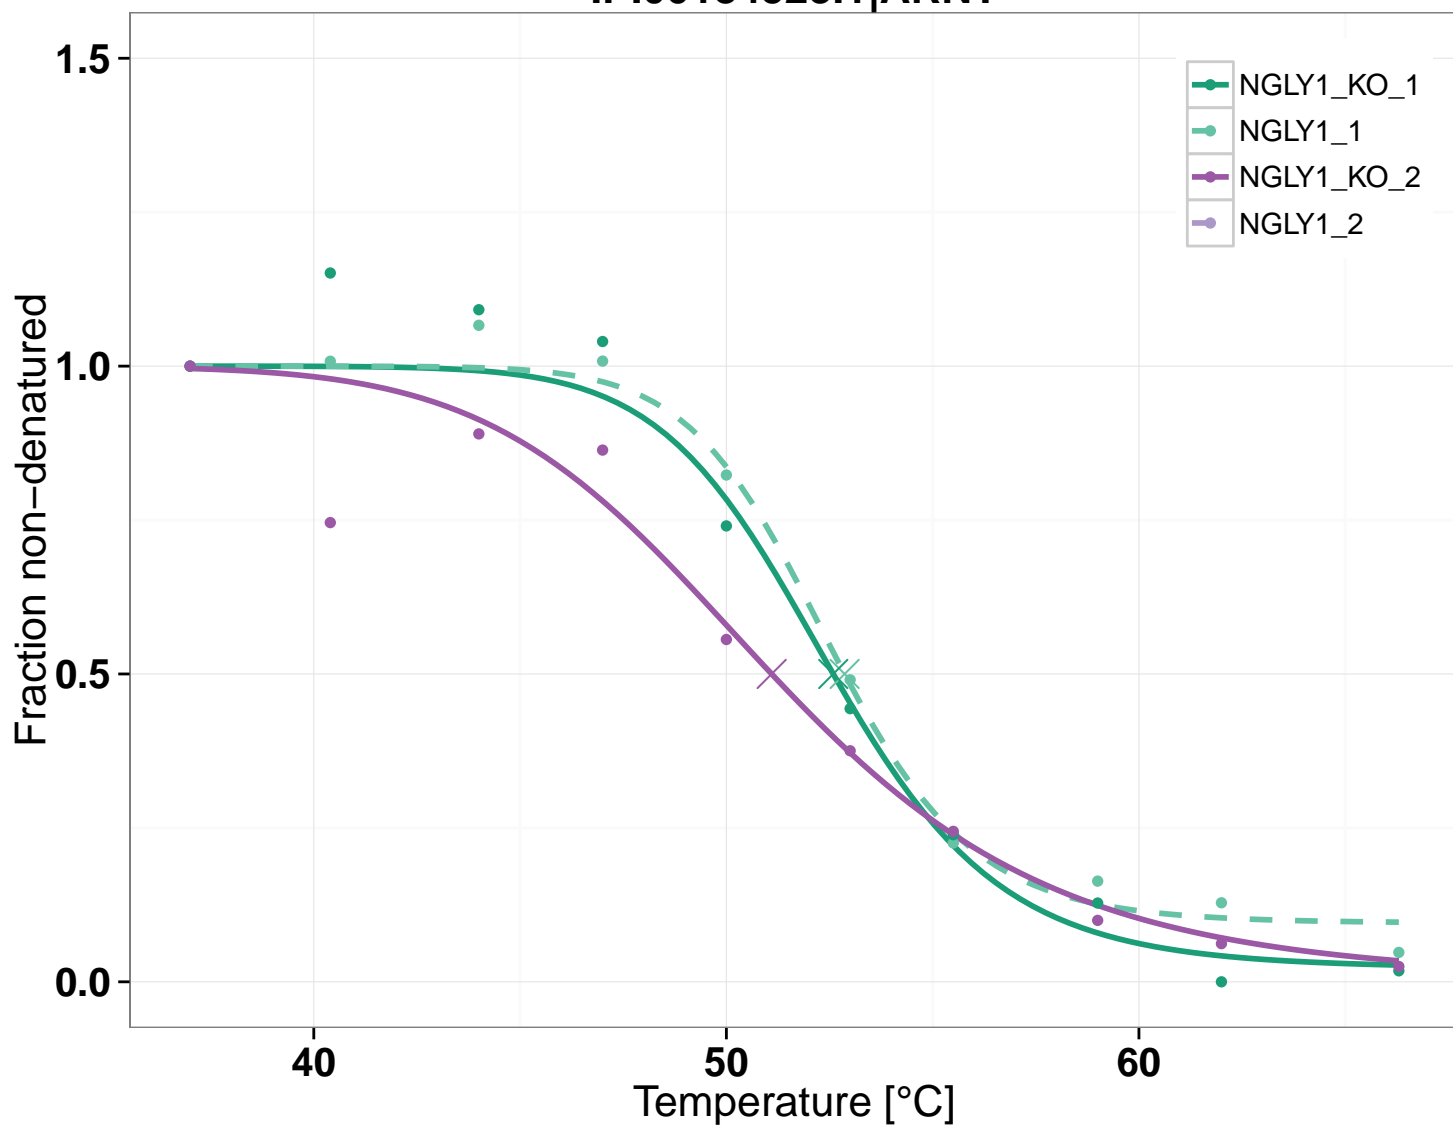

|            | meltPoint | slope  | plateau | R2   |
|------------|-----------|--------|---------|------|
| NGLY1_KO_1 | 52.59     | -0.12  | 0.02    | 0.98 |
| NGLY1_1    | 52.87     | -0.13  | 0.1     | 0.99 |
| NGLY1_KO_2 | 51.1      | -0.073 | 0       | 0.95 |
| NGLY1_2    | -         | -      | -       | -    |

Supplement: Supplementary file 5453 [file 1]

IPI00215888.4|SRP72

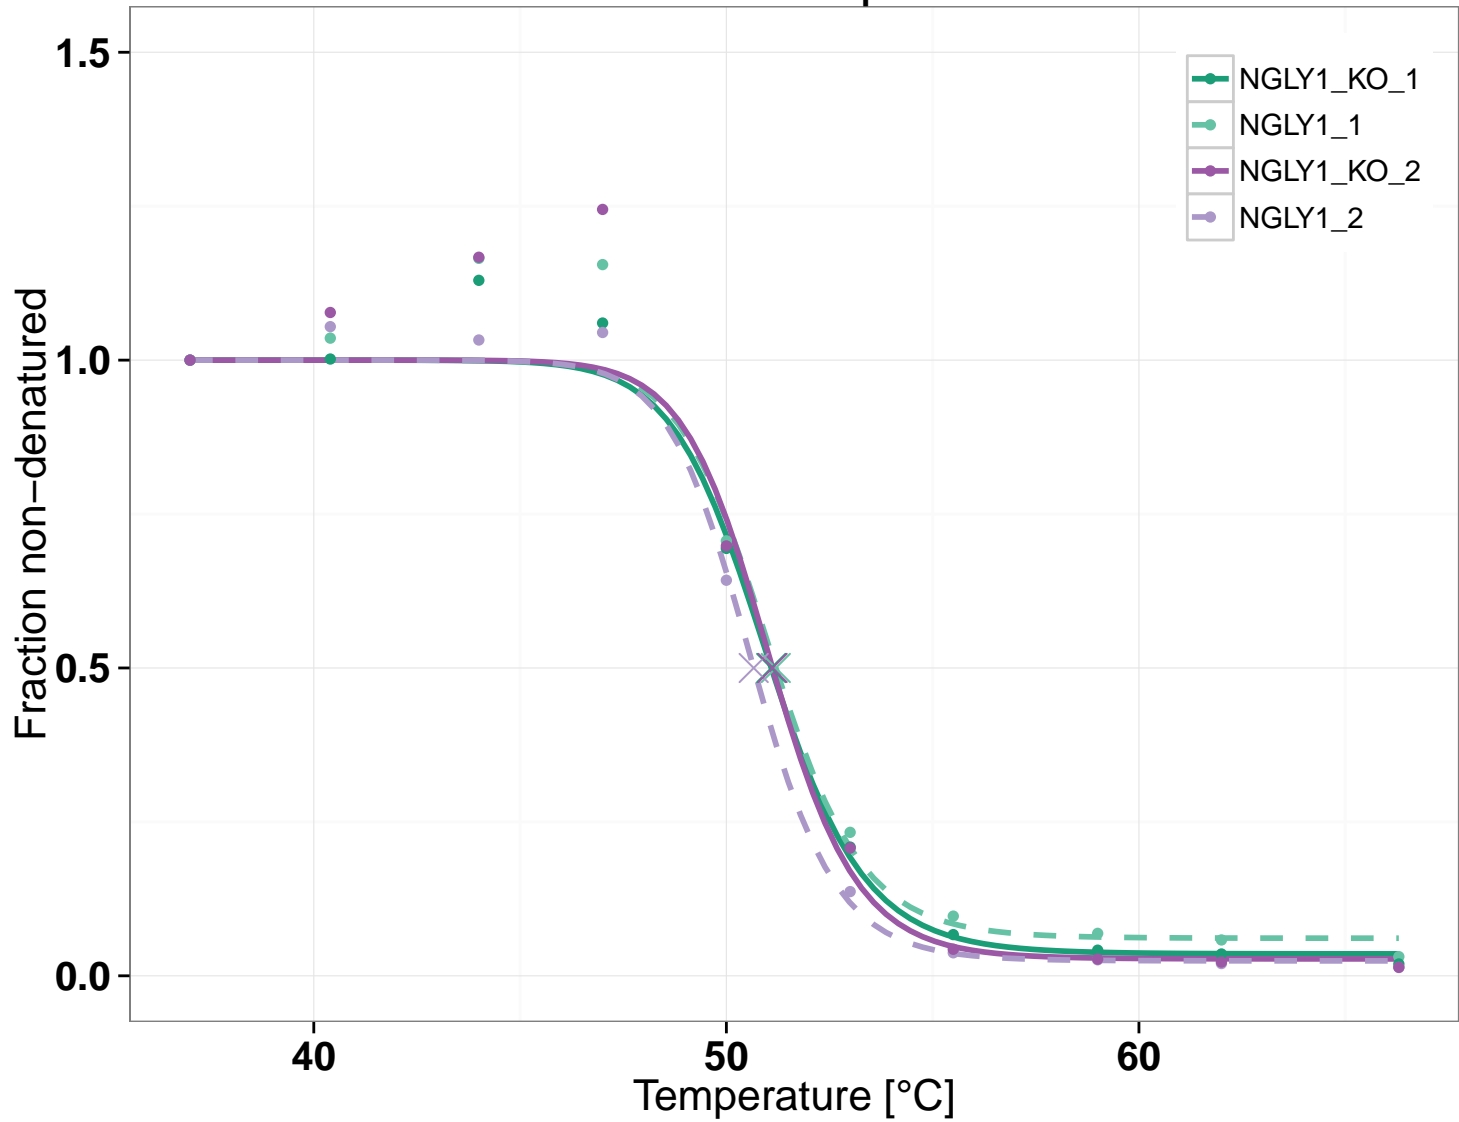

|            | meltPoint | slope | plateau | R2   |
|------------|-----------|-------|---------|------|
| NGLY1_KO_1 | 51.09     | -0.21 | 0.04    | 0.99 |
| NGLY1_1    | 51.2      | -0.21 | 0.06    | 0.97 |
| NGLY1_KO_2 | 51.12     | -0.23 | 0.03    | 0.96 |
| NGLY1_2    | 50.66     | -0.24 | 0.02    | 1    |

Supplement: Supplementary file 5454 [file 1]

IPI00031616.6|C17ORF37

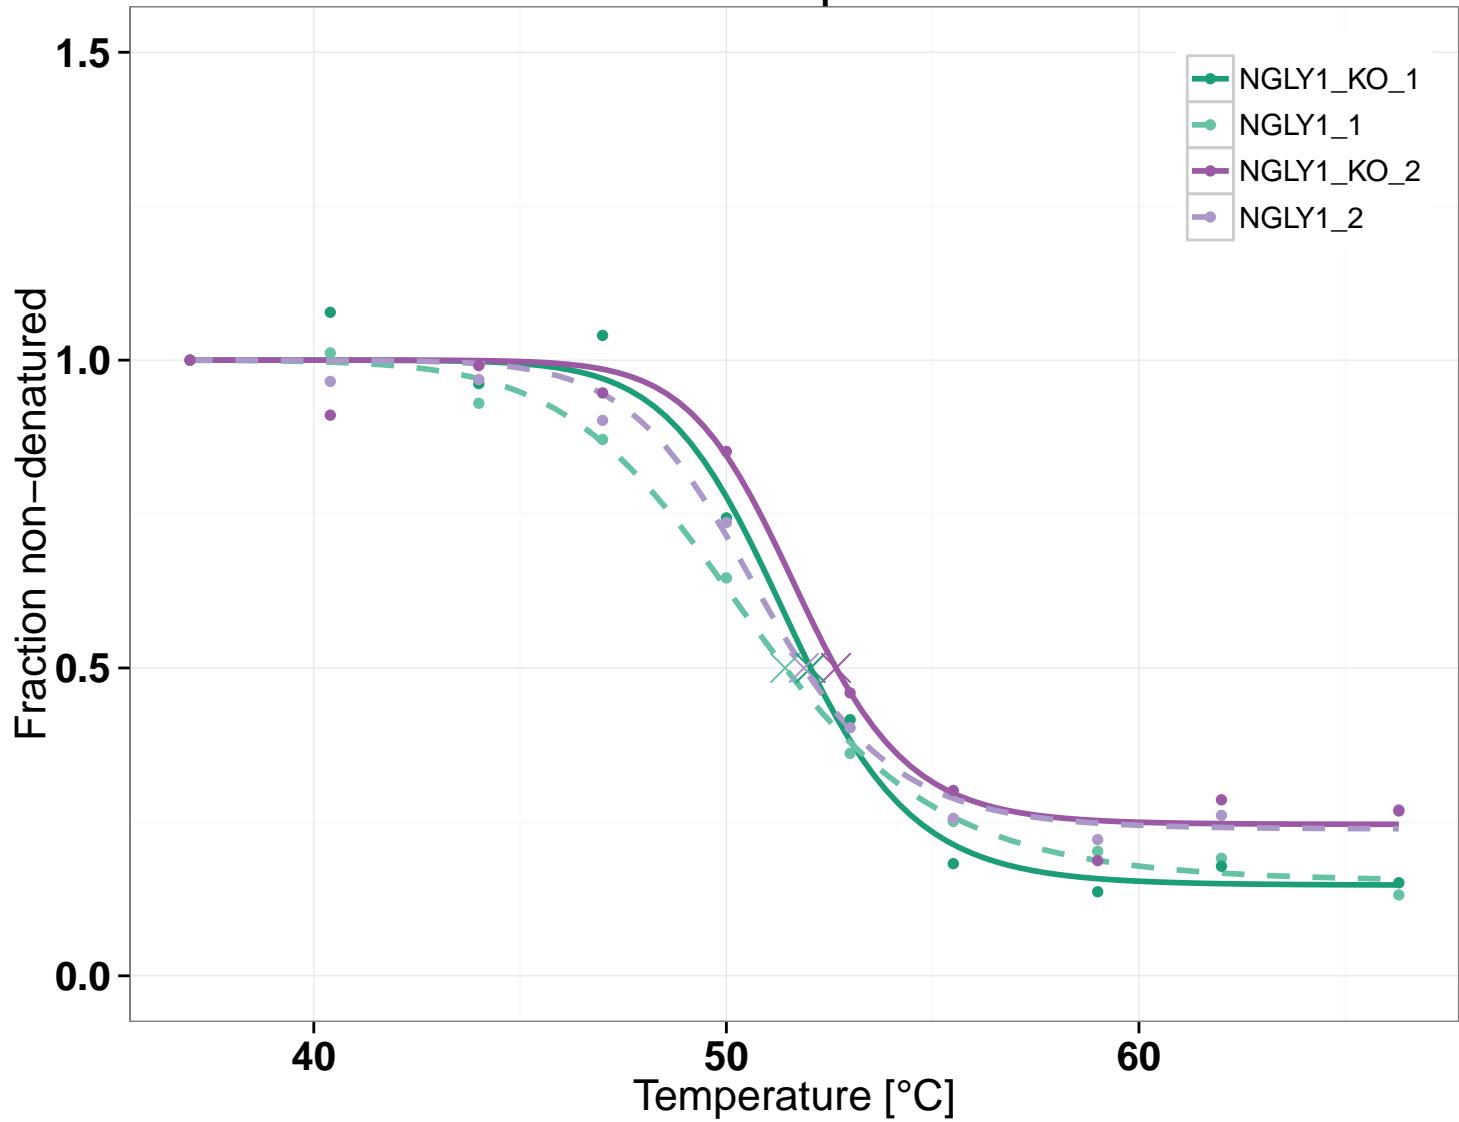

|            | meltPoint | slope  | plateau | R2   |
|------------|-----------|--------|---------|------|
| NGLY1_KO_1 | 52.04     | -0.14  | 0.15    | 0.99 |
| NGLY1_1    | 51.42     | -0.093 | 0.15    | 1    |
| NGLY1_KO_2 | 52.66     | -0.14  | 0.25    | 0.99 |
| NGLY1_2    | 51.88     | -0.12  | 0.24    | 0.99 |

Supplement: Supplementary file 5455 [file 1]

IPI00221179.2|ZDHHC7

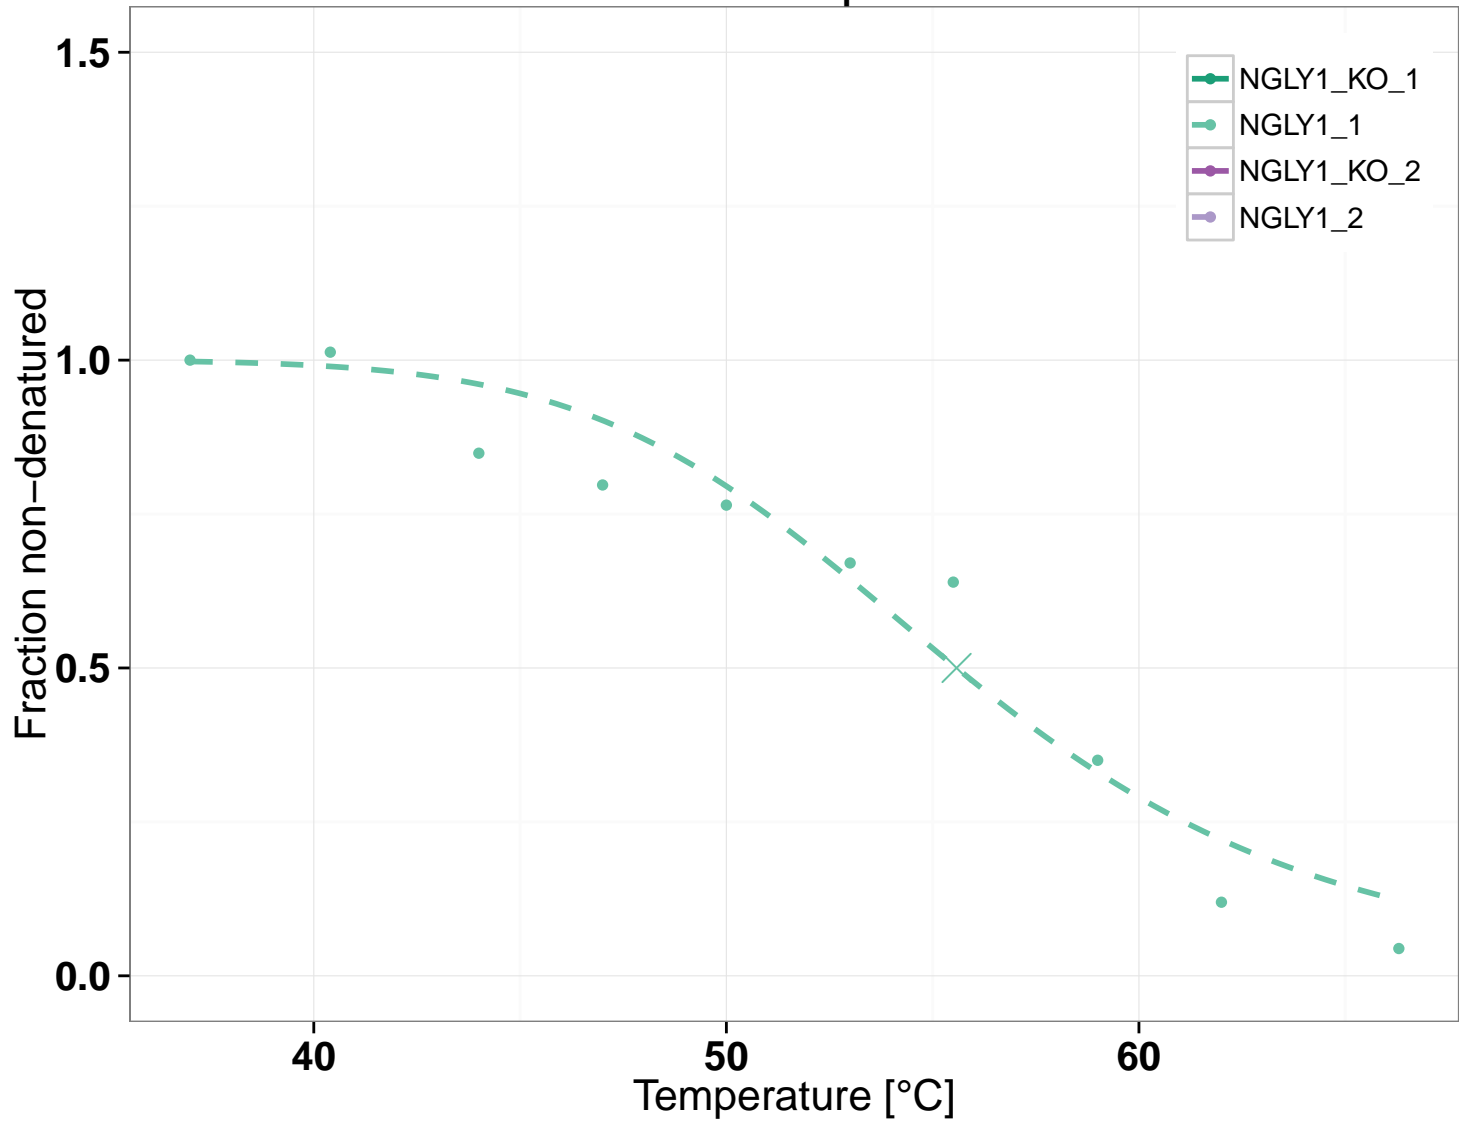

|            | meltPoint | slope  | plateau | R2   |
|------------|-----------|--------|---------|------|
| NGLY1_KO_1 | -         | -      | -       | -    |
| NGLY1_1    | 55.58     | -0.056 | 0       | 0.94 |
| NGLY1_KO_2 | -         | -      | -       | -    |
| NGLY1_2    | -         | -      | -       | -    |

Supplement: Supplementary file 5456 [file 1]

# IPI00639812.1|MGST3

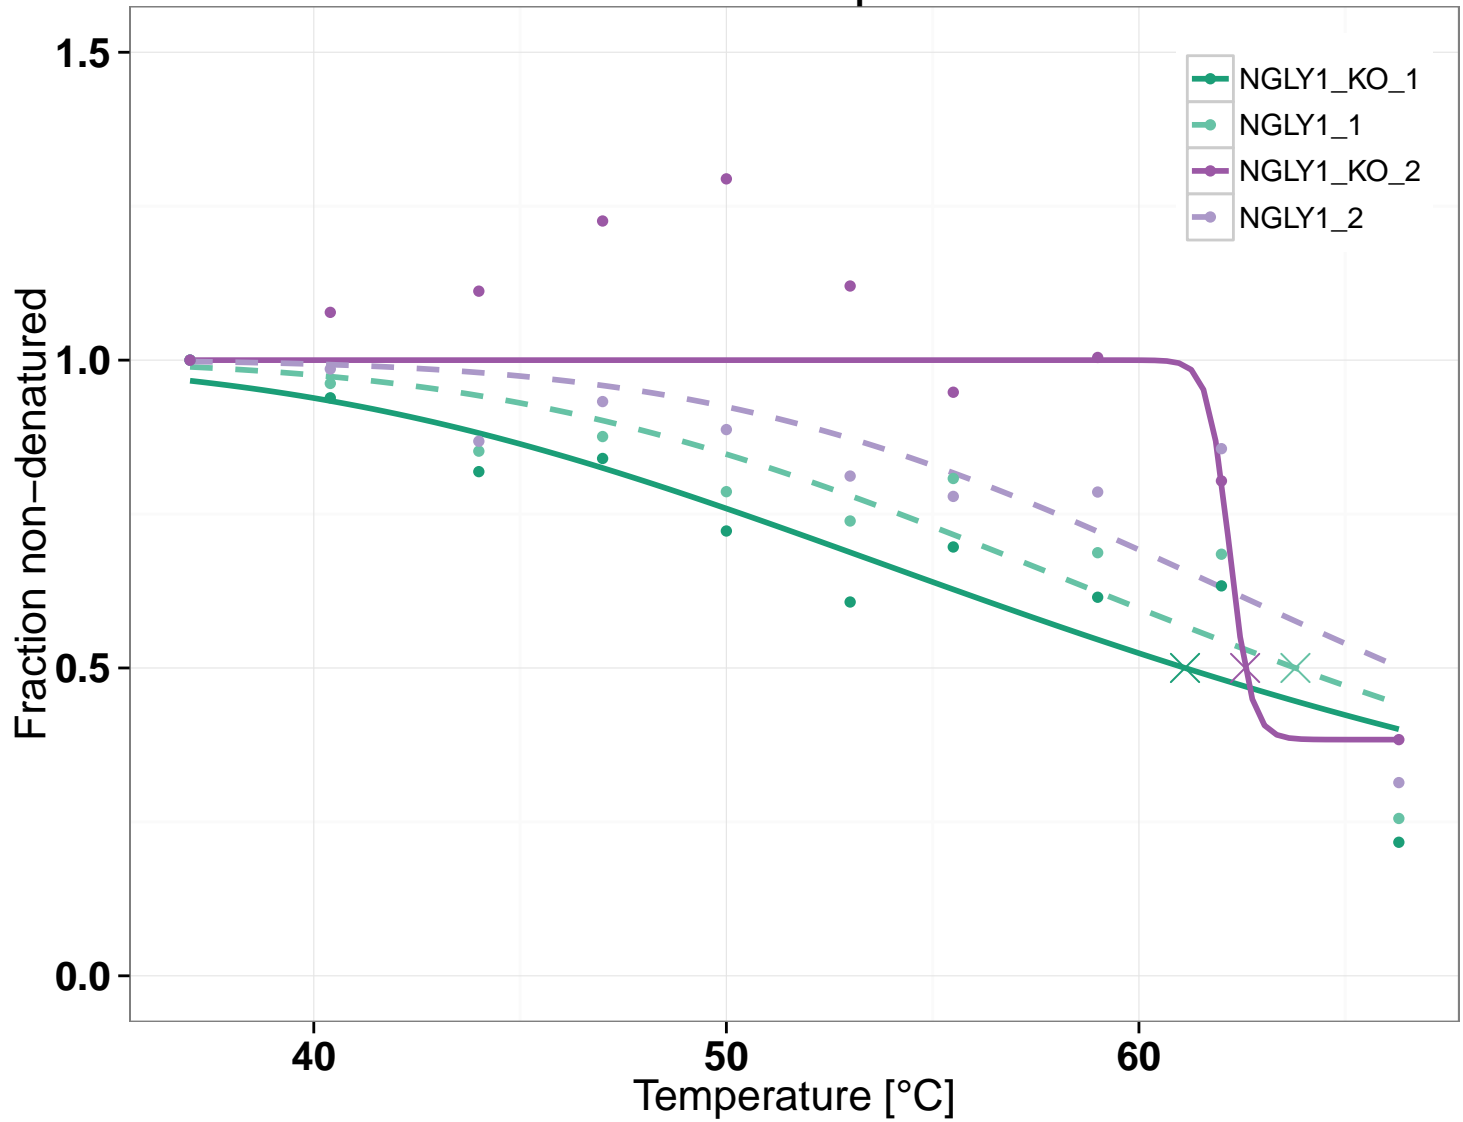

|            | meltPoint | slope  | plateau | R2   |
|------------|-----------|--------|---------|------|
| NGLY1_KO_1 | 61.12     | -0.024 | 0       | 0.82 |
| NGLY1_1    | 63.79     | -0.027 | 0       | 0.79 |
| NGLY1_KO_2 | 62.57     | -0.6   | 0.38    | 0.71 |
| NGLY1_2    | –         | -0.031 | 0       | 0.68 |

Supplement: Supplementary file 5457 [file 1]

# IPI00640817.1|AK1

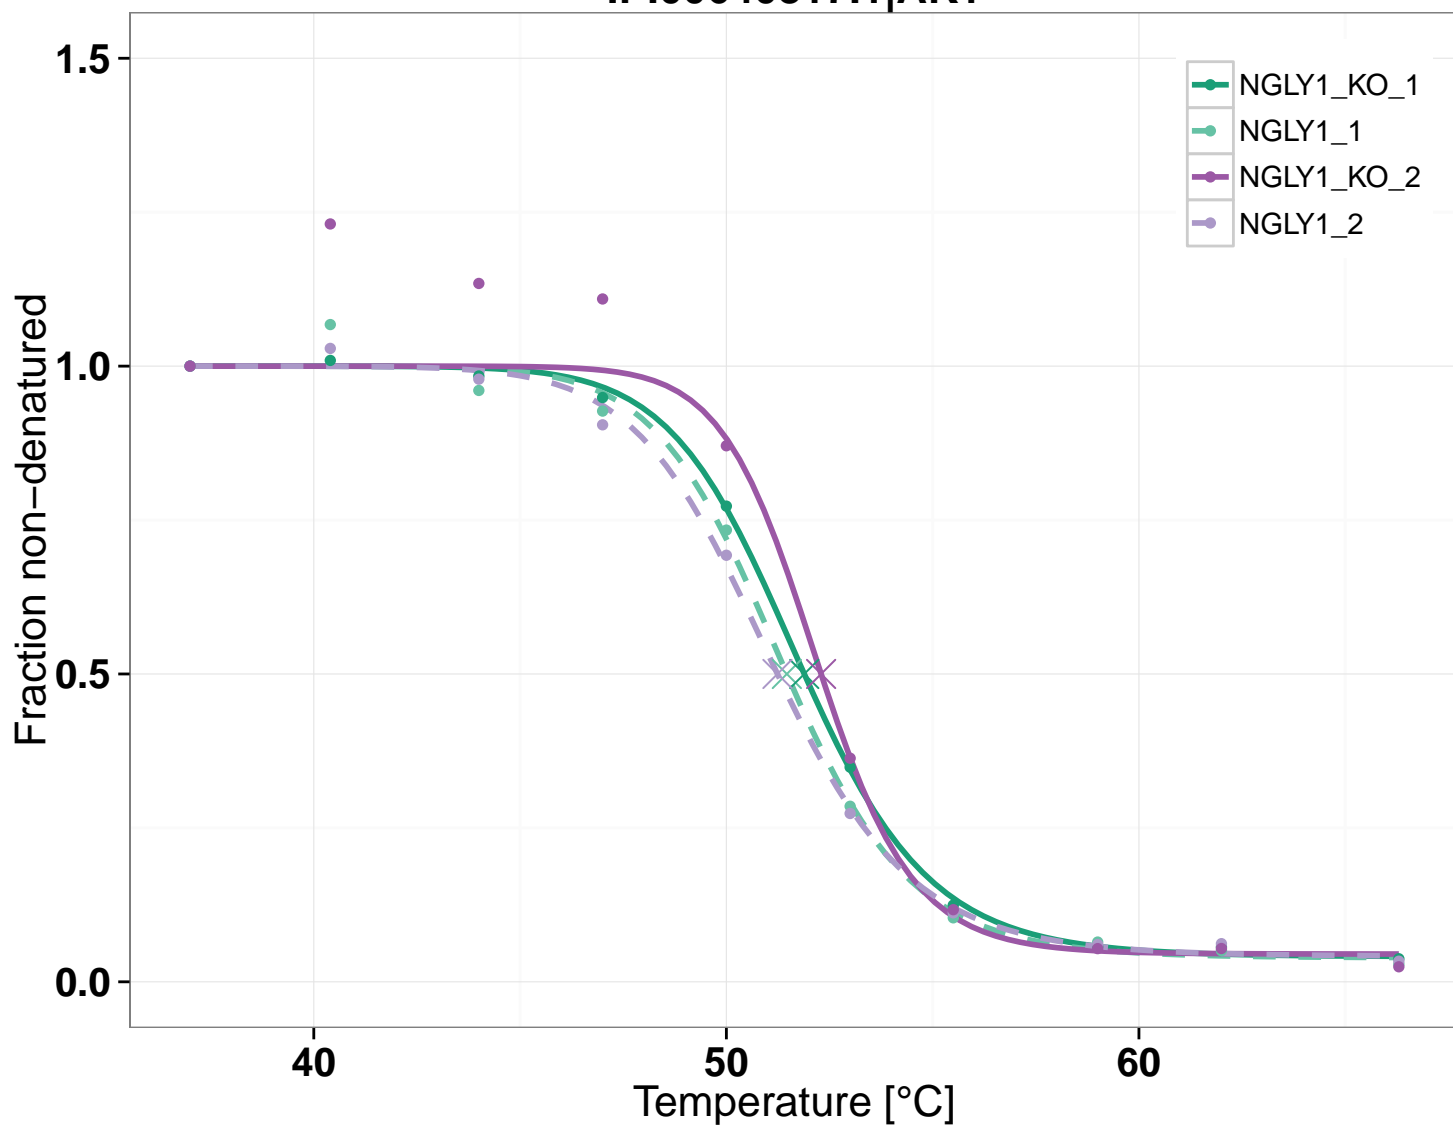

|            | meltPoint | slope | plateau | R2   |
|------------|-----------|-------|---------|------|
| NGLY1_KO_1 | 51.89     | -0.15 | 0.04    | 1    |
| NGLY1_1    | 51.47     | -0.16 | 0.04    | 1    |
| NGLY1_KO_2 | 52.3      | -0.21 | 0.05    | 0.96 |
| NGLY1_2    | 51.24     | -0.14 | 0.04    | 1    |

Supplement: Supplementary file 5458 [file 1]

# IPI00307659.2|CBX8

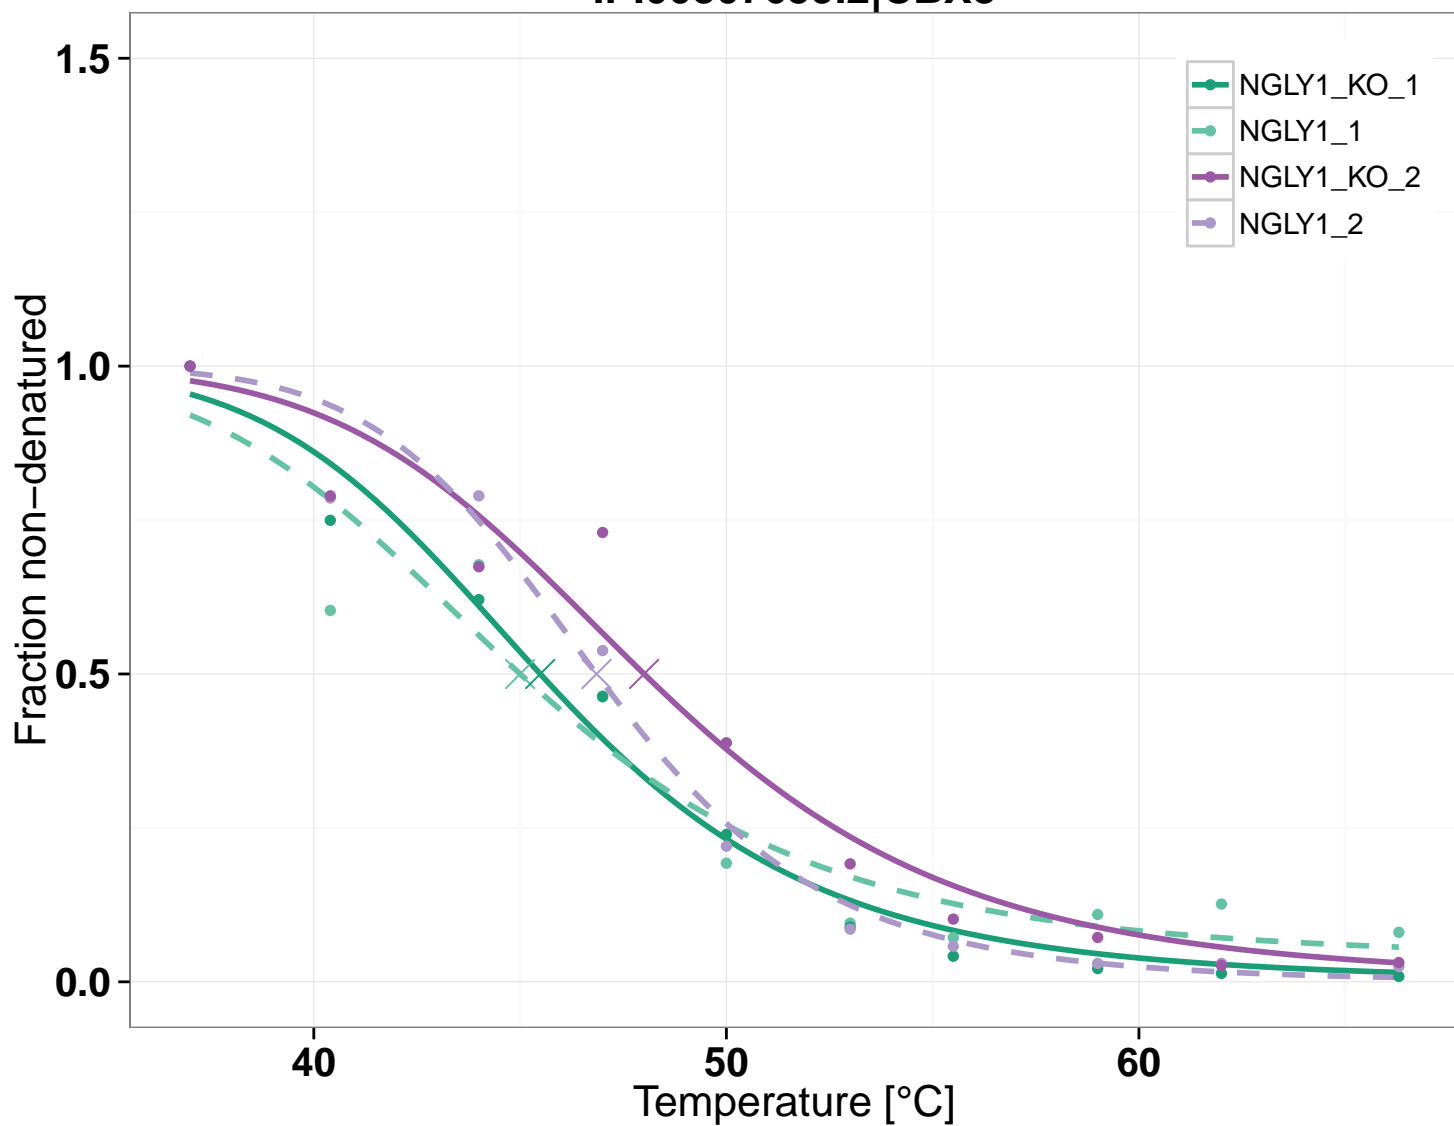

|            | meltPoint | slope  | plateau | R2   |
|------------|-----------|--------|---------|------|
| NGLY1_KO_1 | 45.49     | -0.075 | 0       | 0.98 |
| NGLY1_1    | 45        | -0.064 | 0.03    | 0.92 |
| NGLY1_KO_2 | 48.01     | -0.067 | 0       | 0.95 |
| NGLY1_2    | 46.85     | -0.091 | 0       | 0.98 |

Supplement: Supplementary file 5459 [file 1]

IPI00217661.4|RAVER1

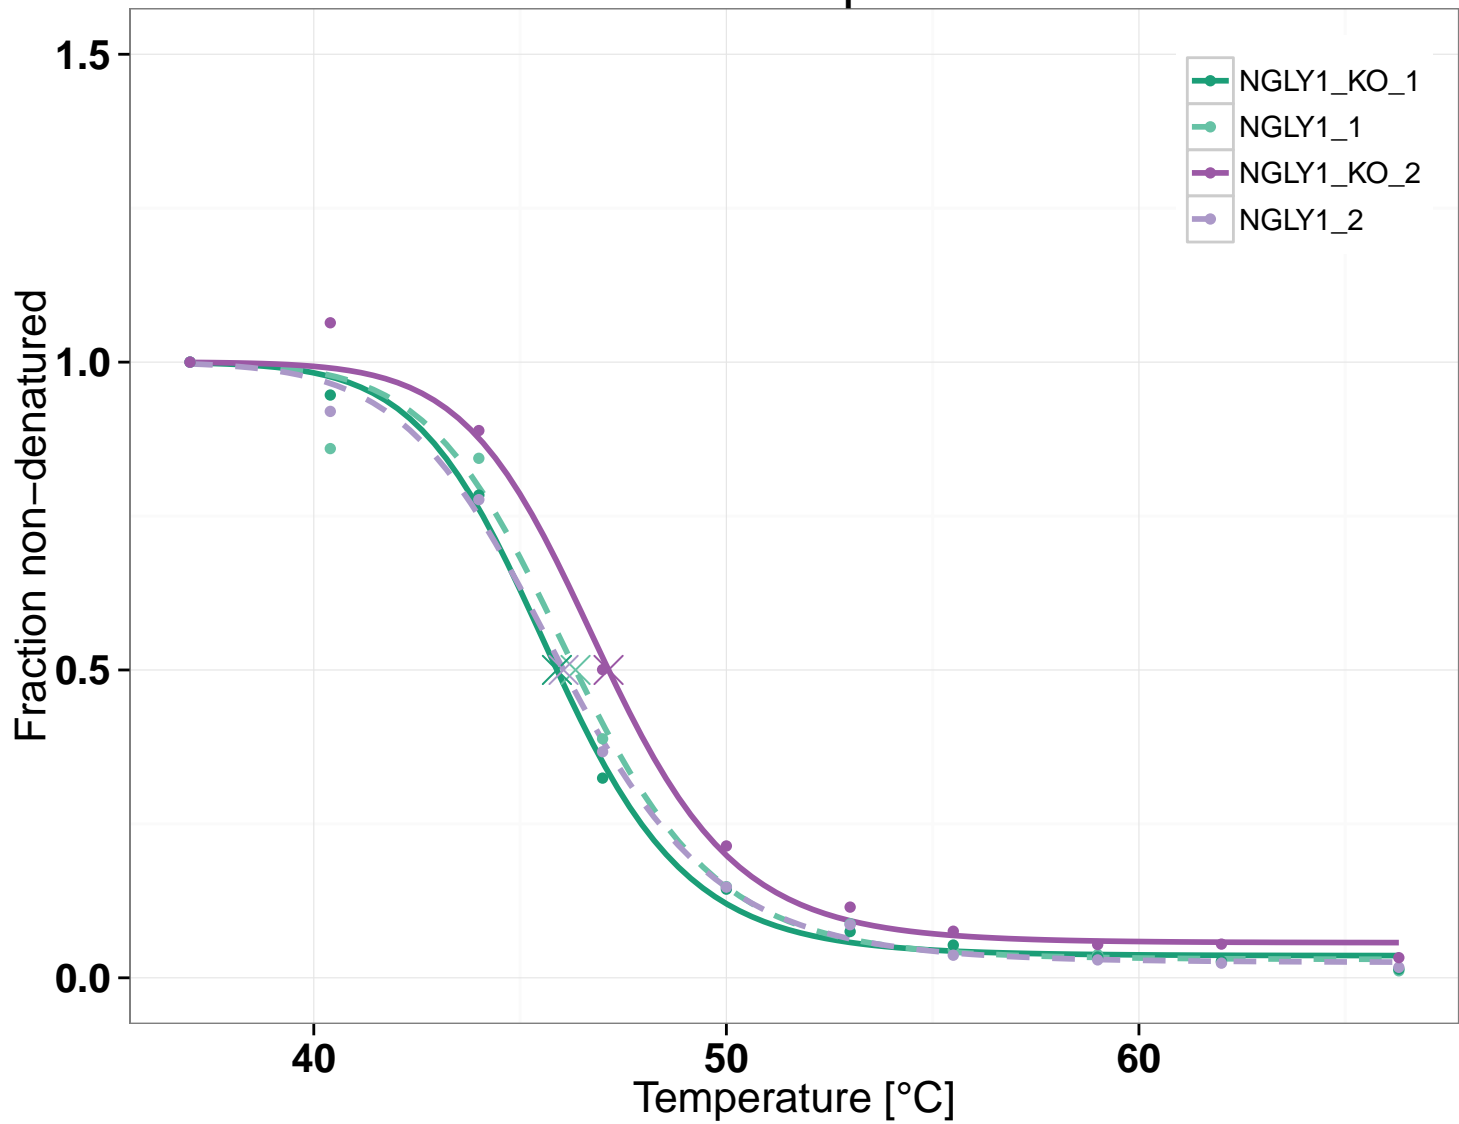

|            | meltPoint | slope | plateau | R2   |
|------------|-----------|-------|---------|------|
| NGLY1_KO_1 | 45.89     | -0.15 | 0.04    | 1    |
| NGLY1_1    | 46.34     | -0.14 | 0.03    | 0.99 |
| NGLY1_KO_2 | 47.14     | -0.14 | 0.06    | 1    |
| NGLY1_2    | 46.05     | -0.13 | 0.02    | 1    |

Supplement: Supplementary file 5460 [file 1]

IPI00004312.1|STAT2

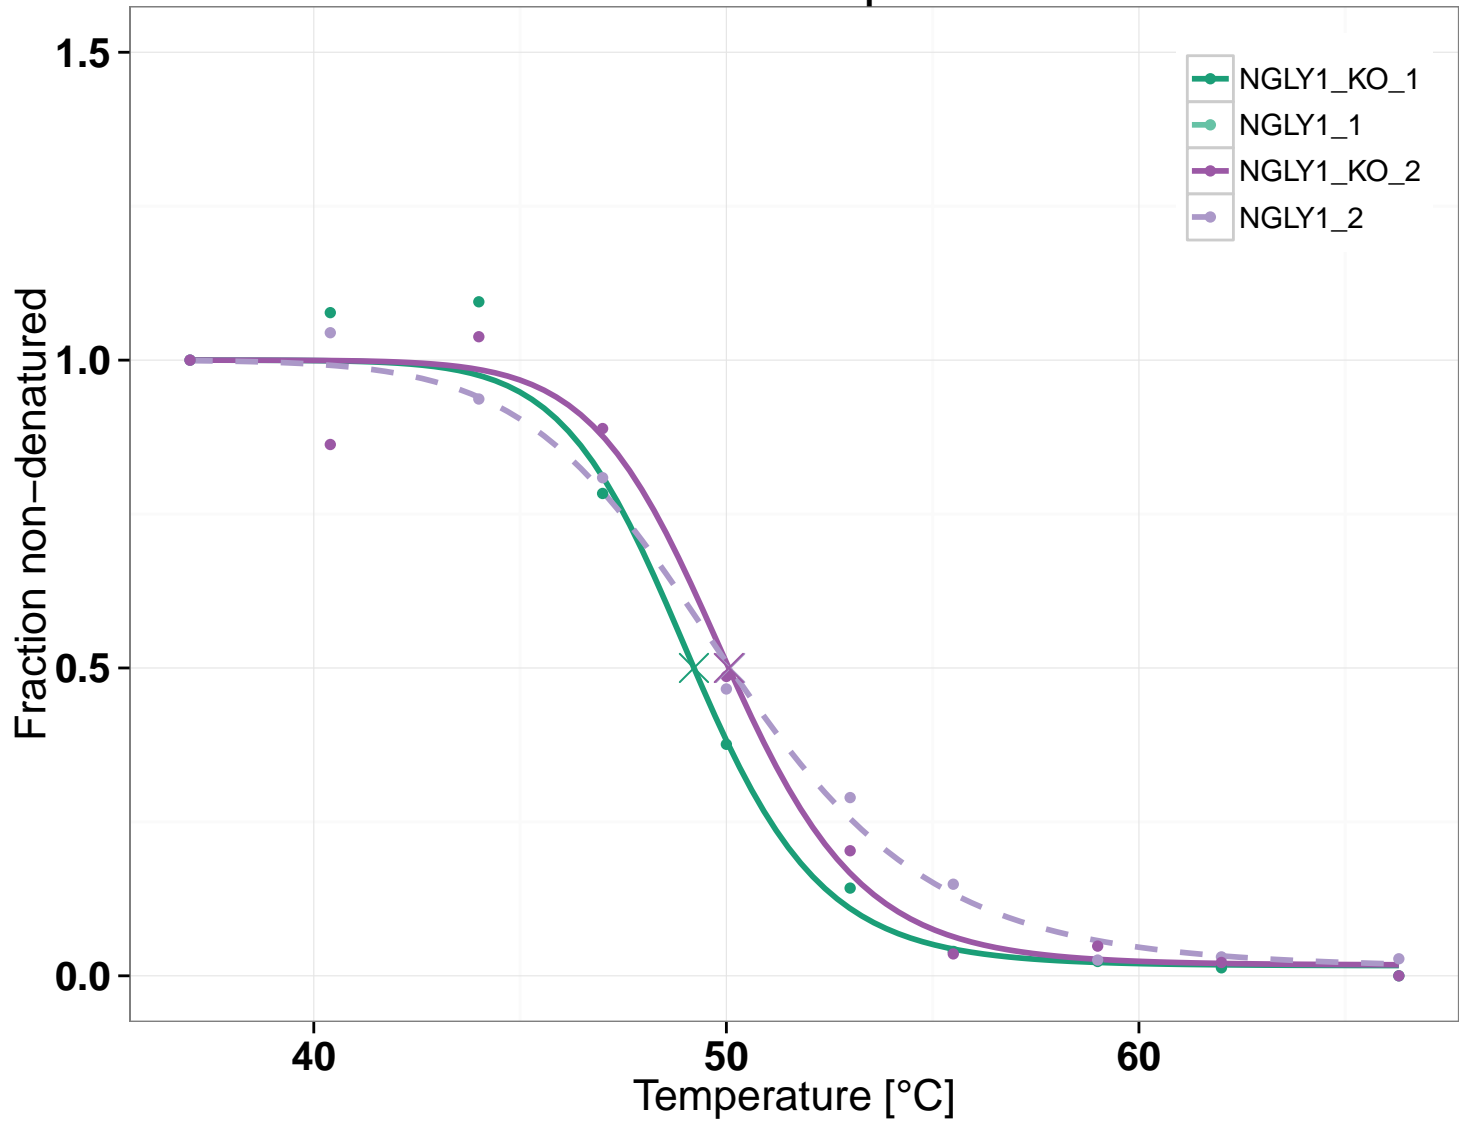

|            | meltPoint | slope | plateau | R2   |
|------------|-----------|-------|---------|------|
| NGLY1_KO_1 | 49.21     | -0.16 | 0.02    | 0.99 |
| NGLY1_1    | -         | -     | -       | -    |
| NGLY1_KO_2 | 50.06     | -0.15 | 0.02    | 0.99 |
| NGLY1_2    | 50.09     | -0.1  | 0.01    | 1    |

Supplement: Supplementary file 5461 [file 1]

IPI00477802.1|TCEAL1

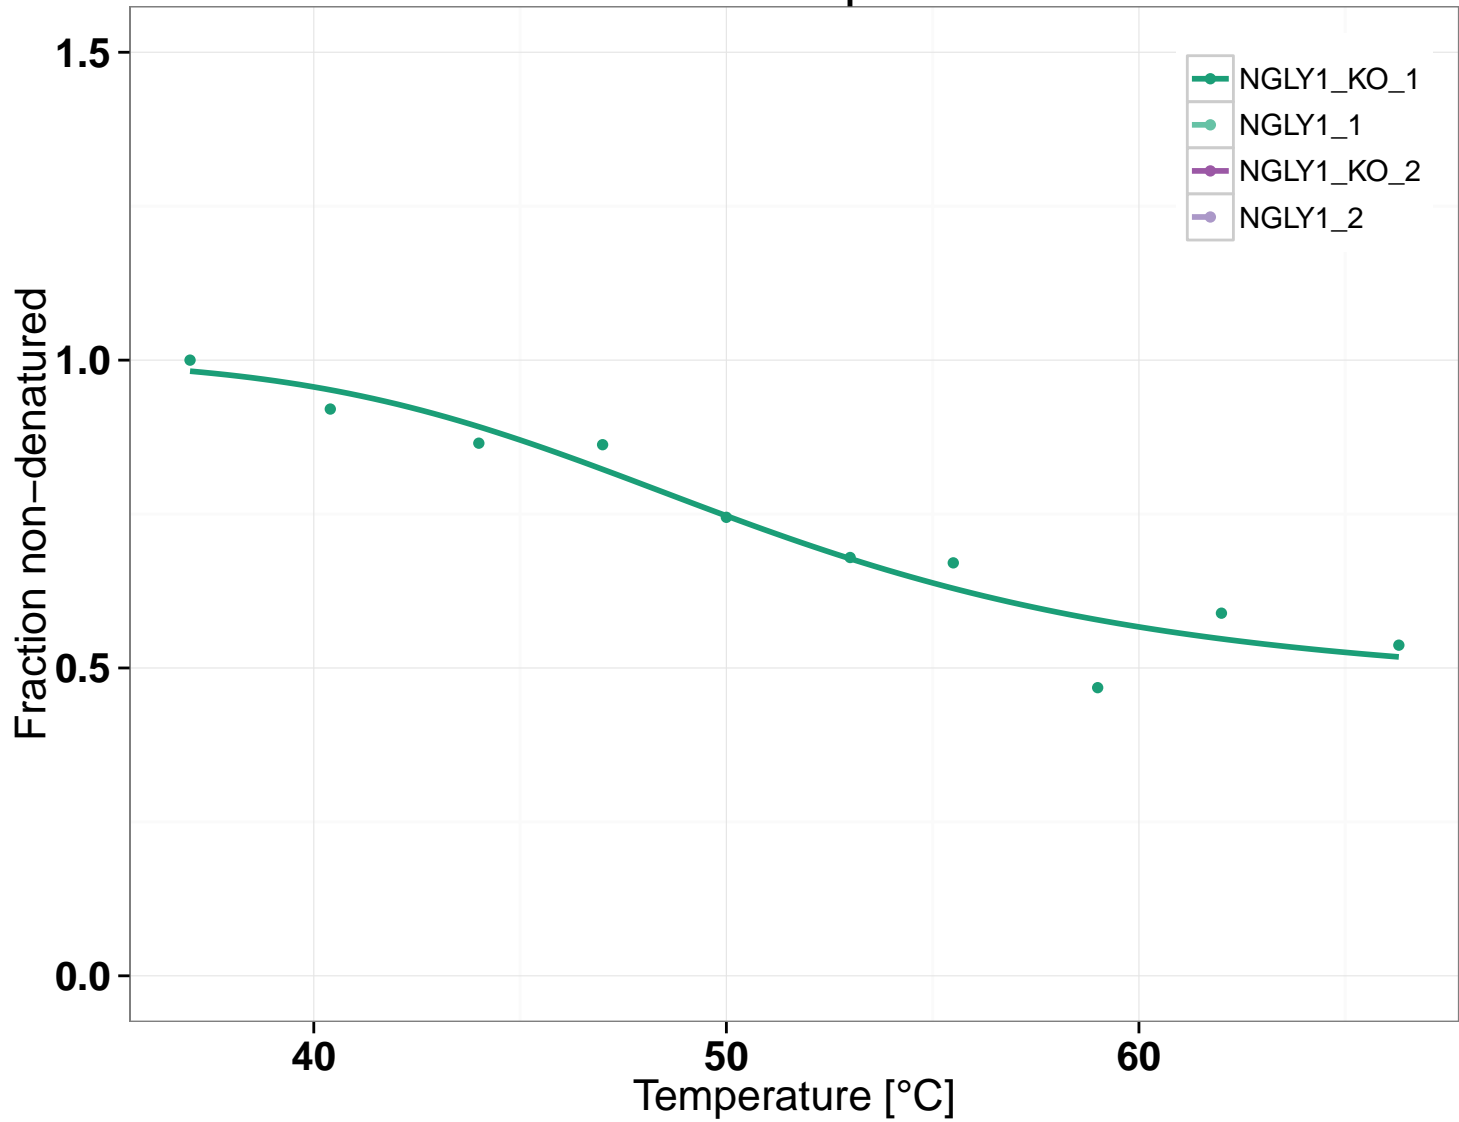

|            | meltPoint | slope  | plateau | R2   |
|------------|-----------|--------|---------|------|
| NGLY1_KO_1 | —         | -0.025 | 0.46    | 0.93 |
| NGLY1_1    | —         | —      | —       | —    |
| NGLY1_KO_2 | —         | —      | —       | —    |
| NGLY1_2    | —         | —      | —       | —    |

Supplement: Supplementary file 5462 [file 1]

IPI00012439.5|HDAC10

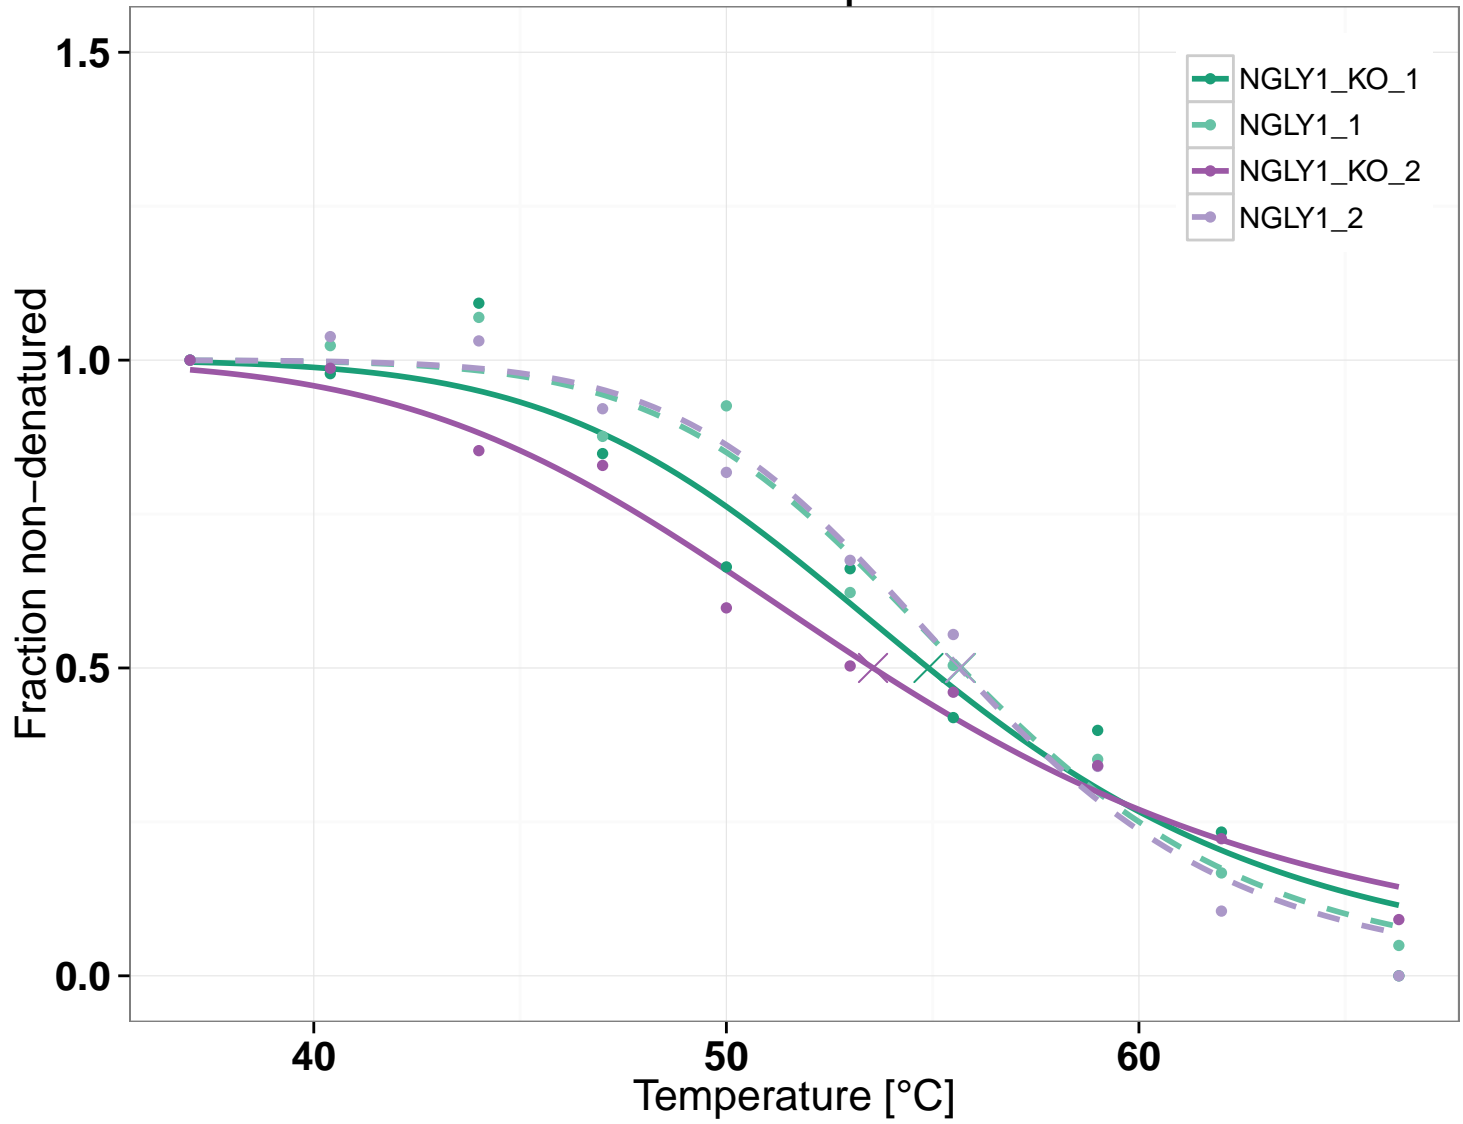

|            | meltPoint | slope  | plateau | R2   |
|------------|-----------|--------|---------|------|
| NGLY1_KO_1 | 54.9      | -0.056 | 0       | 0.95 |
| NGLY1_1    | 55.69     | -0.07  | 0       | 0.98 |
| NGLY1_KO_2 | 53.56     | -0.045 | 0       | 0.98 |
| NGLY1_2    | 55.66     | -0.074 | 0       | 0.99 |

Supplement: Supplementary file 5463 [file 1]

# IPI00411706.1|ESD

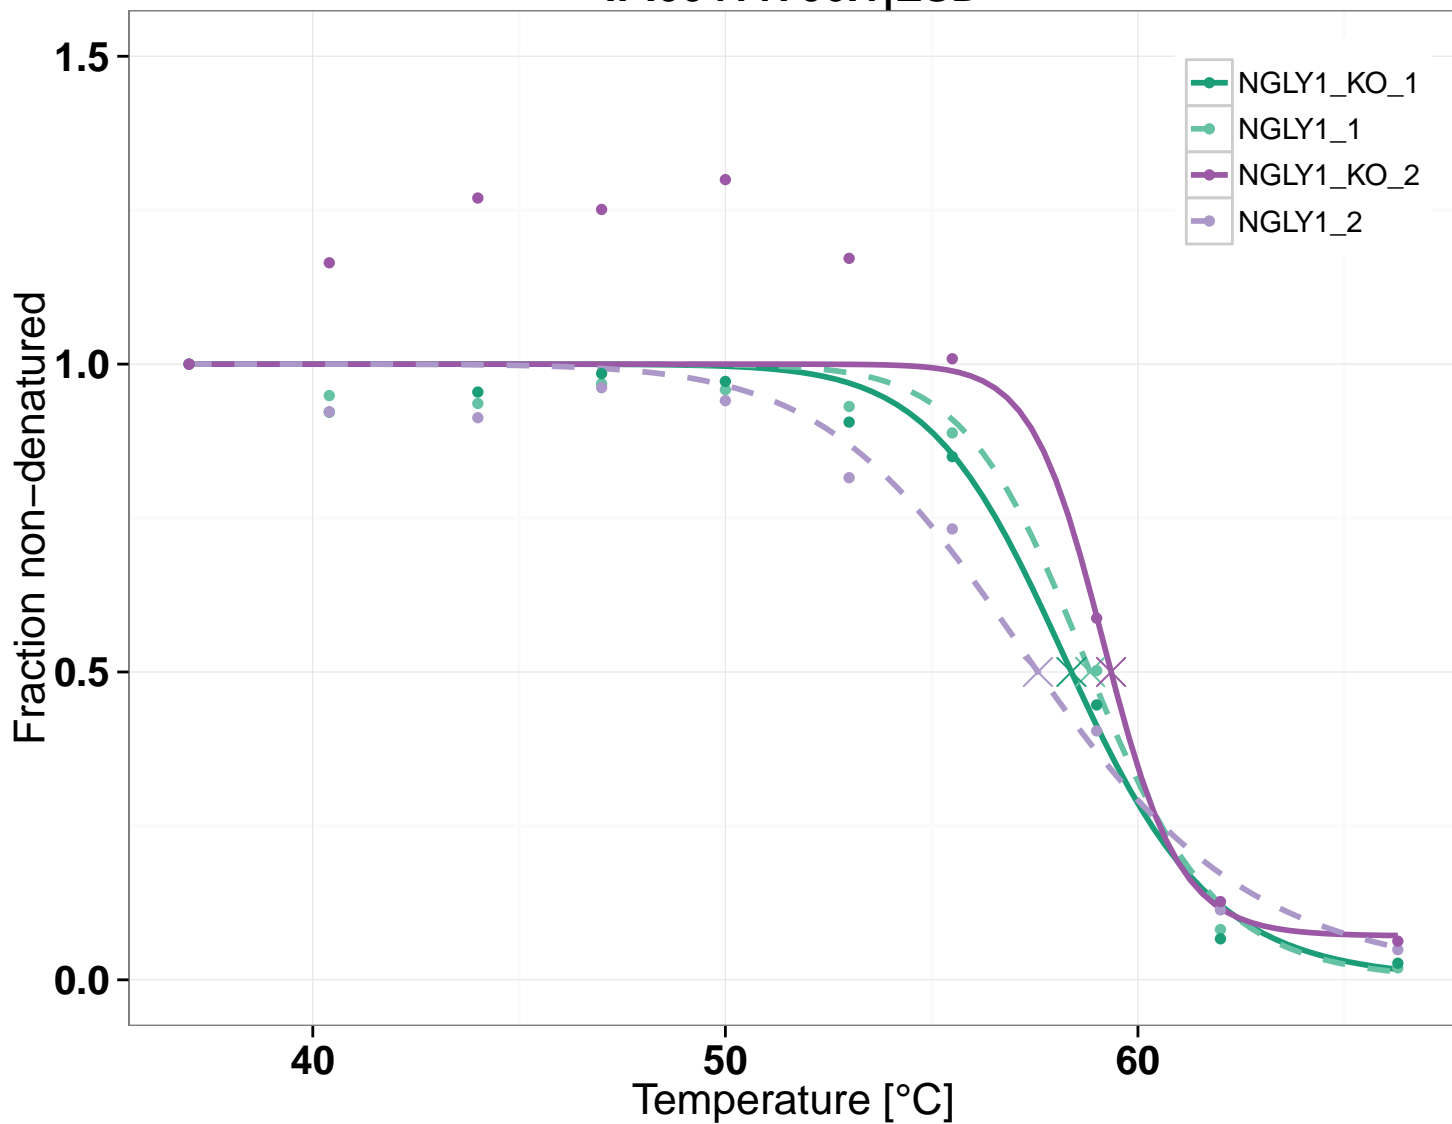

|            | meltPoint | slope  | plateau | R2   |
|------------|-----------|--------|---------|------|
| NGLY1_KO_1 | 58.39     | -0.15  | 0       | 0.99 |
| NGLY1_1    | 58.84     | -0.16  | 0       | 0.99 |
| NGLY1_KO_2 | 59.35     | -0.26  | 0.07    | 0.86 |
| NGLY1_2    | 57.58     | -0.096 | 0       | 0.98 |

Supplement: Supplementary file 5464 [file 1]

IPI00003311.1|POLR2L

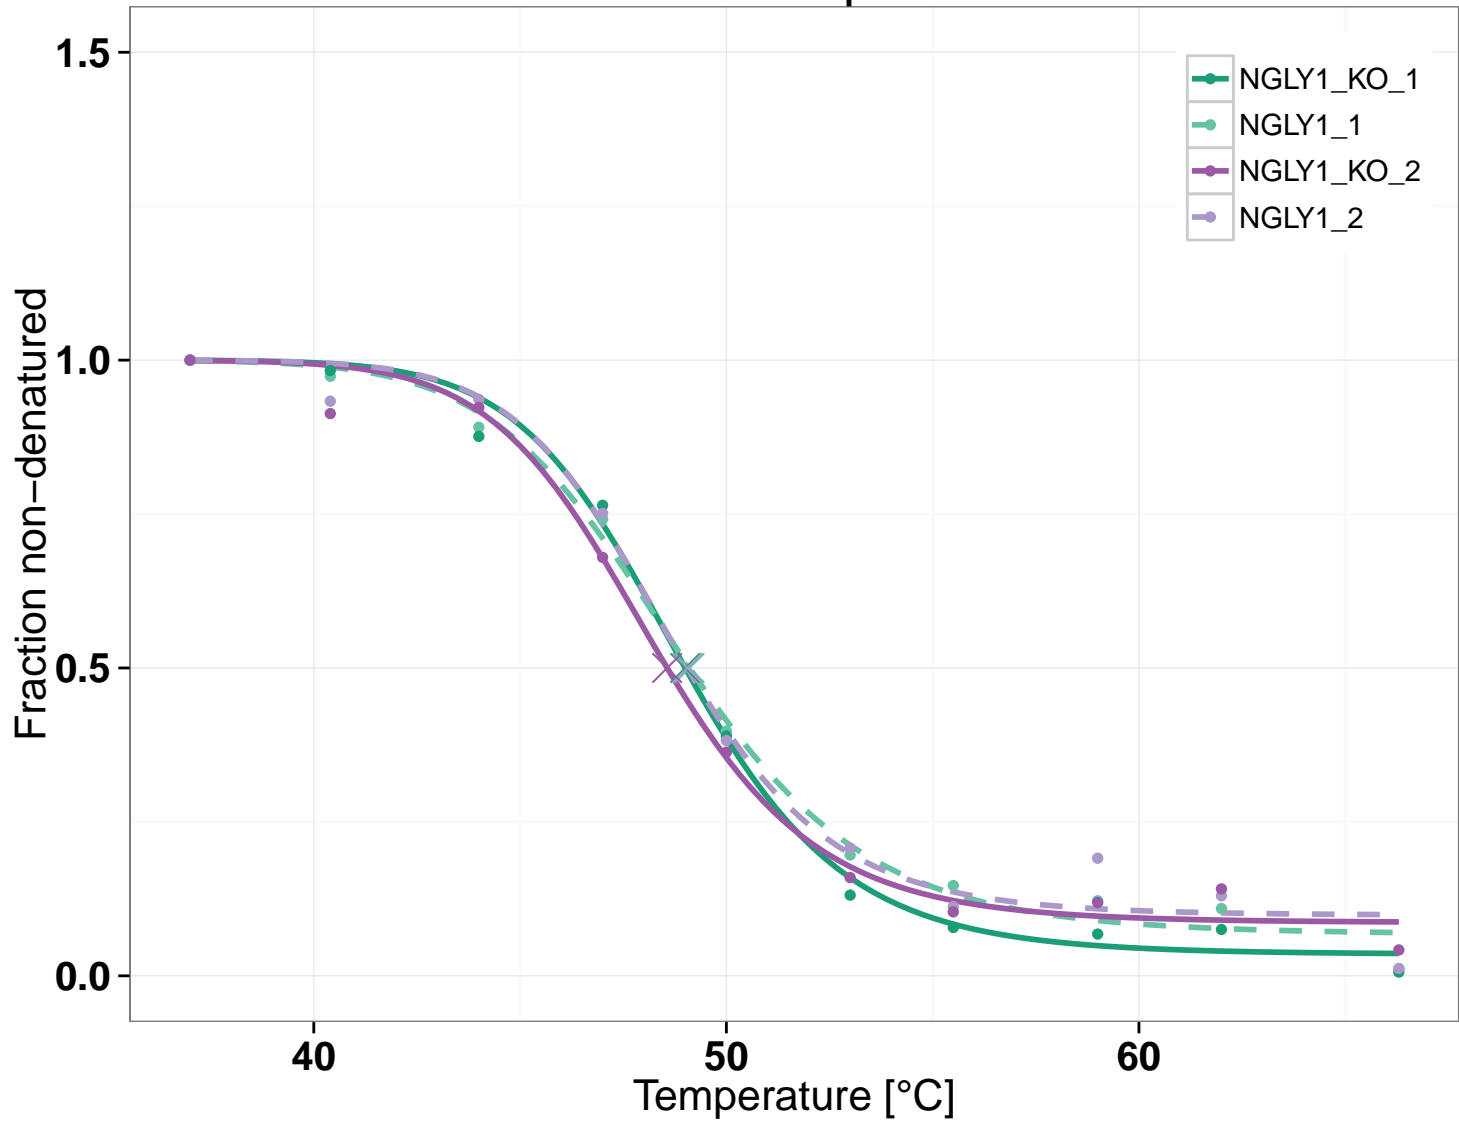

|            | meltPoint | slope | plateau | R2   |
|------------|-----------|-------|---------|------|
| NGLY1_KO_1 | 49        | -0.12 | 0.03    | 0.99 |
| NGLY1_1    | 49.11     | -0.1  | 0.07    | 0.99 |
| NGLY1_KO_2 | 48.57     | -0.12 | 0.09    | 0.99 |
| NGLY1_2    | 49.05     | -0.12 | 0.1     | 0.99 |

Supplement: Supplementary file 5465 [file 1]

IPI00024933.3|RPL12

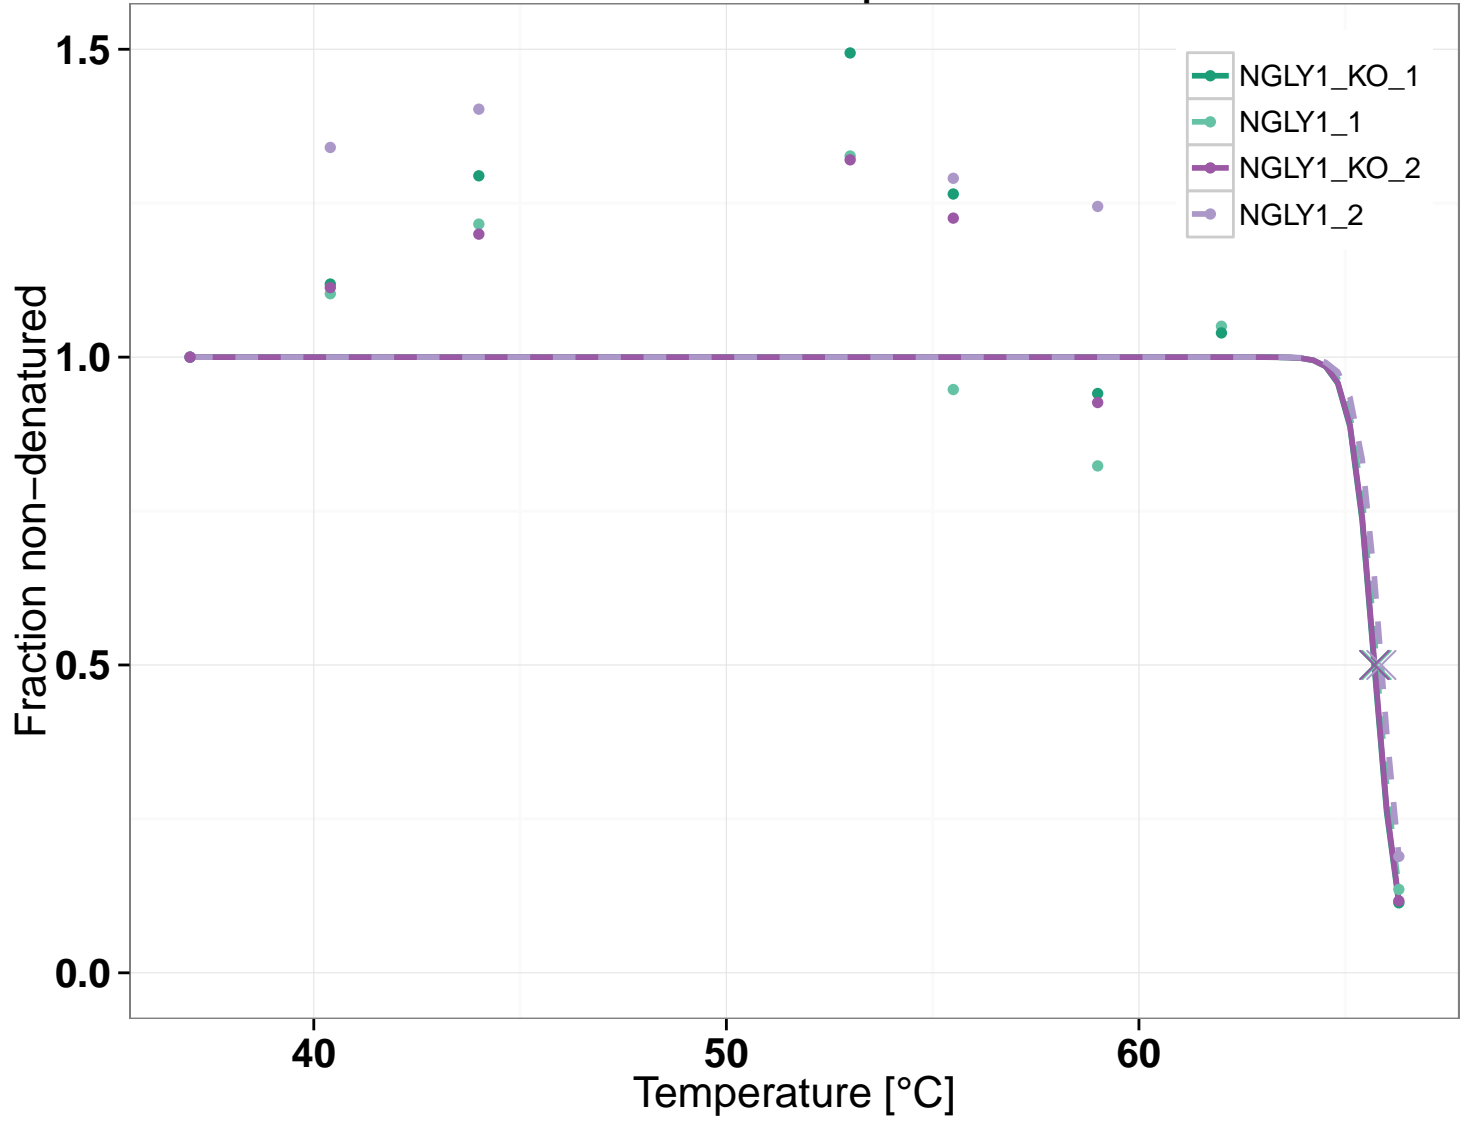

|            | meltPoint | slope | plateau | R2    |
|------------|-----------|-------|---------|-------|
| NGLY1_KO_1 | 65.7      | -0.87 | 0       | 0.3   |
| NGLY1_1    | 65.76     | -0.87 | 0       | 0.48  |
| NGLY1_KO_2 | 65.71     | -0.87 | 0       | 0.41  |
| NGLY1_2    | 65.88     | -0.86 | 0       | -0.17 |

Supplement: Supplementary file 5466 [file 1]

# IPI00016637.3|OXSM

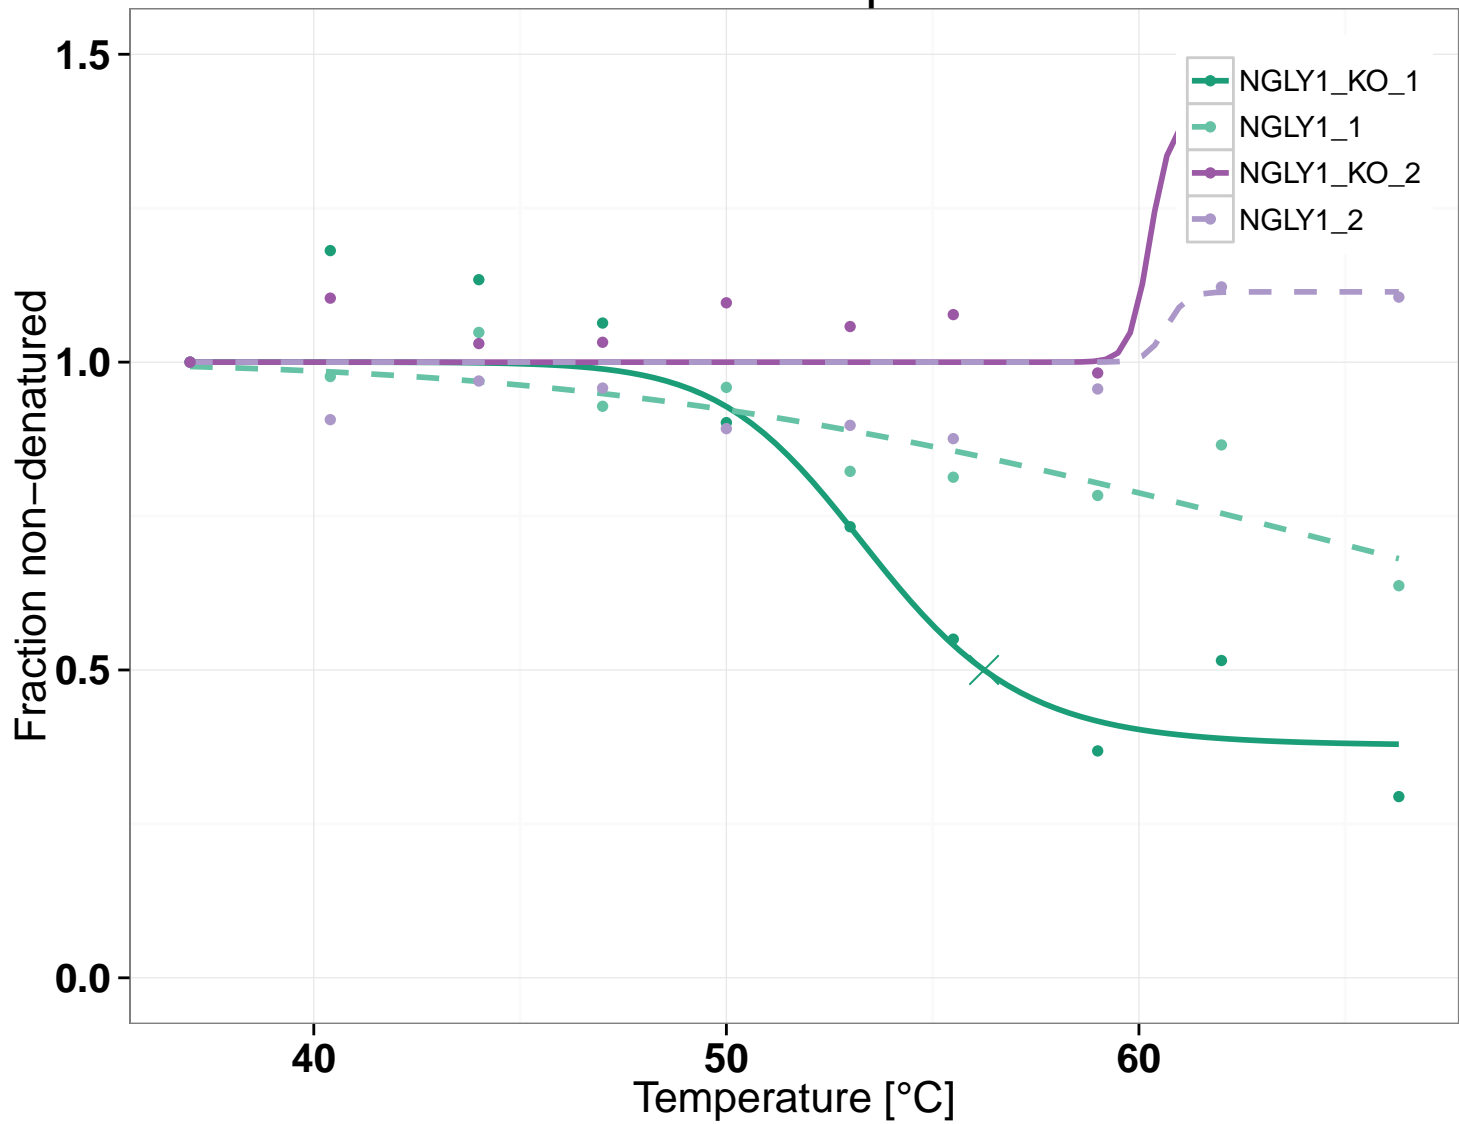

|            | meltPoint | slope  | plateau | R2   |
|------------|-----------|--------|---------|------|
| NGLY1_KO_1 | 56.25     | -0.085 | 0.38    | 0.91 |
| NGLY1_1    | -         | -0.017 | 0       | 0.79 |
| NGLY1_KO_2 | -         | 0.41   | 1.4     | 0.78 |
| NGLY1_2    | -         | 0.12   | 1.11    | 0.24 |

Supplement: Supplementary file 5467 [file 1]

IPI00010415.2|ACOT7

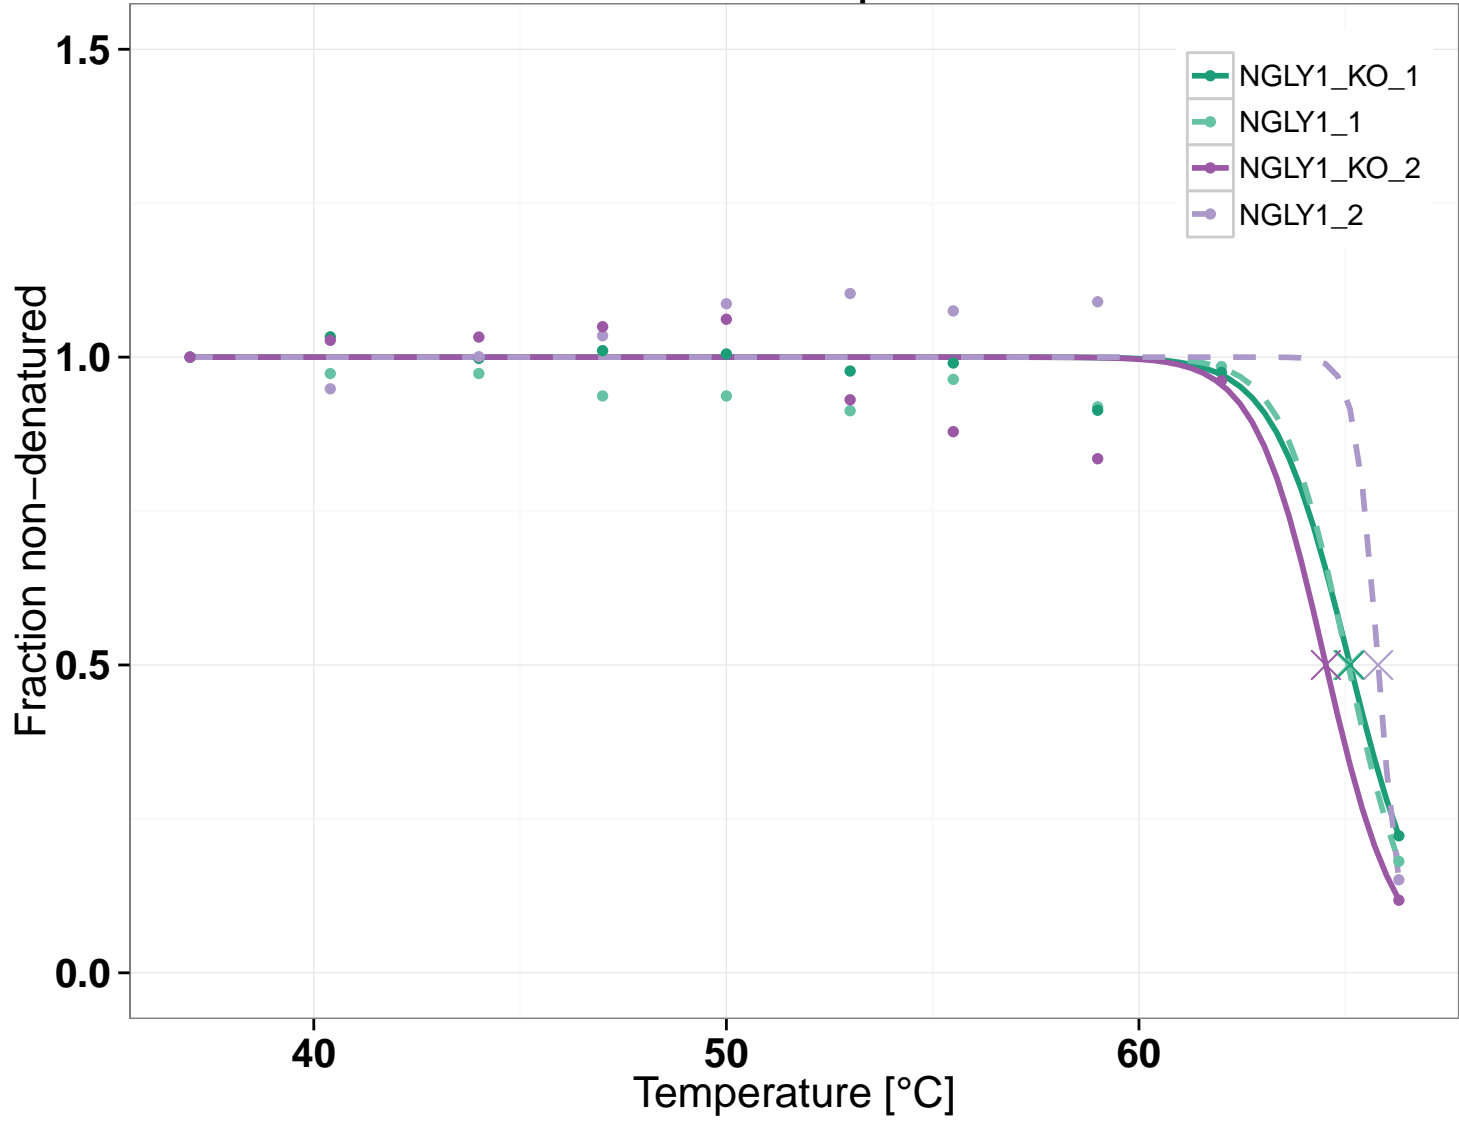

|            | meltPoint | slope | plateau | R2   |
|------------|-----------|-------|---------|------|
| NGLY1_KO_1 | 65.12     | -0.27 | 0       | 0.98 |
| NGLY1_1    | 65.07     | -0.31 | 0       | 0.95 |
| NGLY1_KO_2 | 64.53     | -0.29 | 0       | 0.92 |
| NGLY1_2    | 65.8      | -0.87 | 0       | 0.82 |

Supplement: Supplementary file 5468 [file 1]

IPI00478376.2|INPP5B

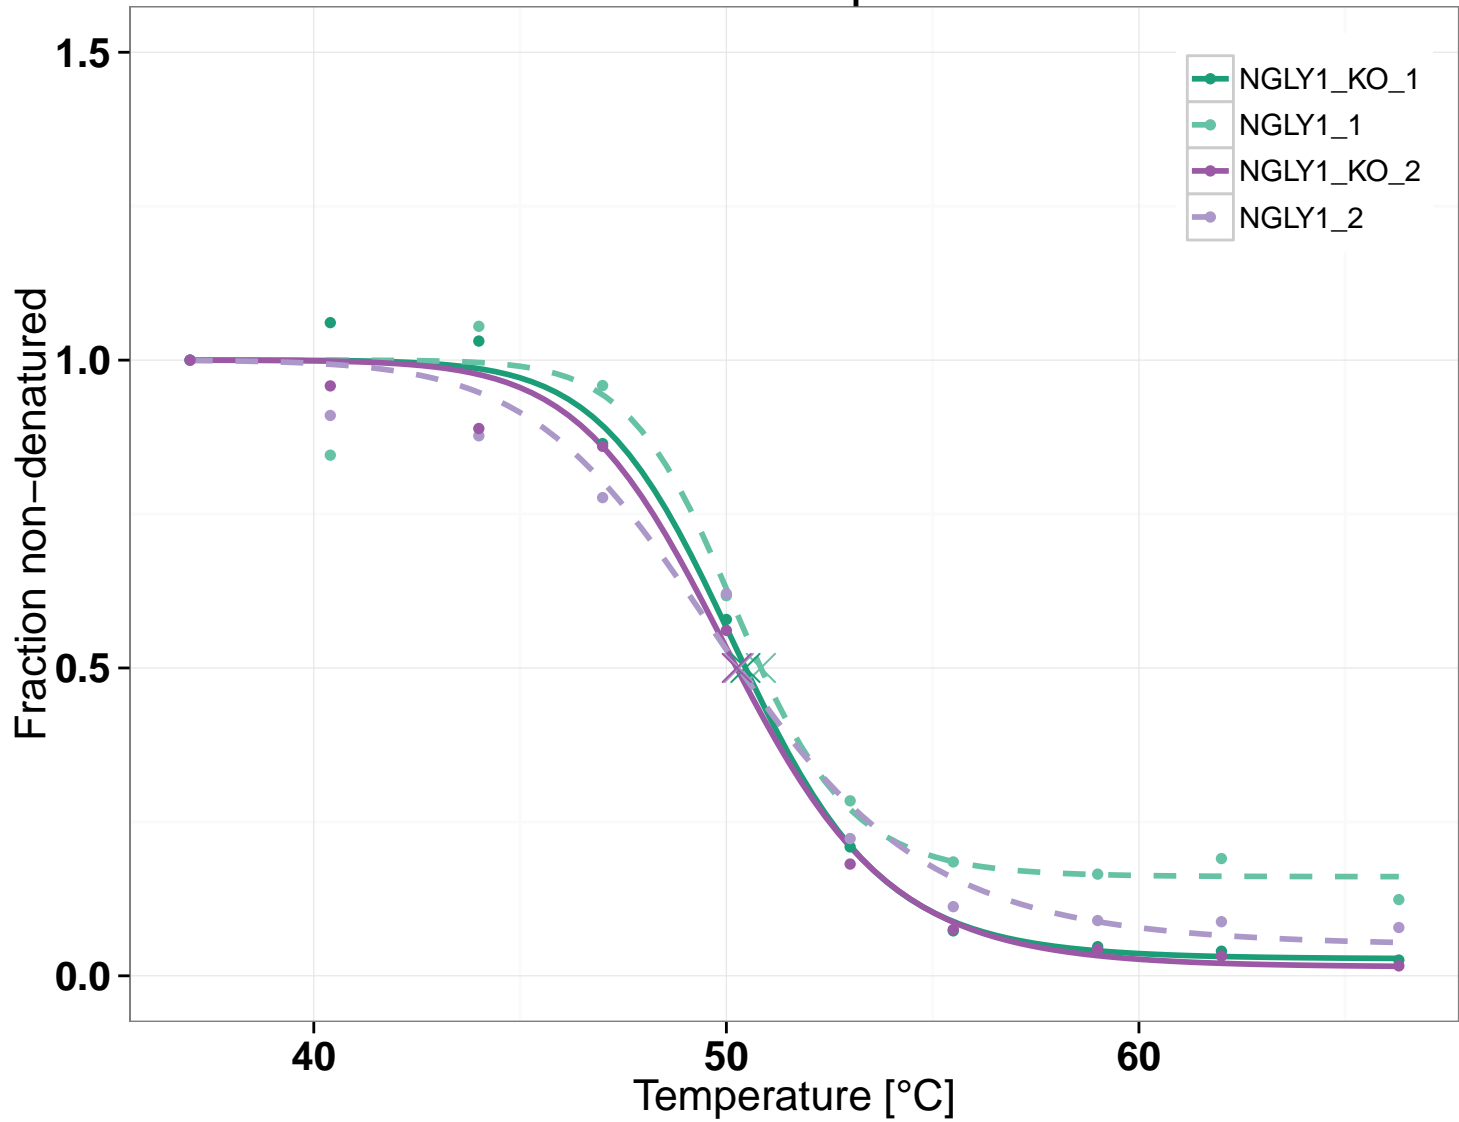

|            | meltPoint | slope  | plateau | R2   |
|------------|-----------|--------|---------|------|
| NGLY1_KO_1 | 50.46     | -0.14  | 0.03    | 1    |
| NGLY1_1    | 50.84     | -0.16  | 0.16    | 0.98 |
| NGLY1_KO_2 | 50.25     | -0.13  | 0.01    | 0.99 |
| NGLY1_2    | 50.3      | -0.099 | 0.05    | 0.98 |

Supplement: Supplementary file 5469 [file 1]

# IPI00045914.1|SPEN

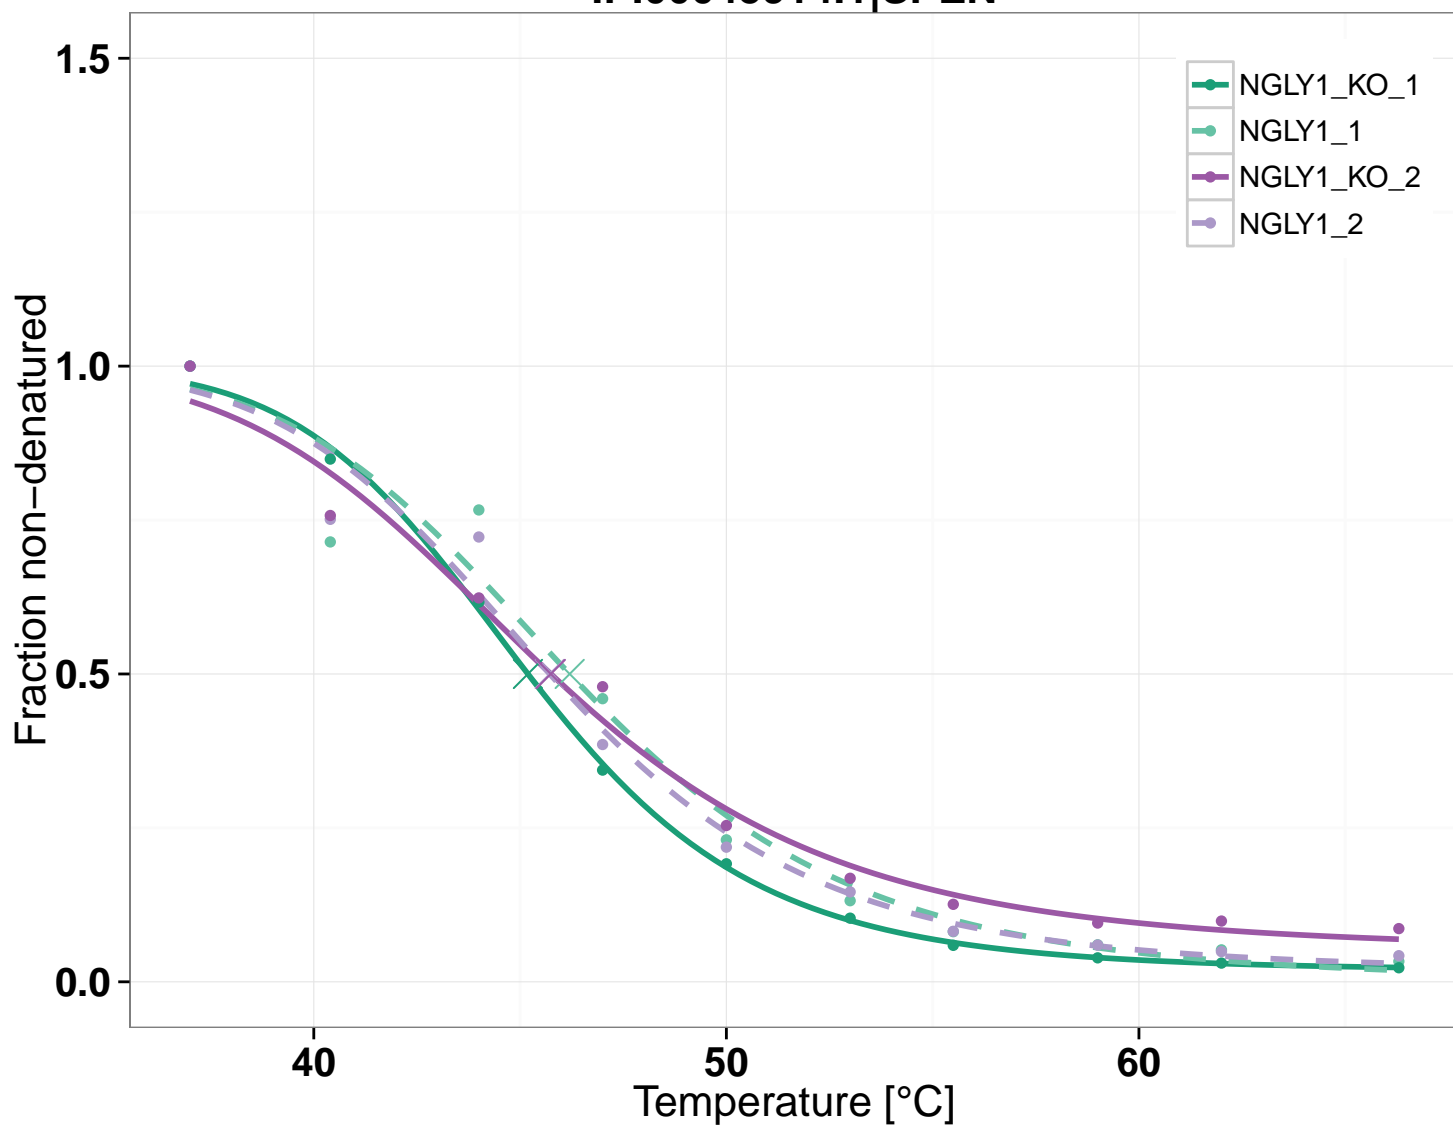

|            | meltPoint | slope  | plateau | R2   |
|------------|-----------|--------|---------|------|
| NGLY1_KO_1 | 45.19     | -0.089 | 0.02    | 1    |
| NGLY1_1    | 46.2      | -0.072 | 0       | 0.97 |
| NGLY1_KO_2 | 45.75     | -0.066 | 0.05    | 0.99 |
| NGLY1_2    | 45.72     | -0.076 | 0.02    | 0.98 |

Supplement: Supplementary file 5470 [file 1]

IPI00059955.3|DHRS13

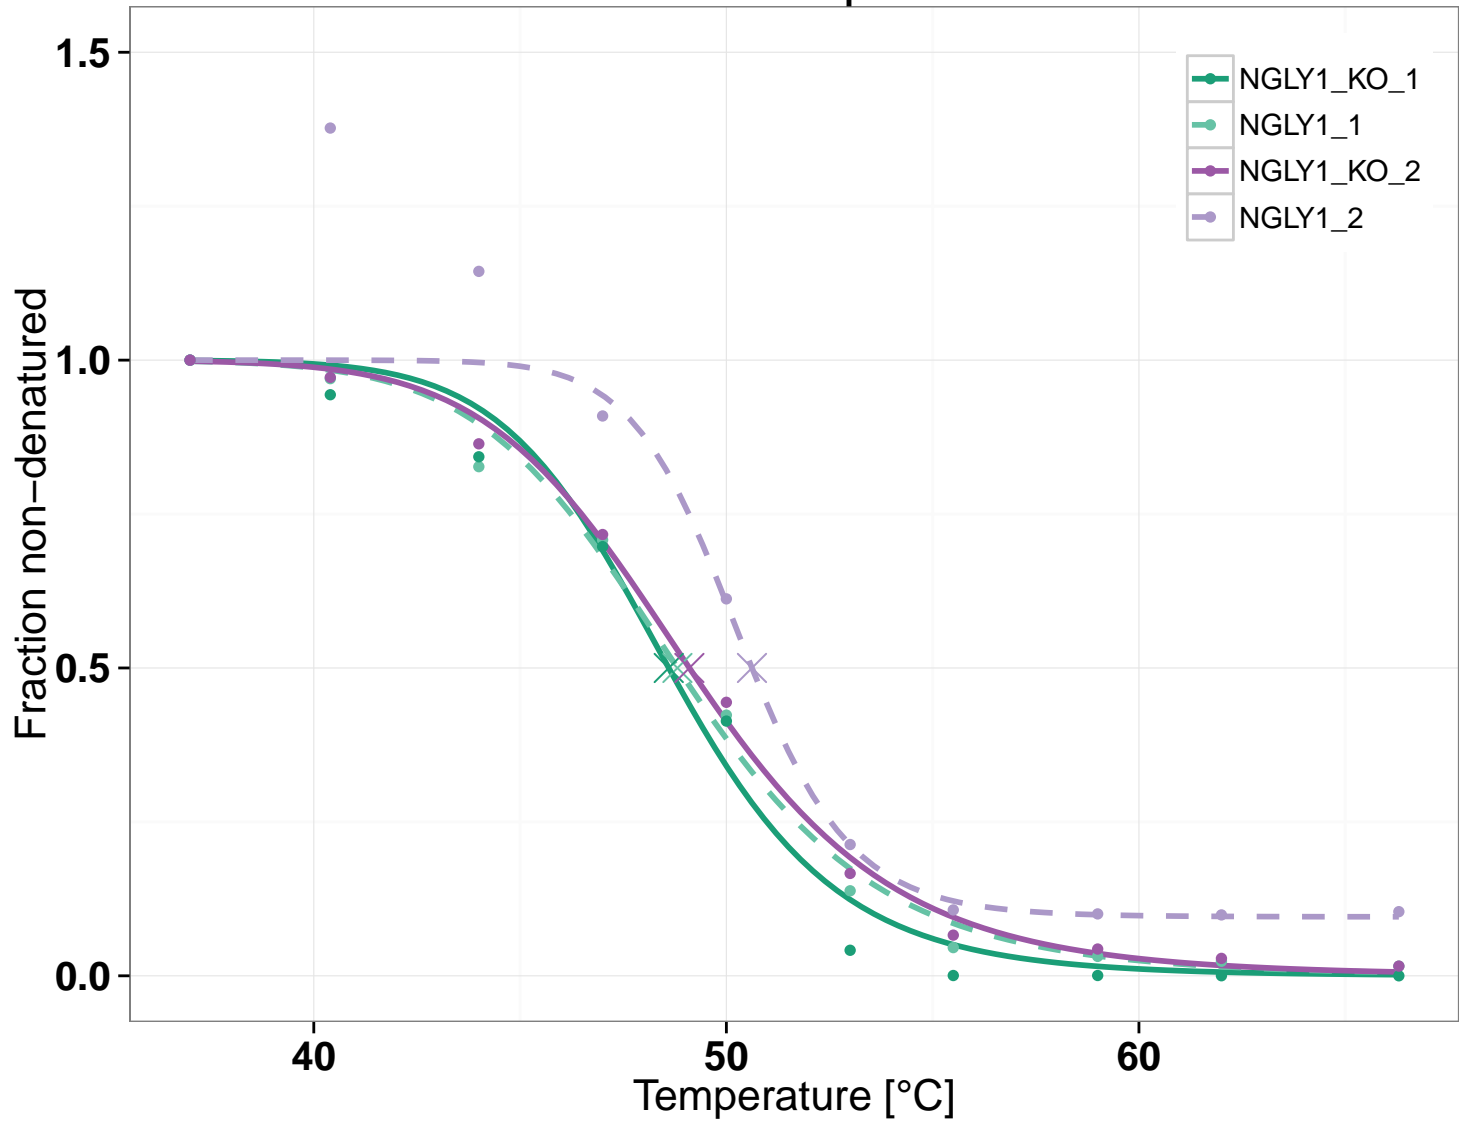

|            | meltPoint | slope | plateau | R2   |
|------------|-----------|-------|---------|------|
| NGLY1_KO_1 | 48.6      | -0.12 | 0       | 0.99 |
| NGLY1_1    | 48.81     | -0.1  | 0       | 0.99 |
| NGLY1_KO_2 | 49.1      | -0.1  | 0       | 1    |
| NGLY1_2    | 50.62     | -0.17 | 0.1     | 0.93 |

Supplement: Supplementary file 5471 [file 1]

IPI00448751.3|KIAA1598

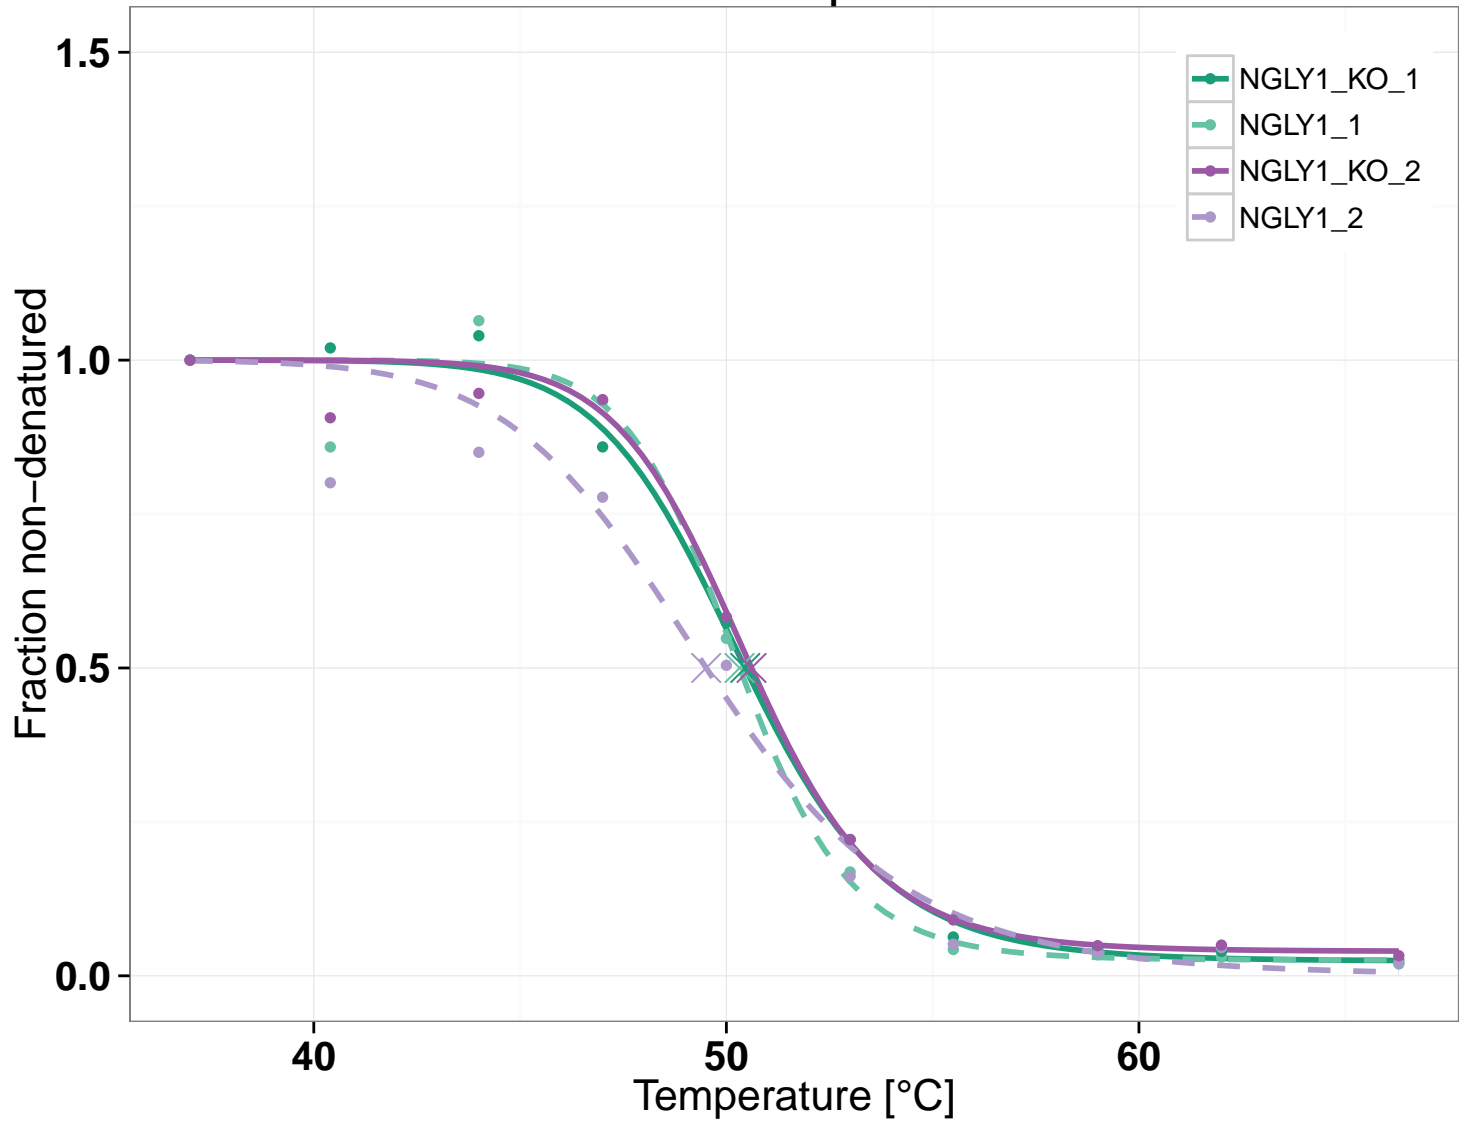

|            | meltPoint | slope | plateau | R2   |
|------------|-----------|-------|---------|------|
| NGLY1_KO_1 | 50.46     | -0.14 | 0.02    | 1    |
| NGLY1_1    | 50.32     | -0.18 | 0.03    | 0.99 |
| NGLY1_KO_2 | 50.61     | -0.15 | 0.04    | 0.99 |
| NGLY1_2    | 49.51     | -0.1  | 0       | 0.96 |

Supplement: Supplementary file 5472 [file 1]

# IPI00018311.1|NPTN

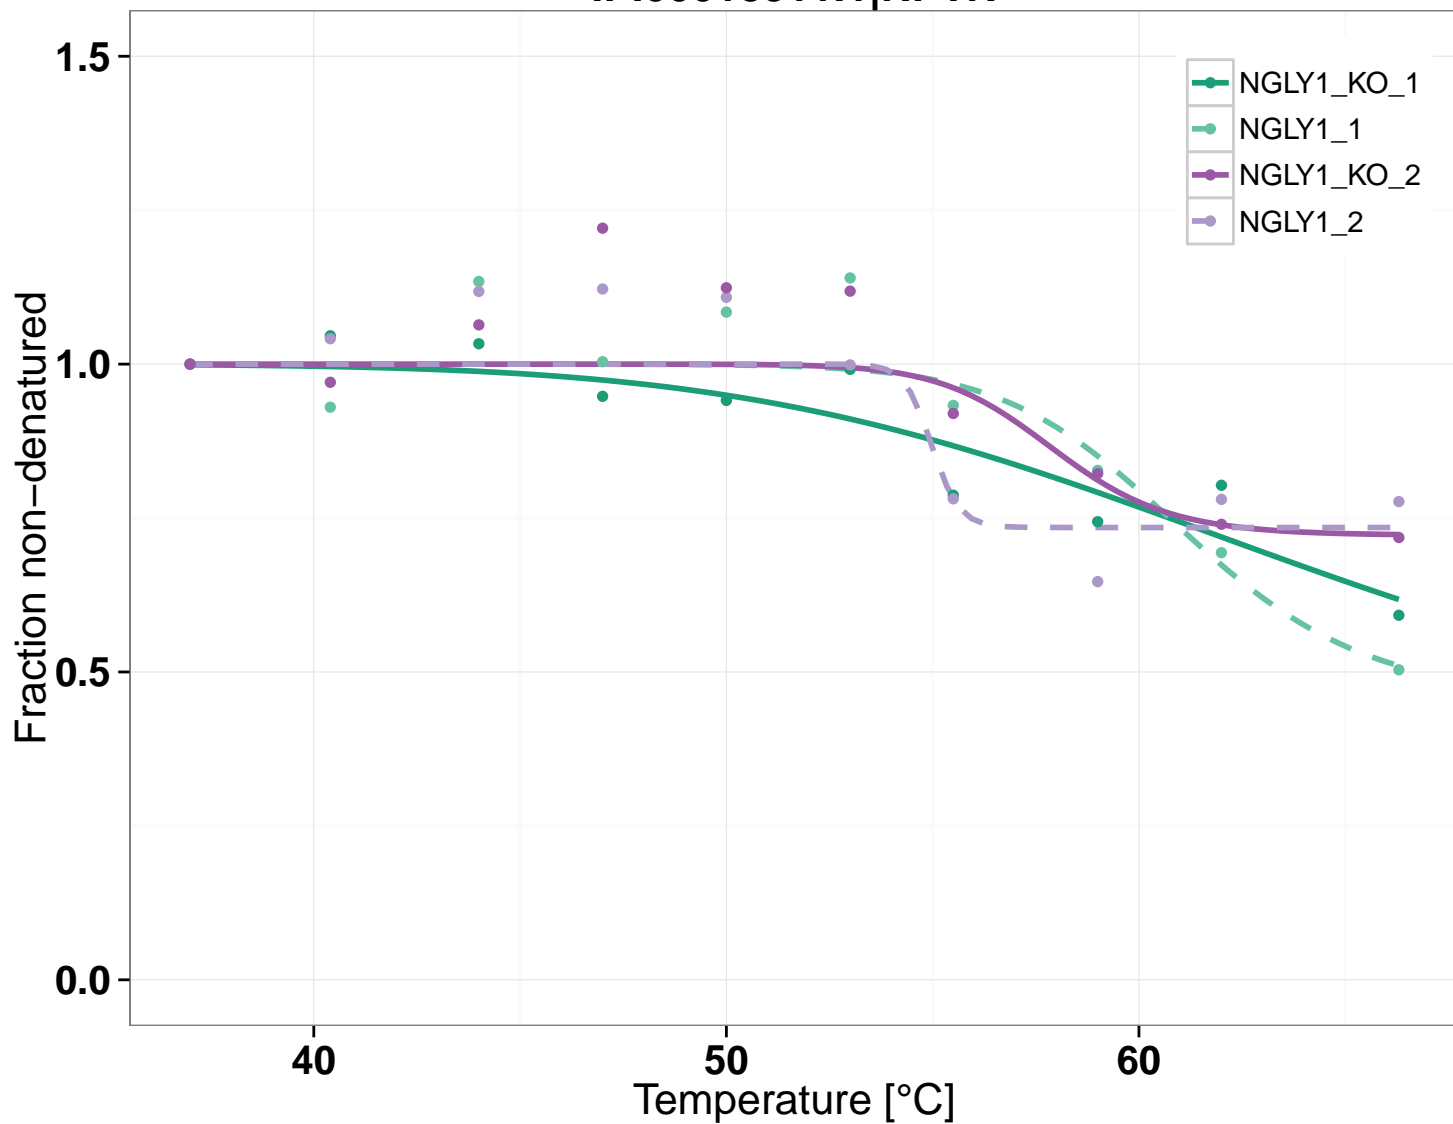

|            | meltPoint | slope  | plateau | R2   |
|------------|-----------|--------|---------|------|
| NGLY1_KO_1 | —         | −0.024 | 0.29    | 0.86 |
| NGLY1_1    | —         | −0.062 | 0.45    | 0.85 |
| NGLY1_KO_2 | —         | −0.05  | 0.72    | 0.67 |
| NGLY1_2    | —         | −0.2   | 0.73    | 0.8  |

Supplement: Supplementary file 5473 [file 1]

IPI00414482.2|GTF3C1

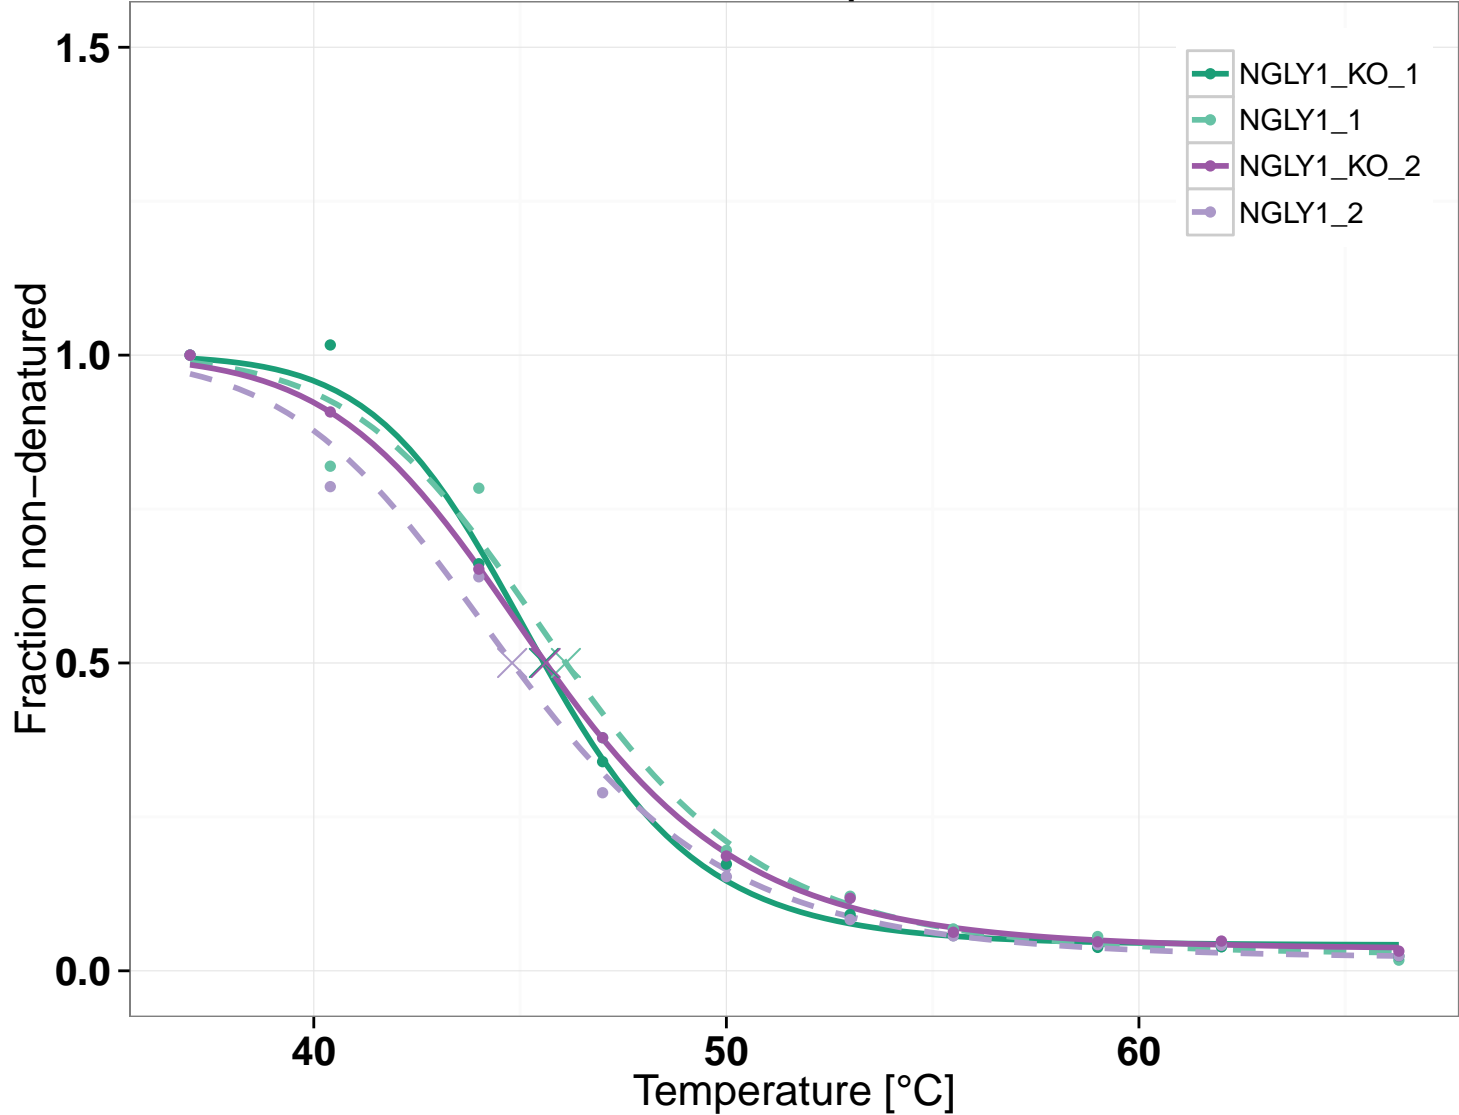

|            | meltPoint | slope  | plateau | R2   |
|------------|-----------|--------|---------|------|
| NGLY1_KO_1 | 45.58     | -0.12  | 0.04    | 1    |
| NGLY1_1    | 46.11     | -0.097 | 0.03    | 0.98 |
| NGLY1_KO_2 | 45.62     | -0.097 | 0.03    | 1    |
| NGLY1_2    | 44.81     | -0.092 | 0.02    | 0.99 |

Supplement: Supplementary file 5474 [file 1]

IPI00012545.2|TGOLN2

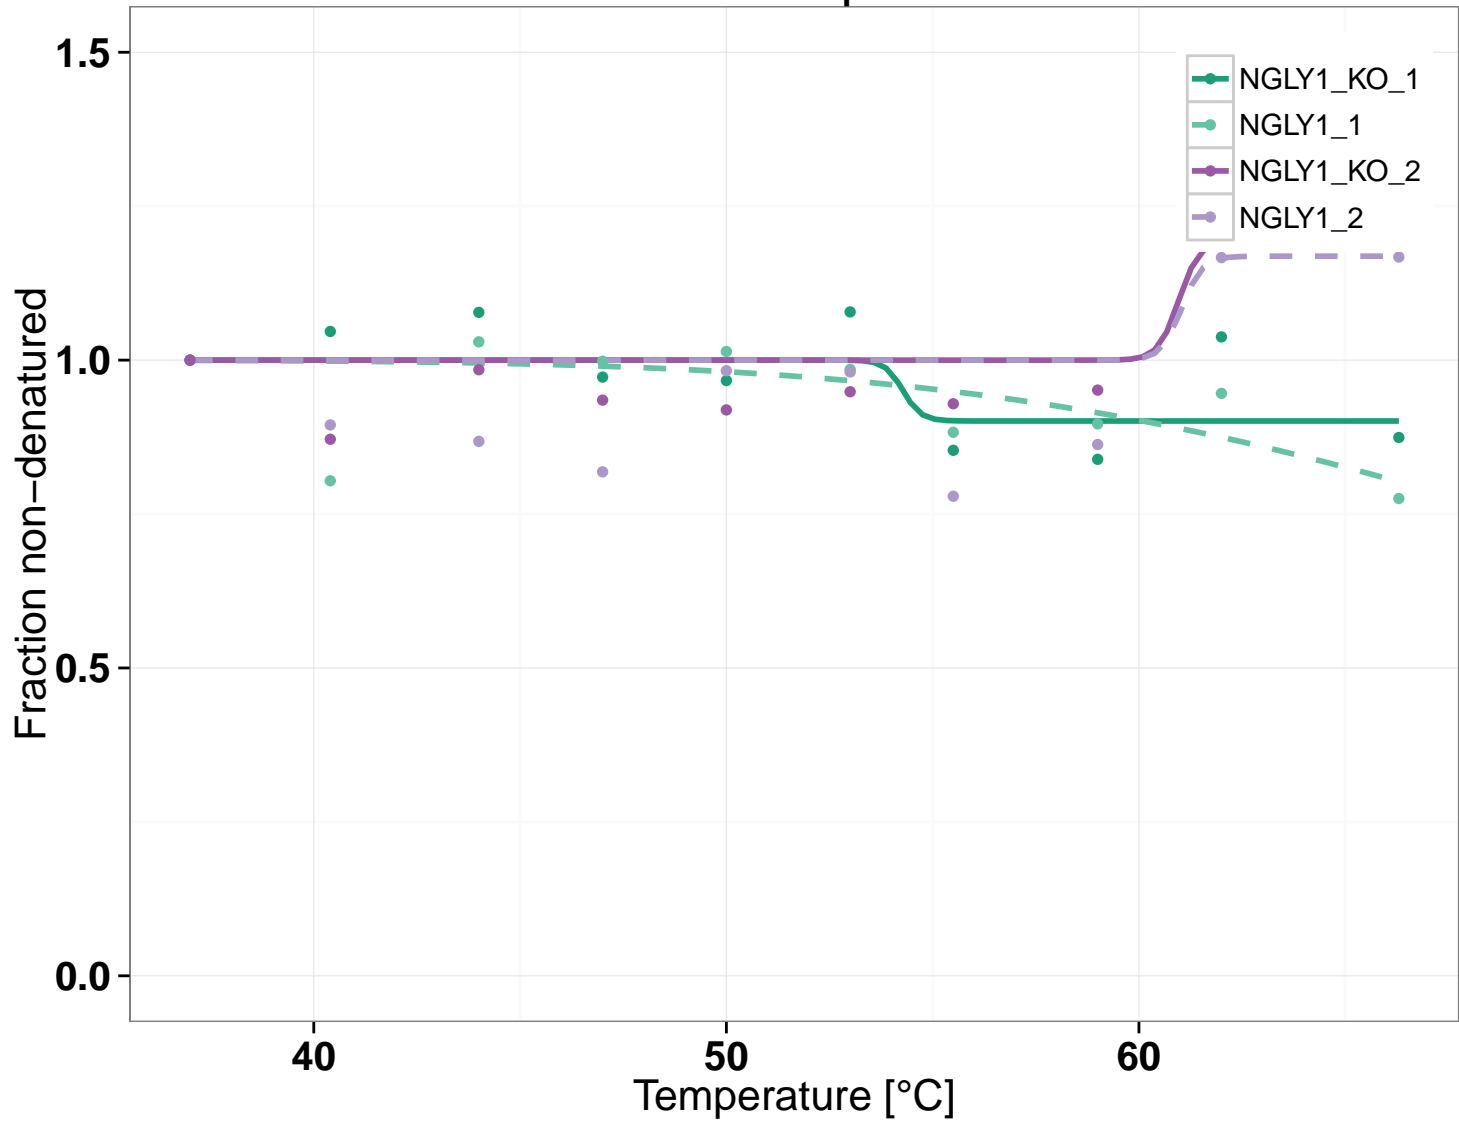

|            | meltPoint | slope | plateau | R2   |
|------------|-----------|-------|---------|------|
| NGLY1_KO_1 | —         | -0.11 | 0.9     | 0.44 |
| NGLY1_1    | —         | —     | 0       | 0.3  |
| NGLY1_KO_2 | —         | 0.2   | 1.19    | 0.66 |
| NGLY1_2    | —         | 0.17  | 1.17    | 0.2  |

Supplement: Supplementary file 5475 [file 1]

# IPI00018206.3|GOT2

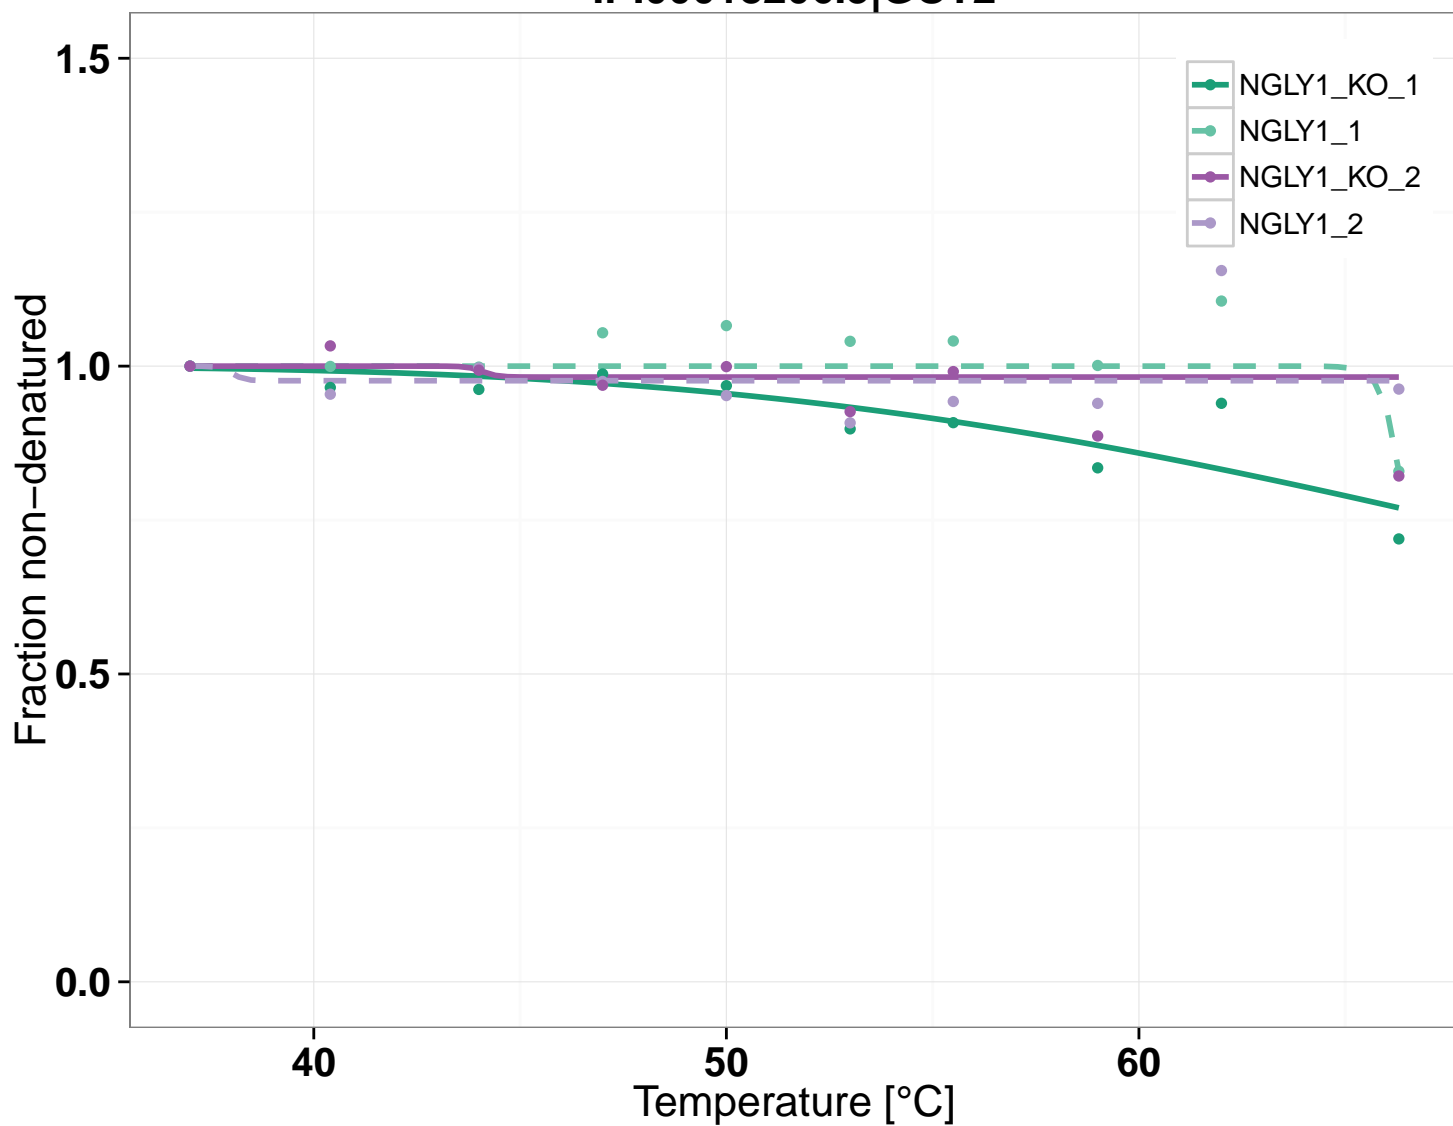

|            | meltPoint | slope  | plateau | R2   |
|------------|-----------|--------|---------|------|
| NGLY1_KO_1 | -         | -      | 0       | 0.72 |
| NGLY1_1    | -         | -      | 0       | 0.56 |
| NGLY1_KO_2 | -         | -0.025 | 0.98    | 0.01 |
| NGLY1_2    | -         | -0.039 | 0.98    | 0.01 |

Supplement: Supplementary file 5476 [file 1]

IPI00398406.3|MEF2A

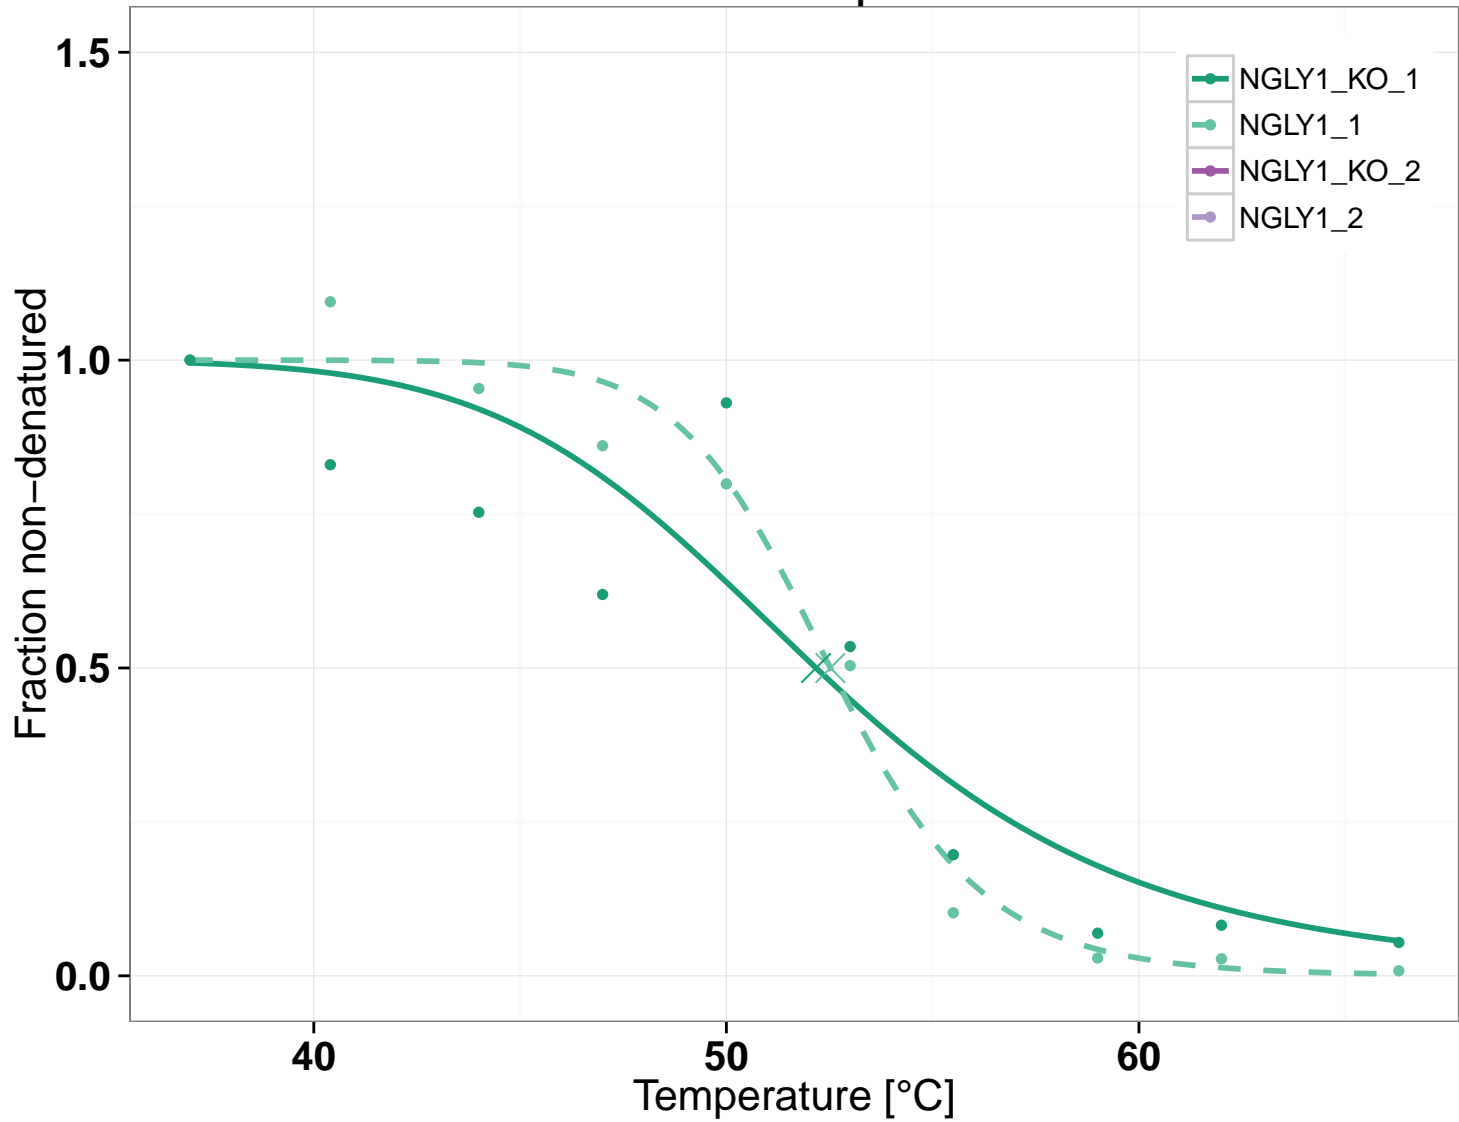

|            | meltPoint | slope  | plateau | R2   |
|------------|-----------|--------|---------|------|
| NGLY1_KO_1 | 52.17     | -0.065 | 0       | 0.84 |
| NGLY1_1    | 52.52     | -0.14  | 0       | 0.98 |
| NGLY1_KO_2 | -         | -      | -       | -    |
| NGLY1_2    | -         | -      | -       | -    |

Supplement: Supplementary file 5477 [file 1]

IPI00296830.5|LUZP1

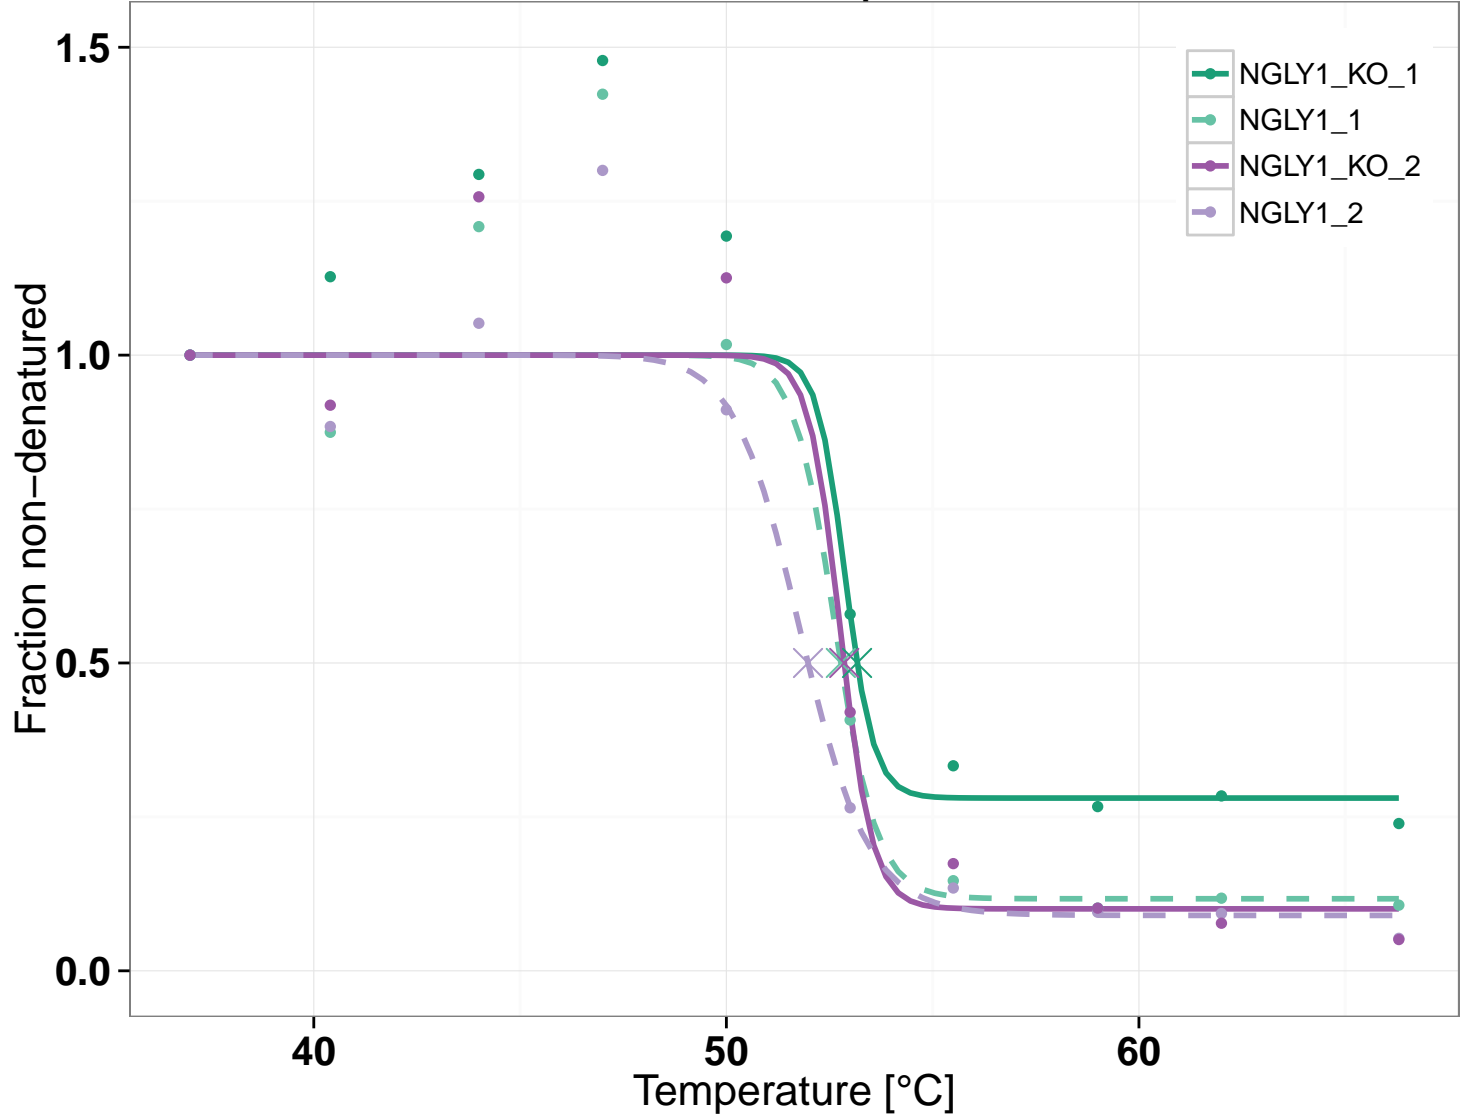

|            | meltPoint | slope | plateau | R2   |
|------------|-----------|-------|---------|------|
| NGLY1_KO_1 | 53.17     | -0.52 | 0.28    | 0.83 |
| NGLY1_1    | 52.77     | -0.44 | 0.12    | 0.9  |
| NGLY1_KO_2 | 52.86     | -0.58 | 0.1     | 0.85 |
| NGLY1_2    | 51.98     | -0.28 | 0.09    | 0.95 |

Supplement: Supplementary file 5478 [file 1]

IPI00893772.1|MPV17

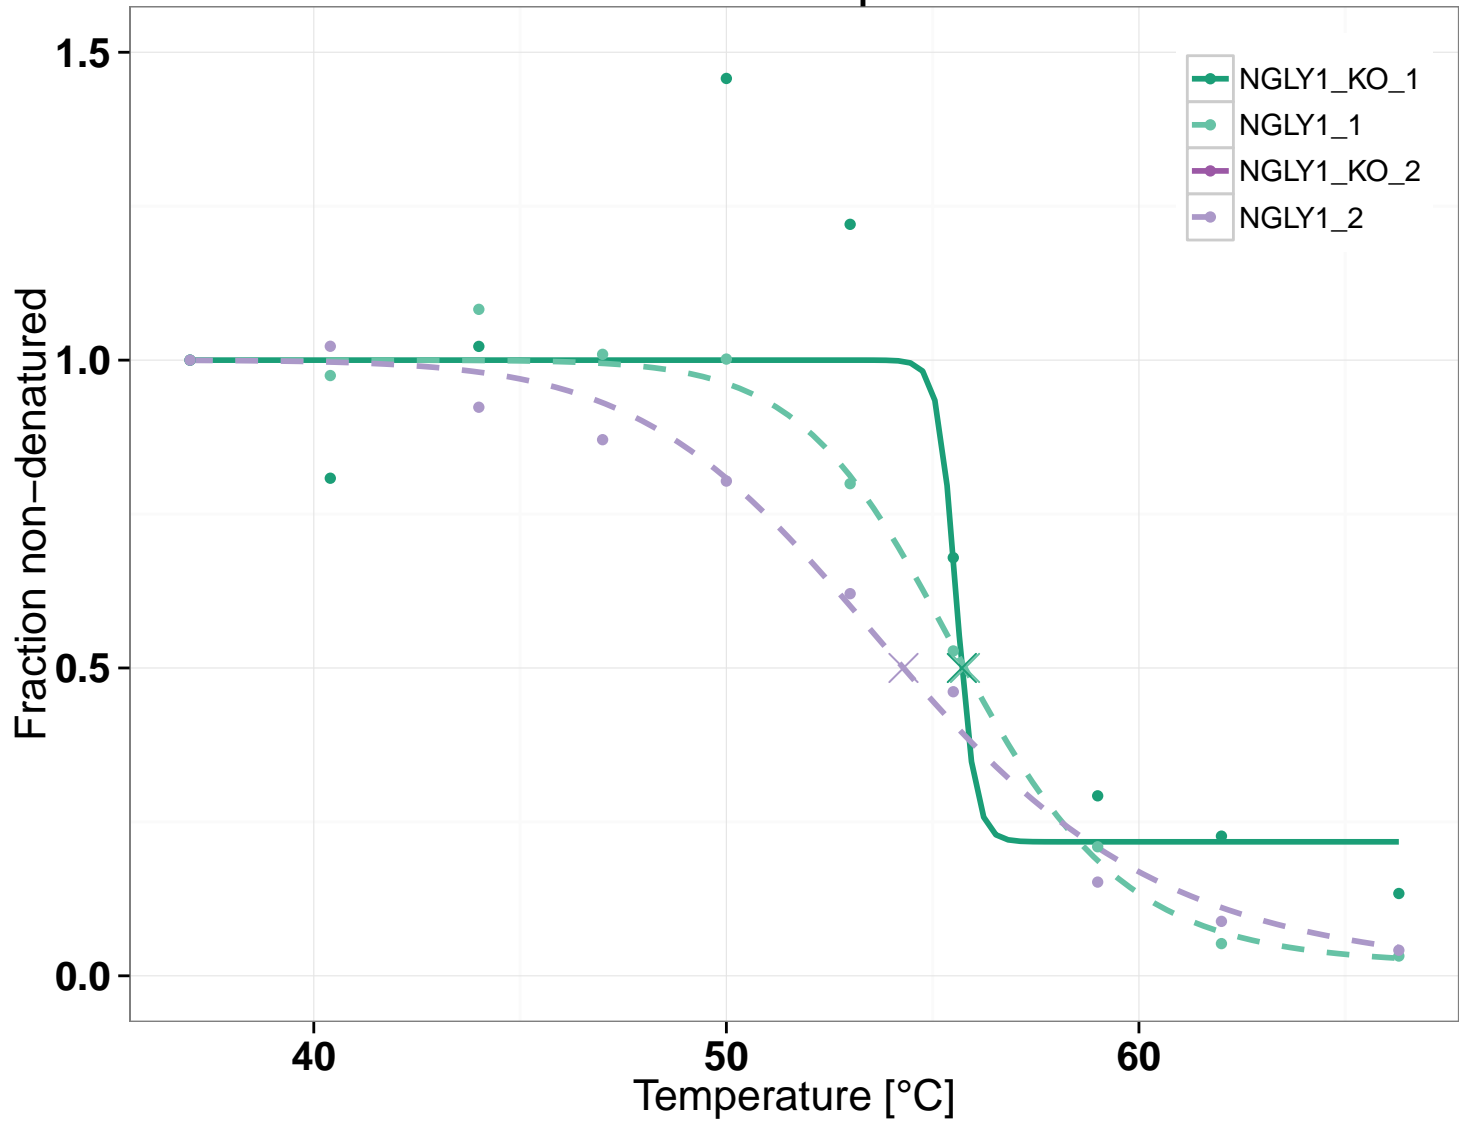

|            | meltPoint | slope  | plateau | R2   |
|------------|-----------|--------|---------|------|
| NGLY1_KO_1 | 55.71     | -0.88  | 0.22    | 0.73 |
| NGLY1_1    | 55.78     | -0.12  | 0.02    | 0.99 |
| NGLY1_KO_2 | -         | -      | -       | -    |
| NGLY1_2    | 54.29     | -0.078 | 0       | 0.99 |

Supplement: Supplementary file 5479 [file 1]

# IPI00219029.3|GOT1

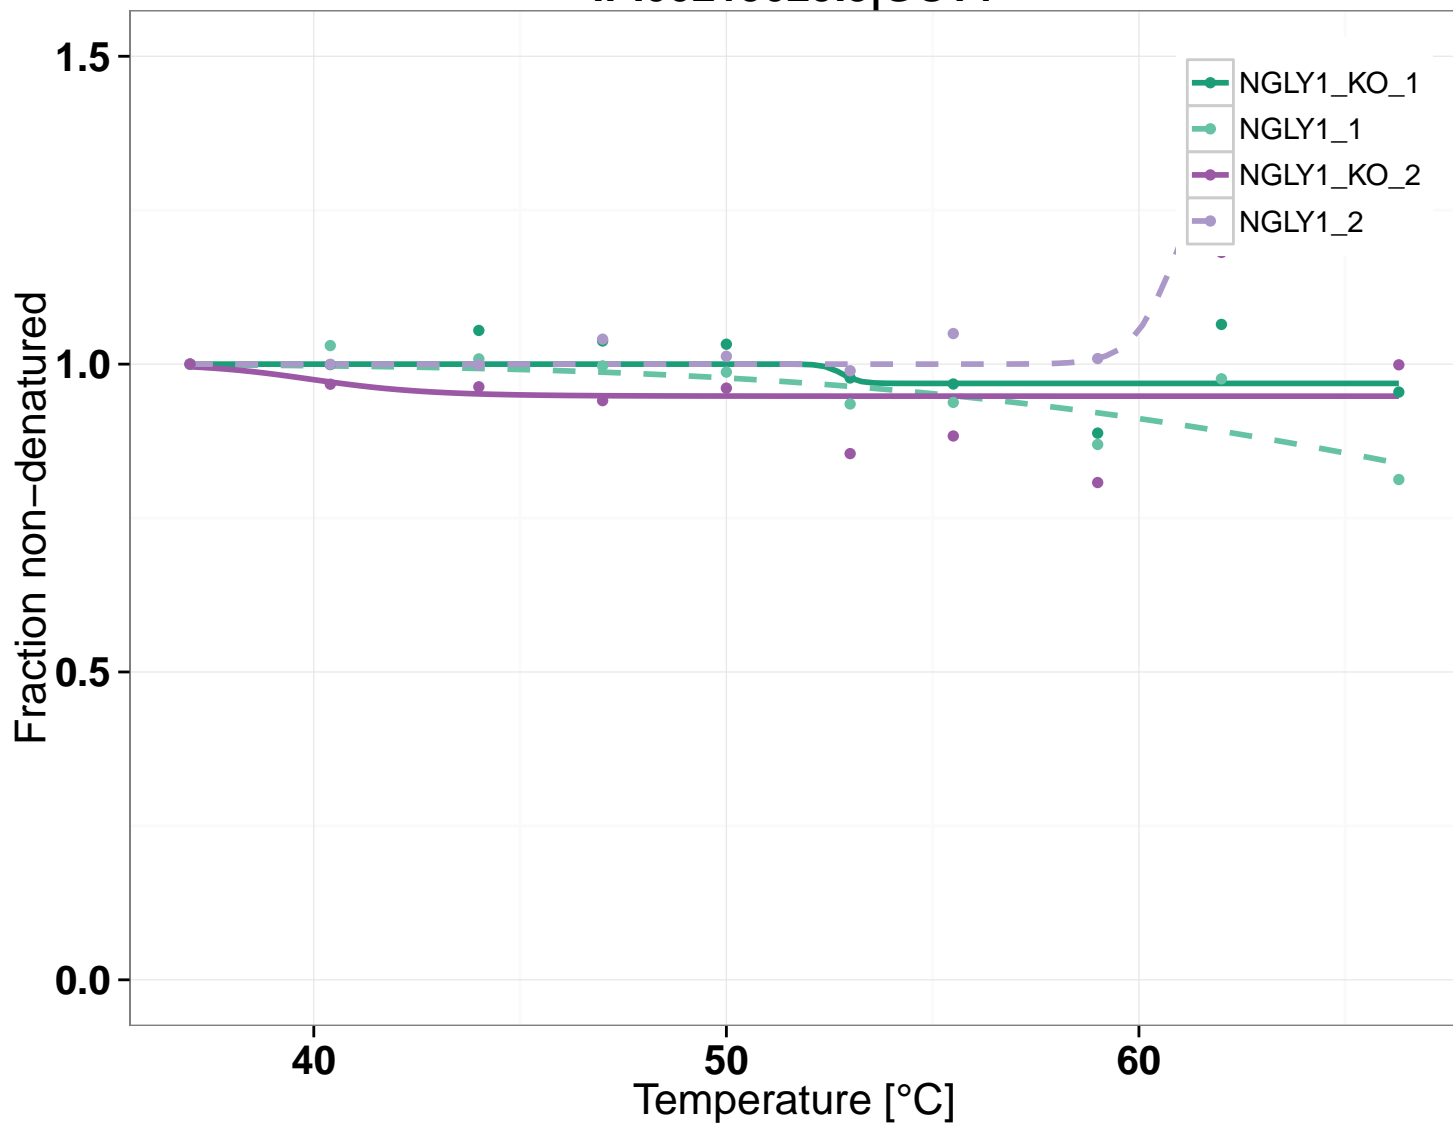

|            | meltPoint | slope   | plateau | R2   |
|------------|-----------|---------|---------|------|
| NGLY1_KO_1 | -         | -0.037  | 0.97    | 0.17 |
| NGLY1_1    | -         | -       | 0       | 0.69 |
| NGLY1_KO_2 | -         | -0.0095 | 0.95    | 0.03 |
| NGLY1_2    | -         | 0.17    | 1.37    | 0.98 |

Supplement: Supplementary file 5480 [file 1]

IPI00167515.1|PTGR2

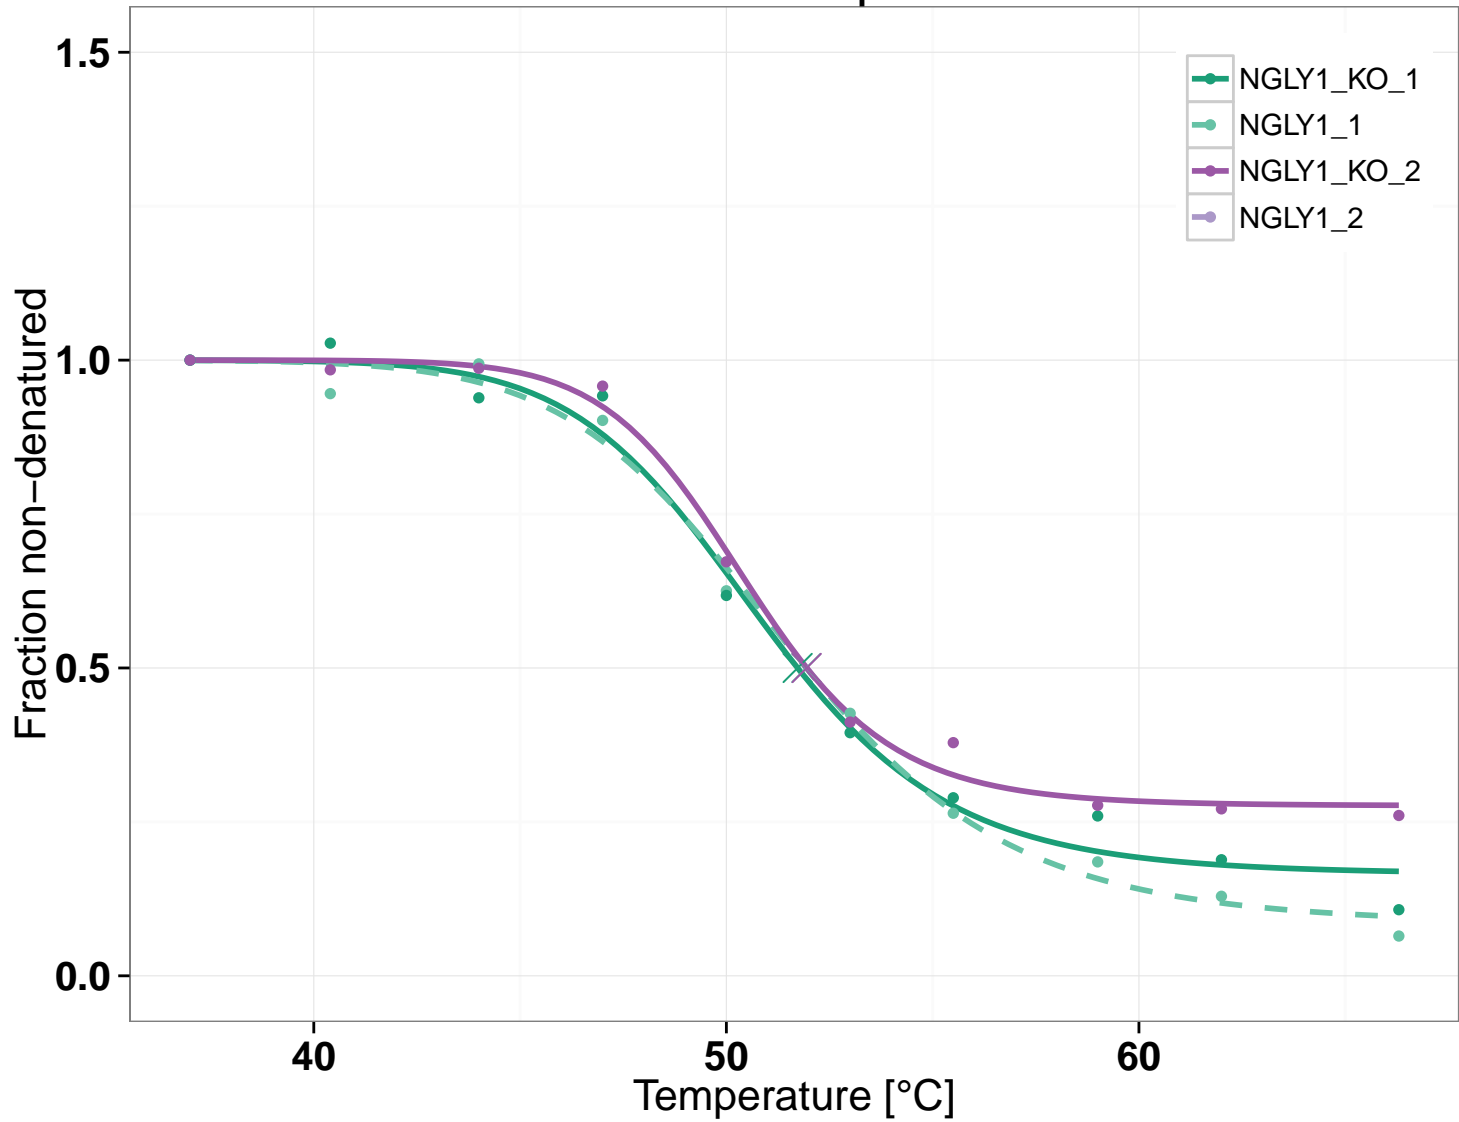

|            | meltPoint | slope  | plateau | R2   |
|------------|-----------|--------|---------|------|
| NGLY1_KO_1 | 51.73     | -0.091 | 0.16    | 0.99 |
| NGLY1_1    | 51.94     | -0.085 | 0.08    | 0.99 |
| NGLY1_KO_2 | 51.95     | -0.1   | 0.28    | 0.99 |
| NGLY1_2    | -         | -      | -       | -    |

Supplement: Supplementary file 5481 [file 1]

IPI00556013.1|GPI

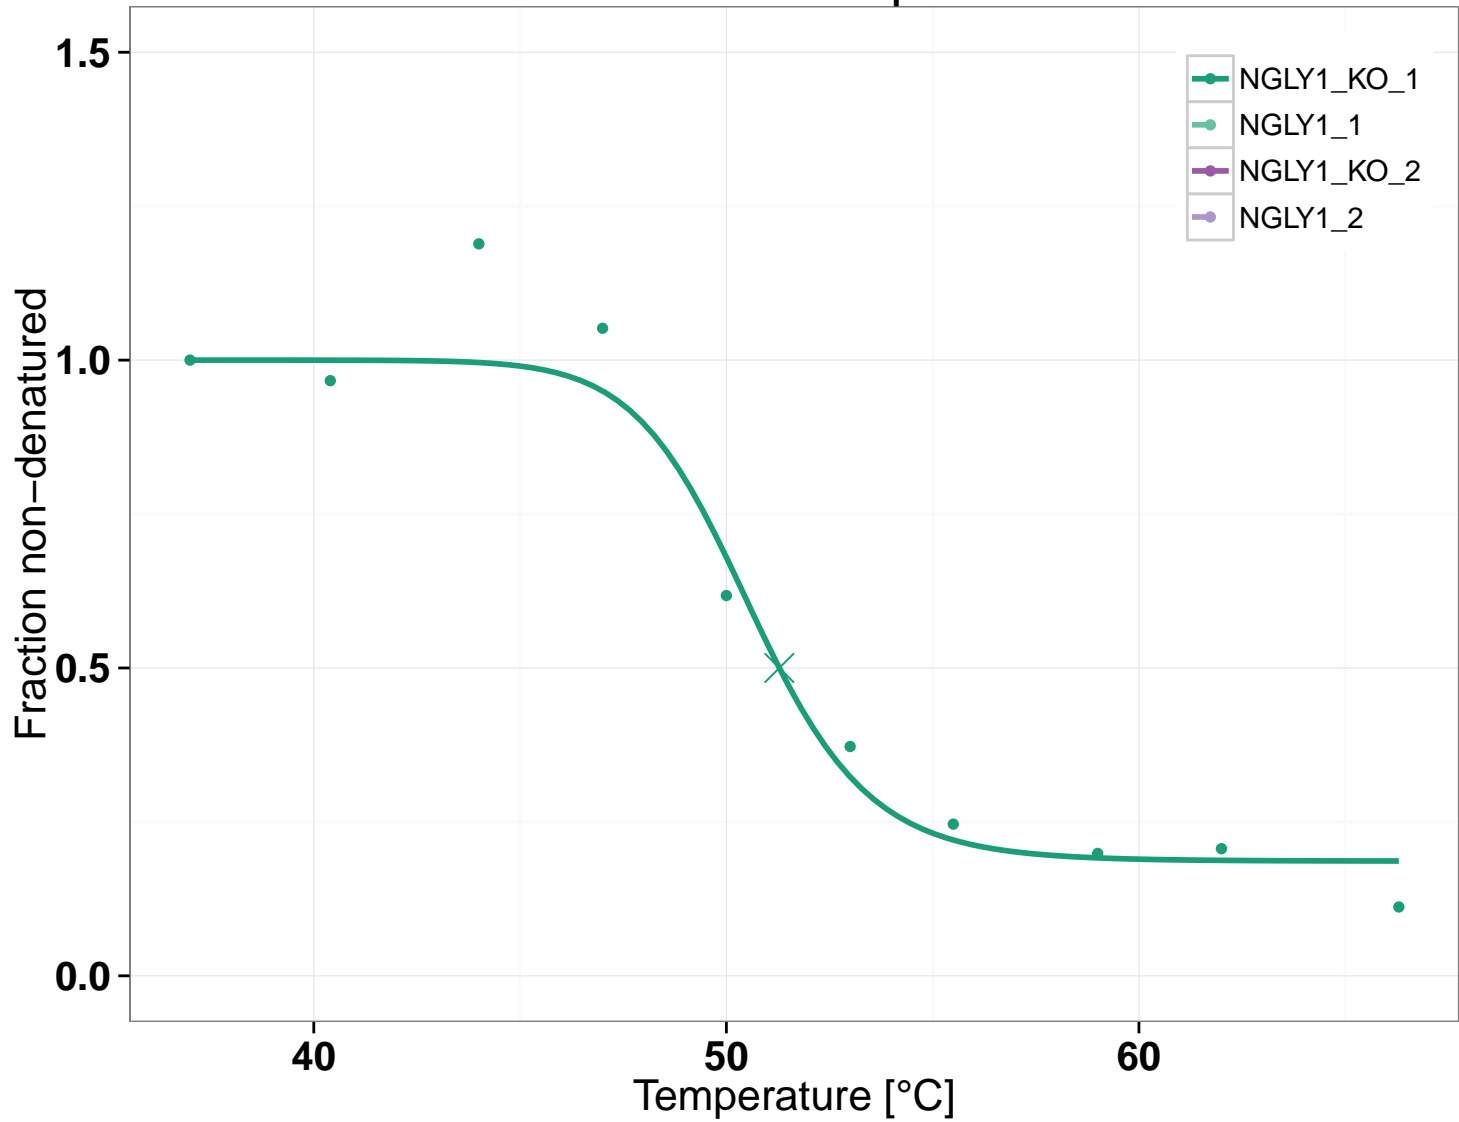

|            | meltPoint | slope | plateau | R2   |
|------------|-----------|-------|---------|------|
| NGLY1_KO_1 | 51.28     | -0.14 | 0.19    | 0.96 |
| NGLY1_1    | -         | -     | -       | -    |
| NGLY1_KO_2 | -         | -     | -       | -    |
| NGLY1_2    | -         | -     | -       | -    |

Supplement: Supplementary file 5482 [file 1]

# IPI00221232.9|GNG12

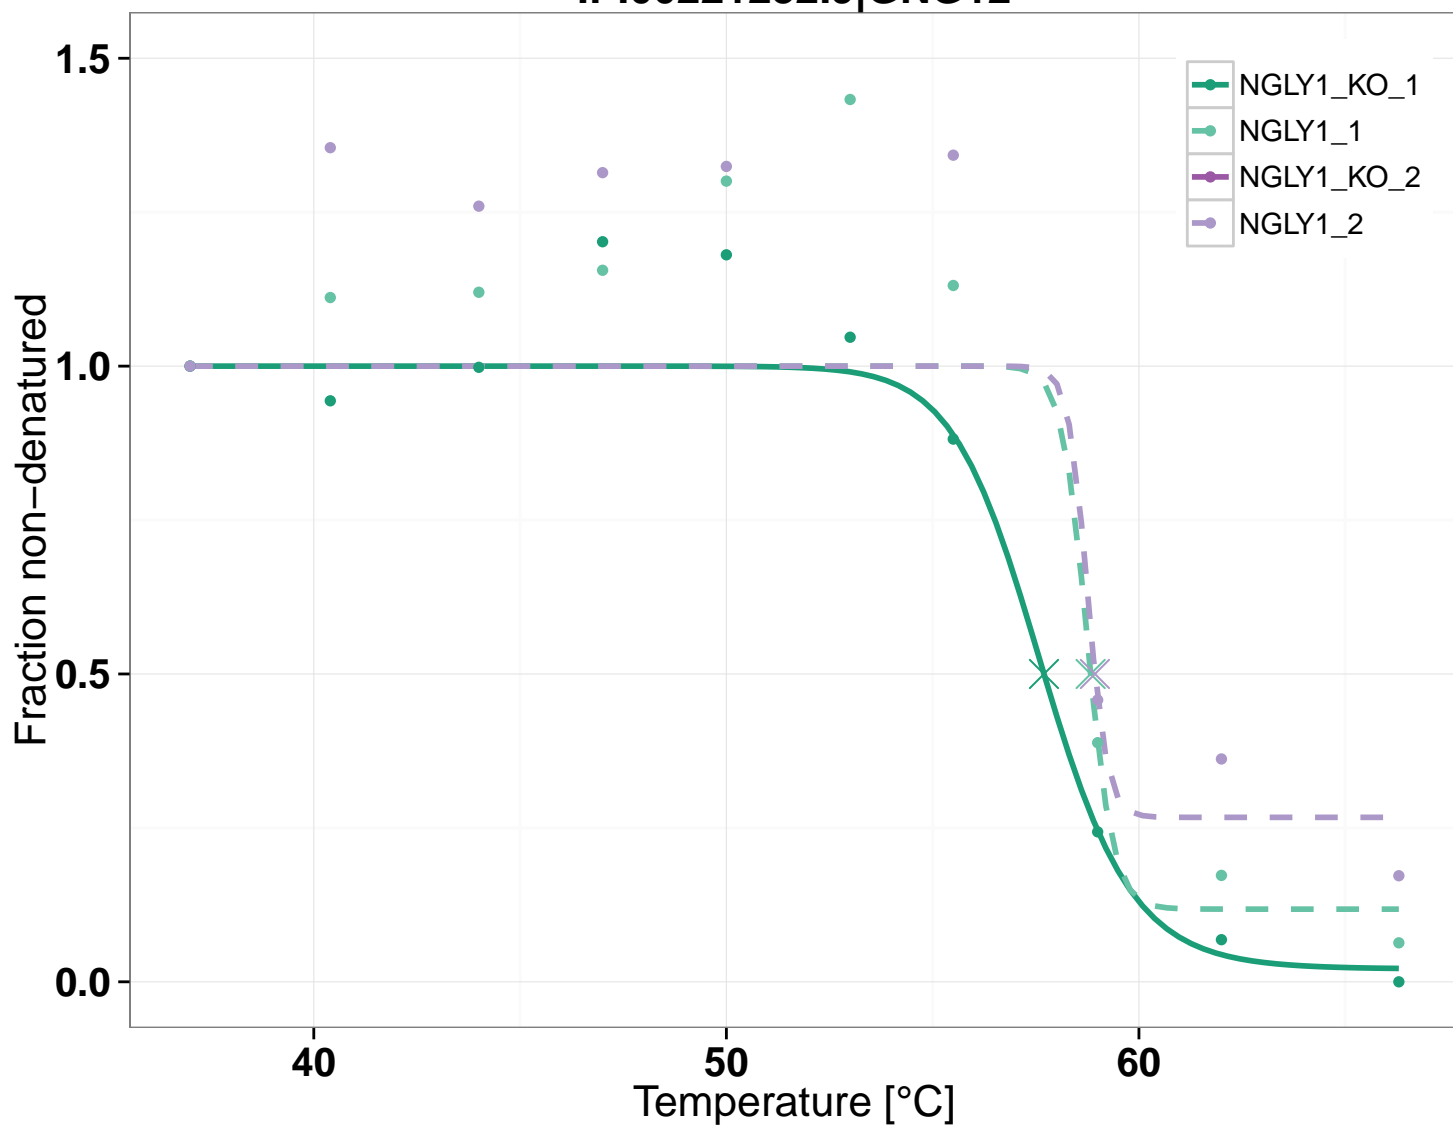

|            | meltPoint | slope | plateau | R2   |
|------------|-----------|-------|---------|------|
| NGLY1_KO_1 | 57.7      | -0.23 | 0.02    | 0.96 |
| NGLY1_1    | 58.83     | -0.71 | 0.12    | 0.84 |
| NGLY1_KO_2 | -         | -     | -       | -    |
| NGLY1_2    | 58.93     | -0.78 | 0.27    | 0.63 |

Supplement: Supplementary file 5483 [file 1]

IPI00003739.5|DDX49

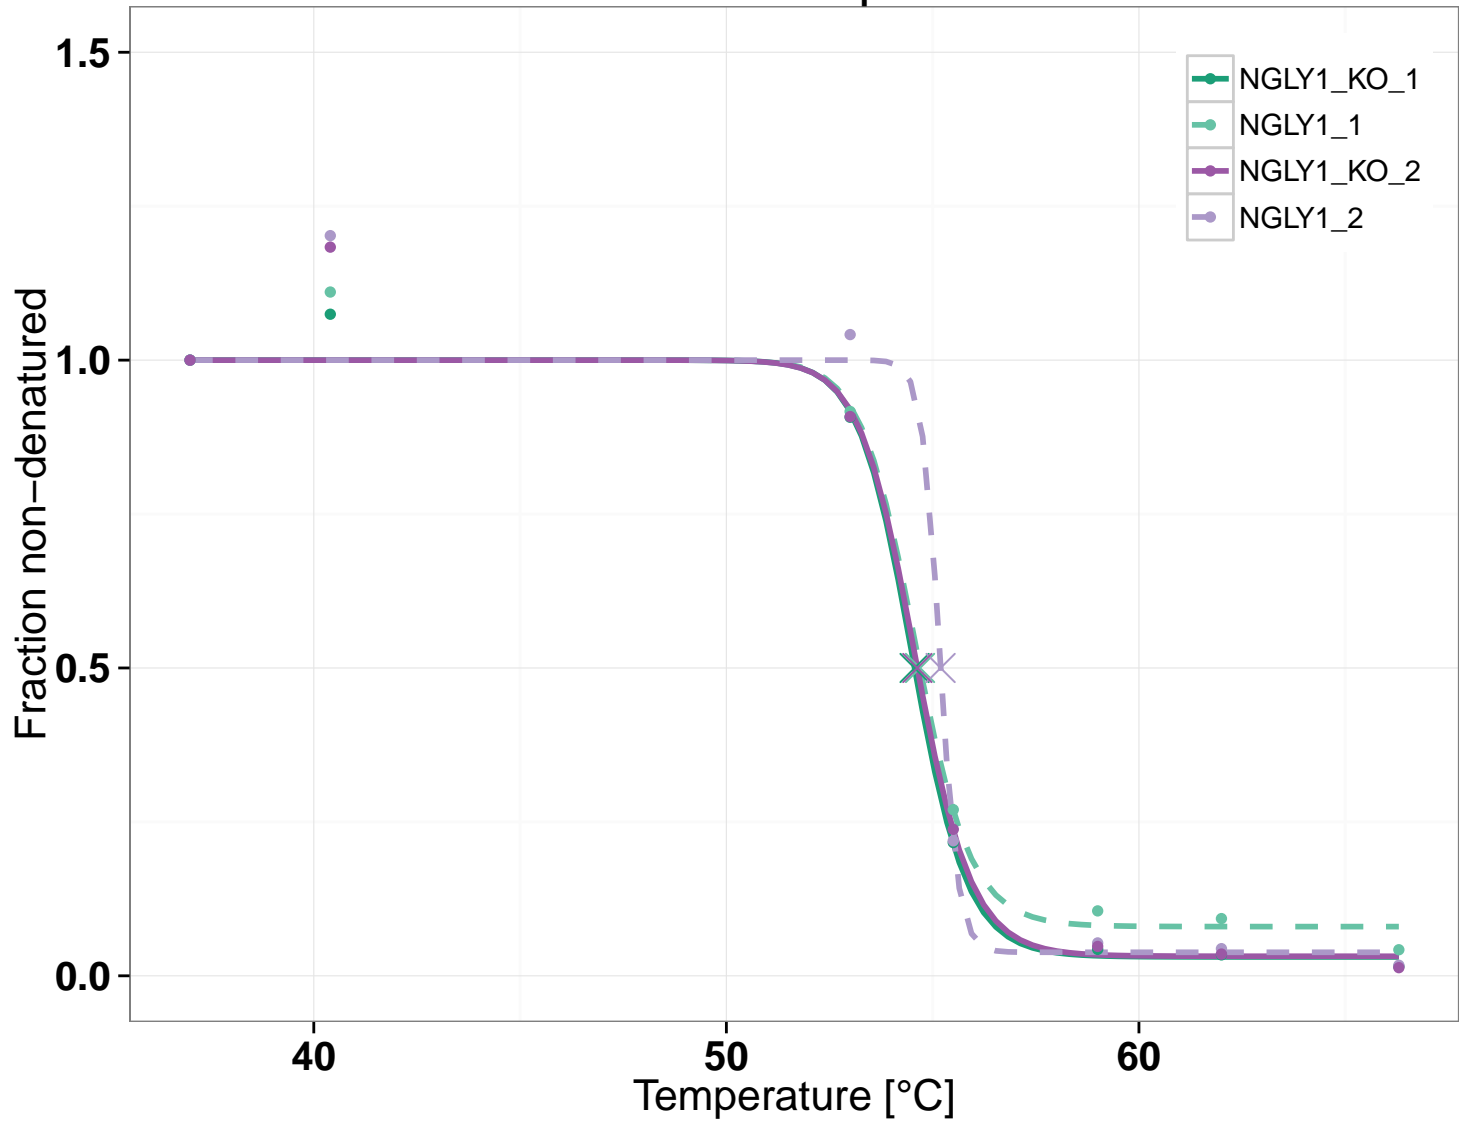

|            | meltPoint | slope | plateau | R2   |
|------------|-----------|-------|---------|------|
| NGLY1_KO_1 | 54.56     | -0.37 | 0.03    | 0.67 |
| NGLY1_1    | 54.69     | -0.35 | 0.08    | 0.65 |
| NGLY1_KO_2 | 54.63     | -0.36 | 0.03    | 0.68 |
| NGLY1_2    | 55.19     | -1.1  | 0.04    | 0.57 |

Supplement: Supplementary file 5484 [file 1]

IPI00292000.6|PRPF31

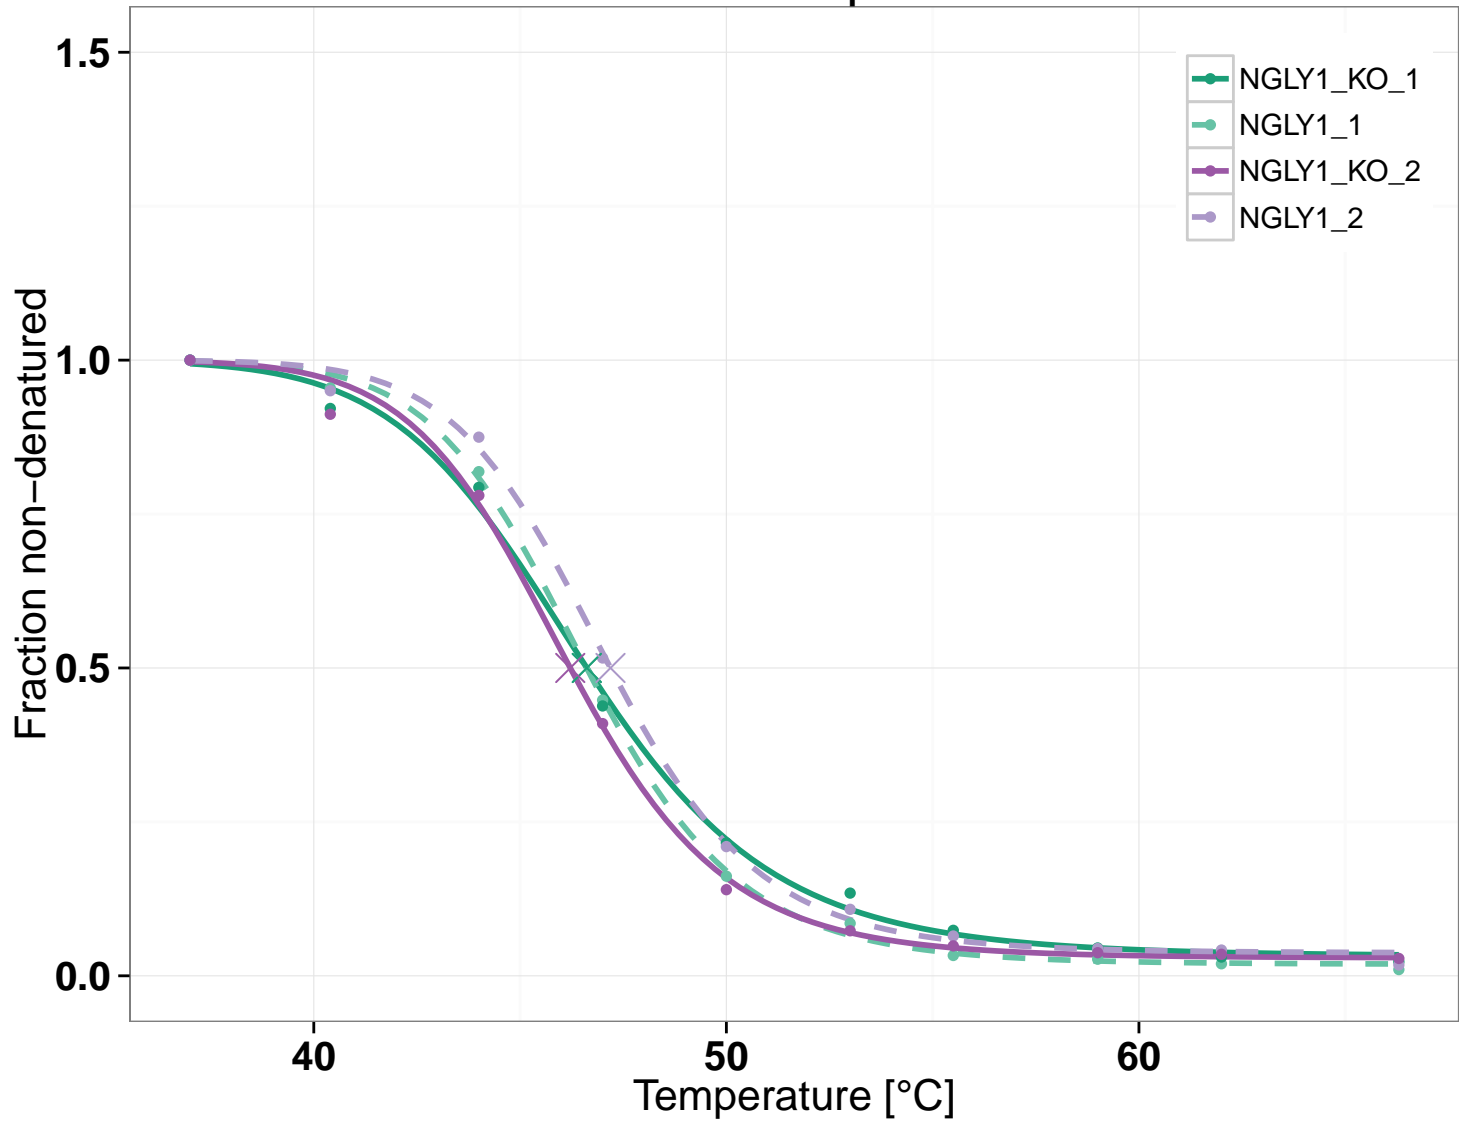

|            | meltPoint | slope | plateau | R2 |
|------------|-----------|-------|---------|----|
| NGLY1_KO_1 | 46.62     | -0.1  | 0.03    | 1  |
| NGLY1_1    | 46.61     | -0.13 | 0.02    | 1  |
| NGLY1_KO_2 | 46.22     | -0.13 | 0.03    | 1  |
| NGLY1_2    | 47.19     | -0.13 | 0.04    | 1  |

Supplement: Supplementary file 5485 [file 1]

IPI00294879.1|RANGAP1

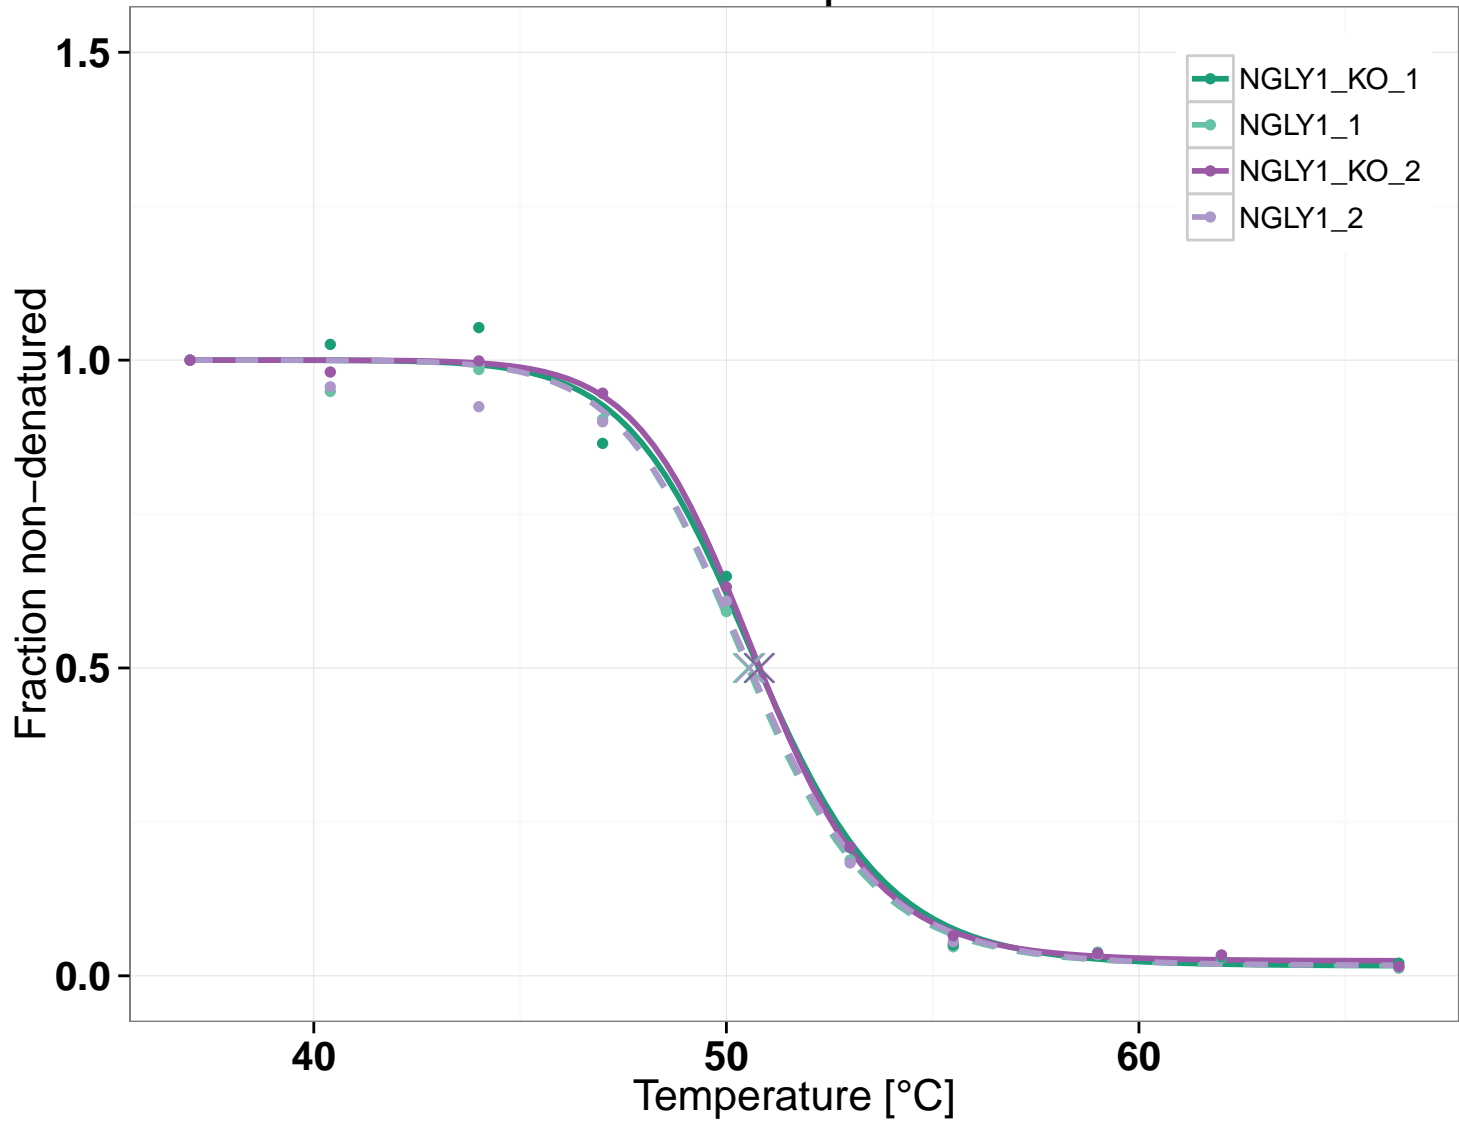

|            | meltPoint | slope | plateau | R2   |
|------------|-----------|-------|---------|------|
| NGLY1_KO_1 | 50.79     | -0.15 | 0.02    | 0.99 |
| NGLY1_1    | 50.52     | -0.16 | 0.02    | 1    |
| NGLY1_KO_2 | 50.81     | -0.17 | 0.02    | 1    |
| NGLY1_2    | 50.58     | -0.16 | 0.02    | 1    |

Supplement: Supplementary file 5486 [file 1]

IPI00103175.1|CANT1

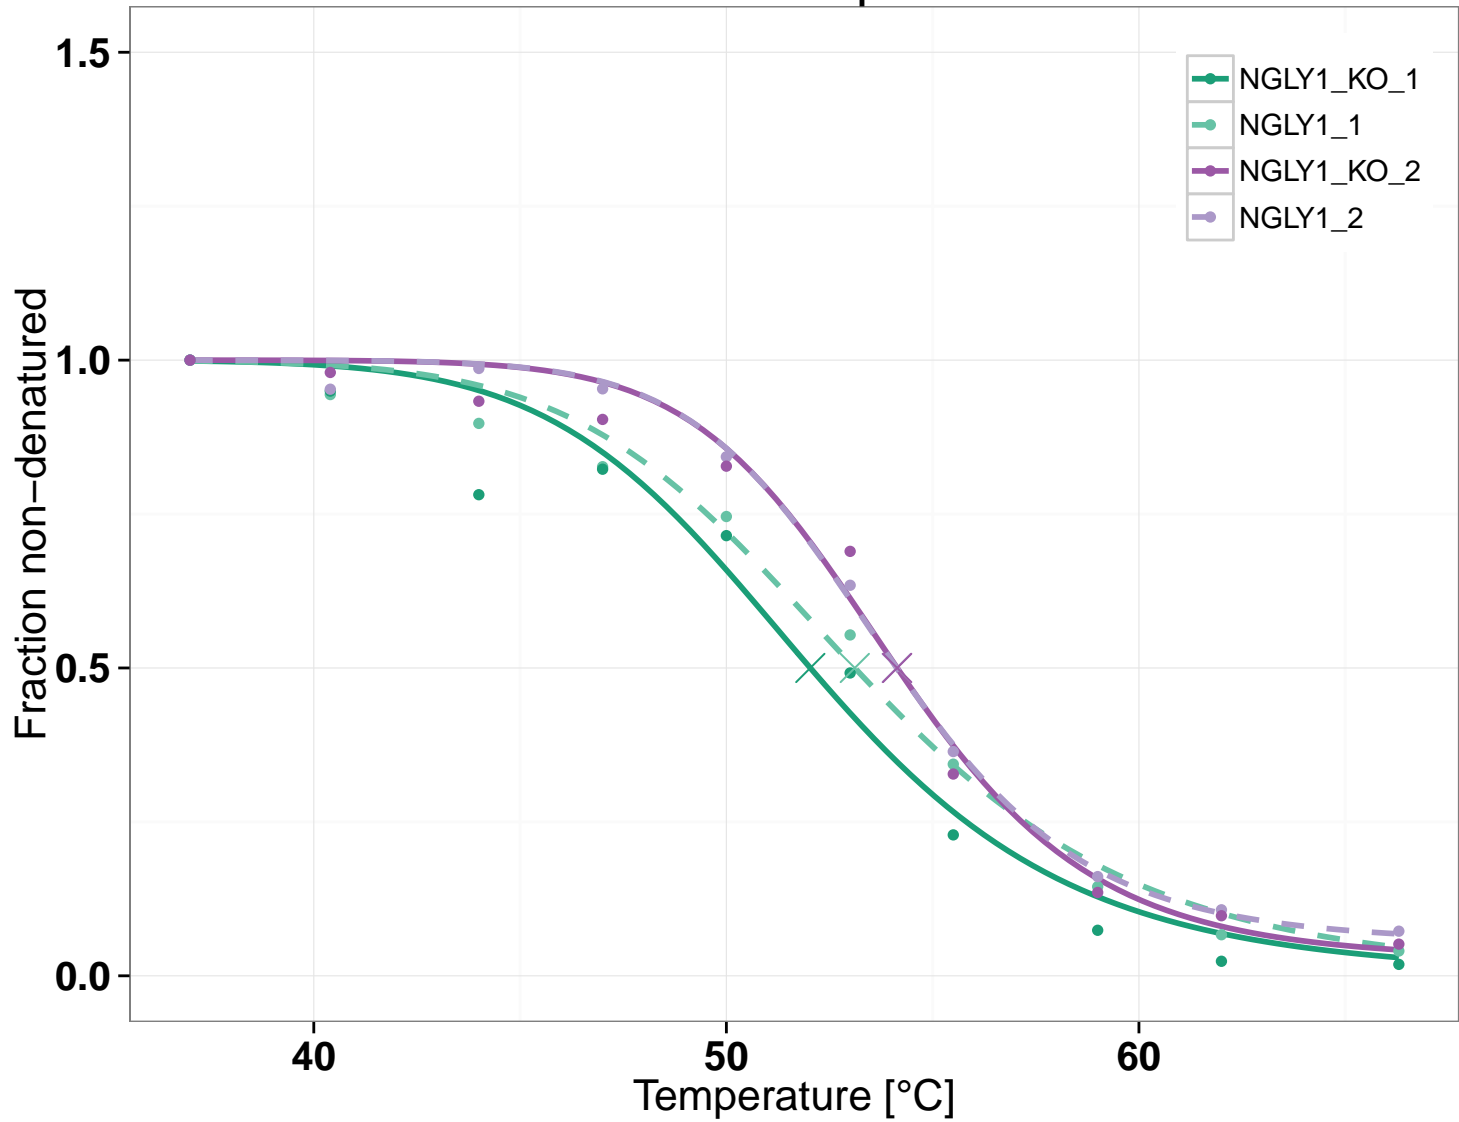

|            | meltPoint | slope  | plateau | R2   |
|------------|-----------|--------|---------|------|
| NGLY1_KO_1 | 52.03     | -0.079 | 0       | 0.97 |
| NGLY1_1    | 53.11     | -0.073 | 0       | 0.99 |
| NGLY1_KO_2 | 54.14     | -0.1   | 0.03    | 0.99 |
| NGLY1_2    | 54.13     | -0.099 | 0.05    | 1    |

Supplement: Supplementary file 5487 [file 1]

IPI00217553.1|MRPL41

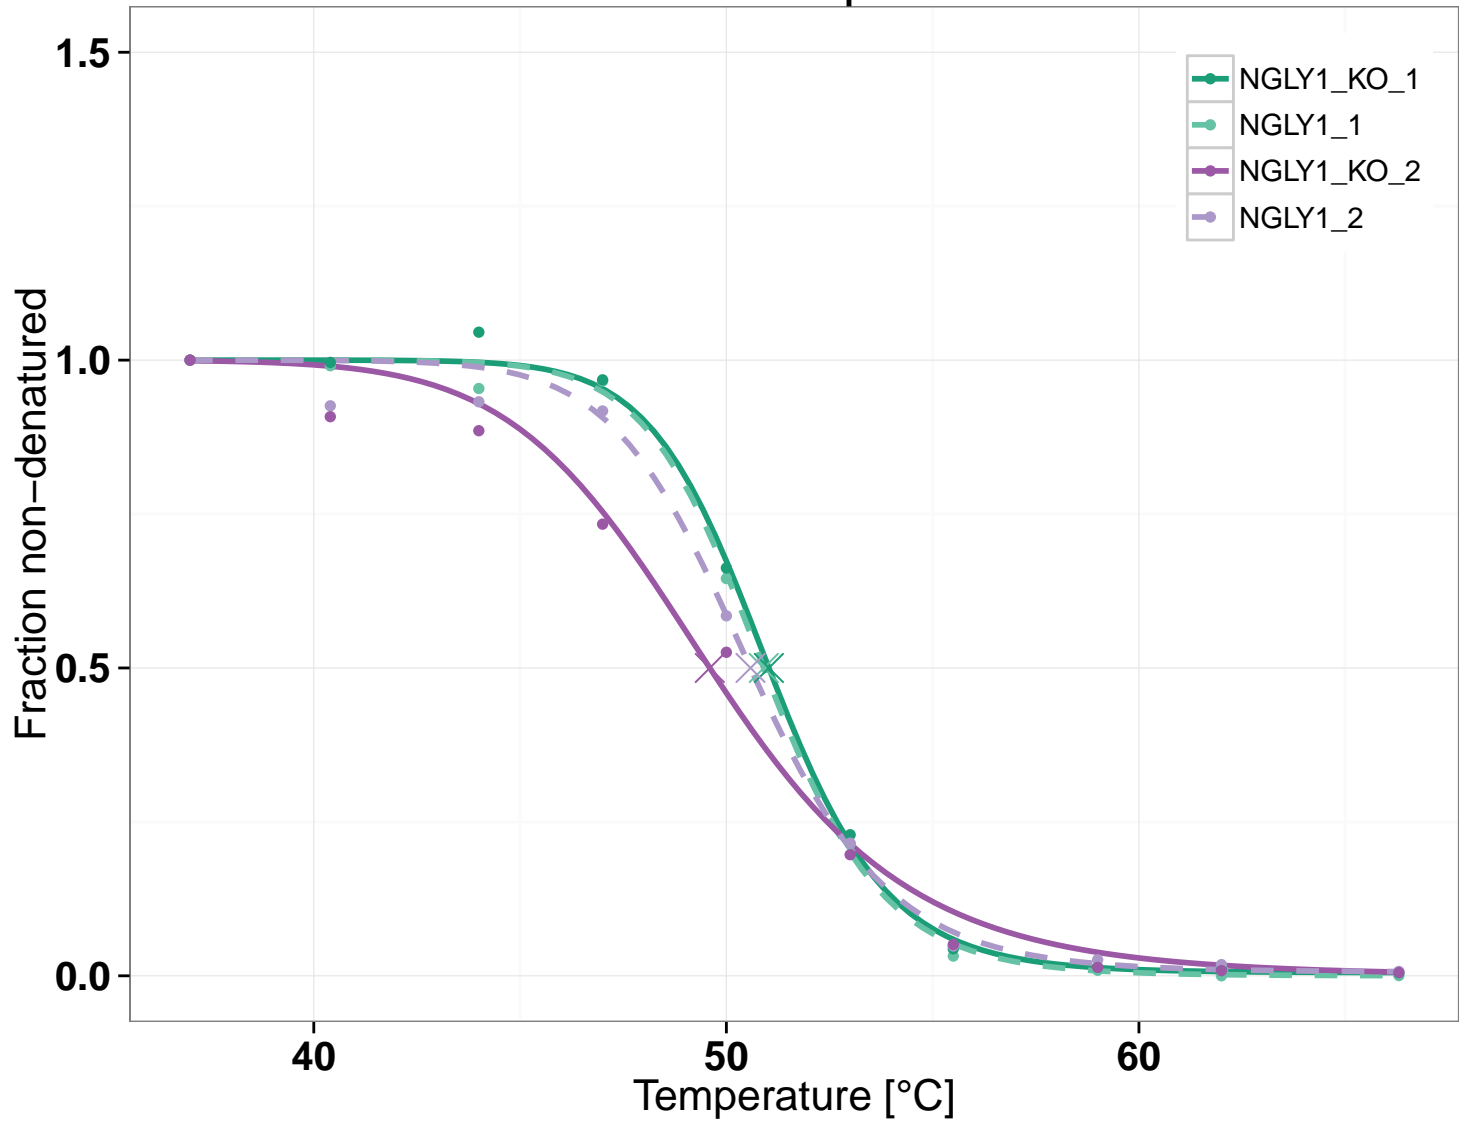

|            | meltPoint | slope | plateau | R2   |
|------------|-----------|-------|---------|------|
| NGLY1_KO_1 | 51.03     | -0.17 | 0.01    | 1    |
| NGLY1_1    | 50.91     | -0.17 | 0       | 1    |
| NGLY1_KO_2 | 49.6      | -0.1  | 0       | 0.99 |
| NGLY1_2    | 50.59     | -0.15 | 0.01    | 0.99 |

Supplement: Supplementary file 5488 [file 1]

IPI00328688.3|SCML2

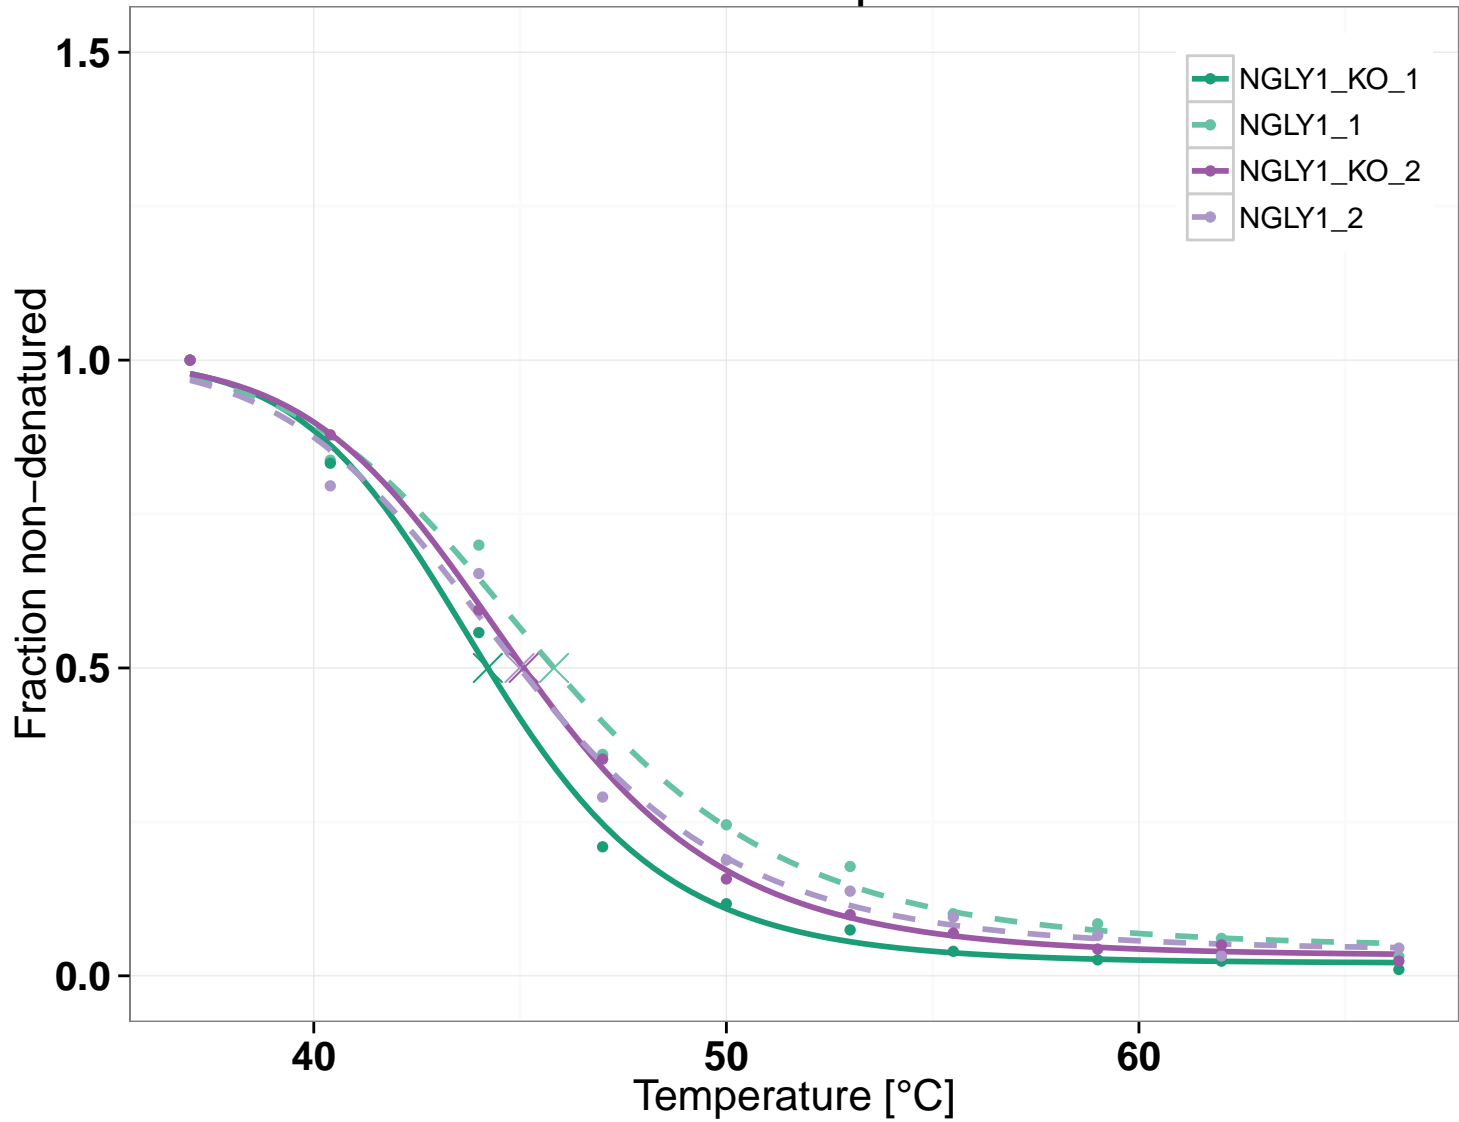

|            | meltPoint | slope  | plateau | R2   |
|------------|-----------|--------|---------|------|
| NGLY1_KO_1 | 44.22     | -0.11  | 0.02    | 1    |
| NGLY1_1    | 45.82     | -0.081 | 0.04    | 0.99 |
| NGLY1_KO_2 | 45.09     | -0.096 | 0.03    | 1    |
| NGLY1_2    | 44.99     | -0.087 | 0.04    | 0.99 |

Supplement: Supplementary file 5489 [file 1]

IPI00006737.1|MAGEB4

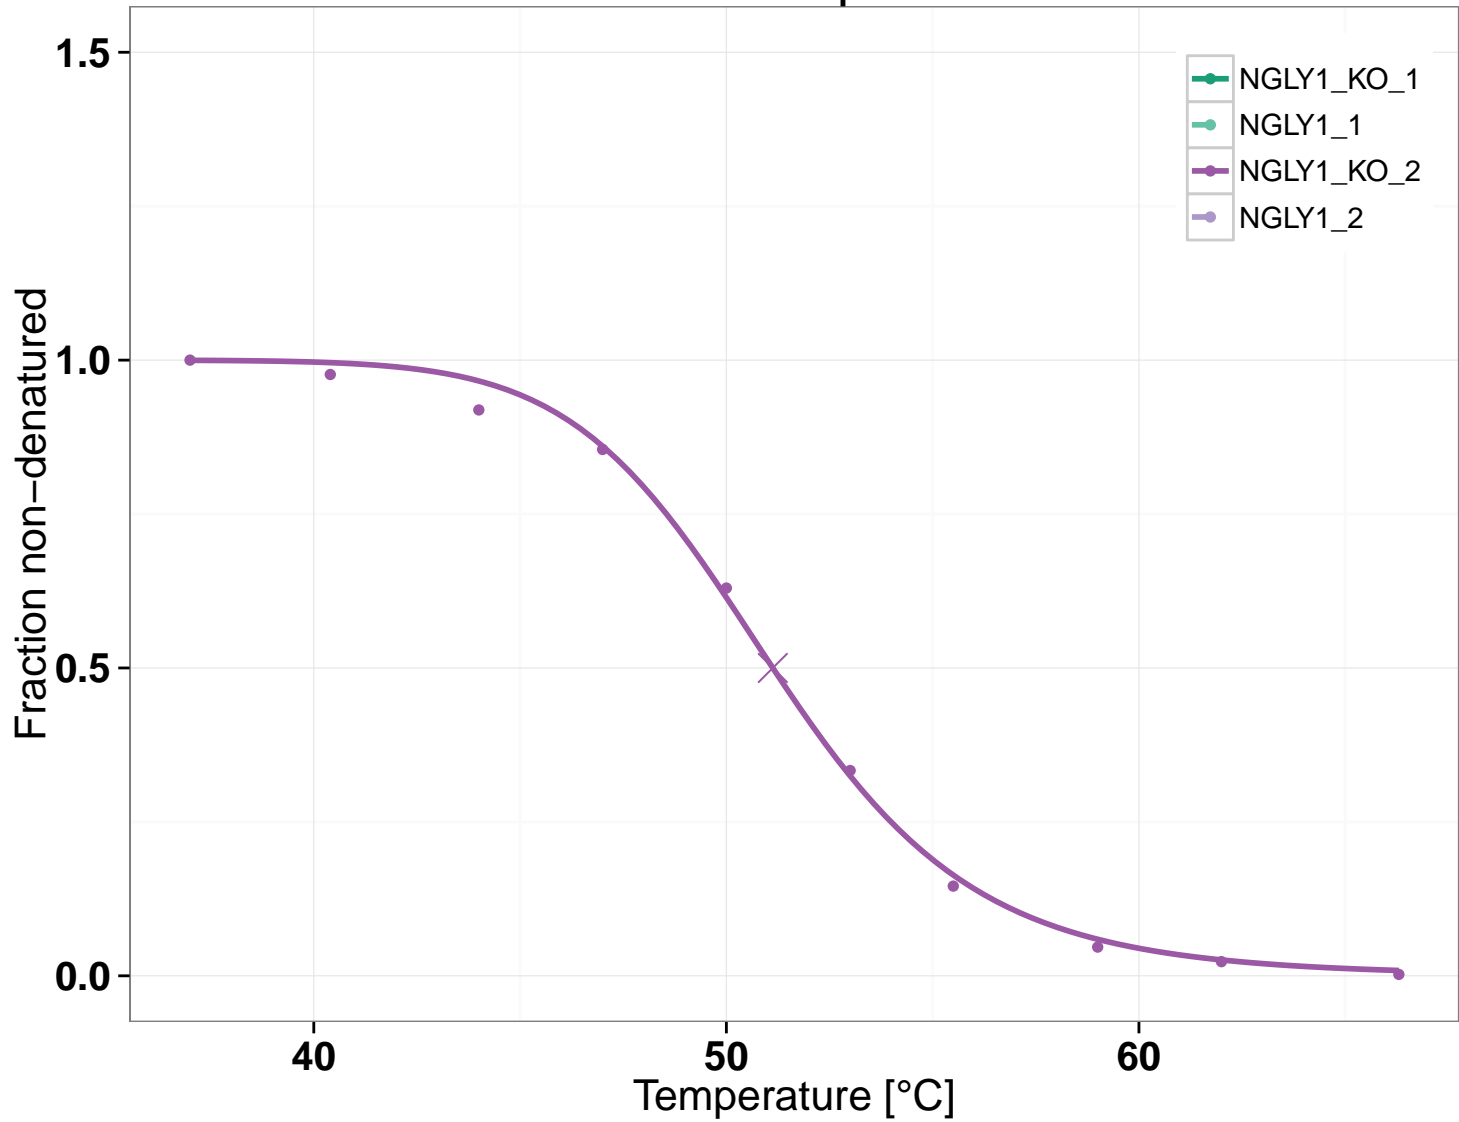

|            | meltPoint | slope | plateau | R2 |
|------------|-----------|-------|---------|----|
| NGLY1_KO_1 | —         | —     | —       | —  |
| NGLY1_1    | —         | —     | —       | —  |
| NGLY1_KO_2 | 51.13     | -0.1  | 0       | 1  |
| NGLY1_2    | —         | —     | —       | —  |

Supplement: Supplementary file 5490 [file 1]

IPI00015119.1|POLR2F

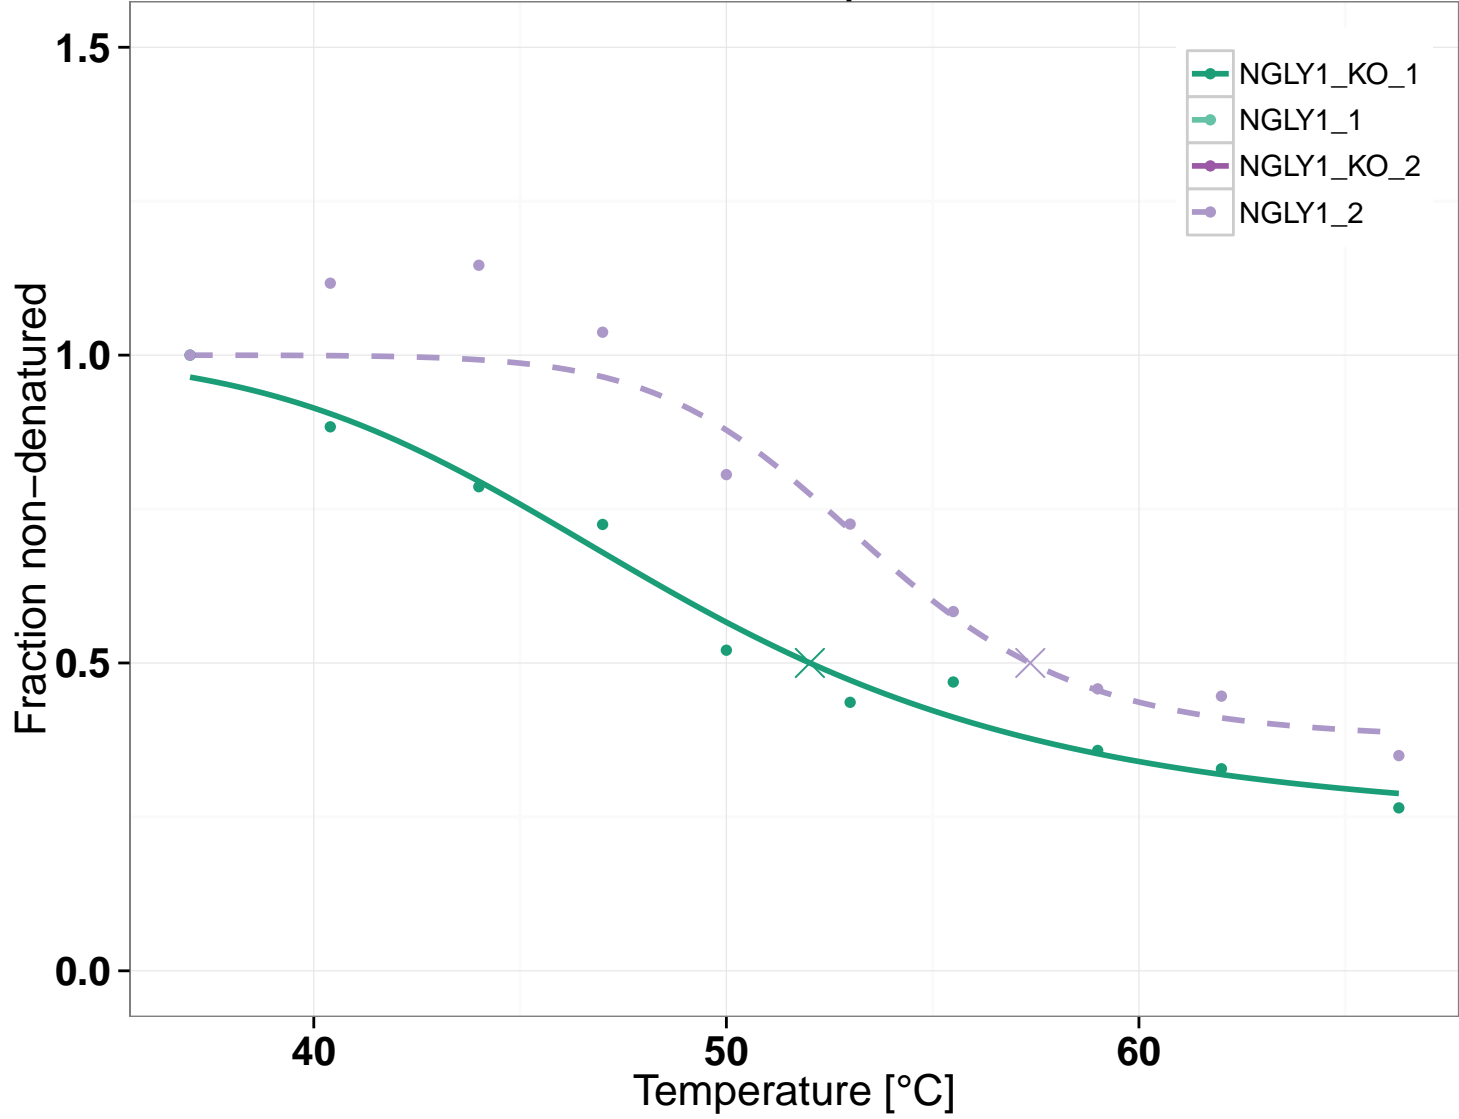

|            | meltPoint | slope  | plateau | R2   |
|------------|-----------|--------|---------|------|
| NGLY1_KO_1 | 52.02     | -0.039 | 0.23    | 0.98 |
| NGLY1_1    | -         | -      | -       | -    |
| NGLY1_KO_2 | -         | -      | -       | -    |
| NGLY1_2    | 57.37     | -0.06  | 0.38    | 0.94 |

Supplement: Supplementary file 5491 [file 1]

# IPI00022462.2|TFRC

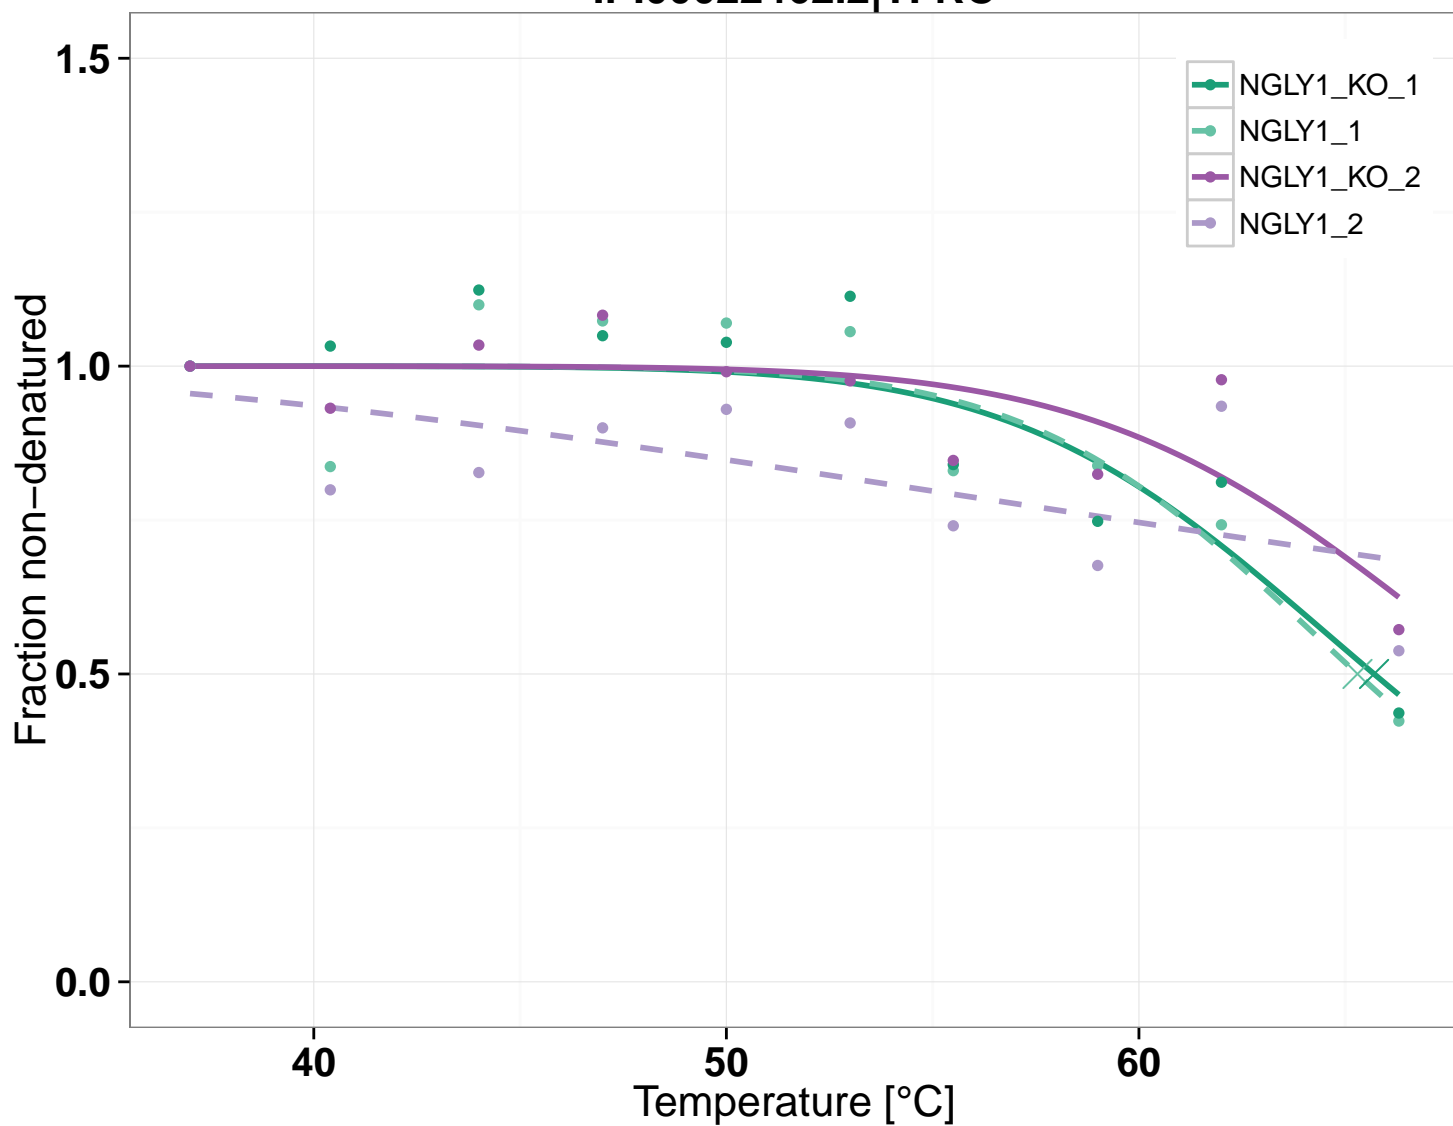

|            | meltPoint | slope  | plateau | R2   |
|------------|-----------|--------|---------|------|
| NGLY1_KO_1 | 65.7      | -0.058 | 0       | 0.82 |
| NGLY1_1    | 65.3      | -0.062 | 0       | 0.82 |
| NGLY1_KO_2 | -         | -      | 0       | 0.68 |
| NGLY1_2    | -         | -0.01  | 0       | 0.35 |

Supplement: Supplementary file 5492 [file 1]

IPI00307165.1|TRIM47

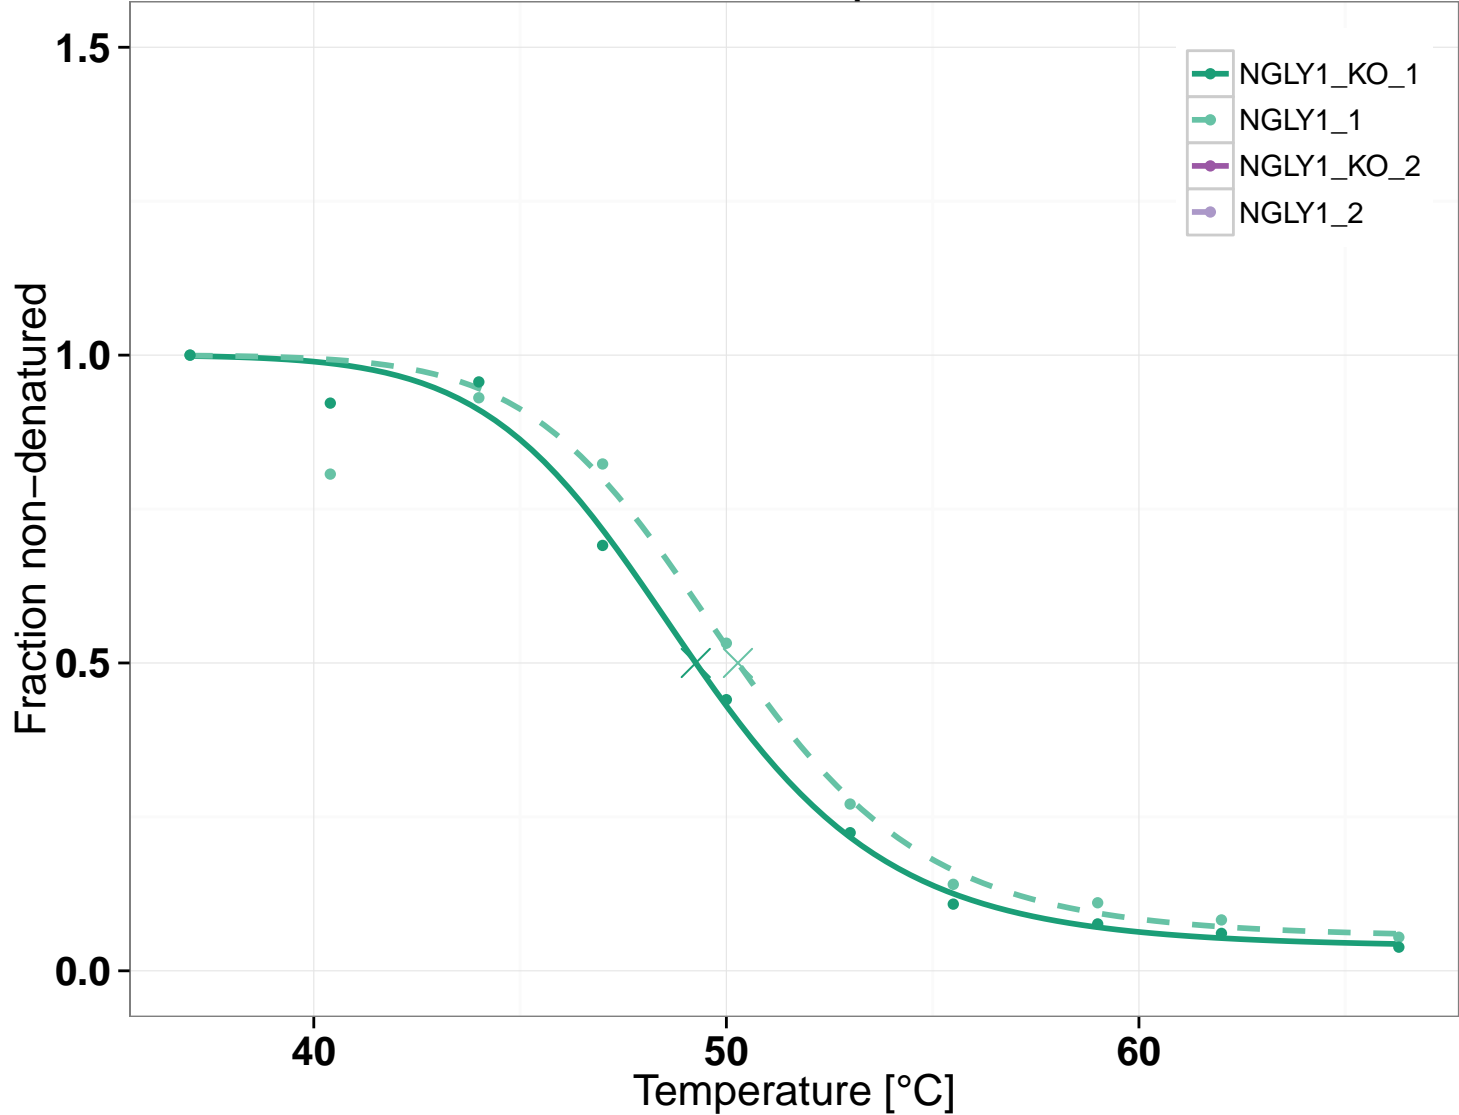

|            | meltPoint | slope  | plateau | R2   |
|------------|-----------|--------|---------|------|
| NGLY1_KO_1 | 49.26     | -0.098 | 0.04    | 0.99 |
| NGLY1_1    | 50.28     | -0.098 | 0.05    | 0.97 |
| NGLY1_KO_2 | -         | -      | -       | -    |
| NGLY1_2    | -         | -      | -       | -    |

Supplement: Supplementary file 5493 [file 1]

IPI00103525.1|PSPC1

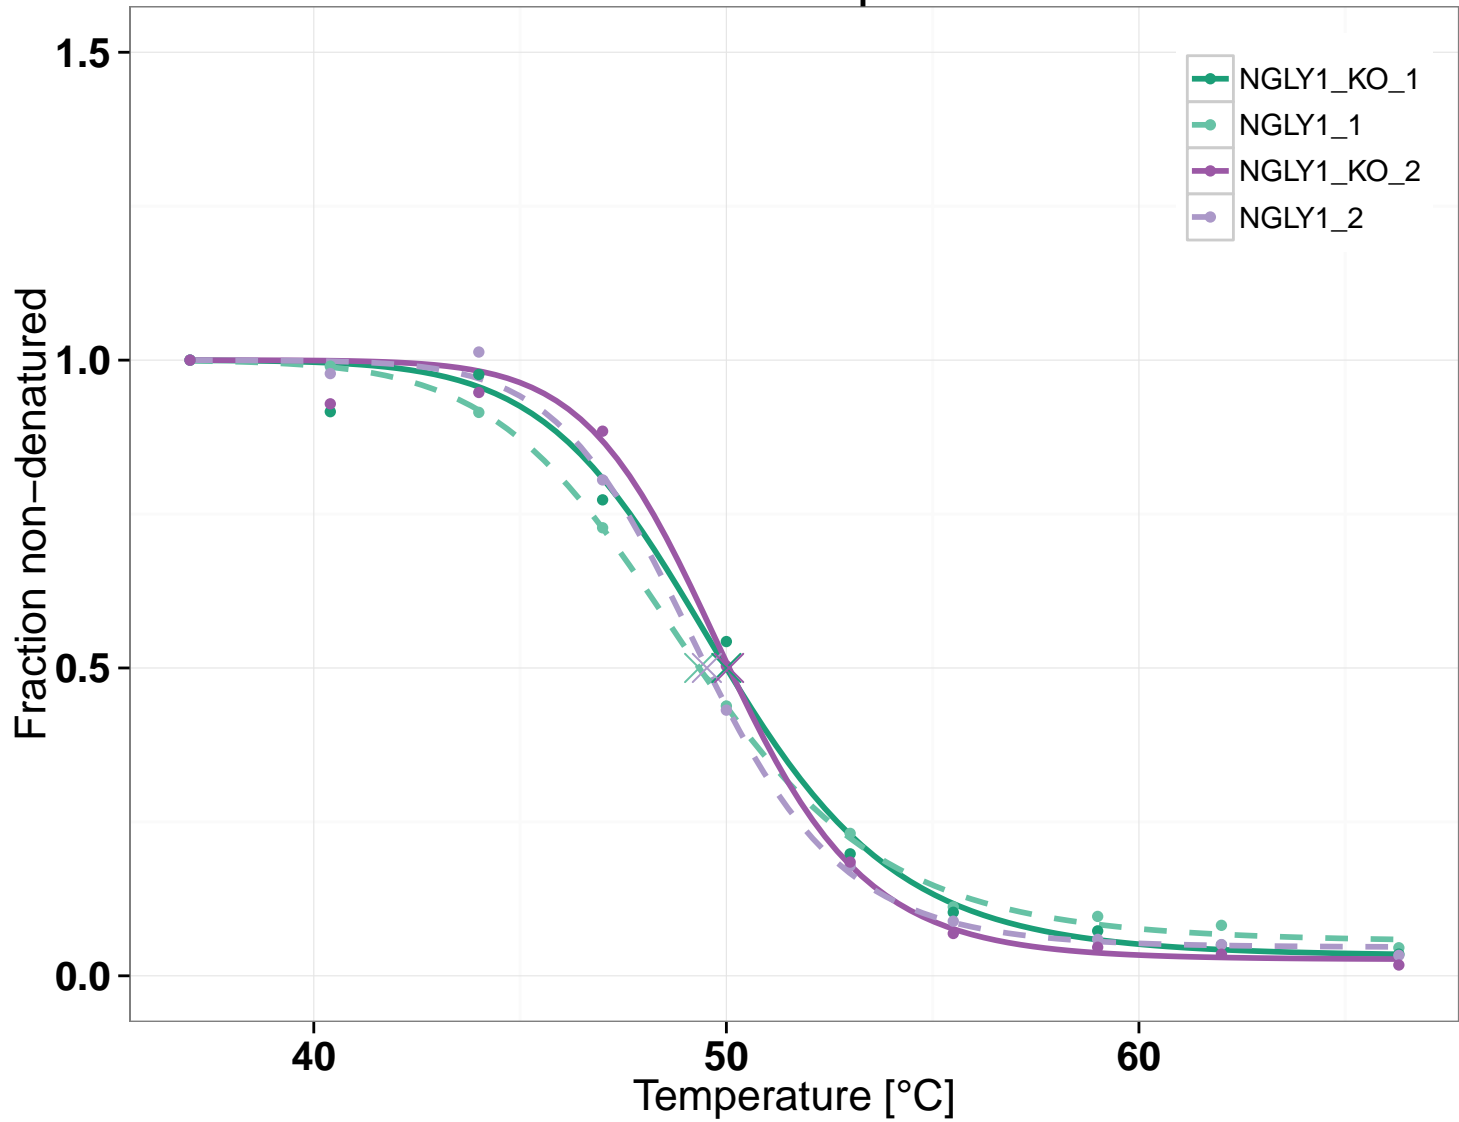

|            | meltPoint | slope | plateau | R2   |
|------------|-----------|-------|---------|------|
| NGLY1_KO_1 | 50        | -0.11 | 0.03    | 0.99 |
| NGLY1_1    | 49.34     | -0.1  | 0.05    | 1    |
| NGLY1_KO_2 | 50.07     | -0.14 | 0.03    | 1    |
| NGLY1_2    | 49.53     | -0.14 | 0.05    | 1    |

Supplement: Supplementary file 5494 [file 1]

# IPI00306330.7|NSL1

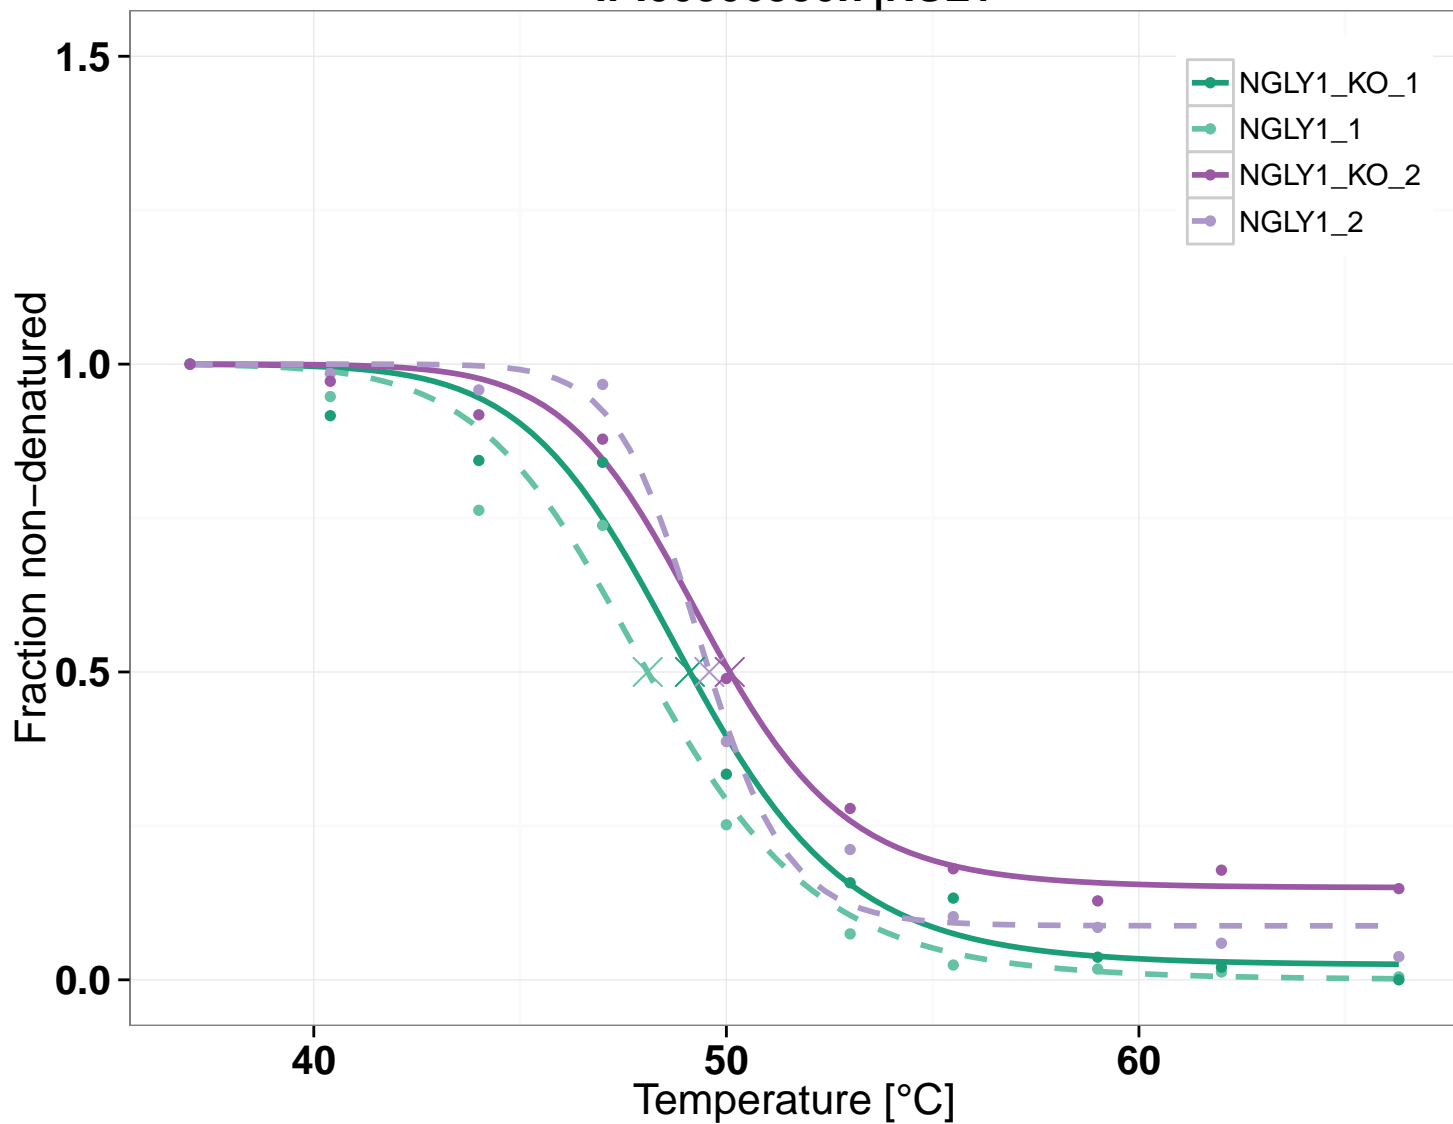

|            | meltPoint | slope | plateau | R2   |
|------------|-----------|-------|---------|------|
| NGLY1_KO_1 | 49.12     | -0.12 | 0.02    | 0.98 |
| NGLY1_1    | 48.09     | -0.12 | 0       | 0.98 |
| NGLY1_KO_2 | 50.08     | -0.12 | 0.15    | 0.99 |
| NGLY1_2    | 49.59     | -0.22 | 0.09    | 0.99 |

Supplement: Supplementary file 5495 [file 1]

IPI00179330.6|RPS27A

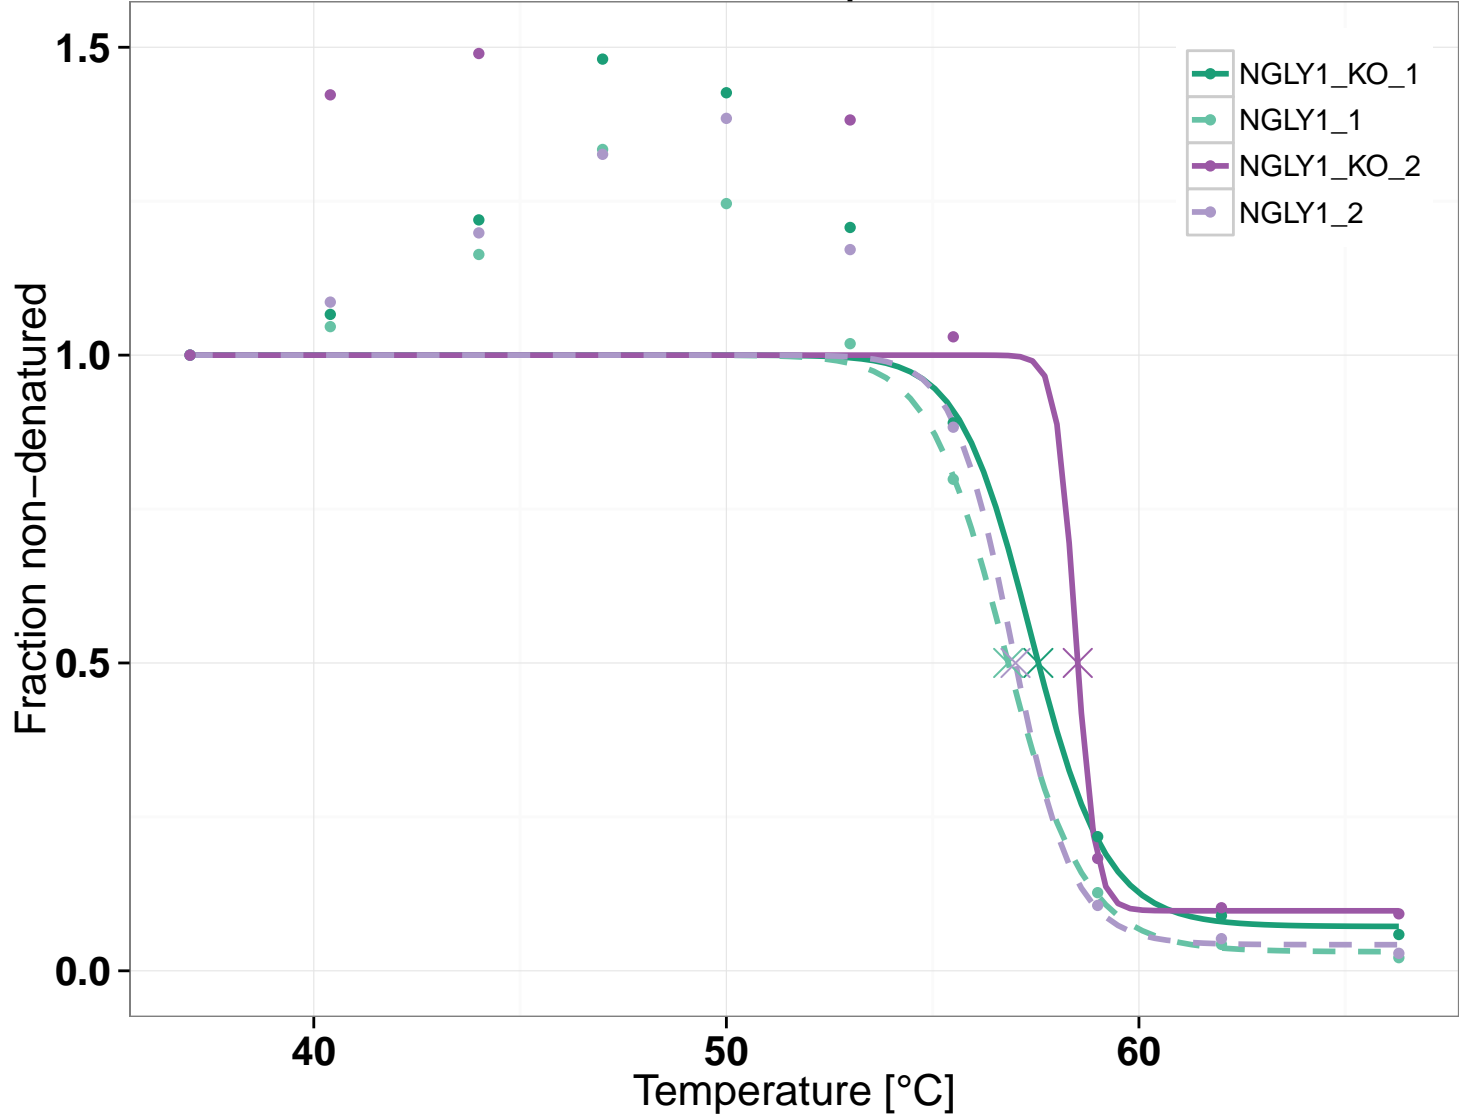

|            | meltPoint | slope | plateau | R2   |
|------------|-----------|-------|---------|------|
| NGLY1_KO_1 | 57.56     | -0.26 | 0.07    | 0.81 |
| NGLY1_1    | 56.83     | -0.26 | 0.03    | 0.92 |
| NGLY1_KO_2 | 58.52     | -0.96 | 0.1     | 0.55 |
| NGLY1_2    | 57.01     | -0.33 | 0.04    | 0.88 |

Supplement: Supplementary file 5496 [file 1]

IPI00300371.5|SF3B3

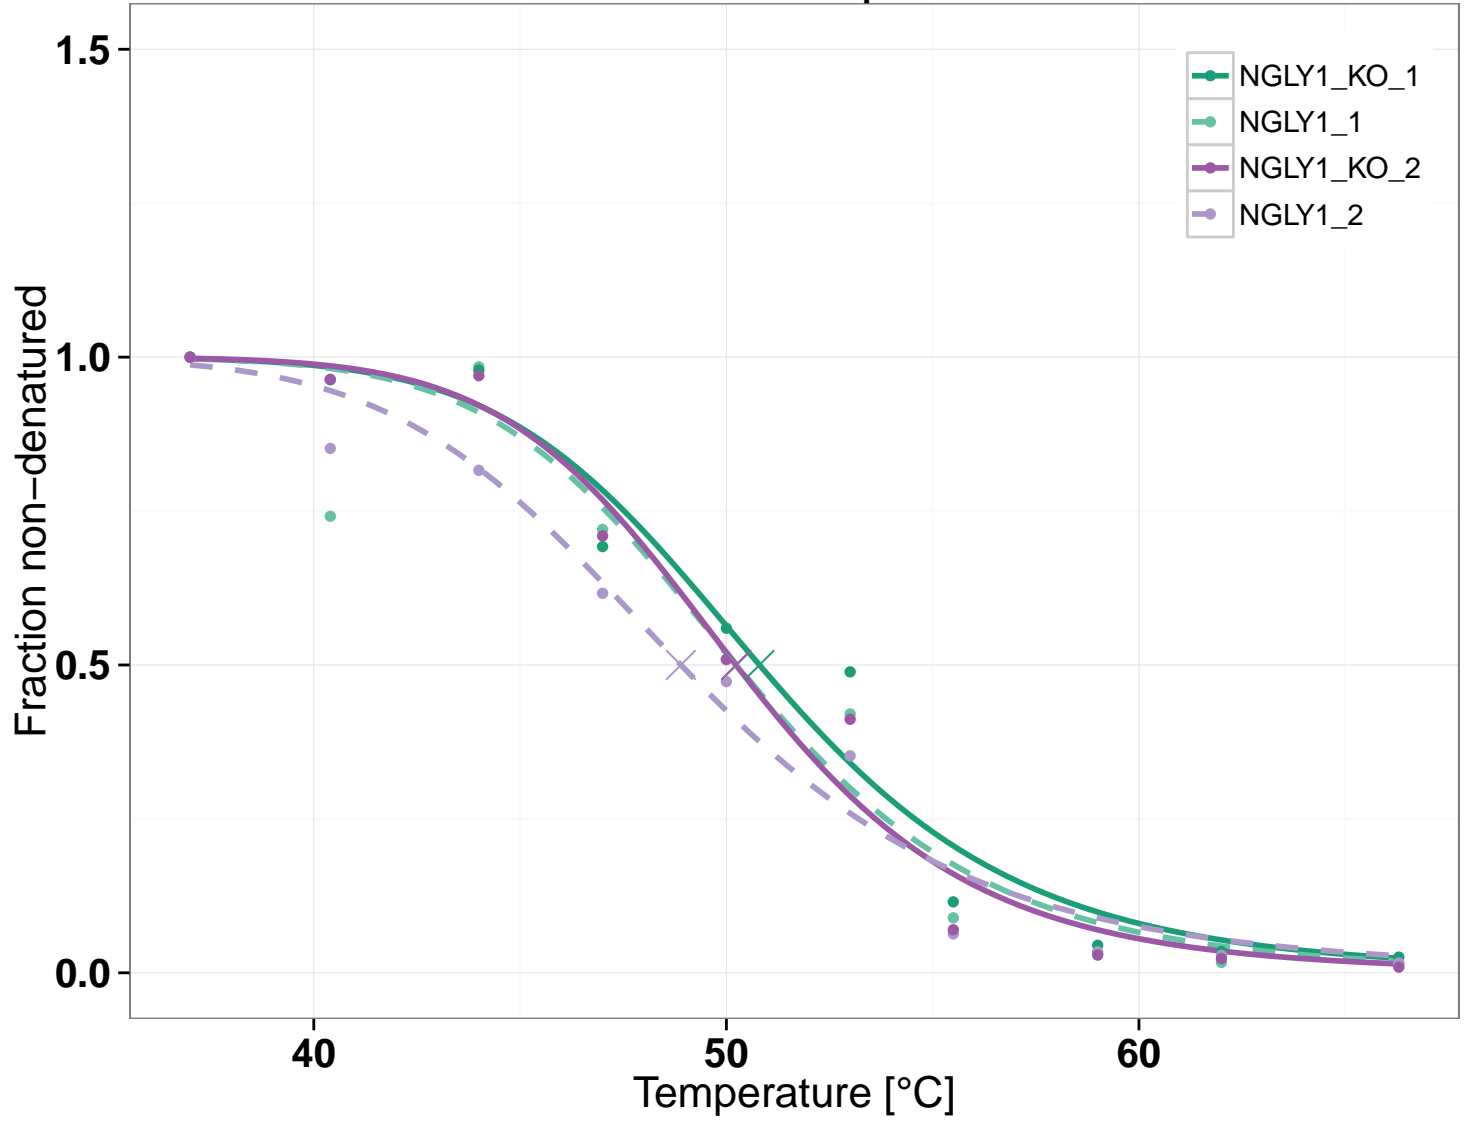

|            | meltPoint | slope  | plateau | R2   |
|------------|-----------|--------|---------|------|
| NGLY1_KO_1 | 50.8      | -0.08  | 0       | 0.97 |
| NGLY1_1    | 50.25     | -0.082 | 0       | 0.94 |
| NGLY1_KO_2 | 50.23     | -0.088 | 0       | 0.98 |
| NGLY1_2    | 48.9      | -0.071 | 0       | 0.97 |

Supplement: Supplementary file 5497 [file 1]

# IPI00009032.1|SSB

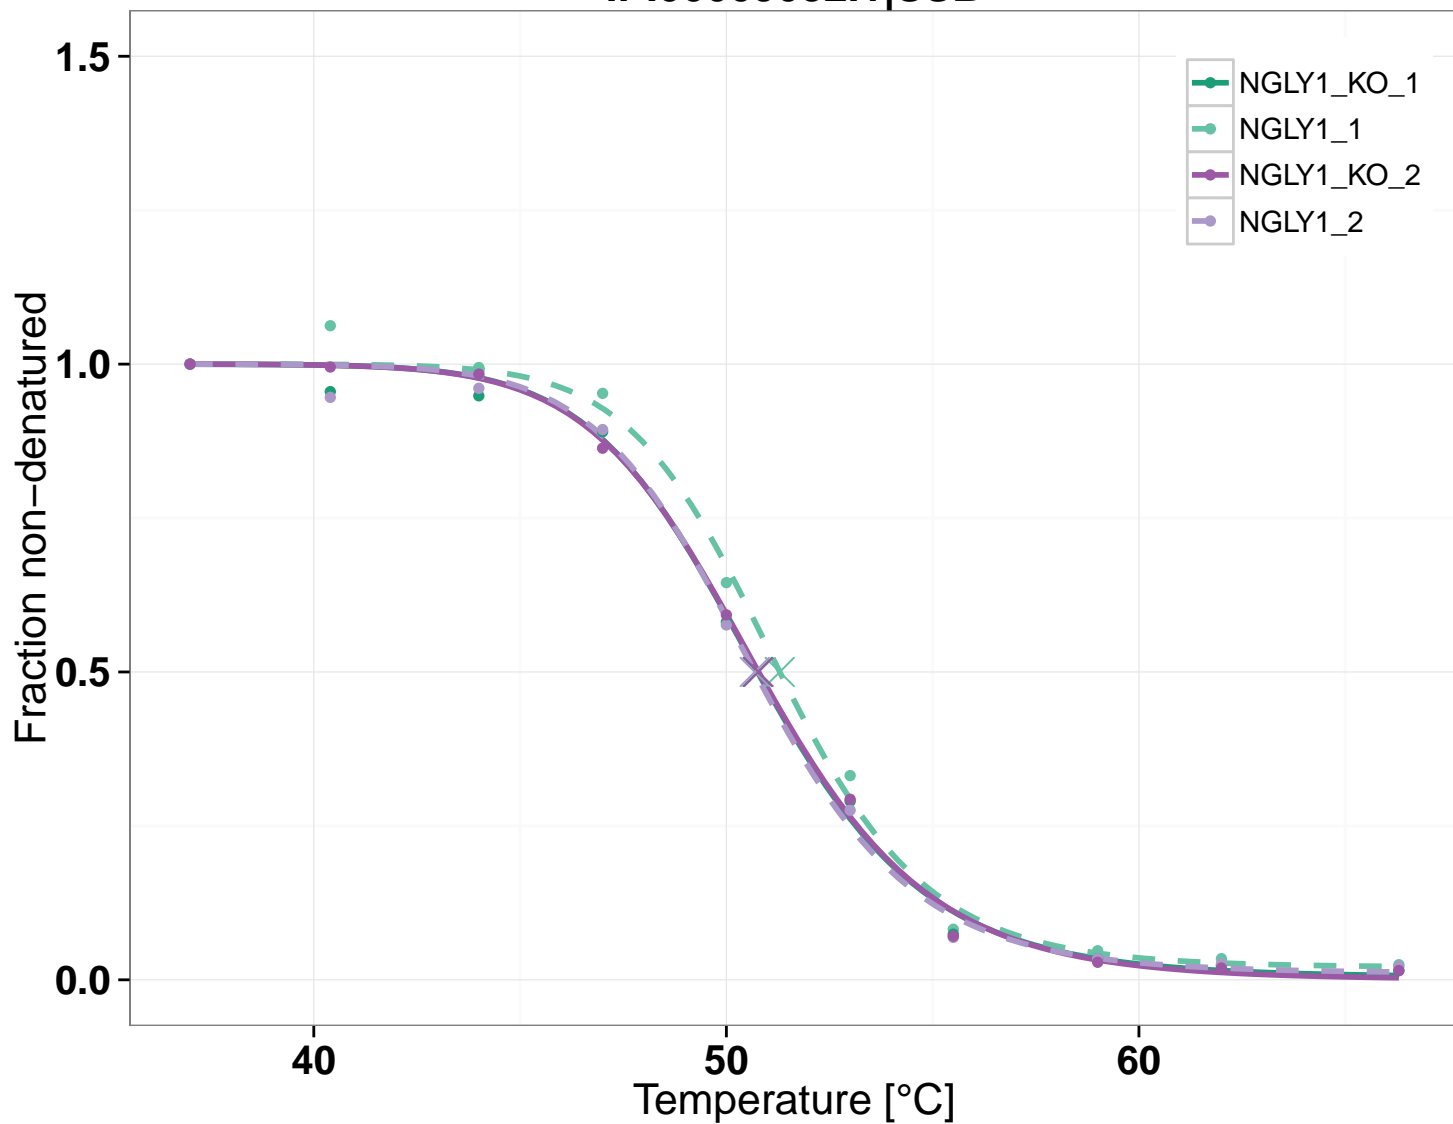

|            | meltPoint | slope | plateau | R2 |
|------------|-----------|-------|---------|----|
| NGLY1_KO_1 | 50.76     | -0.12 | 0       | 1  |
| NGLY1_1    | 51.29     | -0.14 | 0.02    | 1  |
| NGLY1_KO_2 | 50.78     | -0.12 | 0       | 1  |
| NGLY1_2    | 50.69     | -0.13 | 0.01    | 1  |

Supplement: Supplementary file 5498 [file 1]

IPI00217970.1|RTKN2

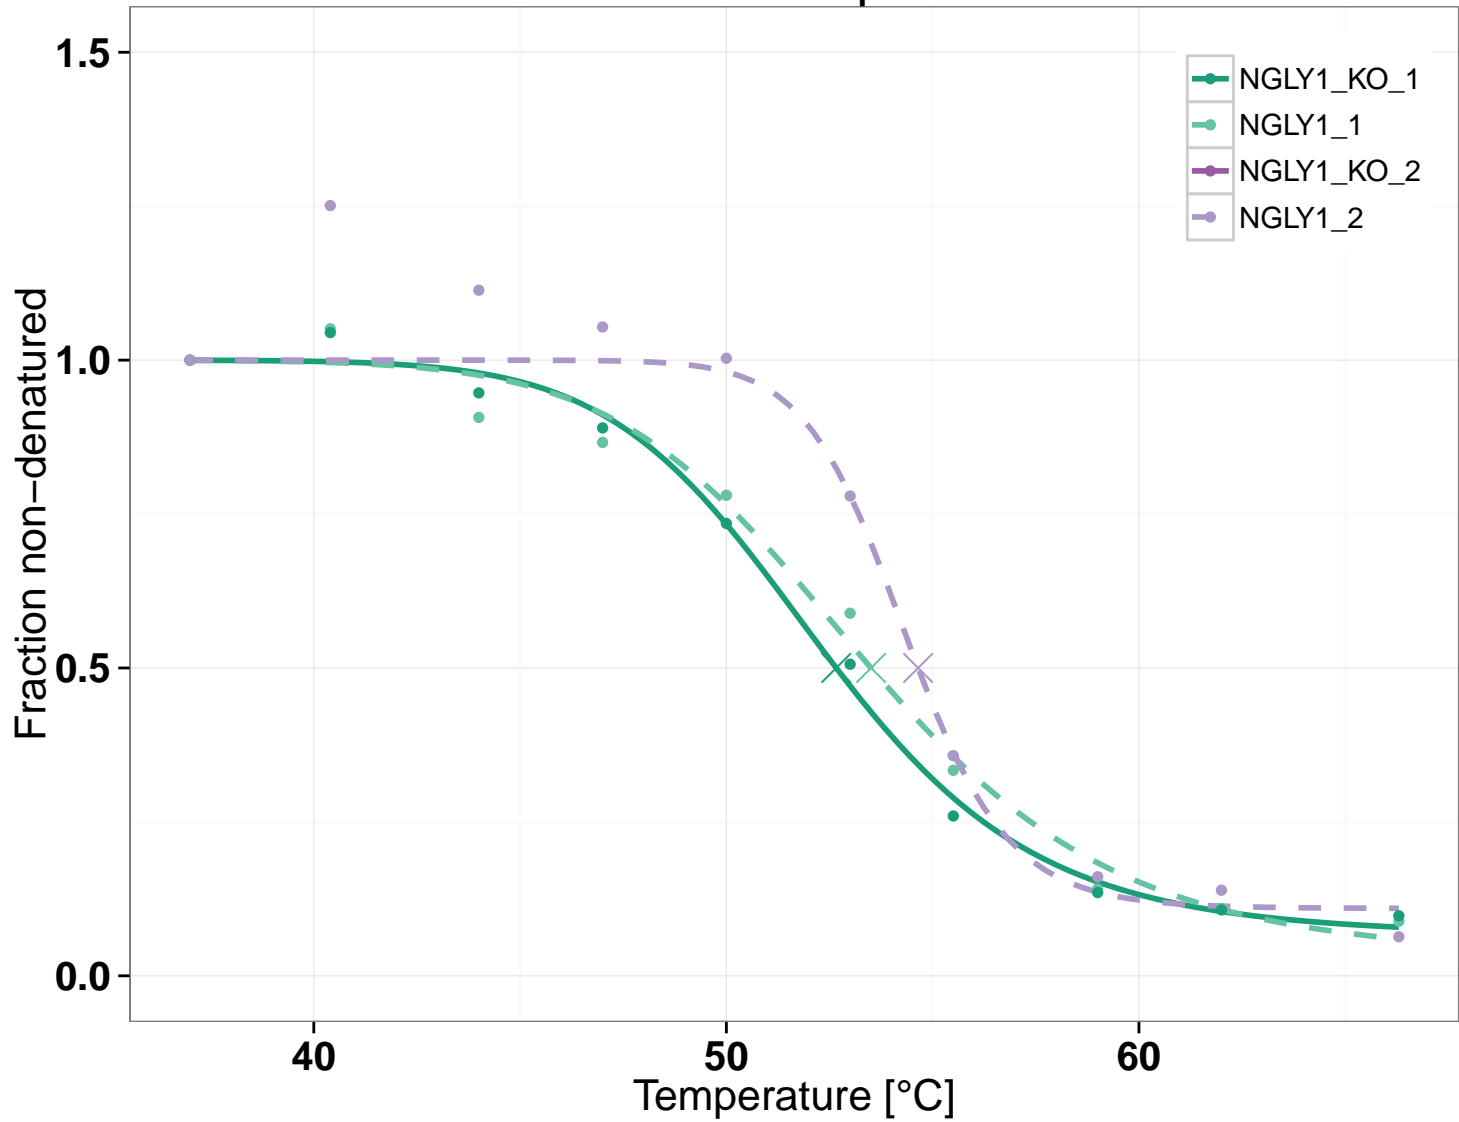

|            | meltPoint | slope | plateau | R2   |
|------------|-----------|-------|---------|------|
| NGLY1_KO_1 | 52.66     | -0.09 | 0.07    | 1    |
| NGLY1_1    | 53.51     | -0.08 | 0.03    | 0.99 |
| NGLY1_KO_2 | -         | -     | -       | -    |
| NGLY1_2    | 54.65     | -0.18 | 0.11    | 0.96 |

Supplement: Supplementary file 5499 [file 1]

IPI00289654.6|PRDM16

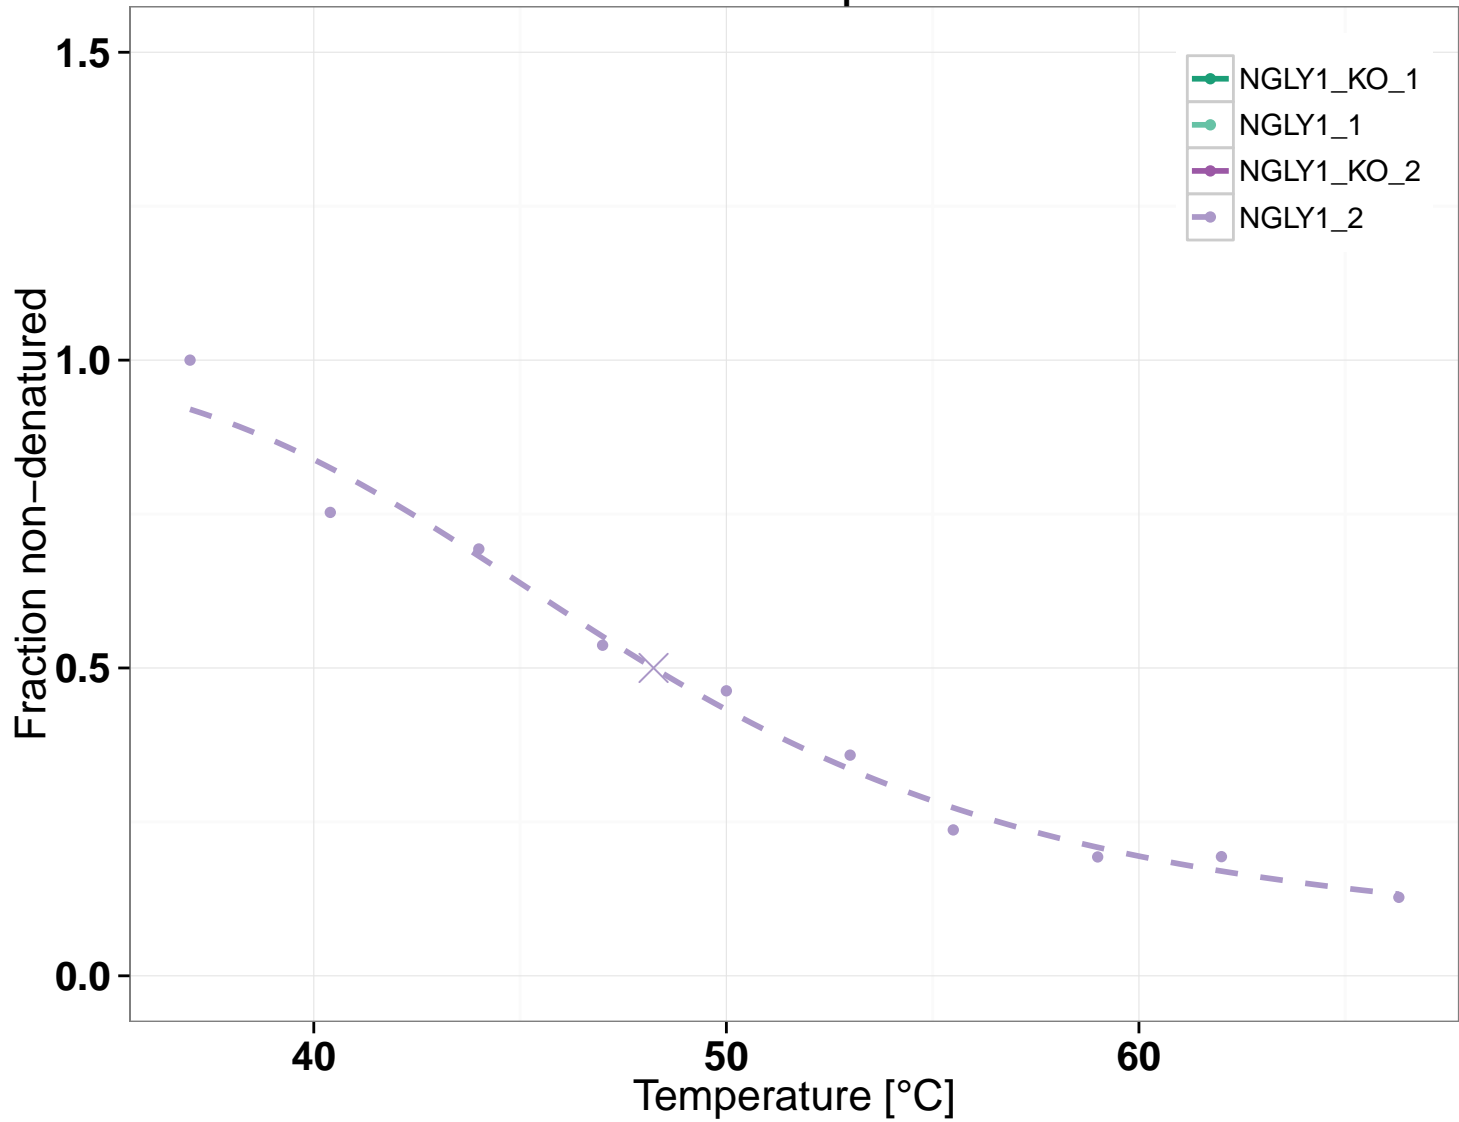

|            | meltPoint | slope  | plateau | R2   |
|------------|-----------|--------|---------|------|
| NGLY1_KO_1 | —         | —      | —       | —    |
| NGLY1_1    | —         | —      | —       | —    |
| NGLY1_KO_2 | —         | —      | —       | —    |
| NGLY1_2    | 48.24     | -0.044 | 0.05    | 0.98 |

Supplement: Supplementary file 5500 [file 1]

# IPI00025049.1|M6PR

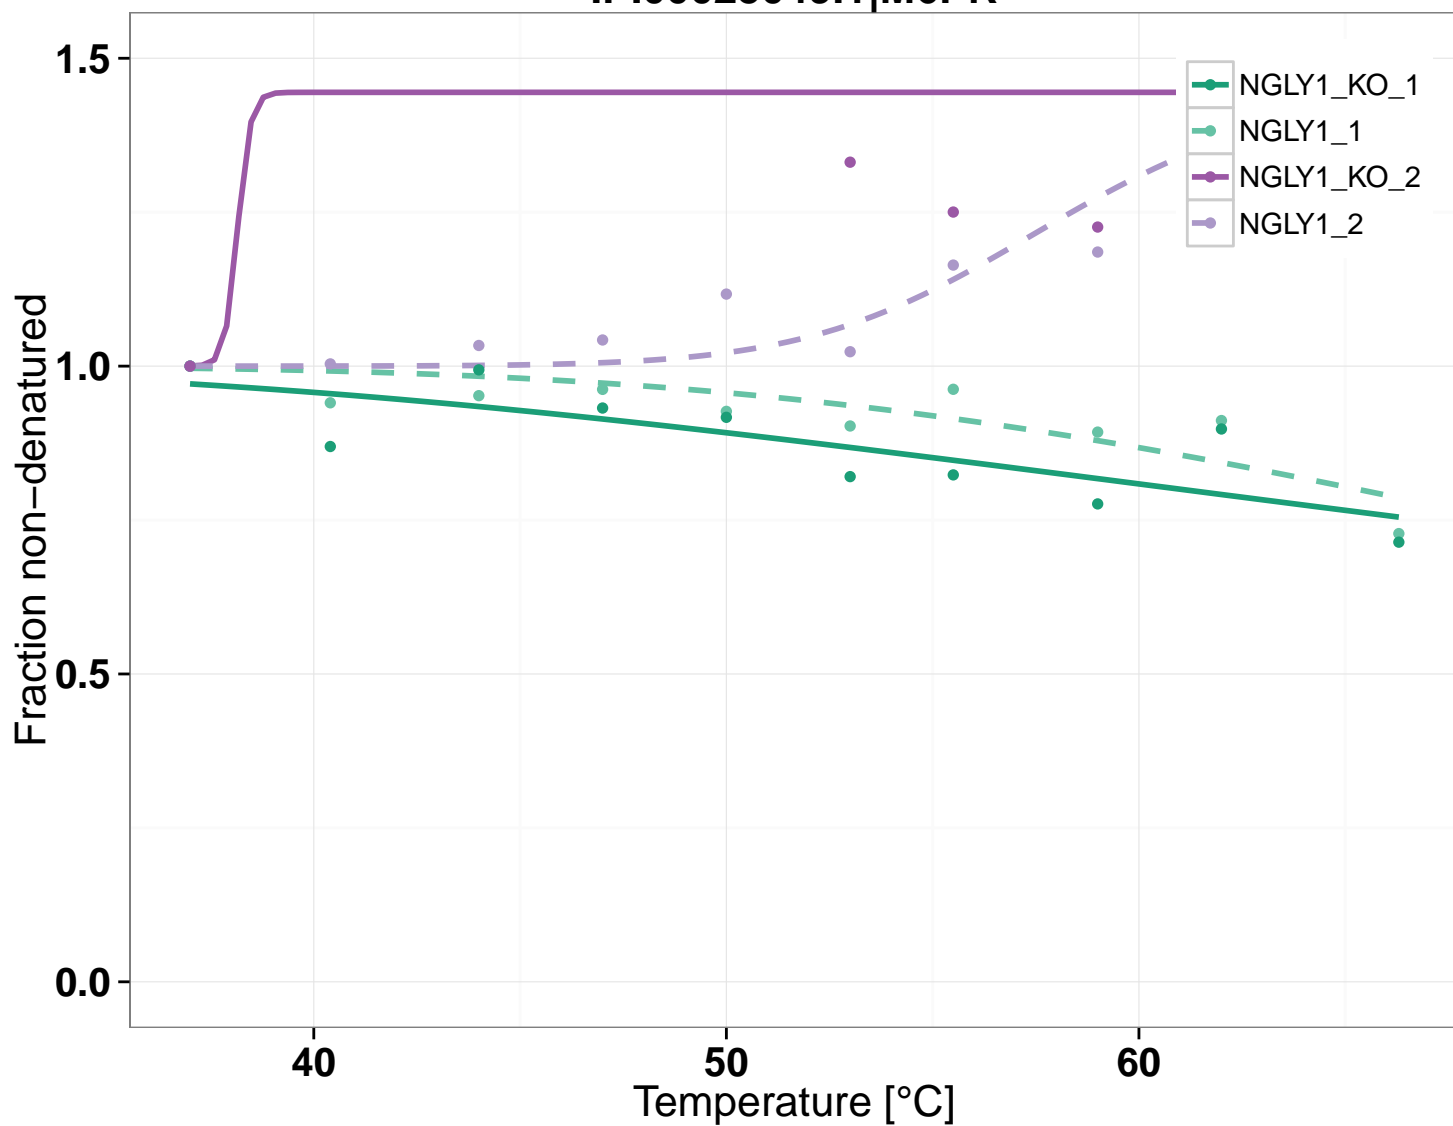

|            | meltPoint | slope   | plateau | R2   |
|------------|-----------|---------|---------|------|
| NGLY1_KO_1 | -         | -0.0086 | 0       | 0.61 |
| NGLY1_1    | -         | -       | 0       | 0.67 |
| NGLY1_KO_2 | -         | 0.73    | 1.44    | 0.44 |
| NGLY1_2    | -         | 0.039   | 1.48    | 0.85 |

Supplement: Supplementary file 5501 [file 1]

IPI00164719.11|KIAA1432

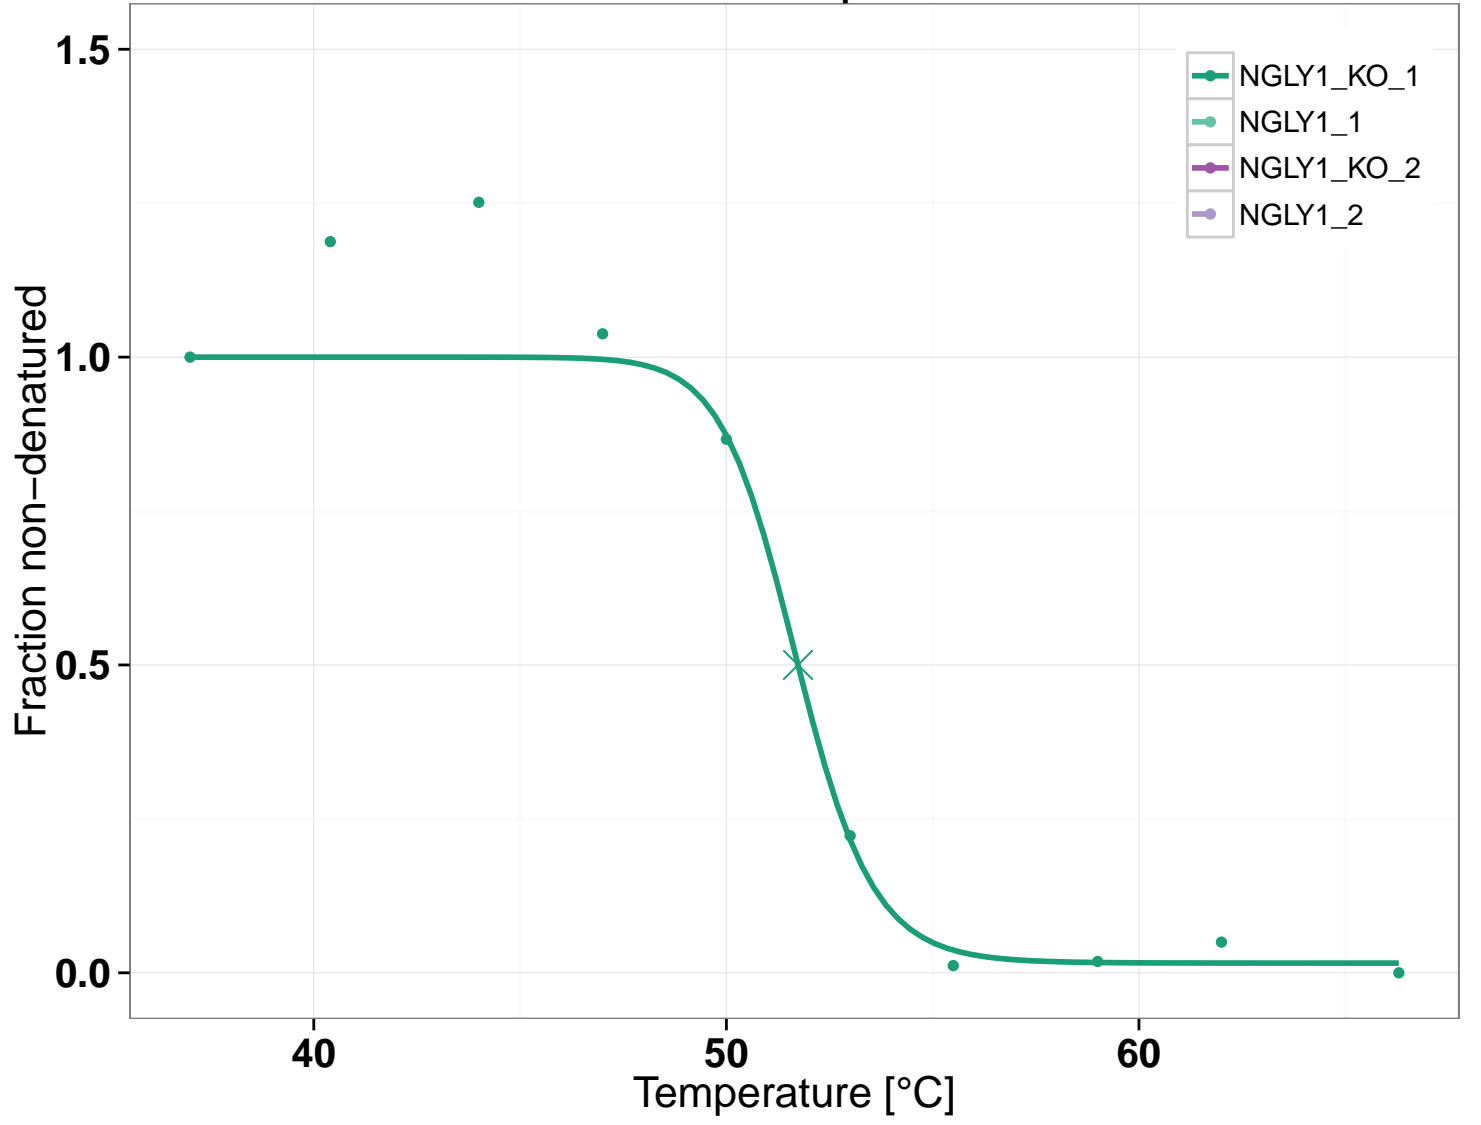

|            | meltPoint | slope | plateau | R2   |
|------------|-----------|-------|---------|------|
| NGLY1_KO_1 | 51.74     | -0.27 | 0.02    | 0.96 |
| NGLY1_1    | -         | -     | -       | -    |
| NGLY1_KO_2 | -         | -     | -       | -    |
| NGLY1_2    | -         | -     | -       | -    |

Supplement: Supplementary file 5502 [file 1]

# IPI00167535.6|EP400

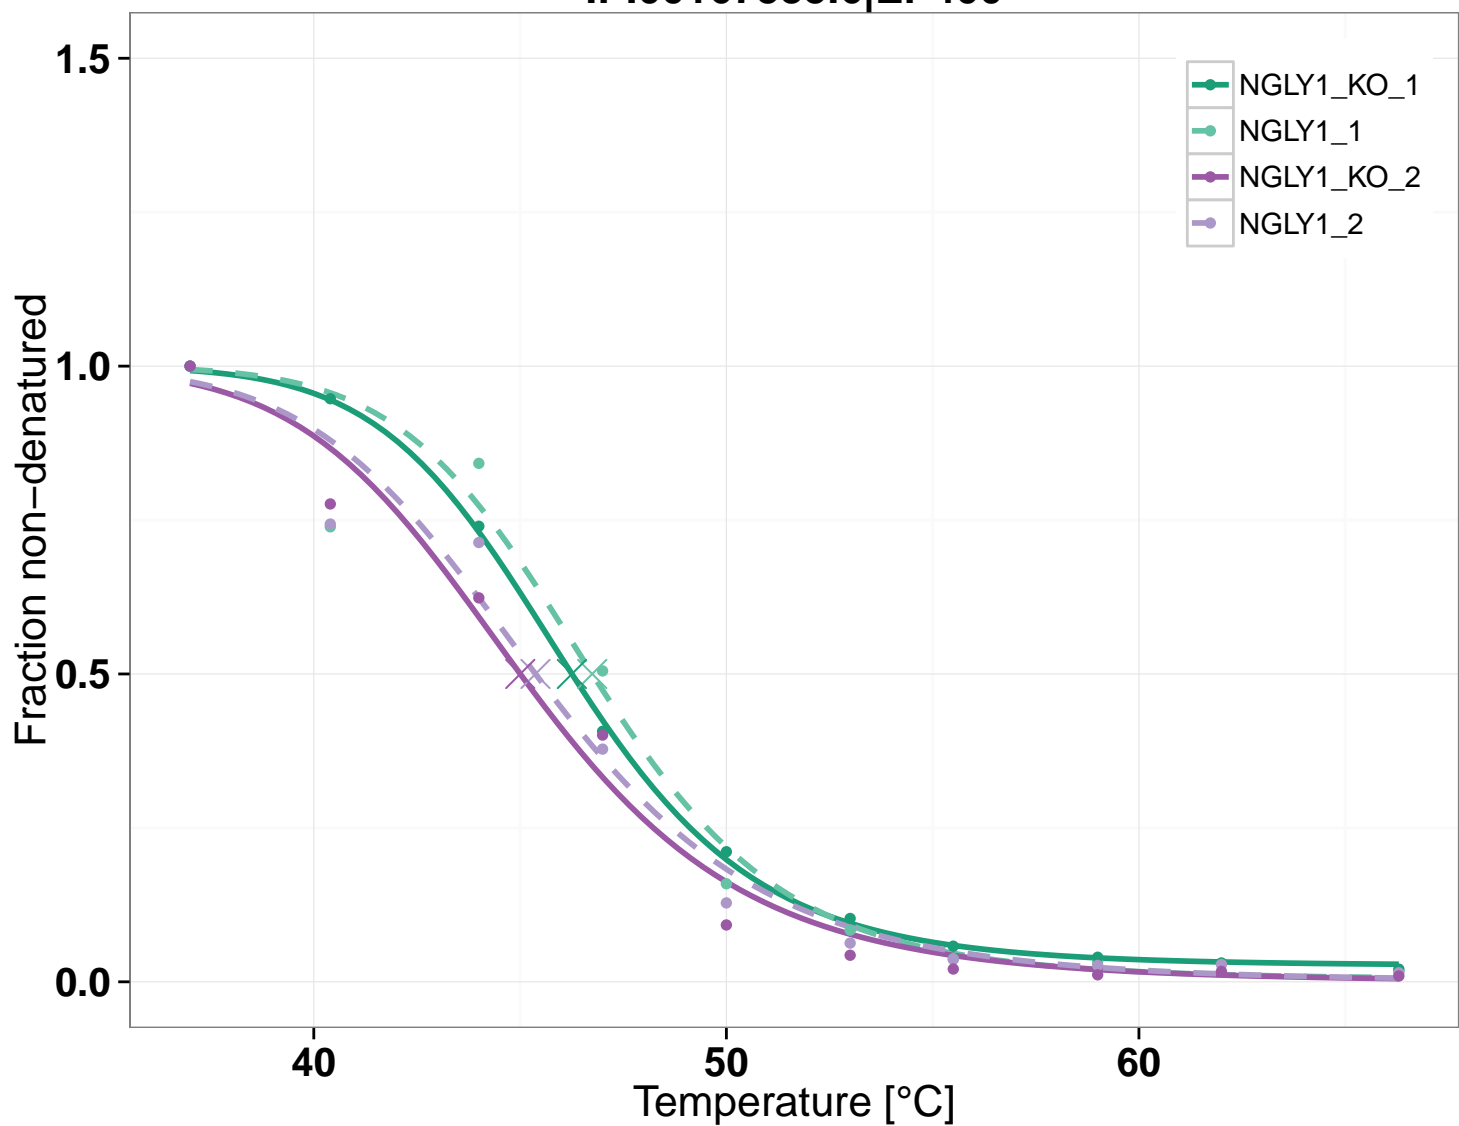

|            | meltPoint | slope  | plateau | R2   |
|------------|-----------|--------|---------|------|
| NGLY1_KO_1 | 46.26     | -0.11  | 0.03    | 1    |
| NGLY1_1    | 46.75     | -0.11  | 0       | 0.96 |
| NGLY1_KO_2 | 45        | -0.093 | 0       | 0.98 |
| NGLY1_2    | 45.37     | -0.09  | 0       | 0.97 |

Supplement: Supplementary file 5503 [file 1]

# IPI00105620.2|RRAGA

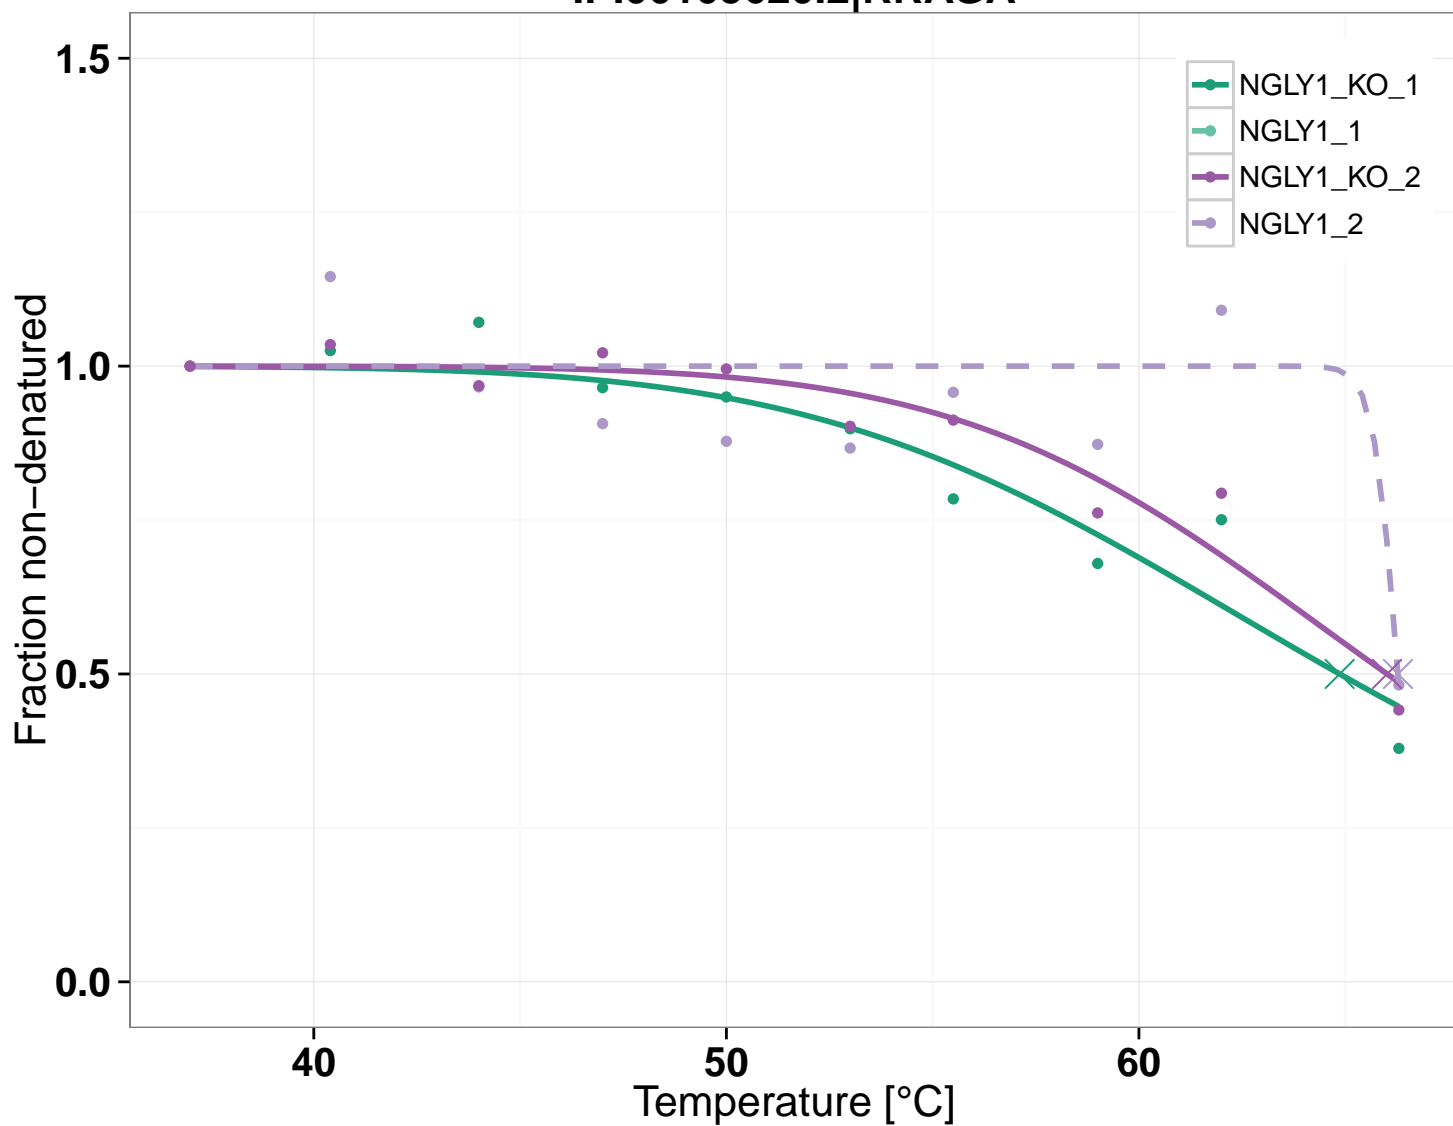

|            | meltPoint | slope  | plateau | R2   |
|------------|-----------|--------|---------|------|
| NGLY1_KO_1 | 64.87     | -0.039 | 0       | 0.91 |
| NGLY1_1    | -         | -      | -       | -    |
| NGLY1_KO_2 | 66.02     | -0.049 | 0       | 0.93 |
| NGLY1_2    | 66.28     | -0.85  | 0       | 0.69 |

Supplement: Supplementary file 5504 [file 1]

# IPI00292753.7|GAPVD1

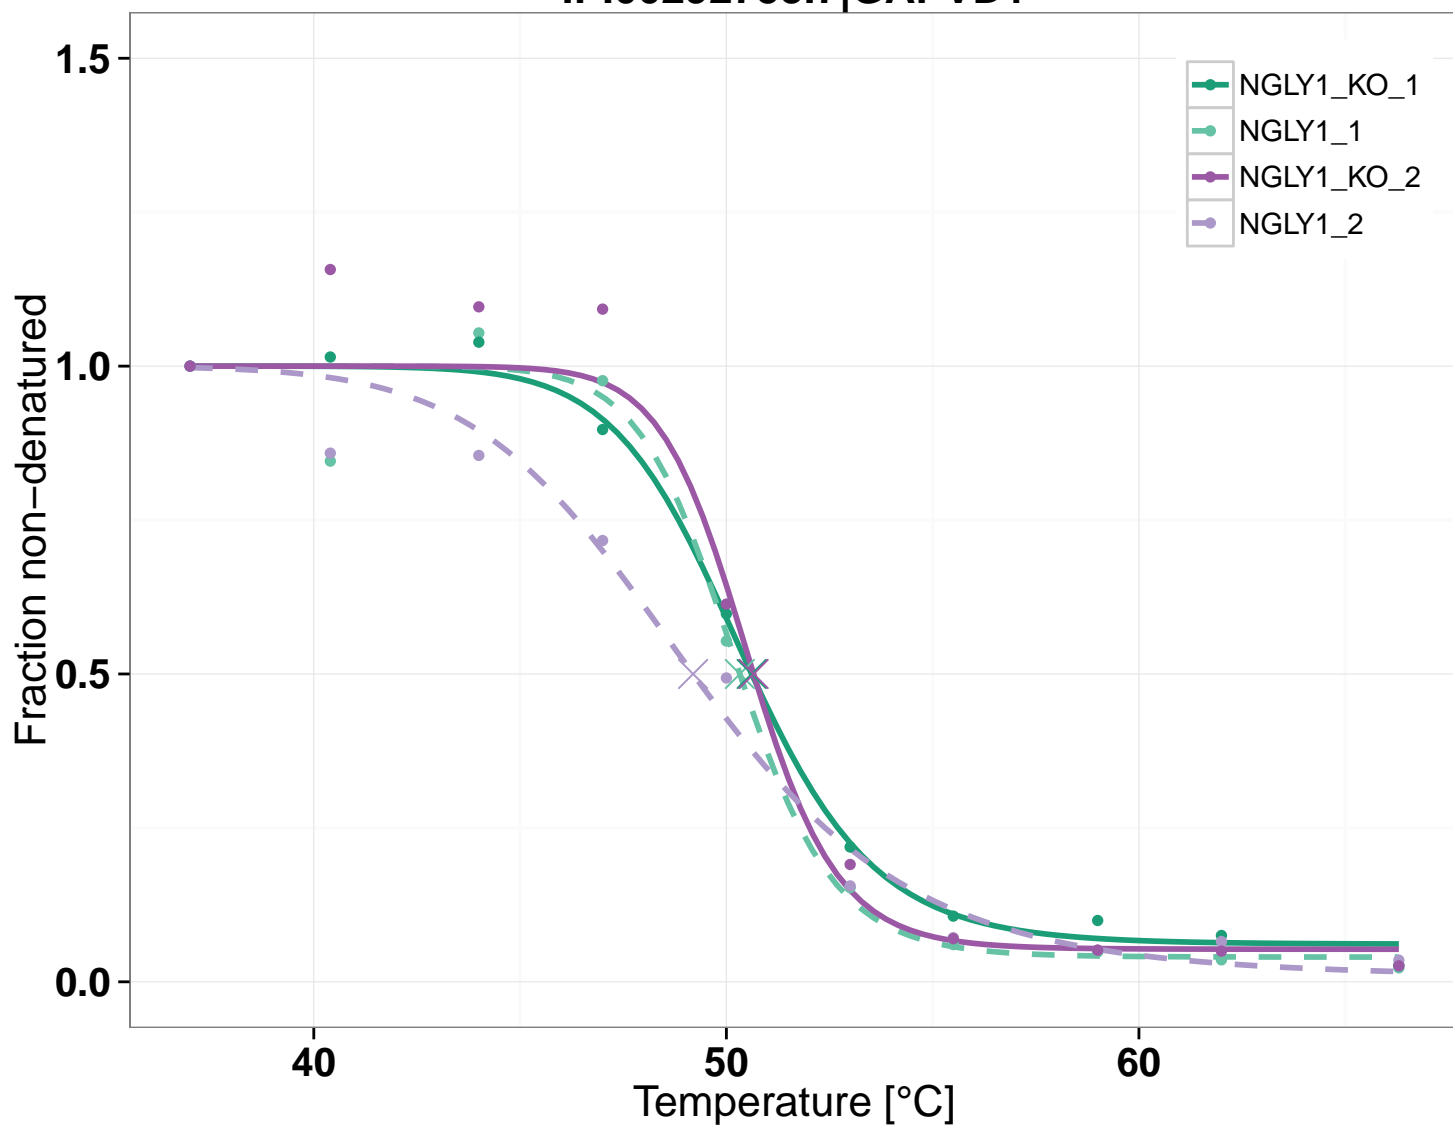

|            | meltPoint | slope  | plateau | R2   |
|------------|-----------|--------|---------|------|
| NGLY1_KO_1 | 50.61     | -0.15  | 0.06    | 1    |
| NGLY1_1    | 50.33     | -0.2   | 0.04    | 0.98 |
| NGLY1_KO_2 | 50.66     | -0.22  | 0.05    | 0.98 |
| NGLY1_2    | 49.19     | -0.093 | 0.01    | 0.98 |

Supplement: Supplementary file 5505 [file 1]

# IPI00480056.8|RAB4A

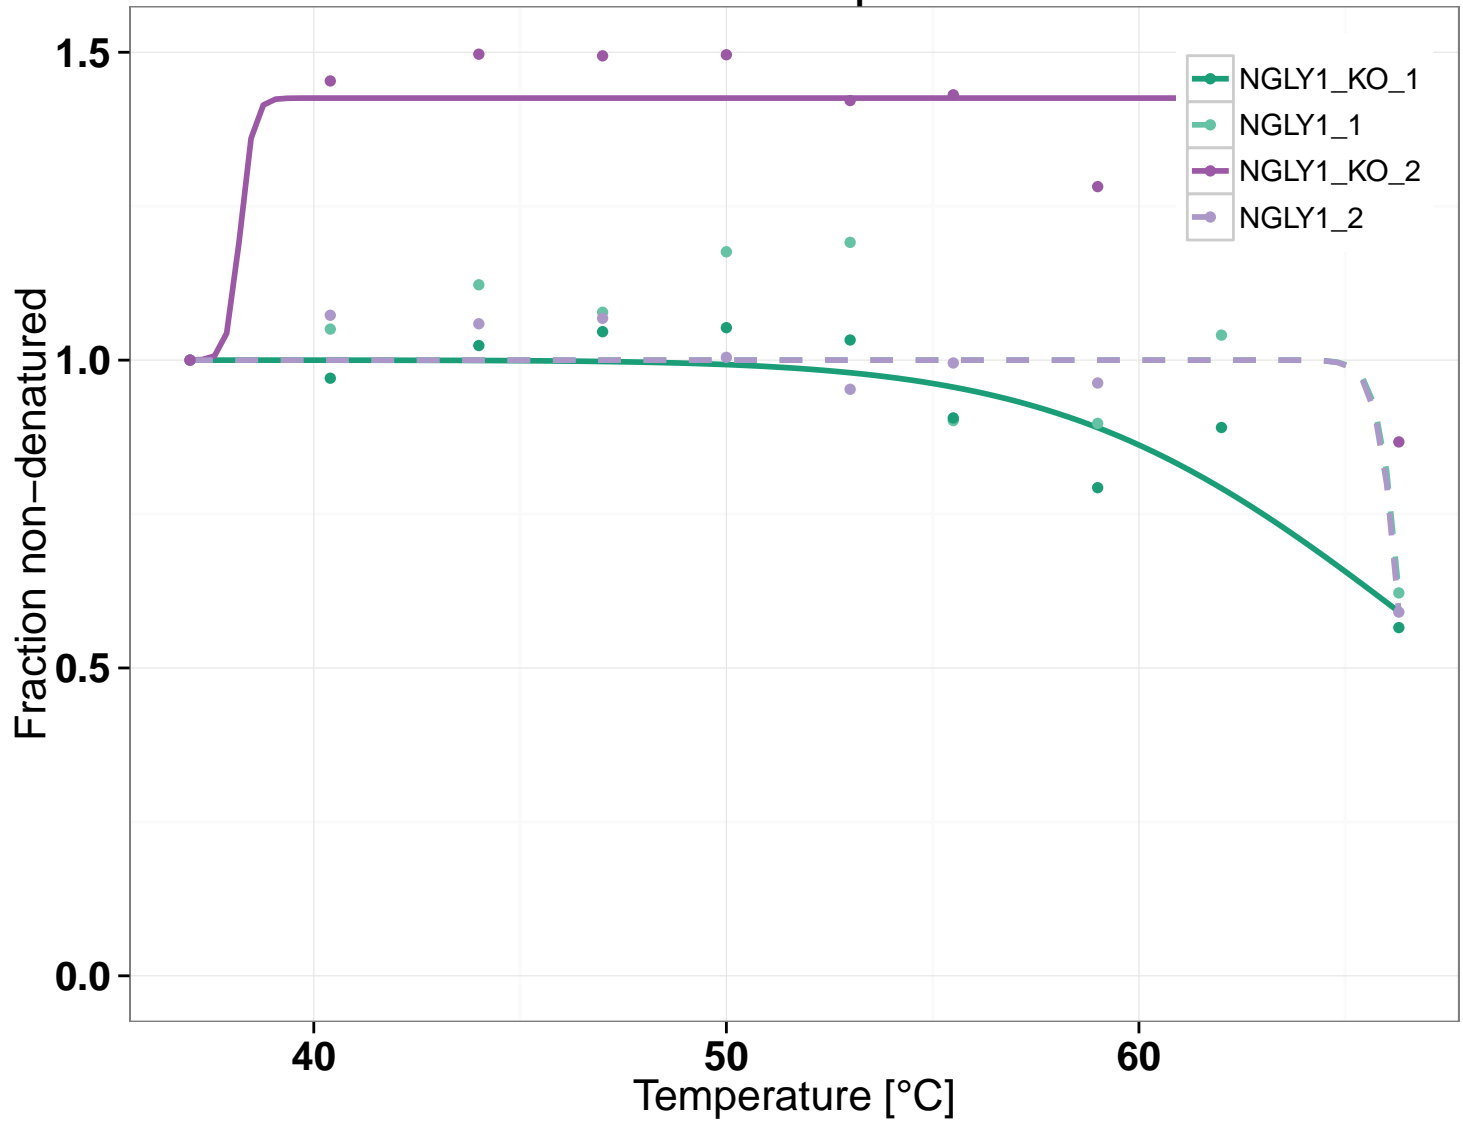

|            | meltPoint | slope | plateau | R2   |
|------------|-----------|-------|---------|------|
| NGLY1_KO_1 | —         | —     | 0       | 0.84 |
| NGLY1_1    | —         | —     | 0       | 0.56 |
| NGLY1_KO_2 | —         | 0.7   | 1.43    | 0.22 |
| NGLY1_2    | —         | —     | 0       | 0.76 |

Supplement: Supplementary file 5506 [file 1]

# IPI00889000.1|NCDN

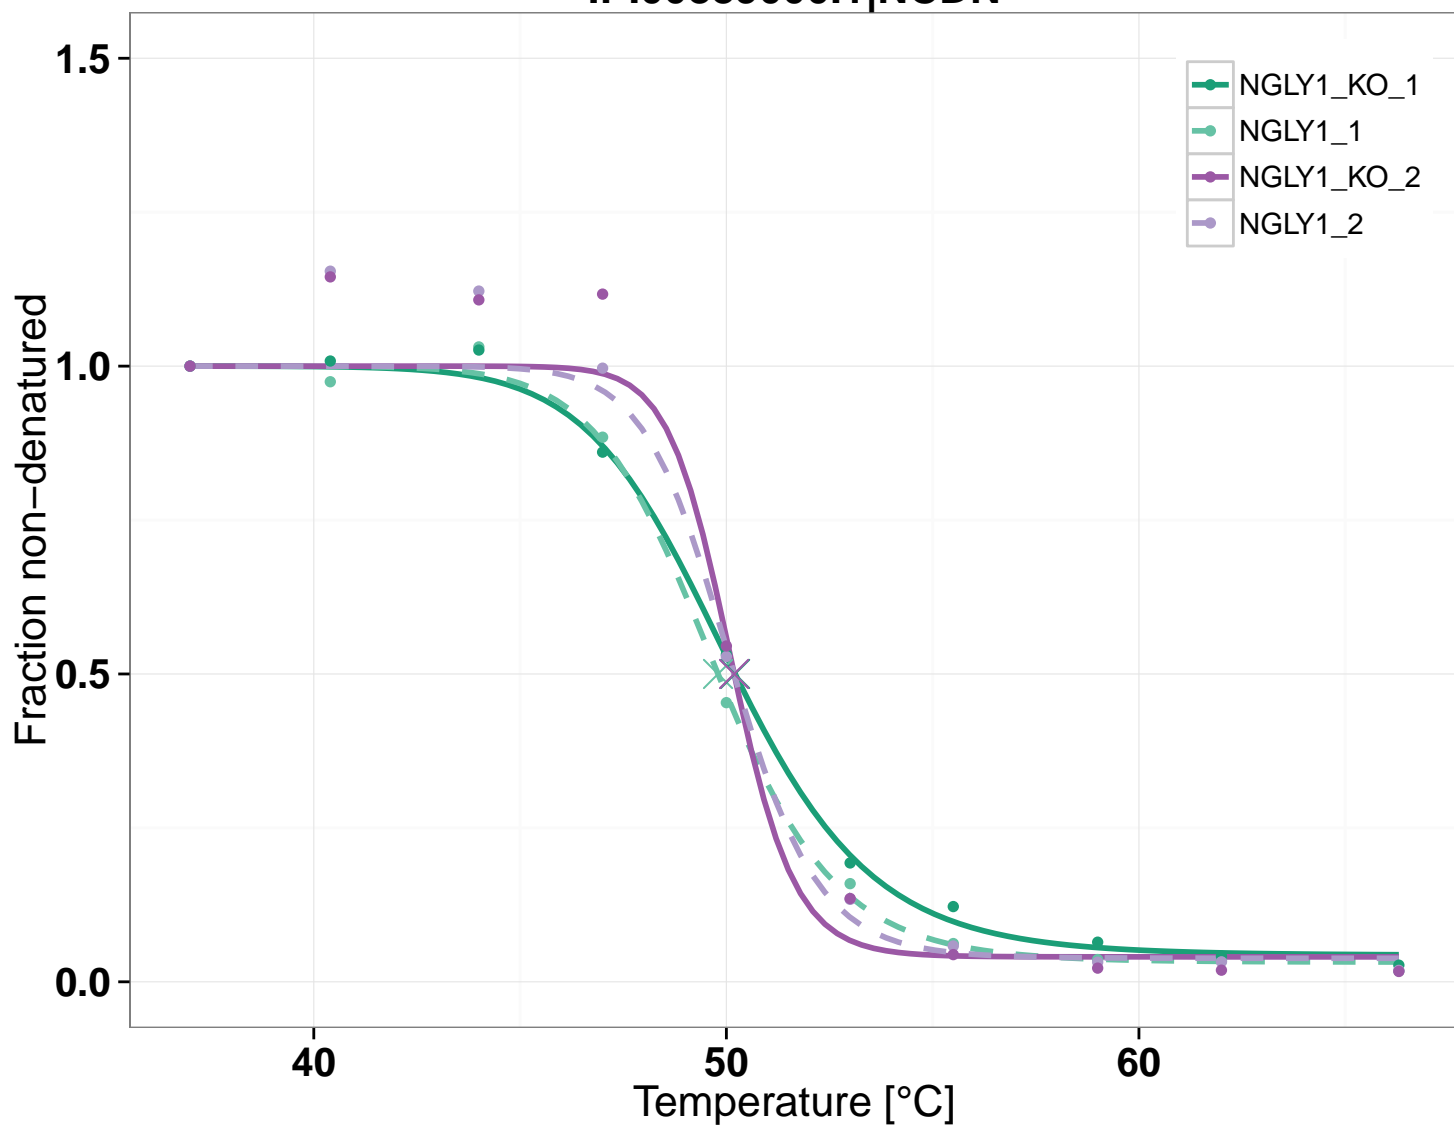

|            | meltPoint | slope | plateau | R2   |
|------------|-----------|-------|---------|------|
| NGLY1_KO_1 | 50.21     | -0.14 | 0.04    | 1    |
| NGLY1_1    | 49.8      | -0.16 | 0.03    | 1    |
| NGLY1_KO_2 | 50.19     | -0.31 | 0.04    | 0.98 |
| NGLY1_2    | 50.19     | -0.23 | 0.04    | 0.98 |

Supplement: Supplementary file 5507 [file 1]

# IPI00012391.3|APC

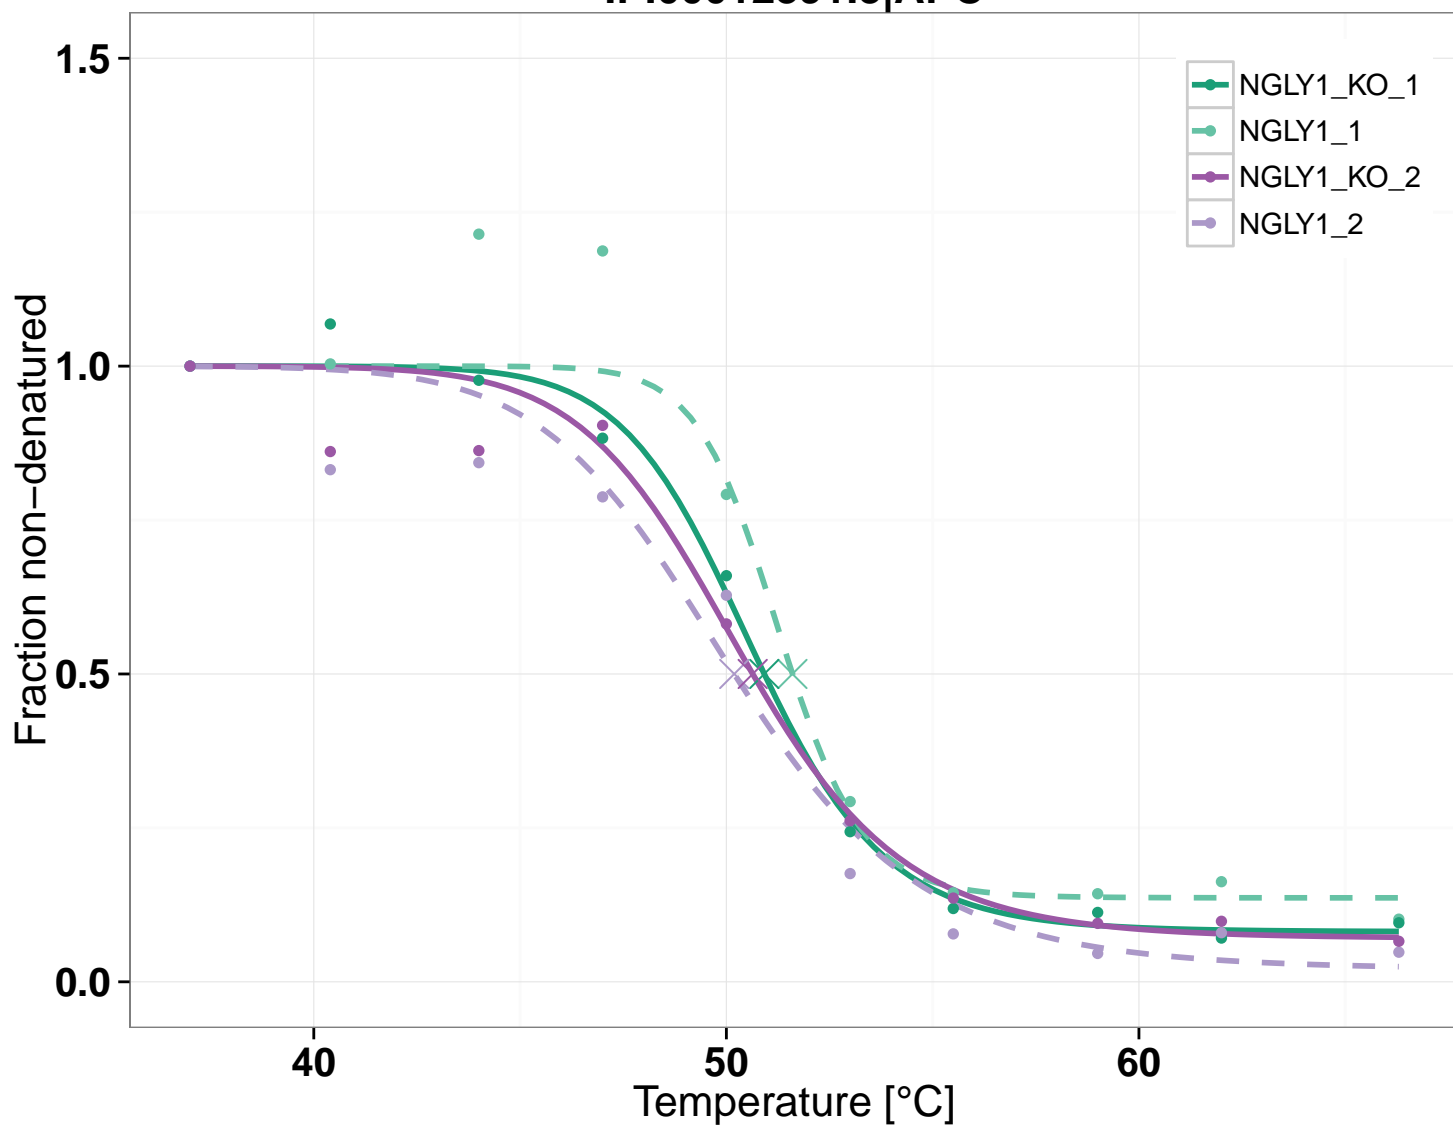

|            | meltPoint | slope | plateau | R2   |
|------------|-----------|-------|---------|------|
| NGLY1_KO_1 | 50.92     | -0.14 | 0.08    | 0.99 |
| NGLY1_1    | 51.6      | -0.22 | 0.14    | 0.96 |
| NGLY1_KO_2 | 50.64     | -0.12 | 0.07    | 0.98 |
| NGLY1_2    | 50.19     | -0.11 | 0.02    | 0.96 |

Supplement: Supplementary file 5508 [file 1]

# IPI00030371.2|TRIM4

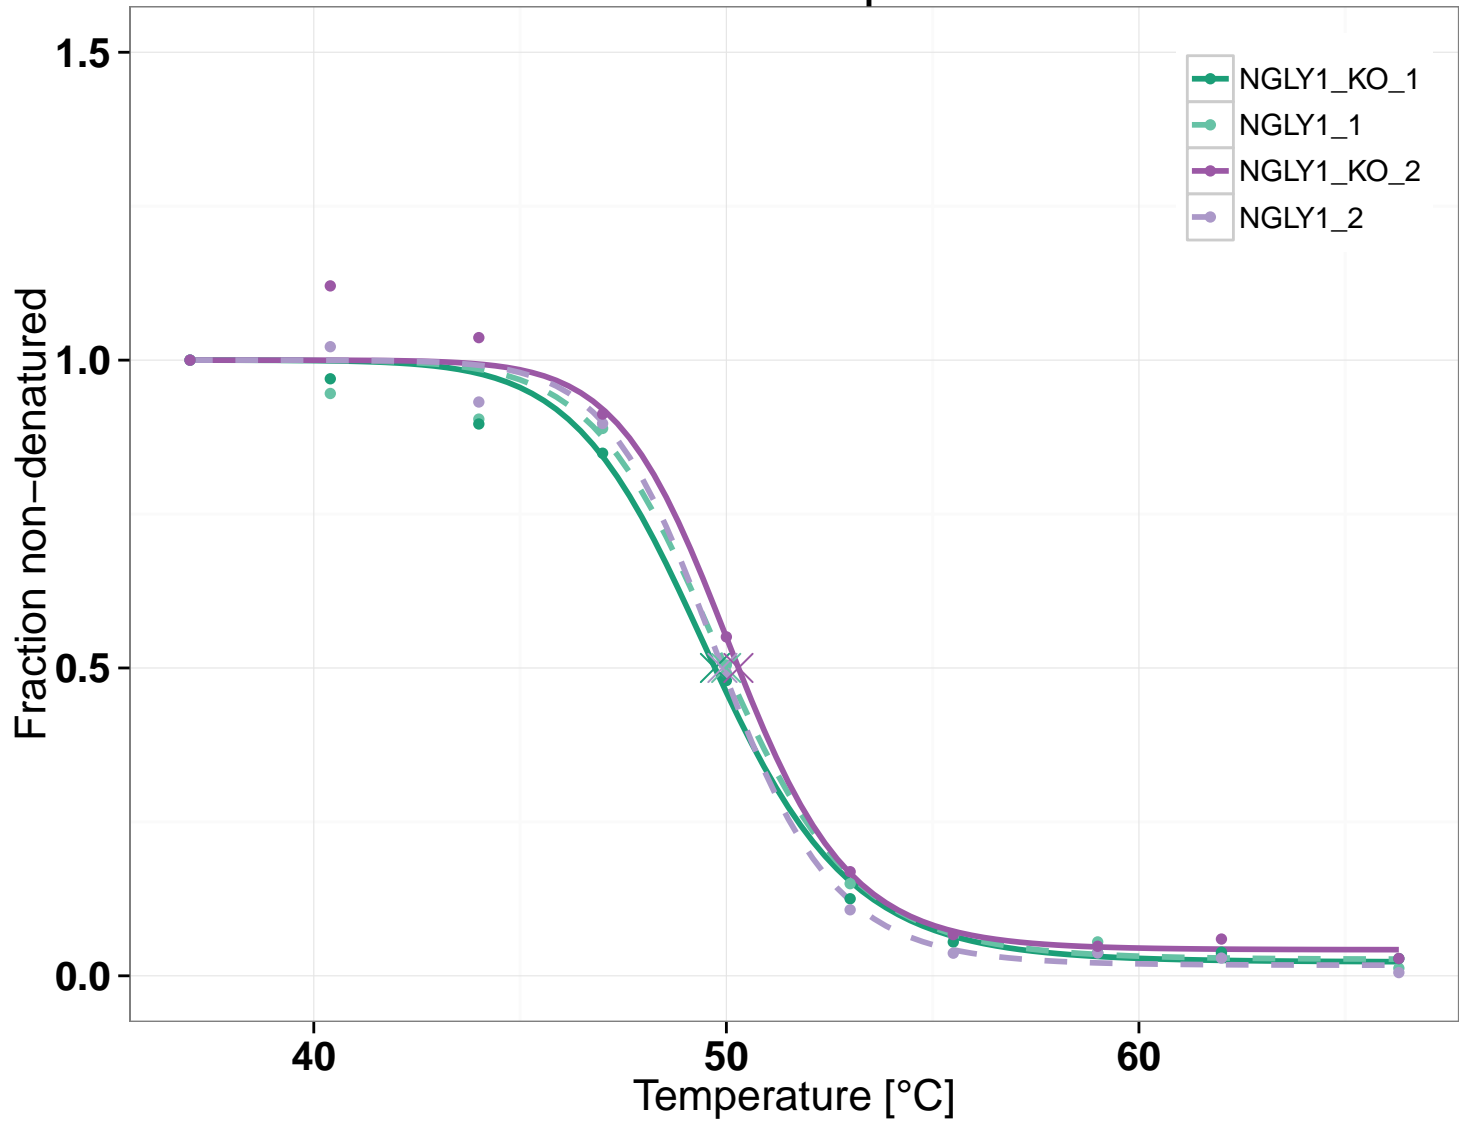

|            | meltPoint | slope | plateau | R2   |
|------------|-----------|-------|---------|------|
| NGLY1_KO_1 | 49.72     | -0.15 | 0.02    | 0.99 |
| NGLY1_1    | 50        | -0.15 | 0.03    | 0.99 |
| NGLY1_KO_2 | 50.29     | -0.17 | 0.04    | 0.99 |
| NGLY1_2    | 49.9      | -0.18 | 0.02    | 1    |

Supplement: Supplementary file 5509 [file 1]

IPI00001062.7|MYD88

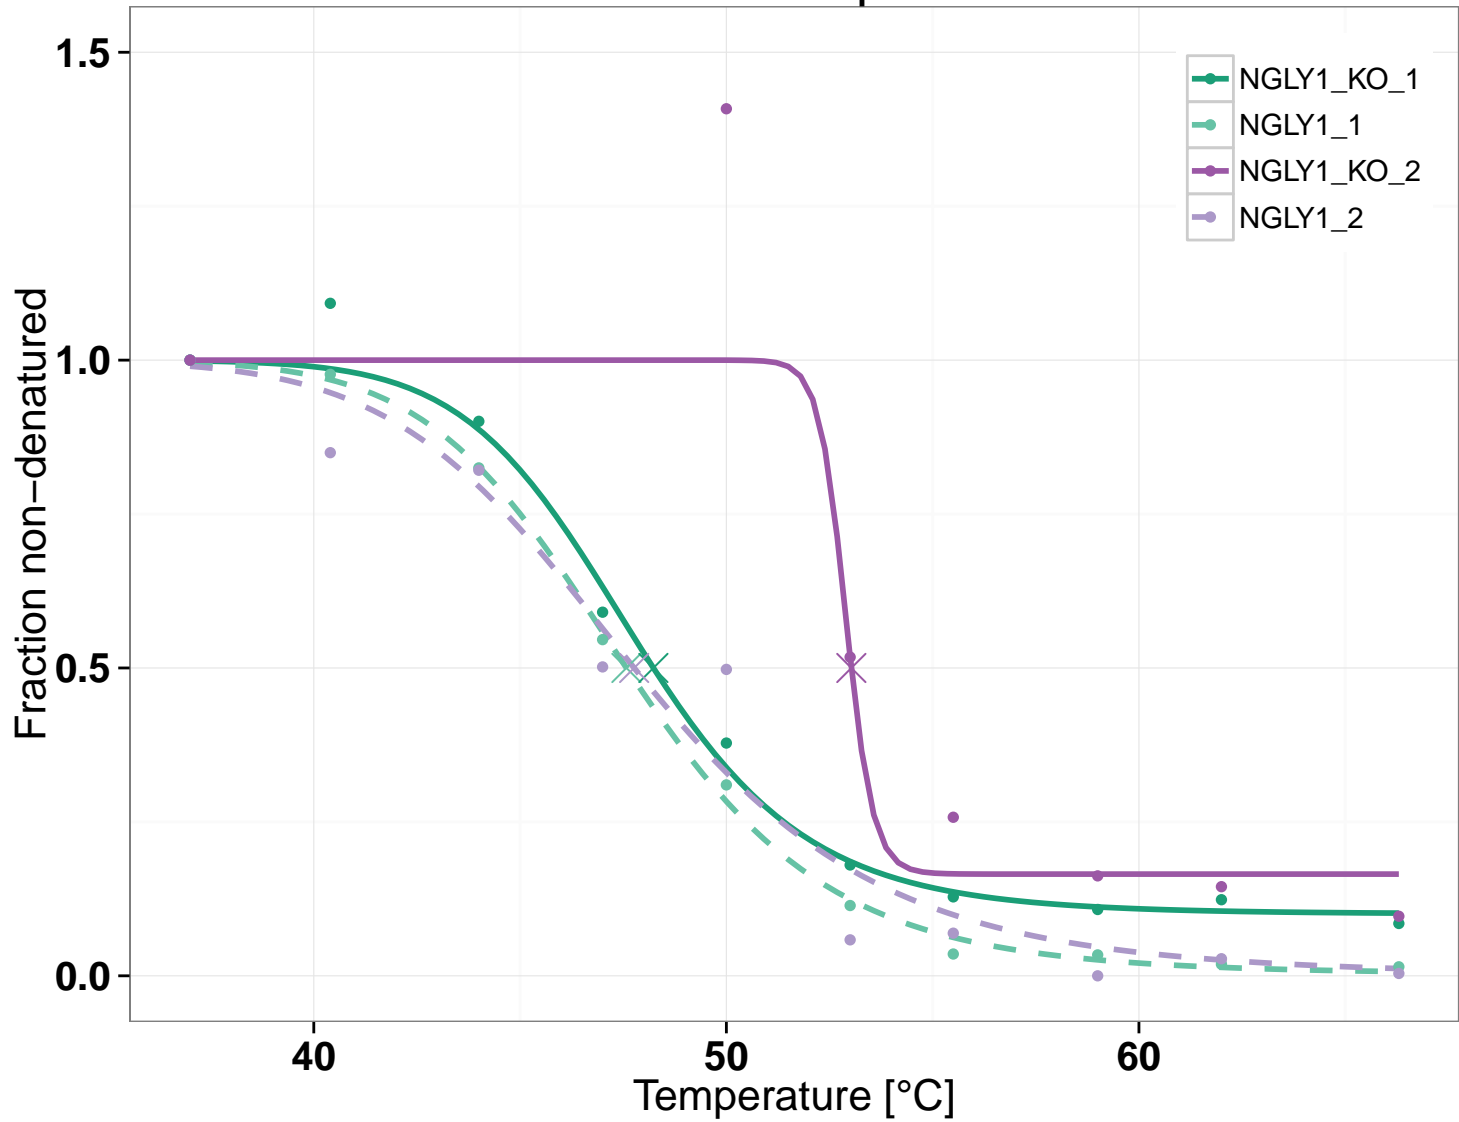

|            | meltPoint | slope  | plateau | R2   |
|------------|-----------|--------|---------|------|
| NGLY1_KO_1 | 48.23     | -0.11  | 0.1     | 0.99 |
| NGLY1_1    | 47.58     | -0.1   | 0       | 1    |
| NGLY1_KO_2 | 53.03     | -0.64  | 0.17    | 0.12 |
| NGLY1_2    | 47.77     | -0.084 | 0       | 0.96 |

Supplement: Supplementary file 5510 [file 1]

# IPI00063160.3|OXNAD1

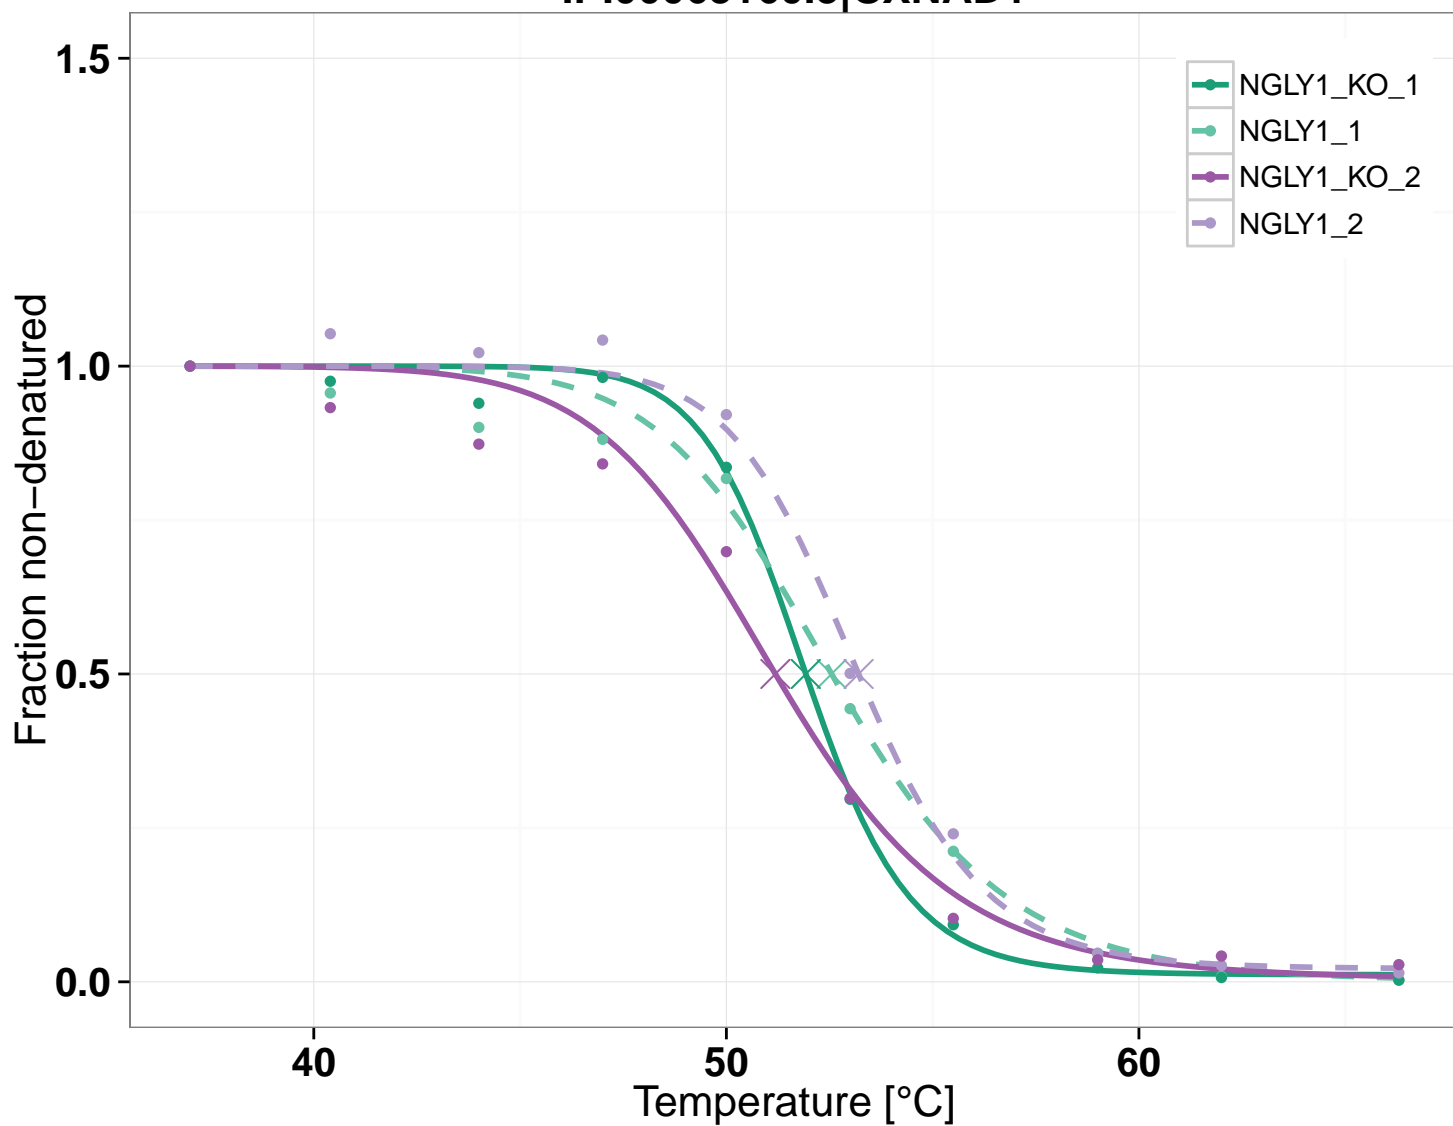

|            | meltPoint | slope | plateau | R2   |
|------------|-----------|-------|---------|------|
| NGLY1_KO_1 | 51.93     | -0.2  | 0.01    | 1    |
| NGLY1_1    | 52.55     | -0.12 | 0       | 0.99 |
| NGLY1_KO_2 | 51.19     | -0.11 | 0       | 0.98 |
| NGLY1_2    | 53.21     | -0.16 | 0.02    | 1    |

Supplement: Supplementary file 5511 [file 1]

# IPI00386924.2|C16ORF70

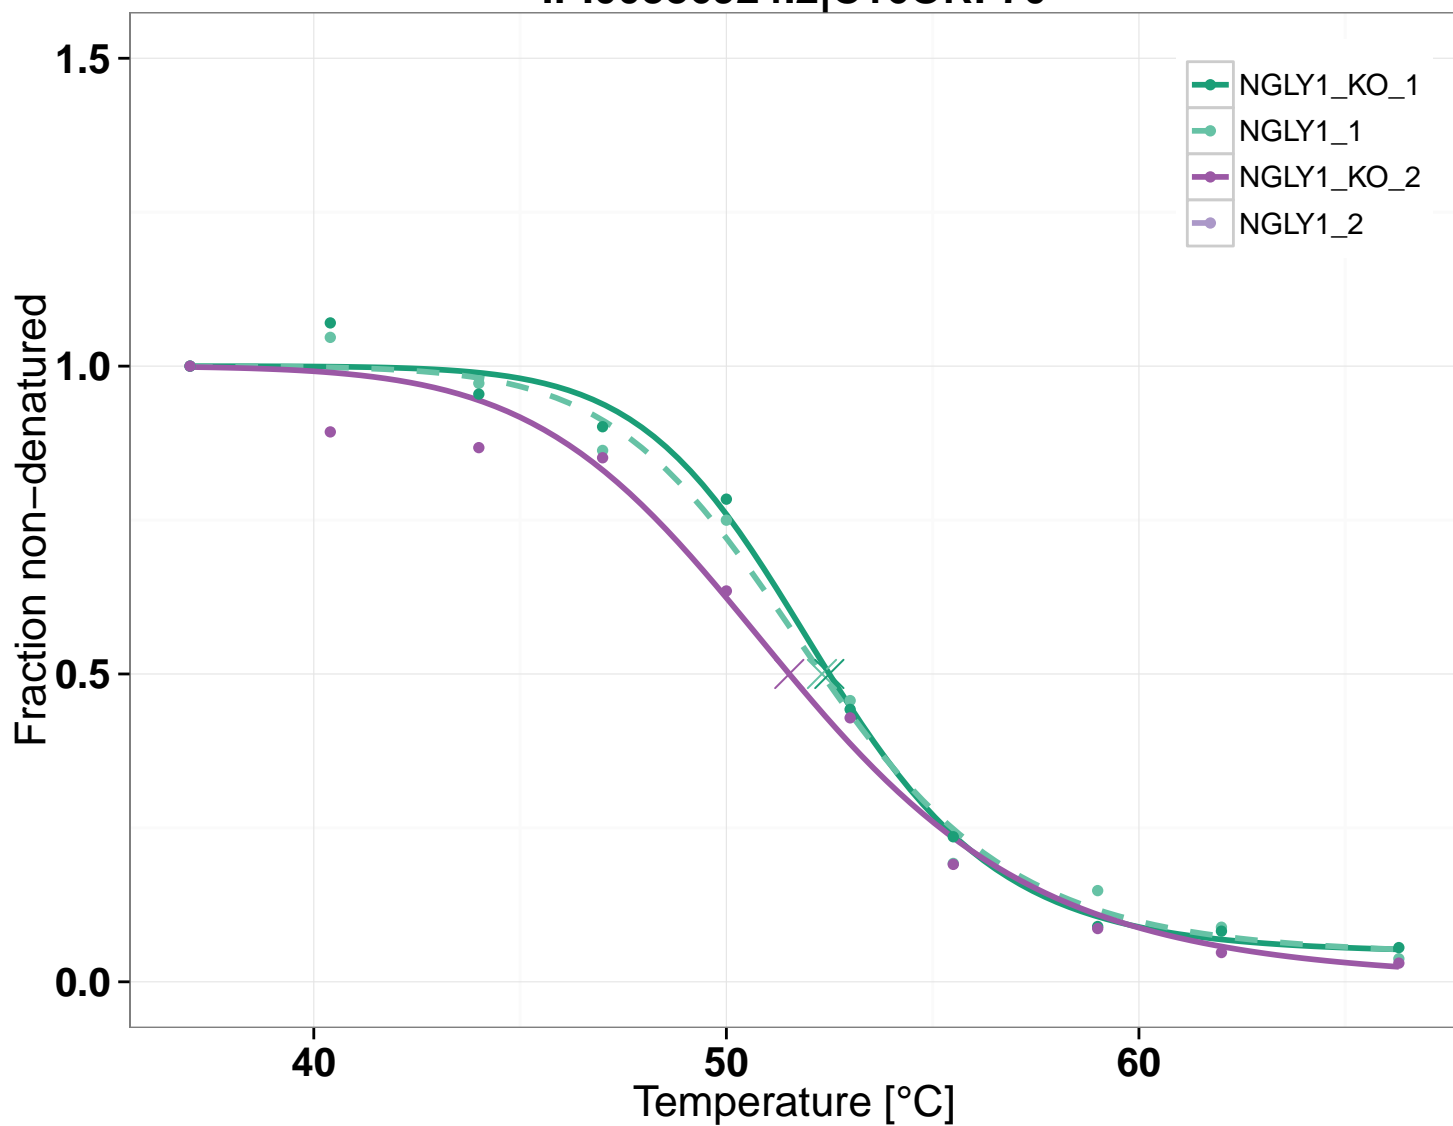

|            | meltPoint | slope  | plateau | R2   |
|------------|-----------|--------|---------|------|
| NGLY1_KO_1 | 52.5      | -0.11  | 0.05    | 0.99 |
| NGLY1_1    | 52.32     | -0.098 | 0.04    | 0.99 |
| NGLY1_KO_2 | 51.53     | -0.082 | 0       | 0.99 |
| NGLY1_2    | -         | -      | -       | -    |

Supplement: Supplementary file 5512 [file 1]

IPI00296869.5|F2R

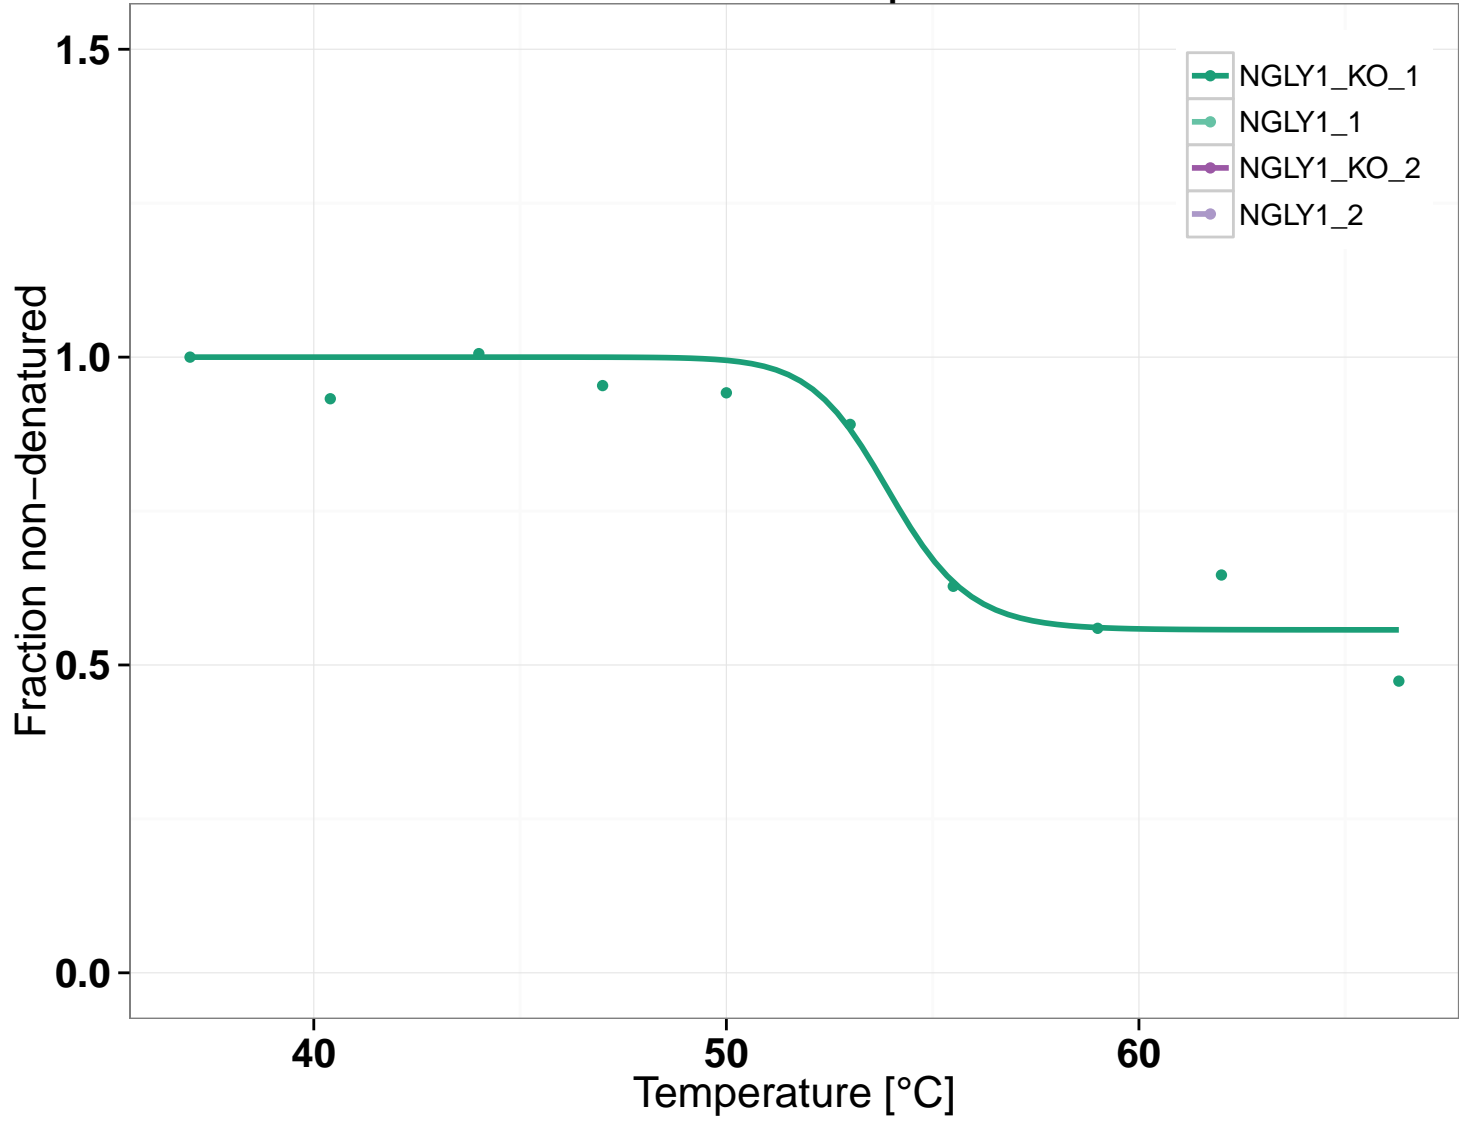

|            | meltPoint | slope | plateau | R2   |
|------------|-----------|-------|---------|------|
| NGLY1_KO_1 | —         | −0.11 | 0.56    | 0.93 |
| NGLY1_1    | —         | —     | —       | —    |
| NGLY1_KO_2 | —         | —     | —       | —    |
| NGLY1_2    | —         | —     | —       | —    |

Supplement: Supplementary file 5513 [file 1]

IPI00797353.3|MFSD1

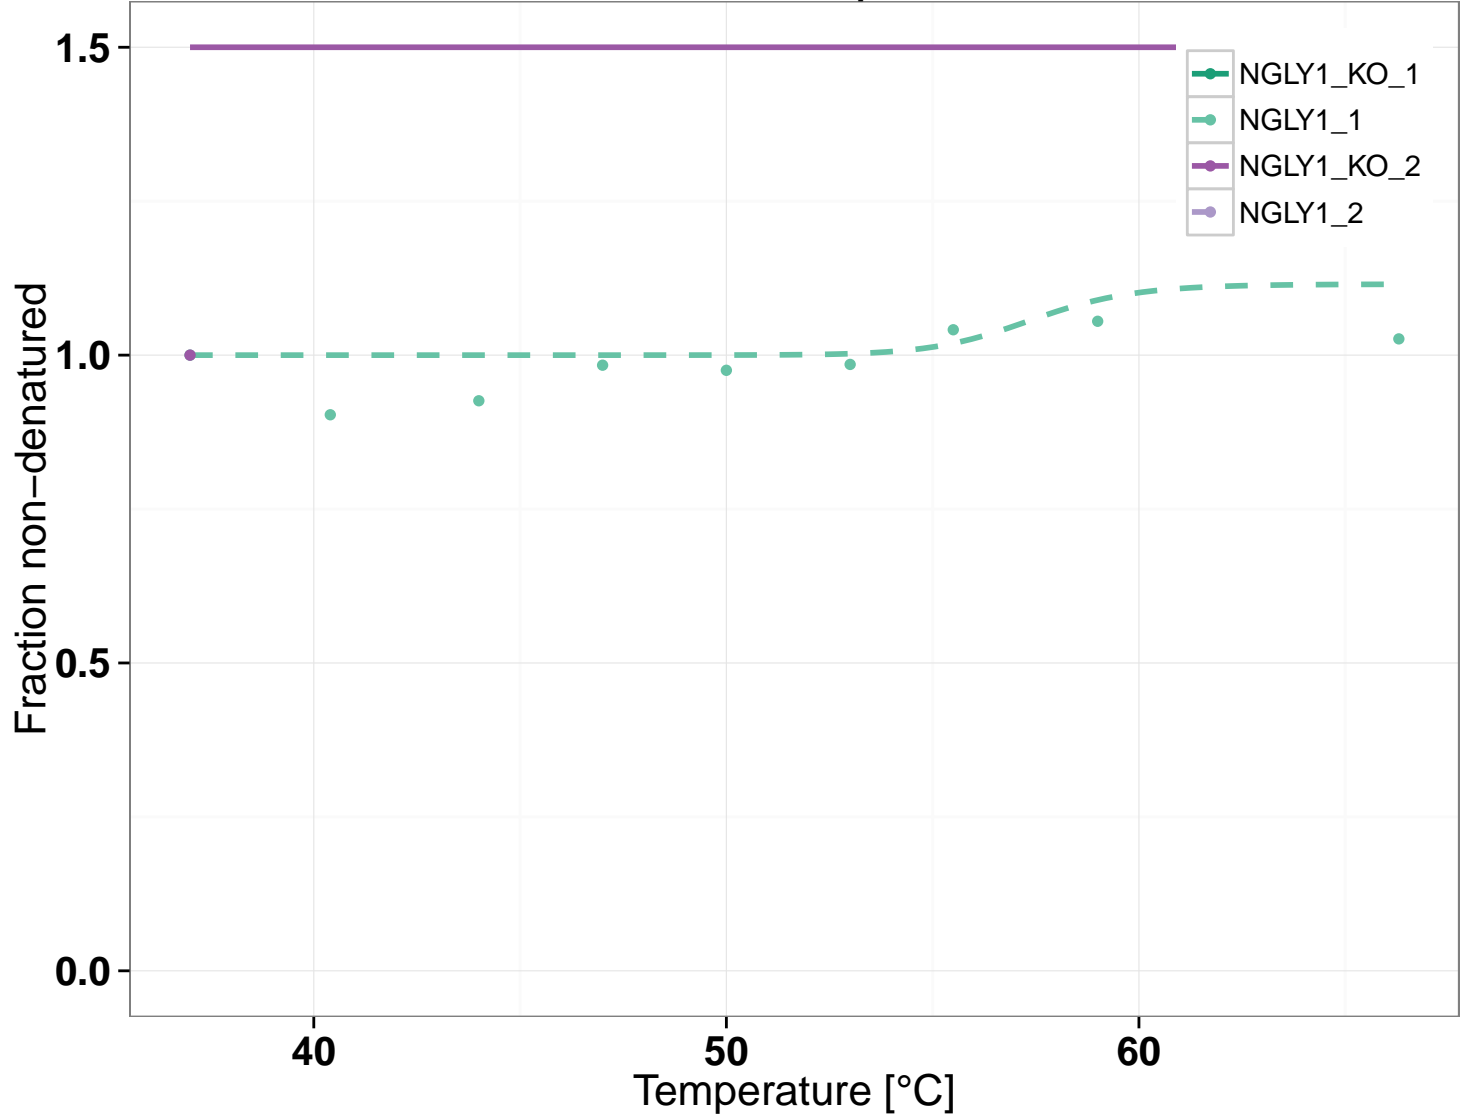

|            | meltPoint | slope | plateau | R2    |
|------------|-----------|-------|---------|-------|
| NGLY1_KO_1 | -         | -     | -       | -     |
| NGLY1_1    | -         | 0.023 | 1.12    | 0.46  |
| NGLY1_KO_2 | -         | -     | 1.5     | -1.92 |
| NGLY1_2    | -         | -     | -       | -     |

Supplement: Supplementary file 5514 [file 1]

IPI00410618.4|KIAA1143

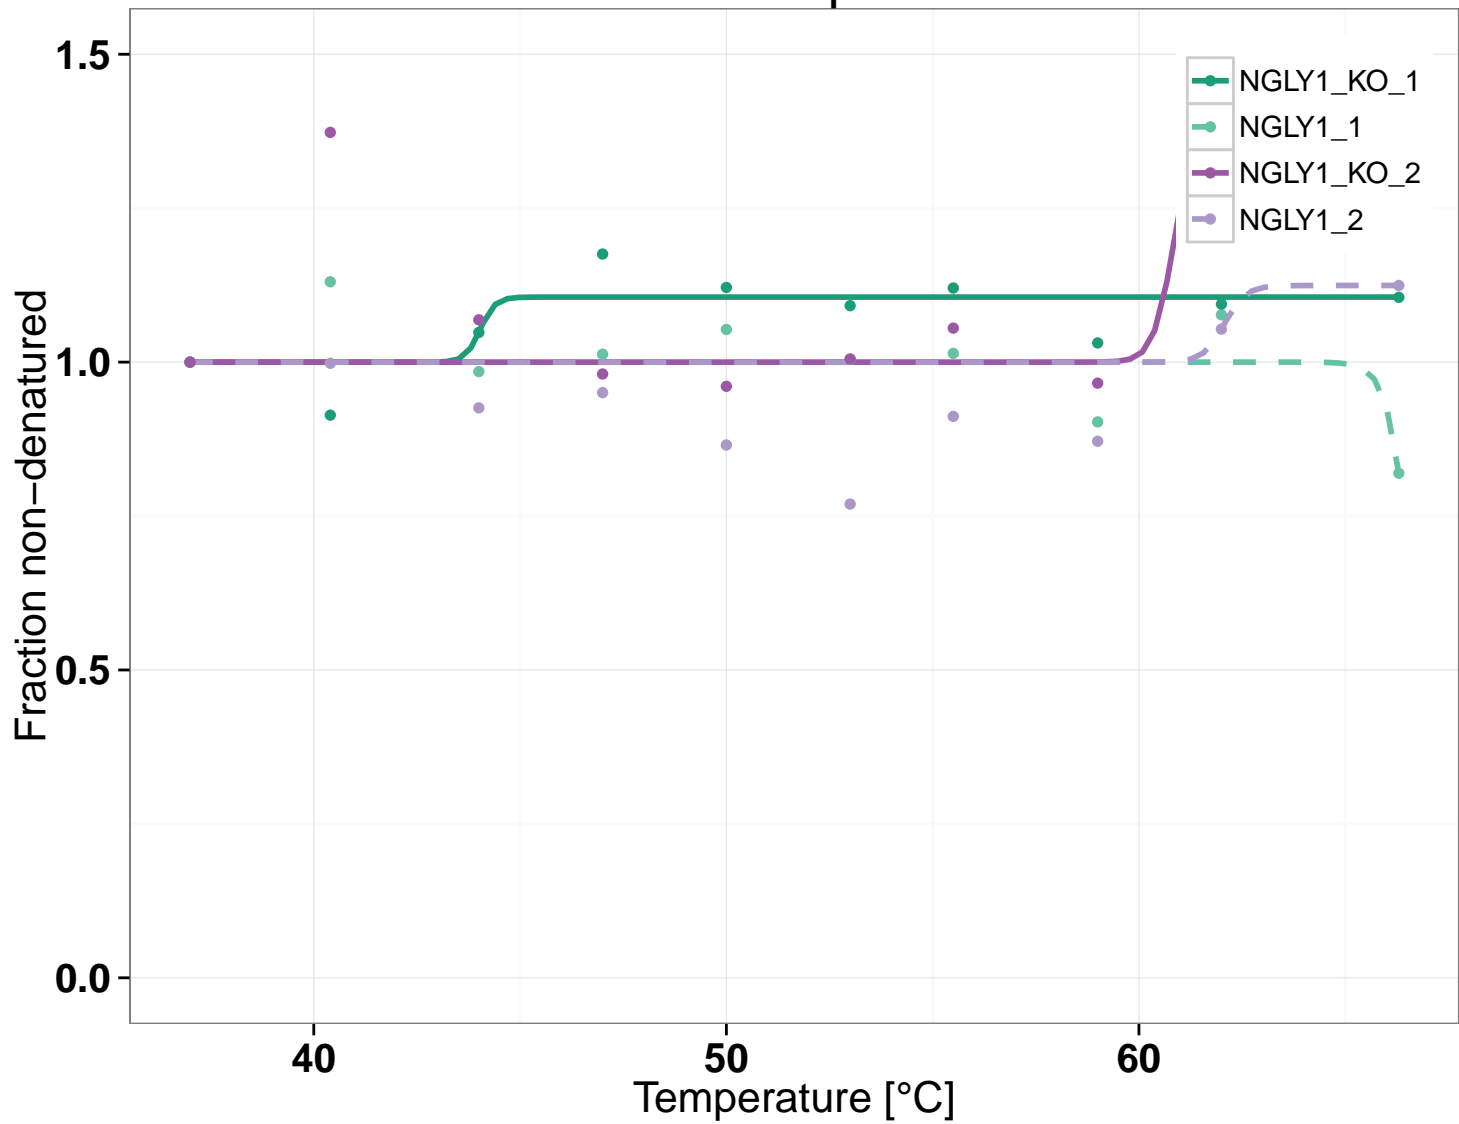

|            | meltPoint | slope | plateau | R2   |
|------------|-----------|-------|---------|------|
| NGLY1_KO_1 | —         | 0.15  | 1.11    | 0.63 |
| NGLY1_1    | —         | —     | 0       | 0.48 |
| NGLY1_KO_2 | —         | 0.39  | 1.38    | 0.5  |
| NGLY1_2    | —         | 0.12  | 1.12    | -0.1 |

Supplement: Supplementary file 5515 [file 1]

IPI00020920.1|ADCY7

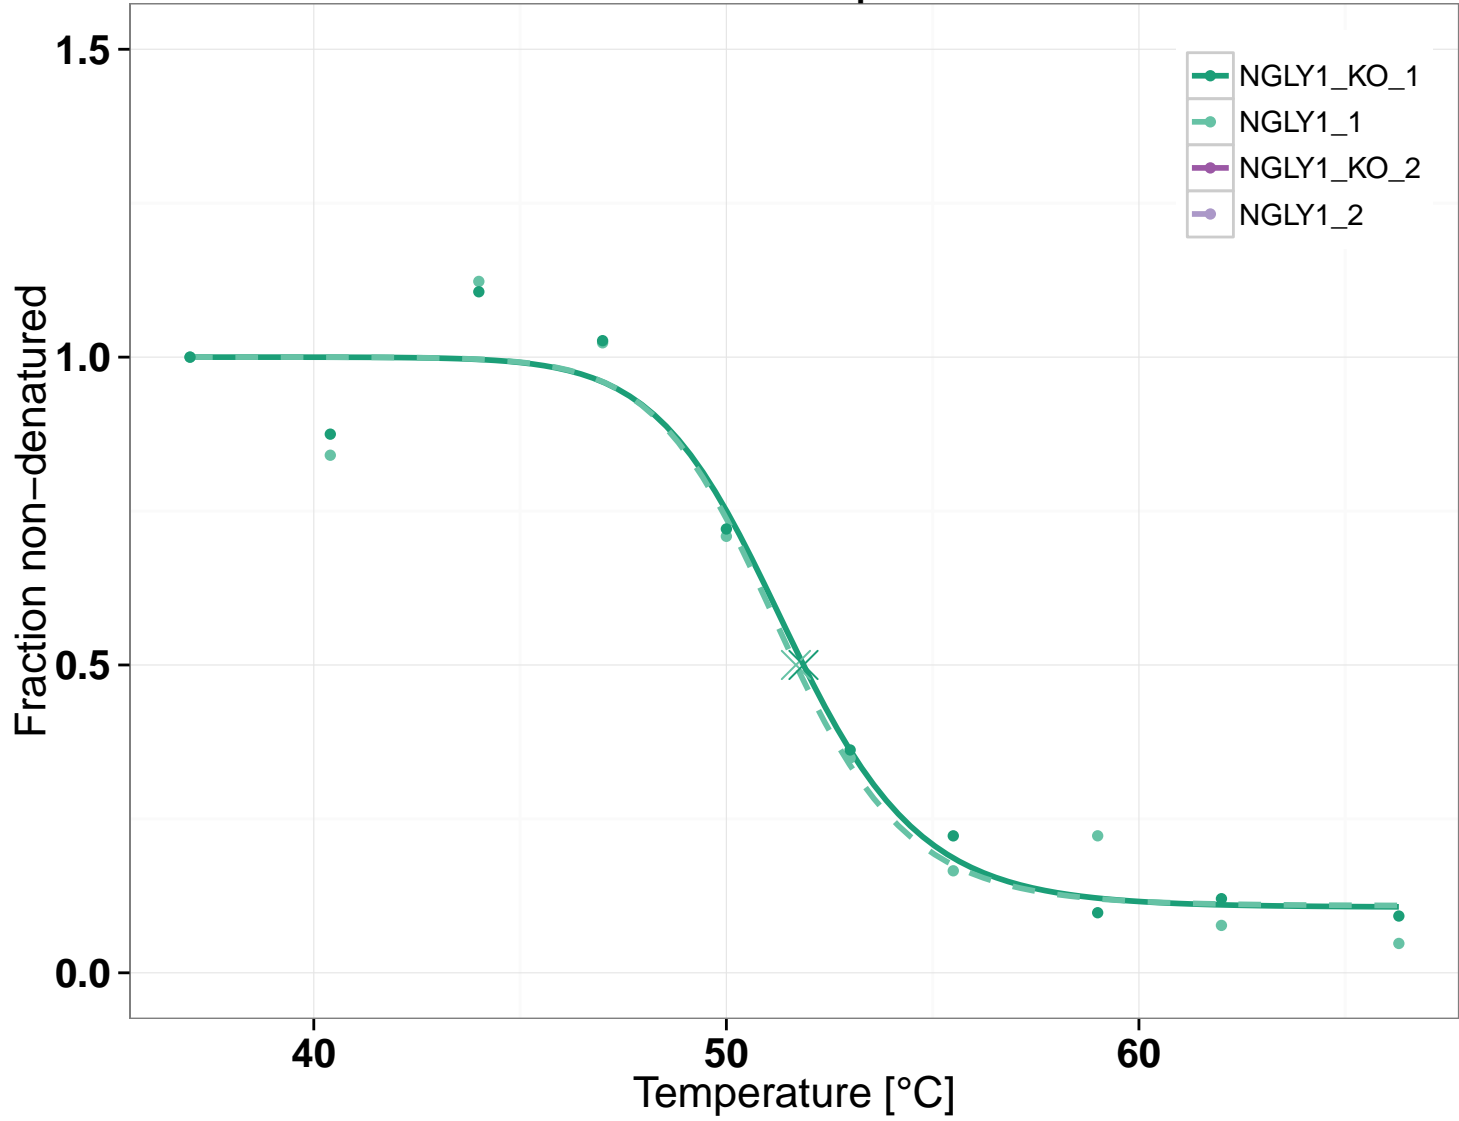

|            | meltPoint | slope | plateau | R2   |
|------------|-----------|-------|---------|------|
| NGLY1_KO_1 | 51.87     | -0.14 | 0.11    | 0.98 |
| NGLY1_1    | 51.69     | -0.15 | 0.11    | 0.96 |
| NGLY1_KO_2 | -         | -     | -       | -    |
| NGLY1_2    | -         | -     | -       | -    |

Supplement: Supplementary file 5516 [file 1]

IPI00427037.1|TSEN2

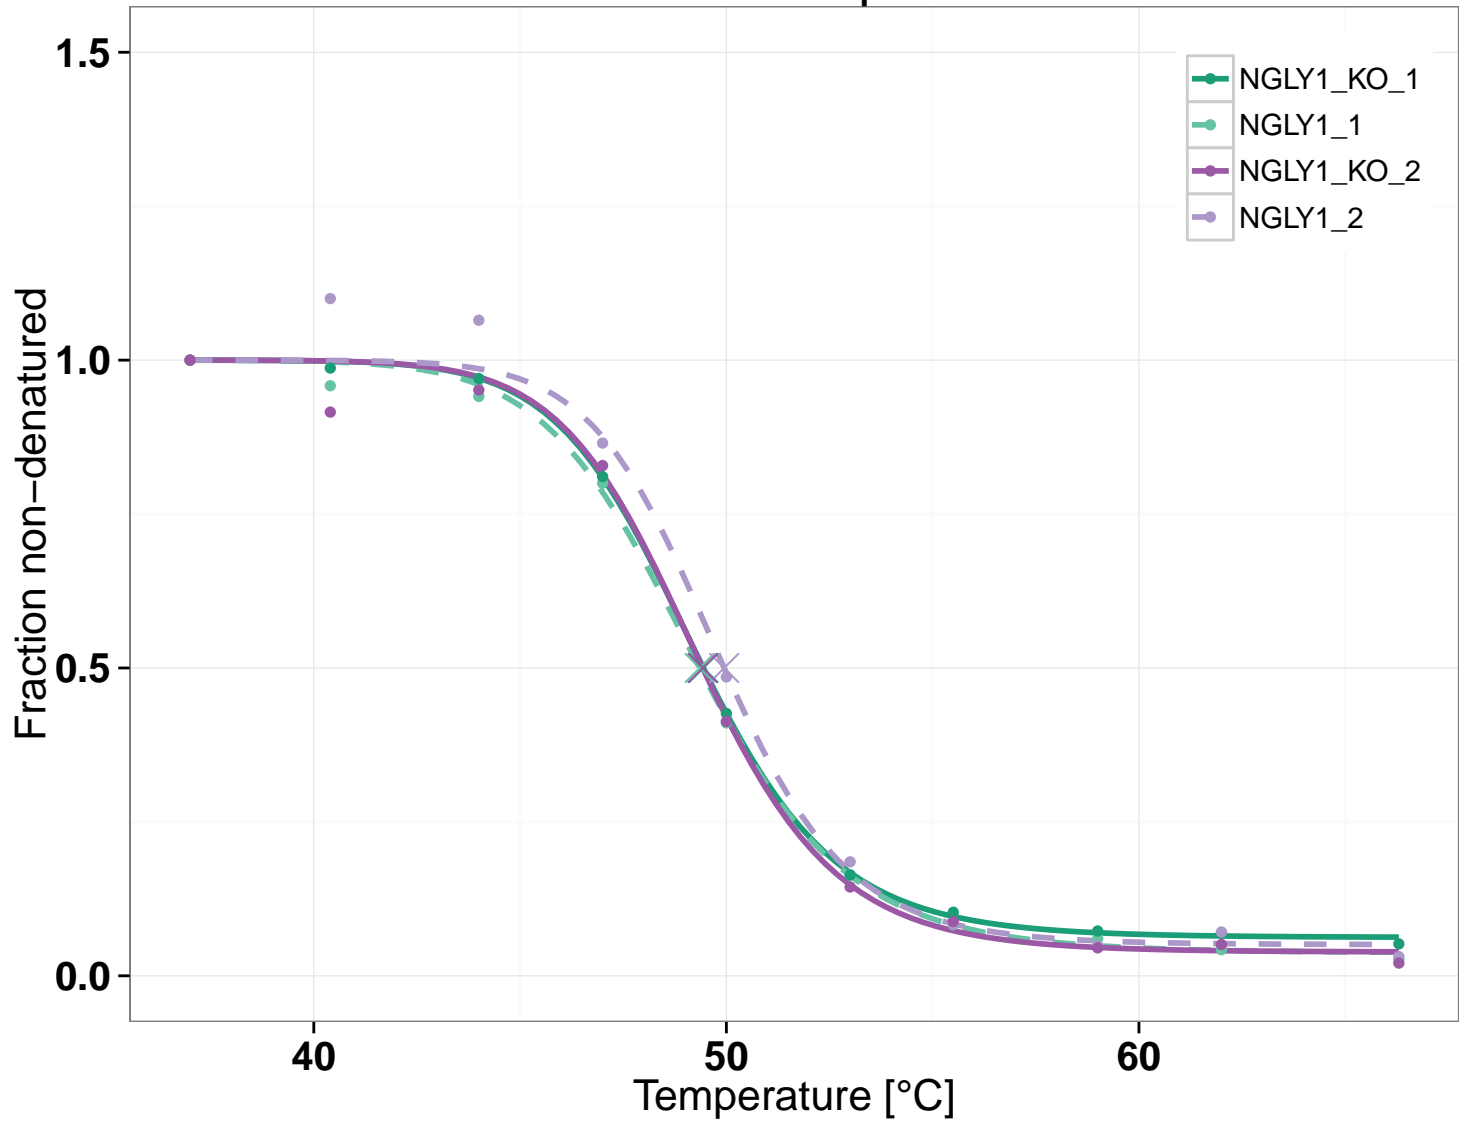

|            | meltPoint | slope | plateau | R2   |
|------------|-----------|-------|---------|------|
| NGLY1_KO_1 | 49.44     | -0.14 | 0.06    | 1    |
| NGLY1_1    | 49.35     | -0.13 | 0.04    | 1    |
| NGLY1_KO_2 | 49.42     | -0.14 | 0.04    | 0.99 |
| NGLY1_2    | 49.95     | -0.15 | 0.05    | 0.99 |

Supplement: Supplementary file 5517 [file 1]

IPI00183626.8|PTBP1

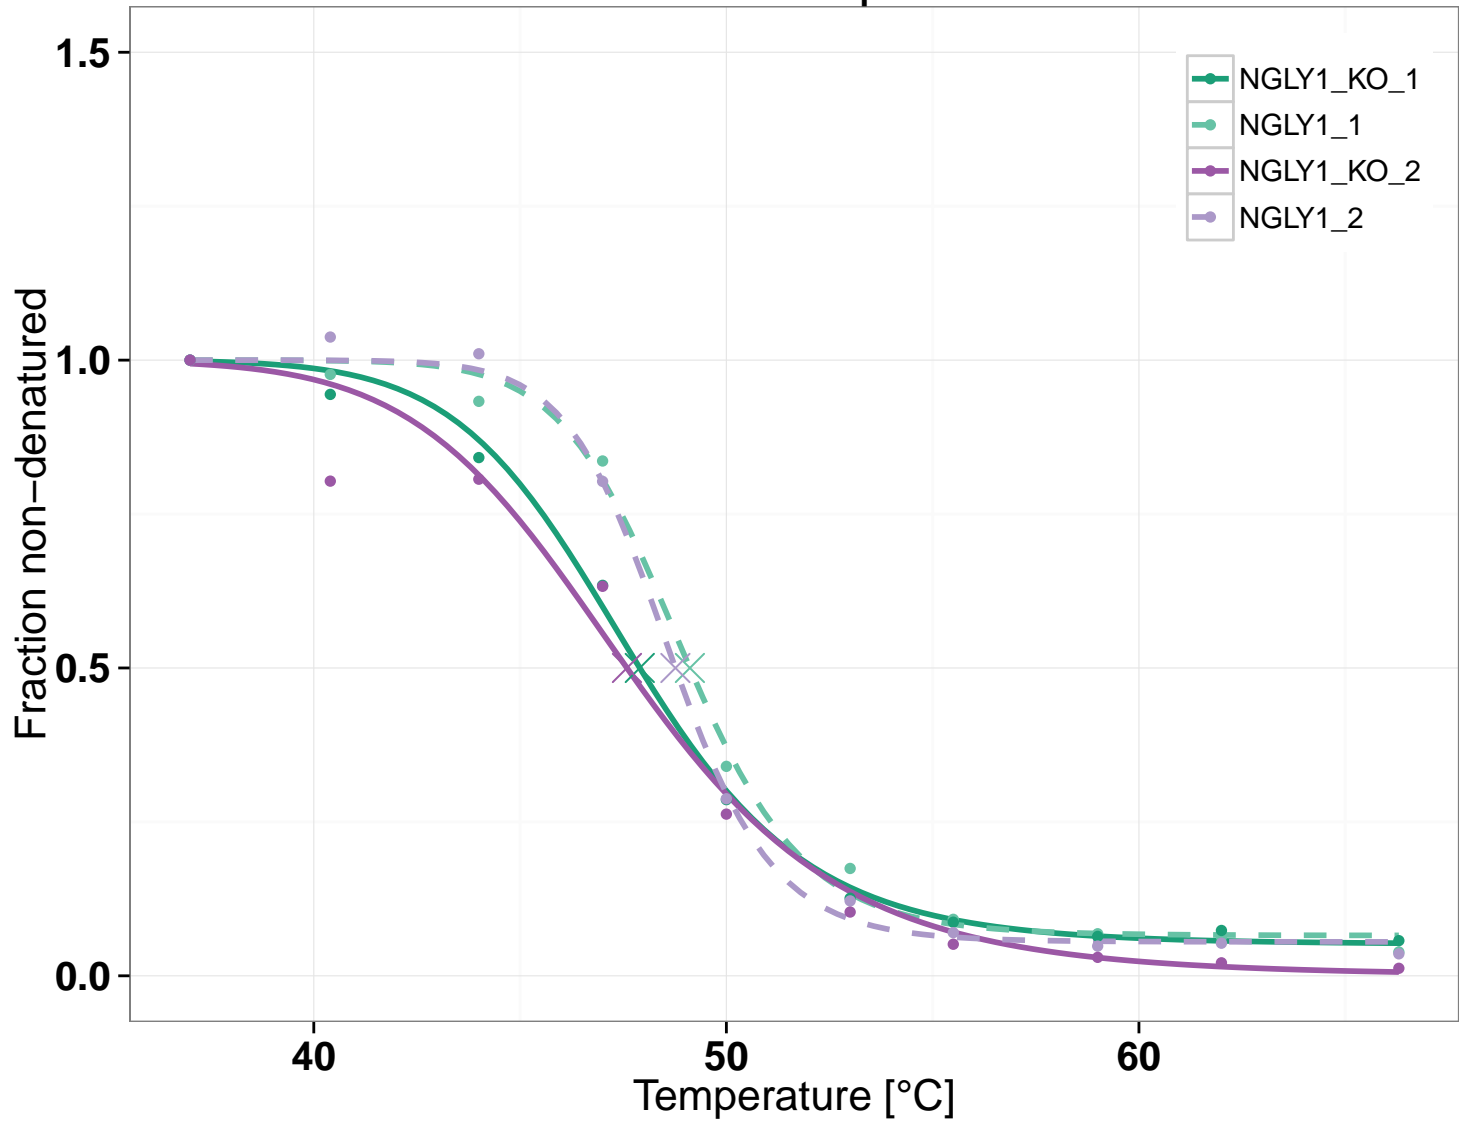

|            | meltPoint | slope  | plateau | R2   |
|------------|-----------|--------|---------|------|
| NGLY1_KO_1 | 47.9      | -0.11  | 0.05    | 1    |
| NGLY1_1    | 49.12     | -0.16  | 0.07    | 1    |
| NGLY1_KO_2 | 47.59     | -0.096 | 0       | 0.98 |
| NGLY1_2    | 48.76     | -0.19  | 0.06    | 1    |

Supplement: Supplementary file 5518 [file 1]

# IPI00168877.3|HELB

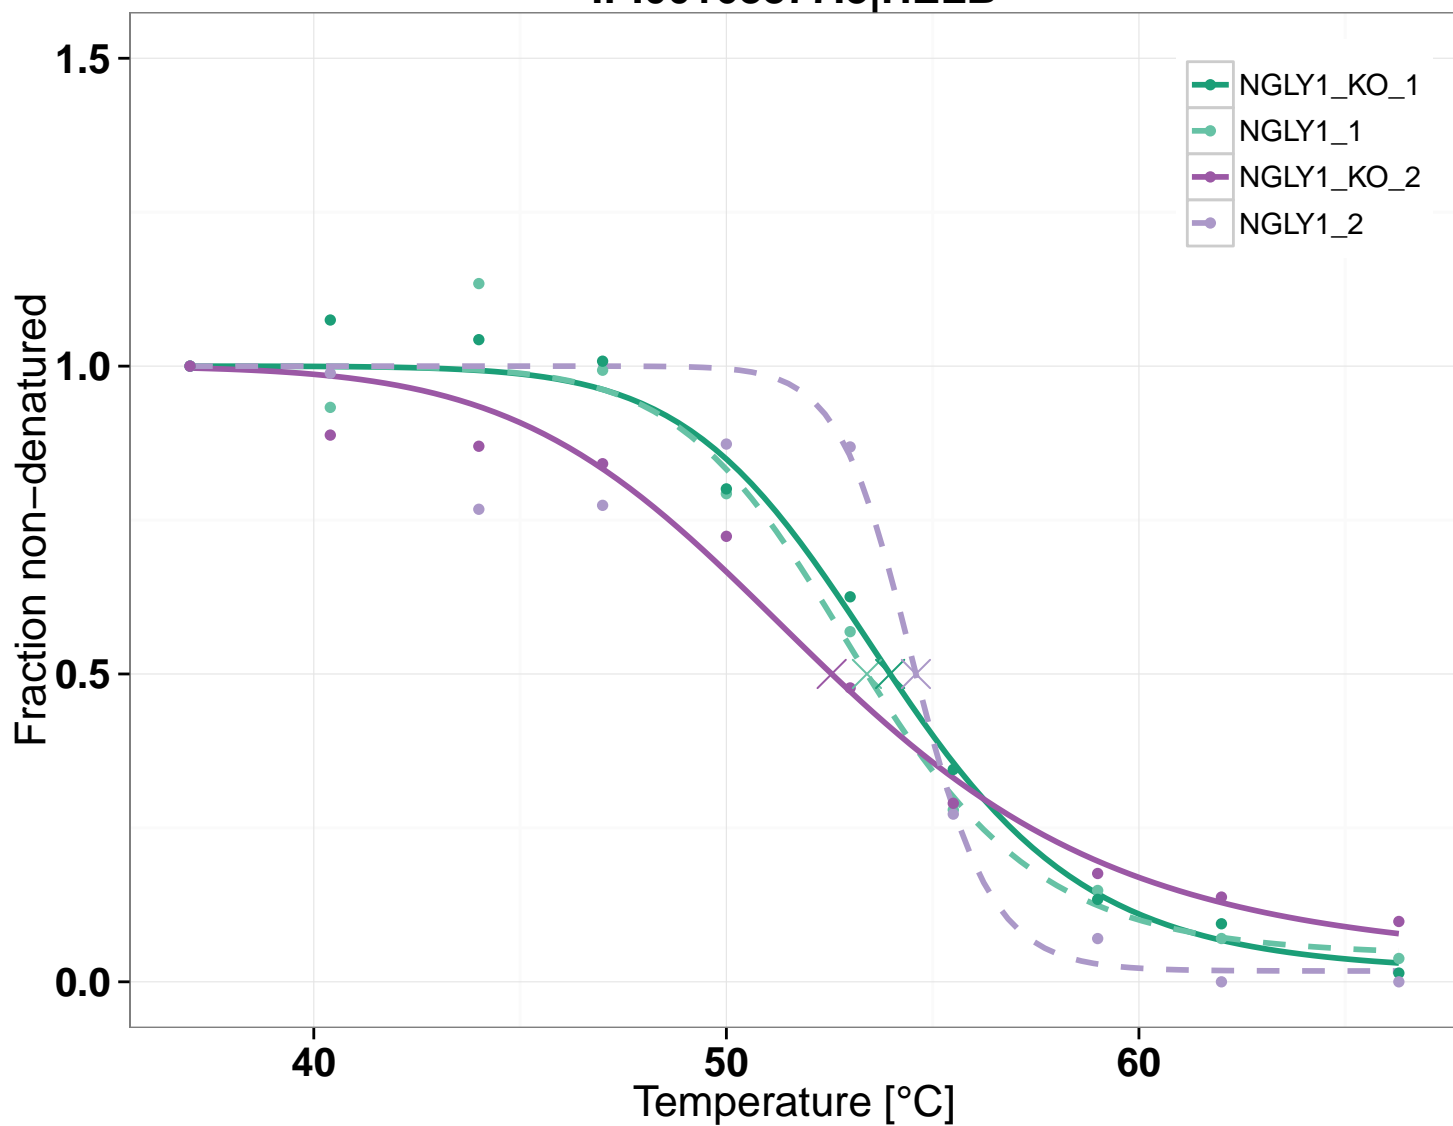

|            | meltPoint | slope  | plateau | R2   |
|------------|-----------|--------|---------|------|
| NGLY1_KO_1 | 53.97     | -0.1   | 0.01    | 0.99 |
| NGLY1_1    | 53.41     | -0.11  | 0.04    | 0.98 |
| NGLY1_KO_2 | 52.55     | -0.066 | 0.03    | 0.98 |
| NGLY1_2    | 54.59     | -0.27  | 0.02    | 0.92 |

Supplement: Supplementary file 5519 [file 1]

IPI00014978.3|PPP2R5A

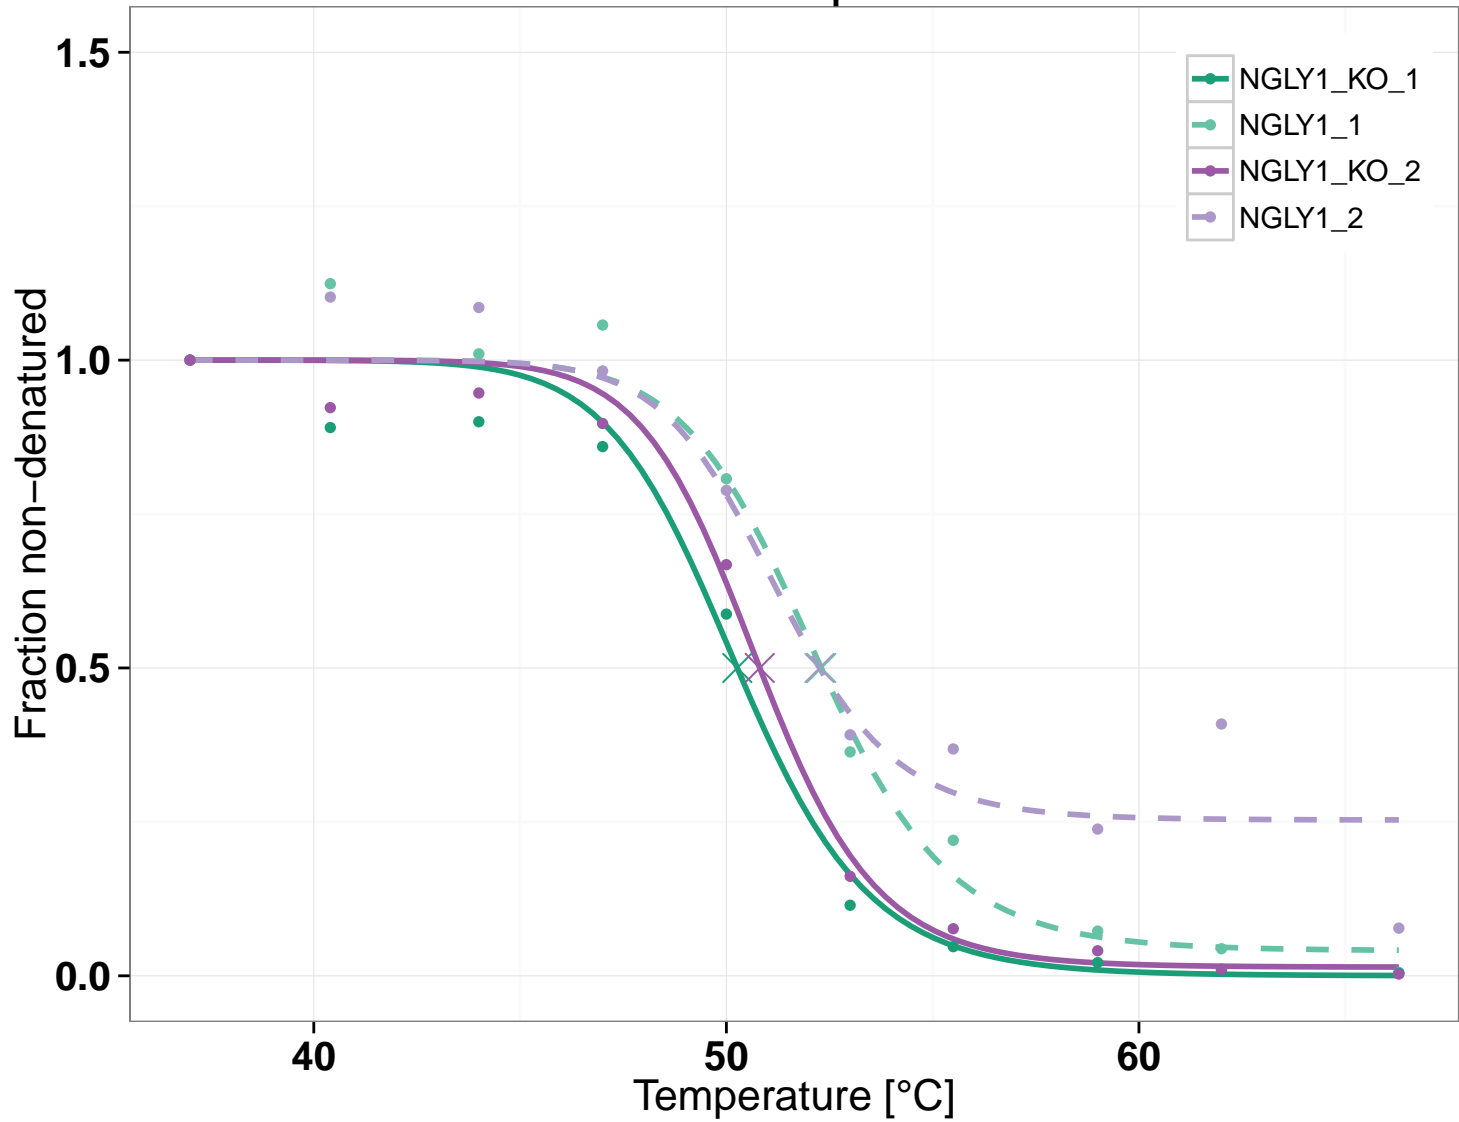

|            | meltPoint | slope | plateau | R2   |
|------------|-----------|-------|---------|------|
| NGLY1_KO_1 | 50.26     | -0.16 | 0       | 0.98 |
| NGLY1_1    | 52.3      | -0.15 | 0.04    | 0.99 |
| NGLY1_KO_2 | 50.81     | -0.17 | 0.01    | 0.99 |
| NGLY1_2    | 52.26     | -0.13 | 0.25    | 0.94 |

Supplement: Supplementary file 5520 [file 1]

IPI00178512.7|C1ORF112

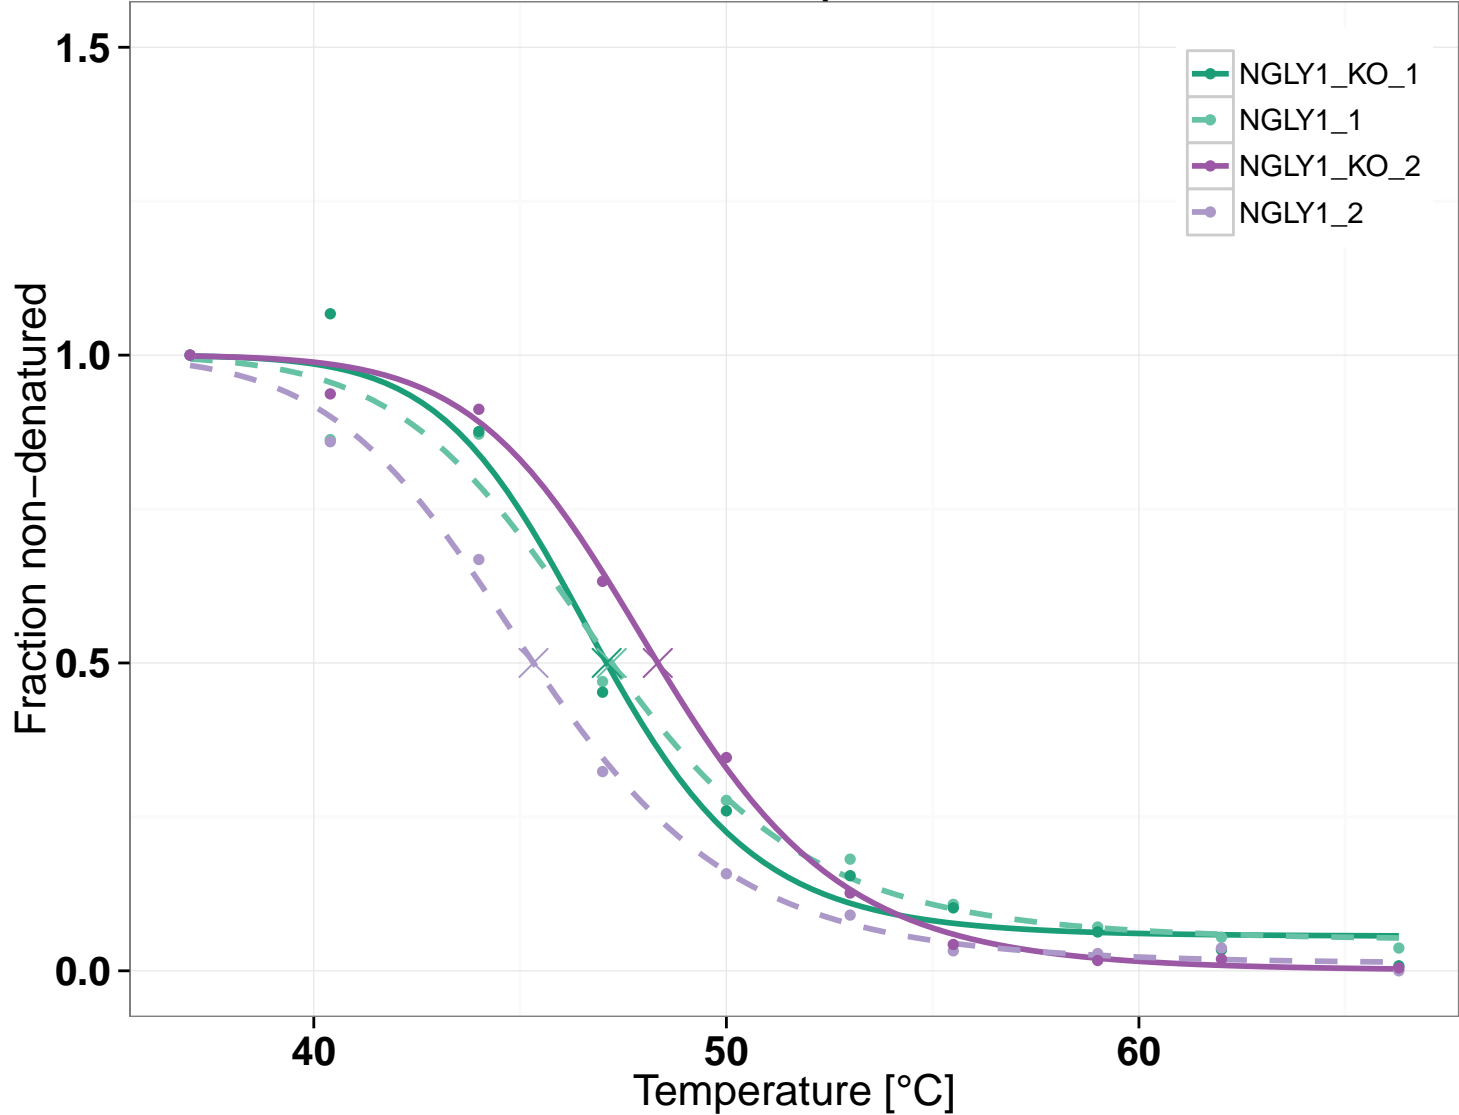

|            | meltPoint | slope  | plateau | R2   |
|------------|-----------|--------|---------|------|
| NGLY1_KO_1 | 47.1      | -0.12  | 0.06    | 0.99 |
| NGLY1_1    | 47.22     | -0.095 | 0.05    | 0.99 |
| NGLY1_KO_2 | 48.34     | -0.11  | 0       | 1    |
| NGLY1_2    | 45.33     | -0.1   | 0.01    | 1    |

Supplement: Supplementary file 5521 [file 1]

# IPI00442121.3|ALAD

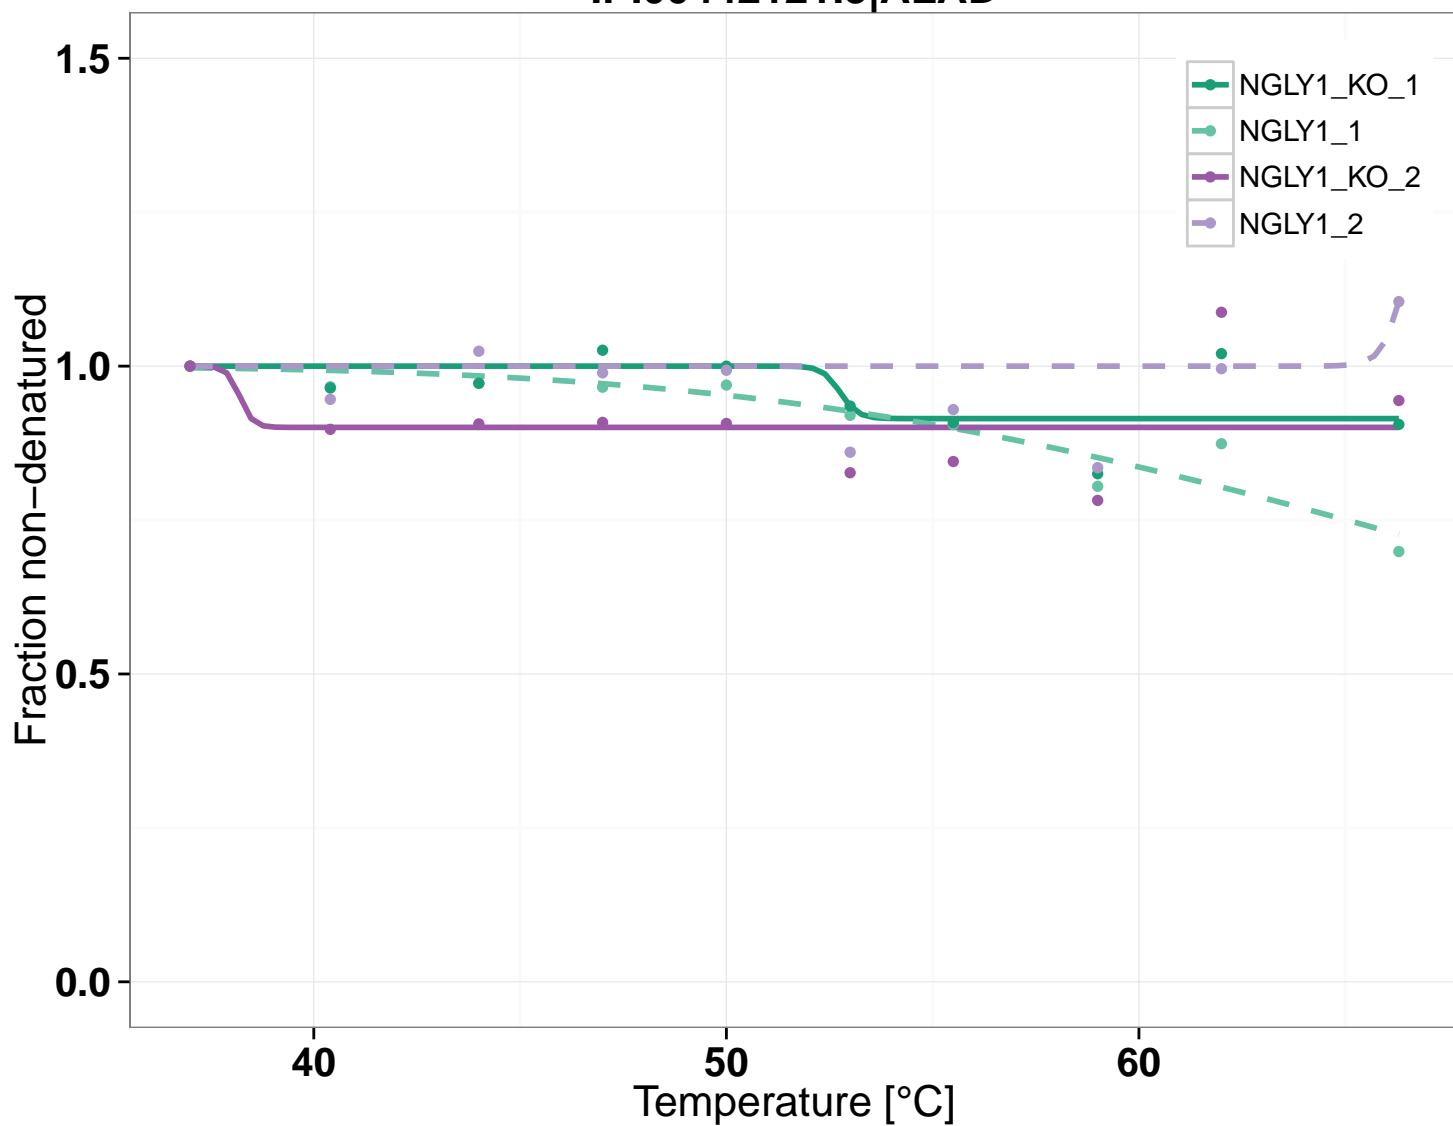

|            | meltPoint | slope | plateau | R2   |
|------------|-----------|-------|---------|------|
| NGLY1_KO_1 | -         | -0.1  | 0.91    | 0.38 |
| NGLY1_1    | -         | -     | 0       | 0.88 |
| NGLY1_KO_2 | -         | -0.16 | 0.9     | 0.13 |
| NGLY1_2    | -         | -     | 1.5     | 0.01 |

Supplement: Supplementary file 5522 [file 1]

# IPI00292221.3|BXDC5

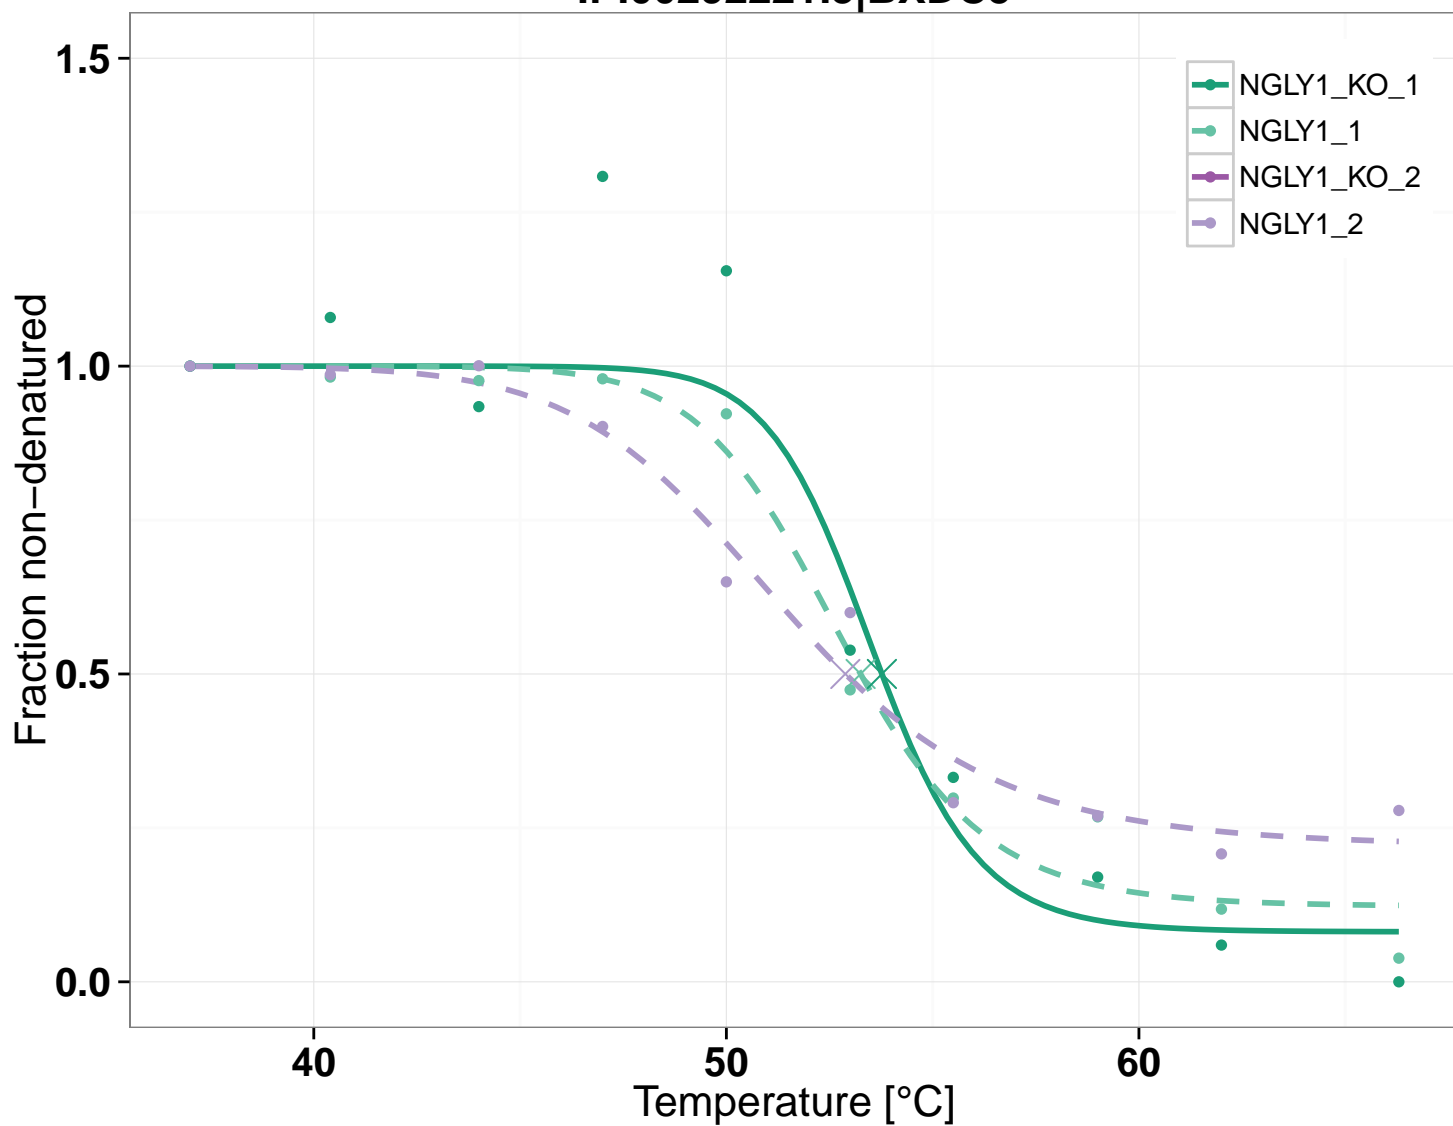

|            | meltPoint | slope  | plateau | R2   |
|------------|-----------|--------|---------|------|
| NGLY1_KO_1 | 53.77     | -0.18  | 0.08    | 0.92 |
| NGLY1_1    | 53.25     | -0.13  | 0.12    | 0.98 |
| NGLY1_KO_2 | -         | -      | -       | -    |
| NGLY1_2    | 52.88     | -0.076 | 0.22    | 0.98 |

Supplement: Supplementary file 5523 [file 1]
