# Supplementary material (part 56 of 85)
Source: publisher figshare collection journal article supplement (https://gsajournals.figshare.com/articles/dataset/_/12014913)

IPI00418603.1|UBE2R2

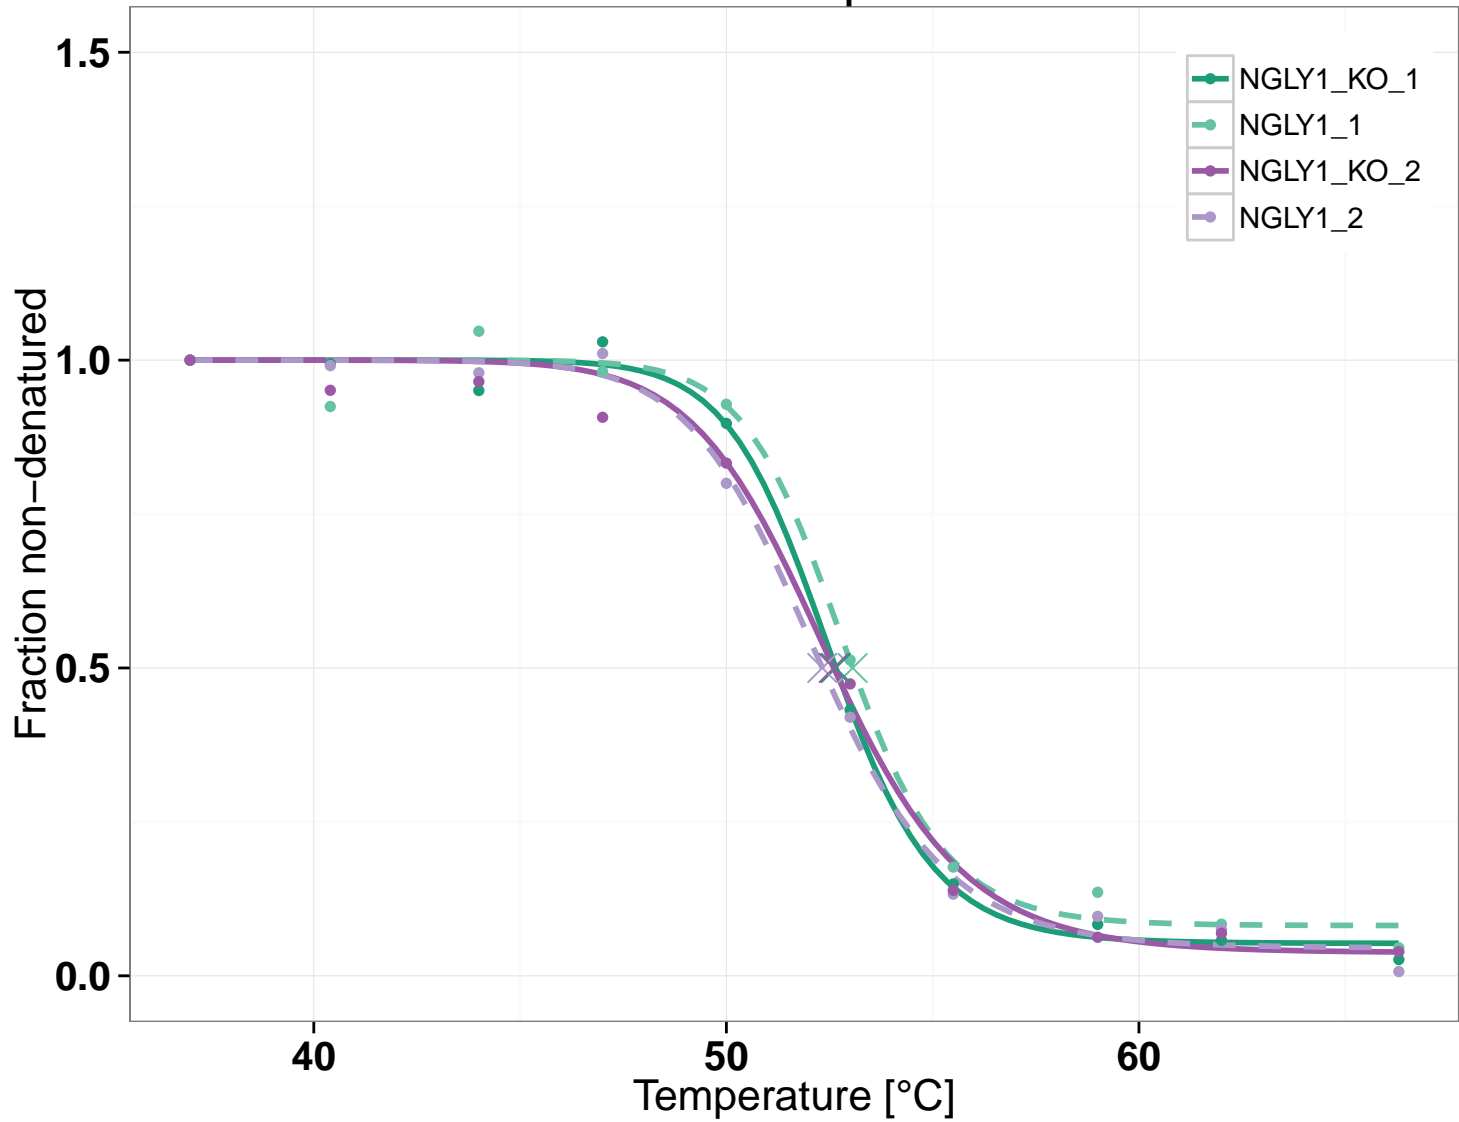

|            | meltPoint | slope | plateau | R2   |
|------------|-----------|-------|---------|------|
| NGLY1_KO_1 | 52.65     | -0.19 | 0.05    | 1    |
| NGLY1_1    | 53.06     | -0.19 | 0.08    | 0.99 |
| NGLY1_KO_2 | 52.6      | -0.15 | 0.04    | 0.99 |
| NGLY1_2    | 52.33     | -0.15 | 0.05    | 1    |

Supplement: Supplementary file 5524 [file 1]

# IPI00329236.3|PRKCD

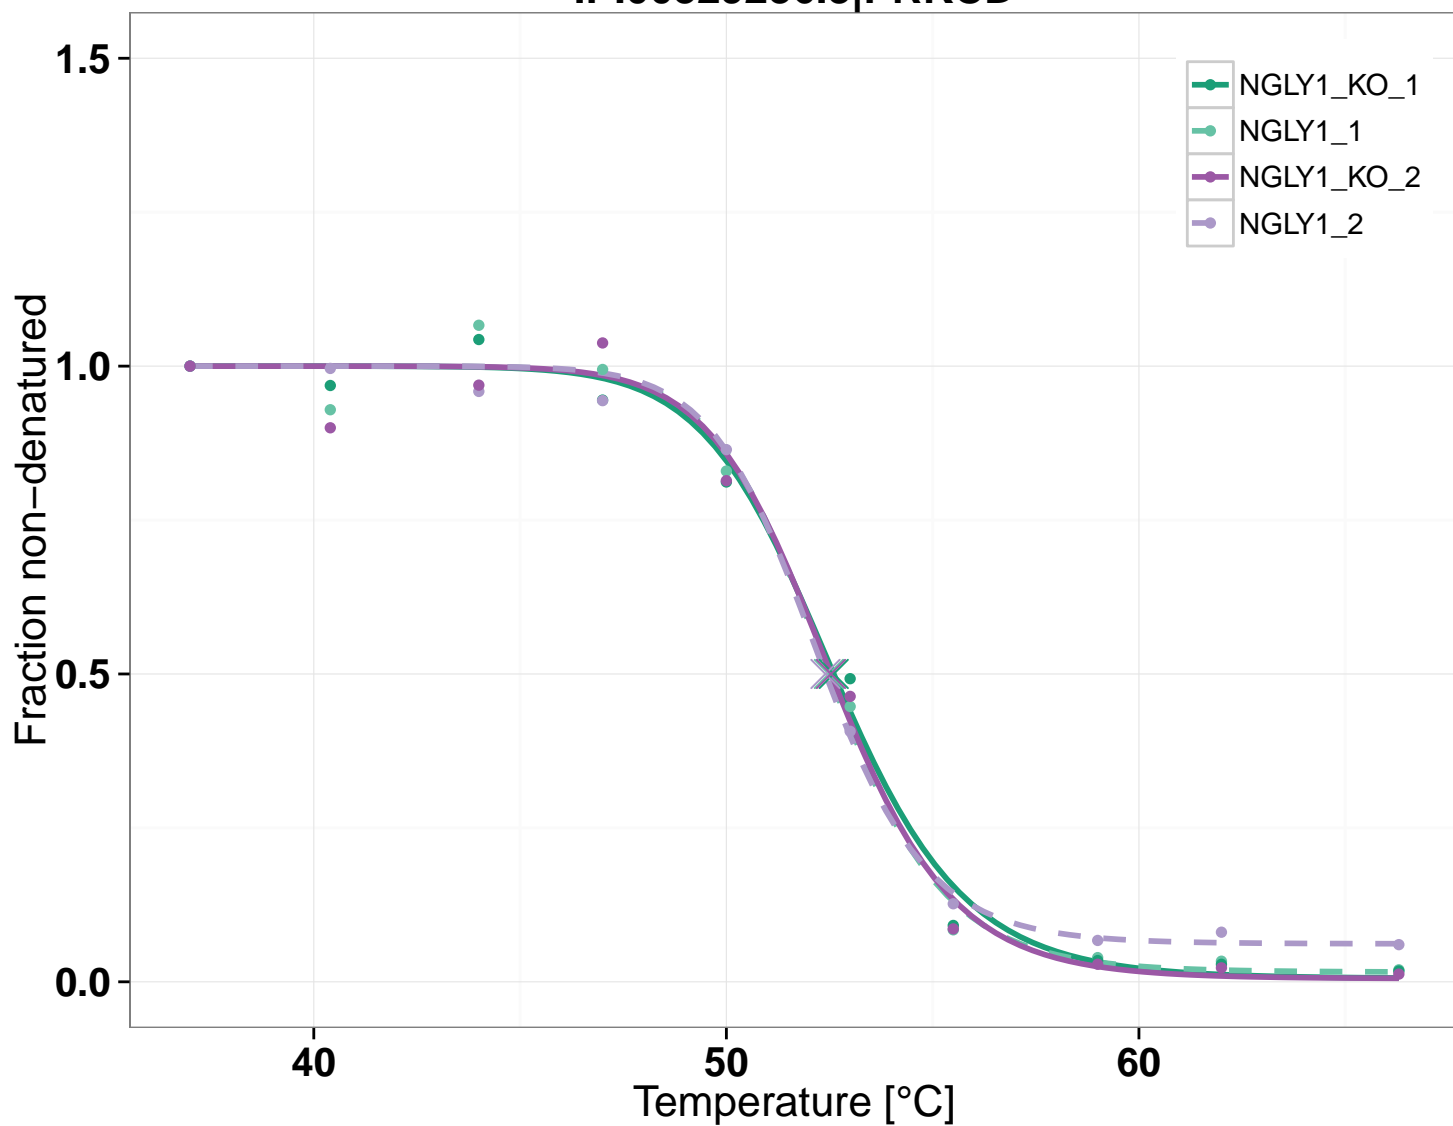

|            | meltPoint | slope | plateau | R2   |
|------------|-----------|-------|---------|------|
| NGLY1_KO_1 | 52.6      | -0.16 | 0.01    | 0.99 |
| NGLY1_1    | 52.49     | -0.17 | 0.02    | 0.99 |
| NGLY1_KO_2 | 52.53     | -0.17 | 0.01    | 0.99 |
| NGLY1_2    | 52.4      | -0.18 | 0.06    | 1    |

Supplement: Supplementary file 5525 [file 1]

# IPI00645711.1|GSTM2

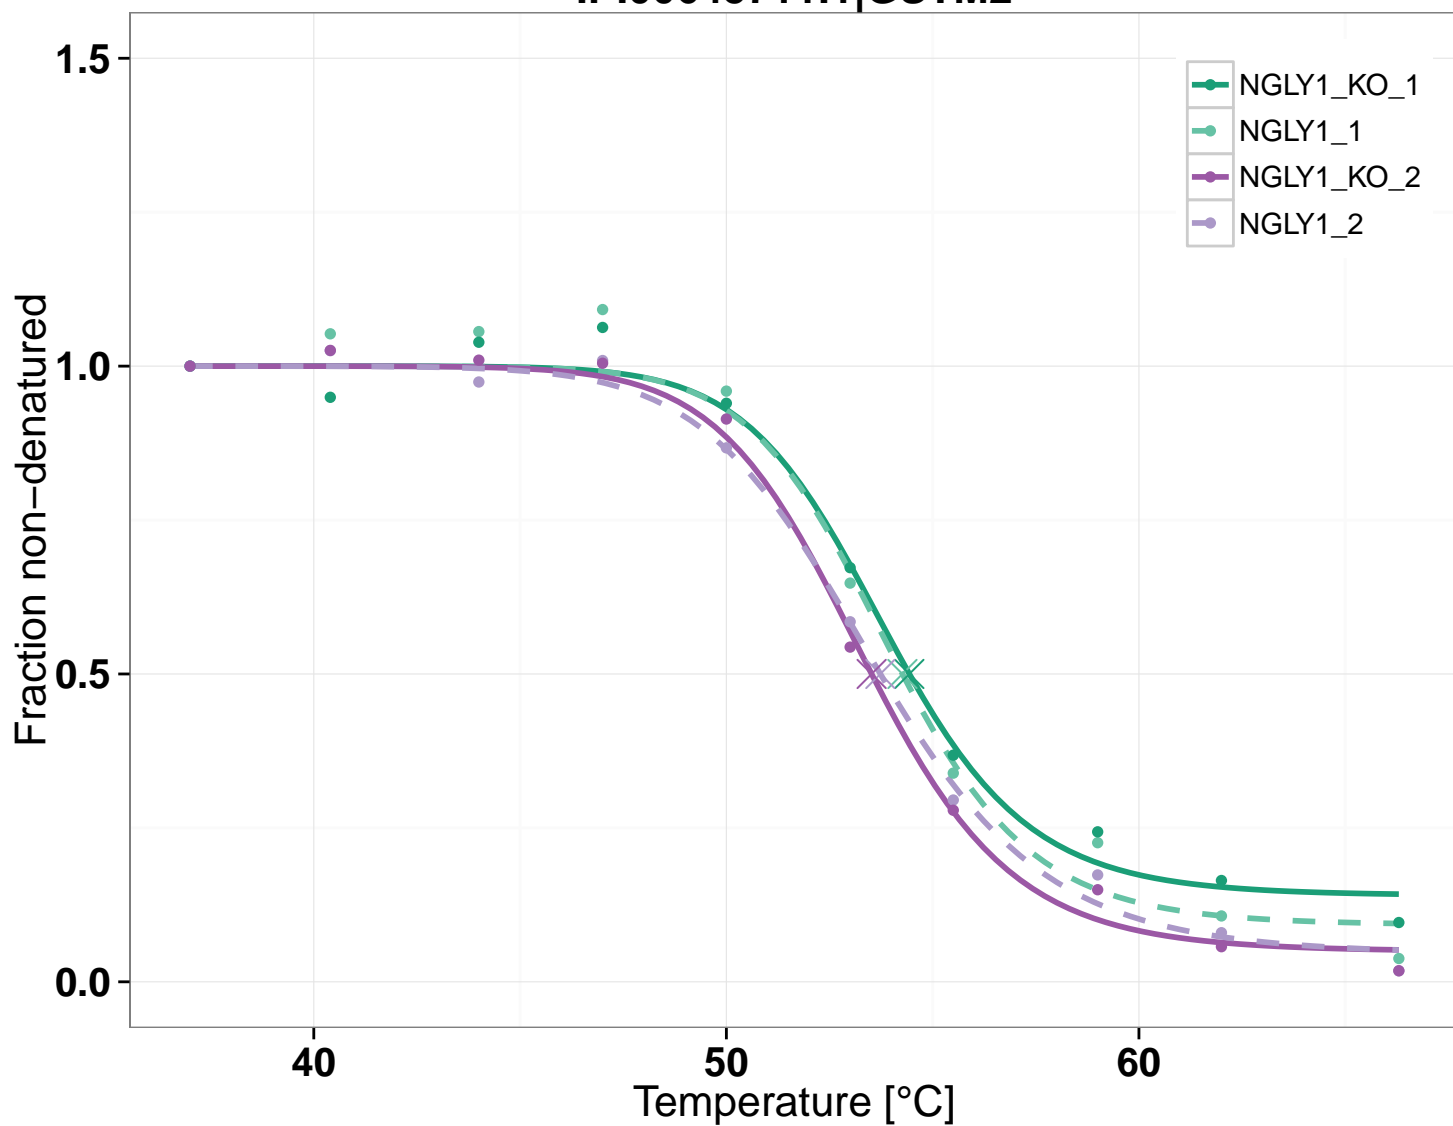

|            | meltPoint | slope | plateau | R2   |
|------------|-----------|-------|---------|------|
| NGLY1_KO_1 | 54.44     | -0.13 | 0.14    | 0.99 |
| NGLY1_1    | 54.27     | -0.13 | 0.09    | 0.98 |
| NGLY1_KO_2 | 53.52     | -0.13 | 0.05    | 1    |
| NGLY1_2    | 53.73     | -0.11 | 0.04    | 1    |

Supplement: Supplementary file 5526 [file 1]

IPI00219381.5|NDUFA2

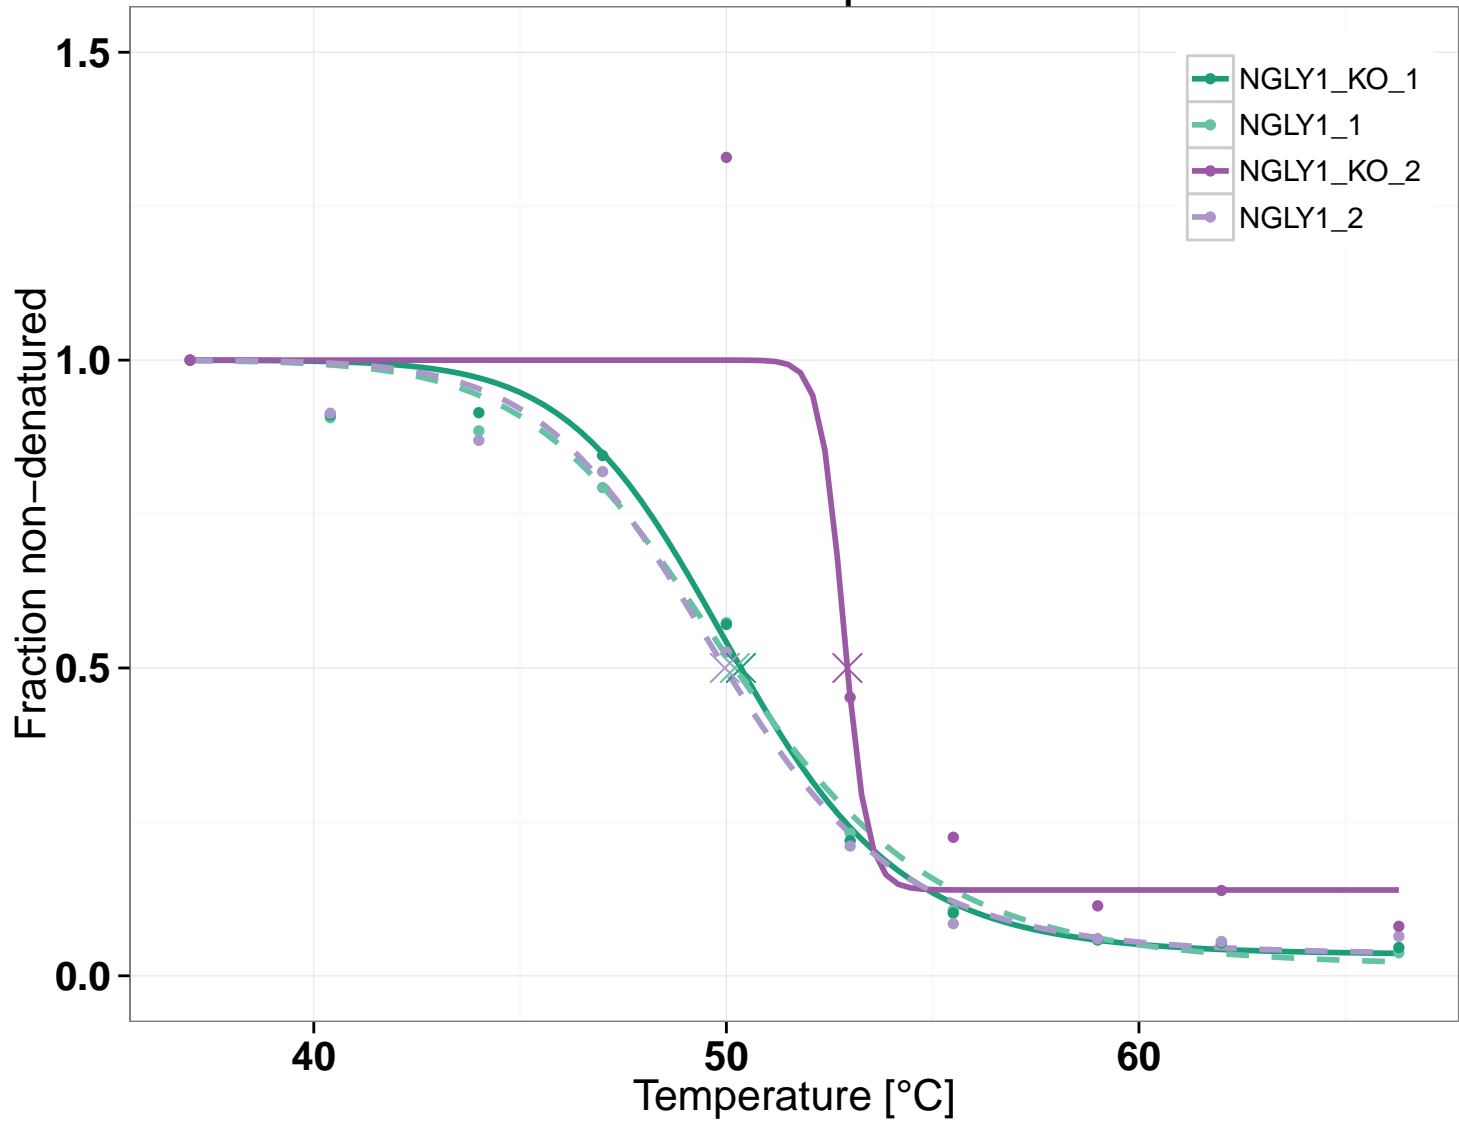

|            | meltPoint | slope  | plateau | R2   |
|------------|-----------|--------|---------|------|
| NGLY1_KO_1 | 50.35     | -0.12  | 0.03    | 0.99 |
| NGLY1_1    | 50.21     | -0.099 | 0.02    | 0.99 |
| NGLY1_KO_2 | 52.93     | -0.75  | 0.14    | 0.49 |
| NGLY1_2    | 49.96     | -0.11  | 0.03    | 0.99 |

Supplement: Supplementary file 5527 [file 1]

IPI00030328.1|SRR

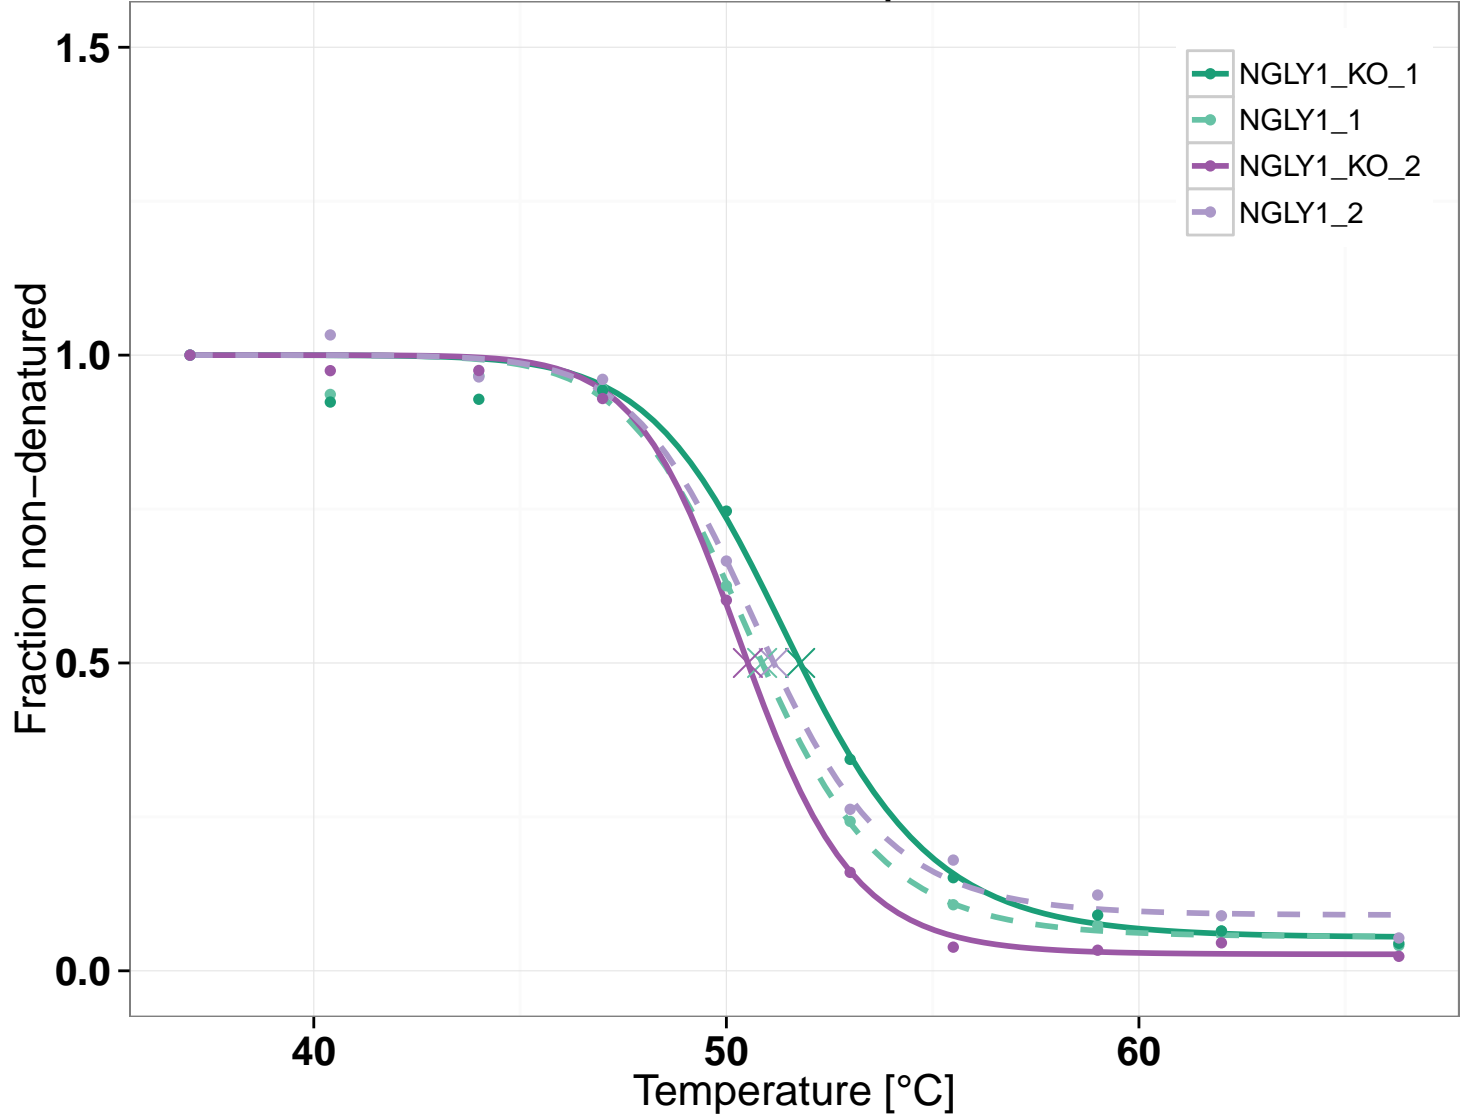

|            | meltPoint | slope | plateau | R2   |
|------------|-----------|-------|---------|------|
| NGLY1_KO_1 | 51.79     | -0.14 | 0.05    | 0.99 |
| NGLY1_1    | 50.87     | -0.15 | 0.06    | 1    |
| NGLY1_KO_2 | 50.52     | -0.18 | 0.03    | 1    |
| NGLY1_2    | 51.15     | -0.15 | 0.09    | 1    |

Supplement: Supplementary file 5528 [file 1]

IPI00018037.2|SURF2

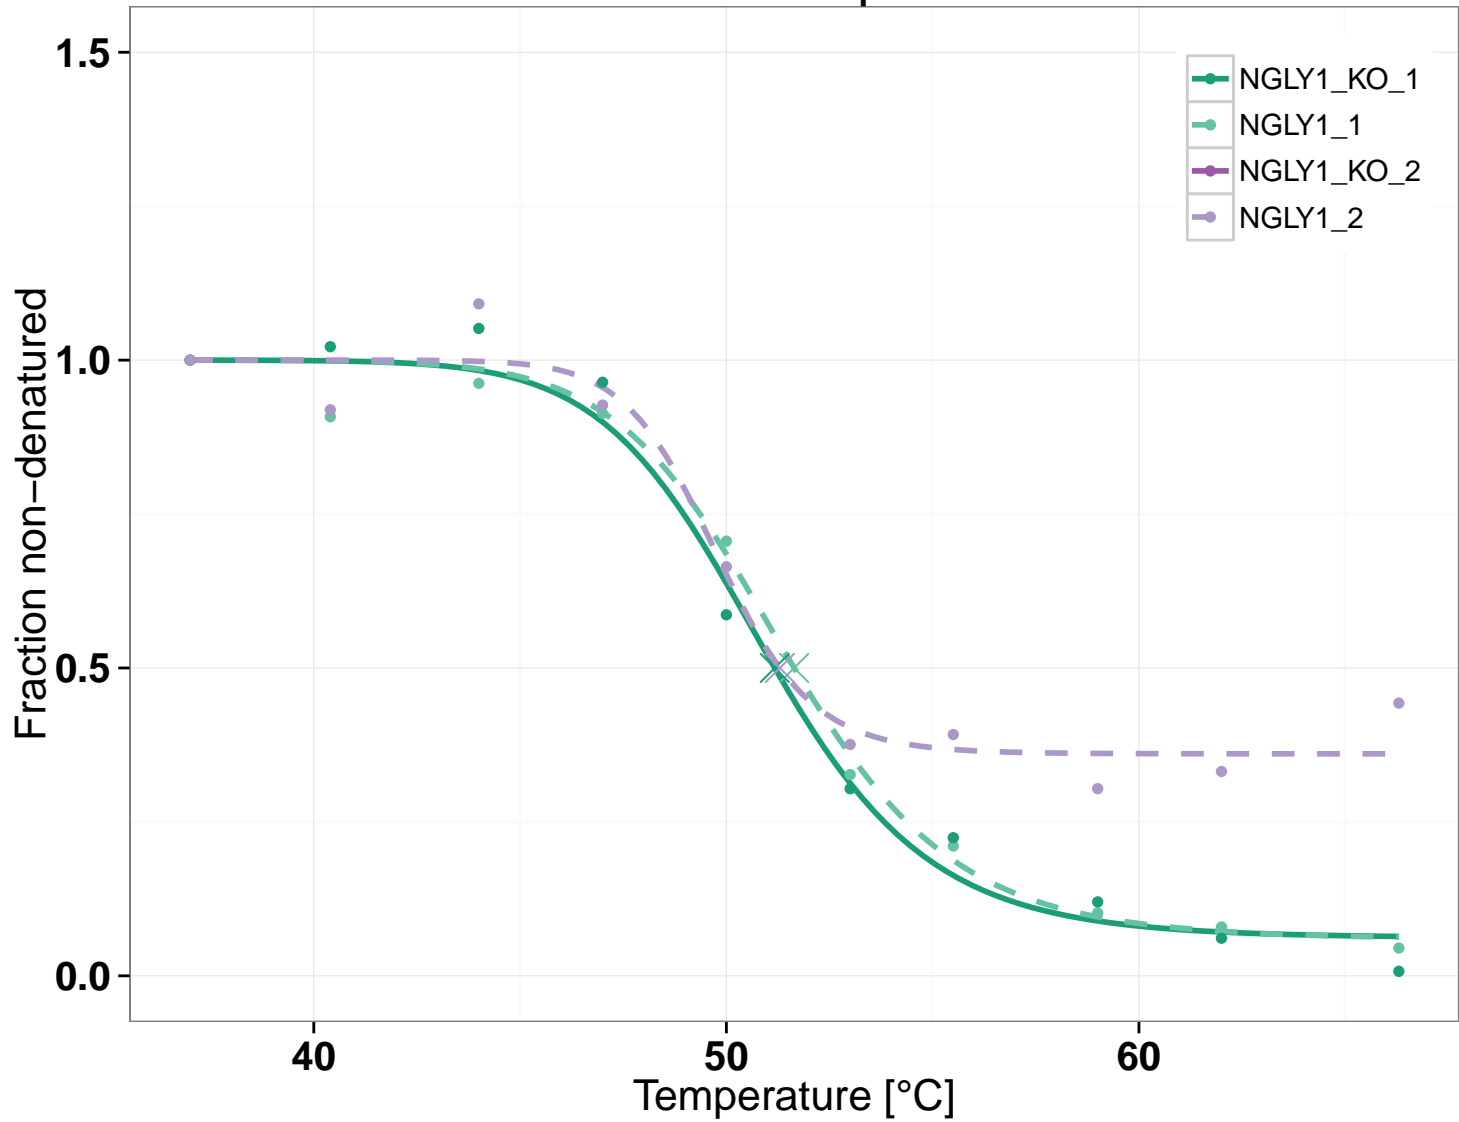

|            | meltPoint | slope | plateau | R2   |
|------------|-----------|-------|---------|------|
| NGLY1_KO_1 | 51.17     | -0.12 | 0.06    | 0.99 |
| NGLY1_1    | 51.64     | -0.11 | 0.06    | 0.99 |
| NGLY1_KO_2 | -         | -     | -       | -    |
| NGLY1_2    | 51.29     | -0.14 | 0.36    | 0.97 |

Supplement: Supplementary file 5529 [file 1]

# IPI00419249.5|PSMA3

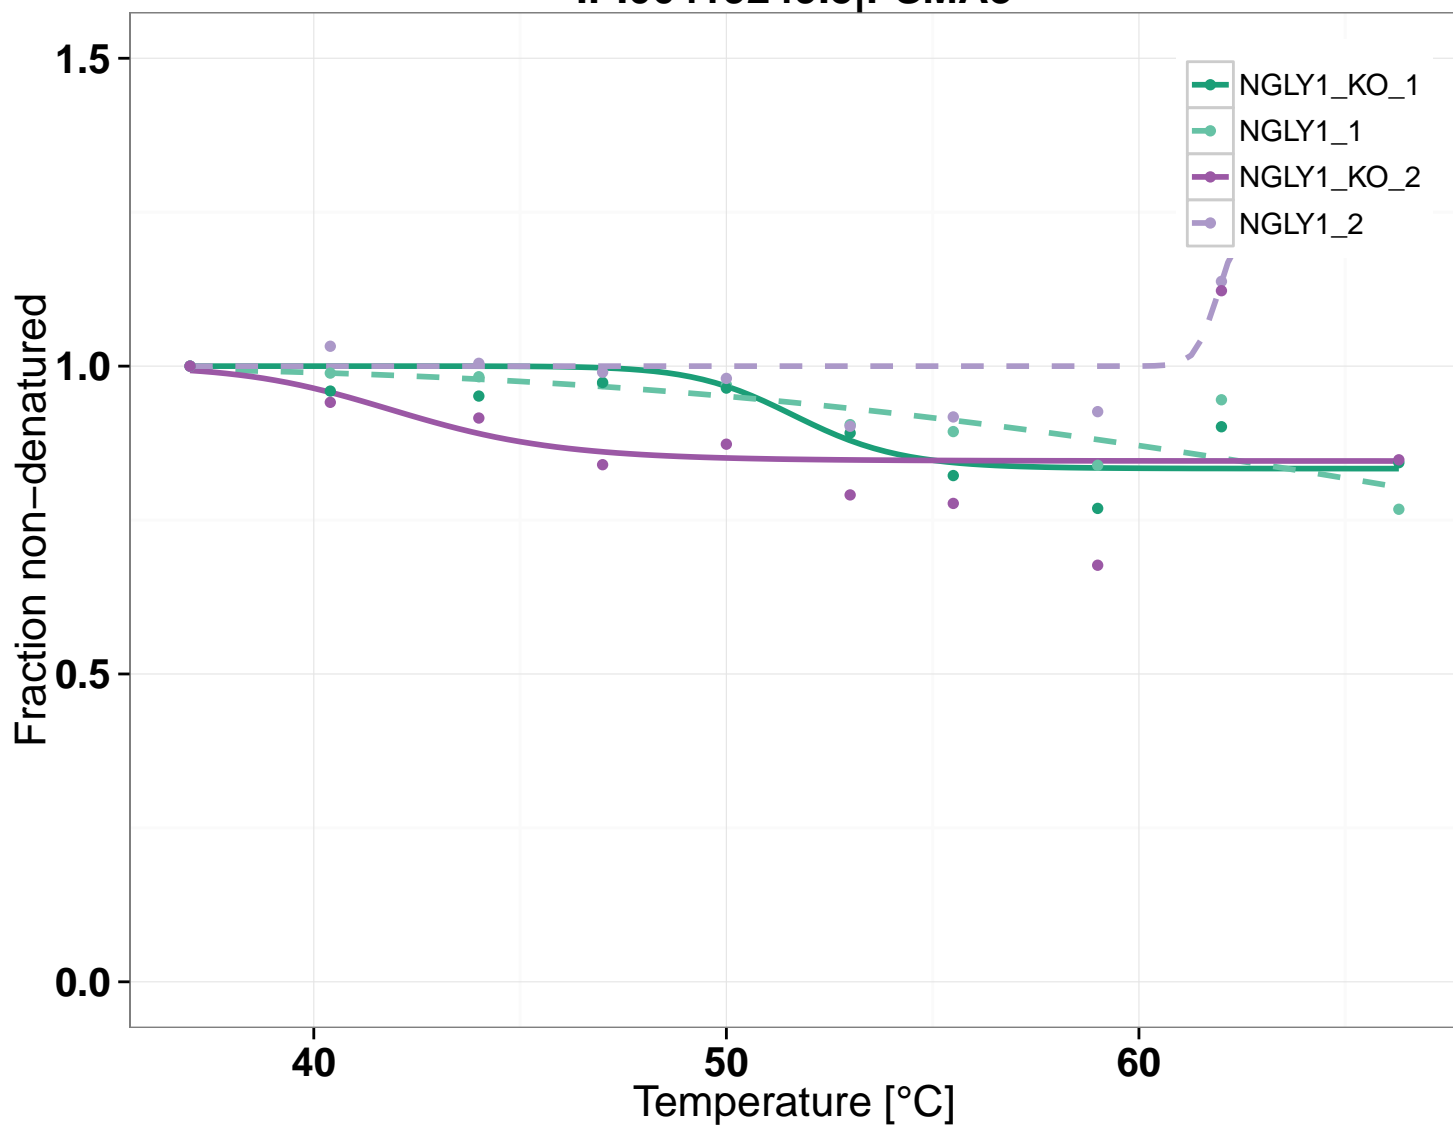

|            | meltPoint | slope  | plateau | R2   |
|------------|-----------|--------|---------|------|
| NGLY1_KO_1 | –         | –0.033 | 0.83    | 0.73 |
| NGLY1_1    | –         | –      | 0       | 0.74 |
| NGLY1_KO_2 | –         | –0.02  | 0.85    | 0.18 |
| NGLY1_2    | –         | 0.22   | 1.23    | 0.75 |

Supplement: Supplementary file 5530 [file 1]

# IPI00032936.4|ERF

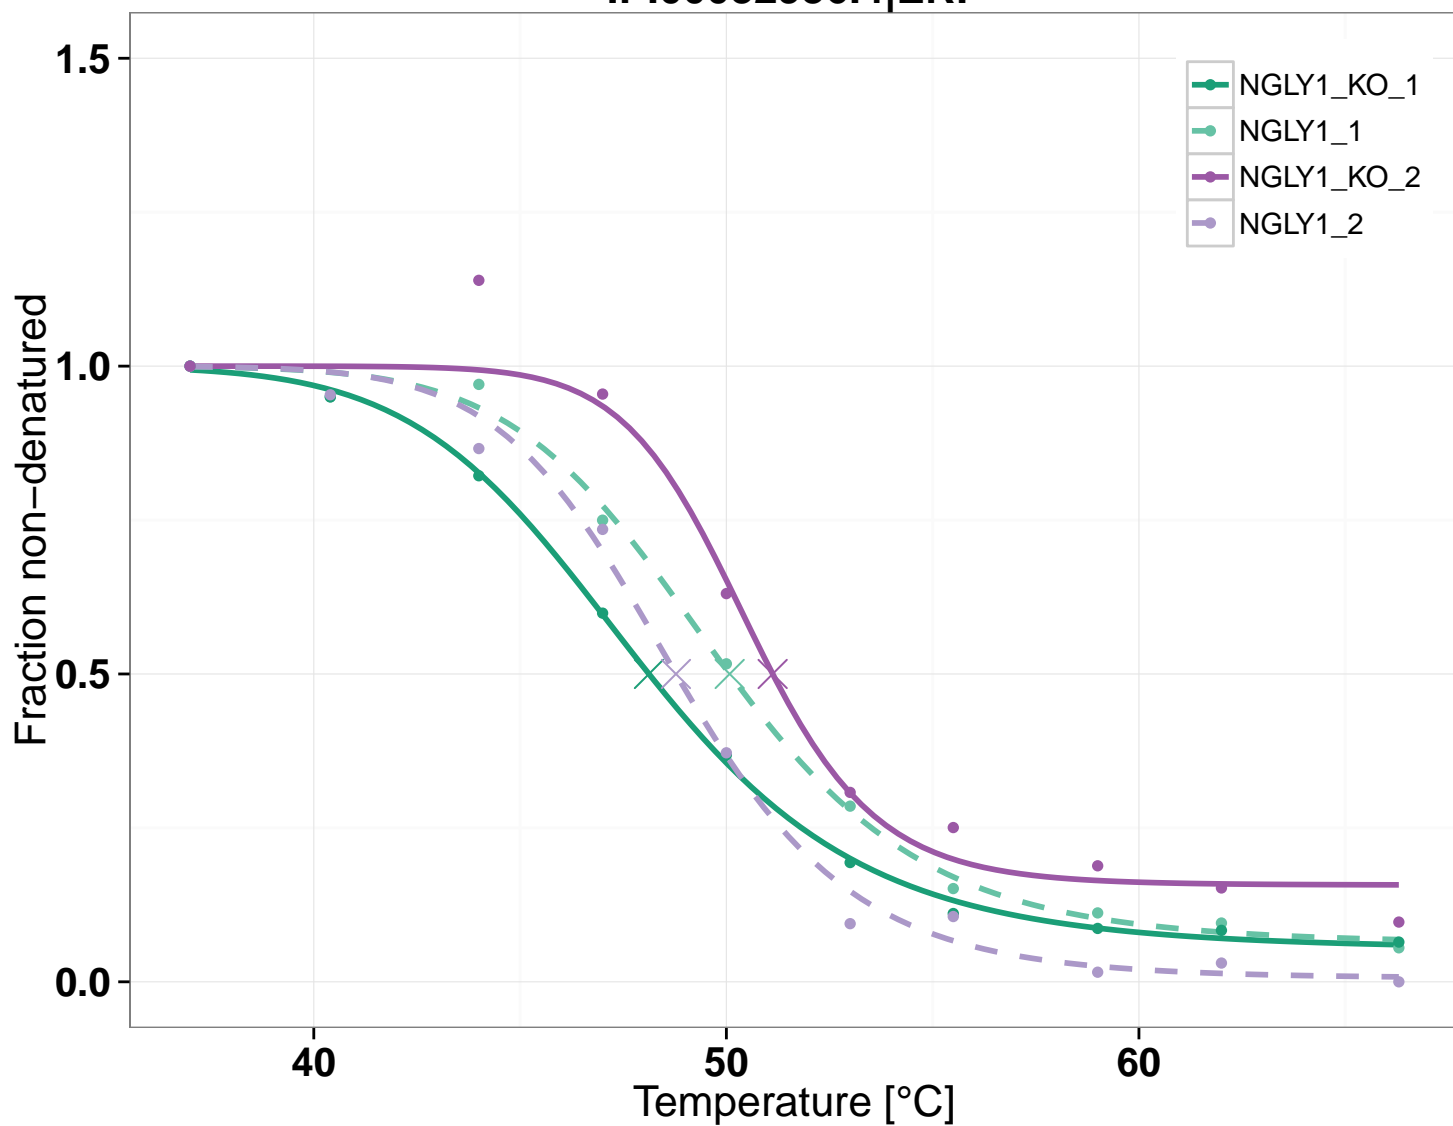

|            | meltPoint | slope  | plateau | R2   |
|------------|-----------|--------|---------|------|
| NGLY1_KO_1 | 48.12     | -0.087 | 0.05    | 1    |
| NGLY1_1    | 50.08     | -0.093 | 0.06    | 1    |
| NGLY1_KO_2 | 51.12     | -0.14  | 0.16    | 0.83 |
| NGLY1_2    | 48.78     | -0.12  | 0.01    | 0.99 |

Supplement: Supplementary file 5531 [file 1]

IPI00219978.3|TDRD5

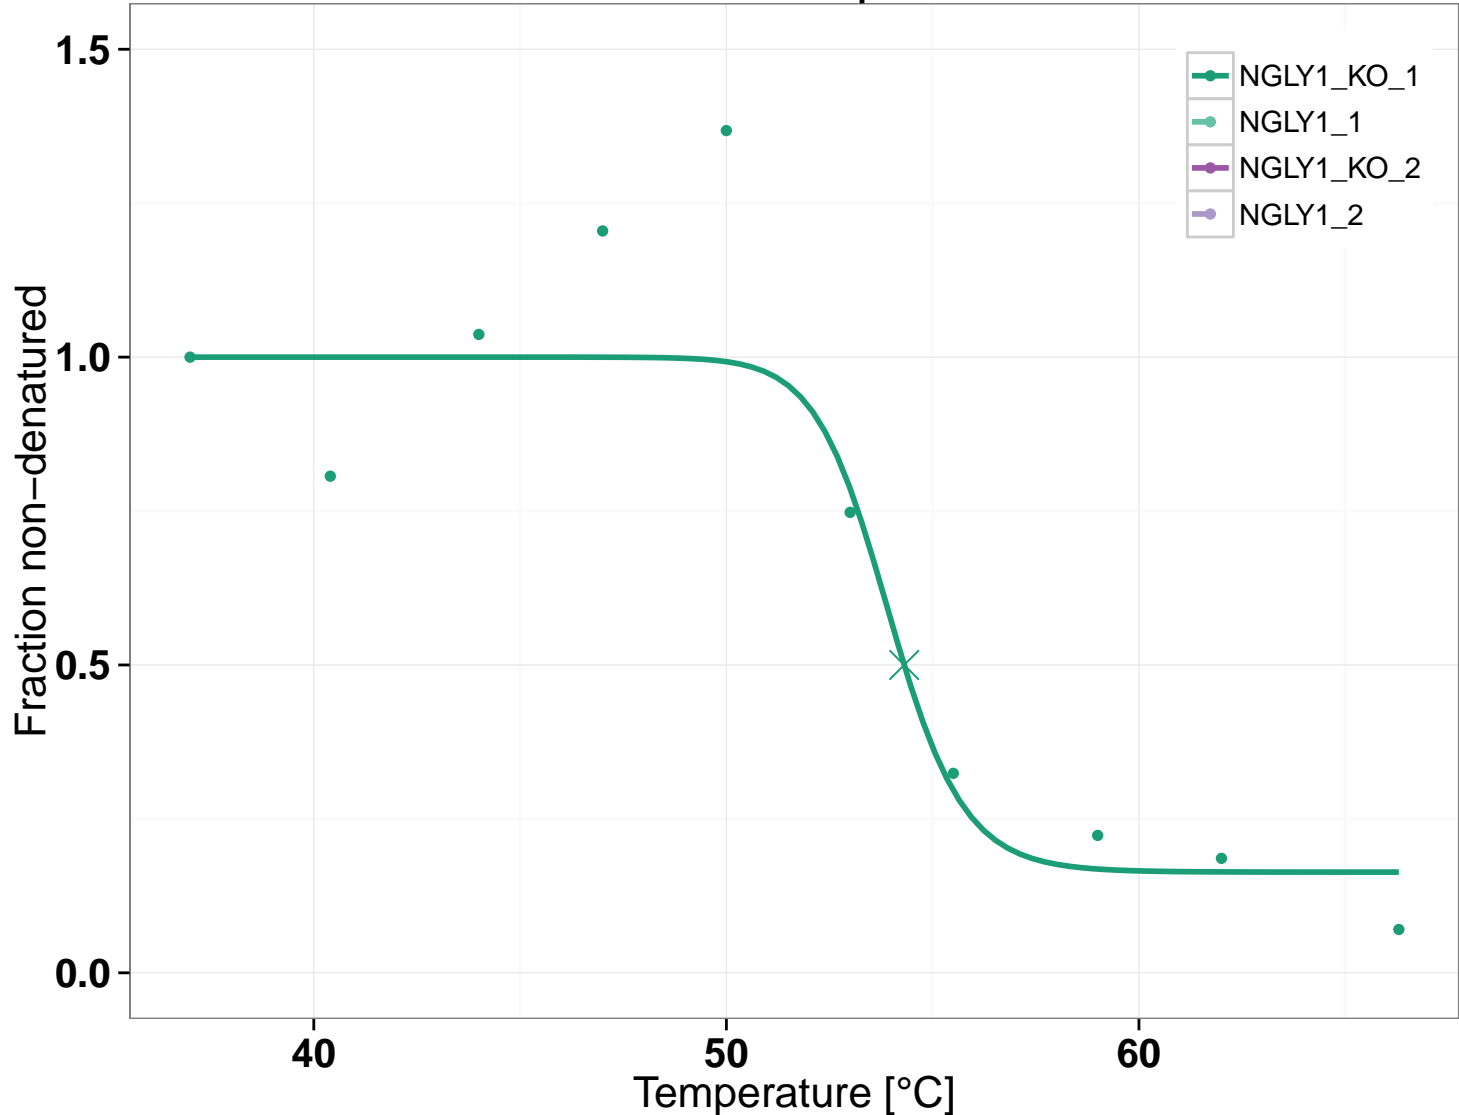

|            | meltPoint | slope | plateau | R2   |
|------------|-----------|-------|---------|------|
| NGLY1_KO_1 | 54.31     | -0.23 | 0.16    | 0.88 |
| NGLY1_1    | -         | -     | -       | -    |
| NGLY1_KO_2 | -         | -     | -       | -    |
| NGLY1_2    | -         | -     | -       | -    |

Supplement: Supplementary file 5532 [file 1]

# IPI00251454.5|PLD6

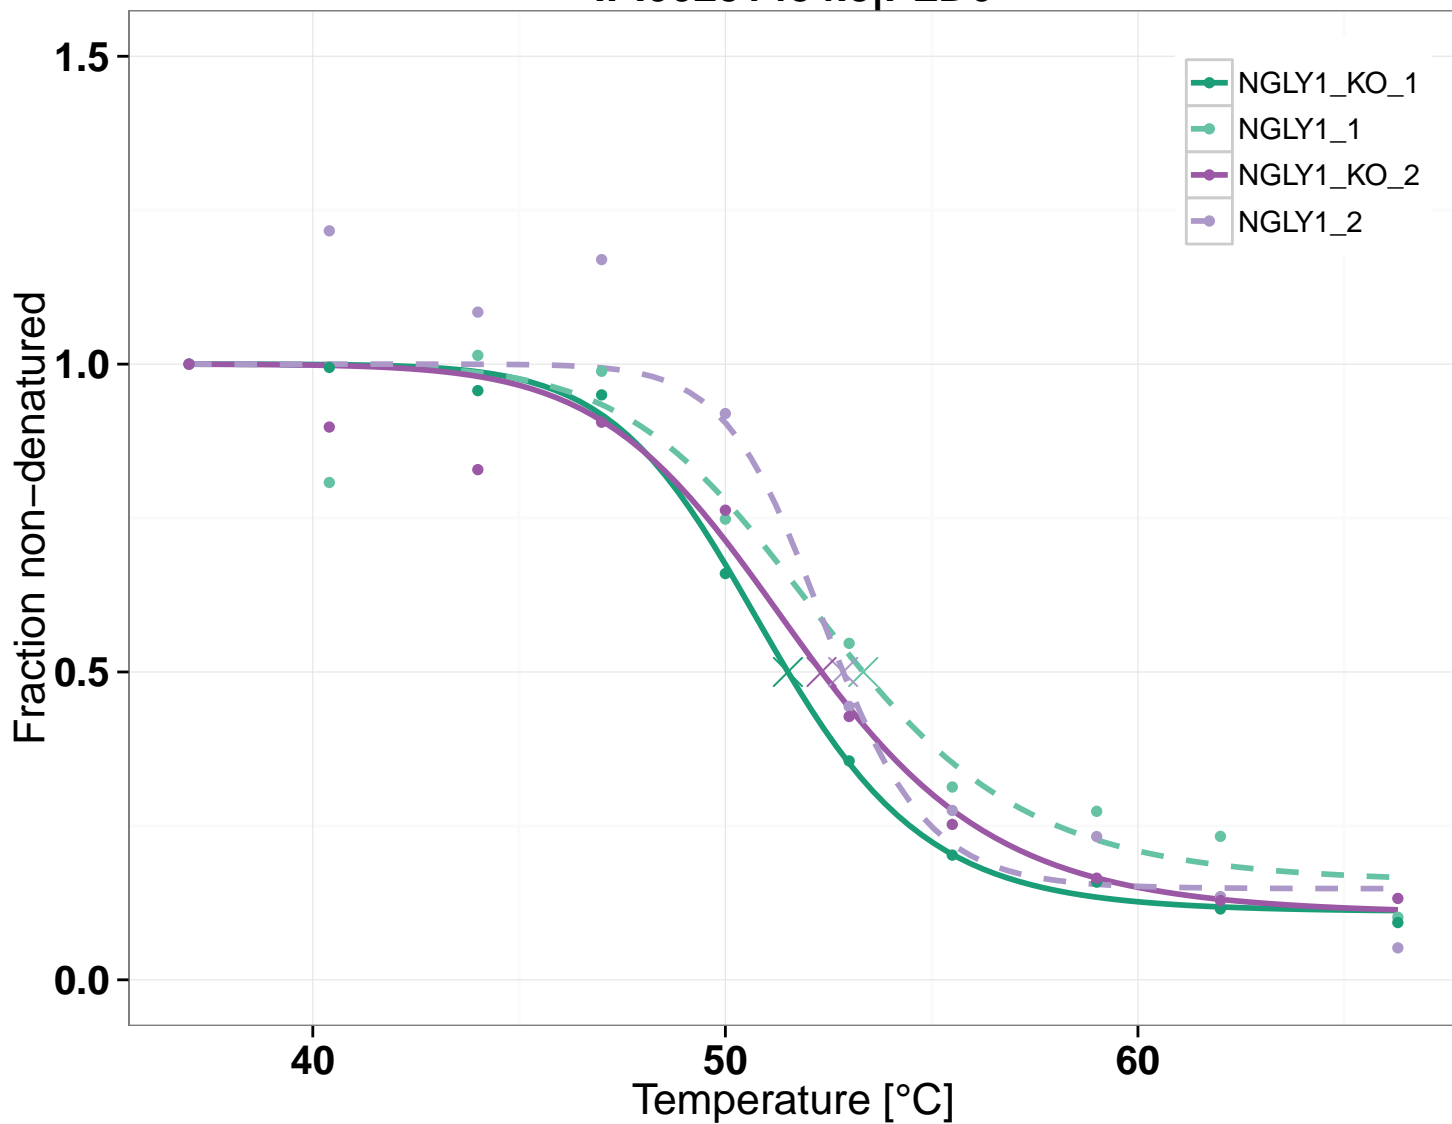

|            | meltPoint | slope  | plateau | R2   |
|------------|-----------|--------|---------|------|
| NGLY1_KO_1 | 51.52     | -0.12  | 0.11    | 1    |
| NGLY1_1    | 53.34     | -0.087 | 0.16    | 0.95 |
| NGLY1_KO_2 | 52.33     | -0.094 | 0.11    | 0.97 |
| NGLY1_2    | 52.85     | -0.17  | 0.15    | 0.95 |

Supplement: Supplementary file 5533 [file 1]

# IPI00183530.2|SNX1

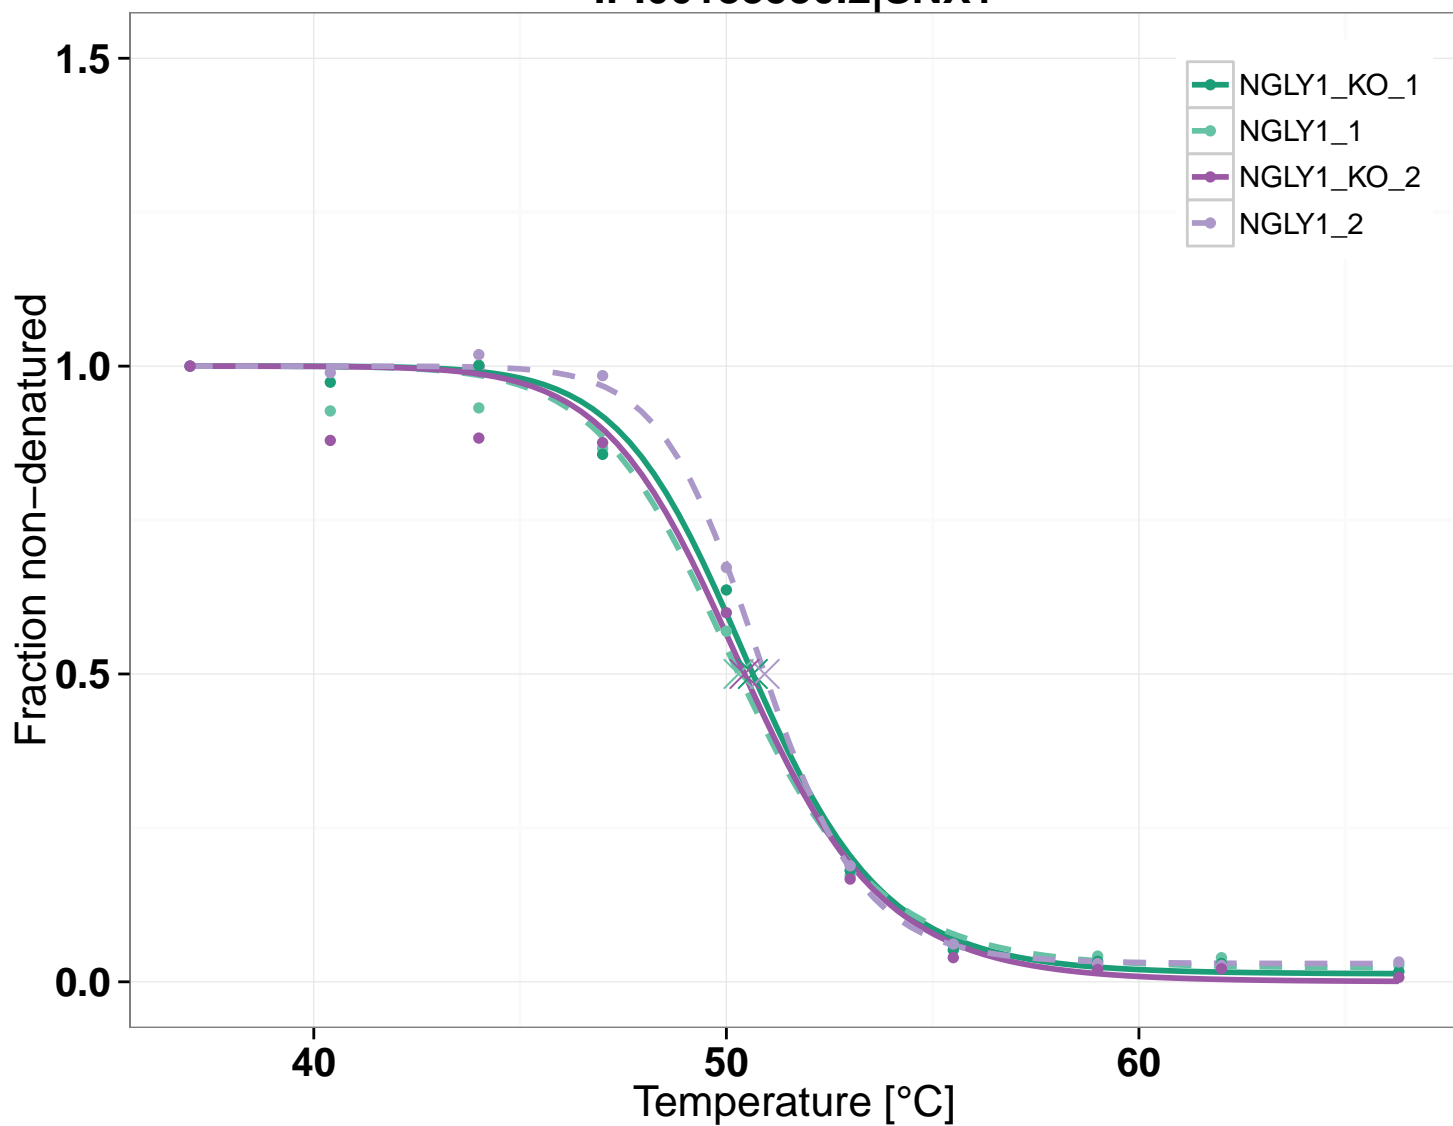

|            | meltPoint | slope | plateau | R2   |
|------------|-----------|-------|---------|------|
| NGLY1_KO_1 | 50.64     | -0.15 | 0.01    | 1    |
| NGLY1_1    | 50.3      | -0.14 | 0.02    | 0.99 |
| NGLY1_KO_2 | 50.44     | -0.15 | 0       | 0.98 |
| NGLY1_2    | 50.93     | -0.2  | 0.03    | 1    |

Supplement: Supplementary file 5534 [file 1]

# IPI00019182.2|PITX1

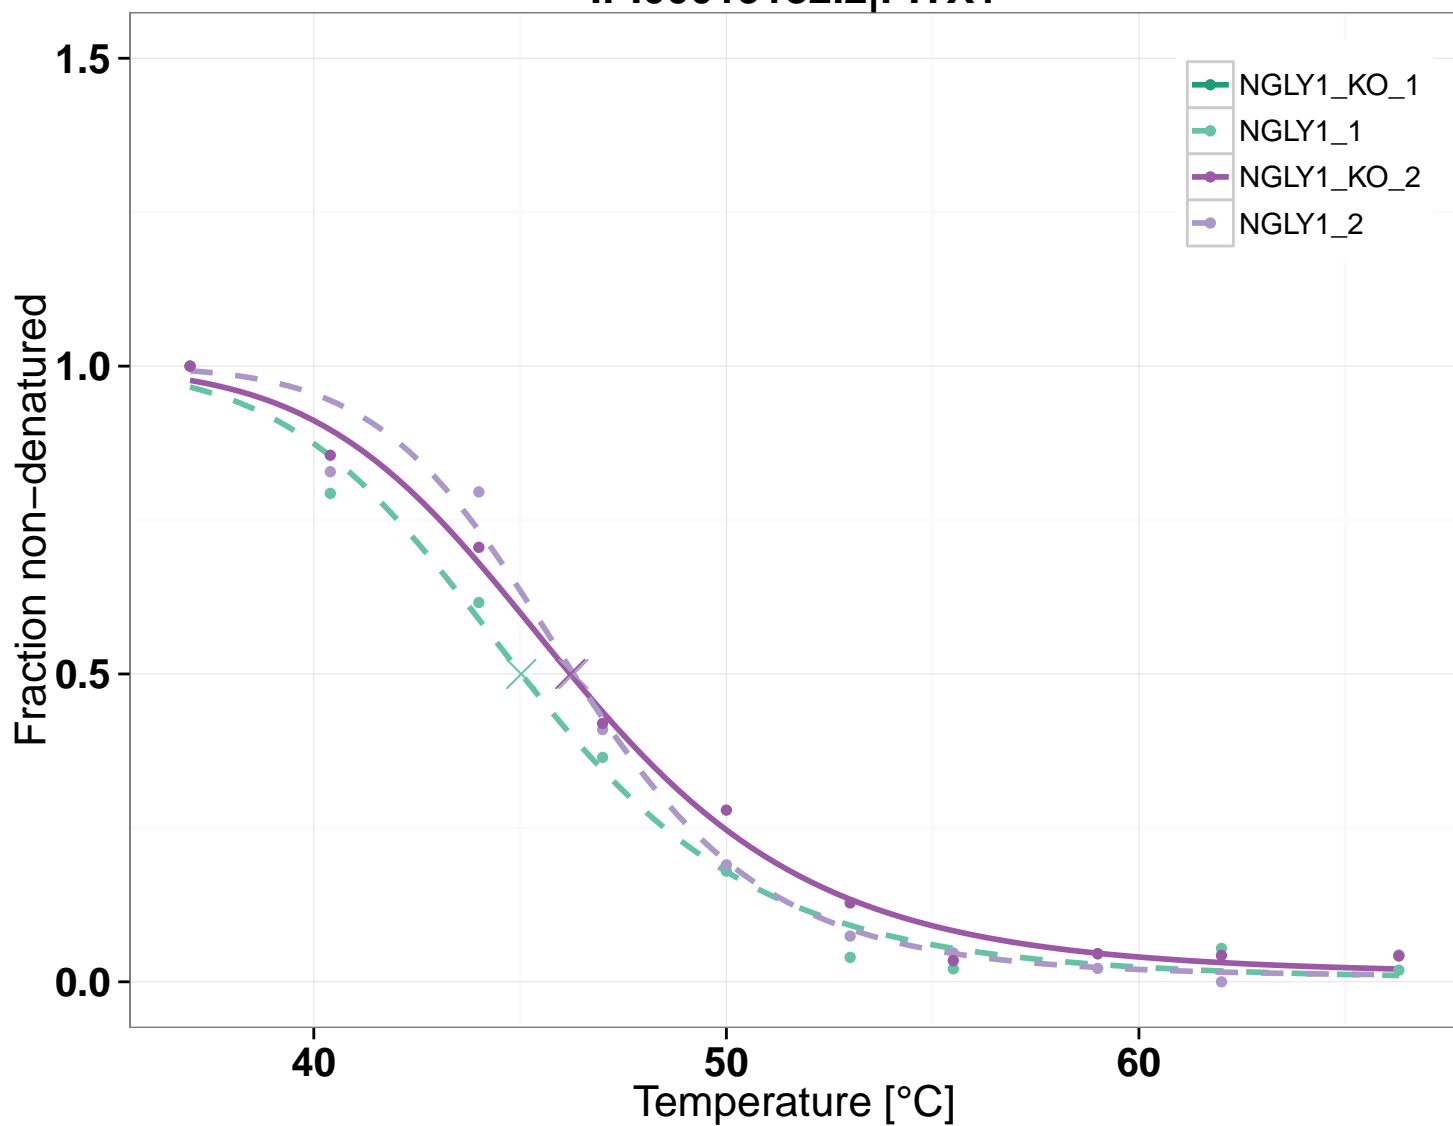

|            | meltPoint | slope  | plateau | R2   |
|------------|-----------|--------|---------|------|
| NGLY1_KO_1 | –         | –      | –       | –    |
| NGLY1_1    | 45.03     | –0.087 | 0       | 0.99 |
| NGLY1_KO_2 | 46.22     | –0.082 | 0.01    | 0.99 |
| NGLY1_2    | 46.3      | –0.11  | 0.01    | 0.99 |

Supplement: Supplementary file 5535 [file 1]

# IPI00183503.8|YOD1

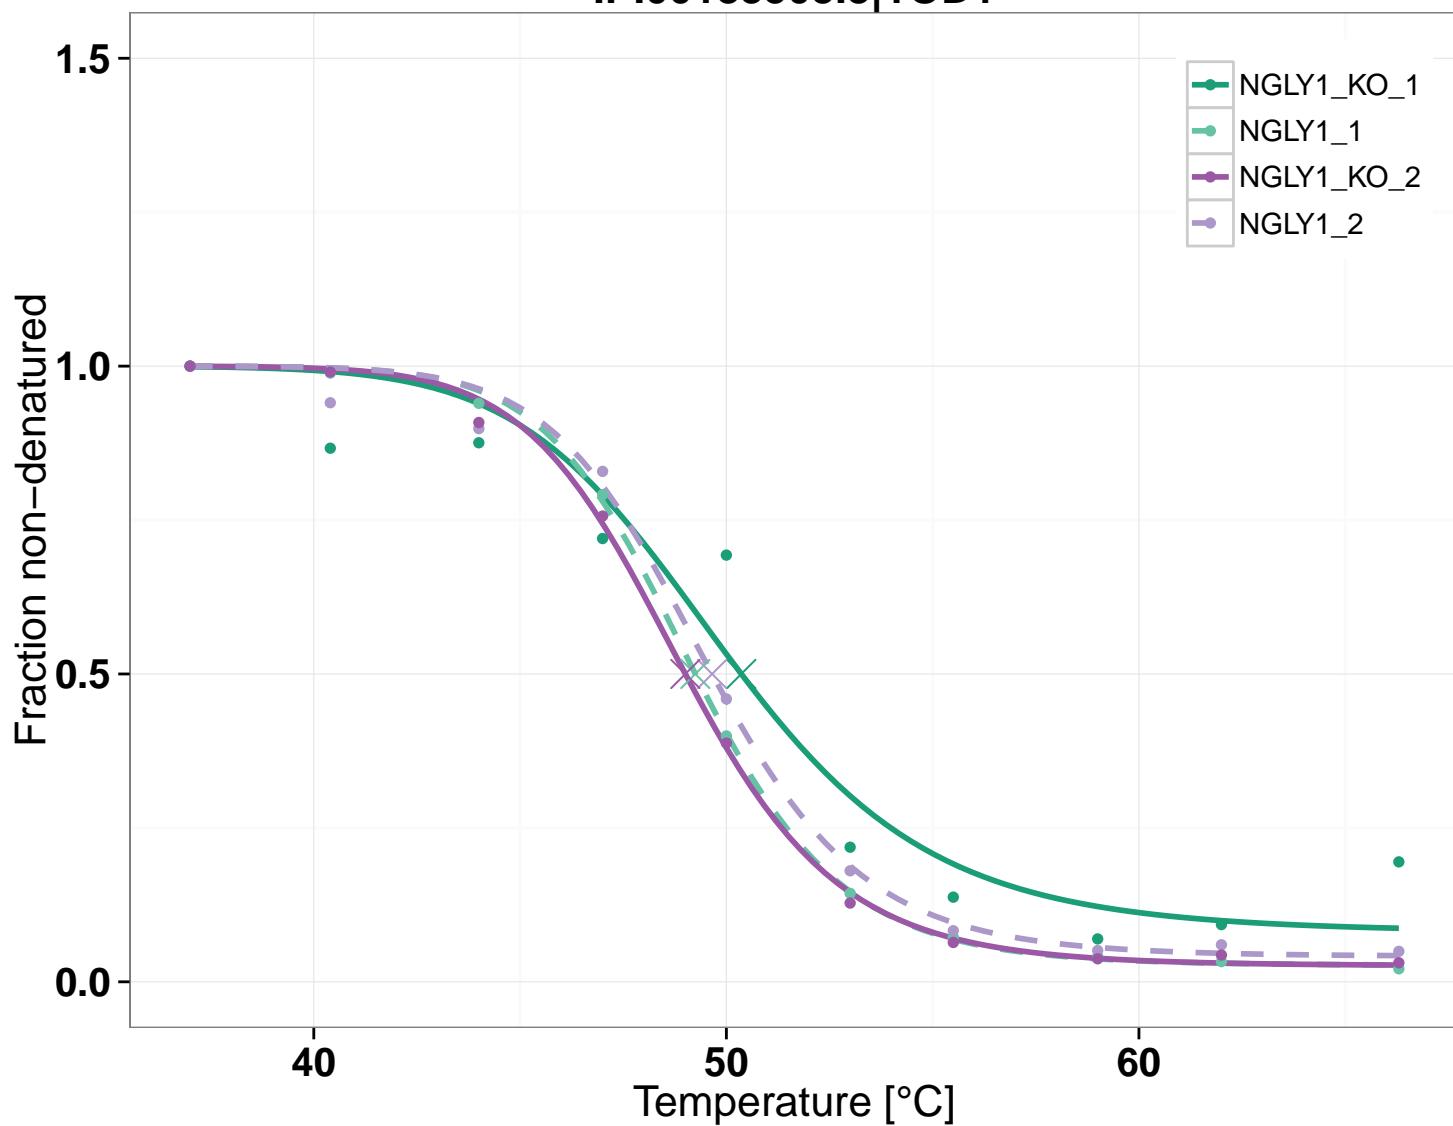

|            | meltPoint | slope  | plateau | R2   |
|------------|-----------|--------|---------|------|
| NGLY1_KO_1 | 50.36     | -0.092 | 0.08    | 0.94 |
| NGLY1_1    | 49.25     | -0.13  | 0.03    | 1    |
| NGLY1_KO_2 | 49.01     | -0.13  | 0.03    | 1    |
| NGLY1_2    | 49.65     | -0.13  | 0.04    | 0.99 |

Supplement: Supplementary file 5536 [file 1]

IPI00300531.10|BAG1

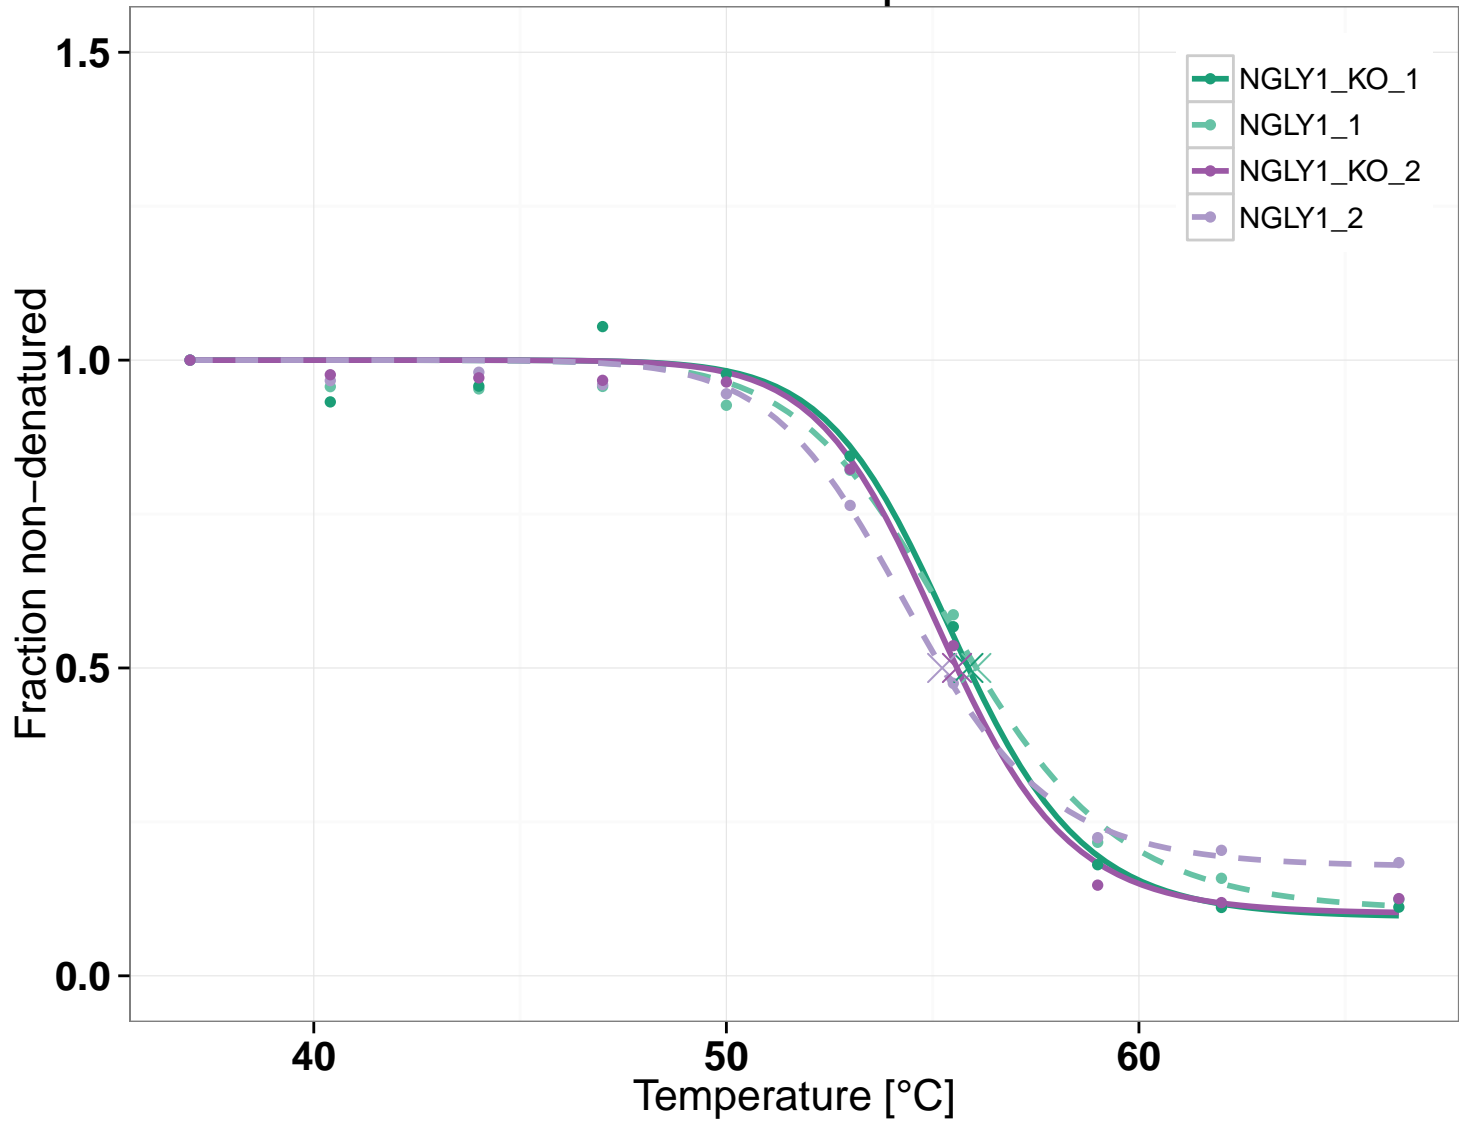

|            | meltPoint | slope | plateau | R2   |
|------------|-----------|-------|---------|------|
| NGLY1_KO_1 | 55.87     | -0.15 | 0.09    | 0.99 |
| NGLY1_1    | 56.06     | -0.11 | 0.1     | 0.99 |
| NGLY1_KO_2 | 55.59     | -0.15 | 0.1     | 1    |
| NGLY1_2    | 55.23     | -0.12 | 0.18    | 1    |

Supplement: Supplementary file 5537 [file 1]

IPI00105598.3|PSMD11

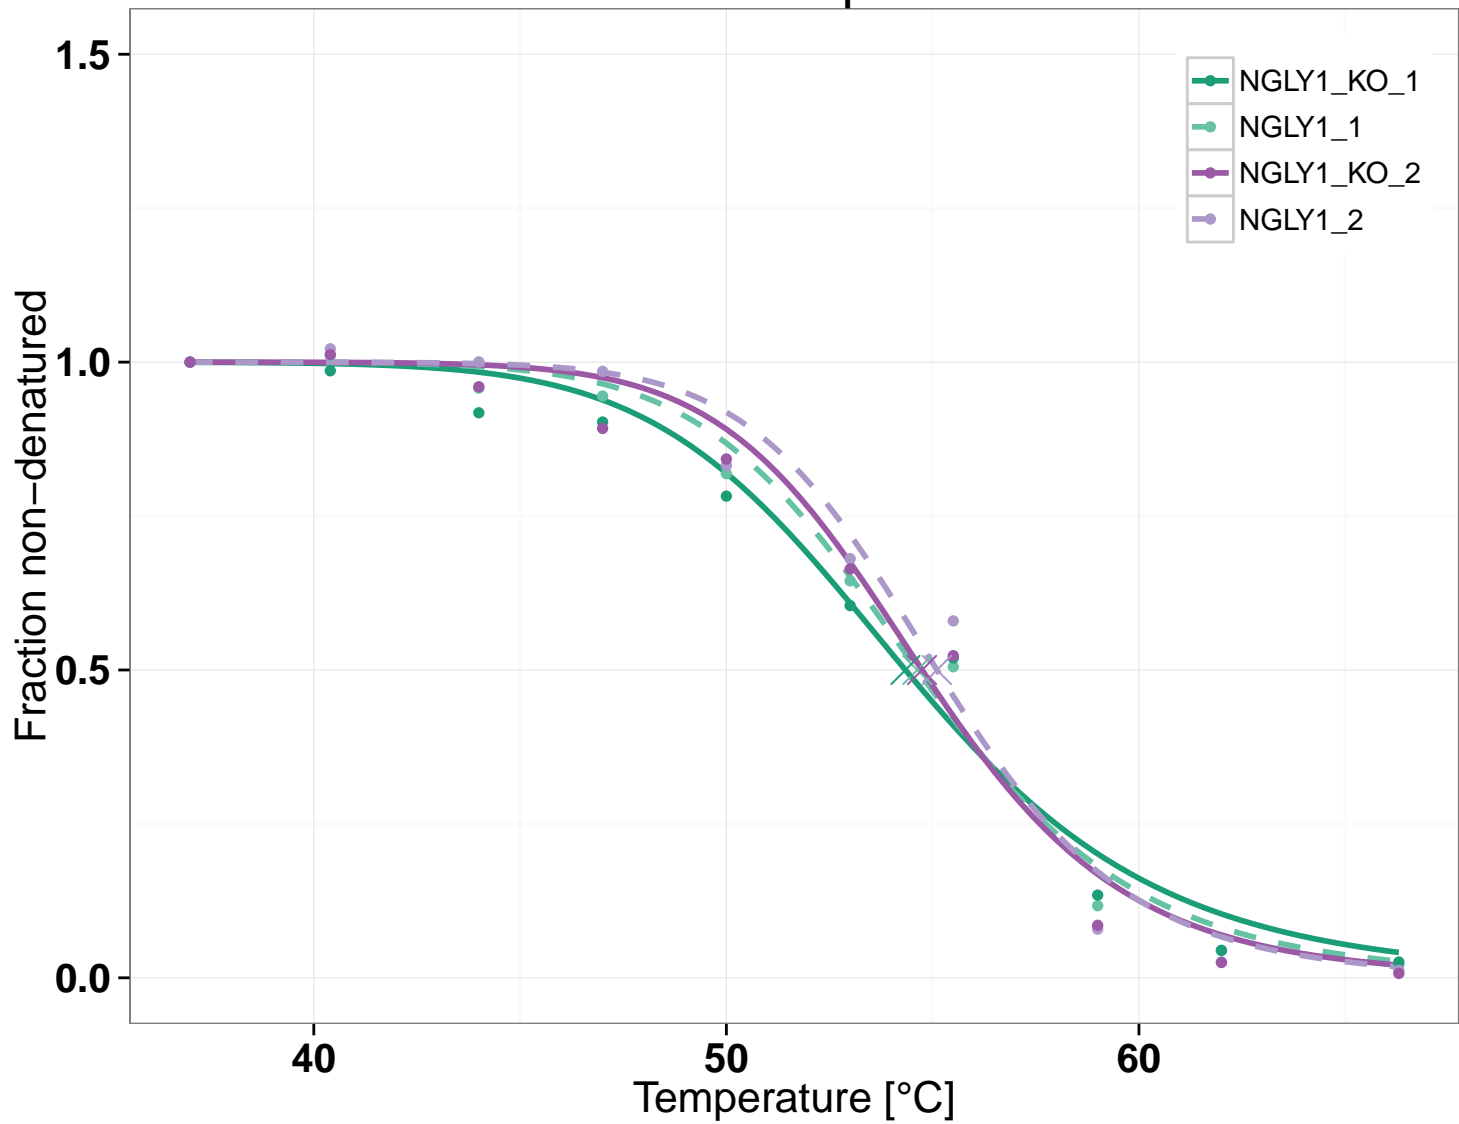

|            | meltPoint | slope  | plateau | R2   |
|------------|-----------|--------|---------|------|
| NGLY1_KO_1 | 54.34     | -0.081 | 0       | 0.98 |
| NGLY1_1    | 54.63     | -0.094 | 0       | 0.99 |
| NGLY1_KO_2 | 54.74     | -0.1   | 0       | 0.98 |
| NGLY1_2    | 55.1      | -0.11  | 0       | 0.98 |

Supplement: Supplementary file 5538 [file 1]

IPI00014344.1|DYRK1A

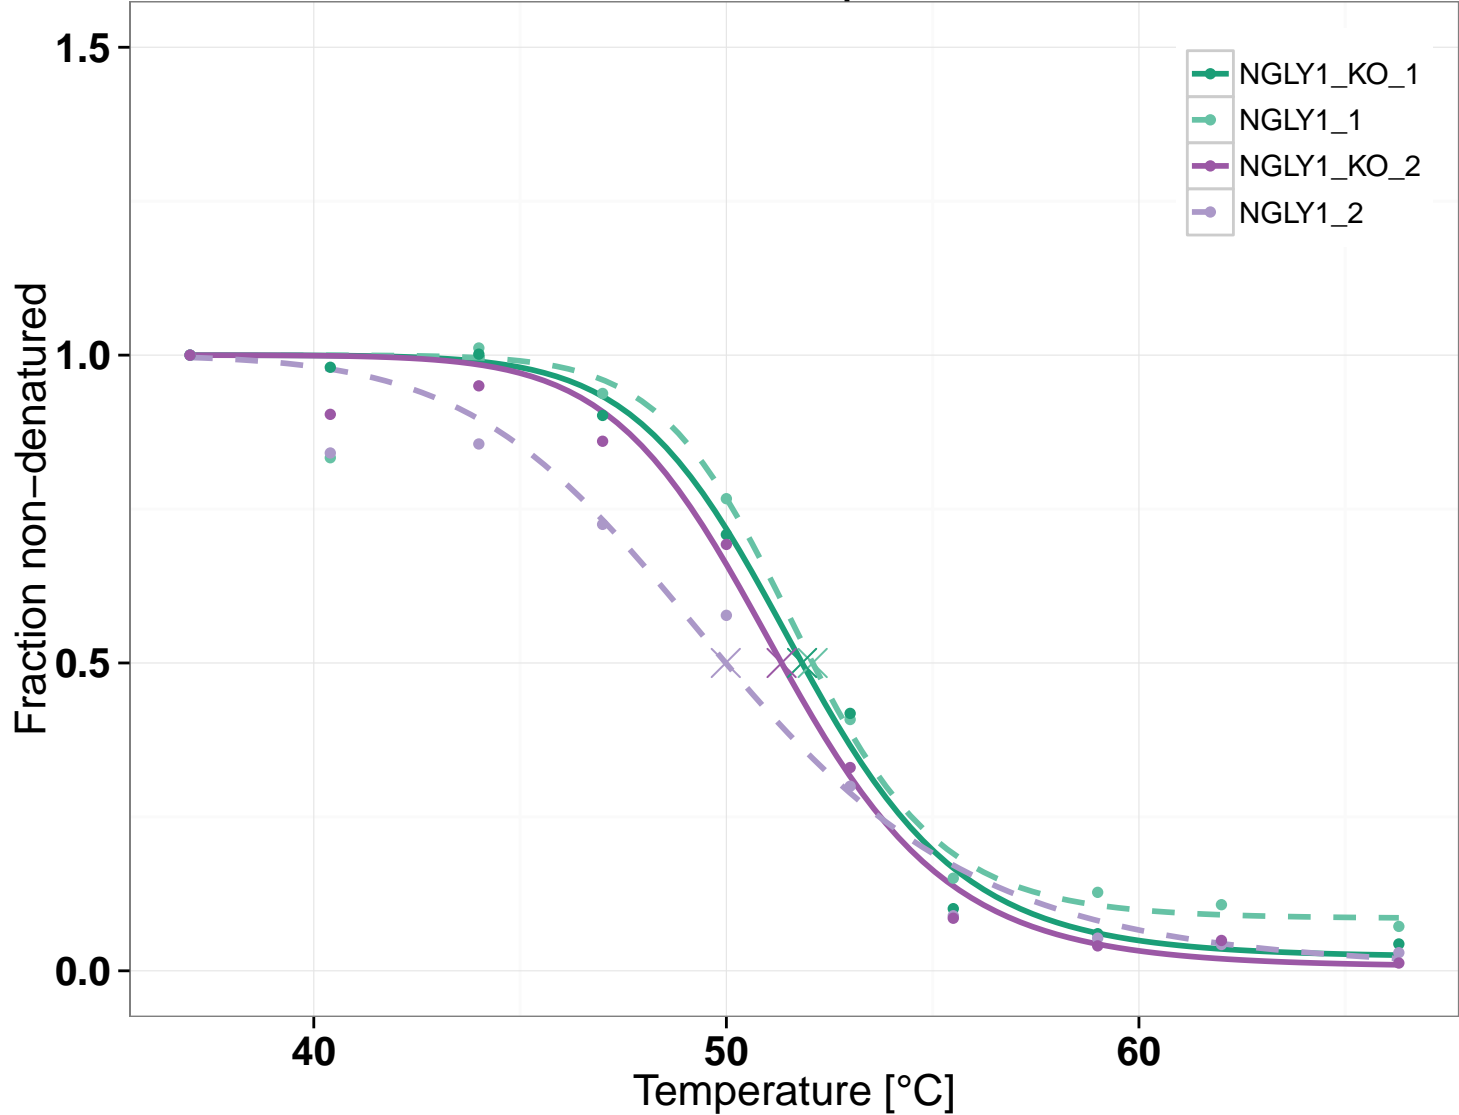

|            | meltPoint | slope  | plateau | R2   |
|------------|-----------|--------|---------|------|
| NGLY1_KO_1 | 51.84     | -0.12  | 0.02    | 0.99 |
| NGLY1_1    | 52.09     | -0.13  | 0.08    | 0.98 |
| NGLY1_KO_2 | 51.34     | -0.12  | 0.01    | 0.99 |
| NGLY1_2    | 49.99     | -0.081 | 0       | 0.97 |

Supplement: Supplementary file 5539 [file 1]

IPI00030316.3|FOXF1

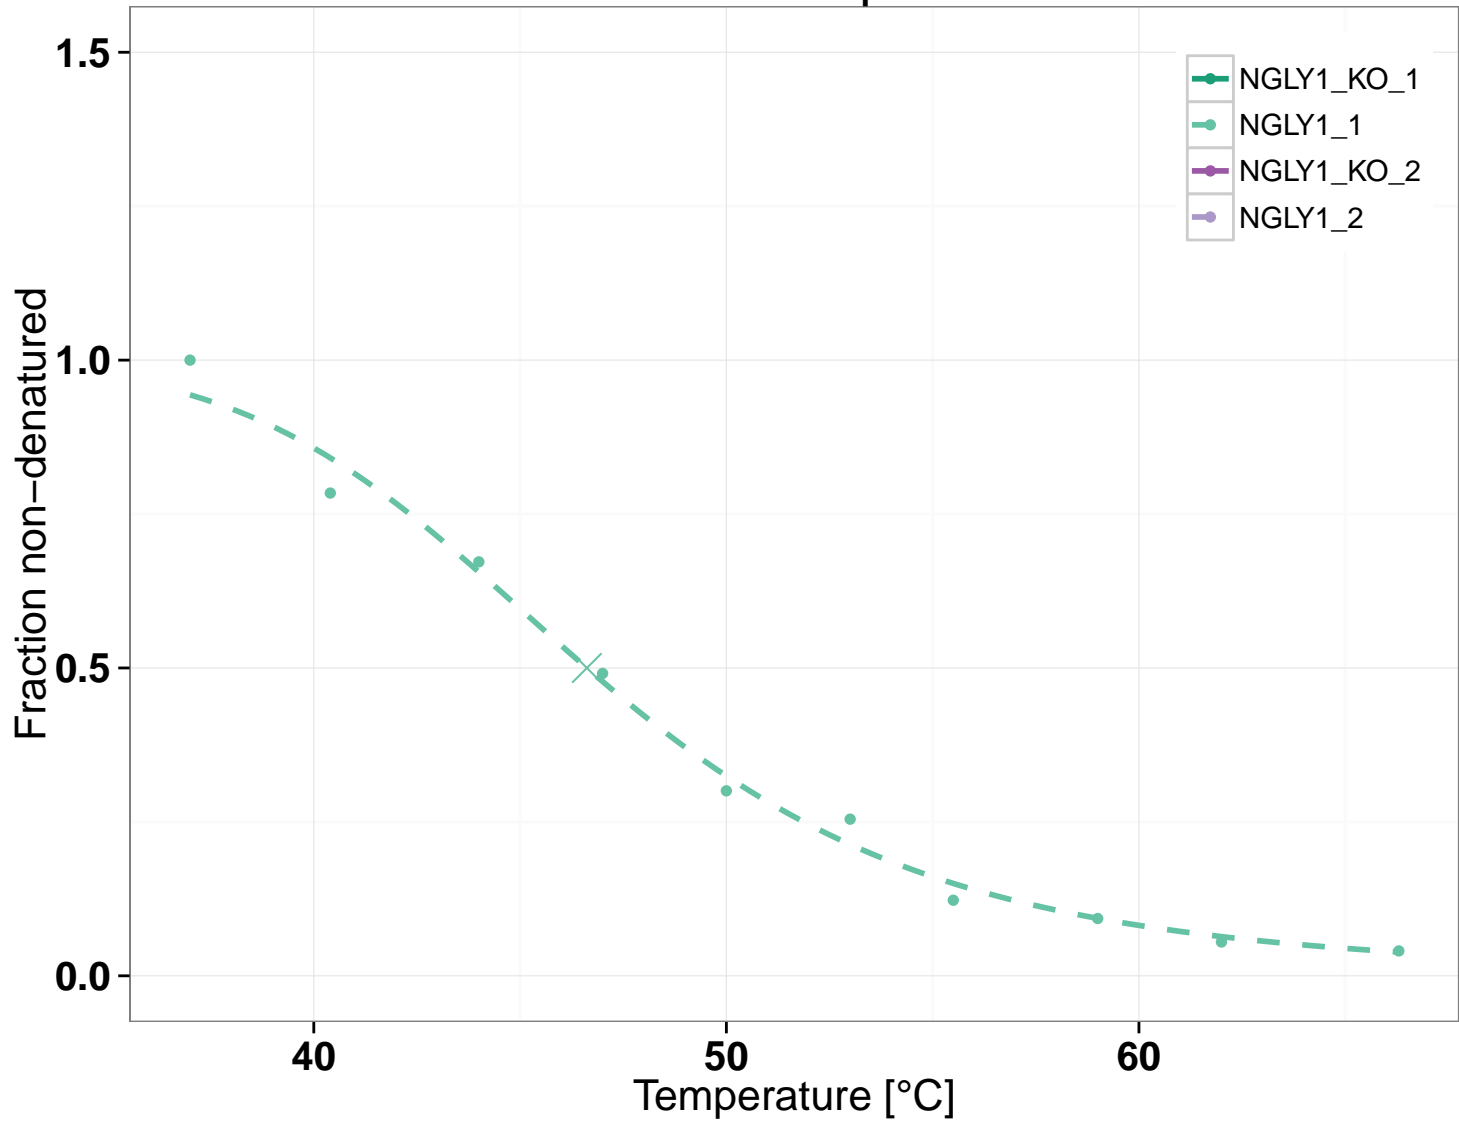

|            | meltPoint | slope | plateau | R2   |
|------------|-----------|-------|---------|------|
| NGLY1_KO_1 | -         | -     | -       | -    |
| NGLY1_1    | 46.62     | -0.06 | 0       | 0.99 |
| NGLY1_KO_2 | -         | -     | -       | -    |
| NGLY1_2    | -         | -     | -       | -    |

Supplement: Supplementary file 5540 [file 1]

IPI00790832.1|SLC39A7

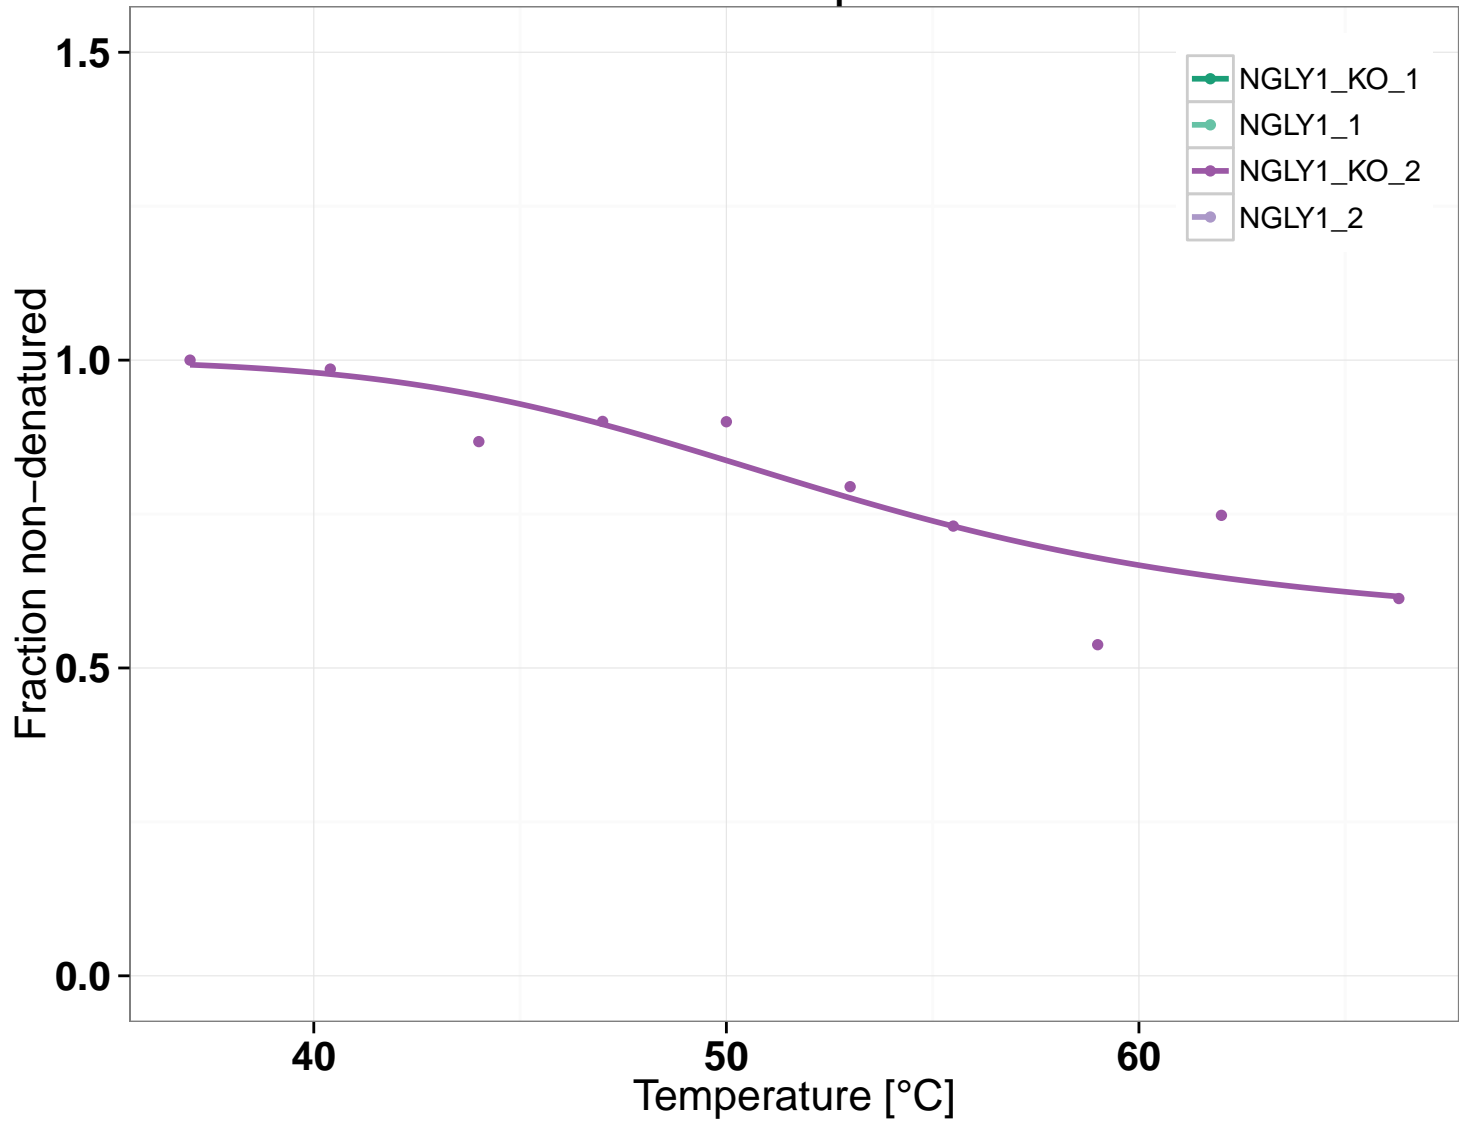

|            | meltPoint | slope  | plateau | R2   |
|------------|-----------|--------|---------|------|
| NGLY1_KO_1 | -         | -      | -       | -    |
| NGLY1_1    | -         | -      | -       | -    |
| NGLY1_KO_2 | -         | -0.021 | 0.56    | 0.81 |
| NGLY1_2    | -         | -      | -       | -    |

Supplement: Supplementary file 5541 [file 1]

# IPI00061678.2|MFSD3

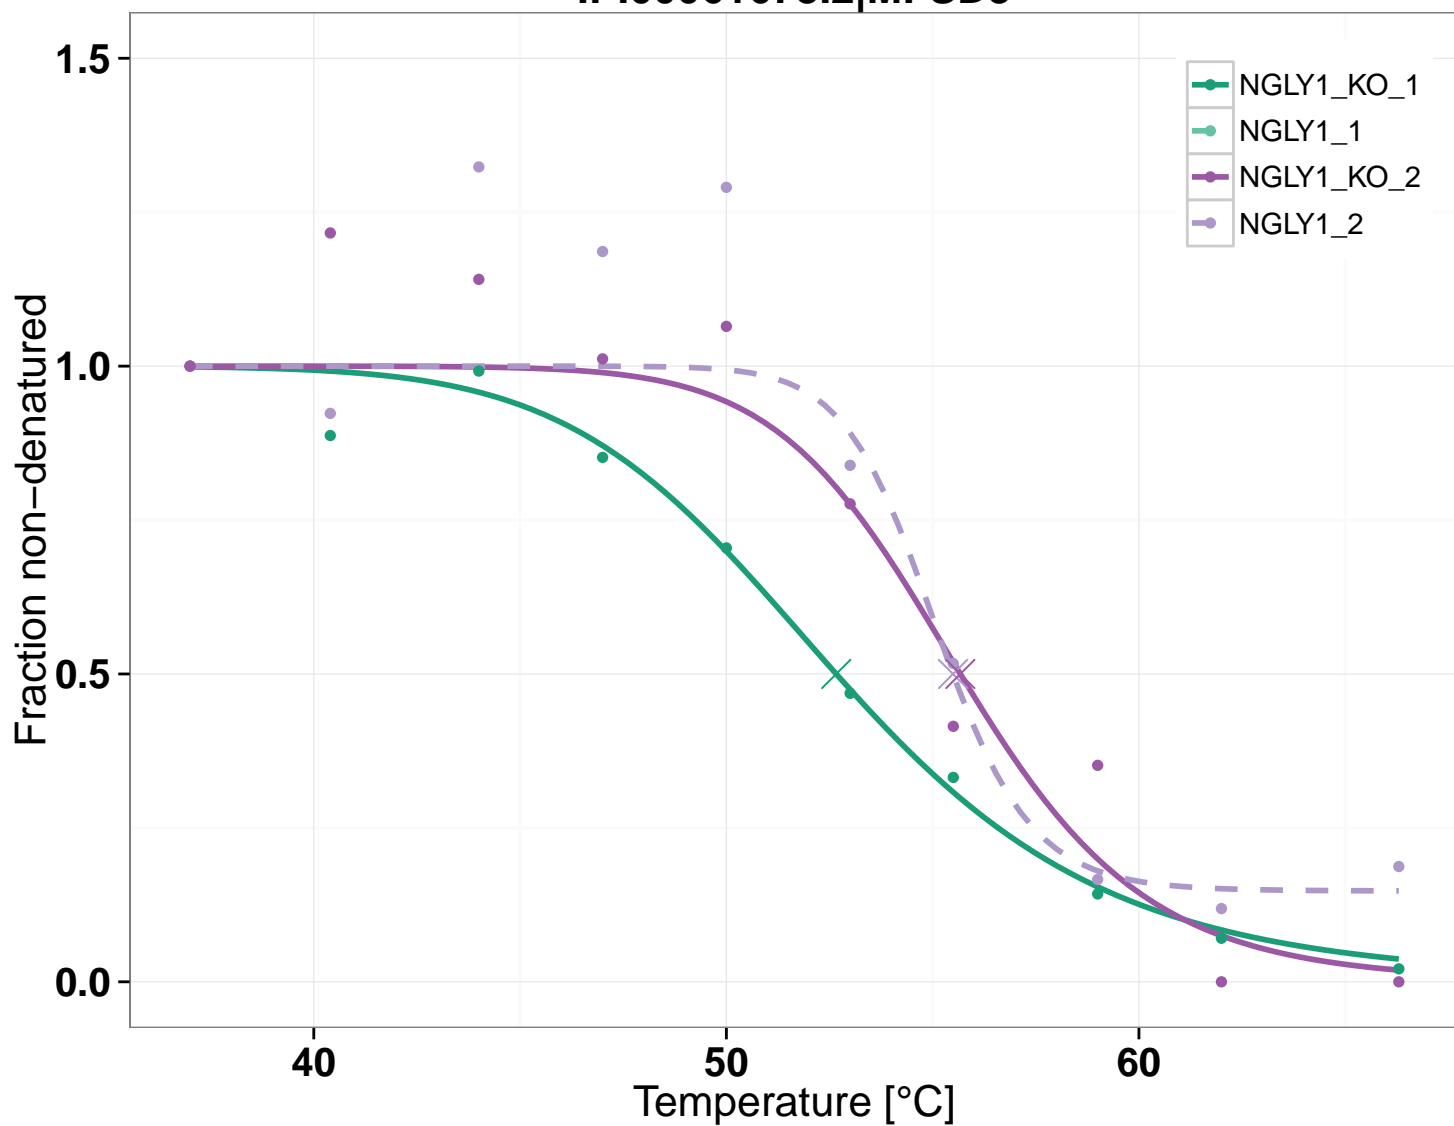

|            | meltPoint | slope  | plateau | R2   |
|------------|-----------|--------|---------|------|
| NGLY1_KO_1 | 52.66     | -0.076 | 0       | 0.99 |
| NGLY1_1    | -         | -      | -       | -    |
| NGLY1_KO_2 | 55.67     | -0.11  | 0       | 0.94 |
| NGLY1_2    | 55.49     | -0.19  | 0.15    | 0.88 |

Supplement: Supplementary file 5542 [file 1]

IPI00021258.2|ARFIP1

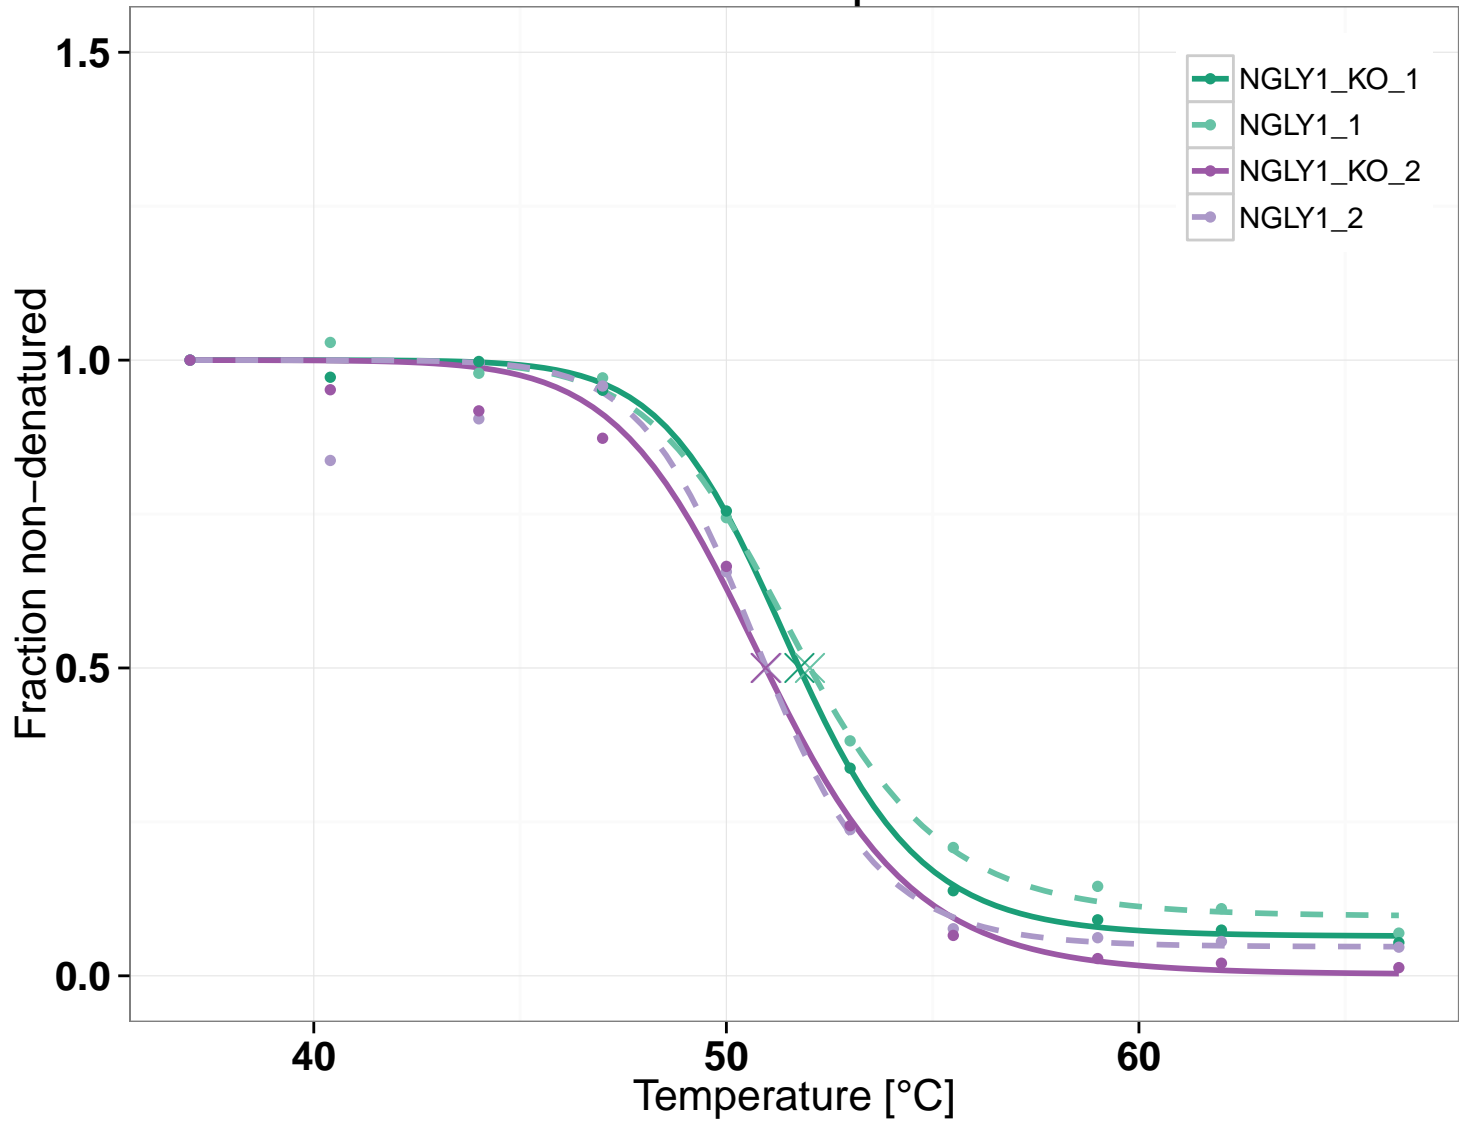

|            | meltPoint | slope | plateau | R2   |
|------------|-----------|-------|---------|------|
| NGLY1_KO_1 | 51.77     | -0.15 | 0.06    | 1    |
| NGLY1_1    | 52.03     | -0.13 | 0.1     | 1    |
| NGLY1_KO_2 | 50.95     | -0.14 | 0       | 0.99 |
| NGLY1_2    | 50.97     | -0.16 | 0.05    | 0.98 |

Supplement: Supplementary file 5543 [file 1]

IPI00337800.3|DAAM1

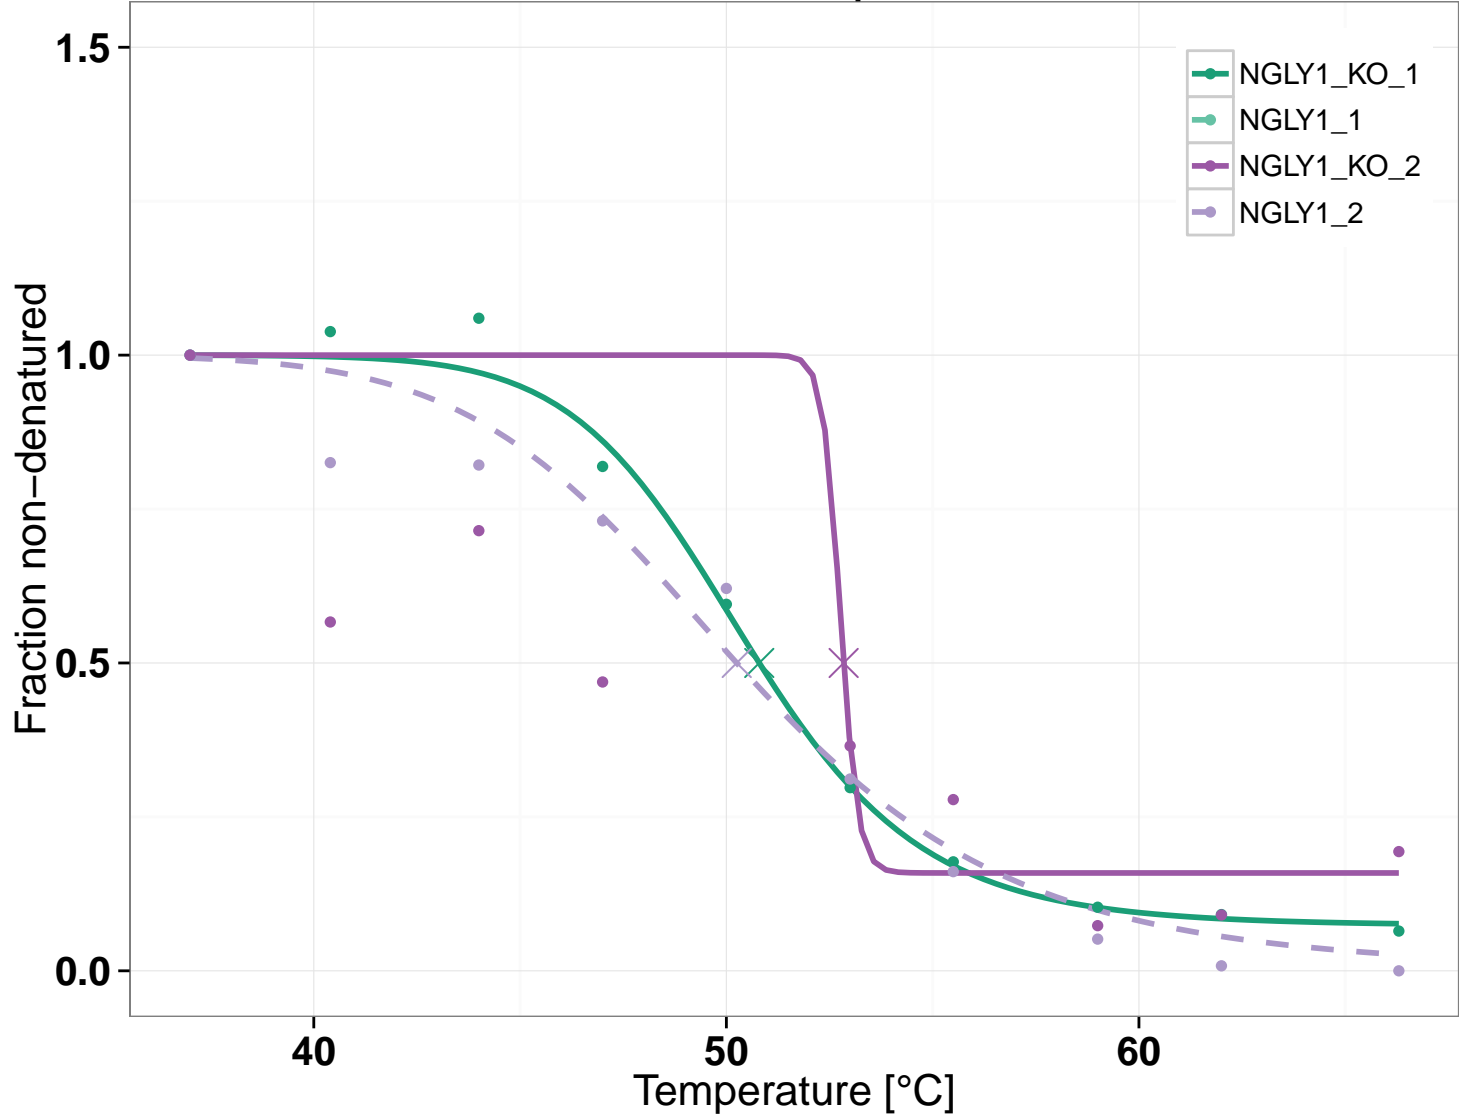

|            | meltPoint | slope  | plateau | R2   |
|------------|-----------|--------|---------|------|
| NGLY1_KO_1 | 50.8      | -0.11  | 0.07    | 0.99 |
| NGLY1_1    | -         | -      | -       | -    |
| NGLY1_KO_2 | 52.84     | -1     | 0.16    | 0.54 |
| NGLY1_2    | 50.25     | -0.076 | 0       | 0.97 |

Supplement: Supplementary file 5544 [file 1]

IPI00029513.1|NOL10

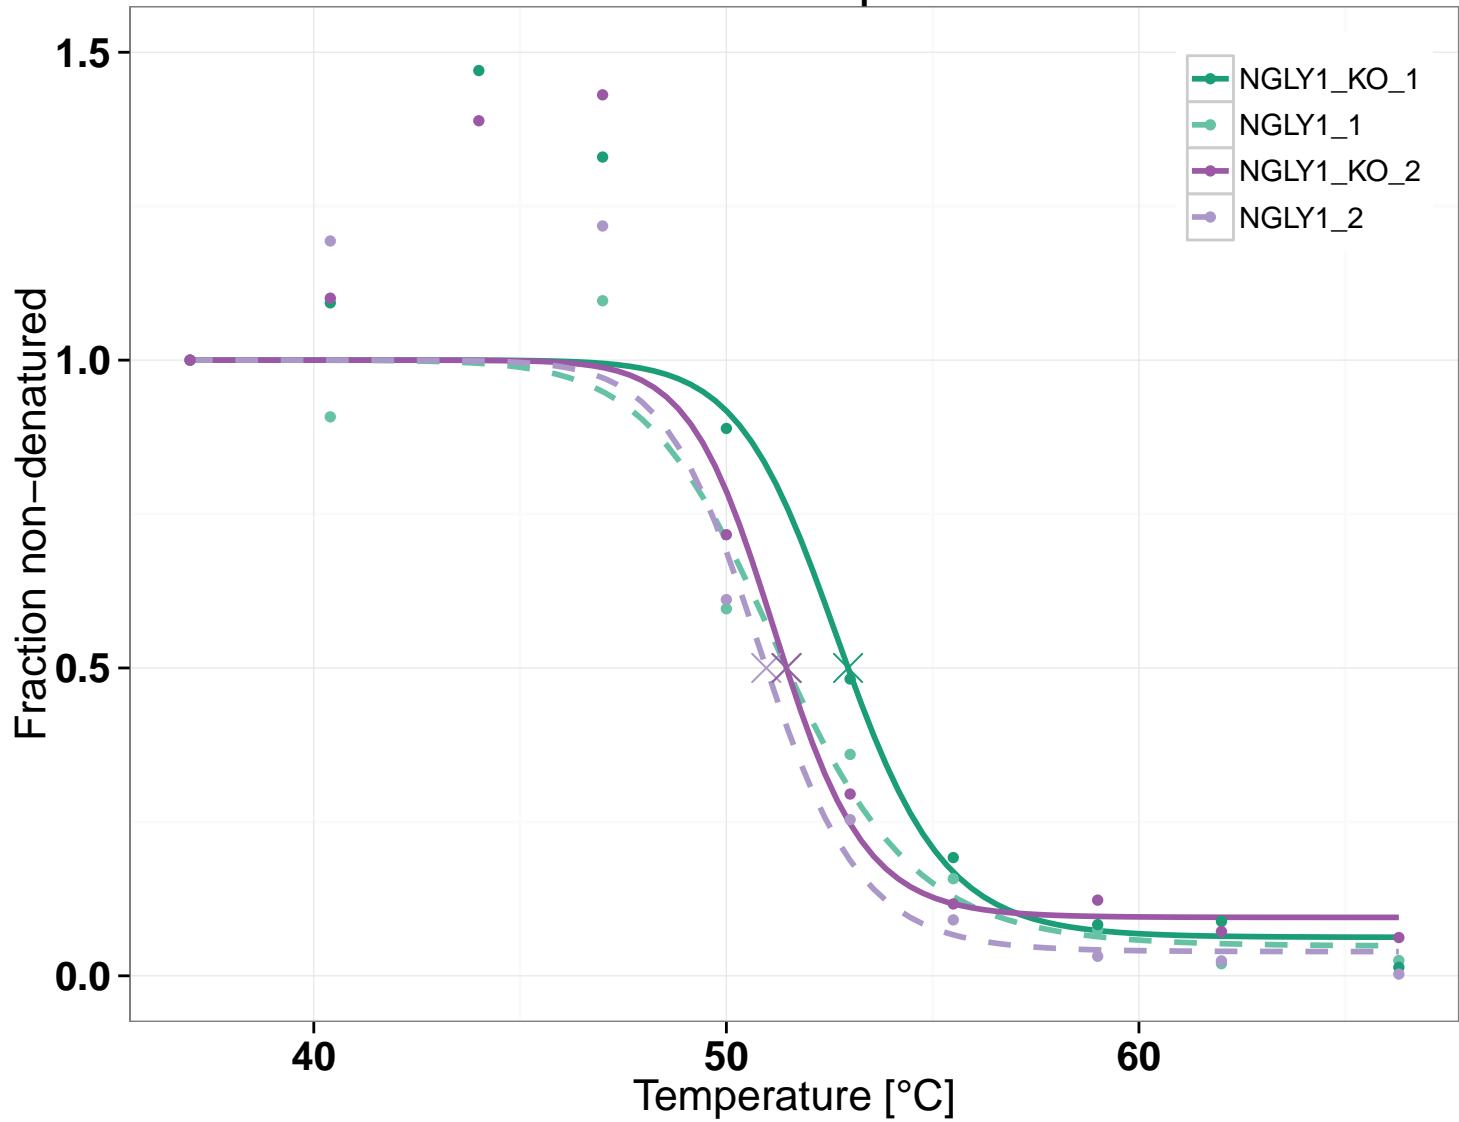

|            | meltPoint | slope | plateau | R2   |
|------------|-----------|-------|---------|------|
| NGLY1_KO_1 | 52.95     | -0.19 | 0.06    | 0.88 |
| NGLY1_1    | 51.46     | -0.15 | 0.05    | 0.87 |
| NGLY1_KO_2 | 51.46     | -0.21 | 0.09    | 0.87 |
| NGLY1_2    | 50.97     | -0.2  | 0.04    | 0.88 |

Supplement: Supplementary file 5545 [file 1]

IPI00024913.2|C21ORF33

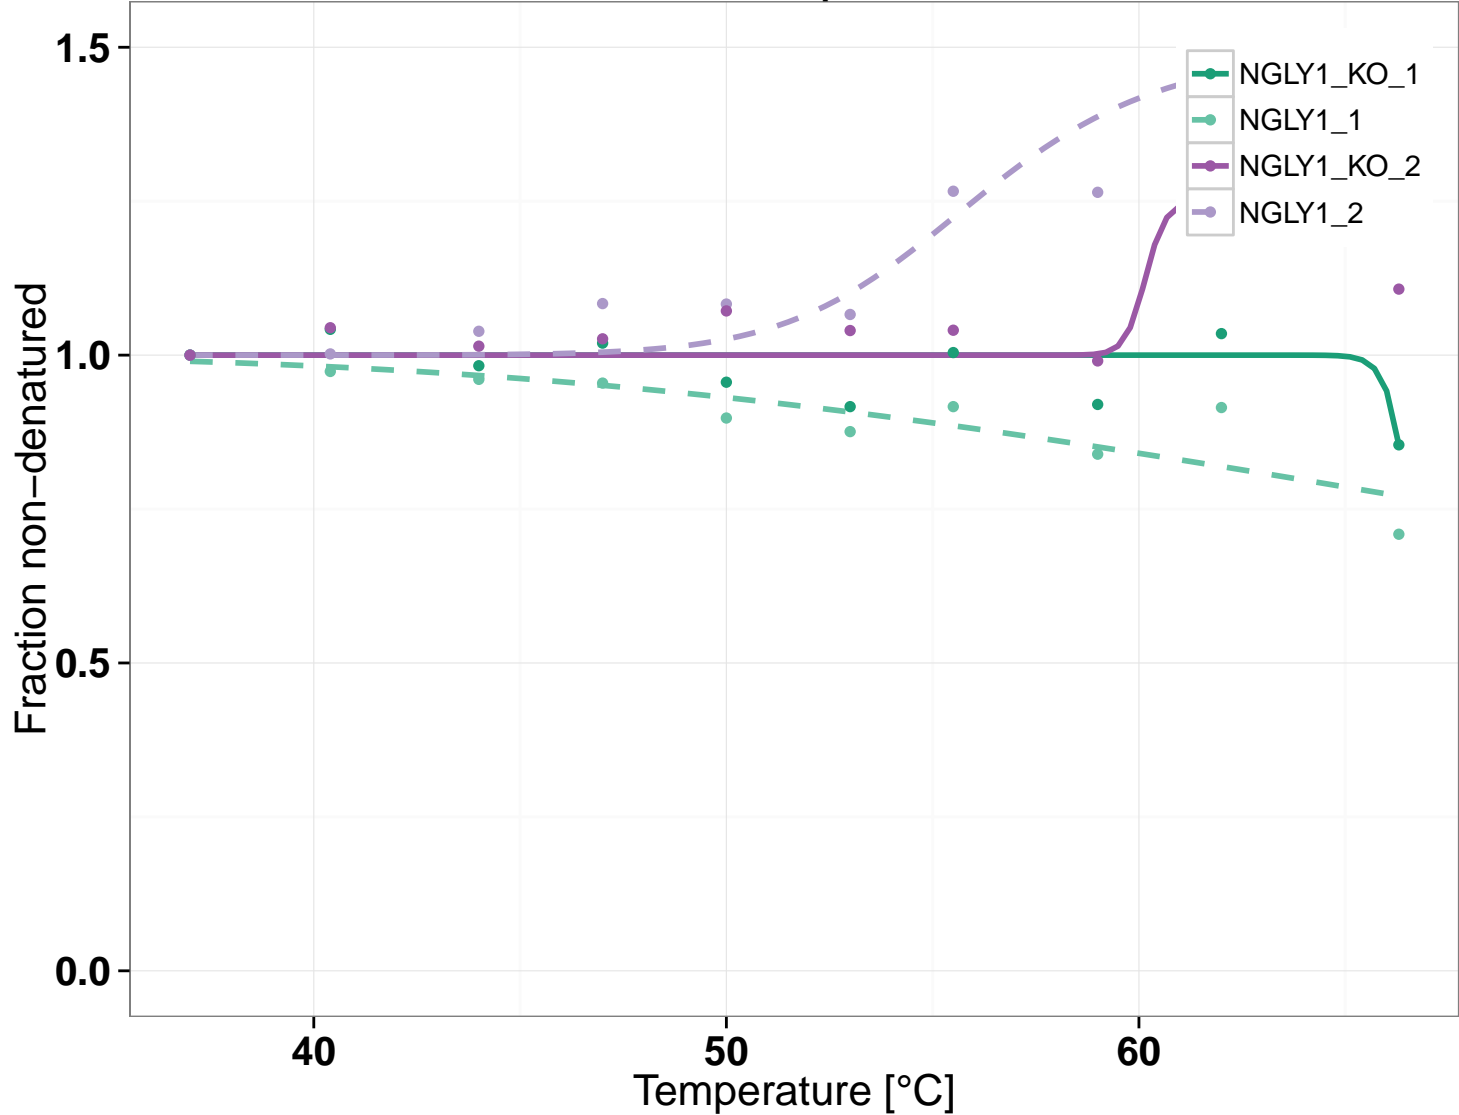

|            | meltPoint | slope | plateau | R2   |
|------------|-----------|-------|---------|------|
| NGLY1_KO_1 | -         | -     | 0       | 0.42 |
| NGLY1_1    | -         | -     | 0       | 0.74 |
| NGLY1_KO_2 | -         | 0.26  | 1.25    | 0.58 |
| NGLY1_2    | -         | 0.054 | 1.5     | 0.88 |

Supplement: Supplementary file 5546 [file 1]

IPI00060031.3|ARL8A

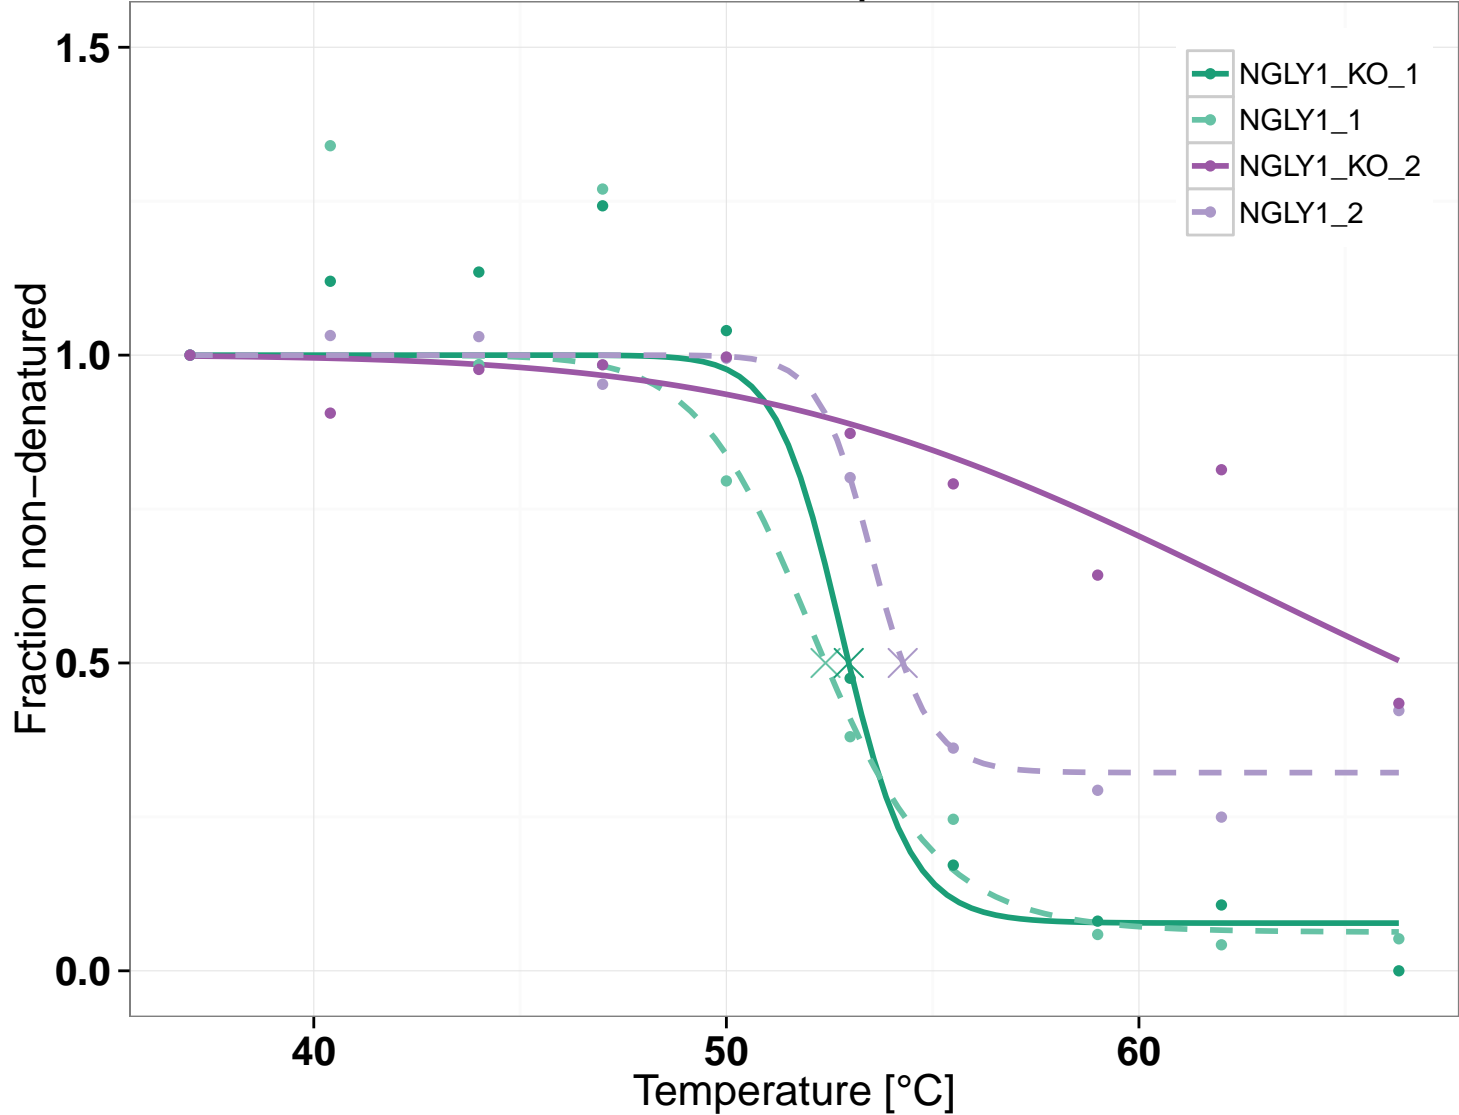

|            | meltPoint | slope  | plateau | R2   |
|------------|-----------|--------|---------|------|
| NGLY1_KO_1 | 52.97     | -0.28  | 0.08    | 0.96 |
| NGLY1_1    | 52.4      | -0.16  | 0.06    | 0.91 |
| NGLY1_KO_2 | -         | -0.033 | 0       | 0.81 |
| NGLY1_2    | 54.27     | -0.26  | 0.32    | 0.98 |

Supplement: Supplementary file 5547 [file 1]

IPI00023407.4|NCKAP1L

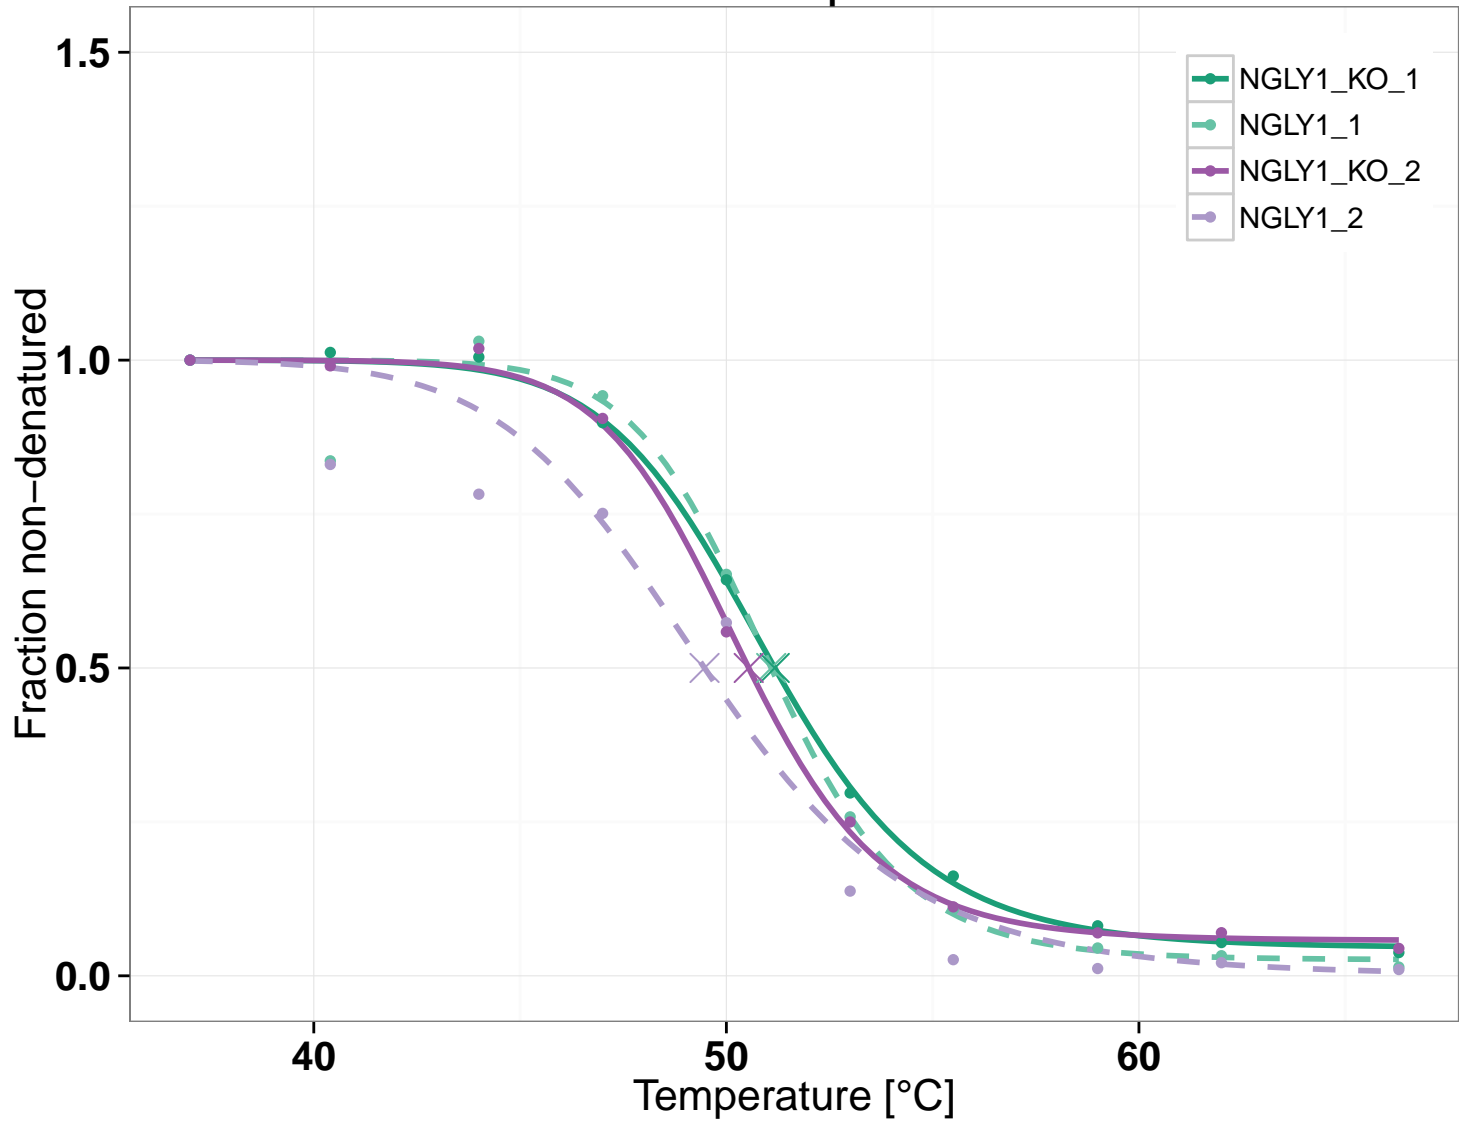

|            | meltPoint | slope | plateau | R2   |
|------------|-----------|-------|---------|------|
| NGLY1_KO_1 | 51.17     | -0.12 | 0.05    | 1    |
| NGLY1_1    | 51.09     | -0.15 | 0.03    | 0.98 |
| NGLY1_KO_2 | 50.54     | -0.14 | 0.06    | 1    |
| NGLY1_2    | 49.47     | -0.1  | 0       | 0.95 |

Supplement: Supplementary file 5548 [file 1]

IPI00011180.4|ZBTB24

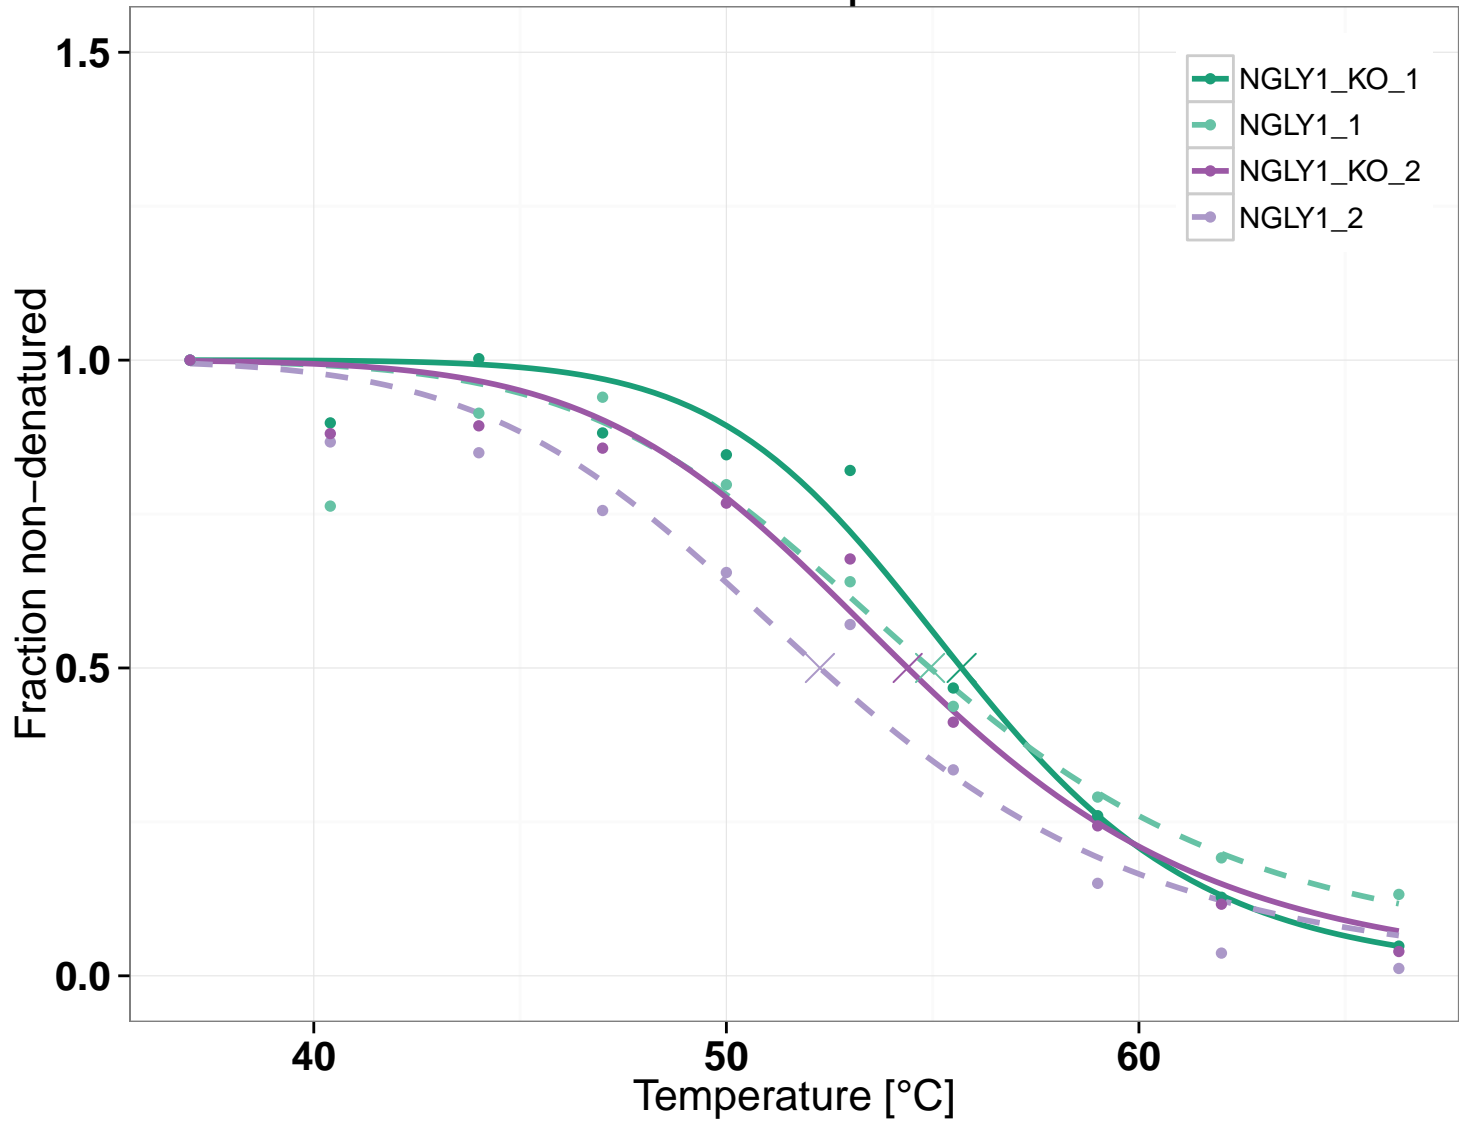

|            | meltPoint | slope  | plateau | R2   |
|------------|-----------|--------|---------|------|
| NGLY1_KO_1 | 55.7      | -0.085 | 0       | 0.97 |
| NGLY1_1    | 54.94     | -0.06  | 0.03    | 0.94 |
| NGLY1_KO_2 | 54.39     | -0.066 | 0       | 0.97 |
| NGLY1_2    | 52.27     | -0.062 | 0       | 0.96 |

Supplement: Supplementary file 5549 [file 1]

# IPI00007926.1|C6ORF108

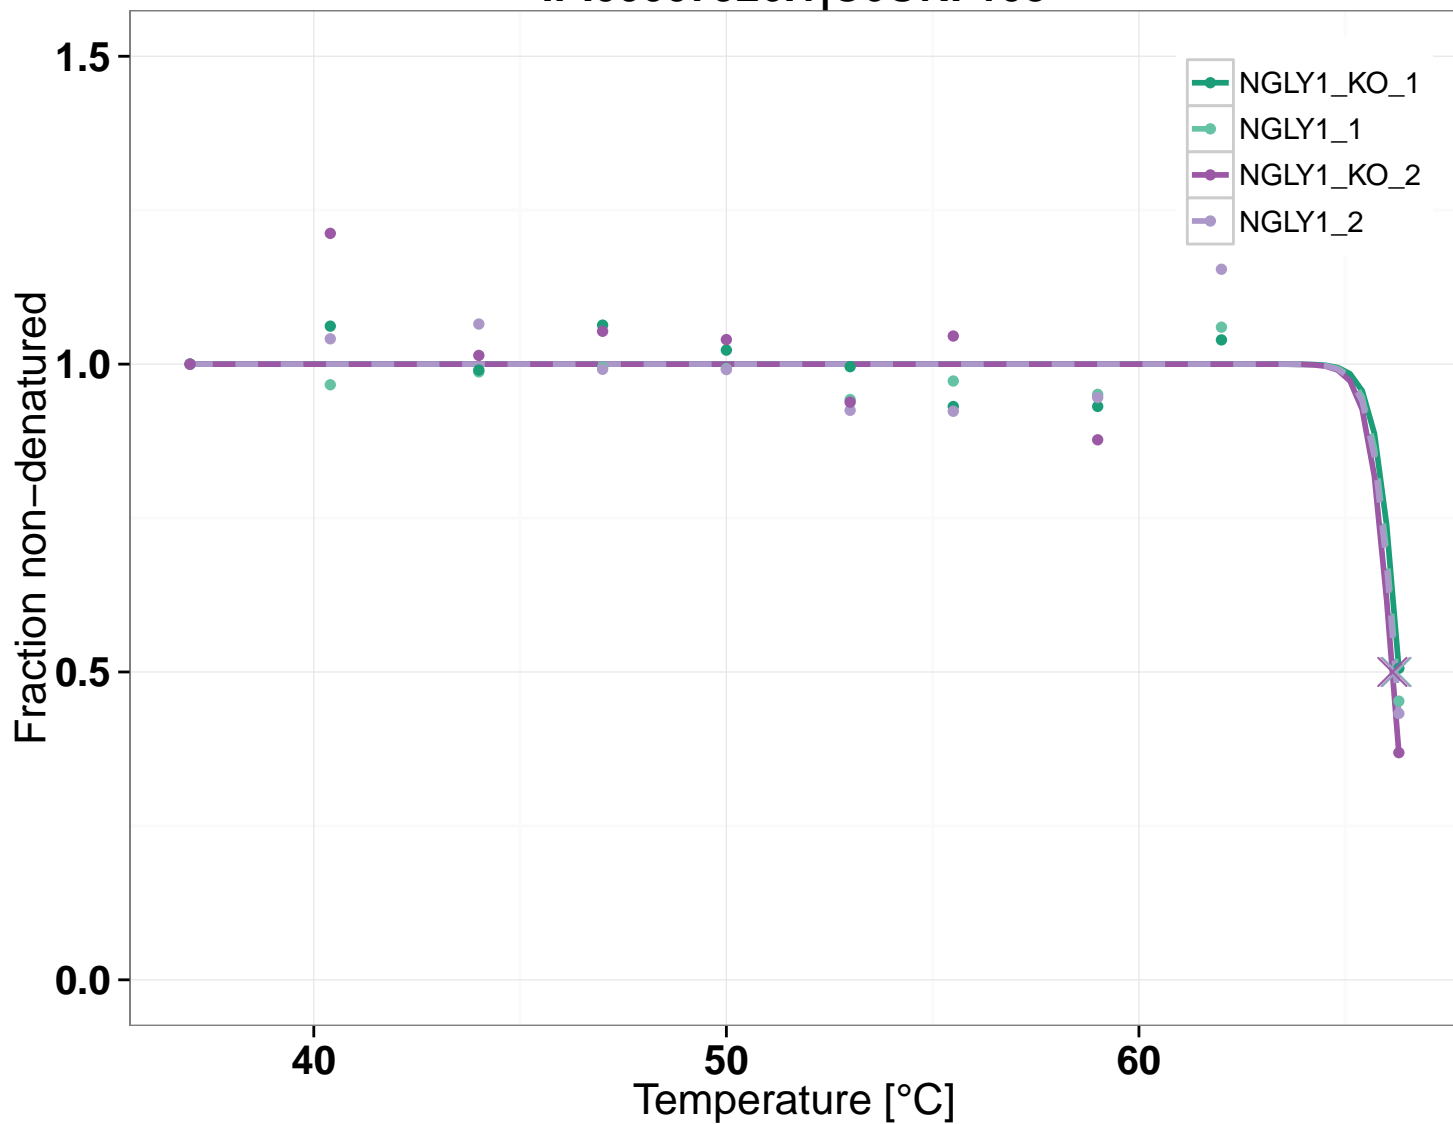

|            | meltPoint | slope | plateau | R2   |
|------------|-----------|-------|---------|------|
| NGLY1_KO_1 | –         | –     | 0       | 0.92 |
| NGLY1_1    | 66.24     | –0.85 | 0       | 0.96 |
| NGLY1_KO_2 | 66.14     | –0.86 | 0       | 0.7  |
| NGLY1_2    | 66.22     | –0.84 | 0       | 0.87 |

Supplement: Supplementary file 5550 [file 1]

IPI00910781.1|GPI

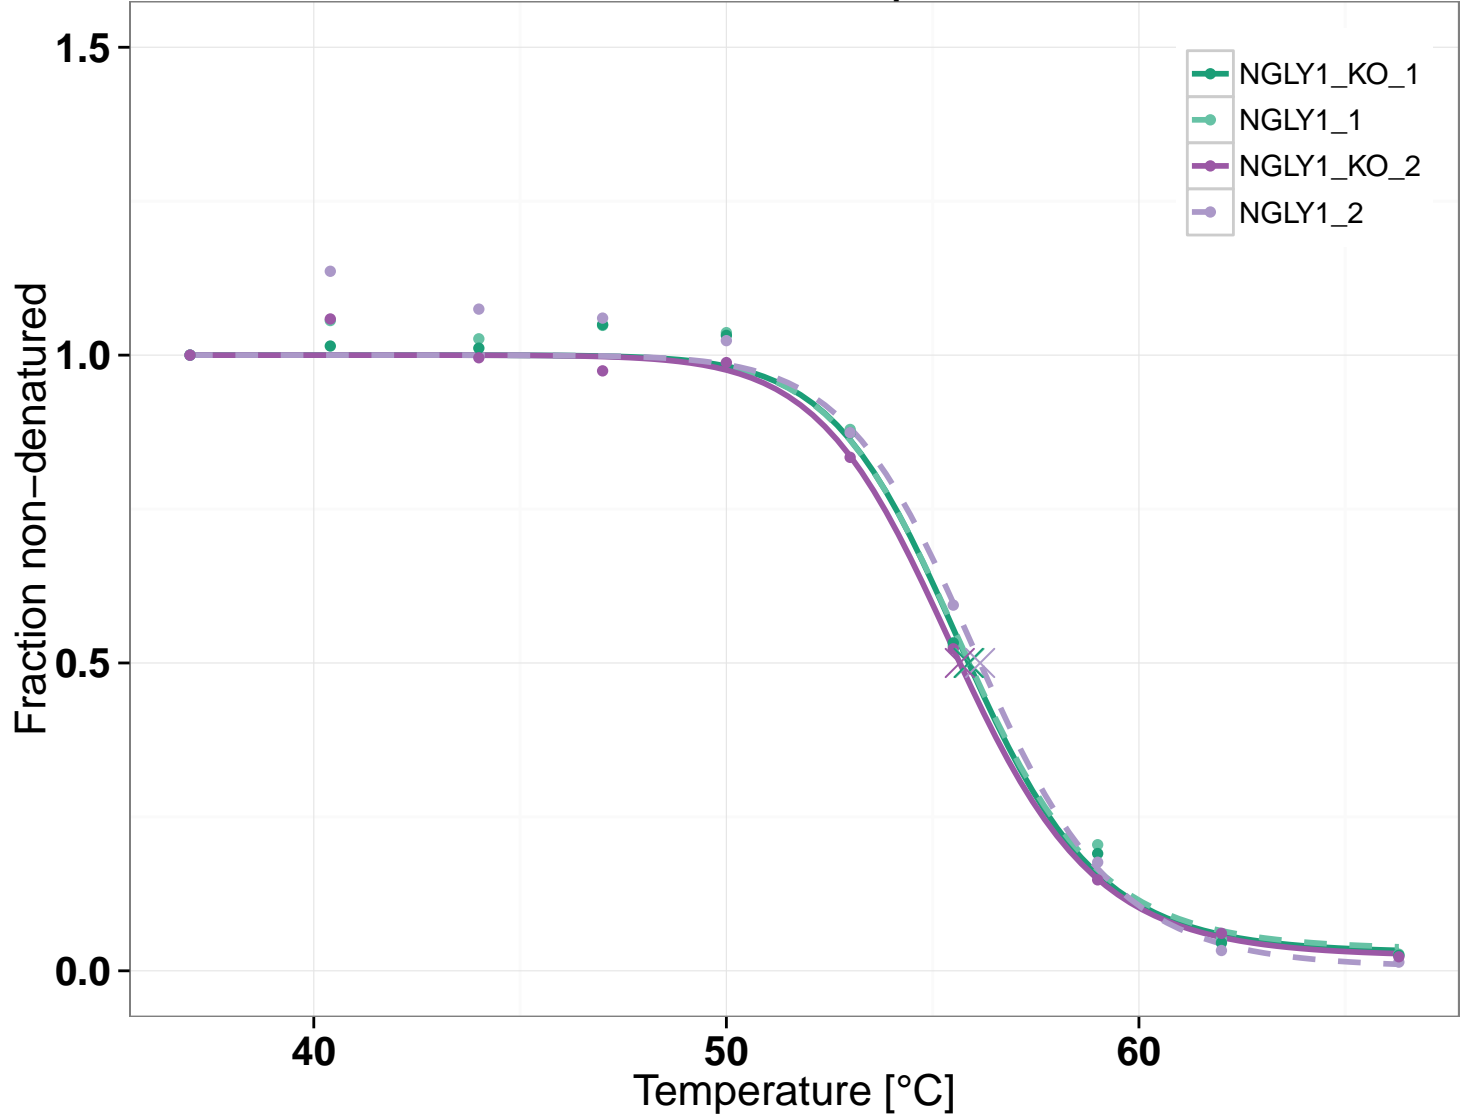

|            | meltPoint | slope | plateau | R2   |
|------------|-----------|-------|---------|------|
| NGLY1_KO_1 | 55.87     | -0.15 | 0.03    | 1    |
| NGLY1_1    | 55.89     | -0.15 | 0.03    | 0.99 |
| NGLY1_KO_2 | 55.66     | -0.15 | 0.02    | 1    |
| NGLY1_2    | 56.15     | -0.15 | 0.01    | 0.98 |

Supplement: Supplementary file 5551 [file 1]

# IPI00007074.5|YARS

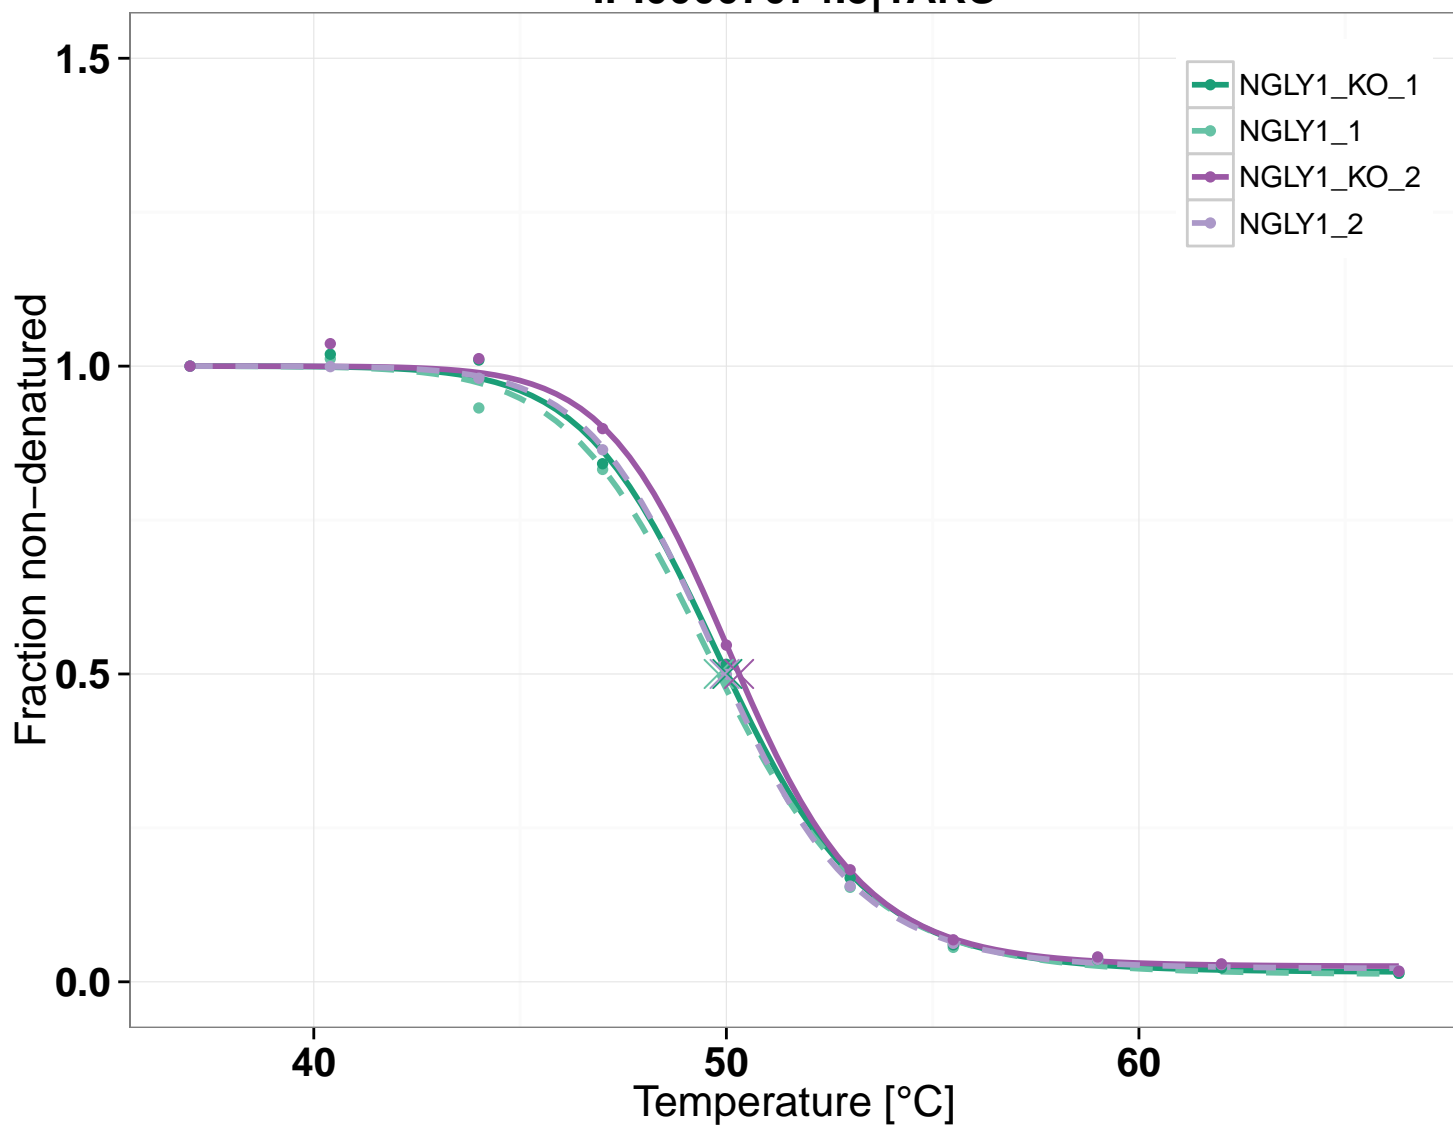

|            | meltPoint | slope | plateau | R2 |
|------------|-----------|-------|---------|----|
| NGLY1_KO_1 | 50.02     | -0.14 | 0.02    | 1  |
| NGLY1_1    | 49.81     | -0.14 | 0.01    | 1  |
| NGLY1_KO_2 | 50.31     | -0.16 | 0.03    | 1  |
| NGLY1_2    | 49.96     | -0.15 | 0.02    | 1  |

Supplement: Supplementary file 5552 [file 1]

IPI00414668.4|NBEAL1

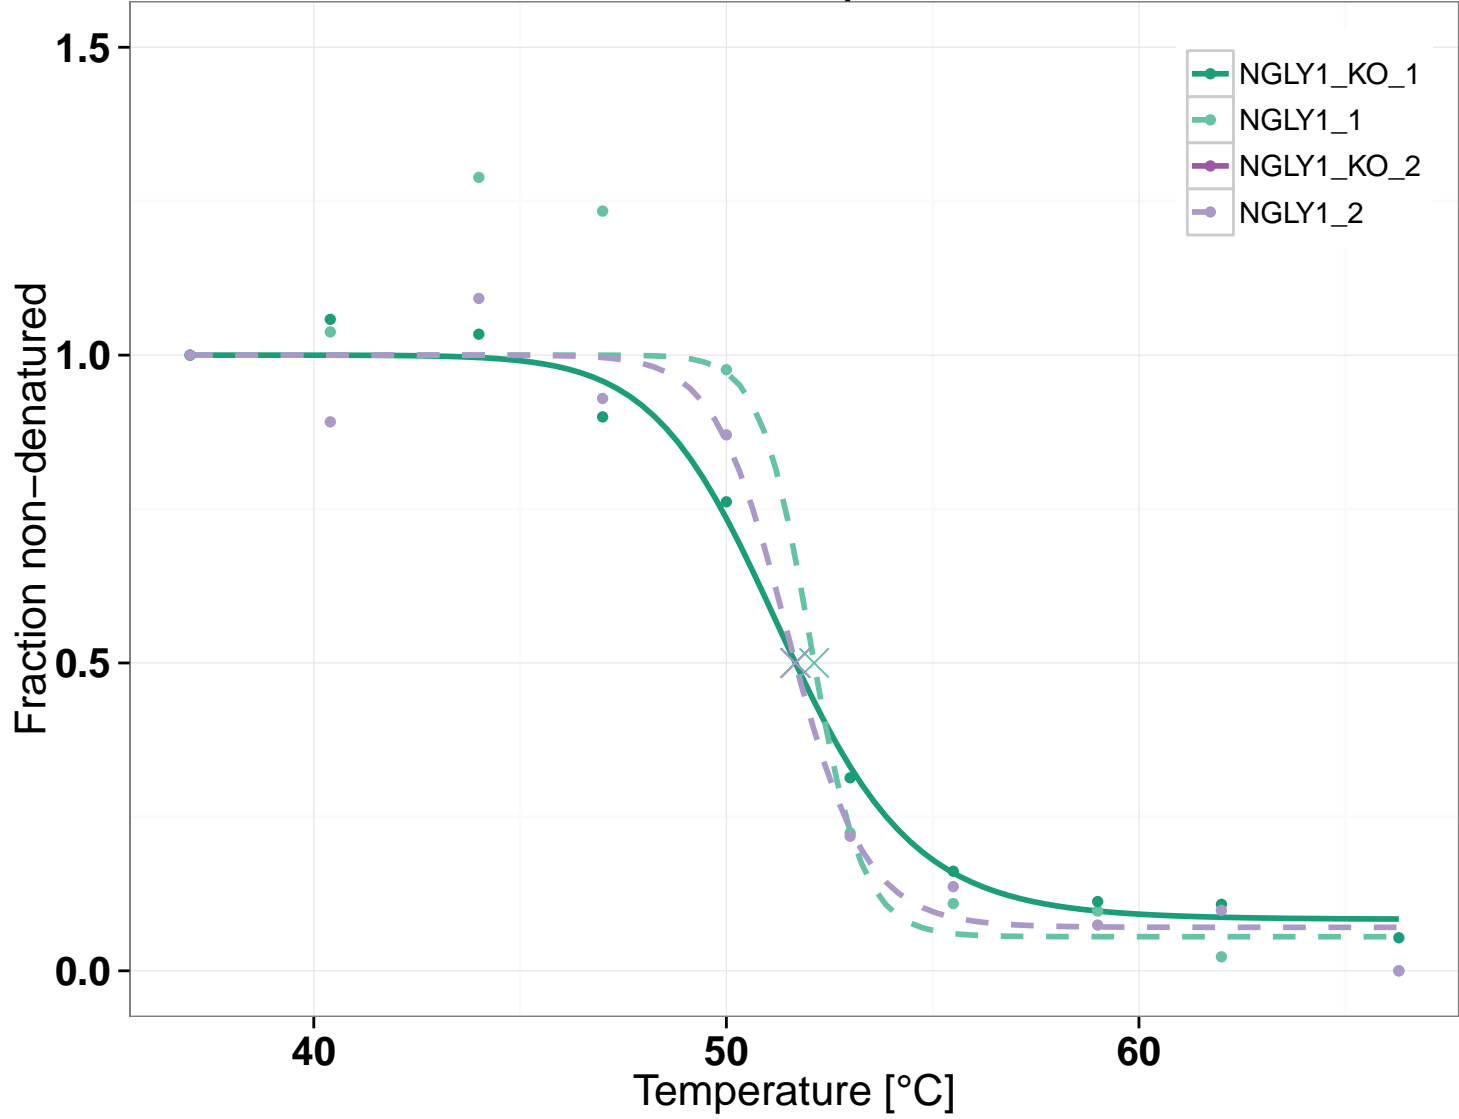

|            | meltPoint | slope | plateau | R2   |
|------------|-----------|-------|---------|------|
| NGLY1_KO_1 | 51.67     | -0.15 | 0.08    | 0.99 |
| NGLY1_1    | 52.13     | -0.38 | 0.06    | 0.95 |
| NGLY1_KO_2 | -         | -     | -       | -    |
| NGLY1_2    | 51.67     | -0.26 | 0.07    | 0.98 |

Supplement: Supplementary file 5553 [file 1]

IPI00607575.2|RXRB

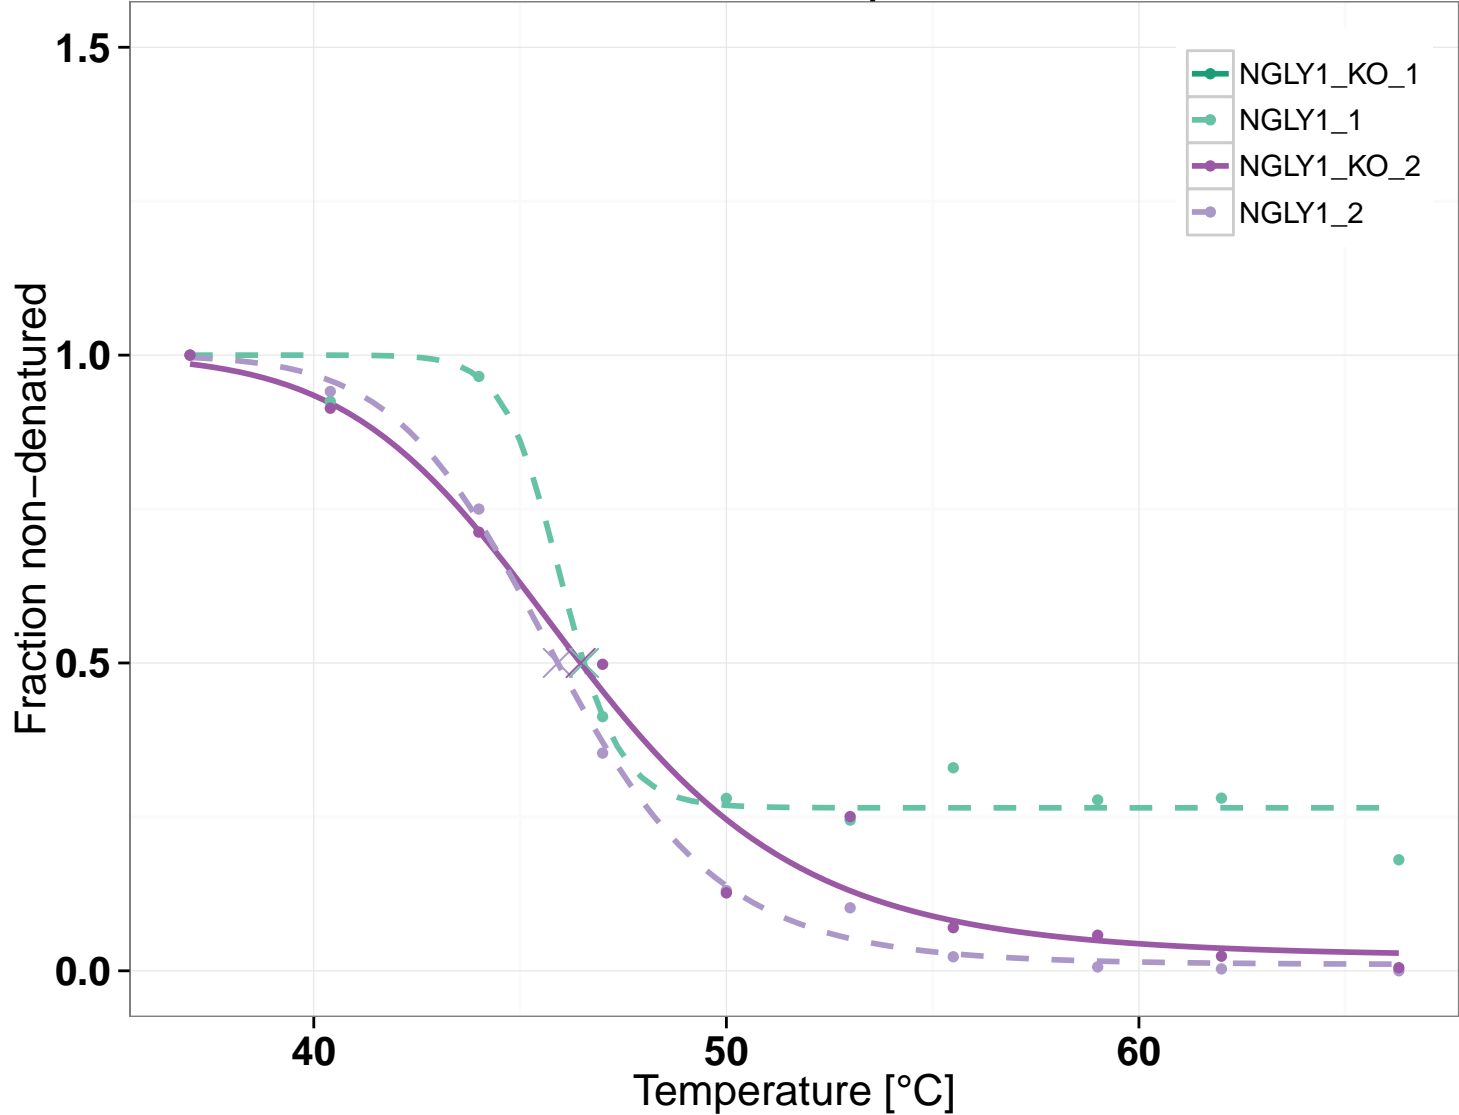

|            | meltPoint | slope  | plateau | R2   |
|------------|-----------|--------|---------|------|
| NGLY1_KO_1 | -         | -      | -       | -    |
| NGLY1_1    | 46.55     | -0.26  | 0.26    | 0.98 |
| NGLY1_KO_2 | 46.47     | -0.089 | 0.02    | 0.98 |
| NGLY1_2    | 45.91     | -0.13  | 0.01    | 1    |

Supplement: Supplementary file 5554 [file 1]

IPI00888881.1|LOC440706

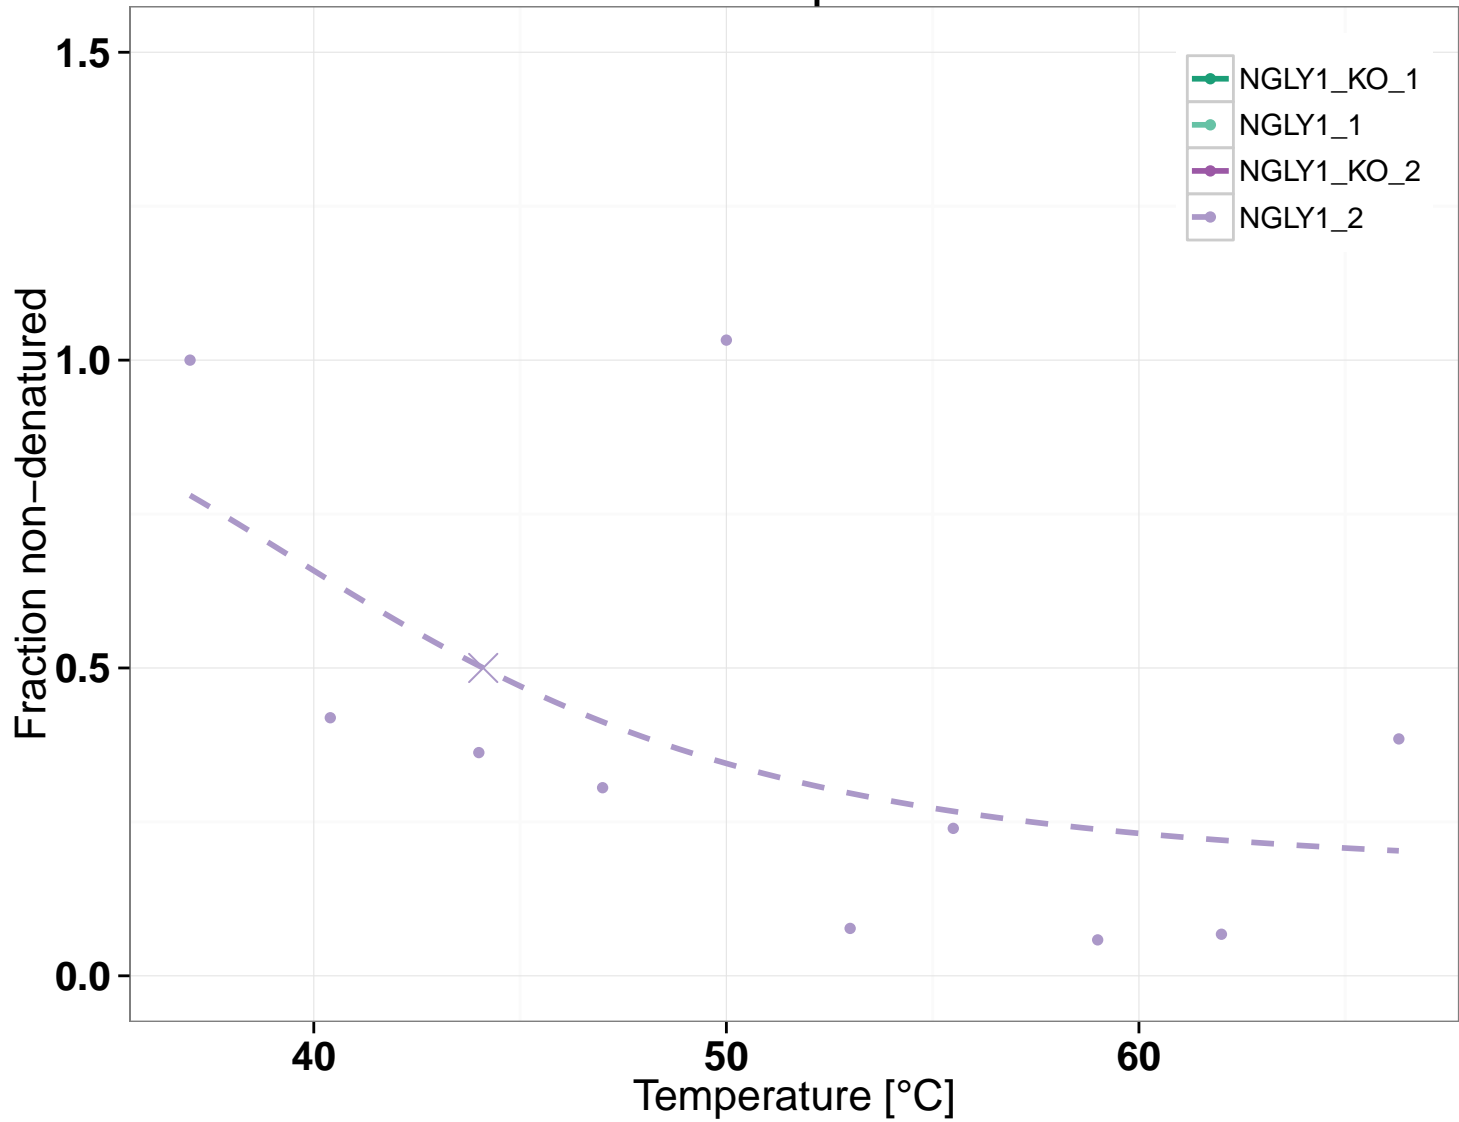

|            | meltPoint | slope  | plateau | R2   |
|------------|-----------|--------|---------|------|
| NGLY1_KO_1 | -         | -      | -       | -    |
| NGLY1_1    | -         | -      | -       | -    |
| NGLY1_KO_2 | -         | -      | -       | -    |
| NGLY1_2    | 44.11     | -0.042 | 0.16    | 0.34 |

Supplement: Supplementary file 5555 [file 1]

IPI00328147.4|AGBL2

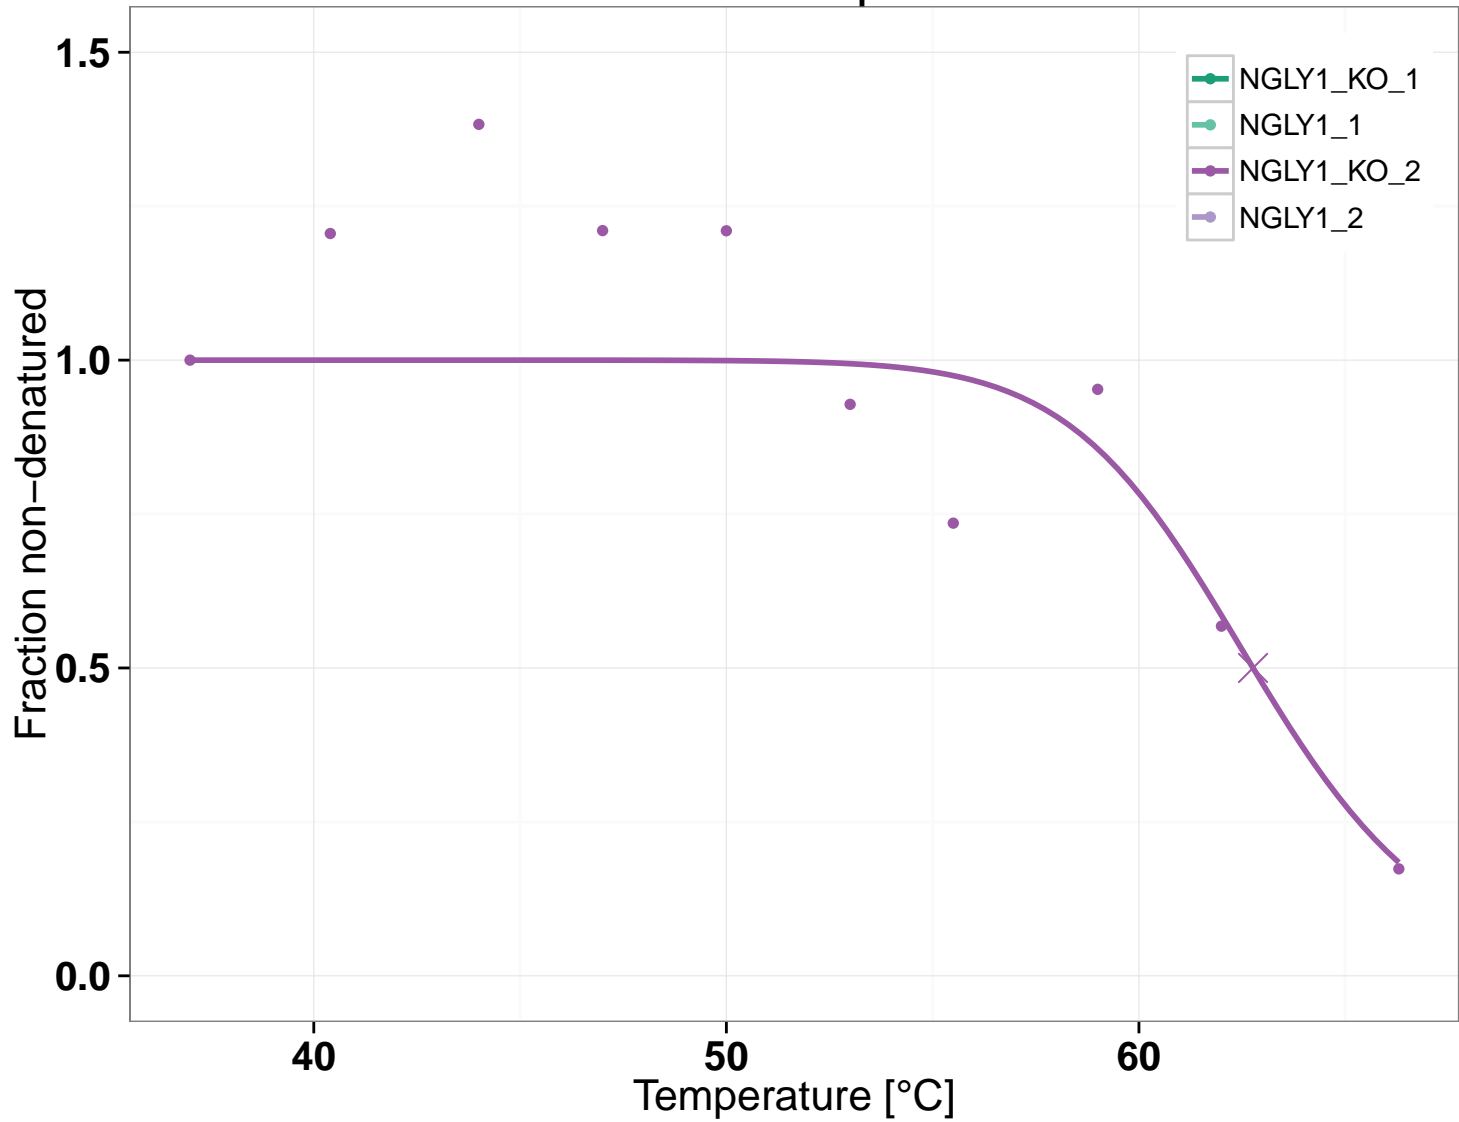

|            | meltPoint | slope | plateau | R2   |
|------------|-----------|-------|---------|------|
| NGLY1_KO_1 | -         | -     | -       | -    |
| NGLY1_1    | -         | -     | -       | -    |
| NGLY1_KO_2 | 62.77     | -0.11 | 0       | 0.71 |
| NGLY1_2    | -         | -     | -       | -    |

Supplement: Supplementary file 5556 [file 1]

IPI00017292.1|CTNNB1

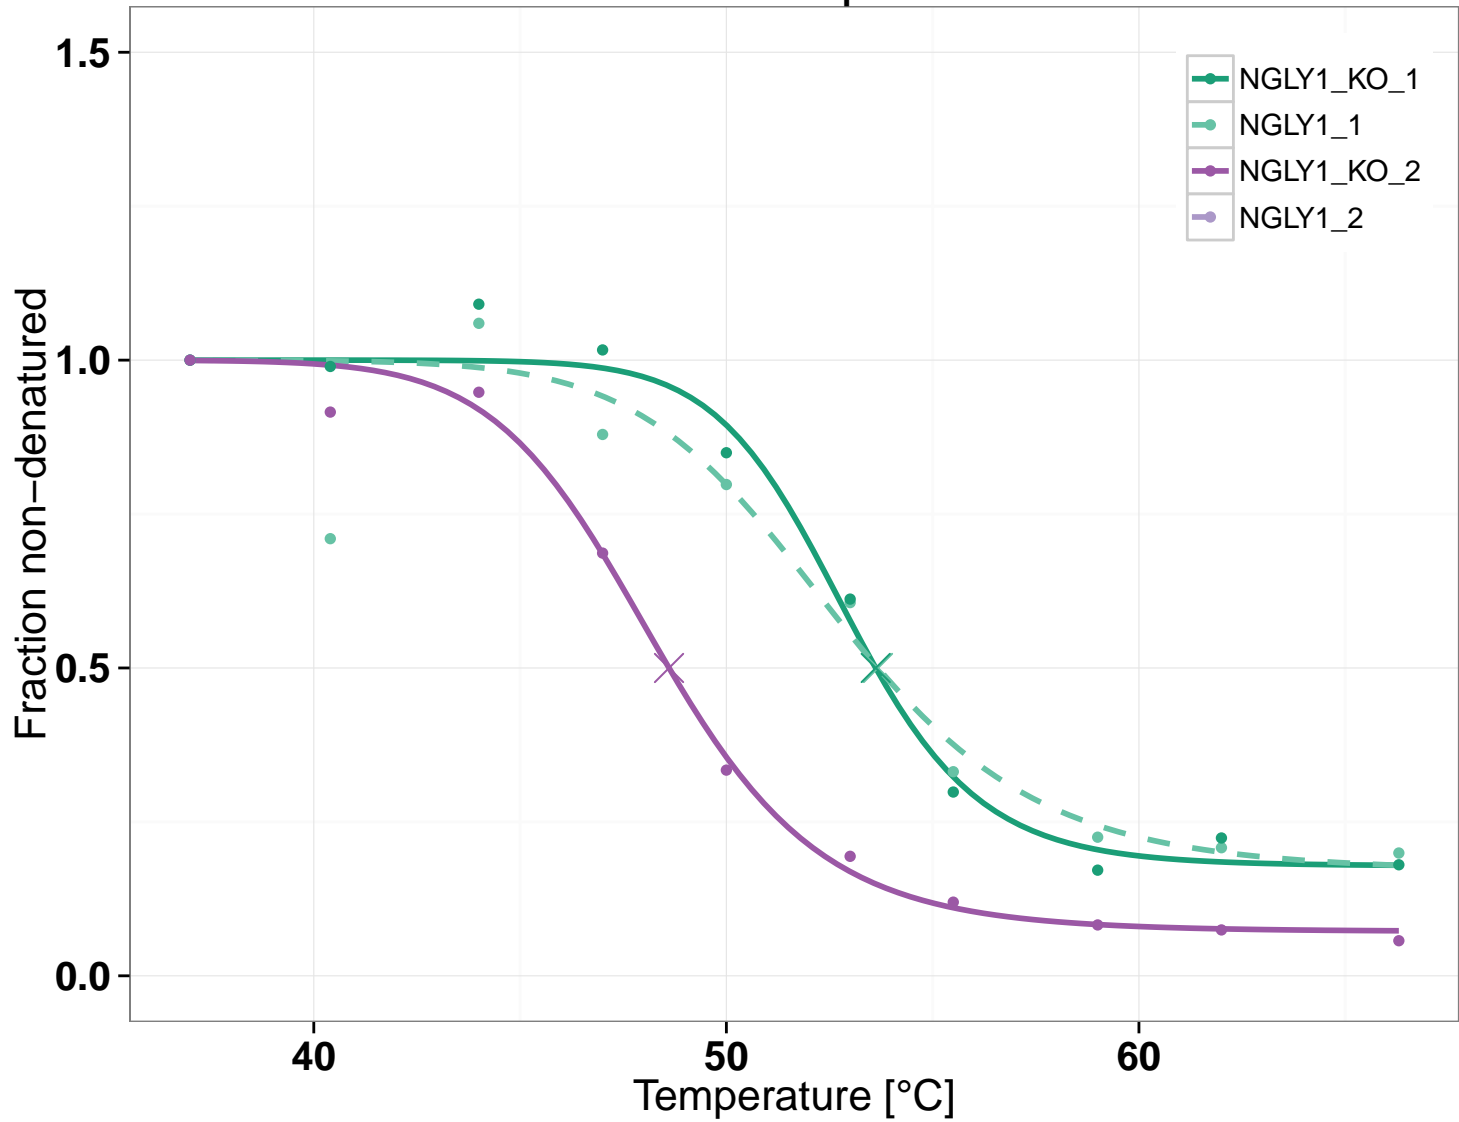

|            | meltPoint | slope  | plateau | R2   |
|------------|-----------|--------|---------|------|
| NGLY1_KO_1 | 53.62     | -0.13  | 0.18    | 0.99 |
| NGLY1_1    | 53.67     | -0.086 | 0.17    | 0.9  |
| NGLY1_KO_2 | 48.61     | -0.12  | 0.07    | 0.99 |
| NGLY1_2    | -         | -      | -       | -    |

Supplement: Supplementary file 5557 [file 1]

# IPI00043494.6|ZNF48

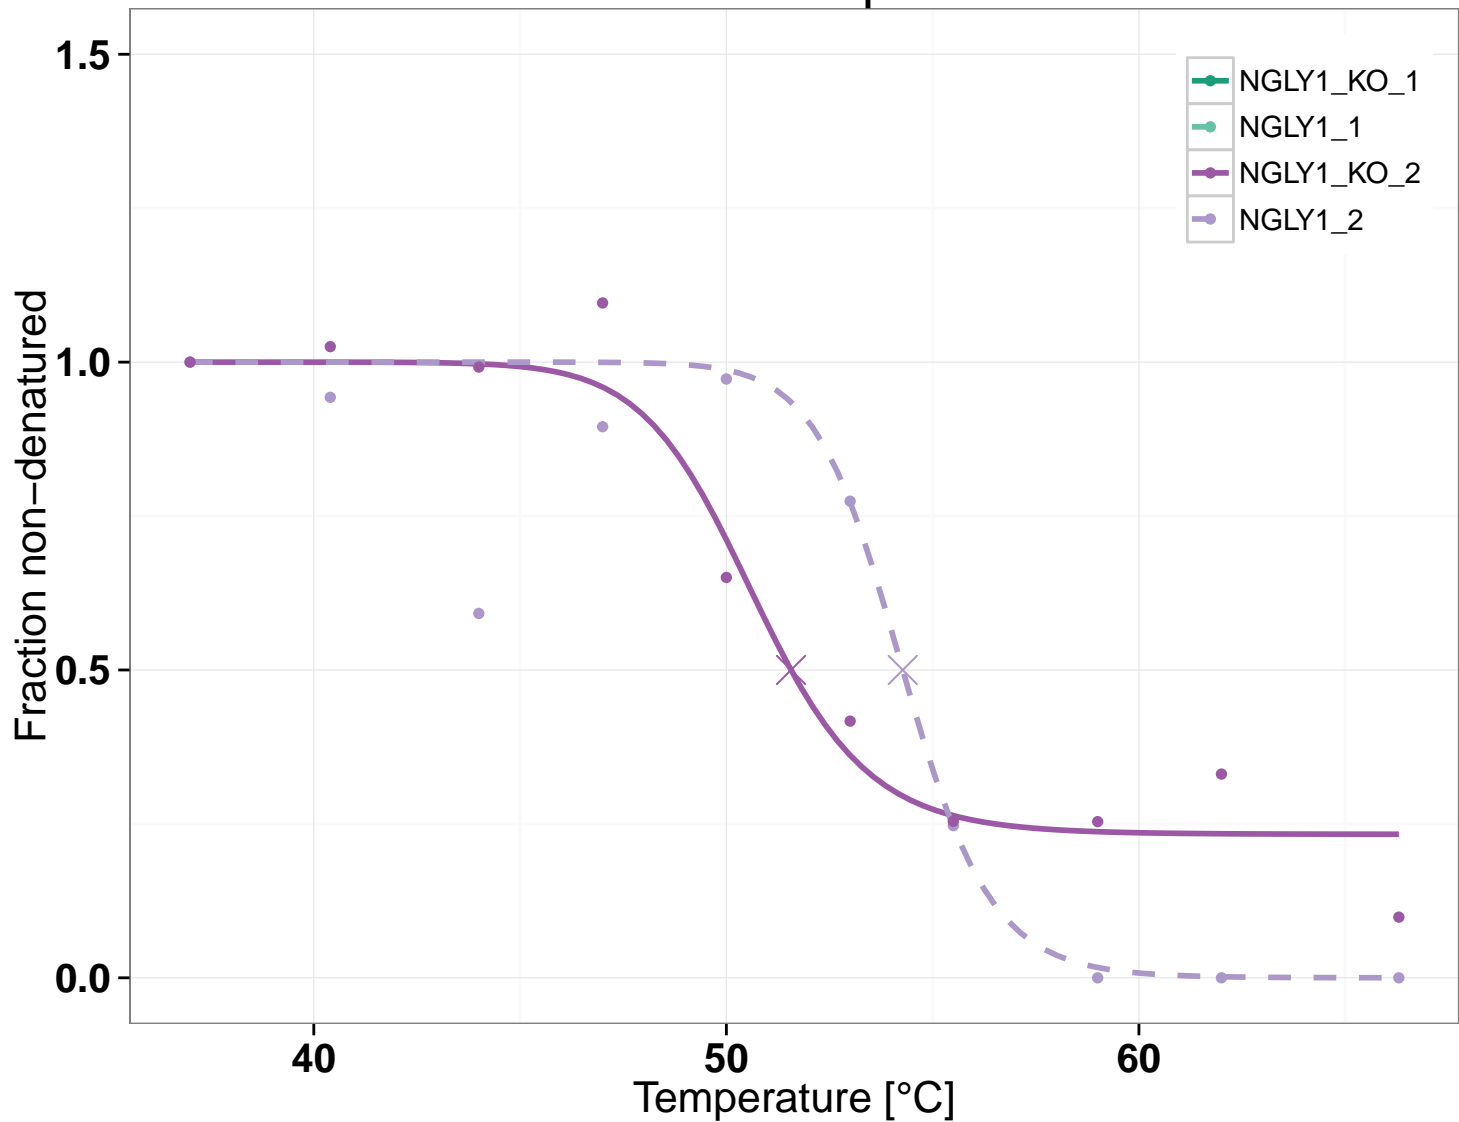

|            | meltPoint | slope | plateau | R2   |
|------------|-----------|-------|---------|------|
| NGLY1_KO_1 | -         | -     | -       | -    |
| NGLY1_1    | -         | -     | -       | -    |
| NGLY1_KO_2 | 51.57     | -0.14 | 0.23    | 0.96 |
| NGLY1_2    | 54.28     | -0.23 | 0       | 0.89 |

Supplement: Supplementary file 5558 [file 1]

IPI00002806.1|TAF12

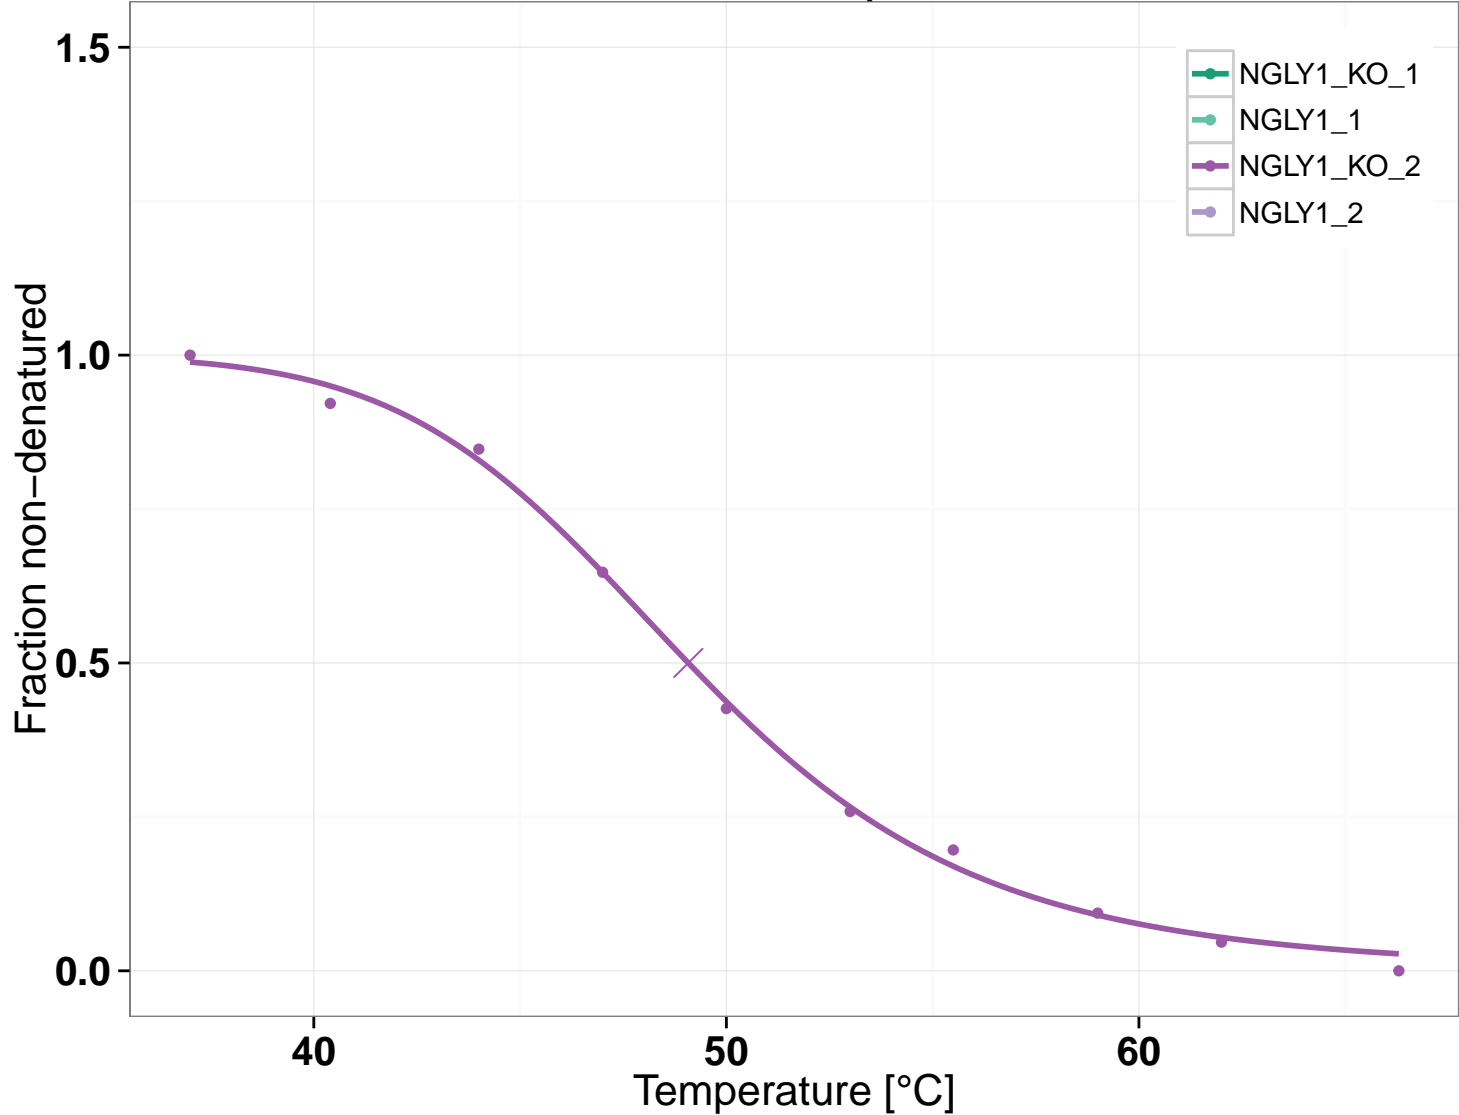

|            | meltPoint | slope  | plateau | R2 |
|------------|-----------|--------|---------|----|
| NGLY1_KO_1 | -         | -      | -       | -  |
| NGLY1_1    | -         | -      | -       | -  |
| NGLY1_KO_2 | 49.08     | -0.071 | 0       | 1  |
| NGLY1_2    | -         | -      | -       | -  |

Supplement: Supplementary file 5559 [file 1]

IPI00167492.5|C4ORF32

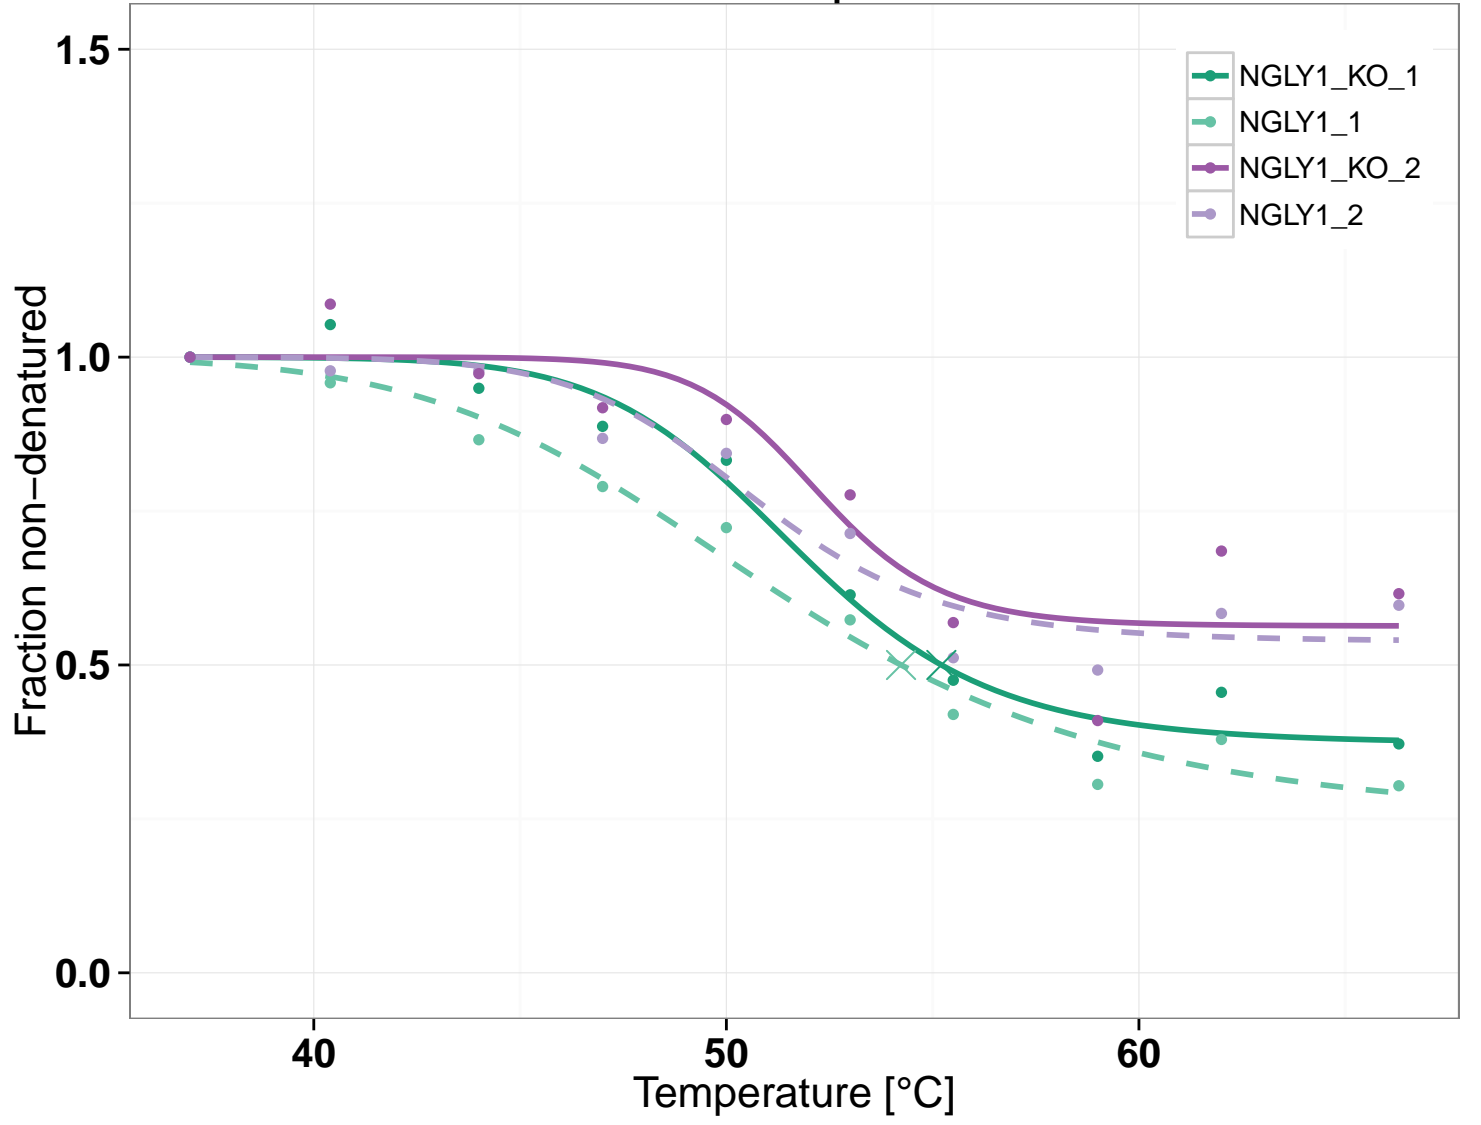

|            | meltPoint | slope  | plateau | R2   |
|------------|-----------|--------|---------|------|
| NGLY1_KO_1 | 55.21     | -0.066 | 0.37    | 0.98 |
| NGLY1_1    | 54.23     | -0.045 | 0.24    | 0.98 |
| NGLY1_KO_2 | -         | -0.073 | 0.56    | 0.86 |
| NGLY1_2    | -         | -0.052 | 0.54    | 0.93 |

Supplement: Supplementary file 5560 [file 1]

# IPI00297241.3|URB1

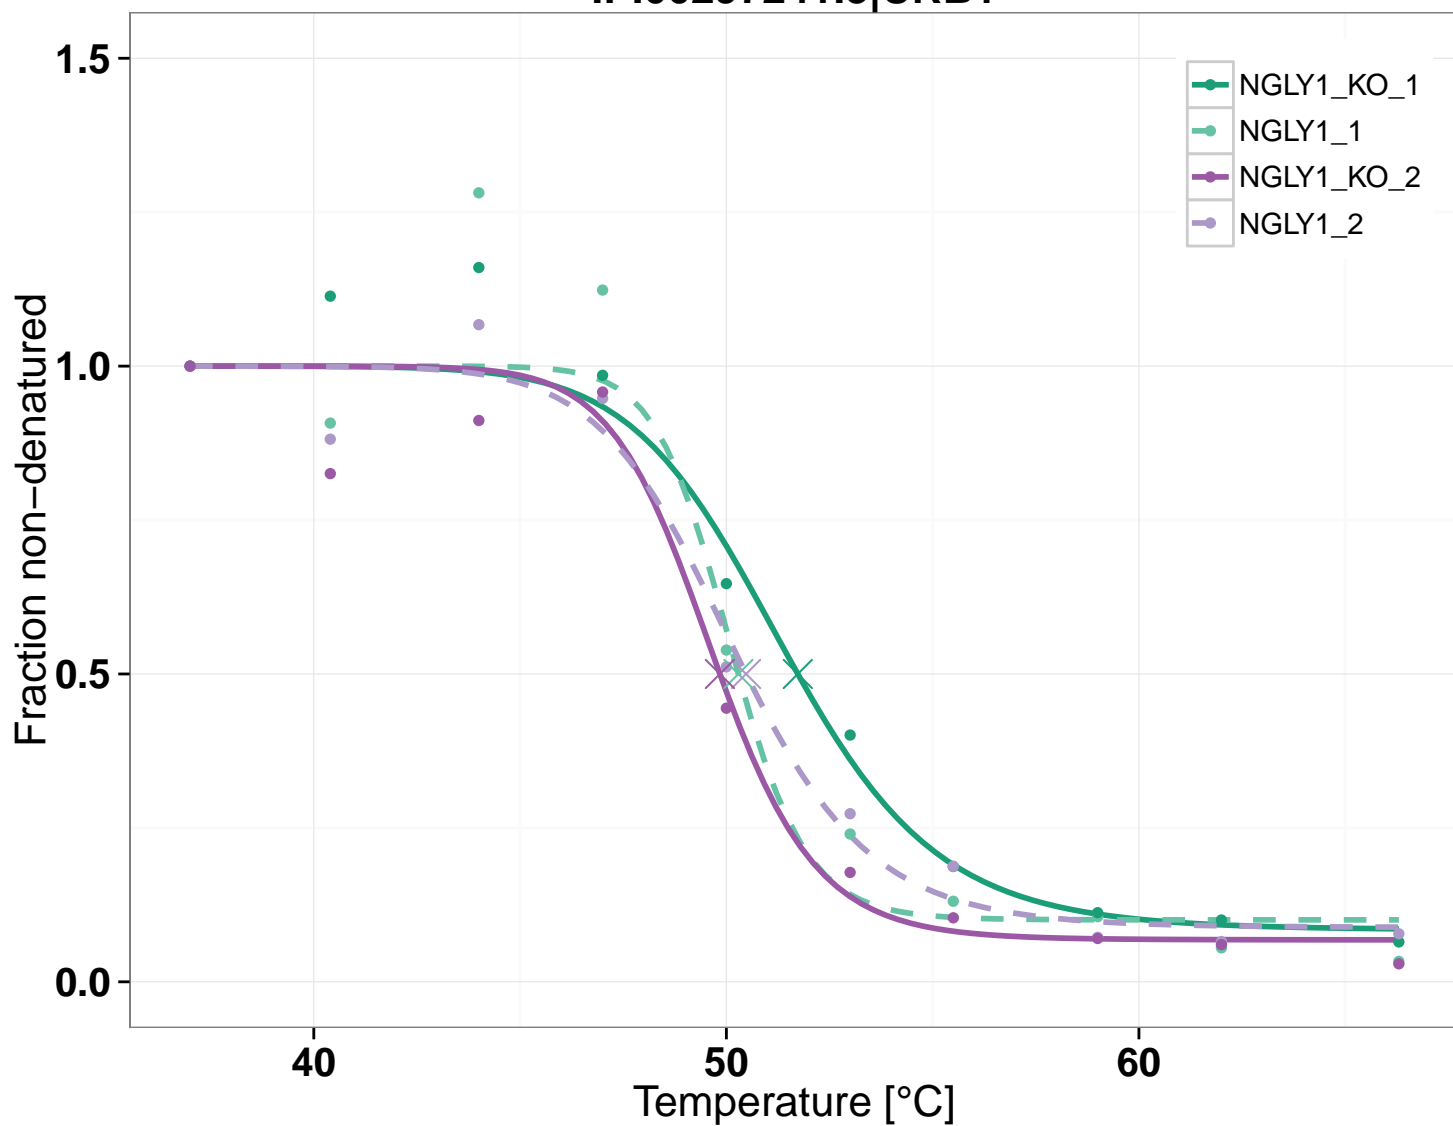

|            | meltPoint | slope | plateau | R2   |
|------------|-----------|-------|---------|------|
| NGLY1_KO_1 | 51.73     | -0.12 | 0.08    | 0.97 |
| NGLY1_1    | 50.29     | -0.25 | 0.1     | 0.94 |
| NGLY1_KO_2 | 49.84     | -0.19 | 0.07    | 0.97 |
| NGLY1_2    | 50.48     | -0.14 | 0.09    | 0.98 |

Supplement: Supplementary file 5561 [file 1]

IPI00328793.3|SREBF2

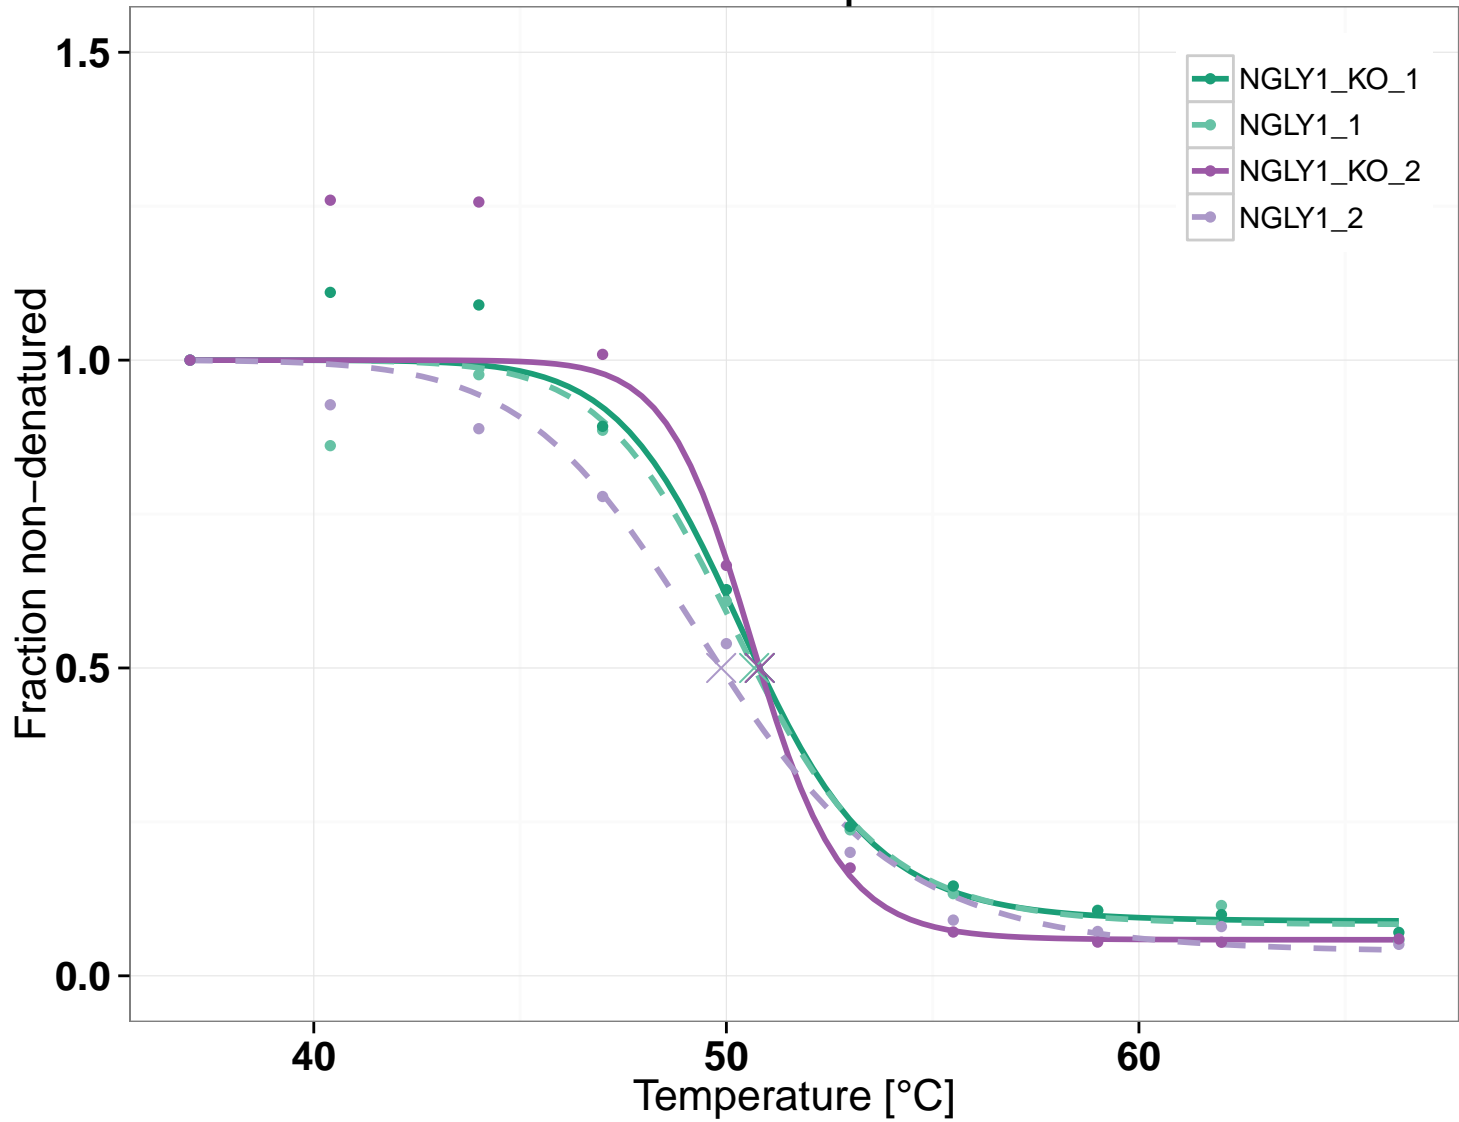

|            | meltPoint | slope | plateau | R2   |
|------------|-----------|-------|---------|------|
| NGLY1_KO_1 | 50.81     | -0.15 | 0.09    | 0.99 |
| NGLY1_1    | 50.67     | -0.14 | 0.08    | 0.99 |
| NGLY1_KO_2 | 50.81     | -0.22 | 0.06    | 0.95 |
| NGLY1_2    | 49.87     | -0.11 | 0.04    | 0.99 |

Supplement: Supplementary file 5562 [file 1]

IPI00016868.3|TELO2

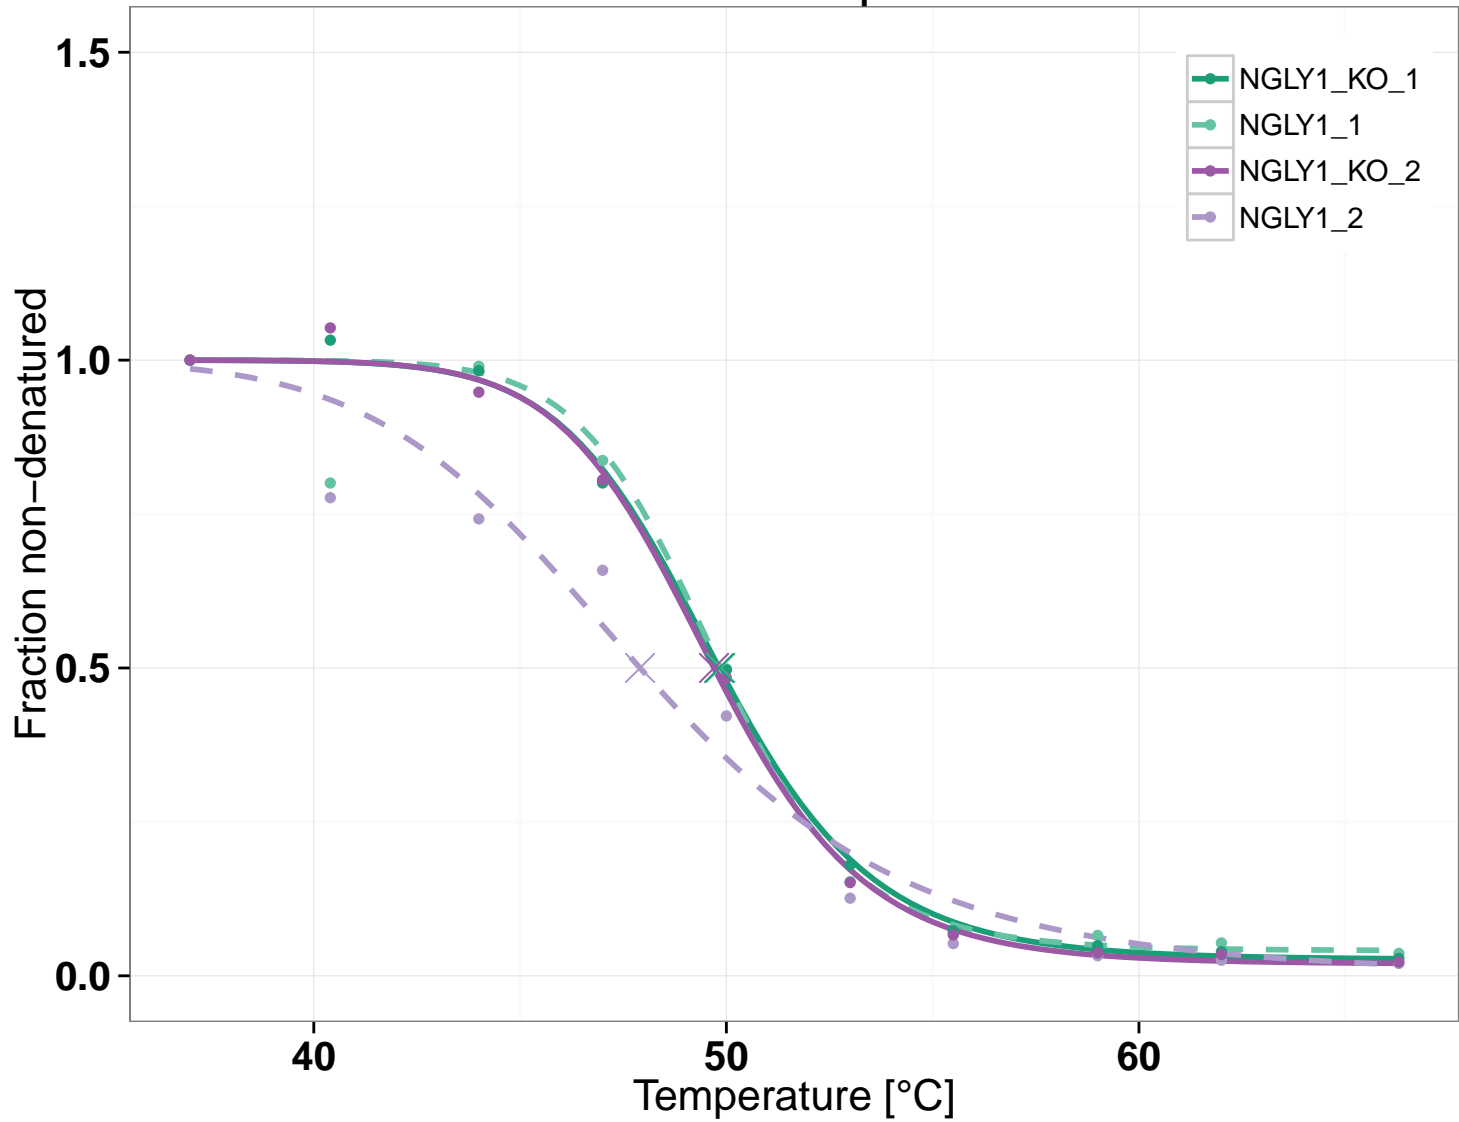

|            | meltPoint | slope  | plateau | R2   |
|------------|-----------|--------|---------|------|
| NGLY1_KO_1 | 49.83     | -0.13  | 0.03    | 1    |
| NGLY1_1    | 49.85     | -0.14  | 0.04    | 0.97 |
| NGLY1_KO_2 | 49.7      | -0.13  | 0.02    | 1    |
| NGLY1_2    | 47.91     | -0.077 | 0       | 0.96 |

Supplement: Supplementary file 5563 [file 1]

# IPI00300971.4|ALG6

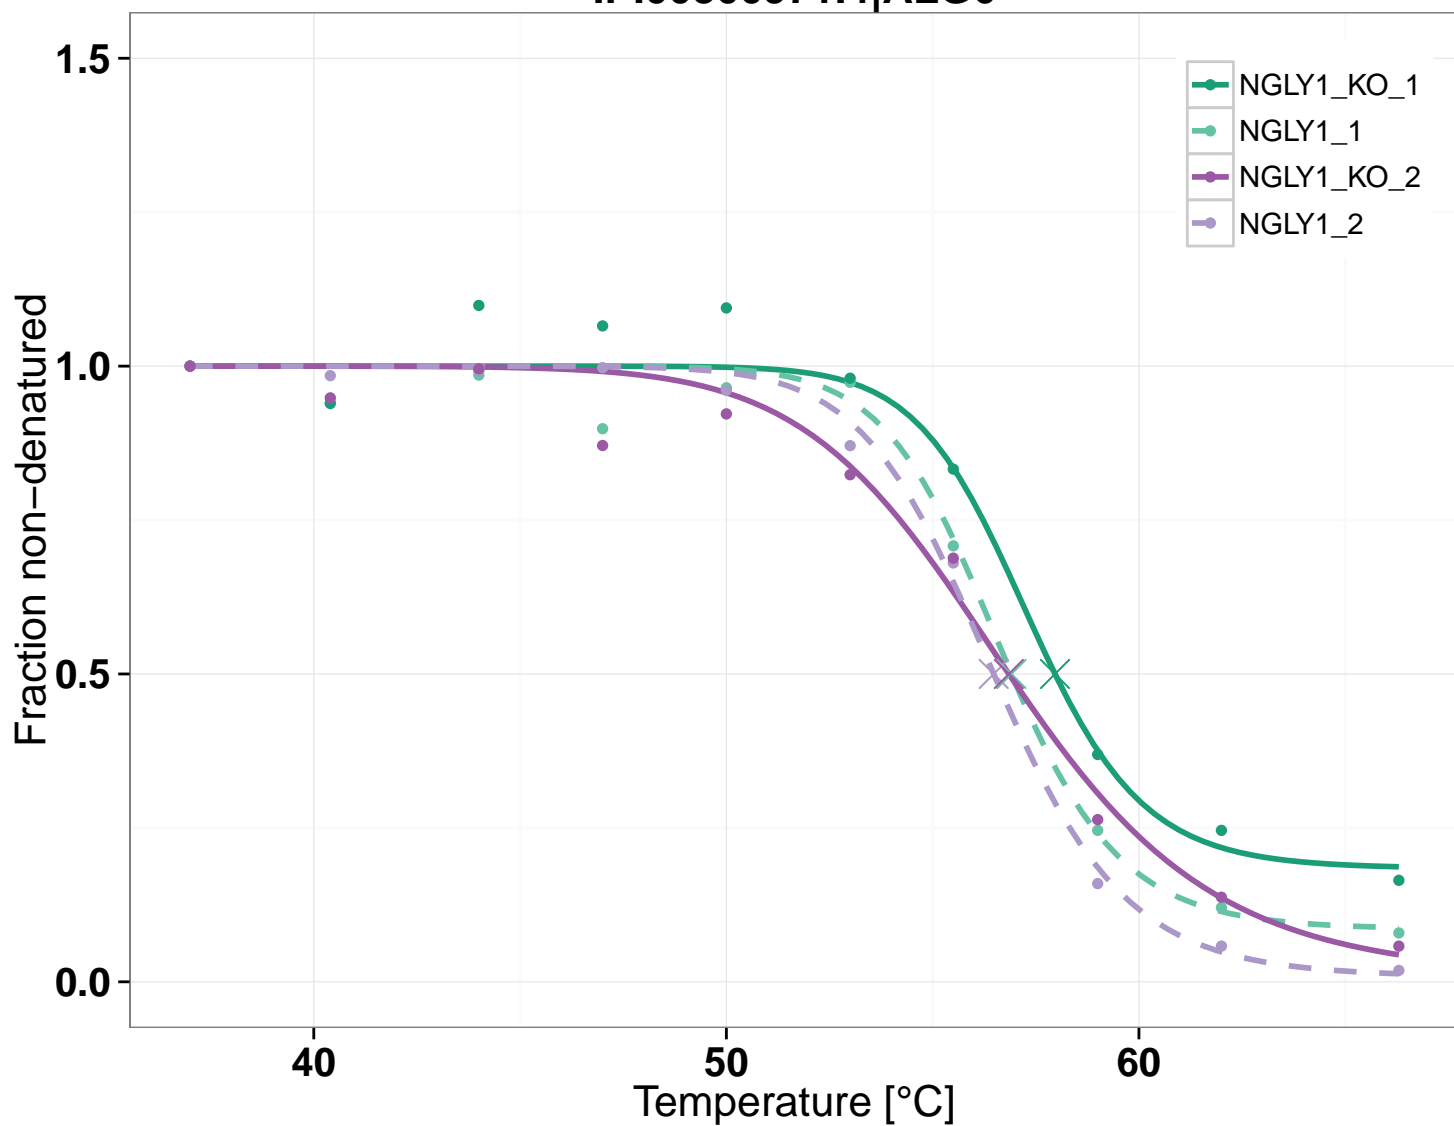

|            | meltPoint | slope | plateau | R2   |
|------------|-----------|-------|---------|------|
| NGLY1_KO_1 | 57.97     | -0.15 | 0.18    | 0.98 |
| NGLY1_1    | 56.91     | -0.16 | 0.09    | 0.99 |
| NGLY1_KO_2 | 56.85     | -0.1  | 0.01    | 0.98 |
| NGLY1_2    | 56.48     | -0.16 | 0.01    | 1    |

Supplement: Supplementary file 5564 [file 1]

IPI00028888.1|HNRNPD

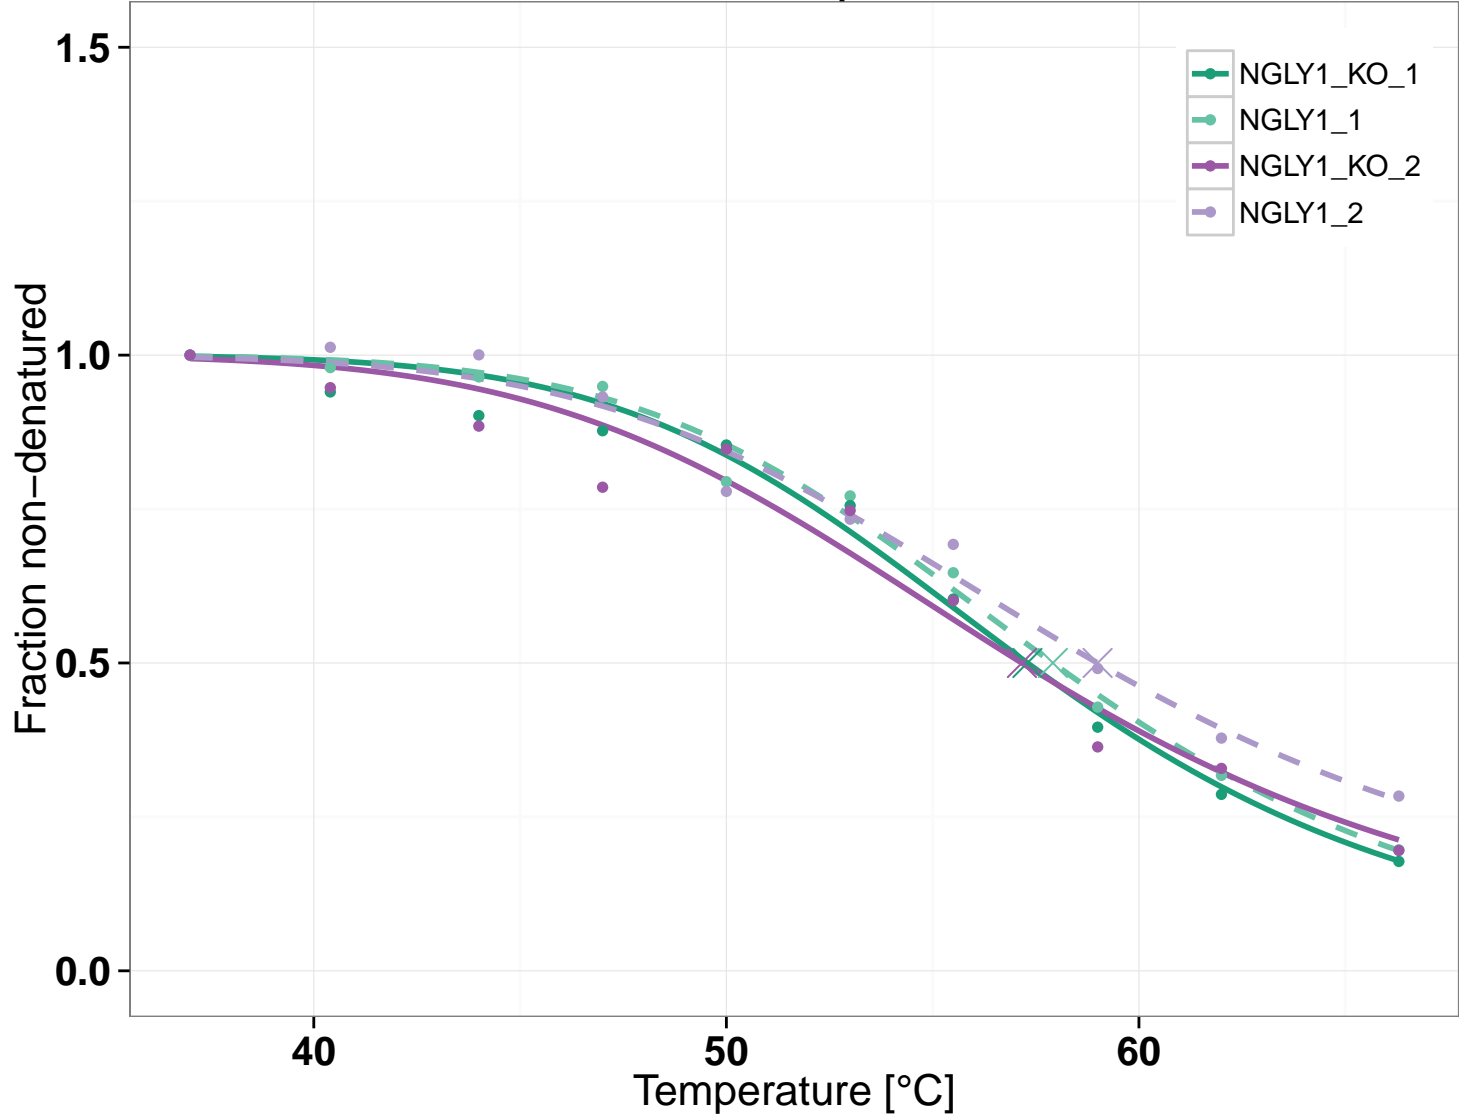

|            | meltPoint | slope  | plateau | R2   |
|------------|-----------|--------|---------|------|
| NGLY1_KO_1 | 57.3      | -0.051 | 0       | 0.98 |
| NGLY1_1    | 57.91     | -0.05  | 0       | 0.99 |
| NGLY1_KO_2 | 57.16     | -0.043 | 0       | 0.96 |
| NGLY1_2    | 59        | -0.041 | 0.06    | 0.99 |

Supplement: Supplementary file 5565 [file 1]

# IPI00337495.3|PLOD2

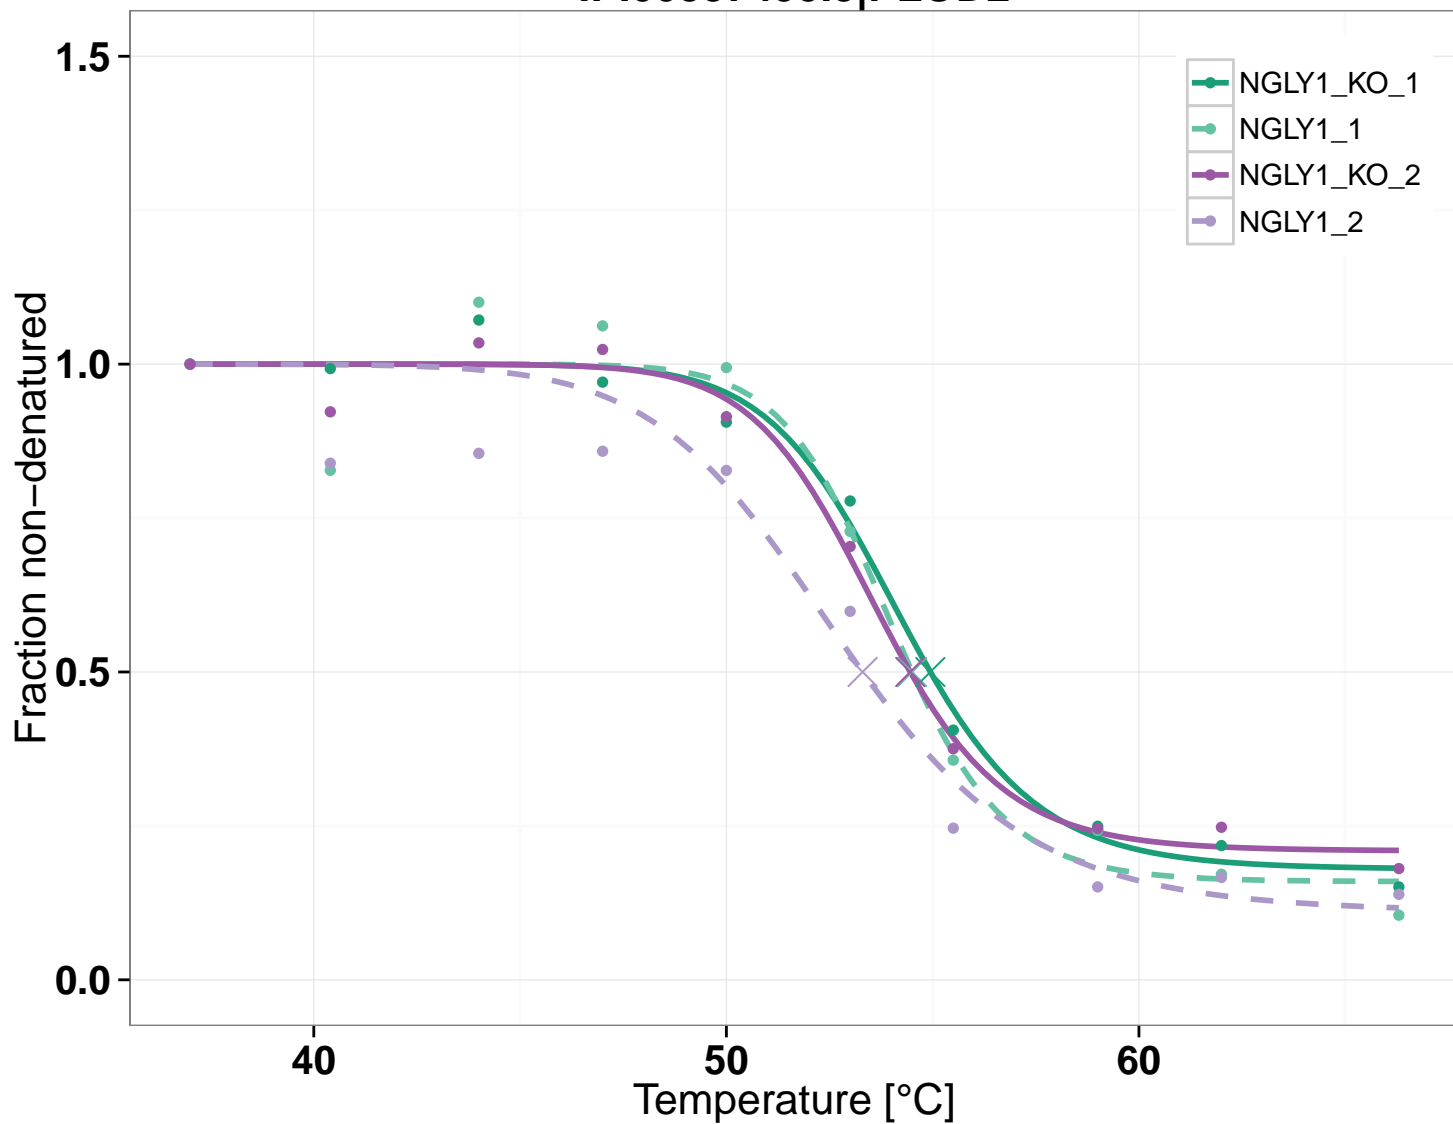

|            | meltPoint | slope  | plateau | R2   |
|------------|-----------|--------|---------|------|
| NGLY1_KO_1 | 54.94     | -0.13  | 0.18    | 0.99 |
| NGLY1_1    | 54.5      | -0.16  | 0.16    | 0.96 |
| NGLY1_KO_2 | 54.46     | -0.13  | 0.21    | 0.99 |
| NGLY1_2    | 53.3      | -0.098 | 0.11    | 0.94 |

Supplement: Supplementary file 5566 [file 1]

# IPI00293963.4|CDYL

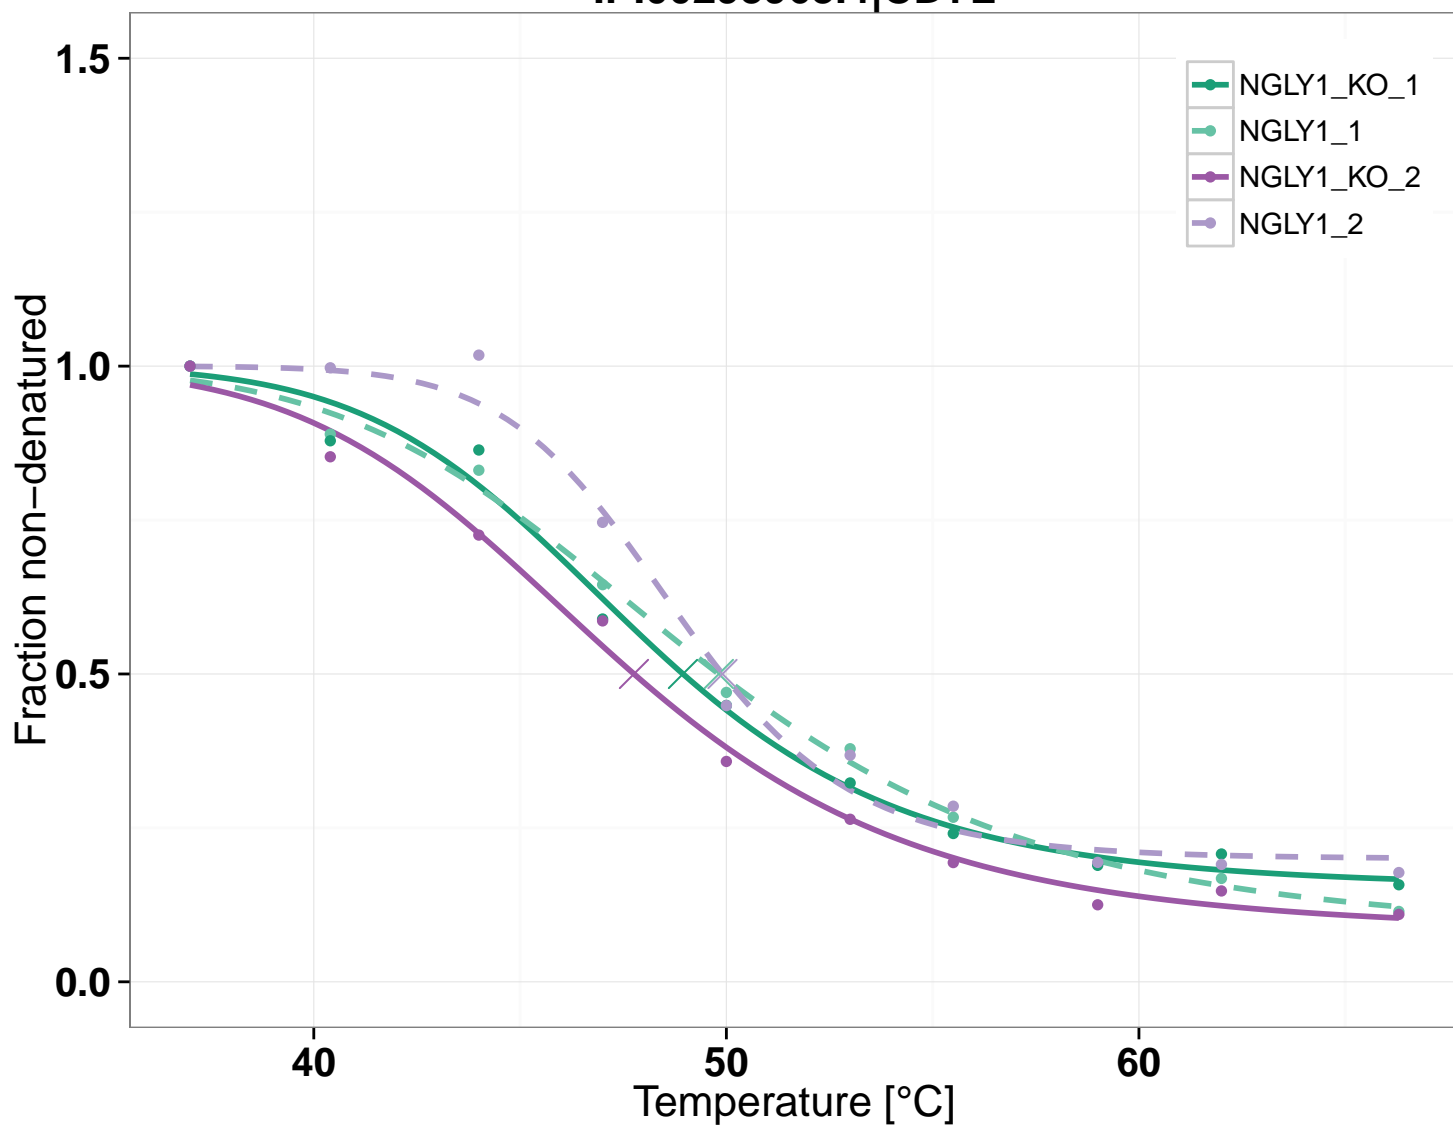

|            | meltPoint | slope  | plateau | R2   |
|------------|-----------|--------|---------|------|
| NGLY1_KO_1 | 48.95     | -0.065 | 0.15    | 0.99 |
| NGLY1_1    | 49.82     | -0.054 | 0.07    | 1    |
| NGLY1_KO_2 | 47.76     | -0.062 | 0.08    | 0.99 |
| NGLY1_2    | 49.91     | -0.095 | 0.2     | 0.99 |

Supplement: Supplementary file 5567 [file 1]

IPI00514648.1|SMARCA2

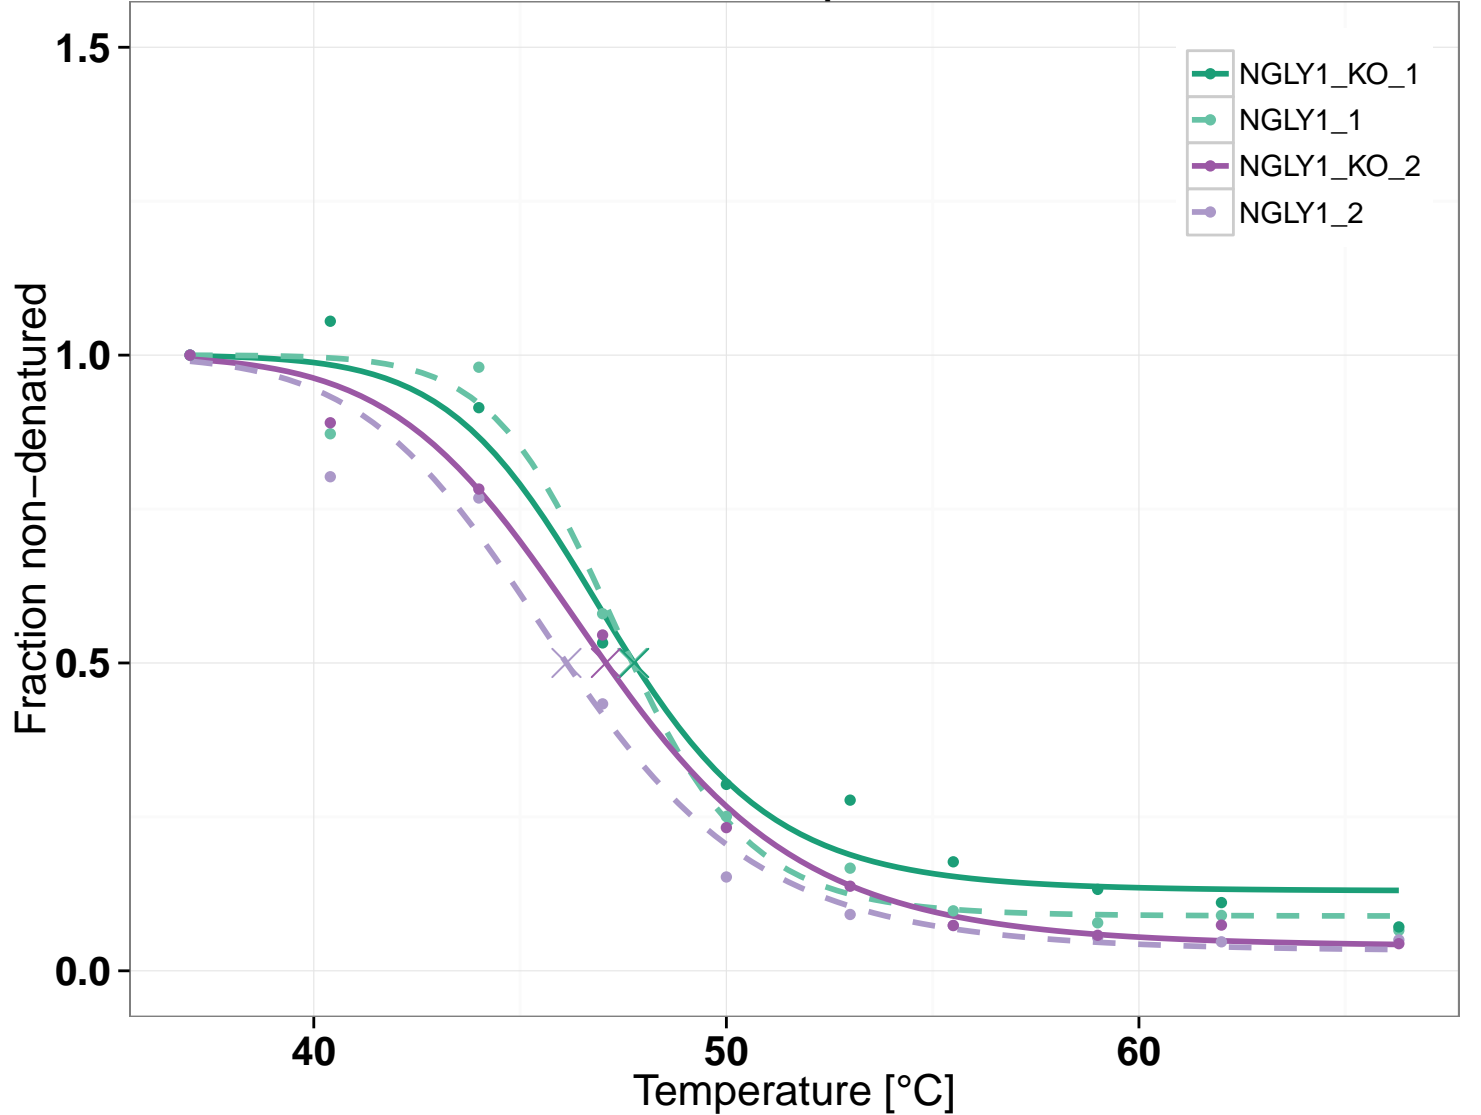

|            | meltPoint | slope  | plateau | R2   |
|------------|-----------|--------|---------|------|
| NGLY1_KO_1 | 47.76     | -0.11  | 0.13    | 0.98 |
| NGLY1_1    | 47.72     | -0.15  | 0.09    | 0.98 |
| NGLY1_KO_2 | 47.08     | -0.097 | 0.04    | 0.99 |
| NGLY1_2    | 46.12     | -0.1   | 0.03    | 0.98 |

Supplement: Supplementary file 5568 [file 1]

IPI00414860.6|RPL37A

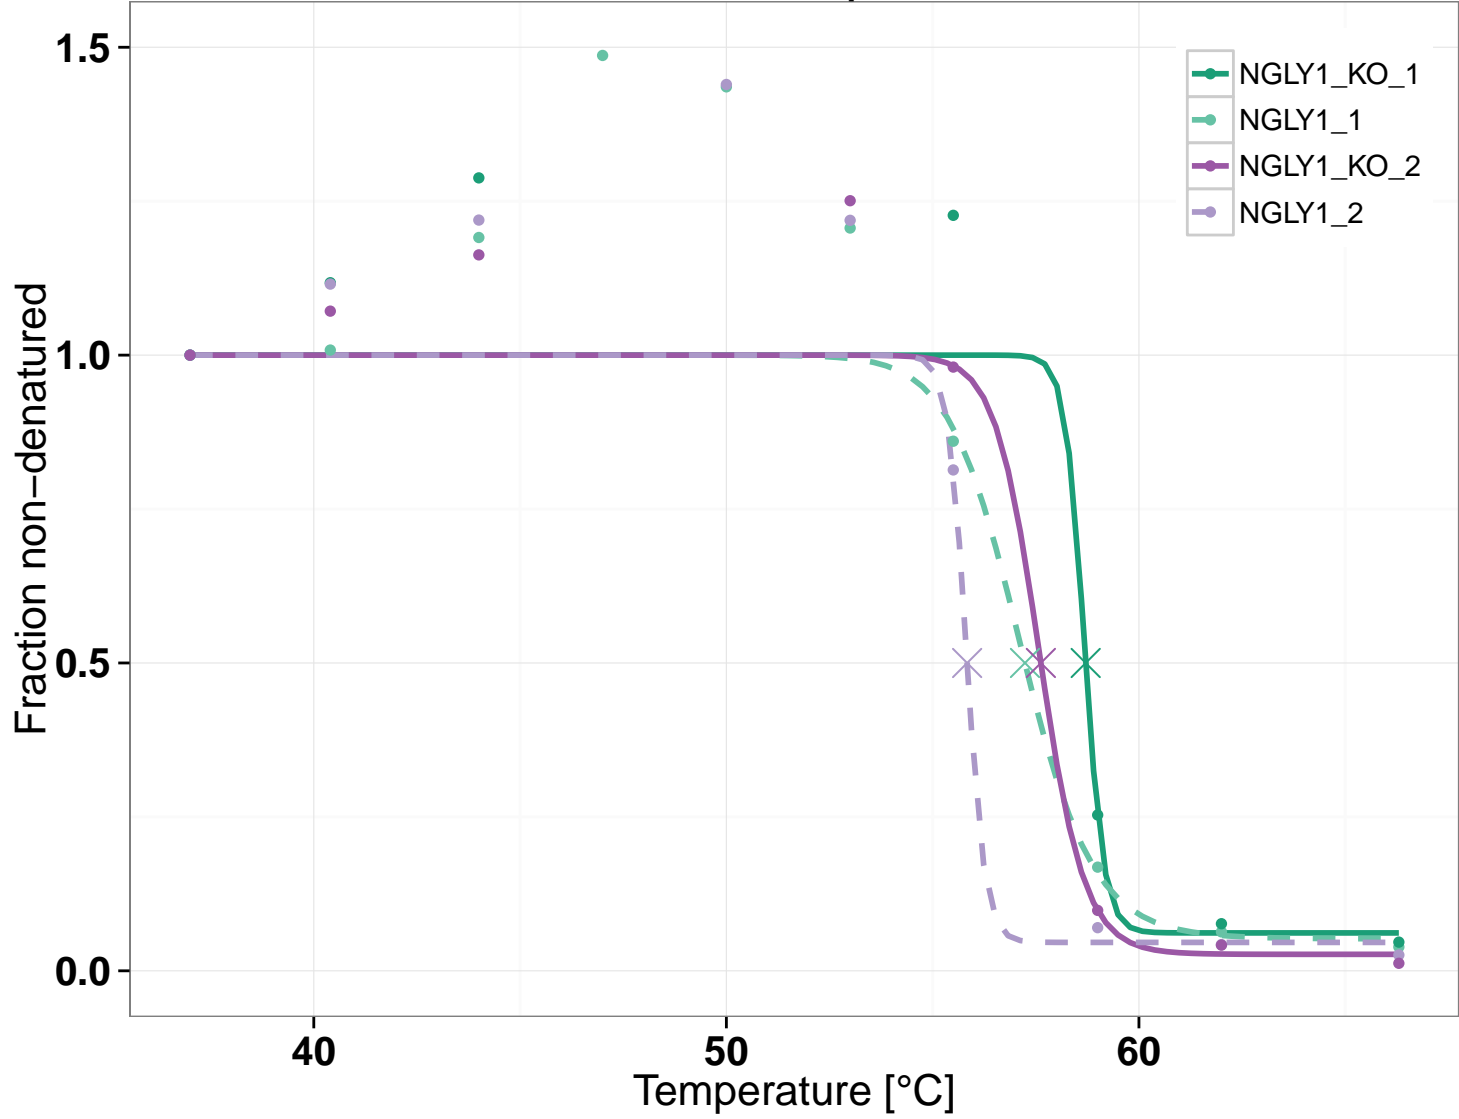

|            | meltPoint | slope | plateau | R2   |
|------------|-----------|-------|---------|------|
| NGLY1_KO_1 | 58.71     | -1    | 0.06    | 0.58 |
| NGLY1_1    | 57.24     | -0.27 | 0.05    | 0.82 |
| NGLY1_KO_2 | 57.62     | -0.45 | 0.03    | 0.75 |
| NGLY1_2    | 55.84     | -1.1  | 0.05    | 0.78 |

Supplement: Supplementary file 5569 [file 1]

IPI00873376.1|VPS13A

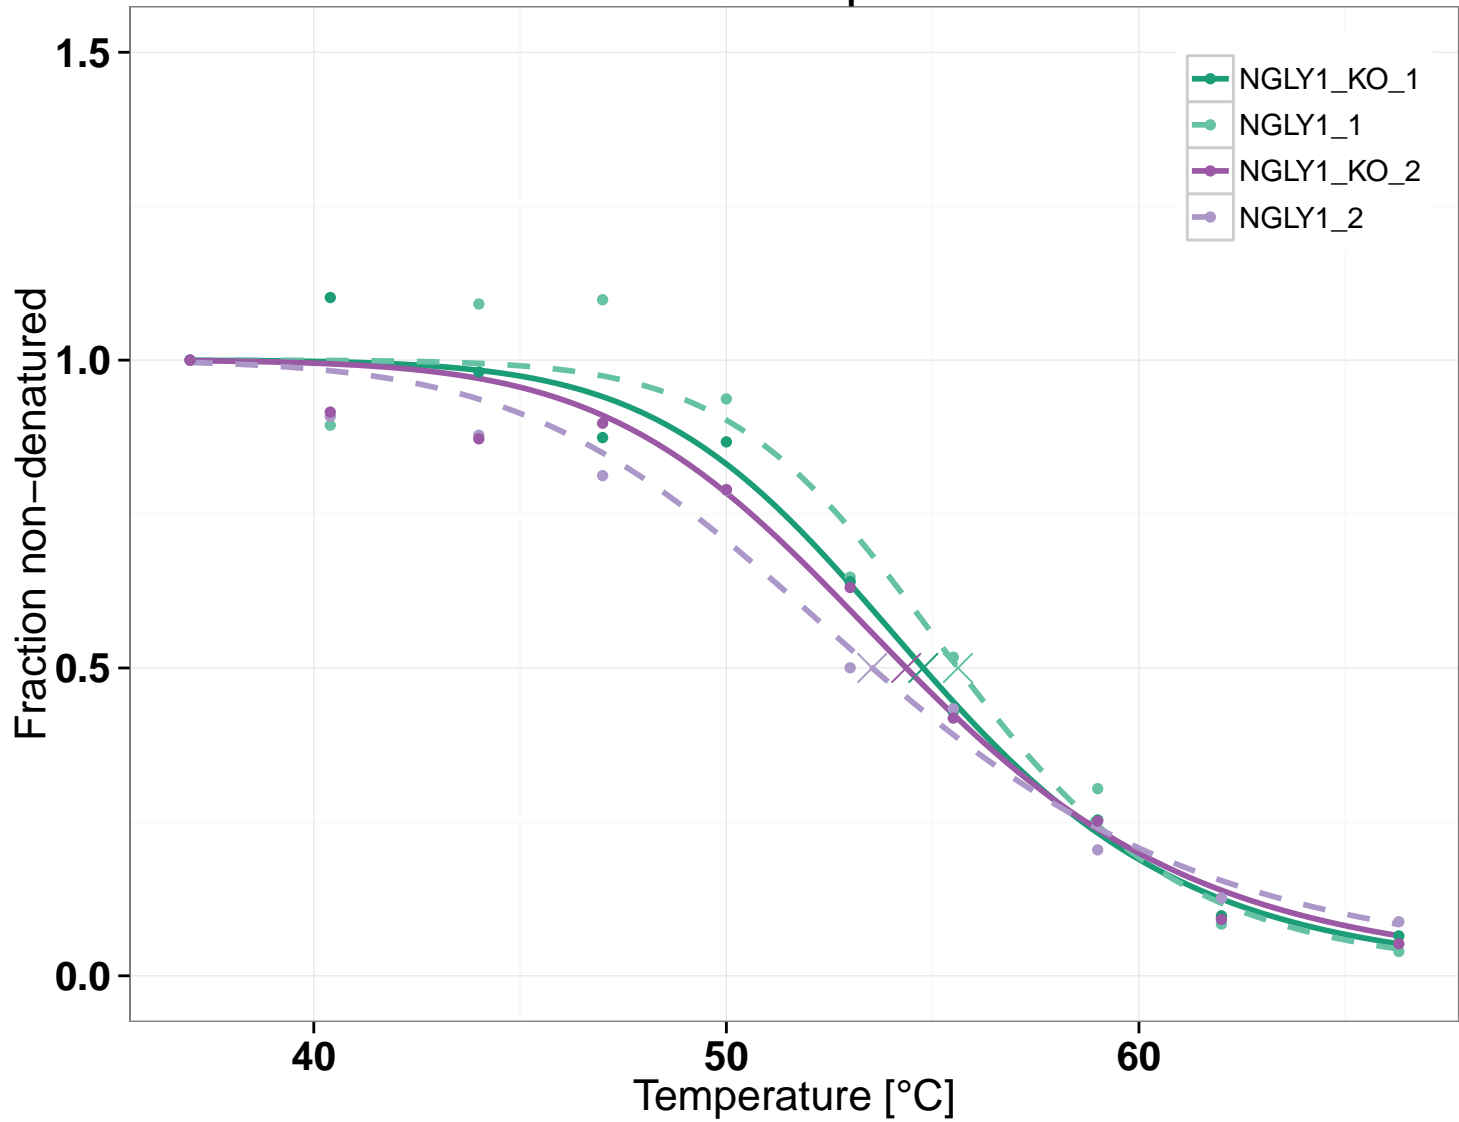

|            | meltPoint | slope  | plateau | R2   |
|------------|-----------|--------|---------|------|
| NGLY1_KO_1 | 54.77     | -0.077 | 0       | 0.99 |
| NGLY1_1    | 55.61     | -0.09  | 0.01    | 0.97 |
| NGLY1_KO_2 | 54.36     | -0.069 | 0       | 0.98 |
| NGLY1_2    | 53.54     | -0.06  | 0       | 0.98 |

Supplement: Supplementary file 5570 [file 1]

IPI00788879.2|TBC1D23

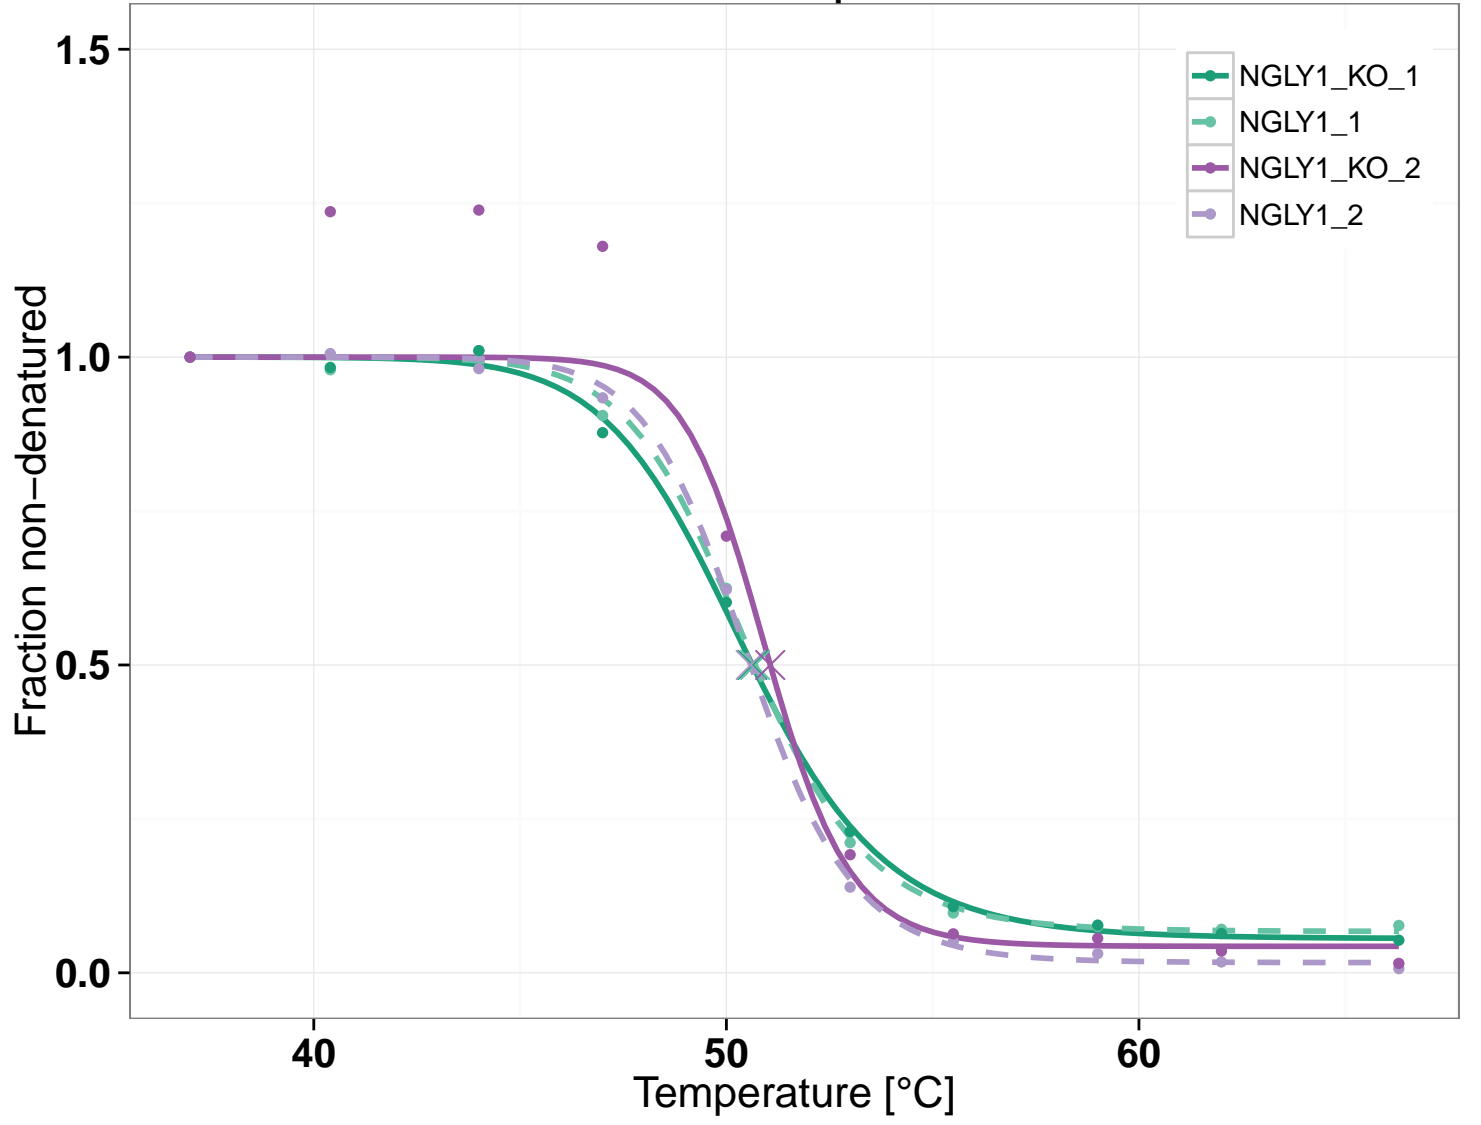

|            | meltPoint | slope | plateau | R2   |
|------------|-----------|-------|---------|------|
| NGLY1_KO_1 | 50.63     | -0.14 | 0.06    | 1    |
| NGLY1_1    | 50.7      | -0.16 | 0.07    | 1    |
| NGLY1_KO_2 | 51.06     | -0.24 | 0.04    | 0.94 |
| NGLY1_2    | 50.59     | -0.19 | 0.02    | 1    |

Supplement: Supplementary file 5571 [file 1]

# IPI00873649.1|CDKN2AIPNL

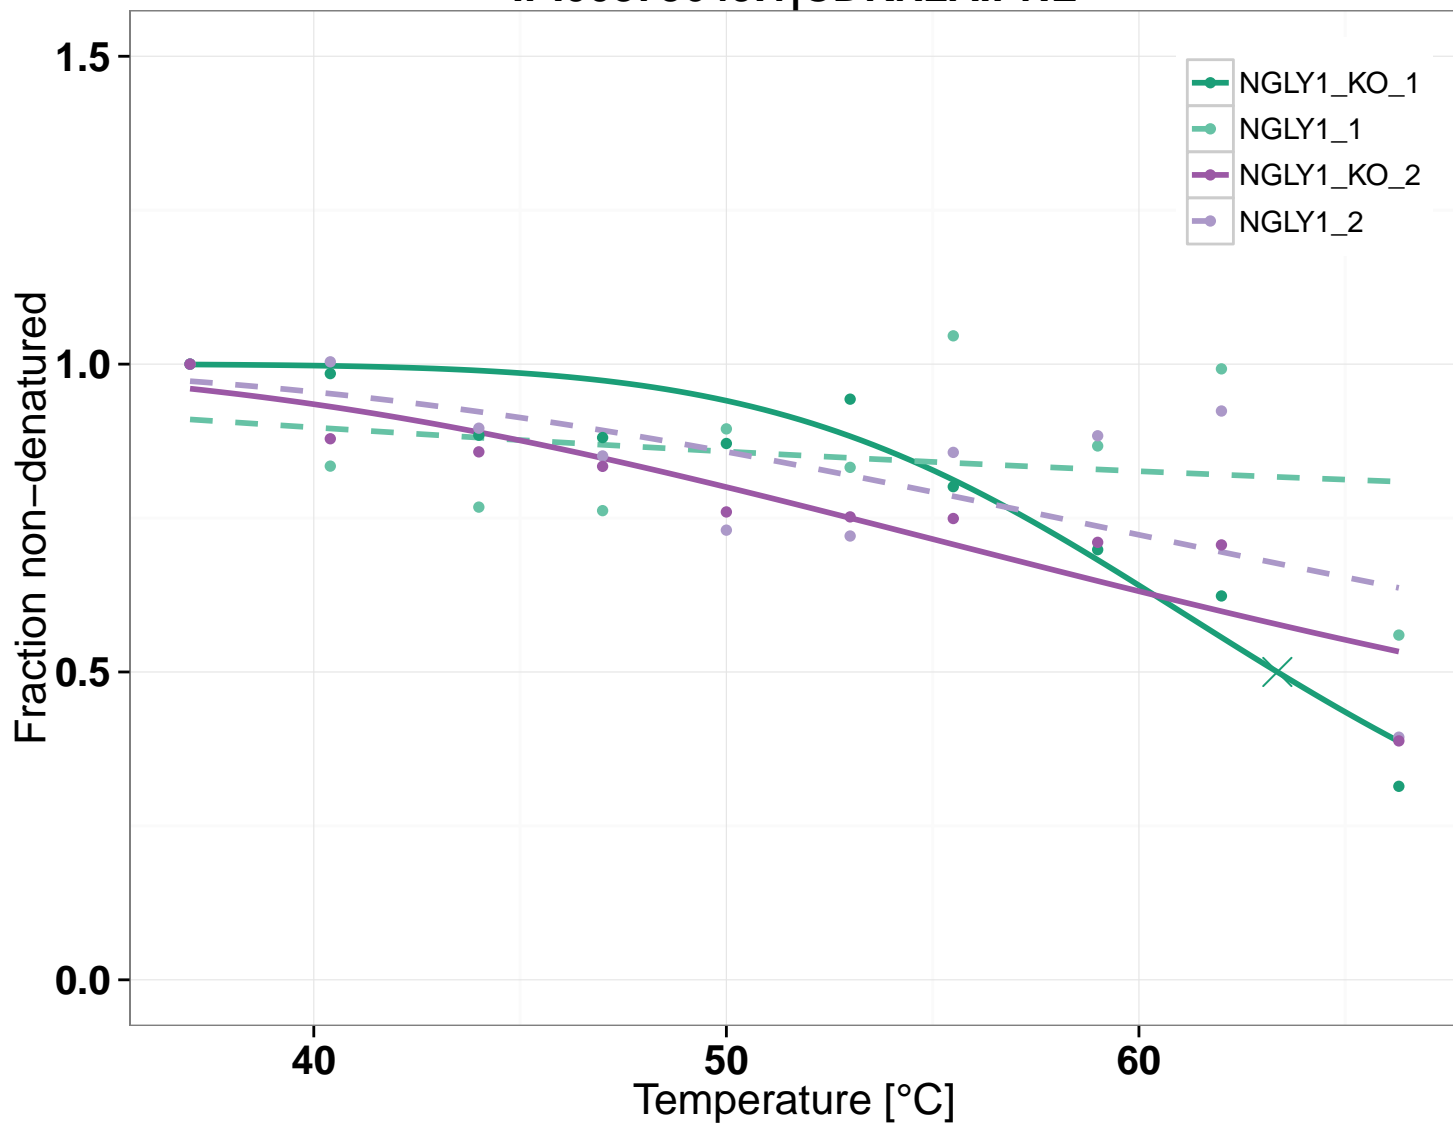

|            | meltPoint | slope  | plateau | R2   |
|------------|-----------|--------|---------|------|
| NGLY1_KO_1 | 63.36     | -0.042 | 0       | 0.9  |
| NGLY1_1    | -         | -      | 0.21    | 0.05 |
| NGLY1_KO_2 | -         | -0.017 | 0       | 0.8  |
| NGLY1_2    | -         | -0.014 | 0       | 0.41 |

Supplement: Supplementary file 5572 [file 1]

IPI00306380.10|GNL3

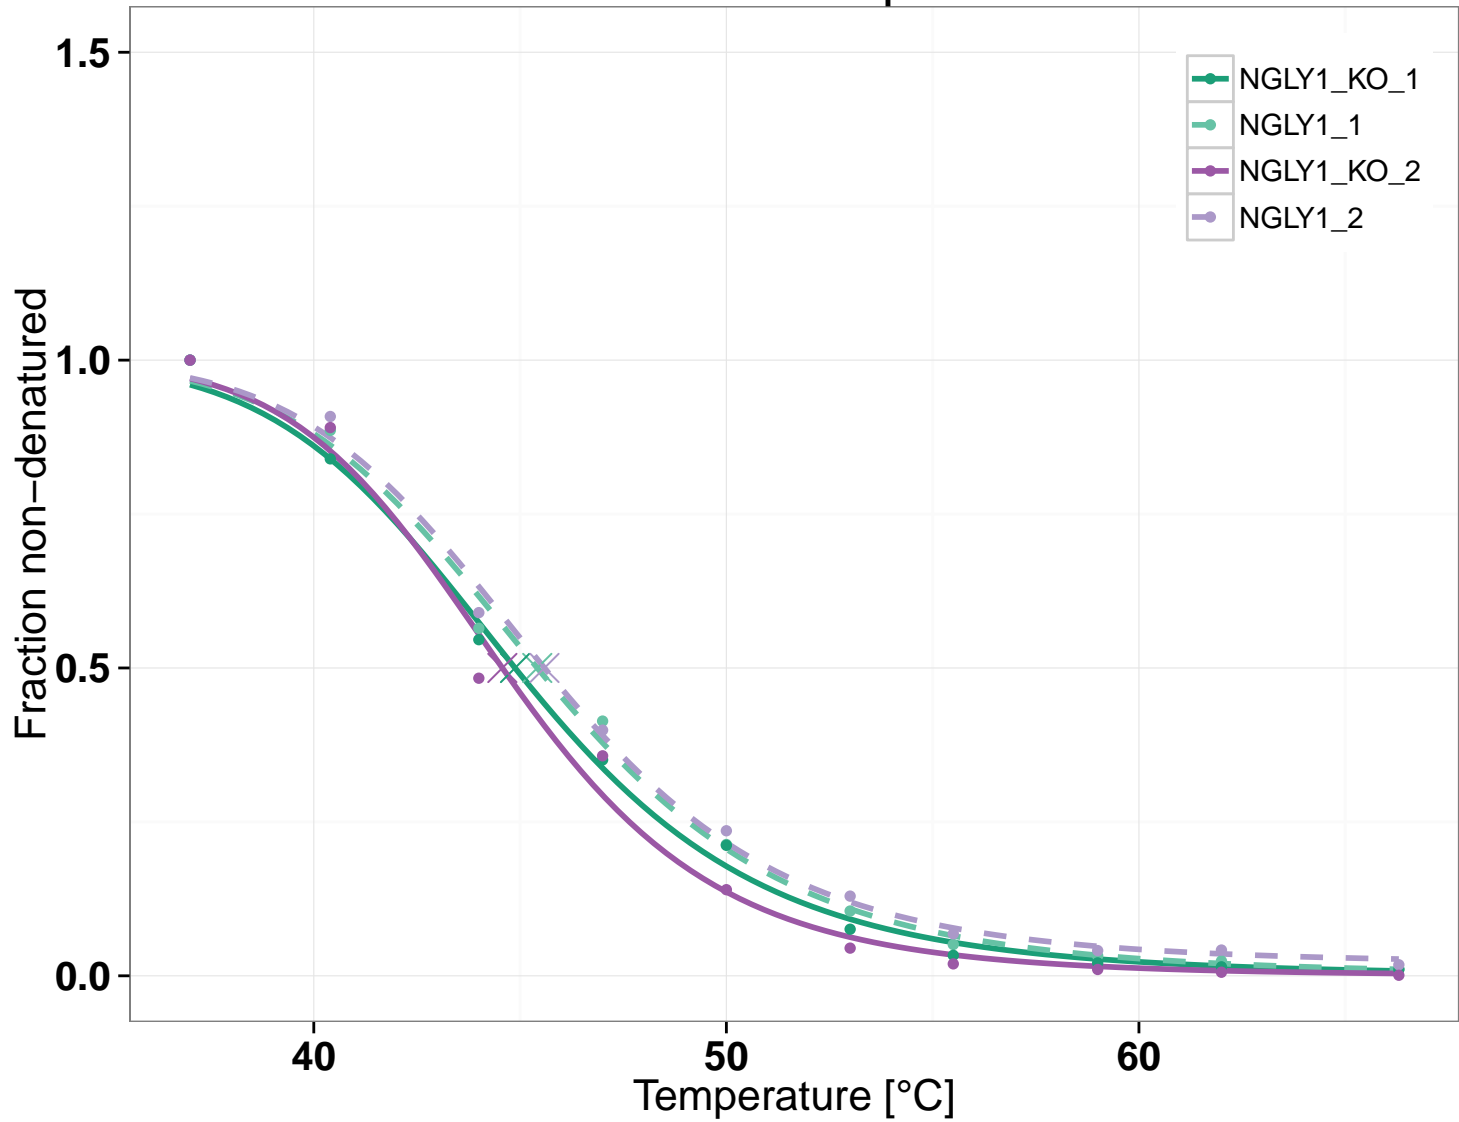

|            | meltPoint | slope  | plateau | R2   |
|------------|-----------|--------|---------|------|
| NGLY1_KO_1 | 44.88     | -0.085 | 0       | 1    |
| NGLY1_1    | 45.42     | -0.083 | 0       | 1    |
| NGLY1_KO_2 | 44.57     | -0.097 | 0       | 0.99 |
| NGLY1_2    | 45.59     | -0.084 | 0.02    | 1    |

Supplement: Supplementary file 5573 [file 1]

IPI00303439.2|SMARCB1

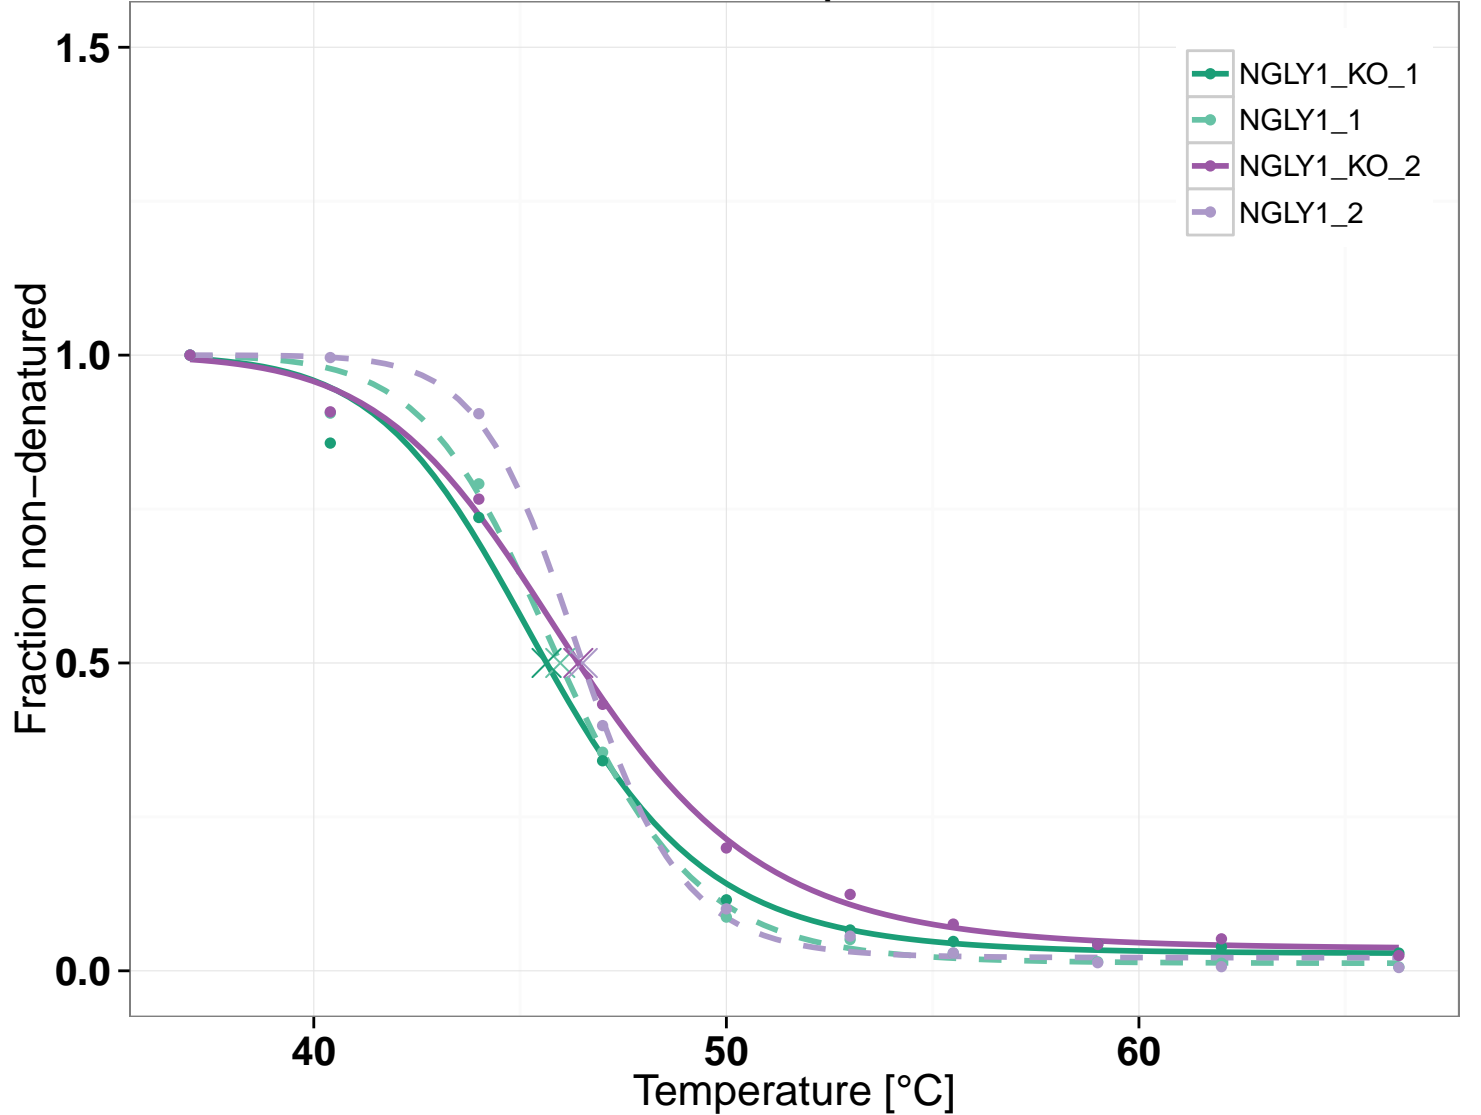

|            | meltPoint | slope | plateau | R2   |
|------------|-----------|-------|---------|------|
| NGLY1_KO_1 | 45.64     | -0.12 | 0.03    | 0.99 |
| NGLY1_1    | 45.97     | -0.15 | 0.01    | 1    |
| NGLY1_KO_2 | 46.41     | -0.1  | 0.04    | 1    |
| NGLY1_2    | 46.52     | -0.2  | 0.02    | 1    |

Supplement: Supplementary file 5574 [file 1]

IPI00306056.3|RPP25

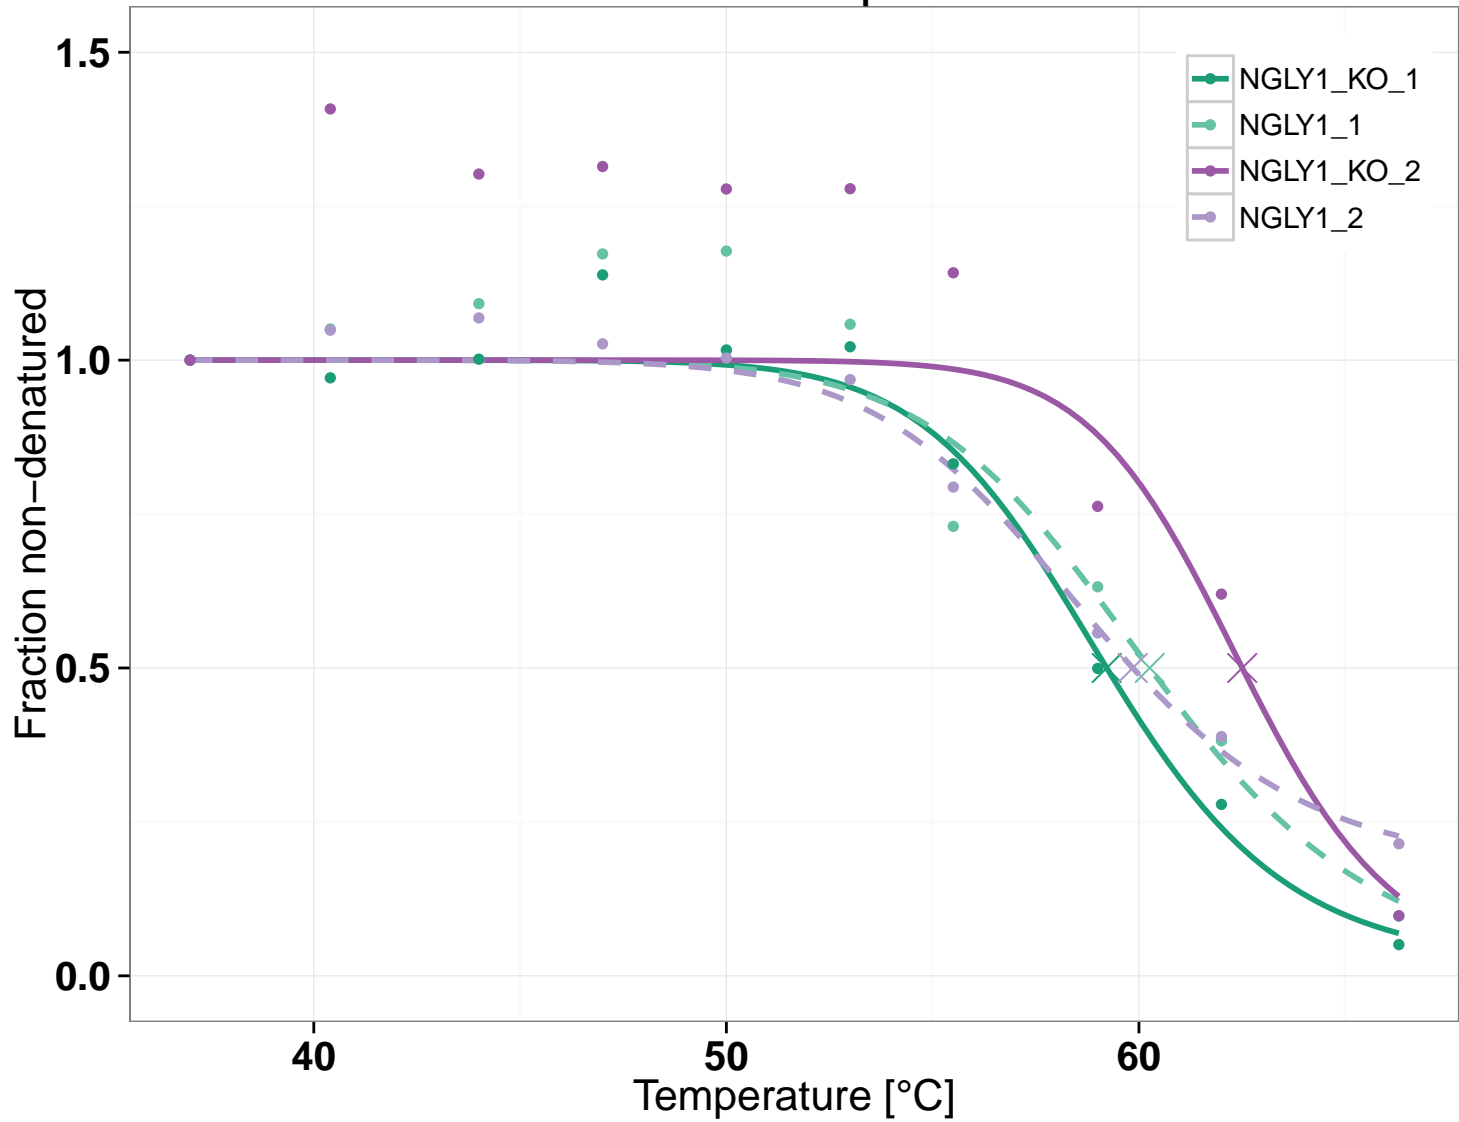

|            | meltPoint | slope  | plateau | R2   |
|------------|-----------|--------|---------|------|
| NGLY1_KO_1 | 59.22     | -0.11  | 0.02    | 0.98 |
| NGLY1_1    | 60.26     | -0.091 | 0       | 0.91 |
| NGLY1_KO_2 | 62.5      | -0.13  | 0       | 0.64 |
| NGLY1_2    | 59.85     | -0.08  | 0.17    | 0.99 |

Supplement: Supplementary file 5575 [file 1]

IPI00885055.1|KIDINS220

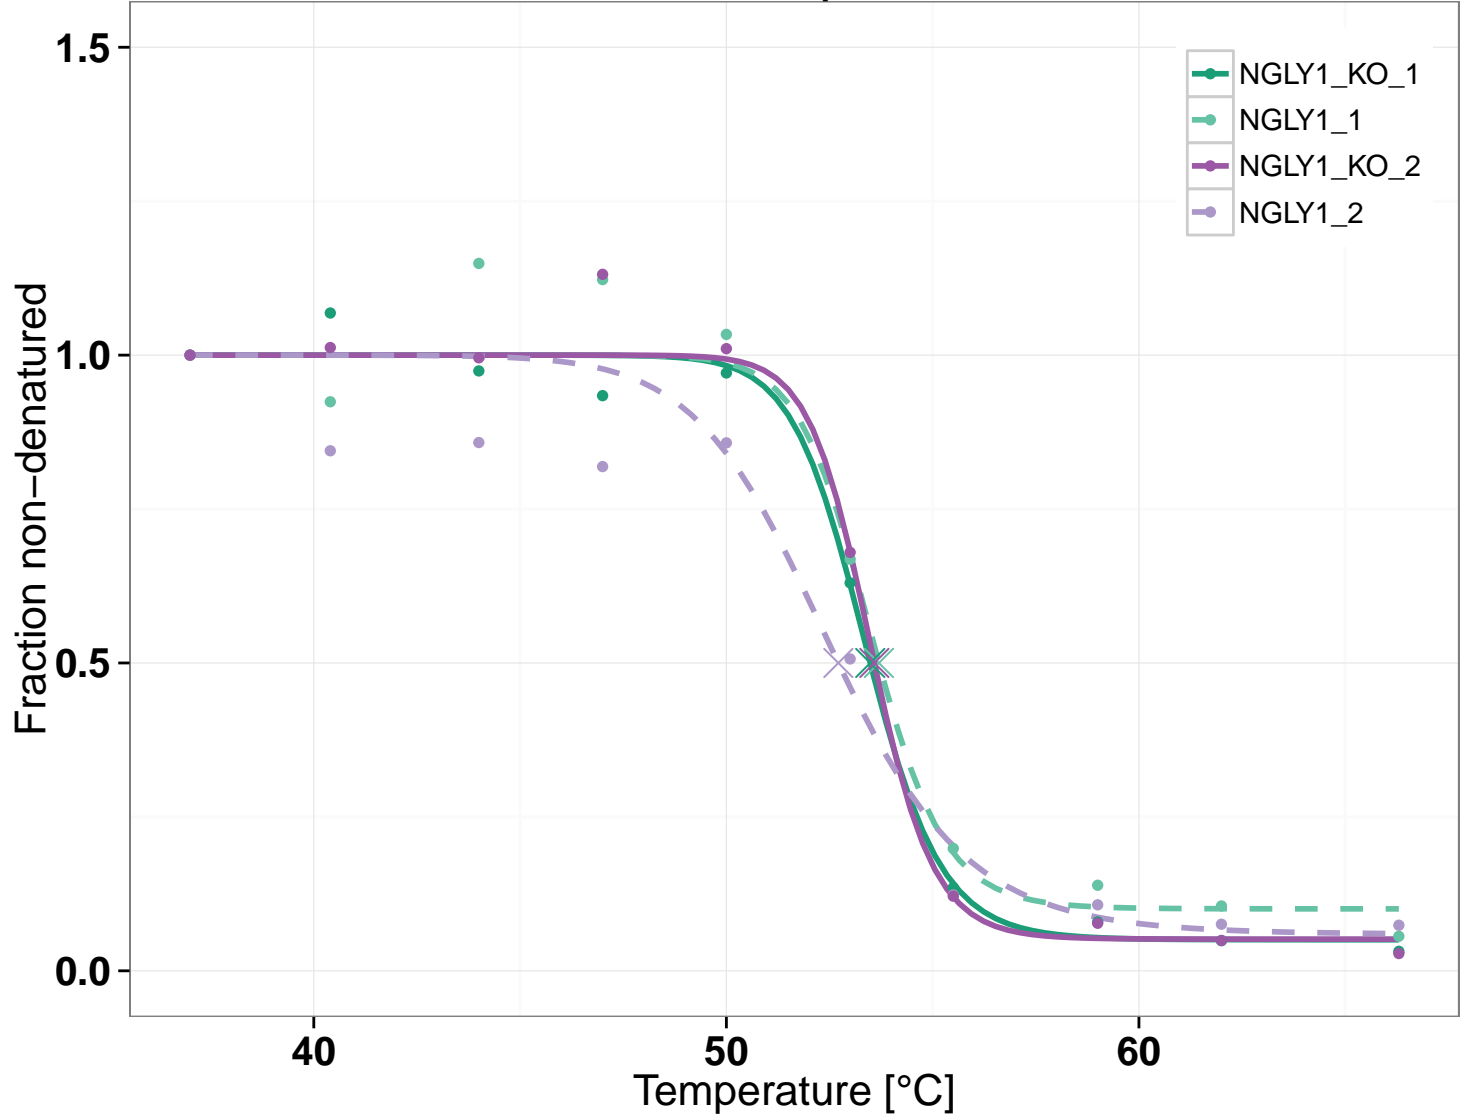

|            | meltPoint | slope | plateau | R2   |
|------------|-----------|-------|---------|------|
| NGLY1_KO_1 | 53.49     | -0.26 | 0.05    | 0.99 |
| NGLY1_1    | 53.7      | -0.26 | 0.1     | 0.97 |
| NGLY1_KO_2 | 53.59     | -0.32 | 0.05    | 0.99 |
| NGLY1_2    | 52.71     | -0.14 | 0.06    | 0.94 |

Supplement: Supplementary file 5576 [file 1]

# IPI00013847.4|UQCRC1

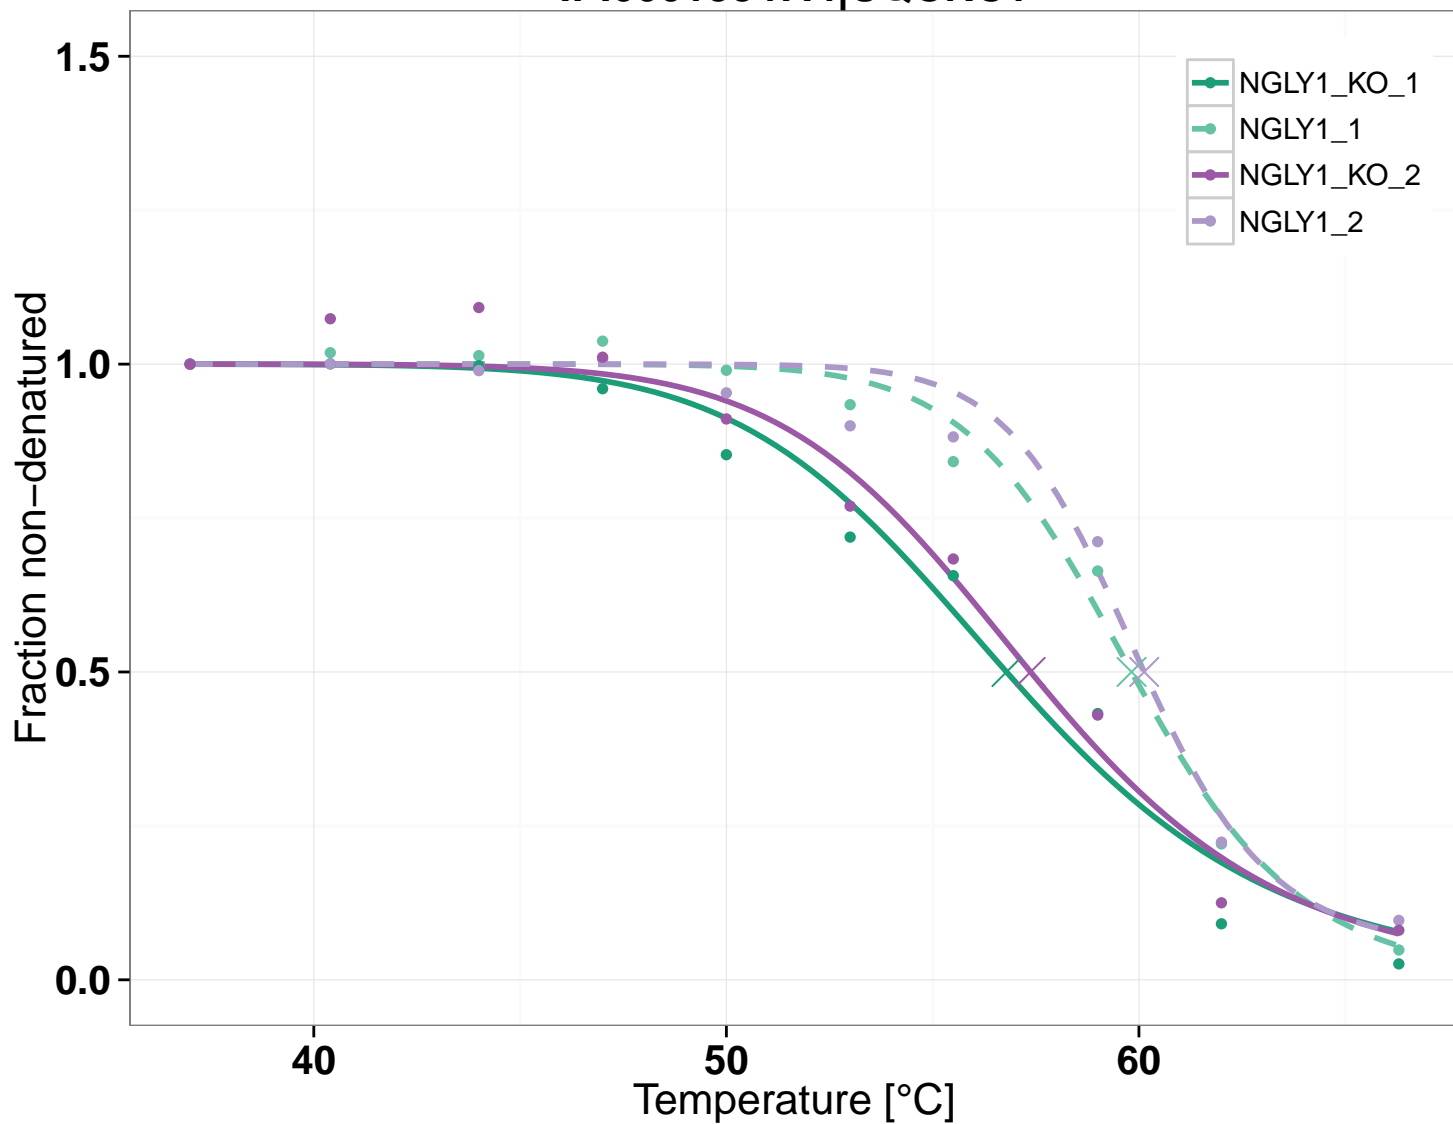

|            | meltPoint | slope  | plateau | R2   |
|------------|-----------|--------|---------|------|
| NGLY1_KO_1 | 56.79     | -0.077 | 0       | 0.98 |
| NGLY1_1    | 59.82     | -0.12  | 0       | 0.99 |
| NGLY1_KO_2 | 57.37     | -0.082 | 0       | 0.98 |
| NGLY1_2    | 60.13     | -0.15  | 0.05    | 0.98 |

Supplement: Supplementary file 5577 [file 1]

# IPI00464980.3|SIN3B

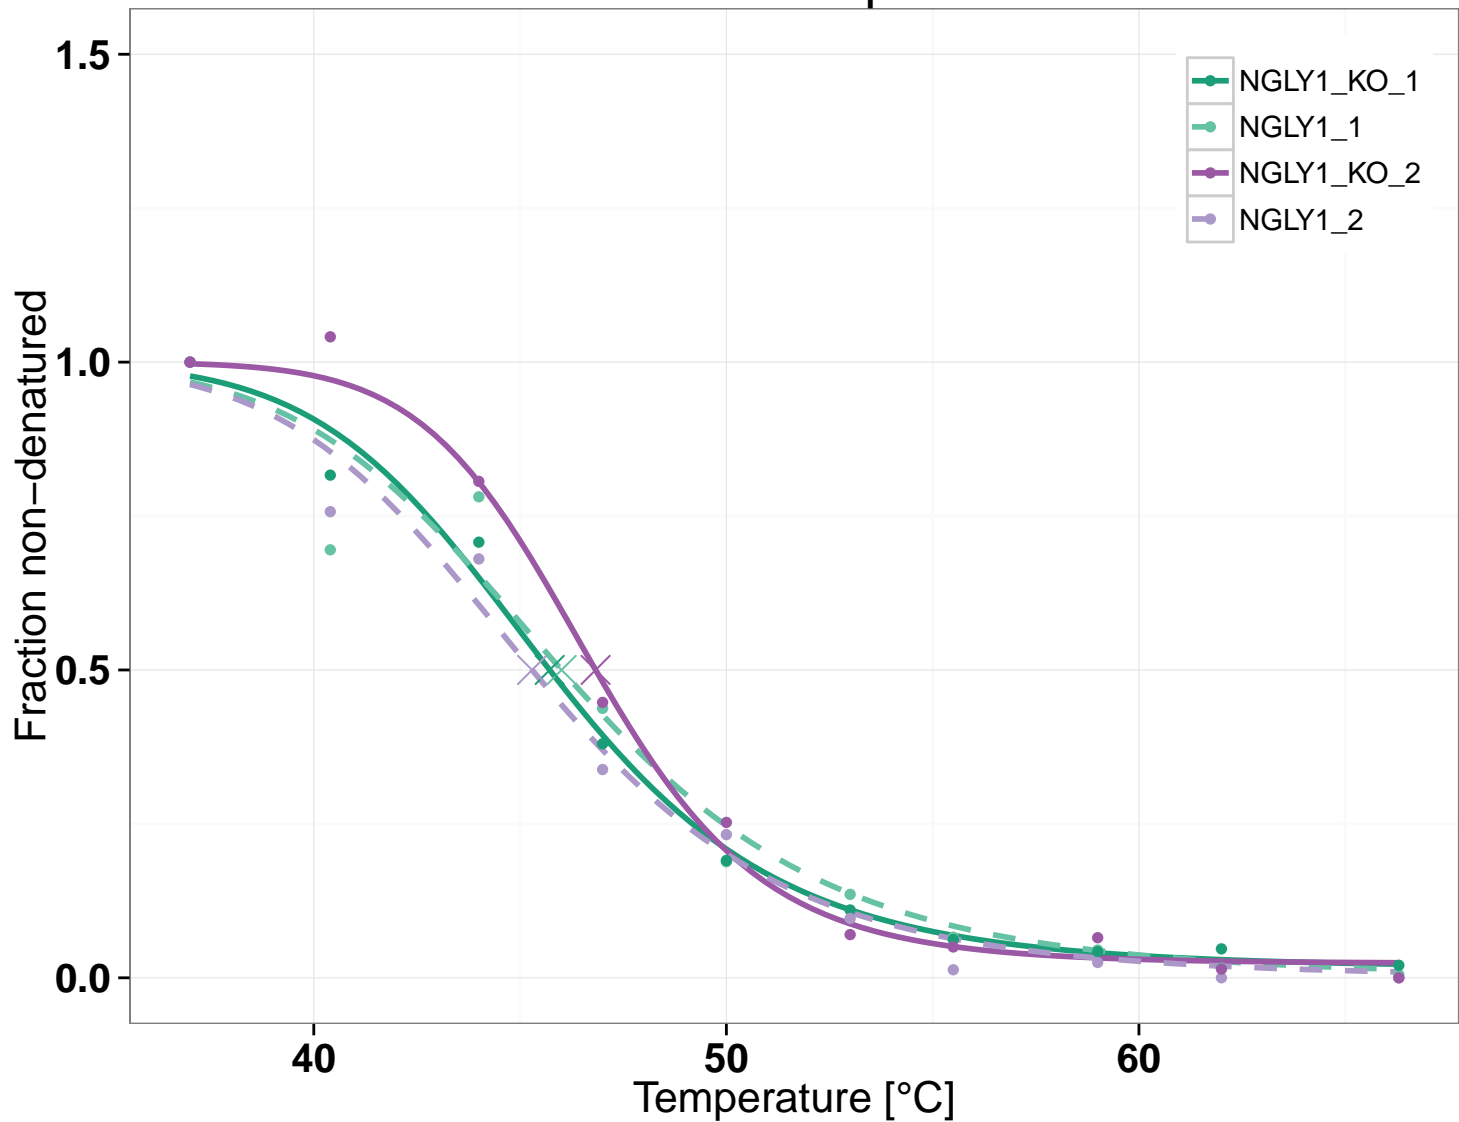

|            | meltPoint | slope  | plateau | R2   |
|------------|-----------|--------|---------|------|
| NGLY1_KO_1 | 45.72     | -0.088 | 0.02    | 0.99 |
| NGLY1_1    | 46.01     | -0.077 | 0       | 0.96 |
| NGLY1_KO_2 | 46.83     | -0.12  | 0.02    | 0.99 |
| NGLY1_2    | 45.29     | -0.082 | 0       | 0.98 |

Supplement: Supplementary file 5578 [file 1]

IPI00396279.3|CLASP1

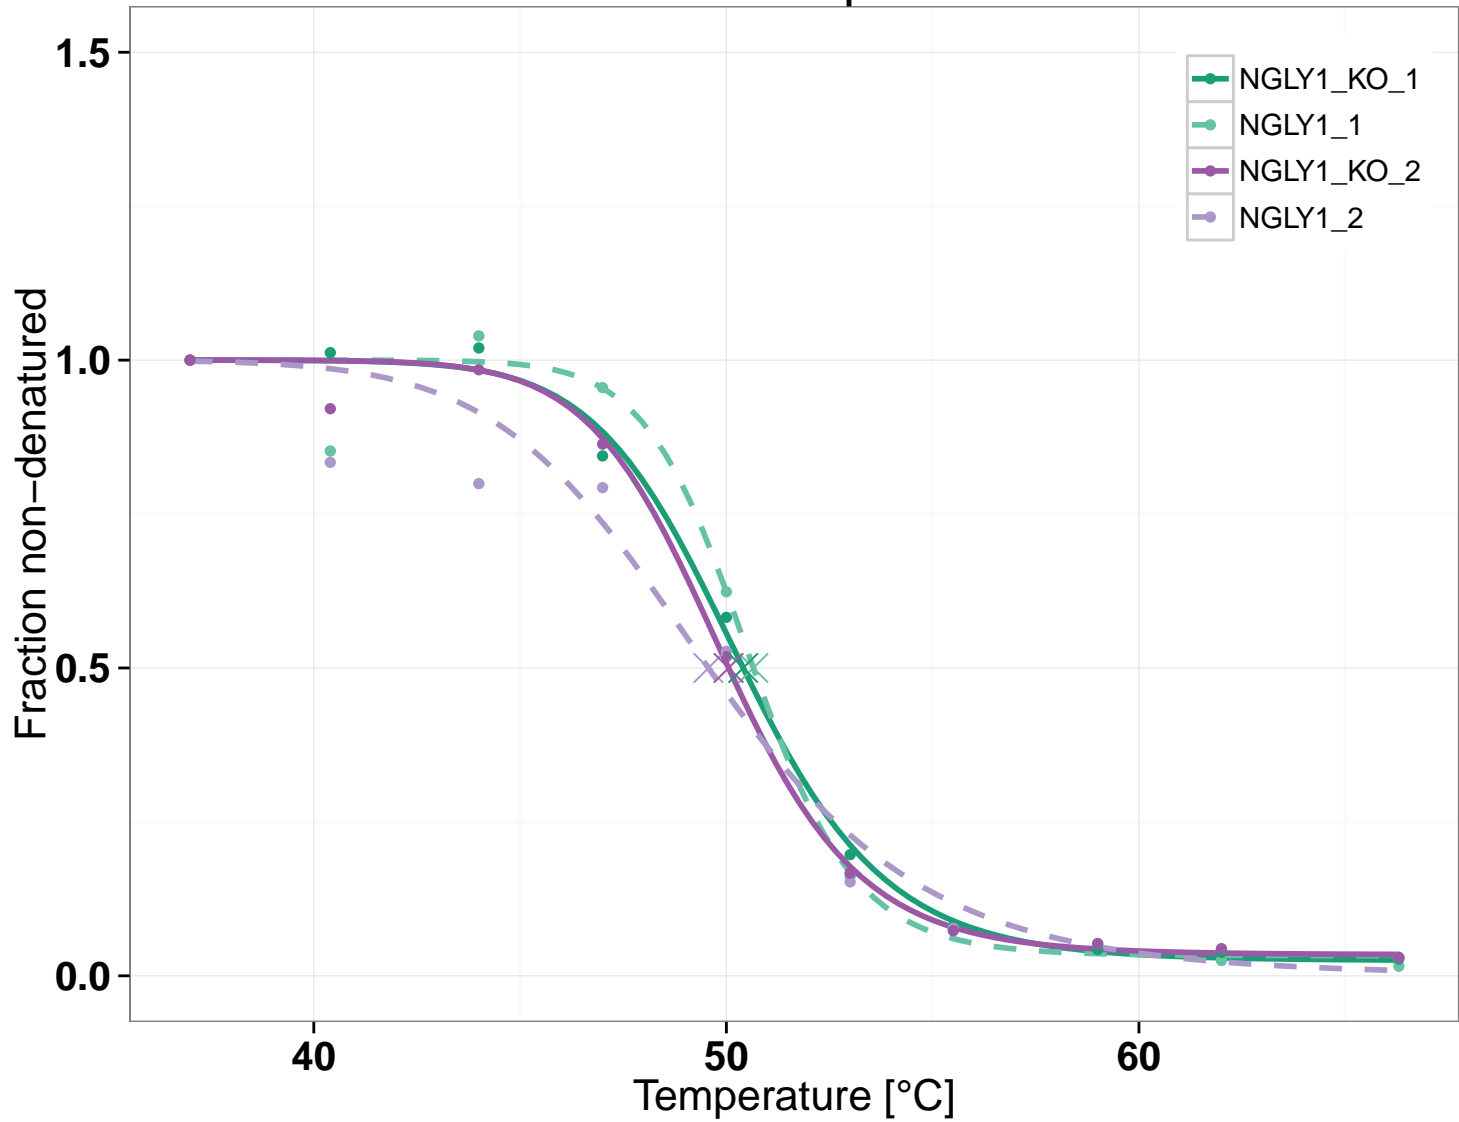

|            | meltPoint | slope  | plateau | R2   |
|------------|-----------|--------|---------|------|
| NGLY1_KO_1 | 50.41     | -0.14  | 0.02    | 1    |
| NGLY1_1    | 50.66     | -0.19  | 0.03    | 0.99 |
| NGLY1_KO_2 | 50.05     | -0.15  | 0.03    | 1    |
| NGLY1_2    | 49.57     | -0.096 | 0       | 0.96 |

Supplement: Supplementary file 5579 [file 1]

IPI00032313.1|S100A4

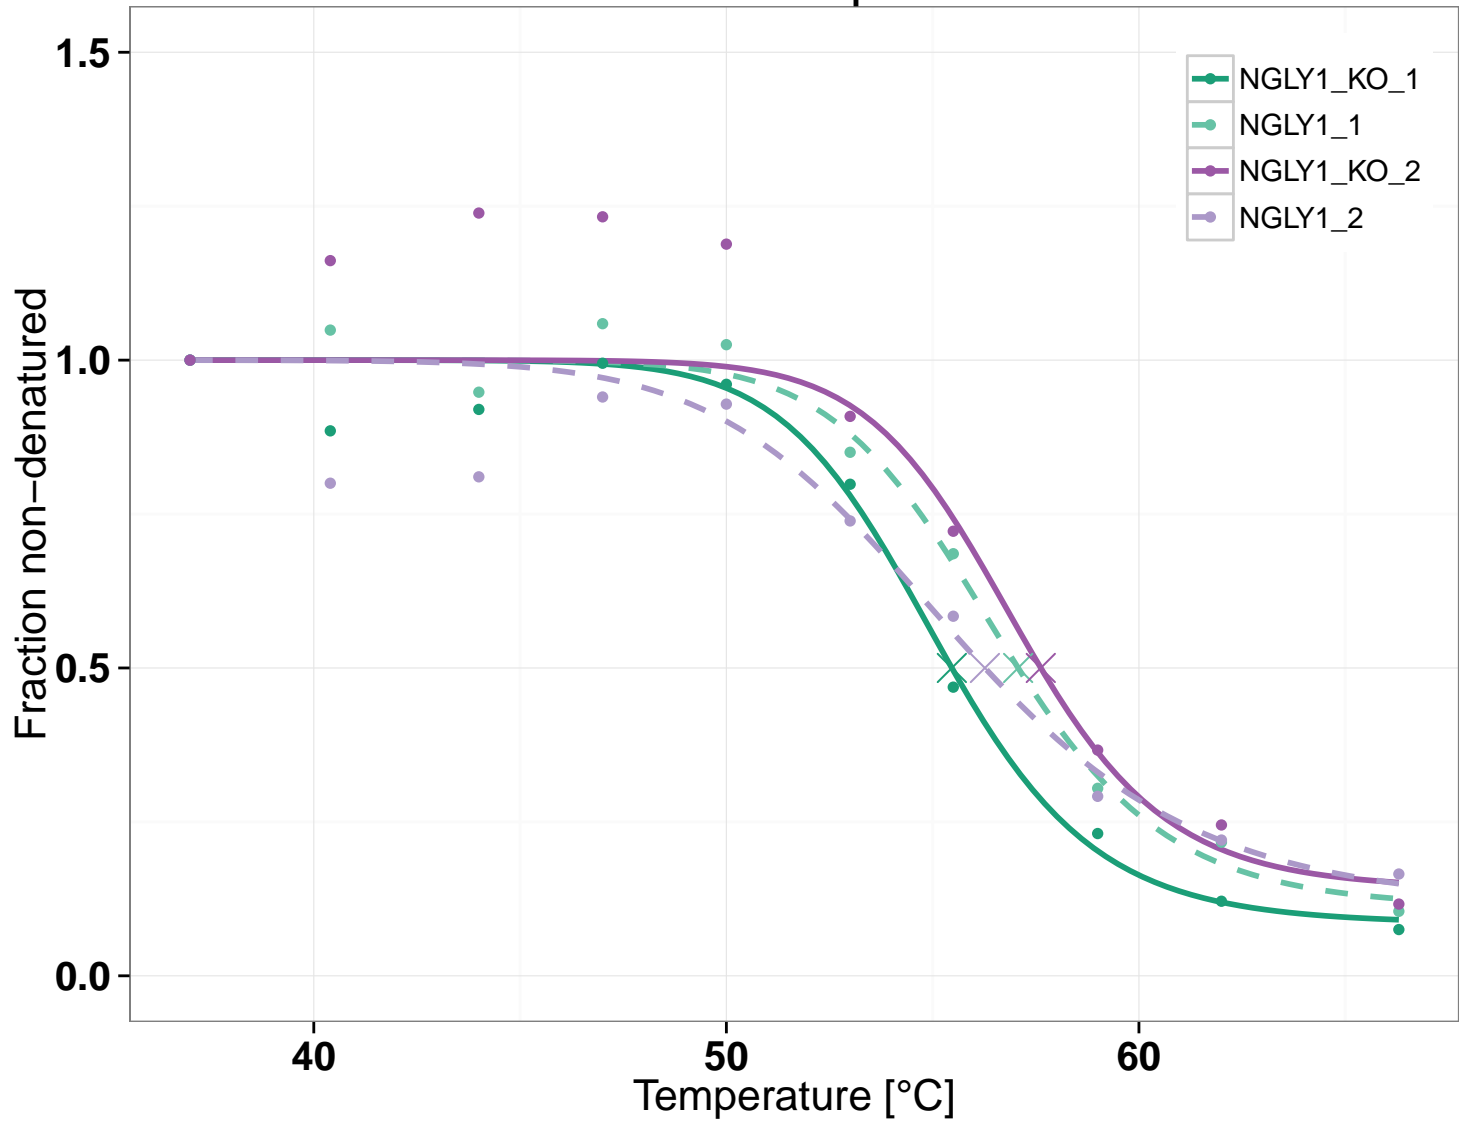

|            | meltPoint | slope  | plateau | R2   |
|------------|-----------|--------|---------|------|
| NGLY1_KO_1 | 55.47     | -0.12  | 0.08    | 0.98 |
| NGLY1_1    | 57.07     | -0.11  | 0.11    | 0.99 |
| NGLY1_KO_2 | 57.62     | -0.12  | 0.14    | 0.89 |
| NGLY1_2    | 56.27     | -0.076 | 0.11    | 0.91 |

Supplement: Supplementary file 5580 [file 1]

IPI00853093.2|METTL2B

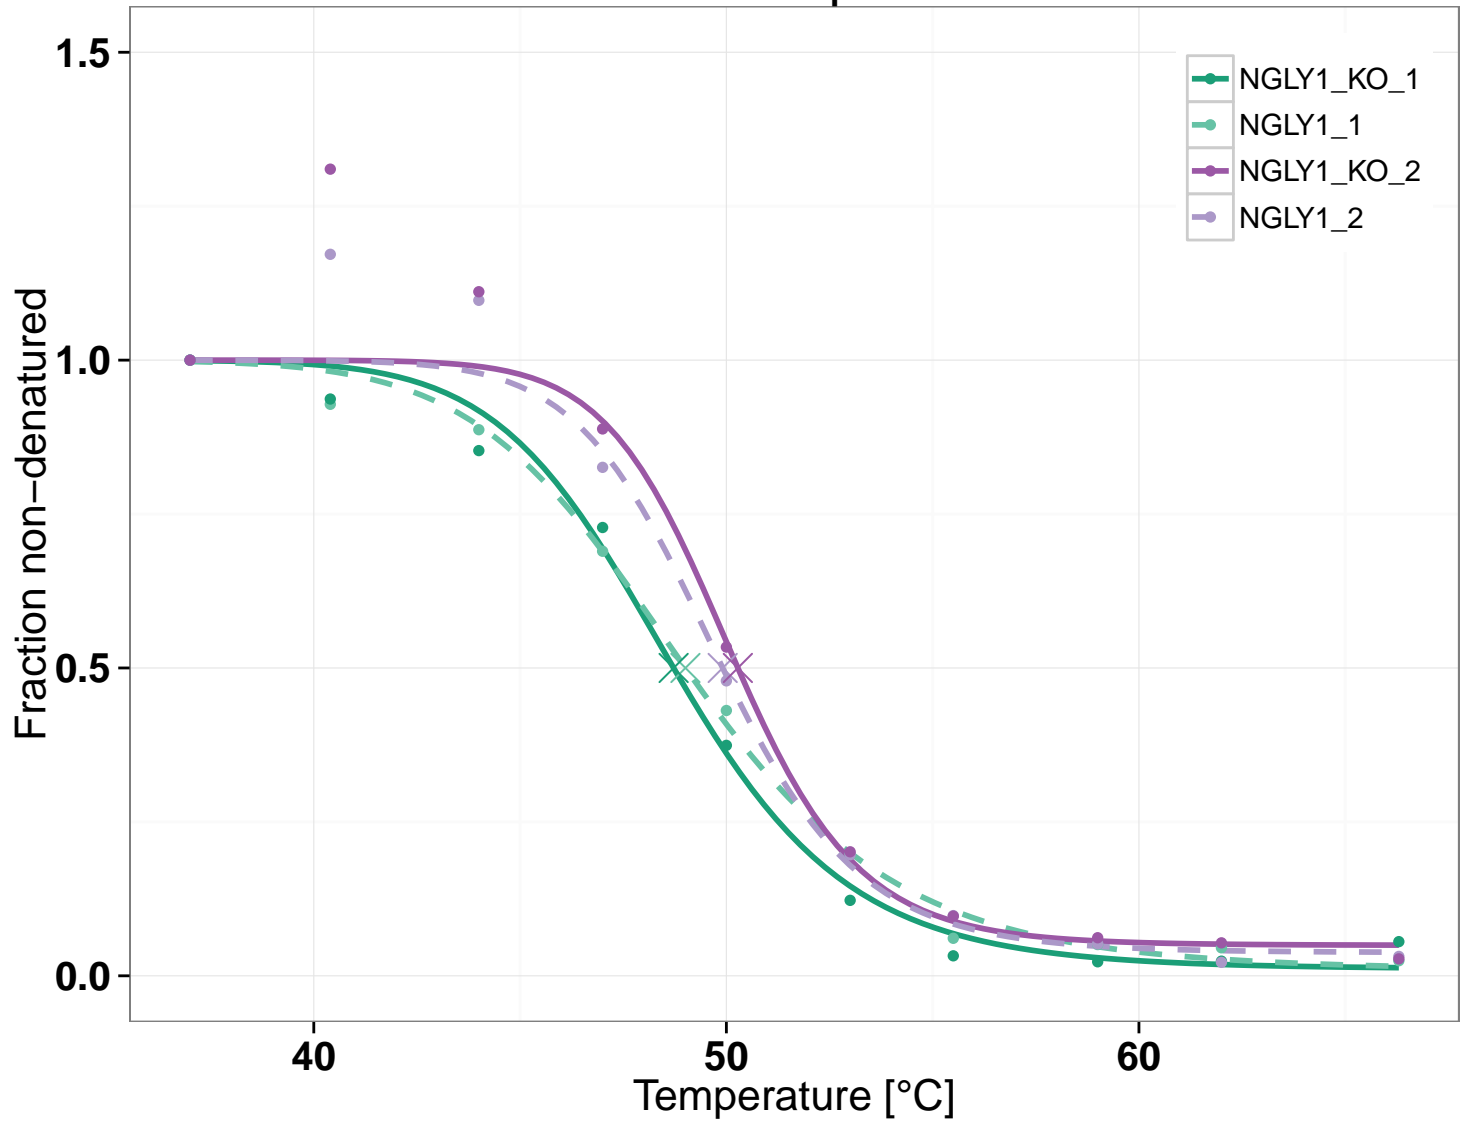

|            | meltPoint | slope  | plateau | R2   |
|------------|-----------|--------|---------|------|
| NGLY1_KO_1 | 48.72     | -0.12  | 0.01    | 0.99 |
| NGLY1_1    | 49.01     | -0.096 | 0.01    | 1    |
| NGLY1_KO_2 | 50.28     | -0.15  | 0.05    | 0.95 |
| NGLY1_2    | 49.91     | -0.14  | 0.04    | 0.98 |

Supplement: Supplementary file 5581 [file 1]

# IPI00743284.2|MTR

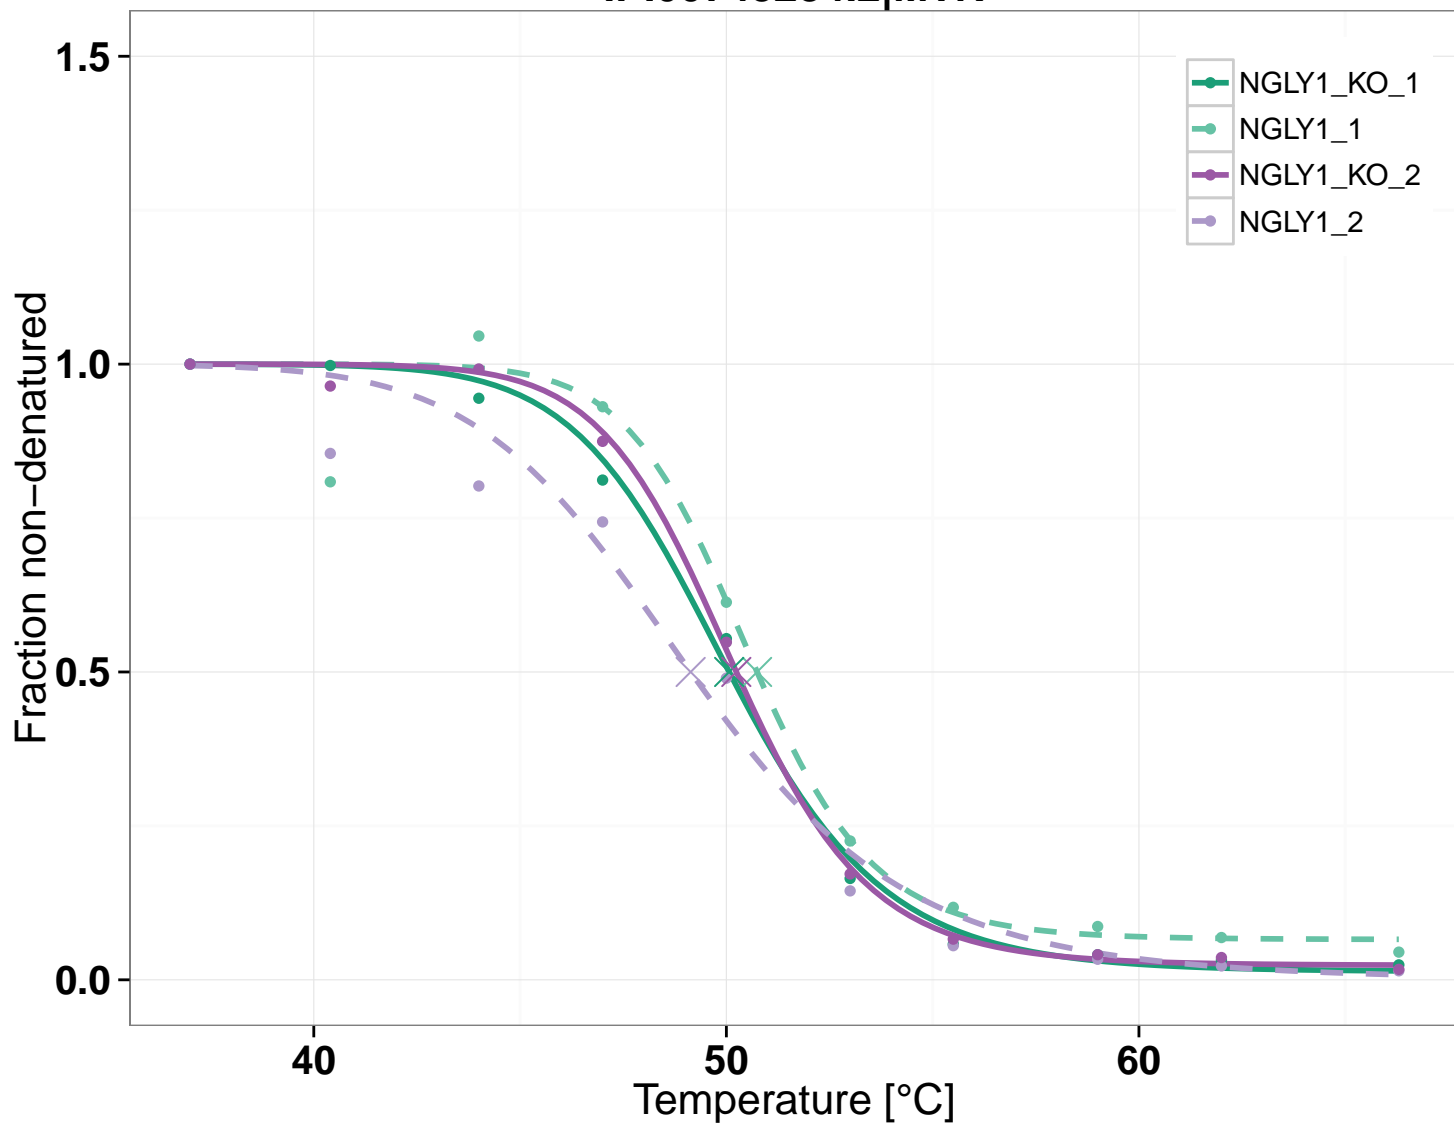

|            | meltPoint | slope  | plateau | R2   |
|------------|-----------|--------|---------|------|
| NGLY1_KO_1 | 50.07     | -0.13  | 0.01    | 1    |
| NGLY1_1    | 50.74     | -0.16  | 0.07    | 0.98 |
| NGLY1_KO_2 | 50.24     | -0.15  | 0.02    | 1    |
| NGLY1_2    | 49.13     | -0.095 | 0       | 0.97 |

Supplement: Supplementary file 5582 [file 1]

# IPI00796379.2|B2M

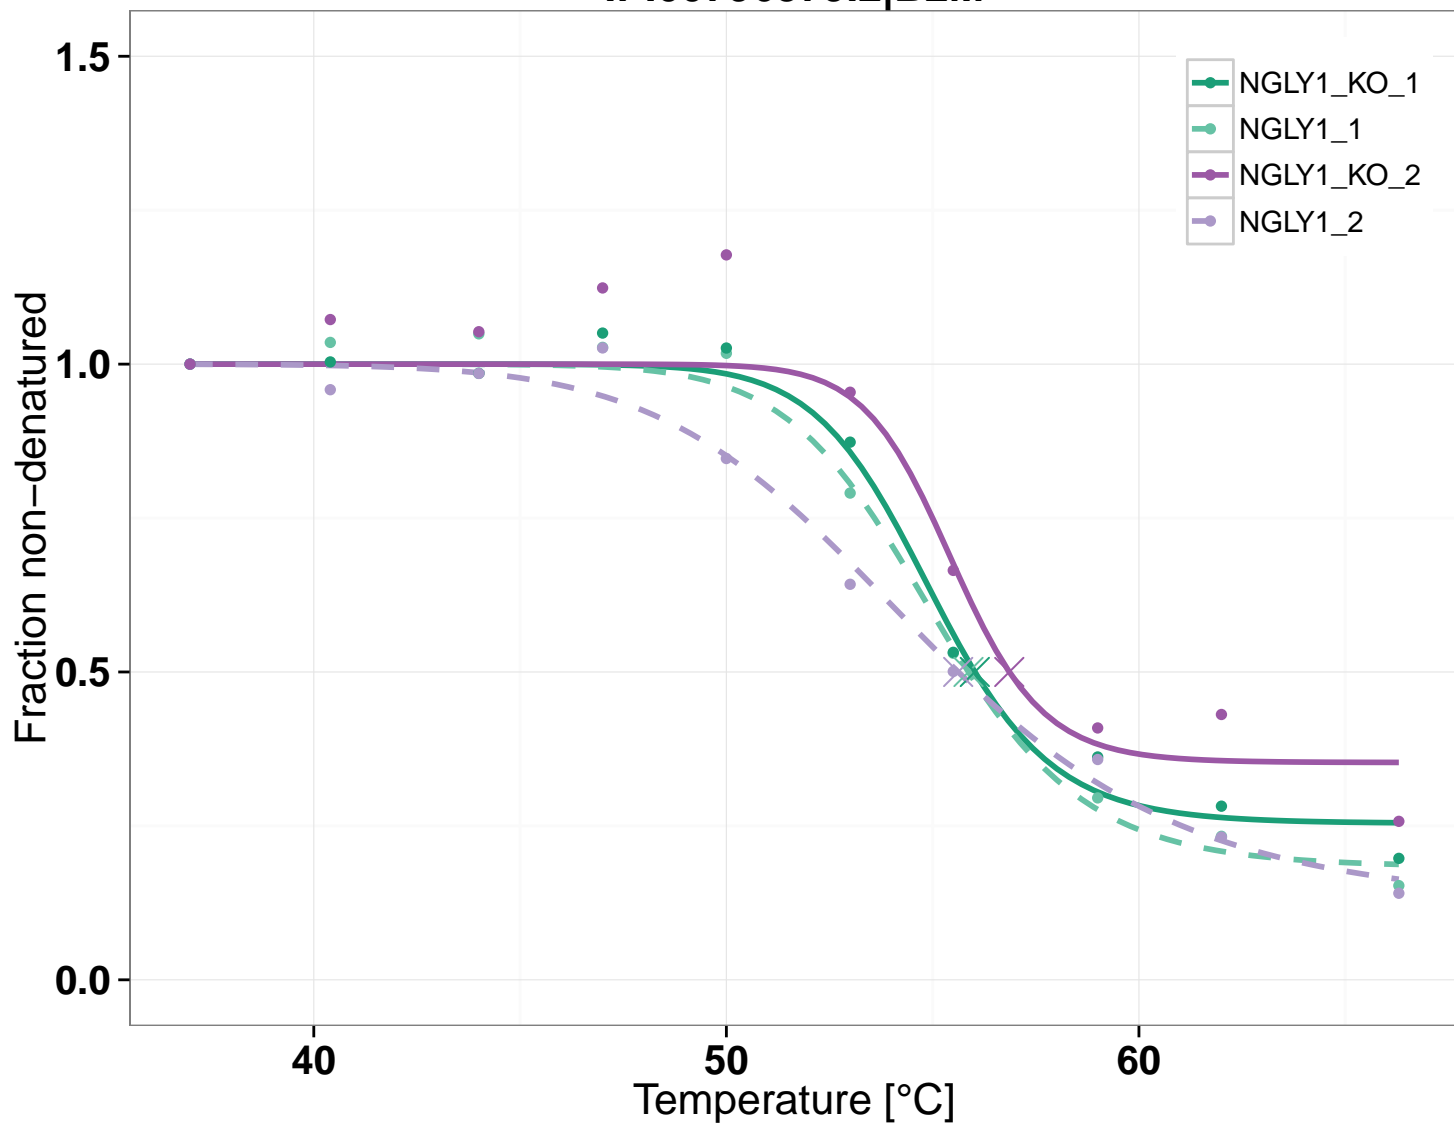

|            | meltPoint | slope  | plateau | R2   |
|------------|-----------|--------|---------|------|
| NGLY1_KO_1 | 56.02     | -0.13  | 0.25    | 0.99 |
| NGLY1_1    | 55.87     | -0.11  | 0.18    | 0.99 |
| NGLY1_KO_2 | 56.86     | -0.15  | 0.35    | 0.93 |
| NGLY1_2    | 55.62     | -0.069 | 0.12    | 0.99 |

Supplement: Supplementary file 5583 [file 1]

IPI00465160.4|ABCF3

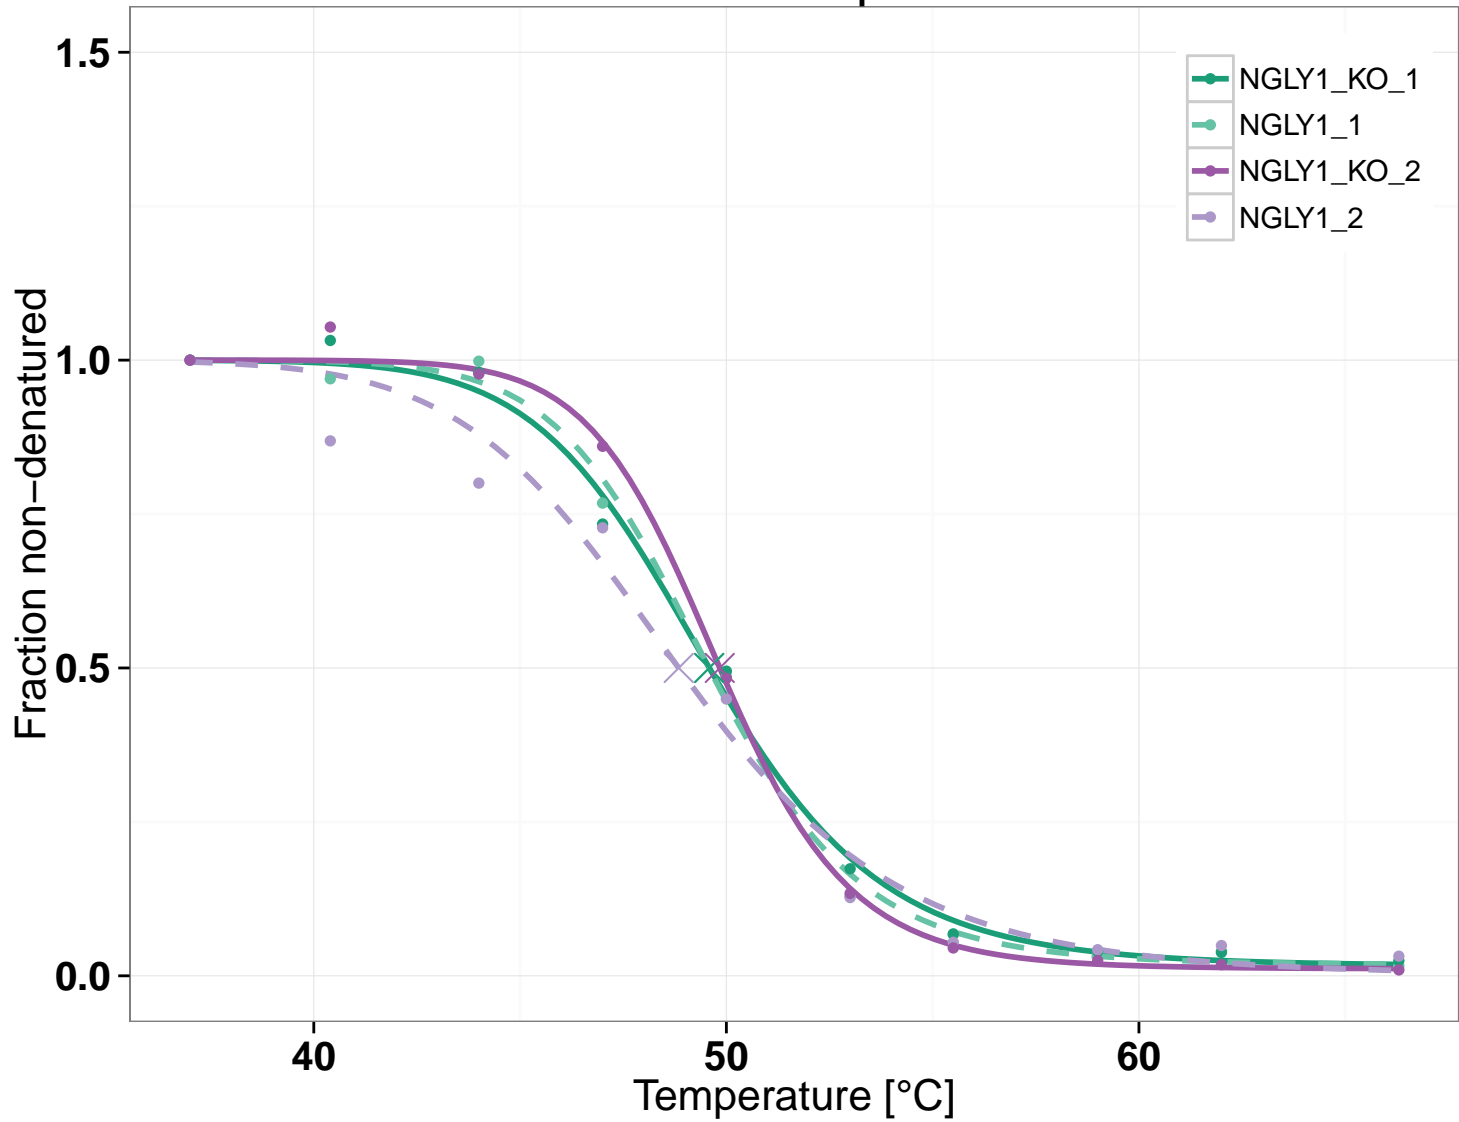

|            | meltPoint | slope  | plateau | R2   |
|------------|-----------|--------|---------|------|
| NGLY1_KO_1 | 49.59     | -0.12  | 0.02    | 1    |
| NGLY1_1    | 49.58     | -0.13  | 0.02    | 1    |
| NGLY1_KO_2 | 49.84     | -0.16  | 0.01    | 1    |
| NGLY1_2    | 48.84     | -0.093 | 0       | 0.98 |

Supplement: Supplementary file 5584 [file 1]

# IPI00013810.2|WBSCR22

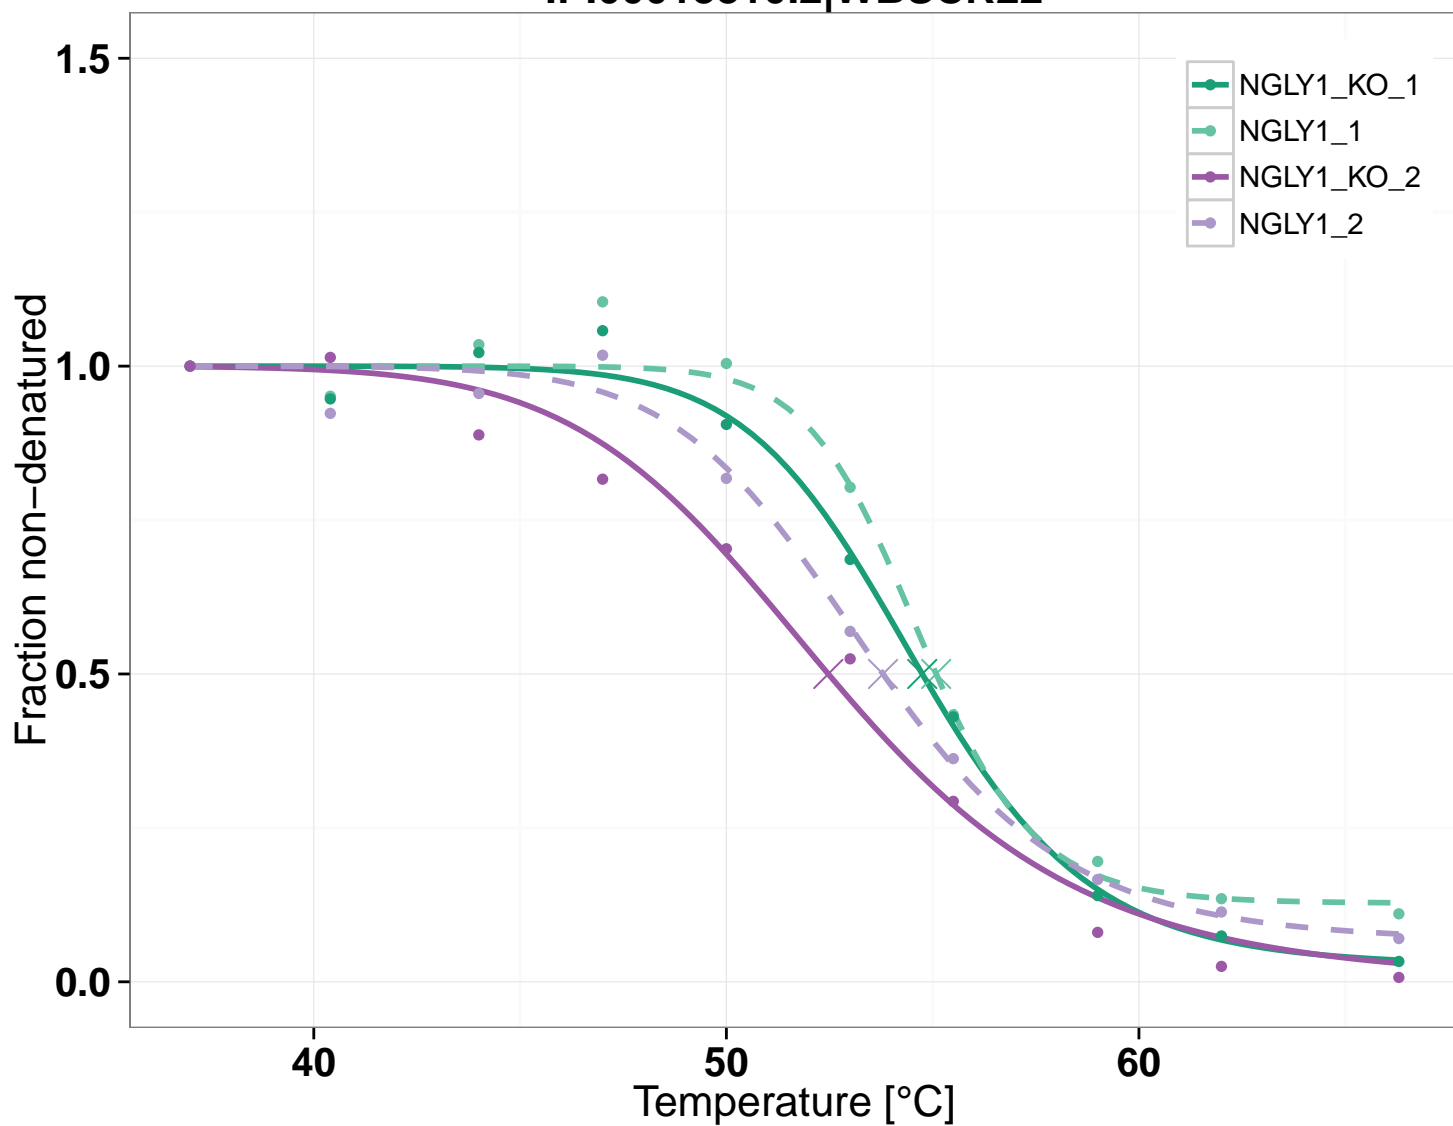

|            | meltPoint | slope  | plateau | R2   |
|------------|-----------|--------|---------|------|
| NGLY1_KO_1 | 54.75     | -0.12  | 0.03    | 0.99 |
| NGLY1_1    | 55.09     | -0.16  | 0.13    | 0.99 |
| NGLY1_KO_2 | 52.47     | -0.08  | 0       | 0.99 |
| NGLY1_2    | 53.8      | -0.098 | 0.07    | 0.99 |

Supplement: Supplementary file 5585 [file 1]

# IPI00171336.3|RIOK1

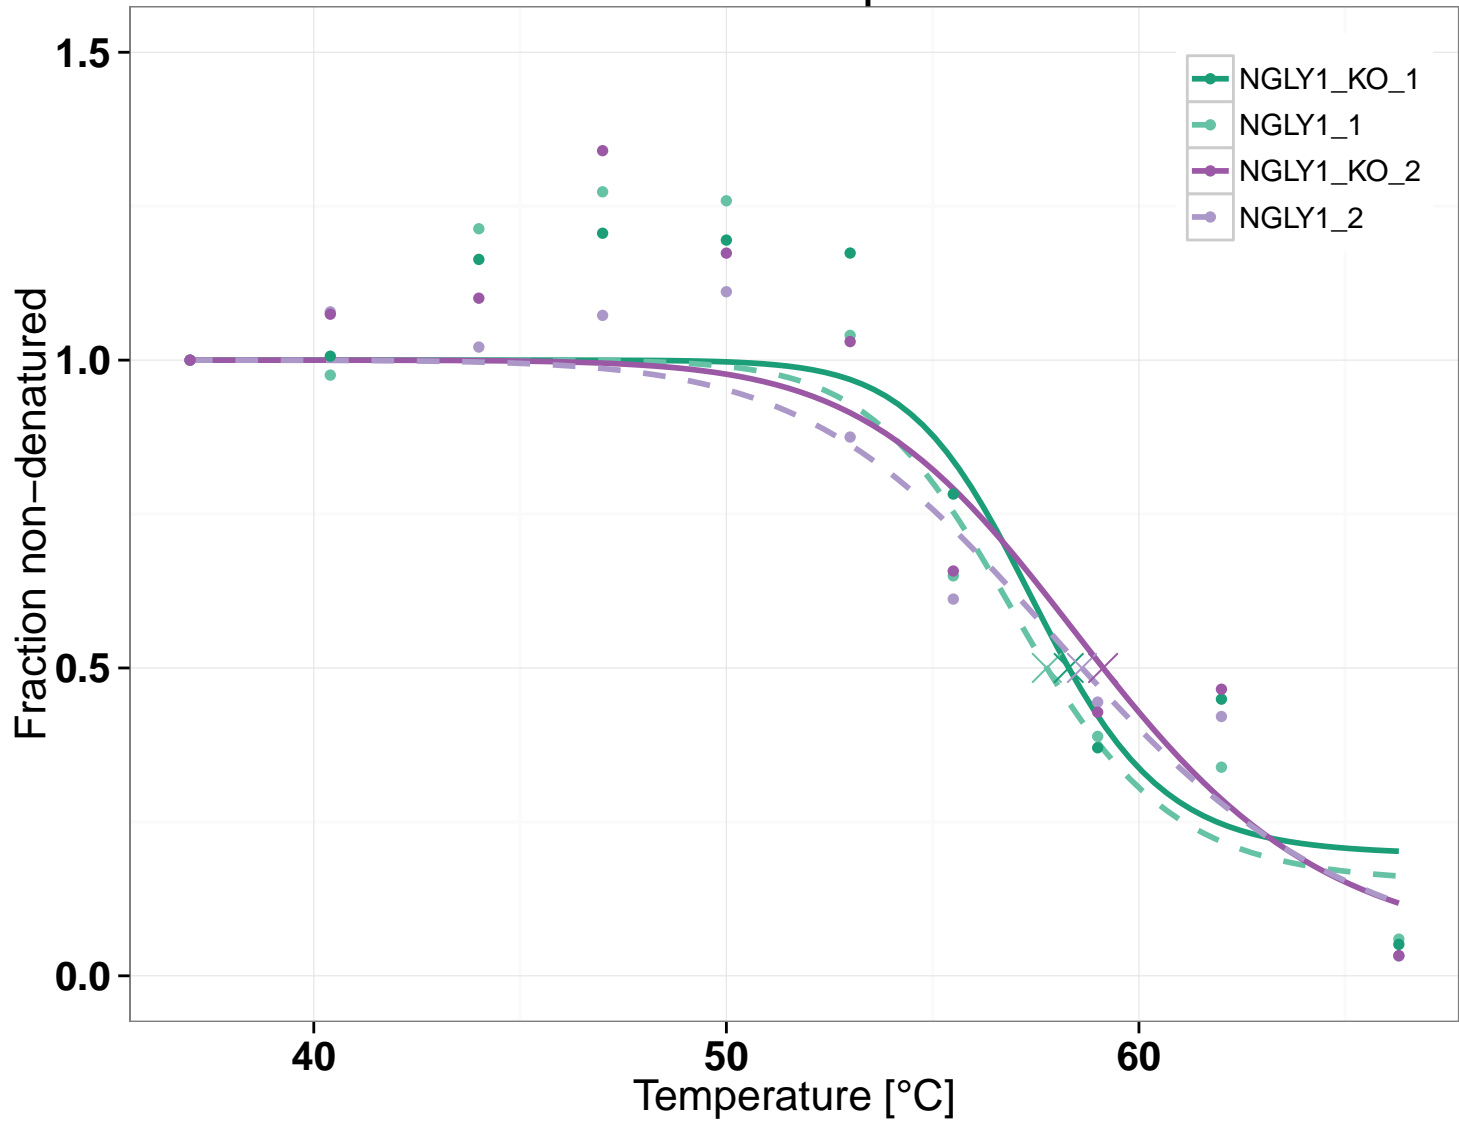

|            | meltPoint | slope  | plateau | R2   |
|------------|-----------|--------|---------|------|
| NGLY1_KO_1 | 58.3      | -0.13  | 0.2     | 0.86 |
| NGLY1_1    | 57.77     | -0.12  | 0.15    | 0.86 |
| NGLY1_KO_2 | 59.13     | -0.086 | 0.03    | 0.84 |
| NGLY1_2    | 58.62     | -0.075 | 0       | 0.93 |

Supplement: Supplementary file 5586 [file 1]

IPI00171176.3|PANK2

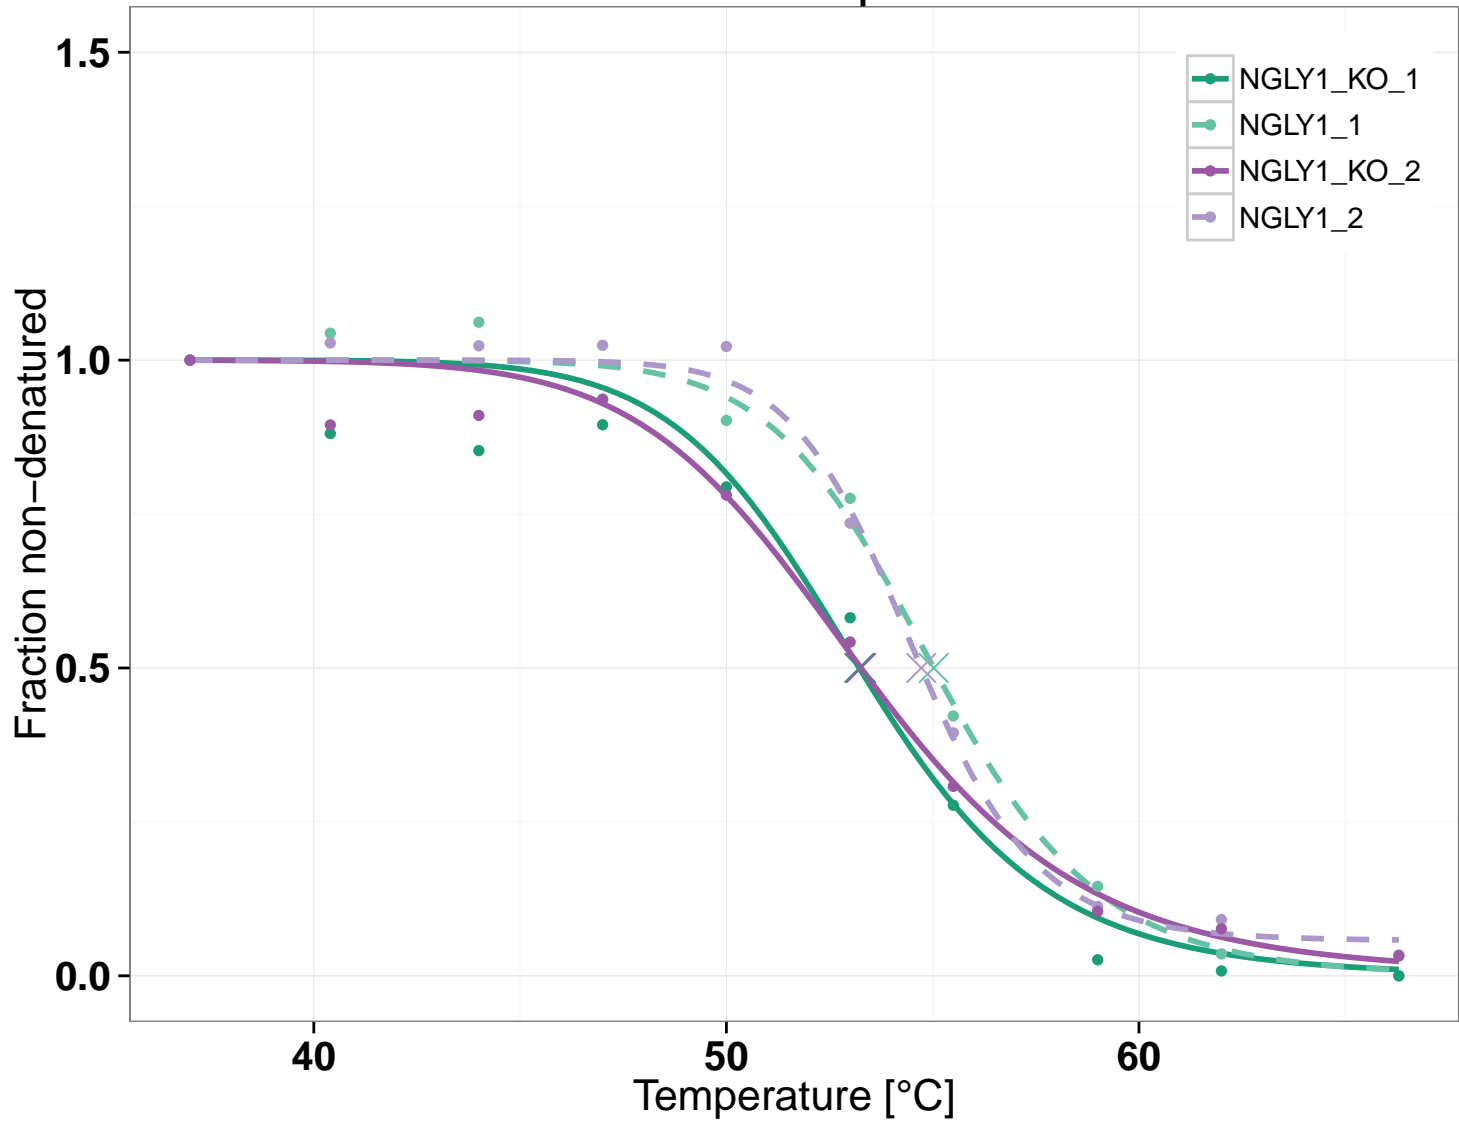

|            | meltPoint | slope  | plateau | R2   |
|------------|-----------|--------|---------|------|
| NGLY1_KO_1 | 53.22     | -0.11  | 0       | 0.97 |
| NGLY1_1    | 55.03     | -0.13  | 0       | 0.99 |
| NGLY1_KO_2 | 53.26     | -0.092 | 0       | 0.99 |
| NGLY1_2    | 54.73     | -0.16  | 0.06    | 1    |

Supplement: Supplementary file 5587 [file 1]

IPI00171712.1|LCMT2

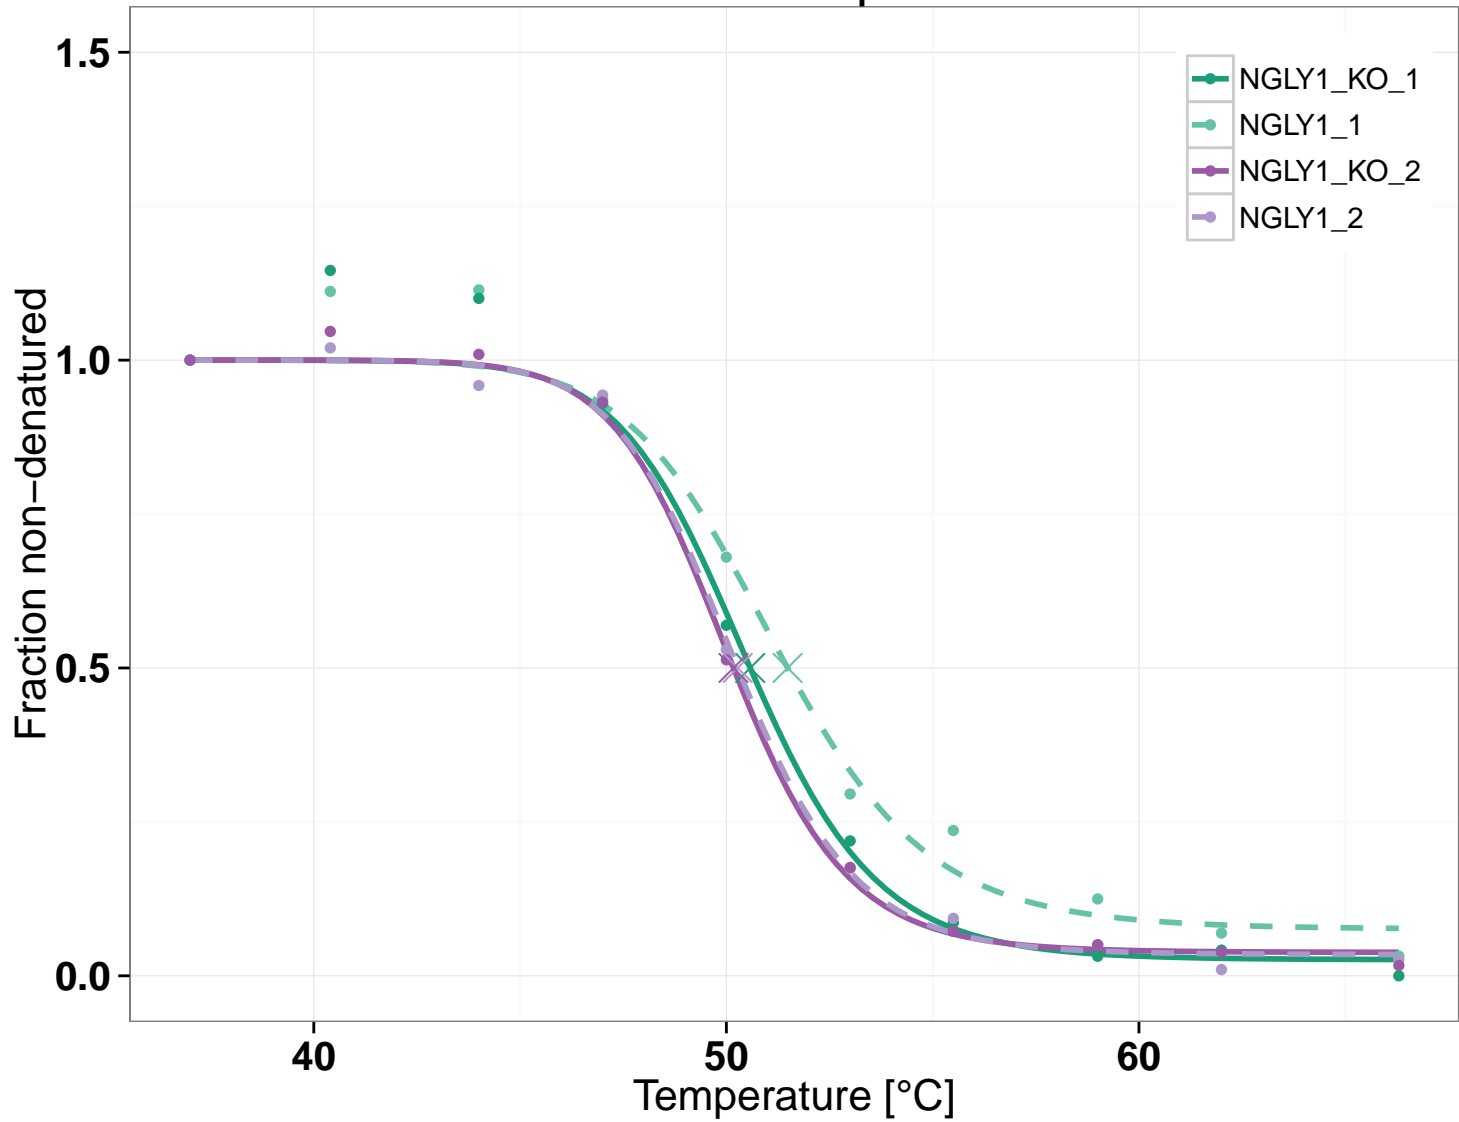

|            | meltPoint | slope | plateau | R2   |
|------------|-----------|-------|---------|------|
| NGLY1_KO_1 | 50.58     | -0.16 | 0.03    | 0.98 |
| NGLY1_1    | 51.48     | -0.13 | 0.08    | 0.98 |
| NGLY1_KO_2 | 50.17     | -0.17 | 0.04    | 1    |
| NGLY1_2    | 50.27     | -0.17 | 0.03    | 1    |

Supplement: Supplementary file 5588 [file 1]

IPI00003865.1|HSPA8

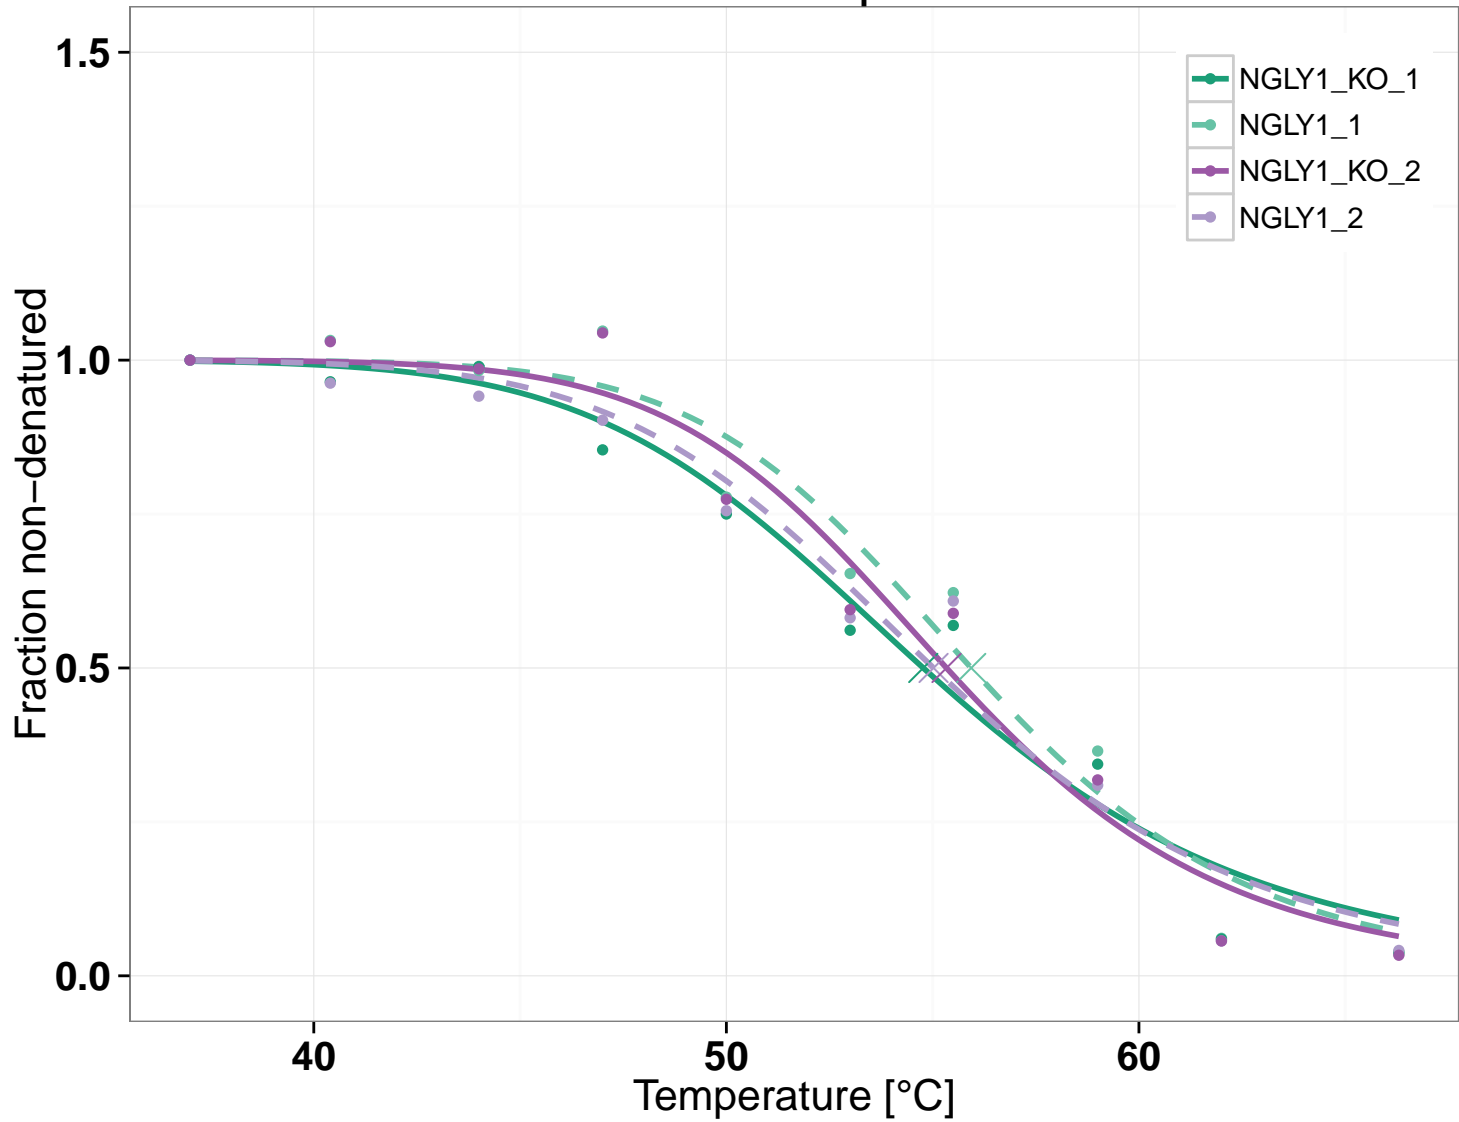

|            | meltPoint | slope  | plateau | R2   |
|------------|-----------|--------|---------|------|
| NGLY1_KO_1 | 54.77     | -0.062 | 0       | 0.97 |
| NGLY1_1    | 55.94     | -0.075 | 0       | 0.97 |
| NGLY1_KO_2 | 55.34     | -0.074 | 0       | 0.97 |
| NGLY1_2    | 55.02     | -0.065 | 0       | 0.97 |

Supplement: Supplementary file 5589 [file 1]

IPI00395887.4|TXNDC1

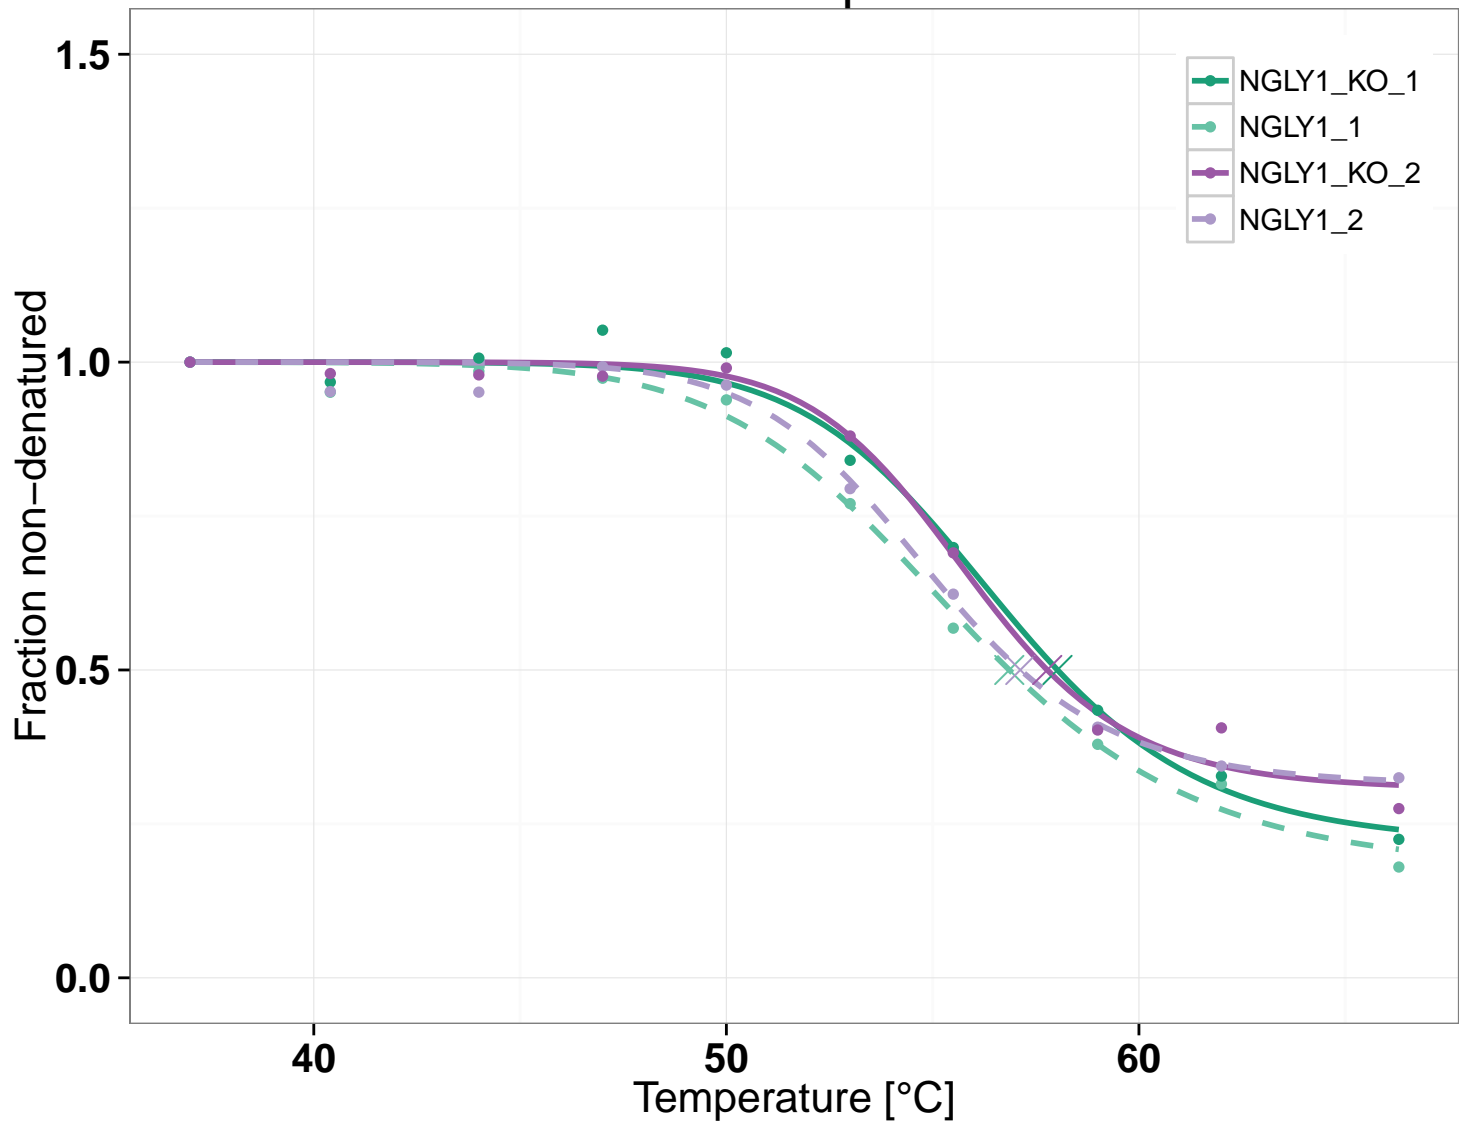

|            | meltPoint | slope  | plateau | R2   |
|------------|-----------|--------|---------|------|
| NGLY1_KO_1 | 58.03     | -0.082 | 0.22    | 0.99 |
| NGLY1_1    | 56.86     | -0.072 | 0.17    | 0.99 |
| NGLY1_KO_2 | 57.78     | -0.09  | 0.31    | 0.99 |
| NGLY1_2    | 57.12     | -0.081 | 0.31    | 0.99 |

Supplement: Supplementary file 5590 [file 1]

IPI00018696.4|TBCCD1

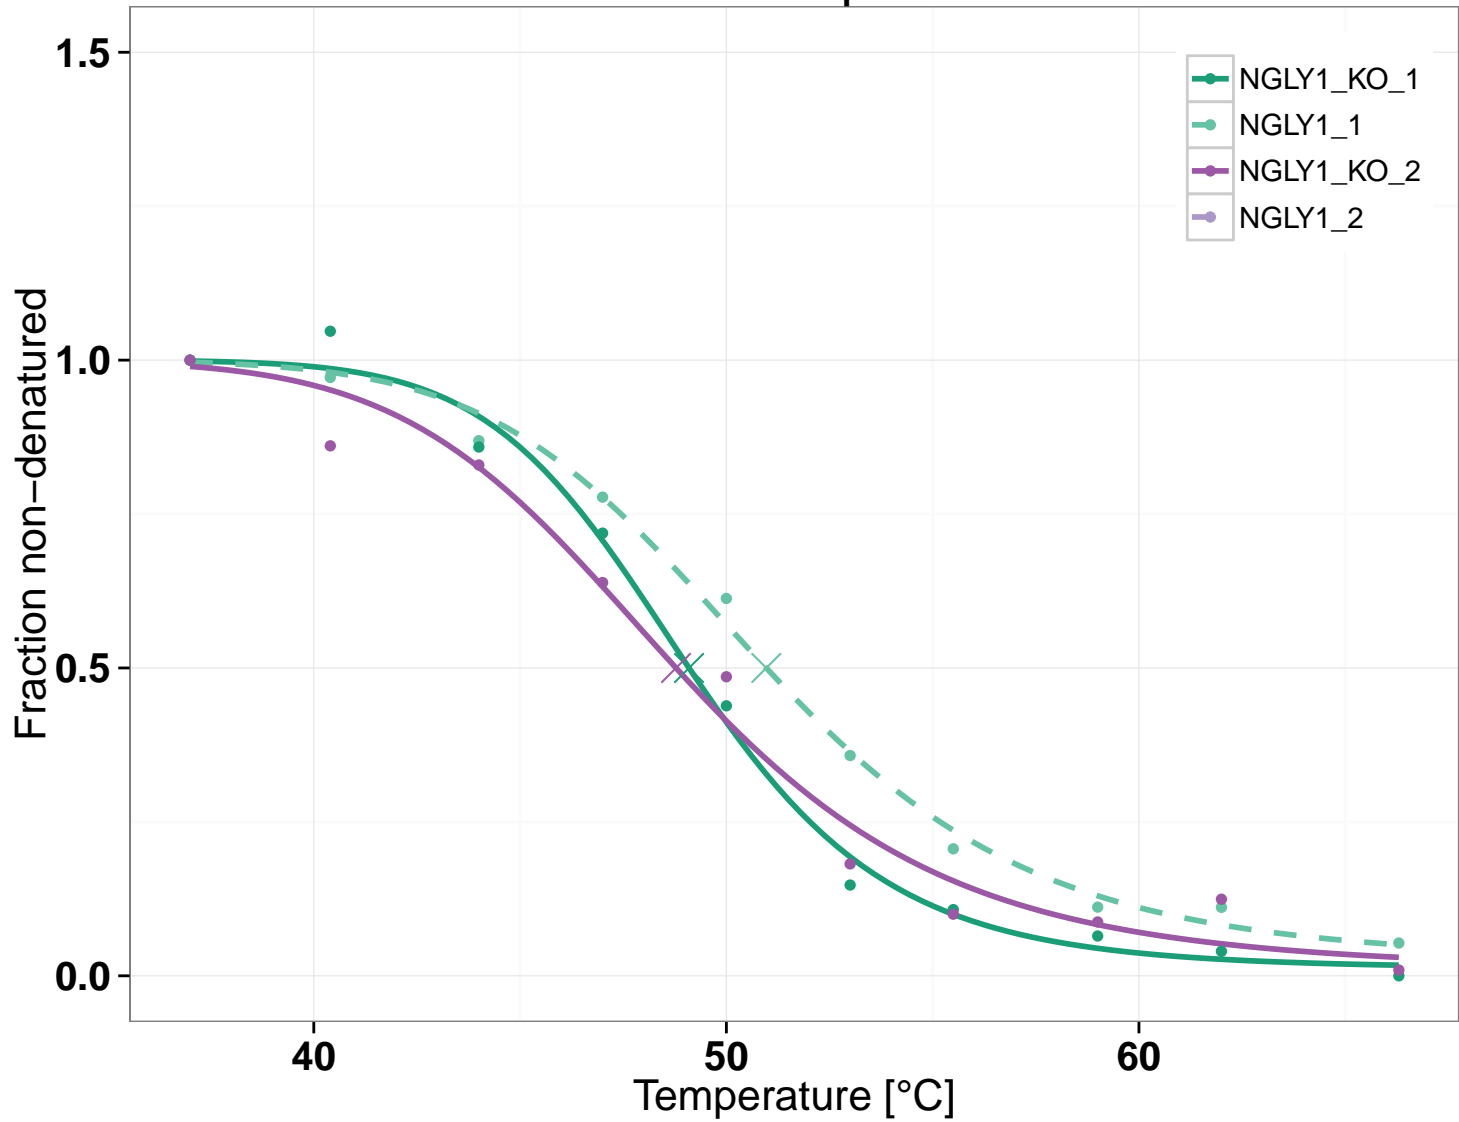

|            | meltPoint | slope  | plateau | R2   |
|------------|-----------|--------|---------|------|
| NGLY1_KO_1 | 49.1      | -0.1   | 0.01    | 0.99 |
| NGLY1_1    | 50.97     | -0.074 | 0.02    | 1    |
| NGLY1_KO_2 | 48.78     | -0.075 | 0.01    | 0.98 |
| NGLY1_2    | -         | -      | -       | -    |

Supplement: Supplementary file 5591 [file 1]

# IPI00759680.2|BRD9

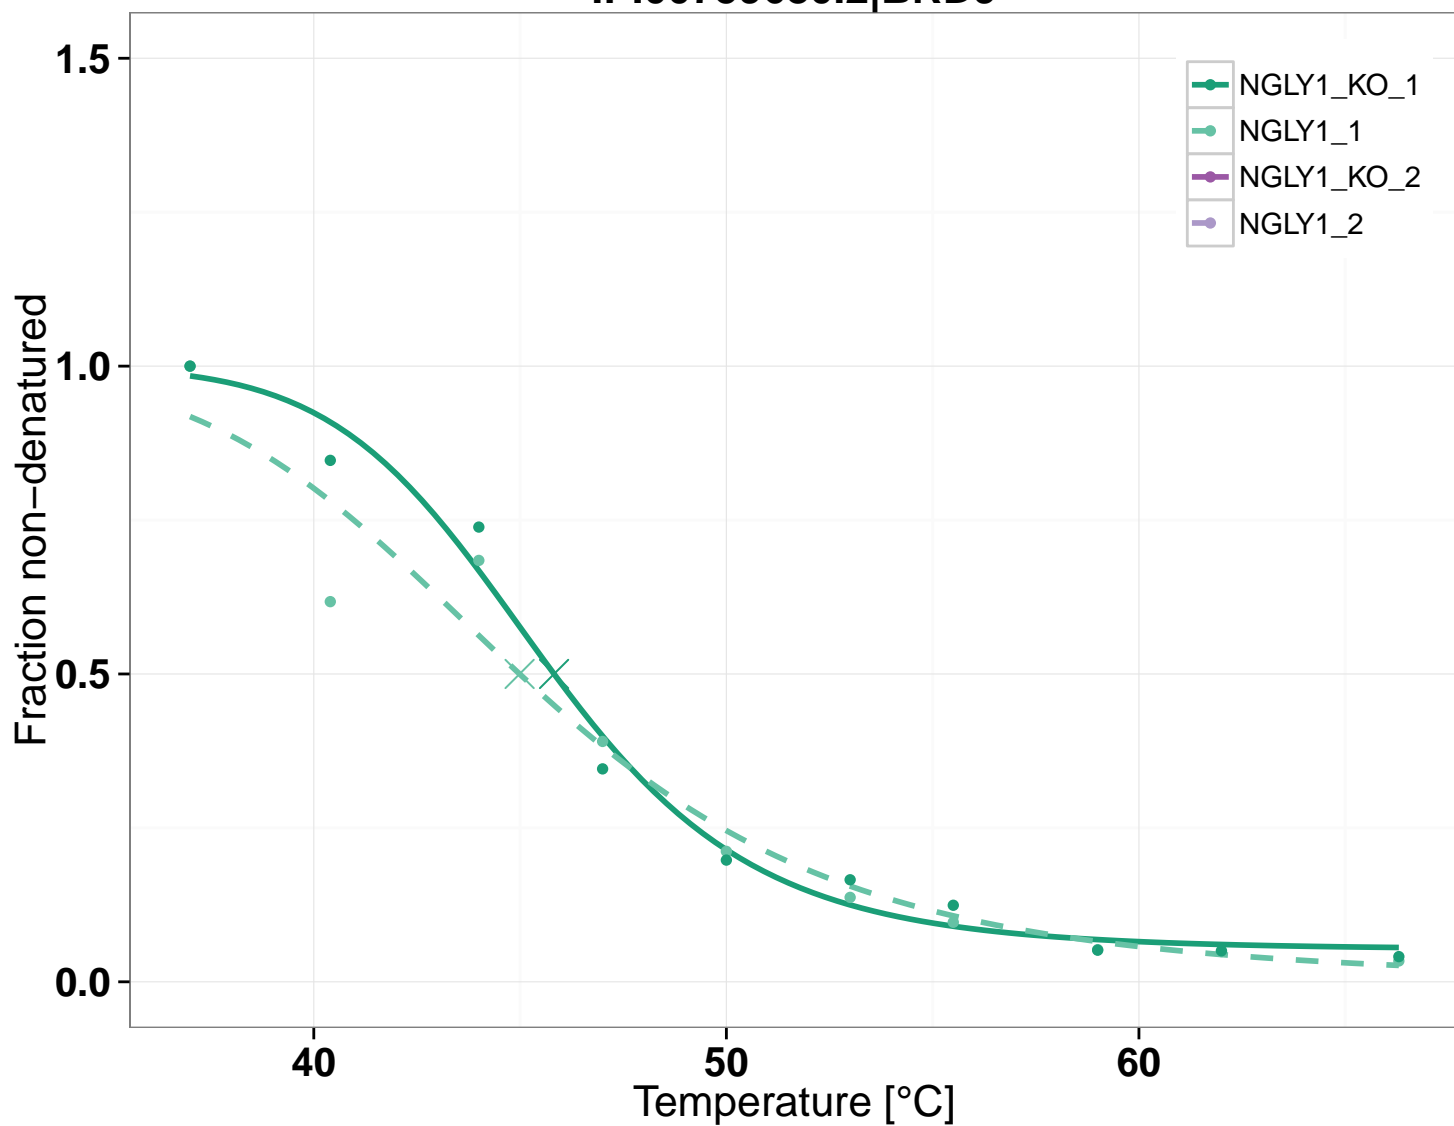

|            | meltPoint | slope  | plateau | R2   |
|------------|-----------|--------|---------|------|
| NGLY1_KO_1 | 45.82     | -0.093 | 0.05    | 0.99 |
| NGLY1_1    | 44.99     | -0.064 | 0       | 0.95 |
| NGLY1_KO_2 | -         | -      | -       | -    |
| NGLY1_2    | -         | -      | -       | -    |

Supplement: Supplementary file 5592 [file 1]

# IPI00029773.1|REL

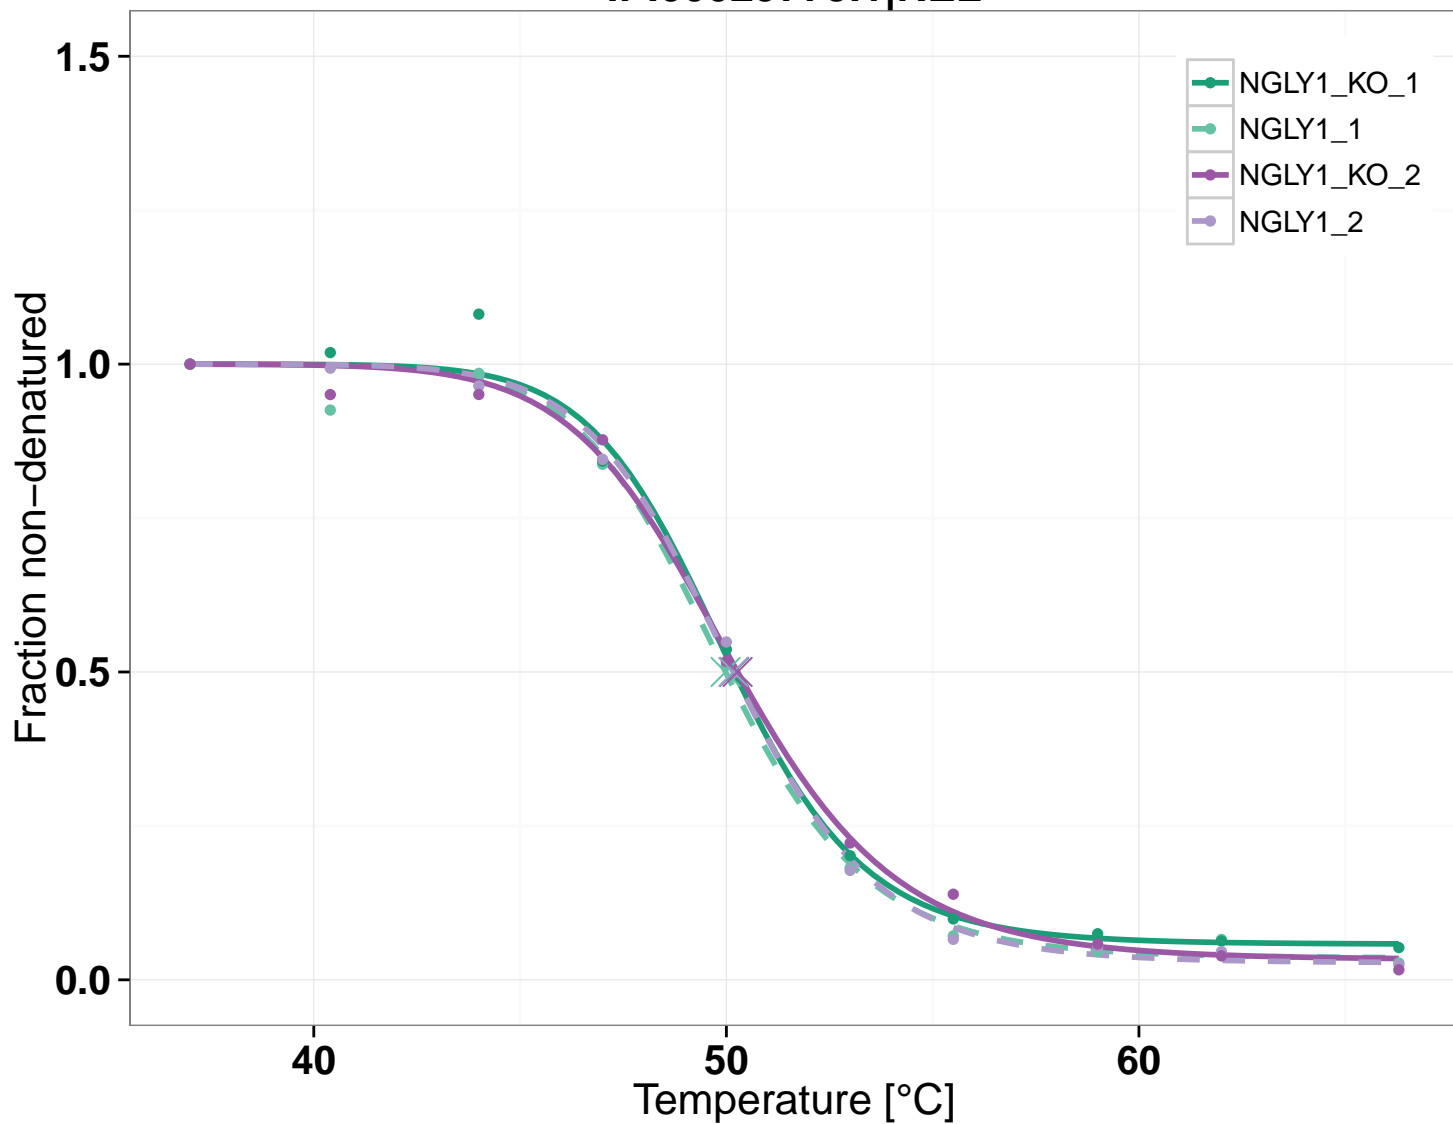

|            | meltPoint | slope | plateau | R2   |
|------------|-----------|-------|---------|------|
| NGLY1_KO_1 | 50.19     | -0.14 | 0.06    | 0.99 |
| NGLY1_1    | 49.98     | -0.14 | 0.04    | 1    |
| NGLY1_KO_2 | 50.27     | -0.12 | 0.03    | 1    |
| NGLY1_2    | 50.17     | -0.14 | 0.03    | 1    |

Supplement: Supplementary file 5593 [file 1]

IPI00419535.5|LRRC8E

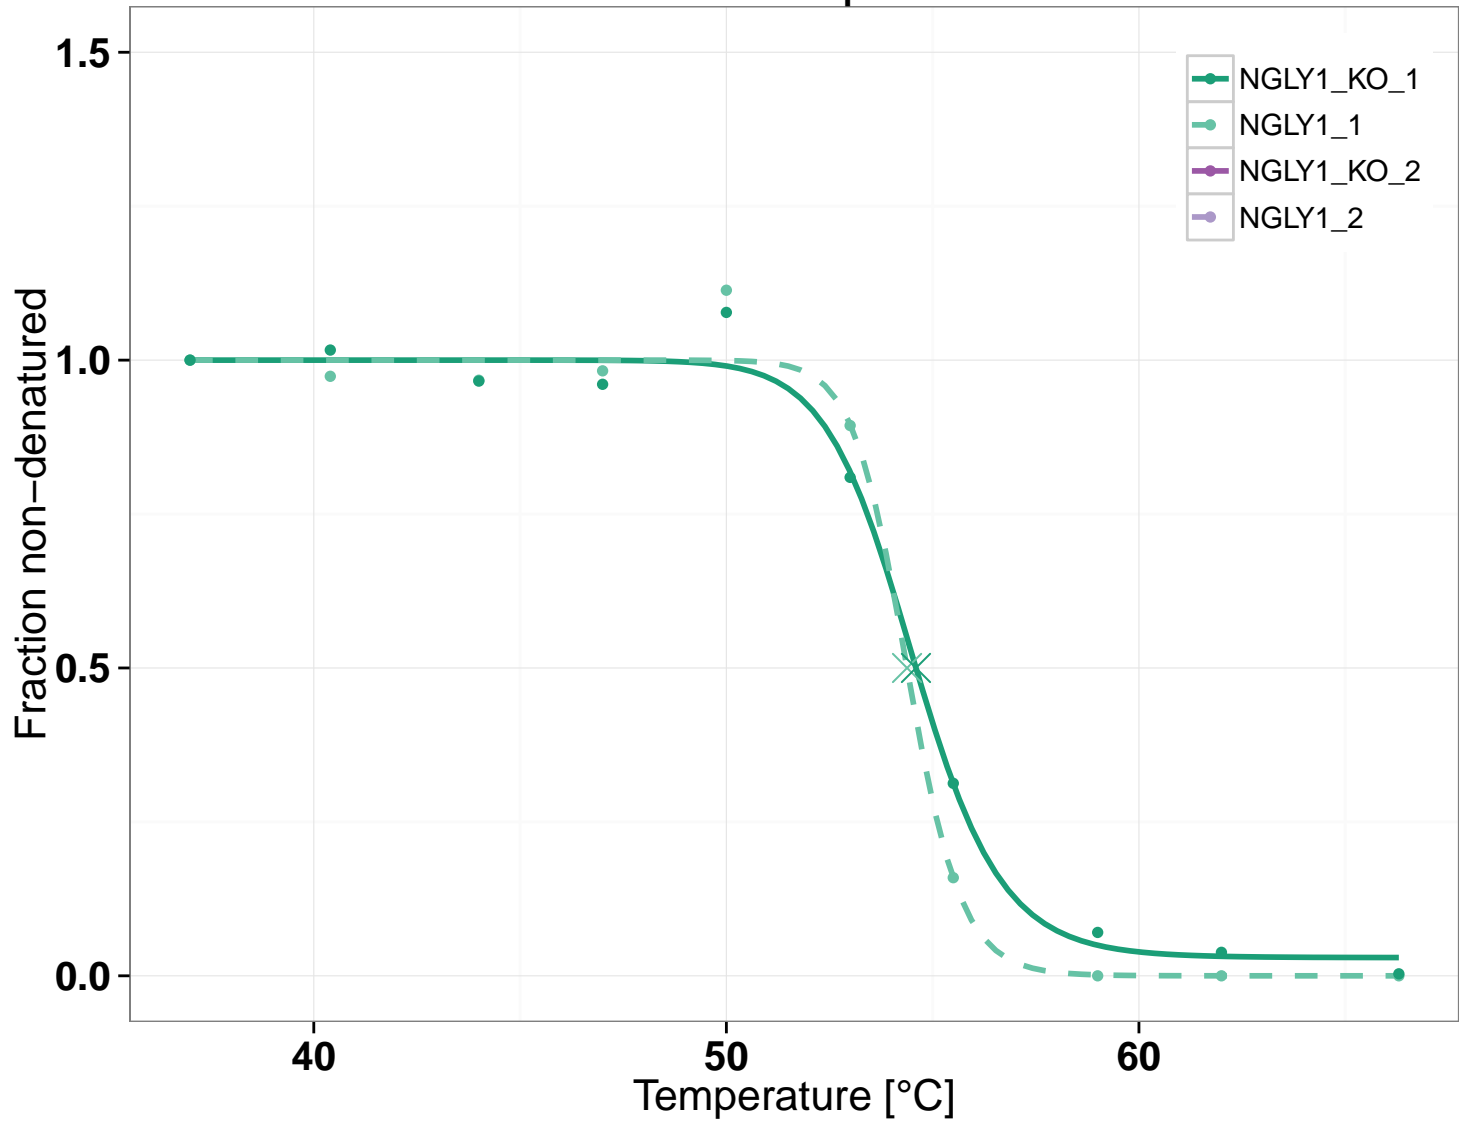

|            | meltPoint | slope | plateau | R2   |
|------------|-----------|-------|---------|------|
| NGLY1_KO_1 | 54.6      | -0.23 | 0.03    | 0.99 |
| NGLY1_1    | 54.38     | -0.38 | 0       | 0.99 |
| NGLY1_KO_2 | -         | -     | -       | -    |
| NGLY1_2    | -         | -     | -       | -    |

Supplement: Supplementary file 5594 [file 1]

IPI00432368.1|CSRP2BP

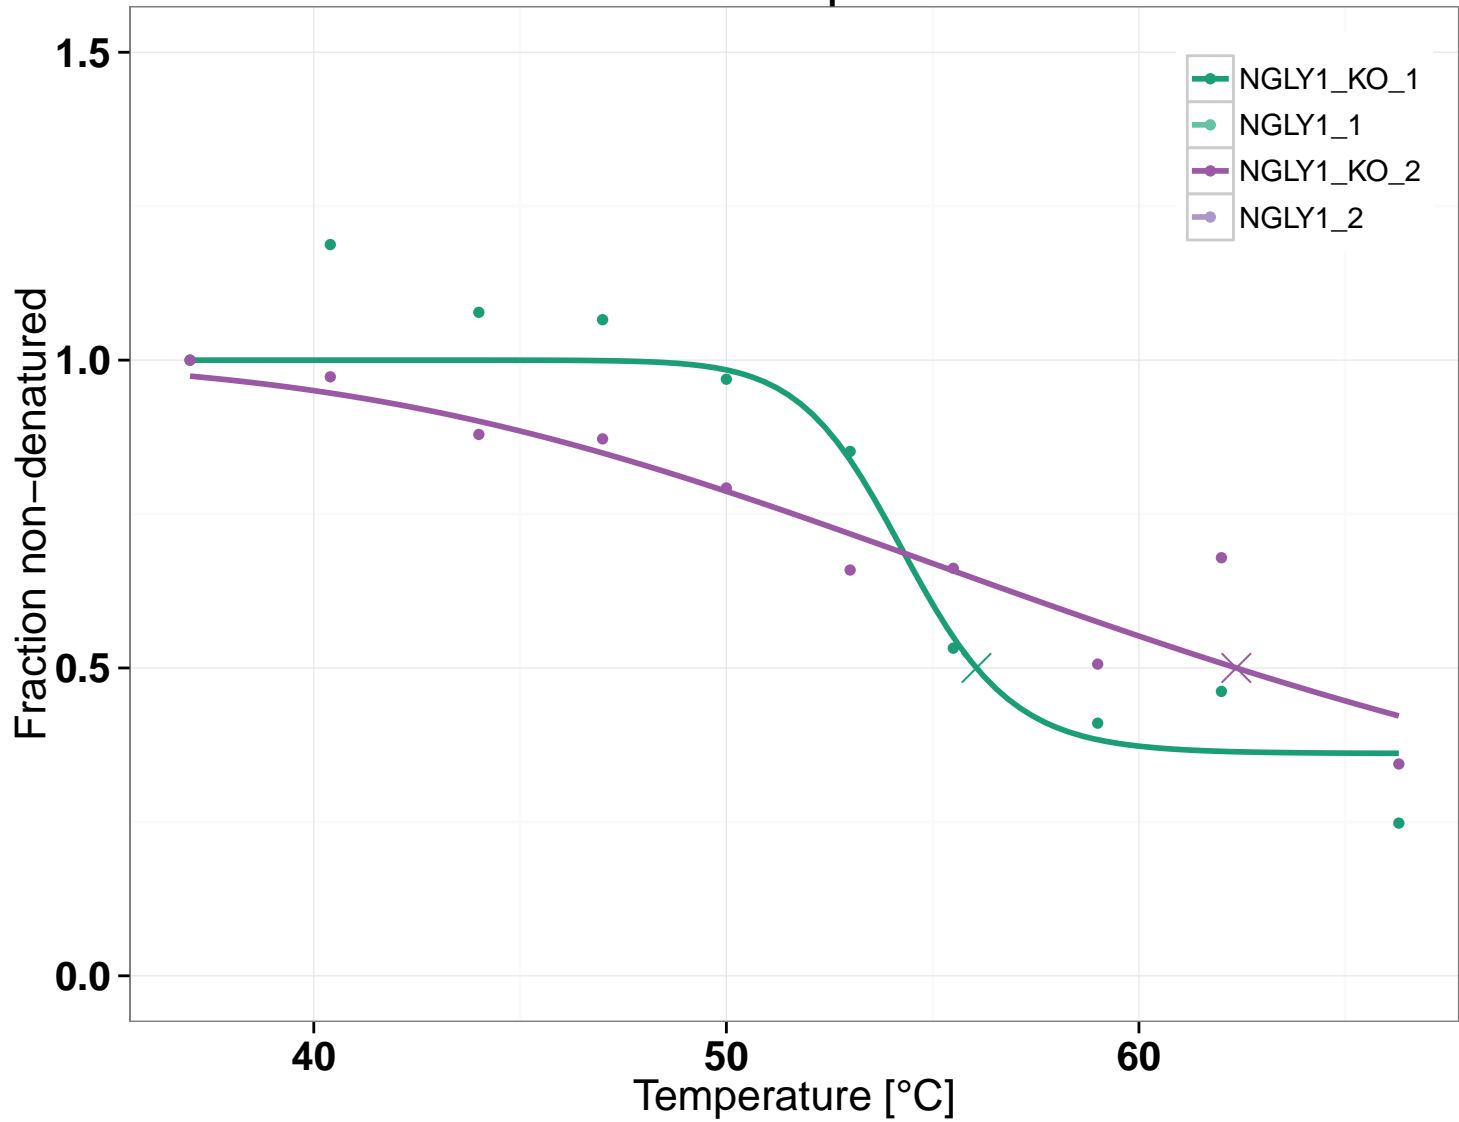

|            | meltPoint | slope  | plateau | R2   |
|------------|-----------|--------|---------|------|
| NGLY1_KO_1 | 56.06     | -0.12  | 0.36    | 0.93 |
| NGLY1_1    | -         | -      | -       | -    |
| NGLY1_KO_2 | 62.36     | -0.024 | 0       | 0.88 |
| NGLY1_2    | -         | -      | -       | -    |

Supplement: Supplementary file 5595 [file 1]

IPI00375462.1|SFRS12

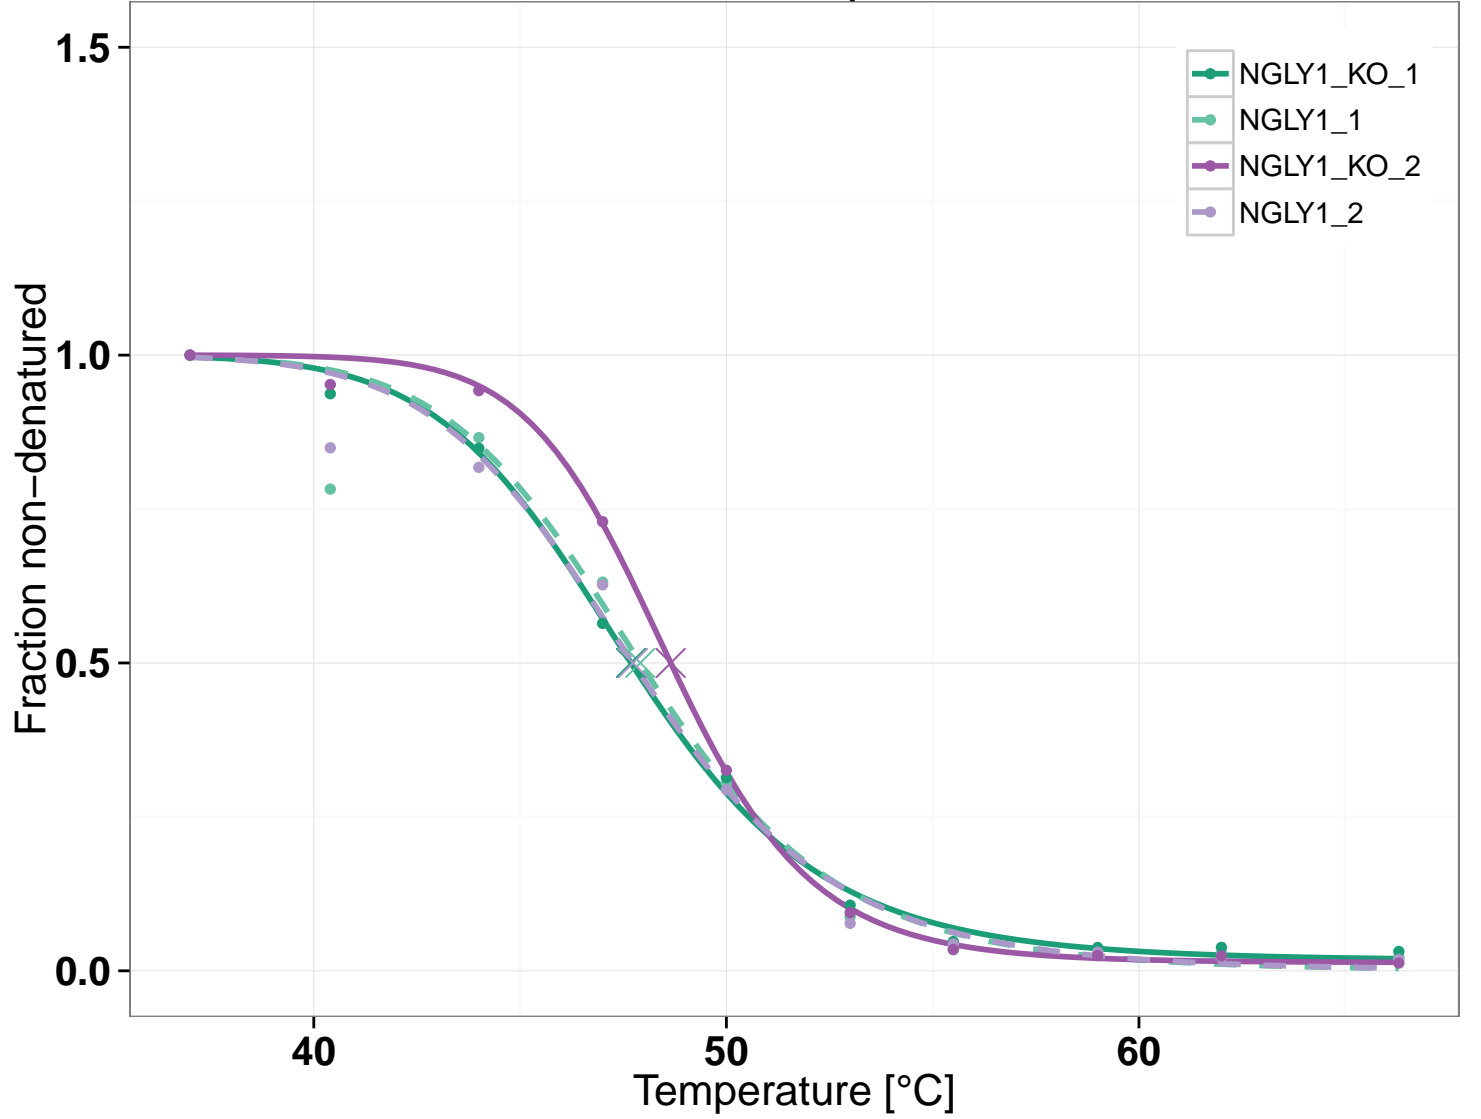

|            | meltPoint | slope | plateau | R2   |
|------------|-----------|-------|---------|------|
| NGLY1_KO_1 | 47.69     | -0.1  | 0.02    | 1    |
| NGLY1_1    | 47.91     | -0.1  | 0       | 0.97 |
| NGLY1_KO_2 | 48.65     | -0.14 | 0.01    | 1    |
| NGLY1_2    | 47.74     | -0.1  | 0       | 0.99 |

Supplement: Supplementary file 5596 [file 1]

# IPI00479786.5|KHSRP

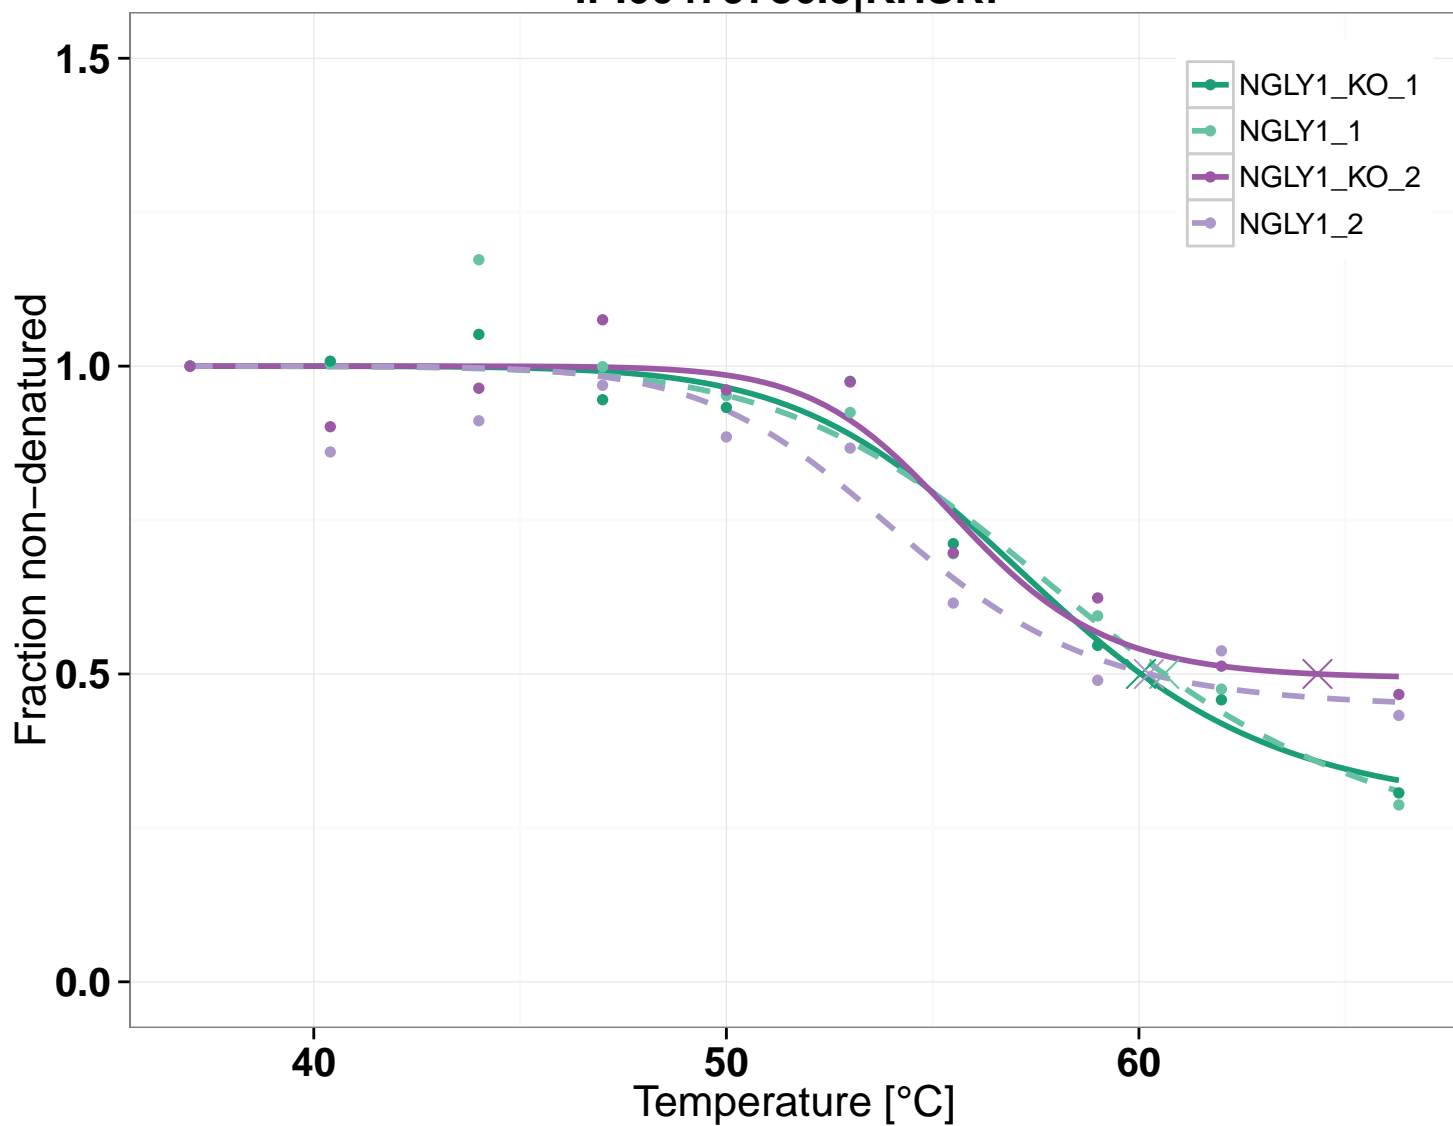

|            | meltPoint | slope  | plateau | R2   |
|------------|-----------|--------|---------|------|
| NGLY1_KO_1 | 60.05     | -0.063 | 0.28    | 0.97 |
| NGLY1_1    | 60.61     | -0.055 | 0.2     | 0.94 |
| NGLY1_KO_2 | 64.33     | -0.071 | 0.49    | 0.93 |
| NGLY1_2    | 60.24     | -0.057 | 0.44    | 0.9  |

Supplement: Supplementary file 5597 [file 1]

# IPI00184032.3|ZNF511

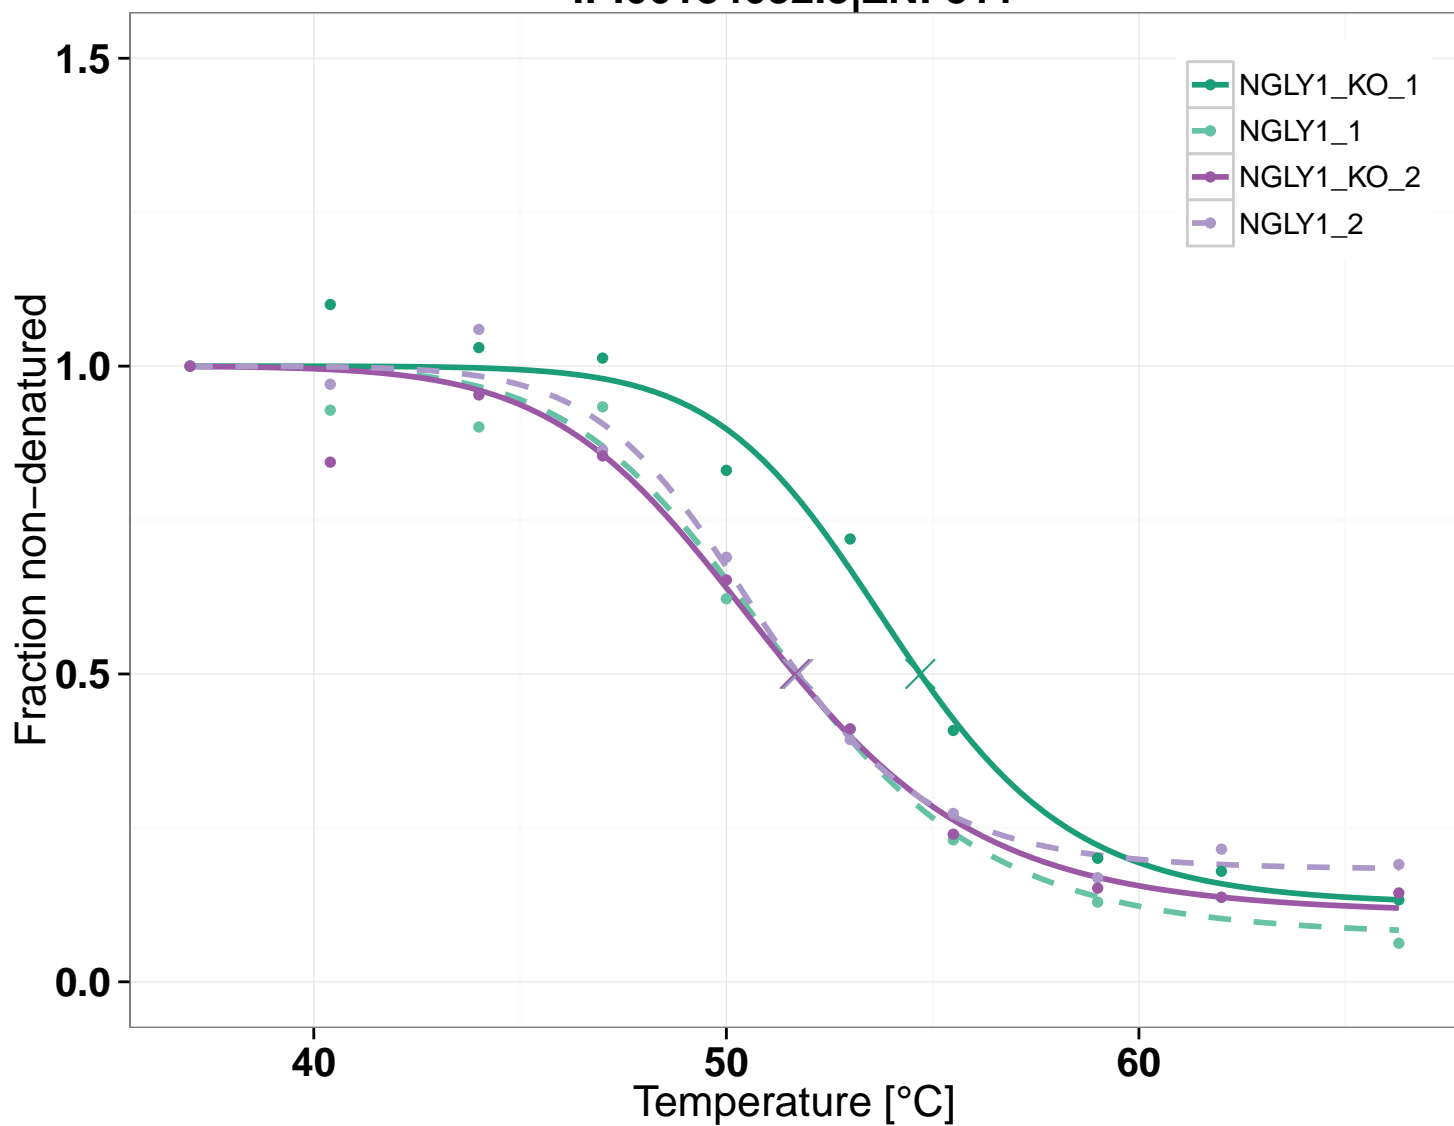

|            | meltPoint | slope  | plateau | R2   |
|------------|-----------|--------|---------|------|
| NGLY1_KO_1 | 54.7      | -0.1   | 0.12    | 0.99 |
| NGLY1_1    | 51.71     | -0.091 | 0.07    | 0.99 |
| NGLY1_KO_2 | 51.66     | -0.085 | 0.11    | 0.98 |
| NGLY1_2    | 51.74     | -0.1   | 0.18    | 0.99 |

Supplement: Supplementary file 5598 [file 1]

IPI00455165.1|PANX1

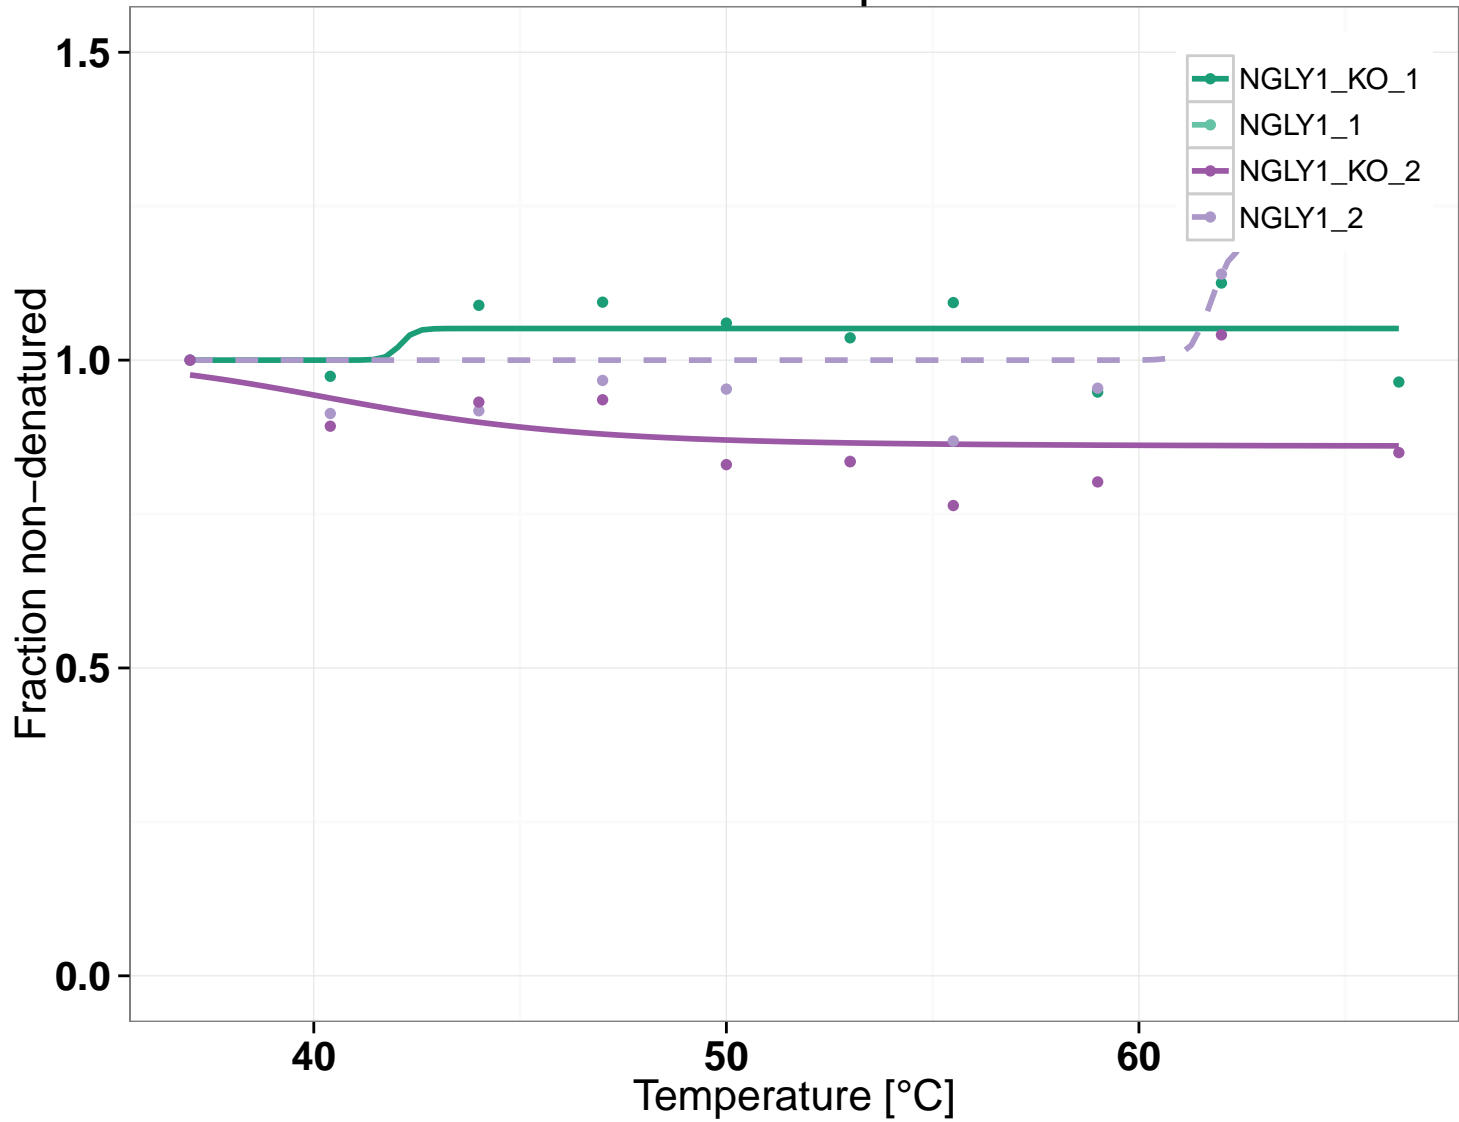

|            | meltPoint | slope  | plateau | R2   |
|------------|-----------|--------|---------|------|
| NGLY1_KO_1 | –         | 0.076  | 1.05    | 0.18 |
| NGLY1_1    | –         | –      | –       | –    |
| NGLY1_KO_2 | –         | –0.012 | 0.86    | 0.22 |
| NGLY1_2    | –         | 0.19   | 1.19    | 0.44 |

Supplement: Supplementary file 5599 [file 1]

IPI00795148.1|SLC11A2

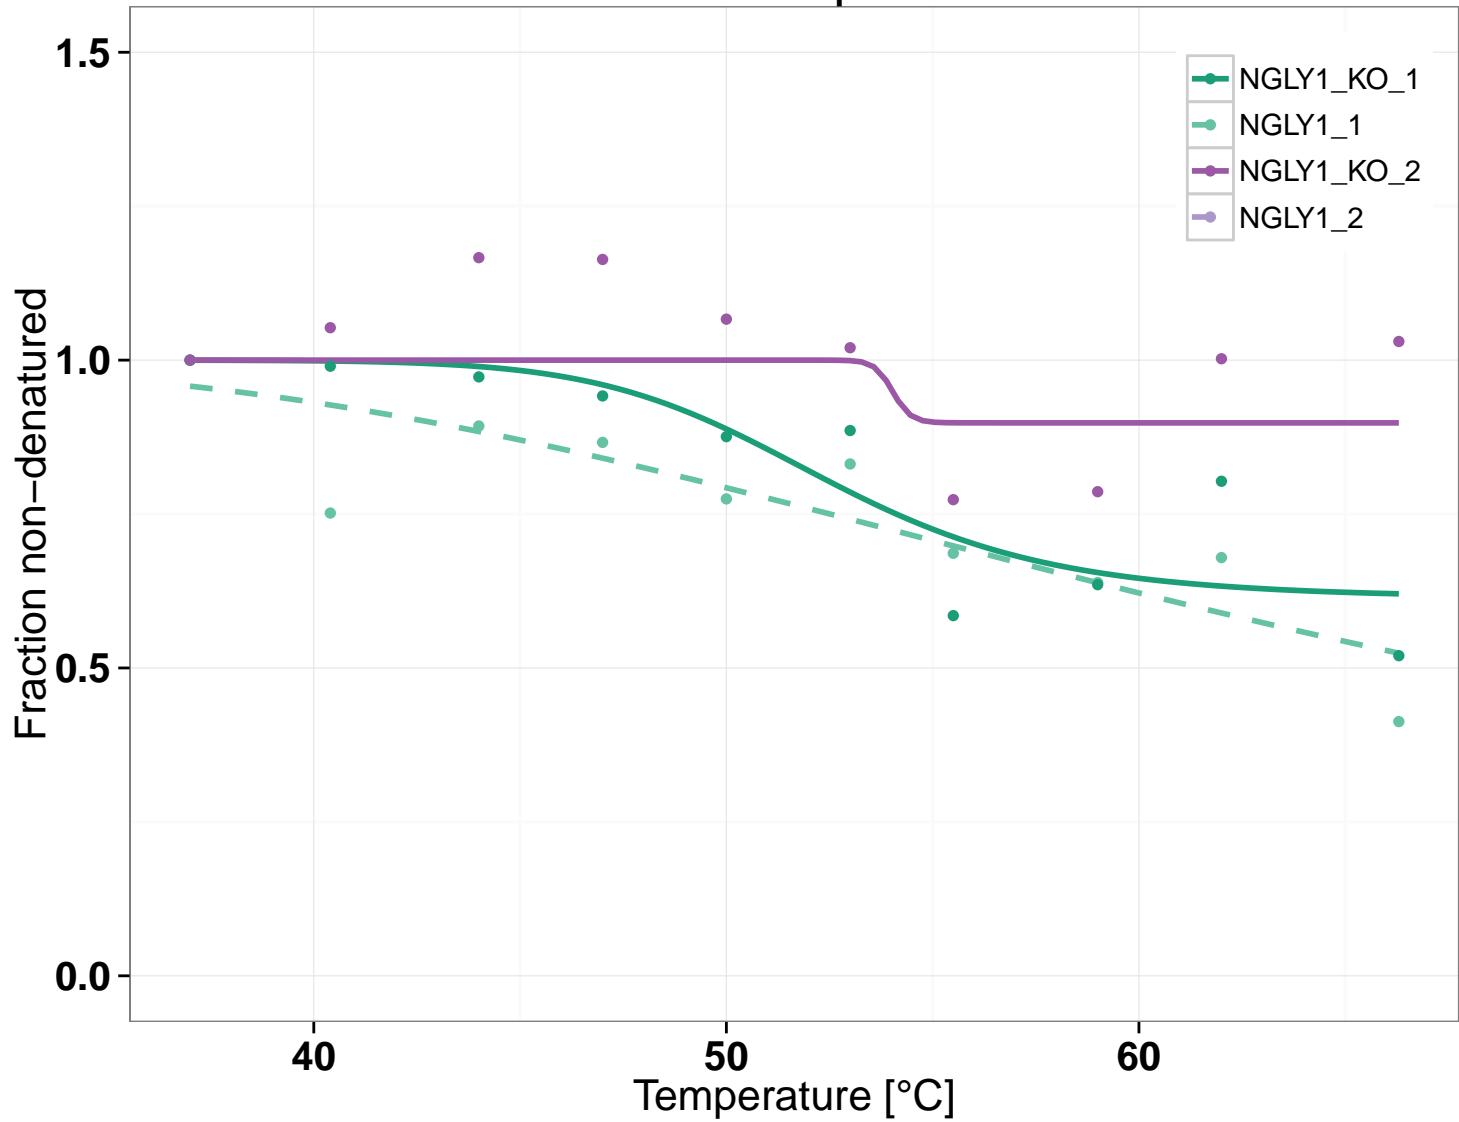

|            | meltPoint | slope  | plateau | R2   |
|------------|-----------|--------|---------|------|
| NGLY1_KO_1 | -         | -0.035 | 0.61    | 0.77 |
| NGLY1_1    | -         | -0.017 | 0       | 0.74 |
| NGLY1_KO_2 | -         | -0.12  | 0.9     | 0.26 |
| NGLY1_2    | -         | -      | -       | -    |

Supplement: Supplementary file 5600 [file 1]

IPI00465023.1|C22ORF25

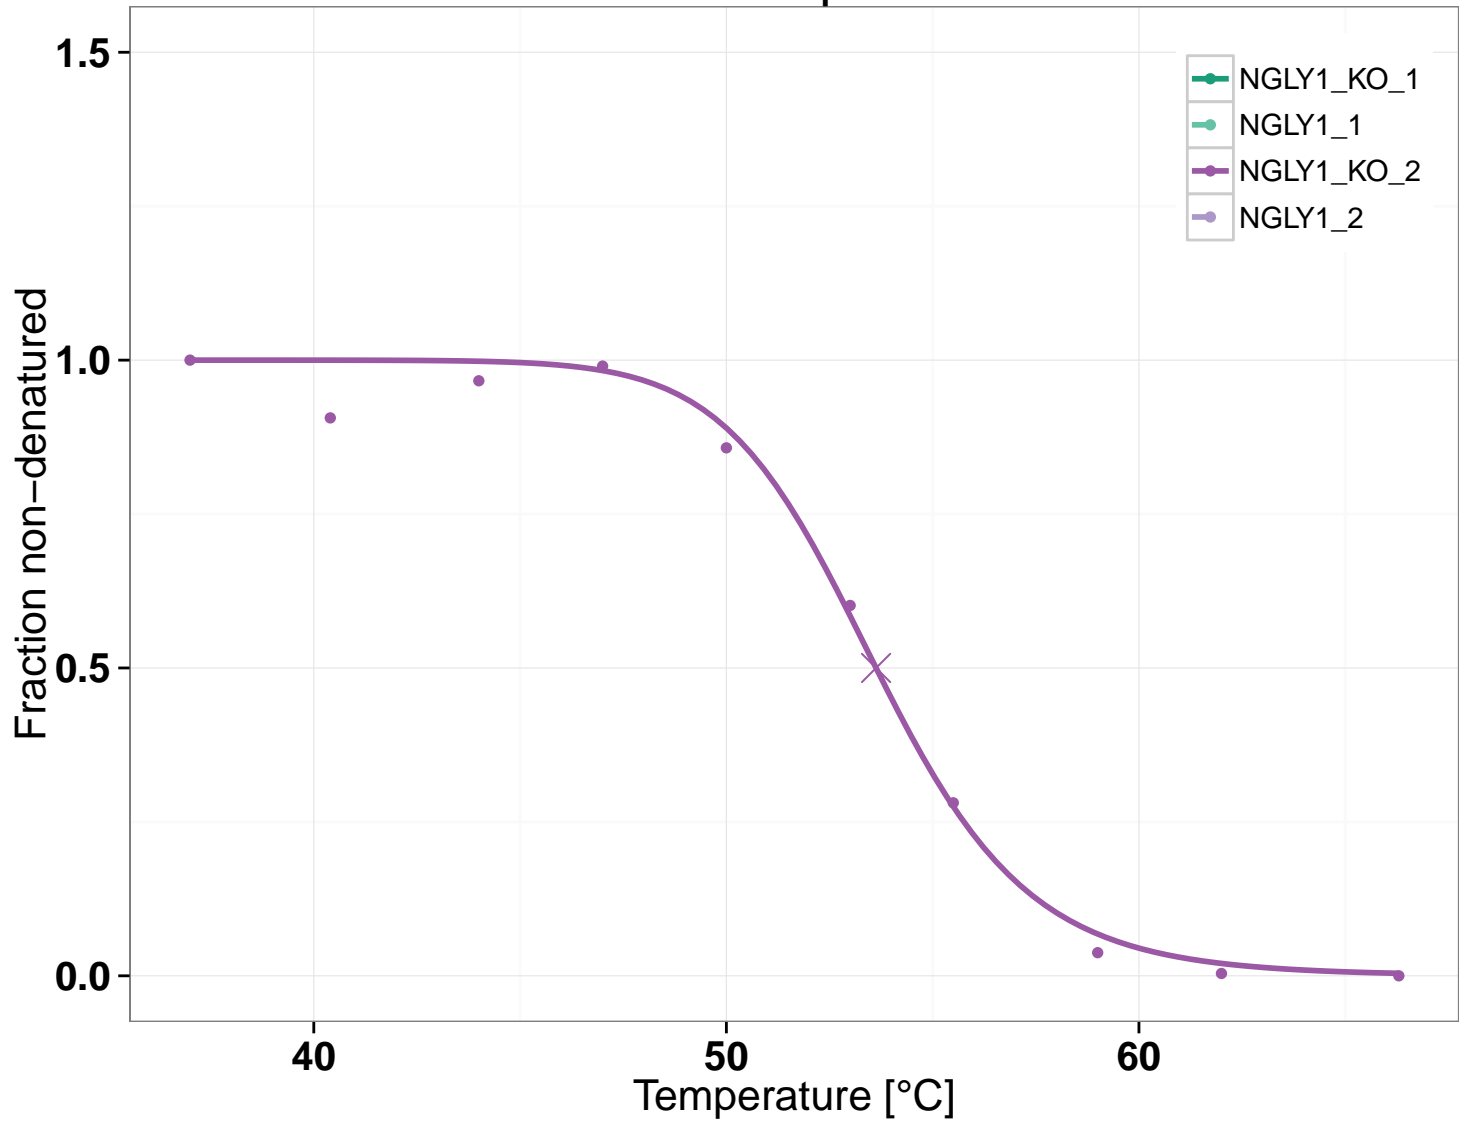

|            | meltPoint | slope | plateau | R2   |
|------------|-----------|-------|---------|------|
| NGLY1_KO_1 | -         | -     | -       | -    |
| NGLY1_1    | -         | -     | -       | -    |
| NGLY1_KO_2 | 53.63     | -0.13 | 0       | 0.99 |
| NGLY1_2    | -         | -     | -       | -    |

Supplement: Supplementary file 5601 [file 1]

# IPI00465436.4|CAT

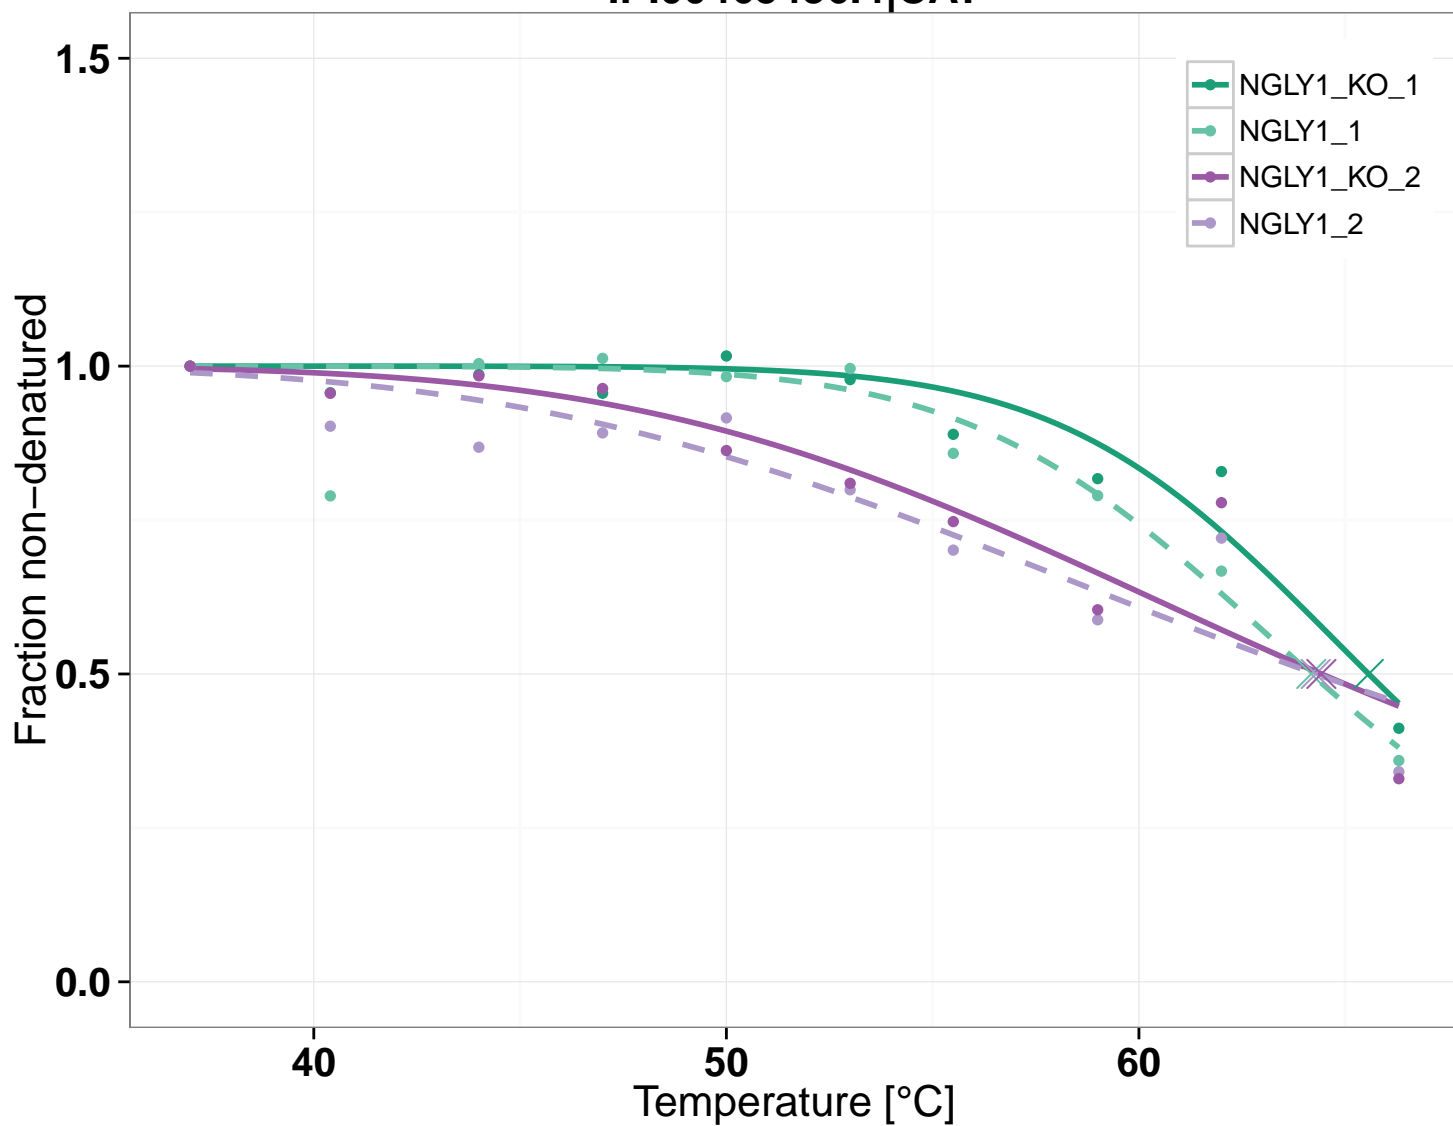

|            | meltPoint | slope  | plateau | R2   |
|------------|-----------|--------|---------|------|
| NGLY1_KO_1 | 65.57     | -0.067 | 0       | 0.92 |
| NGLY1_1    | 64.18     | -0.06  | 0       | 0.87 |
| NGLY1_KO_2 | 64.42     | -0.031 | 0       | 0.84 |
| NGLY1_2    | 64.29     | -0.026 | 0       | 0.83 |

Supplement: Supplementary file 5602 [file 1]

IPI00220194.6|SLC2A1

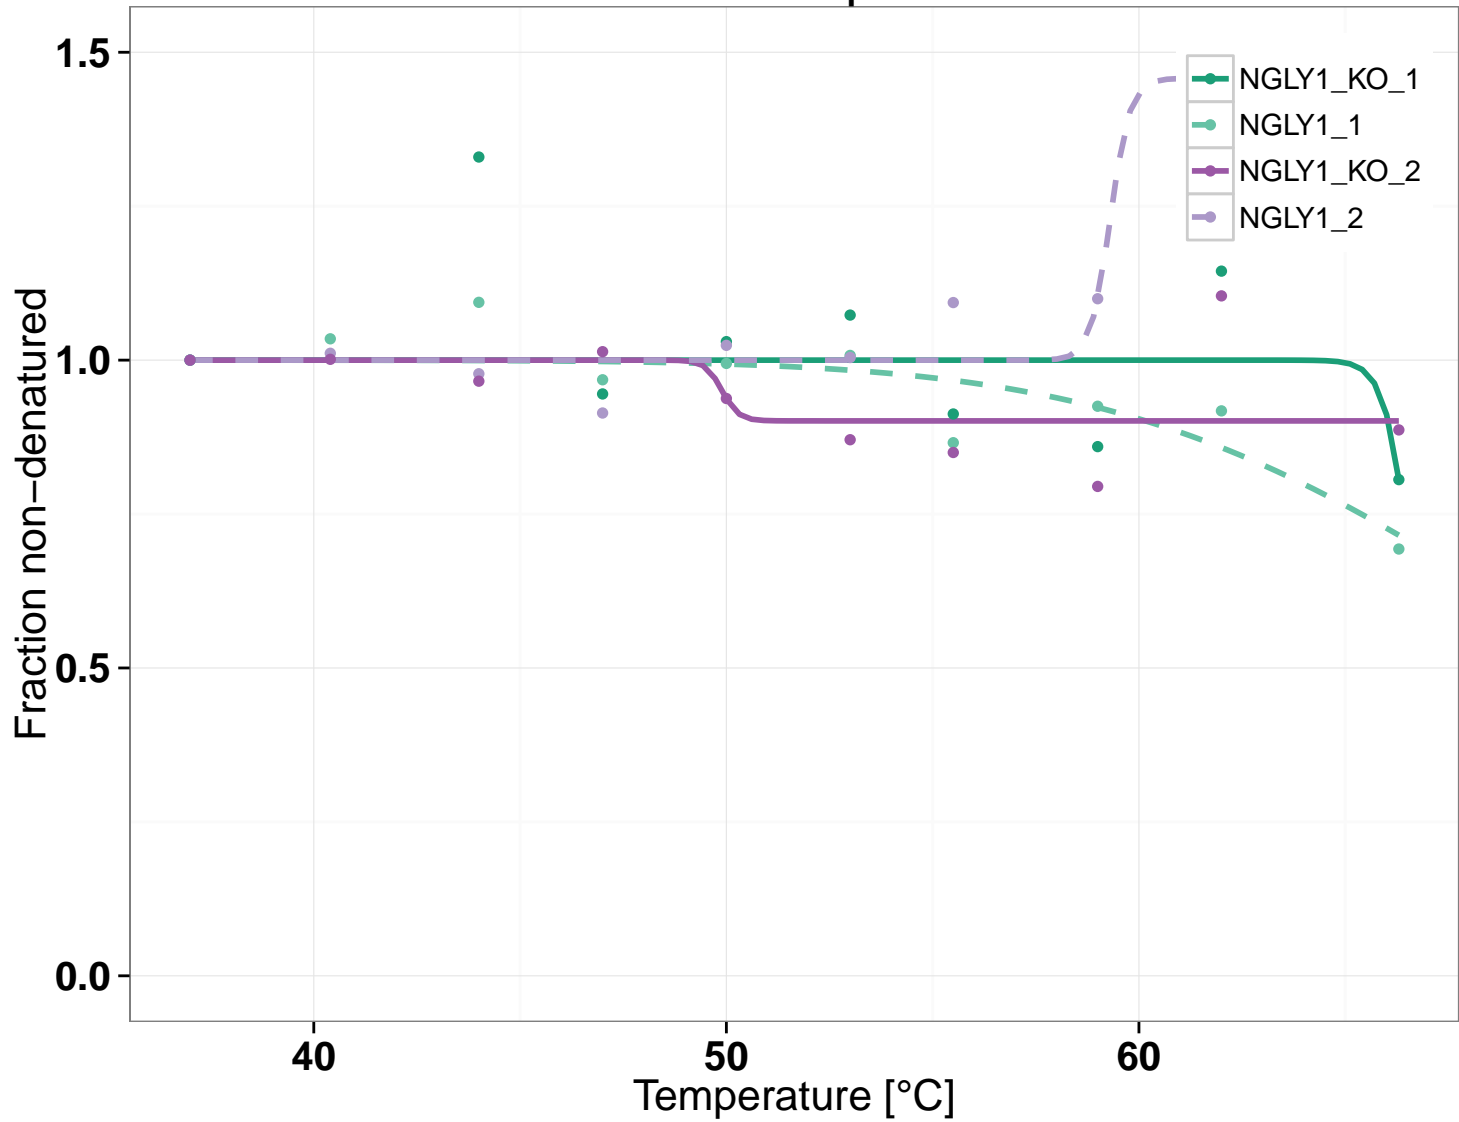

|            | meltPoint | slope | plateau | R2    |
|------------|-----------|-------|---------|-------|
| NGLY1_KO_1 | -         | -     | 0.02    | -0.01 |
| NGLY1_1    | -         | -     | 0       | 0.77  |
| NGLY1_KO_2 | -         | -0.12 | 0.9     | 0.25  |
| NGLY1_2    | -         | 0.48  | 1.46    | 0.92  |

Supplement: Supplementary file 5603 [file 1]

IPI00143921.9|KDELC2

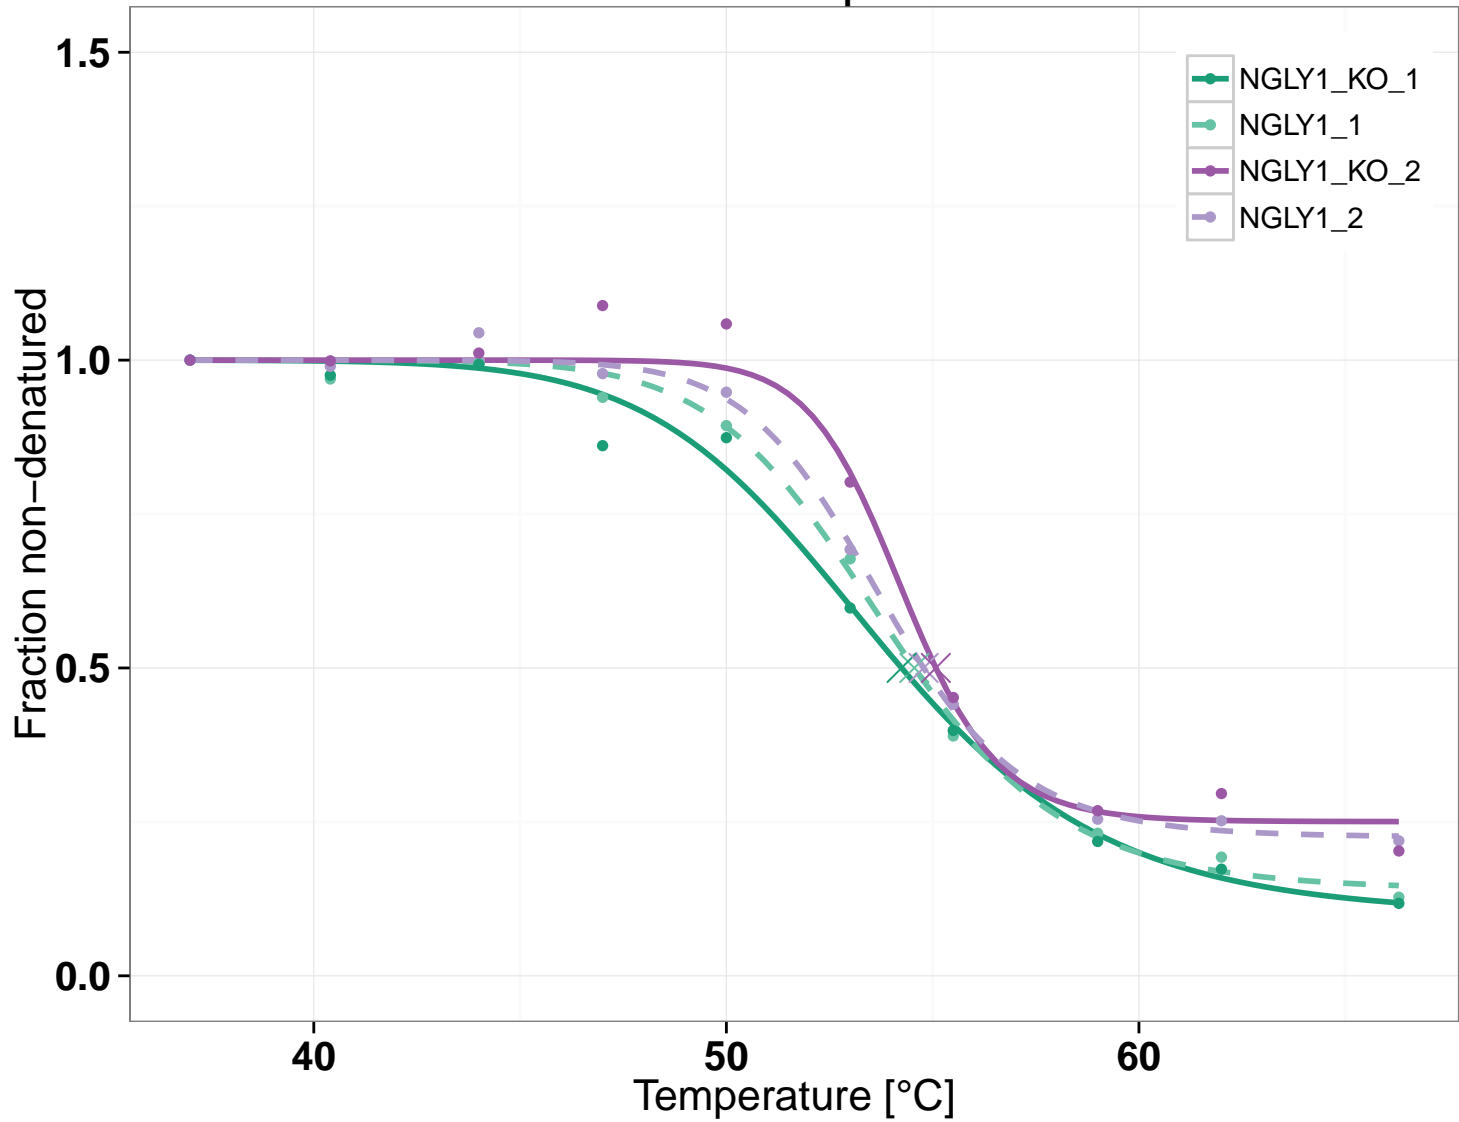

|            | meltPoint | slope  | plateau | R2   |
|------------|-----------|--------|---------|------|
| NGLY1_KO_1 | 54.25     | -0.082 | 0.1     | 0.99 |
| NGLY1_1    | 54.56     | -0.1   | 0.14    | 1    |
| NGLY1_KO_2 | 55.08     | -0.16  | 0.25    | 0.99 |
| NGLY1_2    | 54.78     | -0.12  | 0.23    | 1    |

Supplement: Supplementary file 5604 [file 1]

# IPI00412343.2|FMR1

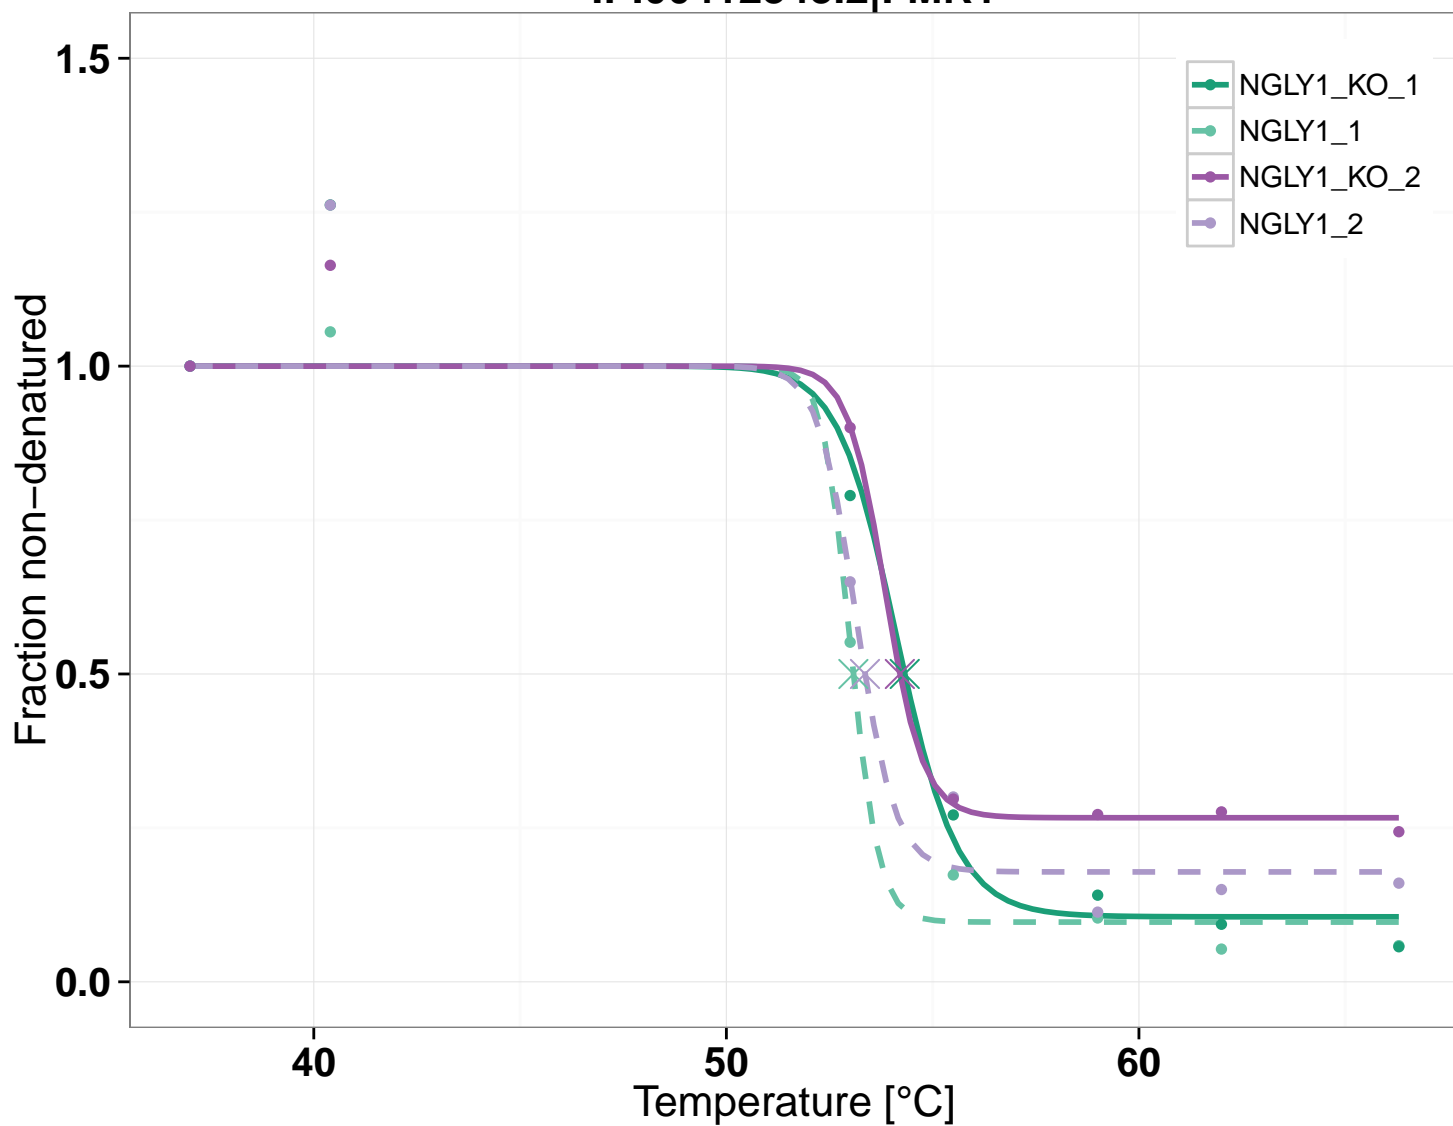

|            | meltPoint | slope | plateau | R2   |
|------------|-----------|-------|---------|------|
| NGLY1_KO_1 | 54.32     | -0.31 | 0.11    | 0.21 |
| NGLY1_1    | 53.08     | -0.67 | 0.1     | 0.55 |
| NGLY1_KO_2 | 54.21     | -0.4  | 0.27    | 0.11 |
| NGLY1_2    | 53.36     | -0.44 | 0.18    | 0.51 |

Supplement: Supplementary file 5605 [file 1]

IPI00830136.1|C1ORF31

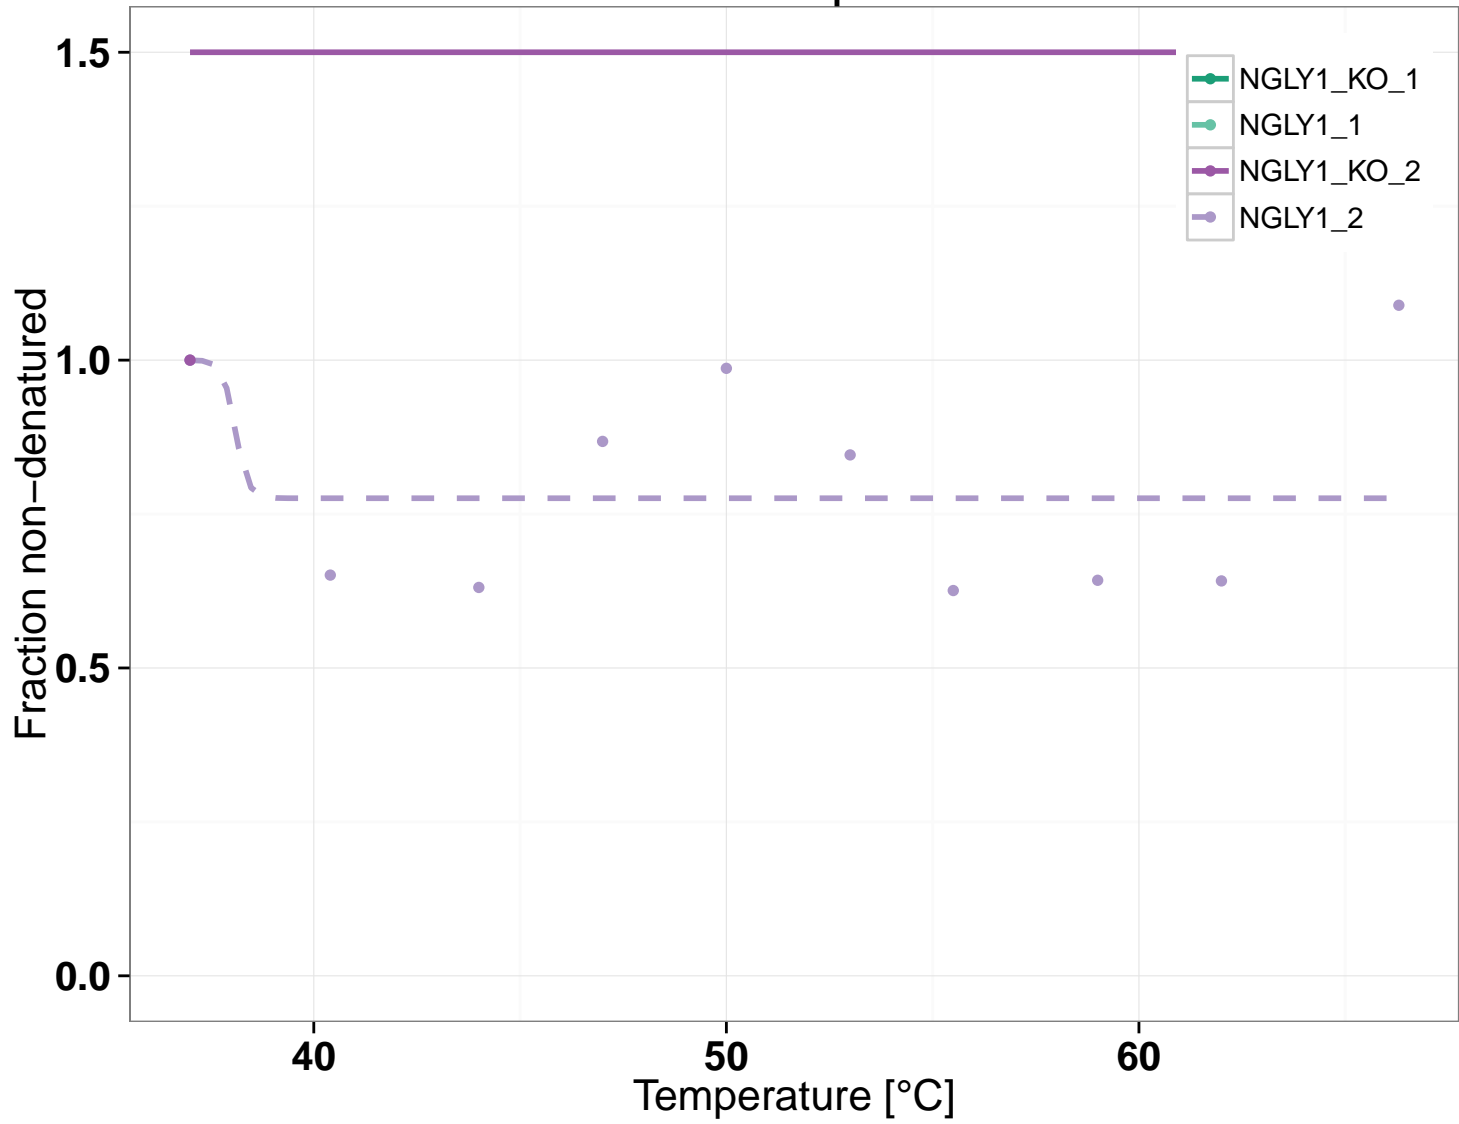

|            | meltPoint | slope | plateau | R2   |
|------------|-----------|-------|---------|------|
| NGLY1_KO_1 | -         | -     | -       | -    |
| NGLY1_1    | -         | -     | -       | -    |
| NGLY1_KO_2 | -         | -     | 1.5     | -0.9 |
| NGLY1_2    | -         | -0.37 | 0.78    | 0.15 |

Supplement: Supplementary file 5606 [file 1]

IPI00790230.1|CCDC55

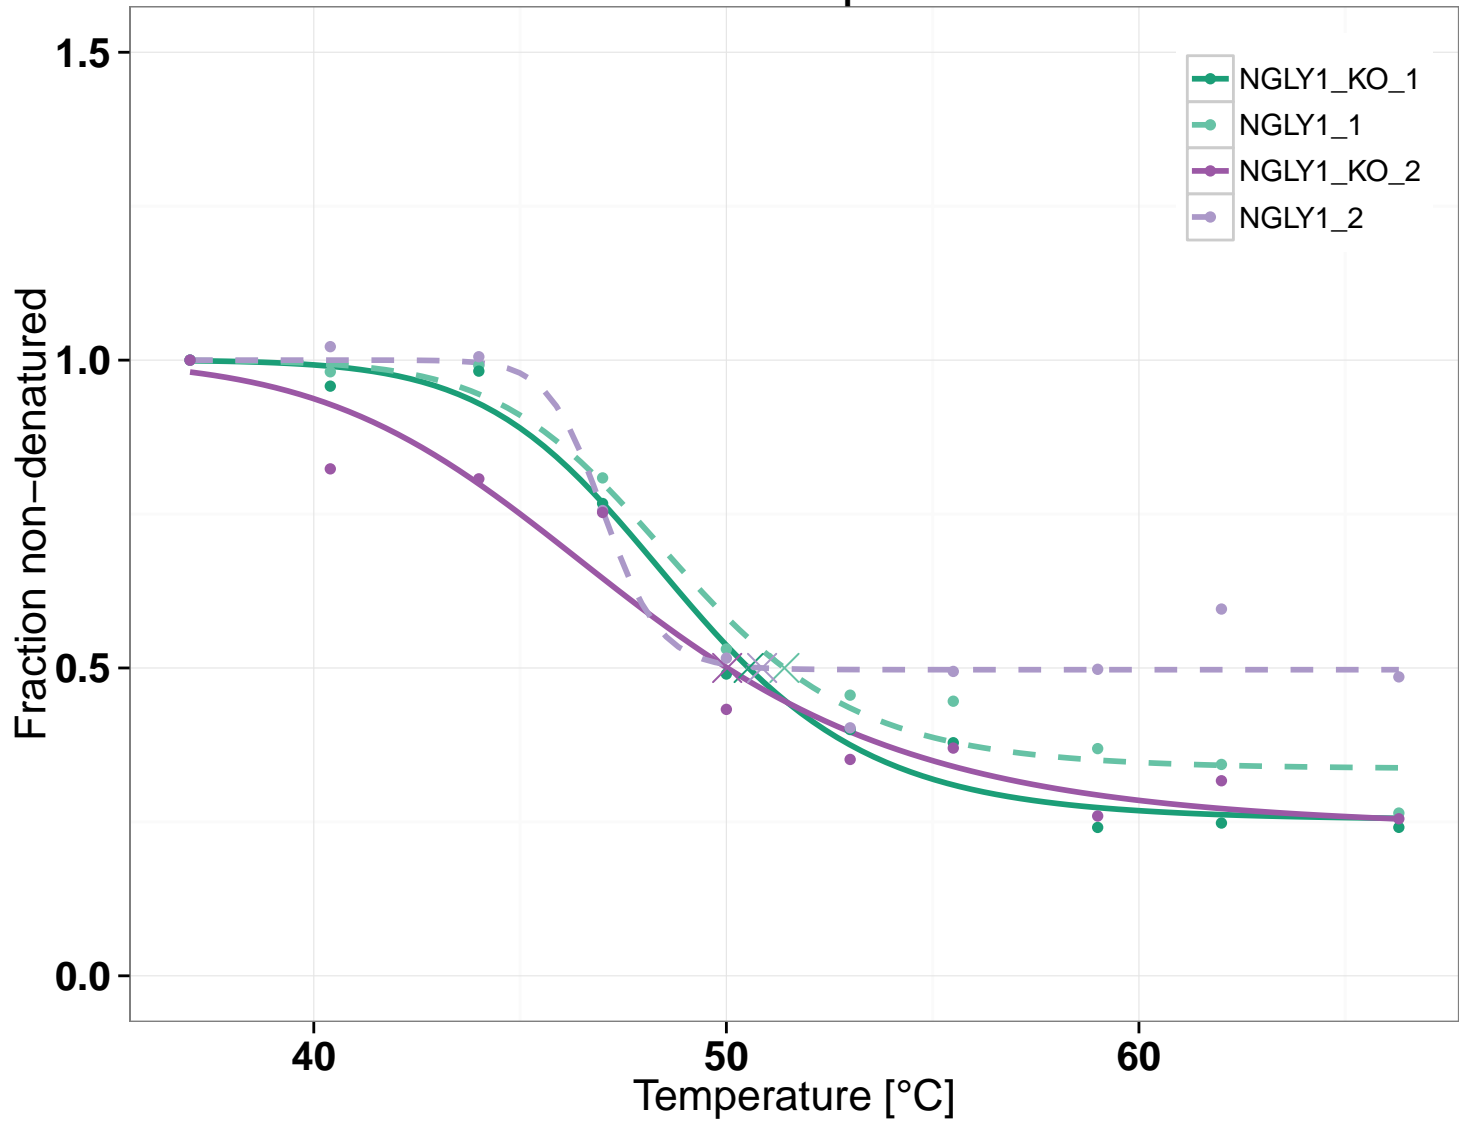

|            | meltPoint | slope  | plateau | R2   |
|------------|-----------|--------|---------|------|
| NGLY1_KO_1 | 50.54     | -0.08  | 0.25    | 0.99 |
| NGLY1_1    | 51.41     | -0.075 | 0.34    | 0.98 |
| NGLY1_KO_2 | 50.02     | -0.053 | 0.23    | 0.95 |
| NGLY1_2    | 50.87     | -0.18  | 0.5     | 0.96 |

Supplement: Supplementary file 5607 [file 1]

IPI00853400.1|FKBP15

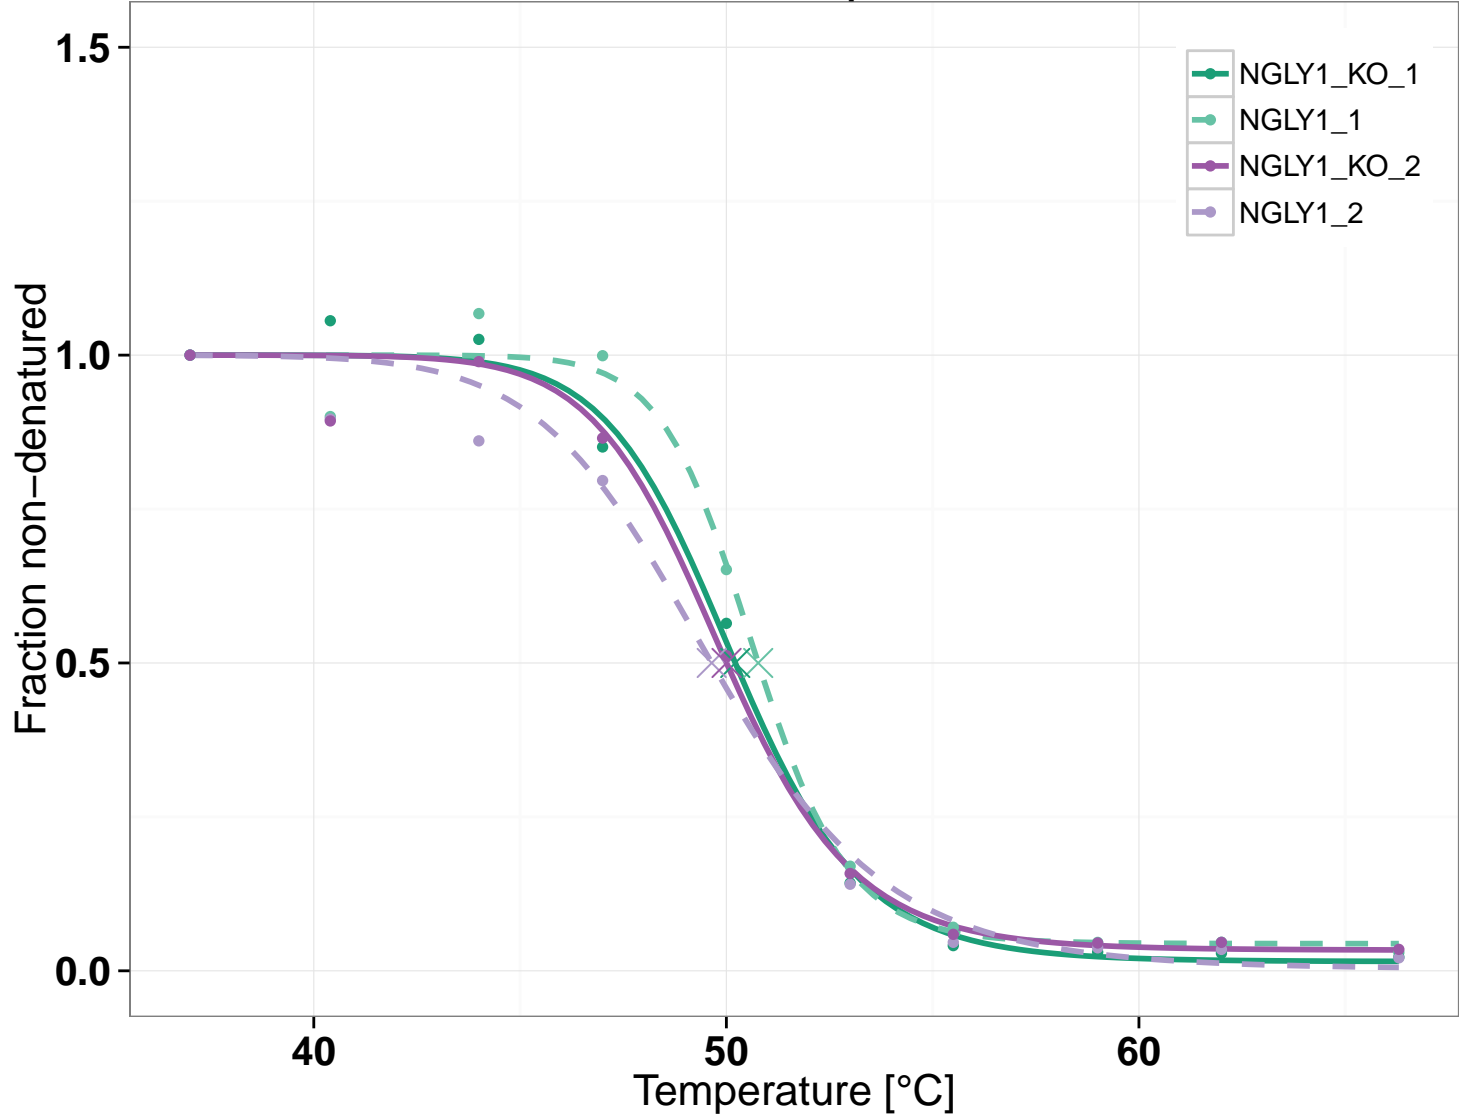

|            | meltPoint | slope | plateau | R2   |
|------------|-----------|-------|---------|------|
| NGLY1_KO_1 | 50.22     | -0.16 | 0.01    | 1    |
| NGLY1_1    | 50.77     | -0.21 | 0.04    | 0.99 |
| NGLY1_KO_2 | 50        | -0.15 | 0.03    | 0.99 |
| NGLY1_2    | 49.65     | -0.12 | 0       | 0.98 |

Supplement: Supplementary file 5608 [file 1]

IPI00009210.1|DUSP12

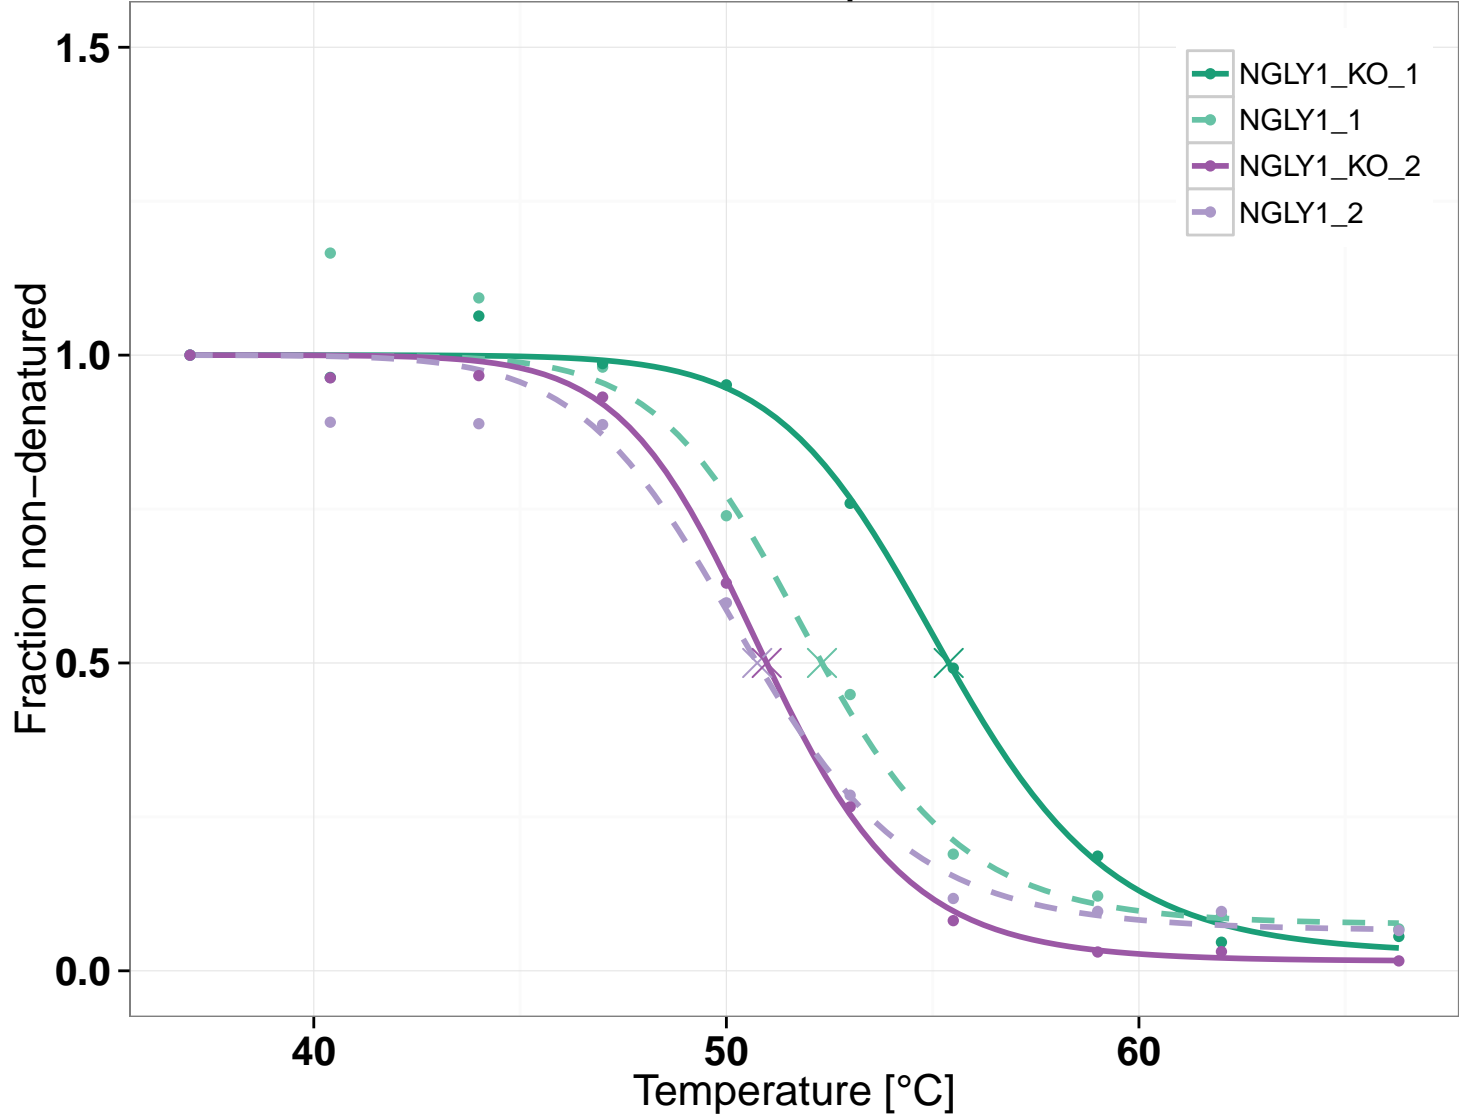

|            | meltPoint | slope | plateau | R2   |
|------------|-----------|-------|---------|------|
| NGLY1_KO_1 | 55.39     | -0.12 | 0.03    | 1    |
| NGLY1_1    | 52.32     | -0.12 | 0.08    | 0.98 |
| NGLY1_KO_2 | 50.98     | -0.14 | 0.02    | 1    |
| NGLY1_2    | 50.75     | -0.12 | 0.06    | 0.98 |

Supplement: Supplementary file 5609 [file 1]

# IPI00384541.4|RPRD2

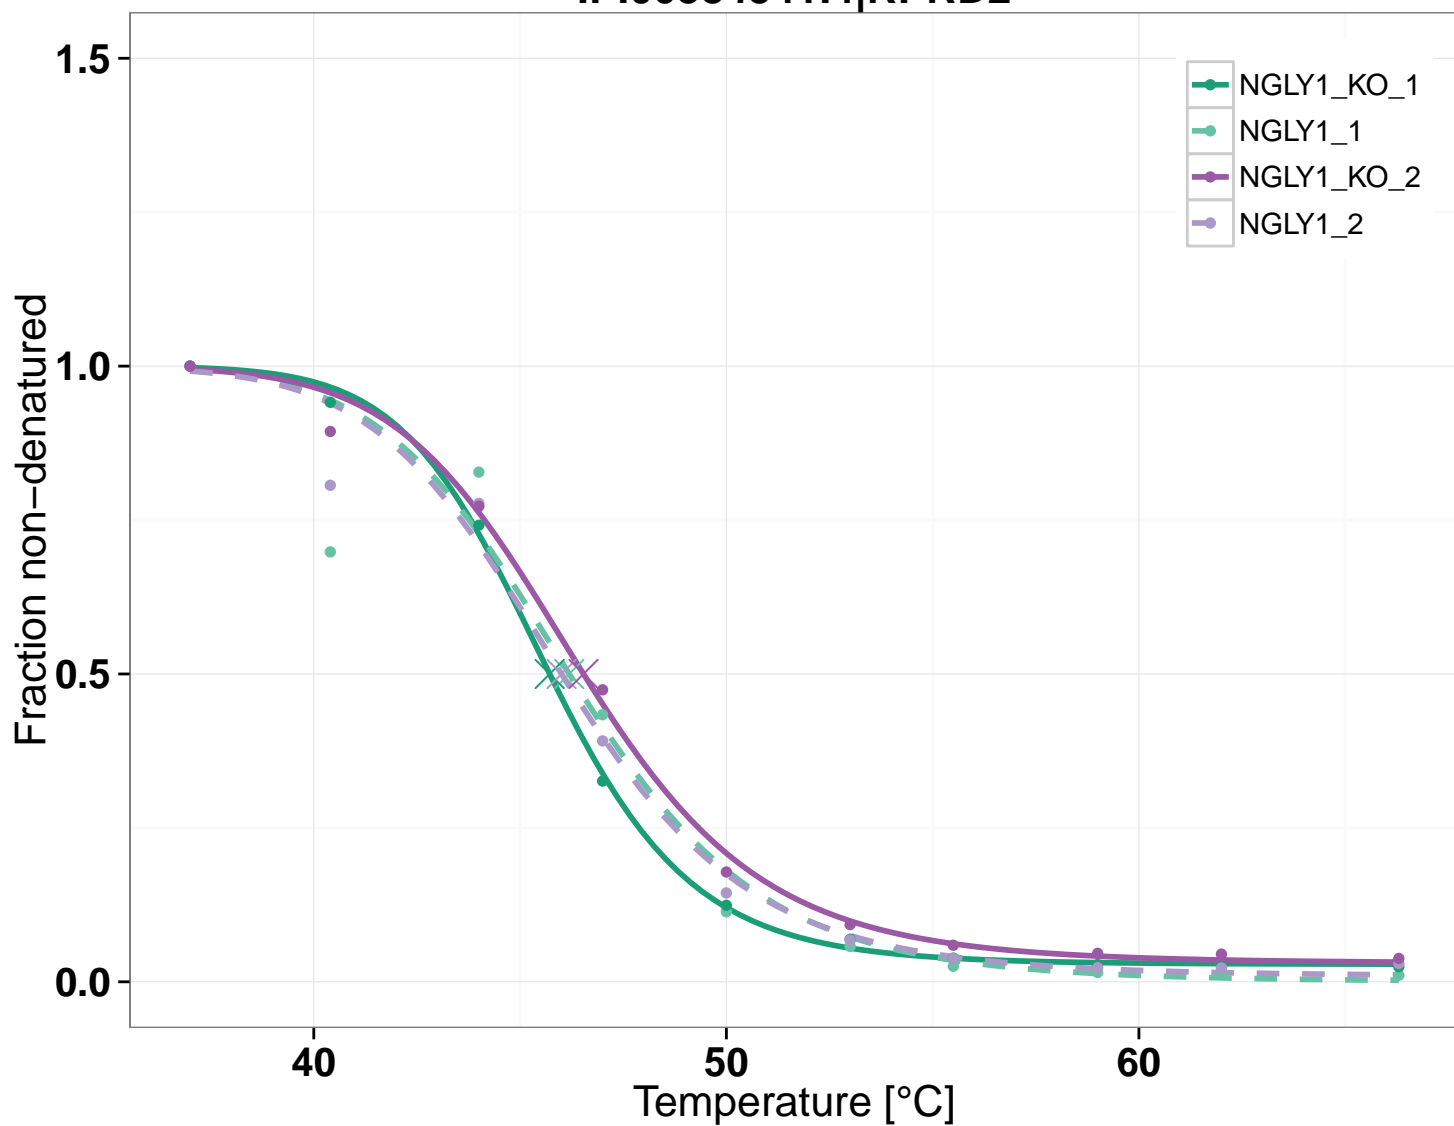

|            | meltPoint | slope | plateau | R2   |
|------------|-----------|-------|---------|------|
| NGLY1_KO_1 | 45.72     | -0.14 | 0.03    | 1    |
| NGLY1_1    | 46.19     | -0.11 | 0       | 0.94 |
| NGLY1_KO_2 | 46.54     | -0.11 | 0.03    | 1    |
| NGLY1_2    | 46        | -0.11 | 0.01    | 0.98 |

Supplement: Supplementary file 5610 [file 1]

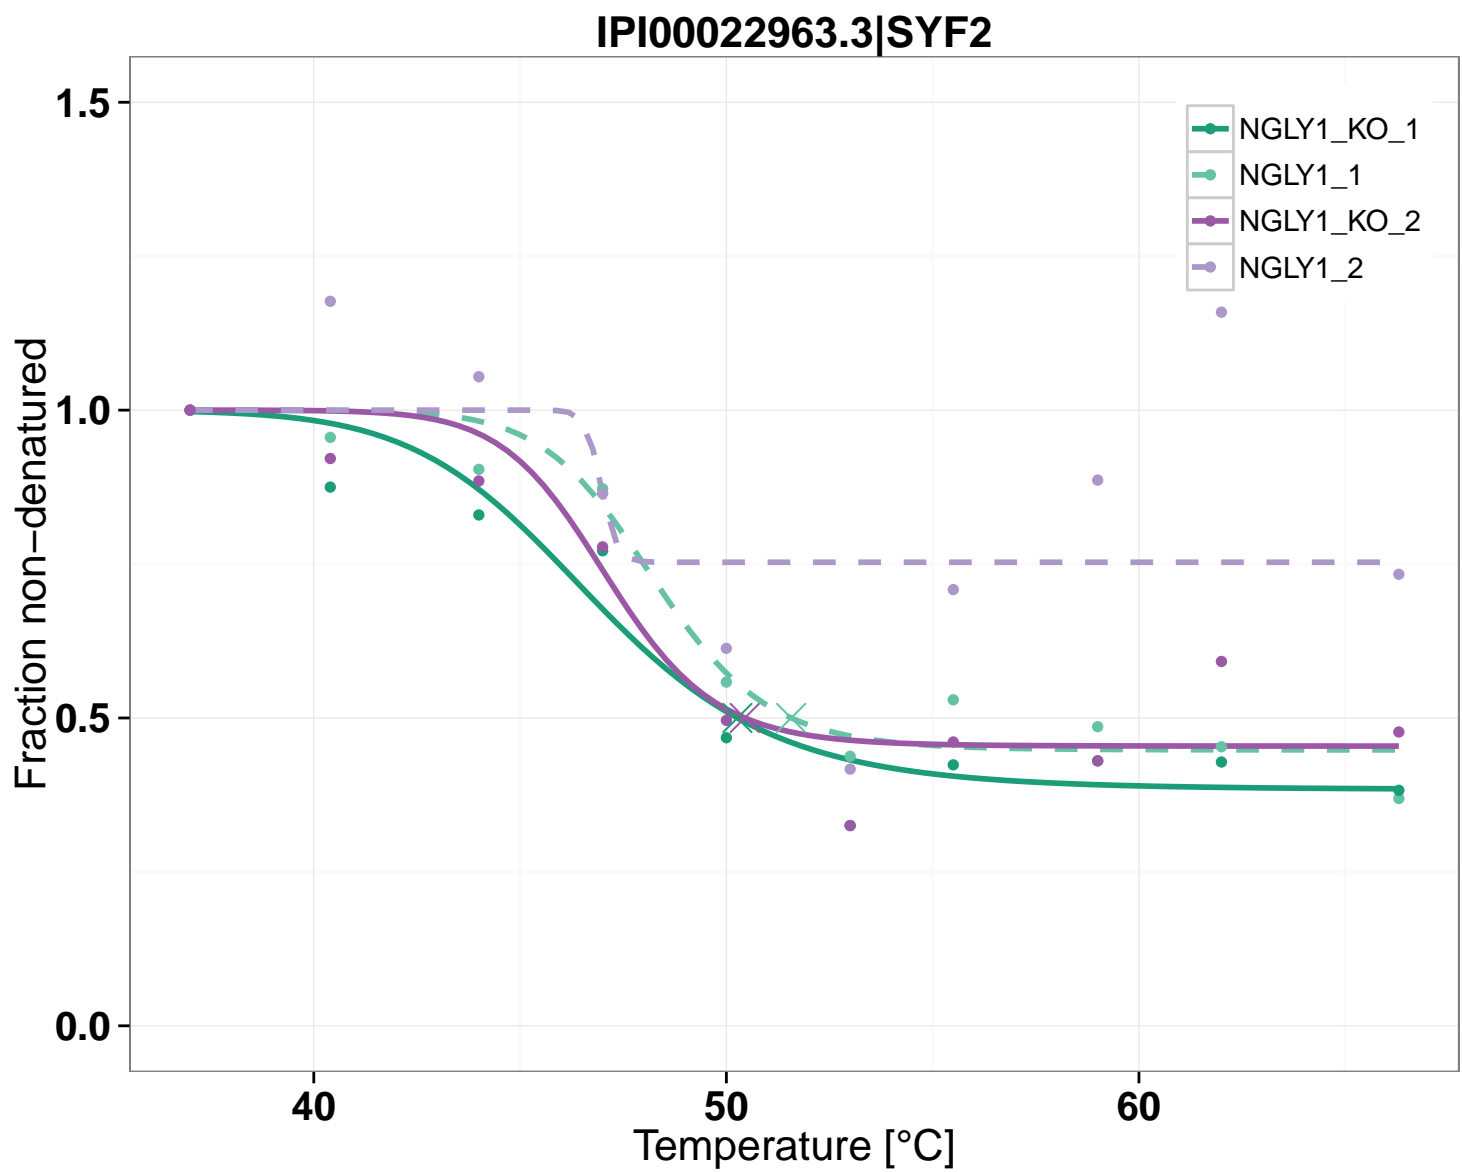

|            | meltPoint | slope | plateau | R2   |
|------------|-----------|-------|---------|------|
| NGLY1_KO_1 | 50.27     | -0.07 | 0.38    | 0.93 |
| NGLY1_1    | 51.57     | -0.1  | 0.45    | 0.96 |
| NGLY1_KO_2 | 50.45     | -0.11 | 0.45    | 0.9  |
| NGLY1_2    | -         | -0.33 | 0.75    | 0.35 |

Supplement: Supplementary file 5611 [file 1]

IPI00409601.1|KIAA1219

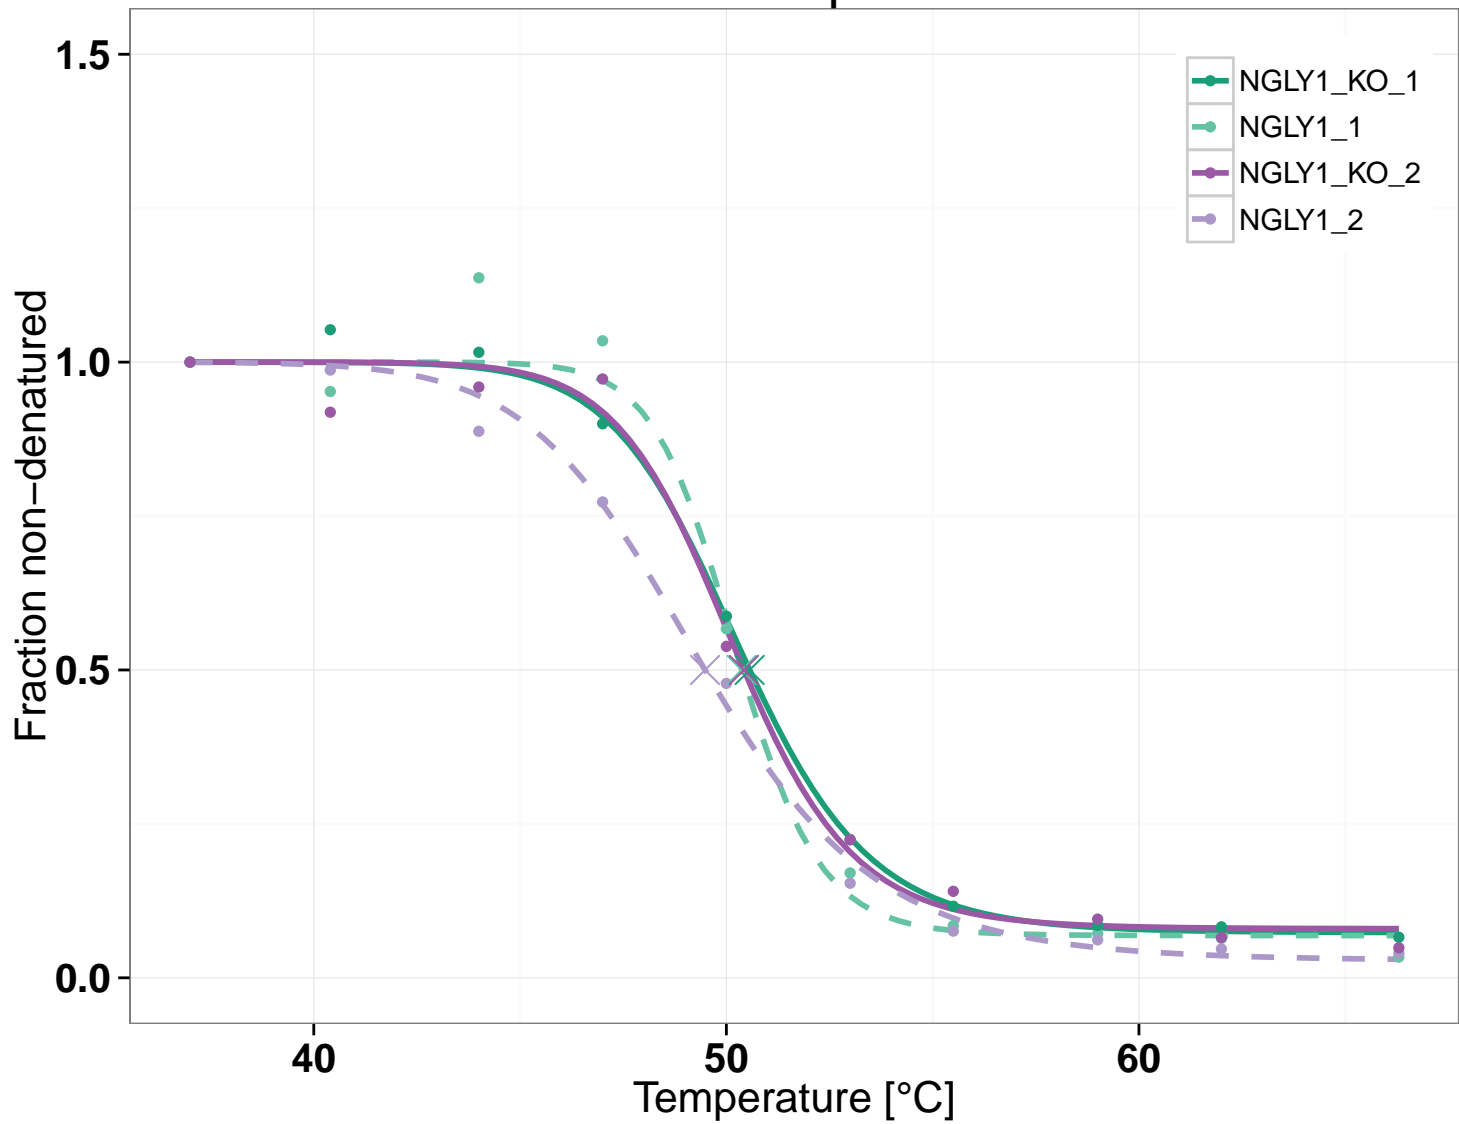

|            | meltPoint | slope | plateau | R2   |
|------------|-----------|-------|---------|------|
| NGLY1_KO_1 | 50.57     | -0.15 | 0.07    | 1    |
| NGLY1_1    | 50.37     | -0.23 | 0.07    | 0.99 |
| NGLY1_KO_2 | 50.43     | -0.16 | 0.08    | 0.99 |
| NGLY1_2    | 49.48     | -0.12 | 0.03    | 1    |

Supplement: Supplementary file 5612 [file 1]

IPI00007756.1|RAB22A

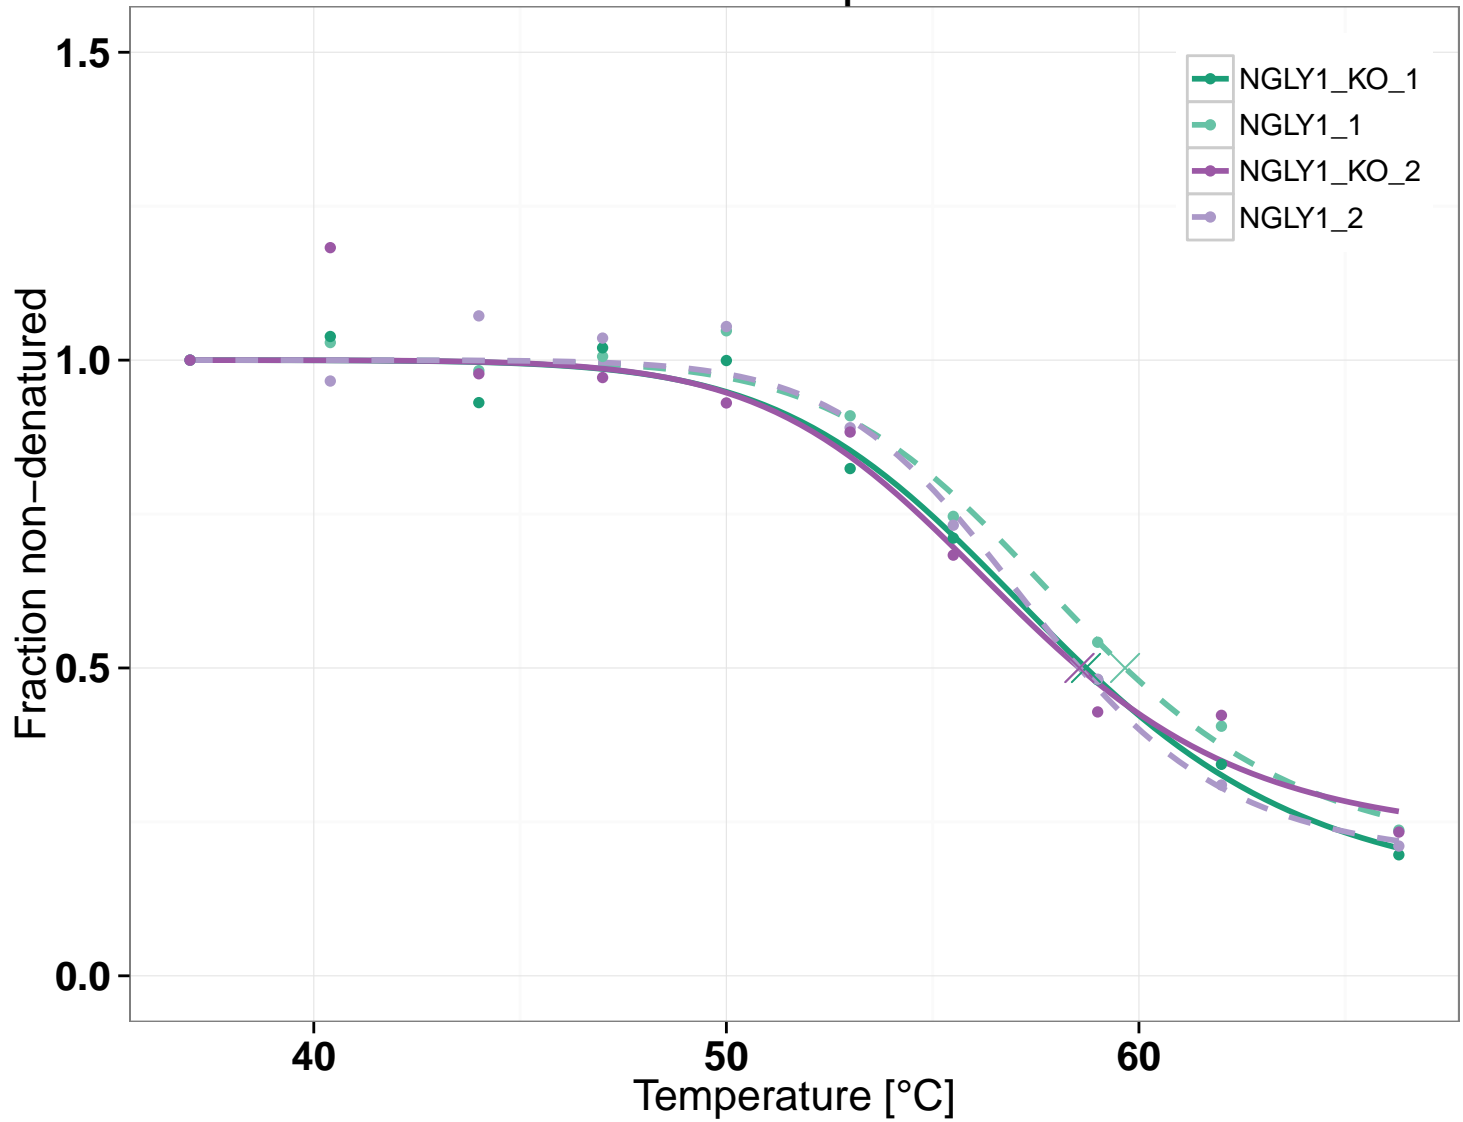

|            | meltPoint | slope  | plateau | R2   |
|------------|-----------|--------|---------|------|
| NGLY1_KO_1 | 58.72     | -0.068 | 0.13    | 0.99 |
| NGLY1_1    | 59.66     | -0.071 | 0.19    | 0.99 |
| NGLY1_KO_2 | 58.56     | -0.067 | 0.22    | 0.95 |
| NGLY1_2    | 58.56     | -0.086 | 0.19    | 0.98 |

Supplement: Supplementary file 5613 [file 1]

IPI00217952.6|GFPT1

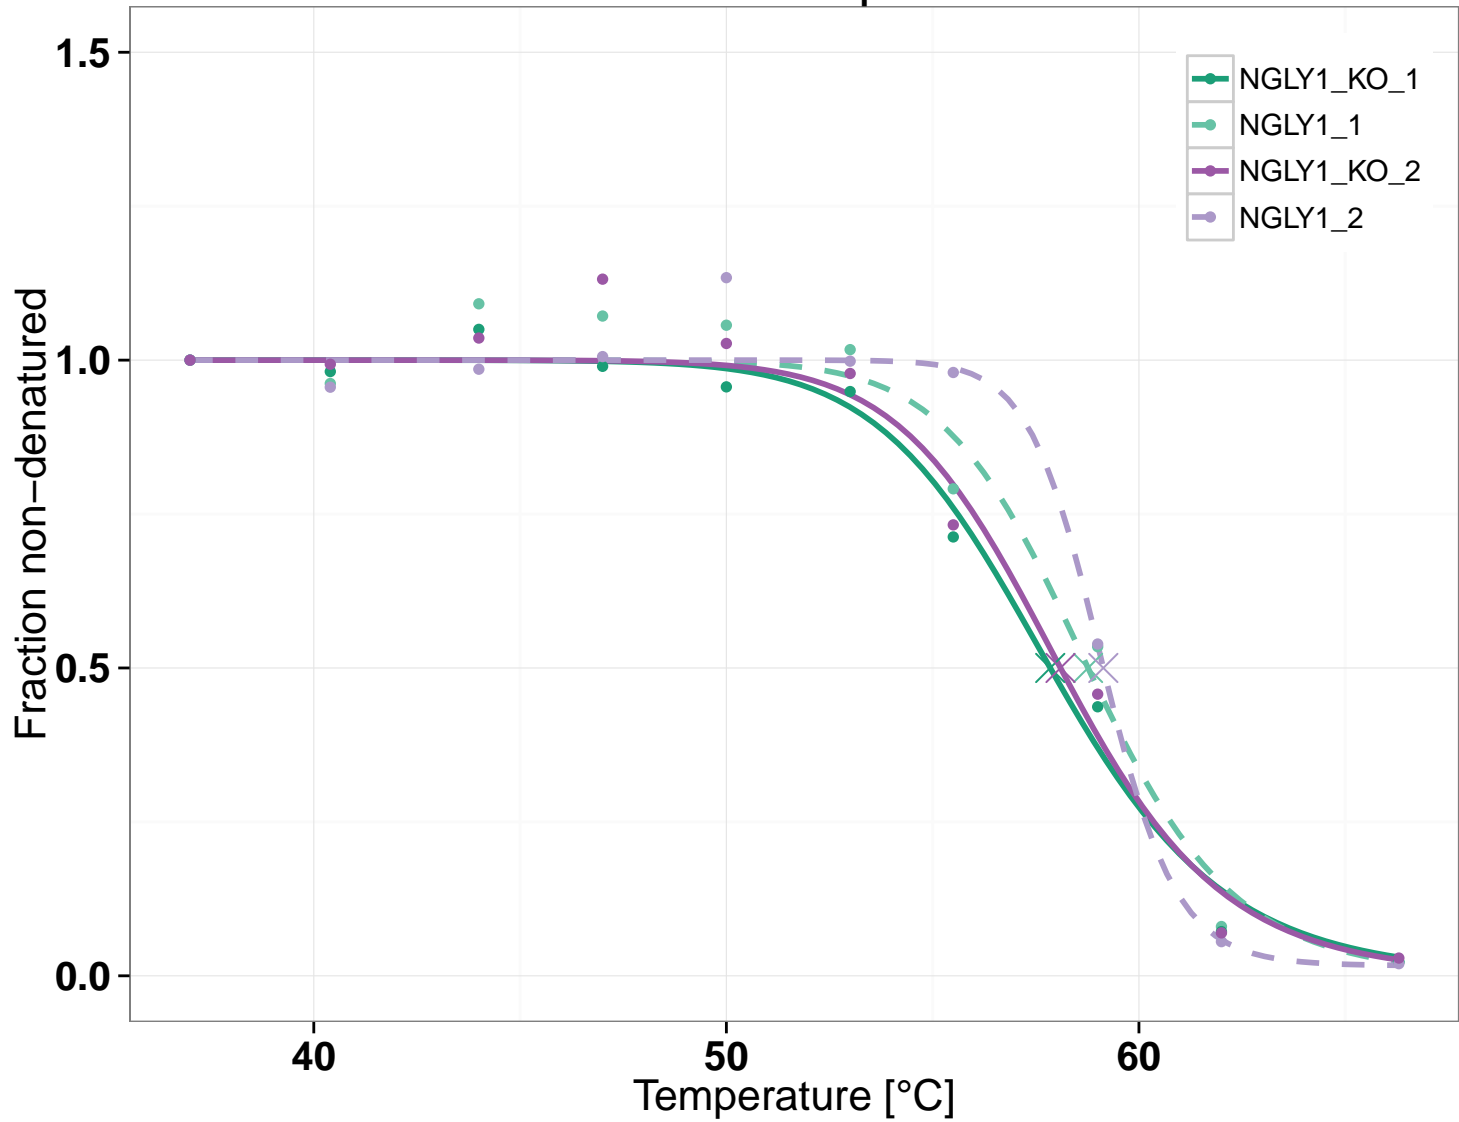

|            | meltPoint | slope | plateau | R2   |
|------------|-----------|-------|---------|------|
| NGLY1_KO_1 | 57.85     | -0.12 | 0       | 0.99 |
| NGLY1_1    | 58.77     | -0.14 | 0       | 0.98 |
| NGLY1_KO_2 | 58.1      | -0.13 | 0       | 0.98 |
| NGLY1_2    | 59.14     | -0.28 | 0.02    | 0.99 |

Supplement: Supplementary file 5614 [file 1]

IPI00006442.1|COIL

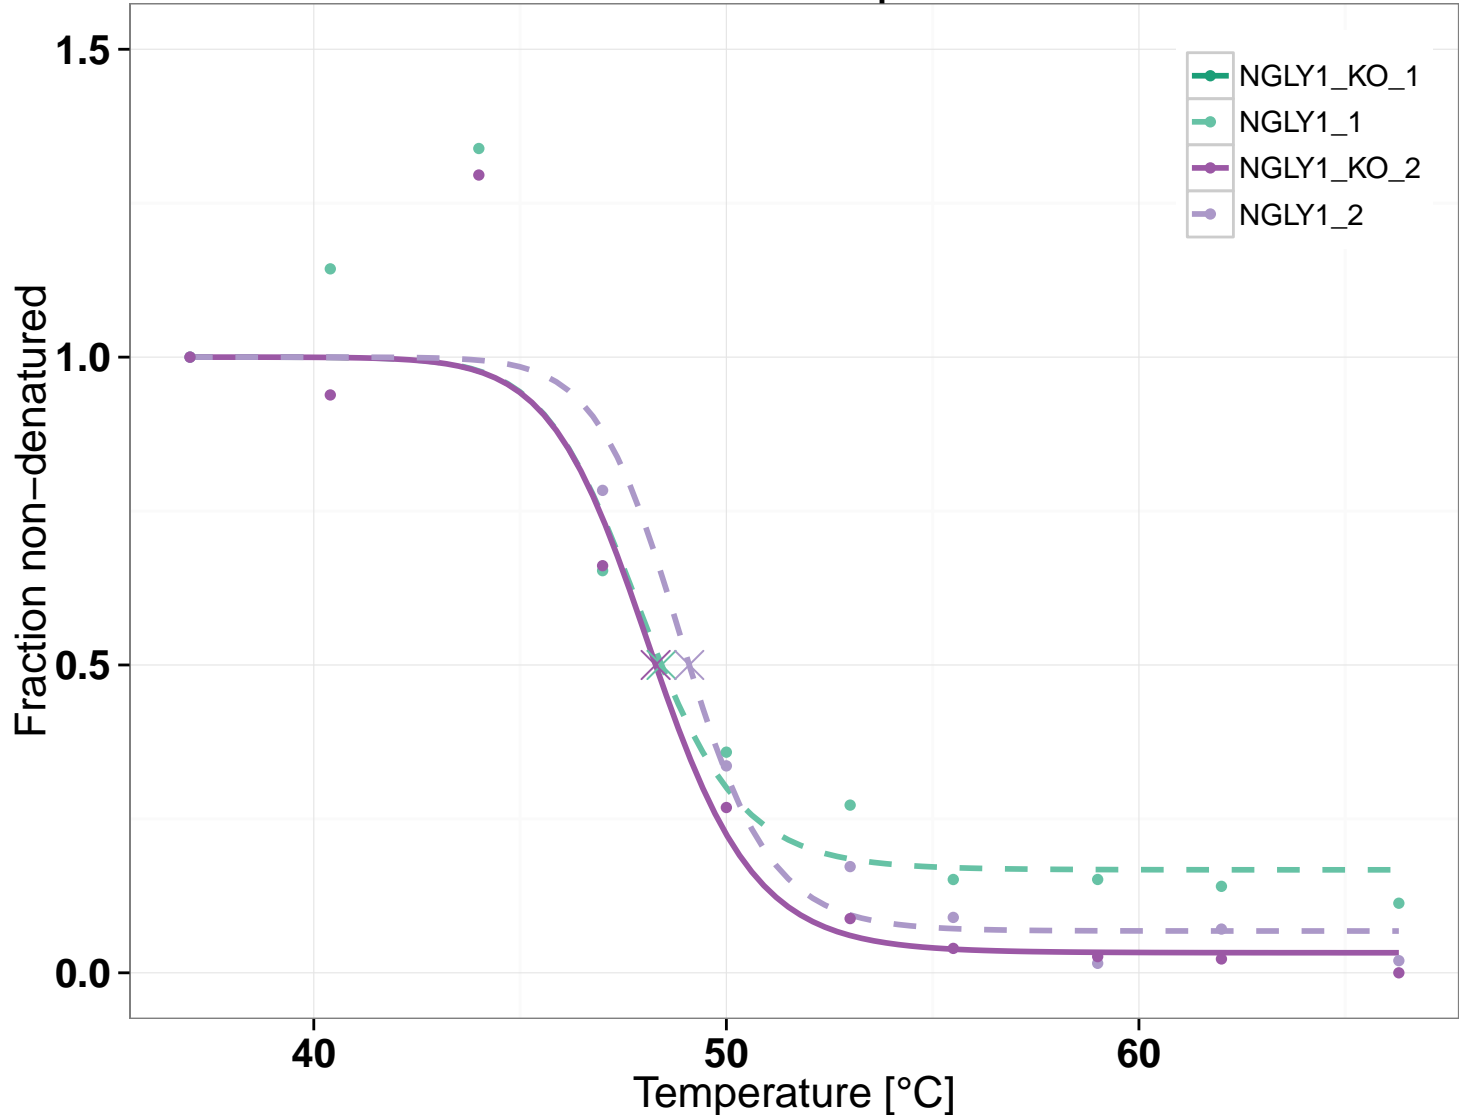

|            | meltPoint | slope | plateau | R2   |
|------------|-----------|-------|---------|------|
| NGLY1_KO_1 | —         | —     | —       | —    |
| NGLY1_1    | 48.43     | -0.17 | 0.17    | 0.91 |
| NGLY1_KO_2 | 48.29     | -0.2  | 0.03    | 0.95 |
| NGLY1_2    | 49.1      | -0.22 | 0.07    | 0.63 |

Supplement: Supplementary file 5615 [file 1]

IPI00032826.1|ST13

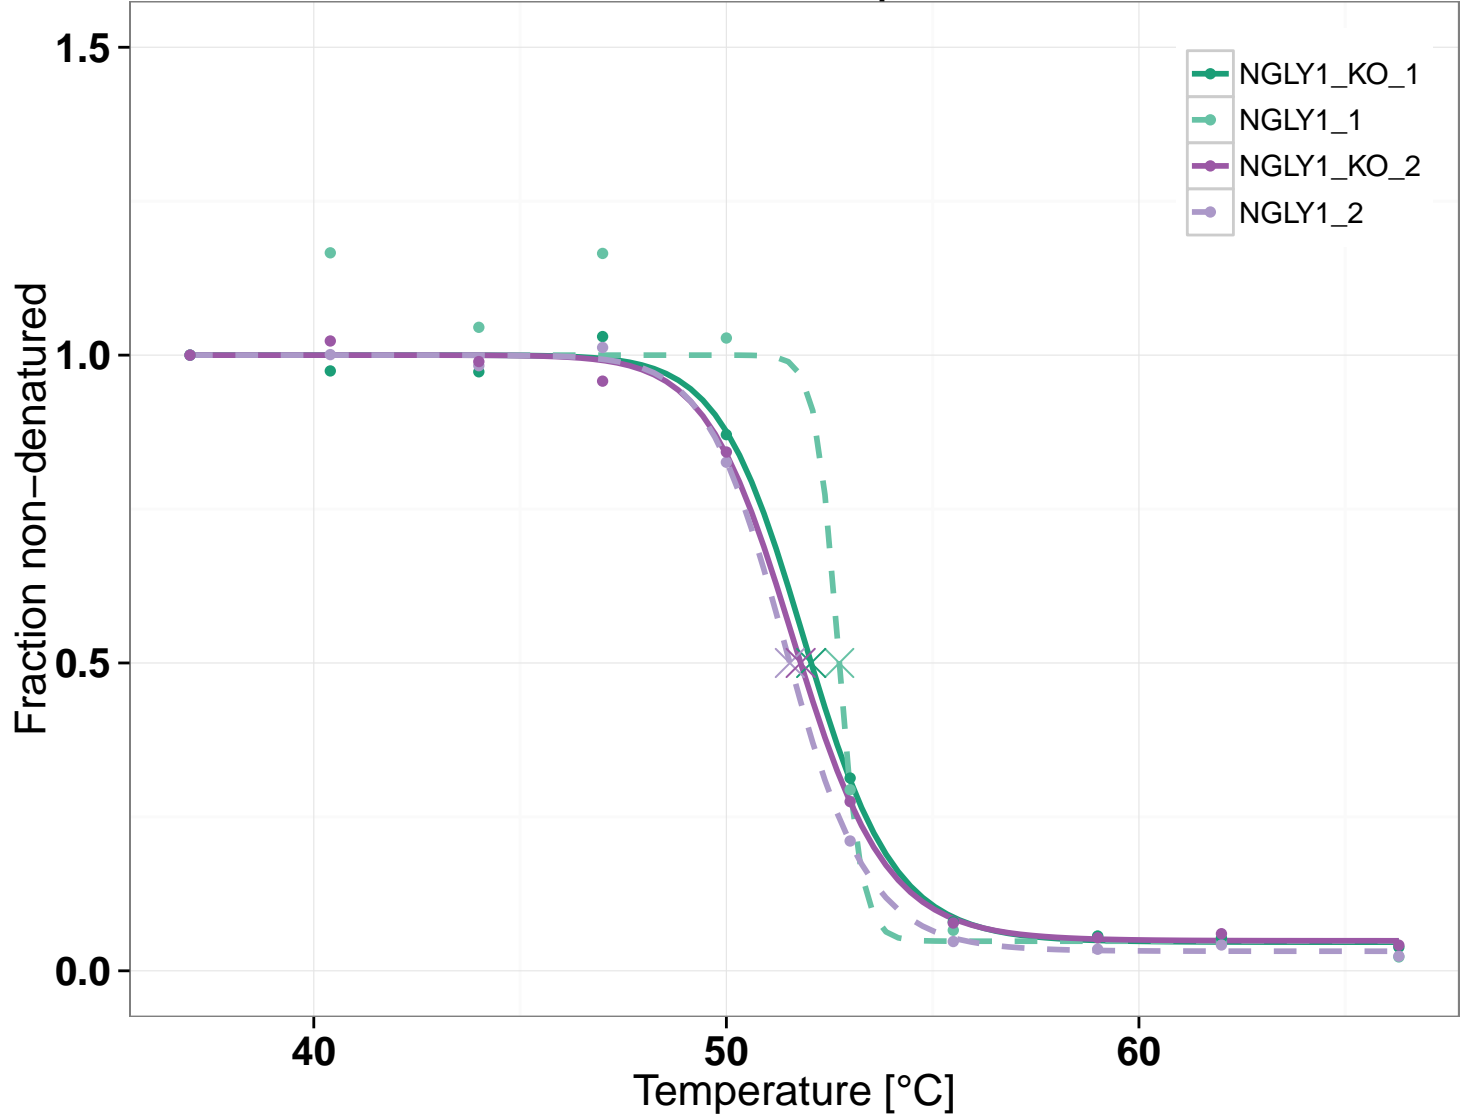

|            | meltPoint | slope | plateau | R2   |
|------------|-----------|-------|---------|------|
| NGLY1_KO_1 | 52.06     | -0.22 | 0.05    | 1    |
| NGLY1_1    | 52.74     | -0.86 | 0.05    | 0.98 |
| NGLY1_KO_2 | 51.8      | -0.22 | 0.05    | 1    |
| NGLY1_2    | 51.54     | -0.25 | 0.03    | 1    |

Supplement: Supplementary file 5616 [file 1]

# IPI00032355.3|PUM1

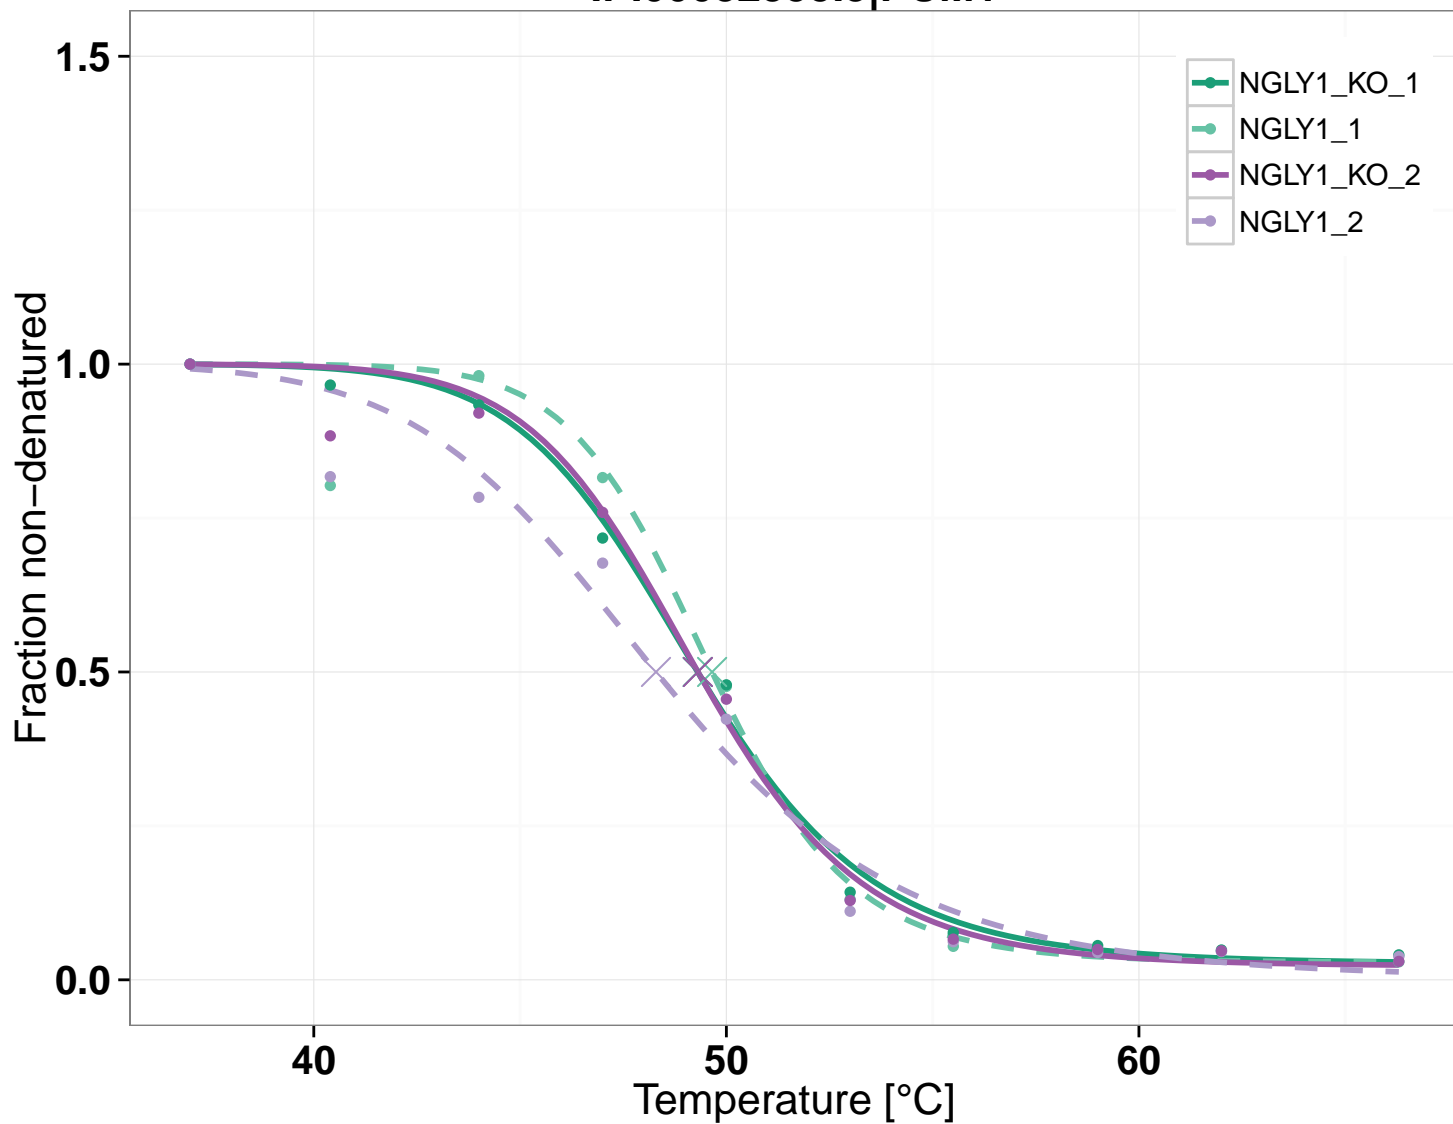

|            | meltPoint | slope  | plateau | R2   |
|------------|-----------|--------|---------|------|
| NGLY1_KO_1 | 49.3      | -0.11  | 0.03    | 1    |
| NGLY1_1    | 49.65     | -0.14  | 0.03    | 0.97 |
| NGLY1_KO_2 | 49.31     | -0.12  | 0.02    | 0.99 |
| NGLY1_2    | 48.29     | -0.084 | 0       | 0.97 |

Supplement: Supplementary file 5617 [file 1]

# IPI00465410.5|C12ORF73

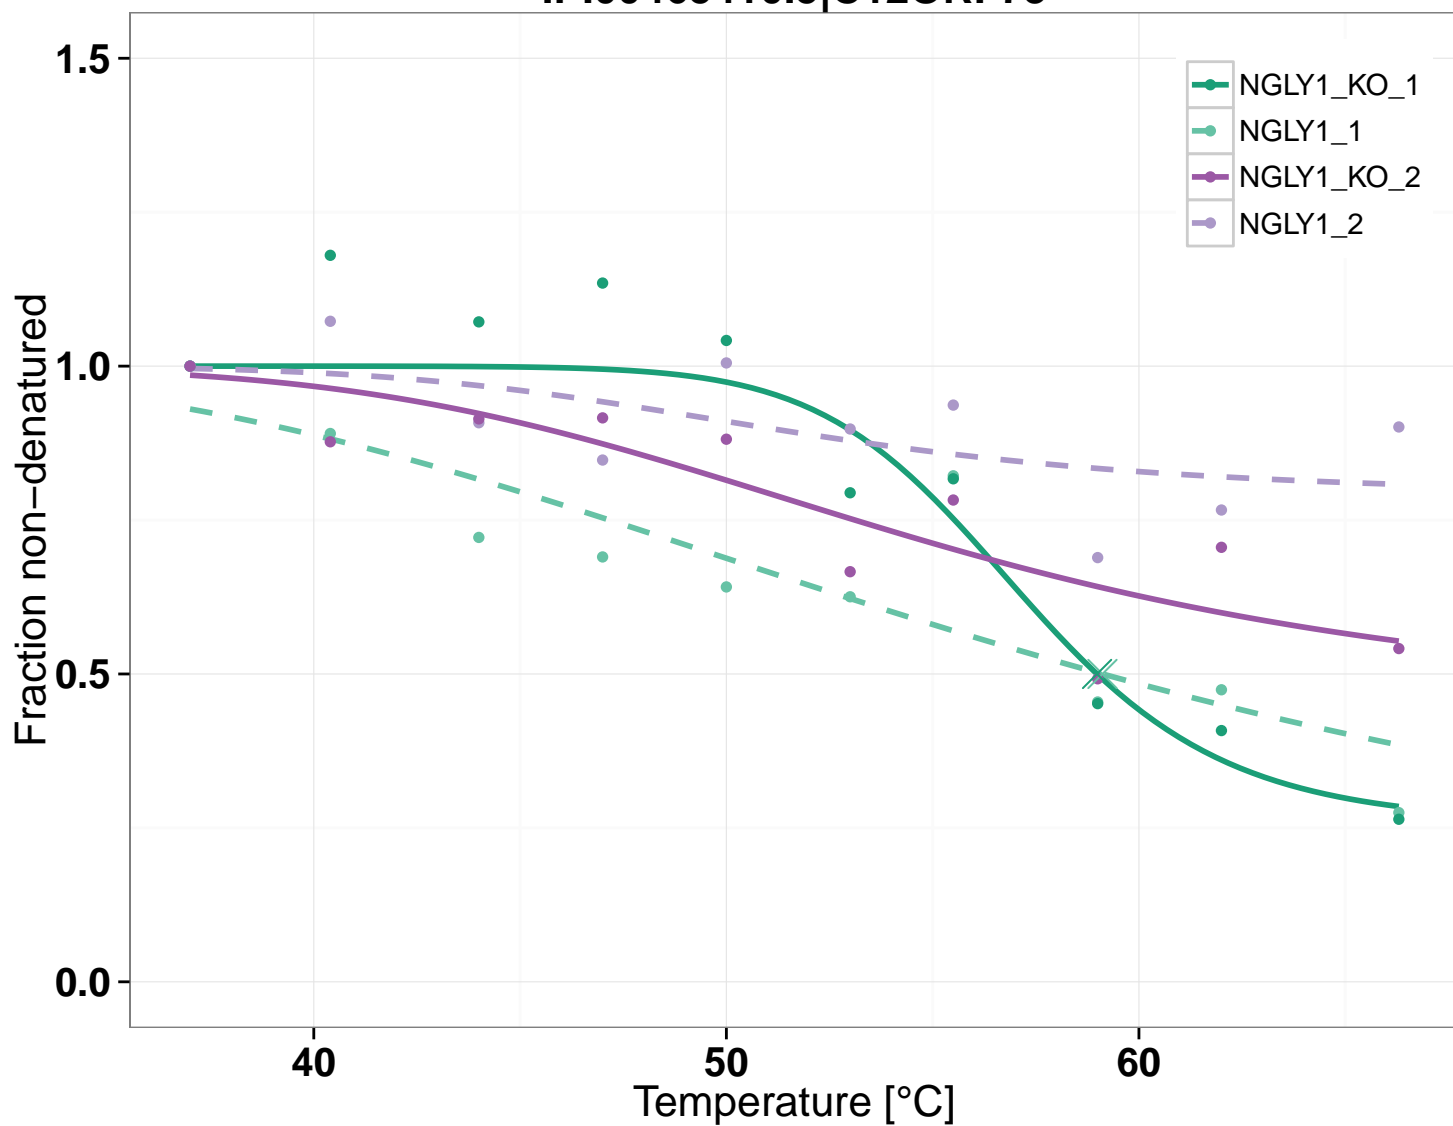

|            | meltPoint | slope  | plateau | R2   |
|------------|-----------|--------|---------|------|
| NGLY1_KO_1 | 58.98     | -0.076 | 0.26    | 0.92 |
| NGLY1_1    | 59.12     | -0.022 | 0       | 0.77 |
| NGLY1_KO_2 | -         | -0.021 | 0.43    | 0.77 |
| NGLY1_2    | -         | -0.011 | 0.79    | 0.42 |

Supplement: Supplementary file 5618 [file 1]

IPI00657692.1|COL4A3BP

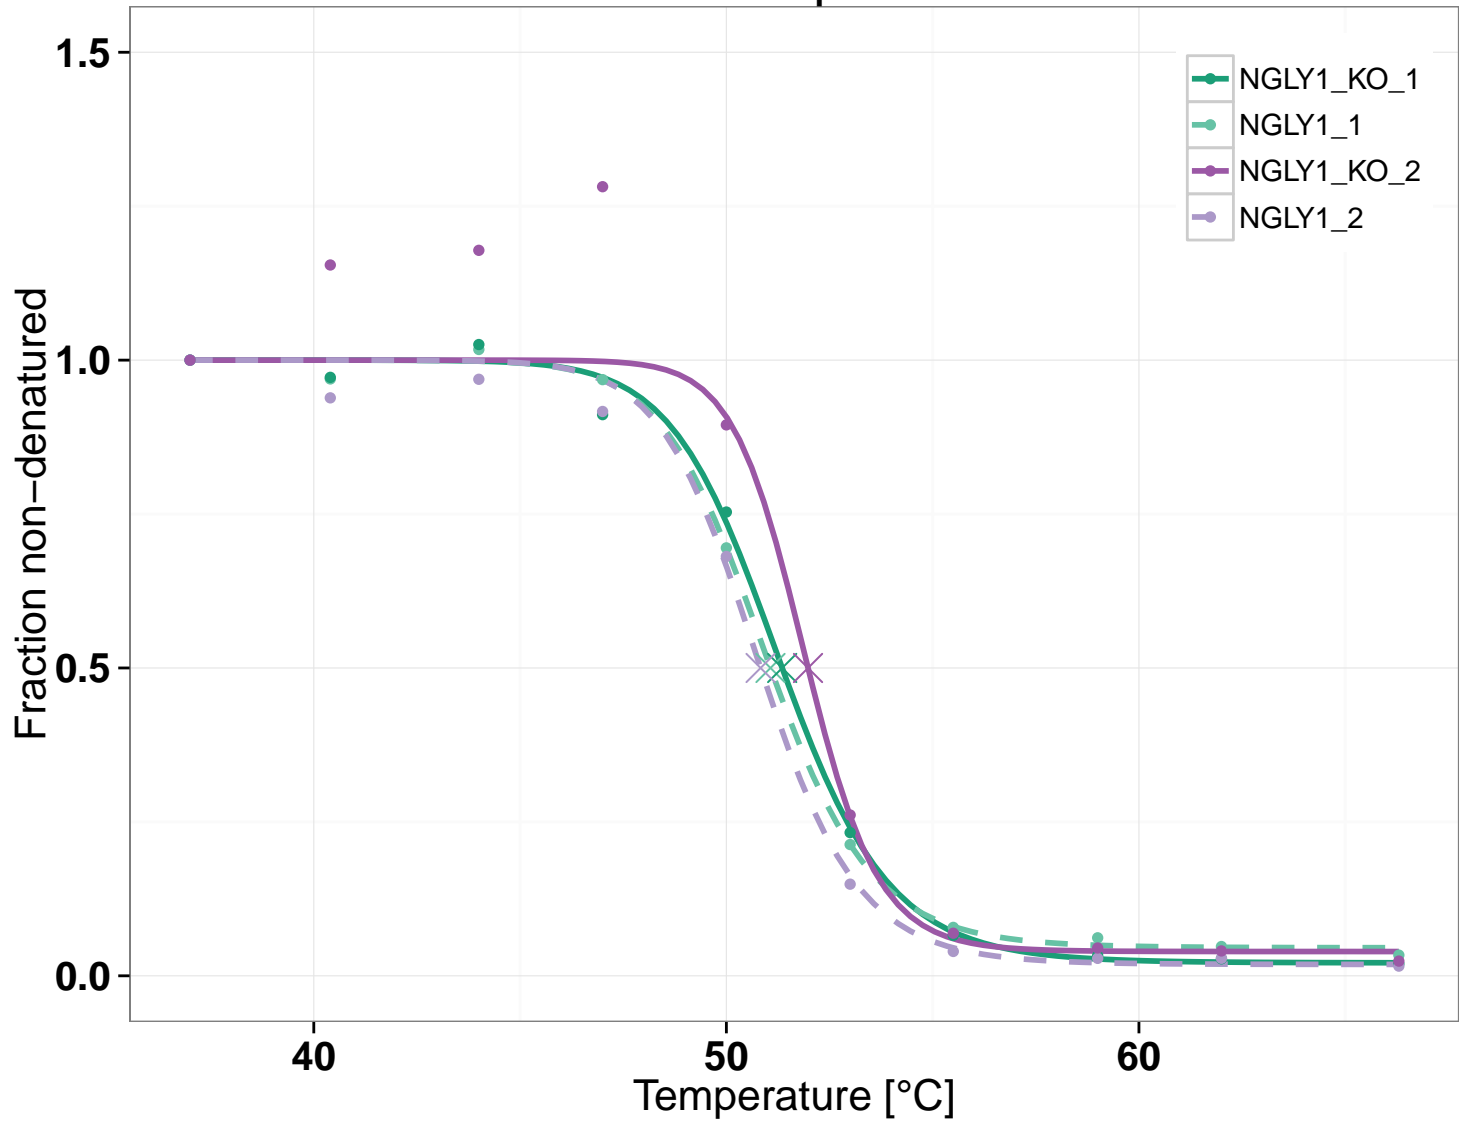

Supplement: Supplementary file 5619 [file 1]

IPI00455473.2|MIA3

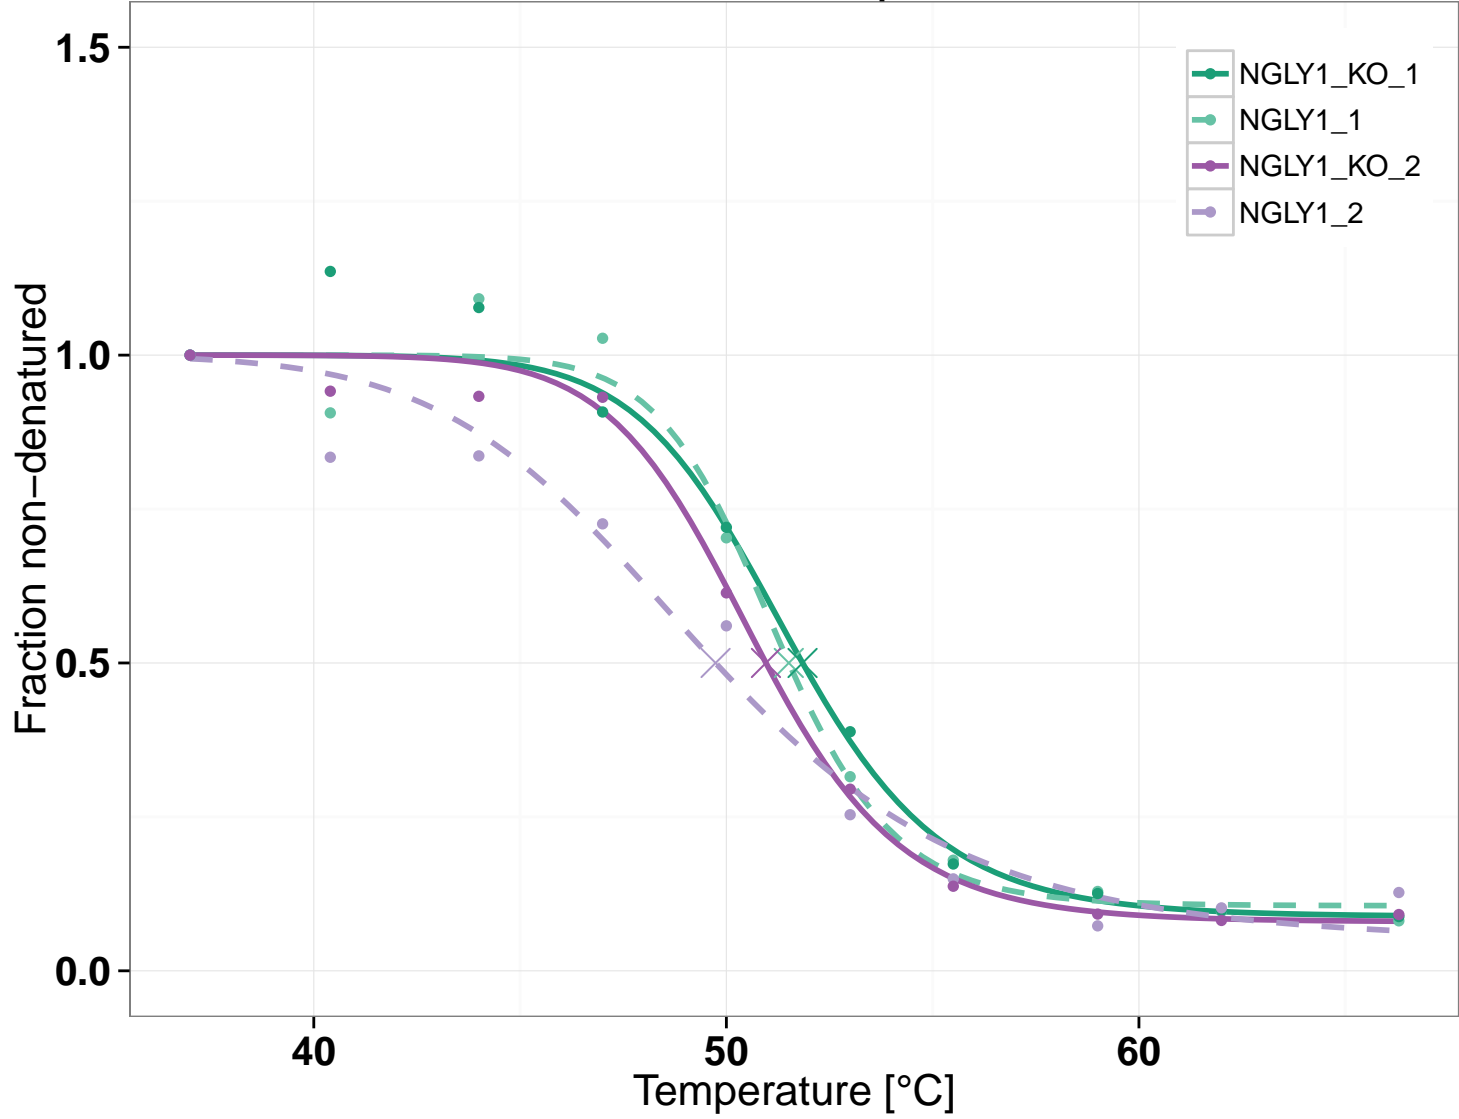

|            | meltPoint | slope  | plateau | R2   |
|------------|-----------|--------|---------|------|
| NGLY1_KO_1 | 51.85     | -0.12  | 0.09    | 0.98 |
| NGLY1_1    | 51.51     | -0.16  | 0.11    | 0.99 |
| NGLY1_KO_2 | 50.96     | -0.13  | 0.08    | 1    |
| NGLY1_2    | 49.74     | -0.075 | 0.05    | 0.97 |

Supplement: Supplementary file 5620 [file 1]

IPI00171925.4|PTCD1

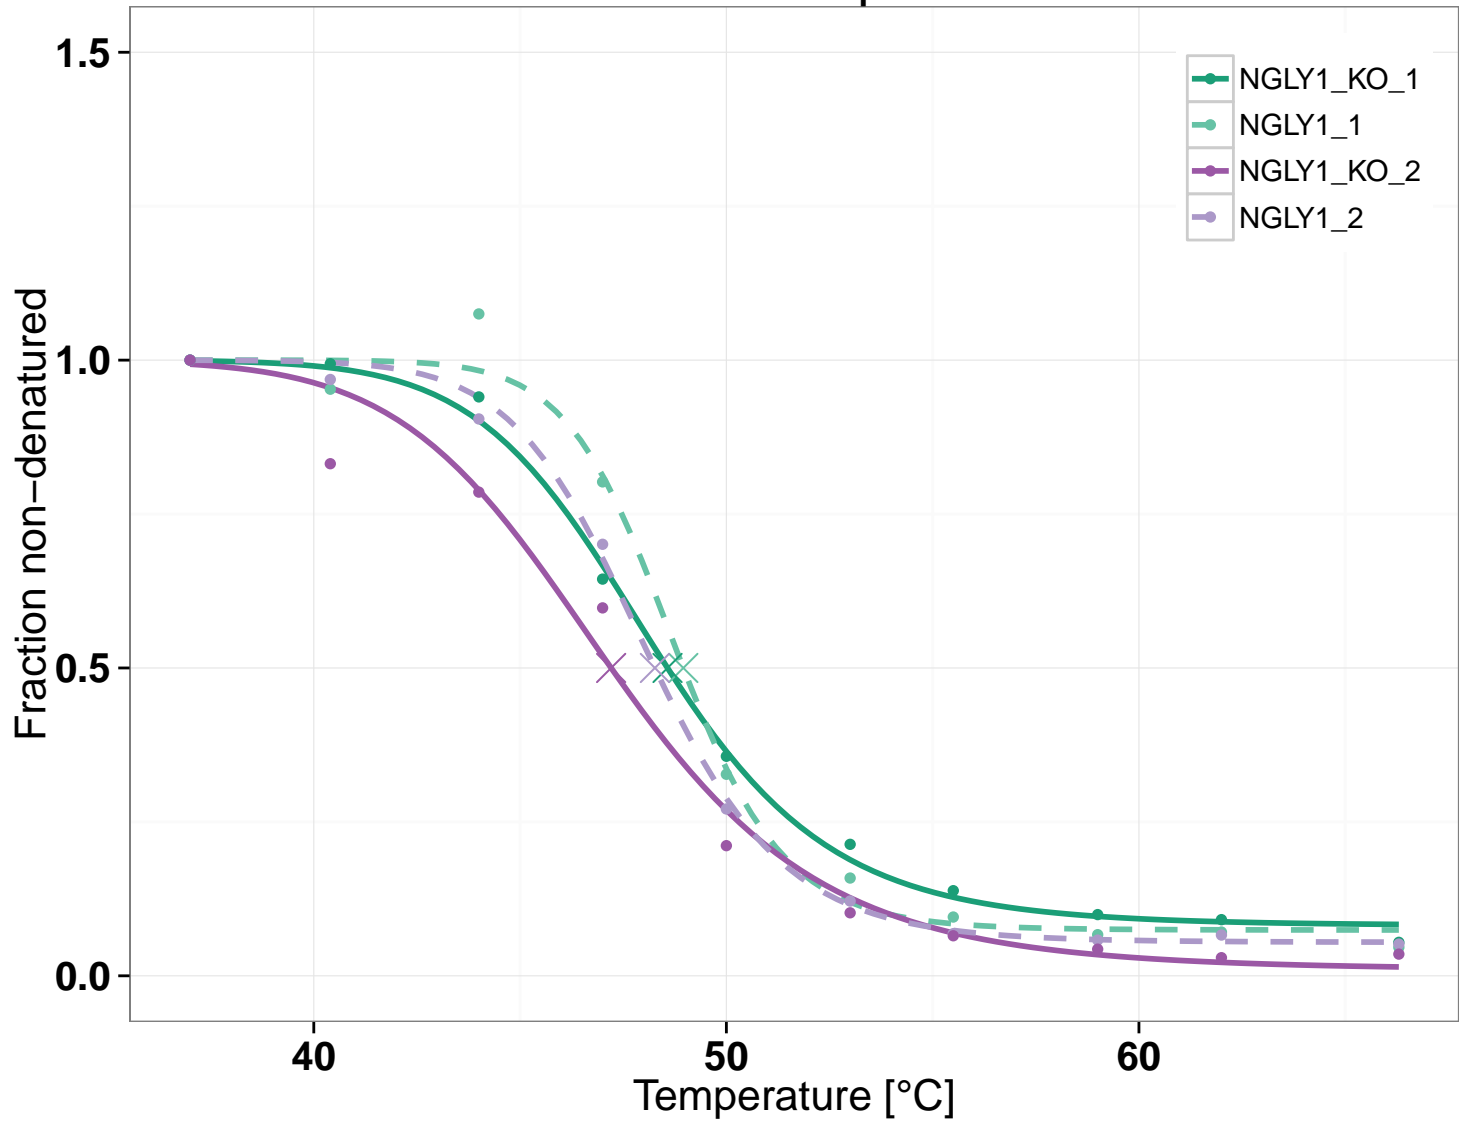

|            | meltPoint | slope  | plateau | R2   |
|------------|-----------|--------|---------|------|
| NGLY1_KO_1 | 48.57     | -0.11  | 0.08    | 1    |
| NGLY1_1    | 48.96     | -0.18  | 0.07    | 0.99 |
| NGLY1_KO_2 | 47.21     | -0.097 | 0.01    | 0.98 |
| NGLY1_2    | 48.27     | -0.14  | 0.05    | 1    |

Supplement: Supplementary file 5621 [file 1]

IPI00782935.1|ING5

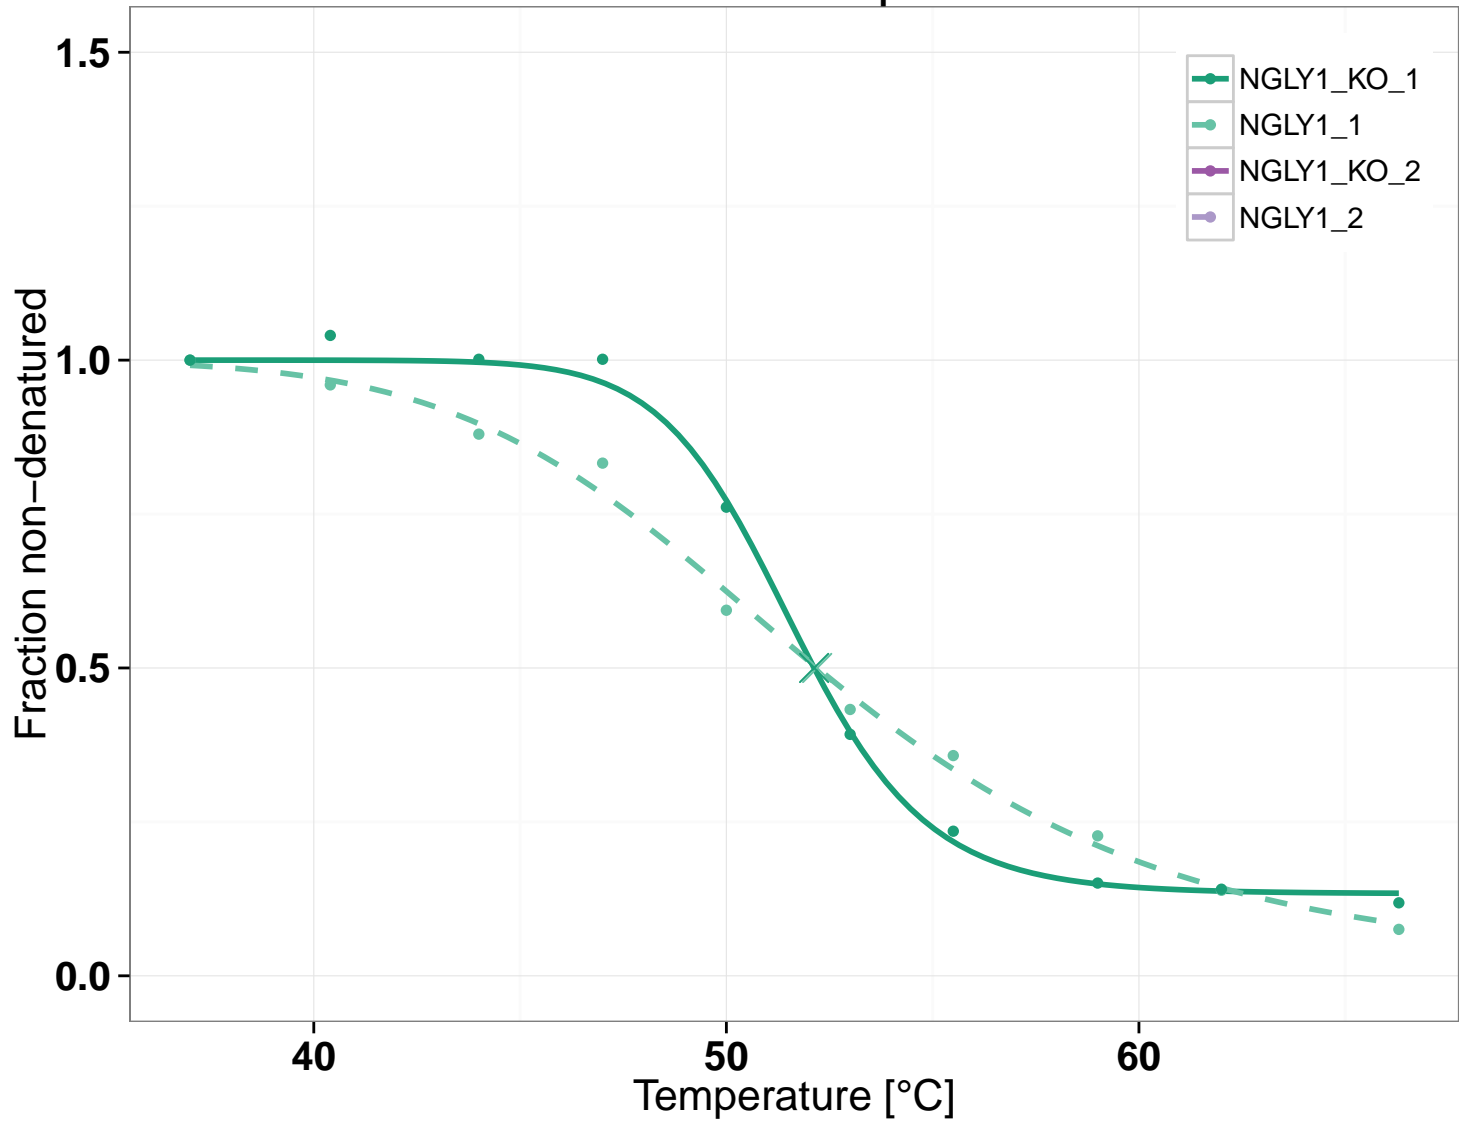

|            | meltPoint | slope  | plateau | R2 |
|------------|-----------|--------|---------|----|
| NGLY1_KO_1 | 52.13     | -0.13  | 0.13    | 1  |
| NGLY1_1    | 52.2      | -0.057 | 0.01    | 1  |
| NGLY1_KO_2 | -         | -      | -       | -  |
| NGLY1_2    | -         | -      | -       | -  |

Supplement: Supplementary file 5622 [file 1]

IPI00477806.1|TSC22D2

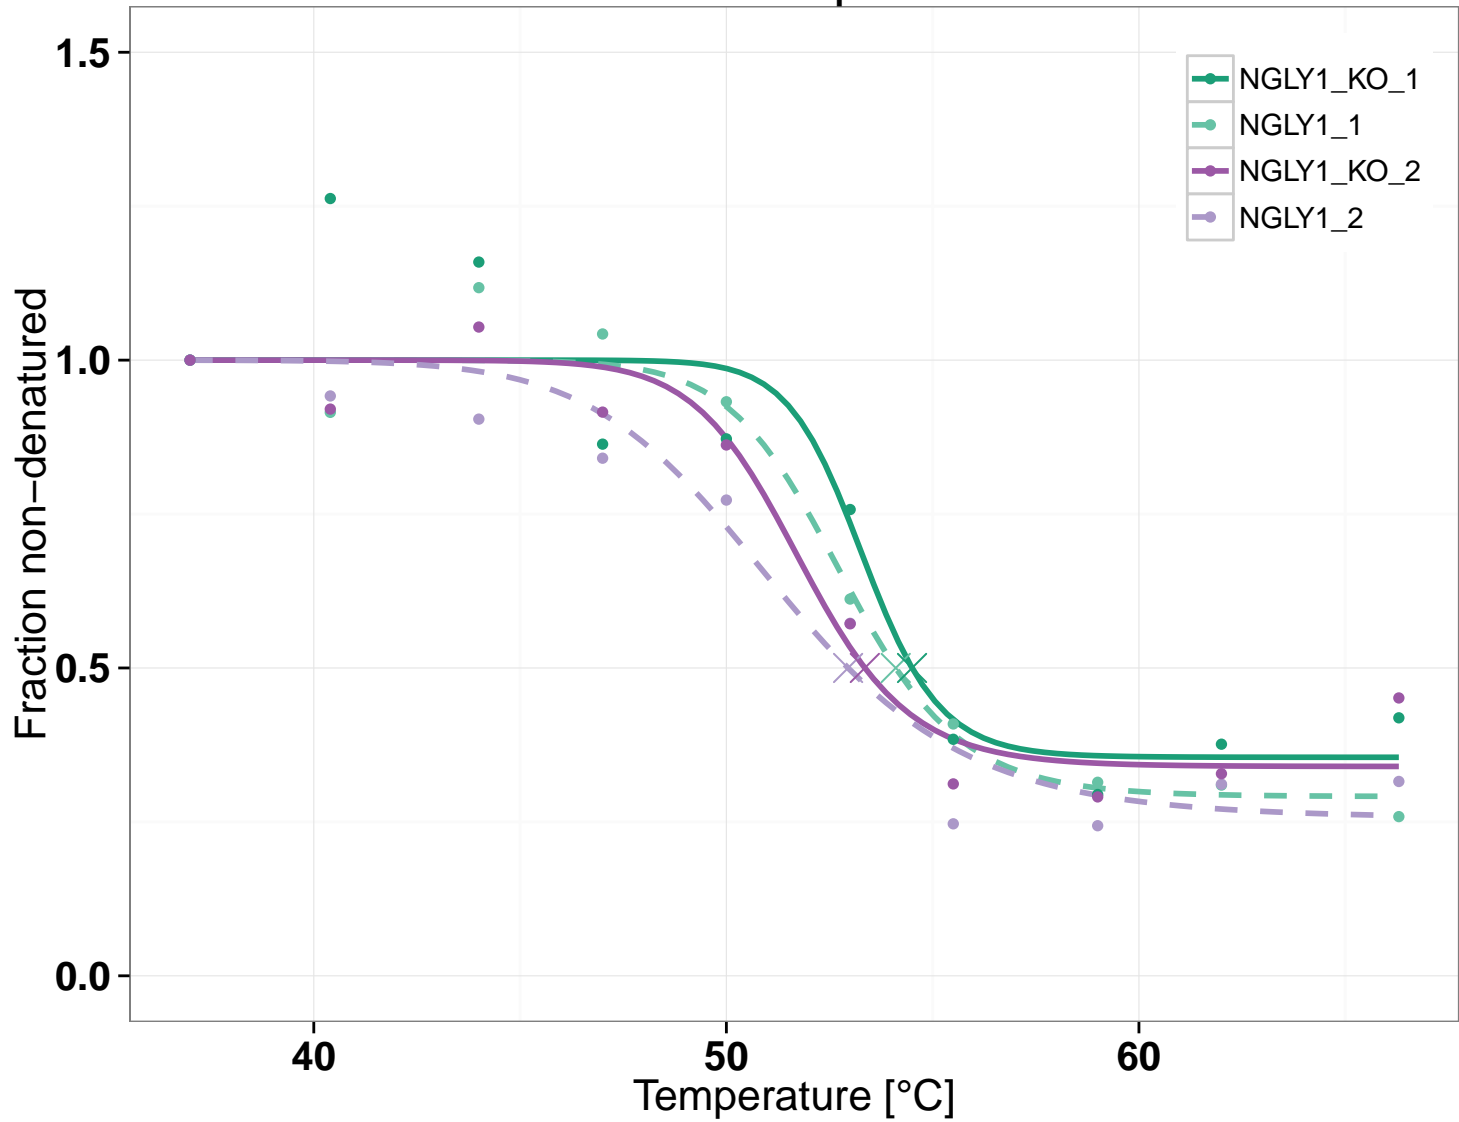

|            | meltPoint | slope  | plateau | R2   |
|------------|-----------|--------|---------|------|
| NGLY1_KO_1 | 54.5      | -0.17  | 0.35    | 0.88 |
| NGLY1_1    | 54.11     | -0.13  | 0.29    | 0.98 |
| NGLY1_KO_2 | 53.36     | -0.13  | 0.34    | 0.96 |
| NGLY1_2    | 52.95     | -0.082 | 0.26    | 0.95 |

Supplement: Supplementary file 5623 [file 1]
