# Supplementary material (part 57 of 85)
Source: publisher figshare collection journal article supplement (https://gsajournals.figshare.com/articles/dataset/_/12014913)

IPI00874044.2|FAM184A

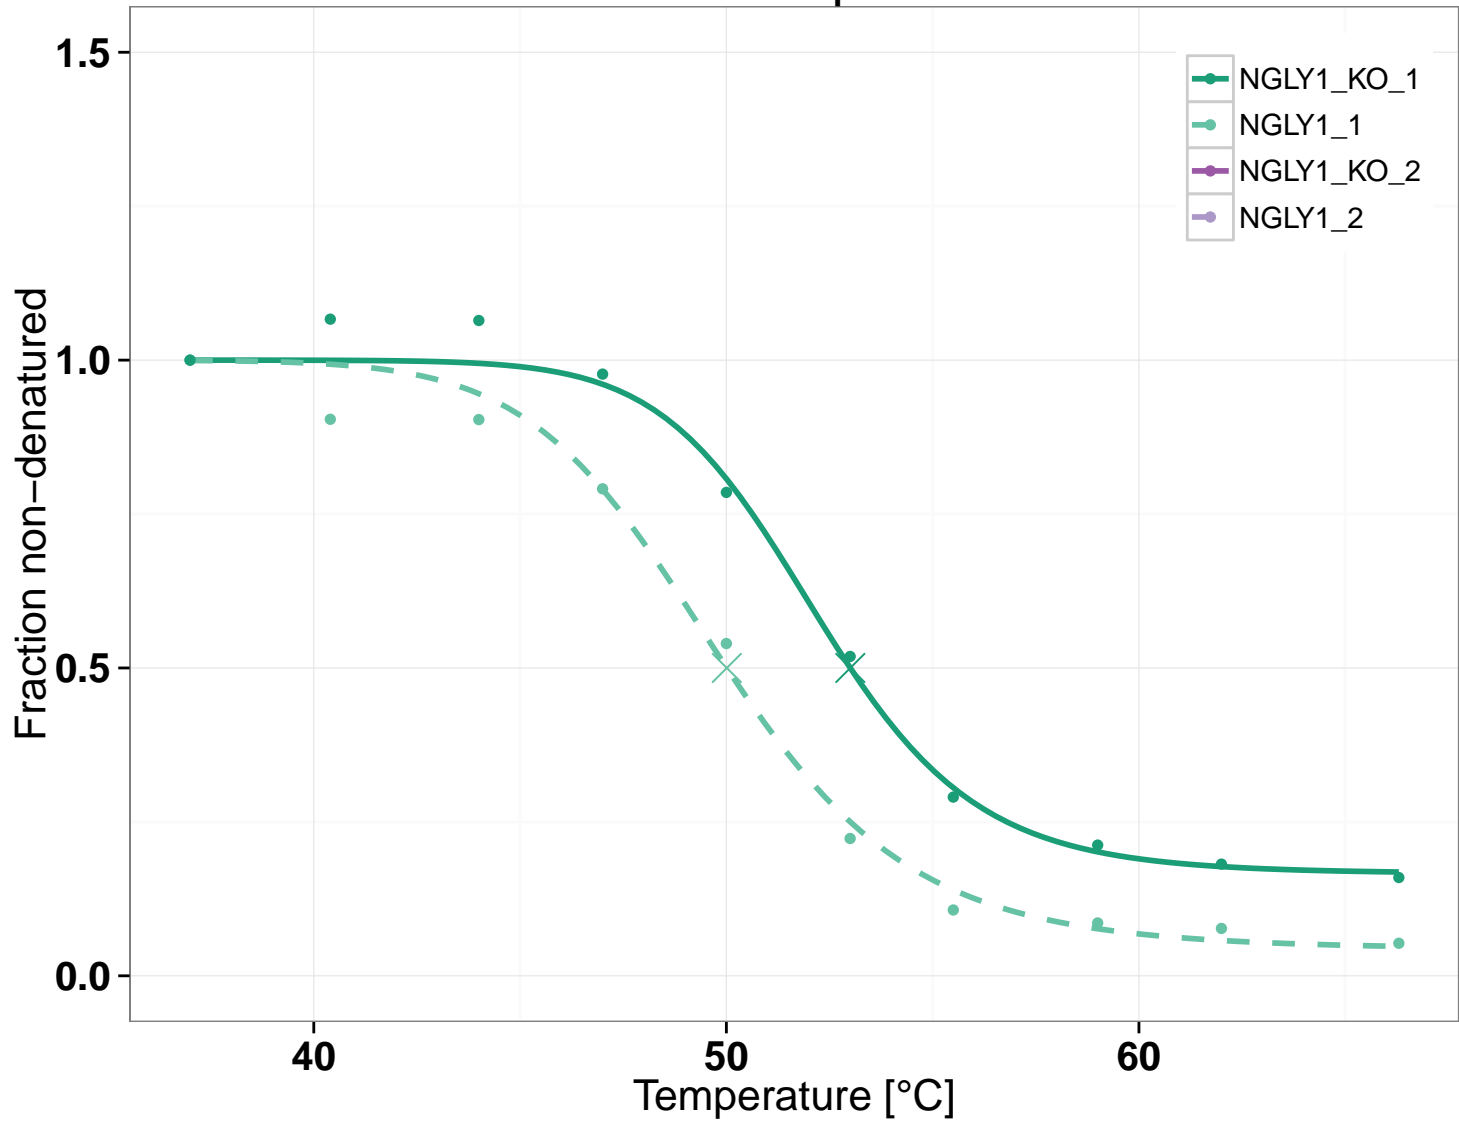

|            | meltPoint | slope | plateau | R2   |
|------------|-----------|-------|---------|------|
| NGLY1_KO_1 | 53        | -0.11 | 0.17    | 0.99 |
| NGLY1_1    | 50.01     | -0.1  | 0.04    | 0.99 |
| NGLY1_KO_2 | -         | -     | -       | -    |
| NGLY1_2    | -         | -     | -       | -    |

Supplement: Supplementary file 5624 [file 1]

IPI00394998.3|METTL4

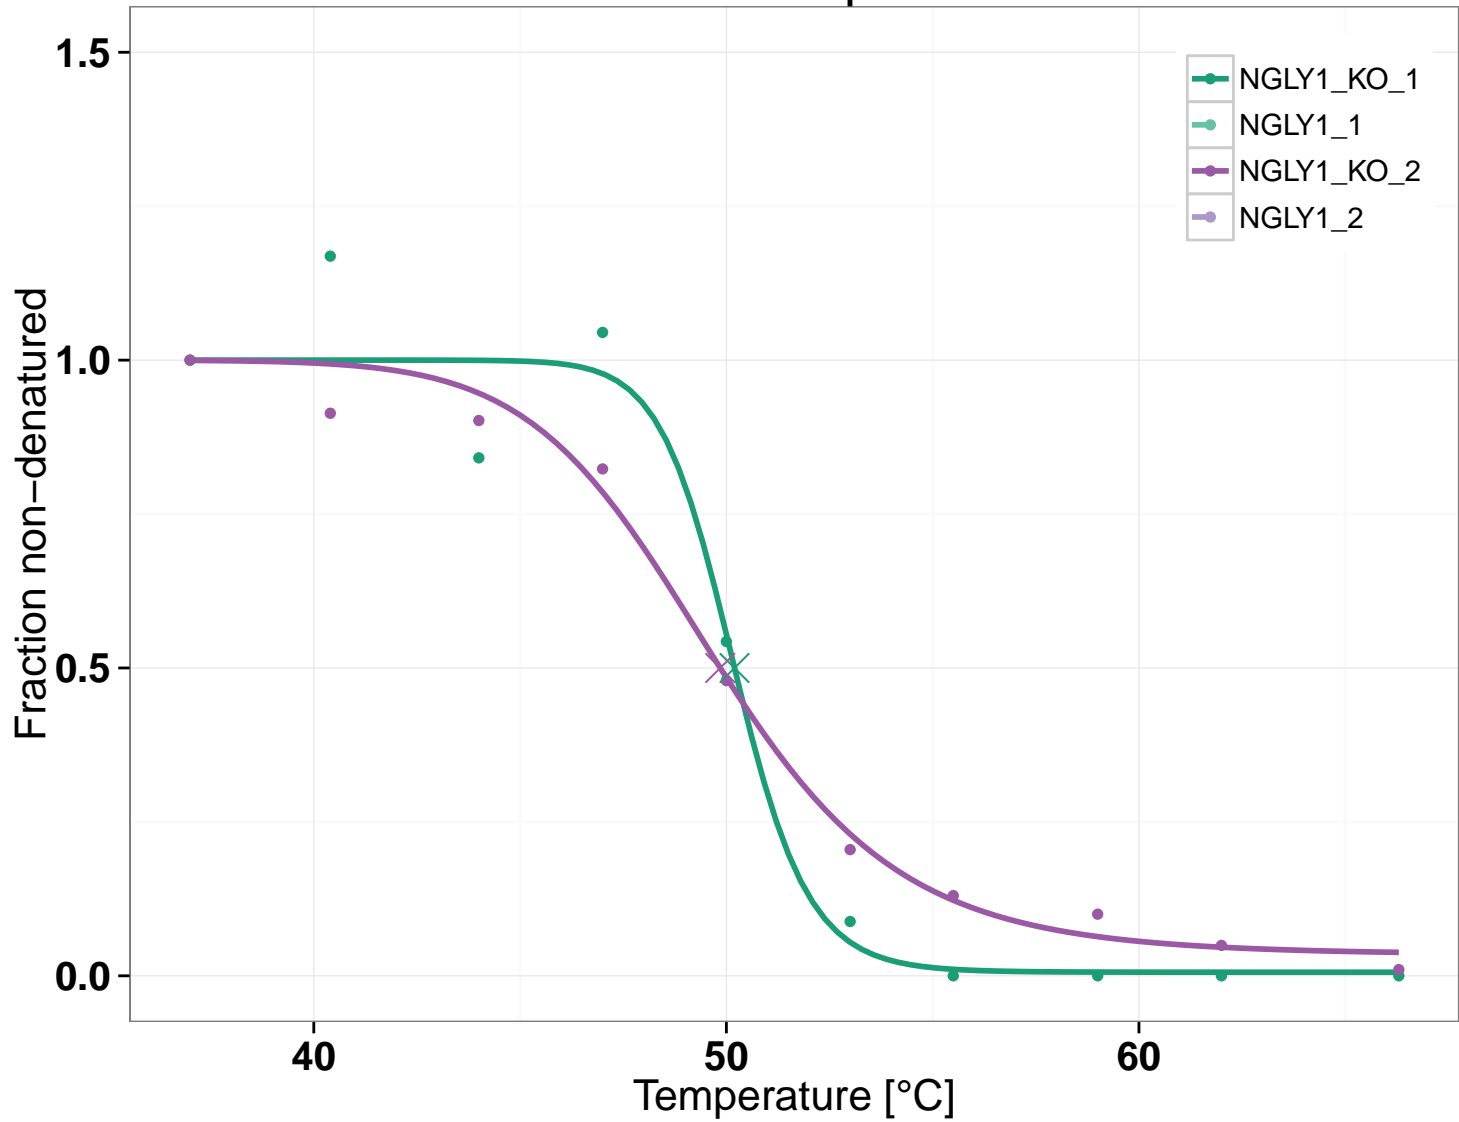

|            | meltPoint | slope | plateau | R2   |
|------------|-----------|-------|---------|------|
| NGLY1_KO_1 | 50.2      | -0.28 | 0.01    | 0.97 |
| NGLY1_1    | -         | -     | -       | -    |
| NGLY1_KO_2 | 49.85     | -0.11 | 0.03    | 0.99 |
| NGLY1_2    | -         | -     | -       | -    |

Supplement: Supplementary file 5625 [file 1]

IPI00001545.3|WAS

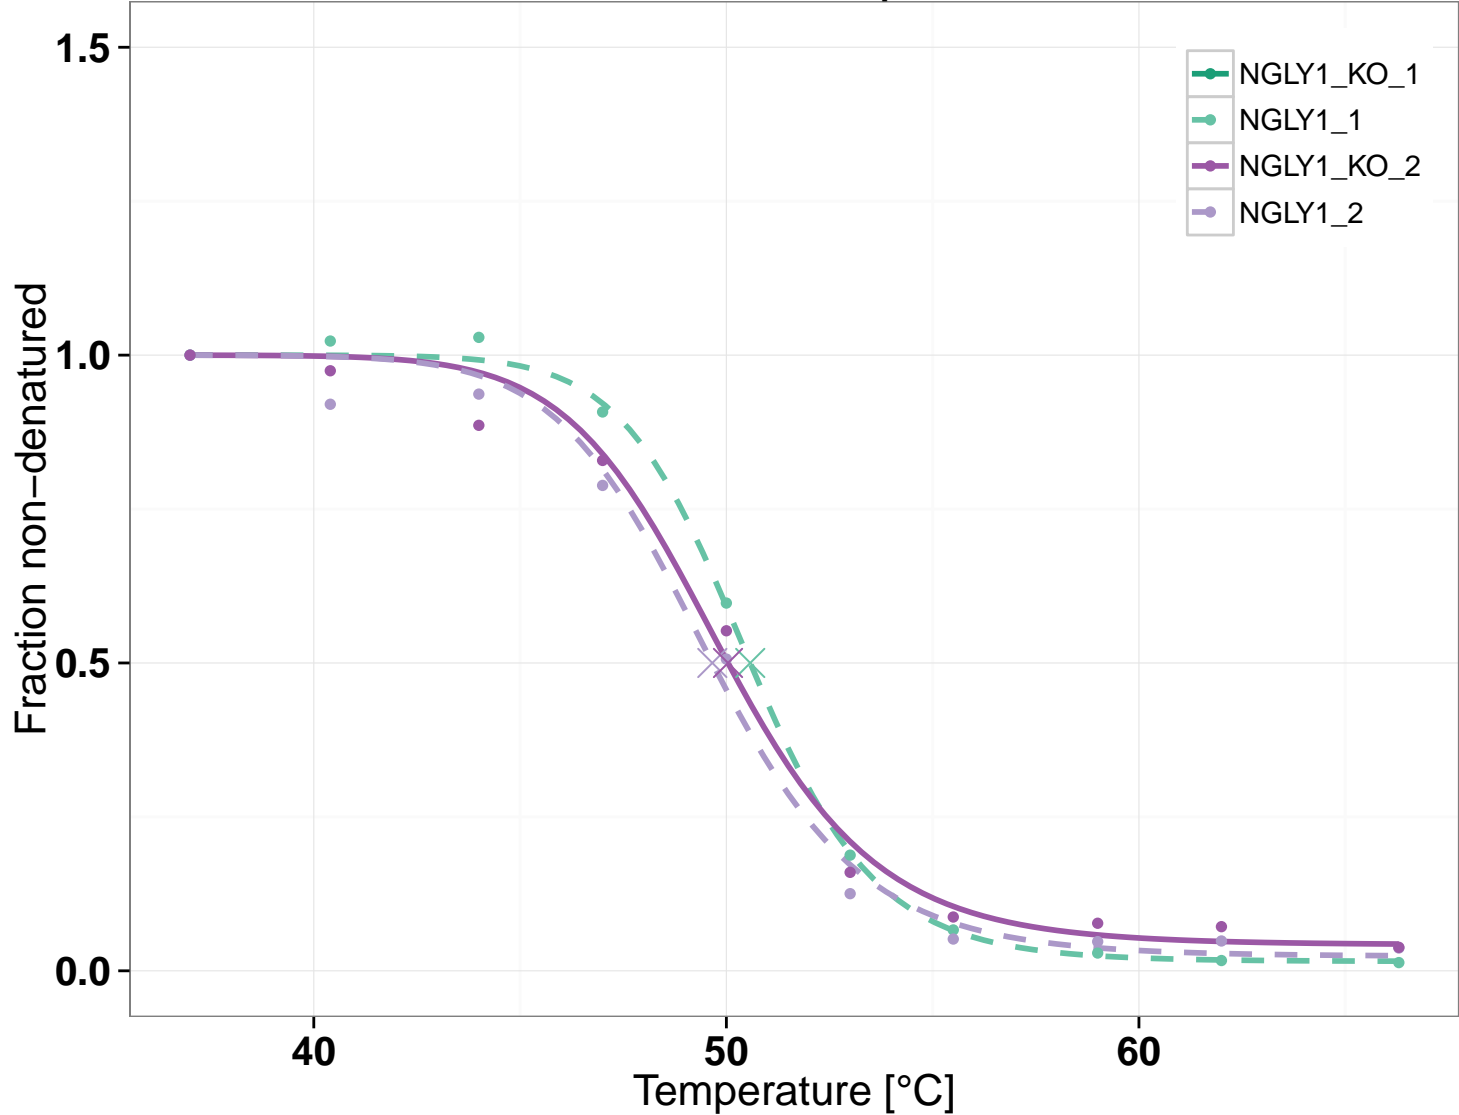

|            | meltPoint | slope | plateau | R2   |
|------------|-----------|-------|---------|------|
| NGLY1_KO_1 | —         | —     | —       | —    |
| NGLY1_1    | 50.58     | -0.16 | 0.02    | 1    |
| NGLY1_KO_2 | 50.04     | -0.13 | 0.04    | 0.99 |
| NGLY1_2    | 49.66     | -0.13 | 0.02    | 0.99 |

Supplement: Supplementary file 5626 [file 1]

IPI00020075.4|ABHD10

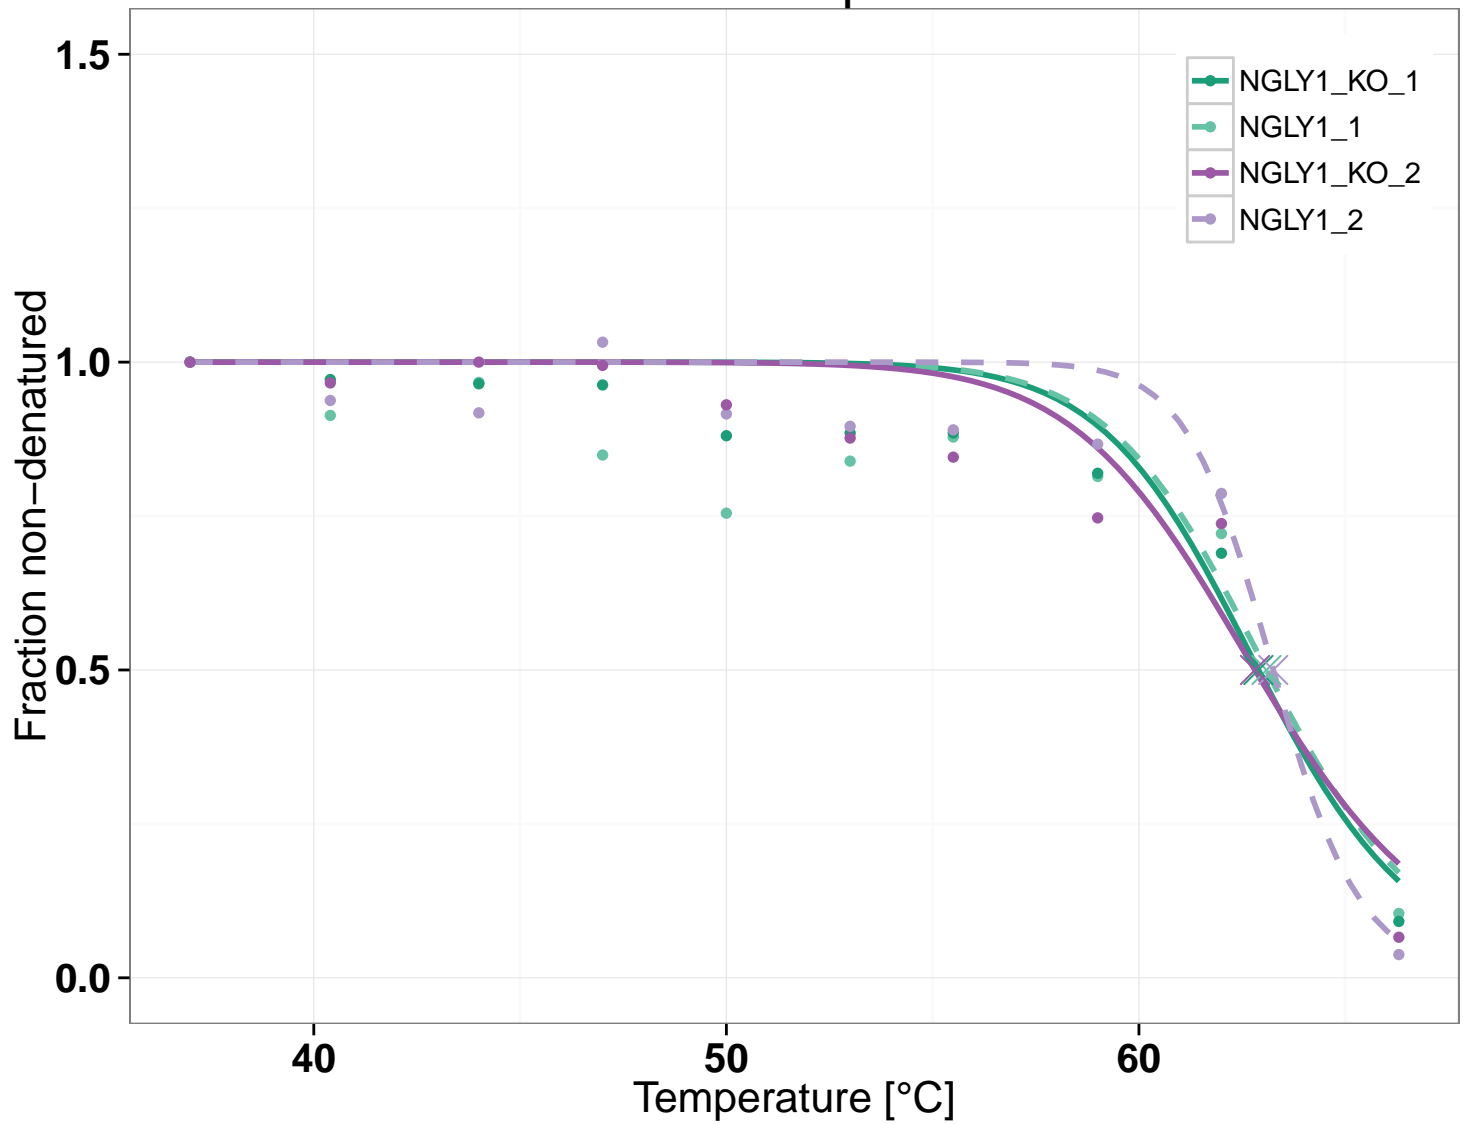

|            | meltPoint | slope | plateau | R2   |
|------------|-----------|-------|---------|------|
| NGLY1_KO_1 | 62.9      | -0.13 | 0       | 0.91 |
| NGLY1_1    | 63.09     | -0.13 | 0       | 0.74 |
| NGLY1_KO_2 | 62.81     | -0.11 | 0       | 0.88 |
| NGLY1_2    | 63.26     | -0.24 | 0       | 0.92 |

Supplement: Supplementary file 5627 [file 1]

IPI00166444.4|SFT2D3

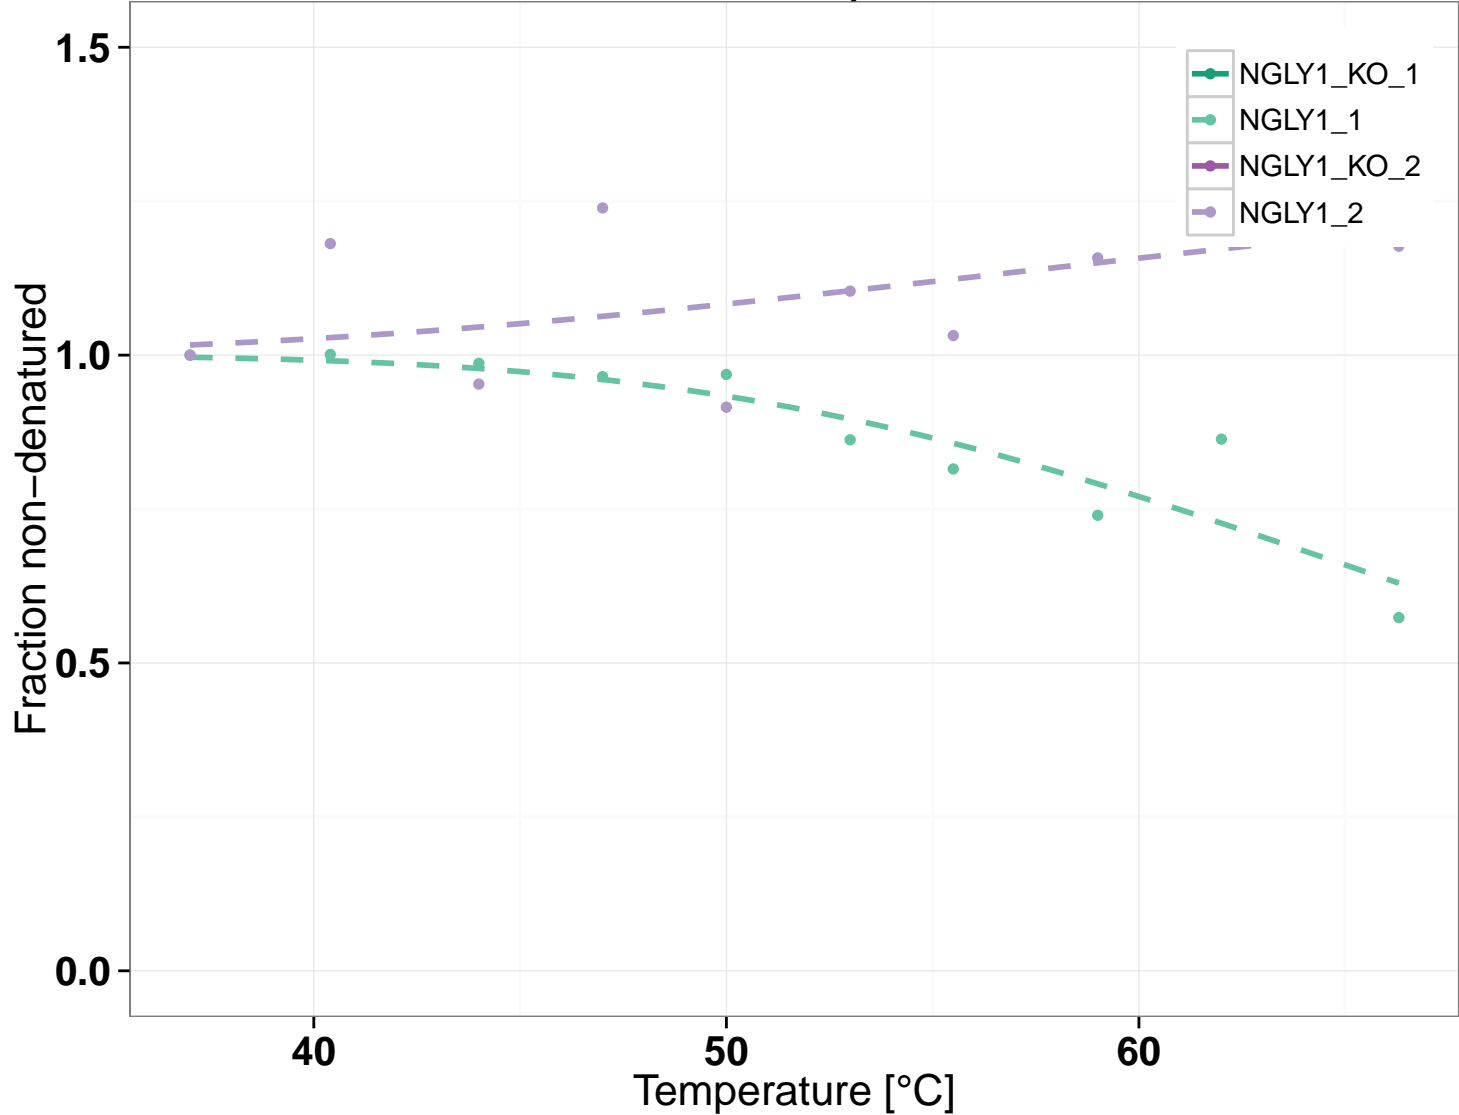

|            | meltPoint | slope  | plateau | R2   |
|------------|-----------|--------|---------|------|
| NGLY1_KO_1 | -         | -      | -       | -    |
| NGLY1_1    | -         | -0.023 | 0       | 0.83 |
| NGLY1_KO_2 | -         | -      | -       | -    |
| NGLY1_2    | -         | 0.0076 | 1.5     | 0.19 |

Supplement: Supplementary file 5628 [file 1]

IPI00022275.6|SACM1L

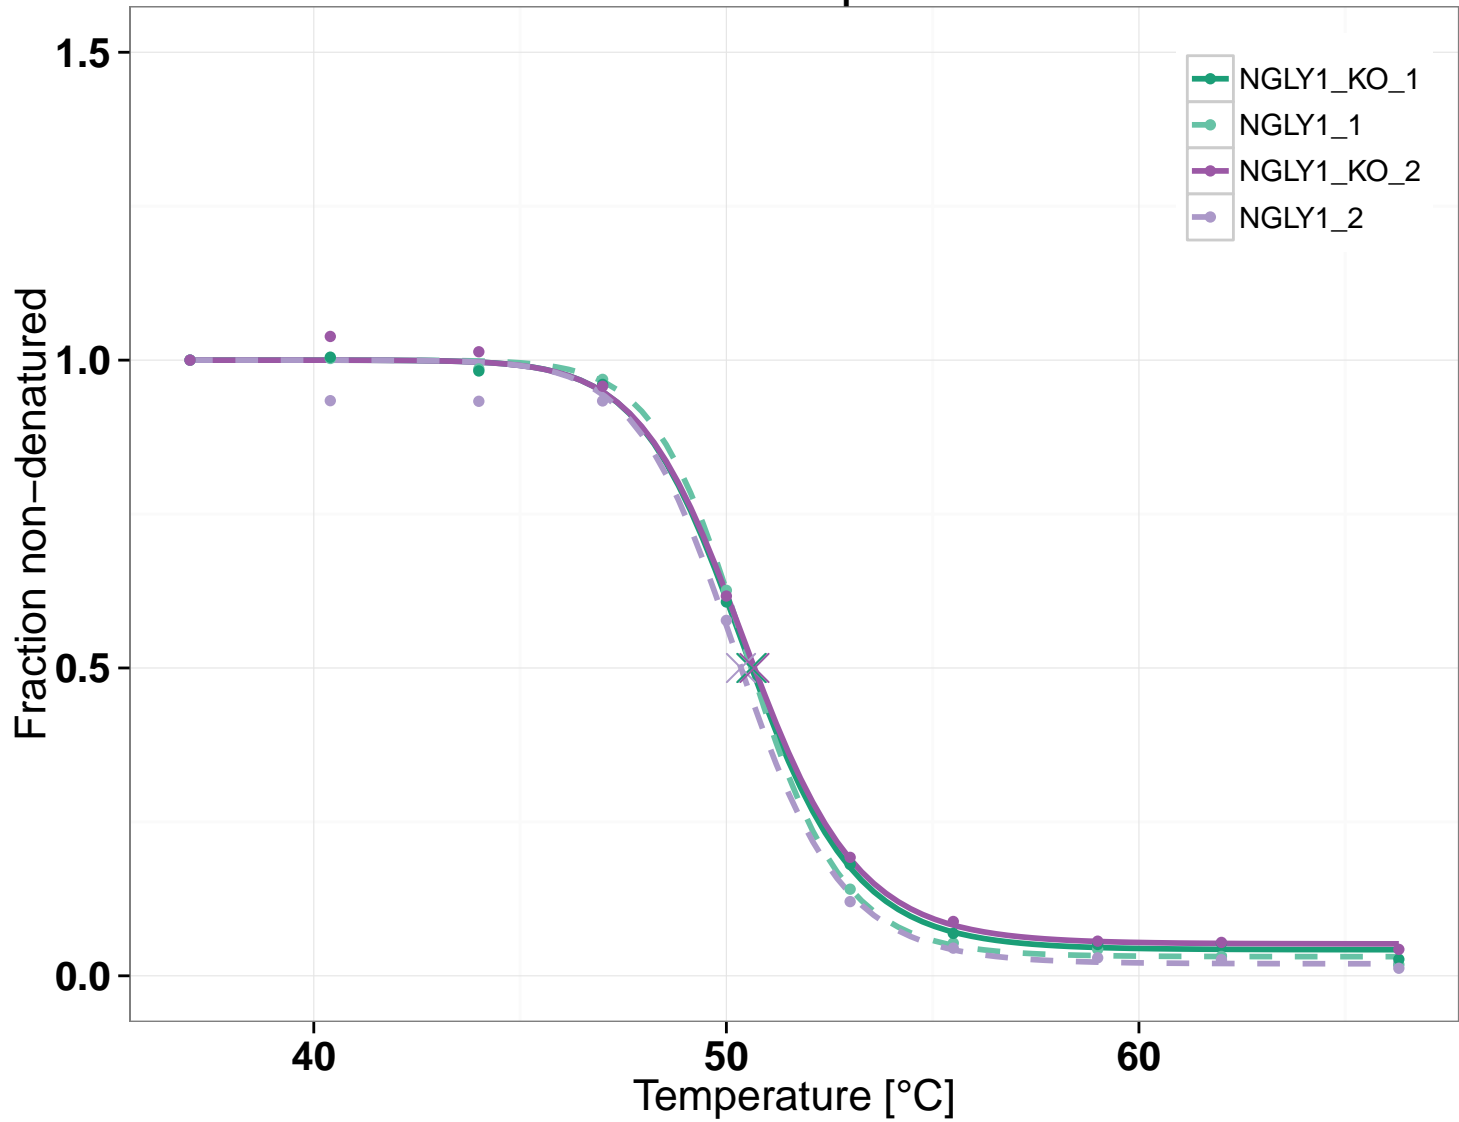

|            | meltPoint | slope | plateau | R2 |
|------------|-----------|-------|---------|----|
| NGLY1_KO_1 | 50.61     | -0.18 | 0.04    | 1  |
| NGLY1_1    | 50.6      | -0.21 | 0.03    | 1  |
| NGLY1_KO_2 | 50.68     | -0.18 | 0.05    | 1  |
| NGLY1_2    | 50.36     | -0.19 | 0.02    | 1  |

Supplement: Supplementary file 5629 [file 1]

IPI00789101.1|PTGES3

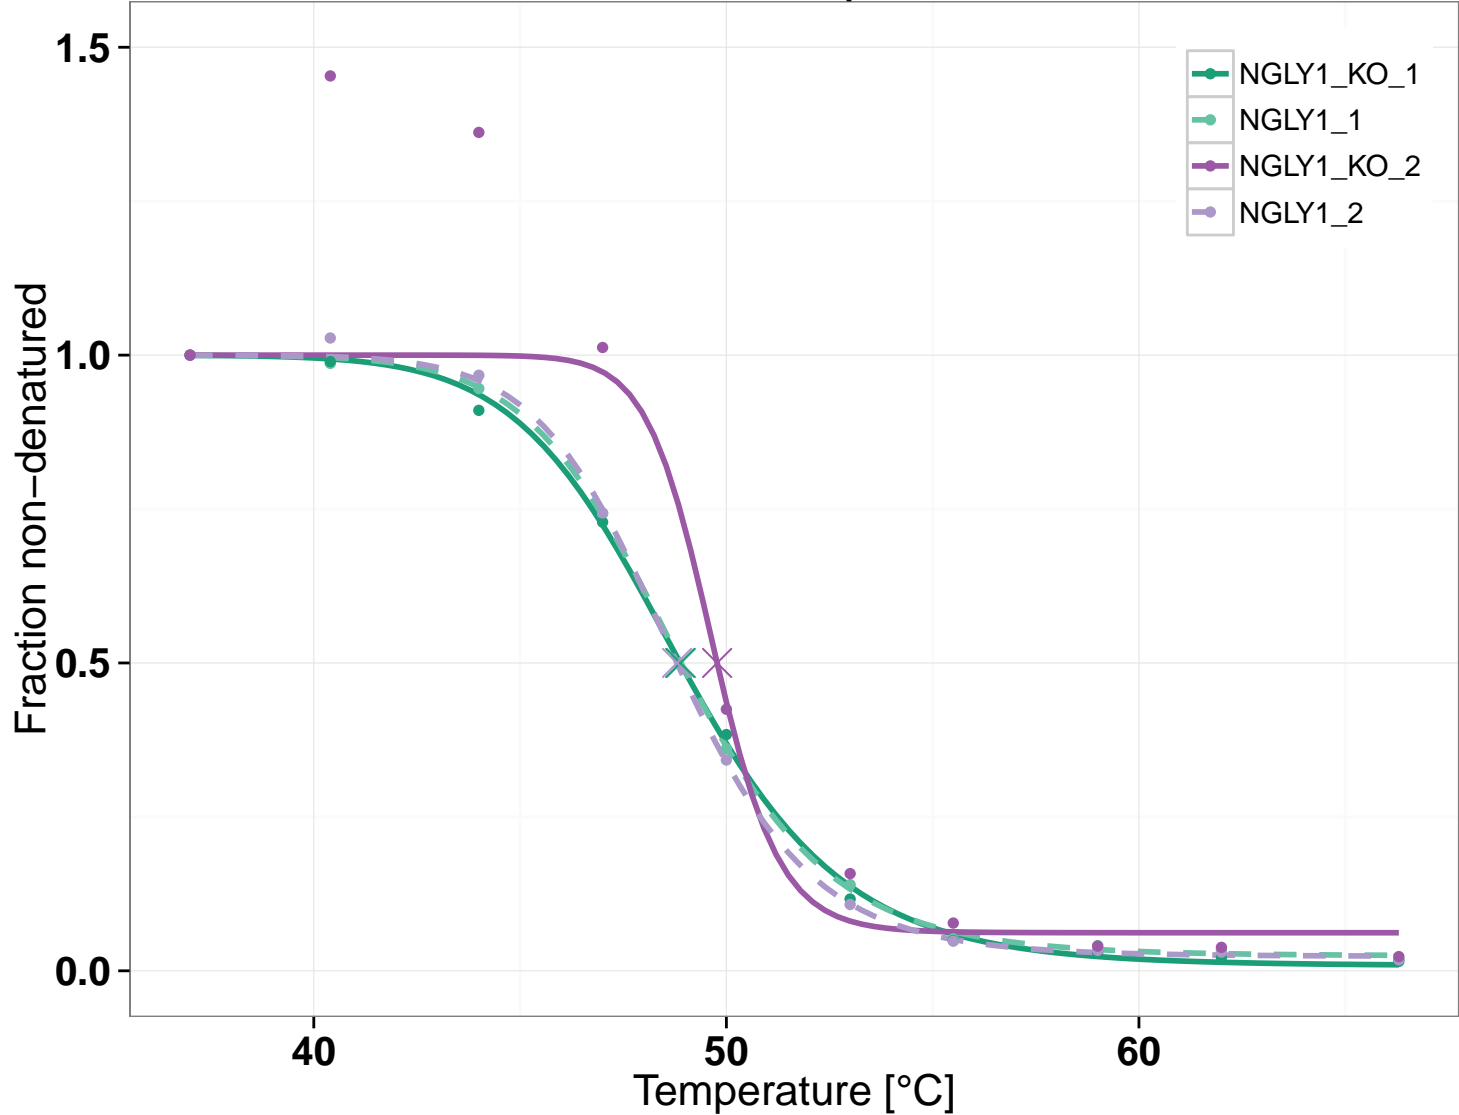

|            | meltPoint | slope | plateau | R2   |
|------------|-----------|-------|---------|------|
| NGLY1_KO_1 | 48.88     | -0.12 | 0.01    | 1    |
| NGLY1_1    | 48.9      | -0.13 | 0.02    | 1    |
| NGLY1_KO_2 | 49.78     | -0.29 | 0.06    | 0.89 |
| NGLY1_2    | 48.8      | -0.15 | 0.02    | 1    |

Supplement: Supplementary file 5630 [file 1]

IPI00295865.1|SRRD

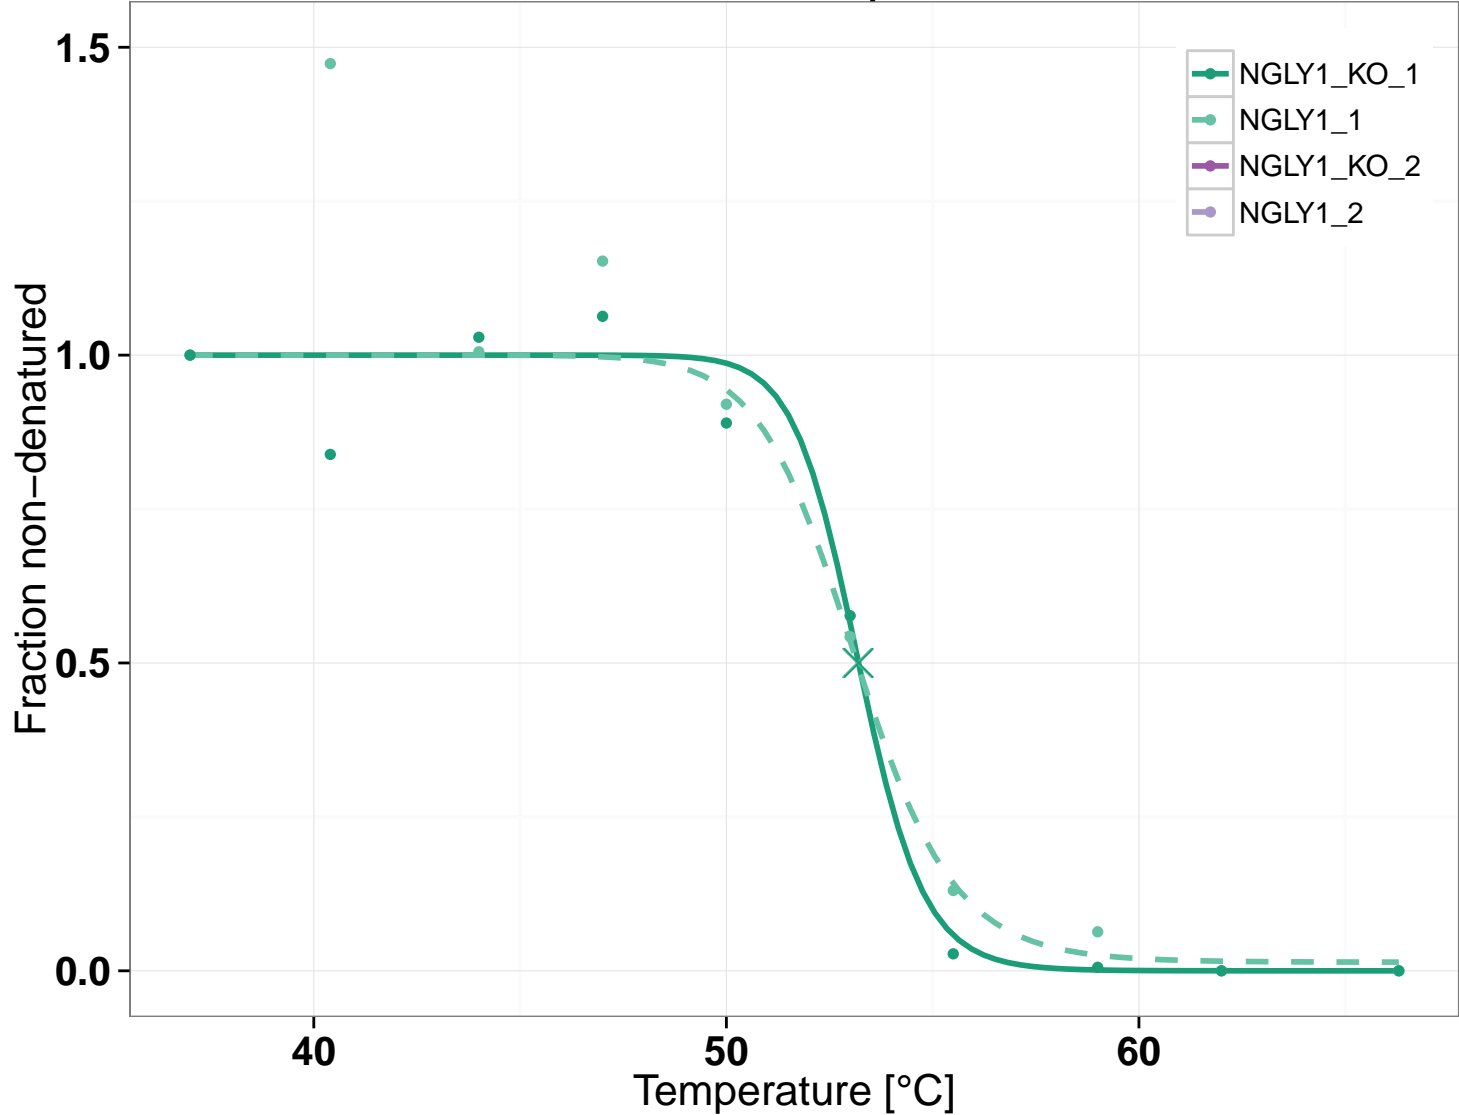

|            | meltPoint | slope | plateau | R2   |
|------------|-----------|-------|---------|------|
| NGLY1_KO_1 | 53.21     | -0.32 | 0       | 0.98 |
| NGLY1_1    | 53.17     | -0.21 | 0.01    | 0.91 |
| NGLY1_KO_2 | -         | -     | -       | -    |
| NGLY1_2    | -         | -     | -       | -    |

Supplement: Supplementary file 5631 [file 1]

IPI00018237.3|TMEM38B

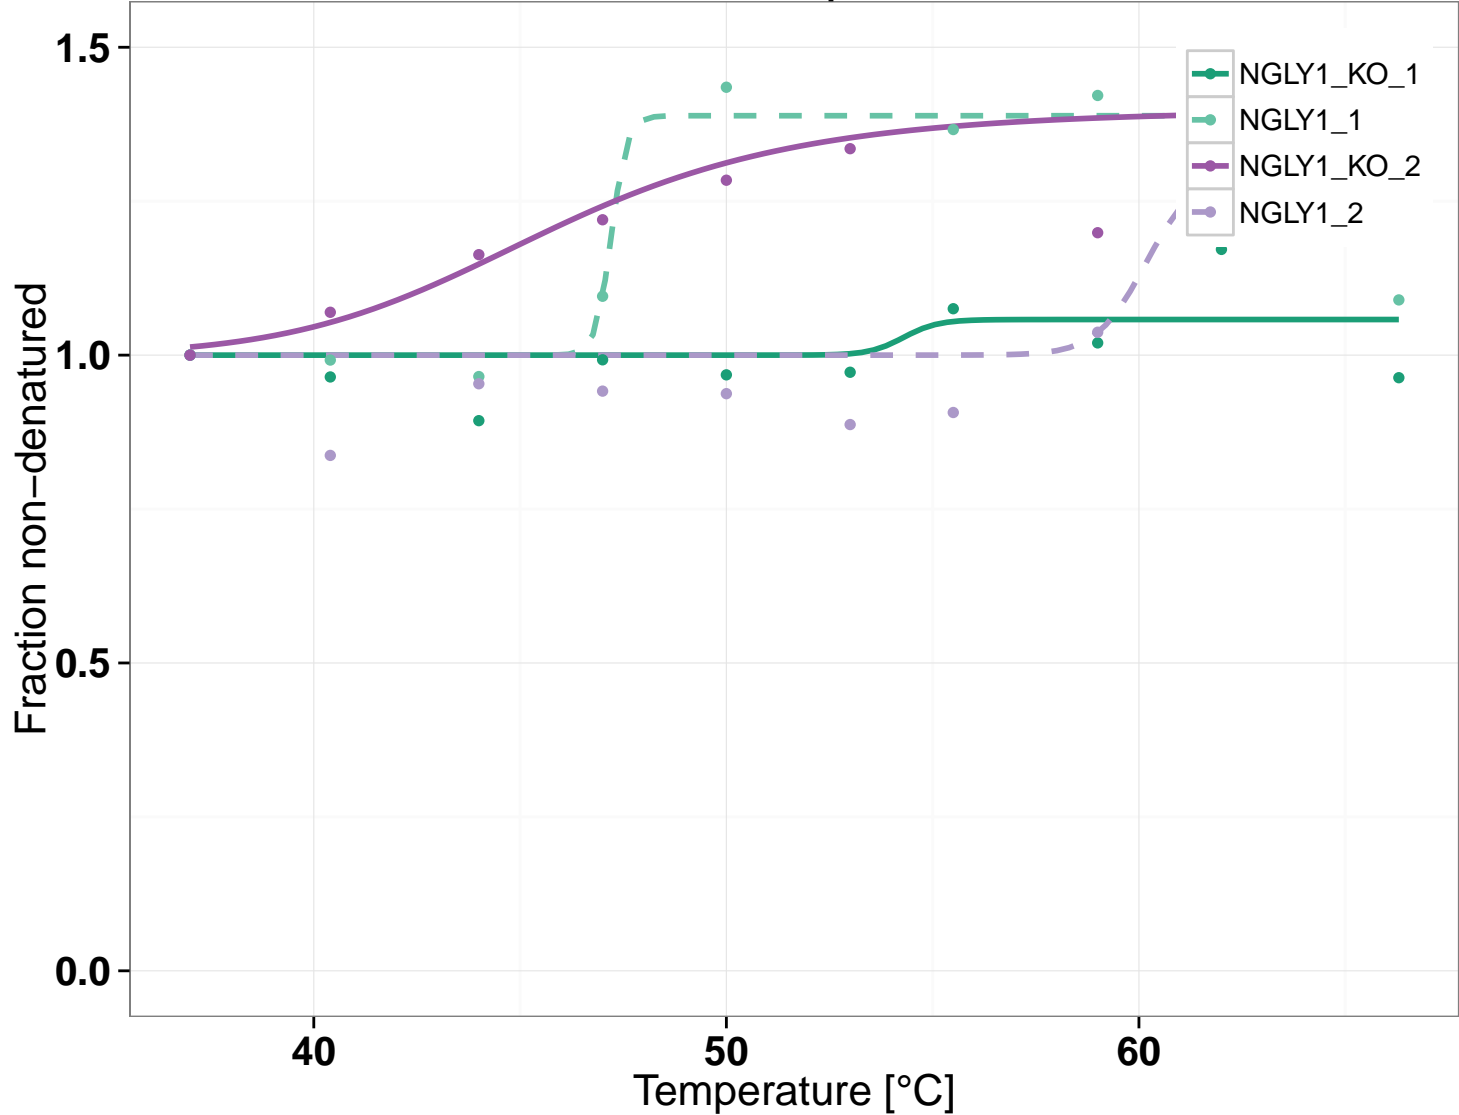

|            | meltPoint | slope | plateau | R2   |
|------------|-----------|-------|---------|------|
| NGLY1_KO_1 | —         | 0.035 | 1.06    | 0.25 |
| NGLY1_1    | —         | 0.51  | 1.39    | 0.74 |
| NGLY1_KO_2 | —         | 0.032 | 1.4     | 0.58 |
| NGLY1_2    | —         | 0.12  | 1.3     | 0.75 |

Supplement: Supplementary file 5632 [file 1]

# IPI00299063.2|STIM1

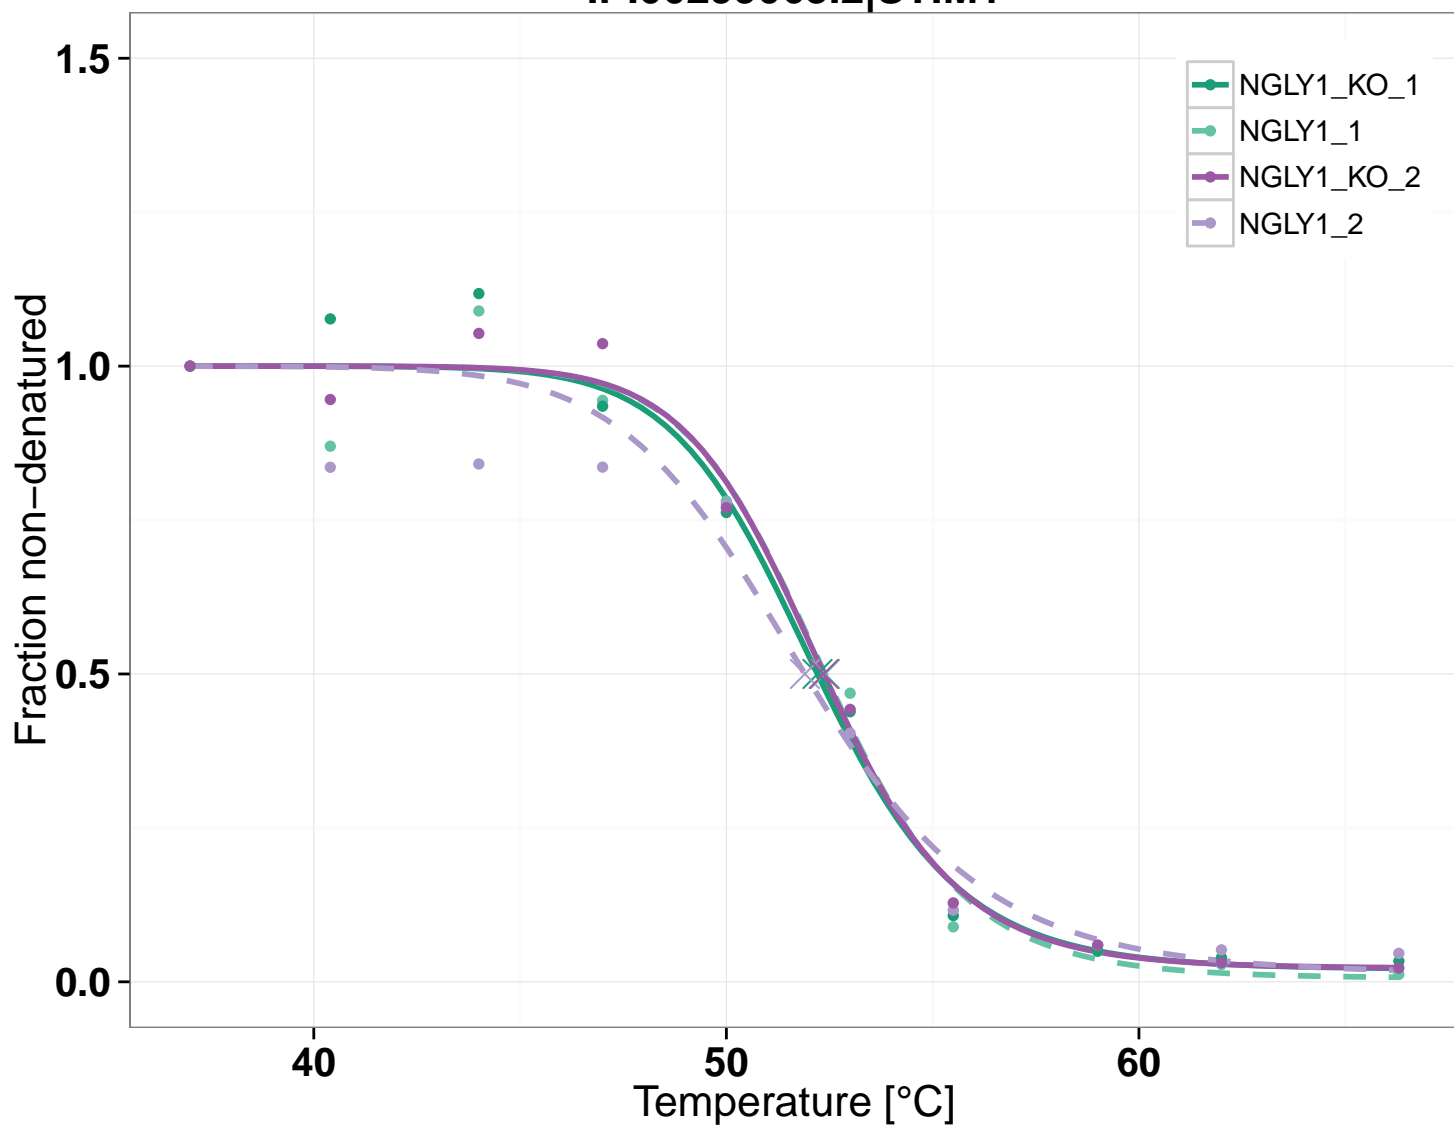

|            | meltPoint | slope | plateau | R2   |
|------------|-----------|-------|---------|------|
| NGLY1_KO_1 | 52.21     | -0.14 | 0.02    | 0.99 |
| NGLY1_1    | 52.39     | -0.15 | 0.01    | 0.98 |
| NGLY1_KO_2 | 52.36     | -0.15 | 0.02    | 0.99 |
| NGLY1_2    | 51.9      | -0.11 | 0.01    | 0.95 |

Supplement: Supplementary file 5633 [file 1]

IPI00005751.1|SPTLC2

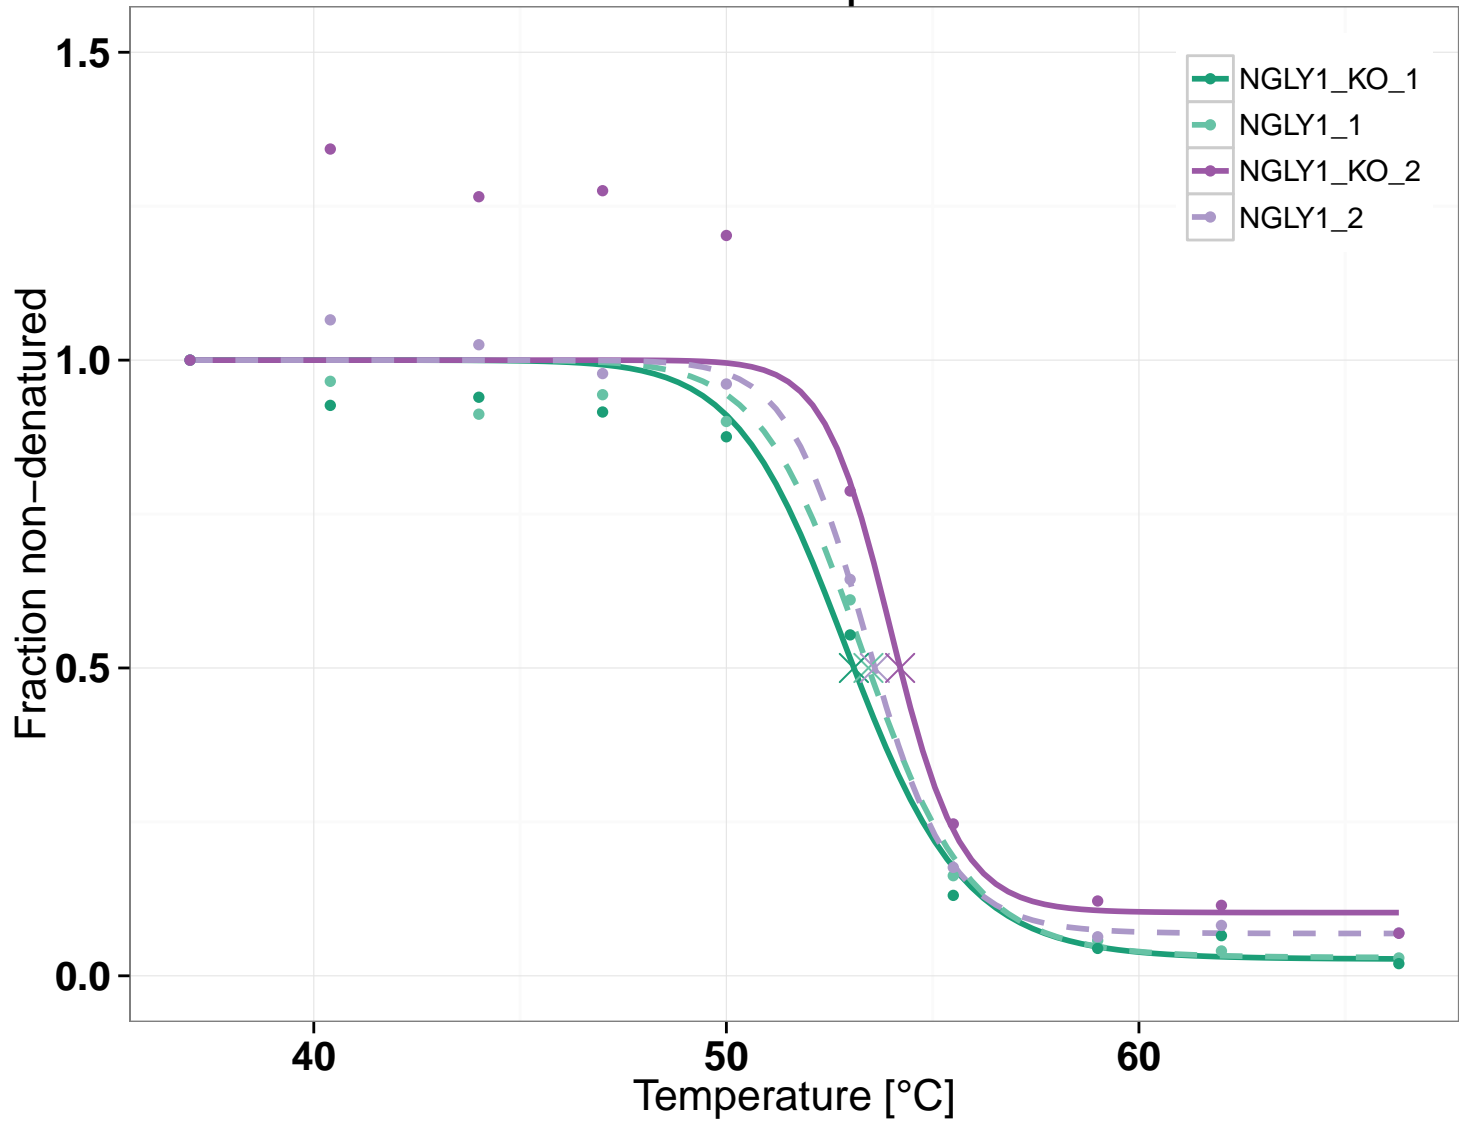

|            | meltPoint | slope | plateau | R2   |
|------------|-----------|-------|---------|------|
| NGLY1_KO_1 | 53.09     | -0.18 | 0.03    | 0.99 |
| NGLY1_1    | 53.44     | -0.19 | 0.03    | 0.99 |
| NGLY1_KO_2 | 54.21     | -0.27 | 0.1     | 0.88 |
| NGLY1_2    | 53.6      | -0.24 | 0.07    | 1    |

Supplement: Supplementary file 5634 [file 1]

IPI00011276.1|BCKDHB

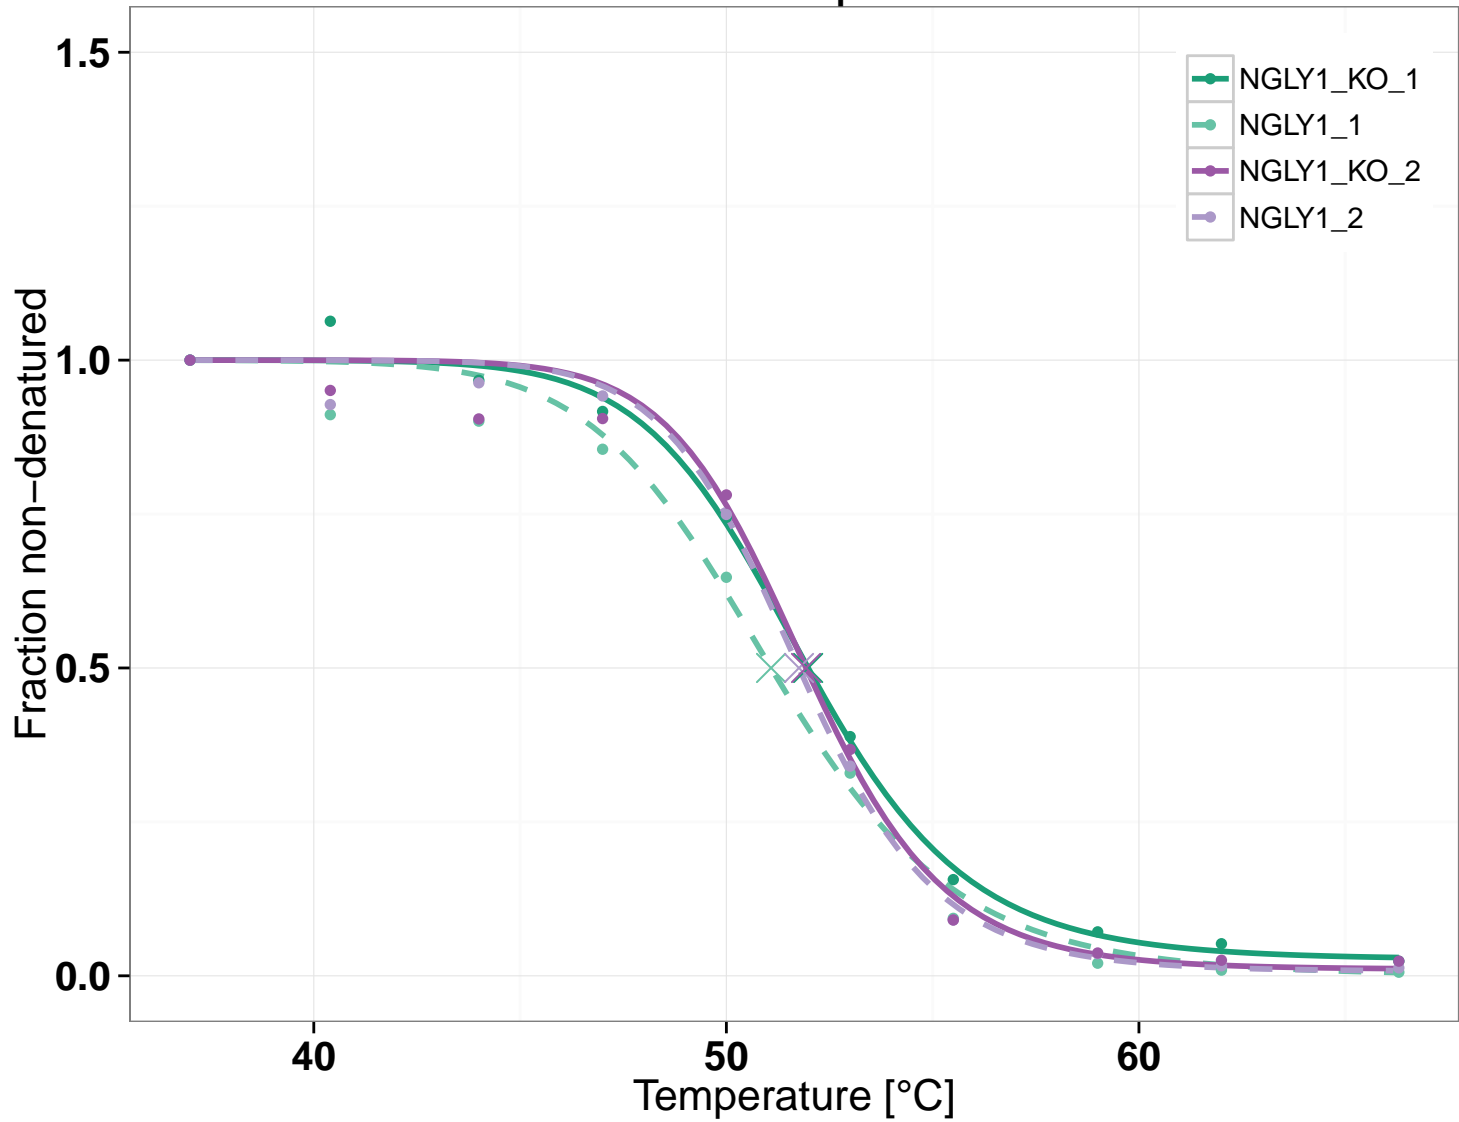

|            | meltPoint | slope | plateau | R2   |
|------------|-----------|-------|---------|------|
| NGLY1_KO_1 | 51.98     | -0.12 | 0.03    | 1    |
| NGLY1_1    | 51.08     | -0.11 | 0       | 0.99 |
| NGLY1_KO_2 | 51.93     | -0.15 | 0.01    | 0.99 |
| NGLY1_2    | 51.76     | -0.15 | 0.01    | 1    |

Supplement: Supplementary file 5635 [file 1]

IPI00418426.5|CNNM4

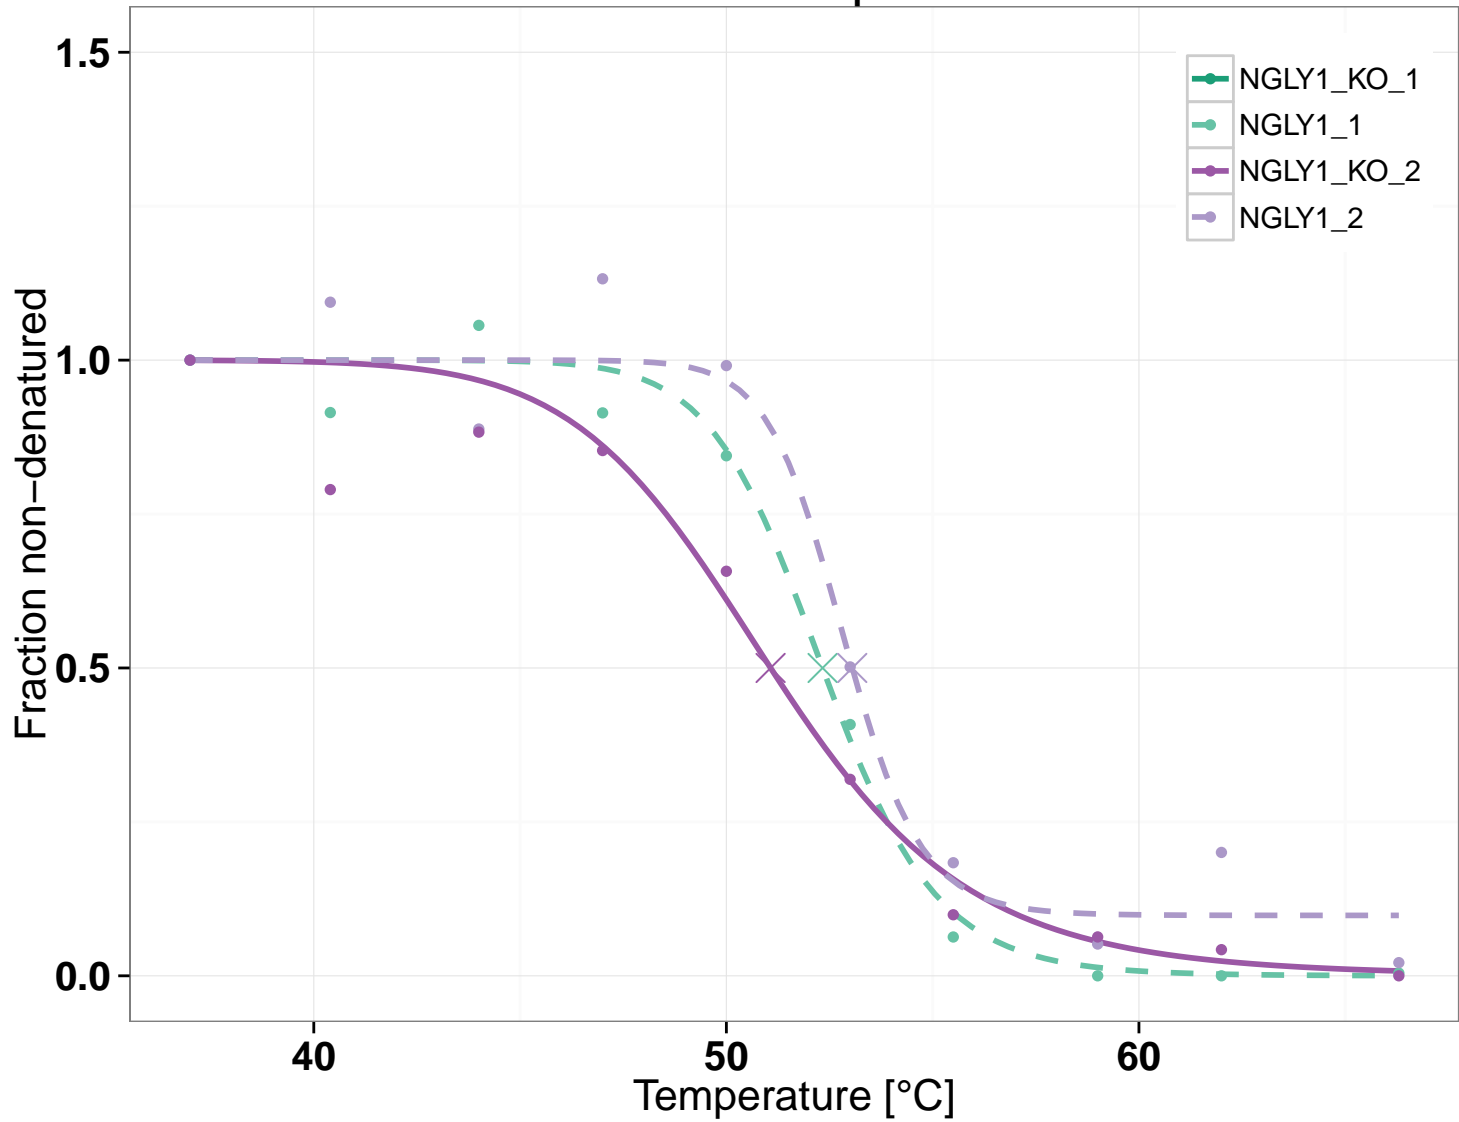

|            | meltPoint | slope | plateau | R2   |
|------------|-----------|-------|---------|------|
| NGLY1_KO_1 | -         | -     | -       | -    |
| NGLY1_1    | 52.33     | -0.18 | 0       | 0.99 |
| NGLY1_KO_2 | 51.07     | -0.1  | 0       | 0.96 |
| NGLY1_2    | 53.05     | -0.24 | 0.1     | 0.97 |

Supplement: Supplementary file 5636 [file 1]

# IPI00478842.3|NHEDC2

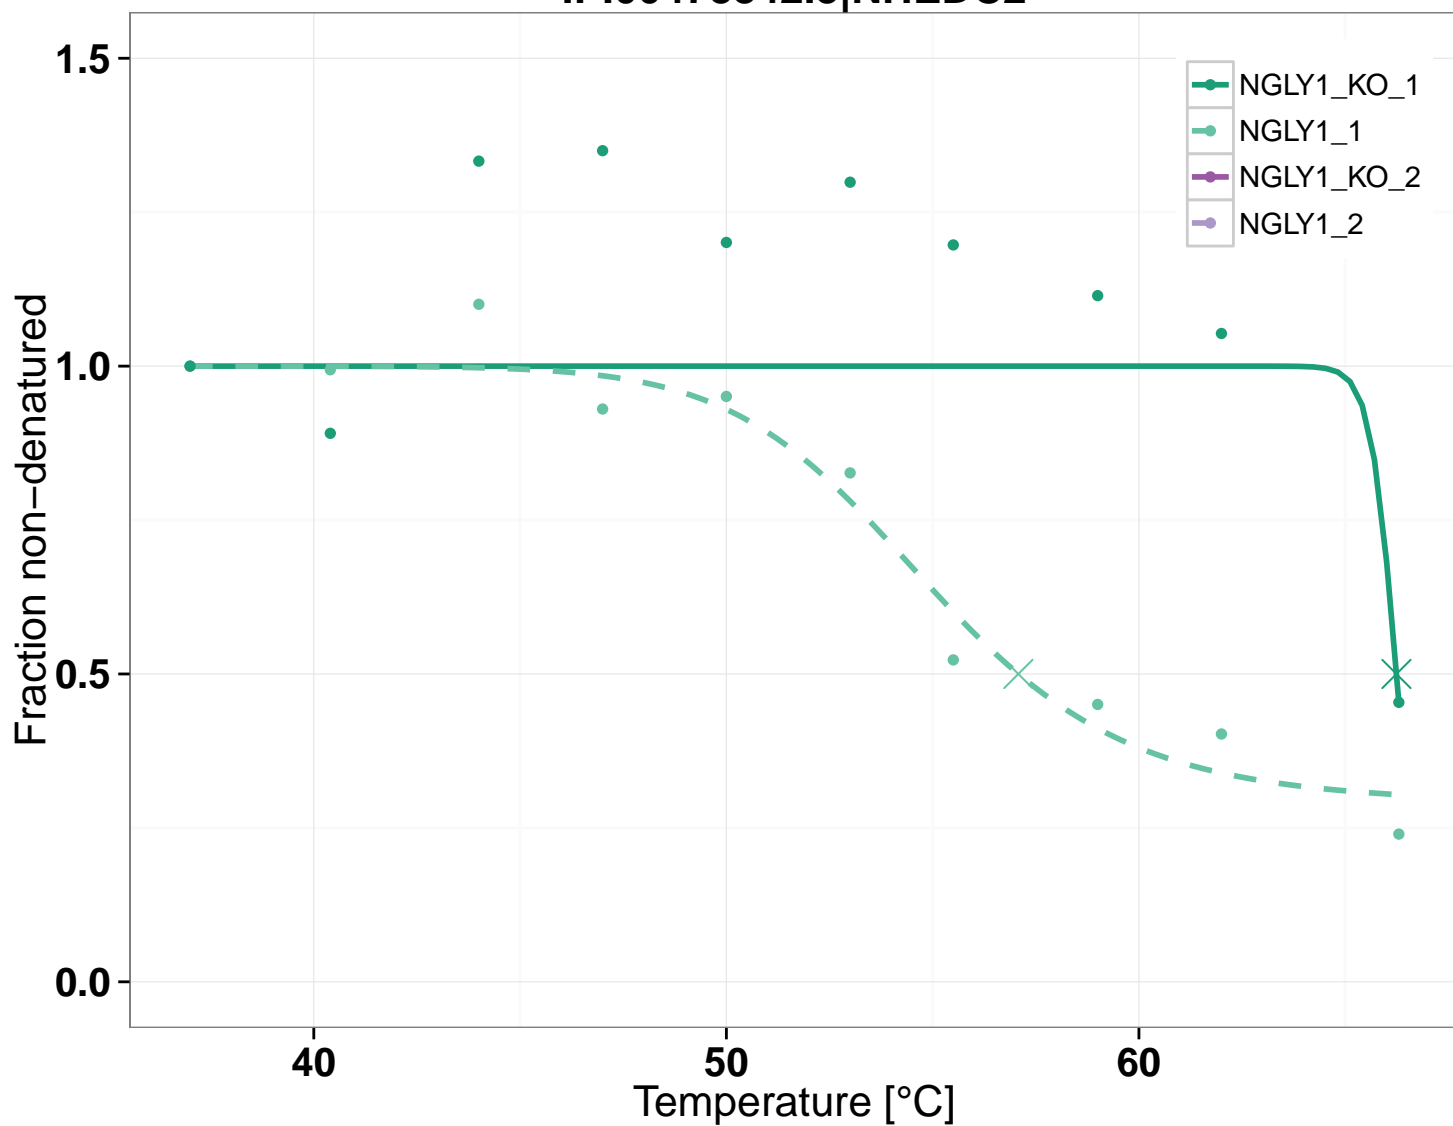

|            | meltPoint | slope  | plateau | R2   |
|------------|-----------|--------|---------|------|
| NGLY1_KO_1 | 66.24     | -0.8   | 0       | 0.34 |
| NGLY1_1    | 57.08     | -0.074 | 0.29    | 0.96 |
| NGLY1_KO_2 | -         | -      | -       | -    |
| NGLY1_2    | -         | -      | -       | -    |

Supplement: Supplementary file 5637 [file 1]

# IPI00328703.1|OAF

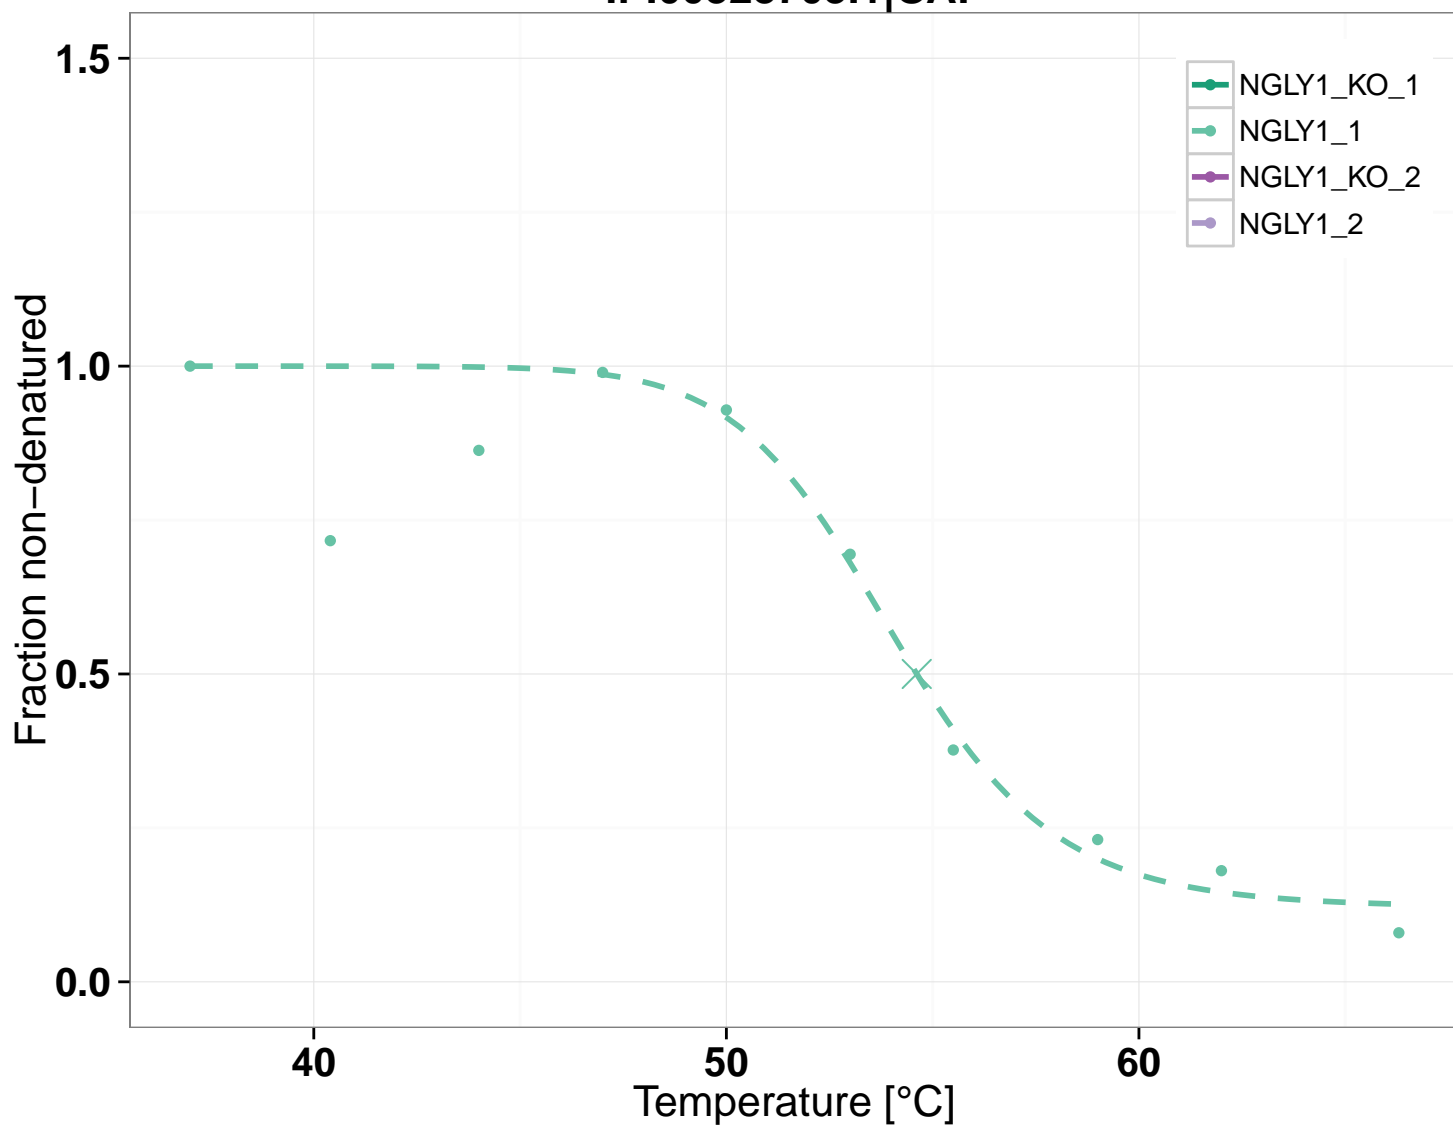

|            | meltPoint | slope | plateau | R2   |
|------------|-----------|-------|---------|------|
| NGLY1_KO_1 | –         | –     | –       | –    |
| NGLY1_1    | 54.61     | –0.11 | 0.12    | 0.91 |
| NGLY1_KO_2 | –         | –     | –       | –    |
| NGLY1_2    | –         | –     | –       | –    |

Supplement: Supplementary file 5638 [file 1]

# IPI00455623.4|ARD1B

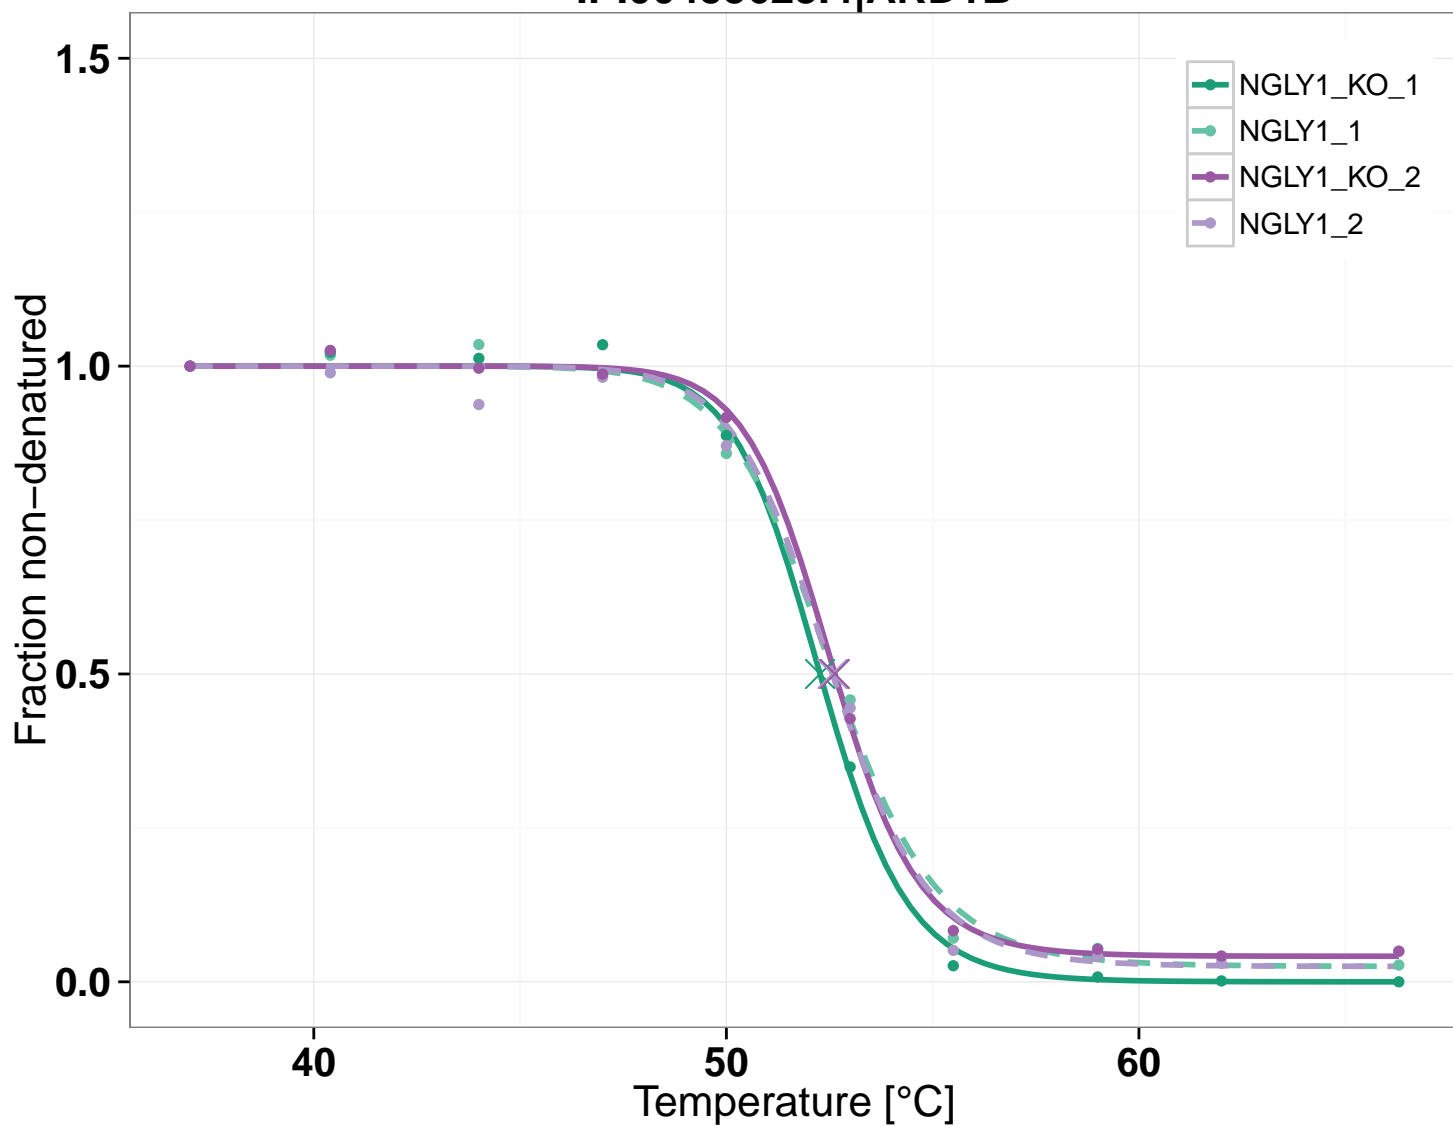

|            | meltPoint | slope | plateau | R2   |
|------------|-----------|-------|---------|------|
| NGLY1_KO_1 | 52.27     | -0.24 | 0       | 1    |
| NGLY1_1    | 52.6      | -0.19 | 0.03    | 1    |
| NGLY1_KO_2 | 52.63     | -0.23 | 0.04    | 1    |
| NGLY1_2    | 52.57     | -0.21 | 0.03    | 0.99 |

Supplement: Supplementary file 5639 [file 1]

IPI00890837.1|SMCHD1

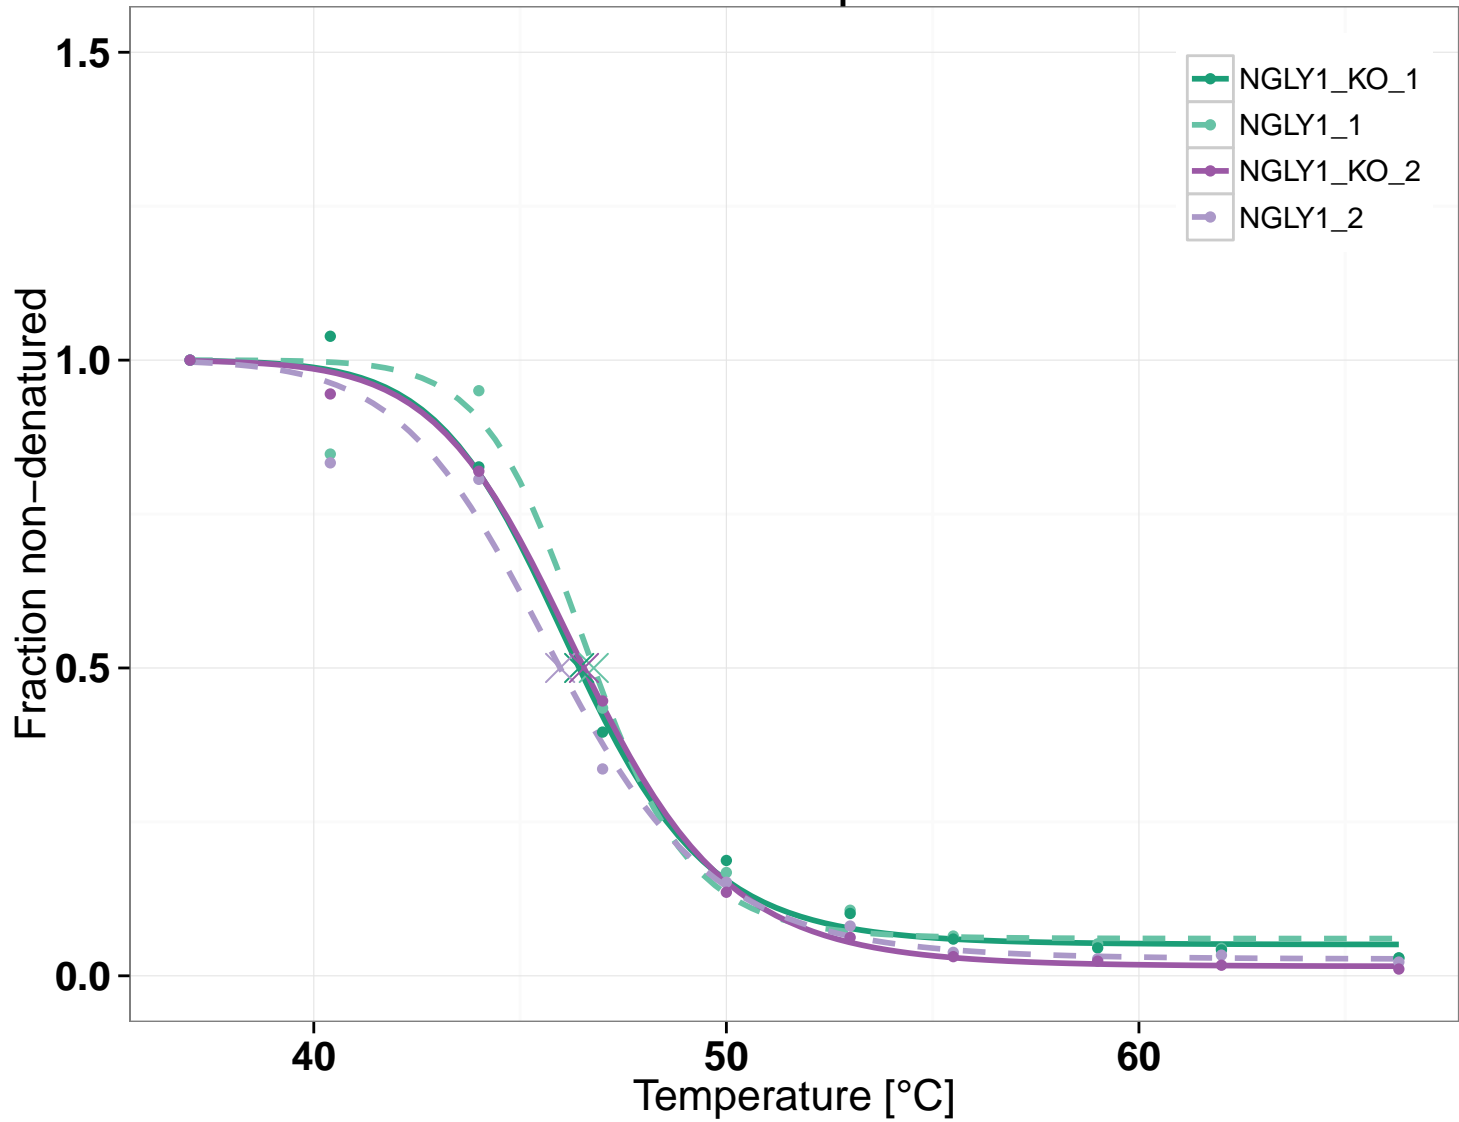

|            | meltPoint | slope | plateau | R2   |
|------------|-----------|-------|---------|------|
| NGLY1_KO_1 | 46.43     | -0.14 | 0.05    | 1    |
| NGLY1_1    | 46.79     | -0.19 | 0.06    | 0.98 |
| NGLY1_KO_2 | 46.55     | -0.14 | 0.02    | 1    |
| NGLY1_2    | 45.97     | -0.13 | 0.03    | 0.98 |

Supplement: Supplementary file 5640 [file 1]

IPI00872668.2|NIT2

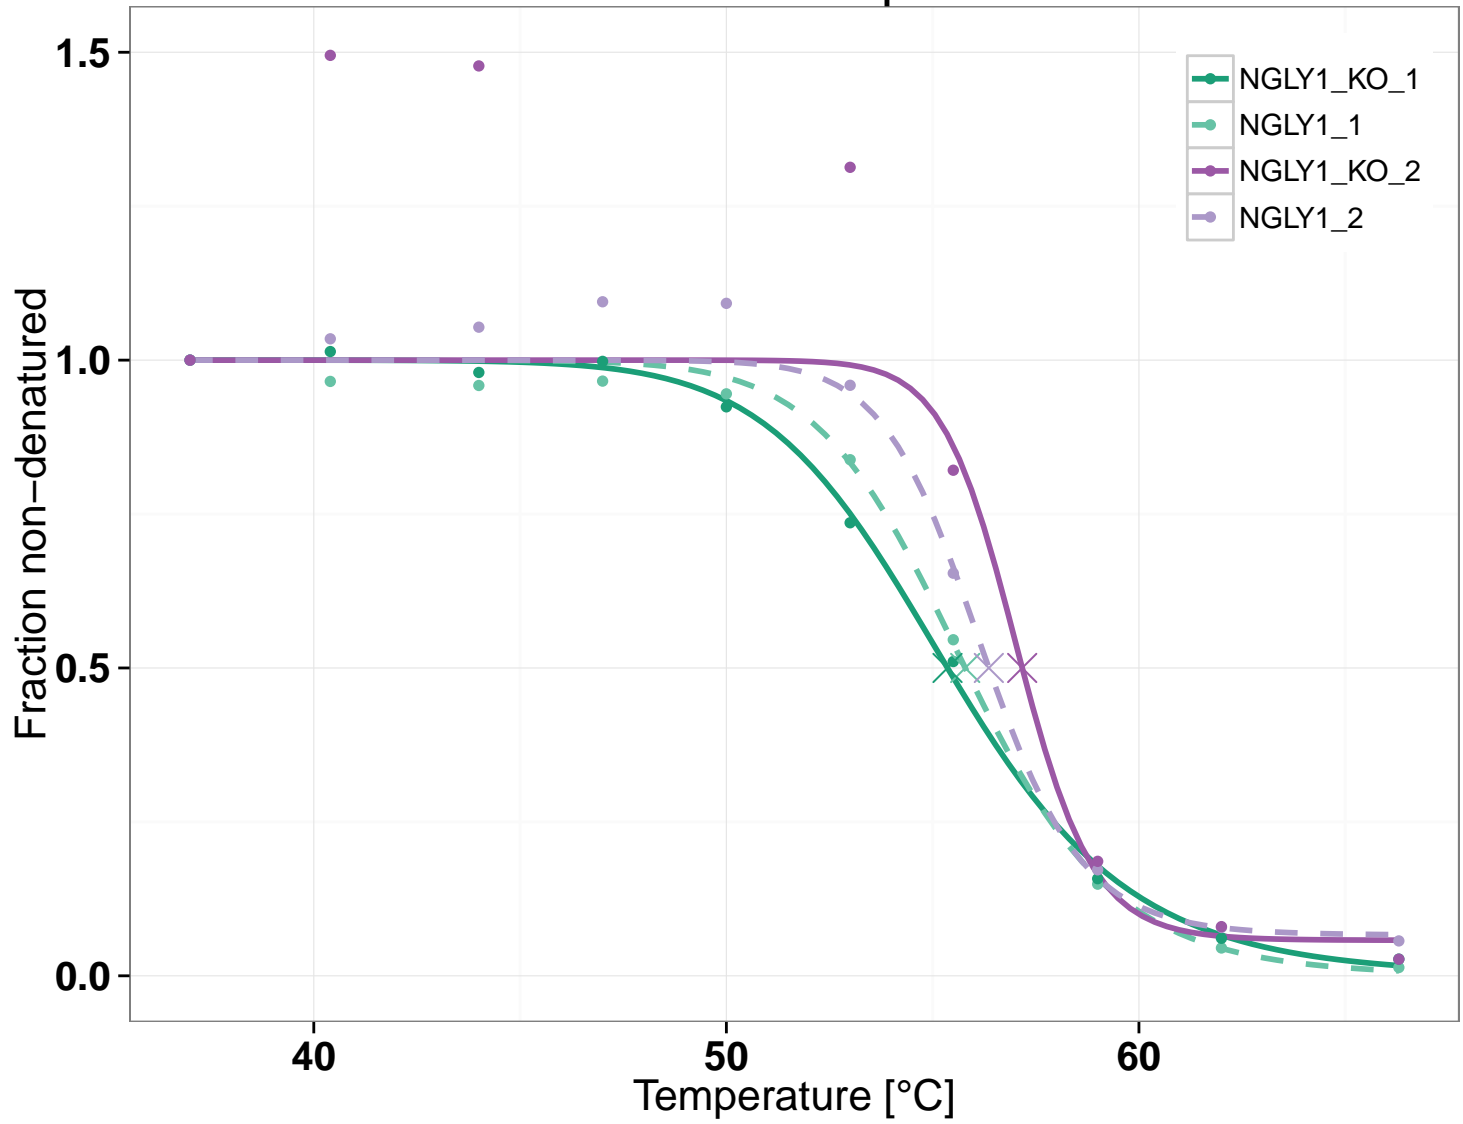

|            | meltPoint | slope | plateau | R2   |
|------------|-----------|-------|---------|------|
| NGLY1_KO_1 | 55.36     | -0.11 | 0       | 1    |
| NGLY1_1    | 55.79     | -0.14 | 0       | 1    |
| NGLY1_KO_2 | 57.17     | -0.26 | 0.06    | 0.68 |
| NGLY1_2    | 56.36     | -0.19 | 0.07    | 0.99 |

Supplement: Supplementary file 5641 [file 1]

# IPI00298218.3|TERT

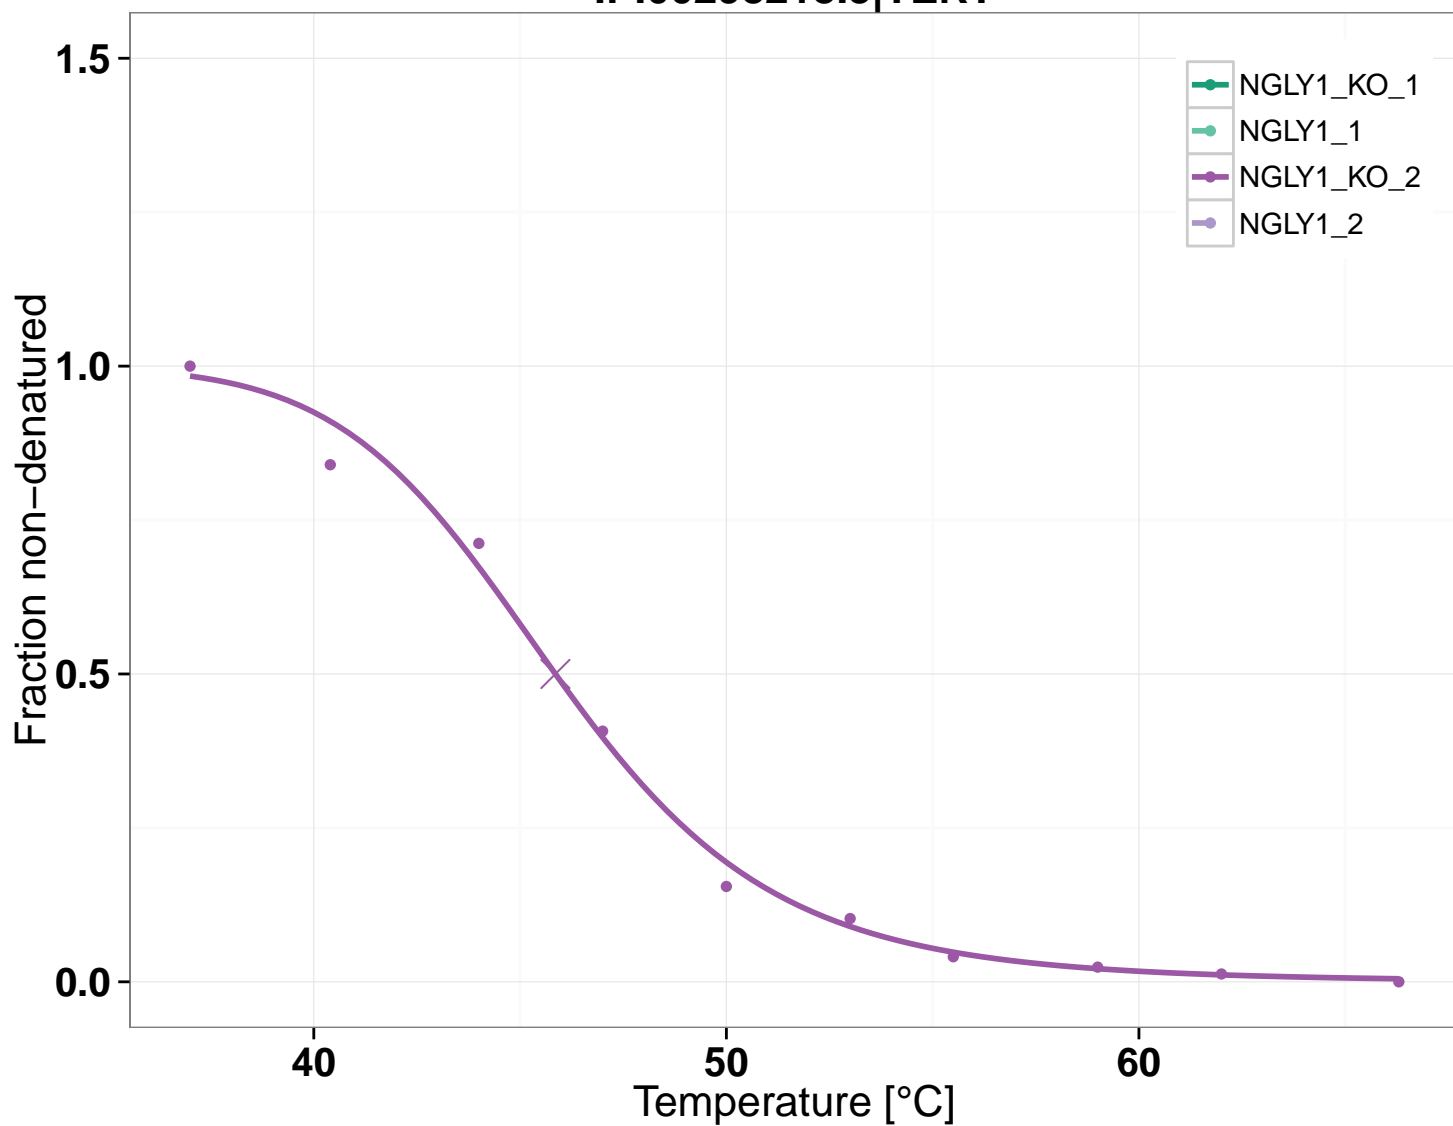

|            | meltPoint | slope  | plateau | R2   |
|------------|-----------|--------|---------|------|
| NGLY1_KO_1 | —         | —      | —       | —    |
| NGLY1_1    | —         | —      | —       | —    |
| NGLY1_KO_2 | 45.86     | -0.095 | 0       | 0.99 |
| NGLY1_2    | —         | —      | —       | —    |

Supplement: Supplementary file 5642 [file 1]

# IPI00641788.1|SNRPC

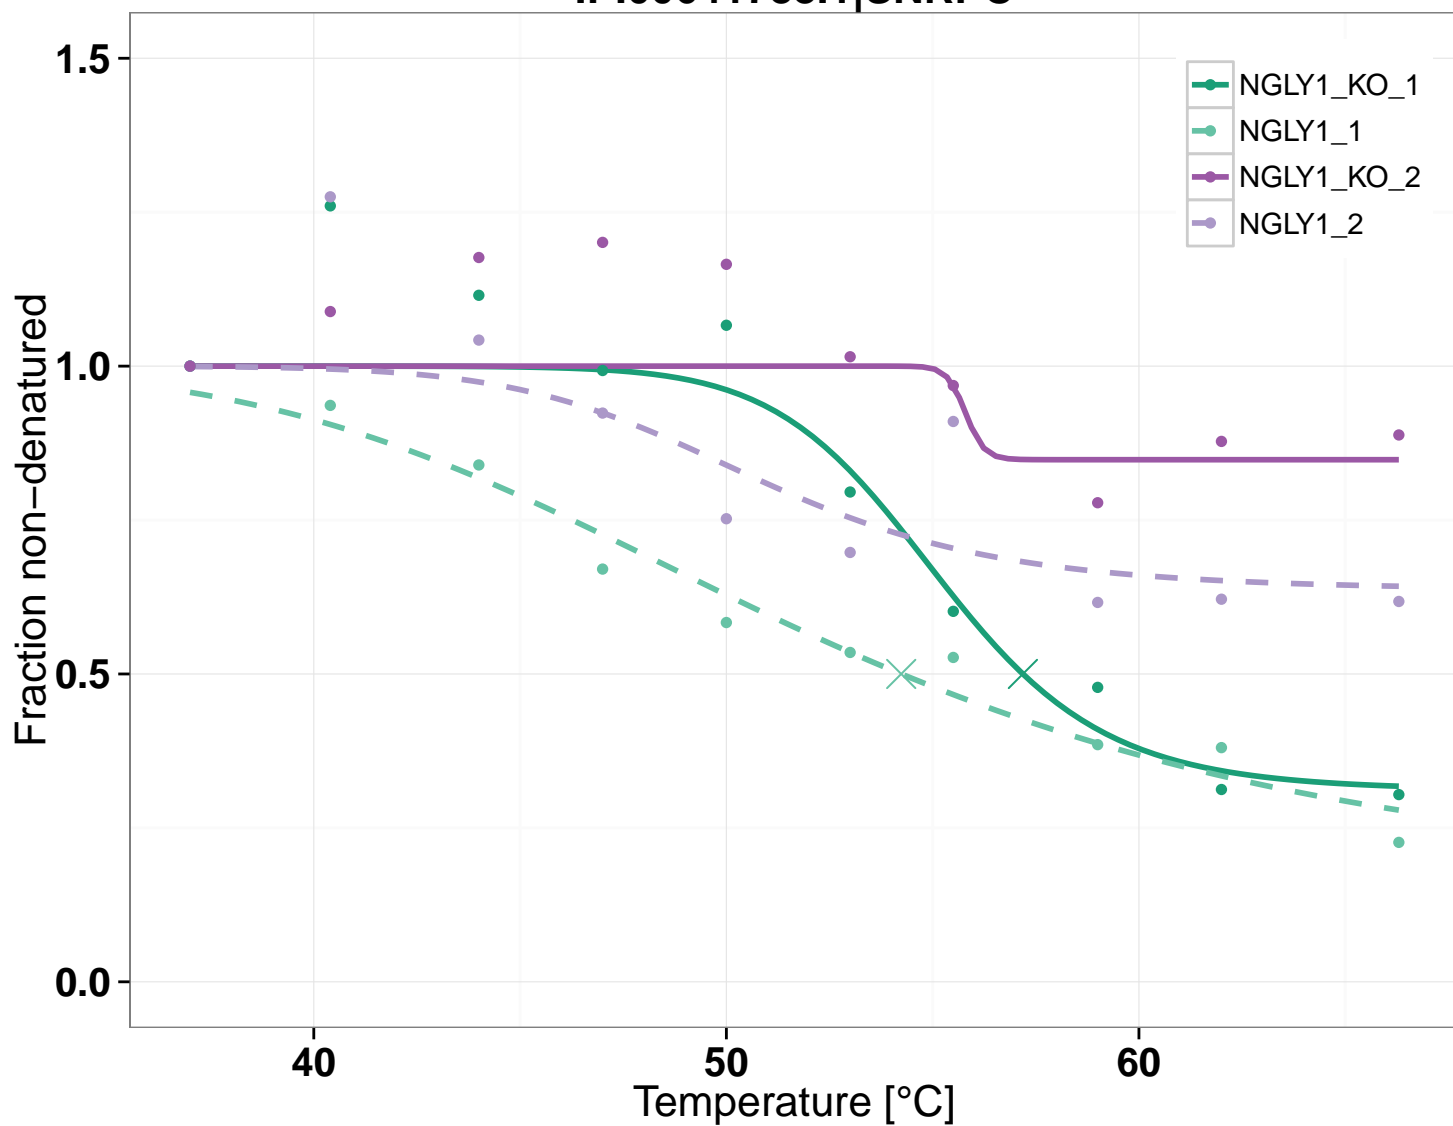

|            | meltPoint | slope  | plateau | R2   |
|------------|-----------|--------|---------|------|
| NGLY1_KO_1 | 57.19     | -0.086 | 0.31    | 0.91 |
| NGLY1_1    | 54.24     | -0.033 | 0.13    | 0.97 |
| NGLY1_KO_2 | -         | -0.17  | 0.85    | 0.37 |
| NGLY1_2    | -         | -0.031 | 0.64    | 0.68 |

Supplement: Supplementary file 5643 [file 1]

IPI00068506.1|ABCF2

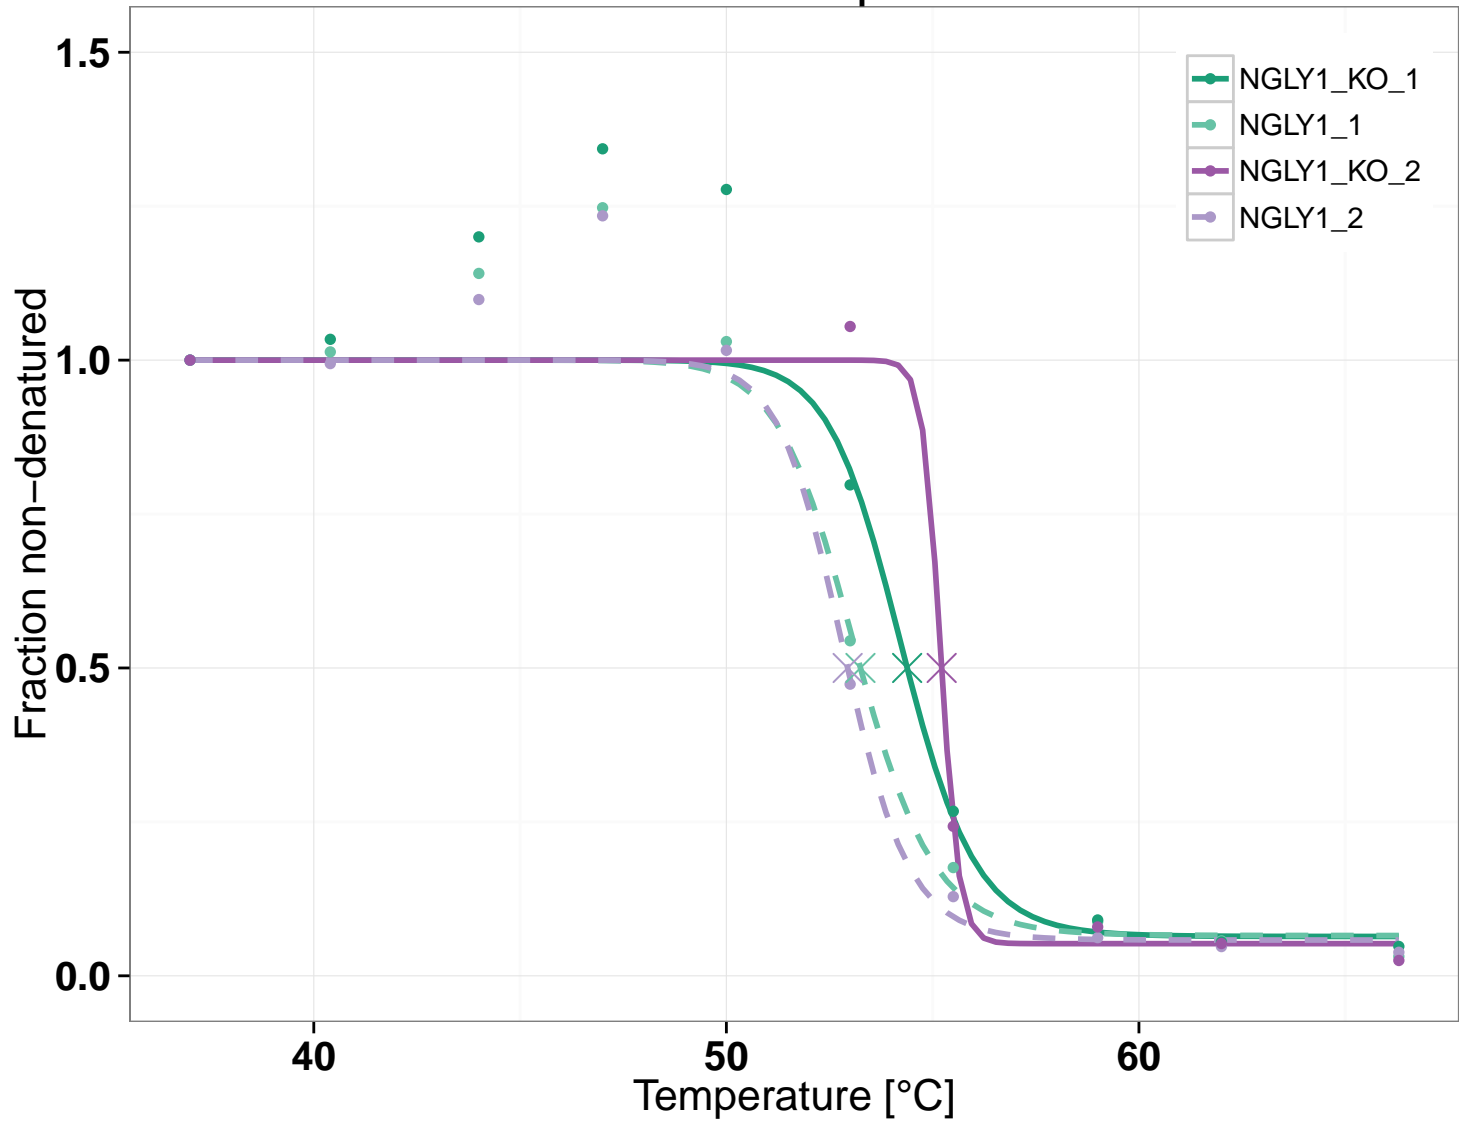

|            | meltPoint | slope | plateau | R2   |
|------------|-----------|-------|---------|------|
| NGLY1_KO_1 | 54.38     | -0.26 | 0.06    | 0.91 |
| NGLY1_1    | 53.25     | -0.25 | 0.07    | 0.96 |
| NGLY1_KO_2 | 55.22     | -1.1  | 0.05    | 0.37 |
| NGLY1_2    | 52.94     | -0.3  | 0.06    | 0.97 |

Supplement: Supplementary file 5644 [file 1]

IPI00386803.4|LASP1

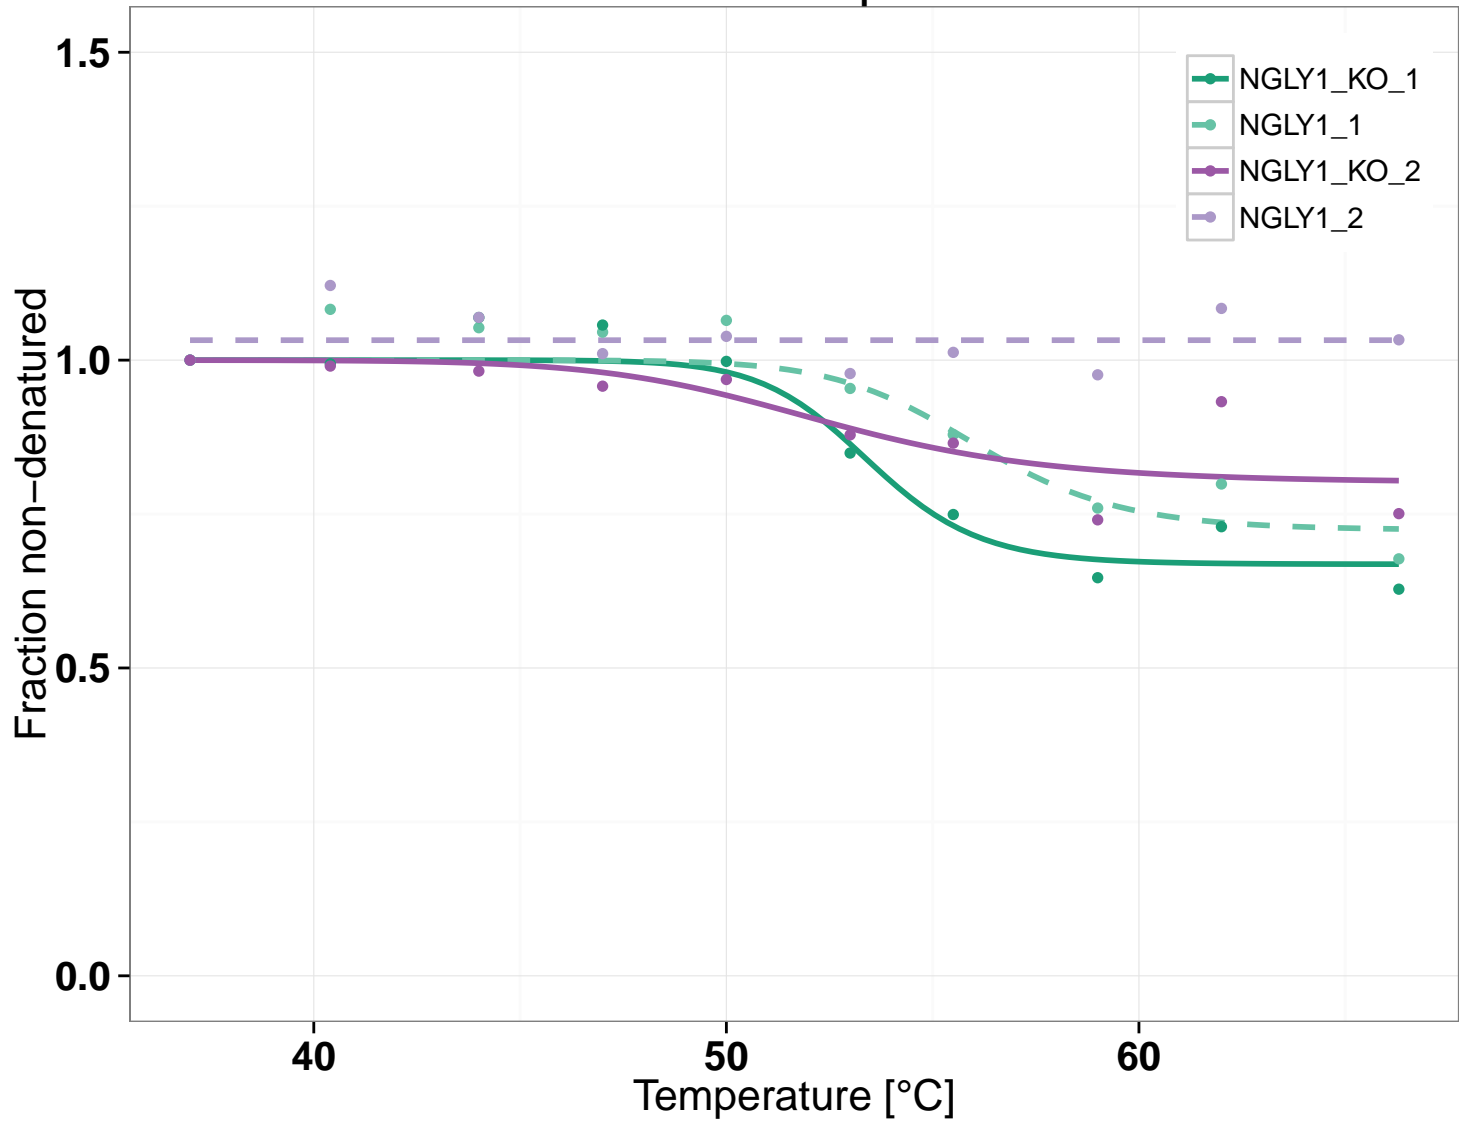

|            | meltPoint | slope  | plateau | R2   |
|------------|-----------|--------|---------|------|
| NGLY1_KO_1 | -         | -0.062 | 0.67    | 0.94 |
| NGLY1_1    | -         | -0.039 | 0.72    | 0.88 |
| NGLY1_KO_2 | -         | -0.018 | 0.8     | 0.69 |
| NGLY1_2    | -         | -      | 1.06    | 0    |

Supplement: Supplementary file 5645 [file 1]

IPI00238218.3|GIT2

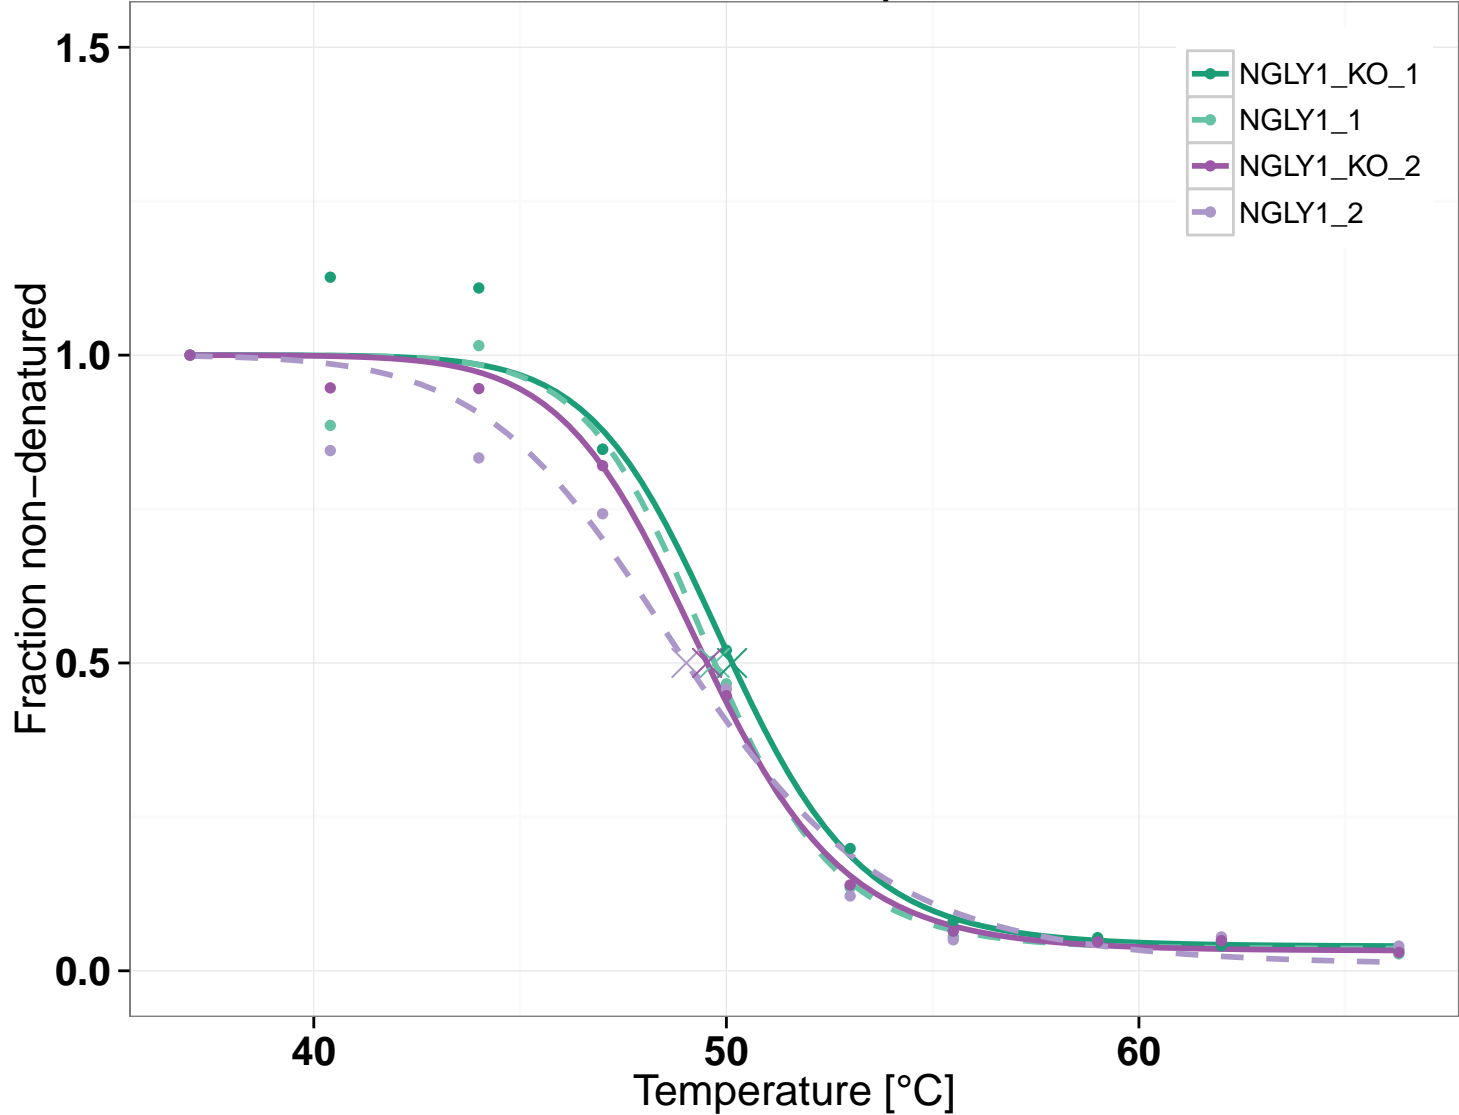

|            | meltPoint | slope | plateau | R2   |
|------------|-----------|-------|---------|------|
| NGLY1_KO_1 | 50.14     | -0.15 | 0.04    | 0.98 |
| NGLY1_1    | 49.72     | -0.16 | 0.04    | 0.99 |
| NGLY1_KO_2 | 49.53     | -0.14 | 0.03    | 1    |
| NGLY1_2    | 49.03     | -0.1  | 0.01    | 0.97 |

Supplement: Supplementary file 5646 [file 1]

# IPI00021842.1|APOE

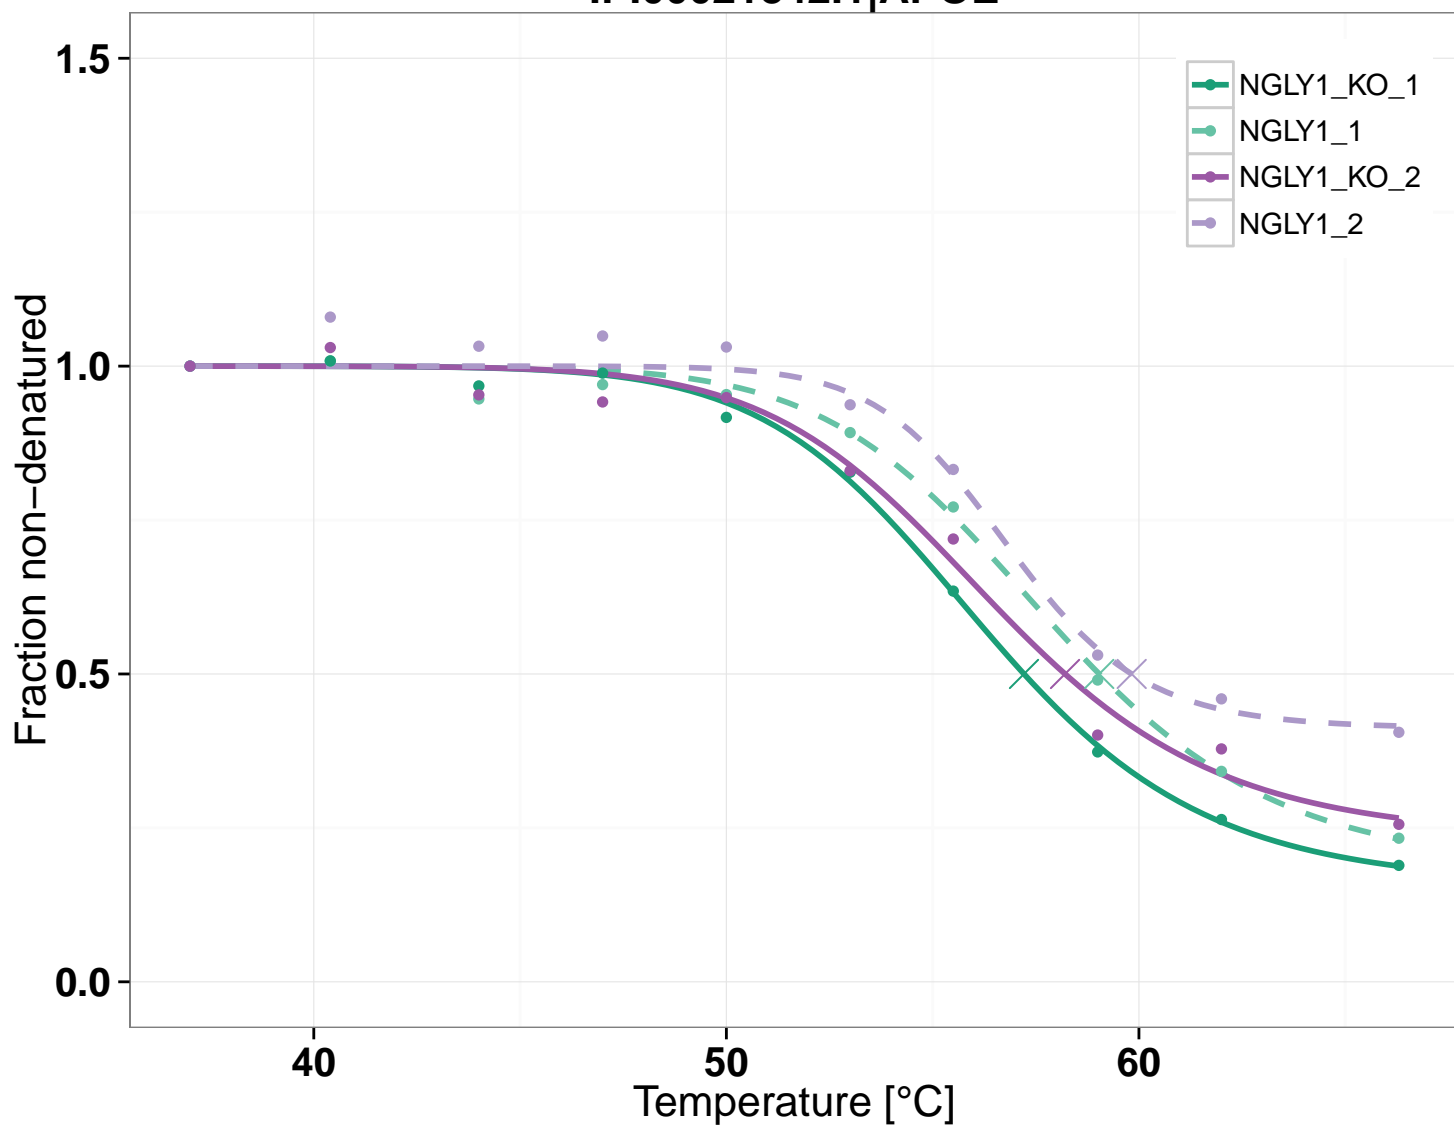

|            | meltPoint | slope  | plateau | R2   |
|------------|-----------|--------|---------|------|
| NGLY1_KO_1 | 57.21     | -0.079 | 0.15    | 1    |
| NGLY1_1    | 59.04     | -0.075 | 0.18    | 0.99 |
| NGLY1_KO_2 | 58.21     | -0.07  | 0.23    | 0.99 |
| NGLY1_2    | 59.82     | -0.09  | 0.41    | 0.98 |

Supplement: Supplementary file 5647 [file 1]

# IPI00294065.6|GOLGA5

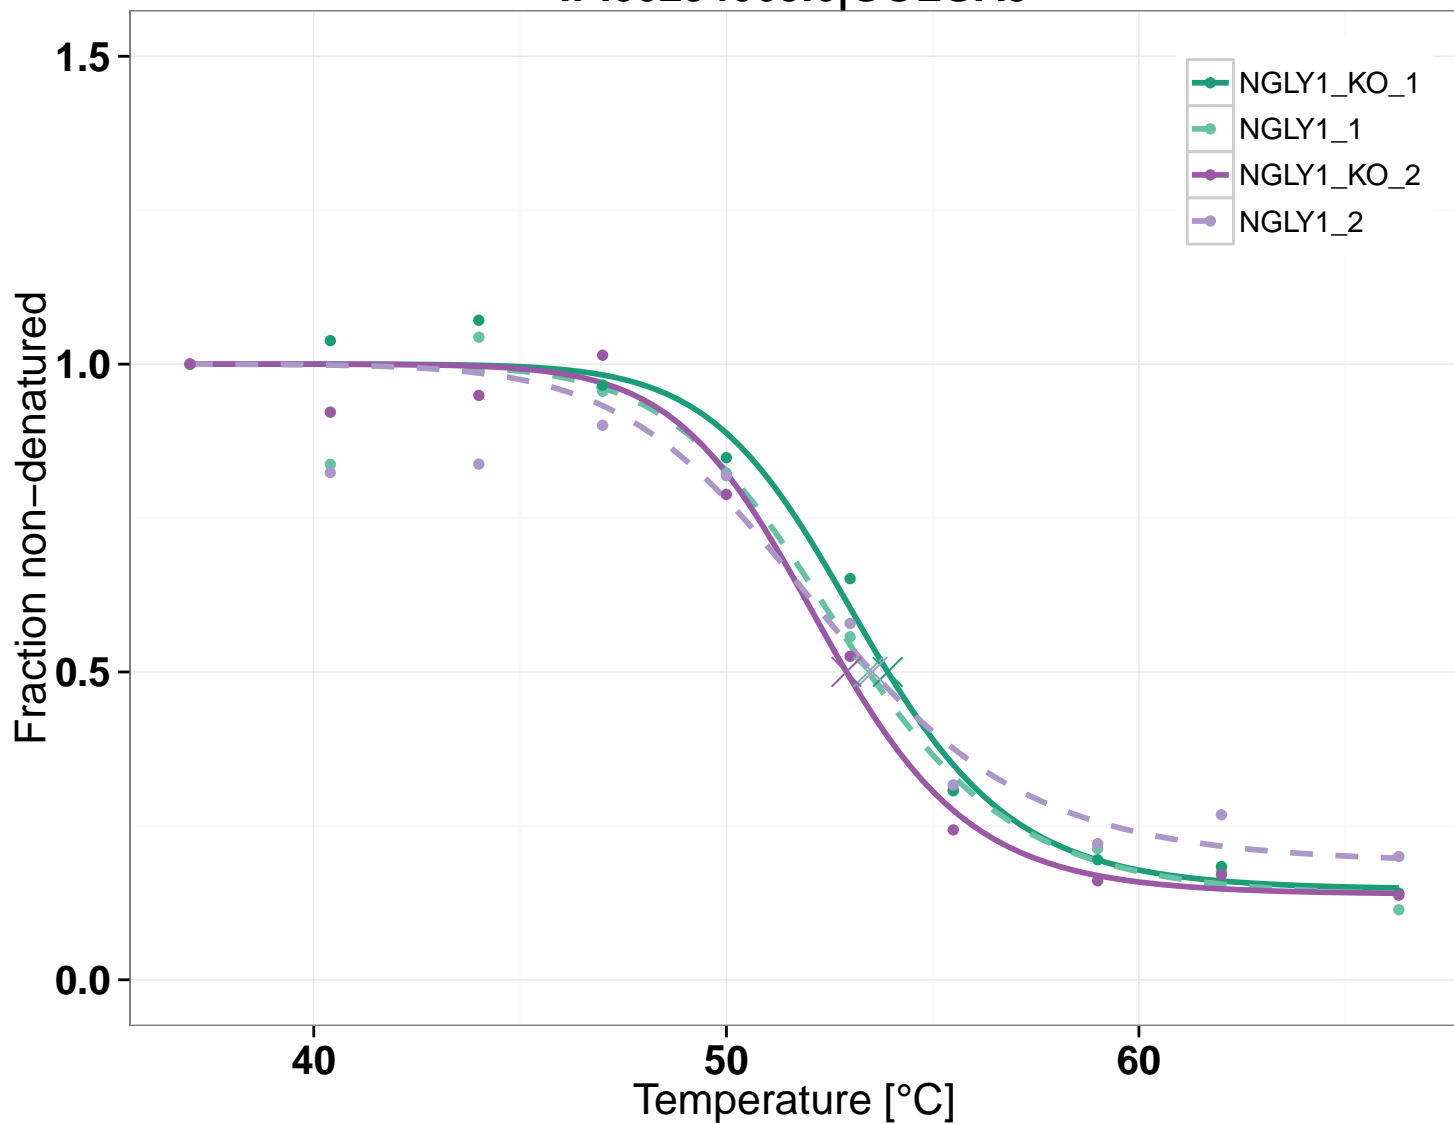

|            | meltPoint | slope  | plateau | R2   |
|------------|-----------|--------|---------|------|
| NGLY1_KO_1 | 53.91     | -0.12  | 0.15    | 0.99 |
| NGLY1_1    | 53.44     | -0.1   | 0.14    | 0.97 |
| NGLY1_KO_2 | 52.91     | -0.12  | 0.14    | 0.99 |
| NGLY1_2    | 53.54     | -0.083 | 0.19    | 0.93 |

Supplement: Supplementary file 5648 [file 1]

IPI00219072.5|STK11

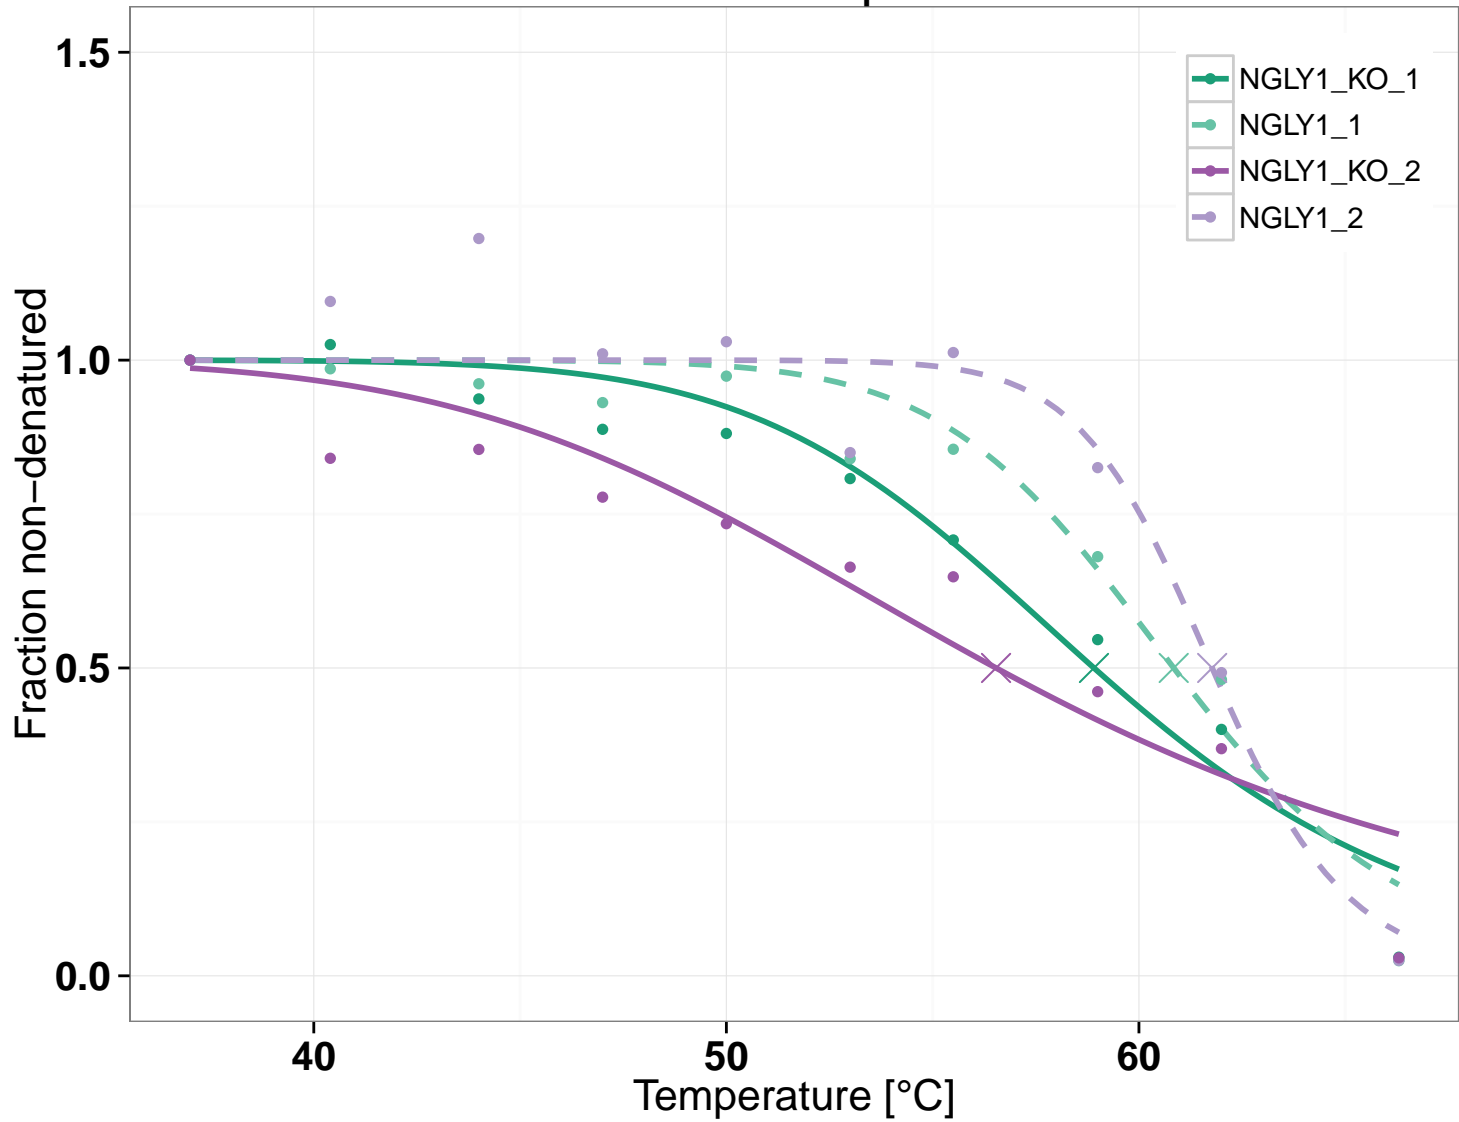

|            | meltPoint | slope  | plateau | R2   |
|------------|-----------|--------|---------|------|
| NGLY1_KO_1 | 58.91     | -0.061 | 0       | 0.95 |
| NGLY1_1    | 60.84     | -0.088 | 0       | 0.95 |
| NGLY1_KO_2 | 56.54     | -0.038 | 0       | 0.89 |
| NGLY1_2    | 61.78     | -0.15  | 0       | 0.93 |

Supplement: Supplementary file 5649 [file 1]

# IPI00414782.3|ZFP64

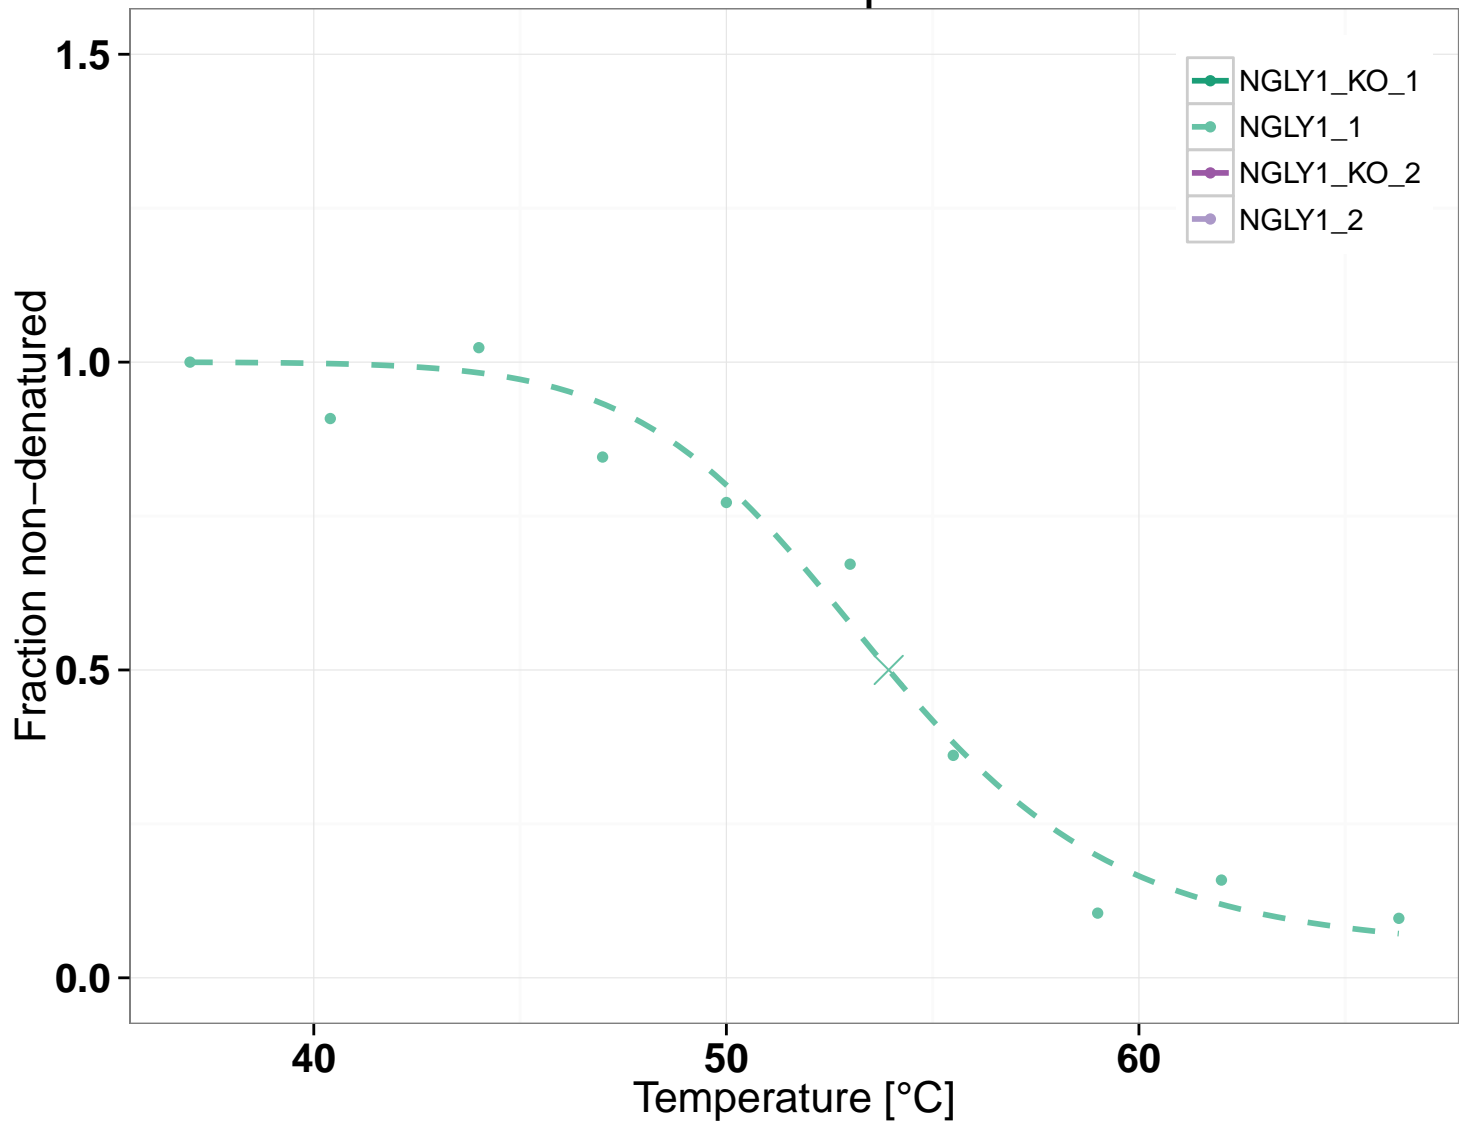

|            | meltPoint | slope  | plateau | R2   |
|------------|-----------|--------|---------|------|
| NGLY1_KO_1 | -         | -      | -       | -    |
| NGLY1_1    | 53.93     | -0.082 | 0.04    | 0.97 |
| NGLY1_KO_2 | -         | -      | -       | -    |
| NGLY1_2    | -         | -      | -       | -    |

Supplement: Supplementary file 5650 [file 1]

IPI00219910.2|BLVRB

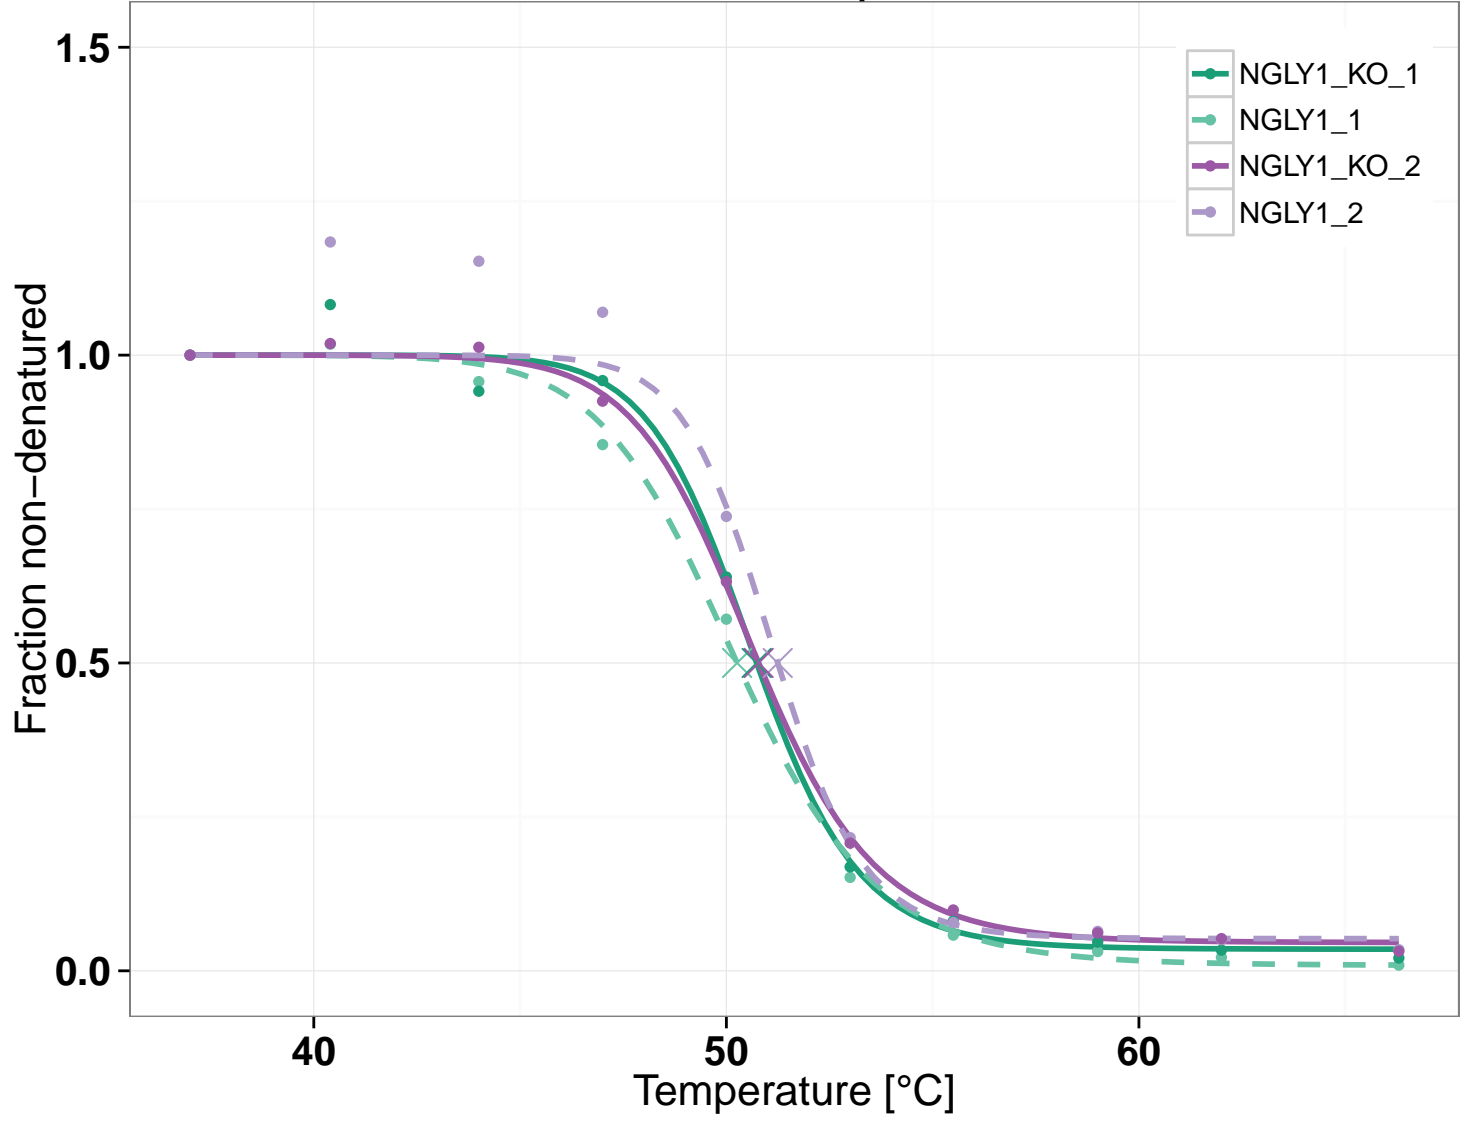

|            | meltPoint | slope | plateau | R2   |
|------------|-----------|-------|---------|------|
| NGLY1_KO_1 | 50.73     | -0.19 | 0.04    | 0.99 |
| NGLY1_1    | 50.26     | -0.15 | 0.01    | 1    |
| NGLY1_KO_2 | 50.78     | -0.16 | 0.05    | 1    |
| NGLY1_2    | 51.25     | -0.22 | 0.05    | 0.97 |

Supplement: Supplementary file 5651 [file 1]

IPI00220139.2|ZNF74

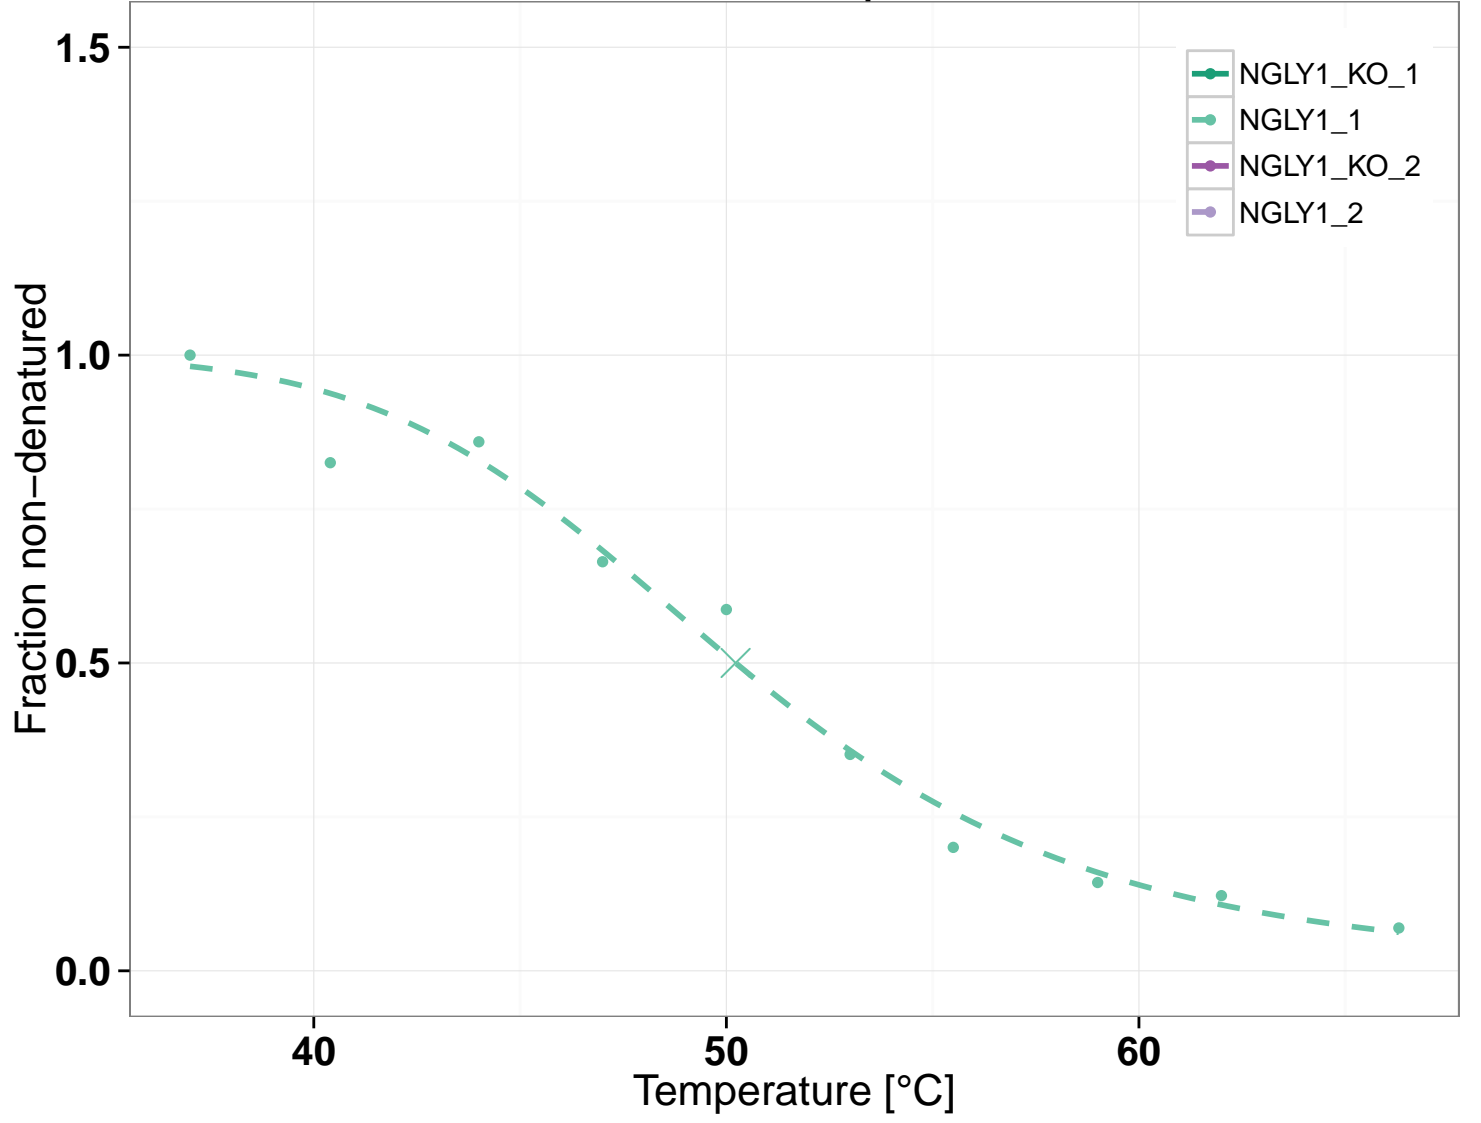

|            | meltPoint | slope  | plateau | R2   |
|------------|-----------|--------|---------|------|
| NGLY1_KO_1 | -         | -      | -       | -    |
| NGLY1_1    | 50.22     | -0.057 | 0       | 0.98 |
| NGLY1_KO_2 | -         | -      | -       | -    |
| NGLY1_2    | -         | -      | -       | -    |

Supplement: Supplementary file 5652 [file 1]

# IPI00004924.3|DEF6

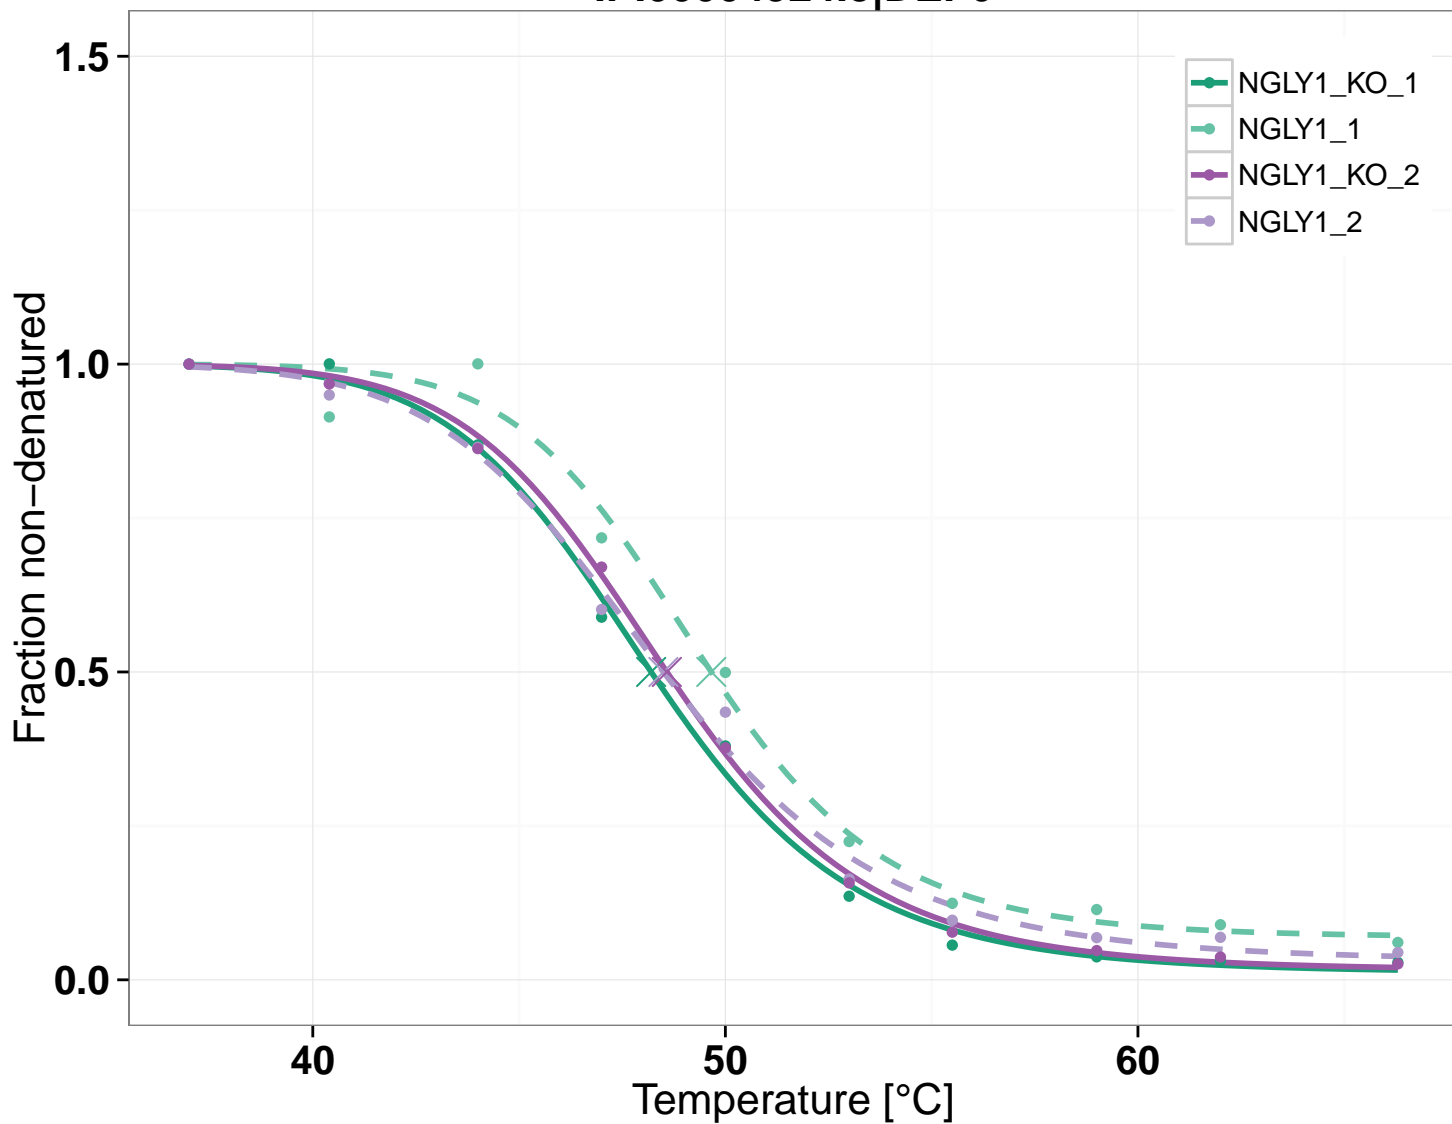

|            | meltPoint | slope  | plateau | R2   |
|------------|-----------|--------|---------|------|
| NGLY1_KO_1 | 48.2      | -0.1   | 0.01    | 1    |
| NGLY1_1    | 49.66     | -0.1   | 0.07    | 0.99 |
| NGLY1_KO_2 | 48.58     | -0.1   | 0.01    | 1    |
| NGLY1_2    | 48.5      | -0.089 | 0.03    | 0.99 |

Supplement: Supplementary file 5653 [file 1]

# IPI00014440.3|SLC25A17

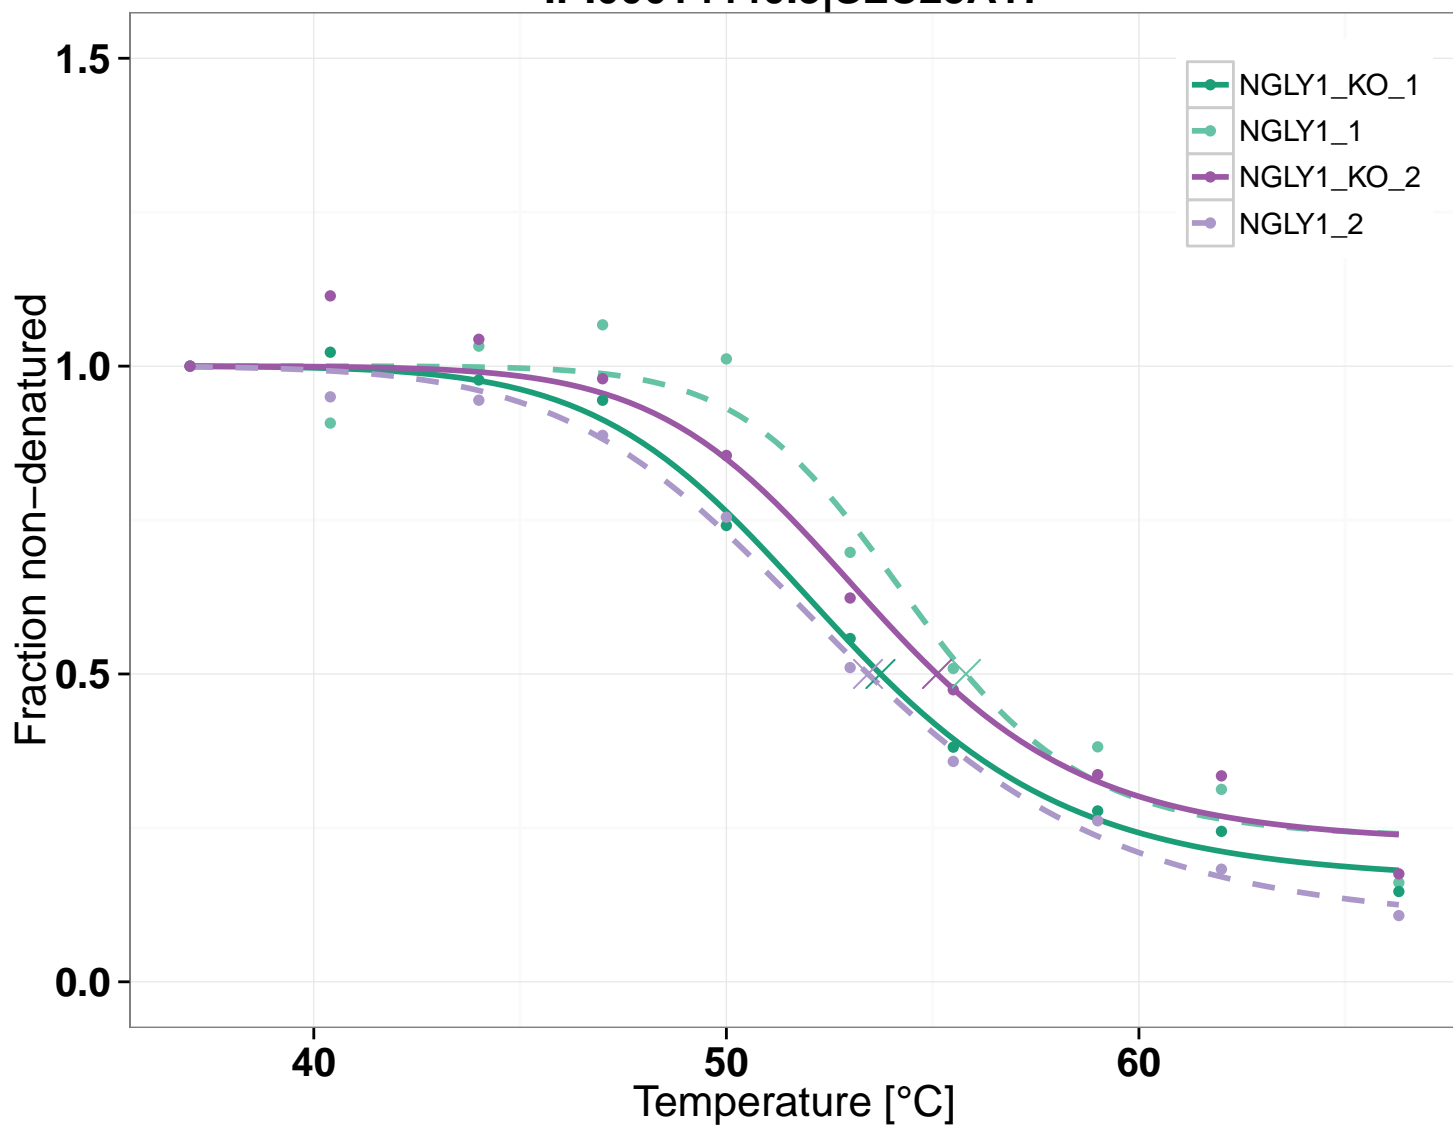

|            | meltPoint | slope  | plateau | R2   |
|------------|-----------|--------|---------|------|
| NGLY1_KO_1 | 53.74     | -0.073 | 0.16    | 1    |
| NGLY1_1    | 55.81     | -0.092 | 0.23    | 0.96 |
| NGLY1_KO_2 | 55.11     | -0.074 | 0.22    | 0.98 |
| NGLY1_2    | 53.43     | -0.068 | 0.09    | 1    |

Supplement: Supplementary file 5654 [file 1]

IPI00008350.1|ZDHHC6

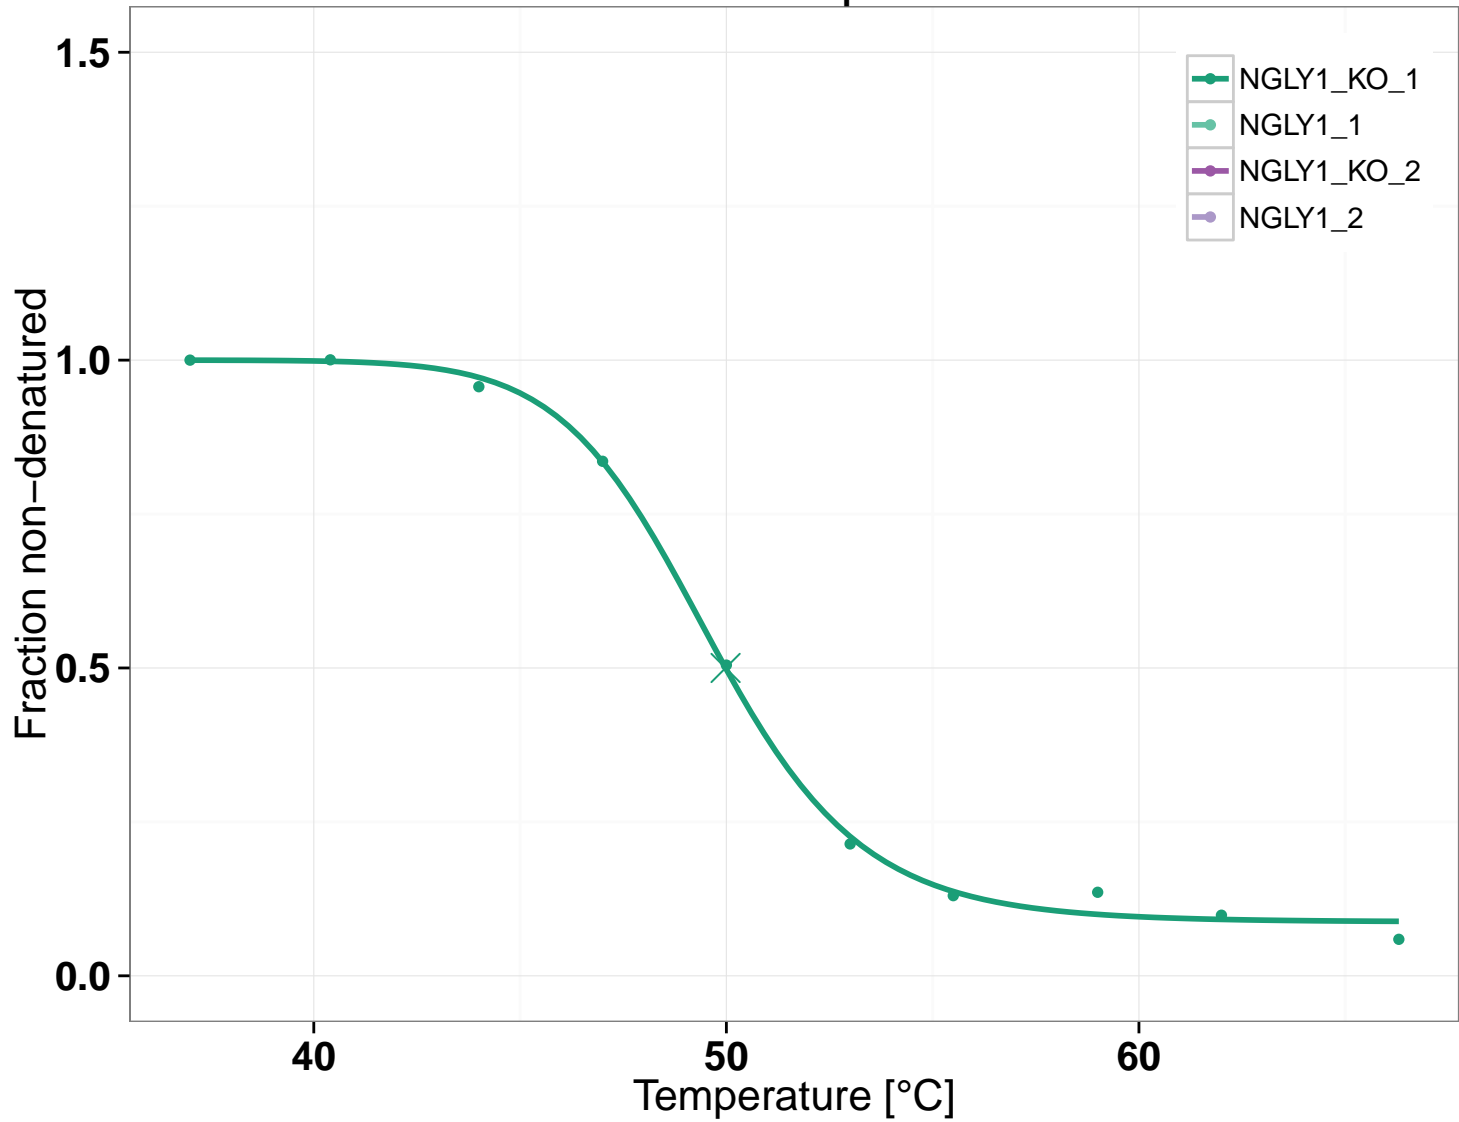

|            | meltPoint | slope | plateau | R2 |
|------------|-----------|-------|---------|----|
| NGLY1_KO_1 | 49.98     | -0.12 | 0.09    | 1  |
| NGLY1_1    | -         | -     | -       | -  |
| NGLY1_KO_2 | -         | -     | -       | -  |
| NGLY1_2    | -         | -     | -       | -  |

Supplement: Supplementary file 5655 [file 1]

IPI00015154.1|ATP13A2

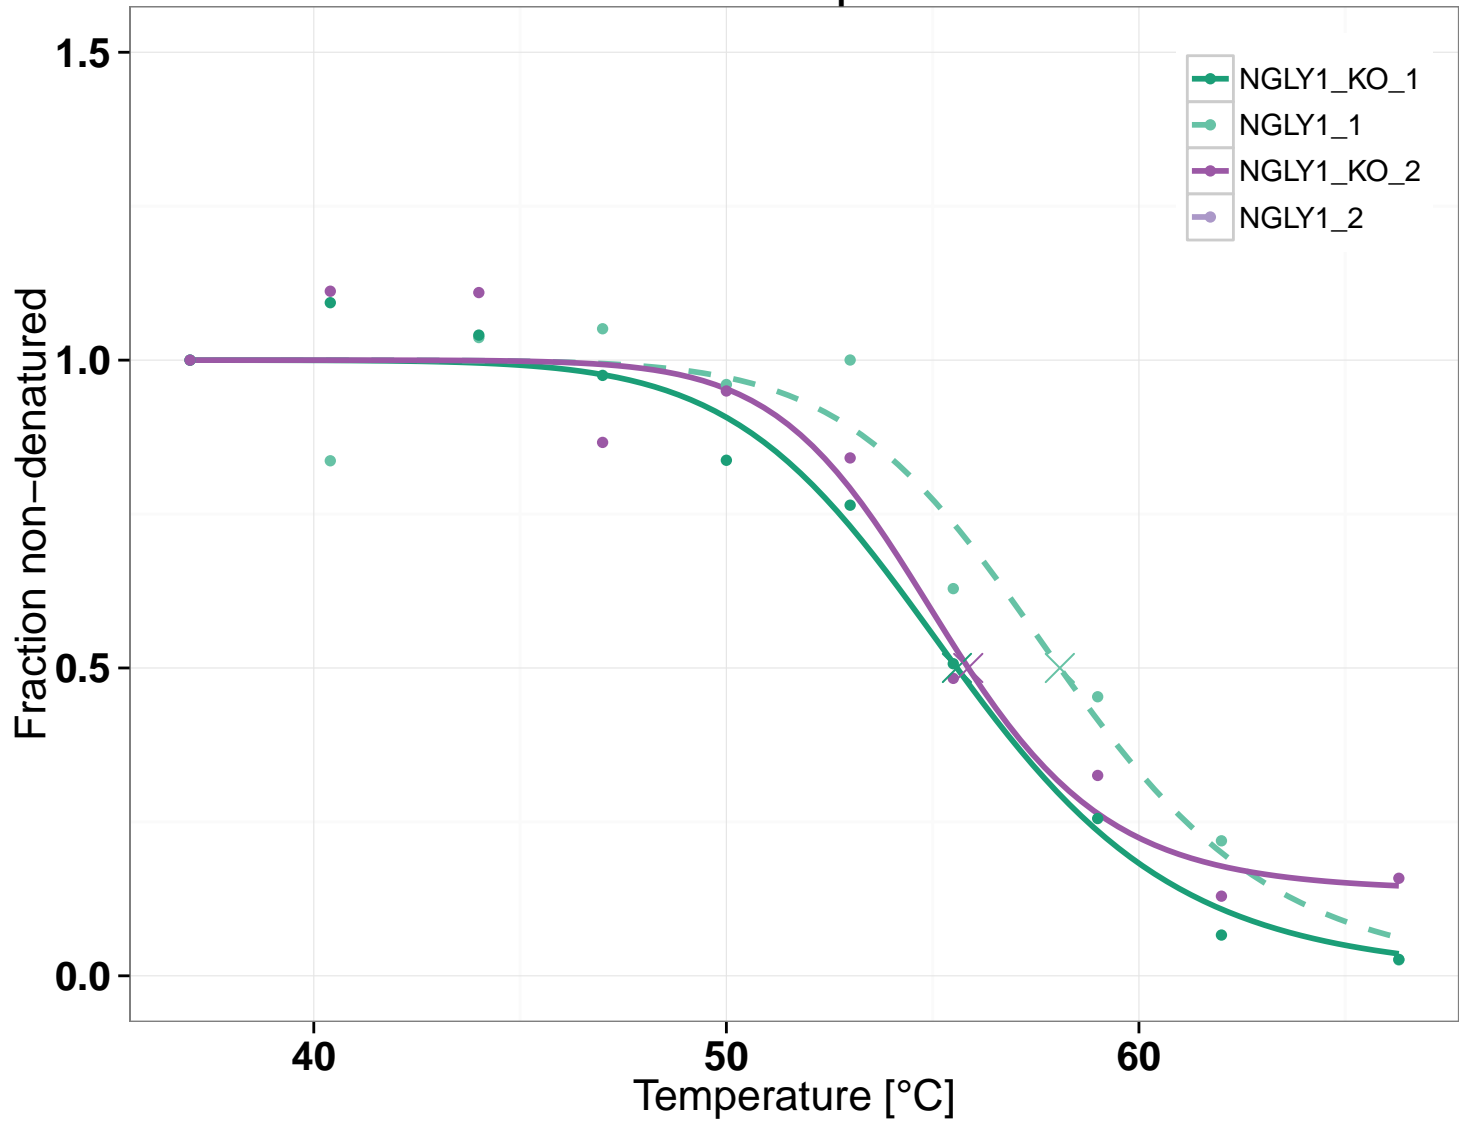

|            | meltPoint | slope  | plateau | R2   |
|------------|-----------|--------|---------|------|
| NGLY1_KO_1 | 55.59     | -0.093 | 0       | 0.99 |
| NGLY1_1    | 58.08     | -0.095 | 0       | 0.95 |
| NGLY1_KO_2 | 55.86     | -0.11  | 0.14    | 0.96 |
| NGLY1_2    | -         | -      | -       | -    |

Supplement: Supplementary file 5656 [file 1]

# IPI00020632.4|ASS1

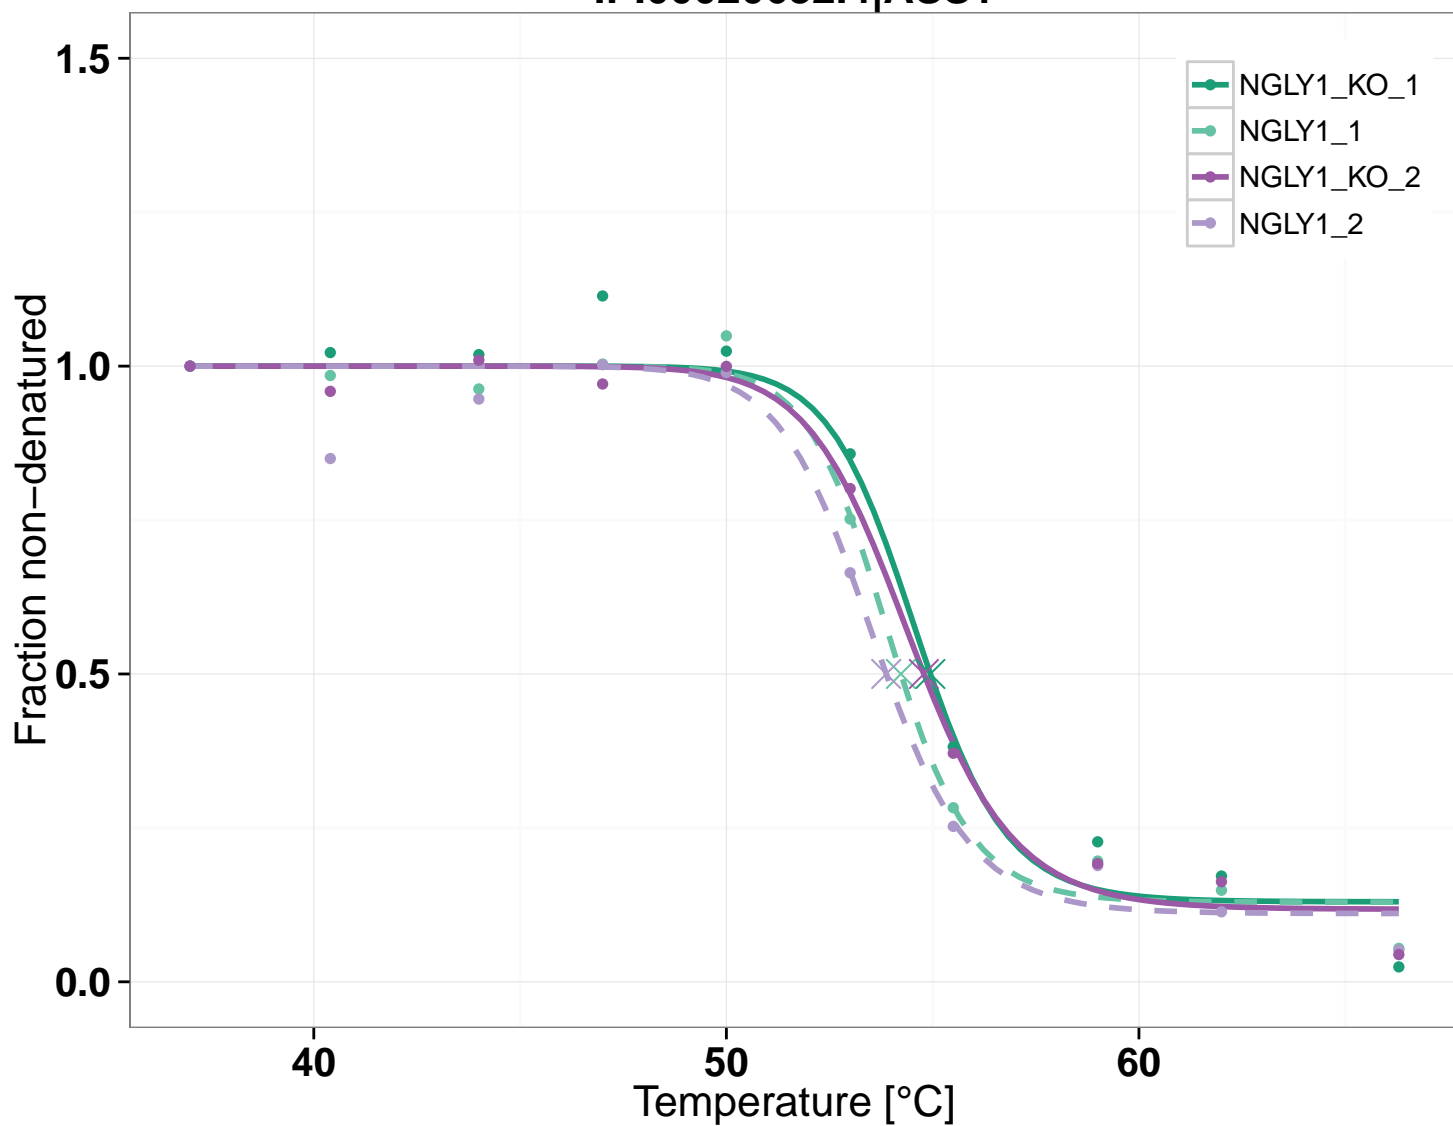

|            | meltPoint | slope | plateau | R2   |
|------------|-----------|-------|---------|------|
| NGLY1_KO_1 | 54.94     | -0.2  | 0.13    | 0.98 |
| NGLY1_1    | 54.23     | -0.22 | 0.13    | 0.99 |
| NGLY1_KO_2 | 54.79     | -0.18 | 0.12    | 0.99 |
| NGLY1_2    | 53.88     | -0.19 | 0.11    | 0.98 |

Supplement: Supplementary file 5657 [file 1]

IPI00795654.4|ATF7IP

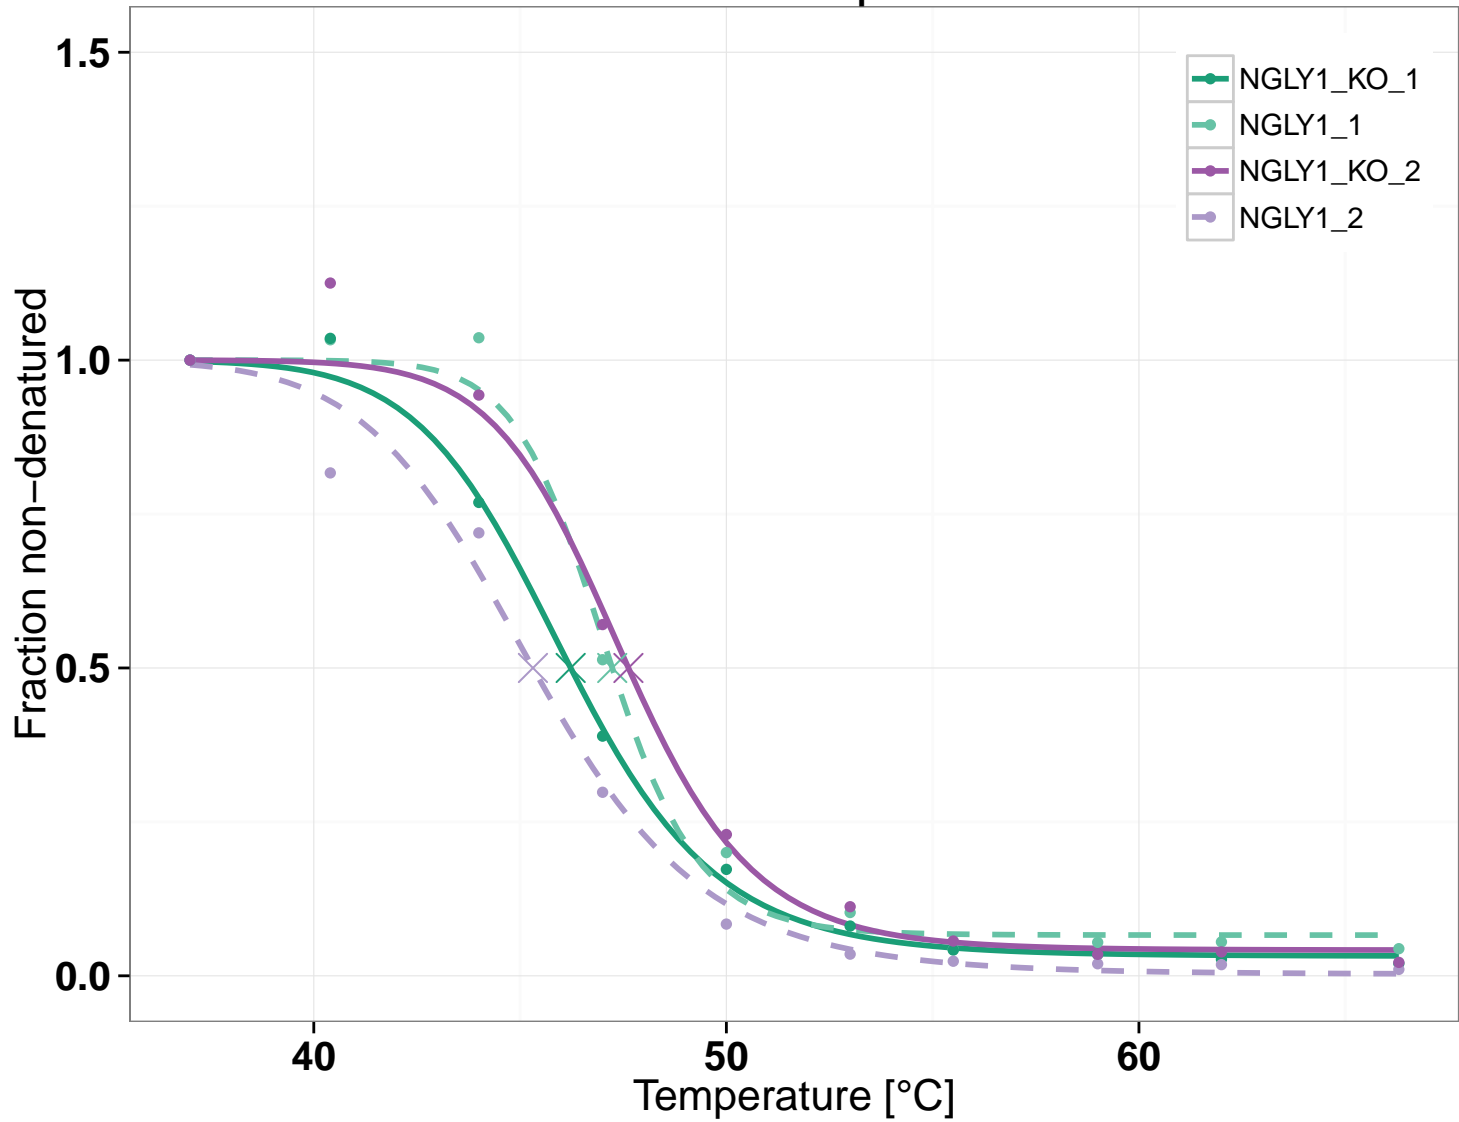

|            | meltPoint | slope | plateau | R2   |
|------------|-----------|-------|---------|------|
| NGLY1_KO_1 | 46.23     | -0.13 | 0.03    | 1    |
| NGLY1_1    | 47.23     | -0.21 | 0.07    | 0.99 |
| NGLY1_KO_2 | 47.63     | -0.15 | 0.04    | 0.99 |
| NGLY1_2    | 45.31     | -0.12 | 0       | 0.99 |

Supplement: Supplementary file 5658 [file 1]

# IPI00018402.1|TBCE

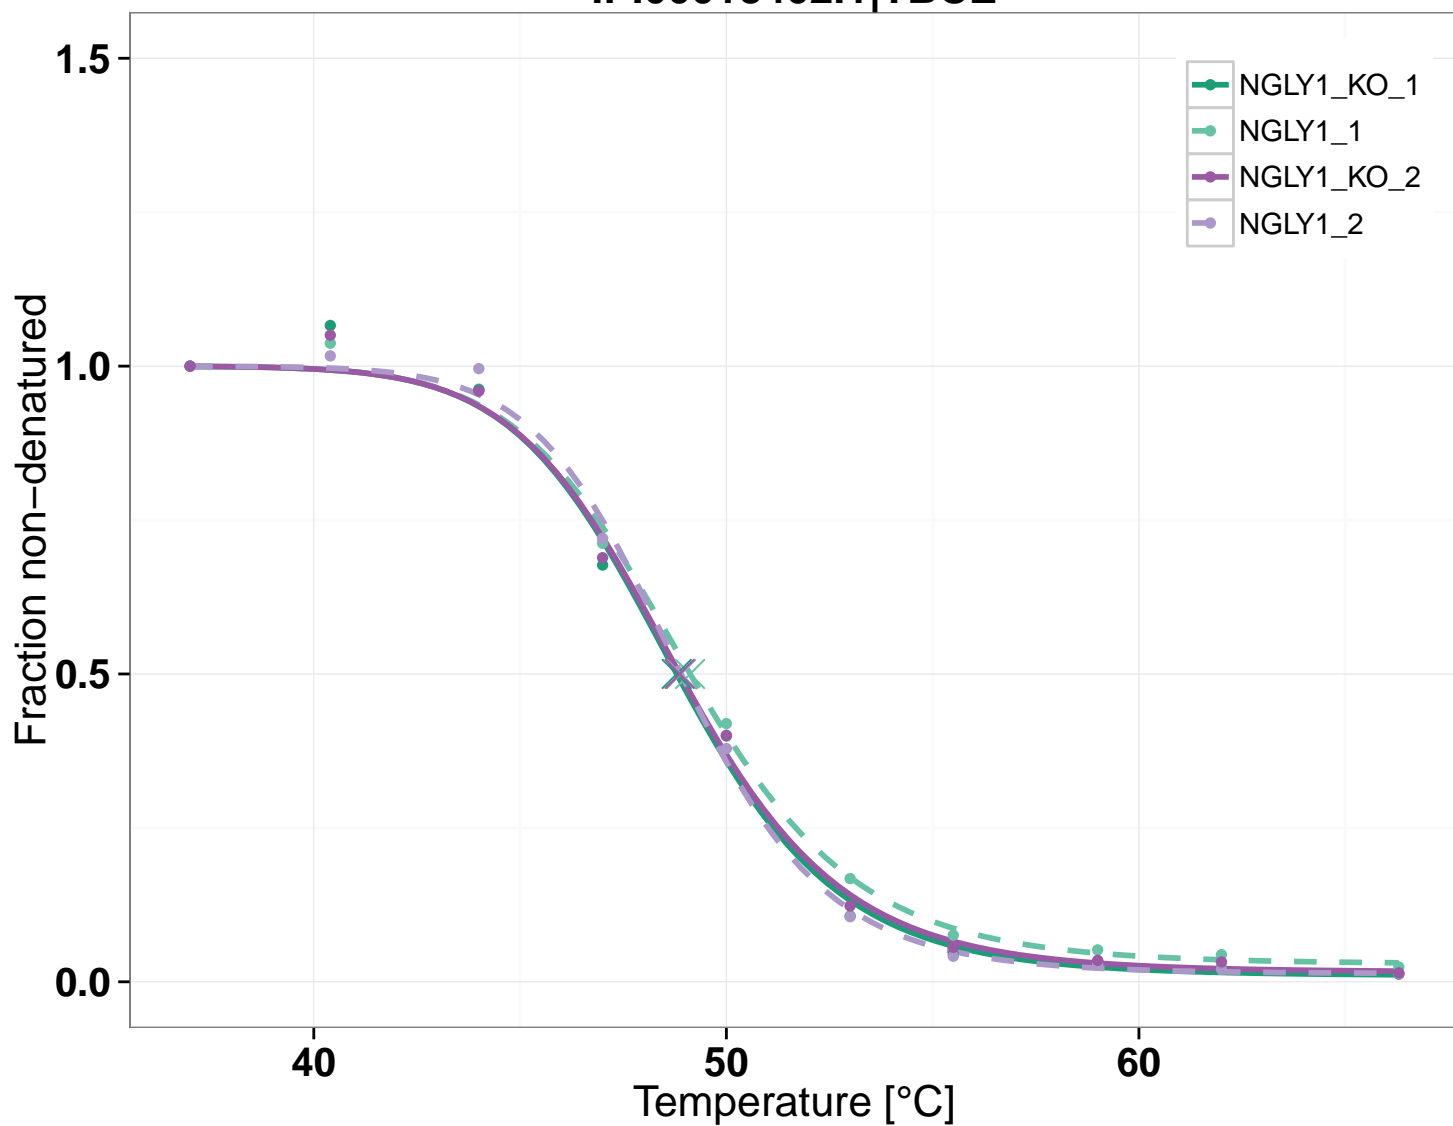

|            | meltPoint | slope | plateau | R2   |
|------------|-----------|-------|---------|------|
| NGLY1_KO_1 | 48.8      | -0.13 | 0.01    | 0.99 |
| NGLY1_1    | 49.12     | -0.12 | 0.03    | 1    |
| NGLY1_KO_2 | 48.87     | -0.12 | 0.02    | 1    |
| NGLY1_2    | 48.9      | -0.14 | 0.01    | 1    |

Supplement: Supplementary file 5659 [file 1]

IPI00293427.1|ZNRF2

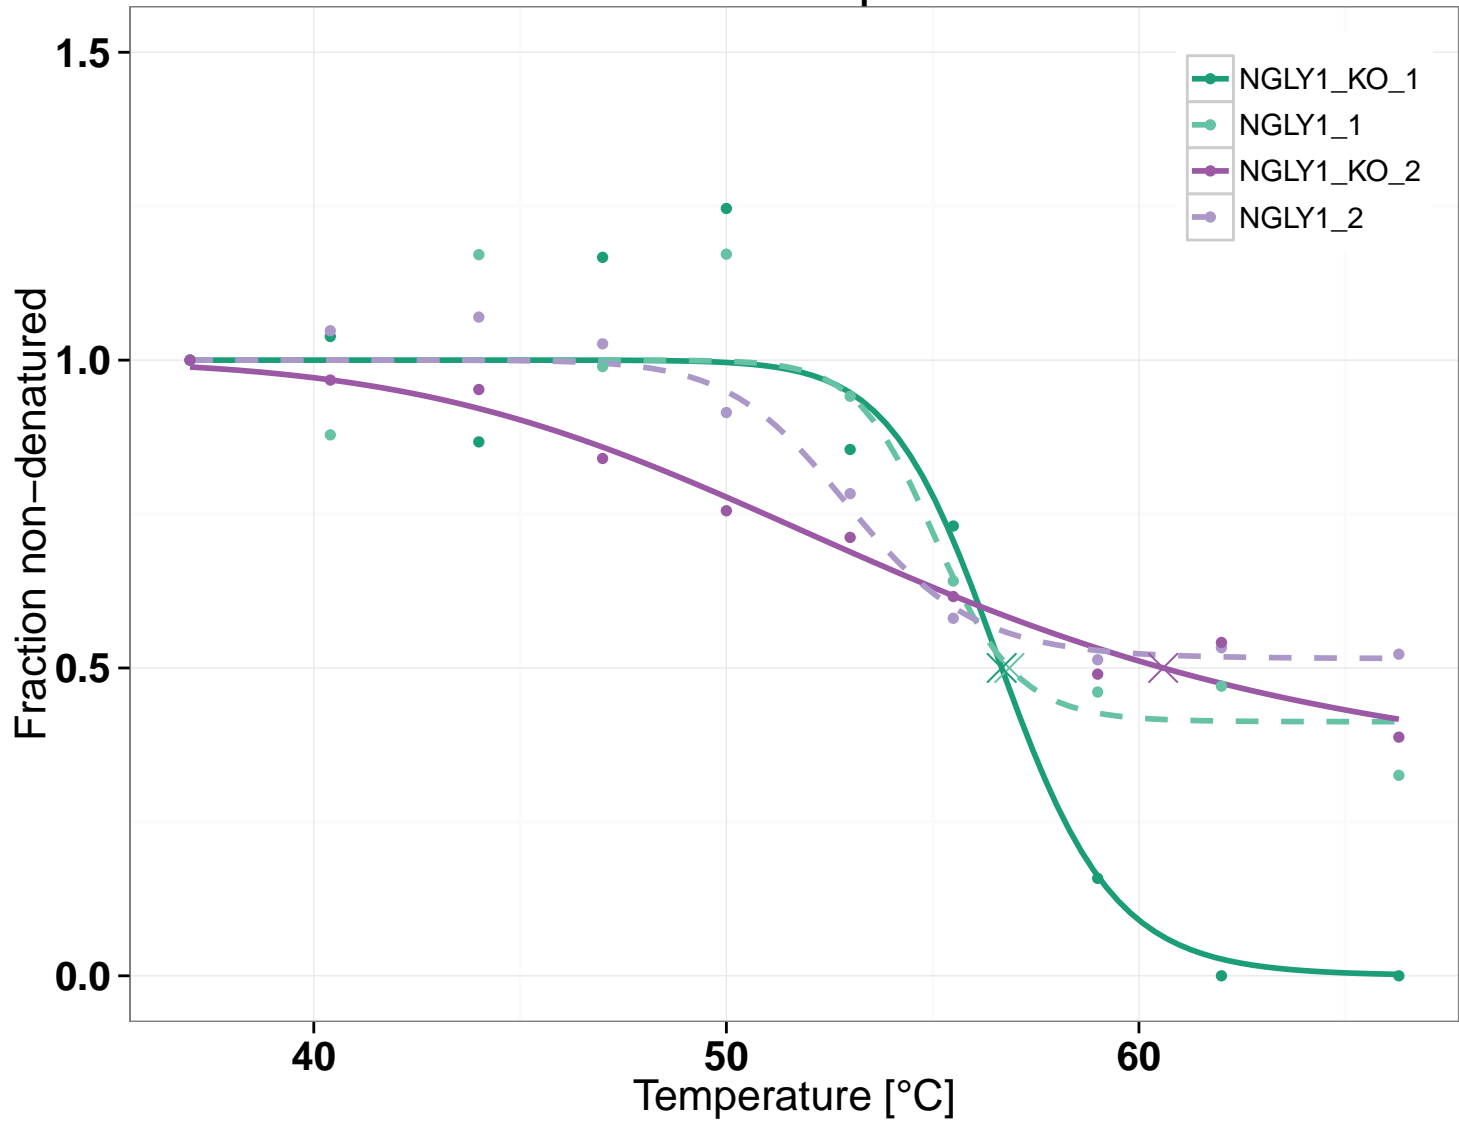

|            | meltPoint | slope  | plateau | R2   |
|------------|-----------|--------|---------|------|
| NGLY1_KO_1 | 56.67     | -0.18  | 0       | 0.94 |
| NGLY1_1    | 56.86     | -0.15  | 0.41    | 0.9  |
| NGLY1_KO_2 | 60.59     | -0.03  | 0.3     | 0.98 |
| NGLY1_2    | -         | -0.081 | 0.52    | 0.98 |

Supplement: Supplementary file 5660 [file 1]

# IPI00744685.3|BTD

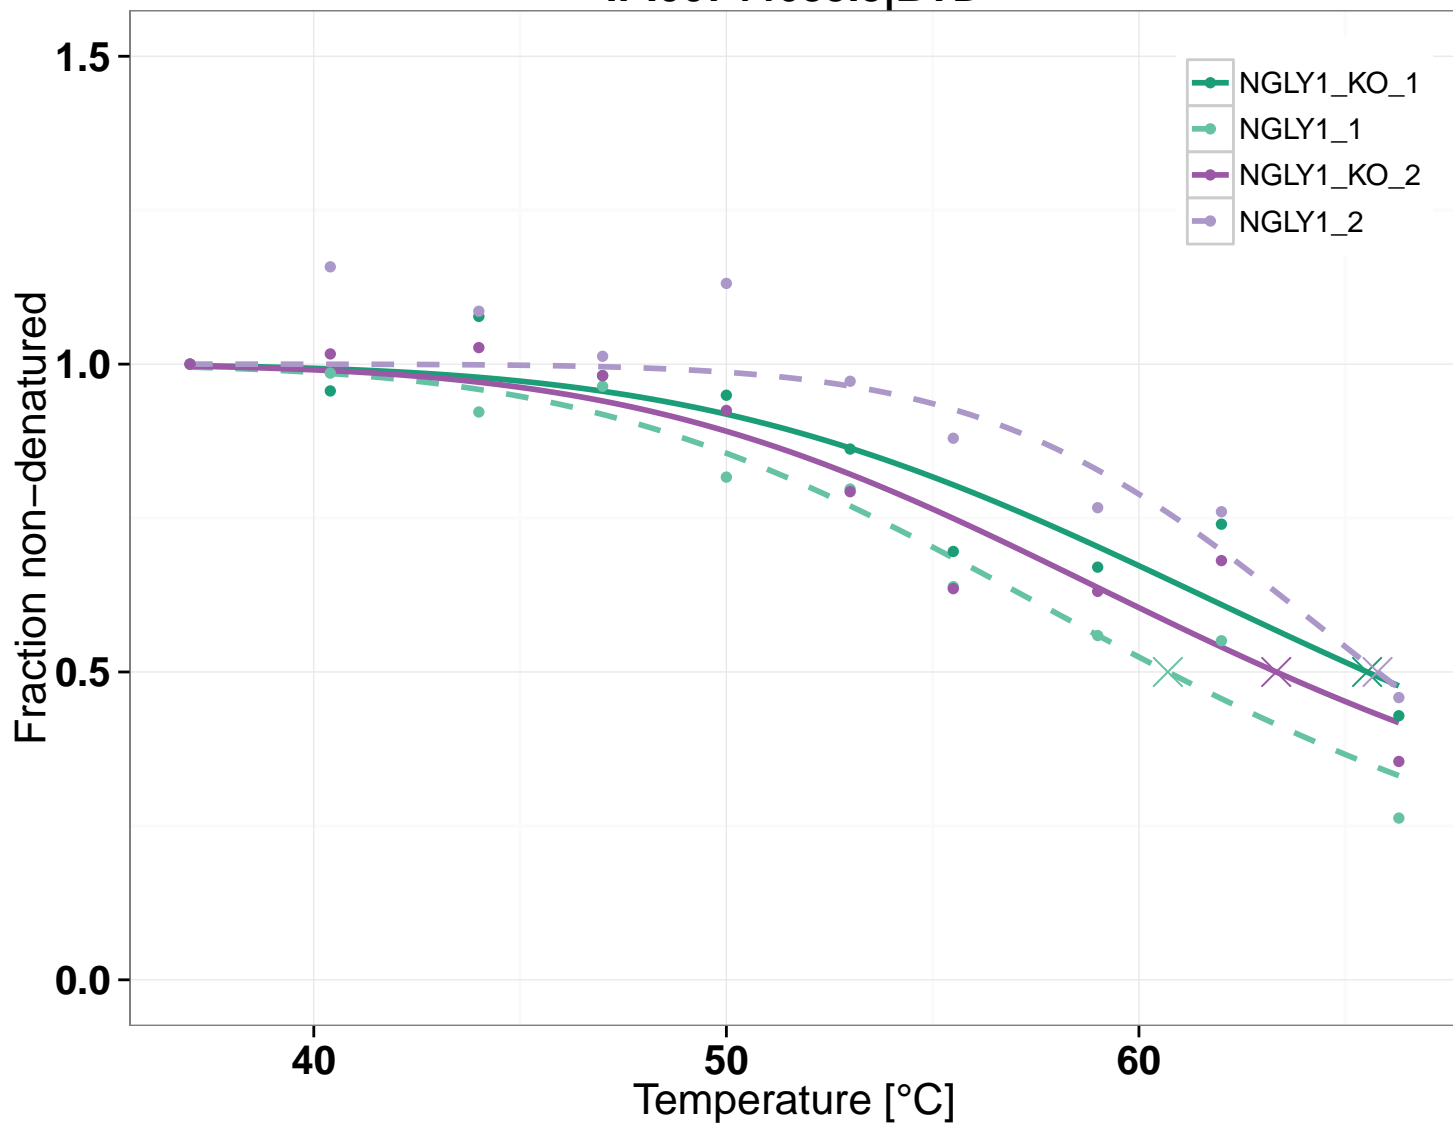

|            | meltPoint | slope  | plateau | R2   |
|------------|-----------|--------|---------|------|
| NGLY1_KO_1 | 65.53     | -0.032 | 0       | 0.87 |
| NGLY1_1    | 60.7      | -0.036 | 0       | 0.96 |
| NGLY1_KO_2 | 63.33     | -0.033 | 0.07    | 0.9  |
| NGLY1_2    | 65.78     | -0.053 | 0       | 0.84 |

Supplement: Supplementary file 5661 [file 1]

IPI00550192.2|XPNPEP3

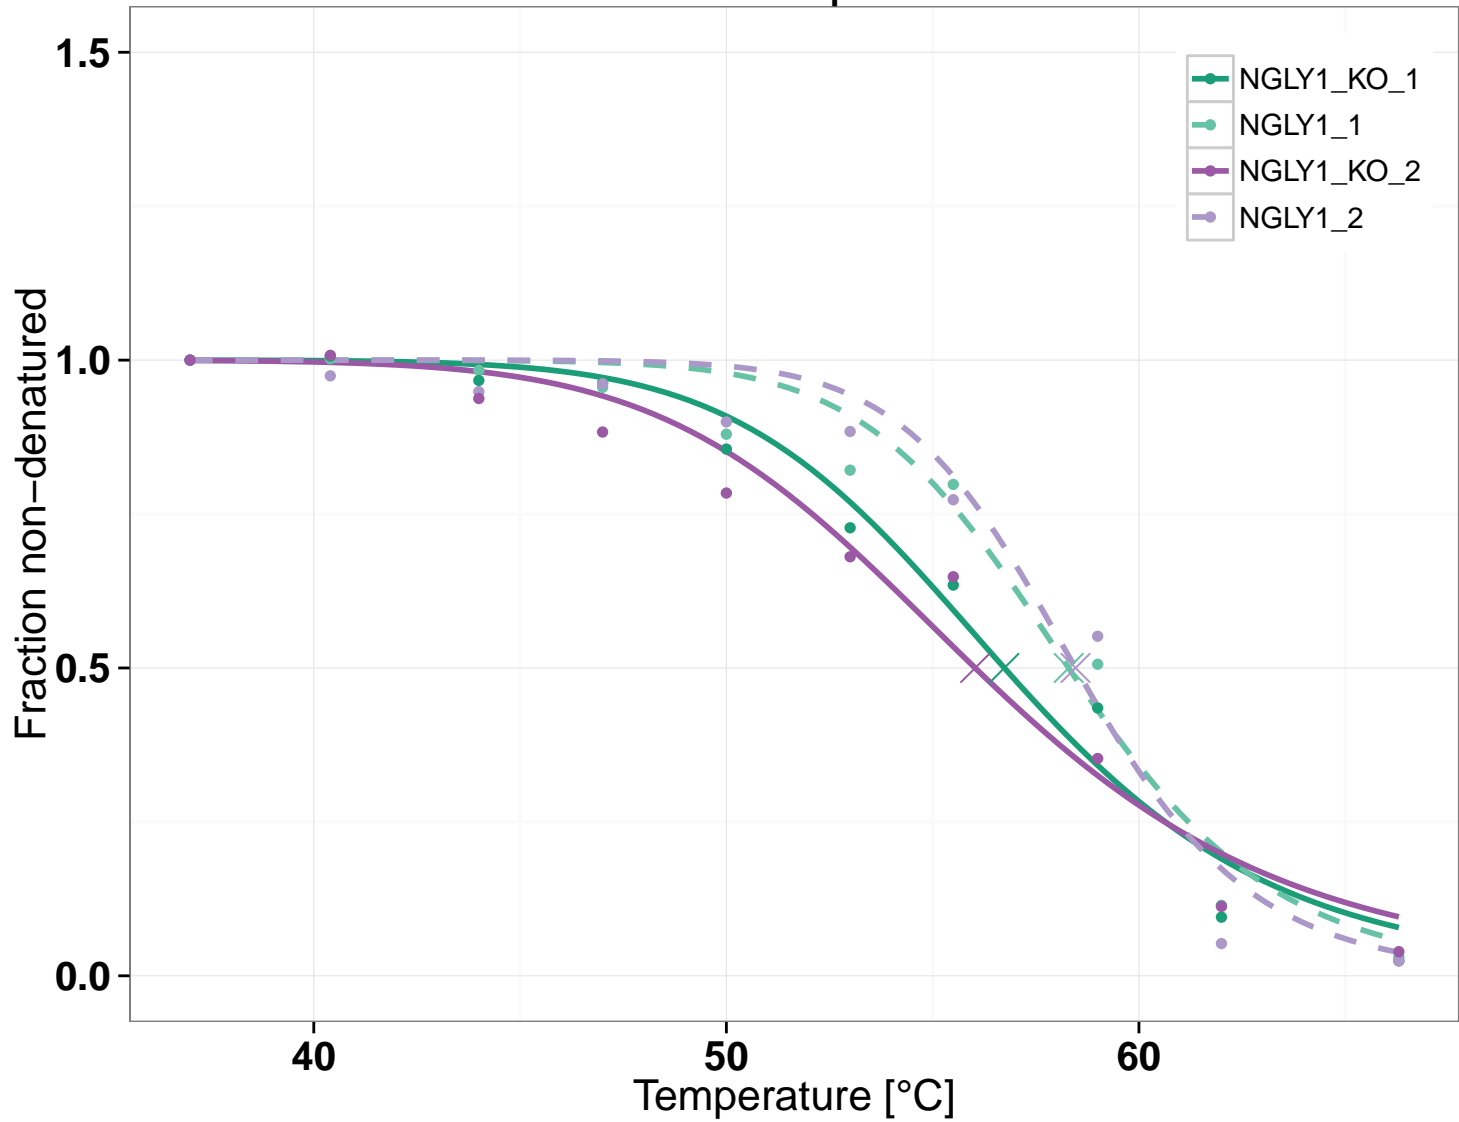

|            | meltPoint | slope  | plateau | R2   |
|------------|-----------|--------|---------|------|
| NGLY1_KO_1 | 56.74     | -0.076 | 0       | 0.98 |
| NGLY1_1    | 58.3      | -0.1   | 0       | 0.97 |
| NGLY1_KO_2 | 56.03     | -0.066 | 0       | 0.97 |
| NGLY1_2    | 58.46     | -0.12  | 0       | 0.96 |

Supplement: Supplementary file 5662 [file 1]

IPI00300501.4|E2F5

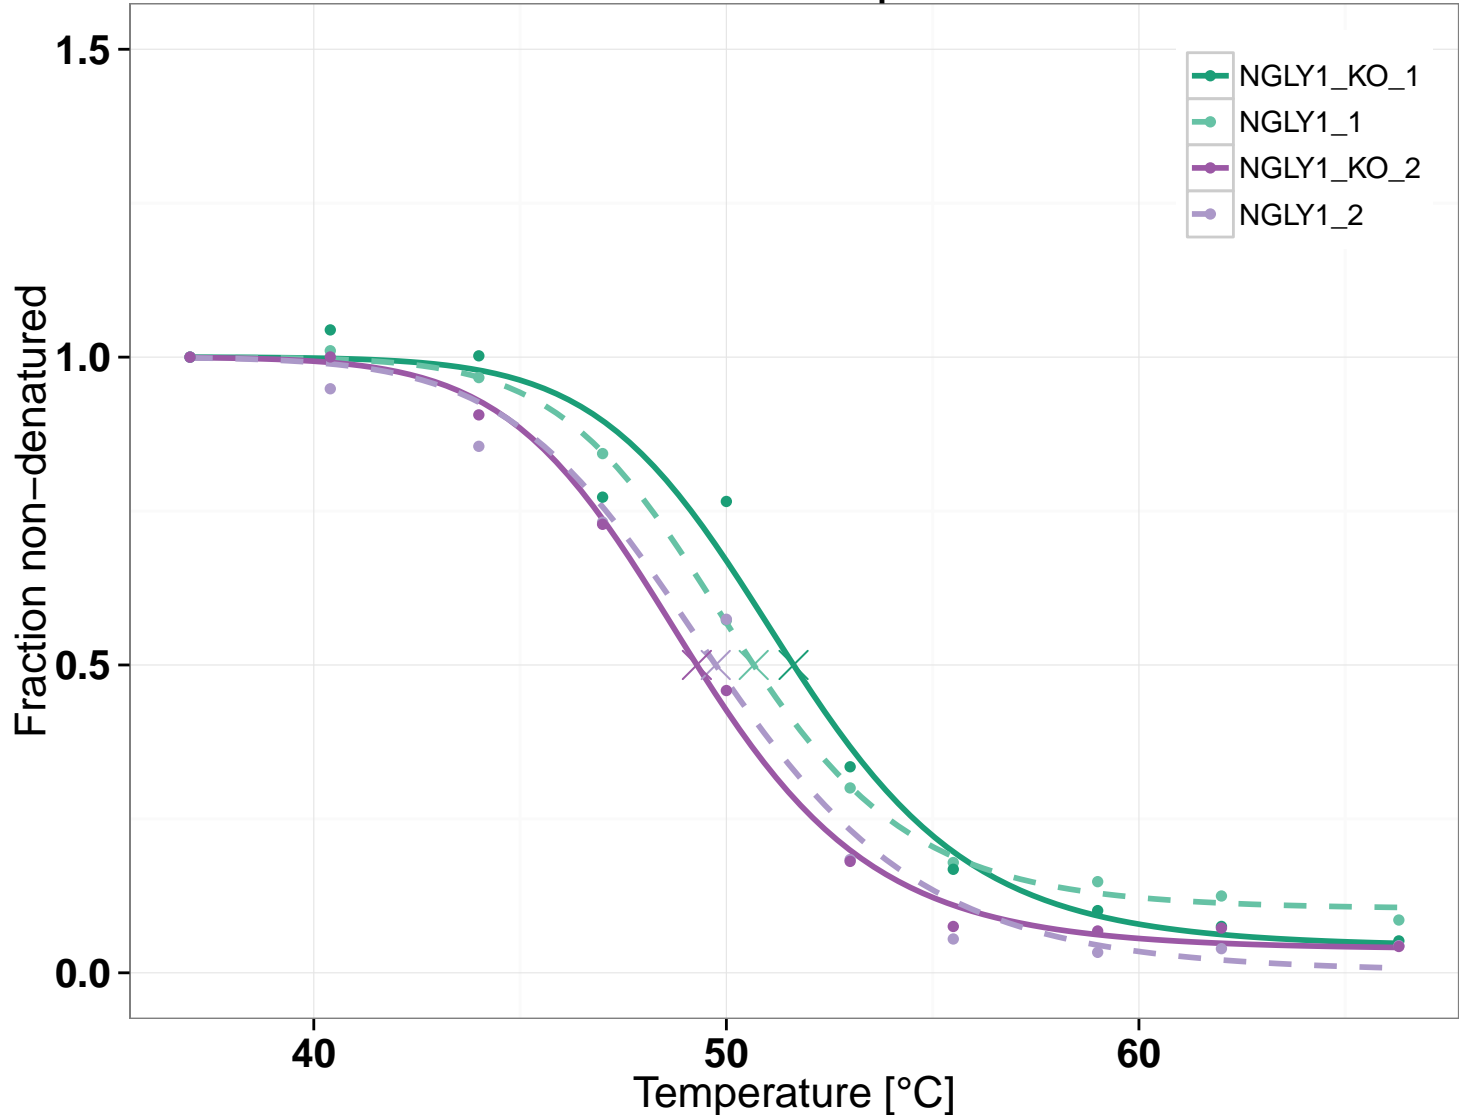

|            | meltPoint | slope  | plateau | R2   |
|------------|-----------|--------|---------|------|
| NGLY1_KO_1 | 51.63     | -0.11  | 0.04    | 0.98 |
| NGLY1_1    | 50.66     | -0.11  | 0.1     | 1    |
| NGLY1_KO_2 | 49.29     | -0.11  | 0.04    | 1    |
| NGLY1_2    | 49.74     | -0.099 | 0       | 0.98 |

Supplement: Supplementary file 5663 [file 1]

# IPI00790739.1|ACO2

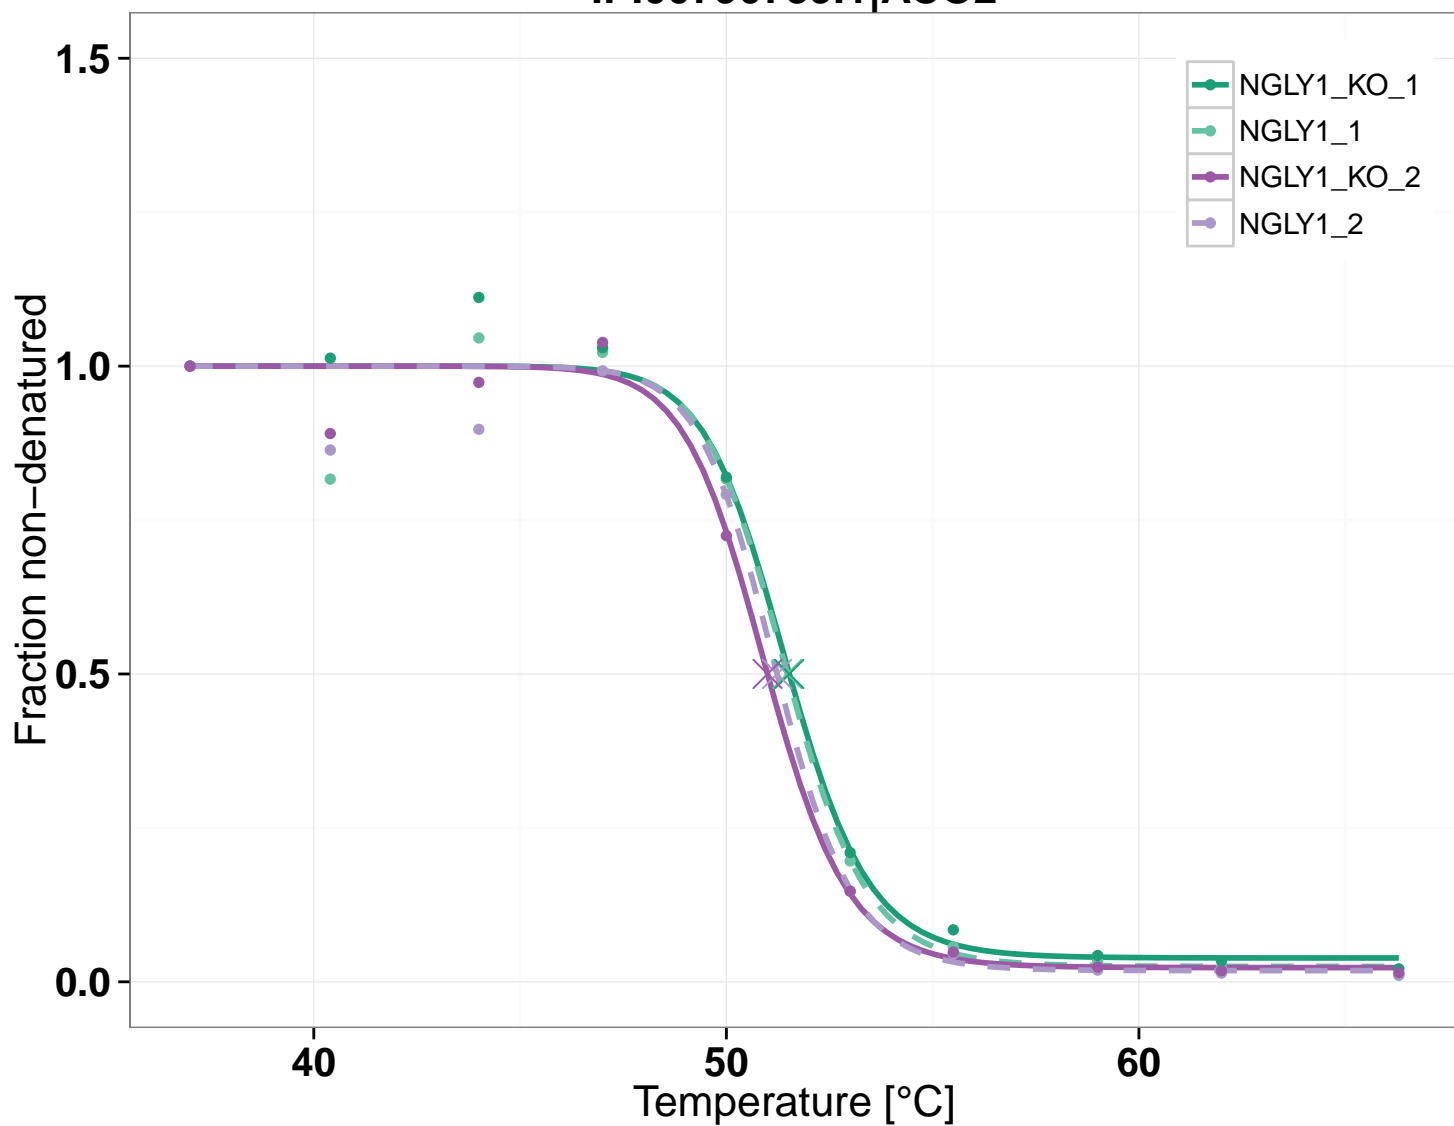

|            | meltPoint | slope | plateau | R2   |
|------------|-----------|-------|---------|------|
| NGLY1_KO_1 | 51.53     | -0.24 | 0.04    | 0.99 |
| NGLY1_1    | 51.48     | -0.25 | 0.03    | 0.98 |
| NGLY1_KO_2 | 51        | -0.24 | 0.02    | 0.99 |
| NGLY1_2    | 51.23     | -0.26 | 0.02    | 0.98 |

Supplement: Supplementary file 5664 [file 1]

# IPI00165651.1|ERGIC2

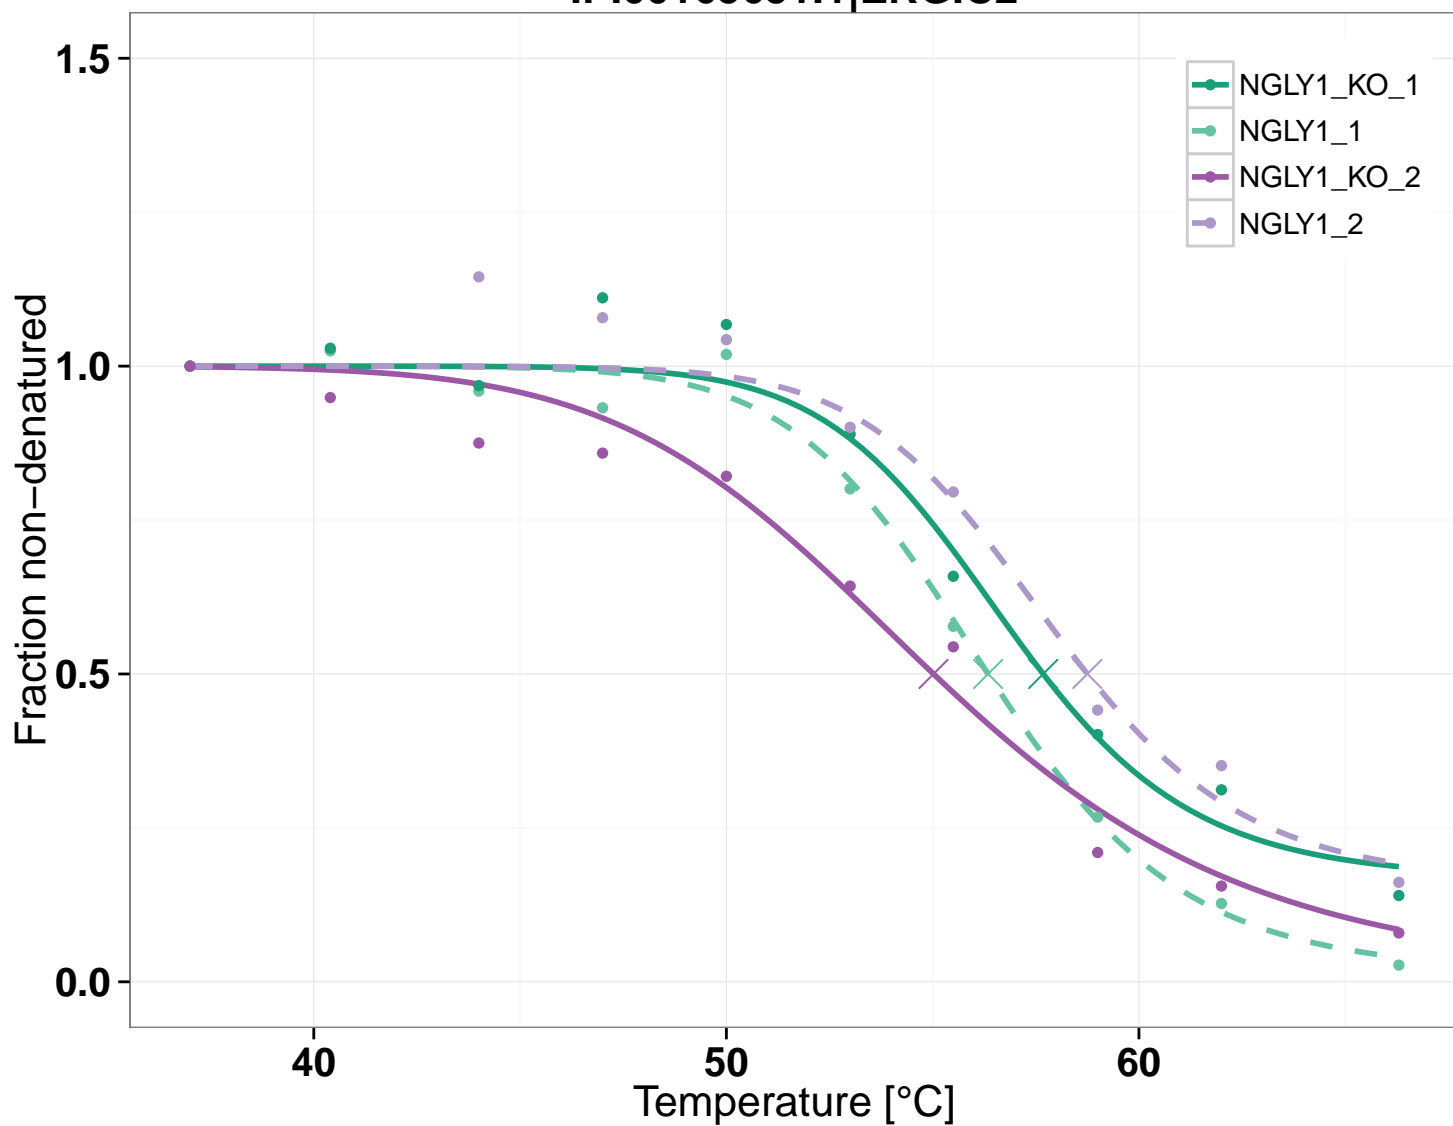

|            | meltPoint | slope  | plateau | R2   |
|------------|-----------|--------|---------|------|
| NGLY1_KO_1 | 57.68     | -0.094 | 0.17    | 0.97 |
| NGLY1_1    | 56.34     | -0.1   | 0.01    | 0.99 |
| NGLY1_KO_2 | 55.02     | -0.065 | 0       | 0.98 |
| NGLY1_2    | 58.75     | -0.091 | 0.16    | 0.8  |

Supplement: Supplementary file 5665 [file 1]

IPI00028491.4|AGPAT5

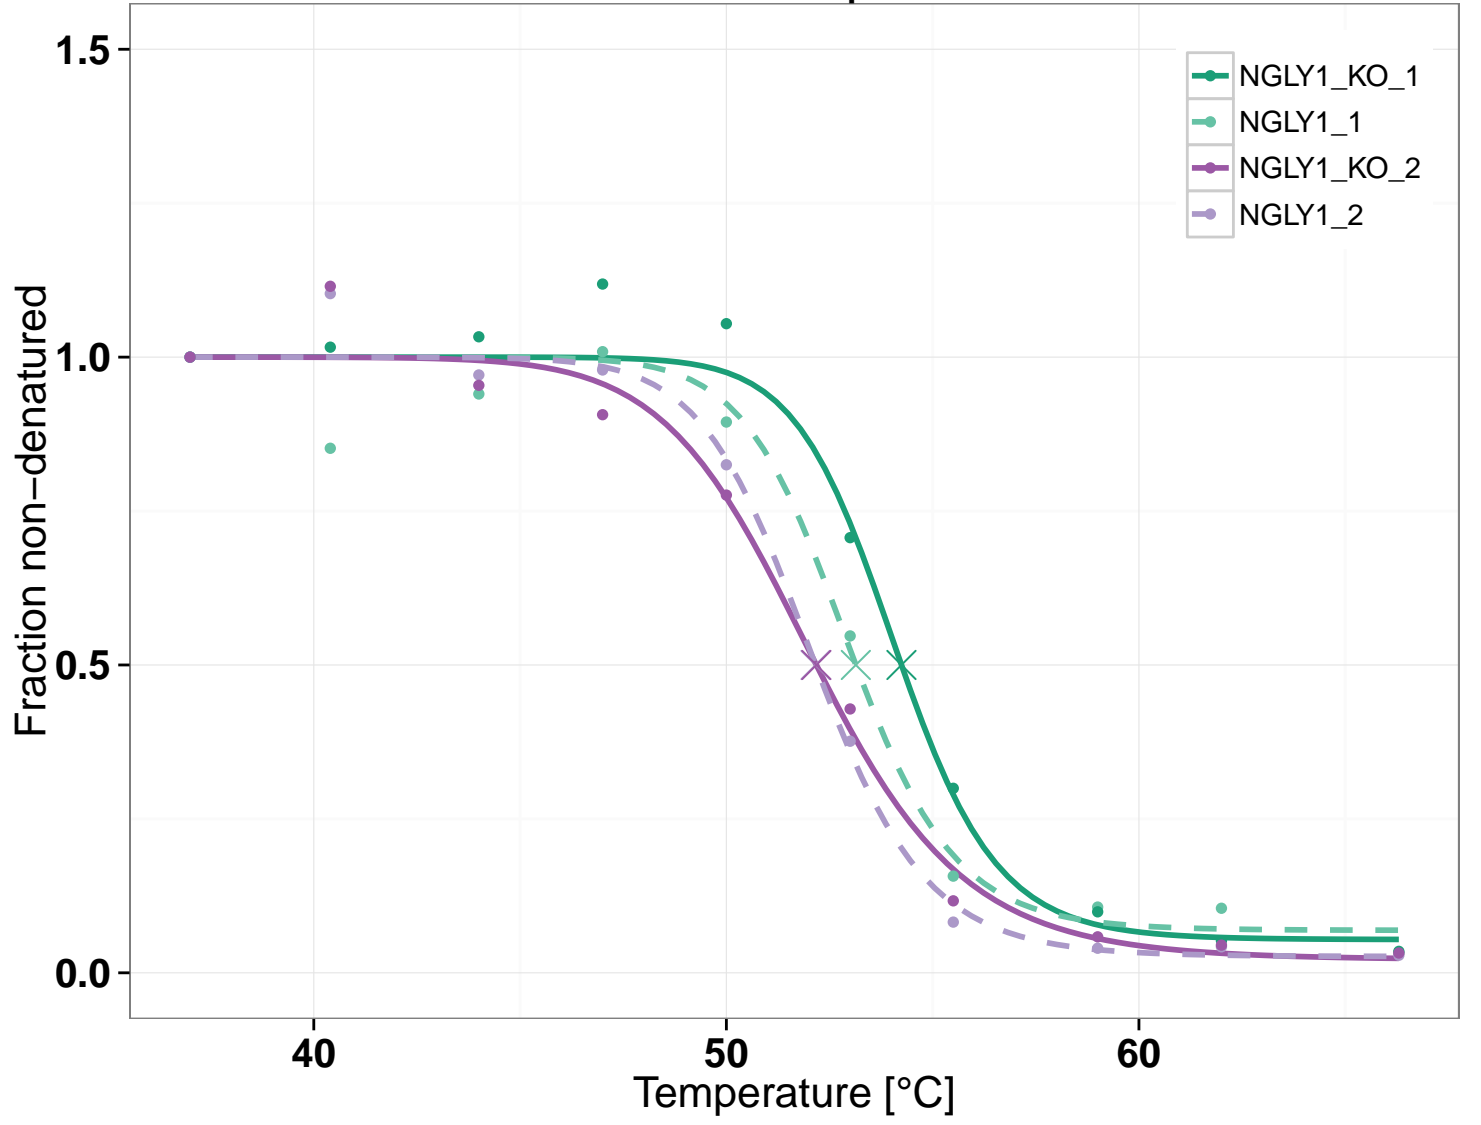

|            | meltPoint | slope | plateau | R2   |
|------------|-----------|-------|---------|------|
| NGLY1_KO_1 | 54.24     | -0.19 | 0.05    | 0.99 |
| NGLY1_1    | 53.14     | -0.18 | 0.07    | 0.98 |
| NGLY1_KO_2 | 52.18     | -0.13 | 0.02    | 0.99 |
| NGLY1_2    | 52.16     | -0.18 | 0.03    | 0.99 |

Supplement: Supplementary file 5666 [file 1]

# IPI00478003.1|A2M

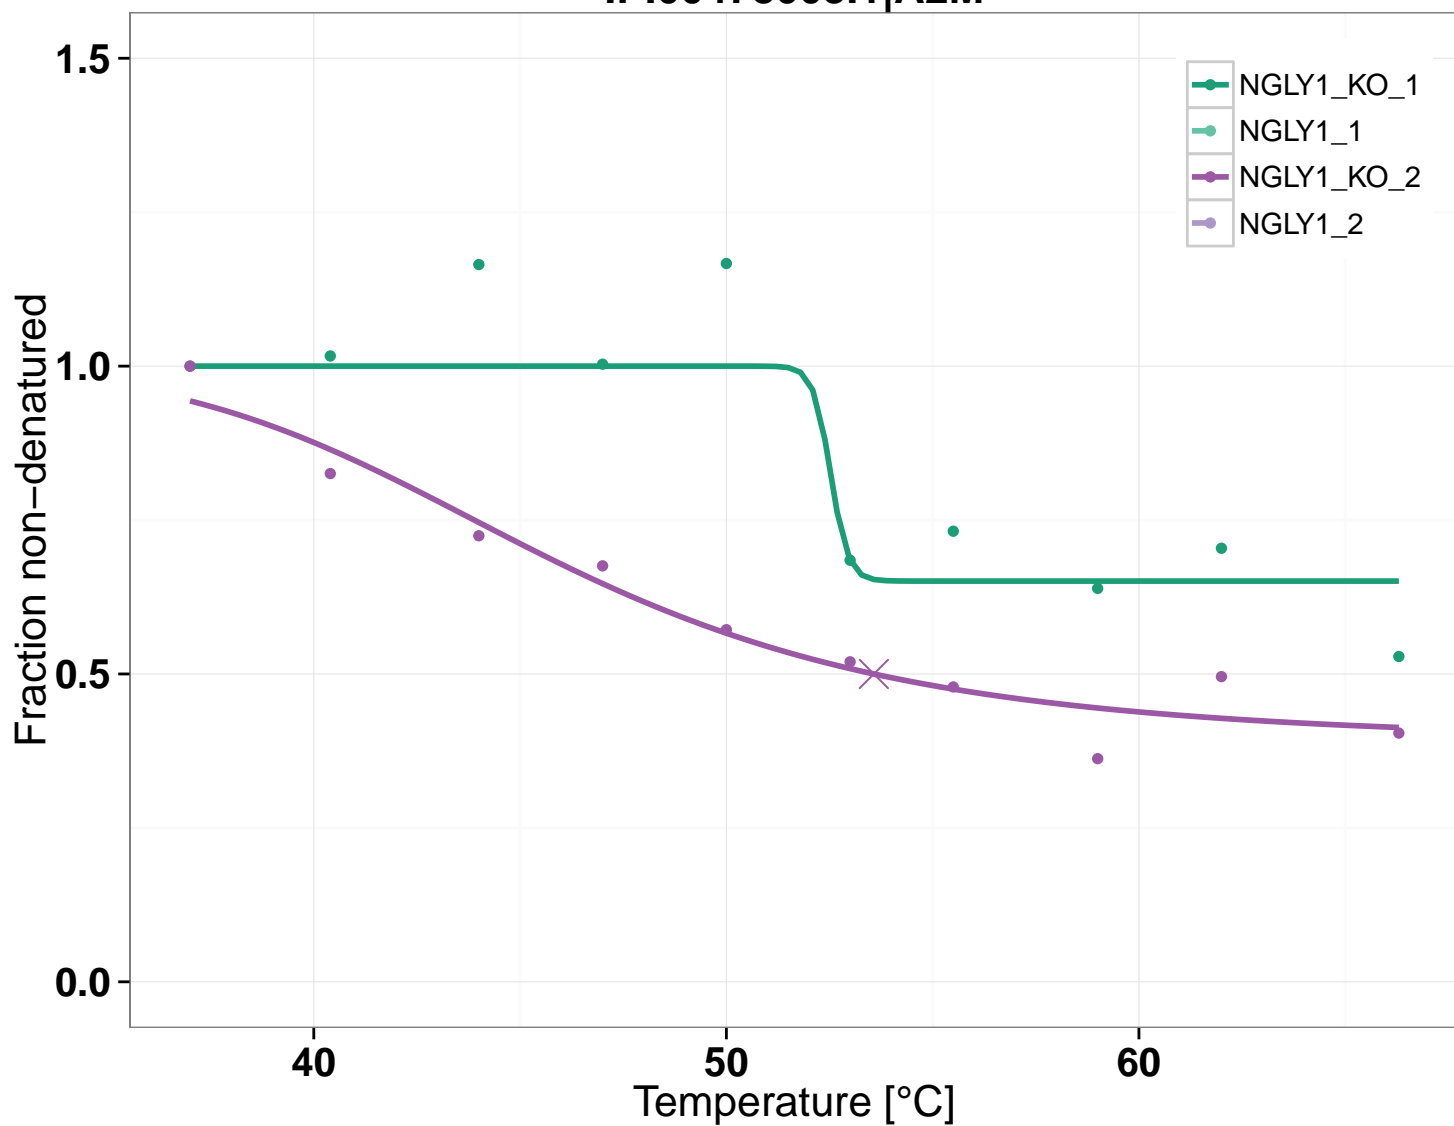

|            | meltPoint | slope  | plateau | R2   |
|------------|-----------|--------|---------|------|
| NGLY1_KO_1 | —         | -0.42  | 0.65    | 0.83 |
| NGLY1_1    | —         | —      | —       | —    |
| NGLY1_KO_2 | 53.57     | -0.035 | 0.39    | 0.95 |
| NGLY1_2    | —         | —      | —       | —    |

Supplement: Supplementary file 5667 [file 1]

IPI00152769.4|TRPC4AP

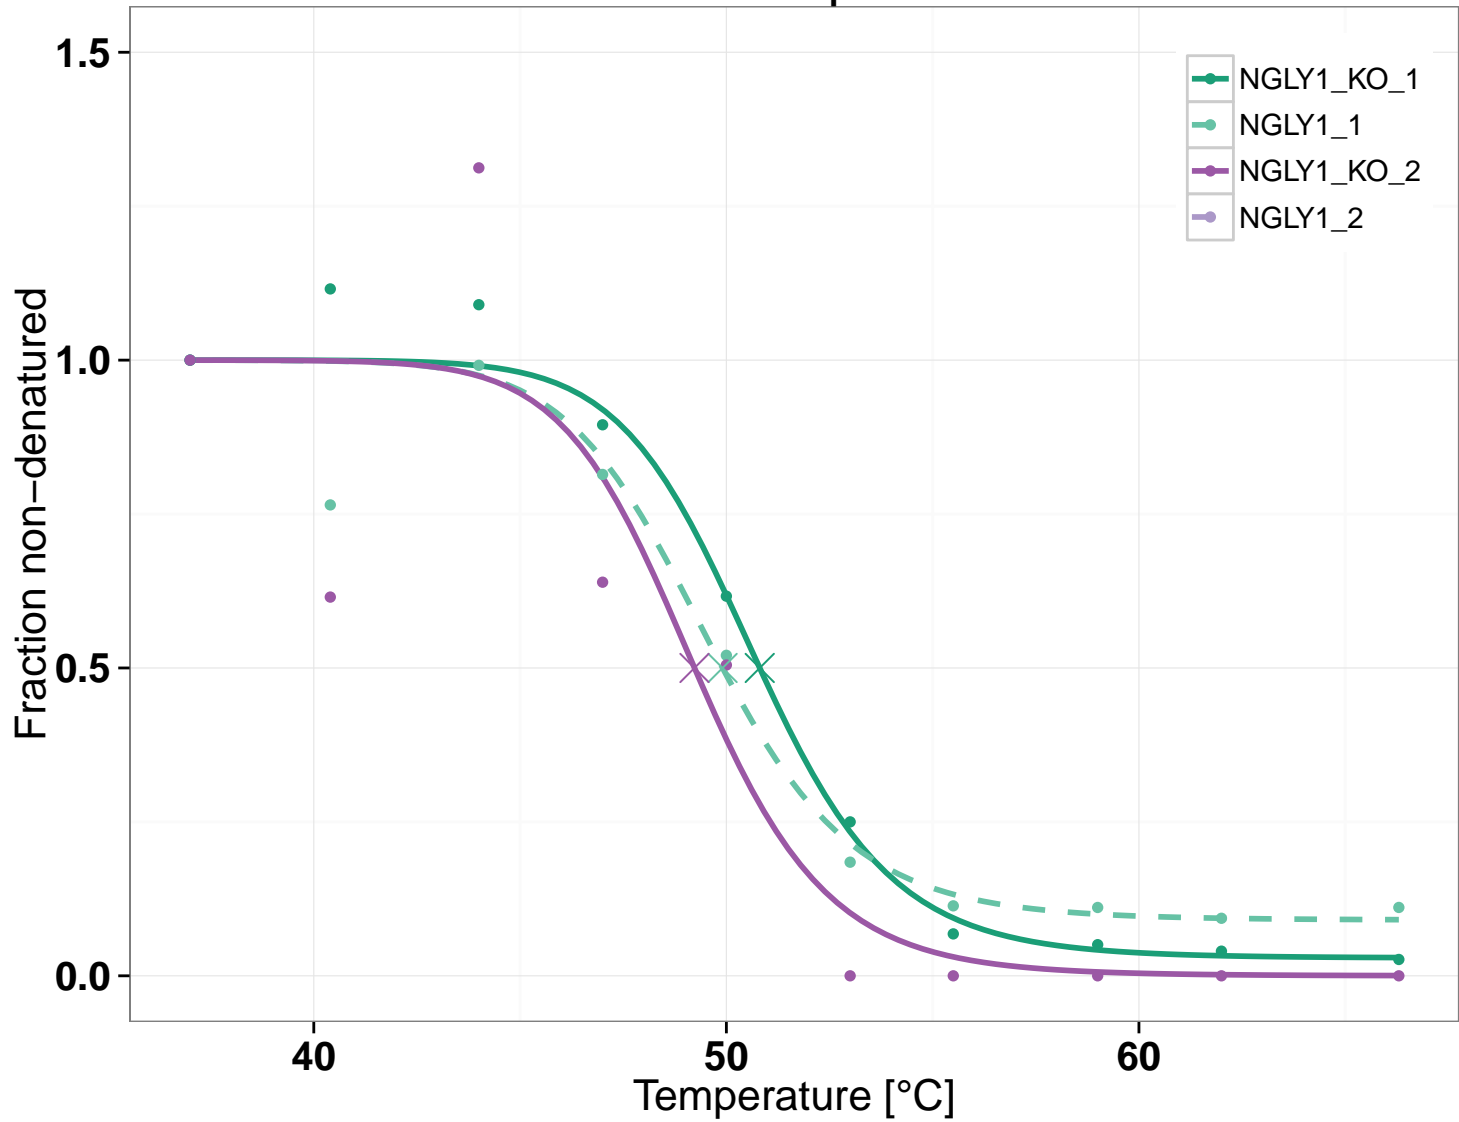

|            | meltPoint | slope | plateau | R2   |
|------------|-----------|-------|---------|------|
| NGLY1_KO_1 | 50.81     | -0.15 | 0.03    | 0.99 |
| NGLY1_1    | 49.91     | -0.13 | 0.09    | 0.96 |
| NGLY1_KO_2 | 49.23     | -0.16 | 0       | 0.85 |
| NGLY1_2    | -         | -     | -       | -    |

Supplement: Supplementary file 5668 [file 1]

IPI00419531.2|CPSF2

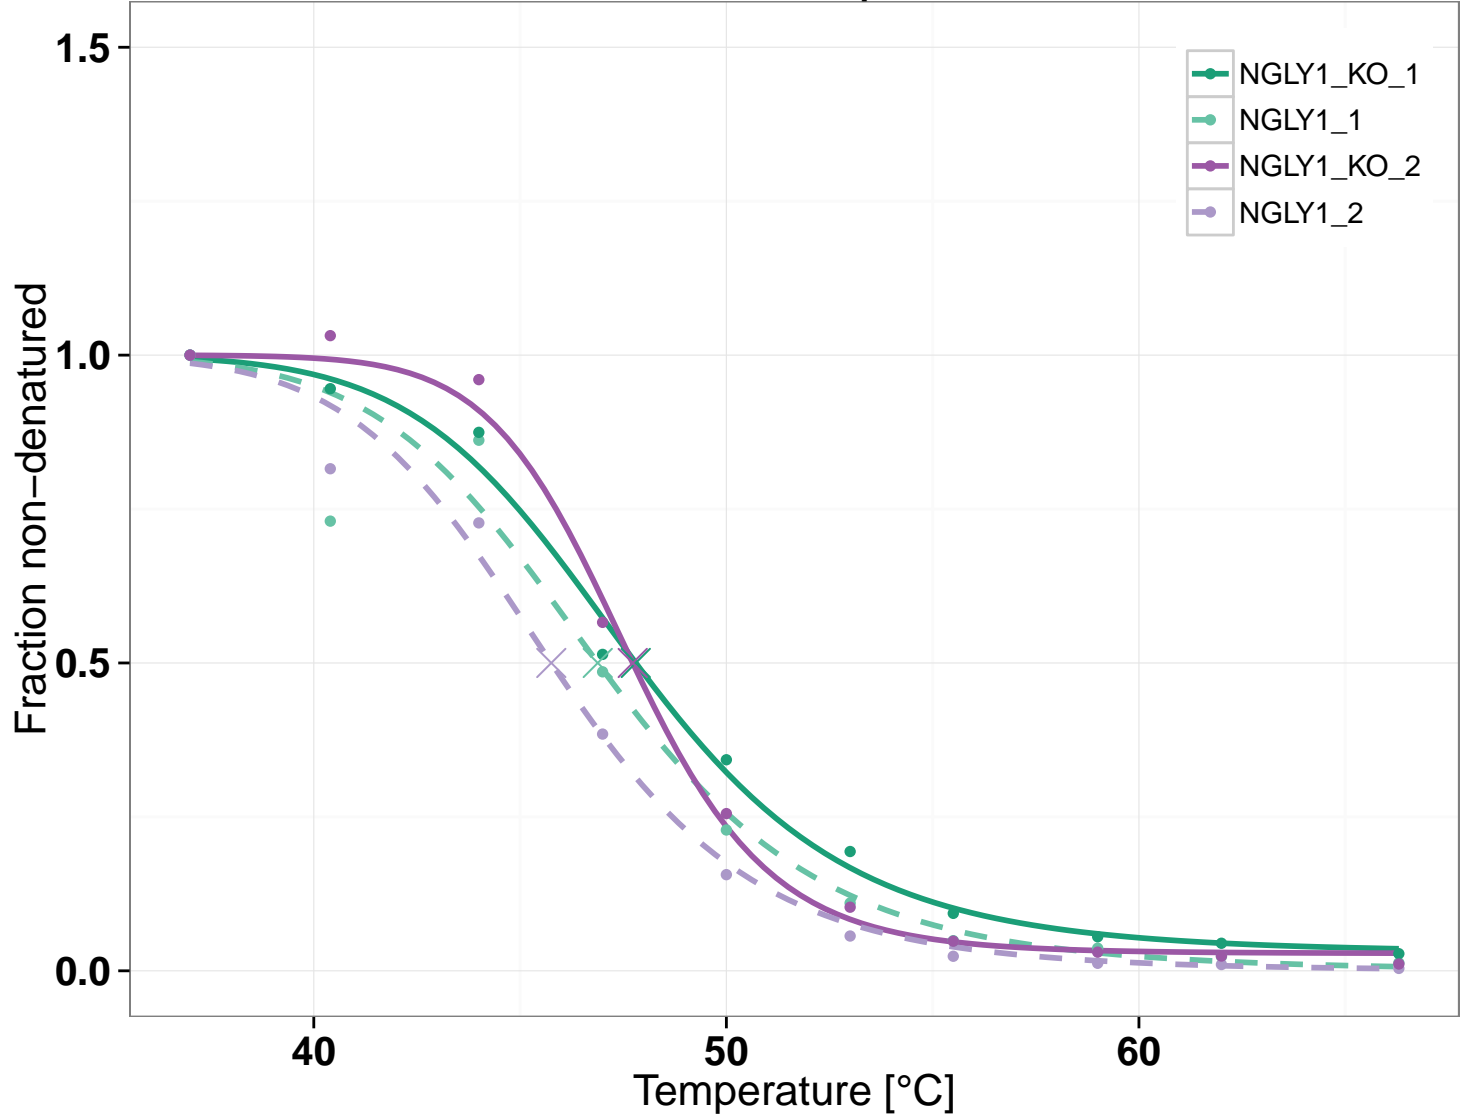

|            | meltPoint | slope  | plateau | R2   |
|------------|-----------|--------|---------|------|
| NGLY1_KO_1 | 47.8      | -0.092 | 0.03    | 0.99 |
| NGLY1_1    | 46.88     | -0.092 | 0       | 0.96 |
| NGLY1_KO_2 | 47.73     | -0.14  | 0.03    | 1    |
| NGLY1_2    | 45.76     | -0.1   | 0       | 0.99 |

Supplement: Supplementary file 5669 [file 1]

IPI00009805.3|PSMC3IP

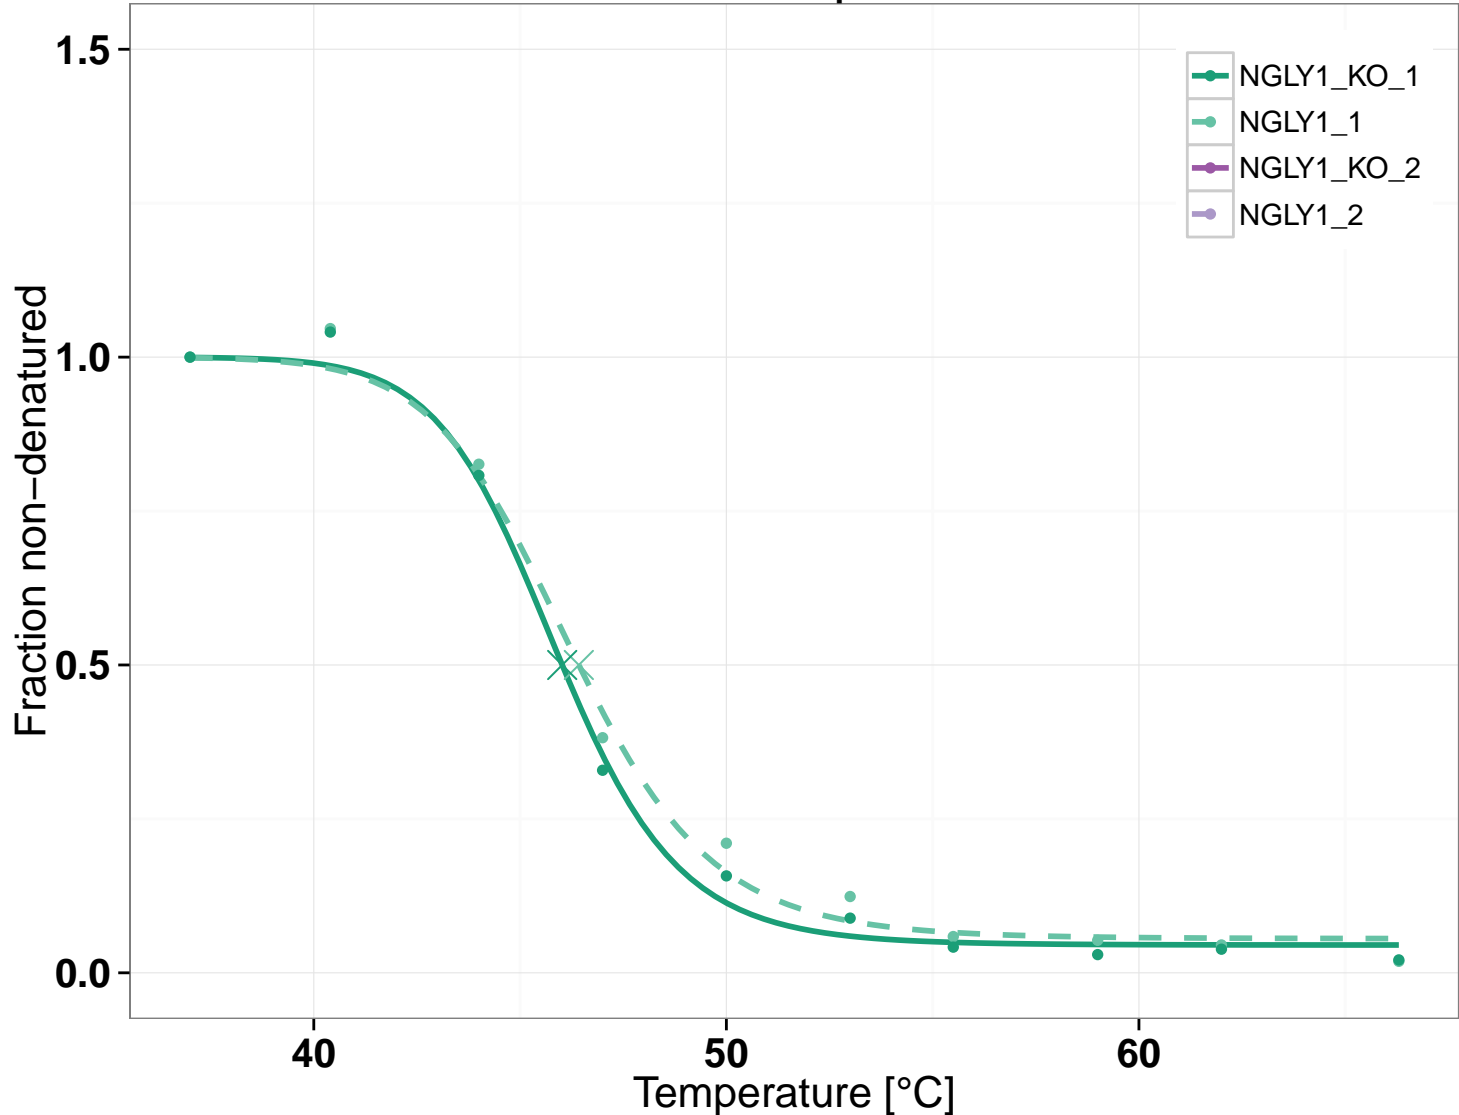

|            | meltPoint | slope | plateau | R2   |
|------------|-----------|-------|---------|------|
| NGLY1_KO_1 | 46.02     | -0.16 | 0.05    | 1    |
| NGLY1_1    | 46.42     | -0.14 | 0.06    | 0.99 |
| NGLY1_KO_2 | -         | -     | -       | -    |
| NGLY1_2    | -         | -     | -       | -    |

Supplement: Supplementary file 5670 [file 1]

# IPI00386642.2|MEF2B

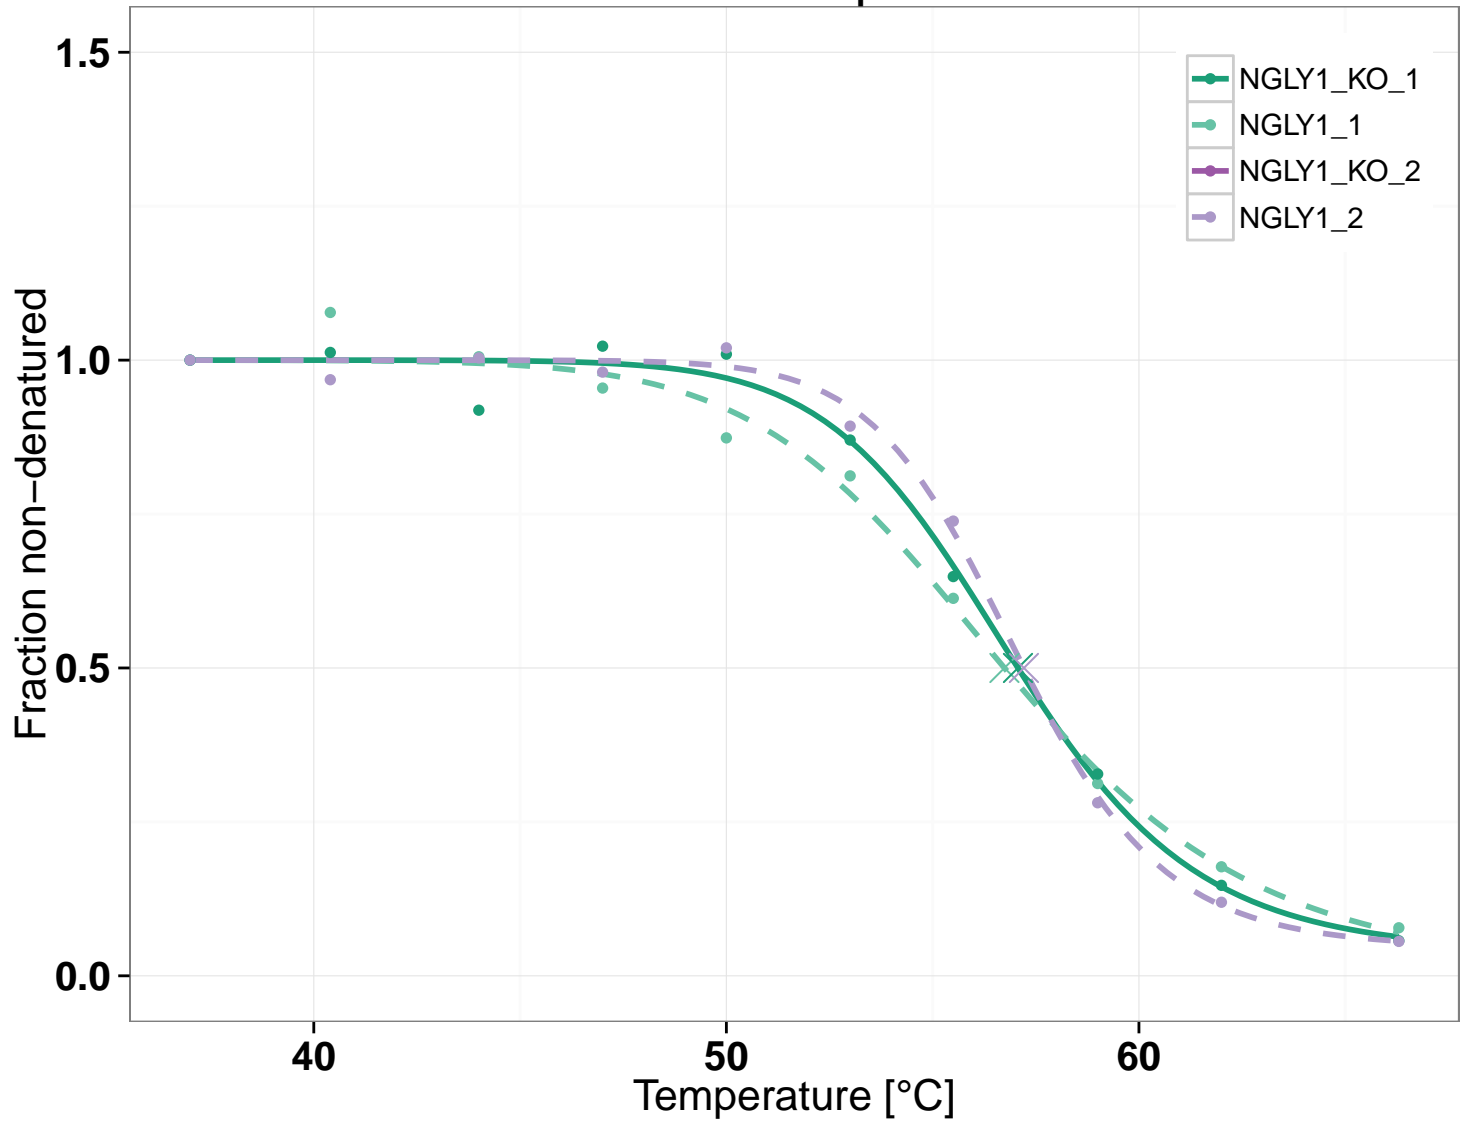

|            | meltPoint | slope  | plateau | R2   |
|------------|-----------|--------|---------|------|
| NGLY1_KO_1 | 57.07     | -0.11  | 0.04    | 0.99 |
| NGLY1_1    | 56.74     | -0.081 | 0       | 0.99 |
| NGLY1_KO_2 | -         | -      | -       | -    |
| NGLY1_2    | 57.21     | -0.13  | 0.05    | 1    |

Supplement: Supplementary file 5671 [file 1]

# IPI00329216.3|DNMT3A

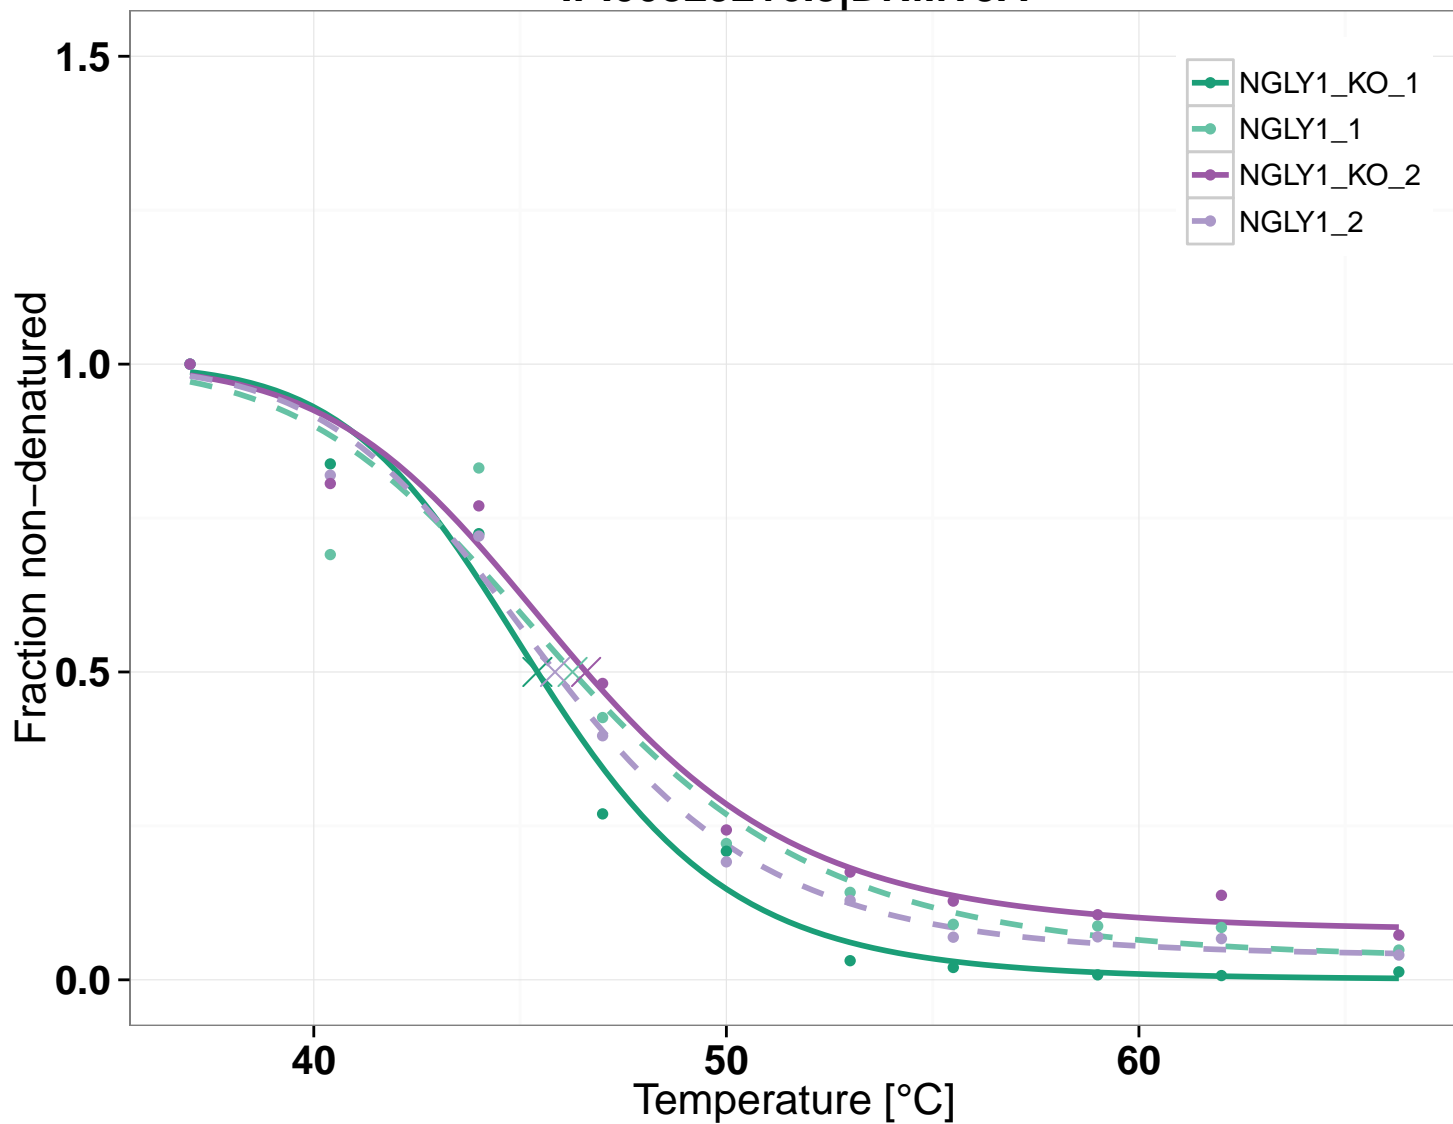

|            | meltPoint | slope  | plateau | R2   |
|------------|-----------|--------|---------|------|
| NGLY1_KO_1 | 45.42     | -0.11  | 0       | 0.98 |
| NGLY1_1    | 46.27     | -0.076 | 0.03    | 0.94 |
| NGLY1_KO_2 | 46.6      | -0.081 | 0.08    | 0.98 |
| NGLY1_2    | 45.85     | -0.089 | 0.04    | 0.99 |

Supplement: Supplementary file 5672 [file 1]

IPI00793169.1|HYPOTHETICAL PROTEIN.

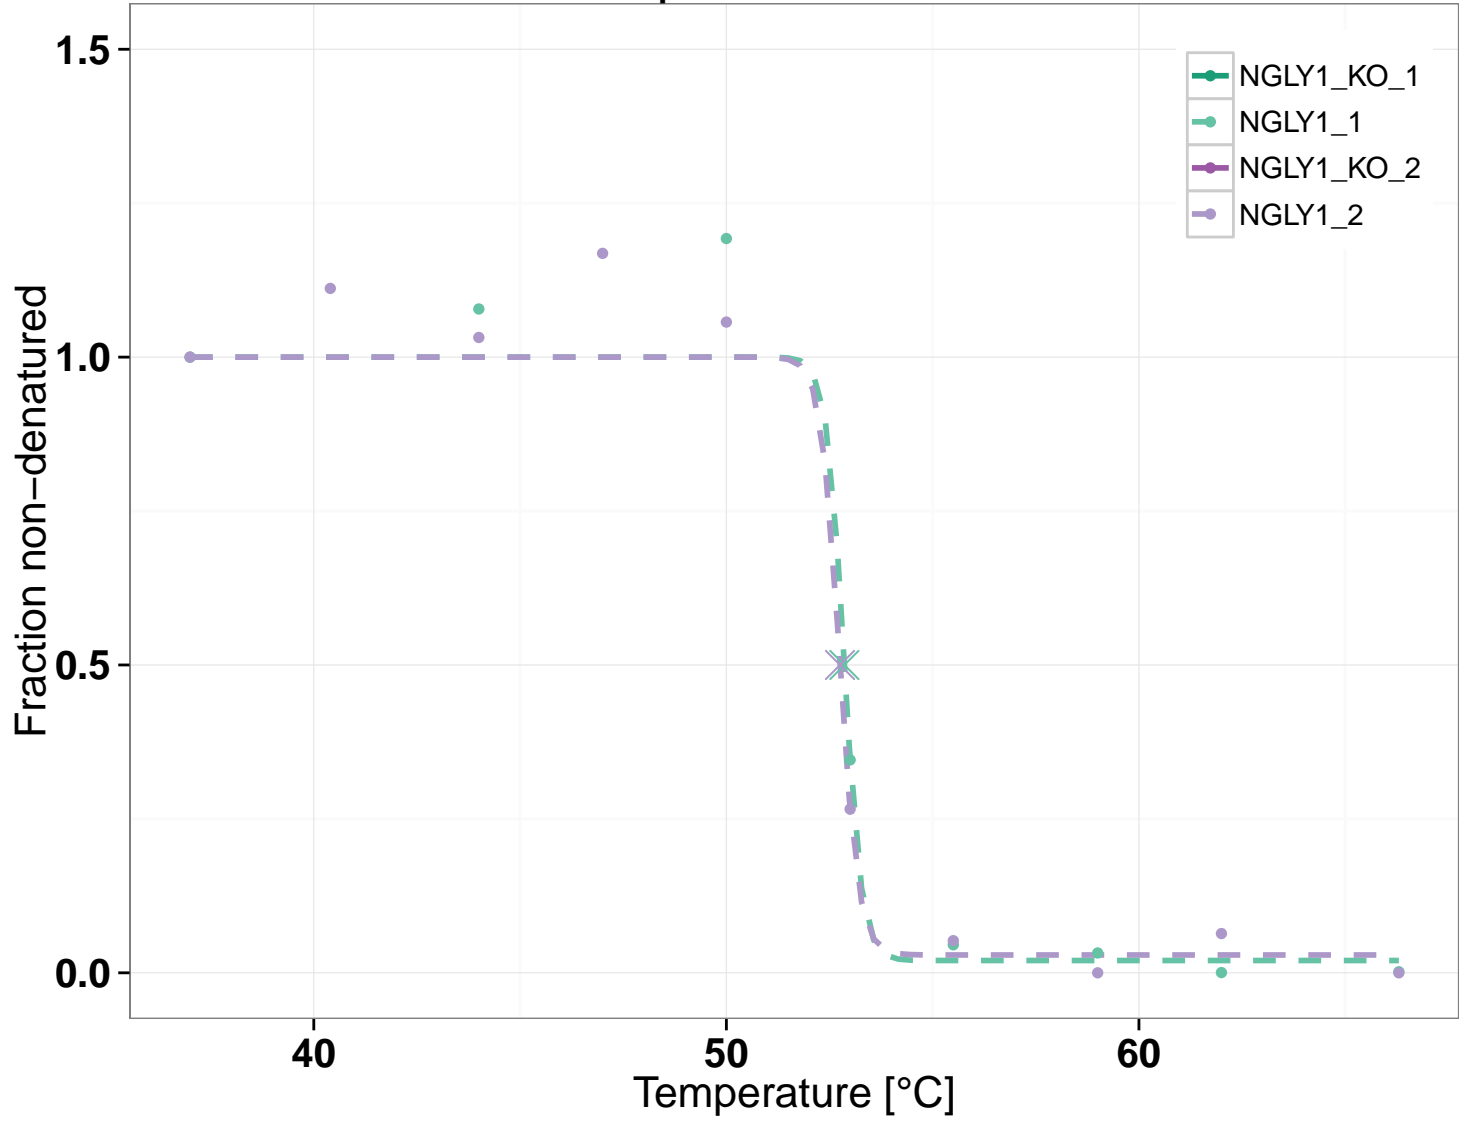

|            | meltPoint | slope | plateau | R2   |
|------------|-----------|-------|---------|------|
| NGLY1_KO_1 | -         | -     | -       | -    |
| NGLY1_1    | 52.86     | -1.2  | 0.02    | 0.83 |
| NGLY1_KO_2 | -         | -     | -       | -    |
| NGLY1_2    | 52.75     | -1.1  | 0.03    | 0.98 |

Supplement: Supplementary file 5673 [file 1]

IPI00103087.2|GEMIN6

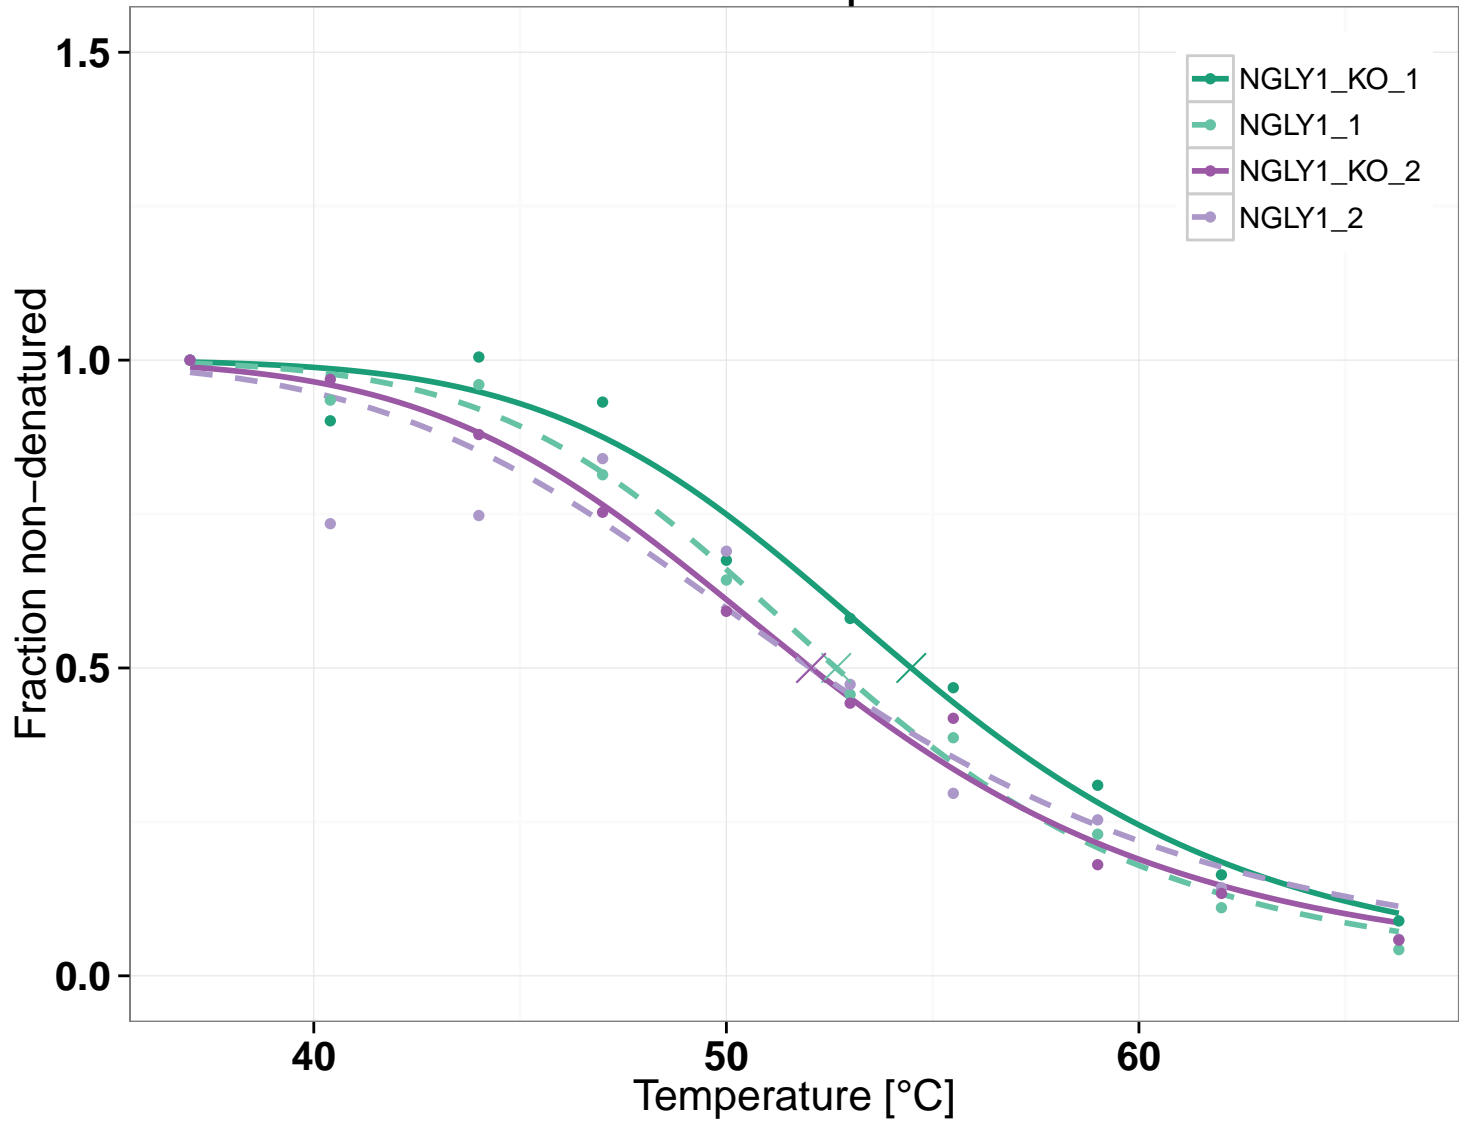

|            | meltPoint | slope  | plateau | R2   |
|------------|-----------|--------|---------|------|
| NGLY1_KO_1 | 54.48     | -0.058 | 0       | 0.98 |
| NGLY1_1    | 52.66     | -0.061 | 0       | 0.99 |
| NGLY1_KO_2 | 52.06     | -0.054 | 0       | 0.99 |
| NGLY1_2    | 52.05     | -0.048 | 0       | 0.91 |

Supplement: Supplementary file 5674 [file 1]

IPI00220388.2|SH2D2A

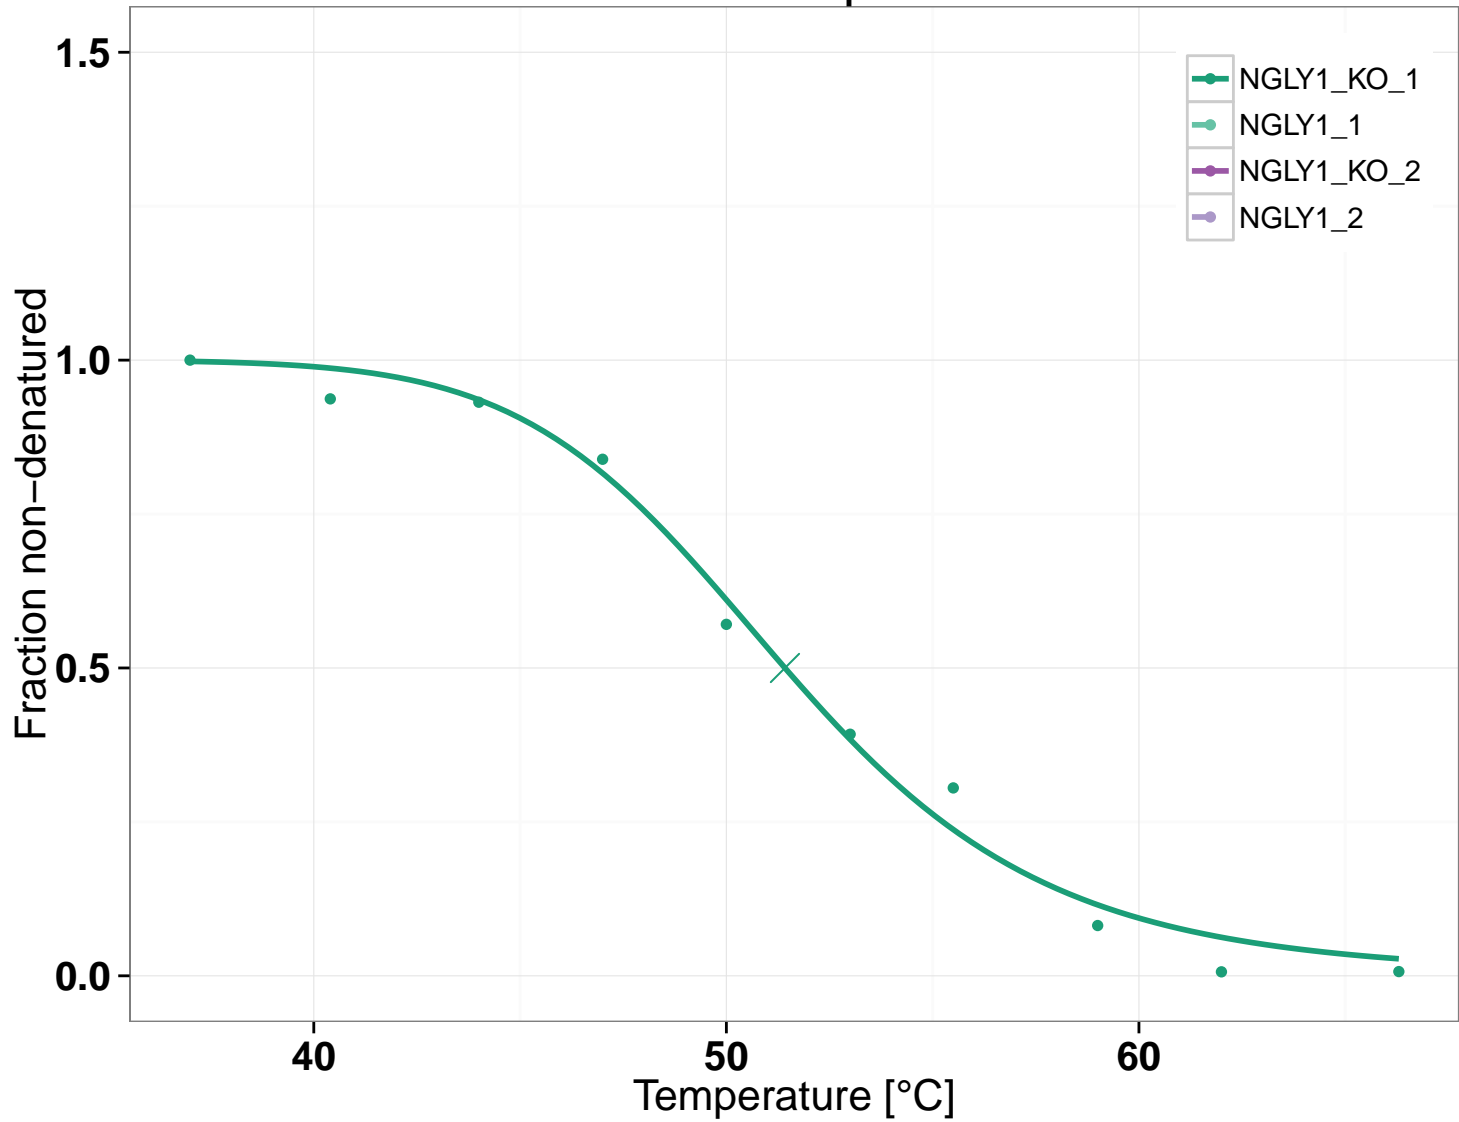

|            | meltPoint | slope  | plateau | R2   |
|------------|-----------|--------|---------|------|
| NGLY1_KO_1 | 51.42     | -0.078 | 0       | 0.99 |
| NGLY1_1    | -         | -      | -       | -    |
| NGLY1_KO_2 | -         | -      | -       | -    |
| NGLY1_2    | -         | -      | -       | -    |

Supplement: Supplementary file 5675 [file 1]

IPI00556641.3|LPIN3

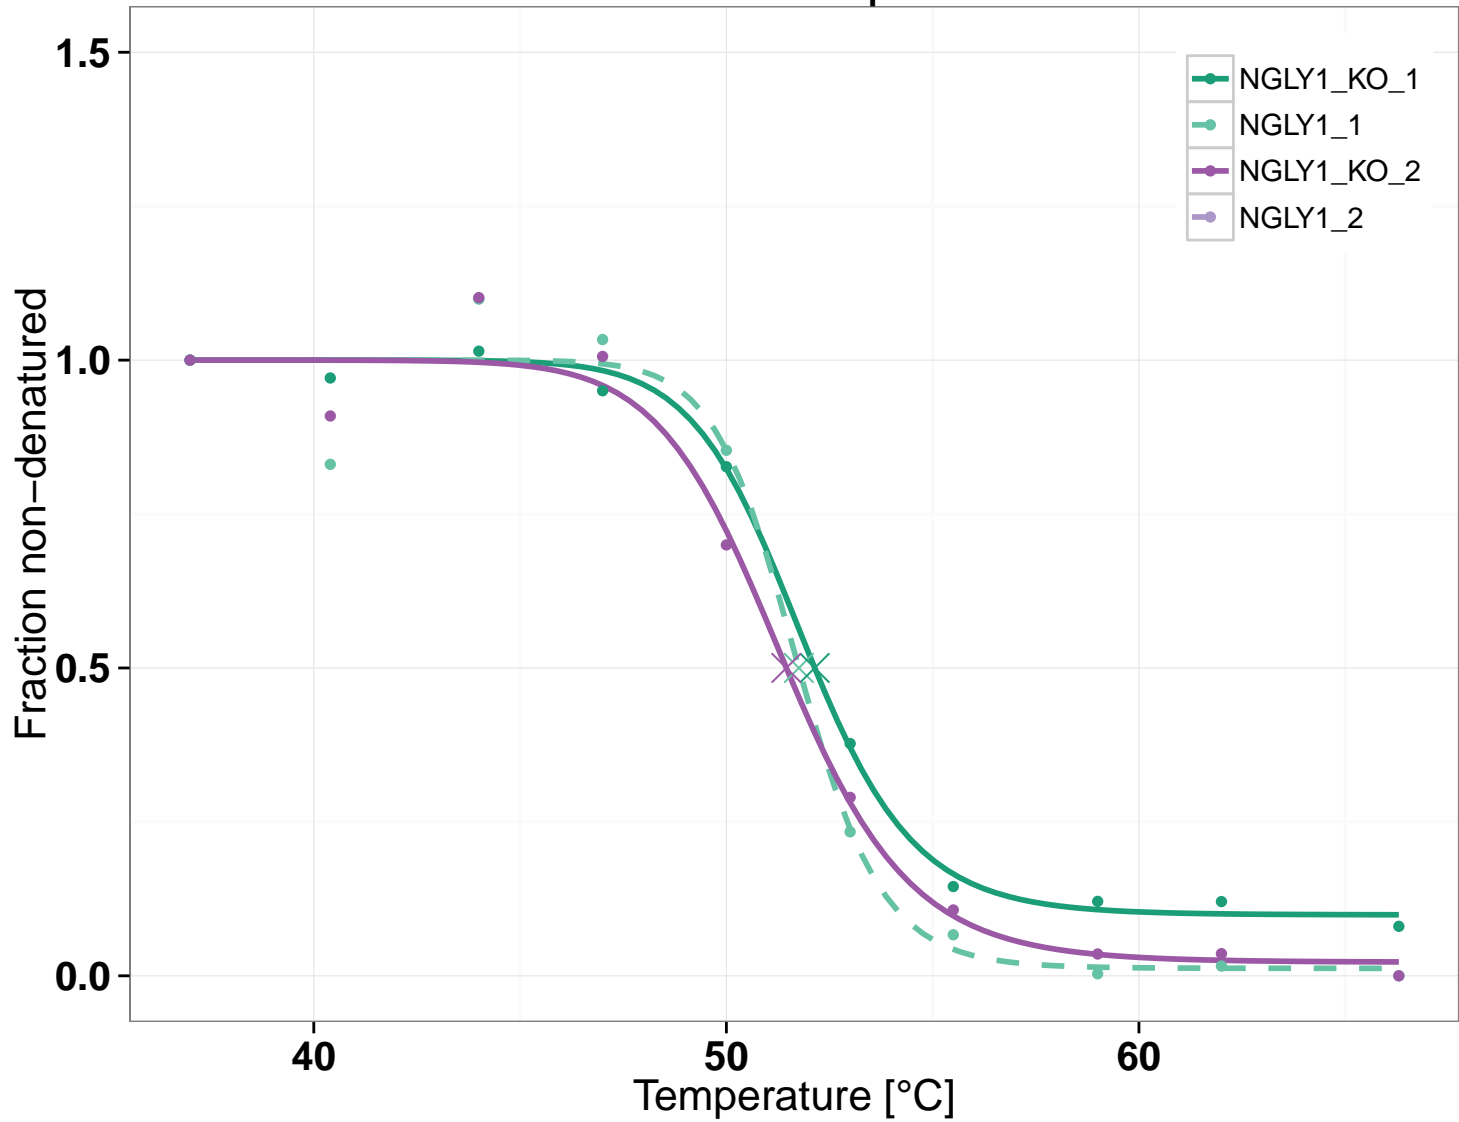

|            | meltPoint | slope | plateau | R2   |
|------------|-----------|-------|---------|------|
| NGLY1_KO_1 | 52.14     | -0.17 | 0.1     | 1    |
| NGLY1_1    | 51.76     | -0.24 | 0.01    | 0.98 |
| NGLY1_KO_2 | 51.45     | -0.16 | 0.02    | 0.99 |
| NGLY1_2    | -         | -     | -       | -    |

Supplement: Supplementary file 5676 [file 1]

# IPI00743293.2|RTN3

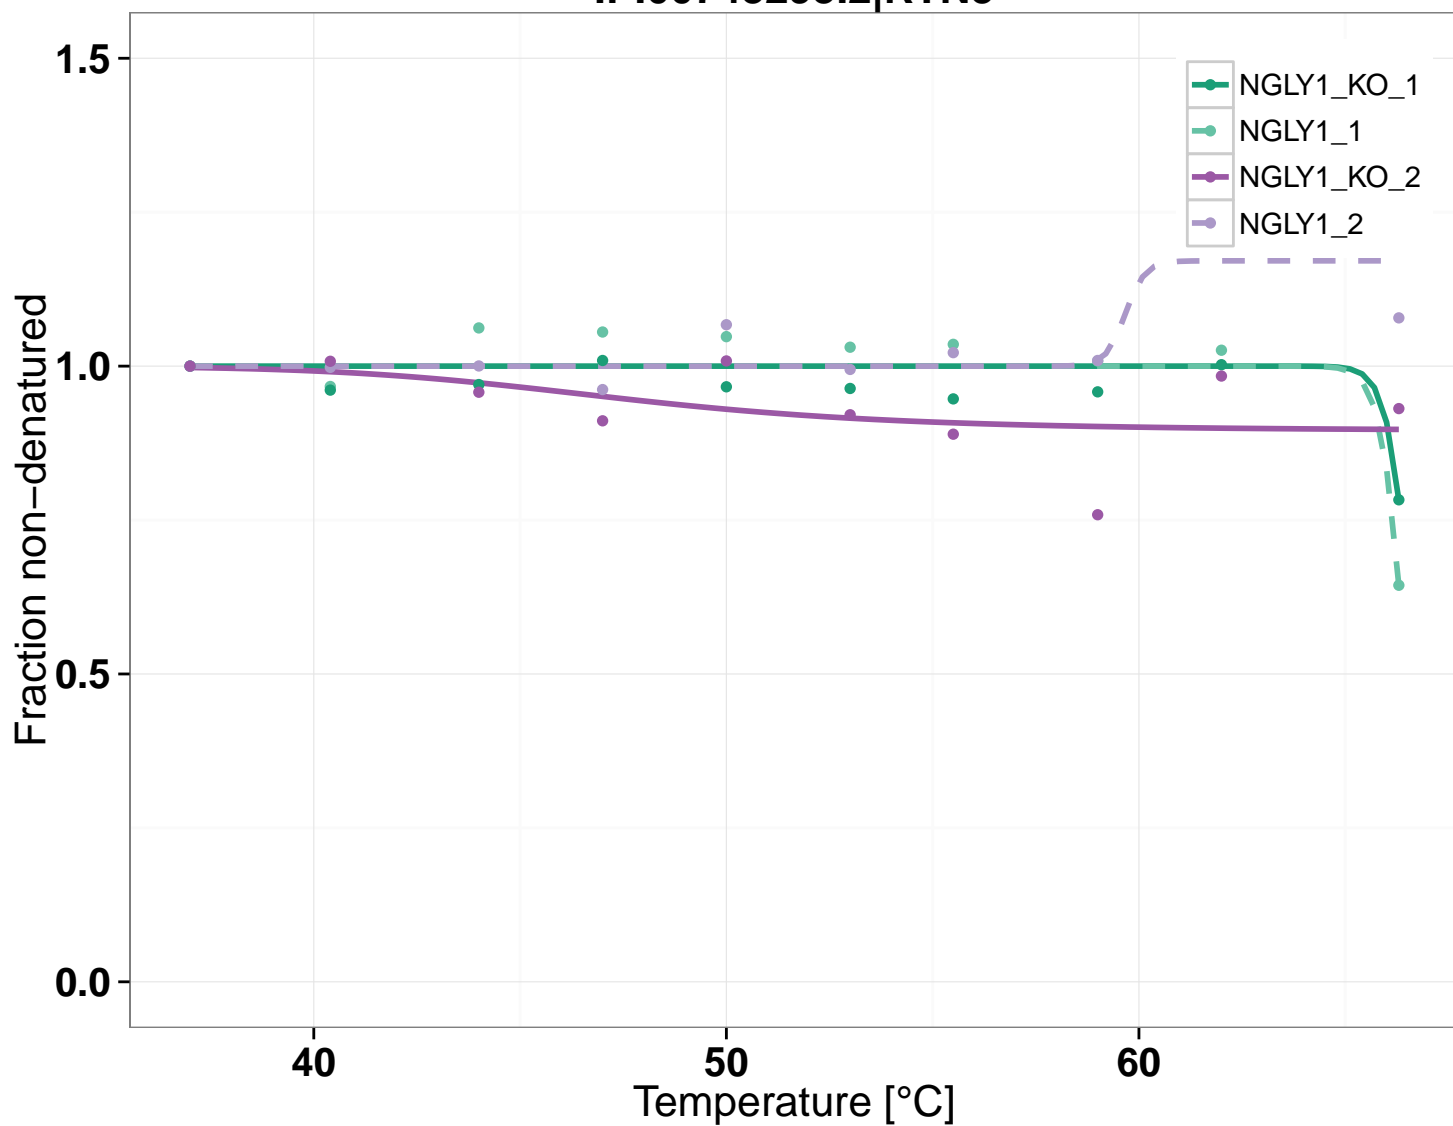

|            | meltPoint | slope   | plateau | R2   |
|------------|-----------|---------|---------|------|
| NGLY1_KO_1 | -         | -       | 0       | 0.74 |
| NGLY1_1    | -         | -       | 0       | 0.9  |
| NGLY1_KO_2 | -         | -0.0076 | 0.9     | 0.28 |
| NGLY1_2    | -         | 0.18    | 1.17    | 0.64 |

Supplement: Supplementary file 5677 [file 1]

# IPI00022215.1|ADNP

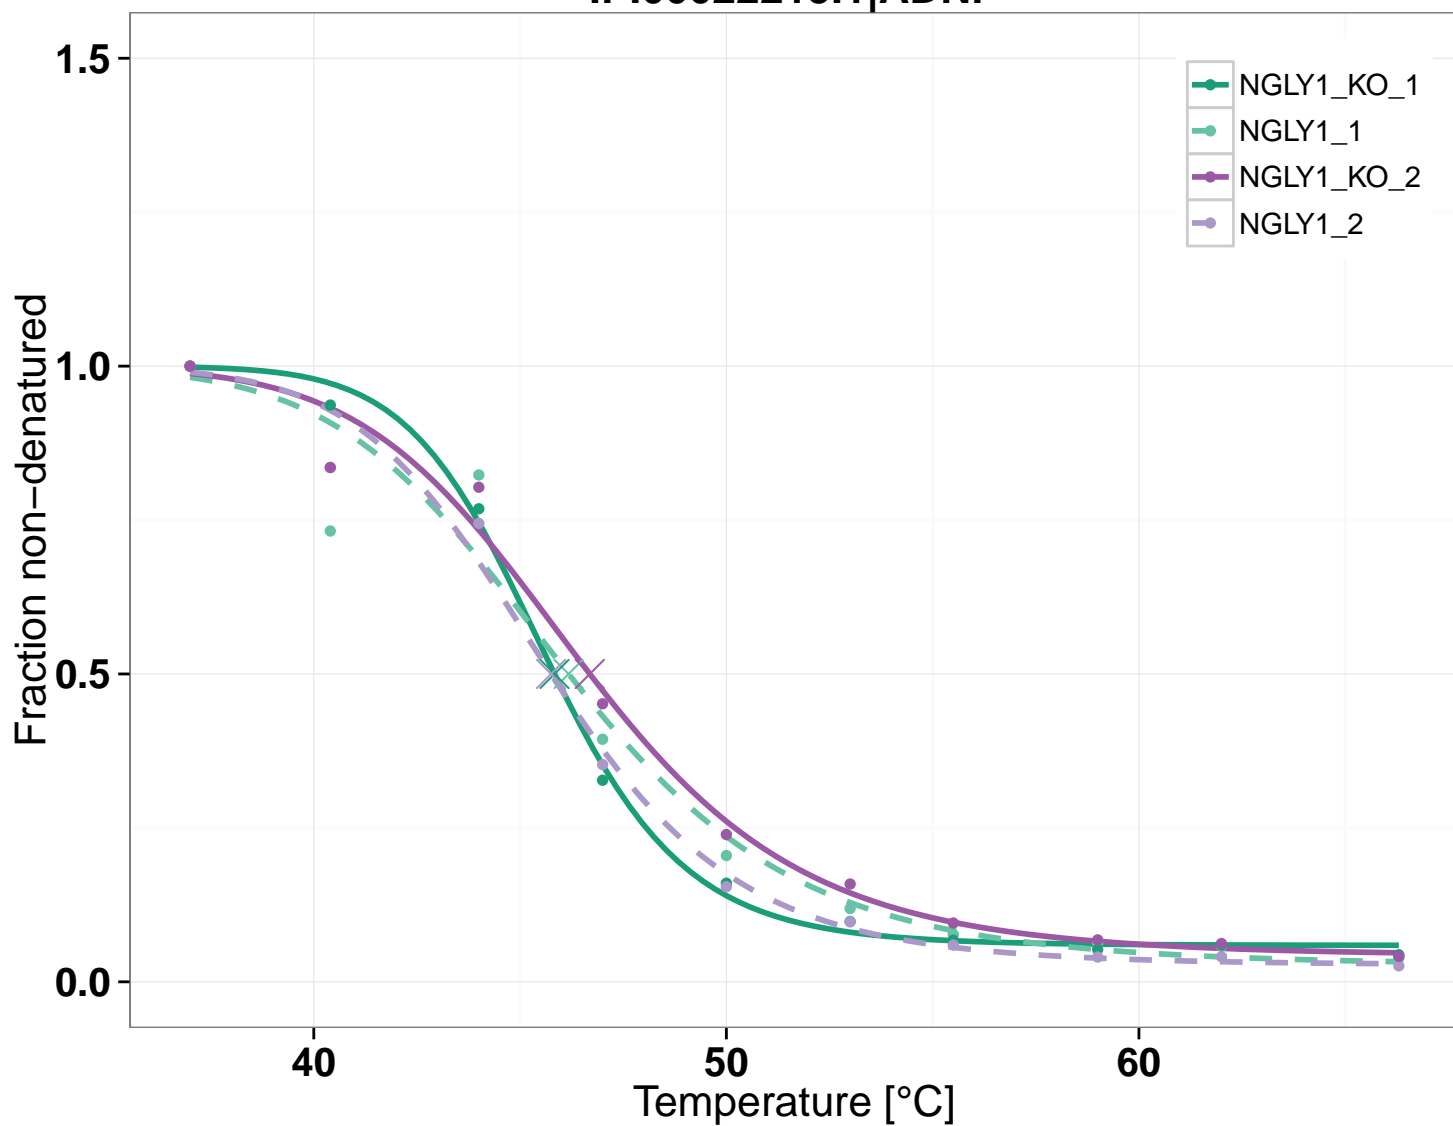

|            | meltPoint | slope  | plateau | R2   |
|------------|-----------|--------|---------|------|
| NGLY1_KO_1 | 45.83     | -0.14  | 0.06    | 1    |
| NGLY1_1    | 46.18     | -0.087 | 0.03    | 0.96 |
| NGLY1_KO_2 | 46.69     | -0.09  | 0.04    | 0.99 |
| NGLY1_2    | 45.75     | -0.11  | 0.03    | 0.99 |

Supplement: Supplementary file 5678 [file 1]

IPI00240812.6|PDS5B

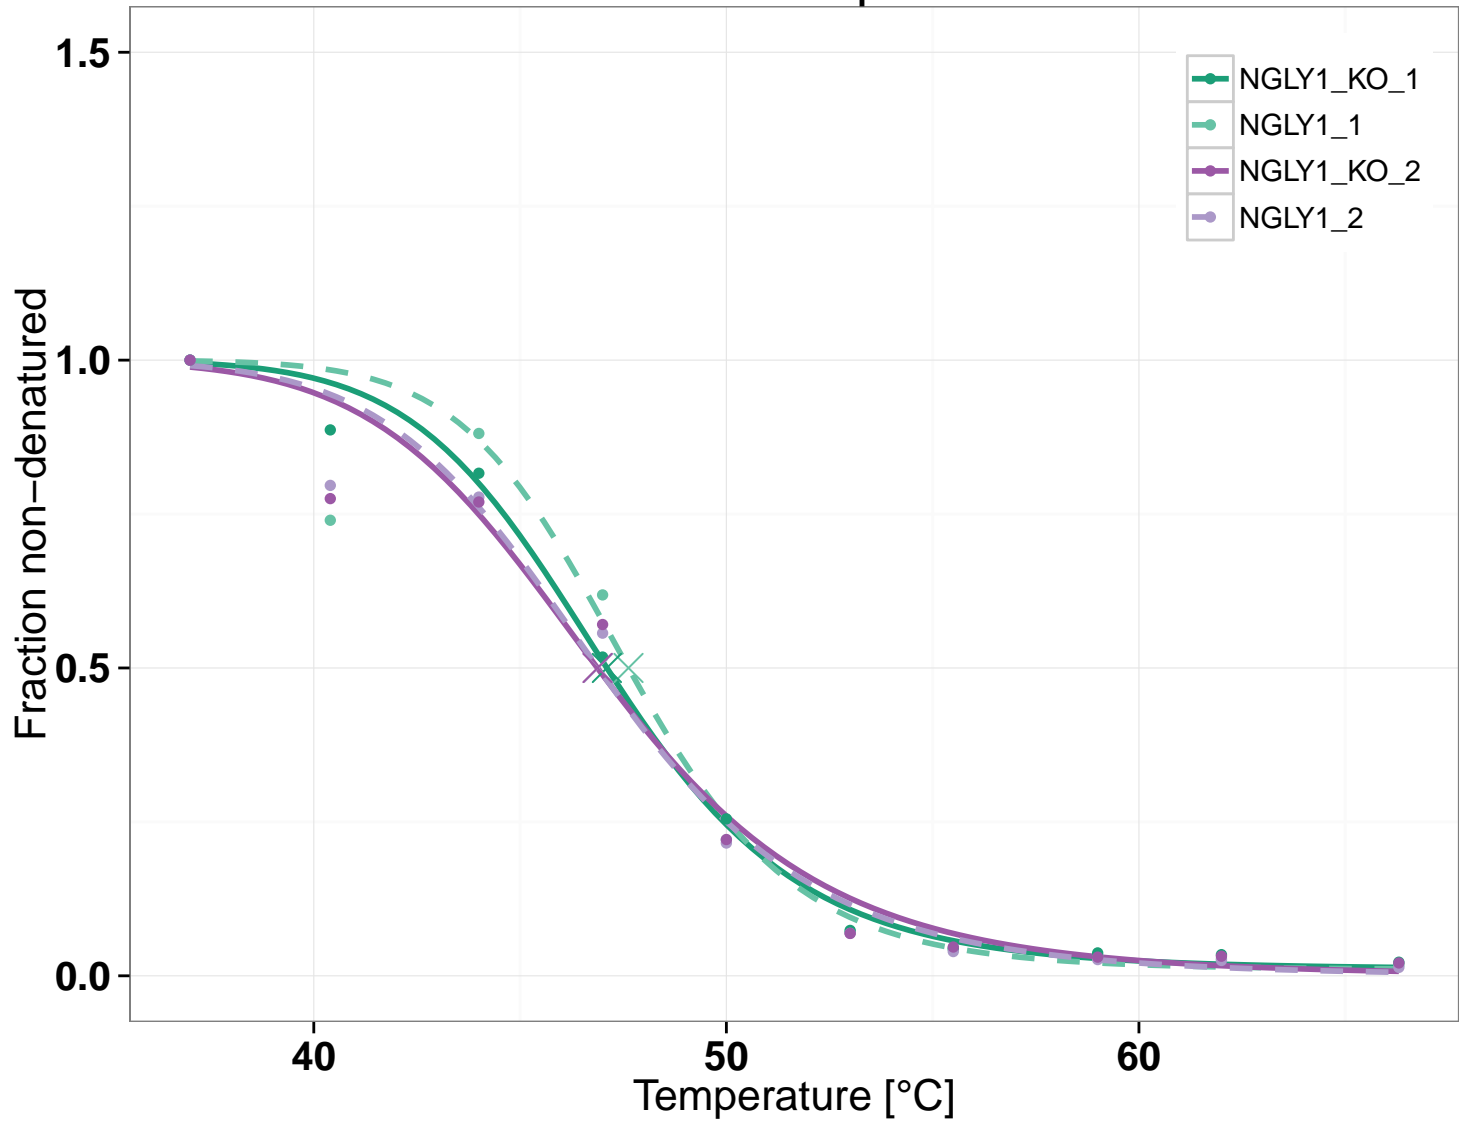

|            | meltPoint | slope  | plateau | R2   |
|------------|-----------|--------|---------|------|
| NGLY1_KO_1 | 47.1      | -0.11  | 0.01    | 0.99 |
| NGLY1_1    | 47.63     | -0.12  | 0.01    | 0.96 |
| NGLY1_KO_2 | 46.88     | -0.091 | 0       | 0.97 |
| NGLY1_2    | 46.89     | -0.095 | 0       | 0.98 |

Supplement: Supplementary file 5679 [file 1]

IPI00640364.2|OTUD5

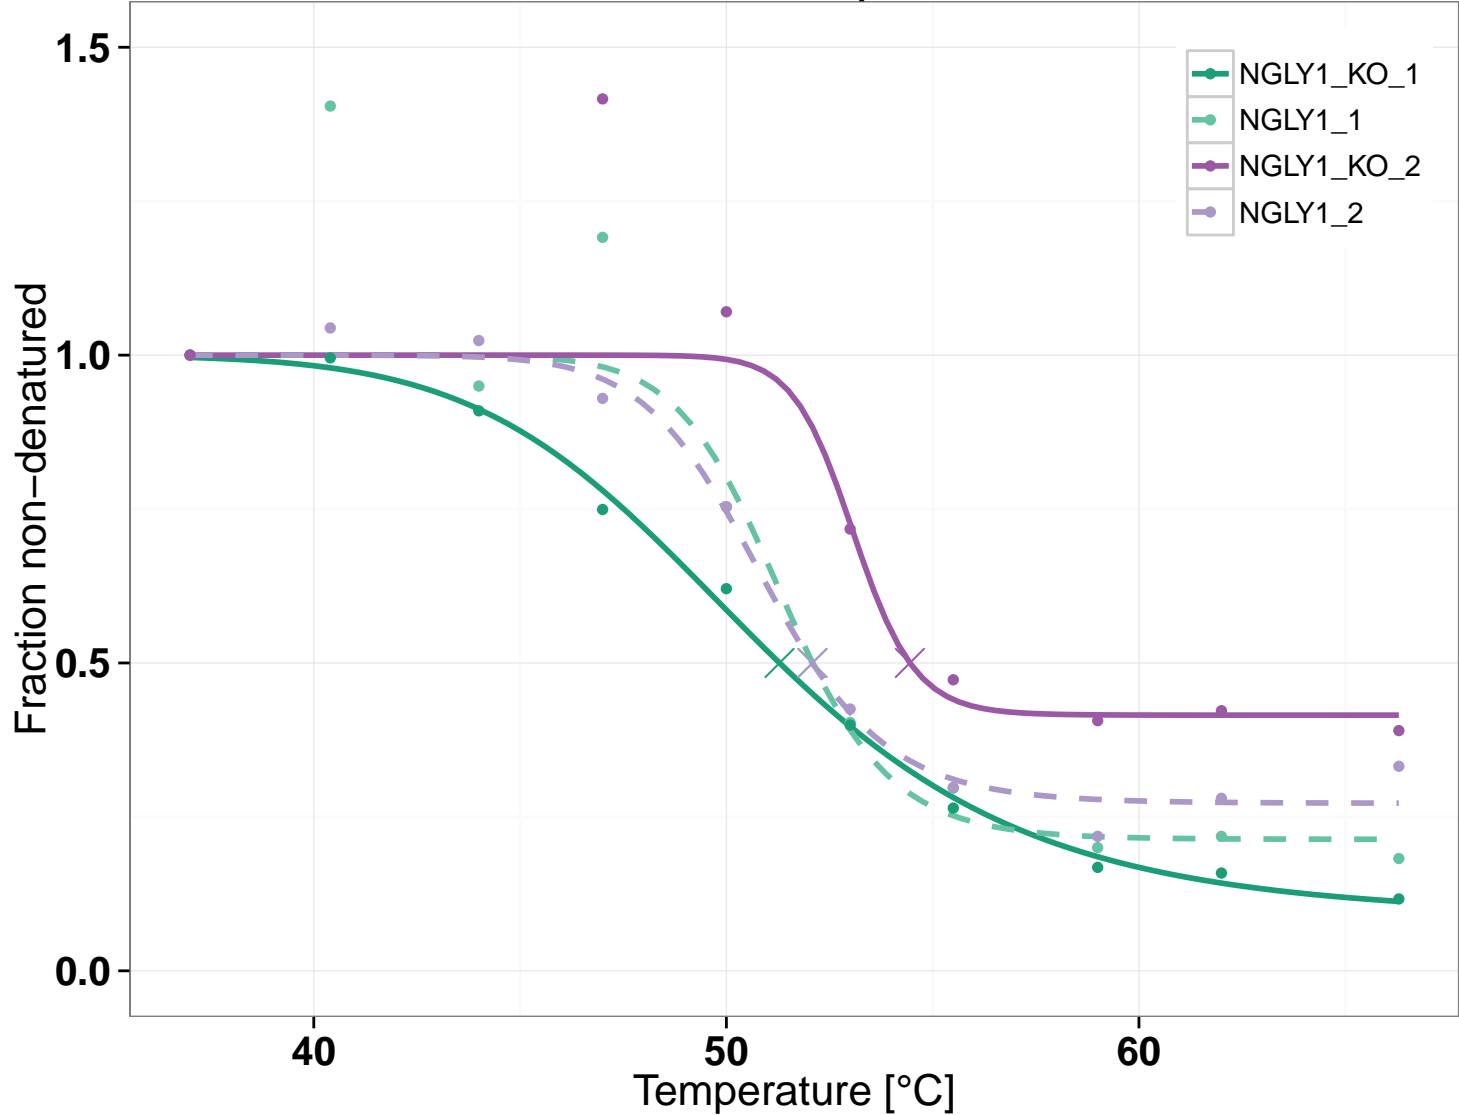

|            | meltPoint | slope  | plateau | R2   |
|------------|-----------|--------|---------|------|
| NGLY1_KO_1 | 51.29     | -0.068 | 0.09    | 1    |
| NGLY1_1    | 52.09     | -0.15  | 0.21    | 0.88 |
| NGLY1_KO_2 | 54.45     | -0.2   | 0.42    | 0.56 |
| NGLY1_2    | 52.08     | -0.12  | 0.27    | 0.99 |

Supplement: Supplementary file 5680 [file 1]

IPI00479125.3|SRGAP2

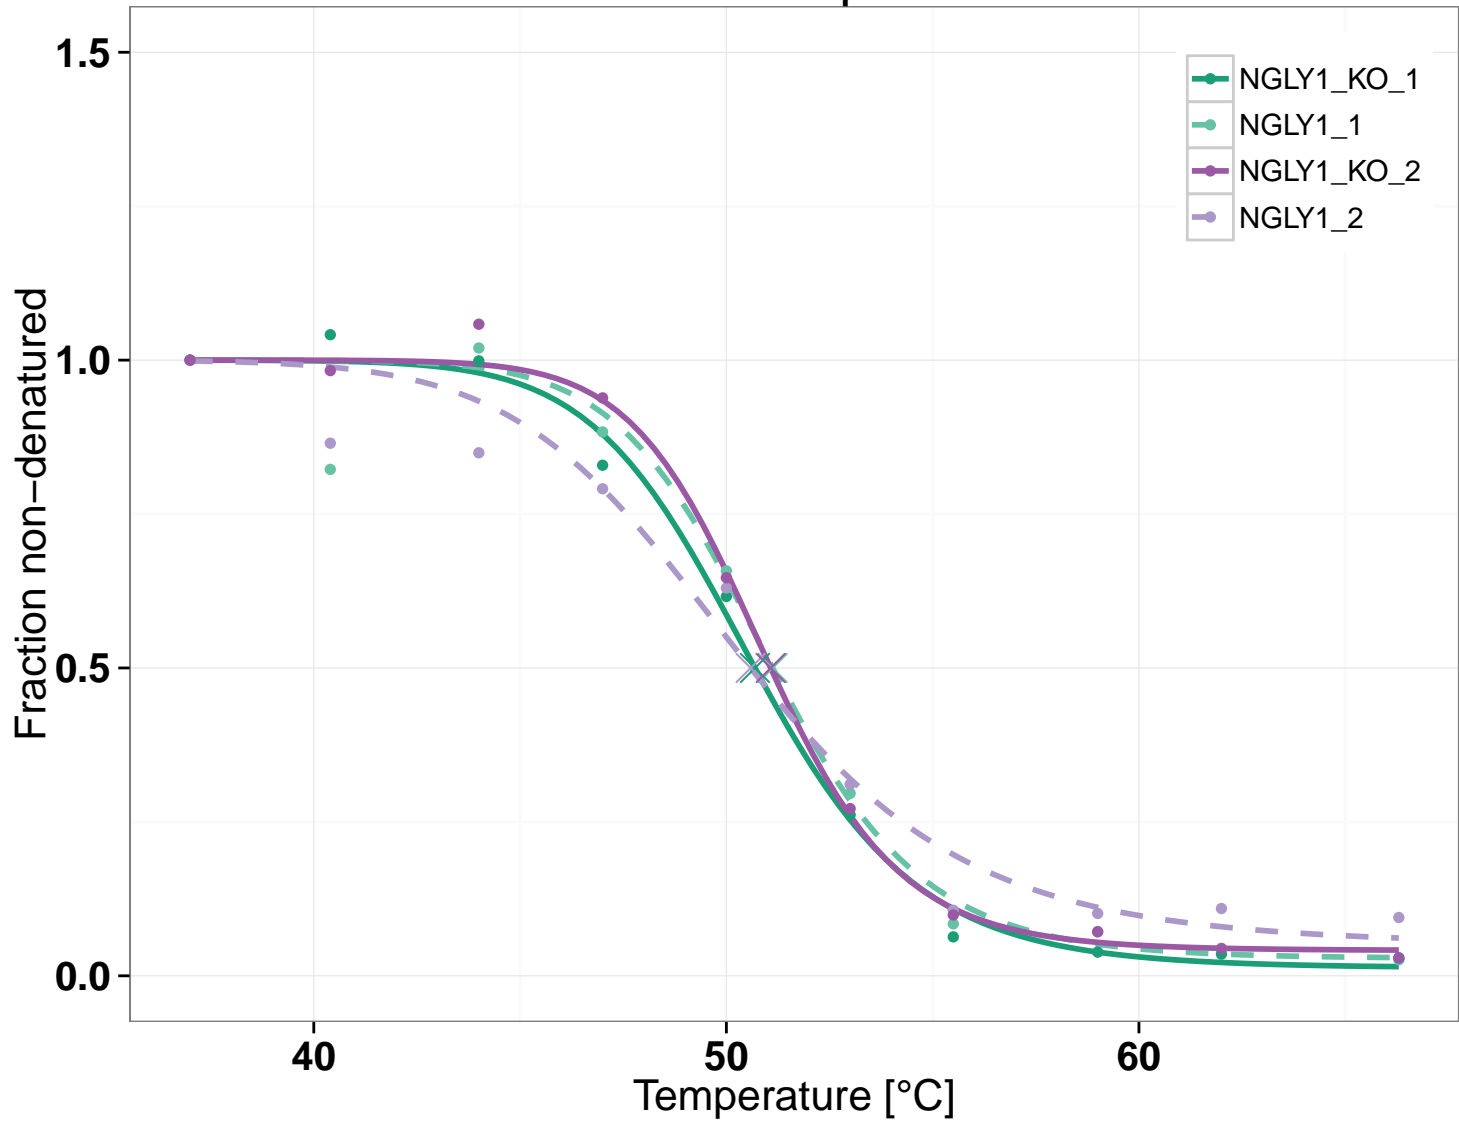

|            | meltPoint | slope  | plateau | R2   |
|------------|-----------|--------|---------|------|
| NGLY1_KO_1 | 50.69     | -0.12  | 0.01    | 1    |
| NGLY1_1    | 51.12     | -0.13  | 0.03    | 0.98 |
| NGLY1_KO_2 | 51.07     | -0.15  | 0.04    | 1    |
| NGLY1_2    | 50.59     | -0.086 | 0.05    | 0.97 |

Supplement: Supplementary file 5681 [file 1]

IPI00013185.8|JARID1C

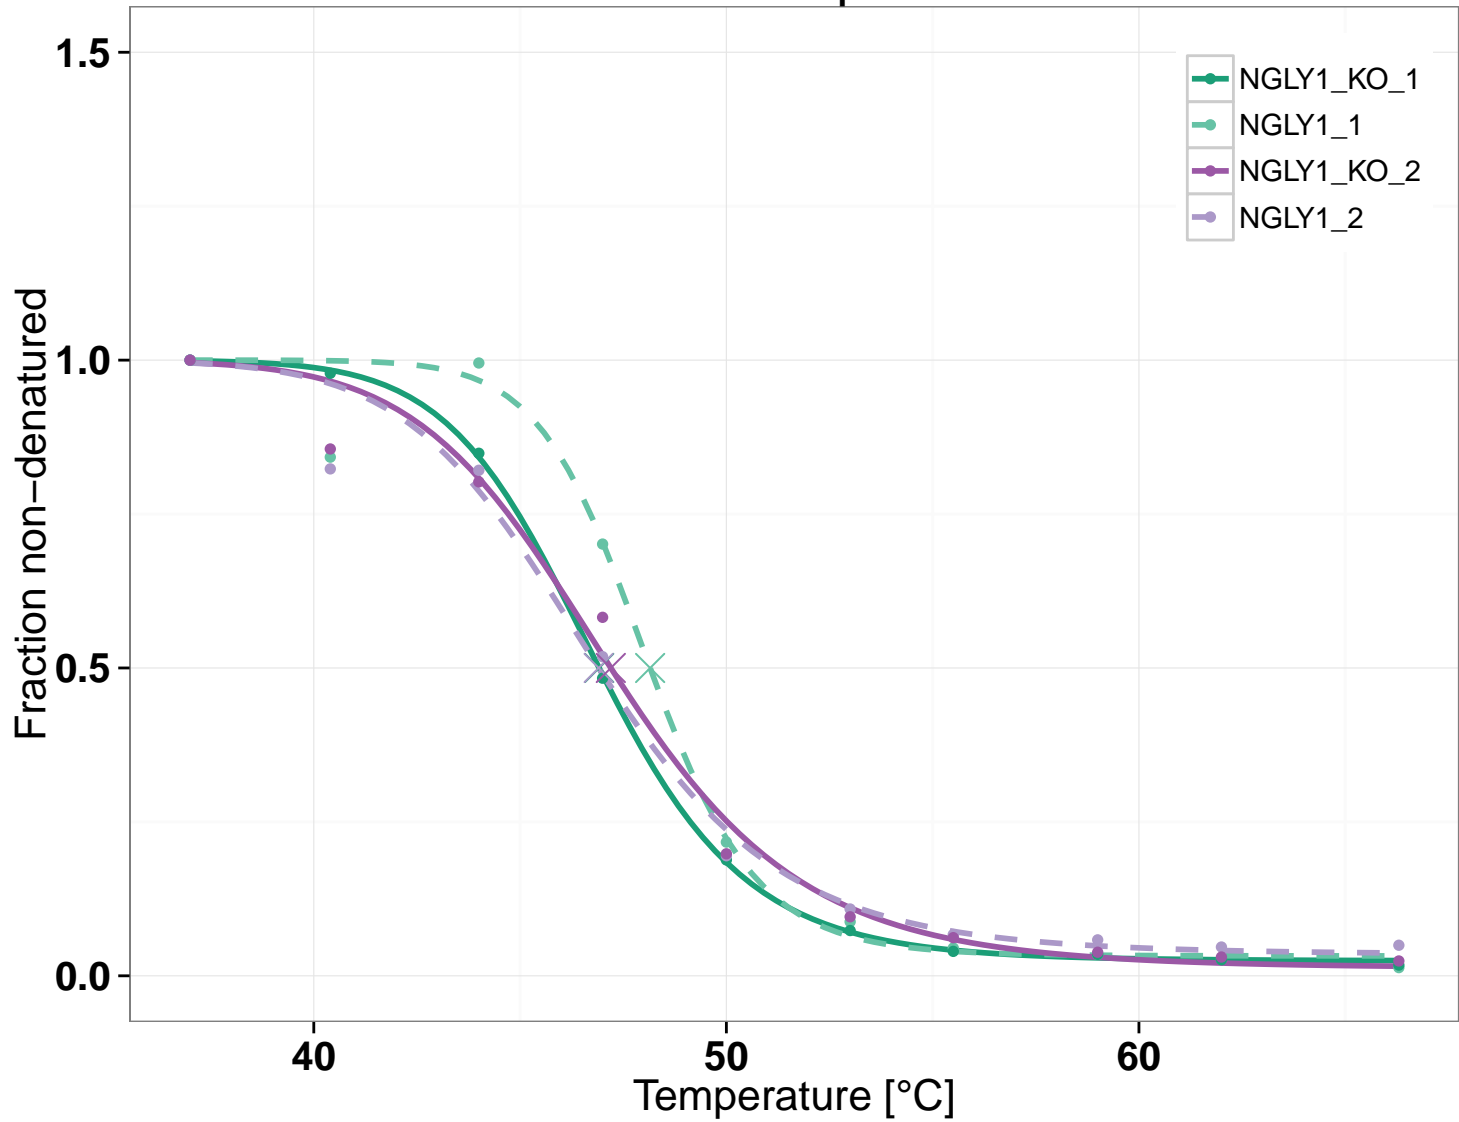

|            | meltPoint | slope | plateau | R2   |
|------------|-----------|-------|---------|------|
| NGLY1_KO_1 | 46.92     | -0.13 | 0.02    | 1    |
| NGLY1_1    | 48.15     | -0.18 | 0.03    | 0.98 |
| NGLY1_KO_2 | 47.2      | -0.11 | 0.01    | 0.99 |
| NGLY1_2    | 46.91     | -0.11 | 0.03    | 0.98 |

Supplement: Supplementary file 5682 [file 1]

IPI00007148.1|LYRM2

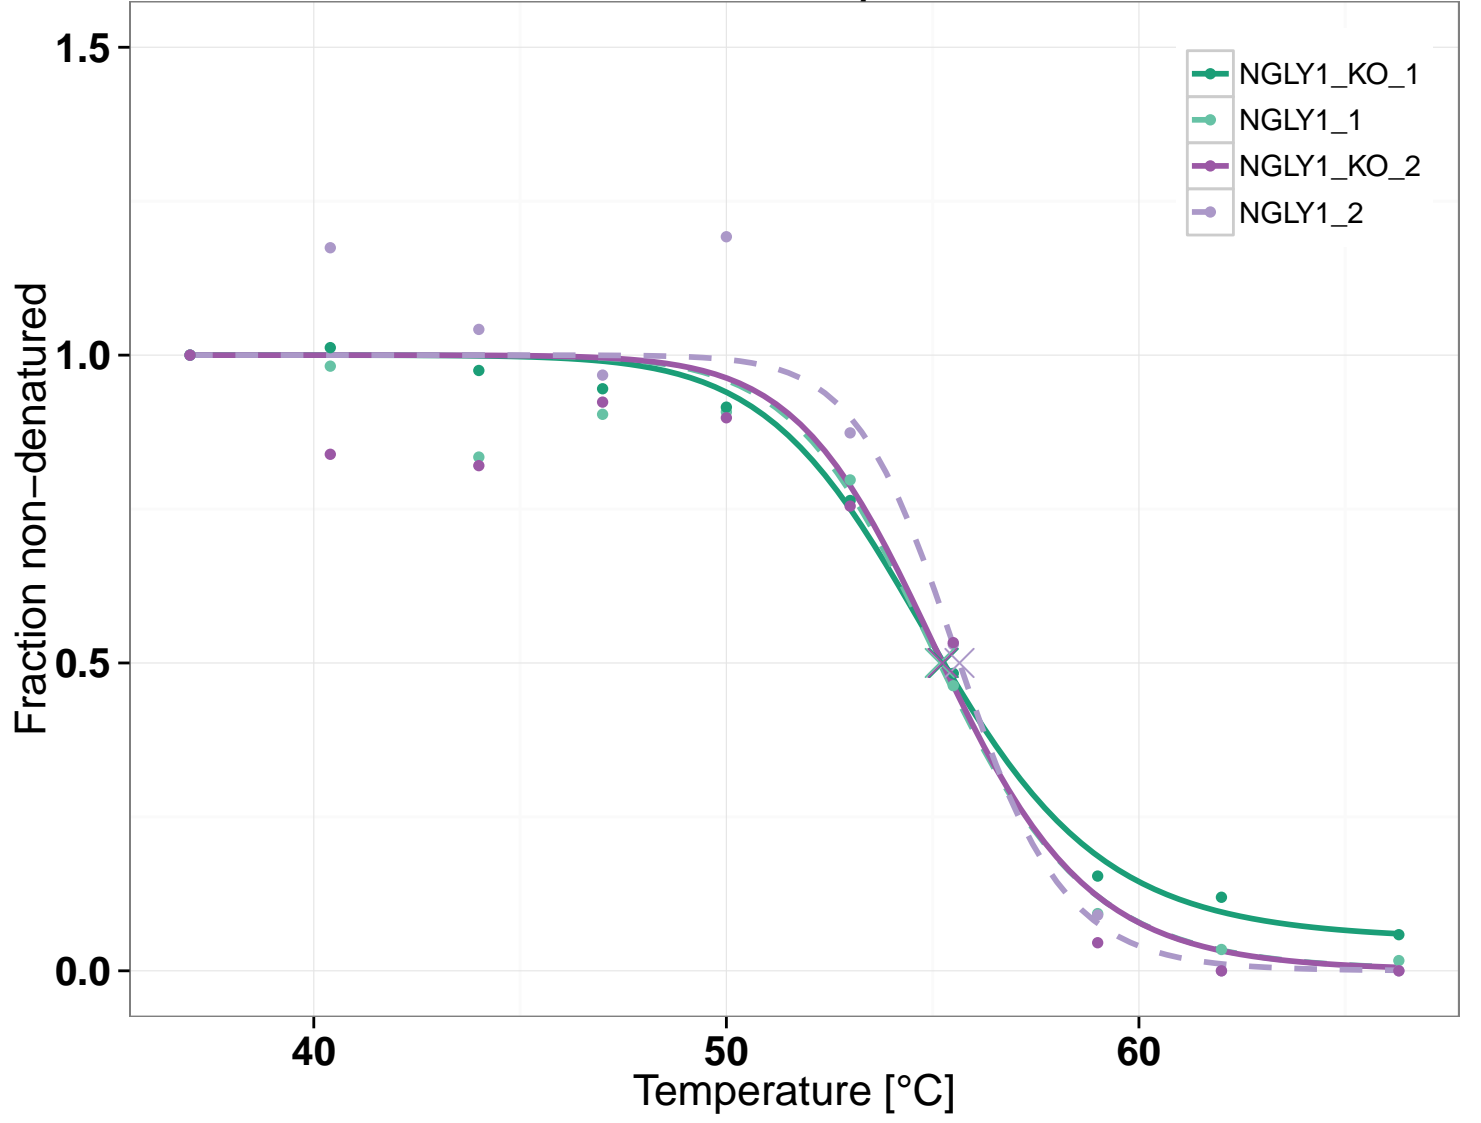

|            | meltPoint | slope | plateau | R2   |
|------------|-----------|-------|---------|------|
| NGLY1_KO_1 | 55.27     | -0.12 | 0.05    | 1    |
| NGLY1_1    | 55.17     | -0.14 | 0       | 0.97 |
| NGLY1_KO_2 | 55.24     | -0.14 | 0       | 0.95 |
| NGLY1_2    | 55.65     | -0.2  | 0       | 0.97 |

Supplement: Supplementary file 5683 [file 1]

IPI00789548.1|SMCR7

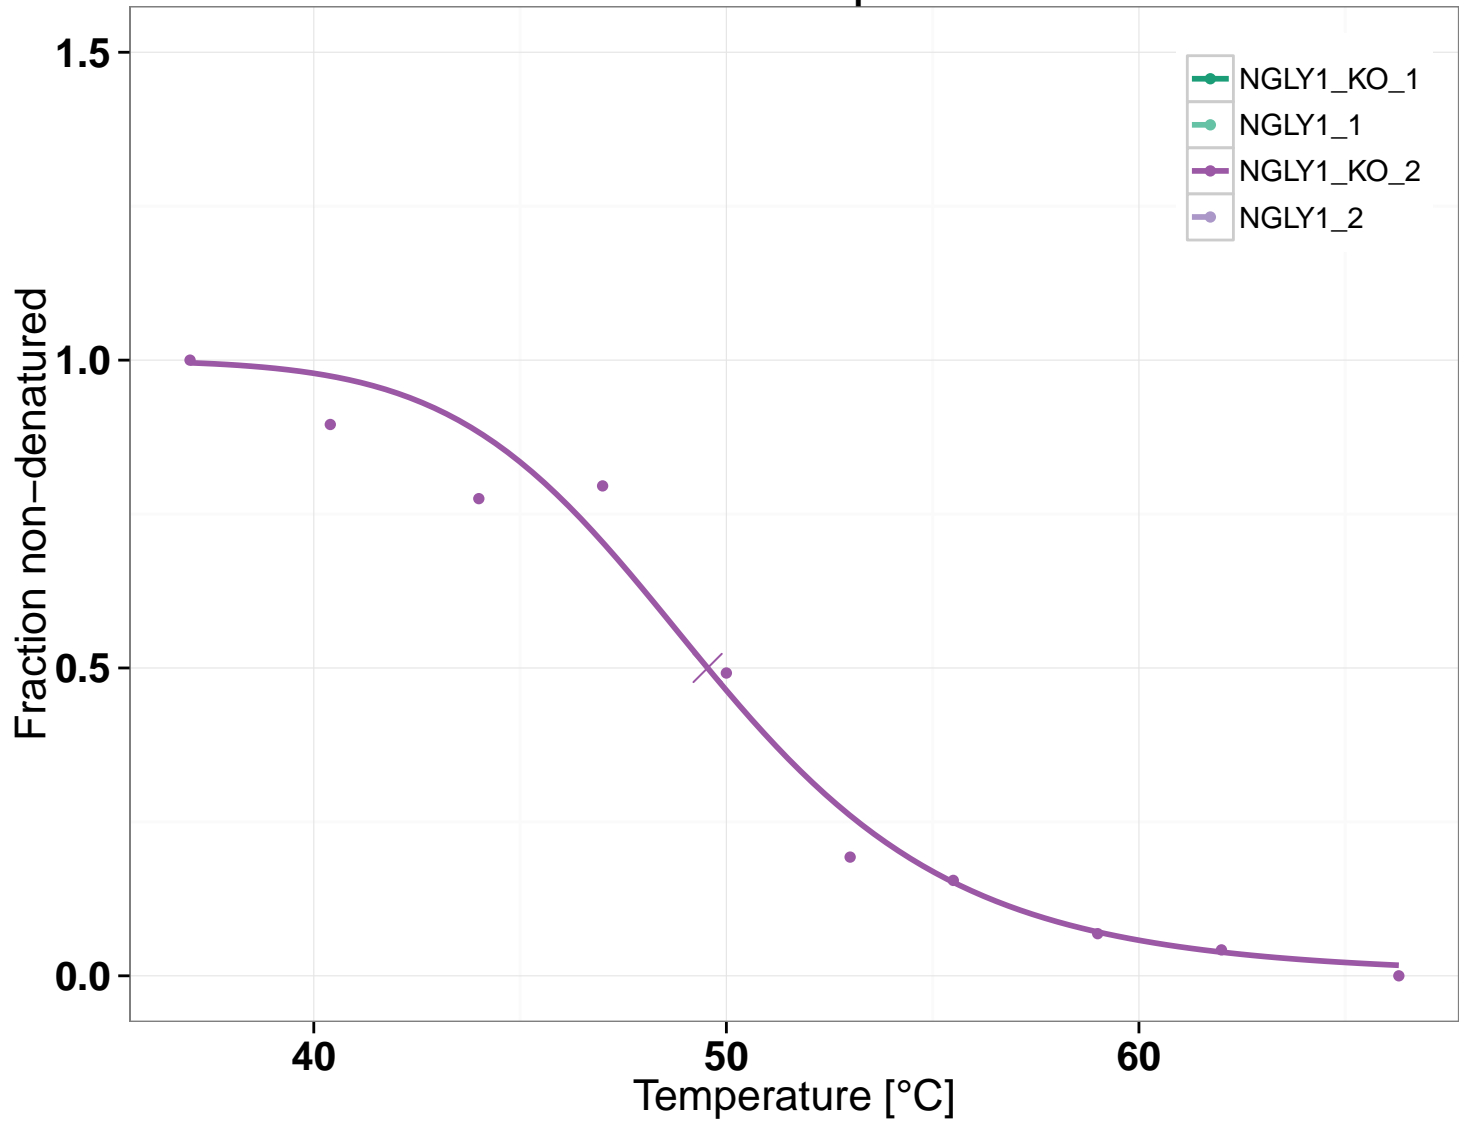

|            | meltPoint | slope  | plateau | R2   |
|------------|-----------|--------|---------|------|
| NGLY1_KO_1 | —         | —      | —       | —    |
| NGLY1_1    | —         | —      | —       | —    |
| NGLY1_KO_2 | 49.55     | -0.082 | 0       | 0.98 |
| NGLY1_2    | —         | —      | —       | —    |

Supplement: Supplementary file 5684 [file 1]

# IPI00001589.1|TIMM13

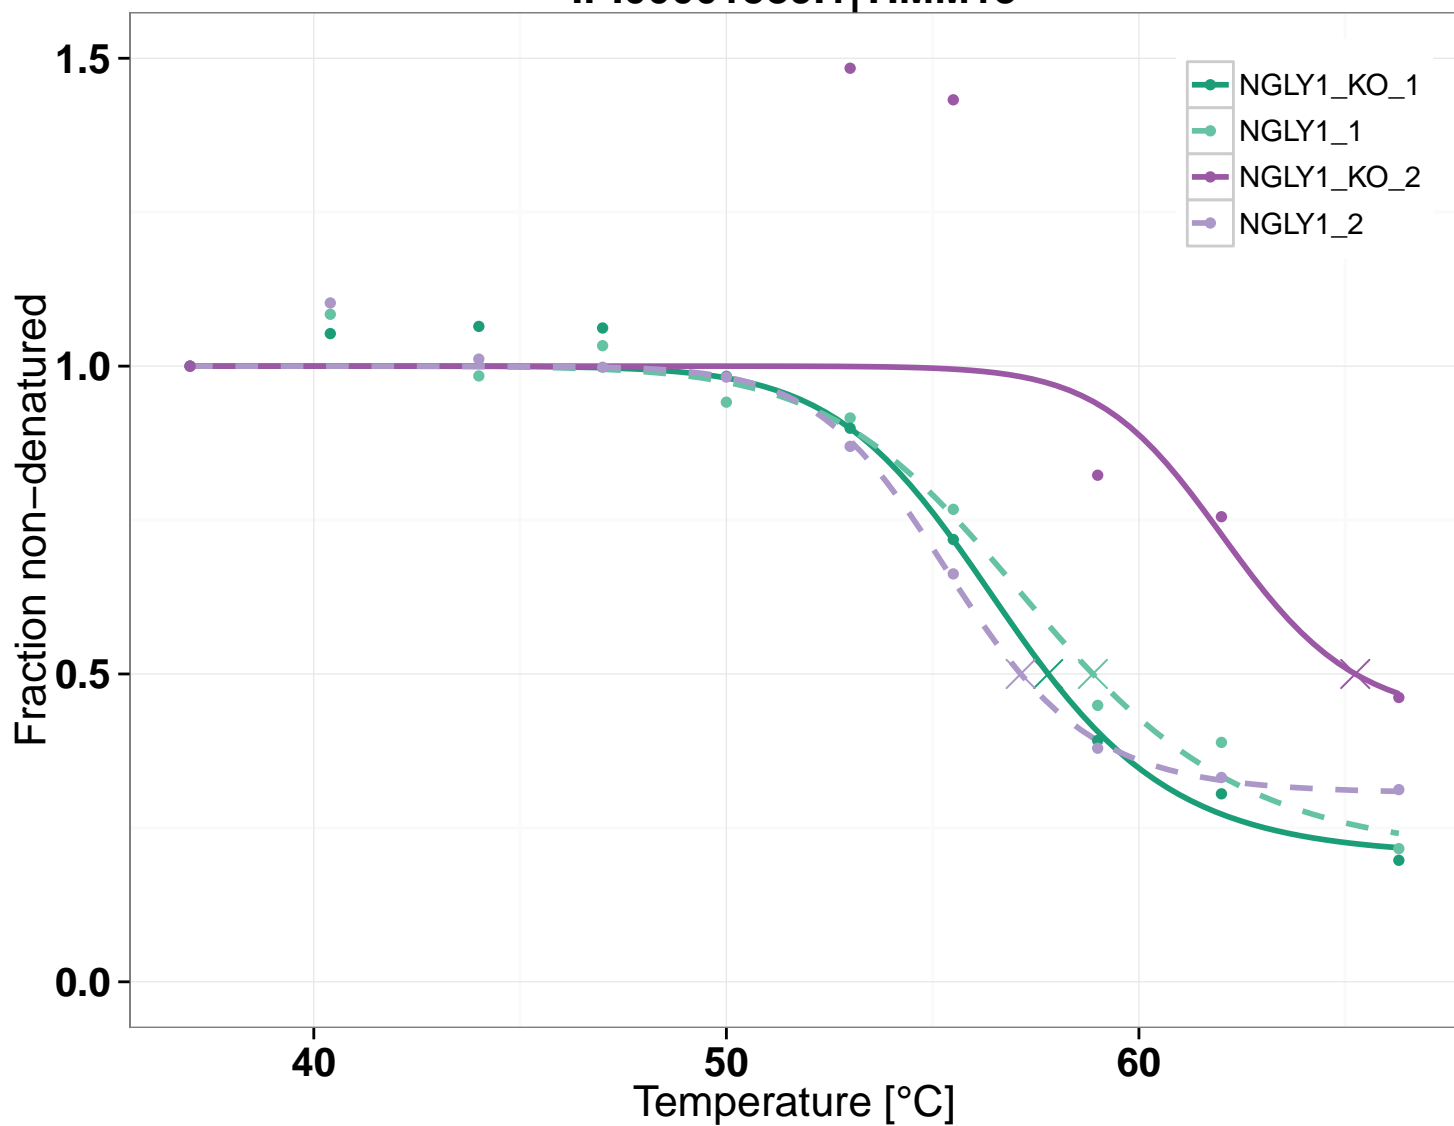

|            | meltPoint | slope  | plateau | R2    |
|------------|-----------|--------|---------|-------|
| NGLY1_KO_1 | 57.8      | -0.097 | 0.2     | 0.99  |
| NGLY1_1    | 58.88     | -0.079 | 0.2     | 0.98  |
| NGLY1_KO_2 | 65.24     | -0.092 | 0.42    | -0.33 |
| NGLY1_2    | 57.13     | -0.1   | 0.31    | 0.99  |

Supplement: Supplementary file 5685 [file 1]

# IPI00167773.2|BANP

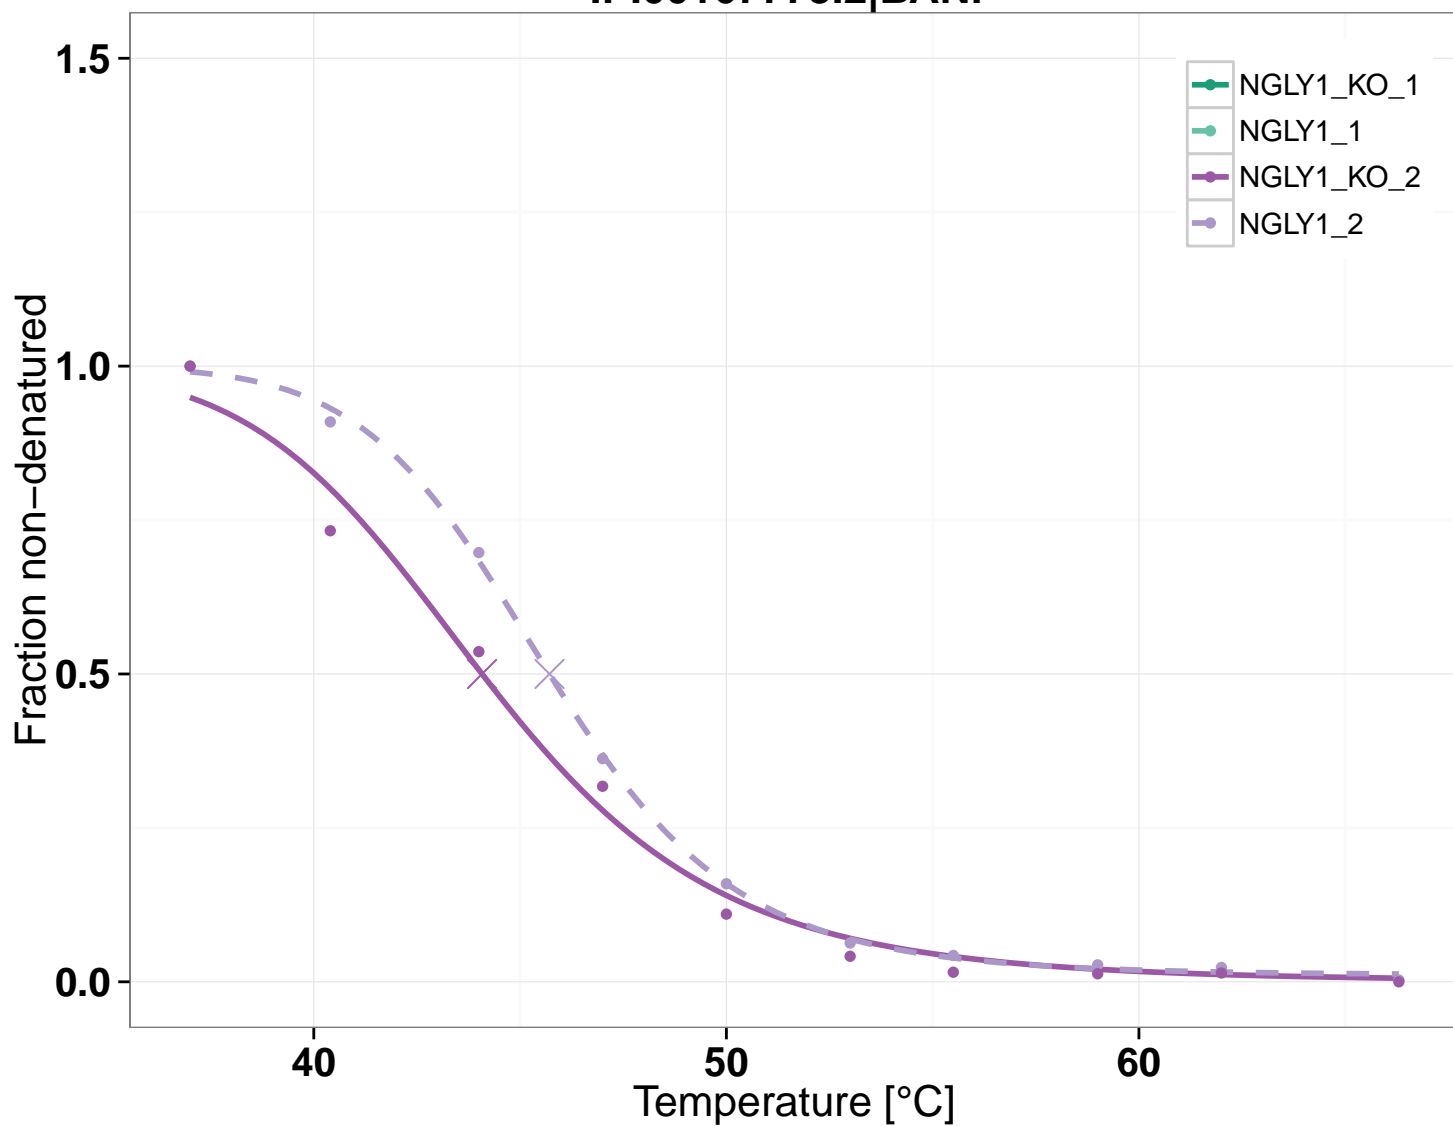

|            | meltPoint | slope  | plateau | R2   |
|------------|-----------|--------|---------|------|
| NGLY1_KO_1 | -         | -      | -       | -    |
| NGLY1_1    | -         | -      | -       | -    |
| NGLY1_KO_2 | 44.08     | -0.088 | 0       | 0.99 |
| NGLY1_2    | 45.71     | -0.11  | 0.01    | 1    |

Supplement: Supplementary file 5686 [file 1]

IPI00293363.2|KBTBD2

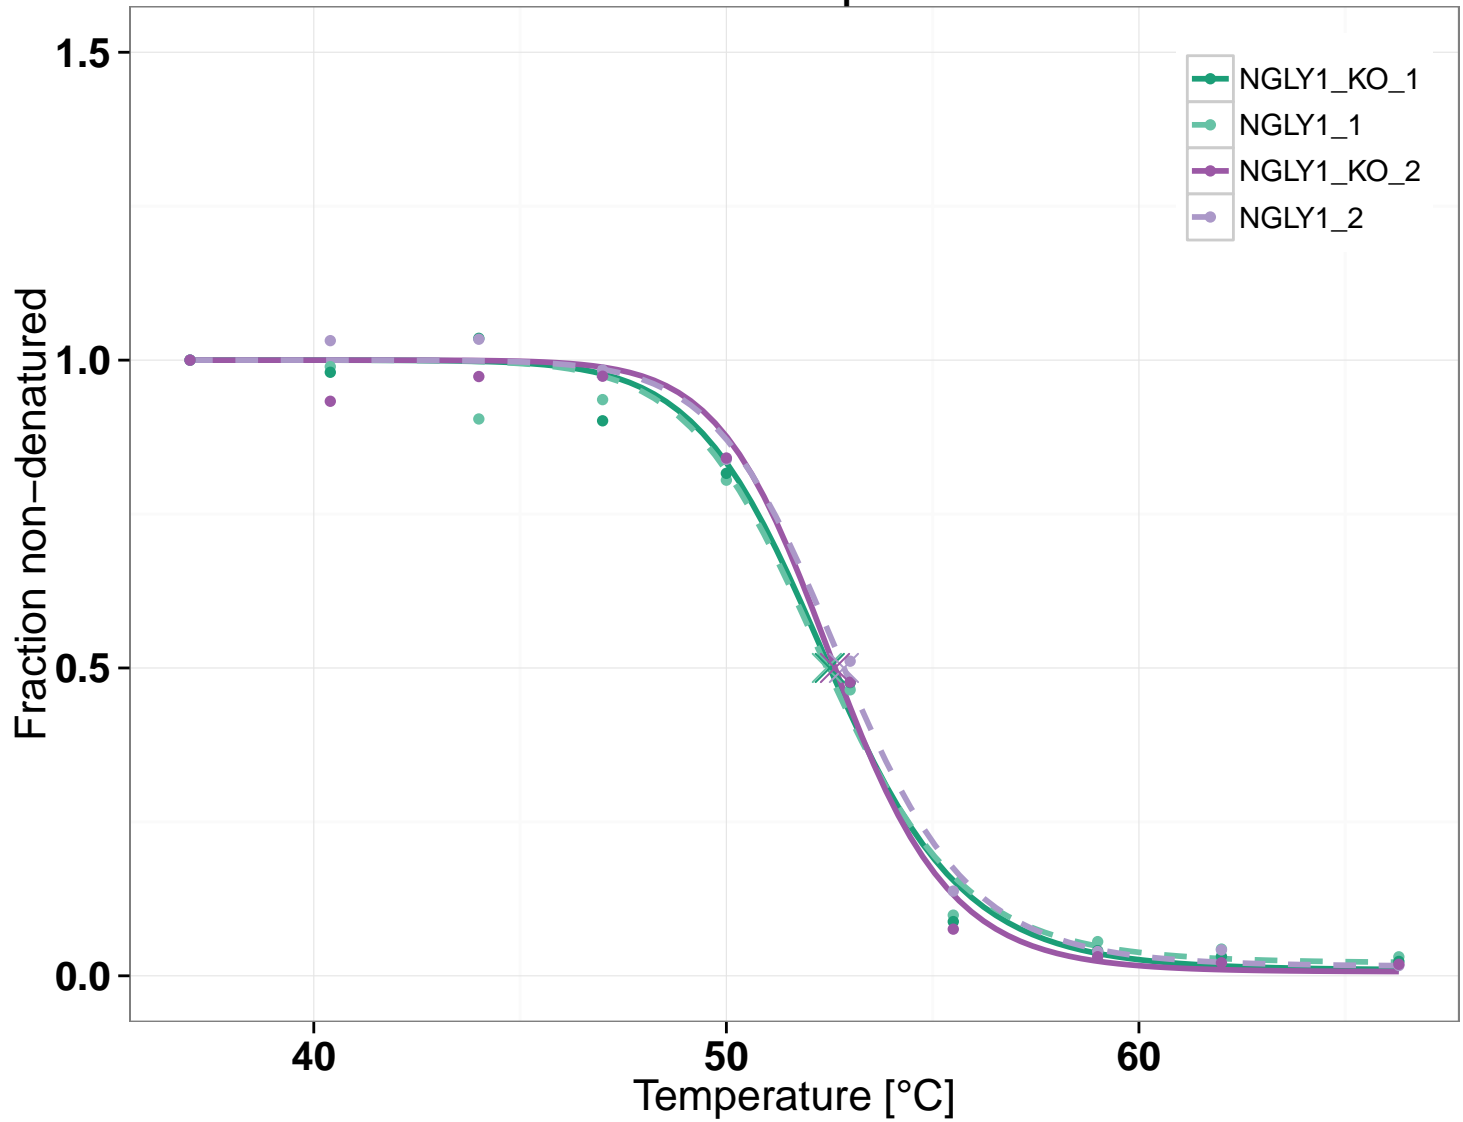

|            | meltPoint | slope | plateau | R2   |
|------------|-----------|-------|---------|------|
| NGLY1_KO_1 | 52.51     | -0.15 | 0.01    | 0.99 |
| NGLY1_1    | 52.44     | -0.15 | 0.02    | 0.99 |
| NGLY1_KO_2 | 52.63     | -0.18 | 0.01    | 0.99 |
| NGLY1_2    | 52.85     | -0.16 | 0.02    | 1    |

Supplement: Supplementary file 5687 [file 1]

IPI00215780.5|RPS19

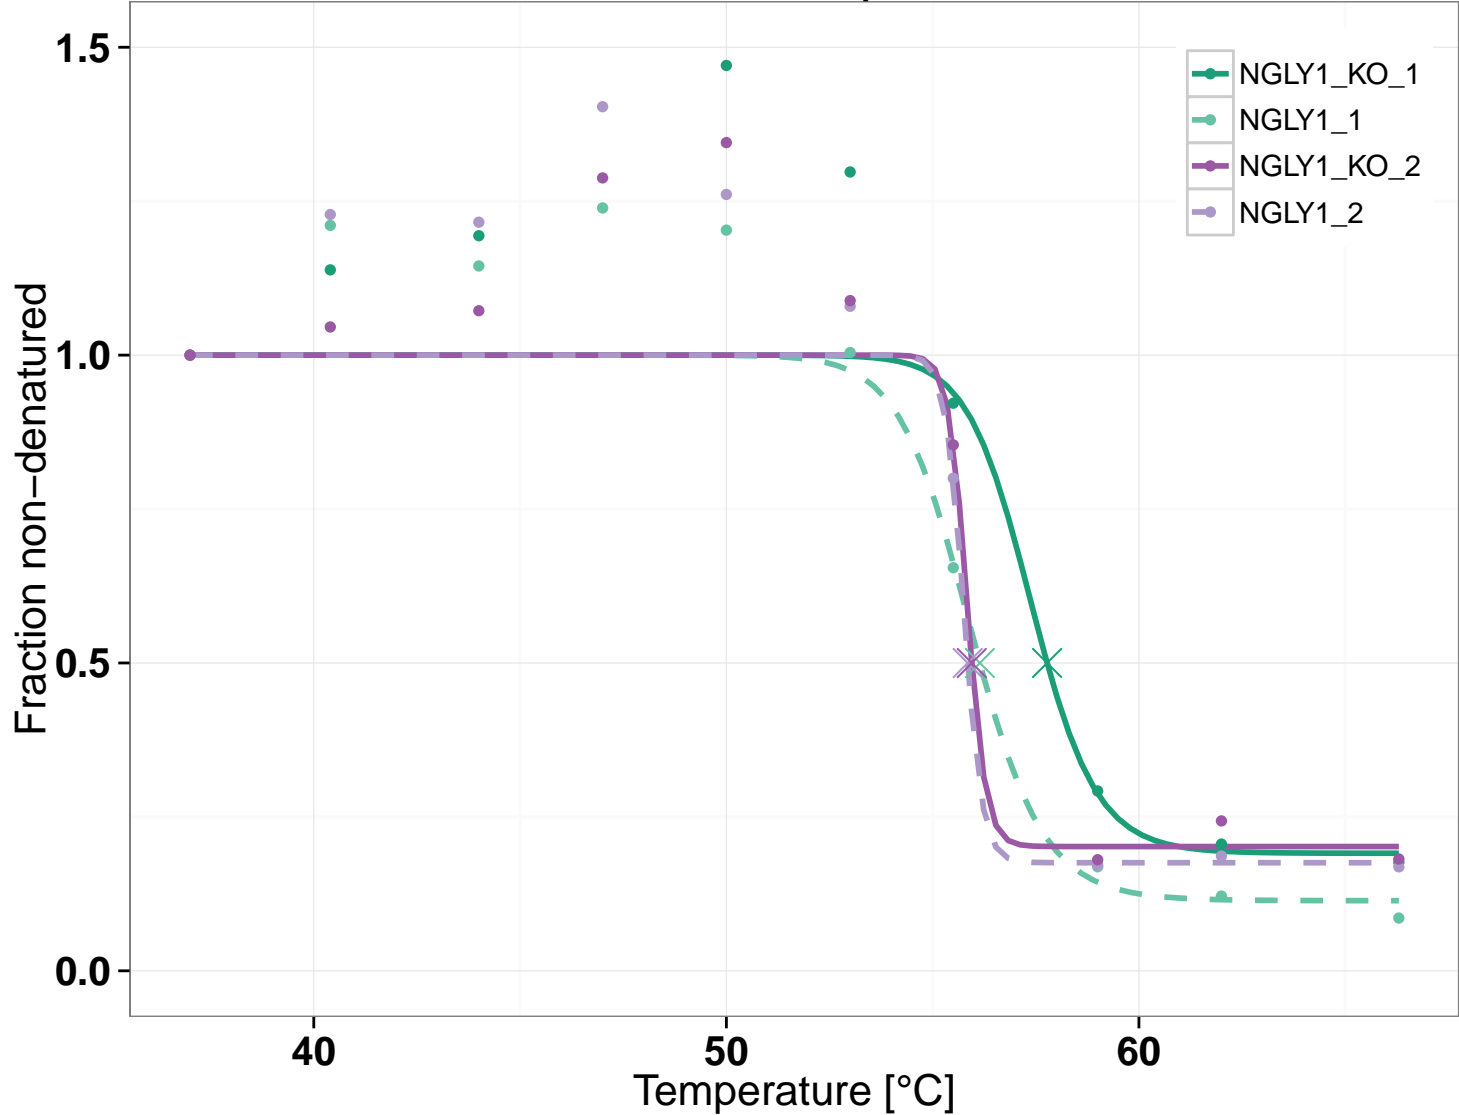

|            | meltPoint | slope | plateau | R2   |
|------------|-----------|-------|---------|------|
| NGLY1_KO_1 | 57.77     | -0.26 | 0.19    | 0.73 |
| NGLY1_1    | 56.14     | -0.25 | 0.11    | 0.92 |
| NGLY1_KO_2 | 55.95     | -0.89 | 0.2     | 0.88 |
| NGLY1_2    | 55.85     | -0.92 | 0.18    | 0.85 |

Supplement: Supplementary file 5688 [file 1]

IPI00873899.1|ABCF1

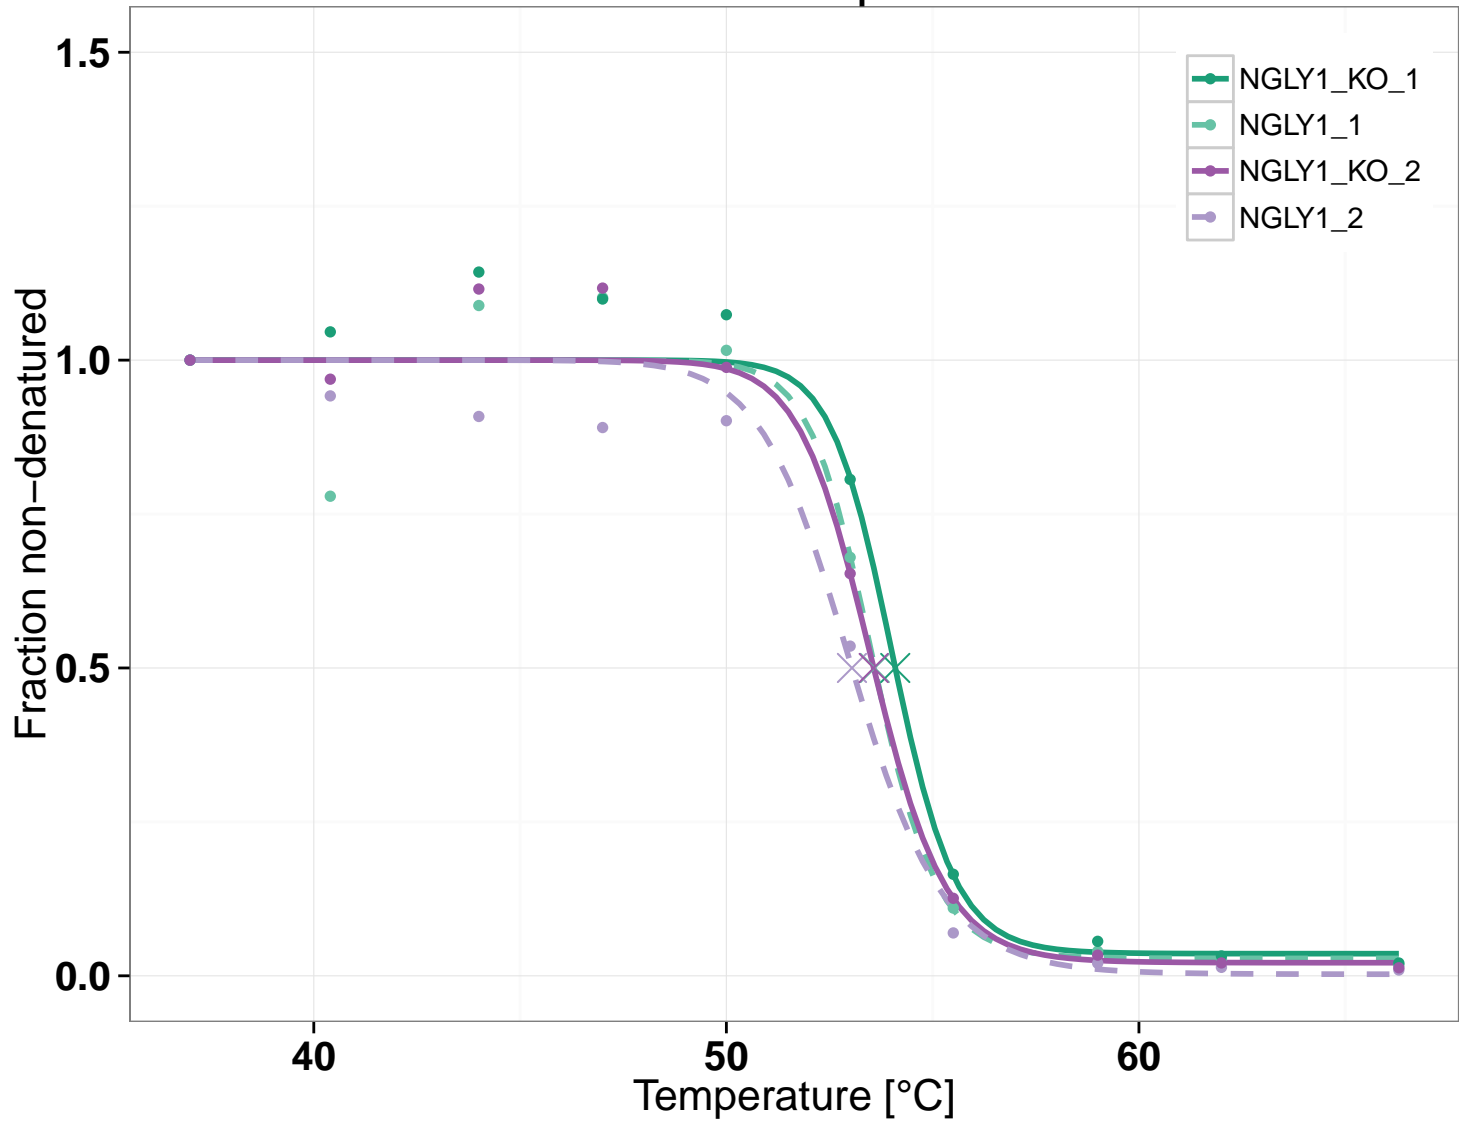

|            | meltPoint | slope | plateau | R2   |
|------------|-----------|-------|---------|------|
| NGLY1_KO_1 | 54.09     | -0.32 | 0.04    | 0.98 |
| NGLY1_1    | 53.6      | -0.31 | 0.03    | 0.97 |
| NGLY1_KO_2 | 53.57     | -0.27 | 0.02    | 0.99 |
| NGLY1_2    | 53.04     | -0.22 | 0       | 0.98 |

Supplement: Supplementary file 5689 [file 1]

# IPI00027142.2|POP7

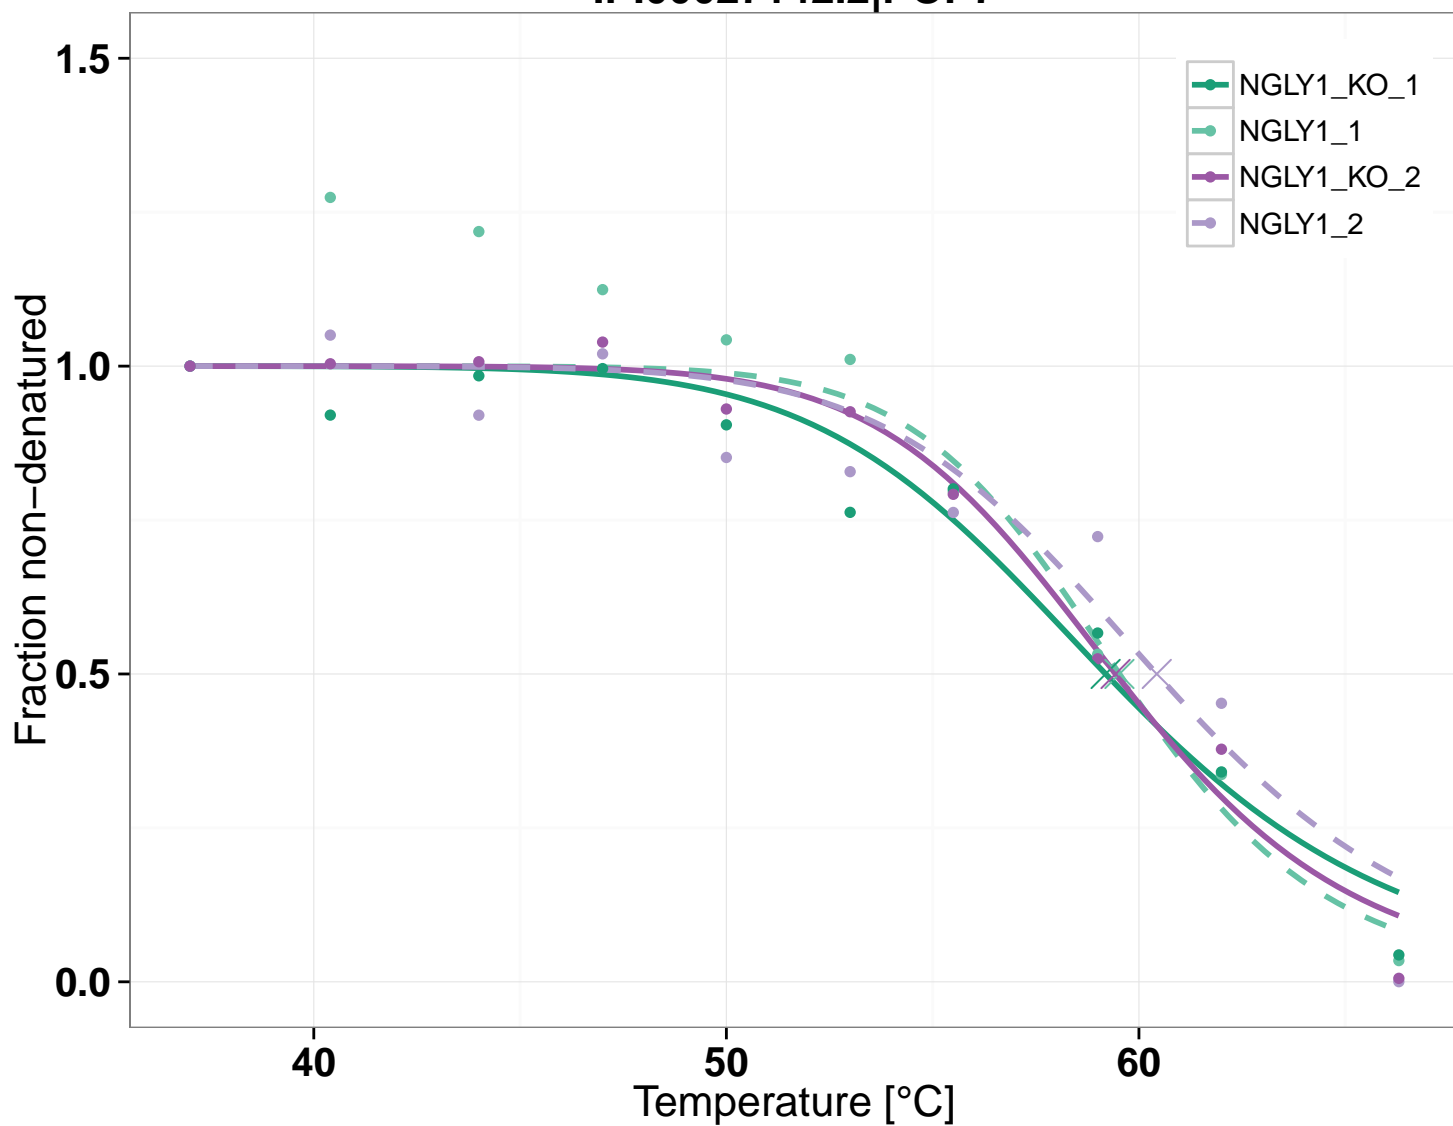

|            | meltPoint | slope  | plateau | R2   |
|------------|-----------|--------|---------|------|
| NGLY1_KO_1 | 59.19     | -0.071 | 0       | 0.96 |
| NGLY1_1    | 59.53     | -0.099 | 0       | 0.9  |
| NGLY1_KO_2 | 59.43     | -0.087 | 0       | 0.98 |
| NGLY1_2    | 60.43     | -0.075 | 0       | 0.91 |

Supplement: Supplementary file 5690 [file 1]

# IPI00856045.1|AHNAK2

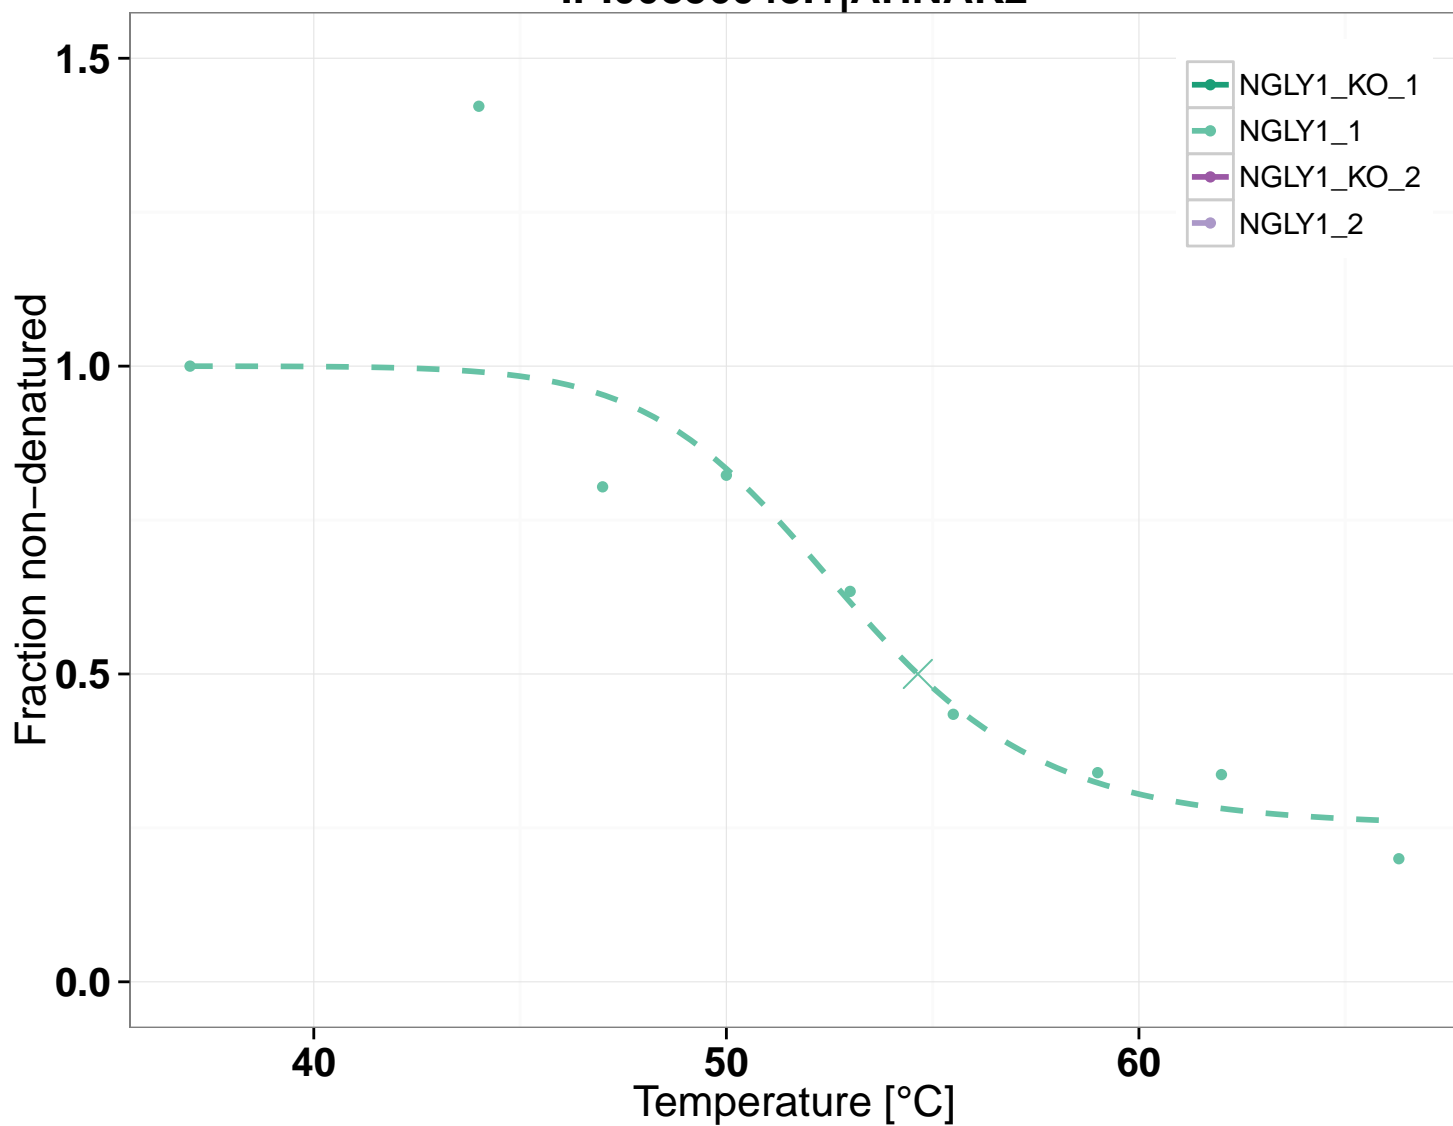

|            | meltPoint | slope  | plateau | R2   |
|------------|-----------|--------|---------|------|
| NGLY1_KO_1 | —         | —      | —       | —    |
| NGLY1_1    | 54.64     | -0.077 | 0.25    | 0.63 |
| NGLY1_KO_2 | —         | —      | —       | —    |
| NGLY1_2    | —         | —      | —       | —    |

Supplement: Supplementary file 5691 [file 1]

IPI00642584.2|KIAA0090

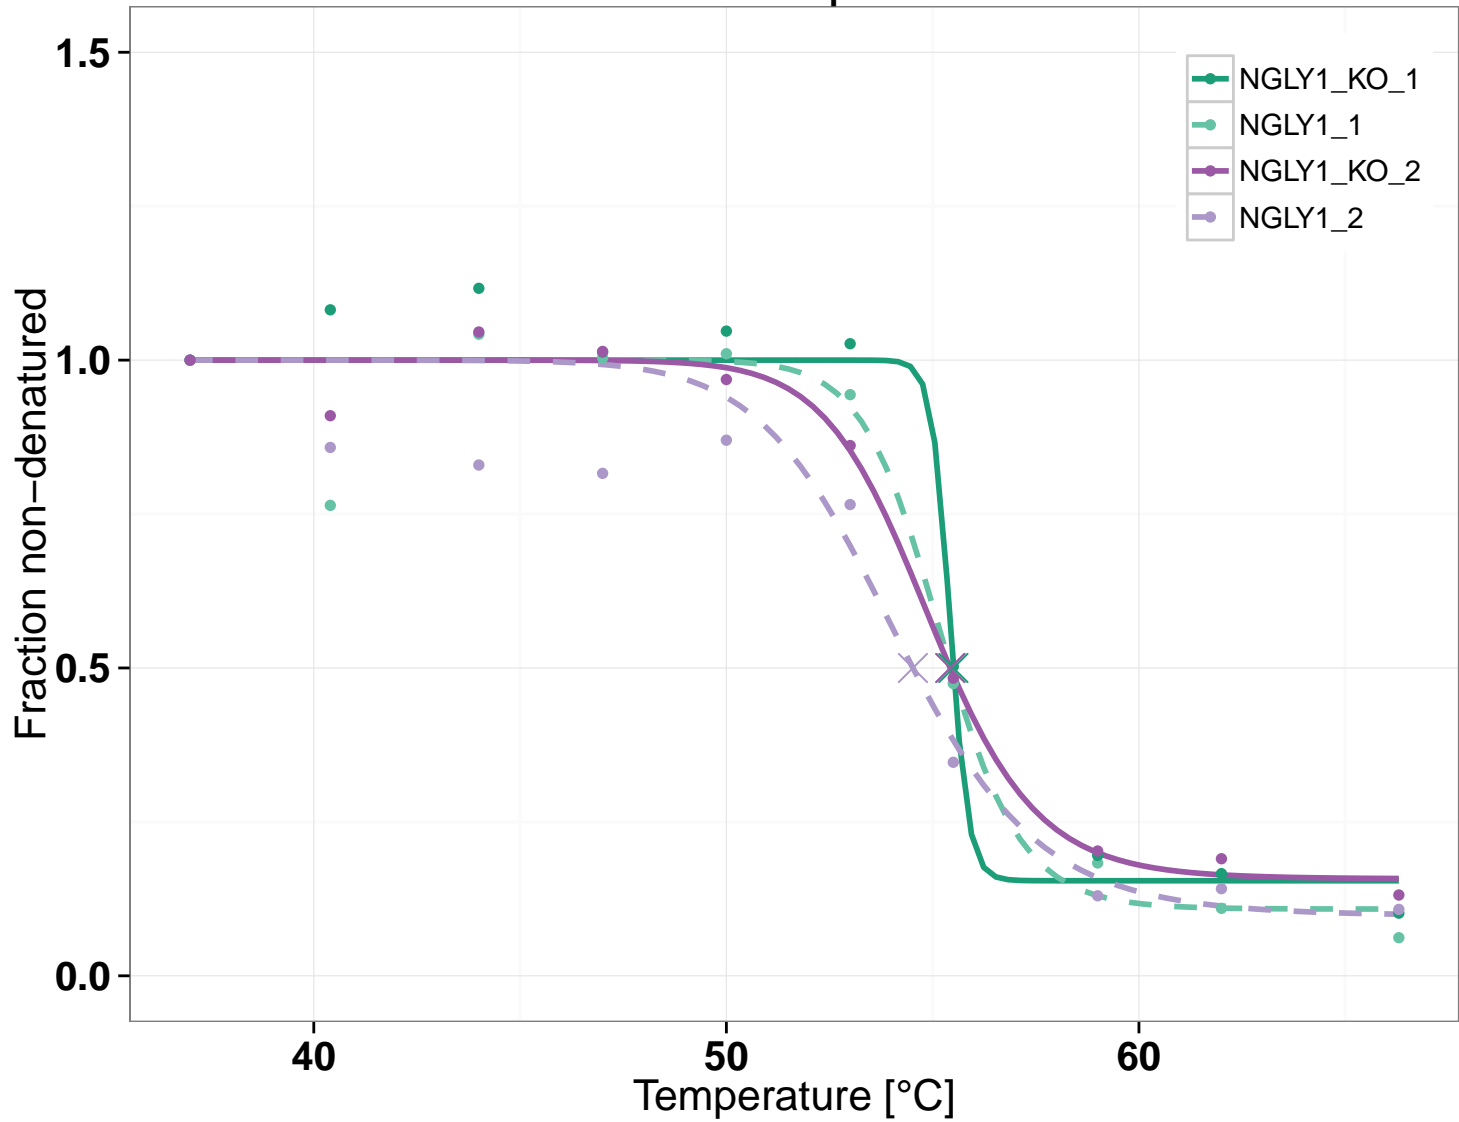

|            | meltPoint | slope | plateau | R2   |
|------------|-----------|-------|---------|------|
| NGLY1_KO_1 | 55.5      | -0.95 | 0.15    | 0.98 |
| NGLY1_1    | 55.44     | -0.23 | 0.11    | 0.96 |
| NGLY1_KO_2 | 55.43     | -0.16 | 0.16    | 0.99 |
| NGLY1_2    | 54.52     | -0.13 | 0.1     | 0.92 |

Supplement: Supplementary file 5692 [file 1]

# IPI00019983.1|BCL2L1

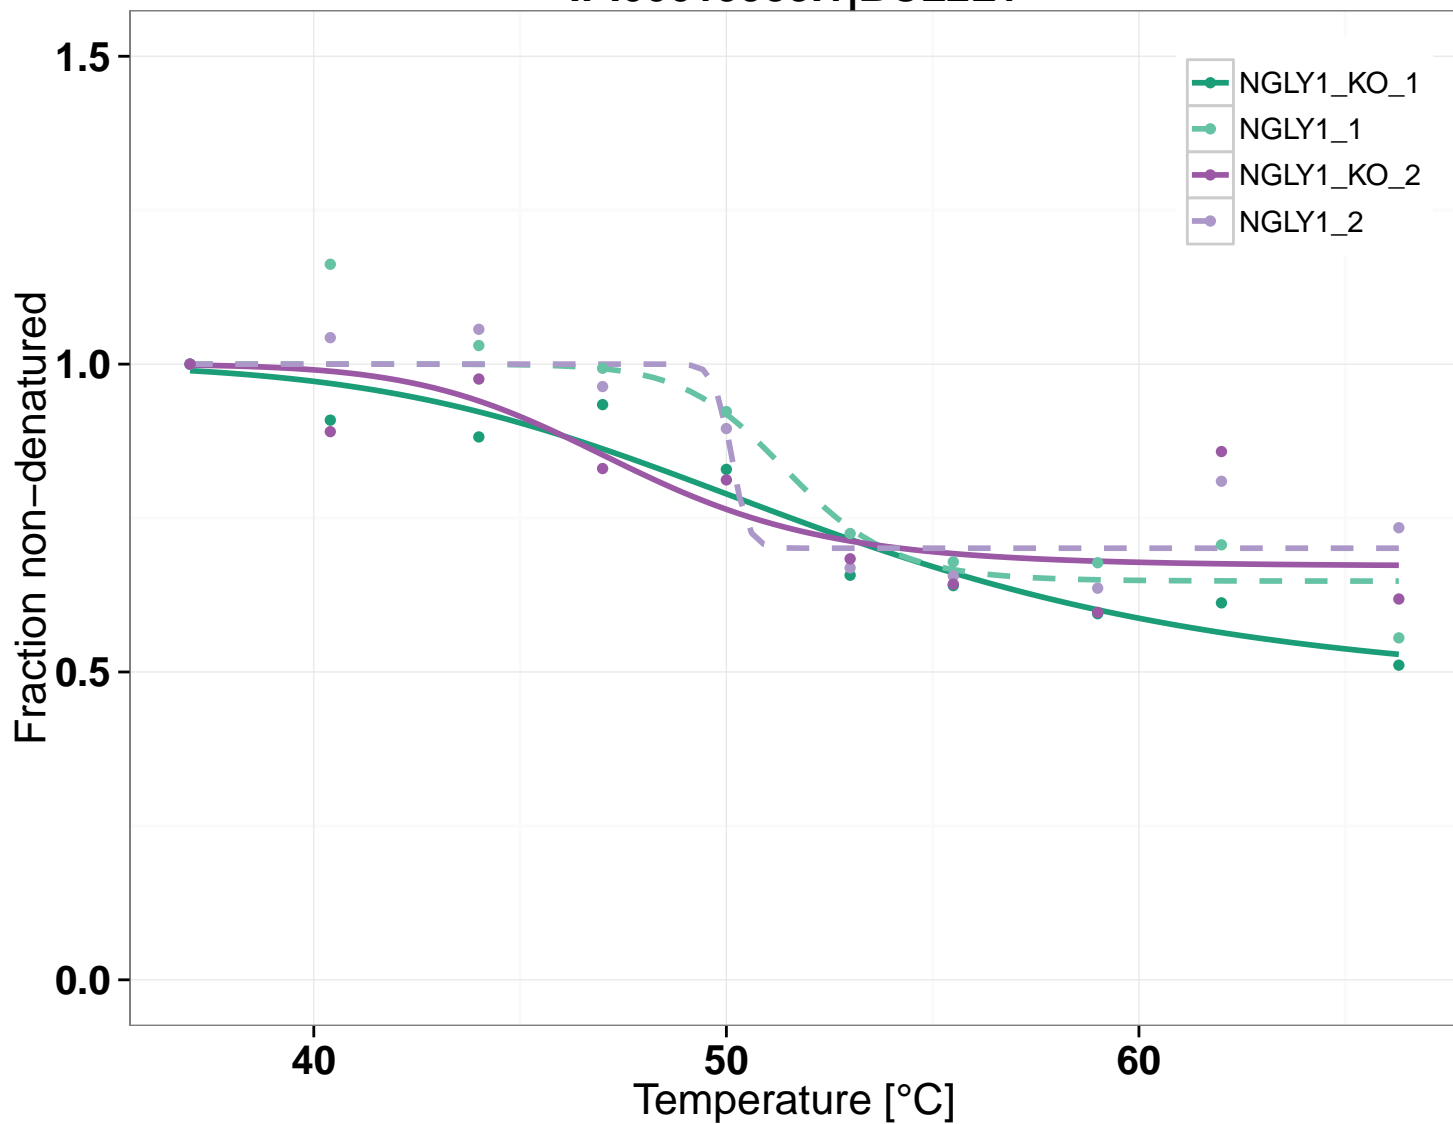

|            | meltPoint | slope  | plateau | R2   |
|------------|-----------|--------|---------|------|
| NGLY1_KO_1 | –         | –0.025 | 0.46    | 0.93 |
| NGLY1_1    | –         | –0.069 | 0.65    | 0.89 |
| NGLY1_KO_2 | –         | –0.033 | 0.67    | 0.69 |
| NGLY1_2    | –         | –0.37  | 0.7     | 0.89 |

Supplement: Supplementary file 5693 [file 1]

IPI00872771.2|RAPGEF6

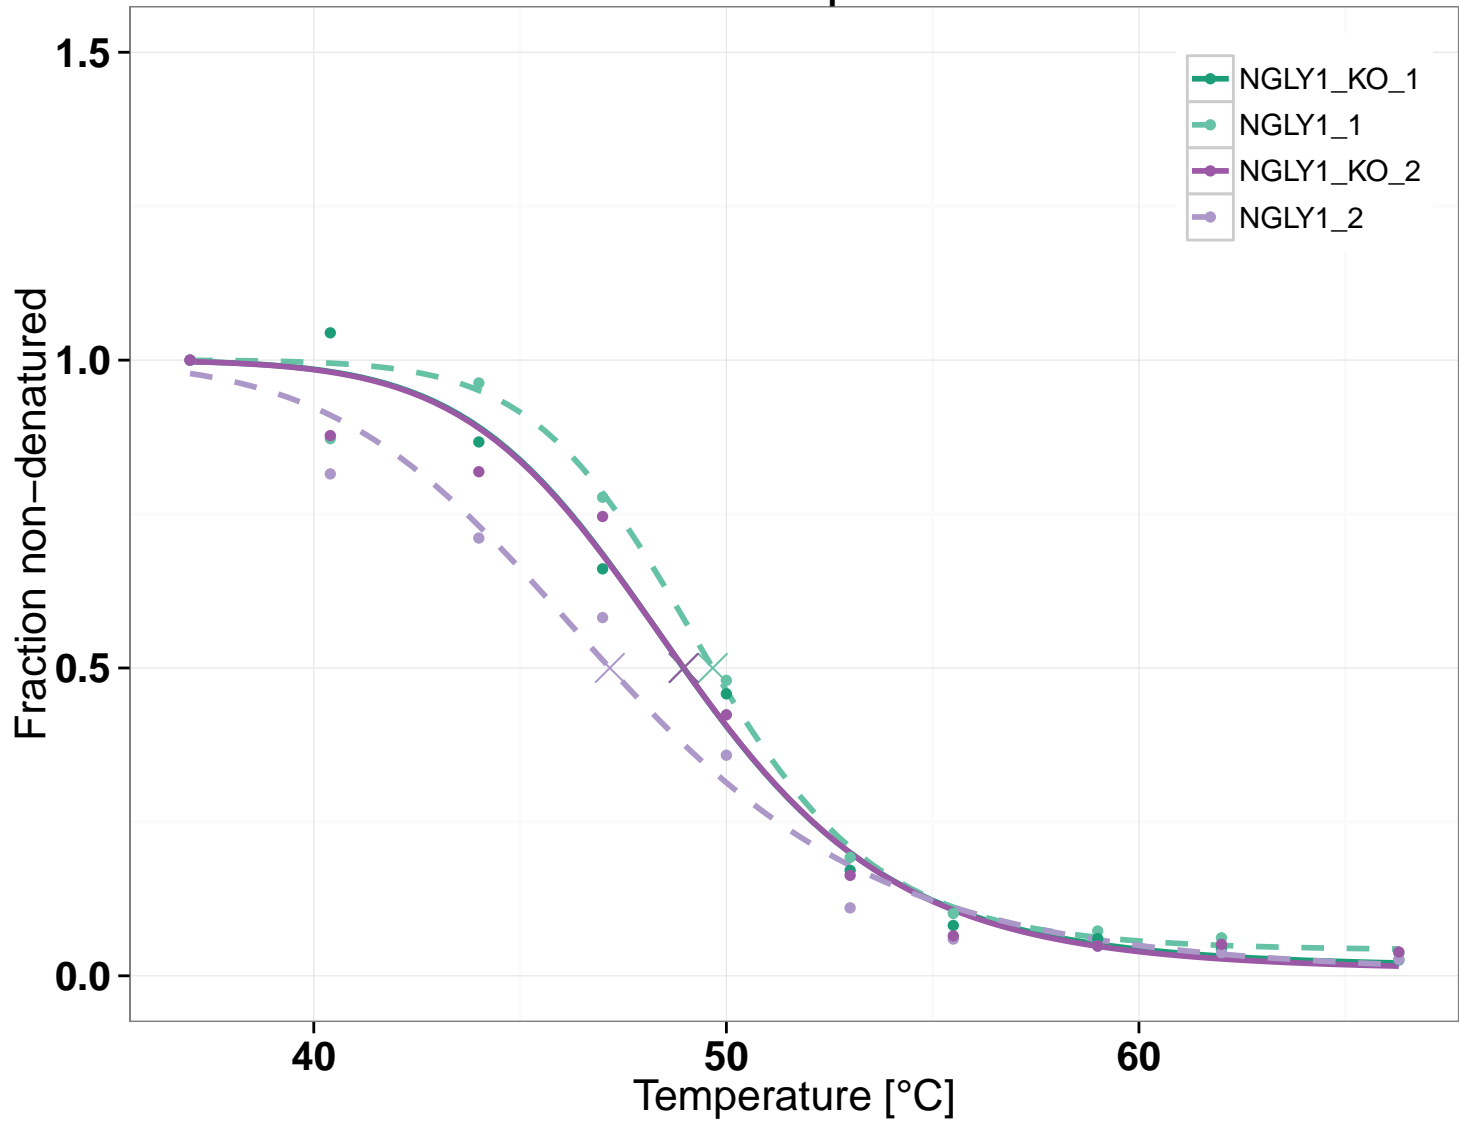

|            | meltPoint | slope  | plateau | R2   |
|------------|-----------|--------|---------|------|
| NGLY1_KO_1 | 48.96     | -0.096 | 0.01    | 0.99 |
| NGLY1_1    | 49.67     | -0.11  | 0.04    | 0.99 |
| NGLY1_KO_2 | 48.97     | -0.095 | 0.01    | 0.98 |
| NGLY1_2    | 47.17     | -0.075 | 0       | 0.98 |

Supplement: Supplementary file 5694 [file 1]

IPI00480032.3|LOC653156

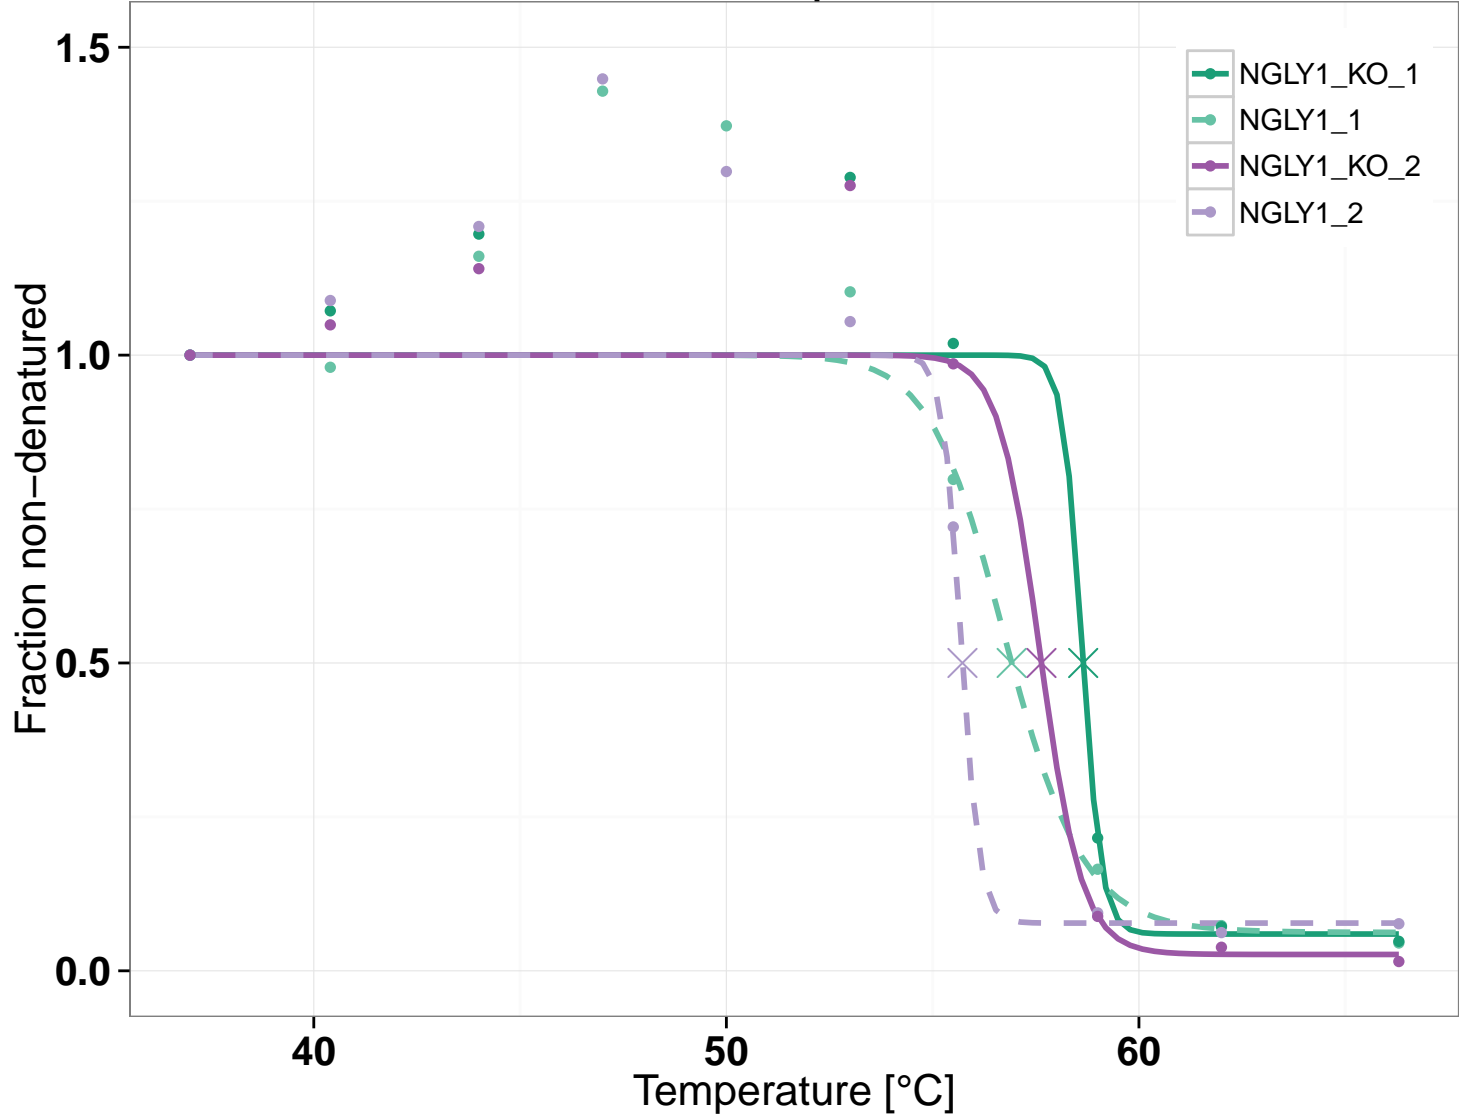

|            | meltPoint | slope | plateau | R2   |
|------------|-----------|-------|---------|------|
| NGLY1_KO_1 | 58.65     | -1    | 0.06    | 0.73 |
| NGLY1_1    | 56.92     | -0.25 | 0.06    | 0.86 |
| NGLY1_KO_2 | 57.64     | -0.48 | 0.03    | 0.77 |
| NGLY1_2    | 55.72     | -1    | 0.08    | 0.87 |

Supplement: Supplementary file 5695 [file 1]

IPI00798102.1|VPS29

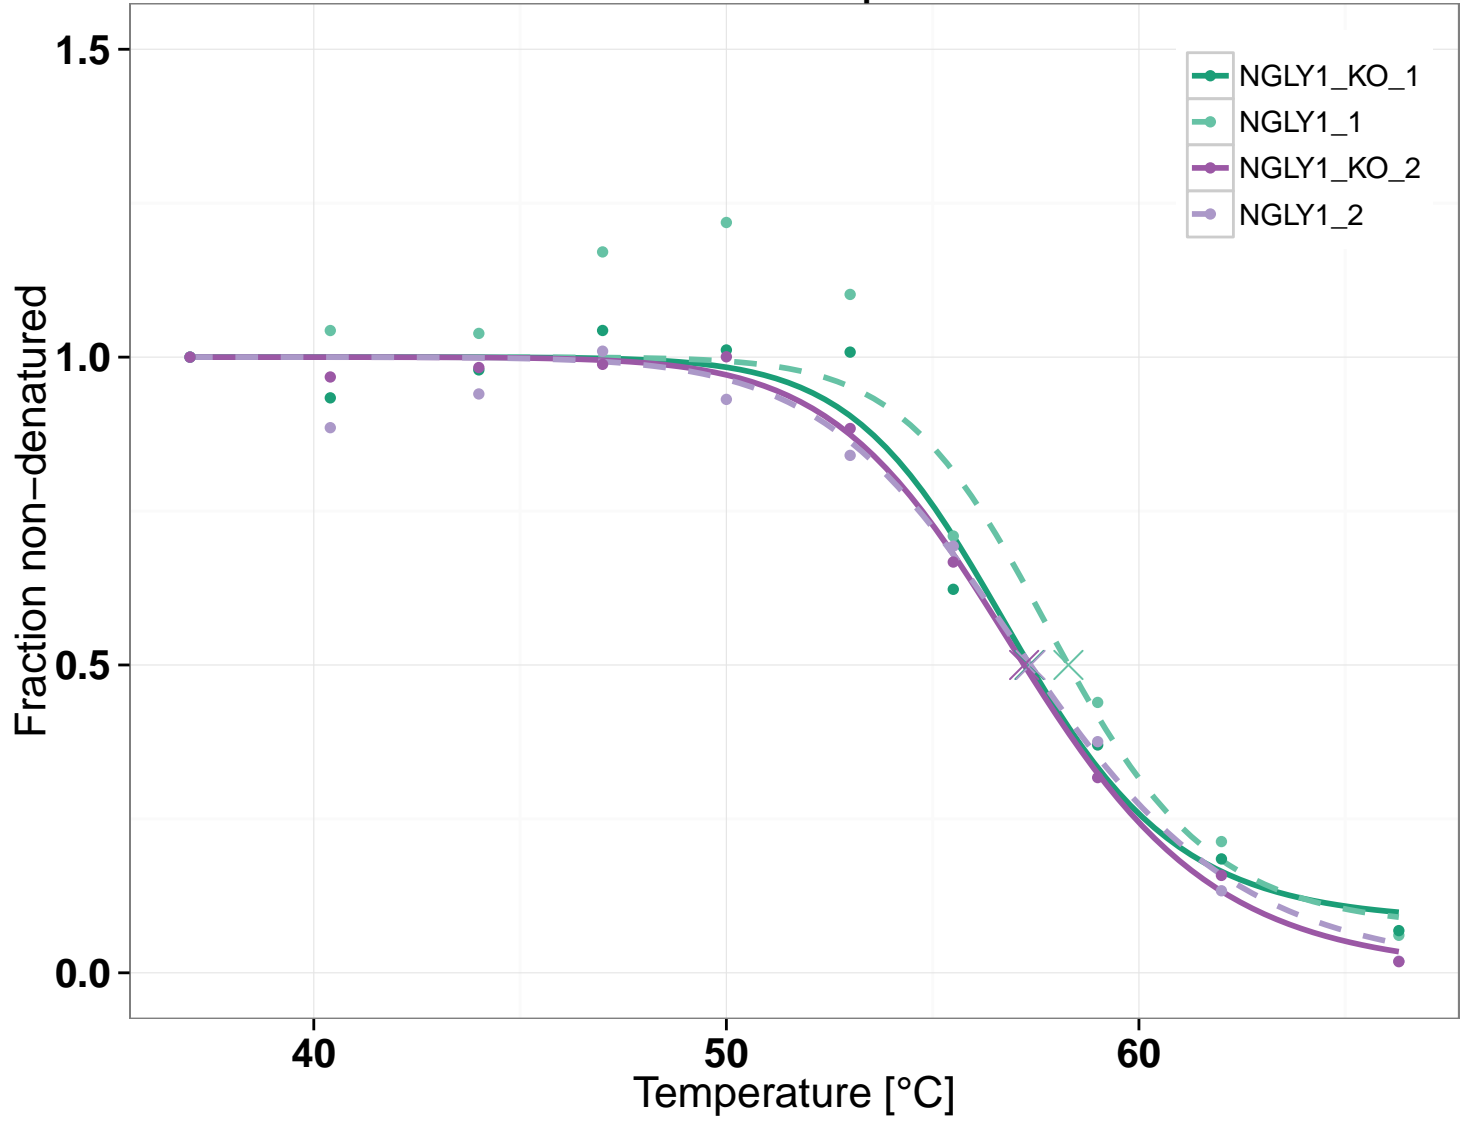

|            | meltPoint | slope  | plateau | R2   |
|------------|-----------|--------|---------|------|
| NGLY1_KO_1 | 57.35     | -0.12  | 0.08    | 0.98 |
| NGLY1_1    | 58.29     | -0.12  | 0.07    | 0.92 |
| NGLY1_KO_2 | 57.22     | -0.11  | 0       | 1    |
| NGLY1_2    | 57.37     | -0.098 | 0       | 0.98 |

Supplement: Supplementary file 5696 [file 1]

IPI00010153.5|RPL23

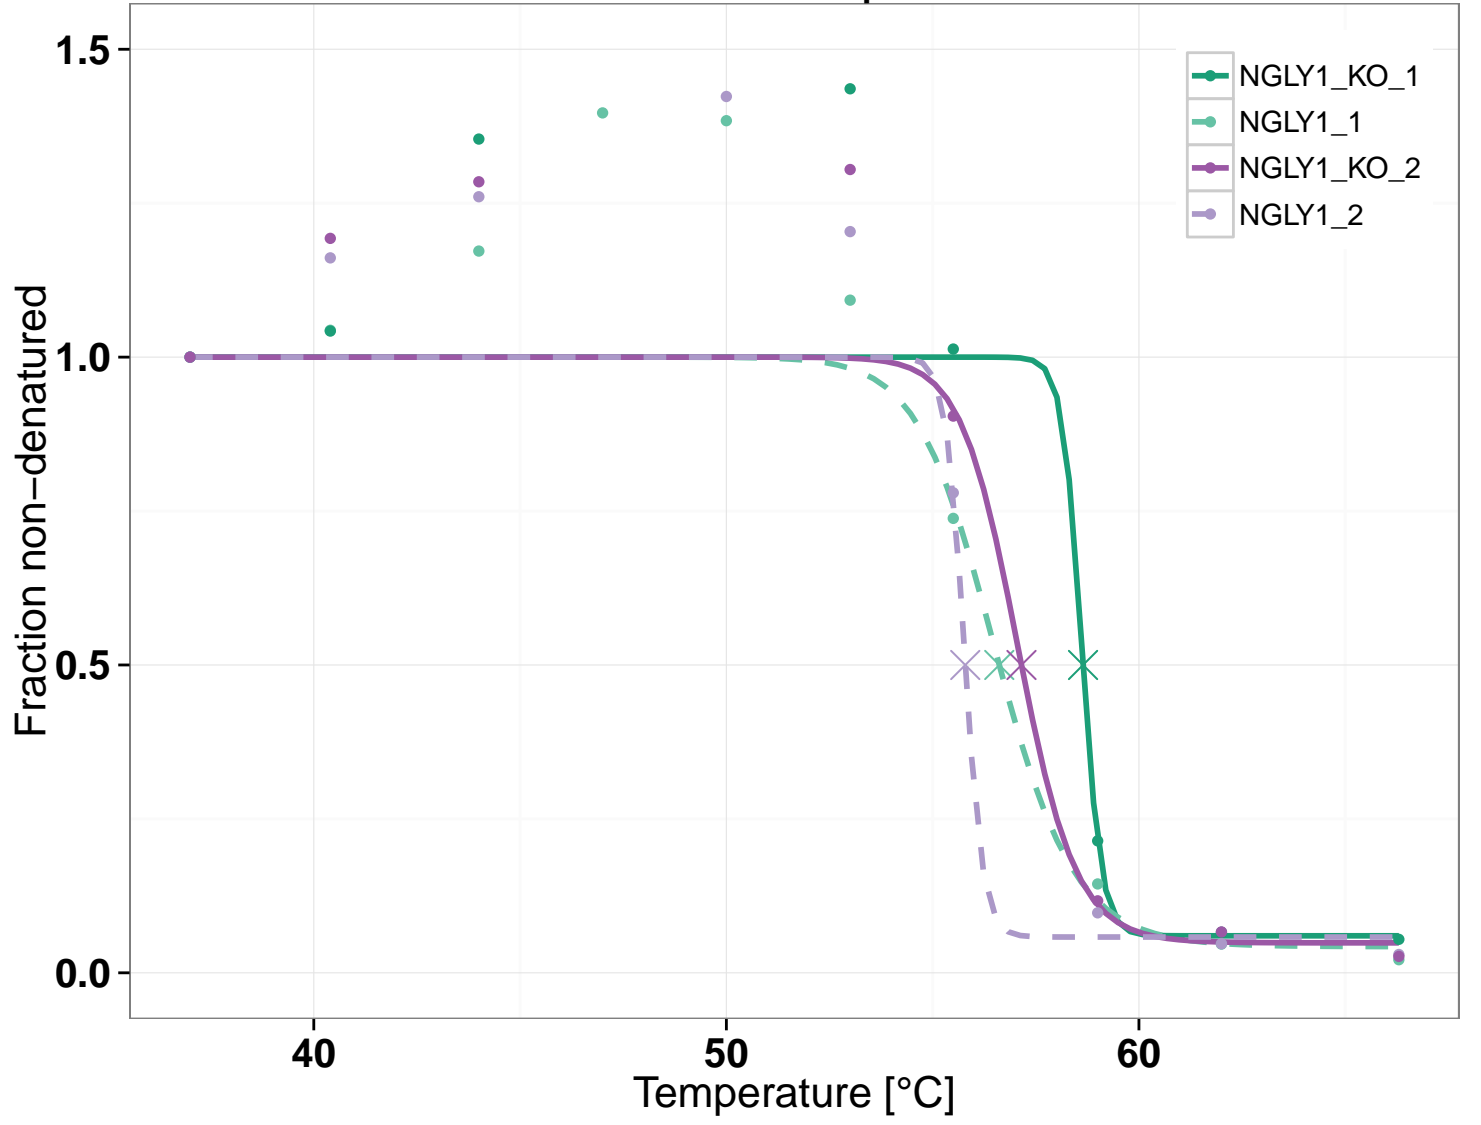

|            | meltPoint | slope | plateau | R2   |
|------------|-----------|-------|---------|------|
| NGLY1_KO_1 | 58.65     | -1    | 0.06    | 0.67 |
| NGLY1_1    | 56.61     | -0.25 | 0.04    | 0.87 |
| NGLY1_KO_2 | 57.15     | -0.34 | 0.05    | 0.72 |
| NGLY1_2    | 55.79     | -1.1  | 0.06    | 0.79 |

Supplement: Supplementary file 5697 [file 1]

# IPI00872214.1|TBCA

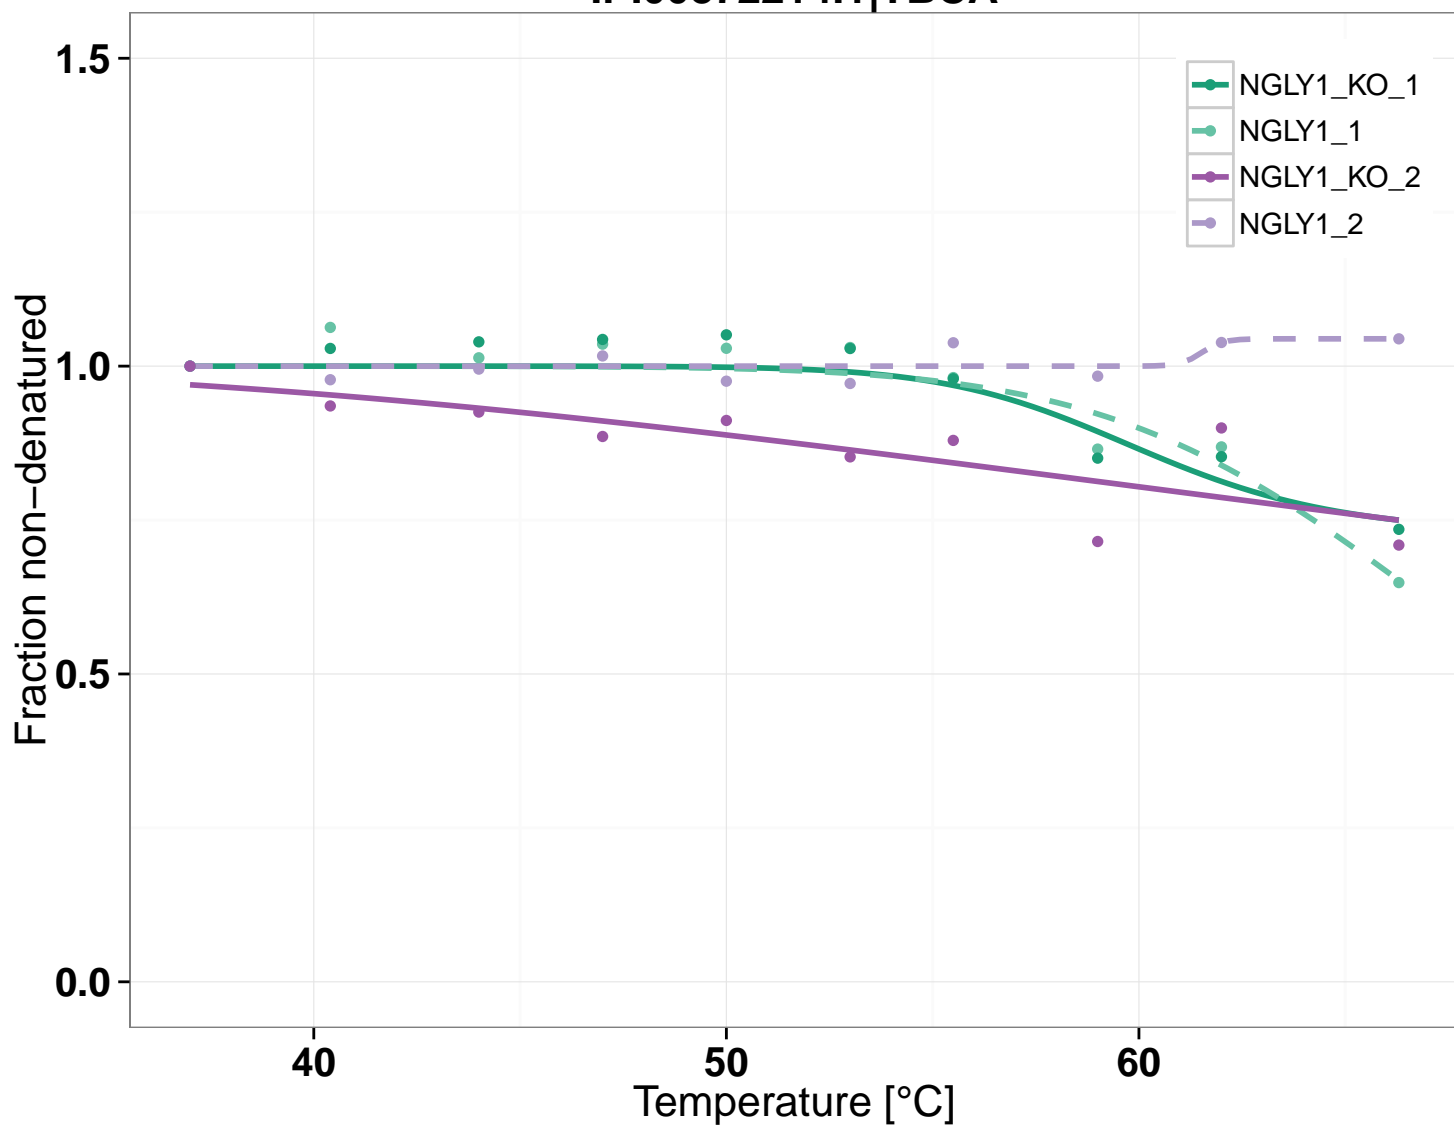

|            | meltPoint | slope   | plateau | R2   |
|------------|-----------|---------|---------|------|
| NGLY1_KO_1 | —         | -0.029  | 0.73    | 0.88 |
| NGLY1_1    | —         | —       | 0.11    | 0.91 |
| NGLY1_KO_2 | —         | -0.0087 | 0       | 0.64 |
| NGLY1_2    | —         | 0.044   | 1.04    | 0.46 |

Supplement: Supplementary file 5698 [file 1]

# IPI00301395.4|CPVL

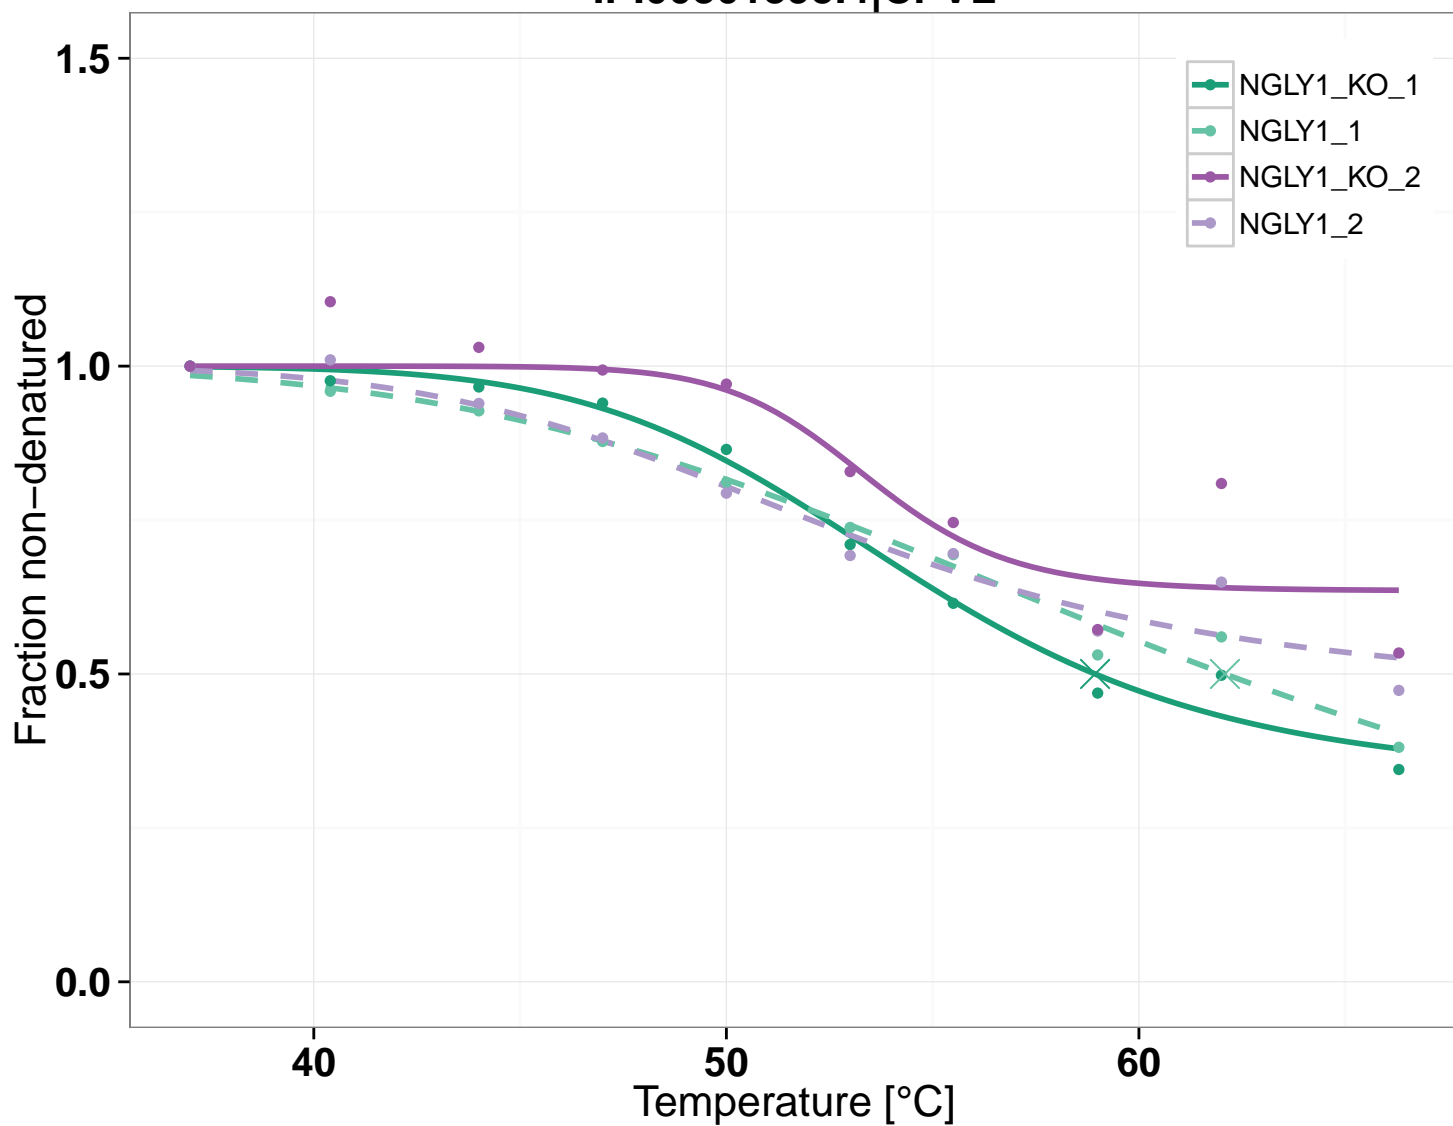

|            | meltPoint | slope  | plateau | R2   |
|------------|-----------|--------|---------|------|
| NGLY1_KO_1 | 58.94     | -0.044 | 0.33    | 0.99 |
| NGLY1_1    | 62.08     | -0.027 | 0       | 0.98 |
| NGLY1_KO_2 | -         | -0.053 | 0.64    | 0.83 |
| NGLY1_2    | -         | -0.027 | 0.47    | 0.95 |

Supplement: Supplementary file 5699 [file 1]

# IPI00477527.3|SLC25A44

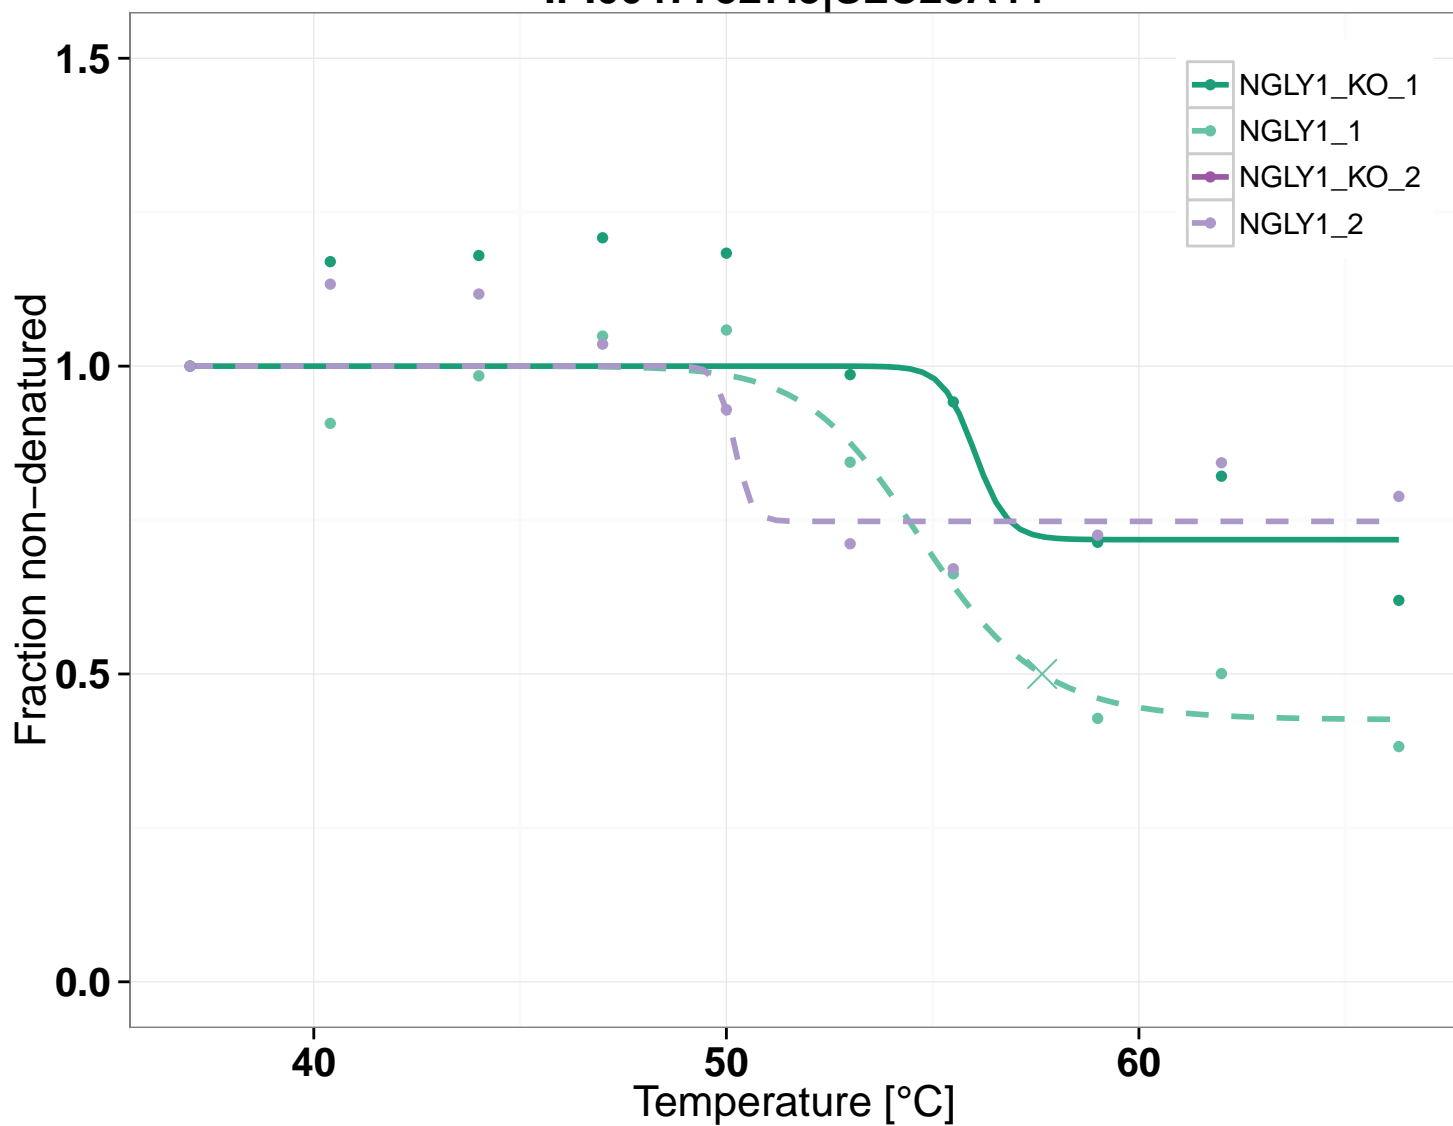

|            | meltPoint | slope | plateau | R2   |
|------------|-----------|-------|---------|------|
| NGLY1_KO_1 | -         | -0.18 | 0.72    | 0.6  |
| NGLY1_1    | 57.65     | -0.1  | 0.43    | 0.96 |
| NGLY1_KO_2 | -         | -     | -       | -    |
| NGLY1_2    | -         | -0.31 | 0.75    | 0.81 |

Supplement: Supplementary file 5700 [file 1]

IPI00007423.1|ANP32B

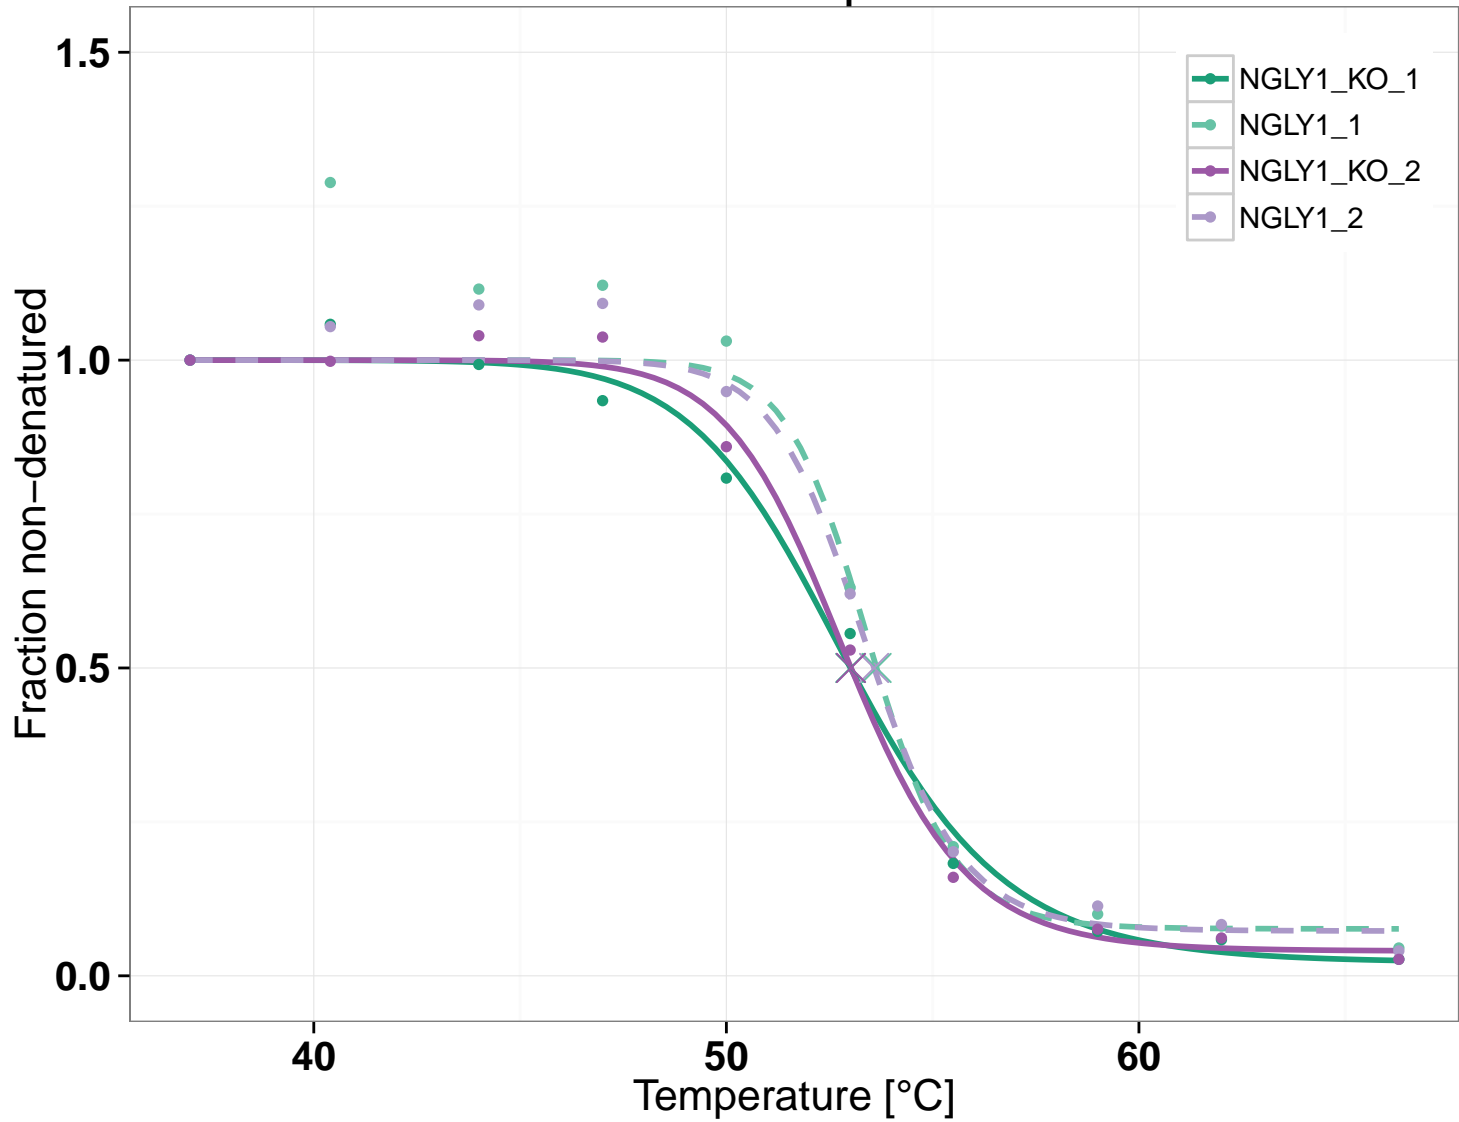

|            | meltPoint | slope | plateau | R2   |
|------------|-----------|-------|---------|------|
| NGLY1_KO_1 | 53.01     | -0.13 | 0.02    | 0.99 |
| NGLY1_1    | 53.64     | -0.23 | 0.08    | 0.95 |
| NGLY1_KO_2 | 53.02     | -0.16 | 0.04    | 1    |
| NGLY1_2    | 53.58     | -0.2  | 0.07    | 0.99 |

Supplement: Supplementary file 5701 [file 1]

# IPI00288947.3|GNAQ

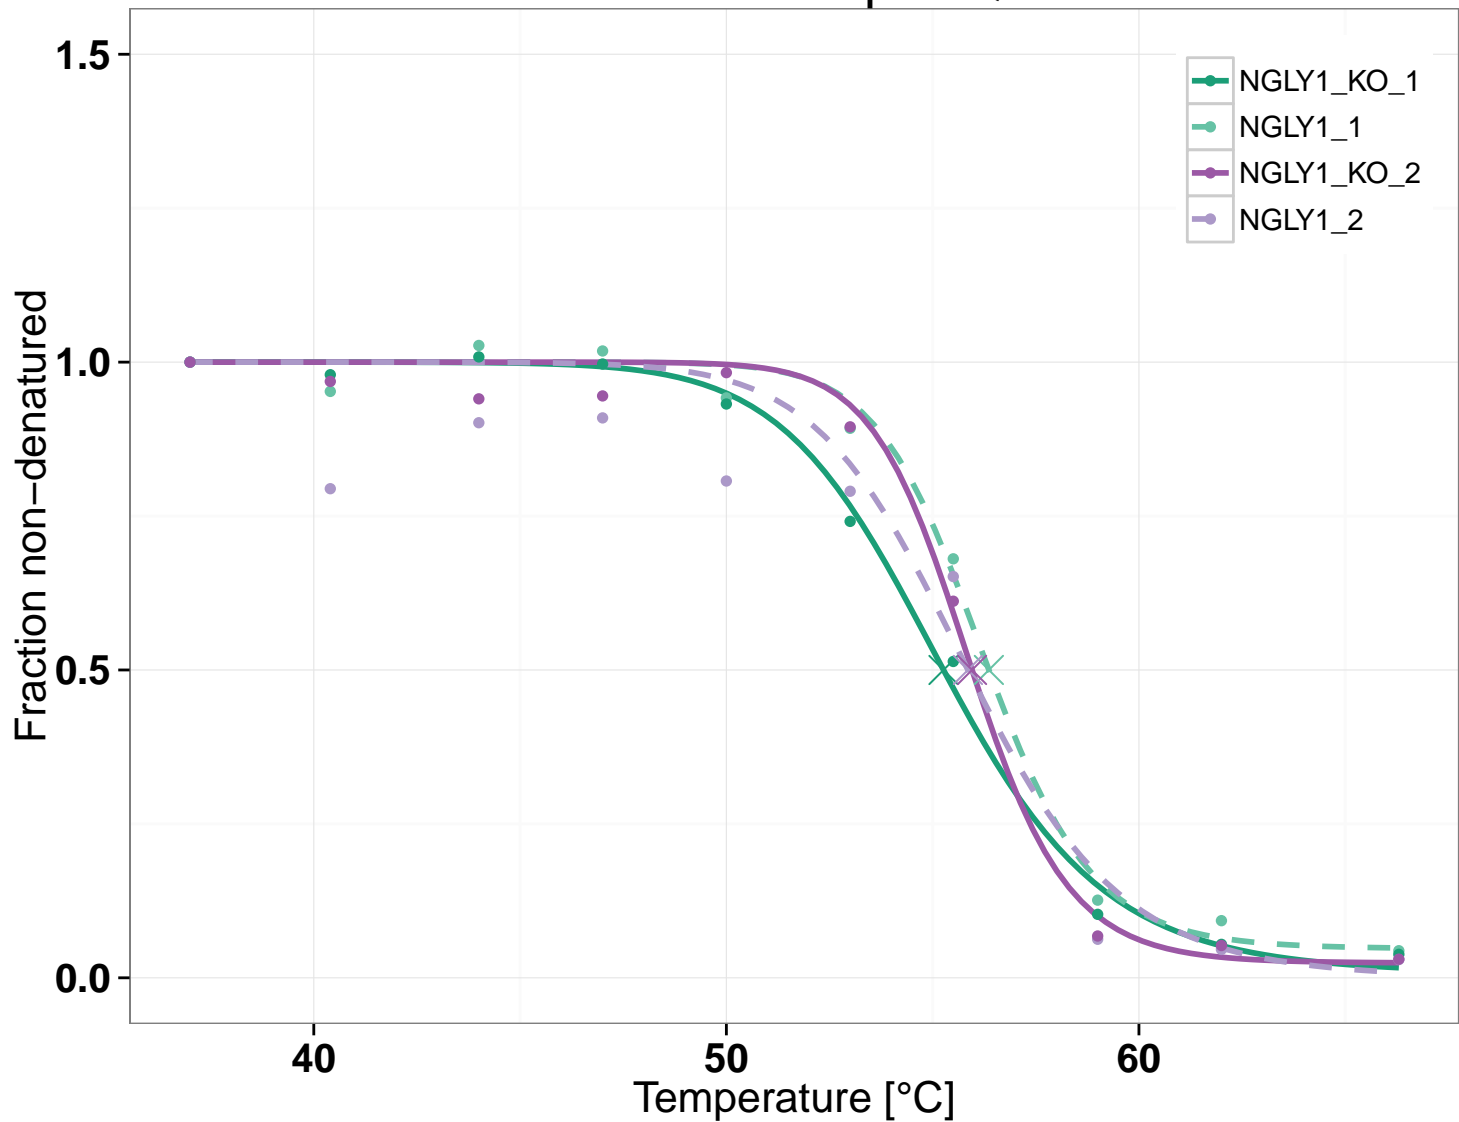

|            | meltPoint | slope | plateau | R2   |
|------------|-----------|-------|---------|------|
| NGLY1_KO_1 | 55.26     | -0.13 | 0.01    | 1    |
| NGLY1_1    | 56.36     | -0.18 | 0.05    | 0.99 |
| NGLY1_KO_2 | 55.95     | -0.21 | 0.02    | 0.99 |
| NGLY1_2    | 55.86     | -0.13 | 0       | 0.92 |

Supplement: Supplementary file 5702 [file 1]

# IPI00748895.3|ANK1

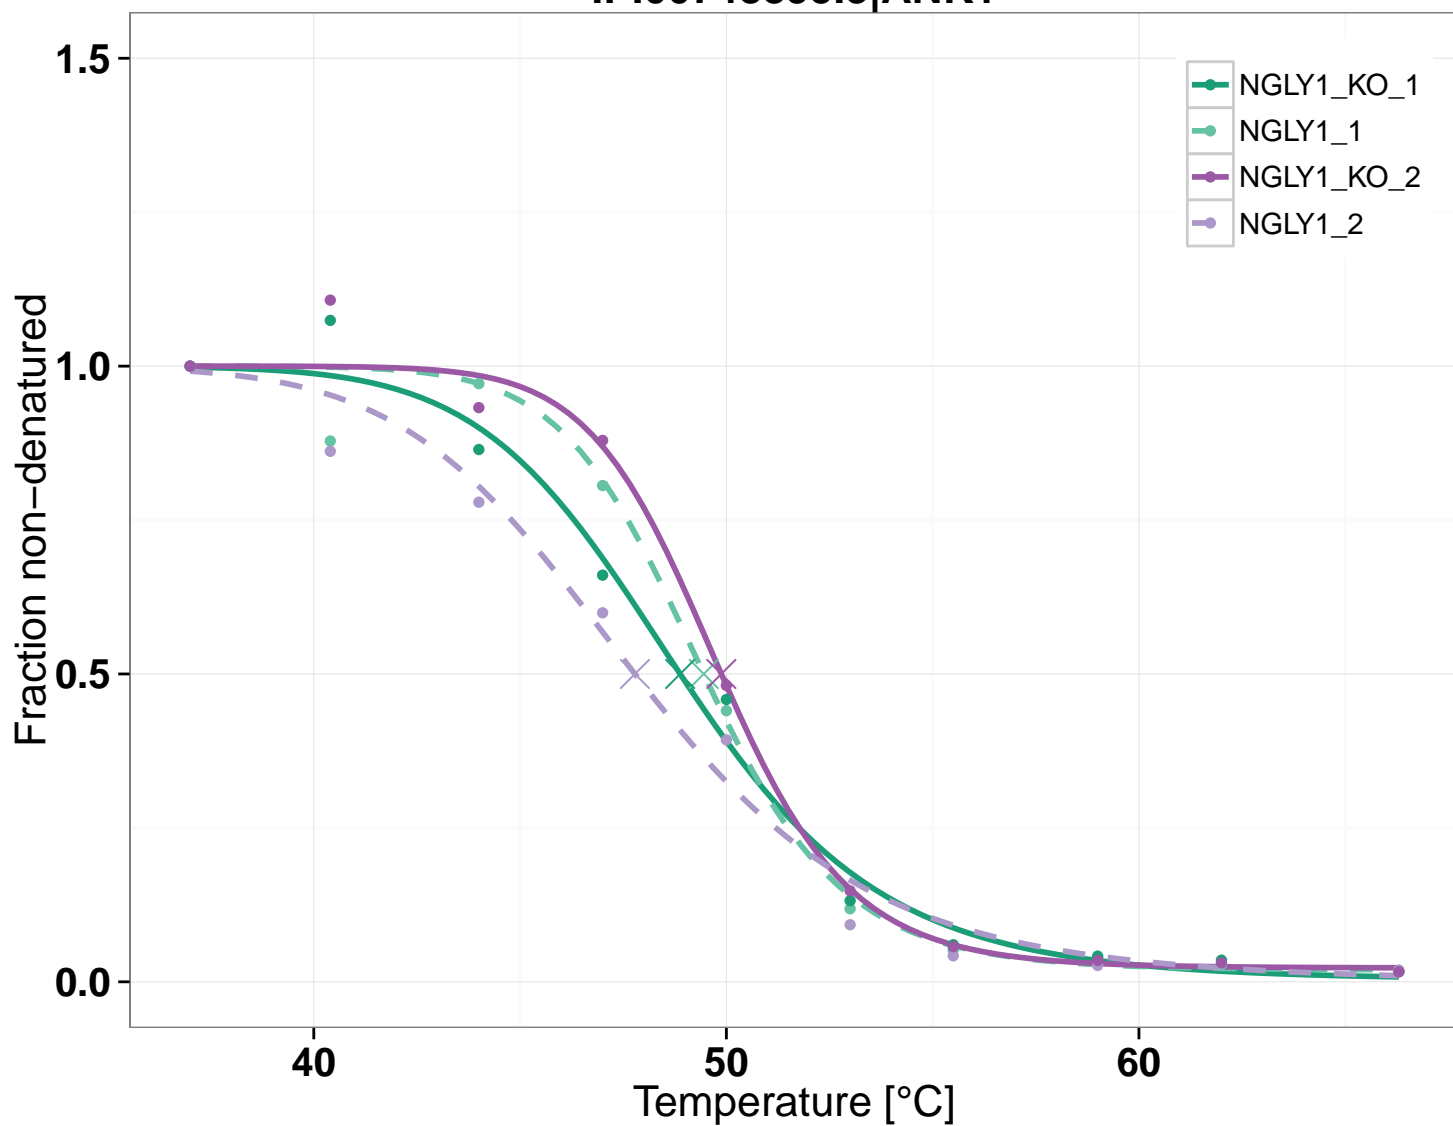

|            | meltPoint | slope  | plateau | R2   |
|------------|-----------|--------|---------|------|
| NGLY1_KO_1 | 48.88     | -0.1   | 0       | 0.99 |
| NGLY1_1    | 49.45     | -0.14  | 0.02    | 0.99 |
| NGLY1_KO_2 | 49.88     | -0.15  | 0.02    | 0.99 |
| NGLY1_2    | 47.78     | -0.087 | 0       | 0.98 |

Supplement: Supplementary file 5703 [file 1]

IPI00872359.1|DCTN1

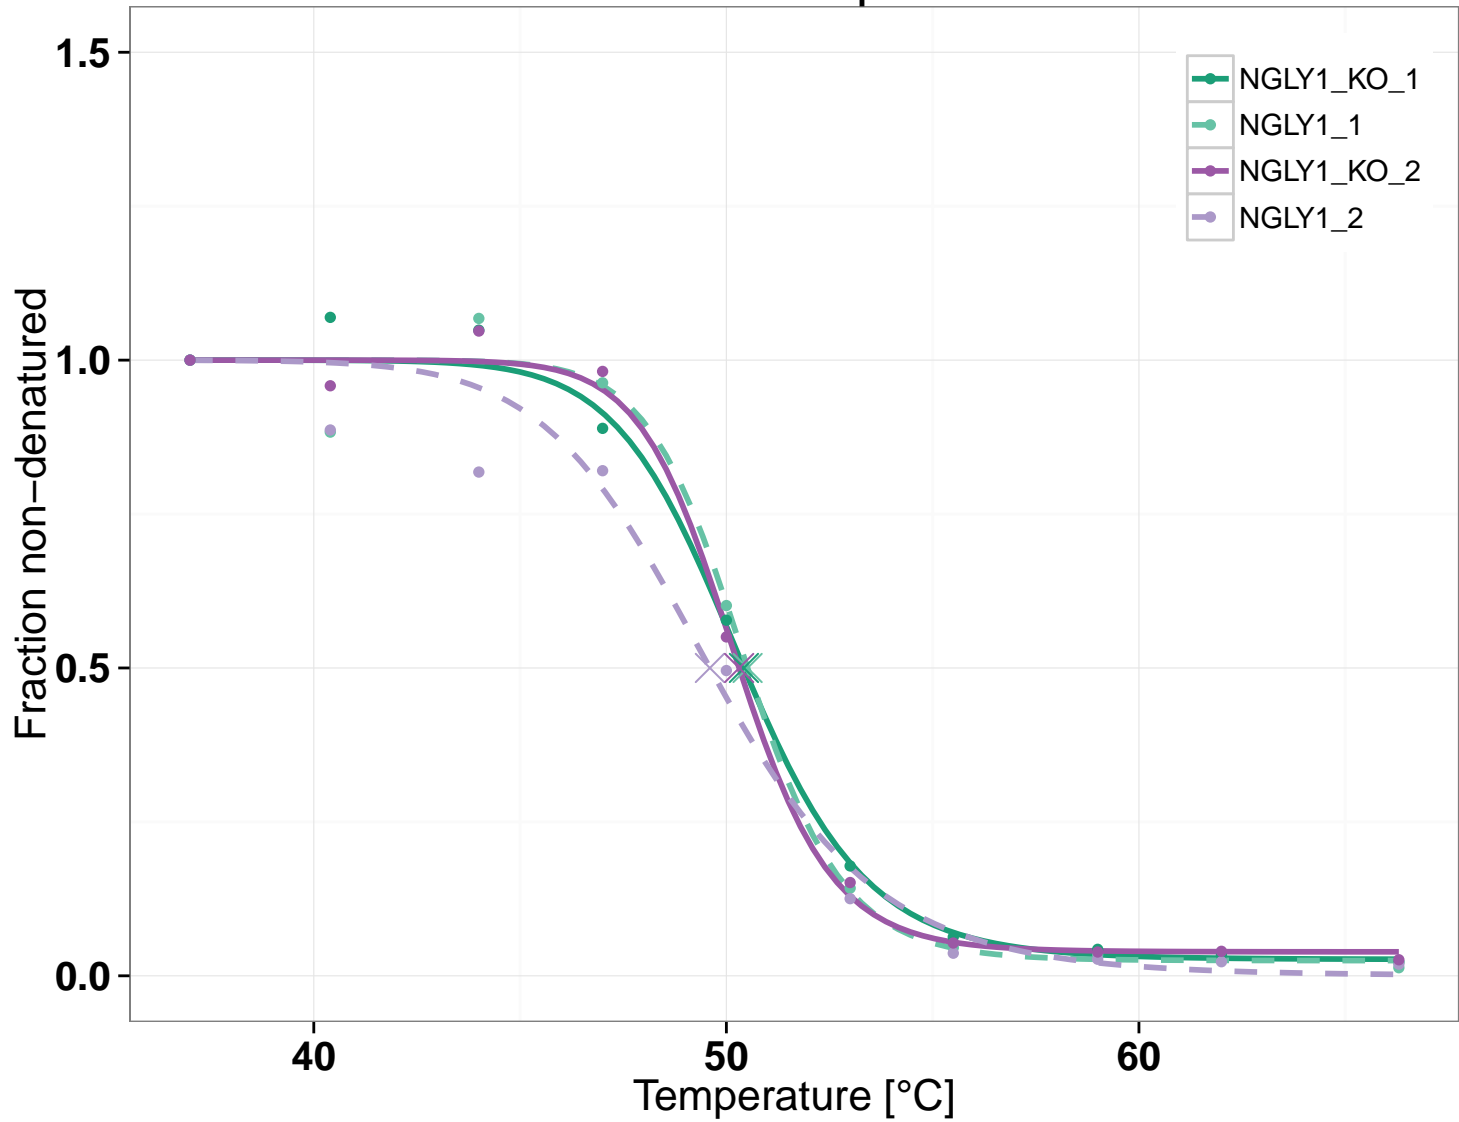

|            | meltPoint | slope | plateau | R2   |
|------------|-----------|-------|---------|------|
| NGLY1_KO_1 | 50.43     | -0.16 | 0.03    | 1    |
| NGLY1_1    | 50.51     | -0.2  | 0.02    | 0.99 |
| NGLY1_KO_2 | 50.31     | -0.21 | 0.04    | 1    |
| NGLY1_2    | 49.6      | -0.12 | 0       | 0.98 |

Supplement: Supplementary file 5704 [file 1]

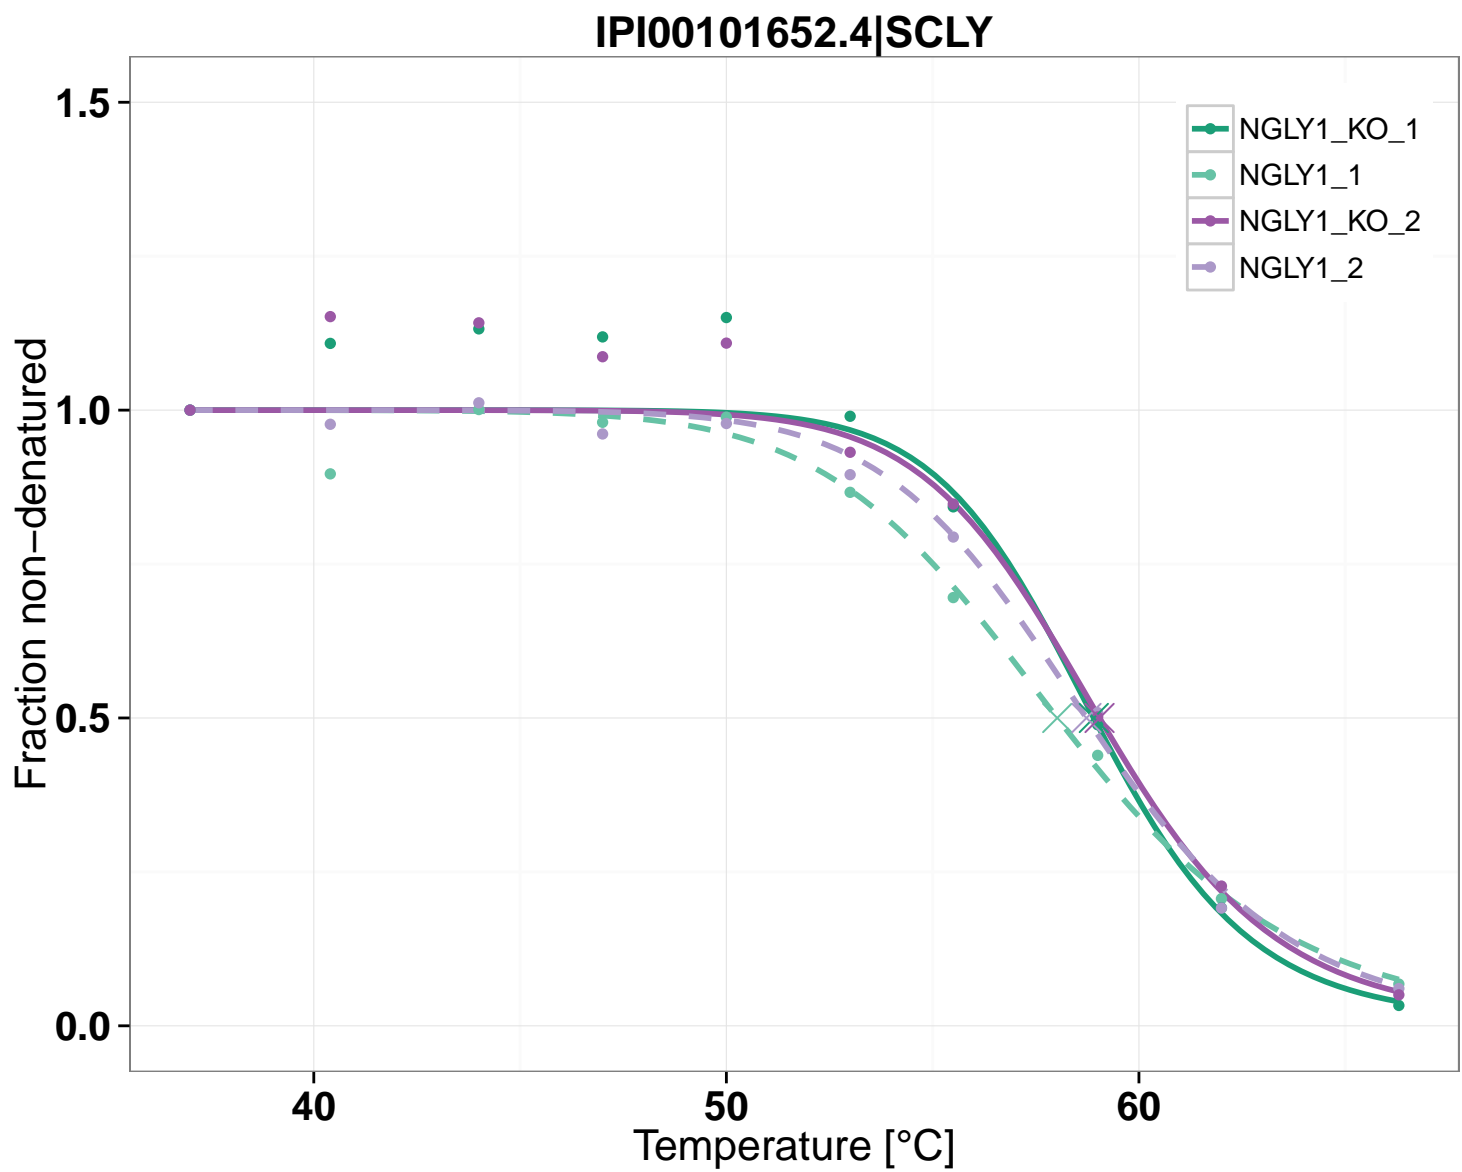

|            | meltPoint | slope  | plateau | R2   |
|------------|-----------|--------|---------|------|
| NGLY1_KO_1 | 58.91     | -0.13  | 0.01    | 0.96 |
| NGLY1_1    | 58.02     | -0.087 | 0       | 0.99 |
| NGLY1_KO_2 | 59.05     | -0.11  | 0.01    | 0.96 |
| NGLY1_2    | 58.73     | -0.1   | 0       | 1    |

Supplement: Supplementary file 5705 [file 1]

# IPI00016891.1|RAB6B

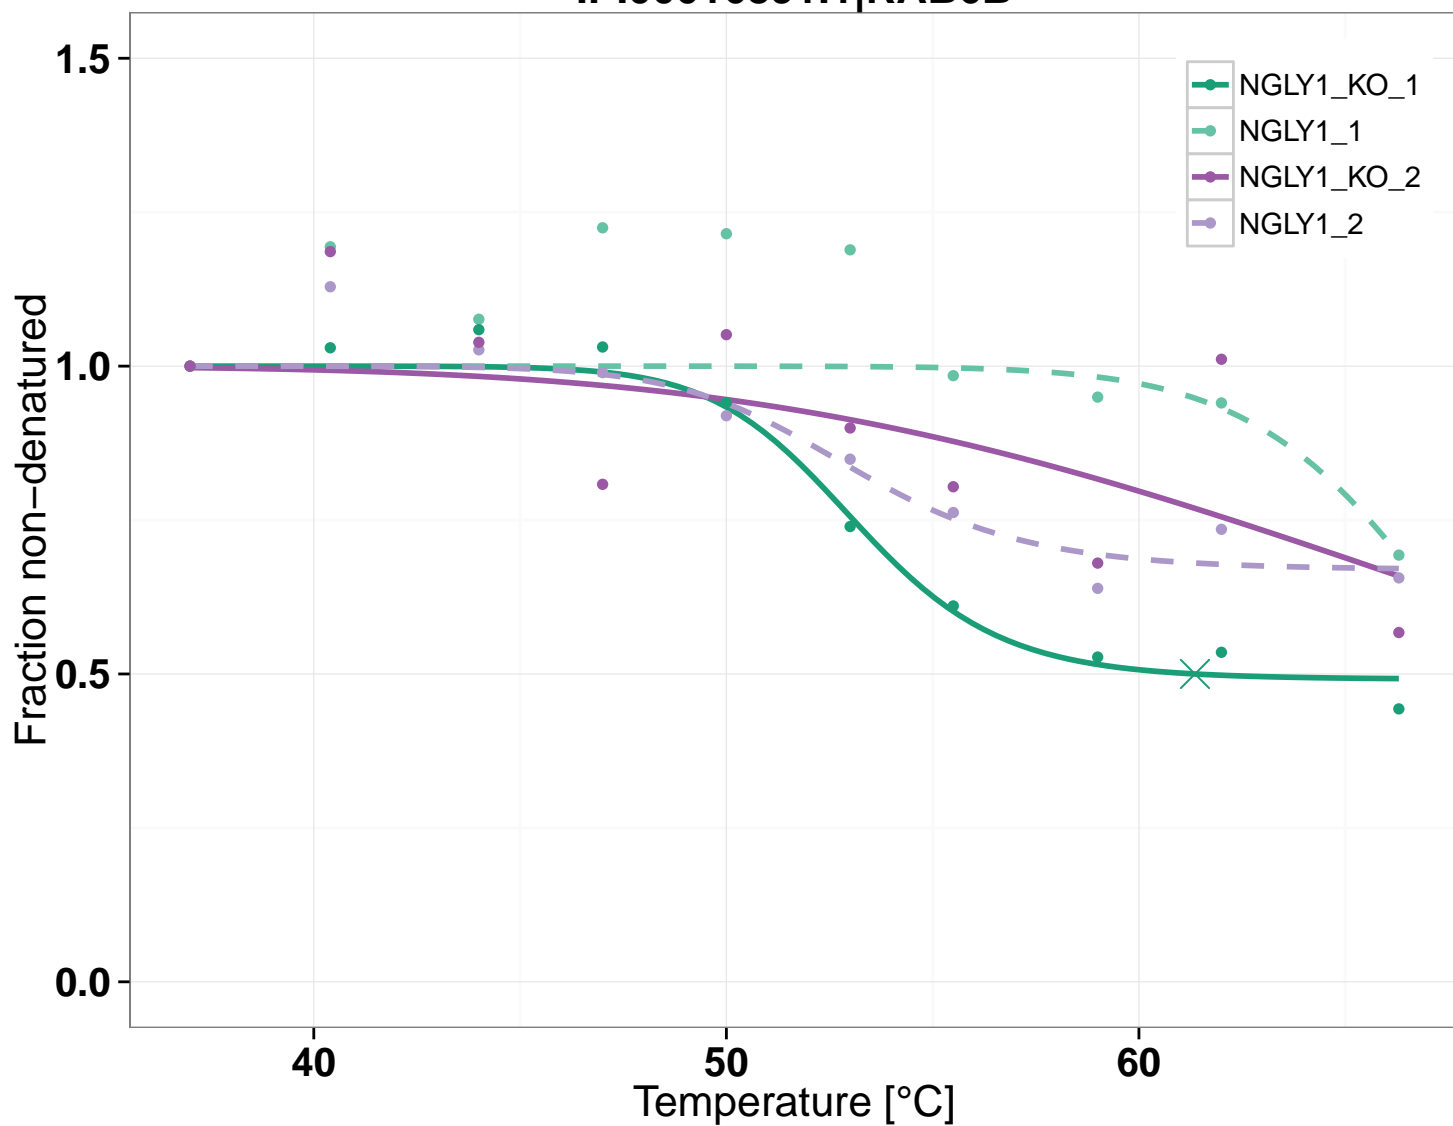

|            | meltPoint | slope  | plateau | R2   |
|------------|-----------|--------|---------|------|
| NGLY1_KO_1 | 61.36     | -0.073 | 0.49    | 0.98 |
| NGLY1_1    | -         | -      | 0       | 0.3  |
| NGLY1_KO_2 | -         | -      | 0       | 0.46 |
| NGLY1_2    | -         | -0.039 | 0.67    | 0.9  |

Supplement: Supplementary file 5706 [file 1]

IPI00303318.2|FAM49B

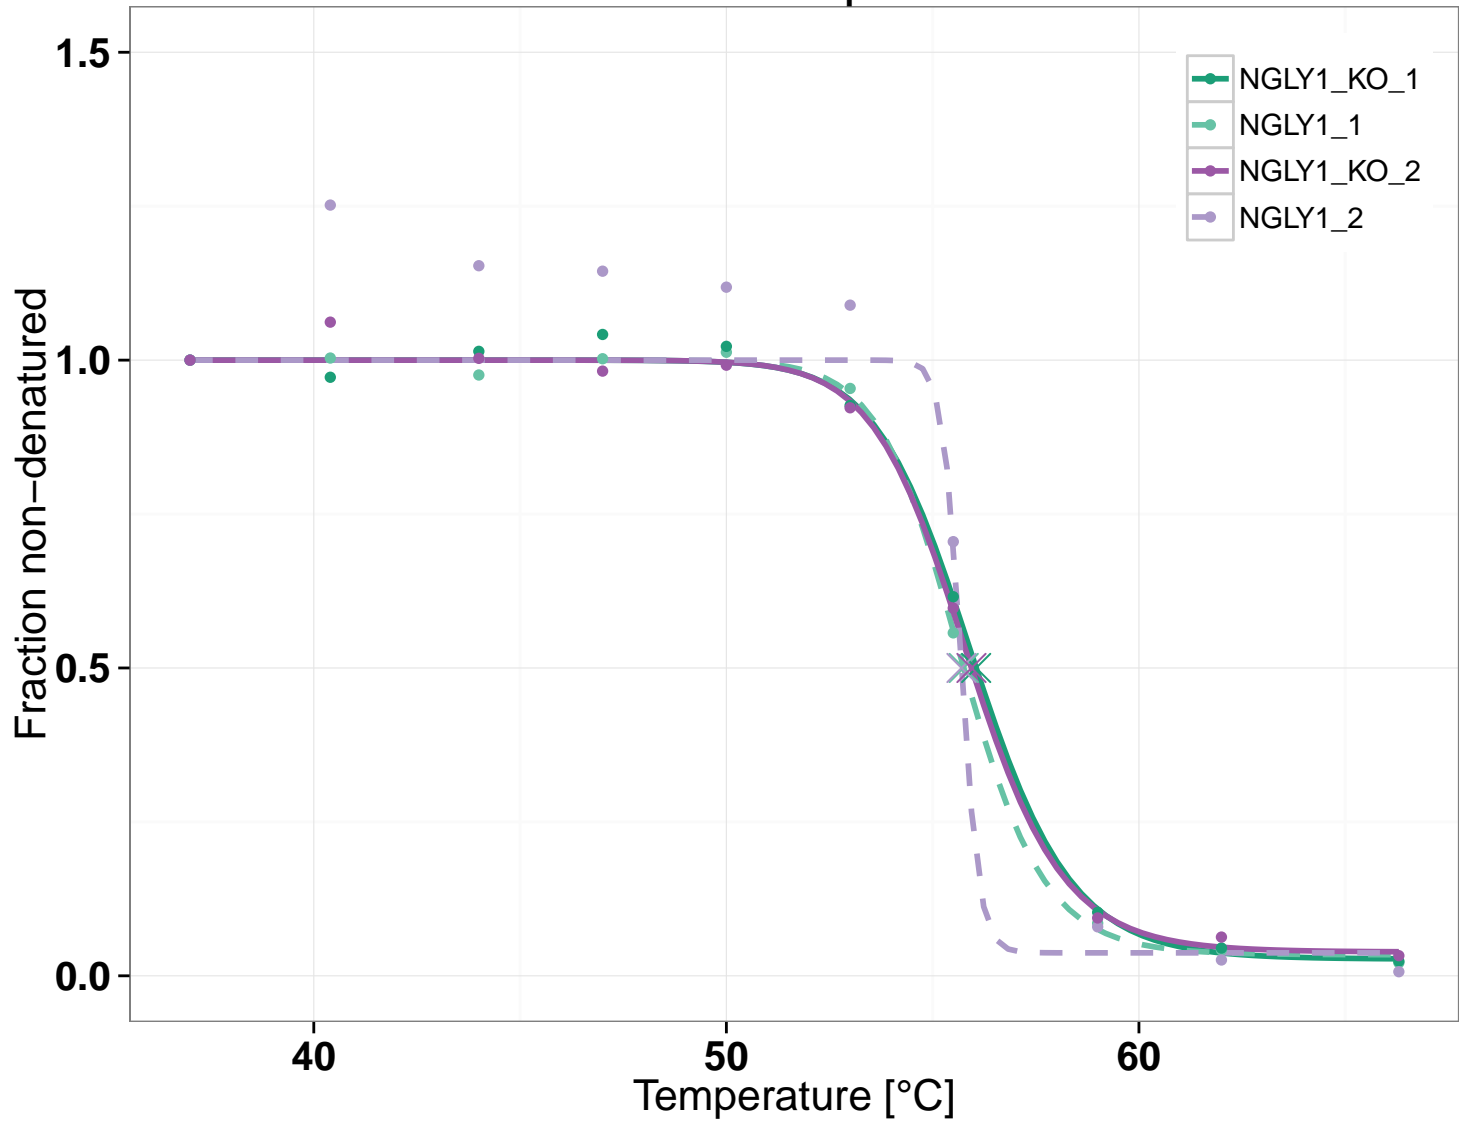

|            | meltPoint | slope | plateau | R2   |
|------------|-----------|-------|---------|------|
| NGLY1_KO_1 | 56.05     | -0.2  | 0.03    | 1    |
| NGLY1_1    | 55.75     | -0.24 | 0.03    | 1    |
| NGLY1_KO_2 | 55.94     | -0.21 | 0.04    | 1    |
| NGLY1_2    | 55.7      | -1.1  | 0.04    | 0.94 |

Supplement: Supplementary file 5707 [file 1]

# IPI00295851.4|COPB1

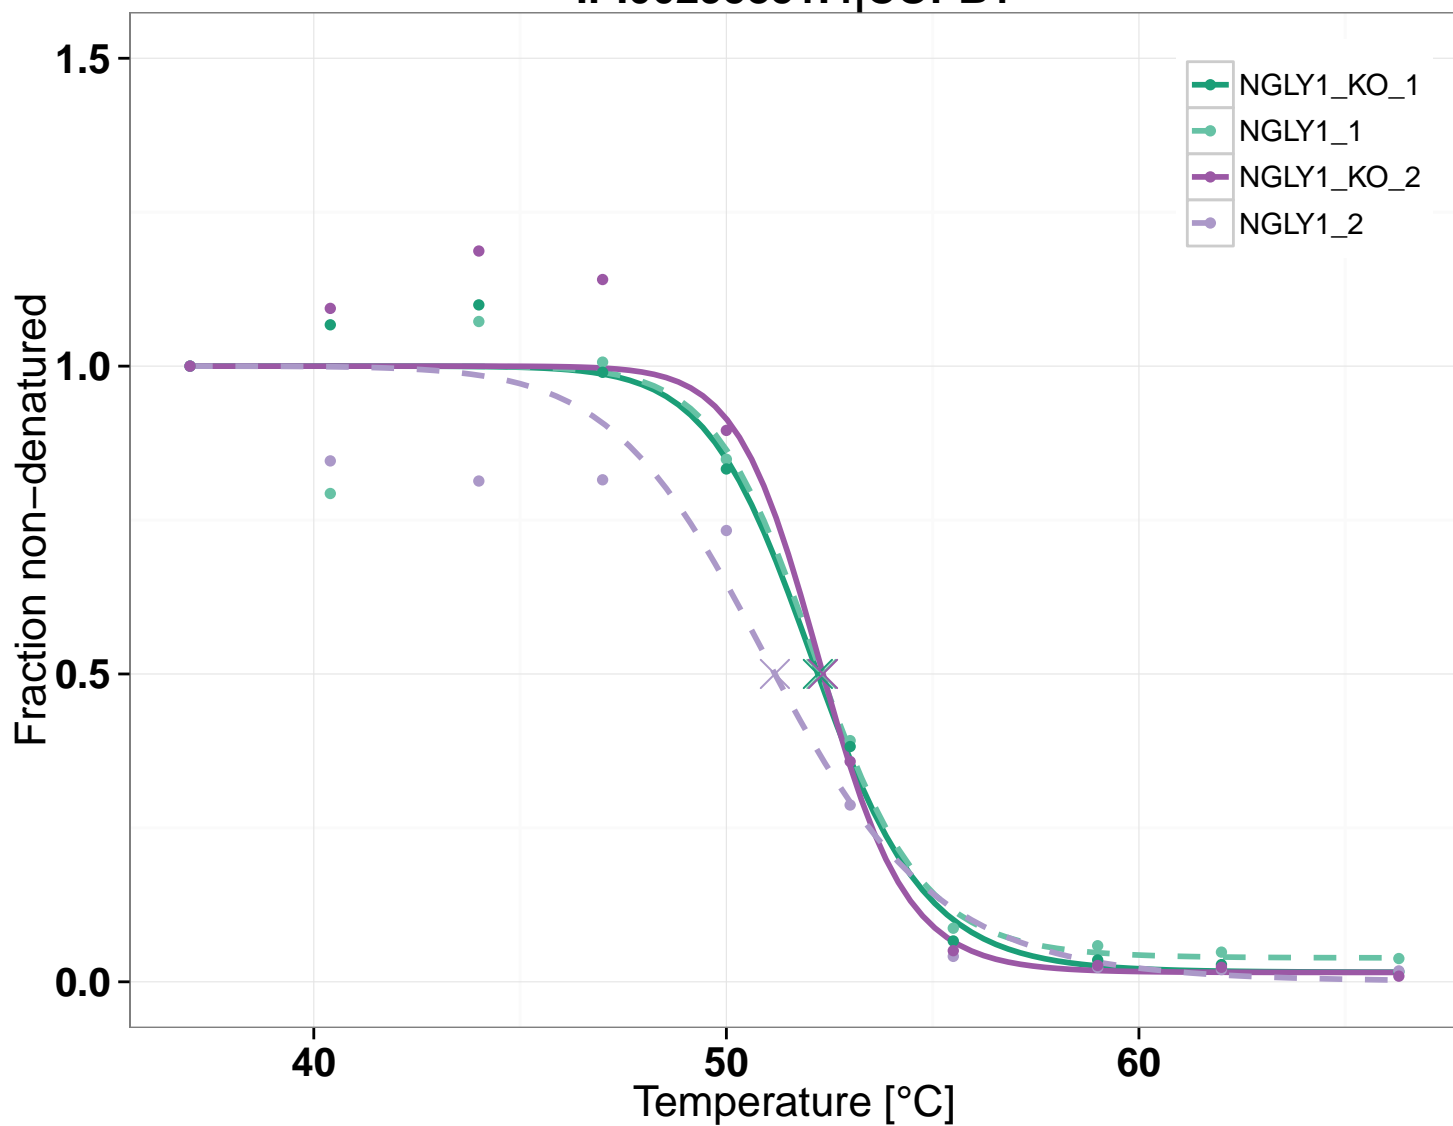

|            | meltPoint | slope | plateau | R2   |
|------------|-----------|-------|---------|------|
| NGLY1_KO_1 | 52.22     | -0.19 | 0.02    | 0.99 |
| NGLY1_1    | 52.3      | -0.19 | 0.04    | 0.97 |
| NGLY1_KO_2 | 52.34     | -0.24 | 0.02    | 0.97 |
| NGLY1_2    | 51.18     | -0.13 | 0       | 0.95 |

Supplement: Supplementary file 5708 [file 1]

# IPI00033008.1|FOS

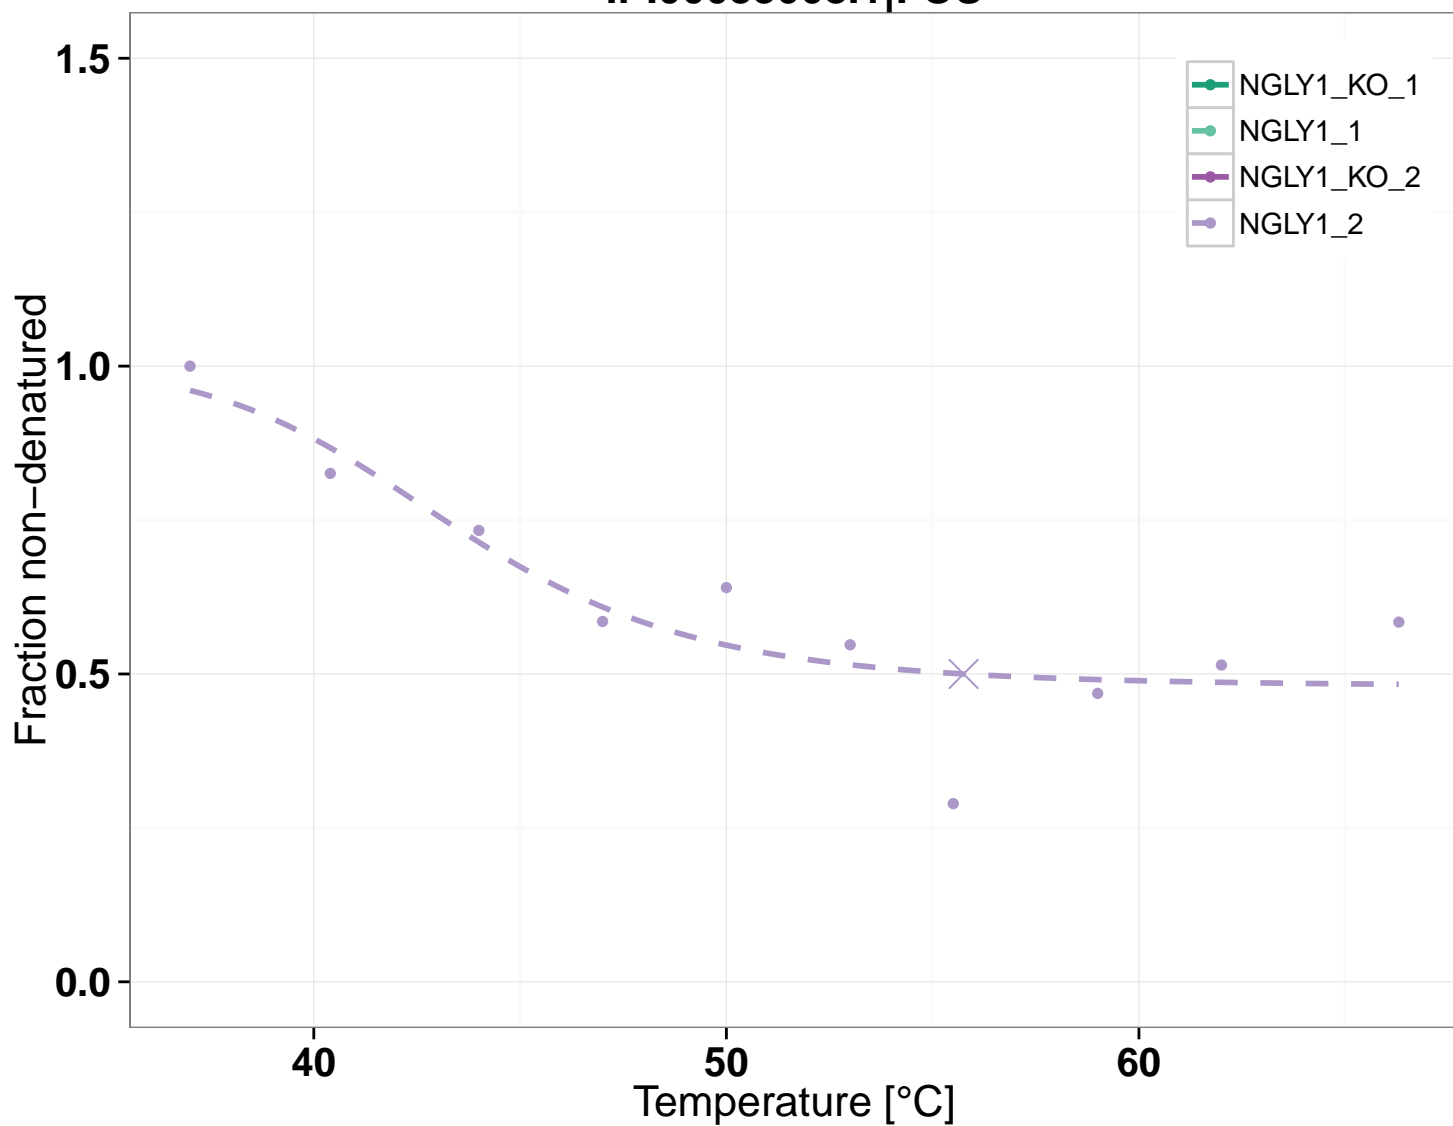

|            | meltPoint | slope  | plateau | R2  |
|------------|-----------|--------|---------|-----|
| NGLY1_KO_1 | —         | —      | —       | —   |
| NGLY1_1    | —         | —      | —       | —   |
| NGLY1_KO_2 | —         | —      | —       | —   |
| NGLY1_2    | 55.75     | -0.044 | 0.48    | 0.8 |

Supplement: Supplementary file 5709 [file 1]

IPI00514050.2|UBE2J2

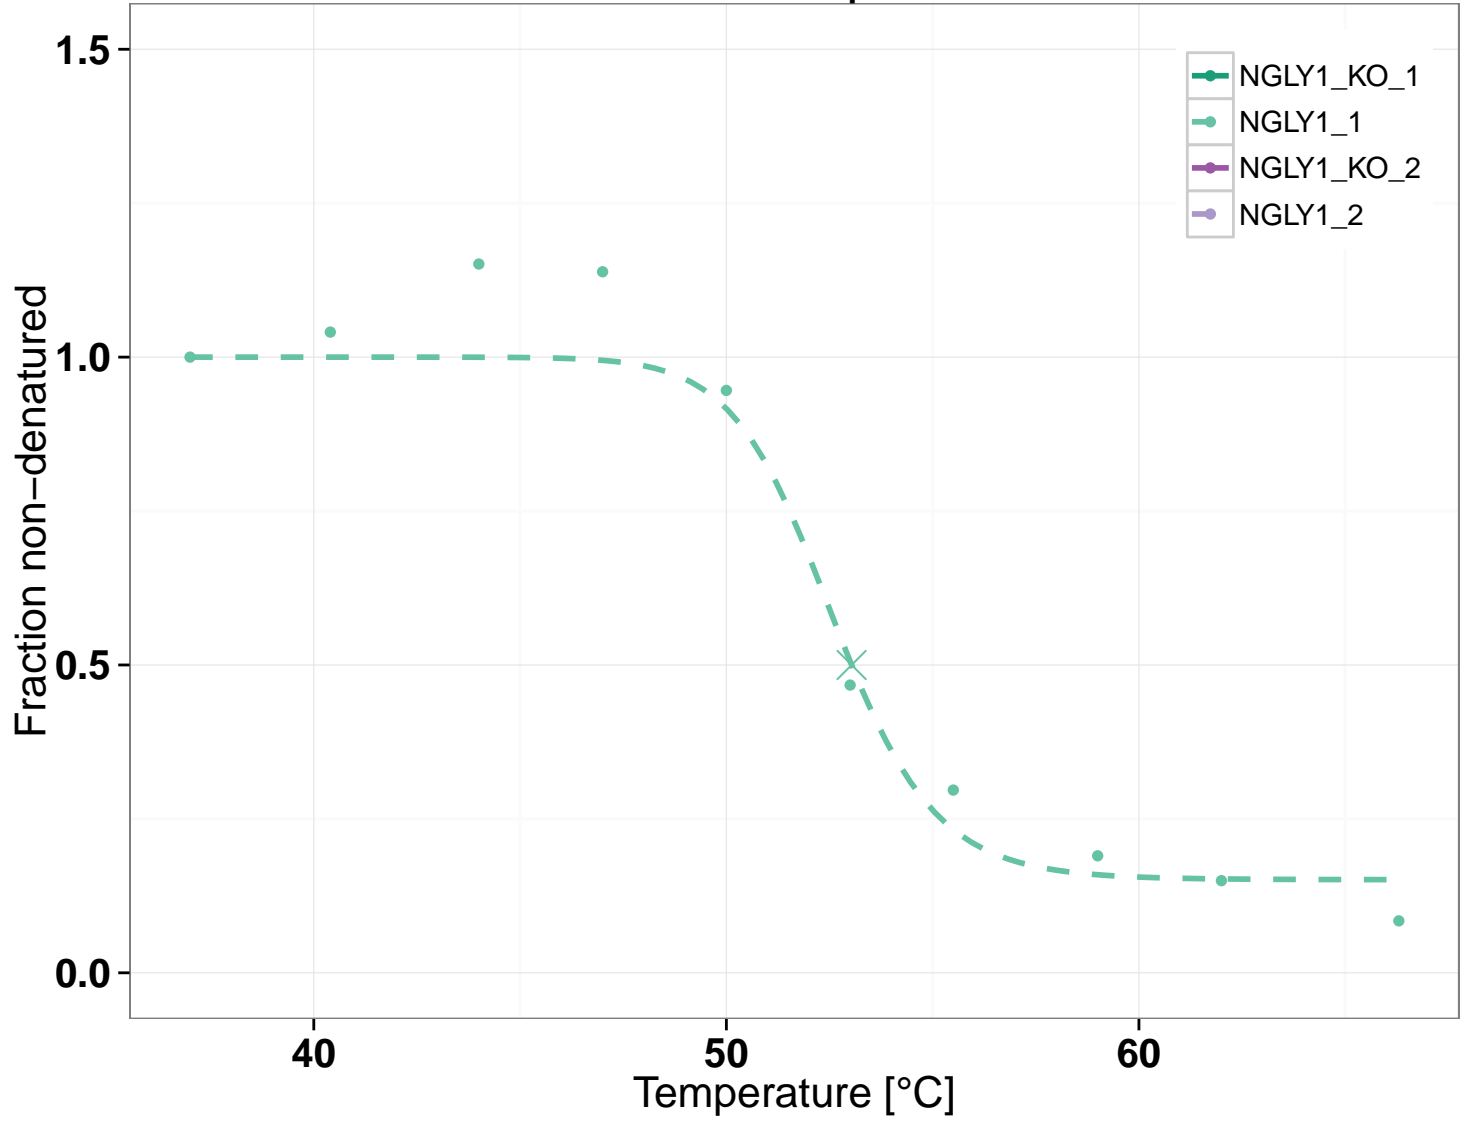

|            | meltPoint | slope | plateau | R2   |
|------------|-----------|-------|---------|------|
| NGLY1_KO_1 | –         | –     | –       | –    |
| NGLY1_1    | 53.04     | –0.17 | 0.15    | 0.97 |
| NGLY1_KO_2 | –         | –     | –       | –    |
| NGLY1_2    | –         | –     | –       | –    |

Supplement: Supplementary file 5710 [file 1]

# IPI00290460.3|EIF3G

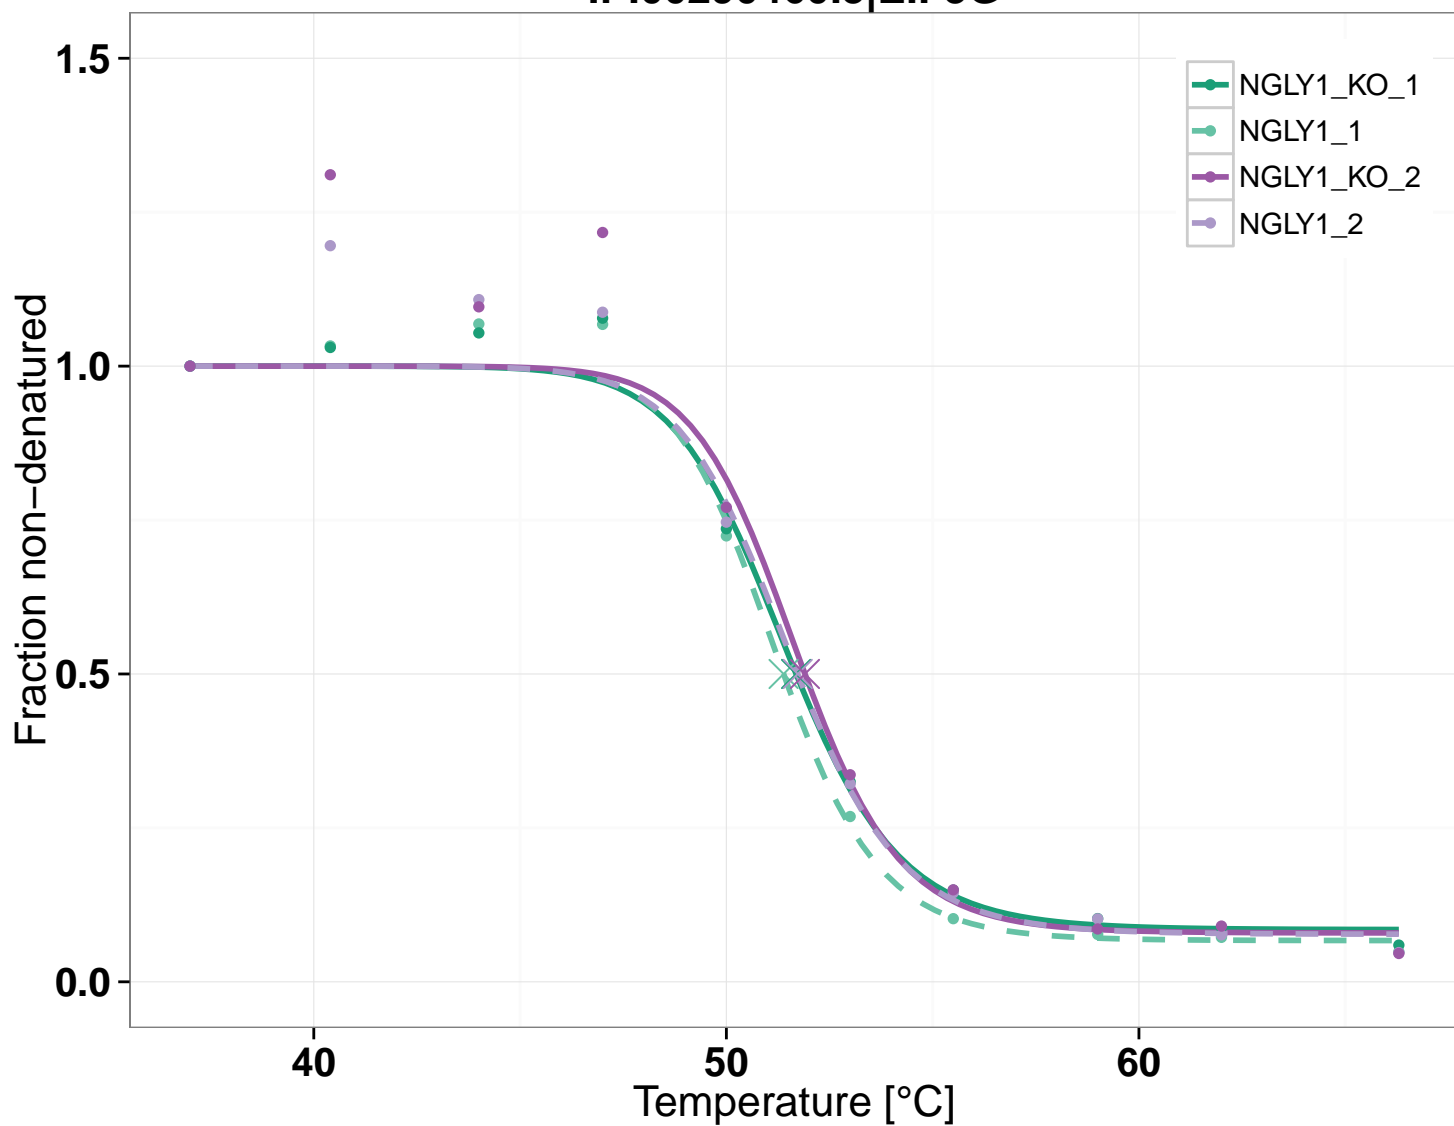

|            | meltPoint | slope | plateau | R2   |
|------------|-----------|-------|---------|------|
| NGLY1_KO_1 | 51.69     | -0.17 | 0.08    | 0.99 |
| NGLY1_1    | 51.39     | -0.19 | 0.07    | 0.99 |
| NGLY1_KO_2 | 51.9      | -0.18 | 0.08    | 0.93 |
| NGLY1_2    | 51.73     | -0.17 | 0.08    | 0.97 |

Supplement: Supplementary file 5711 [file 1]

# IPI00026555.1|TRMU

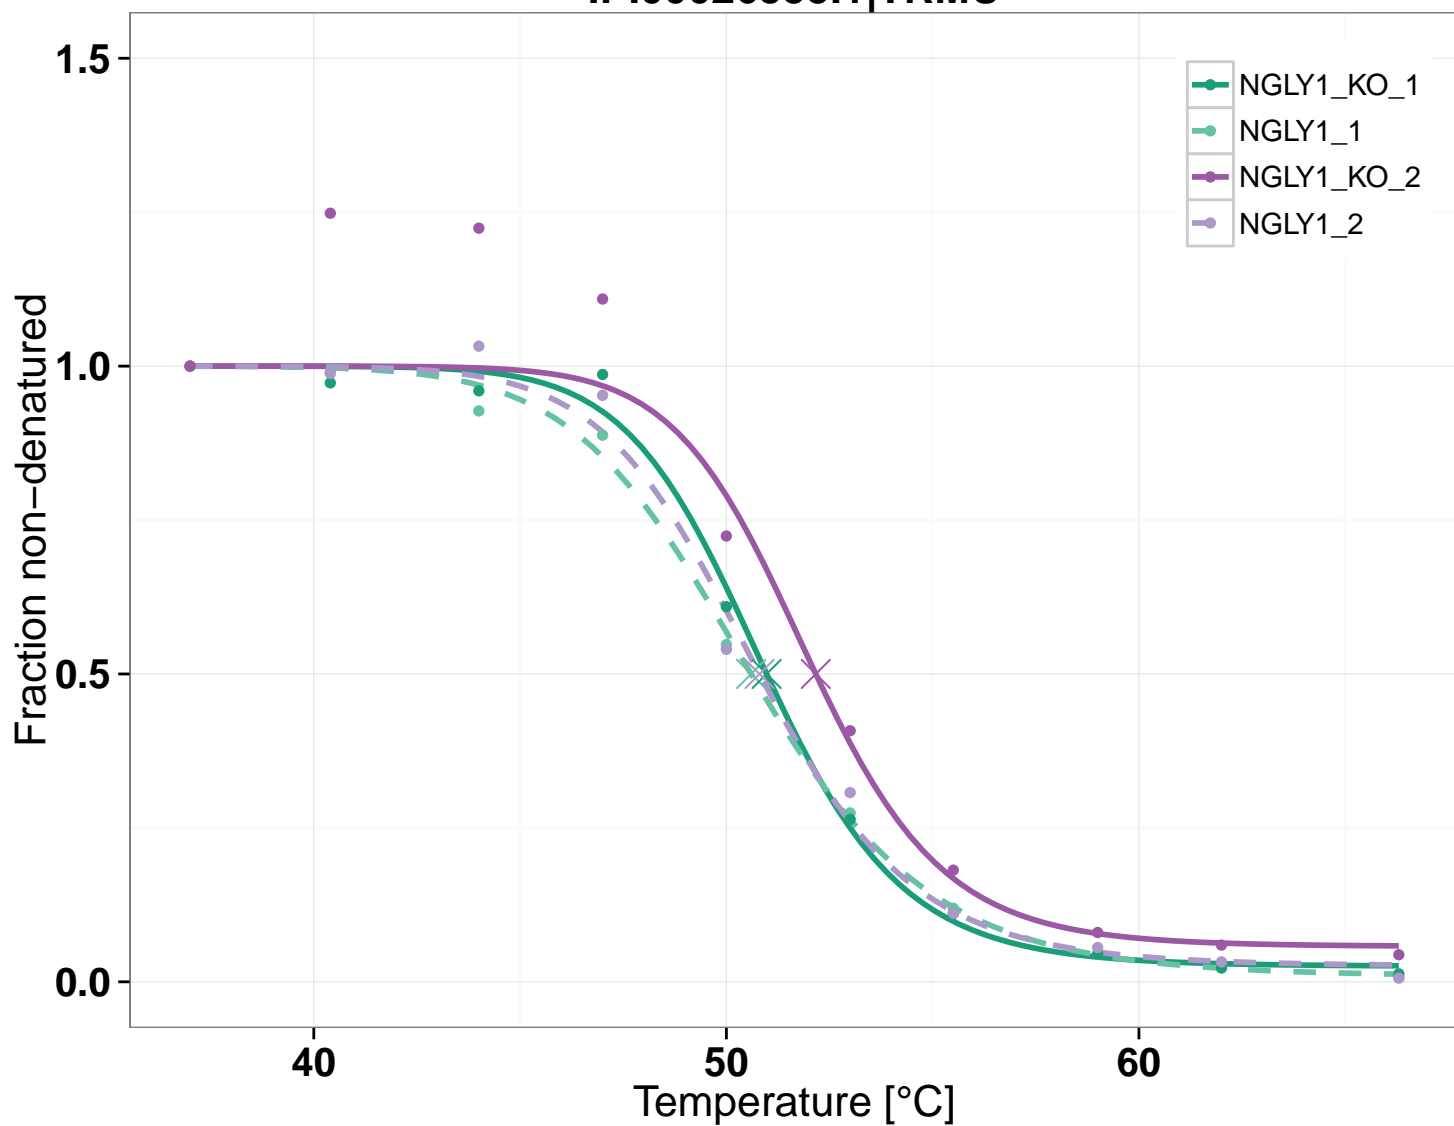

|            | meltPoint | slope | plateau | R2   |
|------------|-----------|-------|---------|------|
| NGLY1_KO_1 | 50.98     | -0.15 | 0.03    | 1    |
| NGLY1_1    | 50.6      | -0.11 | 0.01    | 1    |
| NGLY1_KO_2 | 52.17     | -0.14 | 0.06    | 0.94 |
| NGLY1_2    | 50.8      | -0.13 | 0.03    | 0.99 |

Supplement: Supplementary file 5712 [file 1]

# IPI00644290.1|NDRG3

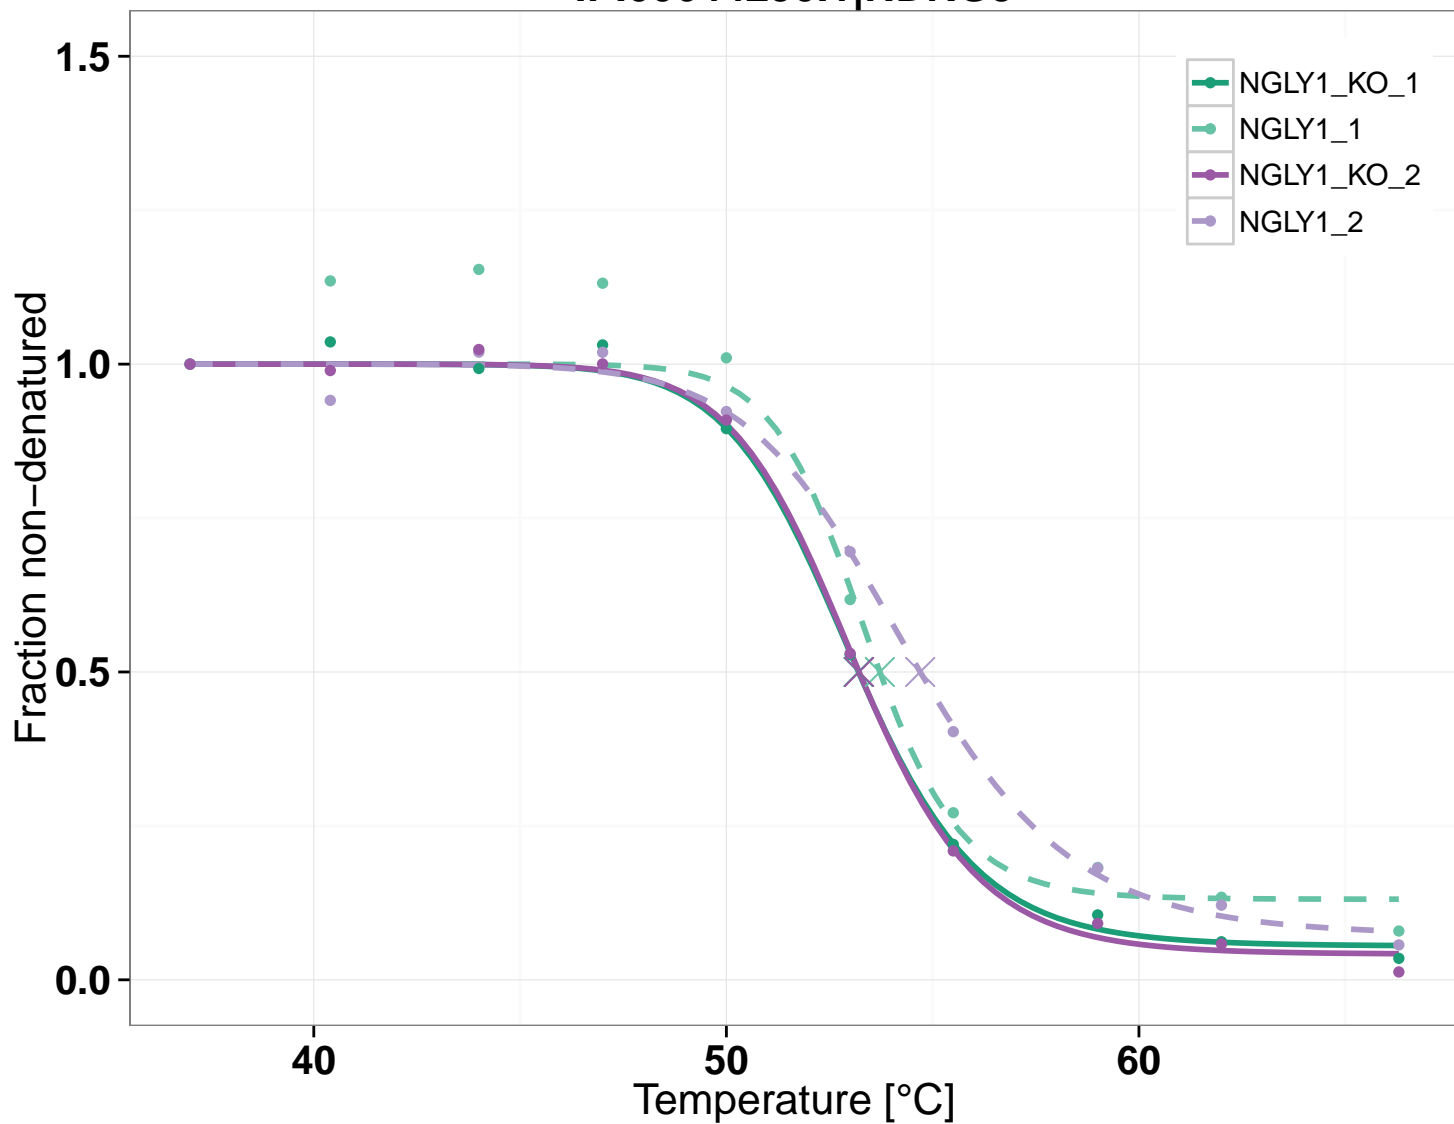

|            | meltPoint | slope | plateau | R2   |
|------------|-----------|-------|---------|------|
| NGLY1_KO_1 | 53.2      | -0.15 | 0.05    | 1    |
| NGLY1_1    | 53.72     | -0.19 | 0.13    | 0.97 |
| NGLY1_KO_2 | 53.22     | -0.16 | 0.04    | 1    |
| NGLY1_2    | 54.7      | -0.12 | 0.07    | 1    |

Supplement: Supplementary file 5713 [file 1]

IPI00073357.1|FBXO4

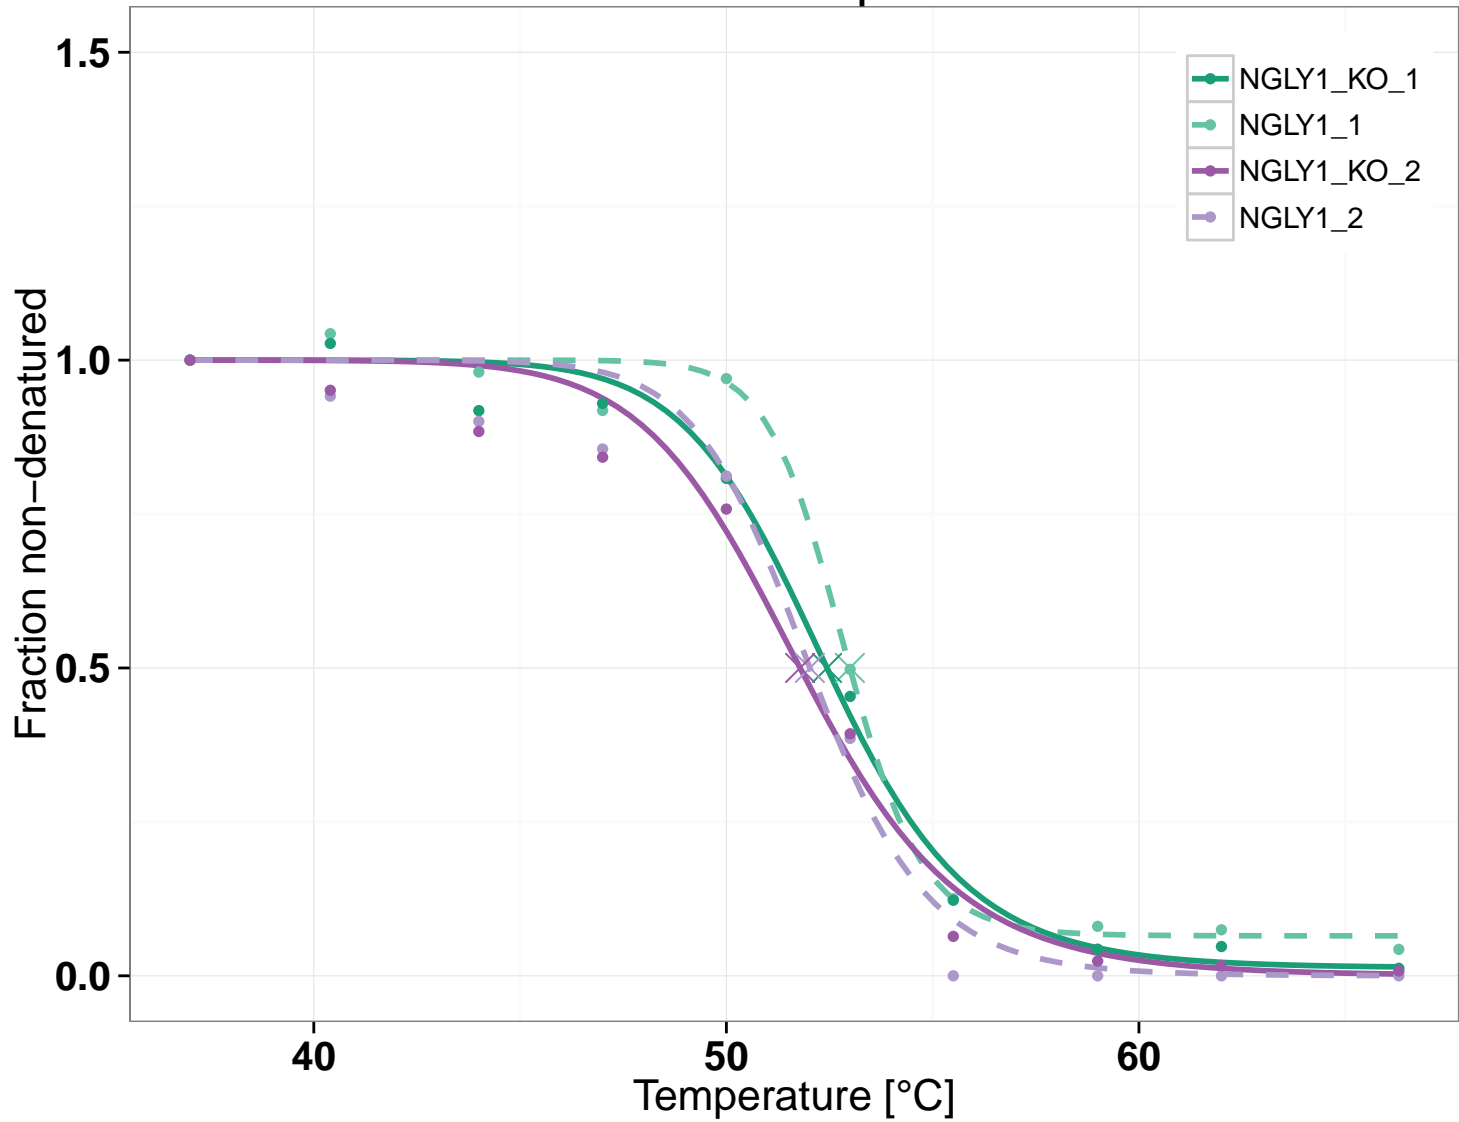

|            | meltPoint | slope | plateau | R2   |
|------------|-----------|-------|---------|------|
| NGLY1_KO_1 | 52.44     | -0.14 | 0.01    | 0.99 |
| NGLY1_1    | 52.99     | -0.25 | 0.06    | 0.99 |
| NGLY1_KO_2 | 51.79     | -0.13 | 0       | 0.98 |
| NGLY1_2    | 52.02     | -0.18 | 0       | 0.98 |

Supplement: Supplementary file 5714 [file 1]

IPI00172656.6|FAF2

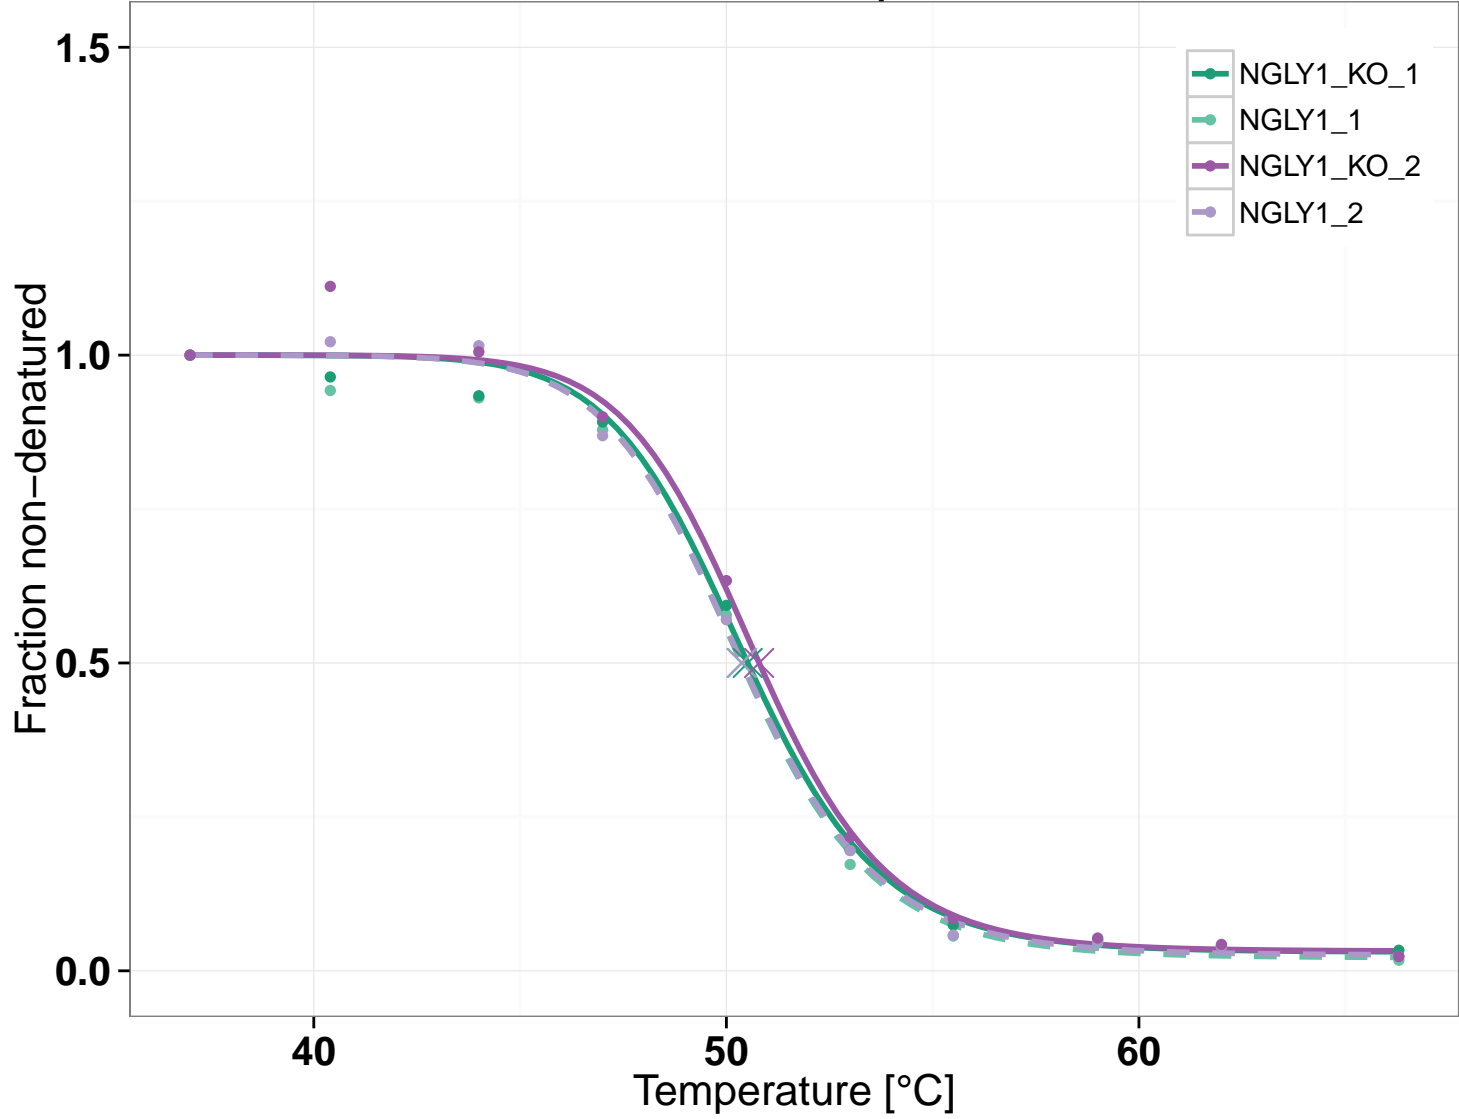

|            | meltPoint | slope | plateau | R2   |
|------------|-----------|-------|---------|------|
| NGLY1_KO_1 | 50.52     | -0.15 | 0.03    | 1    |
| NGLY1_1    | 50.37     | -0.15 | 0.02    | 1    |
| NGLY1_KO_2 | 50.79     | -0.15 | 0.03    | 0.99 |
| NGLY1_2    | 50.38     | -0.15 | 0.03    | 1    |

Supplement: Supplementary file 5715 [file 1]

IPI00477619.2|C19ORF2

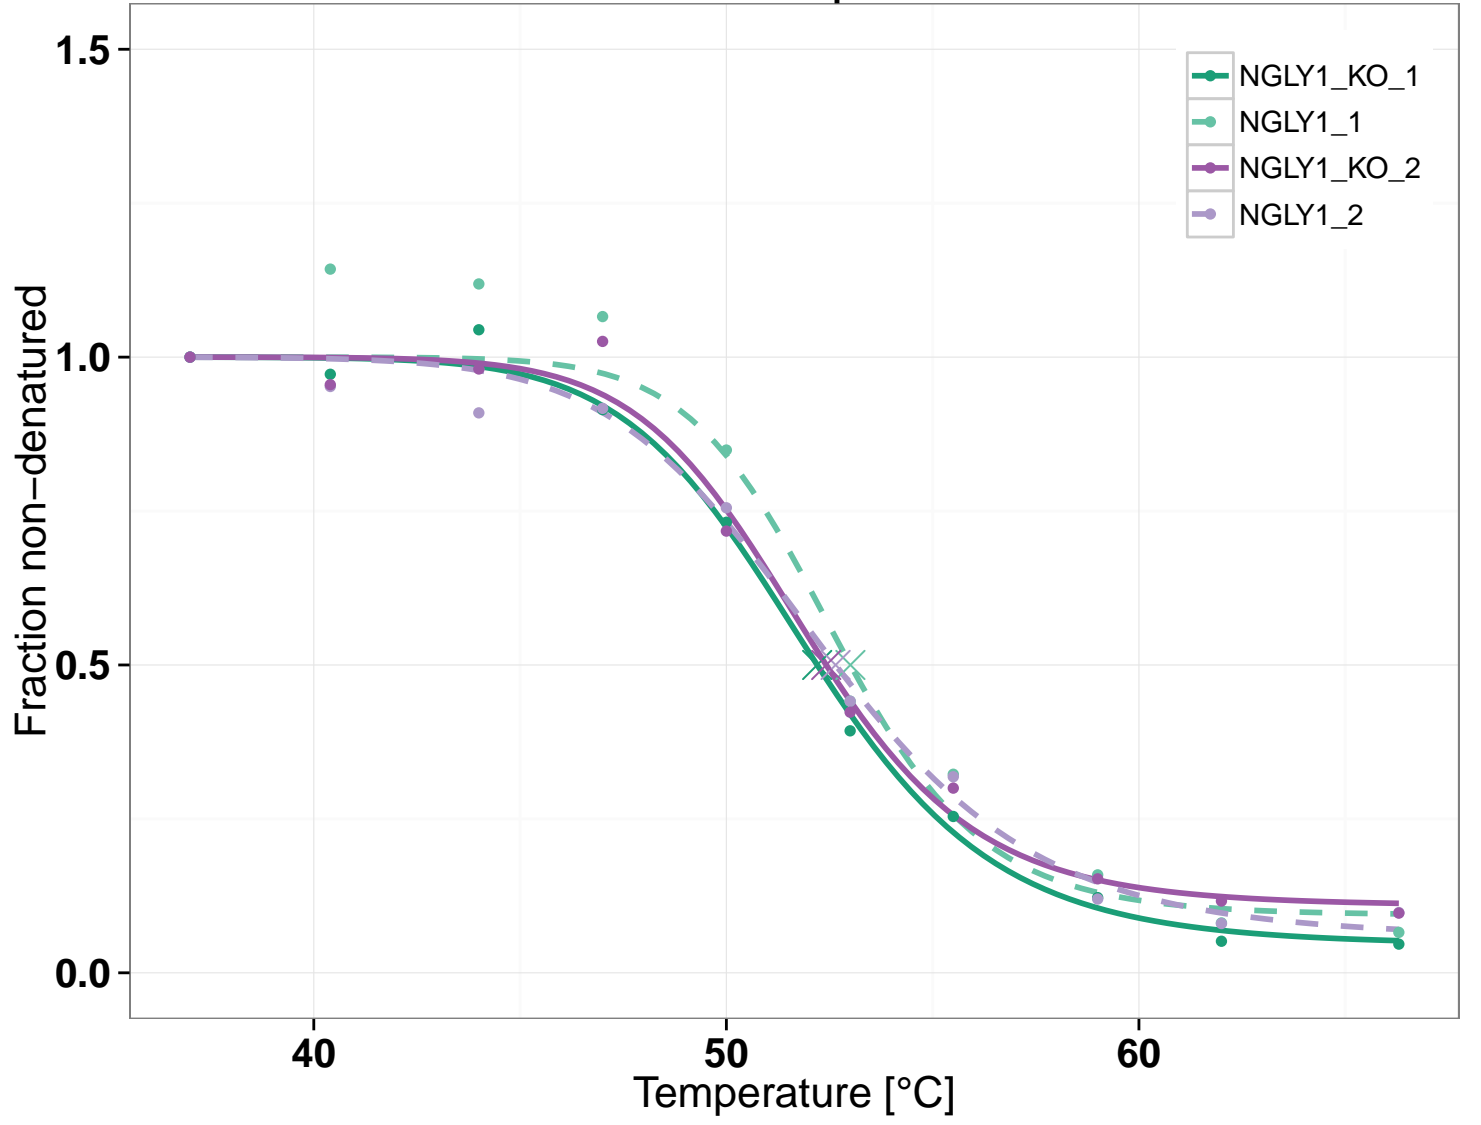

|            | meltPoint | slope | plateau | R2   |
|------------|-----------|-------|---------|------|
| NGLY1_KO_1 | 52.2      | -0.11 | 0.05    | 1    |
| NGLY1_1    | 53.01     | -0.13 | 0.09    | 0.97 |
| NGLY1_KO_2 | 52.42     | -0.11 | 0.11    | 0.99 |
| NGLY1_2    | 52.65     | -0.09 | 0.06    | 0.99 |

Supplement: Supplementary file 5716 [file 1]

# IPI00221108.5|TYMS

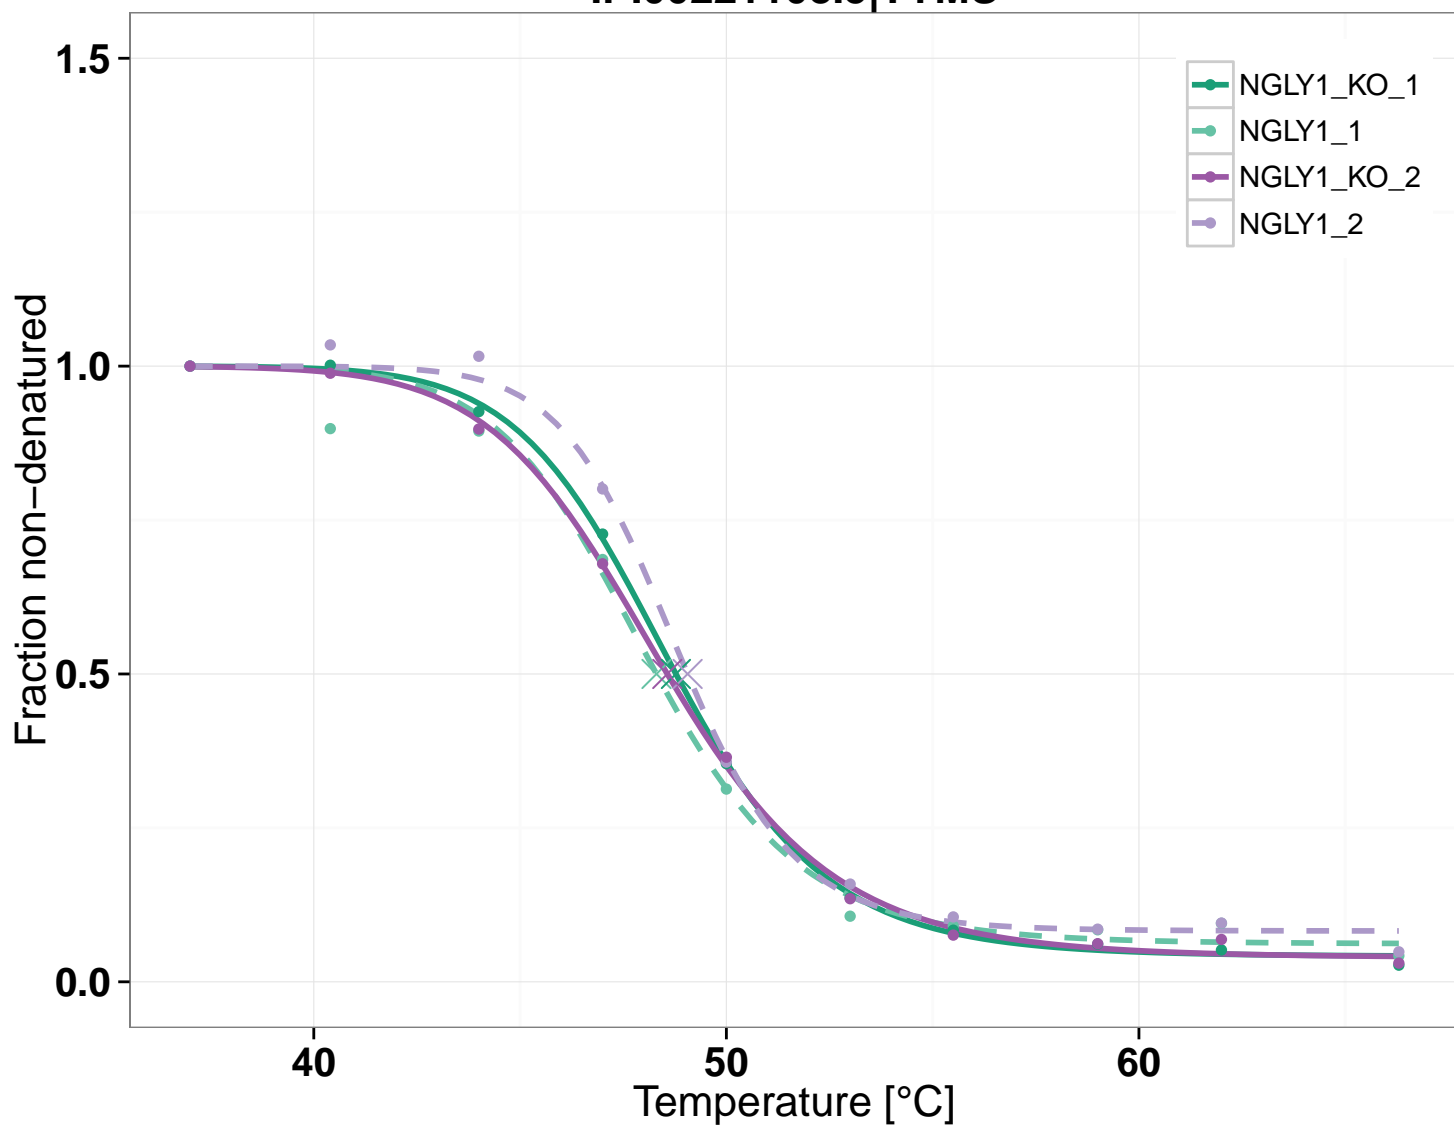

|            | meltPoint | slope | plateau | R2   |
|------------|-----------|-------|---------|------|
| NGLY1_KO_1 | 48.78     | -0.13 | 0.04    | 1    |
| NGLY1_1    | 48.31     | -0.13 | 0.06    | 0.99 |
| NGLY1_KO_2 | 48.57     | -0.11 | 0.04    | 1    |
| NGLY1_2    | 49.06     | -0.16 | 0.08    | 1    |

Supplement: Supplementary file 5717 [file 1]

IPI00012438.1|PRKRIR

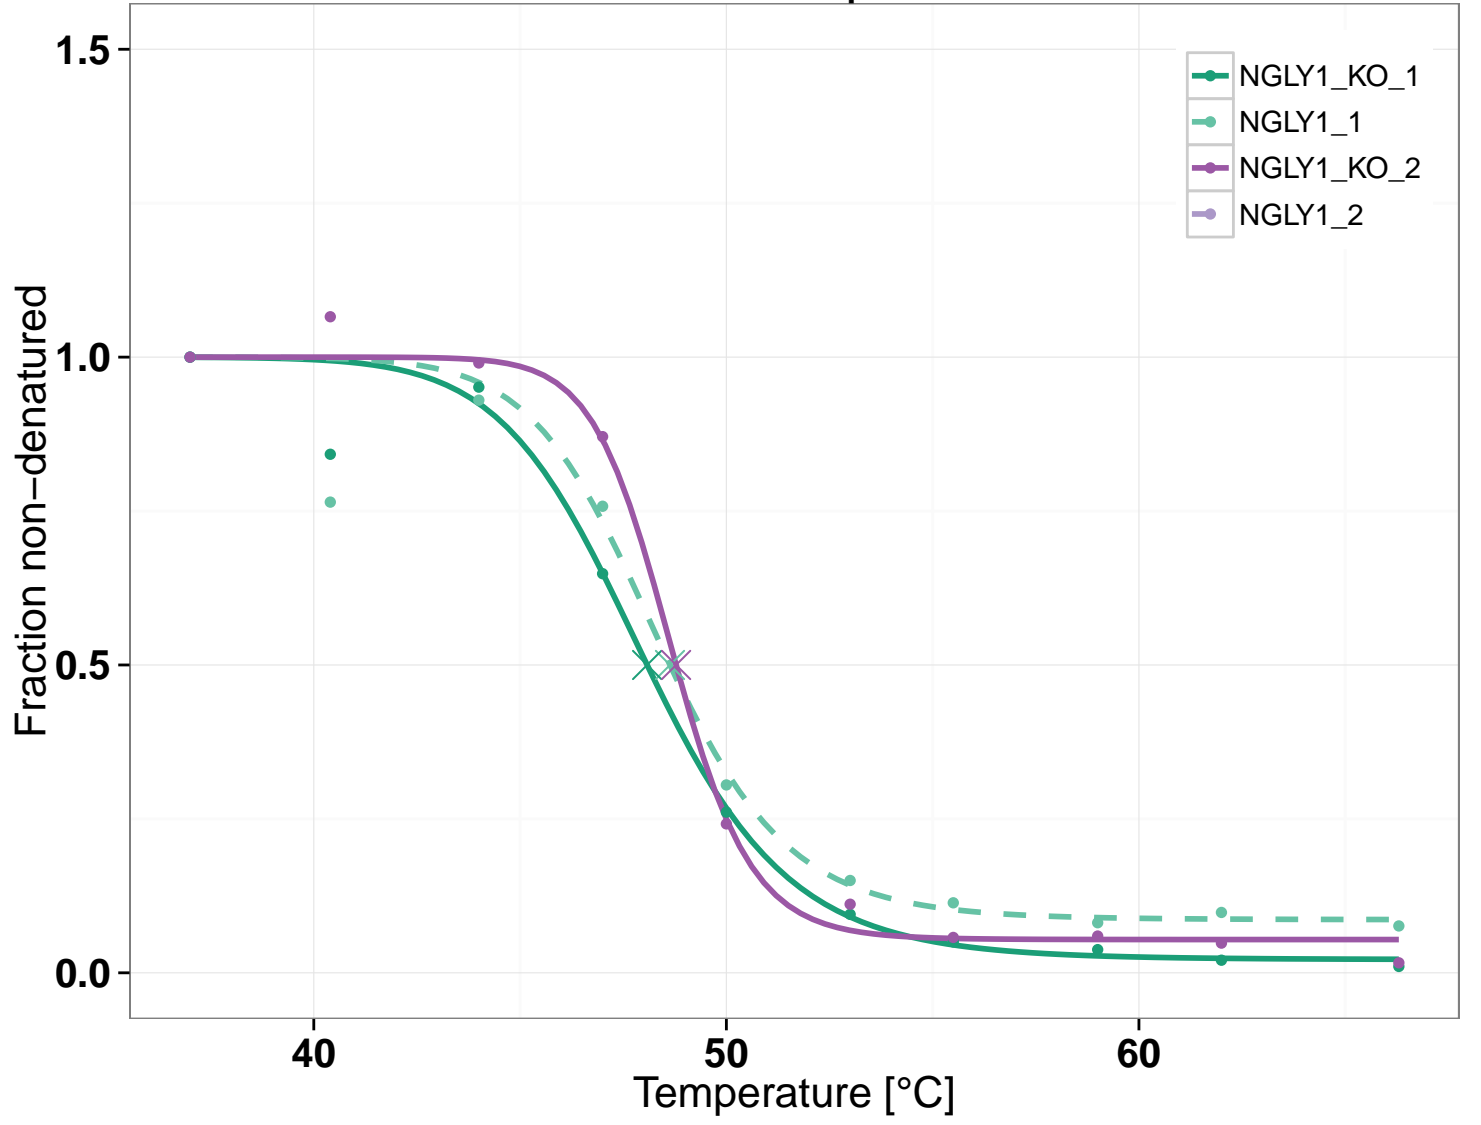

|            | meltPoint | slope | plateau | R2   |
|------------|-----------|-------|---------|------|
| NGLY1_KO_1 | 48.08     | -0.14 | 0.02    | 0.98 |
| NGLY1_1    | 48.63     | -0.15 | 0.09    | 0.96 |
| NGLY1_KO_2 | 48.78     | -0.25 | 0.05    | 1    |
| NGLY1_2    | -         | -     | -       | -    |

Supplement: Supplementary file 5718 [file 1]

IPI00419992.5|AASDH

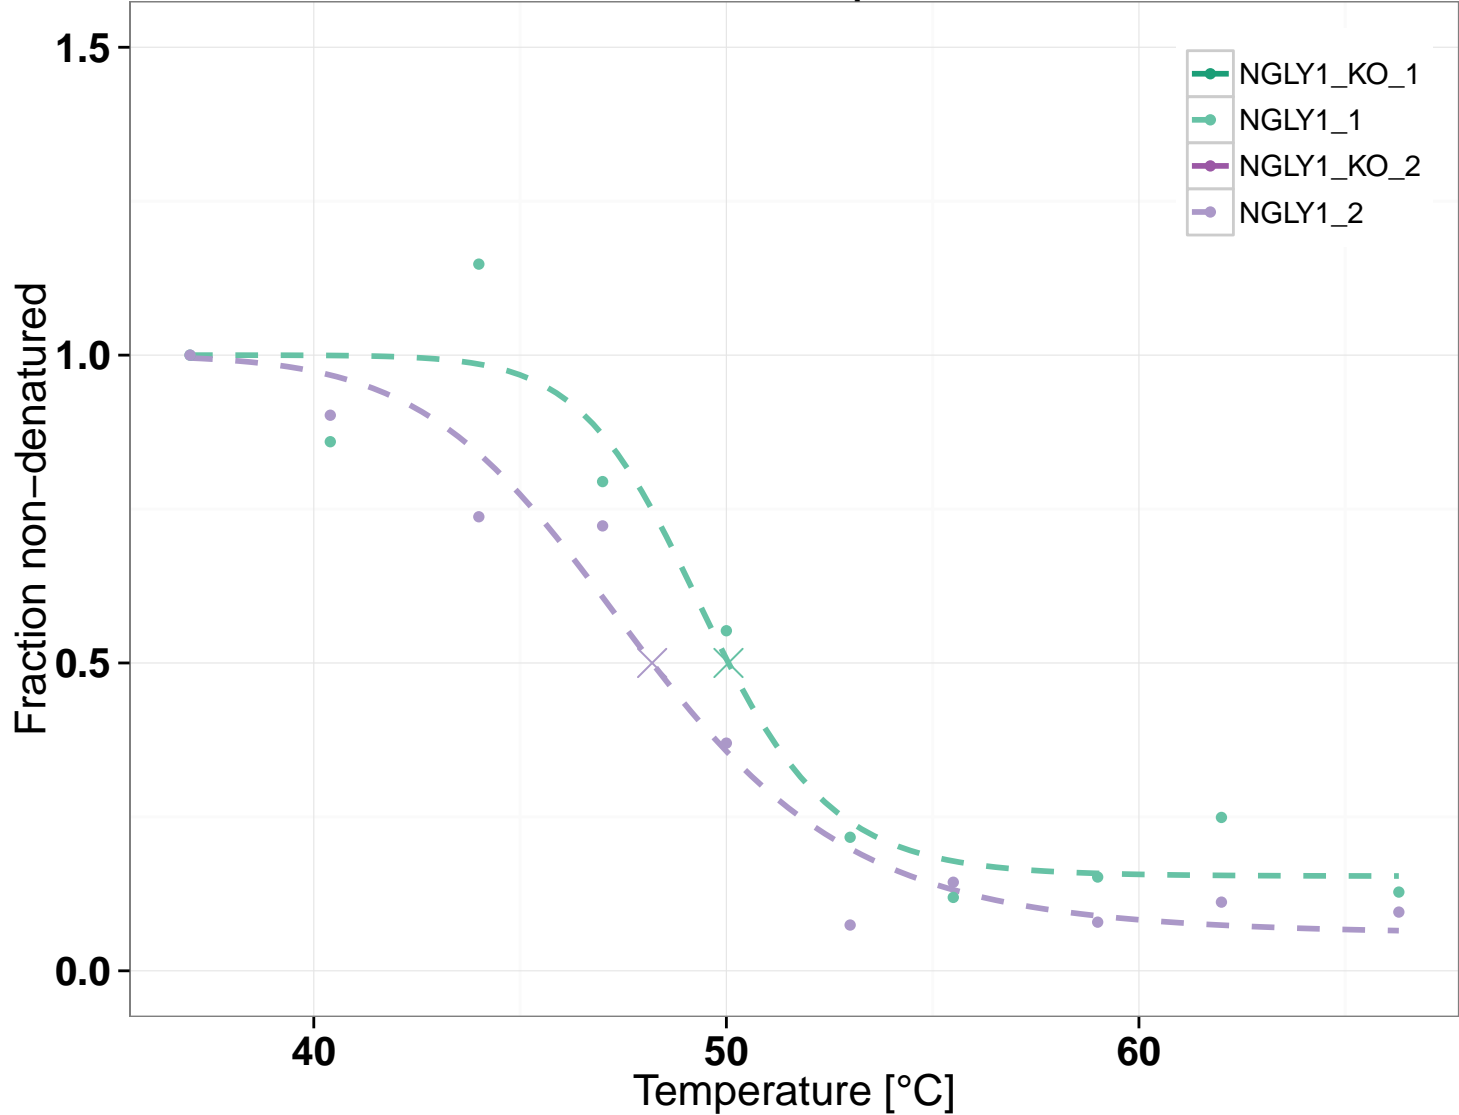

|            | meltPoint | slope | plateau | R2   |
|------------|-----------|-------|---------|------|
| NGLY1_KO_1 | —         | —     | —       | —    |
| NGLY1_1    | 50.05     | -0.14 | 0.15    | 0.95 |
| NGLY1_KO_2 | —         | —     | —       | —    |
| NGLY1_2    | 48.2      | -0.09 | 0.06    | 0.96 |

Supplement: Supplementary file 5719 [file 1]

# IPI00797136.2|IKIP

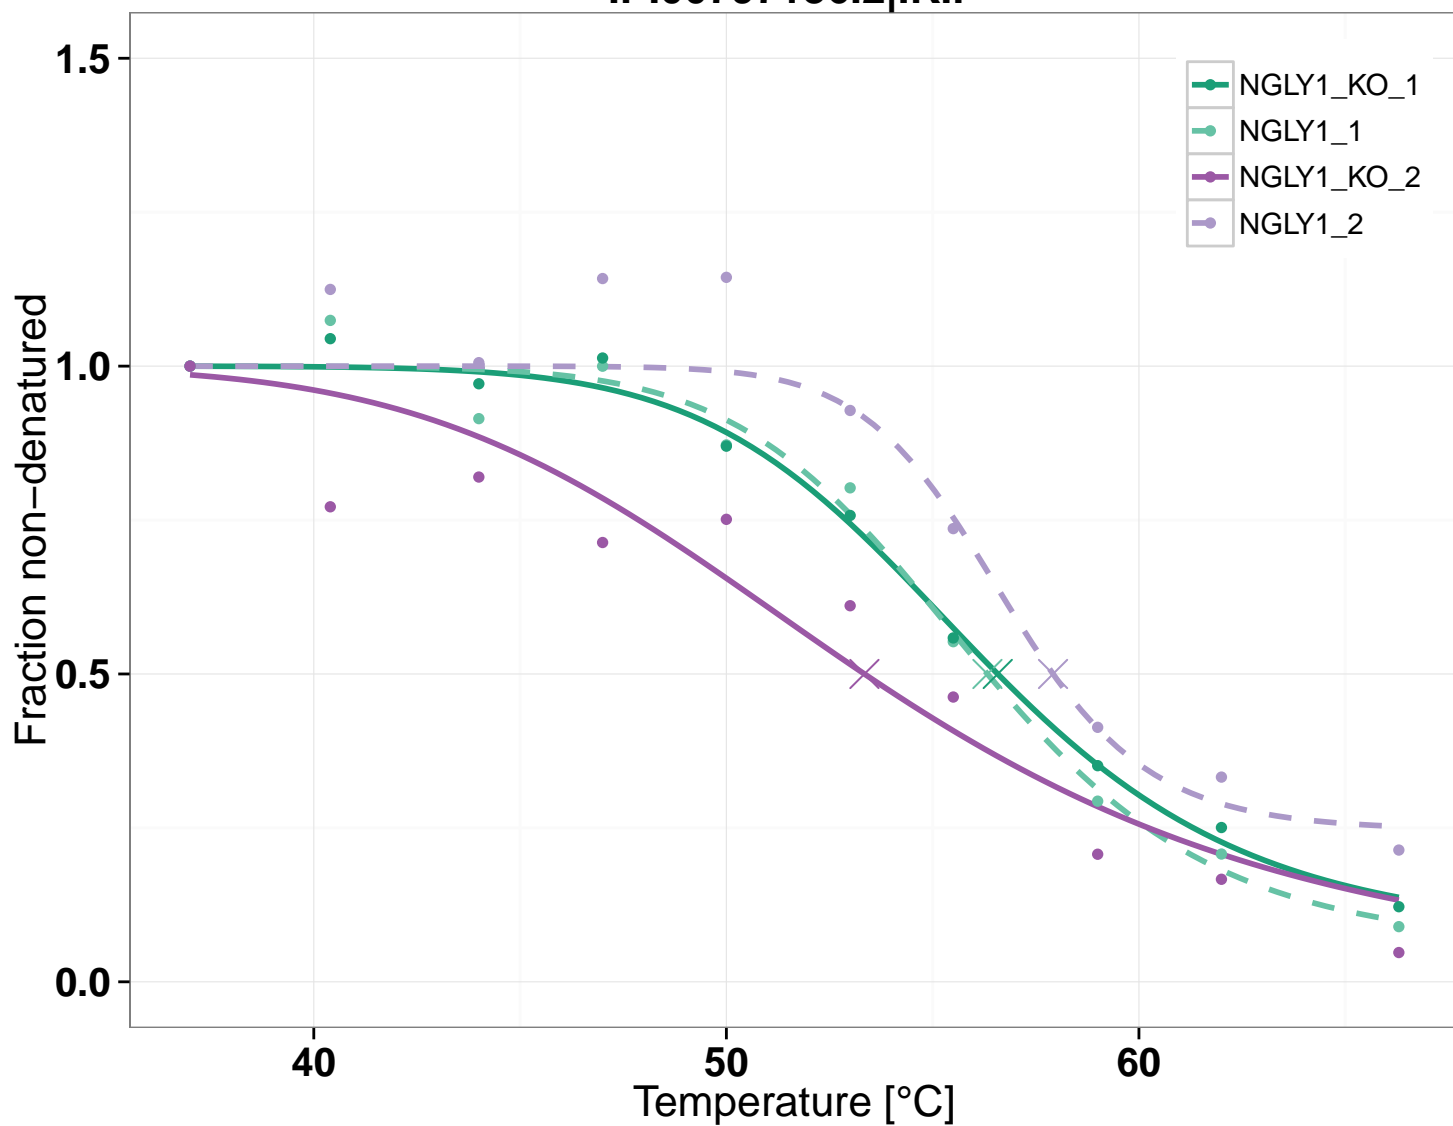

|            | meltPoint | slope  | plateau | R2   |
|------------|-----------|--------|---------|------|
| NGLY1_KO_1 | 56.58     | -0.07  | 0.07    | 0.99 |
| NGLY1_1    | 56.33     | -0.082 | 0.05    | 0.99 |
| NGLY1_KO_2 | 53.35     | -0.047 | 0       | 0.91 |
| NGLY1_2    | 57.92     | -0.11  | 0.25    | 0.95 |

Supplement: Supplementary file 5720 [file 1]

IPI00337766.7|ZCCHC2

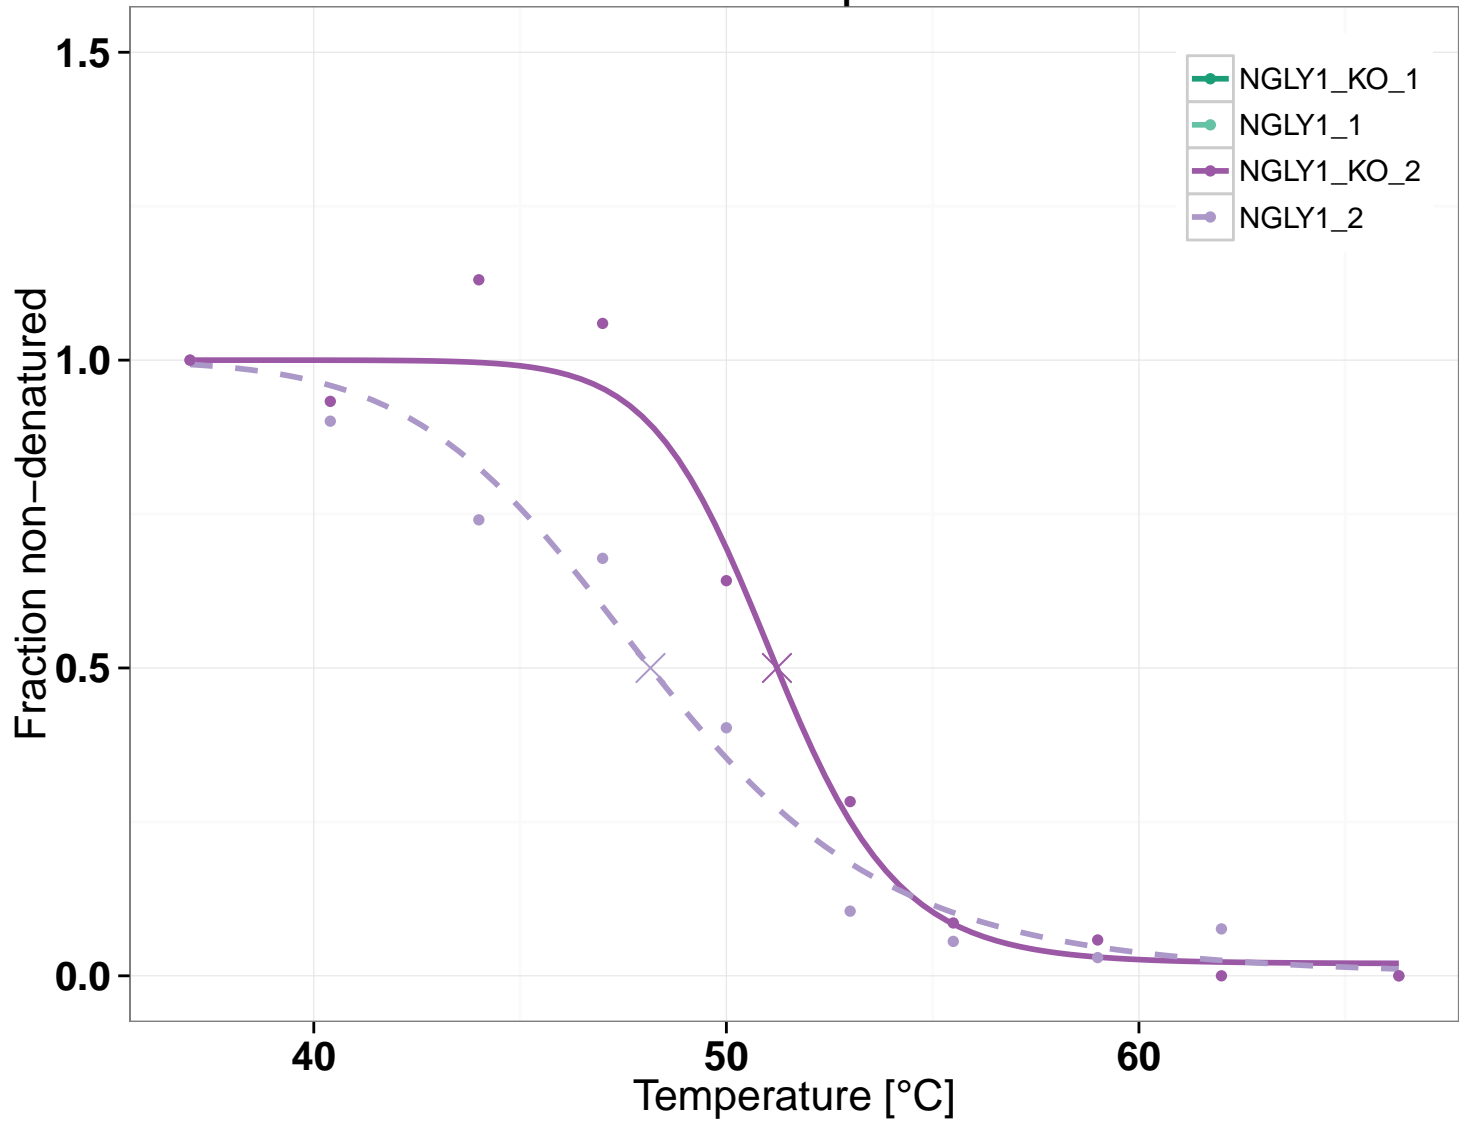

|            | meltPoint | slope  | plateau | R2   |
|------------|-----------|--------|---------|------|
| NGLY1_KO_1 | -         | -      | -       | -    |
| NGLY1_1    | -         | -      | -       | -    |
| NGLY1_KO_2 | 51.23     | -0.16  | 0.02    | 0.98 |
| NGLY1_2    | 48.16     | -0.086 | 0       | 0.98 |

Supplement: Supplementary file 5721 [file 1]

IPI00893197.1|PPP2R4

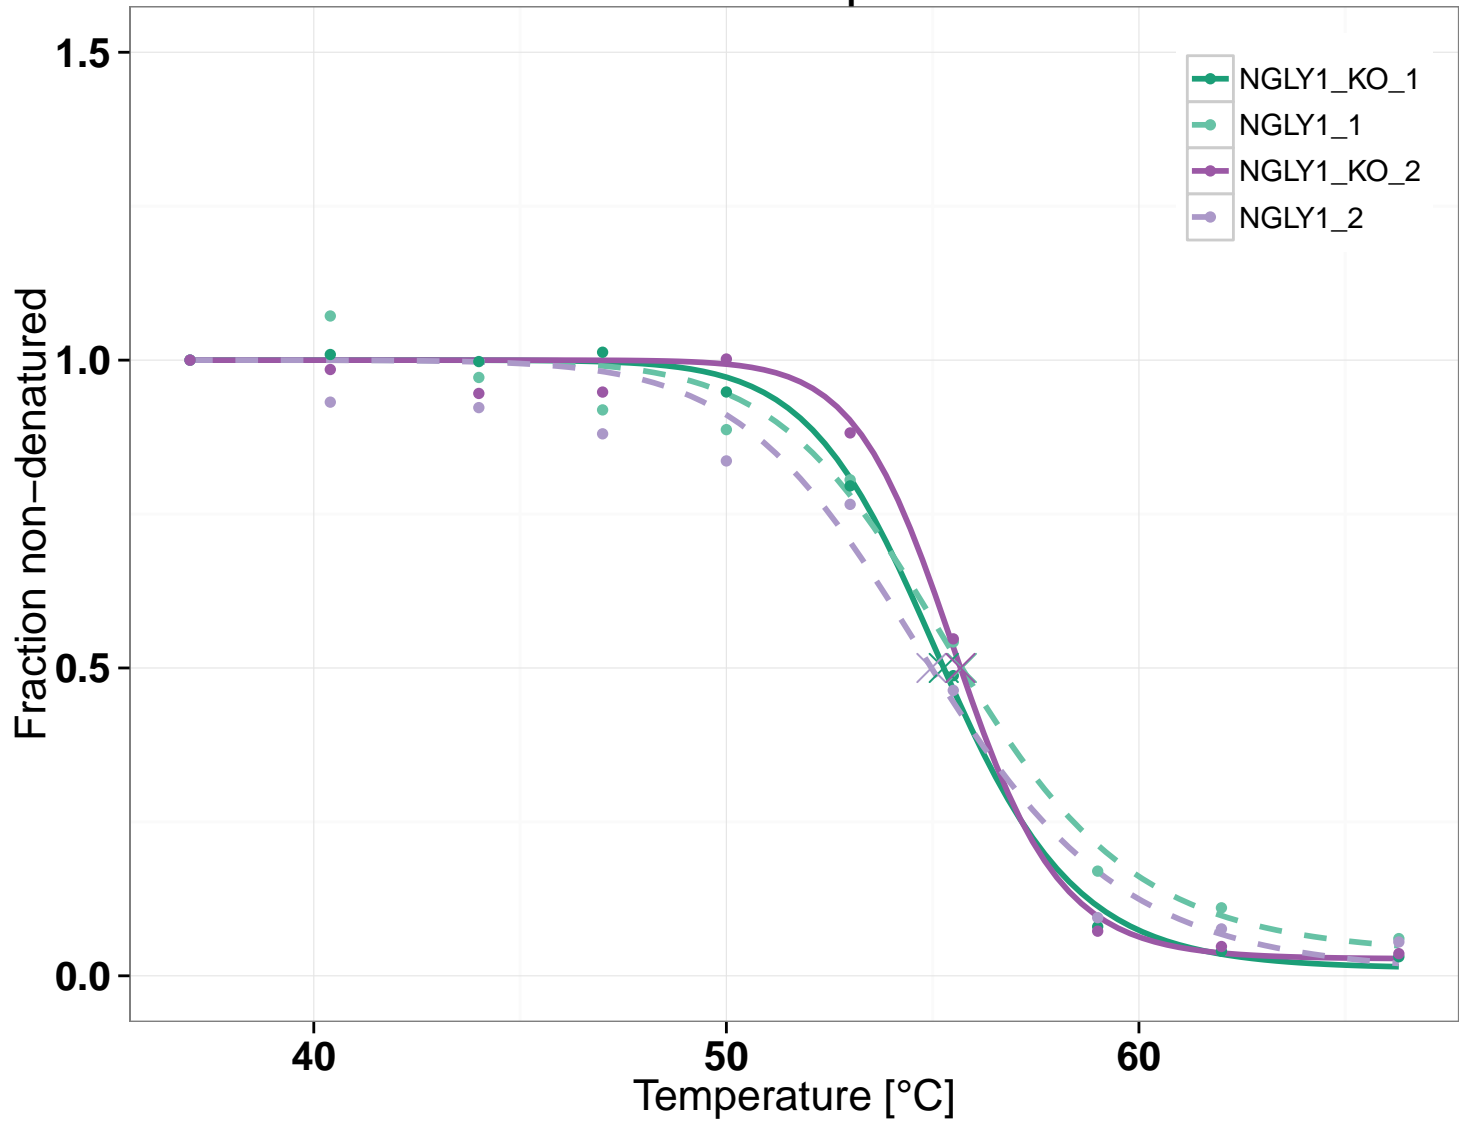

|            | meltPoint | slope | plateau | R2   |
|------------|-----------|-------|---------|------|
| NGLY1_KO_1 | 55.27     | -0.15 | 0.01    | 1    |
| NGLY1_1    | 55.71     | -0.11 | 0.03    | 0.99 |
| NGLY1_KO_2 | 55.67     | -0.2  | 0.03    | 1    |
| NGLY1_2    | 54.97     | -0.11 | 0       | 0.97 |

Supplement: Supplementary file 5722 [file 1]

IPI00027228.1|PET112L

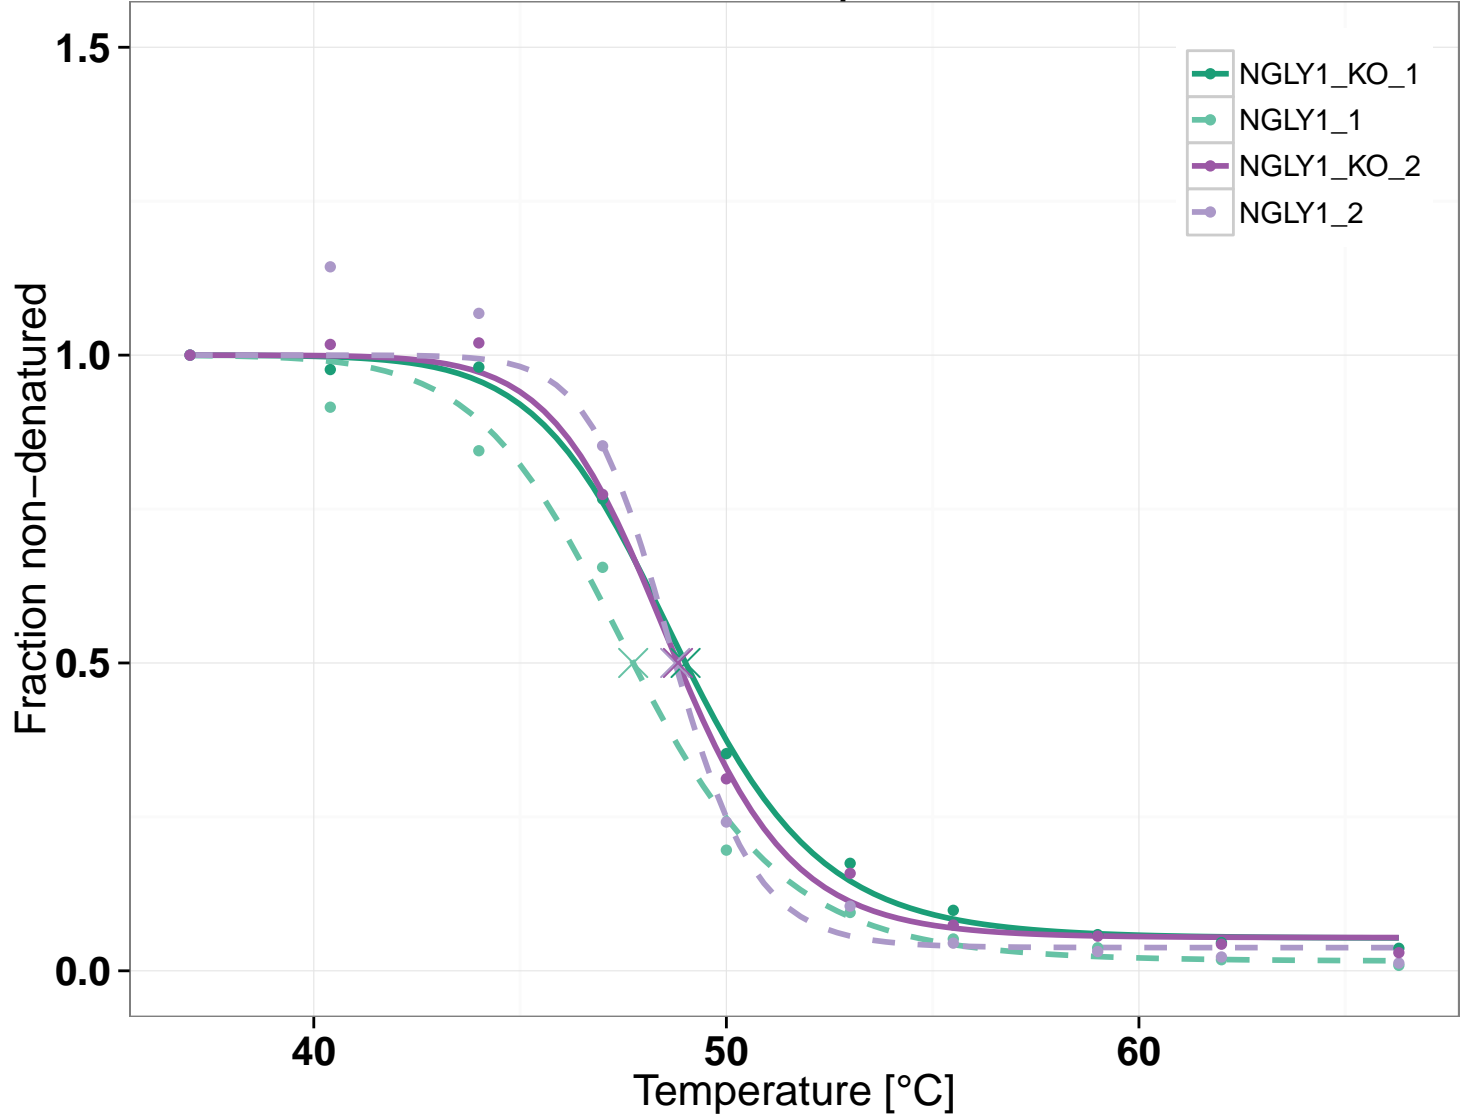

|            | meltPoint | slope | plateau | R2   |
|------------|-----------|-------|---------|------|
| NGLY1_KO_1 | 49.01     | -0.14 | 0.05    | 1    |
| NGLY1_1    | 47.74     | -0.13 | 0.02    | 0.99 |
| NGLY1_KO_2 | 48.83     | -0.16 | 0.05    | 1    |
| NGLY1_2    | 48.76     | -0.24 | 0.04    | 0.99 |

Supplement: Supplementary file 5723 [file 1]
