# Supplementary material (part 58 of 85)
Source: publisher figshare collection journal article supplement (https://gsajournals.figshare.com/articles/dataset/_/12014913)

# IPI00329583.7|SPATA5

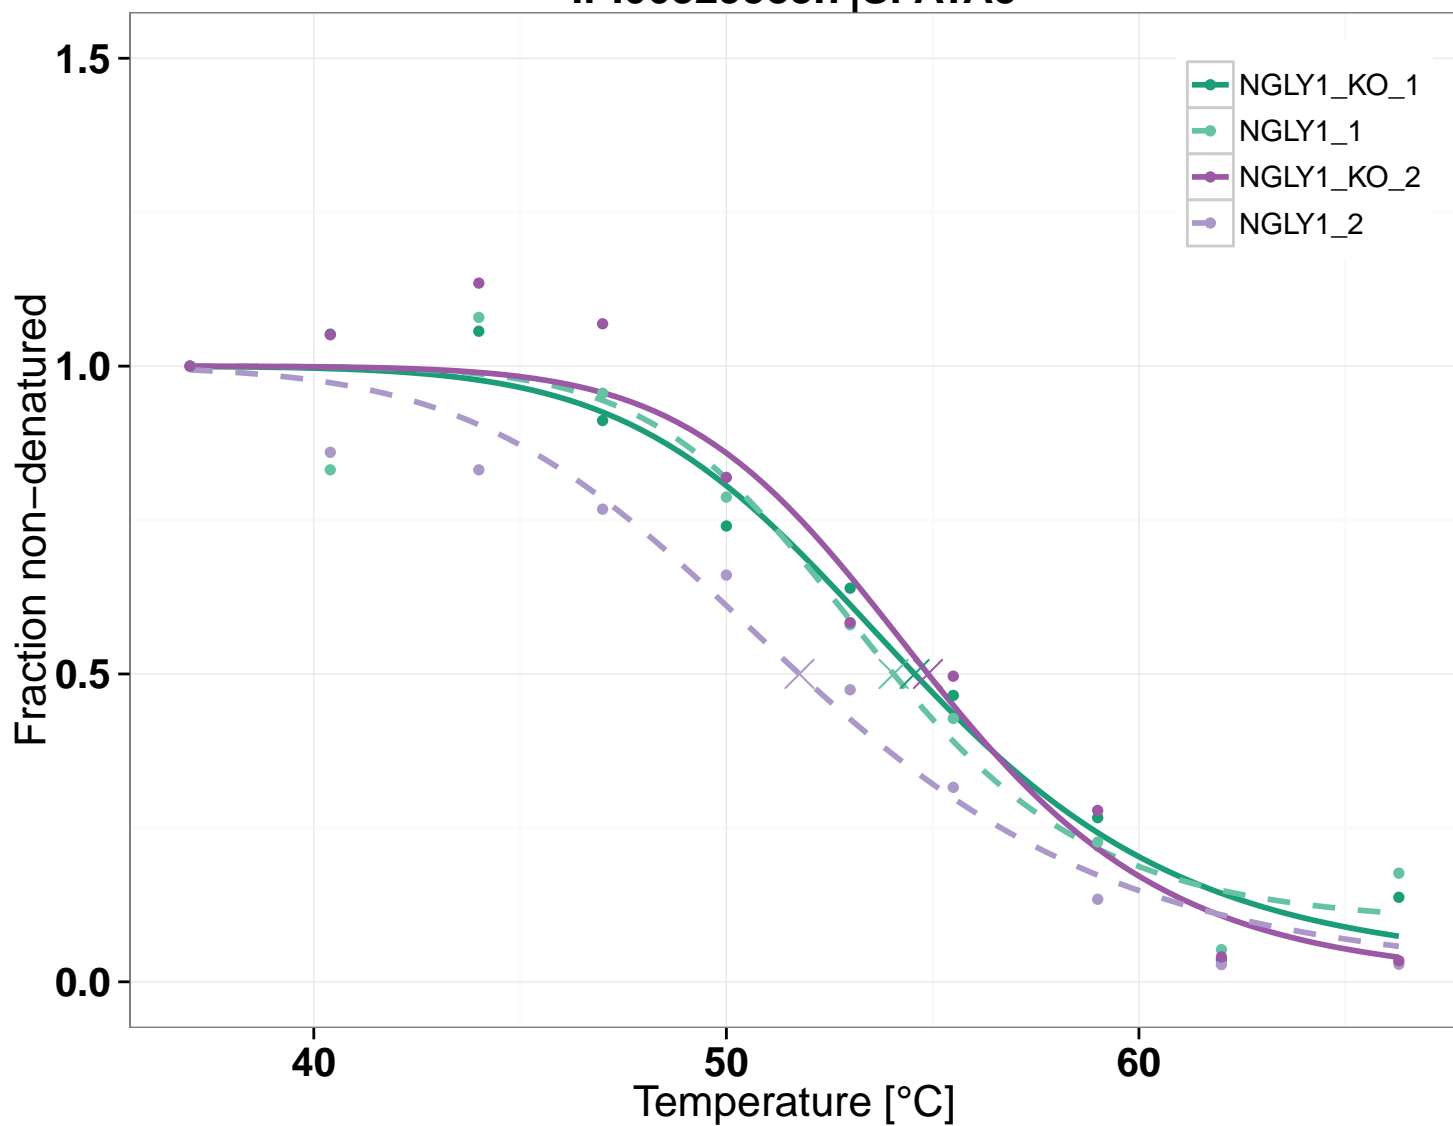

|            | meltPoint | slope  | plateau | R2   |
|------------|-----------|--------|---------|------|
| NGLY1_KO_1 | 54.56     | -0.072 | 0.02    | 0.98 |
| NGLY1_1    | 54.05     | -0.085 | 0.09    | 0.96 |
| NGLY1_KO_2 | 54.89     | -0.085 | 0       | 0.97 |
| NGLY1_2    | 51.77     | -0.063 | 0       | 0.97 |

Supplement: Supplementary file 5724 [file 1]

# IPI00385383.3|ABCC5

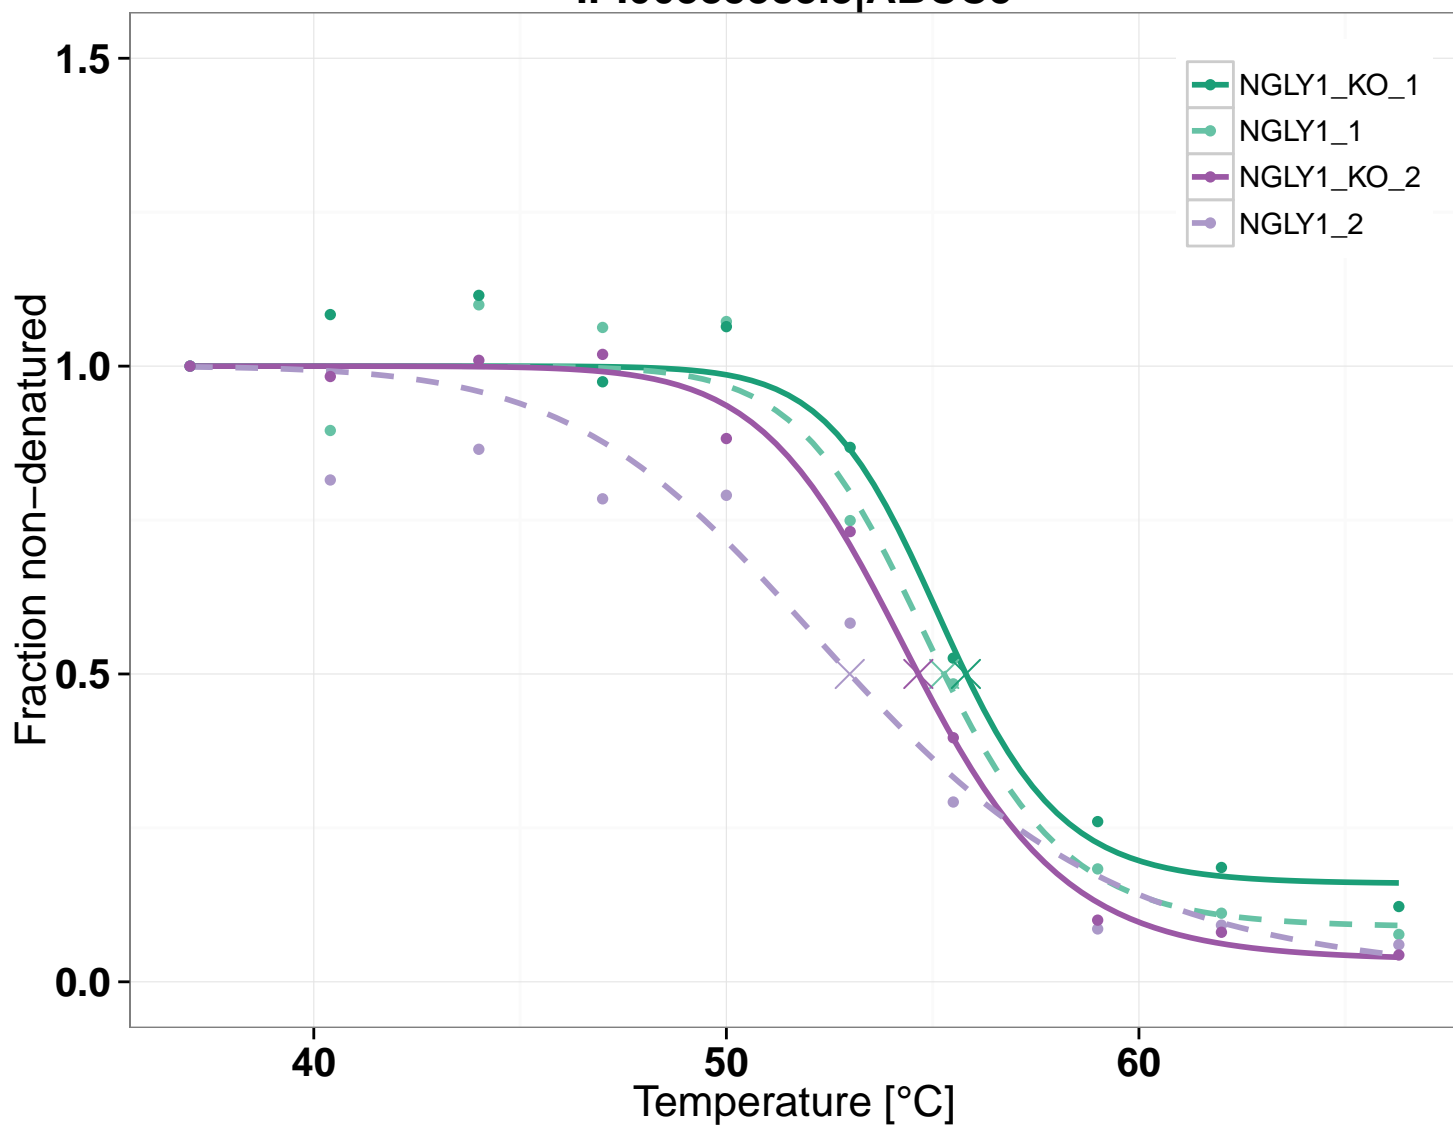

|            | meltPoint | slope  | plateau | R2   |
|------------|-----------|--------|---------|------|
| NGLY1_KO_1 | 55.81     | -0.15  | 0.16    | 0.98 |
| NGLY1_1    | 55.28     | -0.14  | 0.09    | 0.98 |
| NGLY1_KO_2 | 54.65     | -0.13  | 0.03    | 1    |
| NGLY1_2    | 52.99     | -0.074 | 0       | 0.94 |

Supplement: Supplementary file 5725 [file 1]

IPI00790411.1|CNOT10

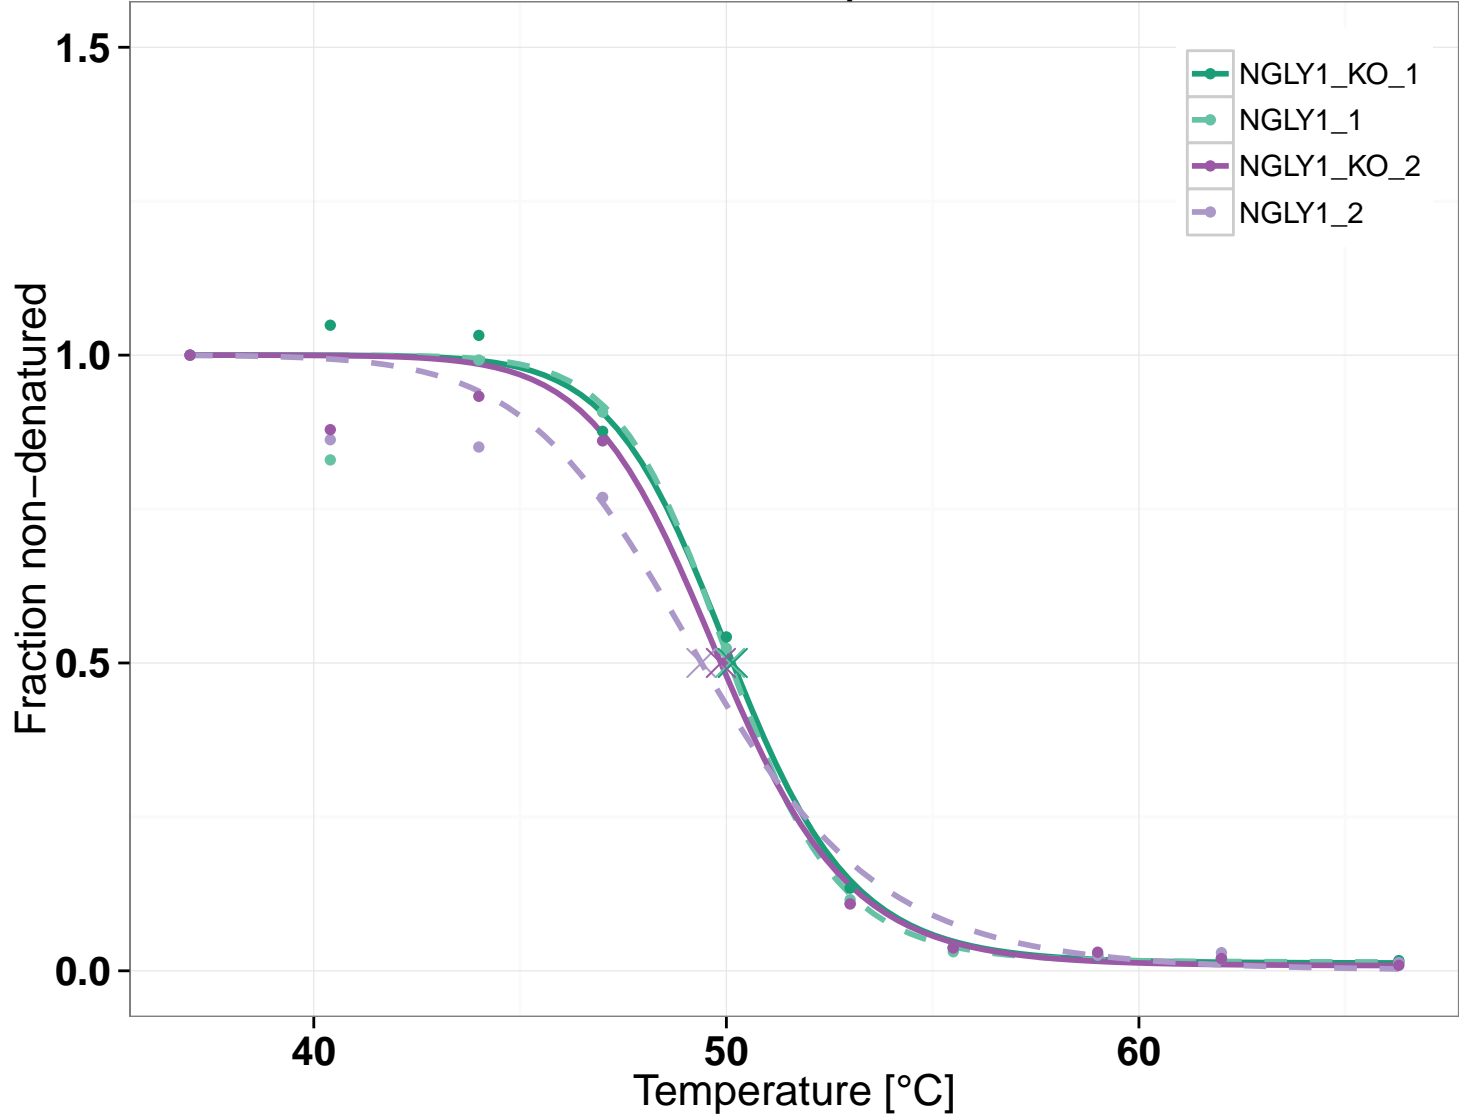

|            | meltPoint | slope | plateau | R2   |
|------------|-----------|-------|---------|------|
| NGLY1_KO_1 | 50.16     | -0.17 | 0.01    | 1    |
| NGLY1_1    | 50.09     | -0.18 | 0.01    | 0.98 |
| NGLY1_KO_2 | 49.87     | -0.16 | 0.01    | 0.99 |
| NGLY1_2    | 49.4      | -0.12 | 0       | 0.98 |

Supplement: Supplementary file 5726 [file 1]

IPI00013835.4|DGKZ

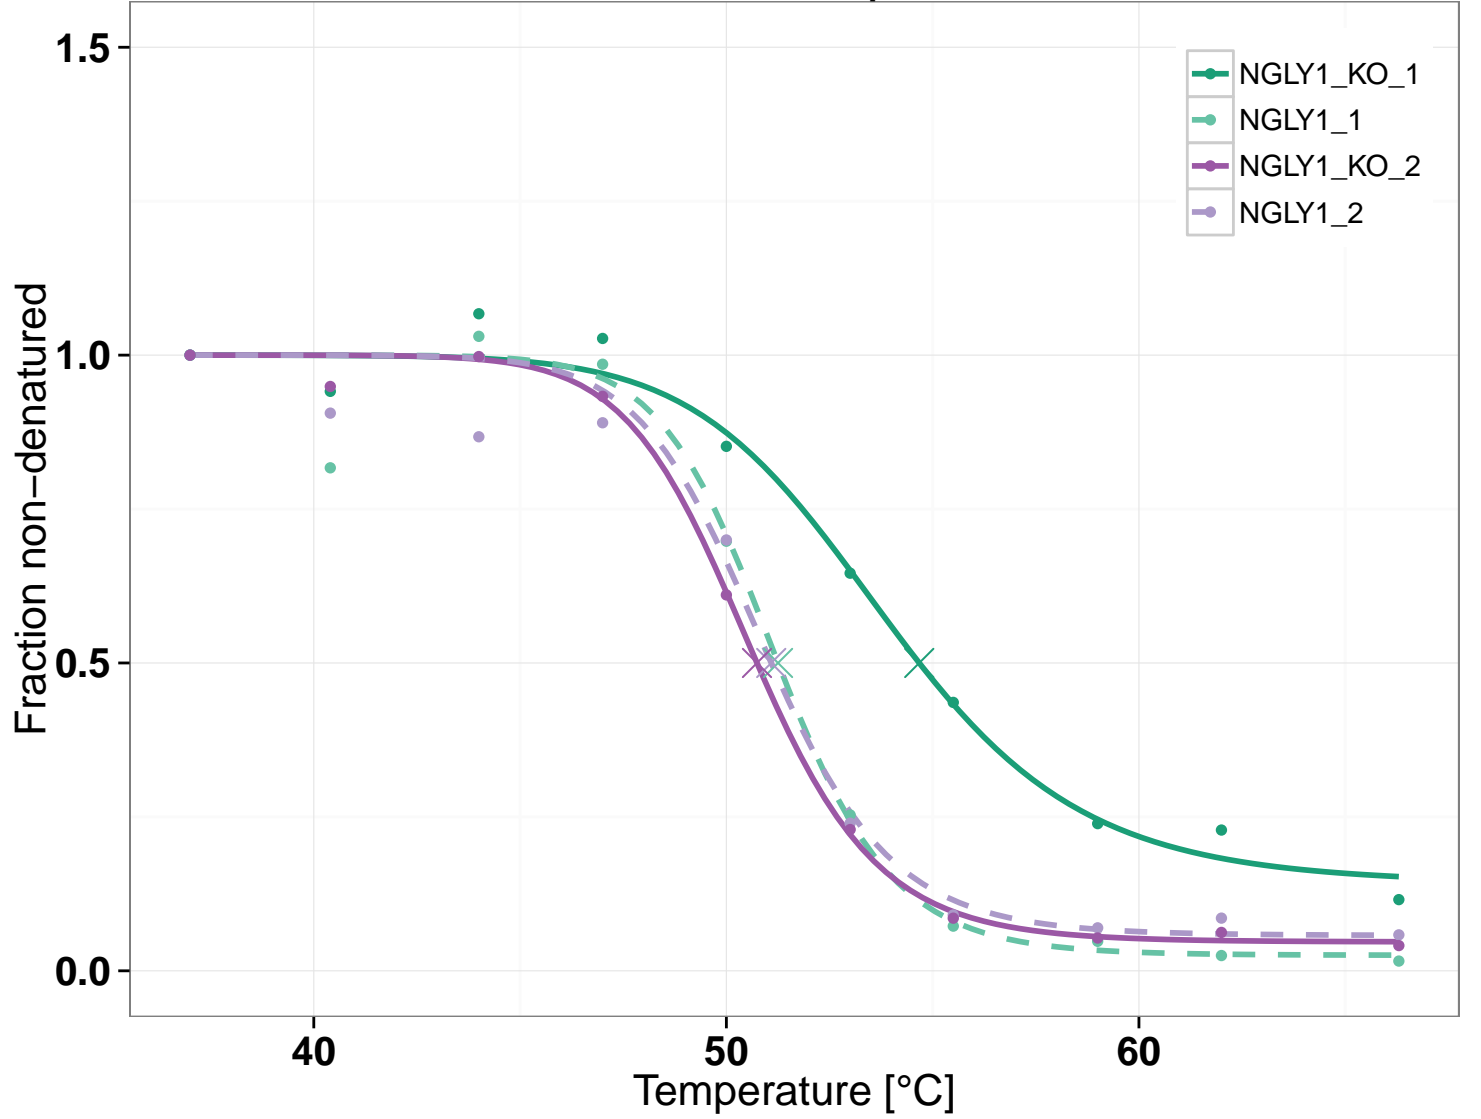

|            | meltPoint | slope  | plateau | R2   |
|------------|-----------|--------|---------|------|
| NGLY1_KO_1 | 54.68     | -0.091 | 0.14    | 0.99 |
| NGLY1_1    | 51.25     | -0.17  | 0.03    | 0.98 |
| NGLY1_KO_2 | 50.74     | -0.16  | 0.05    | 1    |
| NGLY1_2    | 51.09     | -0.15  | 0.06    | 0.98 |

Supplement: Supplementary file 5727 [file 1]

# IPI00022229.1|APOB

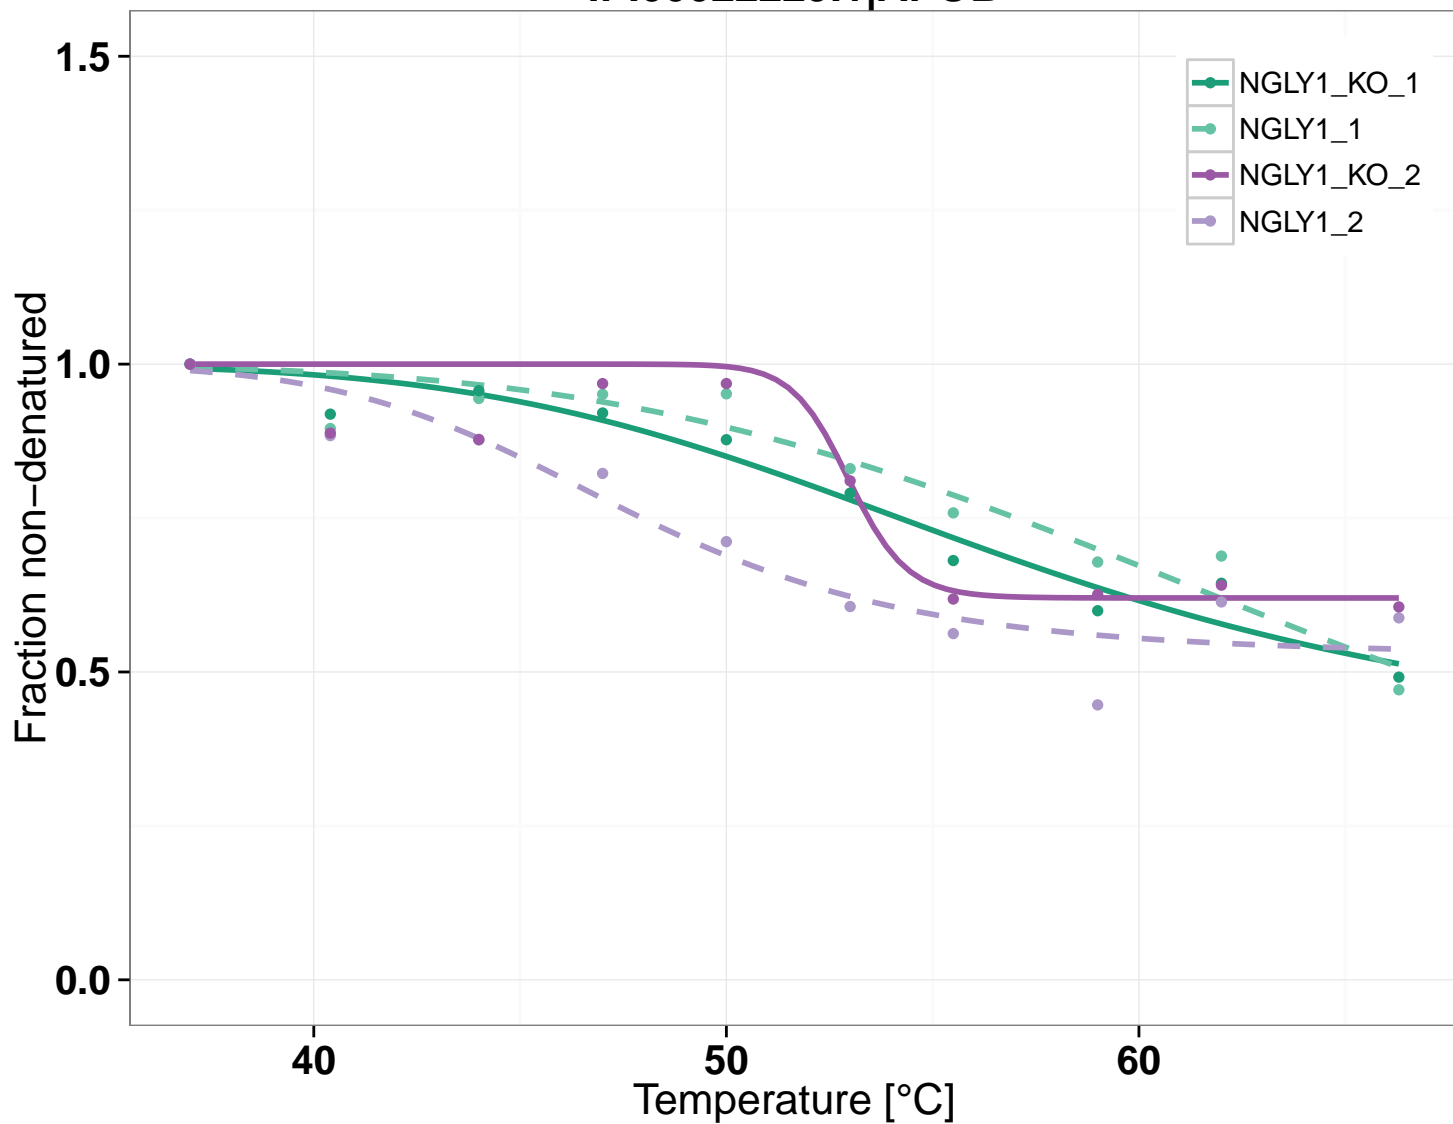

|            | meltPoint | slope  | plateau | R2   |
|------------|-----------|--------|---------|------|
| NGLY1_KO_1 | —         | −0.025 | 0.36    | 0.95 |
| NGLY1_1    | —         | −0.027 | 0       | 0.92 |
| NGLY1_KO_2 | —         | −0.14  | 0.62    | 0.87 |
| NGLY1_2    | —         | −0.034 | 0.53    | 0.9  |

Supplement: Supplementary file 5728 [file 1]

# IPI00006250.4|DHRS3

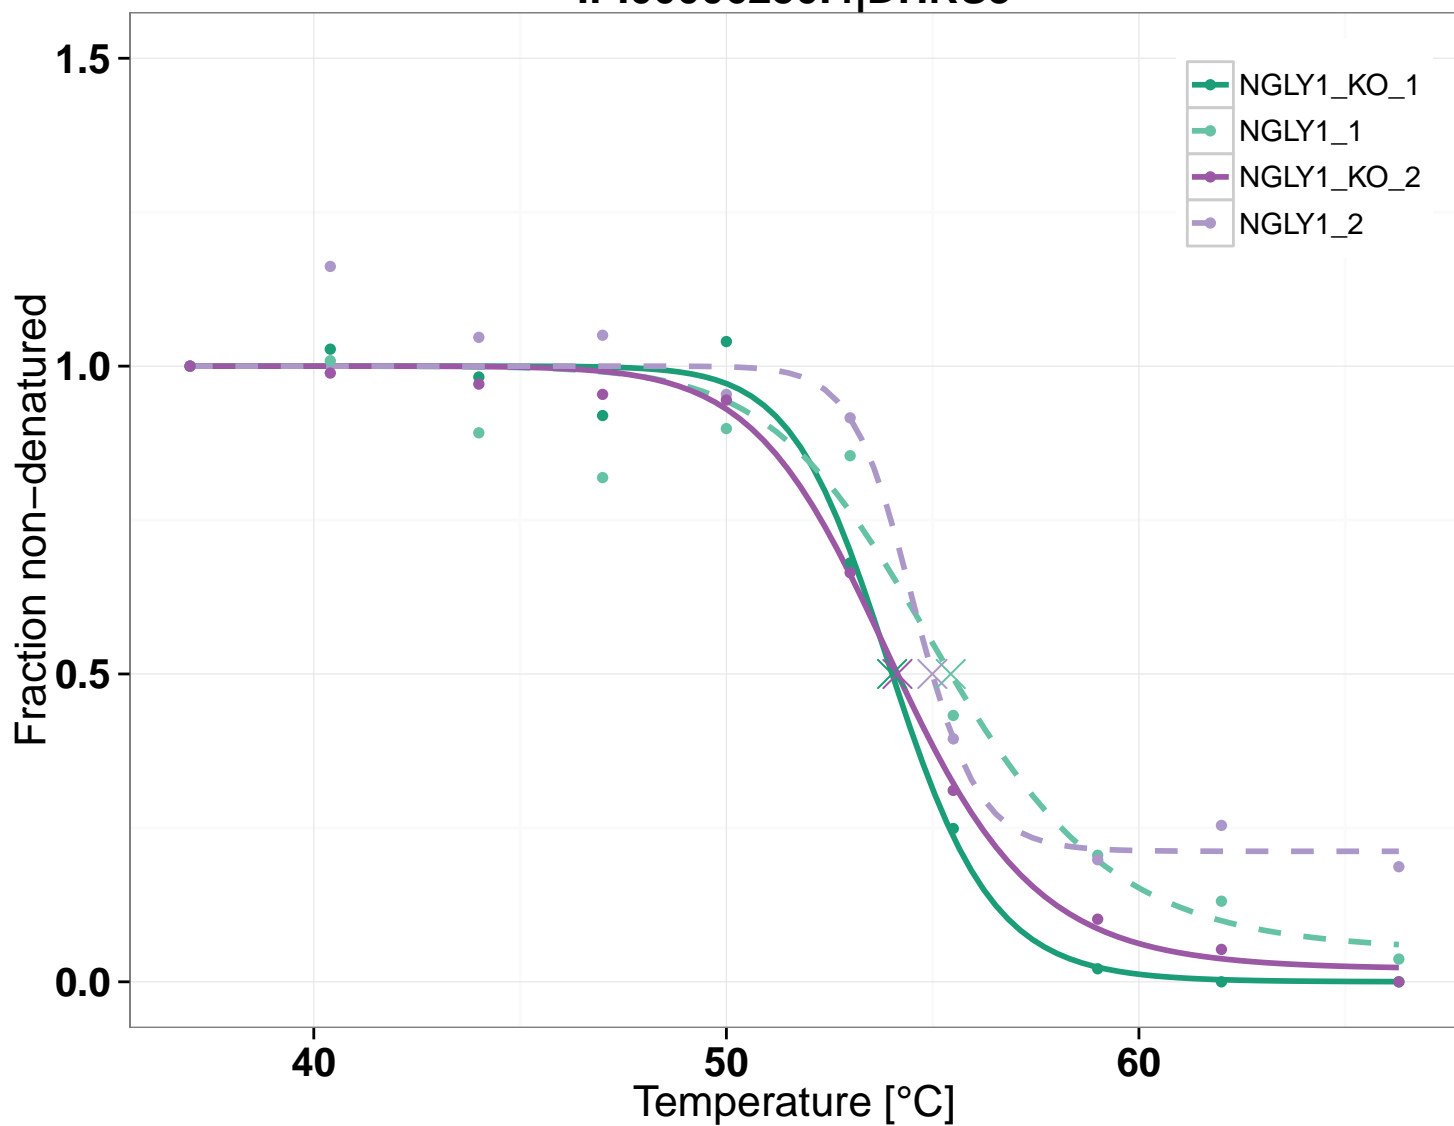

|            | meltPoint | slope | plateau | R2   |
|------------|-----------|-------|---------|------|
| NGLY1_KO_1 | 54.02     | -0.2  | 0       | 0.99 |
| NGLY1_1    | 55.44     | -0.11 | 0.05    | 0.96 |
| NGLY1_KO_2 | 54.15     | -0.14 | 0.02    | 1    |
| NGLY1_2    | 54.99     | -0.26 | 0.21    | 0.98 |

Supplement: Supplementary file 5729 [file 1]

IPI00015773.3|COMMD3

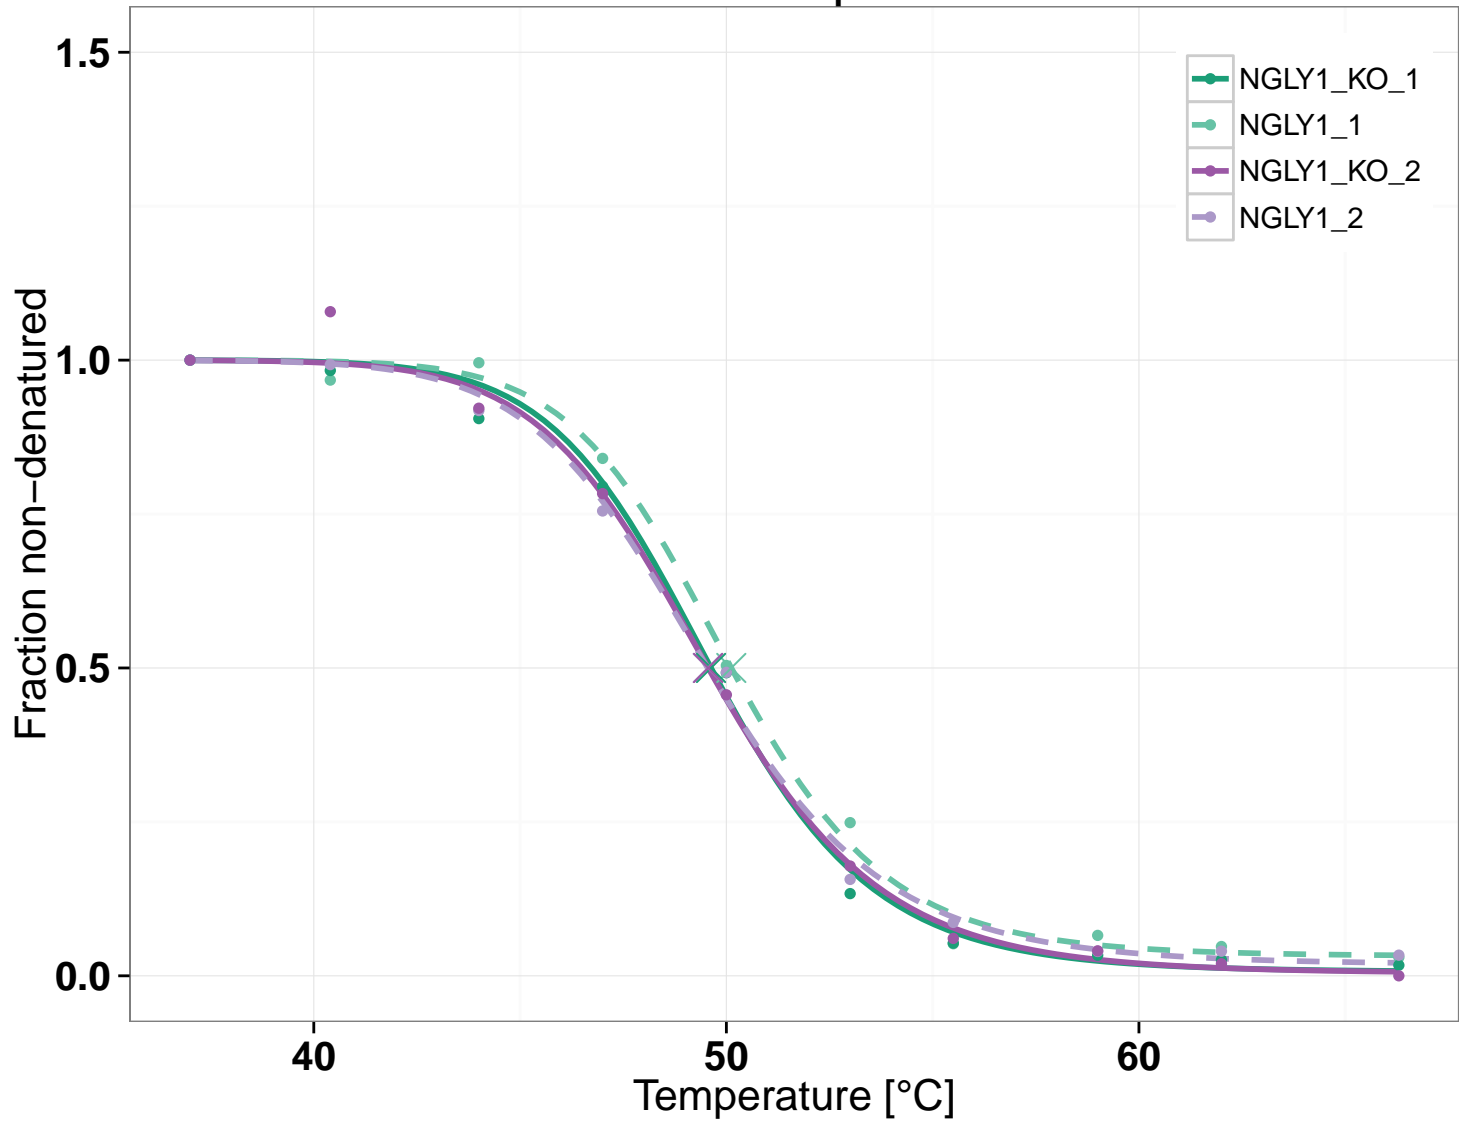

|            | meltPoint | slope | plateau | R2 |
|------------|-----------|-------|---------|----|
| NGLY1_KO_1 | 49.63     | -0.13 | 0.01    | 1  |
| NGLY1_1    | 50.12     | -0.13 | 0.03    | 1  |
| NGLY1_KO_2 | 49.56     | -0.12 | 0       | 1  |
| NGLY1_2    | 49.55     | -0.11 | 0.02    | 1  |

Supplement: Supplementary file 5730 [file 1]

IPI00022430.1|GAPDHS

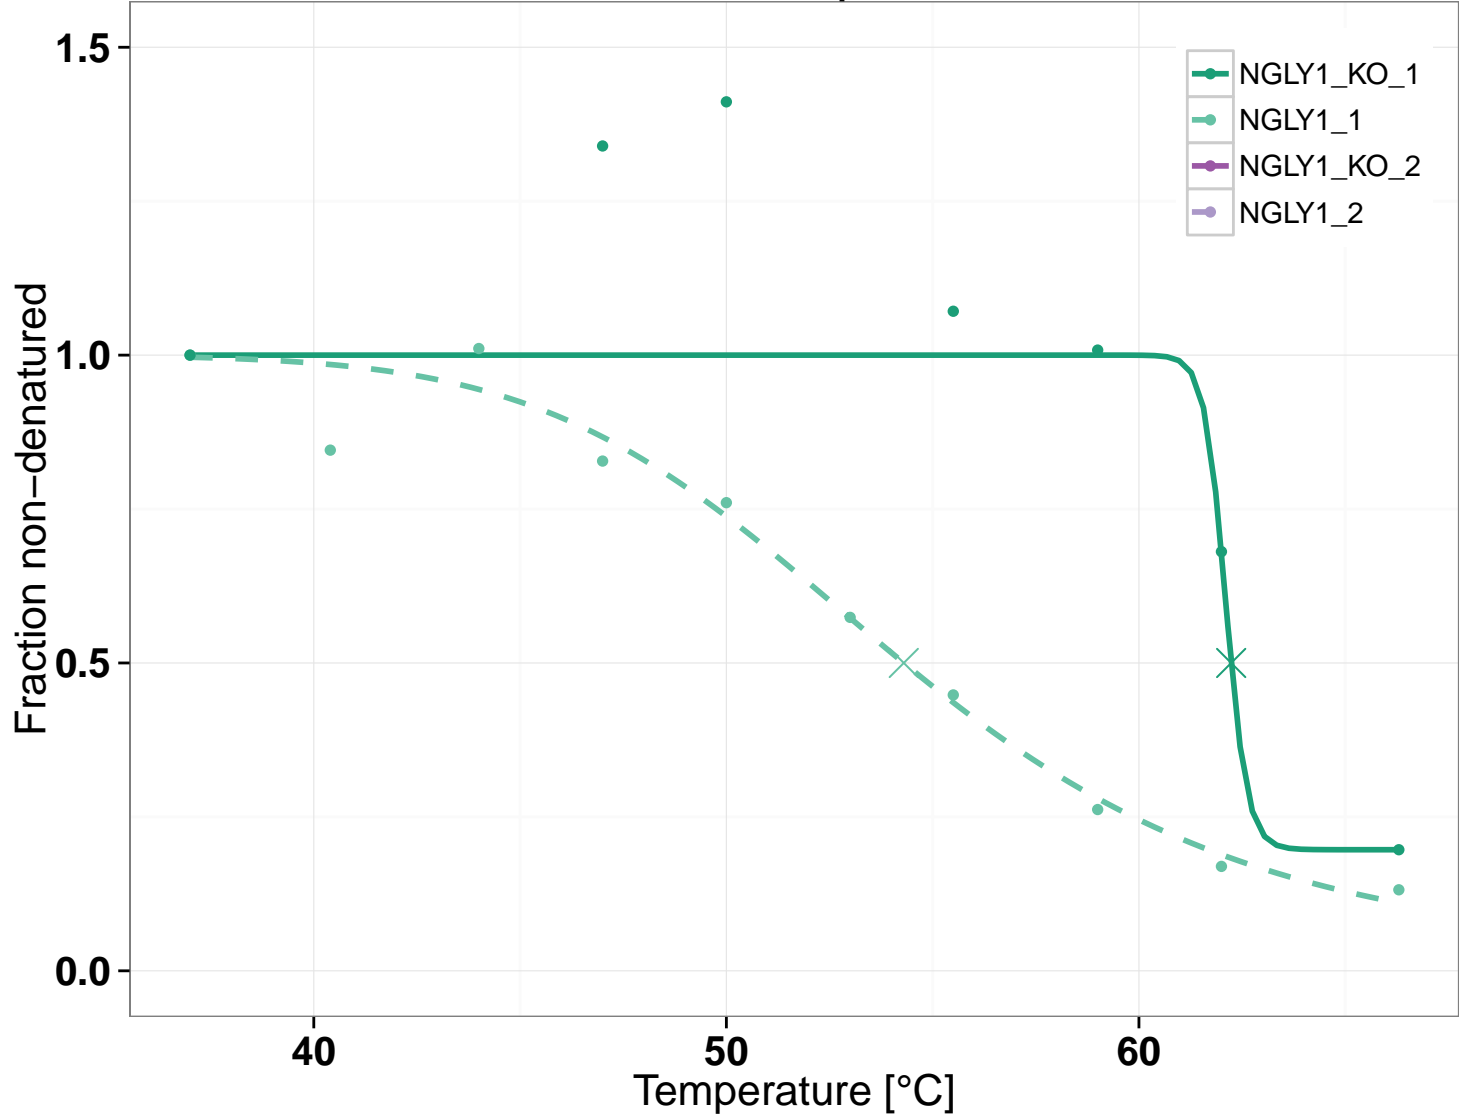

|            | meltPoint | slope  | plateau | R2    |
|------------|-----------|--------|---------|-------|
| NGLY1_KO_1 | 62.24     | -0.78  | 0.2     | -0.02 |
| NGLY1_1    | 54.3      | -0.057 | 0.01    | 0.97  |
| NGLY1_KO_2 | -         | -      | -       | -     |
| NGLY1_2    | -         | -      | -       | -     |

Supplement: Supplementary file 5731 [file 1]

# IPI00015143.1|ORC5L

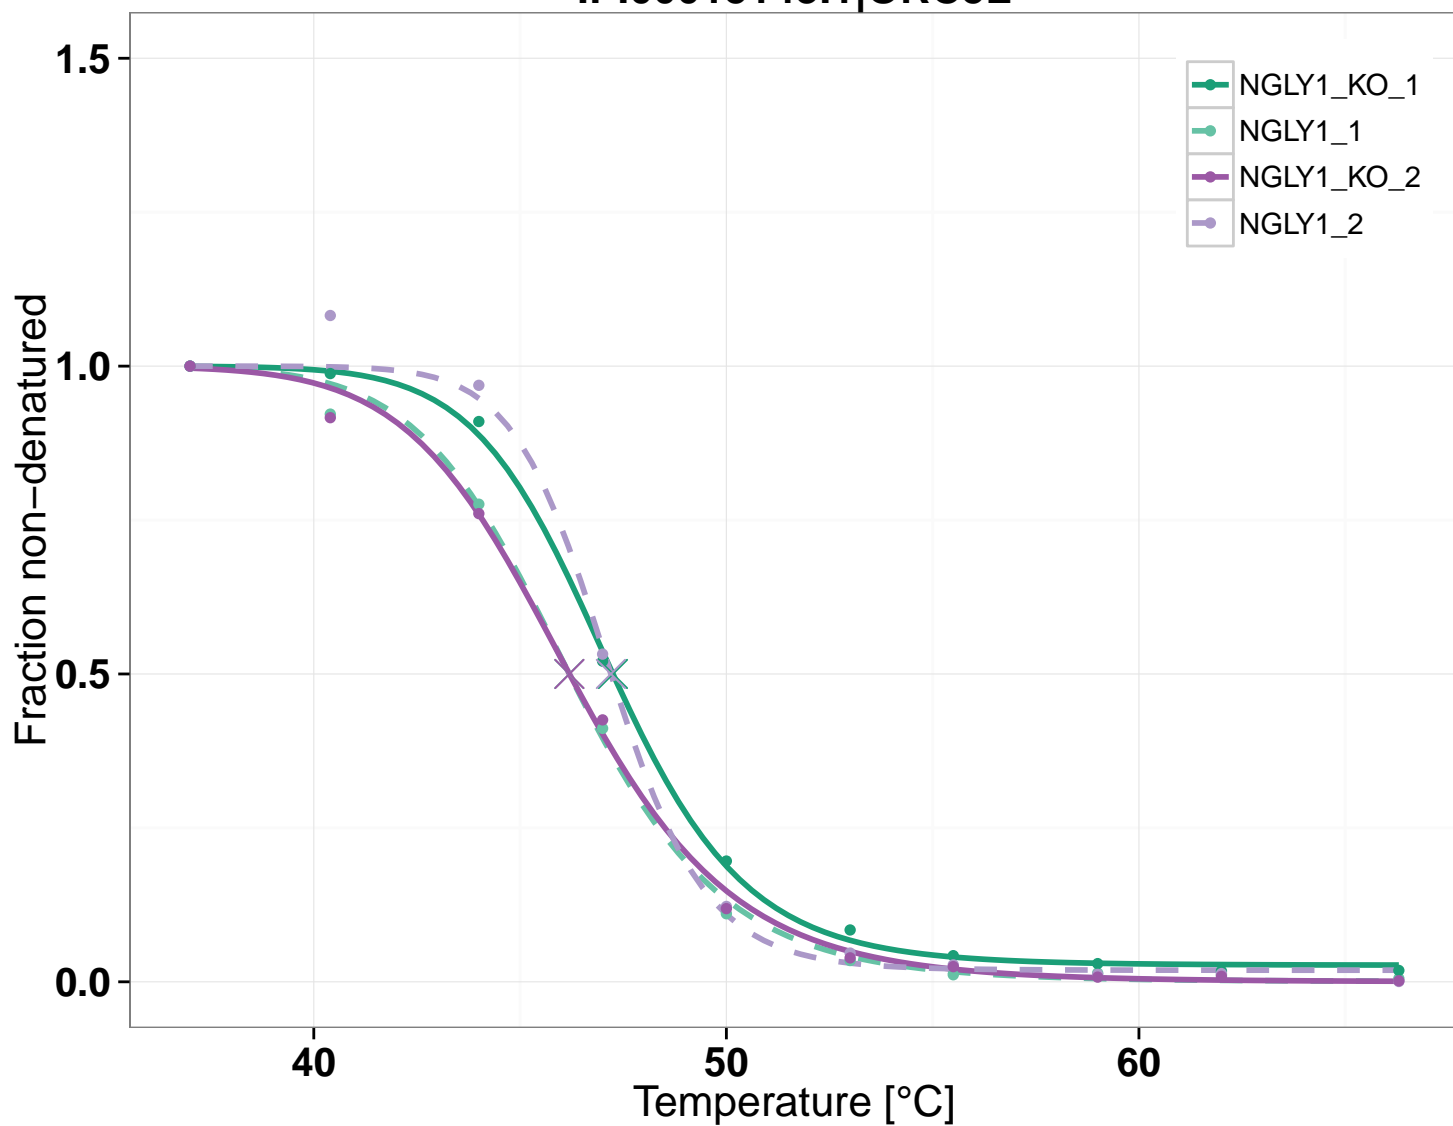

|            | meltPoint | slope | plateau | R2 |
|------------|-----------|-------|---------|----|
| NGLY1_KO_1 | 47.25     | -0.15 | 0.03    | 1  |
| NGLY1_1    | 46.19     | -0.13 | 0       | 1  |
| NGLY1_KO_2 | 46.2      | -0.13 | 0       | 1  |
| NGLY1_2    | 47.2      | -0.21 | 0.02    | 1  |

Supplement: Supplementary file 5732 [file 1]

IPI00304875.2|HIRIP3

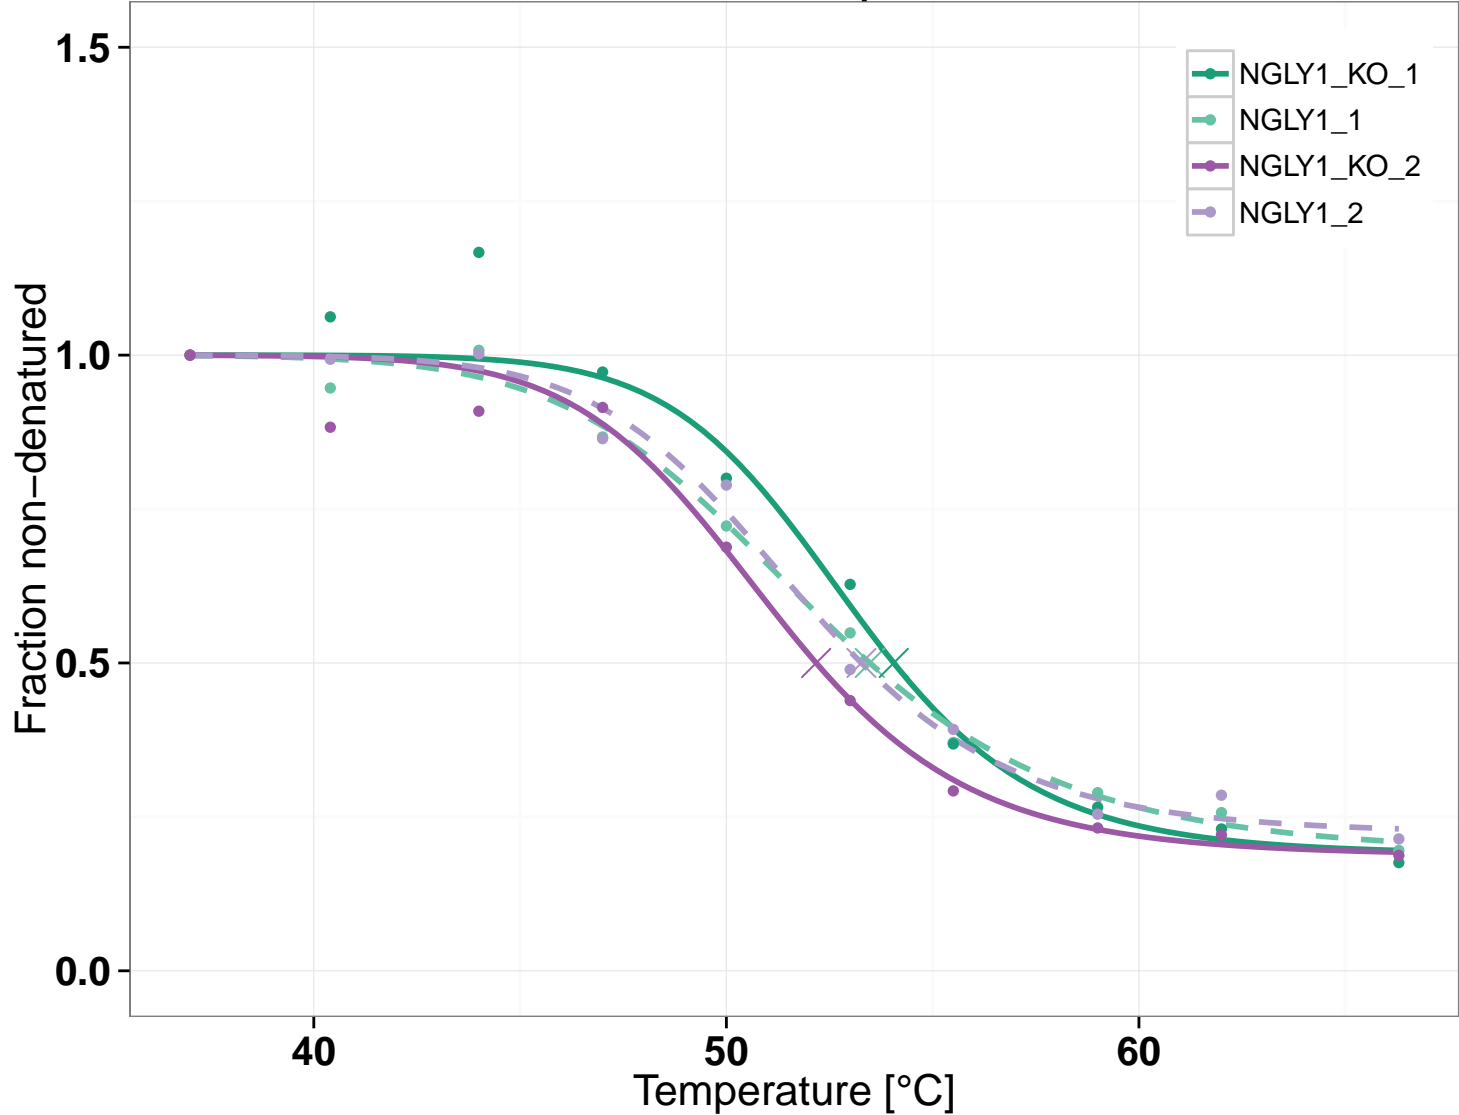

|            | meltPoint | slope  | plateau | R2   |
|------------|-----------|--------|---------|------|
| NGLY1_KO_1 | 54.06     | -0.092 | 0.19    | 0.97 |
| NGLY1_1    | 53.48     | -0.067 | 0.19    | 0.99 |
| NGLY1_KO_2 | 52.18     | -0.086 | 0.19    | 0.98 |
| NGLY1_2    | 53.27     | -0.078 | 0.22    | 0.99 |

Supplement: Supplementary file 5733 [file 1]

# IPI00328713.3|ZNF546

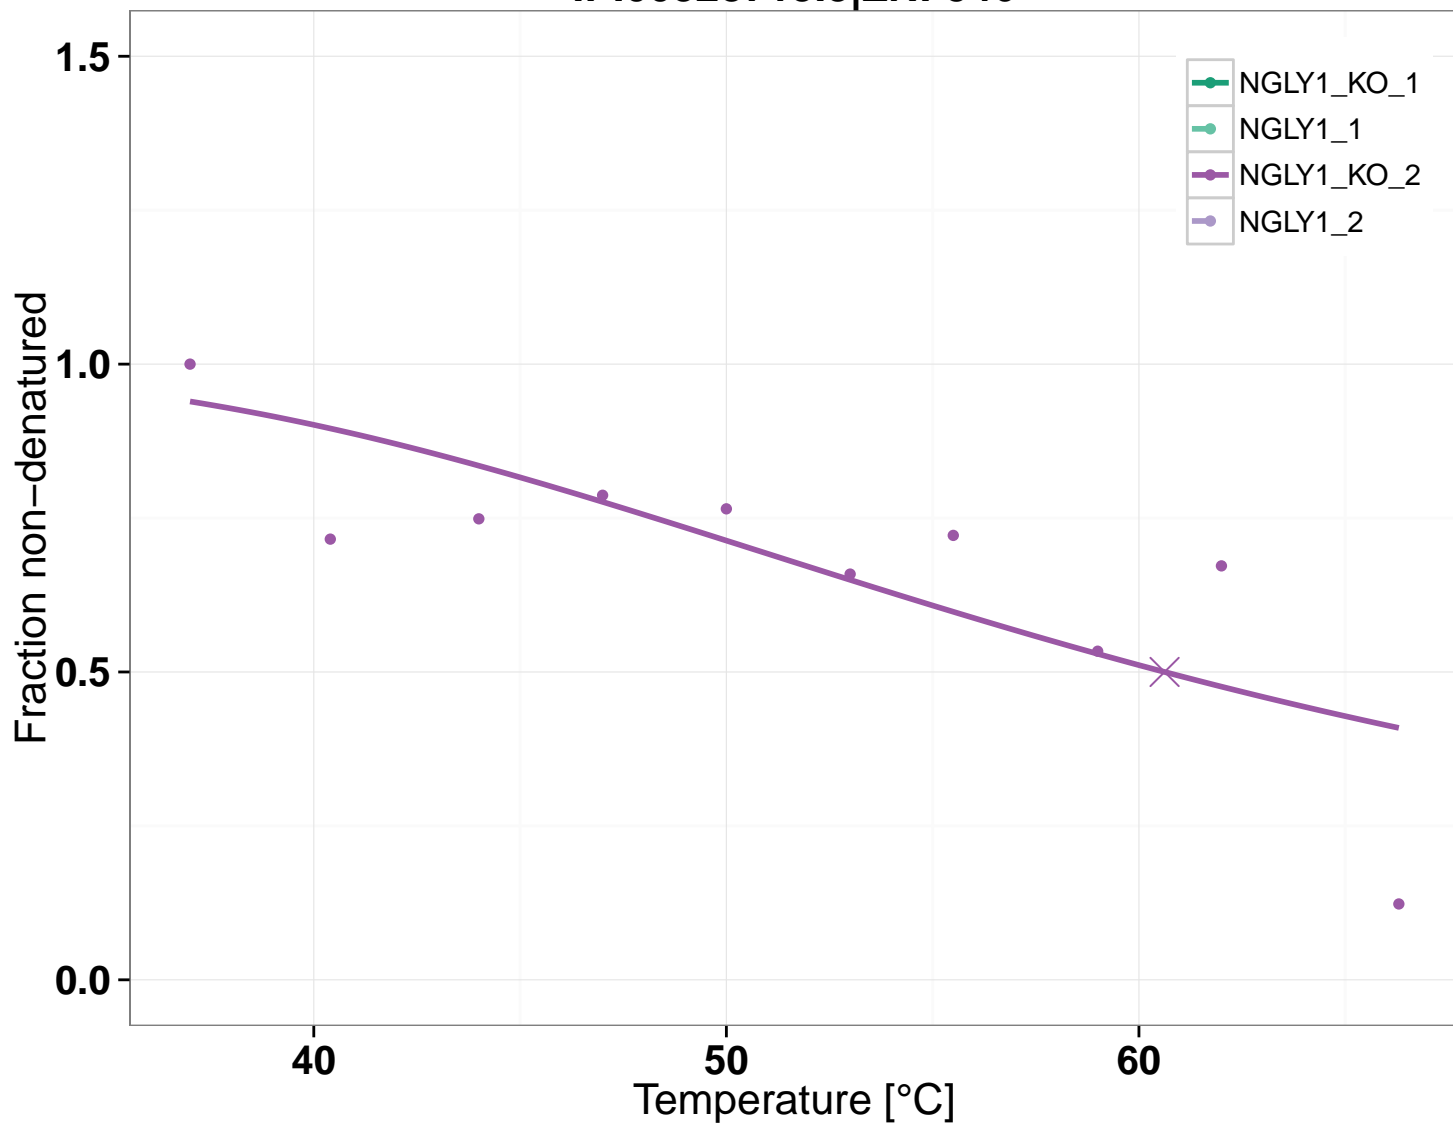

|            | meltPoint | slope  | plateau | R2  |
|------------|-----------|--------|---------|-----|
| NGLY1_KO_1 | —         | —      | —       | —   |
| NGLY1_1    | —         | —      | —       | —   |
| NGLY1_KO_2 | 60.62     | -0.021 | 0       | 0.6 |
| NGLY1_2    | —         | —      | —       | —   |

Supplement: Supplementary file 5734 [file 1]

# IPI00009009.4|CWC15

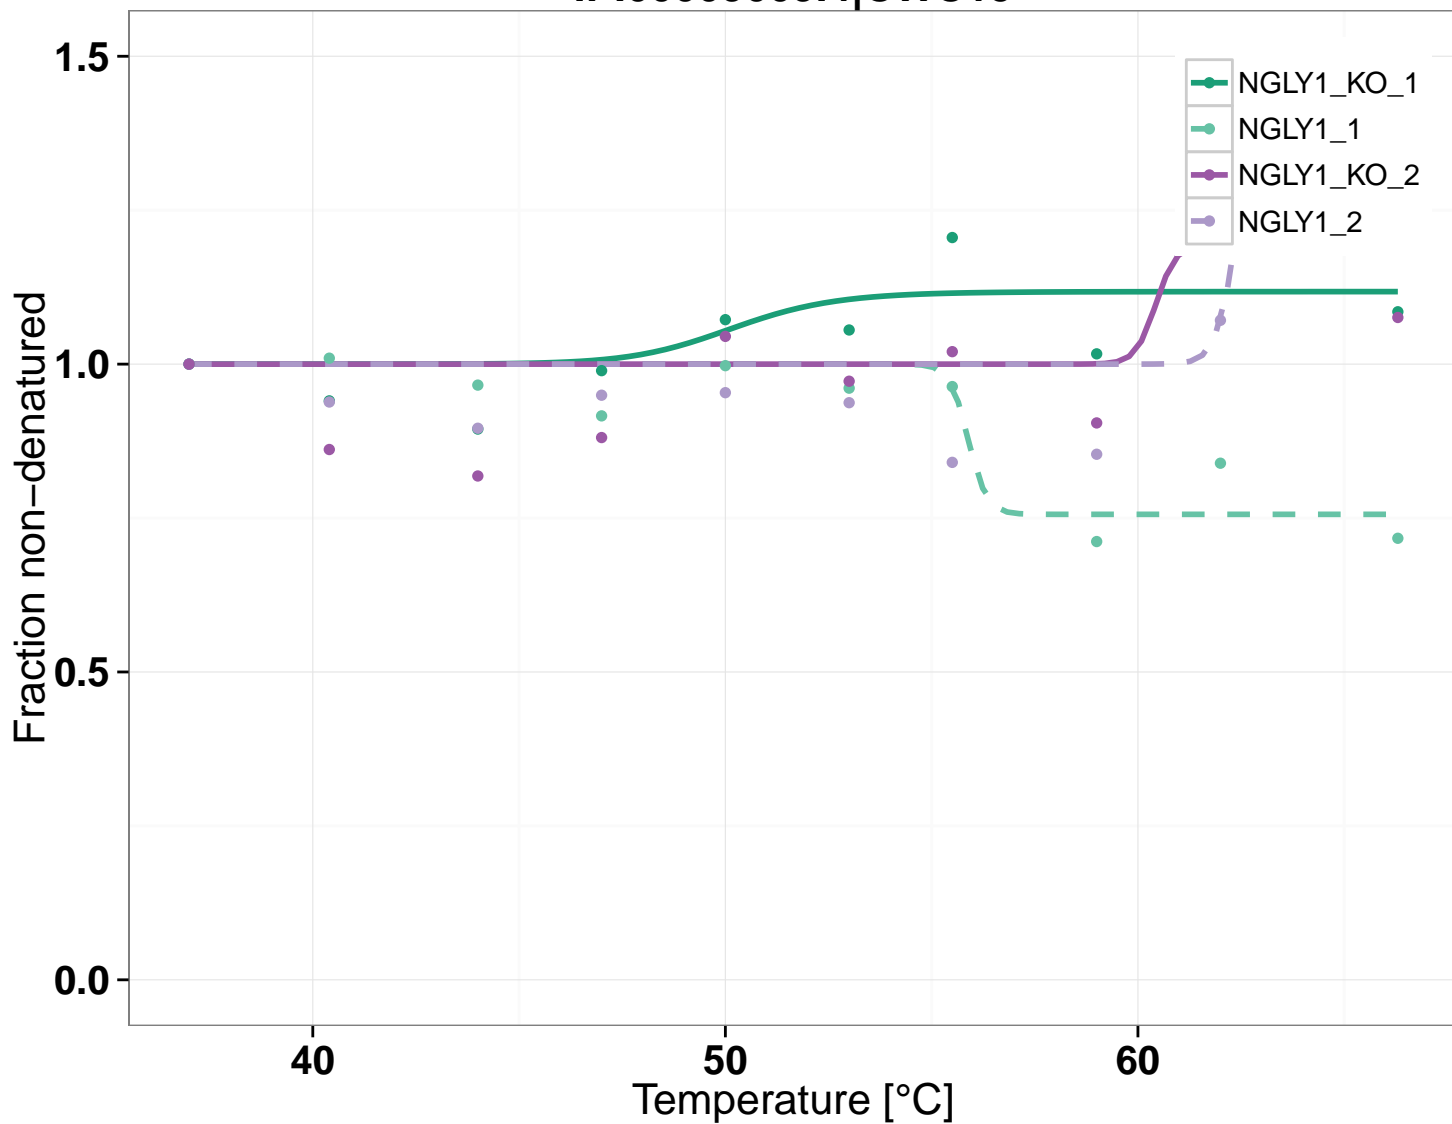

|            | meltPoint | slope | plateau | R2   |
|------------|-----------|-------|---------|------|
| NGLY1_KO_1 | –         | 0.024 | 1.12    | 0.52 |
| NGLY1_1    | –         | –0.27 | 0.76    | 0.83 |
| NGLY1_KO_2 | –         | 0.2   | 1.2     | 0.41 |
| NGLY1_2    | –         | 0.48  | 1.5     | 0.81 |

Supplement: Supplementary file 5735 [file 1]

IPI00028195.1|MAPKAP1

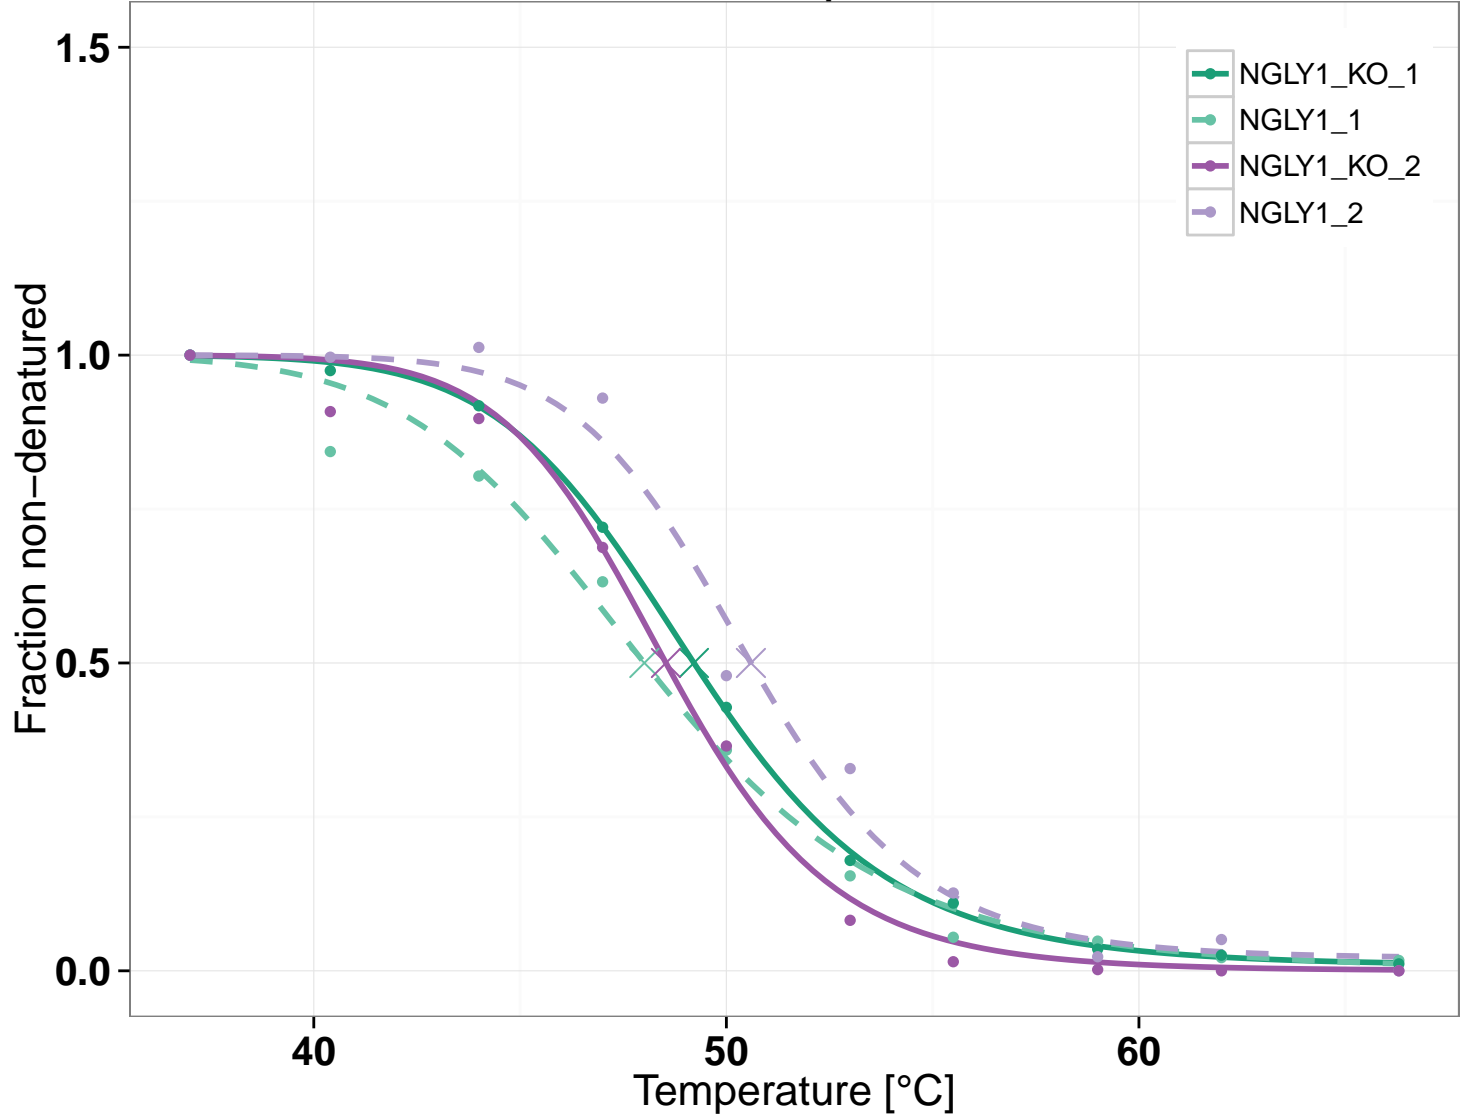

|            | meltPoint | slope  | plateau | R2   |
|------------|-----------|--------|---------|------|
| NGLY1_KO_1 | 49.21     | -0.1   | 0.01    | 1    |
| NGLY1_1    | 48.01     | -0.085 | 0       | 0.99 |
| NGLY1_KO_2 | 48.54     | -0.12  | 0       | 0.99 |
| NGLY1_2    | 50.59     | -0.12  | 0.02    | 0.99 |

Supplement: Supplementary file 5736 [file 1]

IPI00291427.2|CABLES1

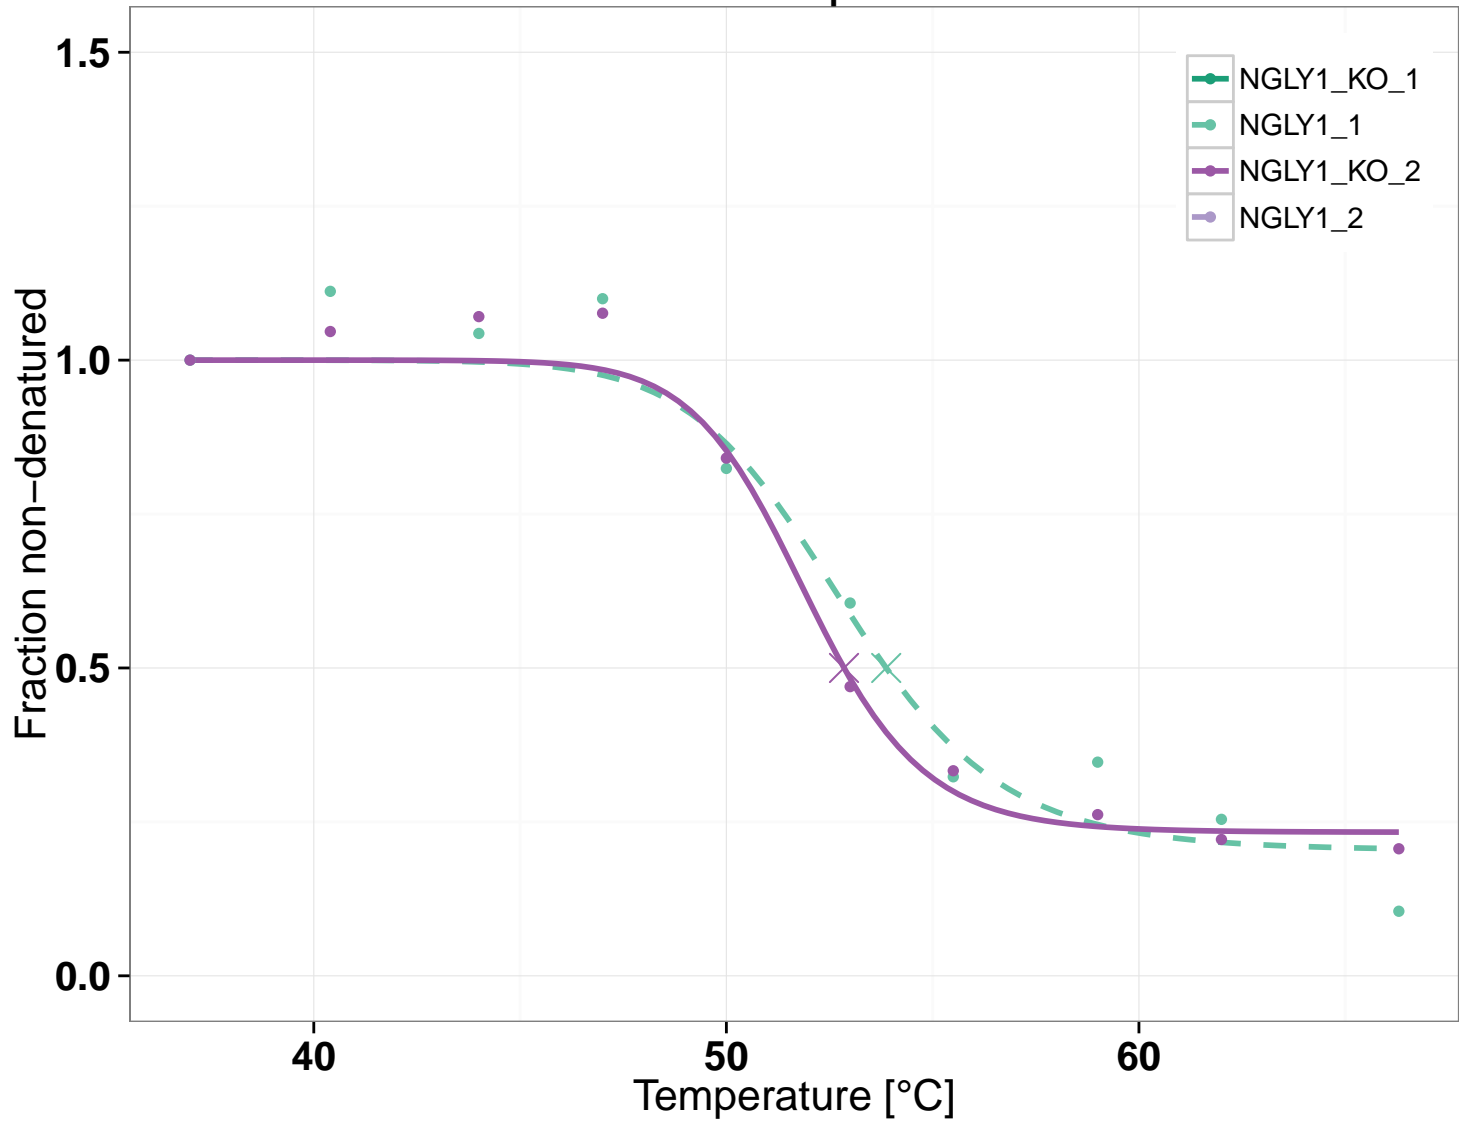

|            | meltPoint | slope | plateau | R2   |
|------------|-----------|-------|---------|------|
| NGLY1_KO_1 | —         | —     | —       | —    |
| NGLY1_1    | 53.87     | -0.1  | 0.2     | 0.96 |
| NGLY1_KO_2 | 52.85     | -0.14 | 0.23    | 0.99 |
| NGLY1_2    | —         | —     | —       | —    |

Supplement: Supplementary file 5737 [file 1]

IPI00298935.4|JMJD1B

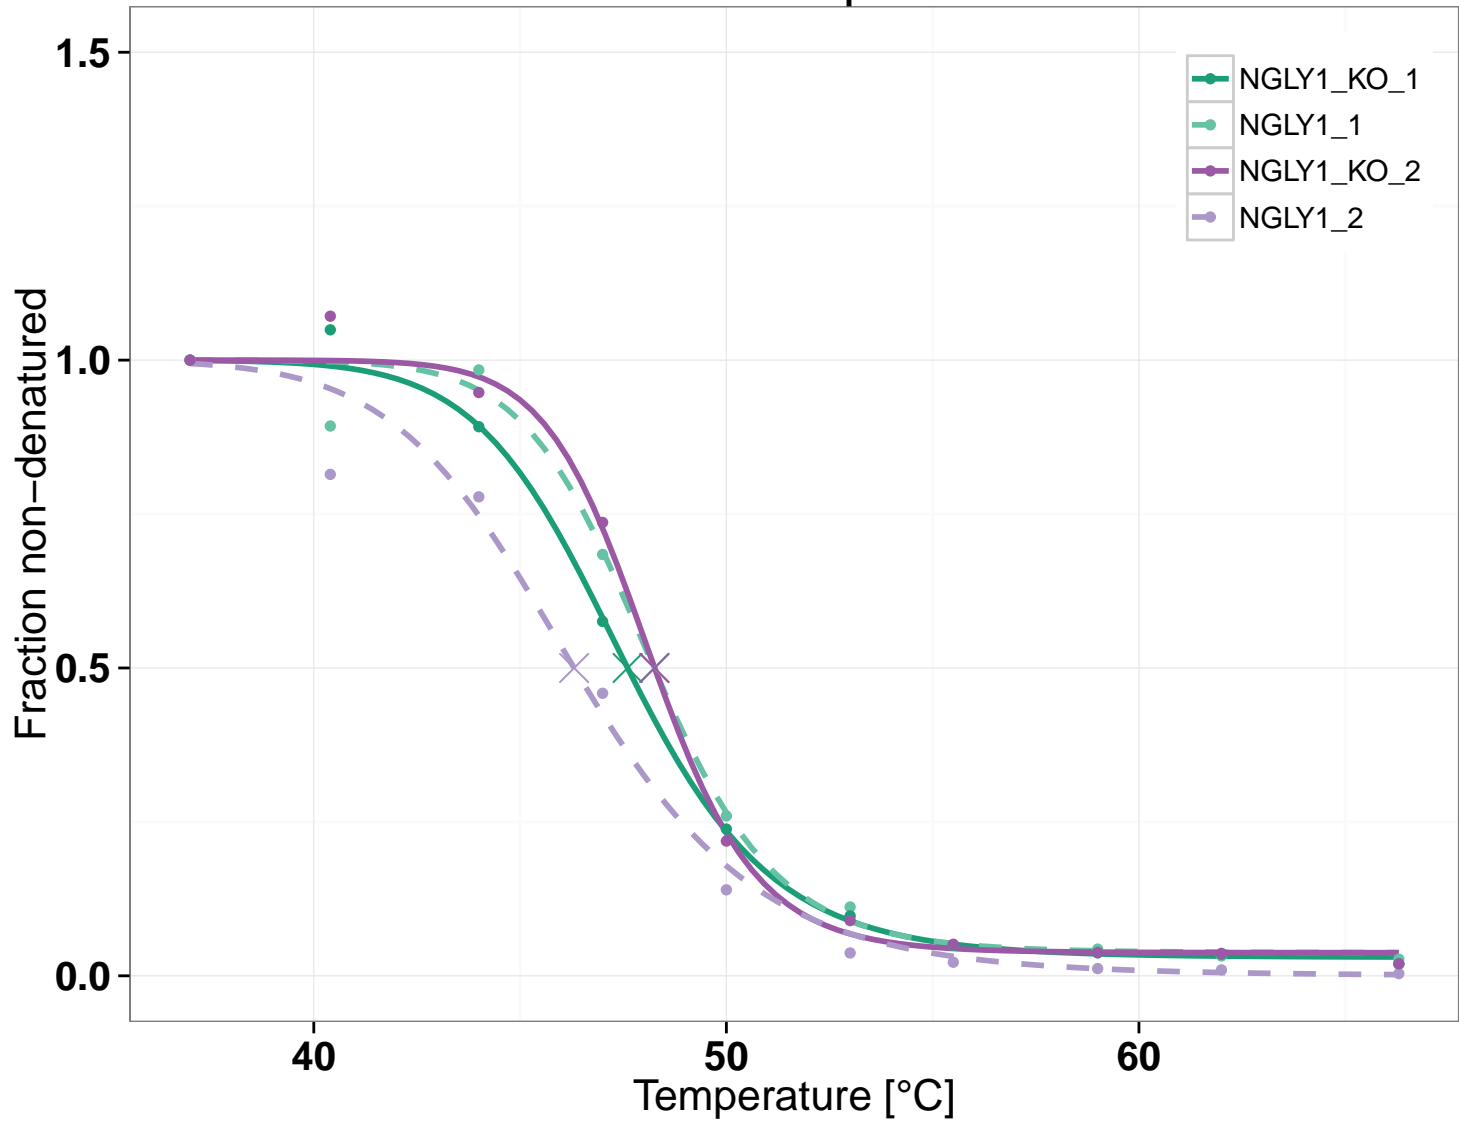

|            | meltPoint | slope | plateau | R2   |
|------------|-----------|-------|---------|------|
| NGLY1_KO_1 | 47.61     | -0.14 | 0.03    | 1    |
| NGLY1_1    | 48.25     | -0.16 | 0.04    | 0.99 |
| NGLY1_KO_2 | 48.26     | -0.19 | 0.04    | 1    |
| NGLY1_2    | 46.31     | -0.11 | 0       | 0.98 |

Supplement: Supplementary file 5738 [file 1]

IPI00414027.3|ITSN2

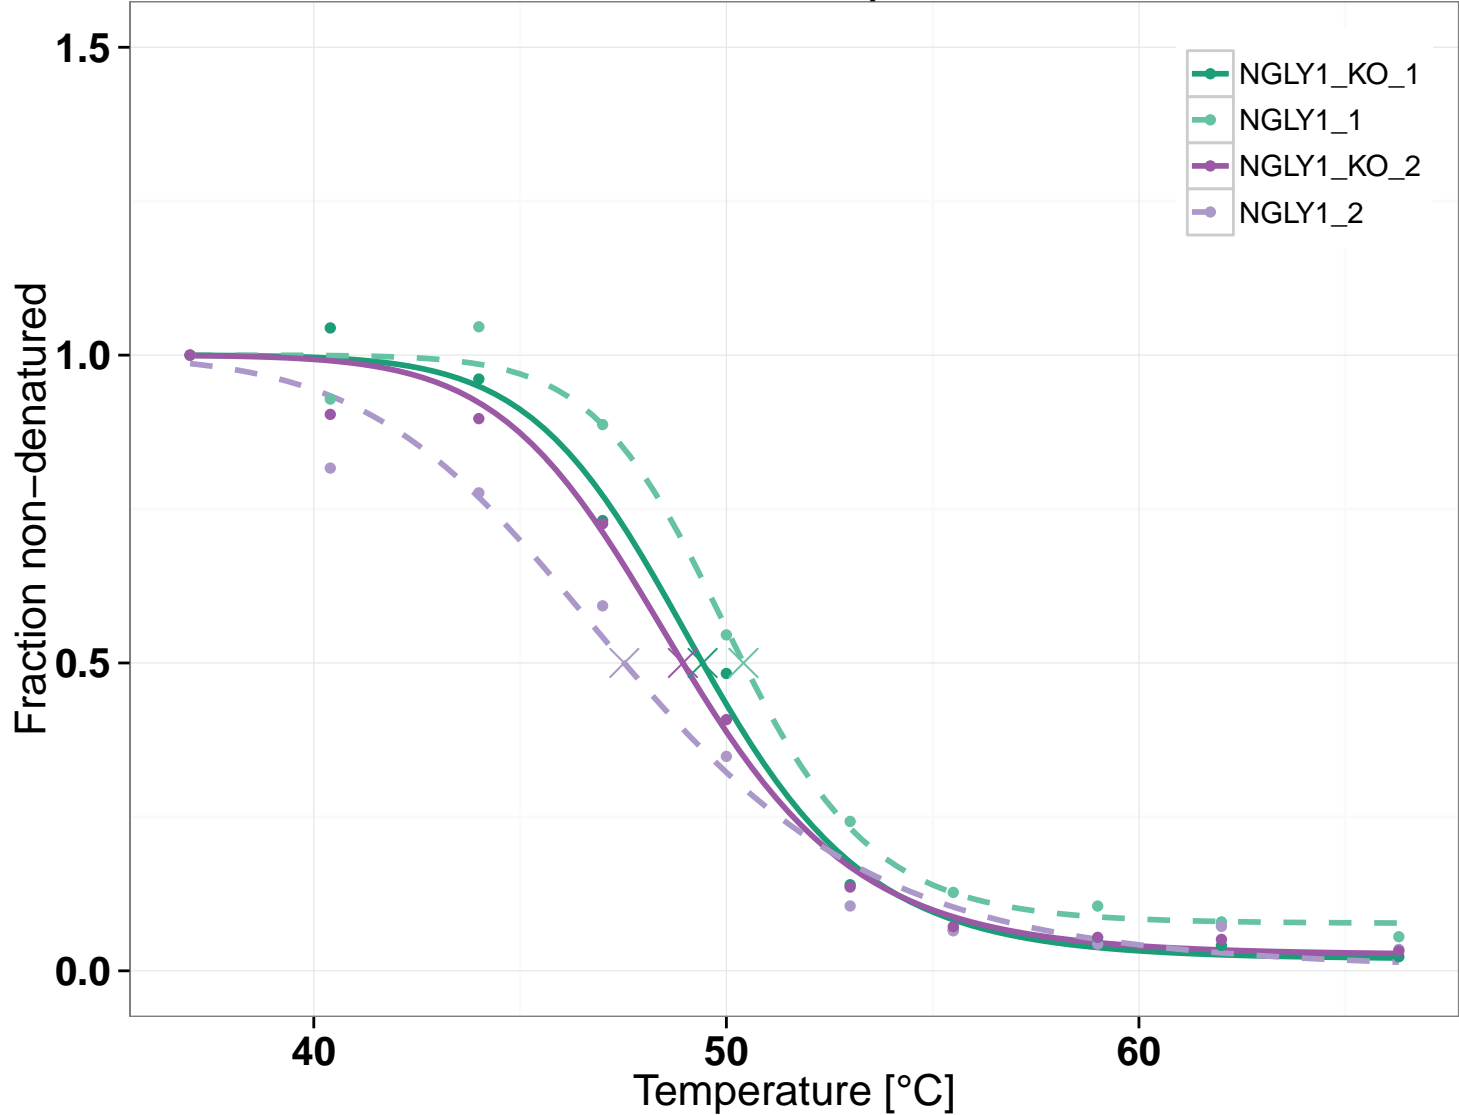

|            | meltPoint | slope | plateau | R2   |
|------------|-----------|-------|---------|------|
| NGLY1_KO_1 | 49.42     | -0.12 | 0.02    | 1    |
| NGLY1_1    | 50.41     | -0.14 | 0.08    | 0.99 |
| NGLY1_KO_2 | 48.95     | -0.11 | 0.03    | 0.99 |
| NGLY1_2    | 47.53     | -0.08 | 0       | 0.98 |

Supplement: Supplementary file 5739 [file 1]

# IPI00009694.1|XPA

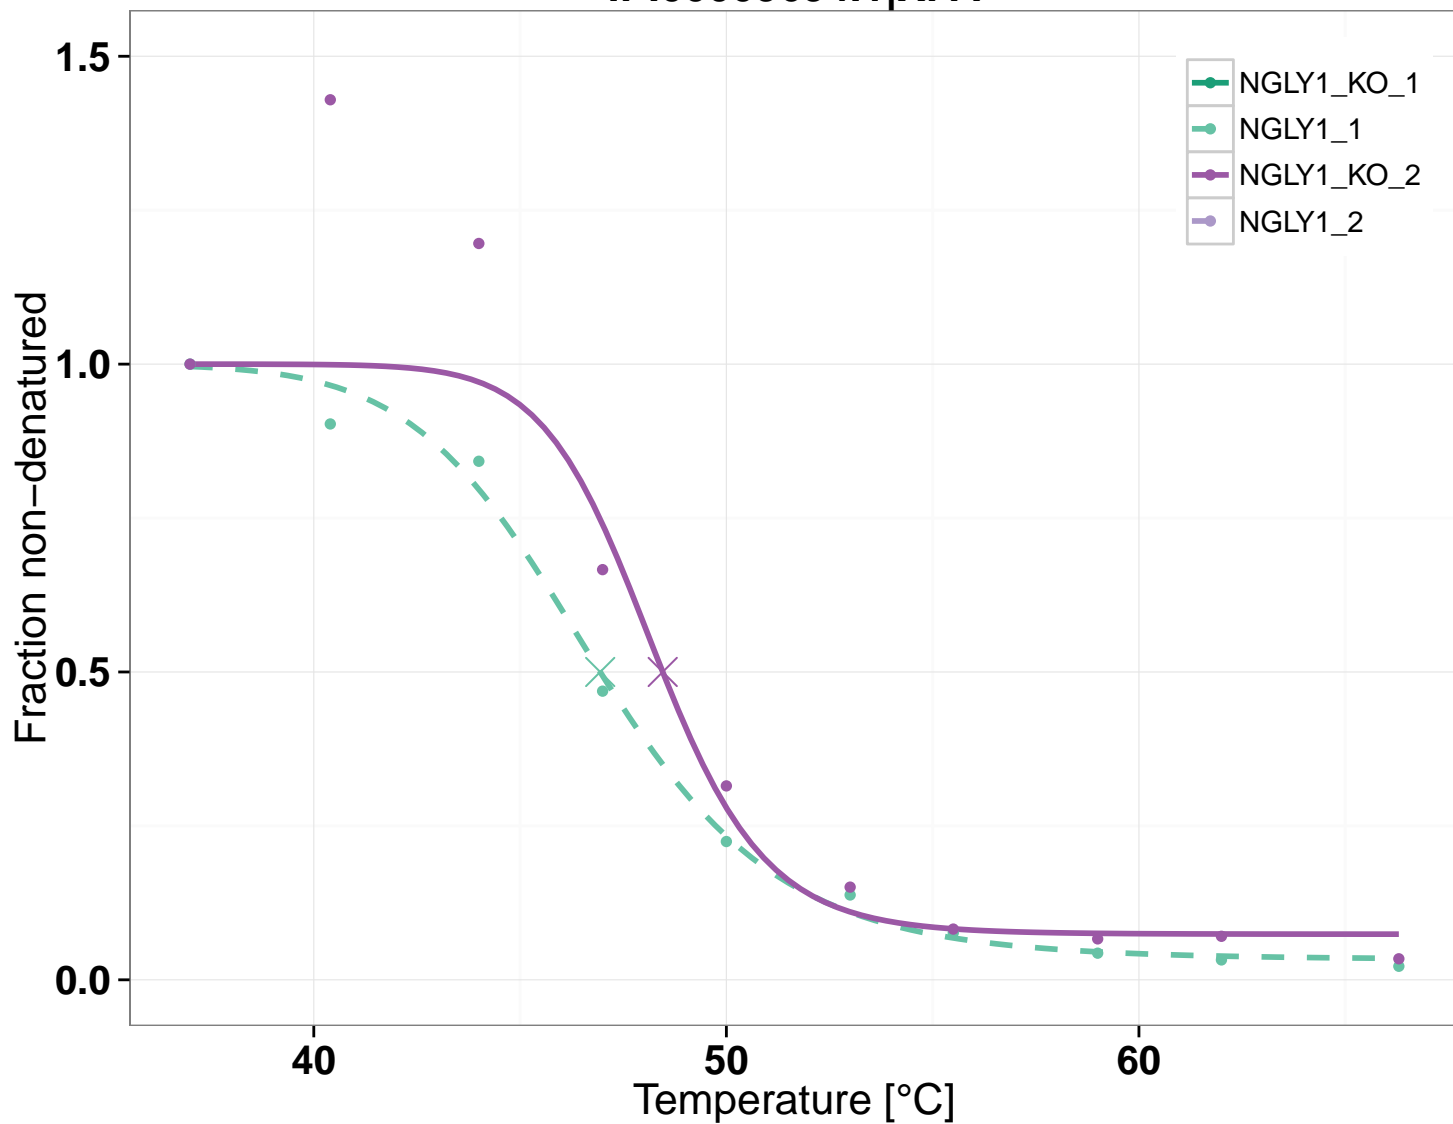

|            | meltPoint | slope | plateau | R2   |
|------------|-----------|-------|---------|------|
| NGLY1_KO_1 | —         | —     | —       | —    |
| NGLY1_1    | 46.94     | -0.11 | 0.03    | 0.99 |
| NGLY1_KO_2 | 48.46     | -0.17 | 0.07    | 0.9  |
| NGLY1_2    | —         | —     | —       | —    |

Supplement: Supplementary file 5740 [file 1]

IPI00030389.1|ABR

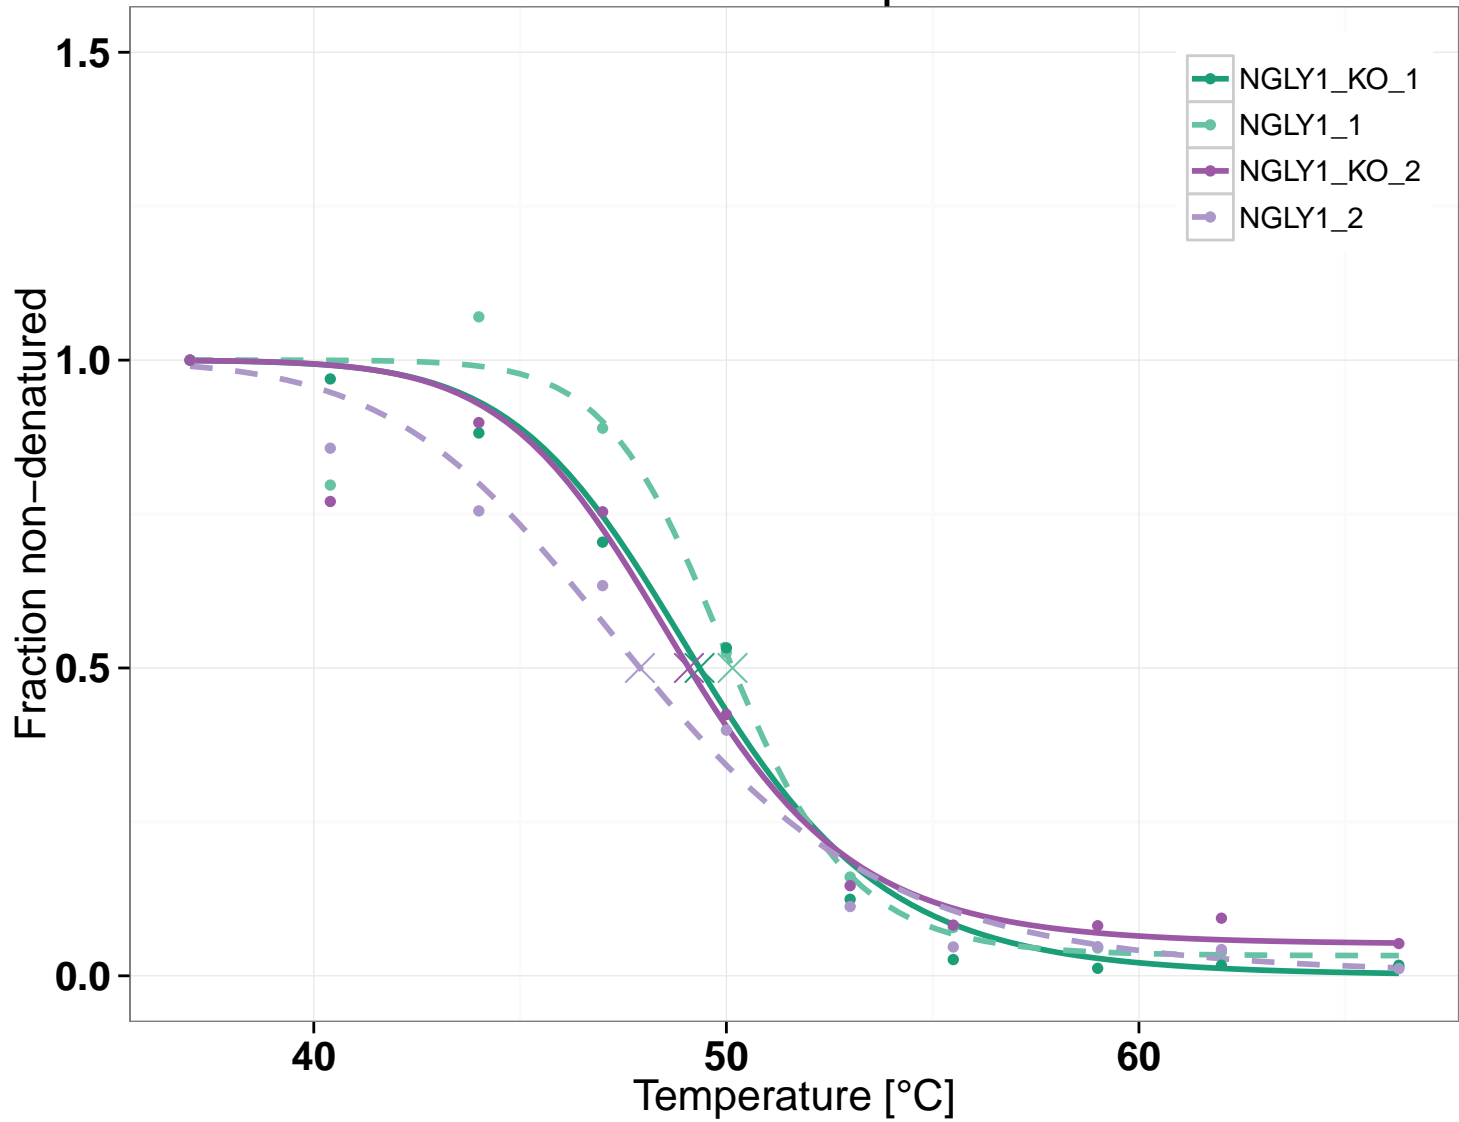

|            | meltPoint | slope  | plateau | R2   |
|------------|-----------|--------|---------|------|
| NGLY1_KO_1 | 49.35     | -0.11  | 0       | 0.99 |
| NGLY1_1    | 50.15     | -0.16  | 0.03    | 0.97 |
| NGLY1_KO_2 | 49.09     | -0.11  | 0.05    | 0.96 |
| NGLY1_2    | 47.91     | -0.083 | 0       | 0.98 |

Supplement: Supplementary file 5741 [file 1]

IPI00097532.2|MED28

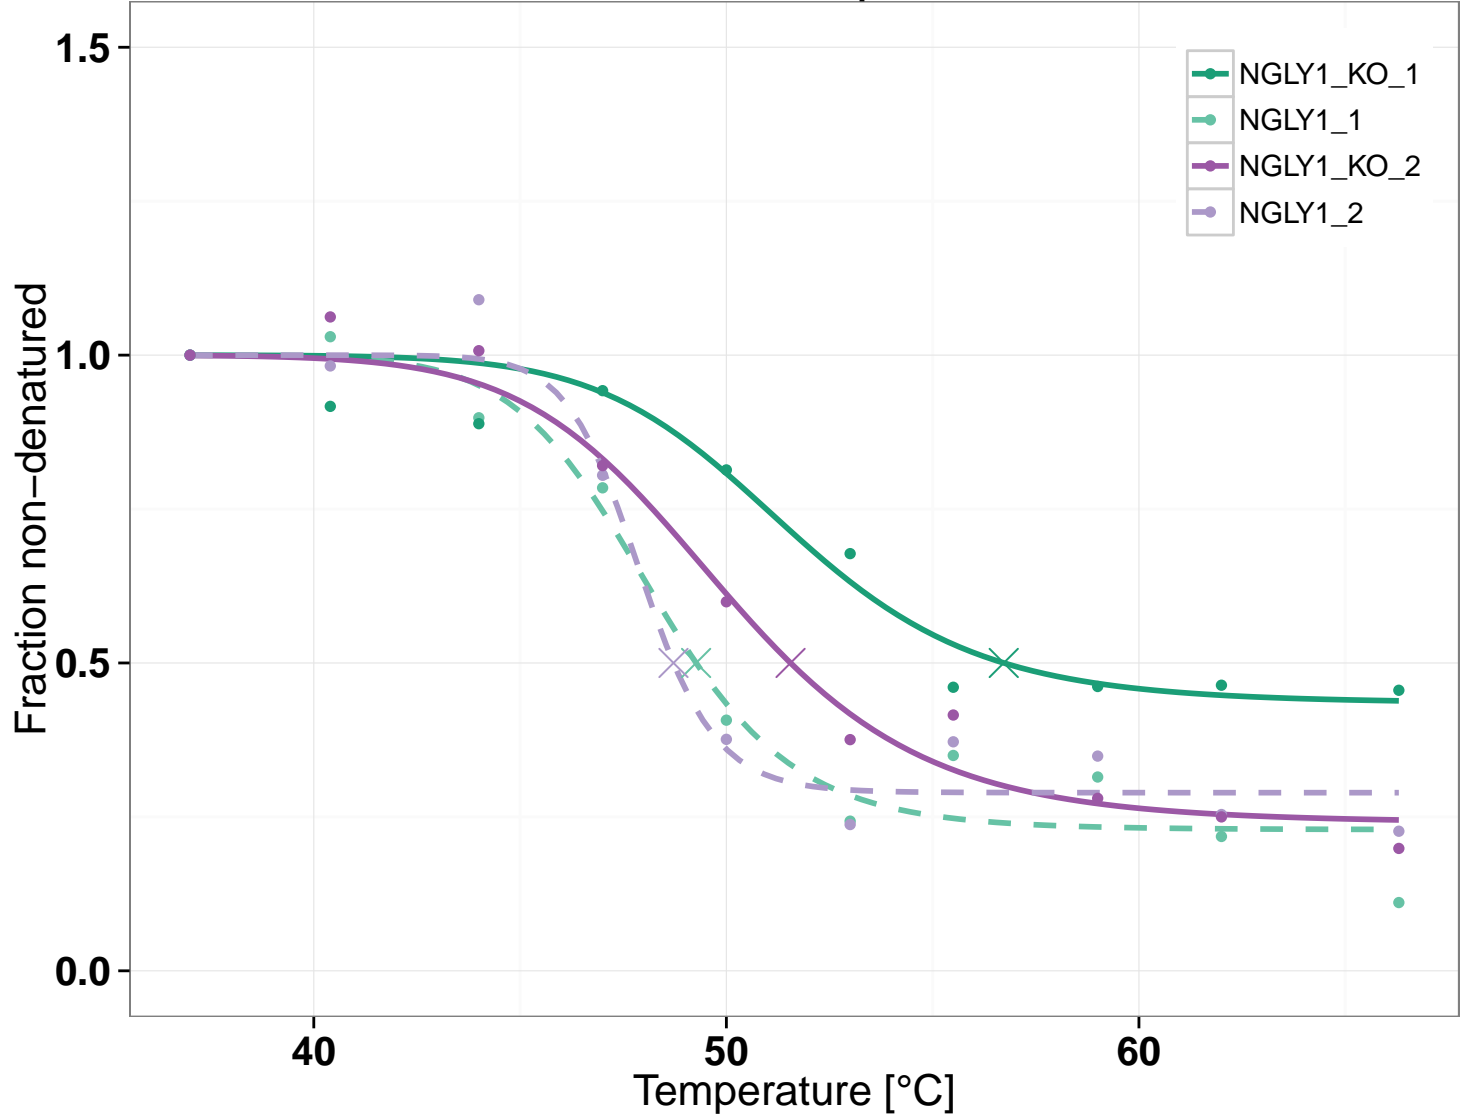

|            | meltPoint | slope  | plateau | R2   |
|------------|-----------|--------|---------|------|
| NGLY1_KO_1 | 56.72     | -0.061 | 0.43    | 0.95 |
| NGLY1_1    | 49.27     | -0.11  | 0.23    | 0.97 |
| NGLY1_KO_2 | 51.56     | -0.078 | 0.24    | 0.98 |
| NGLY1_2    | 48.72     | -0.2   | 0.29    | 0.97 |

Supplement: Supplementary file 5742 [file 1]

# IPI00783082.1|TRIT1

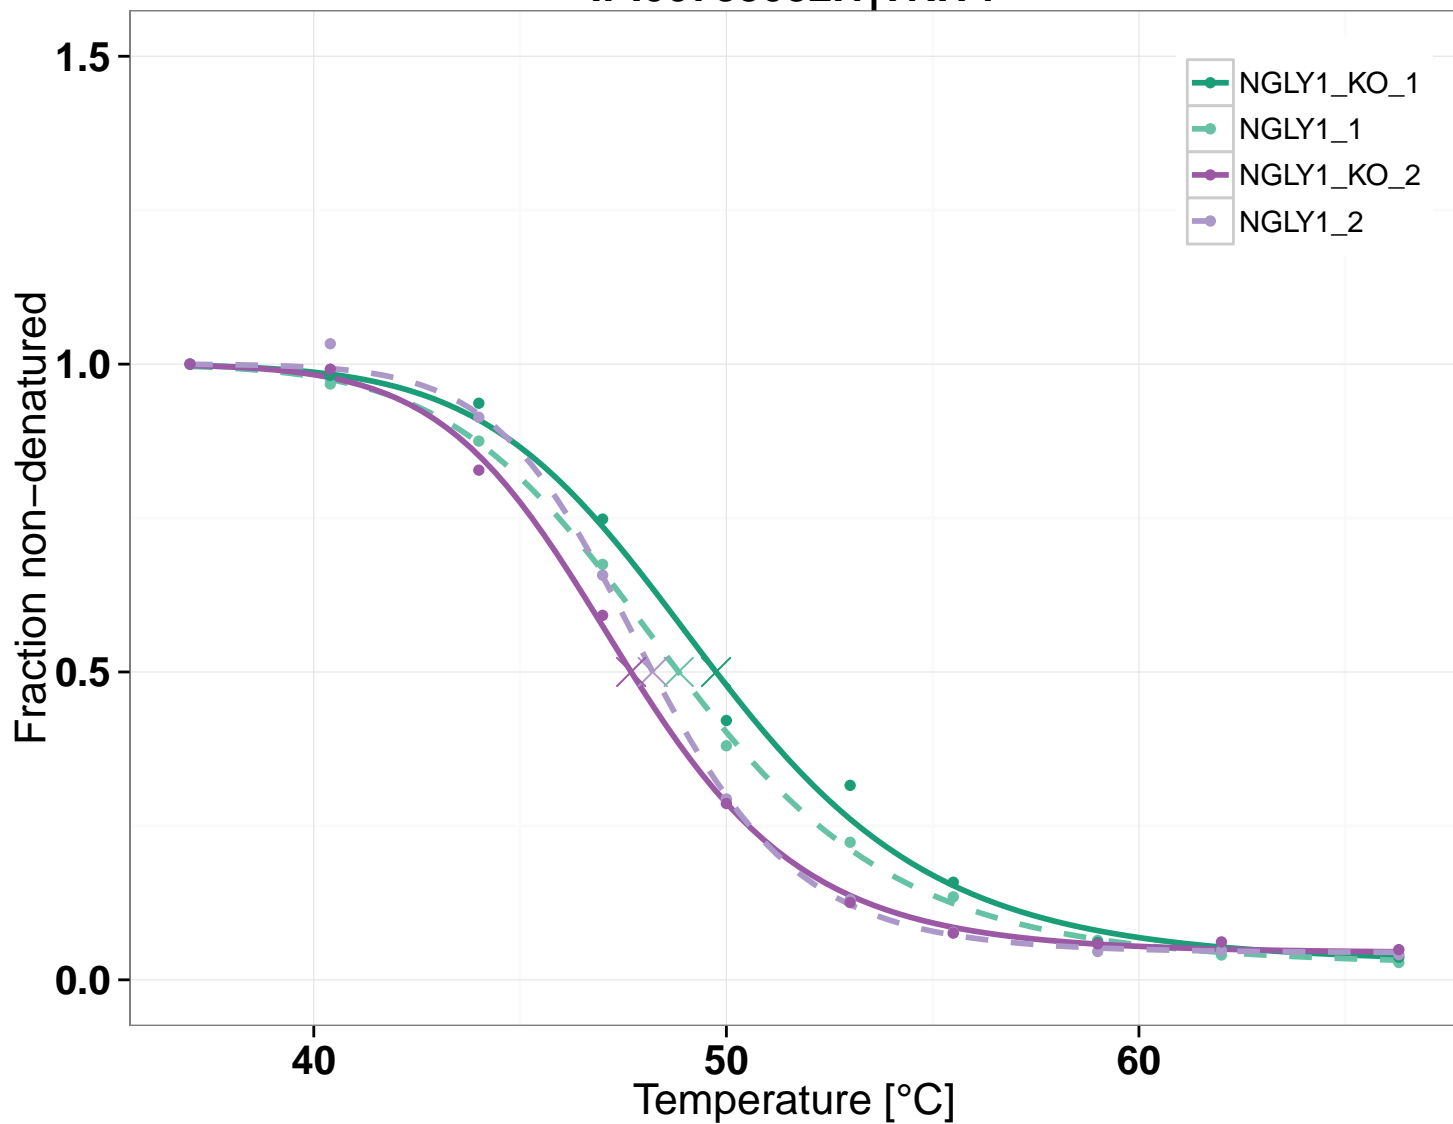

|            | meltPoint | slope  | plateau | R2   |
|------------|-----------|--------|---------|------|
| NGLY1_KO_1 | 49.75     | -0.089 | 0.03    | 0.99 |
| NGLY1_1    | 48.84     | -0.09  | 0.02    | 1    |
| NGLY1_KO_2 | 47.69     | -0.11  | 0.04    | 1    |
| NGLY1_2    | 48.22     | -0.13  | 0.04    | 1    |

Supplement: Supplementary file 5743 [file 1]

# IPI00027269.1|CBL

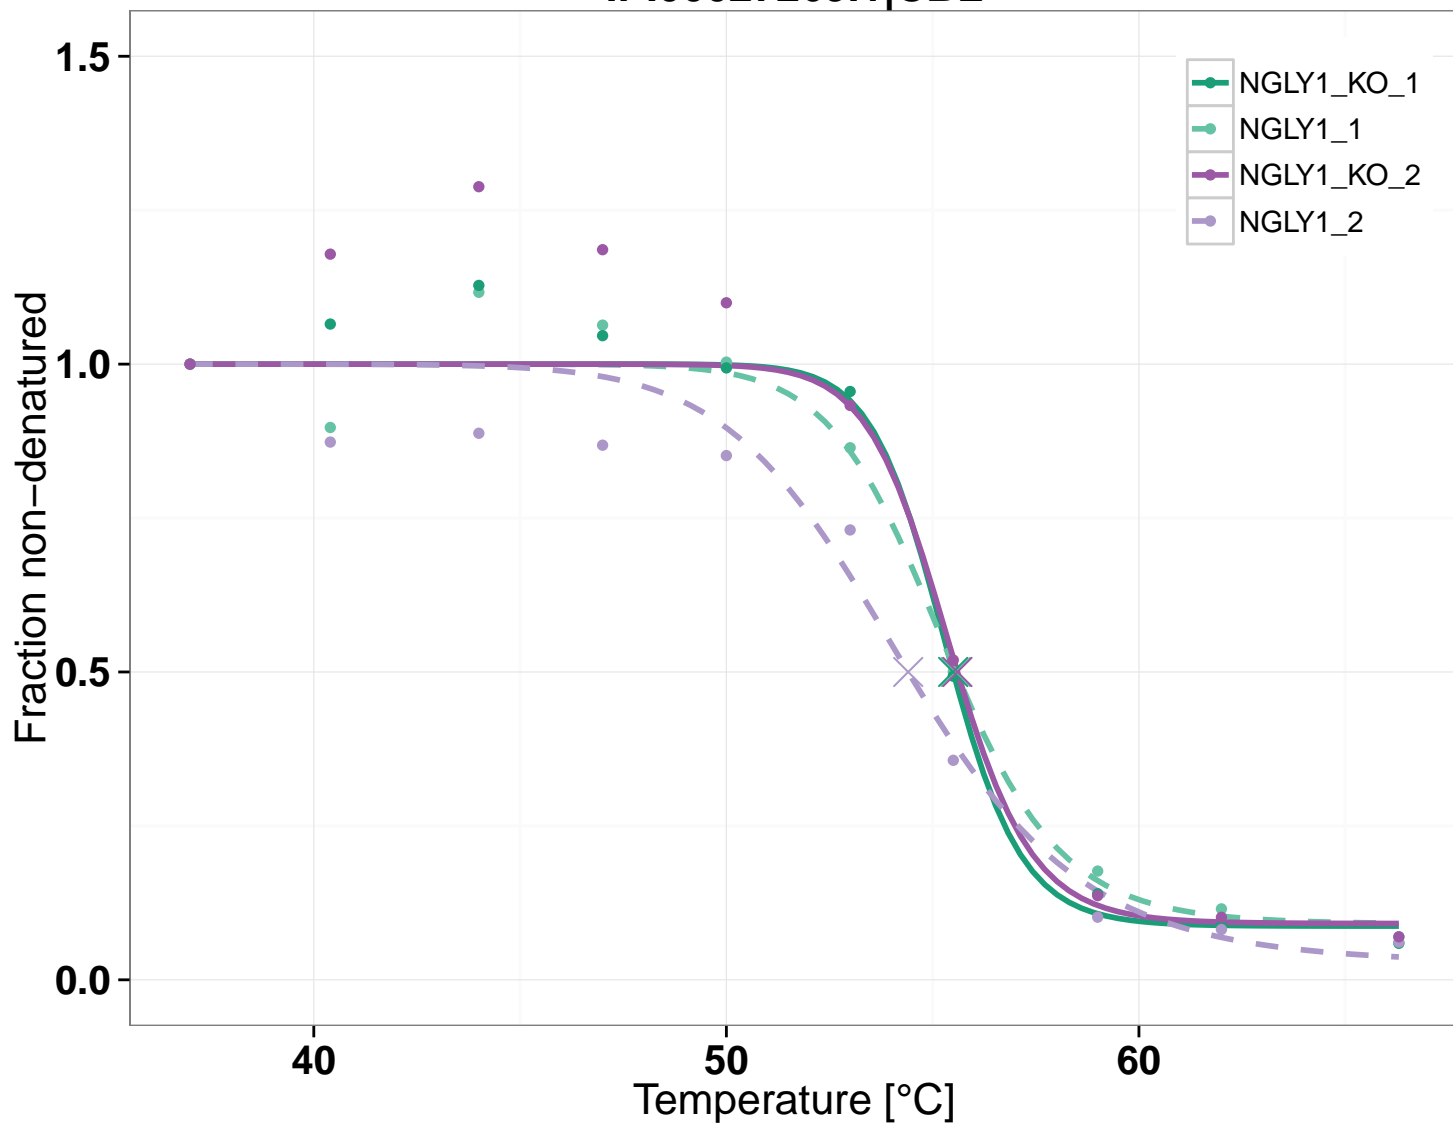

|            | meltPoint | slope | plateau | R2   |
|------------|-----------|-------|---------|------|
| NGLY1_KO_1 | 55.5      | -0.25 | 0.09    | 0.99 |
| NGLY1_1    | 55.56     | -0.16 | 0.09    | 0.98 |
| NGLY1_KO_2 | 55.6      | -0.23 | 0.09    | 0.93 |
| NGLY1_2    | 54.41     | -0.11 | 0.03    | 0.96 |

Supplement: Supplementary file 5744 [file 1]

# IPI00184884.6|NSMCE1

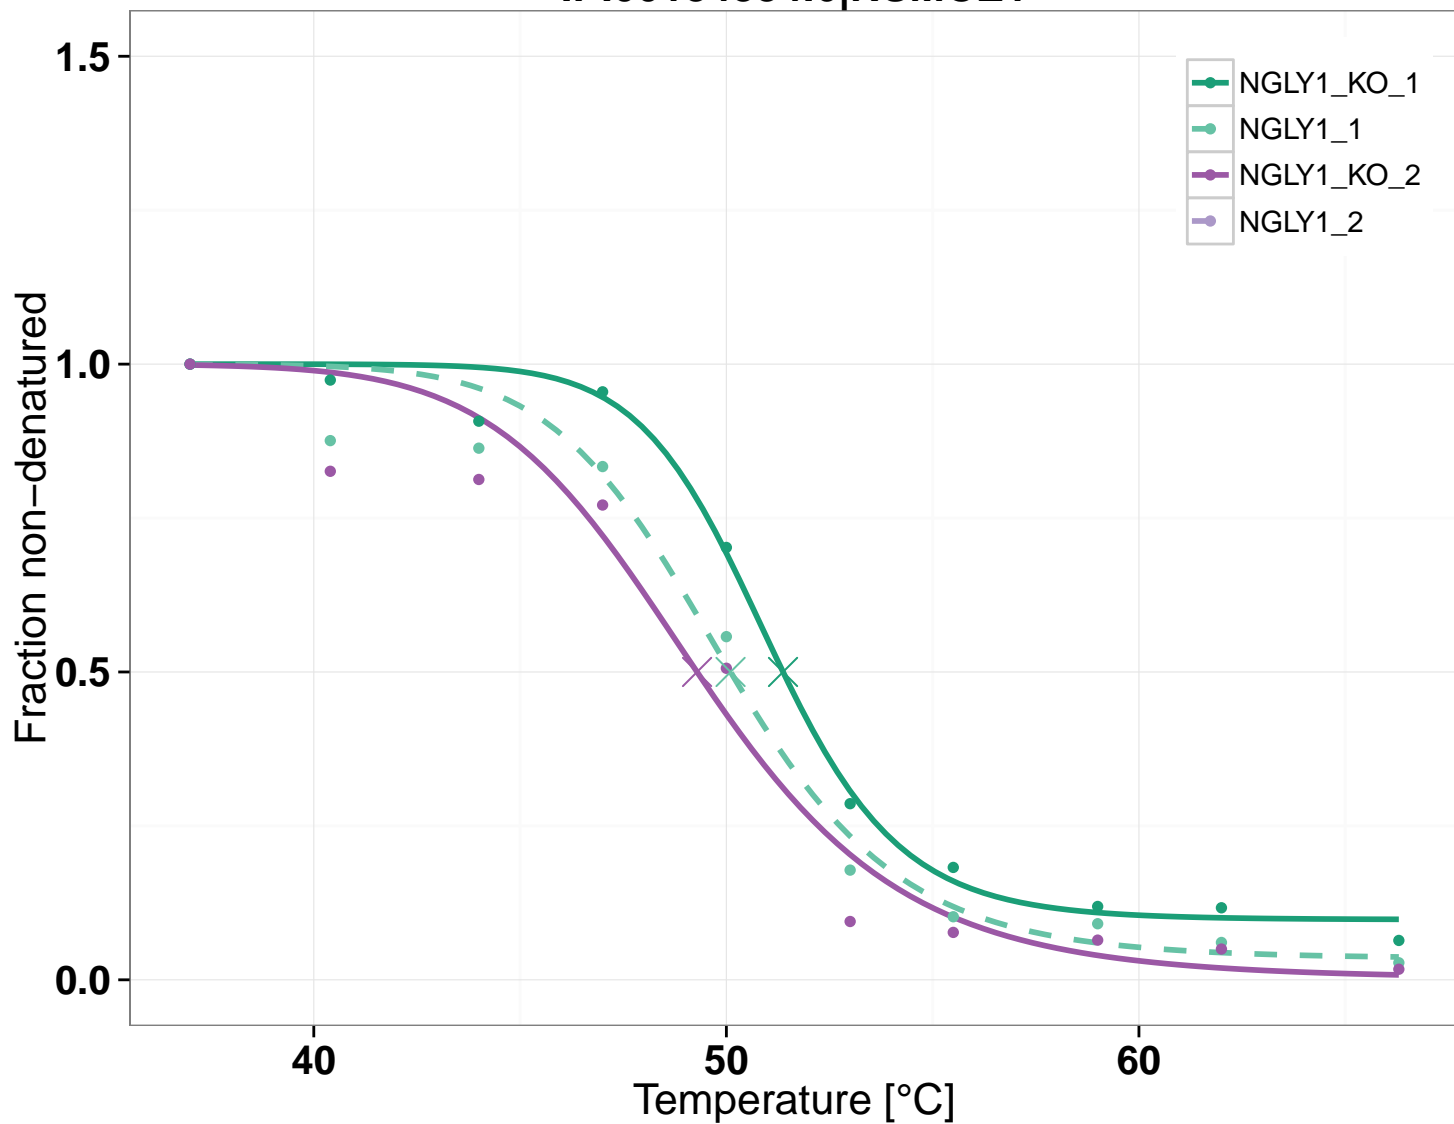

|            | meltPoint | slope | plateau | R2   |
|------------|-----------|-------|---------|------|
| NGLY1_KO_1 | 51.37     | -0.14 | 0.1     | 0.99 |
| NGLY1_1    | 50.1      | -0.11 | 0.03    | 0.98 |
| NGLY1_KO_2 | 49.29     | -0.1  | 0       | 0.96 |
| NGLY1_2    | -         | -     | -       | -    |

Supplement: Supplementary file 5745 [file 1]

IPI00329801.12|ANXA5

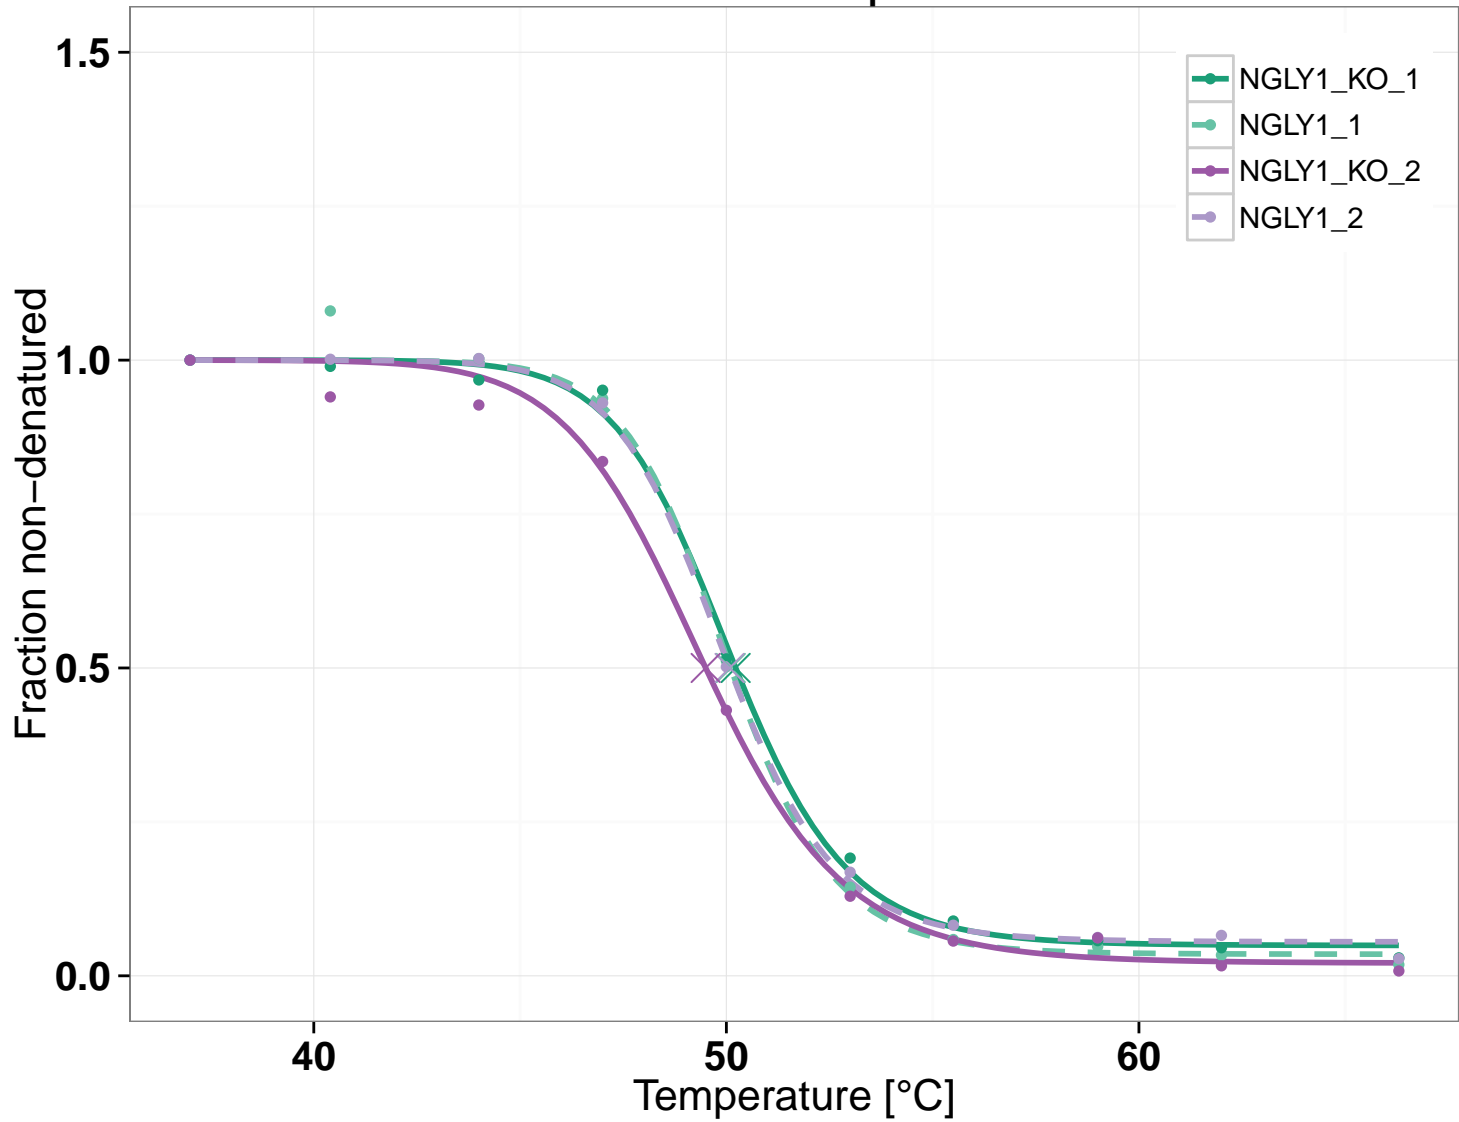

|            | meltPoint | slope | plateau | R2 |
|------------|-----------|-------|---------|----|
| NGLY1_KO_1 | 50.23     | -0.17 | 0.05    | 1  |
| NGLY1_1    | 50.11     | -0.19 | 0.04    | 1  |
| NGLY1_KO_2 | 49.5      | -0.14 | 0.02    | 1  |
| NGLY1_2    | 50.08     | -0.18 | 0.06    | 1  |

Supplement: Supplementary file 5746 [file 1]

IPI00000030.1|PPP2R5D

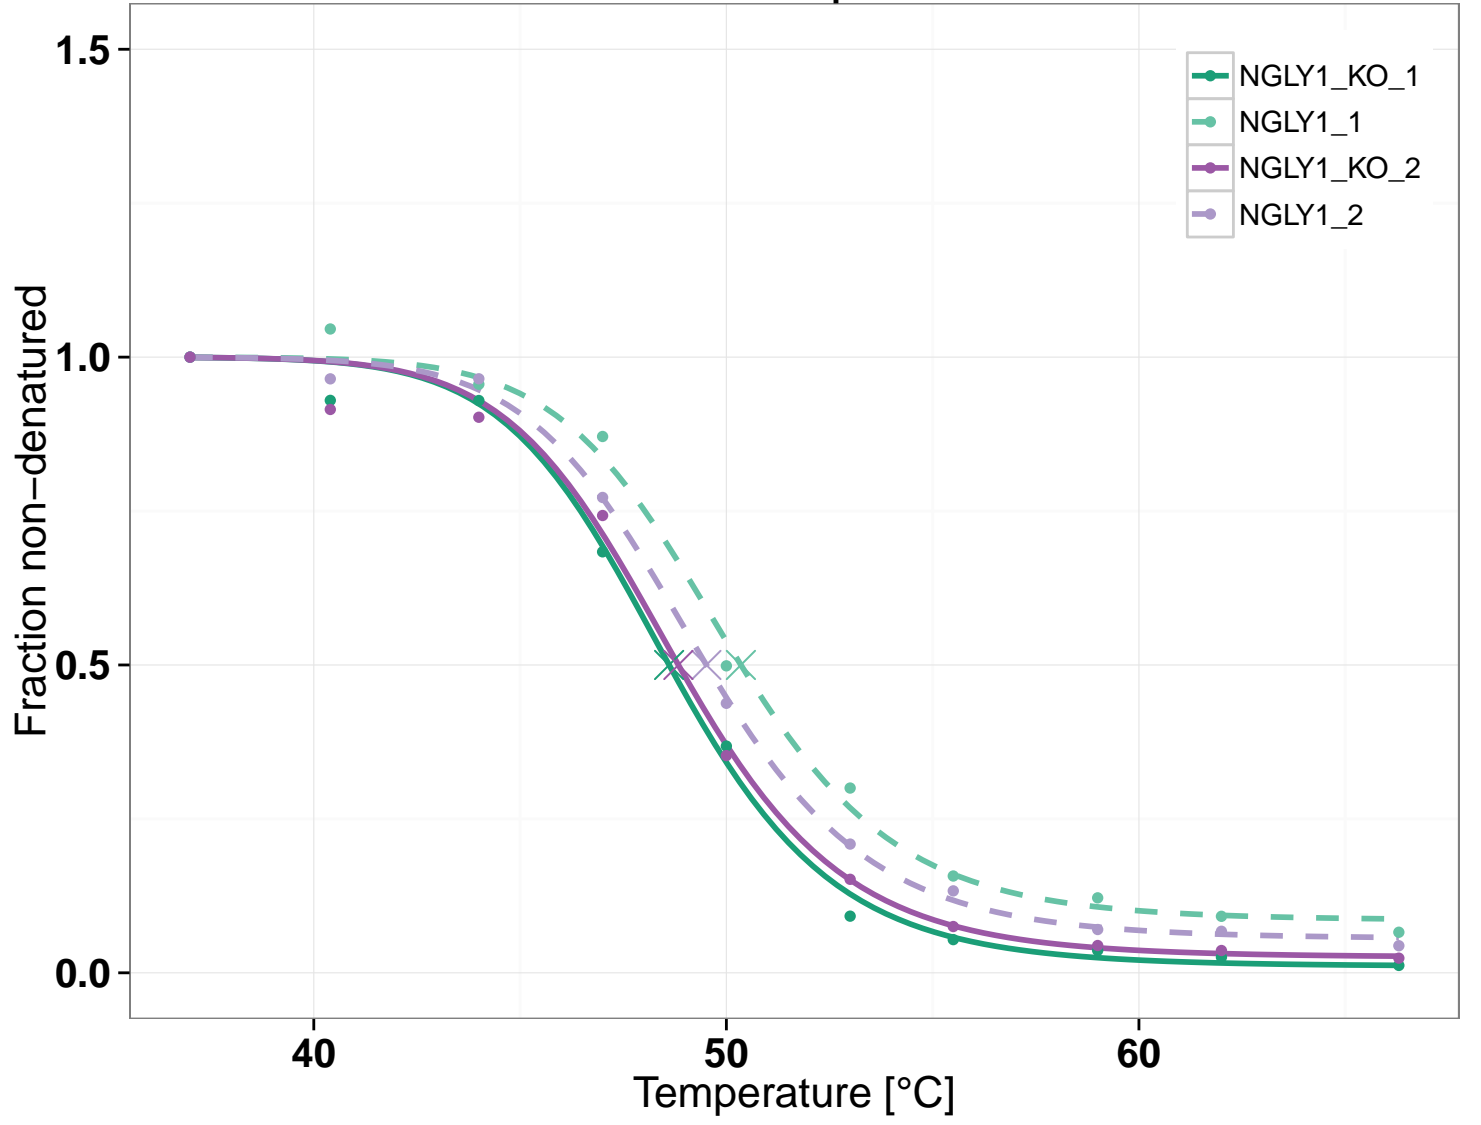

|            | meltPoint | slope | plateau | R2   |
|------------|-----------|-------|---------|------|
| NGLY1_KO_1 | 48.61     | -0.12 | 0.01    | 1    |
| NGLY1_1    | 50.35     | -0.11 | 0.09    | 1    |
| NGLY1_KO_2 | 48.84     | -0.12 | 0.03    | 0.99 |
| NGLY1_2    | 49.52     | -0.11 | 0.06    | 1    |

Supplement: Supplementary file 5747 [file 1]

# IPI00332828.1|CES2

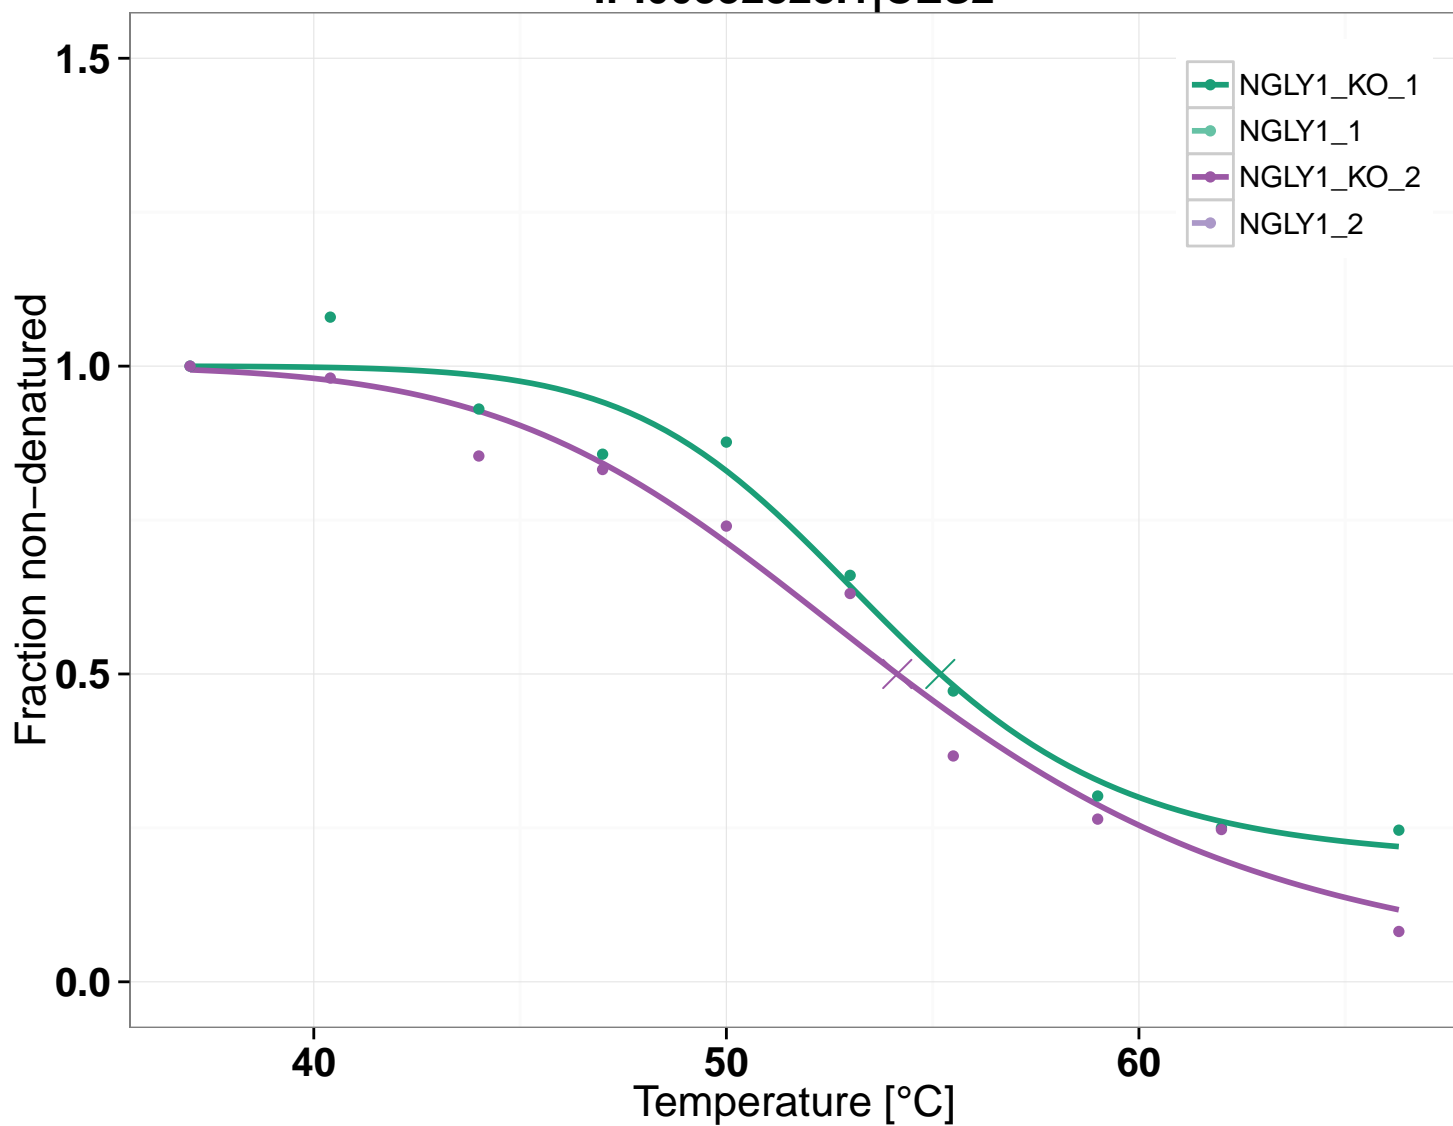

|            | meltPoint | slope  | plateau | R2   |
|------------|-----------|--------|---------|------|
| NGLY1_KO_1 | 55.19     | -0.068 | 0.19    | 0.98 |
| NGLY1_1    | -         | -      | -       | -    |
| NGLY1_KO_2 | 54.14     | -0.053 | 0       | 0.98 |
| NGLY1_2    | -         | -      | -       | -    |

Supplement: Supplementary file 5748 [file 1]

# IPI00291007.6|SCARB1

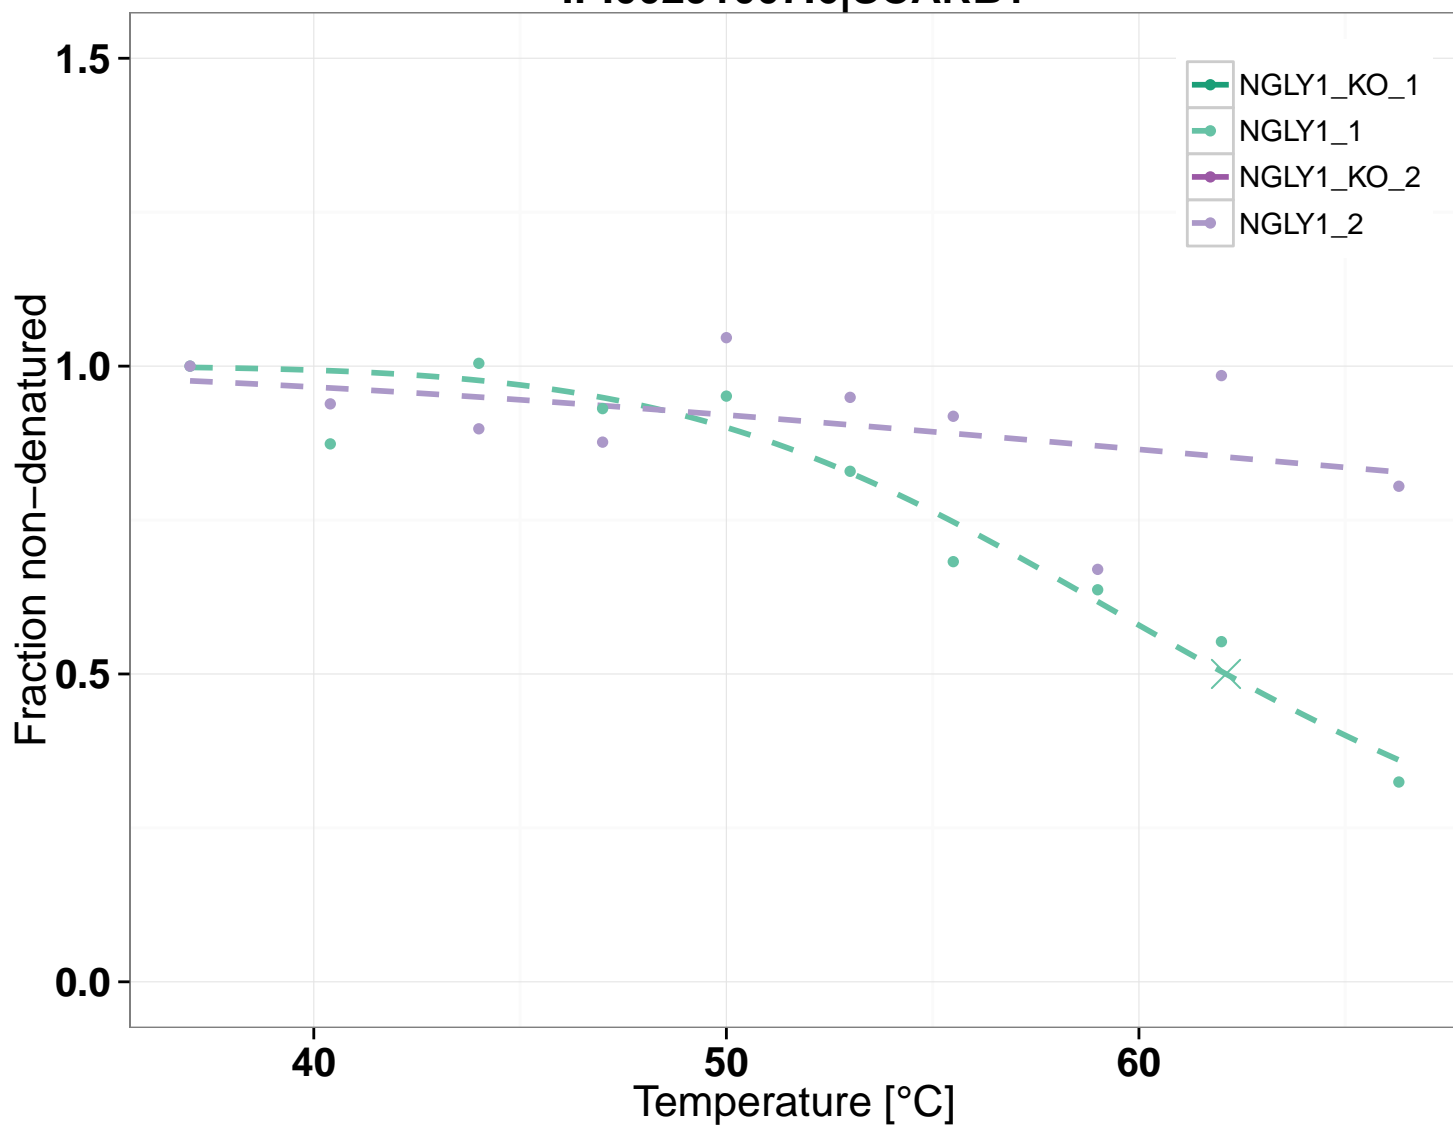

|            | meltPoint | slope   | plateau | R2   |
|------------|-----------|---------|---------|------|
| NGLY1_KO_1 | -         | -       | -       | -    |
| NGLY1_1    | 62.11     | -0.038  | 0       | 0.94 |
| NGLY1_KO_2 | -         | -       | -       | -    |
| NGLY1_2    | -         | -0.0058 | 0       | 0.2  |

Supplement: Supplementary file 5749 [file 1]

IPI00180154.4|ATXN2

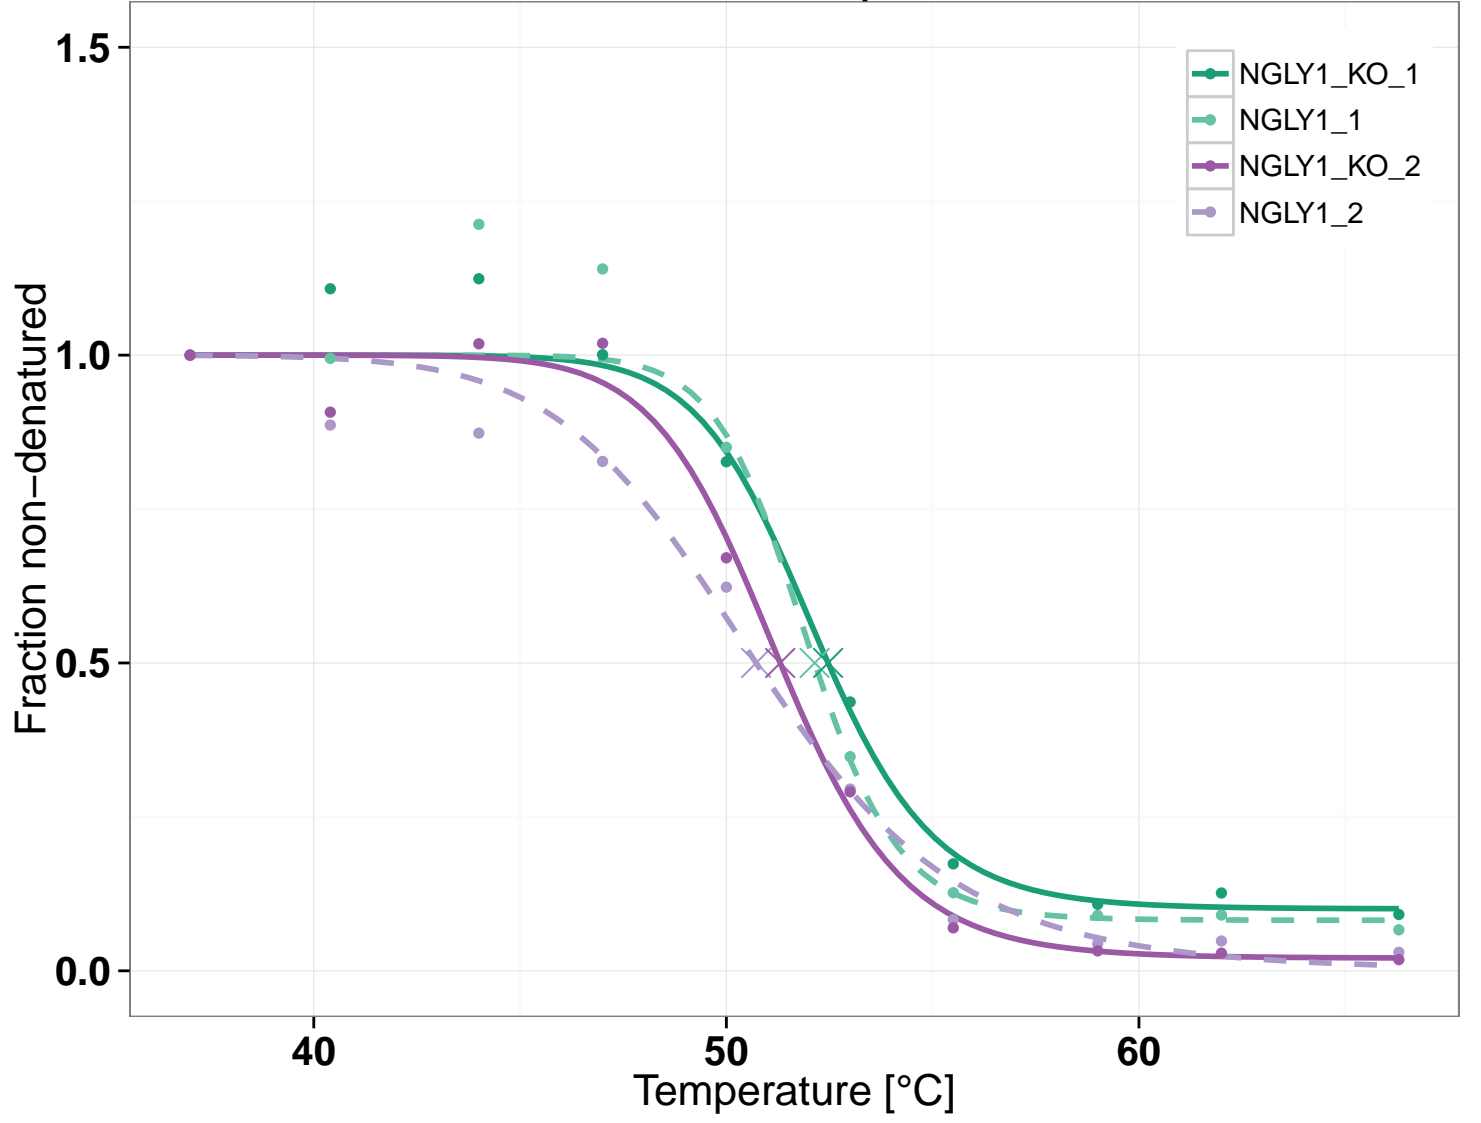

|            | meltPoint | slope | plateau | R2   |
|------------|-----------|-------|---------|------|
| NGLY1_KO_1 | 52.47     | -0.16 | 0.1     | 0.98 |
| NGLY1_1    | 52.14     | -0.21 | 0.08    | 0.97 |
| NGLY1_KO_2 | 51.31     | -0.16 | 0.02    | 0.99 |
| NGLY1_2    | 50.72     | -0.1  | 0       | 0.98 |

Supplement: Supplementary file 5750 [file 1]

IPI00005537.2|MRPL12

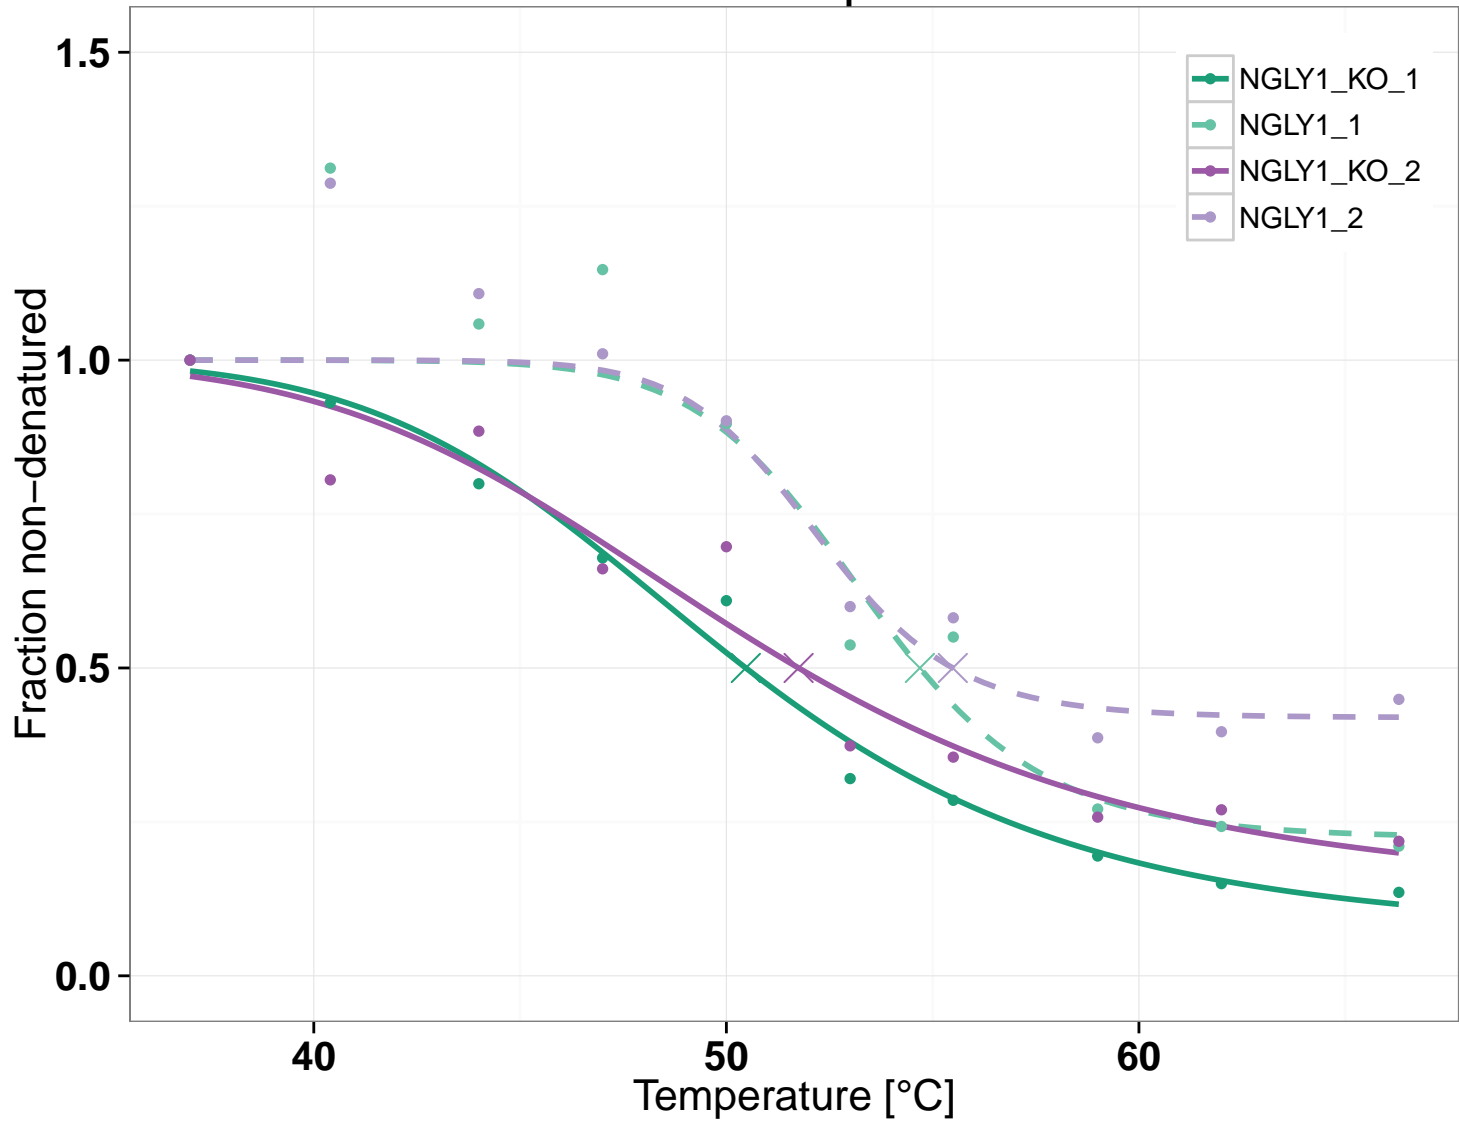

|            | meltPoint | slope  | plateau | R2   |
|------------|-----------|--------|---------|------|
| NGLY1_KO_1 | 50.47     | -0.055 | 0.06    | 0.99 |
| NGLY1_1    | 54.69     | -0.093 | 0.22    | 0.9  |
| NGLY1_KO_2 | 51.75     | -0.044 | 0.12    | 0.94 |
| NGLY1_2    | 55.49     | -0.088 | 0.42    | 0.89 |

Supplement: Supplementary file 5751 [file 1]

# IPI00032491.1|LEMD3

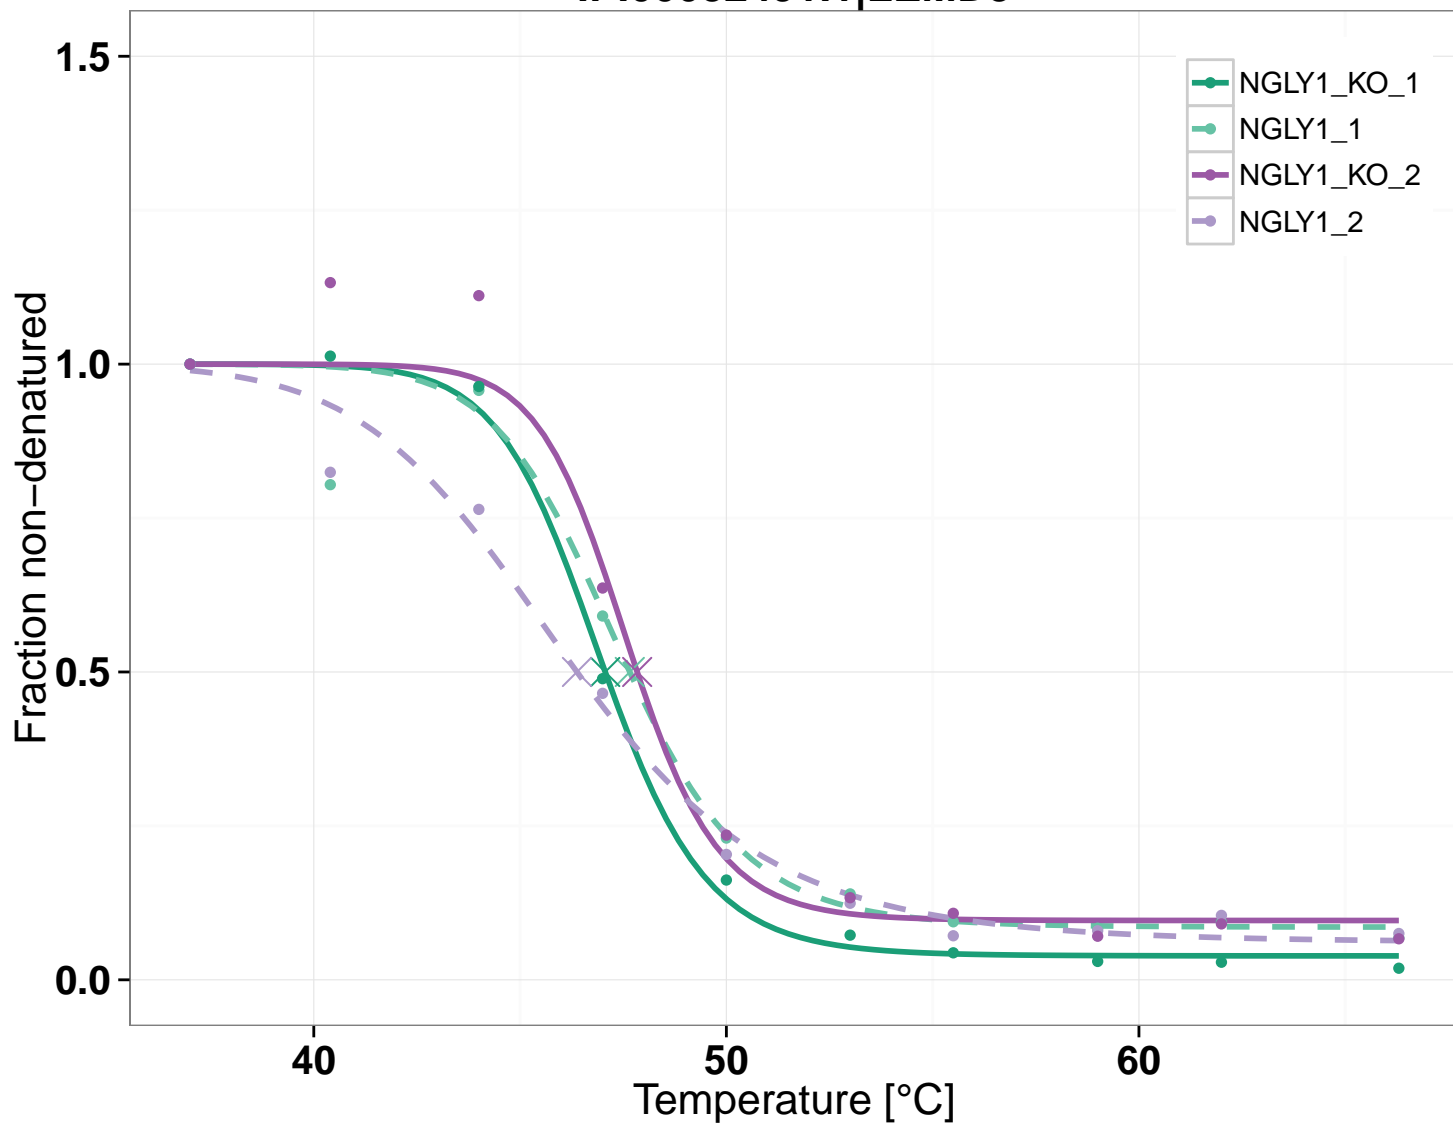

|            | meltPoint | slope  | plateau | R2   |
|------------|-----------|--------|---------|------|
| NGLY1_KO_1 | 47.06     | -0.19  | 0.04    | 1    |
| NGLY1_1    | 47.66     | -0.15  | 0.09    | 0.97 |
| NGLY1_KO_2 | 47.84     | -0.21  | 0.1     | 0.98 |
| NGLY1_2    | 46.38     | -0.095 | 0.06    | 0.98 |

Supplement: Supplementary file 5752 [file 1]

# IPI00260715.5|FUS

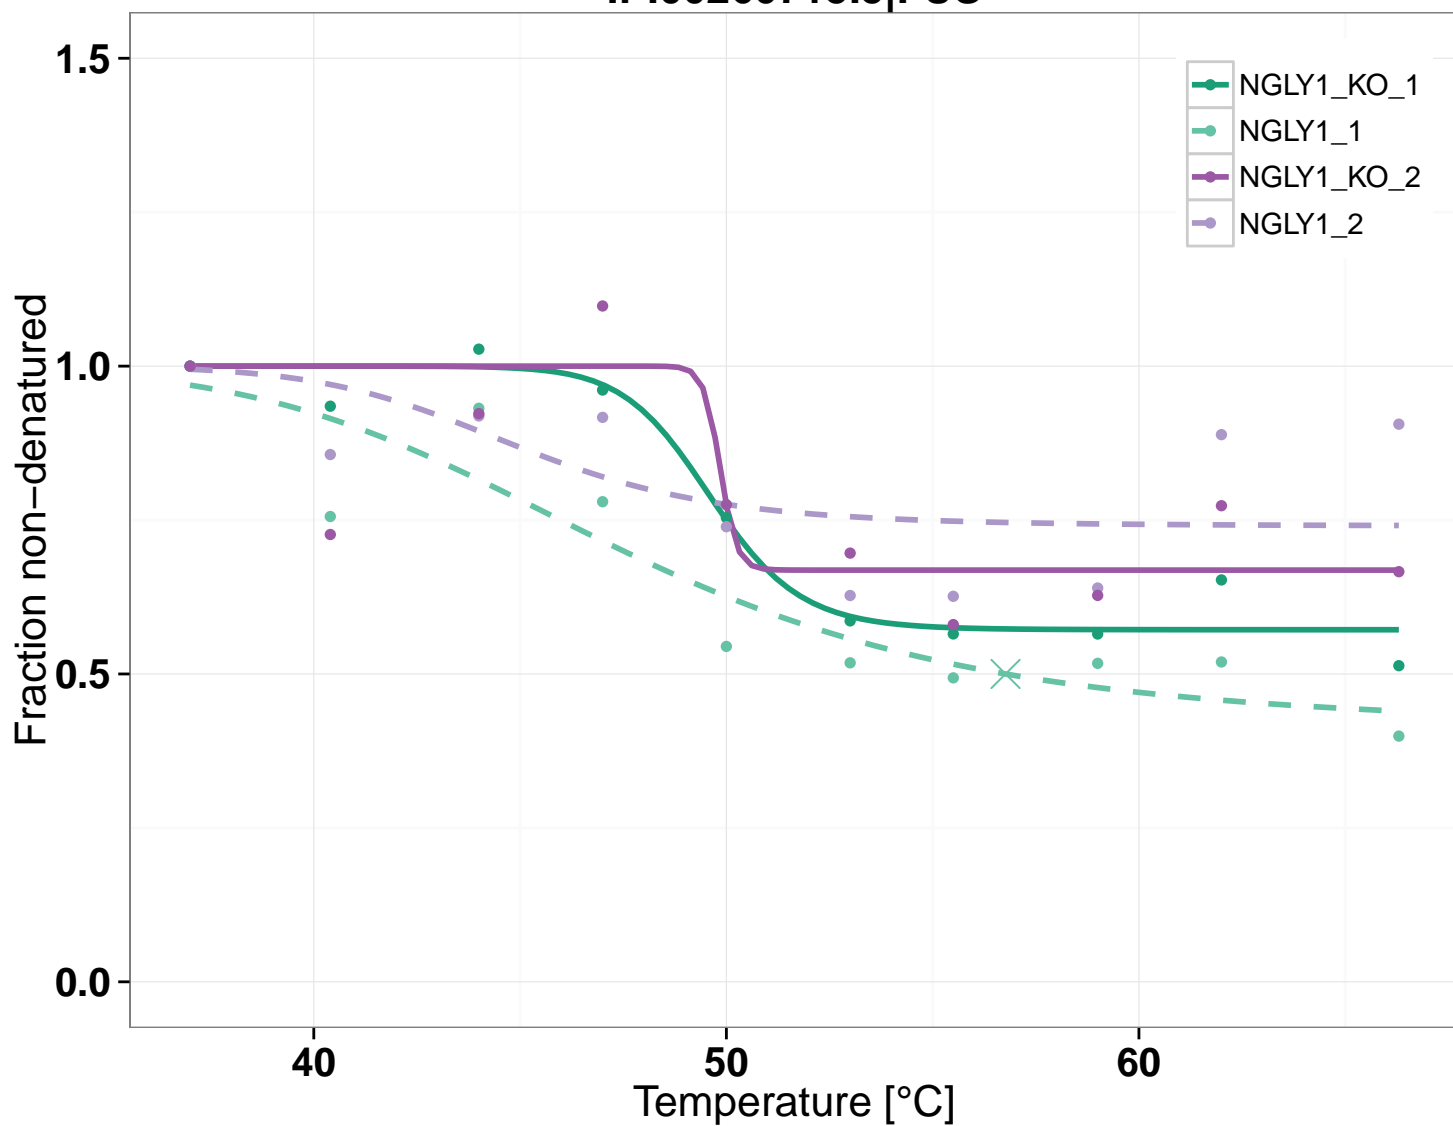

|            | meltPoint | slope  | plateau | R2   |
|------------|-----------|--------|---------|------|
| NGLY1_KO_1 | –         | –0.1   | 0.57    | 0.96 |
| NGLY1_1    | 56.77     | –0.033 | 0.41    | 0.84 |
| NGLY1_KO_2 | –         | –0.42  | 0.67    | 0.56 |
| NGLY1_2    | –         | –0.027 | 0.74    | 0.35 |

Supplement: Supplementary file 5753 [file 1]

IPI00045660.4|C1ORF31

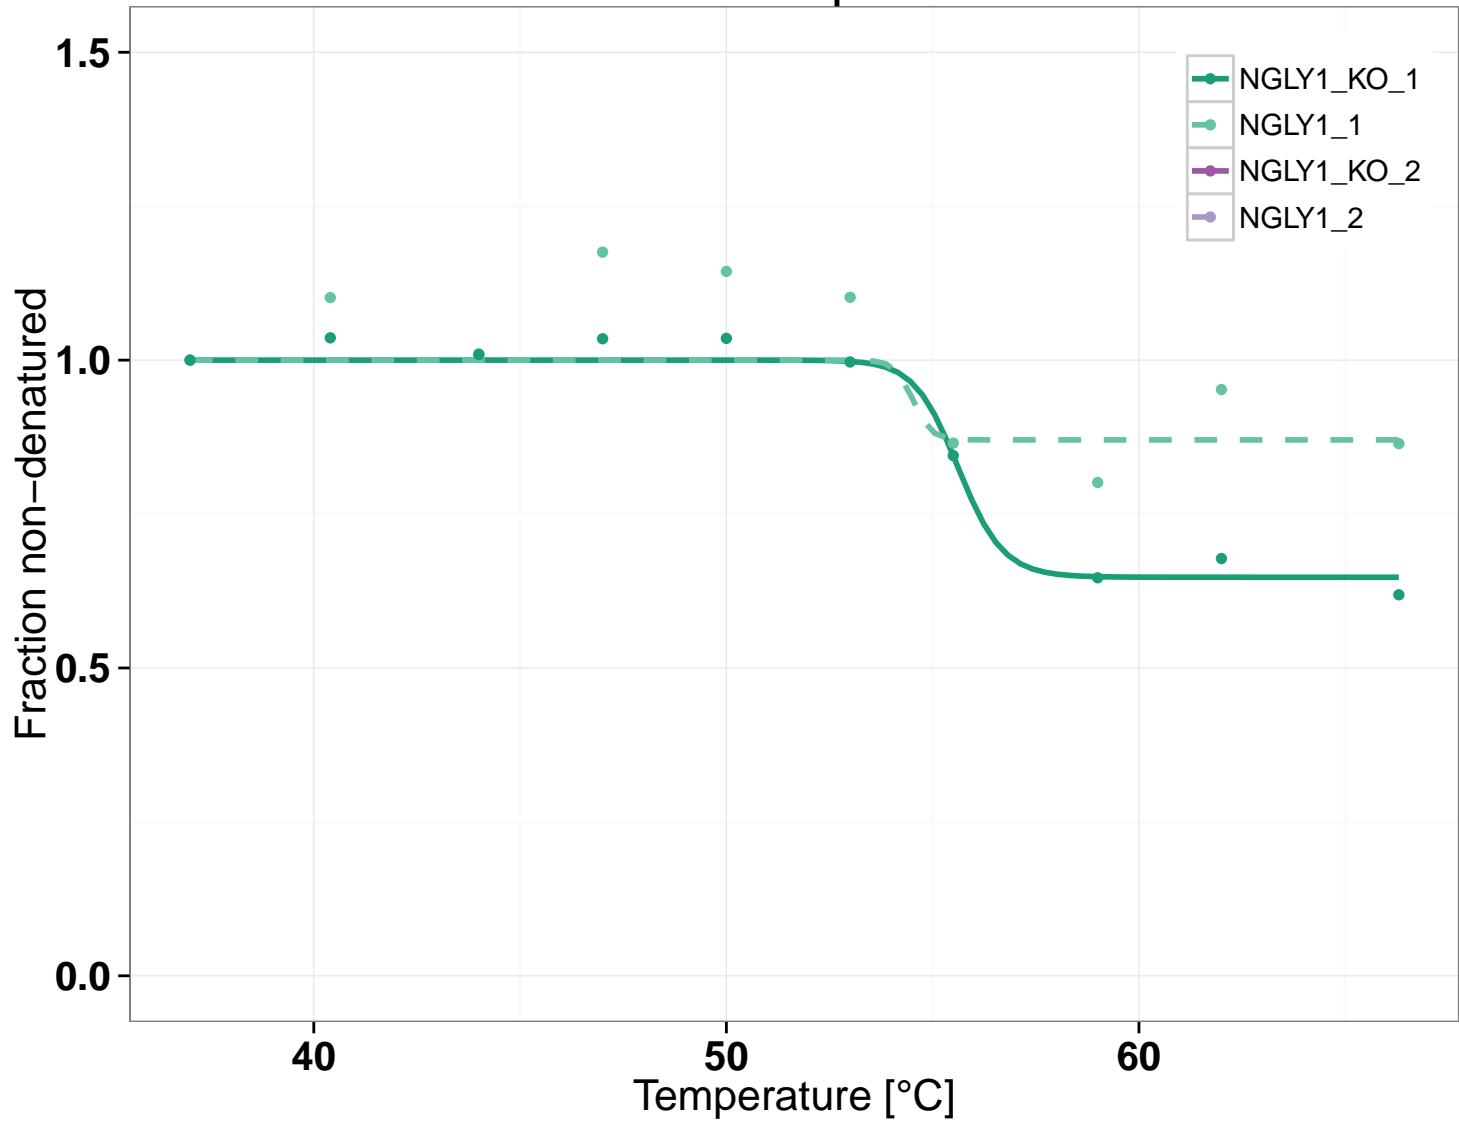

|            | meltPoint | slope | plateau | R2   |
|------------|-----------|-------|---------|------|
| NGLY1_KO_1 | —         | −0.16 | 0.65    | 0.98 |
| NGLY1_1    | —         | −0.15 | 0.87    | 0.44 |
| NGLY1_KO_2 | —         | —     | —       | —    |
| NGLY1_2    | —         | —     | —       | —    |

Supplement: Supplementary file 5754 [file 1]

IPI00306353.3|DUSP23

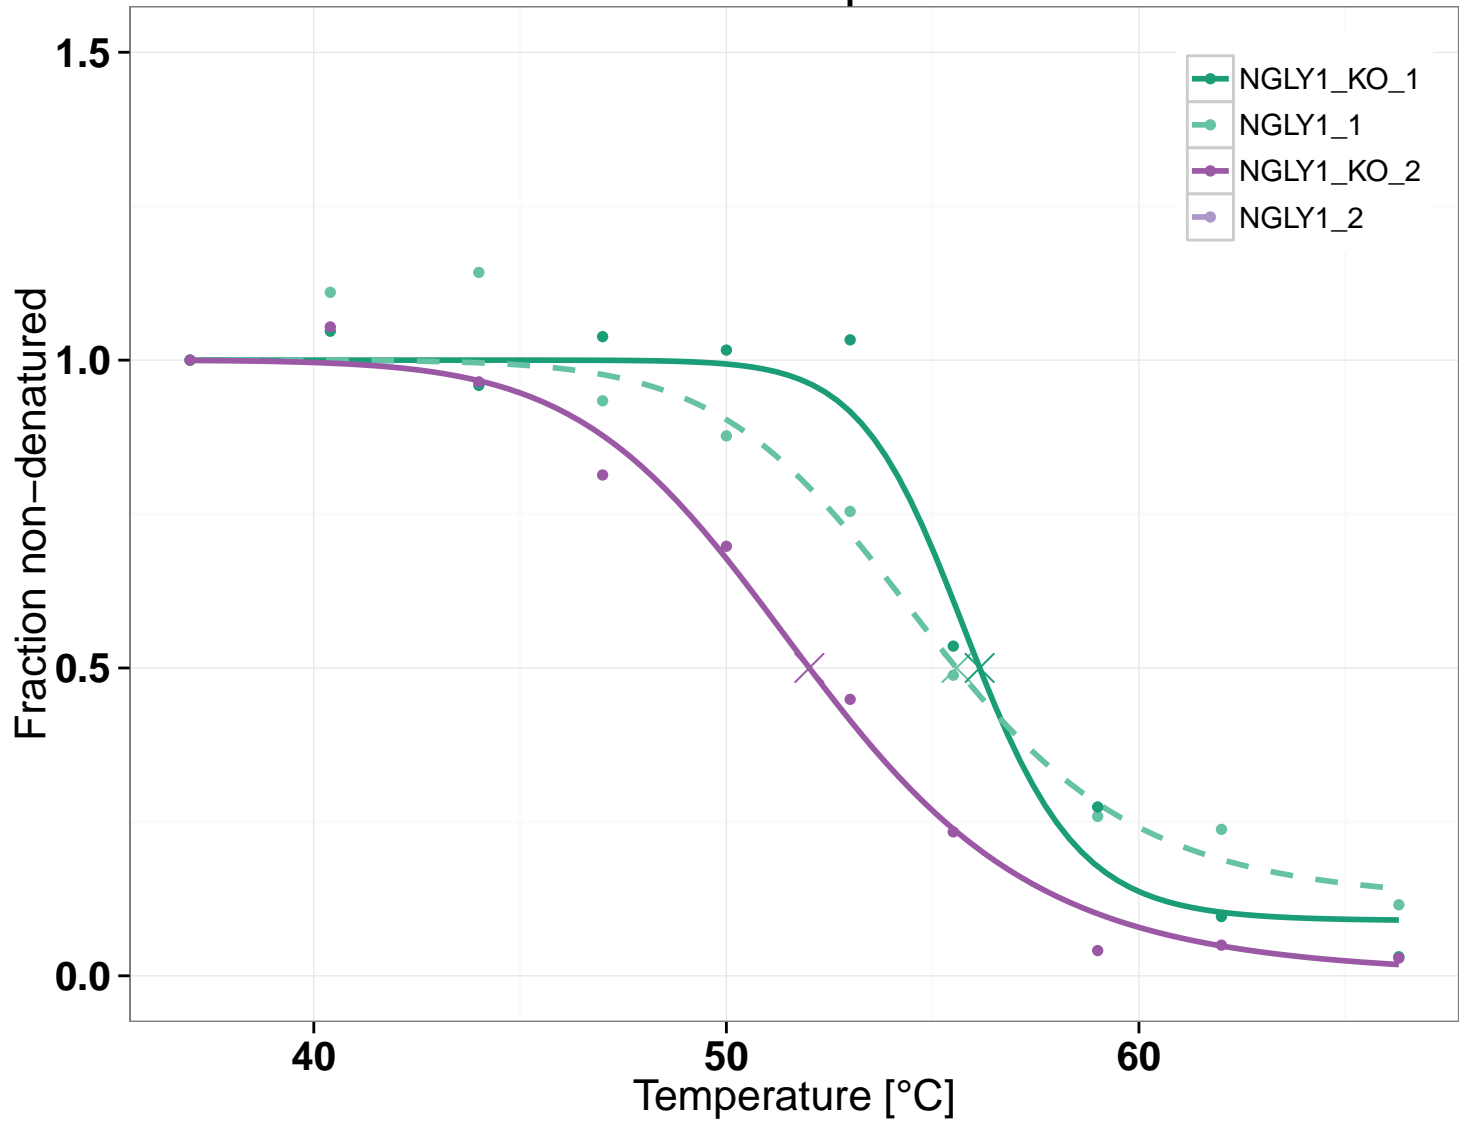

|            | meltPoint | slope  | plateau | R2   |
|------------|-----------|--------|---------|------|
| NGLY1_KO_1 | 56.14     | -0.17  | 0.09    | 0.98 |
| NGLY1_1    | 55.58     | -0.087 | 0.12    | 0.97 |
| NGLY1_KO_2 | 52.01     | -0.09  | 0       | 0.99 |
| NGLY1_2    | -         | -      | -       | -    |

Supplement: Supplementary file 5755 [file 1]

# IPI00646240.3|HIST2H2BA

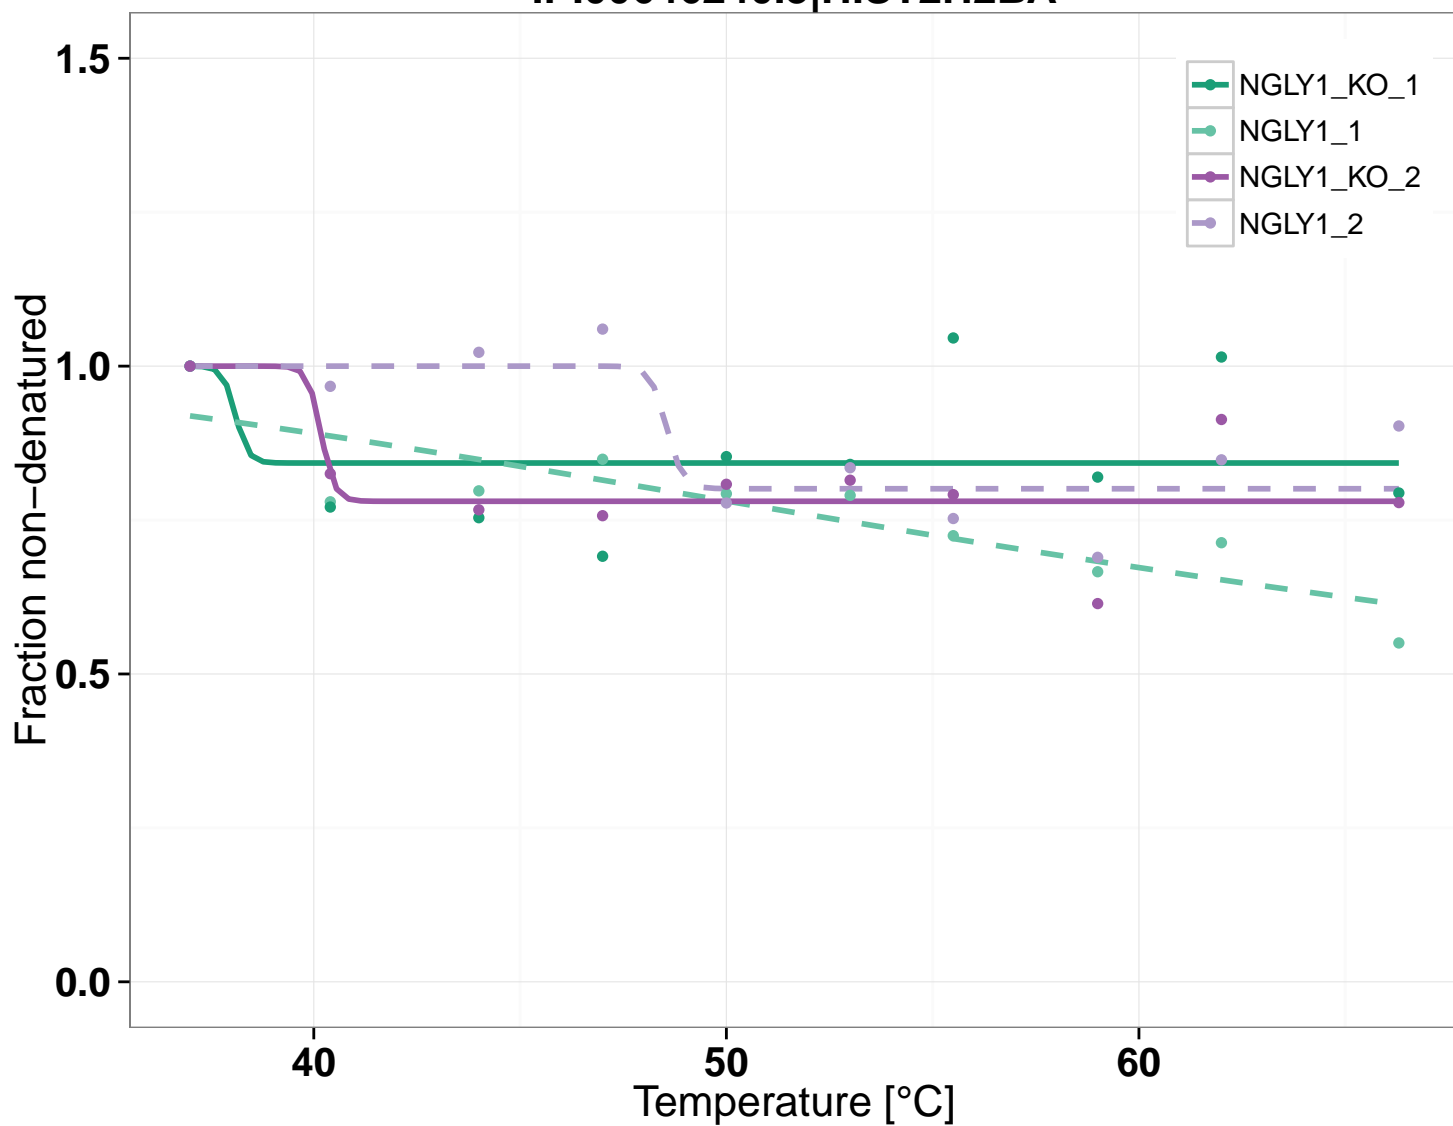

|            | meltPoint | slope  | plateau | R2   |
|------------|-----------|--------|---------|------|
| NGLY1_KO_1 | —         | −0.26  | 0.84    | 0.17 |
| NGLY1_1    | —         | −0.011 | 0       | 0.75 |
| NGLY1_KO_2 | —         | −0.34  | 0.78    | 0.47 |
| NGLY1_2    | —         | −0.26  | 0.8     | 0.76 |

Supplement: Supplementary file 5756 [file 1]

IPI00797738.1|COX6B1

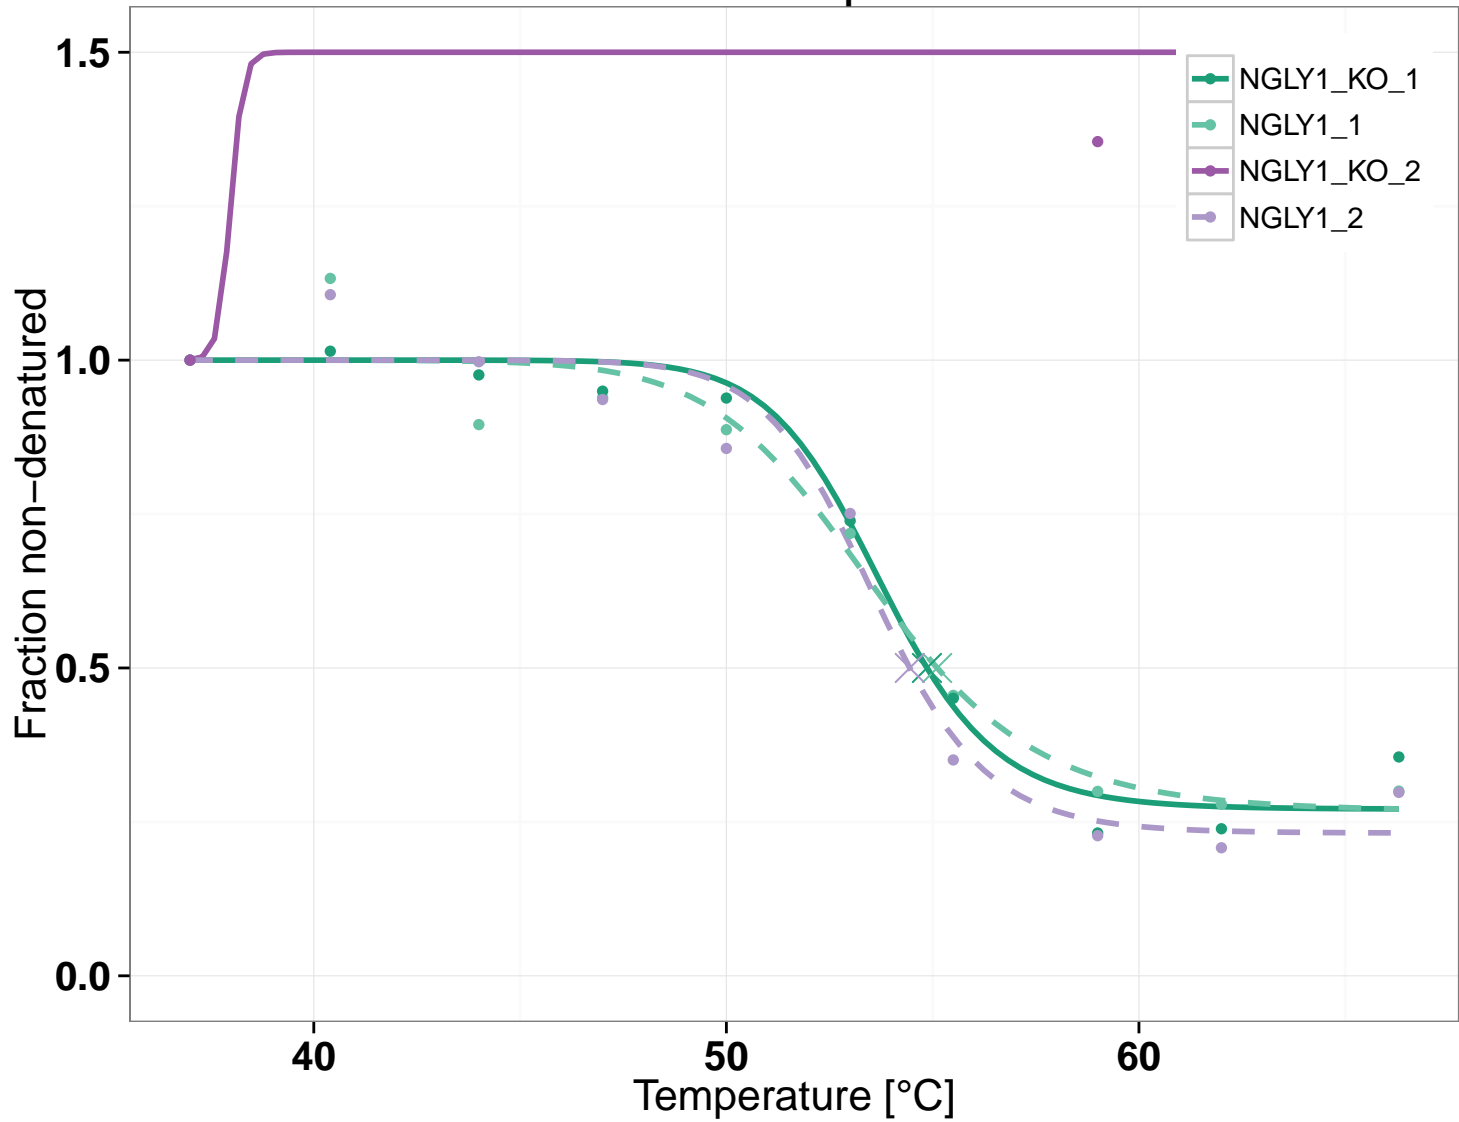

|            | meltPoint | slope  | plateau | R2    |
|------------|-----------|--------|---------|-------|
| NGLY1_KO_1 | 54.86     | -0.13  | 0.27    | 0.98  |
| NGLY1_1    | 55.11     | -0.093 | 0.27    | 0.97  |
| NGLY1_KO_2 | -         | 0.82   | 1.5     | -0.99 |
| NGLY1_2    | 54.45     | -0.14  | 0.23    | 0.97  |

Supplement: Supplementary file 5757 [file 1]

# IPI00056314.1|TSR2

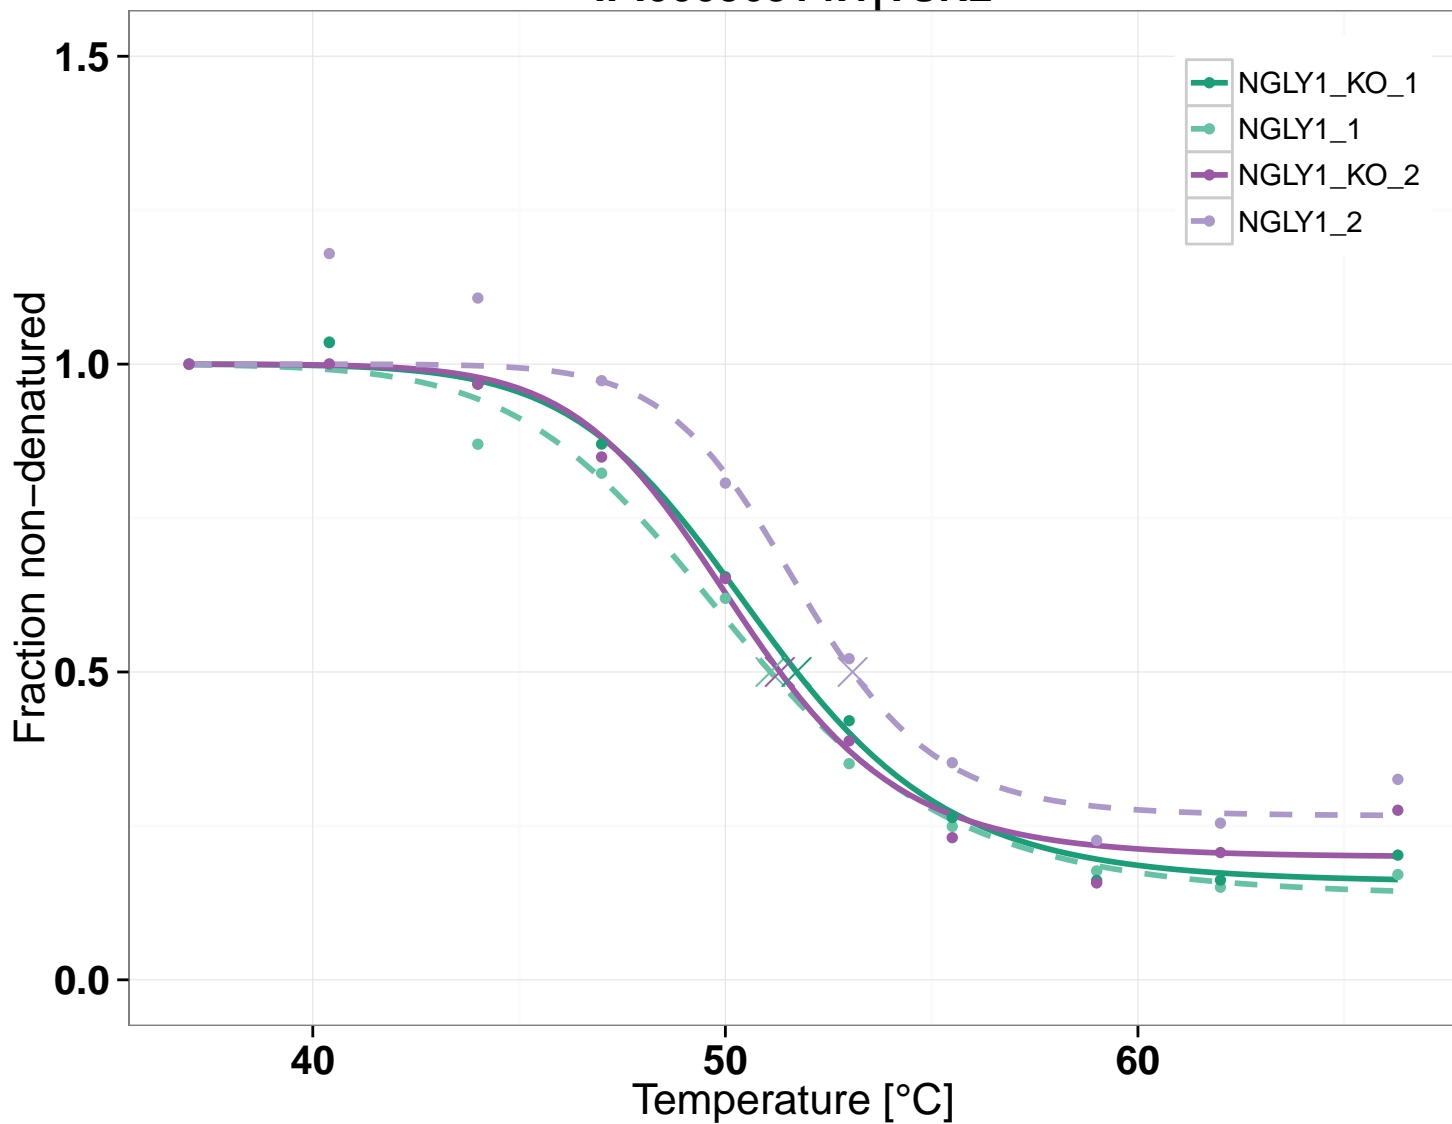

|            | meltPoint | slope  | plateau | R2   |
|------------|-----------|--------|---------|------|
| NGLY1_KO_1 | 51.73     | -0.092 | 0.16    | 1    |
| NGLY1_1    | 51.09     | -0.082 | 0.14    | 0.99 |
| NGLY1_KO_2 | 51.32     | -0.1   | 0.2     | 0.99 |
| NGLY1_2    | 53.08     | -0.11  | 0.27    | 0.96 |

Supplement: Supplementary file 5758 [file 1]

# IPI00301185.2|CHID1

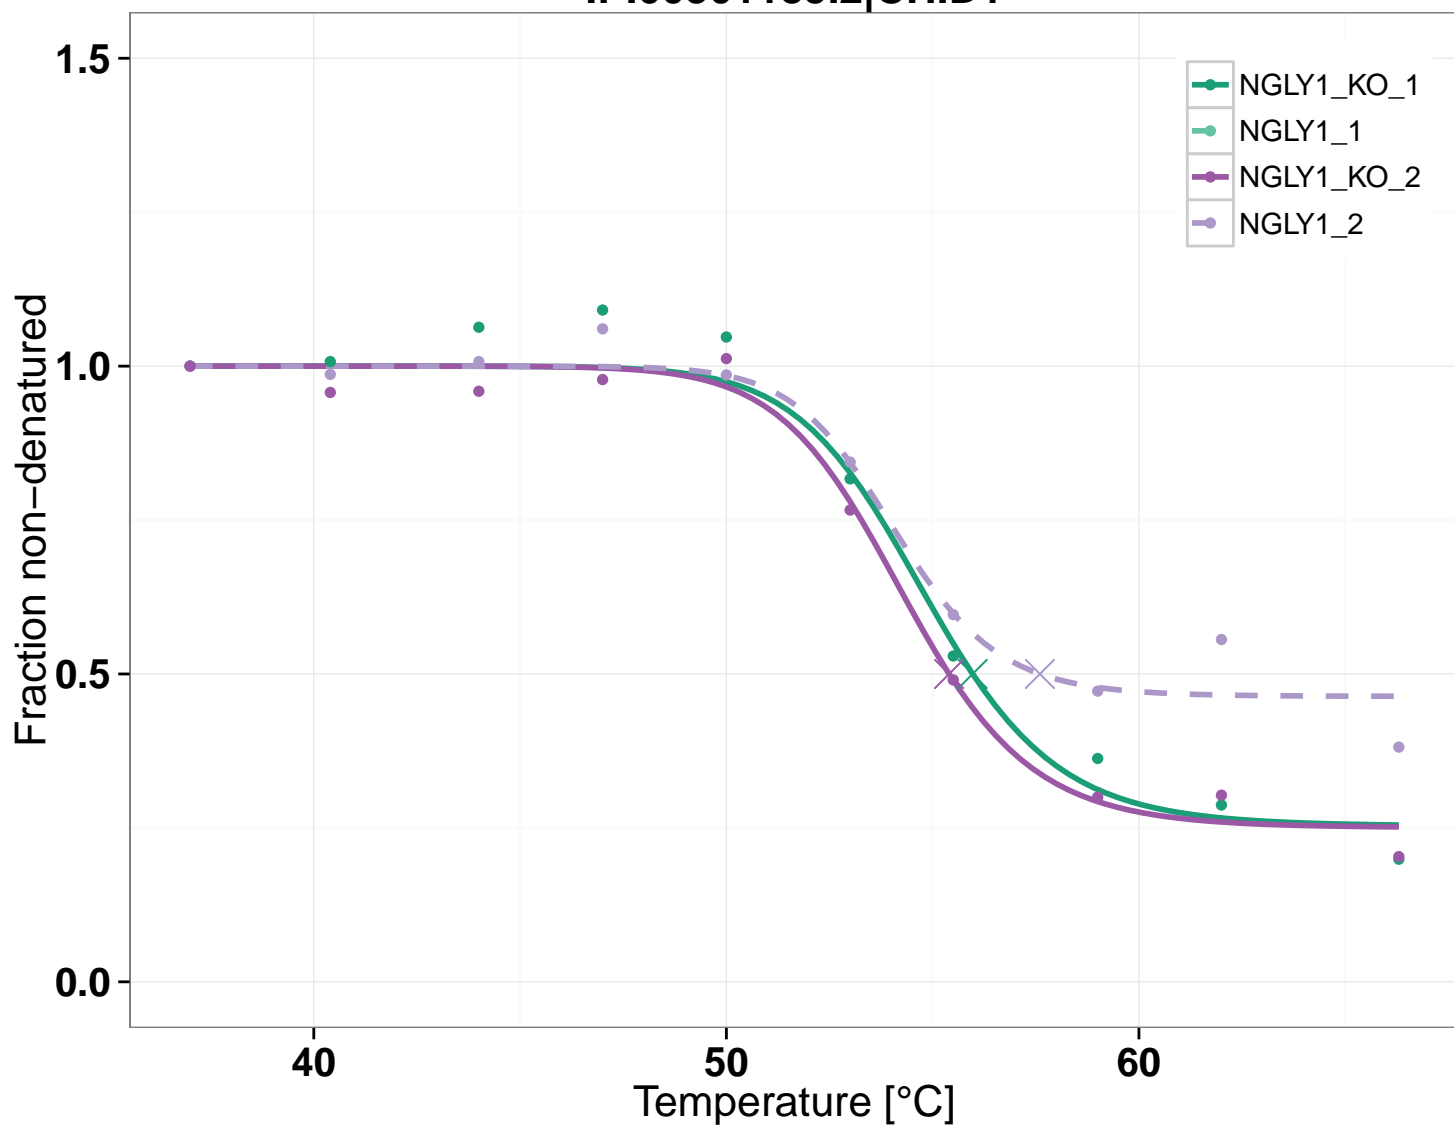

|            | meltPoint | slope | plateau | R2   |
|------------|-----------|-------|---------|------|
| NGLY1_KO_1 | 55.97     | -0.12 | 0.25    | 0.98 |
| NGLY1_1    | -         | -     | -       | -    |
| NGLY1_KO_2 | 55.4      | -0.12 | 0.25    | 0.99 |
| NGLY1_2    | 57.6      | -0.11 | 0.46    | 0.97 |

Supplement: Supplementary file 5759 [file 1]

IPI00418530.2|AGTPBP1

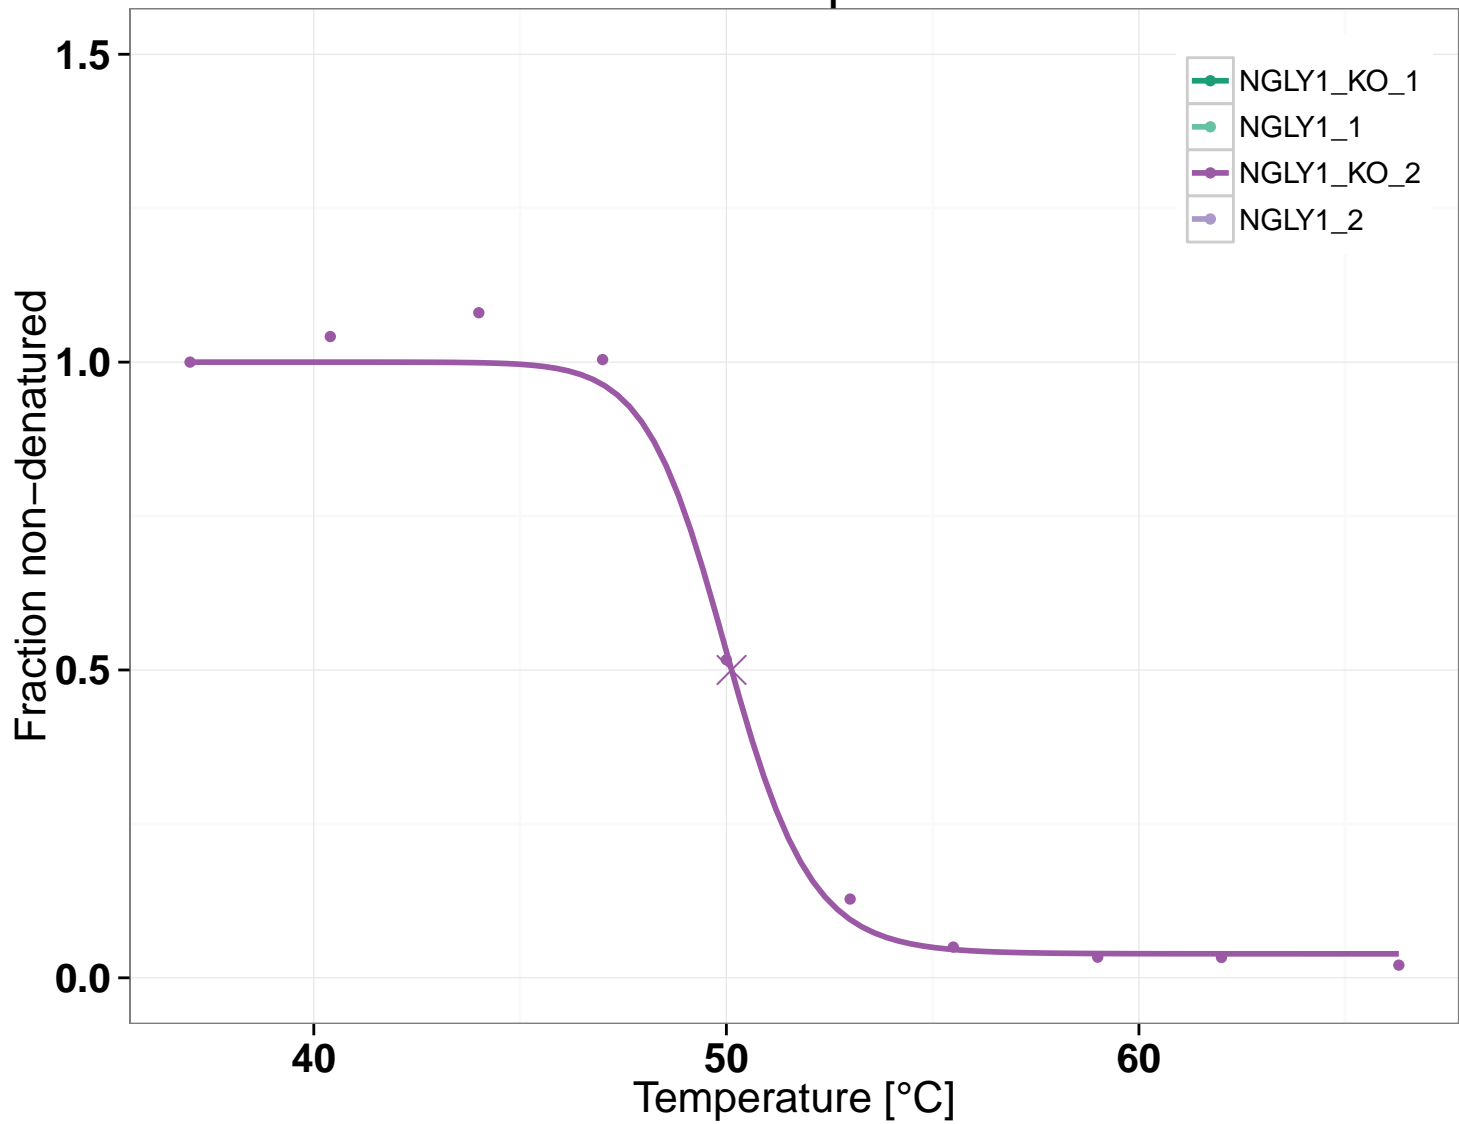

|            | meltPoint | slope | plateau | R2   |
|------------|-----------|-------|---------|------|
| NGLY1_KO_1 | -         | -     | -       | -    |
| NGLY1_1    | -         | -     | -       | -    |
| NGLY1_KO_2 | 50.13     | -0.24 | 0.04    | 0.99 |
| NGLY1_2    | -         | -     | -       | -    |

Supplement: Supplementary file 5760 [file 1]

IPI00479545.9|JMJD1A

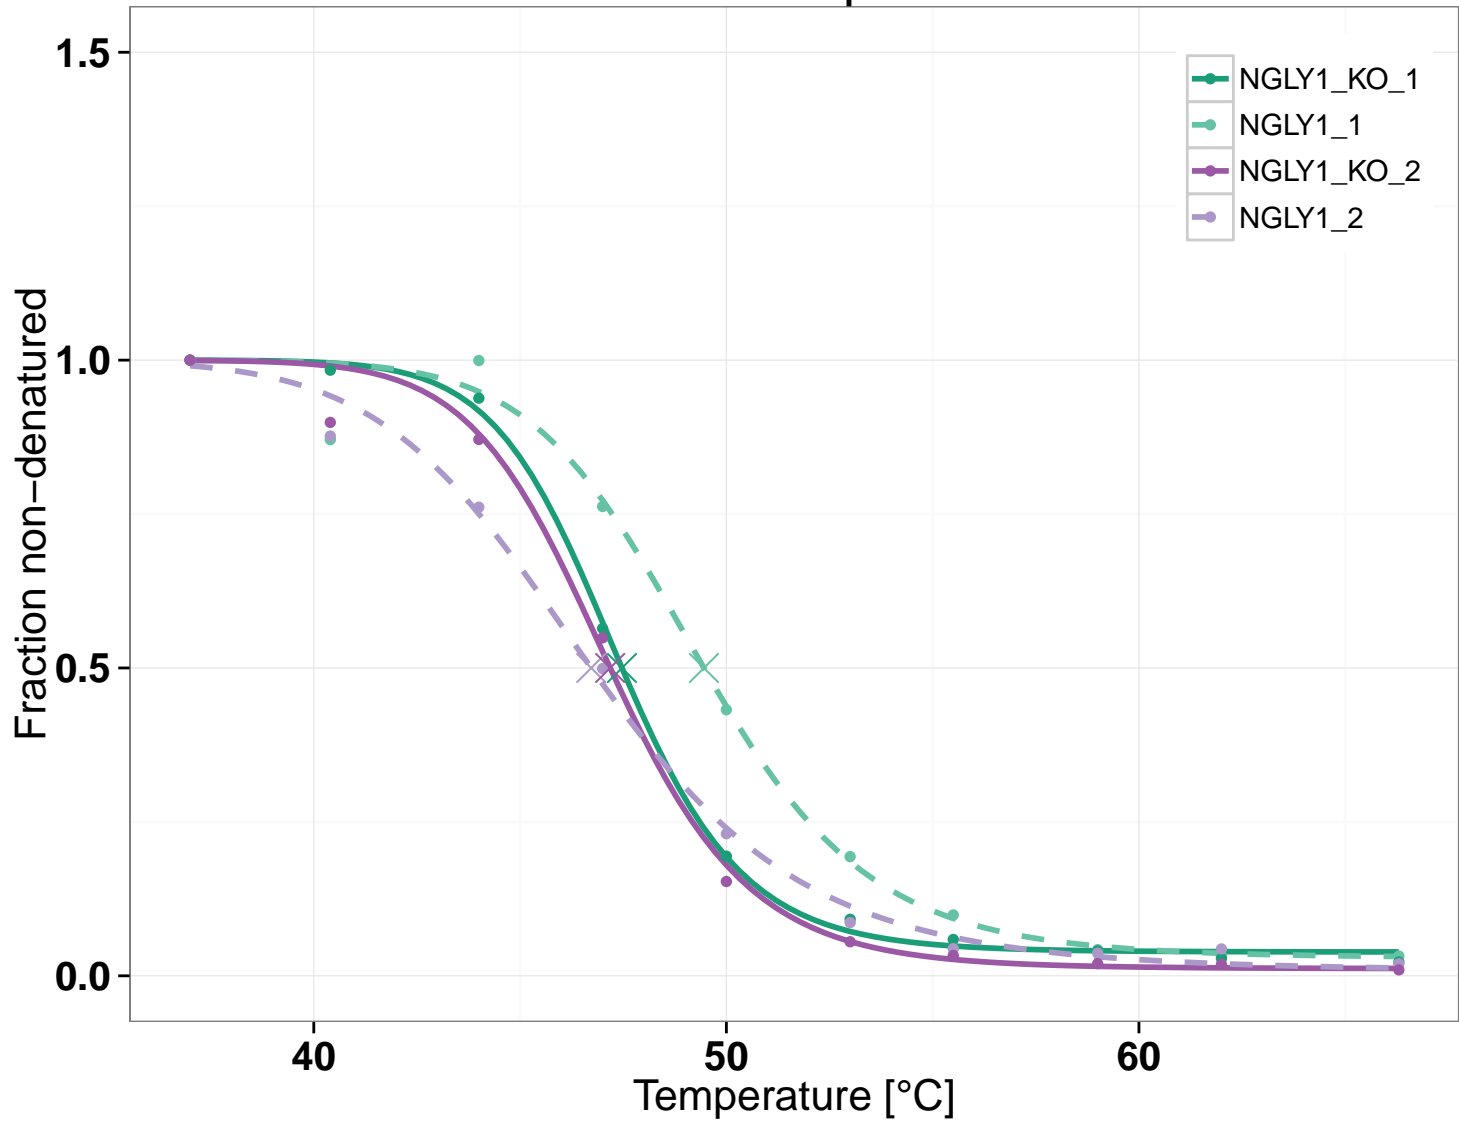

|            | meltPoint | slope  | plateau | R2   |
|------------|-----------|--------|---------|------|
| NGLY1_KO_1 | 47.47     | -0.16  | 0.04    | 1    |
| NGLY1_1    | 49.46     | -0.12  | 0.03    | 0.99 |
| NGLY1_KO_2 | 47.18     | -0.15  | 0.01    | 0.99 |
| NGLY1_2    | 46.72     | -0.096 | 0.01    | 0.99 |

Supplement: Supplementary file 5761 [file 1]

IPI00301465.3|HJURP

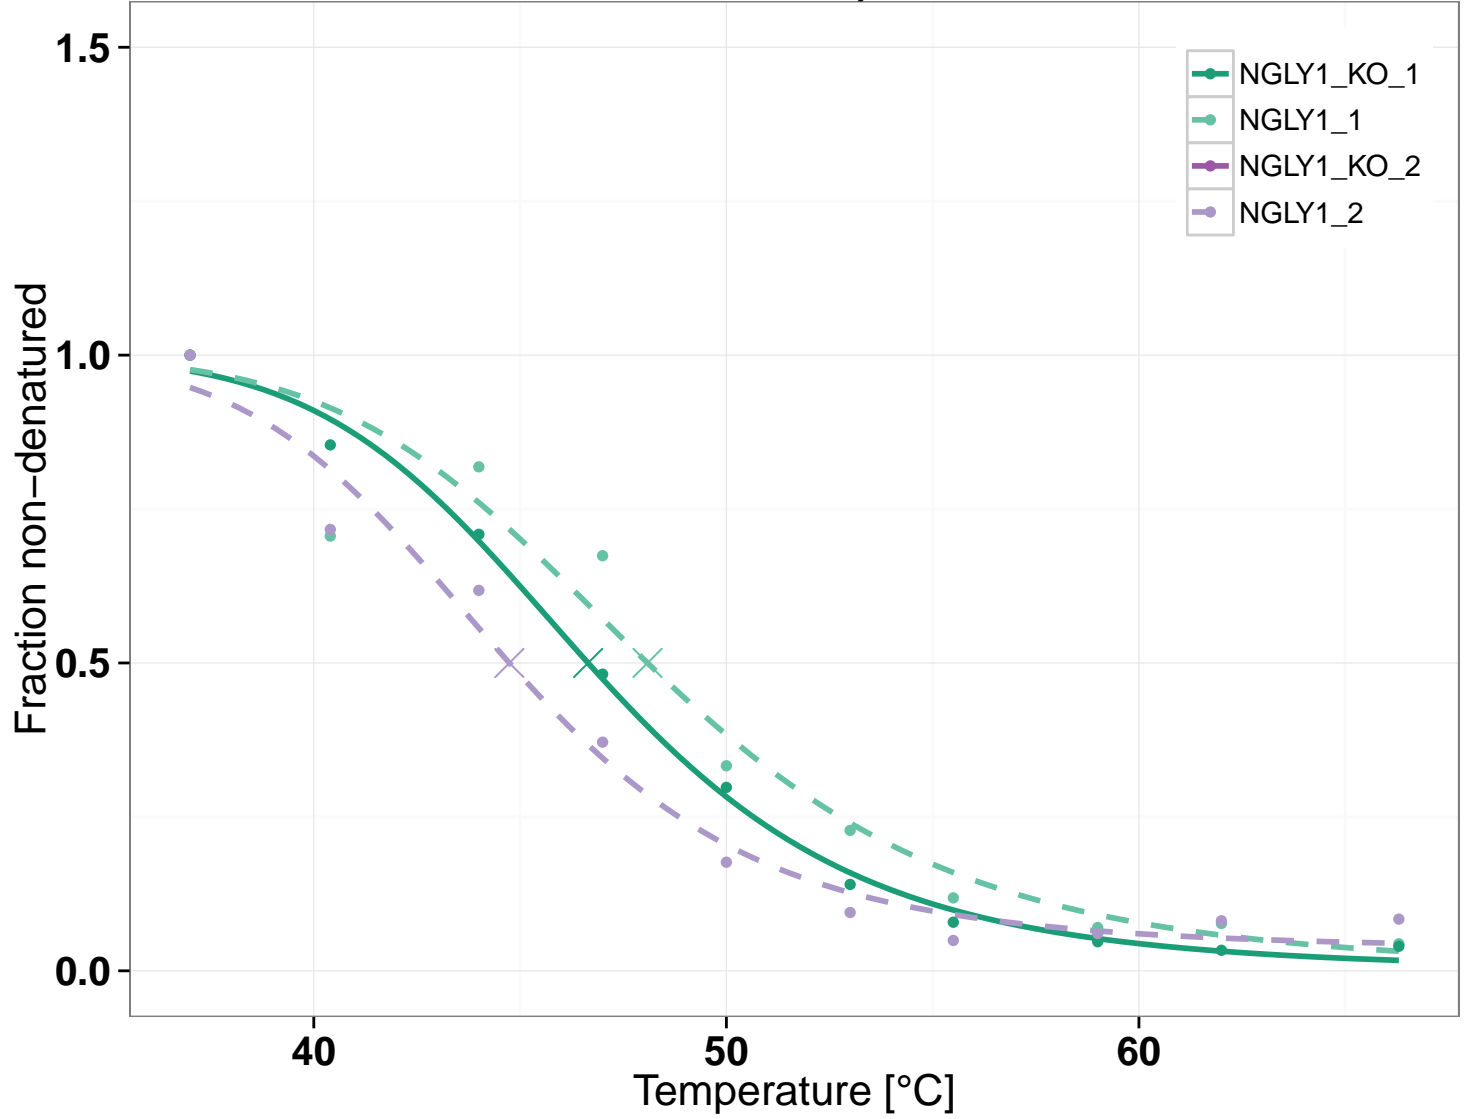

|            | meltPoint | slope  | plateau | R2   |
|------------|-----------|--------|---------|------|
| NGLY1_KO_1 | 46.65     | -0.076 | 0       | 1    |
| NGLY1_1    | 48.09     | -0.066 | 0       | 0.95 |
| NGLY1_KO_2 | -         | -      | -       | -    |
| NGLY1_2    | 44.74     | -0.078 | 0.04    | 0.98 |

Supplement: Supplementary file 5762 [file 1]

IPI00168691.7|SHCBP1

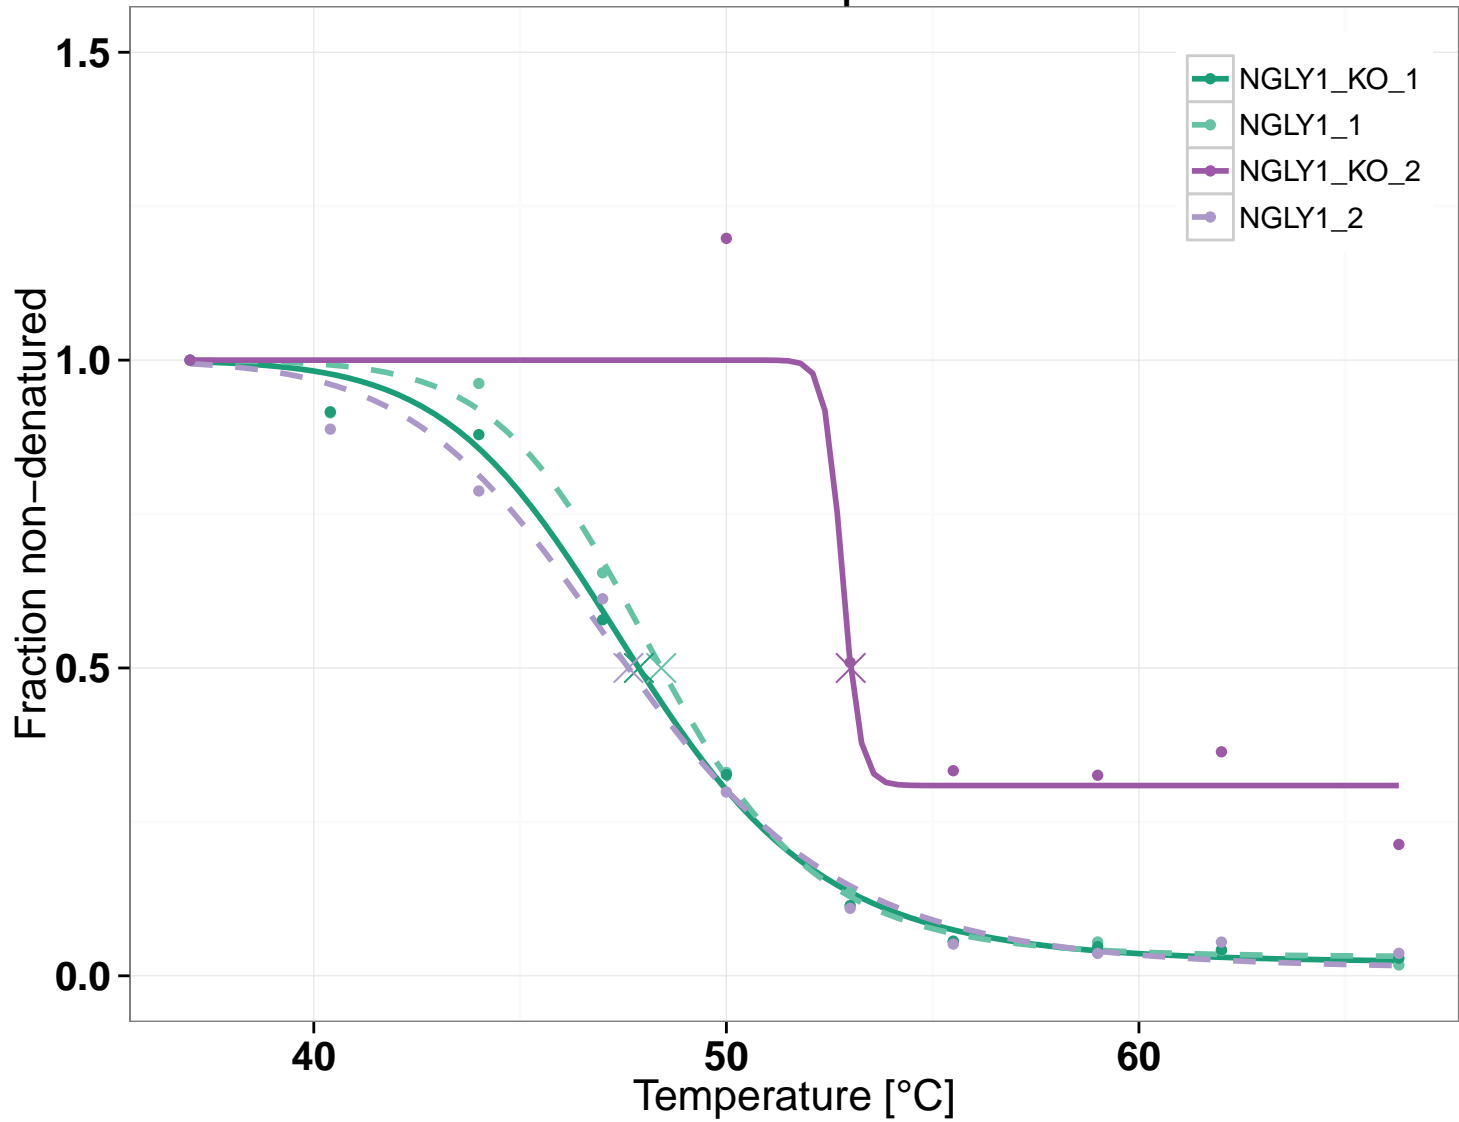

|            | meltPoint | slope  | plateau | R2   |
|------------|-----------|--------|---------|------|
| NGLY1_KO_1 | 47.88     | -0.11  | 0.02    | 1    |
| NGLY1_1    | 48.42     | -0.12  | 0.03    | 0.99 |
| NGLY1_KO_2 | 53.01     | -0.82  | 0.31    | 0.05 |
| NGLY1_2    | 47.63     | -0.095 | 0.01    | 0.99 |

Supplement: Supplementary file 5763 [file 1]

IPI00604624.1|NIF3L1

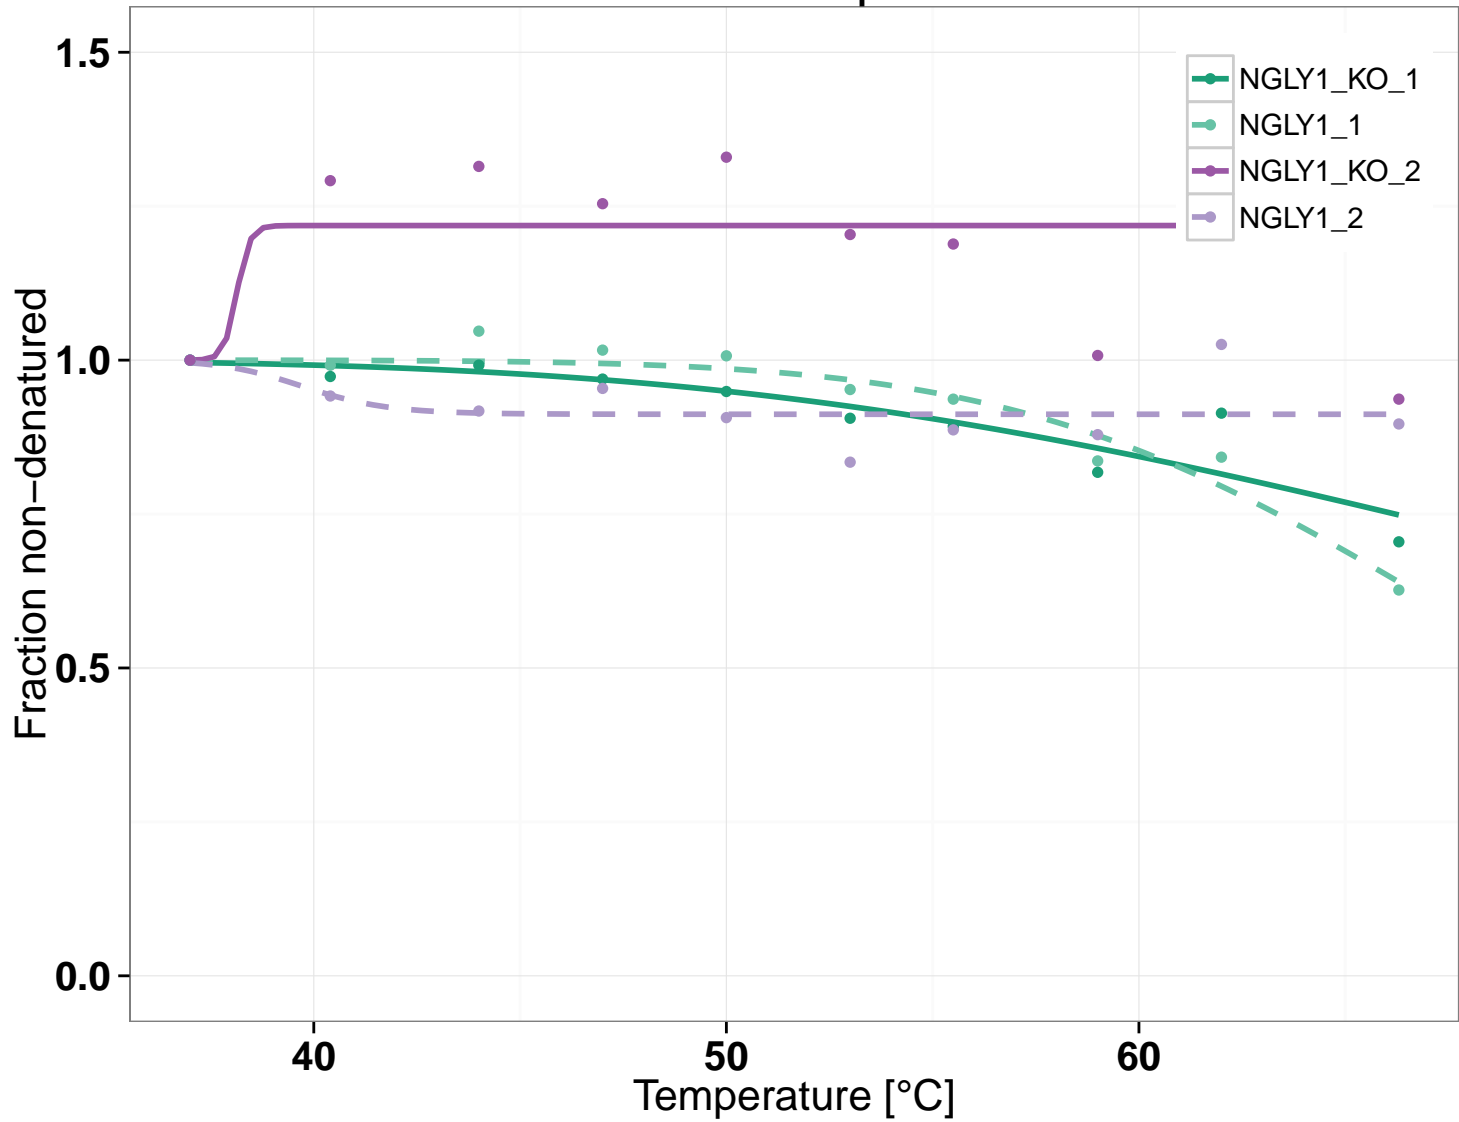

|            | meltPoint | slope  | plateau | R2   |
|------------|-----------|--------|---------|------|
| NGLY1_KO_1 | -         | -      | 0       | 0.81 |
| NGLY1_1    | -         | -      | 0       | 0.95 |
| NGLY1_KO_2 | -         | 0.36   | 1.22    | 0.18 |
| NGLY1_2    | -         | -0.022 | 0.91    | 0.24 |

Supplement: Supplementary file 5764 [file 1]

IPI00790107.2|FLJ10357

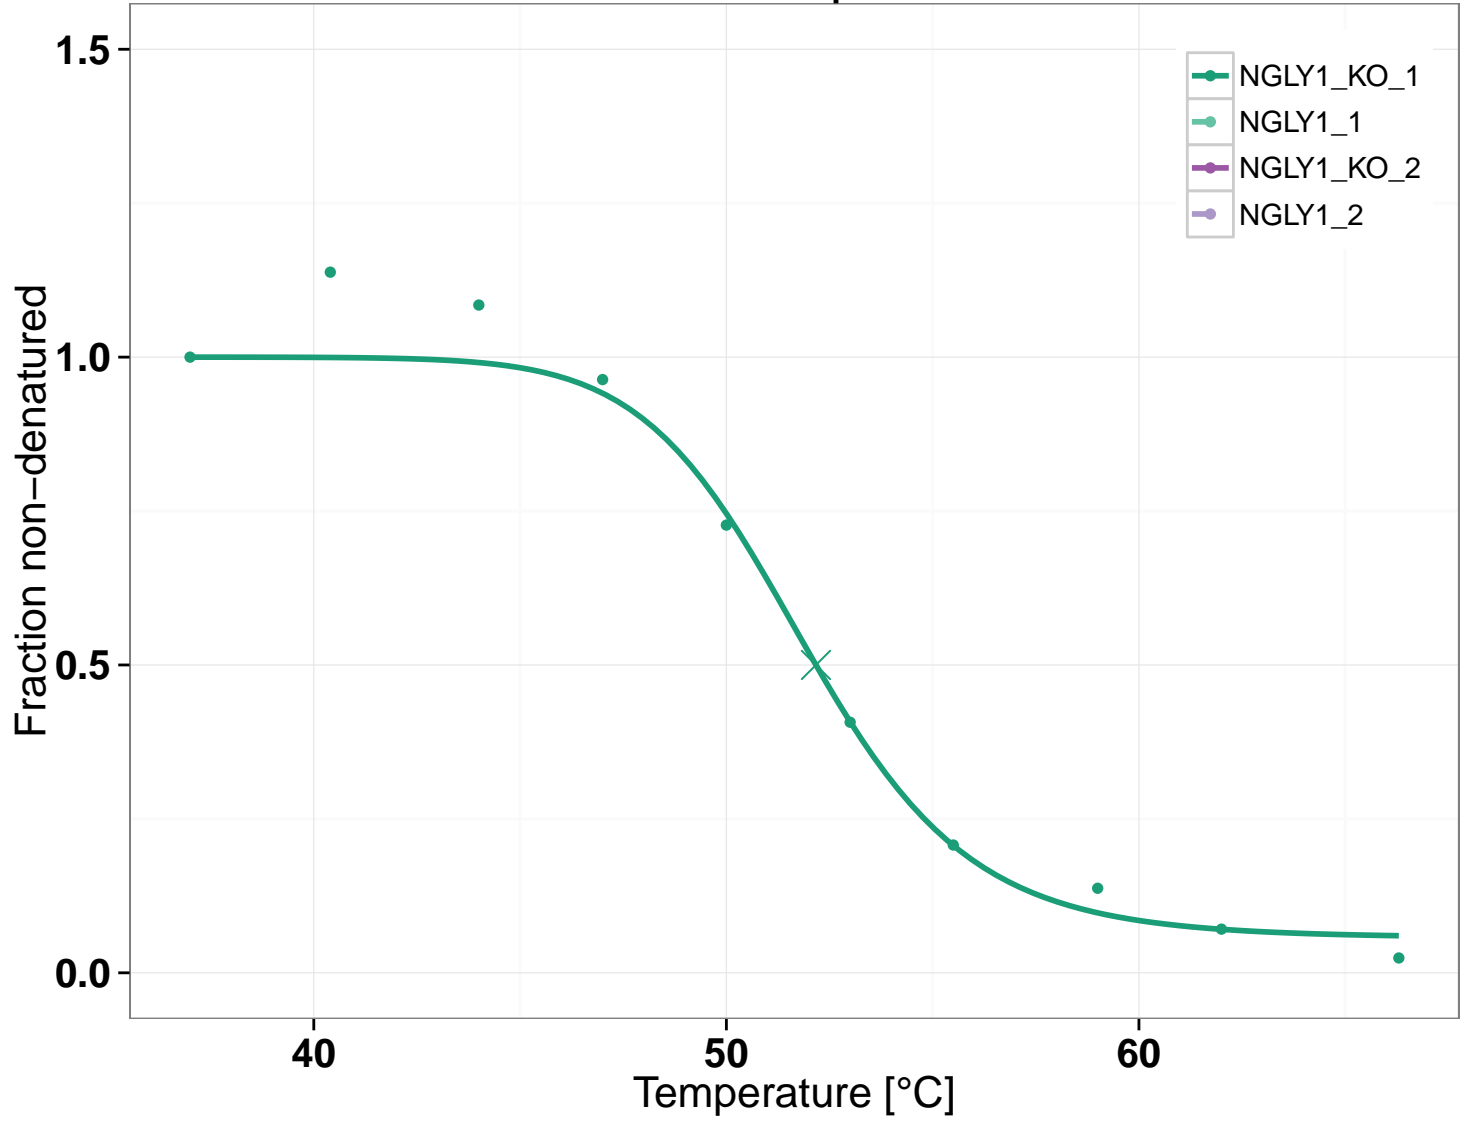

|            | meltPoint | slope | plateau | R2   |
|------------|-----------|-------|---------|------|
| NGLY1_KO_1 | 52.17     | -0.12 | 0.06    | 0.98 |
| NGLY1_1    | -         | -     | -       | -    |
| NGLY1_KO_2 | -         | -     | -       | -    |
| NGLY1_2    | -         | -     | -       | -    |

Supplement: Supplementary file 5766 [file 1]

# IPI00293857.1|ARRB1

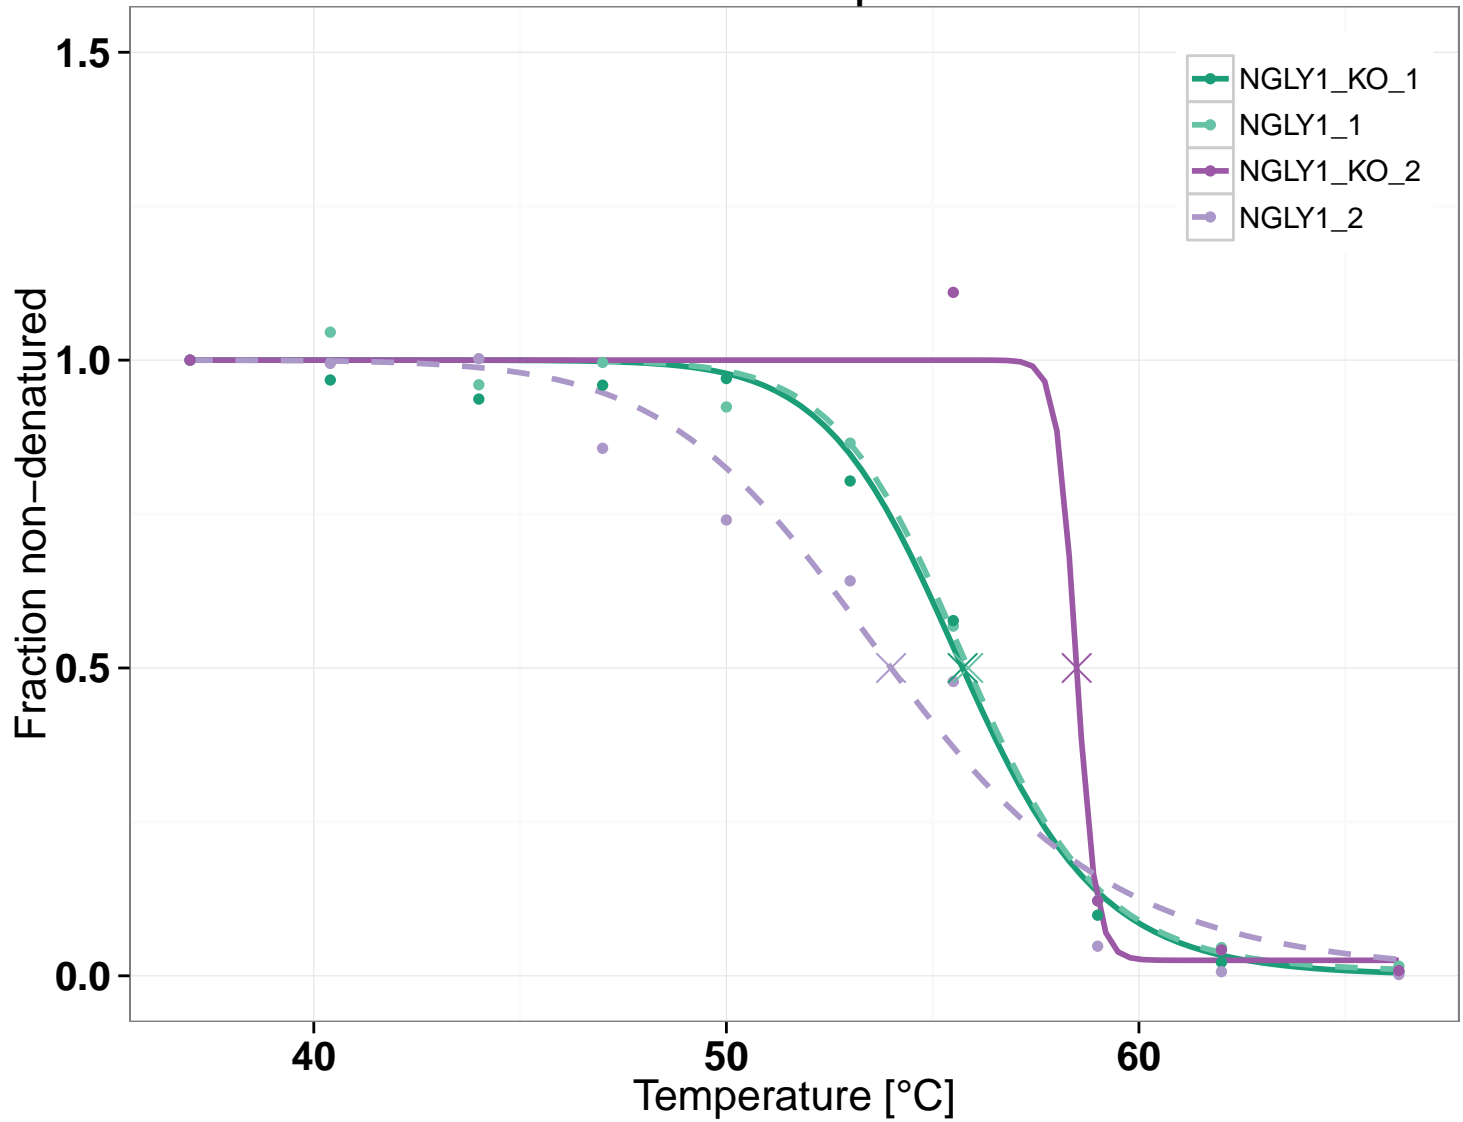

|            | meltPoint | slope  | plateau | R2   |
|------------|-----------|--------|---------|------|
| NGLY1_KO_1 | 55.73     | -0.15  | 0       | 0.99 |
| NGLY1_1    | 55.86     | -0.15  | 0.01    | 1    |
| NGLY1_KO_2 | 58.49     | -1     | 0.03    | 0.43 |
| NGLY1_2    | 53.99     | -0.091 | 0       | 0.97 |

Supplement: Supplementary file 5767 [file 1]

# IPI00784044.1|MCCC2

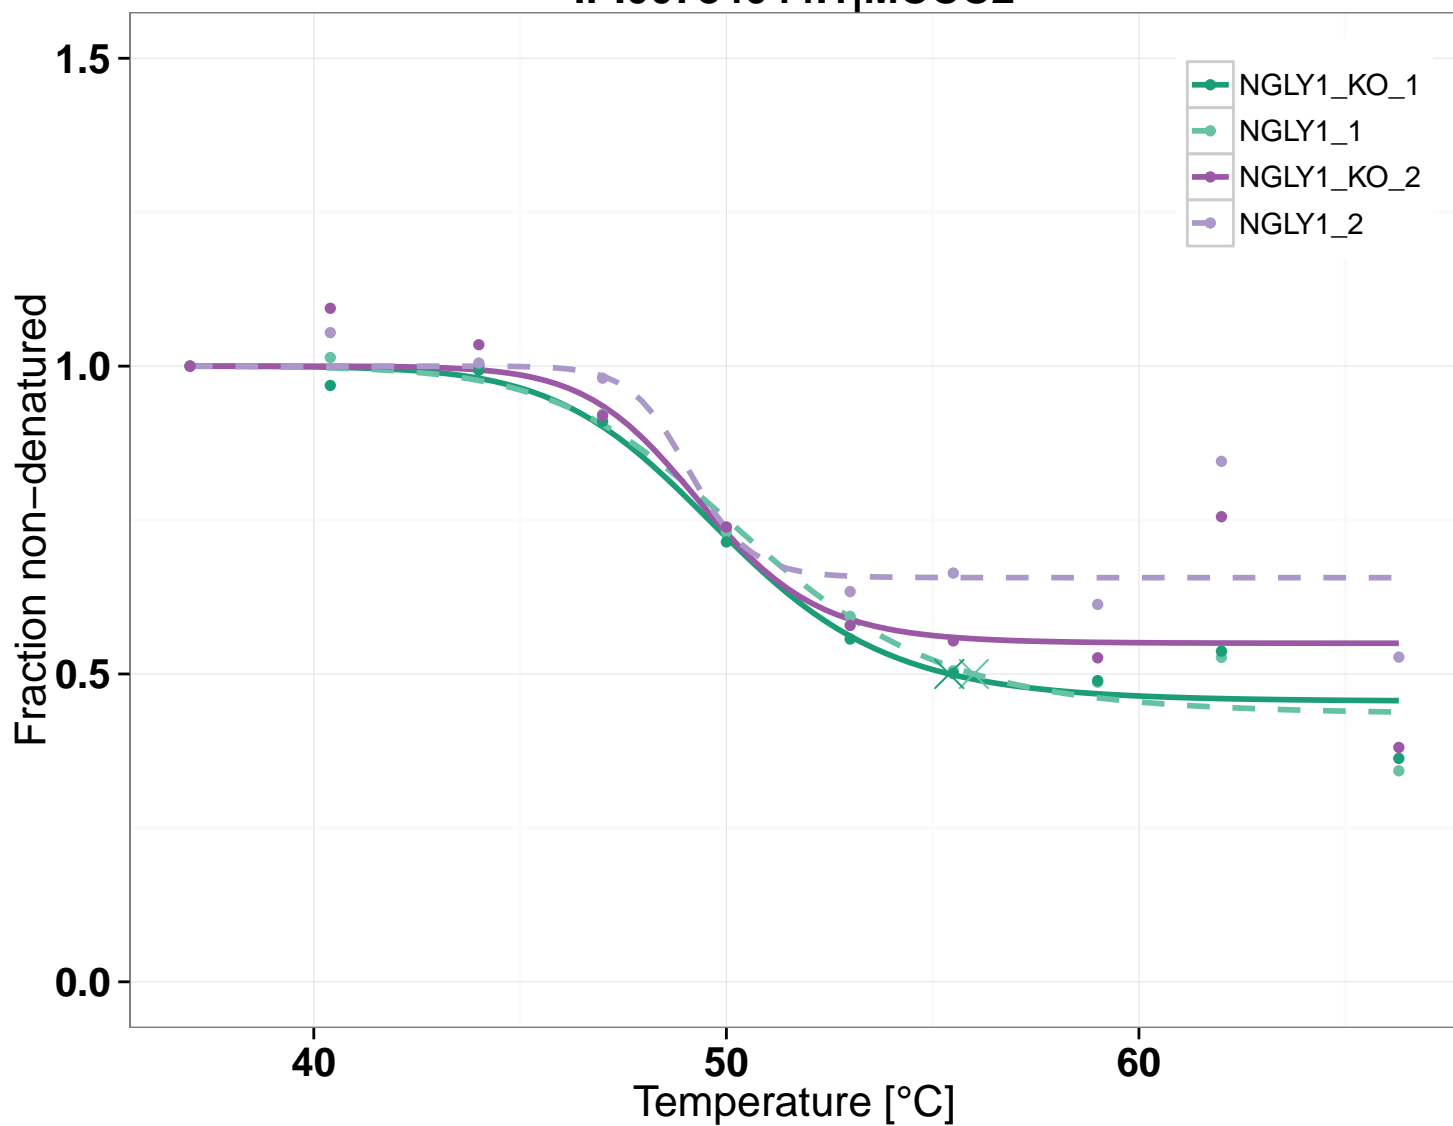

|            | meltPoint | slope  | plateau | R2   |
|------------|-----------|--------|---------|------|
| NGLY1_KO_1 | 55.4      | -0.067 | 0.46    | 0.97 |
| NGLY1_1    | 56        | -0.059 | 0.43    | 0.97 |
| NGLY1_KO_2 | -         | -0.08  | 0.55    | 0.85 |
| NGLY1_2    | -         | -0.12  | 0.66    | 0.83 |

Supplement: Supplementary file 5768 [file 1]

# IPI00027626.3|CCT6A

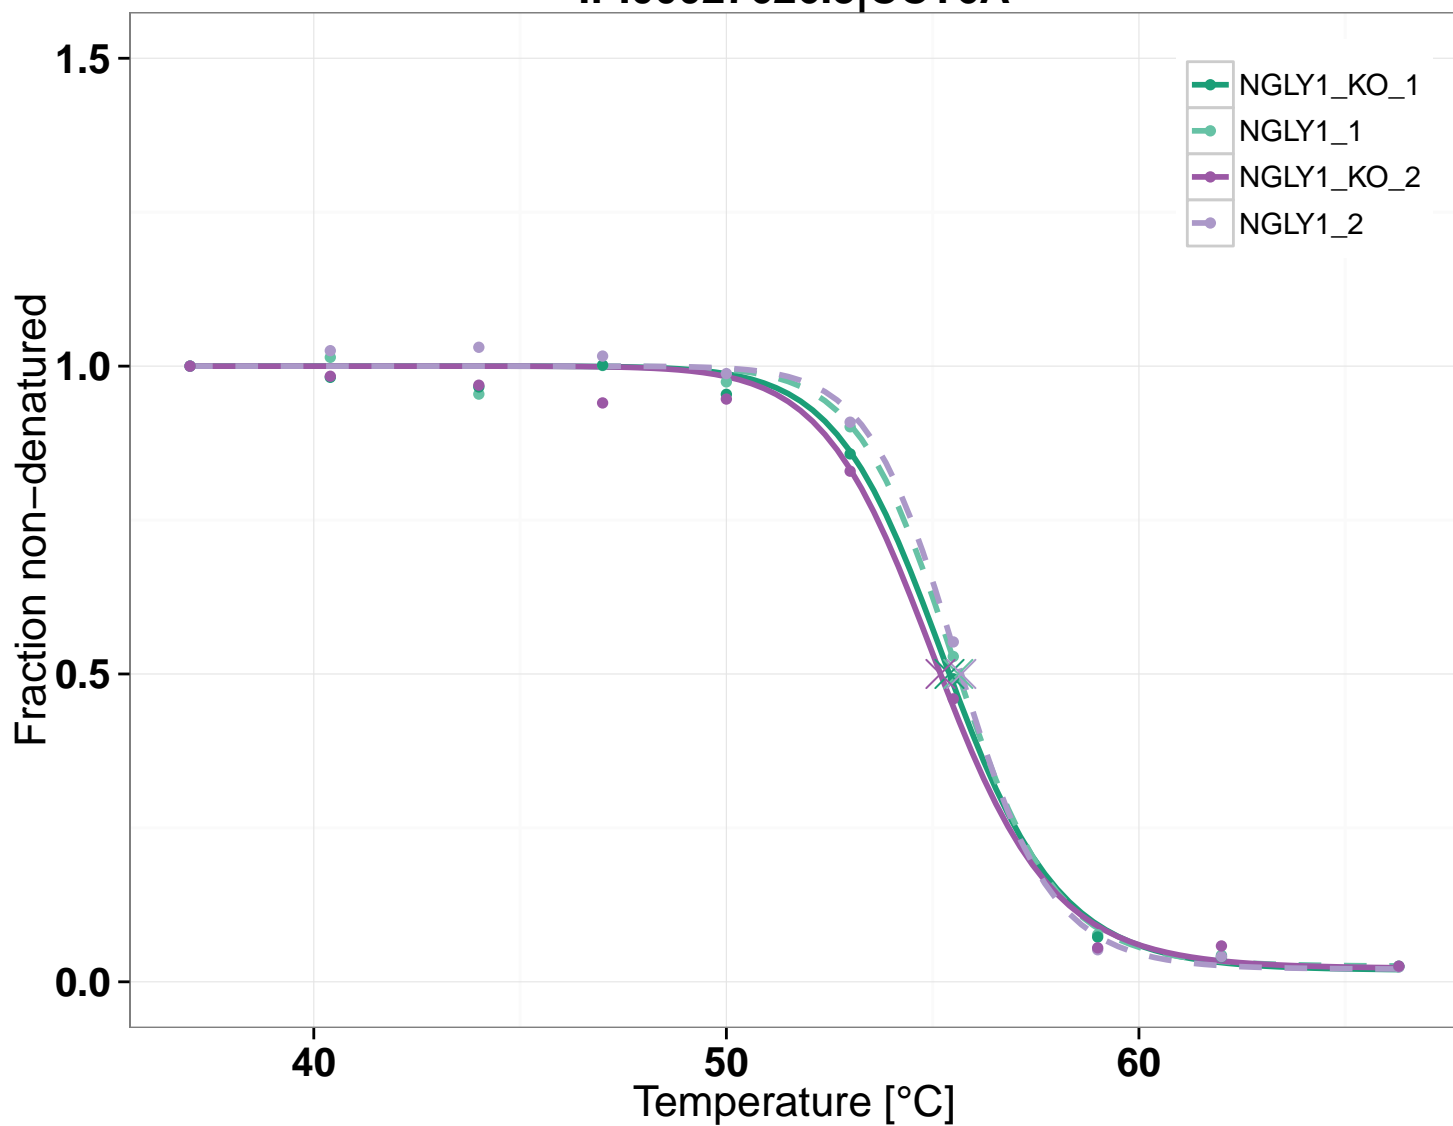

|            | meltPoint | slope | plateau | R2 |
|------------|-----------|-------|---------|----|
| NGLY1_KO_1 | 55.41     | -0.18 | 0.02    | 1  |
| NGLY1_1    | 55.62     | -0.2  | 0.03    | 1  |
| NGLY1_KO_2 | 55.19     | -0.17 | 0.02    | 1  |
| NGLY1_2    | 55.69     | -0.22 | 0.02    | 1  |

Supplement: Supplementary file 5769 [file 1]

IPI00221235.3|NUP160

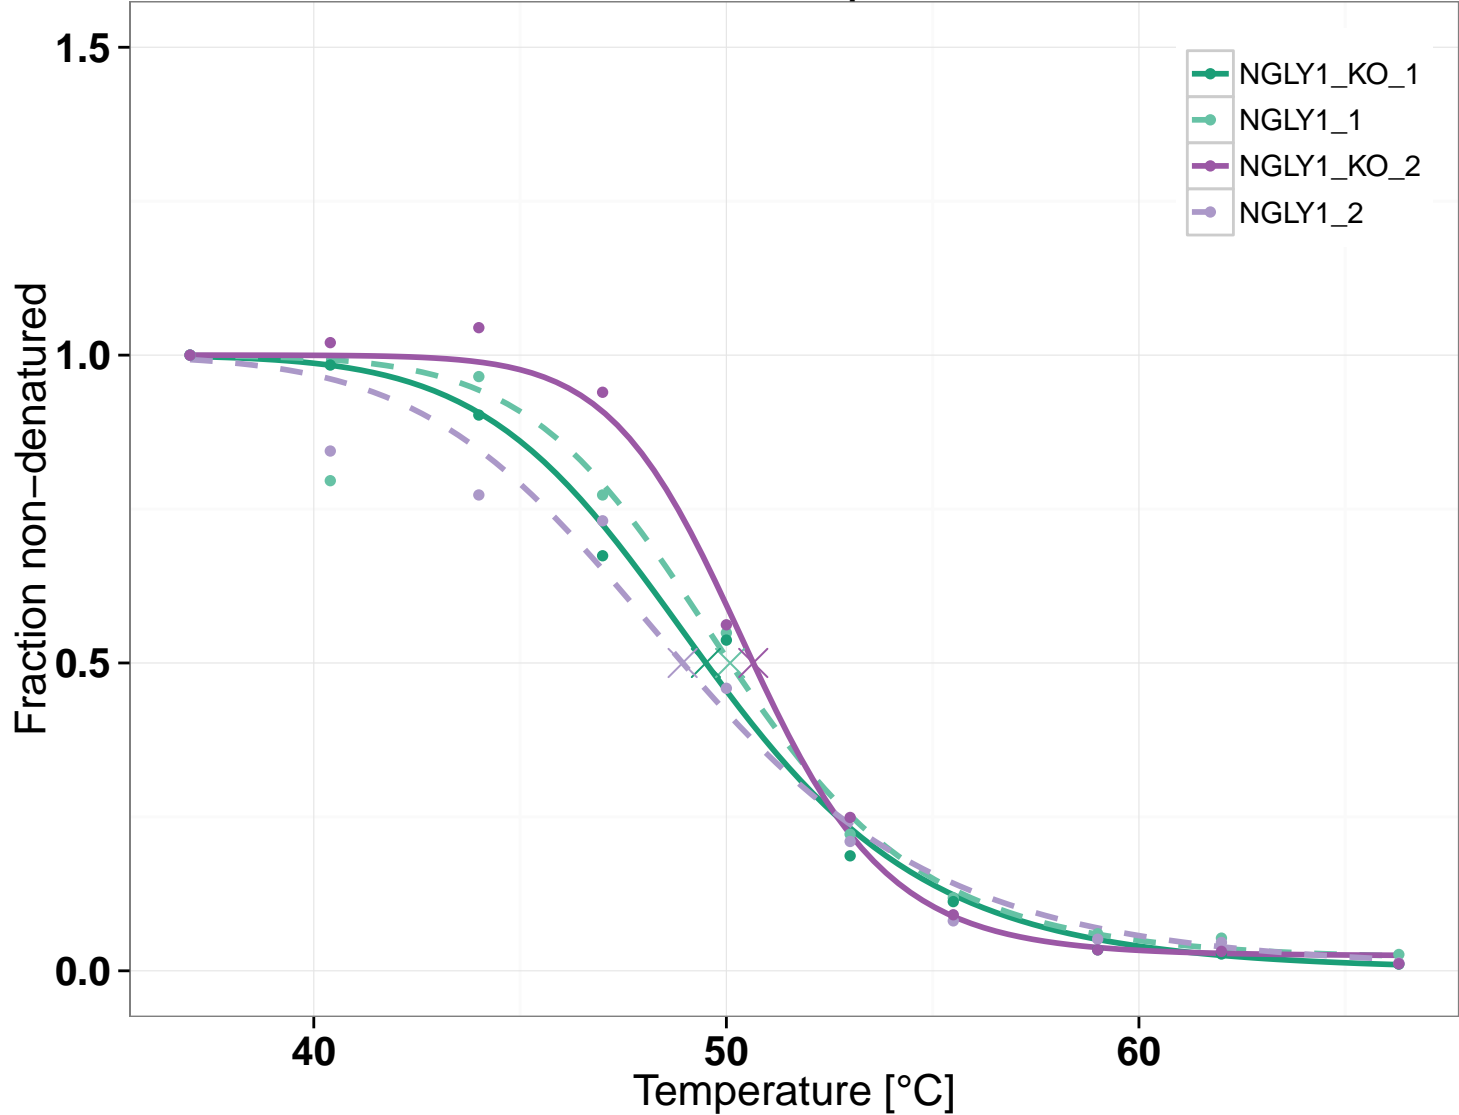

|            | meltPoint | slope  | plateau | R2   |
|------------|-----------|--------|---------|------|
| NGLY1_KO_1 | 49.5      | -0.093 | 0       | 0.99 |
| NGLY1_1    | 50.09     | -0.1   | 0.02    | 0.97 |
| NGLY1_KO_2 | 50.65     | -0.14  | 0.02    | 1    |
| NGLY1_2    | 48.94     | -0.079 | 0       | 0.98 |

Supplement: Supplementary file 5770 [file 1]

IPI00797720.1|RASA2

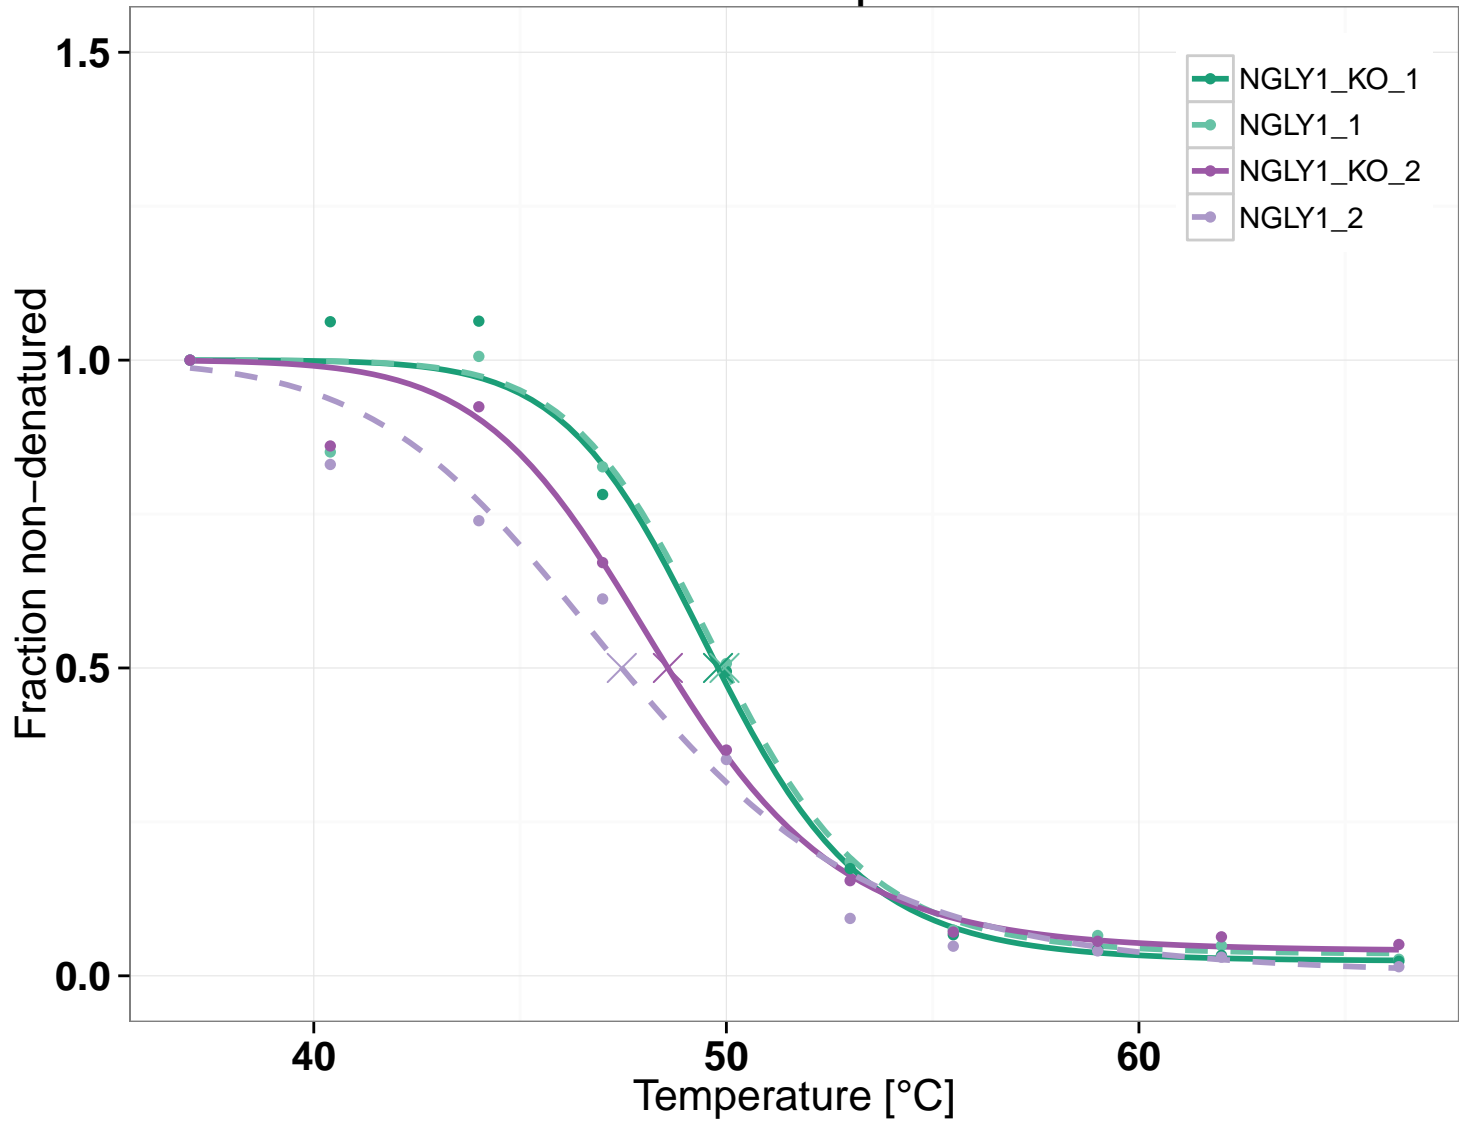

|            | meltPoint | slope  | plateau | R2   |
|------------|-----------|--------|---------|------|
| NGLY1_KO_1 | 49.8      | -0.13  | 0.02    | 0.99 |
| NGLY1_1    | 49.95     | -0.13  | 0.04    | 0.99 |
| NGLY1_KO_2 | 48.58     | -0.11  | 0.04    | 0.99 |
| NGLY1_2    | 47.46     | -0.082 | 0       | 0.98 |

Supplement: Supplementary file 5771 [file 1]

IPI00742743.1|TP53BP1

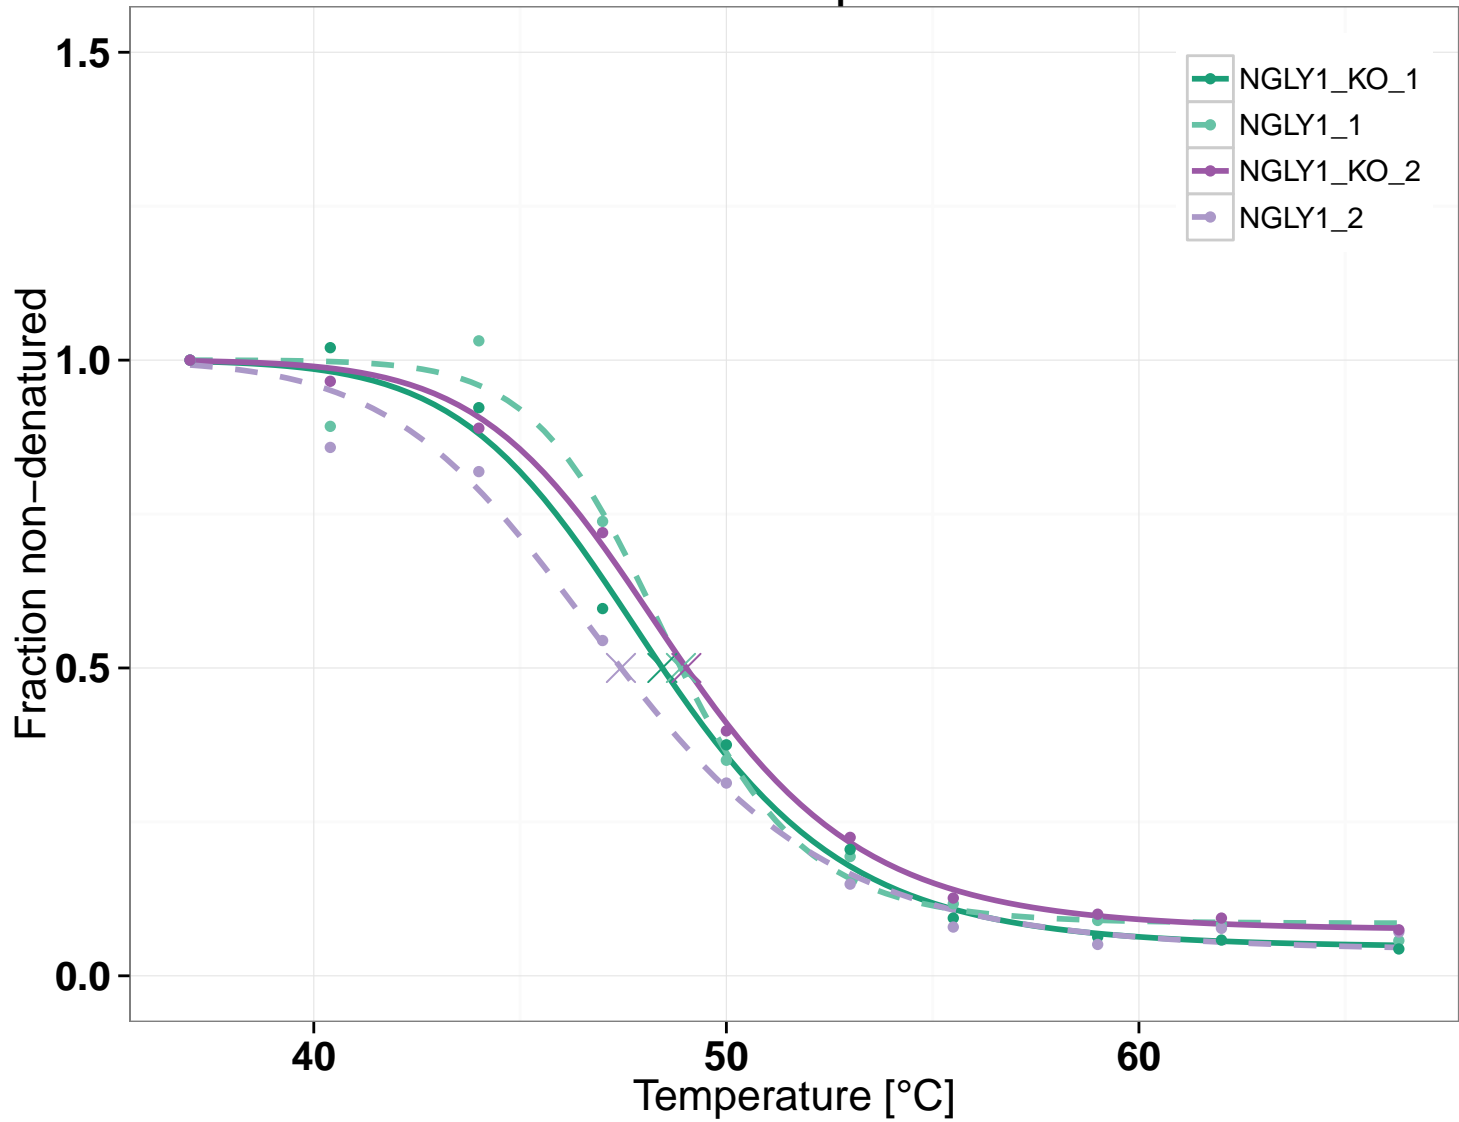

|            | meltPoint | slope  | plateau | R2   |
|------------|-----------|--------|---------|------|
| NGLY1_KO_1 | 48.45     | -0.1   | 0.05    | 1    |
| NGLY1_1    | 48.9      | -0.14  | 0.09    | 0.99 |
| NGLY1_KO_2 | 49.03     | -0.1   | 0.07    | 1    |
| NGLY1_2    | 47.44     | -0.089 | 0.04    | 0.99 |

Supplement: Supplementary file 5772 [file 1]

# IPI00022520.1|RFXANK

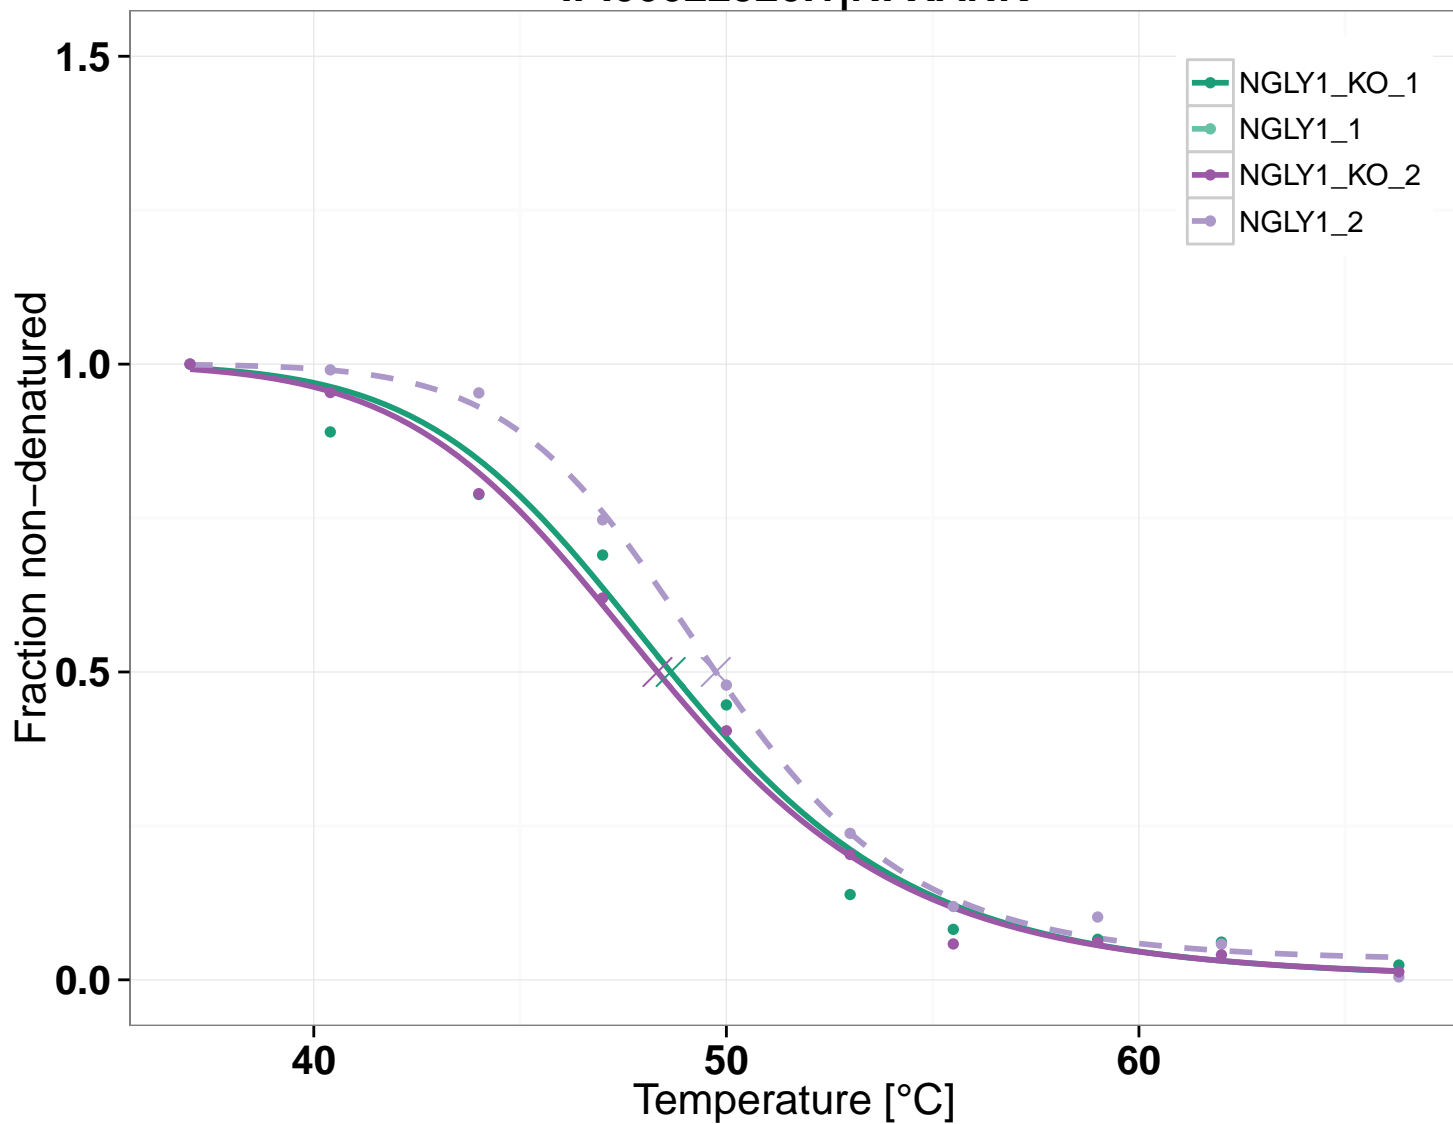

|            | meltPoint | slope  | plateau | R2   |
|------------|-----------|--------|---------|------|
| NGLY1_KO_1 | 48.65     | -0.084 | 0       | 0.98 |
| NGLY1_1    | -         | -      | -       | -    |
| NGLY1_KO_2 | 48.33     | -0.082 | 0       | 1    |
| NGLY1_2    | 49.74     | -0.1   | 0.03    | 1    |

Supplement: Supplementary file 5773 [file 1]

# IPI00329480.1|NIPA2

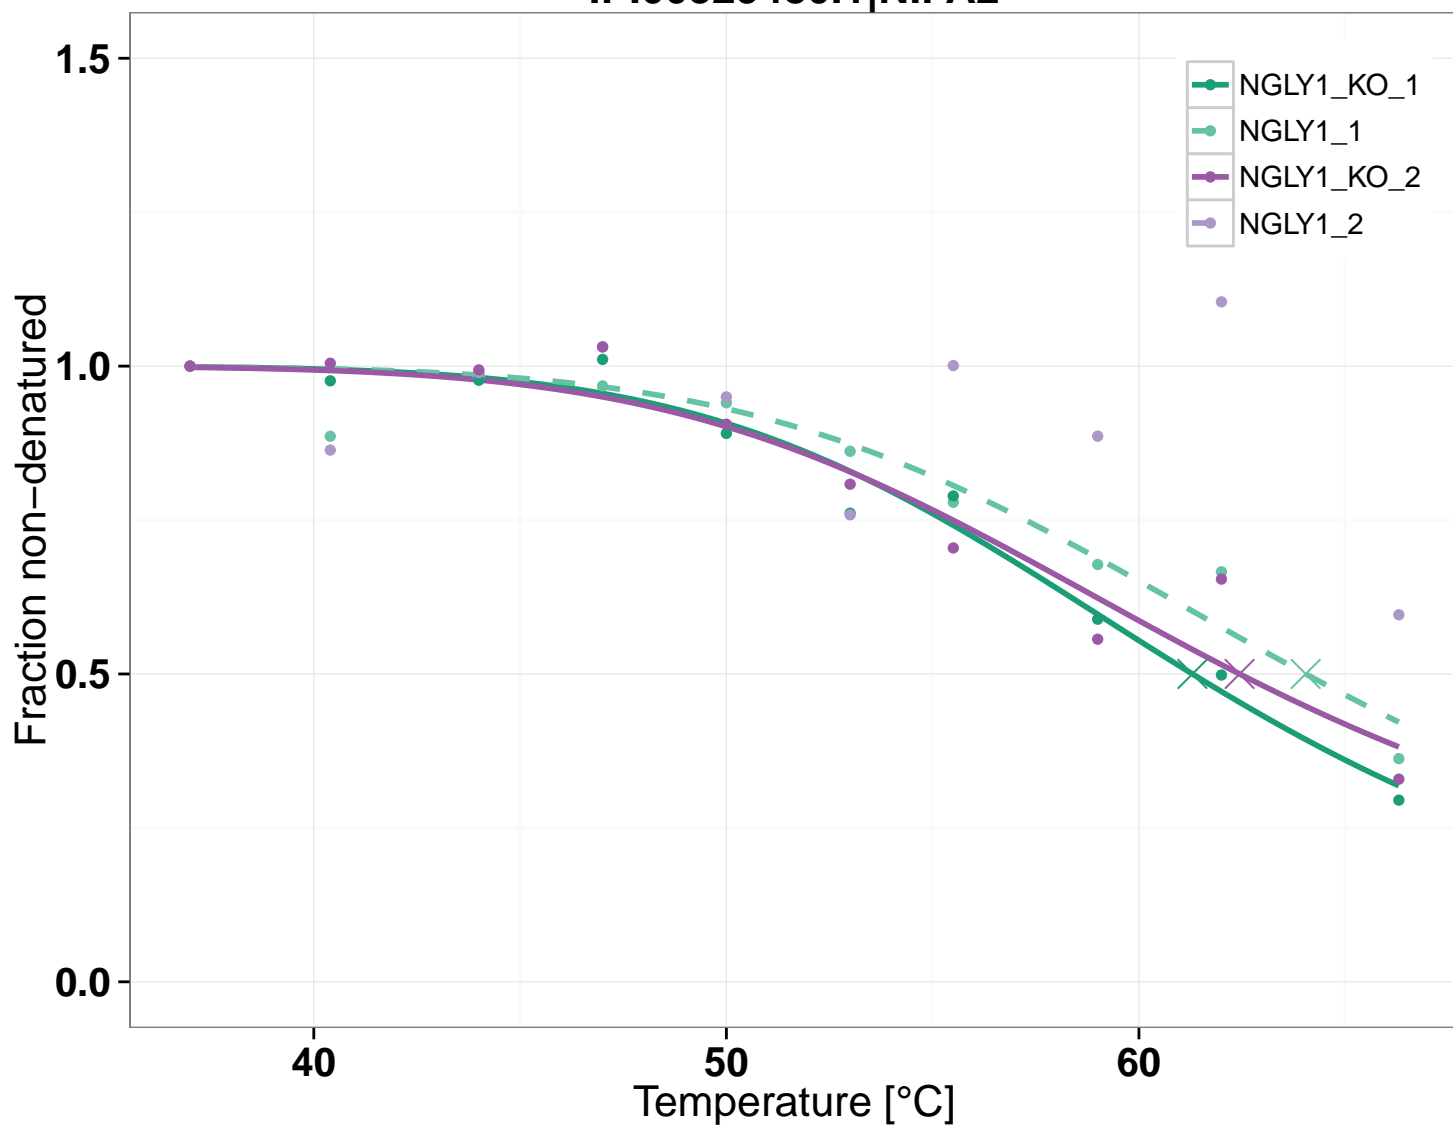

|            | meltPoint | slope  | plateau | R2   |
|------------|-----------|--------|---------|------|
| NGLY1_KO_1 | 61.3      | -0.043 | 0       | 0.98 |
| NGLY1_1    | 64.04     | -0.038 | 0       | 0.93 |
| NGLY1_KO_2 | 62.44     | -0.037 | 0.07    | 0.93 |
| NGLY1_2    | —         | —      | —       | —    |

Supplement: Supplementary file 5774 [file 1]

IPI00016759.3|SLC18A2

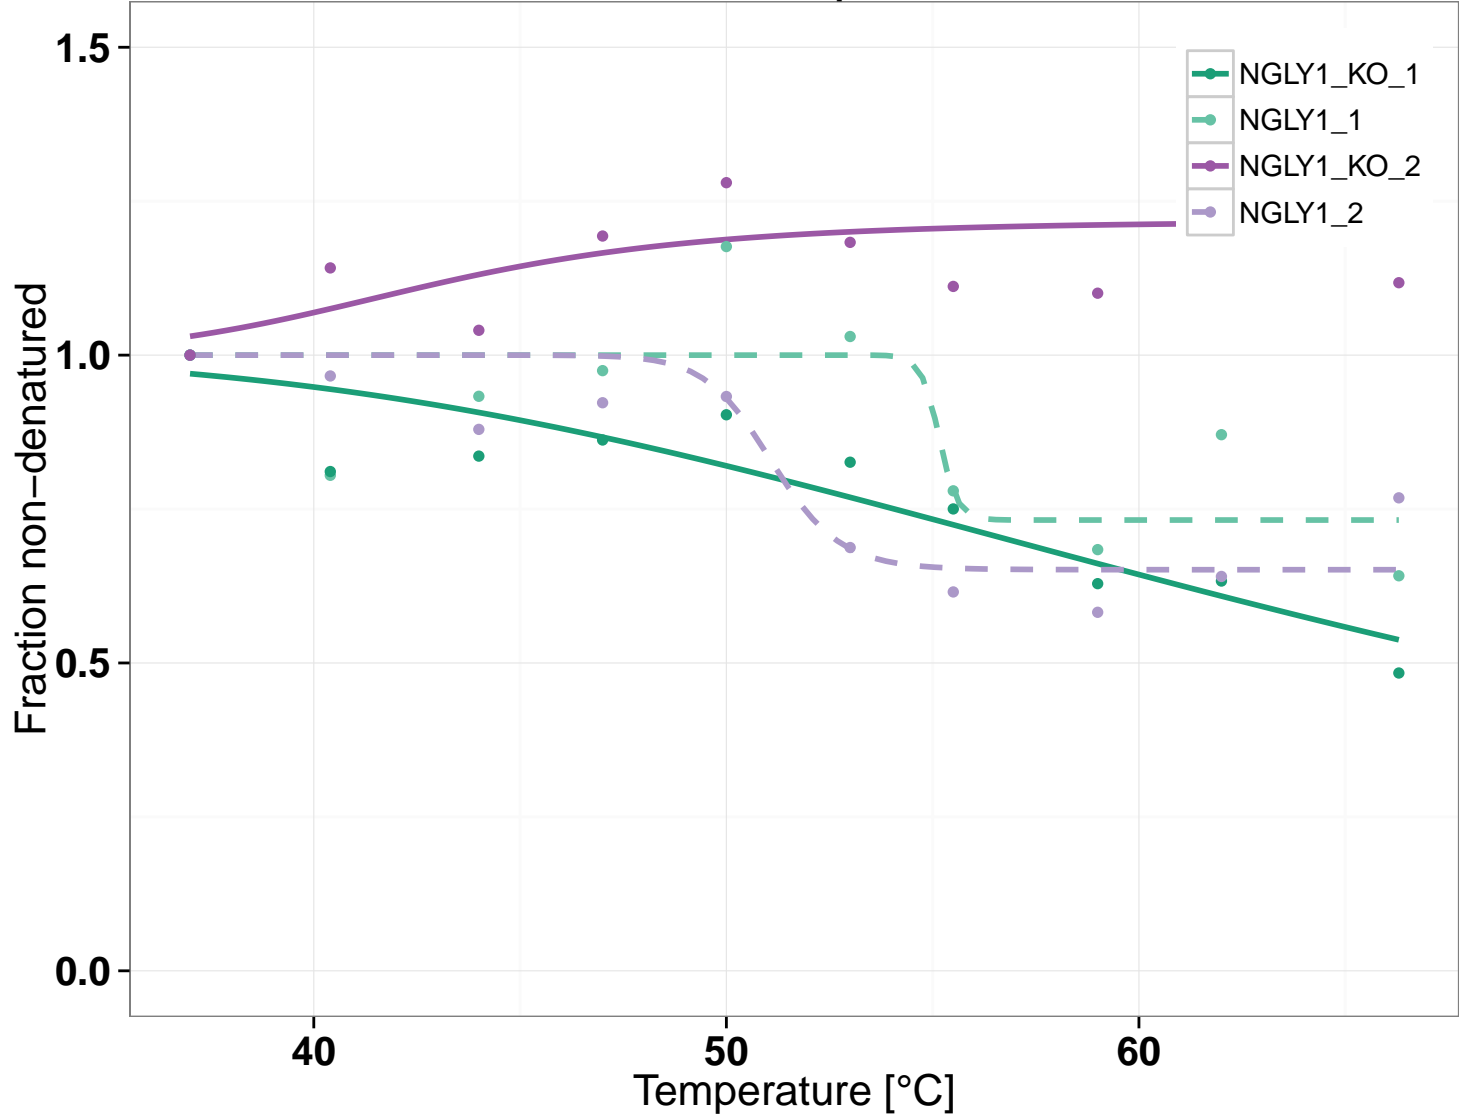

|            | meltPoint | slope  | plateau | R2   |
|------------|-----------|--------|---------|------|
| NGLY1_KO_1 | -         | -0.018 | 0       | 0.81 |
| NGLY1_1    | -         | -0.3   | 0.73    | 0.57 |
| NGLY1_KO_2 | -         | 0.016  | 1.22    | 0.25 |
| NGLY1_2    | -         | -0.11  | 0.65    | 0.82 |

Supplement: Supplementary file 5775 [file 1]

IPI00024580.4|MCCC1

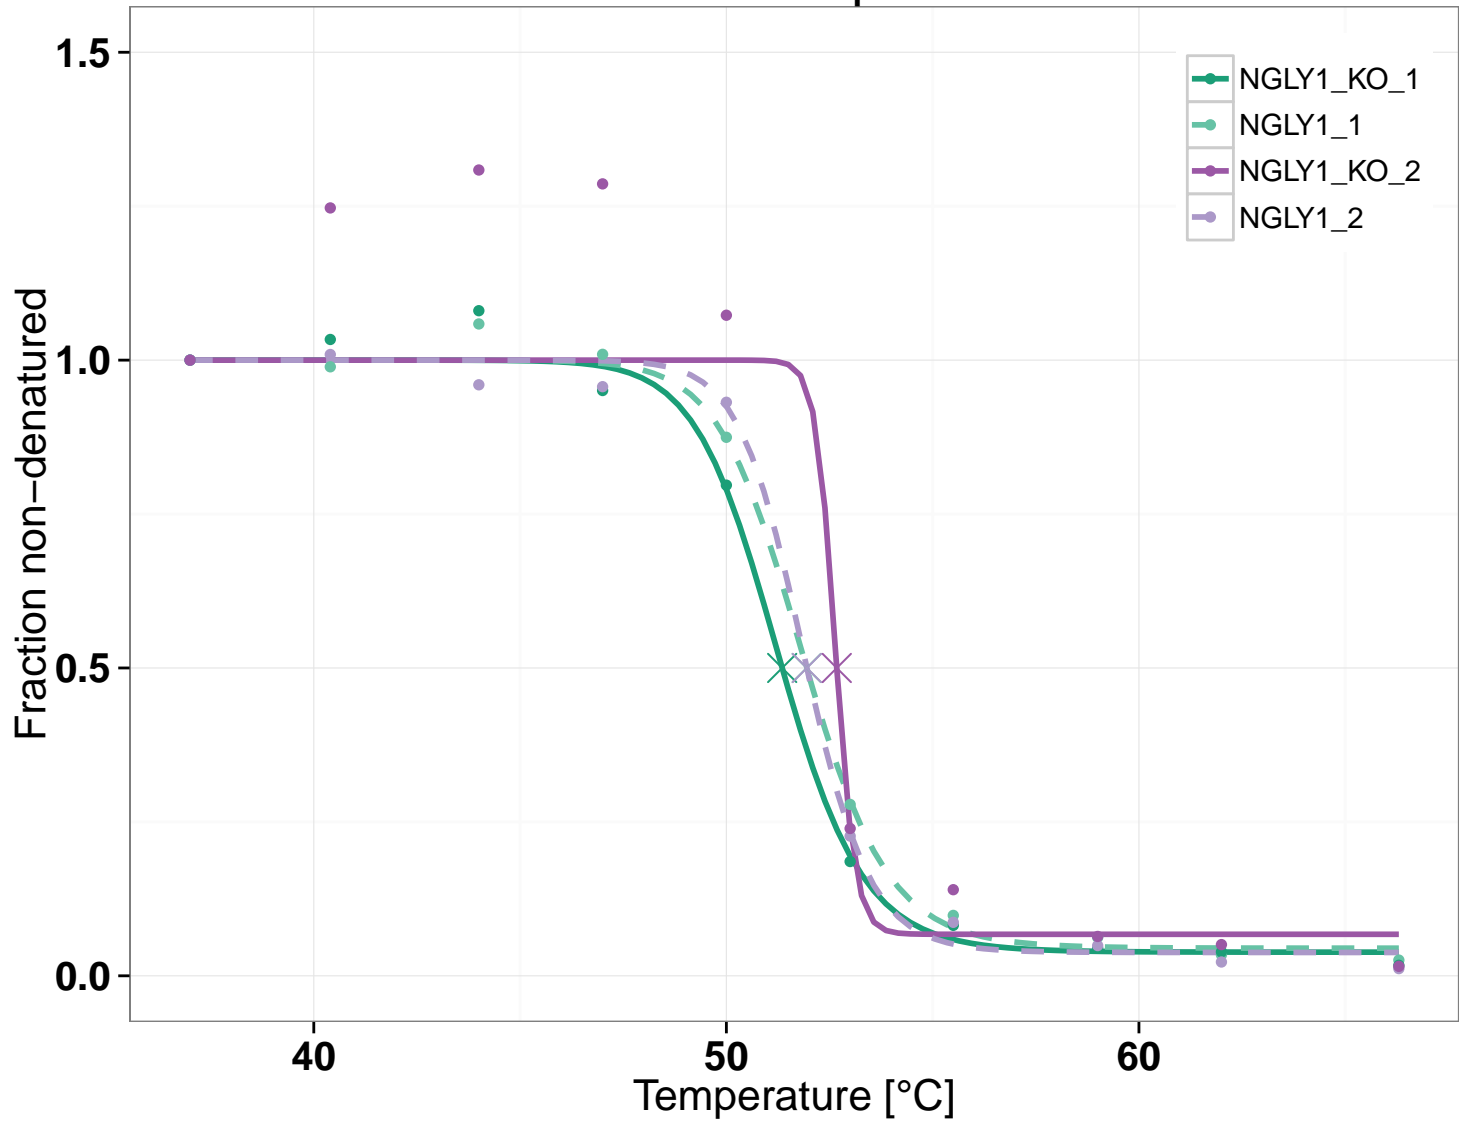

|            | meltPoint | slope | plateau | R2   |
|------------|-----------|-------|---------|------|
| NGLY1_KO_1 | 51.35     | -0.24 | 0.04    | 1    |
| NGLY1_1    | 51.95     | -0.23 | 0.04    | 1    |
| NGLY1_KO_2 | 52.68     | -0.98 | 0.07    | 0.92 |
| NGLY1_2    | 51.95     | -0.3  | 0.04    | 1    |

Supplement: Supplementary file 5776 [file 1]

IPI00028264.3|EXOC8

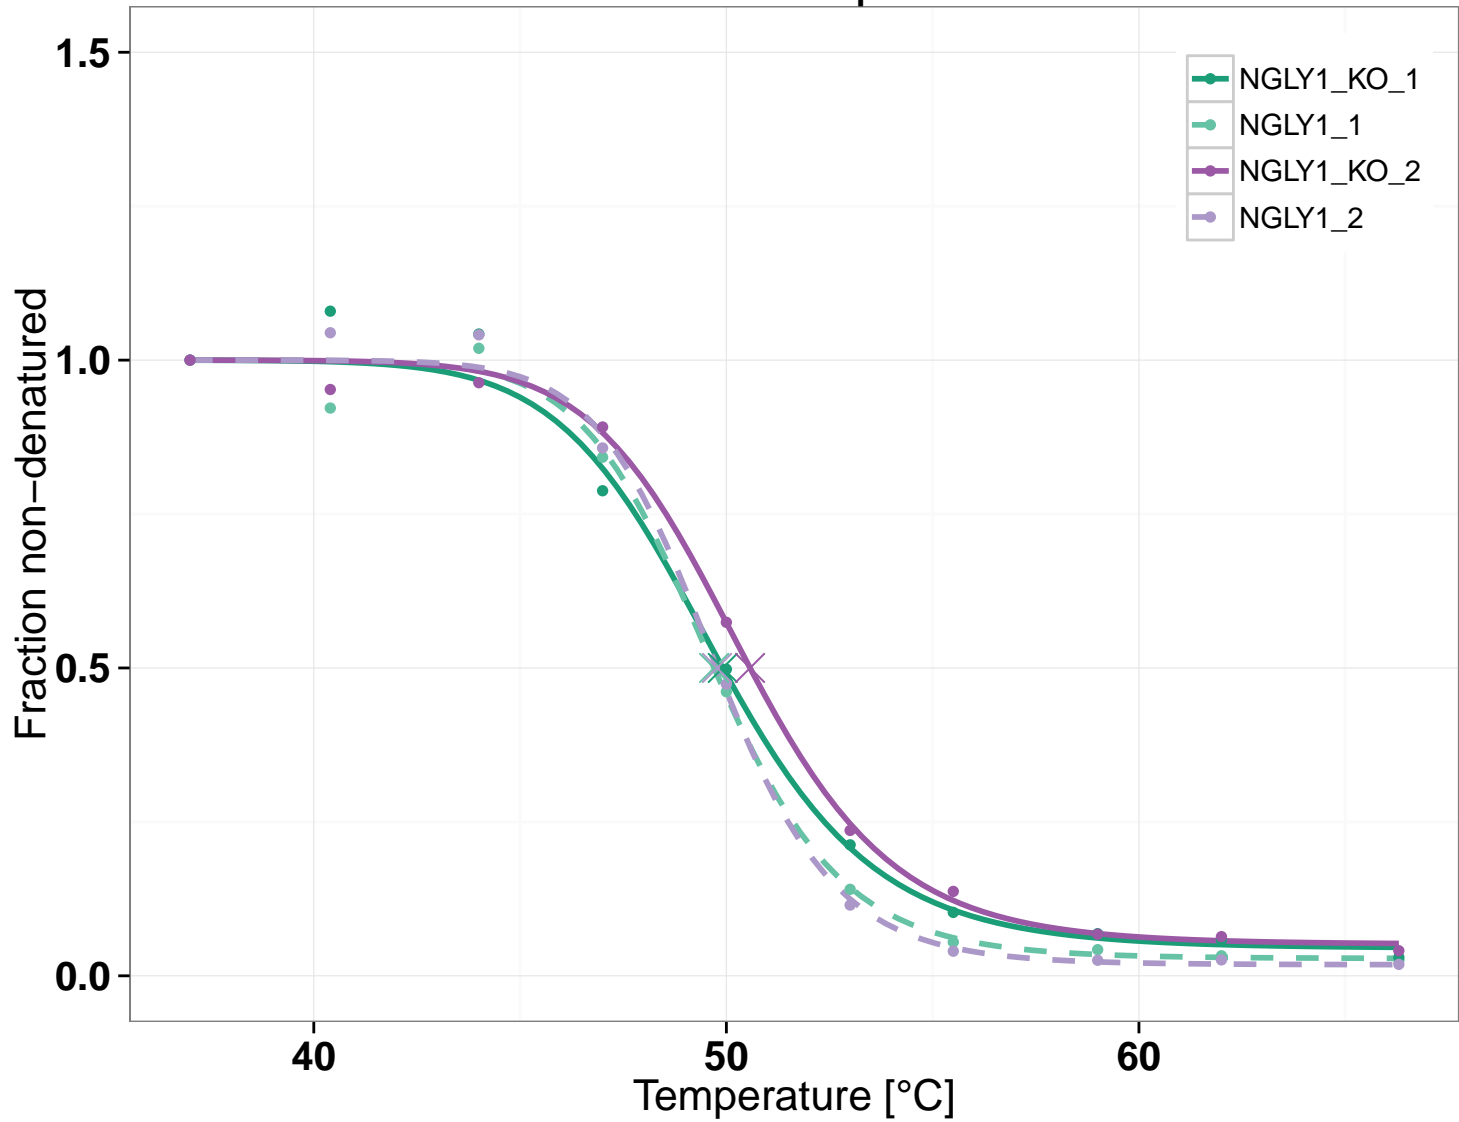

|            | meltPoint | slope | plateau | R2   |
|------------|-----------|-------|---------|------|
| NGLY1_KO_1 | 49.91     | -0.12 | 0.04    | 0.99 |
| NGLY1_1    | 49.7      | -0.15 | 0.03    | 1    |
| NGLY1_KO_2 | 50.57     | -0.13 | 0.05    | 1    |
| NGLY1_2    | 49.77     | -0.17 | 0.02    | 1    |

Supplement: Supplementary file 5777 [file 1]

IPI00167560.2|PAPD4

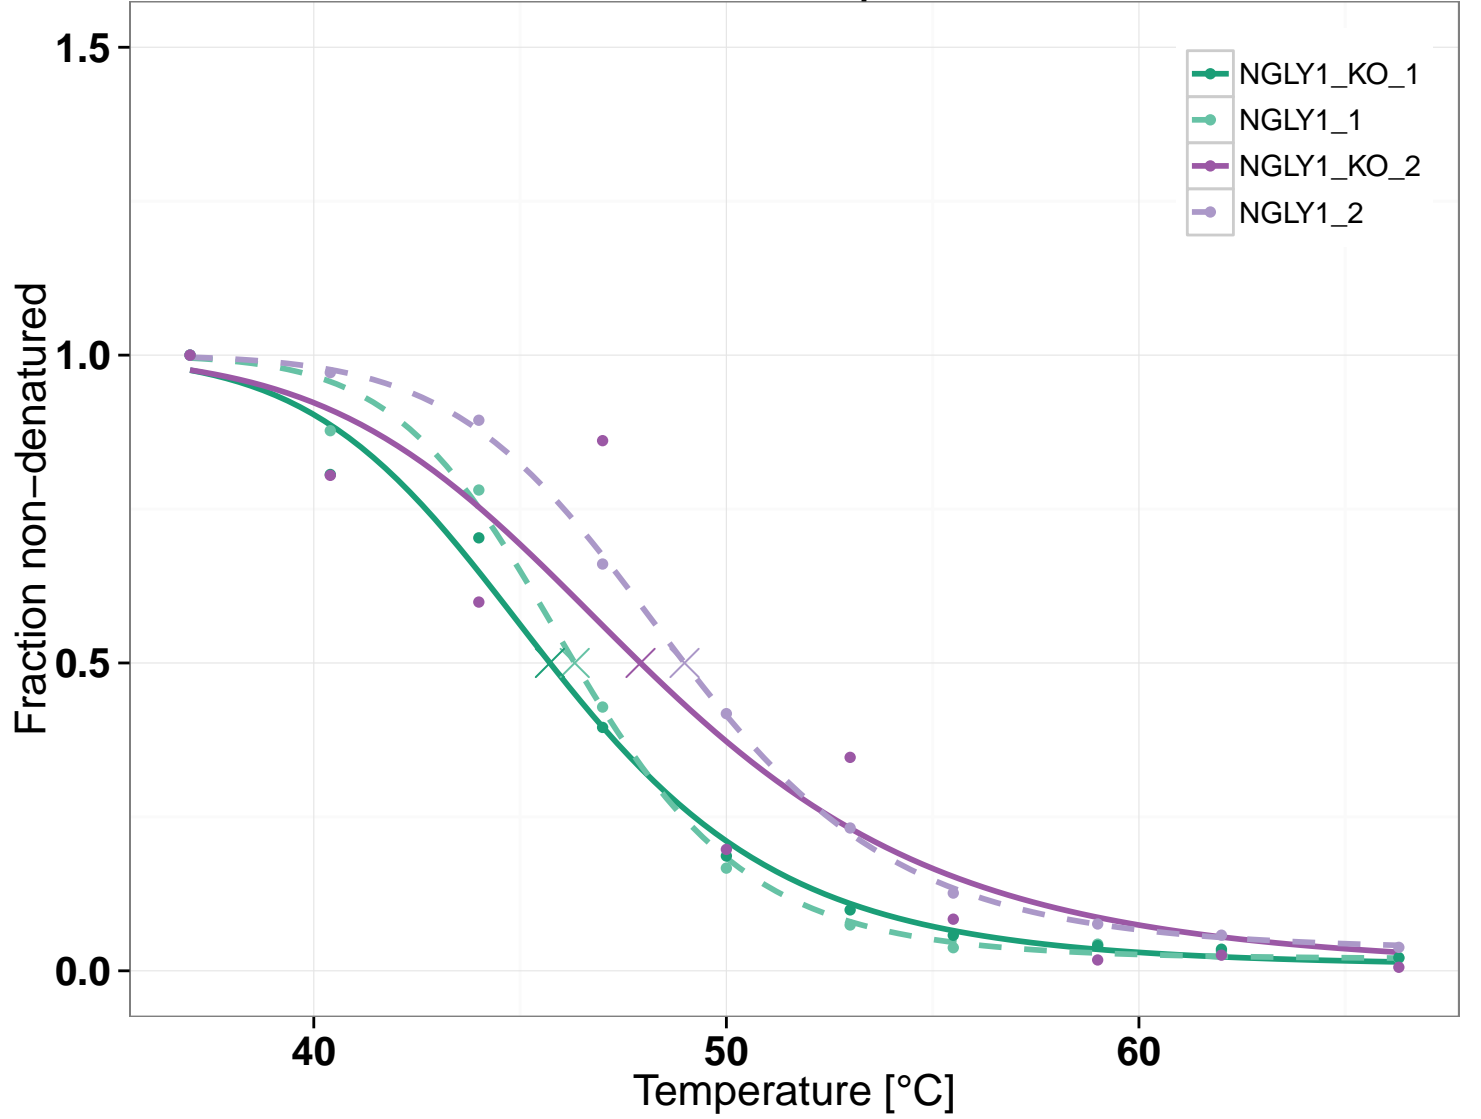

|            | meltPoint | slope  | plateau | R2   |
|------------|-----------|--------|---------|------|
| NGLY1_KO_1 | 45.72     | -0.087 | 0.01    | 0.99 |
| NGLY1_1    | 46.32     | -0.11  | 0.02    | 0.99 |
| NGLY1_KO_2 | 47.92     | -0.067 | 0       | 0.87 |
| NGLY1_2    | 48.99     | -0.089 | 0.03    | 1    |

Supplement: Supplementary file 5778 [file 1]

# IPI00879060.1|GCAT

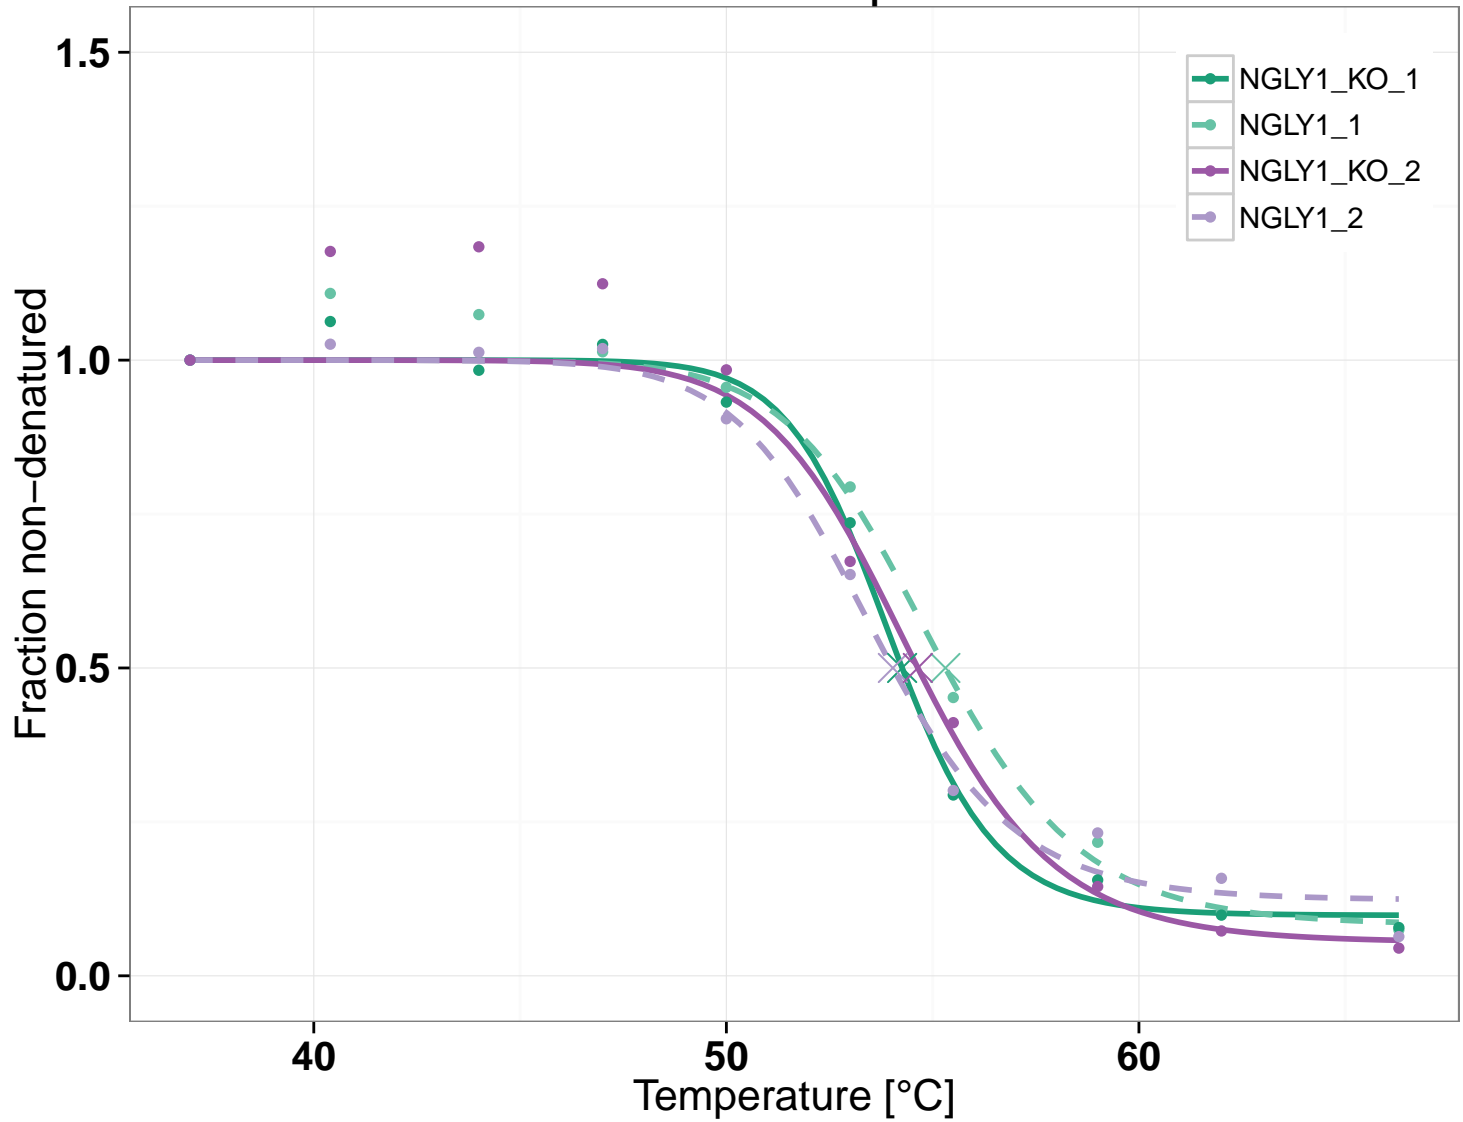

|            | meltPoint | slope | plateau | R2   |
|------------|-----------|-------|---------|------|
| NGLY1_KO_1 | 54.26     | -0.18 | 0.1     | 0.99 |
| NGLY1_1    | 55.31     | -0.13 | 0.08    | 0.99 |
| NGLY1_KO_2 | 54.64     | -0.14 | 0.05    | 0.96 |
| NGLY1_2    | 54.04     | -0.13 | 0.12    | 0.99 |

Supplement: Supplementary file 5779 [file 1]

IPI00908957.1|B4DUY4\_HUMAN

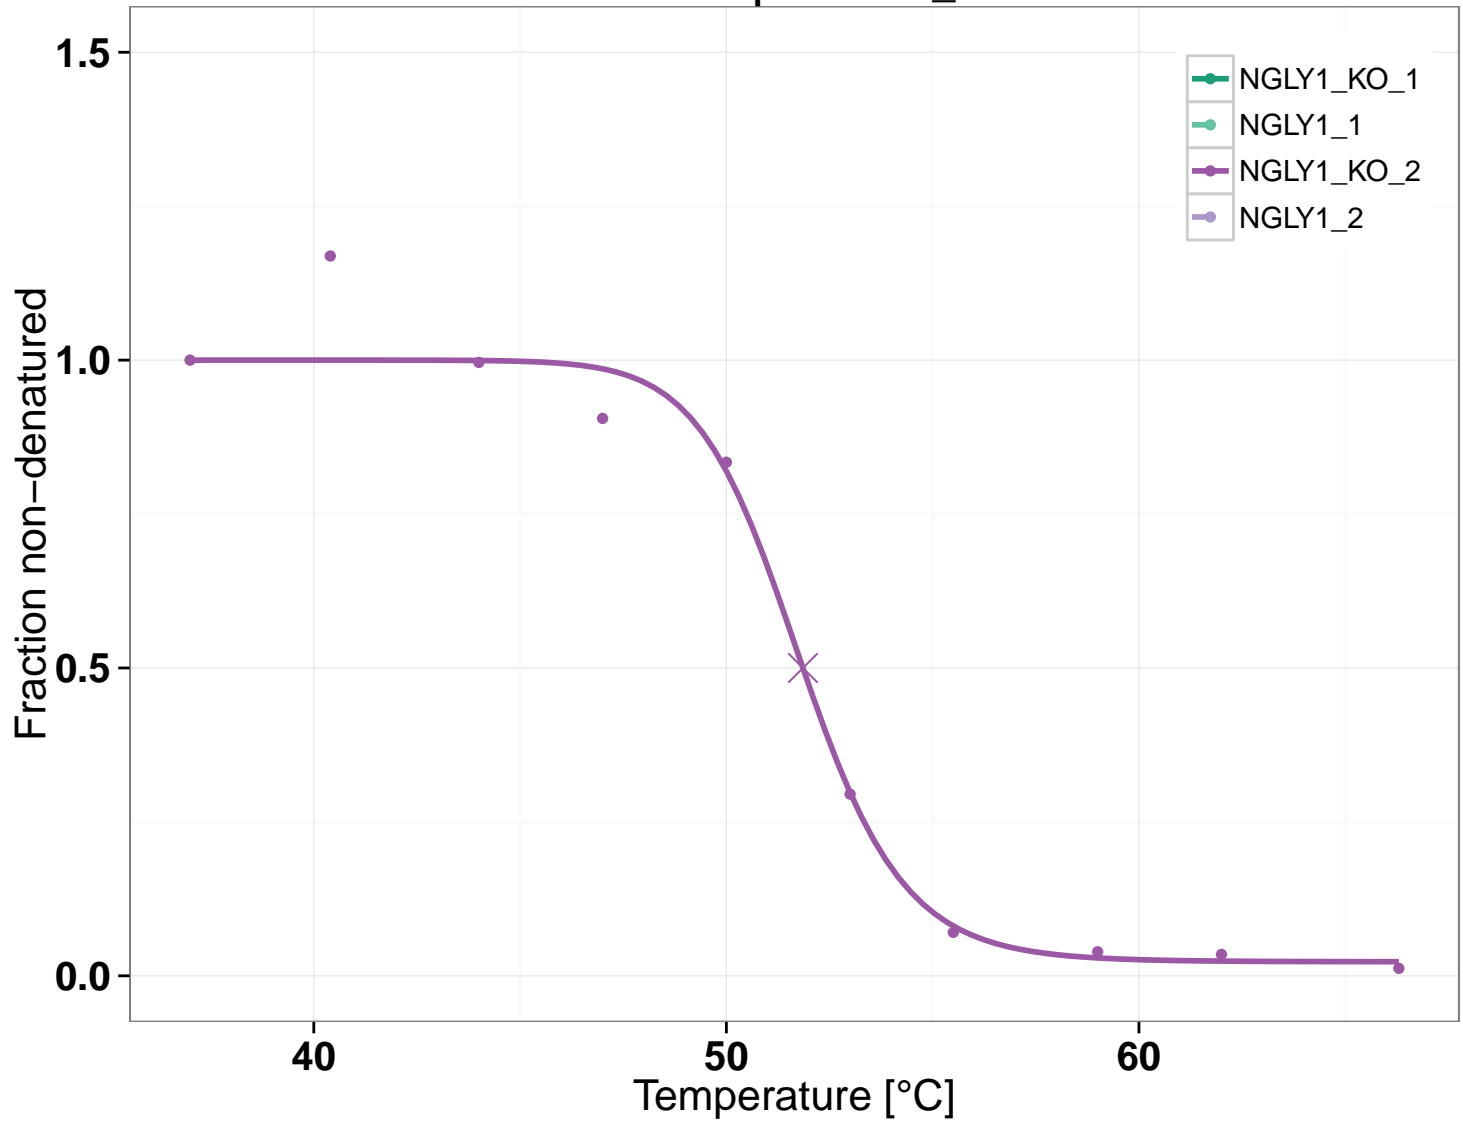

|            | meltPoint | slope | plateau | R2   |
|------------|-----------|-------|---------|------|
| NGLY1_KO_1 | —         | —     | —       | —    |
| NGLY1_1    | —         | —     | —       | —    |
| NGLY1_KO_2 | 51.86     | -0.2  | 0.02    | 0.98 |
| NGLY1_2    | —         | —     | —       | —    |

Supplement: Supplementary file 5780 [file 1]

# IPI00020719.2|VISA

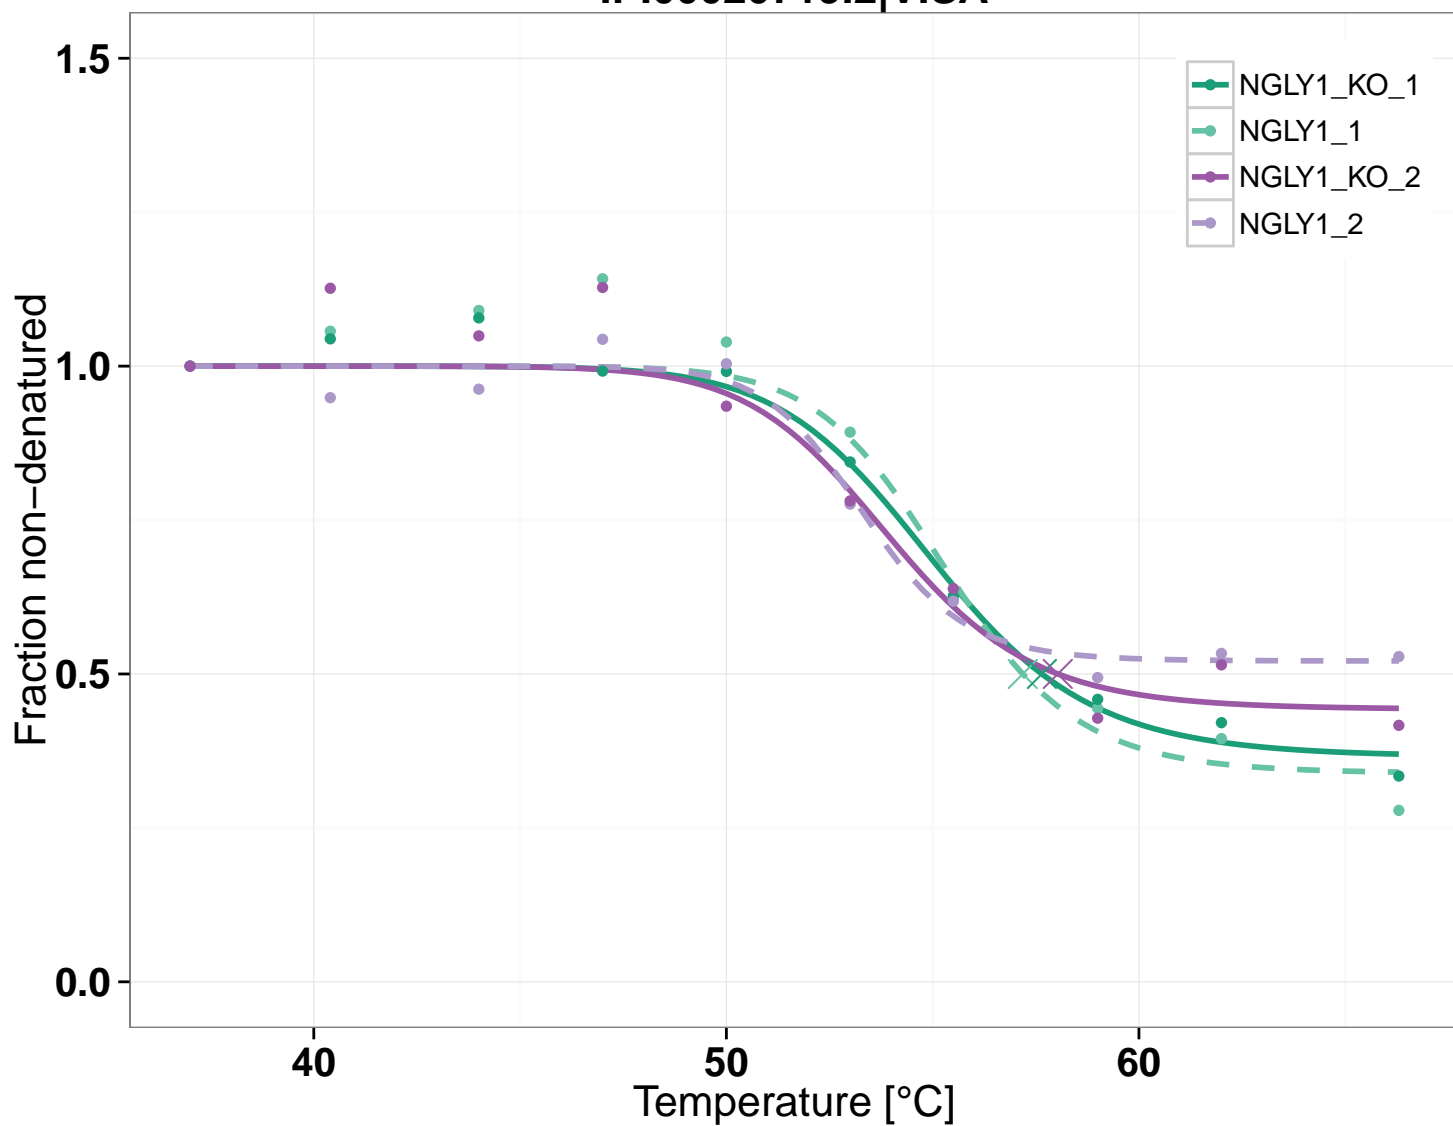

|            | meltPoint | slope  | plateau | R2   |
|------------|-----------|--------|---------|------|
| NGLY1_KO_1 | 57.65     | -0.083 | 0.37    | 0.98 |
| NGLY1_1    | 57.18     | -0.1   | 0.34    | 0.96 |
| NGLY1_KO_2 | 58.03     | -0.08  | 0.44    | 0.94 |
| NGLY1_2    | -         | -0.099 | 0.52    | 0.98 |

Supplement: Supplementary file 5781 [file 1]

# IPI00917964.1|MPP6

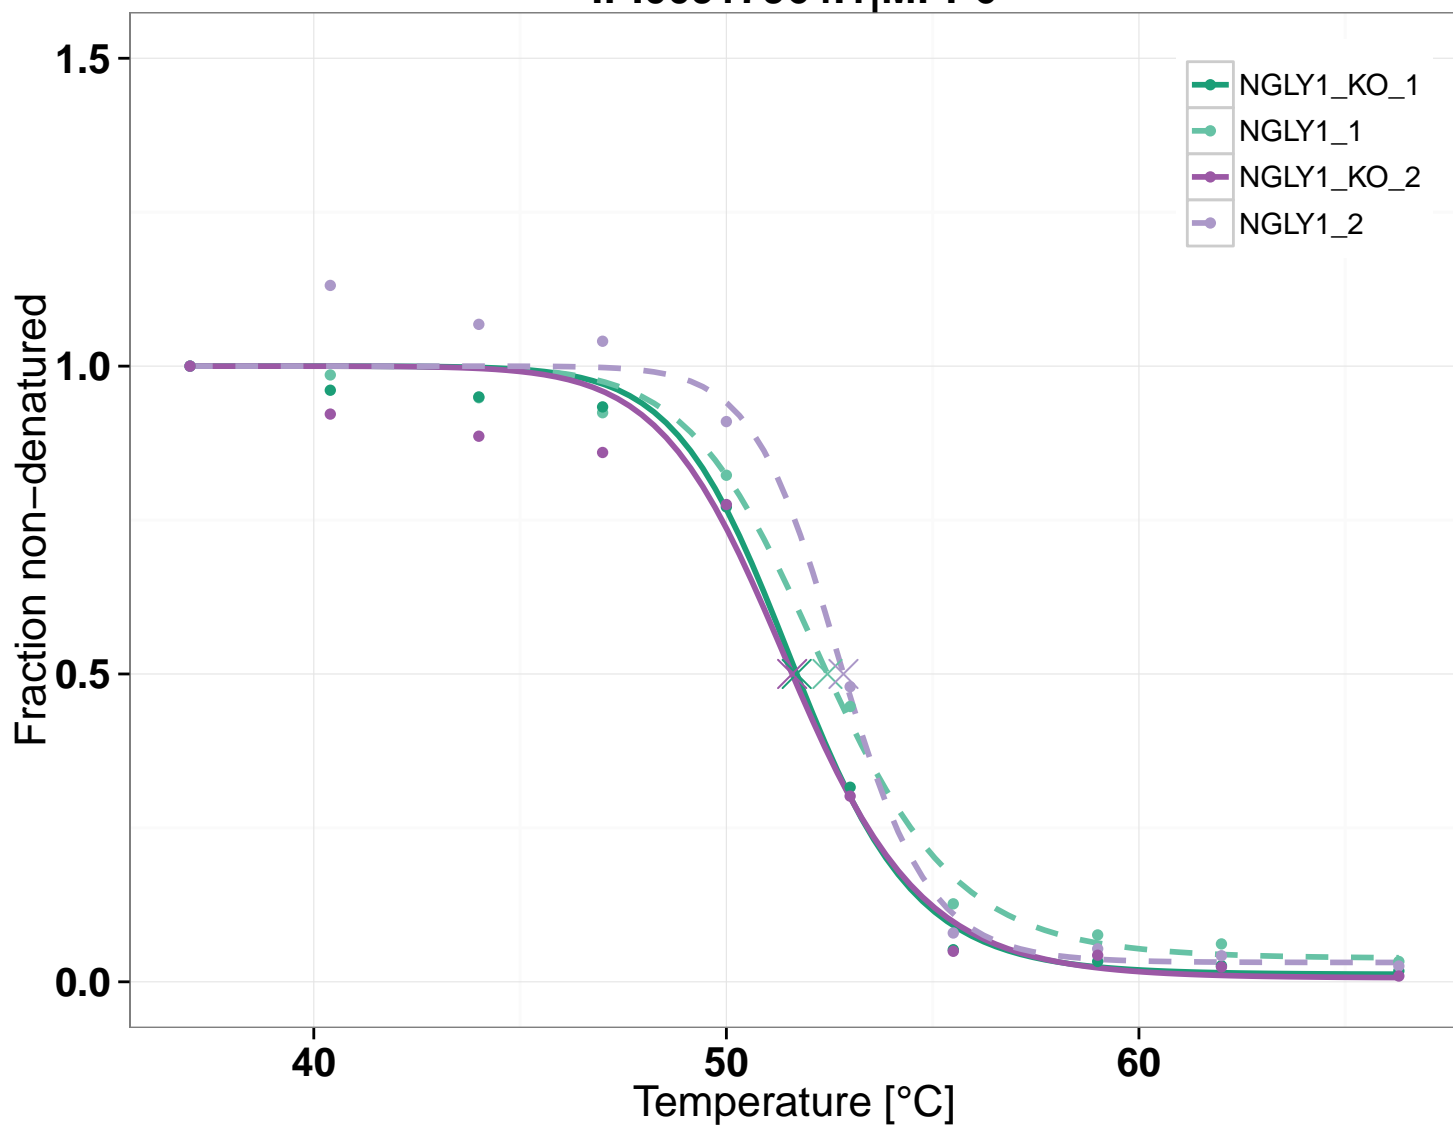

|            | meltPoint | slope | plateau | R2   |
|------------|-----------|-------|---------|------|
| NGLY1_KO_1 | 51.7      | -0.17 | 0.01    | 1    |
| NGLY1_1    | 52.45     | -0.15 | 0.04    | 1    |
| NGLY1_KO_2 | 51.59     | -0.16 | 0.01    | 0.98 |
| NGLY1_2    | 52.84     | -0.23 | 0.03    | 0.99 |

Supplement: Supplementary file 5782 [file 1]

# IPI00061116.1|MUCL1

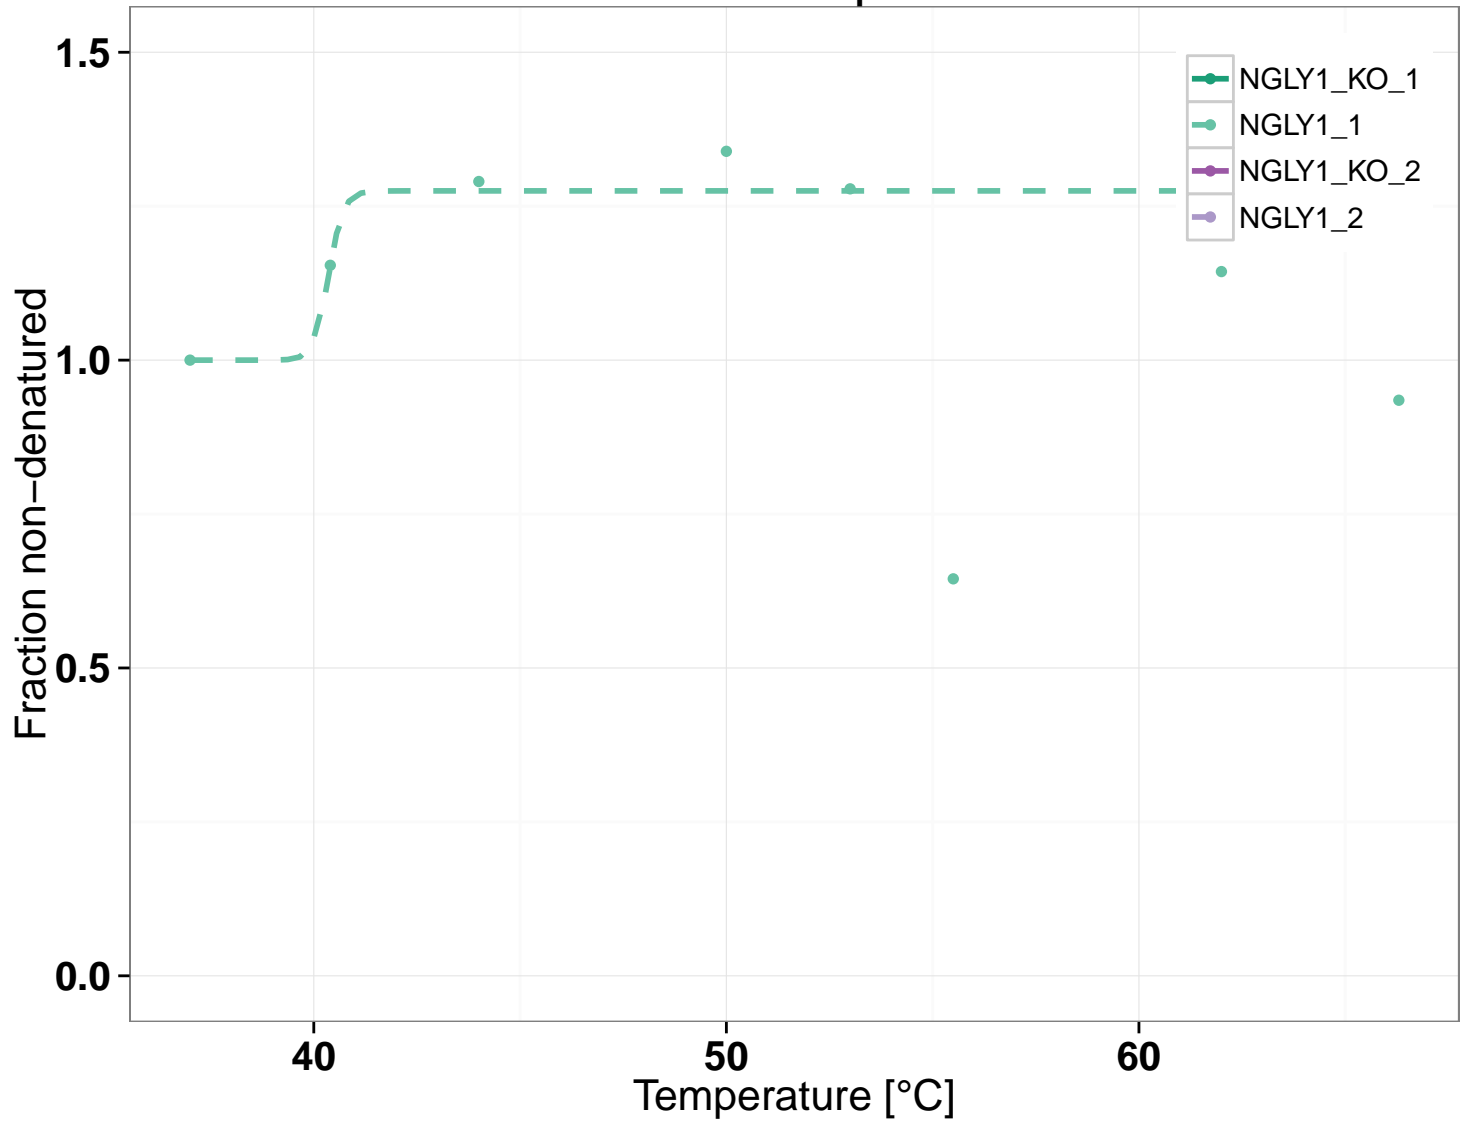

|            | meltPoint | slope | plateau | R2   |
|------------|-----------|-------|---------|------|
| NGLY1_KO_1 | —         | —     | —       | —    |
| NGLY1_1    | —         | 0.39  | 1.27    | 0.06 |
| NGLY1_KO_2 | —         | —     | —       | —    |
| NGLY1_2    | —         | —     | —       | —    |

Supplement: Supplementary file 5783 [file 1]

IPI00015101.2|C9ORF167

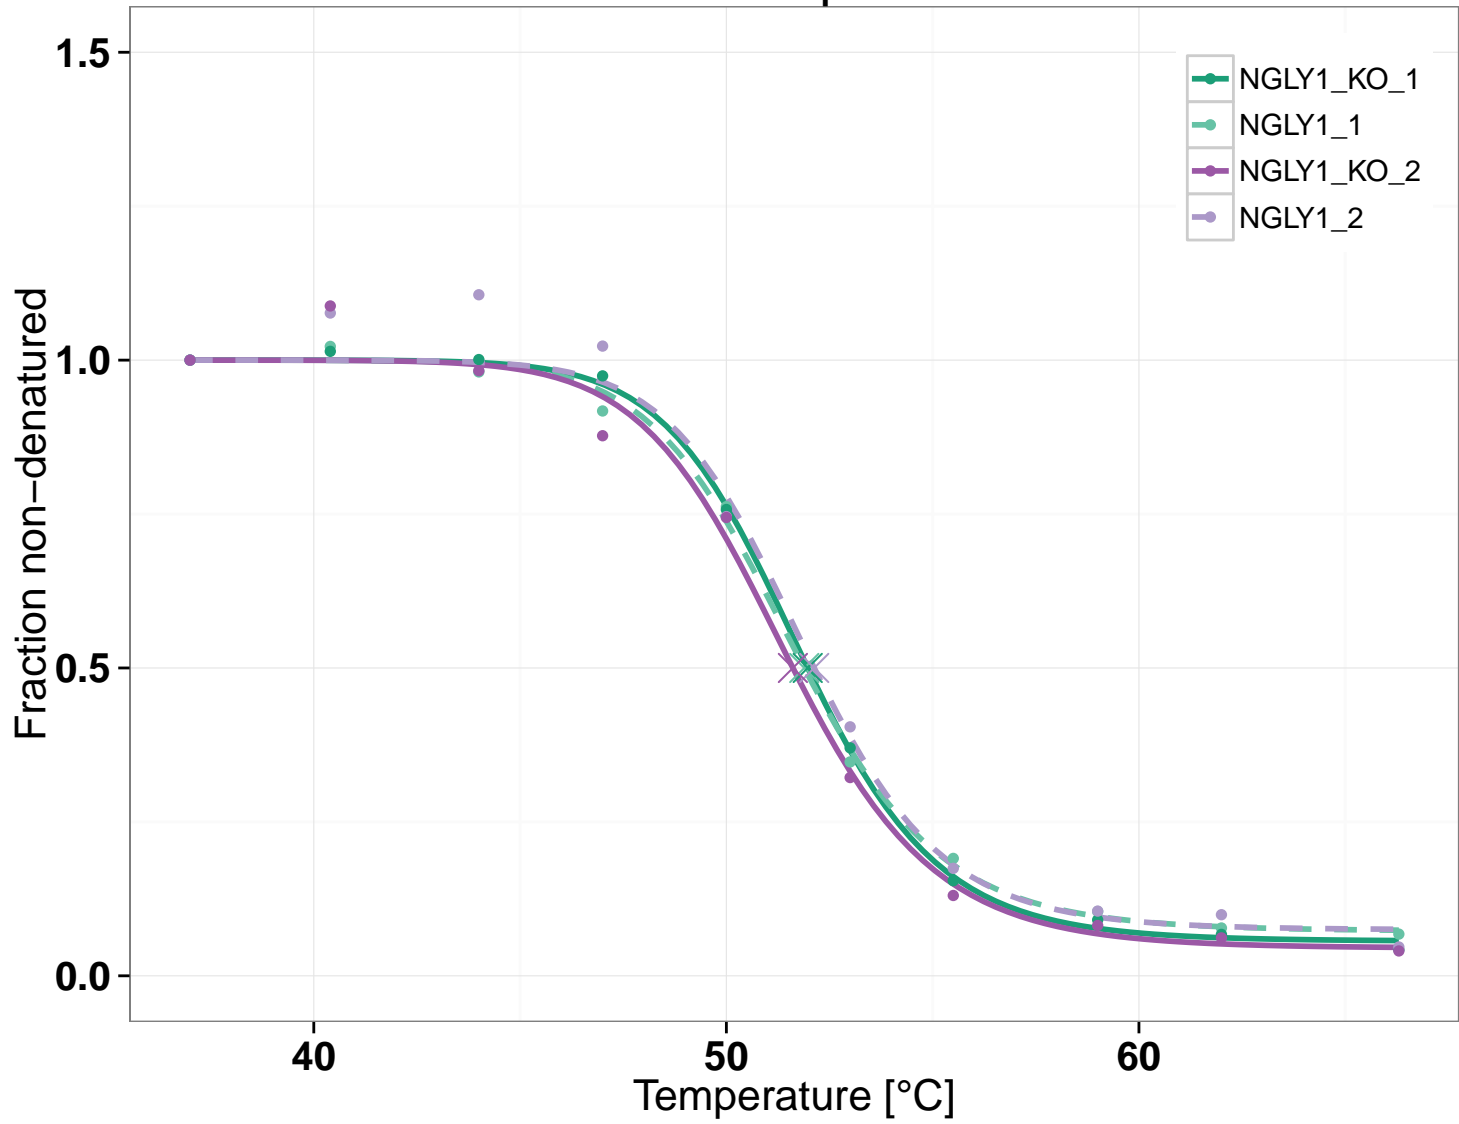

|            | meltPoint | slope | plateau | R2   |
|------------|-----------|-------|---------|------|
| NGLY1_KO_1 | 51.97     | -0.14 | 0.06    | 1    |
| NGLY1_1    | 51.89     | -0.13 | 0.07    | 1    |
| NGLY1_KO_2 | 51.61     | -0.13 | 0.04    | 0.99 |
| NGLY1_2    | 52.13     | -0.14 | 0.07    | 0.99 |

Supplement: Supplementary file 5784 [file 1]

# IPI00006615.3|CLPB

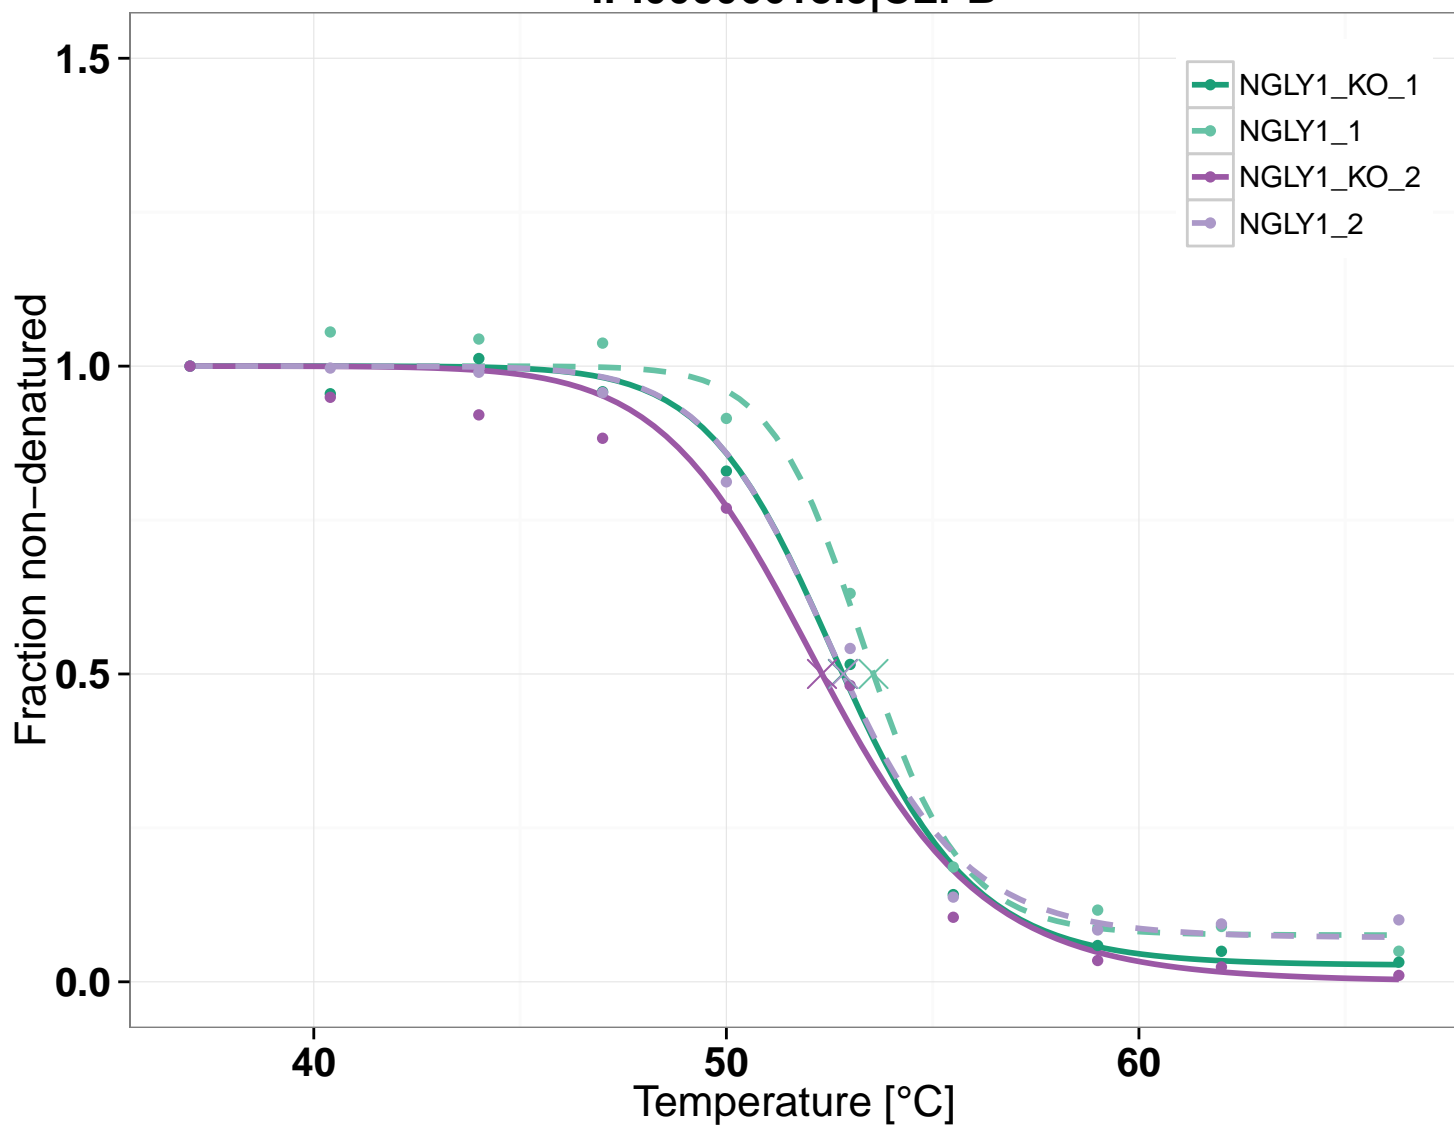

|            | meltPoint | slope | plateau | R2   |
|------------|-----------|-------|---------|------|
| NGLY1_KO_1 | 52.82     | -0.15 | 0.03    | 1    |
| NGLY1_1    | 53.57     | -0.2  | 0.08    | 0.99 |
| NGLY1_KO_2 | 52.32     | -0.13 | 0       | 0.99 |
| NGLY1_2    | 52.84     | -0.15 | 0.07    | 0.99 |

Supplement: Supplementary file 5785 [file 1]

IPI00398511.1|HISPPD2A

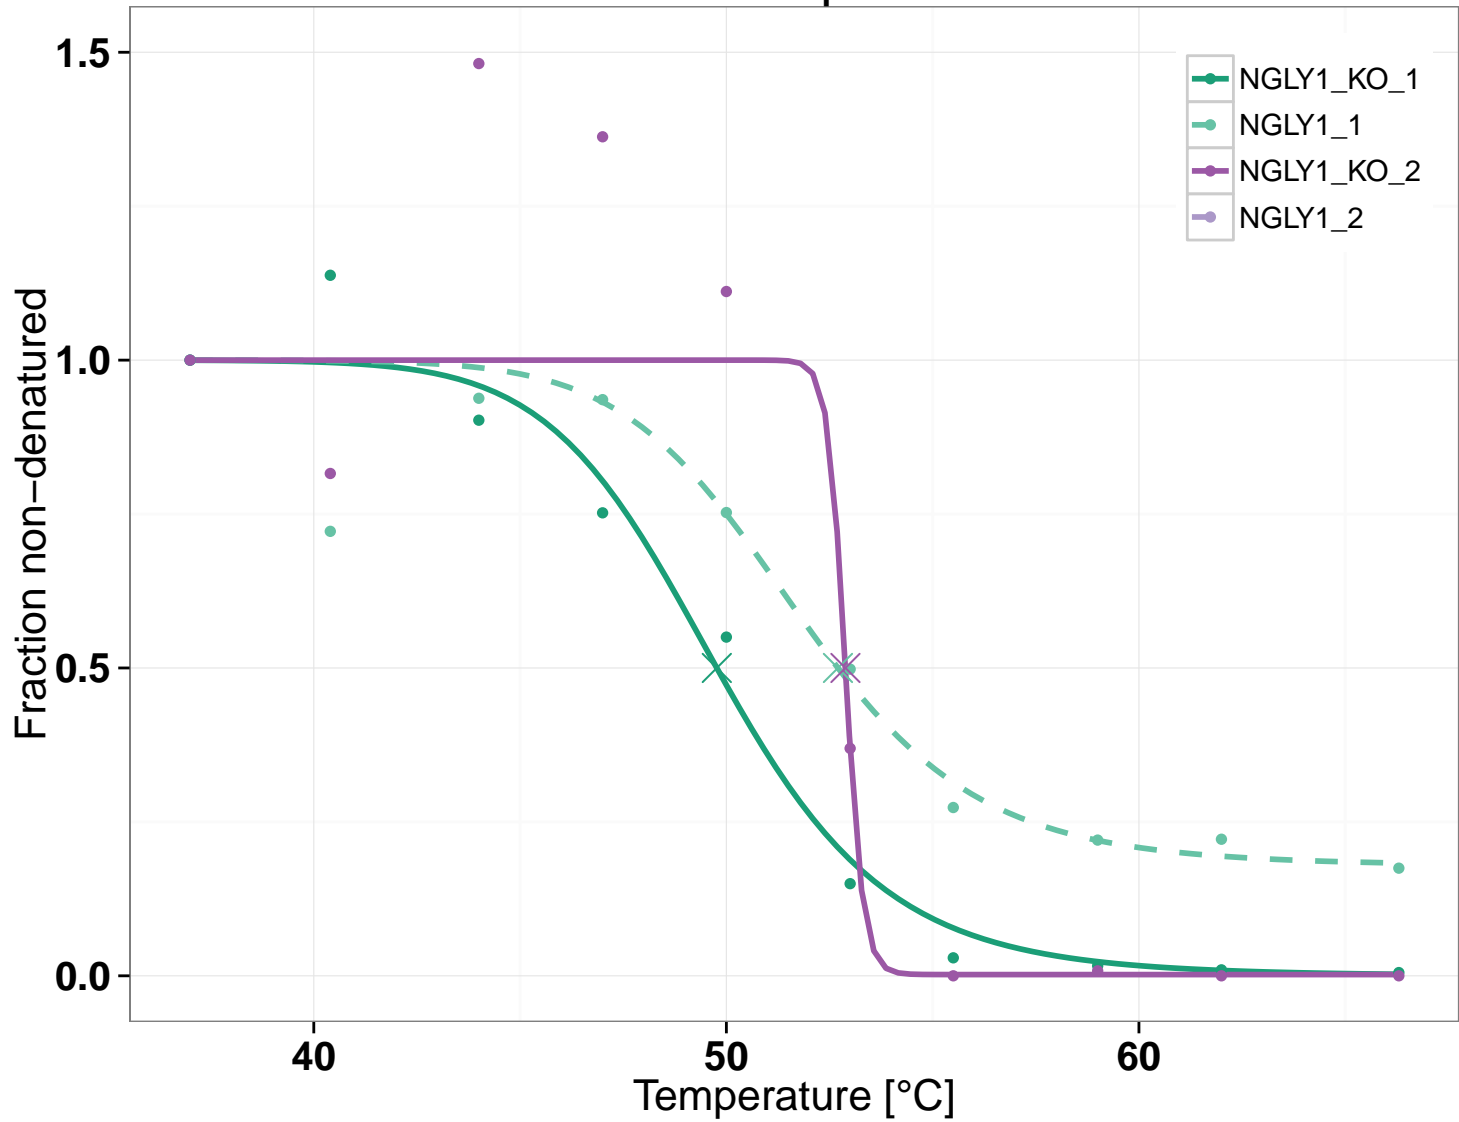

|            | meltPoint | slope  | plateau | R2   |
|------------|-----------|--------|---------|------|
| NGLY1_KO_1 | 49.77     | -0.12  | 0       | 0.98 |
| NGLY1_1    | 52.7      | -0.095 | 0.18    | 0.92 |
| NGLY1_KO_2 | 52.89     | -1.2   | 0       | 0.88 |
| NGLY1_2    | -         | -      | -       | -    |

Supplement: Supplementary file 5786 [file 1]

# IPI00383751.1|Q9UDG2\_HUMAN

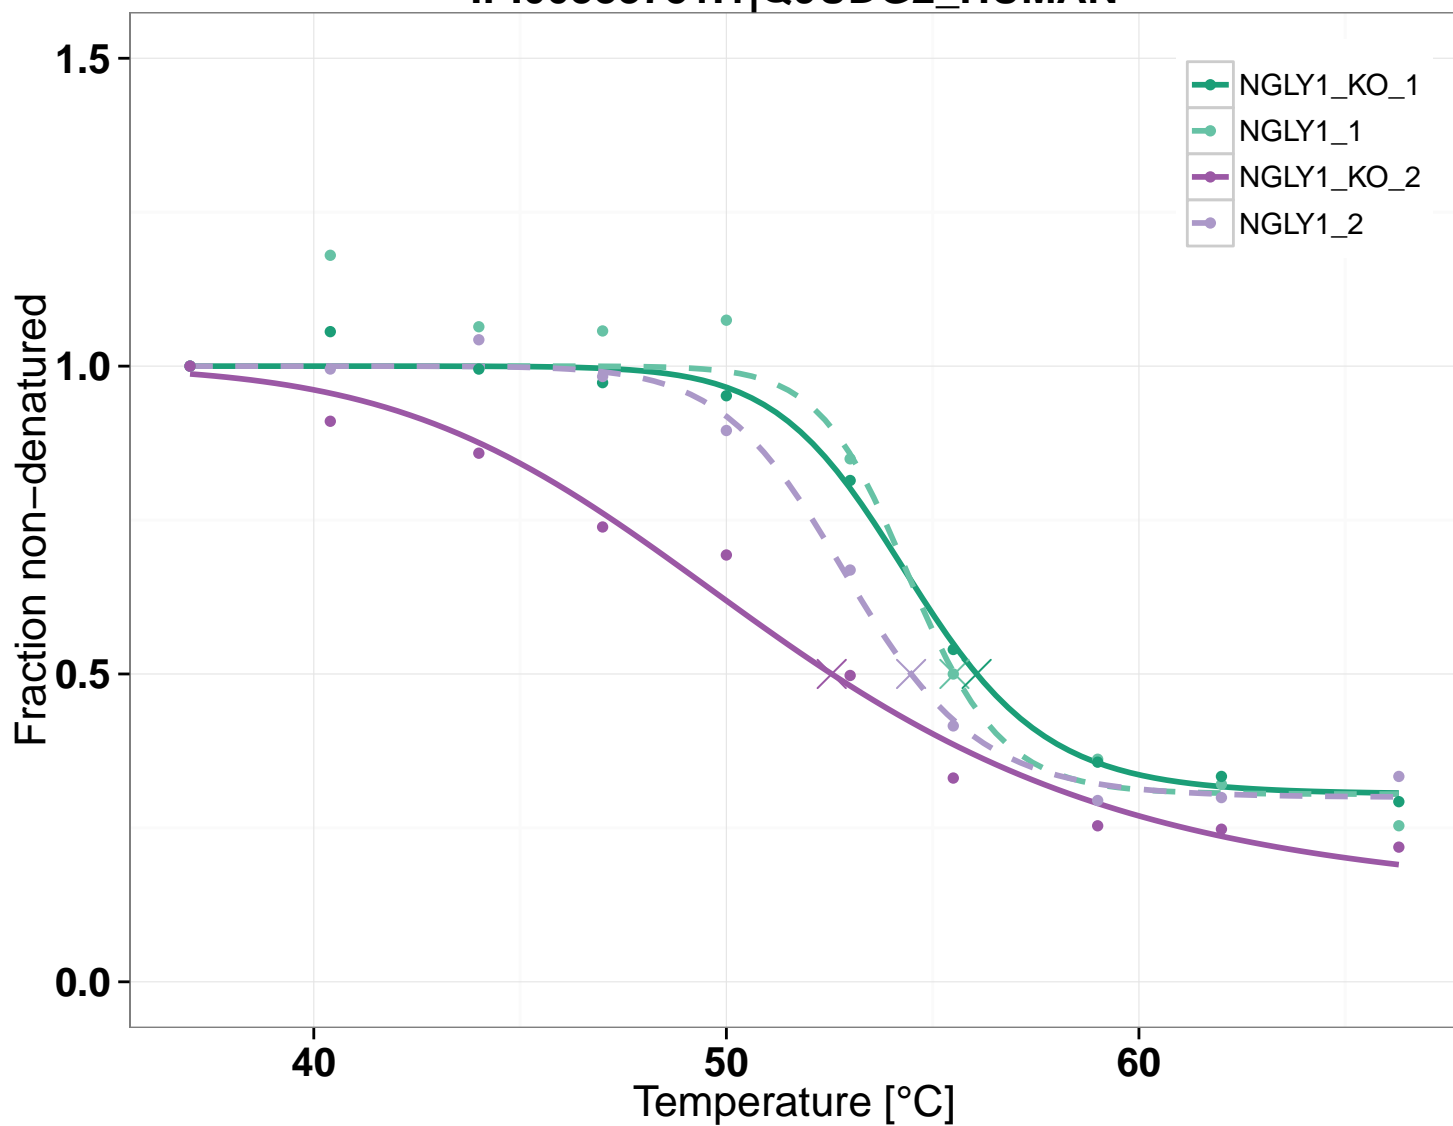

|            | meltPoint | slope  | plateau | R2   |
|------------|-----------|--------|---------|------|
| NGLY1_KO_1 | 56.07     | -0.11  | 0.3     | 0.99 |
| NGLY1_1    | 55.53     | -0.16  | 0.3     | 0.96 |
| NGLY1_KO_2 | 52.55     | -0.049 | 0.12    | 0.98 |
| NGLY1_2    | 54.48     | -0.11  | 0.3     | 0.99 |

Supplement: Supplementary file 5787 [file 1]

# IPI00873942.1|CBARA1

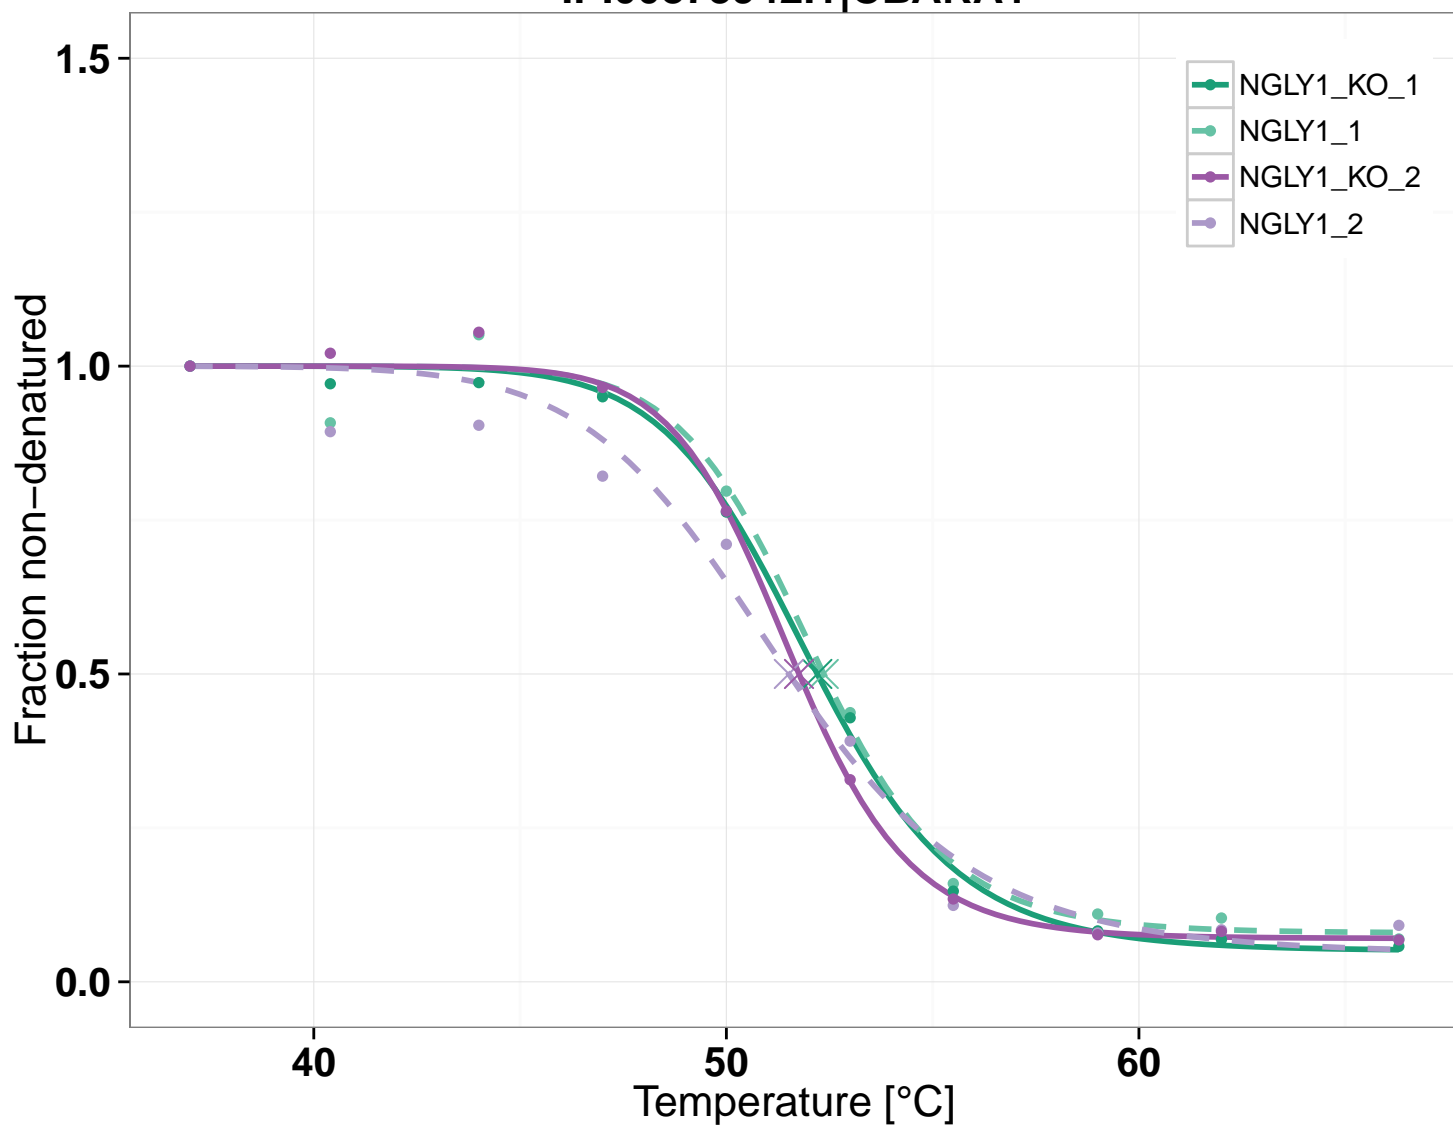

|            | meltPoint | slope | plateau | R2   |
|------------|-----------|-------|---------|------|
| NGLY1_KO_1 | 52.2      | -0.13 | 0.05    | 1    |
| NGLY1_1    | 52.36     | -0.14 | 0.08    | 0.99 |
| NGLY1_KO_2 | 51.76     | -0.16 | 0.07    | 1    |
| NGLY1_2    | 51.51     | -0.1  | 0.05    | 0.98 |

Supplement: Supplementary file 5788 [file 1]

IPI00104219.5|TM2D1

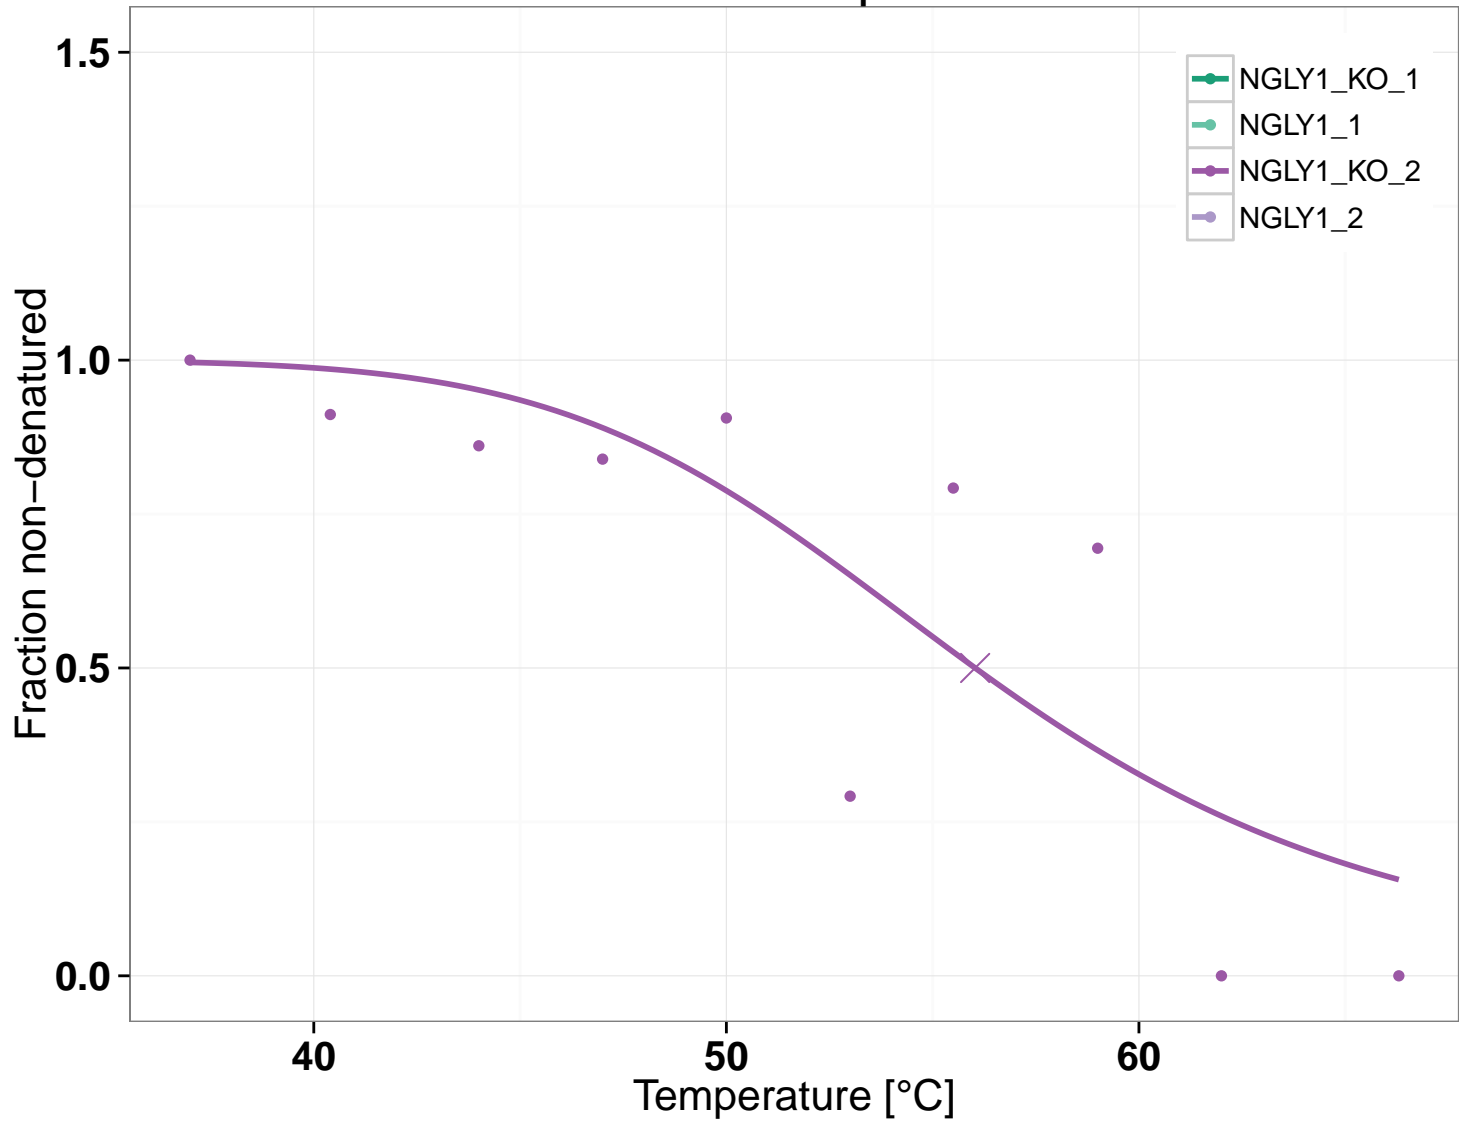

|            | meltPoint | slope | plateau | R2   |
|------------|-----------|-------|---------|------|
| NGLY1_KO_1 | —         | —     | —       | —    |
| NGLY1_1    | —         | —     | —       | —    |
| NGLY1_KO_2 | 56.03     | -0.05 | 0       | 0.68 |
| NGLY1_2    | —         | —     | —       | —    |

Supplement: Supplementary file 5789 [file 1]

IPI00412344.5|SRPK1

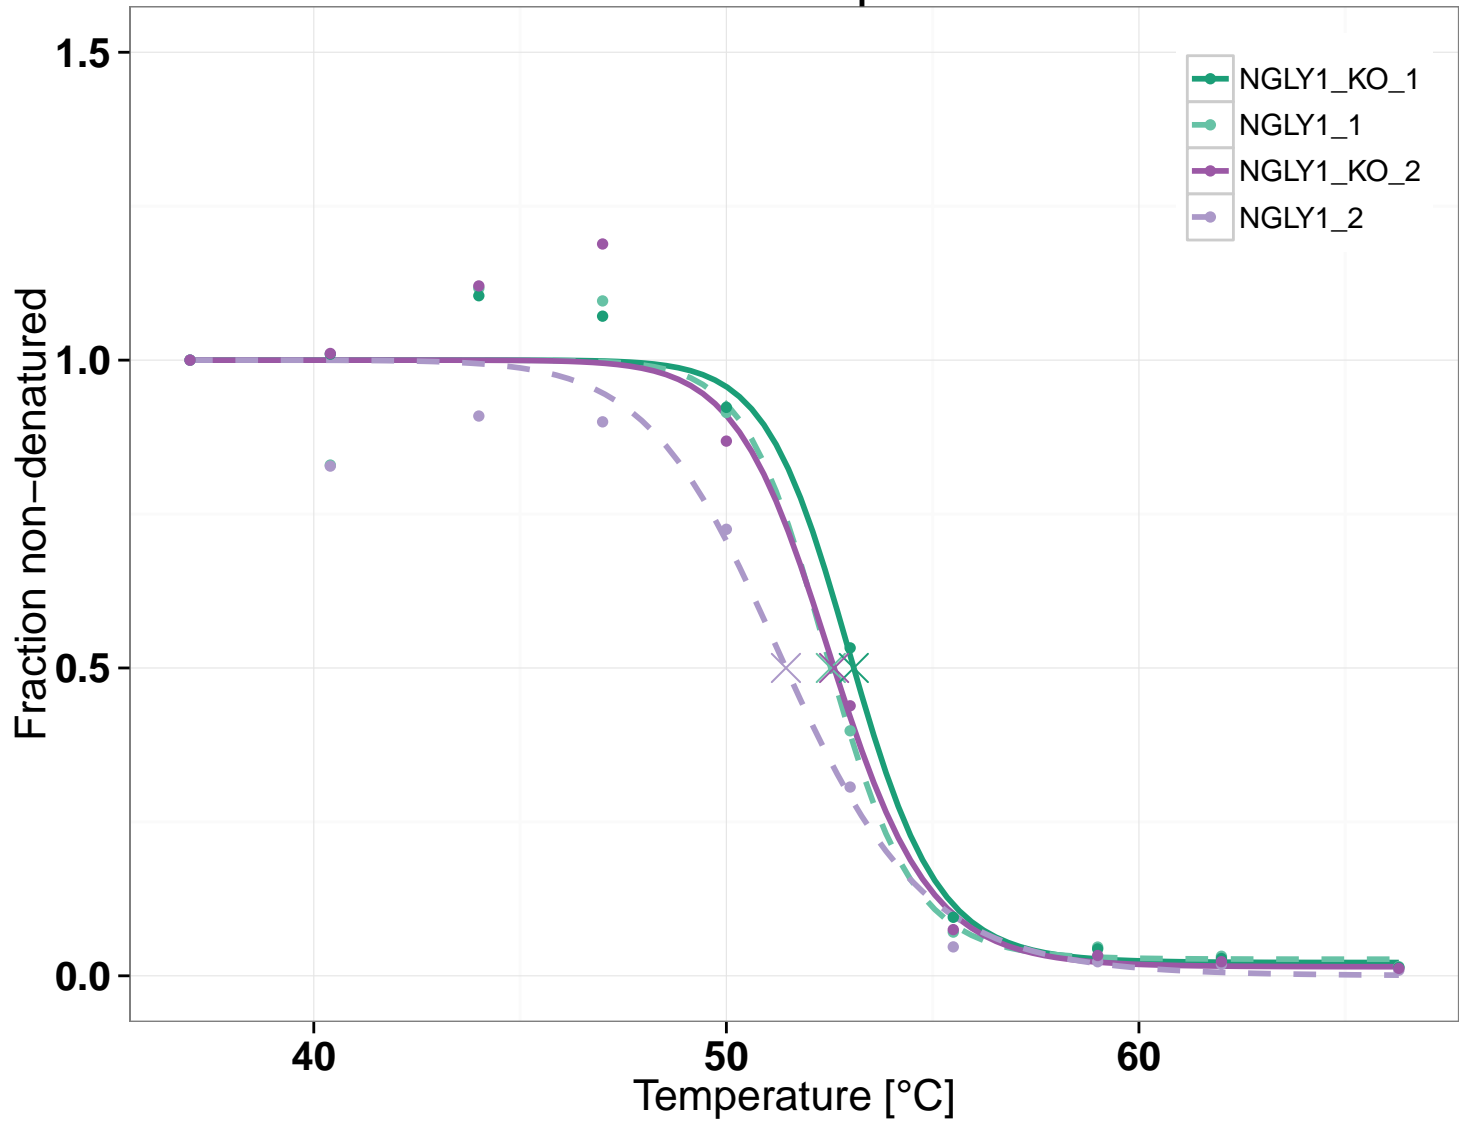

|            | meltPoint | slope | plateau | R2   |
|------------|-----------|-------|---------|------|
| NGLY1_KO_1 | 53.09     | -0.23 | 0.02    | 0.99 |
| NGLY1_1    | 52.53     | -0.24 | 0.03    | 0.97 |
| NGLY1_KO_2 | 52.61     | -0.21 | 0.01    | 0.98 |
| NGLY1_2    | 51.44     | -0.15 | 0       | 0.97 |

Supplement: Supplementary file 5790 [file 1]

# IPI00002879.5|C14ORF169

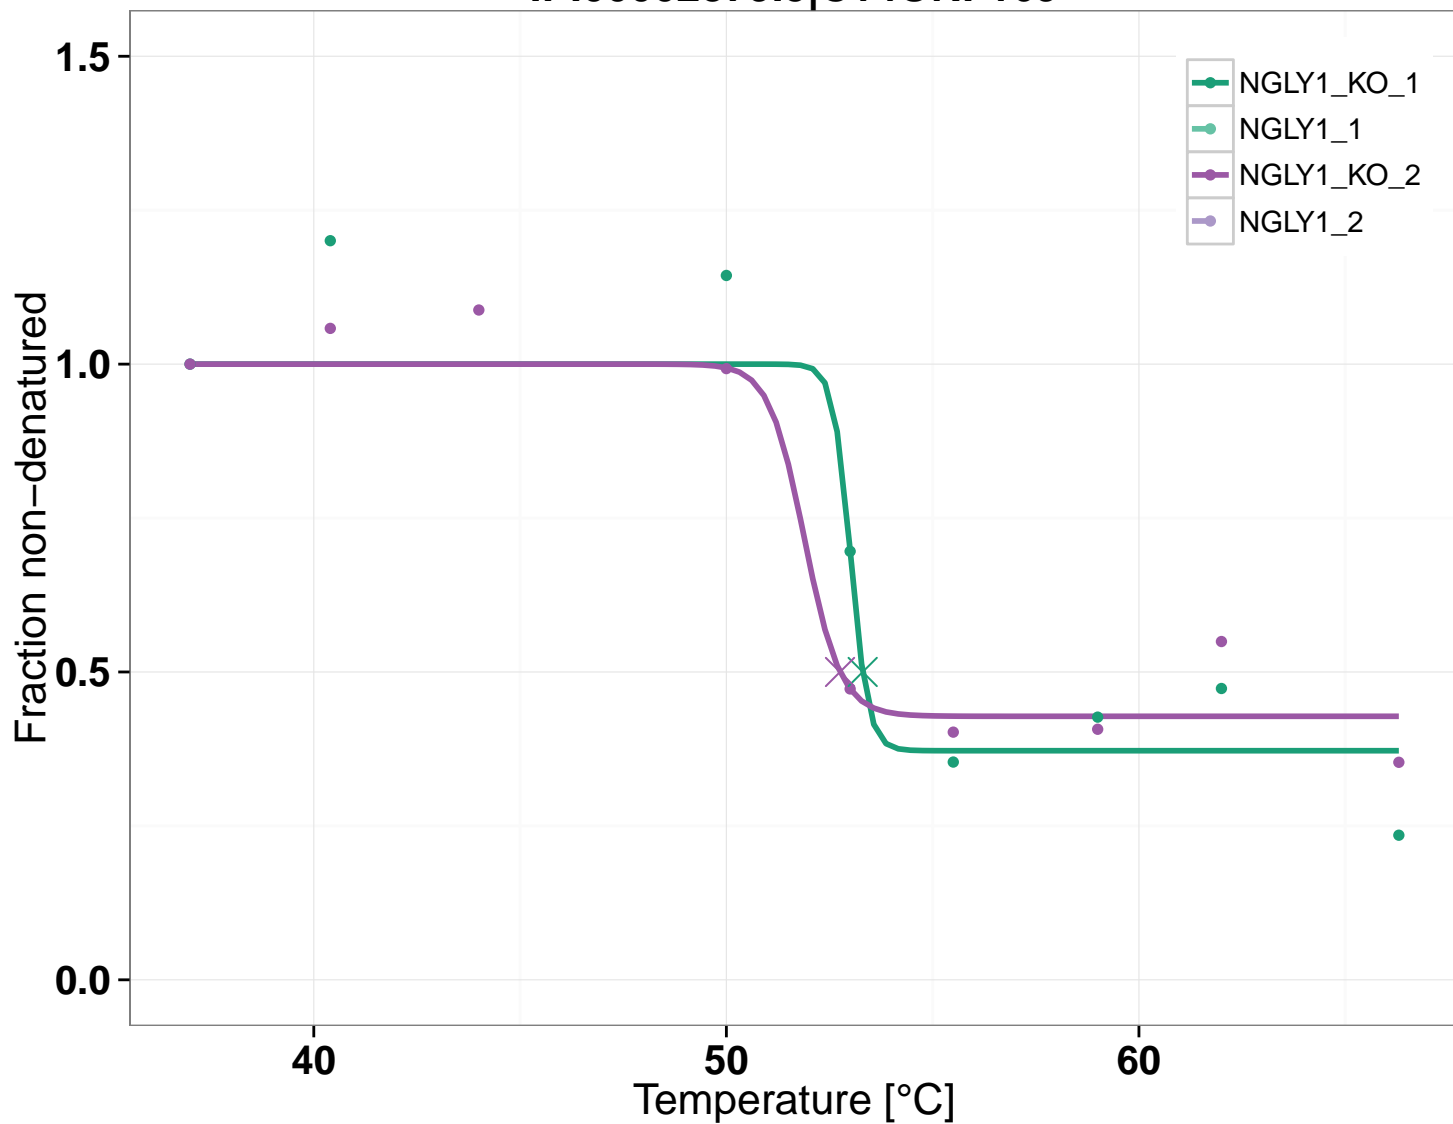

|            | meltPoint | slope | plateau | R2   |
|------------|-----------|-------|---------|------|
| NGLY1_KO_1 | 53.3      | -0.74 | 0.37    | 0.65 |
| NGLY1_1    | -         | -     | -       | -    |
| NGLY1_KO_2 | 52.75     | -0.33 | 0.43    | 0.75 |
| NGLY1_2    | -         | -     | -       | -    |

Supplement: Supplementary file 5791 [file 1]

IPI00477223.3|PNMAL1

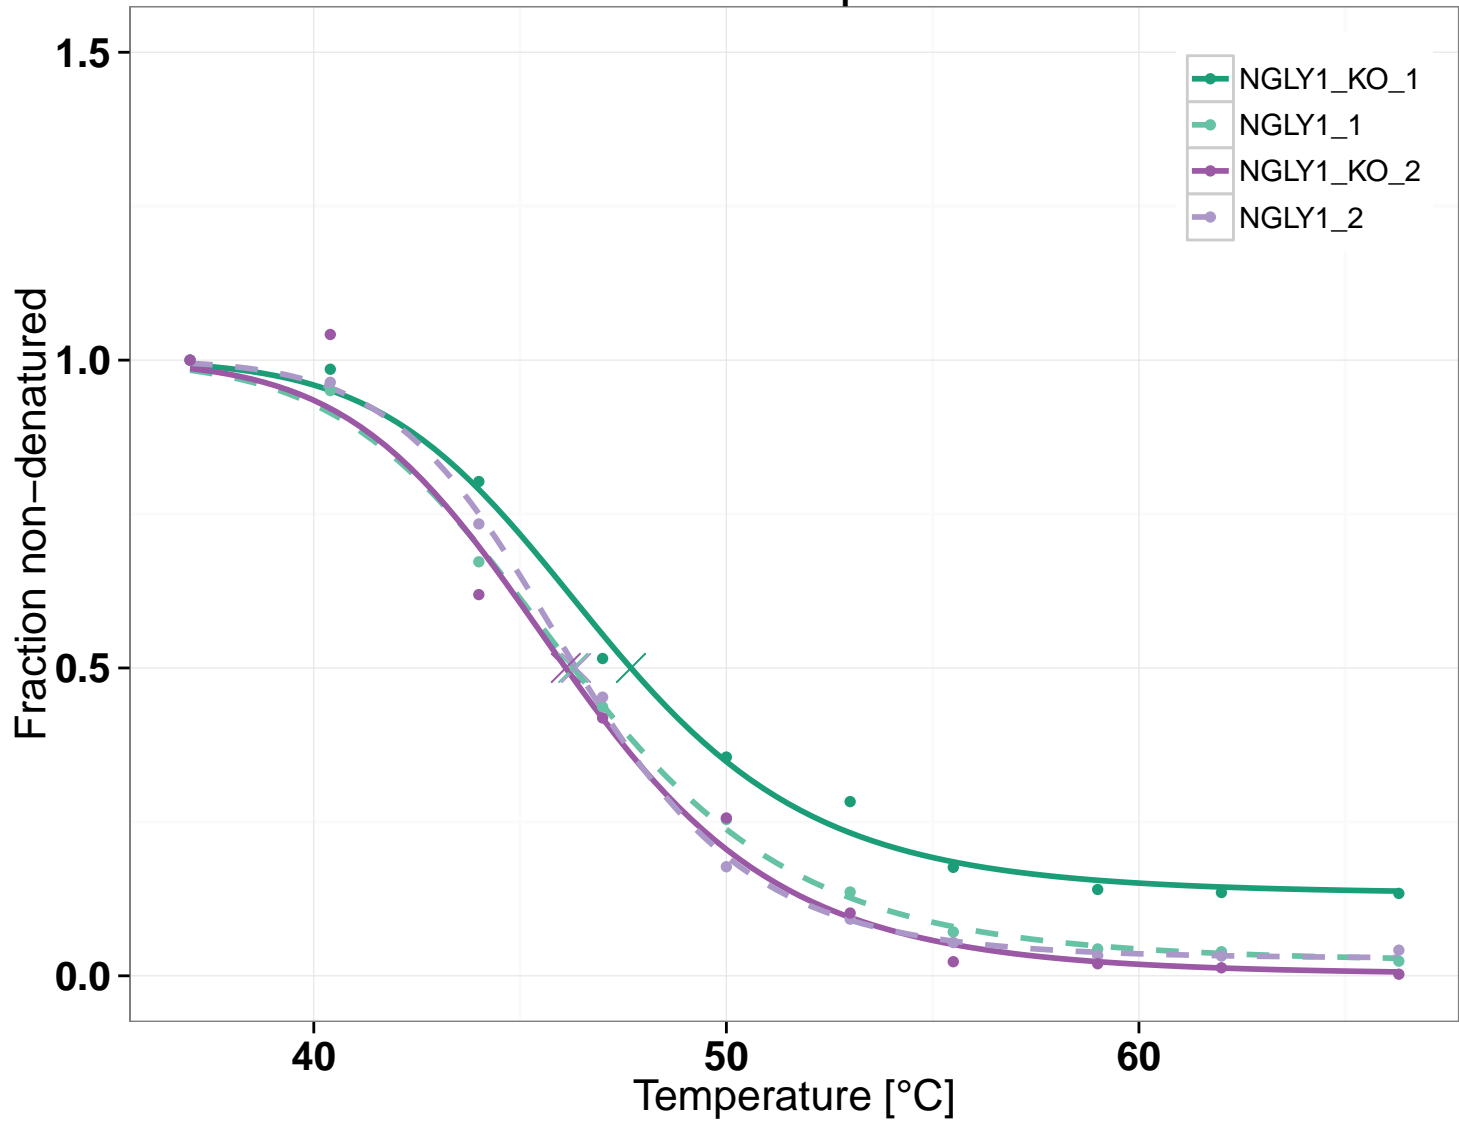

|            | meltPoint | slope  | plateau | R2   |
|------------|-----------|--------|---------|------|
| NGLY1_KO_1 | 47.69     | -0.083 | 0.13    | 0.99 |
| NGLY1_1    | 46.29     | -0.088 | 0.02    | 1    |
| NGLY1_KO_2 | 46.11     | -0.096 | 0       | 0.98 |
| NGLY1_2    | 46.36     | -0.11  | 0.03    | 1    |

Supplement: Supplementary file 5792 [file 1]

# IPI00742996.2|RNF214

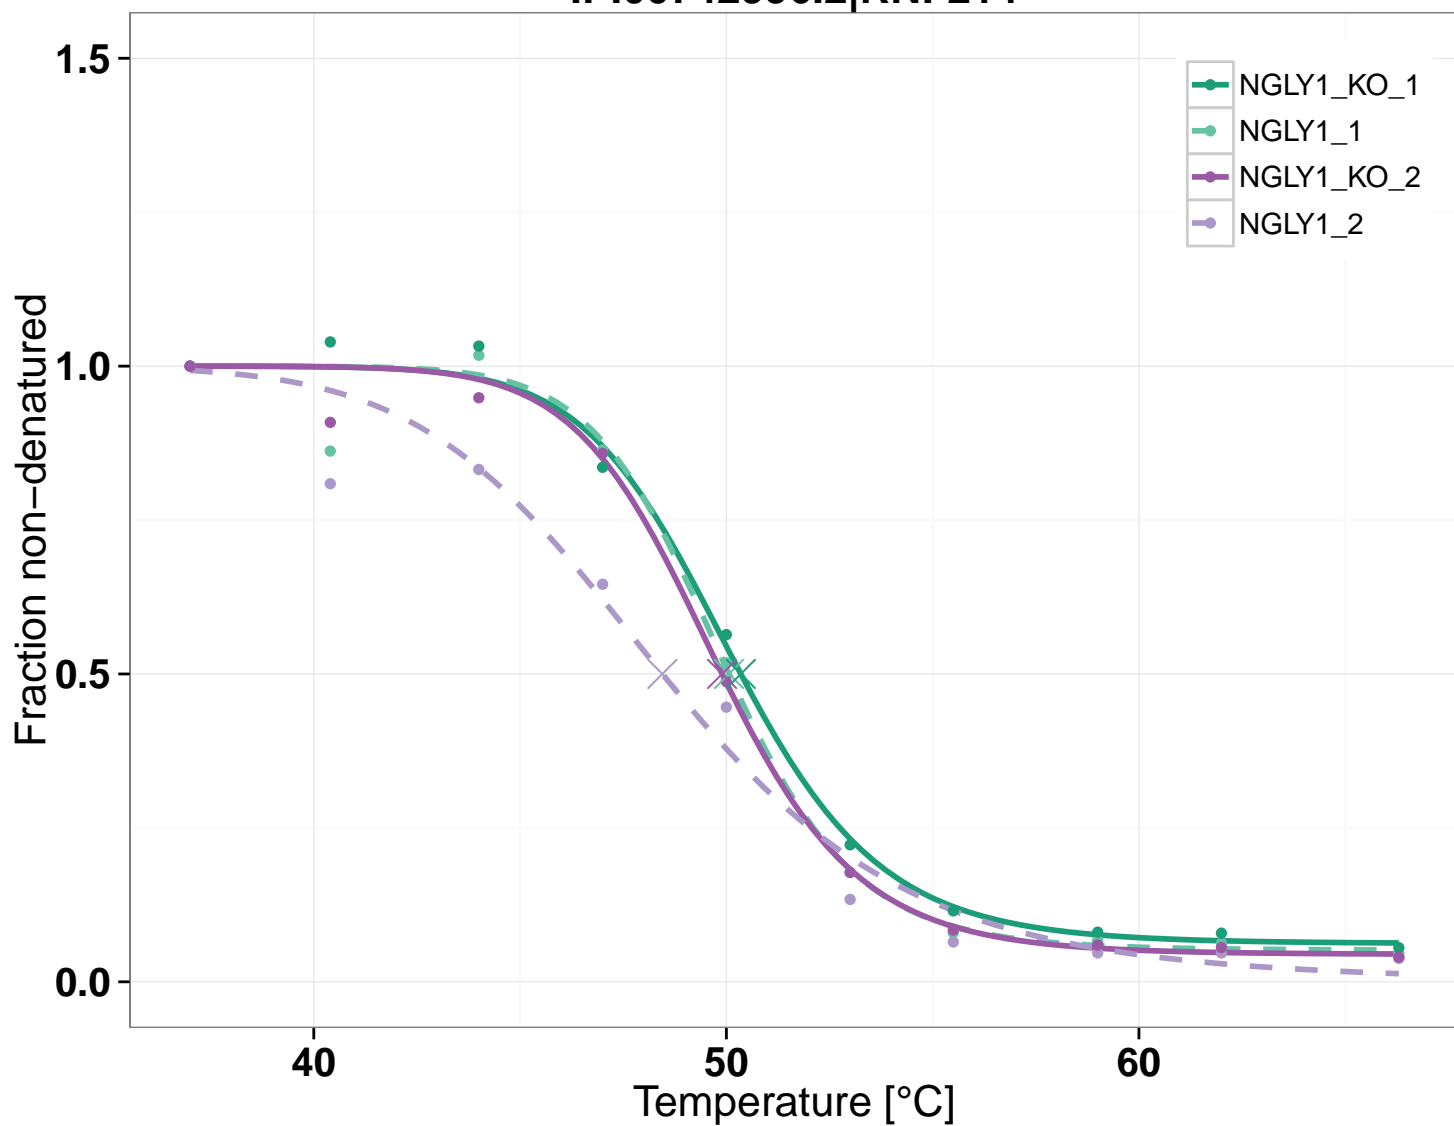

|            | meltPoint | slope  | plateau | R2   |
|------------|-----------|--------|---------|------|
| NGLY1_KO_1 | 50.35     | -0.13  | 0.06    | 1    |
| NGLY1_1    | 50.06     | -0.15  | 0.05    | 0.99 |
| NGLY1_KO_2 | 49.9      | -0.14  | 0.04    | 0.99 |
| NGLY1_2    | 48.45     | -0.084 | 0       | 0.97 |

Supplement: Supplementary file 5793 [file 1]

IPI00013297.1|PDAP1

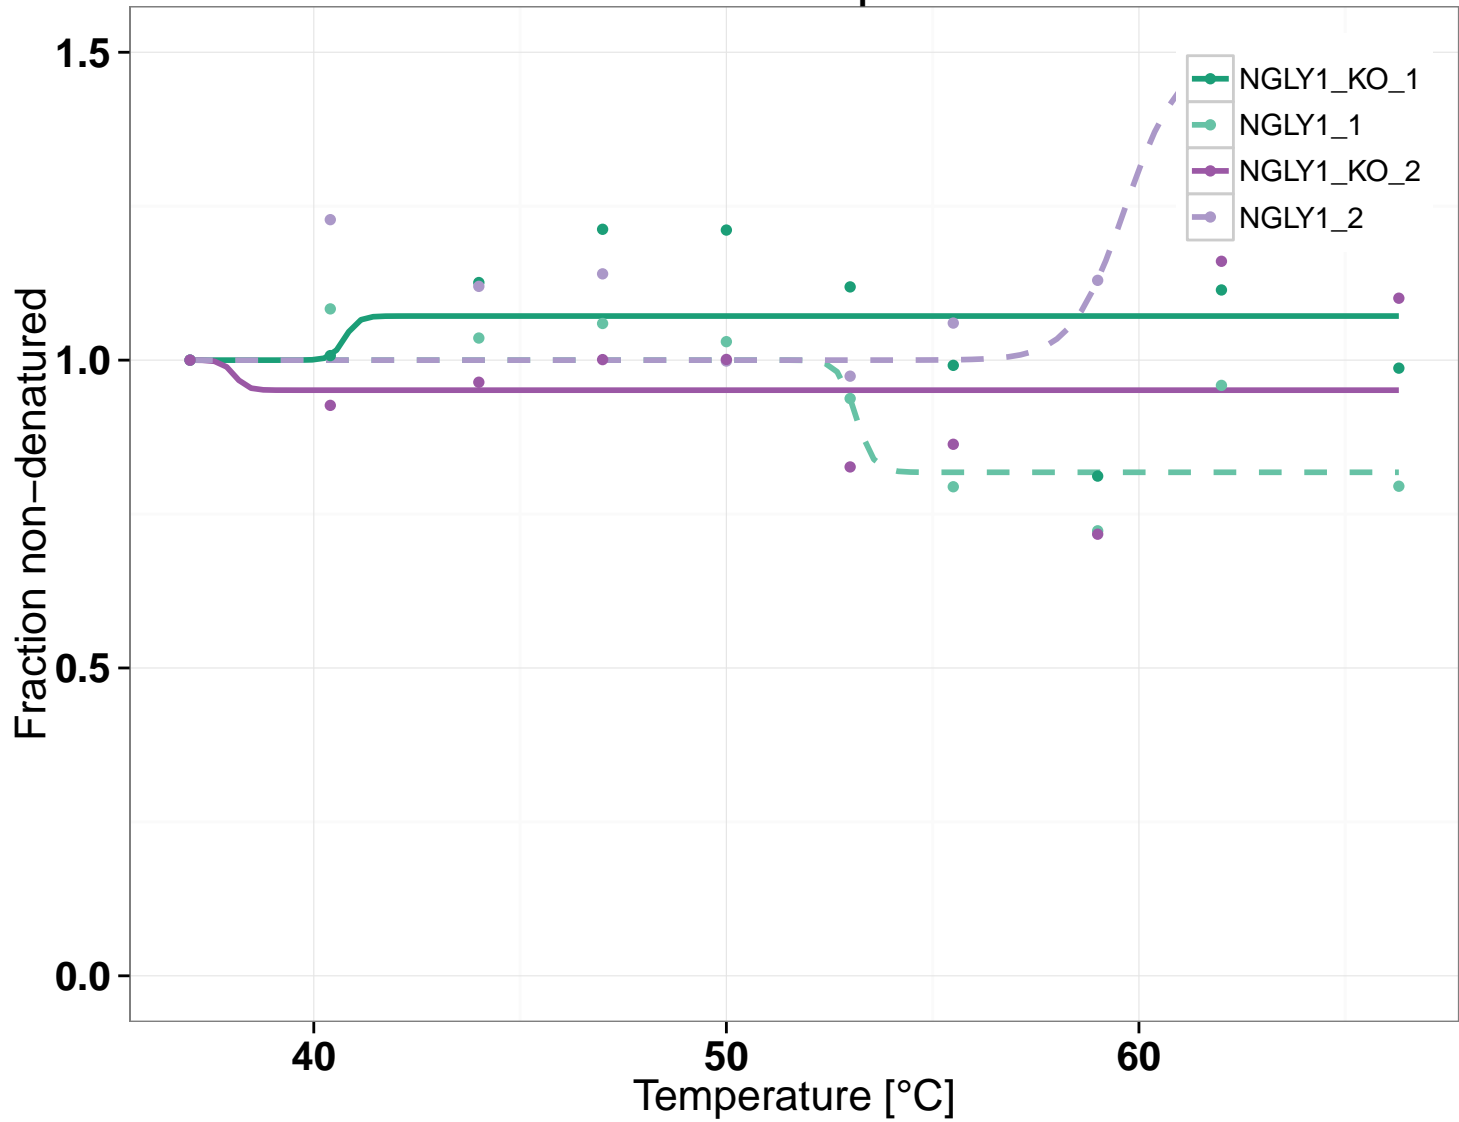

|            | meltPoint | slope | plateau | R2   |
|------------|-----------|-------|---------|------|
| NGLY1_KO_1 | -         | 0.11  | 1.07    | 0.05 |
| NGLY1_1    | -         | -0.21 | 0.82    | 0.71 |
| NGLY1_KO_2 | -         | -0.08 | 0.95    | 0.01 |
| NGLY1_2    | -         | 0.19  | 1.5     | 0.68 |

Supplement: Supplementary file 5794 [file 1]

IPI00005565.1|DGKQ

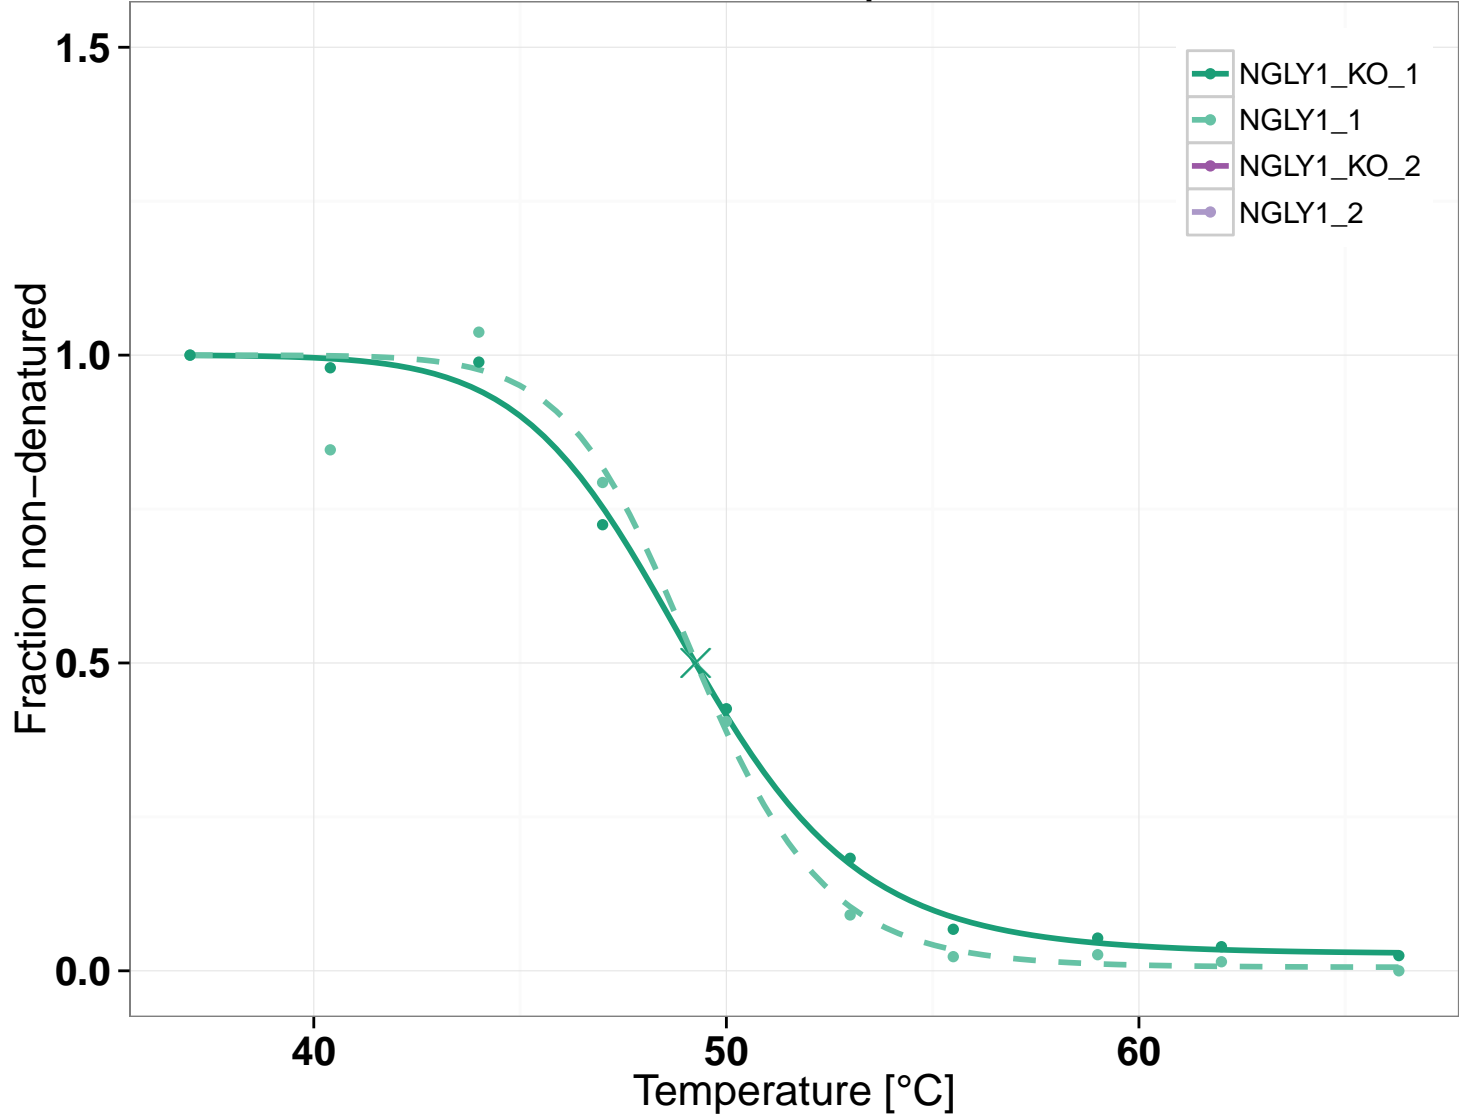

|            | meltPoint | slope | plateau | R2   |
|------------|-----------|-------|---------|------|
| NGLY1_KO_1 | 49.25     | -0.12 | 0.03    | 1    |
| NGLY1_1    | 49.27     | -0.16 | 0.01    | 0.98 |
| NGLY1_KO_2 | -         | -     | -       | -    |
| NGLY1_2    | -         | -     | -       | -    |

Supplement: Supplementary file 5795 [file 1]

IPI00106955.3|C11ORF84

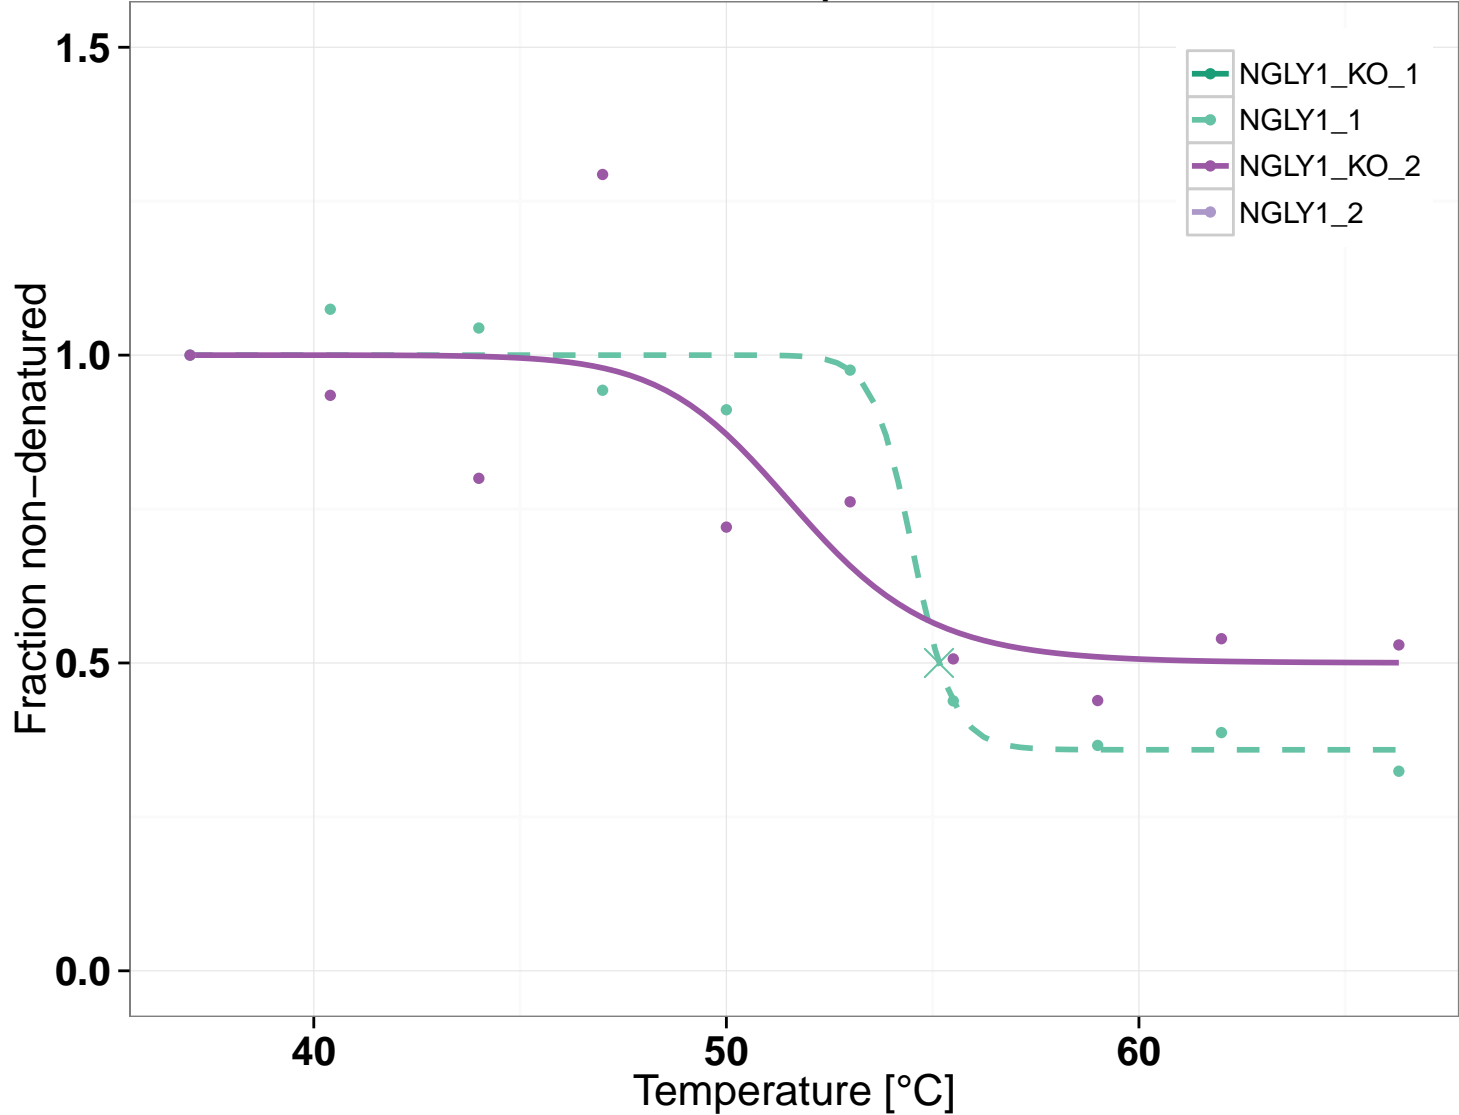

|            | meltPoint | slope  | plateau | R2   |
|------------|-----------|--------|---------|------|
| NGLY1_KO_1 | -         | -      | -       | -    |
| NGLY1_1    | 55.15     | -0.33  | 0.36    | 0.98 |
| NGLY1_KO_2 | -         | -0.076 | 0.5     | 0.71 |
| NGLY1_2    | -         | -      | -       | -    |

Supplement: Supplementary file 5796 [file 1]

# IPI00216715.4|TICAM1

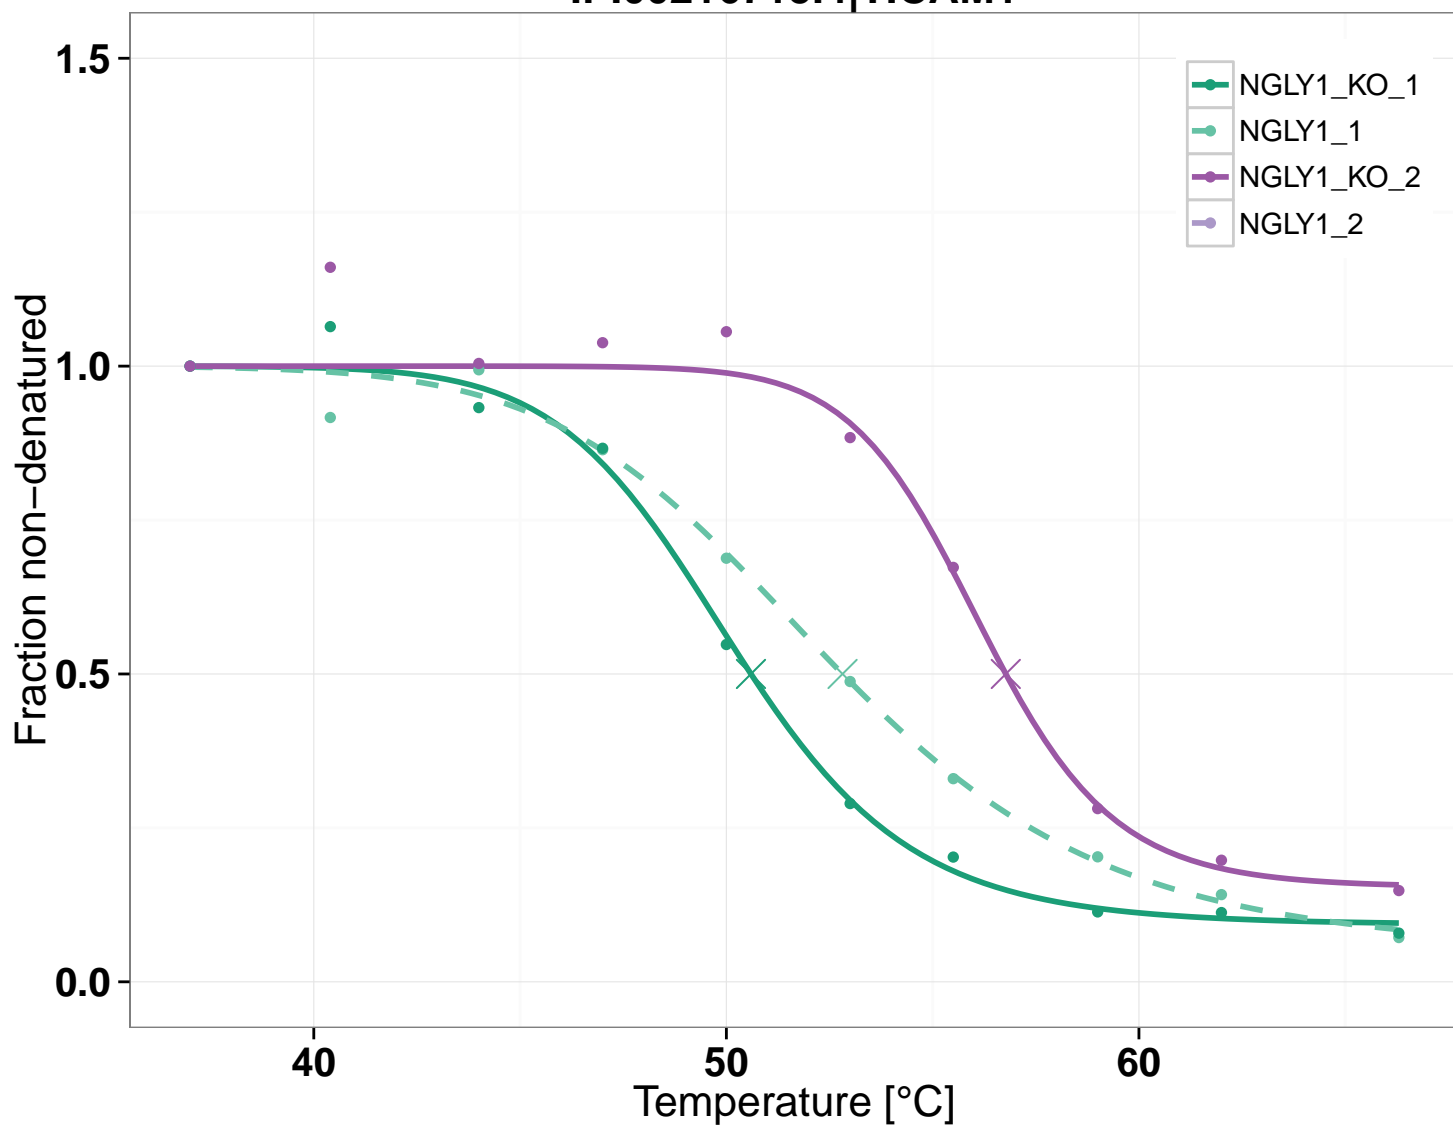

|            | meltPoint | slope  | plateau | R2   |
|------------|-----------|--------|---------|------|
| NGLY1_KO_1 | 50.6      | -0.11  | 0.09    | 1    |
| NGLY1_1    | 52.82     | -0.071 | 0.05    | 0.99 |
| NGLY1_KO_2 | 56.77     | -0.13  | 0.15    | 0.98 |
| NGLY1_2    | -         | -      | -       | -    |

Supplement: Supplementary file 5797 [file 1]

# IPI00217966.7|LDHA

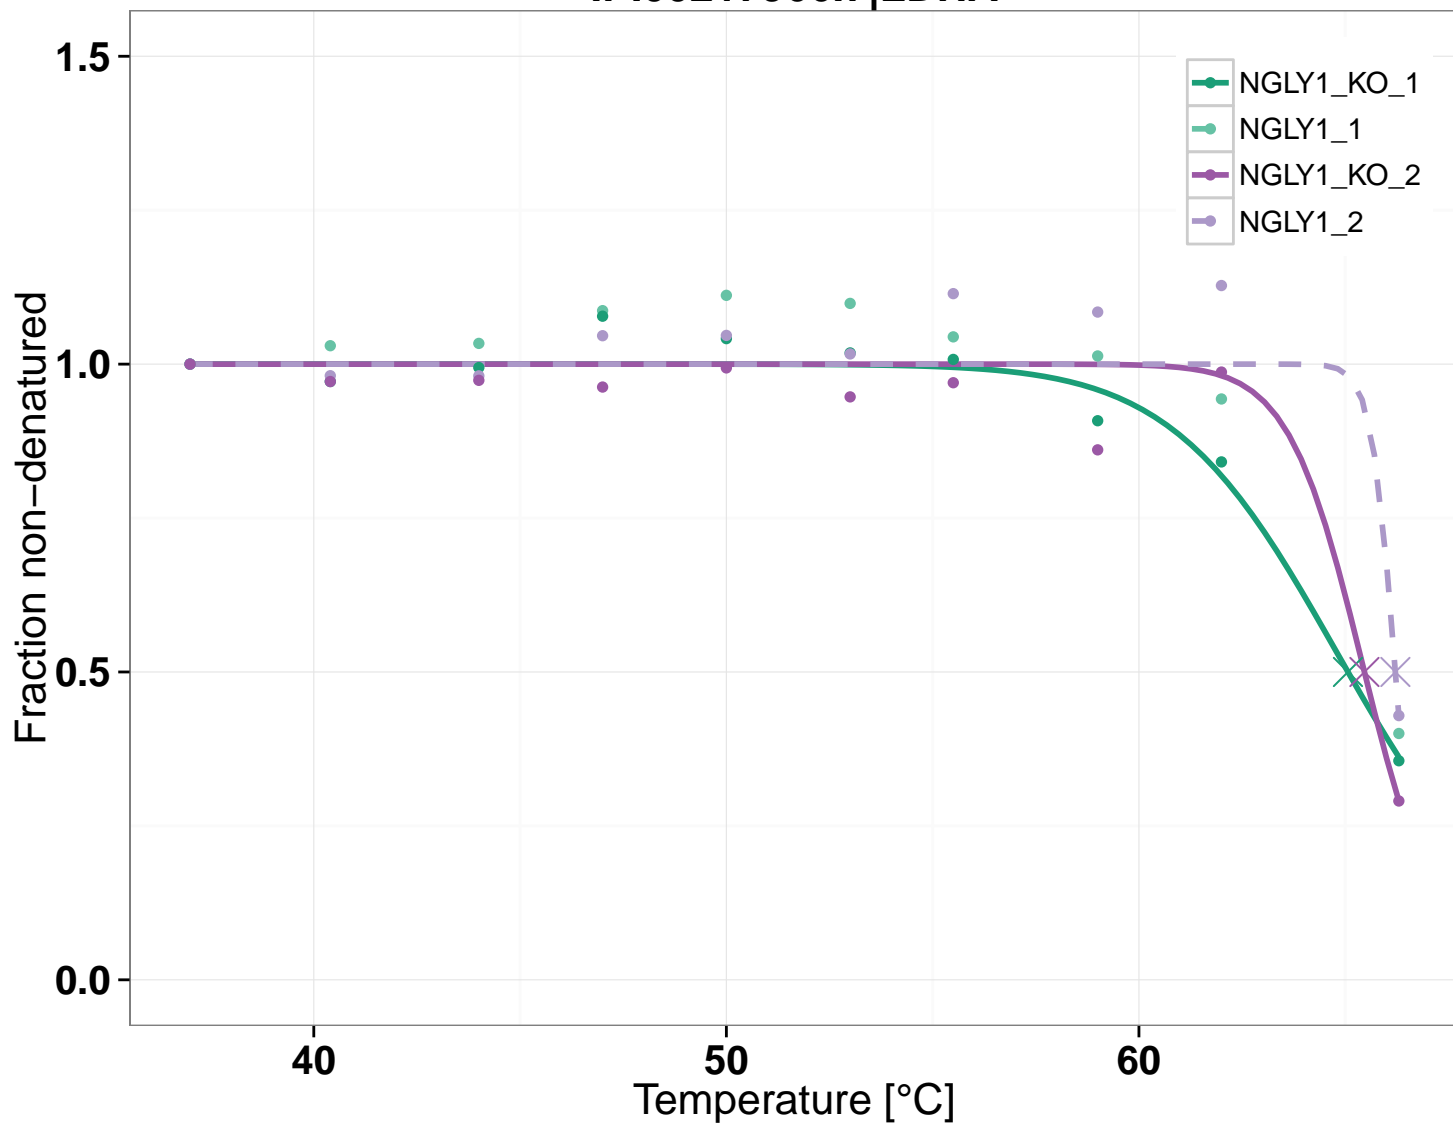

|            | meltPoint | slope | plateau | R2   |
|------------|-----------|-------|---------|------|
| NGLY1_KO_1 | 65.07     | -0.12 | 0       | 0.97 |
| NGLY1_1    | -         | -     | -       | -    |
| NGLY1_KO_2 | 65.47     | -0.27 | 0       | 0.94 |
| NGLY1_2    | 66.22     | -0.86 | 0       | 0.89 |

Supplement: Supplementary file 5798 [file 1]

# IPI00003925.6|PDHB

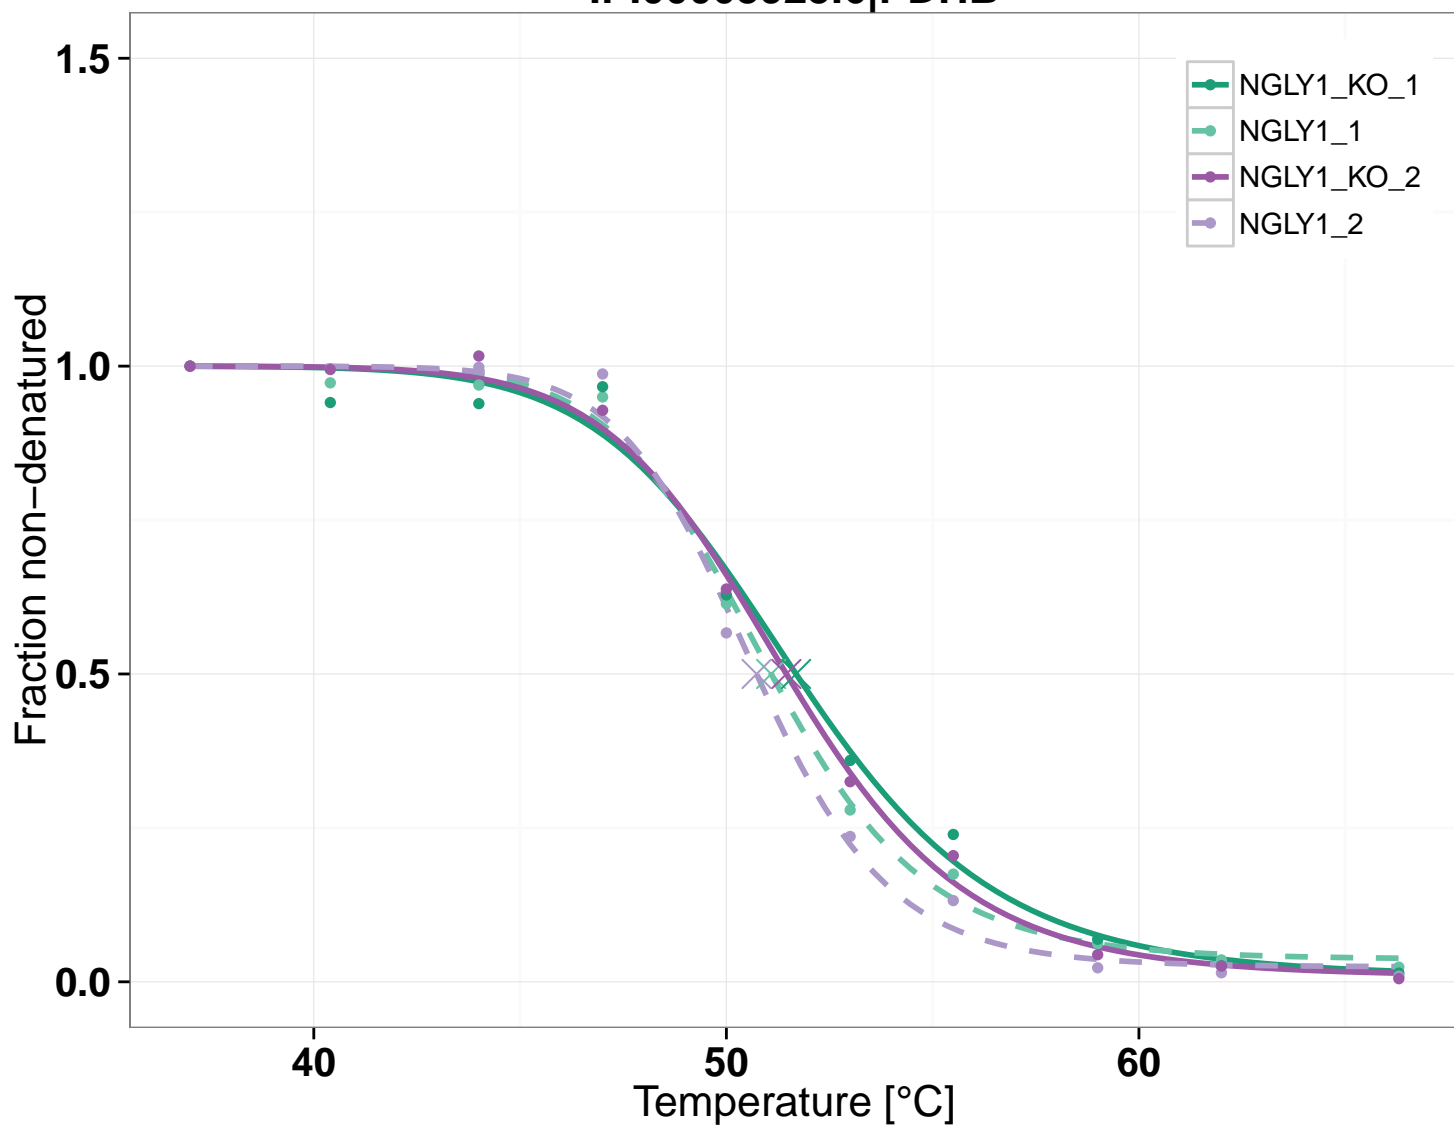

|            | meltPoint | slope | plateau | R2   |
|------------|-----------|-------|---------|------|
| NGLY1_KO_1 | 51.69     | -0.1  | 0.01    | 0.99 |
| NGLY1_1    | 51.09     | -0.13 | 0.04    | 1    |
| NGLY1_KO_2 | 51.45     | -0.11 | 0.01    | 1    |
| NGLY1_2    | 50.73     | -0.15 | 0.02    | 1    |

Supplement: Supplementary file 5799 [file 1]

IPI00017203.5|RMI1

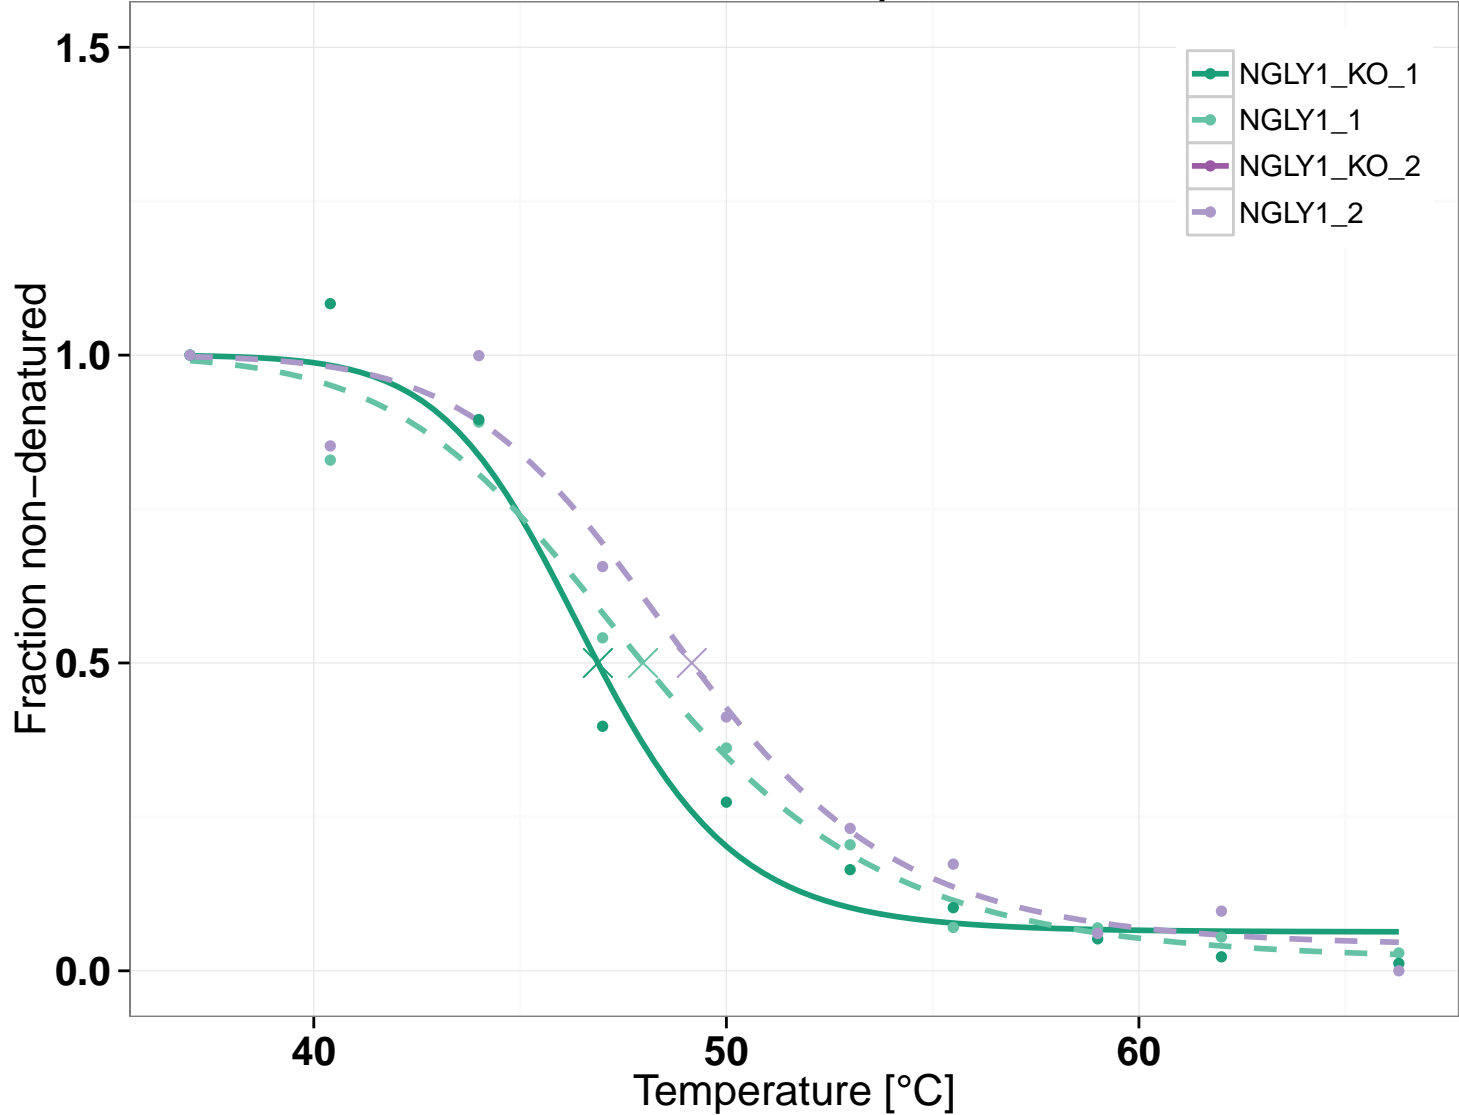

|            | meltPoint | slope  | plateau | R2   |
|------------|-----------|--------|---------|------|
| NGLY1_KO_1 | 46.89     | -0.13  | 0.06    | 0.98 |
| NGLY1_1    | 47.98     | -0.083 | 0.01    | 0.98 |
| NGLY1_KO_2 | -         | -      | -       | -    |
| NGLY1_2    | 49.16     | -0.092 | 0.04    | 0.98 |

Supplement: Supplementary file 5800 [file 1]

# IPI00028565.3|GBP2

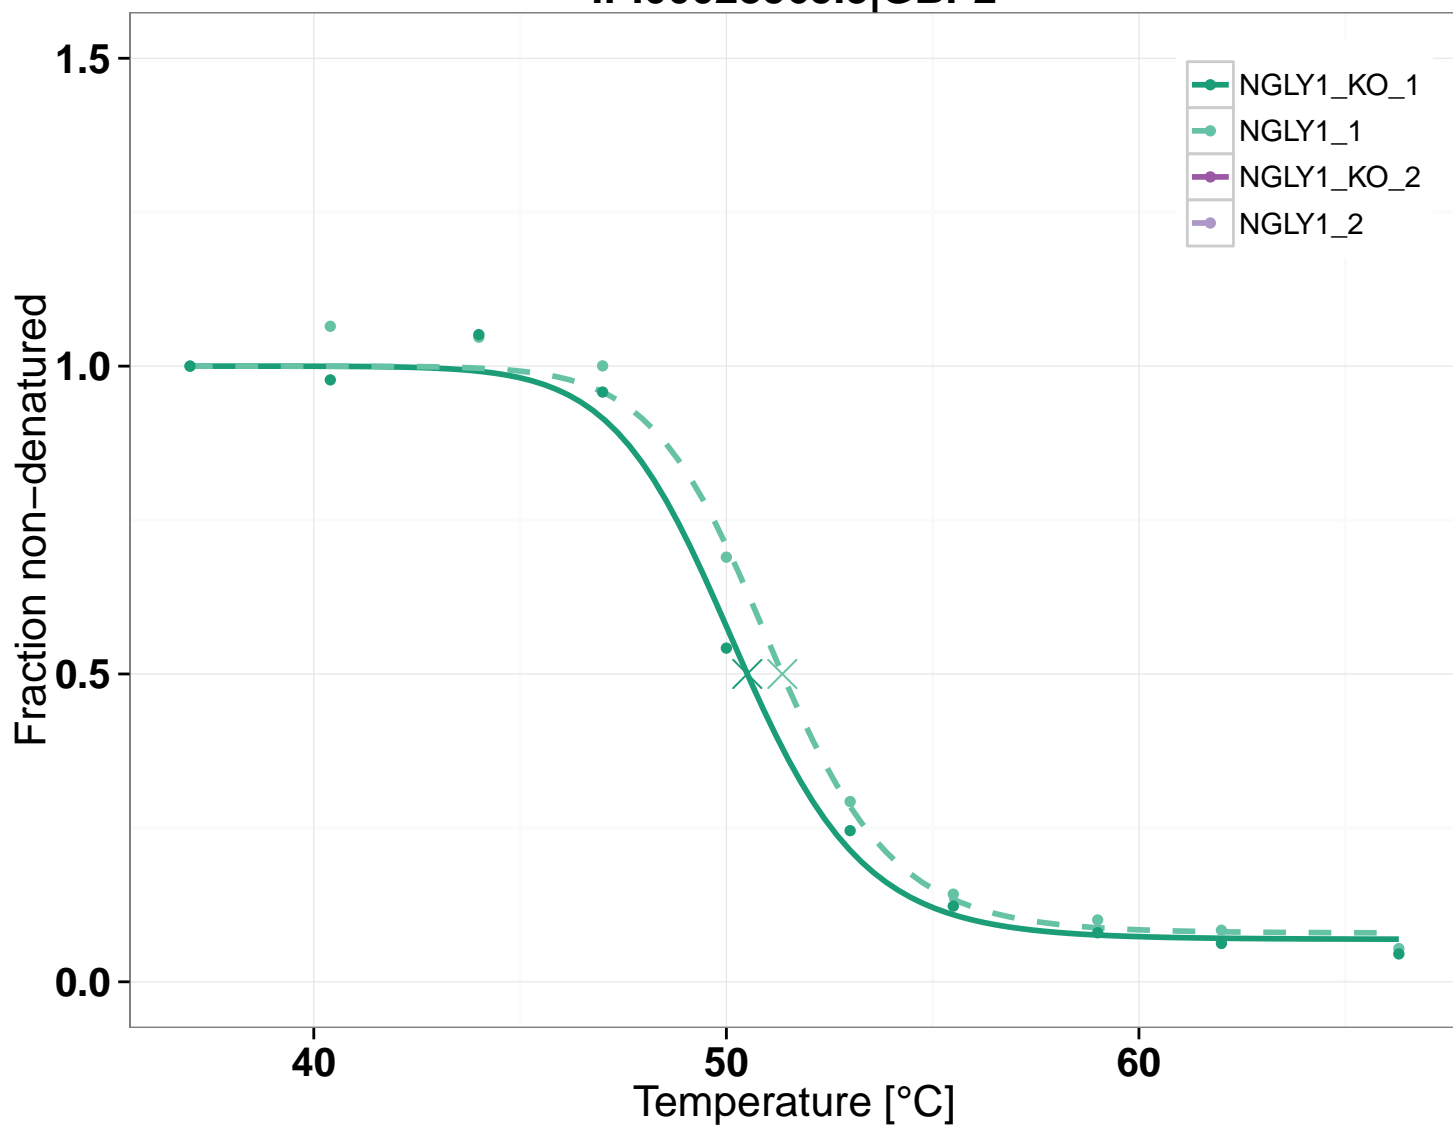

|            | meltPoint | slope | plateau | R2   |
|------------|-----------|-------|---------|------|
| NGLY1_KO_1 | 50.51     | -0.15 | 0.07    | 0.99 |
| NGLY1_1    | 51.36     | -0.16 | 0.08    | 0.99 |
| NGLY1_KO_2 | -         | -     | -       | -    |
| NGLY1_2    | -         | -     | -       | -    |

Supplement: Supplementary file 5801 [file 1]

IPI00743698.1|PTPRA

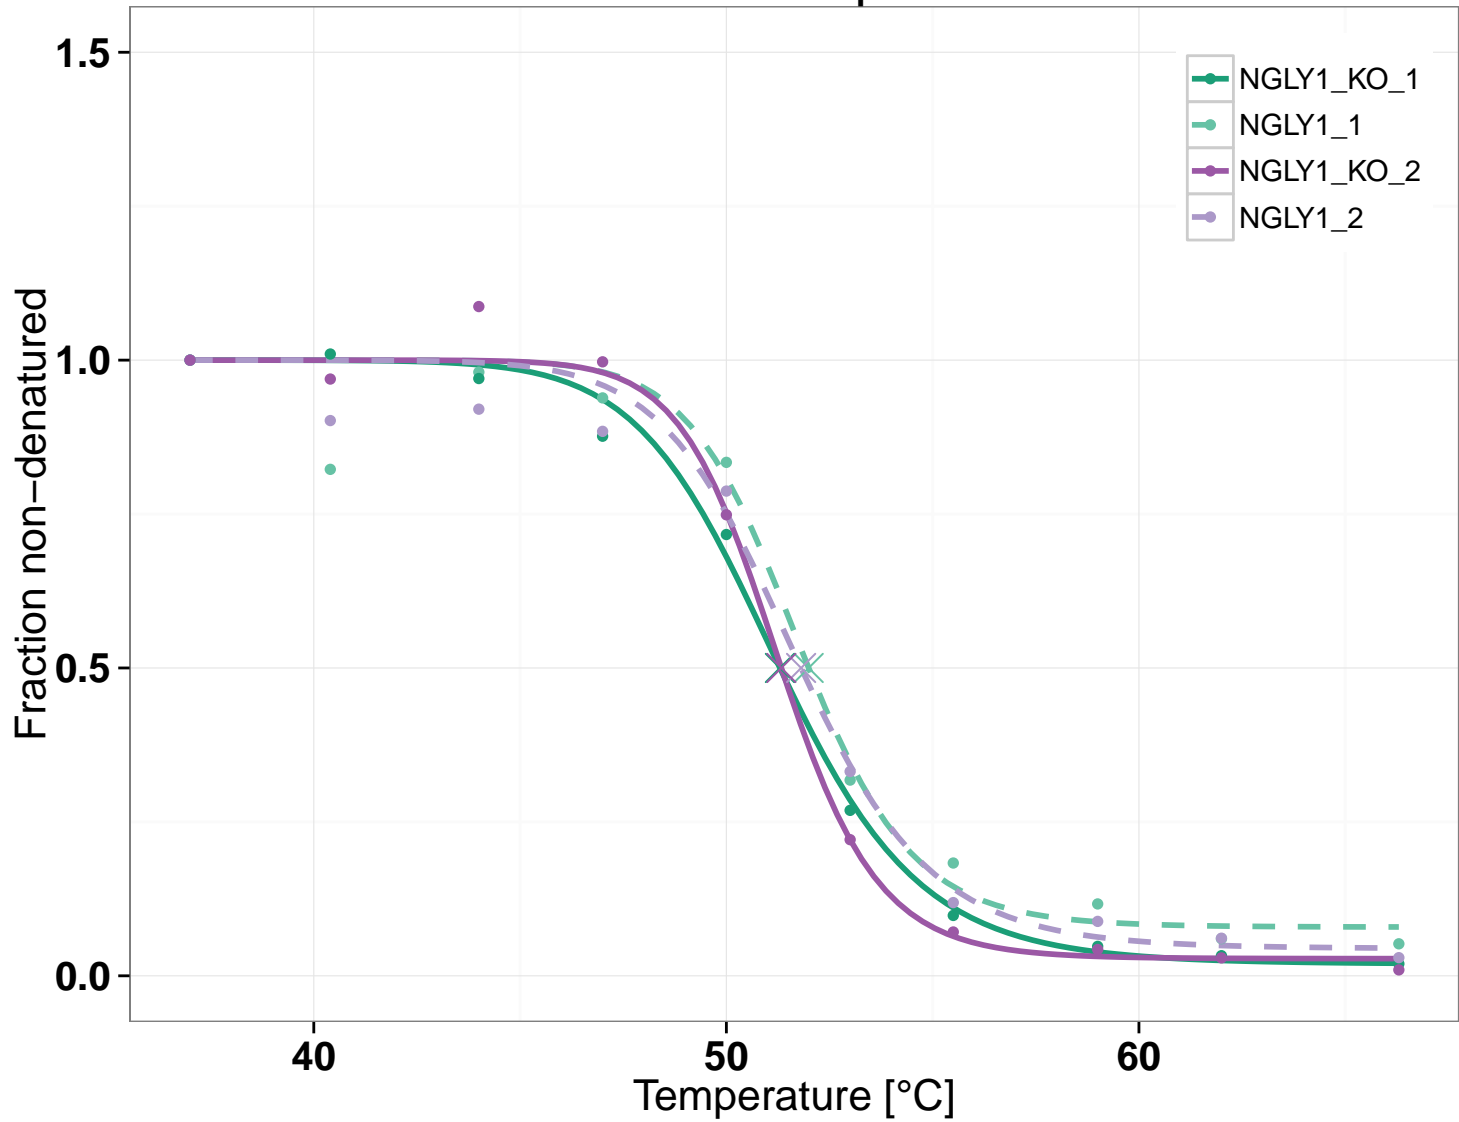

|            | meltPoint | slope | plateau | R2   |
|------------|-----------|-------|---------|------|
| NGLY1_KO_1 | 51.3      | -0.14 | 0.02    | 1    |
| NGLY1_1    | 51.99     | -0.17 | 0.08    | 0.98 |
| NGLY1_KO_2 | 51.33     | -0.2  | 0.03    | 1    |
| NGLY1_2    | 51.81     | -0.15 | 0.04    | 0.98 |

Supplement: Supplementary file 5802 [file 1]

IPI00888710.1|LOC283440

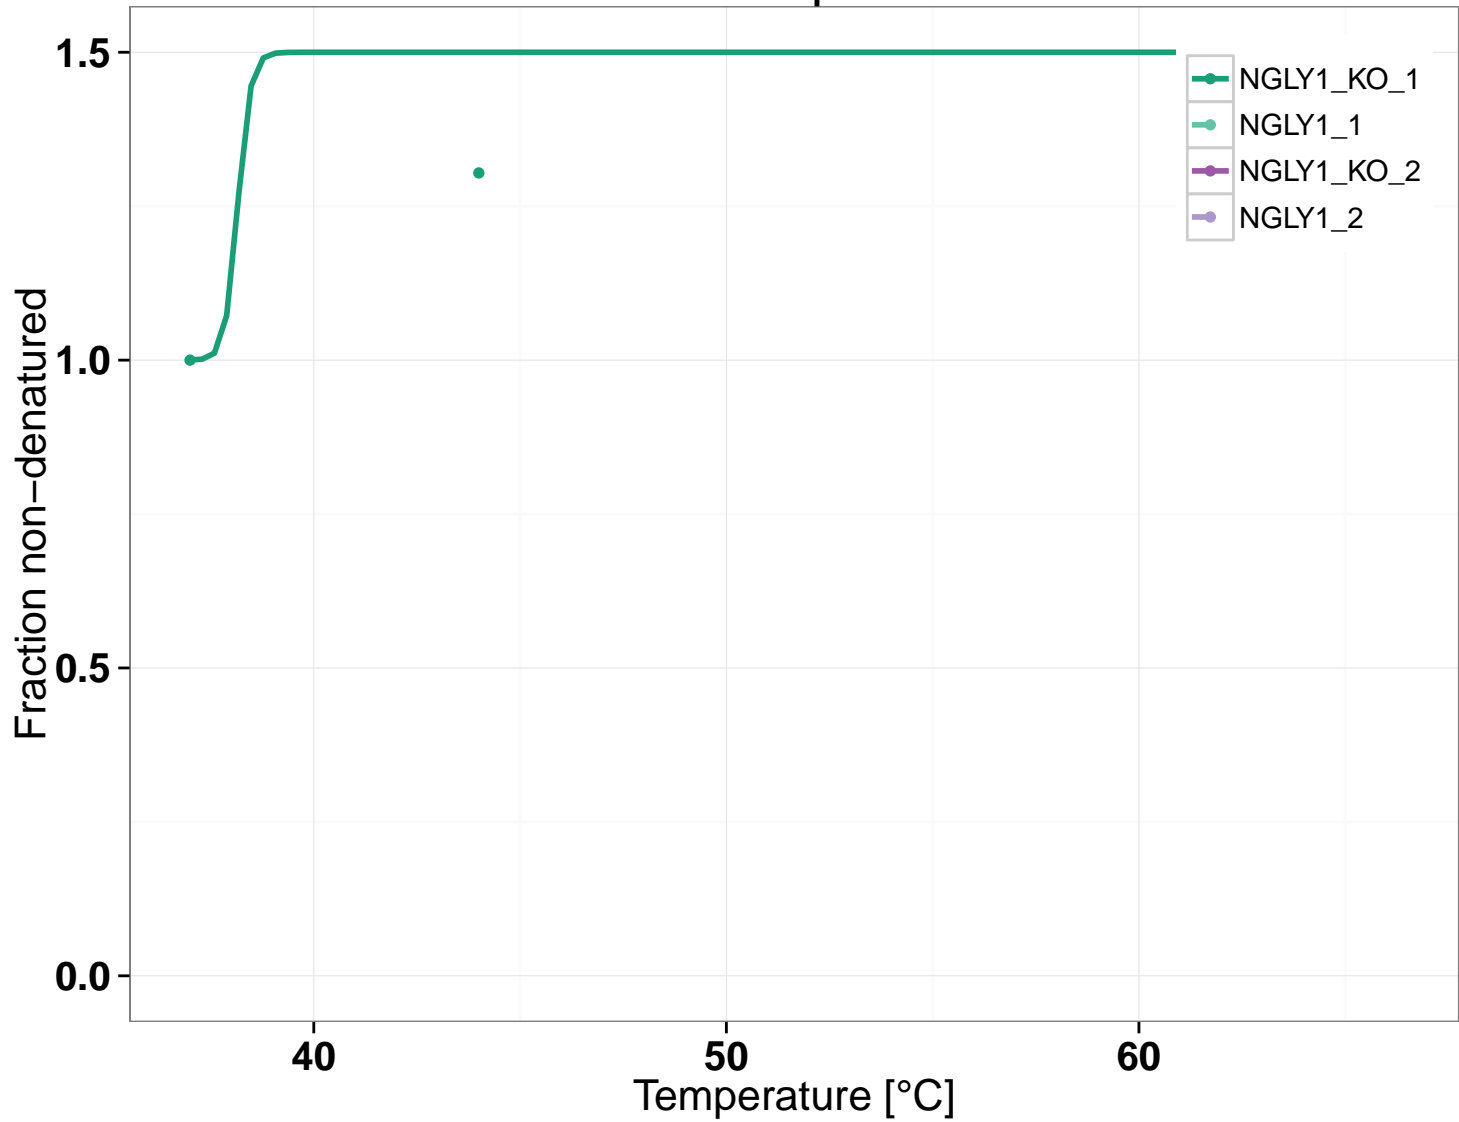

|            | meltPoint | slope | plateau | R2    |
|------------|-----------|-------|---------|-------|
| NGLY1_KO_1 | —         | 0.82  | 1.5     | -0.37 |
| NGLY1_1    | —         | —     | —       | —     |
| NGLY1_KO_2 | —         | —     | —       | —     |
| NGLY1_2    | —         | —     | —       | —     |

Supplement: Supplementary file 5803 [file 1]

# IPI00305552.6|CHCHD5

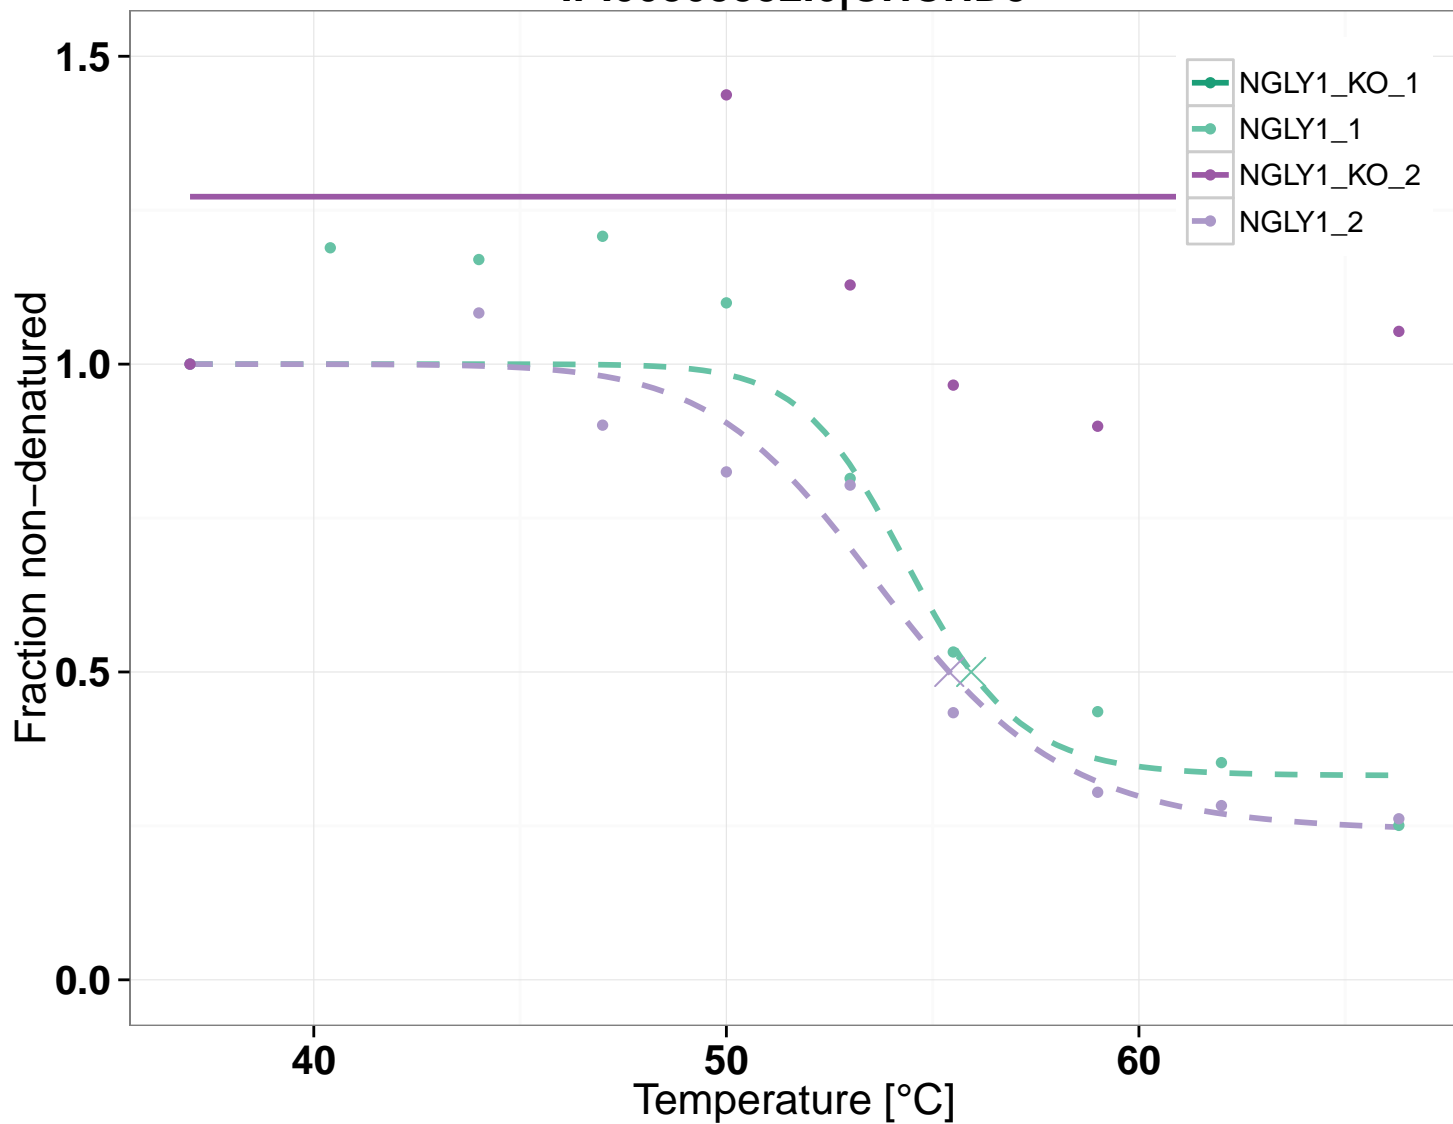

|            | meltPoint | slope  | plateau | R2   |
|------------|-----------|--------|---------|------|
| NGLY1_KO_1 | -         | -      | -       | -    |
| NGLY1_1    | 55.93     | -0.13  | 0.33    | 0.9  |
| NGLY1_KO_2 | -         | -      | 1.5     | 0    |
| NGLY1_2    | 55.4      | -0.088 | 0.24    | 0.73 |

Supplement: Supplementary file 5804 [file 1]

IPI00877662.2|LOC100131294

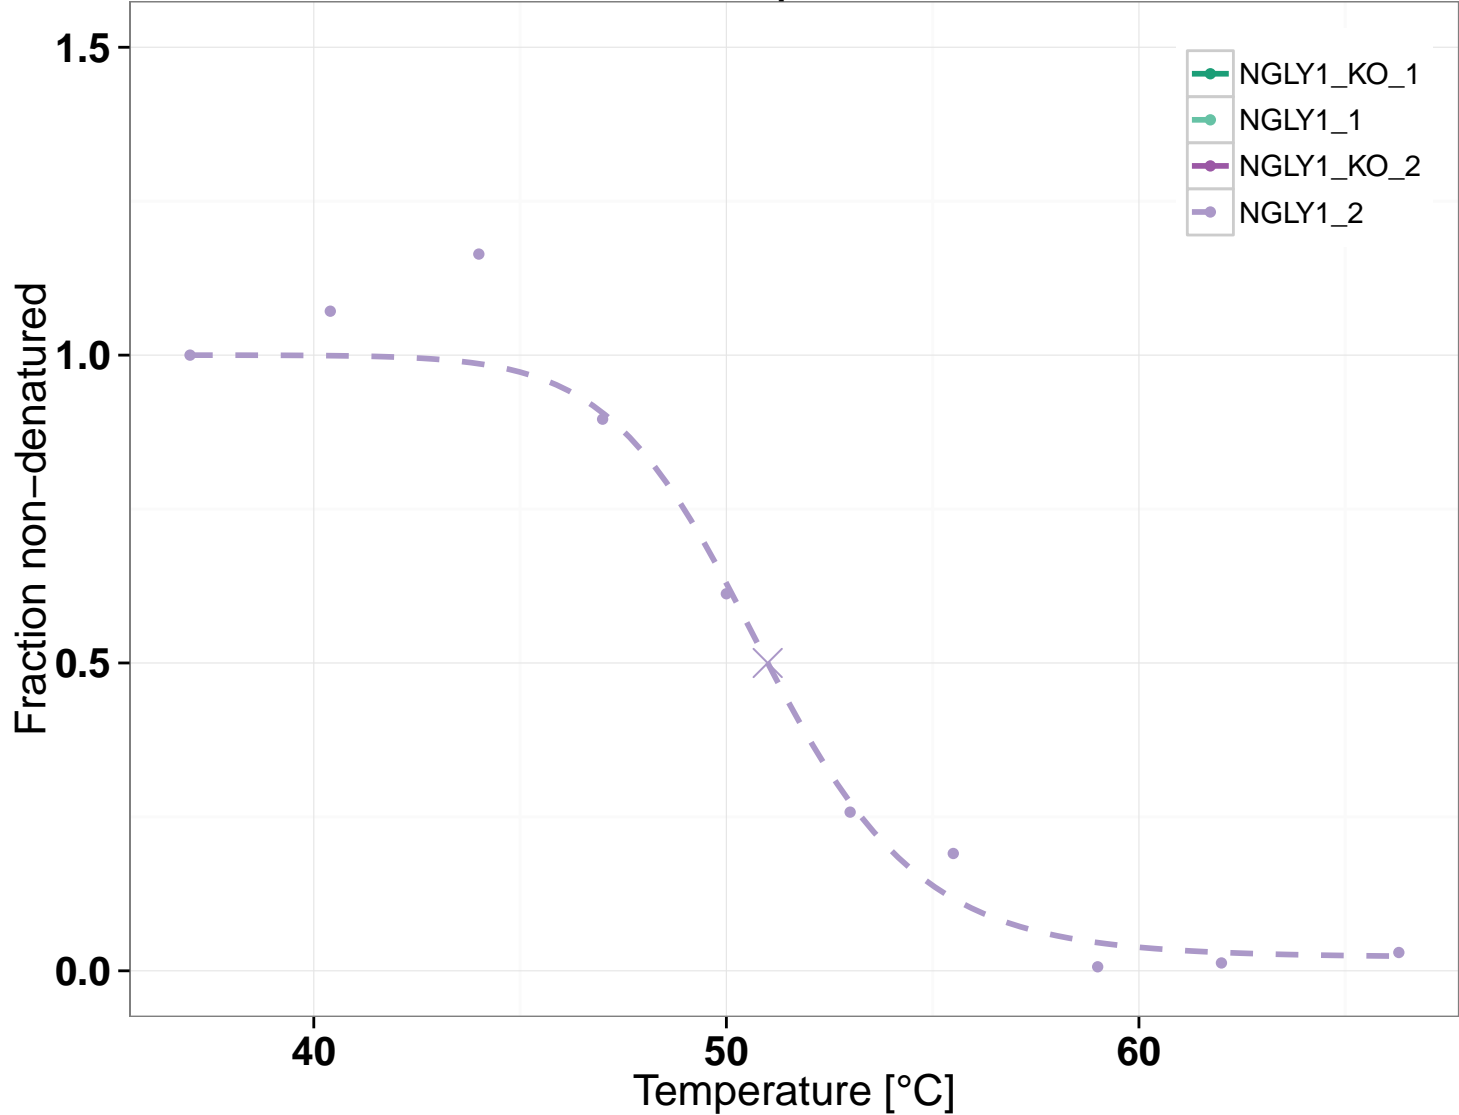

|            | meltPoint | slope | plateau | R2   |
|------------|-----------|-------|---------|------|
| NGLY1_KO_1 | —         | —     | —       | —    |
| NGLY1_1    | —         | —     | —       | —    |
| NGLY1_KO_2 | —         | —     | —       | —    |
| NGLY1_2    | 51        | -0.13 | 0.02    | 0.98 |

Supplement: Supplementary file 5805 [file 1]

IPI00008255.3|AZI2

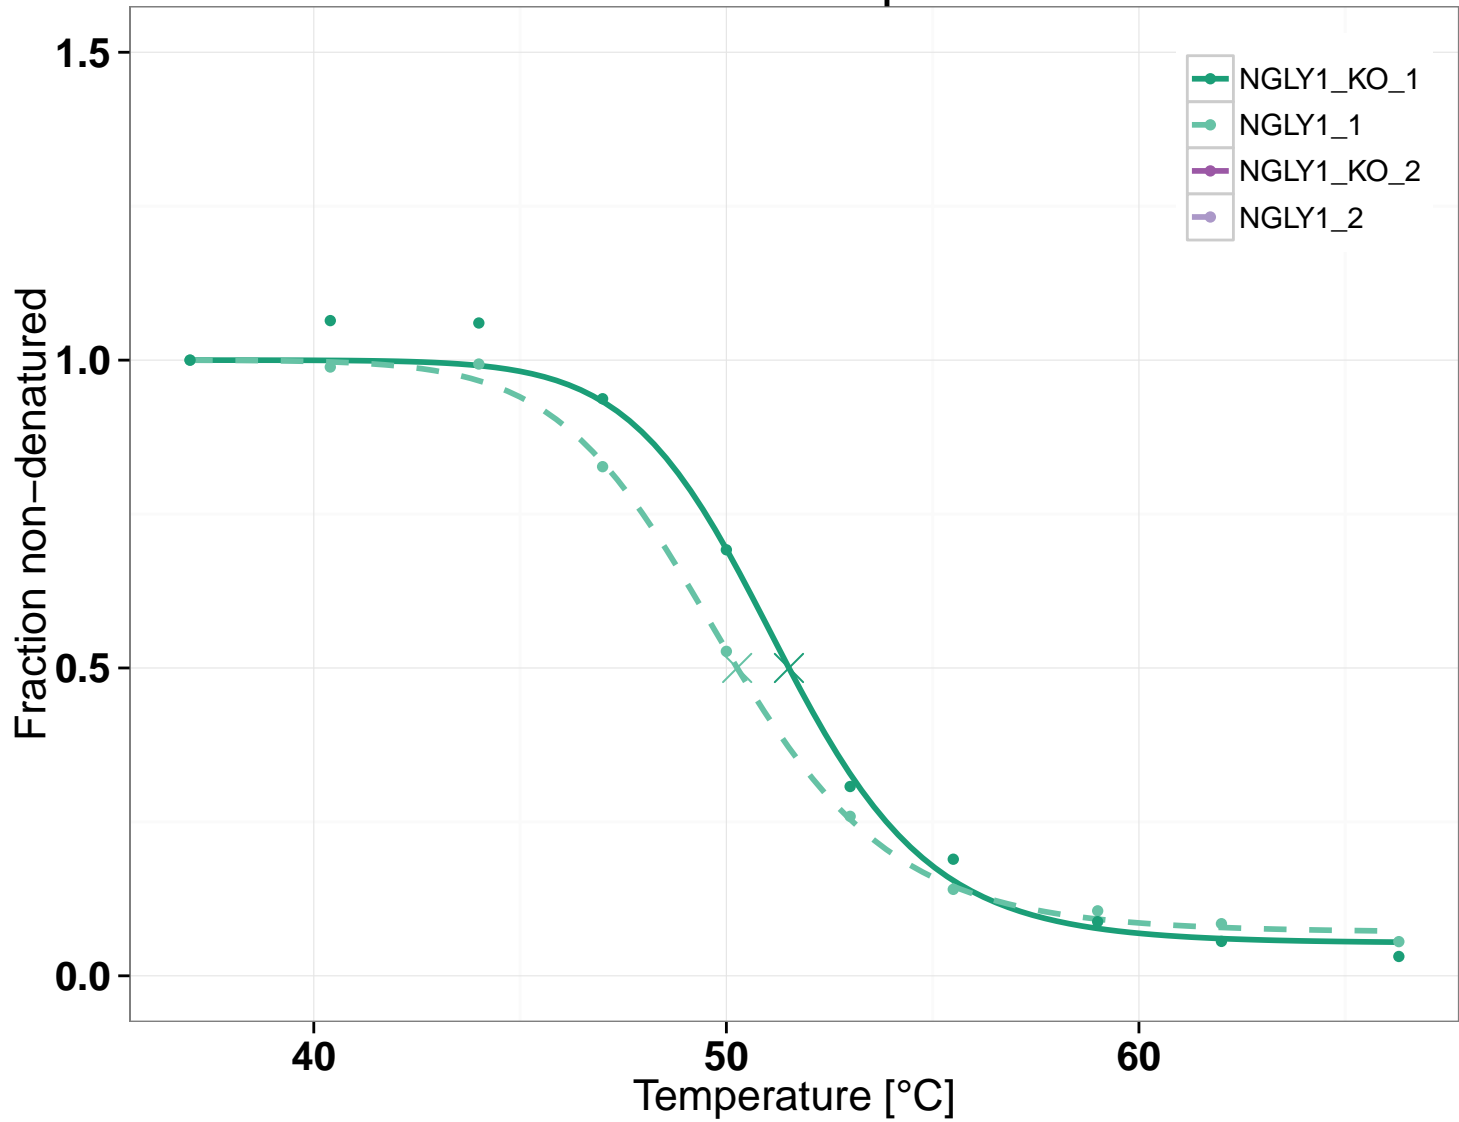

|            | meltPoint | slope | plateau | R2   |
|------------|-----------|-------|---------|------|
| NGLY1_KO_1 | 51.52     | -0.13 | 0.05    | 0.99 |
| NGLY1_1    | 50.26     | -0.11 | 0.07    | 1    |
| NGLY1_KO_2 | -         | -     | -       | -    |
| NGLY1_2    | -         | -     | -       | -    |

Supplement: Supplementary file 5806 [file 1]

IPI00013743.4|BUD13

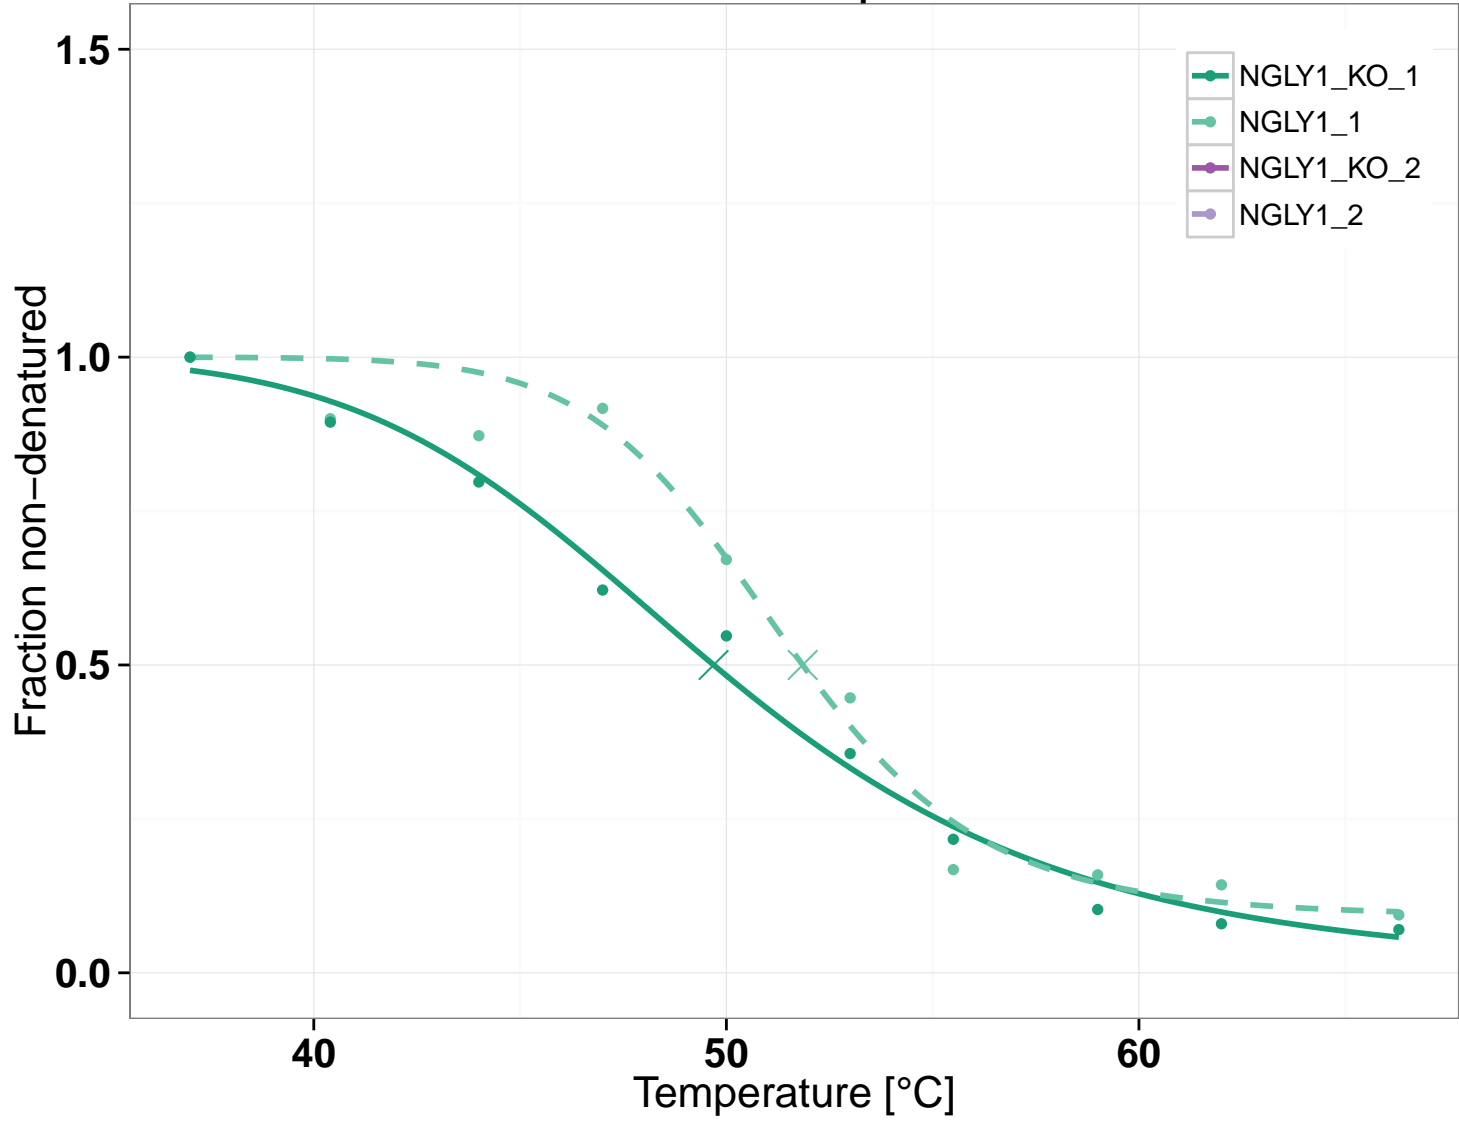

|            | meltPoint | slope  | plateau | R2   |
|------------|-----------|--------|---------|------|
| NGLY1_KO_1 | 49.69     | -0.058 | 0       | 0.99 |
| NGLY1_1    | 51.85     | -0.095 | 0.09    | 0.98 |
| NGLY1_KO_2 | -         | -      | -       | -    |
| NGLY1_2    | -         | -      | -       | -    |

Supplement: Supplementary file 5807 [file 1]

IPI00418142.2|KRIT1

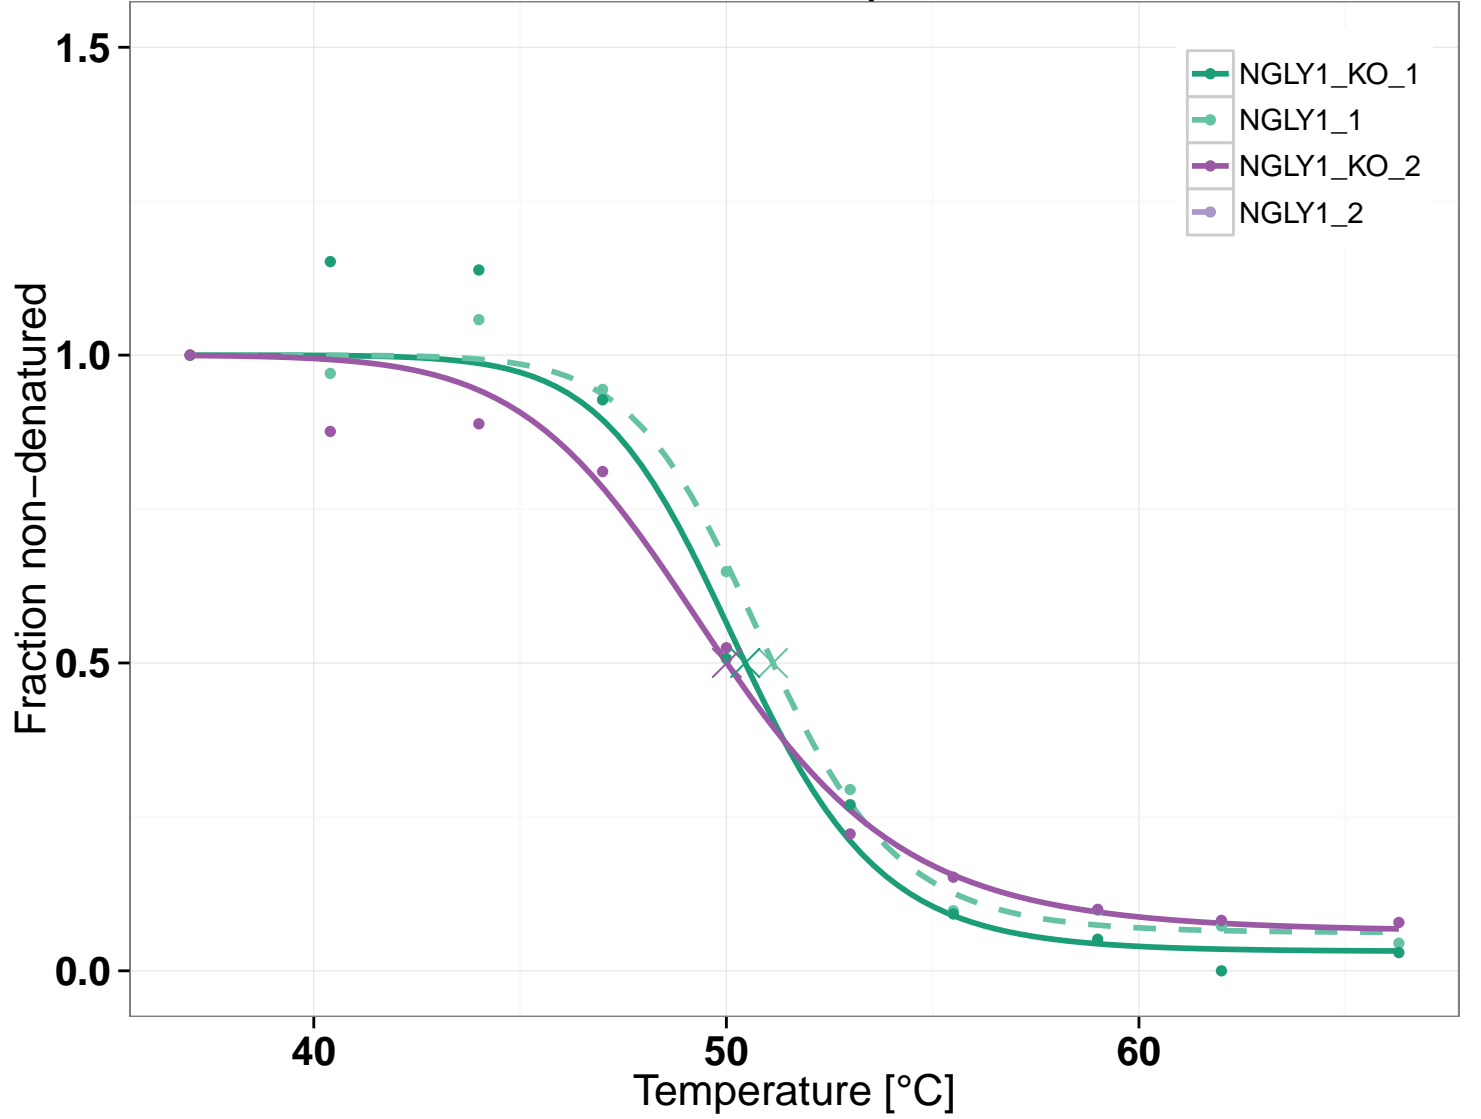

|            | meltPoint | slope | plateau | R2   |
|------------|-----------|-------|---------|------|
| NGLY1_KO_1 | 50.46     | -0.14 | 0.03    | 0.97 |
| NGLY1_1    | 51.13     | -0.15 | 0.06    | 1    |
| NGLY1_KO_2 | 50.01     | -0.1  | 0.06    | 0.99 |
| NGLY1_2    | -         | -     | -       | -    |

Supplement: Supplementary file 5808 [file 1]

IPI00002560.1|NUMBL

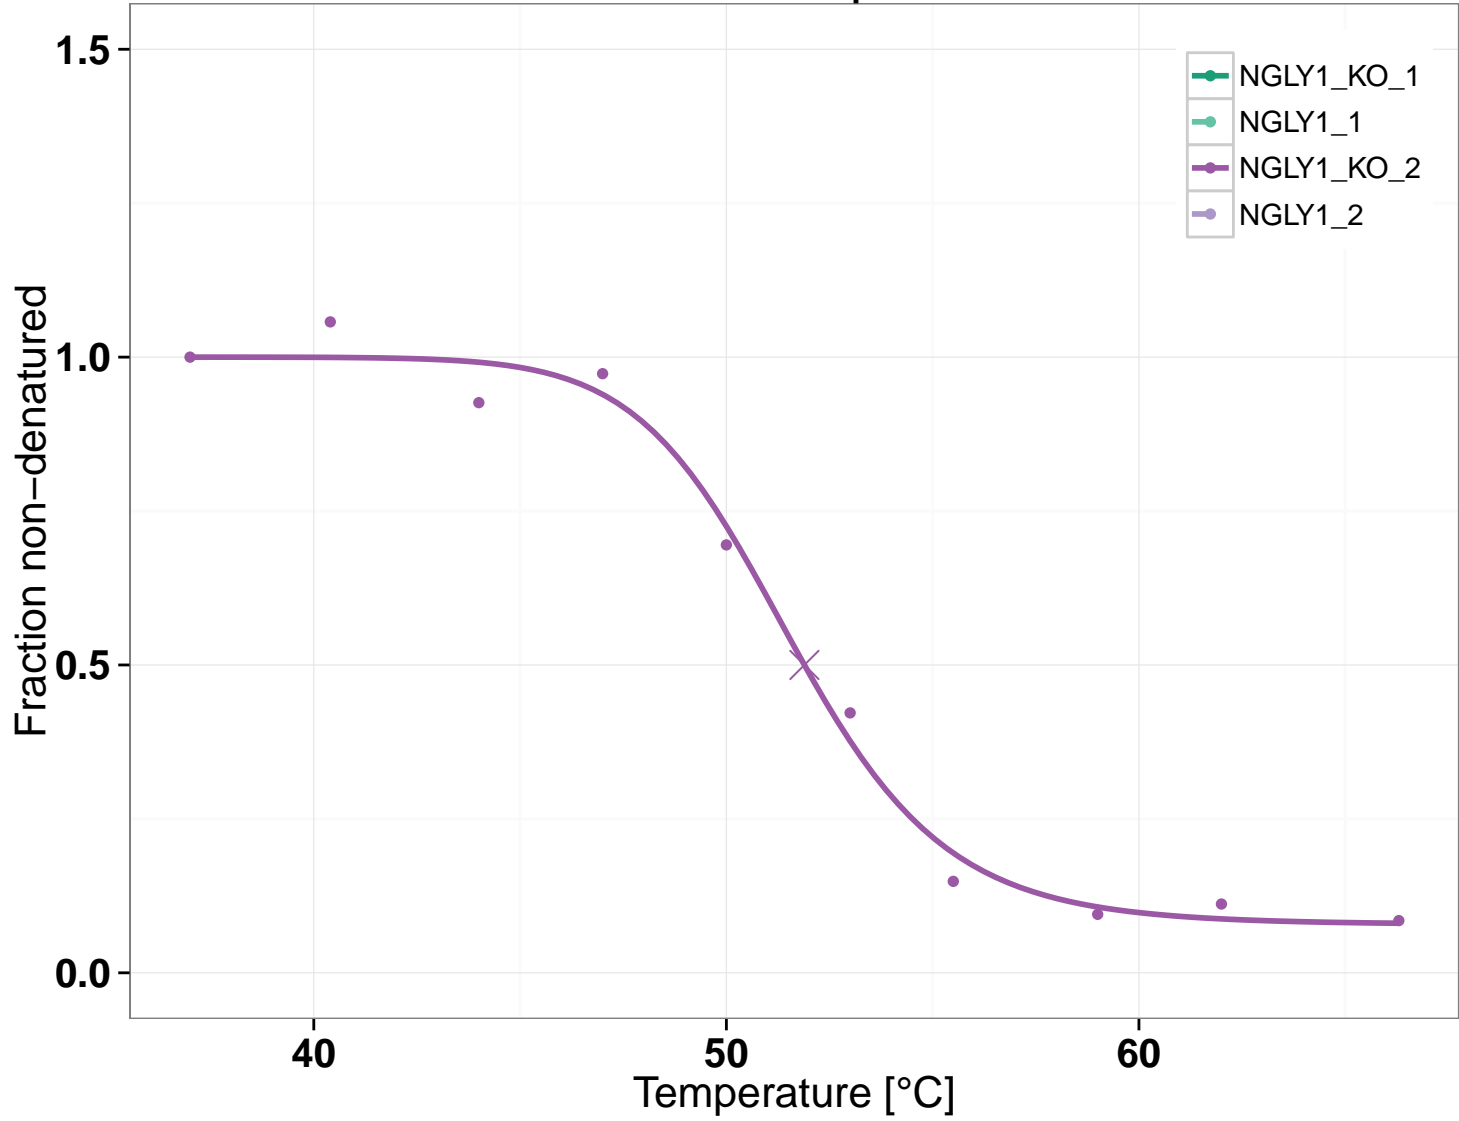

|            | meltPoint | slope | plateau | R2   |
|------------|-----------|-------|---------|------|
| NGLY1_KO_1 | —         | —     | —       | —    |
| NGLY1_1    | —         | —     | —       | —    |
| NGLY1_KO_2 | 51.89     | -0.12 | 0.08    | 0.99 |
| NGLY1_2    | —         | —     | —       | —    |

Supplement: Supplementary file 5809 [file 1]

# IPI00010740.1|SFPQ

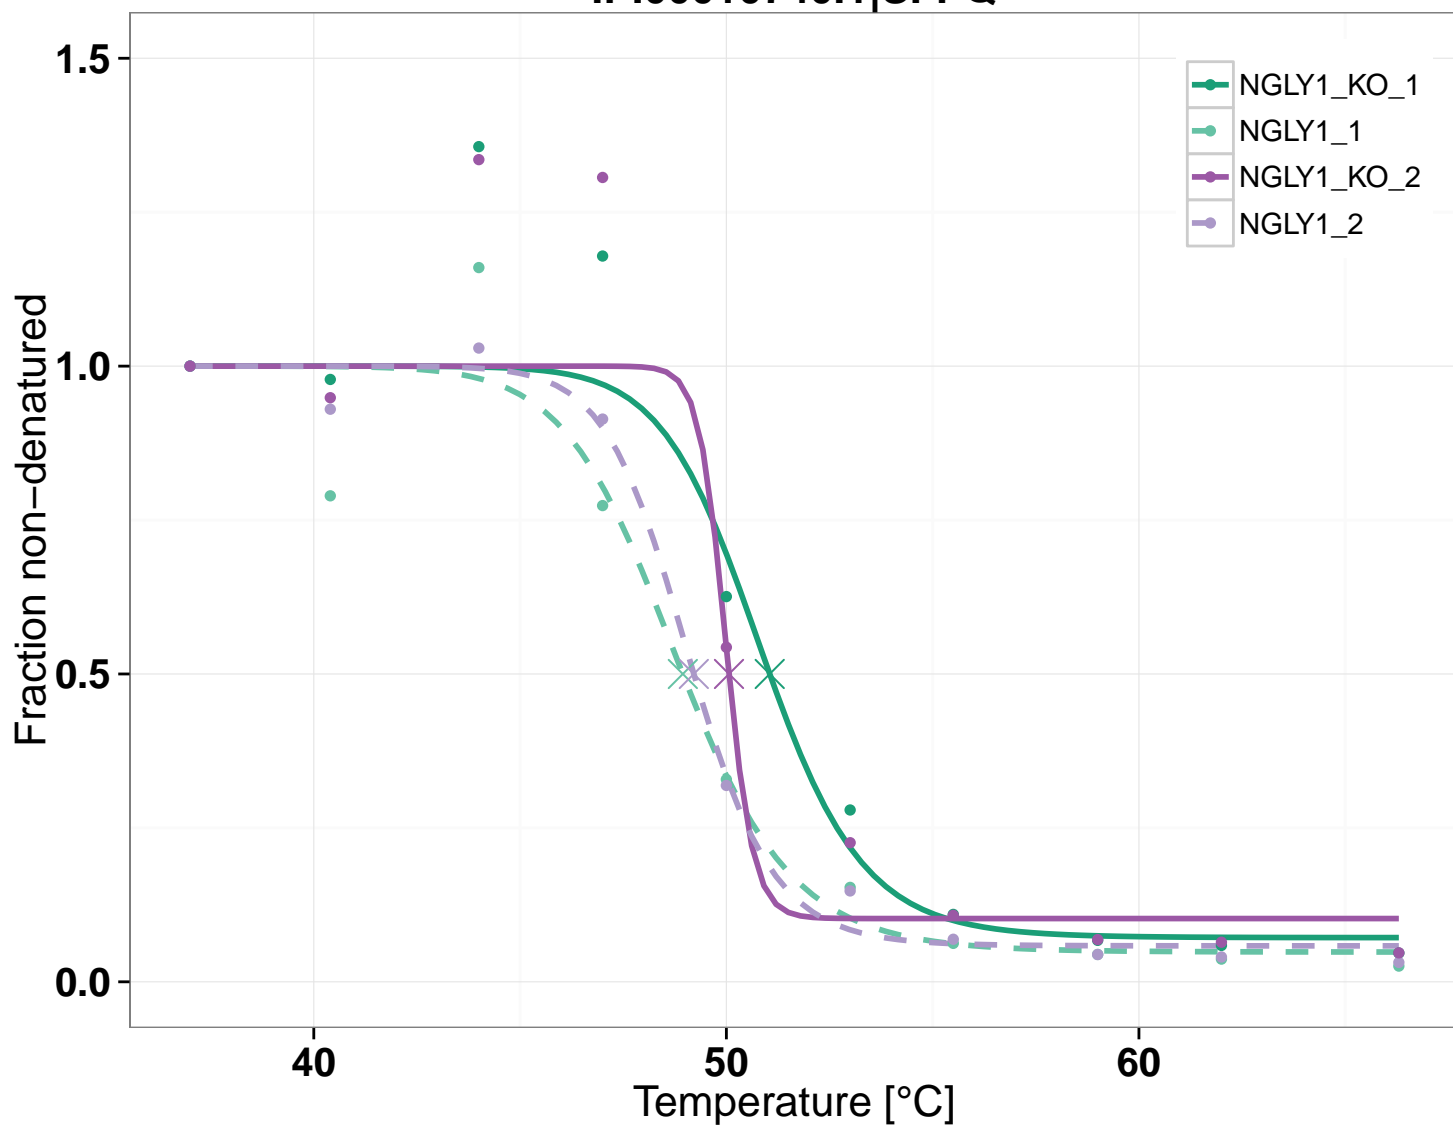

|            | meltPoint | slope | plateau | R2   |
|------------|-----------|-------|---------|------|
| NGLY1_KO_1 | 51.05     | -0.19 | 0.07    | 0.93 |
| NGLY1_1    | 48.94     | -0.17 | 0.05    | 0.96 |
| NGLY1_KO_2 | 50.06     | -0.69 | 0.1     | 0.91 |
| NGLY1_2    | 49.21     | -0.23 | 0.06    | 0.99 |

Supplement: Supplementary file 5810 [file 1]

IPI00910342.1|CCDC12

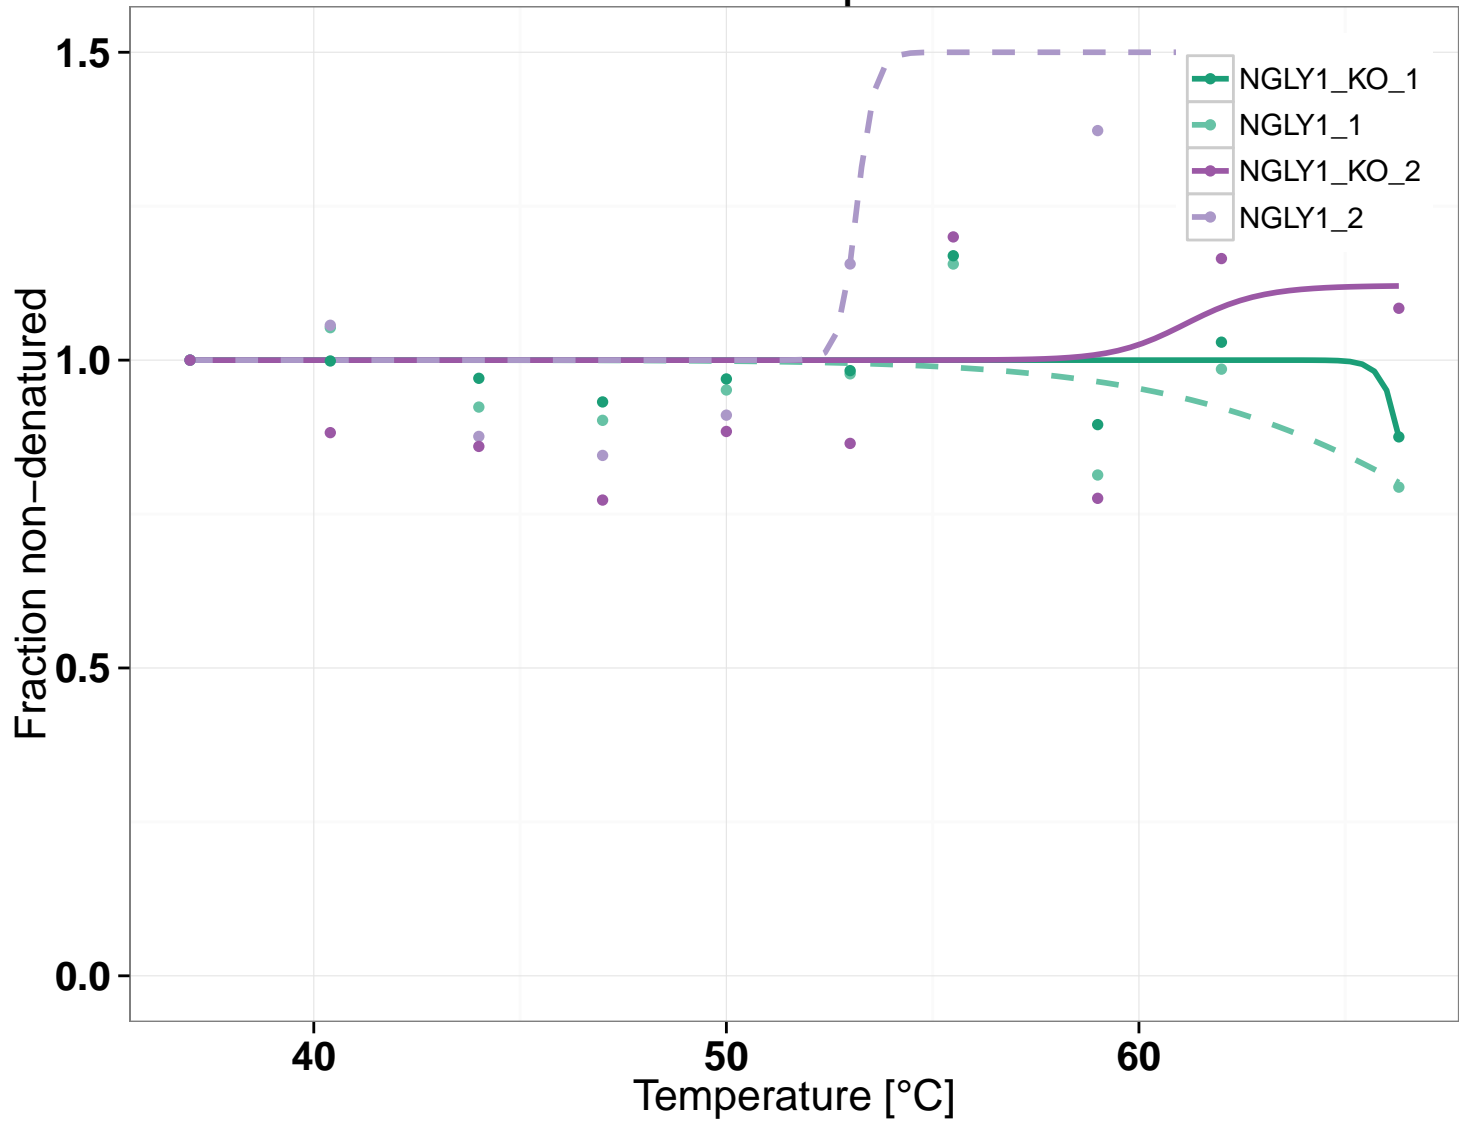

|            | meltPoint | slope | plateau | R2    |
|------------|-----------|-------|---------|-------|
| NGLY1_KO_1 | -         | -     | 0       | 0.21  |
| NGLY1_1    | -         | -     | 0       | 0.27  |
| NGLY1_KO_2 | -         | 0.034 | 1.12    | -0.02 |
| NGLY1_2    | -         | 0.59  | 1.5     | 0.55  |

Supplement: Supplementary file 5811 [file 1]

IPI00619921.3|DIDO1

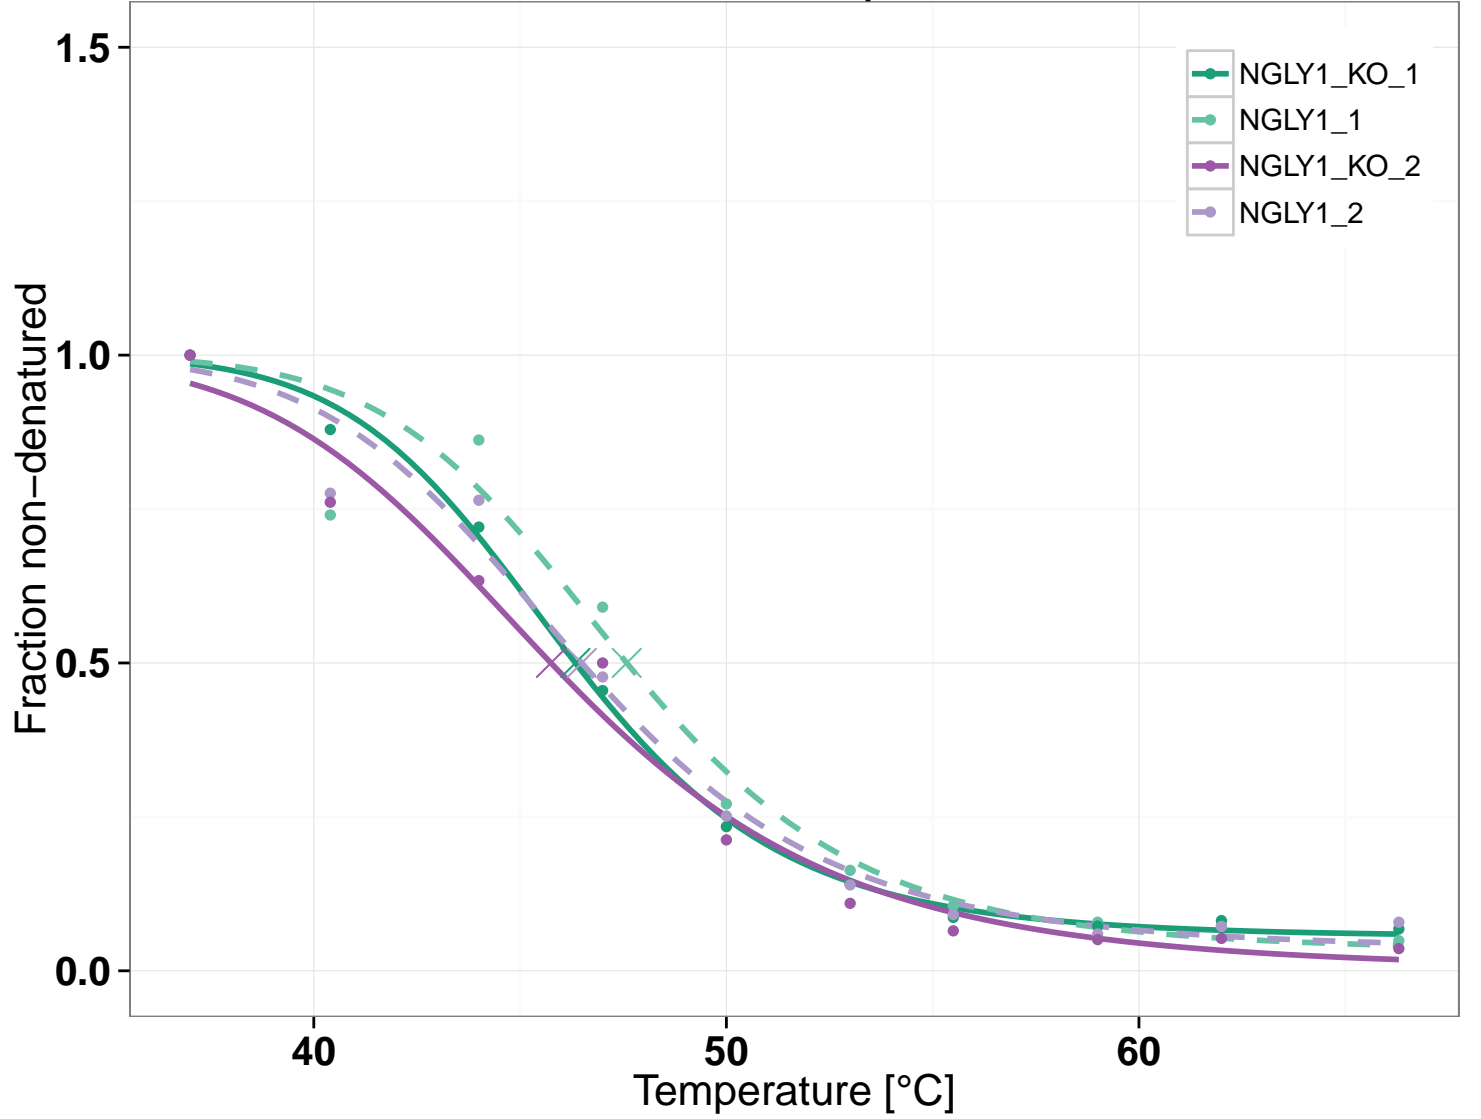

|            | meltPoint | slope  | plateau | R2   |
|------------|-----------|--------|---------|------|
| NGLY1_KO_1 | 46.34     | -0.089 | 0.05    | 1    |
| NGLY1_1    | 47.59     | -0.084 | 0.03    | 0.96 |
| NGLY1_KO_2 | 45.75     | -0.072 | 0       | 0.98 |
| NGLY1_2    | 46.5      | -0.078 | 0.03    | 0.98 |

Supplement: Supplementary file 5812 [file 1]

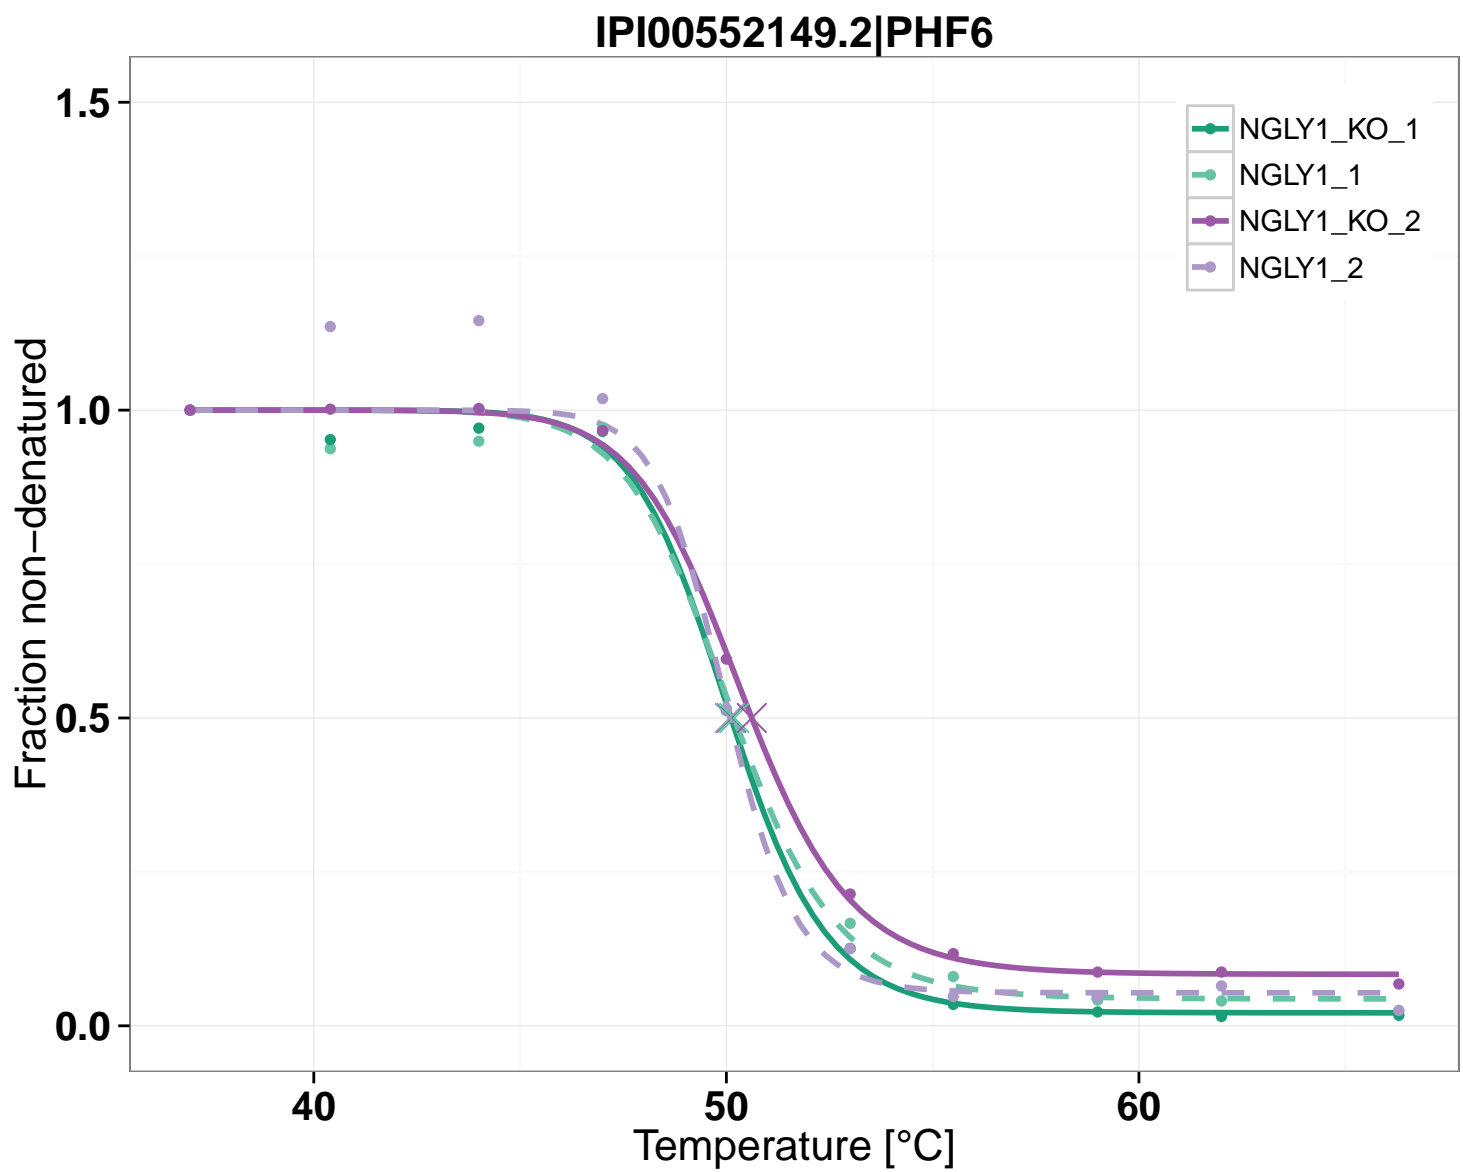

|            | meltPoint | slope | plateau | R2   |
|------------|-----------|-------|---------|------|
| NGLY1_KO_1 | 50.11     | -0.21 | 0.02    | 1    |
| NGLY1_1    | 50.19     | -0.19 | 0.04    | 0.99 |
| NGLY1_KO_2 | 50.62     | -0.17 | 0.08    | 1    |
| NGLY1_2    | 50.08     | -0.28 | 0.05    | 0.98 |

Supplement: Supplementary file 5813 [file 1]

# IPI00002284.1|POLL

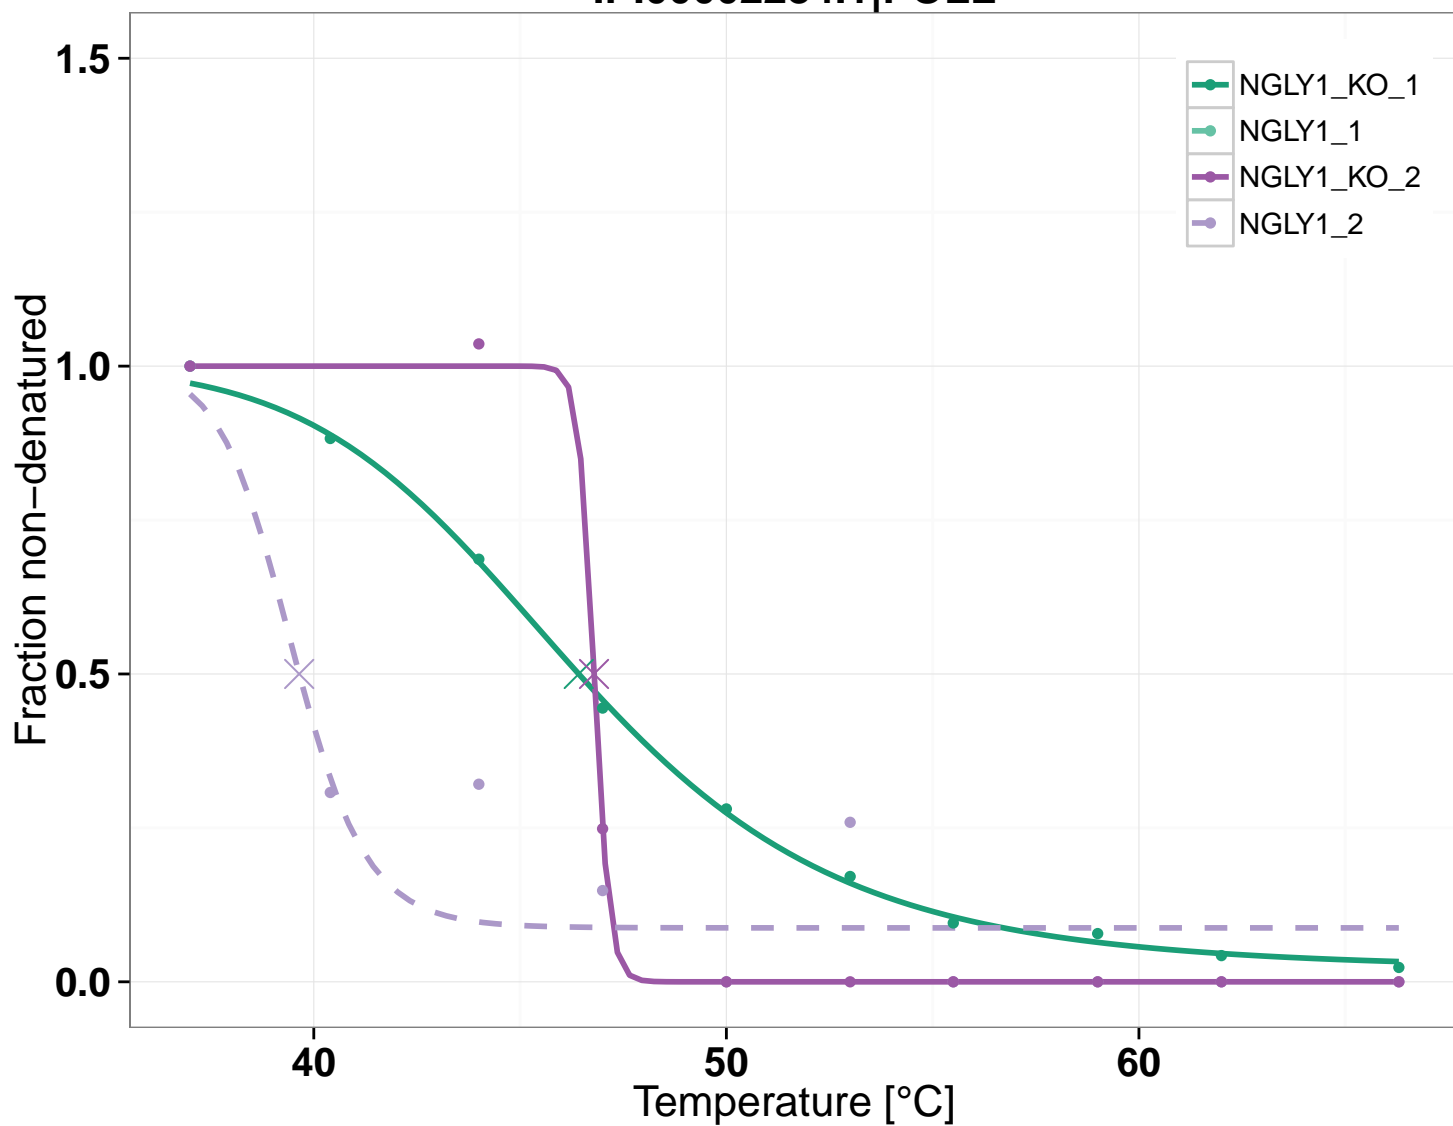

|            | meltPoint | slope  | plateau | R2   |
|------------|-----------|--------|---------|------|
| NGLY1_KO_1 | 46.42     | -0.076 | 0.02    | 1    |
| NGLY1_1    | -         | -      | -       | -    |
| NGLY1_KO_2 | 46.79     | -1.3   | 0       | 0.91 |
| NGLY1_2    | 39.65     | -0.26  | 0.09    | 0.86 |

Supplement: Supplementary file 5814 [file 1]

# IPI00220242.6|GRK6

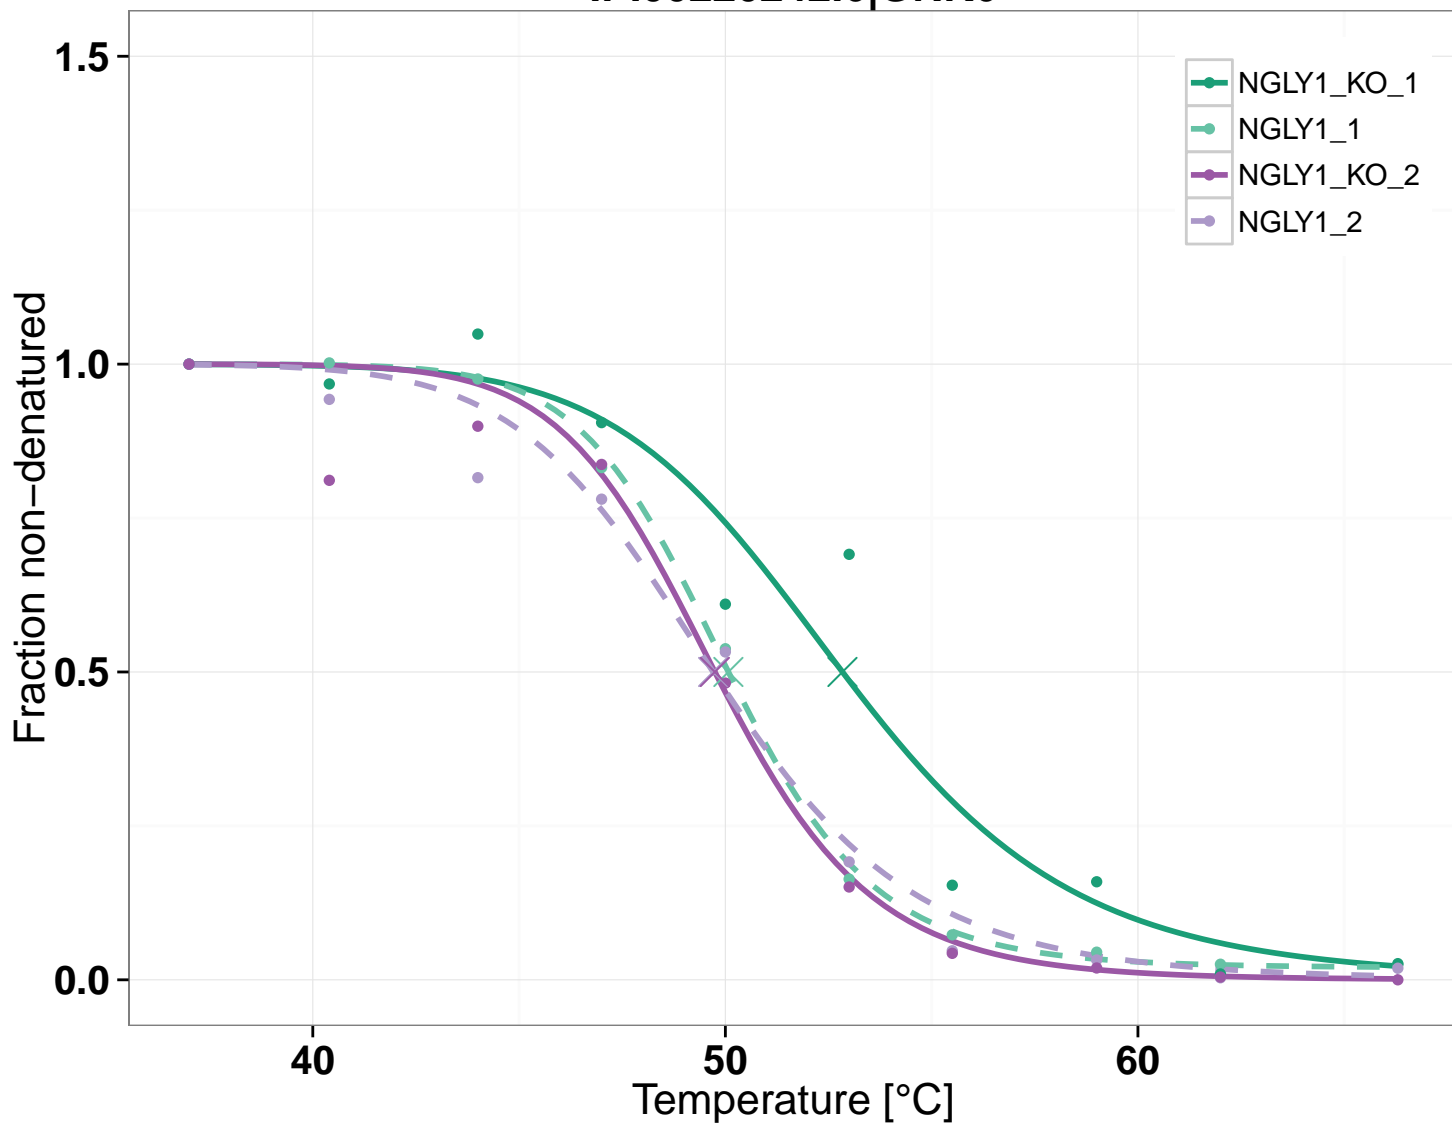

|            | meltPoint | slope  | plateau | R2   |
|------------|-----------|--------|---------|------|
| NGLY1_KO_1 | 52.84     | -0.089 | 0       | 0.95 |
| NGLY1_1    | 50.07     | -0.14  | 0.02    | 1    |
| NGLY1_KO_2 | 49.75     | -0.13  | 0       | 0.97 |
| NGLY1_2    | 49.7      | -0.1   | 0       | 0.98 |

Supplement: Supplementary file 5815 [file 1]

# IPI00062869.3|LIN37

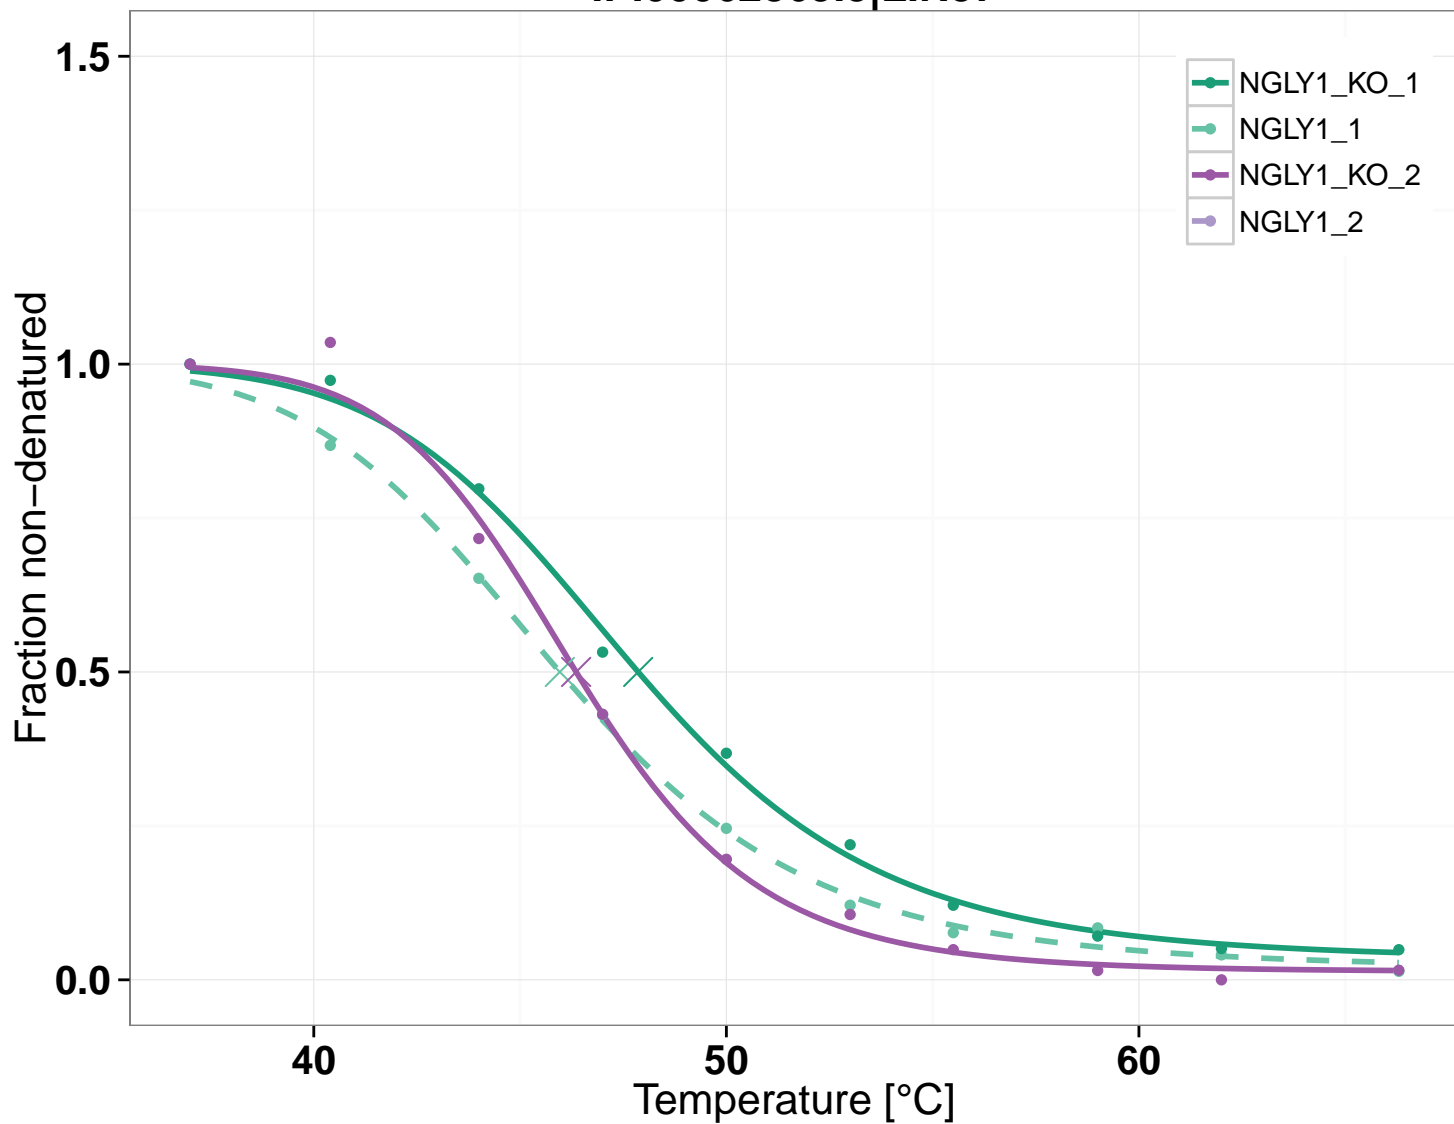

|            | meltPoint | slope | plateau | R2   |
|------------|-----------|-------|---------|------|
| NGLY1_KO_1 | 47.86     | -0.08 | 0.03    | 1    |
| NGLY1_1    | 45.96     | -0.08 | 0.02    | 1    |
| NGLY1_KO_2 | 46.36     | -0.11 | 0.01    | 0.99 |
| NGLY1_2    | -         | -     | -       | -    |

Supplement: Supplementary file 5816 [file 1]

IPI00294186.4|LACTB

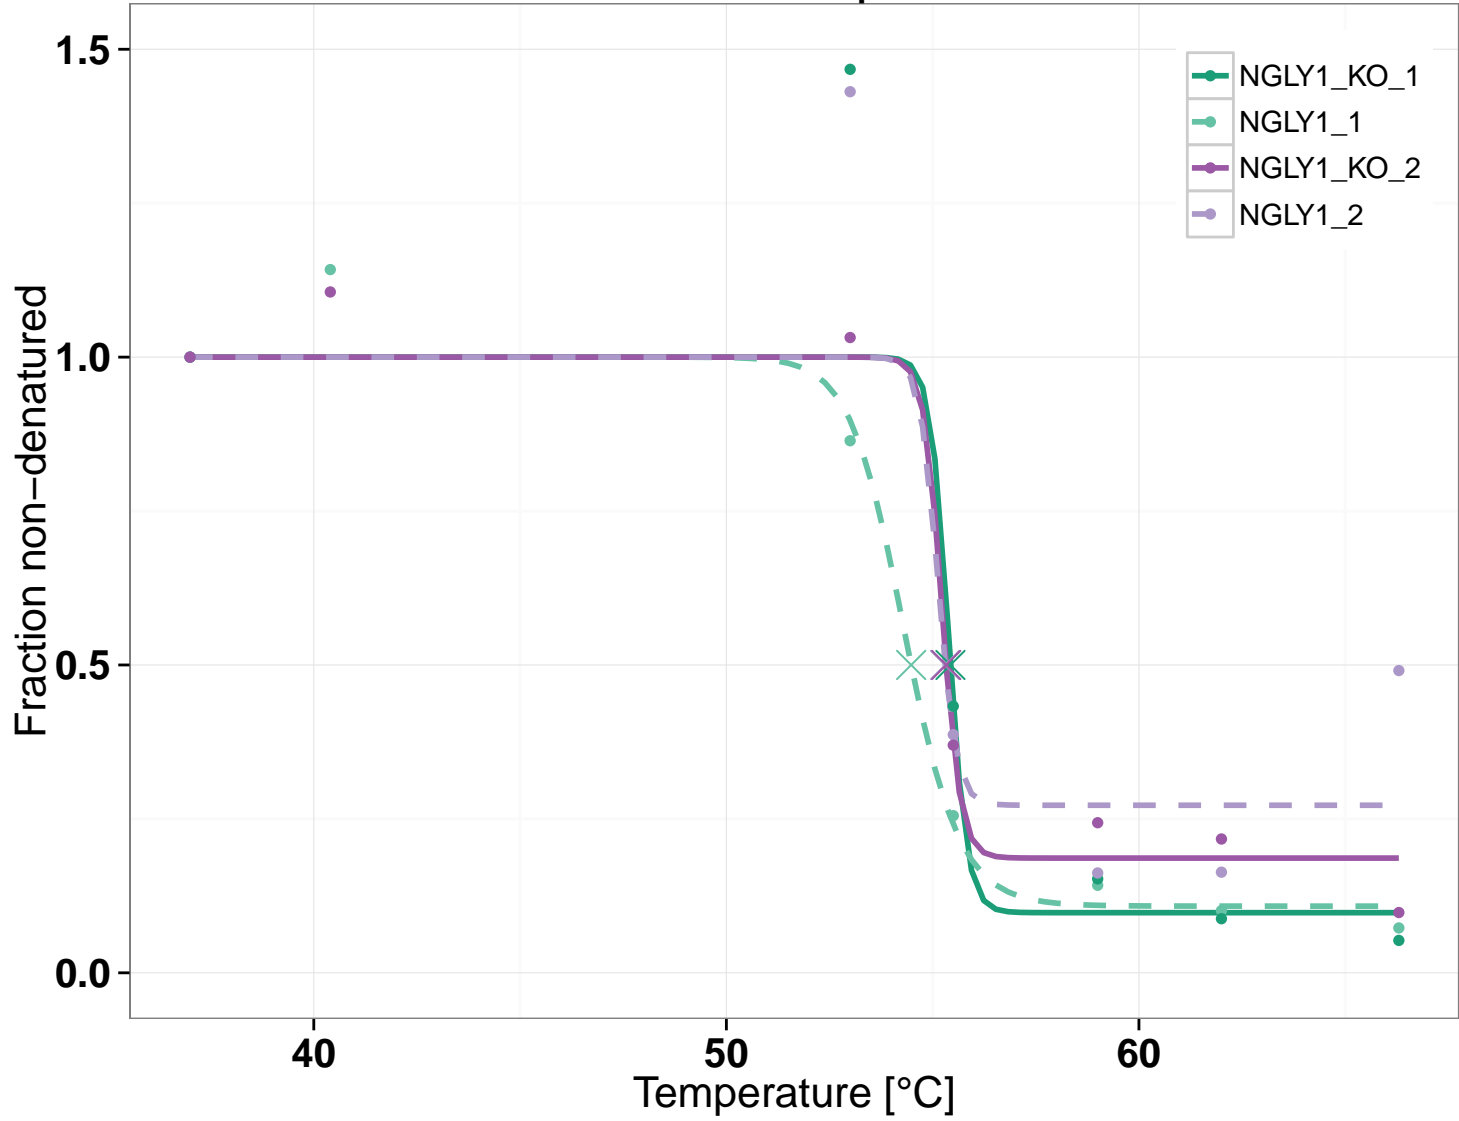

|            | meltPoint | slope | plateau | R2    |
|------------|-----------|-------|---------|-------|
| NGLY1_KO_1 | 55.43     | -1    | 0.1     | -0.15 |
| NGLY1_1    | 54.48     | -0.34 | 0.11    | 0.22  |
| NGLY1_KO_2 | 55.33     | -0.92 | 0.19    | 0.08  |
| NGLY1_2    | 55.3      | -0.83 | 0.27    | -0.18 |

Supplement: Supplementary file 5817 [file 1]

IPI00329238.1|C10ORF78

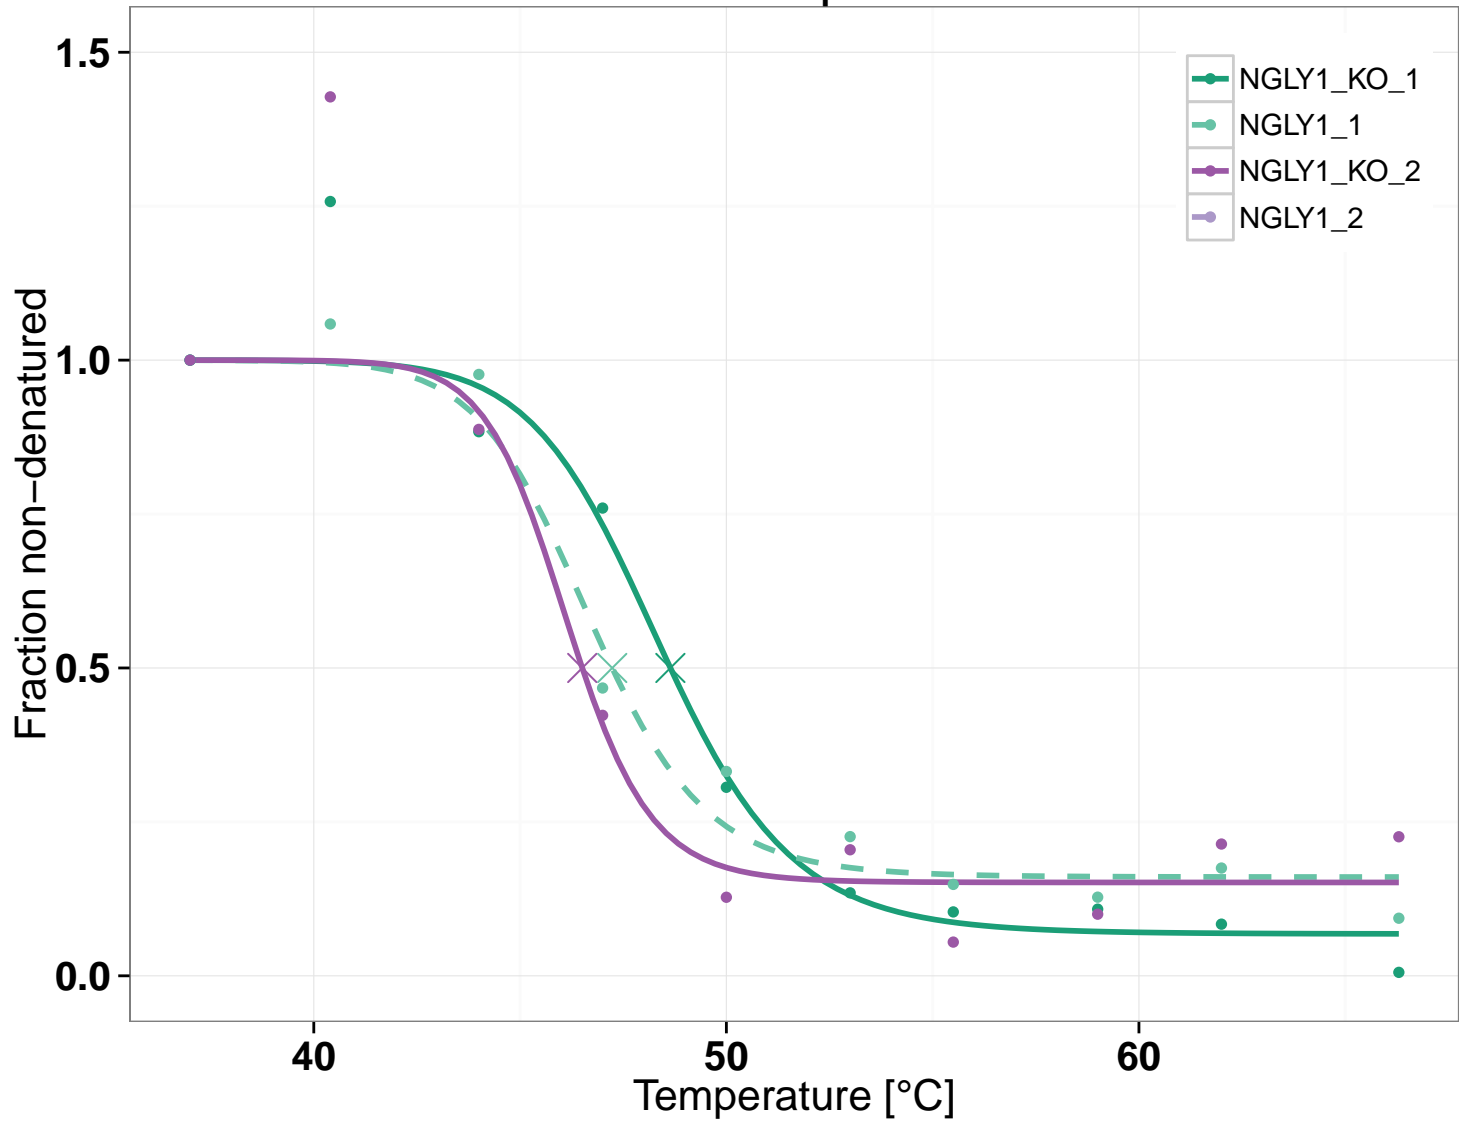

|            | meltPoint | slope | plateau | R2   |
|------------|-----------|-------|---------|------|
| NGLY1_KO_1 | 48.64     | -0.15 | 0.07    | 0.96 |
| NGLY1_1    | 47.23     | -0.15 | 0.16    | 0.98 |
| NGLY1_KO_2 | 46.51     | -0.21 | 0.15    | 0.89 |
| NGLY1_2    | -         | -     | -       | -    |

Supplement: Supplementary file 5818 [file 1]

# IPI00010212.4|TUT1

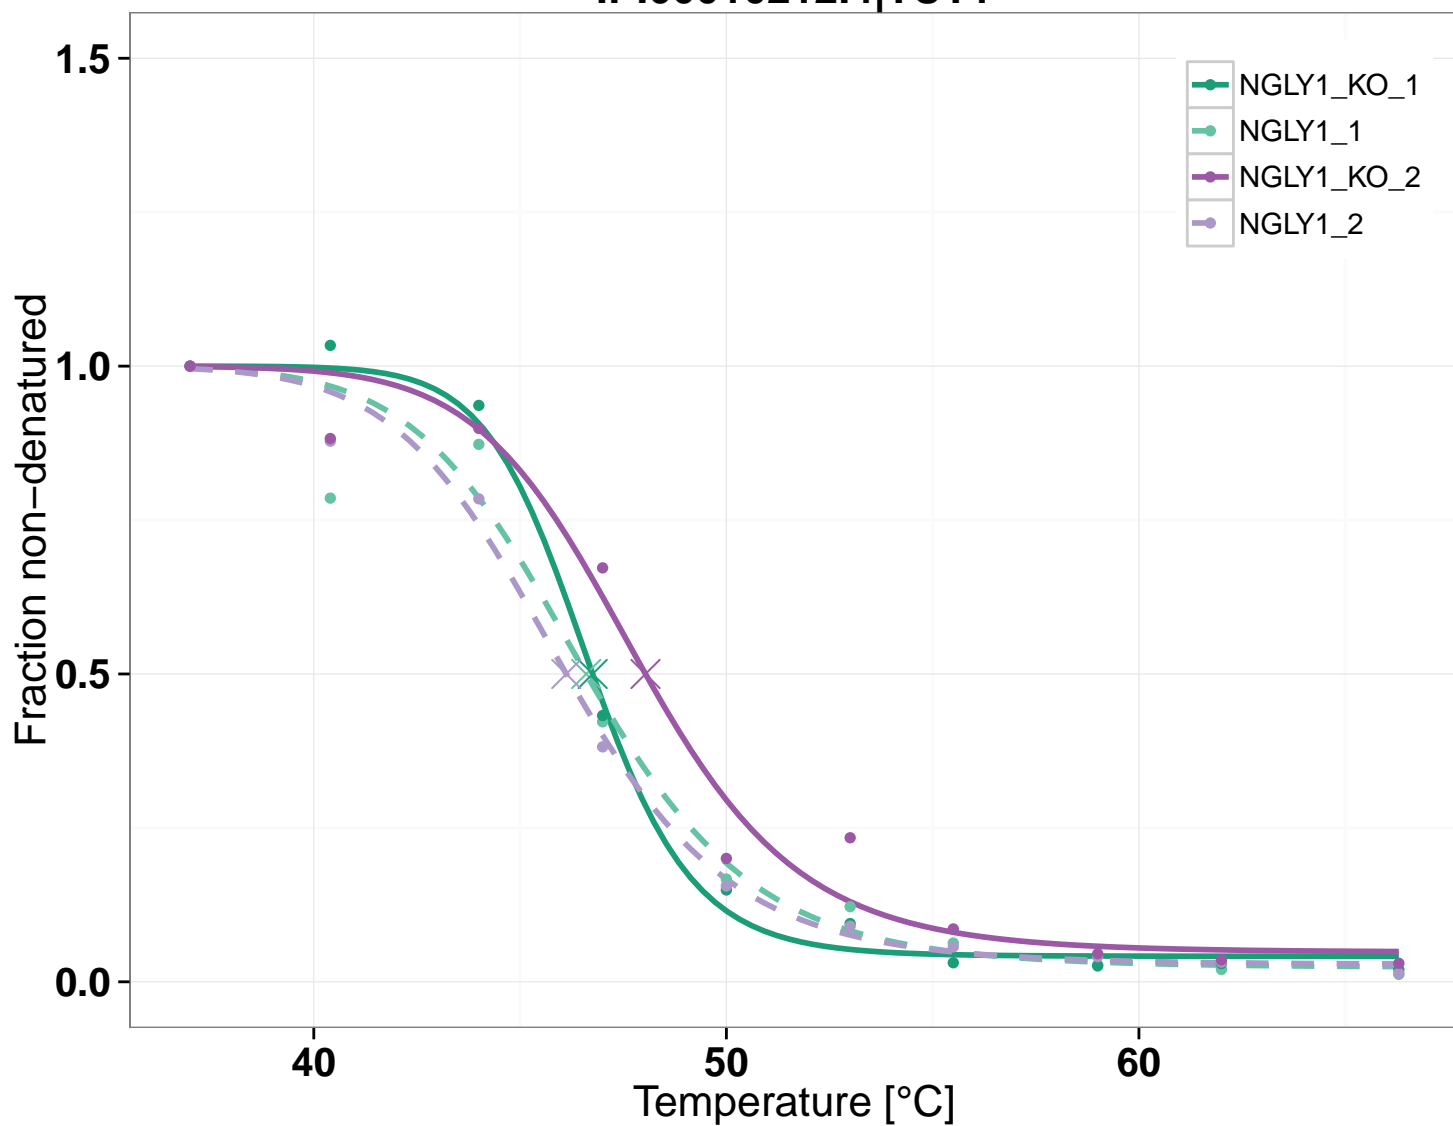

|            | meltPoint | slope | plateau | R2   |
|------------|-----------|-------|---------|------|
| NGLY1_KO_1 | 46.76     | -0.19 | 0.04    | 1    |
| NGLY1_1    | 46.6      | -0.12 | 0.02    | 0.97 |
| NGLY1_KO_2 | 48.04     | -0.12 | 0.05    | 0.98 |
| NGLY1_2    | 46.12     | -0.12 | 0.03    | 0.99 |

Supplement: Supplementary file 5819 [file 1]

IPI00004317.1|POLG

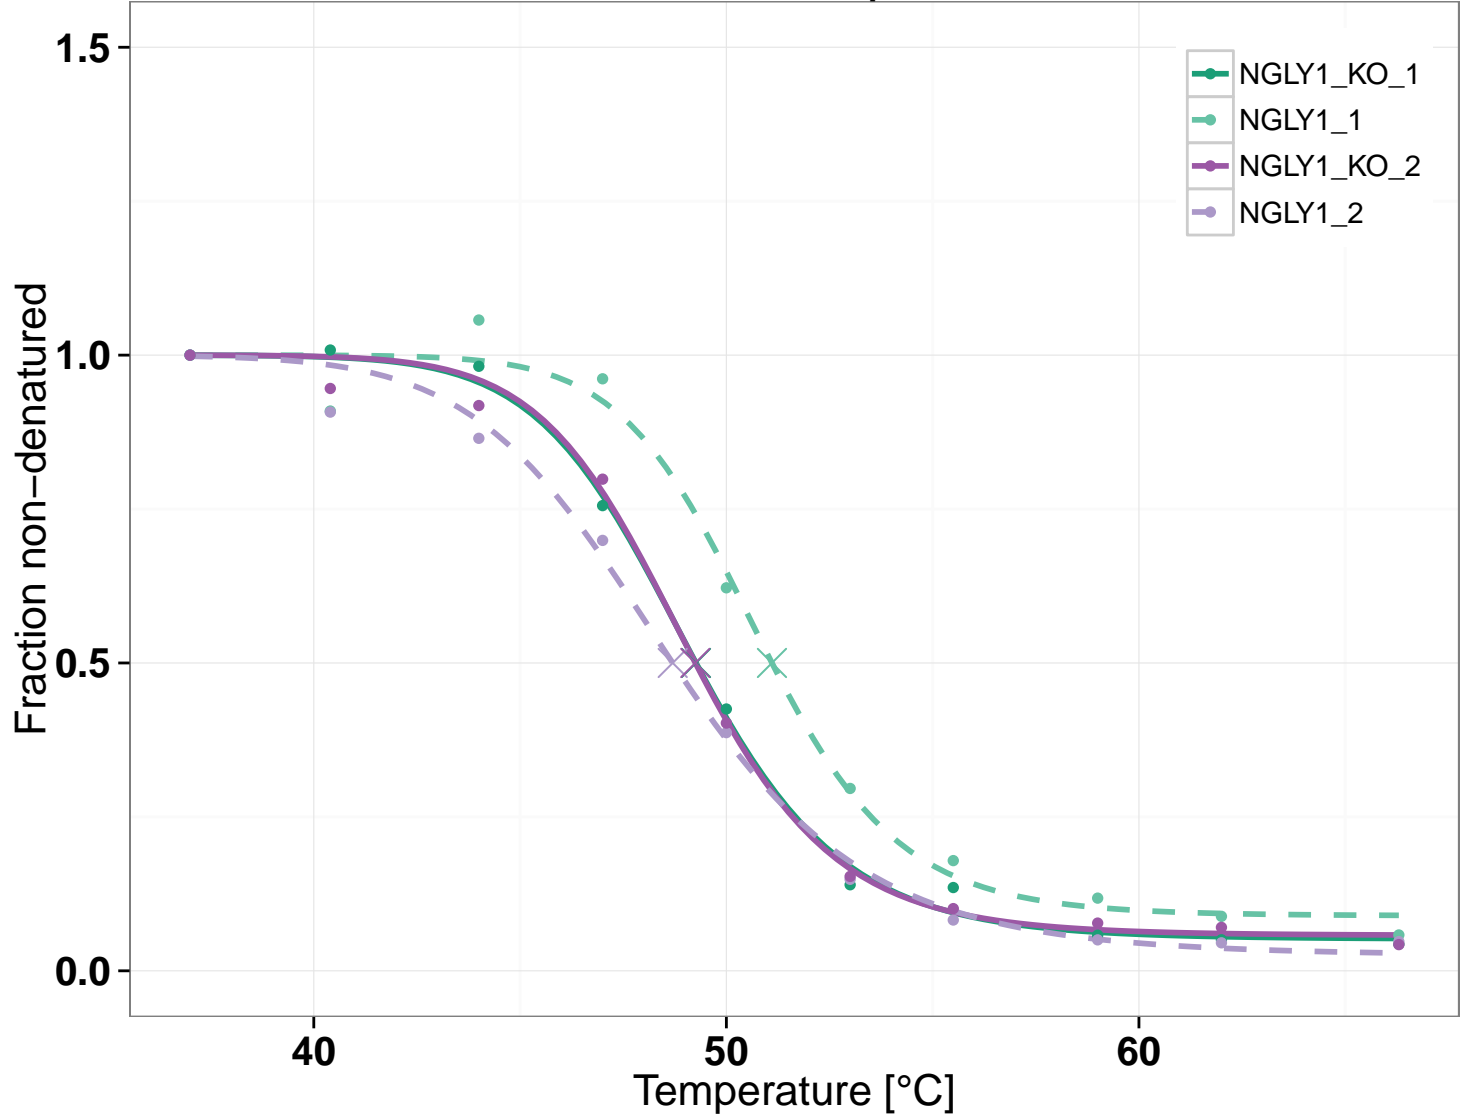

|            | meltPoint | slope | plateau | R2   |
|------------|-----------|-------|---------|------|
| NGLY1_KO_1 | 49.26     | -0.13 | 0.05    | 1    |
| NGLY1_1    | 51.1      | -0.14 | 0.09    | 0.99 |
| NGLY1_KO_2 | 49.25     | -0.13 | 0.06    | 1    |
| NGLY1_2    | 48.7      | -0.1  | 0.02    | 0.99 |

Supplement: Supplementary file 5820 [file 1]

IPI00556393.1|FGFR4

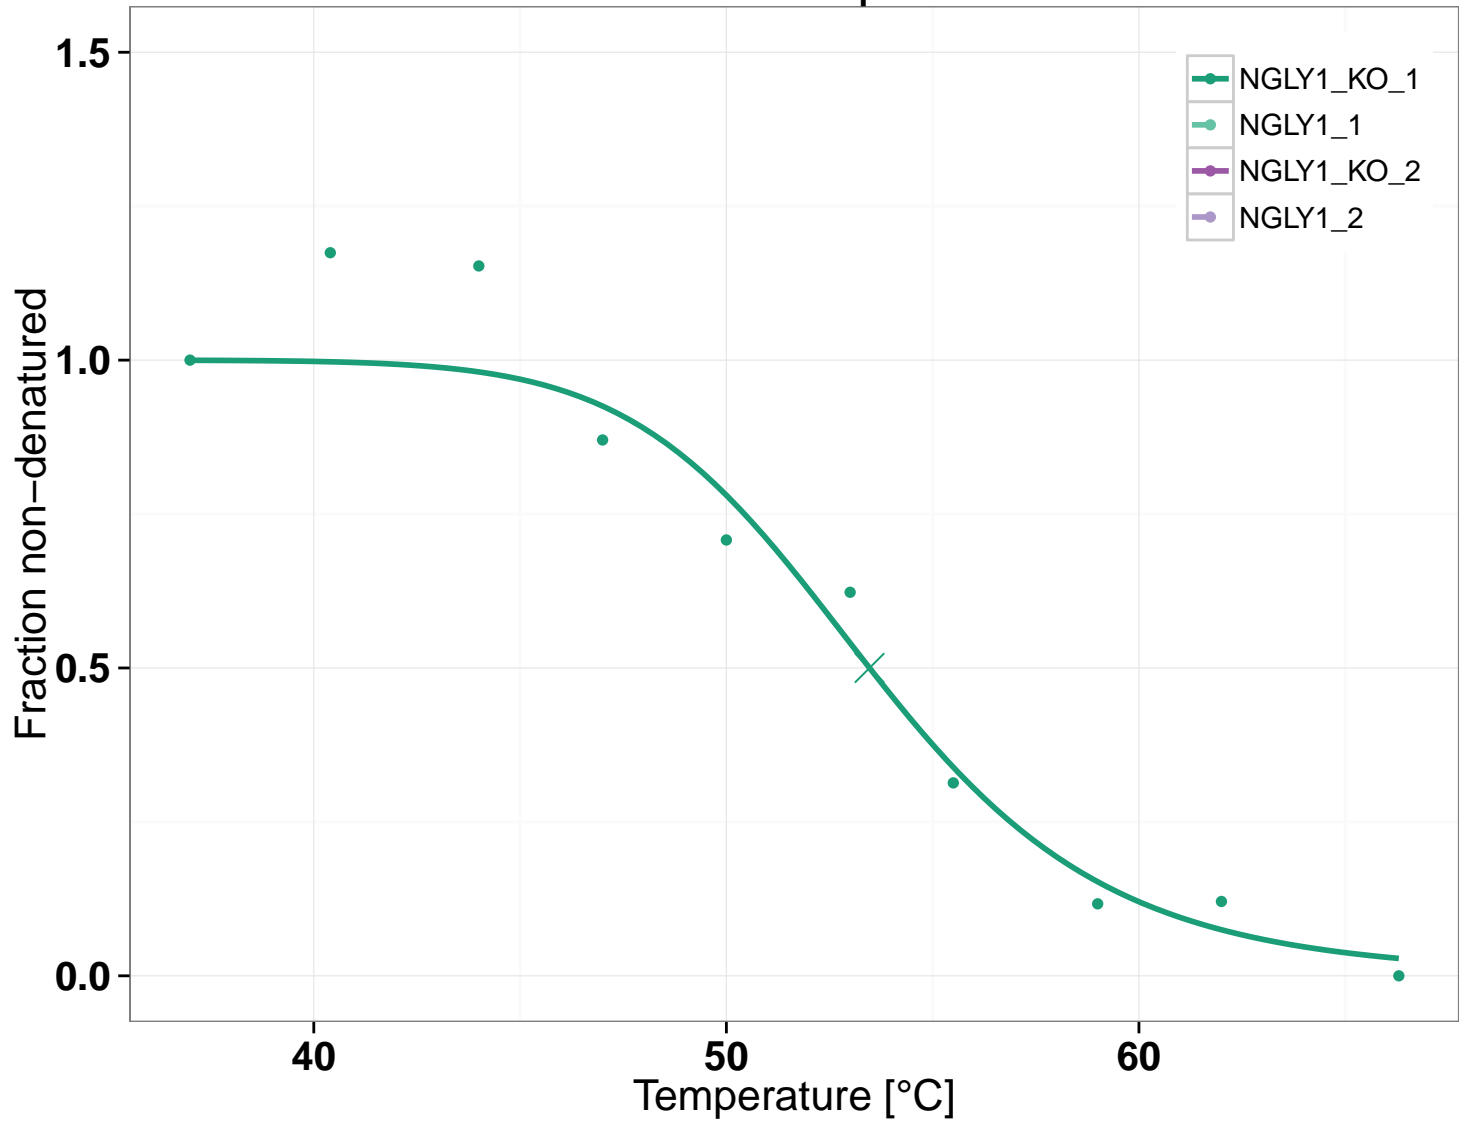

|            | meltPoint | slope  | plateau | R2   |
|------------|-----------|--------|---------|------|
| NGLY1_KO_1 | 53.47     | -0.086 | 0       | 0.95 |
| NGLY1_1    | -         | -      | -       | -    |
| NGLY1_KO_2 | -         | -      | -       | -    |
| NGLY1_2    | -         | -      | -       | -    |

Supplement: Supplementary file 5821 [file 1]

# IPI00553185.2|CCT3

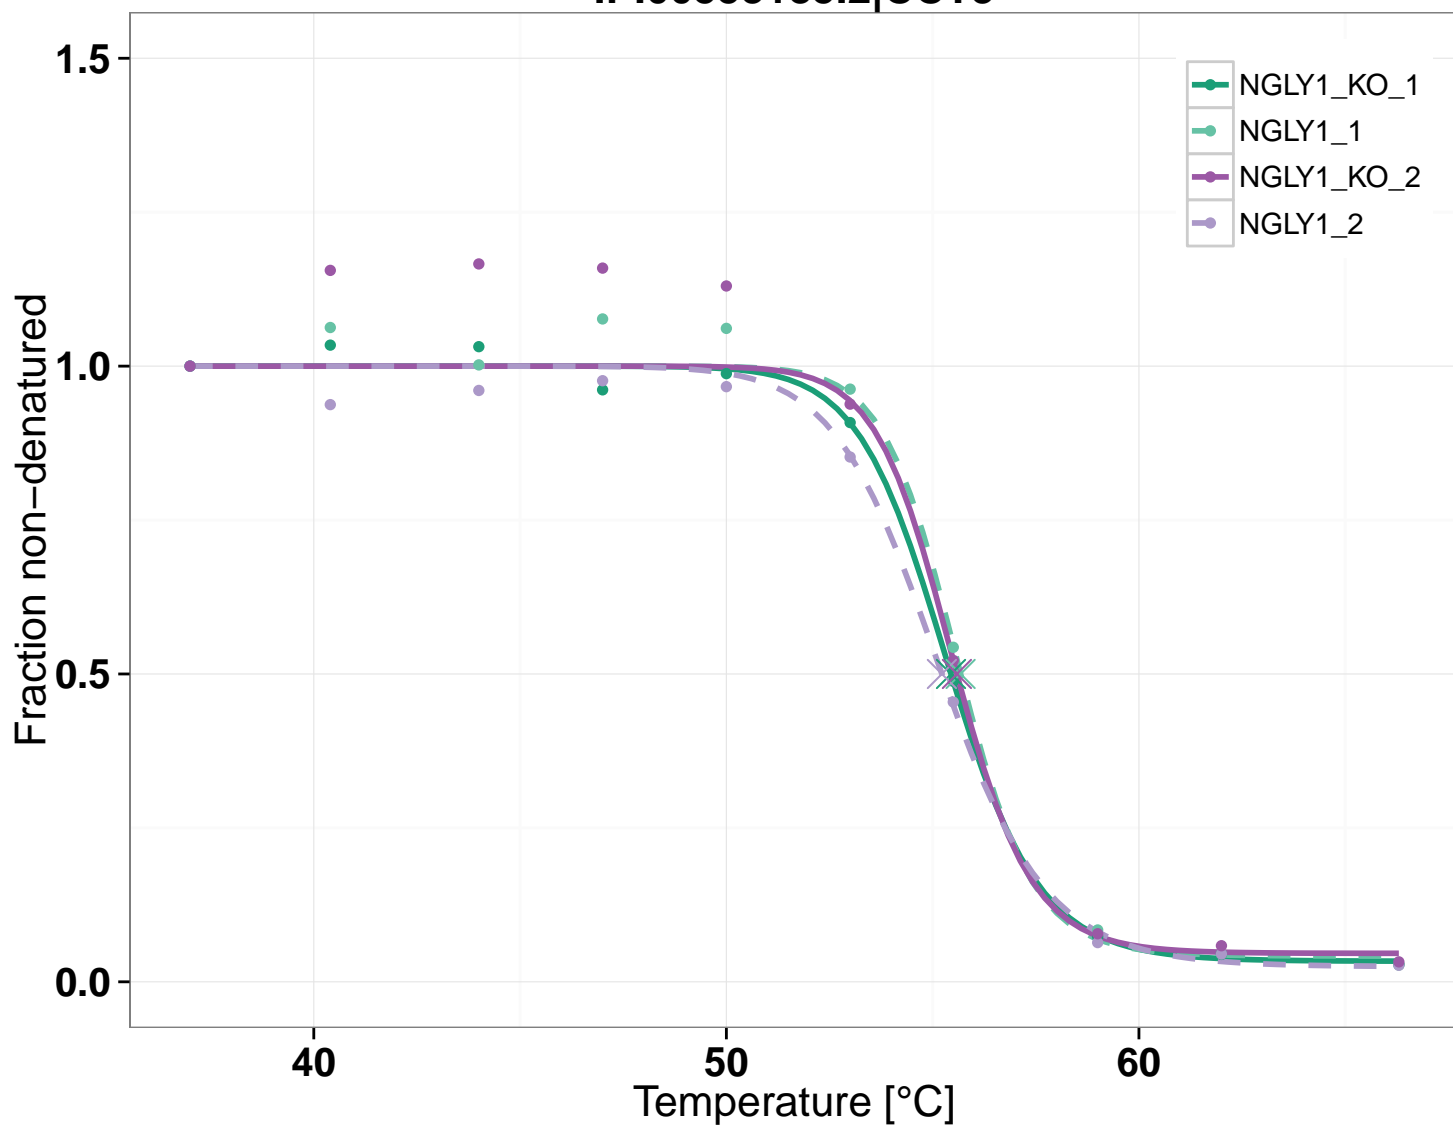

|            | meltPoint | slope | plateau | R2   |
|------------|-----------|-------|---------|------|
| NGLY1_KO_1 | 55.44     | -0.22 | 0.03    | 1    |
| NGLY1_1    | 55.68     | -0.26 | 0.04    | 0.99 |
| NGLY1_KO_2 | 55.59     | -0.25 | 0.05    | 0.96 |
| NGLY1_2    | 55.22     | -0.19 | 0.02    | 1    |

Supplement: Supplementary file 5822 [file 1]

# IPI00102128.1|PRMT6

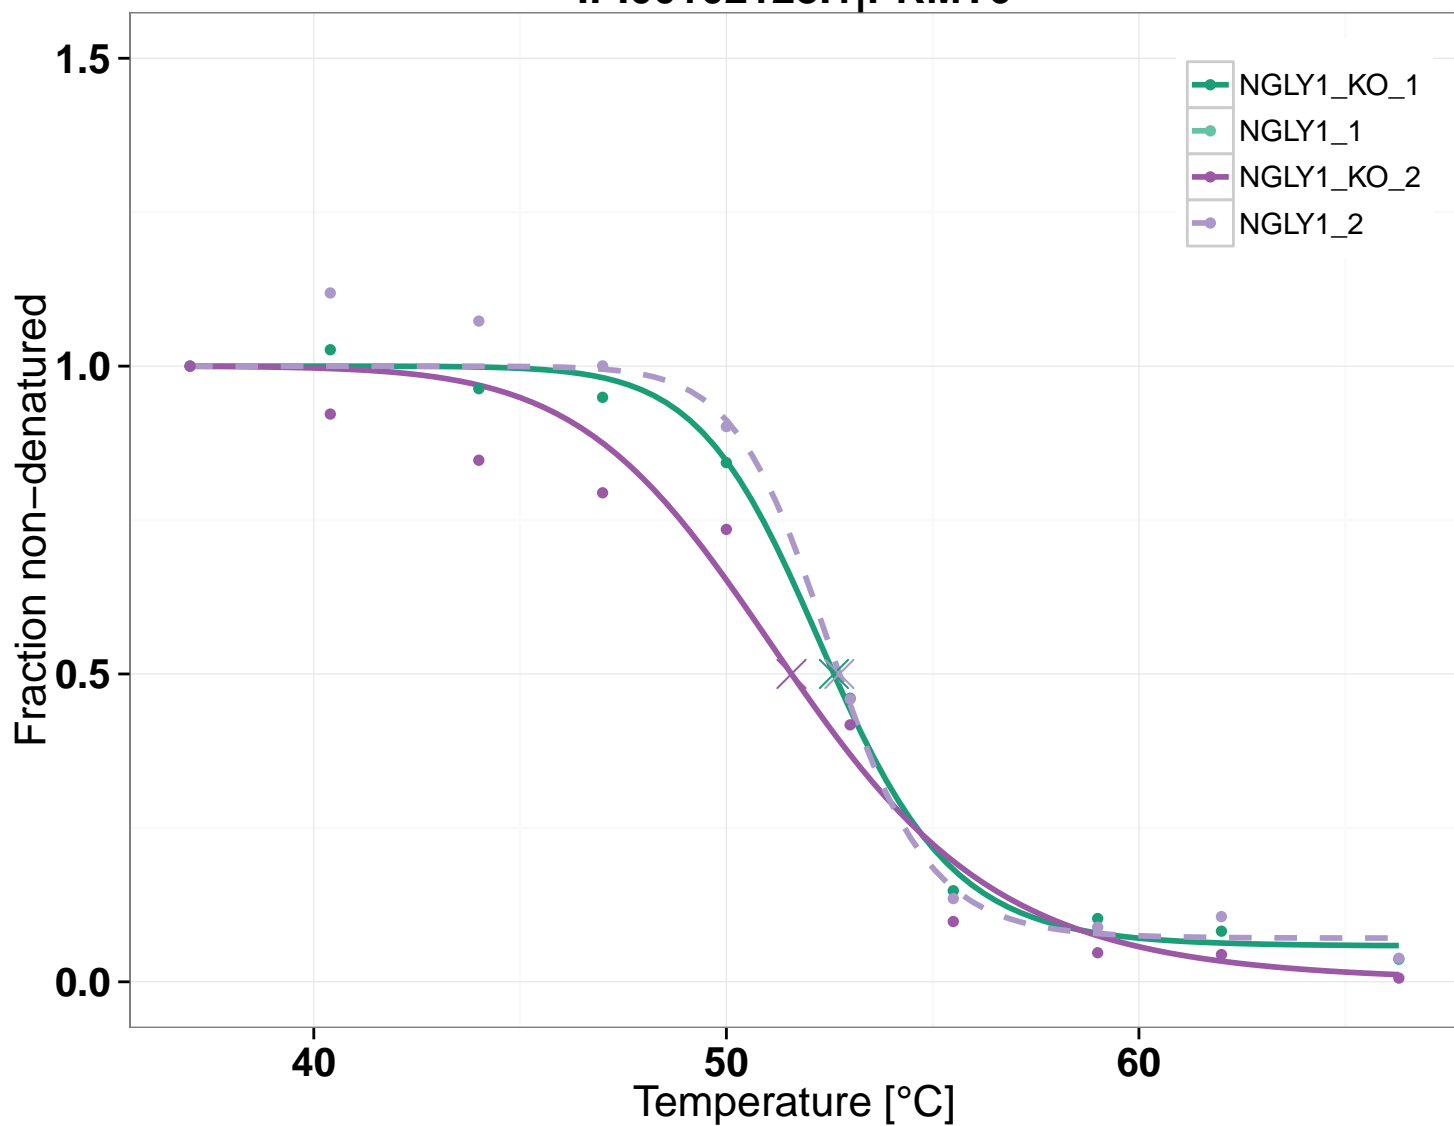

|            | meltPoint | slope  | plateau | R2   |
|------------|-----------|--------|---------|------|
| NGLY1_KO_1 | 52.61     | -0.15  | 0.06    | 1    |
| NGLY1_1    | -         | -      | -       | -    |
| NGLY1_KO_2 | 51.58     | -0.098 | 0       | 0.97 |
| NGLY1_2    | 52.74     | -0.2   | 0.07    | 0.99 |

Supplement: Supplementary file 5823 [file 1]

IPI00760741.3|ZSWIM7

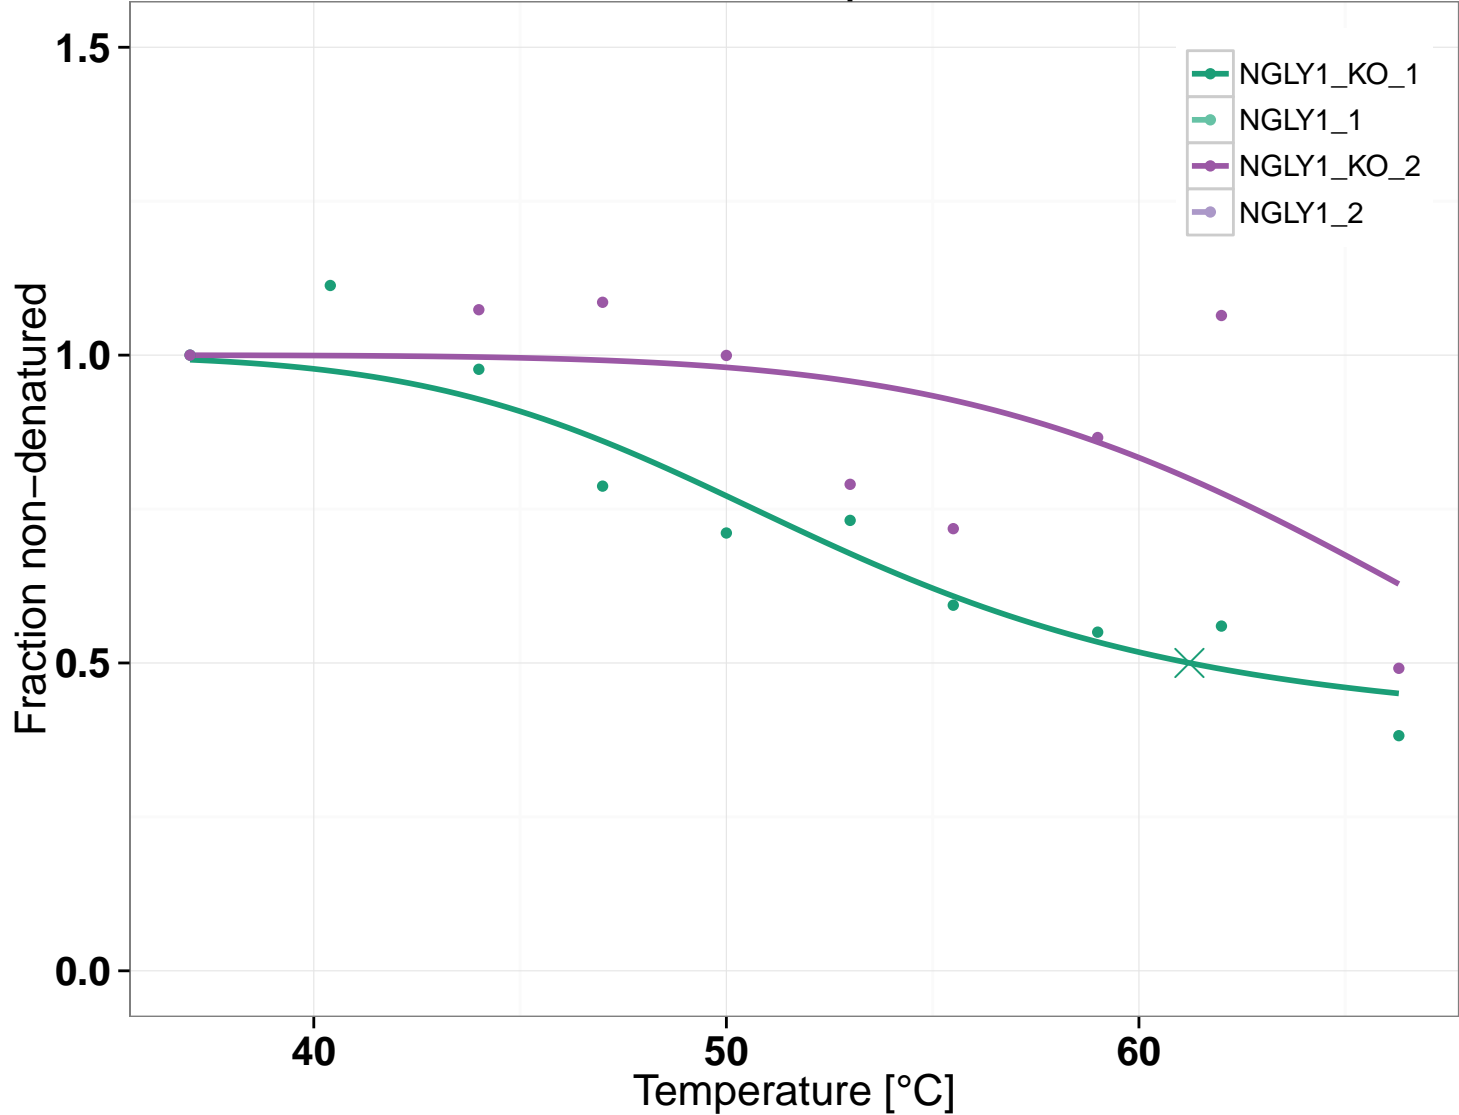

|            | meltPoint | slope  | plateau | R2   |
|------------|-----------|--------|---------|------|
| NGLY1_KO_1 | 61.22     | -0.032 | 0.39    | 0.91 |
| NGLY1_1    | -         | -      | -       | -    |
| NGLY1_KO_2 | -         | -      | 0       | 0.28 |
| NGLY1_2    | -         | -      | -       | -    |

Supplement: Supplementary file 5824 [file 1]
