# Supplementary material (part 59 of 85)
Source: publisher figshare collection journal article supplement (https://gsajournals.figshare.com/articles/dataset/_/12014913)

# IPI00646350.2|NAE1

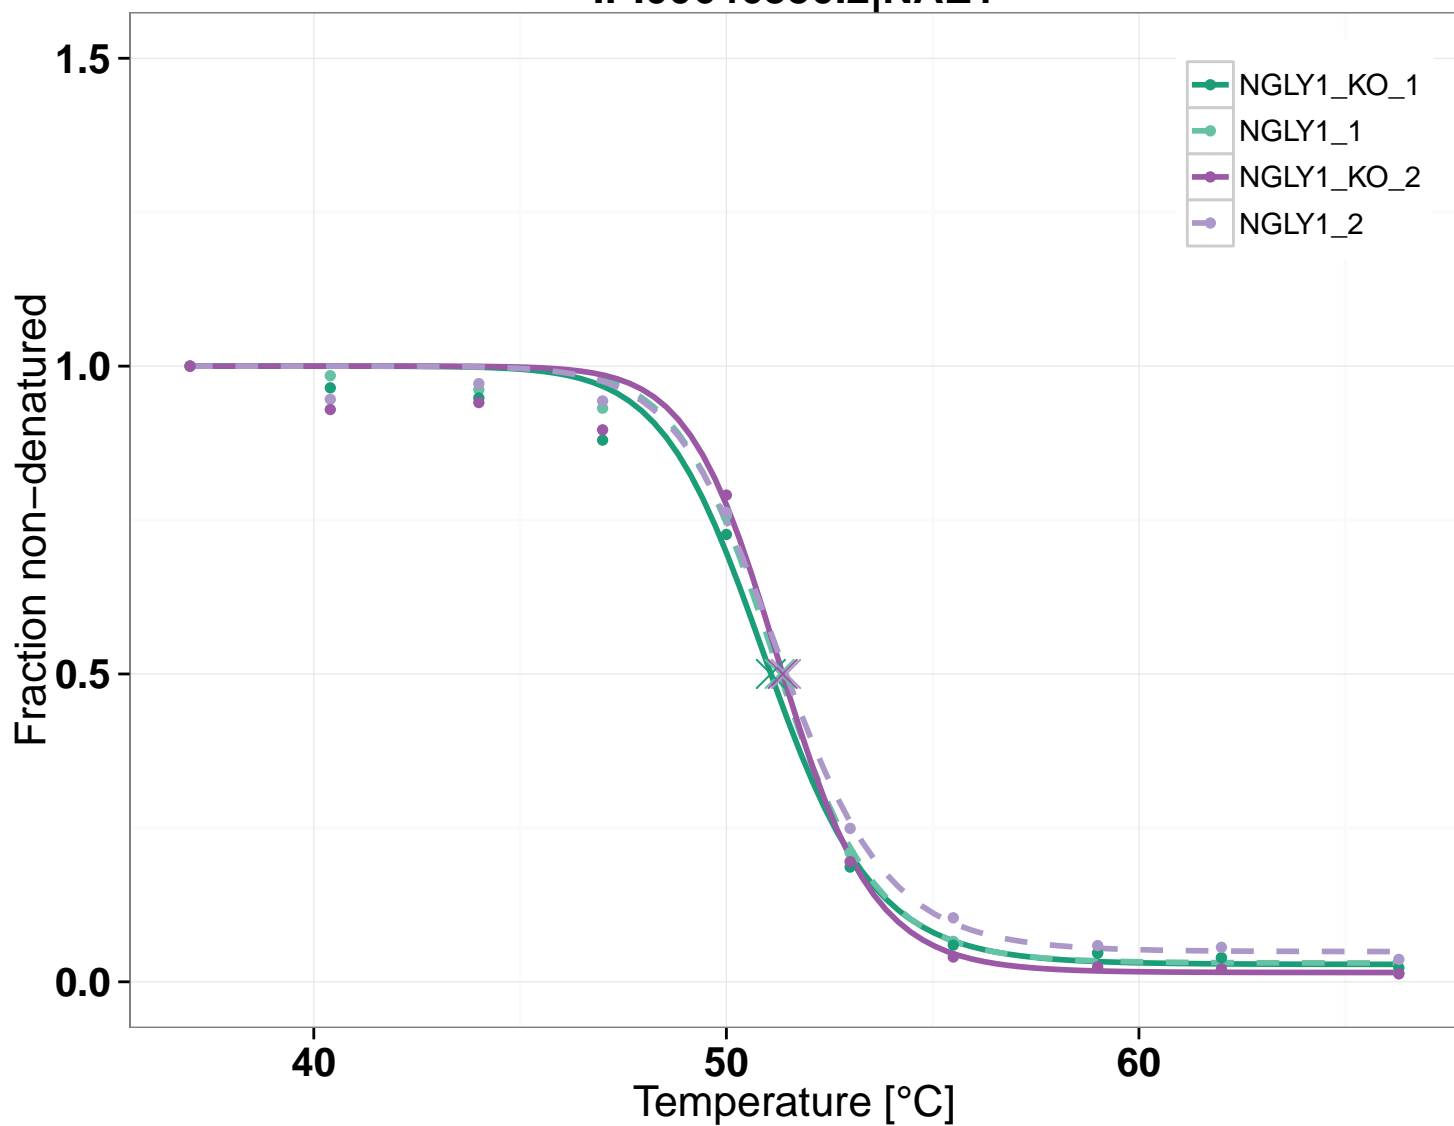

|            | meltPoint | slope | plateau | R2   |
|------------|-----------|-------|---------|------|
| NGLY1_KO_1 | 51.08     | -0.19 | 0.03    | 0.99 |
| NGLY1_1    | 51.29     | -0.2  | 0.03    | 1    |
| NGLY1_KO_2 | 51.36     | -0.22 | 0.02    | 0.99 |
| NGLY1_2    | 51.45     | -0.18 | 0.05    | 1    |

Supplement: Supplementary file 5825 [file 1]

# IPI00013832.3|GATC

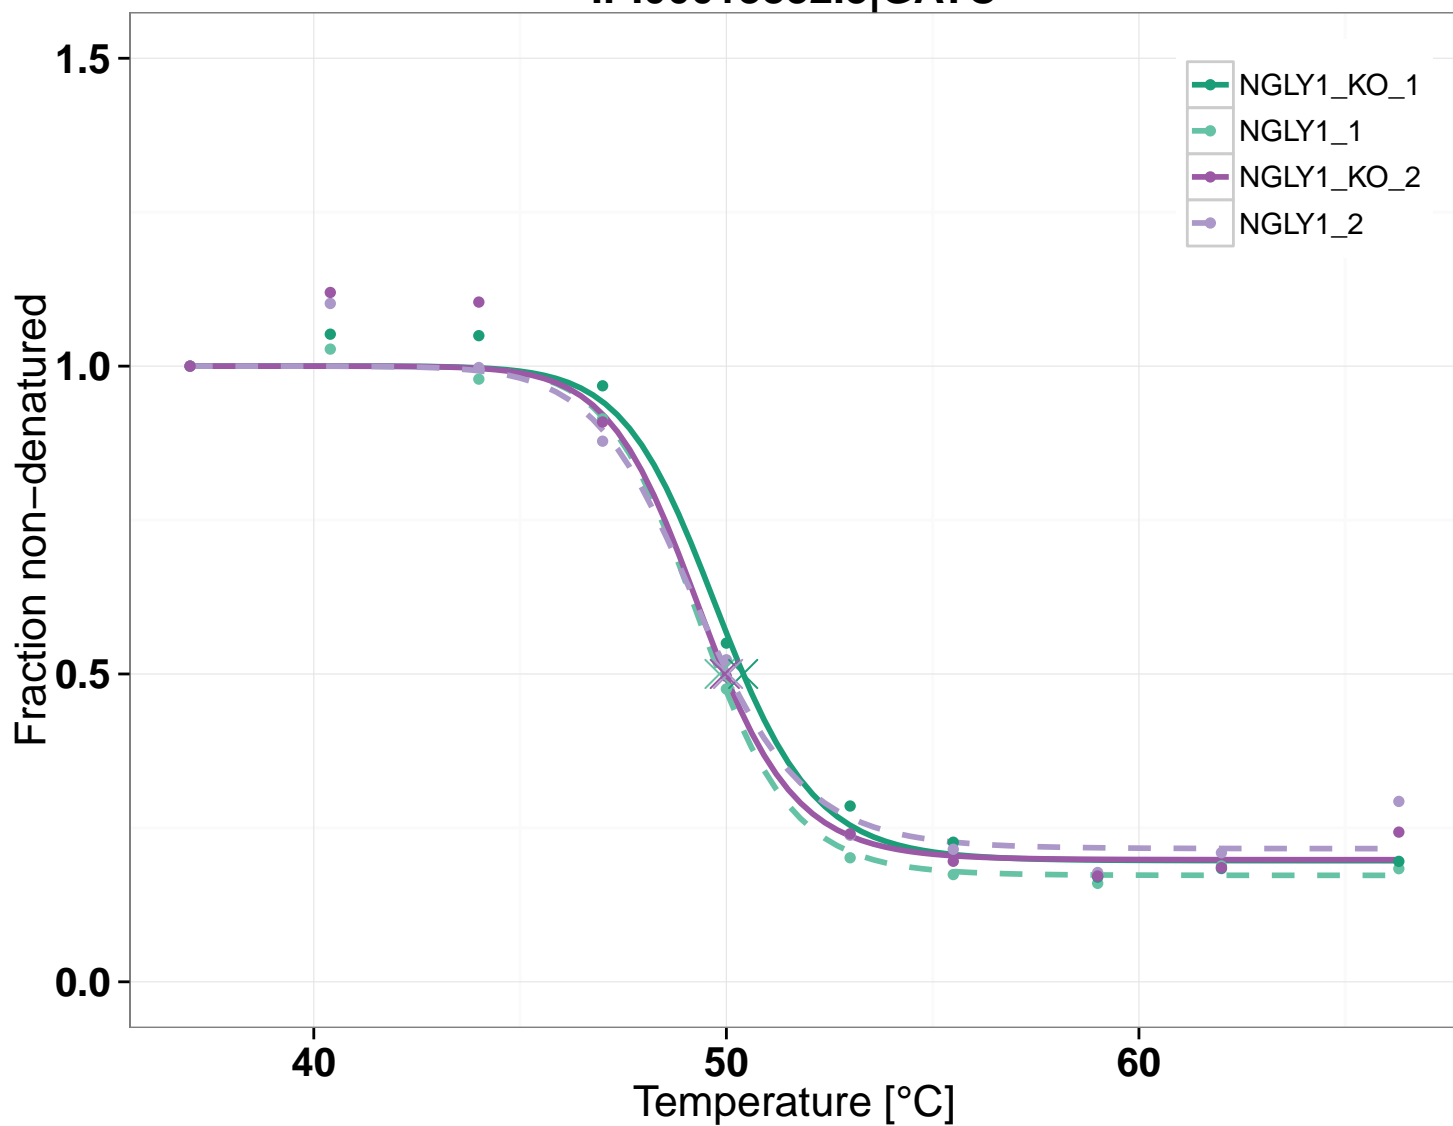

|            | meltPoint | slope | plateau | R2   |
|------------|-----------|-------|---------|------|
| NGLY1_KO_1 | 50.41     | -0.17 | 0.2     | 0.99 |
| NGLY1_1    | 49.83     | -0.18 | 0.17    | 1    |
| NGLY1_KO_2 | 49.96     | -0.18 | 0.2     | 0.98 |
| NGLY1_2    | 50.04     | -0.15 | 0.22    | 0.99 |

Supplement: Supplementary file 5826 [file 1]

# IPI00184477.2|GPHN

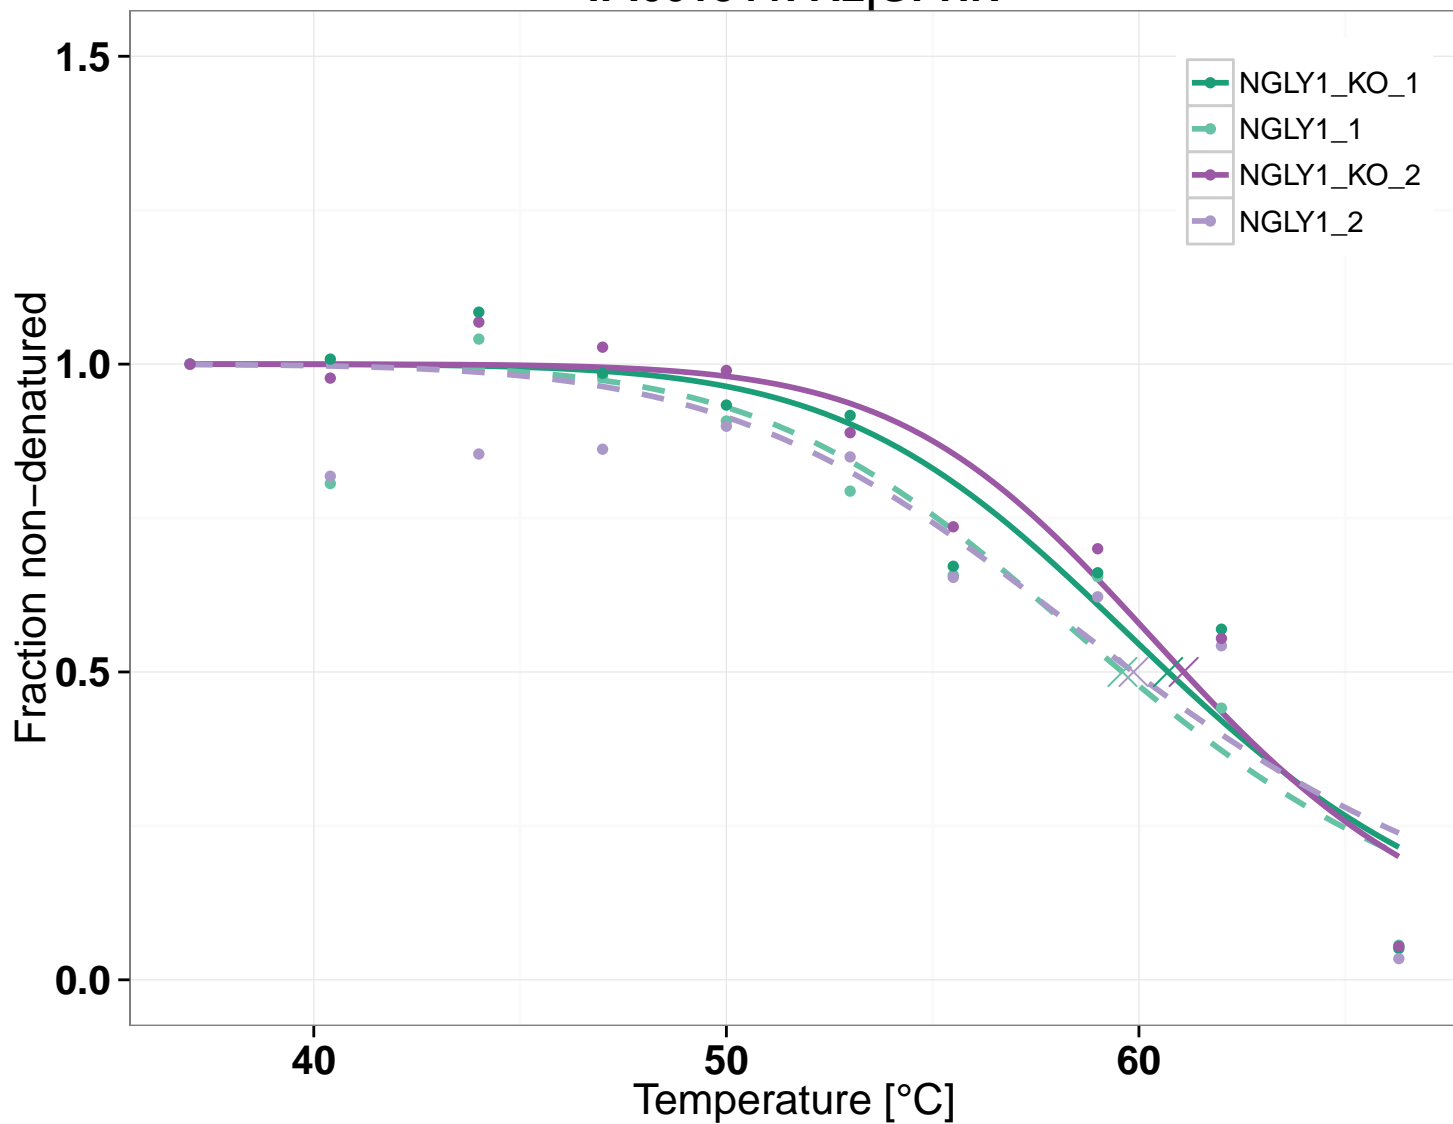

|            | meltPoint | slope  | plateau | R2   |
|------------|-----------|--------|---------|------|
| NGLY1_KO_1 | 60.71     | -0.064 | 0       | 0.91 |
| NGLY1_1    | 59.6      | -0.058 | 0       | 0.89 |
| NGLY1_KO_2 | 61.08     | -0.073 | 0       | 0.93 |
| NGLY1_2    | 59.87     | -0.051 | 0       | 0.81 |

Supplement: Supplementary file 5827 [file 1]

# IPI00302149.2|PHC3

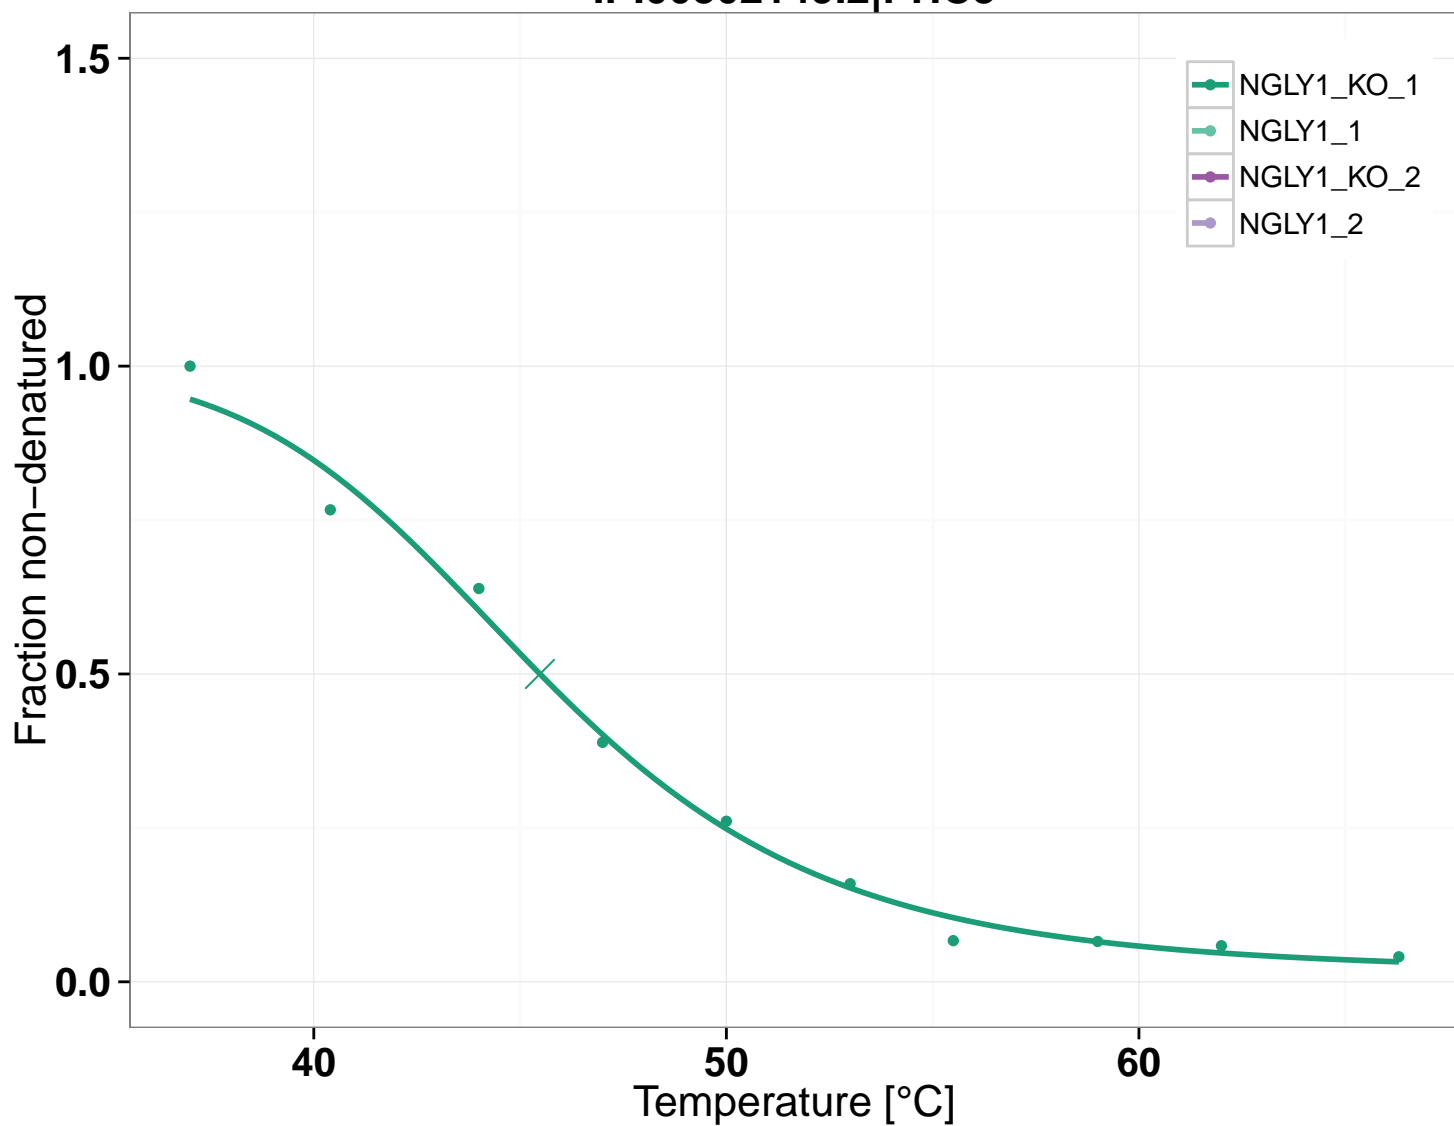

|            | meltPoint | slope | plateau | R2   |
|------------|-----------|-------|---------|------|
| NGLY1_KO_1 | 45.48     | -0.07 | 0.01    | 0.99 |
| NGLY1_1    | -         | -     | -       | -    |
| NGLY1_KO_2 | -         | -     | -       | -    |
| NGLY1_2    | -         | -     | -       | -    |

Supplement: Supplementary file 5828 [file 1]

IPI00006610.1|ZBED4

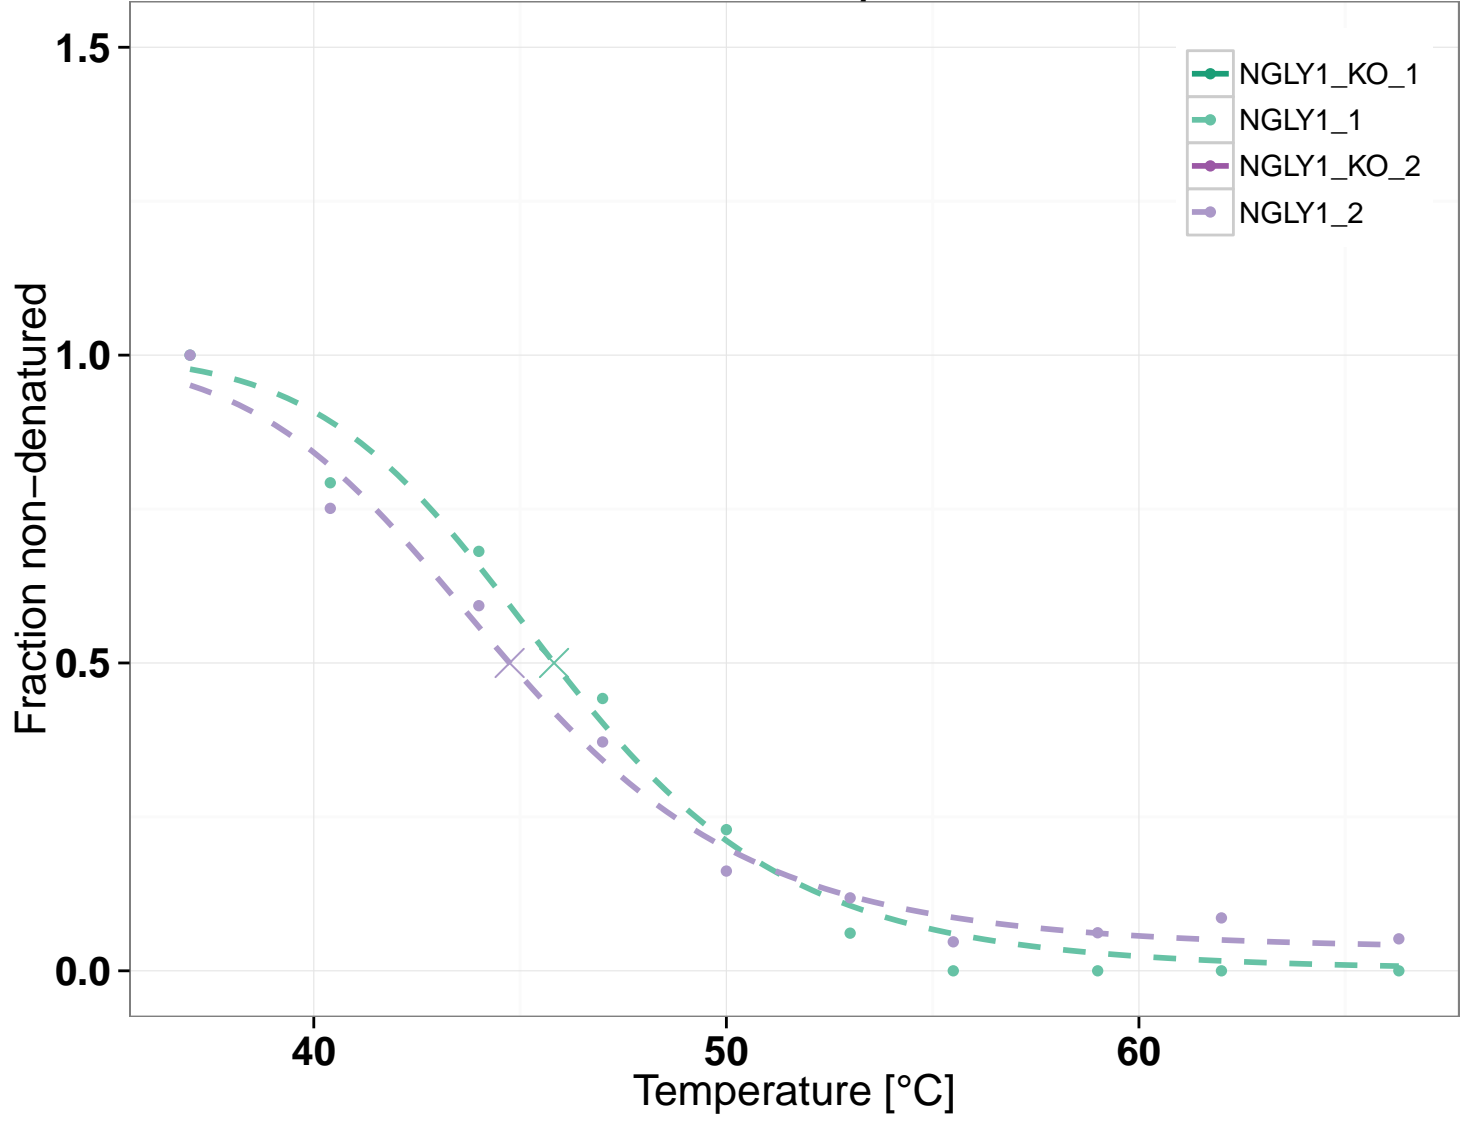

|            | meltPoint | slope  | plateau | R2   |
|------------|-----------|--------|---------|------|
| NGLY1_KO_1 | -         | -      | -       | -    |
| NGLY1_1    | 45.82     | -0.087 | 0       | 0.99 |
| NGLY1_KO_2 | -         | -      | -       | -    |
| NGLY1_2    | 44.75     | -0.08  | 0.03    | 0.99 |

Supplement: Supplementary file 5829 [file 1]

IPI00022937.4|F5

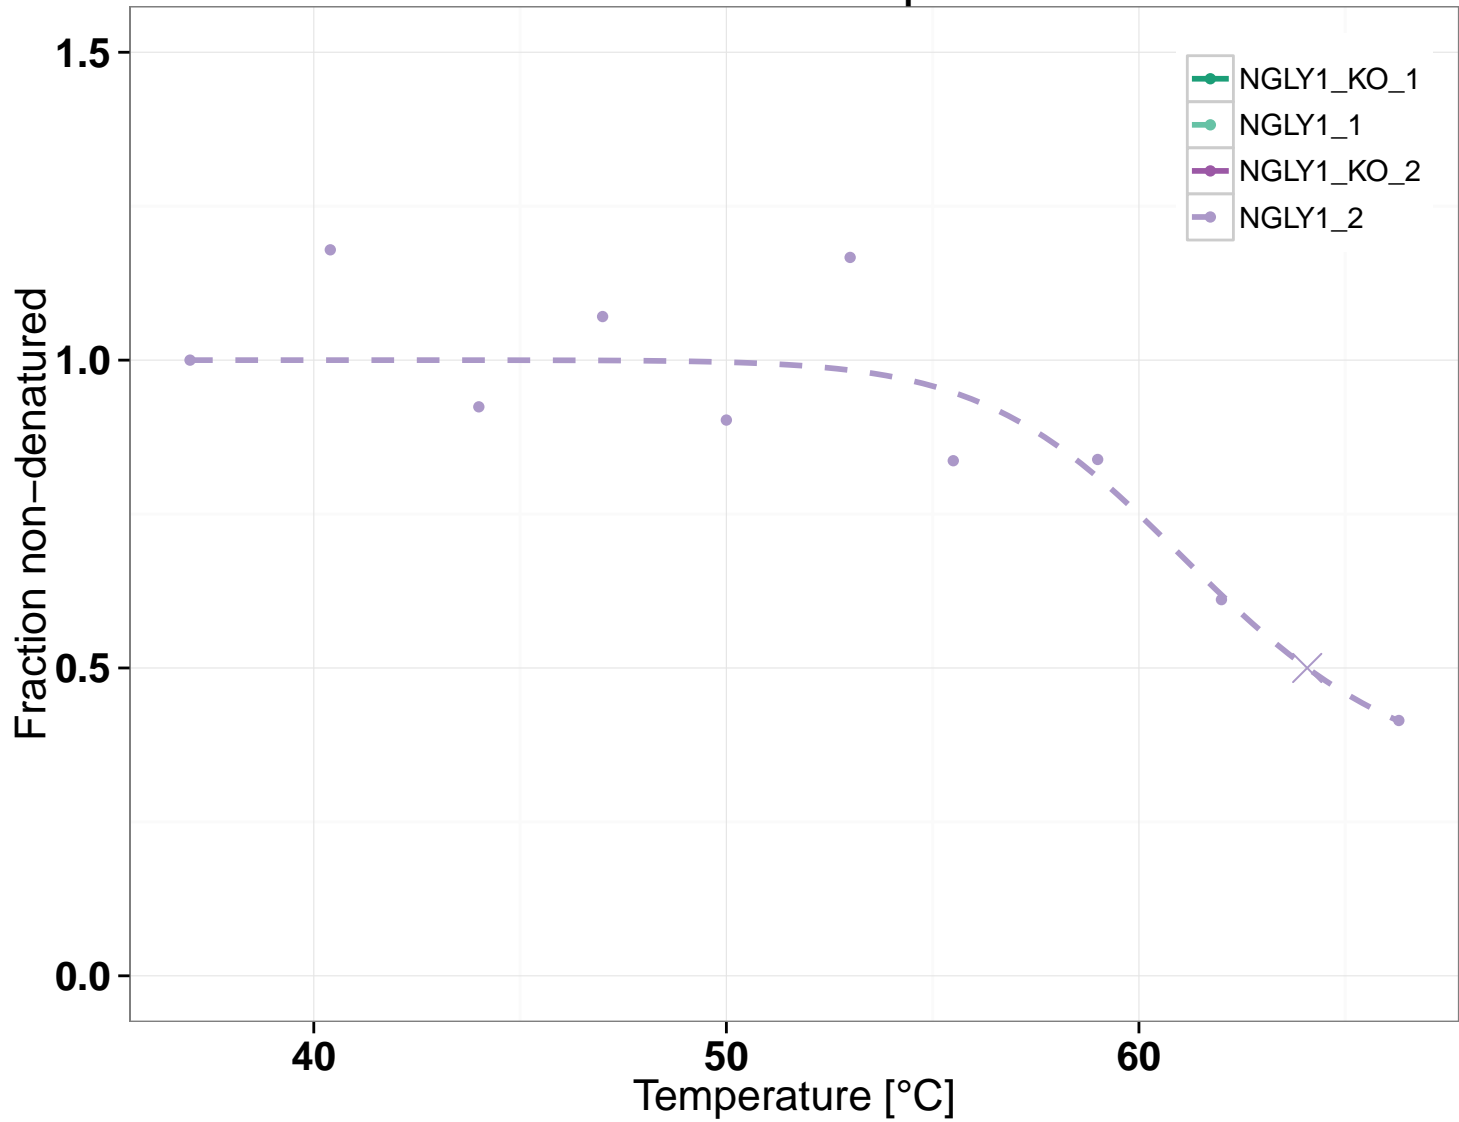

|            | meltPoint | slope  | plateau | R2   |
|------------|-----------|--------|---------|------|
| NGLY1_KO_1 | —         | —      | —       | —    |
| NGLY1_1    | —         | —      | —       | —    |
| NGLY1_KO_2 | —         | —      | —       | —    |
| NGLY1_2    | 64.08     | −0.066 | 0.31    | 0.81 |

Supplement: Supplementary file 5830 [file 1]

# IPI00011285.1|CAPN1

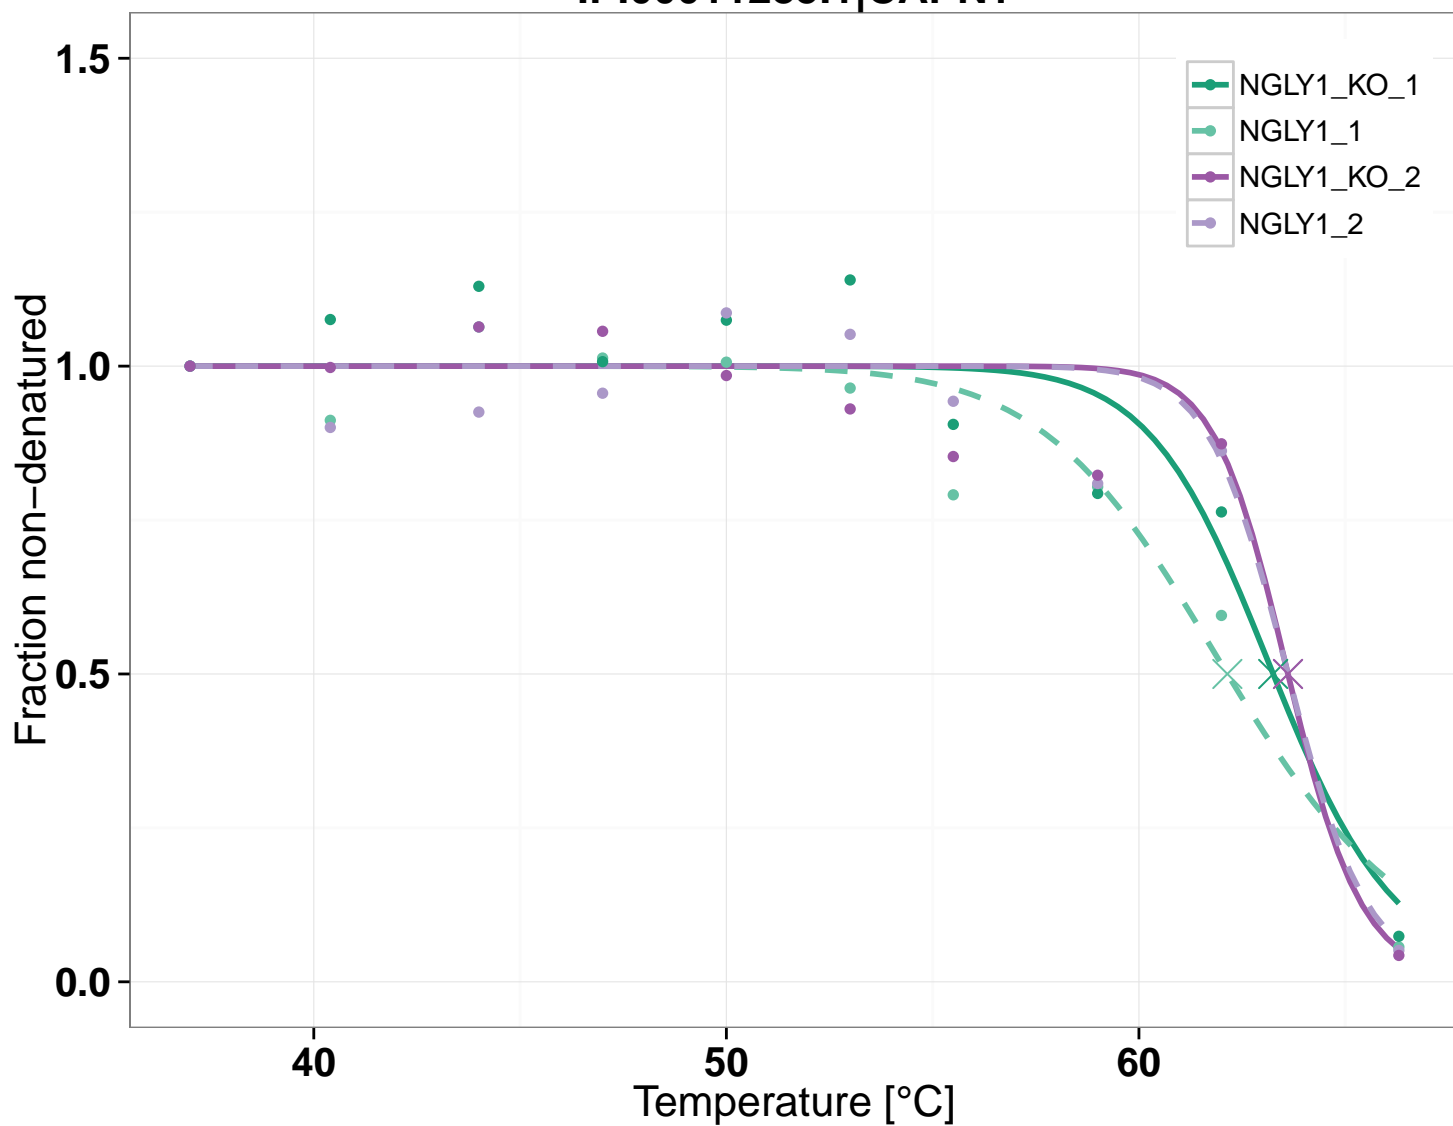

|            | meltPoint | slope | plateau | R2   |
|------------|-----------|-------|---------|------|
| NGLY1_KO_1 | 63.25     | -0.17 | 0       | 0.9  |
| NGLY1_1    | 62.14     | -0.11 | 0       | 0.93 |
| NGLY1_KO_2 | 63.61     | -0.28 | 0       | 0.92 |
| NGLY1_2    | 63.61     | -0.26 | 0       | 0.92 |

Supplement: Supplementary file 5831 [file 1]

IPI00412147.1|SLC27A4

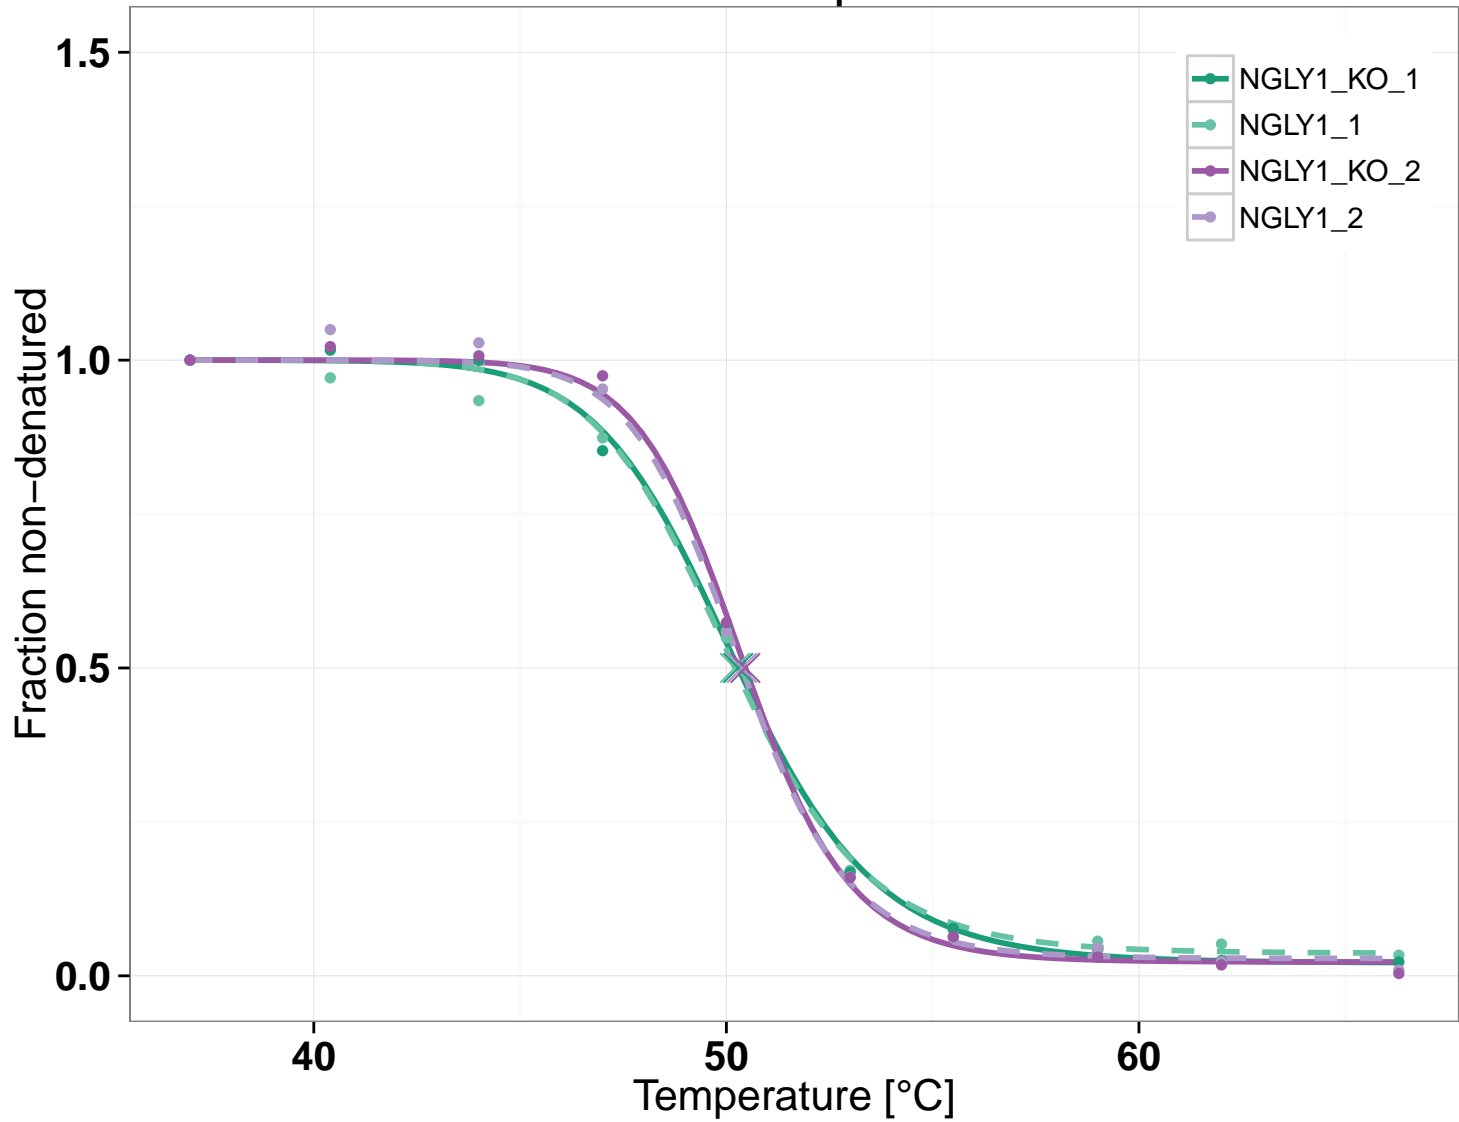

|            | meltPoint | slope | plateau | R2 |
|------------|-----------|-------|---------|----|
| NGLY1_KO_1 | 50.29     | -0.14 | 0.02    | 1  |
| NGLY1_1    | 50.21     | -0.15 | 0.04    | 1  |
| NGLY1_KO_2 | 50.46     | -0.19 | 0.02    | 1  |
| NGLY1_2    | 50.38     | -0.18 | 0.03    | 1  |

Supplement: Supplementary file 5832 [file 1]

IPI00011996.5|UBE2Z

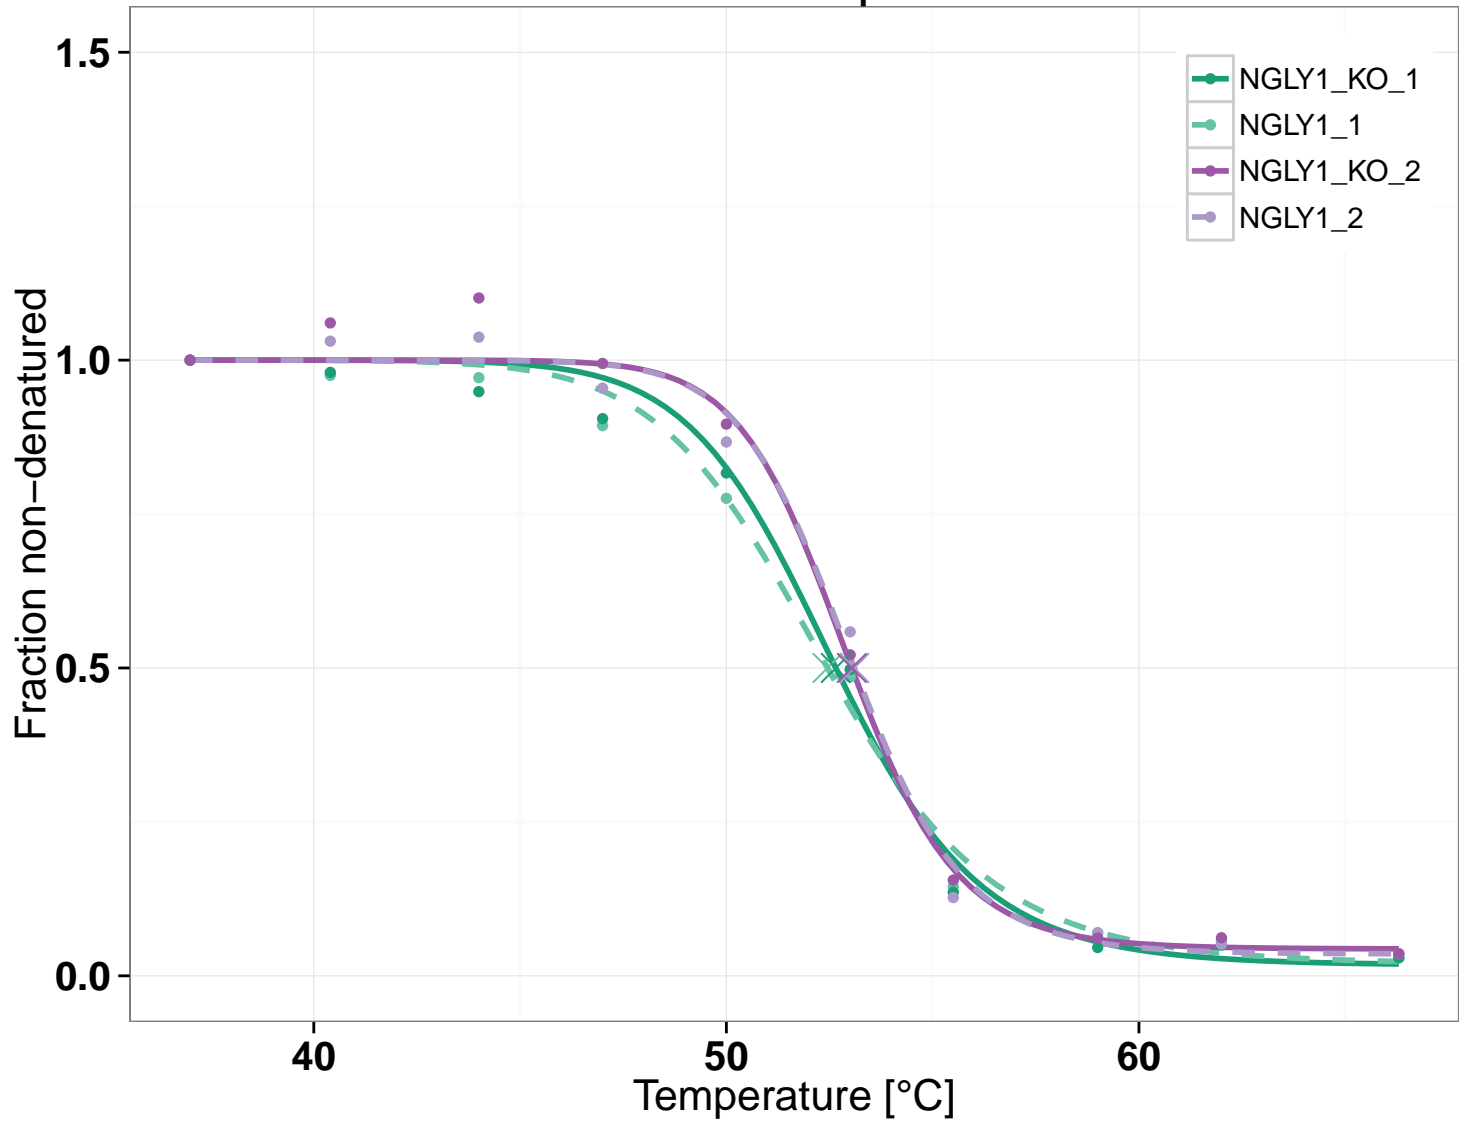

|            | meltPoint | slope | plateau | R2   |
|------------|-----------|-------|---------|------|
| NGLY1_KO_1 | 52.65     | -0.14 | 0.02    | 0.99 |
| NGLY1_1    | 52.45     | -0.12 | 0.02    | 0.99 |
| NGLY1_KO_2 | 53.04     | -0.18 | 0.04    | 0.99 |
| NGLY1_2    | 53.1      | -0.18 | 0.04    | 0.99 |

Supplement: Supplementary file 5833 [file 1]

# IPI00154778.1|MUTED

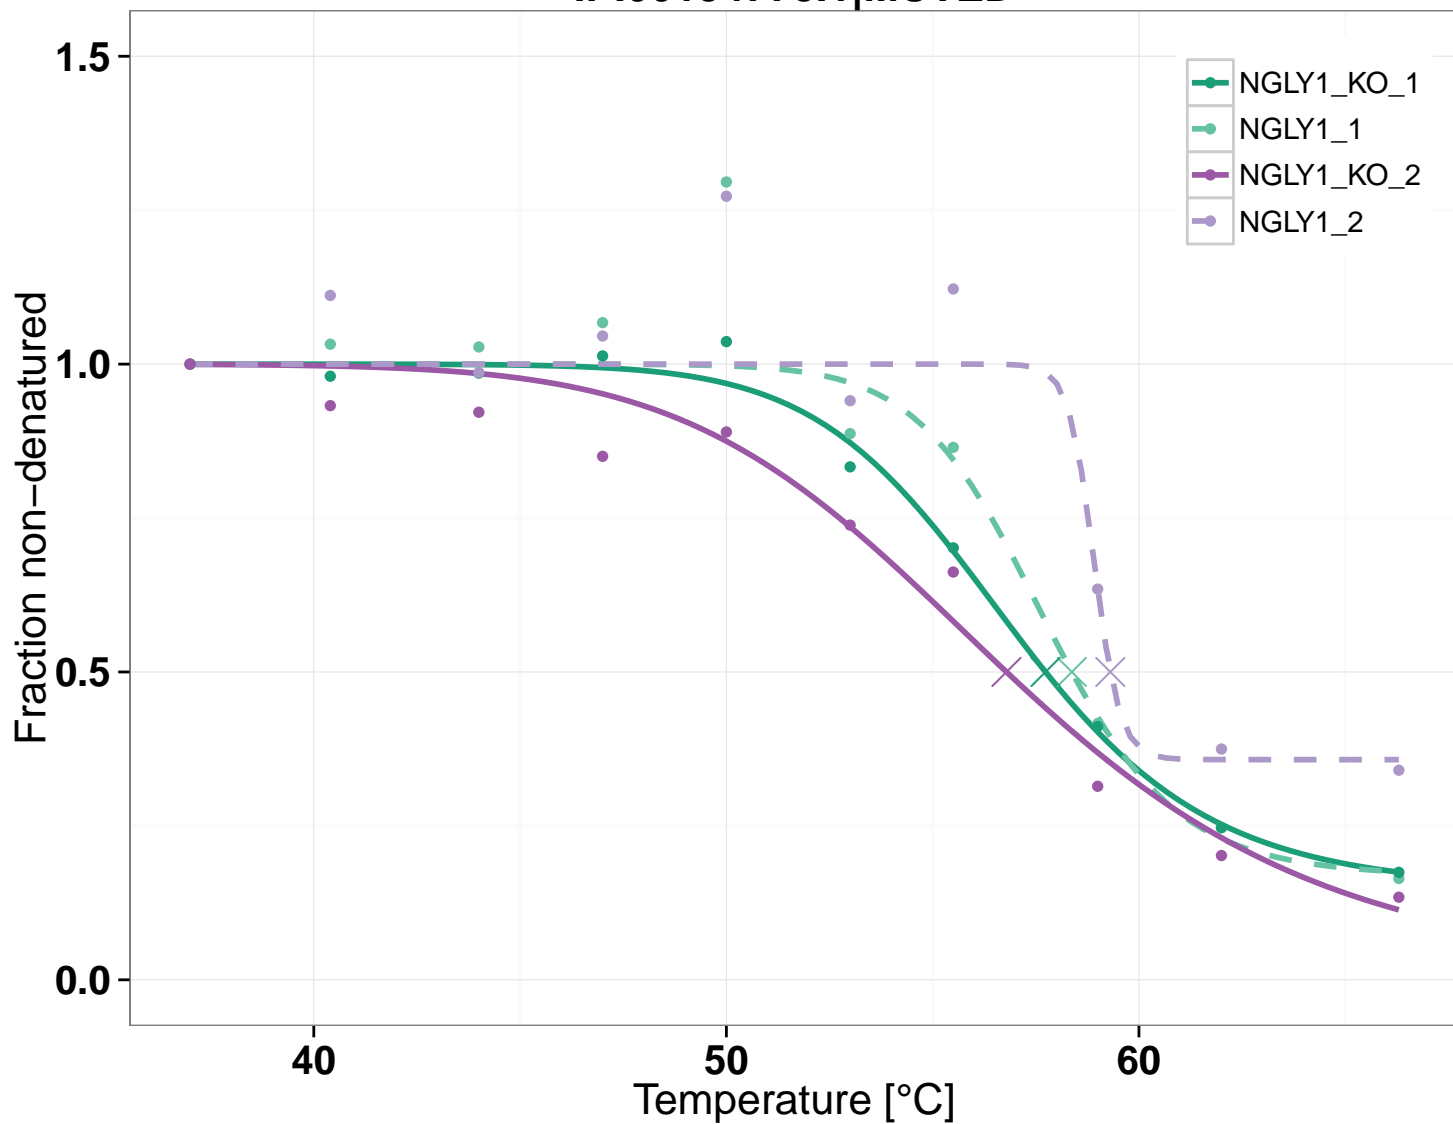

|            | meltPoint | slope  | plateau | R2   |
|------------|-----------|--------|---------|------|
| NGLY1_KO_1 | 57.74     | -0.089 | 0.15    | 0.99 |
| NGLY1_1    | 58.37     | -0.13  | 0.17    | 0.92 |
| NGLY1_KO_2 | 56.79     | -0.064 | 0       | 0.97 |
| NGLY1_2    | 59.31     | -0.52  | 0.36    | 0.88 |

Supplement: Supplementary file 5834 [file 1]

IPI00001580.4|FYCO1

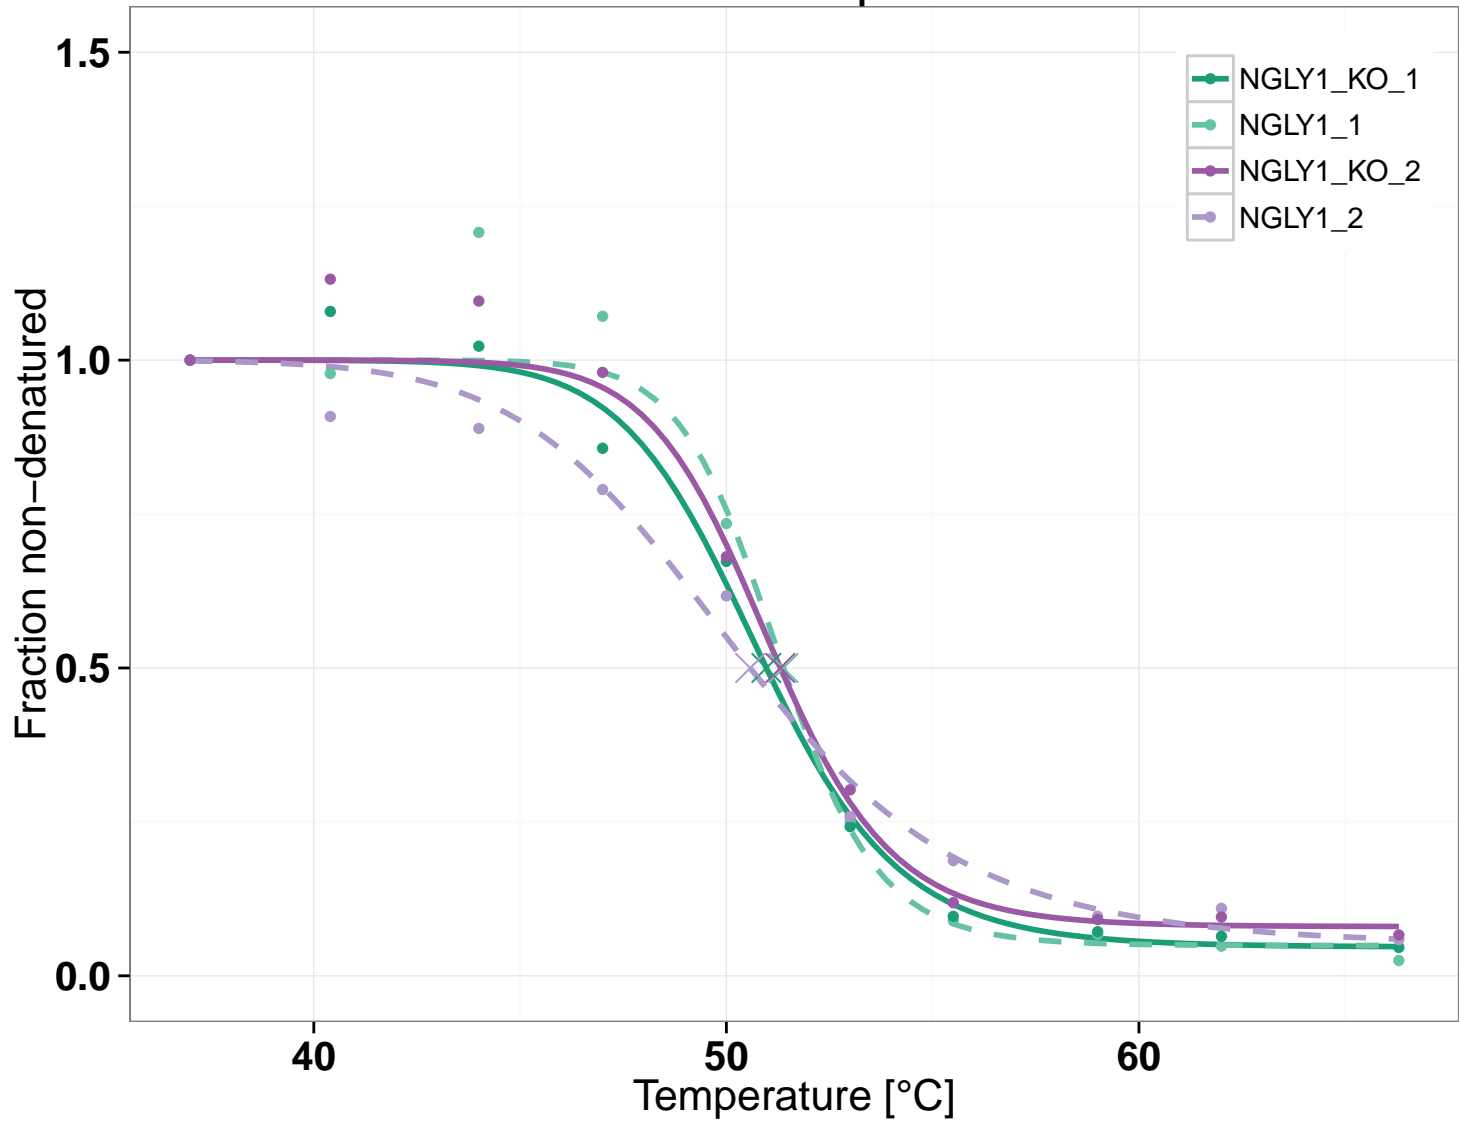

|            | meltPoint | slope  | plateau | R2   |
|------------|-----------|--------|---------|------|
| NGLY1_KO_1 | 50.97     | -0.14  | 0.05    | 0.99 |
| NGLY1_1    | 51.38     | -0.2   | 0.05    | 0.98 |
| NGLY1_KO_2 | 51.31     | -0.16  | 0.08    | 0.98 |
| NGLY1_2    | 50.58     | -0.088 | 0.05    | 0.99 |

Supplement: Supplementary file 5835 [file 1]

IPI00916503.1|BZW1

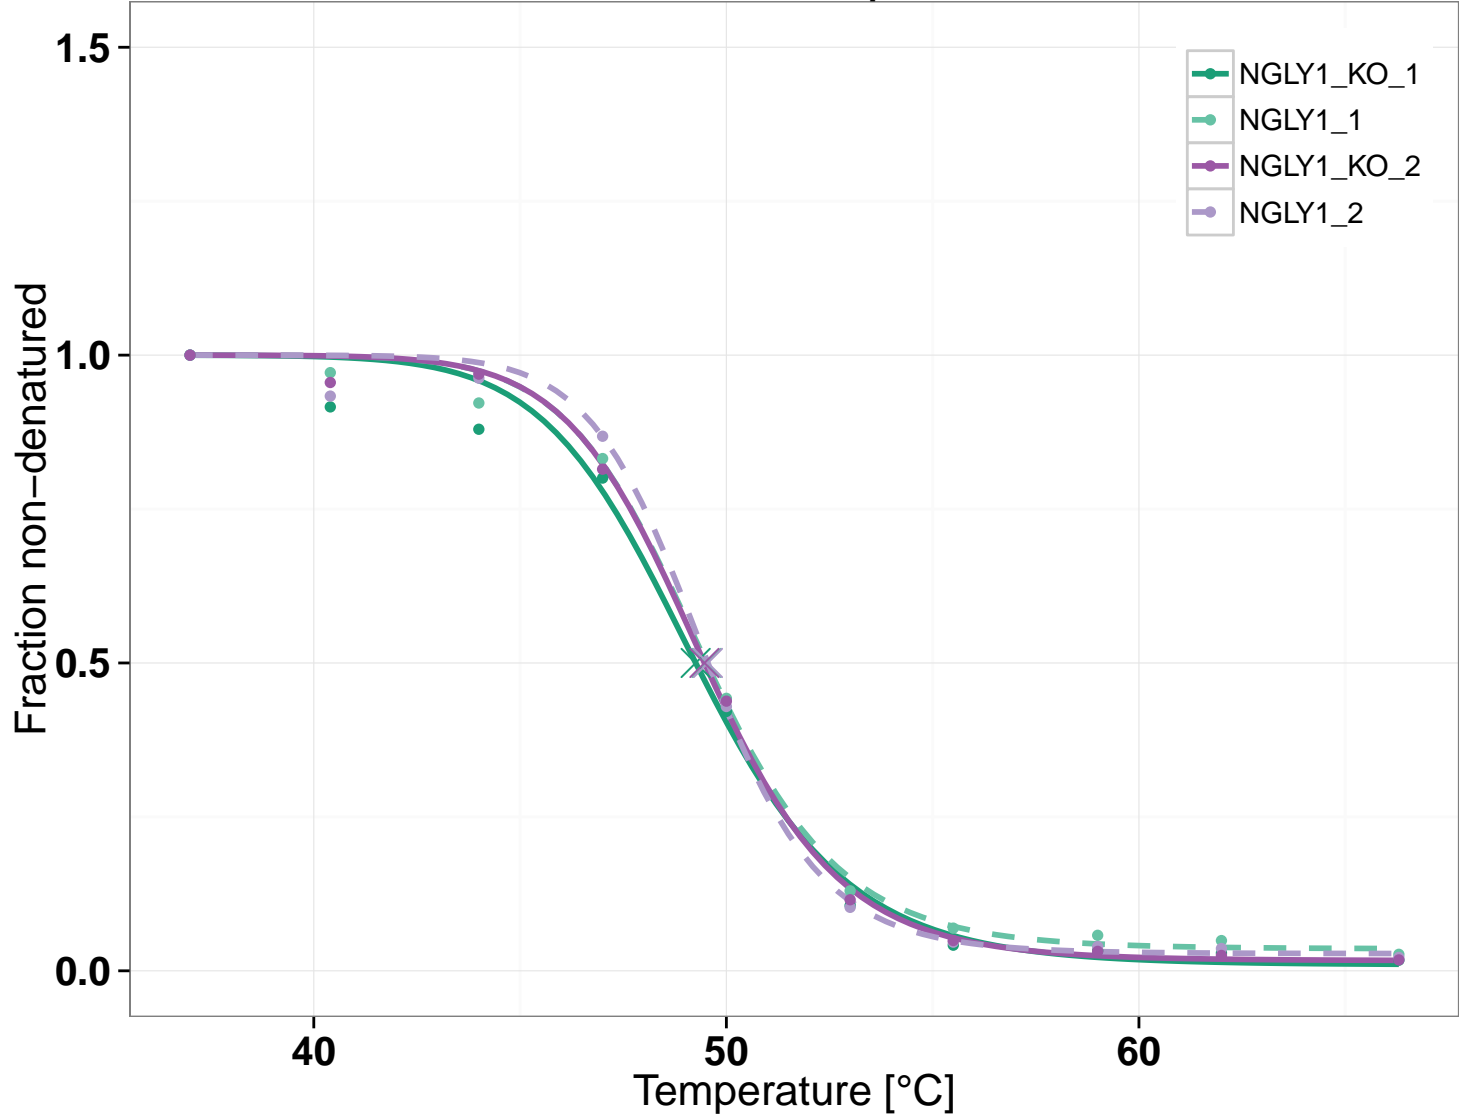

|            | meltPoint | slope | plateau | R2   |
|------------|-----------|-------|---------|------|
| NGLY1_KO_1 | 49.26     | -0.13 | 0.01    | 0.99 |
| NGLY1_1    | 49.52     | -0.14 | 0.04    | 1    |
| NGLY1_KO_2 | 49.47     | -0.15 | 0.02    | 1    |
| NGLY1_2    | 49.55     | -0.17 | 0.03    | 1    |

Supplement: Supplementary file 5836 [file 1]

IPI00185374.4|PSMD12

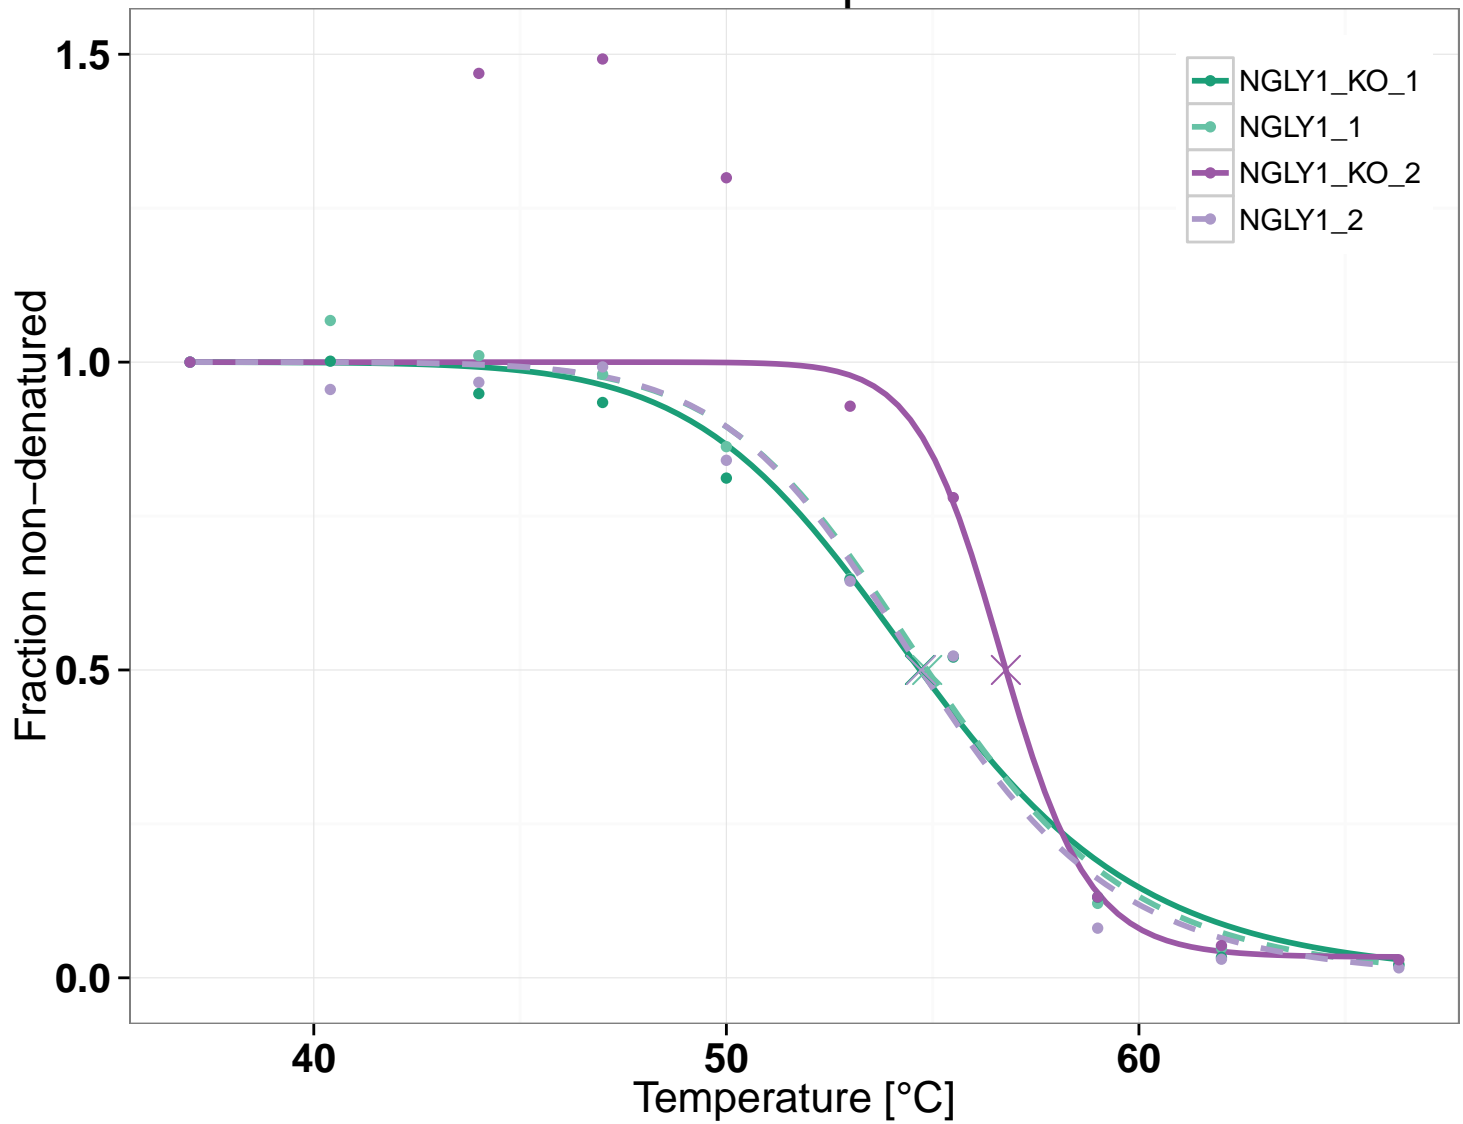

|            | meltPoint | slope  | plateau | R2   |
|------------|-----------|--------|---------|------|
| NGLY1_KO_1 | 54.69     | -0.092 | 0       | 0.99 |
| NGLY1_1    | 54.87     | -0.1   | 0       | 0.99 |
| NGLY1_KO_2 | 56.77     | -0.23  | 0.03    | 0.71 |
| NGLY1_2    | 54.72     | -0.1   | 0       | 0.98 |

Supplement: Supplementary file 5837 [file 1]

# IPI00002134.4|PSMD5

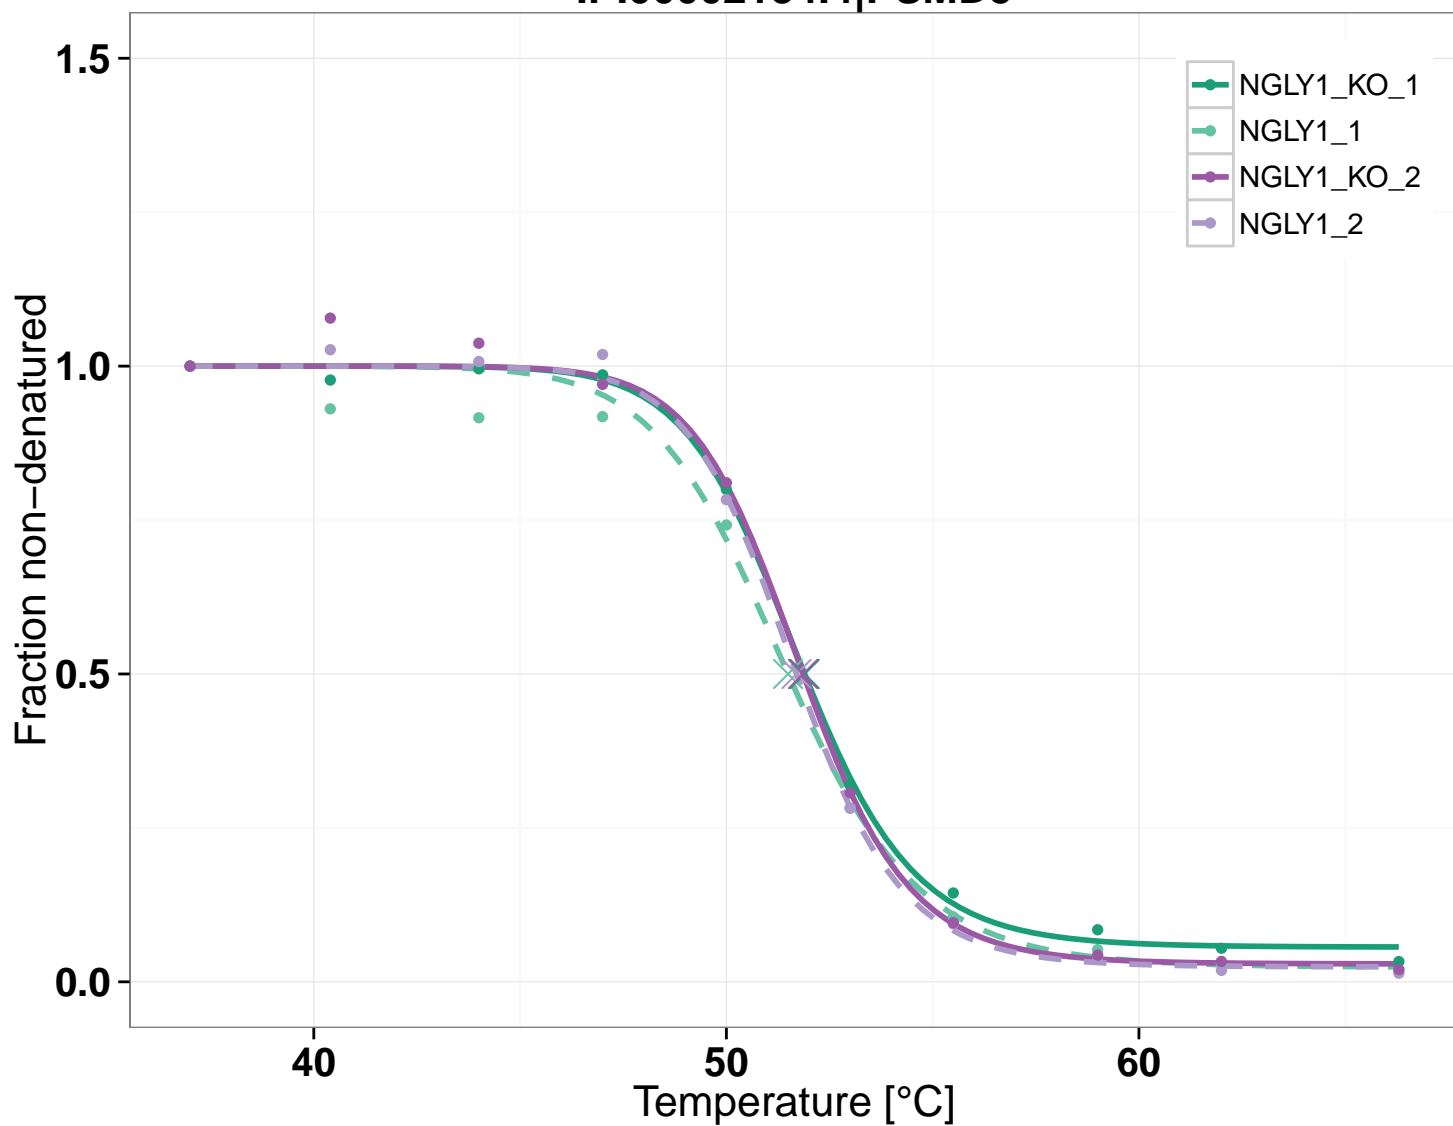

Supplement: Supplementary file 5838 [file 1]

IPI00166010.6|CNOT1

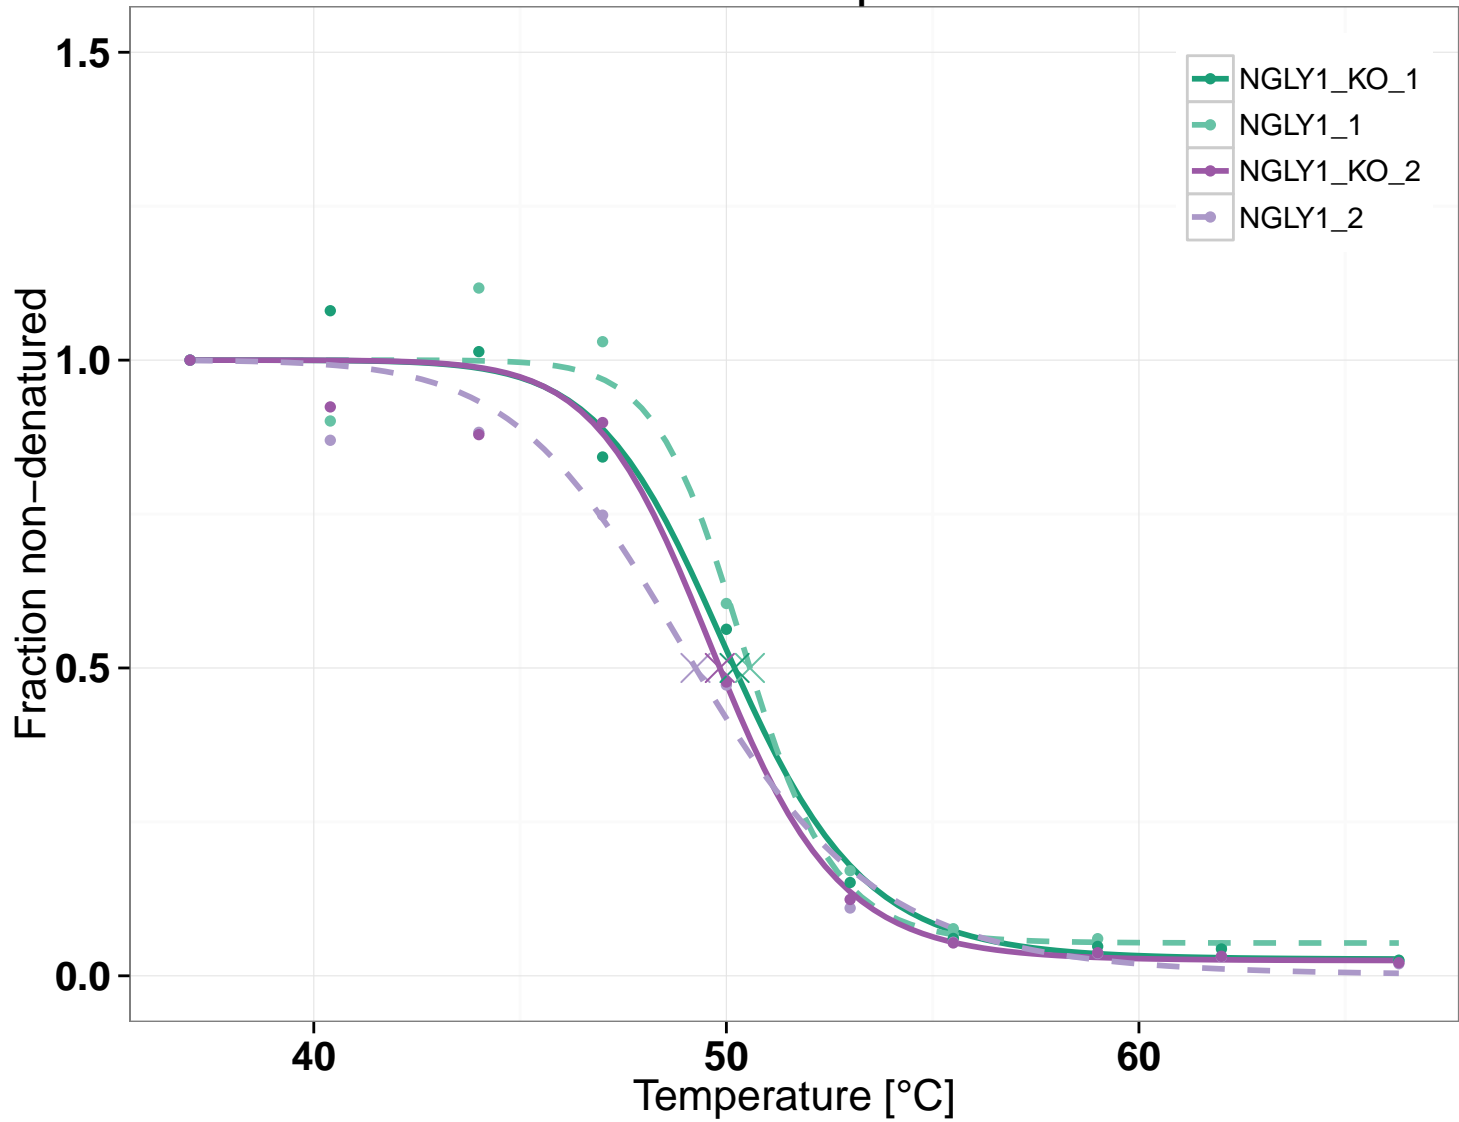

|            | meltPoint | slope | plateau | R2   |
|------------|-----------|-------|---------|------|
| NGLY1_KO_1 | 50.2      | -0.15 | 0.03    | 0.99 |
| NGLY1_1    | 50.57     | -0.22 | 0.05    | 0.99 |
| NGLY1_KO_2 | 49.84     | -0.16 | 0.02    | 0.99 |
| NGLY1_2    | 49.25     | -0.11 | 0       | 0.98 |

Supplement: Supplementary file 5839 [file 1]

# IPI00023165.3|ABCD4

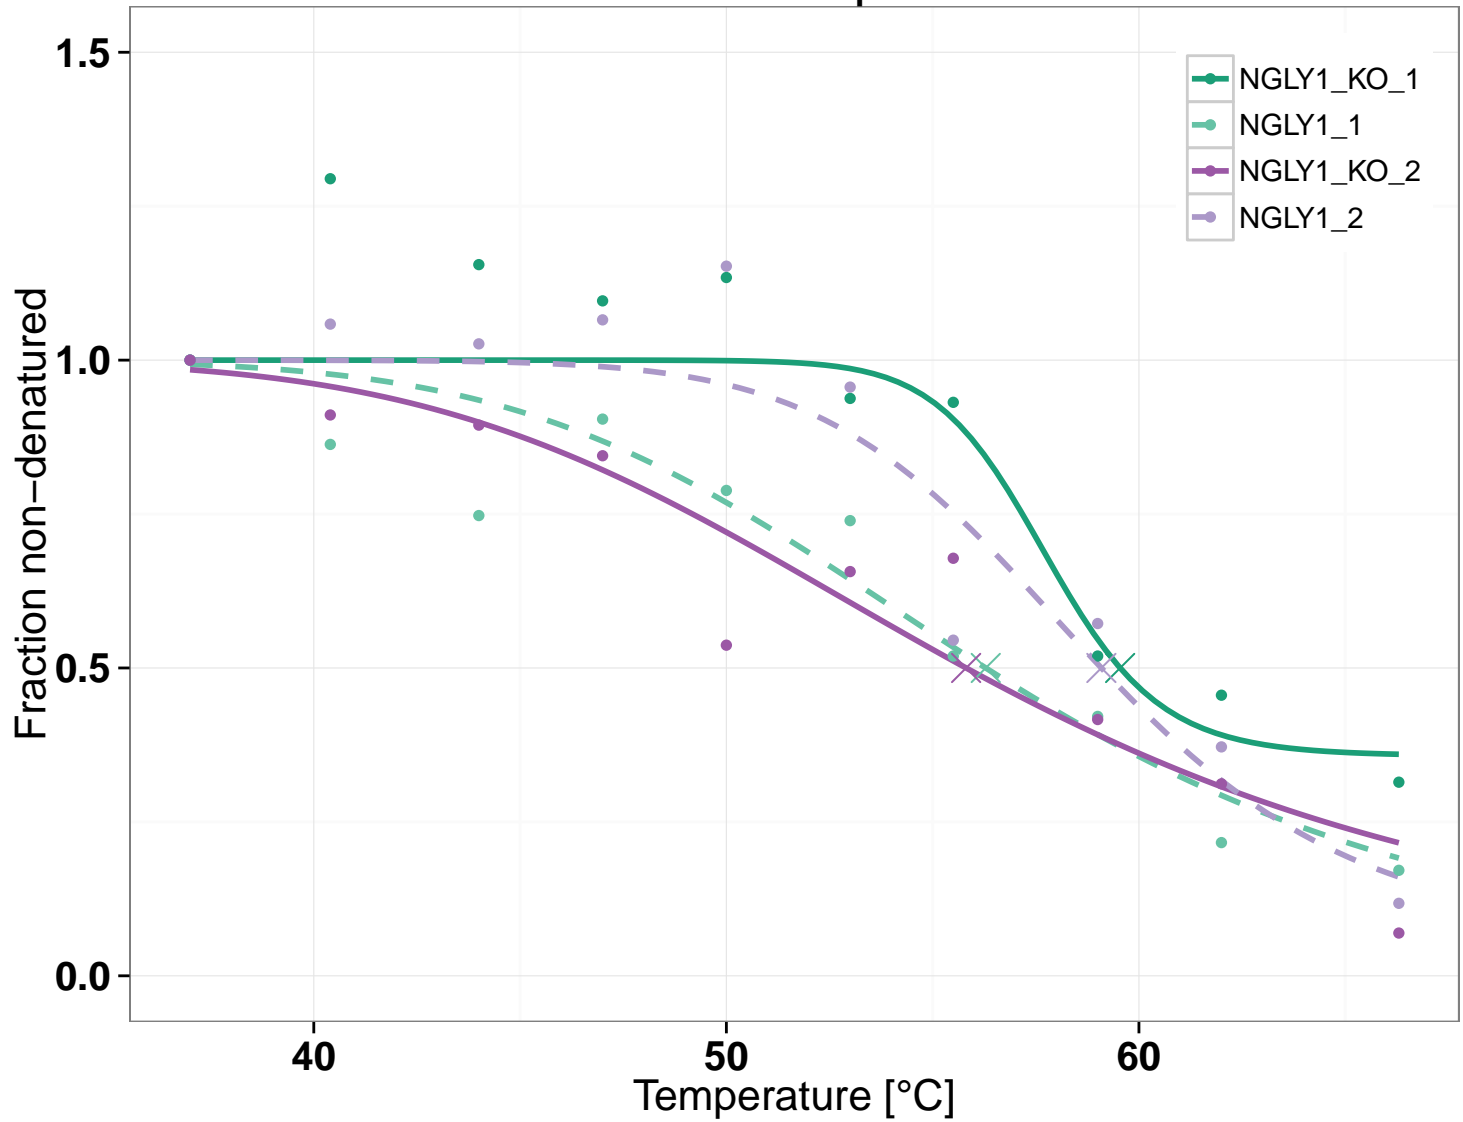

|            | meltPoint | slope  | plateau | R2   |
|------------|-----------|--------|---------|------|
| NGLY1_KO_1 | 59.54     | -0.12  | 0.36    | 0.85 |
| NGLY1_1    | 56.29     | -0.044 | 0       | 0.91 |
| NGLY1_KO_2 | 55.81     | -0.039 | 0       | 0.89 |
| NGLY1_2    | 59.09     | -0.073 | 0.05    | 0.91 |

Supplement: Supplementary file 5840 [file 1]

IPI00032827.1|SF3B14

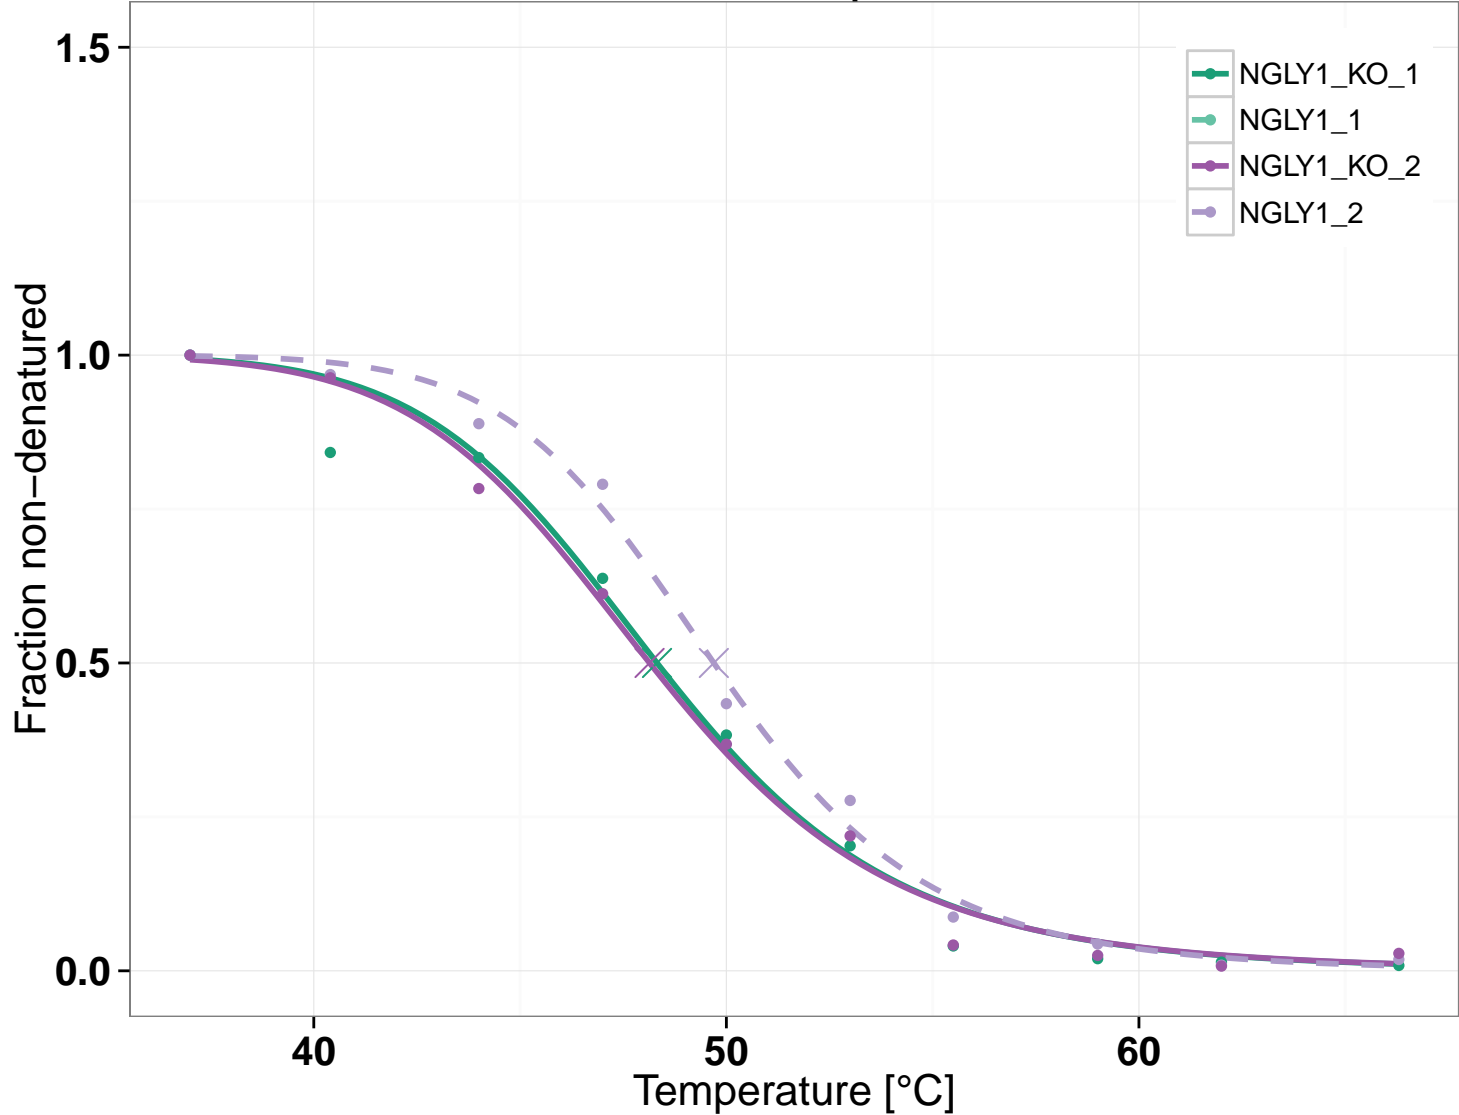

|            | meltPoint | slope  | plateau | R2   |
|------------|-----------|--------|---------|------|
| NGLY1_KO_1 | 48.32     | -0.087 | 0       | 0.99 |
| NGLY1_1    | -         | -      | -       | -    |
| NGLY1_KO_2 | 48.14     | -0.086 | 0       | 0.99 |
| NGLY1_2    | 49.7      | -0.098 | 0       | 1    |

Supplement: Supplementary file 5842 [file 1]

IPI00018404.4|TCEB3

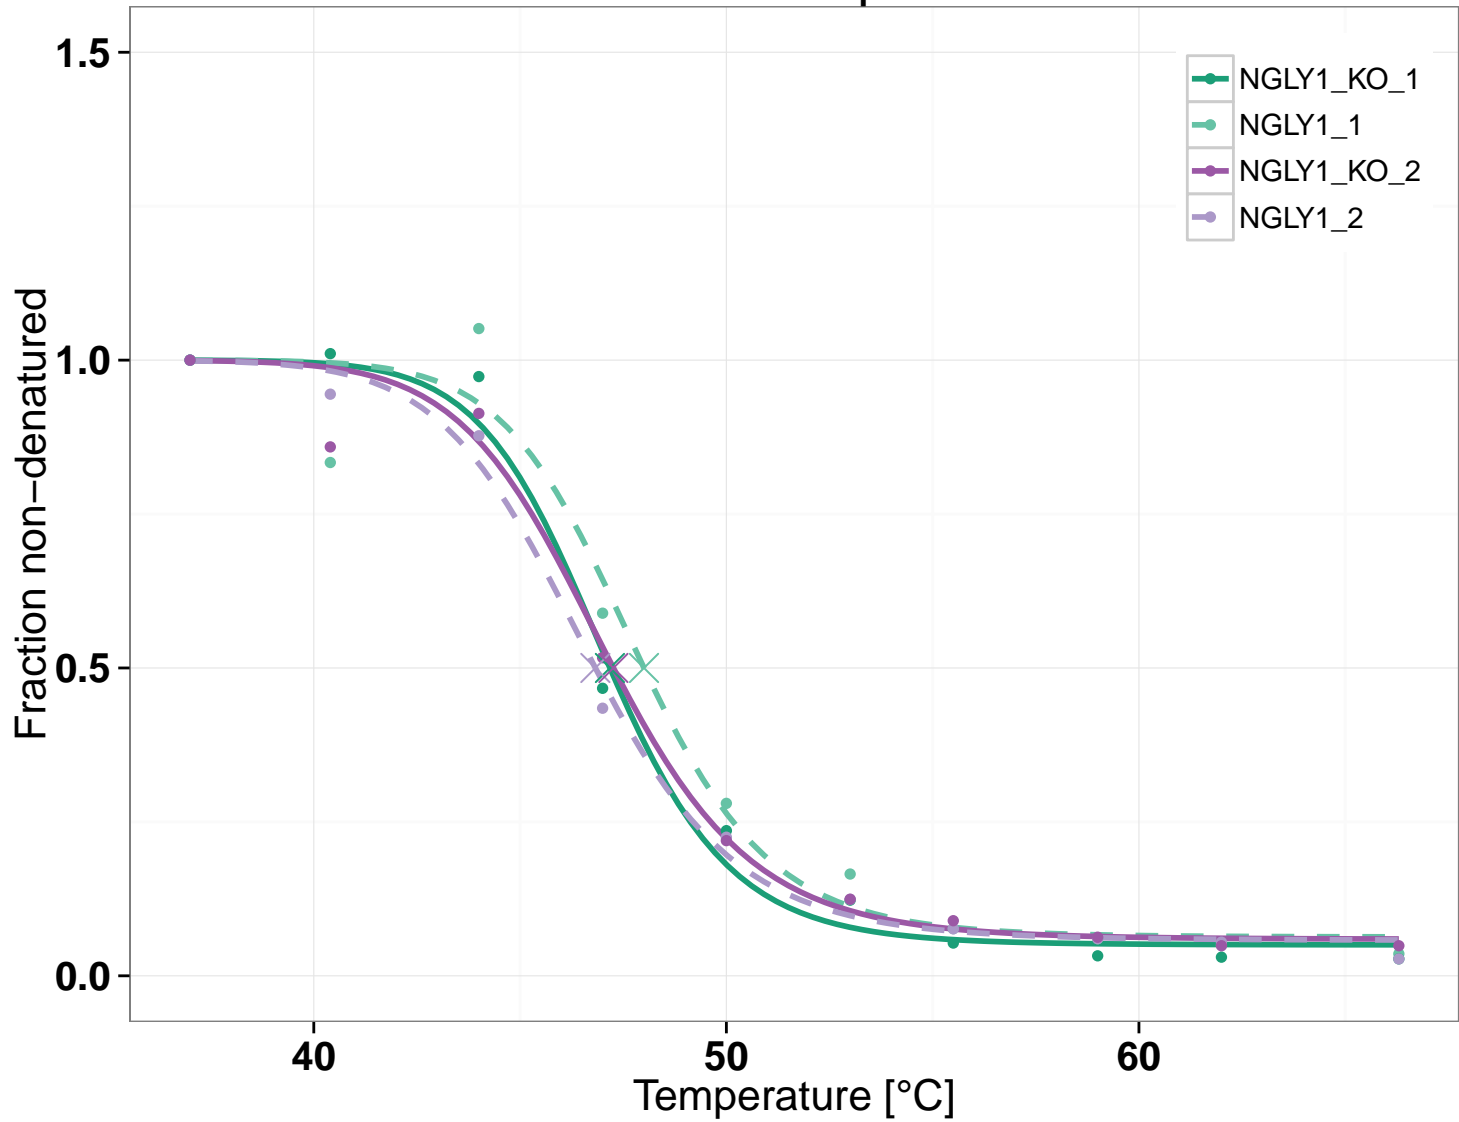

|            | meltPoint | slope | plateau | R2   |
|------------|-----------|-------|---------|------|
| NGLY1_KO_1 | 47.18     | -0.16 | 0.05    | 0.99 |
| NGLY1_1    | 48        | -0.14 | 0.06    | 0.97 |
| NGLY1_KO_2 | 47.26     | -0.13 | 0.06    | 0.99 |
| NGLY1_2    | 46.82     | -0.13 | 0.06    | 0.99 |

Supplement: Supplementary file 5843 [file 1]

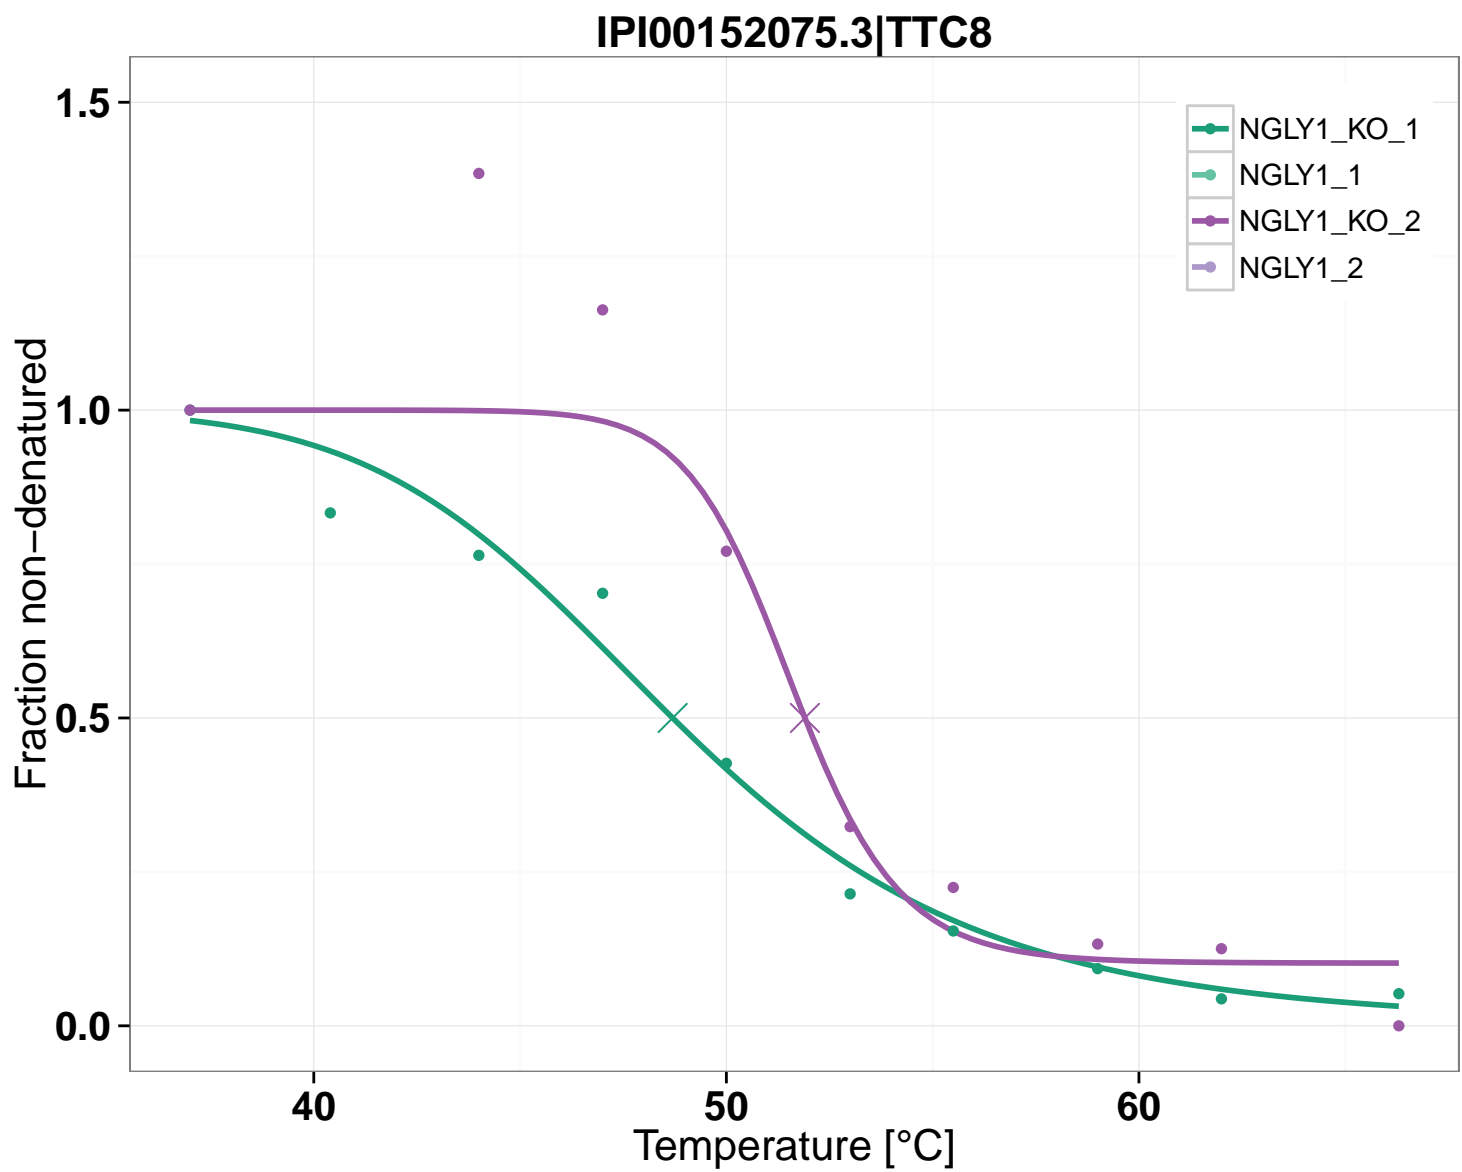

|            | meltPoint | slope  | plateau | R2   |
|------------|-----------|--------|---------|------|
| NGLY1_KO_1 | 48.7      | -0.068 | 0       | 0.98 |
| NGLY1_1    | -         | -      | -       | -    |
| NGLY1_KO_2 | 51.9      | -0.17  | 0.1     | 0.79 |
| NGLY1_2    | -         | -      | -       | -    |

Supplement: Supplementary file 5844 [file 1]

# IPI00465363.3|HIST1H2BA

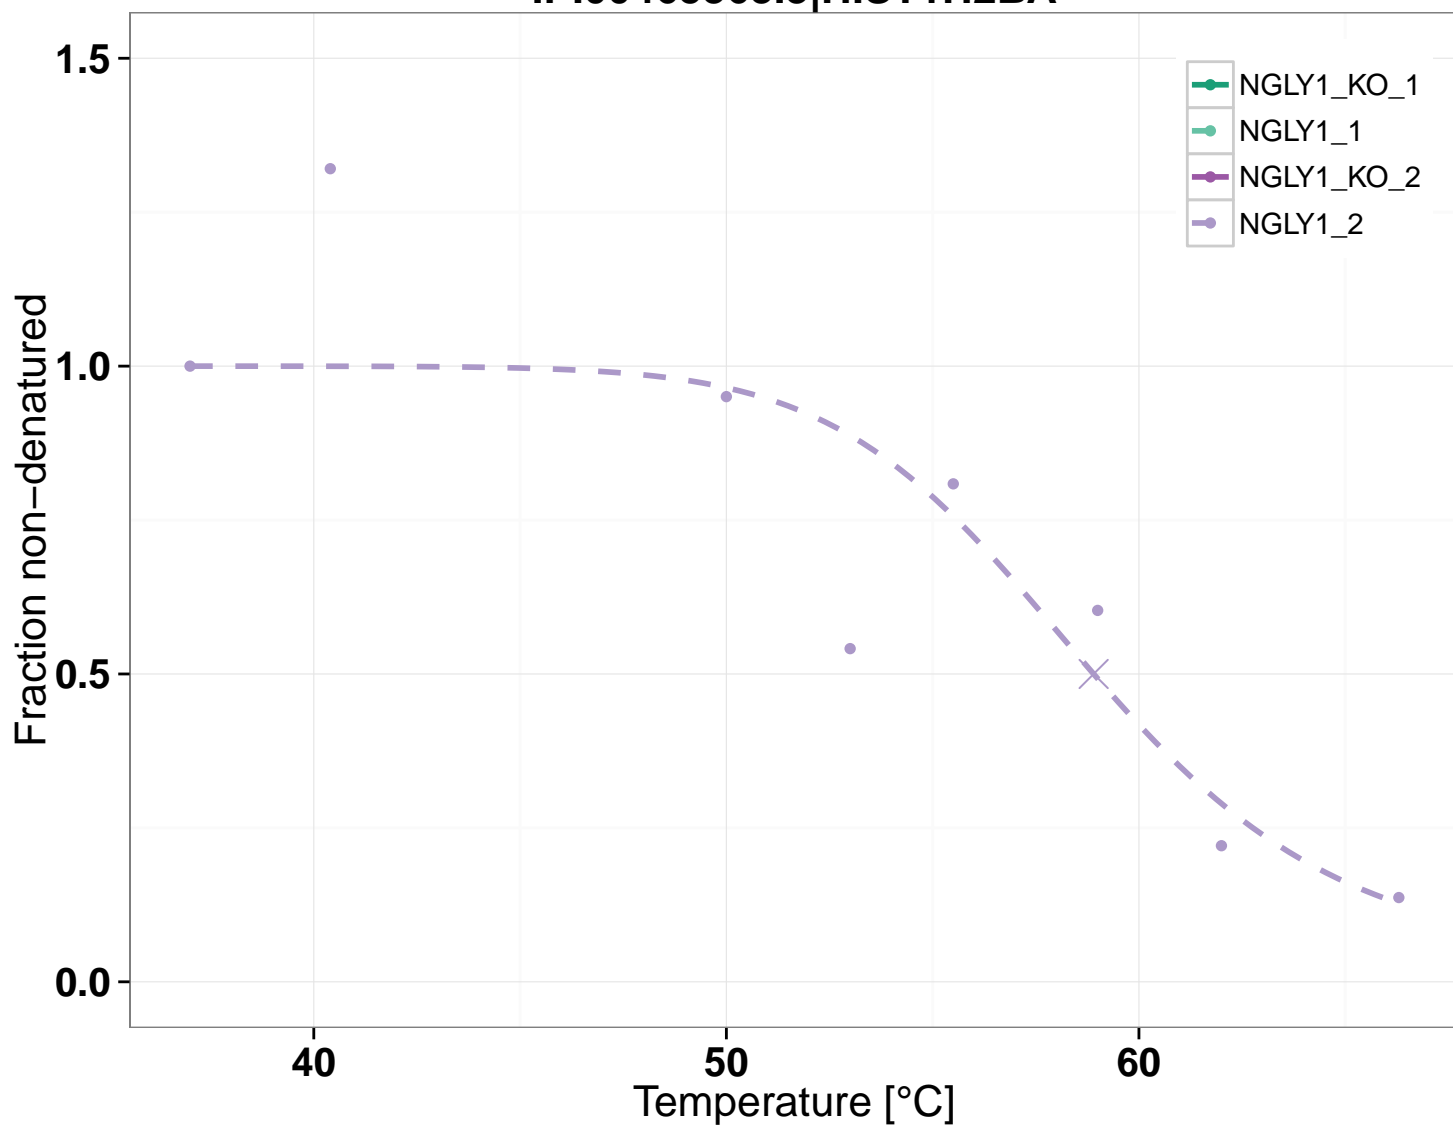

|            | meltPoint | slope  | plateau | R2   |
|------------|-----------|--------|---------|------|
| NGLY1_KO_1 | —         | —      | —       | —    |
| NGLY1_1    | —         | —      | —       | —    |
| NGLY1_KO_2 | —         | —      | —       | —    |
| NGLY1_2    | 58.9      | −0.079 | 0.03    | 0.46 |

Supplement: Supplementary file 5845 [file 1]

# IPI00028980.2|URB2

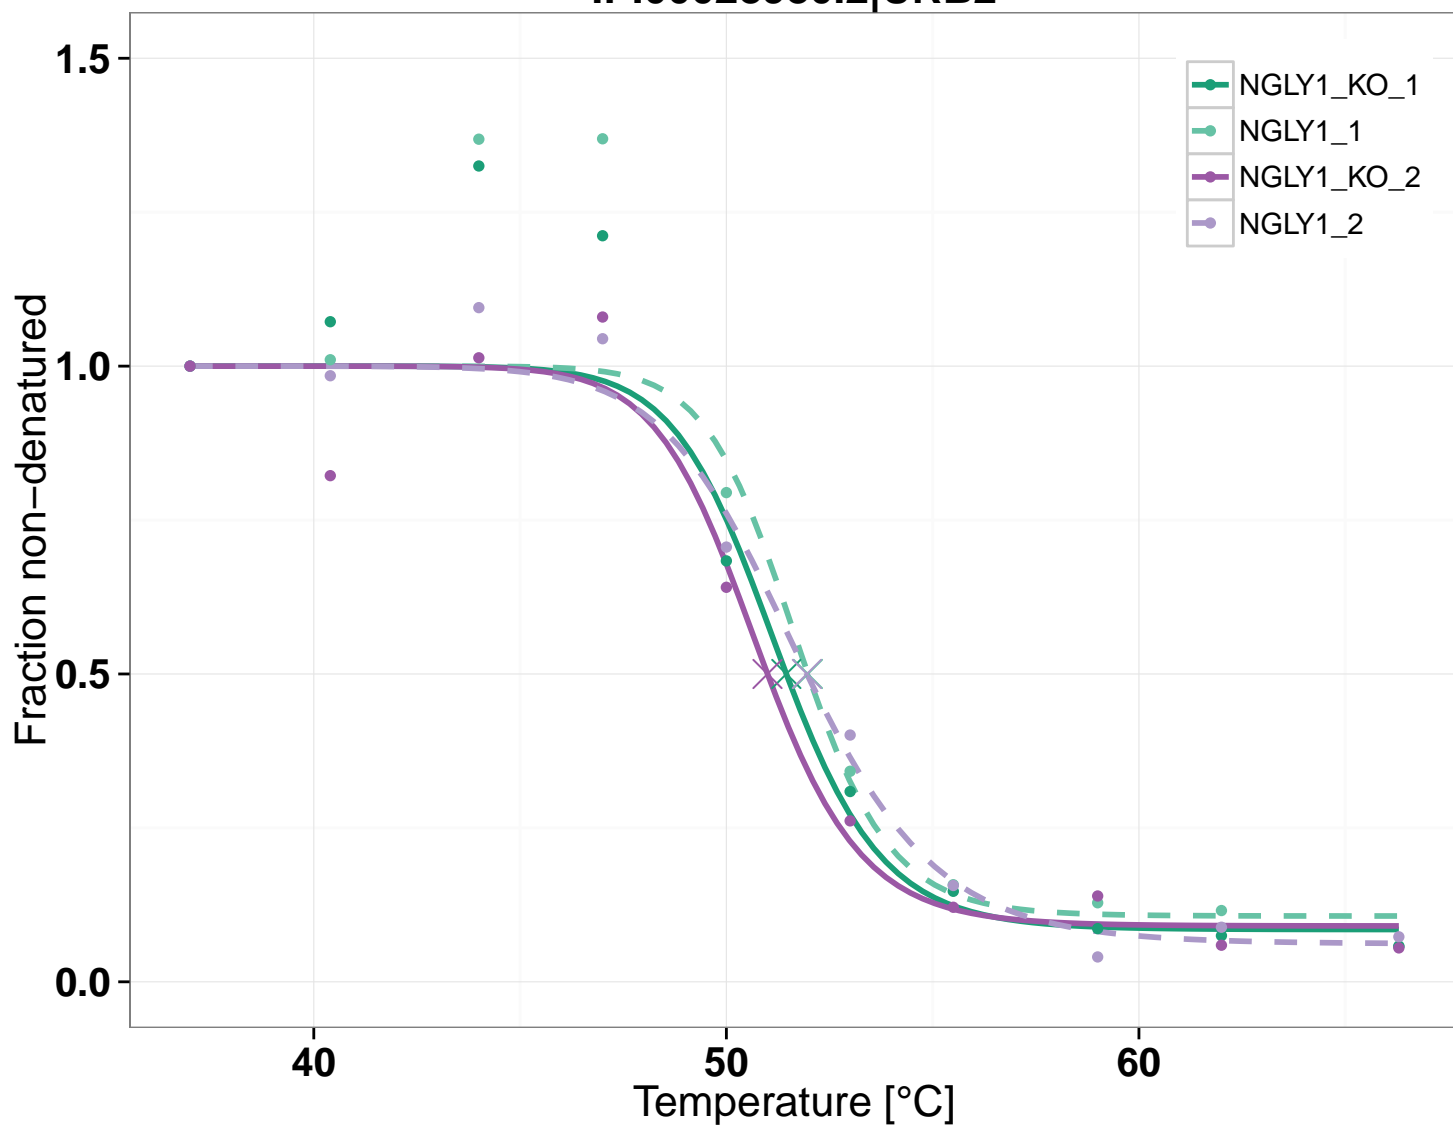

|            | meltPoint | slope | plateau | R2   |
|------------|-----------|-------|---------|------|
| NGLY1_KO_1 | 51.45     | -0.18 | 0.08    | 0.93 |
| NGLY1_1    | 51.98     | -0.2  | 0.11    | 0.89 |
| NGLY1_KO_2 | 51        | -0.18 | 0.09    | 0.97 |
| NGLY1_2    | 51.95     | -0.14 | 0.06    | 0.99 |

Supplement: Supplementary file 5846 [file 1]

IPI00873110.1|LYRM7

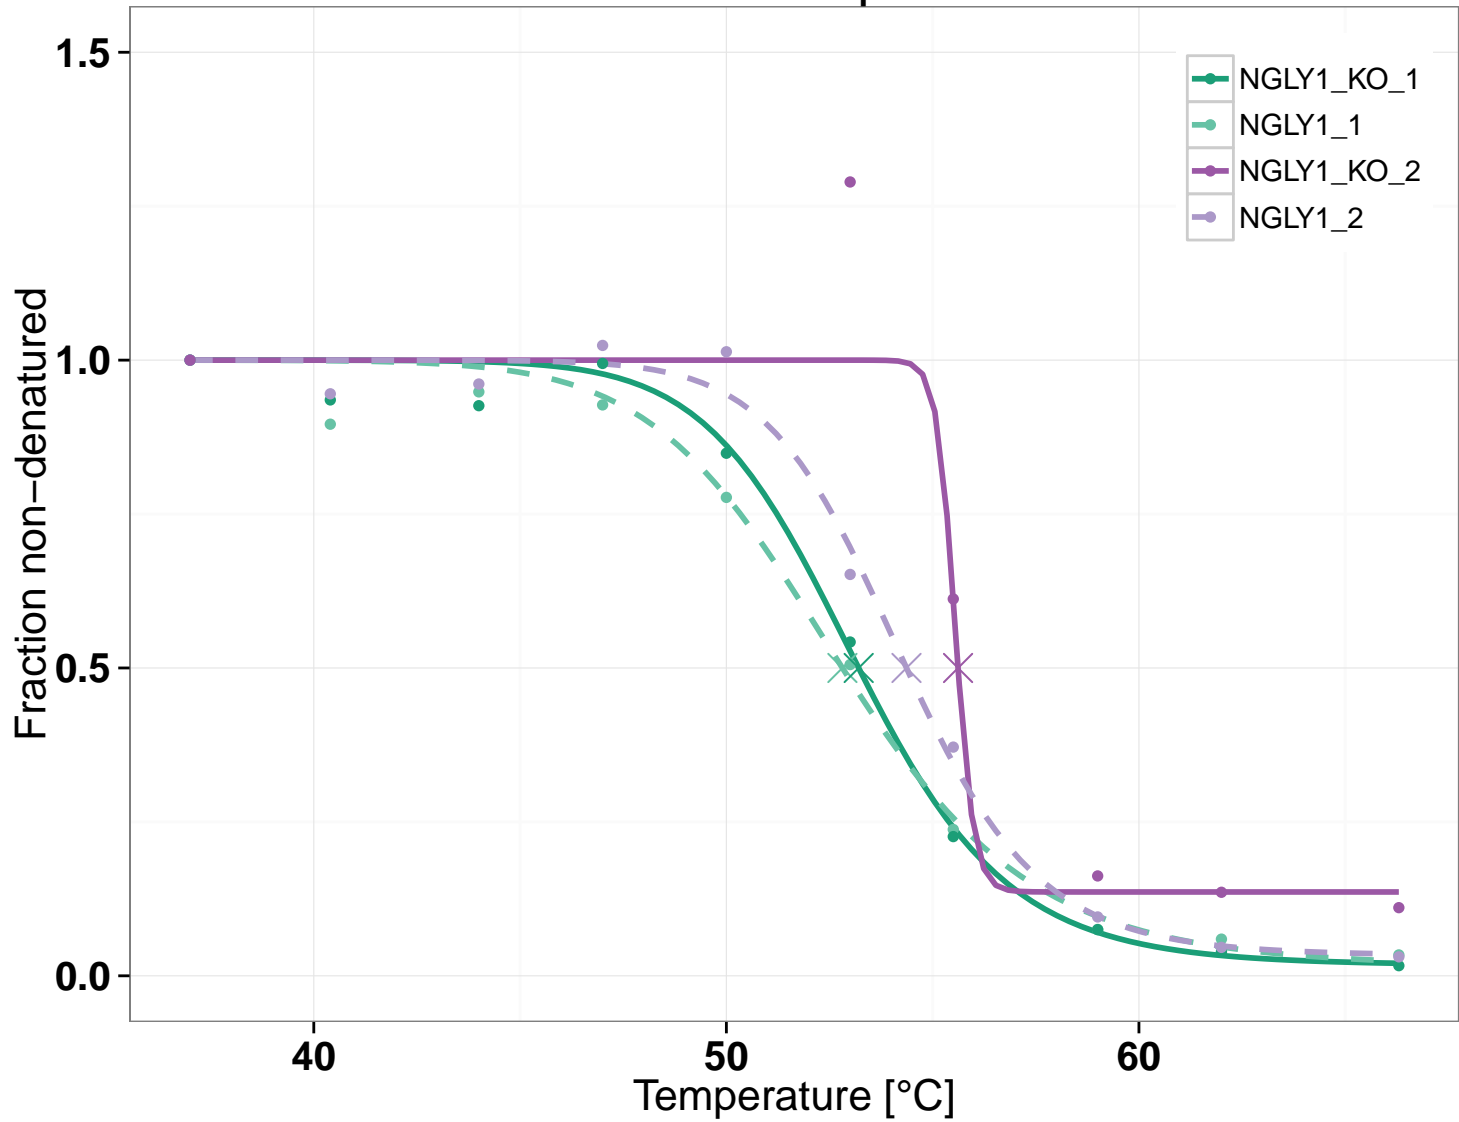

|            | meltPoint | slope | plateau | R2   |
|------------|-----------|-------|---------|------|
| NGLY1_KO_1 | 53.21     | -0.13 | 0.02    | 0.99 |
| NGLY1_1    | 52.81     | -0.11 | 0.01    | 0.99 |
| NGLY1_KO_2 | 55.62     | -0.97 | 0.14    | 0.42 |
| NGLY1_2    | 54.37     | -0.15 | 0.03    | 0.99 |

Supplement: Supplementary file 5847 [file 1]

IPI00743861.3|CONSERVED HYPOTHETICAL PROTEIN.

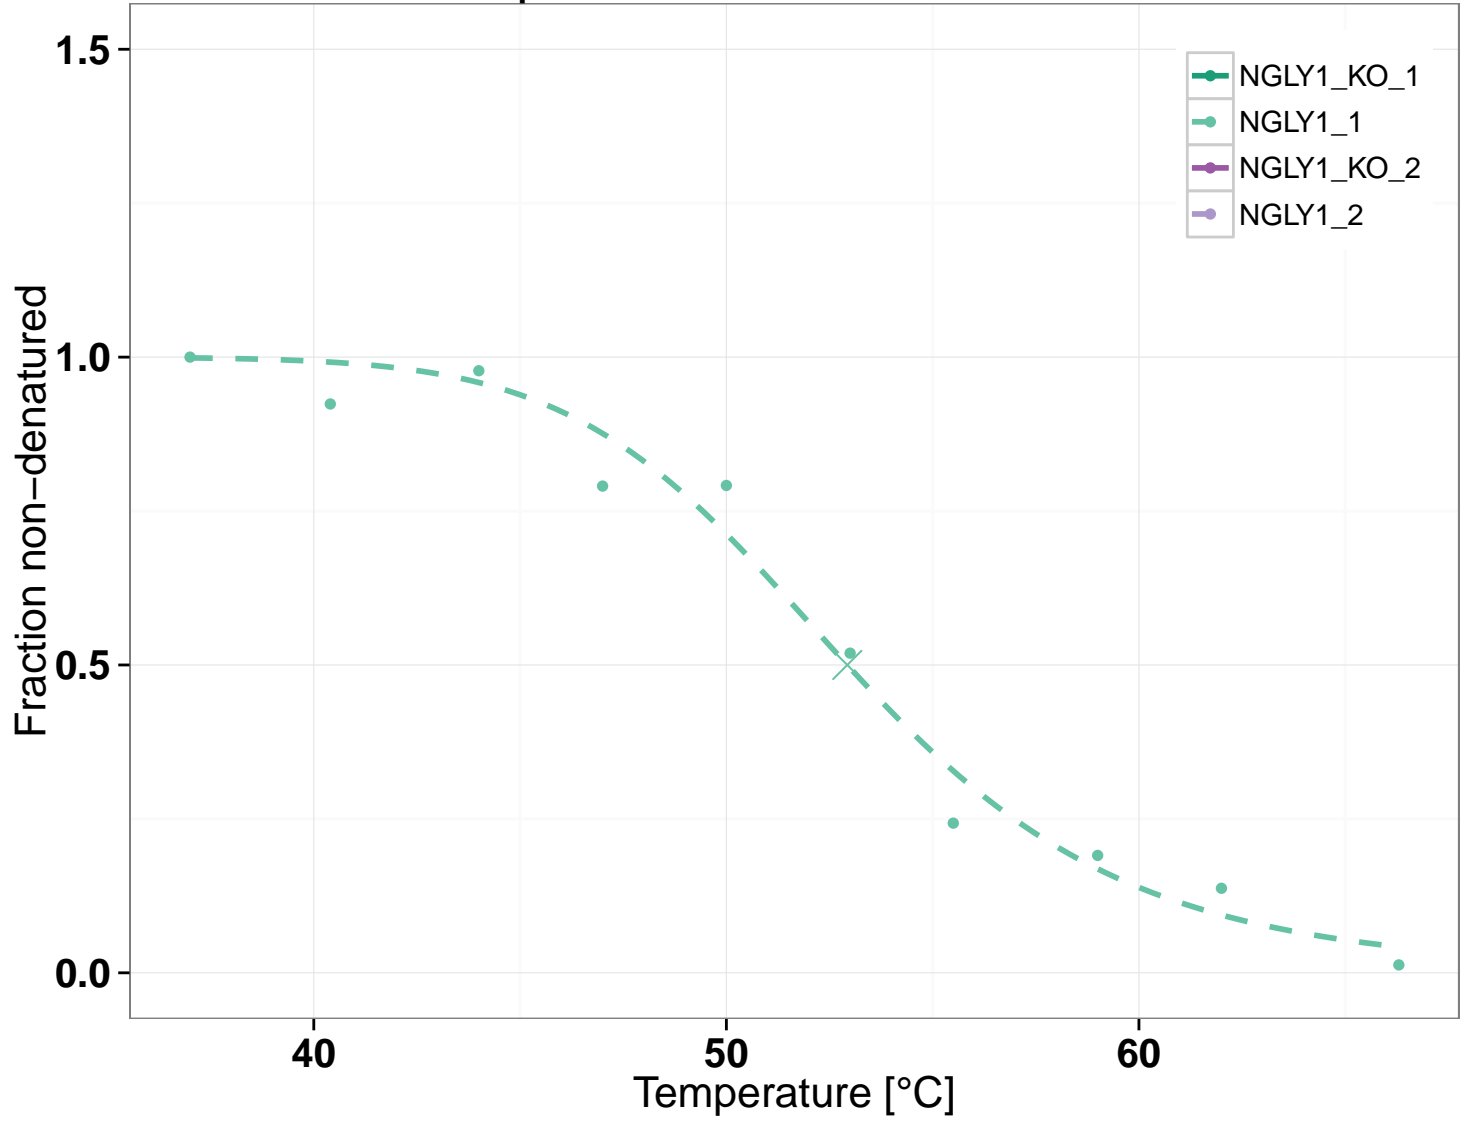

|            | meltPoint | slope  | plateau | R2   |
|------------|-----------|--------|---------|------|
| NGLY1_KO_1 | -         | -      | -       | -    |
| NGLY1_1    | 52.93     | -0.074 | 0       | 0.98 |
| NGLY1_KO_2 | -         | -      | -       | -    |
| NGLY1_2    | -         | -      | -       | -    |

Supplement: Supplementary file 5848 [file 1]

IPI00027350.3|PRDX2

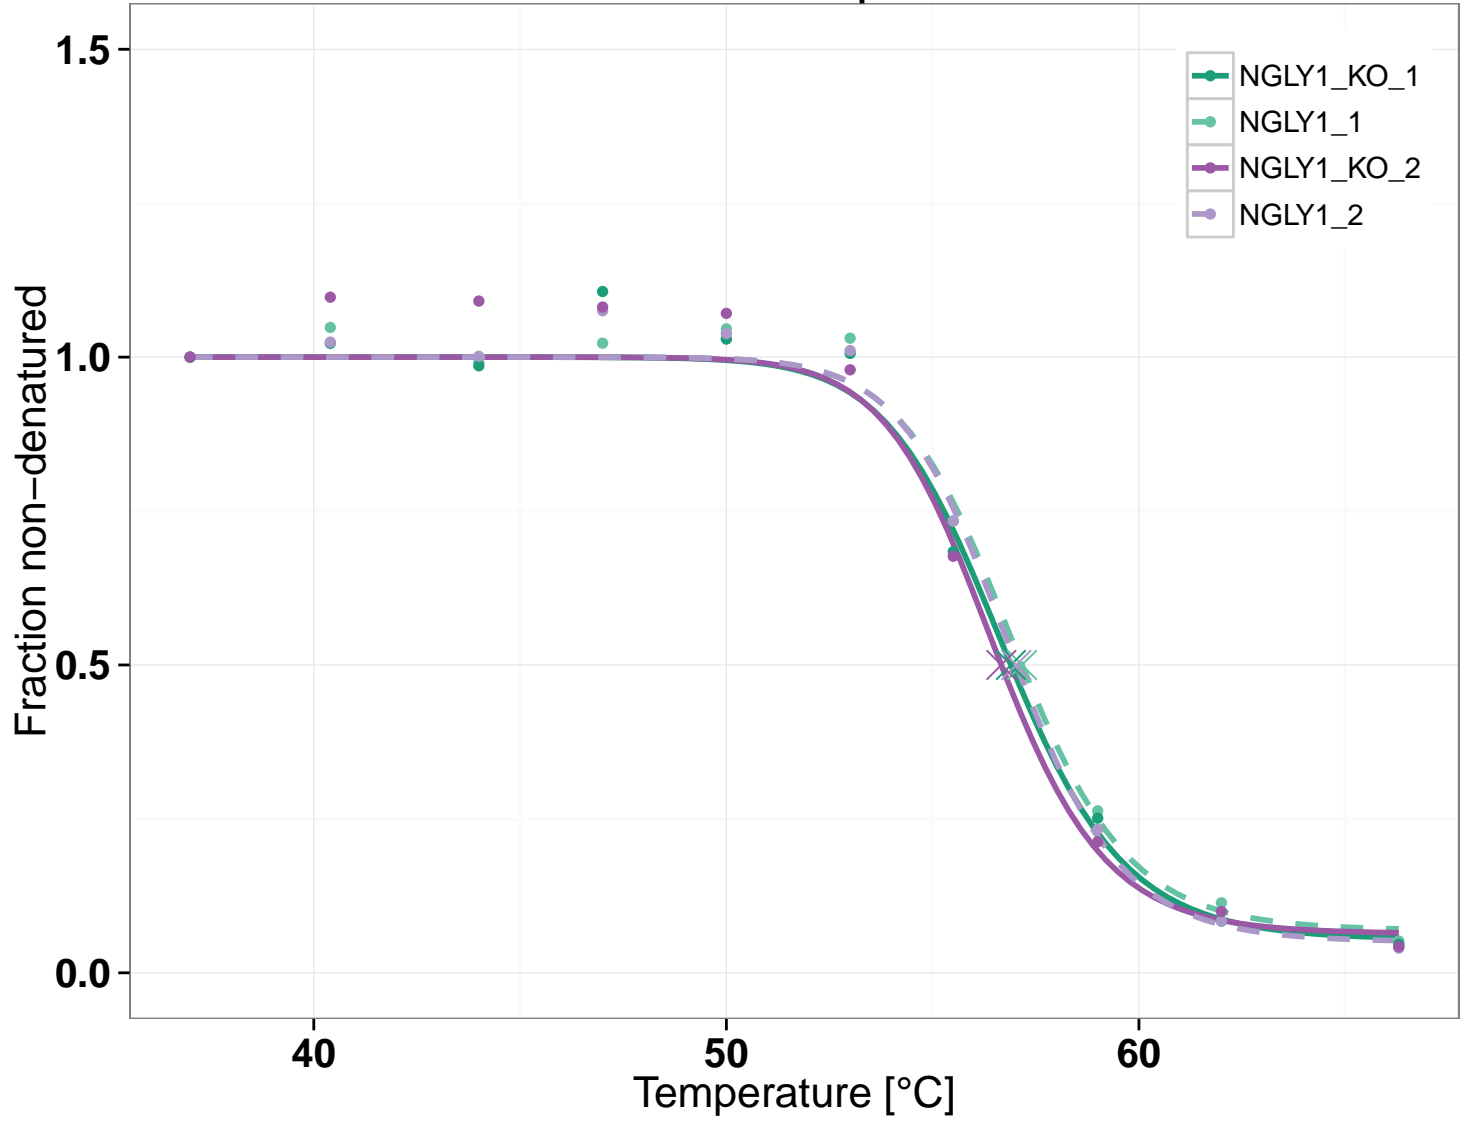

|            | meltPoint | slope | plateau | R2   |
|------------|-----------|-------|---------|------|
| NGLY1_KO_1 | 56.9      | -0.16 | 0.05    | 0.99 |
| NGLY1_1    | 57.16     | -0.17 | 0.07    | 0.99 |
| NGLY1_KO_2 | 56.66     | -0.17 | 0.06    | 0.98 |
| NGLY1_2    | 57.03     | -0.18 | 0.05    | 0.99 |

Supplement: Supplementary file 5849 [file 1]

# IPI00217759.2|FUT11

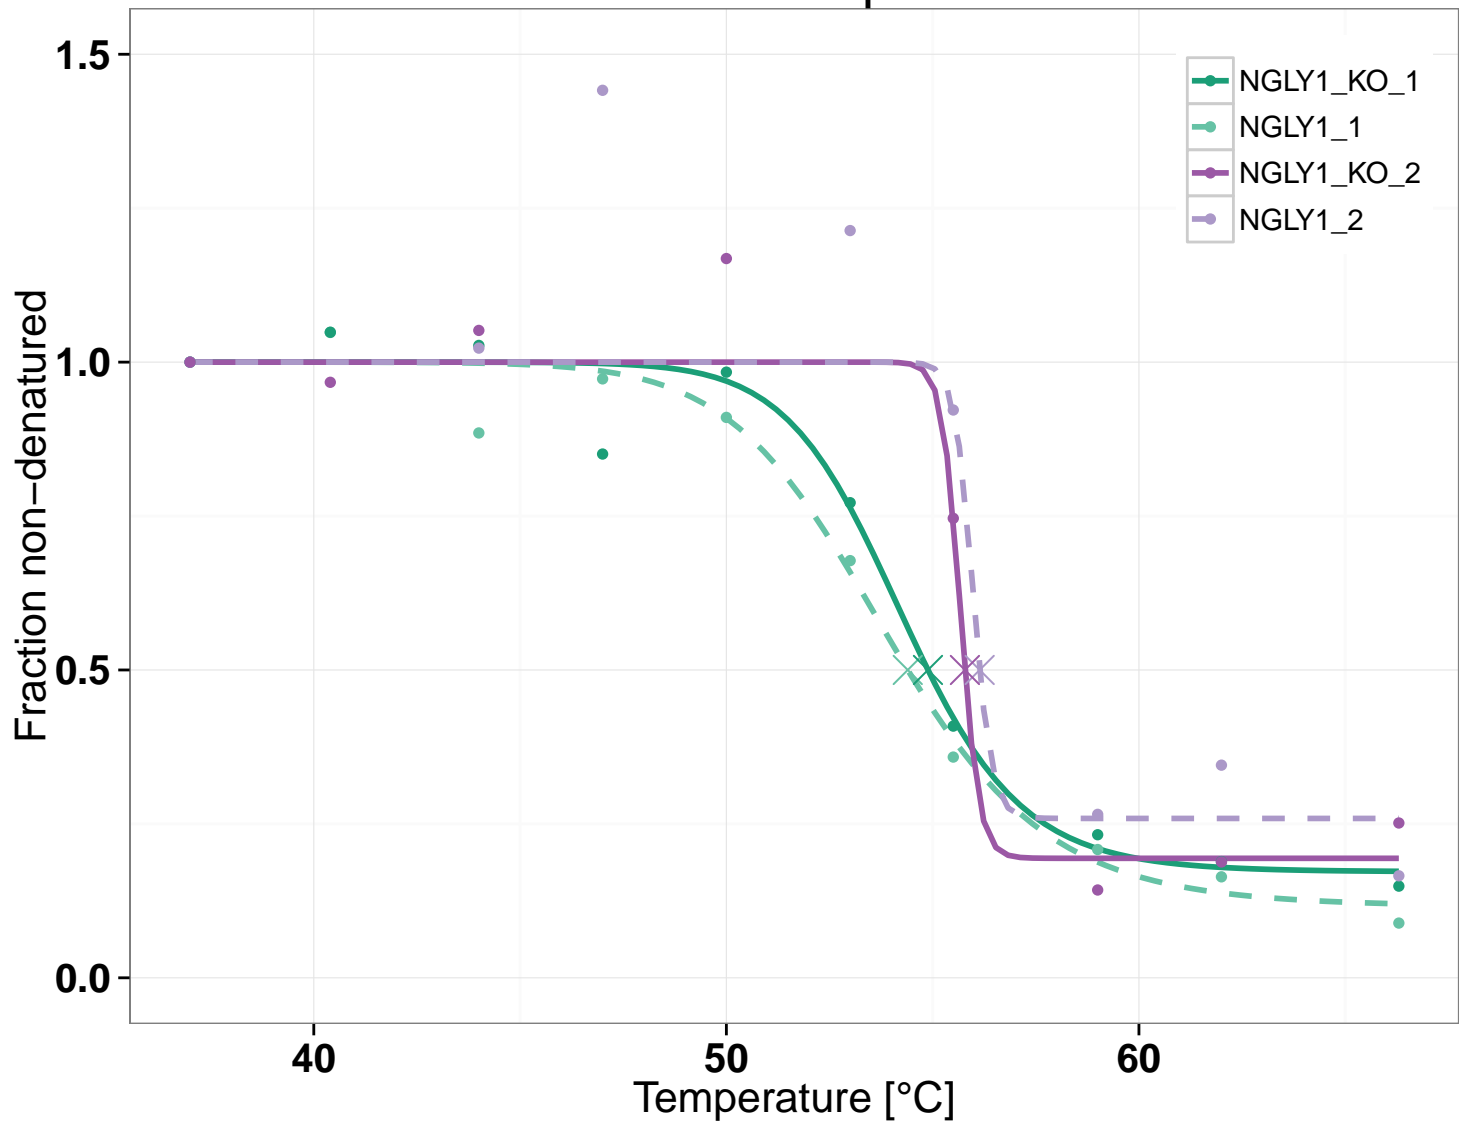

|            | meltPoint | slope | plateau | R2   |
|------------|-----------|-------|---------|------|
| NGLY1_KO_1 | 54.89     | -0.15 | 0.17    | 0.98 |
| NGLY1_1    | 54.4      | -0.11 | 0.12    | 0.99 |
| NGLY1_KO_2 | 55.78     | -0.9  | 0.19    | 0.22 |
| NGLY1_2    | 56.14     | -0.83 | 0.26    | 0.63 |

Supplement: Supplementary file 5850 [file 1]

# IPI00008485.1|ACO1

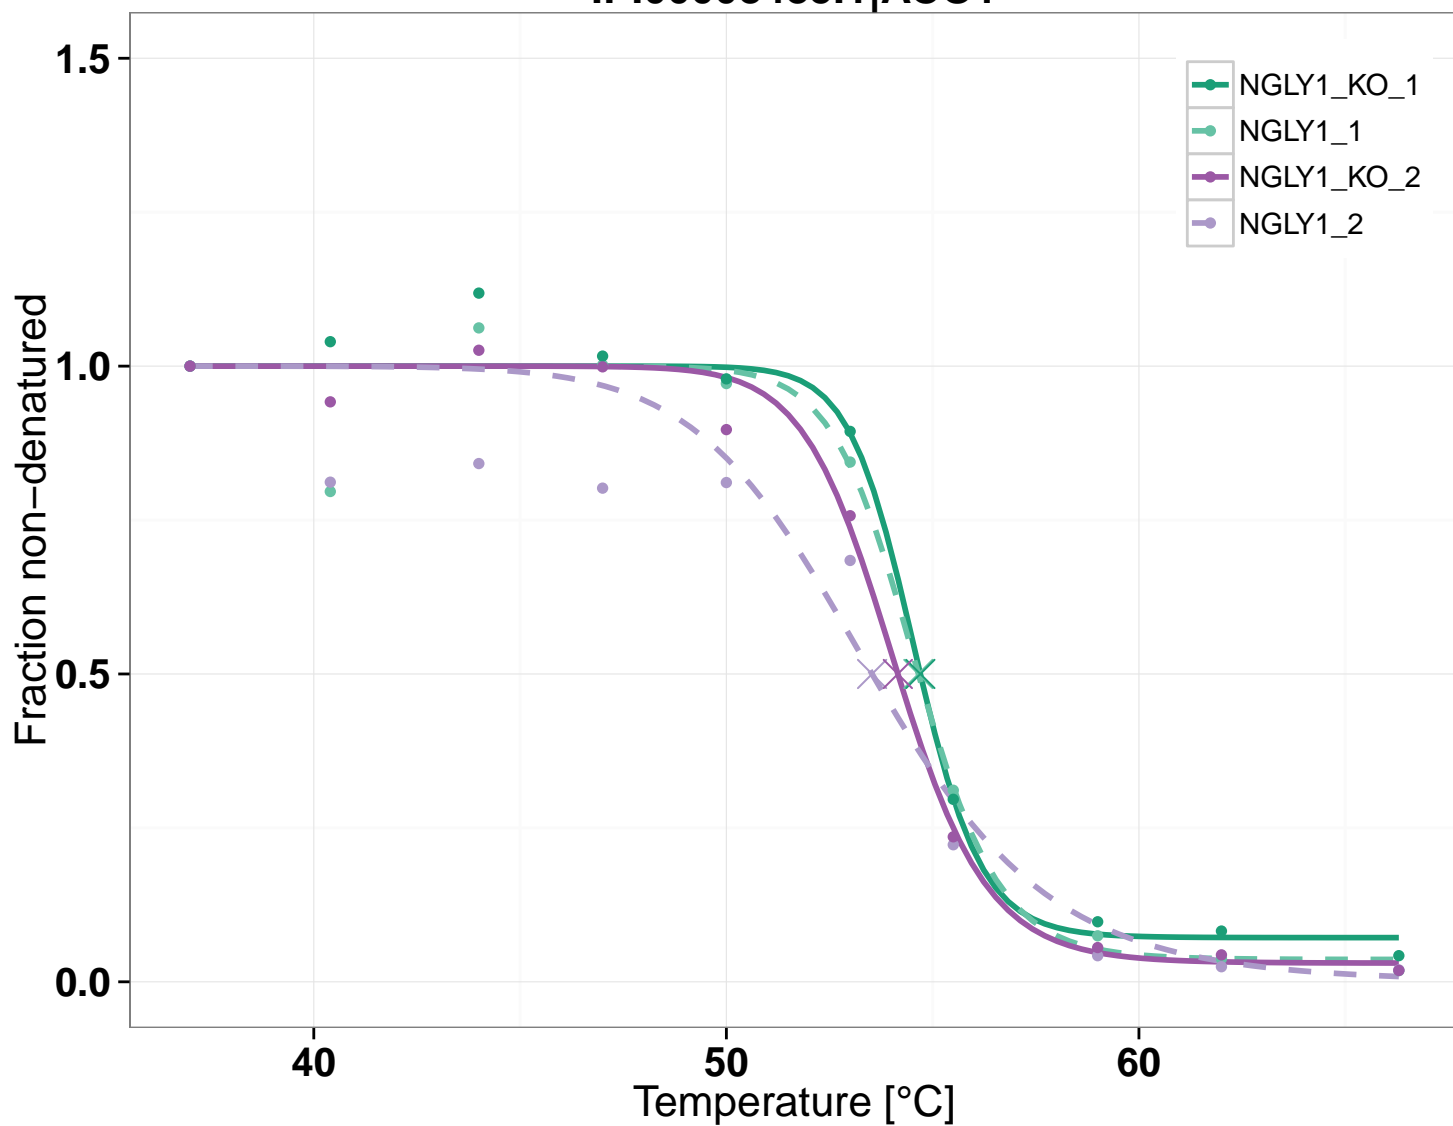

|            | meltPoint | slope | plateau | R2   |
|------------|-----------|-------|---------|------|
| NGLY1_KO_1 | 54.7      | -0.29 | 0.07    | 0.99 |
| NGLY1_1    | 54.65     | -0.24 | 0.04    | 0.97 |
| NGLY1_KO_2 | 54.16     | -0.22 | 0.03    | 0.99 |
| NGLY1_2    | 53.53     | -0.12 | 0       | 0.92 |

Supplement: Supplementary file 5851 [file 1]

IPI00234252.3|SMARCC1

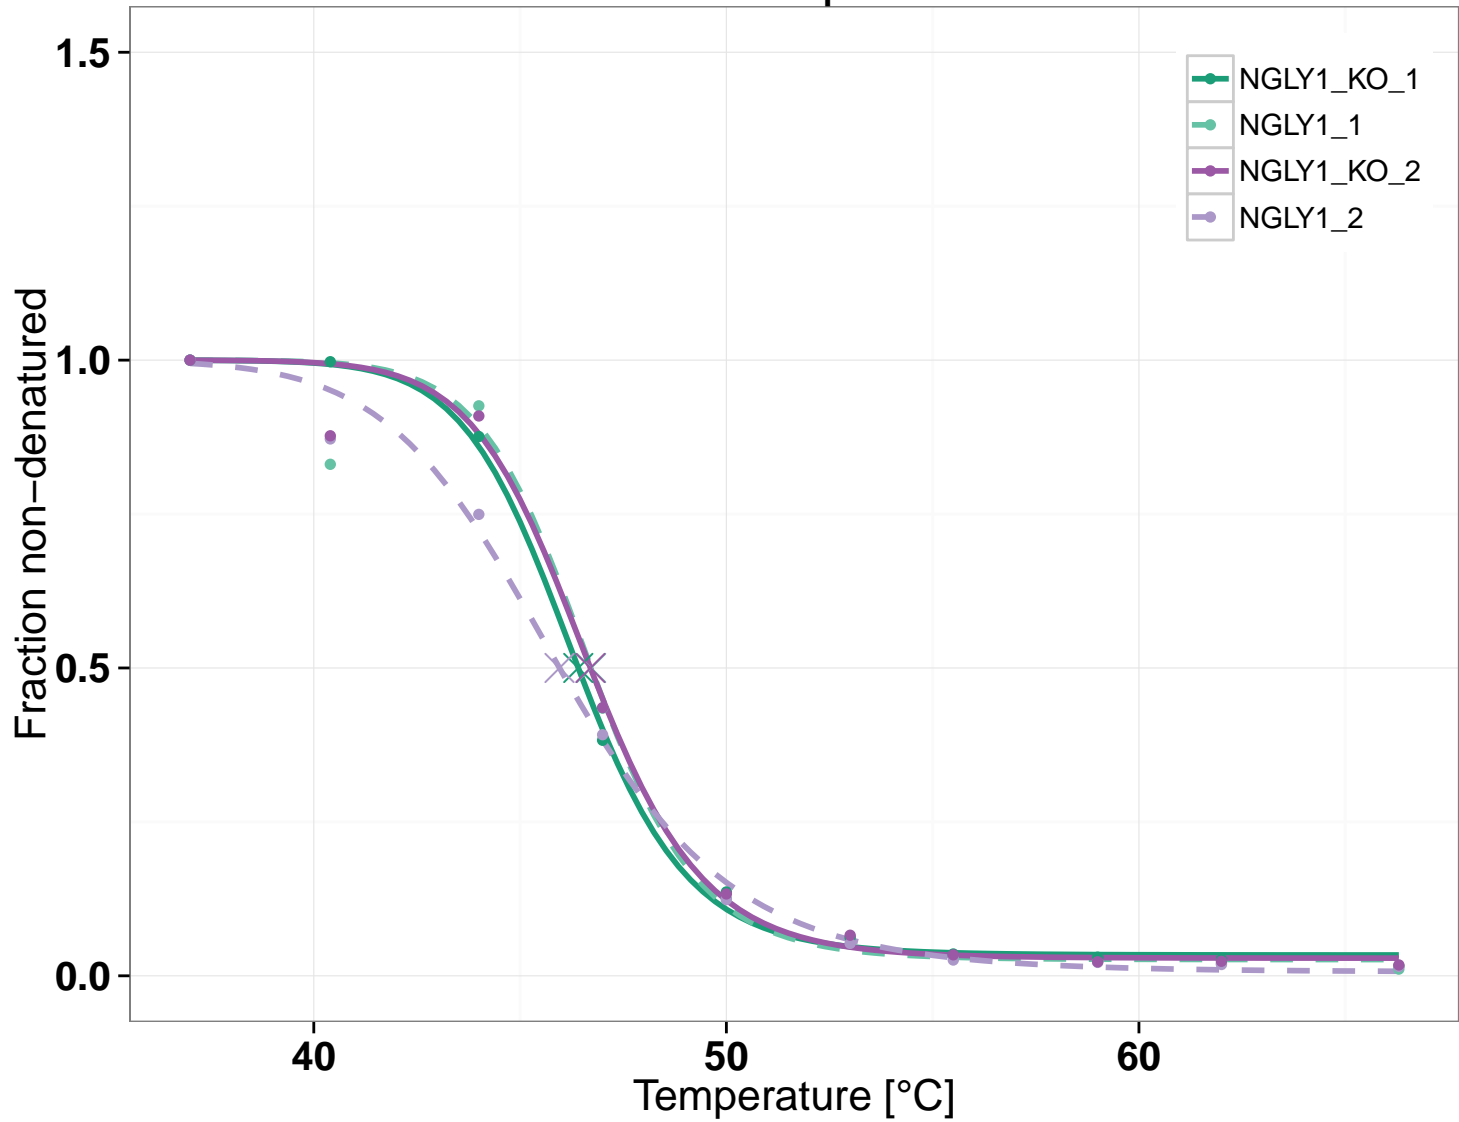

|            | meltPoint | slope | plateau | R2   |
|------------|-----------|-------|---------|------|
| NGLY1_KO_1 | 46.41     | -0.18 | 0.03    | 1    |
| NGLY1_1    | 46.72     | -0.18 | 0.03    | 0.98 |
| NGLY1_KO_2 | 46.7      | -0.17 | 0.03    | 0.99 |
| NGLY1_2    | 45.96     | -0.12 | 0.01    | 0.99 |

Supplement: Supplementary file 5852 [file 1]

IPI00419497.3|CYBASC3

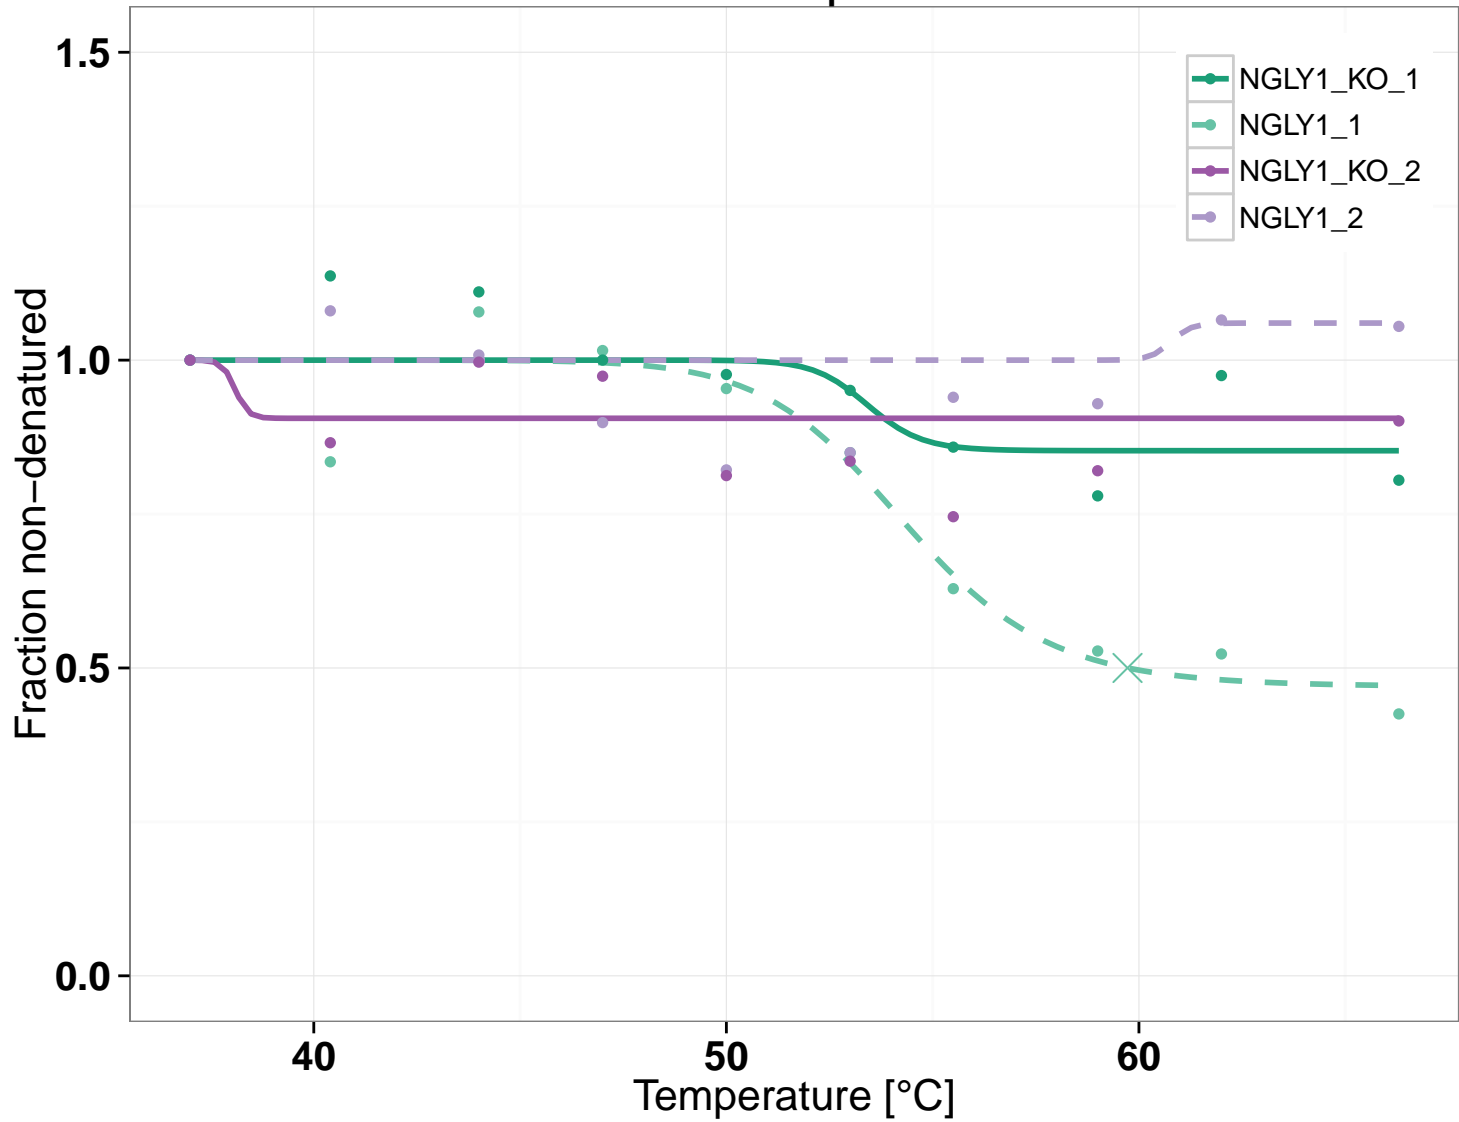

|            | meltPoint | slope  | plateau | R2    |
|------------|-----------|--------|---------|-------|
| NGLY1_KO_1 | -         | -0.056 | 0.85    | 0.57  |
| NGLY1_1    | 59.72     | -0.076 | 0.47    | 0.92  |
| NGLY1_KO_2 | -         | -0.16  | 0.91    | 0.05  |
| NGLY1_2    | -         | 0.061  | 1.06    | -0.07 |

Supplement: Supplementary file 5853 [file 1]

IPI00023137.1|TOR1B

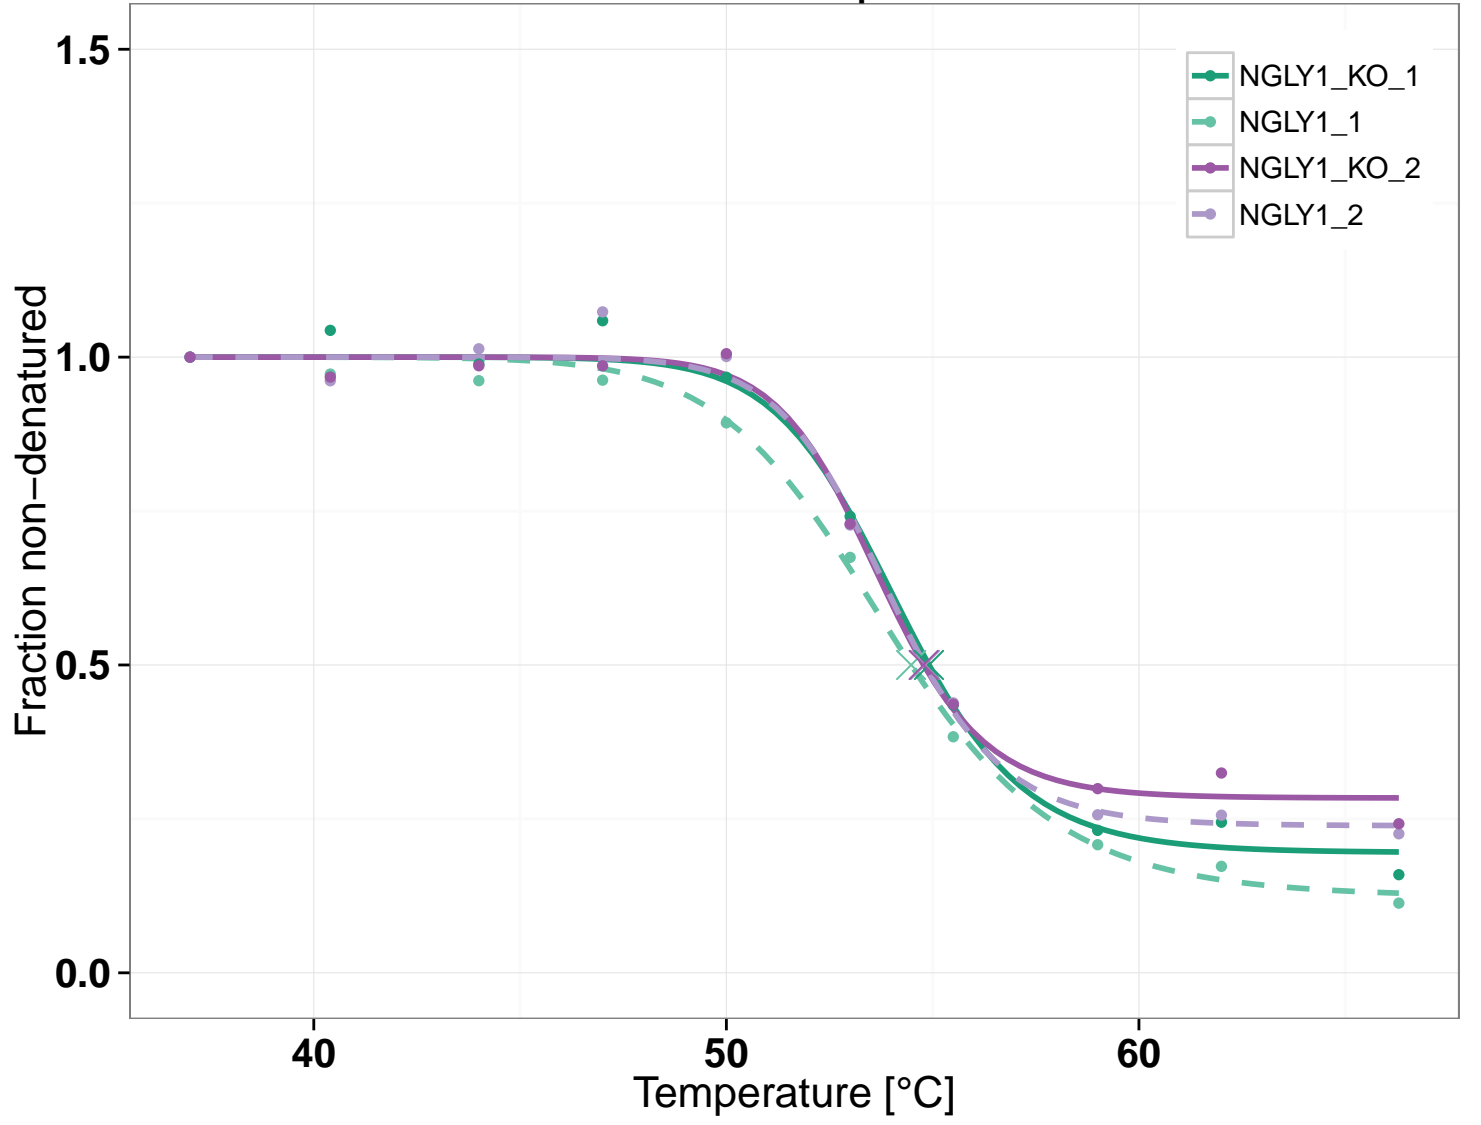

|            | meltPoint | slope | plateau | R2   |
|------------|-----------|-------|---------|------|
| NGLY1_KO_1 | 54.91     | -0.13 | 0.2     | 0.99 |
| NGLY1_1    | 54.48     | -0.11 | 0.12    | 1    |
| NGLY1_KO_2 | 54.78     | -0.14 | 0.28    | 0.99 |
| NGLY1_2    | 54.81     | -0.14 | 0.24    | 0.99 |

Supplement: Supplementary file 5854 [file 1]

IPI00021984.1|SNX19

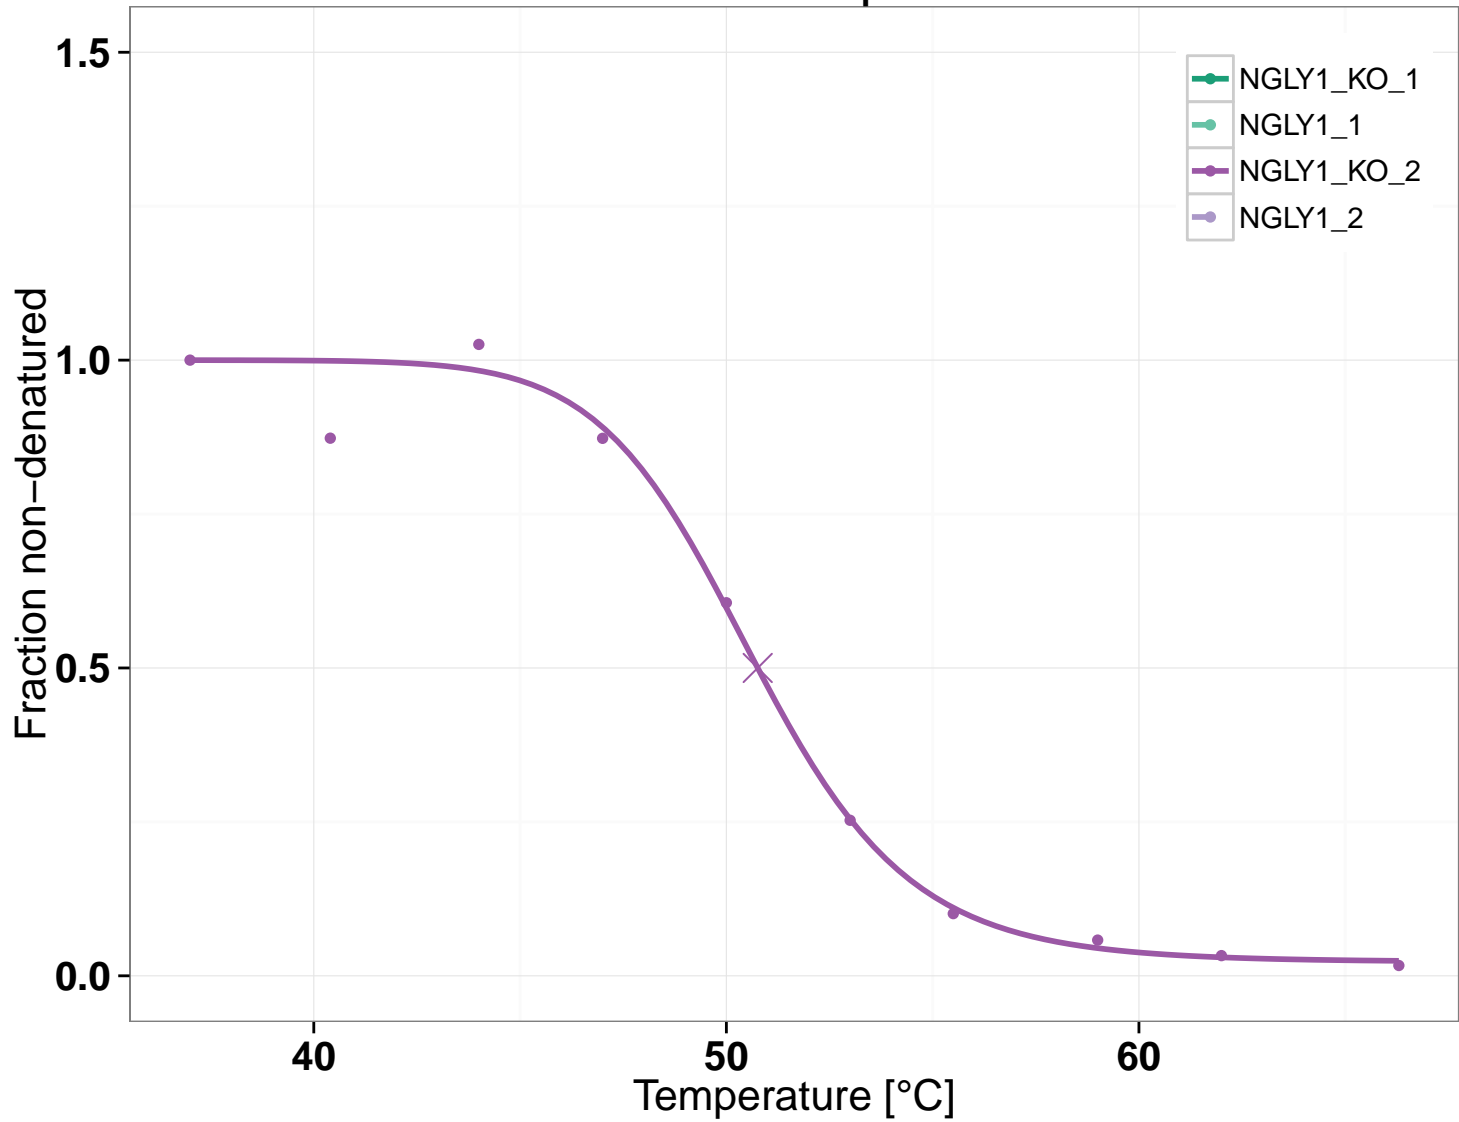

|            | meltPoint | slope | plateau | R2   |
|------------|-----------|-------|---------|------|
| NGLY1_KO_1 | —         | —     | —       | —    |
| NGLY1_1    | —         | —     | —       | —    |
| NGLY1_KO_2 | 50.76     | -0.13 | 0.02    | 0.99 |
| NGLY1_2    | —         | —     | —       | —    |

Supplement: Supplementary file 5855 [file 1]

IPI00018040.1|MED22

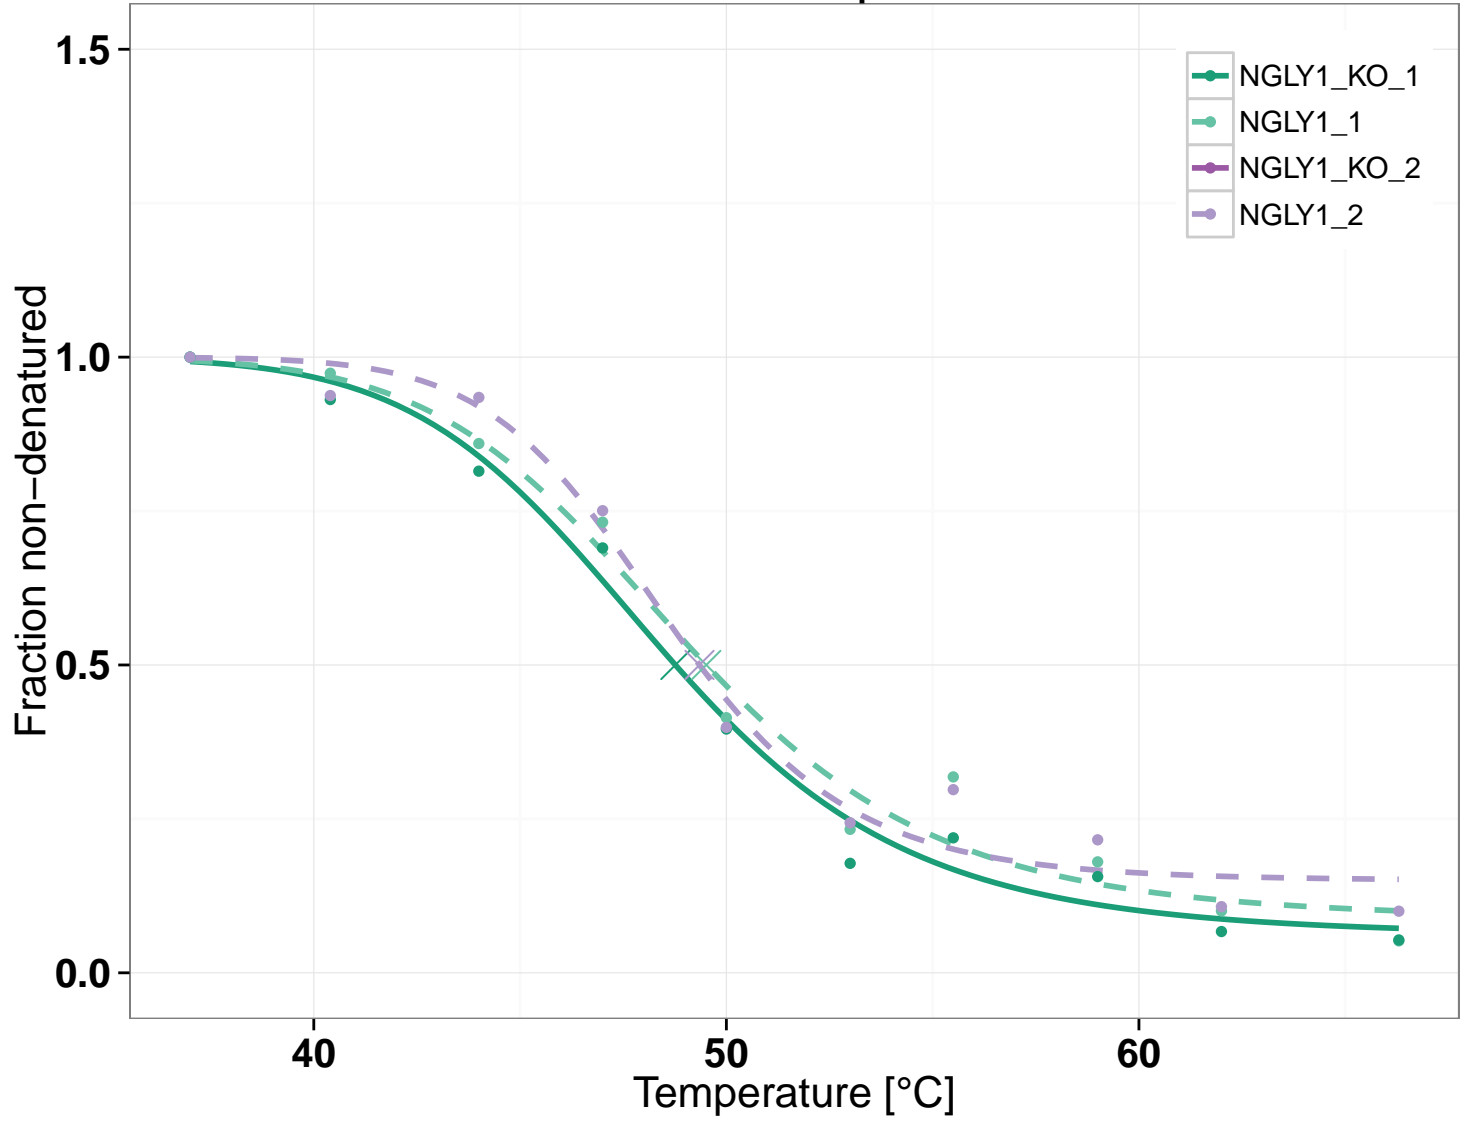

|            | meltPoint | slope  | plateau | R2   |
|------------|-----------|--------|---------|------|
| NGLY1_KO_1 | 48.76     | -0.078 | 0.06    | 0.99 |
| NGLY1_1    | 49.51     | -0.074 | 0.09    | 0.98 |
| NGLY1_KO_2 | -         | -      | -       | -    |
| NGLY1_2    | 49.35     | -0.097 | 0.15    | 0.98 |

Supplement: Supplementary file 5856 [file 1]

IPI00478170.1|ZNF595

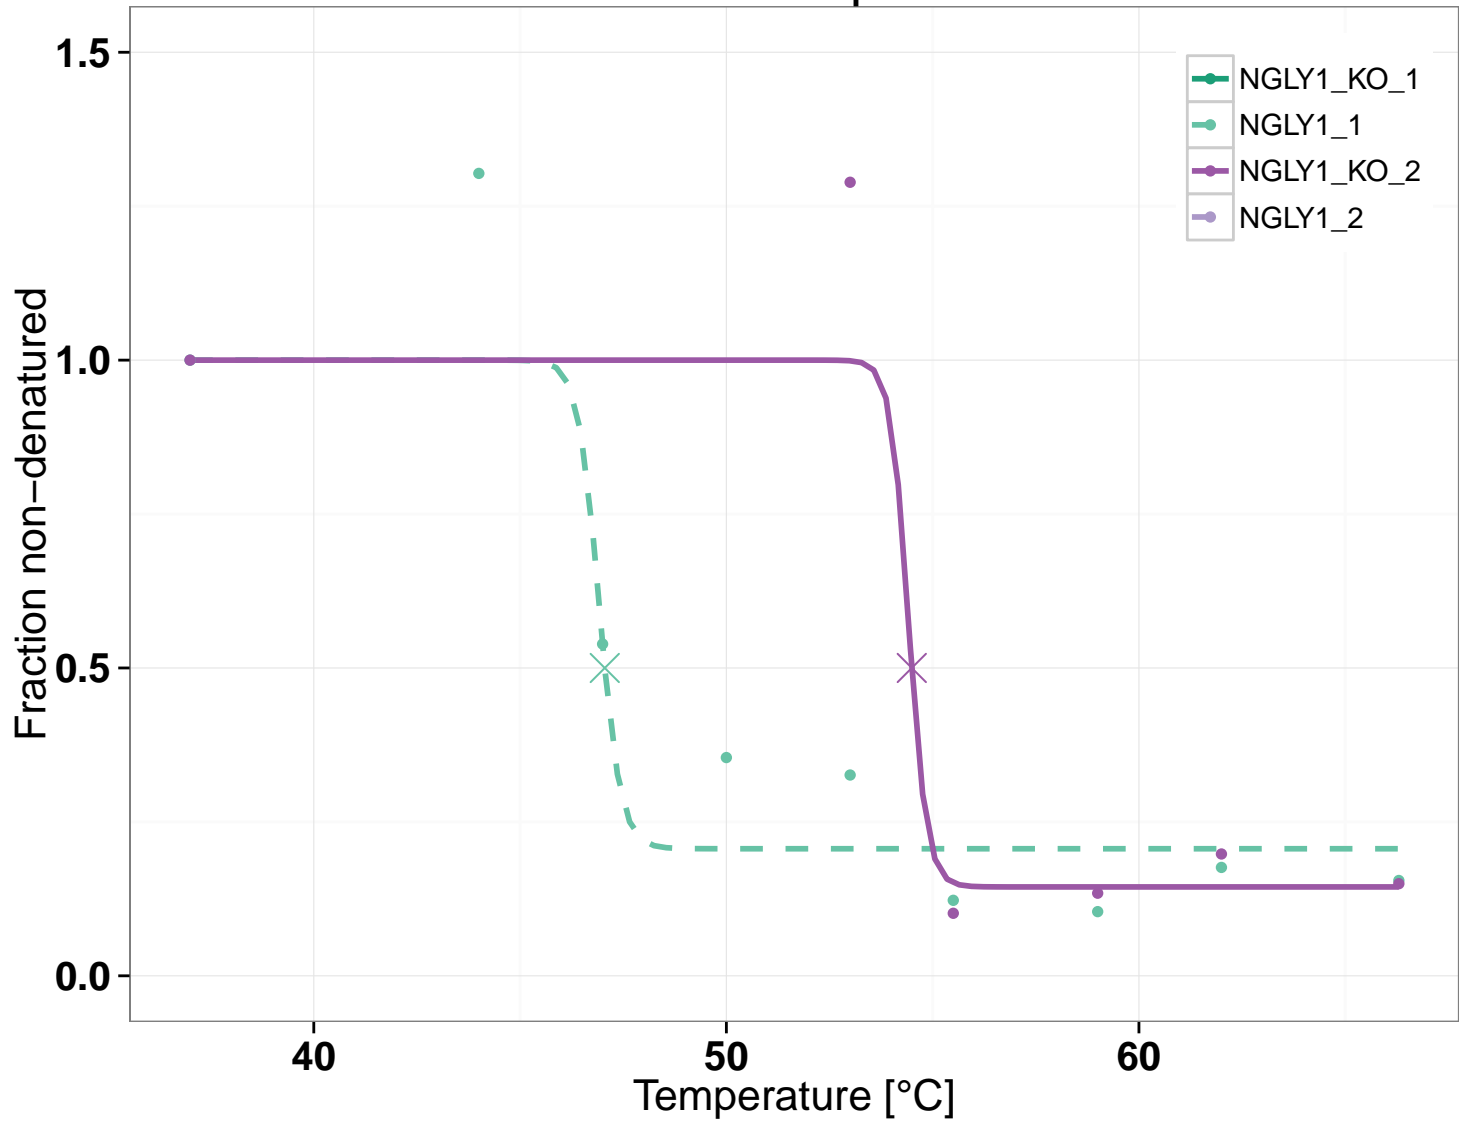

|            | meltPoint | slope | plateau | R2    |
|------------|-----------|-------|---------|-------|
| NGLY1_KO_1 | —         | —     | —       | —     |
| NGLY1_1    | 47.05     | -0.78 | 0.21    | 0.67  |
| NGLY1_KO_2 | 54.49     | -0.98 | 0.14    | -0.29 |
| NGLY1_2    | —         | —     | —       | —     |

Supplement: Supplementary file 5857 [file 1]

IPI00152947.3|MUDENG

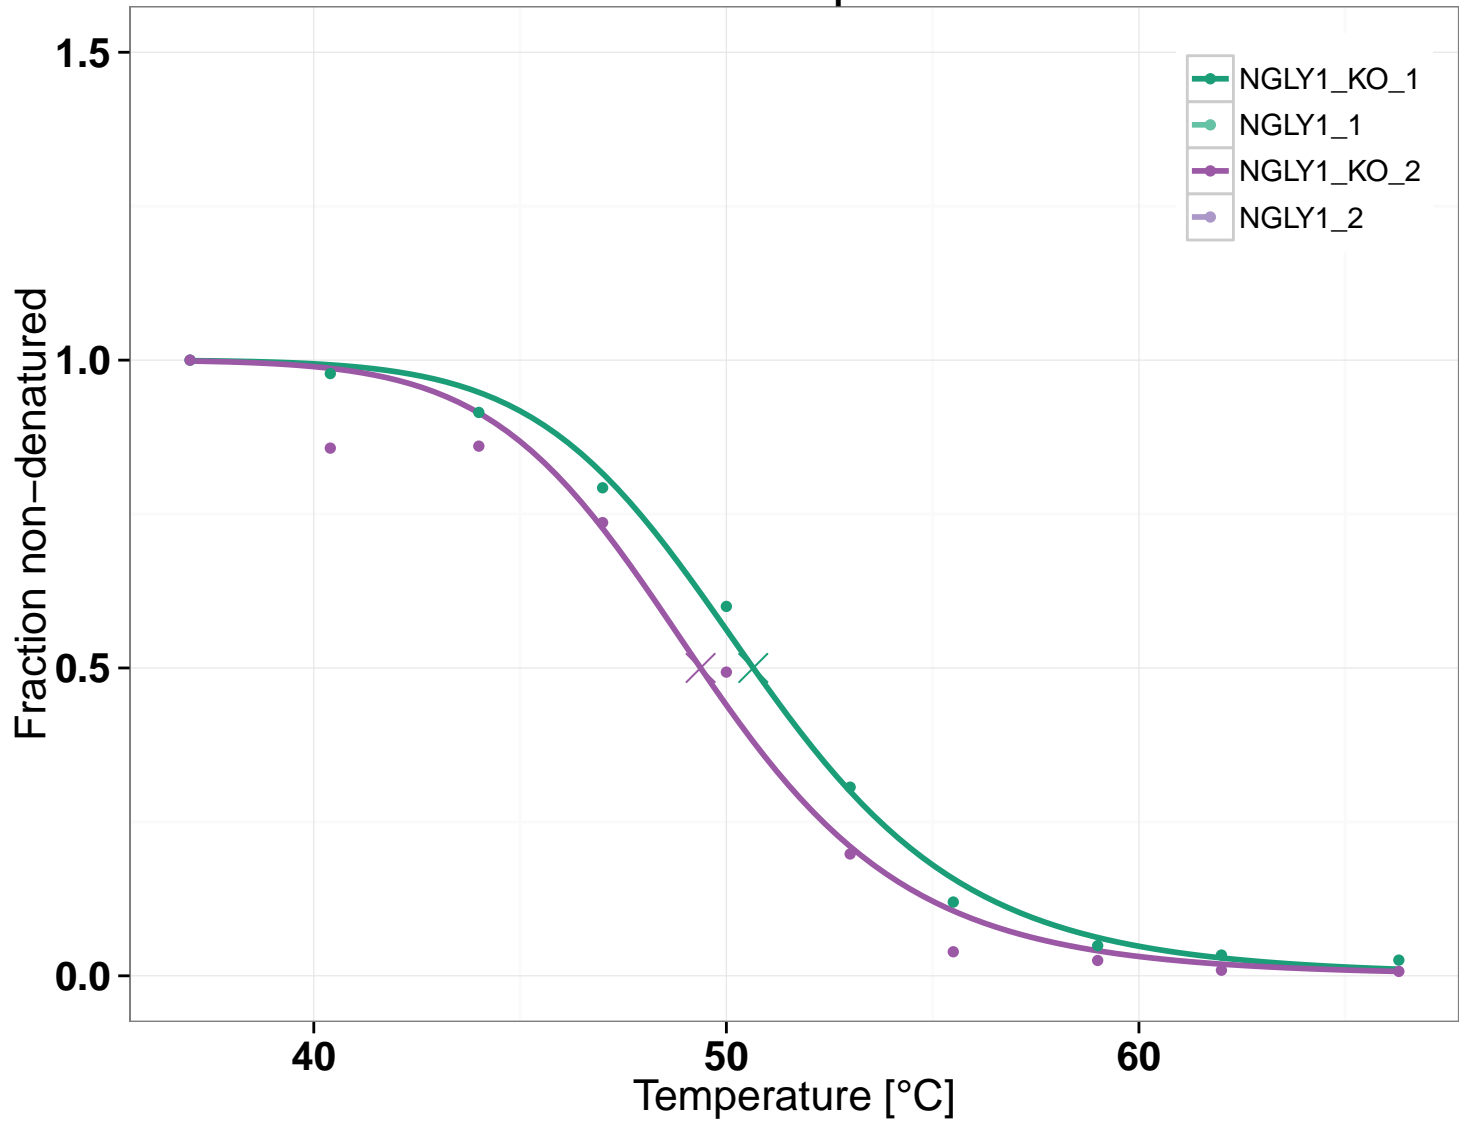

|            | meltPoint | slope  | plateau | R2   |
|------------|-----------|--------|---------|------|
| NGLY1_KO_1 | 50.65     | -0.096 | 0       | 1    |
| NGLY1_1    | -         | -      | -       | -    |
| NGLY1_KO_2 | 49.37     | -0.099 | 0       | 0.98 |
| NGLY1_2    | -         | -      | -       | -    |

Supplement: Supplementary file 5858 [file 1]

# IPI00549381.5|MRPL1

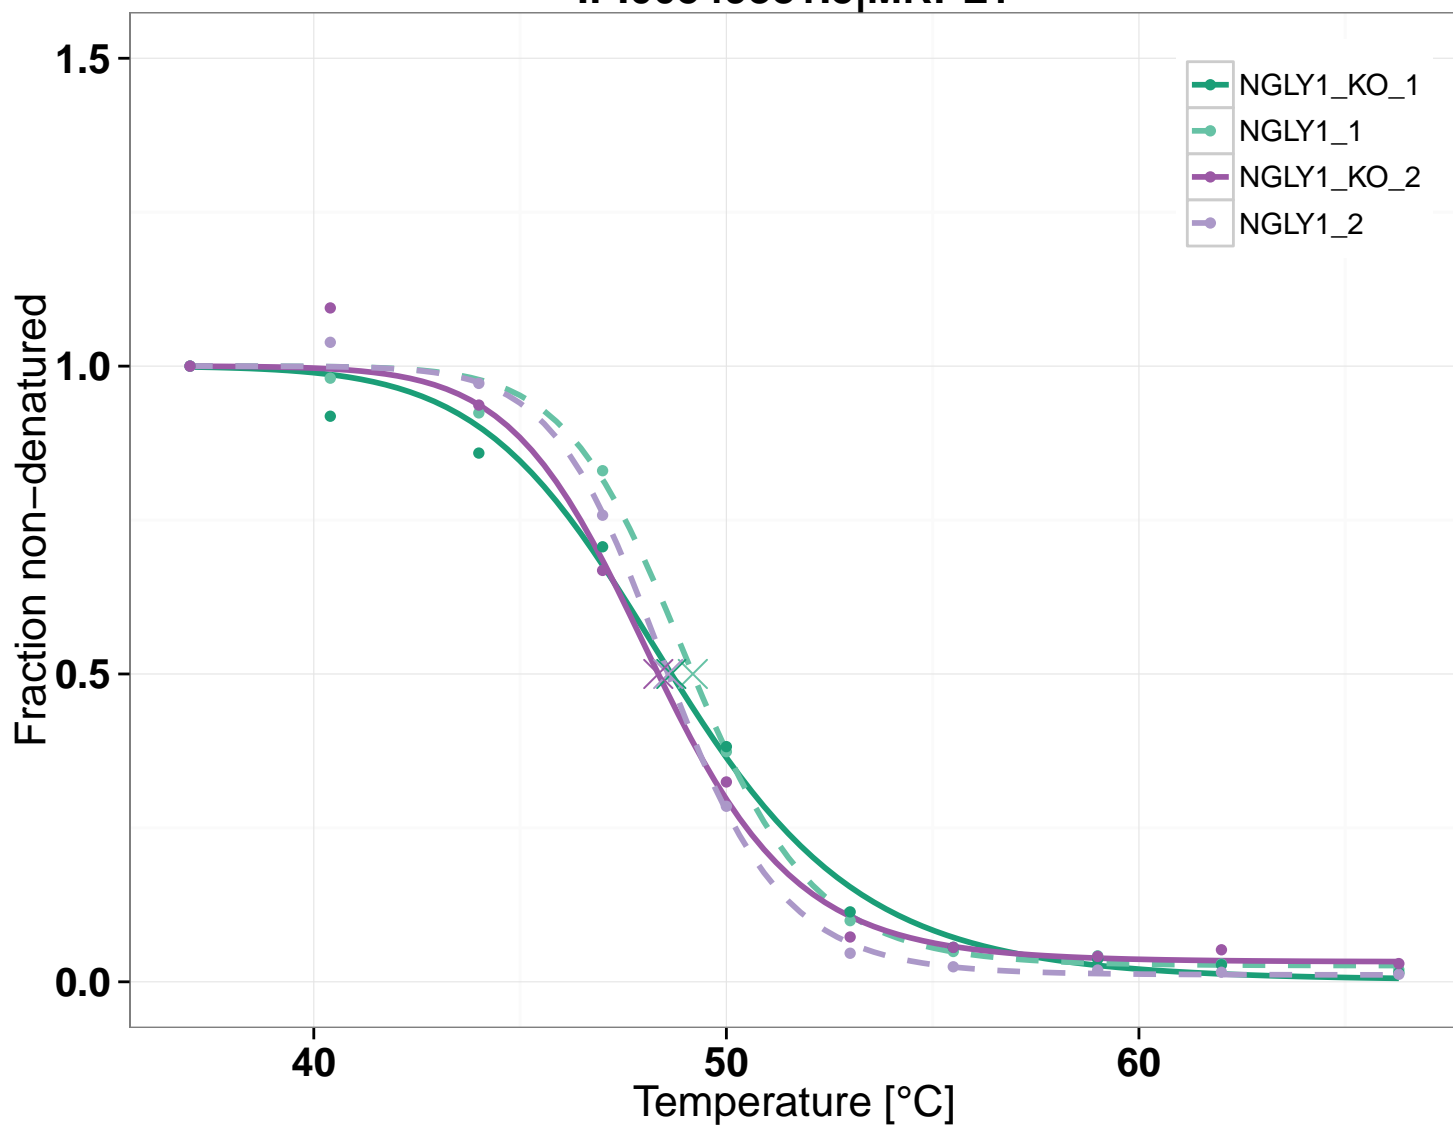

|            | meltPoint | slope | plateau | R2   |
|------------|-----------|-------|---------|------|
| NGLY1_KO_1 | 48.67     | -0.11 | 0       | 0.99 |
| NGLY1_1    | 49.19     | -0.16 | 0.03    | 1    |
| NGLY1_KO_2 | 48.35     | -0.14 | 0.03    | 0.99 |
| NGLY1_2    | 48.59     | -0.18 | 0.01    | 1    |

Supplement: Supplementary file 5859 [file 1]

IPI00867714.1|LSM12

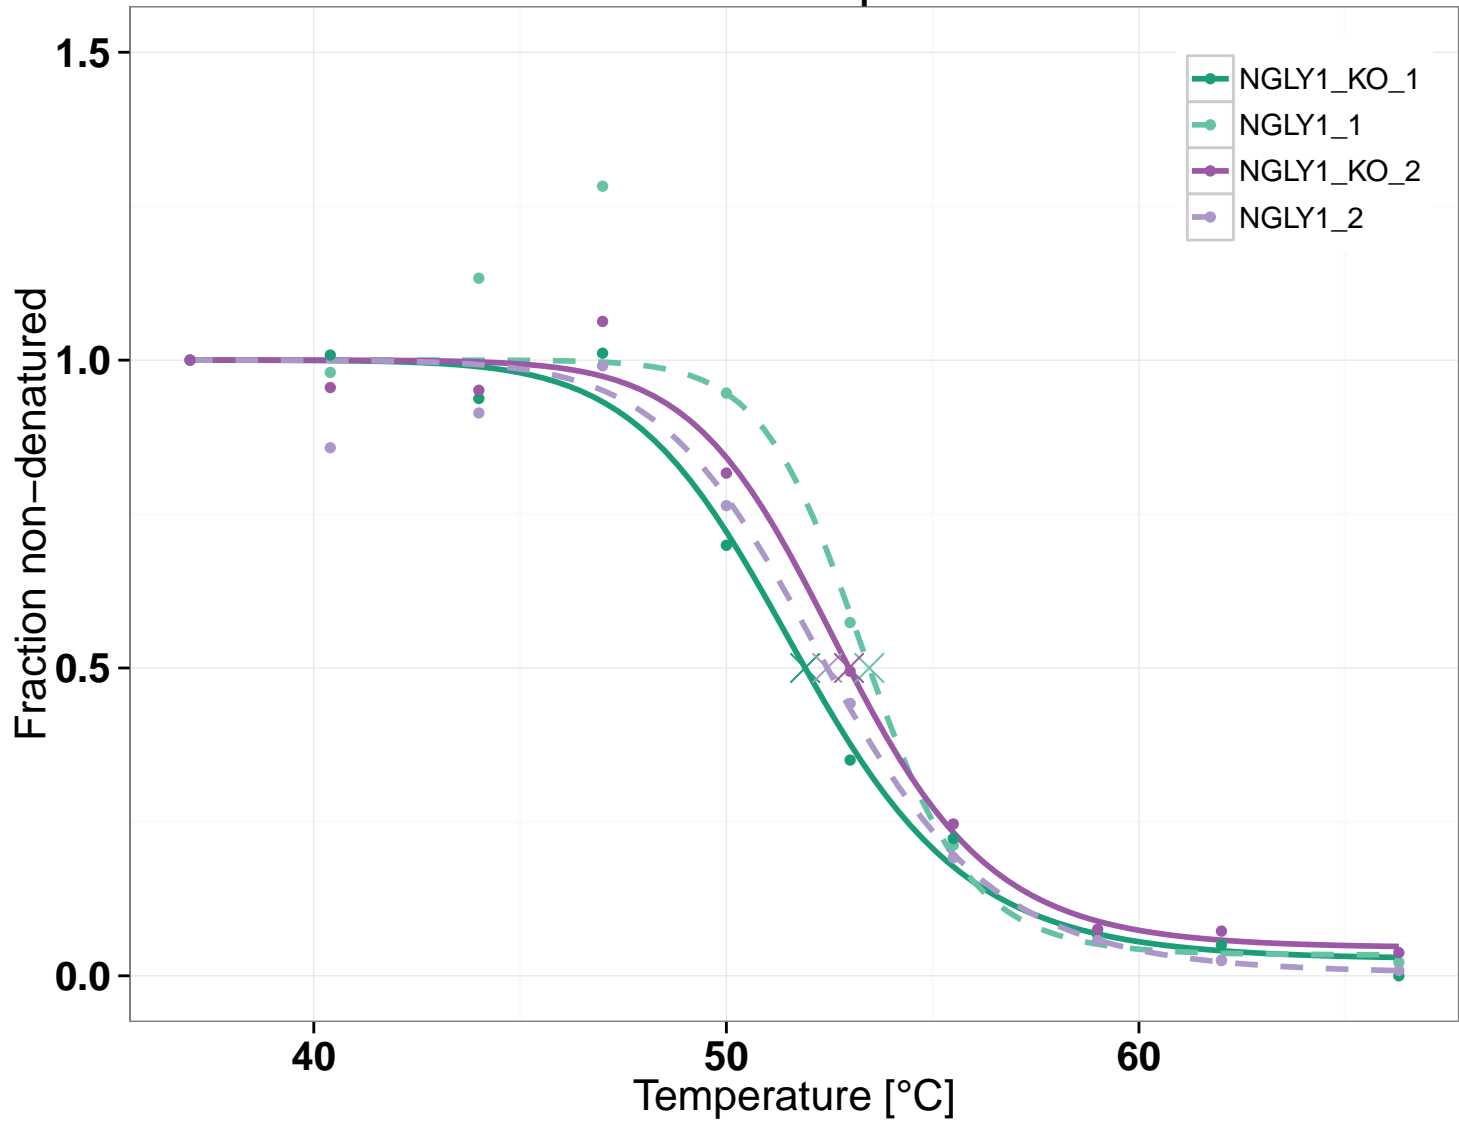

|            | meltPoint | slope | plateau | R2   |
|------------|-----------|-------|---------|------|
| NGLY1_KO_1 | 51.91     | -0.12 | 0.03    | 0.99 |
| NGLY1_1    | 53.46     | -0.19 | 0.03    | 0.96 |
| NGLY1_KO_2 | 52.97     | -0.13 | 0.05    | 0.99 |
| NGLY1_2    | 52.45     | -0.12 | 0       | 0.98 |

Supplement: Supplementary file 5860 [file 1]

IPI00744221.1|FARP2

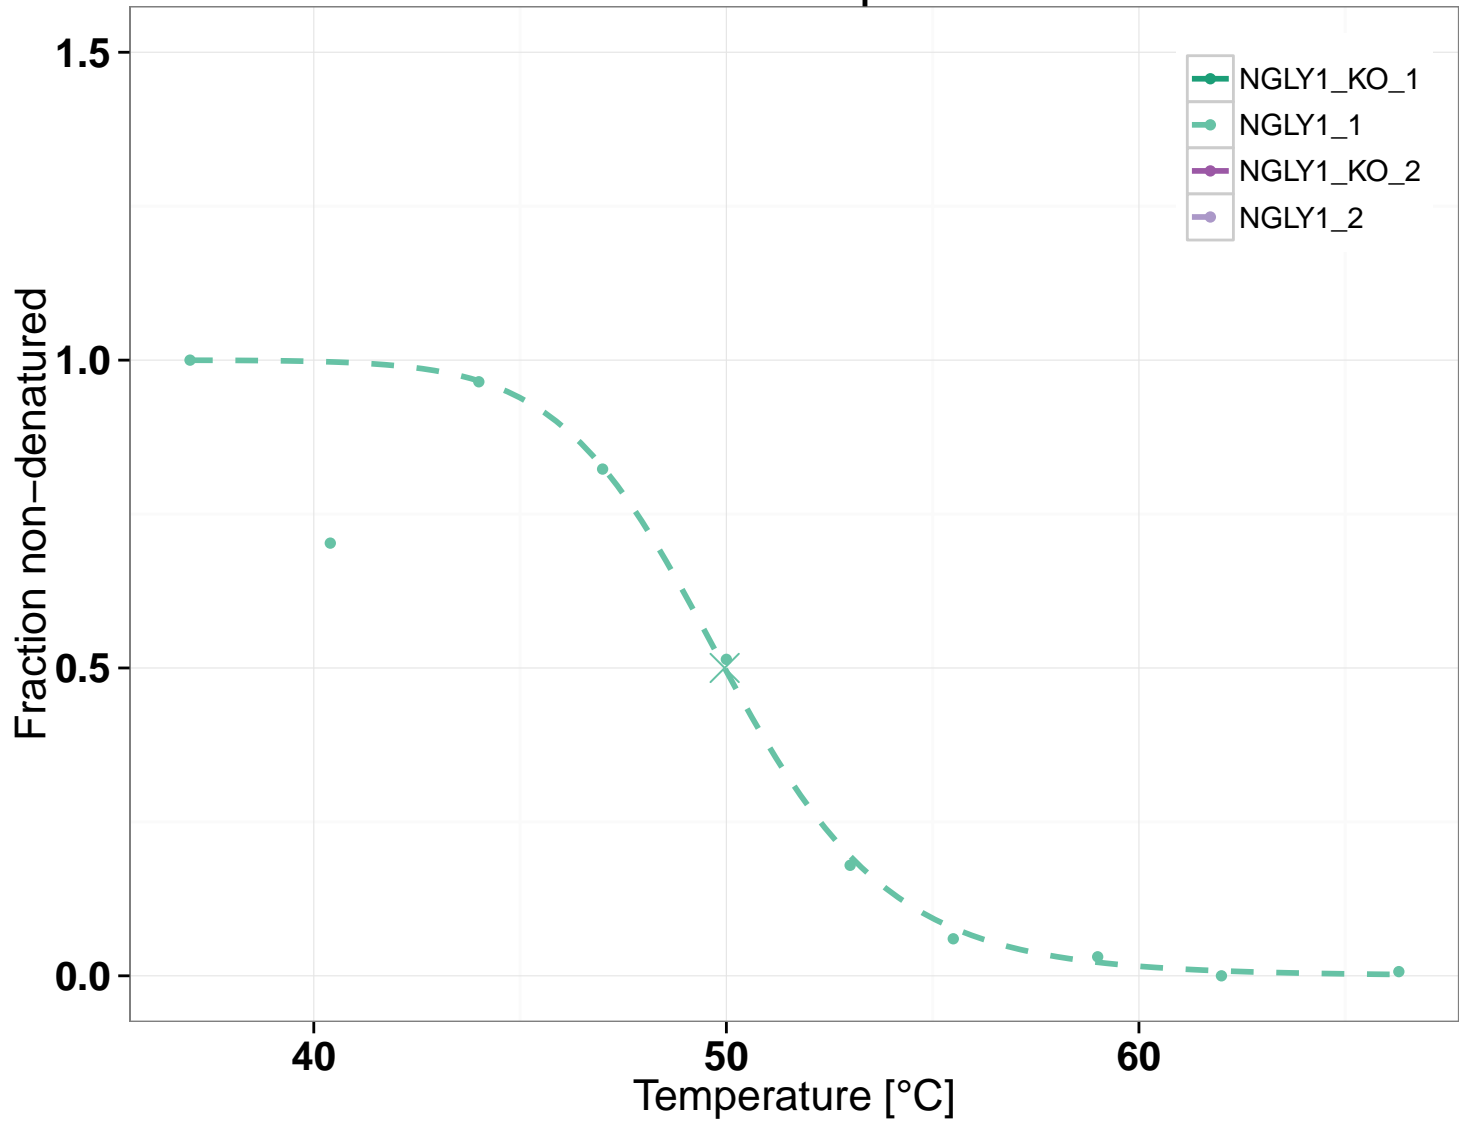

|            | meltPoint | slope | plateau | R2   |
|------------|-----------|-------|---------|------|
| NGLY1_KO_1 | -         | -     | -       | -    |
| NGLY1_1    | 49.96     | -0.12 | 0       | 0.94 |
| NGLY1_KO_2 | -         | -     | -       | -    |
| NGLY1_2    | -         | -     | -       | -    |

Supplement: Supplementary file 5861 [file 1]

IPI00022891.3|SLC25A4

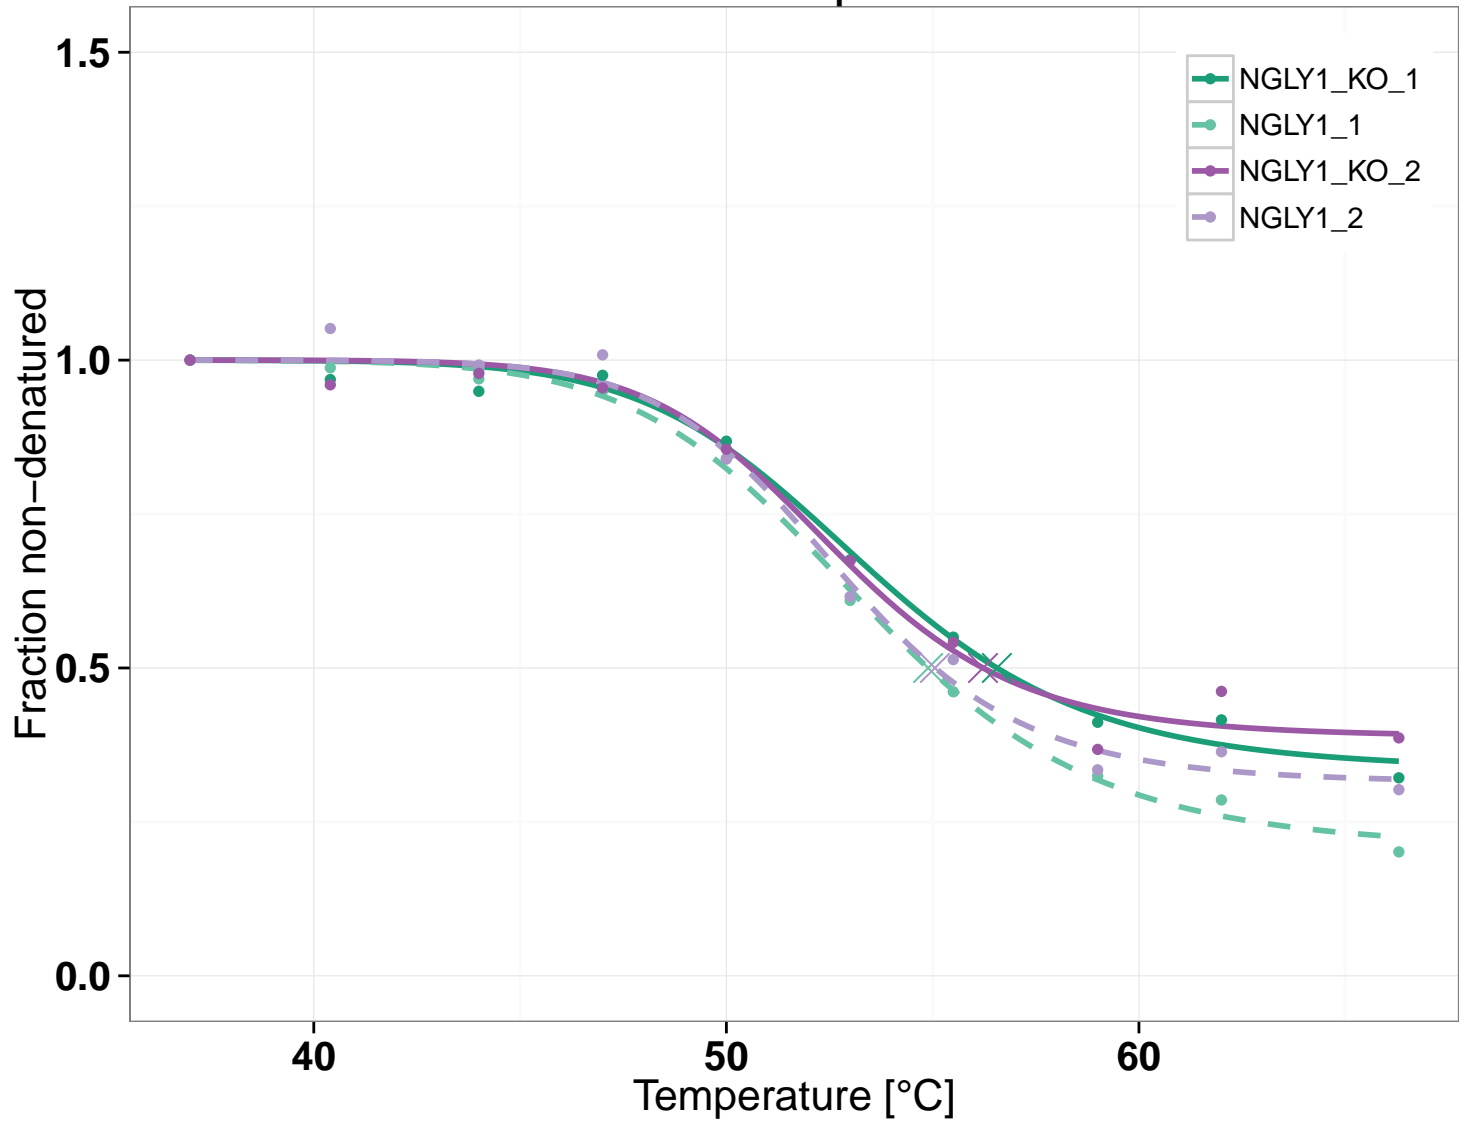

|            | meltPoint | slope  | plateau | R2   |
|------------|-----------|--------|---------|------|
| NGLY1_KO_1 | 56.56     | -0.061 | 0.33    | 0.99 |
| NGLY1_1    | 54.89     | -0.071 | 0.21    | 1    |
| NGLY1_KO_2 | 56.22     | -0.068 | 0.39    | 0.98 |
| NGLY1_2    | 55.06     | -0.077 | 0.31    | 0.99 |

Supplement: Supplementary file 5862 [file 1]

IPI00174190.3|PTPMT1

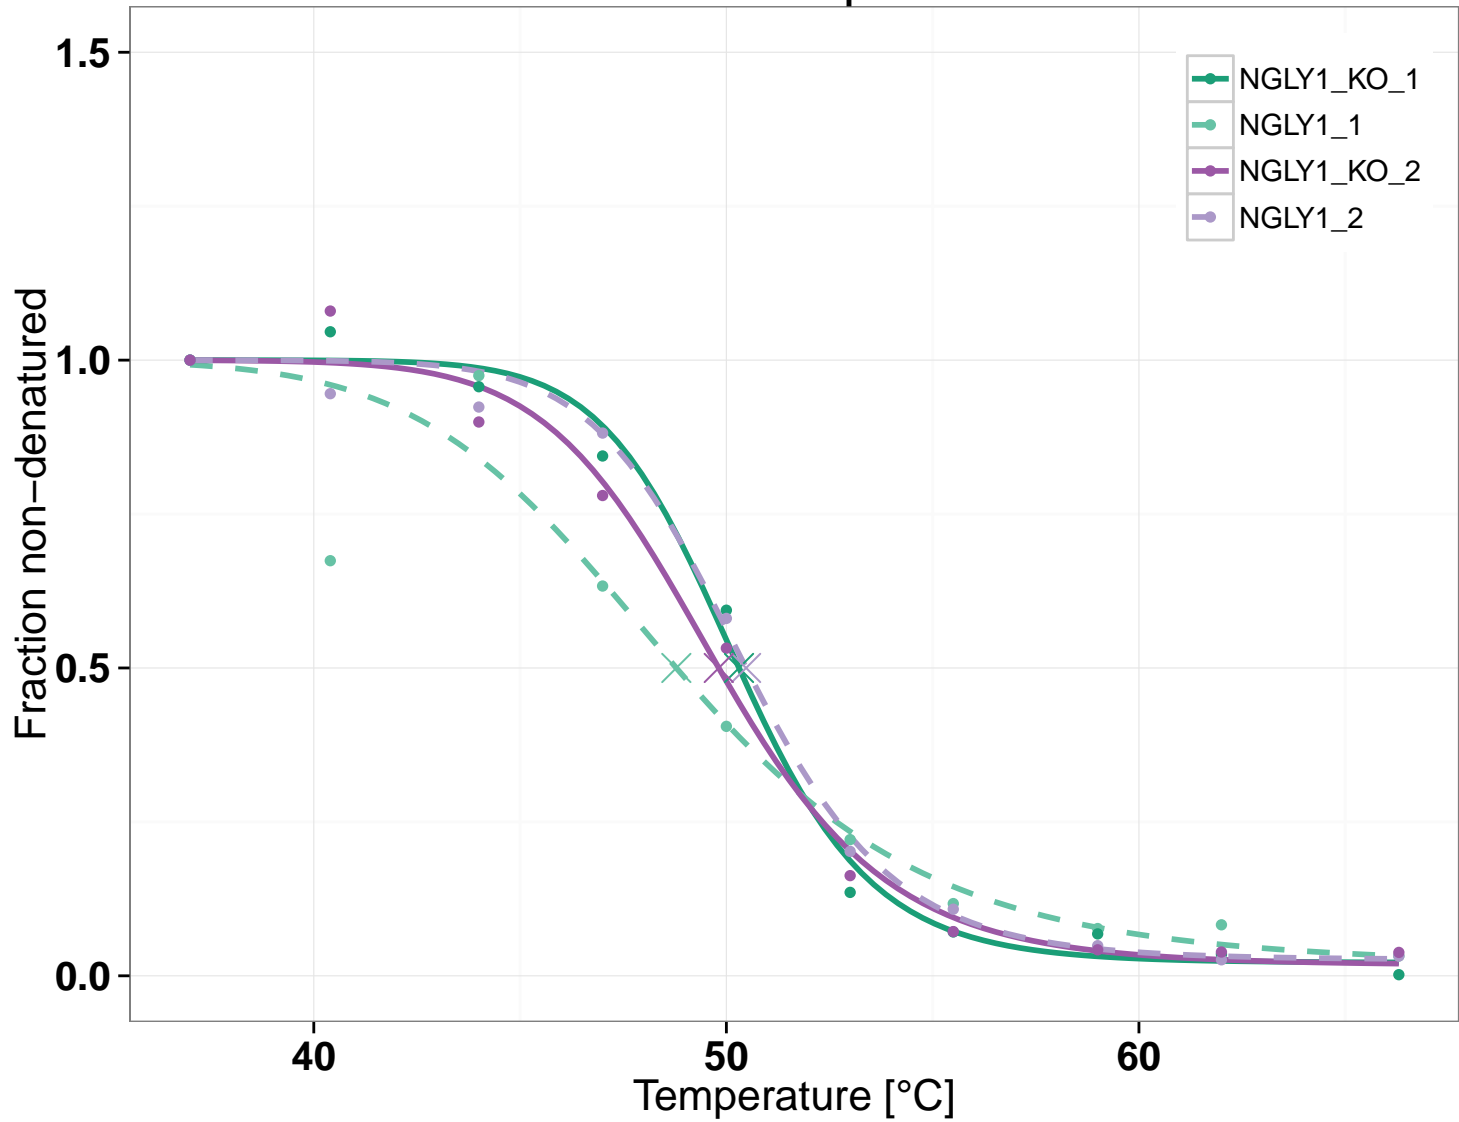

|            | meltPoint | slope  | plateau | R2   |
|------------|-----------|--------|---------|------|
| NGLY1_KO_1 | 50.31     | -0.15  | 0.02    | 0.99 |
| NGLY1_1    | 48.79     | -0.079 | 0.02    | 0.92 |
| NGLY1_KO_2 | 49.82     | -0.12  | 0.02    | 0.99 |
| NGLY1_2    | 50.48     | -0.13  | 0.03    | 1    |

Supplement: Supplementary file 5863 [file 1]

# IPI00008790.2|GALC

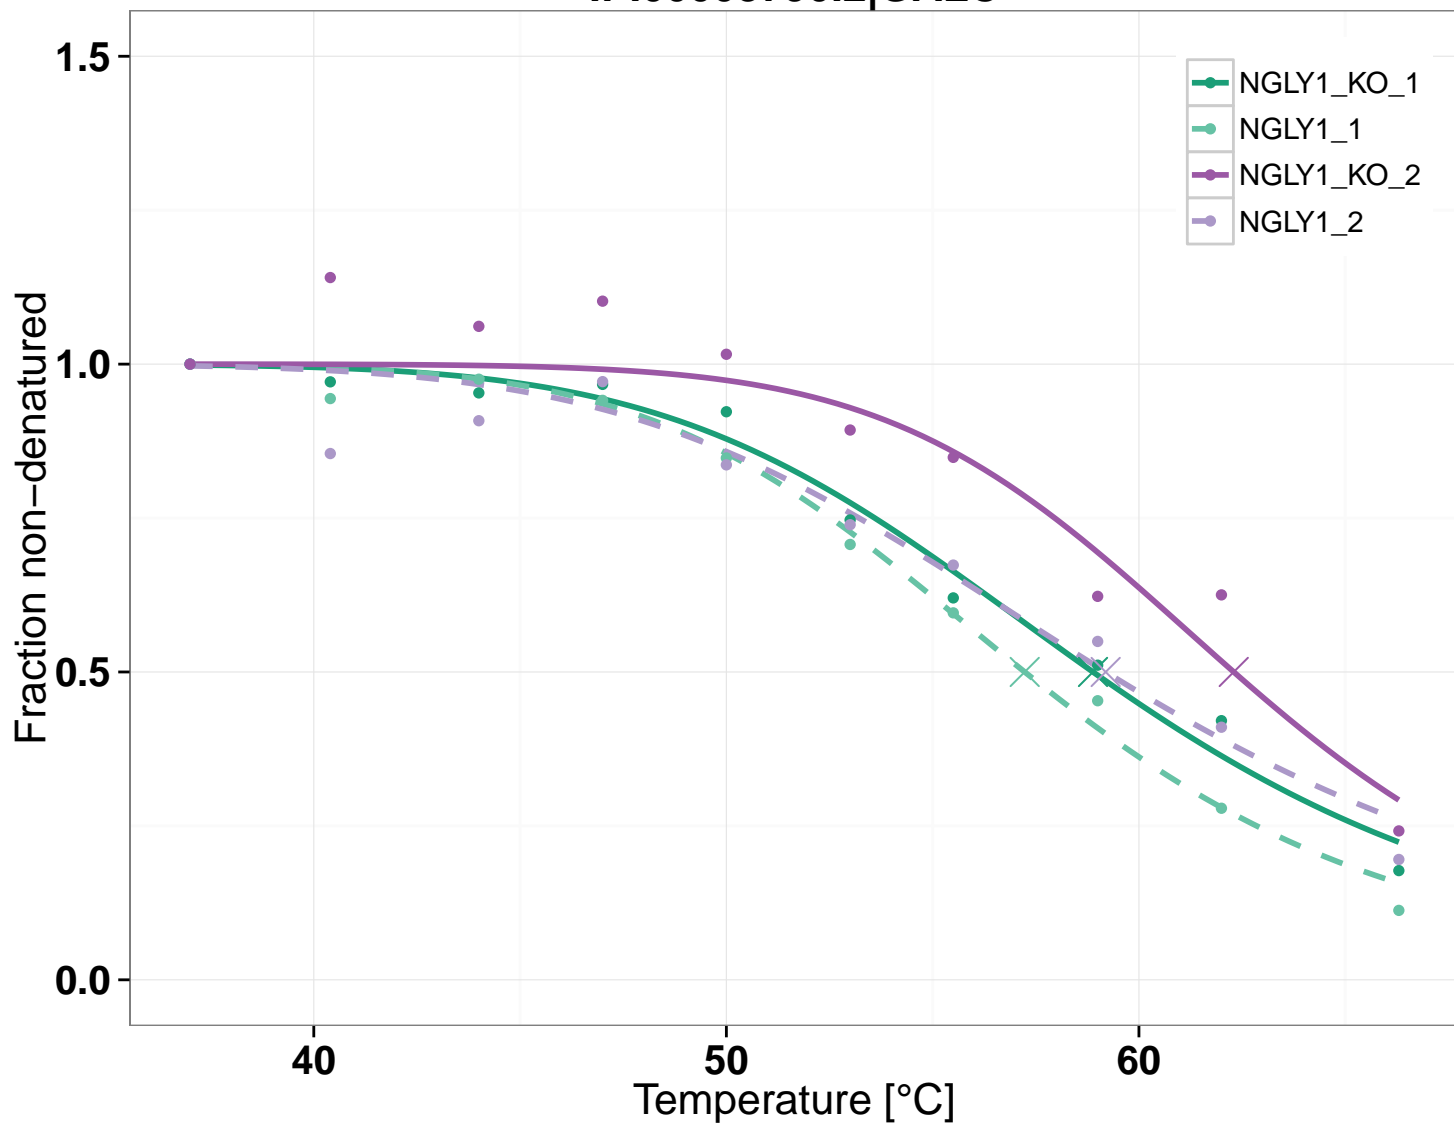

|            | meltPoint | slope  | plateau | R2   |
|------------|-----------|--------|---------|------|
| NGLY1_KO_1 | 58.89     | -0.049 | 0       | 0.98 |
| NGLY1_1    | 57.23     | -0.055 | 0       | 0.99 |
| NGLY1_KO_2 | 62.3      | -0.06  | 0       | 0.92 |
| NGLY1_2    | 59.19     | -0.043 | 0       | 0.95 |

Supplement: Supplementary file 5864 [file 1]

IPI00873199.1|SLCO4A1

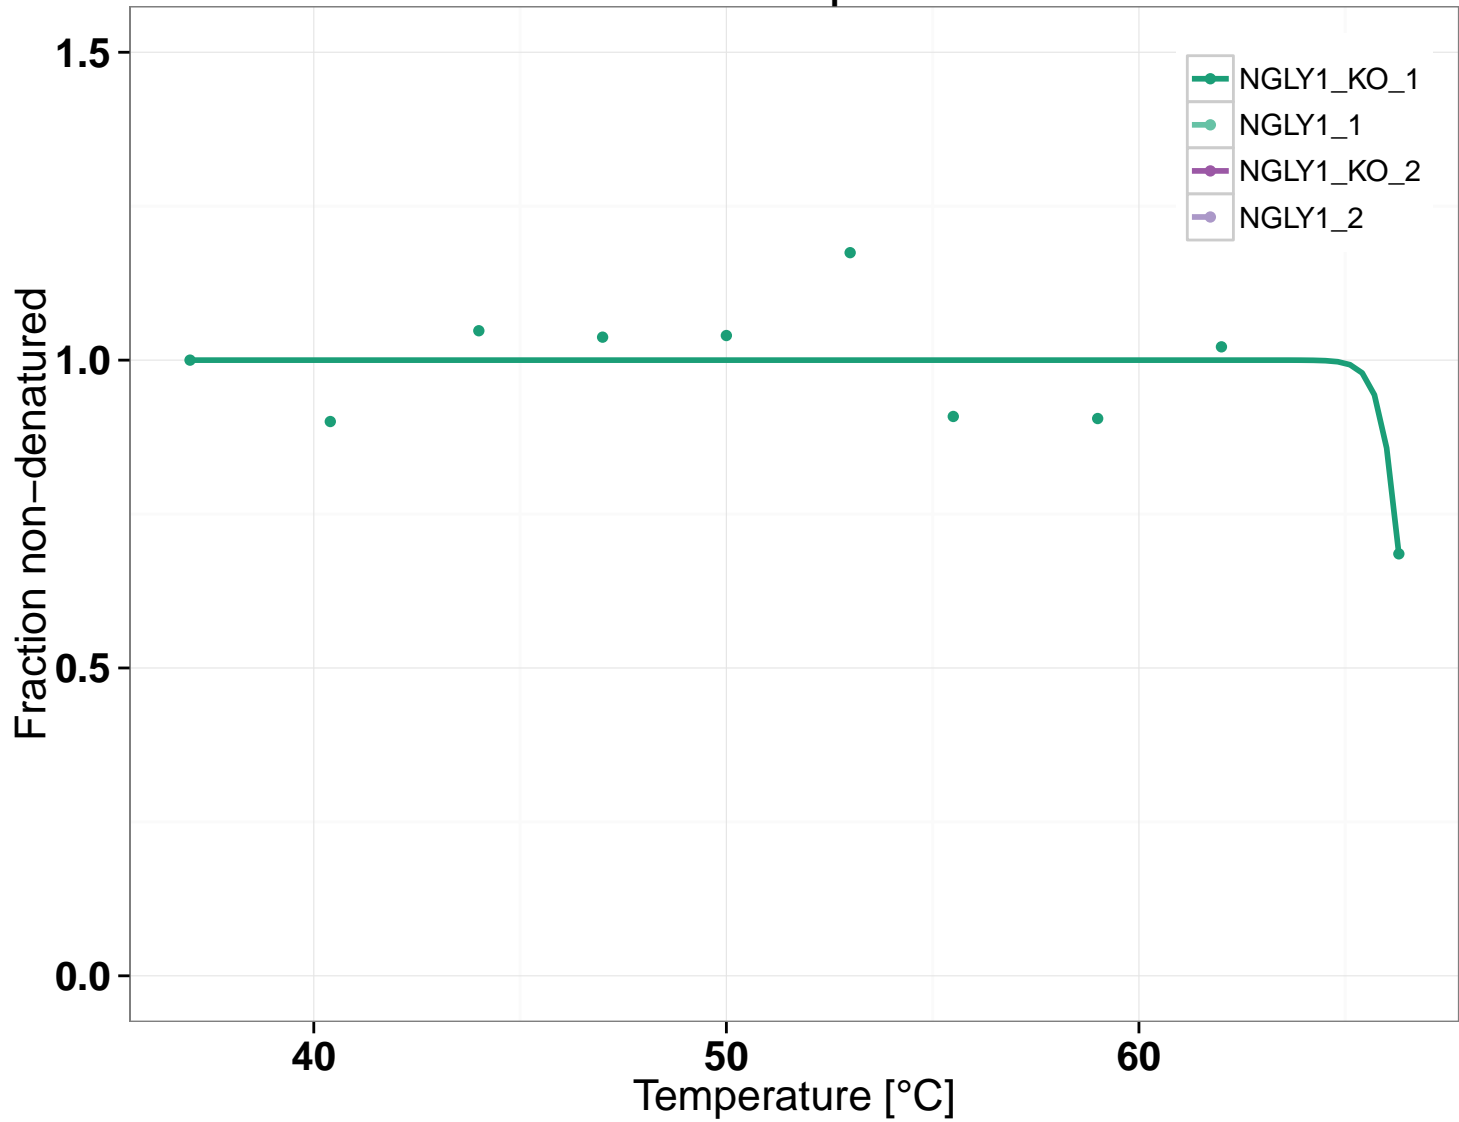

|            | meltPoint | slope | plateau | R2   |
|------------|-----------|-------|---------|------|
| NGLY1_KO_1 | —         | —     | 0       | 0.59 |
| NGLY1_1    | —         | —     | —       | —    |
| NGLY1_KO_2 | —         | —     | —       | —    |
| NGLY1_2    | —         | —     | —       | —    |

Supplement: Supplementary file 5865 [file 1]

IPI00028451.1|SOX15

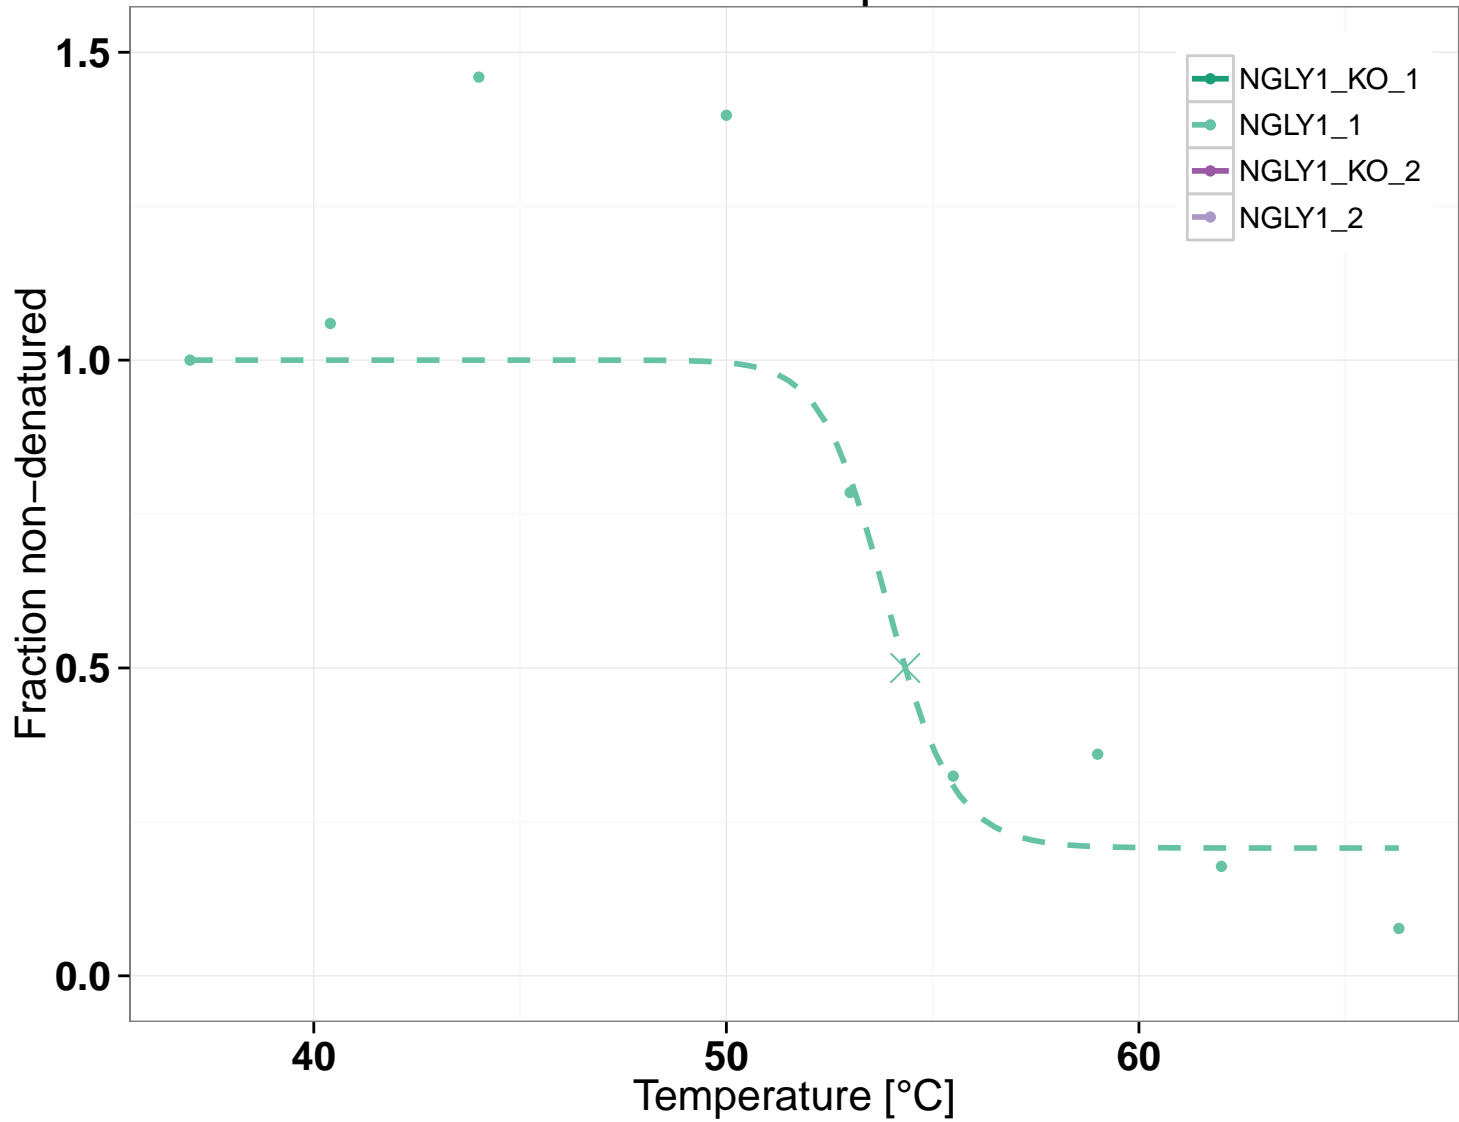

|            | meltPoint | slope | plateau | R2   |
|------------|-----------|-------|---------|------|
| NGLY1_KO_1 | -         | -     | -       | -    |
| NGLY1_1    | 54.34     | -0.25 | 0.21    | 0.75 |
| NGLY1_KO_2 | -         | -     | -       | -    |
| NGLY1_2    | -         | -     | -       | -    |

Supplement: Supplementary file 5866 [file 1]

IPI00022002.6|MRPS27

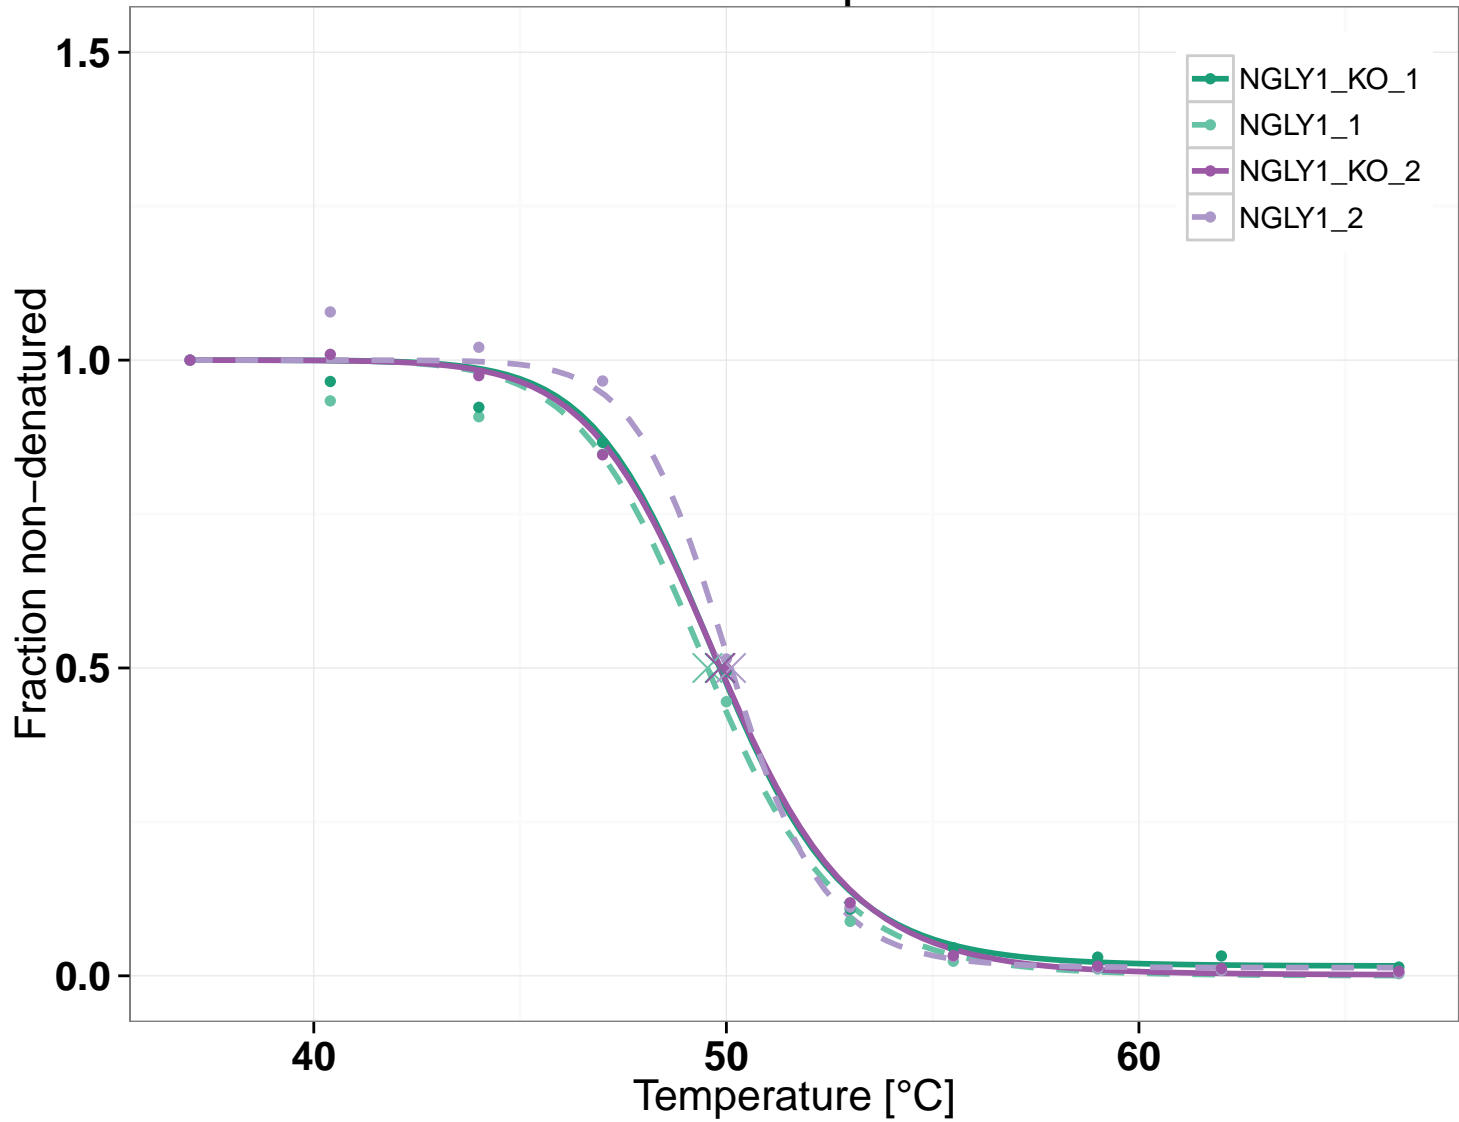

|            | meltPoint | slope | plateau | R2   |
|------------|-----------|-------|---------|------|
| NGLY1_KO_1 | 49.84     | -0.16 | 0.02    | 1    |
| NGLY1_1    | 49.54     | -0.16 | 0       | 0.99 |
| NGLY1_KO_2 | 49.85     | -0.15 | 0       | 1    |
| NGLY1_2    | 50.11     | -0.21 | 0.01    | 1    |

Supplement: Supplementary file 5867 [file 1]

IPI00549664.4|TEX10

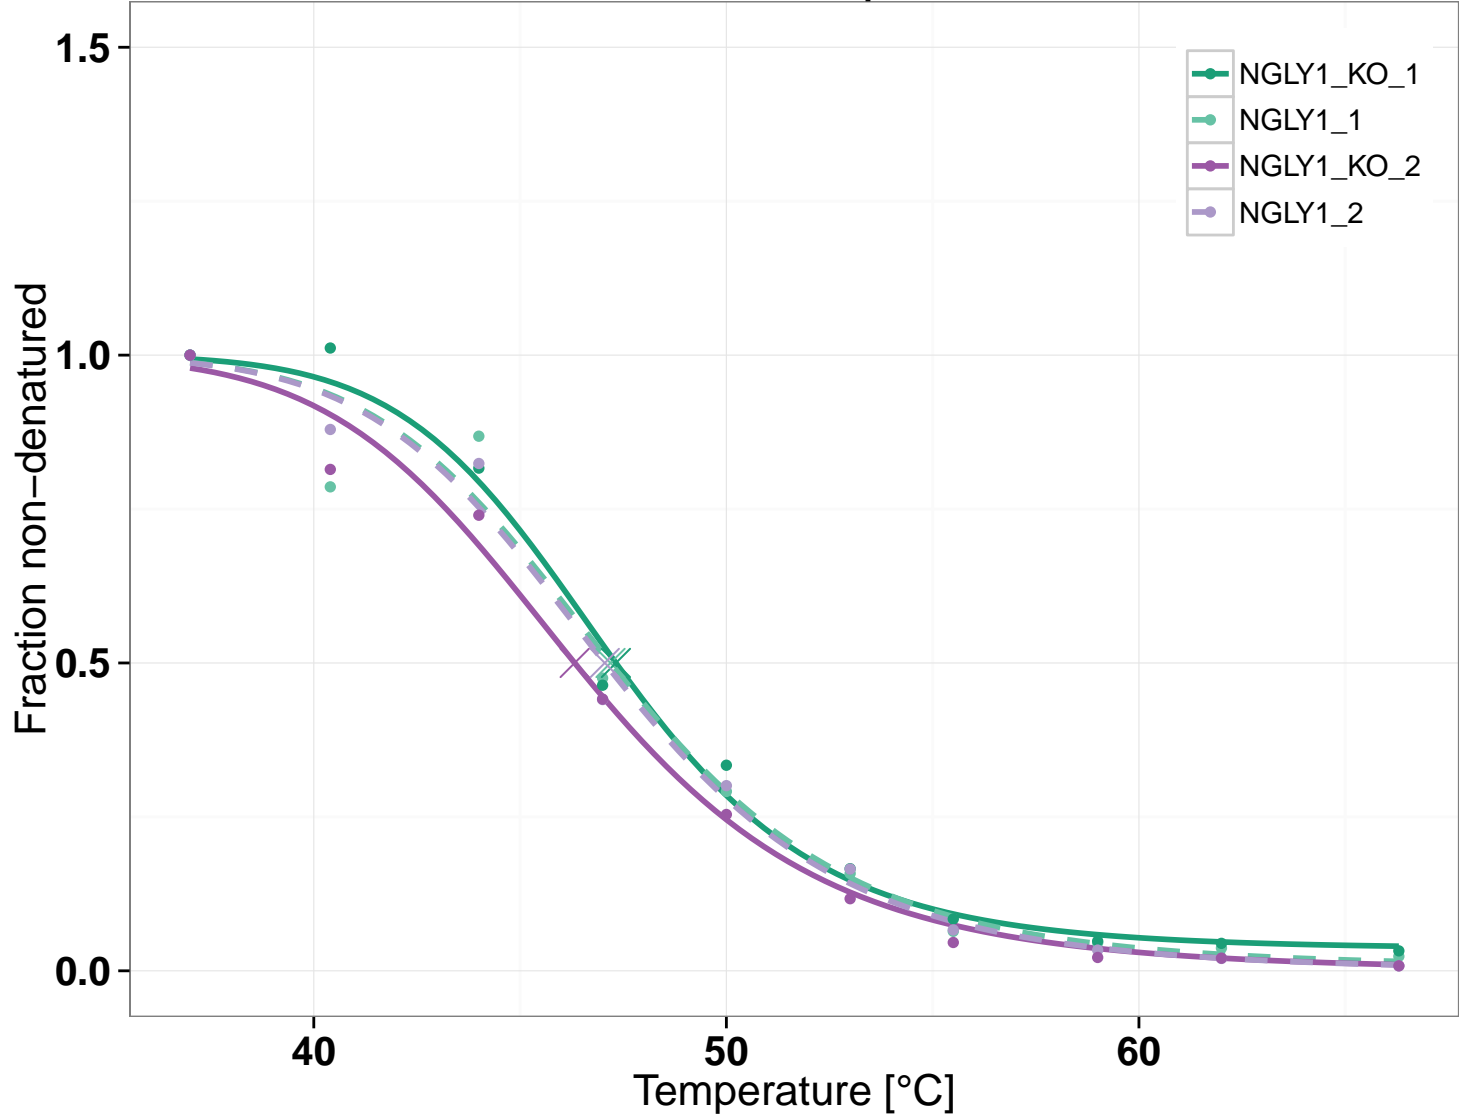

|            | meltPoint | slope  | plateau | R2   |
|------------|-----------|--------|---------|------|
| NGLY1_KO_1 | 47.32     | -0.095 | 0.04    | 0.99 |
| NGLY1_1    | 47.19     | -0.086 | 0.01    | 0.97 |
| NGLY1_KO_2 | 46.32     | -0.084 | 0       | 0.99 |
| NGLY1_2    | 47.05     | -0.087 | 0       | 0.99 |

Supplement: Supplementary file 5868 [file 1]

# IPI00004958.3|C14ORF133

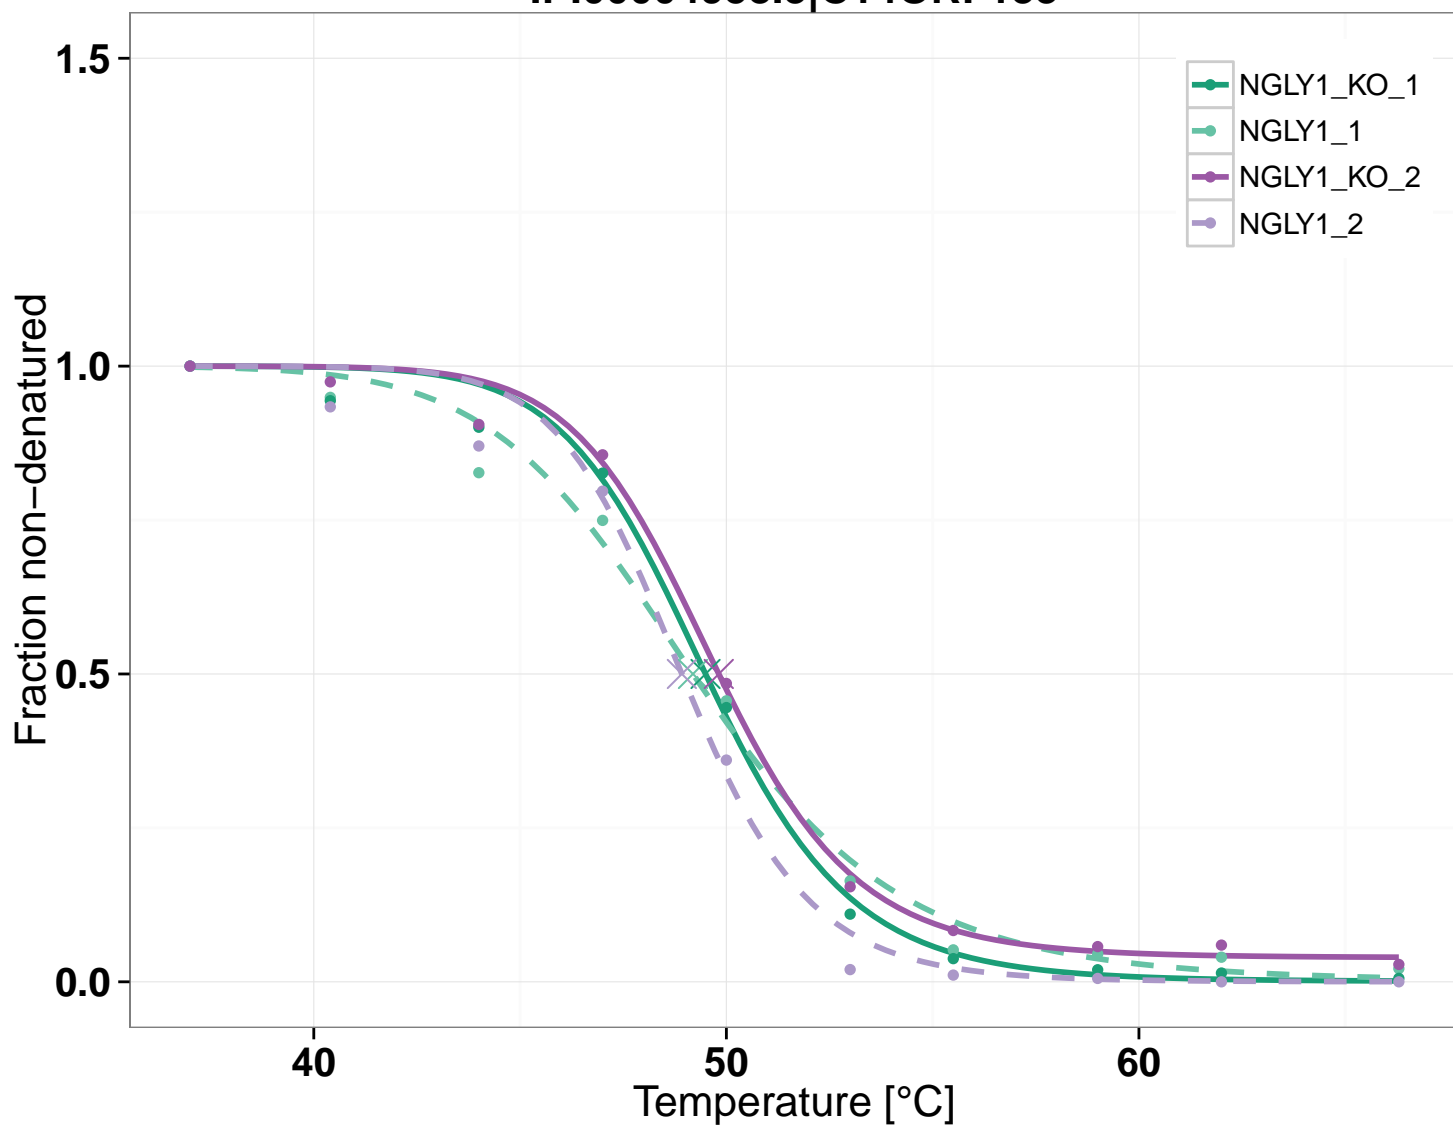

|            | meltPoint | slope | plateau | R2   |
|------------|-----------|-------|---------|------|
| NGLY1_KO_1 | 49.5      | -0.14 | 0       | 0.99 |
| NGLY1_1    | 49.19     | -0.1  | 0       | 0.99 |
| NGLY1_KO_2 | 49.82     | -0.14 | 0.04    | 1    |
| NGLY1_2    | 48.92     | -0.16 | 0       | 0.99 |

Supplement: Supplementary file 5869 [file 1]

IPI00102036.1|ARL5B

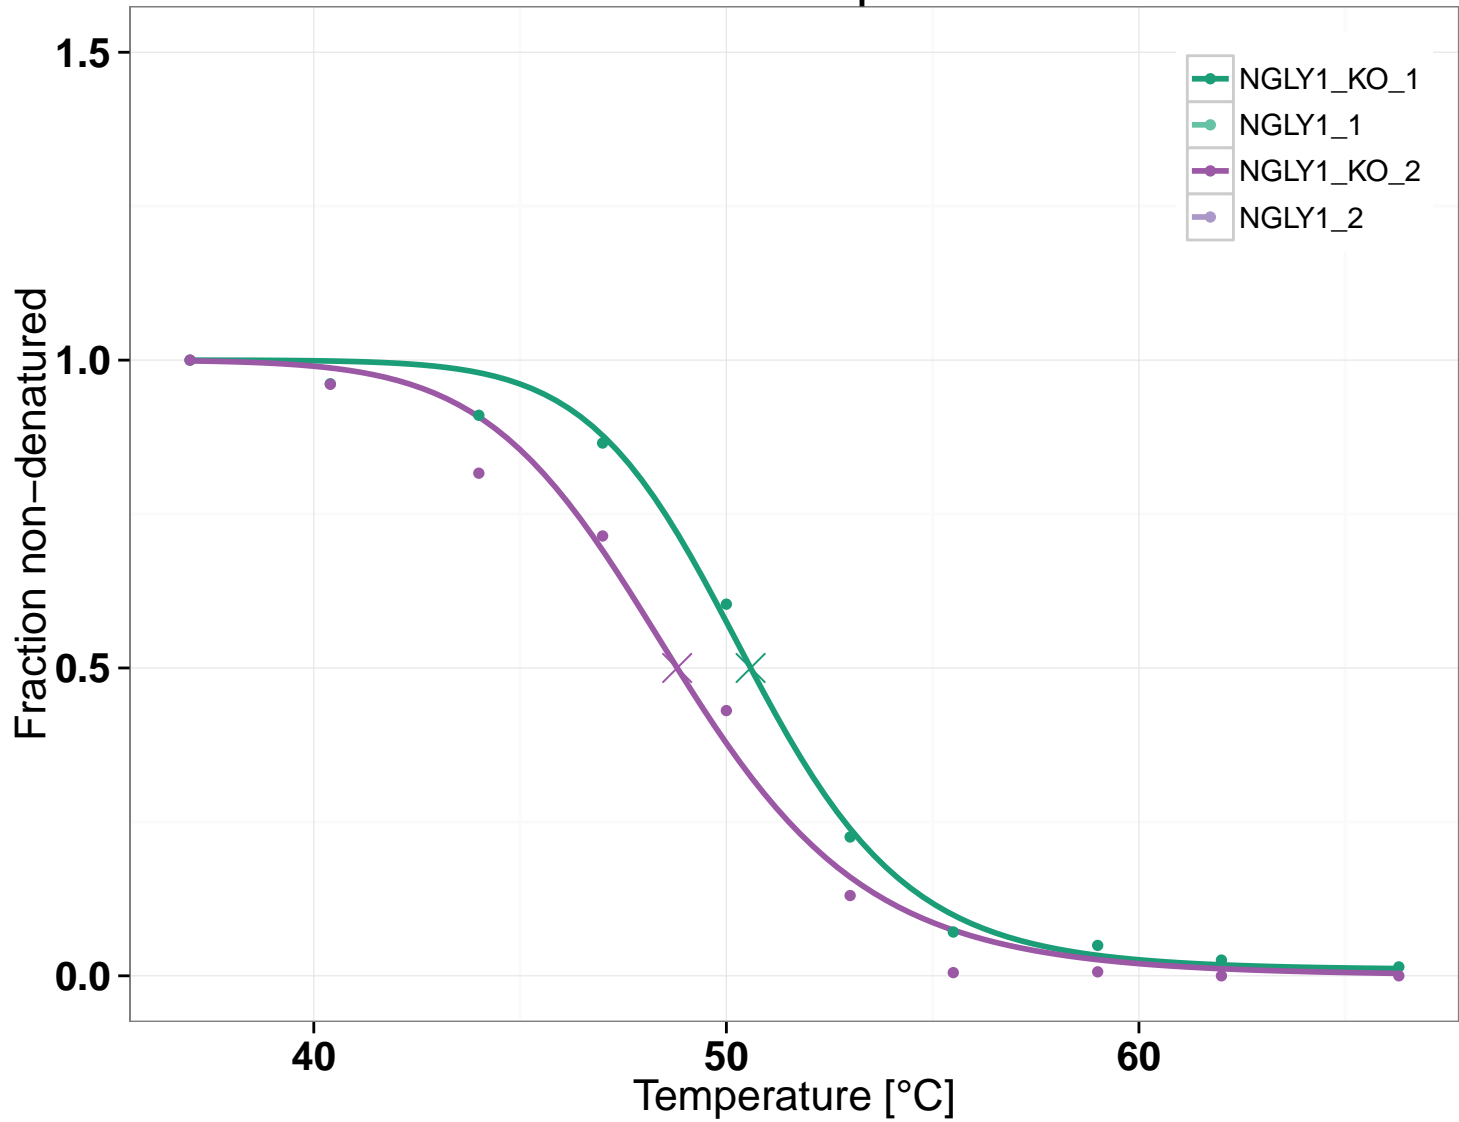

|            | meltPoint | slope | plateau | R2   |
|------------|-----------|-------|---------|------|
| NGLY1_KO_1 | 50.59     | -0.13 | 0.01    | 1    |
| NGLY1_1    | -         | -     | -       | -    |
| NGLY1_KO_2 | 48.81     | -0.11 | 0       | 0.99 |
| NGLY1_2    | -         | -     | -       | -    |

Supplement: Supplementary file 5870 [file 1]

IPI00296788.1|FBXO9

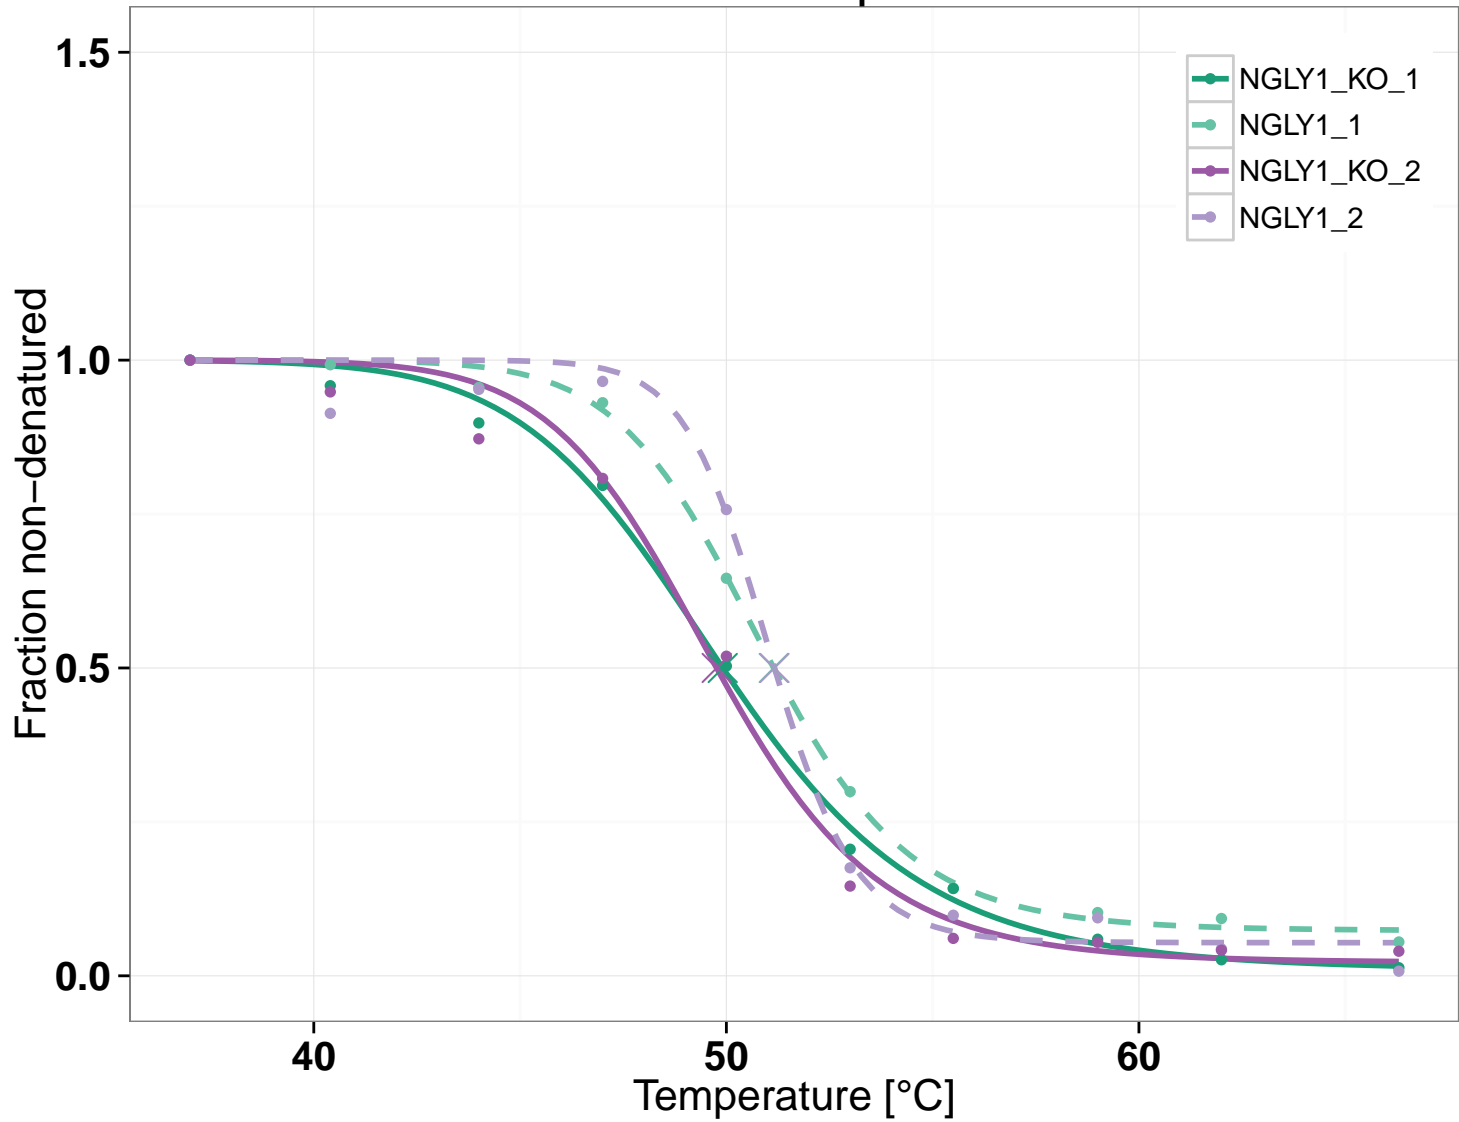

|            | meltPoint | slope | plateau | R2   |
|------------|-----------|-------|---------|------|
| NGLY1_KO_1 | 49.91     | -0.1  | 0.01    | 1    |
| NGLY1_1    | 51.15     | -0.13 | 0.07    | 1    |
| NGLY1_KO_2 | 49.77     | -0.12 | 0.02    | 0.99 |
| NGLY1_2    | 51.17     | -0.23 | 0.05    | 0.99 |

Supplement: Supplementary file 5871 [file 1]

IPI00645523.1|SPPL2B

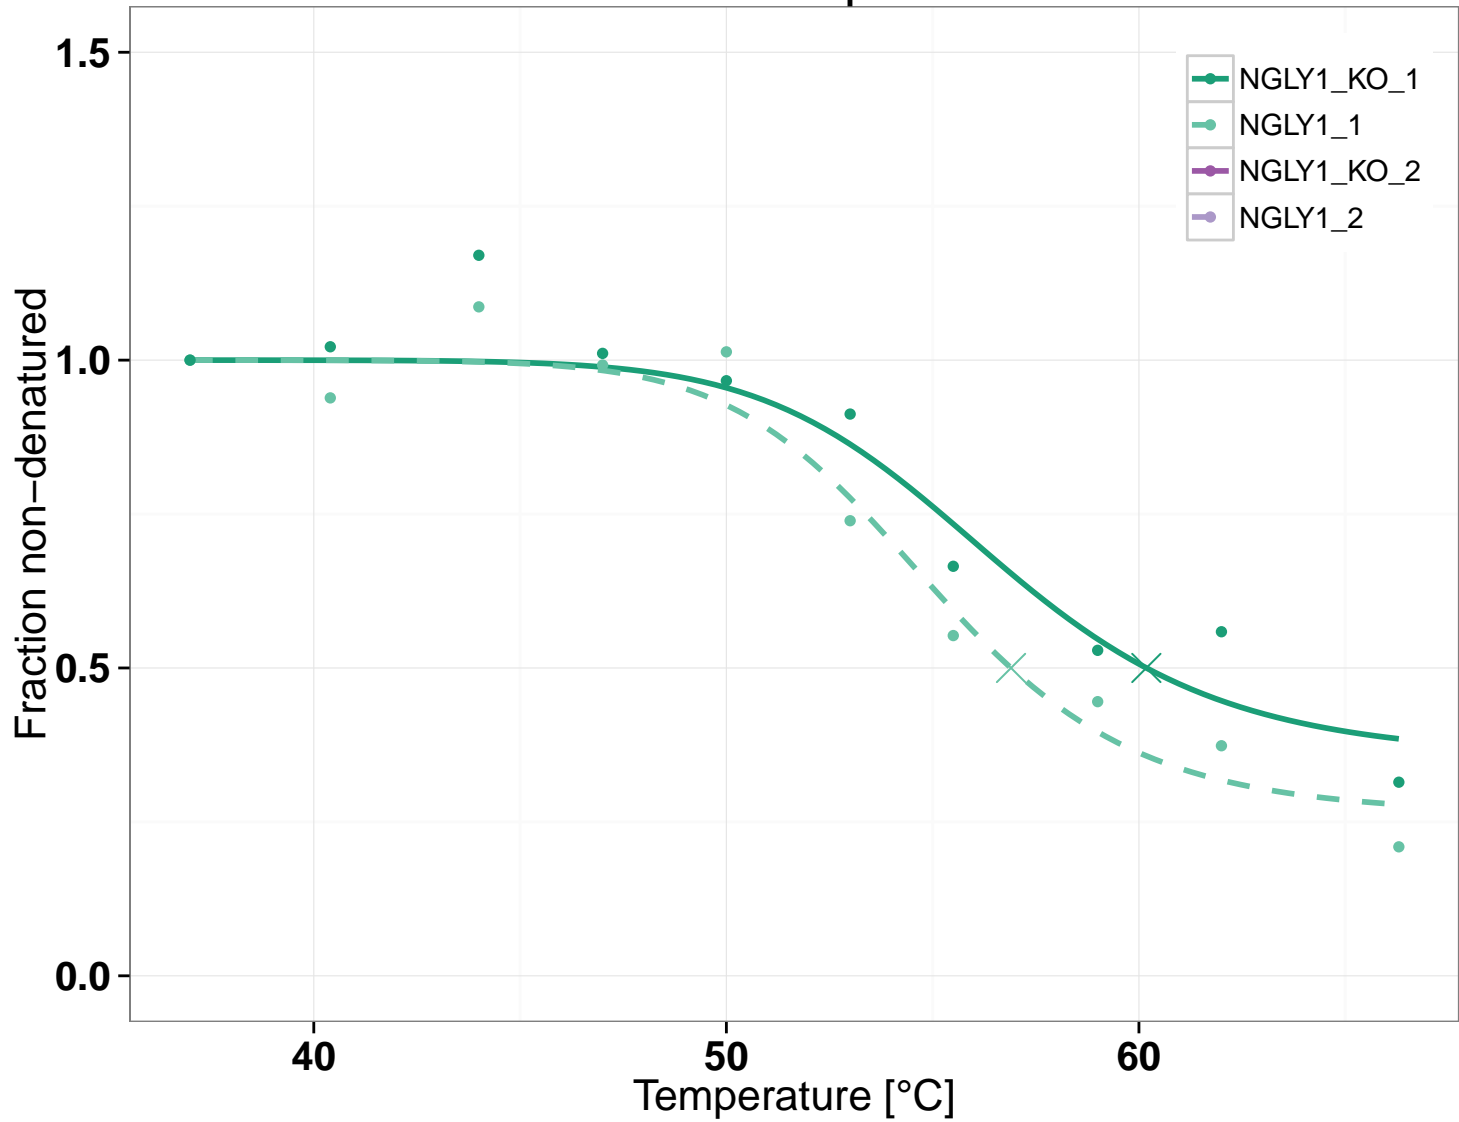

|            | meltPoint | slope  | plateau | R2   |
|------------|-----------|--------|---------|------|
| NGLY1_KO_1 | 60.18     | -0.058 | 0.35    | 0.92 |
| NGLY1_1    | 56.9      | -0.075 | 0.26    | 0.96 |
| NGLY1_KO_2 | -         | -      | -       | -    |
| NGLY1_2    | -         | -      | -       | -    |

Supplement: Supplementary file 5872 [file 1]

IPI00294486.1|DUSP9

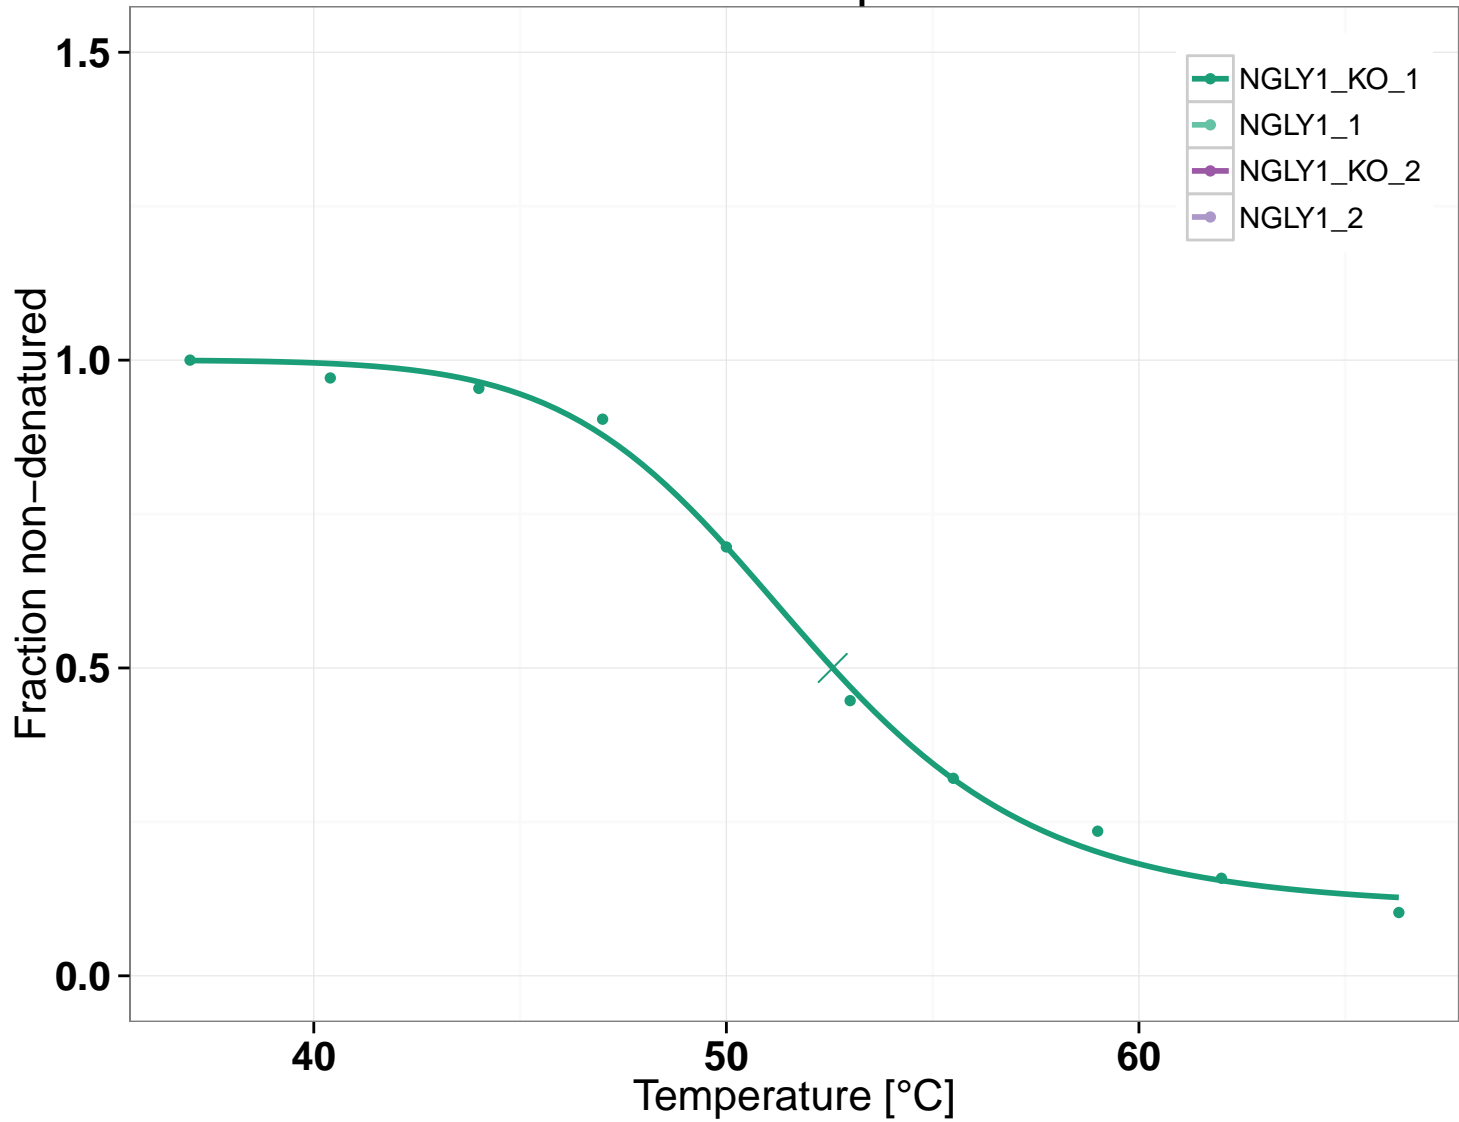

|            | meltPoint | slope  | plateau | R2 |
|------------|-----------|--------|---------|----|
| NGLY1_KO_1 | 52.58     | -0.078 | 0.11    | 1  |
| NGLY1_1    | -         | -      | -       | -  |
| NGLY1_KO_2 | -         | -      | -       | -  |
| NGLY1_2    | -         | -      | -       | -  |

Supplement: Supplementary file 5873 [file 1]

IPI00745406.2|SPAG9

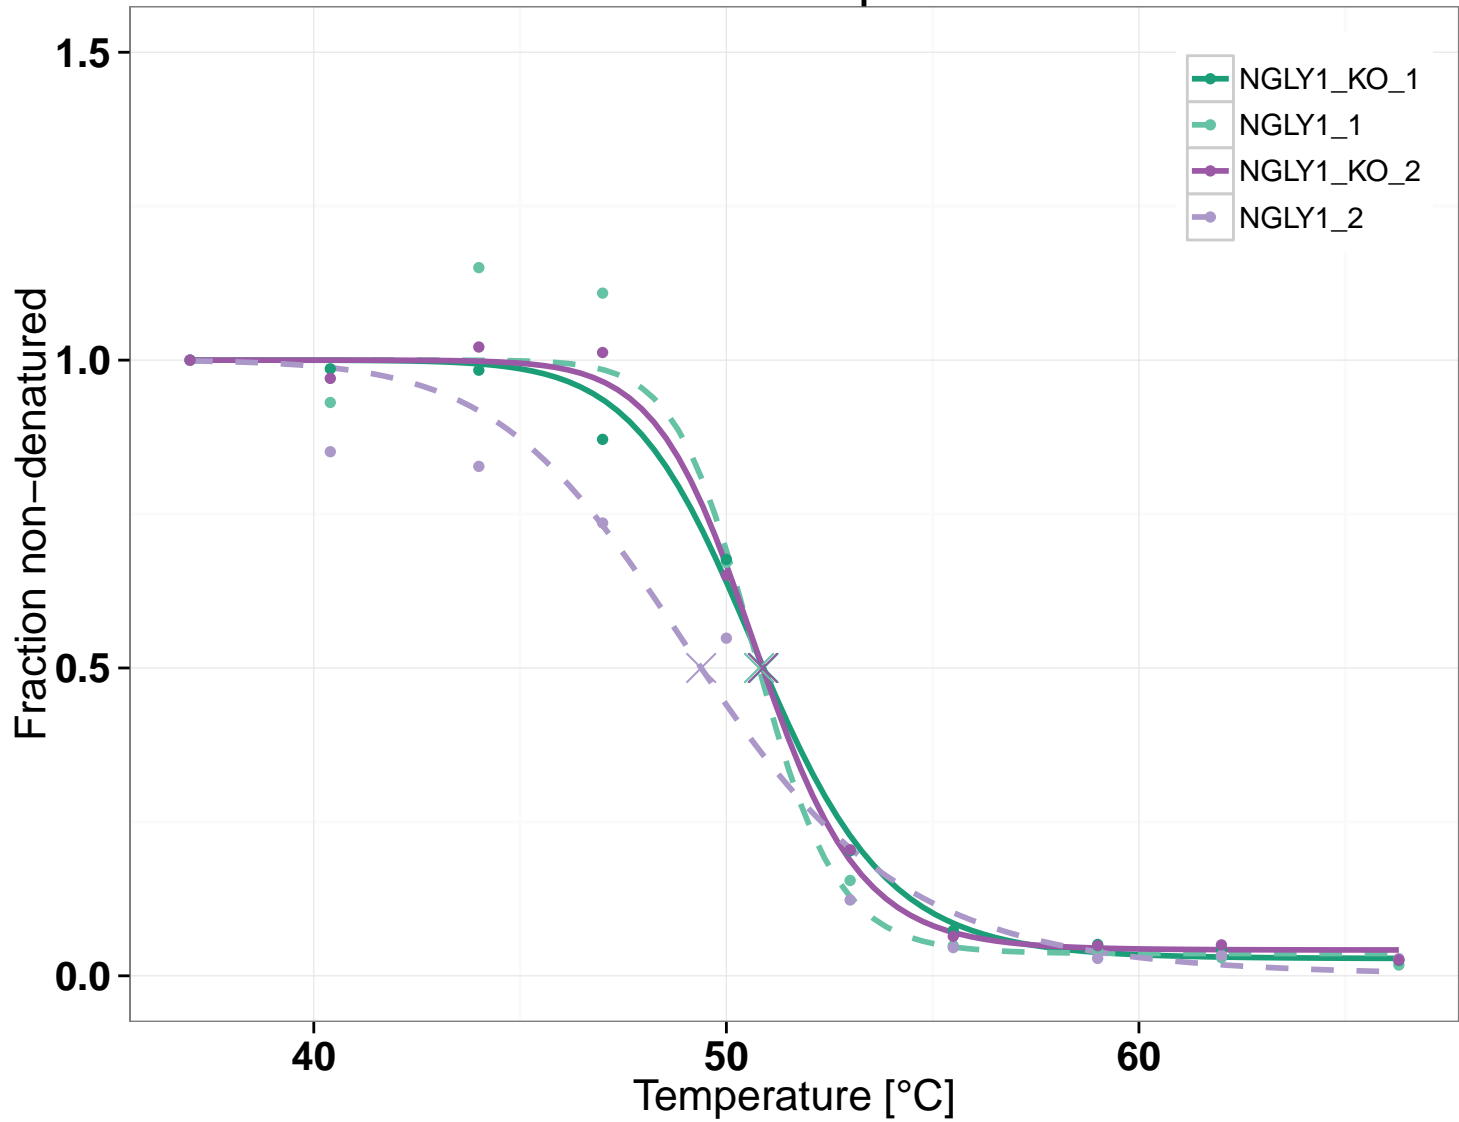

|            | meltPoint | slope | plateau | R2   |
|------------|-----------|-------|---------|------|
| NGLY1_KO_1 | 50.9      | -0.16 | 0.03    | 1    |
| NGLY1_1    | 50.79     | -0.25 | 0.04    | 0.98 |
| NGLY1_KO_2 | 50.88     | -0.19 | 0.04    | 1    |
| NGLY1_2    | 49.39     | -0.1  | 0       | 0.97 |

Supplement: Supplementary file 5874 [file 1]

# IPI00165970.1|DGCR8

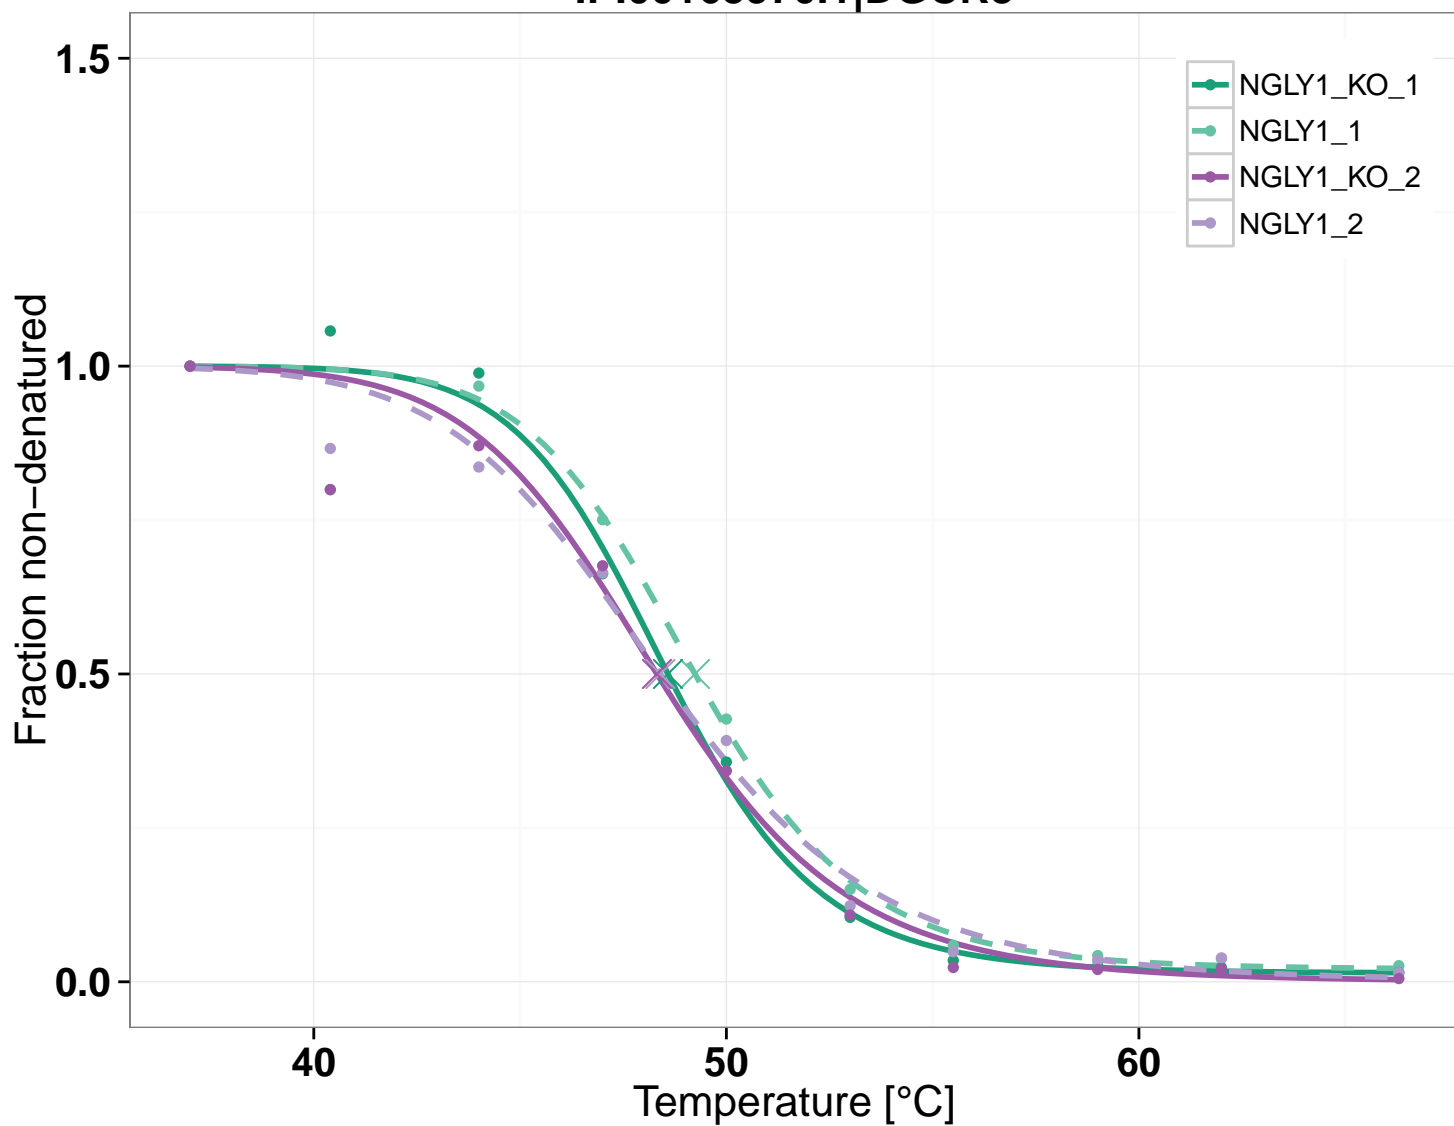

|            | meltPoint | slope  | plateau | R2   |
|------------|-----------|--------|---------|------|
| NGLY1_KO_1 | 48.58     | -0.13  | 0.01    | 0.99 |
| NGLY1_1    | 49.24     | -0.12  | 0.02    | 0.97 |
| NGLY1_KO_2 | 48.32     | -0.11  | 0       | 0.97 |
| NGLY1_2    | 48.4      | -0.096 | 0       | 0.99 |

Supplement: Supplementary file 5875 [file 1]

IPI00737794.1|ODF2L

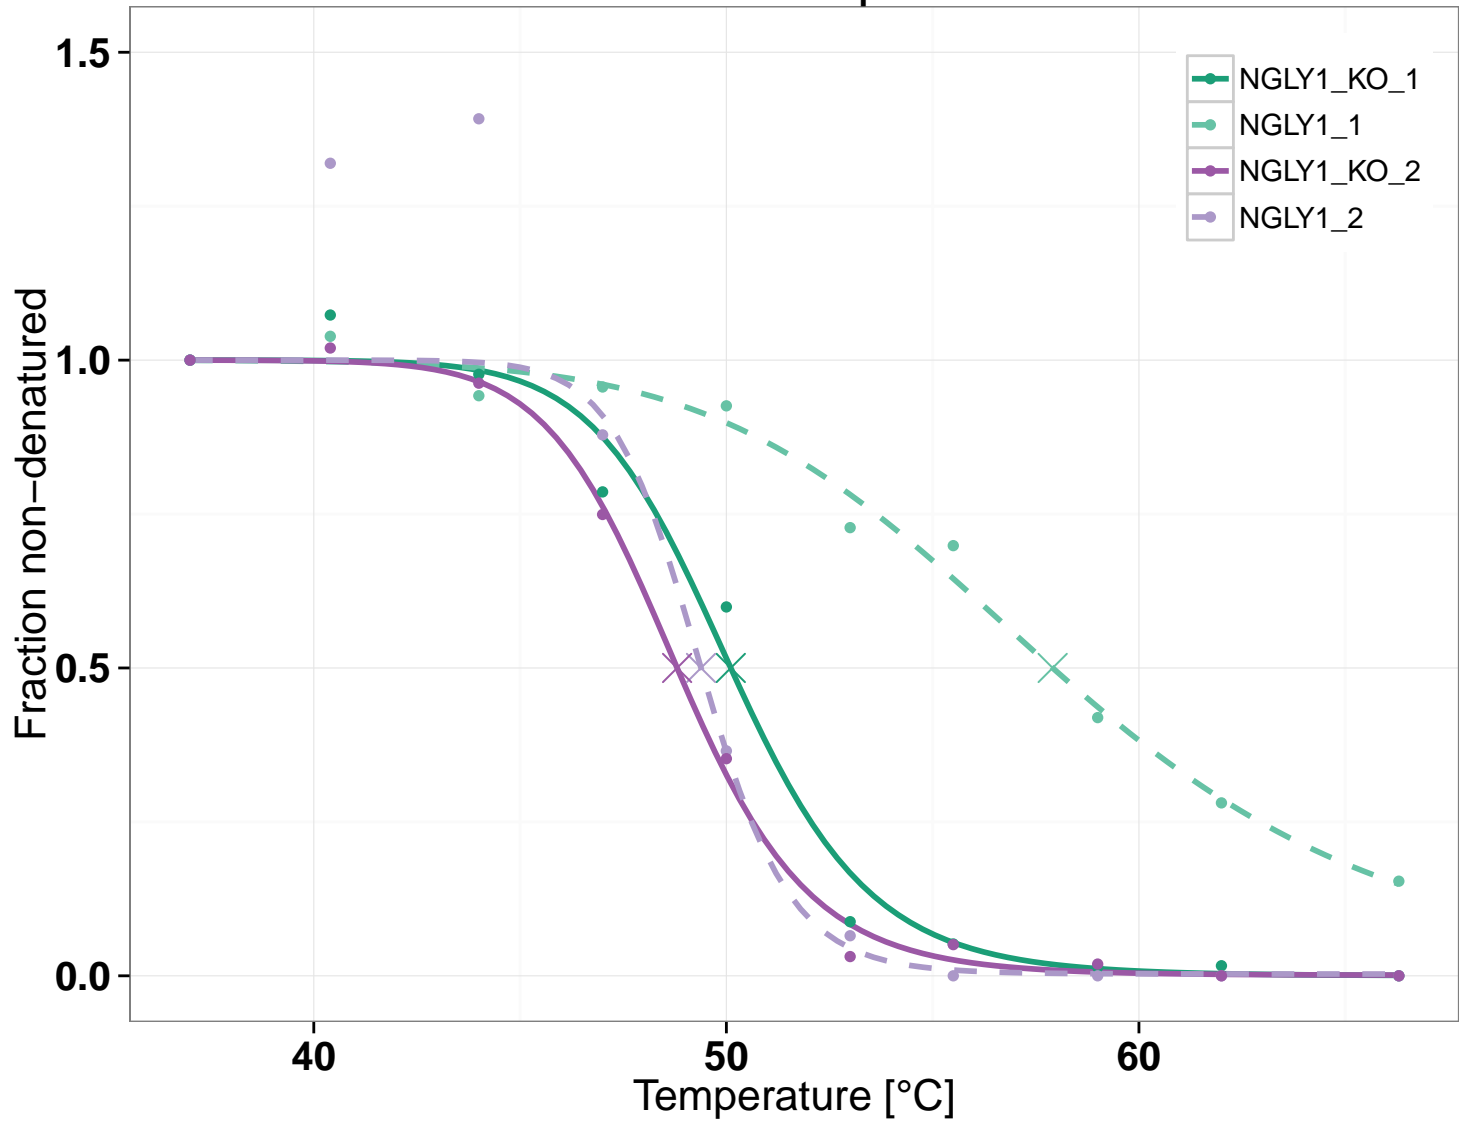

|            | meltPoint | slope  | plateau | R2   |
|------------|-----------|--------|---------|------|
| NGLY1_KO_1 | 50.11     | -0.15  | 0       | 0.99 |
| NGLY1_1    | 57.91     | -0.061 | 0       | 0.99 |
| NGLY1_KO_2 | 48.81     | -0.16  | 0       | 1    |
| NGLY1_2    | 49.39     | -0.23  | 0       | 0.92 |

Supplement: Supplementary file 5876 [file 1]

# IPI00792279.1|CCHCR1

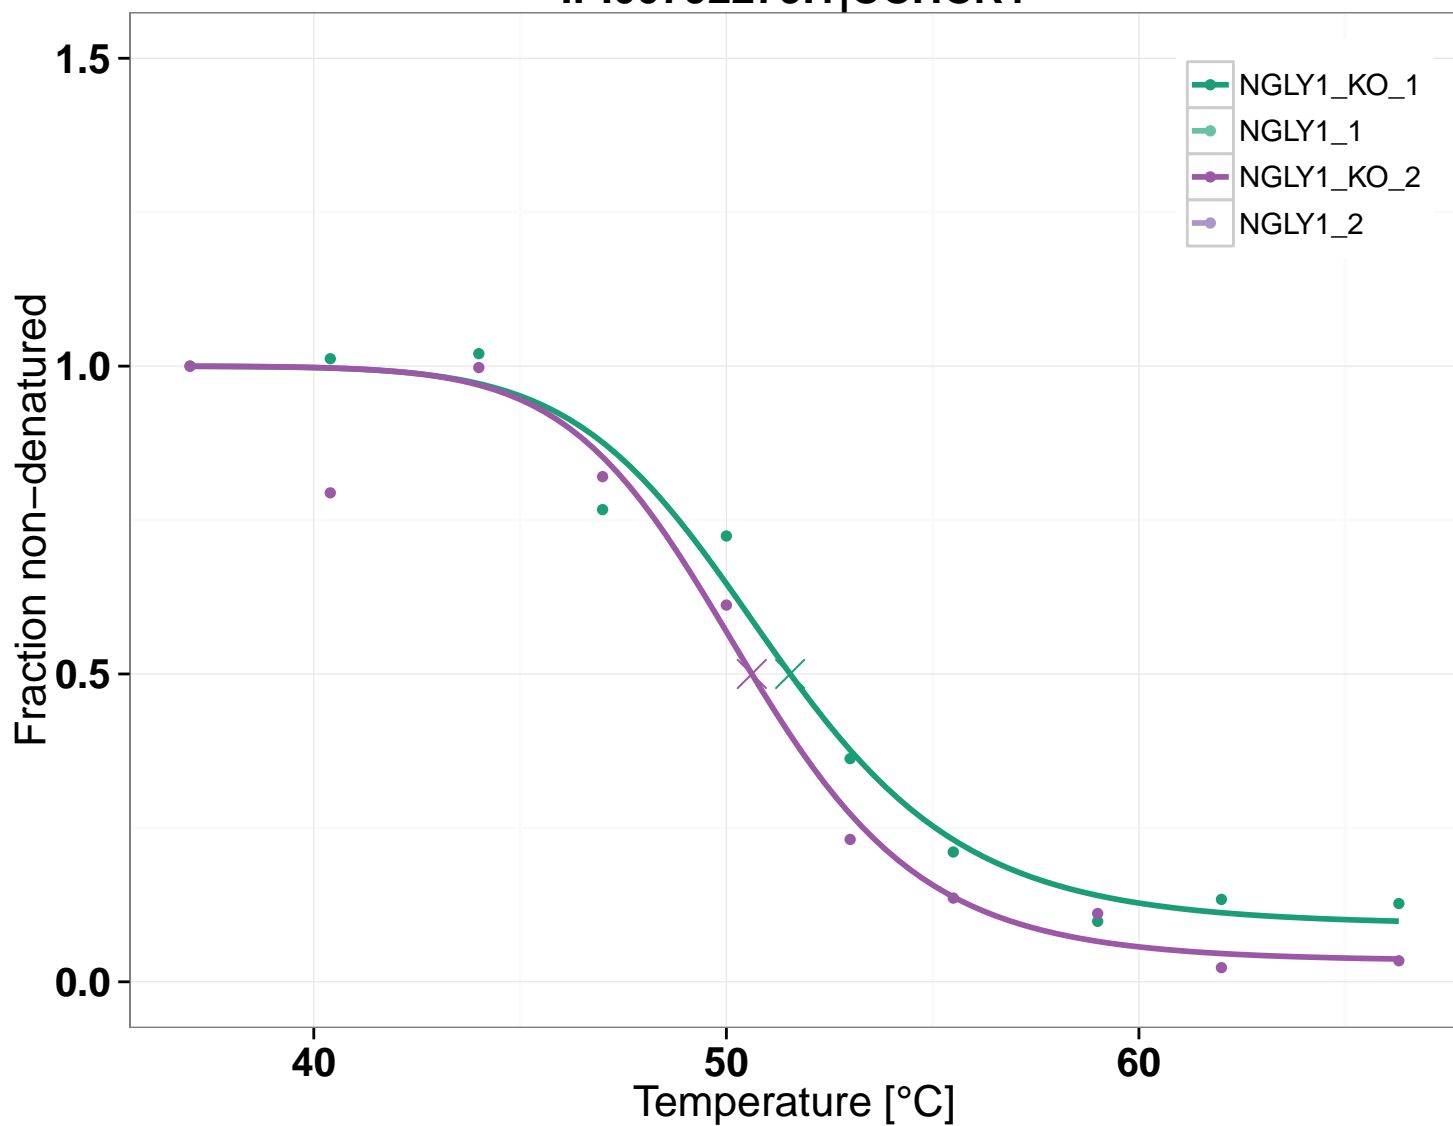

|            | meltPoint | slope  | plateau | R2   |
|------------|-----------|--------|---------|------|
| NGLY1_KO_1 | 51.55     | -0.096 | 0.09    | 0.98 |
| NGLY1_1    | -         | -      | -       | -    |
| NGLY1_KO_2 | 50.62     | -0.11  | 0.03    | 0.97 |
| NGLY1_2    | -         | -      | -       | -    |

Supplement: Supplementary file 5877 [file 1]

IPI00168567.4|TMEM188

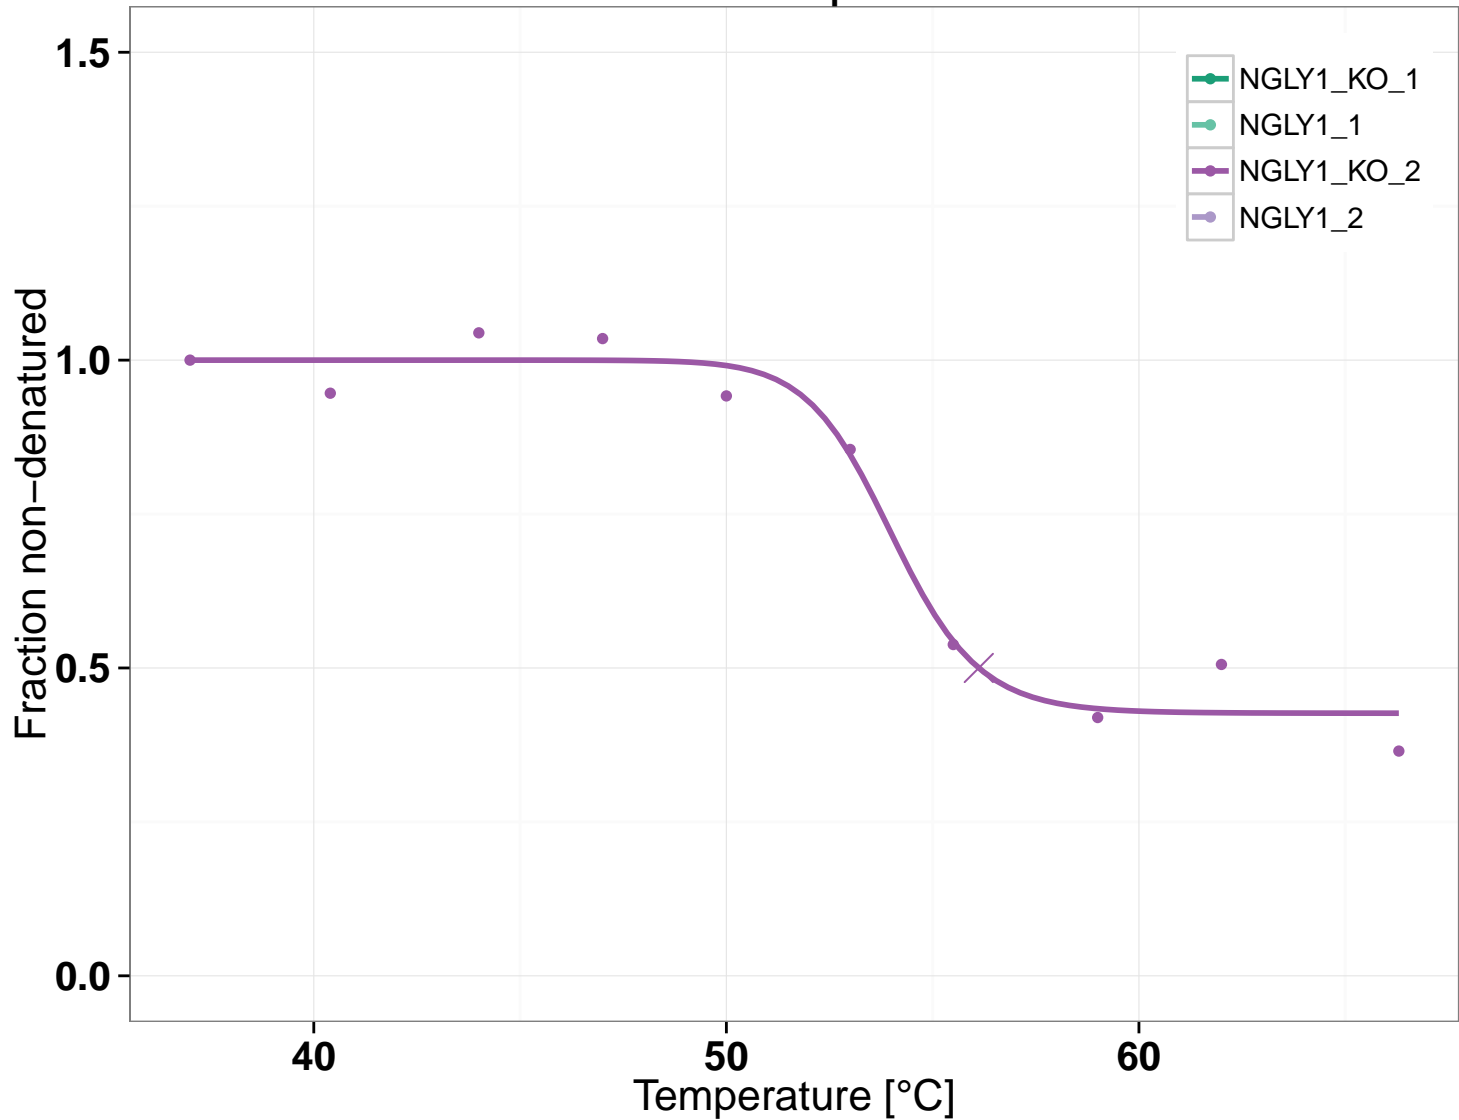

|            | meltPoint | slope | plateau | R2   |
|------------|-----------|-------|---------|------|
| NGLY1_KO_1 | —         | —     | —       | —    |
| NGLY1_1    | —         | —     | —       | —    |
| NGLY1_KO_2 | 56.12     | -0.14 | 0.43    | 0.97 |
| NGLY1_2    | —         | —     | —       | —    |

Supplement: Supplementary file 5878 [file 1]

IPI00090327.1|VPS45

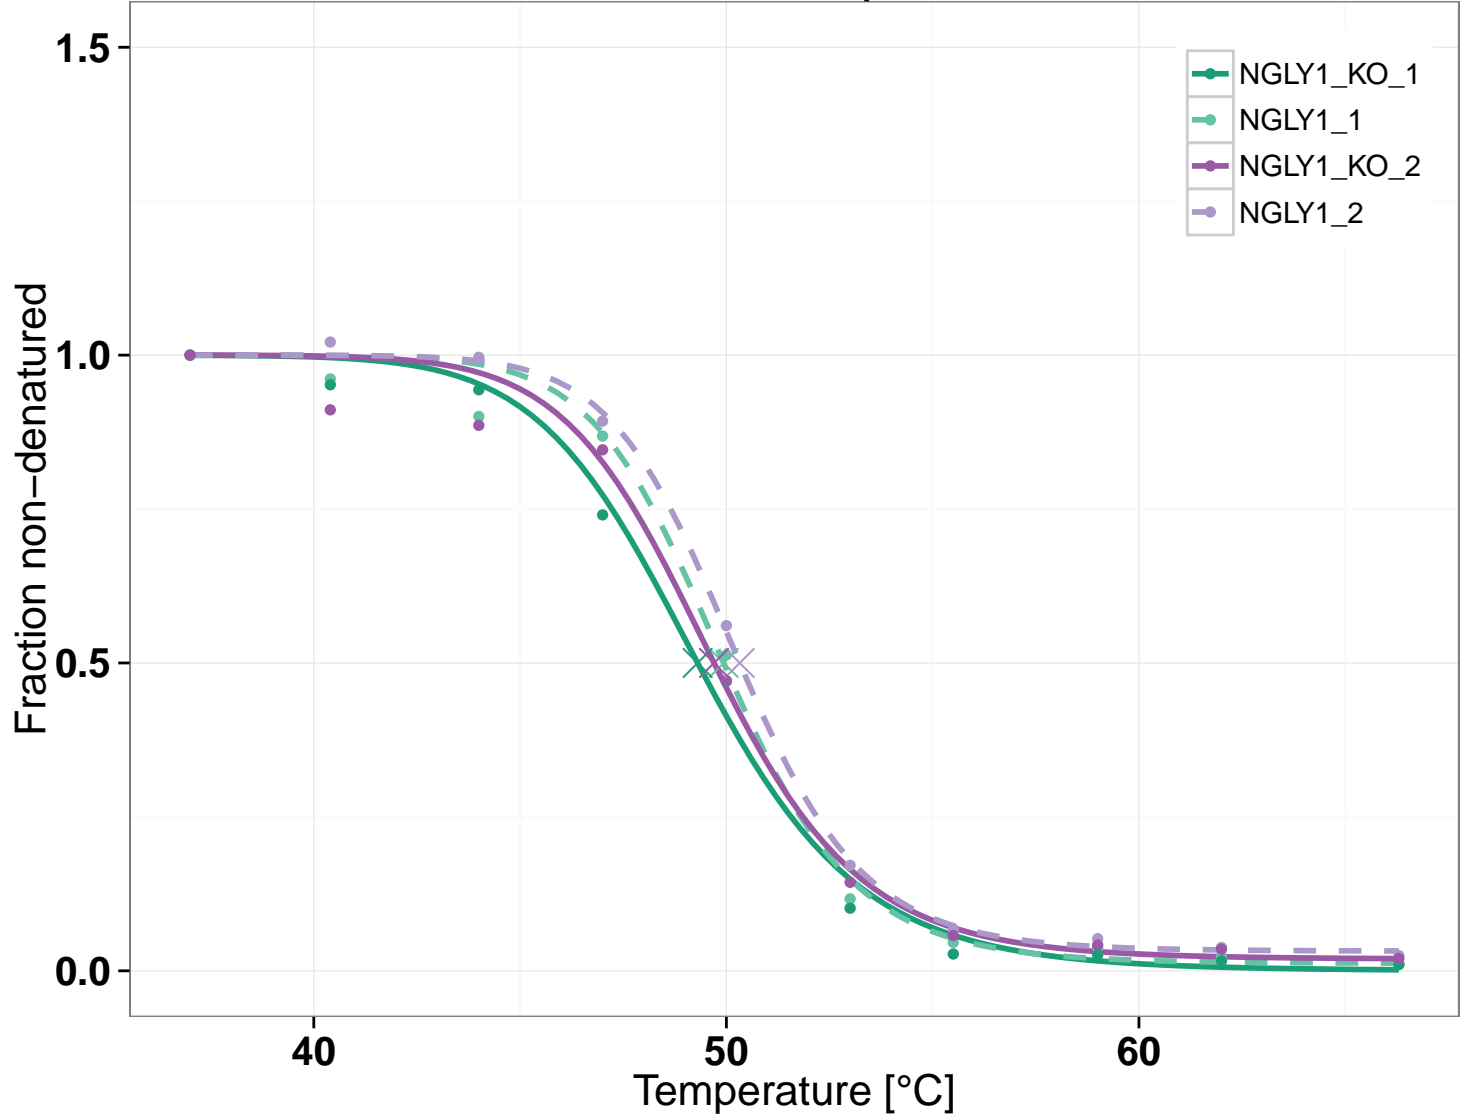

|            | meltPoint | slope | plateau | R2   |
|------------|-----------|-------|---------|------|
| NGLY1_KO_1 | 49.3      | -0.13 | 0       | 0.99 |
| NGLY1_1    | 49.93     | -0.16 | 0.01    | 0.99 |
| NGLY1_KO_2 | 49.7      | -0.14 | 0.02    | 0.99 |
| NGLY1_2    | 50.32     | -0.16 | 0.03    | 1    |

Supplement: Supplementary file 5879 [file 1]

# IPI00332499.1|NASP

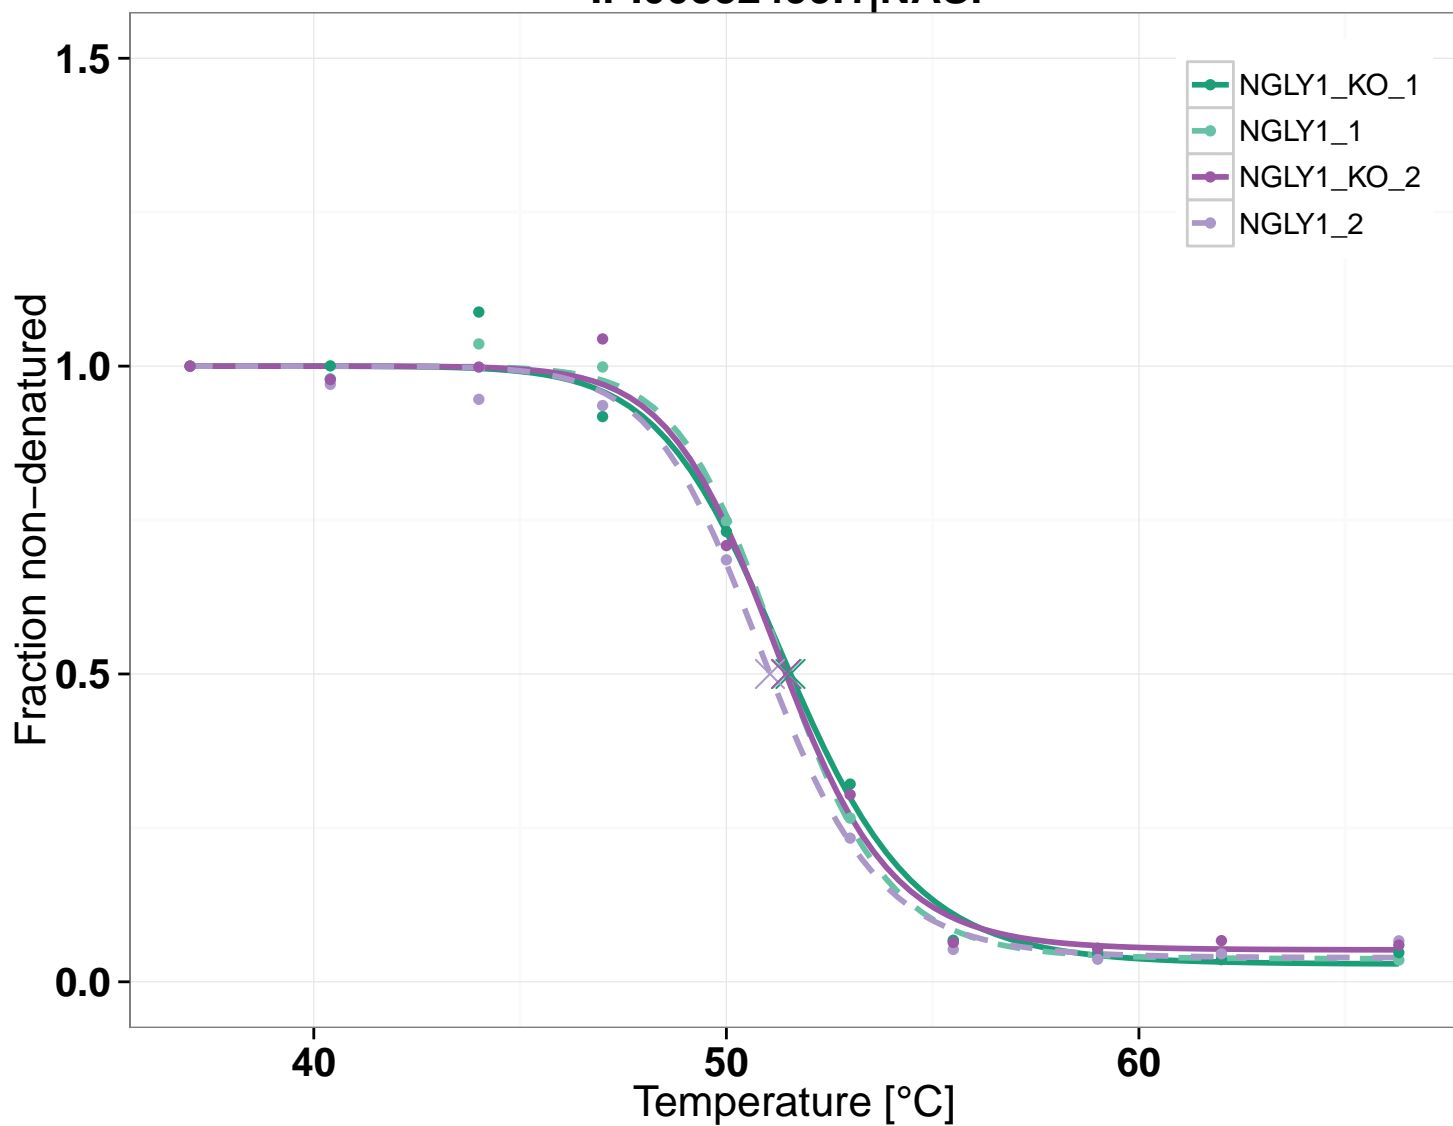

|            | meltPoint | slope | plateau | R2   |
|------------|-----------|-------|---------|------|
| NGLY1_KO_1 | 51.55     | -0.16 | 0.03    | 0.99 |
| NGLY1_1    | 51.46     | -0.19 | 0.04    | 1    |
| NGLY1_KO_2 | 51.44     | -0.17 | 0.05    | 0.99 |
| NGLY1_2    | 51.06     | -0.17 | 0.04    | 1    |

Supplement: Supplementary file 5880 [file 1]

IPI00029144.1|PPP2R3A

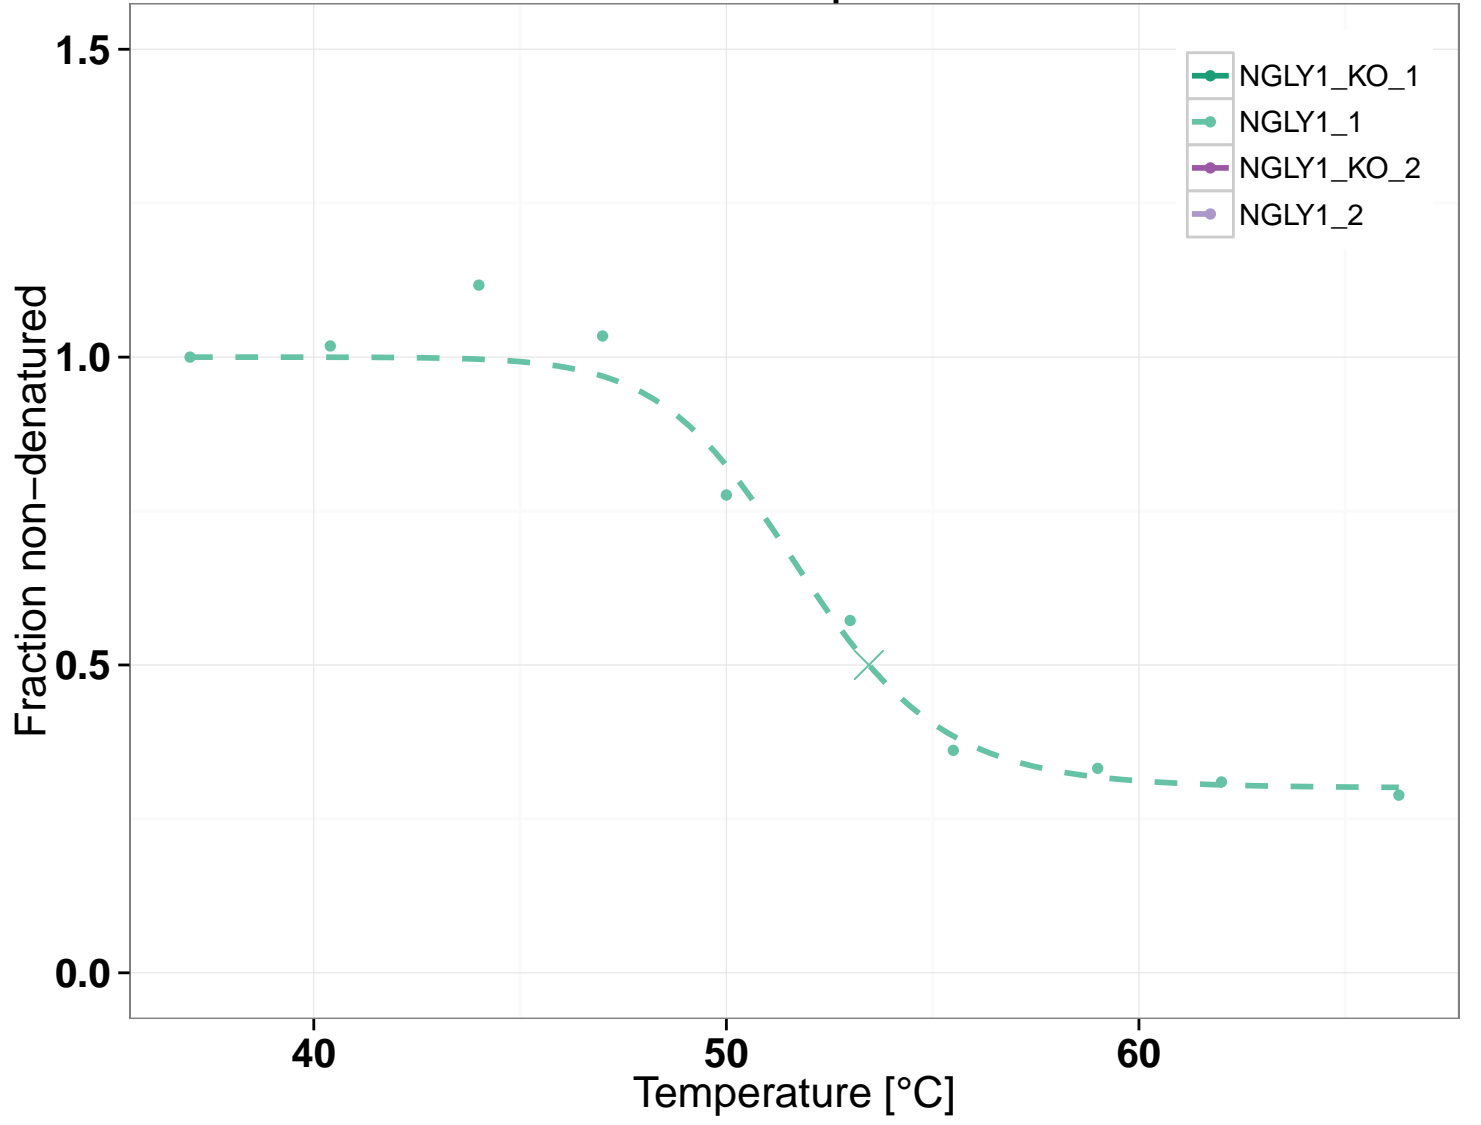

|            | meltPoint | slope | plateau | R2   |
|------------|-----------|-------|---------|------|
| NGLY1_KO_1 | -         | -     | -       | -    |
| NGLY1_1    | 53.45     | -0.1  | 0.3     | 0.98 |
| NGLY1_KO_2 | -         | -     | -       | -    |
| NGLY1_2    | -         | -     | -       | -    |

Supplement: Supplementary file 5881 [file 1]

# IPI00004237.1|PHKA2

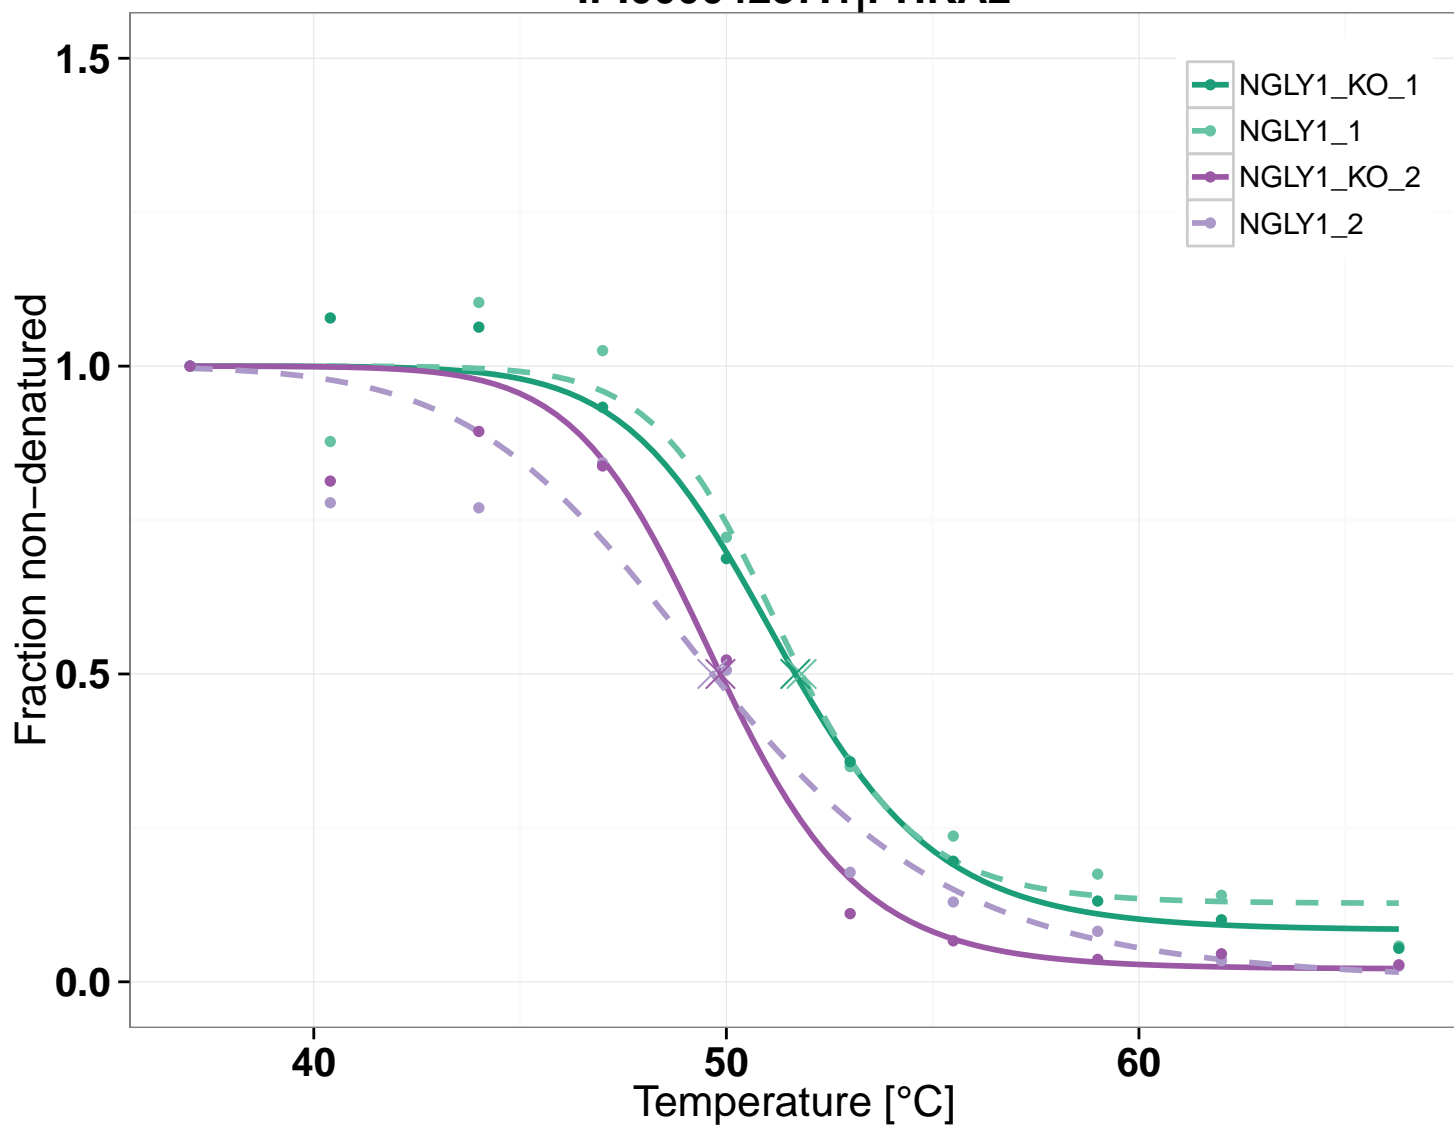

|            | meltPoint | slope  | plateau | R2   |
|------------|-----------|--------|---------|------|
| NGLY1_KO_1 | 51.67     | -0.12  | 0.08    | 0.99 |
| NGLY1_1    | 51.82     | -0.14  | 0.13    | 0.97 |
| NGLY1_KO_2 | 49.86     | -0.14  | 0.02    | 0.97 |
| NGLY1_2    | 49.66     | -0.084 | 0       | 0.94 |

Supplement: Supplementary file 5882 [file 1]

# IPI00217272.7|AACS

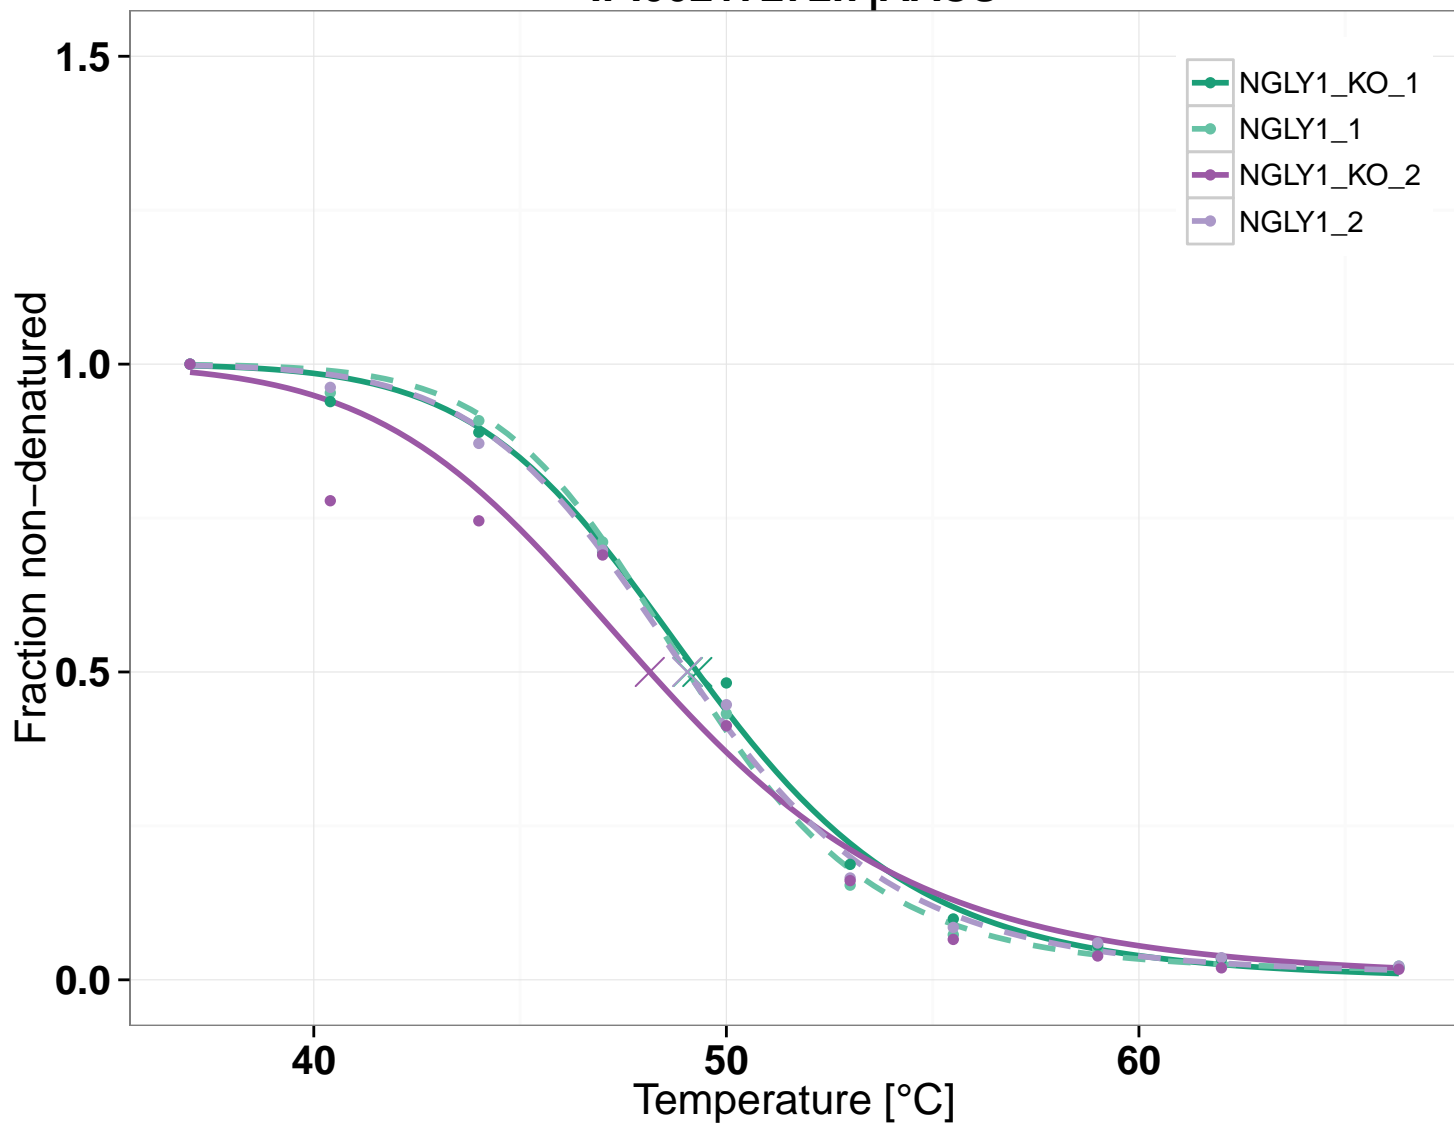

|            | meltPoint | slope  | plateau | R2   |
|------------|-----------|--------|---------|------|
| NGLY1_KO_1 | 49.3      | -0.092 | 0       | 1    |
| NGLY1_1    | 49.07     | -0.11  | 0.01    | 1    |
| NGLY1_KO_2 | 48.14     | -0.076 | 0       | 0.96 |
| NGLY1_2    | 49.05     | -0.097 | 0.01    | 1    |

Supplement: Supplementary file 5883 [file 1]

# IPI00013214.2|MCM3

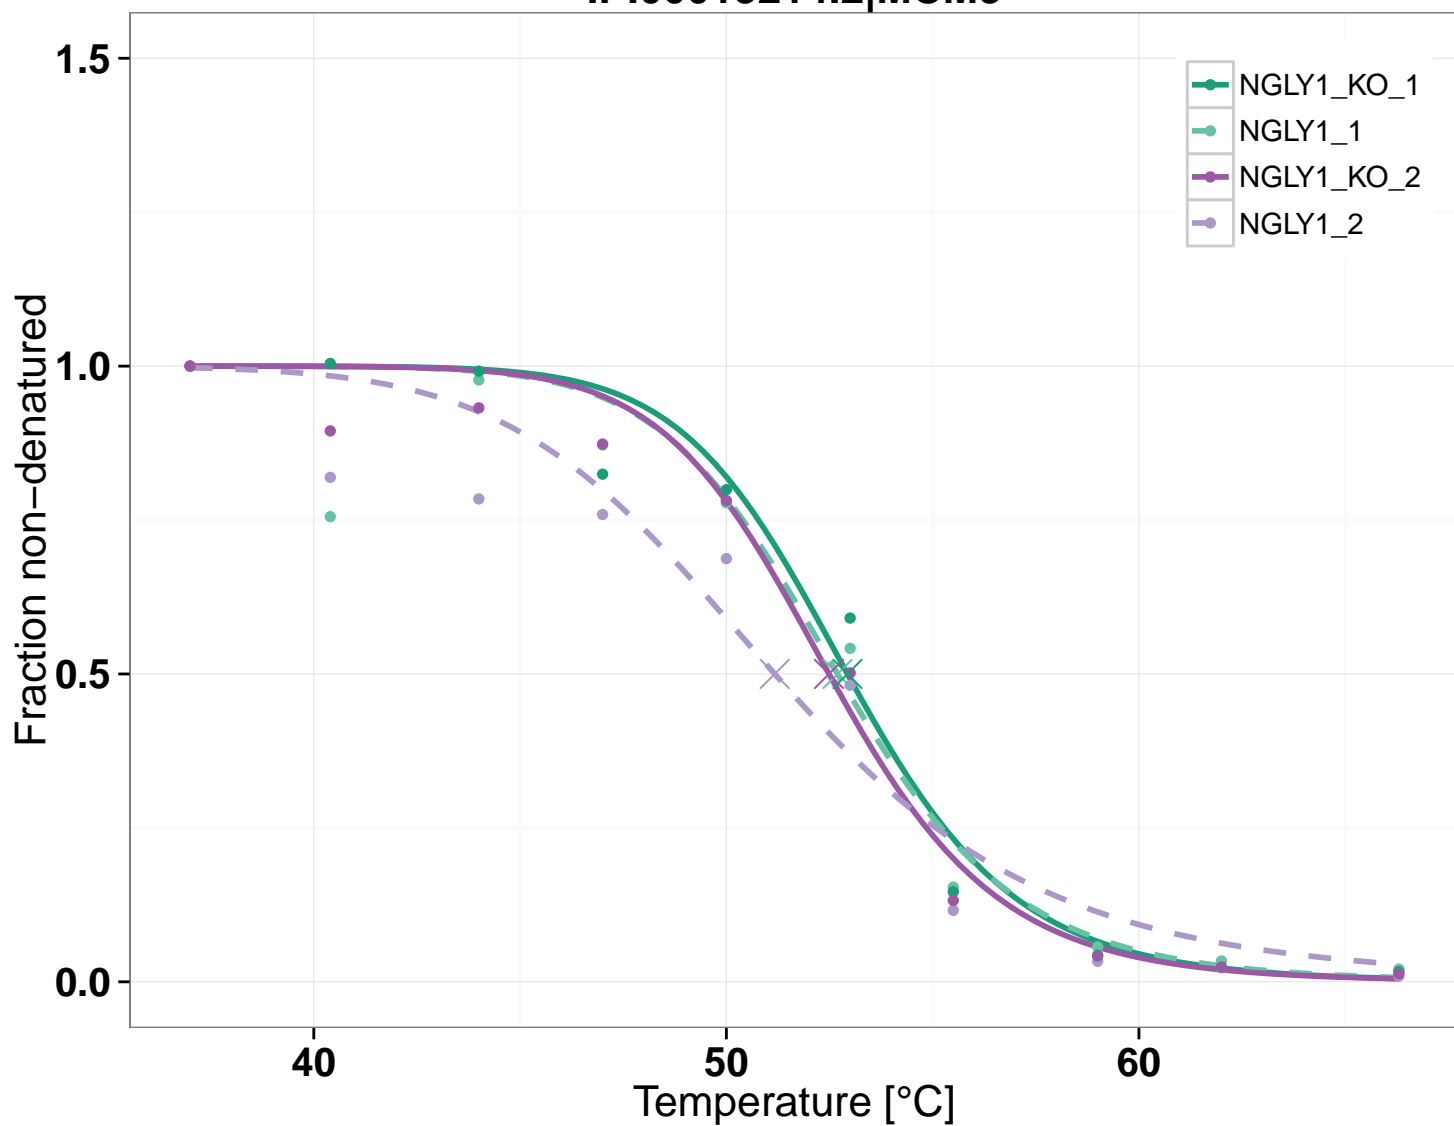

|            | meltPoint | slope  | plateau | R2   |
|------------|-----------|--------|---------|------|
| NGLY1_KO_1 | 52.94     | -0.12  | 0       | 0.98 |
| NGLY1_1    | 52.7      | -0.12  | 0       | 0.95 |
| NGLY1_KO_2 | 52.49     | -0.12  | 0       | 0.98 |
| NGLY1_2    | 51.17     | -0.077 | 0       | 0.93 |

Supplement: Supplementary file 5884 [file 1]

# IPI00289776.3|MYCBP2

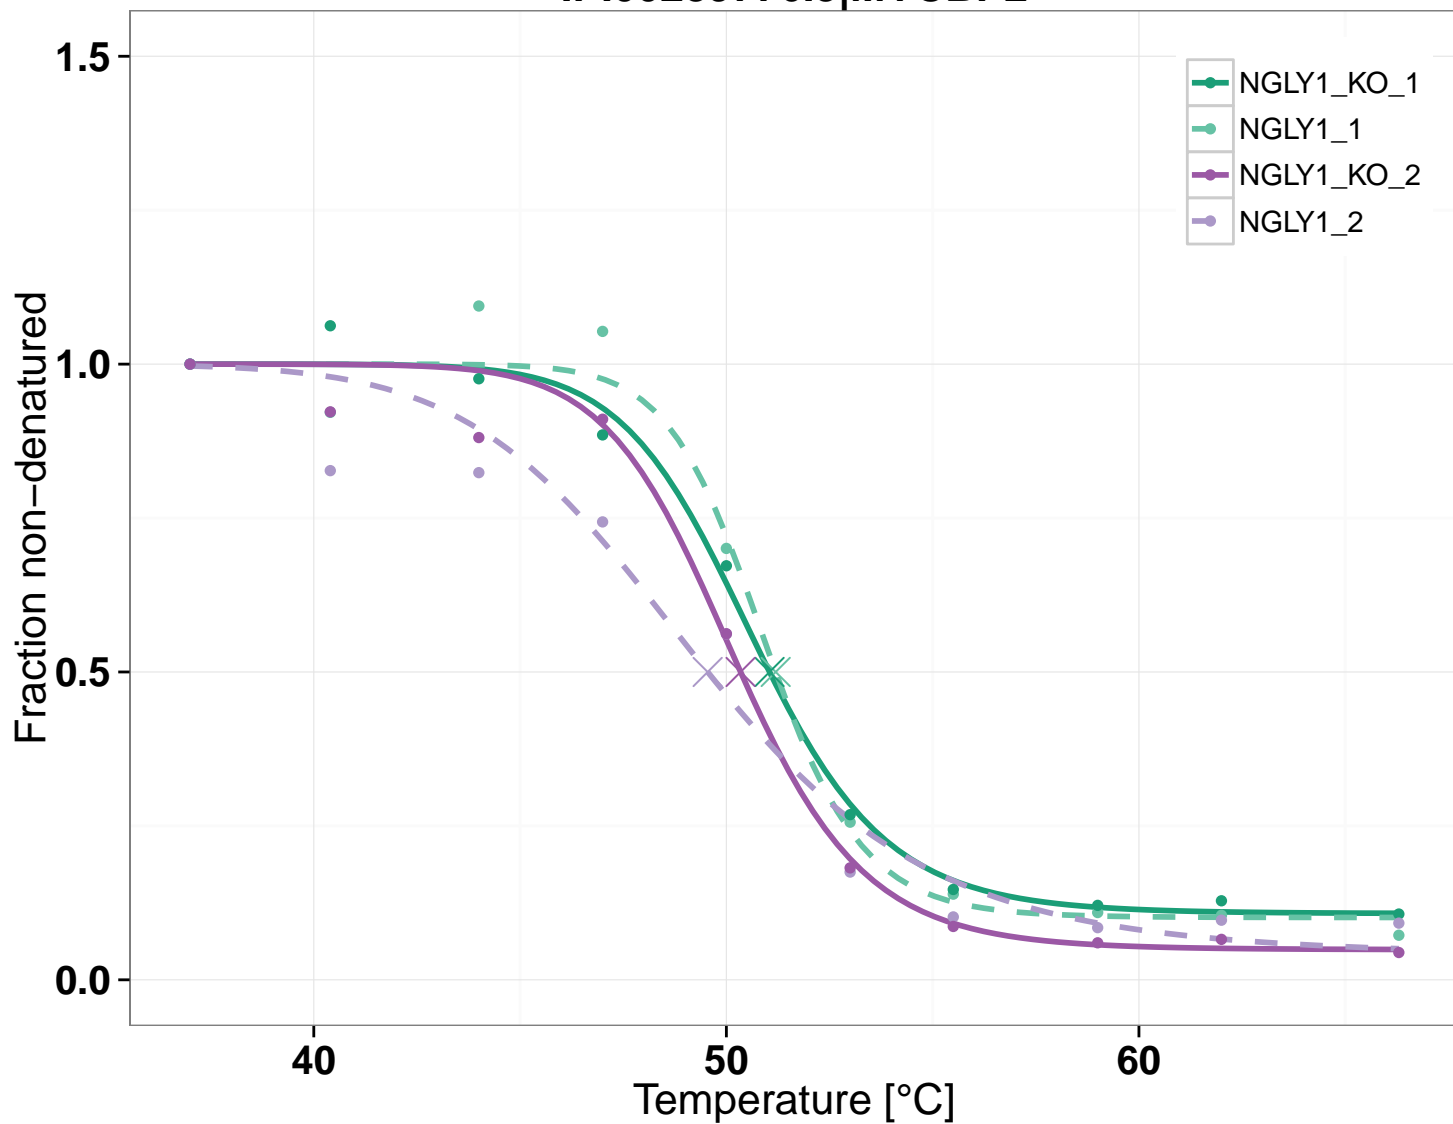

|            | meltPoint | slope  | plateau | R2   |
|------------|-----------|--------|---------|------|
| NGLY1_KO_1 | 51.05     | -0.14  | 0.11    | 1    |
| NGLY1_1    | 51.2      | -0.19  | 0.1     | 0.99 |
| NGLY1_KO_2 | 50.34     | -0.15  | 0.05    | 0.99 |
| NGLY1_2    | 49.55     | -0.085 | 0.04    | 0.96 |

Supplement: Supplementary file 5885 [file 1]

IPI00291570.9|CASP2

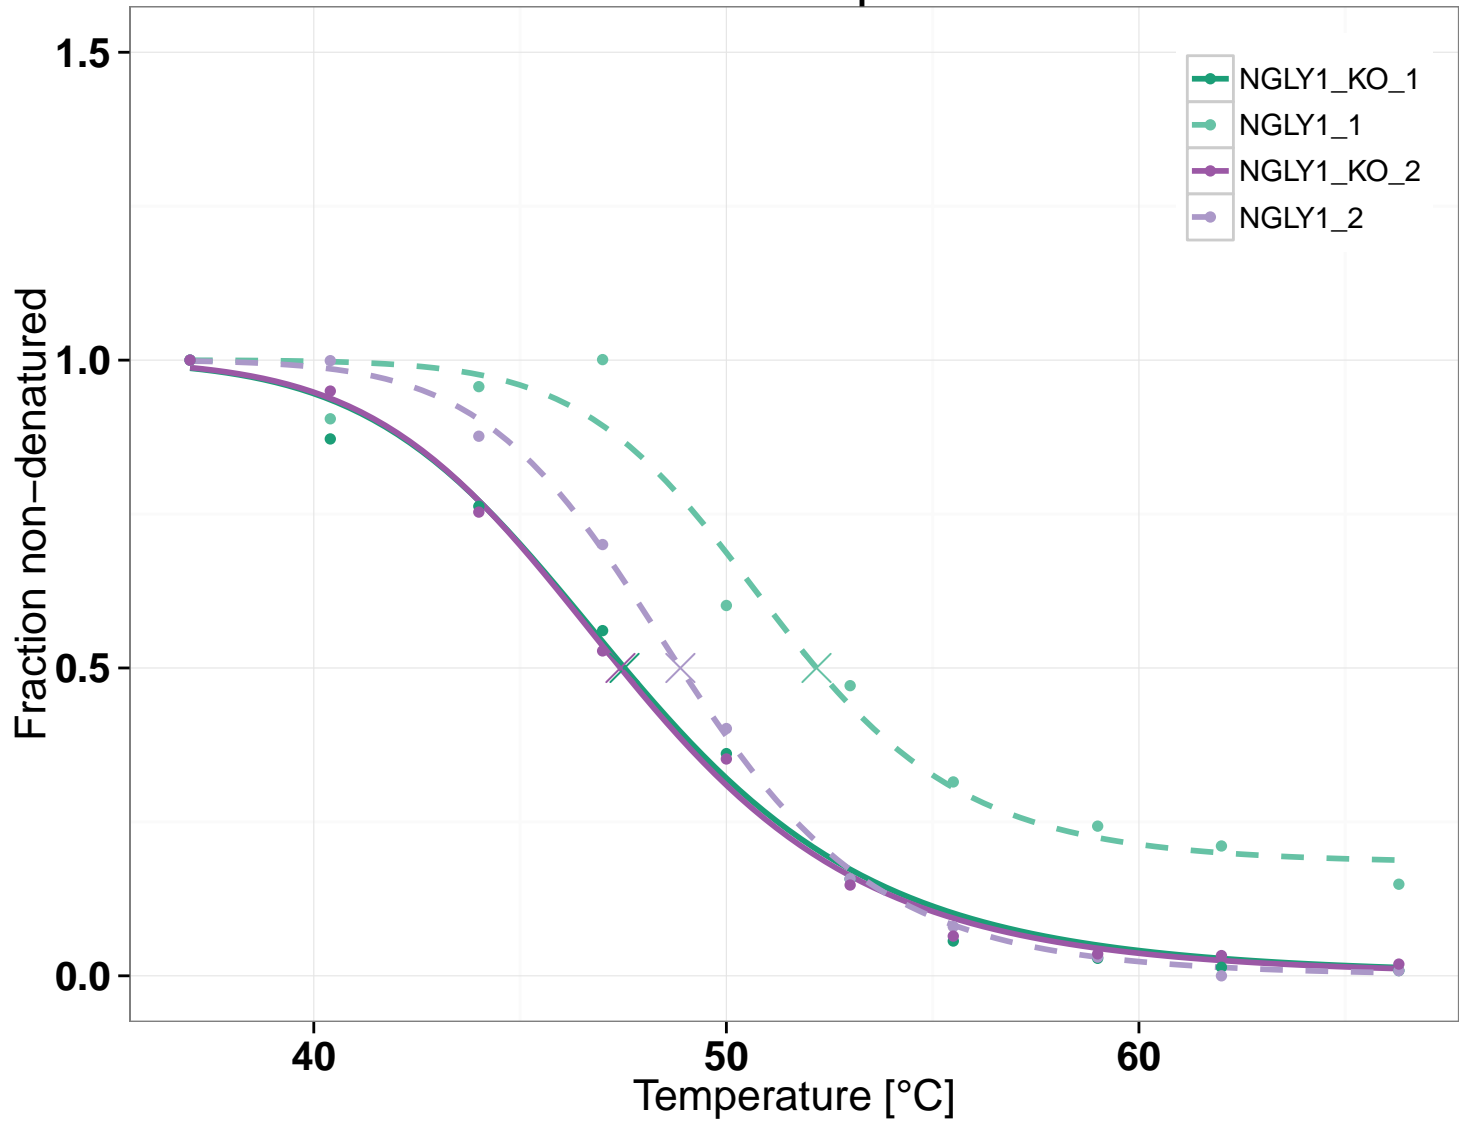

|            | meltPoint | slope  | plateau | R2   |
|------------|-----------|--------|---------|------|
| NGLY1_KO_1 | 47.53     | -0.081 | 0       | 0.99 |
| NGLY1_1    | 52.19     | -0.088 | 0.18    | 0.97 |
| NGLY1_KO_2 | 47.43     | -0.084 | 0       | 1    |
| NGLY1_2    | 48.89     | -0.1   | 0       | 1    |

Supplement: Supplementary file 5886 [file 1]

IPI00014324.3|ING1

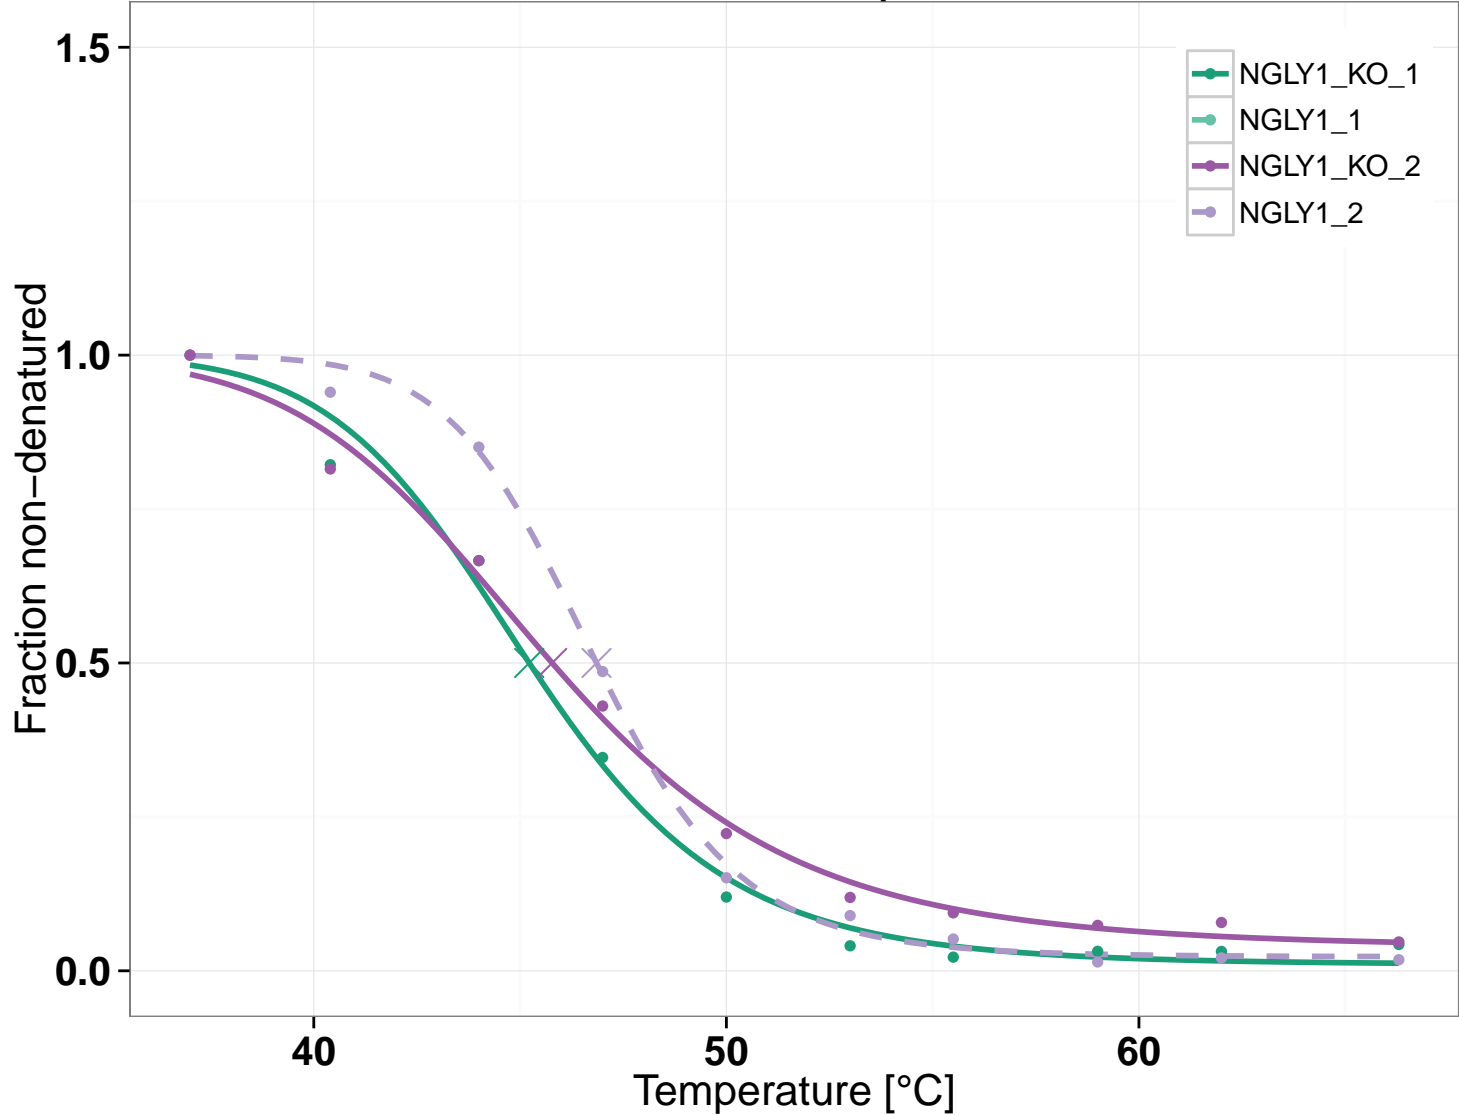

|            | meltPoint | slope  | plateau | R2   |
|------------|-----------|--------|---------|------|
| NGLY1_KO_1 | 45.22     | -0.1   | 0.01    | 0.99 |
| NGLY1_1    | -         | -      | -       | -    |
| NGLY1_KO_2 | 45.78     | -0.079 | 0.04    | 0.99 |
| NGLY1_2    | 46.85     | -0.14  | 0.02    | 1    |

Supplement: Supplementary file 5887 [file 1]

# IPI00014312.1|CUL3

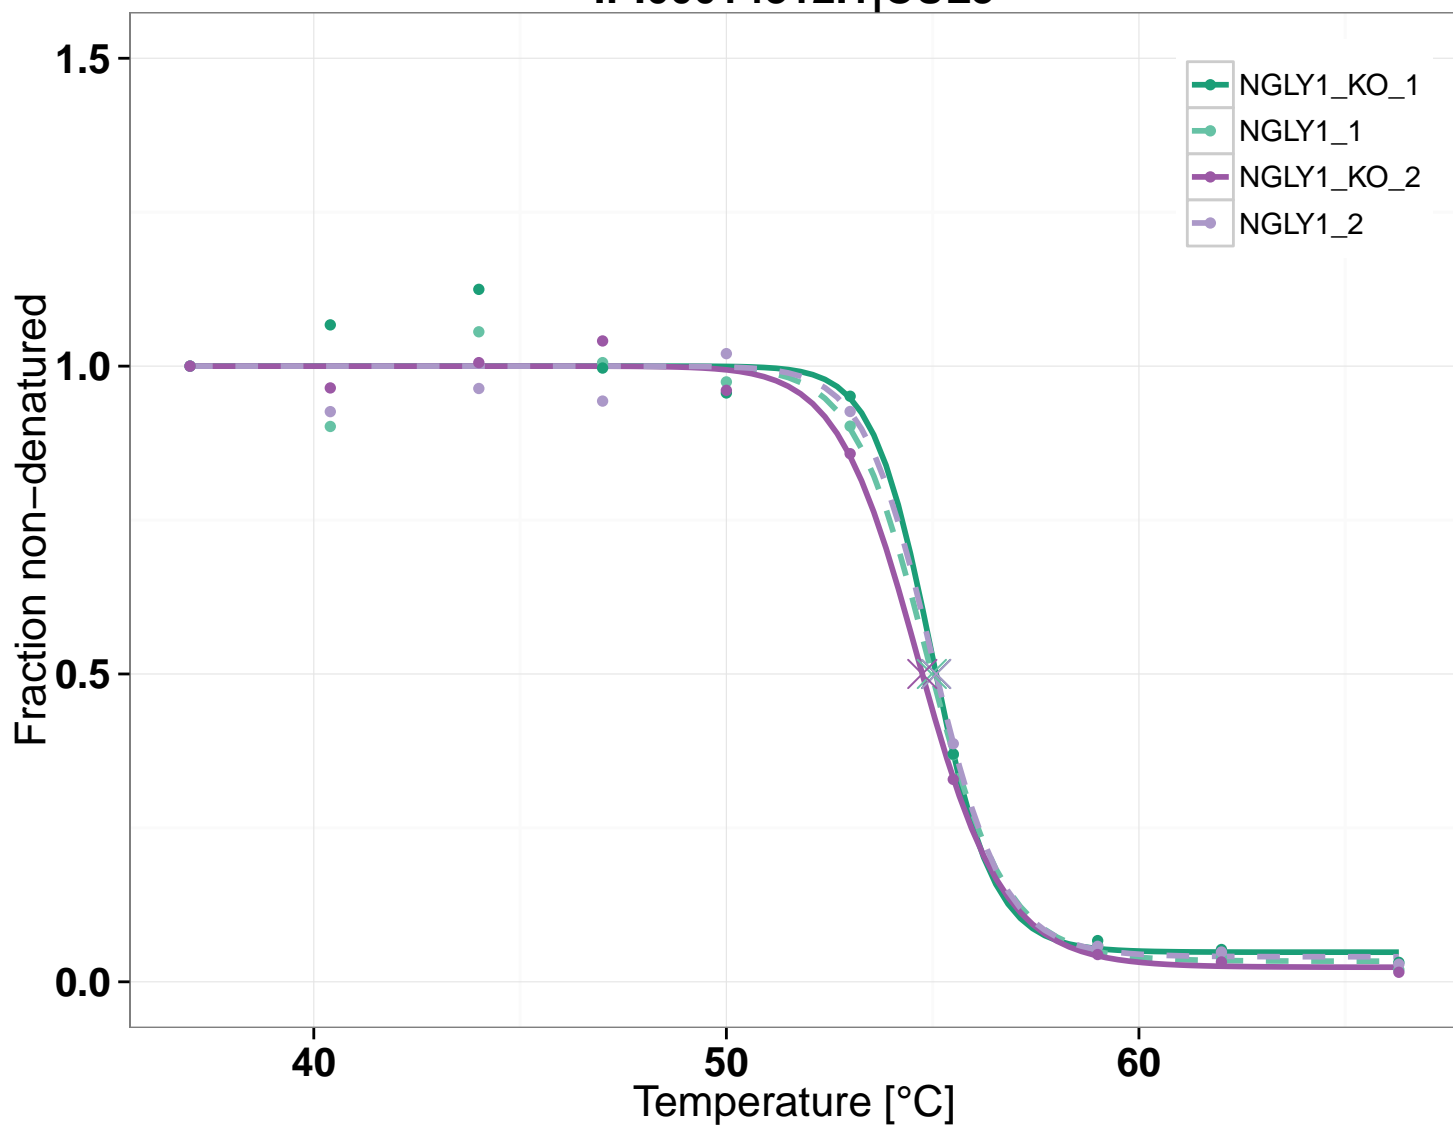

|            | meltPoint | slope | plateau | R2   |
|------------|-----------|-------|---------|------|
| NGLY1_KO_1 | 55.08     | -0.33 | 0.05    | 0.99 |
| NGLY1_1    | 54.98     | -0.26 | 0.03    | 0.99 |
| NGLY1_KO_2 | 54.75     | -0.24 | 0.02    | 1    |
| NGLY1_2    | 55.09     | -0.28 | 0.04    | 0.99 |

Supplement: Supplementary file 5888 [file 1]

IPI00166125.1|PUSL1

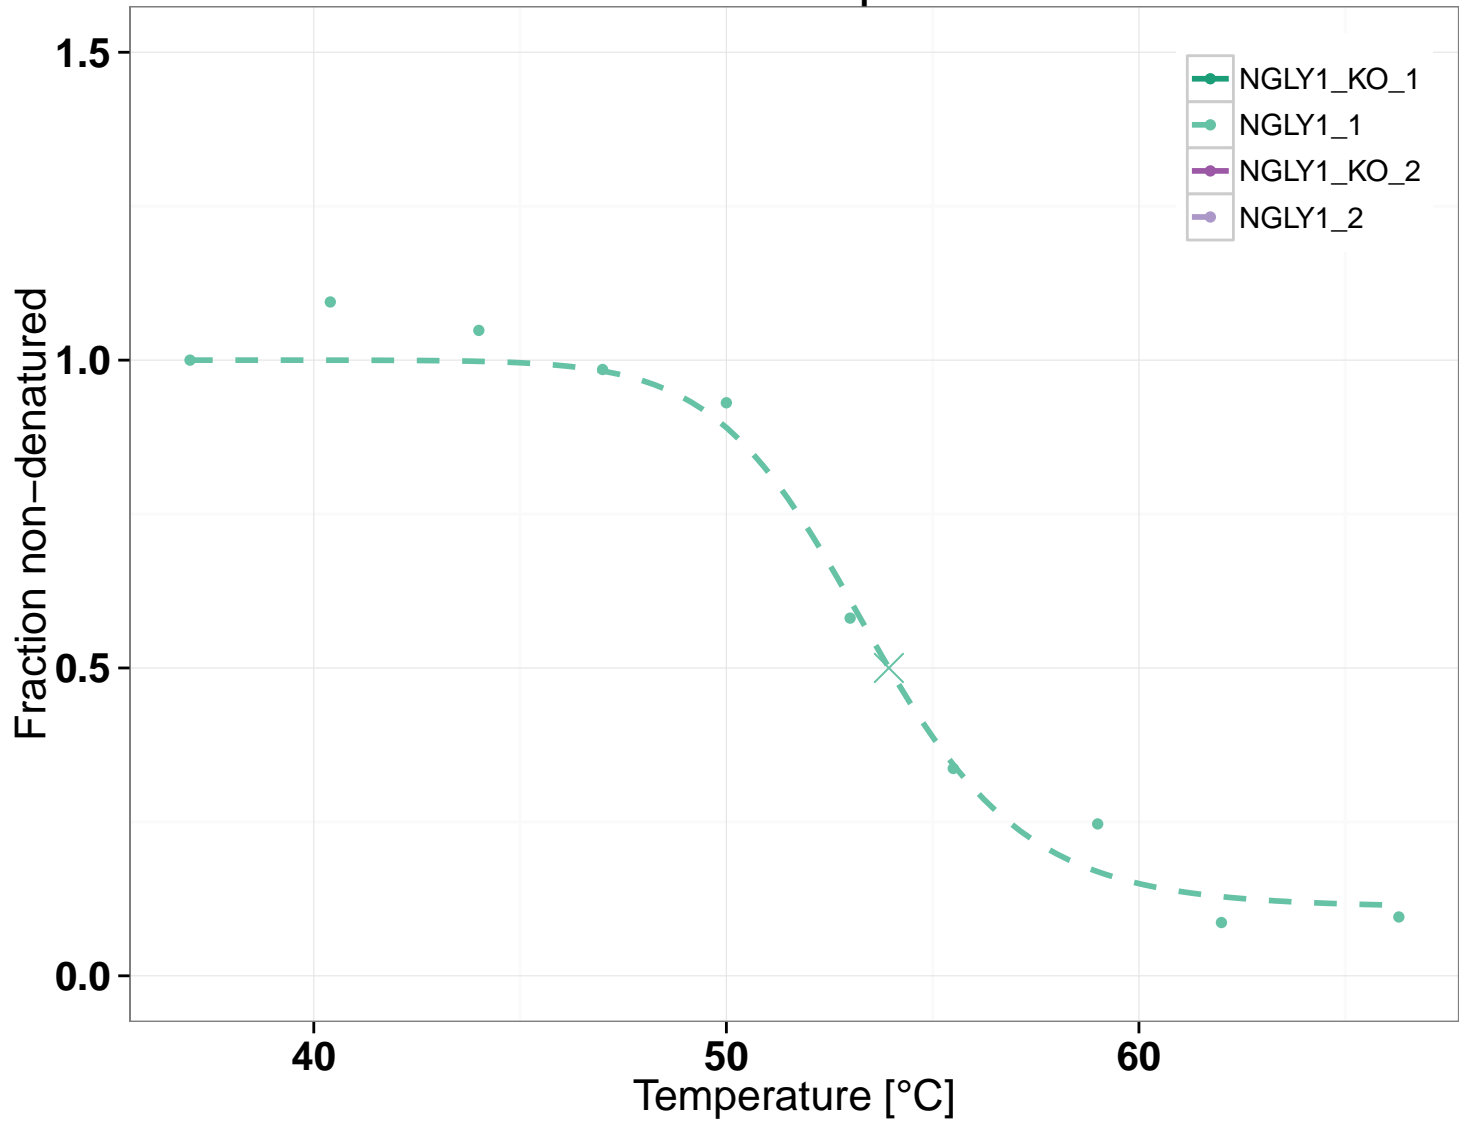

|            | meltPoint | slope | plateau | R2   |
|------------|-----------|-------|---------|------|
| NGLY1_KO_1 | -         | -     | -       | -    |
| NGLY1_1    | 53.94     | -0.12 | 0.11    | 0.99 |
| NGLY1_KO_2 | -         | -     | -       | -    |
| NGLY1_2    | -         | -     | -       | -    |

Supplement: Supplementary file 5889 [file 1]

IPI00183933.10|SLC9A8

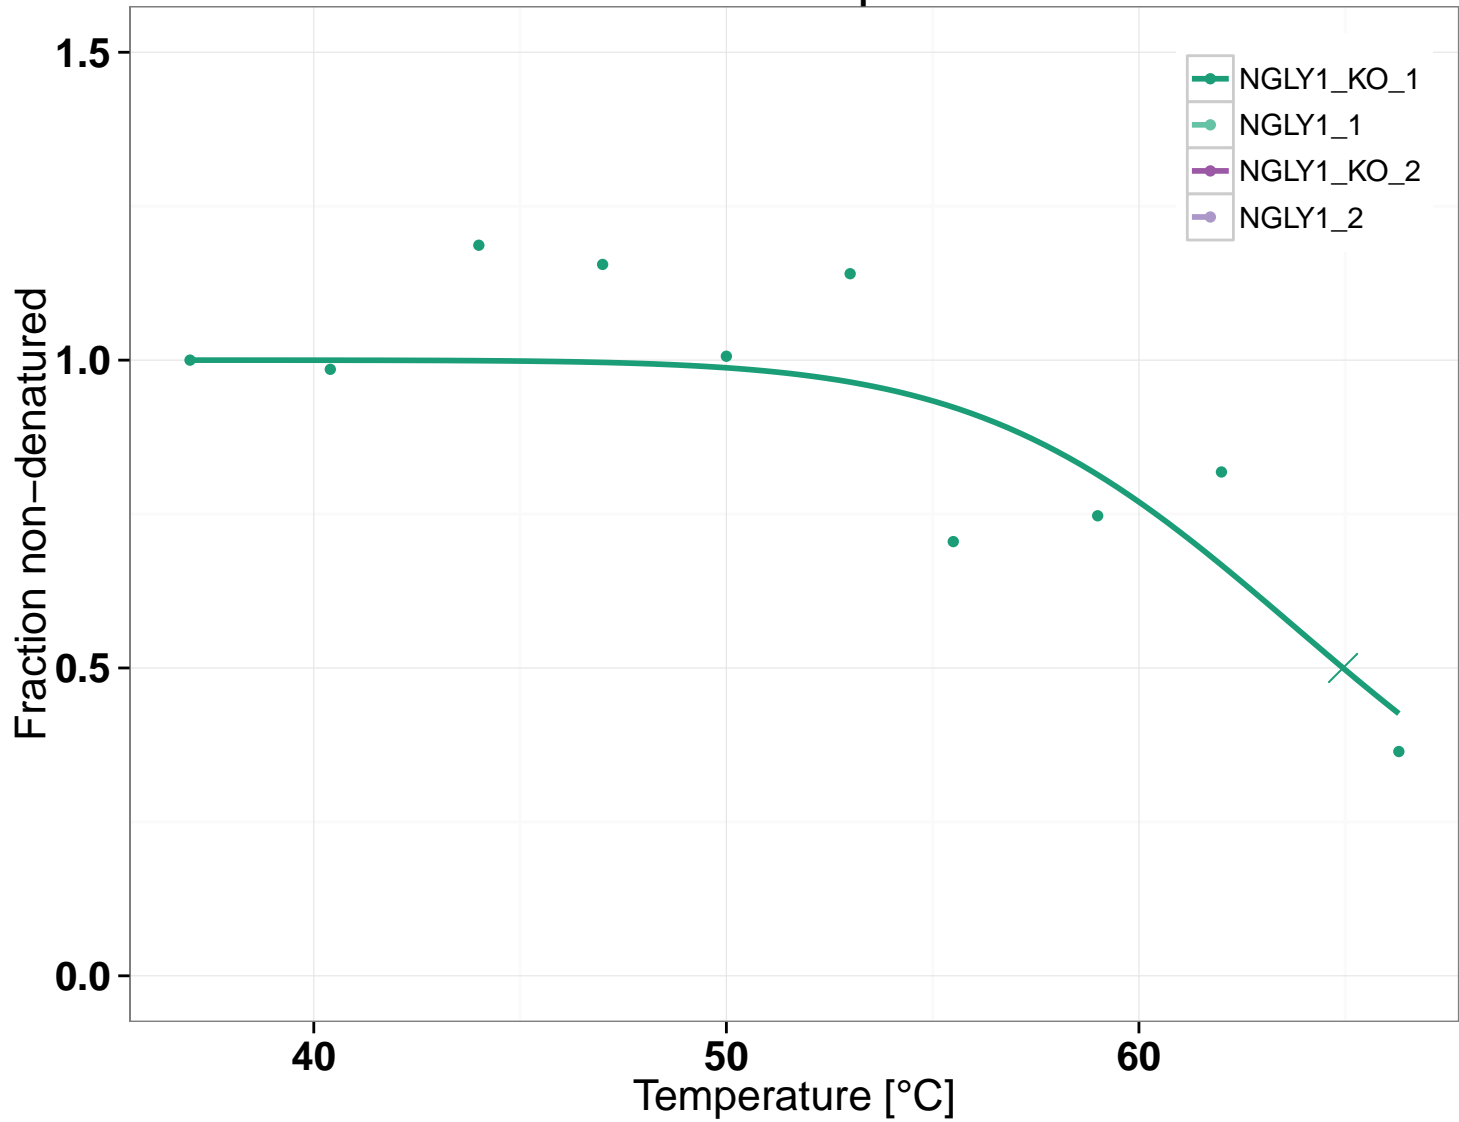

|            | meltPoint | slope  | plateau | R2   |
|------------|-----------|--------|---------|------|
| NGLY1_KO_1 | 64.95     | -0.057 | 0       | 0.71 |
| NGLY1_1    | -         | -      | -       | -    |
| NGLY1_KO_2 | -         | -      | -       | -    |
| NGLY1_2    | -         | -      | -       | -    |

Supplement: Supplementary file 5890 [file 1]

# IPI00006557.8|PJA2

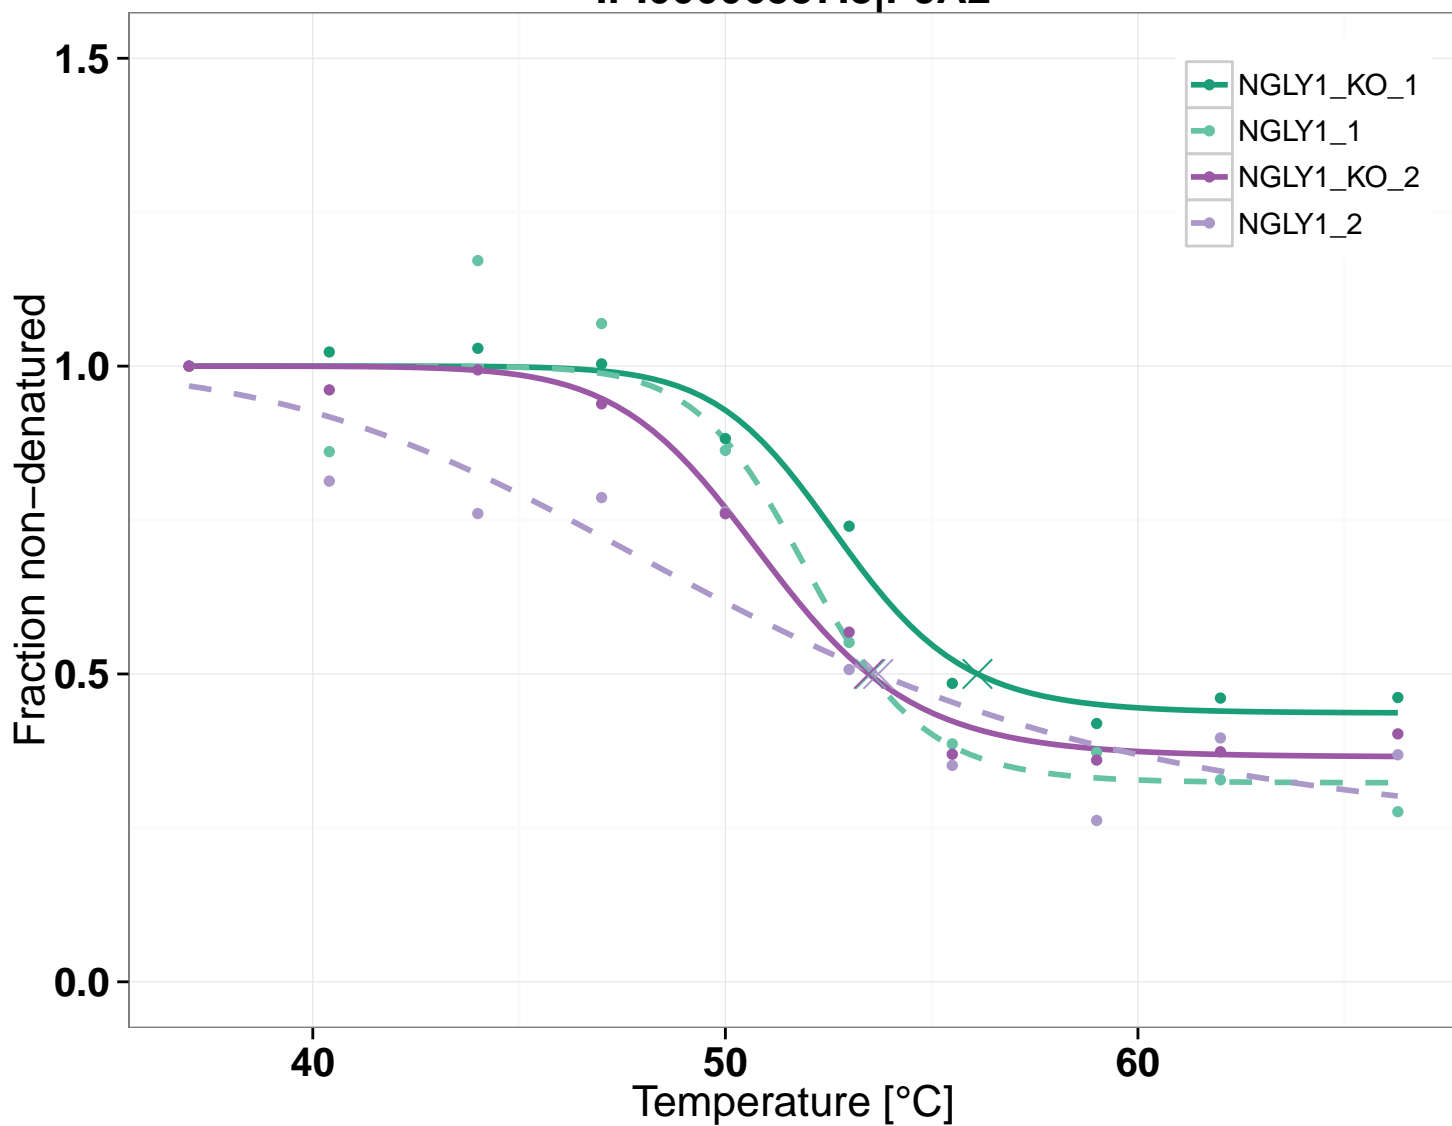

|            | meltPoint | slope  | plateau | R2   |
|------------|-----------|--------|---------|------|
| NGLY1_KO_1 | 56.11     | -0.093 | 0.44    | 0.99 |
| NGLY1_1    | 53.52     | -0.12  | 0.32    | 0.94 |
| NGLY1_KO_2 | 53.48     | -0.088 | 0.37    | 0.99 |
| NGLY1_2    | 53.71     | -0.036 | 0.22    | 0.87 |

Supplement: Supplementary file 5891 [file 1]

# IPI00018294.3|RLF

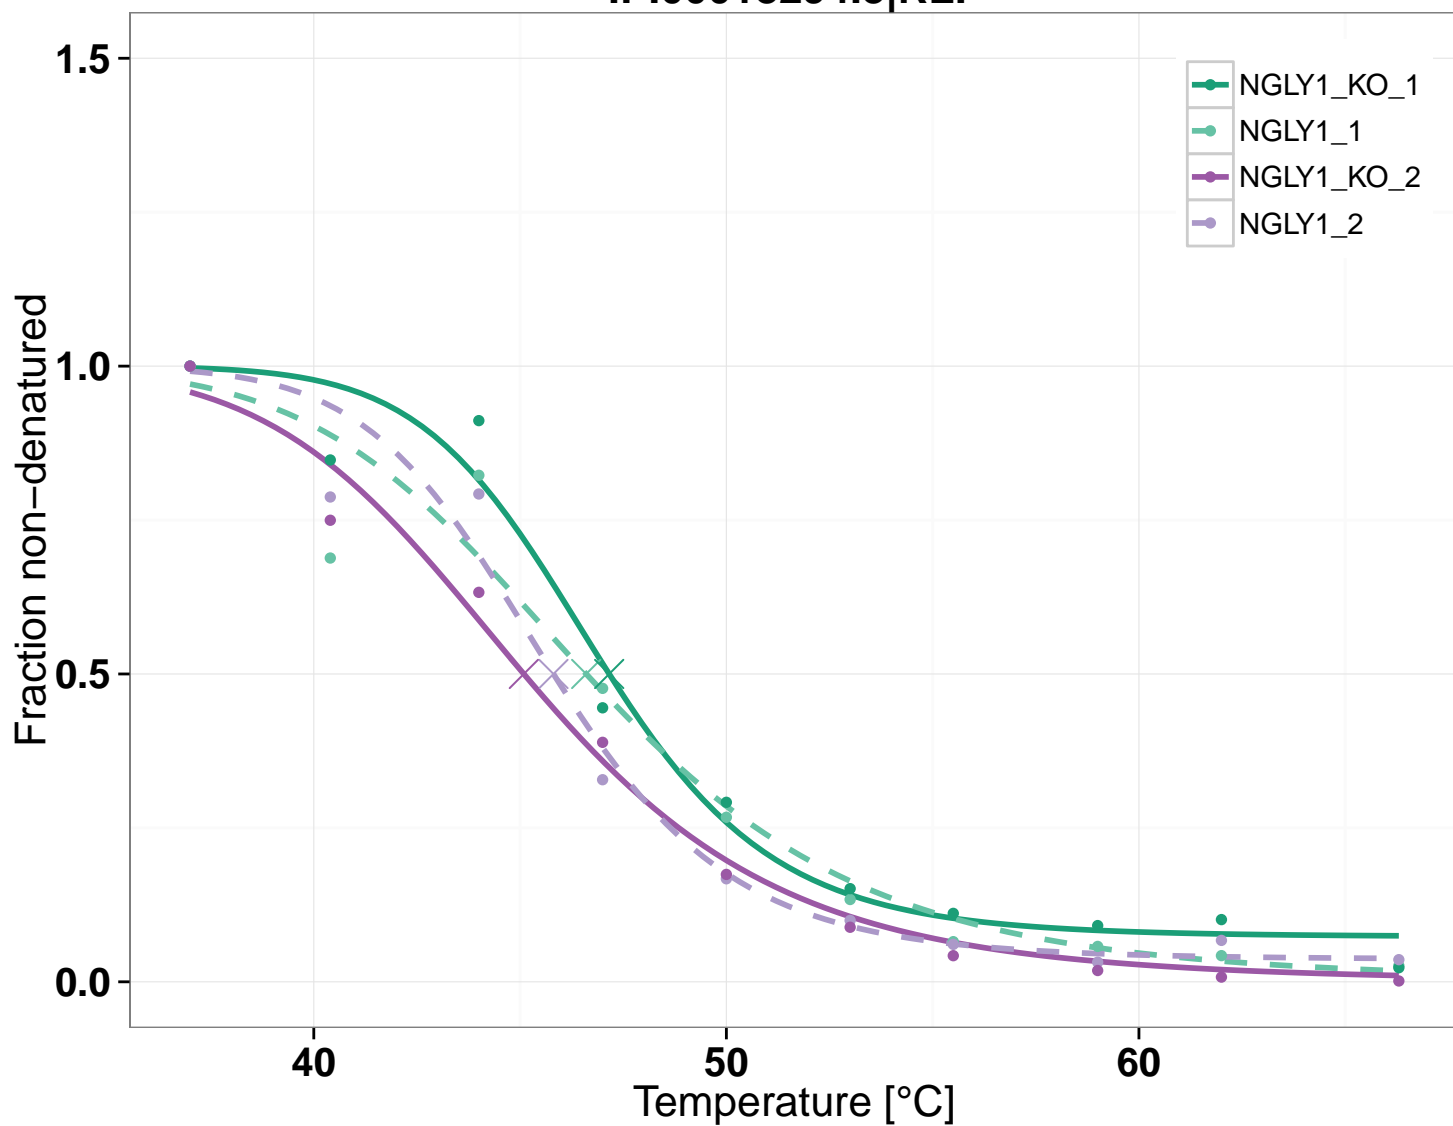

|            | meltPoint | slope  | plateau | R2   |
|------------|-----------|--------|---------|------|
| NGLY1_KO_1 | 47.16     | -0.11  | 0.07    | 0.97 |
| NGLY1_1    | 46.6      | -0.074 | 0       | 0.95 |
| NGLY1_KO_2 | 45.09     | -0.081 | 0       | 0.99 |
| NGLY1_2    | 45.81     | -0.11  | 0.04    | 0.97 |

Supplement: Supplementary file 5892 [file 1]

IPI00217899.1|RNF168

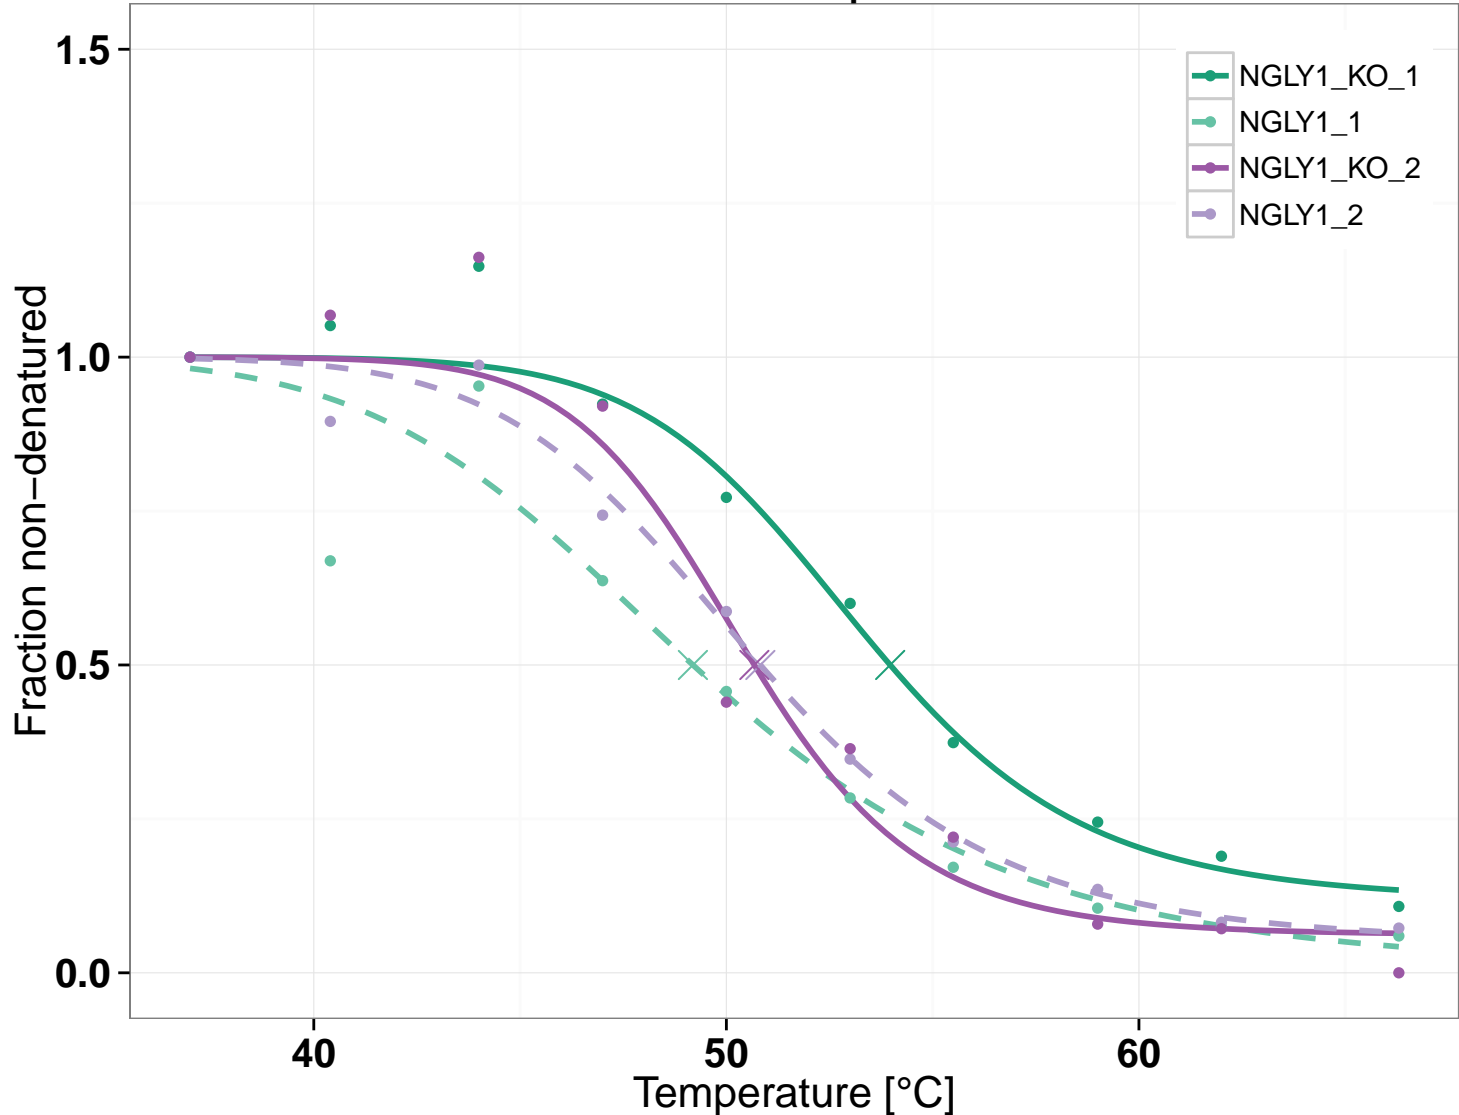

|            | meltPoint | slope  | plateau | R2   |
|------------|-----------|--------|---------|------|
| NGLY1_KO_1 | 53.97     | -0.082 | 0.12    | 0.98 |
| NGLY1_1    | 49.19     | -0.063 | 0       | 0.92 |
| NGLY1_KO_2 | 50.68     | -0.11  | 0.06    | 0.96 |
| NGLY1_2    | 50.82     | -0.079 | 0.05    | 0.99 |

Supplement: Supplementary file 5893 [file 1]

IPI00106567.2|WDR33

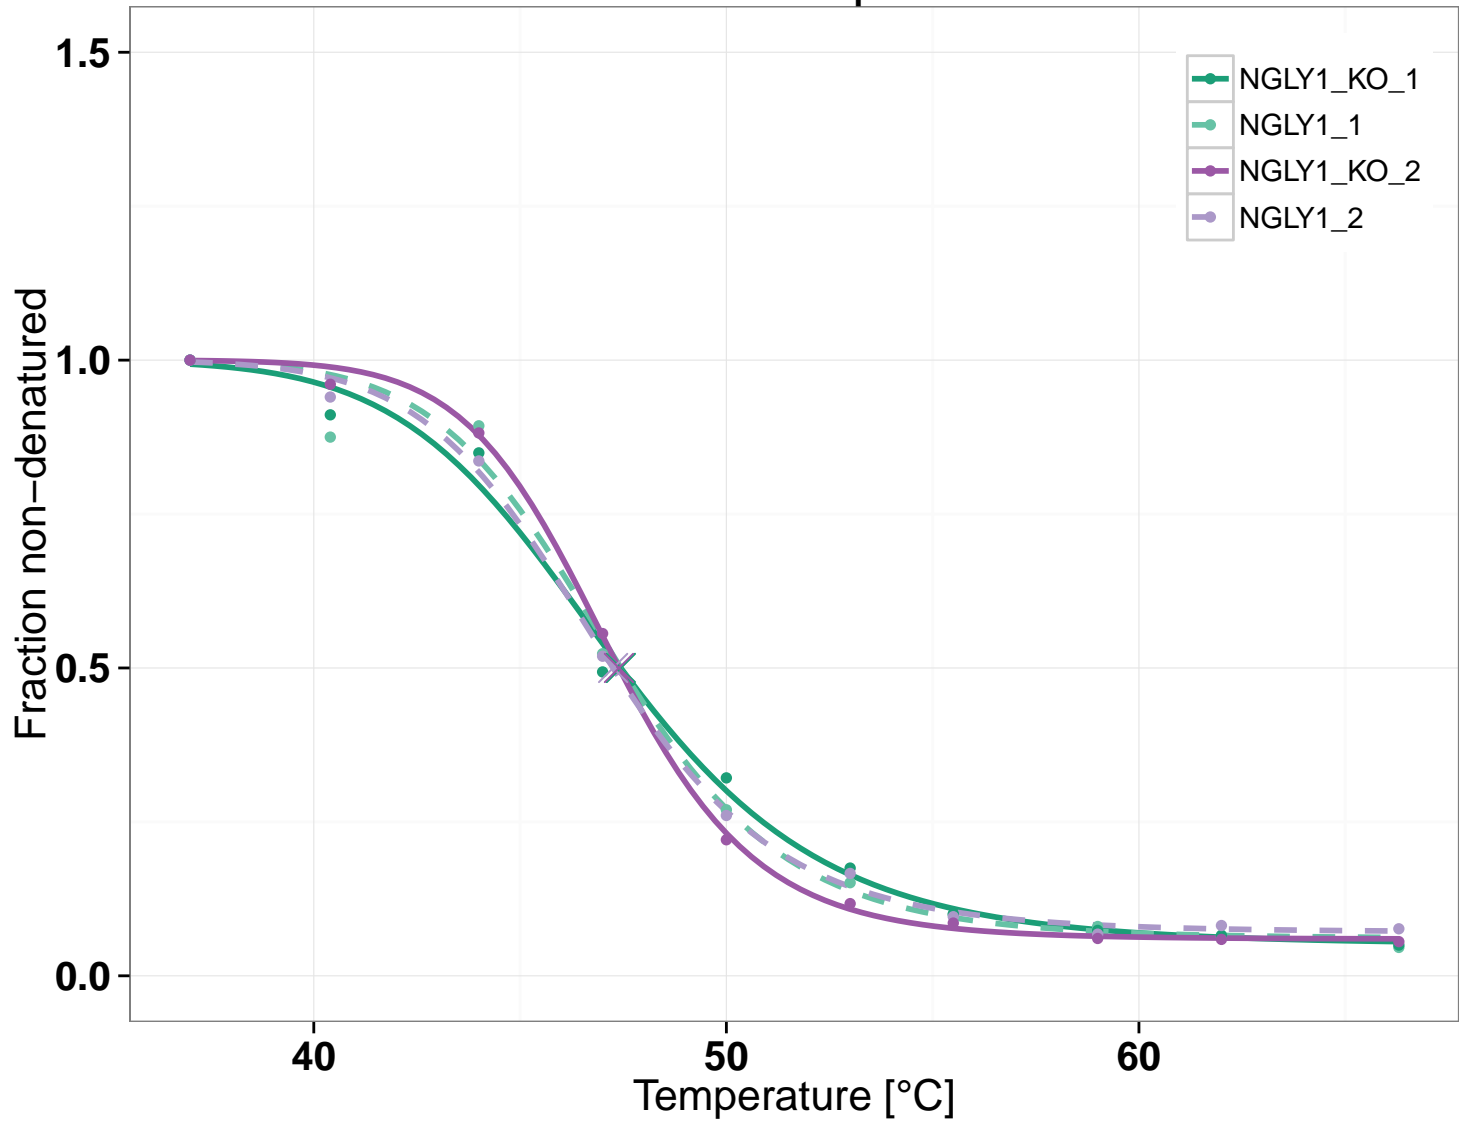

|            | meltPoint | slope  | plateau | R2   |
|------------|-----------|--------|---------|------|
| NGLY1_KO_1 | 47.44     | -0.092 | 0.05    | 0.99 |
| NGLY1_1    | 47.44     | -0.11  | 0.06    | 0.99 |
| NGLY1_KO_2 | 47.4      | -0.13  | 0.06    | 1    |
| NGLY1_2    | 47.25     | -0.11  | 0.07    | 1    |

Supplement: Supplementary file 5894 [file 1]

IPI00373894.6|KIAA0100

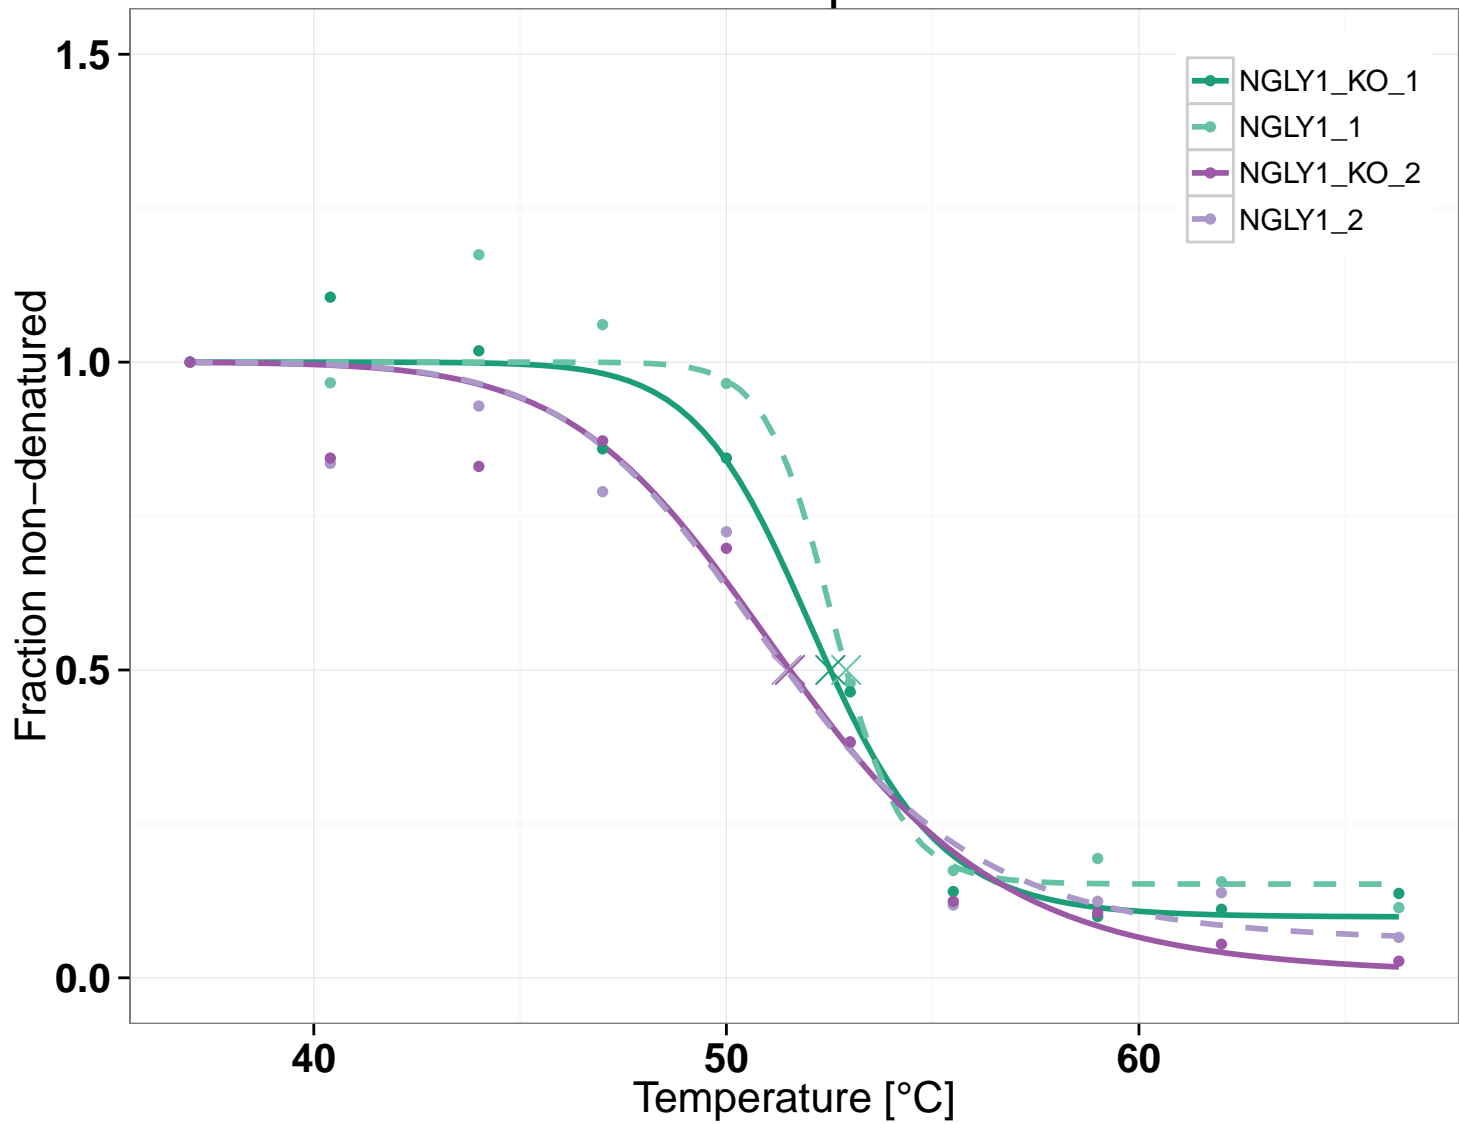

|            | meltPoint | slope  | plateau | R2   |
|------------|-----------|--------|---------|------|
| NGLY1_KO_1 | 52.52     | -0.15  | 0.1     | 0.98 |
| NGLY1_1    | 52.91     | -0.26  | 0.15    | 0.98 |
| NGLY1_KO_2 | 51.54     | -0.094 | 0       | 0.96 |
| NGLY1_2    | 51.46     | -0.094 | 0.06    | 0.96 |

Supplement: Supplementary file 5895 [file 1]

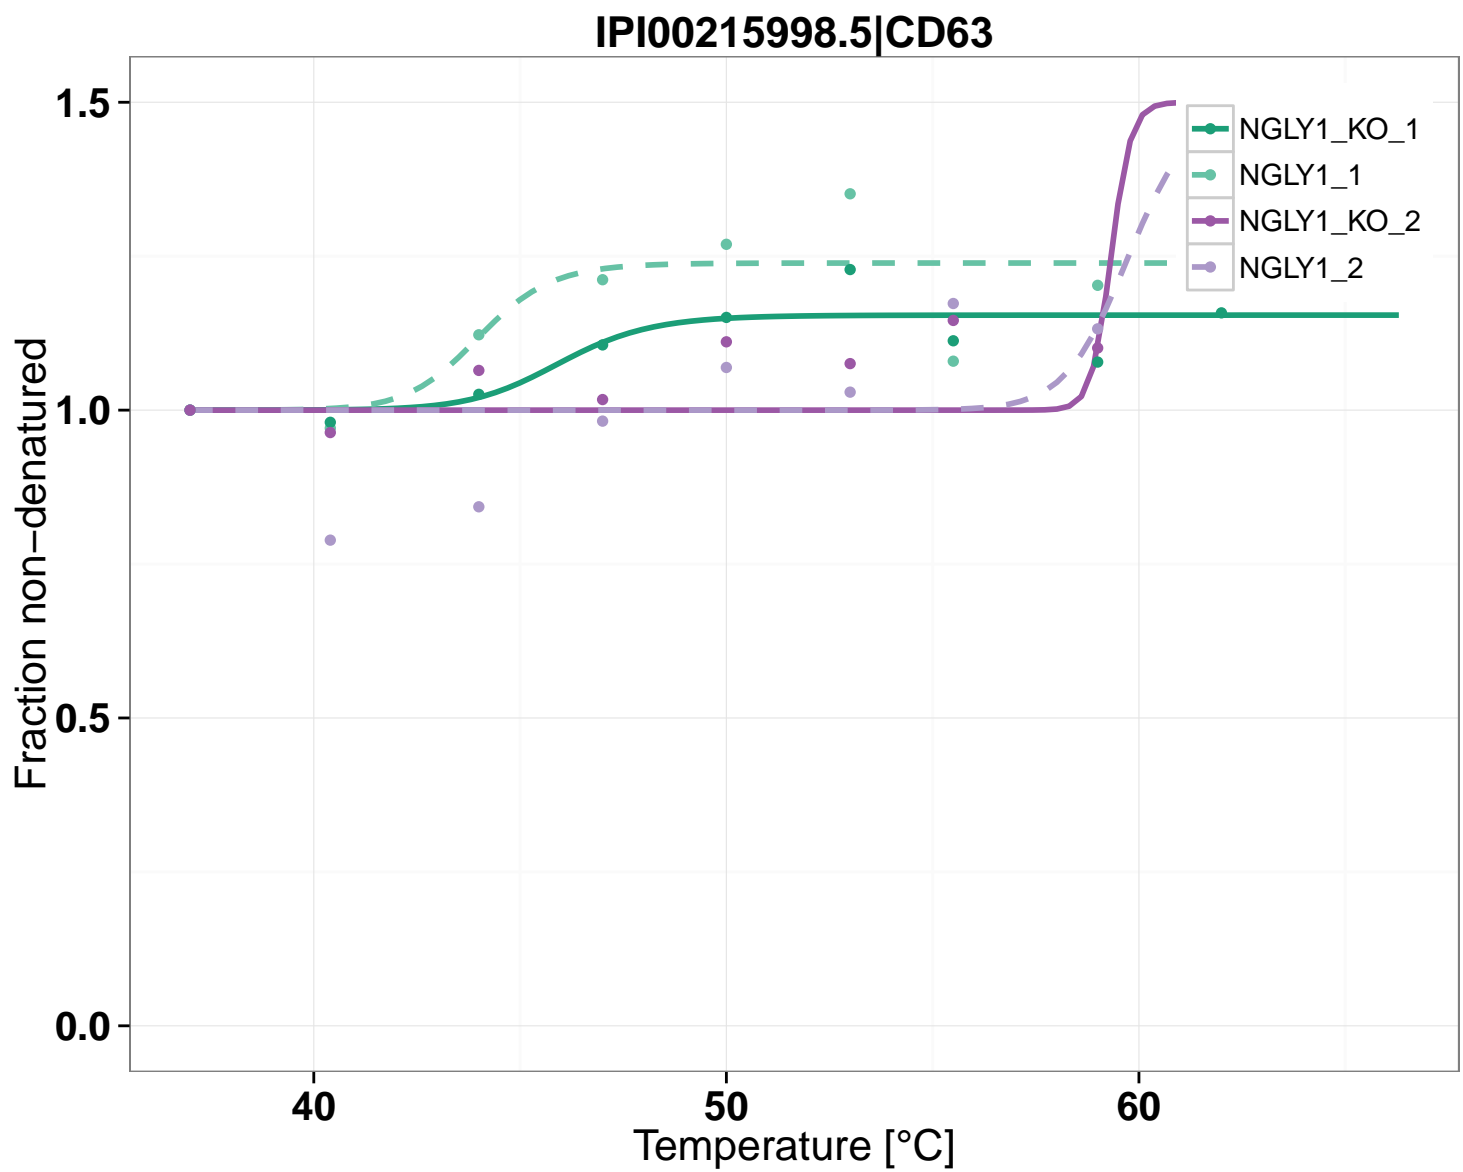

|            | meltPoint | slope | plateau | R2   |
|------------|-----------|-------|---------|------|
| NGLY1_KO_1 | —         | 0.035 | 1.15    | 0.75 |
| NGLY1_1    | —         | 0.068 | 1.24    | 0.68 |
| NGLY1_KO_2 | —         | 0.53  | 1.5     | 0.86 |
| NGLY1_2    | —         | 0.16  | 1.5     | 0.78 |

Supplement: Supplementary file 5896 [file 1]

# IPI00394856.7|KIF7

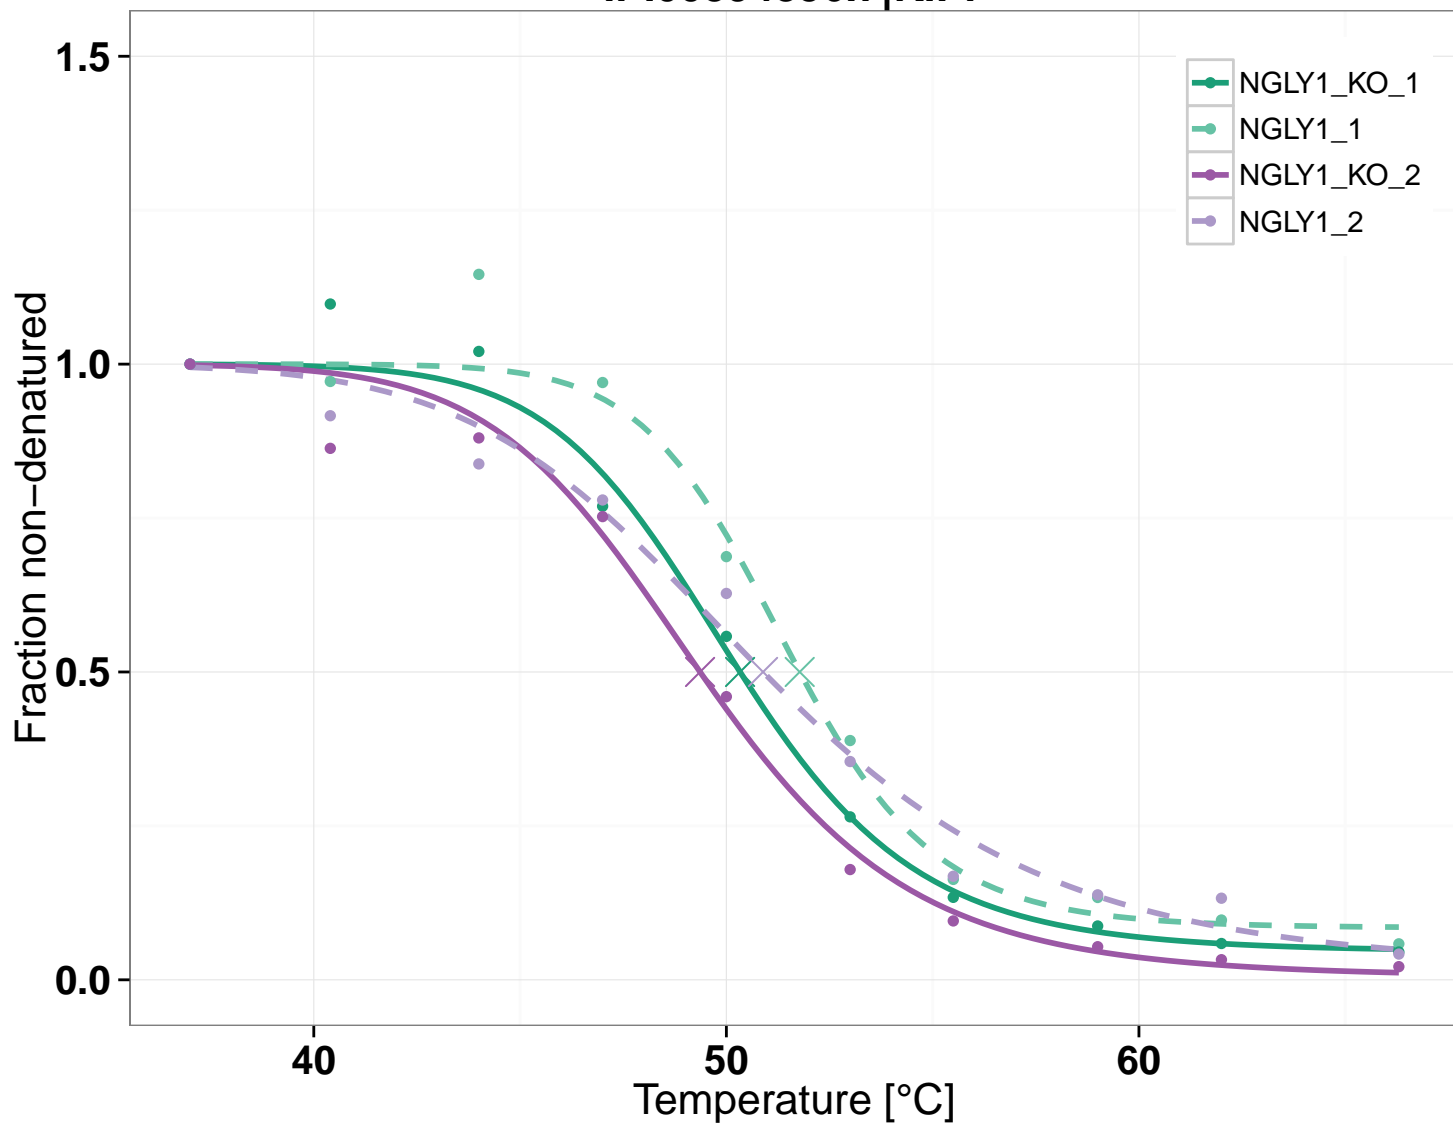

|            | meltPoint | slope  | plateau | R2   |
|------------|-----------|--------|---------|------|
| NGLY1_KO_1 | 50.33     | -0.11  | 0.05    | 0.99 |
| NGLY1_1    | 51.78     | -0.13  | 0.08    | 0.98 |
| NGLY1_KO_2 | 49.36     | -0.098 | 0       | 0.99 |
| NGLY1_2    | 50.89     | -0.07  | 0.01    | 0.98 |

Supplement: Supplementary file 5897 [file 1]

IPI00383758.1|G3P1\_HUMAN

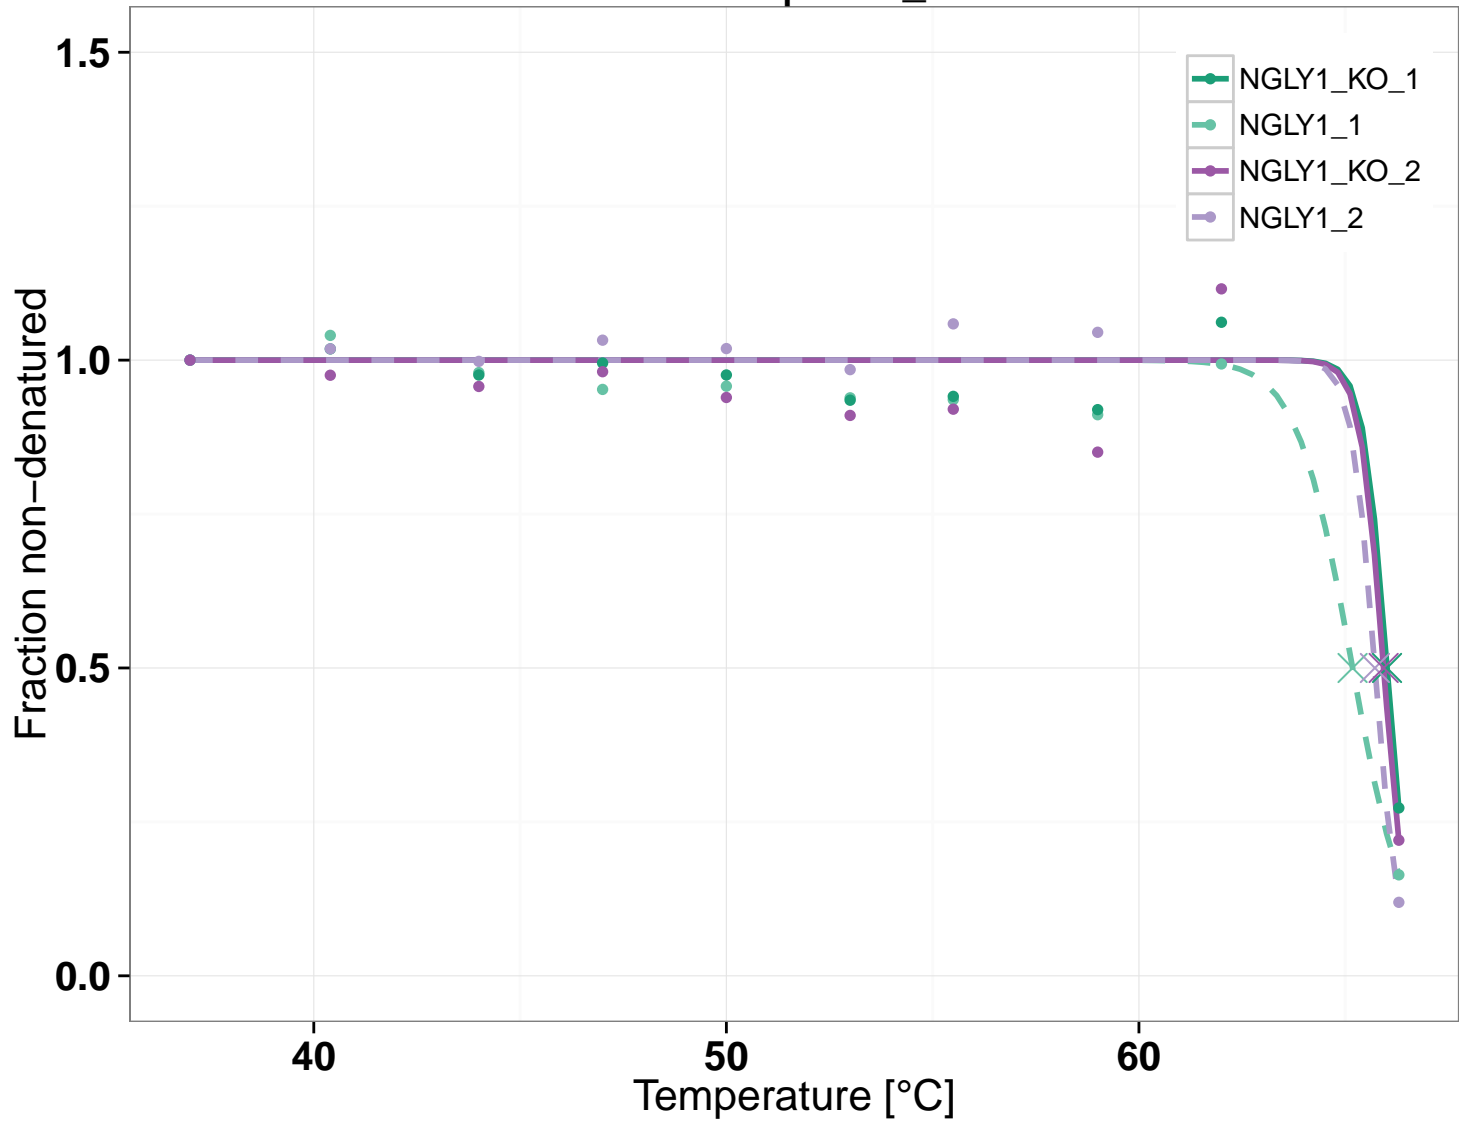

|            | meltPoint | slope | plateau | R2   |
|------------|-----------|-------|---------|------|
| NGLY1_KO_1 | 66.01     | -0.86 | 0       | 0.96 |
| NGLY1_1    | 65.18     | -0.37 | 0       | 0.96 |
| NGLY1_KO_2 | 65.93     | -0.86 | 0       | 0.89 |
| NGLY1_2    | 65.72     | -0.87 | 0       | 0.91 |

Supplement: Supplementary file 5898 [file 1]

# IPI00099838.5|ACP6

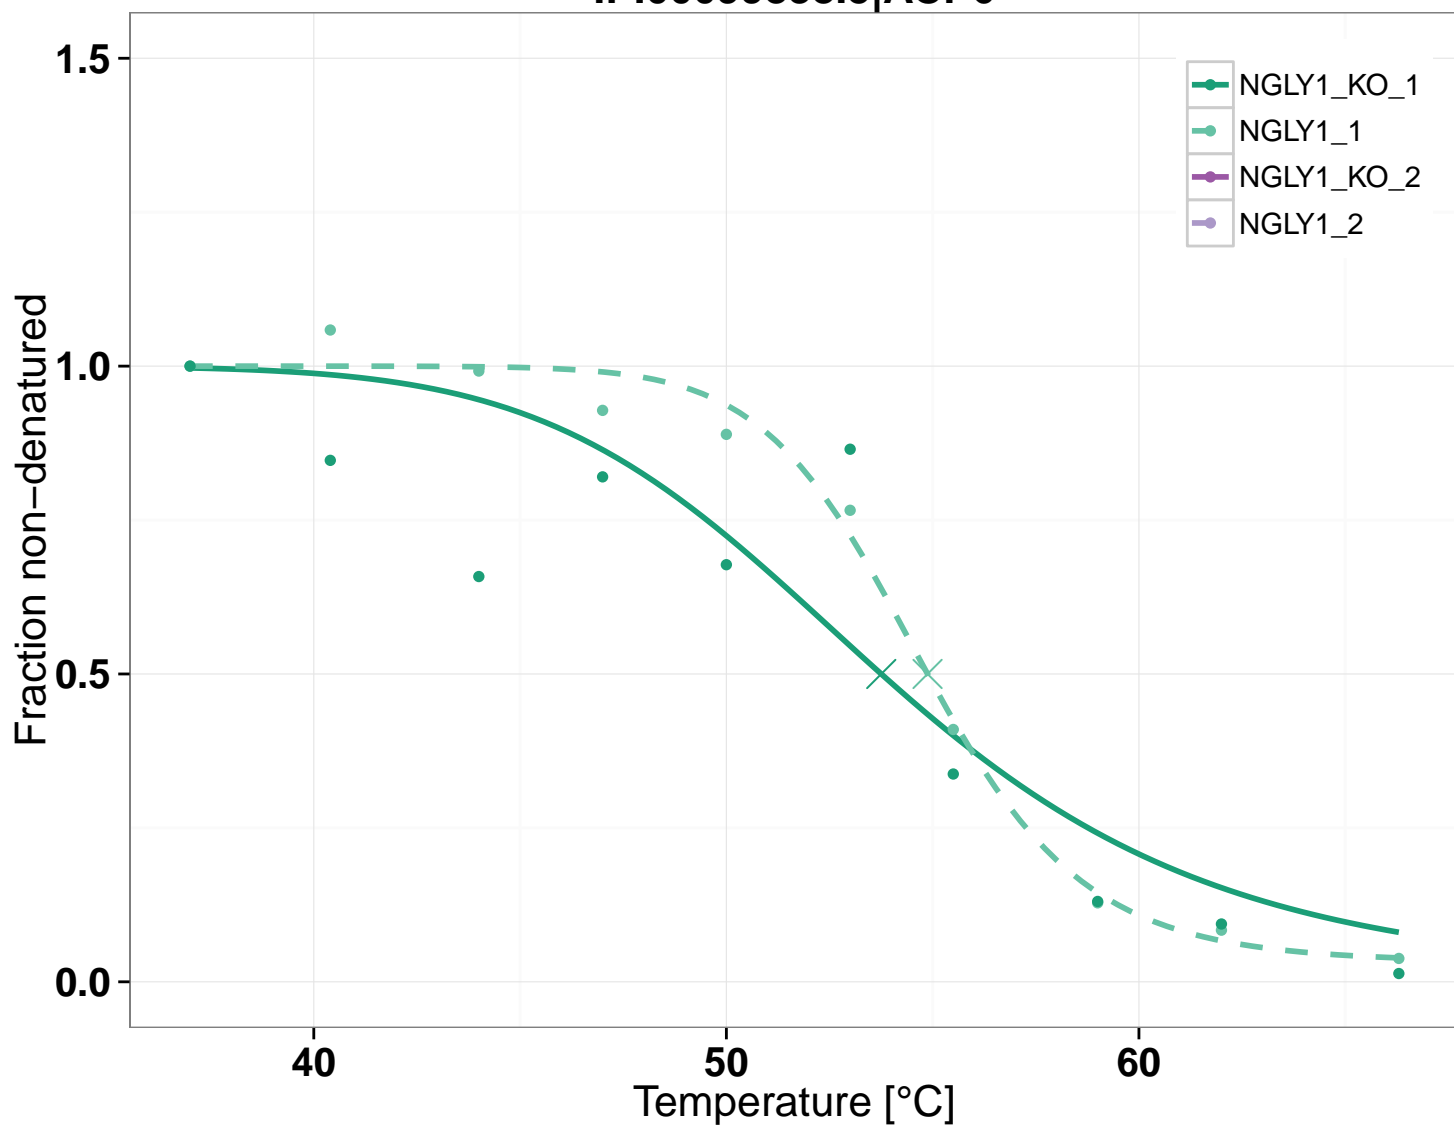

|            | meltPoint | slope  | plateau | R2   |
|------------|-----------|--------|---------|------|
| NGLY1_KO_1 | 53.75     | -0.061 | 0       | 0.81 |
| NGLY1_1    | 54.88     | -0.12  | 0.03    | 0.99 |
| NGLY1_KO_2 | -         | -      | -       | -    |
| NGLY1_2    | -         | -      | -       | -    |

Supplement: Supplementary file 5899 [file 1]

IPI00398725.1|ZNF644

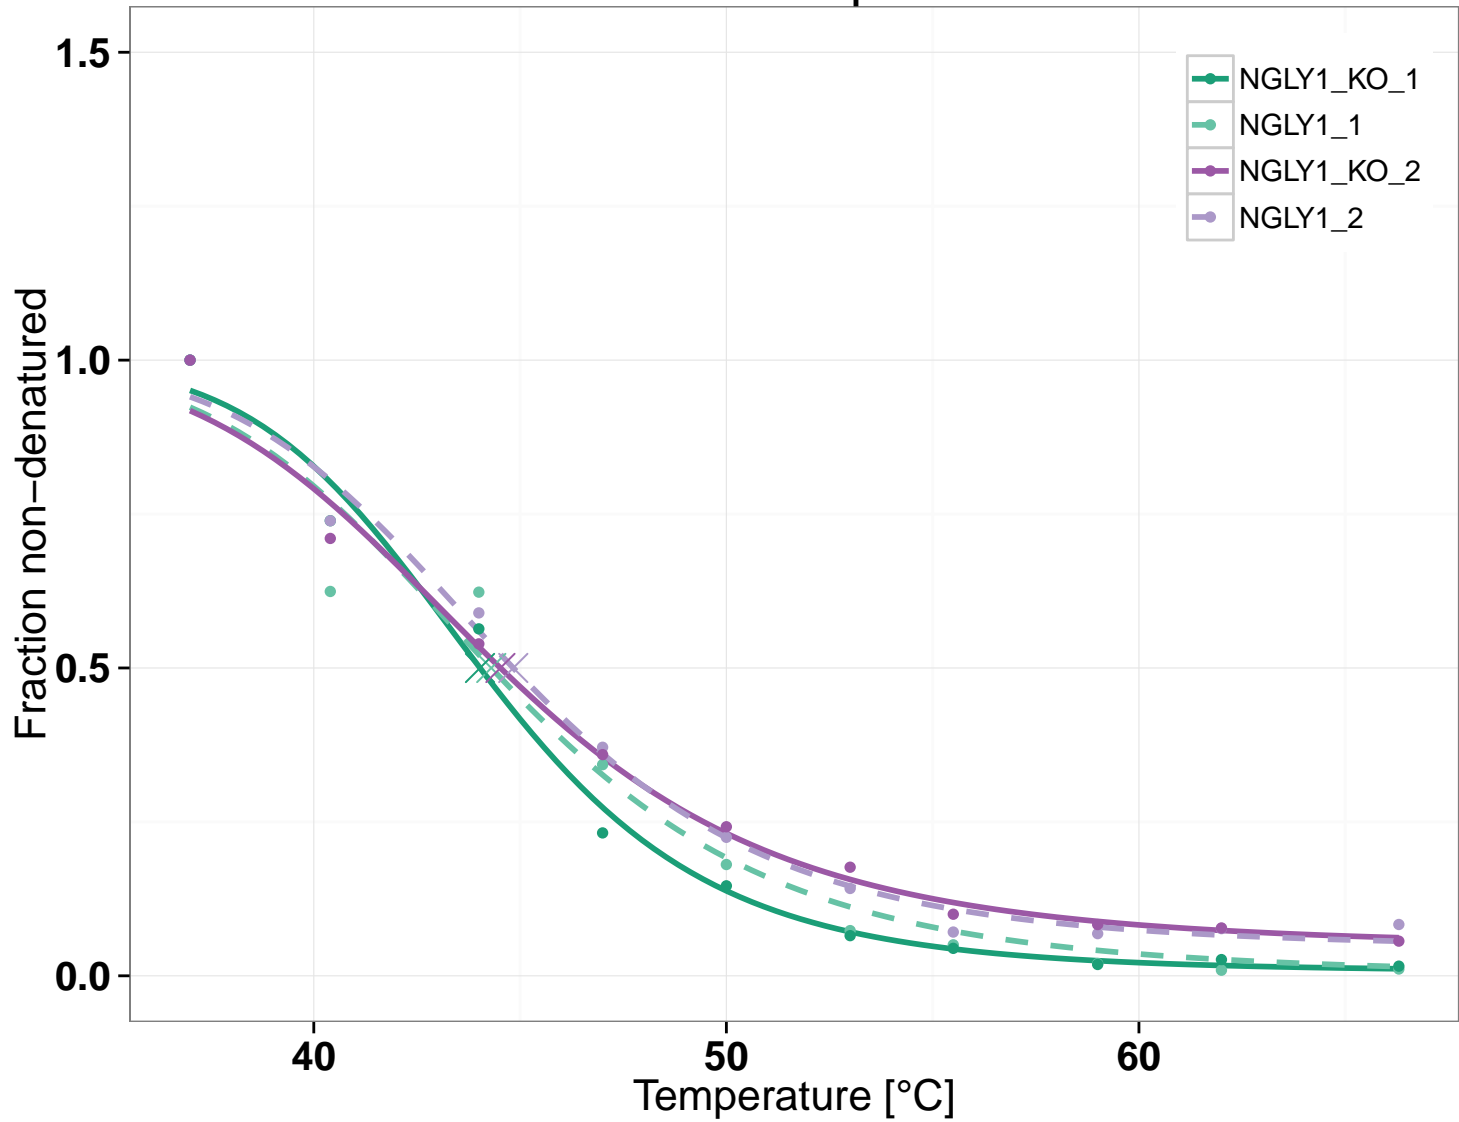

|            | meltPoint | slope  | plateau | R2   |
|------------|-----------|--------|---------|------|
| NGLY1_KO_1 | 44.03     | -0.09  | 0.01    | 0.99 |
| NGLY1_1    | 44.3      | -0.073 | 0       | 0.96 |
| NGLY1_KO_2 | 44.52     | -0.068 | 0.05    | 0.99 |
| NGLY1_2    | 44.84     | -0.073 | 0.04    | 0.99 |

Supplement: Supplementary file 5900 [file 1]

IPI00396306.5|FLJ22374

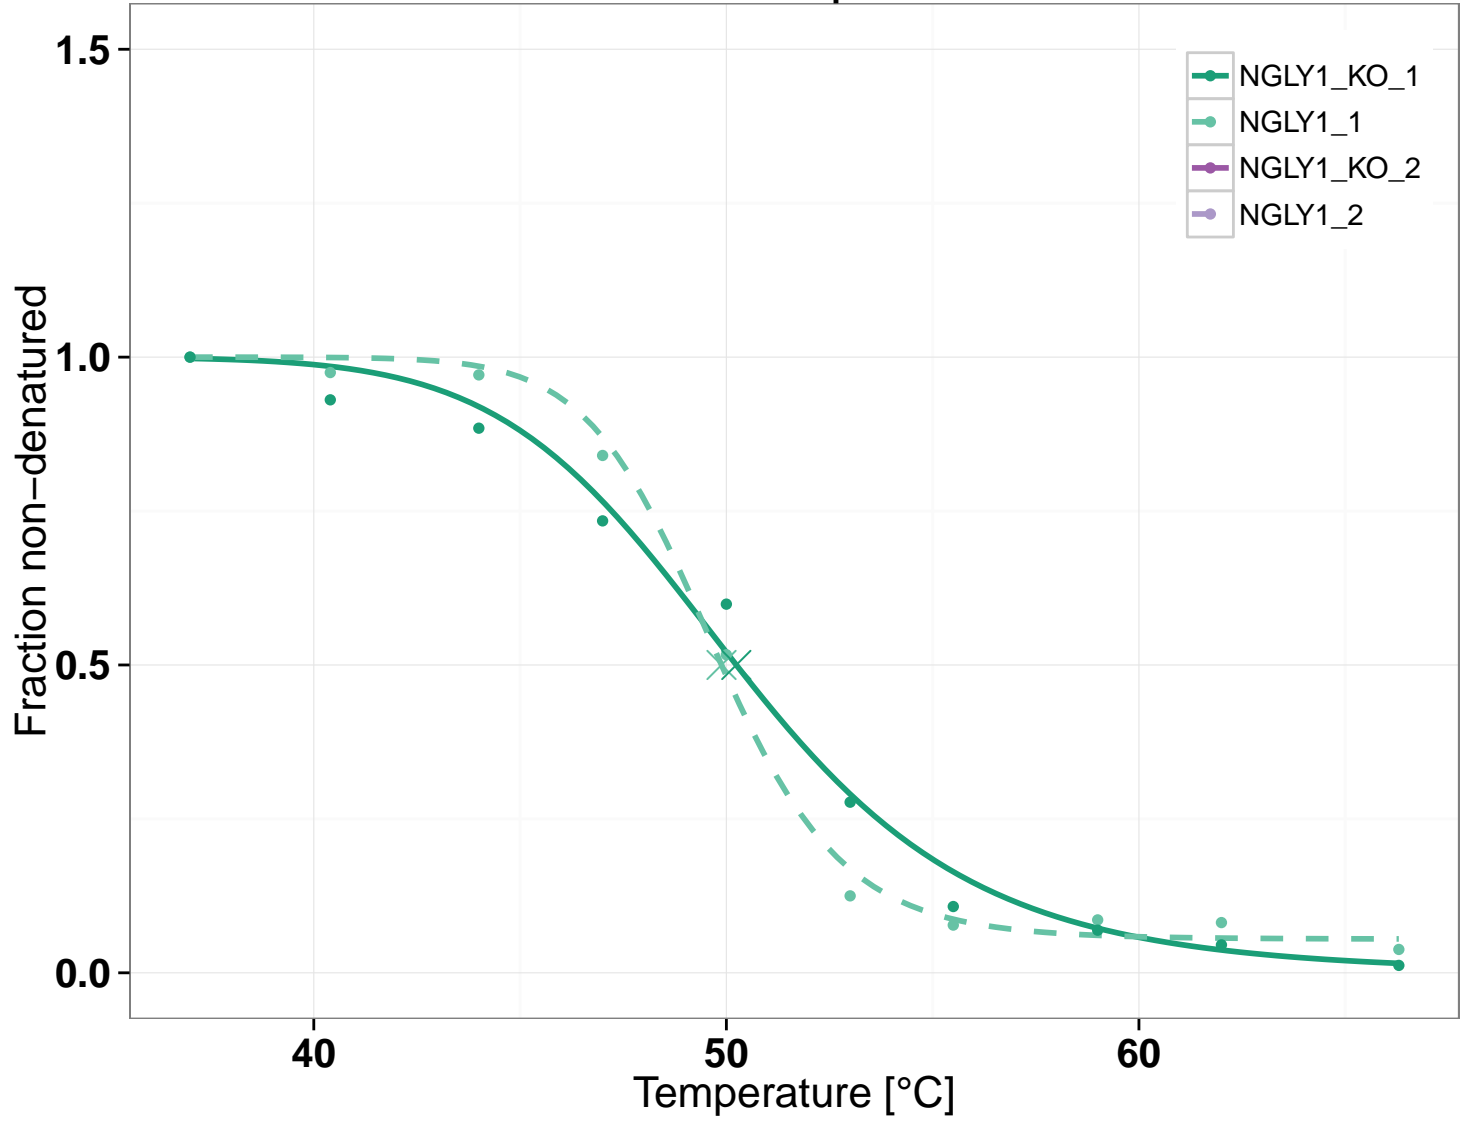

|            | meltPoint | slope  | plateau | R2   |
|------------|-----------|--------|---------|------|
| NGLY1_KO_1 | 50.24     | -0.087 | 0       | 0.99 |
| NGLY1_1    | 49.88     | -0.15  | 0.05    | 1    |
| NGLY1_KO_2 | -         | -      | -       | -    |
| NGLY1_2    | -         | -      | -       | -    |

Supplement: Supplementary file 5901 [file 1]

IPI00552920.2|EXOSC8

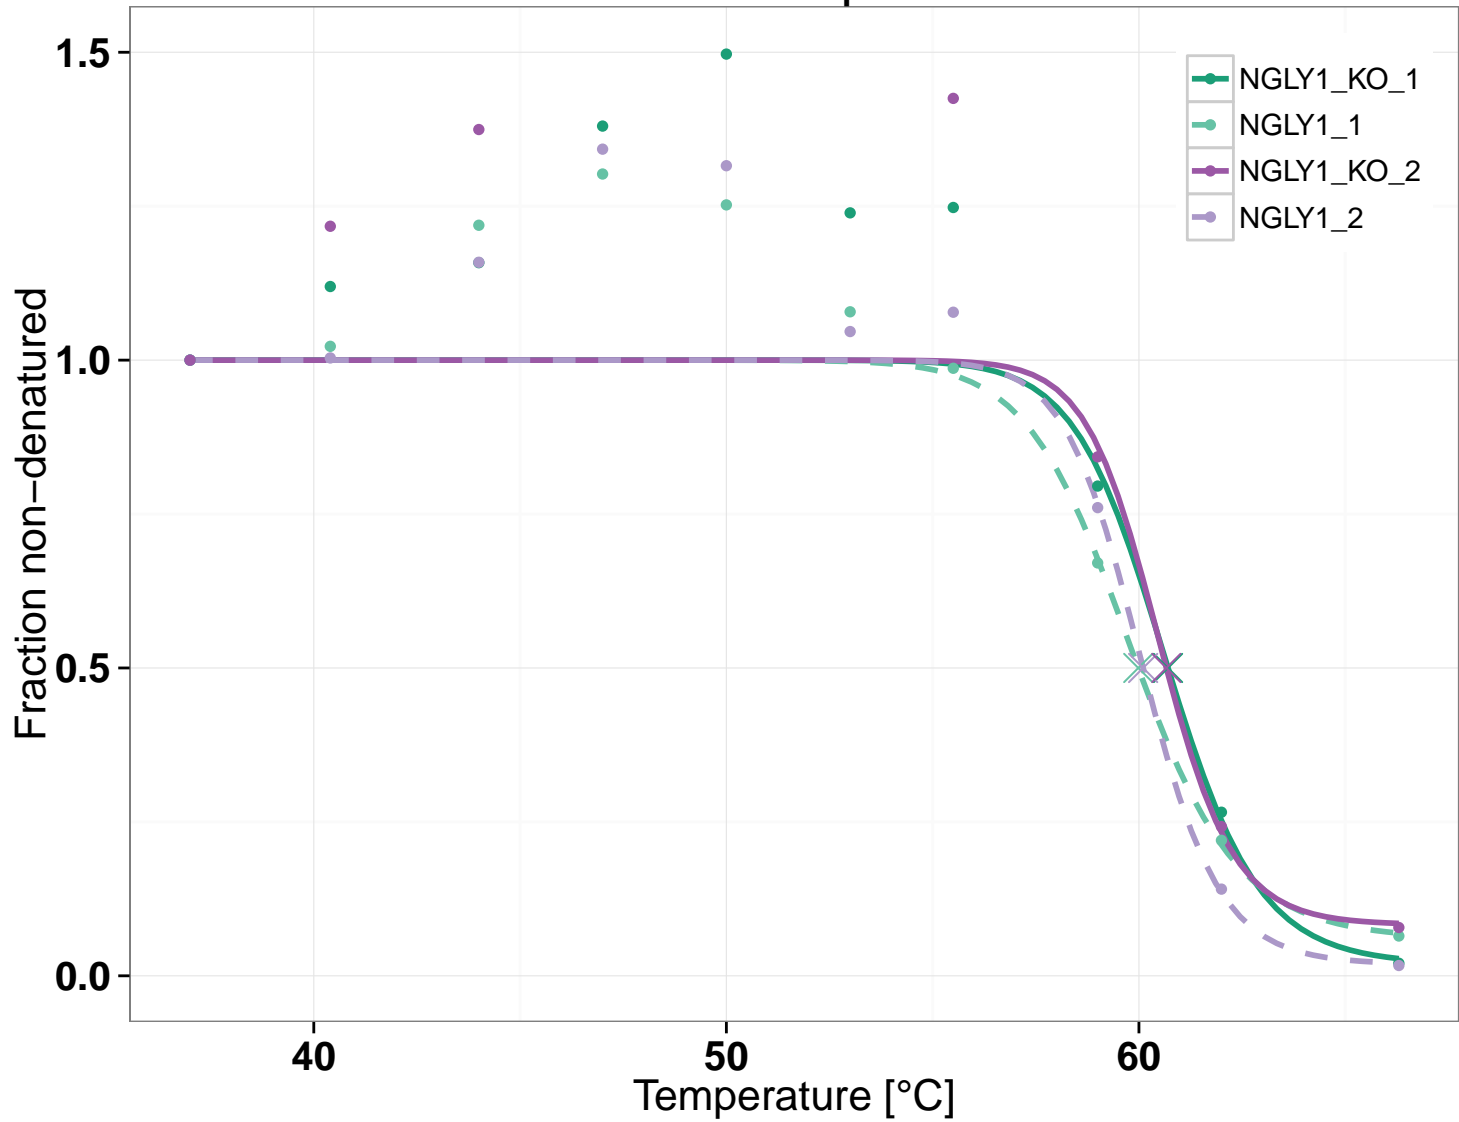

|            | meltPoint | slope | plateau | R2   |
|------------|-----------|-------|---------|------|
| NGLY1_KO_1 | 60.7      | -0.22 | 0.02    | 0.73 |
| NGLY1_1    | 59.98     | -0.18 | 0.06    | 0.87 |
| NGLY1_KO_2 | 60.66     | -0.26 | 0.08    | 0.45 |
| NGLY1_2    | 60.1      | -0.26 | 0.02    | 0.87 |

Supplement: Supplementary file 5902 [file 1]

IPI00008490.2|UNC93B1

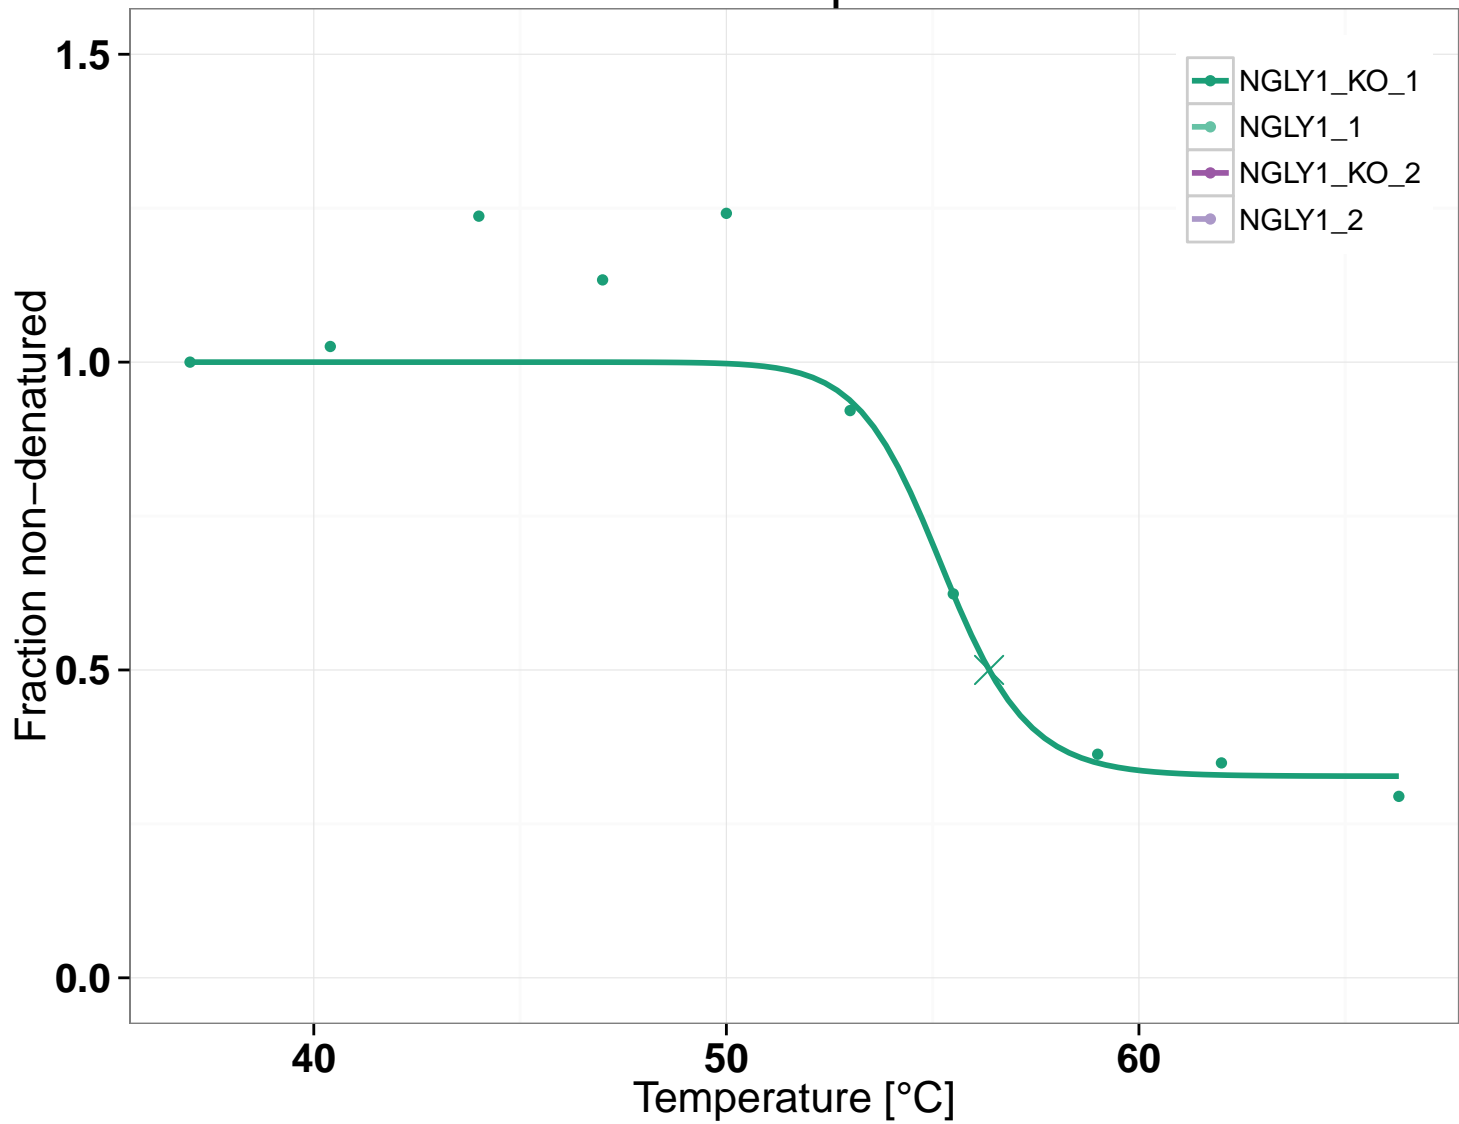

|            | meltPoint | slope | plateau | R2   |
|------------|-----------|-------|---------|------|
| NGLY1_KO_1 | 56.37     | -0.16 | 0.33    | 0.89 |
| NGLY1_1    | -         | -     | -       | -    |
| NGLY1_KO_2 | -         | -     | -       | -    |
| NGLY1_2    | -         | -     | -       | -    |

Supplement: Supplementary file 5903 [file 1]

# IPI00215768.3|GCLC

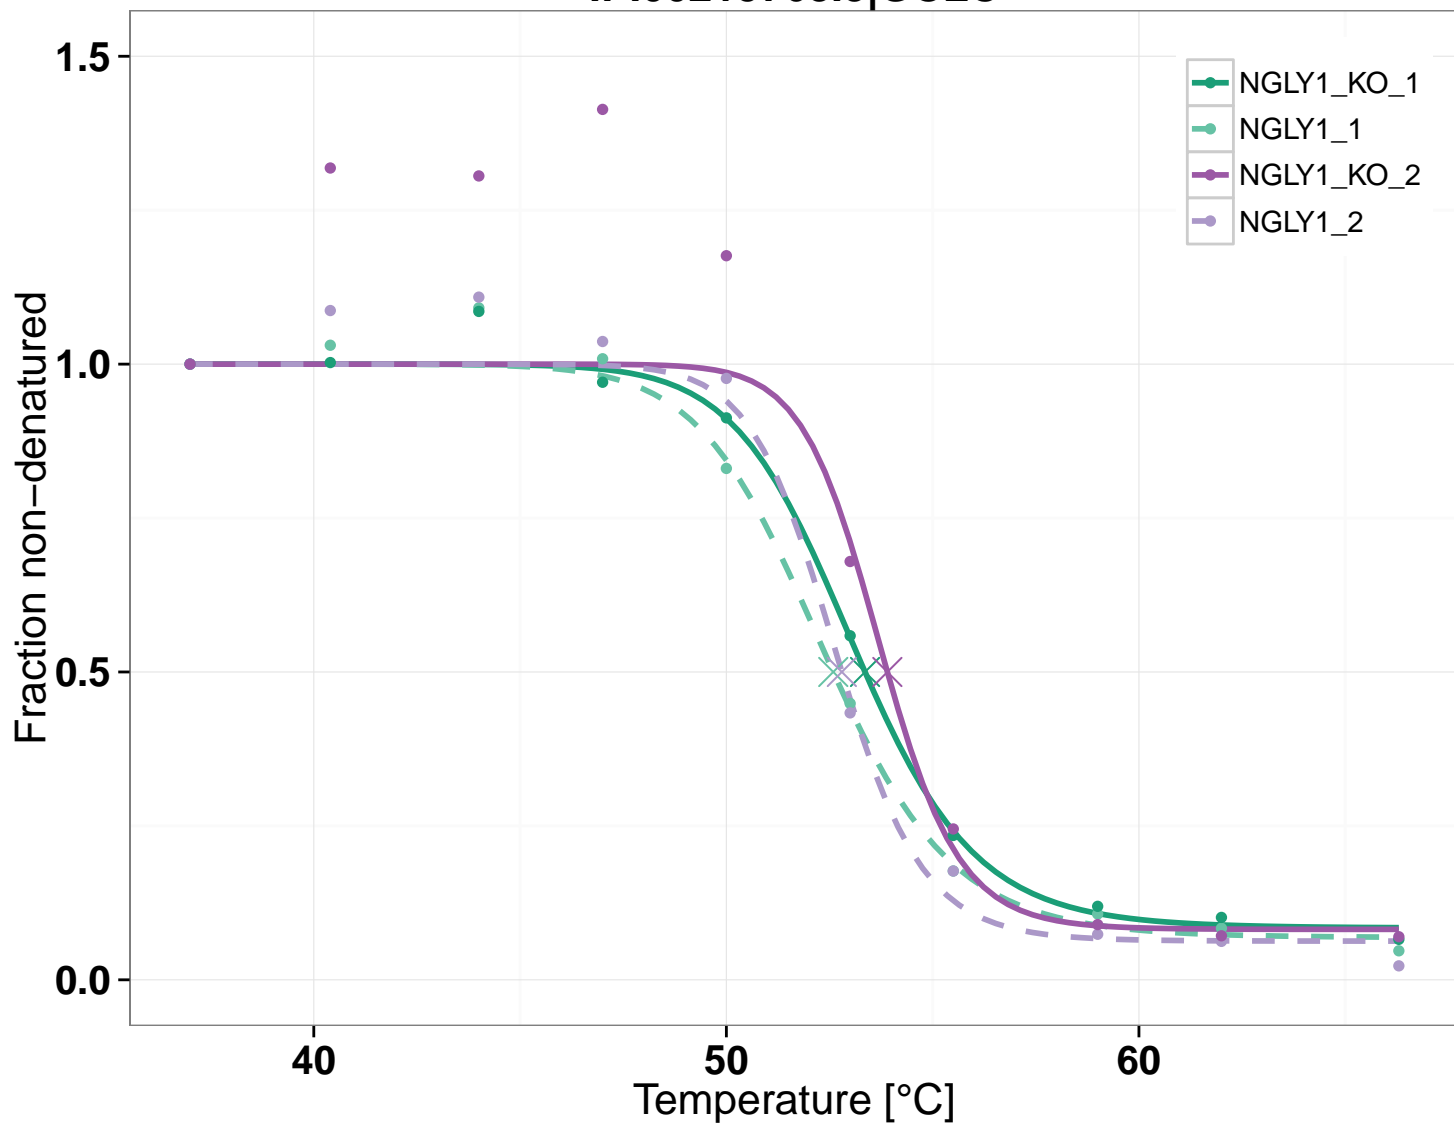

|            | meltPoint | slope | plateau | R2   |
|------------|-----------|-------|---------|------|
| NGLY1_KO_1 | 53.36     | -0.16 | 0.08    | 0.99 |
| NGLY1_1    | 52.59     | -0.15 | 0.07    | 0.99 |
| NGLY1_KO_2 | 53.9      | -0.24 | 0.08    | 0.86 |
| NGLY1_2    | 52.8      | -0.22 | 0.06    | 0.99 |

Supplement: Supplementary file 5904 [file 1]

IPI00299299.3|HSPA13

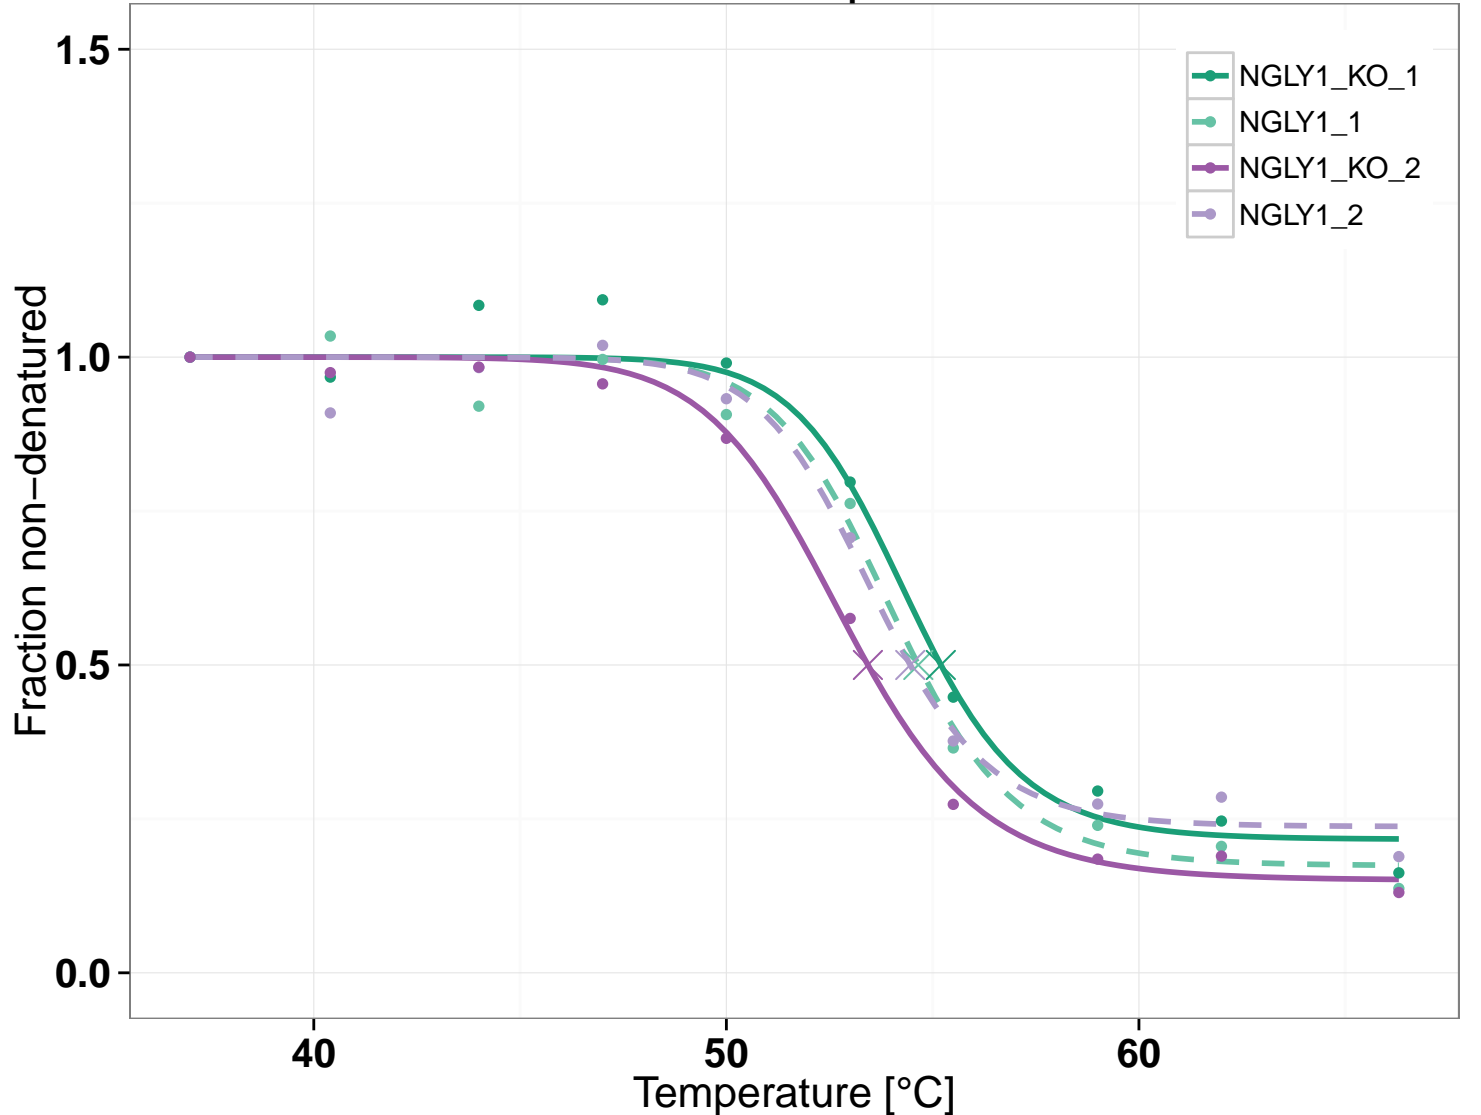

|            | meltPoint | slope | plateau | R2   |
|------------|-----------|-------|---------|------|
| NGLY1_KO_1 | 55.2      | -0.14 | 0.22    | 0.98 |
| NGLY1_1    | 54.65     | -0.14 | 0.17    | 0.99 |
| NGLY1_KO_2 | 53.43     | -0.13 | 0.15    | 1    |
| NGLY1_2    | 54.46     | -0.14 | 0.24    | 0.99 |

Supplement: Supplementary file 5905 [file 1]

# IPI00651737.2|NGRN

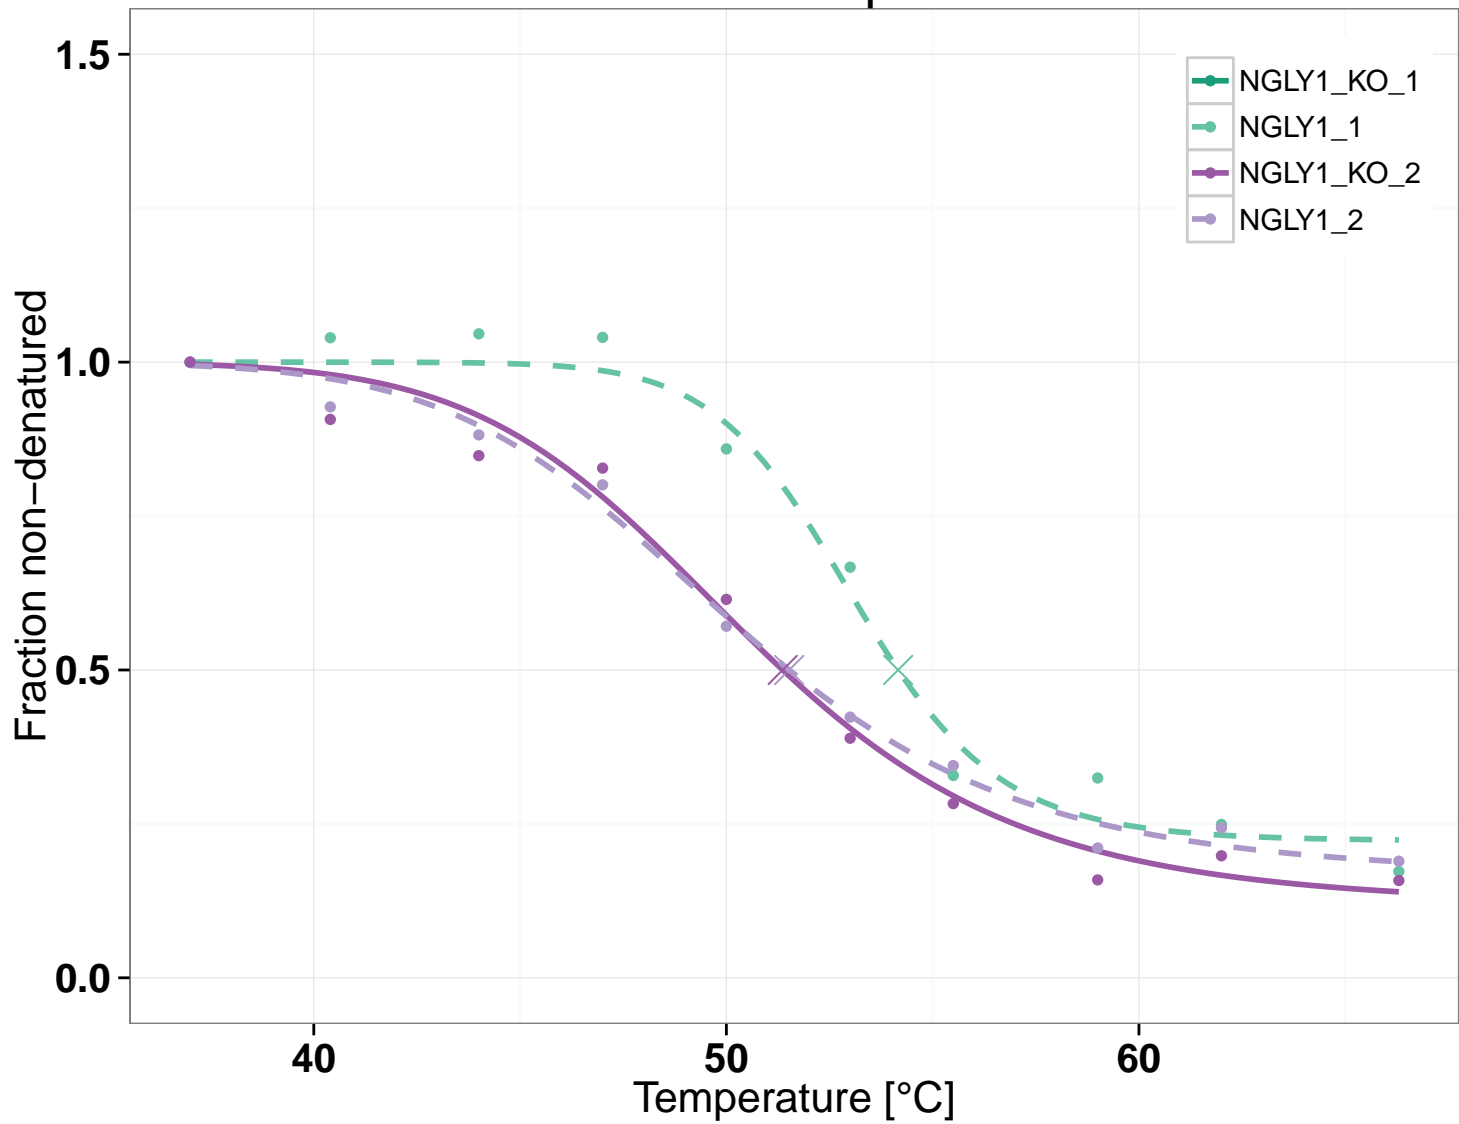

|            | meltPoint | slope  | plateau | R2   |
|------------|-----------|--------|---------|------|
| NGLY1_KO_1 | —         | —      | —       | —    |
| NGLY1_1    | 54.16     | -0.11  | 0.22    | 0.98 |
| NGLY1_KO_2 | 51.37     | -0.067 | 0.12    | 0.98 |
| NGLY1_2    | 51.52     | -0.06  | 0.16    | 0.99 |

Supplement: Supplementary file 5906 [file 1]

IPI00916131.1|C22ORF30

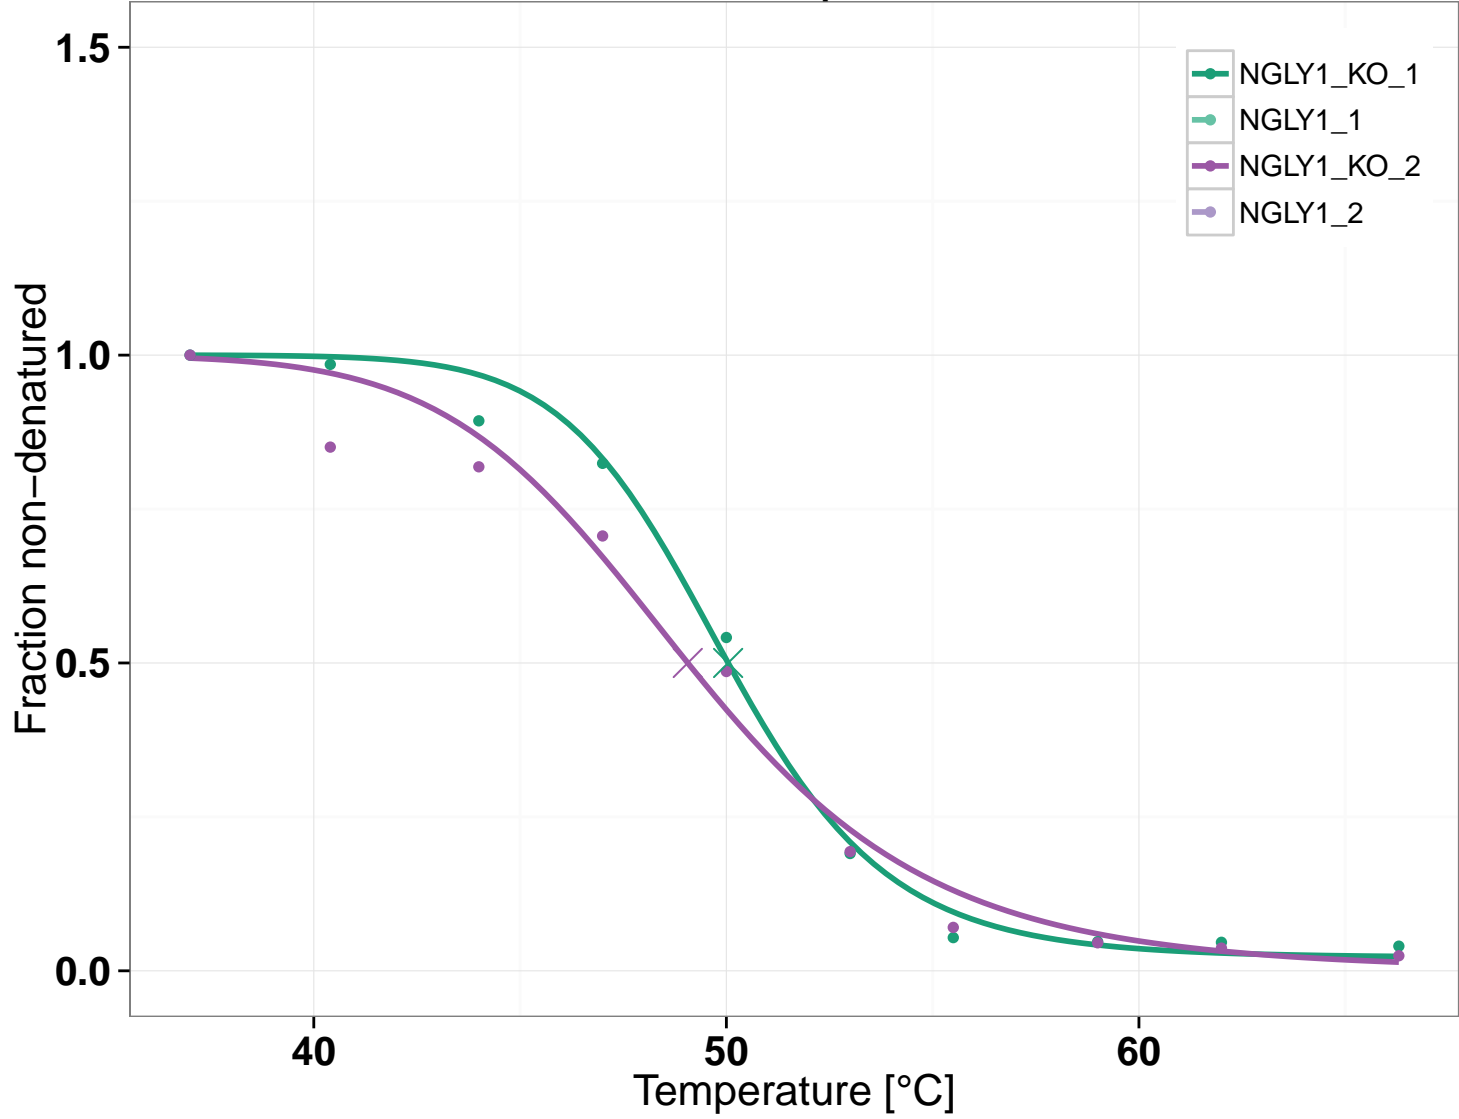

|            | meltPoint | slope  | plateau | R2   |
|------------|-----------|--------|---------|------|
| NGLY1_KO_1 | 50.04     | -0.12  | 0.02    | 0.99 |
| NGLY1_1    | -         | -      | -       | -    |
| NGLY1_KO_2 | 49.07     | -0.085 | 0       | 0.98 |
| NGLY1_2    | -         | -      | -       | -    |

Supplement: Supplementary file 5907 [file 1]

IPI00911031.1|B4DHS2\_HUMAN

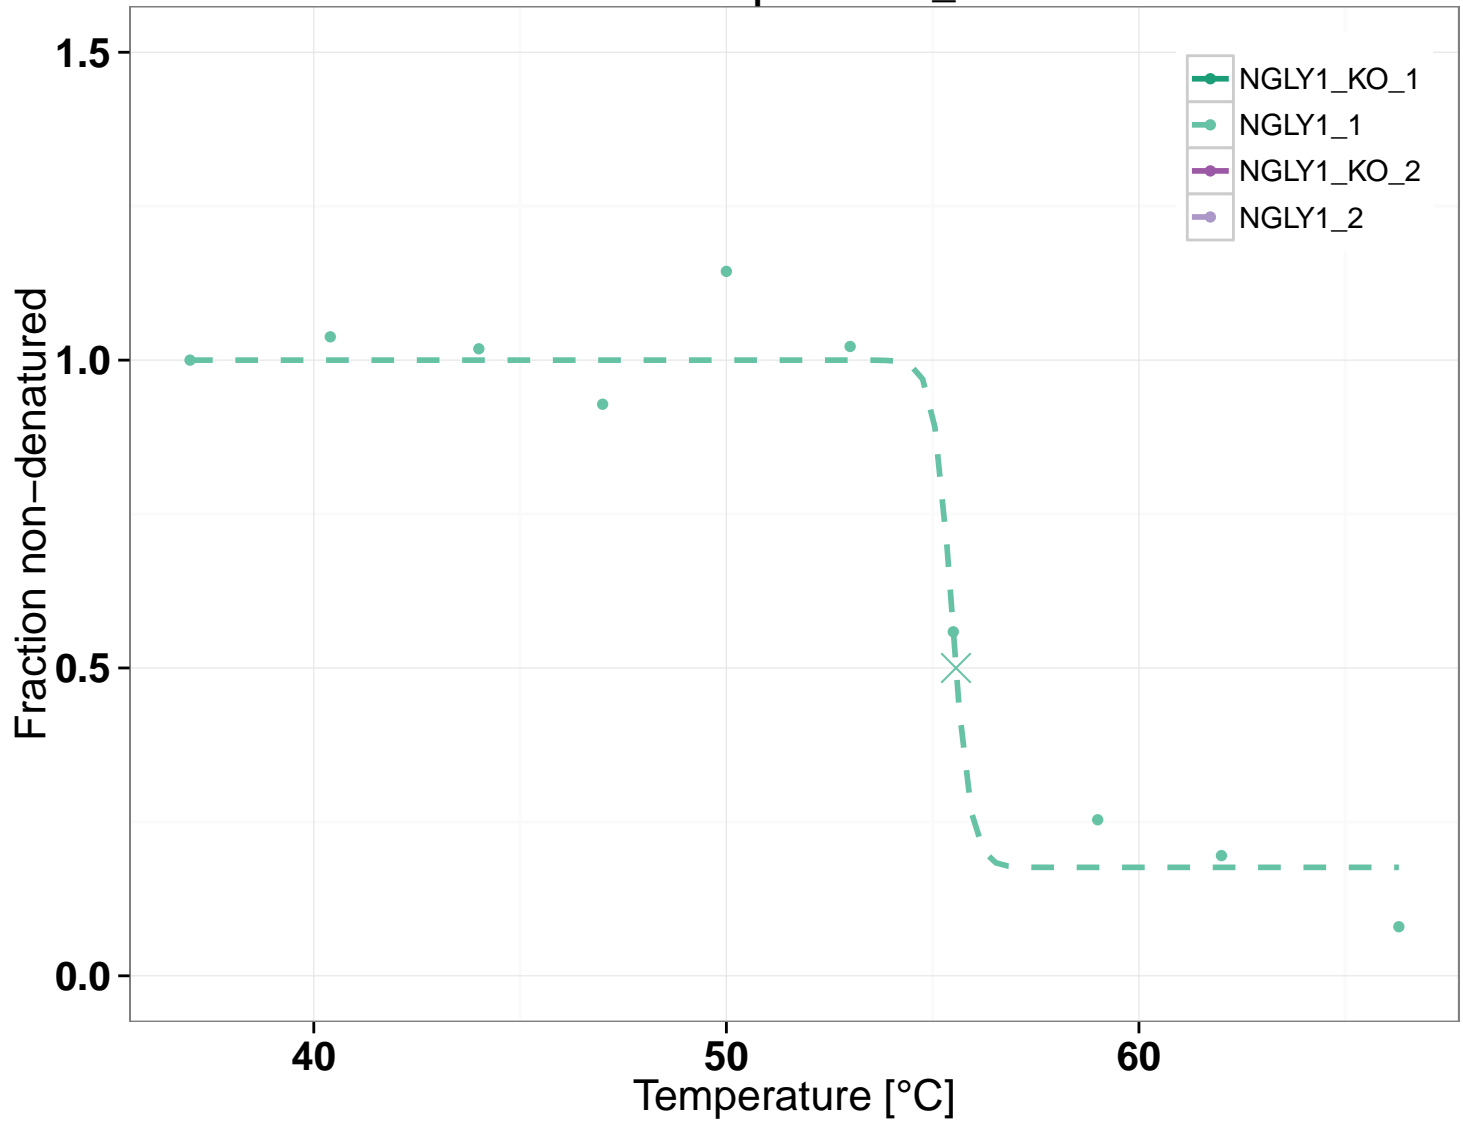

|            | meltPoint | slope | plateau | R2   |
|------------|-----------|-------|---------|------|
| NGLY1_KO_1 | -         | -     | -       | -    |
| NGLY1_1    | 55.56     | -0.93 | 0.18    | 0.97 |
| NGLY1_KO_2 | -         | -     | -       | -    |
| NGLY1_2    | -         | -     | -       | -    |

Supplement: Supplementary file 5908 [file 1]

# IPI00789201.1|CRADD

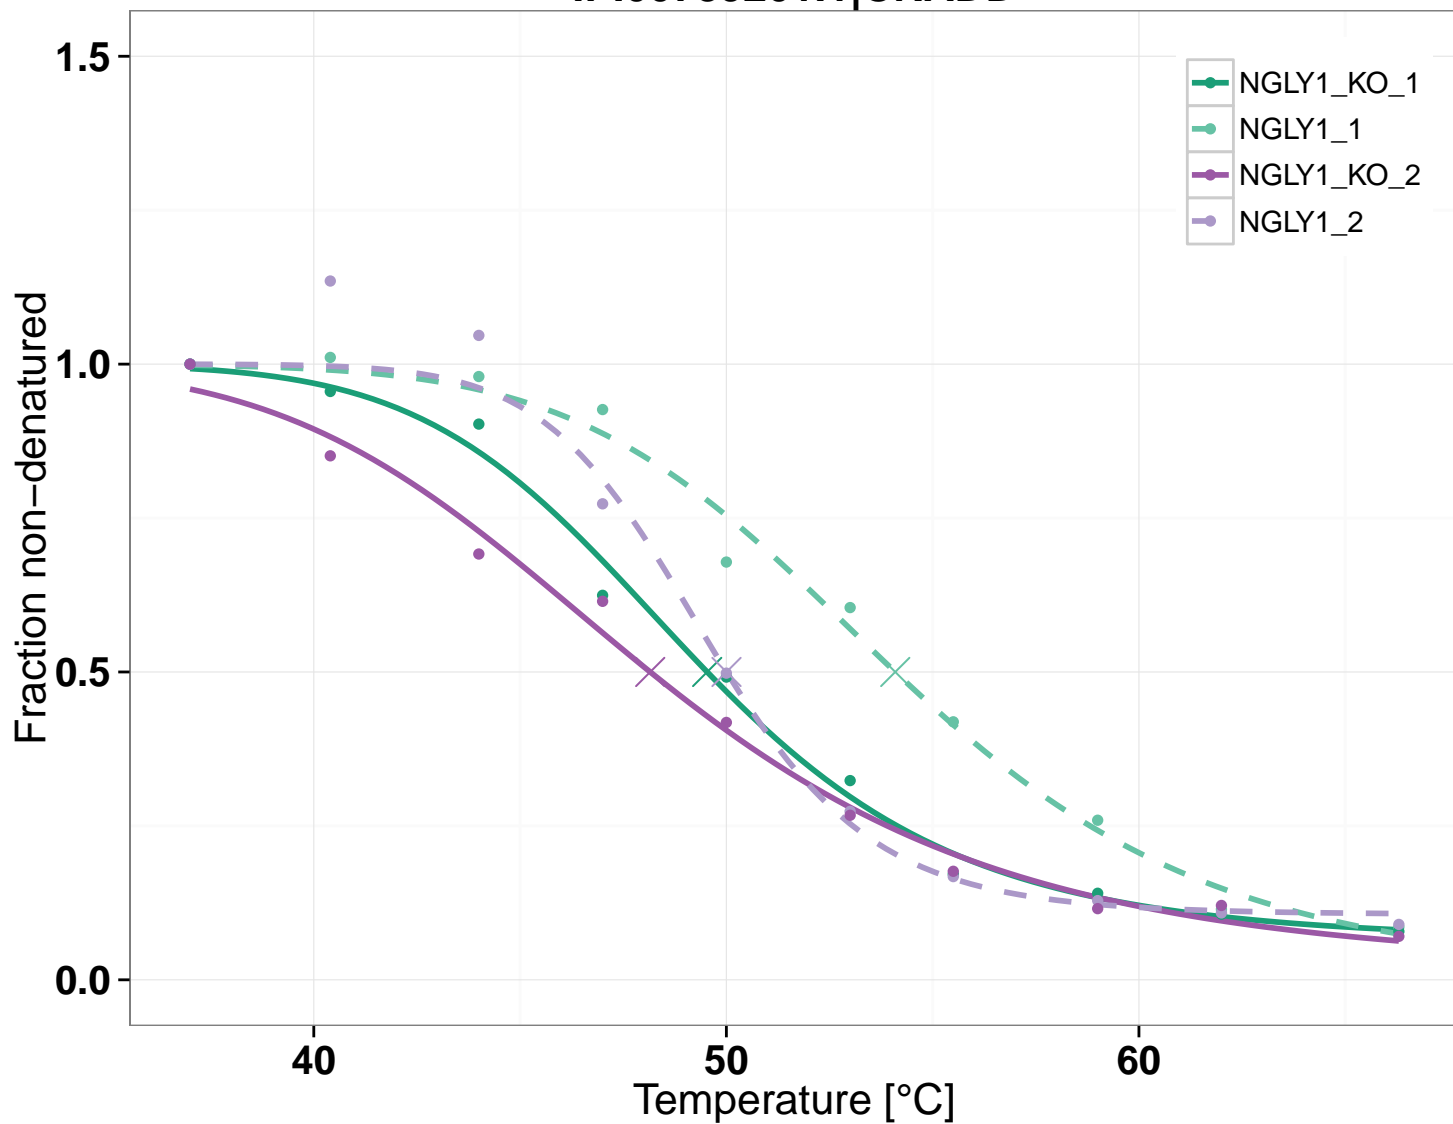

|            | meltPoint | slope  | plateau | R2   |
|------------|-----------|--------|---------|------|
| NGLY1_KO_1 | 49.54     | -0.072 | 0.06    | 0.99 |
| NGLY1_1    | 54.09     | -0.065 | 0       | 0.99 |
| NGLY1_KO_2 | 48.15     | -0.056 | 0.01    | 0.99 |
| NGLY1_2    | 50        | -0.11  | 0.11    | 0.98 |

Supplement: Supplementary file 5909 [file 1]

IPI00219497.1|MYB

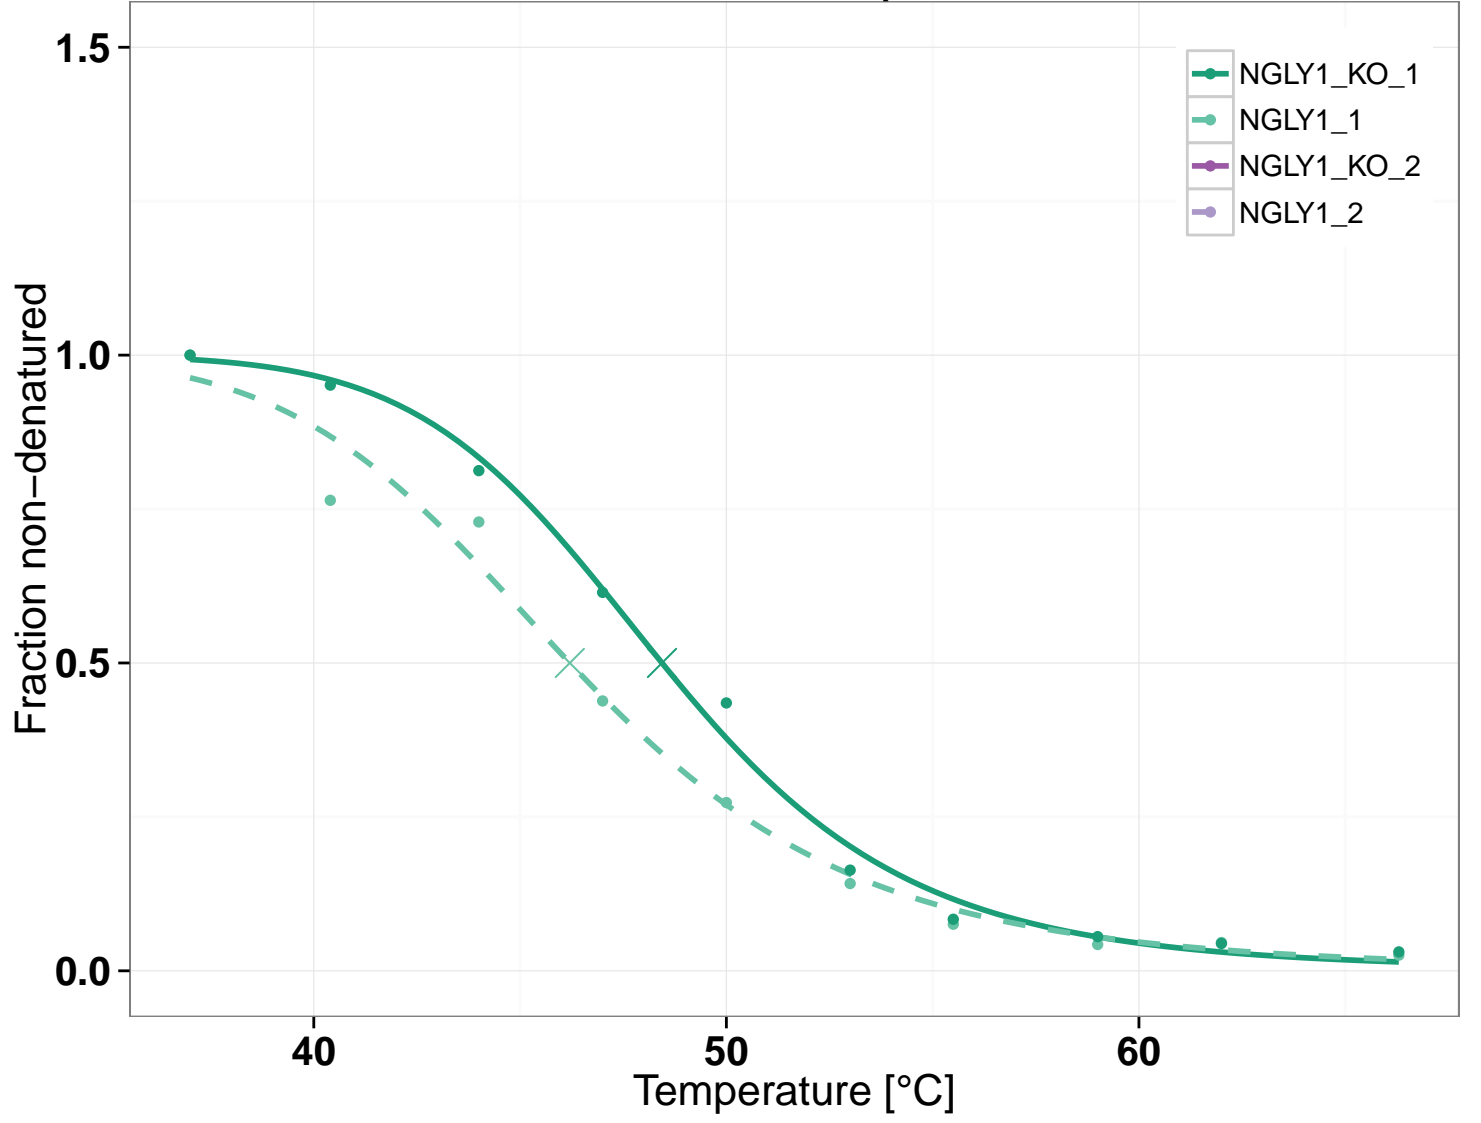

|            | meltPoint | slope  | plateau | R2   |
|------------|-----------|--------|---------|------|
| NGLY1_KO_1 | 48.44     | -0.084 | 0       | 1    |
| NGLY1_1    | 46.21     | -0.073 | 0       | 0.98 |
| NGLY1_KO_2 | -         | -      | -       | -    |
| NGLY1_2    | -         | -      | -       | -    |

Supplement: Supplementary file 5910 [file 1]

# IPI00893407.1|CAD

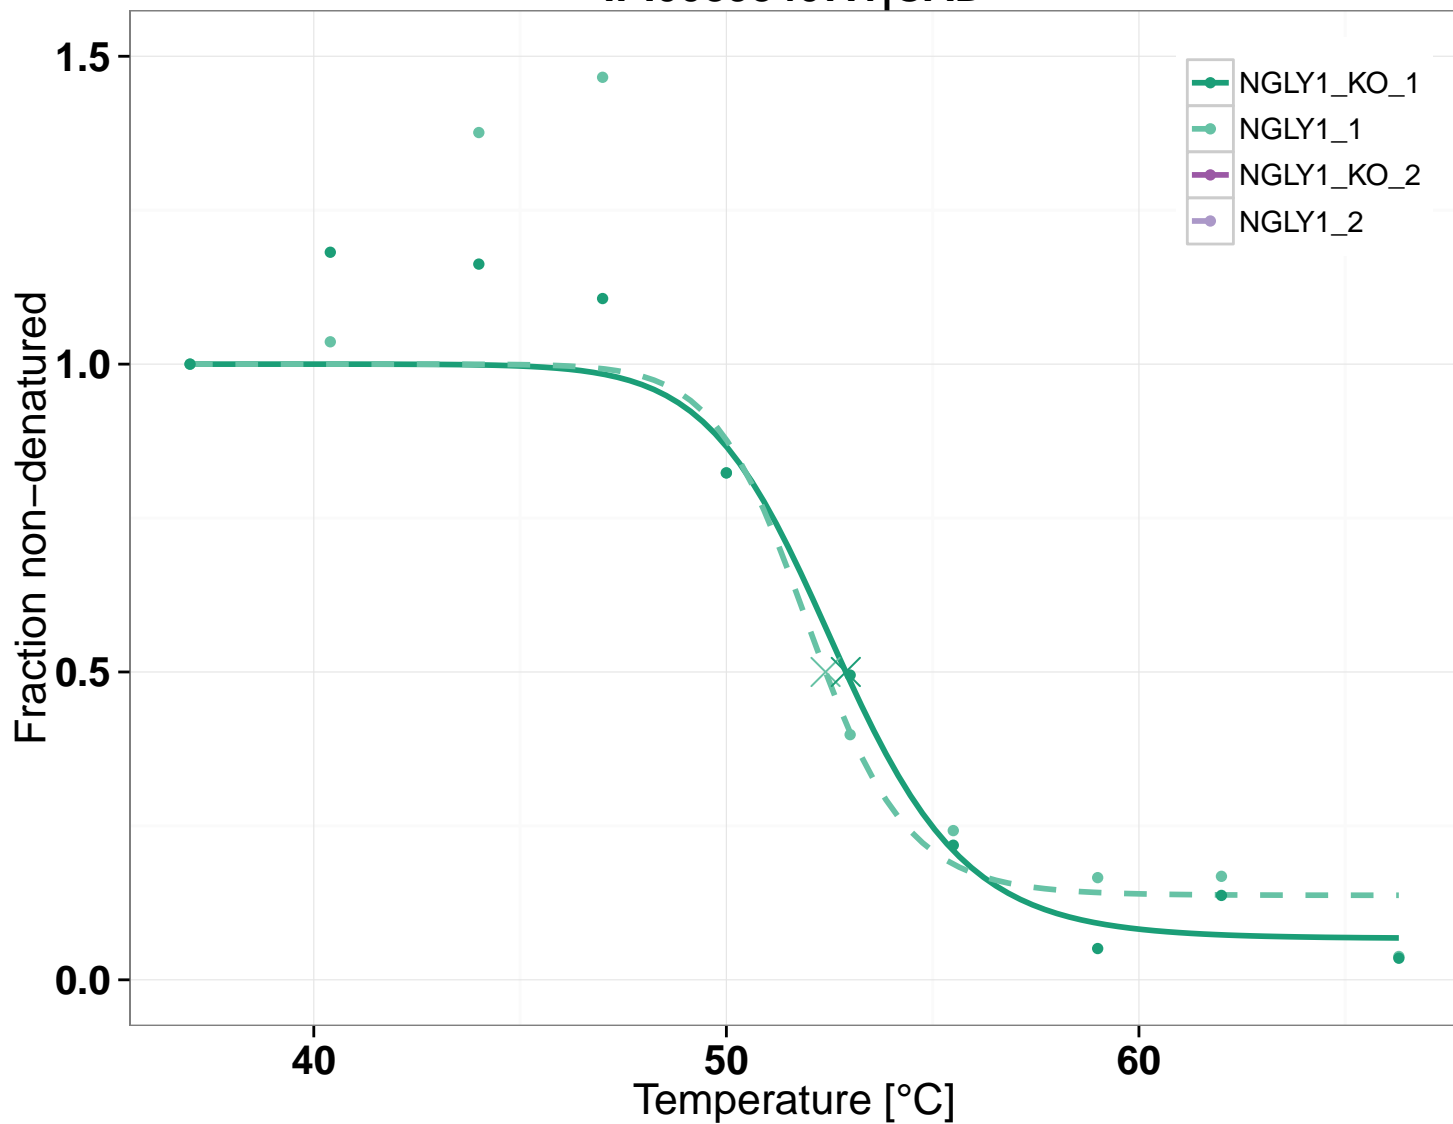

|            | meltPoint | slope | plateau | R2   |
|------------|-----------|-------|---------|------|
| NGLY1_KO_1 | 52.89     | -0.15 | 0.07    | 0.96 |
| NGLY1_1    | 52.4      | -0.18 | 0.14    | 0.85 |
| NGLY1_KO_2 | -         | -     | -       | -    |
| NGLY1_2    | -         | -     | -       | -    |

Supplement: Supplementary file 5911 [file 1]

# IPI00916822.1|PPIL3

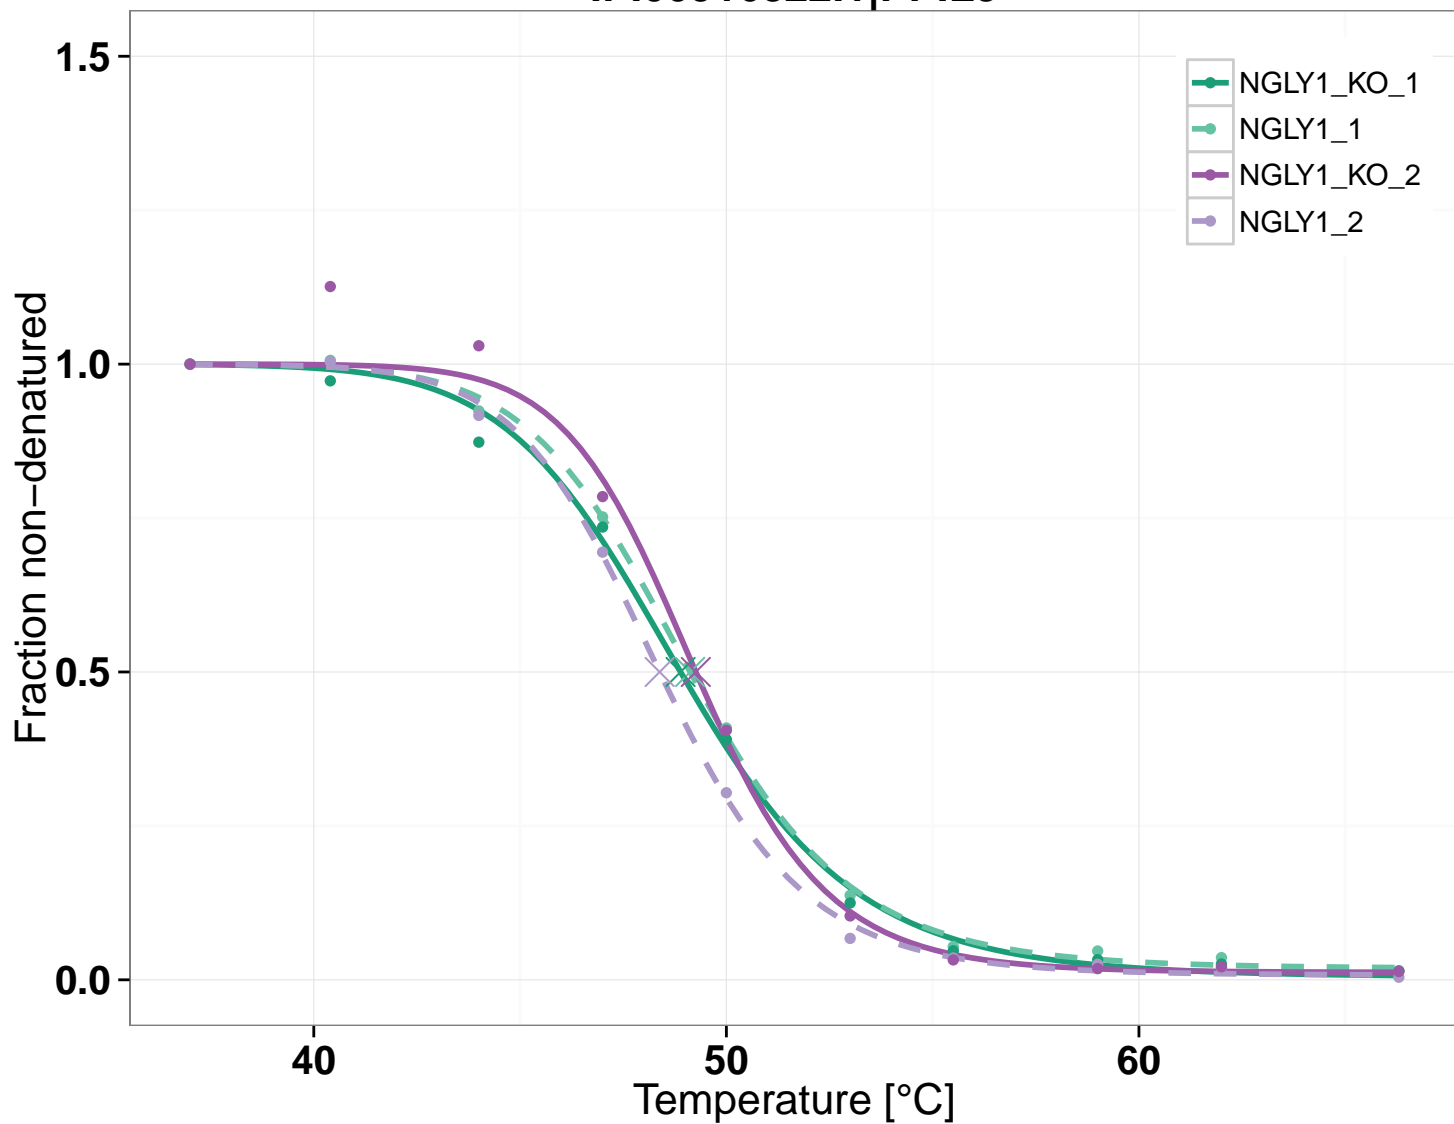

|            | meltPoint | slope | plateau | R2   |
|------------|-----------|-------|---------|------|
| NGLY1_KO_1 | 48.89     | -0.12 | 0       | 1    |
| NGLY1_1    | 49.12     | -0.12 | 0.02    | 1    |
| NGLY1_KO_2 | 49.26     | -0.16 | 0.01    | 0.99 |
| NGLY1_2    | 48.38     | -0.14 | 0.01    | 1    |

Supplement: Supplementary file 5912 [file 1]

IPI00023896.1|MITF

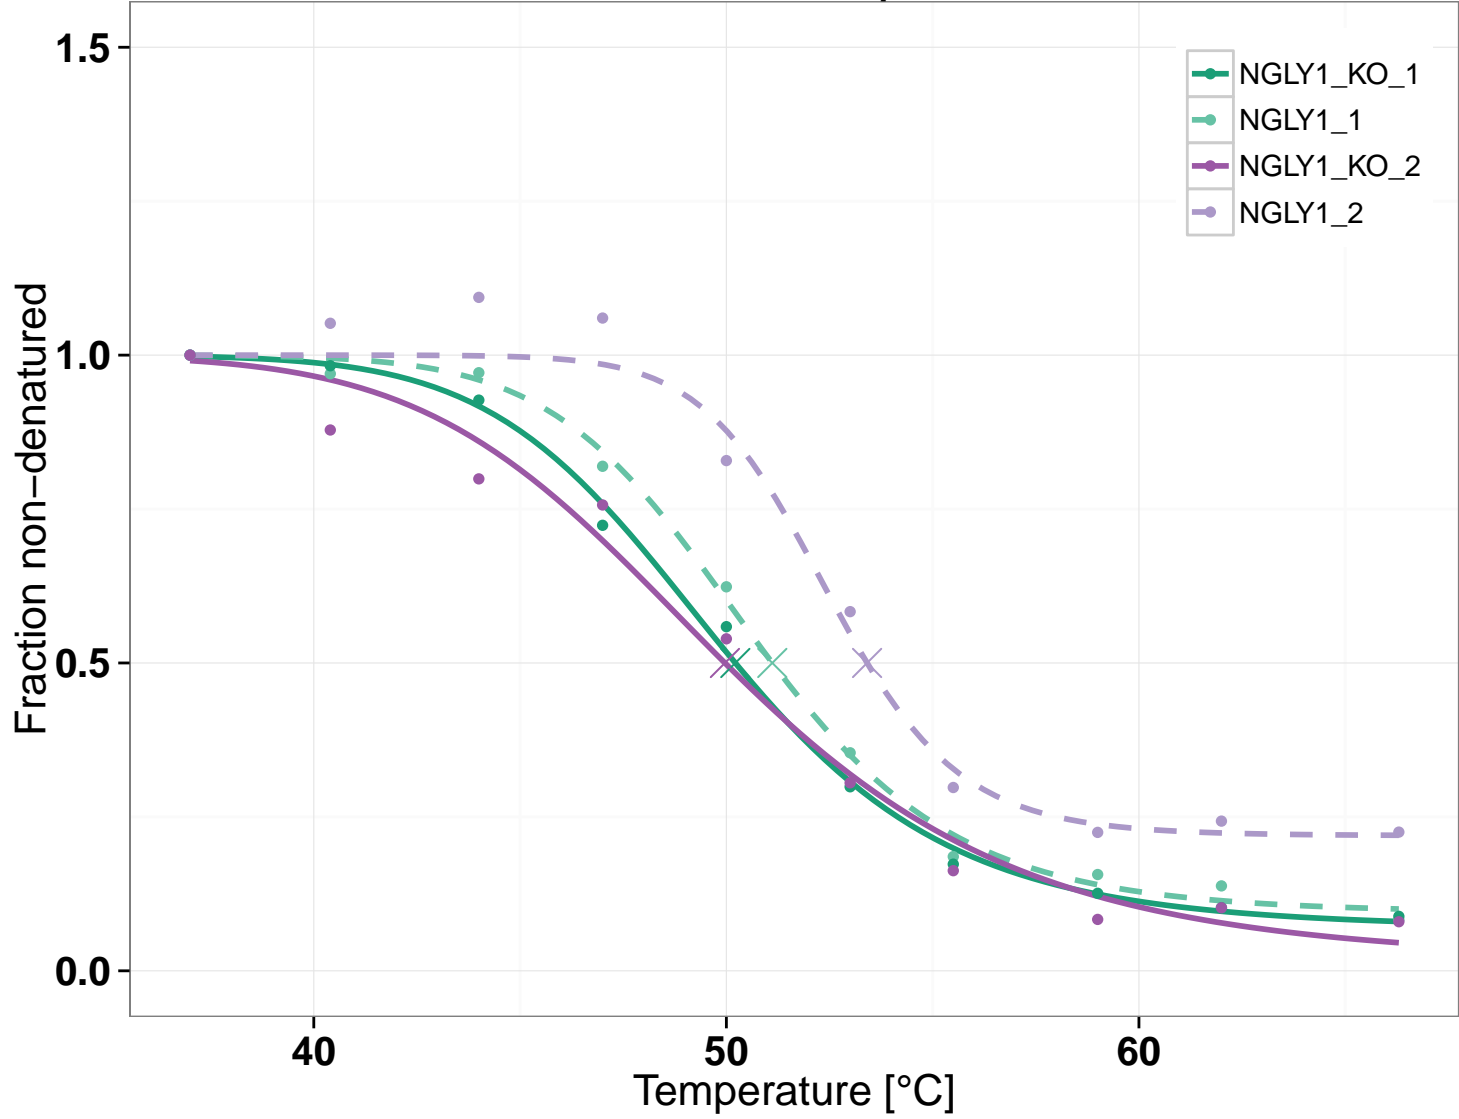

|            | meltPoint | slope  | plateau | R2   |
|------------|-----------|--------|---------|------|
| NGLY1_KO_1 | 50.22     | -0.084 | 0.07    | 1    |
| NGLY1_1    | 51.11     | -0.093 | 0.09    | 1    |
| NGLY1_KO_2 | 49.96     | -0.068 | 0.01    | 0.98 |
| NGLY1_2    | 53.41     | -0.13  | 0.22    | 0.98 |

Supplement: Supplementary file 5913 [file 1]

IPI00480073.1|VPS54

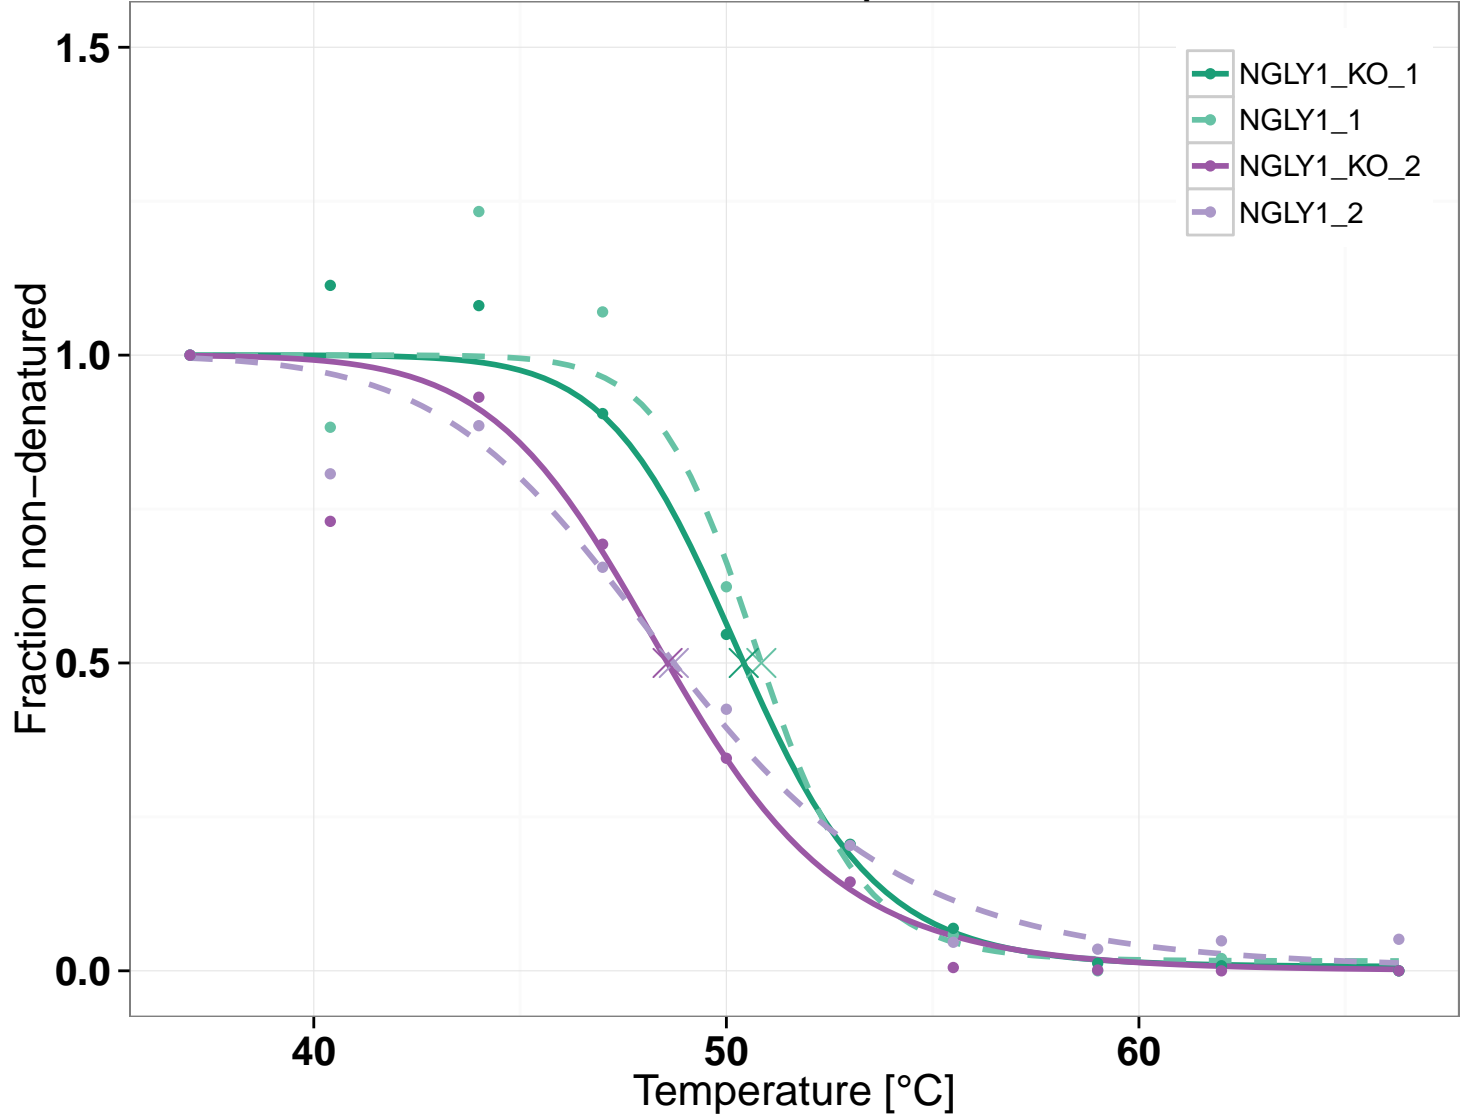

|            | meltPoint | slope  | plateau | R2   |
|------------|-----------|--------|---------|------|
| NGLY1_KO_1 | 50.42     | -0.15  | 0.01    | 0.99 |
| NGLY1_1    | 50.85     | -0.2   | 0.02    | 0.96 |
| NGLY1_KO_2 | 48.58     | -0.12  | 0       | 0.95 |
| NGLY1_2    | 48.73     | -0.087 | 0       | 0.97 |

Supplement: Supplementary file 5914 [file 1]

IPI00020559.2|FAM76A

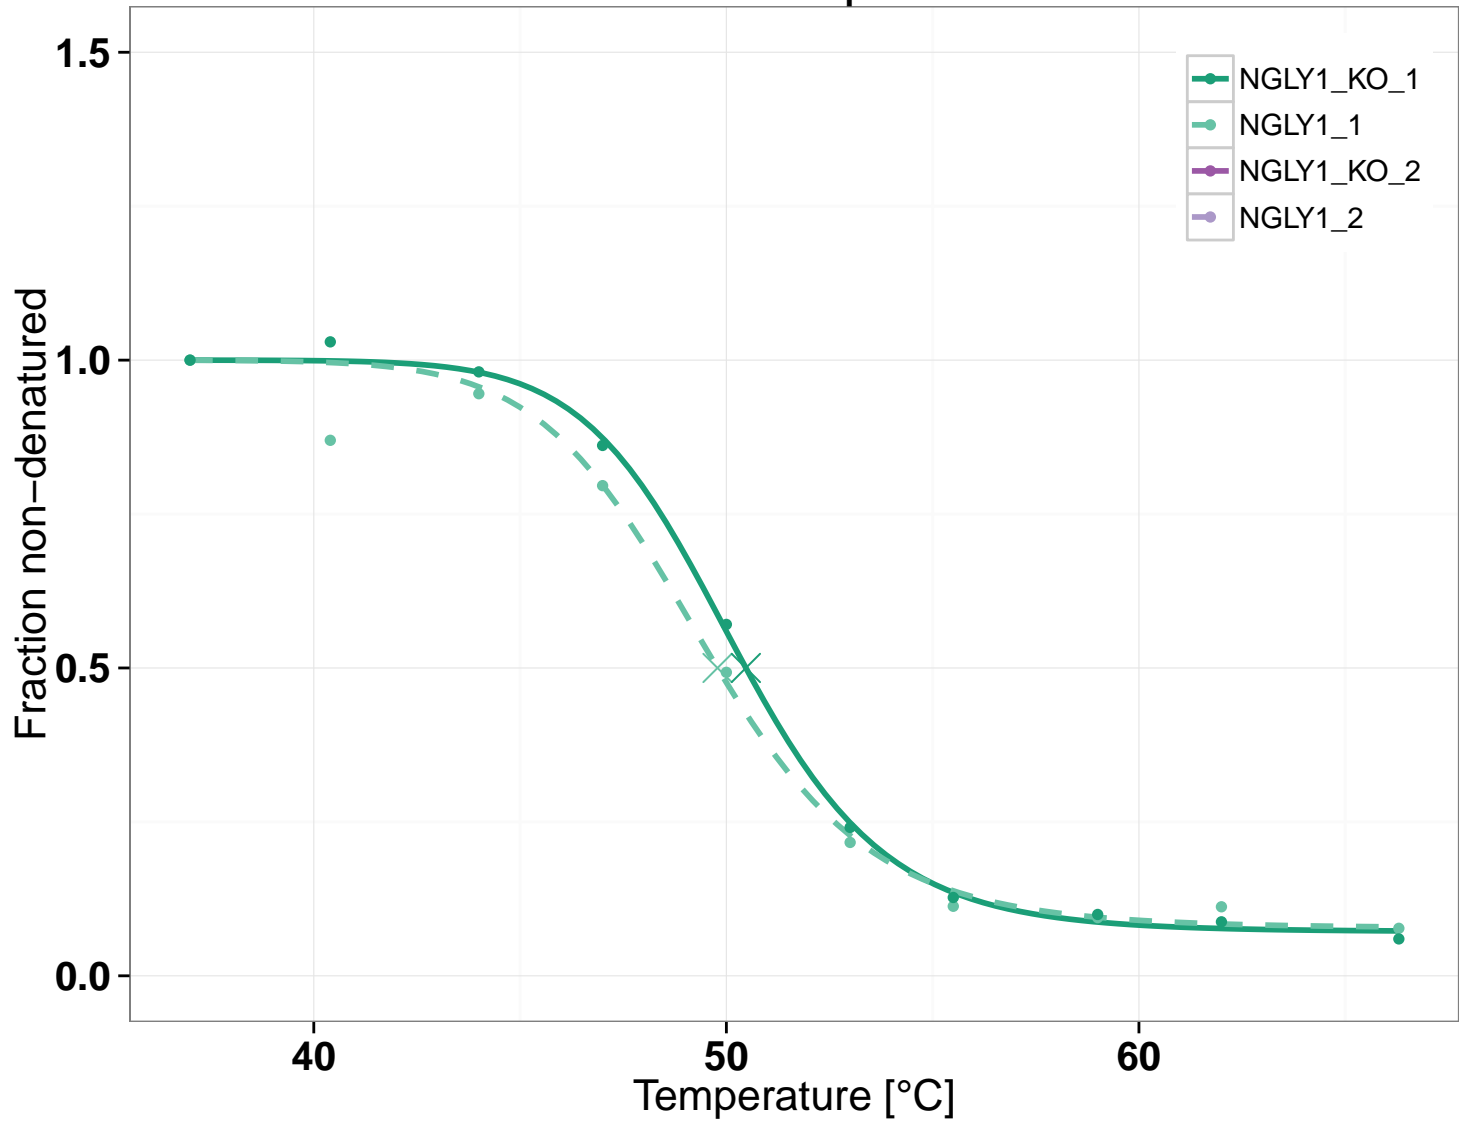

|            | meltPoint | slope | plateau | R2   |
|------------|-----------|-------|---------|------|
| NGLY1_KO_1 | 50.47     | -0.13 | 0.07    | 1    |
| NGLY1_1    | 49.79     | -0.11 | 0.08    | 0.99 |
| NGLY1_KO_2 | -         | -     | -       | -    |
| NGLY1_2    | -         | -     | -       | -    |

Supplement: Supplementary file 5915 [file 1]

# IPI00020906.1|IMPA1

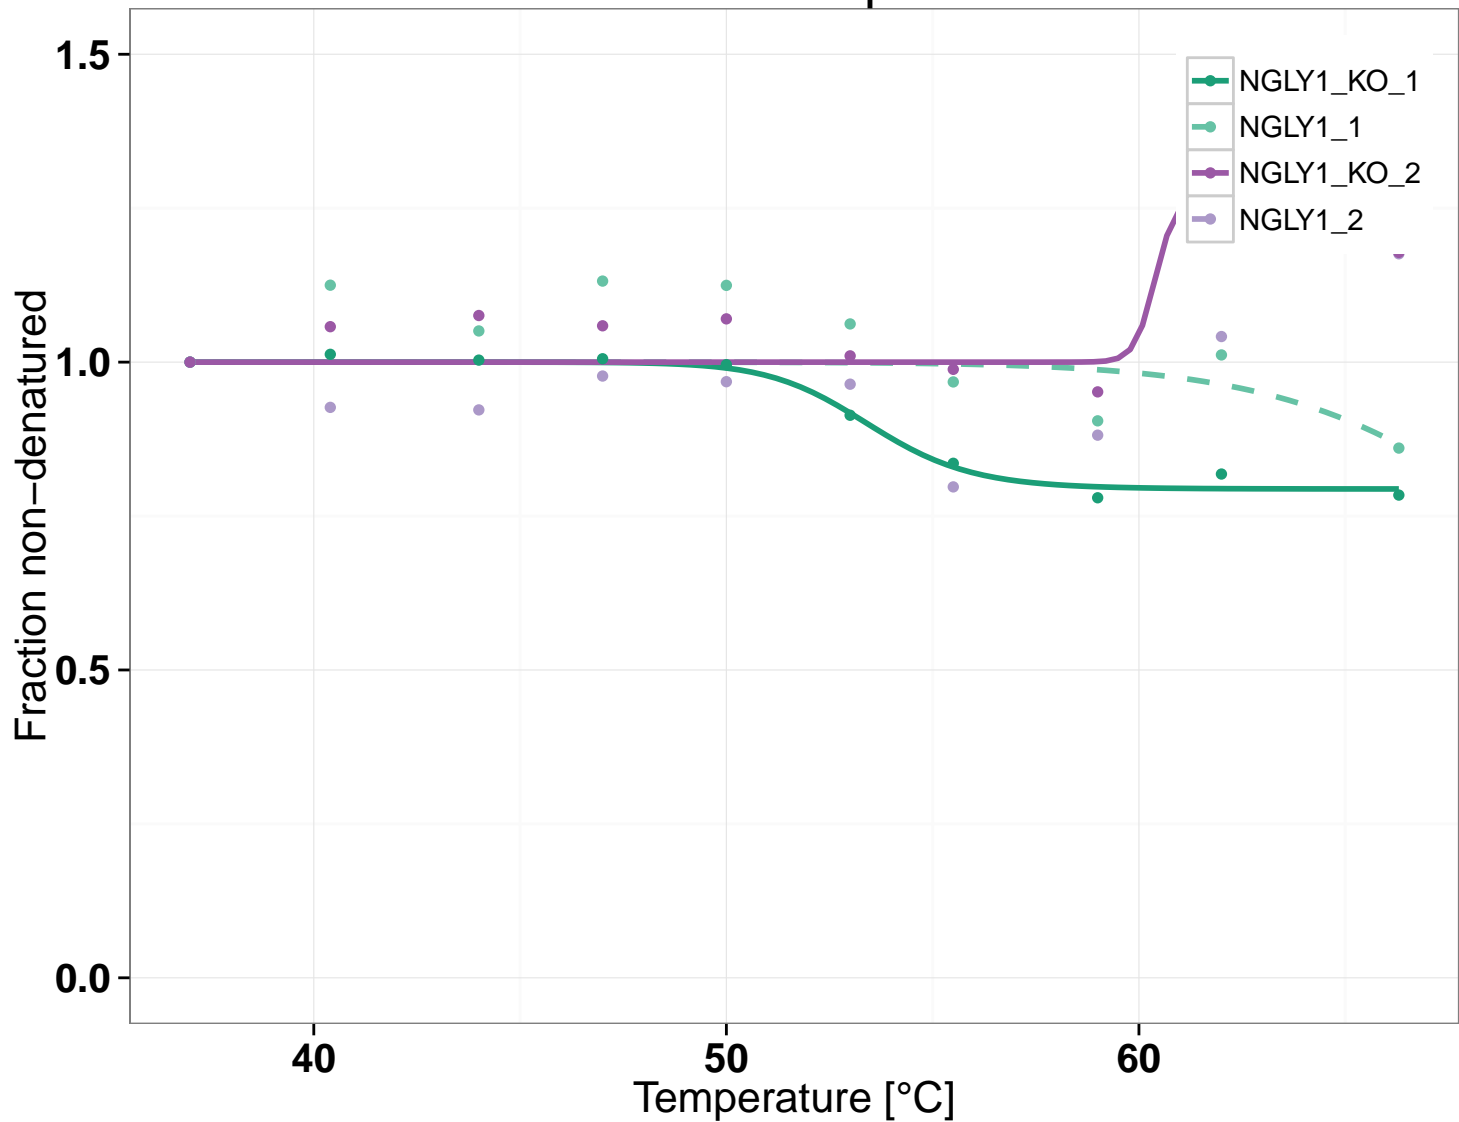

|            | meltPoint | slope  | plateau | R2   |
|------------|-----------|--------|---------|------|
| NGLY1_KO_1 | —         | −0.042 | 0.79    | 0.99 |
| NGLY1_1    | —         | —      | 0       | 0.17 |
| NGLY1_KO_2 | —         | 0.28   | 1.27    | 0.71 |
| NGLY1_2    | —         | —      | —       | —    |

Supplement: Supplementary file 5916 [file 1]

# IPI00745793.1|CCNB1

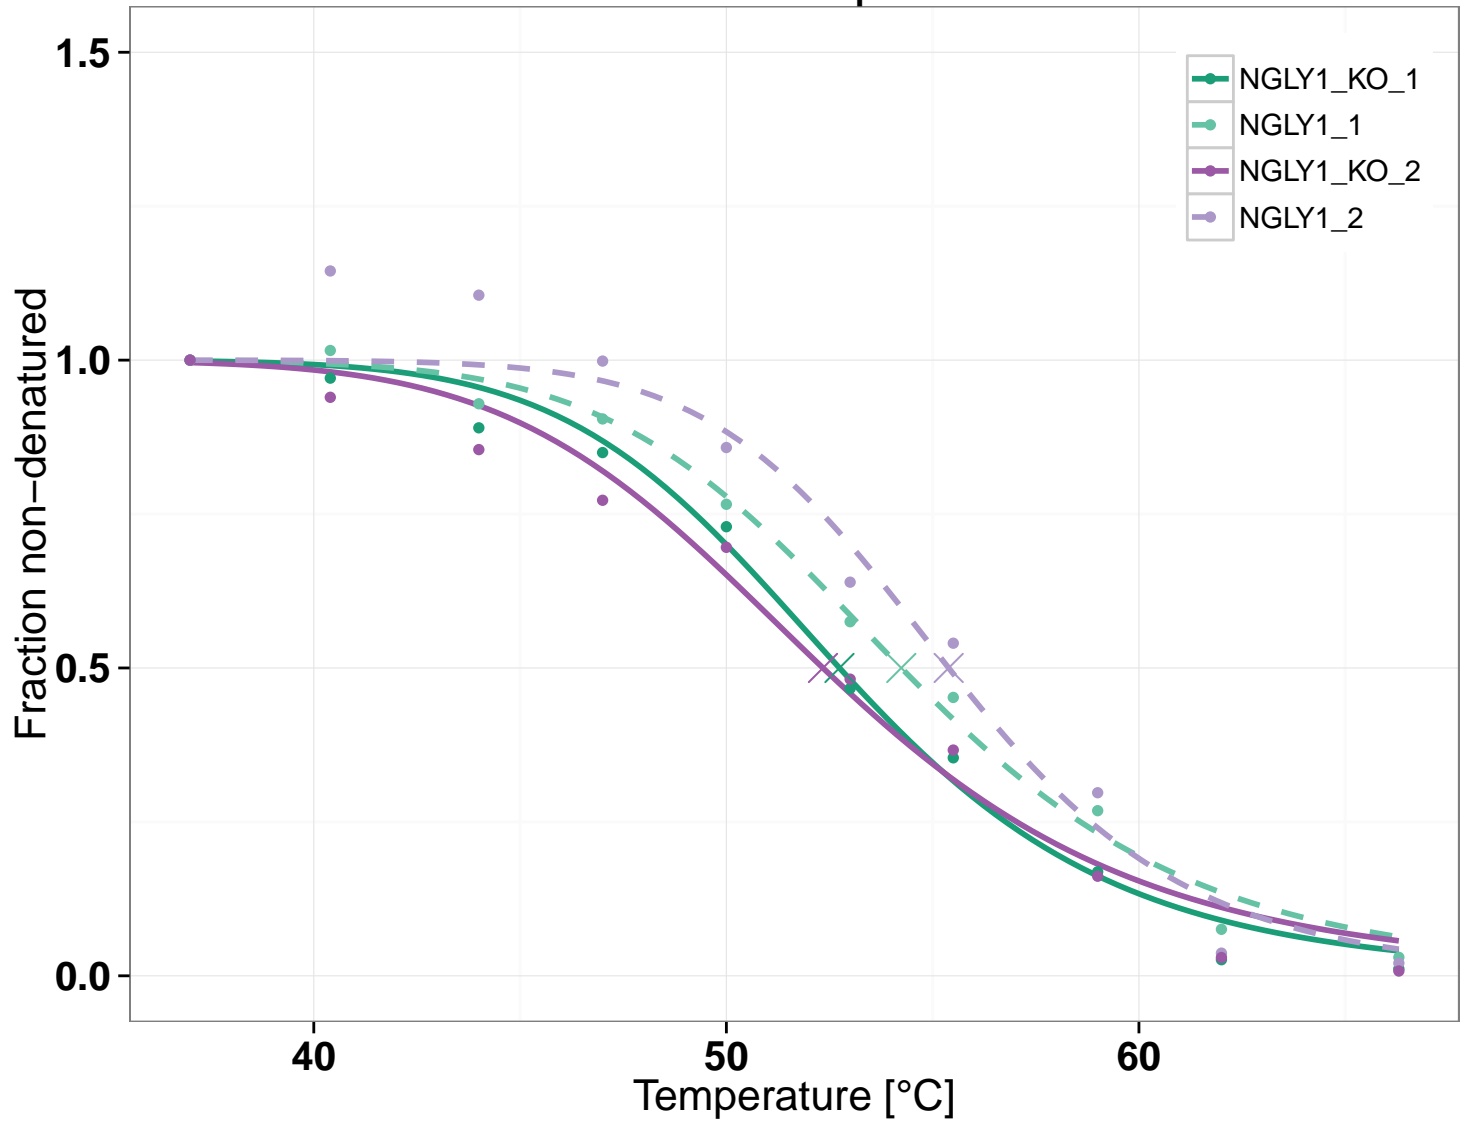

|            | meltPoint | slope  | plateau | R2   |
|------------|-----------|--------|---------|------|
| NGLY1_KO_1 | 52.74     | -0.075 | 0       | 0.99 |
| NGLY1_1    | 54.24     | -0.07  | 0       | 0.99 |
| NGLY1_KO_2 | 52.34     | -0.065 | 0       | 0.98 |
| NGLY1_2    | 55.39     | -0.086 | 0       | 0.97 |

Supplement: Supplementary file 5917 [file 1]

# IPI00394718.1|CSMD1

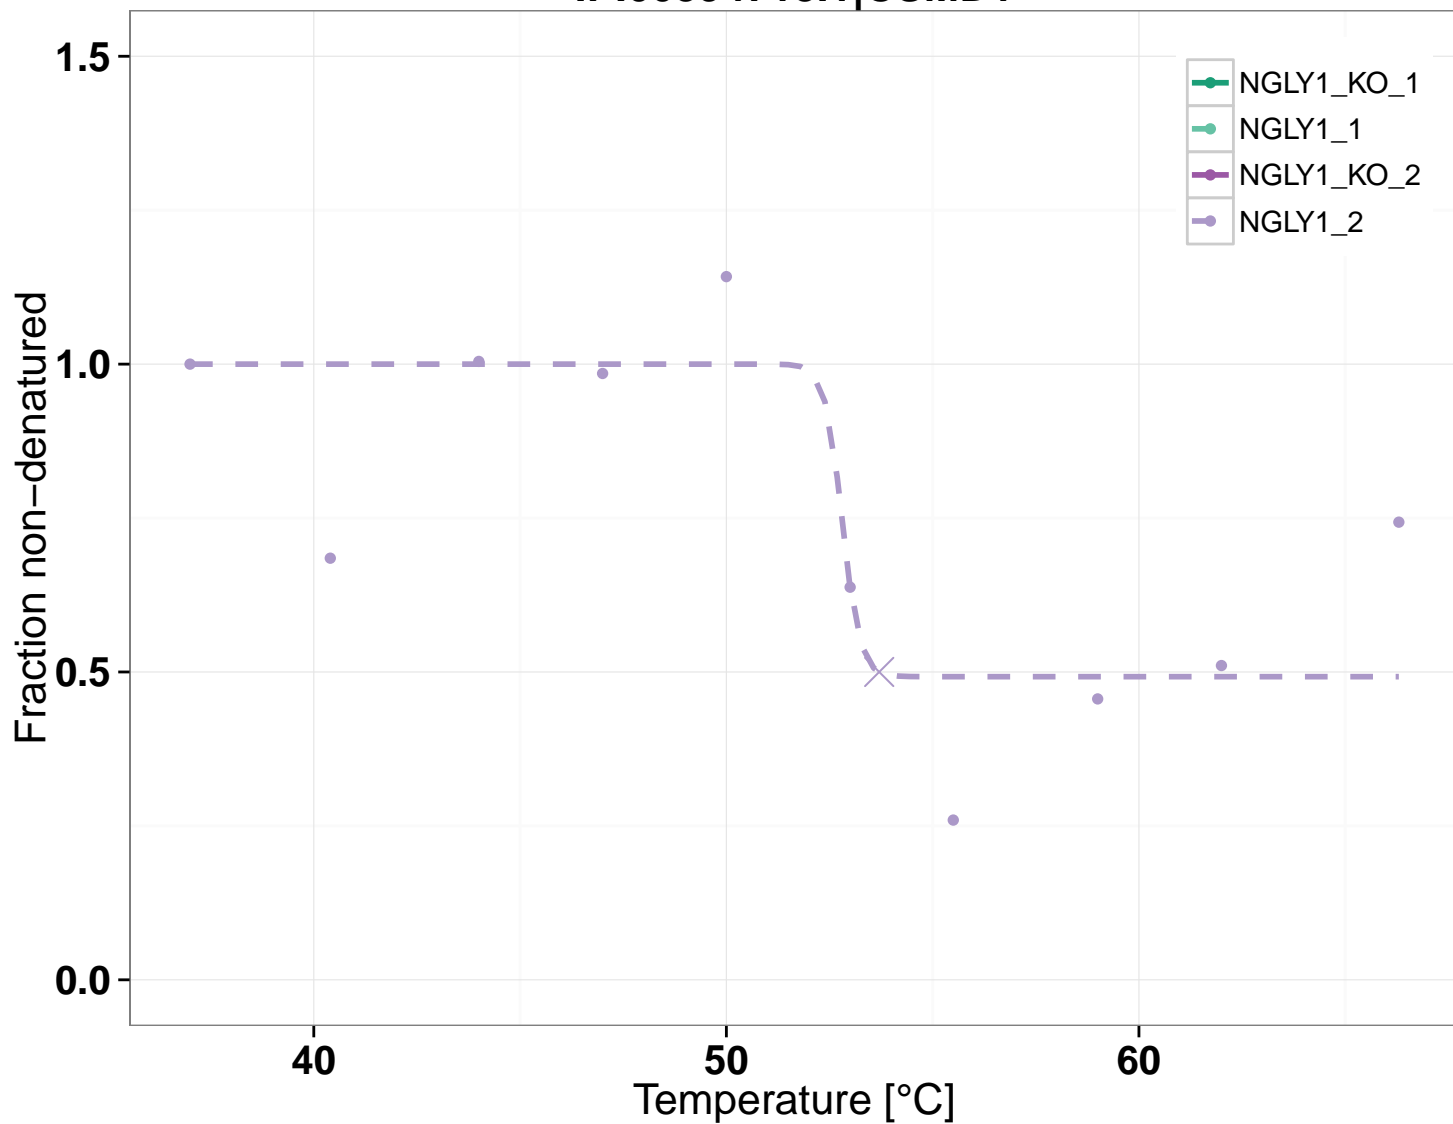

|            | meltPoint | slope | plateau | R2   |
|------------|-----------|-------|---------|------|
| NGLY1_KO_1 | —         | —     | —       | —    |
| NGLY1_1    | —         | —     | —       | —    |
| NGLY1_KO_2 | —         | —     | —       | —    |
| NGLY1_2    | 53.7      | -0.6  | 0.49    | 0.68 |

Supplement: Supplementary file 5918 [file 1]

# IPI00007163.1|LSM7

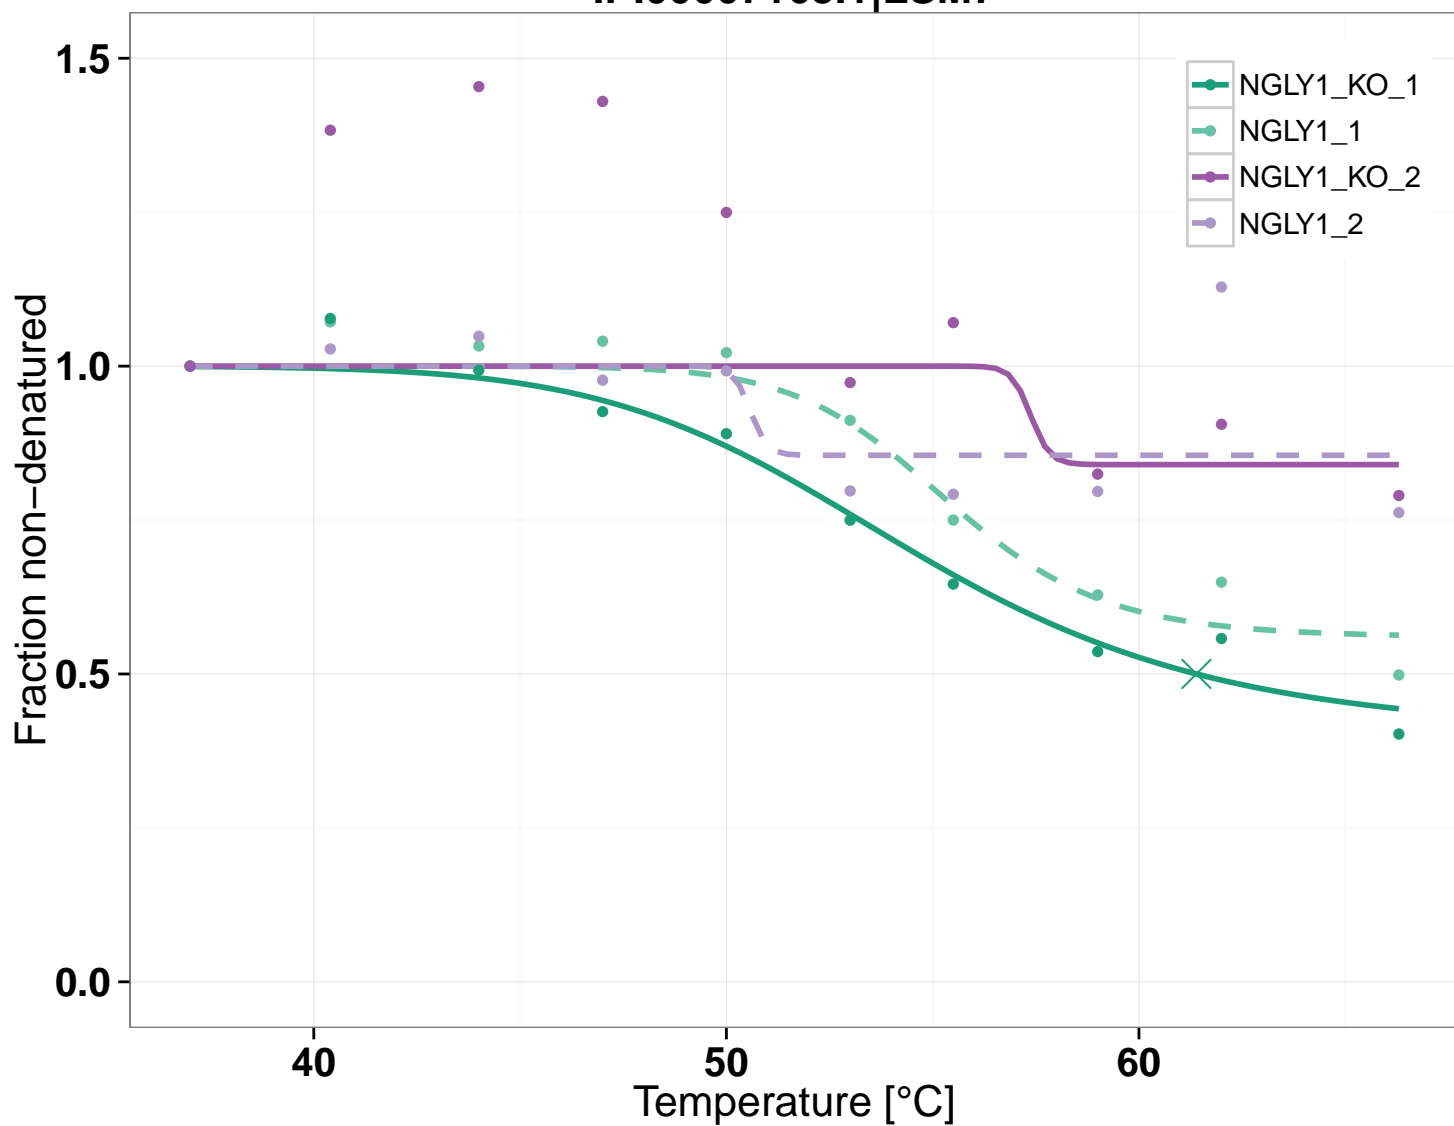

|            | meltPoint | slope  | plateau | R2    |
|------------|-----------|--------|---------|-------|
| NGLY1_KO_1 | 61.39     | -0.04  | 0.4     | 0.97  |
| NGLY1_1    | -         | -0.058 | 0.56    | 0.95  |
| NGLY1_KO_2 | -         | -0.17  | 0.84    | -0.07 |
| NGLY1_2    | -         | -0.18  | 0.86    | 0.38  |

Supplement: Supplementary file 5919 [file 1]

IPI00218836.1|DBI

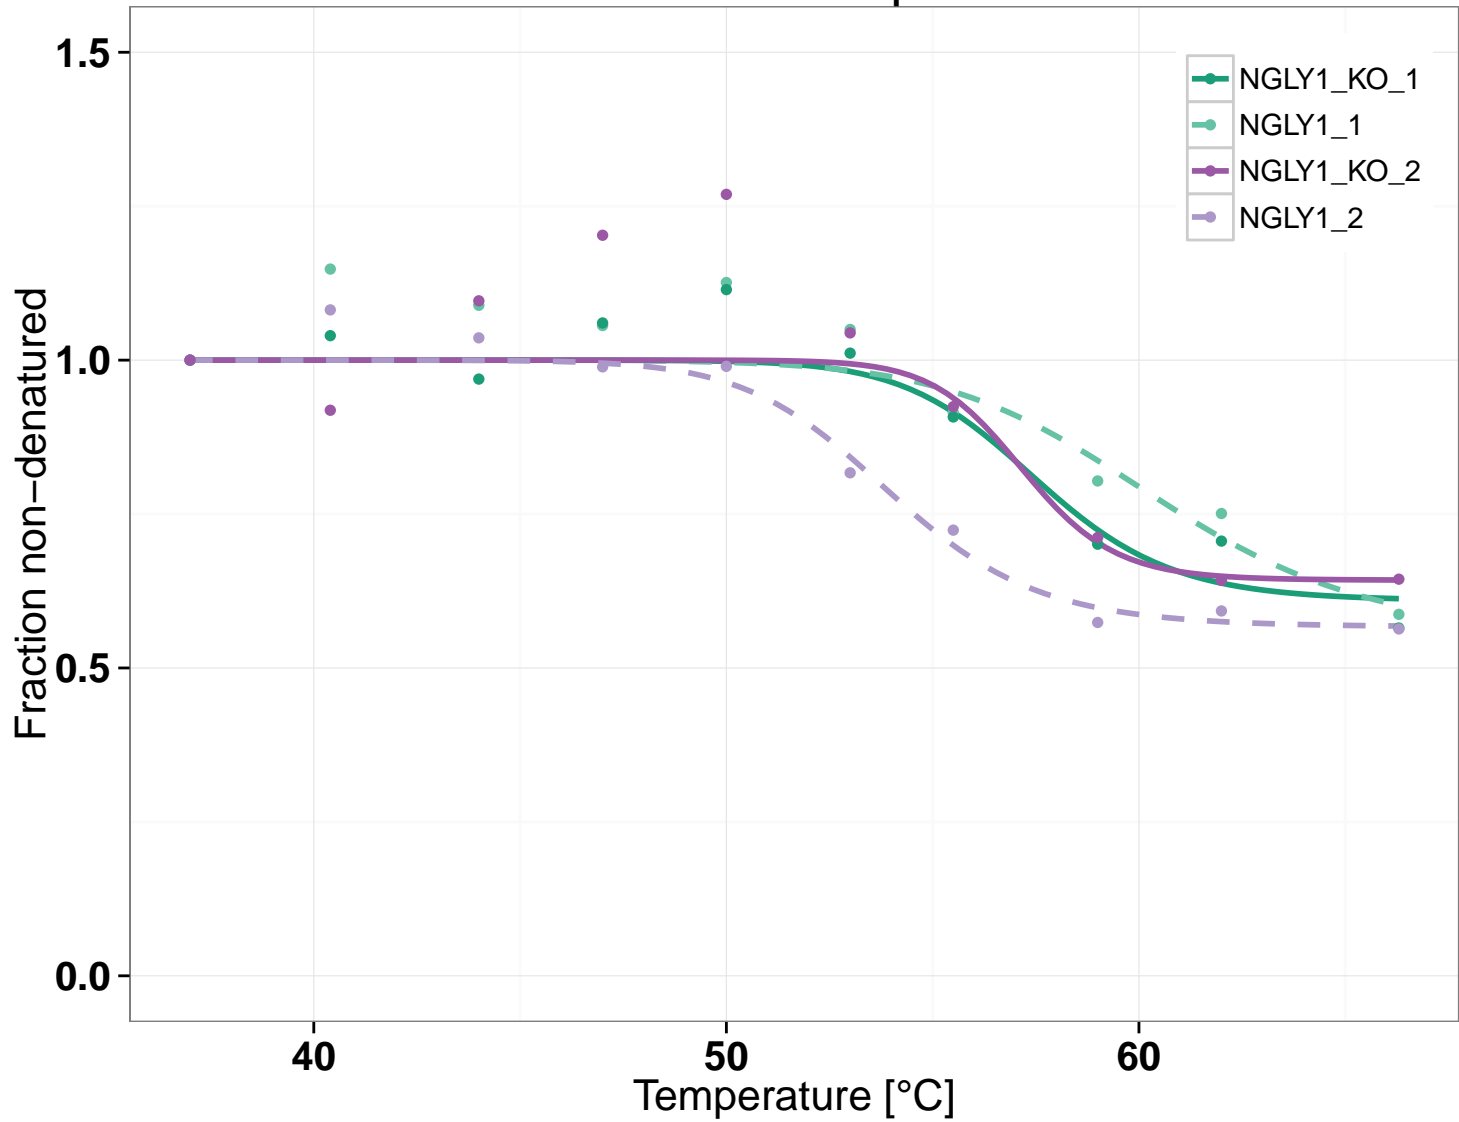

|            | meltPoint | slope  | plateau | R2   |
|------------|-----------|--------|---------|------|
| NGLY1_KO_1 | -         | -0.06  | 0.61    | 0.91 |
| NGLY1_1    | -         | -0.043 | 0.55    | 0.81 |
| NGLY1_KO_2 | -         | -0.081 | 0.64    | 0.7  |
| NGLY1_2    | -         | -0.061 | 0.57    | 0.97 |

Supplement: Supplementary file 5920 [file 1]

# IPI00003807.7|ACP2

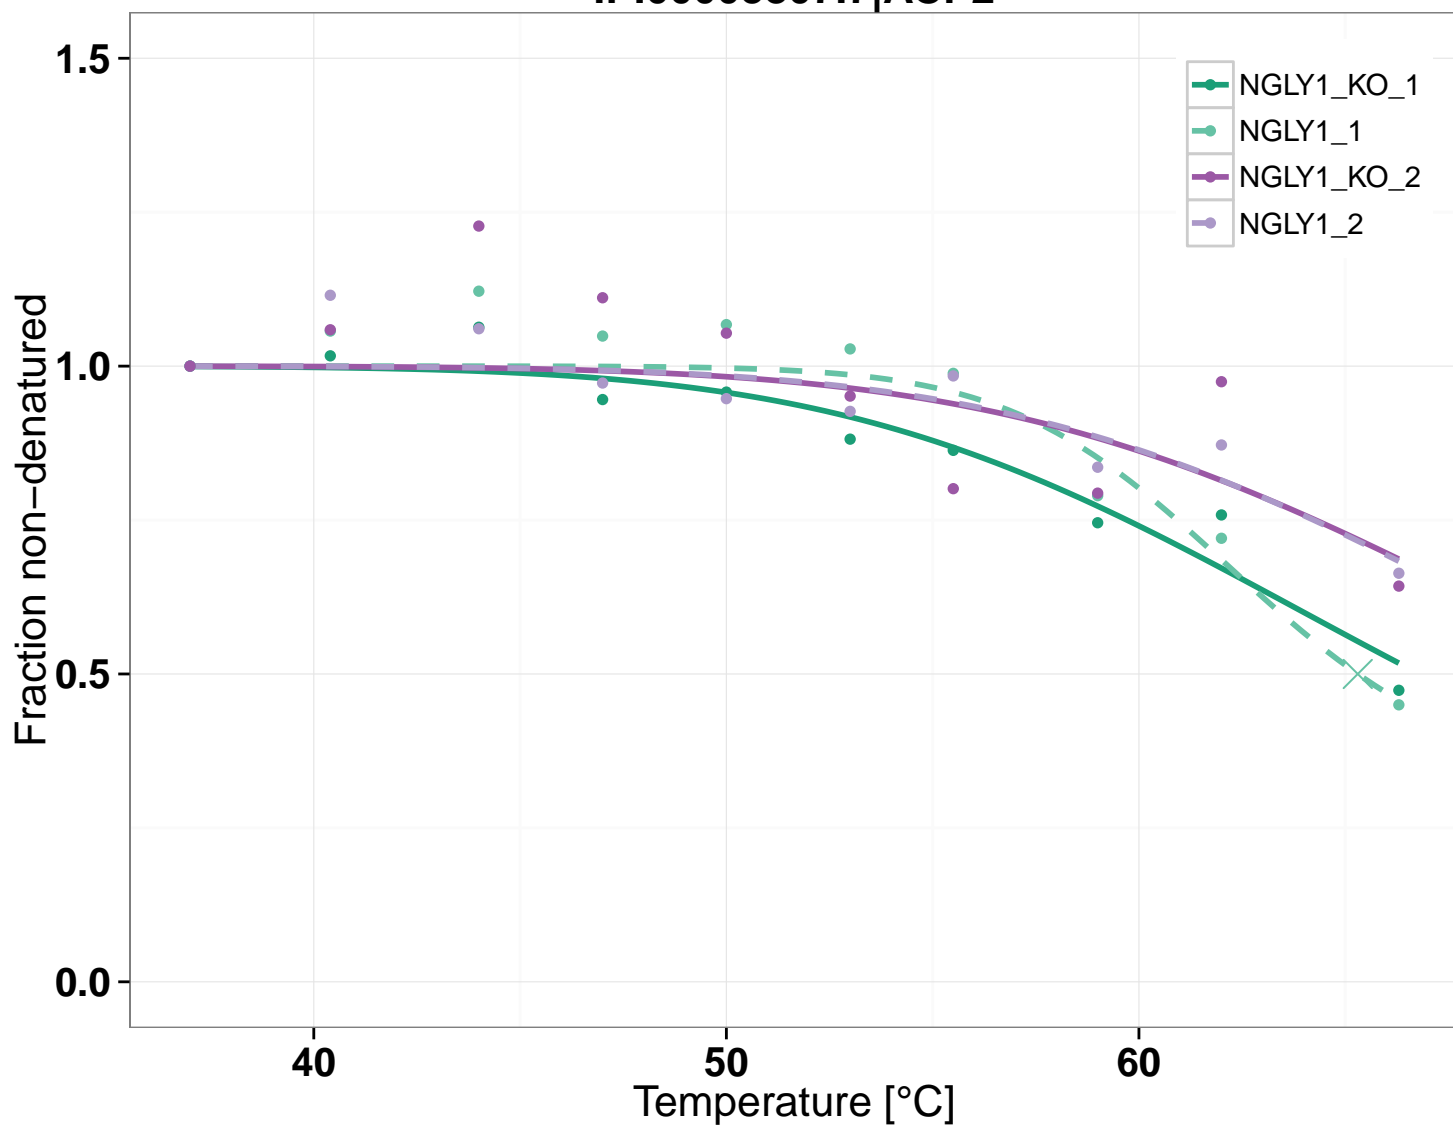

|            | meltPoint | slope  | plateau | R2   |
|------------|-----------|--------|---------|------|
| NGLY1_KO_1 | –         | –0.036 | 0       | 0.93 |
| NGLY1_1    | 65.3      | –0.061 | 0.29    | 0.92 |
| NGLY1_KO_2 | –         | –      | 0       | 0.51 |
| NGLY1_2    | –         | –      | 0       | 0.8  |

Supplement: Supplementary file 5921 [file 1]

IPI00374163.1|C16ORF72

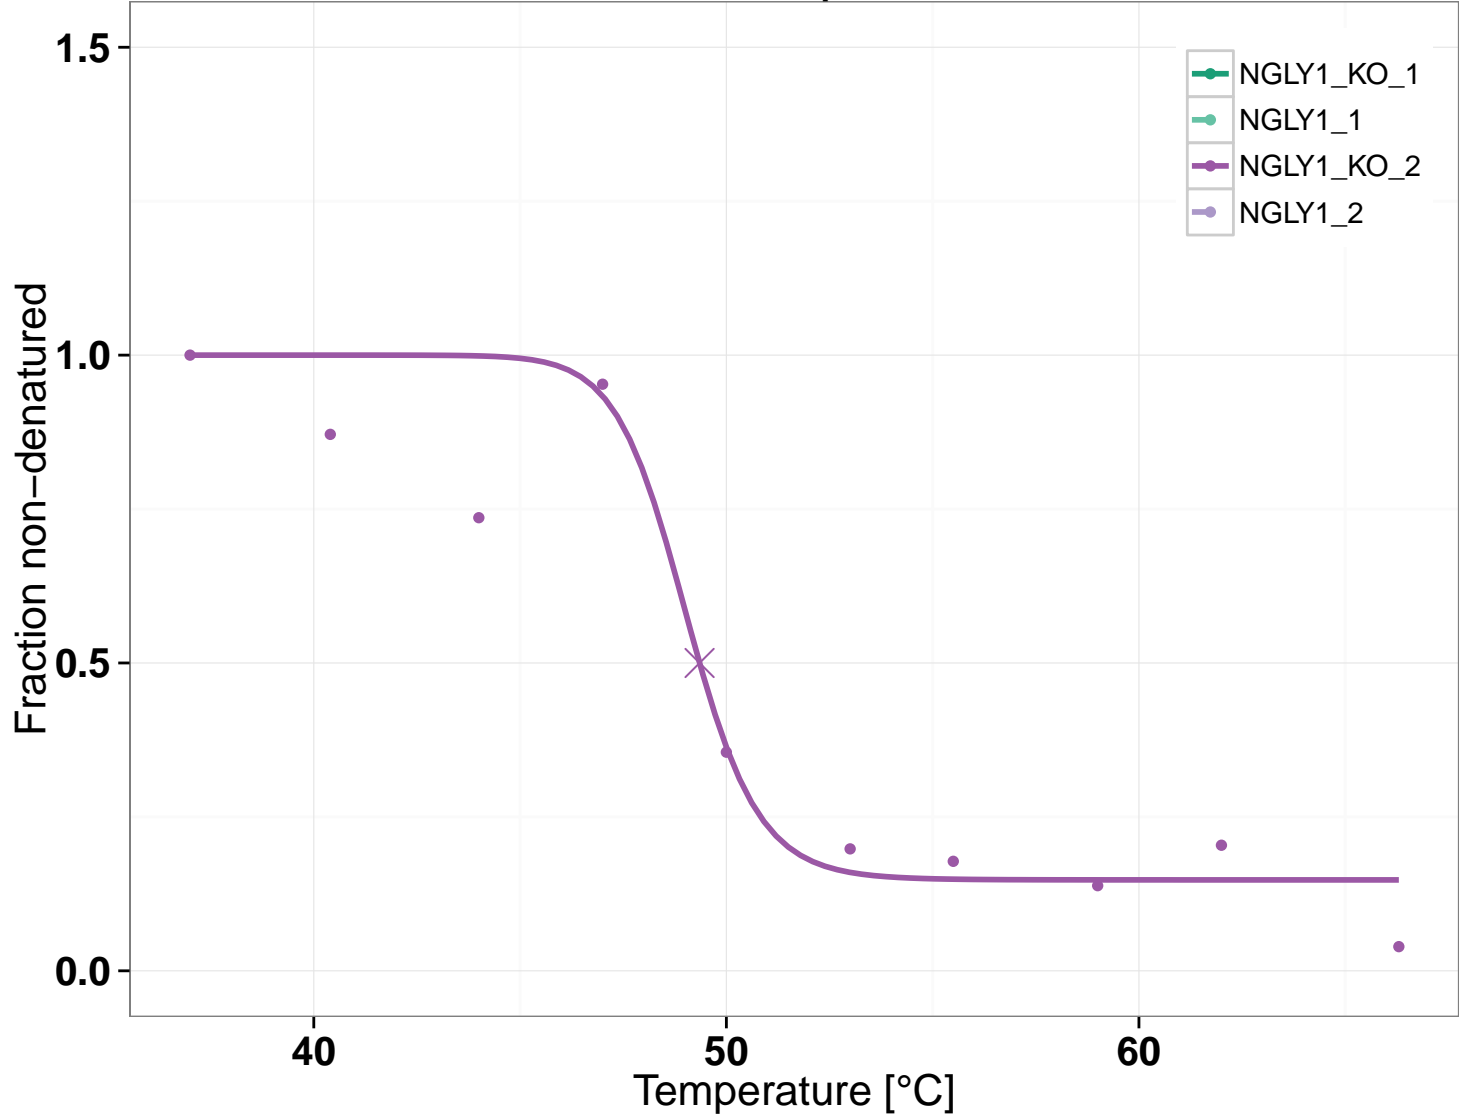

|            | meltPoint | slope | plateau | R2   |
|------------|-----------|-------|---------|------|
| NGLY1_KO_1 | -         | -     | -       | -    |
| NGLY1_1    | -         | -     | -       | -    |
| NGLY1_KO_2 | 49.35     | -0.25 | 0.15    | 0.92 |
| NGLY1_2    | -         | -     | -       | -    |

Supplement: Supplementary file 5922 [file 1]

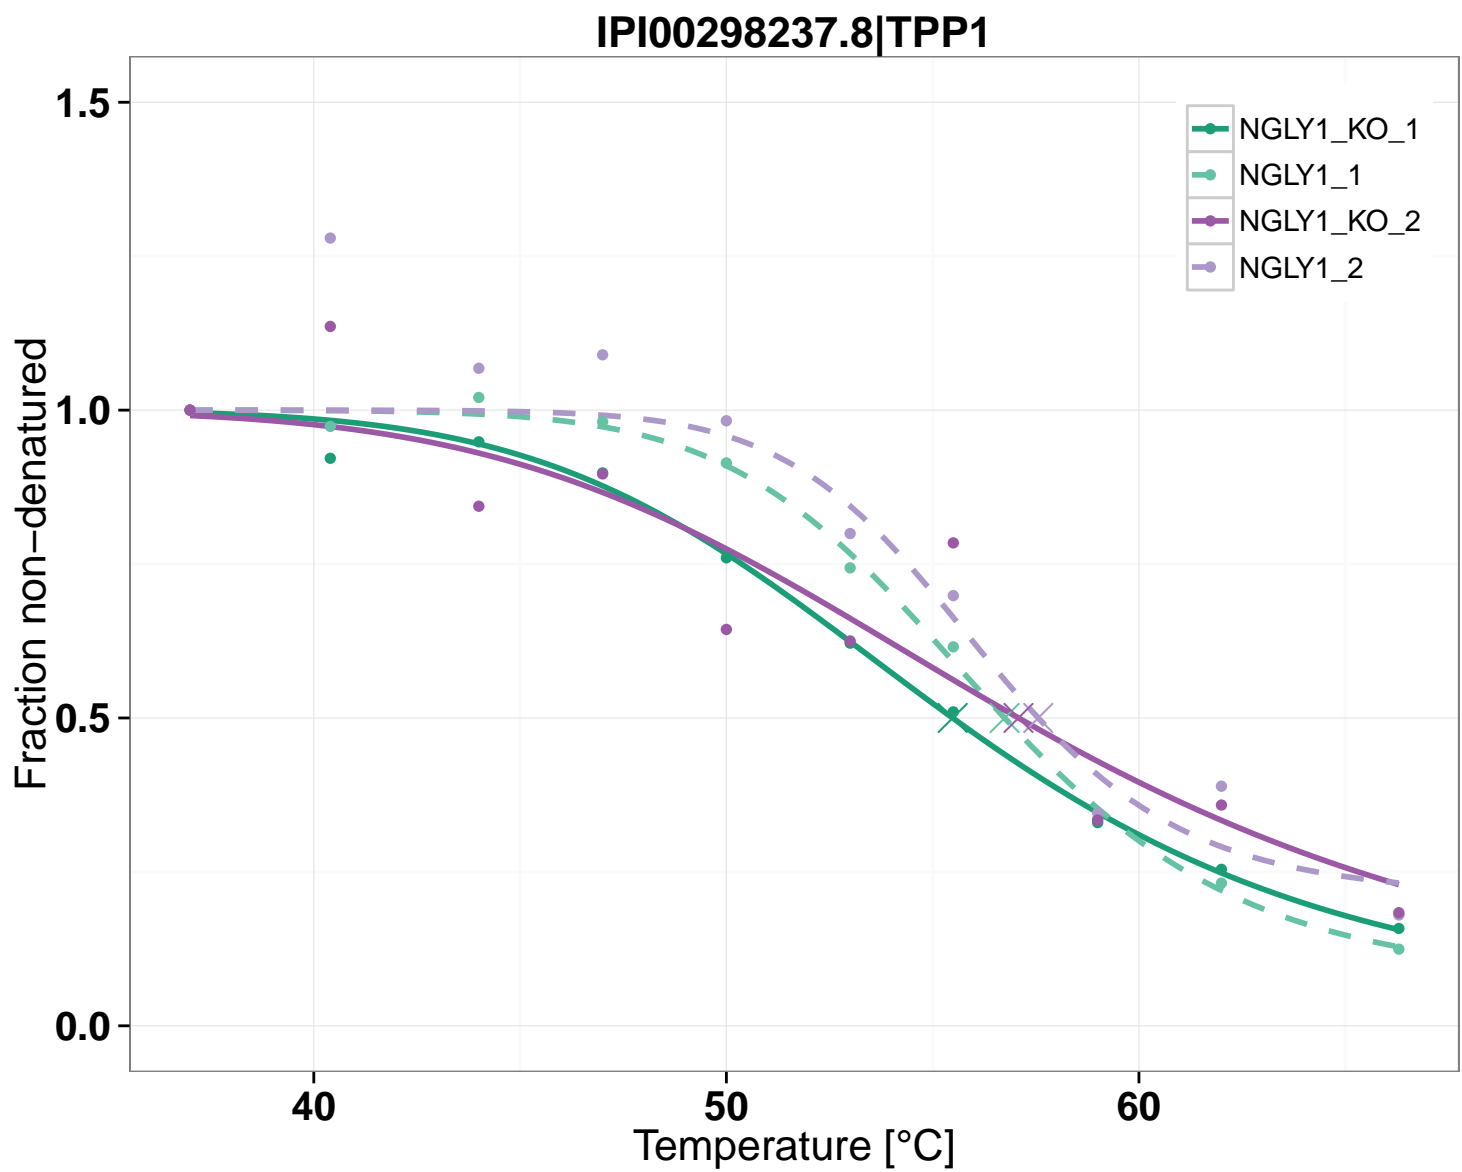

|            | meltPoint | slope  | plateau | R2   |
|------------|-----------|--------|---------|------|
| NGLY1_KO_1 | 55.49     | -0.05  | 0.02    | 0.99 |
| NGLY1_1    | 56.74     | -0.075 | 0.07    | 1    |
| NGLY1_KO_2 | 57.08     | -0.04  | 0       | 0.87 |
| NGLY1_2    | 57.56     | -0.082 | 0.21    | 0.91 |

Supplement: Supplementary file 5923 [file 1]

# IPI00102501.3|AGTRAP

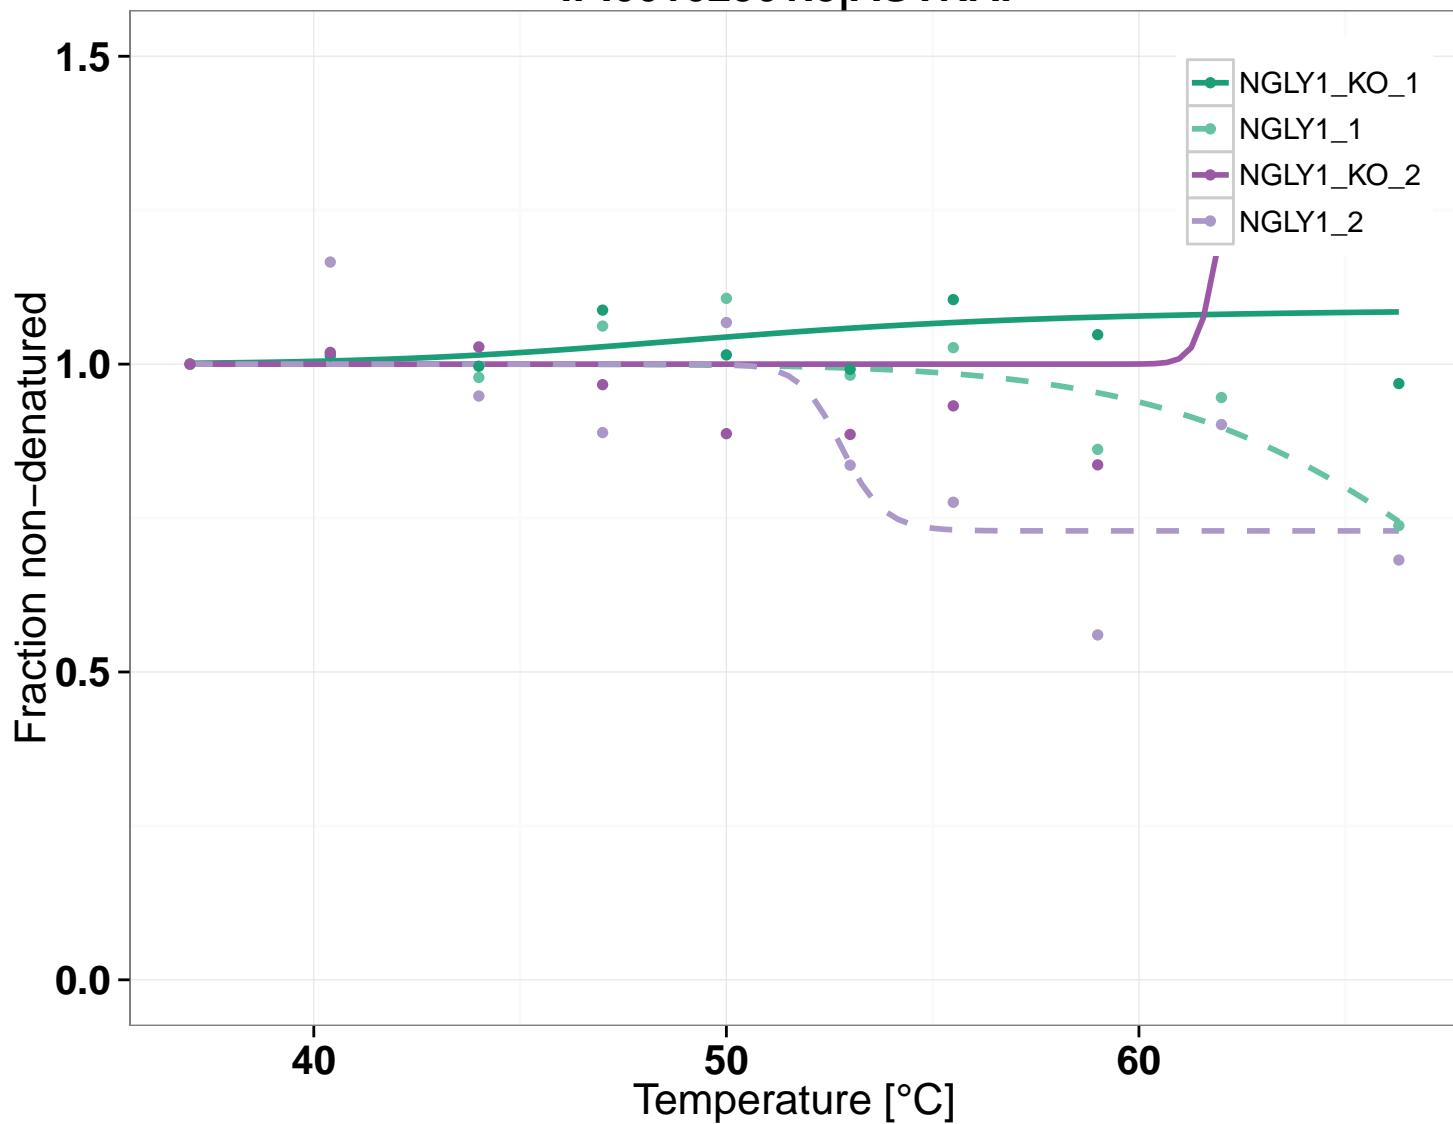

|            | meltPoint | slope  | plateau | R2   |
|------------|-----------|--------|---------|------|
| NGLY1_KO_1 | –         | 0.0053 | 1.09    | 0.14 |
| NGLY1_1    | –         | –      | 0       | 0.71 |
| NGLY1_KO_2 | –         | 0.4    | 1.41    | 0.79 |
| NGLY1_2    | –         | –0.13  | 0.73    | 0.62 |

Supplement: Supplementary file 5924 [file 1]

IPI00008137.1|ZNF295

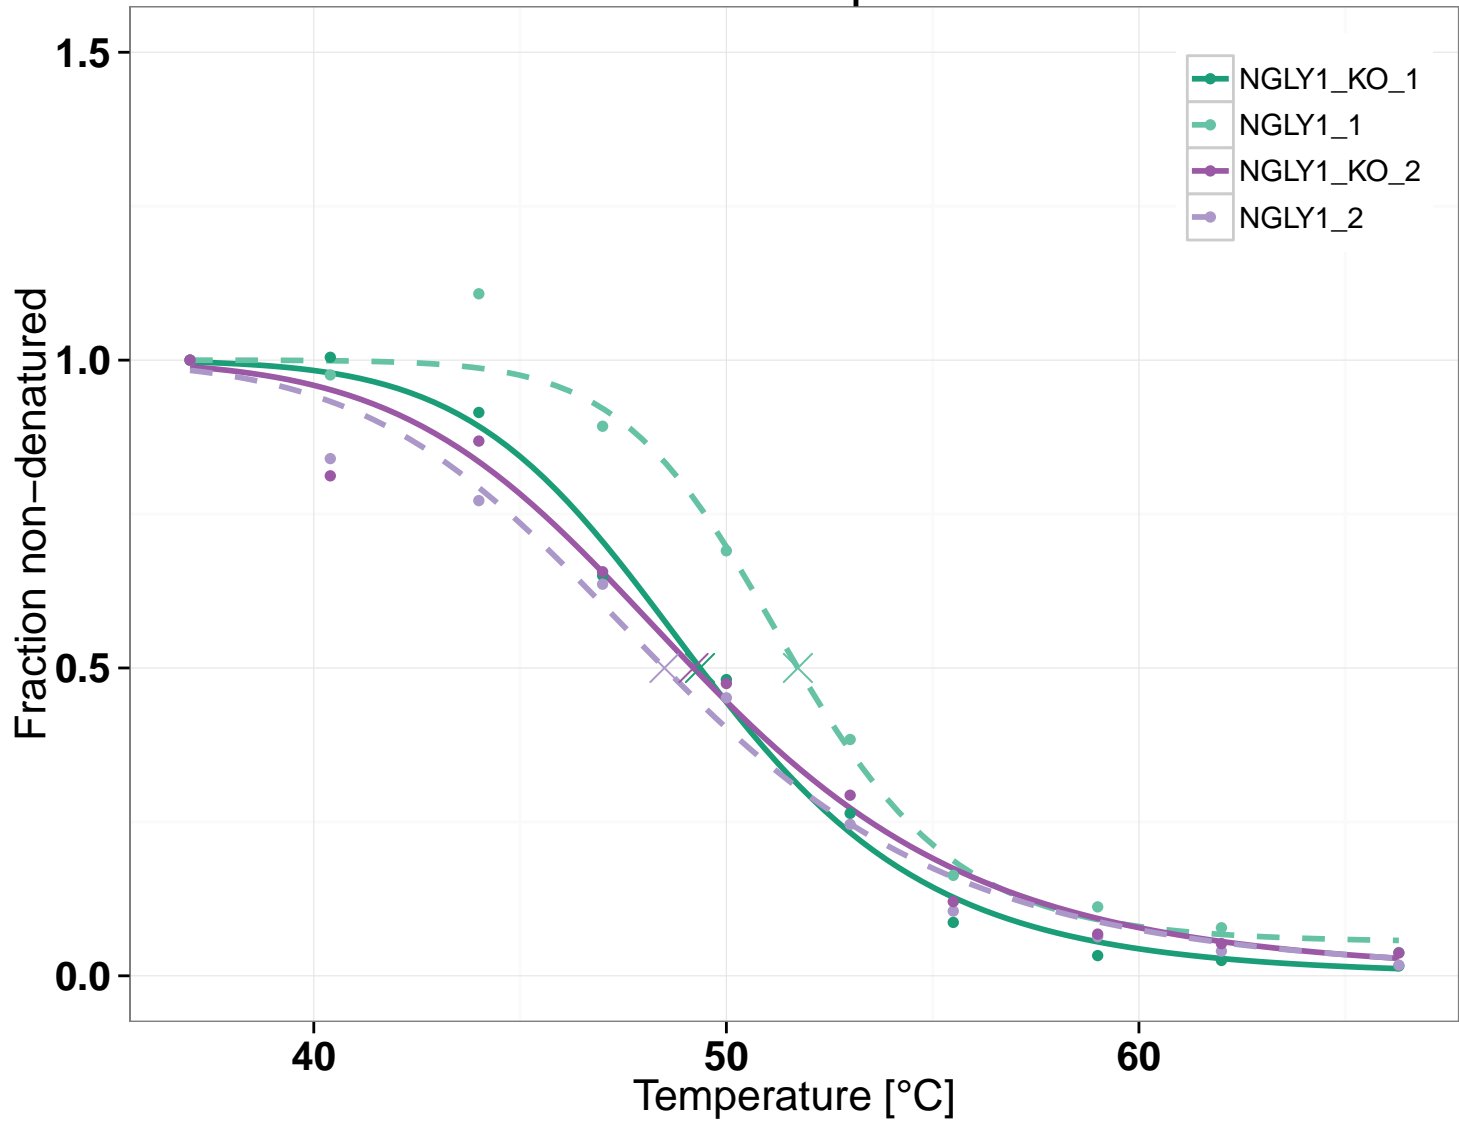

|            | meltPoint | slope  | plateau | R2   |
|------------|-----------|--------|---------|------|
| NGLY1_KO_1 | 49.36     | -0.089 | 0       | 0.99 |
| NGLY1_1    | 51.73     | -0.12  | 0.05    | 0.99 |
| NGLY1_KO_2 | 49.2      | -0.071 | 0       | 0.98 |
| NGLY1_2    | 48.5      | -0.069 | 0       | 0.99 |

Supplement: Supplementary file 5925 [file 1]
