# Supplementary material (part 60 of 85)
Source: publisher figshare collection journal article supplement (https://gsajournals.figshare.com/articles/dataset/_/12014913)

# IPI00397947.1|TMEM189-UBE2V1

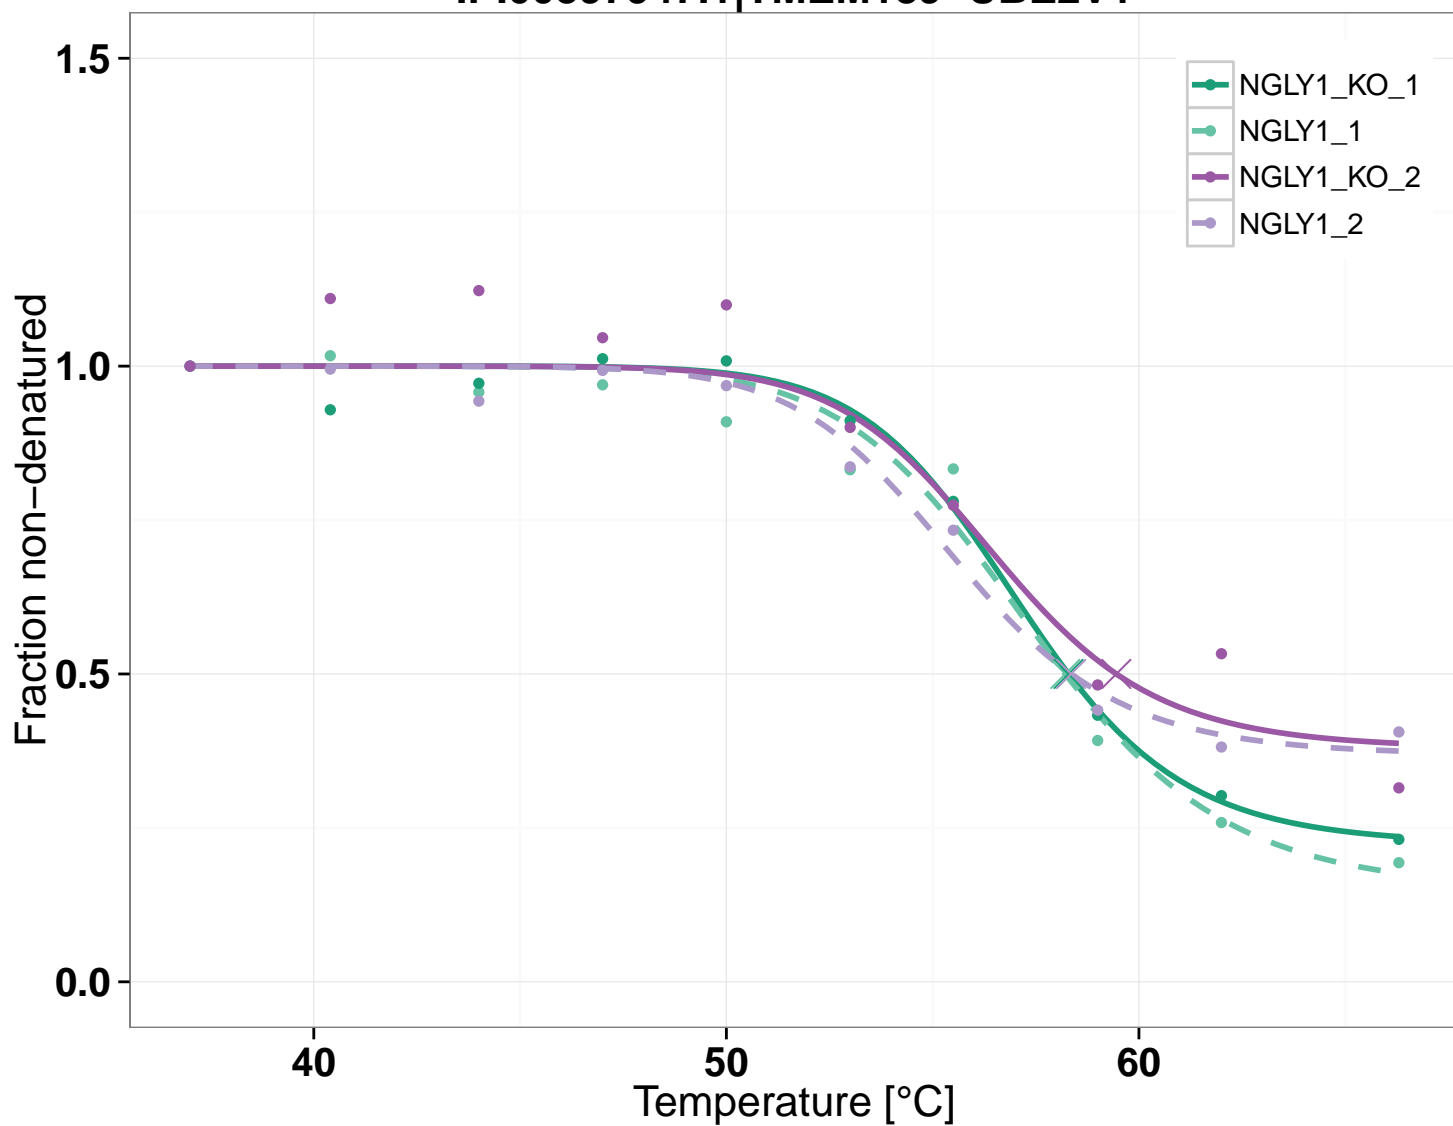

|            | meltPoint | slope  | plateau | R2   |
|------------|-----------|--------|---------|------|
| NGLY1_KO_1 | 58.29     | -0.1   | 0.22    | 0.99 |
| NGLY1_1    | 58.22     | -0.092 | 0.15    | 0.98 |
| NGLY1_KO_2 | 59.45     | -0.08  | 0.38    | 0.92 |
| NGLY1_2    | 58.36     | -0.08  | 0.37    | 0.99 |

Supplement: Supplementary file 5926 [file 1]

IPI00910110.2|ANO6

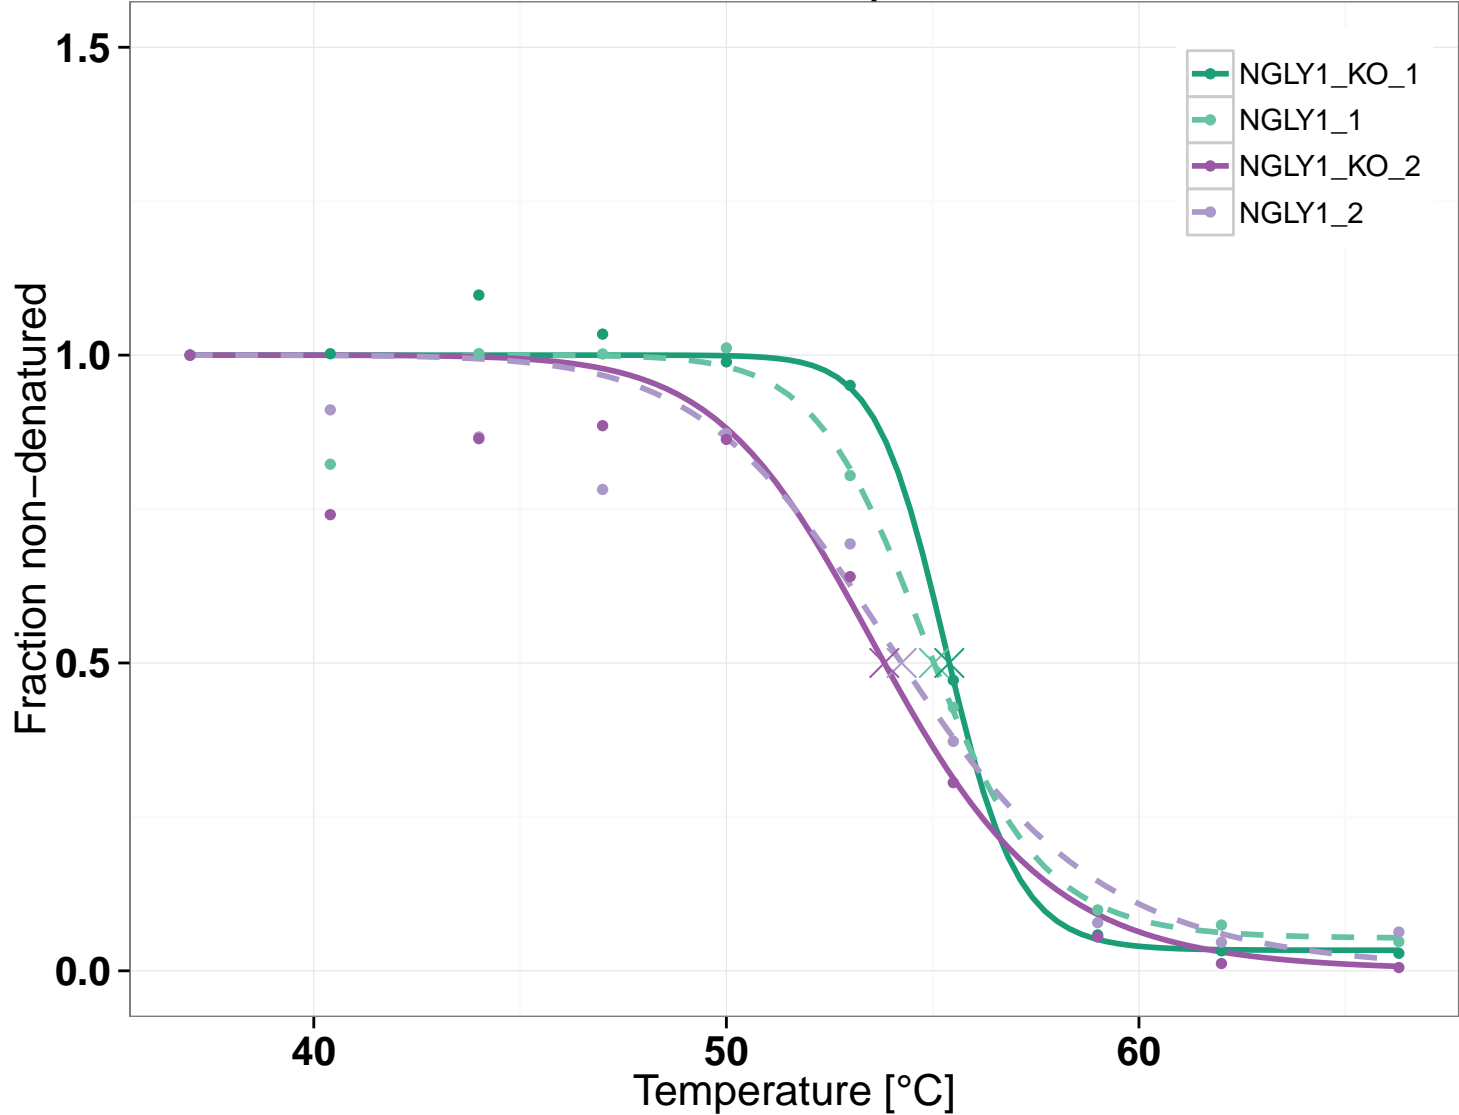

|            | meltPoint | slope | plateau | R2   |
|------------|-----------|-------|---------|------|
| NGLY1_KO_1 | 55.4      | -0.28 | 0.03    | 0.99 |
| NGLY1_1    | 55.03     | -0.17 | 0.05    | 0.98 |
| NGLY1_KO_2 | 53.83     | -0.12 | 0       | 0.93 |
| NGLY1_2    | 54.25     | -0.1  | 0       | 0.95 |

Supplement: Supplementary file 5927 [file 1]

# IPI00783243.2|MREG

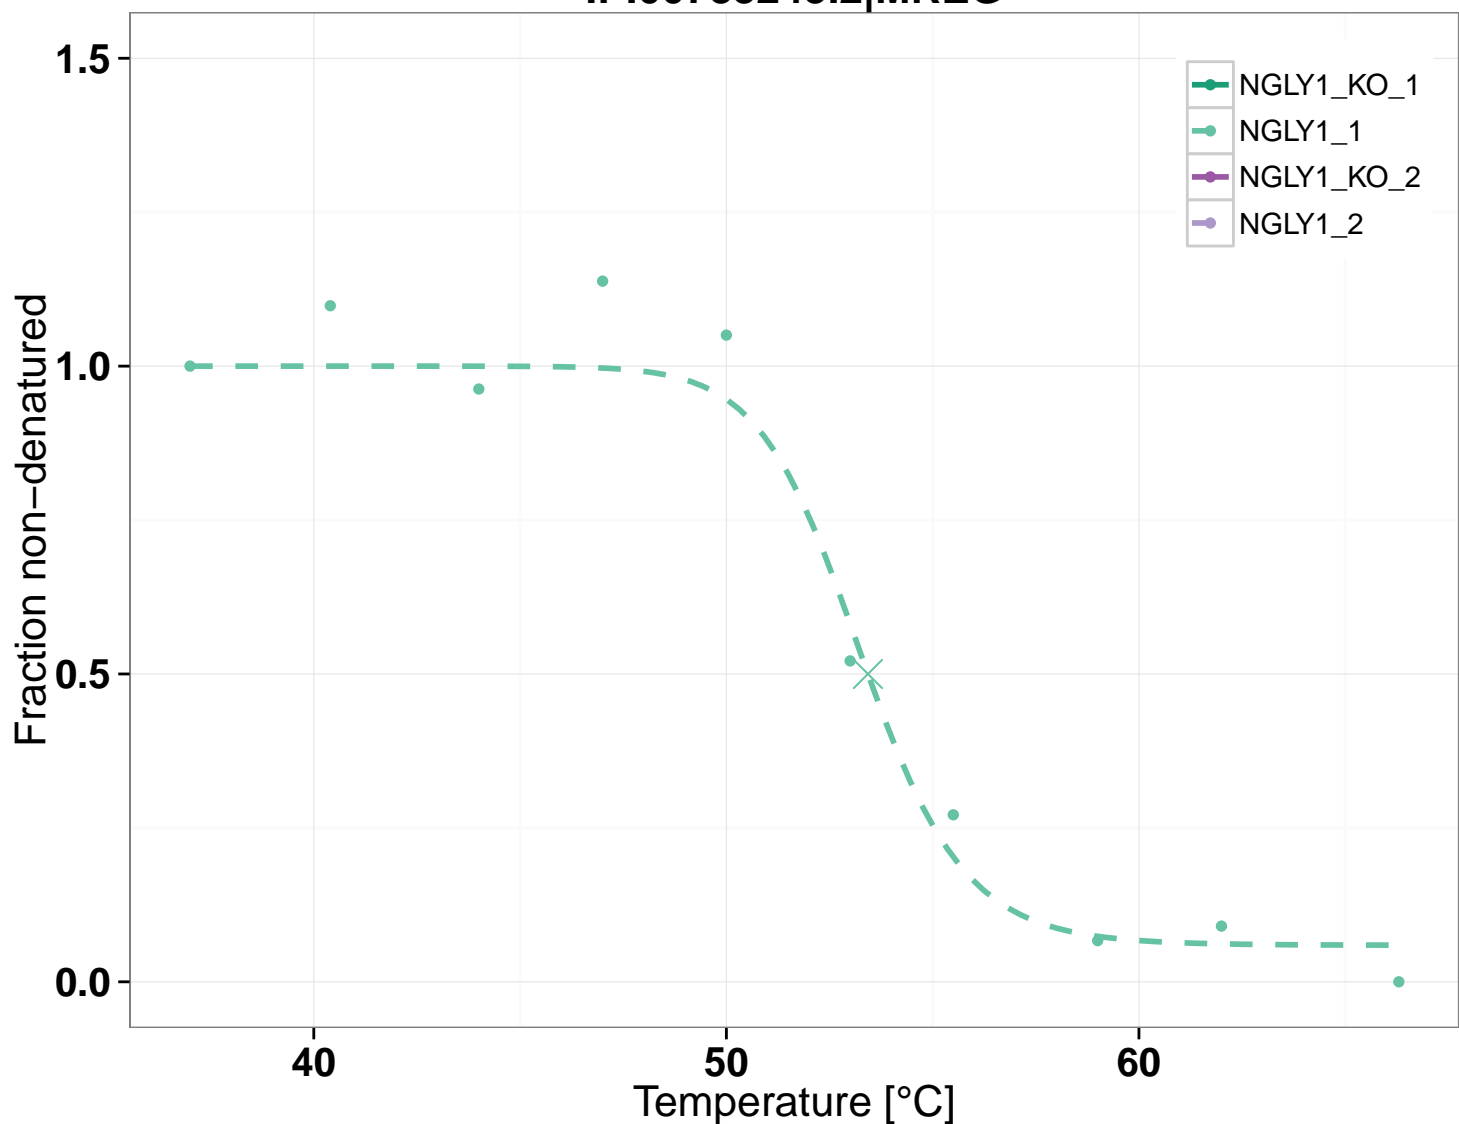

|            | meltPoint | slope | plateau | R2   |
|------------|-----------|-------|---------|------|
| NGLY1_KO_1 | -         | -     | -       | -    |
| NGLY1_1    | 53.43     | -0.19 | 0.06    | 0.97 |
| NGLY1_KO_2 | -         | -     | -       | -    |
| NGLY1_2    | -         | -     | -       | -    |

Supplement: Supplementary file 5928 [file 1]

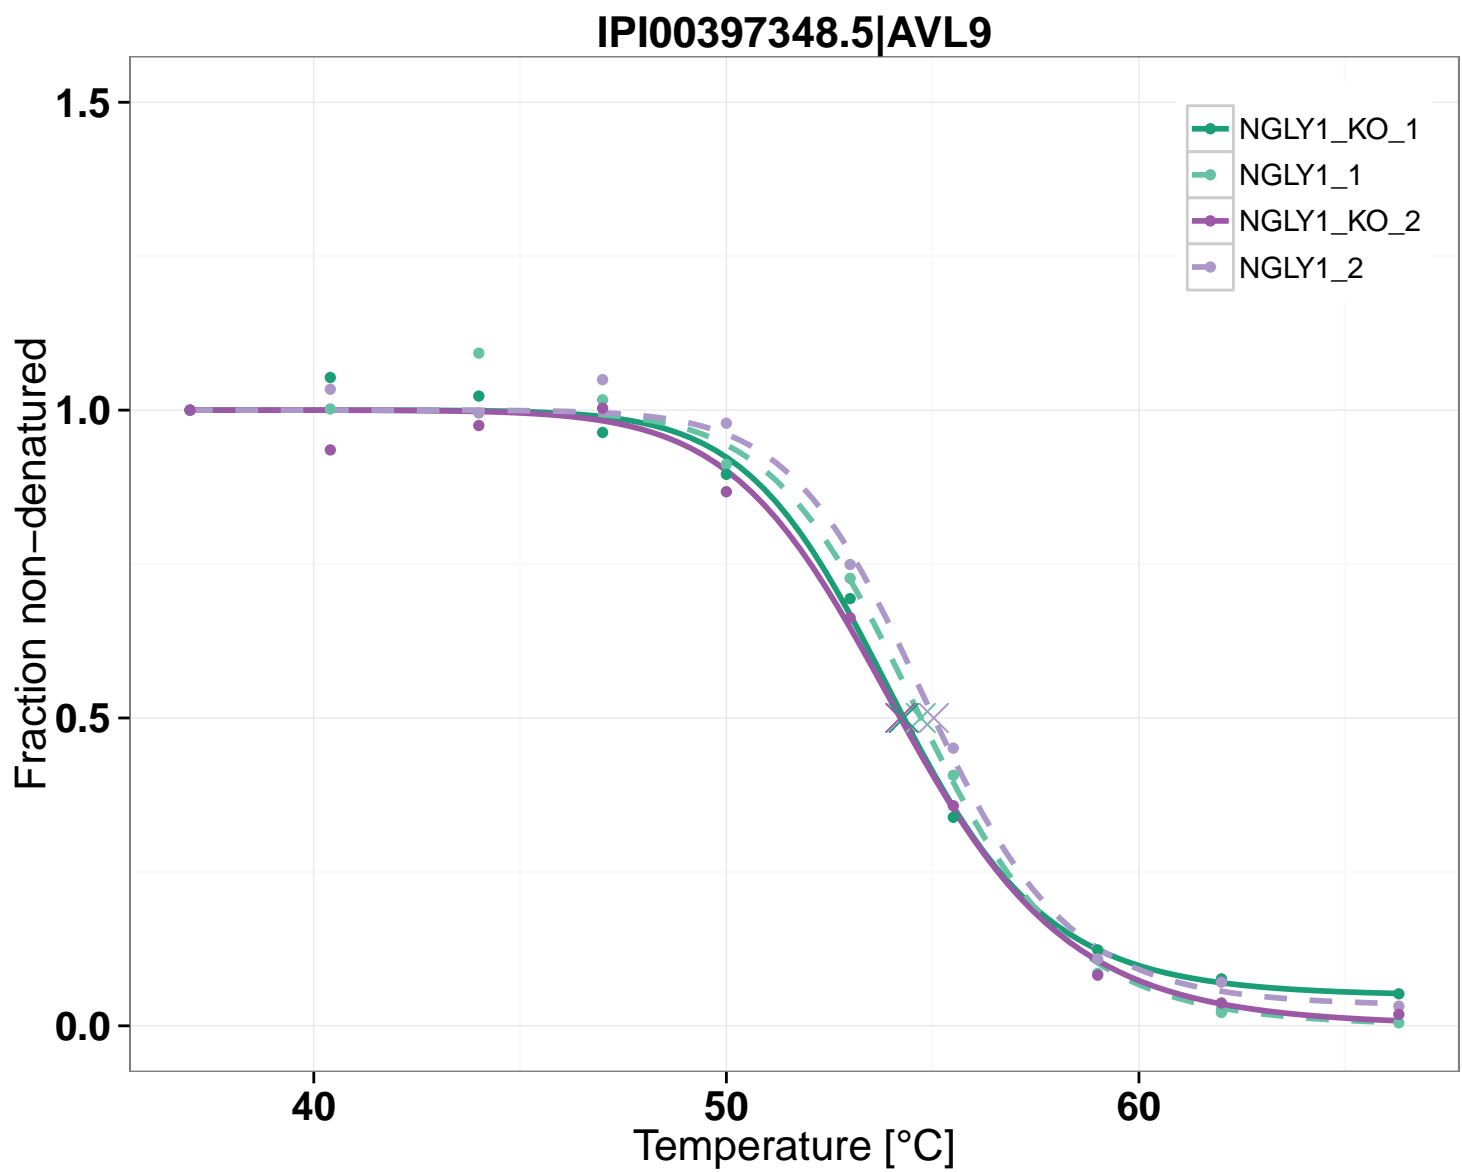

|            | meltPoint | slope | plateau | R2   |
|------------|-----------|-------|---------|------|
| NGLY1_KO_1 | 54.3      | -0.13 | 0.05    | 1    |
| NGLY1_1    | 54.71     | -0.14 | 0       | 0.99 |
| NGLY1_KO_2 | 54.22     | -0.12 | 0       | 1    |
| NGLY1_2    | 55.03     | -0.14 | 0.03    | 1    |

Supplement: Supplementary file 5929 [file 1]

# IPI00479143.2|PCNT

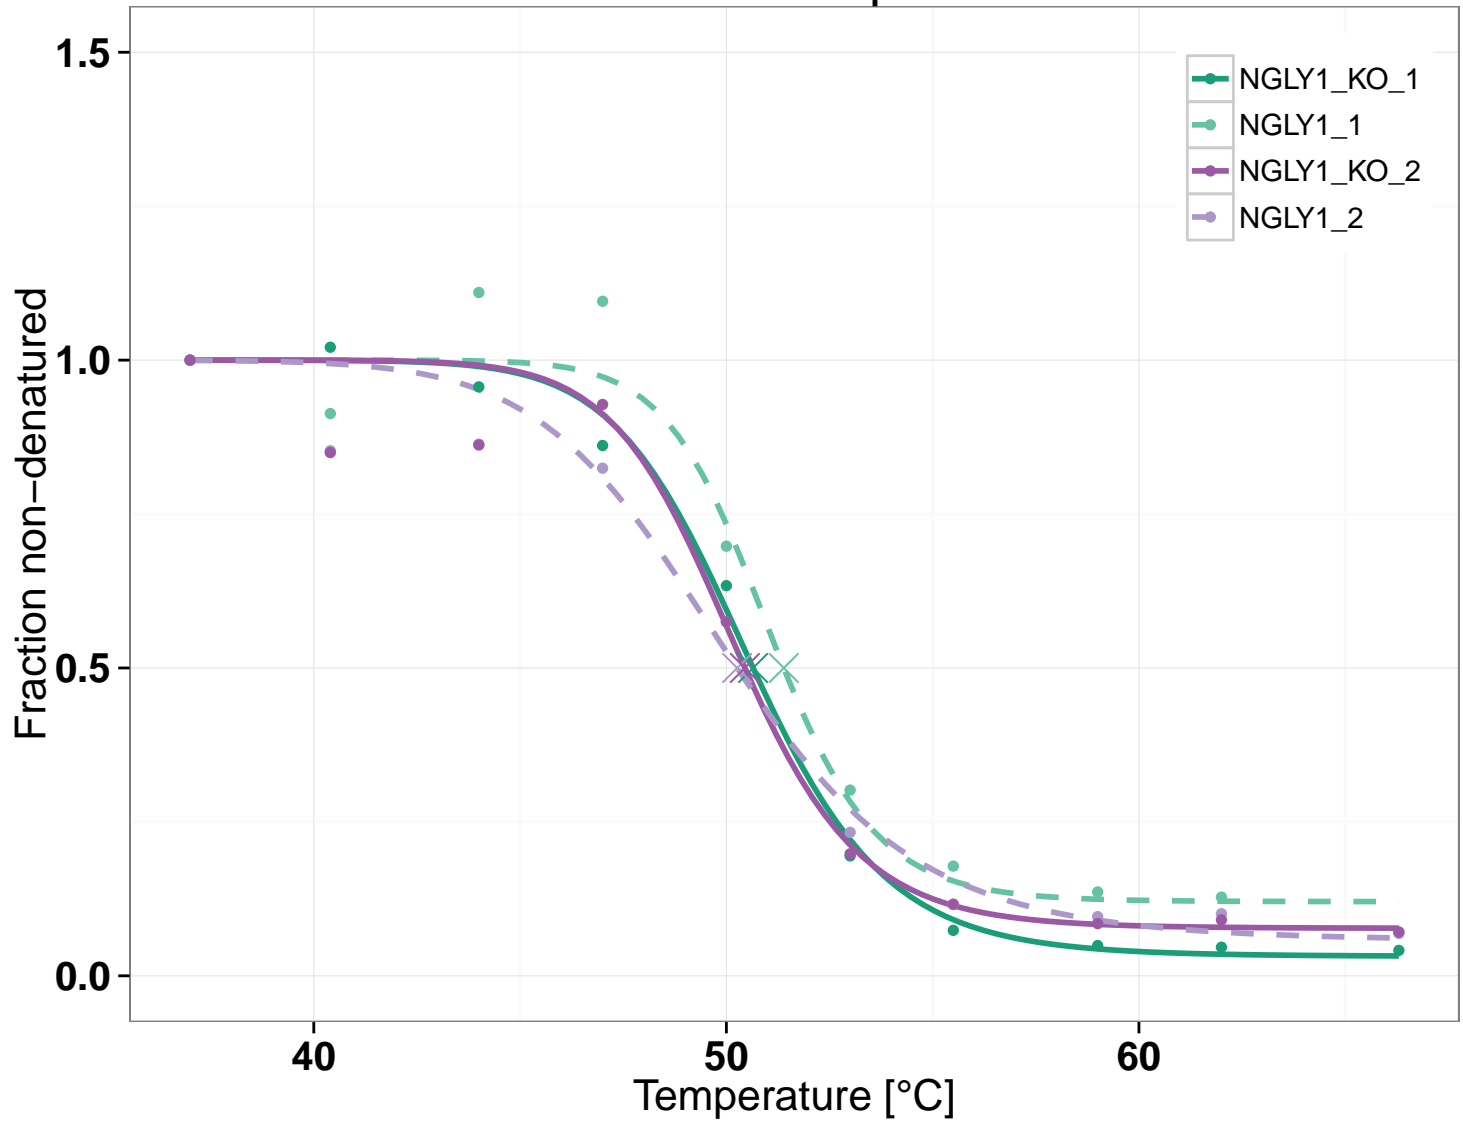

|            | meltPoint | slope | plateau | R2   |
|------------|-----------|-------|---------|------|
| NGLY1_KO_1 | 50.65     | -0.15 | 0.03    | 1    |
| NGLY1_1    | 51.39     | -0.17 | 0.12    | 0.98 |
| NGLY1_KO_2 | 50.45     | -0.15 | 0.08    | 0.97 |
| NGLY1_2    | 50.26     | -0.1  | 0.06    | 0.97 |

Supplement: Supplementary file 5930 [file 1]

IPI00021095.1|C21ORF45

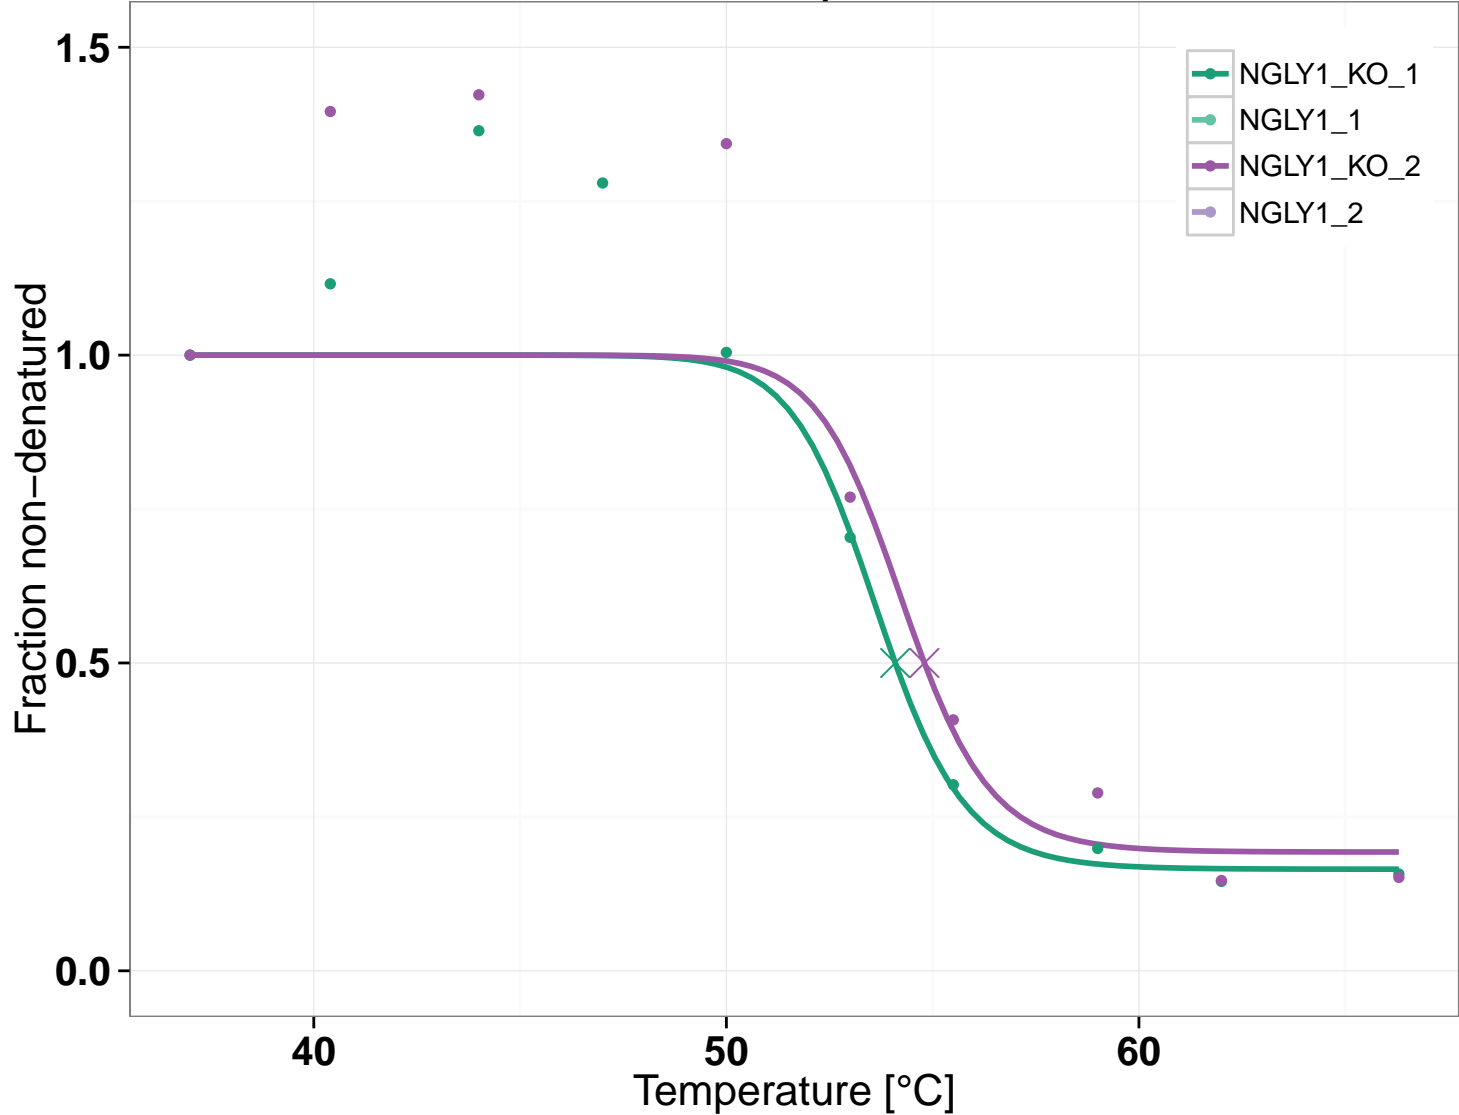

|            | meltPoint | slope | plateau | R2   |
|------------|-----------|-------|---------|------|
| NGLY1_KO_1 | 54.09     | -0.2  | 0.17    | 0.89 |
| NGLY1_1    | -         | -     | -       | -    |
| NGLY1_KO_2 | 54.8      | -0.19 | 0.19    | 0.72 |
| NGLY1_2    | -         | -     | -       | -    |

Supplement: Supplementary file 5931 [file 1]

IPI00550037.3|MRPS15

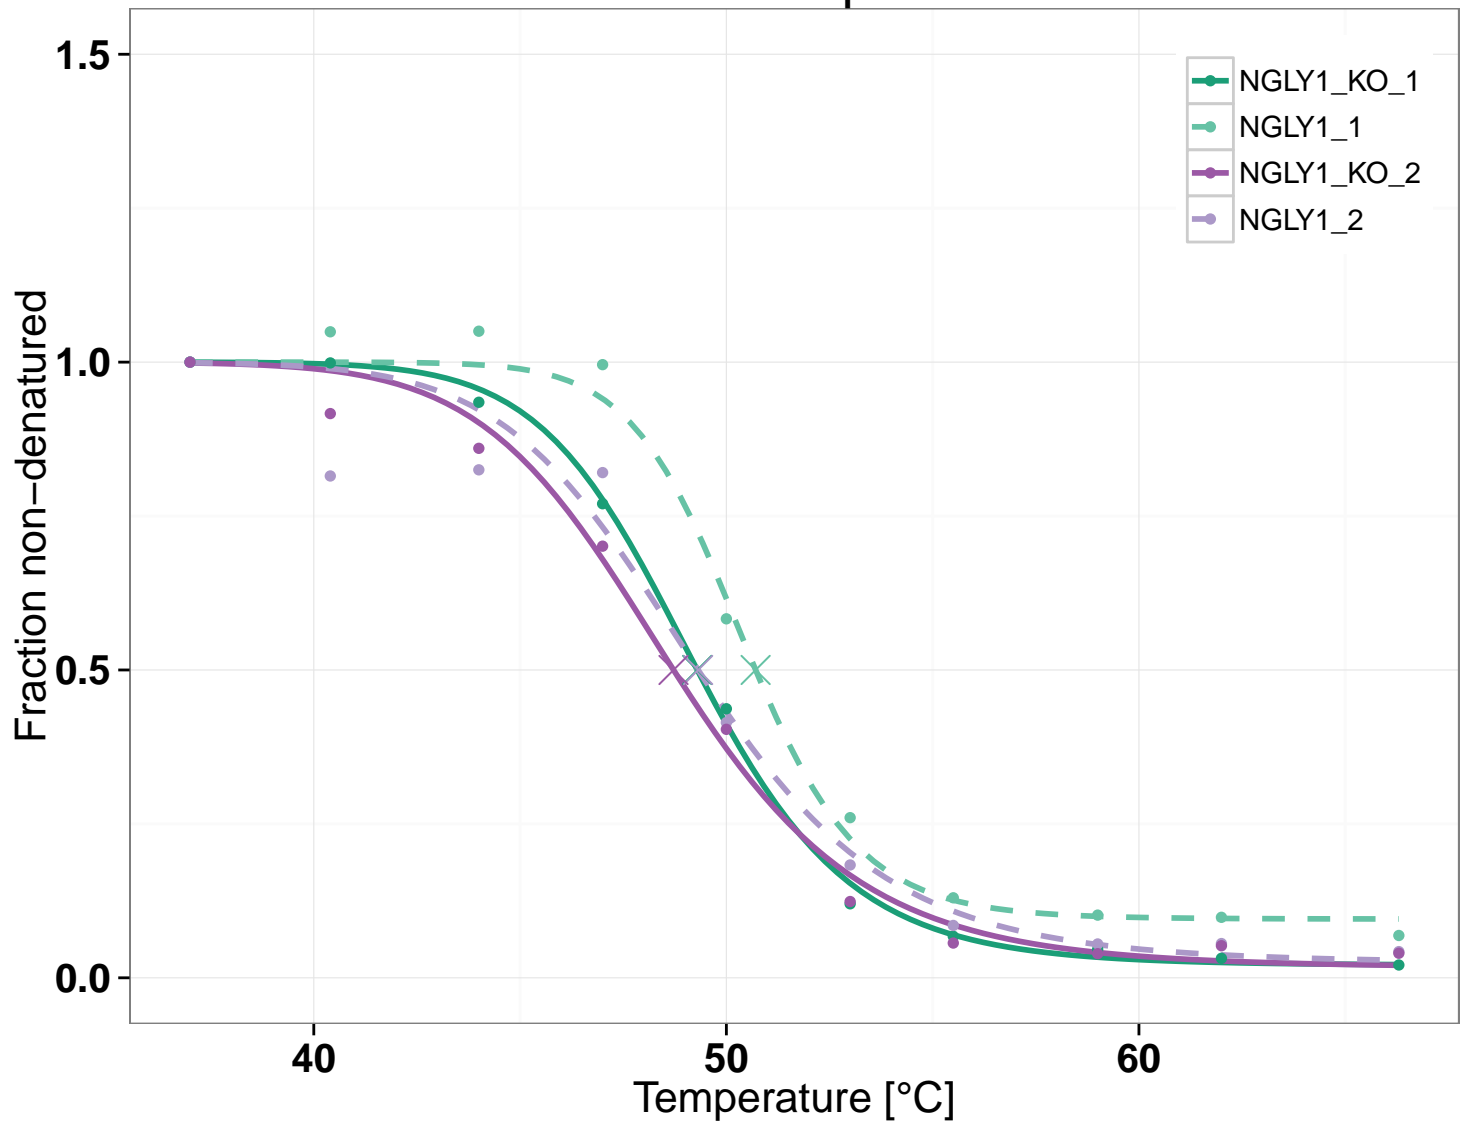

|            | meltPoint | slope | plateau | R2   |
|------------|-----------|-------|---------|------|
| NGLY1_KO_1 | 49.3      | -0.13 | 0.02    | 1    |
| NGLY1_1    | 50.71     | -0.16 | 0.1     | 0.99 |
| NGLY1_KO_2 | 48.72     | -0.11 | 0.02    | 0.99 |
| NGLY1_2    | 49.32     | -0.1  | 0.02    | 0.96 |

Supplement: Supplementary file 5932 [file 1]

IPI00026516.1|OXCT1

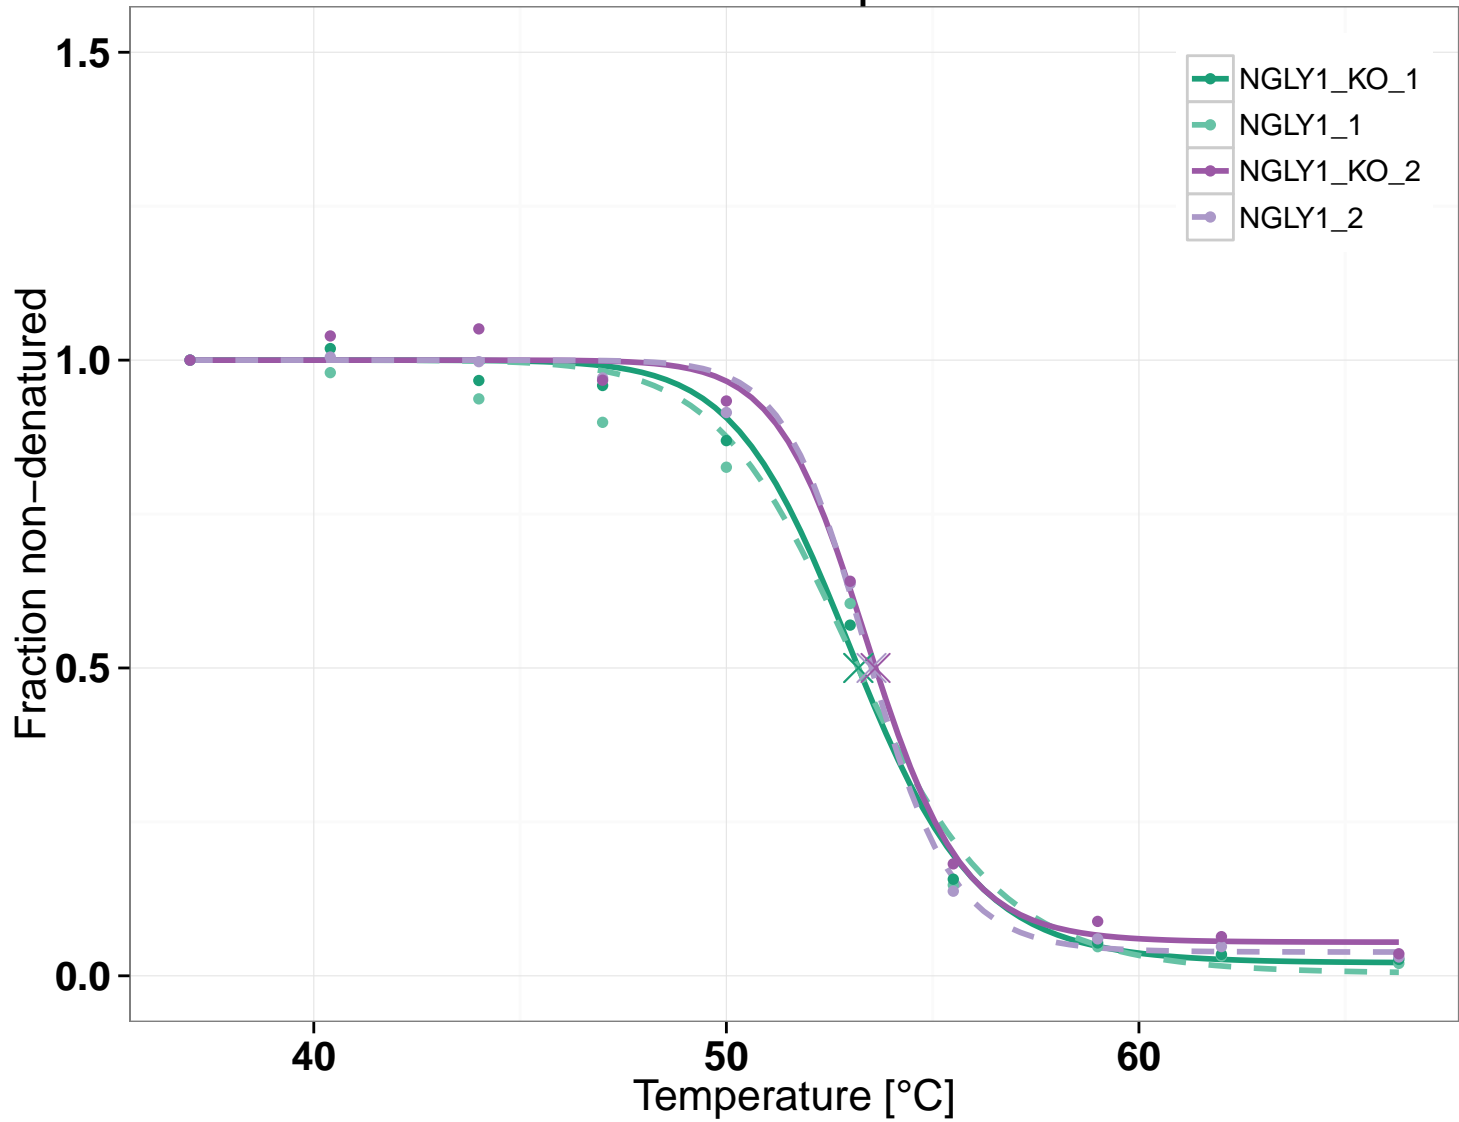

|            | meltPoint | slope | plateau | R2   |
|------------|-----------|-------|---------|------|
| NGLY1_KO_1 | 53.2      | -0.17 | 0.02    | 1    |
| NGLY1_1    | 53.19     | -0.14 | 0       | 0.99 |
| NGLY1_KO_2 | 53.62     | -0.21 | 0.05    | 1    |
| NGLY1_2    | 53.52     | -0.24 | 0.04    | 1    |

Supplement: Supplementary file 5933 [file 1]

IPI00217989.4|SCYL3

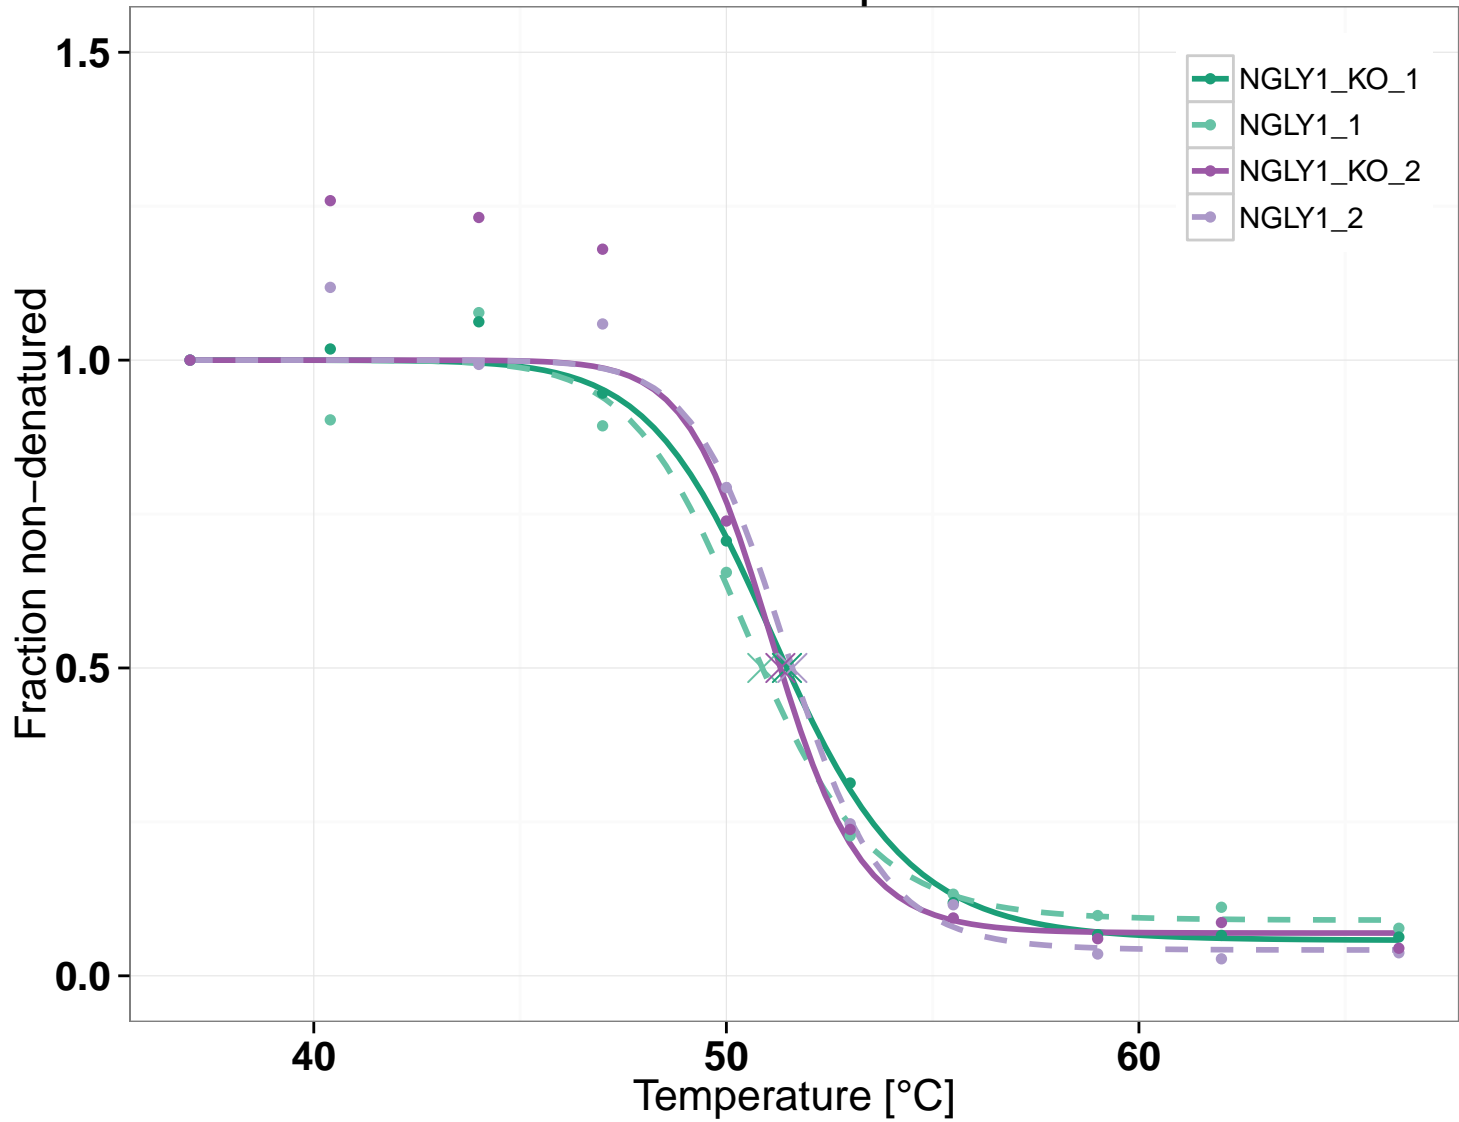

|            | meltPoint | slope | plateau | R2   |
|------------|-----------|-------|---------|------|
| NGLY1_KO_1 | 51.47     | -0.15 | 0.06    | 1    |
| NGLY1_1    | 50.87     | -0.16 | 0.09    | 0.99 |
| NGLY1_KO_2 | 51.31     | -0.22 | 0.07    | 0.94 |
| NGLY1_2    | 51.6      | -0.21 | 0.04    | 0.99 |

Supplement: Supplementary file 5934 [file 1]

# IPI00217601.1|RNF170

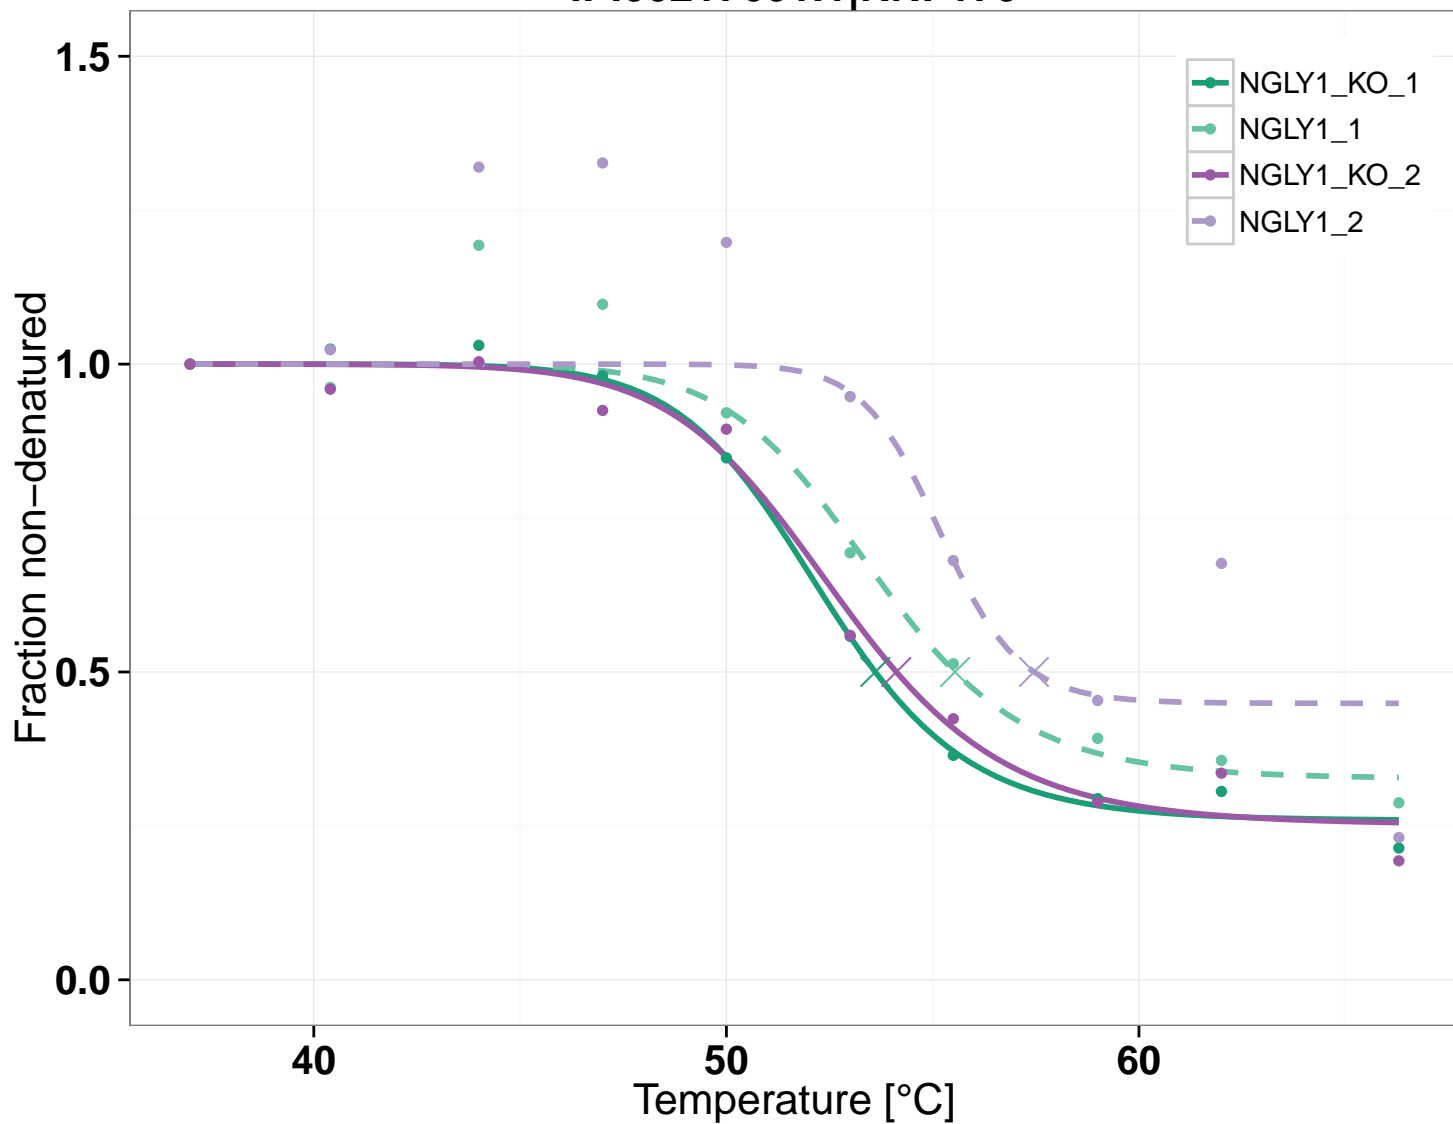

|            | meltPoint | slope  | plateau | R2   |
|------------|-----------|--------|---------|------|
| NGLY1_KO_1 | 53.61     | -0.11  | 0.26    | 0.99 |
| NGLY1_1    | 55.54     | -0.093 | 0.33    | 0.95 |
| NGLY1_KO_2 | 54.12     | -0.093 | 0.25    | 0.98 |
| NGLY1_2    | 57.46     | -0.15  | 0.45    | 0.71 |

Supplement: Supplementary file 5935 [file 1]

# IPI00386258.1|MTCH1

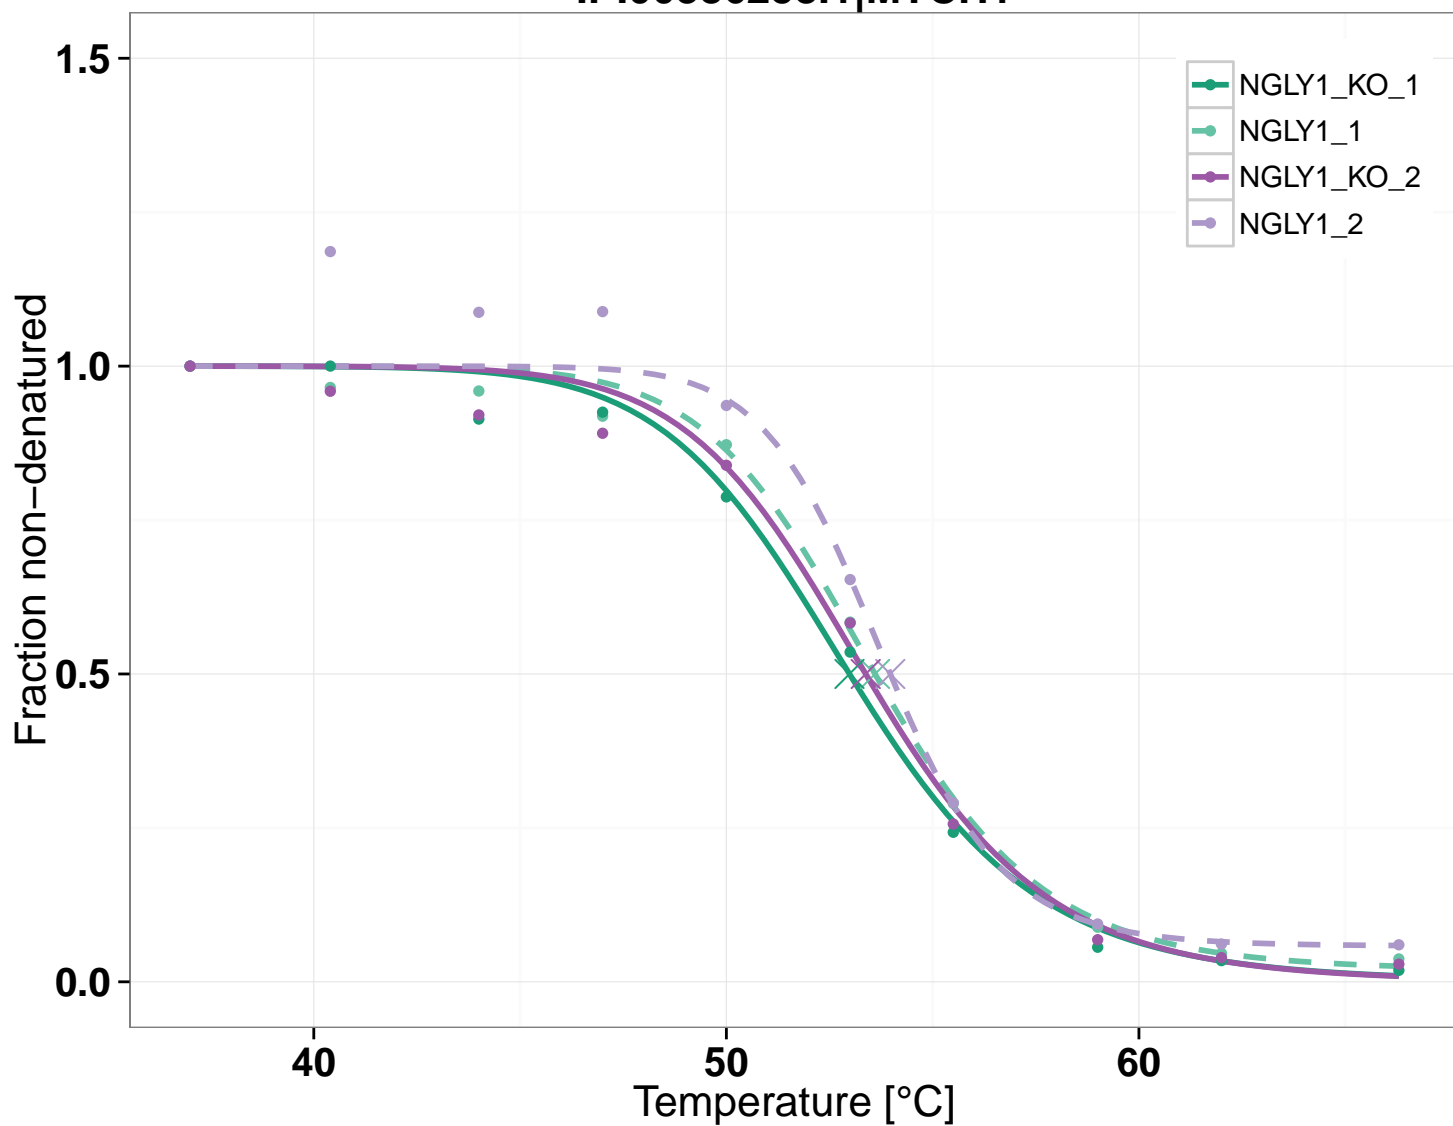

|            | meltPoint | slope | plateau | R2   |
|------------|-----------|-------|---------|------|
| NGLY1_KO_1 | 52.98     | -0.11 | 0       | 0.99 |
| NGLY1_1    | 53.6      | -0.12 | 0.02    | 1    |
| NGLY1_KO_2 | 53.38     | -0.11 | 0       | 0.99 |
| NGLY1_2    | 53.97     | -0.16 | 0.06    | 0.97 |

Supplement: Supplementary file 5936 [file 1]

# IPI00792789.2|THOC7

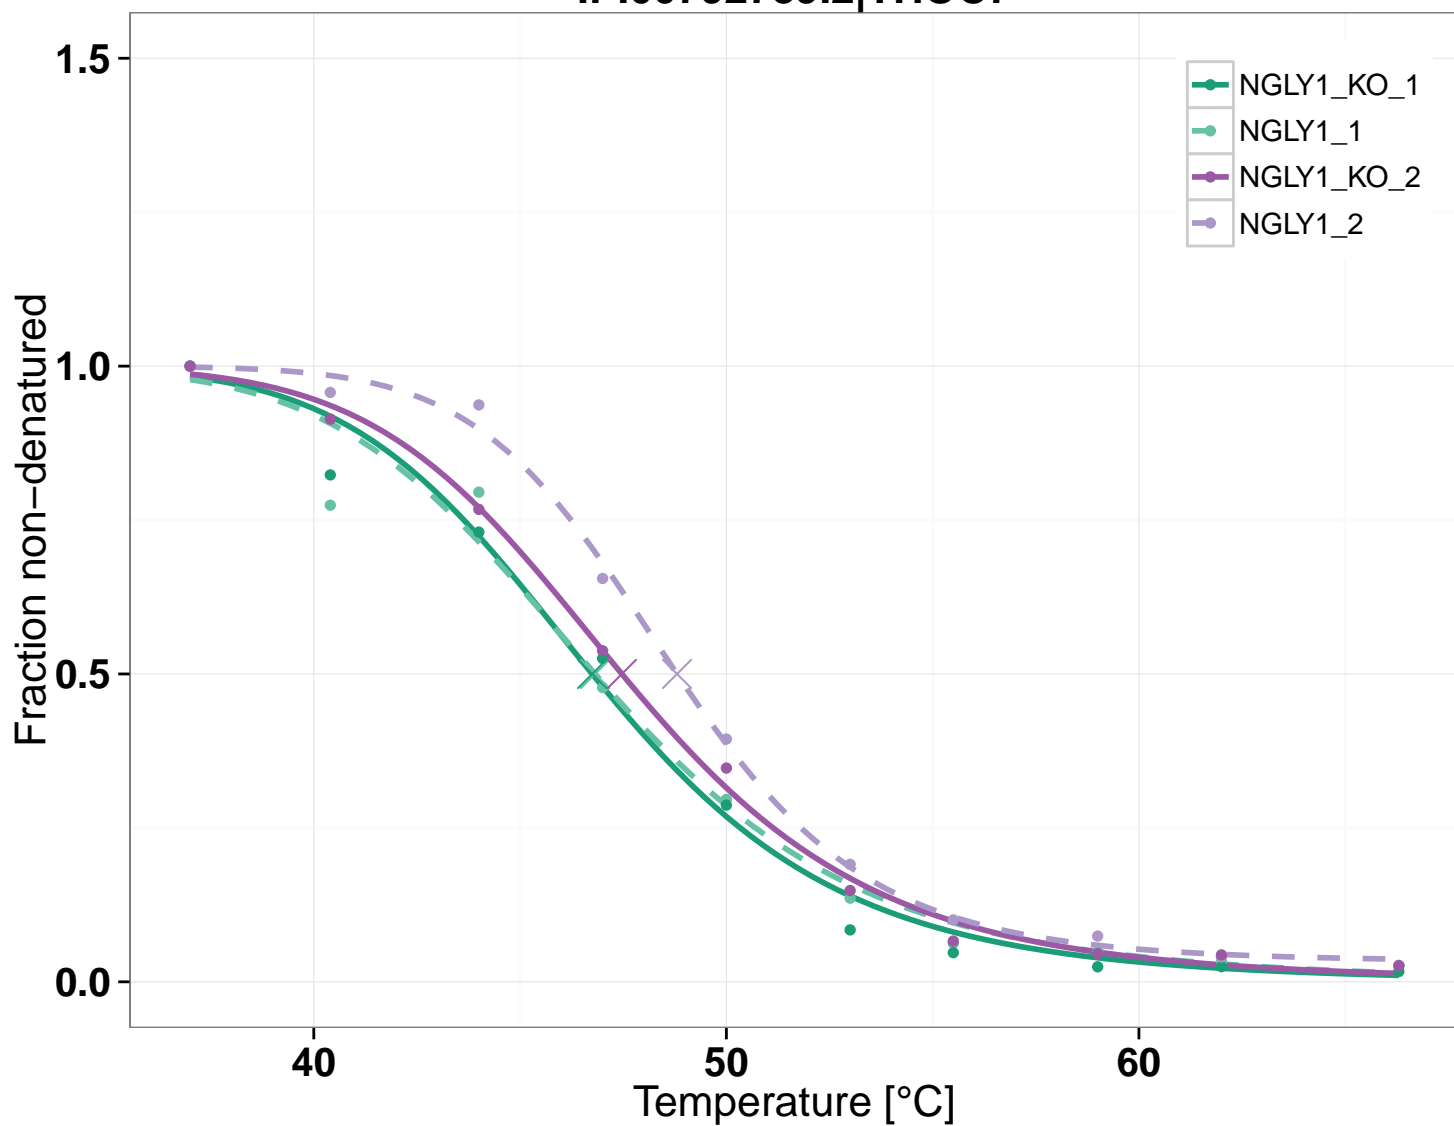

|            | meltPoint | slope  | plateau | R2   |
|------------|-----------|--------|---------|------|
| NGLY1_KO_1 | 46.75     | -0.084 | 0       | 0.99 |
| NGLY1_1    | 46.82     | -0.078 | 0       | 0.98 |
| NGLY1_KO_2 | 47.47     | -0.082 | 0       | 1    |
| NGLY1_2    | 48.8      | -0.1   | 0.03    | 1    |

Supplement: Supplementary file 5937 [file 1]

IPI00008943.3|DDX19A

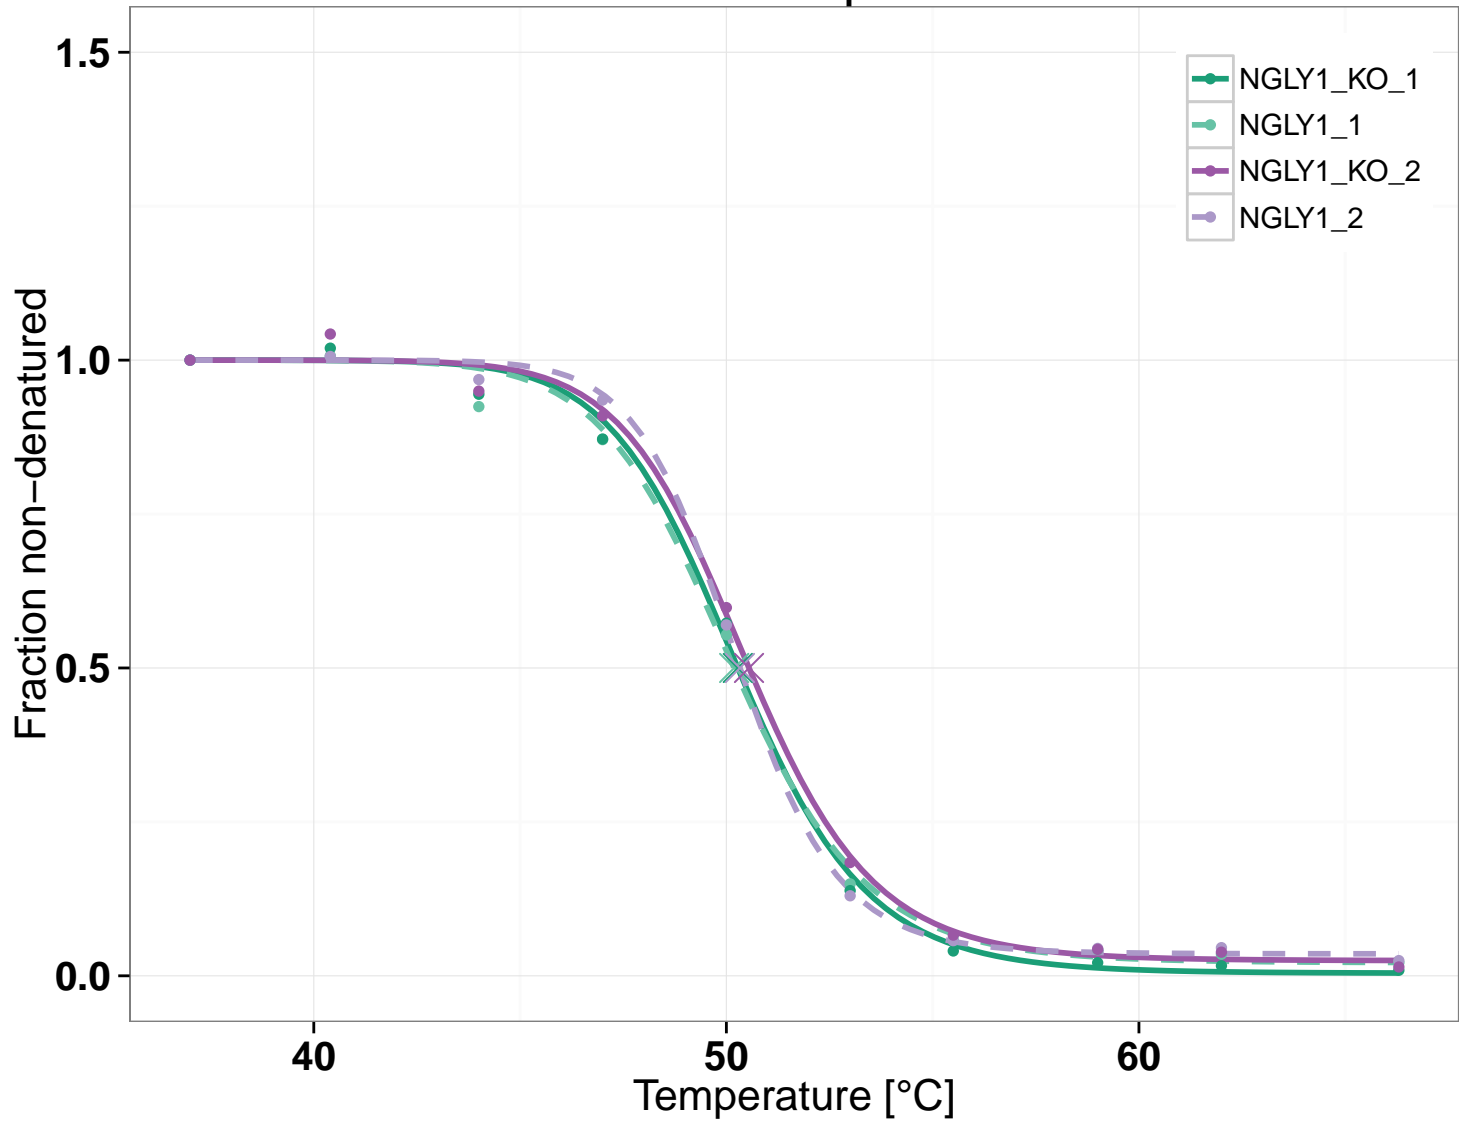

|            | meltPoint | slope | plateau | R2 |
|------------|-----------|-------|---------|----|
| NGLY1_KO_1 | 50.28     | -0.16 | 0       | 1  |
| NGLY1_1    | 50.19     | -0.15 | 0.02    | 1  |
| NGLY1_KO_2 | 50.55     | -0.16 | 0.02    | 1  |
| NGLY1_2    | 50.33     | -0.2  | 0.04    | 1  |

Supplement: Supplementary file 5938 [file 1]

IPI00164672.6|DCP1A

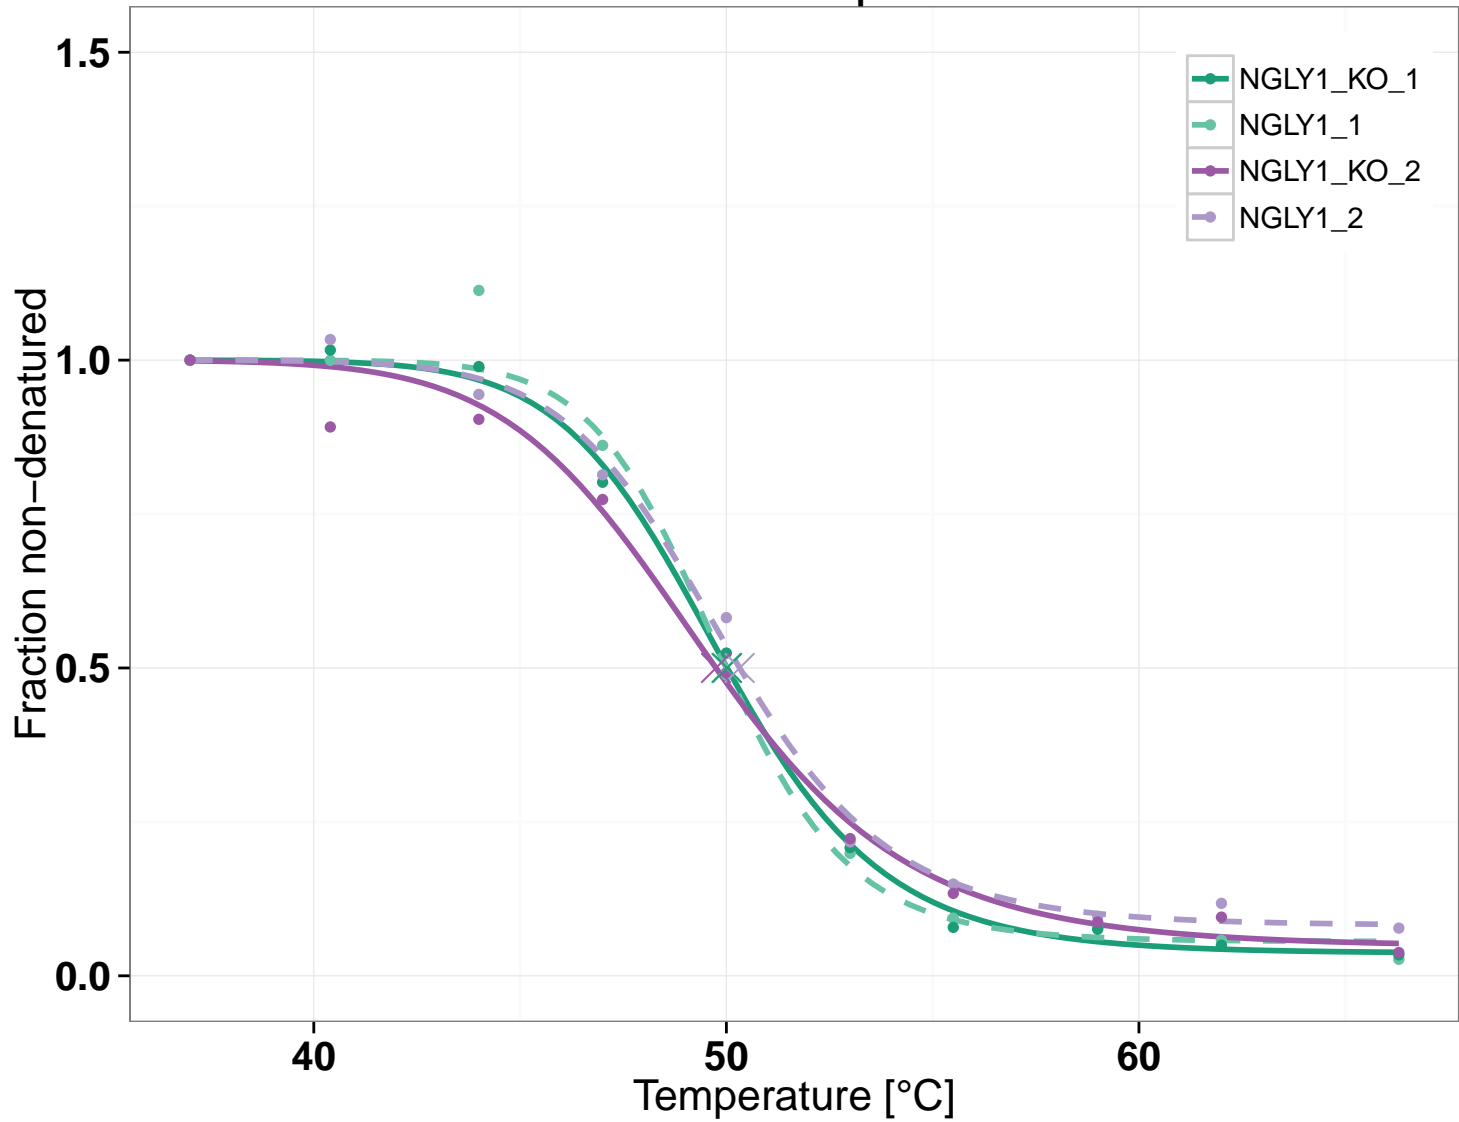

|            | meltPoint | slope  | plateau | R2   |
|------------|-----------|--------|---------|------|
| NGLY1_KO_1 | 50.02     | -0.12  | 0.04    | 1    |
| NGLY1_1    | 50        | -0.15  | 0.06    | 0.99 |
| NGLY1_KO_2 | 49.75     | -0.097 | 0.05    | 0.99 |
| NGLY1_2    | 50.32     | -0.12  | 0.08    | 1    |

Supplement: Supplementary file 5939 [file 1]

IPI00829835.2|GPATCH4

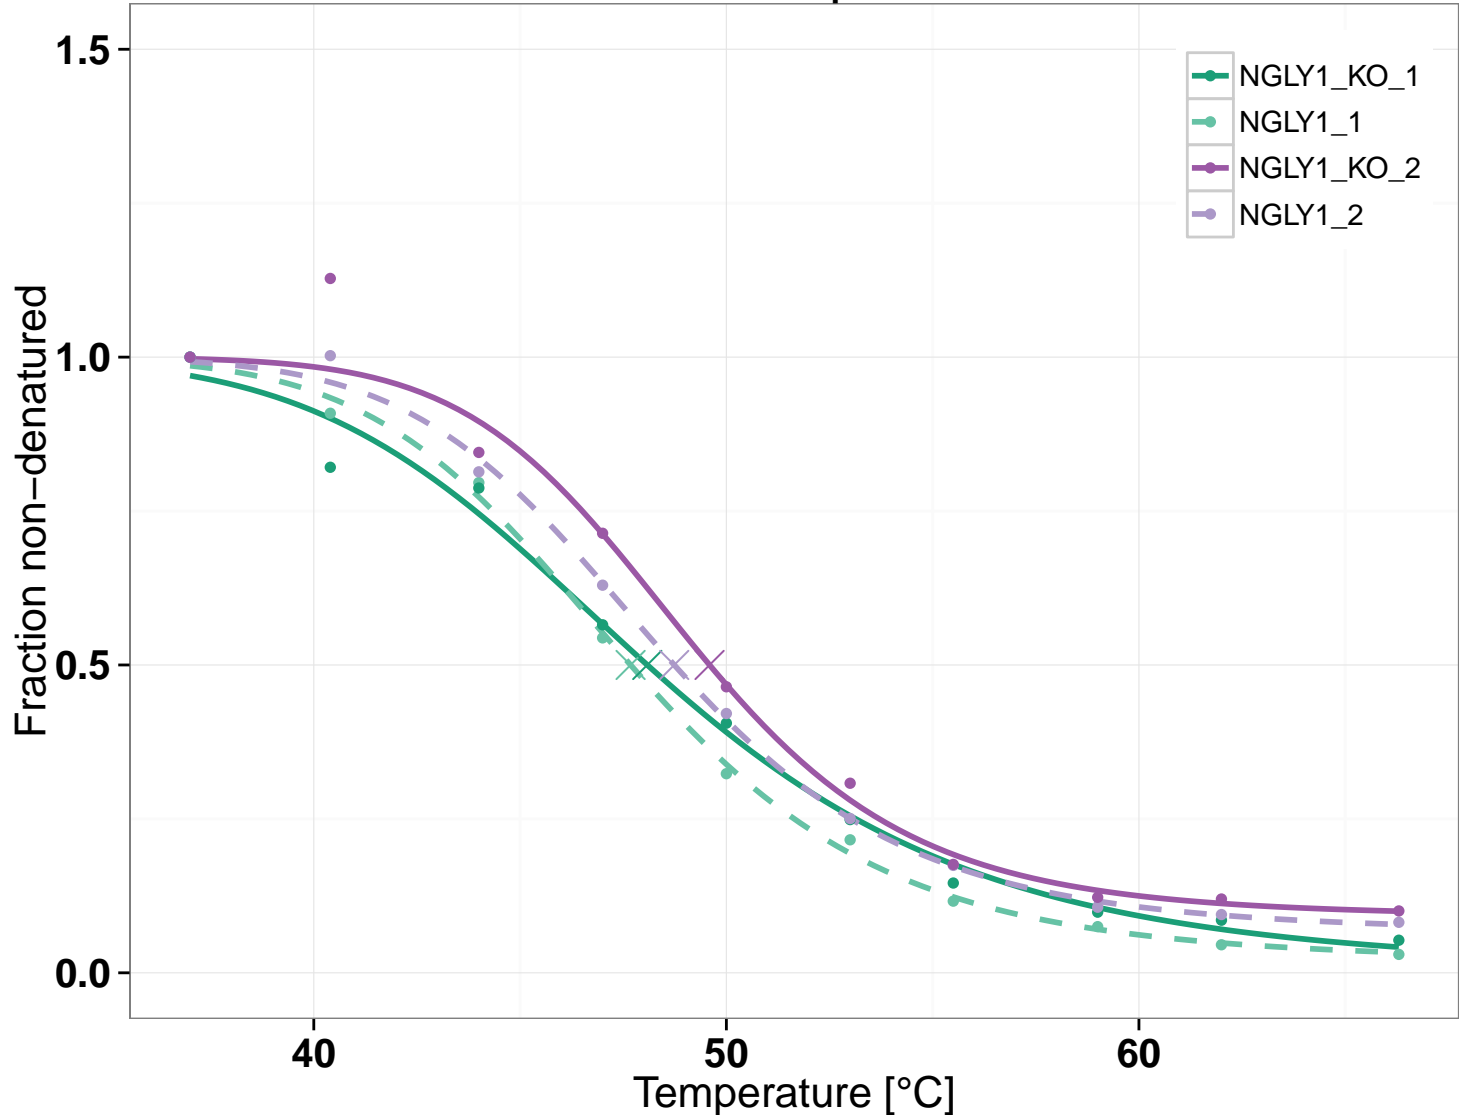

|            | meltPoint | slope  | plateau | R2   |
|------------|-----------|--------|---------|------|
| NGLY1_KO_1 | 48.08     | -0.062 | 0       | 0.99 |
| NGLY1_1    | 47.68     | -0.078 | 0.02    | 1    |
| NGLY1_KO_2 | 49.59     | -0.084 | 0.09    | 0.98 |
| NGLY1_2    | 48.74     | -0.078 | 0.07    | 1    |

Supplement: Supplementary file 5940 [file 1]

# IPI00107366.3|GKAP1

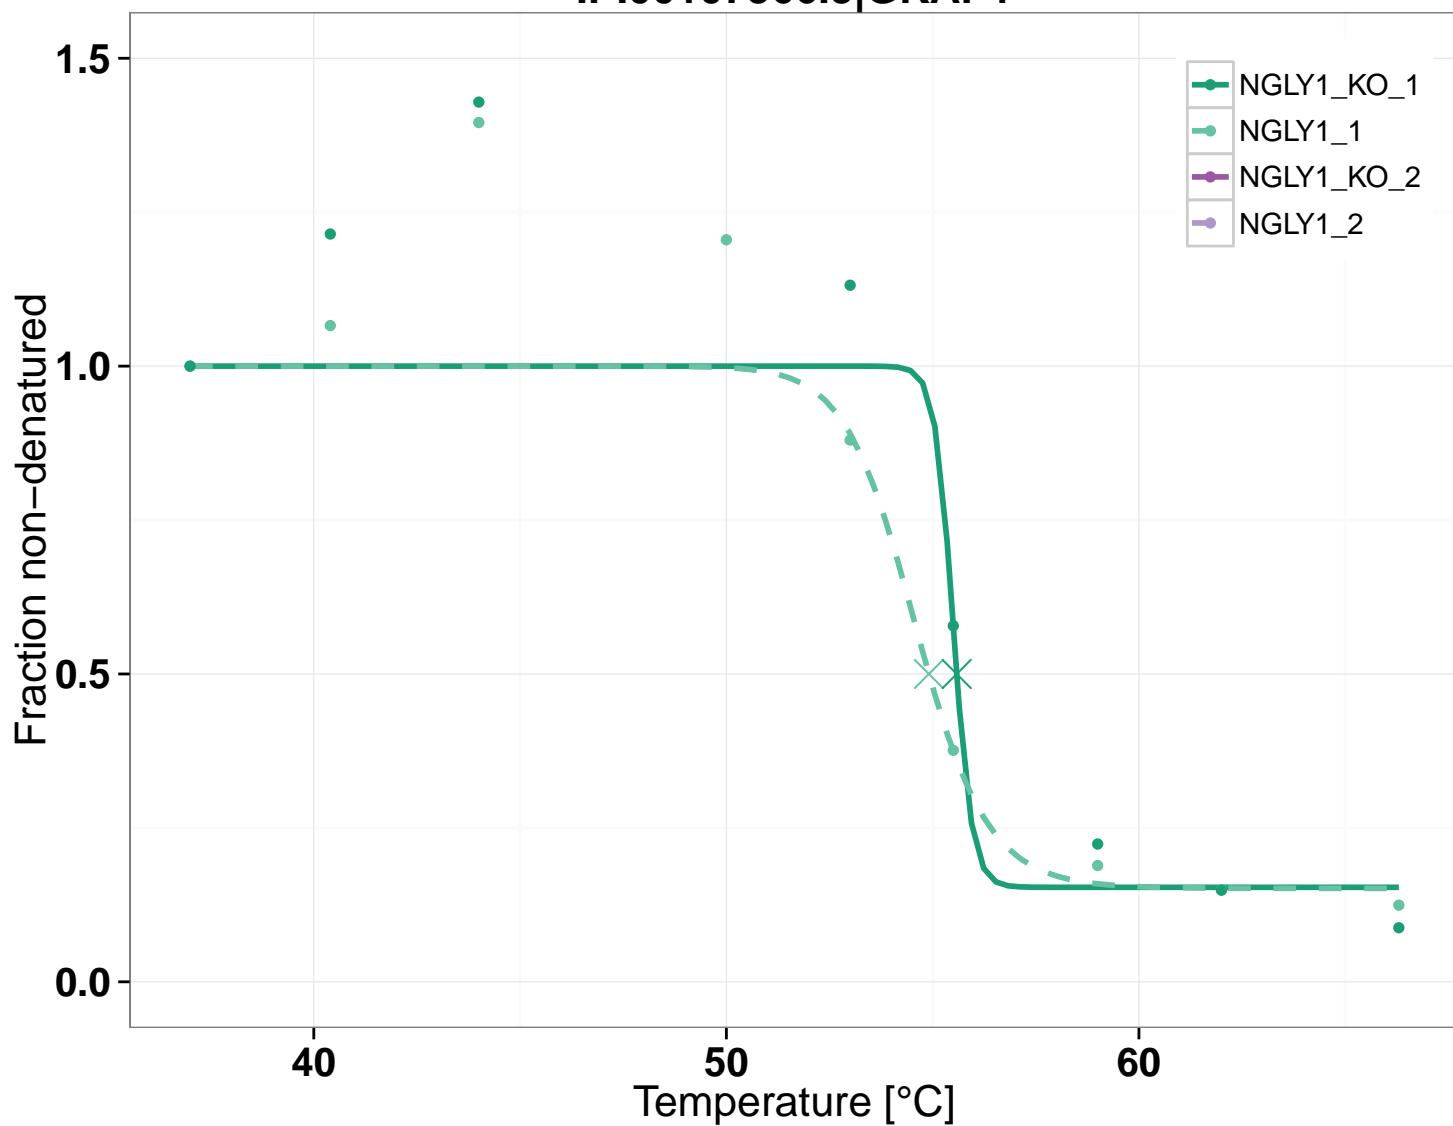

|            | meltPoint | slope | plateau | R2   |
|------------|-----------|-------|---------|------|
| NGLY1_KO_1 | 55.58     | -0.95 | 0.15    | 0.52 |
| NGLY1_1    | 54.91     | -0.25 | 0.15    | 0.81 |
| NGLY1_KO_2 | -         | -     | -       | -    |
| NGLY1_2    | -         | -     | -       | -    |

Supplement: Supplementary file 5941 [file 1]

# IPI00440484.3|PER1

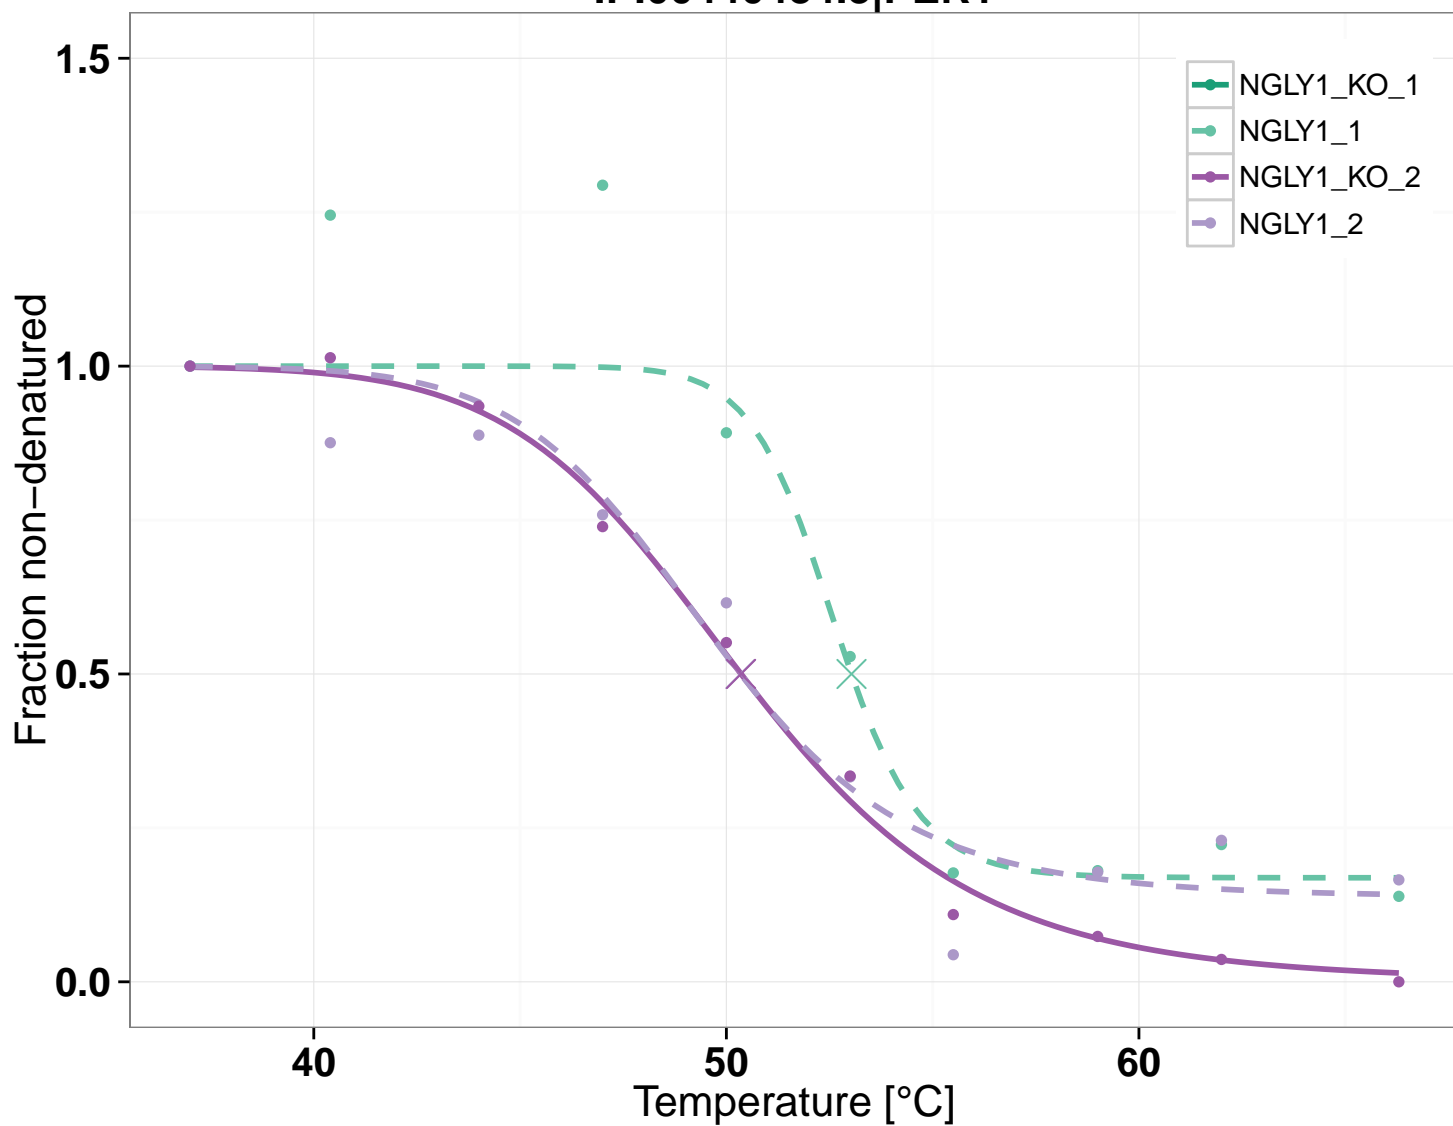

|            | meltPoint | slope  | plateau | R2   |
|------------|-----------|--------|---------|------|
| NGLY1_KO_1 | —         | —      | —       | —    |
| NGLY1_1    | 53.03     | -0.2   | 0.17    | 0.82 |
| NGLY1_KO_2 | 50.36     | -0.088 | 0       | 1    |
| NGLY1_2    | 50.34     | -0.091 | 0.14    | 0.94 |

Supplement: Supplementary file 5942 [file 1]

IPI00217537.2|ASXL1

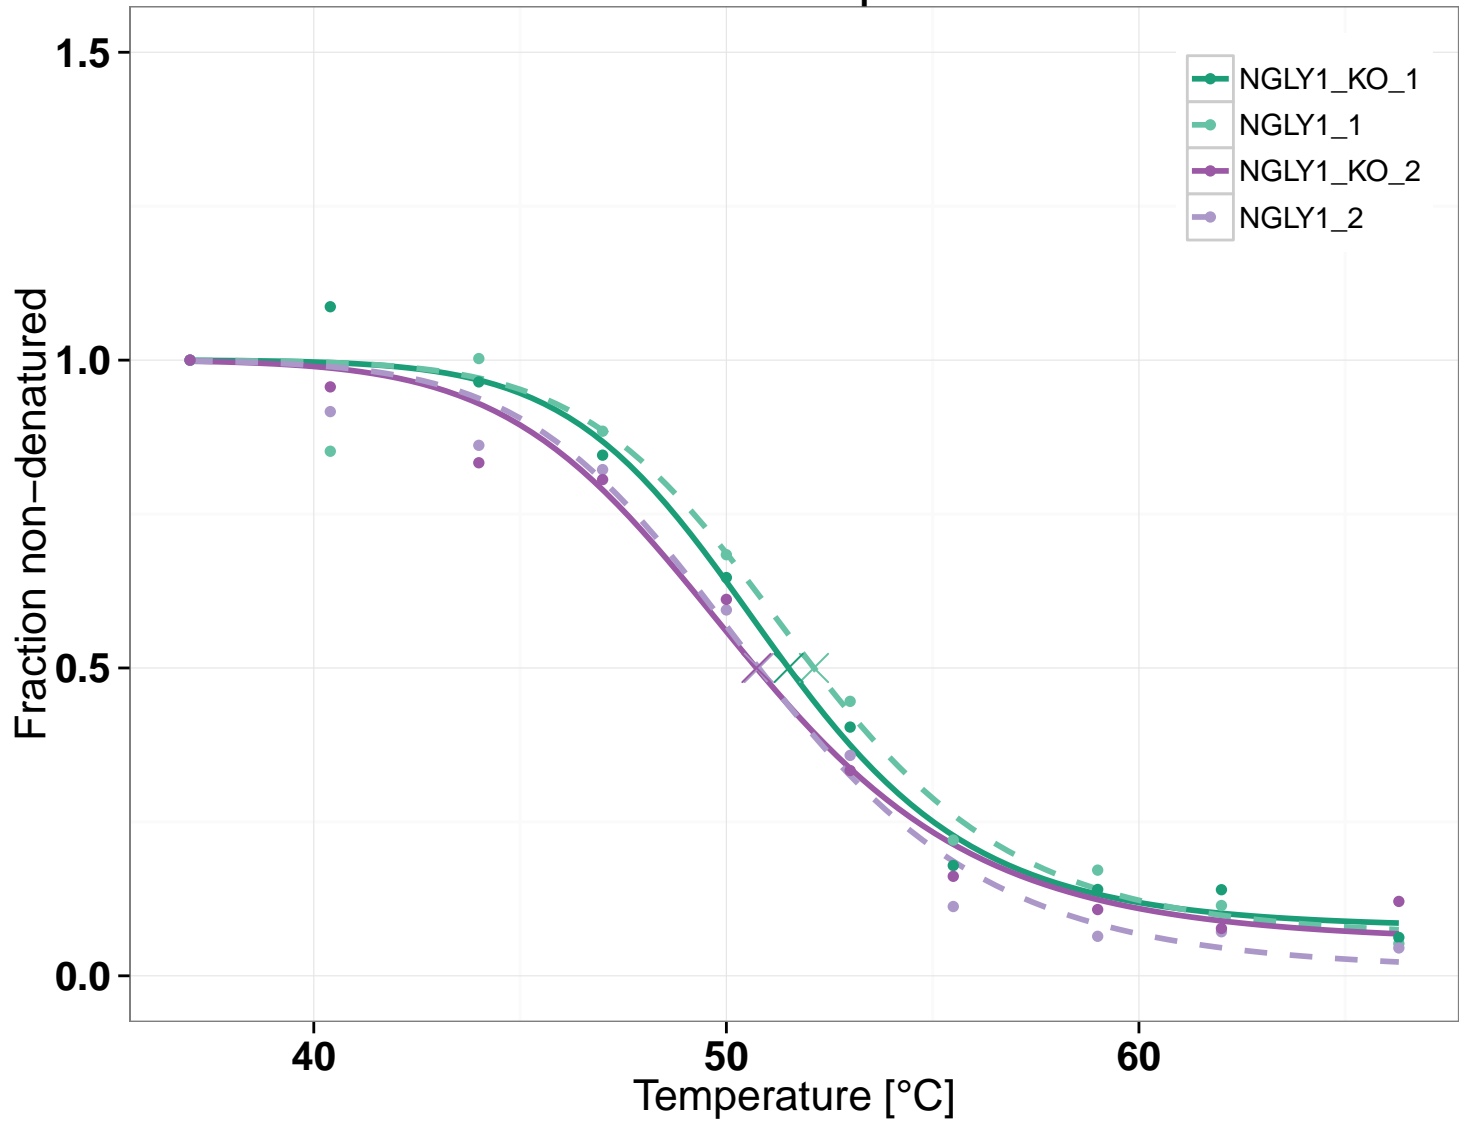

|            | meltPoint | slope  | plateau | R2   |
|------------|-----------|--------|---------|------|
| NGLY1_KO_1 | 51.51     | -0.094 | 0.08    | 0.99 |
| NGLY1_1    | 52.12     | -0.089 | 0.06    | 0.98 |
| NGLY1_KO_2 | 50.73     | -0.082 | 0.05    | 0.99 |
| NGLY1_2    | 50.78     | -0.088 | 0.01    | 0.99 |

Supplement: Supplementary file 5943 [file 1]

# IPI00154645.7|TBC1D15

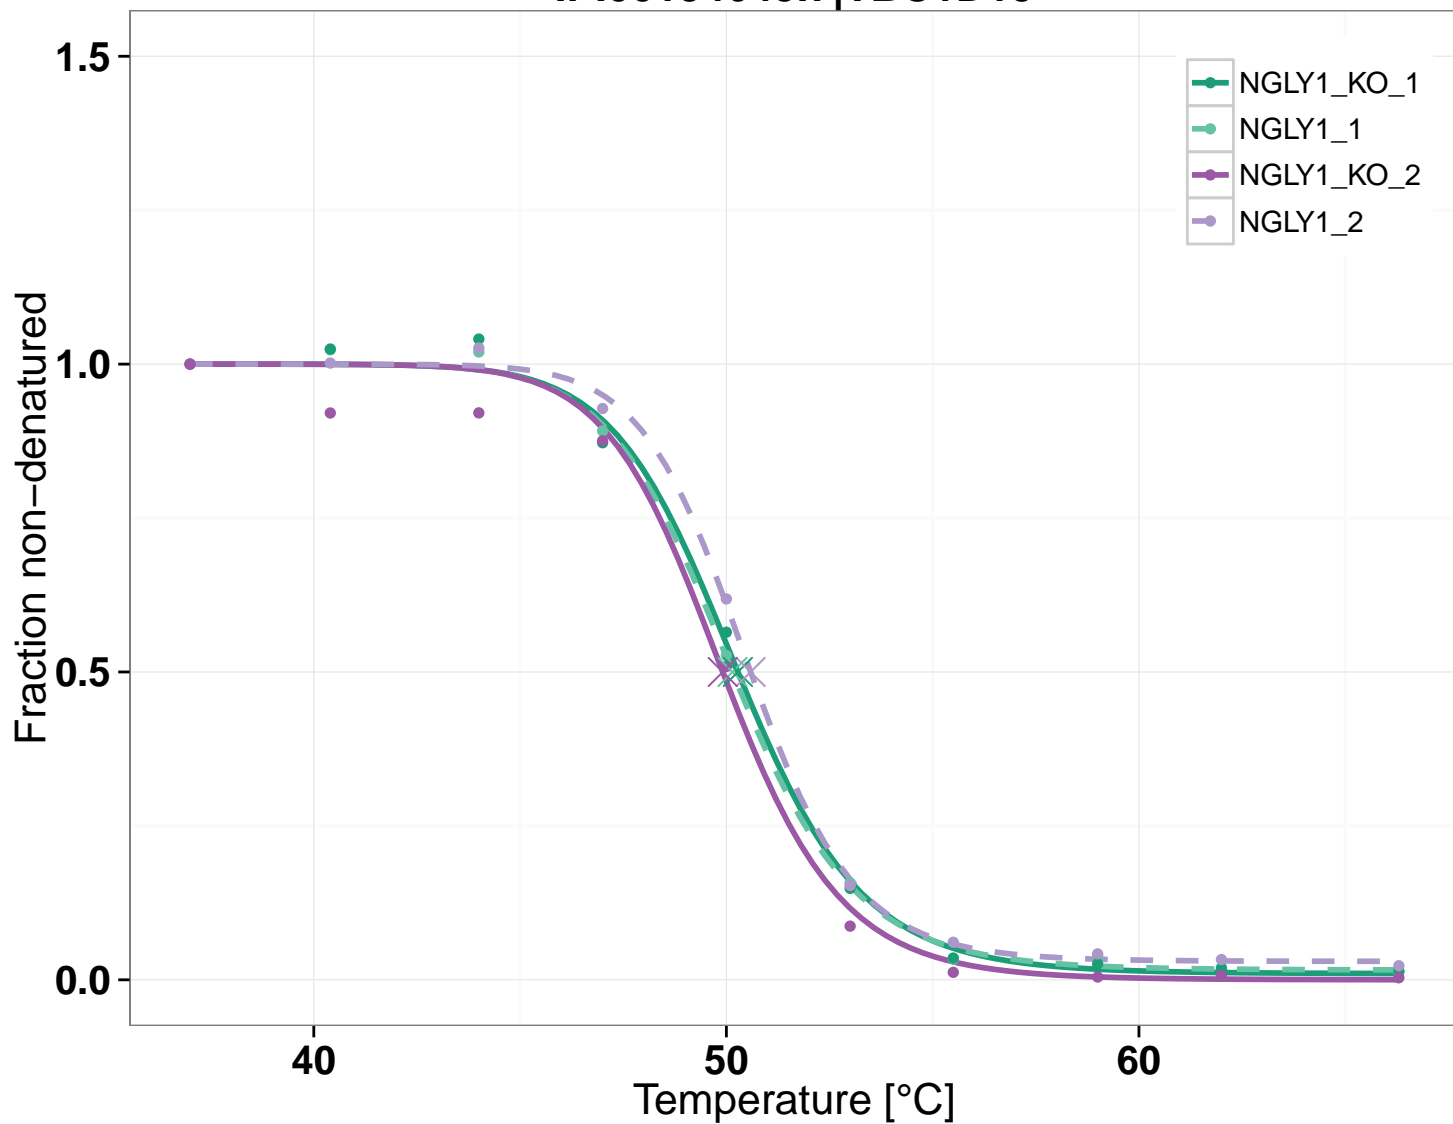

|            | meltPoint | slope | plateau | R2   |
|------------|-----------|-------|---------|------|
| NGLY1_KO_1 | 50.28     | -0.16 | 0.01    | 1    |
| NGLY1_1    | 50.15     | -0.16 | 0.02    | 1    |
| NGLY1_KO_2 | 49.91     | -0.17 | 0       | 0.99 |
| NGLY1_2    | 50.59     | -0.19 | 0.03    | 1    |

Supplement: Supplementary file 5944 [file 1]

IPI00006580.2|FAM117A

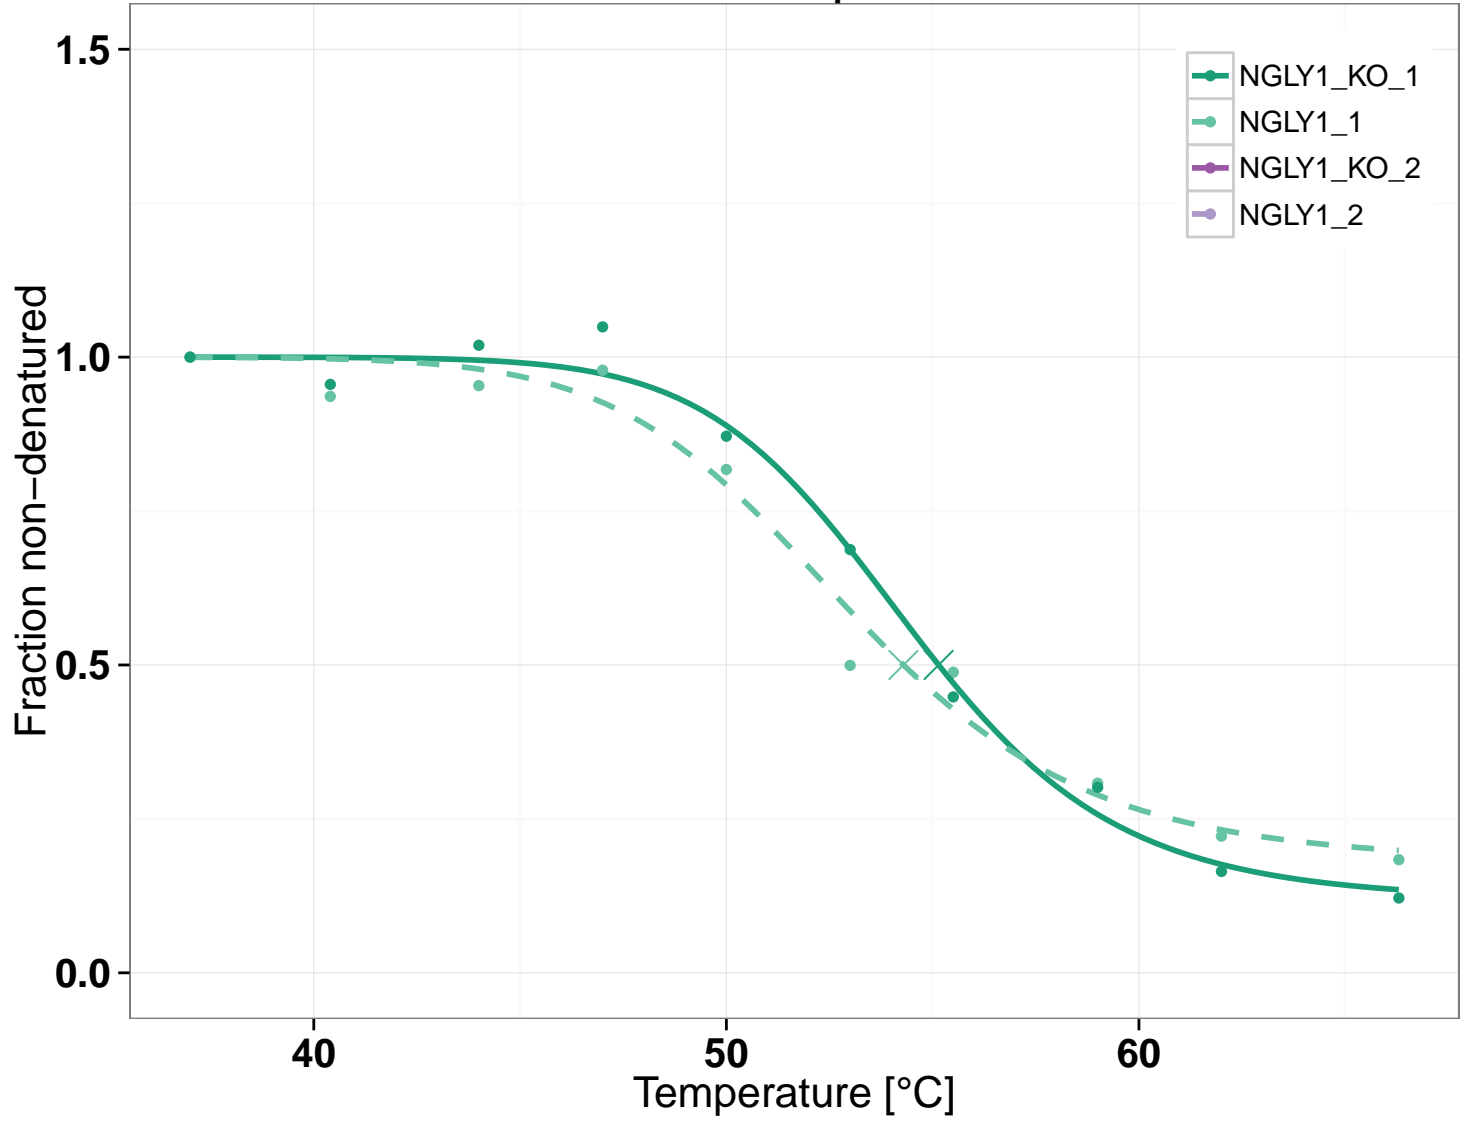

|            | meltPoint | slope  | plateau | R2   |
|------------|-----------|--------|---------|------|
| NGLY1_KO_1 | 55.15     | -0.089 | 0.12    | 0.99 |
| NGLY1_1    | 54.29     | -0.072 | 0.18    | 0.98 |
| NGLY1_KO_2 | -         | -      | -       | -    |
| NGLY1_2    | -         | -      | -       | -    |

Supplement: Supplementary file 5945 [file 1]

# IPI00297333.4|TBC1D24

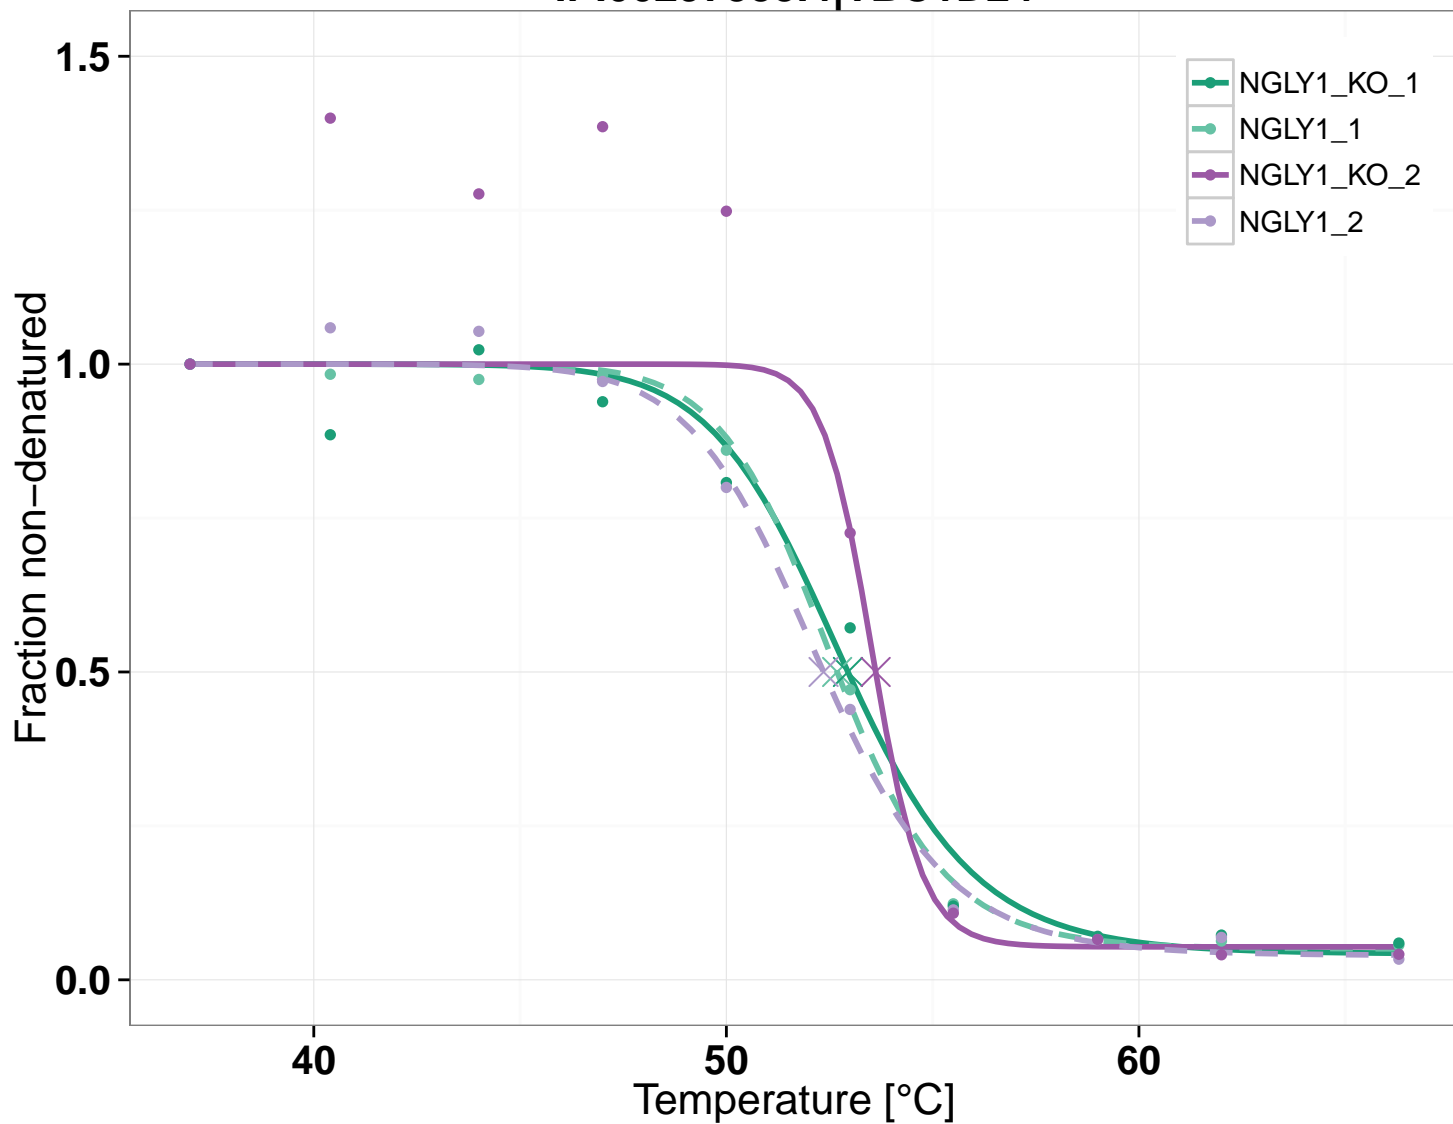

|            | meltPoint | slope | plateau | R2   |
|------------|-----------|-------|---------|------|
| NGLY1_KO_1 | 52.95     | -0.15 | 0.04    | 0.98 |
| NGLY1_1    | 52.69     | -0.17 | 0.05    | 1    |
| NGLY1_KO_2 | 53.62     | -0.39 | 0.05    | 0.86 |
| NGLY1_2    | 52.36     | -0.15 | 0.04    | 0.99 |

Supplement: Supplementary file 5946 [file 1]

IPI00747713.2|BAZ2B

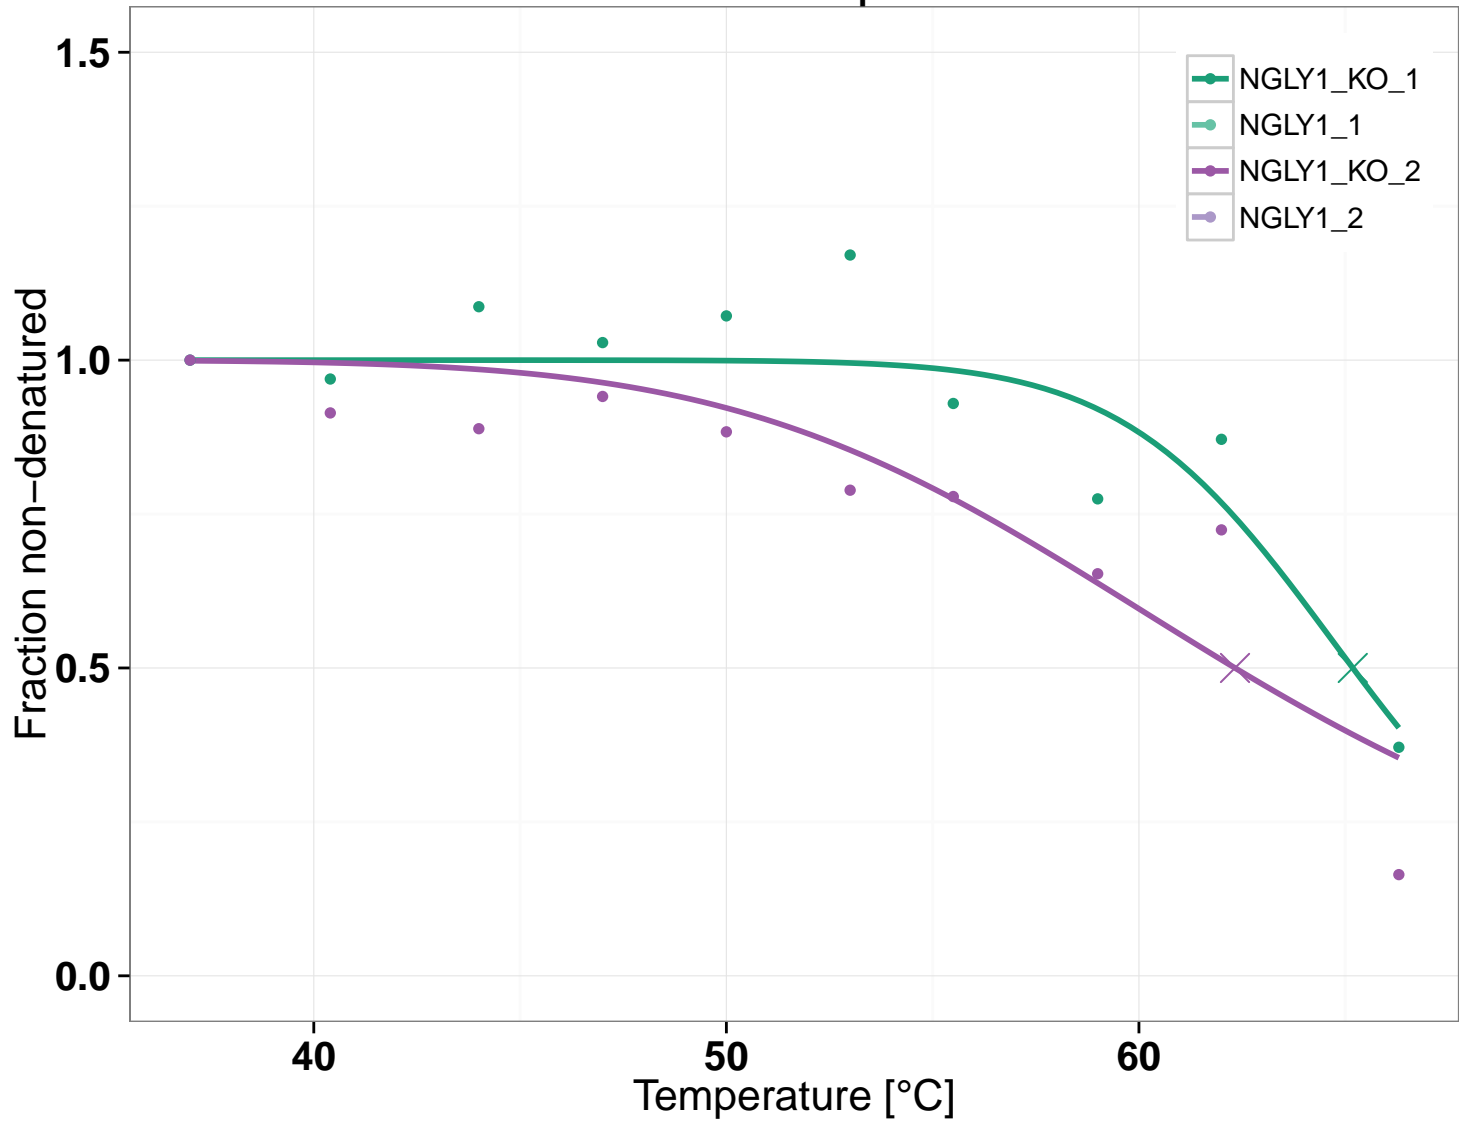

|            | meltPoint | slope  | plateau | R2   |
|------------|-----------|--------|---------|------|
| NGLY1_KO_1 | 65.18     | -0.09  | 0       | 0.82 |
| NGLY1_1    | -         | -      | -       | -    |
| NGLY1_KO_2 | 62.33     | -0.042 | 0       | 0.8  |
| NGLY1_2    | -         | -      | -       | -    |

Supplement: Supplementary file 5947 [file 1]

IPI00149849.5|COG4

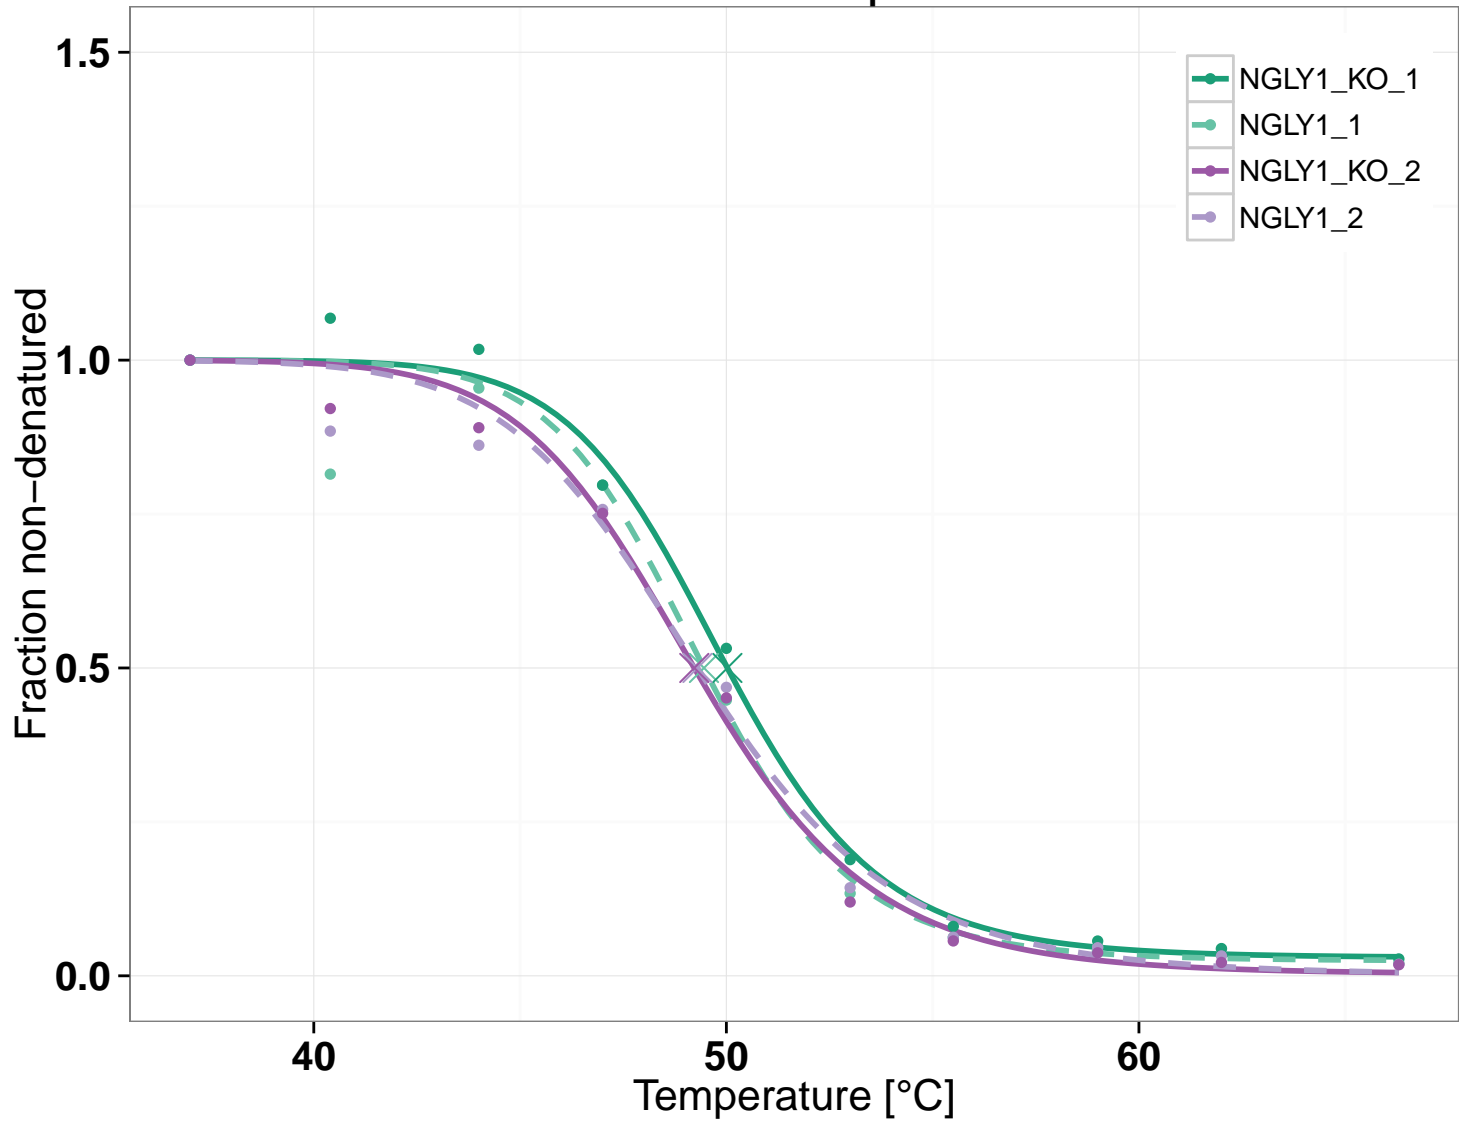

|            | meltPoint | slope | plateau | R2   |
|------------|-----------|-------|---------|------|
| NGLY1_KO_1 | 50.03     | -0.13 | 0.03    | 0.99 |
| NGLY1_1    | 49.46     | -0.13 | 0.02    | 0.98 |
| NGLY1_KO_2 | 49.22     | -0.12 | 0       | 0.99 |
| NGLY1_2    | 49.3      | -0.11 | 0       | 0.99 |

Supplement: Supplementary file 5948 [file 1]

IPI00009645.1|RANBP17

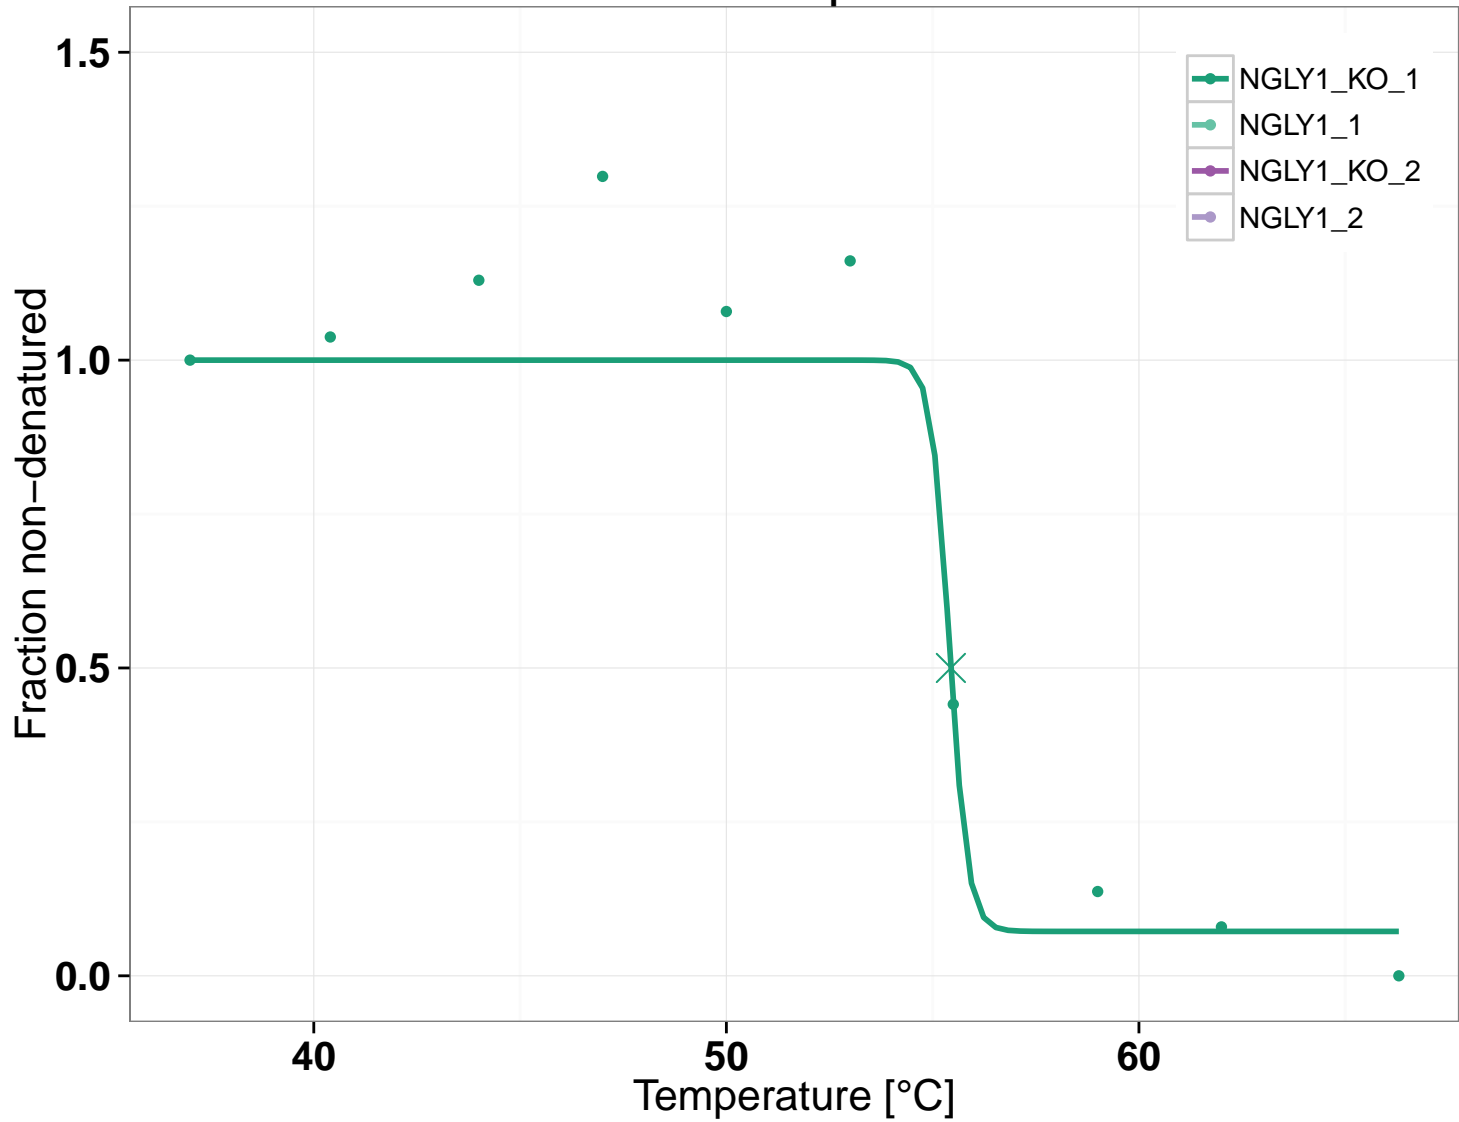

|            | meltPoint | slope | plateau | R2   |
|------------|-----------|-------|---------|------|
| NGLY1_KO_1 | 55.44     | -1    | 0.07    | 0.94 |
| NGLY1_1    | -         | -     | -       | -    |
| NGLY1_KO_2 | -         | -     | -       | -    |
| NGLY1_2    | -         | -     | -       | -    |

Supplement: Supplementary file 5949 [file 1]

IPI00008578.1|CD226

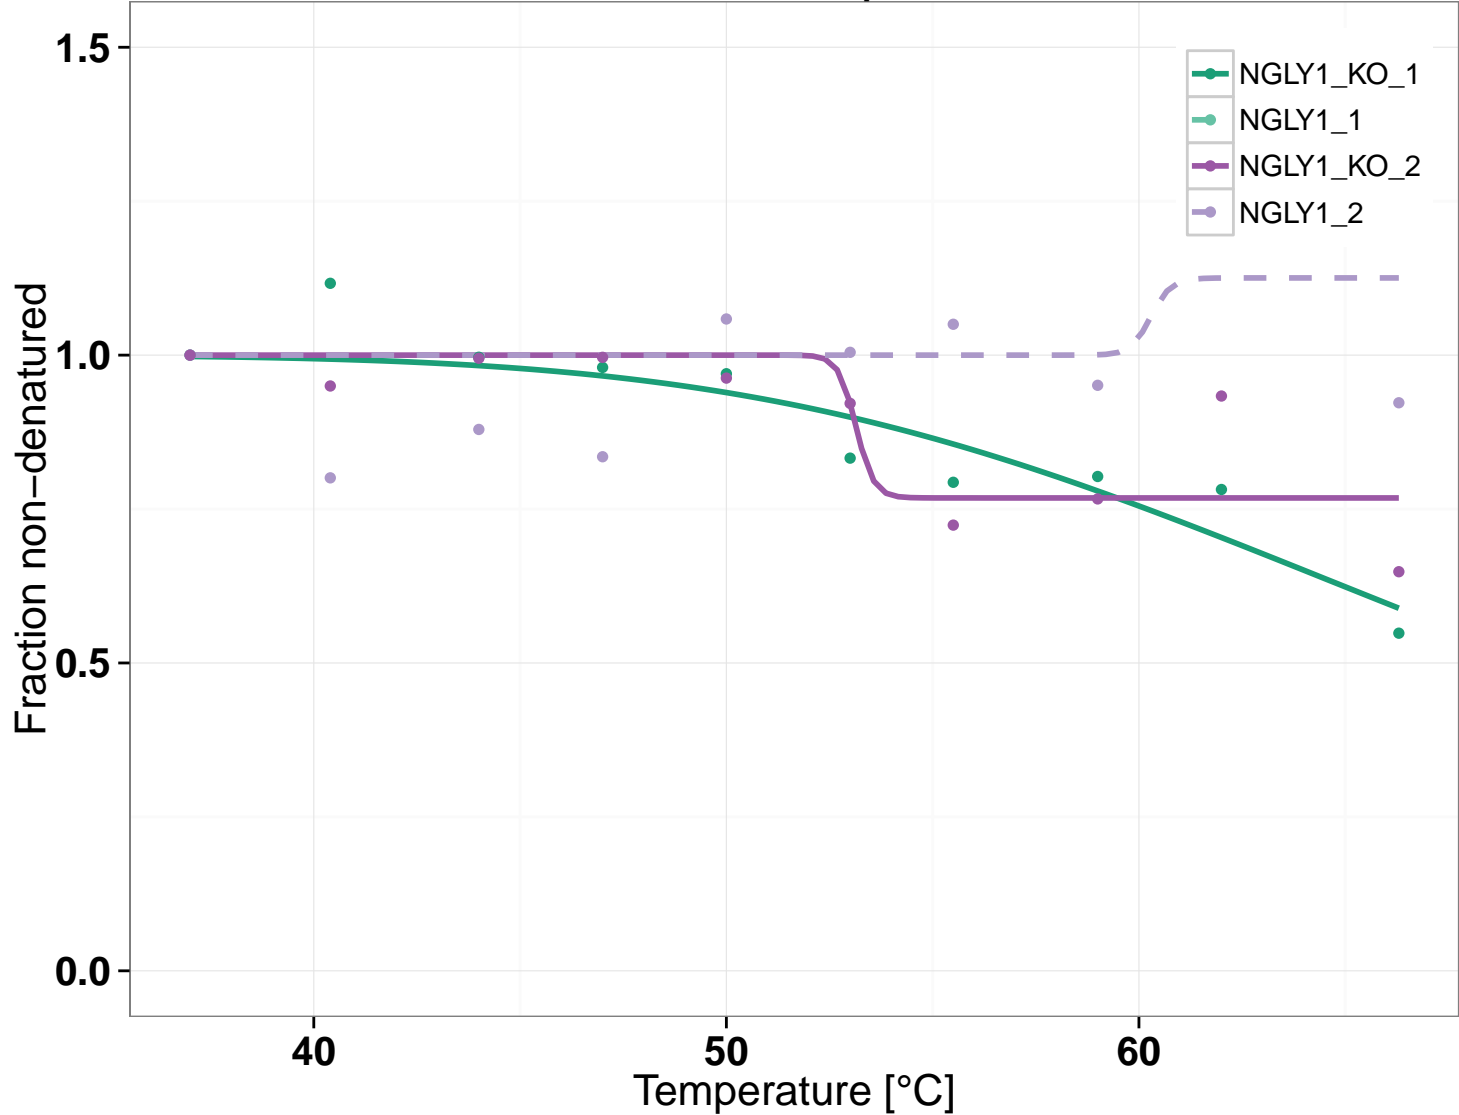

|            | meltPoint | slope  | plateau | R2   |
|------------|-----------|--------|---------|------|
| NGLY1_KO_1 | -         | -0.027 | 0       | 0.86 |
| NGLY1_1    | -         | -      | -       | -    |
| NGLY1_KO_2 | -         | -0.27  | 0.77    | 0.68 |
| NGLY1_2    | -         | 0.13   | 1.13    | 0.14 |

Supplement: Supplementary file 5950 [file 1]

# IPI00171636.3|NAV1

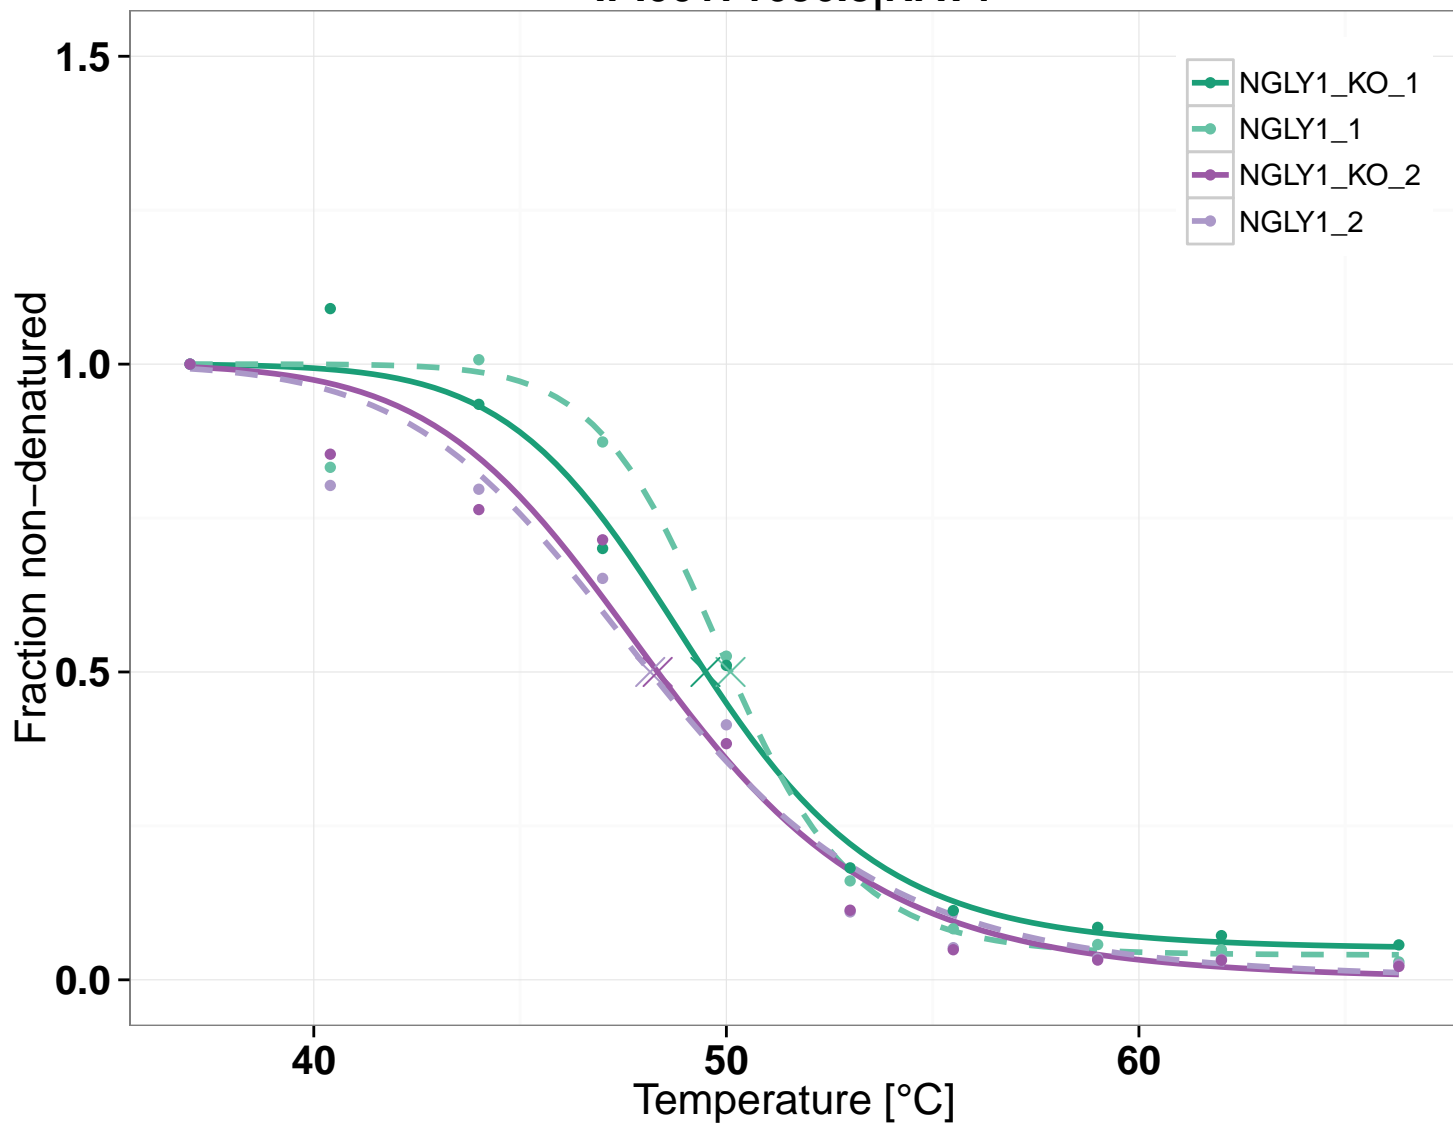

|            | meltPoint | slope  | plateau | R2   |
|------------|-----------|--------|---------|------|
| NGLY1_KO_1 | 49.49     | -0.1   | 0.05    | 0.99 |
| NGLY1_1    | 50.1      | -0.15  | 0.04    | 0.98 |
| NGLY1_KO_2 | 48.33     | -0.091 | 0       | 0.97 |
| NGLY1_2    | 48.15     | -0.085 | 0       | 0.97 |

Supplement: Supplementary file 5951 [file 1]

IPI00073577.1|WDFY2

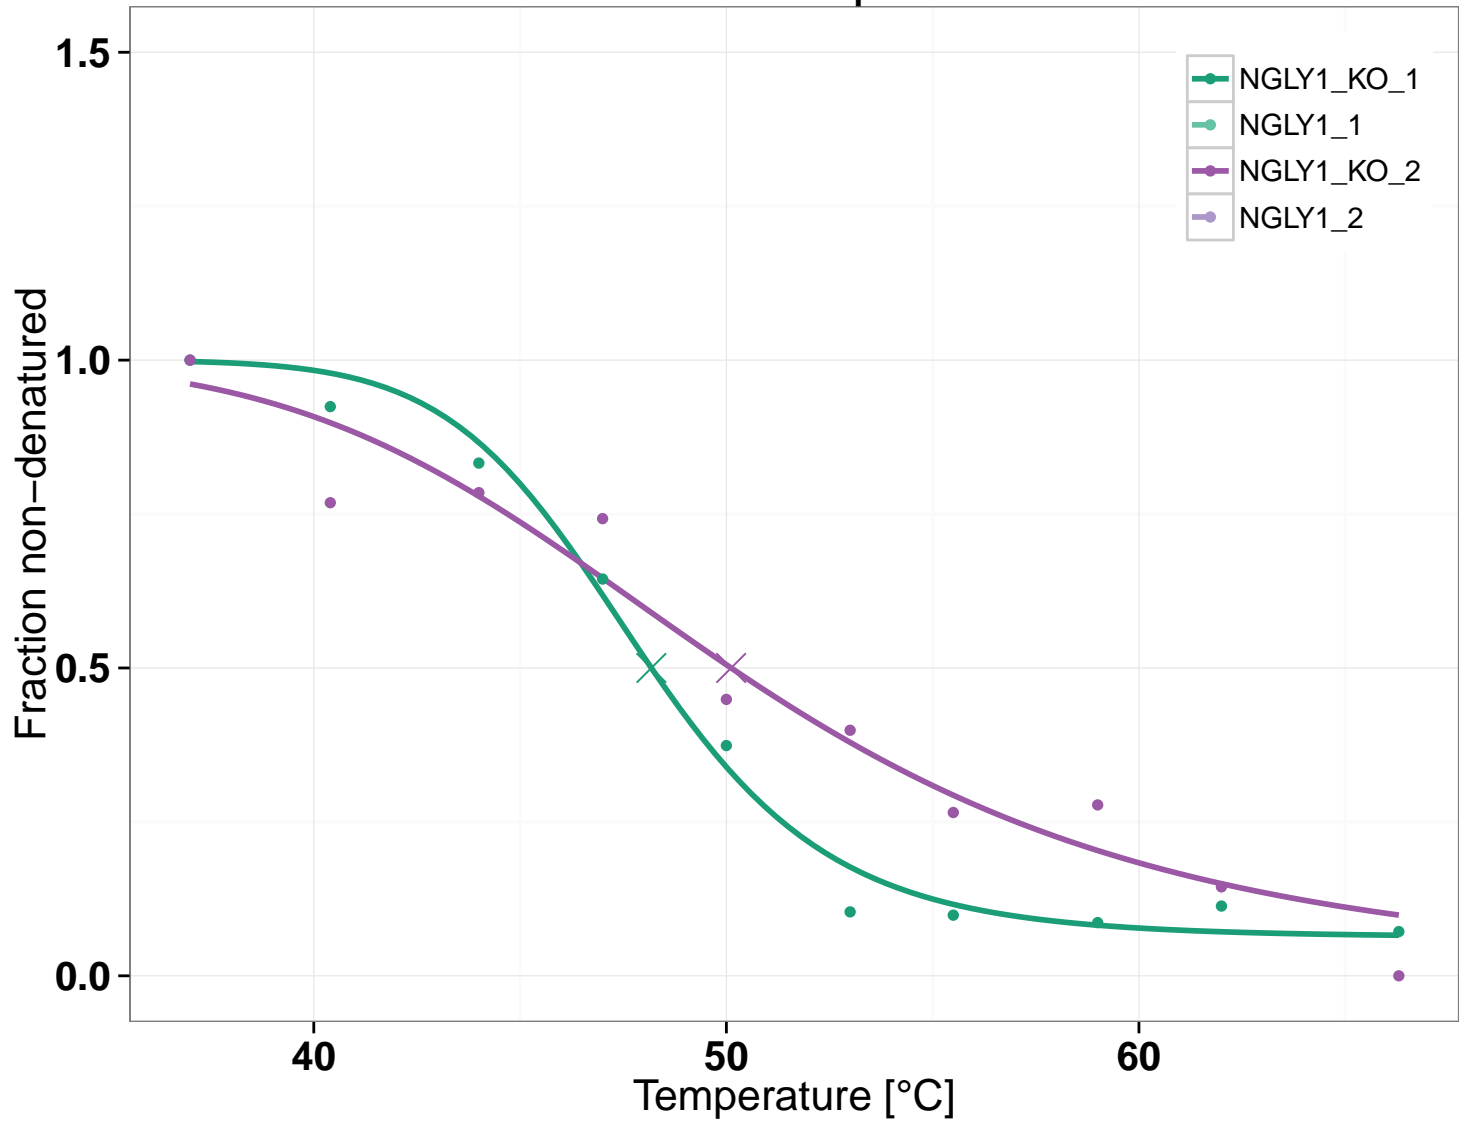

|            | meltPoint | slope  | plateau | R2   |
|------------|-----------|--------|---------|------|
| NGLY1_KO_1 | 48.18     | -0.1   | 0.06    | 0.99 |
| NGLY1_1    | -         | -      | -       | -    |
| NGLY1_KO_2 | 50.12     | -0.047 | 0       | 0.95 |
| NGLY1_2    | -         | -      | -       | -    |

Supplement: Supplementary file 5952 [file 1]

# IPI00294603.6|ZMYM2

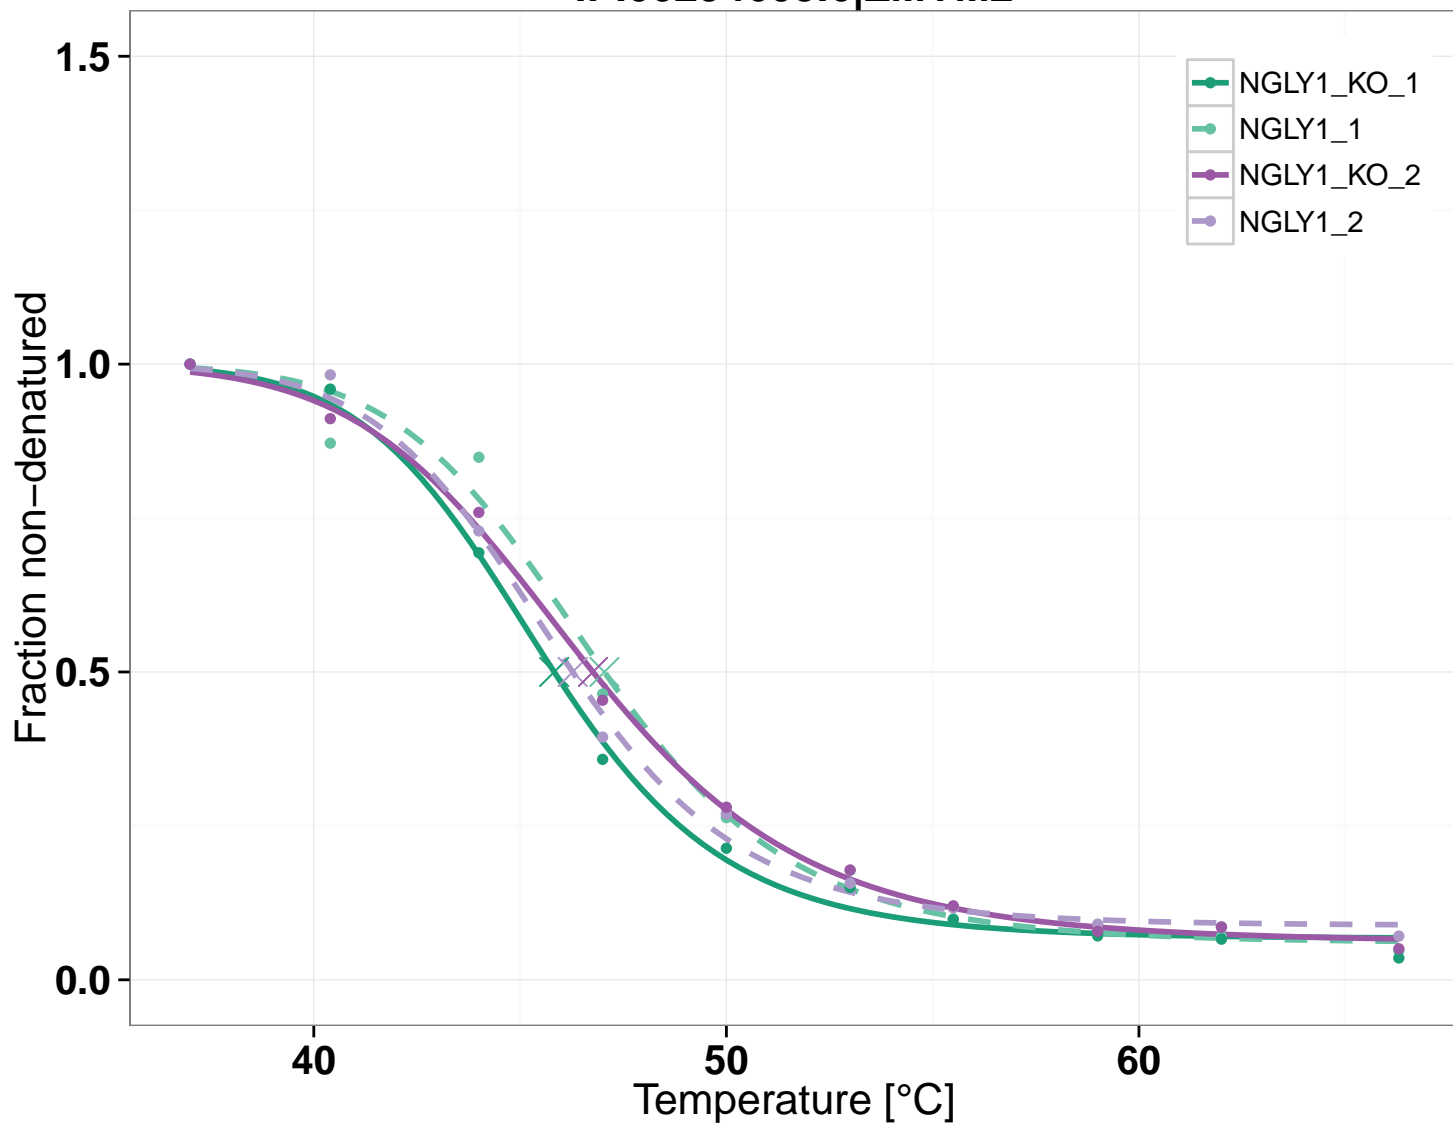

|            | meltPoint | slope  | plateau | R2   |
|------------|-----------|--------|---------|------|
| NGLY1_KO_1 | 45.83     | -0.11  | 0.07    | 1    |
| NGLY1_1    | 47.04     | -0.098 | 0.06    | 0.99 |
| NGLY1_KO_2 | 46.77     | -0.086 | 0.06    | 1    |
| NGLY1_2    | 46.28     | -0.1   | 0.09    | 1    |

Supplement: Supplementary file 5953 [file 1]

IPI00020883.3|HIGD2A

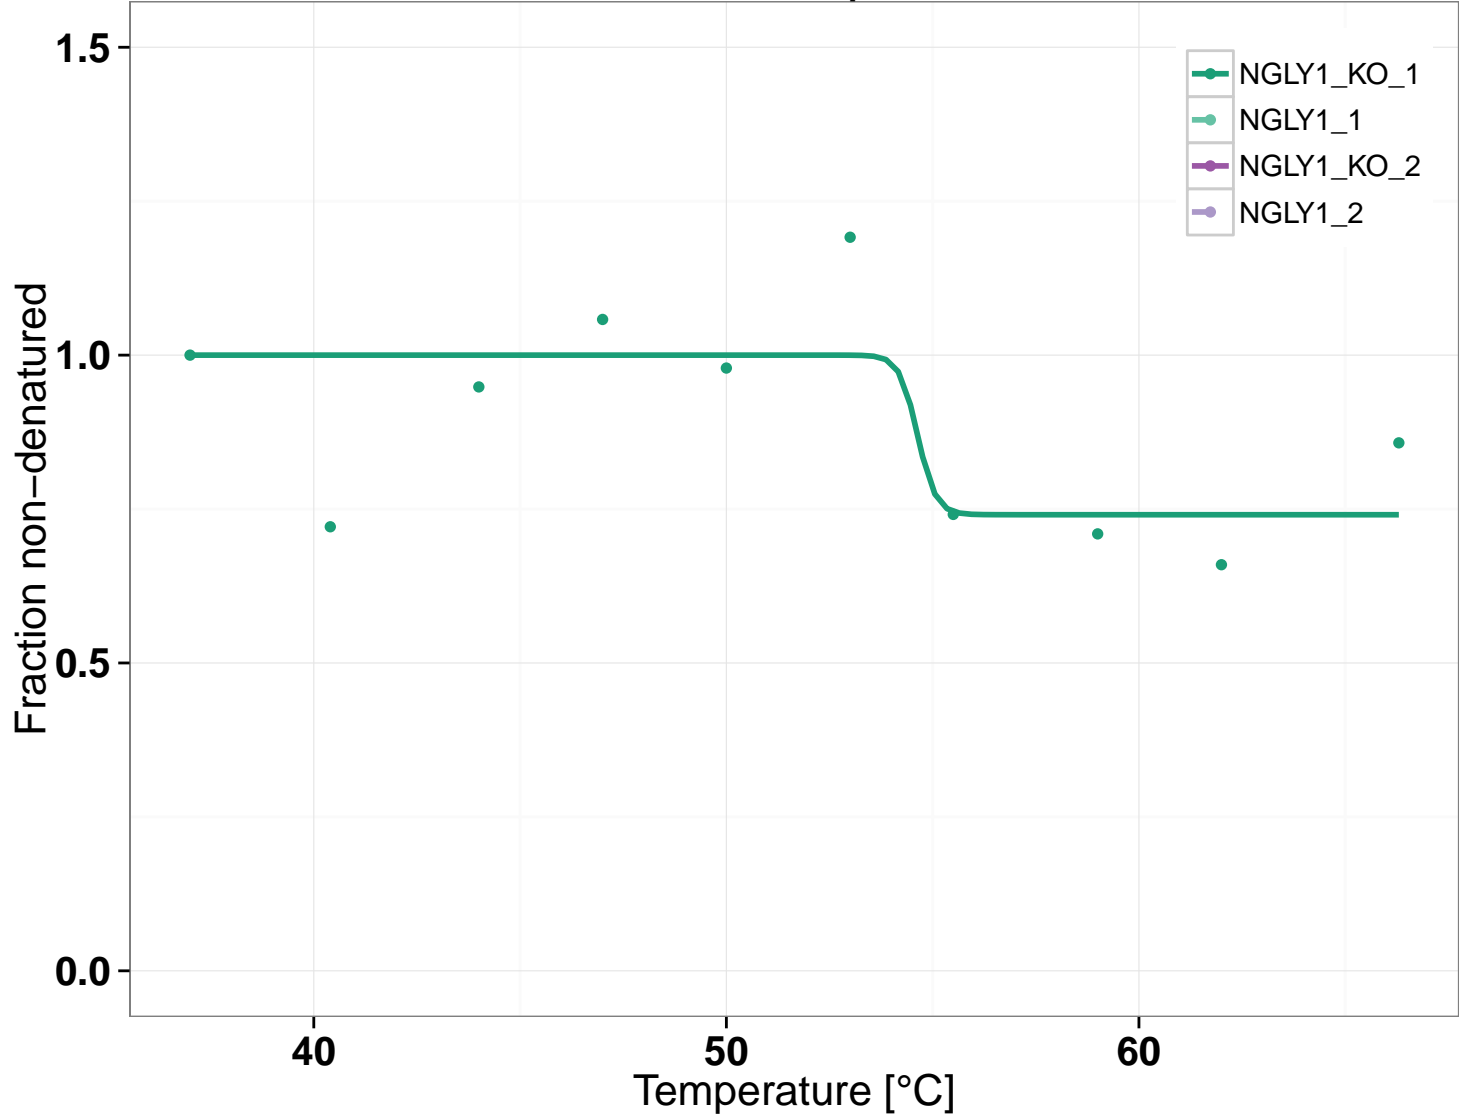

|            | meltPoint | slope | plateau | R2   |
|------------|-----------|-------|---------|------|
| NGLY1_KO_1 | —         | −0.3  | 0.74    | 0.49 |
| NGLY1_1    | —         | —     | —       | —    |
| NGLY1_KO_2 | —         | —     | —       | —    |
| NGLY1_2    | —         | —     | —       | —    |

Supplement: Supplementary file 5954 [file 1]

IPI00167549.3|C11ORF46

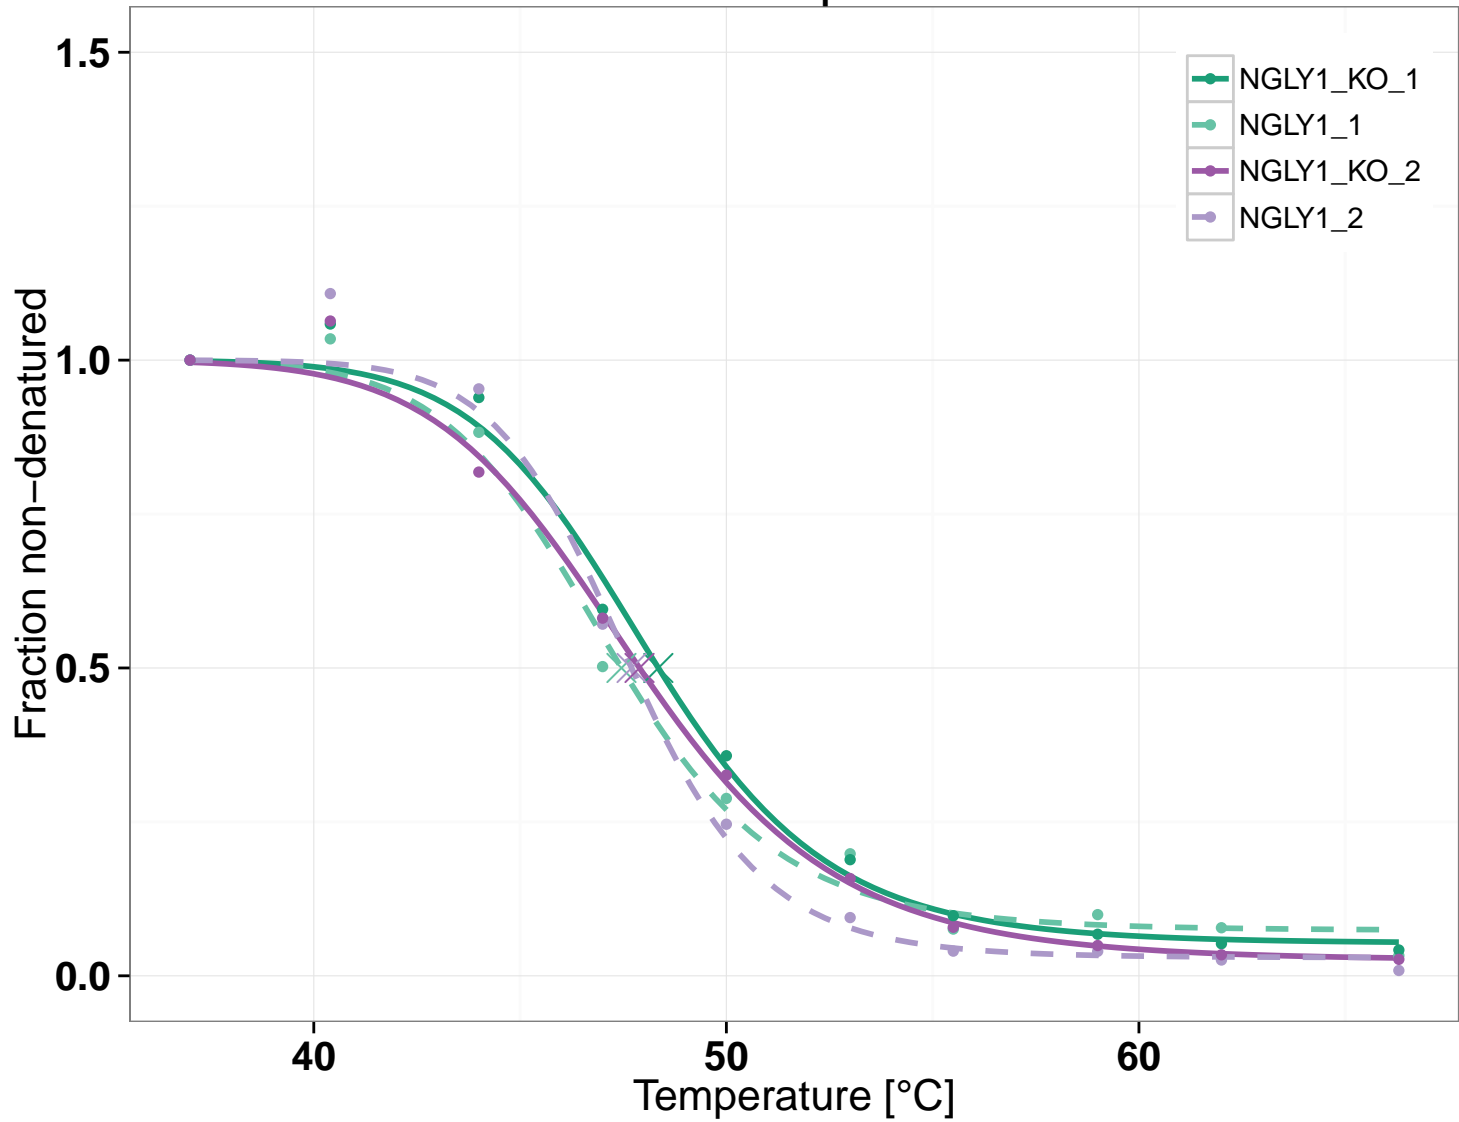

|            | meltPoint | slope | plateau | R2   |
|------------|-----------|-------|---------|------|
| NGLY1_KO_1 | 48.35     | -0.11 | 0.05    | 0.99 |
| NGLY1_1    | 47.46     | -0.11 | 0.07    | 0.99 |
| NGLY1_KO_2 | 47.9      | -0.1  | 0.02    | 0.99 |
| NGLY1_2    | 47.7      | -0.15 | 0.03    | 0.99 |

Supplement: Supplementary file 5955 [file 1]

IPI00028055.4|TMED10

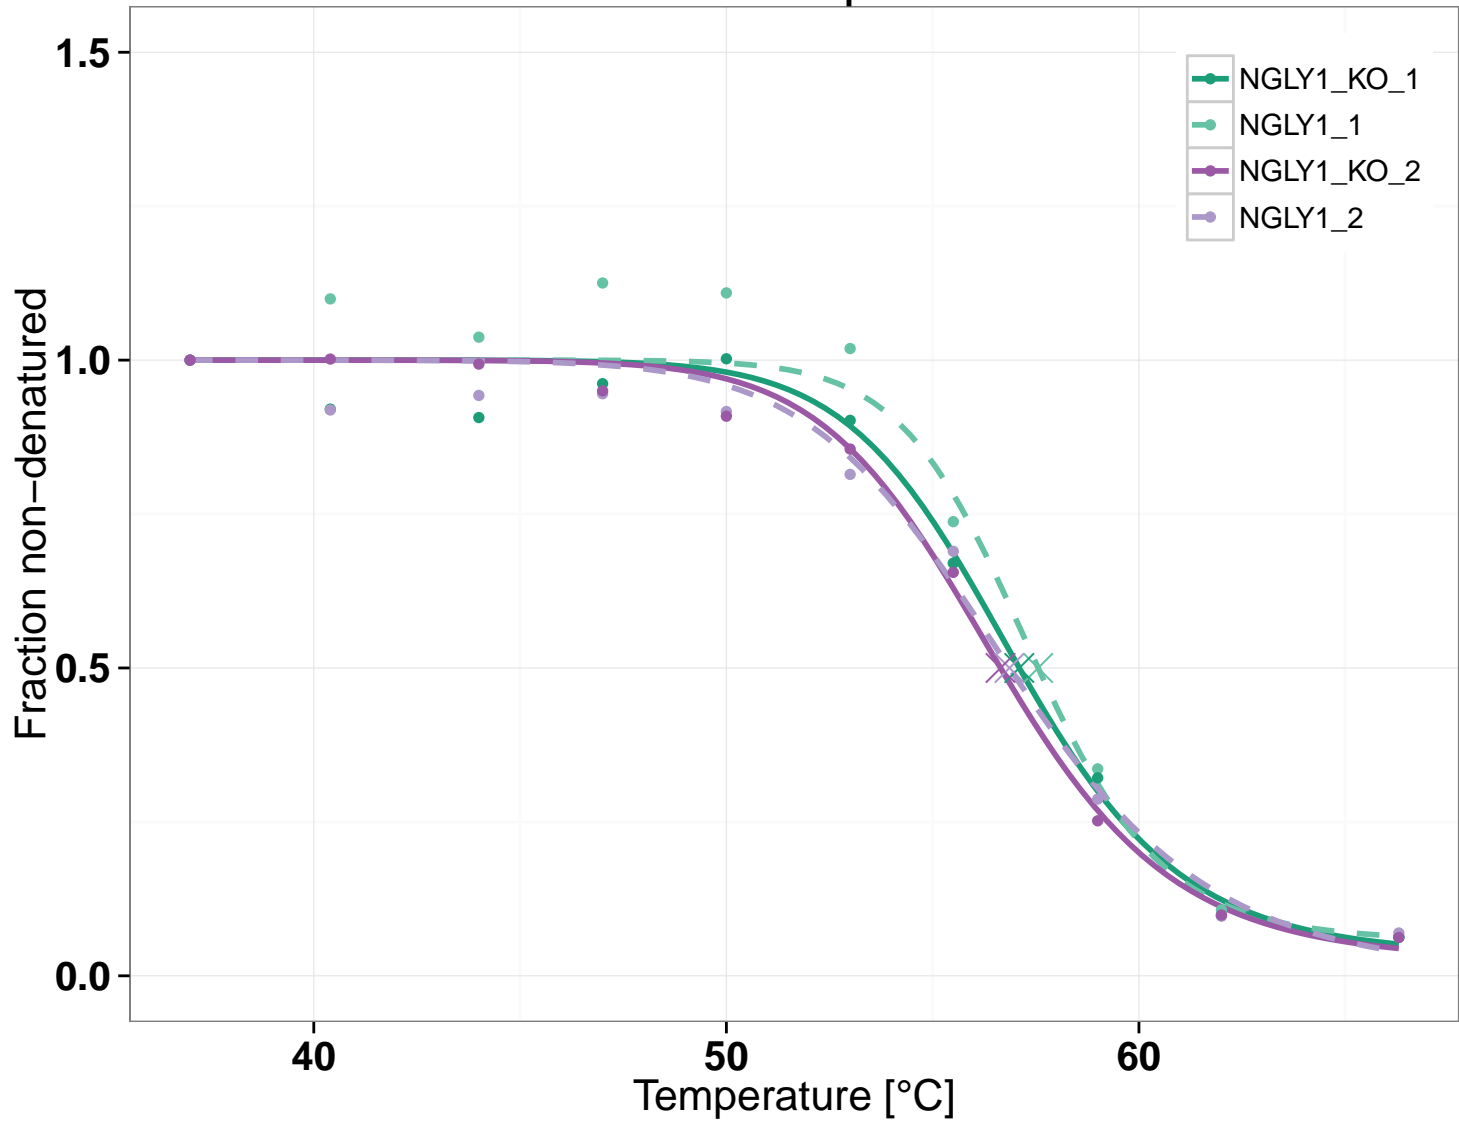

|            | meltPoint | slope | plateau | R2   |
|------------|-----------|-------|---------|------|
| NGLY1_KO_1 | 57.1      | -0.12 | 0.03    | 0.99 |
| NGLY1_1    | 57.56     | -0.15 | 0.06    | 0.97 |
| NGLY1_KO_2 | 56.65     | -0.11 | 0.02    | 0.99 |
| NGLY1_2    | 56.86     | -0.1  | 0       | 0.98 |

Supplement: Supplementary file 5956 [file 1]

# IPI00290142.5|CTPS

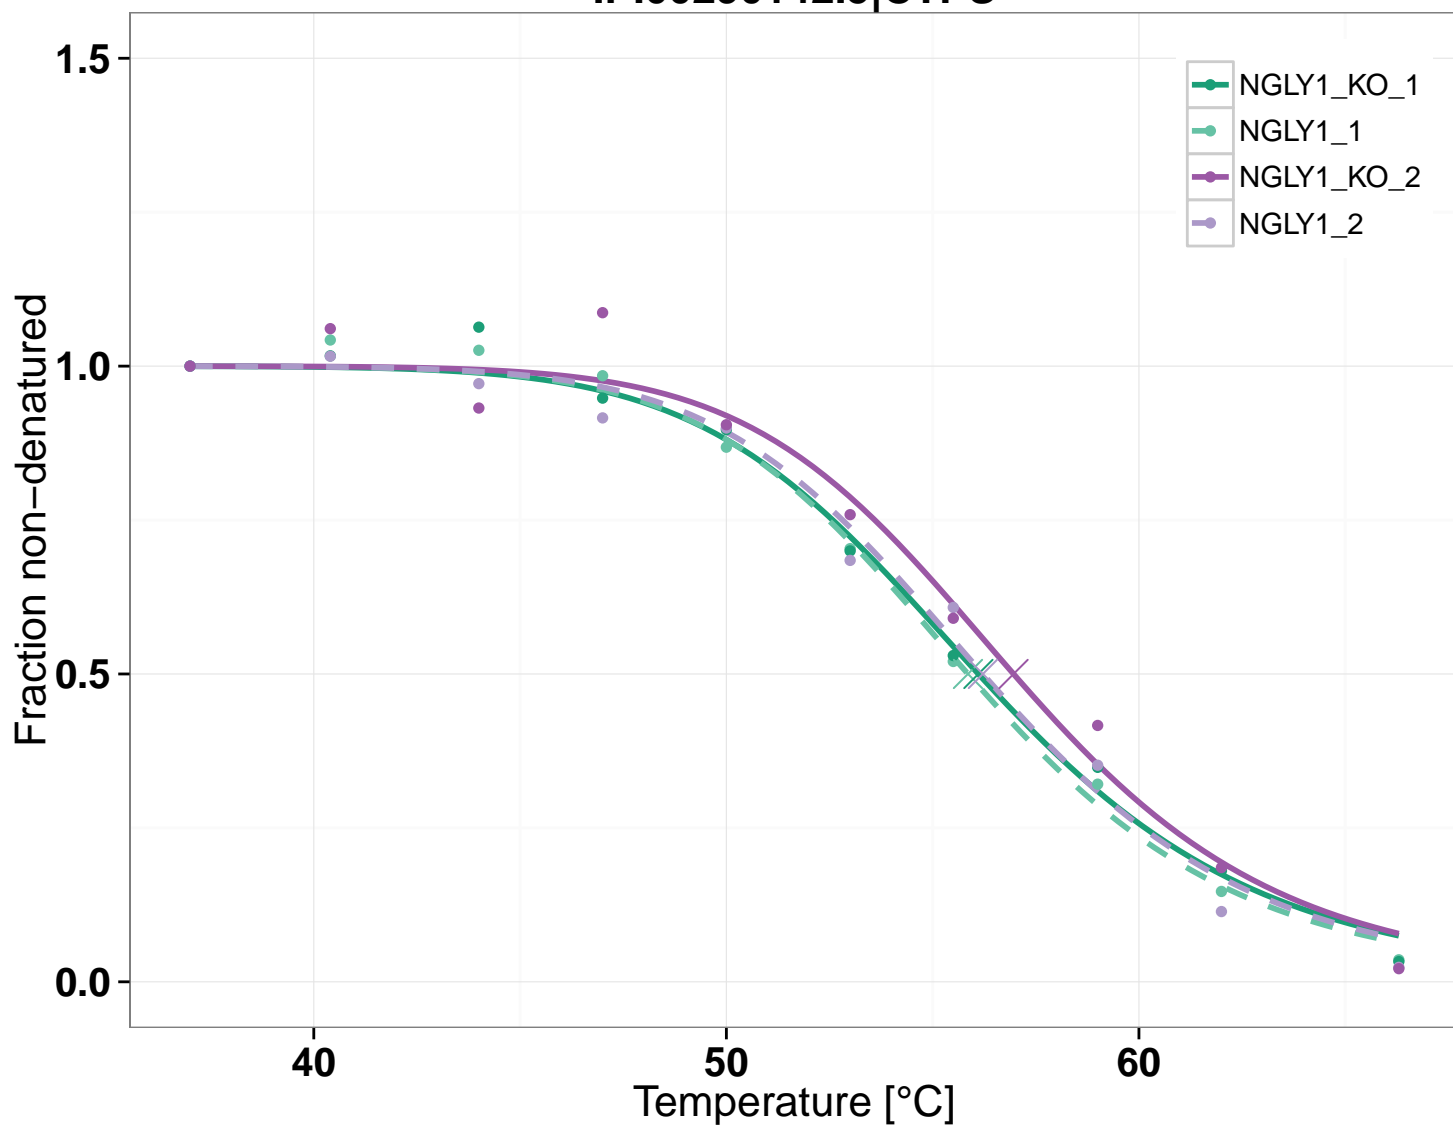

|            | meltPoint | slope  | plateau | R2   |
|------------|-----------|--------|---------|------|
| NGLY1_KO_1 | 56.11     | -0.074 | 0       | 0.99 |
| NGLY1_1    | 55.86     | -0.077 | 0       | 1    |
| NGLY1_KO_2 | 56.96     | -0.078 | 0       | 0.98 |
| NGLY1_2    | 56.22     | -0.077 | 0       | 0.99 |

Supplement: Supplementary file 5957 [file 1]

# IPI00216973.1|LIX1L

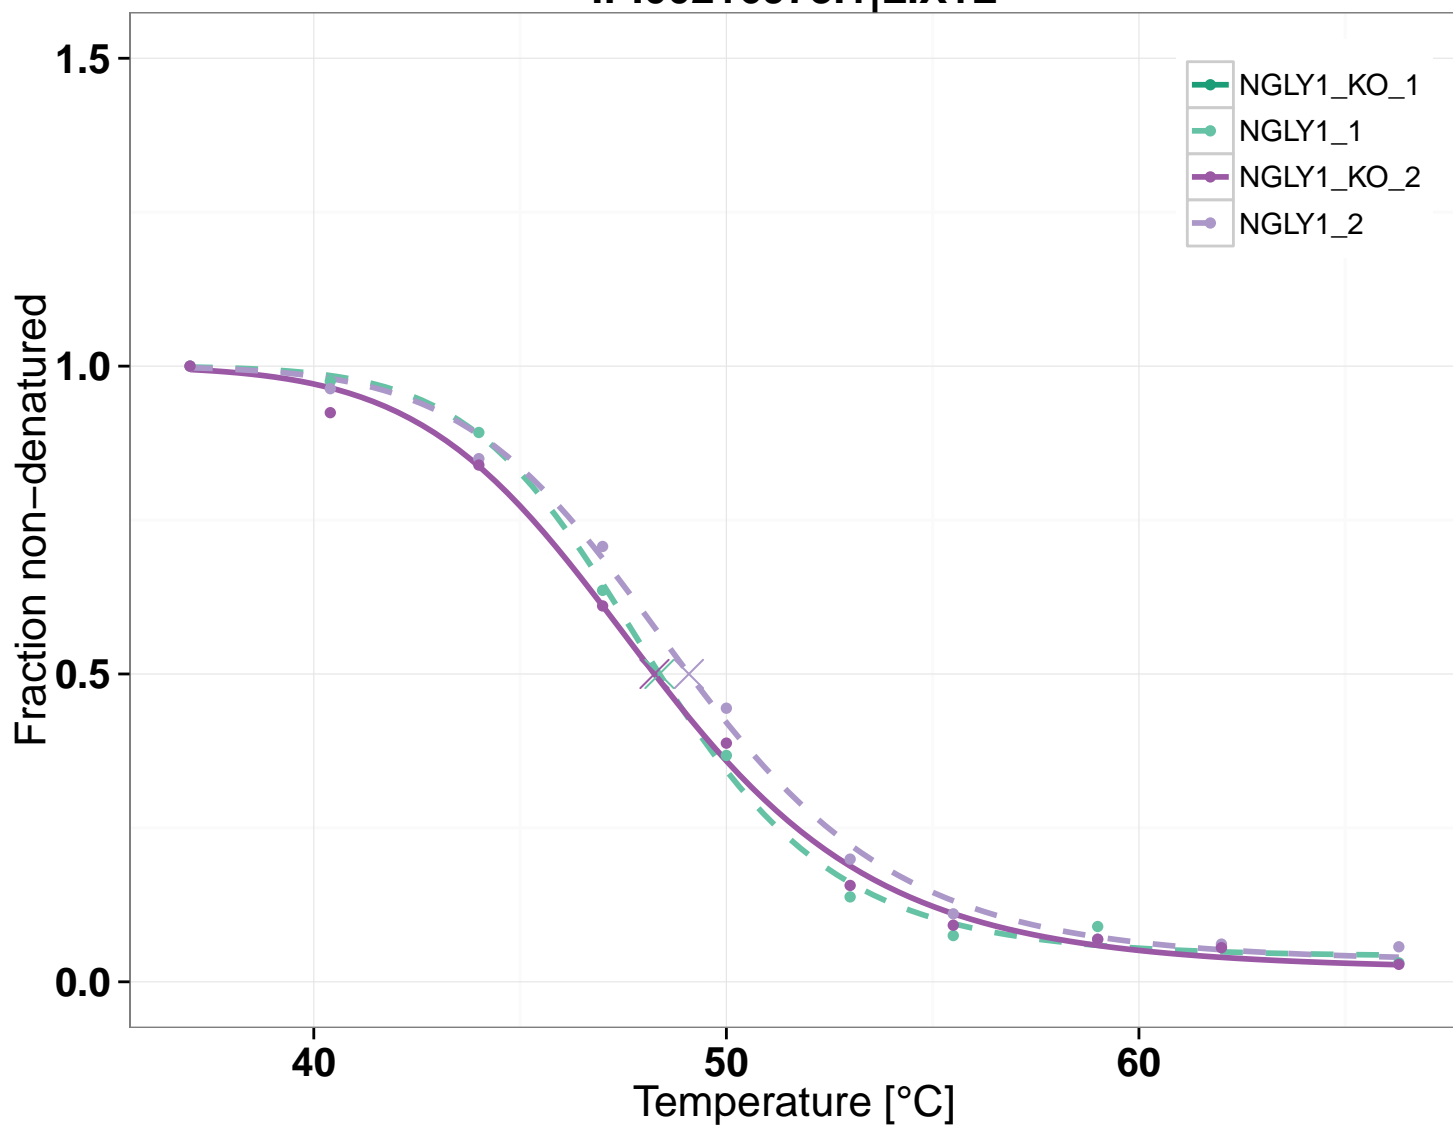

|            | meltPoint | slope  | plateau | R2 |
|------------|-----------|--------|---------|----|
| NGLY1_KO_1 | —         | —      | —       | —  |
| NGLY1_1    | 48.38     | -0.11  | 0.04    | 1  |
| NGLY1_KO_2 | 48.26     | -0.088 | 0.02    | 1  |
| NGLY1_2    | 49.09     | -0.091 | 0.03    | 1  |

Supplement: Supplementary file 5958 [file 1]

IPI00432753.2|TOR2A

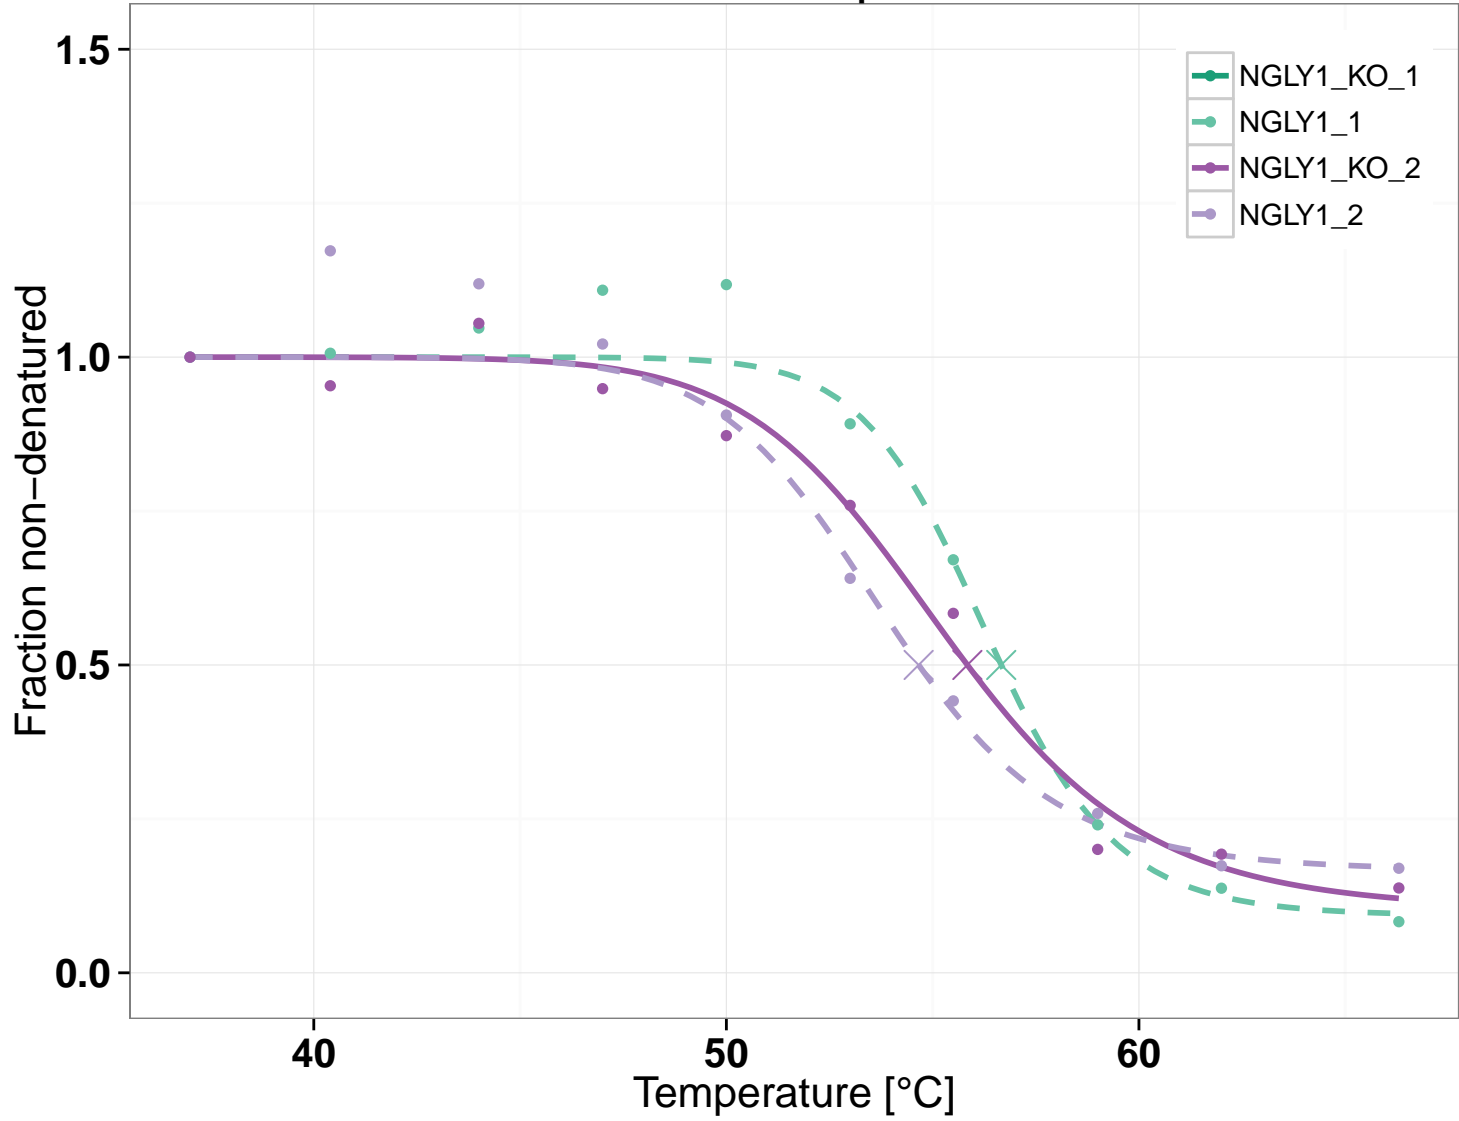

|            | meltPoint | slope  | plateau | R2   |
|------------|-----------|--------|---------|------|
| NGLY1_KO_1 | —         | —      | —       | —    |
| NGLY1_1    | 56.66     | -0.15  | 0.09    | 0.98 |
| NGLY1_KO_2 | 55.84     | -0.093 | 0.1     | 0.98 |
| NGLY1_2    | 54.66     | -0.1   | 0.17    | 0.97 |

Supplement: Supplementary file 5959 [file 1]

# IPI00000105.4|MVP

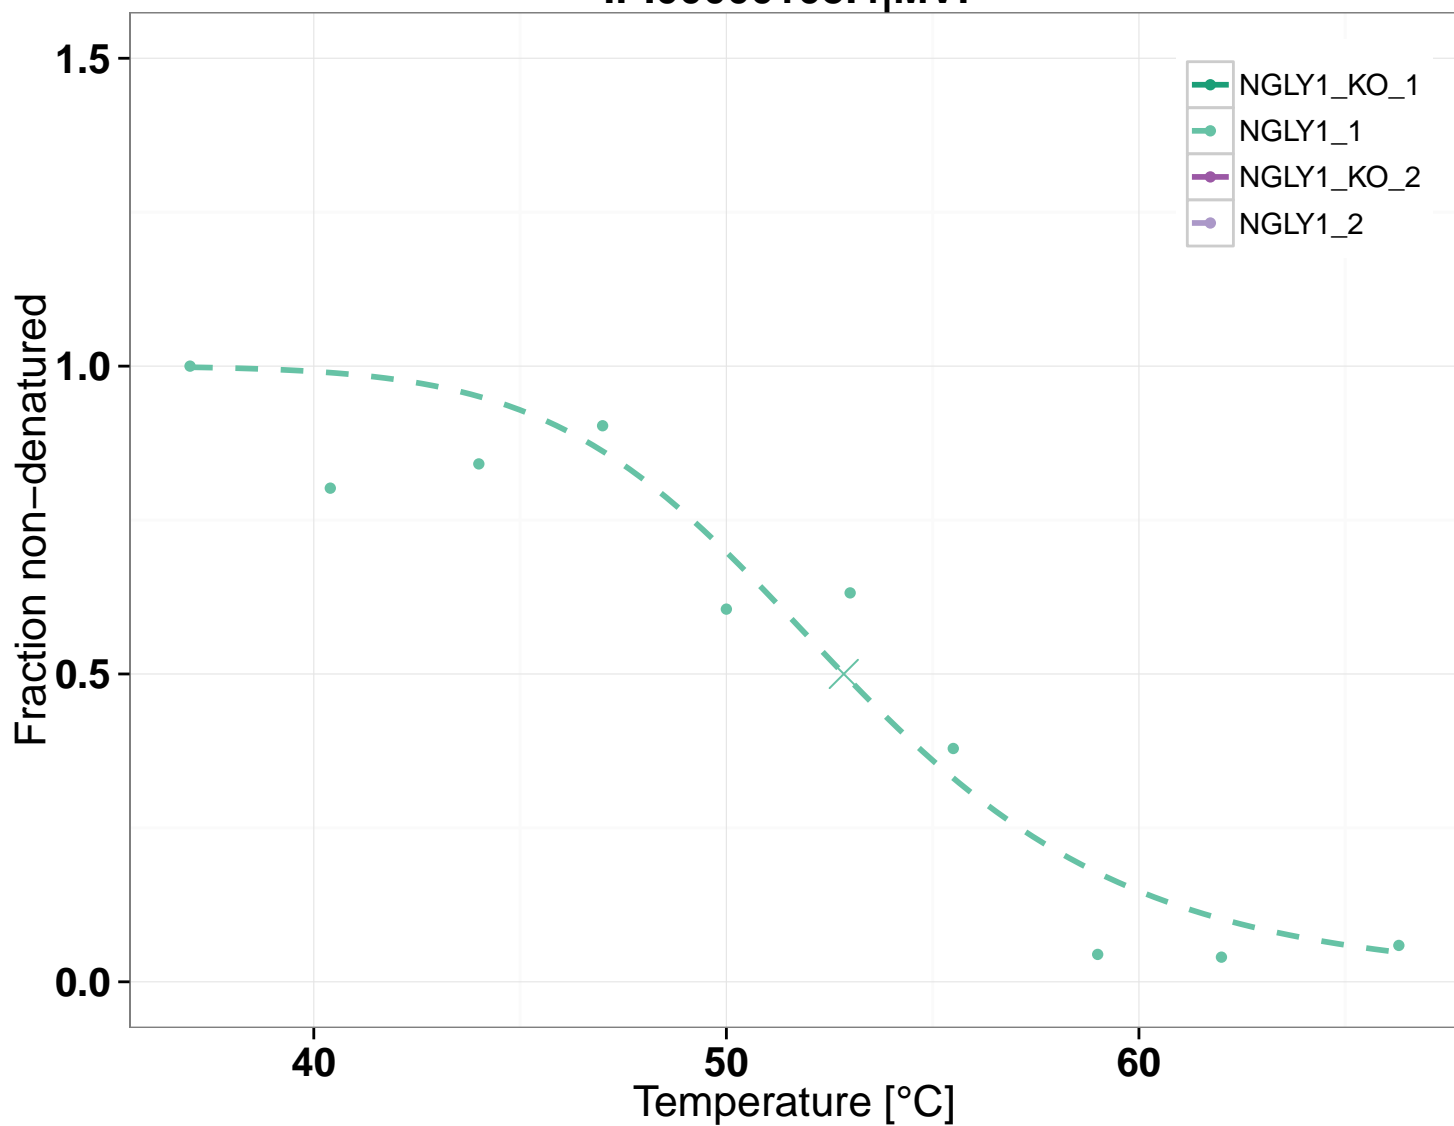

|            | meltPoint | slope  | plateau | R2   |
|------------|-----------|--------|---------|------|
| NGLY1_KO_1 | -         | -      | -       | -    |
| NGLY1_1    | 52.85     | -0.071 | 0       | 0.92 |
| NGLY1_KO_2 | -         | -      | -       | -    |
| NGLY1_2    | -         | -      | -       | -    |

Supplement: Supplementary file 5960 [file 1]

IPI00003801.1|PATZ1

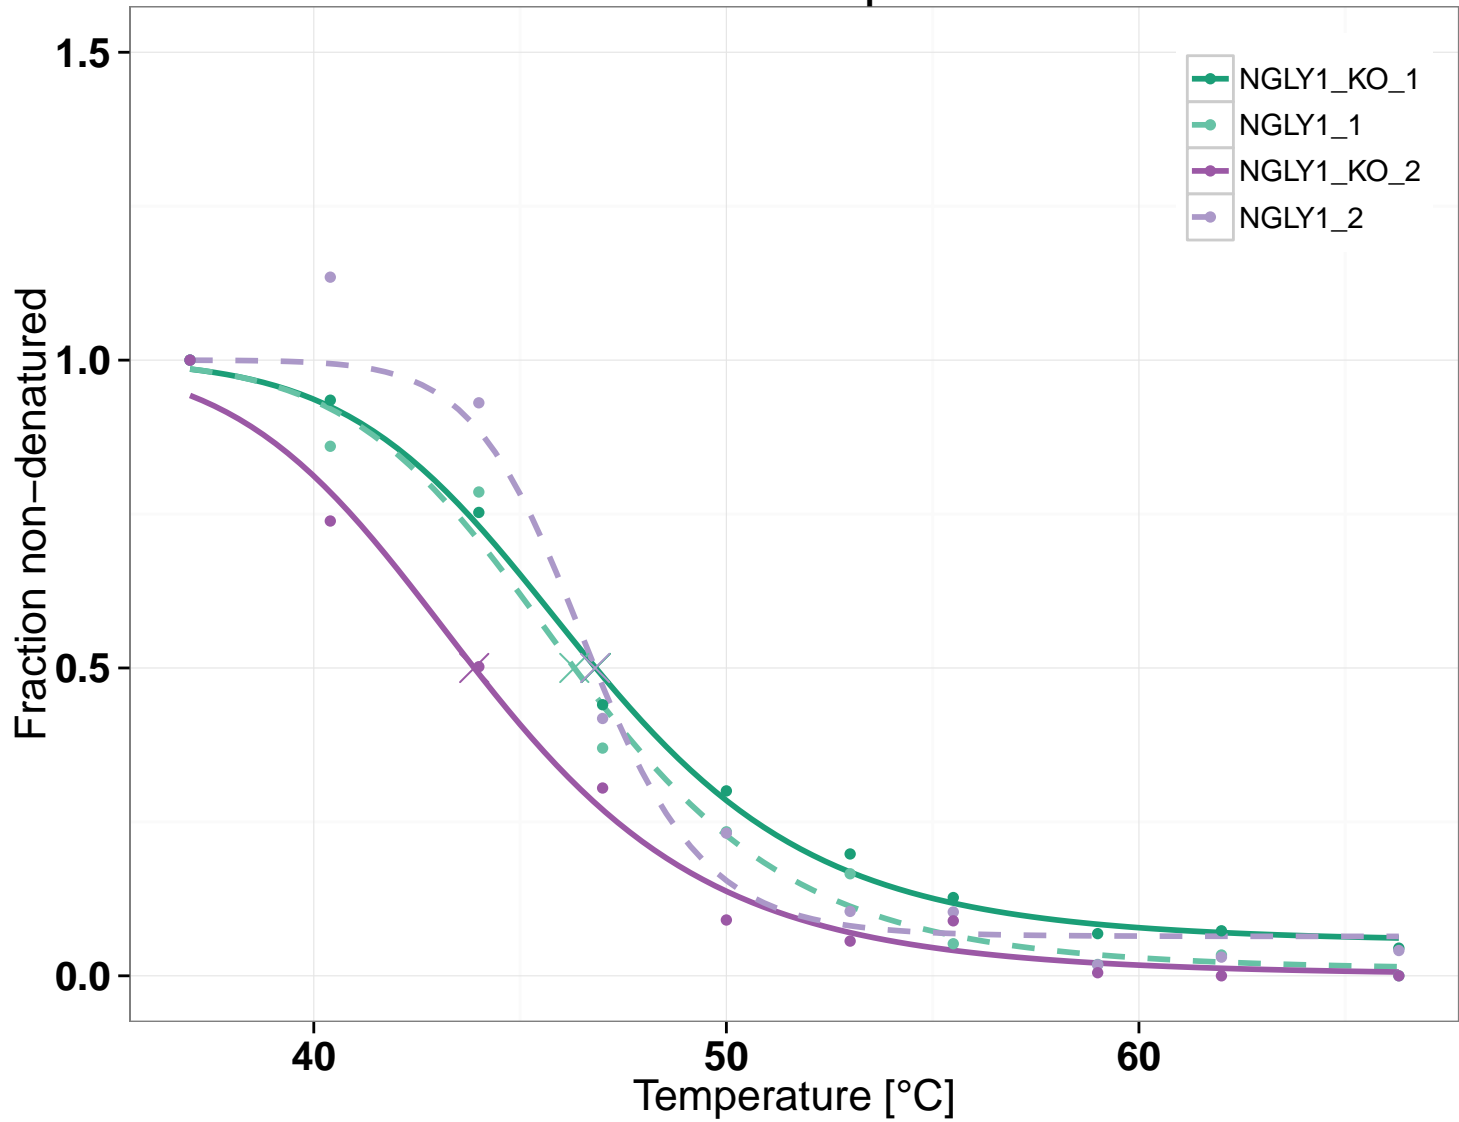

|            | meltPoint | slope  | plateau | R2   |
|------------|-----------|--------|---------|------|
| NGLY1_KO_1 | 46.84     | -0.083 | 0.05    | 1    |
| NGLY1_1    | 46.31     | -0.092 | 0.01    | 0.99 |
| NGLY1_KO_2 | 43.89     | -0.087 | 0       | 0.99 |
| NGLY1_2    | 46.82     | -0.17  | 0.06    | 0.98 |

Supplement: Supplementary file 5961 [file 1]

IPI00069750.2|PUF60

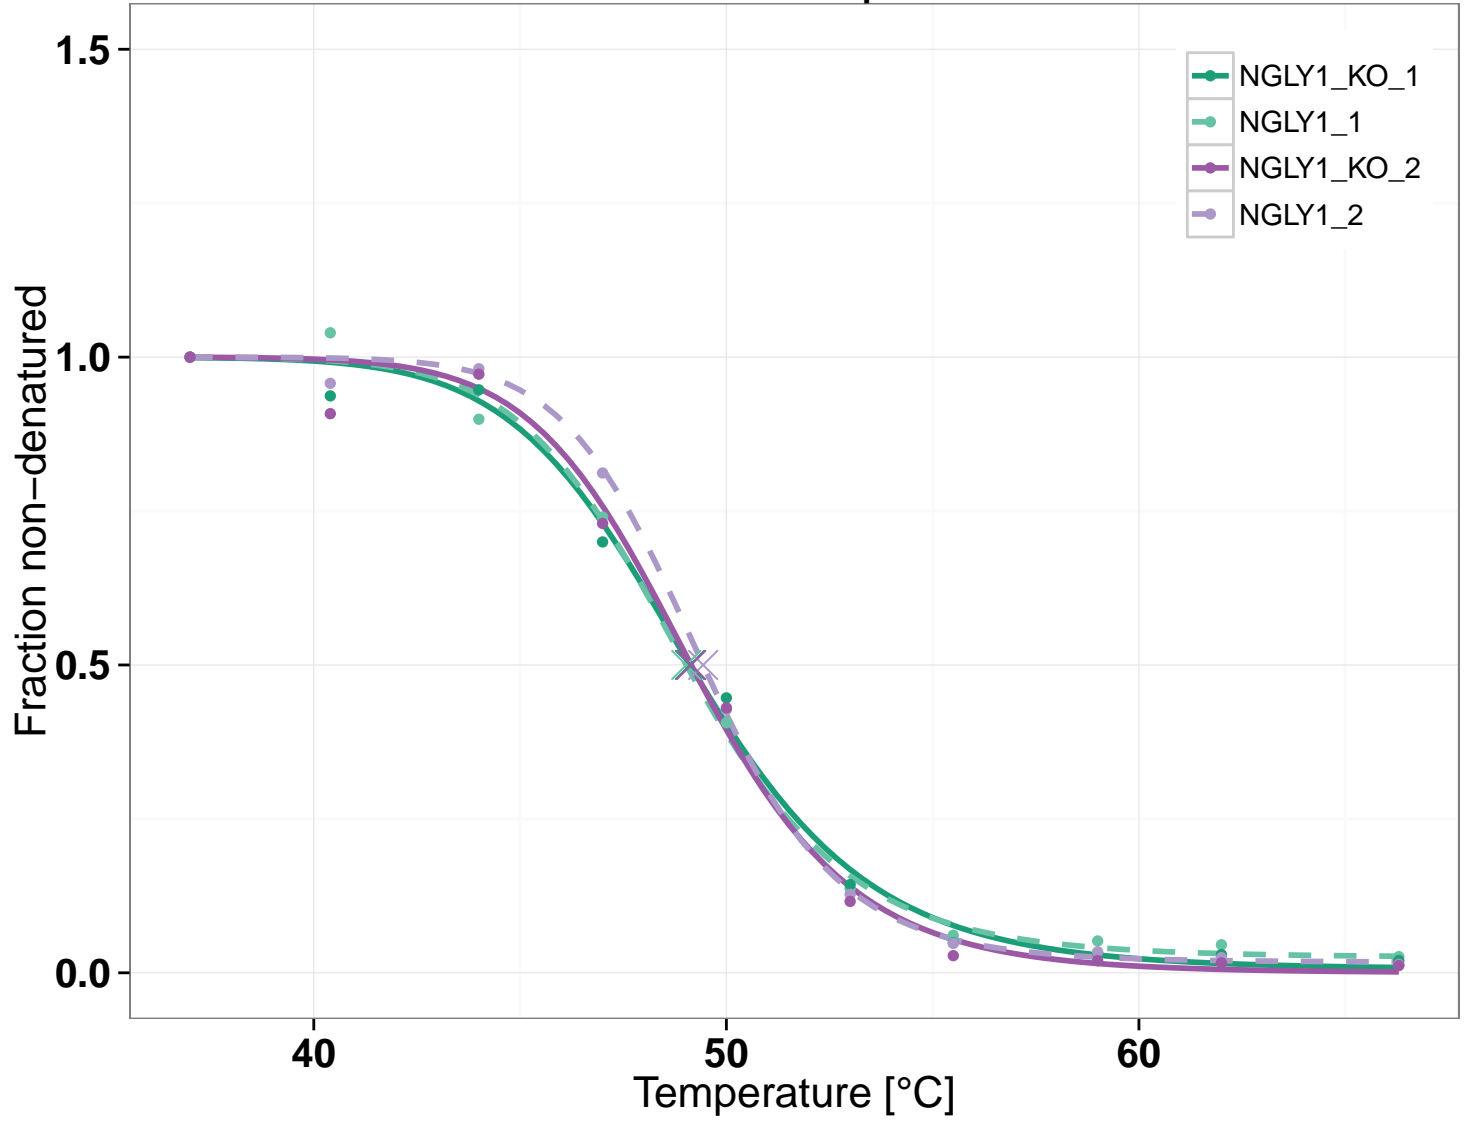

|            | meltPoint | slope | plateau | R2   |
|------------|-----------|-------|---------|------|
| NGLY1_KO_1 | 49.12     | -0.11 | 0.01    | 1    |
| NGLY1_1    | 49.03     | -0.12 | 0.03    | 1    |
| NGLY1_KO_2 | 49.15     | -0.13 | 0       | 0.99 |
| NGLY1_2    | 49.44     | -0.15 | 0.02    | 1    |

Supplement: Supplementary file 5962 [file 1]

# IPI00009123.1|NUCB2

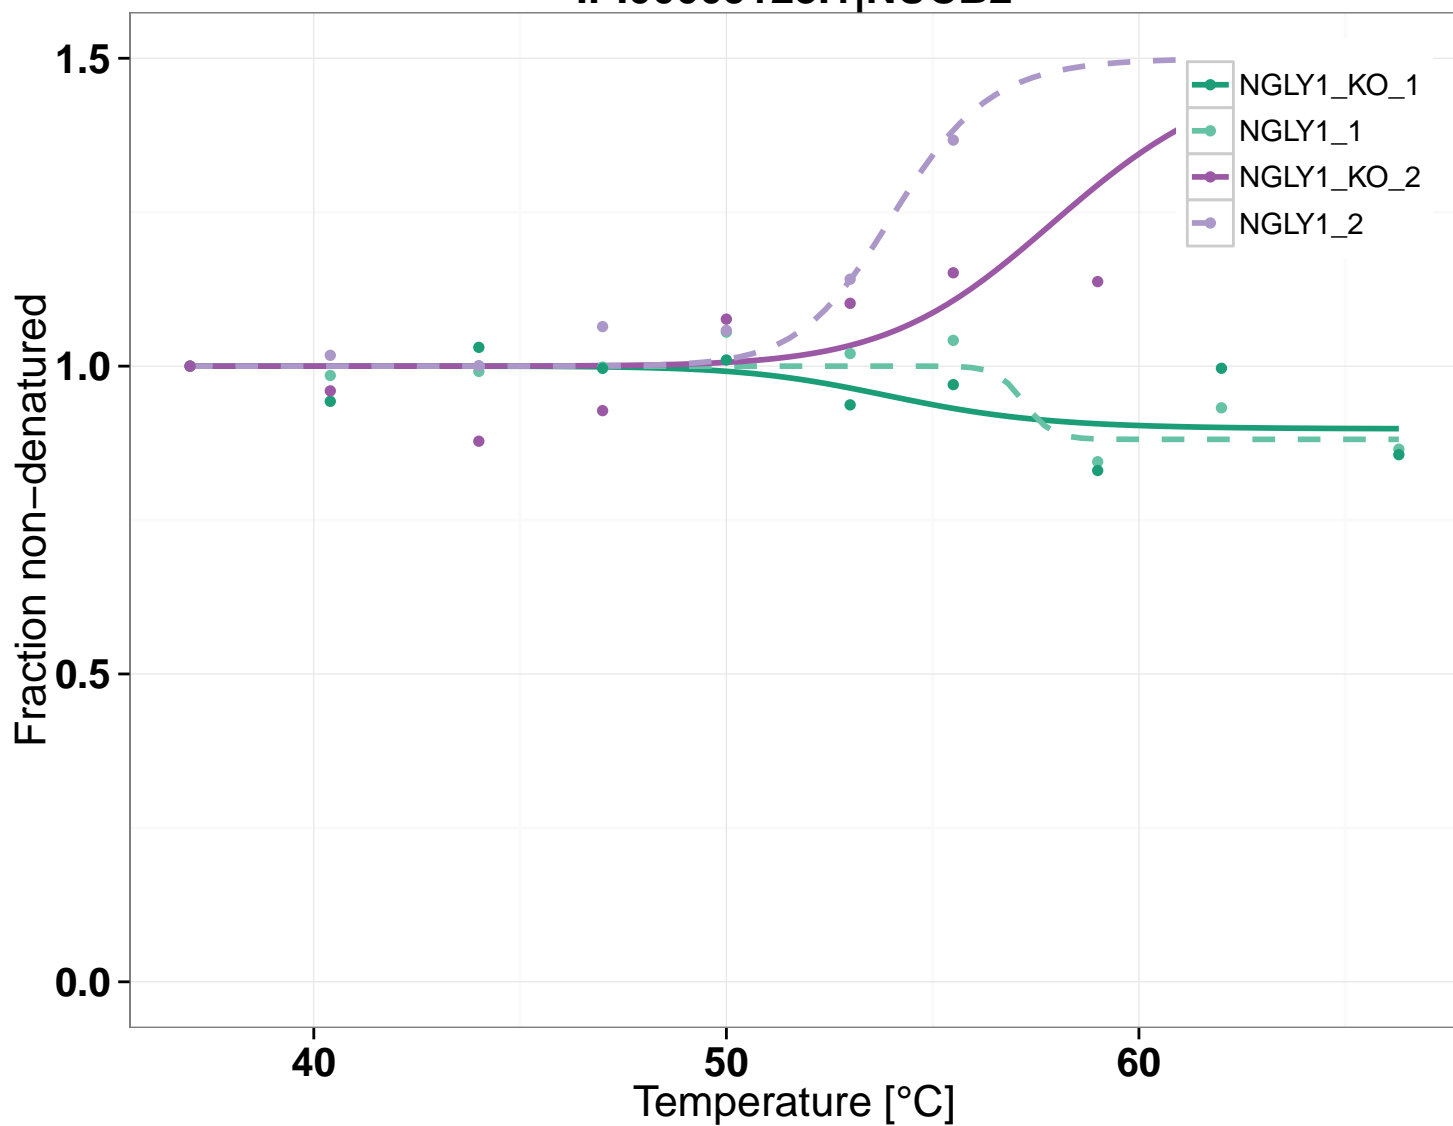

|            | meltPoint | slope  | plateau | R2   |
|------------|-----------|--------|---------|------|
| NGLY1_KO_1 | -         | -0.014 | 0.9     | 0.41 |
| NGLY1_1    | -         | -0.089 | 0.88    | 0.78 |
| NGLY1_KO_2 | -         | 0.058  | 1.5     | 0.78 |
| NGLY1_2    | -         | 0.11   | 1.5     | 0.76 |

Supplement: Supplementary file 5963 [file 1]

IPI00375527.4|IMPDH1

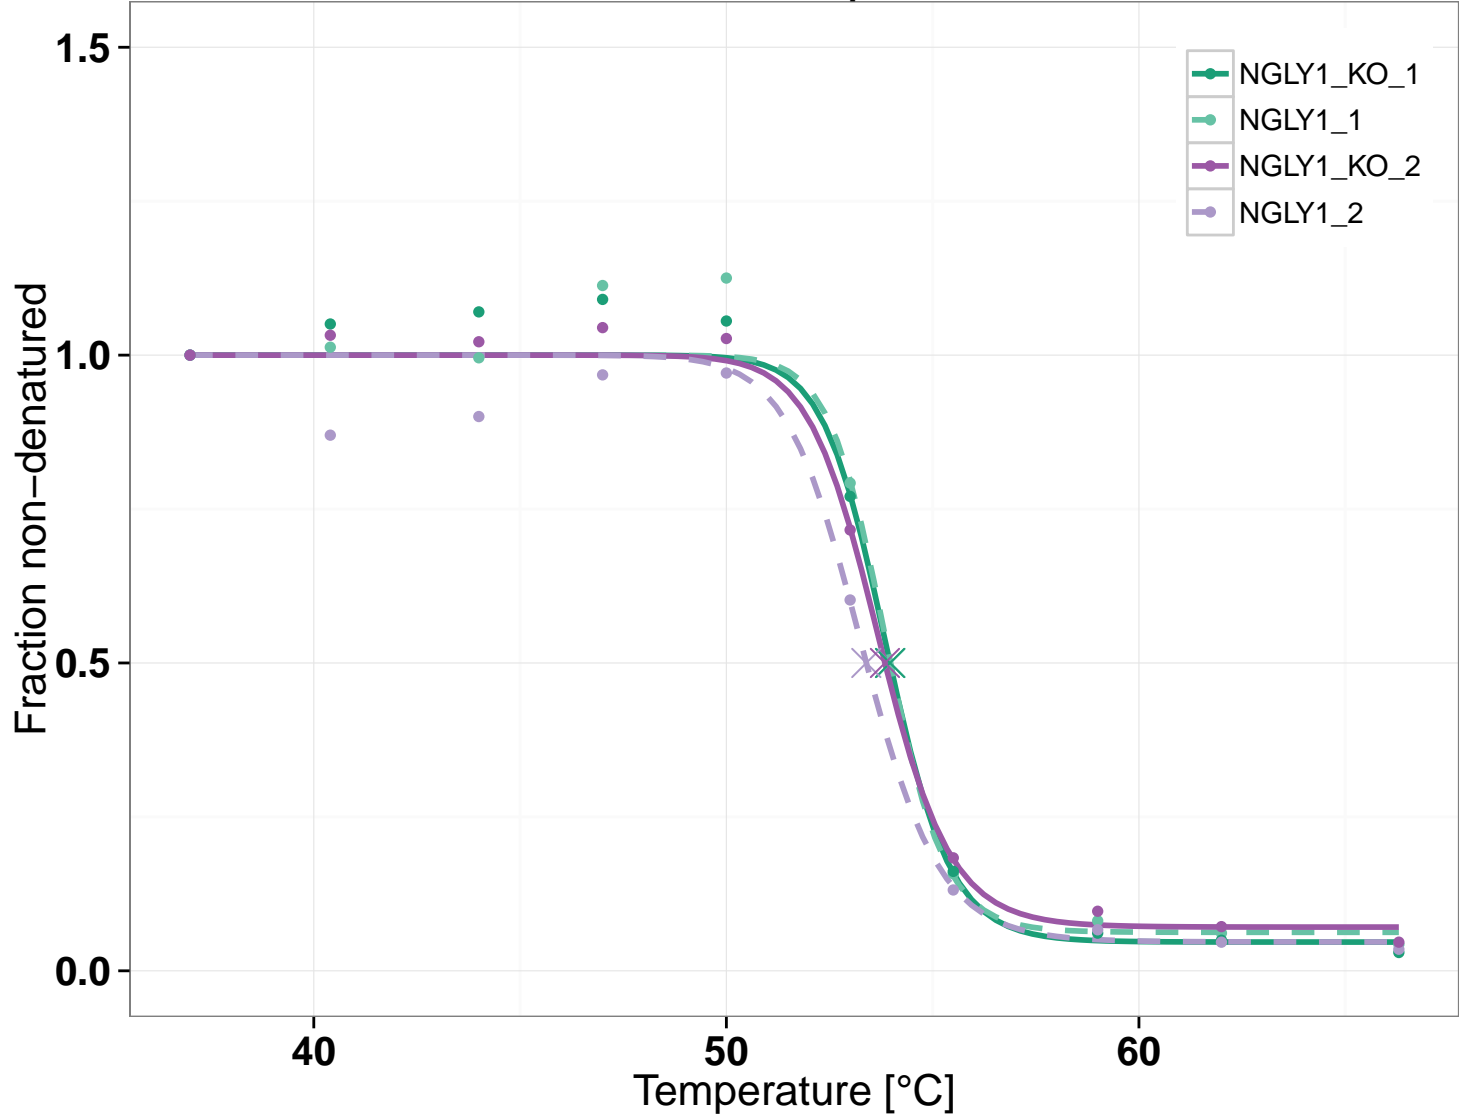

|            | meltPoint | slope | plateau | R2   |
|------------|-----------|-------|---------|------|
| NGLY1_KO_1 | 53.97     | -0.31 | 0.05    | 0.99 |
| NGLY1_1    | 53.98     | -0.33 | 0.06    | 0.99 |
| NGLY1_KO_2 | 53.84     | -0.27 | 0.07    | 1    |
| NGLY1_2    | 53.39     | -0.26 | 0.05    | 0.98 |

Supplement: Supplementary file 5964 [file 1]

# IPI00654582.3|TOLLIP

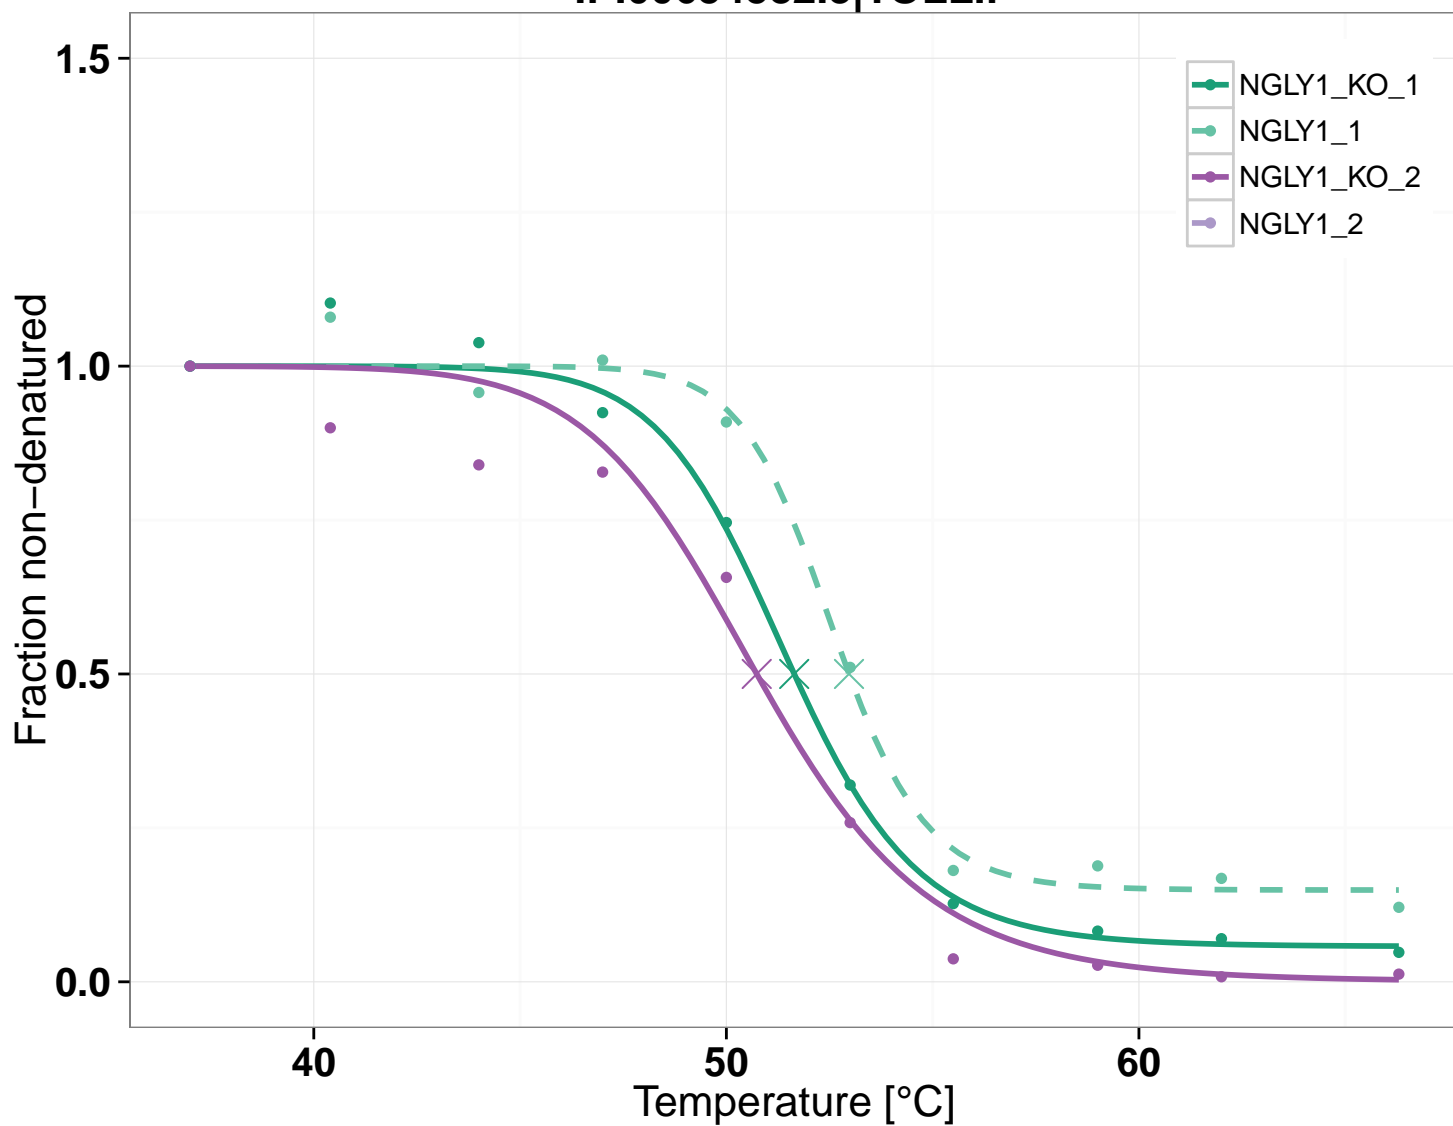

|            | meltPoint | slope | plateau | R2   |
|------------|-----------|-------|---------|------|
| NGLY1_KO_1 | 51.64     | -0.15 | 0.06    | 0.99 |
| NGLY1_1    | 52.97     | -0.19 | 0.15    | 0.99 |
| NGLY1_KO_2 | 50.74     | -0.12 | 0       | 0.97 |
| NGLY1_2    | -         | -     | -       | -    |

Supplement: Supplementary file 5965 [file 1]

# IPI00480140.5|MTHFSD

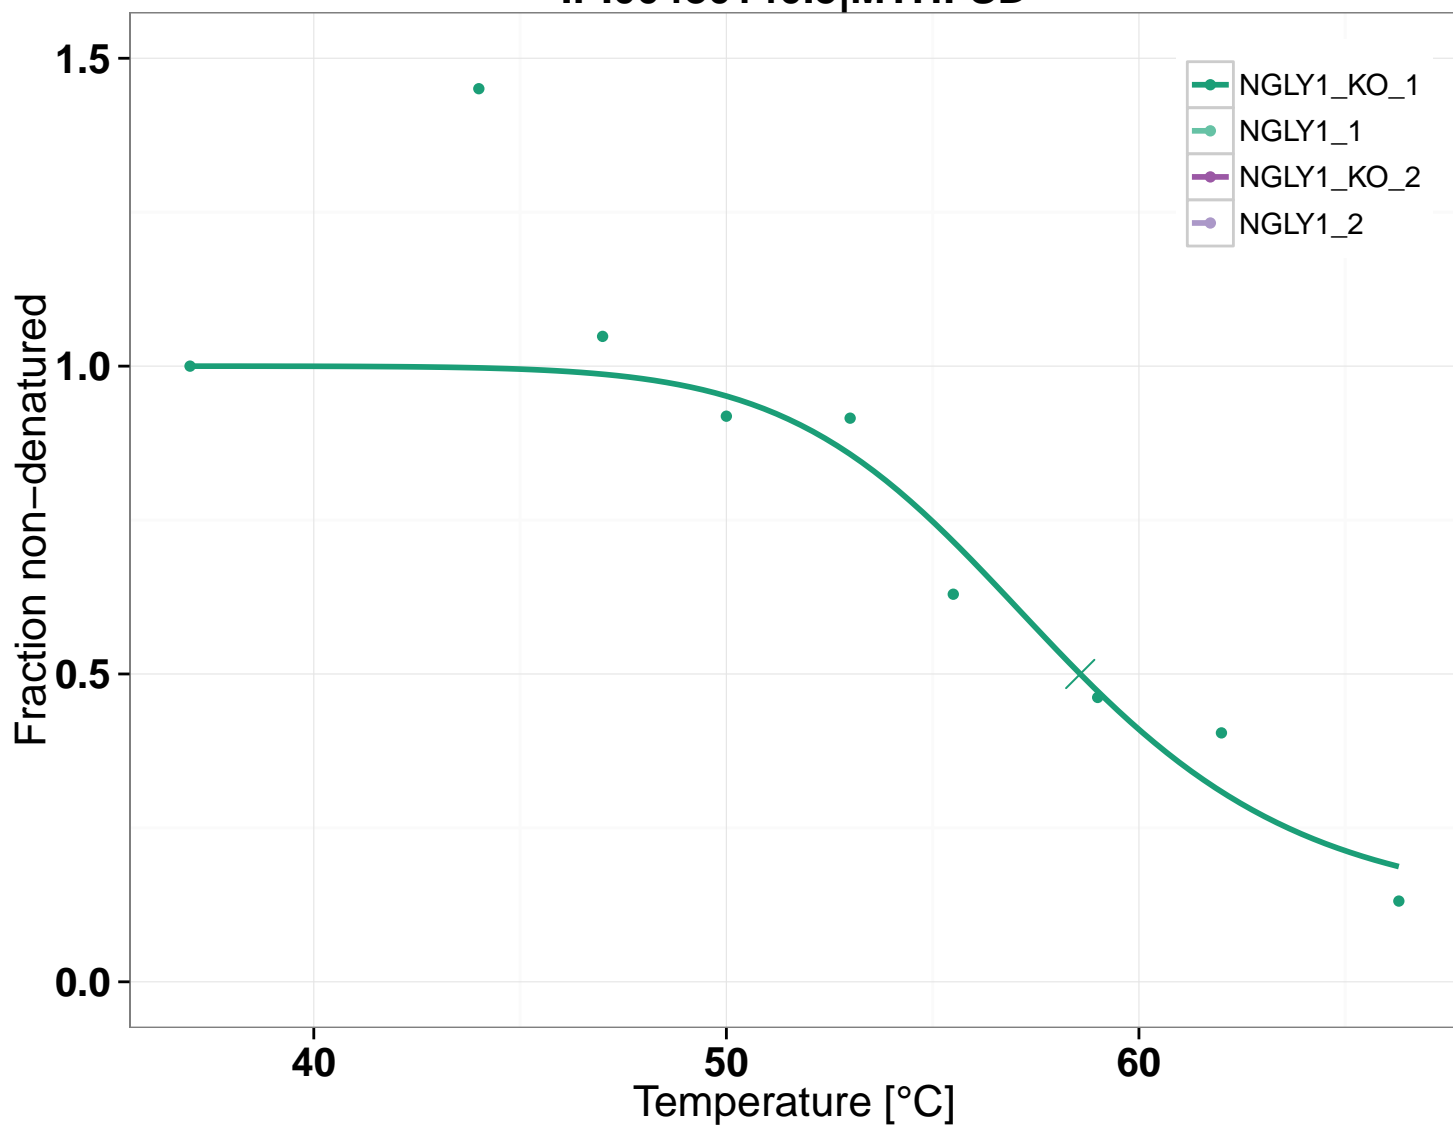

|            | meltPoint | slope  | plateau | R2   |
|------------|-----------|--------|---------|------|
| NGLY1_KO_1 | 58.58     | -0.071 | 0.11    | 0.53 |
| NGLY1_1    | -         | -      | -       | -    |
| NGLY1_KO_2 | -         | -      | -       | -    |
| NGLY1_2    | -         | -      | -       | -    |

Supplement: Supplementary file 5966 [file 1]

IPI00413365.3|ZNF318

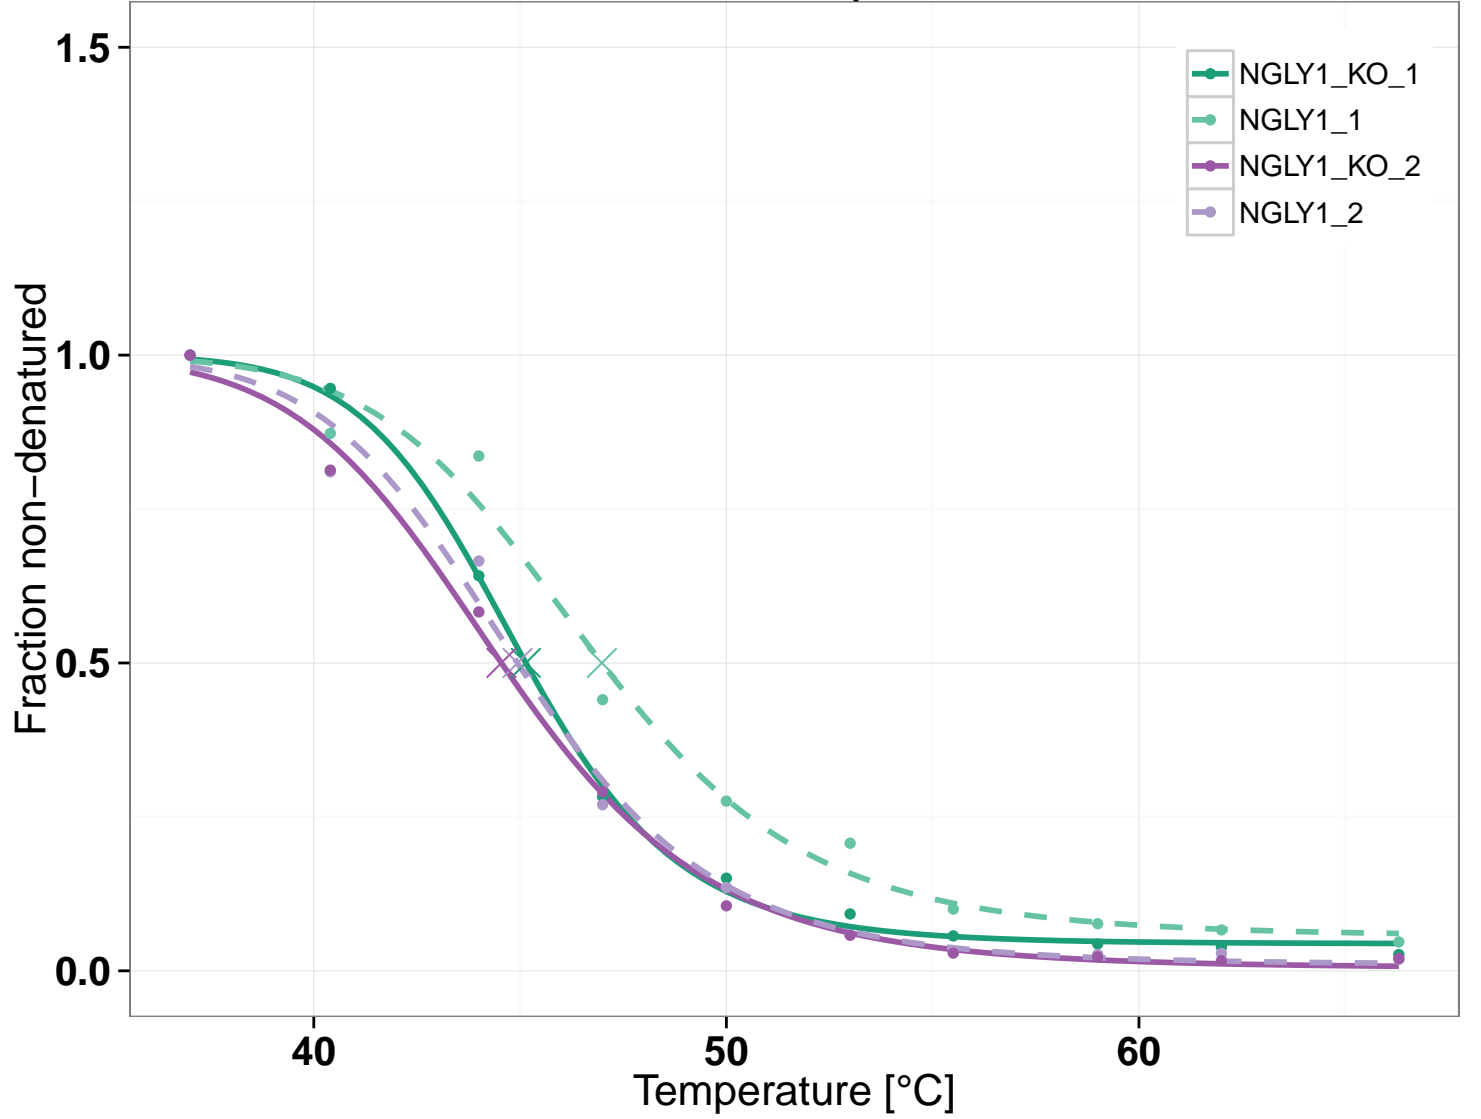

|            | meltPoint | slope  | plateau | R2   |
|------------|-----------|--------|---------|------|
| NGLY1_KO_1 | 45.14     | -0.12  | 0.04    | 1    |
| NGLY1_1    | 46.98     | -0.09  | 0.06    | 0.99 |
| NGLY1_KO_2 | 44.55     | -0.099 | 0       | 1    |
| NGLY1_2    | 44.94     | -0.1   | 0.01    | 0.99 |

Supplement: Supplementary file 5967 [file 1]

IPI00307758.7|PITPNM1

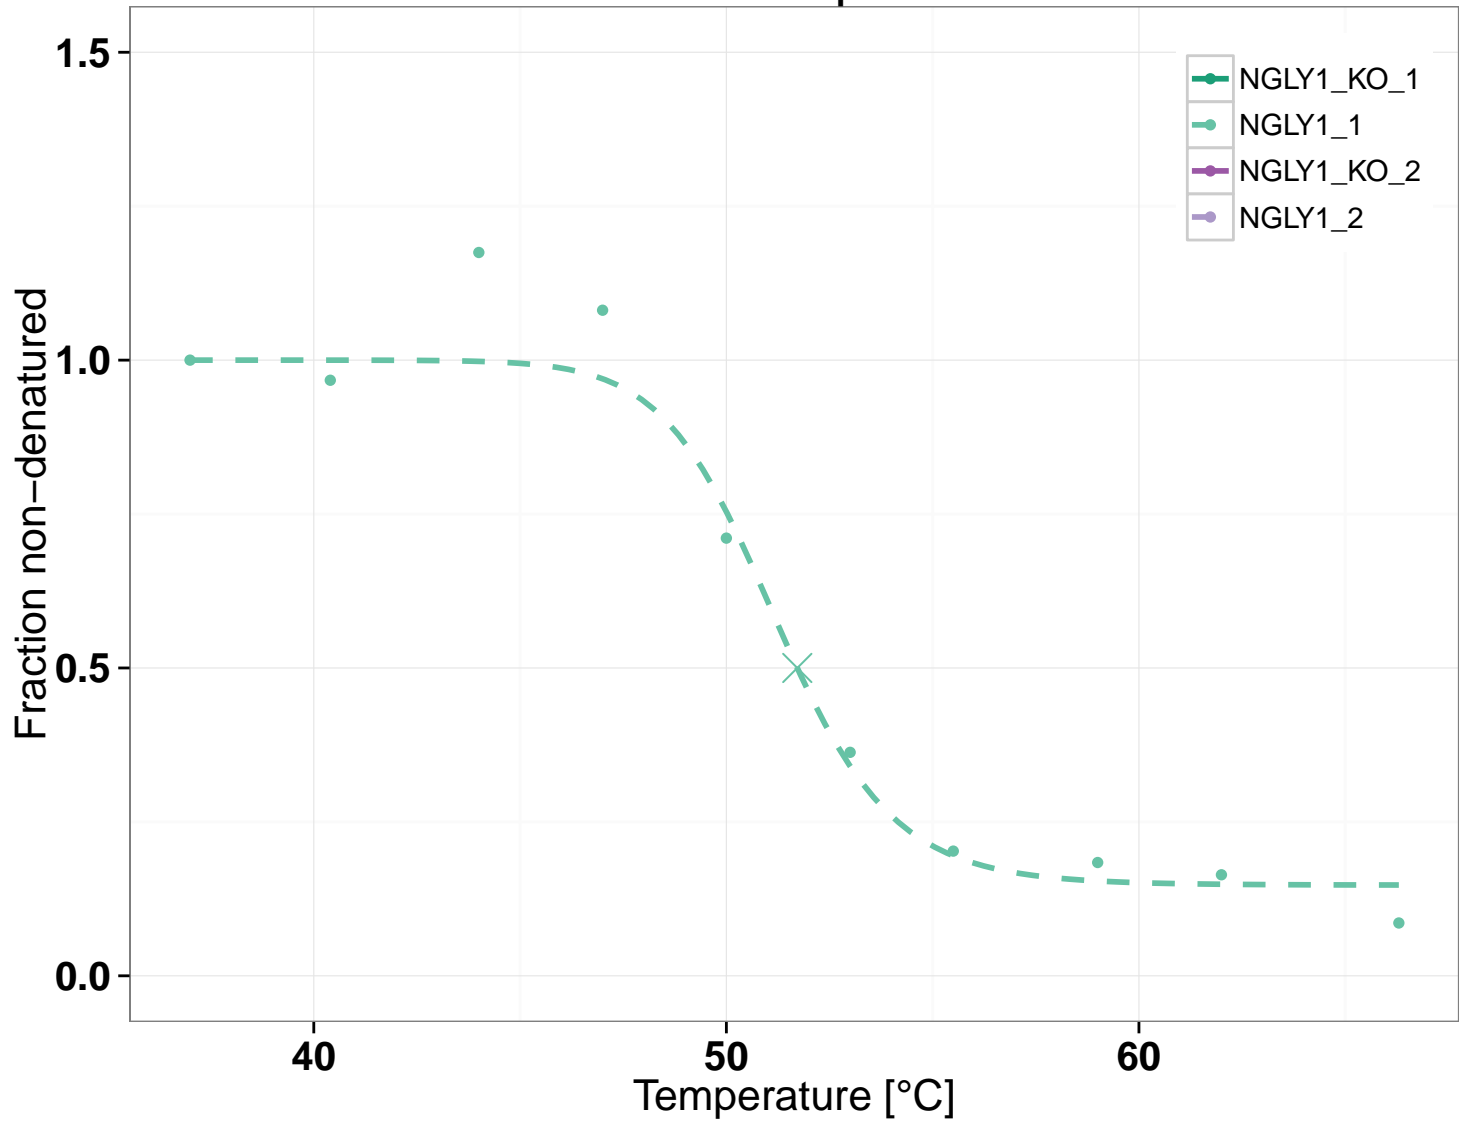

|            | meltPoint | slope | plateau | R2   |
|------------|-----------|-------|---------|------|
| NGLY1_KO_1 | —         | —     | —       | —    |
| NGLY1_1    | 51.72     | -0.15 | 0.15    | 0.97 |
| NGLY1_KO_2 | —         | —     | —       | —    |
| NGLY1_2    | —         | —     | —       | —    |

Supplement: Supplementary file 5968 [file 1]

IPI00658097.1|HMGN1

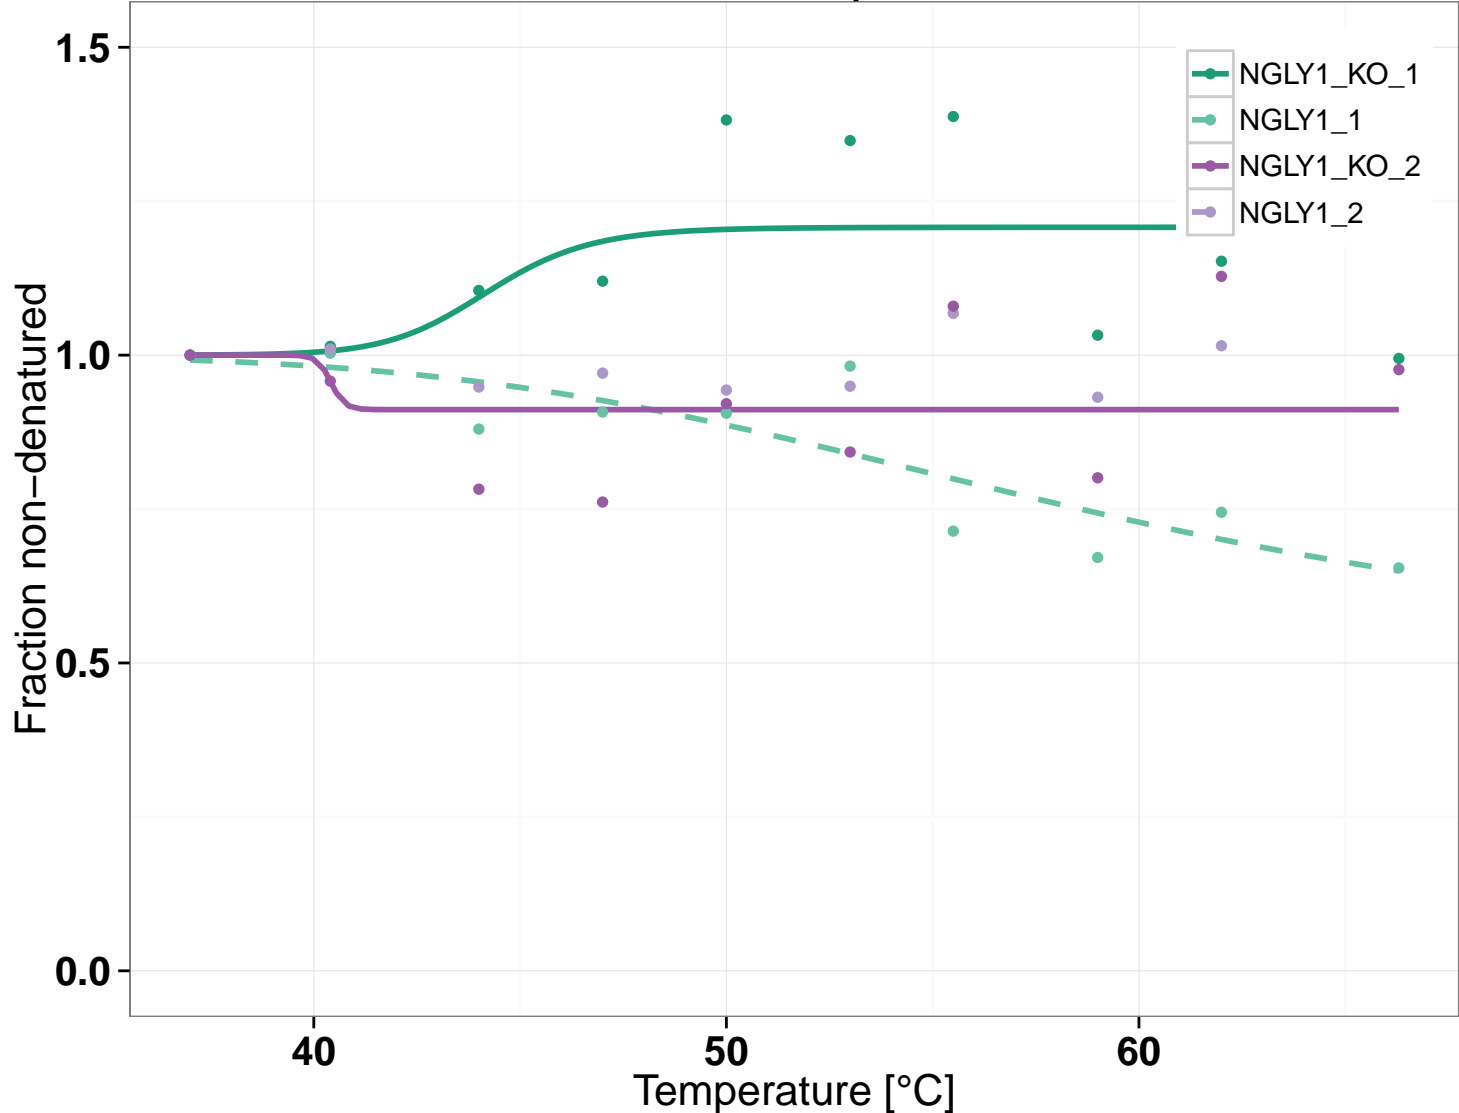

|            | meltPoint | slope  | plateau | R2   |
|------------|-----------|--------|---------|------|
| NGLY1_KO_1 | –         | 0.042  | 1.21    | 0.28 |
| NGLY1_1    | –         | –0.016 | 0.49    | 0.75 |
| NGLY1_KO_2 | –         | –0.14  | 0.91    | 0.06 |
| NGLY1_2    | –         | –      | –       | –    |

Supplement: Supplementary file 5969 [file 1]

IPI00644674.1|NUBP2

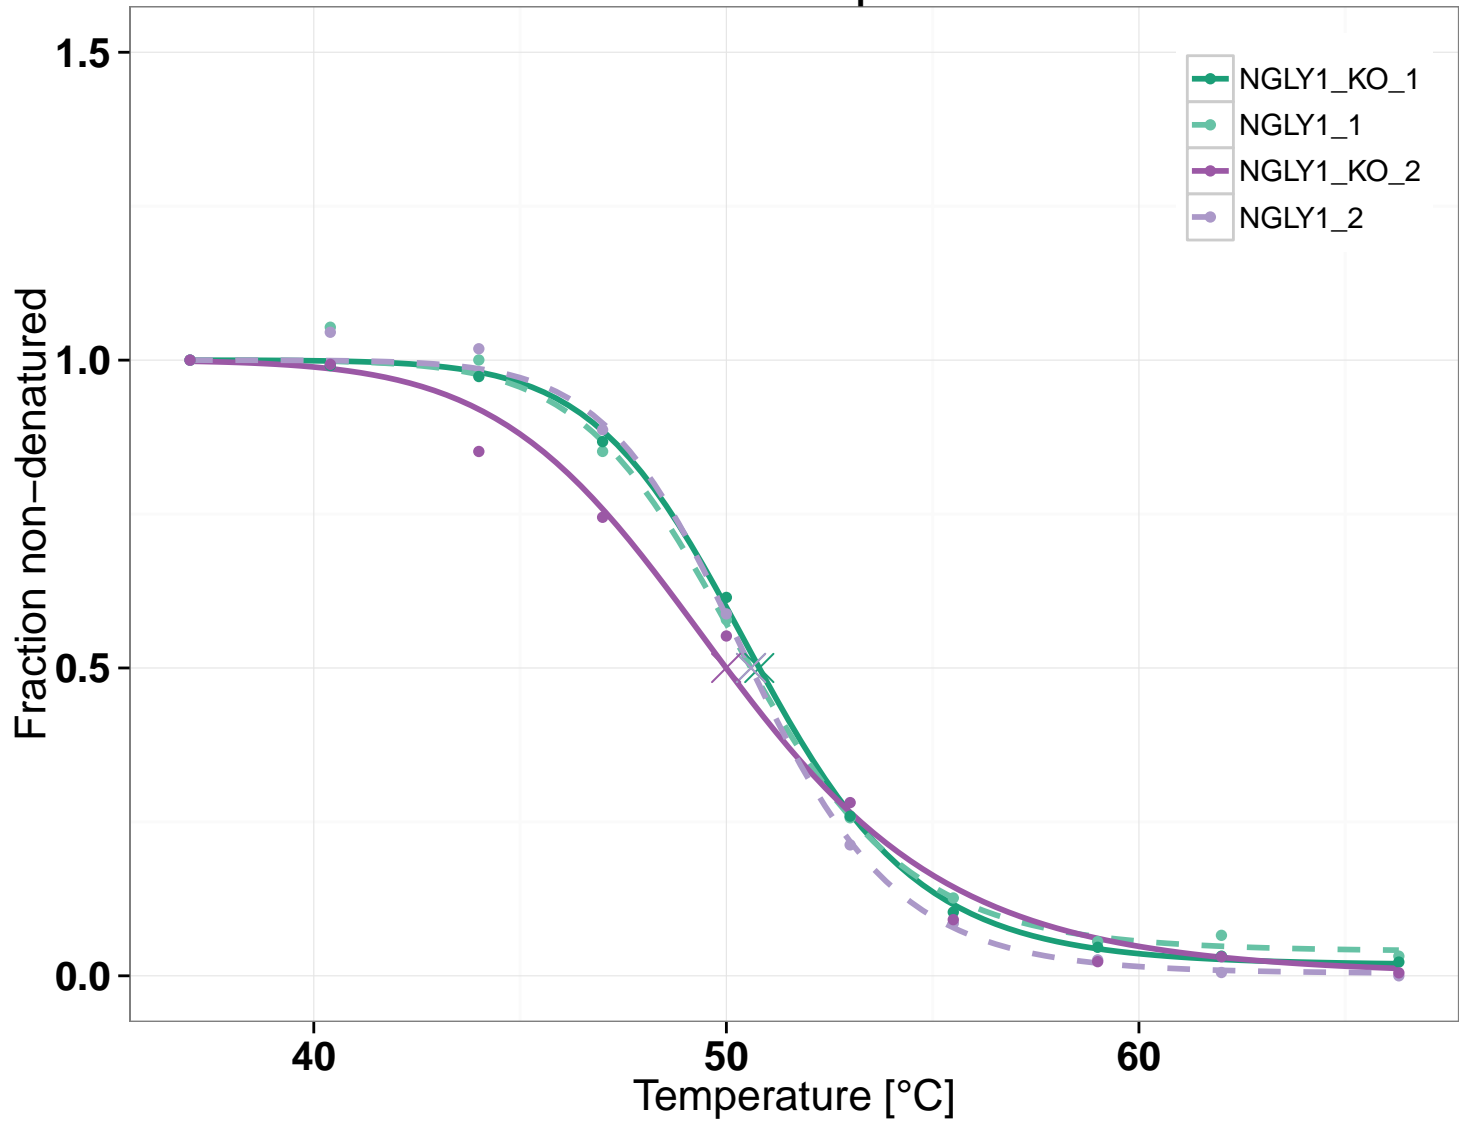

|            | meltPoint | slope  | plateau | R2   |
|------------|-----------|--------|---------|------|
| NGLY1_KO_1 | 50.8      | -0.12  | 0.02    | 1    |
| NGLY1_1    | 50.6      | -0.12  | 0.04    | 1    |
| NGLY1_KO_2 | 49.99     | -0.091 | 0       | 0.99 |
| NGLY1_2    | 50.6      | -0.14  | 0       | 1    |

Supplement: Supplementary file 5970 [file 1]

IPI00465100.1|ZNF574

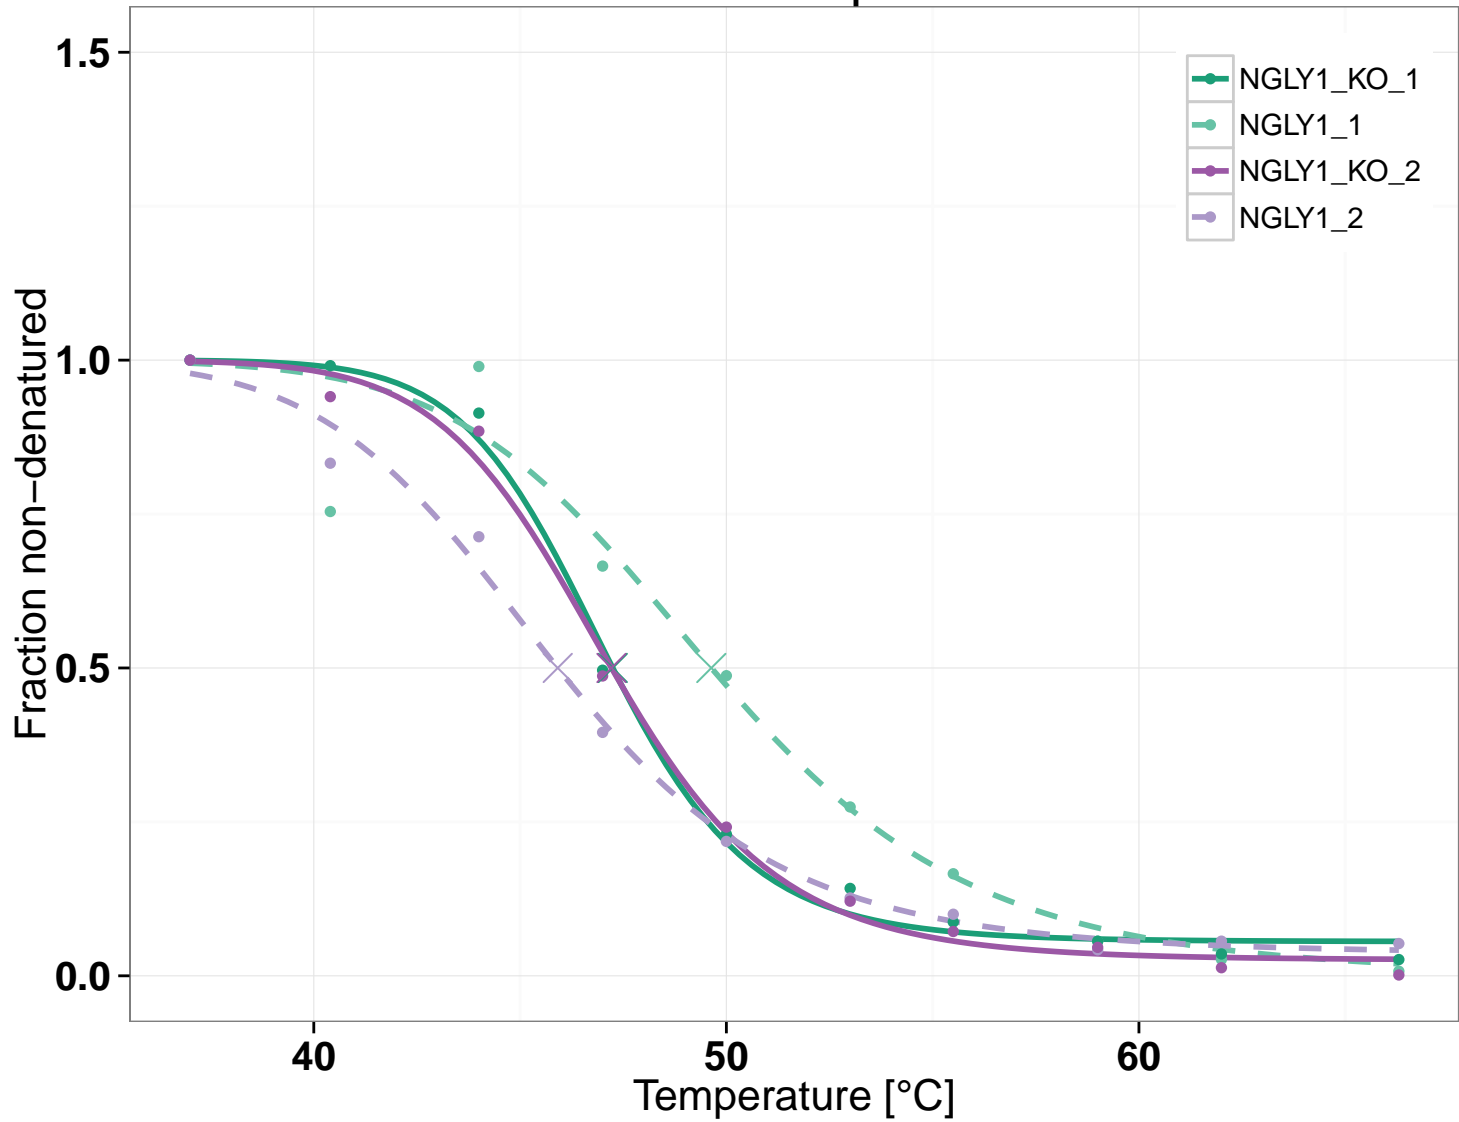

|            | meltPoint | slope  | plateau | R2   |
|------------|-----------|--------|---------|------|
| NGLY1_KO_1 | 47.25     | -0.13  | 0.06    | 1    |
| NGLY1_1    | 49.64     | -0.08  | 0       | 0.95 |
| NGLY1_KO_2 | 47.22     | -0.12  | 0.03    | 1    |
| NGLY1_2    | 45.91     | -0.086 | 0.04    | 0.99 |

Supplement: Supplementary file 5971 [file 1]

IPI00168885.5|DHX57

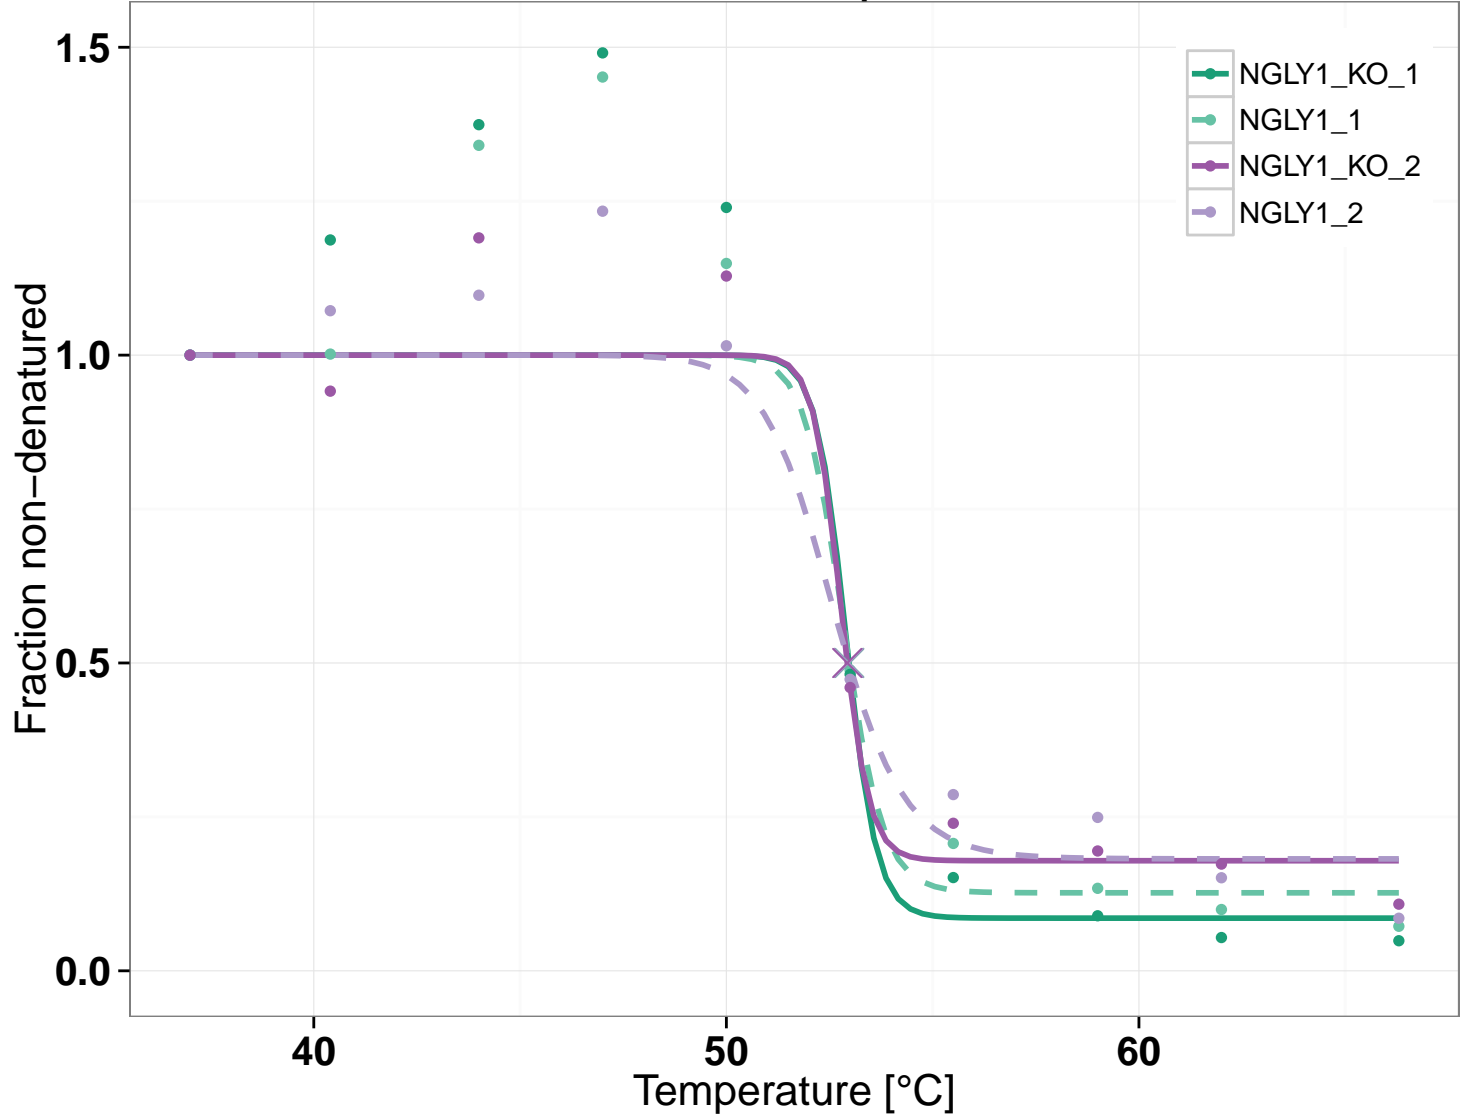

|            | meltPoint | slope | plateau | R2   |
|------------|-----------|-------|---------|------|
| NGLY1_KO_1 | 52.97     | -0.62 | 0.09    | 0.85 |
| NGLY1_1    | 52.98     | -0.46 | 0.13    | 0.87 |
| NGLY1_KO_2 | 52.93     | -0.61 | 0.18    | 0.83 |
| NGLY1_2    | 52.97     | -0.24 | 0.18    | 0.95 |

Supplement: Supplementary file 5972 [file 1]

IPI00646779.2|TUBB6

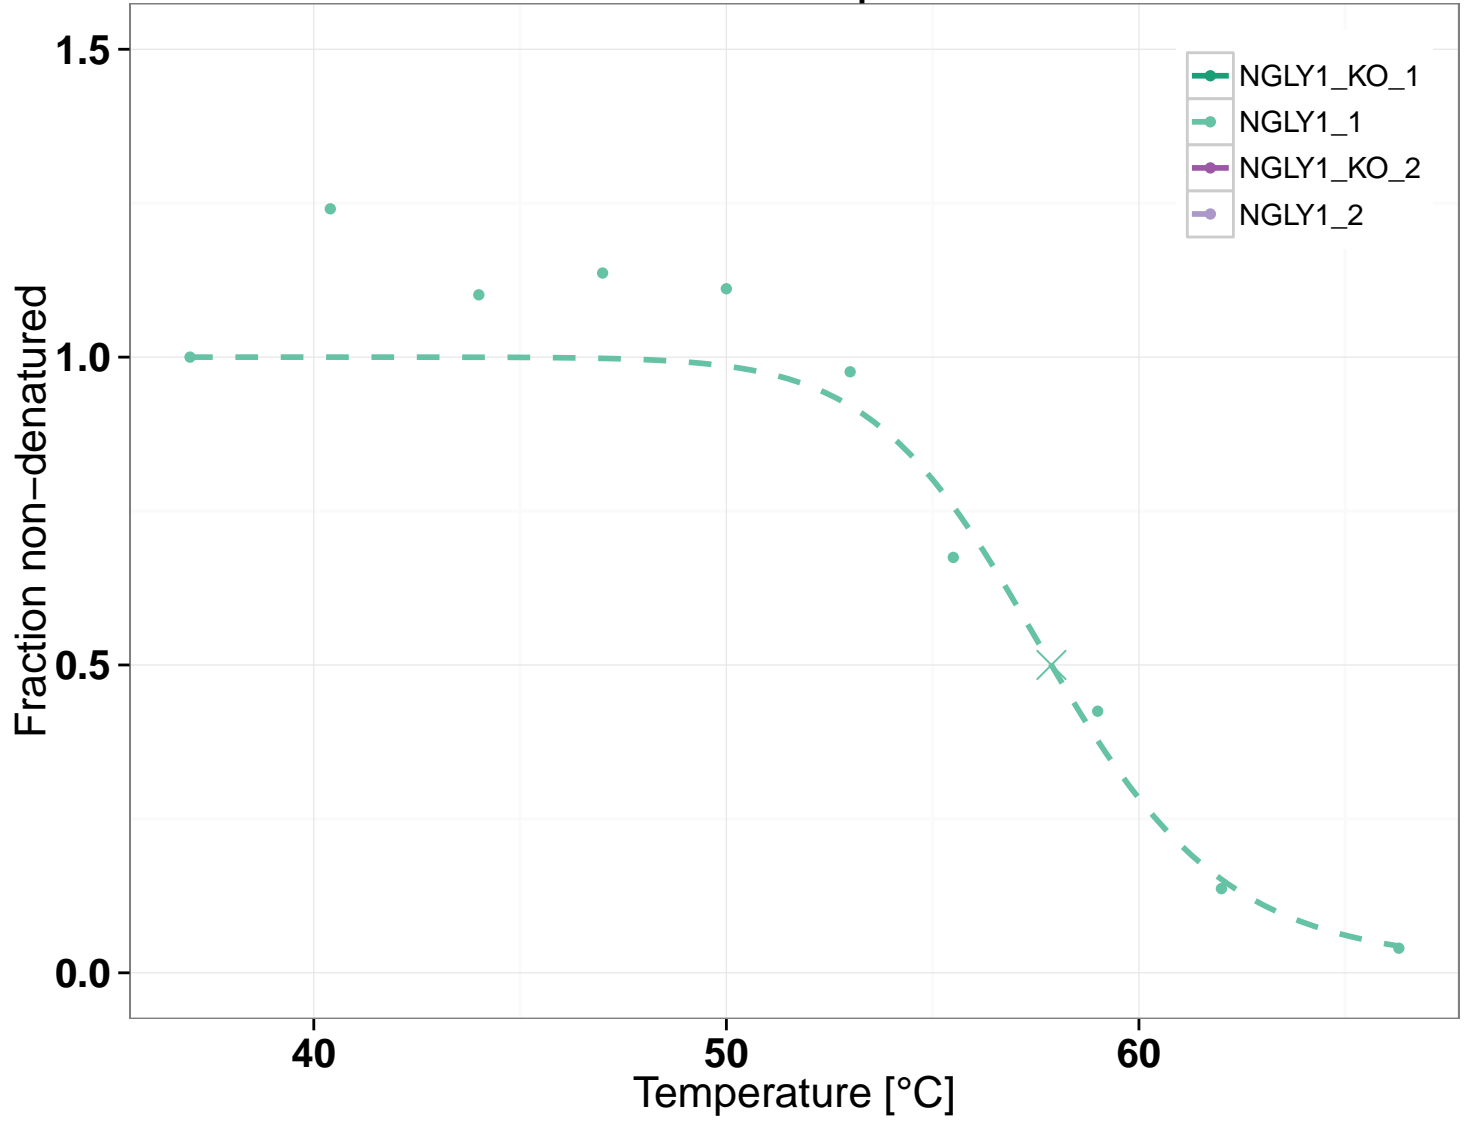

|            | meltPoint | slope | plateau | R2   |
|------------|-----------|-------|---------|------|
| NGLY1_KO_1 | -         | -     | -       | -    |
| NGLY1_1    | 57.88     | -0.12 | 0.01    | 0.93 |
| NGLY1_KO_2 | -         | -     | -       | -    |
| NGLY1_2    | -         | -     | -       | -    |

Supplement: Supplementary file 5973 [file 1]

IPI00412243.4|KIAA1609

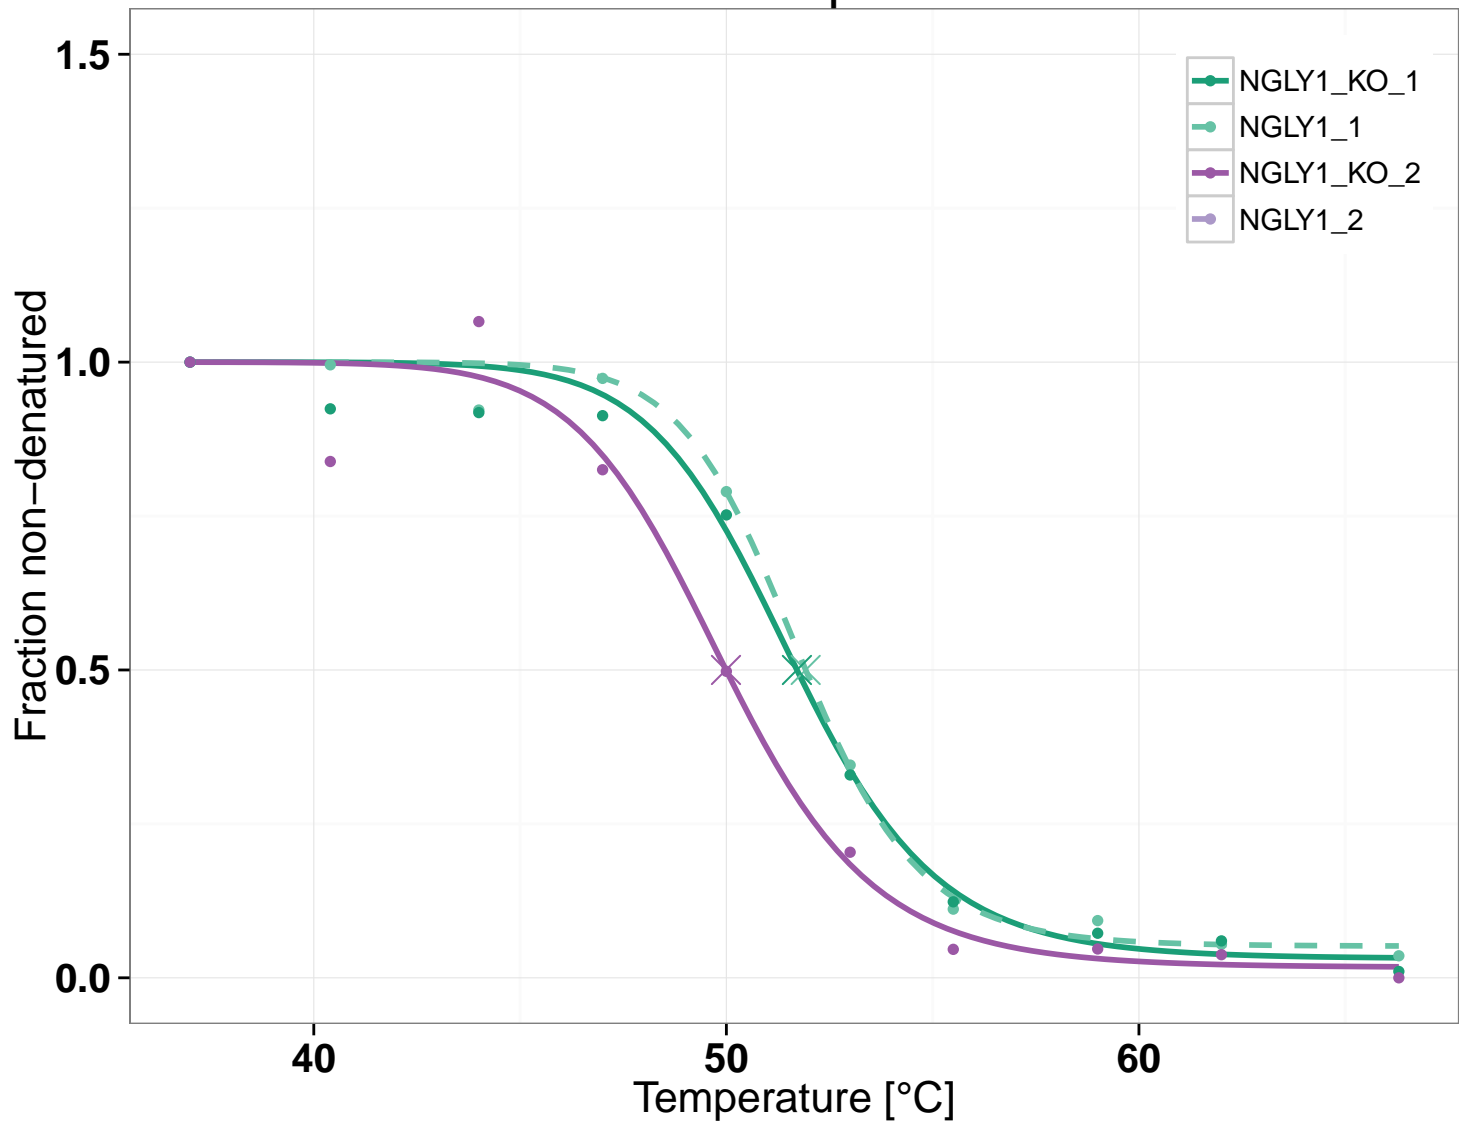

|            | meltPoint | slope | plateau | R2   |
|------------|-----------|-------|---------|------|
| NGLY1_KO_1 | 51.71     | -0.14 | 0.03    | 0.99 |
| NGLY1_1    | 51.92     | -0.16 | 0.05    | 1    |
| NGLY1_KO_2 | 49.99     | -0.14 | 0.02    | 0.98 |
| NGLY1_2    | -         | -     | -       | -    |

Supplement: Supplementary file 5974 [file 1]

IPI00024993.4|ECHS1

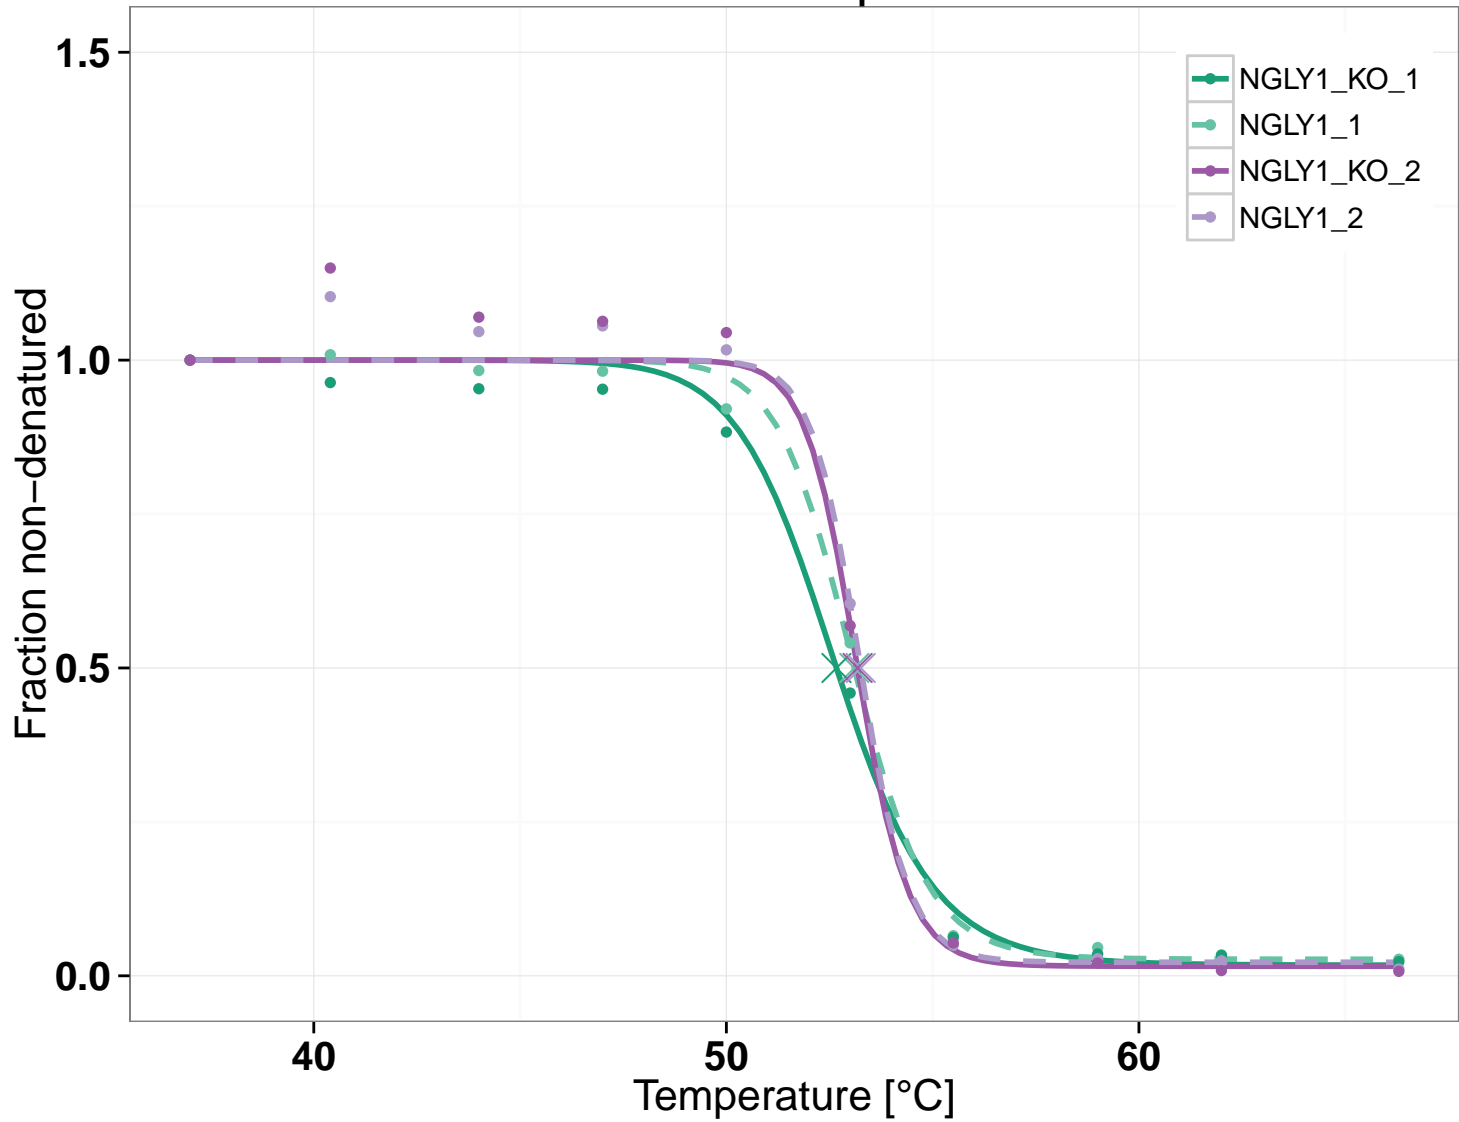

|            | meltPoint | slope | plateau | R2   |
|------------|-----------|-------|---------|------|
| NGLY1_KO_1 | 52.67     | -0.21 | 0.02    | 1    |
| NGLY1_1    | 53.1      | -0.27 | 0.03    | 1    |
| NGLY1_KO_2 | 53.18     | -0.39 | 0.02    | 0.99 |
| NGLY1_2    | 53.26     | -0.41 | 0.02    | 0.99 |

Supplement: Supplementary file 5975 [file 1]

# IPI00418497.1|TIMM50

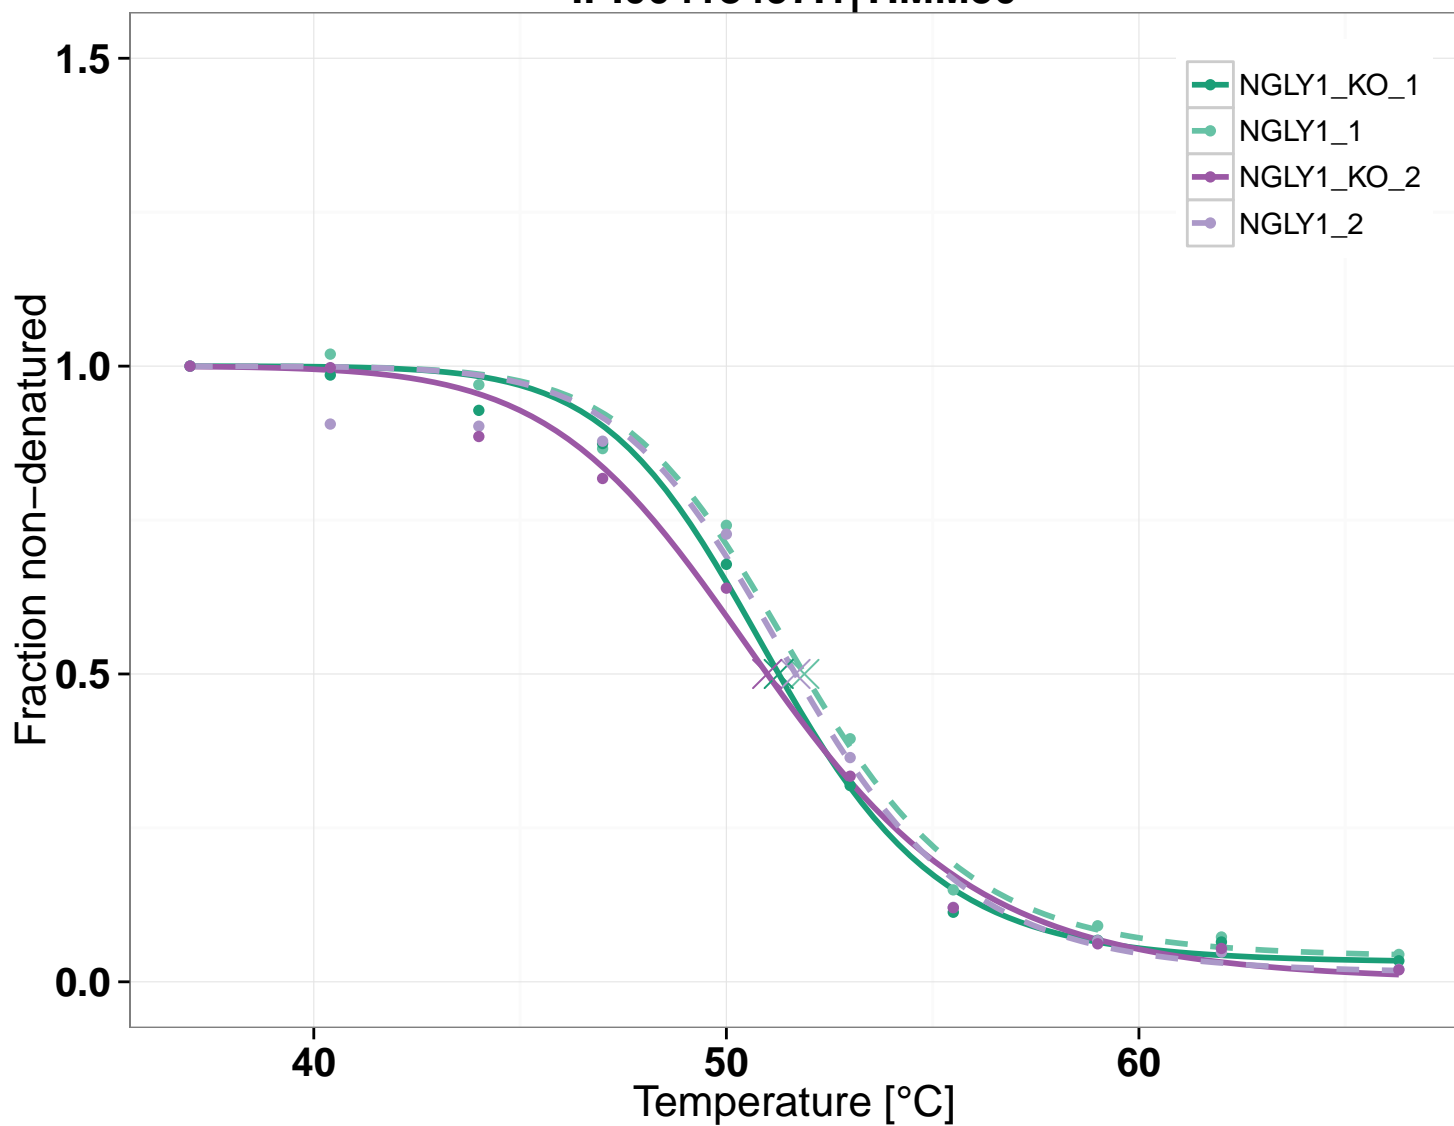

|            | meltPoint | slope  | plateau | R2   |
|------------|-----------|--------|---------|------|
| NGLY1_KO_1 | 51.27     | -0.12  | 0.03    | 1    |
| NGLY1_1    | 51.89     | -0.11  | 0.04    | 1    |
| NGLY1_KO_2 | 50.99     | -0.095 | 0       | 0.99 |
| NGLY1_2    | 51.68     | -0.12  | 0.01    | 0.99 |

Supplement: Supplementary file 5976 [file 1]

IPI00152667.3|ASAP3

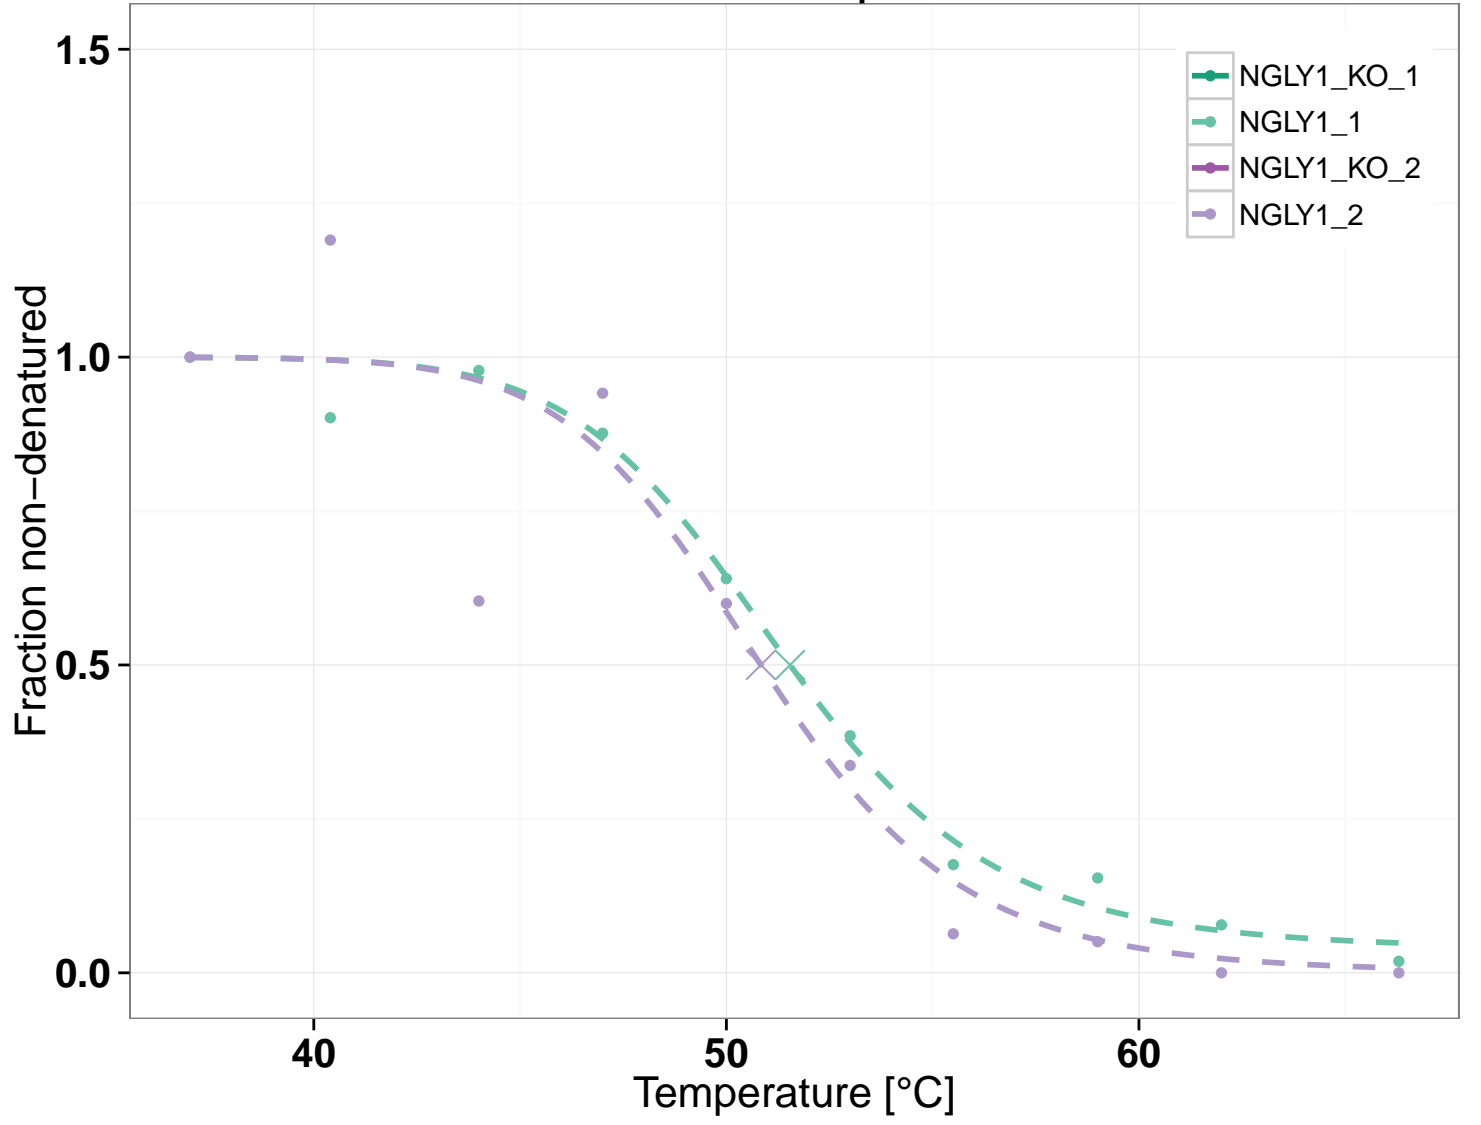

|            | meltPoint | slope  | plateau | R2   |
|------------|-----------|--------|---------|------|
| NGLY1_KO_1 | -         | -      | -       | -    |
| NGLY1_1    | 51.54     | -0.094 | 0.04    | 0.99 |
| NGLY1_KO_2 | -         | -      | -       | -    |
| NGLY1_2    | 50.84     | -0.1   | 0       | 0.9  |

Supplement: Supplementary file 5977 [file 1]

# IPI00001641.3|ORC6L

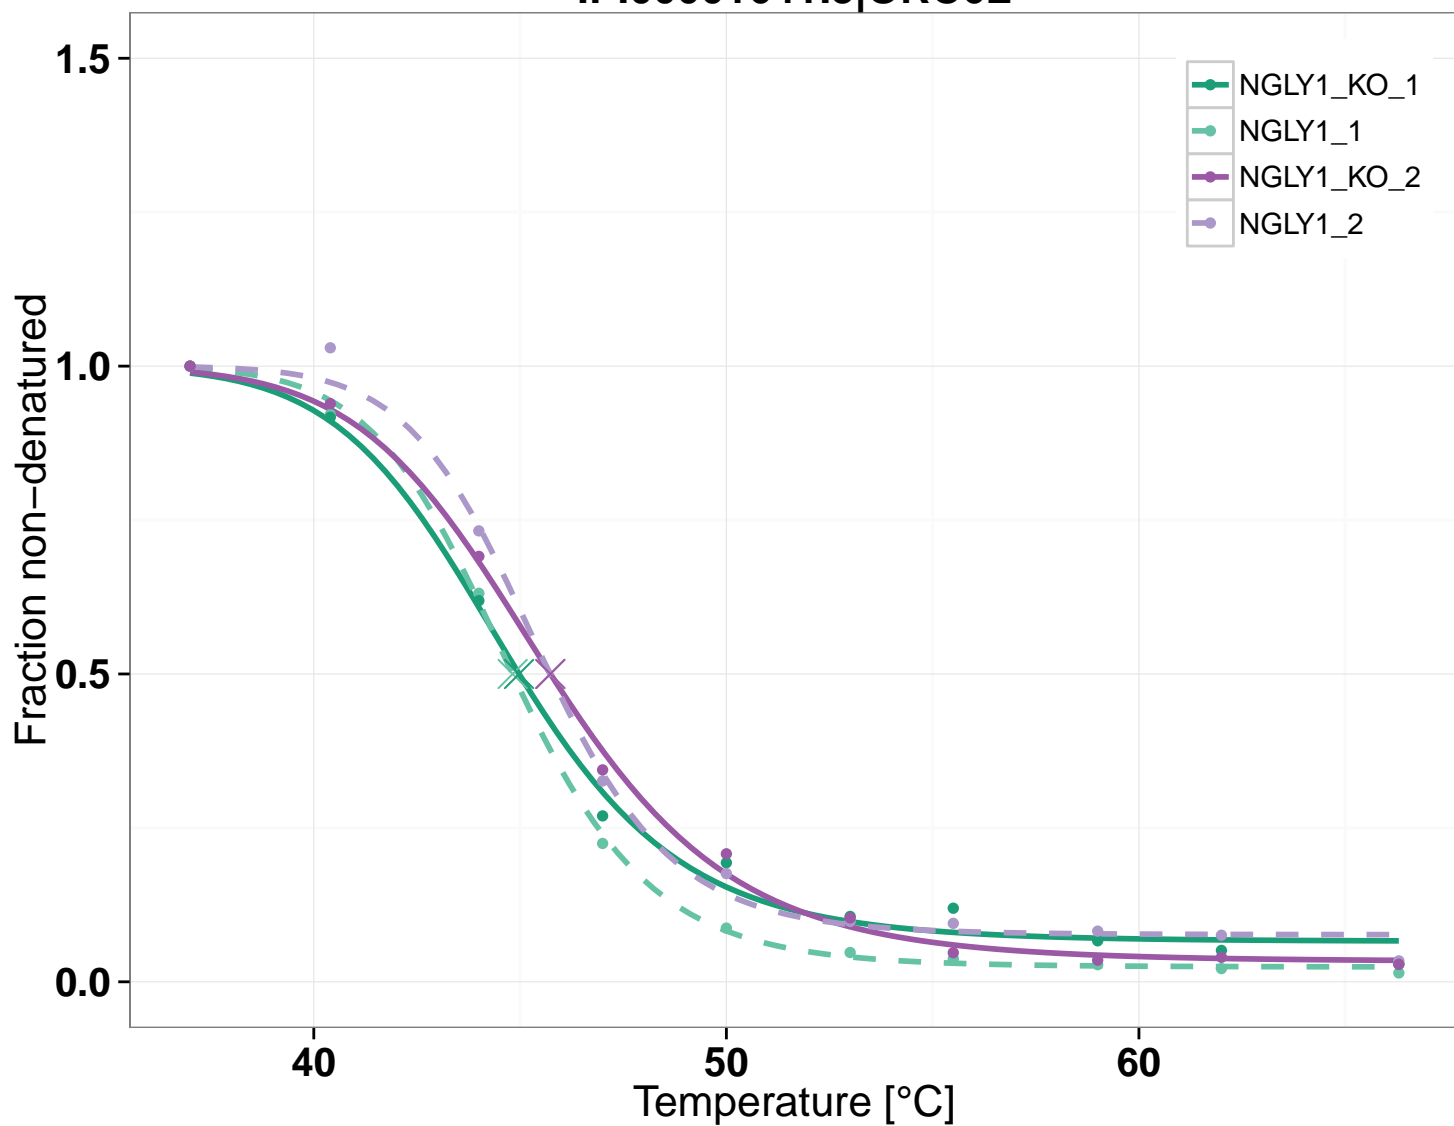

|            | meltPoint | slope | plateau | R2   |
|------------|-----------|-------|---------|------|
| NGLY1_KO_1 | 44.98     | -0.11 | 0.07    | 0.99 |
| NGLY1_1    | 44.82     | -0.14 | 0.02    | 1    |
| NGLY1_KO_2 | 45.74     | -0.11 | 0.03    | 1    |
| NGLY1_2    | 45.73     | -0.14 | 0.08    | 1    |

Supplement: Supplementary file 5978 [file 1]

IPI00028579.2|TAF6

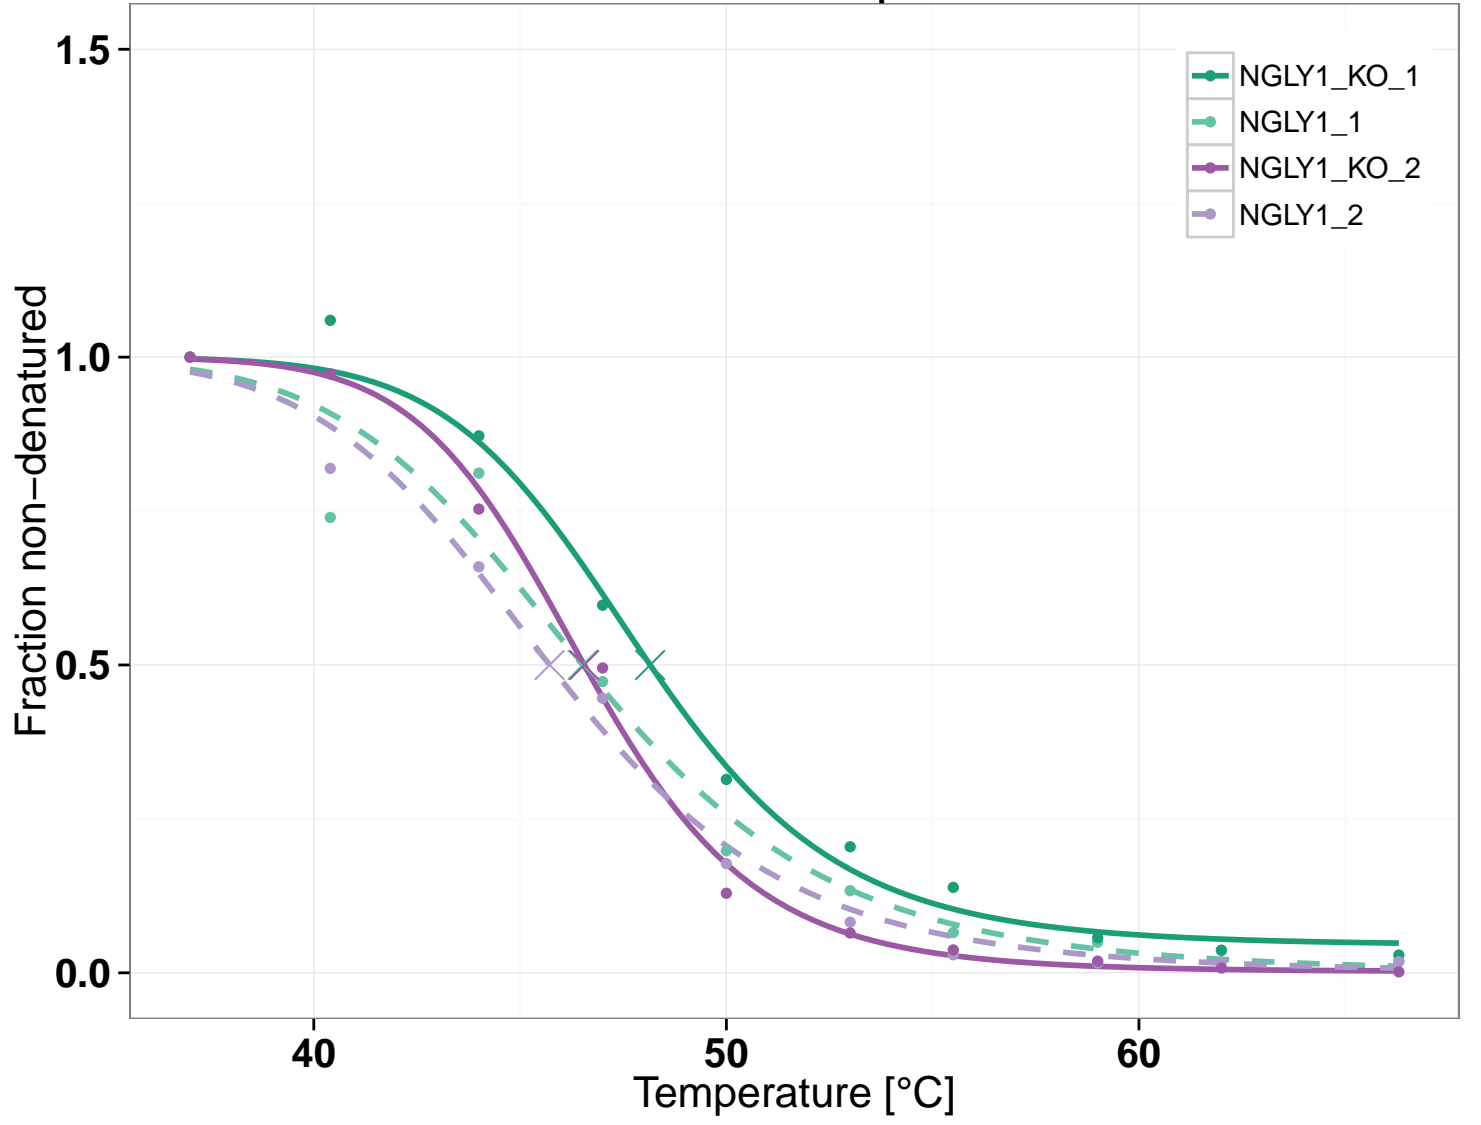

|            | meltPoint | slope  | plateau | R2   |
|------------|-----------|--------|---------|------|
| NGLY1_KO_1 | 48.15     | -0.1   | 0.04    | 0.99 |
| NGLY1_1    | 46.51     | -0.083 | 0       | 0.96 |
| NGLY1_KO_2 | 46.56     | -0.12  | 0       | 1    |
| NGLY1_2    | 45.72     | -0.087 | 0       | 0.99 |

Supplement: Supplementary file 5979 [file 1]

IPI00011592.3|DYNC1LI2

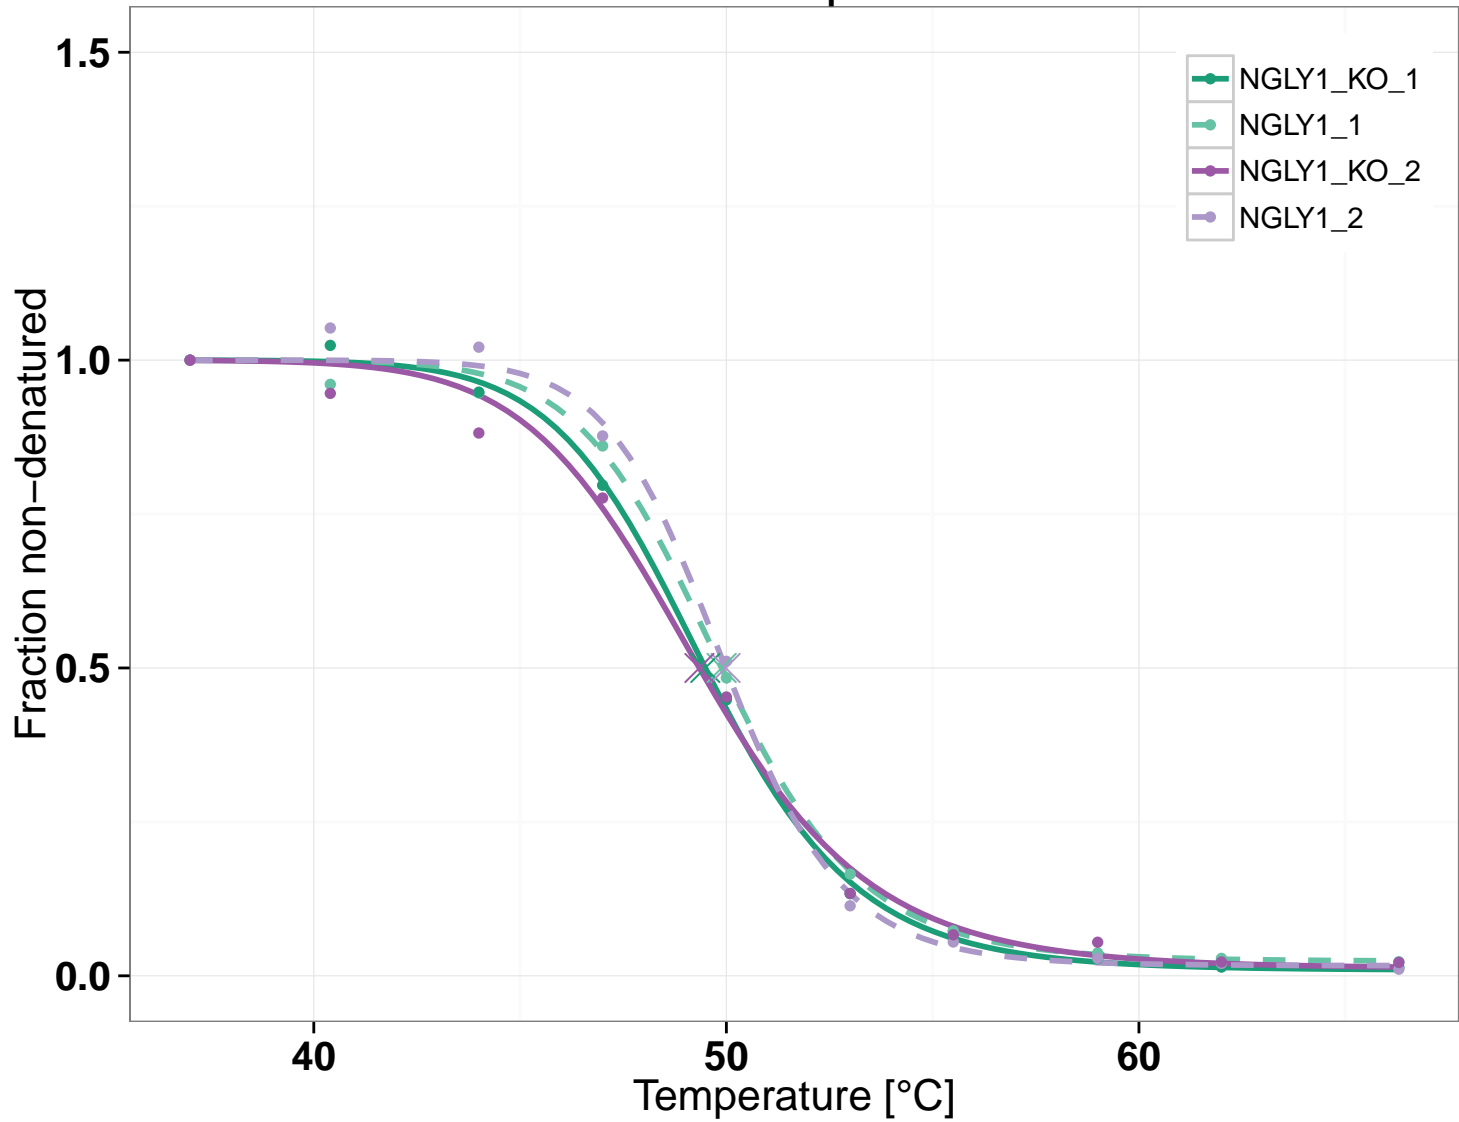

|            | meltPoint | slope | plateau | R2   |
|------------|-----------|-------|---------|------|
| NGLY1_KO_1 | 49.49     | -0.13 | 0.01    | 1    |
| NGLY1_1    | 49.89     | -0.14 | 0.02    | 1    |
| NGLY1_KO_2 | 49.35     | -0.12 | 0.01    | 0.99 |
| NGLY1_2    | 49.98     | -0.17 | 0.02    | 1    |

Supplement: Supplementary file 5980 [file 1]

IPI00031820.3|FARSA

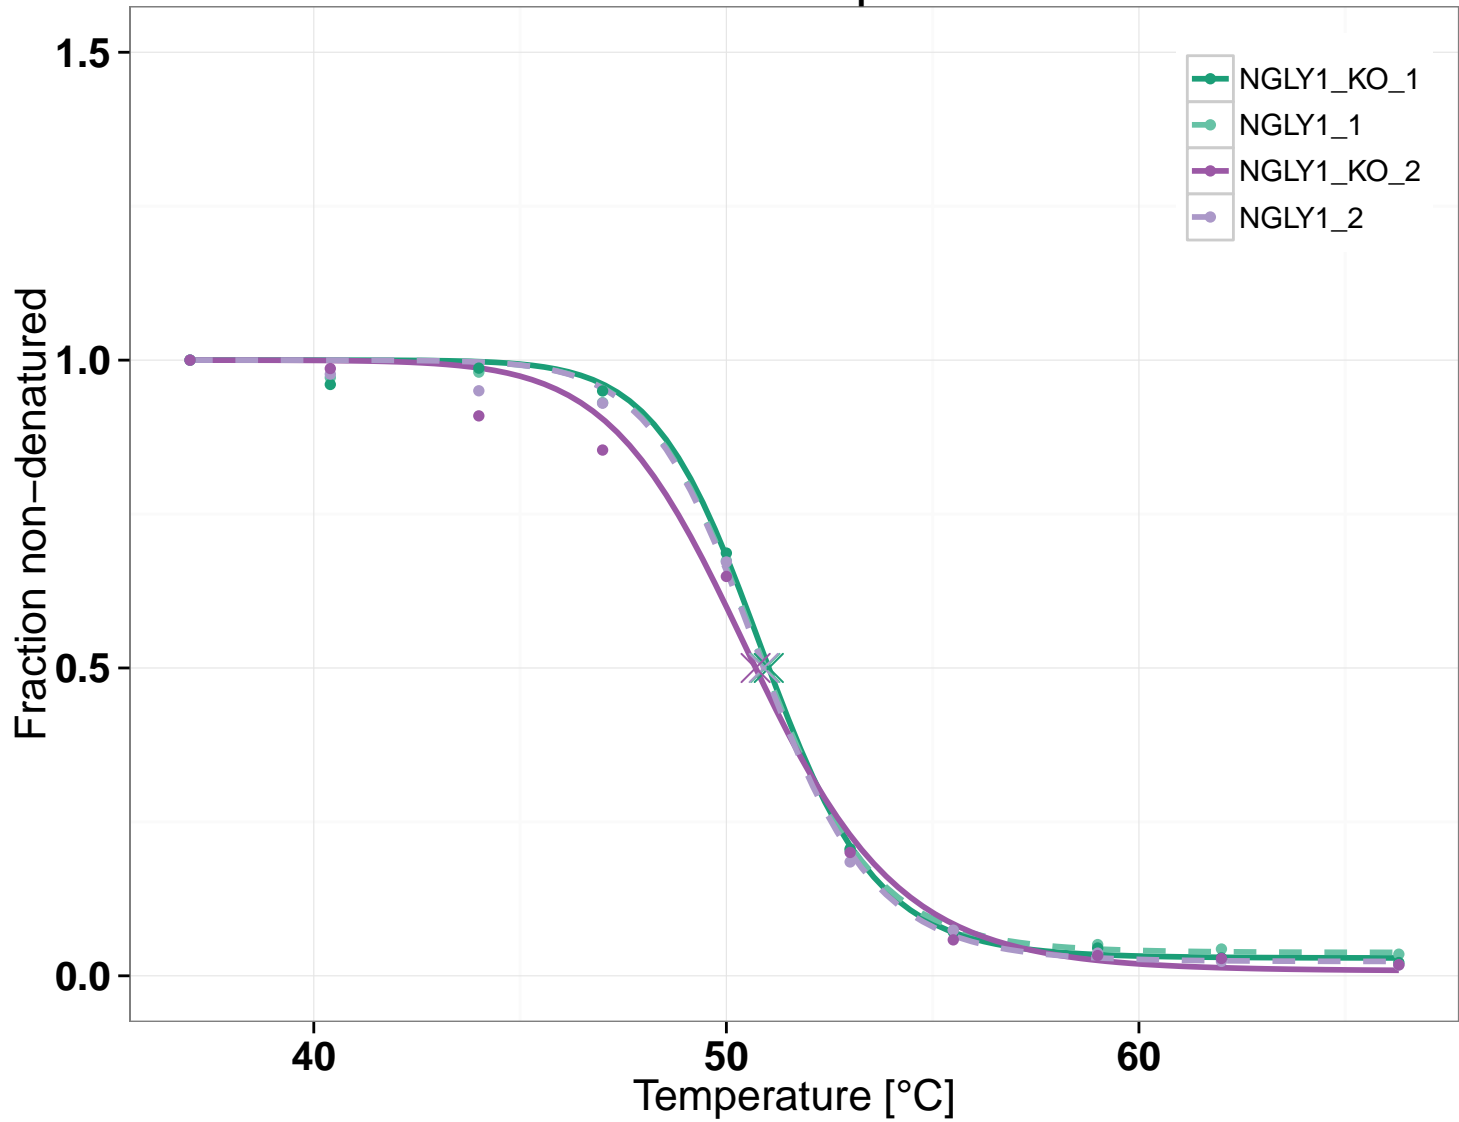

|            | meltPoint | slope | plateau | R2   |
|------------|-----------|-------|---------|------|
| NGLY1_KO_1 | 51.03     | -0.18 | 0.03    | 1    |
| NGLY1_1    | 50.94     | -0.18 | 0.04    | 1    |
| NGLY1_KO_2 | 50.71     | -0.14 | 0.01    | 0.99 |
| NGLY1_2    | 50.9      | -0.18 | 0.02    | 1    |

Supplement: Supplementary file 5981 [file 1]

# IPI00328571.1|WASH1

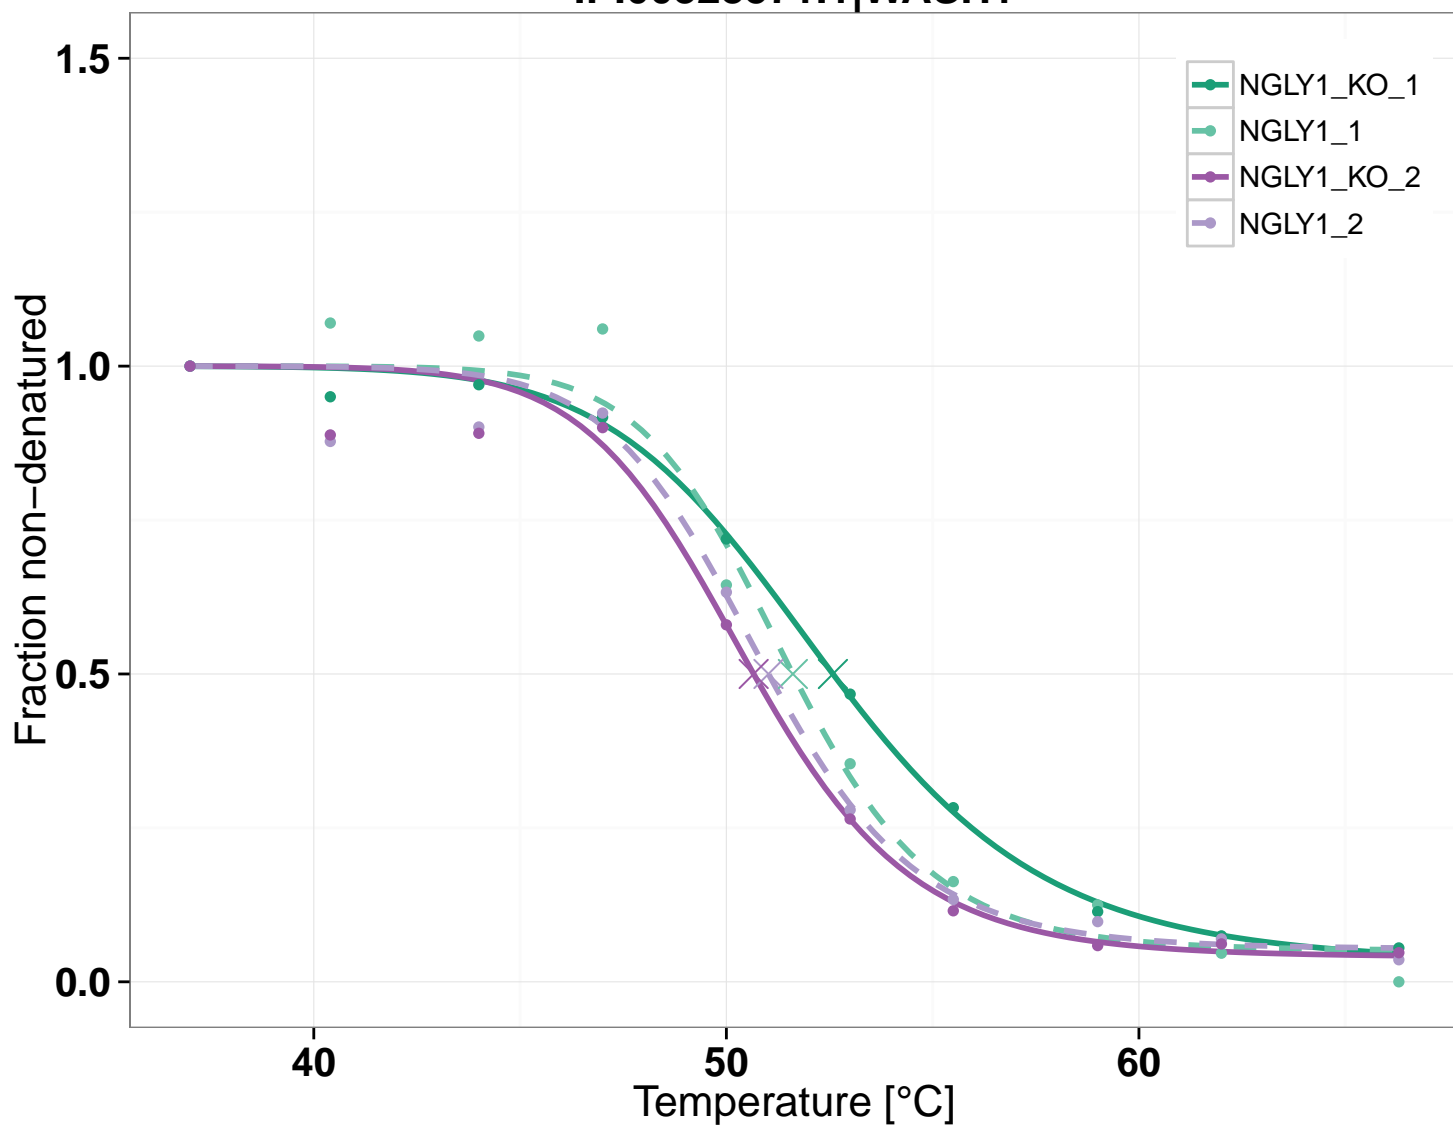

|            | meltPoint | slope  | plateau | R2   |
|------------|-----------|--------|---------|------|
| NGLY1_KO_1 | 52.58     | -0.091 | 0.03    | 1    |
| NGLY1_1    | 51.61     | -0.13  | 0.05    | 0.98 |
| NGLY1_KO_2 | 50.66     | -0.12  | 0.04    | 0.99 |
| NGLY1_2    | 51.02     | -0.13  | 0.05    | 0.98 |

Supplement: Supplementary file 5982 [file 1]

# IPI00096986.2|C20ORF108

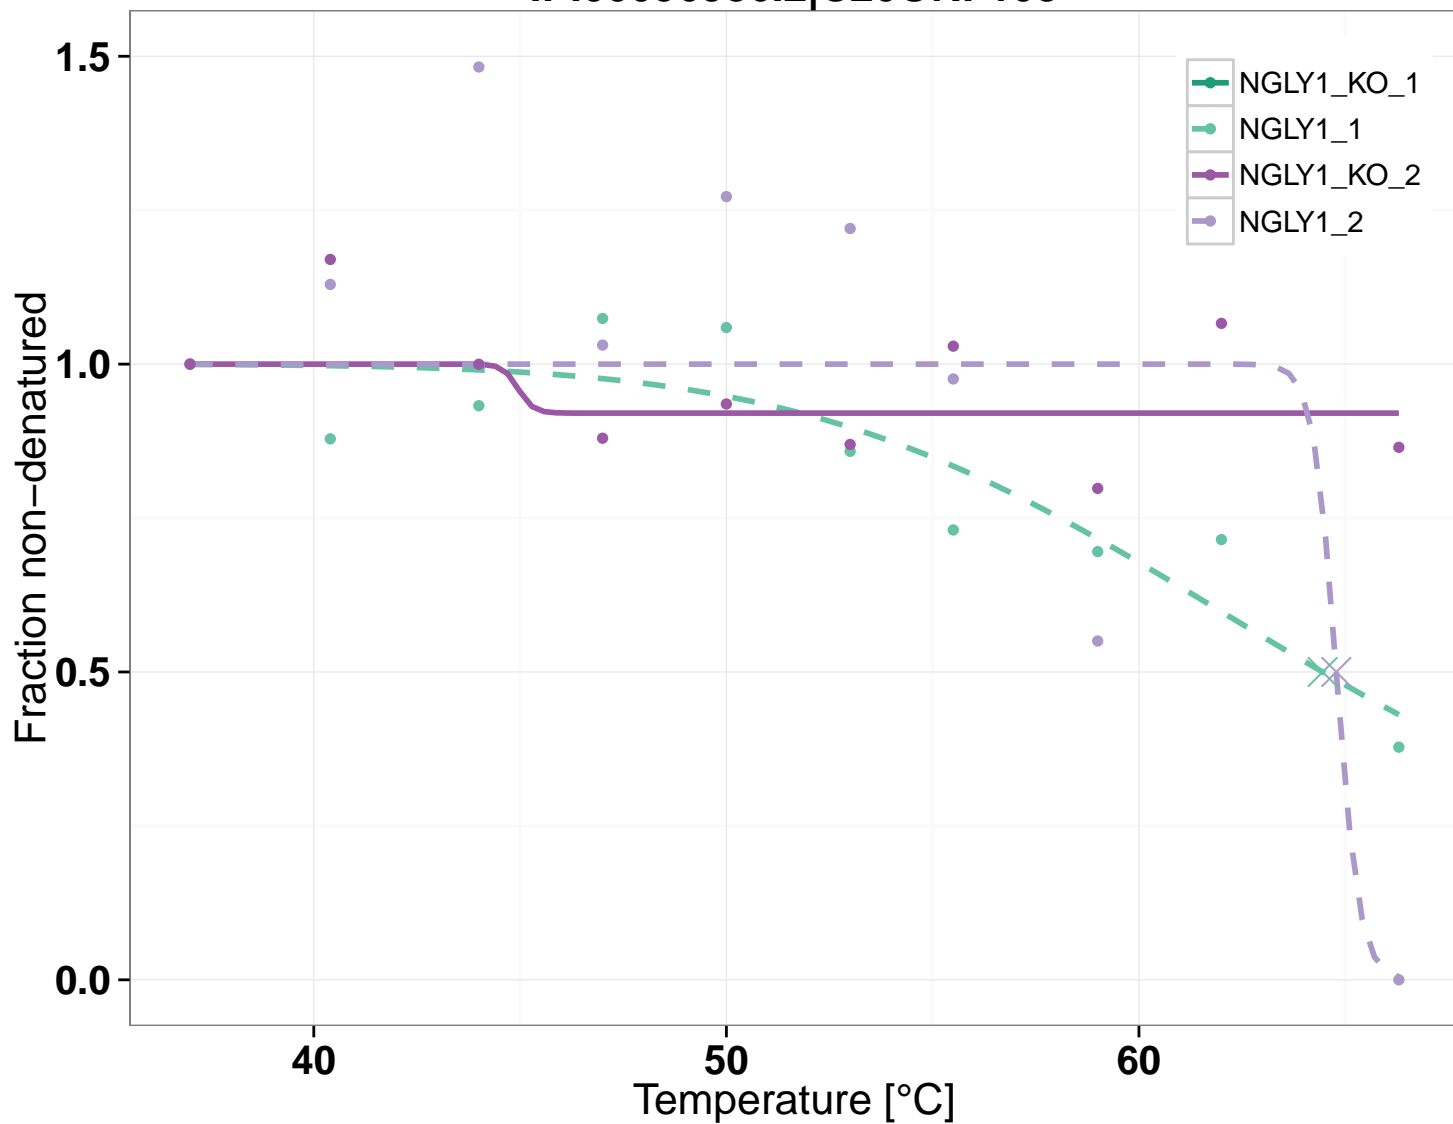

|            | meltPoint | slope | plateau | R2   |
|------------|-----------|-------|---------|------|
| NGLY1_KO_1 | -         | -     | -       | -    |
| NGLY1_1    | 64.45     | -0.04 | 0       | 0.83 |
| NGLY1_KO_2 | -         | -0.11 | 0.92    | 0.26 |
| NGLY1_2    | 64.78     | -0.89 | 0       | 0.44 |

Supplement: Supplementary file 5983 [file 1]

IPI00328391.3|GALNT7

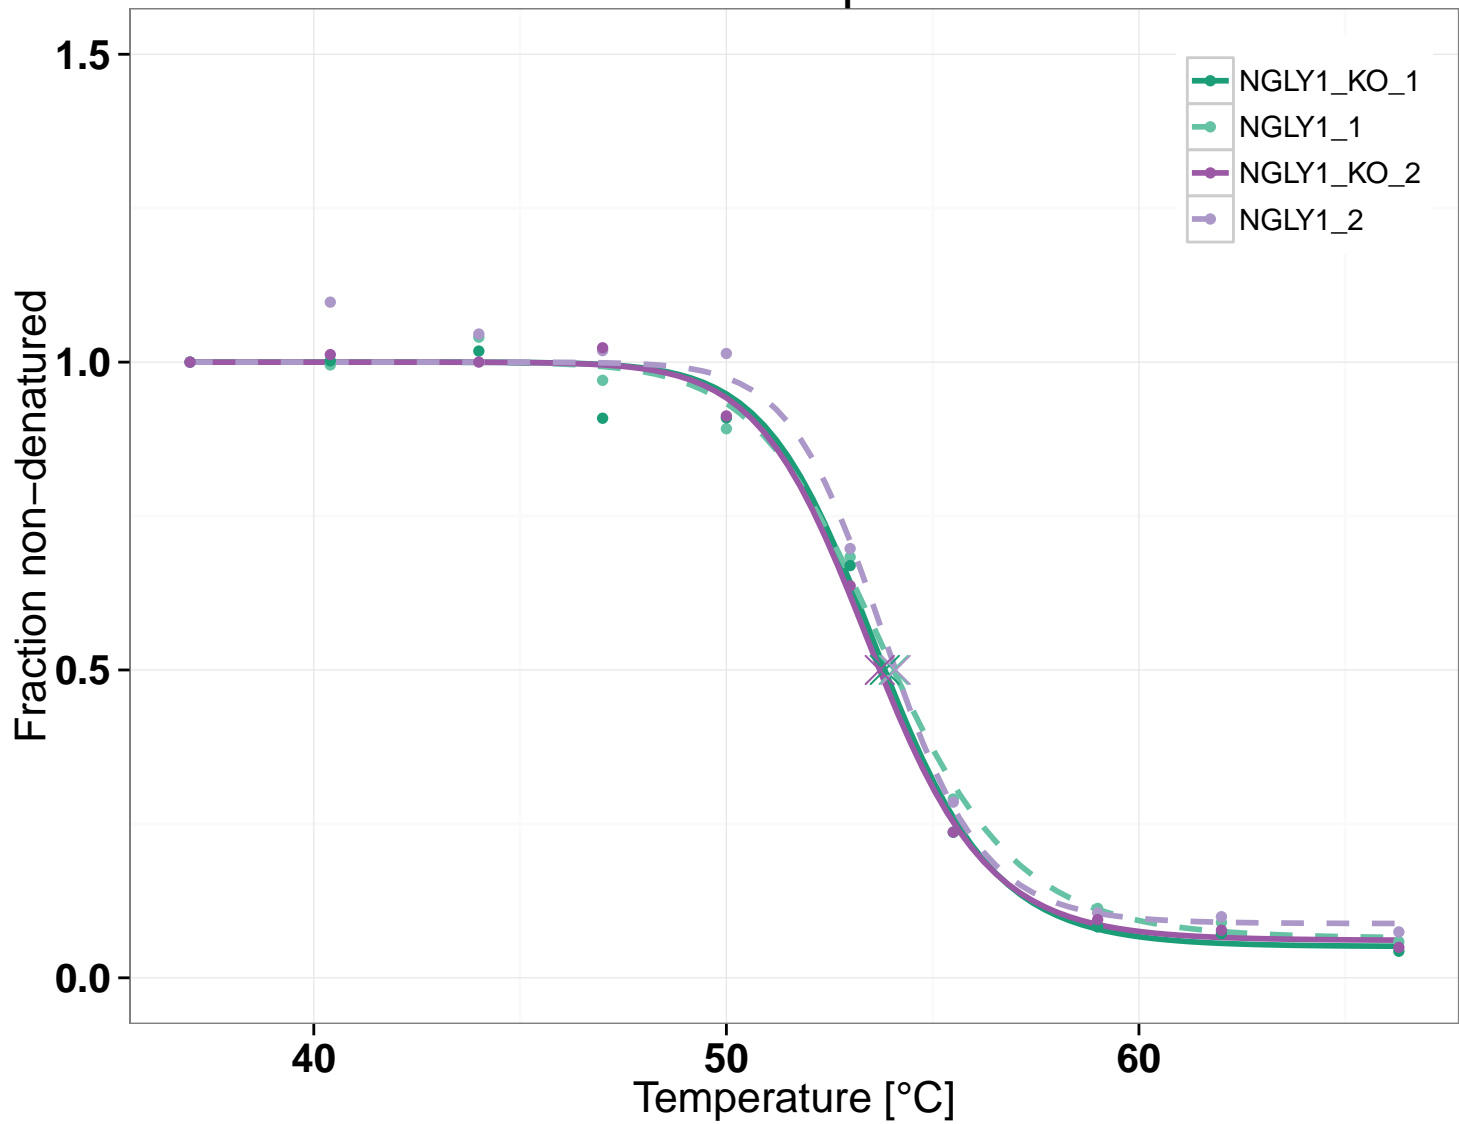

|            | meltPoint | slope | plateau | R2   |
|------------|-----------|-------|---------|------|
| NGLY1_KO_1 | 53.84     | -0.17 | 0.05    | 0.99 |
| NGLY1_1    | 54.05     | -0.15 | 0.06    | 1    |
| NGLY1_KO_2 | 53.72     | -0.17 | 0.06    | 1    |
| NGLY1_2    | 54.1      | -0.19 | 0.09    | 0.99 |

Supplement: Supplementary file 5984 [file 1]

# IPI00030320.4|DDX6

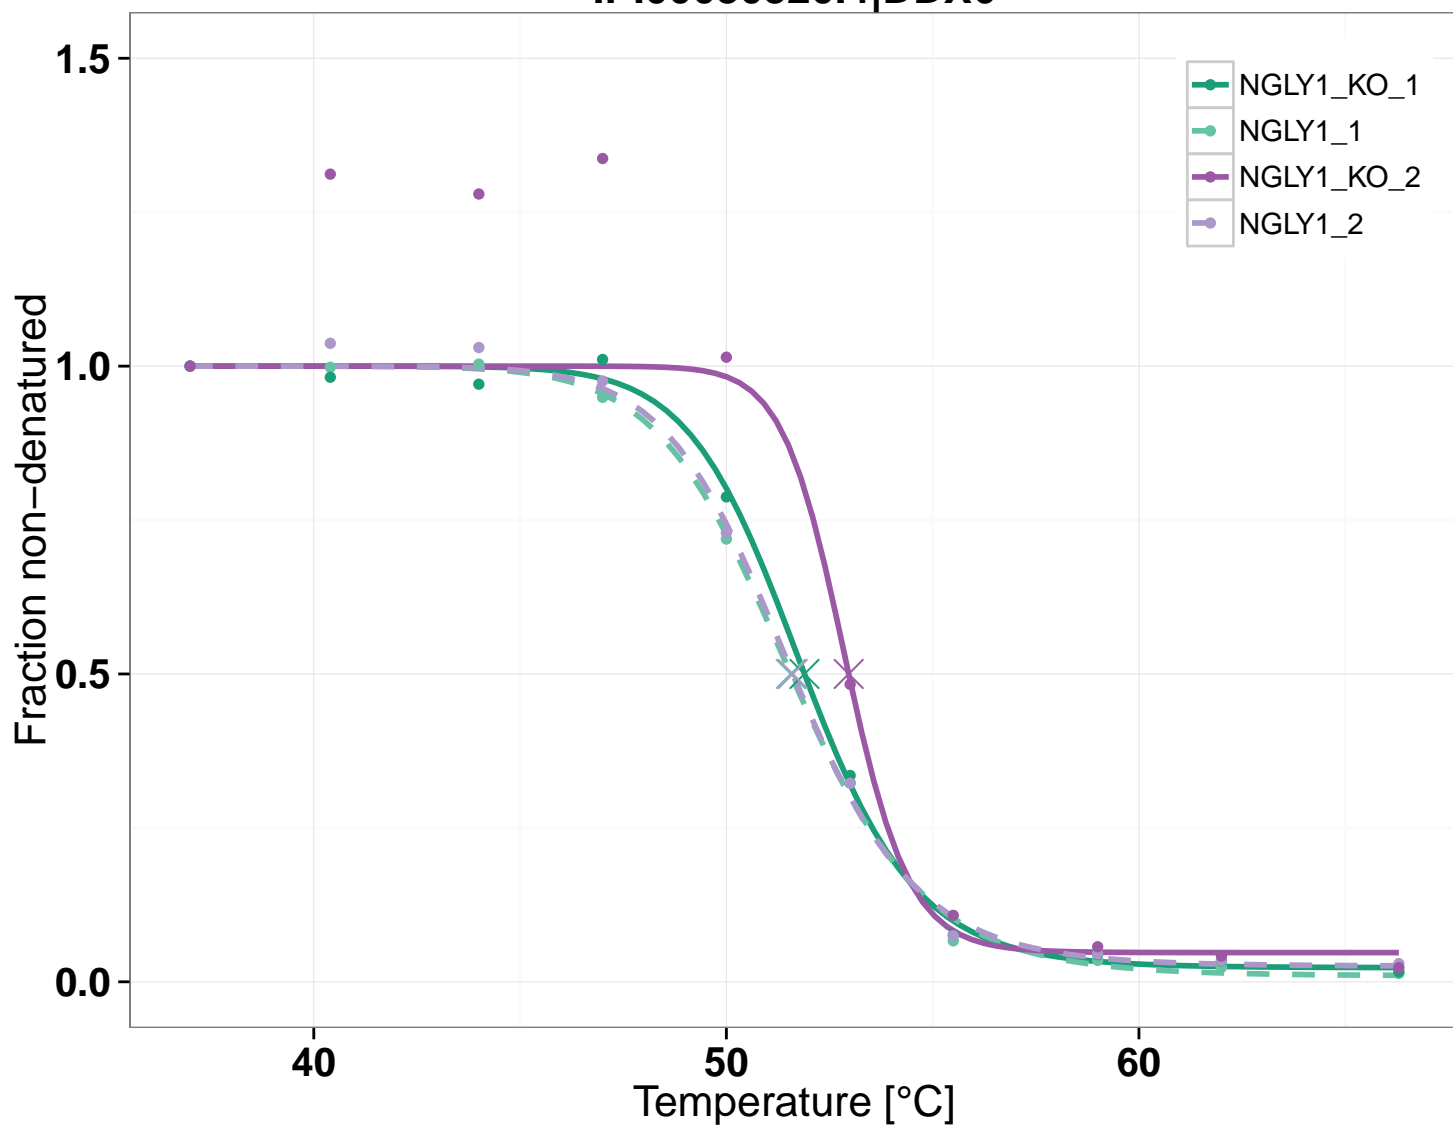

|            | meltPoint | slope | plateau | R2  |
|------------|-----------|-------|---------|-----|
| NGLY1_KO_1 | 51.89     | -0.18 | 0.02    | 1   |
| NGLY1_1    | 51.56     | -0.15 | 0.01    | 1   |
| NGLY1_KO_2 | 52.97     | -0.31 | 0.05    | 0.9 |
| NGLY1_2    | 51.61     | -0.16 | 0.03    | 1   |

Supplement: Supplementary file 5985 [file 1]

# IPI00297084.7|DDOST

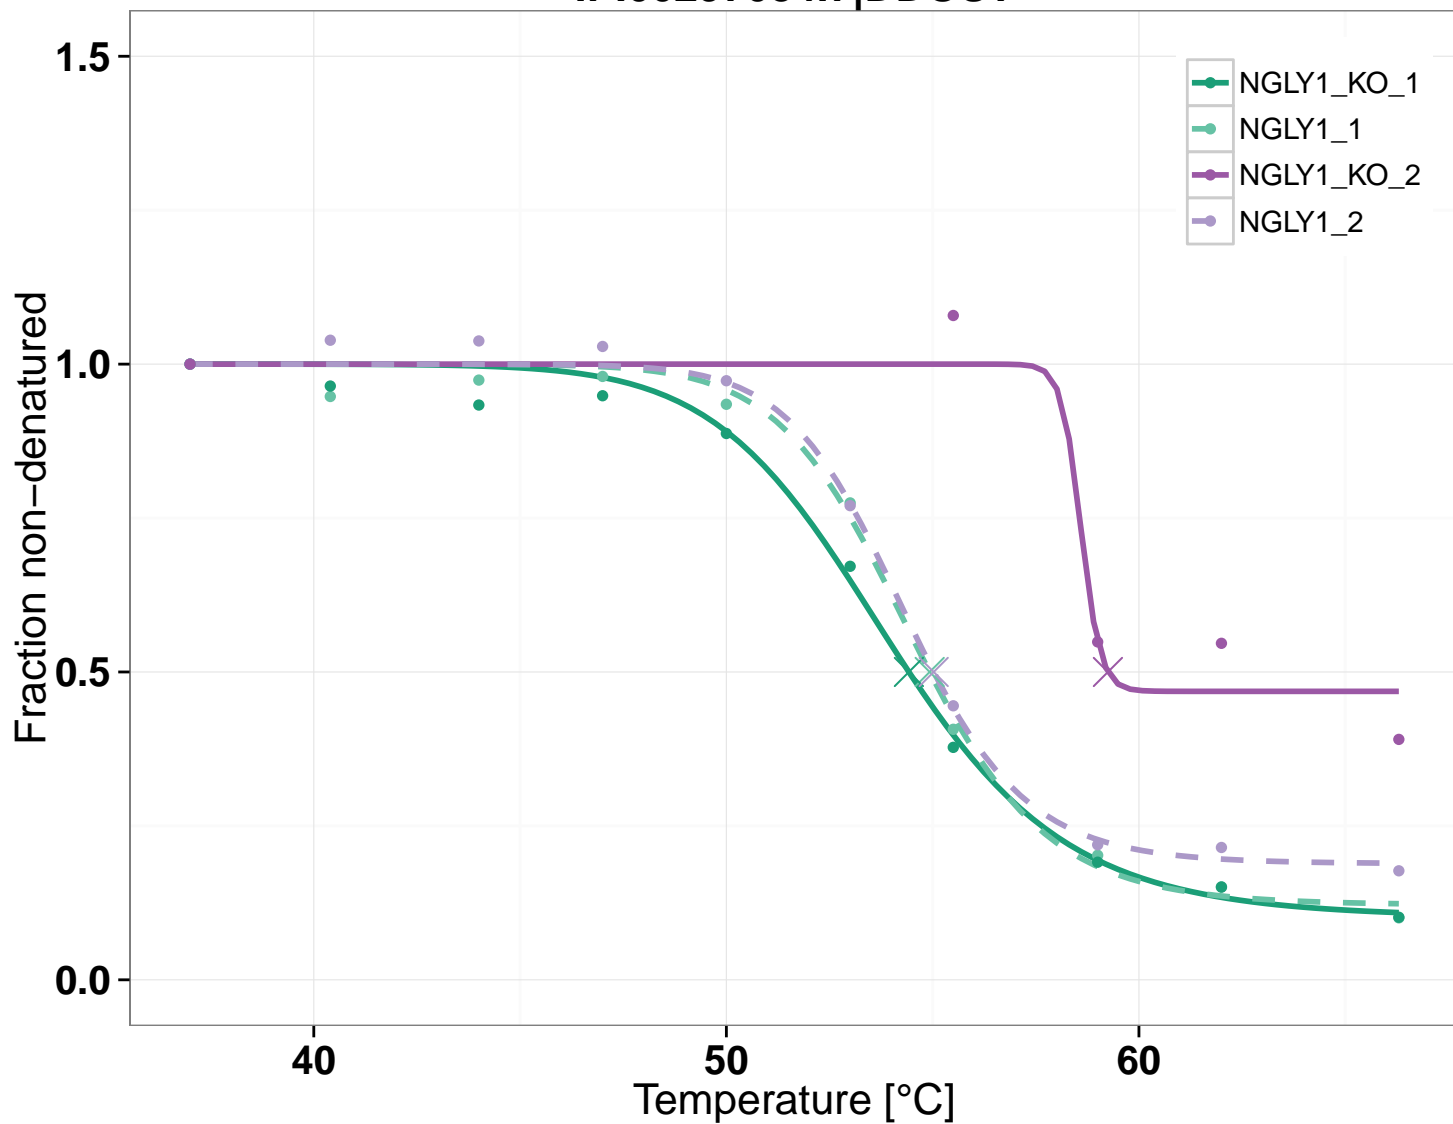

|            | meltPoint | slope | plateau | R2    |
|------------|-----------|-------|---------|-------|
| NGLY1_KO_1 | 54.42     | -0.11 | 0.1     | 0.99  |
| NGLY1_1    | 54.93     | -0.14 | 0.12    | 1     |
| NGLY1_KO_2 | 59.25     | -0.57 | 0.47    | -0.22 |
| NGLY1_2    | 55.03     | -0.14 | 0.19    | 1     |

Supplement: Supplementary file 5986 [file 1]

IPI00329360.2|AXIN1

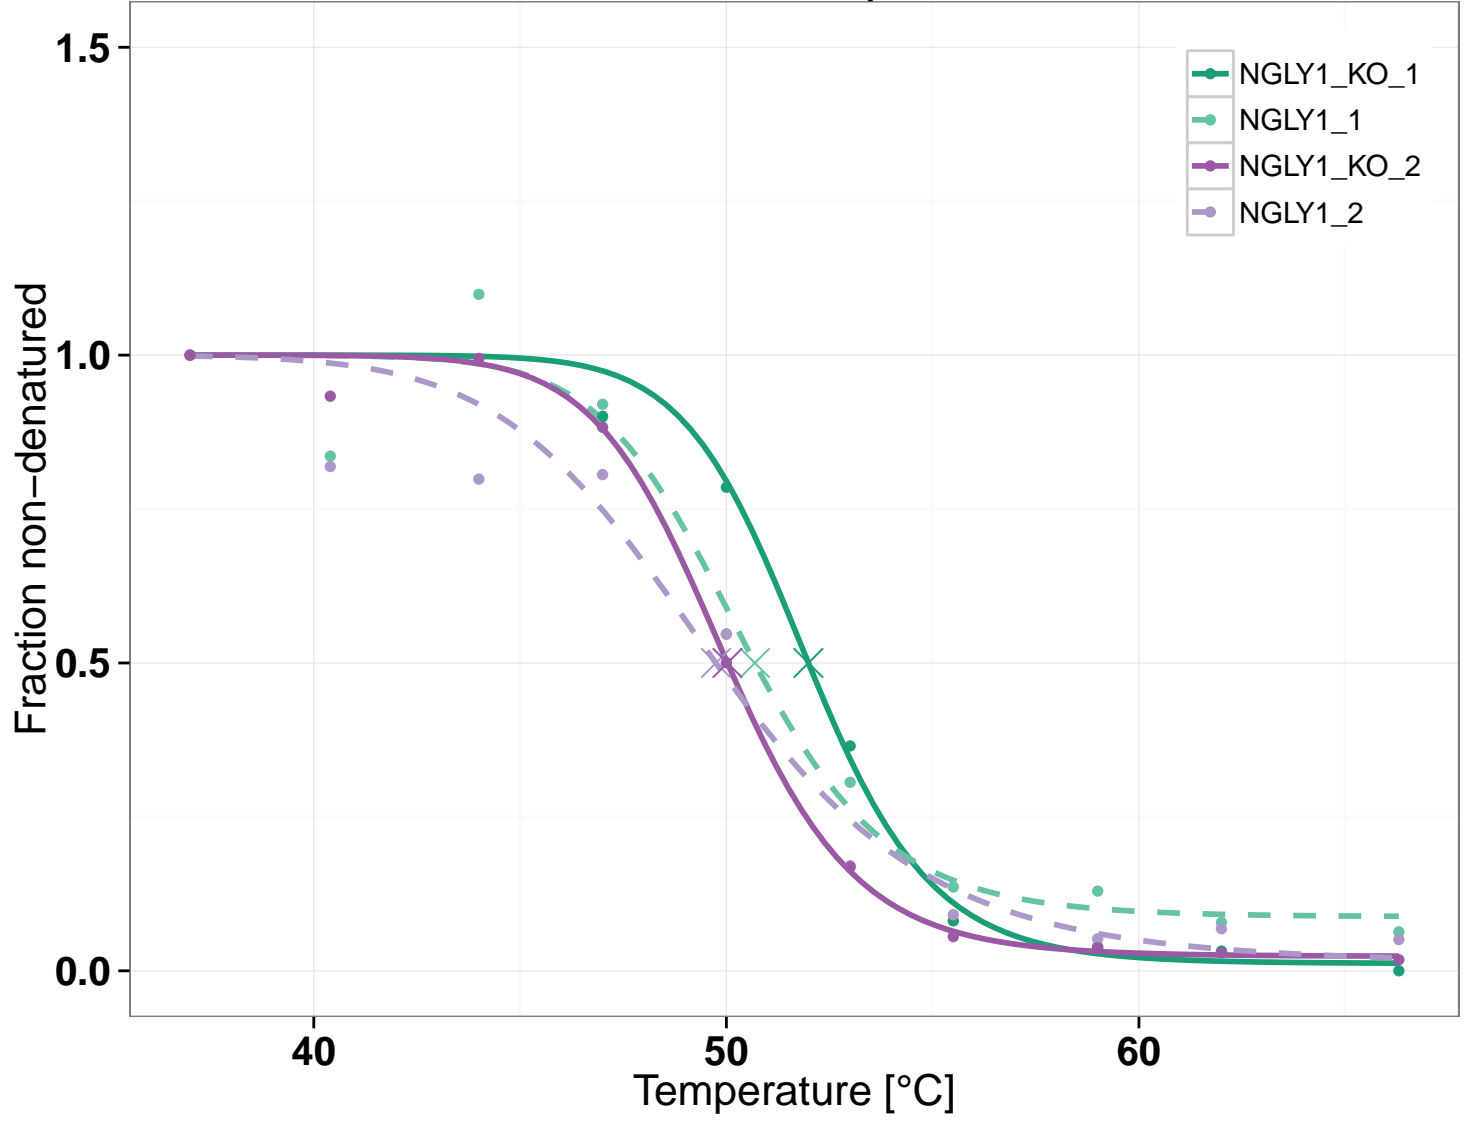

|            | meltPoint | slope  | plateau | R2   |
|------------|-----------|--------|---------|------|
| NGLY1_KO_1 | 51.99     | -0.16  | 0.01    | 0.8  |
| NGLY1_1    | 50.69     | -0.13  | 0.09    | 0.97 |
| NGLY1_KO_2 | 50.03     | -0.15  | 0.02    | 1    |
| NGLY1_2    | 49.75     | -0.095 | 0.01    | 0.96 |

Supplement: Supplementary file 5987 [file 1]

# IPI00220766.5|GLO1

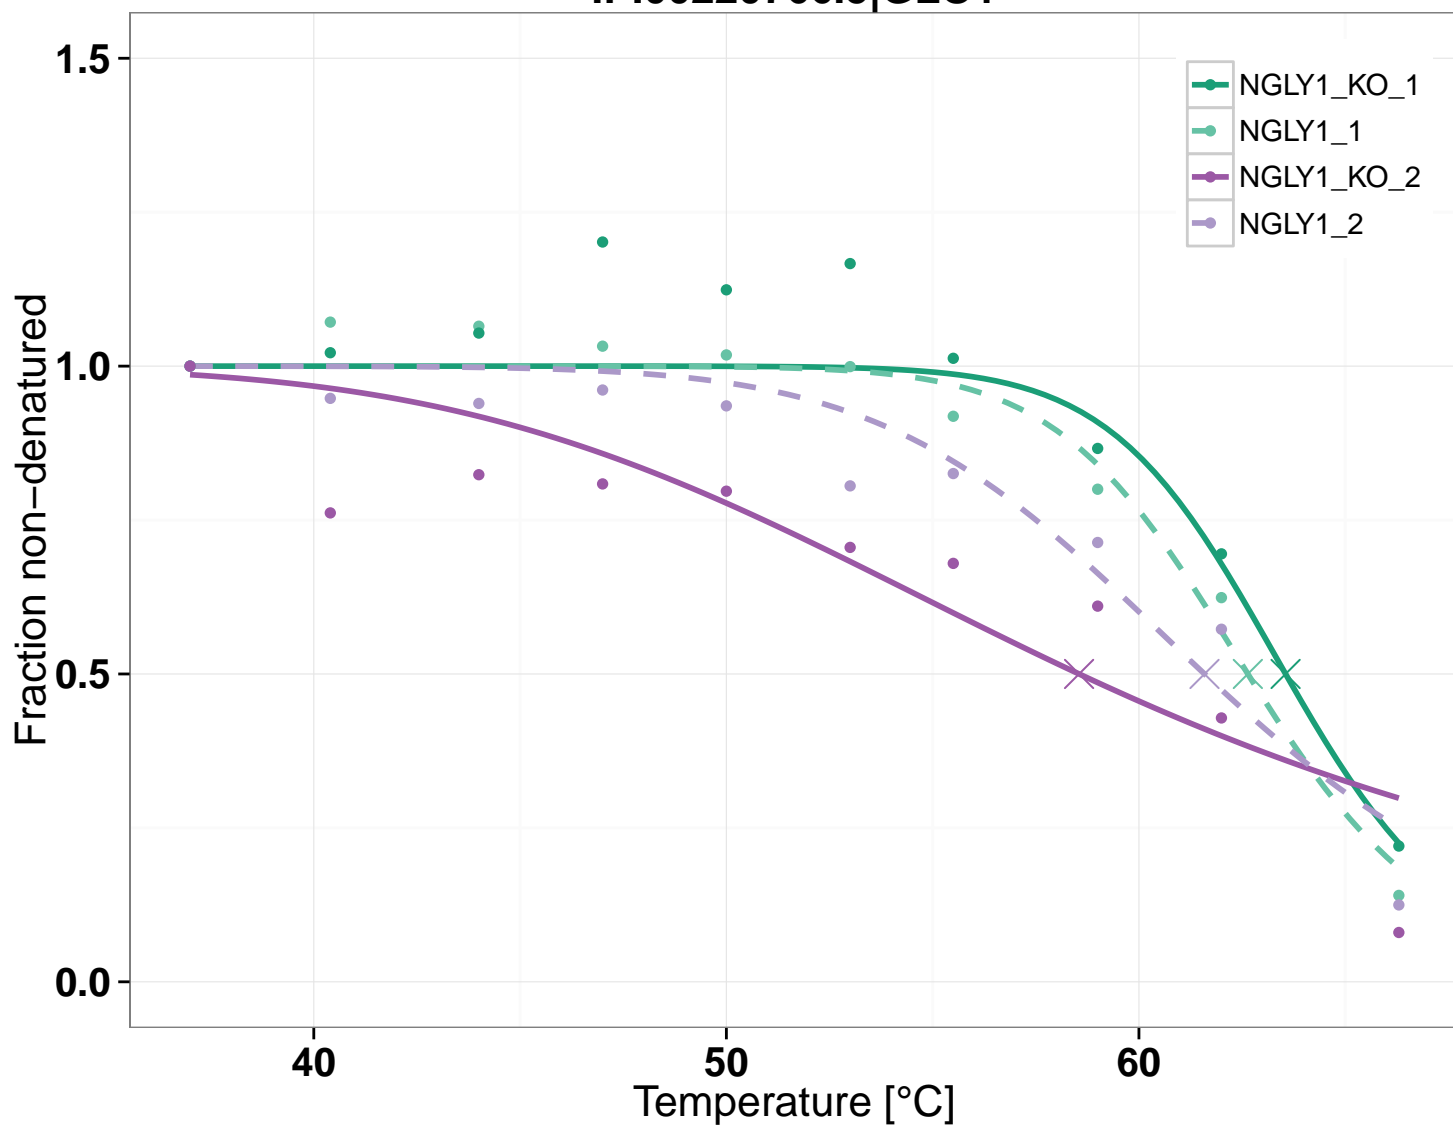

|            | meltPoint | slope  | plateau | R2   |
|------------|-----------|--------|---------|------|
| NGLY1_KO_1 | 63.56     | -0.12  | 0       | 0.88 |
| NGLY1_1    | 62.64     | -0.11  | 0       | 0.97 |
| NGLY1_KO_2 | 58.55     | -0.034 | 0       | 0.79 |
| NGLY1_2    | 61.59     | -0.064 | 0       | 0.92 |

Supplement: Supplementary file 5988 [file 1]

IPI00033054.5|CTDSPL2

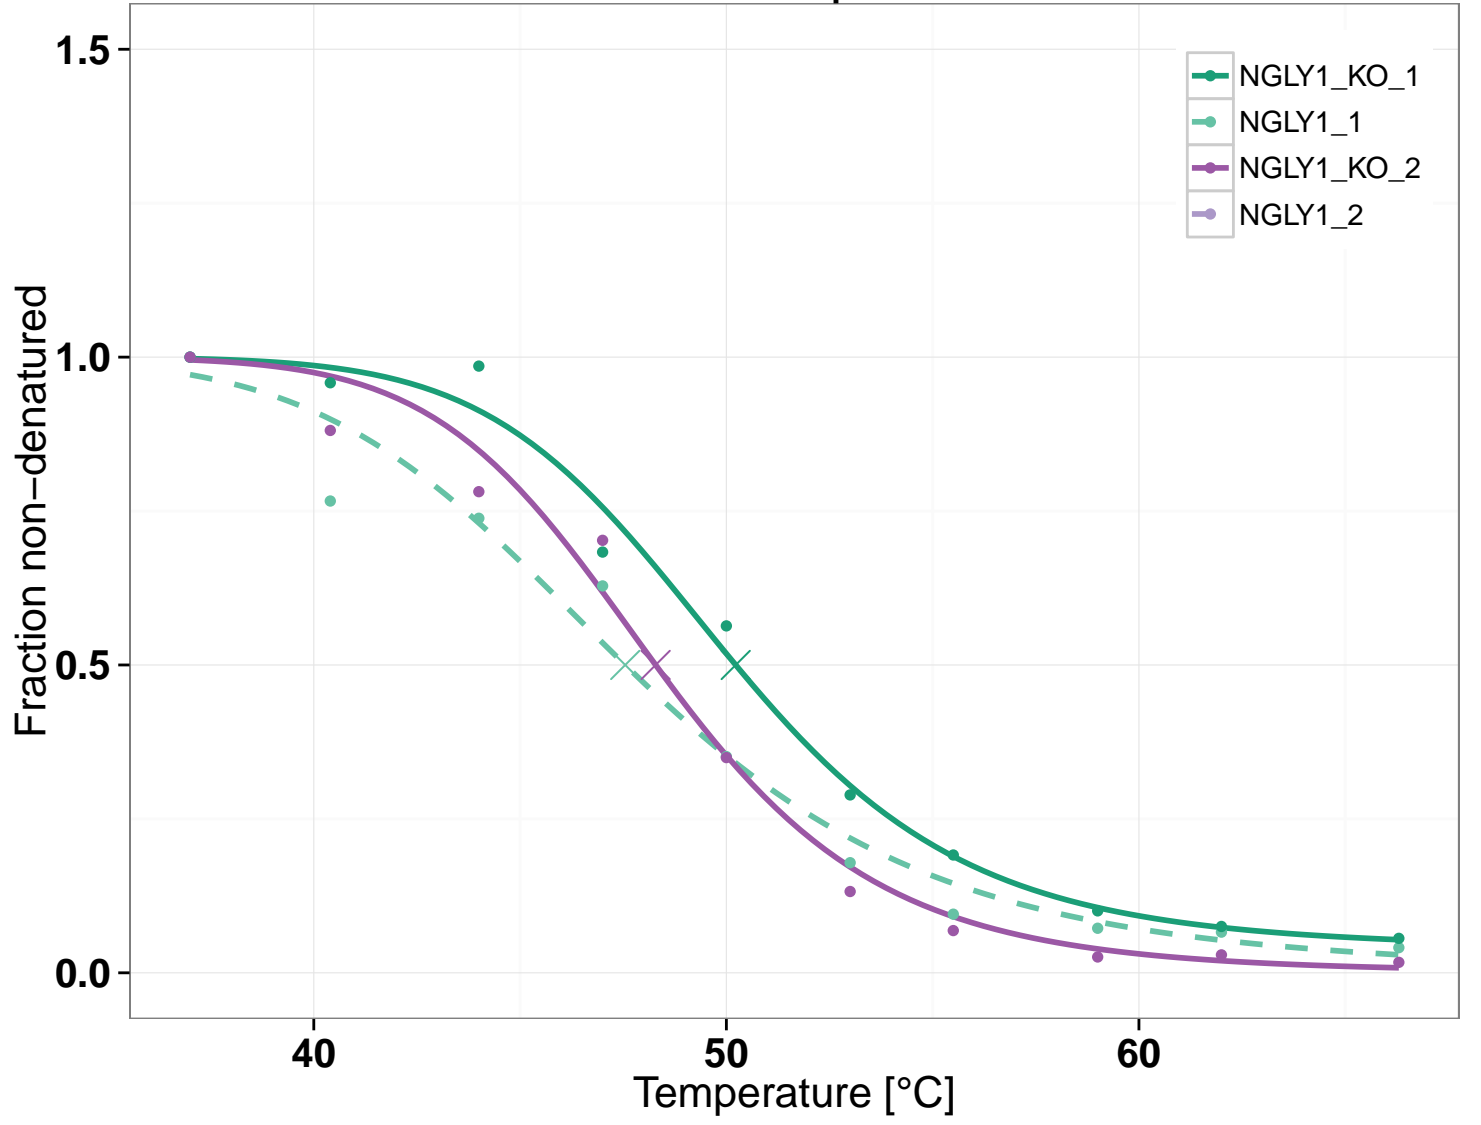

|            | meltPoint | slope  | plateau | R2   |
|------------|-----------|--------|---------|------|
| NGLY1_KO_1 | 50.23     | -0.083 | 0.04    | 0.99 |
| NGLY1_1    | 47.55     | -0.067 | 0       | 0.97 |
| NGLY1_KO_2 | 48.29     | -0.093 | 0       | 0.98 |
| NGLY1_2    | -         | -      | -       | -    |

Supplement: Supplementary file 5989 [file 1]

# IPI00022344.1|FLVCR1

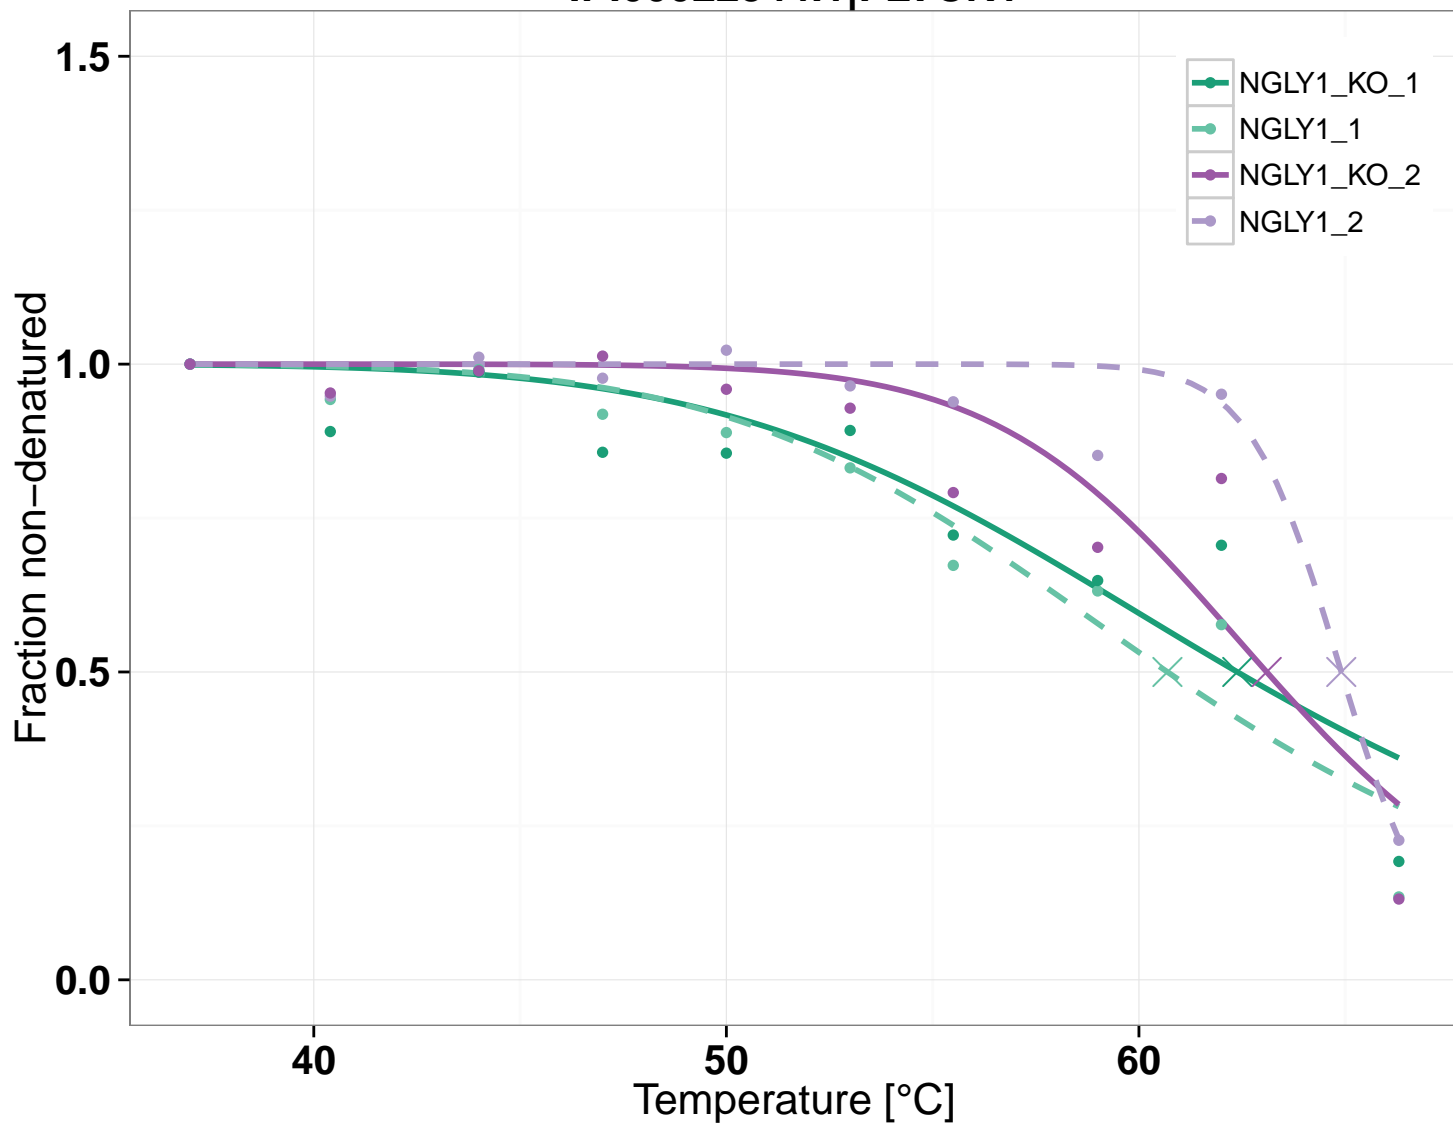

|            | meltPoint | slope  | plateau | R2   |
|------------|-----------|--------|---------|------|
| NGLY1_KO_1 | 62.38     | -0.041 | 0       | 0.81 |
| NGLY1_1    | 60.69     | -0.047 | 0       | 0.92 |
| NGLY1_KO_2 | 63.1      | -0.076 | 0       | 0.83 |
| NGLY1_2    | 64.9      | -0.22  | 0       | 0.94 |

Supplement: Supplementary file 5990 [file 1]

# IPI00017552.2|MED9

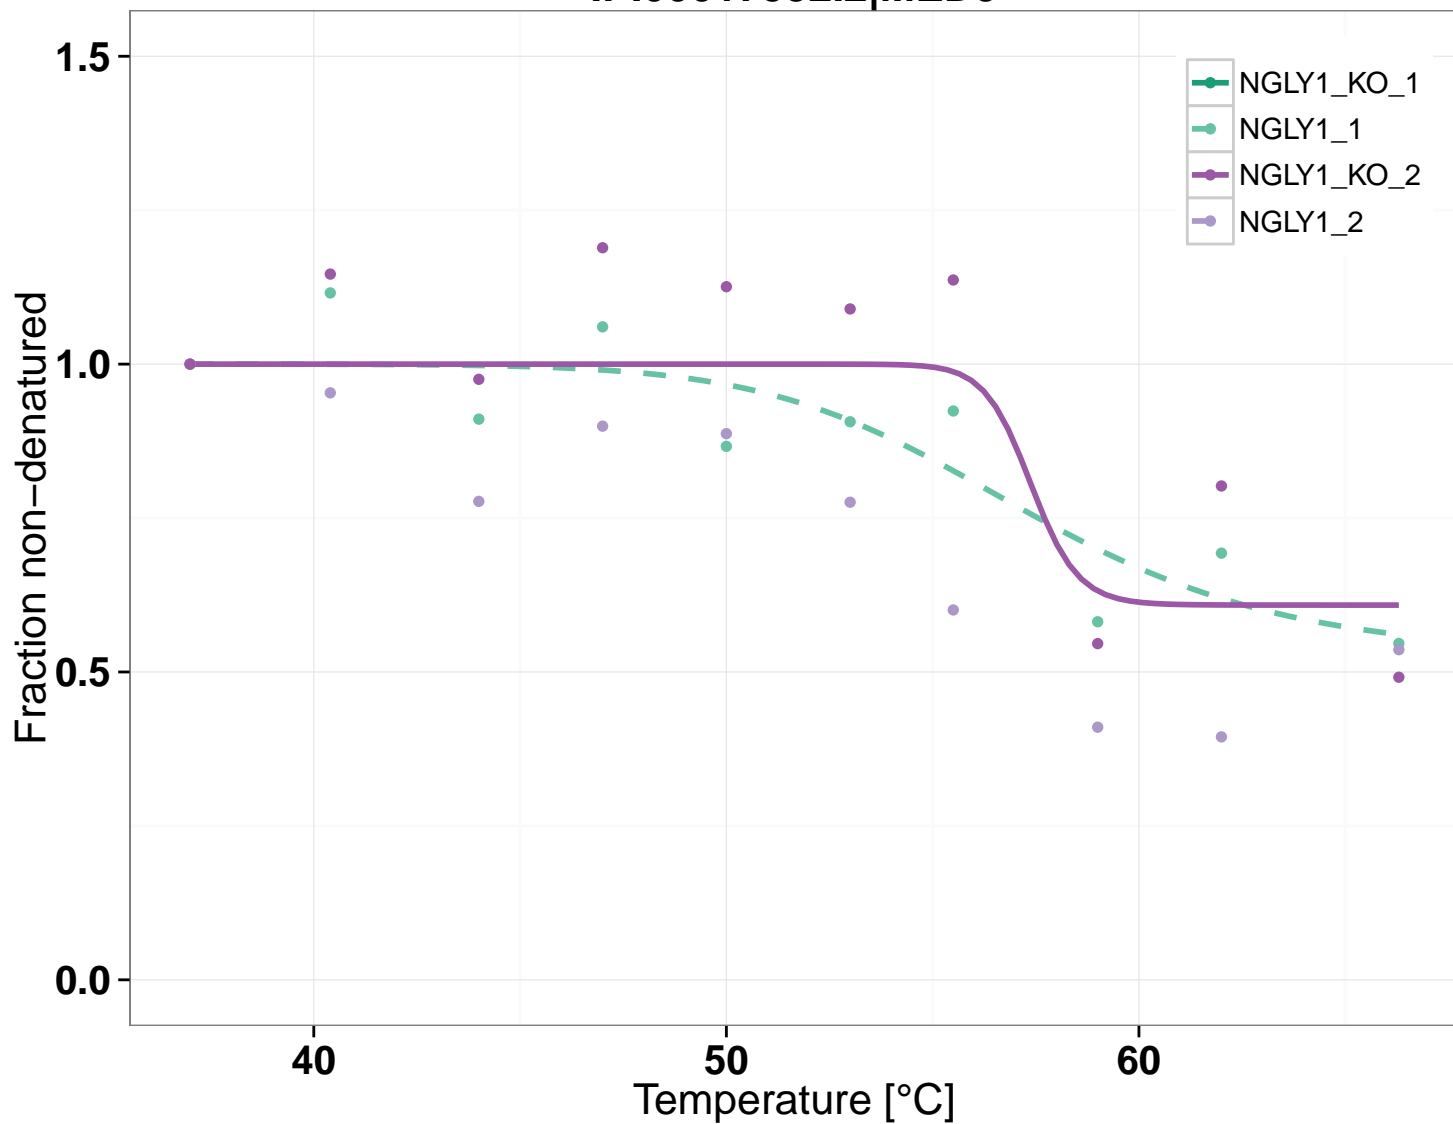

|            | meltPoint | slope  | plateau | R2   |
|------------|-----------|--------|---------|------|
| NGLY1_KO_1 | —         | —      | —       | —    |
| NGLY1_1    | —         | -0.038 | 0.52    | 0.81 |
| NGLY1_KO_2 | —         | -0.17  | 0.61    | 0.72 |
| NGLY1_2    | —         | —      | —       | —    |

Supplement: Supplementary file 5991 [file 1]

IPI00006865.3|SEC22B

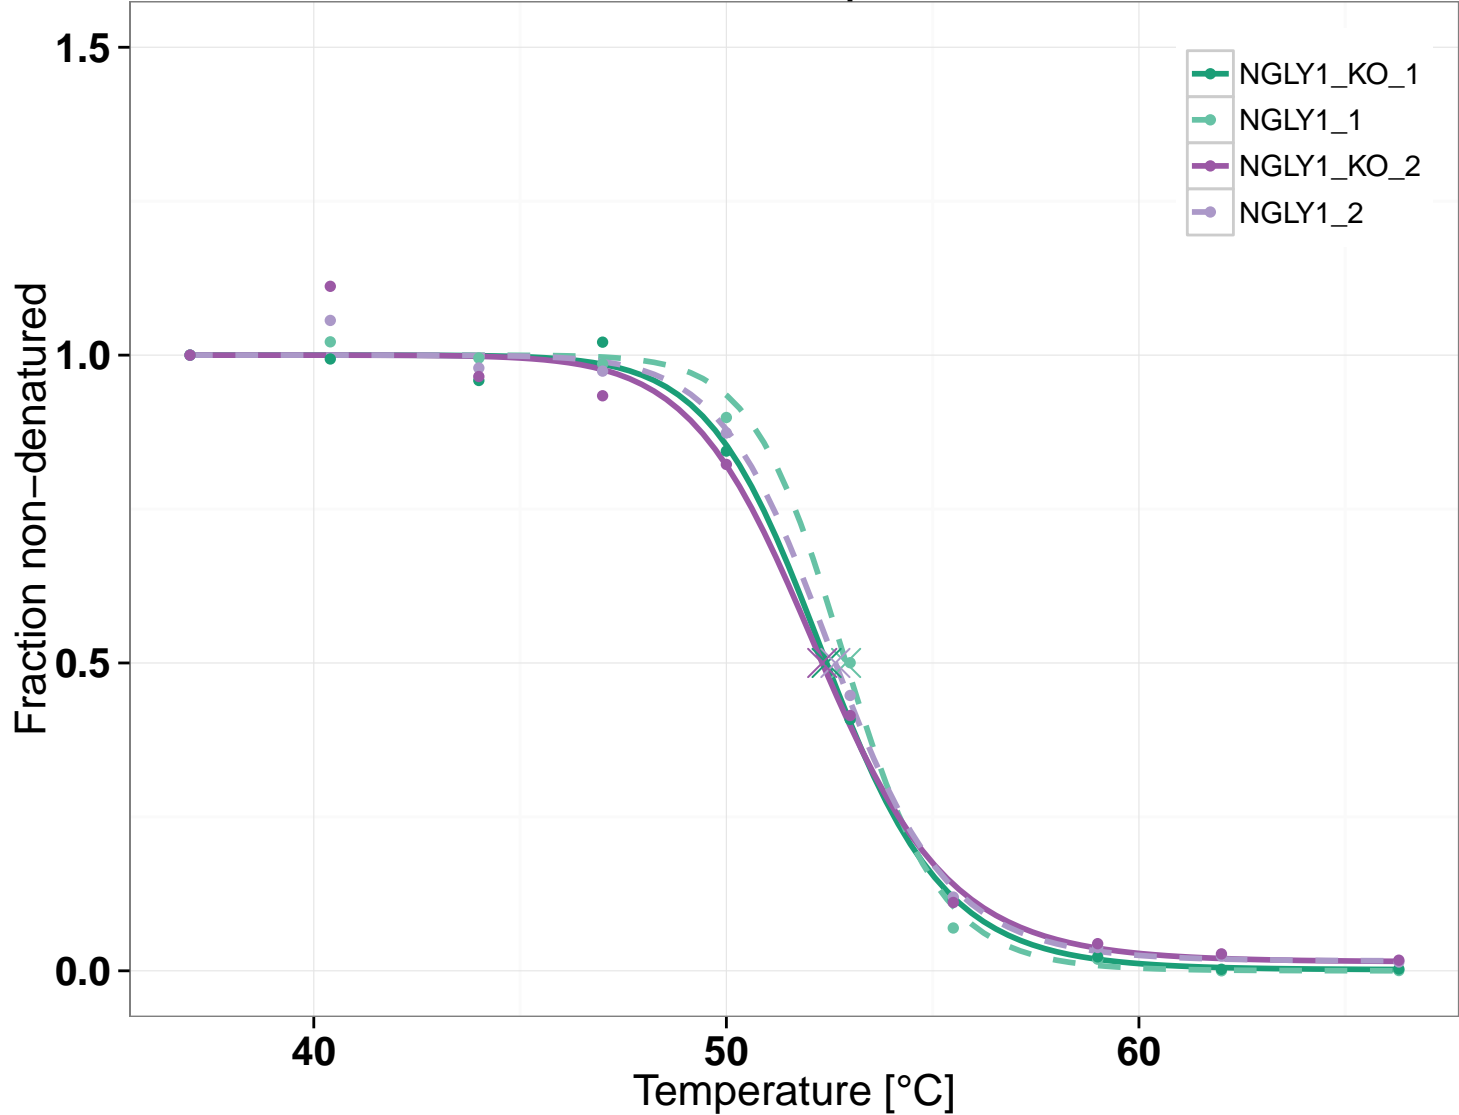

|            | meltPoint | slope | plateau | R2   |
|------------|-----------|-------|---------|------|
| NGLY1_KO_1 | 52.43     | -0.17 | 0       | 1    |
| NGLY1_1    | 52.9      | -0.22 | 0       | 1    |
| NGLY1_KO_2 | 52.32     | -0.16 | 0.01    | 0.99 |
| NGLY1_2    | 52.64     | -0.18 | 0.02    | 1    |

Supplement: Supplementary file 5992 [file 1]

IPI00008205.3|CNOT6

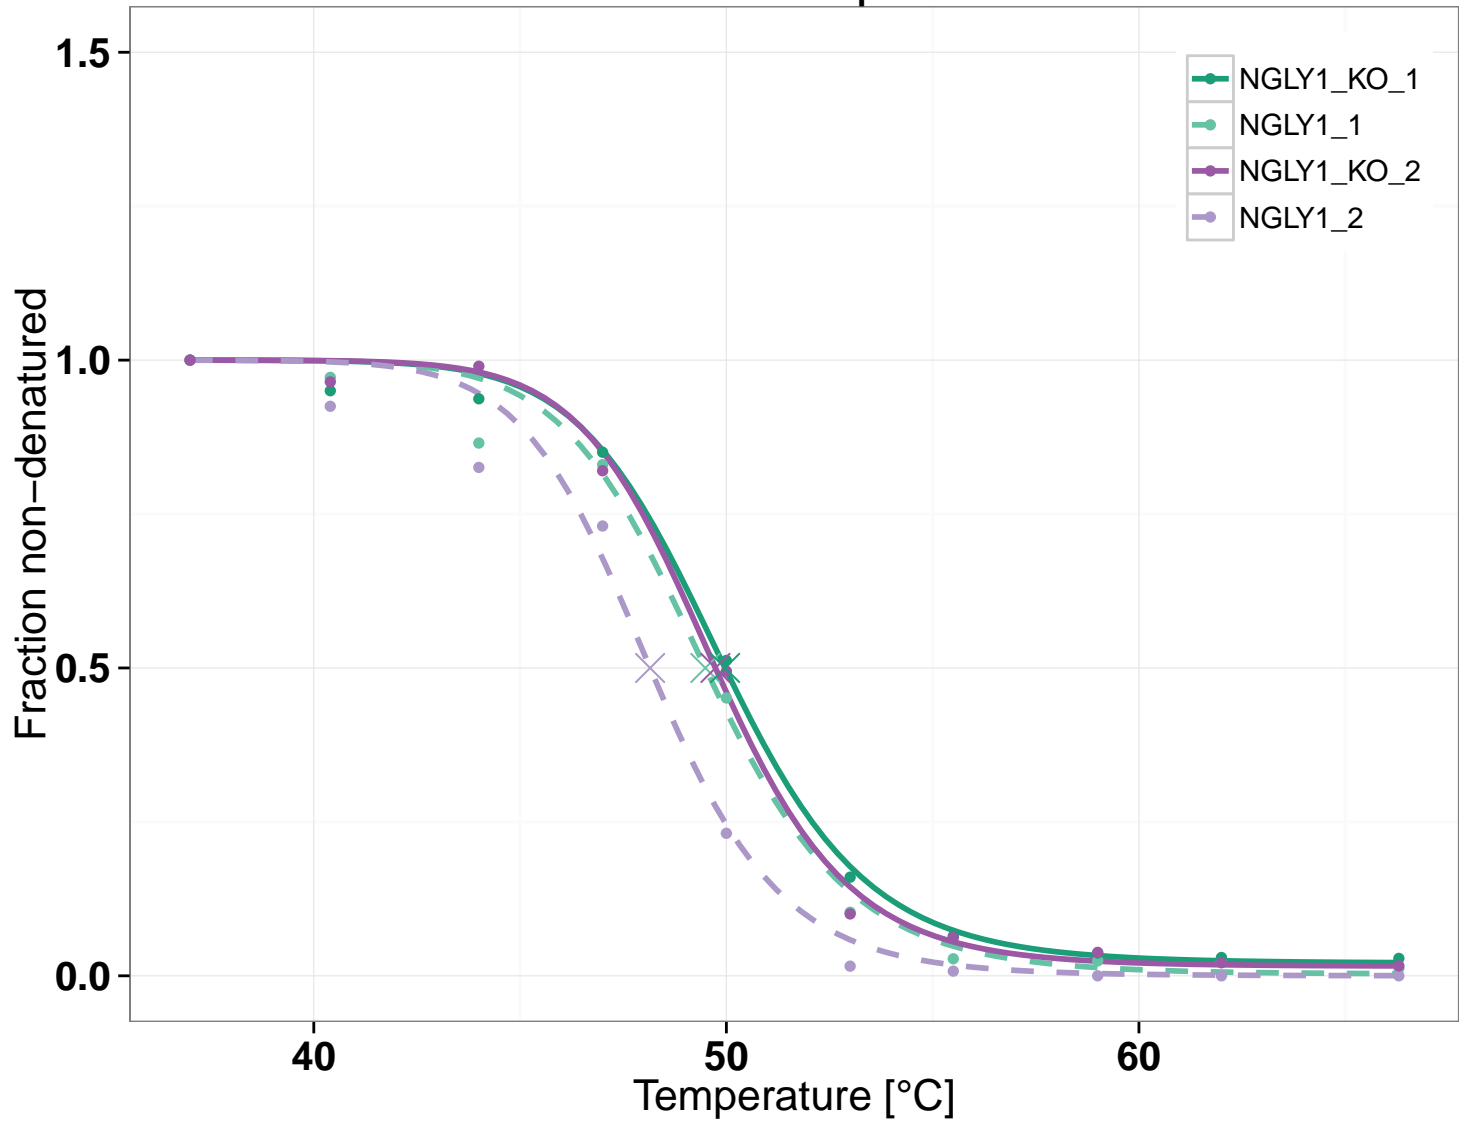

|            | meltPoint | slope | plateau | R2   |
|------------|-----------|-------|---------|------|
| NGLY1_KO_1 | 49.97     | -0.14 | 0.02    | 1    |
| NGLY1_1    | 49.49     | -0.14 | 0       | 0.99 |
| NGLY1_KO_2 | 49.73     | -0.15 | 0.02    | 1    |
| NGLY1_2    | 48.15     | -0.16 | 0       | 0.99 |

Supplement: Supplementary file 5993 [file 1]

IPI00855775.1|RNASET2

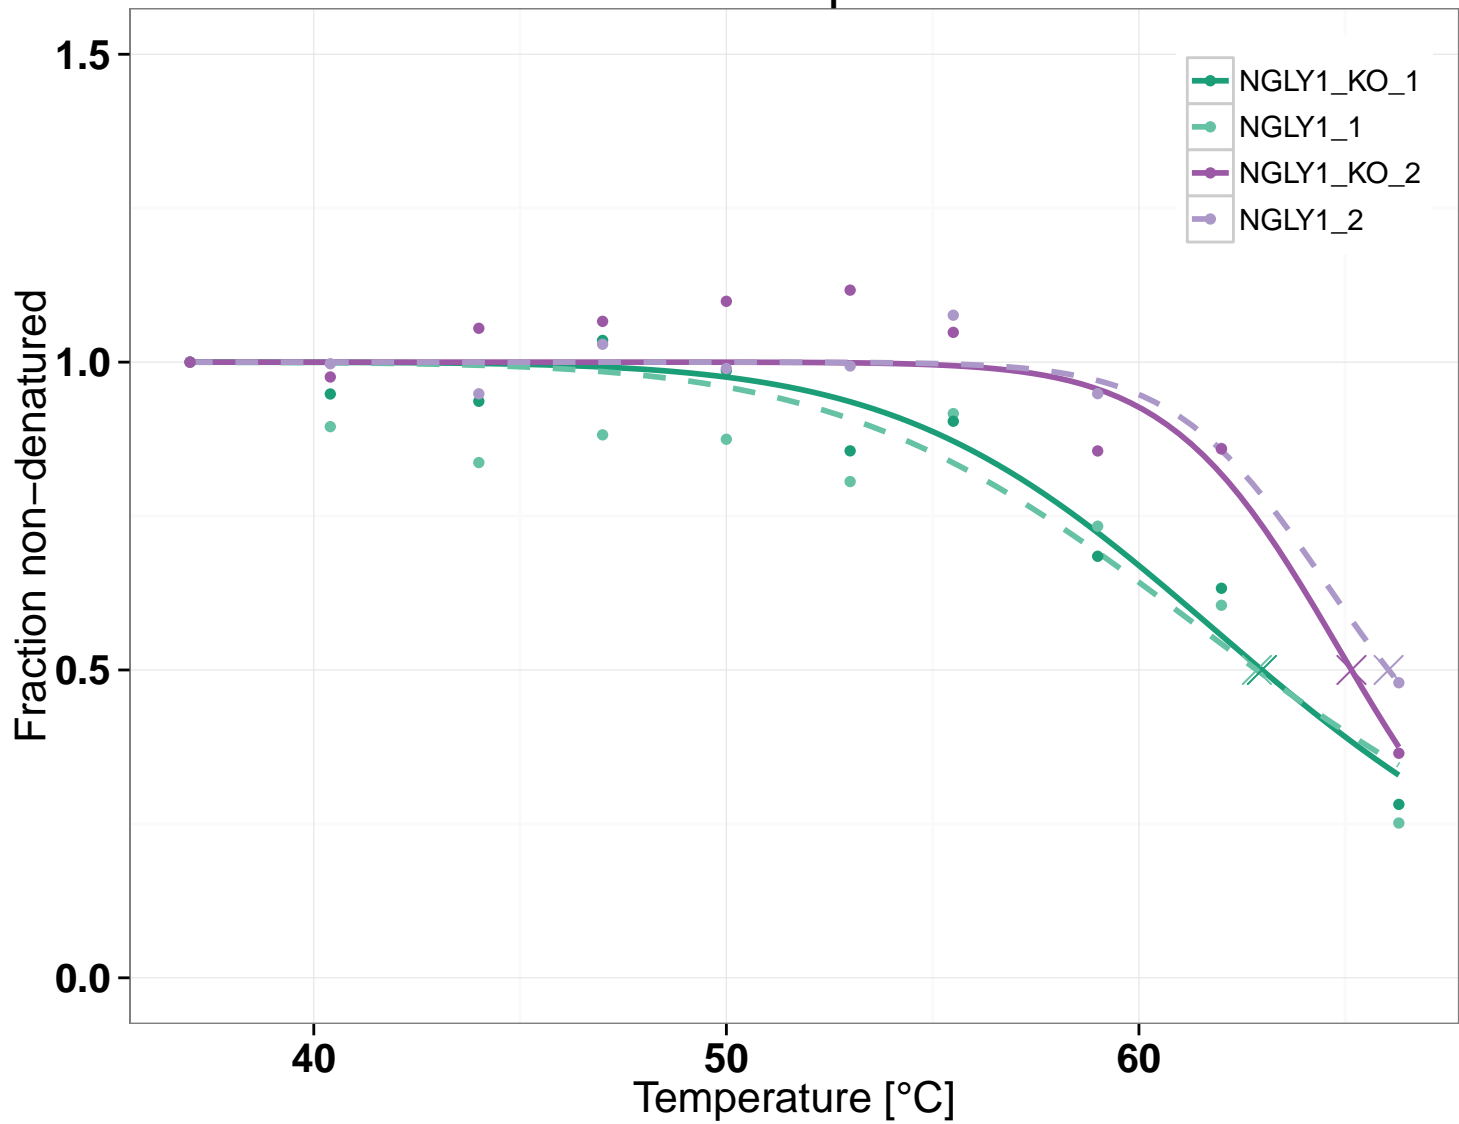

|            | meltPoint | slope  | plateau | R2   |
|------------|-----------|--------|---------|------|
| NGLY1_KO_1 | 62.98     | -0.058 | 0       | 0.95 |
| NGLY1_1    | 62.86     | -0.05  | 0       | 0.8  |
| NGLY1_KO_2 | 65.15     | -0.11  | 0       | 0.9  |
| NGLY1_2    | 66.05     | -0.097 | 0.23    | 0.96 |

Supplement: Supplementary file 5994 [file 1]

# IPI00064739.2|THEM4

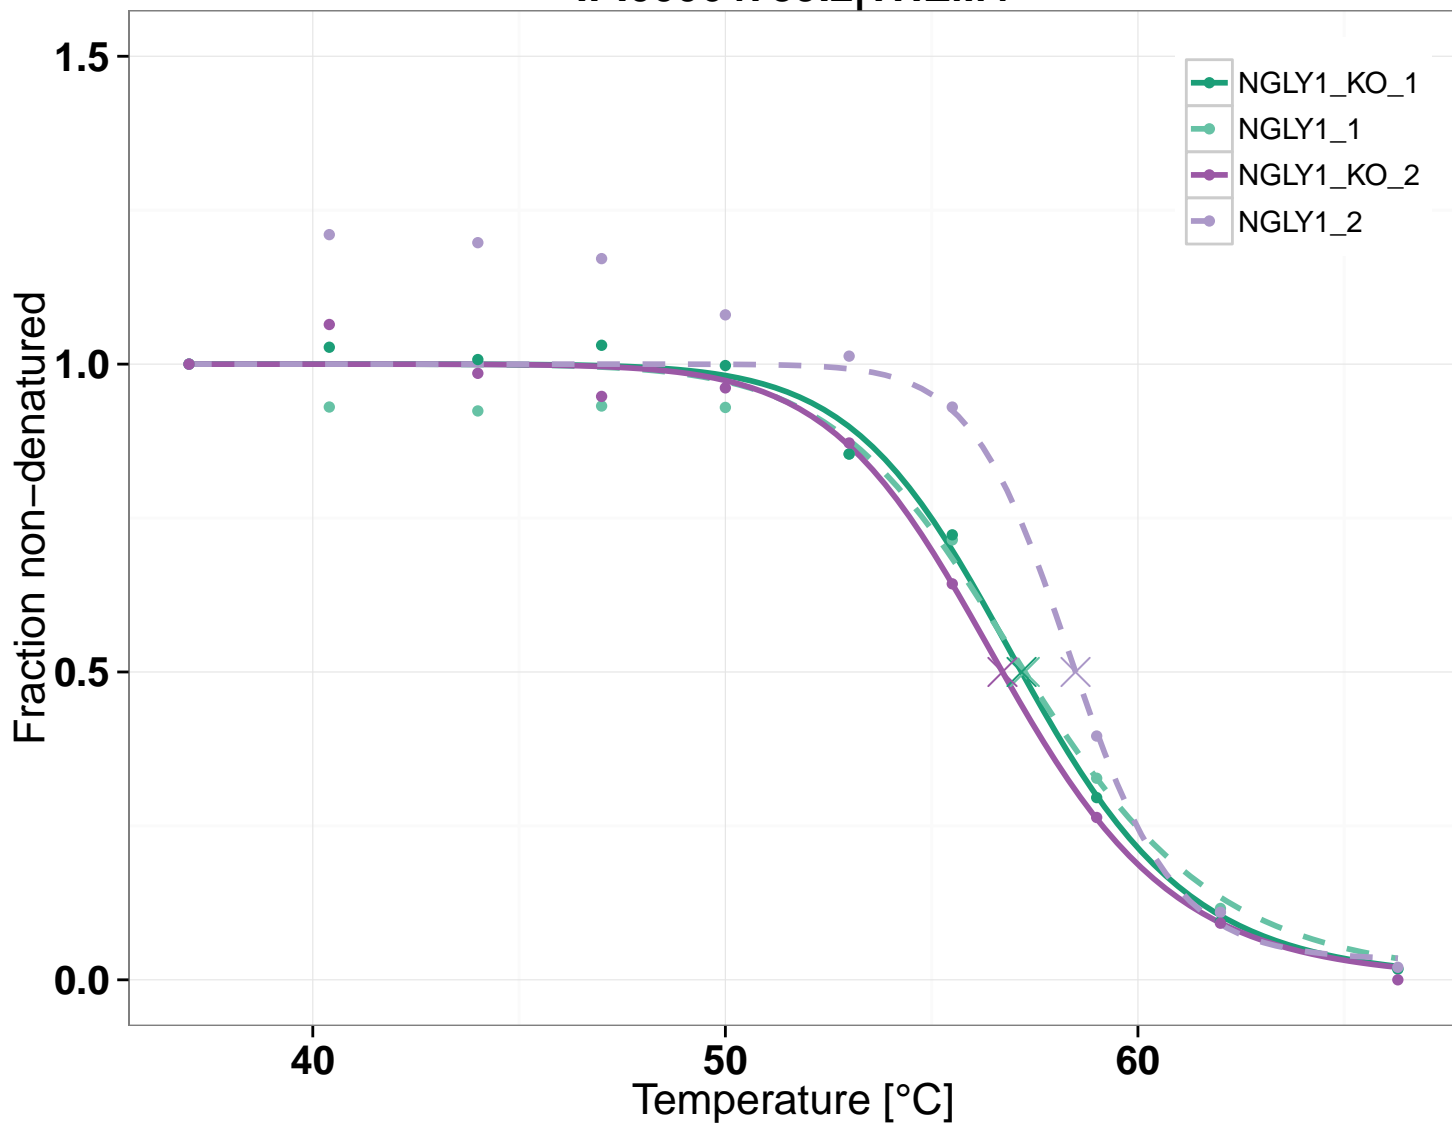

|            | meltPoint | slope | plateau | R2   |
|------------|-----------|-------|---------|------|
| NGLY1_KO_1 | 57.18     | -0.12 | 0       | 1    |
| NGLY1_1    | 57.26     | -0.11 | 0       | 0.99 |
| NGLY1_KO_2 | 56.72     | -0.12 | 0       | 1    |
| NGLY1_2    | 58.49     | -0.2  | 0.03    | 0.94 |

Supplement: Supplementary file 5995 [file 1]

# IPI00910593.1|CNN2

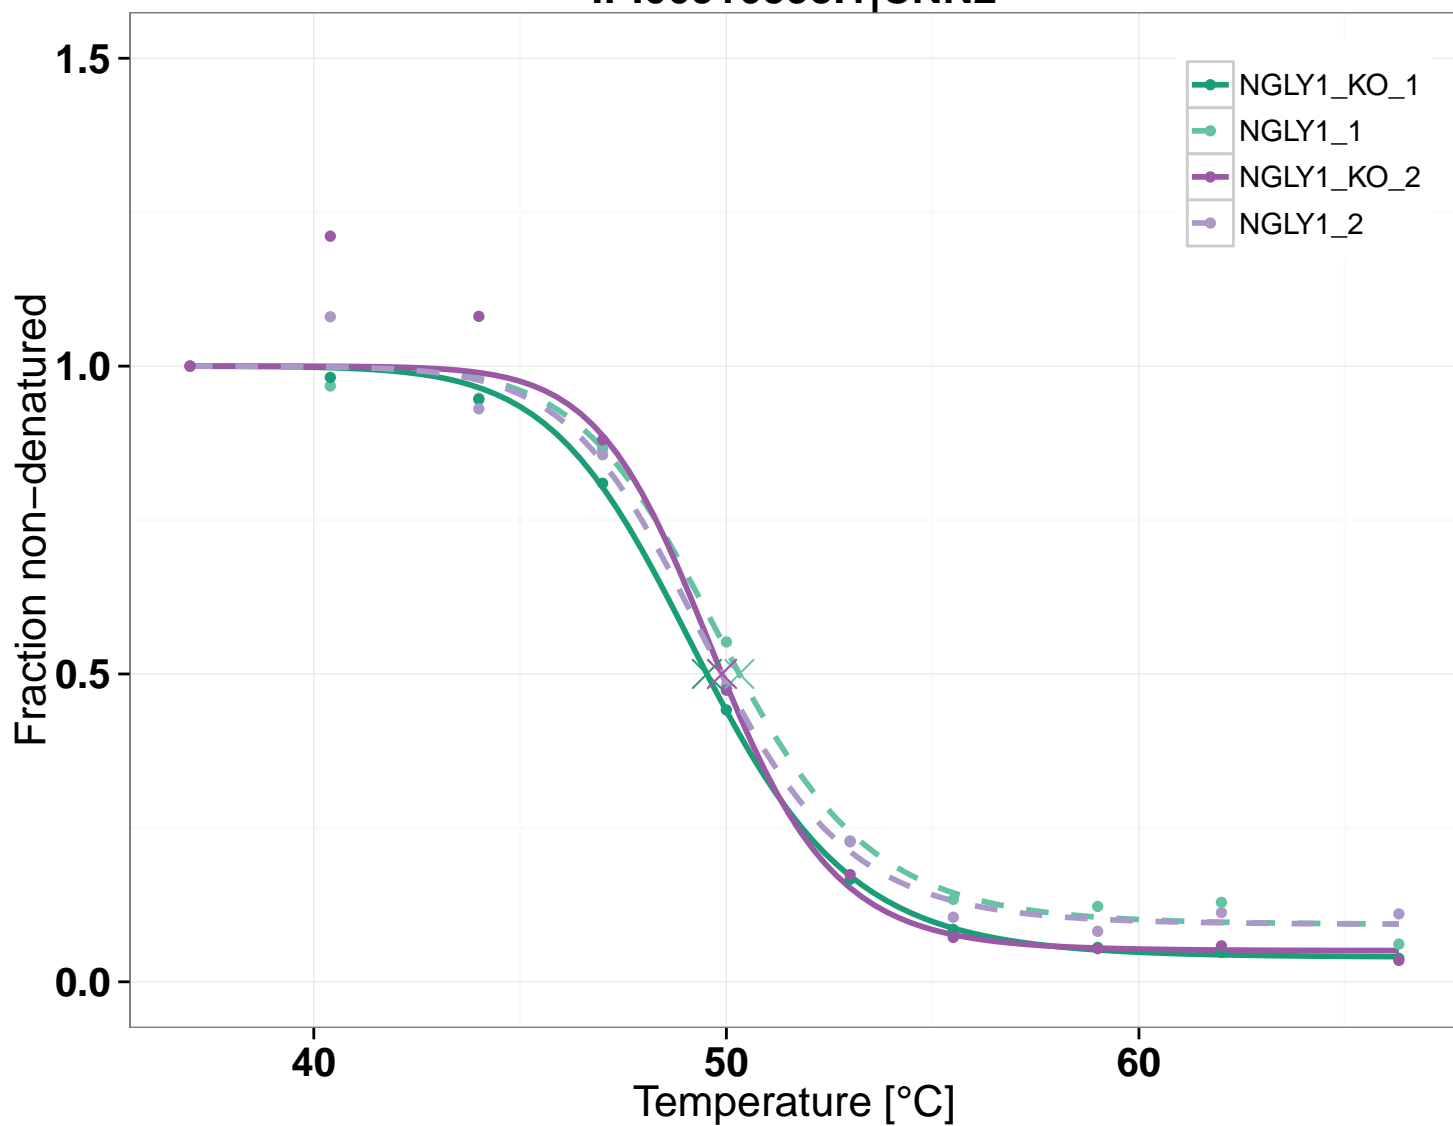

|            | meltPoint | slope | plateau | R2   |
|------------|-----------|-------|---------|------|
| NGLY1_KO_1 | 49.53     | -0.13 | 0.04    | 1    |
| NGLY1_1    | 50.32     | -0.13 | 0.09    | 1    |
| NGLY1_KO_2 | 49.89     | -0.16 | 0.05    | 0.97 |
| NGLY1_2    | 49.89     | -0.13 | 0.09    | 0.99 |

Supplement: Supplementary file 5996 [file 1]

# IPI00021326.4|SHC1

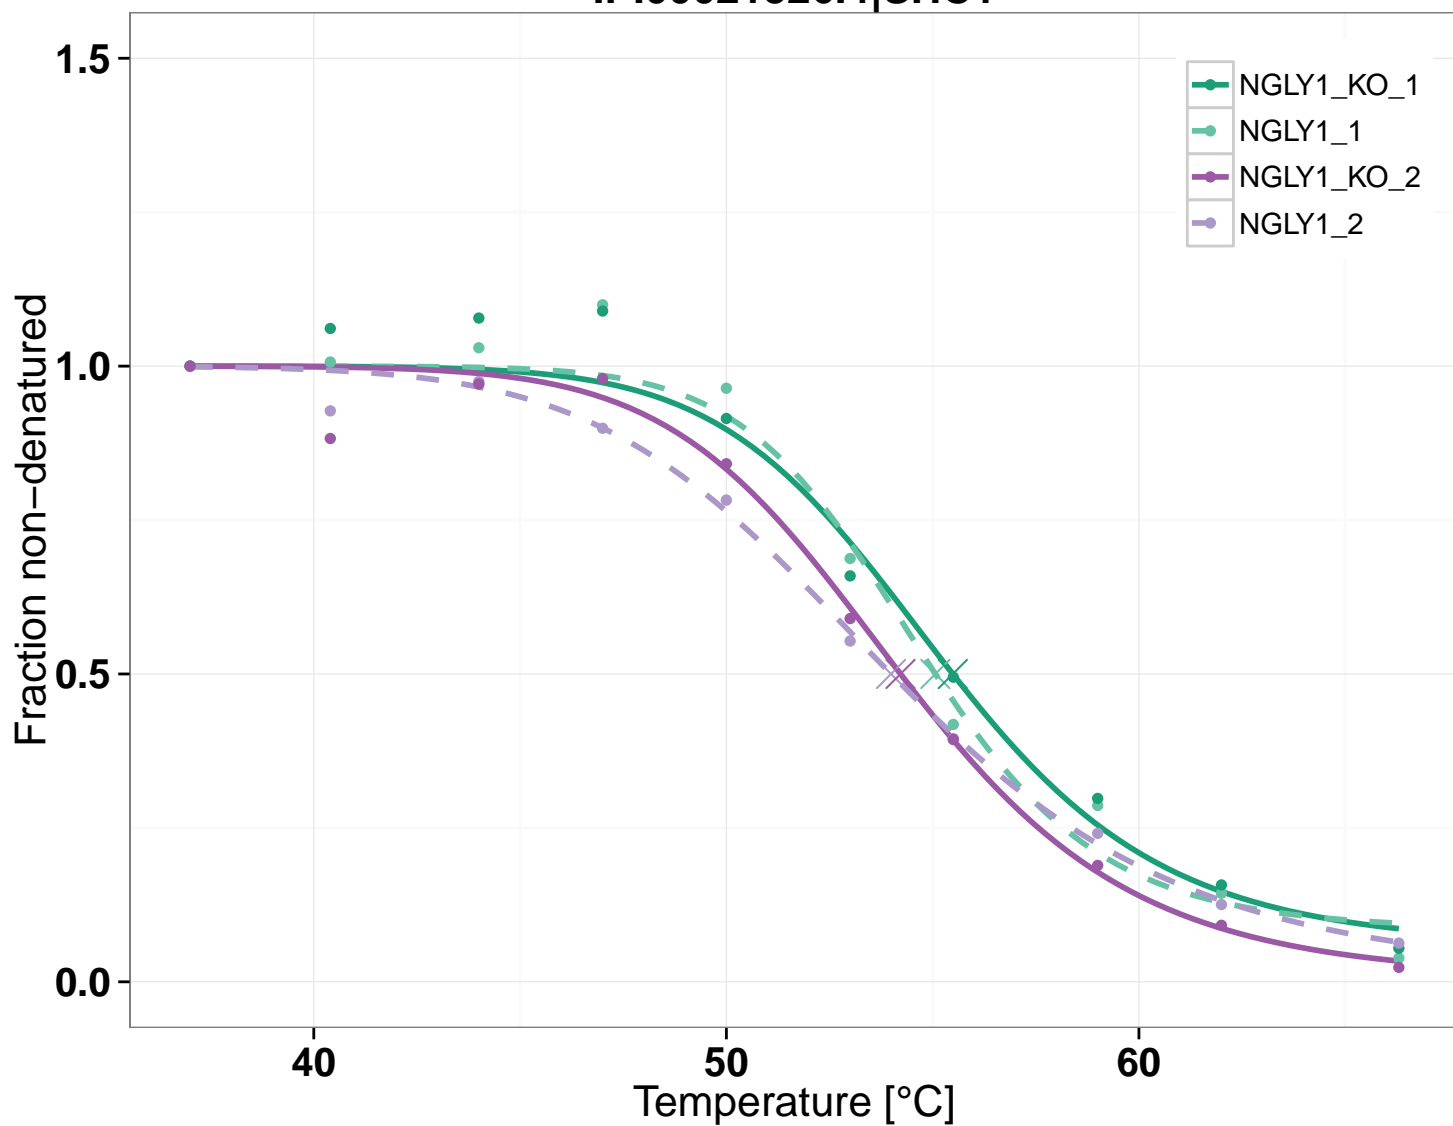

|            | meltPoint | slope  | plateau | R2   |
|------------|-----------|--------|---------|------|
| NGLY1_KO_1 | 55.49     | -0.088 | 0.06    | 0.98 |
| NGLY1_1    | 55.07     | -0.11  | 0.08    | 0.98 |
| NGLY1_KO_2 | 54.22     | -0.089 | 0       | 0.99 |
| NGLY1_2    | 53.99     | -0.069 | 0       | 1    |

Supplement: Supplementary file 5997 [file 1]

IPI00030275.5|TRAP1

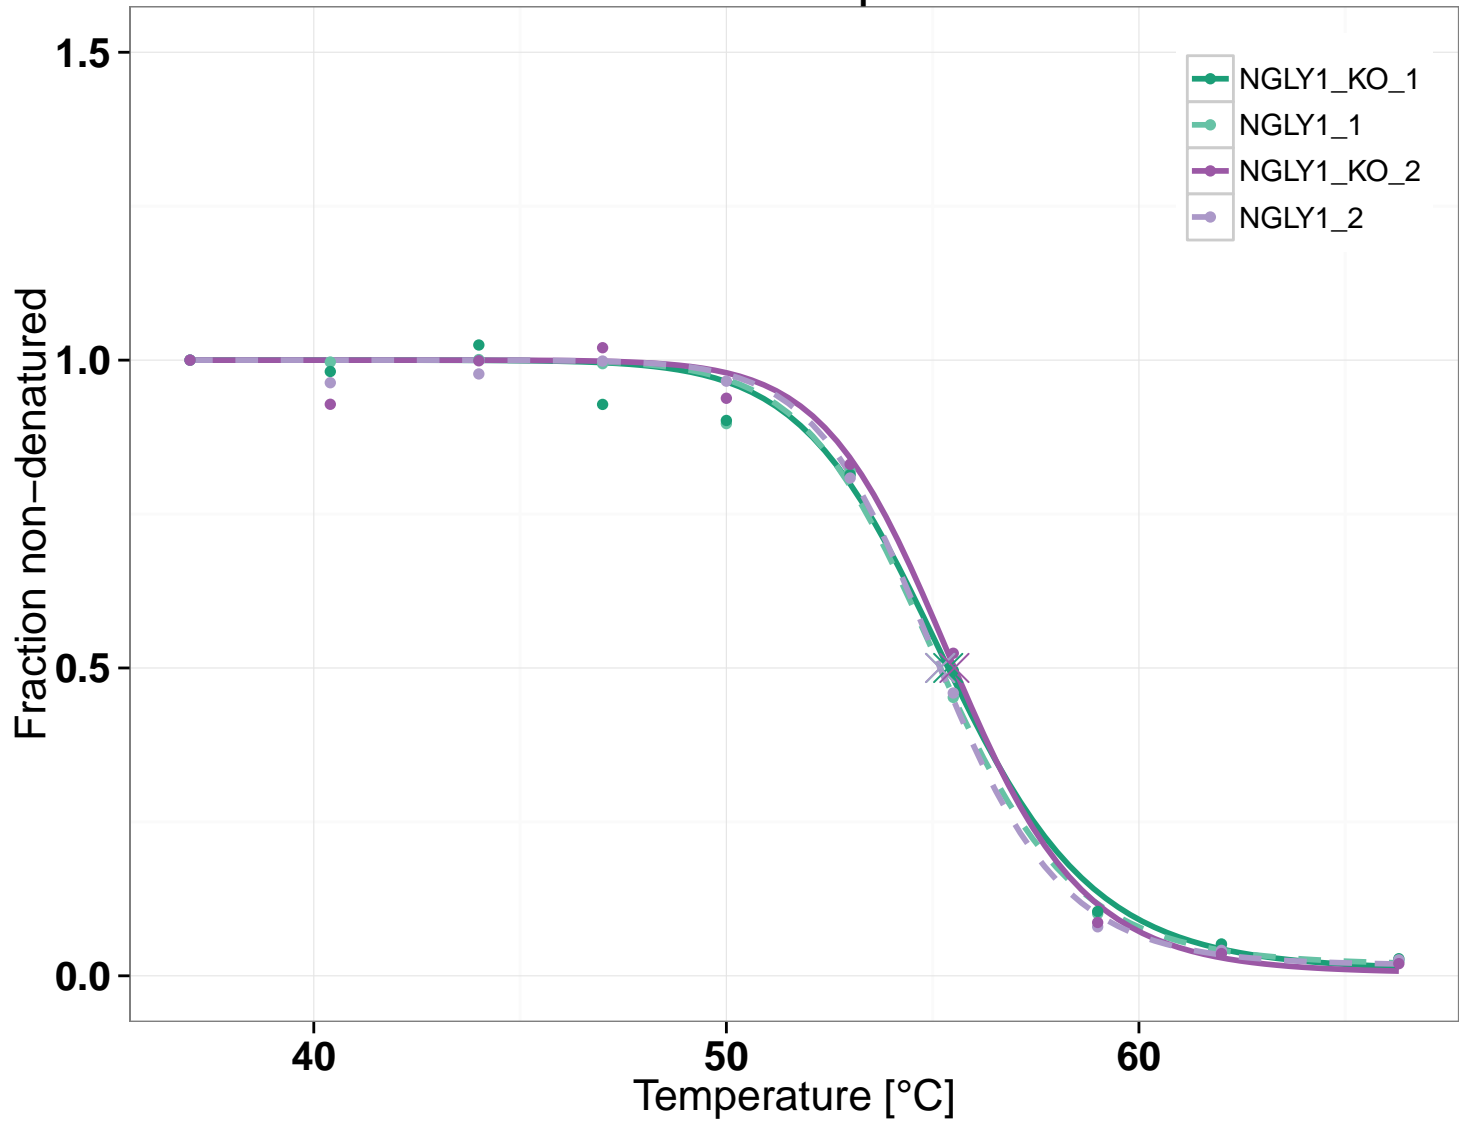

|            | meltPoint | slope | plateau | R2   |
|------------|-----------|-------|---------|------|
| NGLY1_KO_1 | 55.38     | -0.14 | 0.01    | 0.99 |
| NGLY1_1    | 55.19     | -0.15 | 0.02    | 1    |
| NGLY1_KO_2 | 55.53     | -0.16 | 0       | 0.99 |
| NGLY1_2    | 55.18     | -0.16 | 0.02    | 1    |

Supplement: Supplementary file 5998 [file 1]

IPI00242630.3|HEATR2

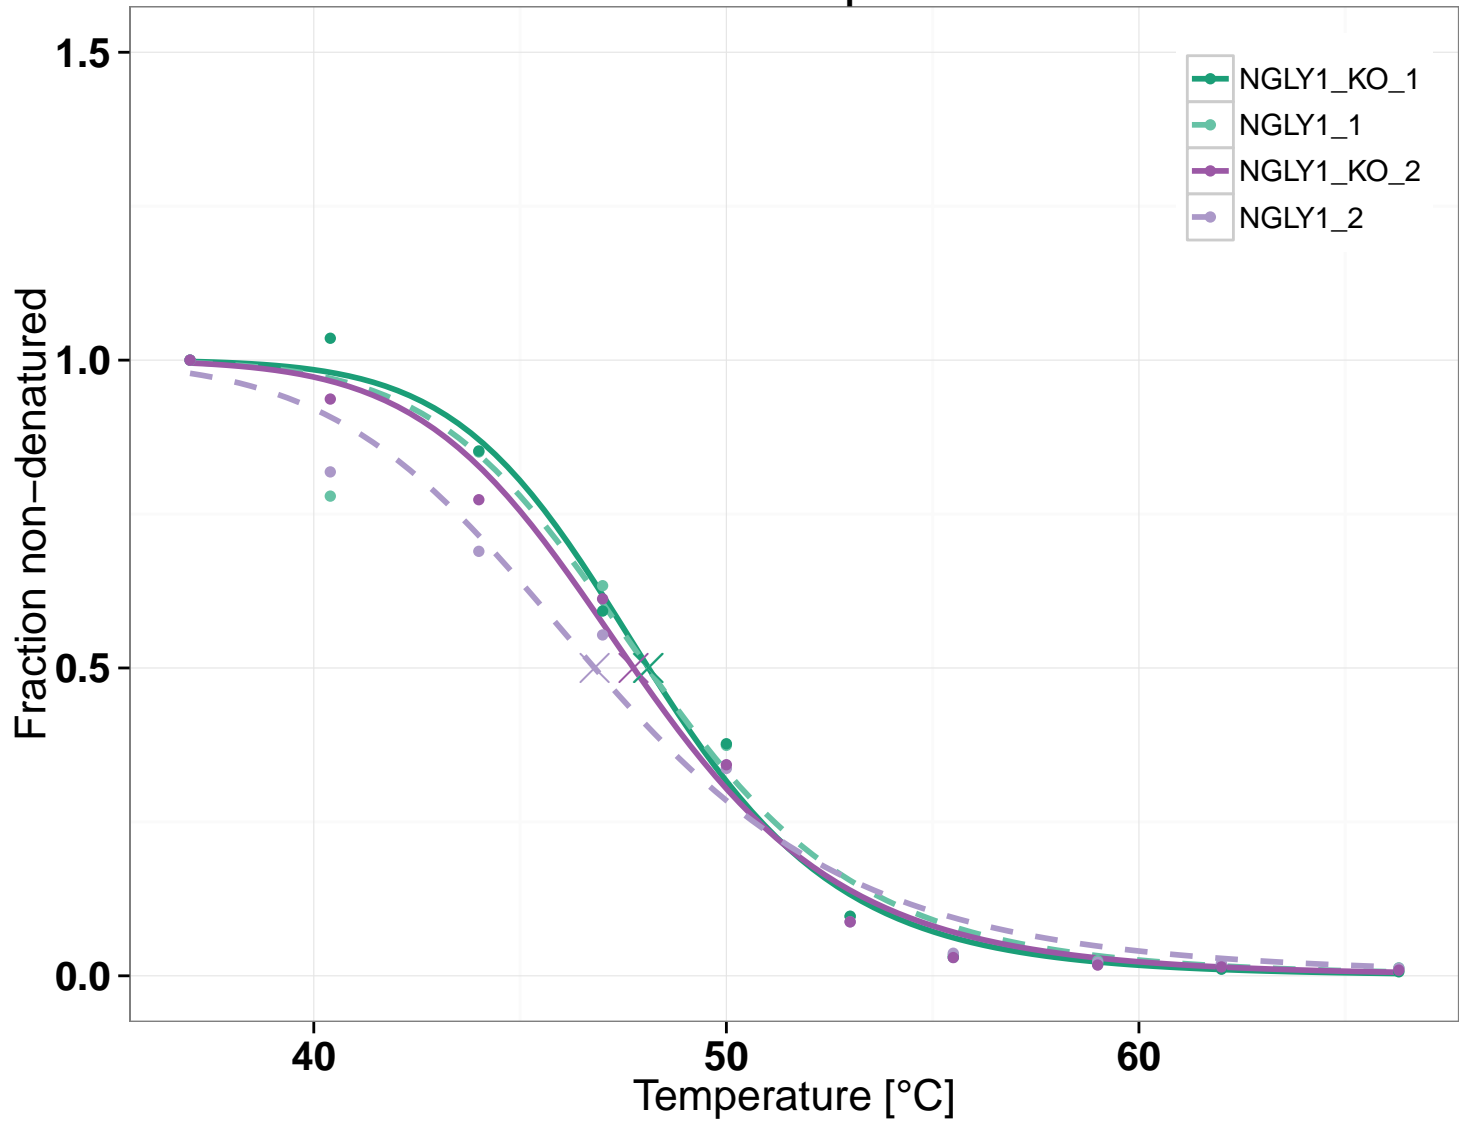

|            | meltPoint | slope  | plateau | R2   |
|------------|-----------|--------|---------|------|
| NGLY1_KO_1 | 48.11     | -0.11  | 0       | 0.99 |
| NGLY1_1    | 48.1      | -0.096 | 0       | 0.97 |
| NGLY1_KO_2 | 47.75     | -0.098 | 0       | 0.99 |
| NGLY1_2    | 46.81     | -0.079 | 0       | 0.98 |

Supplement: Supplementary file 5999 [file 1]

# IPI00376350.1|SGSM3

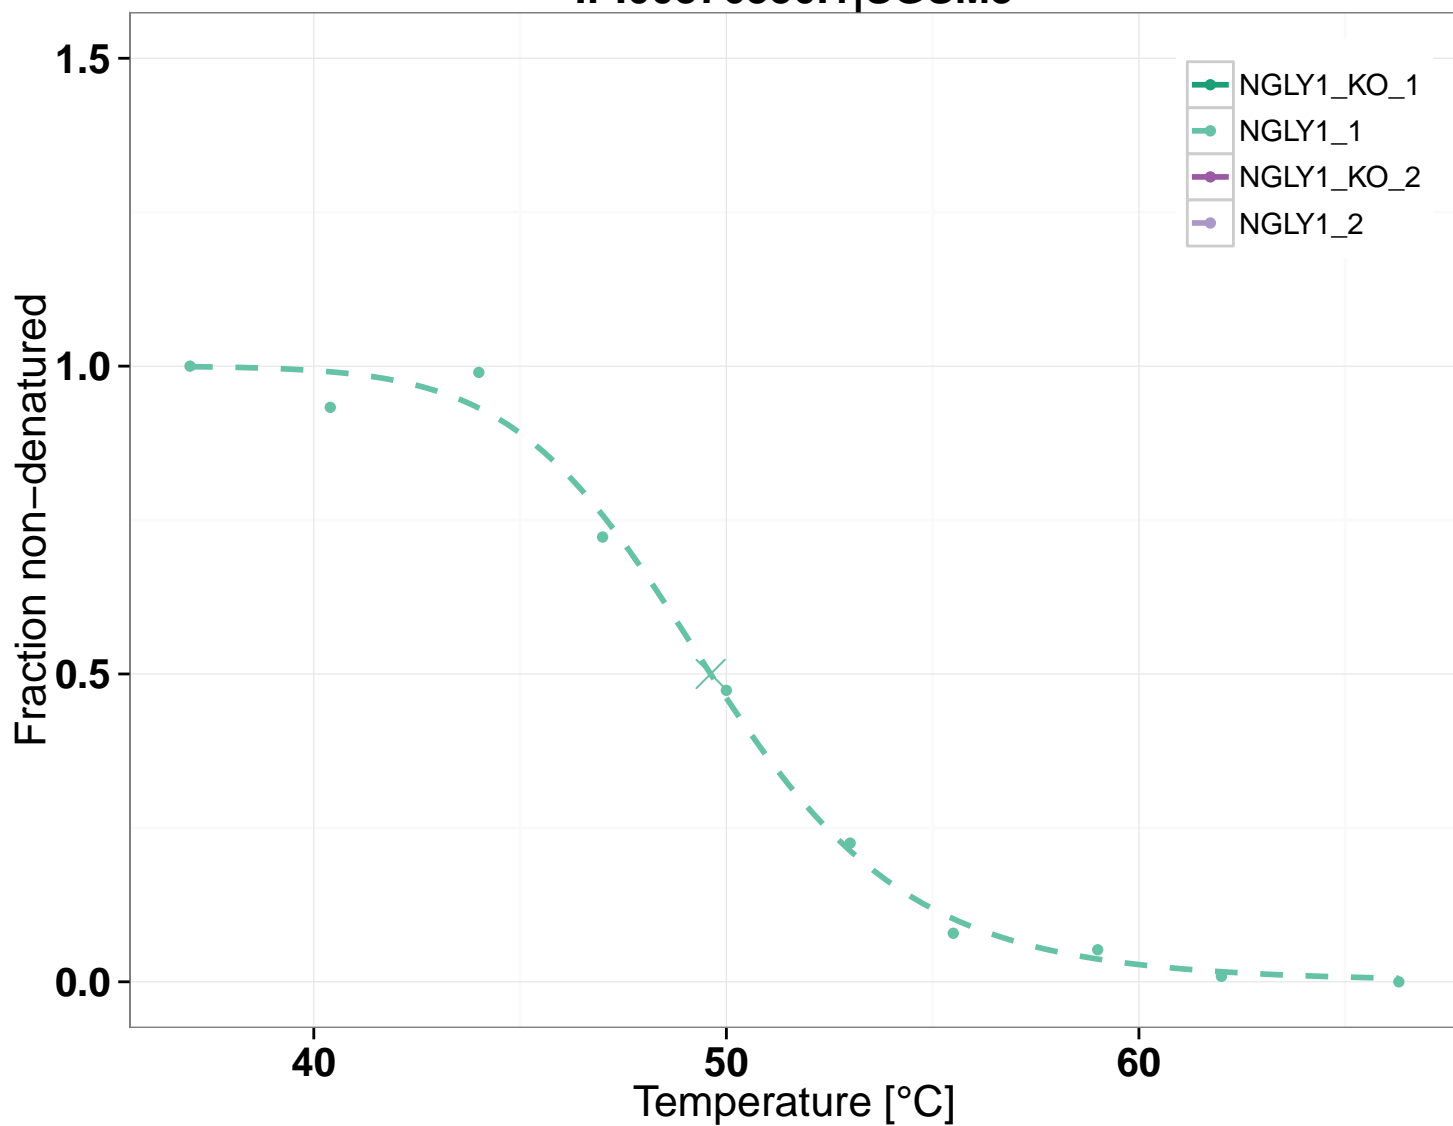

|            | meltPoint | slope | plateau | R2   |
|------------|-----------|-------|---------|------|
| NGLY1_KO_1 | —         | —     | —       | —    |
| NGLY1_1    | 49.62     | -0.1  | 0       | 0.99 |
| NGLY1_KO_2 | —         | —     | —       | —    |
| NGLY1_2    | —         | —     | —       | —    |

Supplement: Supplementary file 6000 [file 1]

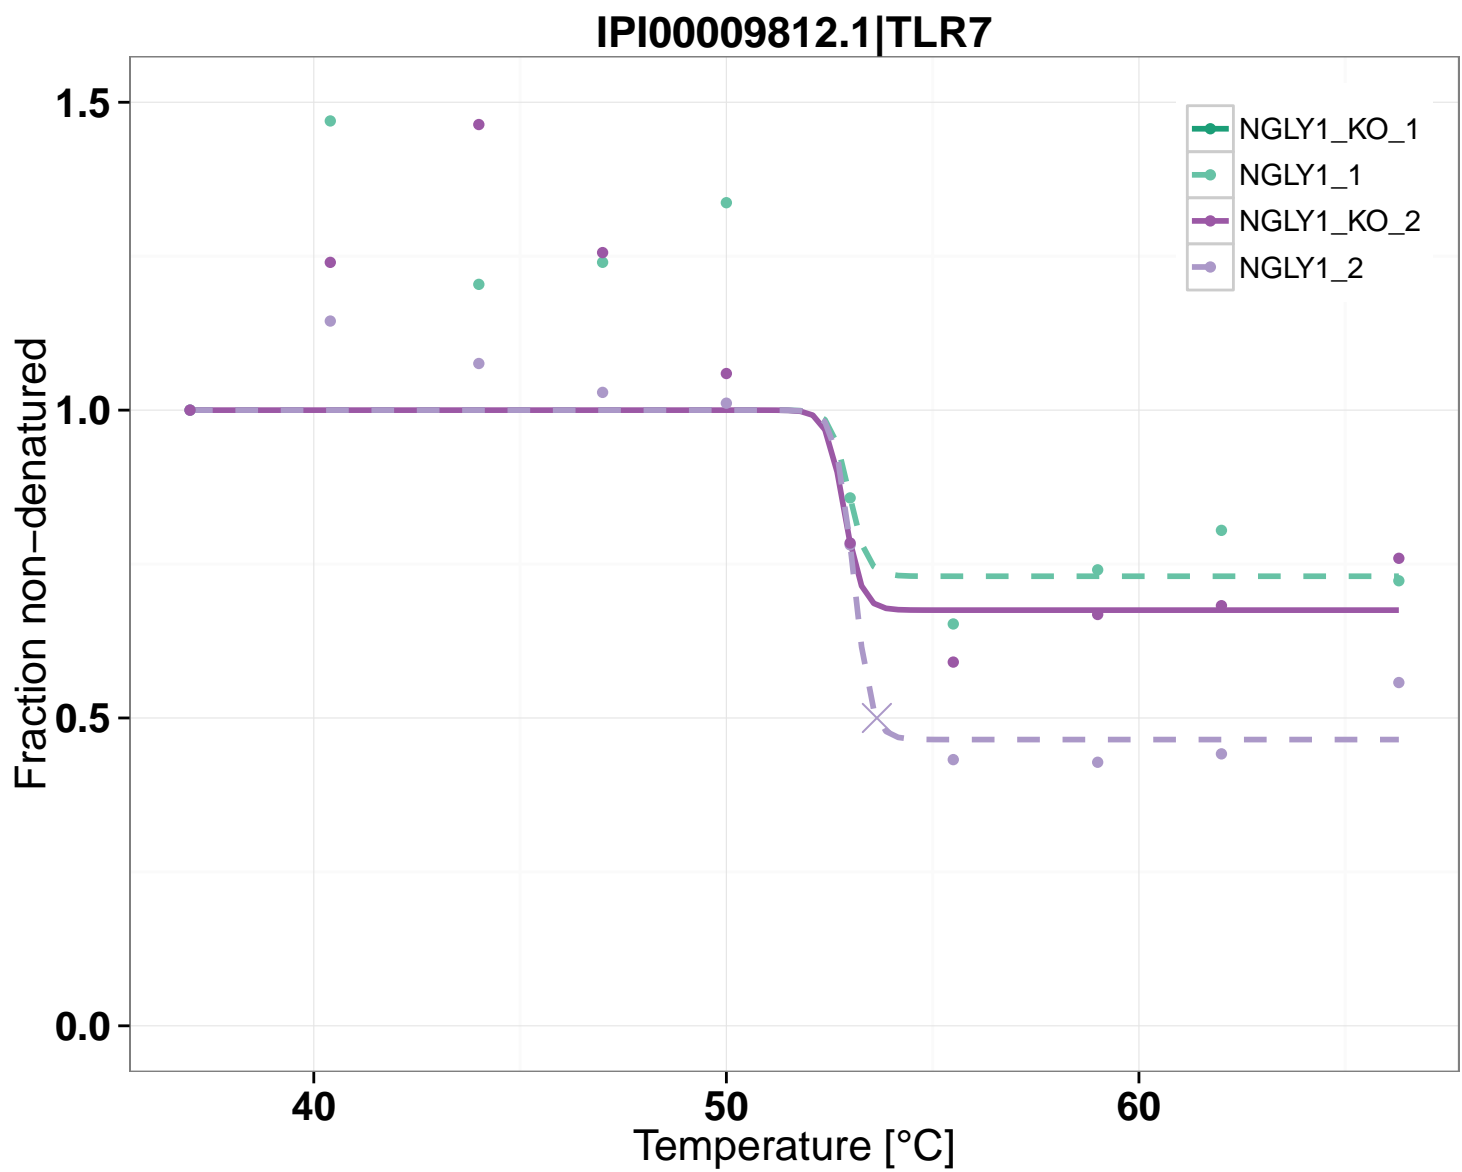

|            | meltPoint | slope | plateau | R2   |
|------------|-----------|-------|---------|------|
| NGLY1_KO_1 | —         | —     | —       | —    |
| NGLY1_1    | —         | -0.32 | 0.73    | 0.41 |
| NGLY1_KO_2 | —         | -0.38 | 0.68    | 0.56 |
| NGLY1_2    | 53.65     | -0.63 | 0.46    | 0.95 |

Supplement: Supplementary file 6001 [file 1]

IPI00033770.5|ALKBH4

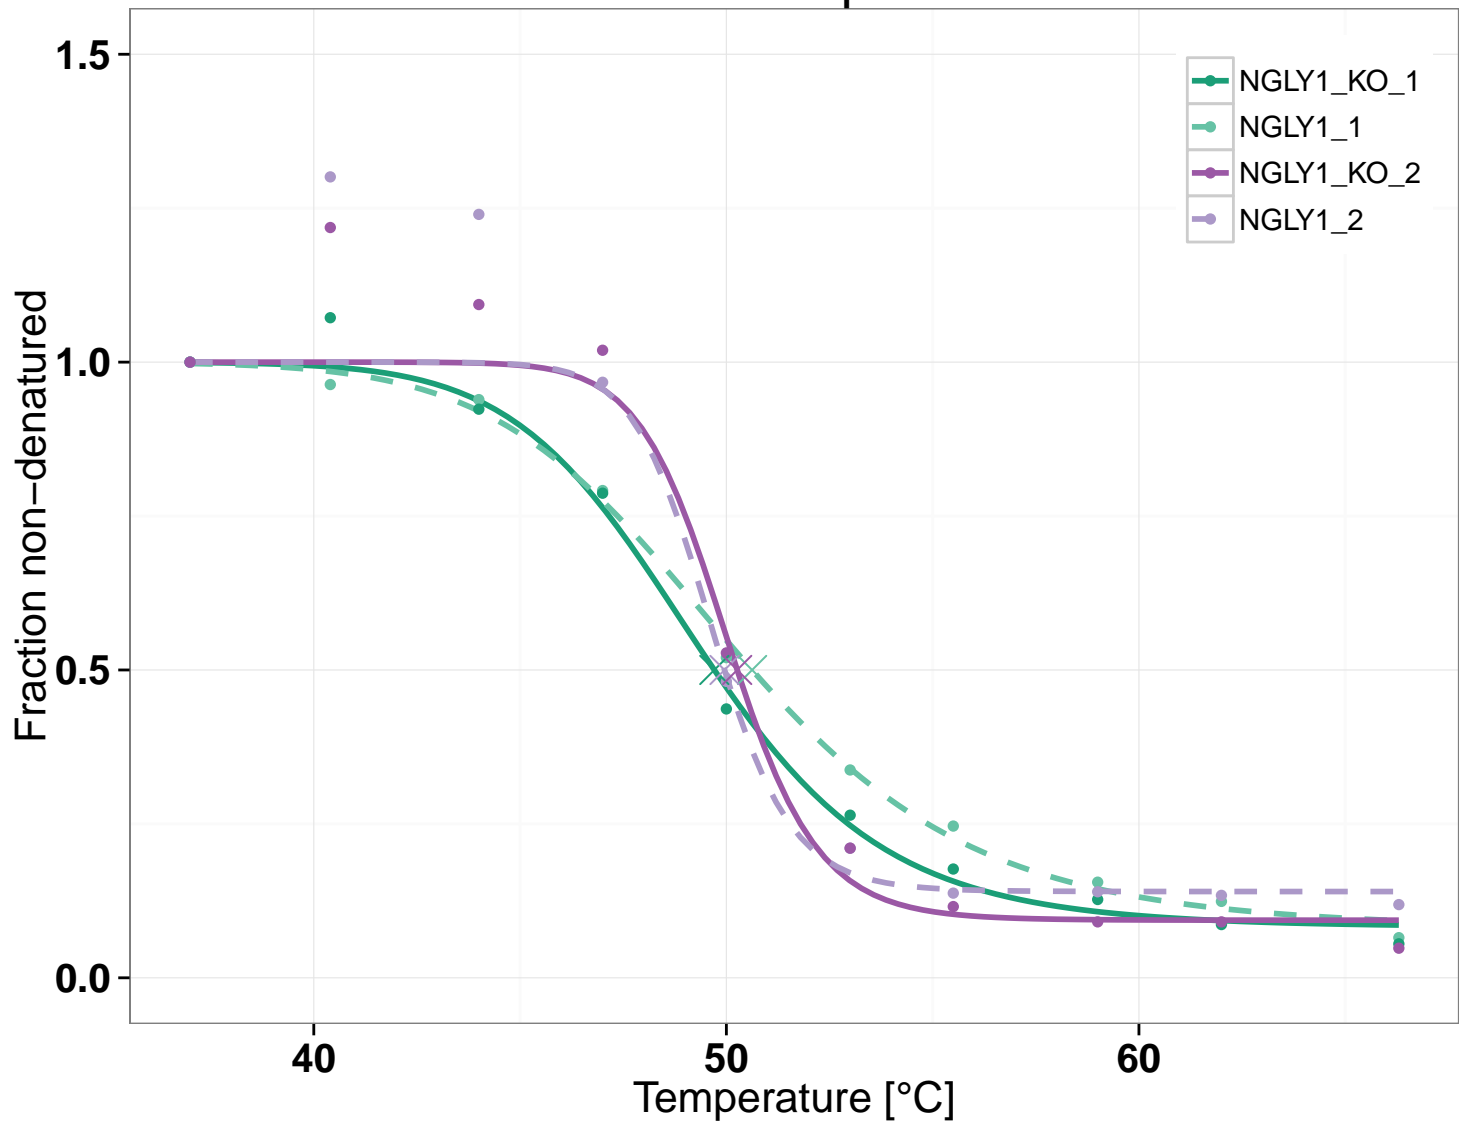

|            | meltPoint | slope  | plateau | R2   |
|------------|-----------|--------|---------|------|
| NGLY1_KO_1 | 49.71     | -0.1   | 0.08    | 0.99 |
| NGLY1_1    | 50.62     | -0.079 | 0.08    | 1    |
| NGLY1_KO_2 | 50.26     | -0.21  | 0.09    | 0.97 |
| NGLY1_2    | 49.96     | -0.23  | 0.14    | 0.93 |

Supplement: Supplementary file 6002 [file 1]

# IPI00021885.1|FGA

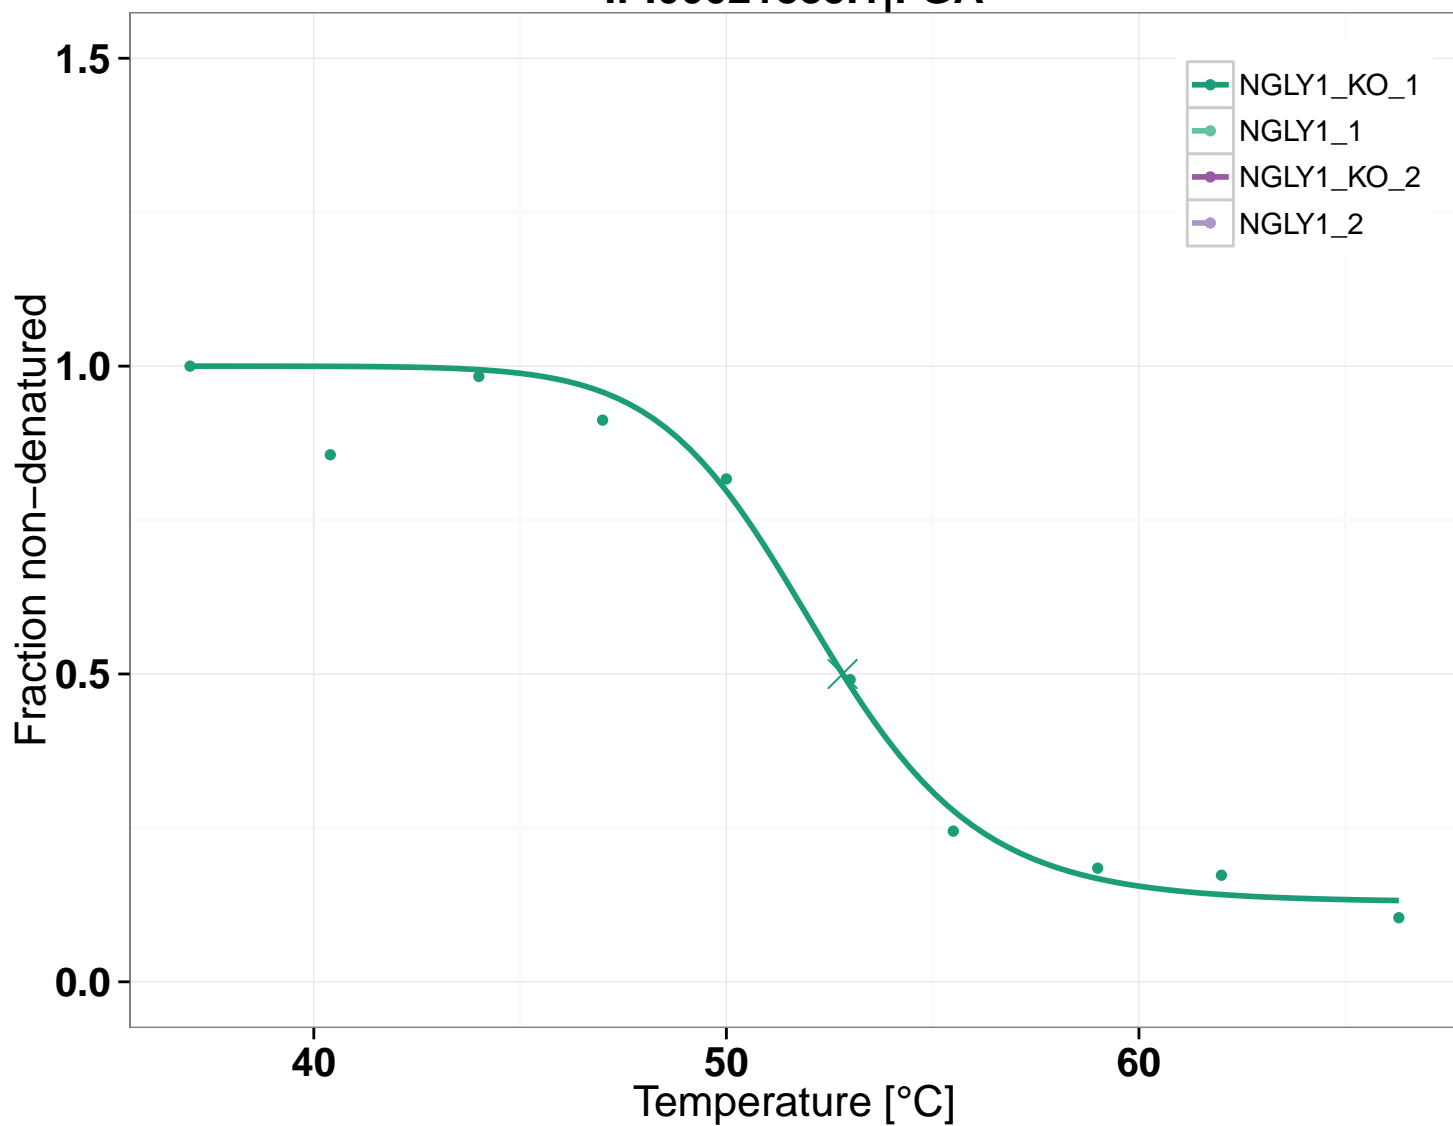

|            | meltPoint | slope | plateau | R2   |
|------------|-----------|-------|---------|------|
| NGLY1_KO_1 | 52.82     | -0.11 | 0.13    | 0.98 |
| NGLY1_1    | -         | -     | -       | -    |
| NGLY1_KO_2 | -         | -     | -       | -    |
| NGLY1_2    | -         | -     | -       | -    |

Supplement: Supplementary file 6003 [file 1]

# IPI00015954.1|SAR1A

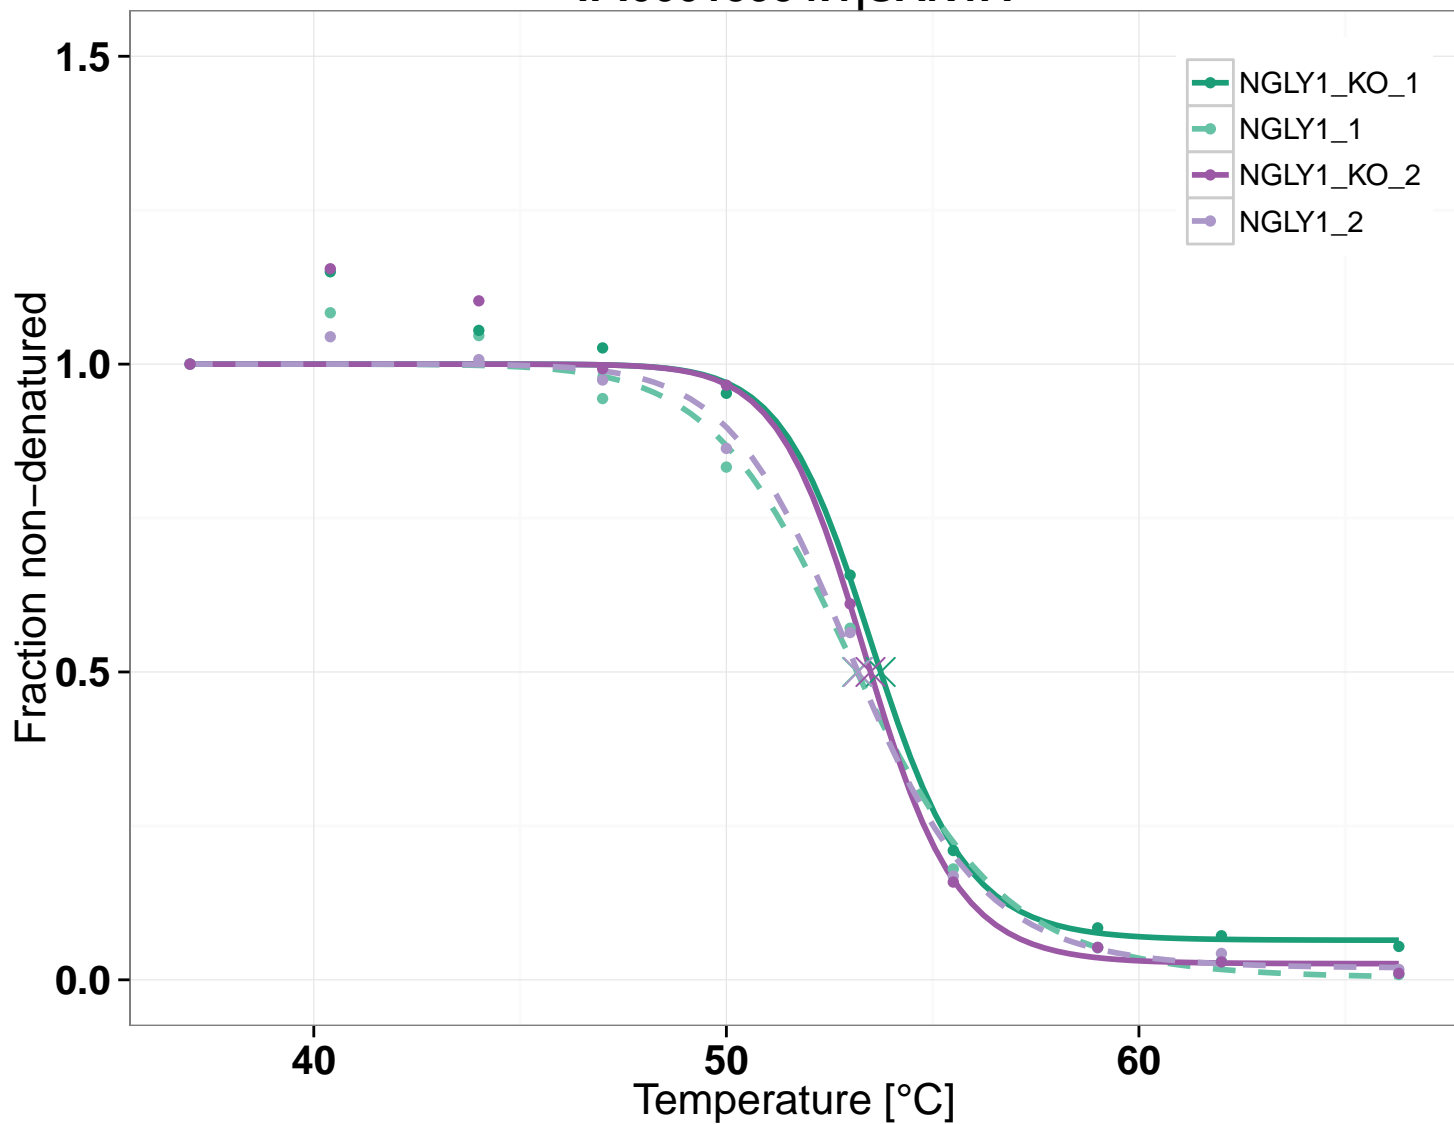

|            | meltPoint | slope | plateau | R2   |
|------------|-----------|-------|---------|------|
| NGLY1_KO_1 | 53.74     | -0.21 | 0.06    | 0.99 |
| NGLY1_1    | 53.17     | -0.14 | 0       | 0.99 |
| NGLY1_KO_2 | 53.49     | -0.22 | 0.03    | 0.98 |
| NGLY1_2    | 53.19     | -0.16 | 0.02    | 1    |

Supplement: Supplementary file 6004 [file 1]

IPI00059762.5|LYPLAL1

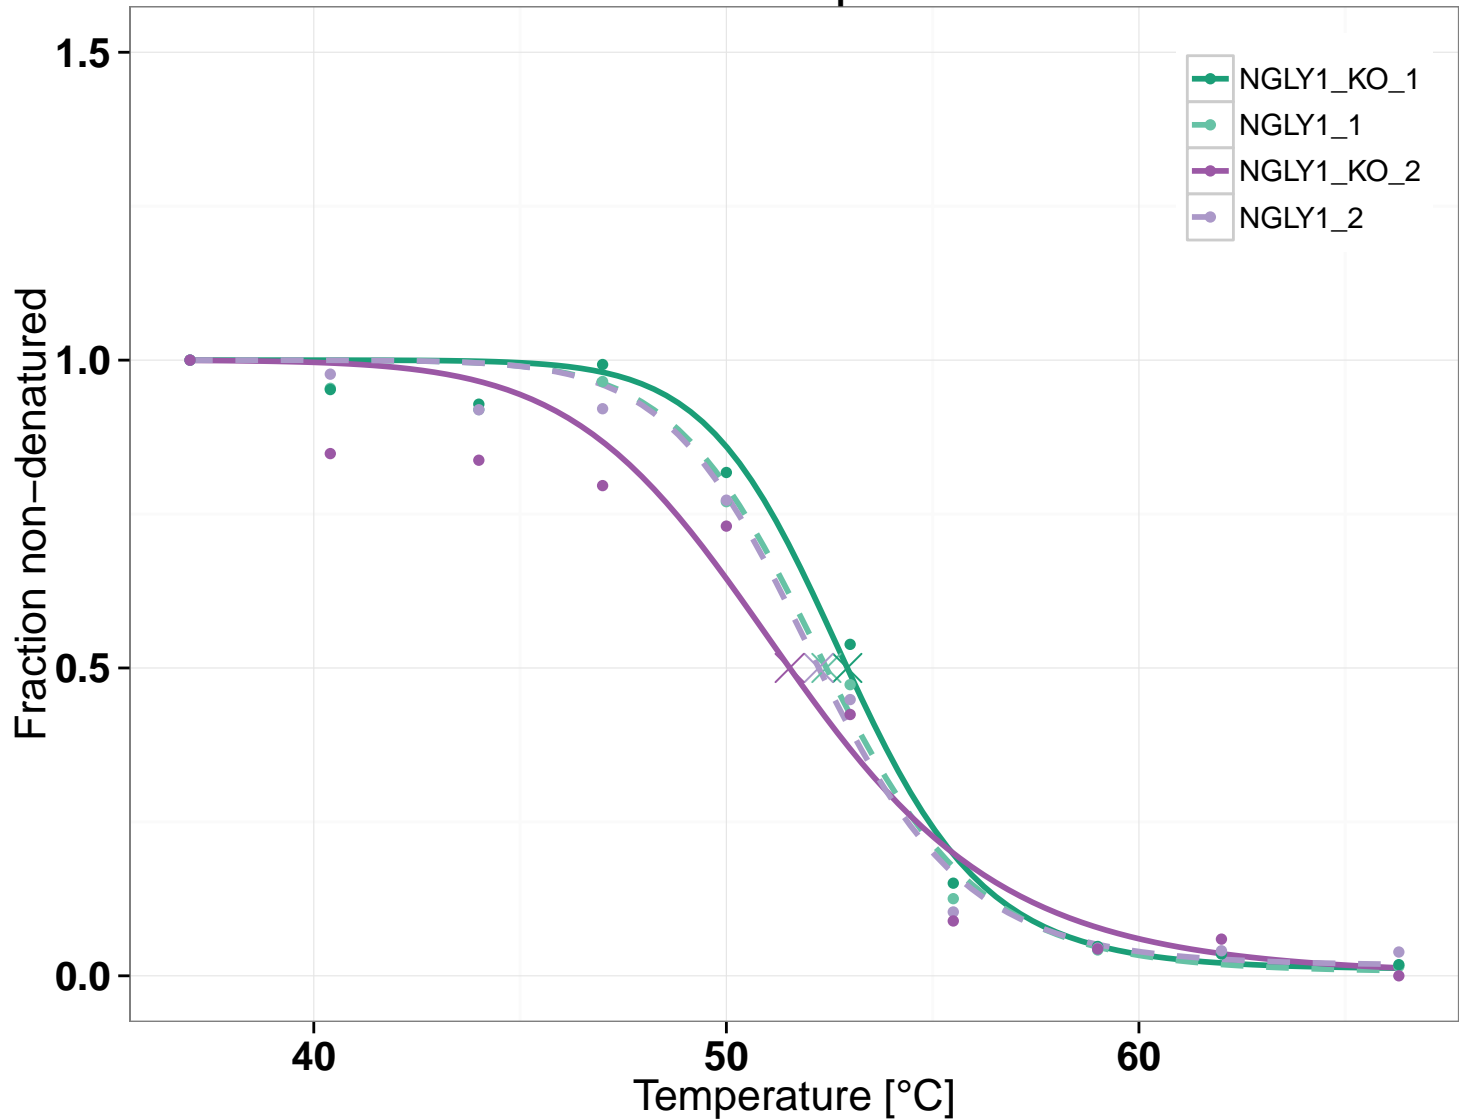

|            | meltPoint | slope  | plateau | R2   |
|------------|-----------|--------|---------|------|
| NGLY1_KO_1 | 52.93     | -0.15  | 0.01    | 0.99 |
| NGLY1_1    | 52.42     | -0.13  | 0.01    | 0.99 |
| NGLY1_KO_2 | 51.53     | -0.096 | 0       | 0.95 |
| NGLY1_2    | 52.24     | -0.14  | 0.02    | 0.99 |

Supplement: Supplementary file 6005 [file 1]

IPI00018098.4|PRPF38B

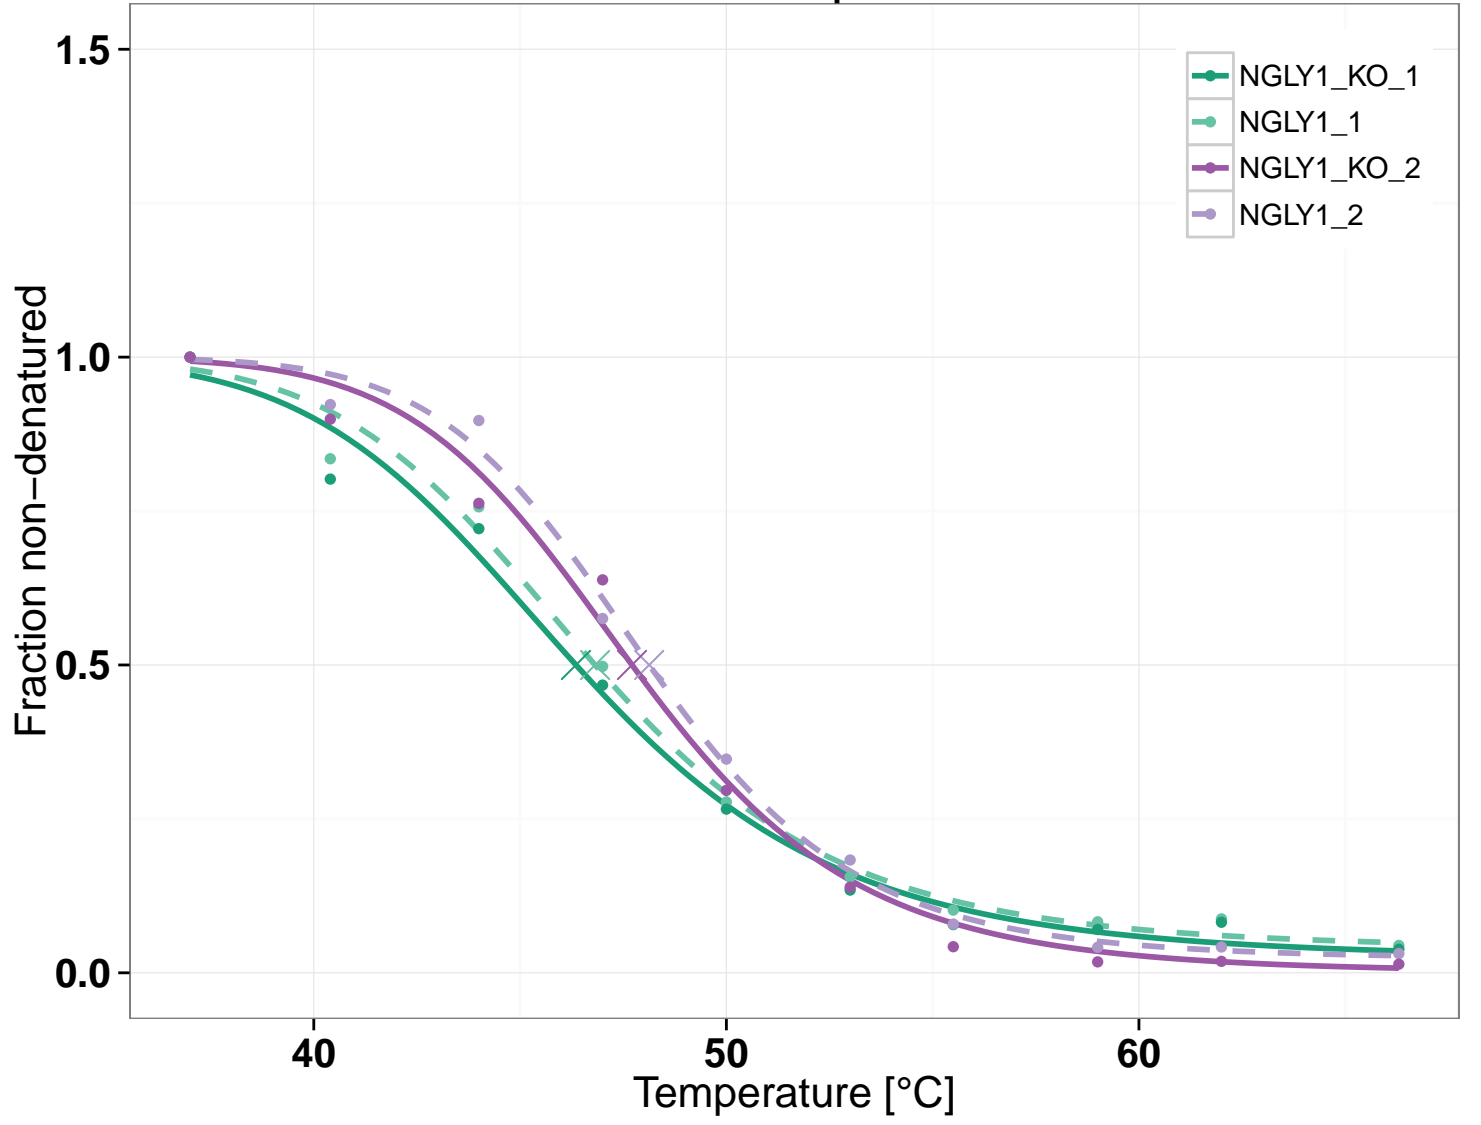

|            | meltPoint | slope  | plateau | R2   |
|------------|-----------|--------|---------|------|
| NGLY1_KO_1 | 46.35     | -0.076 | 0.02    | 0.99 |
| NGLY1_1    | 46.82     | -0.079 | 0.04    | 0.99 |
| NGLY1_KO_2 | 47.71     | -0.092 | 0       | 0.99 |
| NGLY1_2    | 48.13     | -0.097 | 0.02    | 1    |

Supplement: Supplementary file 6006 [file 1]

IPI00219365.3|MSN

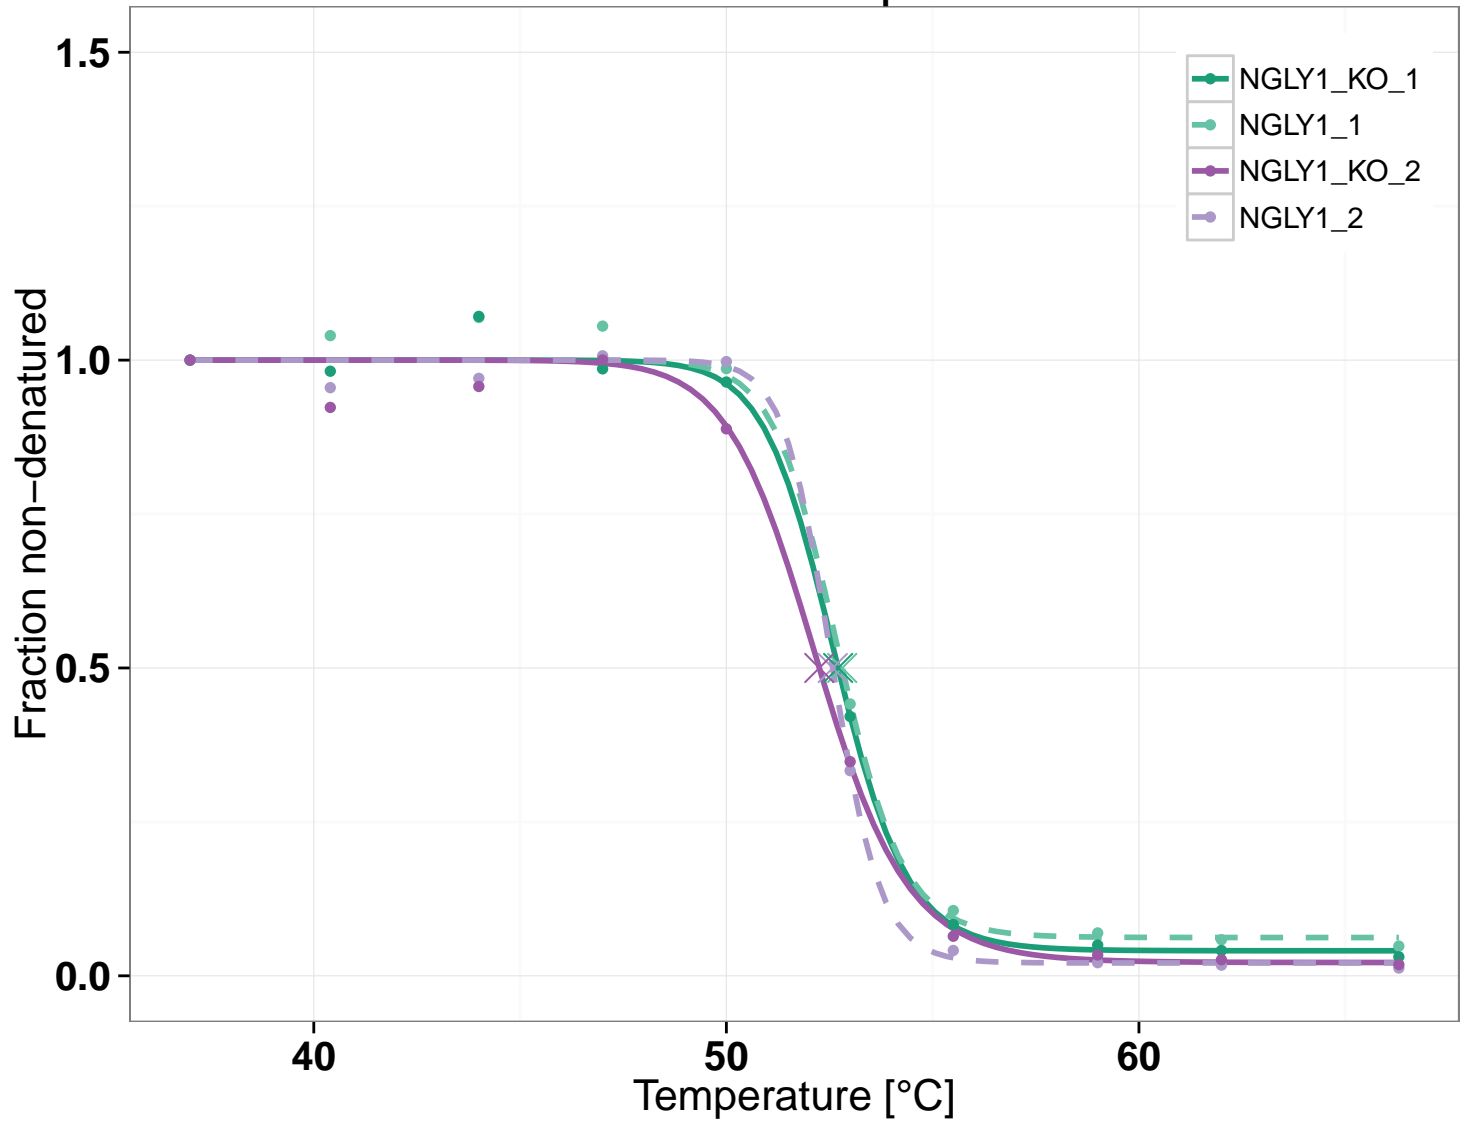

|            | meltPoint | slope | plateau | R2 |
|------------|-----------|-------|---------|----|
| NGLY1_KO_1 | 52.71     | -0.28 | 0.04    | 1  |
| NGLY1_1    | 52.81     | -0.3  | 0.06    | 1  |
| NGLY1_KO_2 | 52.25     | -0.22 | 0.02    | 1  |
| NGLY1_2    | 52.58     | -0.42 | 0.02    | 1  |

Supplement: Supplementary file 6007 [file 1]

IPI00457284.2|GPATCH8

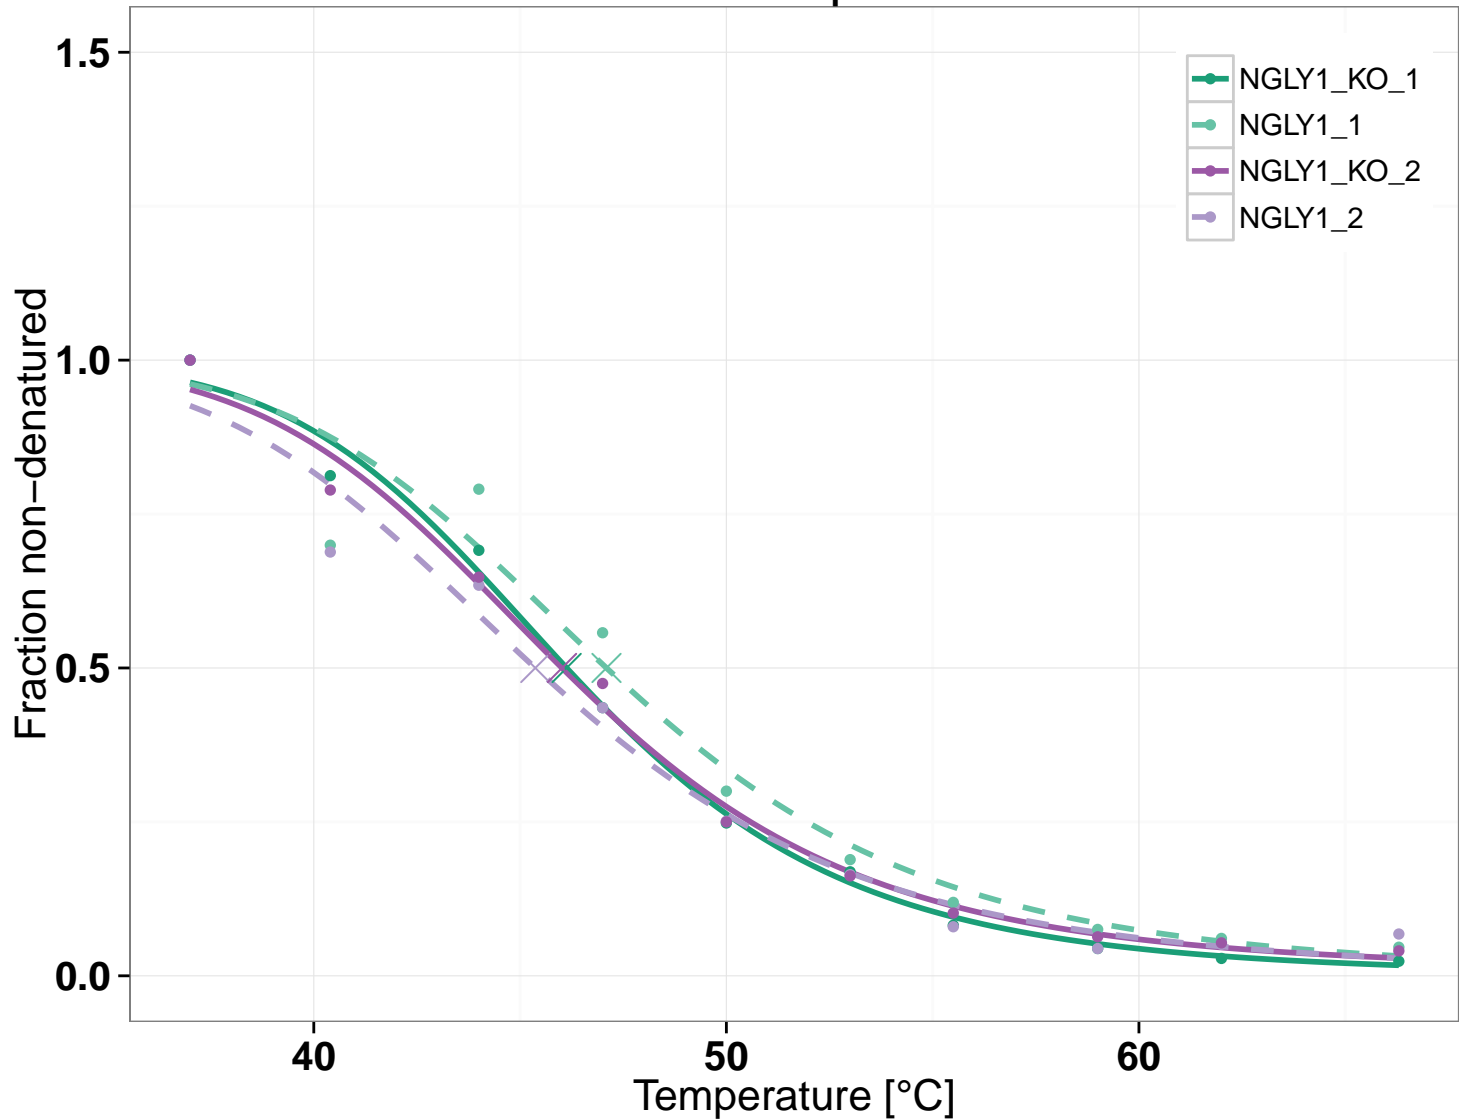

|            | meltPoint | slope  | plateau | R2   |
|------------|-----------|--------|---------|------|
| NGLY1_KO_1 | 46.13     | -0.074 | 0       | 0.99 |
| NGLY1_1    | 47.09     | -0.064 | 0       | 0.96 |
| NGLY1_KO_2 | 46.02     | -0.068 | 0.01    | 0.99 |
| NGLY1_2    | 45.37     | -0.063 | 0       | 0.98 |

Supplement: Supplementary file 6008 [file 1]

# IPI00028509.1|GNG7

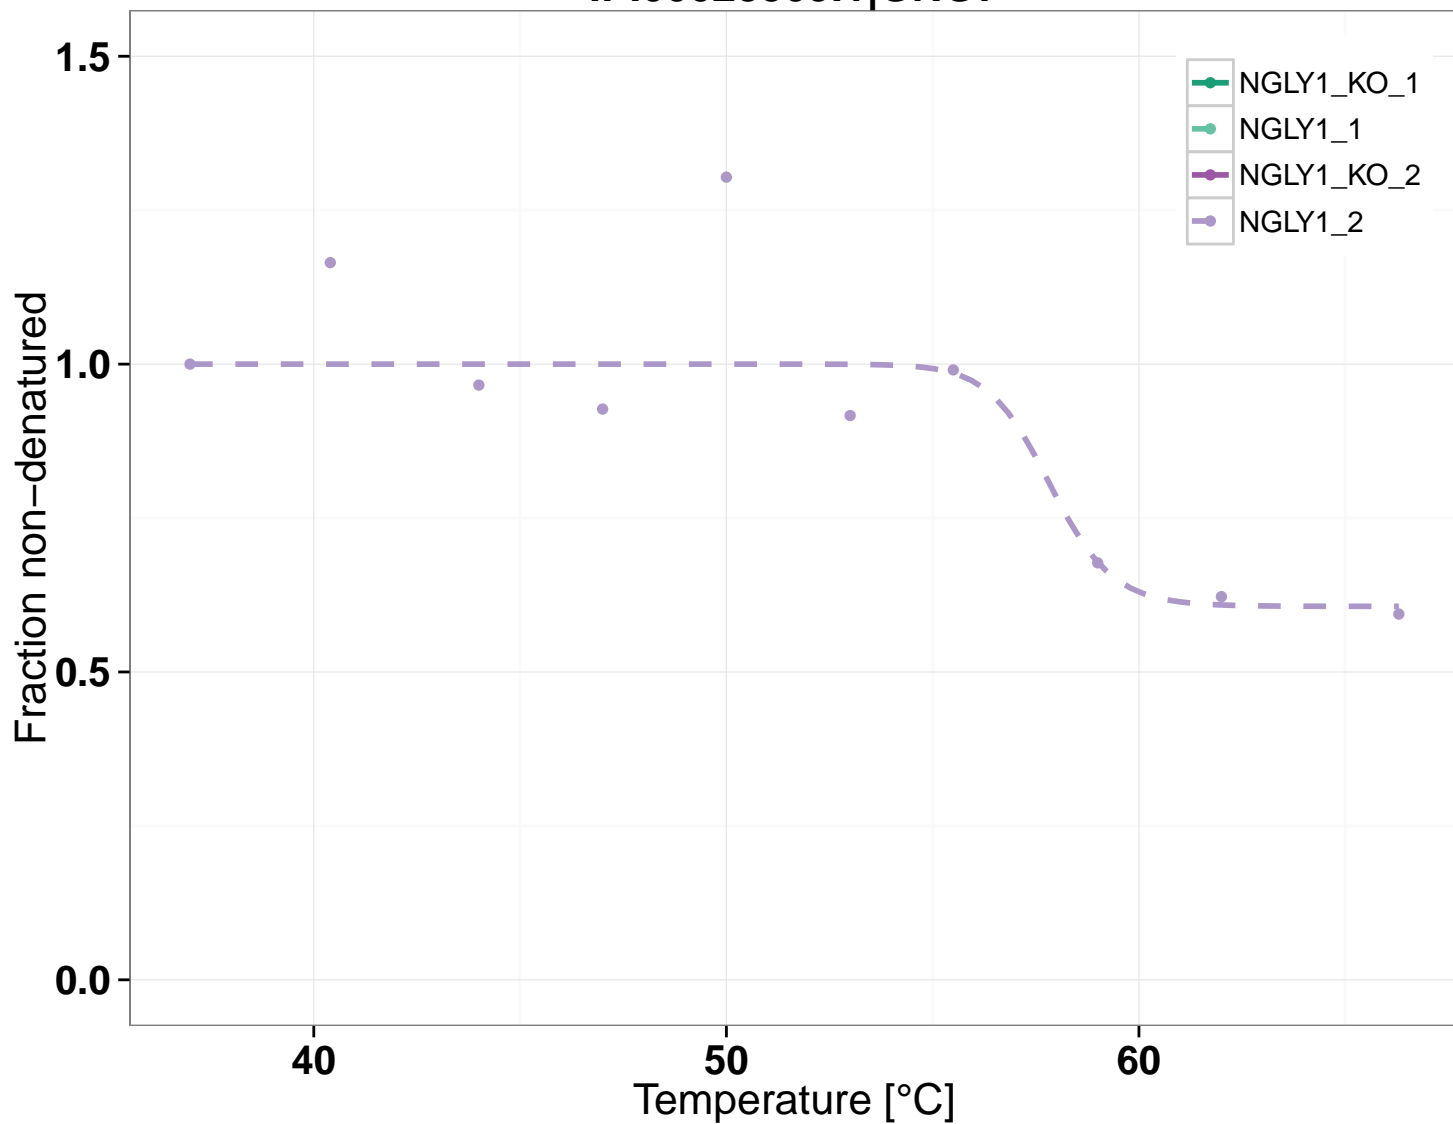

|            | meltPoint | slope | plateau | R2   |
|------------|-----------|-------|---------|------|
| NGLY1_KO_1 | -         | -     | -       | -    |
| NGLY1_1    | -         | -     | -       | -    |
| NGLY1_KO_2 | -         | -     | -       | -    |
| NGLY1_2    | -         | -0.13 | 0.61    | 0.72 |

Supplement: Supplementary file 6009 [file 1]

IPI00853077.1|PHF20L1

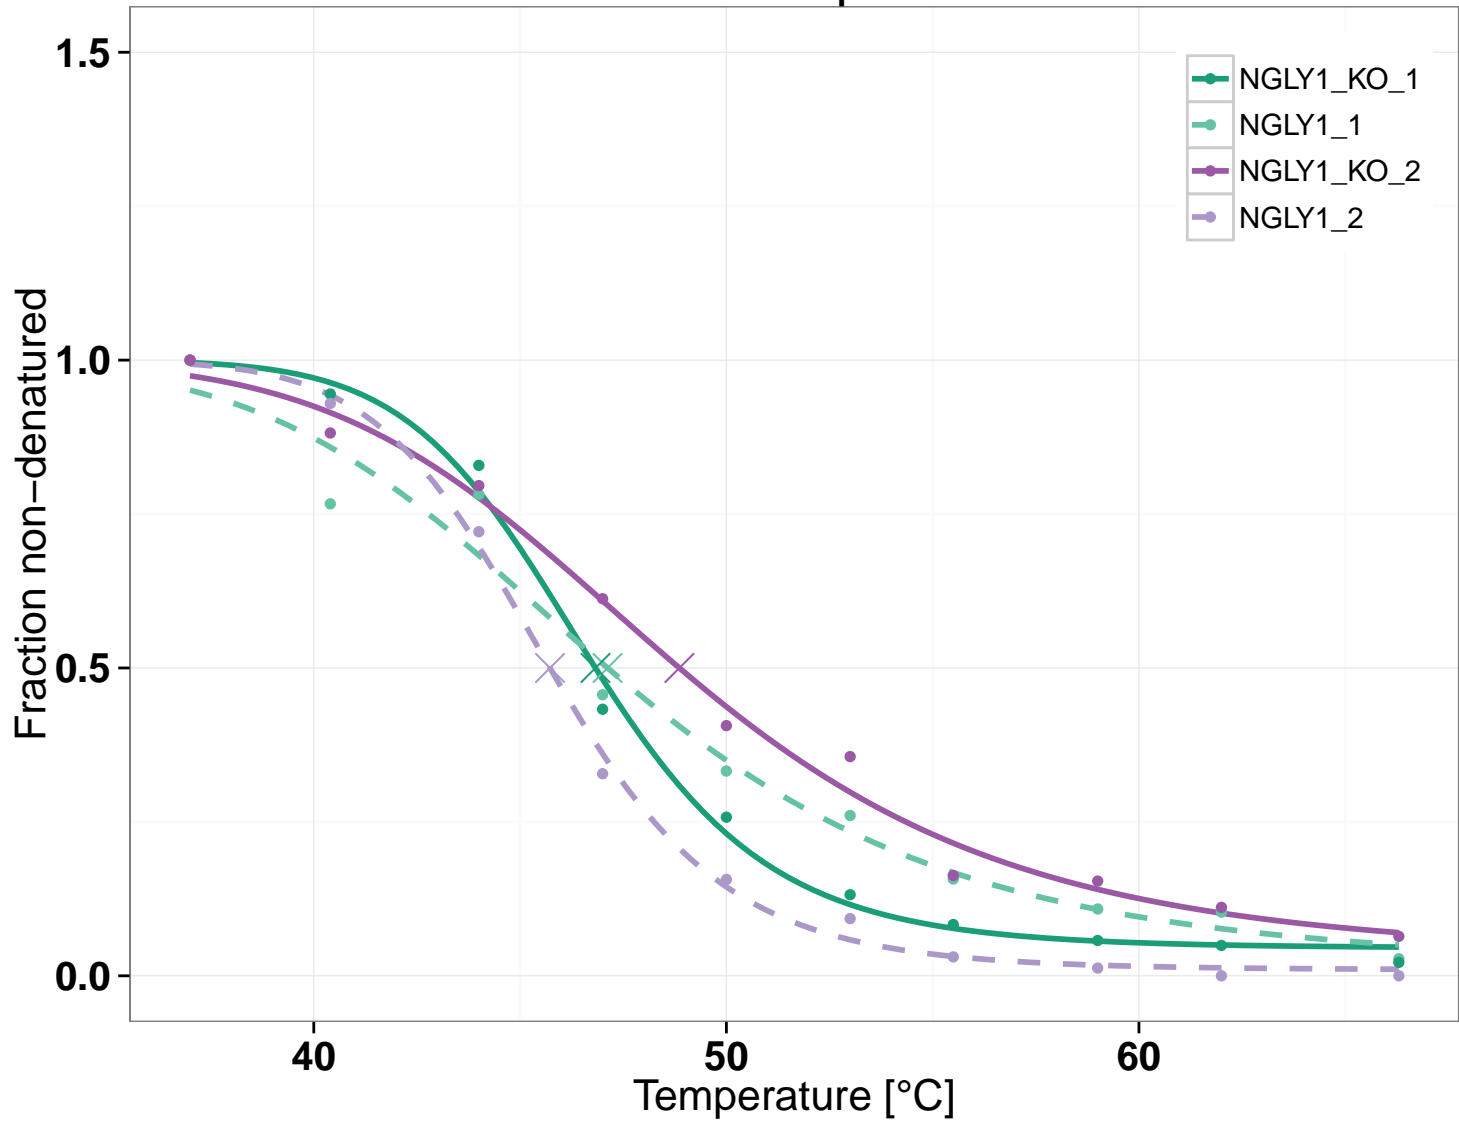

|            | meltPoint | slope  | plateau | R2   |
|------------|-----------|--------|---------|------|
| NGLY1_KO_1 | 46.83     | -0.11  | 0.04    | 1    |
| NGLY1_1    | 47.12     | -0.059 | 0.01    | 0.98 |
| NGLY1_KO_2 | 48.86     | -0.059 | 0.03    | 0.99 |
| NGLY1_2    | 45.72     | -0.12  | 0.01    | 1    |

Supplement: Supplementary file 6010 [file 1]

IPI00787089.1|PELP1

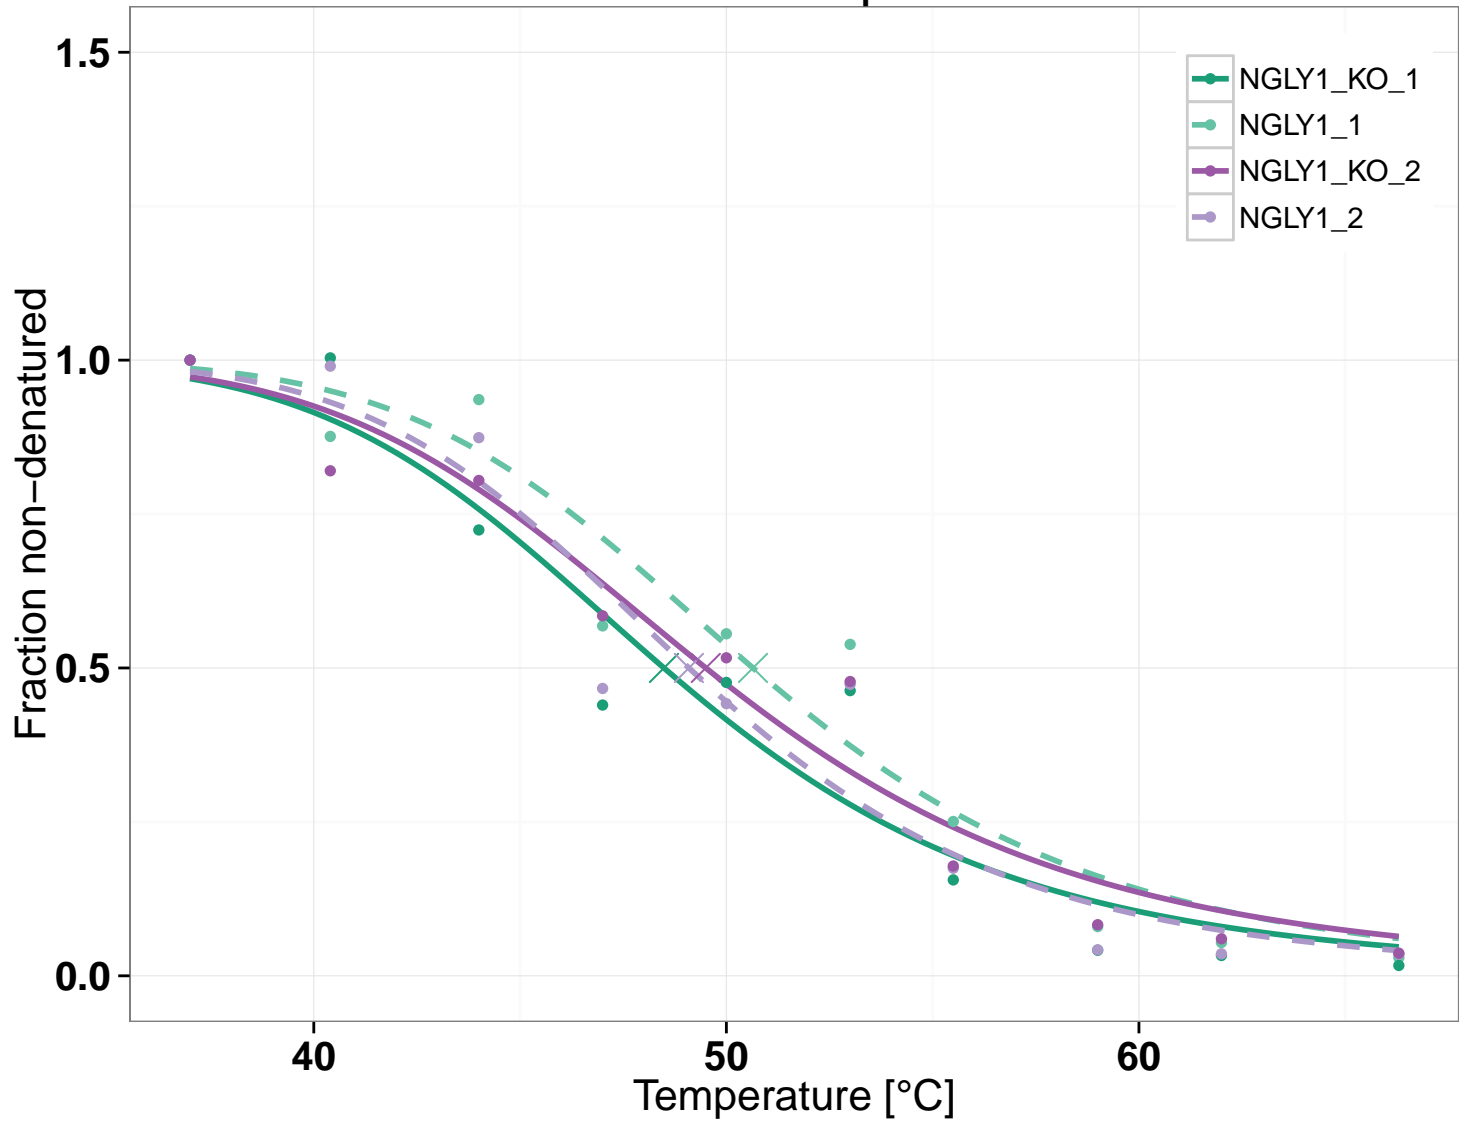

|            | meltPoint | slope  | plateau | R2   |
|------------|-----------|--------|---------|------|
| NGLY1_KO_1 | 48.49     | -0.06  | 0       | 0.94 |
| NGLY1_1    | 50.65     | -0.059 | 0       | 0.94 |
| NGLY1_KO_2 | 49.5      | -0.055 | 0       | 0.96 |
| NGLY1_2    | 49.09     | -0.063 | 0       | 0.94 |

Supplement: Supplementary file 6012 [file 1]

IPI00220726.1|CASP8

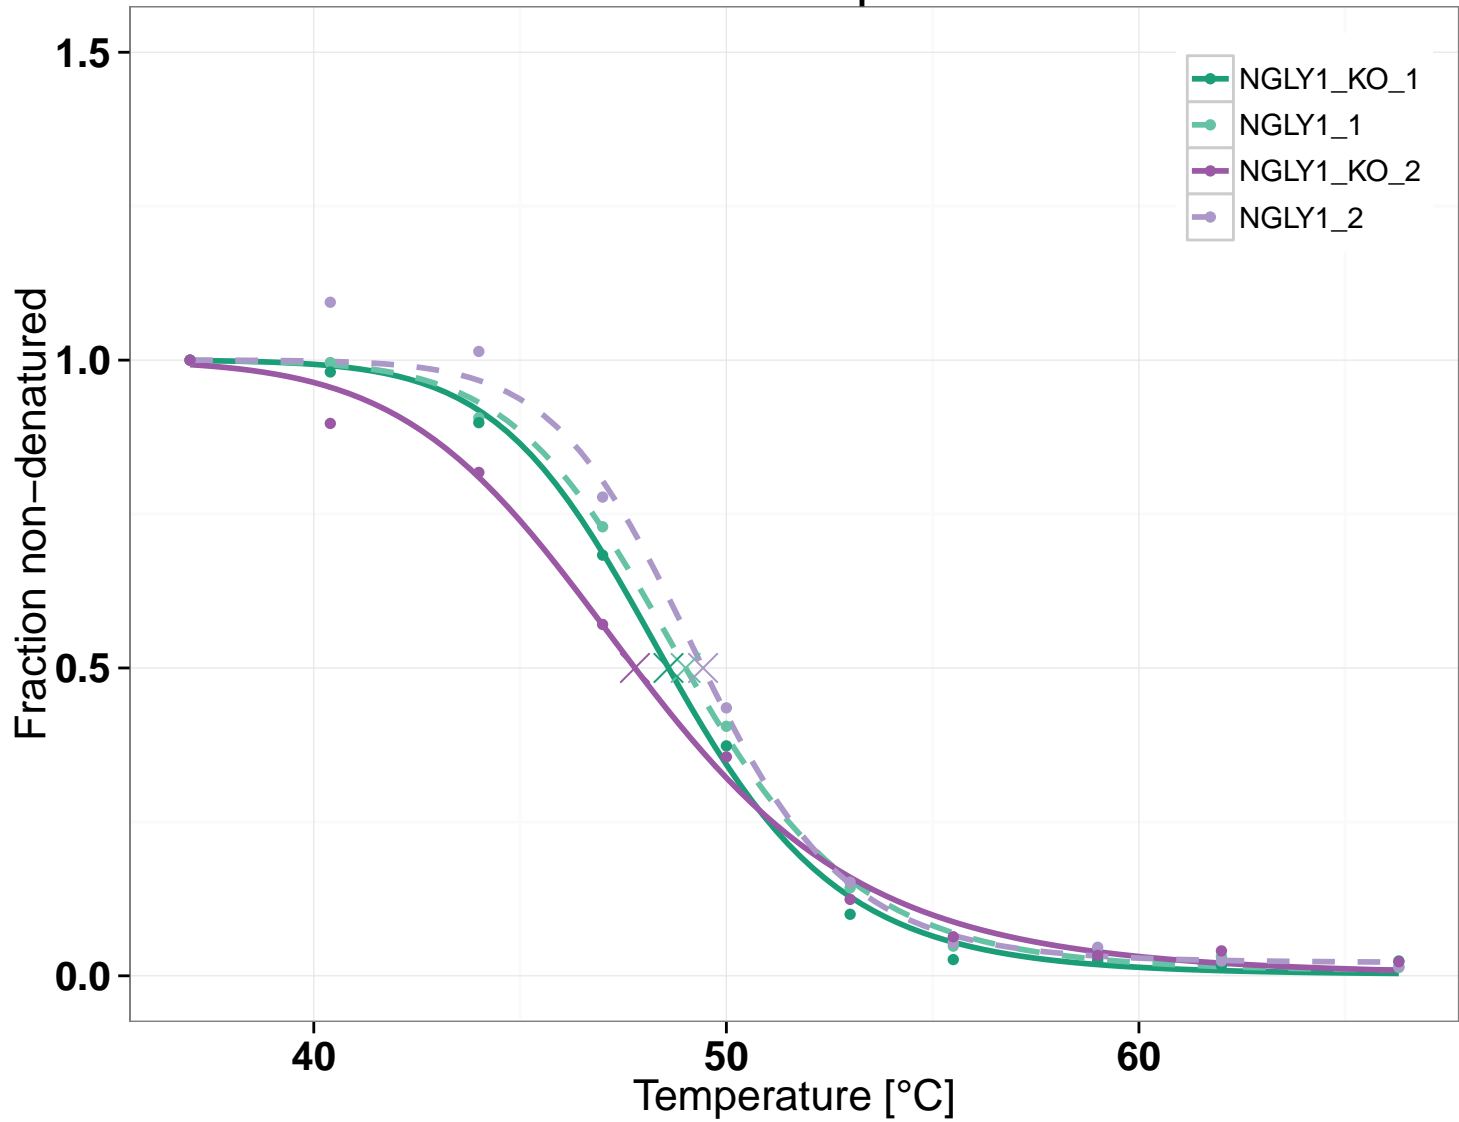

|            | meltPoint | slope  | plateau | R2   |
|------------|-----------|--------|---------|------|
| NGLY1_KO_1 | 48.6      | -0.12  | 0       | 1    |
| NGLY1_1    | 49.01     | -0.12  | 0.01    | 1    |
| NGLY1_KO_2 | 47.78     | -0.089 | 0       | 0.99 |
| NGLY1_2    | 49.44     | -0.14  | 0.02    | 0.99 |

Supplement: Supplementary file 6013 [file 1]

IPI00306871.4|KAT2A

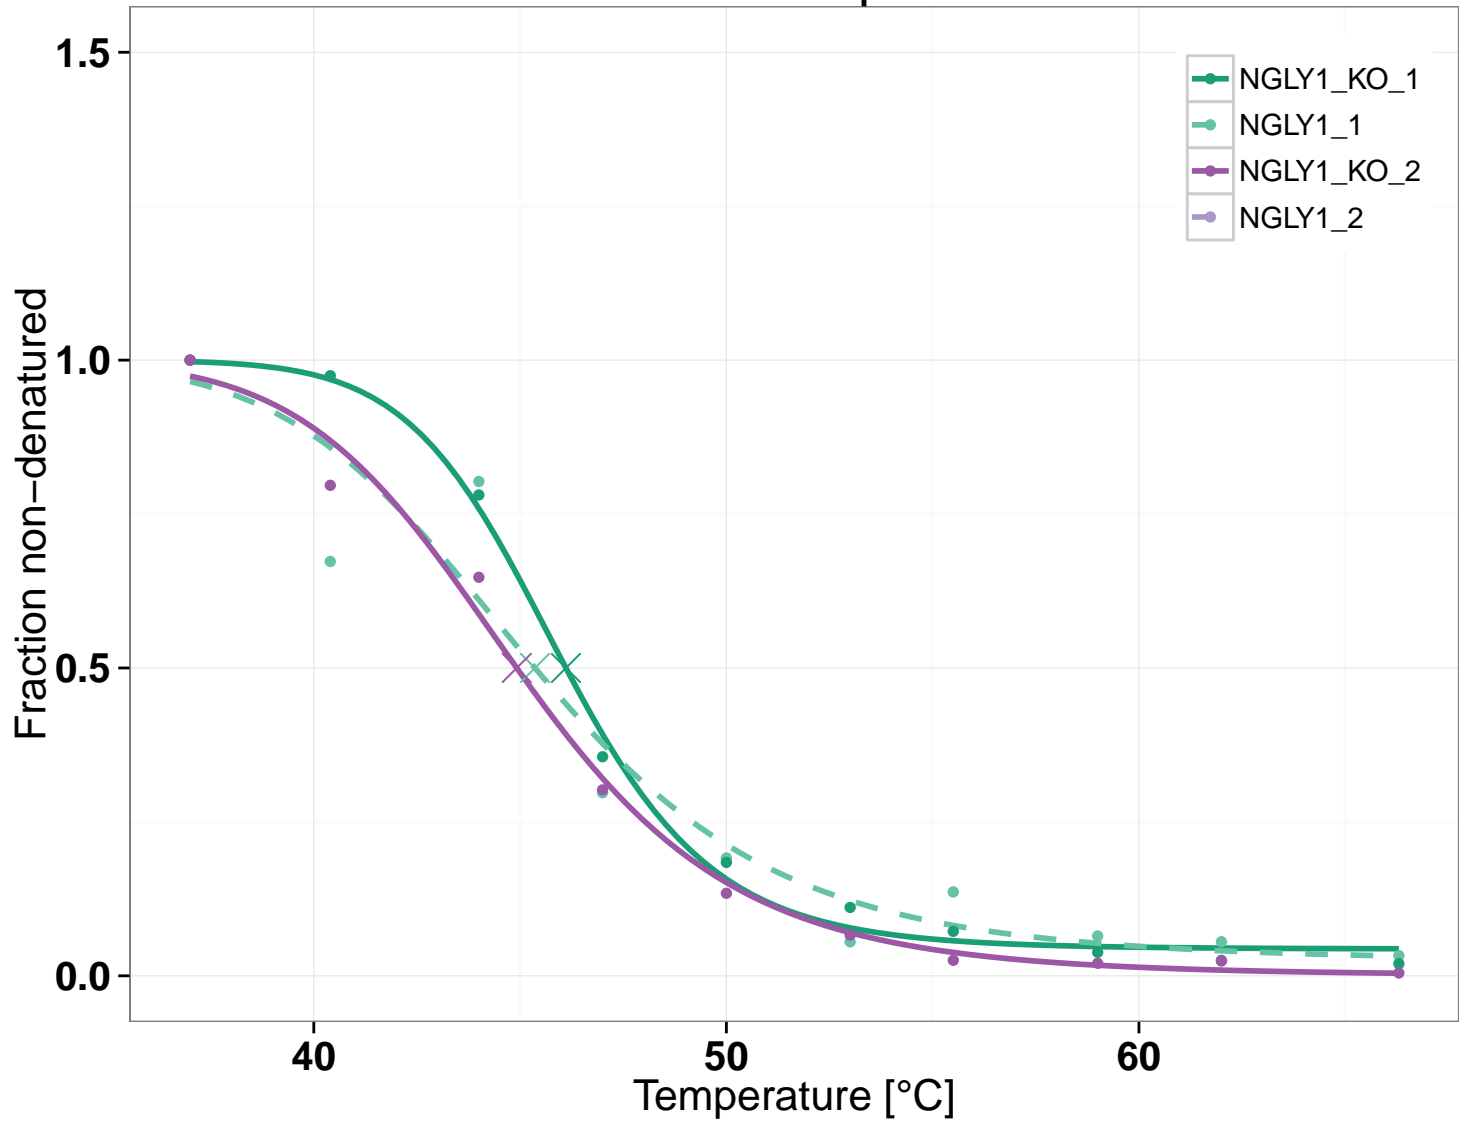

|            | meltPoint | slope  | plateau | R2   |
|------------|-----------|--------|---------|------|
| NGLY1_KO_1 | 46.11     | -0.13  | 0.04    | 1    |
| NGLY1_1    | 45.36     | -0.082 | 0.02    | 0.92 |
| NGLY1_KO_2 | 44.92     | -0.096 | 0       | 0.99 |
| NGLY1_2    | -         | -      | -       | -    |

Supplement: Supplementary file 6014 [file 1]

# IPI00383046.3|CMBL

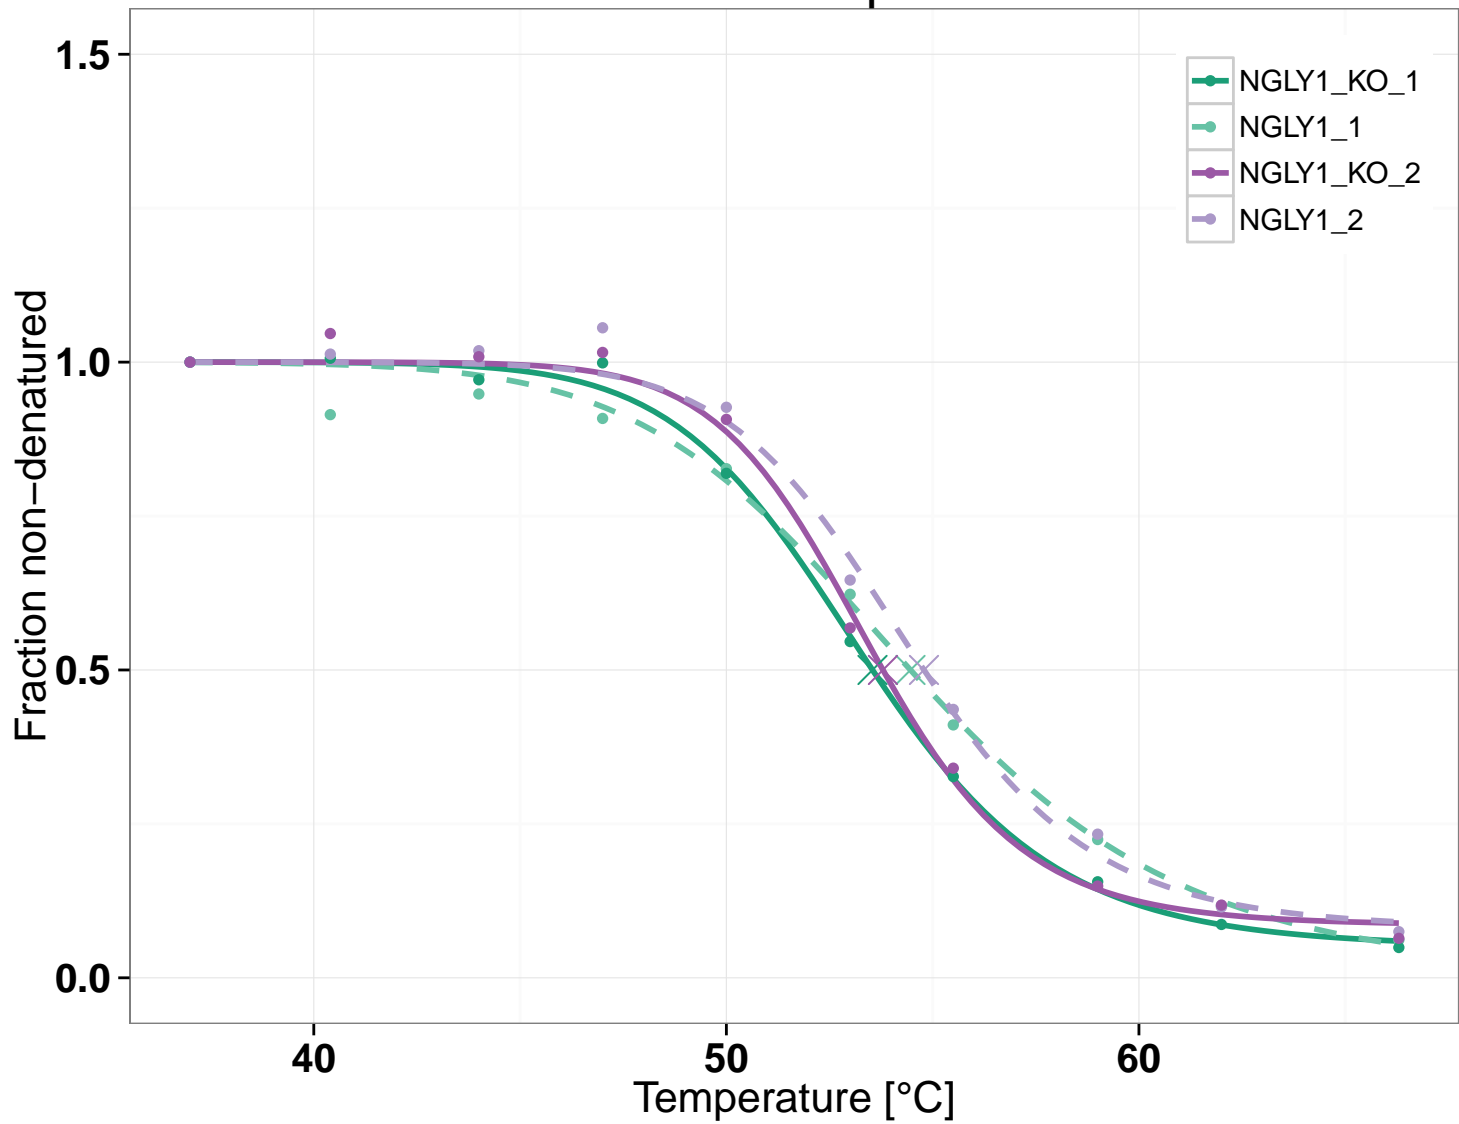

|            | meltPoint | slope  | plateau | R2   |
|------------|-----------|--------|---------|------|
| NGLY1_KO_1 | 53.54     | -0.1   | 0.05    | 1    |
| NGLY1_1    | 54.46     | -0.075 | 0       | 0.99 |
| NGLY1_KO_2 | 53.8      | -0.12  | 0.09    | 1    |
| NGLY1_2    | 54.79     | -0.1   | 0.08    | 0.99 |

Supplement: Supplementary file 6015 [file 1]

IPI00075081.1|FANCD2

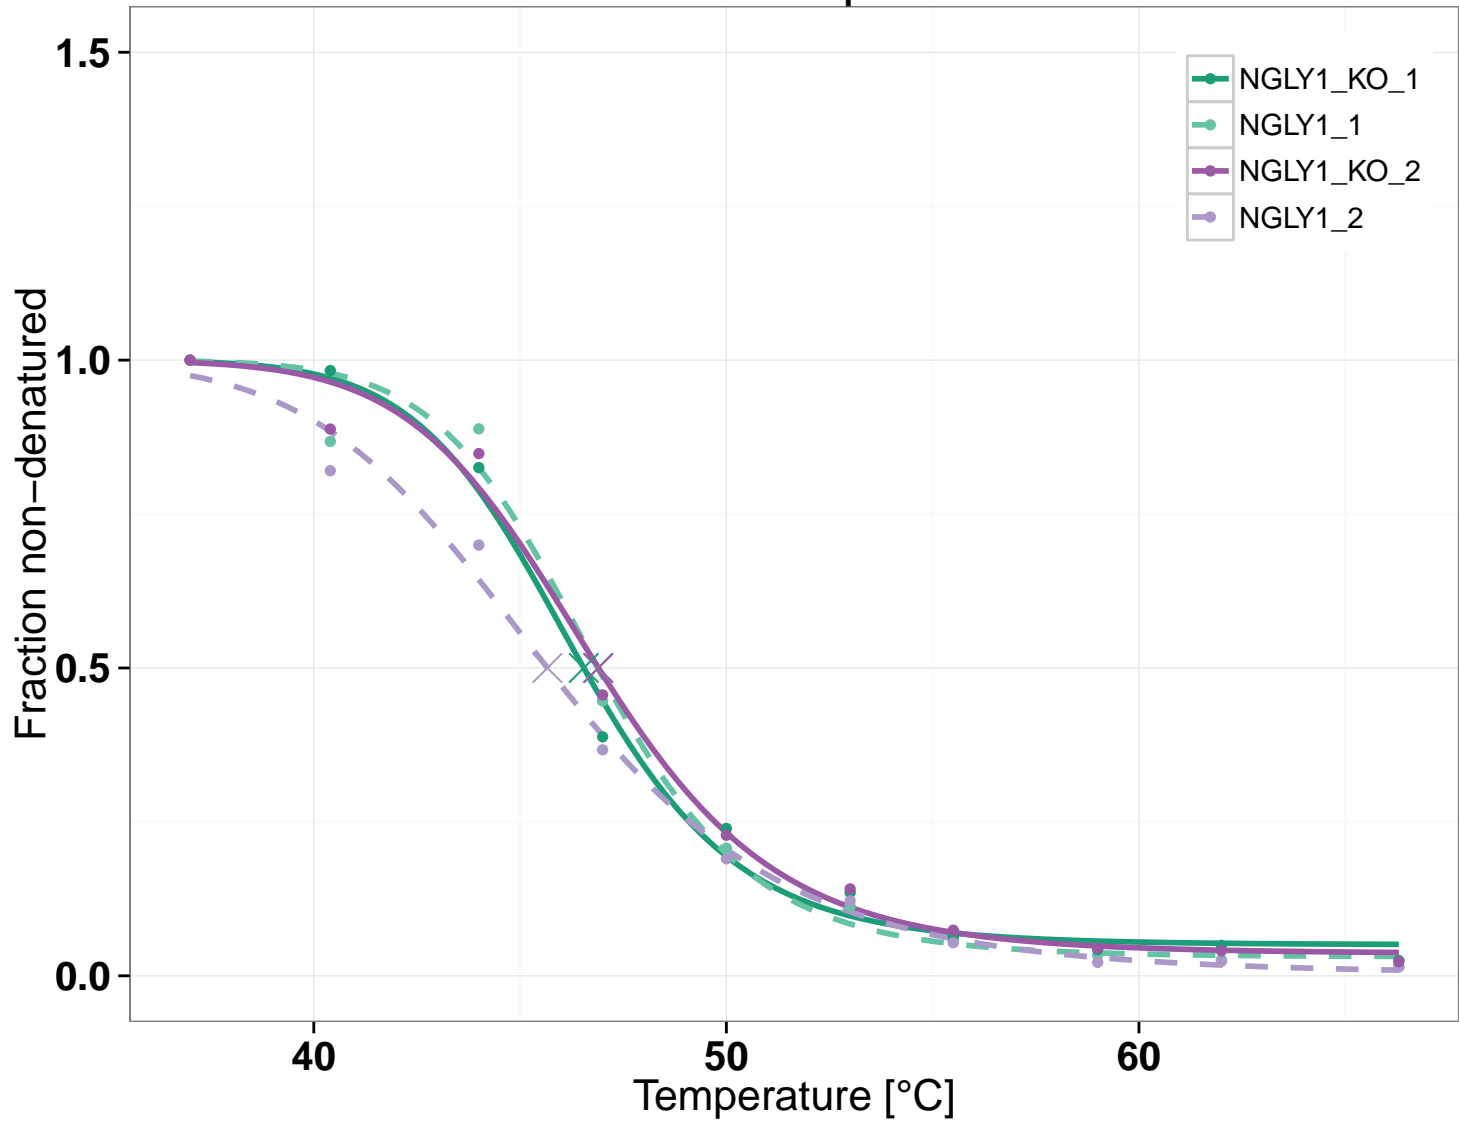

|            | meltPoint | slope  | plateau | R2   |
|------------|-----------|--------|---------|------|
| NGLY1_KO_1 | 46.54     | -0.12  | 0.05    | 0.99 |
| NGLY1_1    | 46.88     | -0.13  | 0.03    | 0.99 |
| NGLY1_KO_2 | 46.9      | -0.11  | 0.04    | 0.99 |
| NGLY1_2    | 45.66     | -0.087 | 0       | 0.99 |

Supplement: Supplementary file 6016 [file 1]

IPI00396098.1|ZNF800

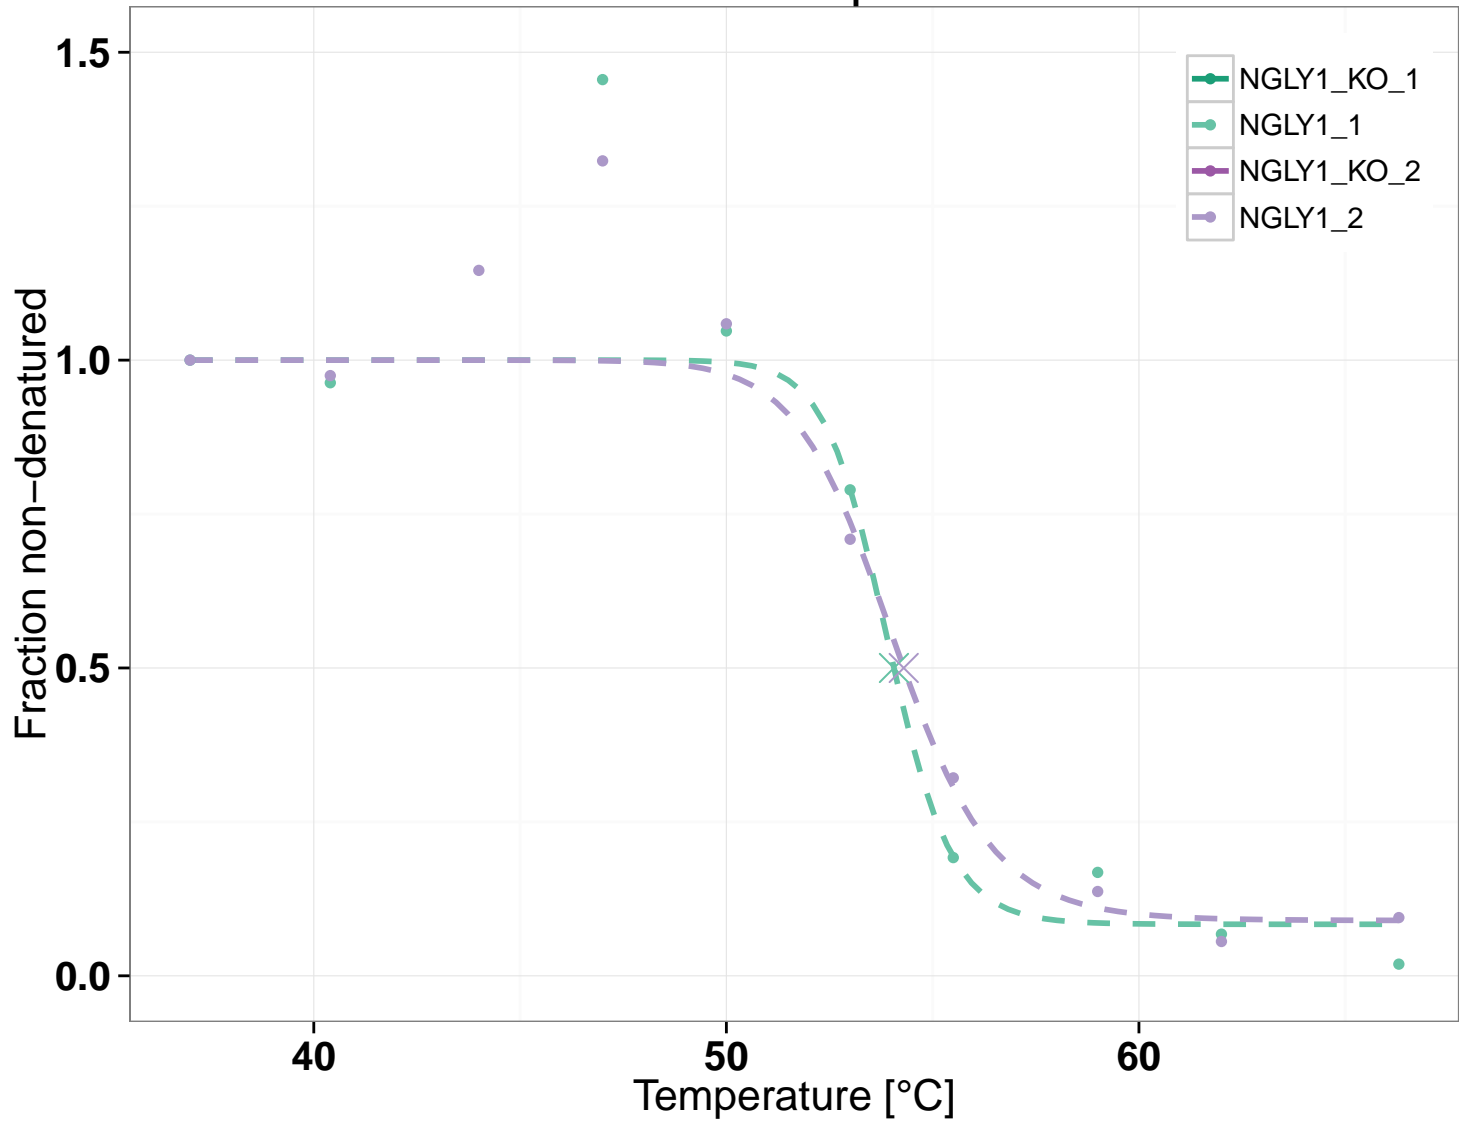

|            | meltPoint | slope | plateau | R2   |
|------------|-----------|-------|---------|------|
| NGLY1_KO_1 | -         | -     | -       | -    |
| NGLY1_1    | 54.06     | -0.3  | 0.08    | 0.82 |
| NGLY1_KO_2 | -         | -     | -       | -    |
| NGLY1_2    | 54.3      | -0.19 | 0.09    | 0.94 |

Supplement: Supplementary file 6017 [file 1]

IPI00020827.1|LOC100129759

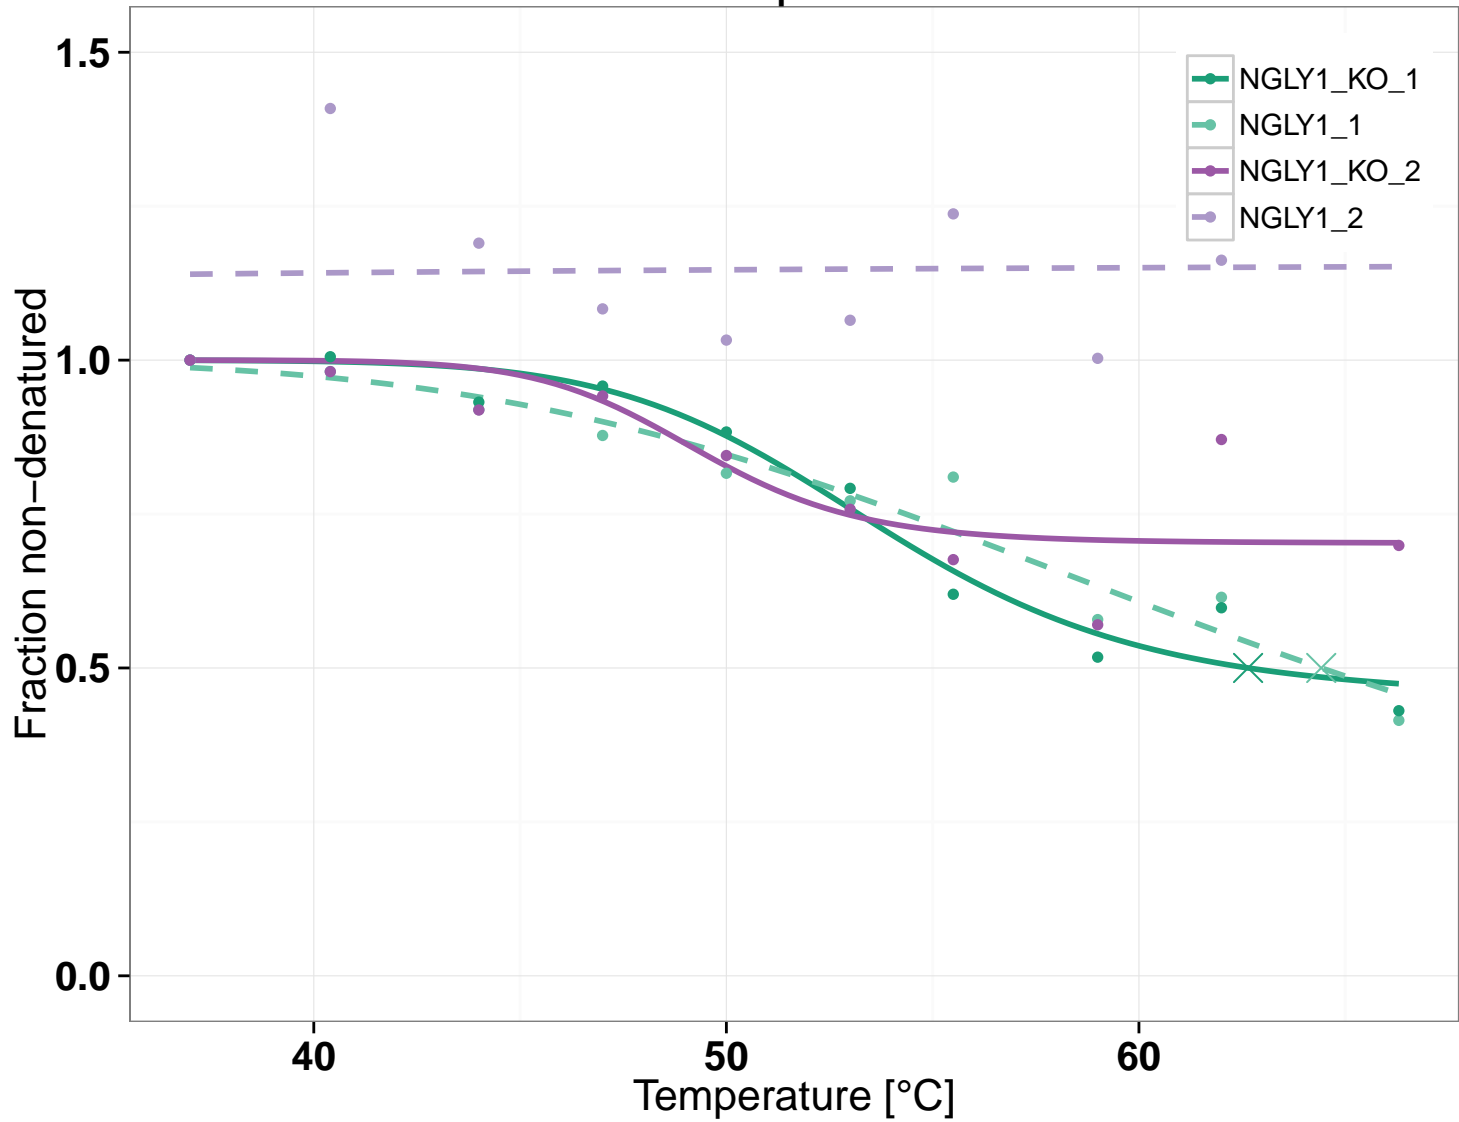

|            | meltPoint | slope  | plateau | R2   |
|------------|-----------|--------|---------|------|
| NGLY1_KO_1 | 62.65     | -0.042 | 0.45    | 0.96 |
| NGLY1_1    | 64.42     | -0.026 | 0       | 0.94 |
| NGLY1_KO_2 | -         | -0.038 | 0.7     | 0.71 |
| NGLY1_2    | -         | -      | 1.33    | 0    |

Supplement: Supplementary file 6018 [file 1]

IPI00020991.2|CDKN2AIP

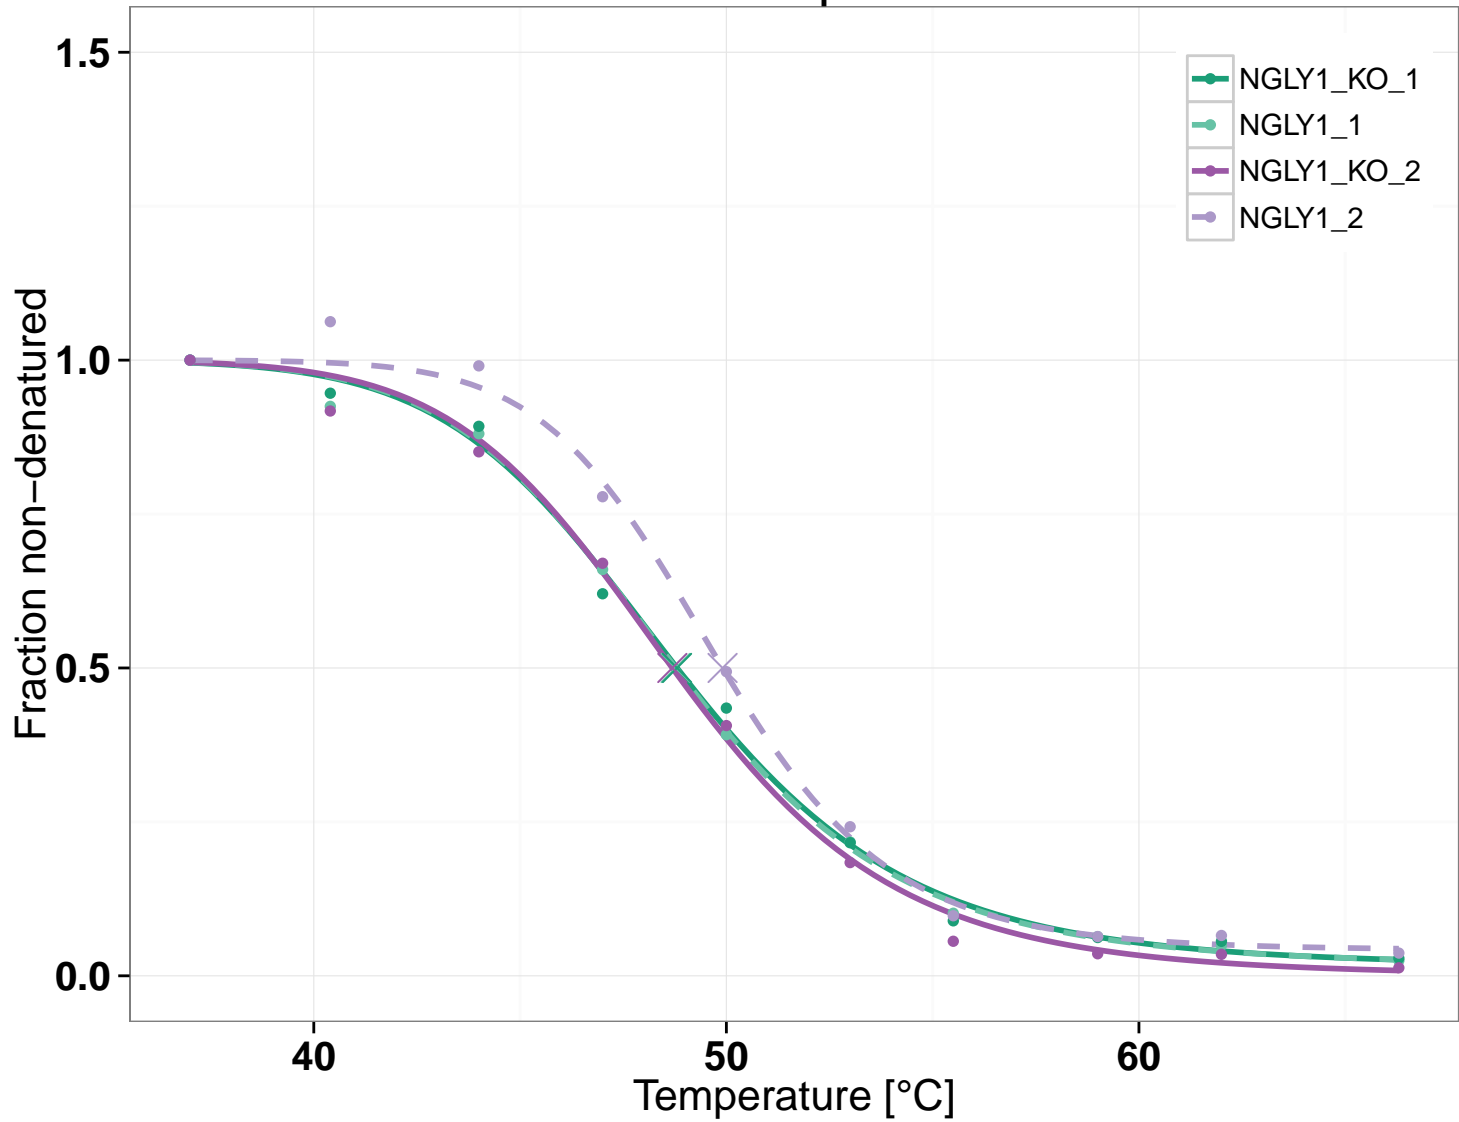

|            | meltPoint | slope  | plateau | R2 |
|------------|-----------|--------|---------|----|
| NGLY1_KO_1 | 48.8      | -0.088 | 0.02    | 1  |
| NGLY1_1    | 48.77     | -0.089 | 0.02    | 1  |
| NGLY1_KO_2 | 48.69     | -0.093 | 0       | 1  |
| NGLY1_2    | 49.91     | -0.11  | 0.04    | 1  |

Supplement: Supplementary file 6019 [file 1]

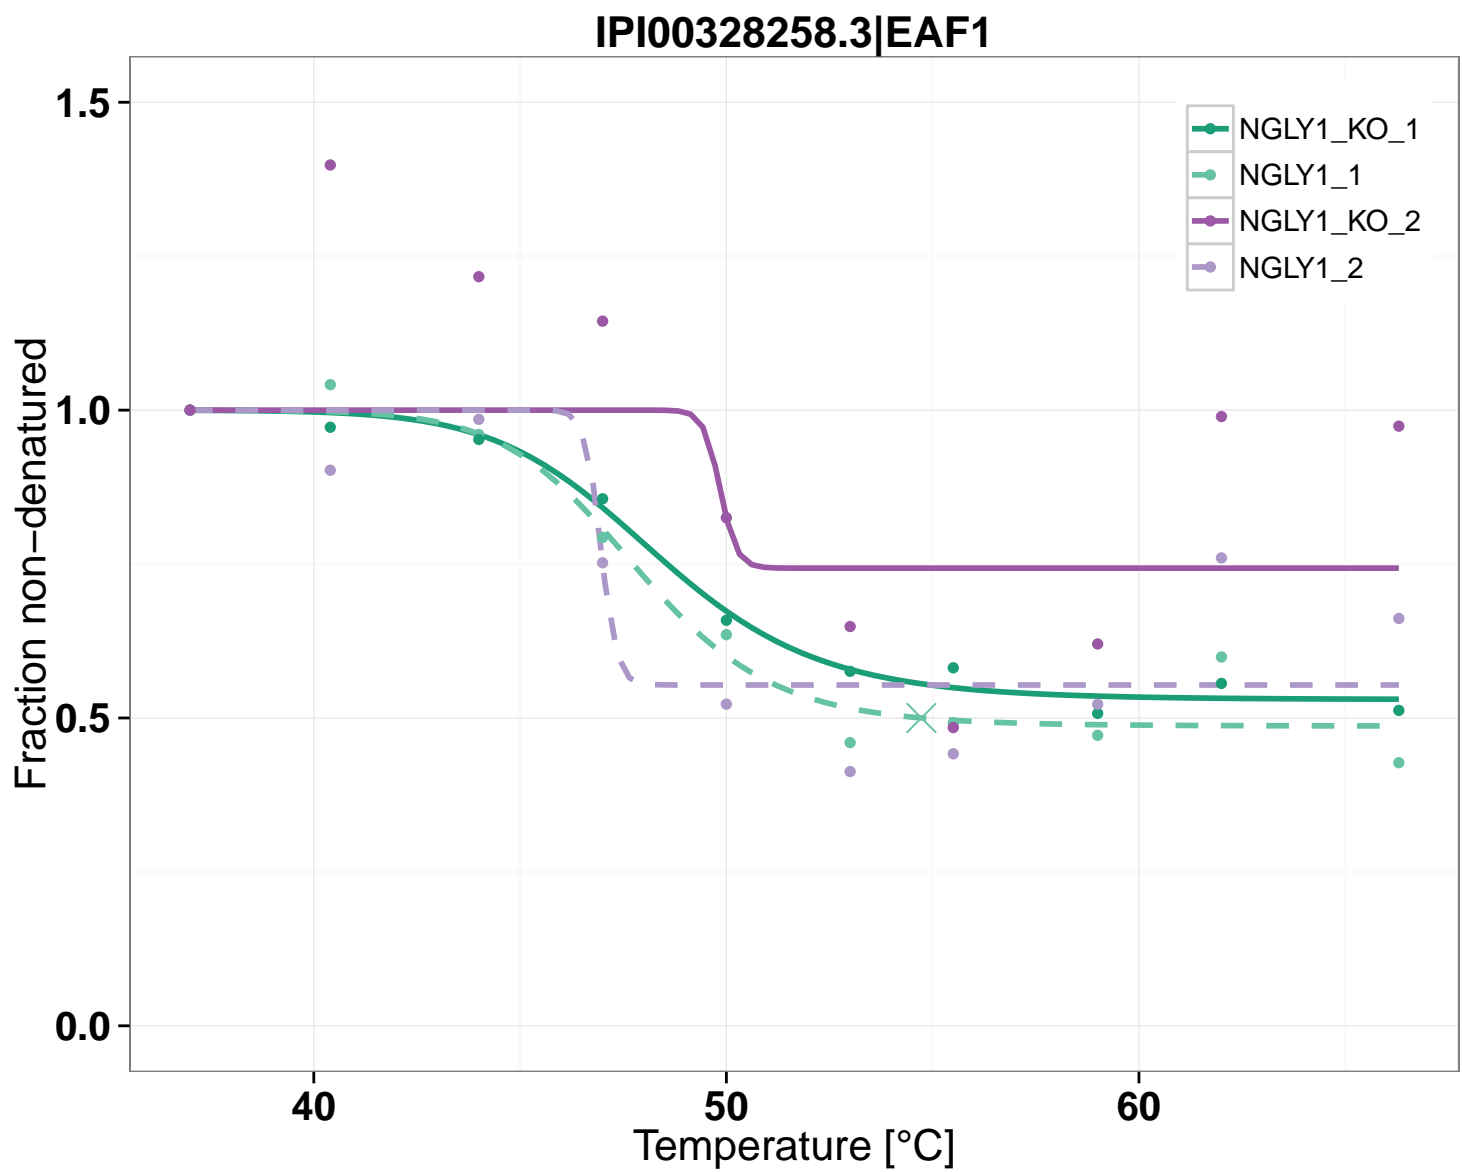

|            | meltPoint | slope  | plateau | R2   |
|------------|-----------|--------|---------|------|
| NGLY1_KO_1 | –         | –0.06  | 0.53    | 0.99 |
| NGLY1_1    | 54.73     | –0.078 | 0.49    | 0.96 |
| NGLY1_KO_2 | –         | –0.32  | 0.74    | 0.42 |
| NGLY1_2    | –         | –0.59  | 0.55    | 0.77 |

Supplement: Supplementary file 6020 [file 1]

# IPI00376002.2|TRIM46

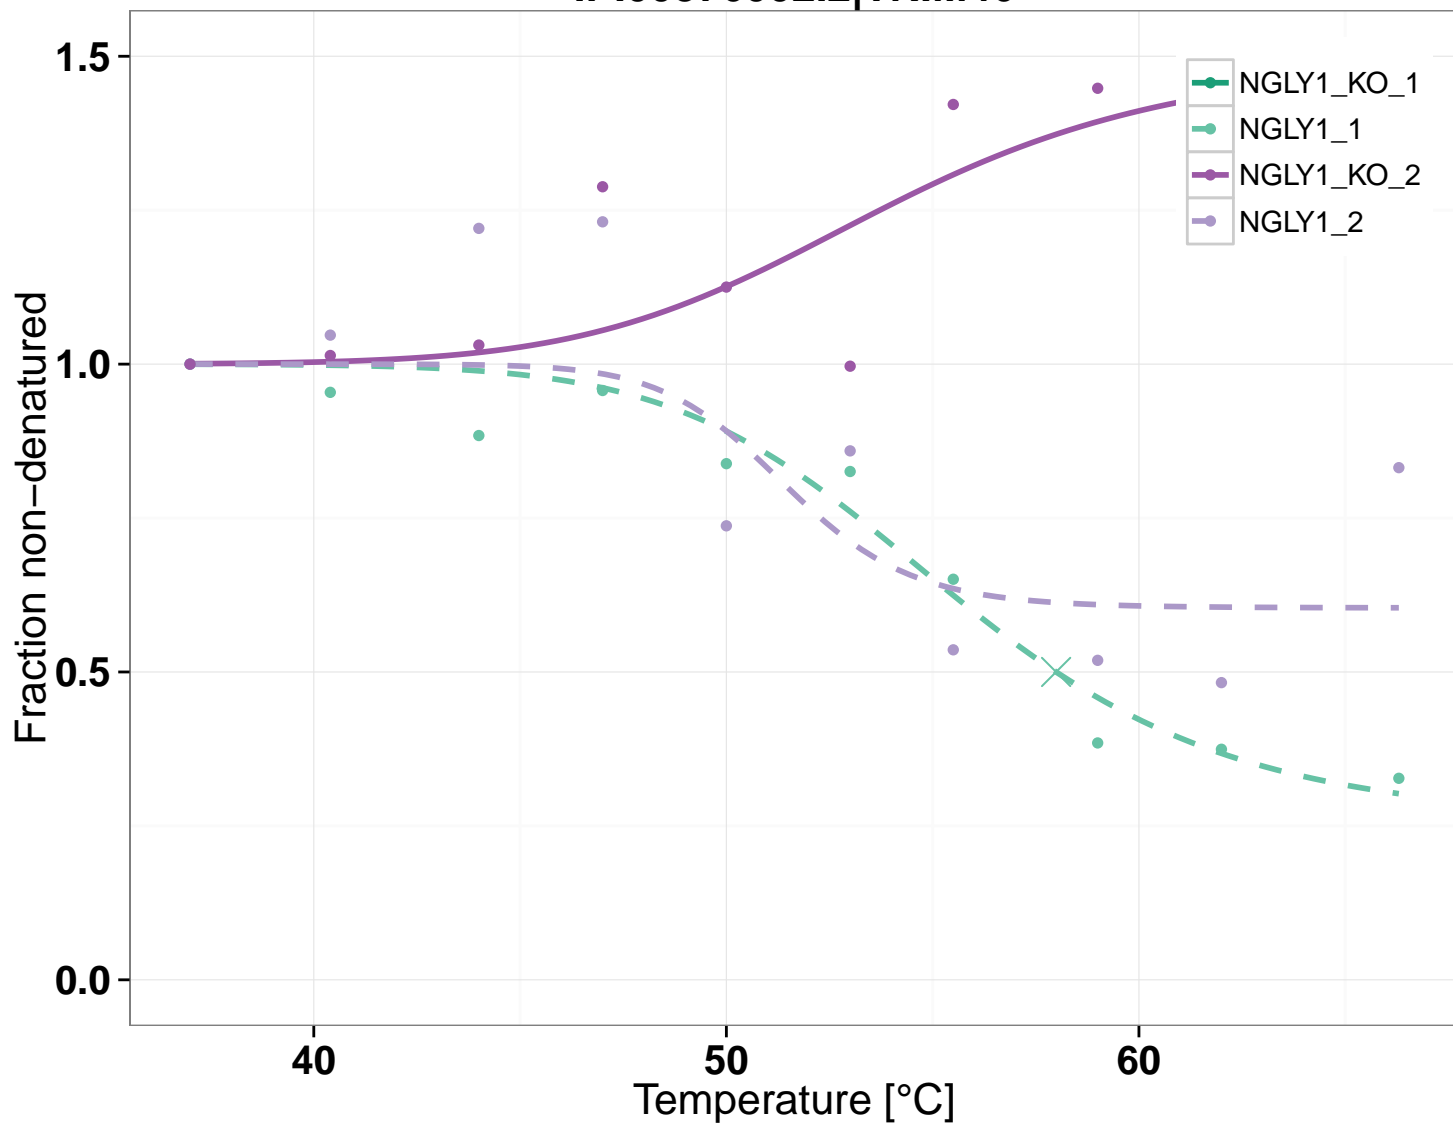

|            | meltPoint | slope  | plateau | R2   |
|------------|-----------|--------|---------|------|
| NGLY1_KO_1 | -         | -      | -       | -    |
| NGLY1_1    | 57.99     | -0.055 | 0.25    | 0.96 |
| NGLY1_KO_2 | -         | 0.035  | 1.5     | 0.52 |
| NGLY1_2    | -         | -0.065 | 0.6     | 0.65 |

Supplement: Supplementary file 6021 [file 1]

# IPI00456008.1|ATP5J

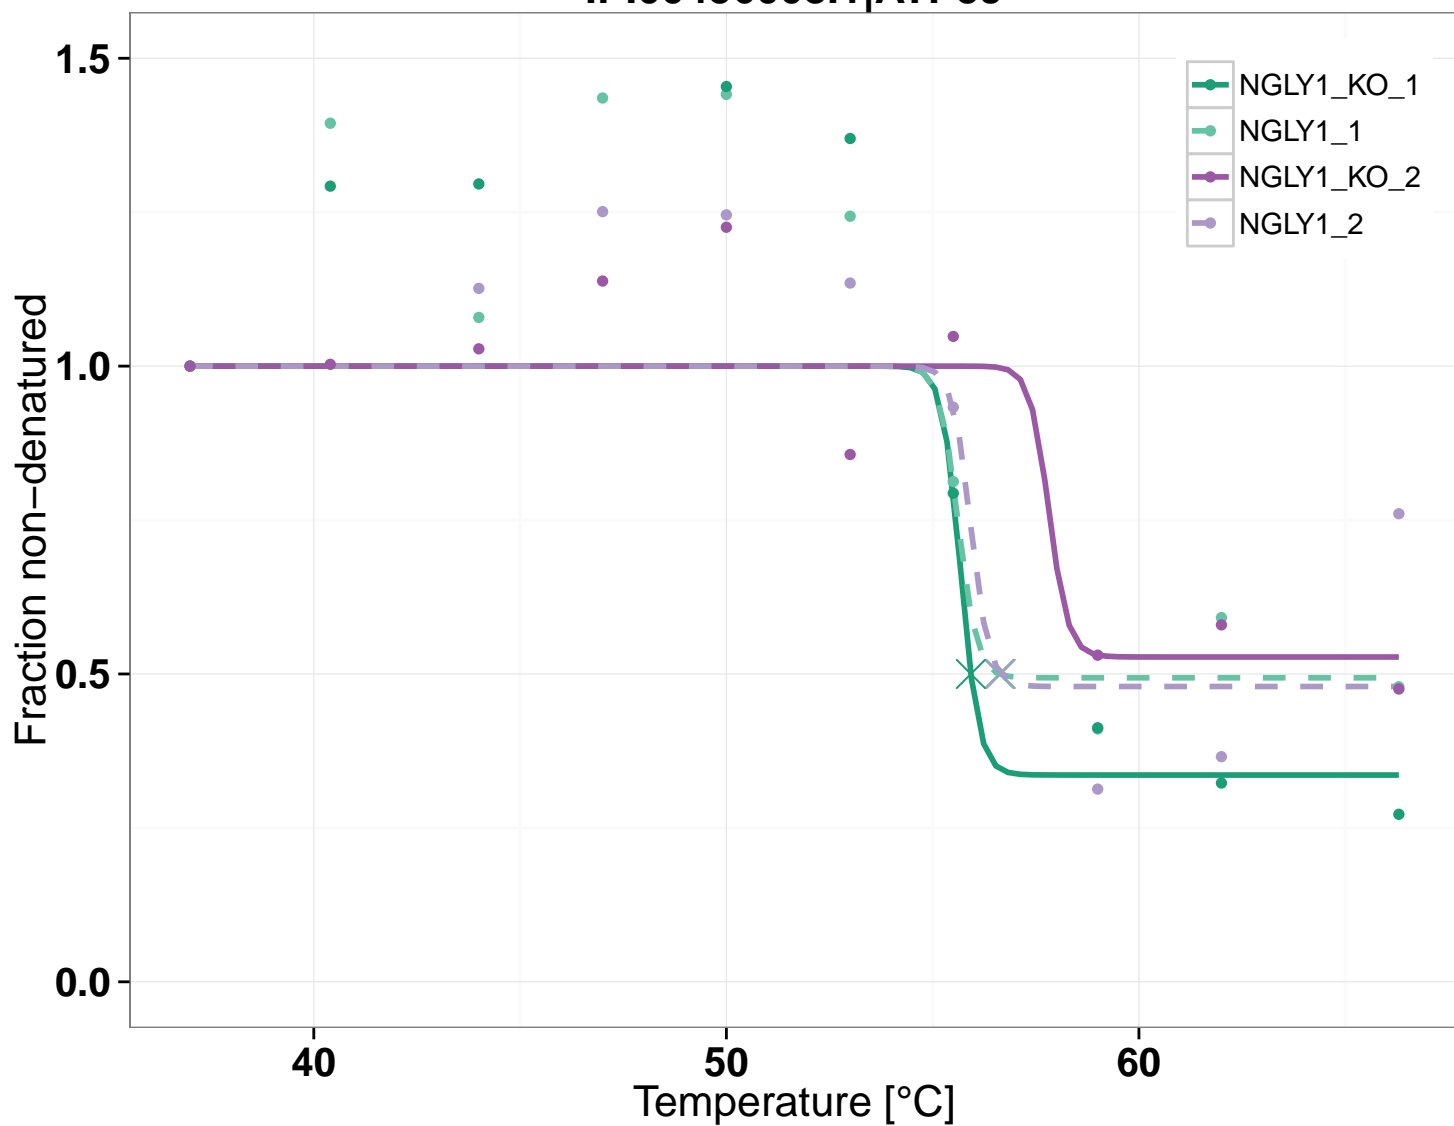

|            | meltPoint | slope | plateau | R2   |
|------------|-----------|-------|---------|------|
| NGLY1_KO_1 | 55.93     | -0.75 | 0.34    | 0.63 |
| NGLY1_1    | 56.61     | -0.57 | 0.49    | 0.56 |
| NGLY1_KO_2 | -         | -0.51 | 0.53    | 0.85 |
| NGLY1_2    | 56.65     | -0.58 | 0.48    | 0.6  |

Supplement: Supplementary file 6022 [file 1]

IPI00307683.6|SENP2

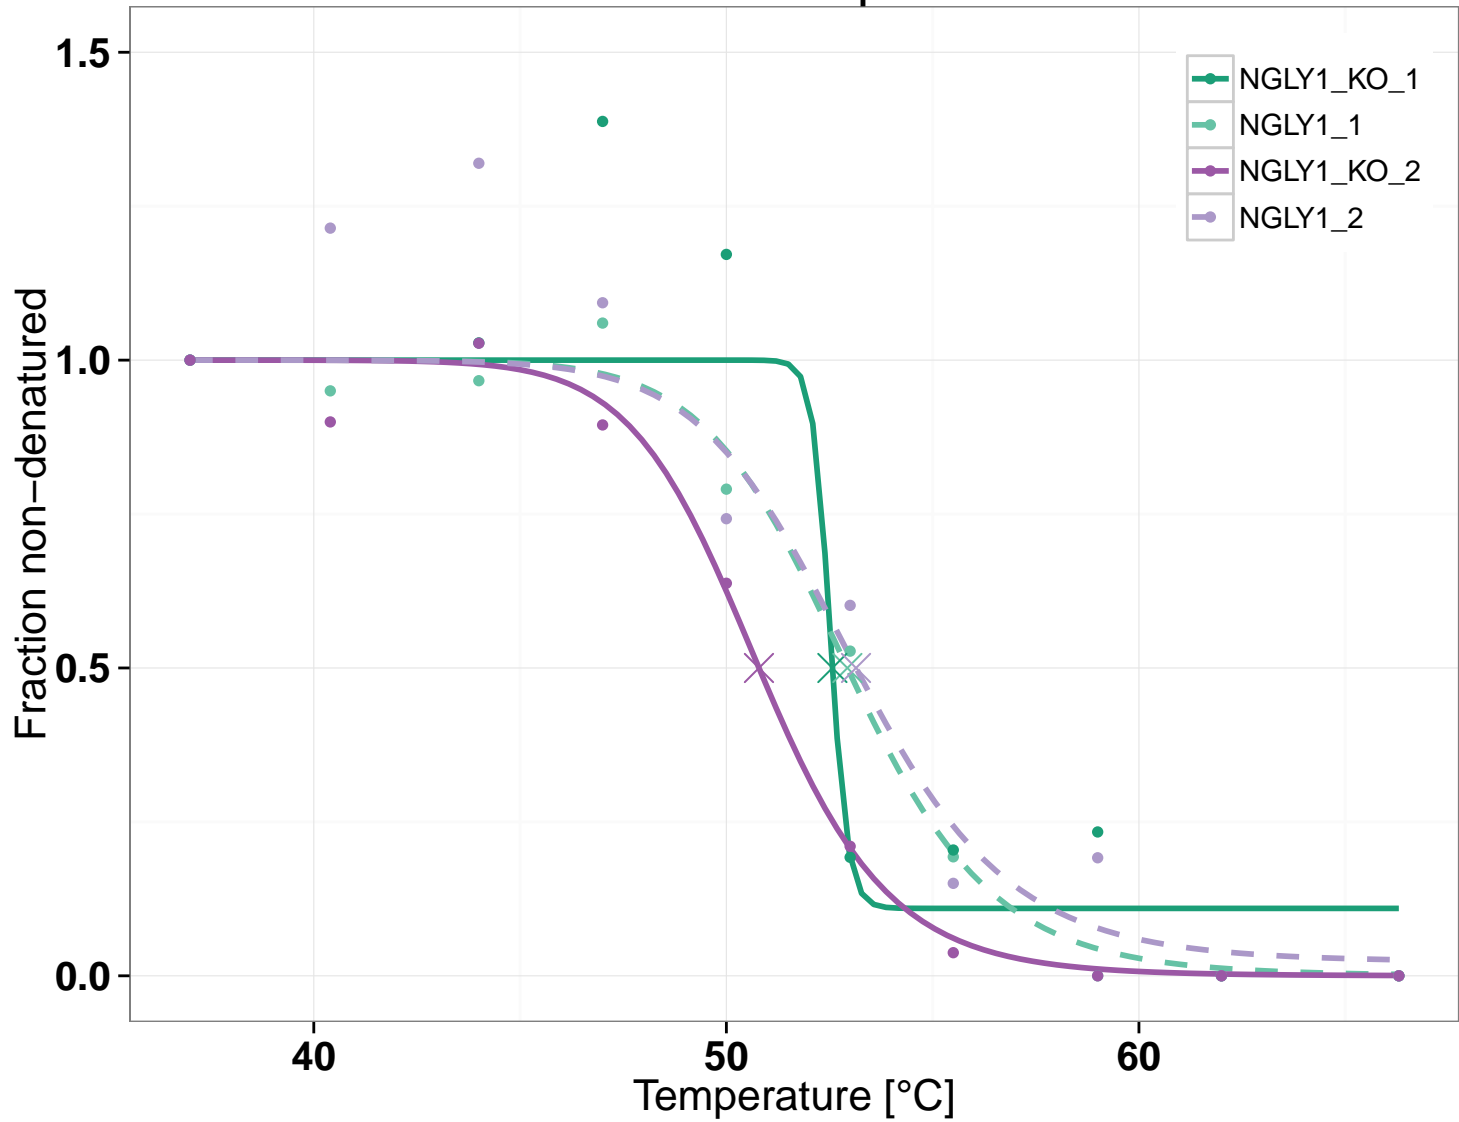

|            | meltPoint | slope | plateau | R2   |
|------------|-----------|-------|---------|------|
| NGLY1_KO_1 | 52.57     | -1.1  | 0.11    | 0.85 |
| NGLY1_1    | 52.93     | -0.14 | 0       | 0.99 |
| NGLY1_KO_2 | 50.79     | -0.16 | 0       | 0.99 |
| NGLY1_2    | 53.14     | -0.13 | 0.02    | 0.91 |

Supplement: Supplementary file 6023 [file 1]

# IPI00295487.5|KIF13A

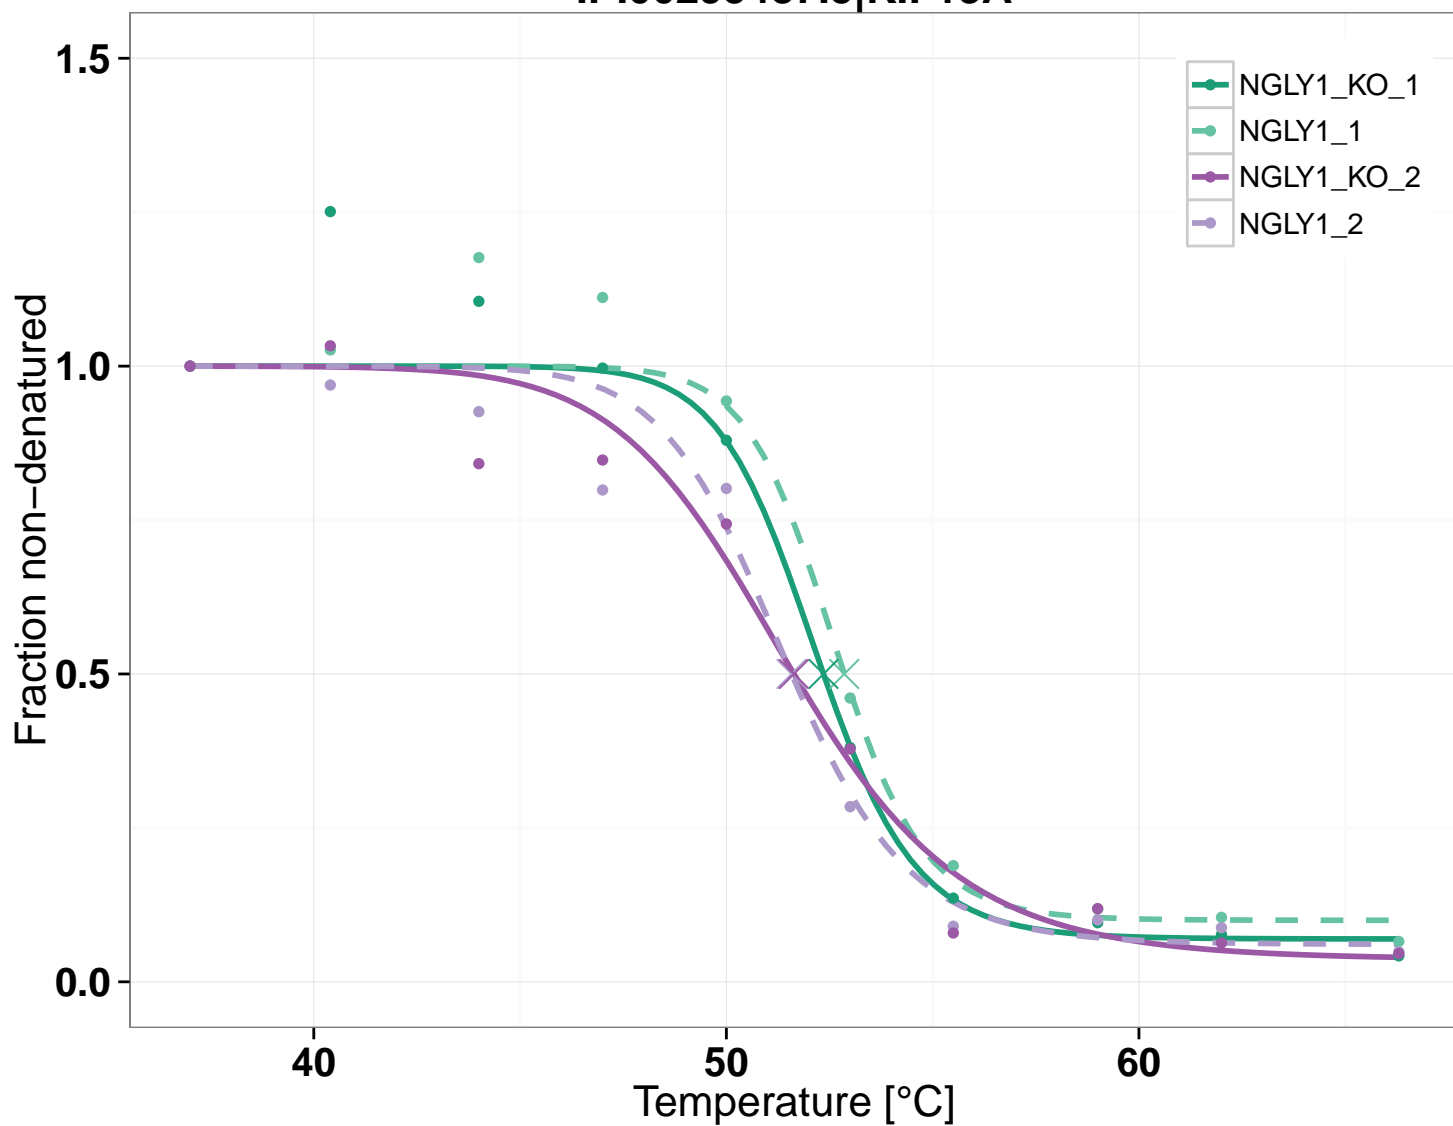

|            | meltPoint | slope | plateau | R2   |
|------------|-----------|-------|---------|------|
| NGLY1_KO_1 | 52.35     | -0.19 | 0.07    | 0.97 |
| NGLY1_1    | 52.86     | -0.21 | 0.1     | 0.98 |
| NGLY1_KO_2 | 51.64     | -0.11 | 0.04    | 0.97 |
| NGLY1_2    | 51.58     | -0.16 | 0.06    | 0.97 |

Supplement: Supplementary file 6024 [file 1]

IPI00792904.1|KIAA0430

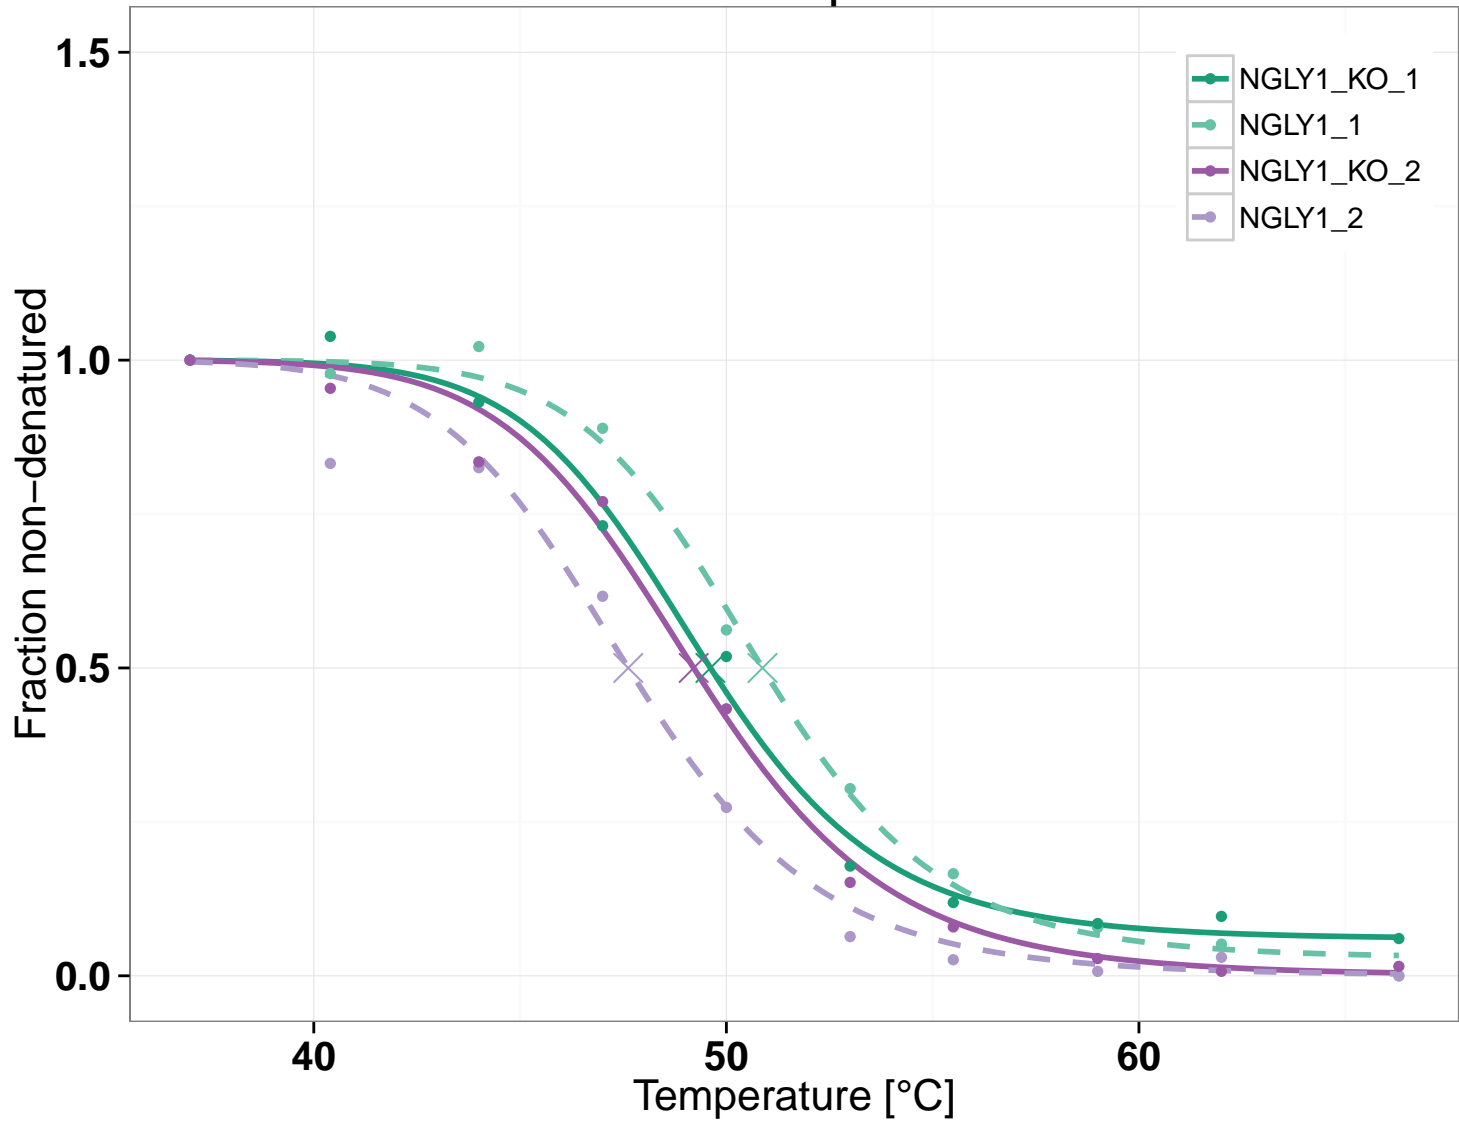

|            | meltPoint | slope | plateau | R2   |
|------------|-----------|-------|---------|------|
| NGLY1_KO_1 | 49.61     | -0.11 | 0.06    | 0.99 |
| NGLY1_1    | 50.88     | -0.11 | 0.03    | 1    |
| NGLY1_KO_2 | 49.21     | -0.11 | 0       | 0.99 |
| NGLY1_2    | 47.62     | -0.11 | 0       | 0.98 |

Supplement: Supplementary file 6025 [file 1]

IPI00028279.5|TSPYL5

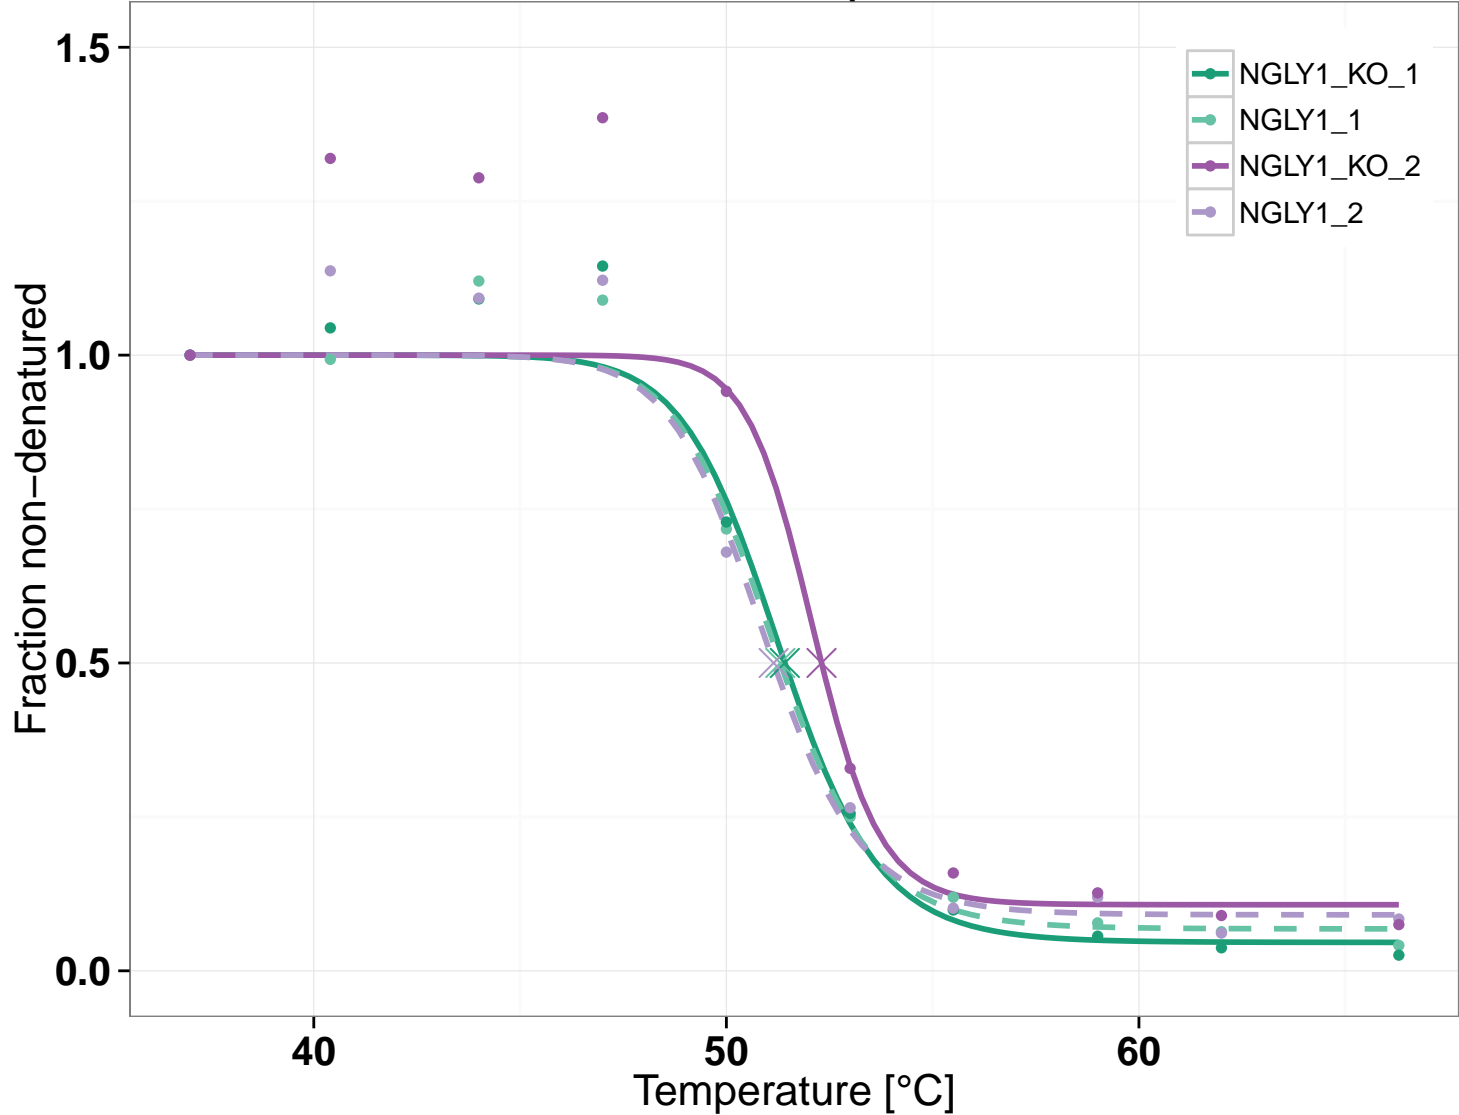

|            | meltPoint | slope | plateau | R2   |
|------------|-----------|-------|---------|------|
| NGLY1_KO_1 | 51.42     | -0.2  | 0.05    | 0.98 |
| NGLY1_1    | 51.31     | -0.2  | 0.07    | 0.99 |
| NGLY1_KO_2 | 52.31     | -0.28 | 0.11    | 0.88 |
| NGLY1_2    | 51.15     | -0.2  | 0.09    | 0.97 |

Supplement: Supplementary file 6026 [file 1]
