# Supplementary material (part 61 of 85)
Source: publisher figshare collection journal article supplement (https://gsajournals.figshare.com/articles/dataset/_/12014913)

IPI00376570.2|HIC2

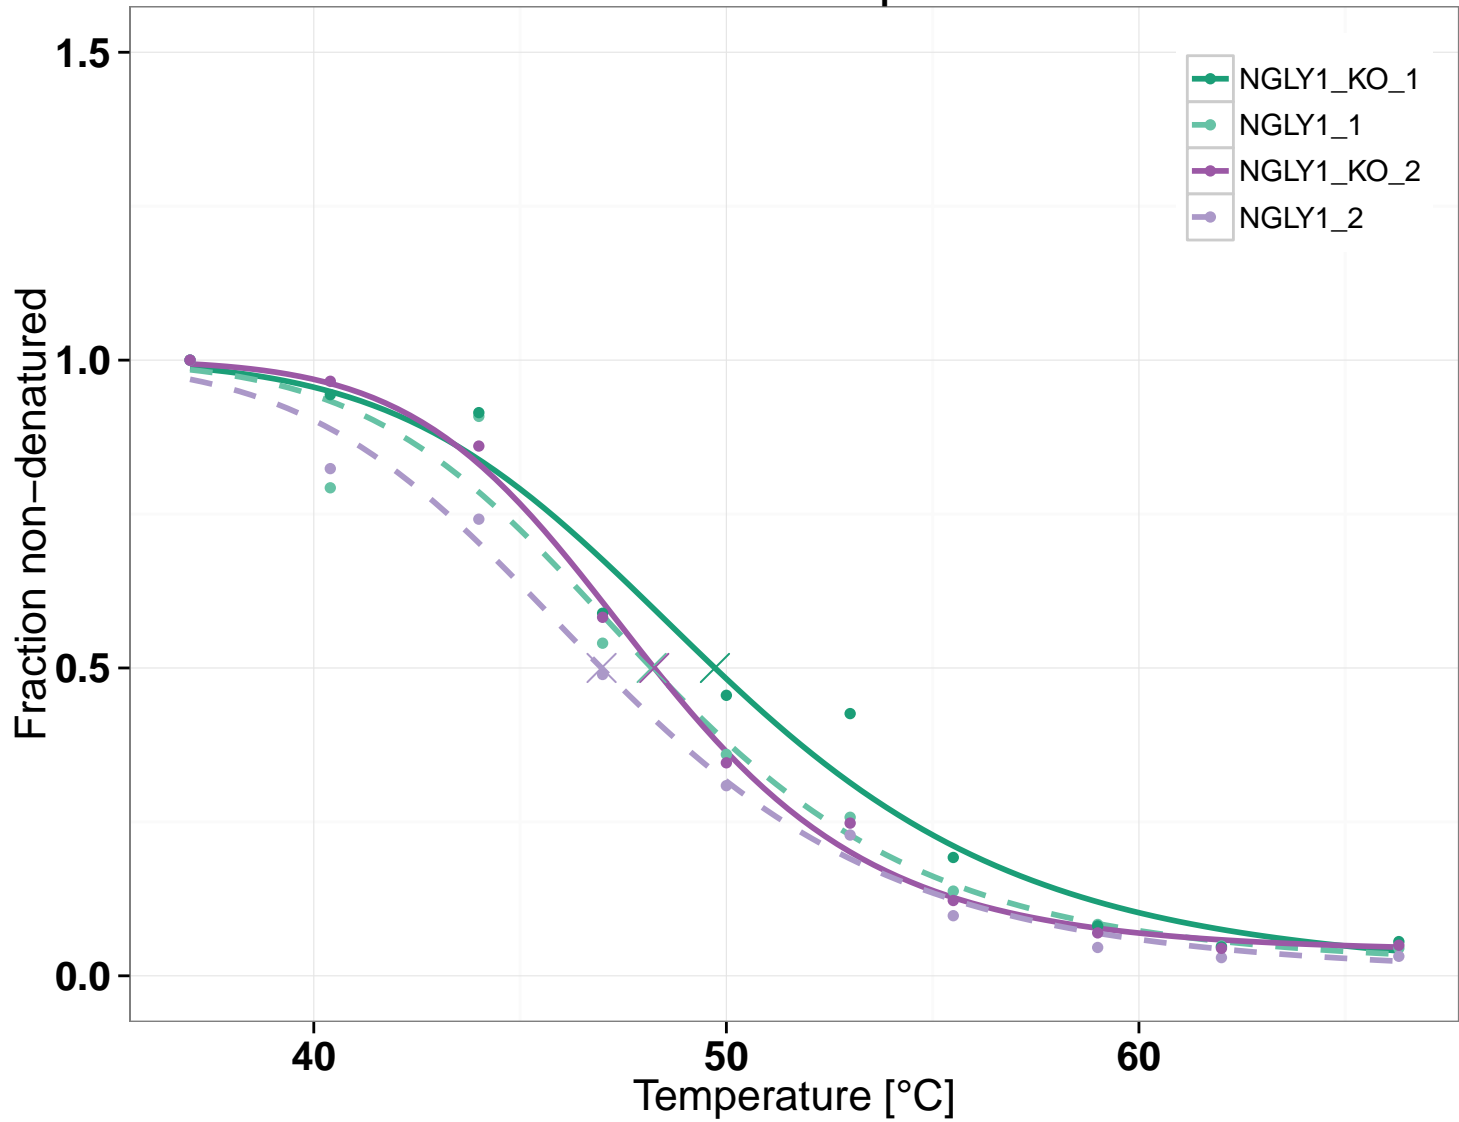

|            | meltPoint | slope  | plateau | R2   |
|------------|-----------|--------|---------|------|
| NGLY1_KO_1 | 49.72     | -0.065 | 0       | 0.98 |
| NGLY1_1    | 48.19     | -0.072 | 0.01    | 0.97 |
| NGLY1_KO_2 | 48.25     | -0.086 | 0.04    | 1    |
| NGLY1_2    | 46.98     | -0.07  | 0       | 0.99 |

Supplement: Supplementary file 6027 [file 1]

IPI00144293.4|YTHDC1

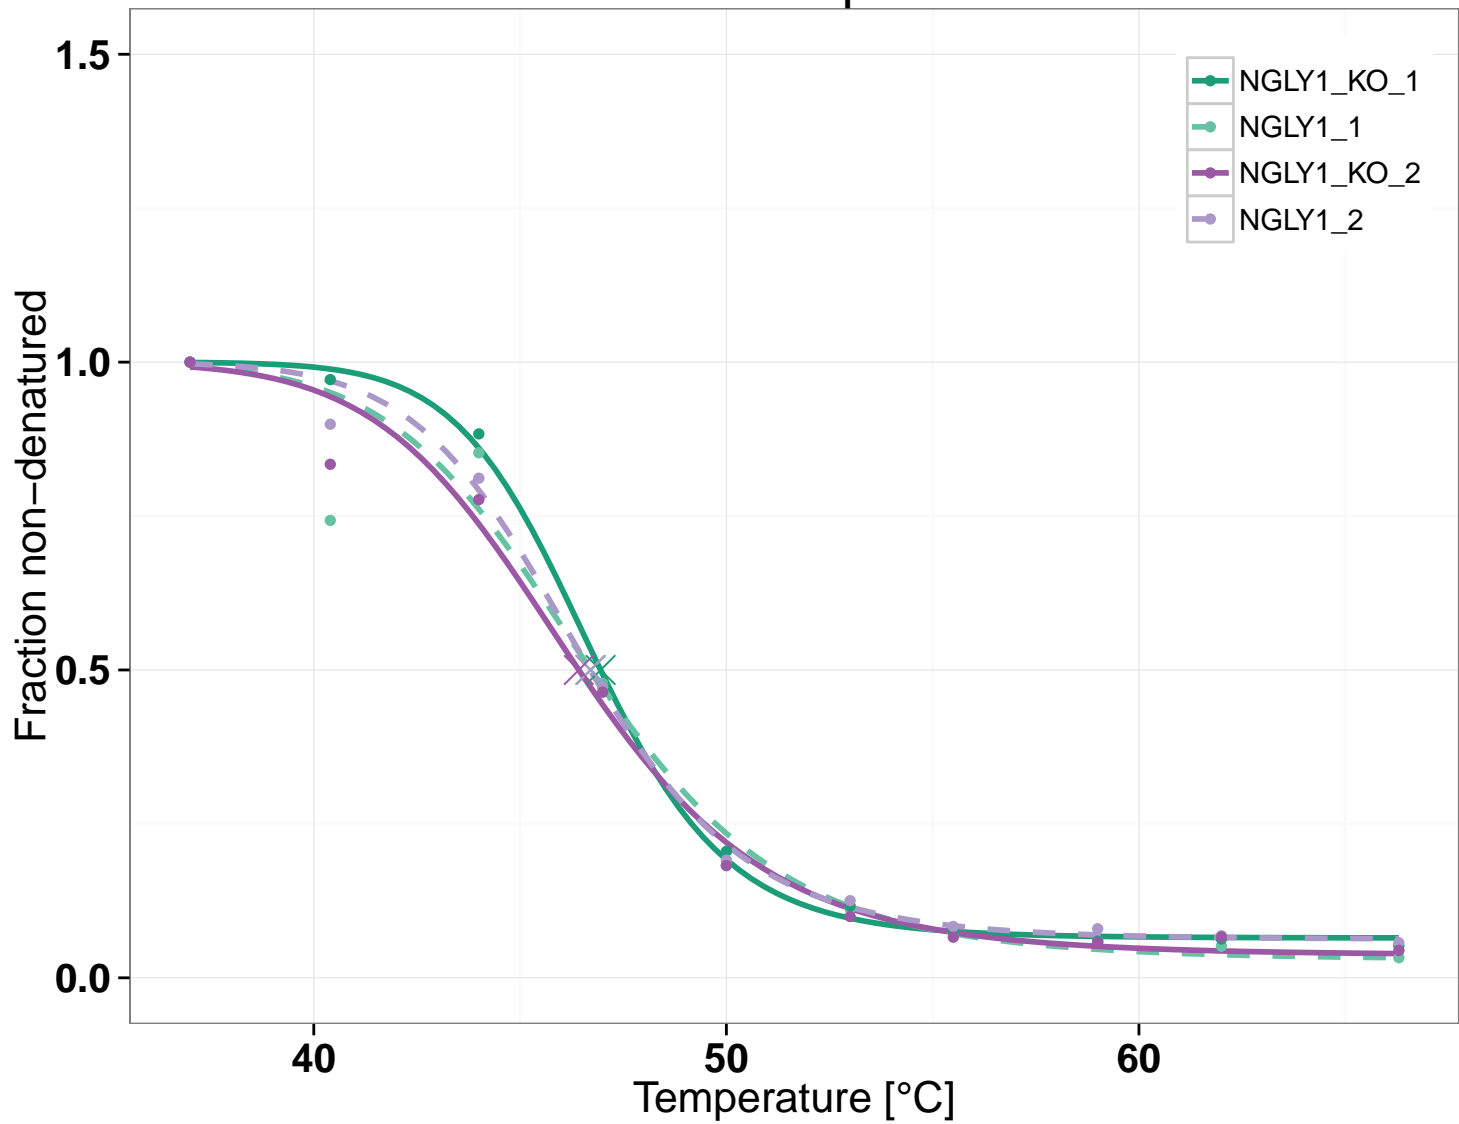

|            | meltPoint | slope | plateau | R2   |
|------------|-----------|-------|---------|------|
| NGLY1_KO_1 | 46.95     | -0.14 | 0.06    | 1    |
| NGLY1_1    | 46.72     | -0.1  | 0.03    | 0.96 |
| NGLY1_KO_2 | 46.42     | -0.1  | 0.04    | 0.99 |
| NGLY1_2    | 46.7      | -0.12 | 0.06    | 1    |

Supplement: Supplementary file 6028 [file 1]

IPI00168317.1|SPC24

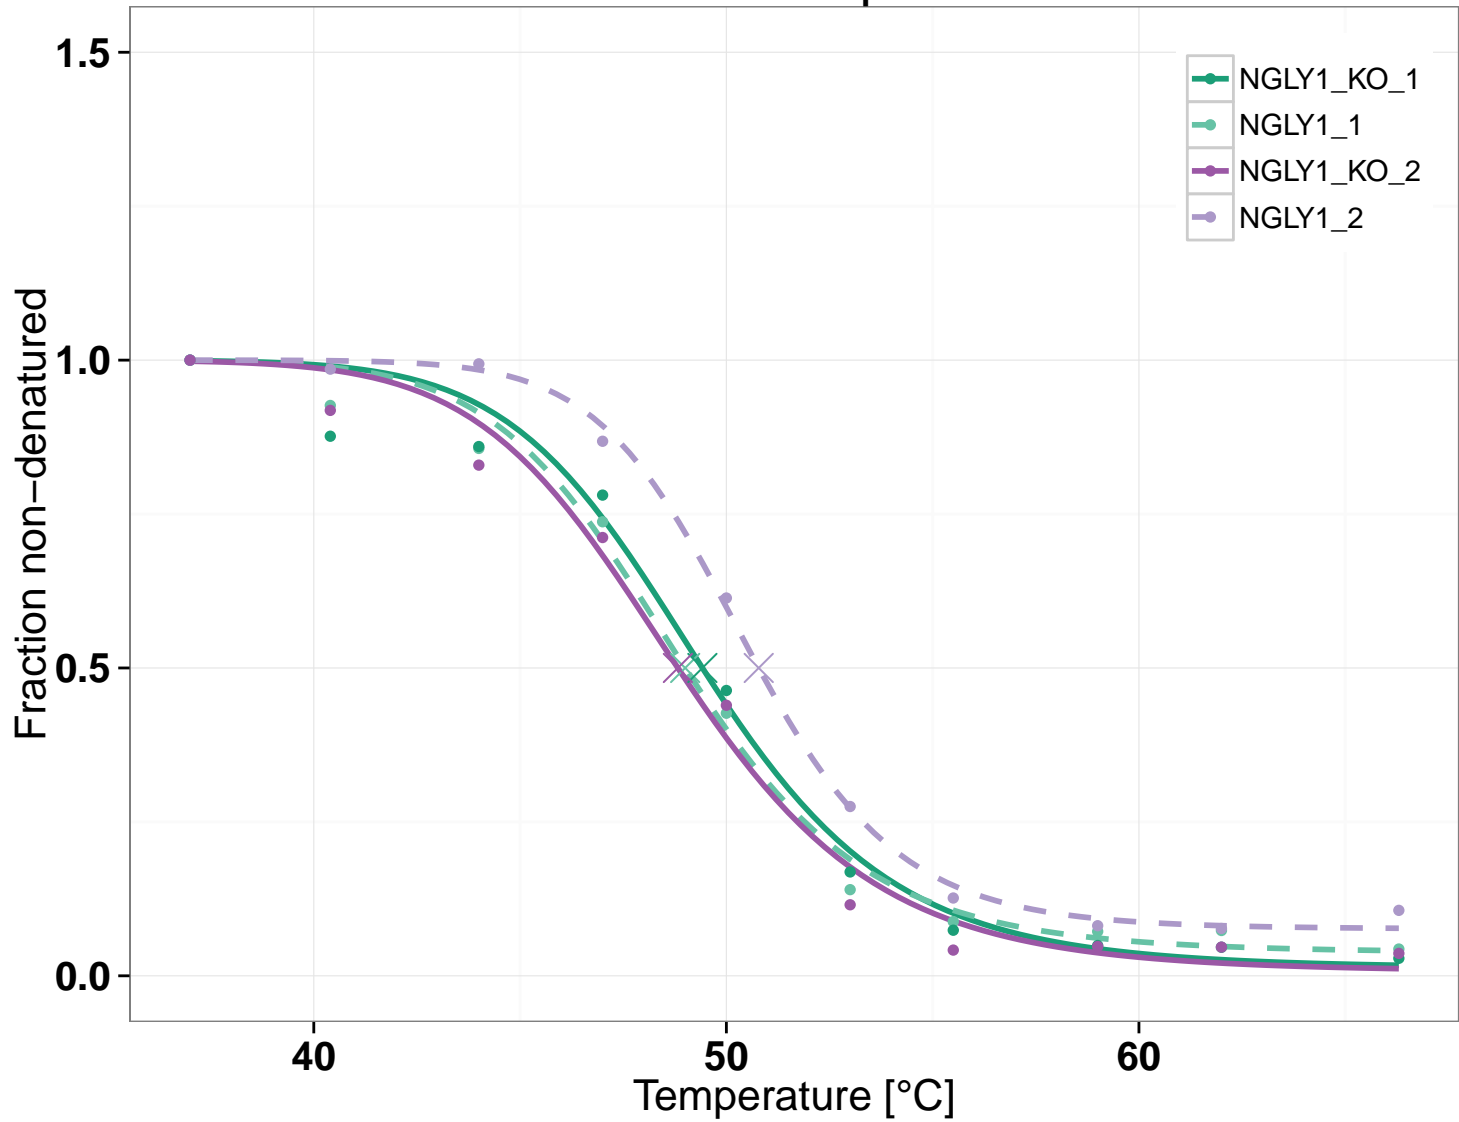

|            | meltPoint | slope | plateau | R2   |
|------------|-----------|-------|---------|------|
| NGLY1_KO_1 | 49.42     | -0.11 | 0.01    | 0.99 |
| NGLY1_1    | 49        | -0.11 | 0.04    | 0.99 |
| NGLY1_KO_2 | 48.82     | -0.1  | 0.01    | 0.99 |
| NGLY1_2    | 50.78     | -0.13 | 0.08    | 1    |

Supplement: Supplementary file 6029 [file 1]

IPI00030648.1|ZFYVE9

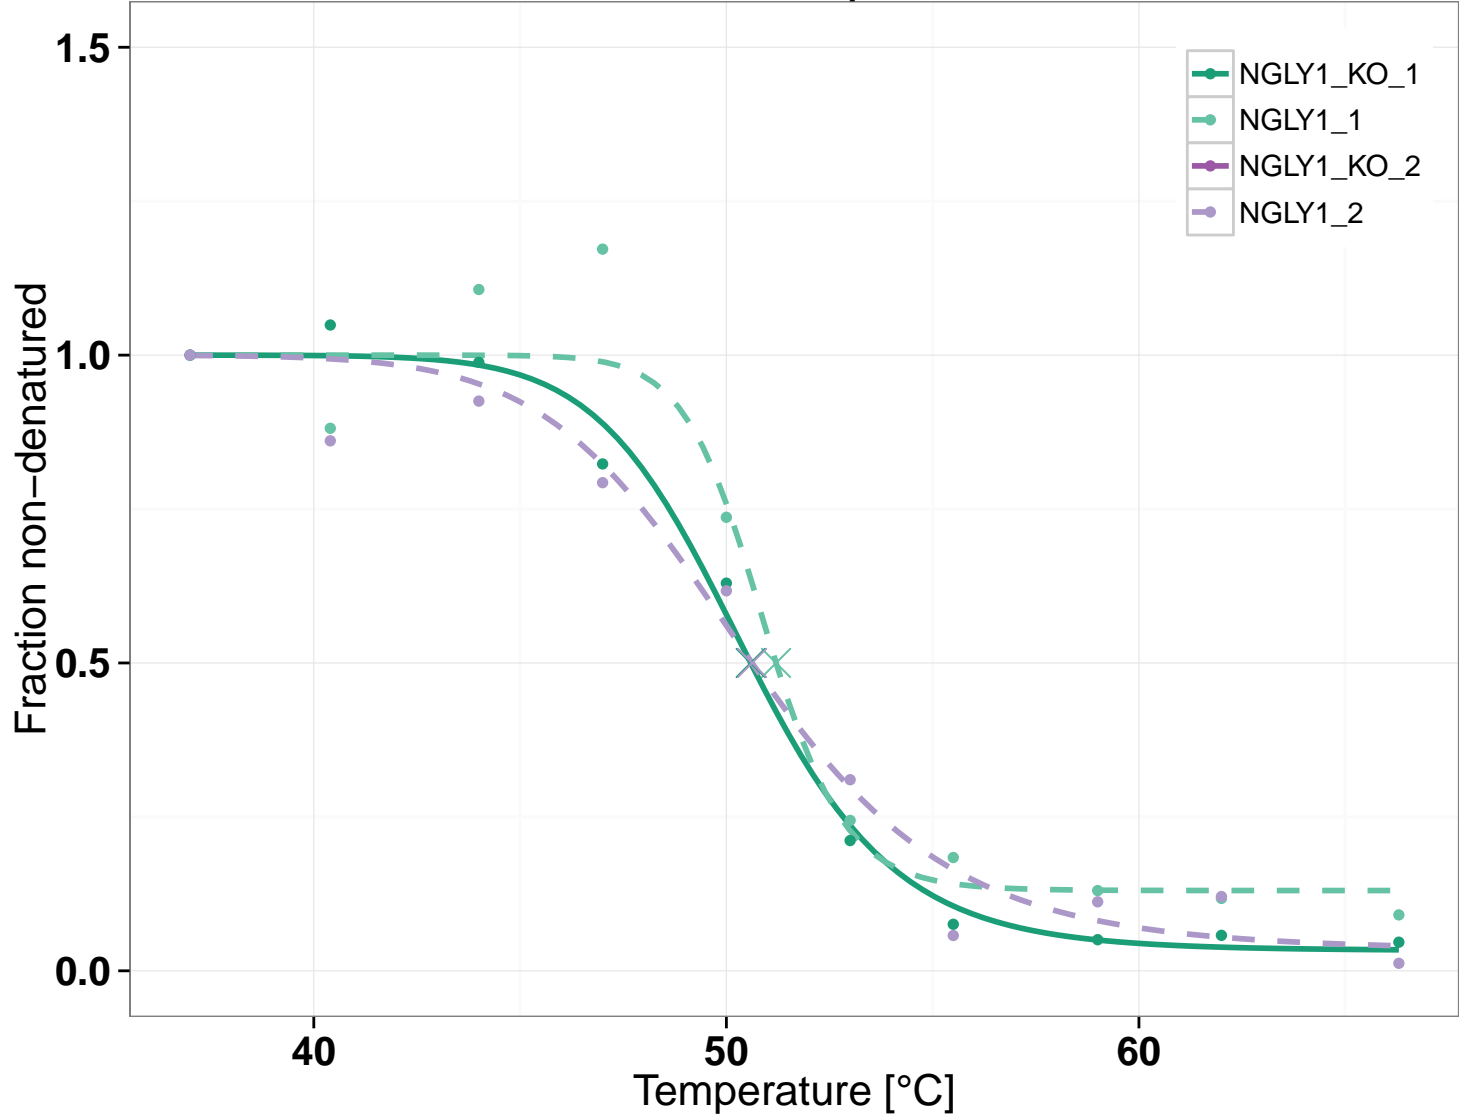

|            | meltPoint | slope  | plateau | R2   |
|------------|-----------|--------|---------|------|
| NGLY1_KO_1 | 50.59     | -0.13  | 0.03    | 0.99 |
| NGLY1_1    | 51.2      | -0.22  | 0.13    | 0.97 |
| NGLY1_KO_2 | -         | -      | -       | -    |
| NGLY1_2    | 50.62     | -0.098 | 0.03    | 0.97 |

Supplement: Supplementary file 6030 [file 1]

IPI00002135.1|TACC3

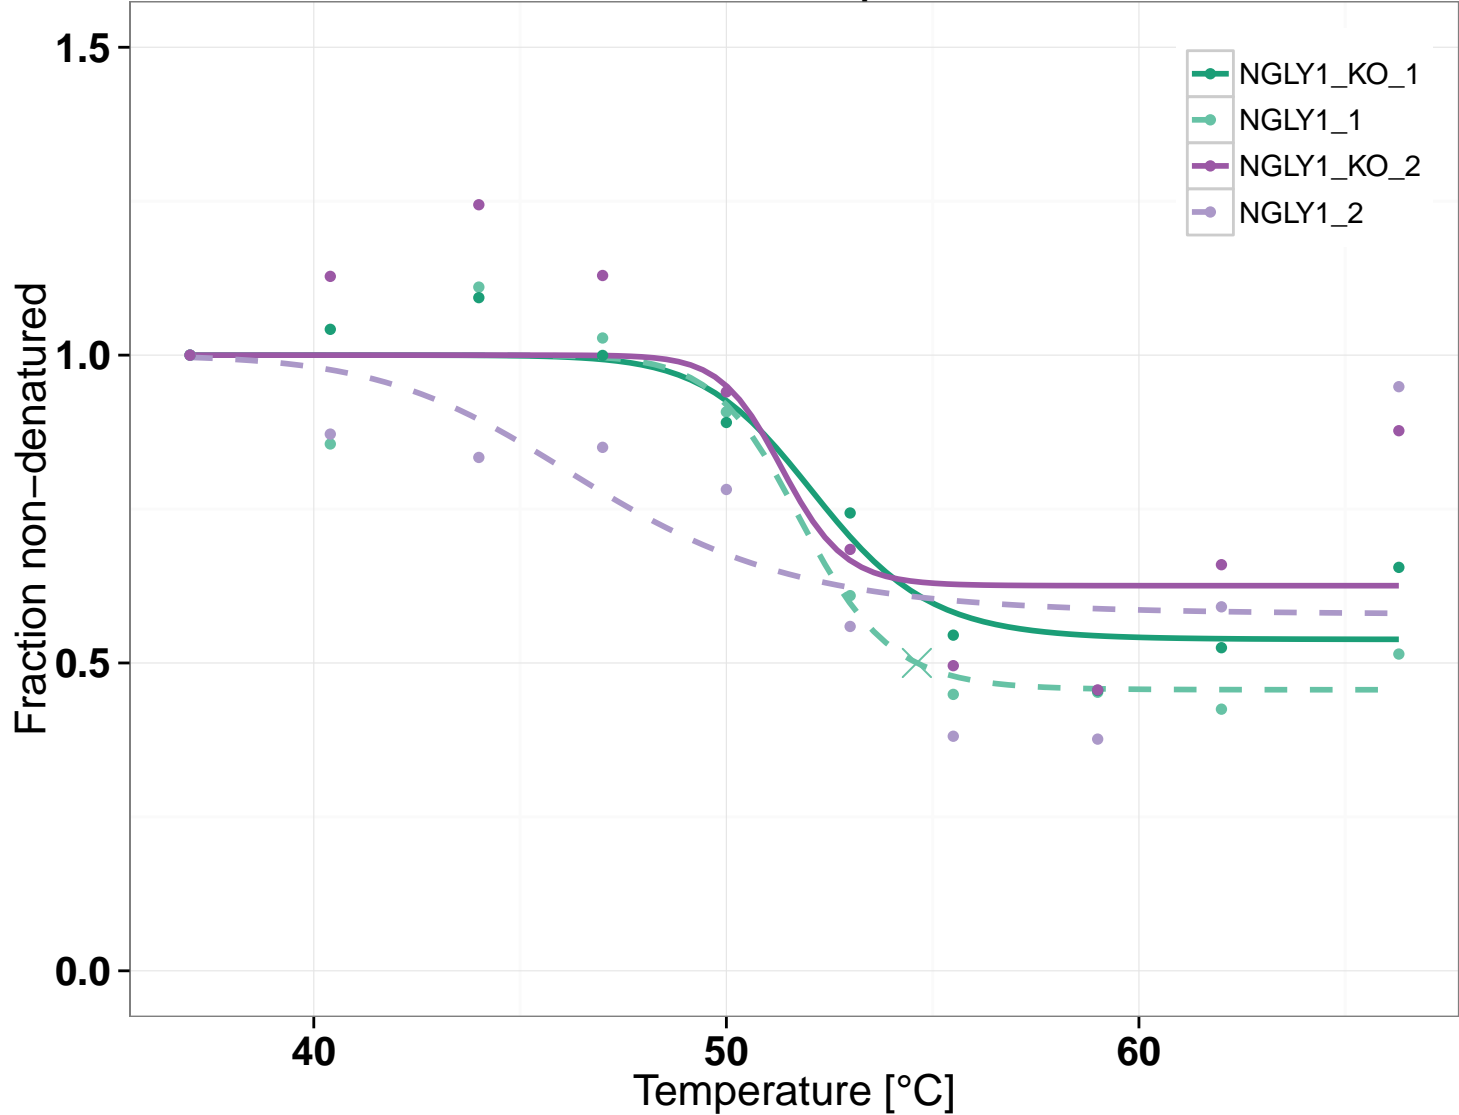

|            | meltPoint | slope  | plateau | R2   |
|------------|-----------|--------|---------|------|
| NGLY1_KO_1 | -         | -0.084 | 0.54    | 0.93 |
| NGLY1_1    | 54.62     | -0.13  | 0.46    | 0.94 |
| NGLY1_KO_2 | -         | -0.12  | 0.63    | 0.7  |
| NGLY1_2    | -         | -0.041 | 0.58    | 0.43 |

Supplement: Supplementary file 6031 [file 1]

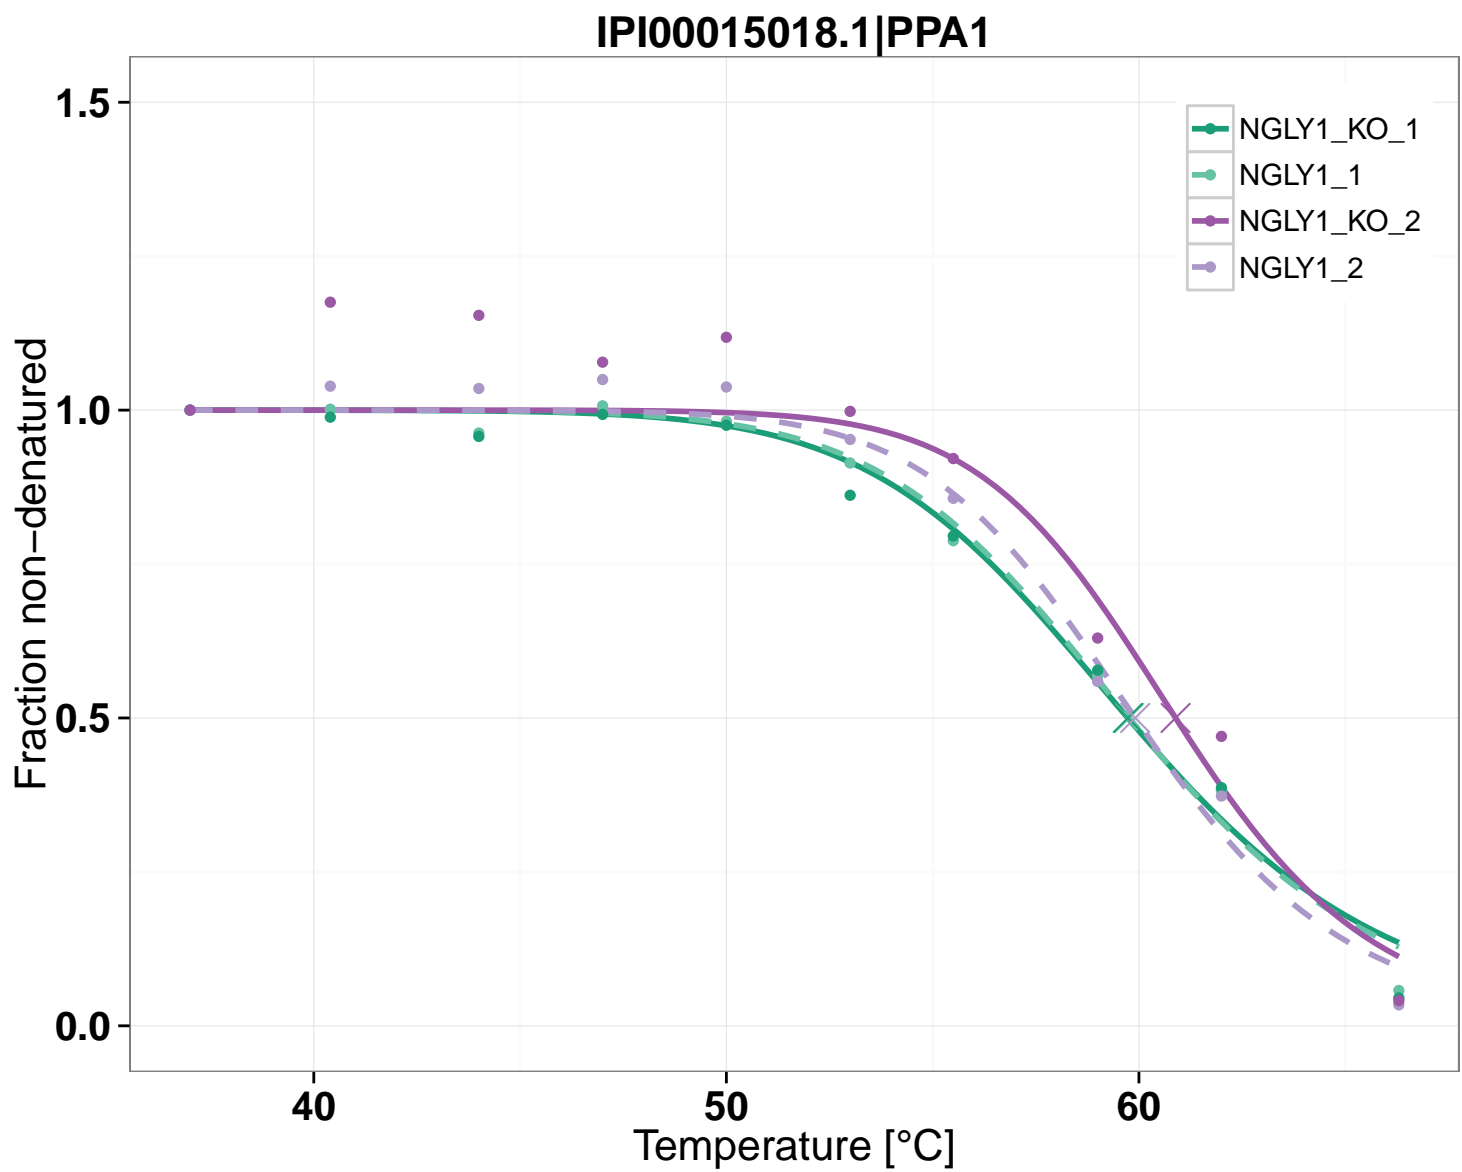

|            | meltPoint | slope  | plateau | R2   |
|------------|-----------|--------|---------|------|
| NGLY1_KO_1 | 59.73     | -0.079 | 0       | 0.98 |
| NGLY1_1    | 59.76     | -0.082 | 0       | 0.99 |
| NGLY1_KO_2 | 60.89     | -0.1   | 0       | 0.92 |
| NGLY1_2    | 59.91     | -0.098 | 0       | 0.99 |

Supplement: Supplementary file 6032 [file 1]

# IPI00014310.3|CUL1

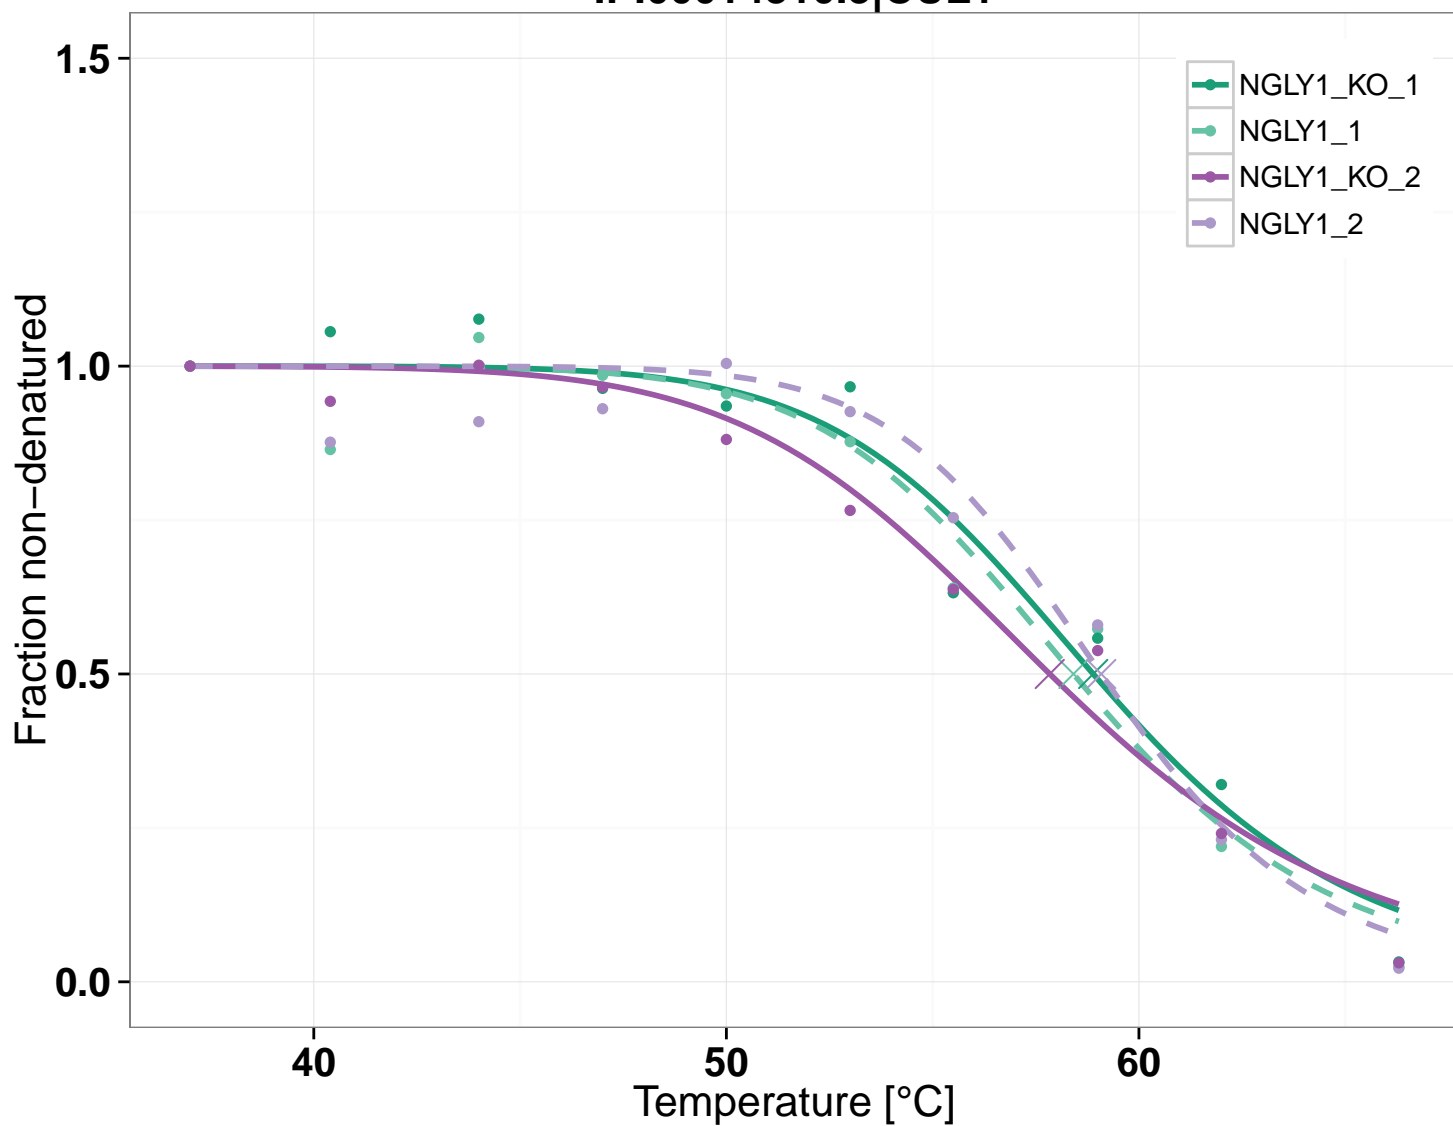

|            | meltPoint | slope  | plateau | R2   |
|------------|-----------|--------|---------|------|
| NGLY1_KO_1 | 58.89     | -0.078 | 0       | 0.96 |
| NGLY1_1    | 58.41     | -0.081 | 0       | 0.96 |
| NGLY1_KO_2 | 57.84     | -0.067 | 0       | 0.97 |
| NGLY1_2    | 59.09     | -0.098 | 0       | 0.96 |

Supplement: Supplementary file 6033 [file 1]

IPI00328737.2|ZNF598

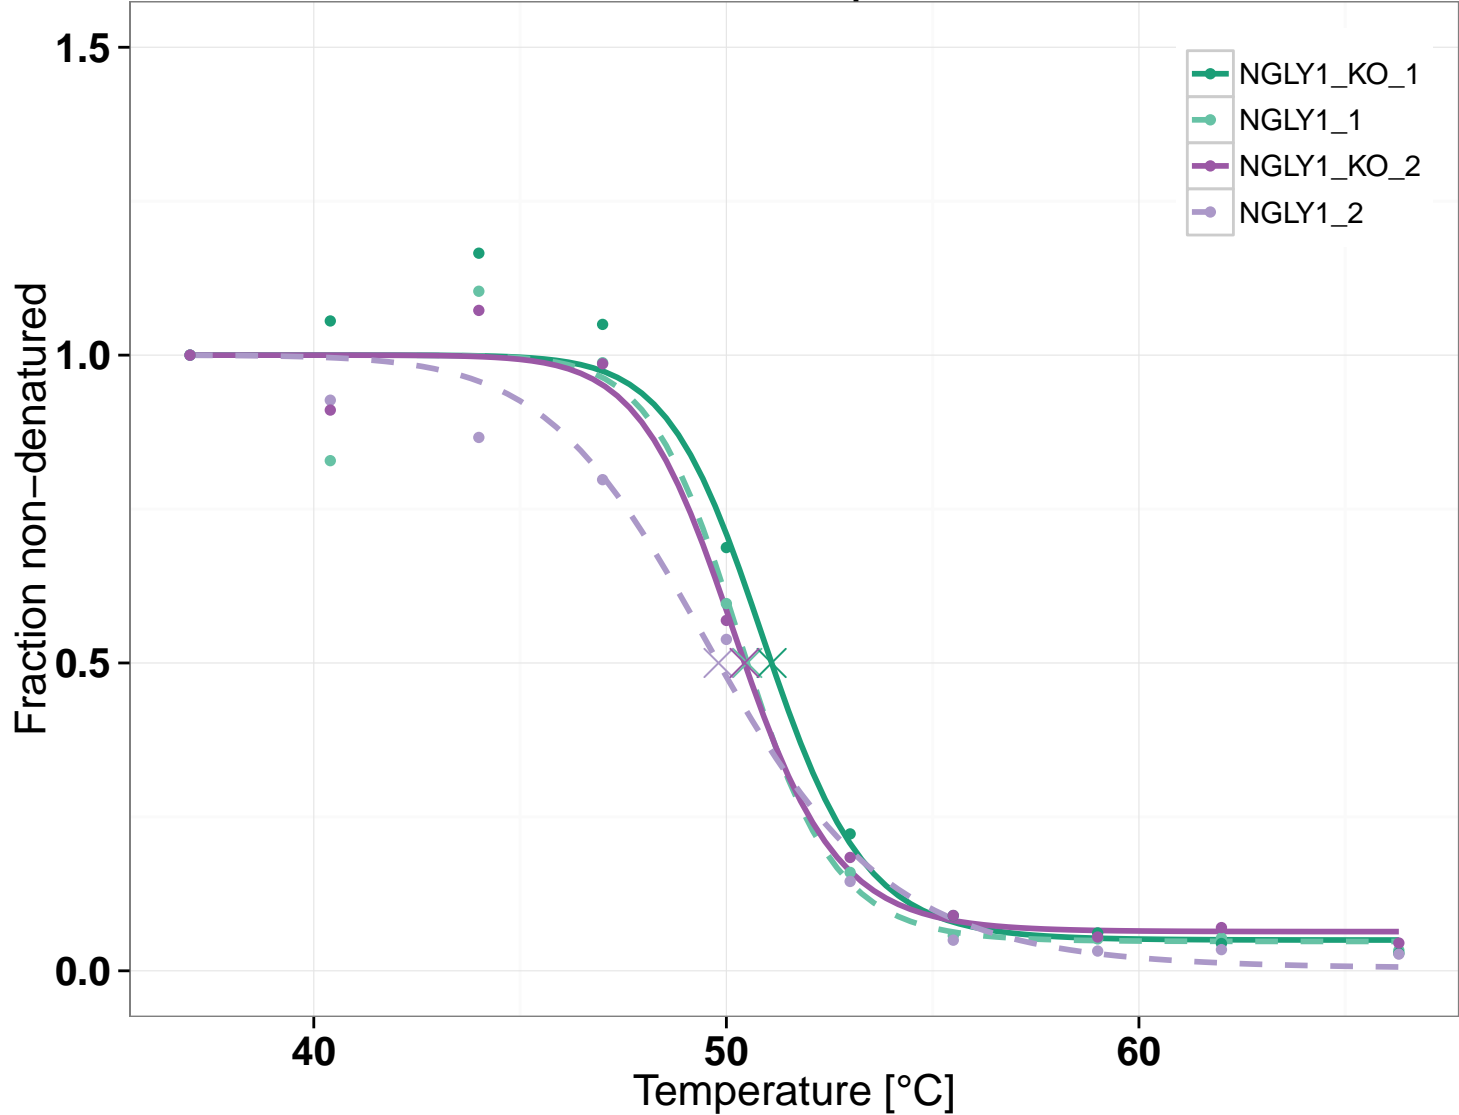

|            | meltPoint | slope | plateau | R2   |
|------------|-----------|-------|---------|------|
| NGLY1_KO_1 | 51.1      | -0.2  | 0.05    | 0.98 |
| NGLY1_1    | 50.51     | -0.21 | 0.05    | 0.98 |
| NGLY1_KO_2 | 50.44     | -0.2  | 0.06    | 0.99 |
| NGLY1_2    | 49.81     | -0.12 | 0       | 0.99 |

Supplement: Supplementary file 6034 [file 1]

IPI00021187.4|RUVBL1

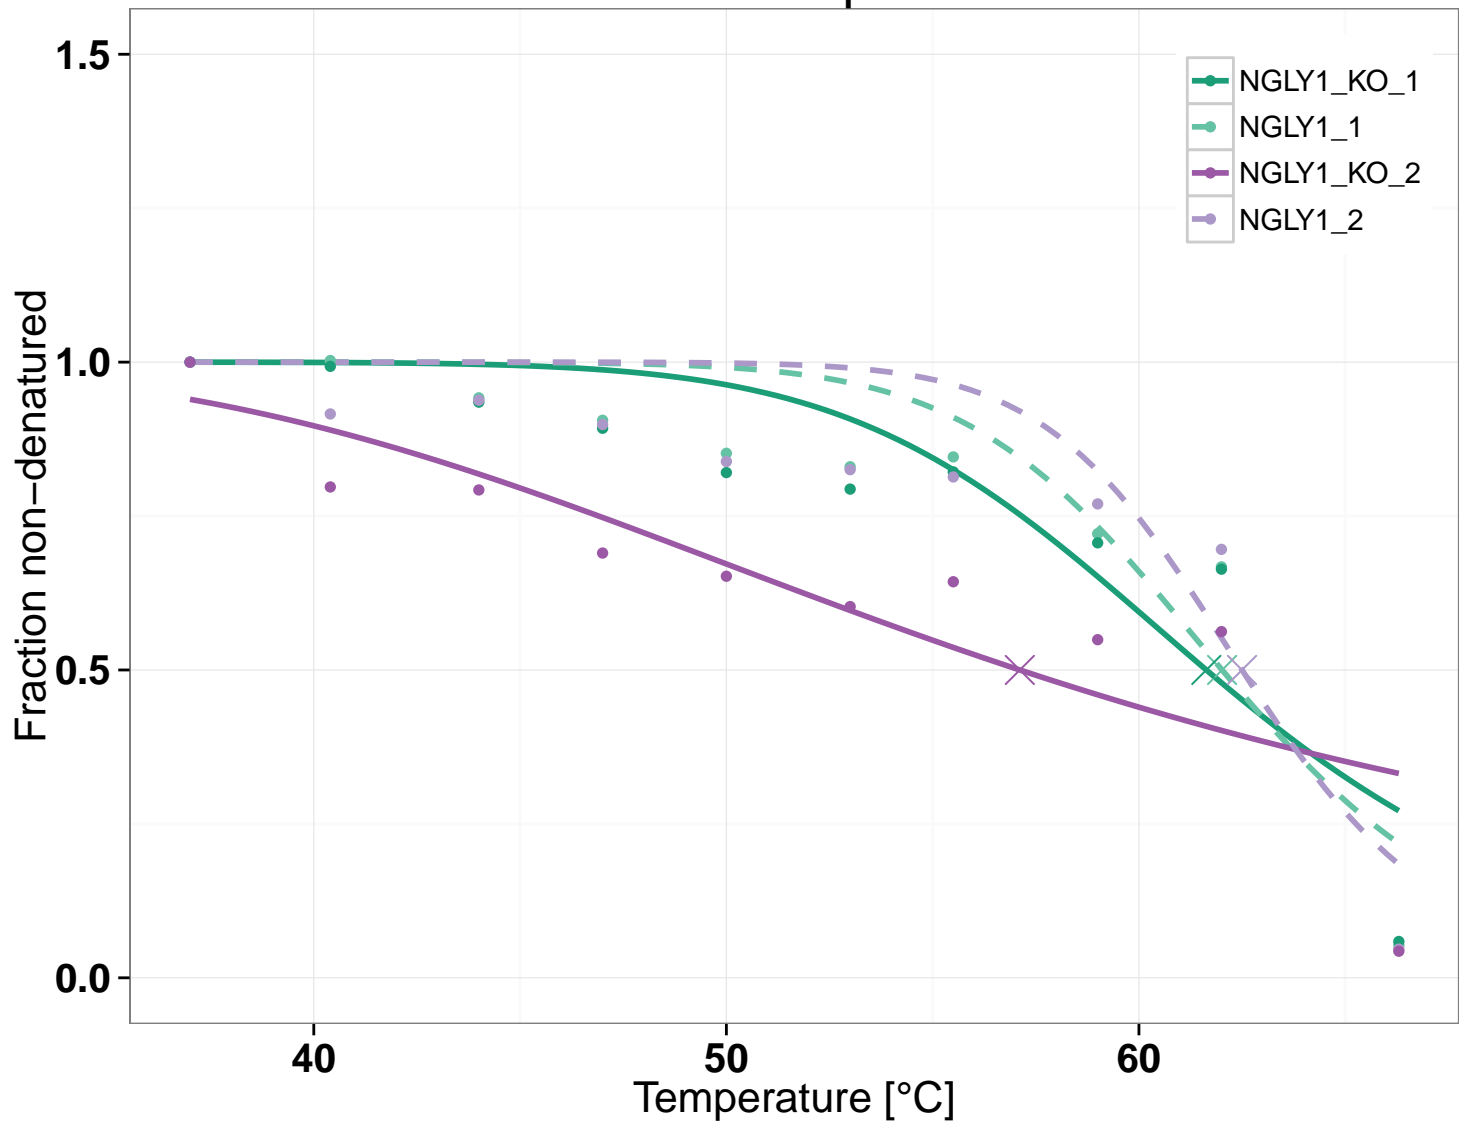

|            | meltPoint | slope  | plateau | R2   |
|------------|-----------|--------|---------|------|
| NGLY1_KO_1 | 61.63     | -0.058 | 0       | 0.81 |
| NGLY1_1    | 62.02     | -0.08  | 0       | 0.84 |
| NGLY1_KO_2 | 57.11     | -0.025 | 0       | 0.74 |
| NGLY1_2    | 62.5      | -0.1   | 0       | 0.79 |

Supplement: Supplementary file 6035 [file 1]

IPI00794229.1|SPCS1

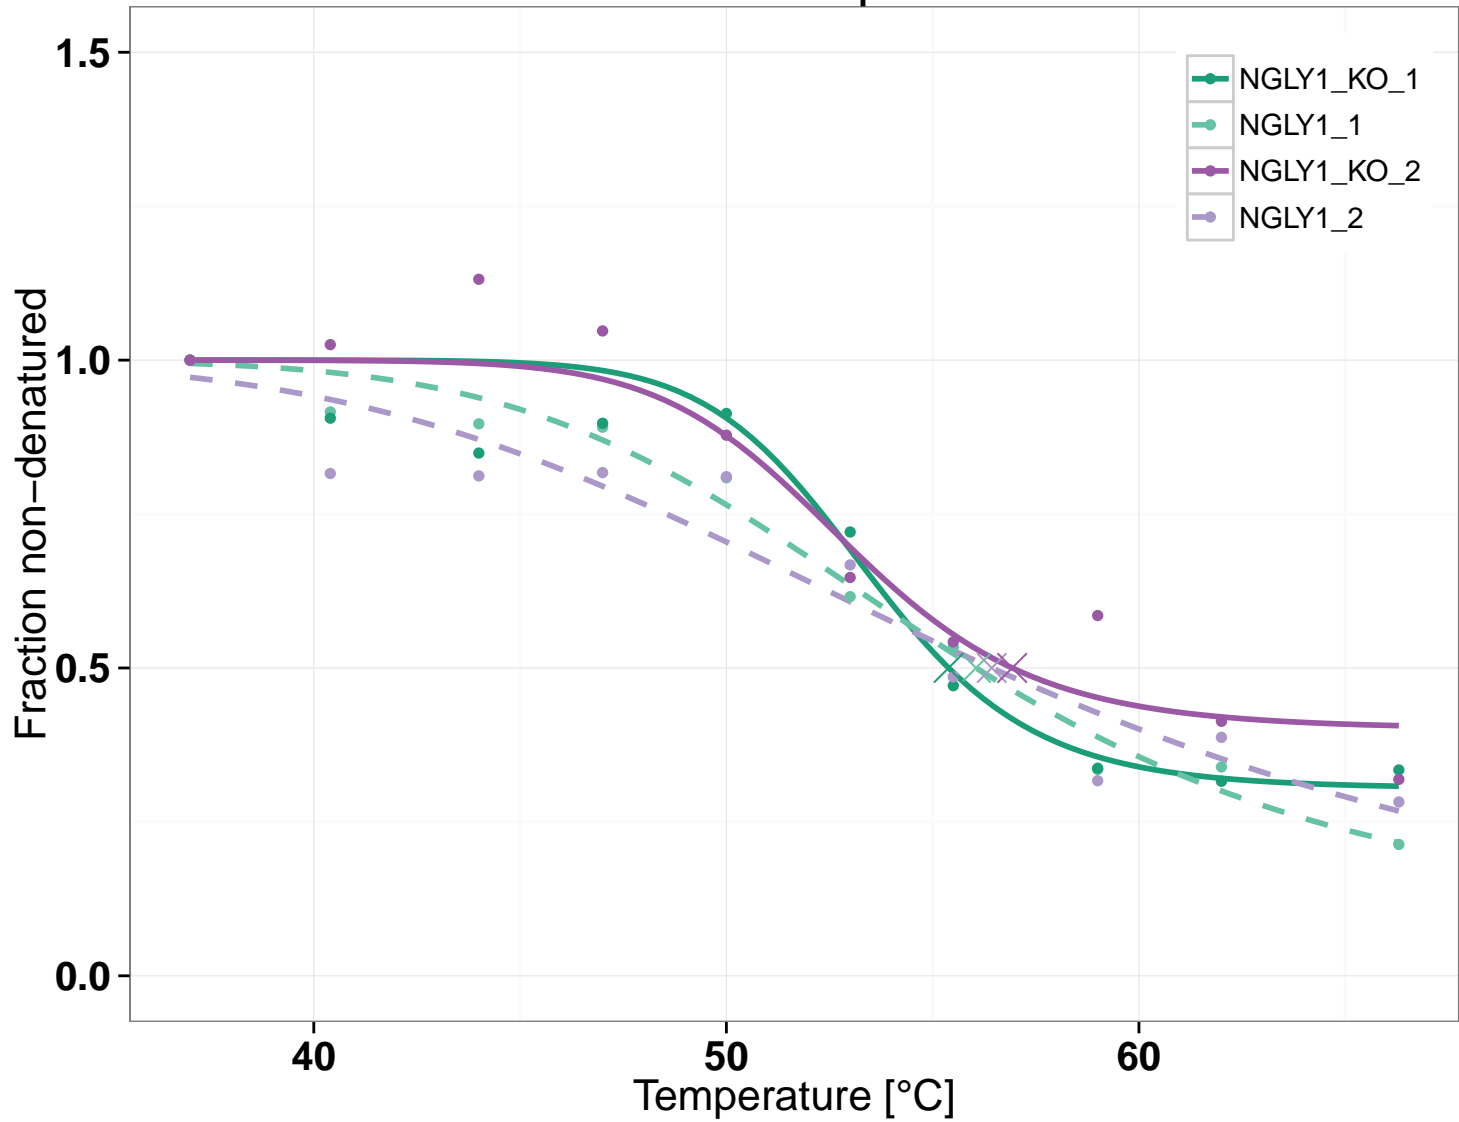

|            | meltPoint | slope  | plateau | R2   |
|------------|-----------|--------|---------|------|
| NGLY1_KO_1 | 55.39     | -0.088 | 0.3     | 0.94 |
| NGLY1_1    | 56.05     | -0.045 | 0.08    | 0.98 |
| NGLY1_KO_2 | 56.93     | -0.066 | 0.4     | 0.93 |
| NGLY1_2    | 56.43     | -0.033 | 0       | 0.91 |

Supplement: Supplementary file 6036 [file 1]

IPI00442098.1|PPP2R5C

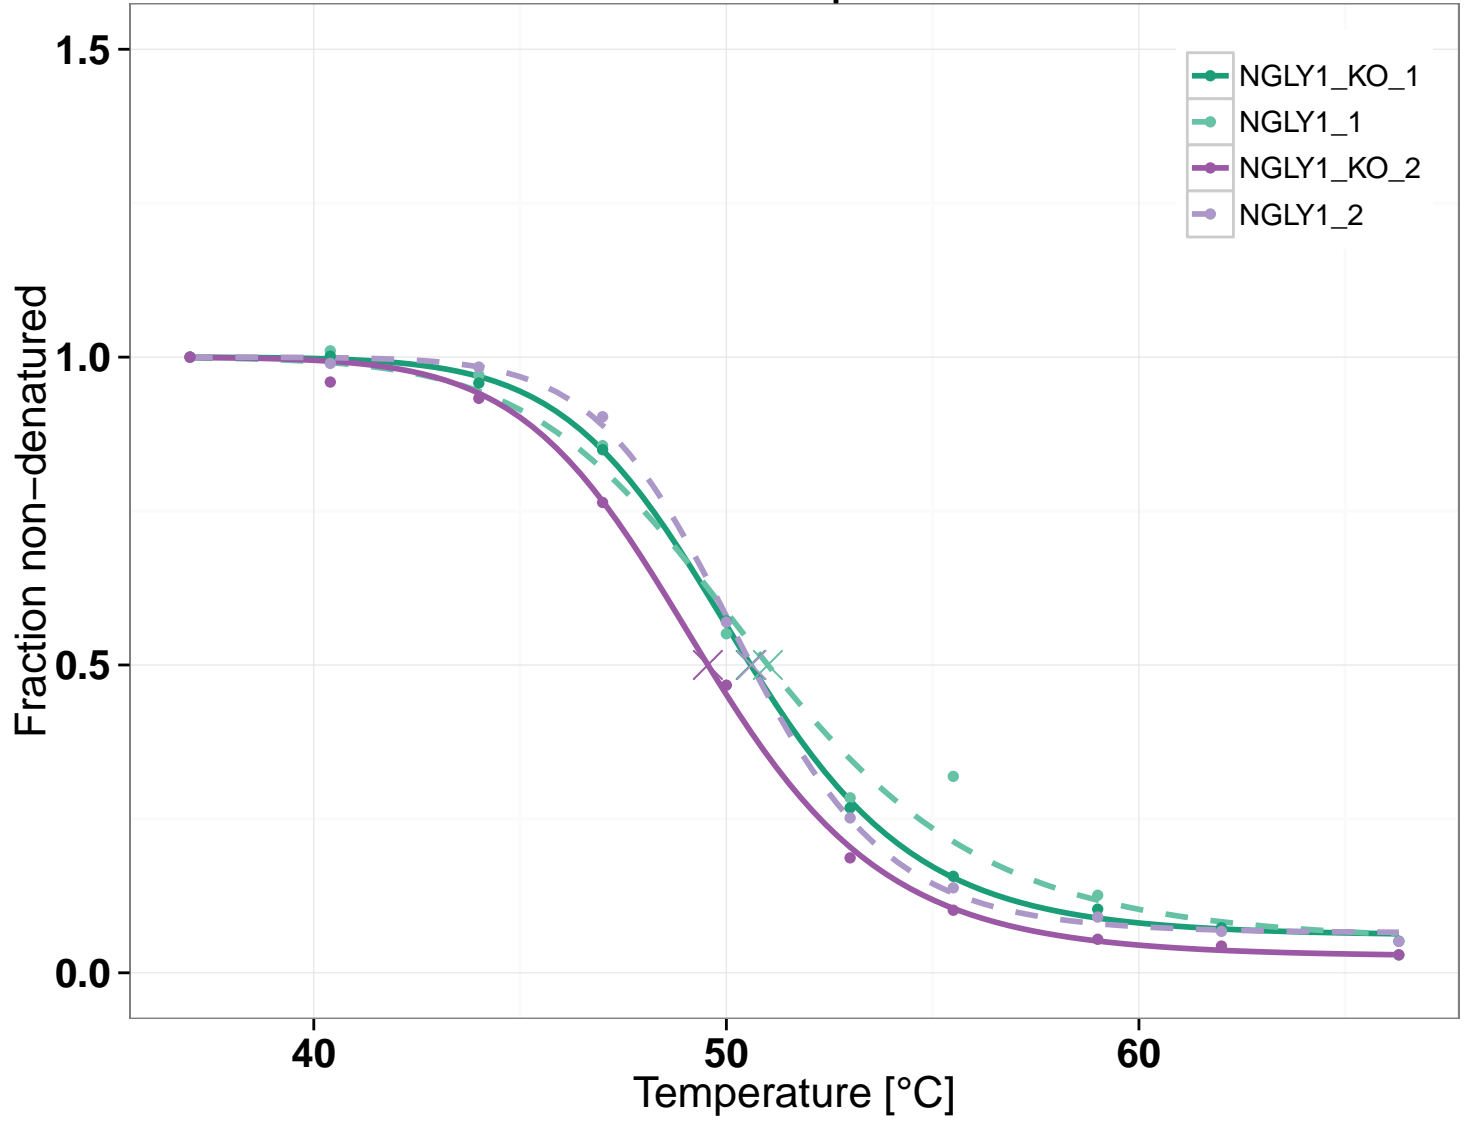

|            | meltPoint | slope  | plateau | R2   |
|------------|-----------|--------|---------|------|
| NGLY1_KO_1 | 50.59     | -0.11  | 0.06    | 1    |
| NGLY1_1    | 51.01     | -0.086 | 0.05    | 0.99 |
| NGLY1_KO_2 | 49.55     | -0.11  | 0.03    | 1    |
| NGLY1_2    | 50.61     | -0.13  | 0.06    | 1    |

Supplement: Supplementary file 6037 [file 1]

# IPI00910978.1|ULK3

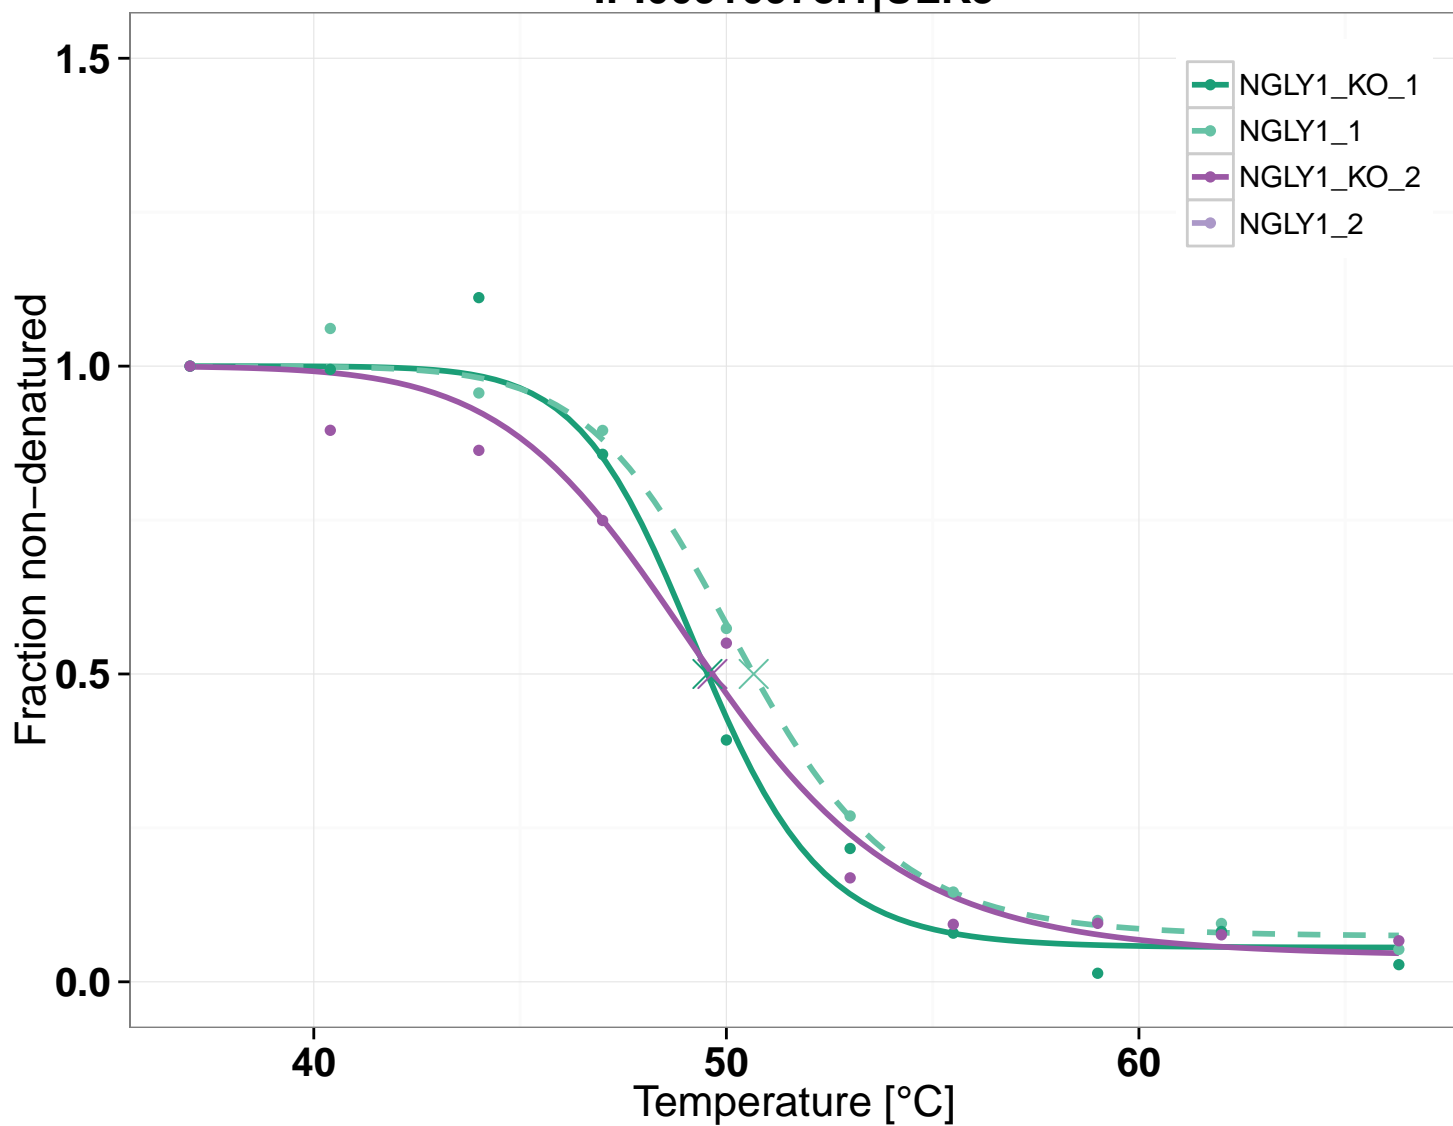

|            | meltPoint | slope  | plateau | R2   |
|------------|-----------|--------|---------|------|
| NGLY1_KO_1 | 49.54     | -0.16  | 0.06    | 0.99 |
| NGLY1_1    | 50.66     | -0.12  | 0.07    | 1    |
| NGLY1_KO_2 | 49.66     | -0.098 | 0.04    | 0.98 |
| NGLY1_2    | -         | -      | -       | -    |

Supplement: Supplementary file 6038 [file 1]

IPI00163337.7|EXOC6

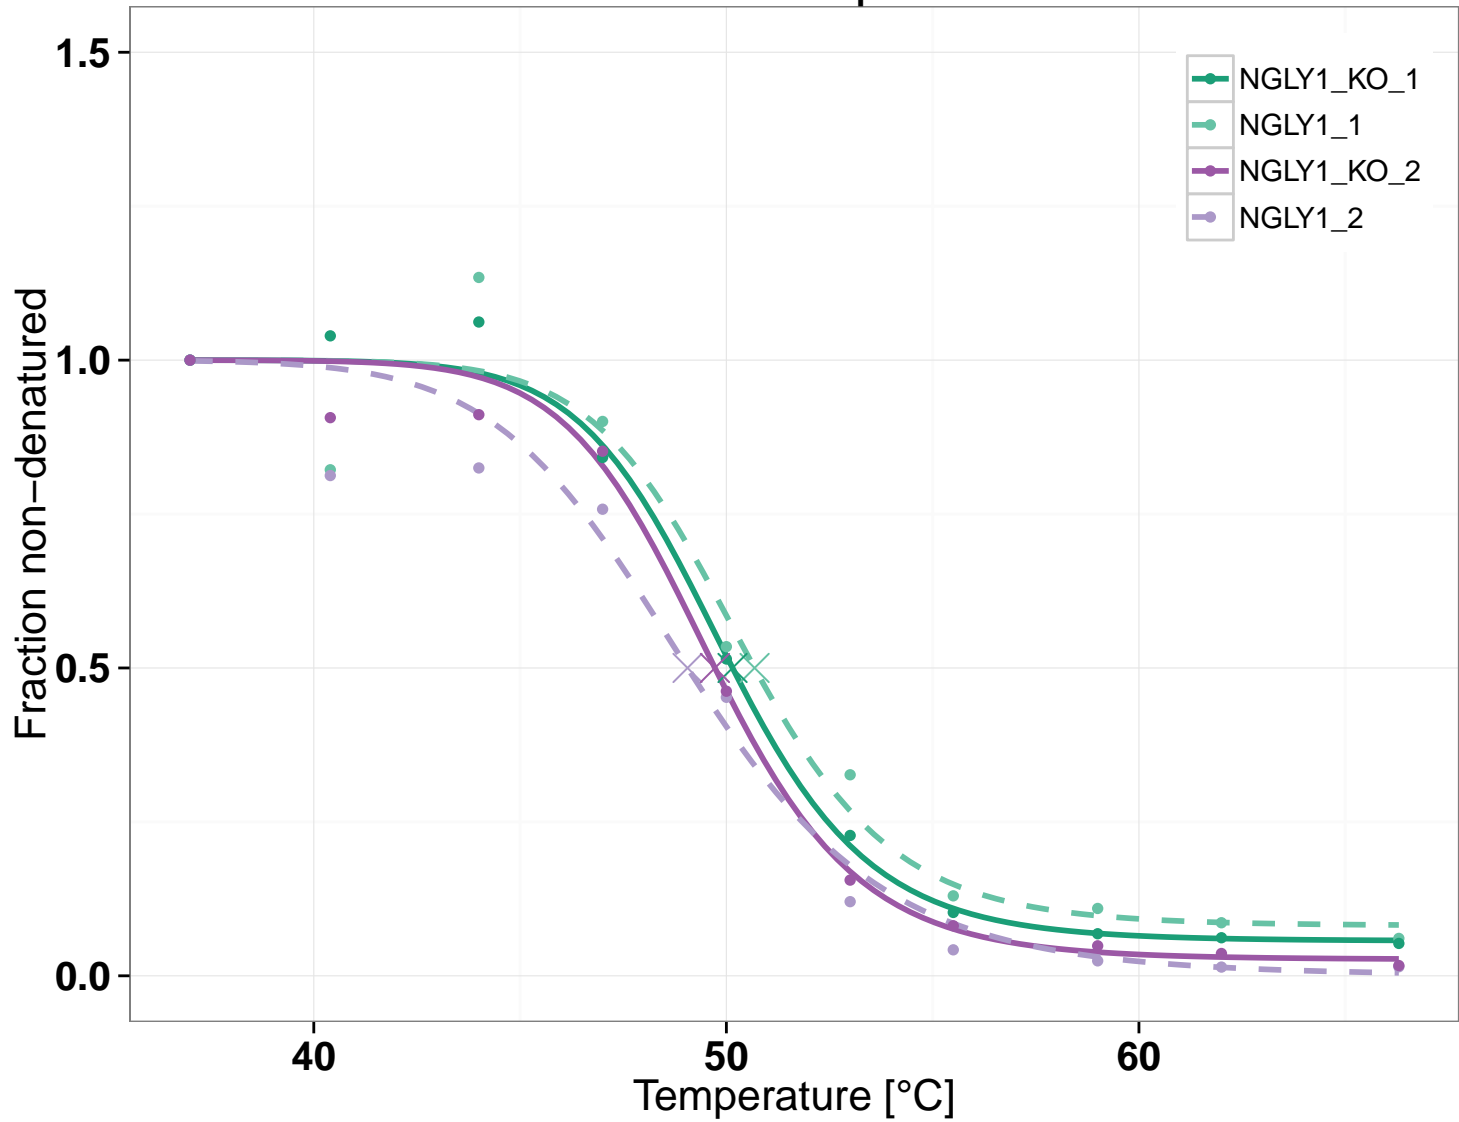

|            | meltPoint | slope | plateau | R2   |
|------------|-----------|-------|---------|------|
| NGLY1_KO_1 | 50.15     | -0.13 | 0.06    | 0.99 |
| NGLY1_1    | 50.68     | -0.13 | 0.08    | 0.96 |
| NGLY1_KO_2 | 49.72     | -0.14 | 0.03    | 0.99 |
| NGLY1_2    | 49.06     | -0.11 | 0       | 0.97 |

Supplement: Supplementary file 6039 [file 1]

IPI00016177.1|MNT

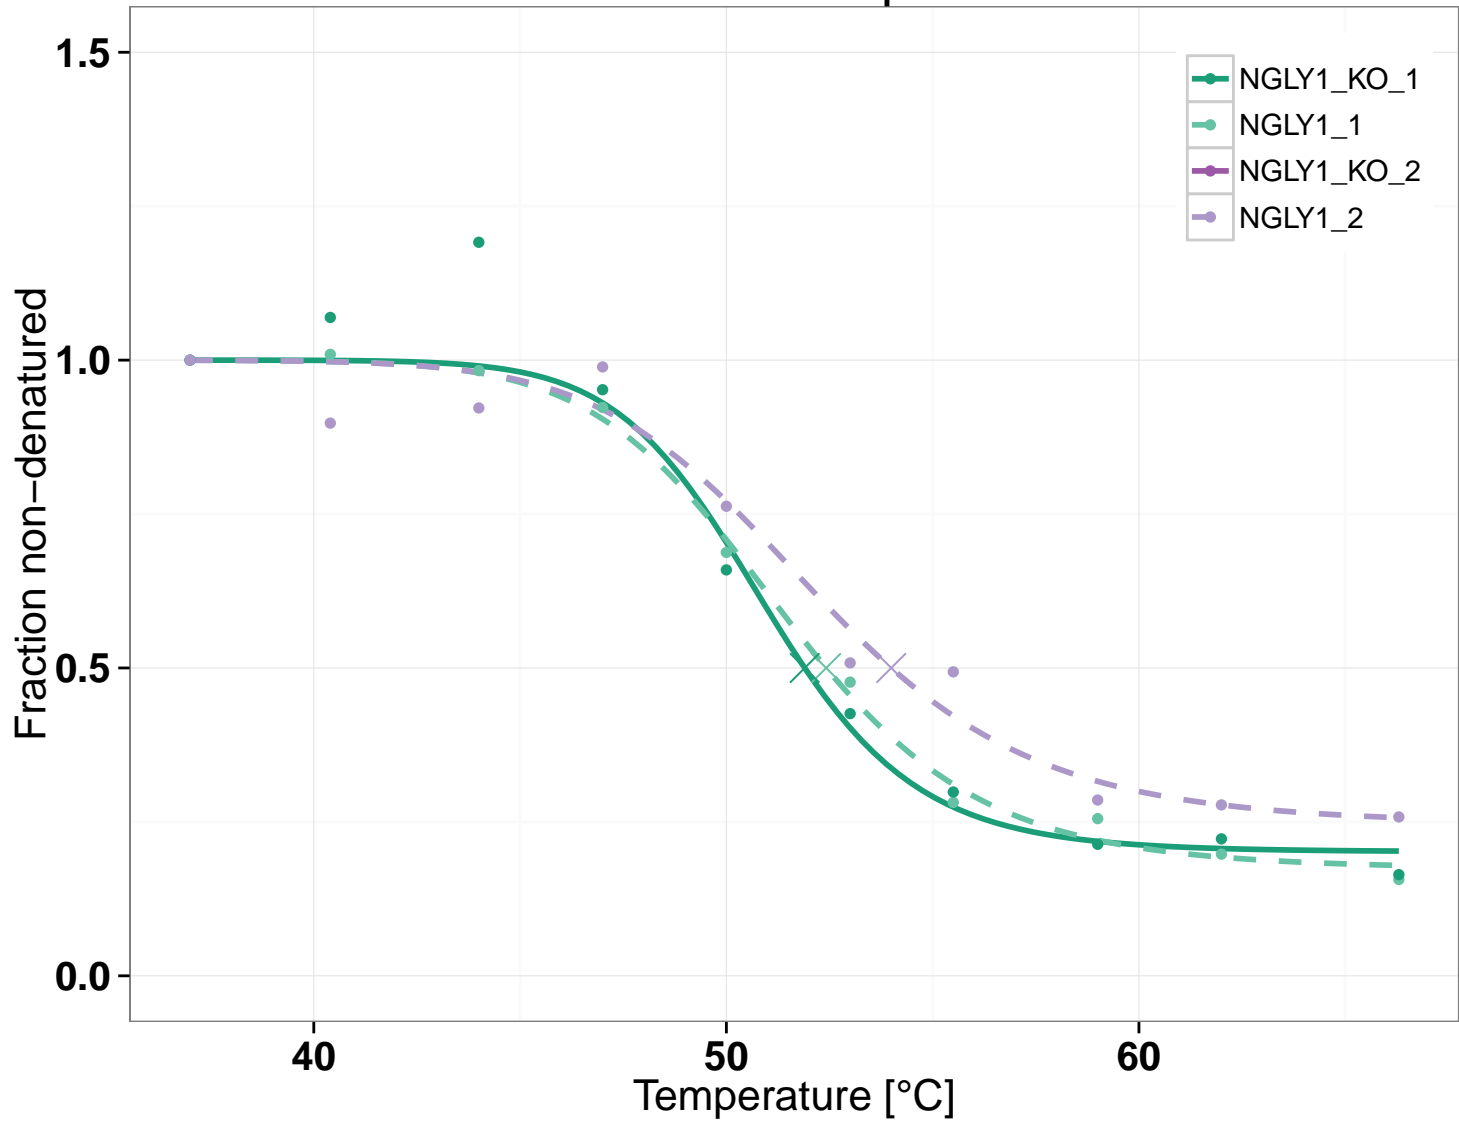

|            | meltPoint | slope  | plateau | R2   |
|------------|-----------|--------|---------|------|
| NGLY1_KO_1 | 51.9      | -0.11  | 0.2     | 0.97 |
| NGLY1_1    | 52.42     | -0.088 | 0.17    | 1    |
| NGLY1_KO_2 | -         | -      | -       | -    |
| NGLY1_2    | 54        | -0.071 | 0.25    | 0.97 |

Supplement: Supplementary file 6040 [file 1]

# IPI00012788.1|CD3EAP

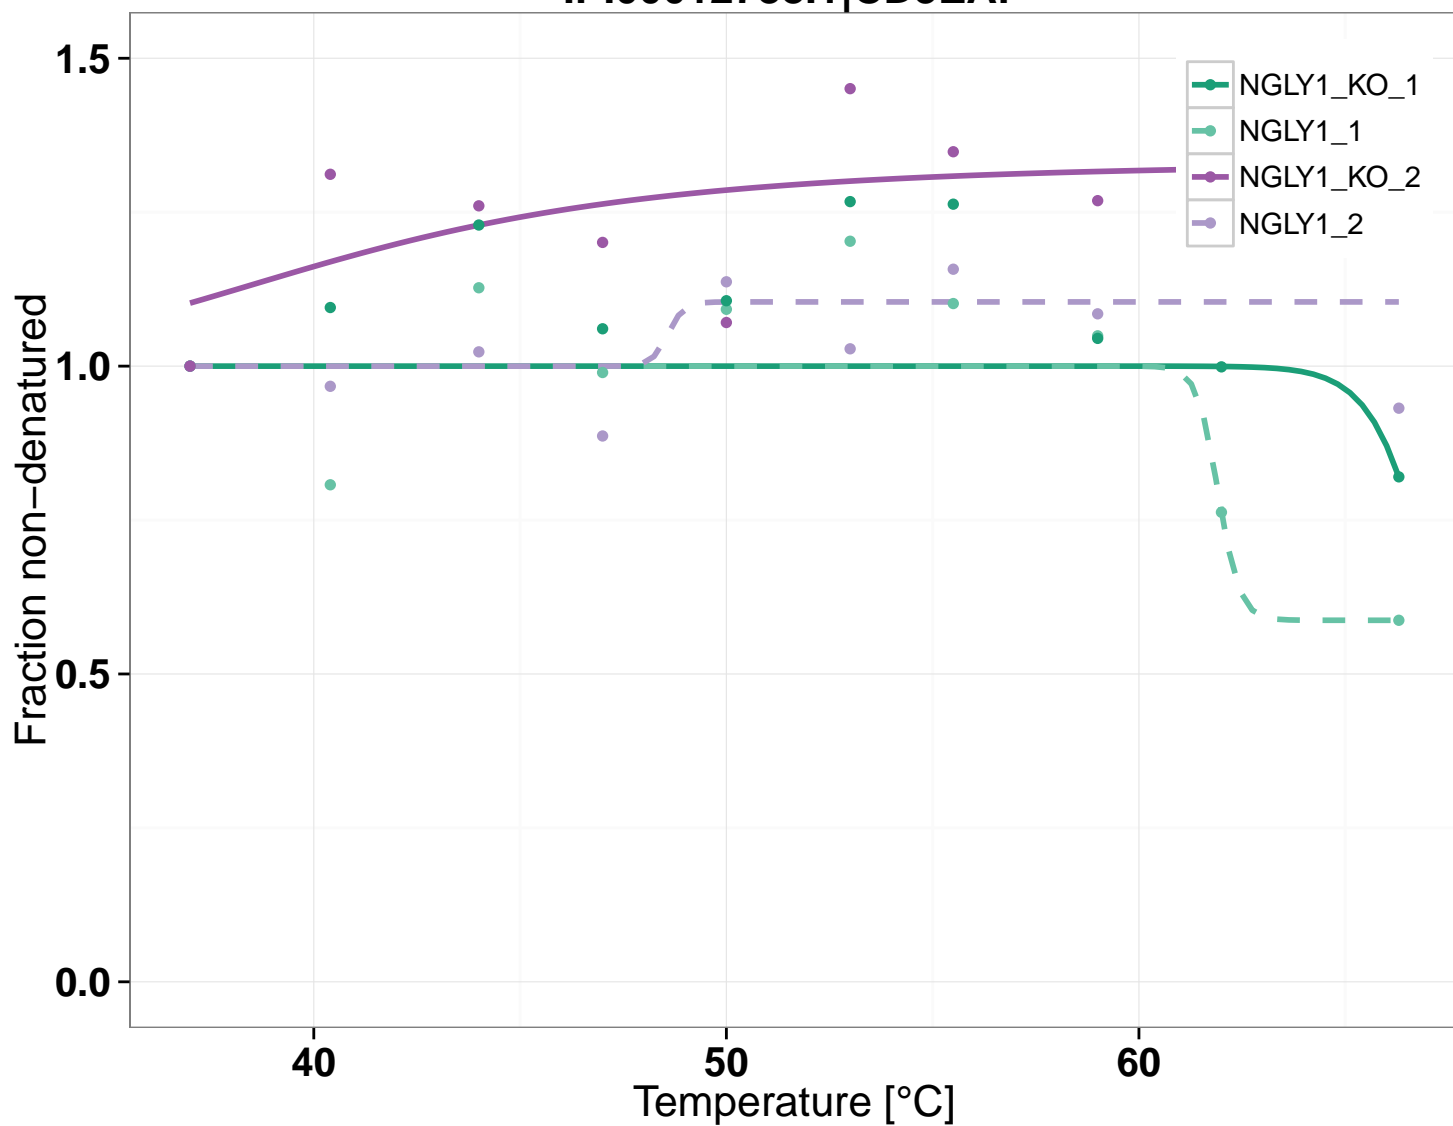

|            | meltPoint | slope | plateau | R2    |
|------------|-----------|-------|---------|-------|
| NGLY1_KO_1 | -         | -     | 0.01    | -0.27 |
| NGLY1_1    | -         | -0.4  | 0.59    | 0.65  |
| NGLY1_KO_2 | -         | 0.02  | 1.33    | 0.32  |
| NGLY1_2    | -         | 0.13  | 1.1     | 0.31  |

Supplement: Supplementary file 6041 [file 1]

# IPI00168884.3|ATP6AP2

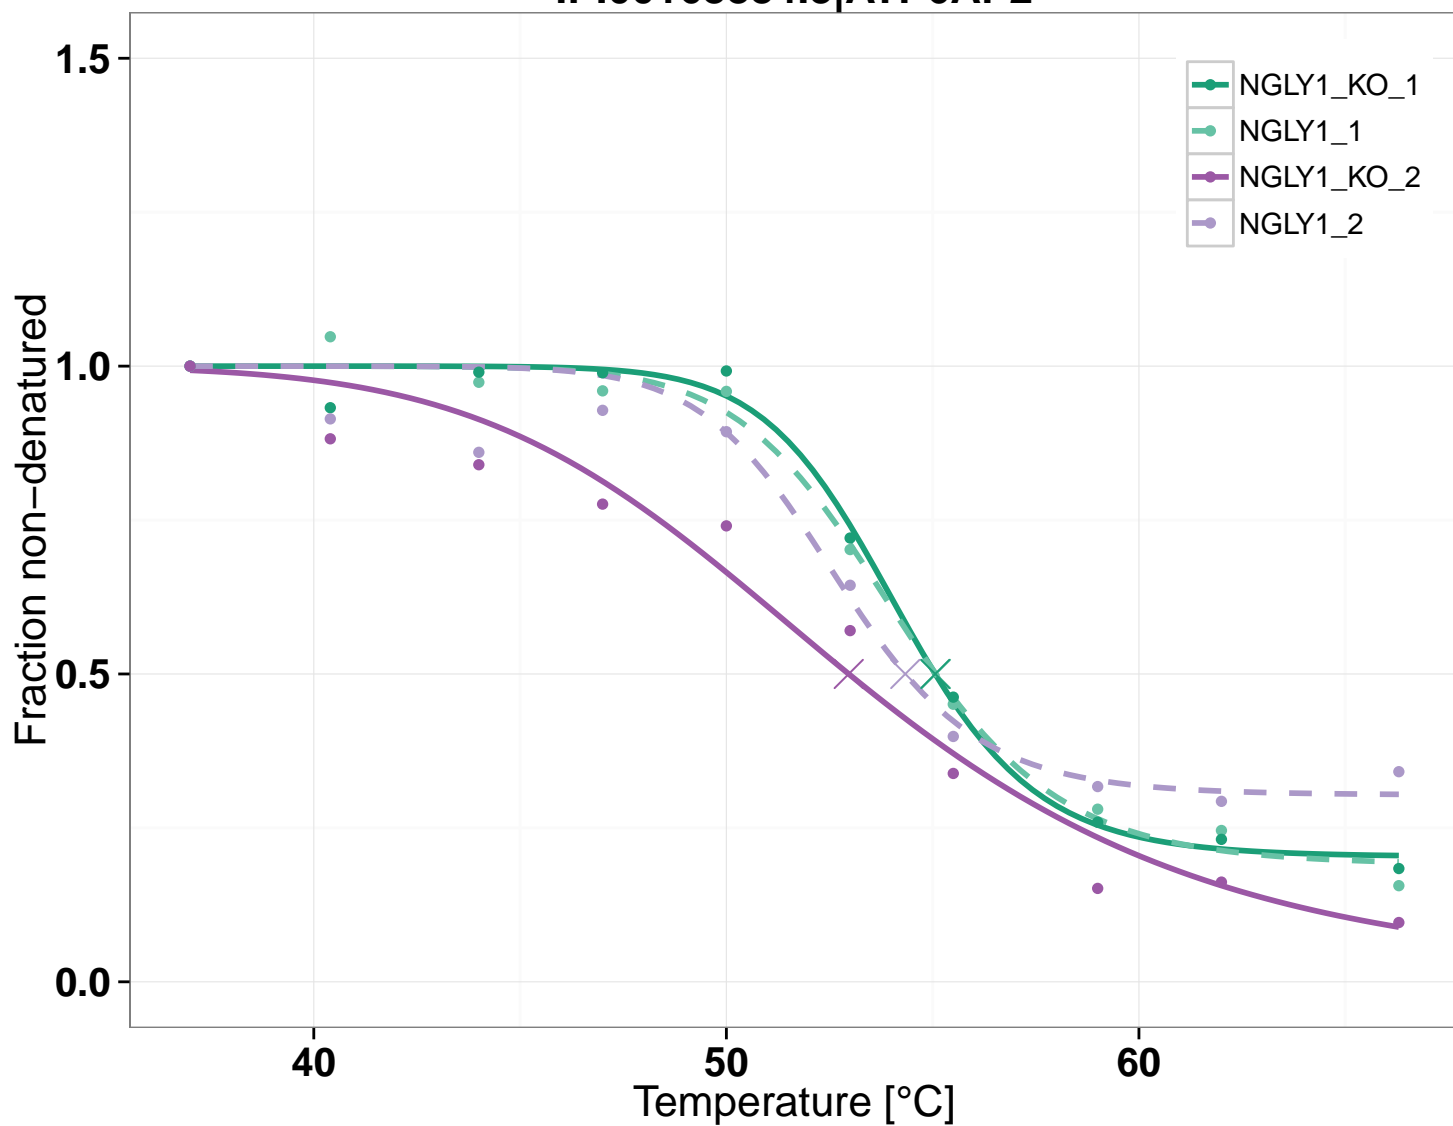

|            | meltPoint | slope  | plateau | R2   |
|------------|-----------|--------|---------|------|
| NGLY1_KO_1 | 55.06     | -0.12  | 0.2     | 0.99 |
| NGLY1_1    | 55.08     | -0.1   | 0.19    | 0.99 |
| NGLY1_KO_2 | 52.97     | -0.056 | 0       | 0.97 |
| NGLY1_2    | 54.34     | -0.1   | 0.3     | 0.96 |

Supplement: Supplementary file 6042 [file 1]

IPI00401900.1|KIAA0907

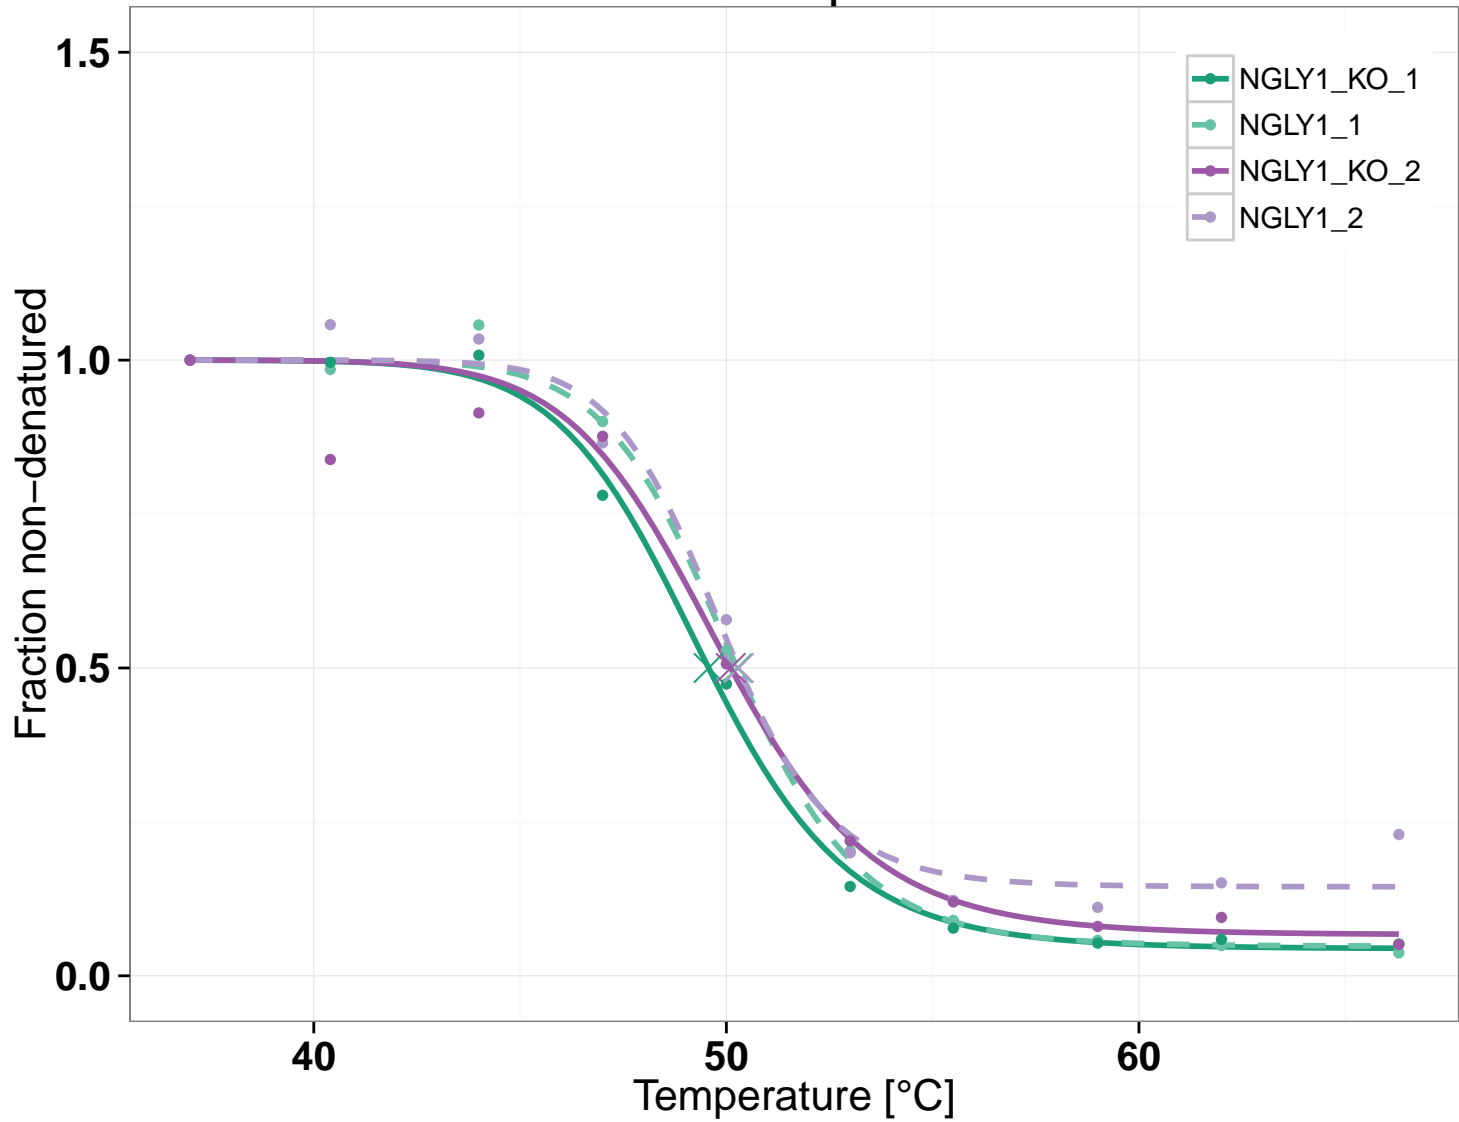

|            | meltPoint | slope | plateau | R2   |
|------------|-----------|-------|---------|------|
| NGLY1_KO_1 | 49.57     | -0.14 | 0.04    | 1    |
| NGLY1_1    | 50.26     | -0.15 | 0.05    | 1    |
| NGLY1_KO_2 | 50.11     | -0.13 | 0.07    | 0.98 |
| NGLY1_2    | 50.3      | -0.16 | 0.14    | 0.99 |

Supplement: Supplementary file 6043 [file 1]

IPI00748003.2|CCDC112

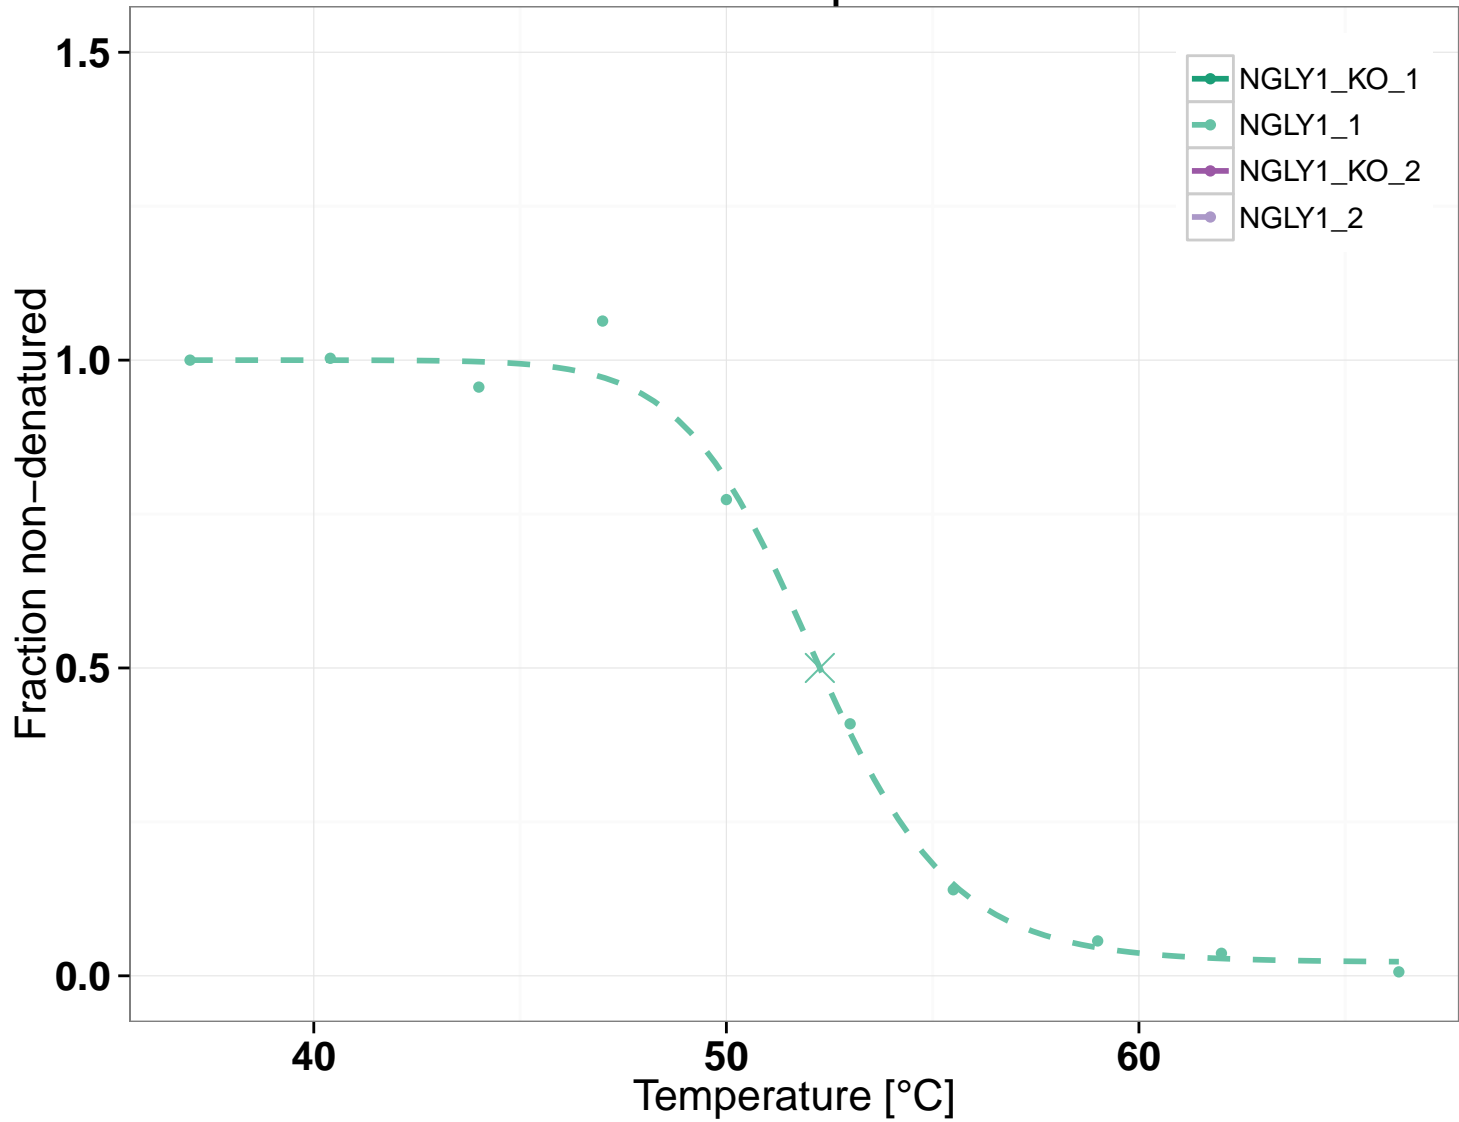

|            | meltPoint | slope | plateau | R2   |
|------------|-----------|-------|---------|------|
| NGLY1_KO_1 | -         | -     | -       | -    |
| NGLY1_1    | 52.27     | -0.15 | 0.02    | 0.99 |
| NGLY1_KO_2 | -         | -     | -       | -    |
| NGLY1_2    | -         | -     | -       | -    |

Supplement: Supplementary file 6044 [file 1]

# IPI00011237.3|NARF

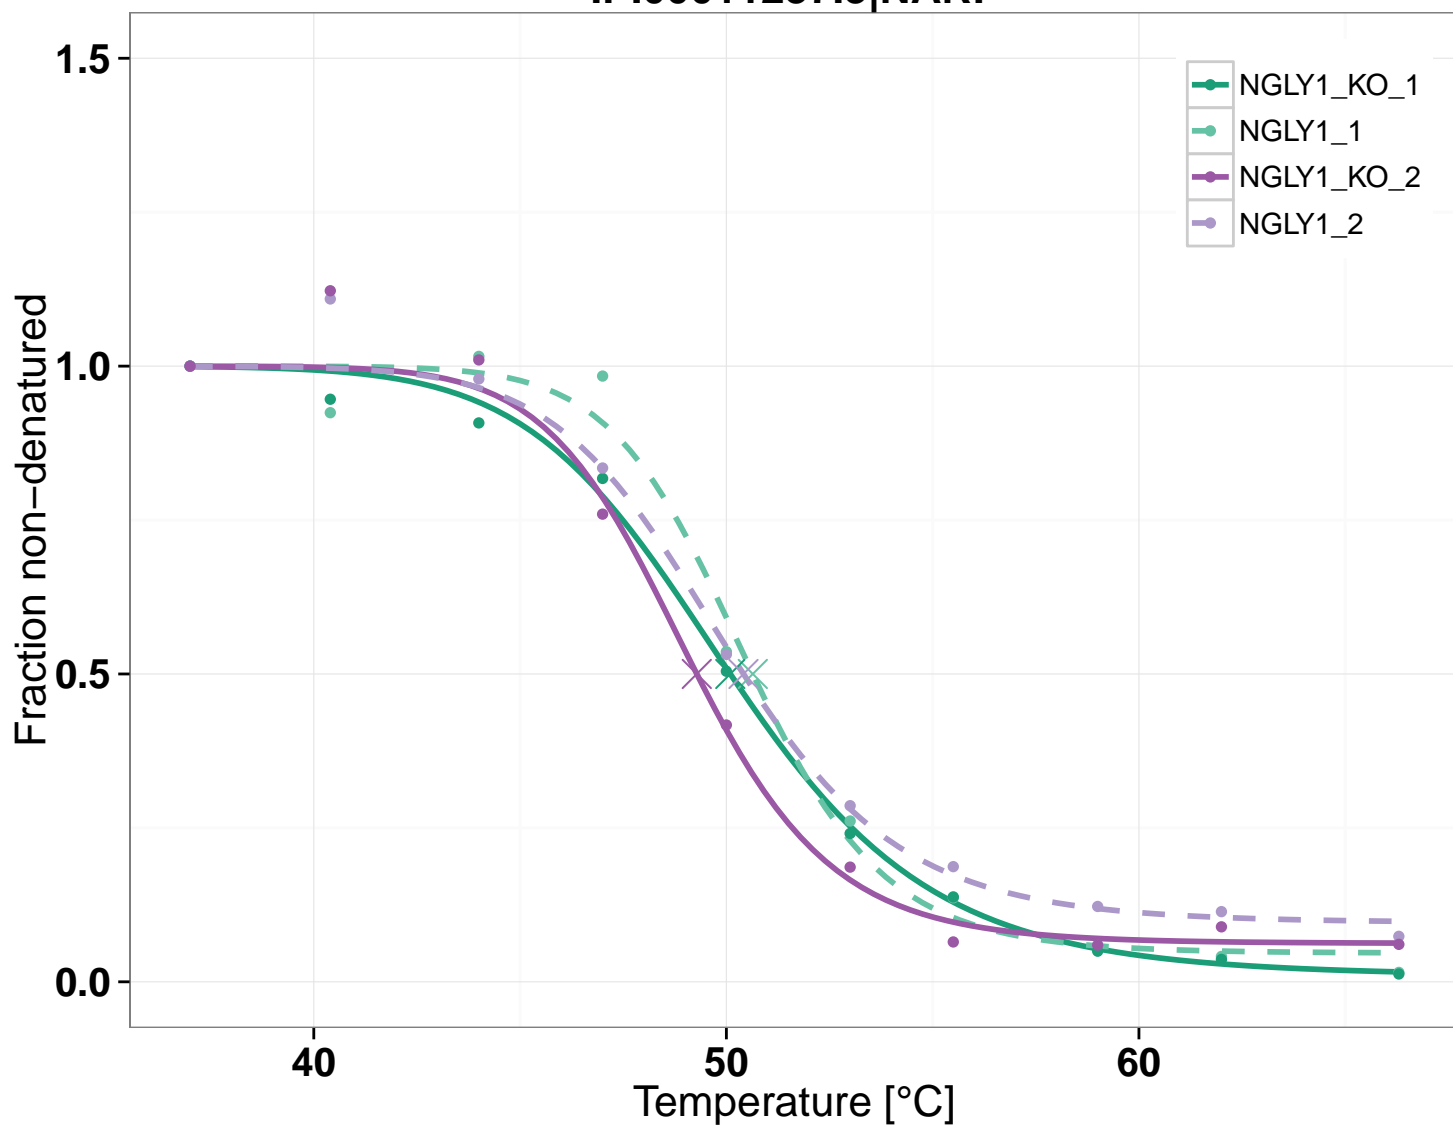

|            | meltPoint | slope | plateau | R2   |
|------------|-----------|-------|---------|------|
| NGLY1_KO_1 | 50.09     | -0.1  | 0.01    | 1    |
| NGLY1_1    | 50.64     | -0.14 | 0.05    | 0.99 |
| NGLY1_KO_2 | 49.28     | -0.13 | 0.06    | 0.99 |
| NGLY1_2    | 50.41     | -0.11 | 0.1     | 0.99 |

Supplement: Supplementary file 6045 [file 1]

IPI00332525.6|MRPL42

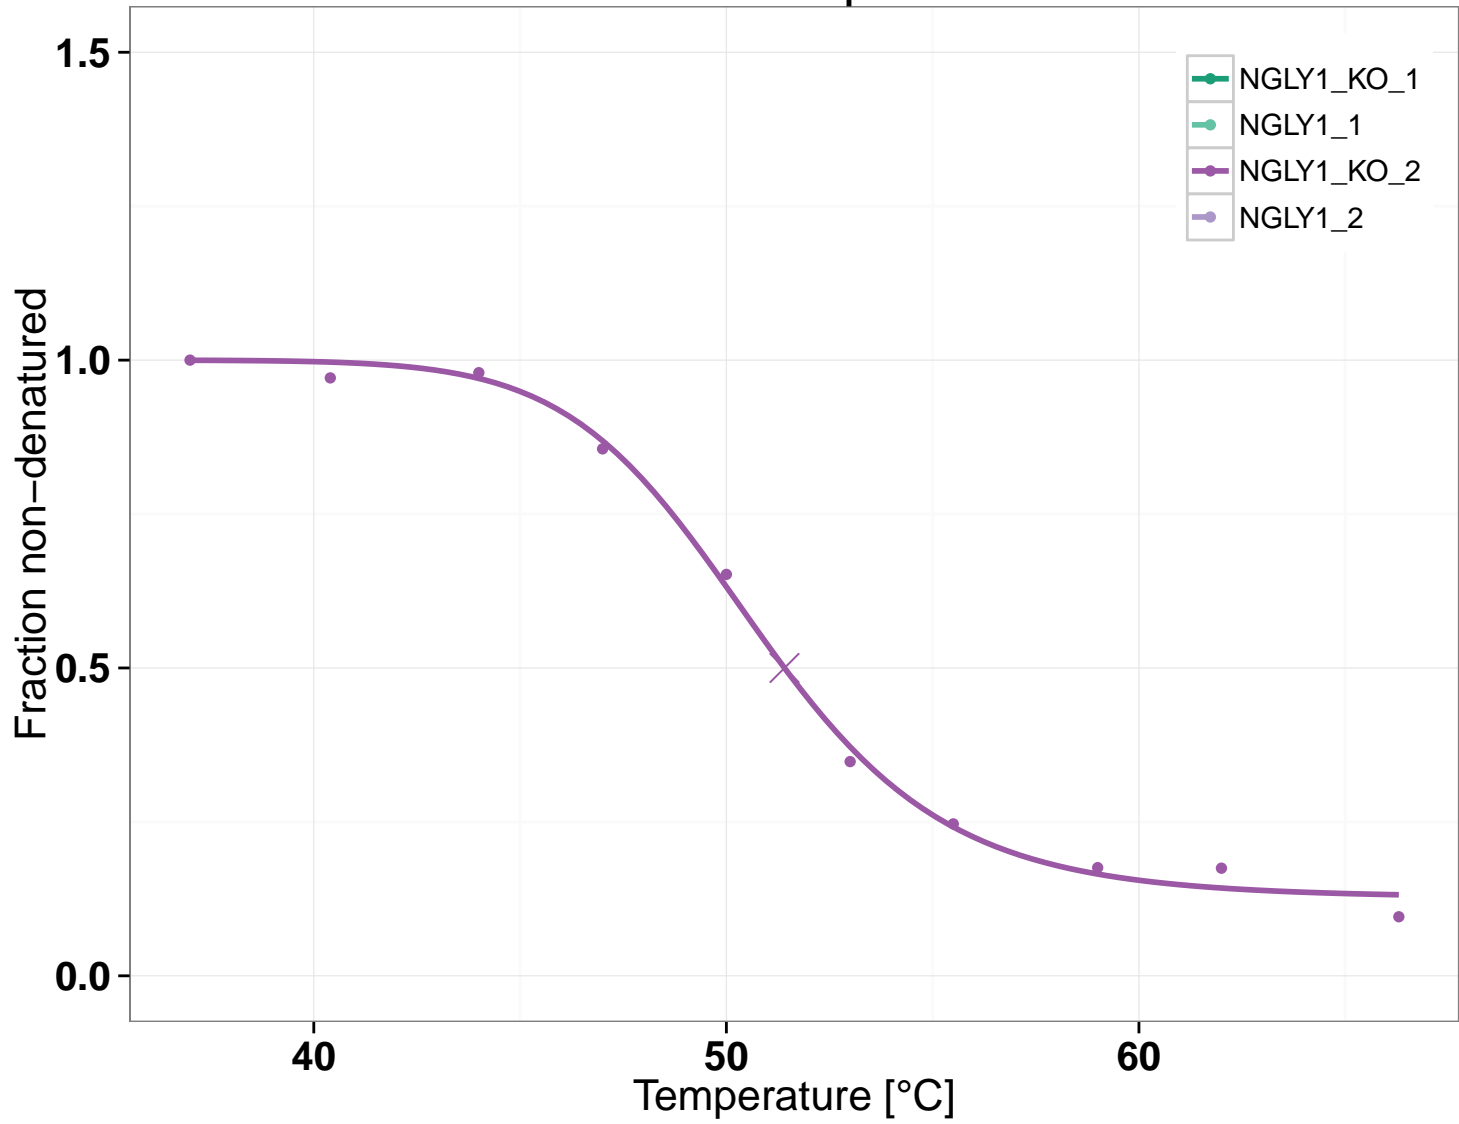

|            | meltPoint | slope  | plateau | R2 |
|------------|-----------|--------|---------|----|
| NGLY1_KO_1 | —         | —      | —       | —  |
| NGLY1_1    | —         | —      | —       | —  |
| NGLY1_KO_2 | 51.41     | -0.095 | 0.13    | 1  |
| NGLY1_2    | —         | —      | —       | —  |

Supplement: Supplementary file 6046 [file 1]

IPI00215978.4|POLR3D

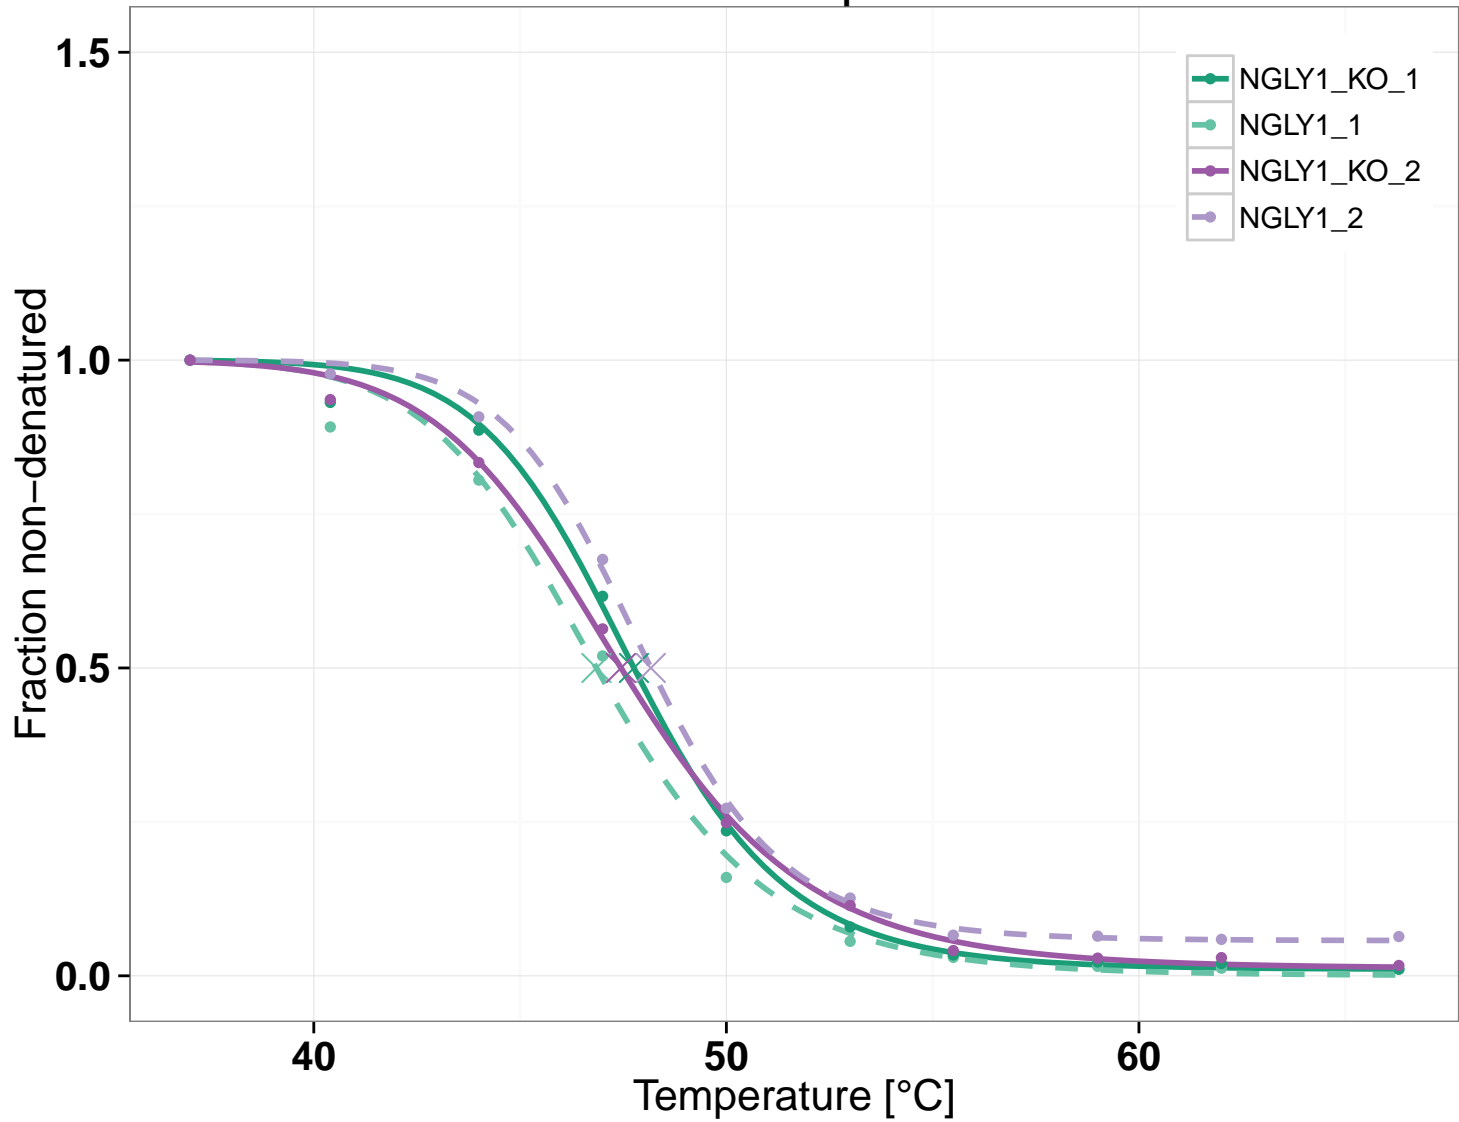

|            | meltPoint | slope | plateau | R2   |
|------------|-----------|-------|---------|------|
| NGLY1_KO_1 | 47.76     | -0.13 | 0.01    | 1    |
| NGLY1_1    | 46.85     | -0.12 | 0       | 0.99 |
| NGLY1_KO_2 | 47.45     | -0.11 | 0.01    | 1    |
| NGLY1_2    | 48.17     | -0.14 | 0.06    | 1    |

Supplement: Supplementary file 6047 [file 1]

IPI00165261.6|SCFD1

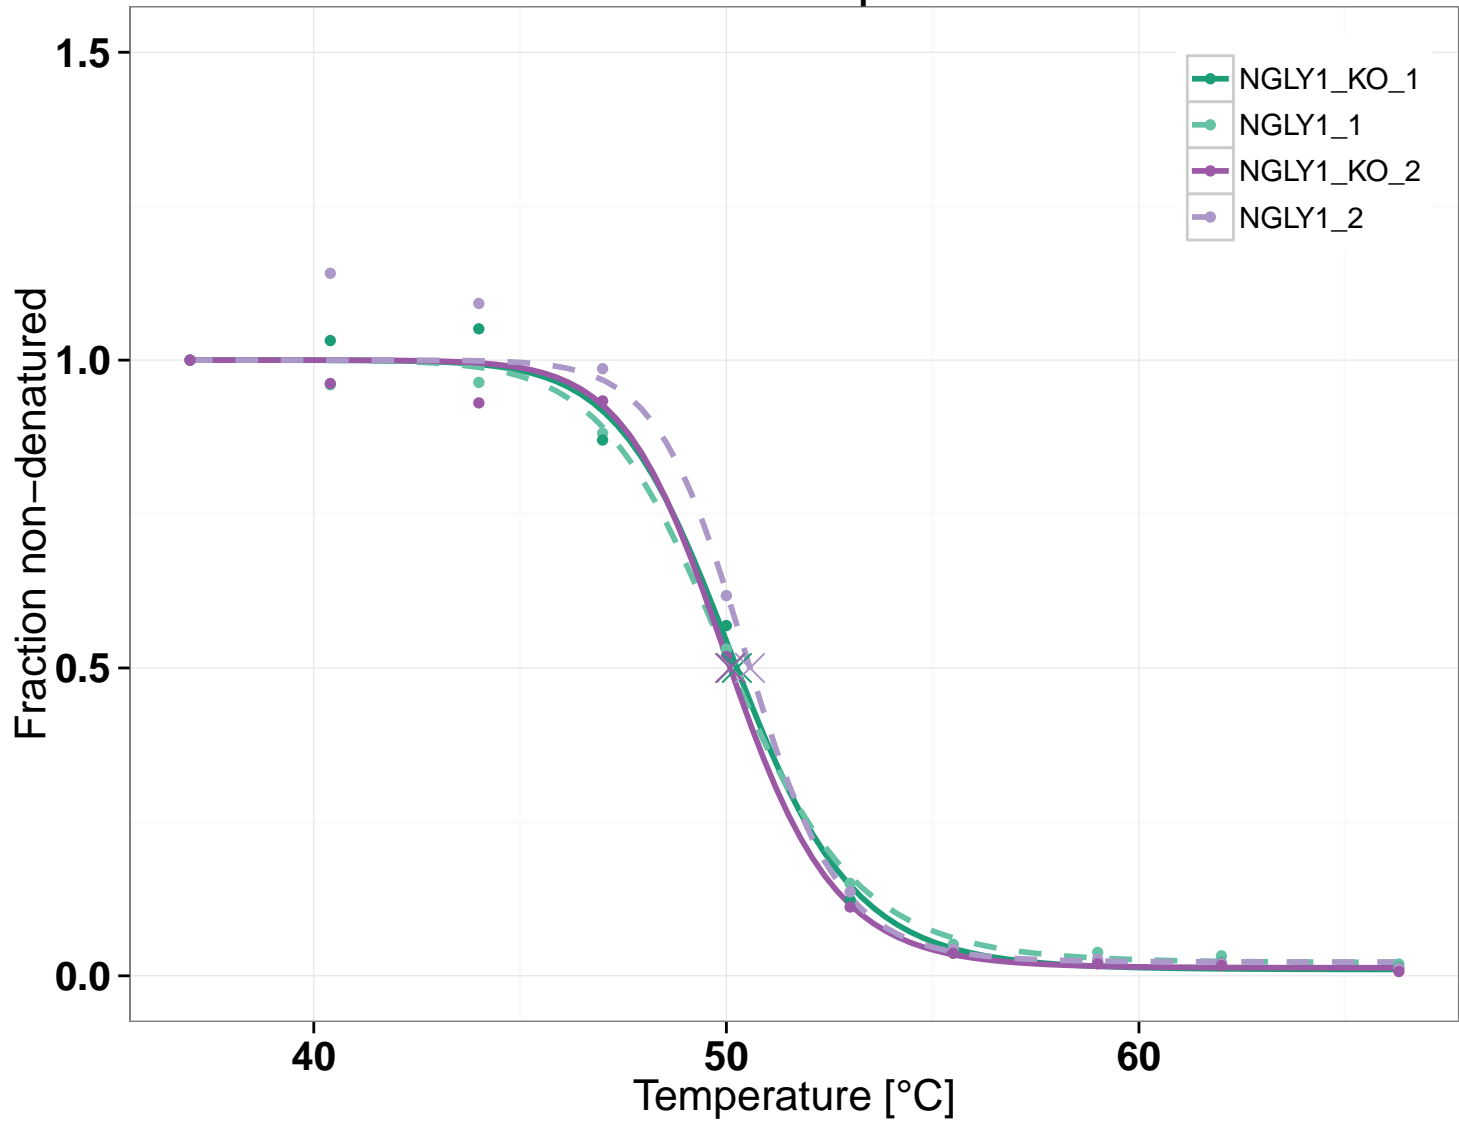

|            | meltPoint | slope | plateau | R2   |
|------------|-----------|-------|---------|------|
| NGLY1_KO_1 | 50.25     | -0.17 | 0.01    | 1    |
| NGLY1_1    | 50.12     | -0.16 | 0.02    | 1    |
| NGLY1_KO_2 | 50.09     | -0.19 | 0.01    | 1    |
| NGLY1_2    | 50.57     | -0.22 | 0.02    | 0.99 |

Supplement: Supplementary file 6048 [file 1]

# IPI00440727.1|BRD4

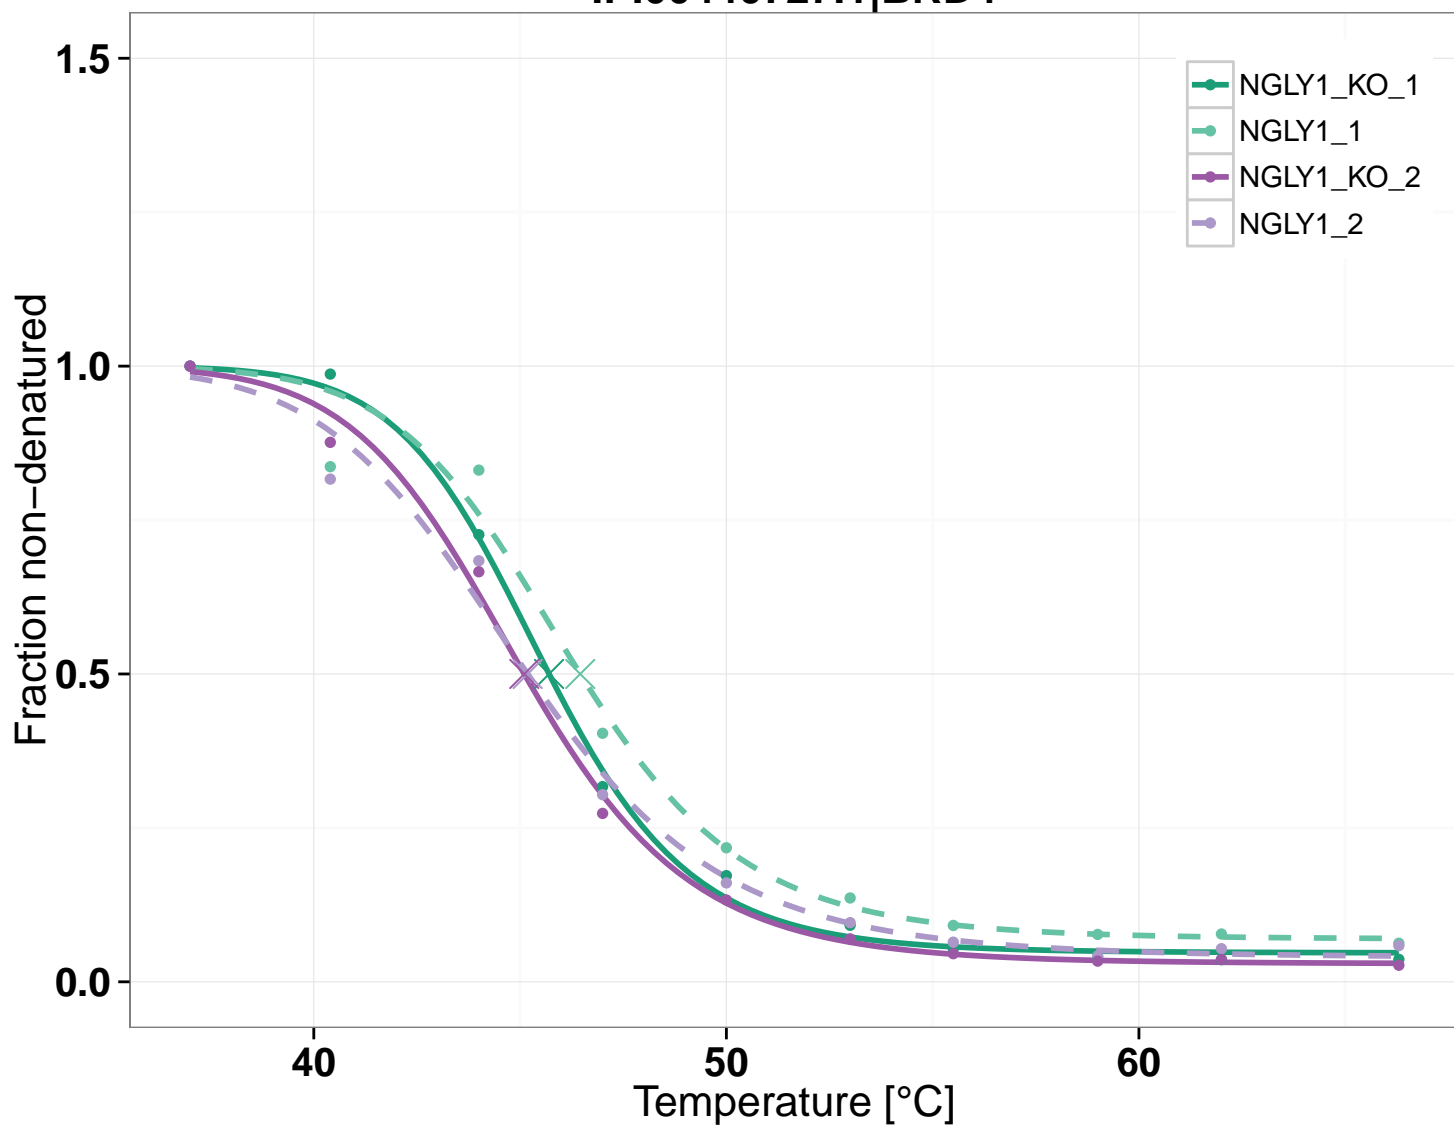

|            | meltPoint | slope | plateau | R2   |
|------------|-----------|-------|---------|------|
| NGLY1_KO_1 | 45.7      | -0.13 | 0.05    | 1    |
| NGLY1_1    | 46.46     | -0.11 | 0.07    | 0.98 |
| NGLY1_KO_2 | 45.1      | -0.12 | 0.03    | 1    |
| NGLY1_2    | 45.18     | -0.1  | 0.04    | 0.99 |

Supplement: Supplementary file 6049 [file 1]

# IPI00002349.2|NUFIP2

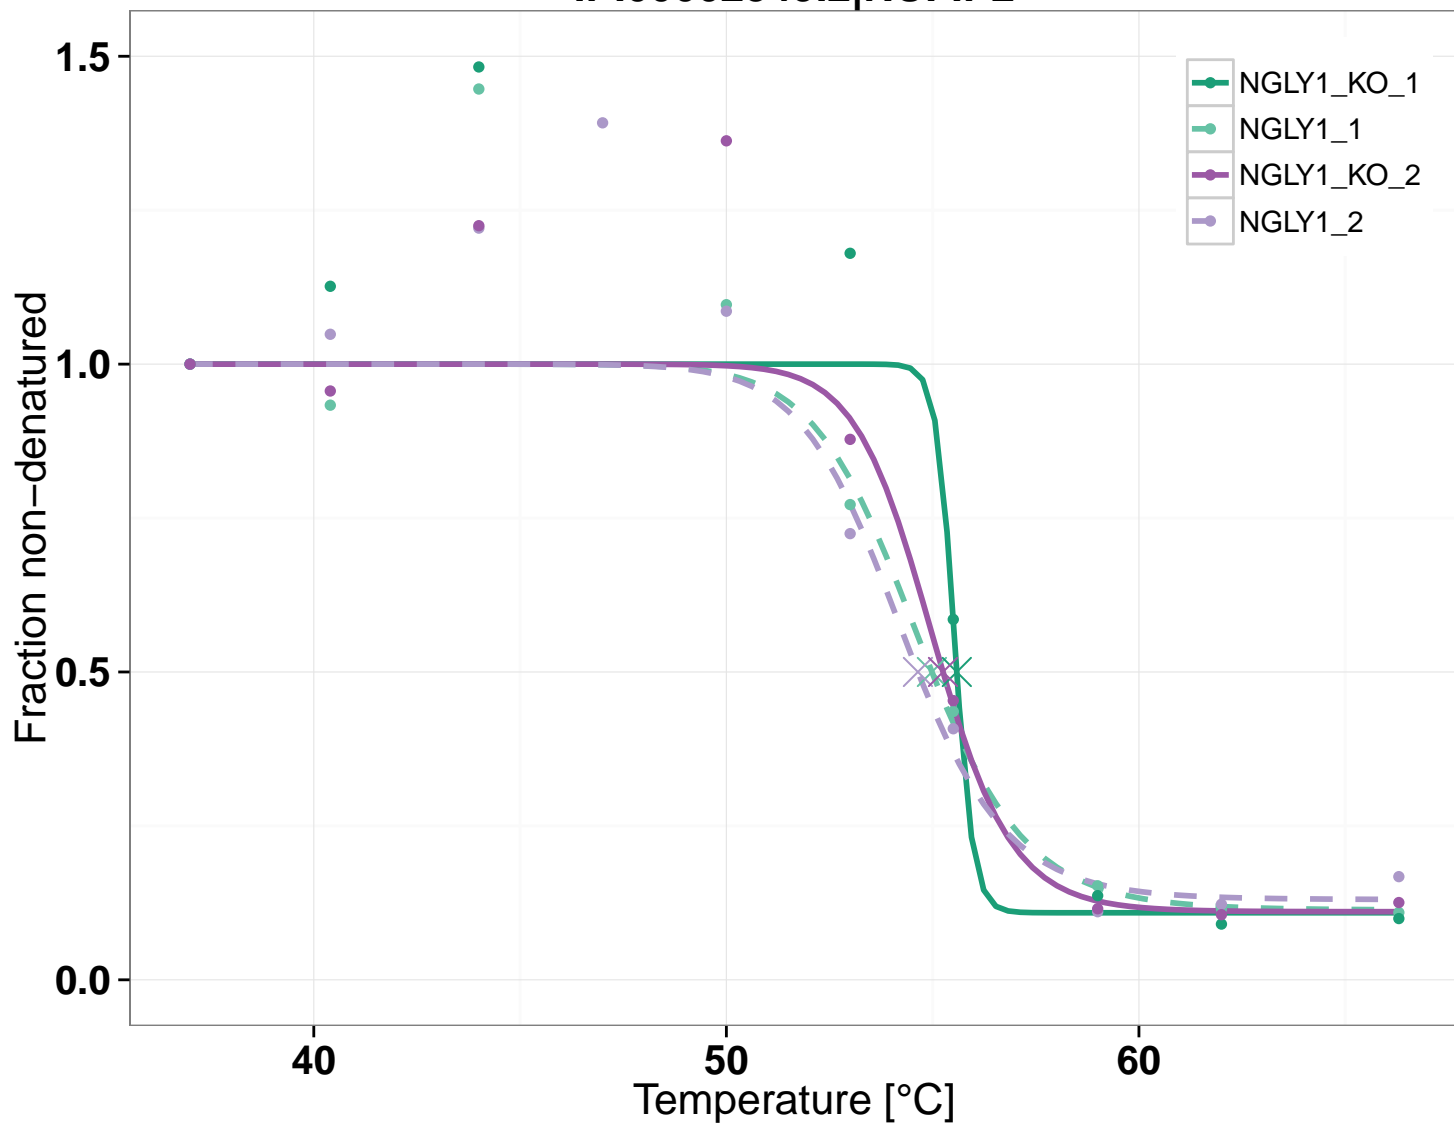

|            | meltPoint | slope | plateau | R2   |
|------------|-----------|-------|---------|------|
| NGLY1_KO_1 | 55.59     | -1    | 0.11    | 0.6  |
| NGLY1_1    | 54.98     | -0.17 | 0.11    | 0.81 |
| NGLY1_KO_2 | 55.25     | -0.23 | 0.11    | 0.72 |
| NGLY1_2    | 54.64     | -0.17 | 0.13    | 0.9  |

Supplement: Supplementary file 6050 [file 1]

IPI00796560.1|ETNK1

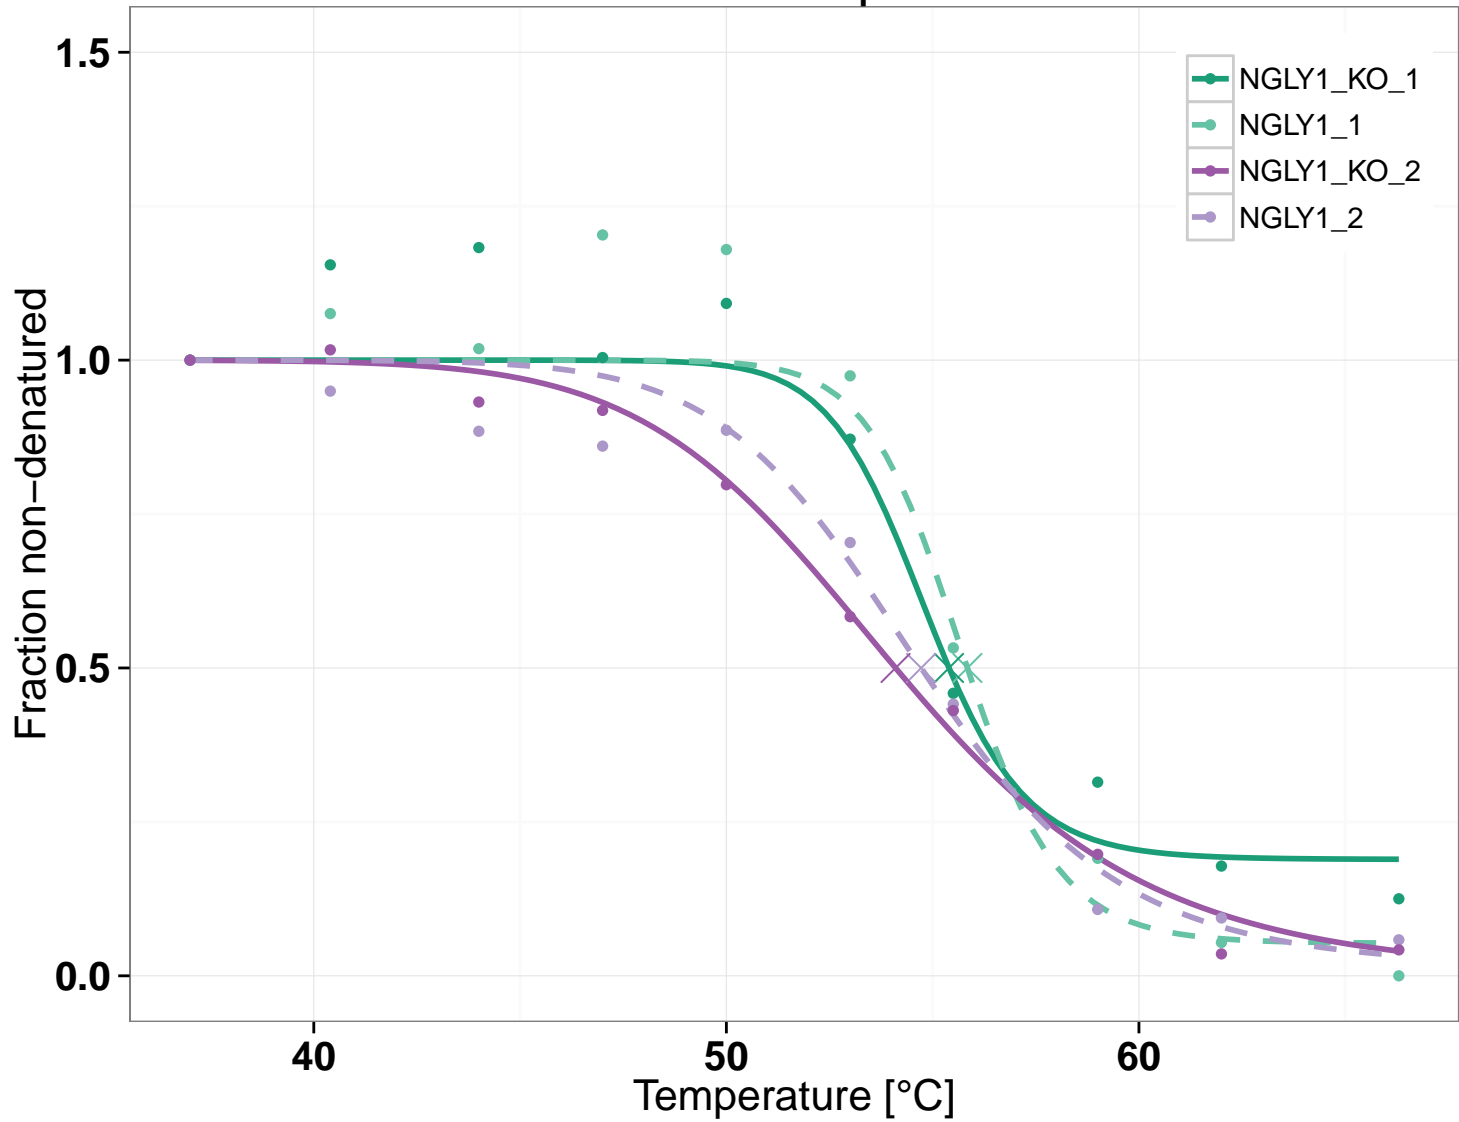

|            | meltPoint | slope  | plateau | R2   |
|------------|-----------|--------|---------|------|
| NGLY1_KO_1 | 55.4      | -0.17  | 0.19    | 0.95 |
| NGLY1_1    | 55.84     | -0.2   | 0.05    | 0.95 |
| NGLY1_KO_2 | 54.1      | -0.081 | 0       | 0.99 |
| NGLY1_2    | 54.72     | -0.1   | 0.01    | 0.97 |

Supplement: Supplementary file 6051 [file 1]

# IPI00794221.1|DBN1

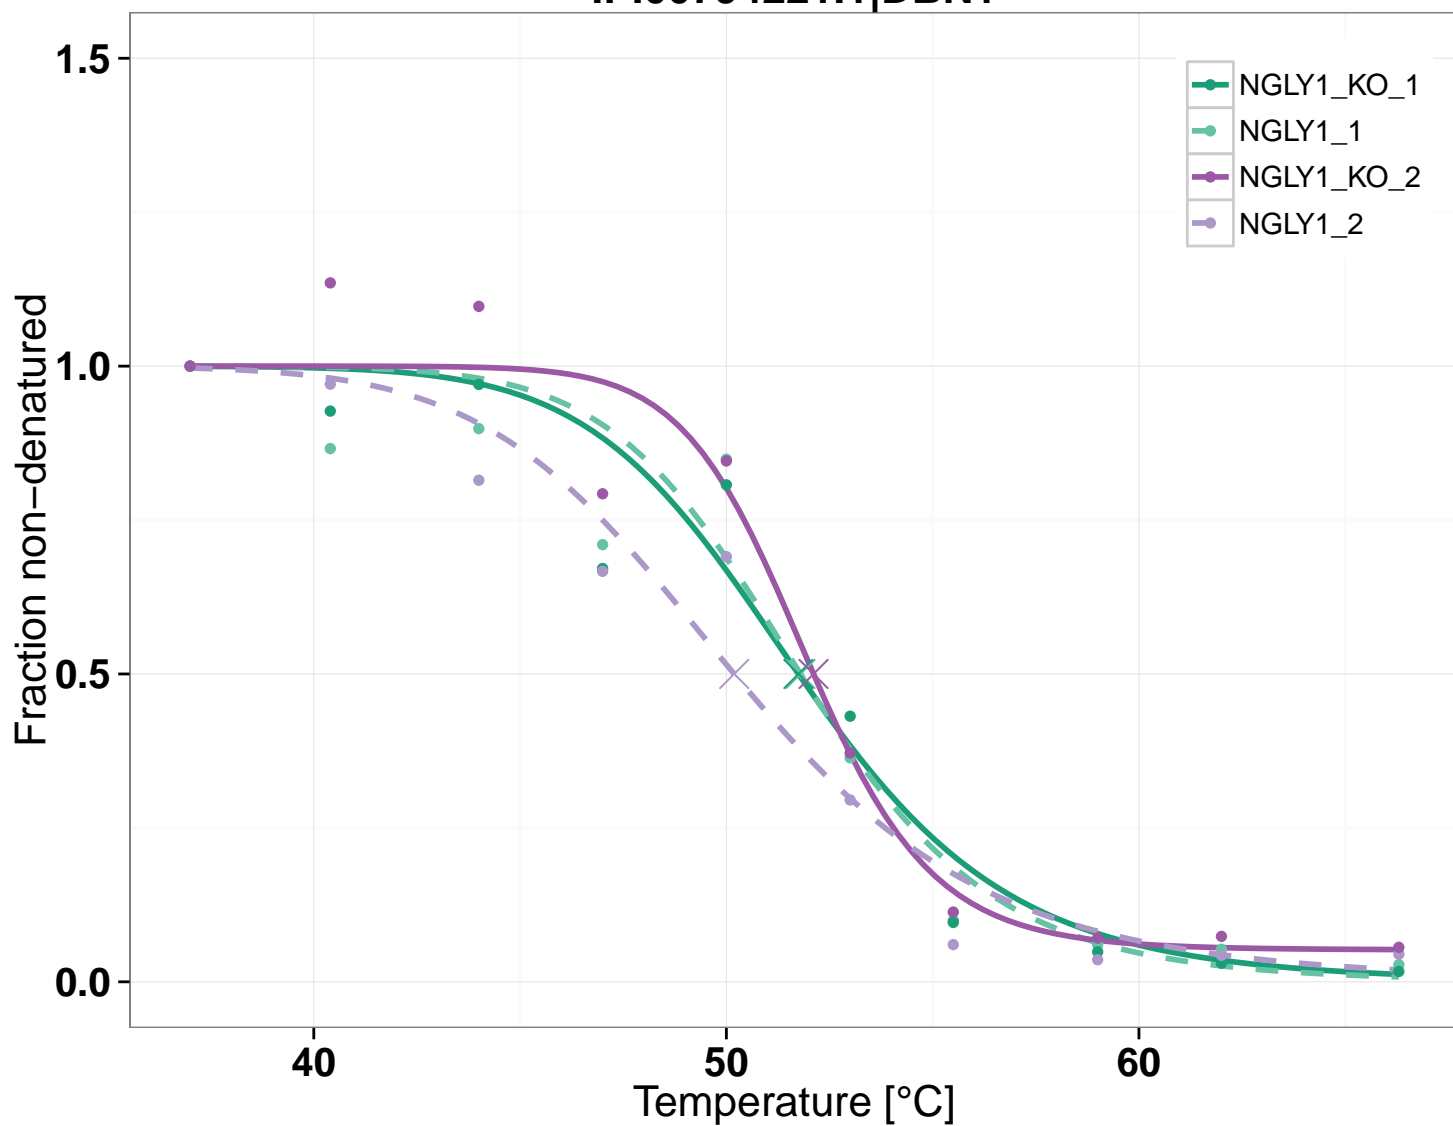

|            | meltPoint | slope  | plateau | R2   |
|------------|-----------|--------|---------|------|
| NGLY1_KO_1 | 51.75     | -0.098 | 0       | 0.95 |
| NGLY1_1    | 51.8      | -0.11  | 0       | 0.94 |
| NGLY1_KO_2 | 52.11     | -0.16  | 0.05    | 0.97 |
| NGLY1_2    | 50.19     | -0.082 | 0       | 0.96 |

Supplement: Supplementary file 6052 [file 1]

IPI00303458.3|USP46

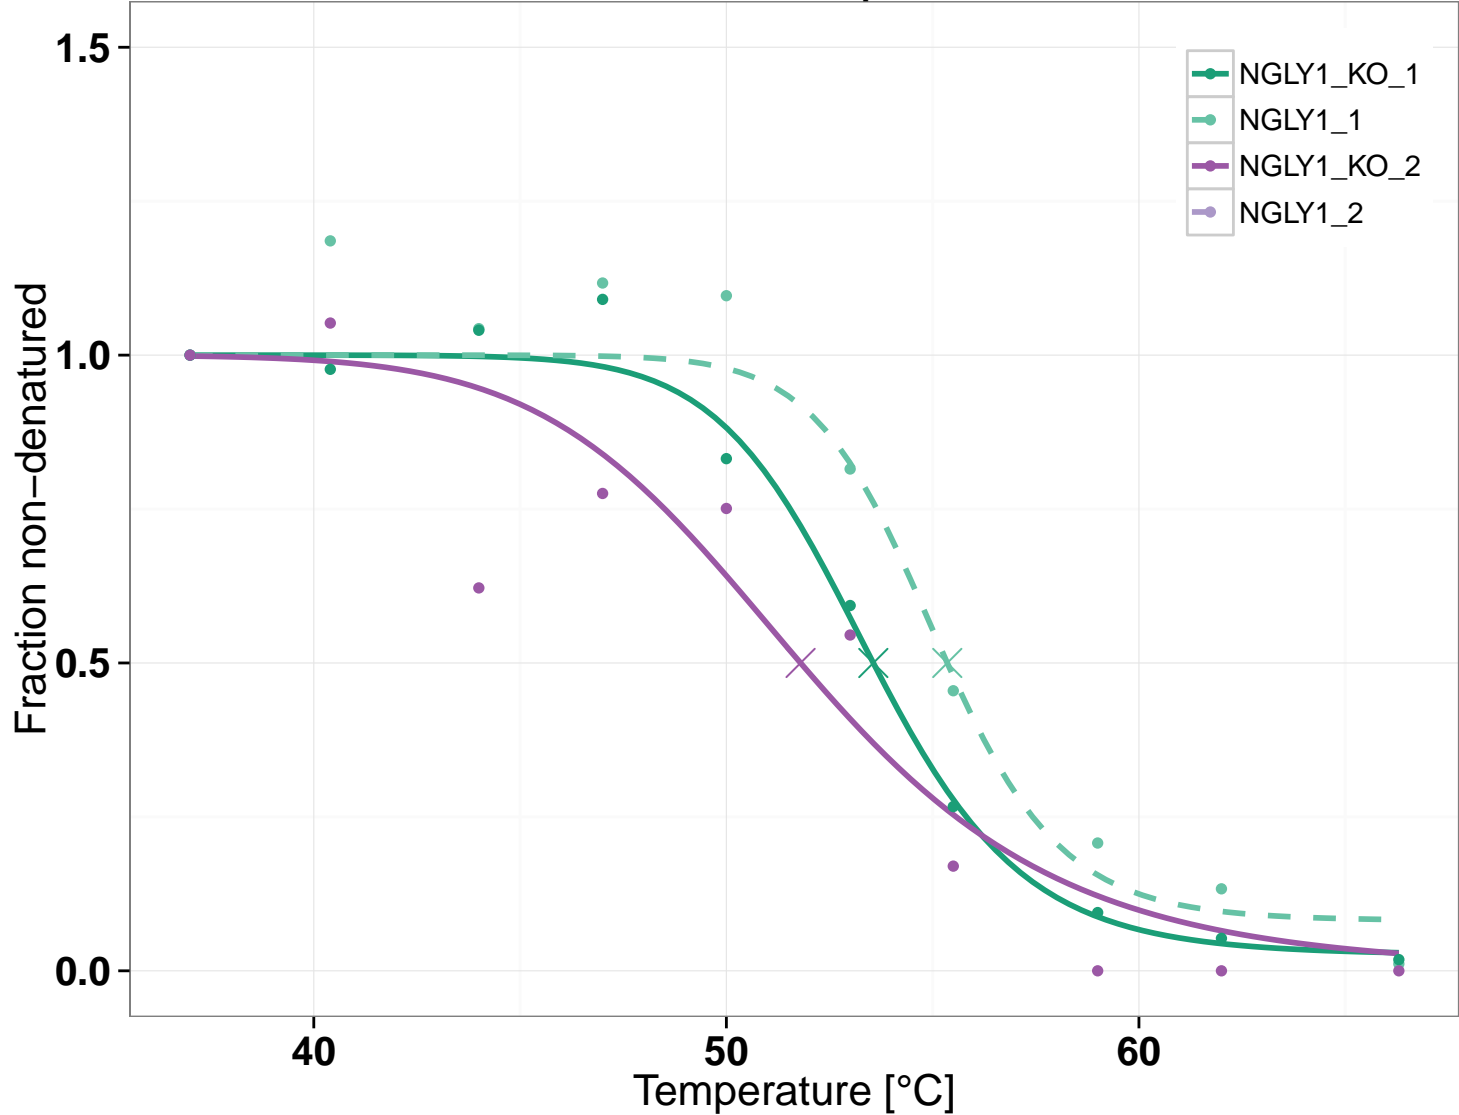

|            | meltPoint | slope  | plateau | R2   |
|------------|-----------|--------|---------|------|
| NGLY1_KO_1 | 53.56     | -0.13  | 0.03    | 0.99 |
| NGLY1_1    | 55.35     | -0.15  | 0.08    | 0.96 |
| NGLY1_KO_2 | 51.8      | -0.079 | 0       | 0.89 |
| NGLY1_2    | -         | -      | -       | -    |

Supplement: Supplementary file 6053 [file 1]

# IPI00217471.3|HBE1

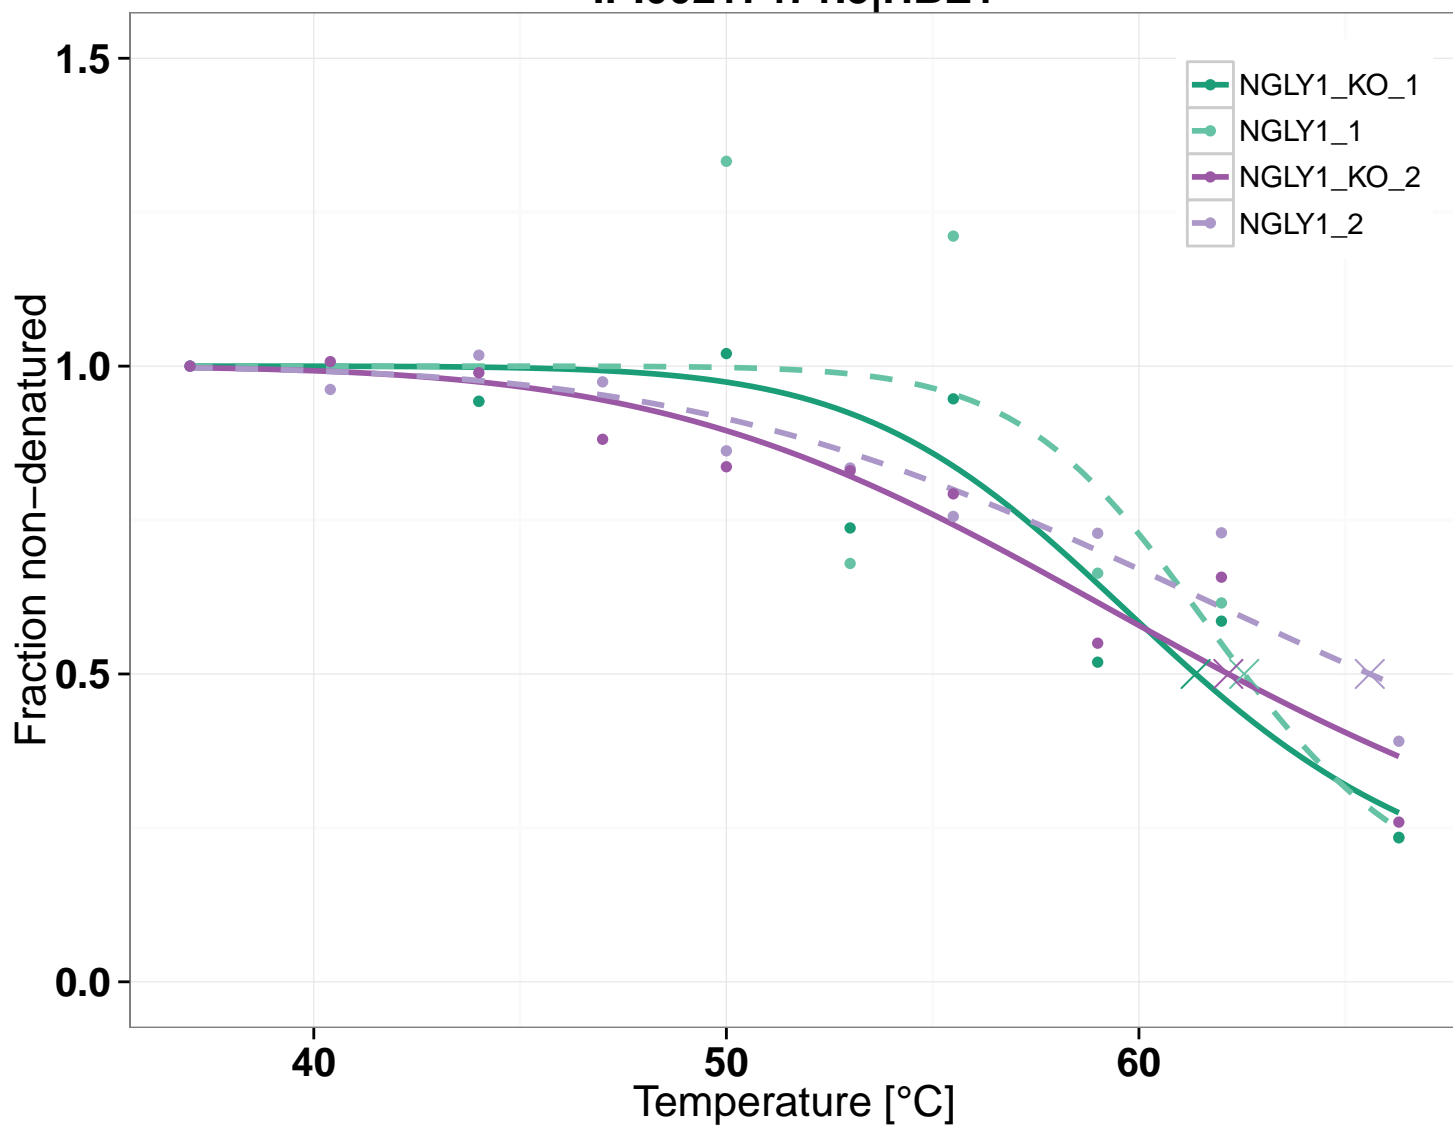

|            | meltPoint | slope  | plateau | R2   |
|------------|-----------|--------|---------|------|
| NGLY1_KO_1 | 61.37     | -0.063 | 0.11    | 0.48 |
| NGLY1_1    | 62.55     | -0.091 | 0.1     | 0.13 |
| NGLY1_KO_2 | 62.17     | -0.037 | 0       | 0.9  |
| NGLY1_2    | 65.6      | -0.031 | 0       | 0.9  |

Supplement: Supplementary file 6054 [file 1]

IPI00477313.3|HNRNPC

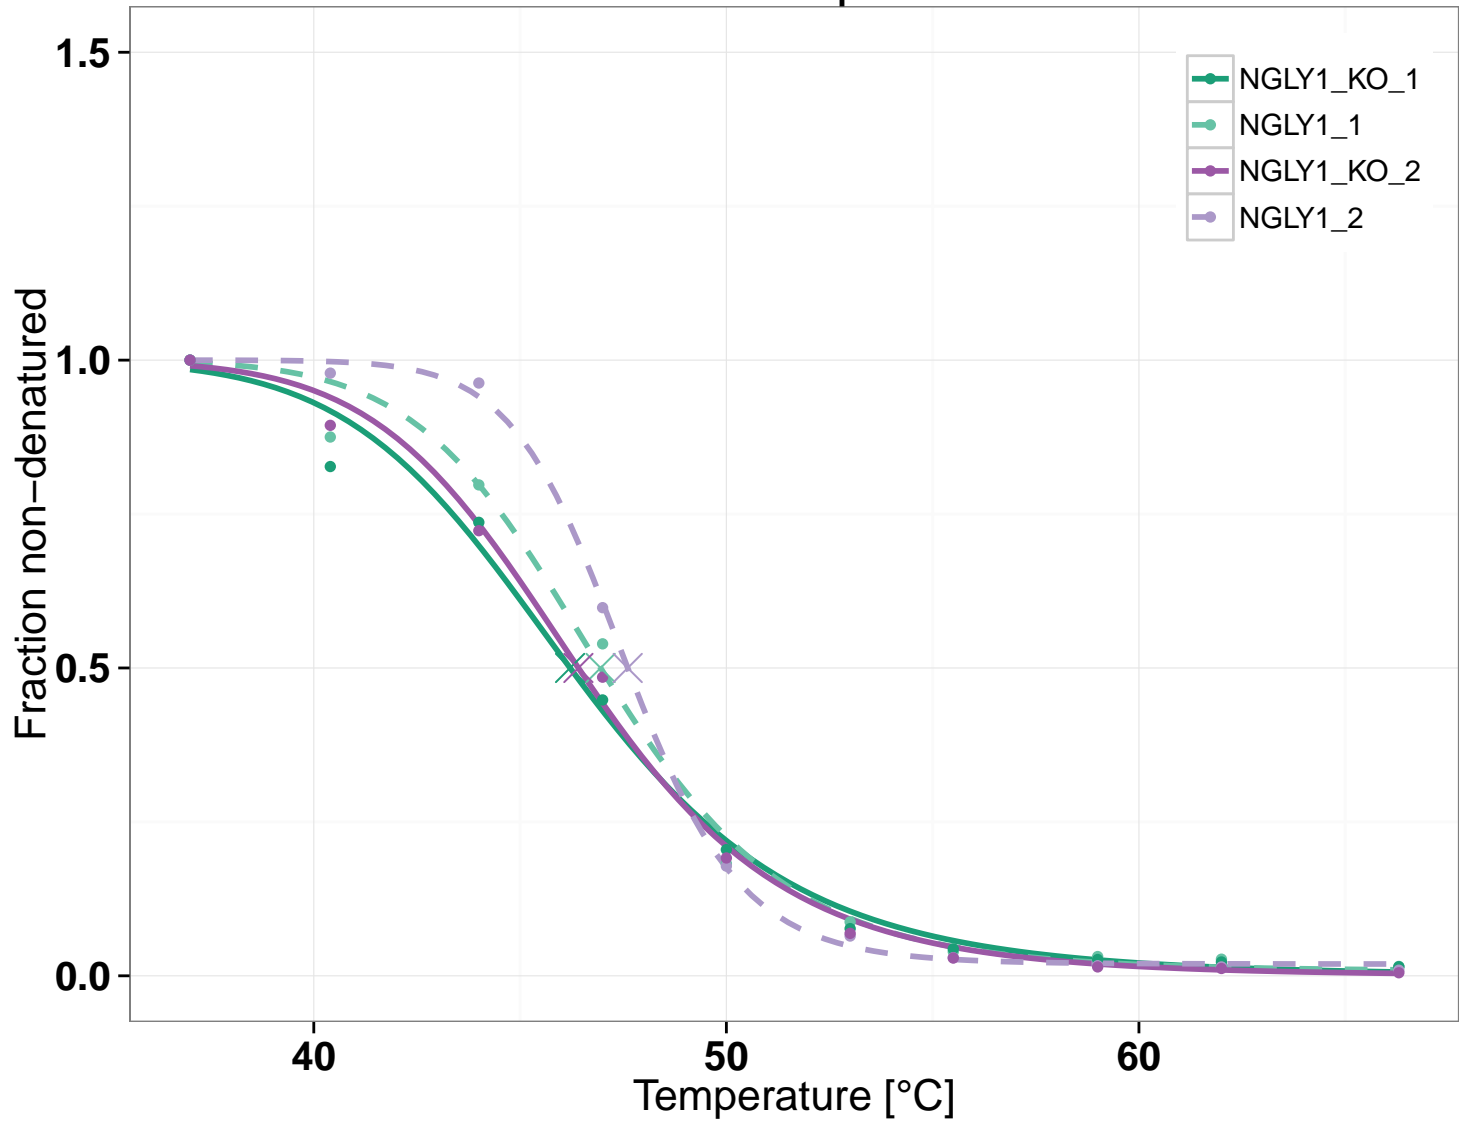

|            | meltPoint | slope  | plateau | R2   |
|------------|-----------|--------|---------|------|
| NGLY1_KO_1 | 46.21     | -0.092 | 0       | 0.99 |
| NGLY1_1    | 46.95     | -0.11  | 0.01    | 0.99 |
| NGLY1_KO_2 | 46.41     | -0.1   | 0       | 1    |
| NGLY1_2    | 47.61     | -0.18  | 0.02    | 1    |

Supplement: Supplementary file 6055 [file 1]

# IPI00027078.3|CPD

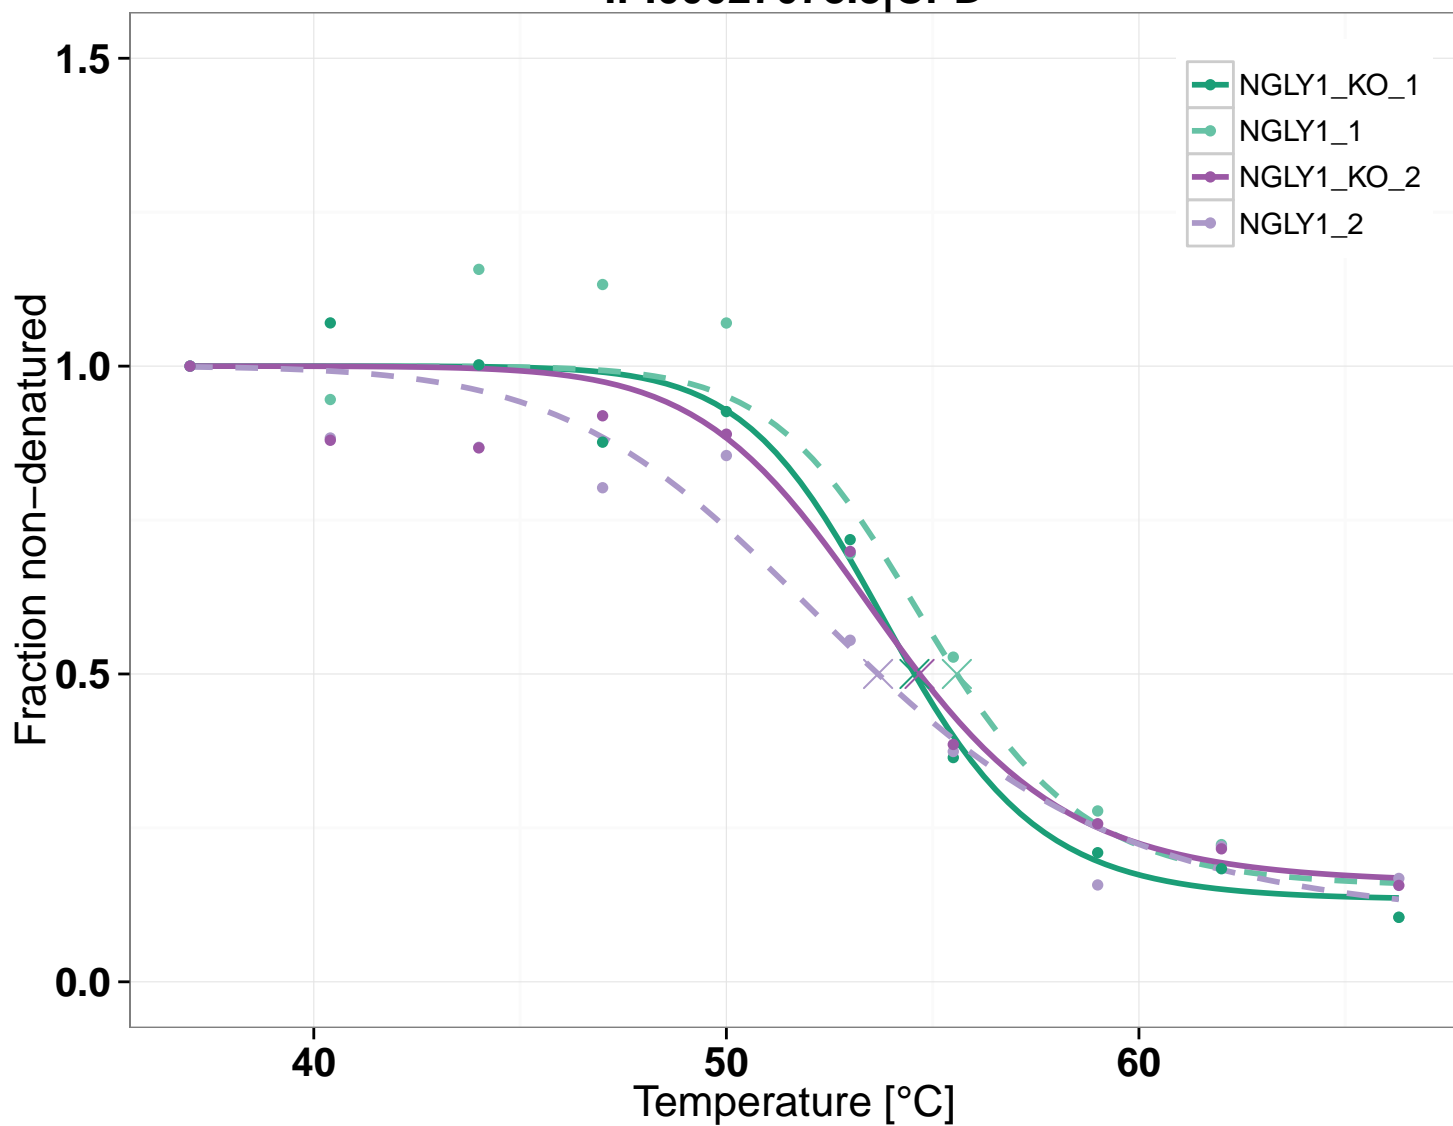

|            | meltPoint | slope  | plateau | R2   |
|------------|-----------|--------|---------|------|
| NGLY1_KO_1 | 54.56     | -0.12  | 0.13    | 0.98 |
| NGLY1_1    | 55.59     | -0.11  | 0.15    | 0.95 |
| NGLY1_KO_2 | 54.68     | -0.094 | 0.16    | 0.96 |
| NGLY1_2    | 53.68     | -0.066 | 0.09    | 0.95 |

Supplement: Supplementary file 6056 [file 1]

IPI00604763.2|TMEM66

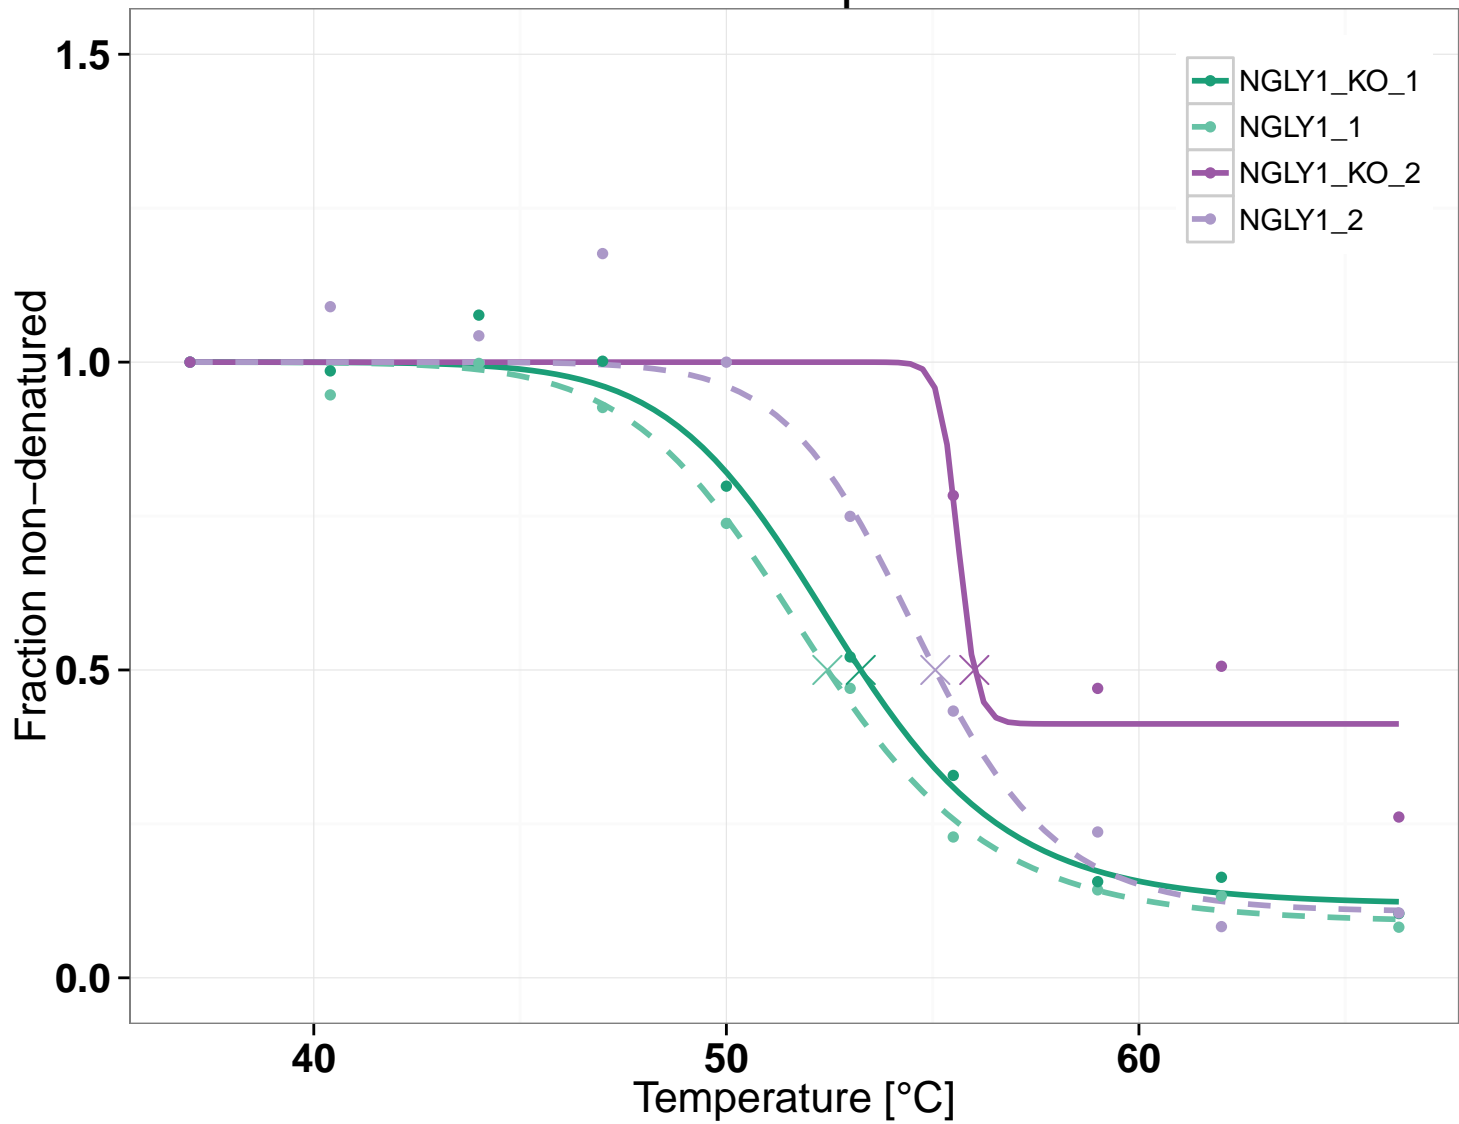

|            | meltPoint | slope | plateau | R2    |
|------------|-----------|-------|---------|-------|
| NGLY1_KO_1 | 53.26     | -0.11 | 0.12    | 0.99  |
| NGLY1_1    | 52.45     | -0.1  | 0.09    | 1     |
| NGLY1_KO_2 | 56.01     | -0.66 | 0.41    | -0.32 |
| NGLY1_2    | 55.06     | -0.14 | 0.11    | 0.97  |

Supplement: Supplementary file 6057 [file 1]

IPI00465299.2|SLC12A6

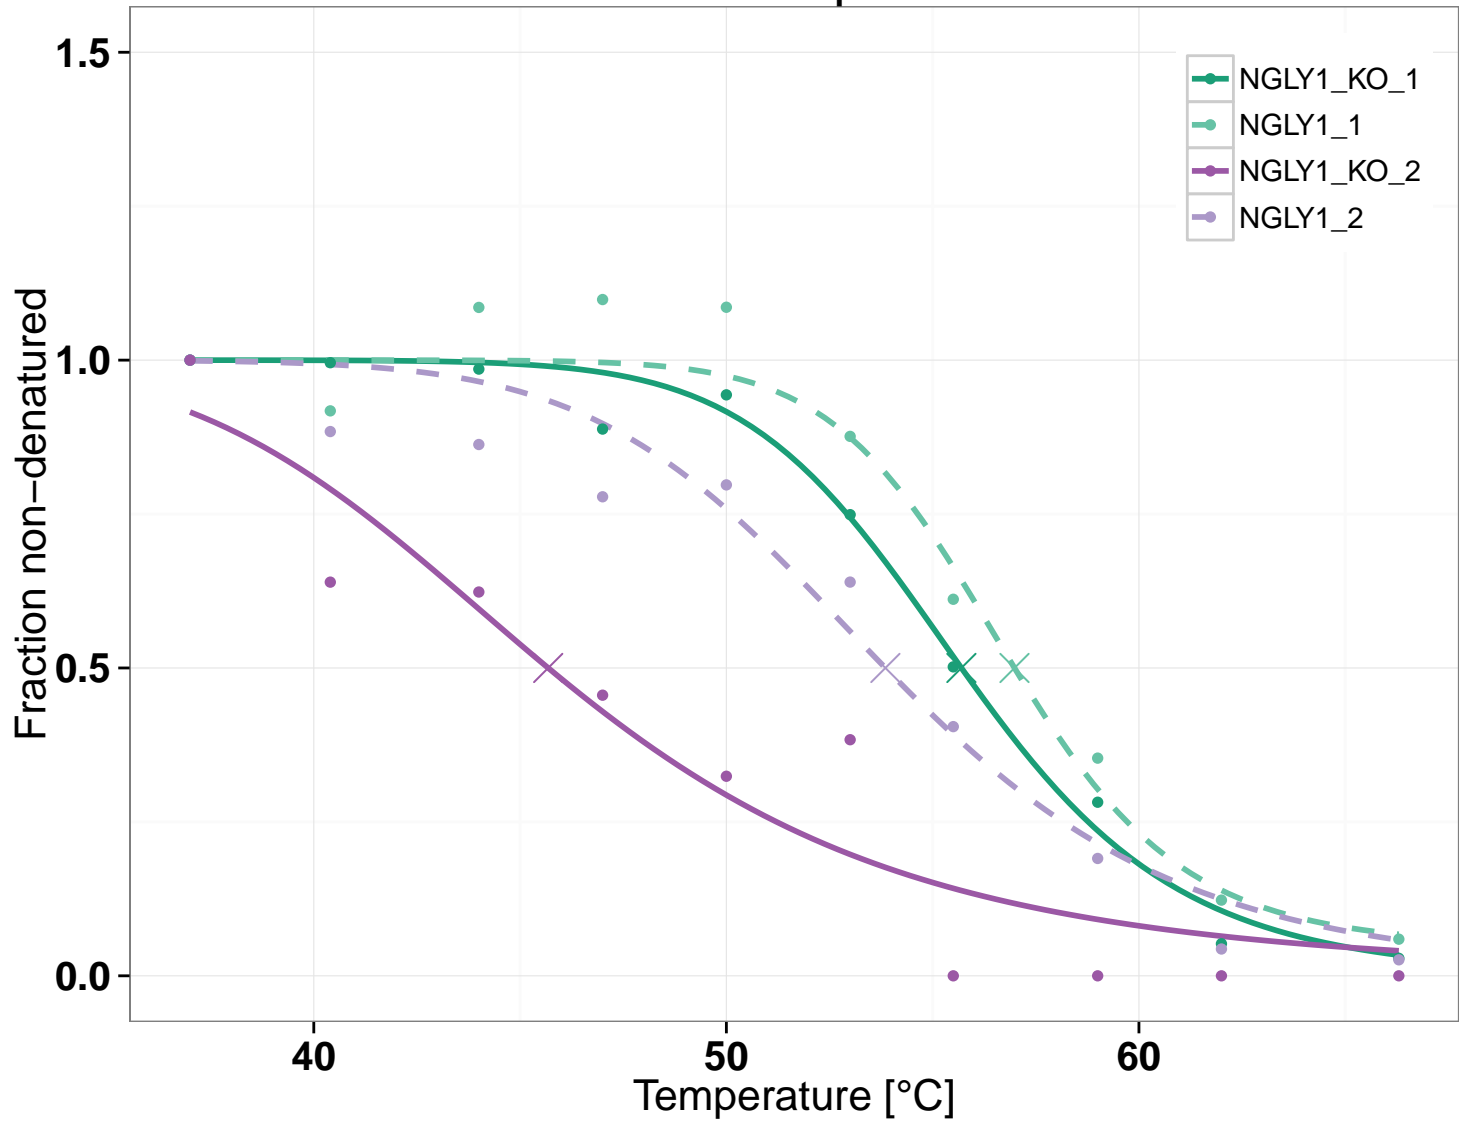

|            | meltPoint | slope  | plateau | R2   |
|------------|-----------|--------|---------|------|
| NGLY1_KO_1 | 55.7      | -0.095 | 0       | 0.99 |
| NGLY1_1    | 56.98     | -0.11  | 0.05    | 0.97 |
| NGLY1_KO_2 | 45.68     | -0.058 | 0       | 0.91 |
| NGLY1_2    | 53.85     | -0.07  | 0       | 0.96 |

Supplement: Supplementary file 6058 [file 1]

# IPI00374208.2|CAND2

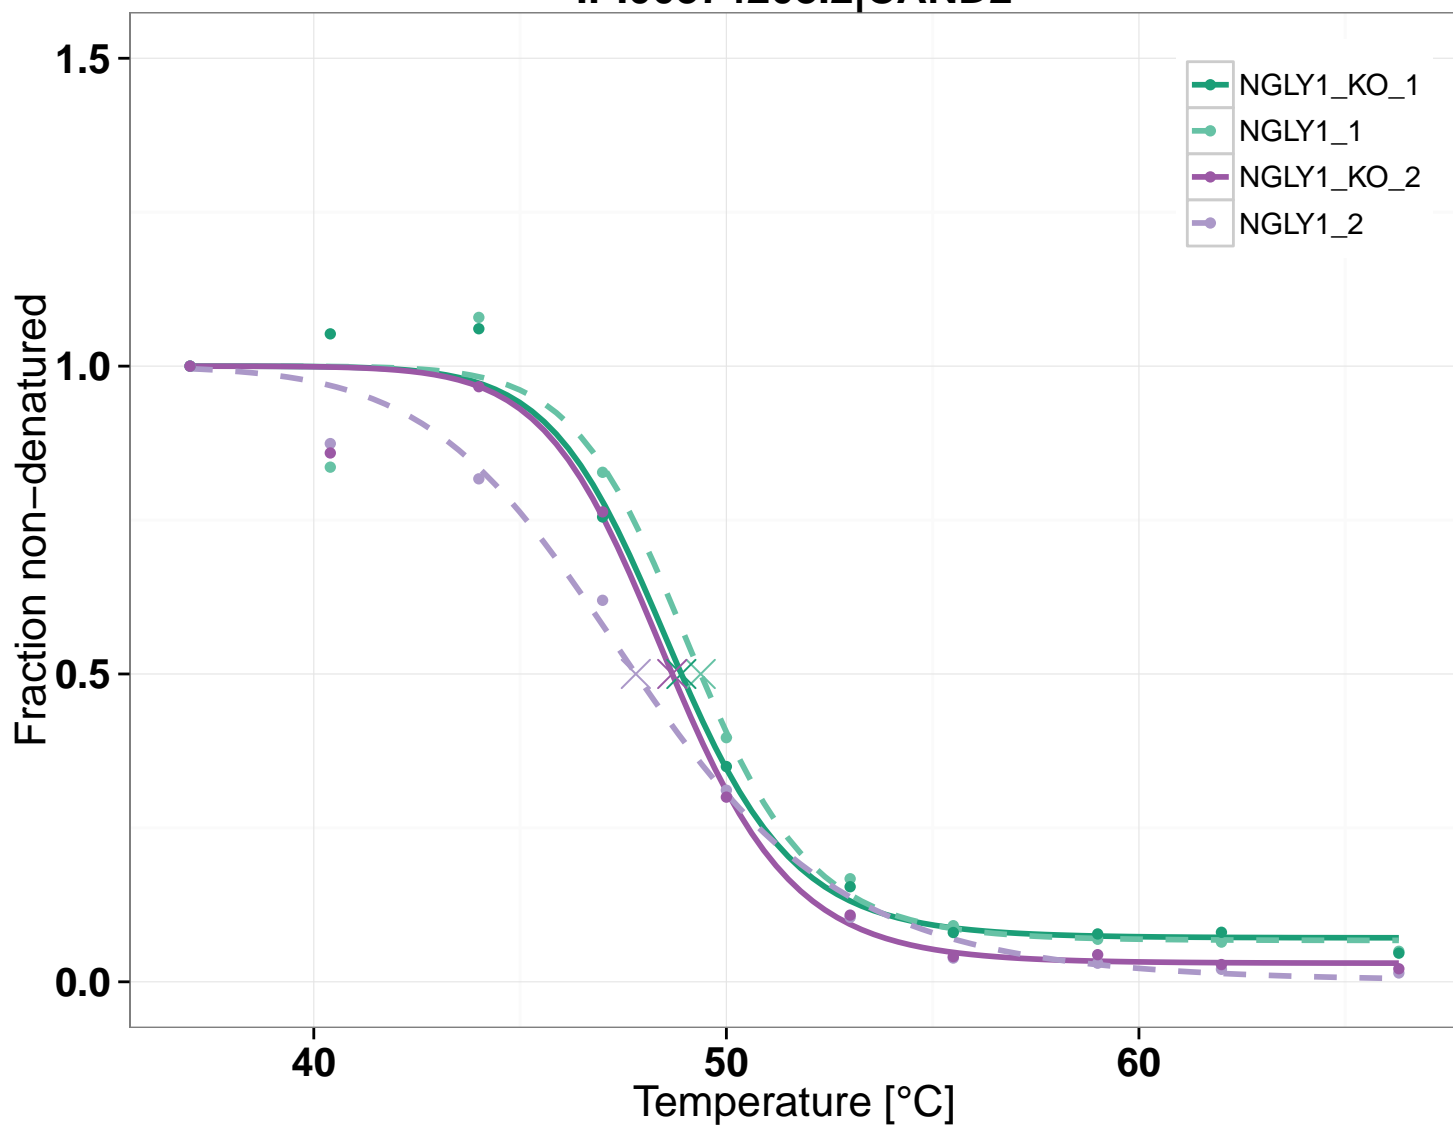

|            | meltPoint | slope  | plateau | R2   |
|------------|-----------|--------|---------|------|
| NGLY1_KO_1 | 48.91     | -0.16  | 0.07    | 0.99 |
| NGLY1_1    | 49.38     | -0.16  | 0.07    | 0.98 |
| NGLY1_KO_2 | 48.69     | -0.16  | 0.03    | 0.99 |
| NGLY1_2    | 47.81     | -0.099 | 0       | 0.99 |

Supplement: Supplementary file 6059 [file 1]

# IPI00174976.5|MPP5

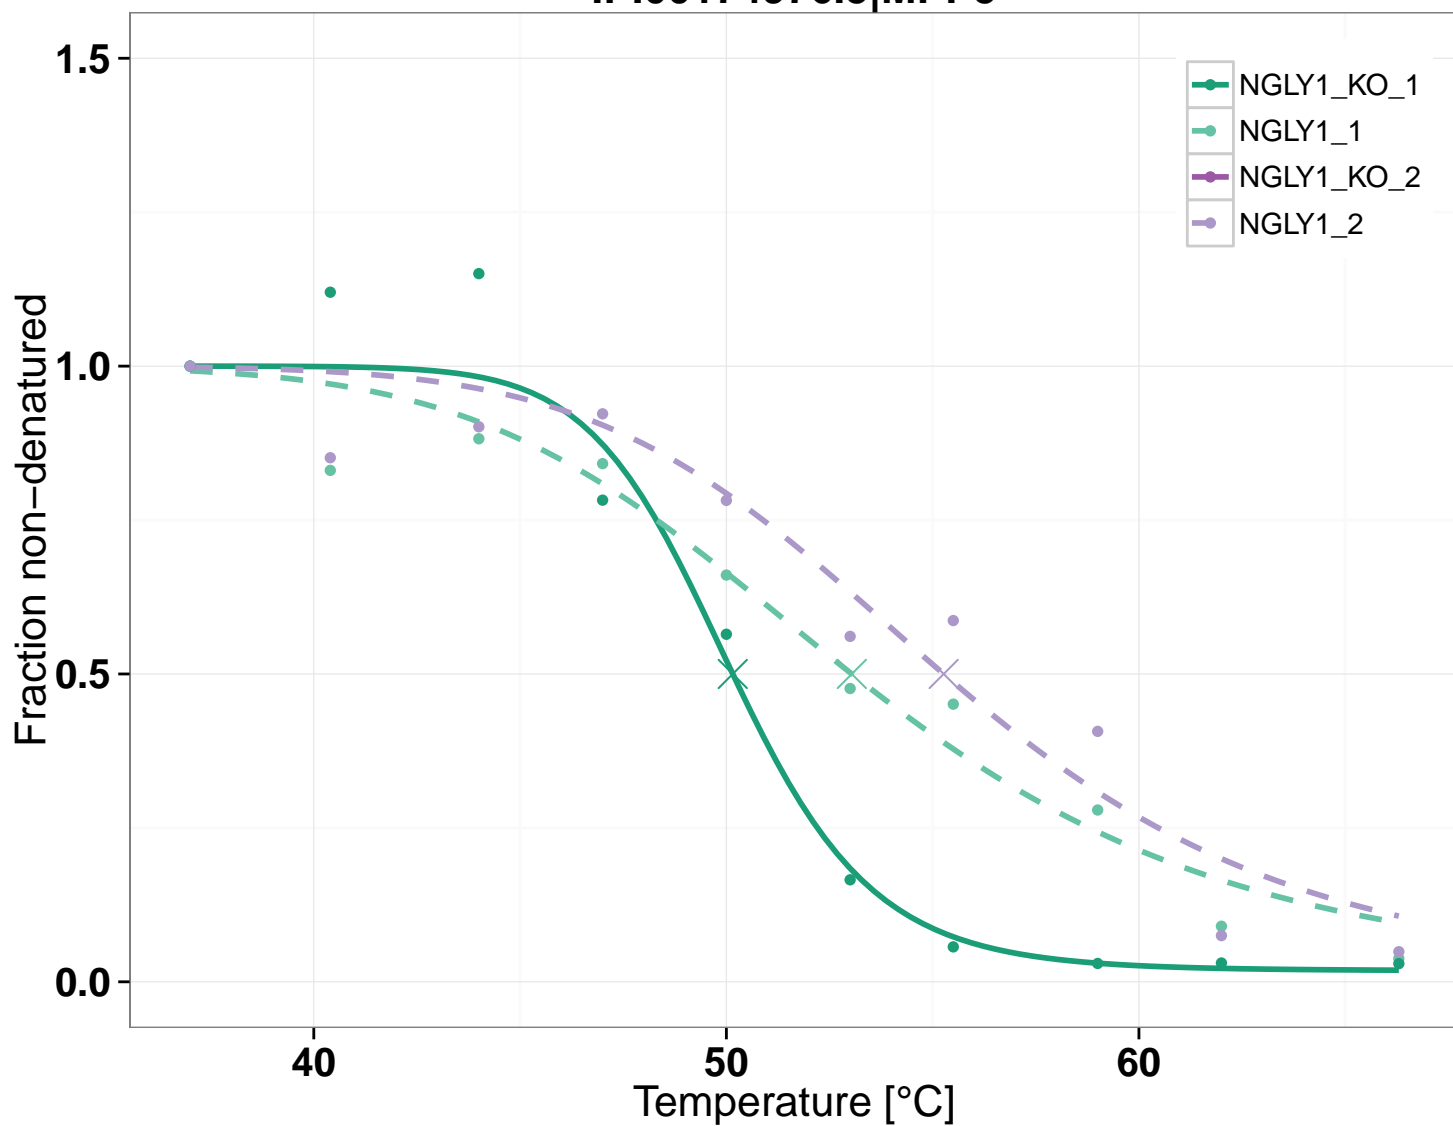

|            | meltPoint | slope  | plateau | R2   |
|------------|-----------|--------|---------|------|
| NGLY1_KO_1 | 50.15     | -0.14  | 0.02    | 0.97 |
| NGLY1_1    | 53.04     | -0.055 | 0       | 0.96 |
| NGLY1_KO_2 | -         | -      | -       | -    |
| NGLY1_2    | 55.27     | -0.059 | 0       | 0.94 |

Supplement: Supplementary file 6060 [file 1]

# IPI00187003.12|C3ORF19

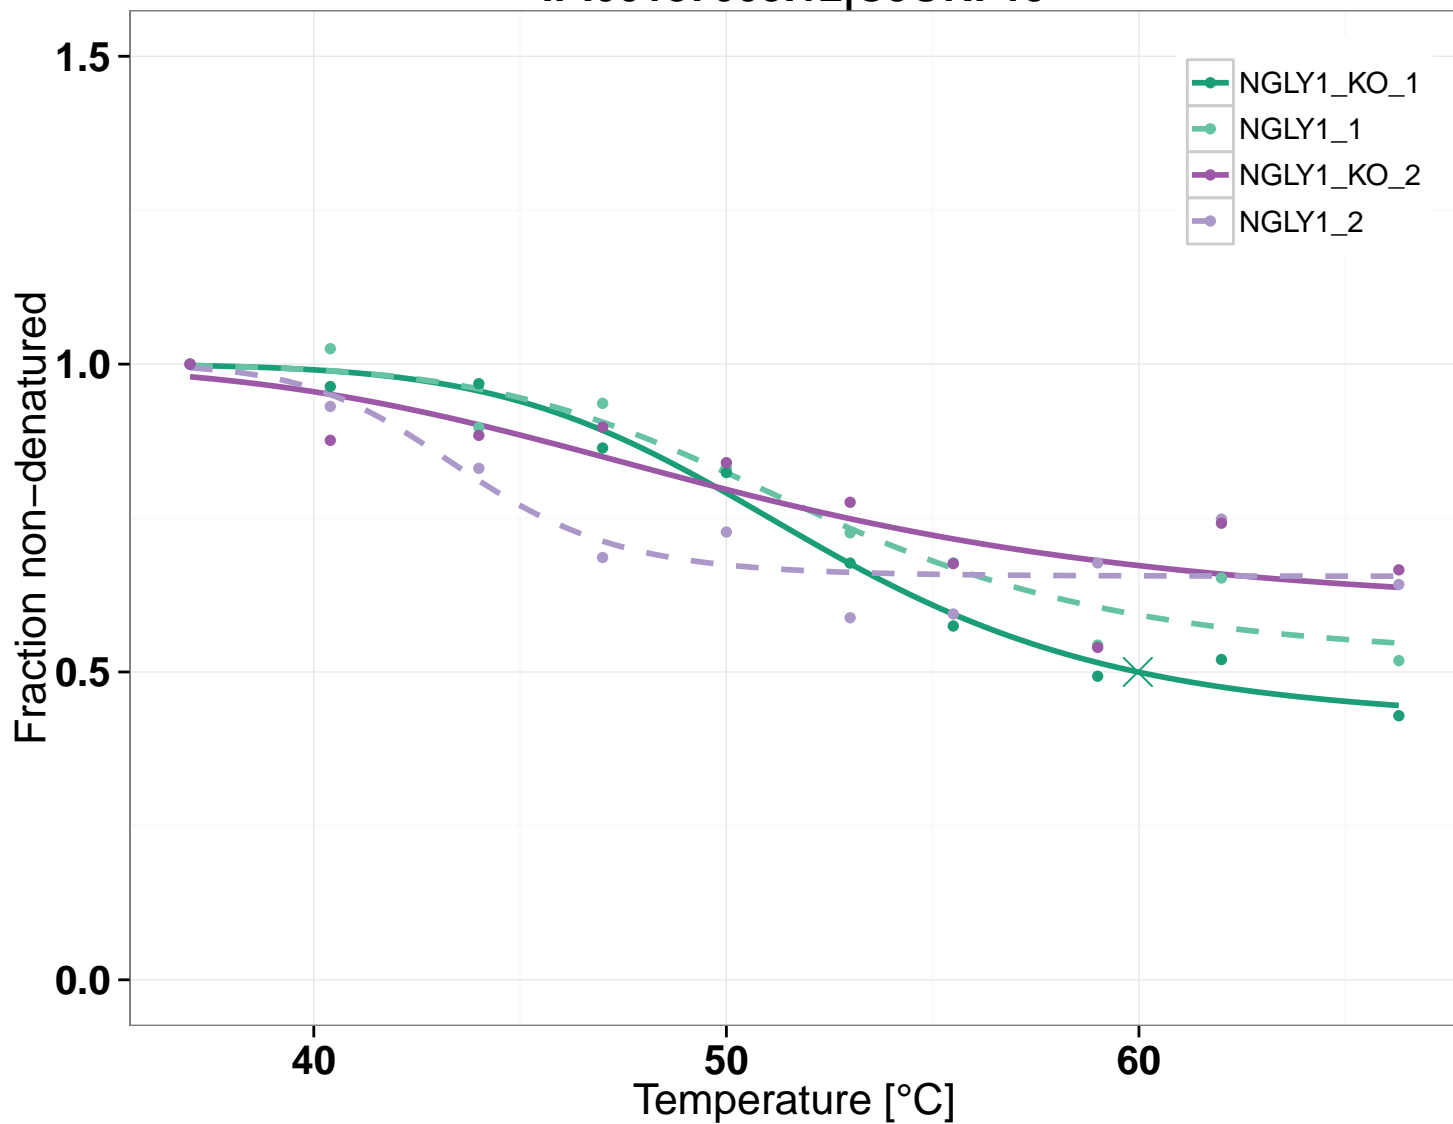

|            | meltPoint | slope  | plateau | R2   |
|------------|-----------|--------|---------|------|
| NGLY1_KO_1 | 59.97     | -0.039 | 0.42    | 0.99 |
| NGLY1_1    | -         | -0.031 | 0.52    | 0.94 |
| NGLY1_KO_2 | -         | -0.018 | 0.59    | 0.76 |
| NGLY1_2    | -         | -0.045 | 0.66    | 0.87 |

Supplement: Supplementary file 6061 [file 1]

IPI00171573.2|CCDC109A

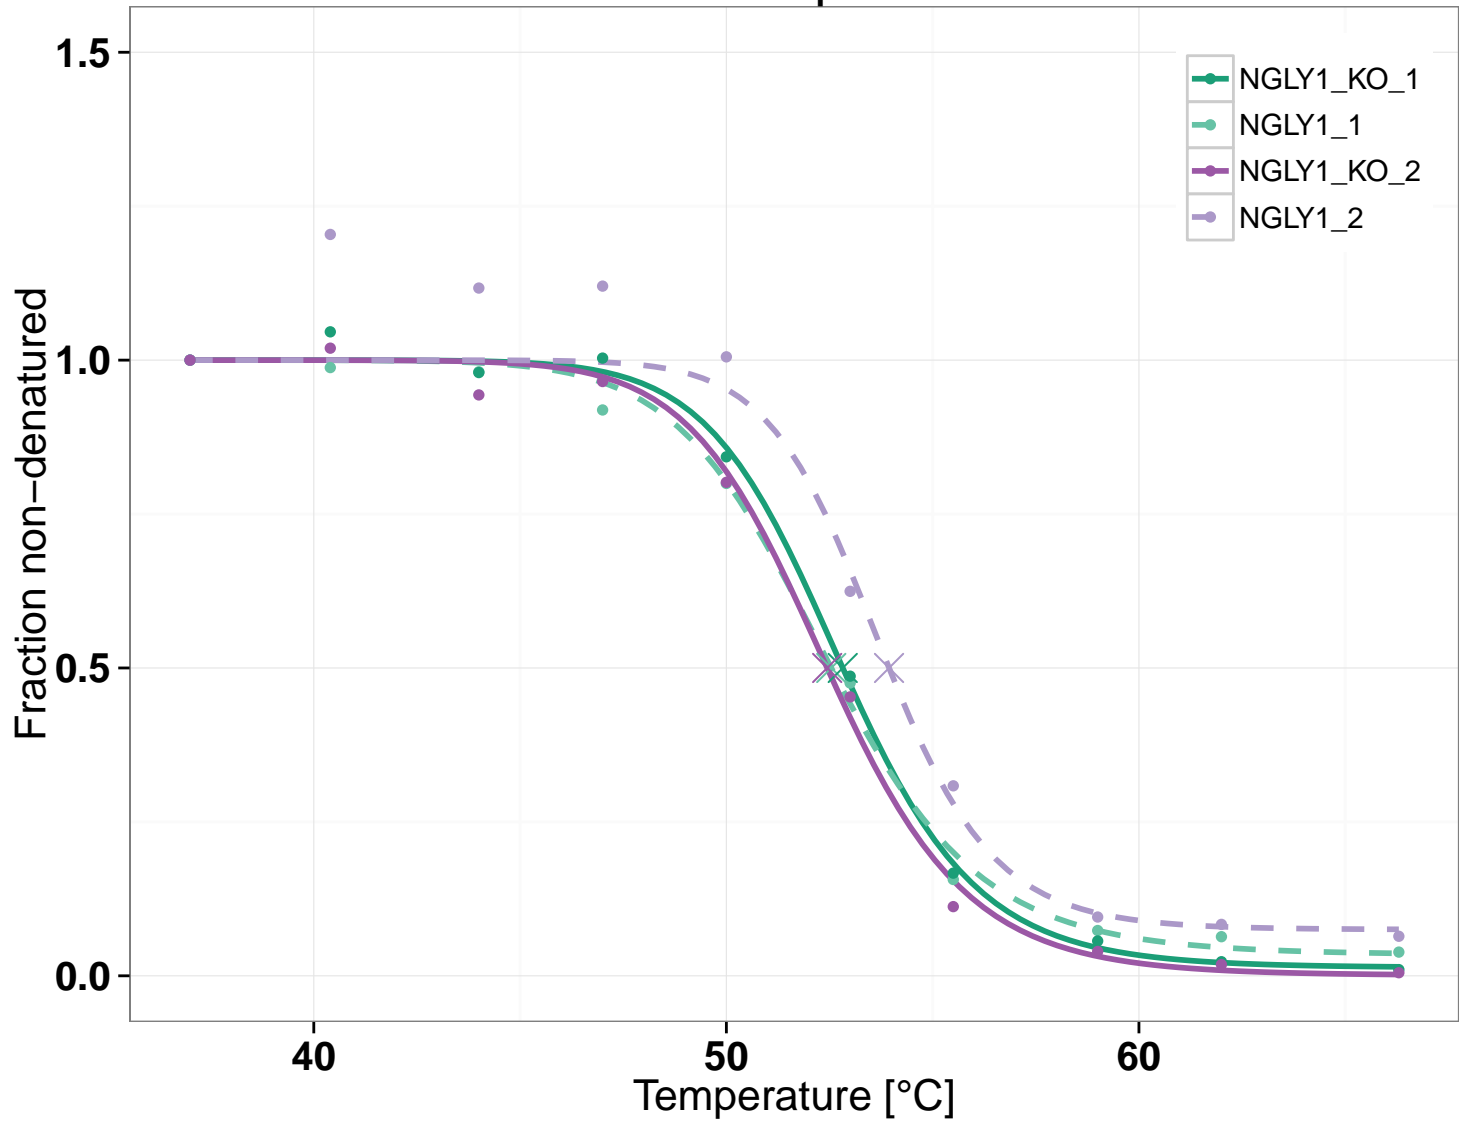

|            | meltPoint | slope | plateau | R2   |
|------------|-----------|-------|---------|------|
| NGLY1_KO_1 | 52.82     | -0.15 | 0.01    | 1    |
| NGLY1_1    | 52.54     | -0.13 | 0.03    | 1    |
| NGLY1_KO_2 | 52.44     | -0.15 | 0       | 1    |
| NGLY1_2    | 53.94     | -0.17 | 0.07    | 0.96 |

Supplement: Supplementary file 6062 [file 1]

# IPI00555988.2|C17ORF90

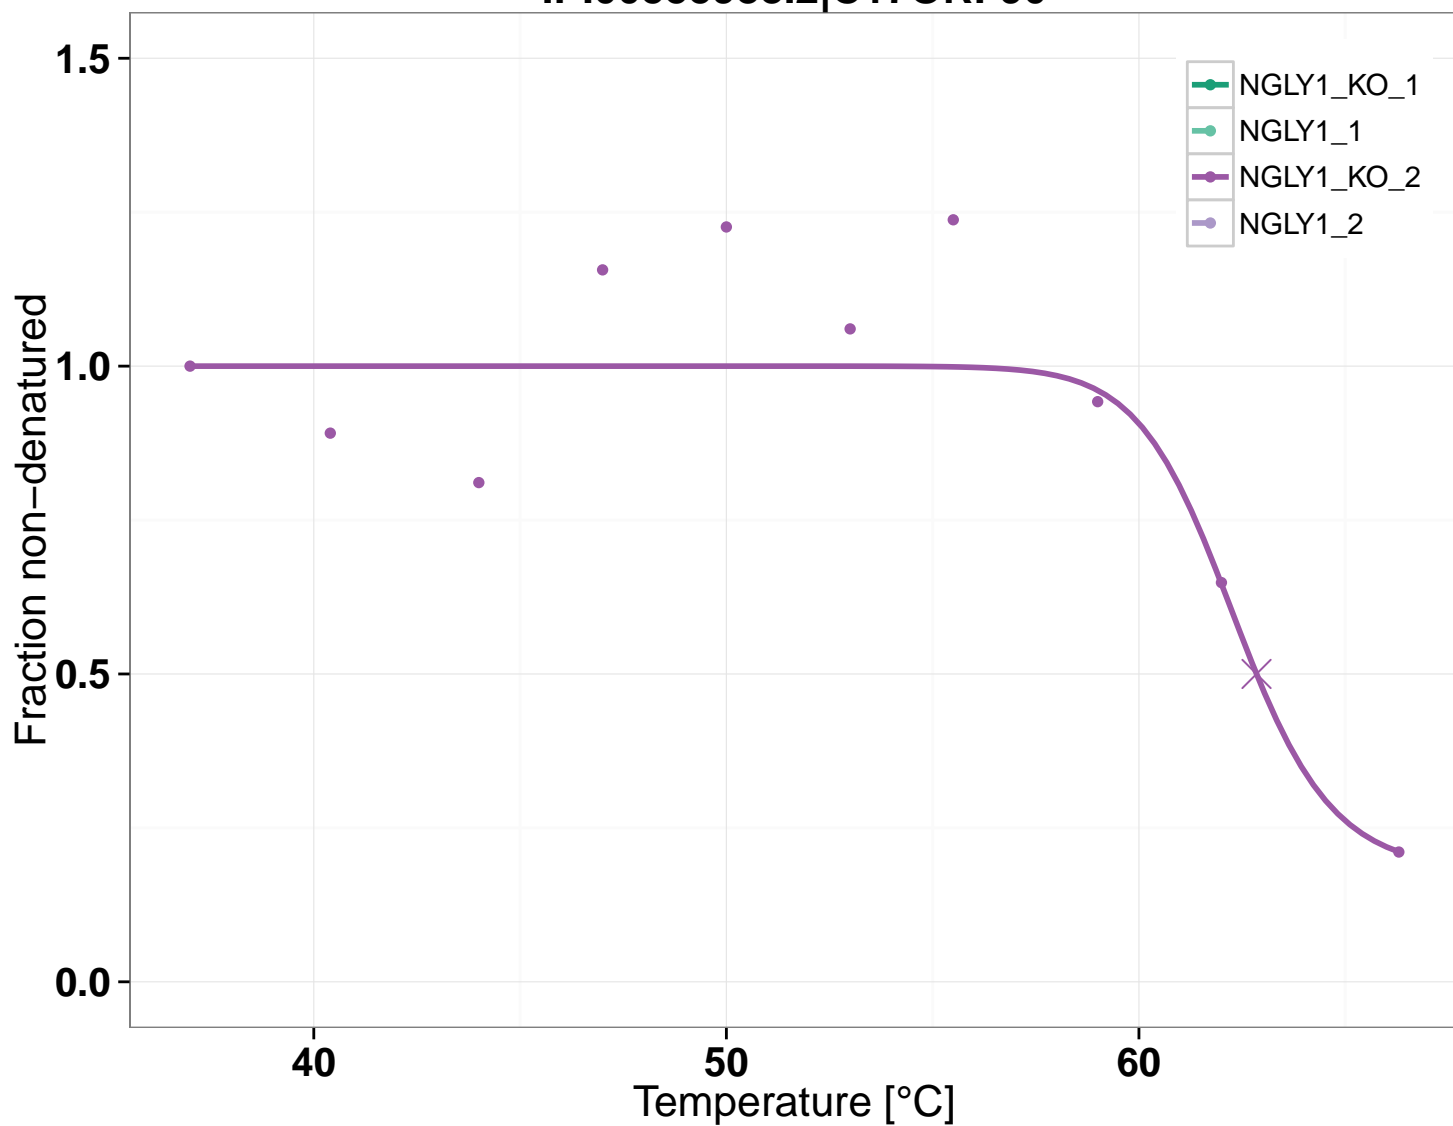

|            | meltPoint | slope | plateau | R2   |
|------------|-----------|-------|---------|------|
| NGLY1_KO_1 | —         | —     | —       | —    |
| NGLY1_1    | —         | —     | —       | —    |
| NGLY1_KO_2 | 62.85     | -0.18 | 0.18    | 0.79 |
| NGLY1_2    | —         | —     | —       | —    |

Supplement: Supplementary file 6063 [file 1]

IPI00872773.1|ERO1L

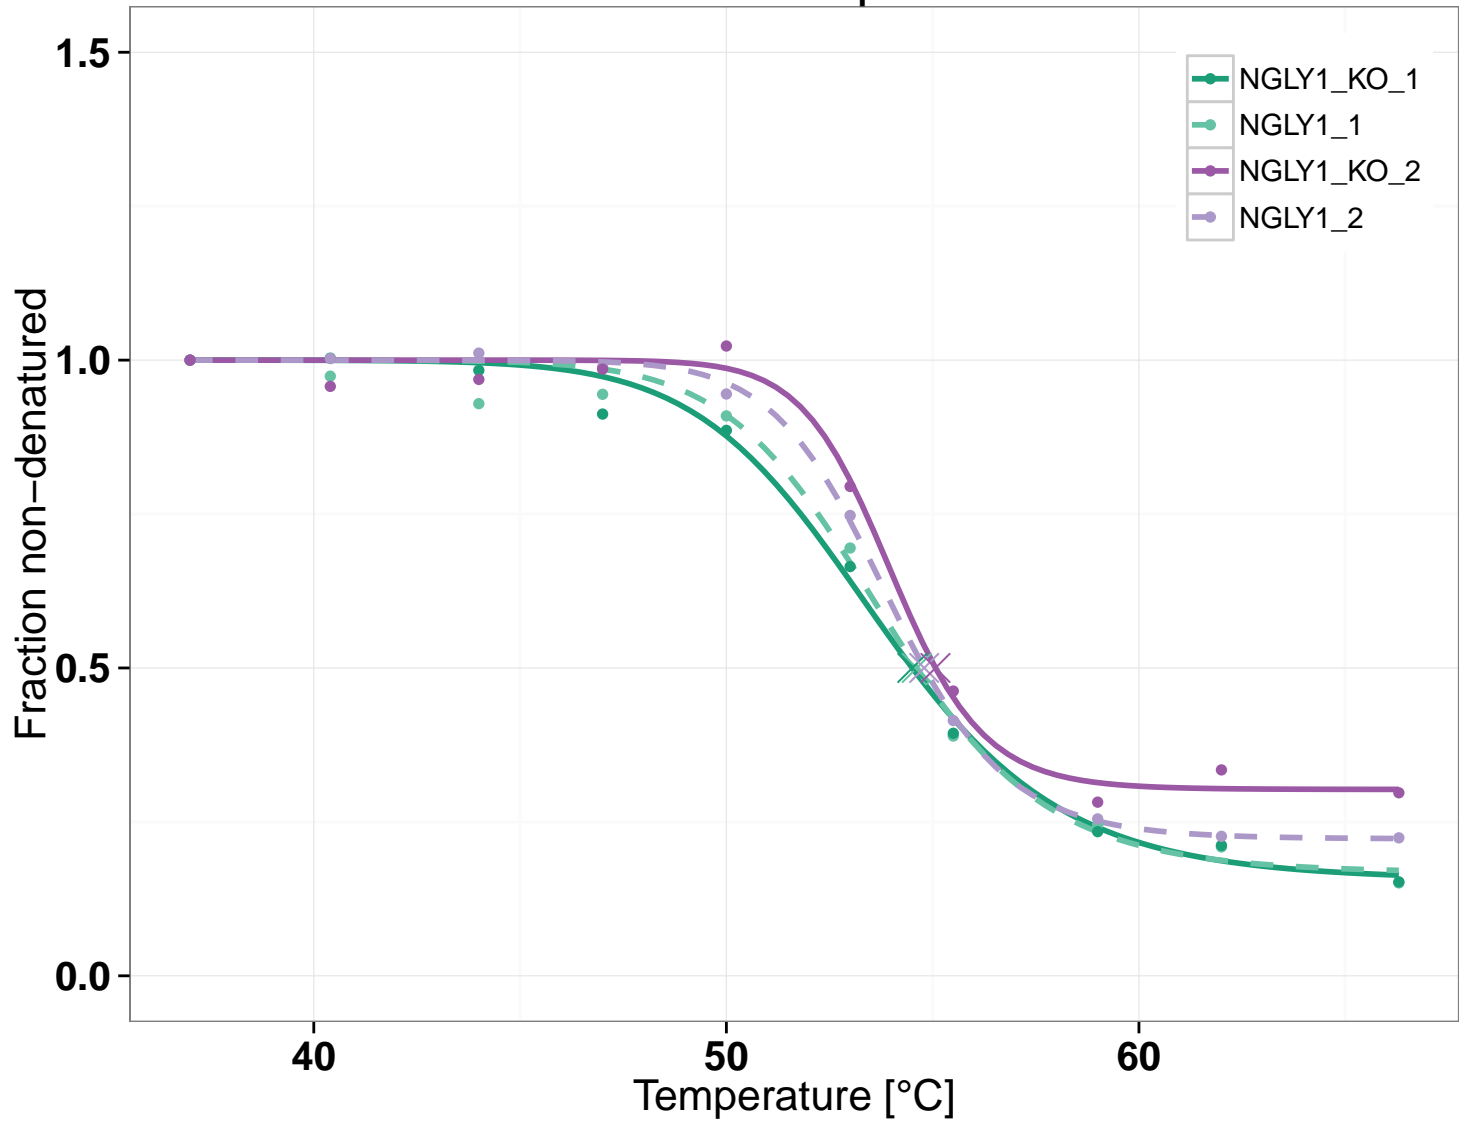

|            | meltPoint | slope  | plateau | R2   |
|------------|-----------|--------|---------|------|
| NGLY1_KO_1 | 54.51     | -0.096 | 0.16    | 0.99 |
| NGLY1_1    | 54.61     | -0.11  | 0.17    | 0.99 |
| NGLY1_KO_2 | 55.07     | -0.16  | 0.3     | 0.99 |
| NGLY1_2    | 54.8      | -0.14  | 0.22    | 1    |

Supplement: Supplementary file 6064 [file 1]

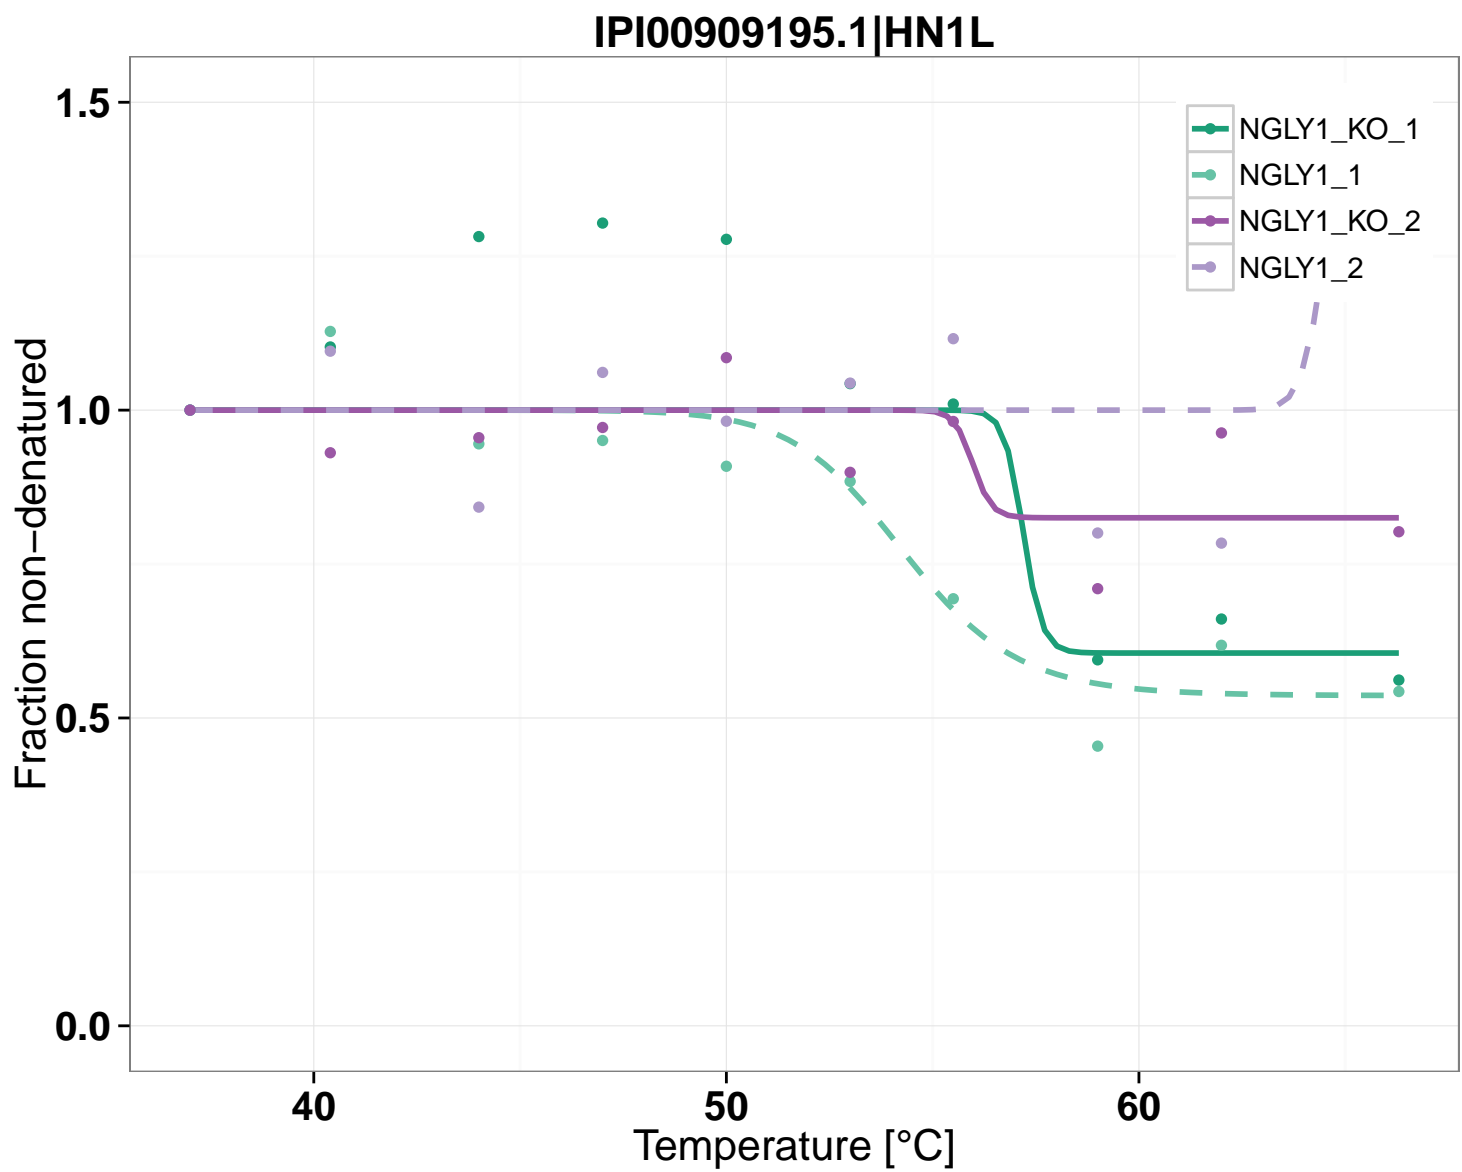

|            | meltPoint | slope  | plateau | R2   |
|------------|-----------|--------|---------|------|
| NGLY1_KO_1 | —         | −0.43  | 0.61    | 0.64 |
| NGLY1_1    | —         | −0.084 | 0.54    | 0.9  |
| NGLY1_KO_2 | —         | −0.2   | 0.83    | 0.43 |
| NGLY1_2    | —         | 0.45   | 1.5     | 0.64 |

Supplement: Supplementary file 6065 [file 1]

IPI00829615.1|SDR39U1

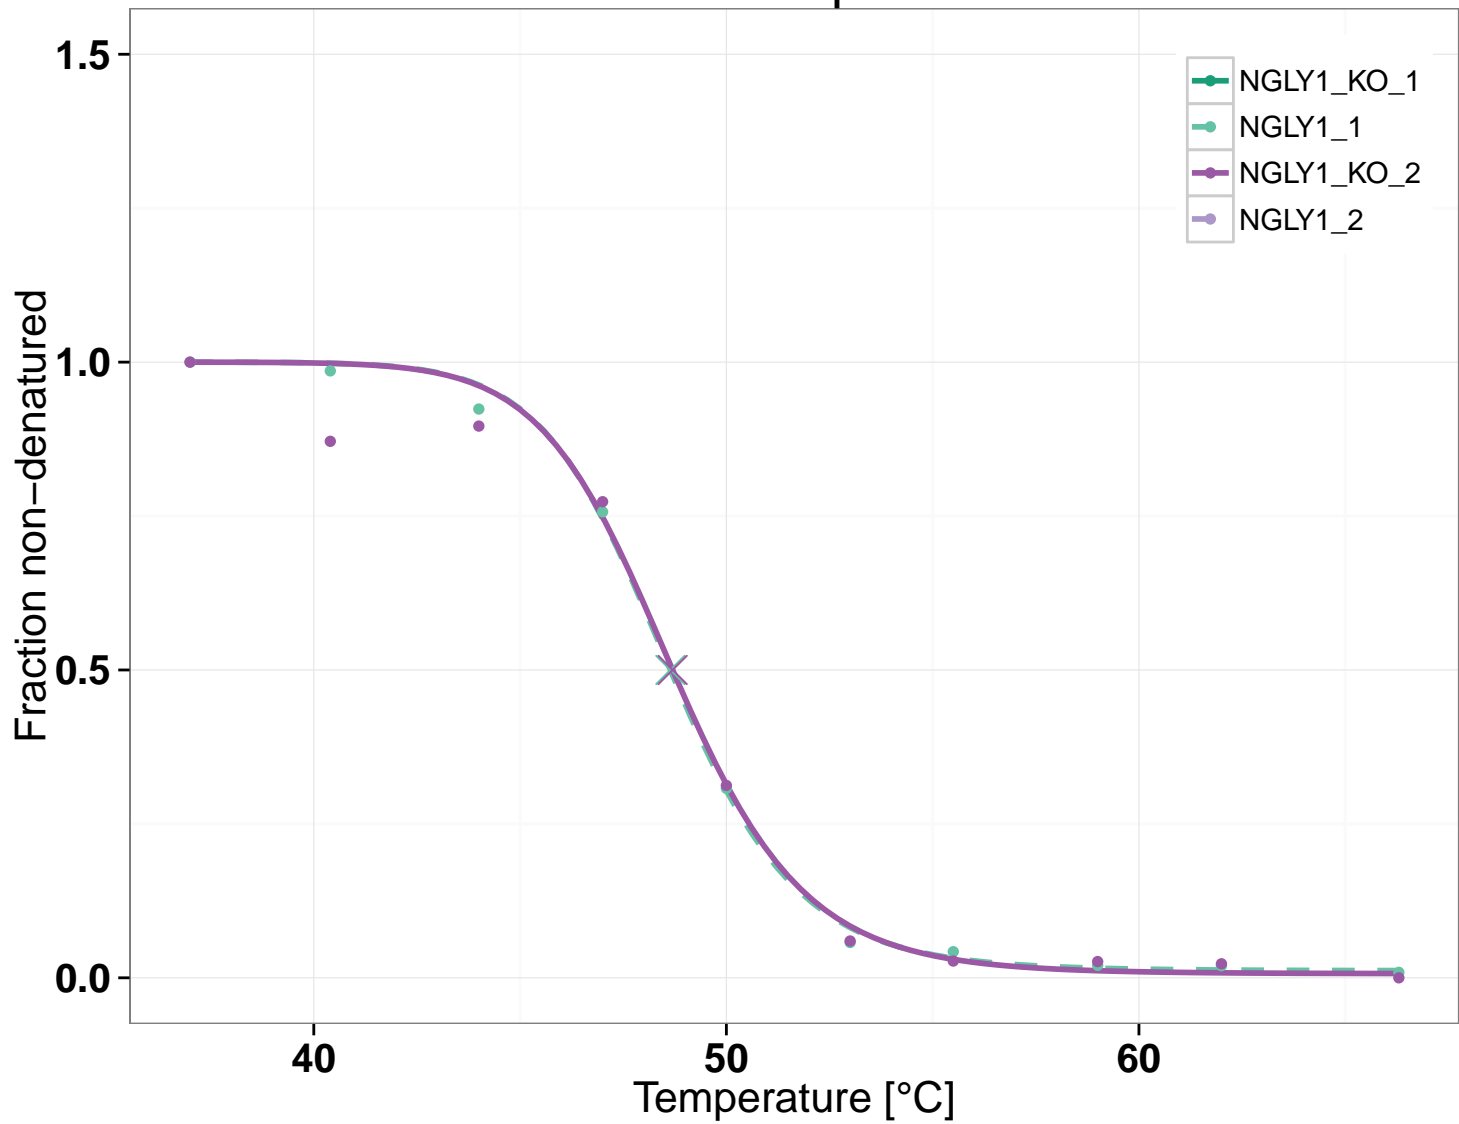

|            | meltPoint | slope | plateau | R2   |
|------------|-----------|-------|---------|------|
| NGLY1_KO_1 | –         | –     | –       | –    |
| NGLY1_1    | 48.64     | –0.16 | 0.01    | 1    |
| NGLY1_KO_2 | 48.7      | –0.16 | 0.01    | 0.99 |
| NGLY1_2    | –         | –     | –       | –    |

Supplement: Supplementary file 6066 [file 1]

IPI00012500.1|BRIP1

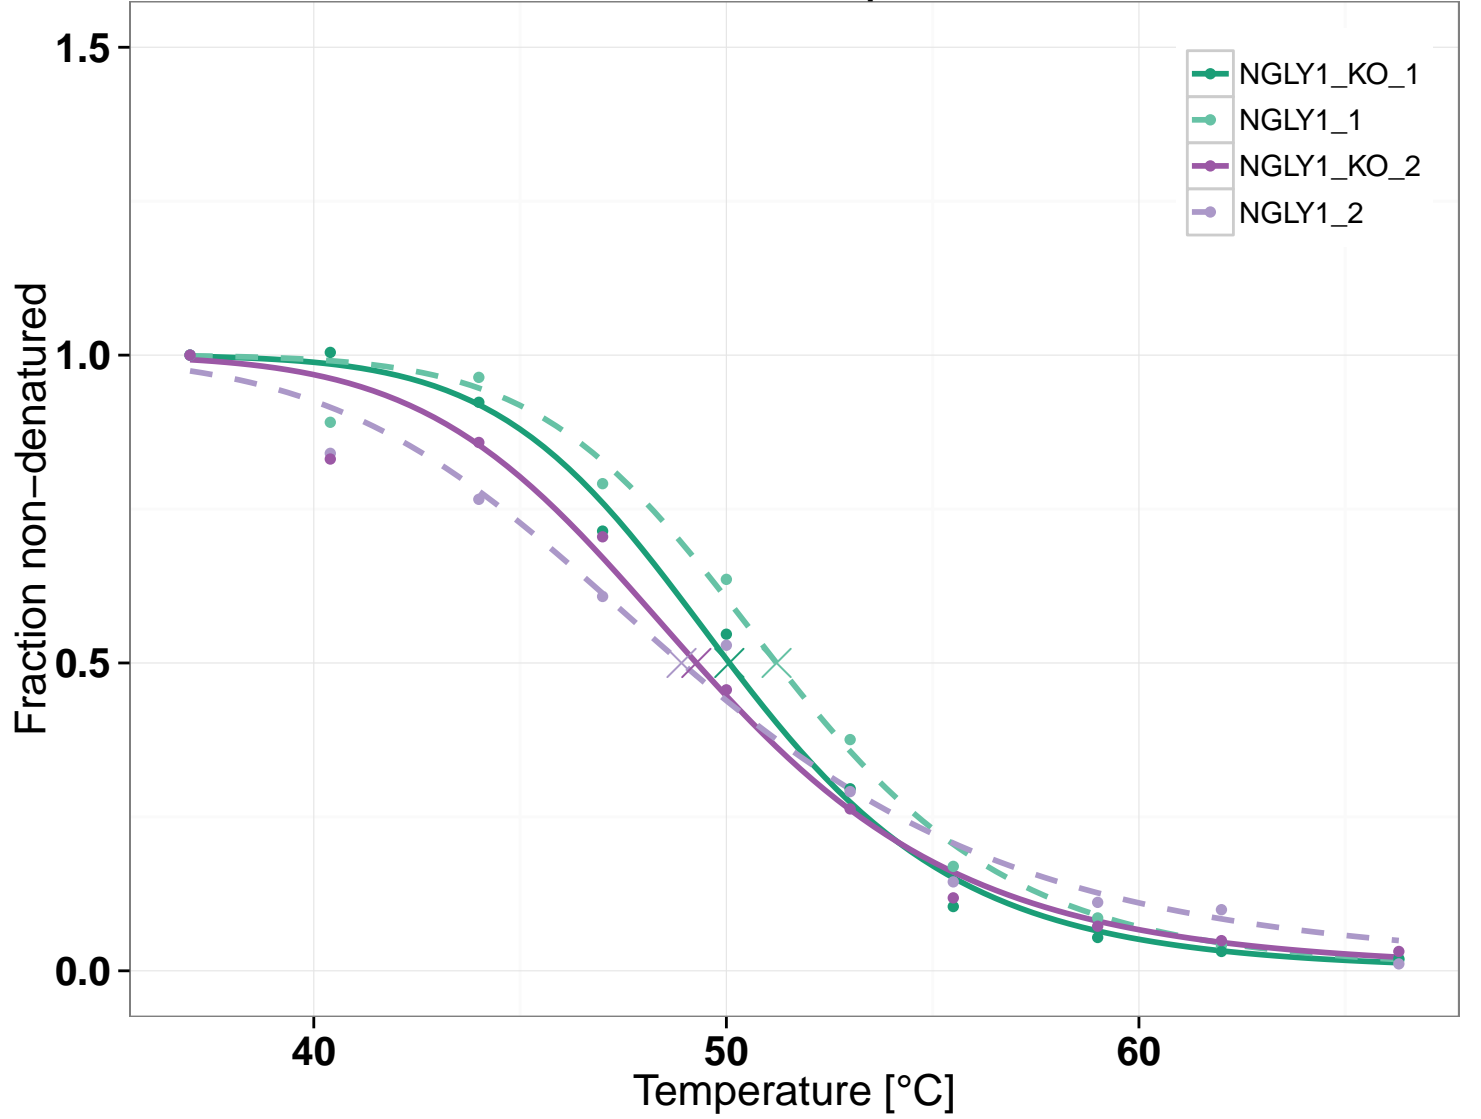

|            | meltPoint | slope  | plateau | R2   |
|------------|-----------|--------|---------|------|
| NGLY1_KO_1 | 50.07     | -0.089 | 0       | 1    |
| NGLY1_1    | 51.22     | -0.087 | 0       | 0.99 |
| NGLY1_KO_2 | 49.27     | -0.076 | 0       | 0.98 |
| NGLY1_2    | 48.91     | -0.06  | 0       | 0.98 |

Supplement: Supplementary file 6067 [file 1]

IPI00010146.1|TMEM50B

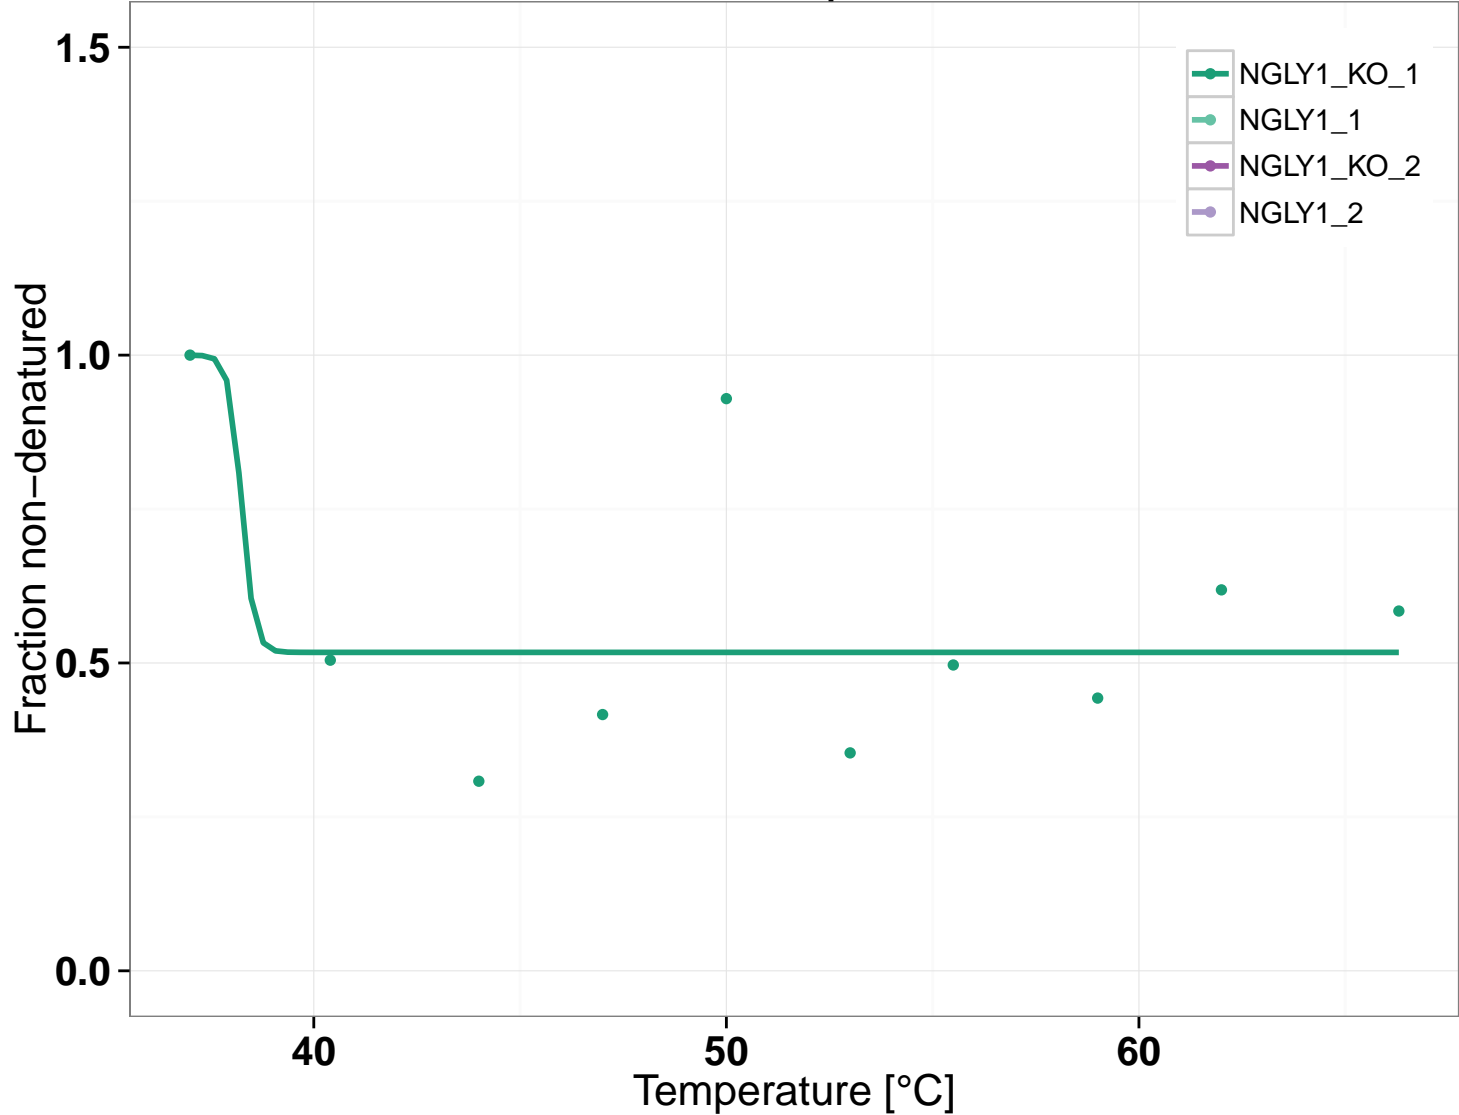

|            | meltPoint | slope | plateau | R2   |
|------------|-----------|-------|---------|------|
| NGLY1_KO_1 | —         | -0.79 | 0.52    | 0.44 |
| NGLY1_1    | —         | —     | —       | —    |
| NGLY1_KO_2 | —         | —     | —       | —    |
| NGLY1_2    | —         | —     | —       | —    |

Supplement: Supplementary file 6068 [file 1]

# IPI00554541.2|ILVBL

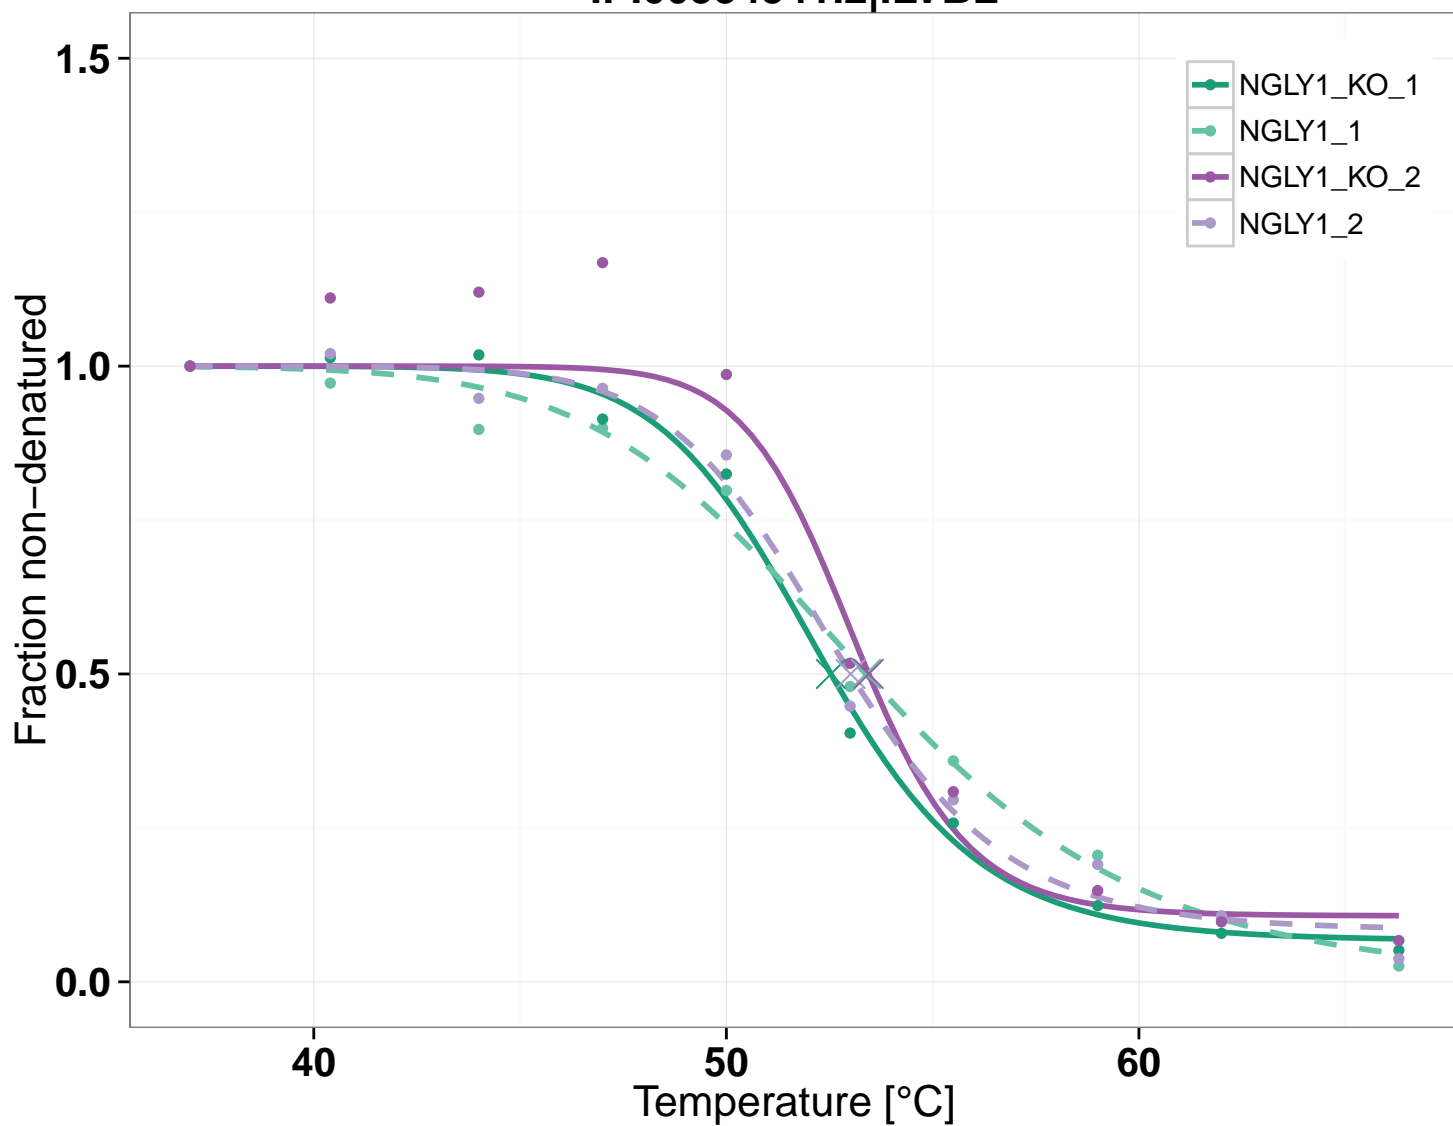

|            | meltPoint | slope  | plateau | R2   |
|------------|-----------|--------|---------|------|
| NGLY1_KO_1 | 52.53     | -0.12  | 0.07    | 1    |
| NGLY1_1    | 53.38     | -0.074 | 0       | 0.99 |
| NGLY1_KO_2 | 53.45     | -0.16  | 0.11    | 0.96 |
| NGLY1_2    | 53.01     | -0.11  | 0.08    | 0.99 |

Supplement: Supplementary file 6069 [file 1]

IPI00472116.1|ZNF688

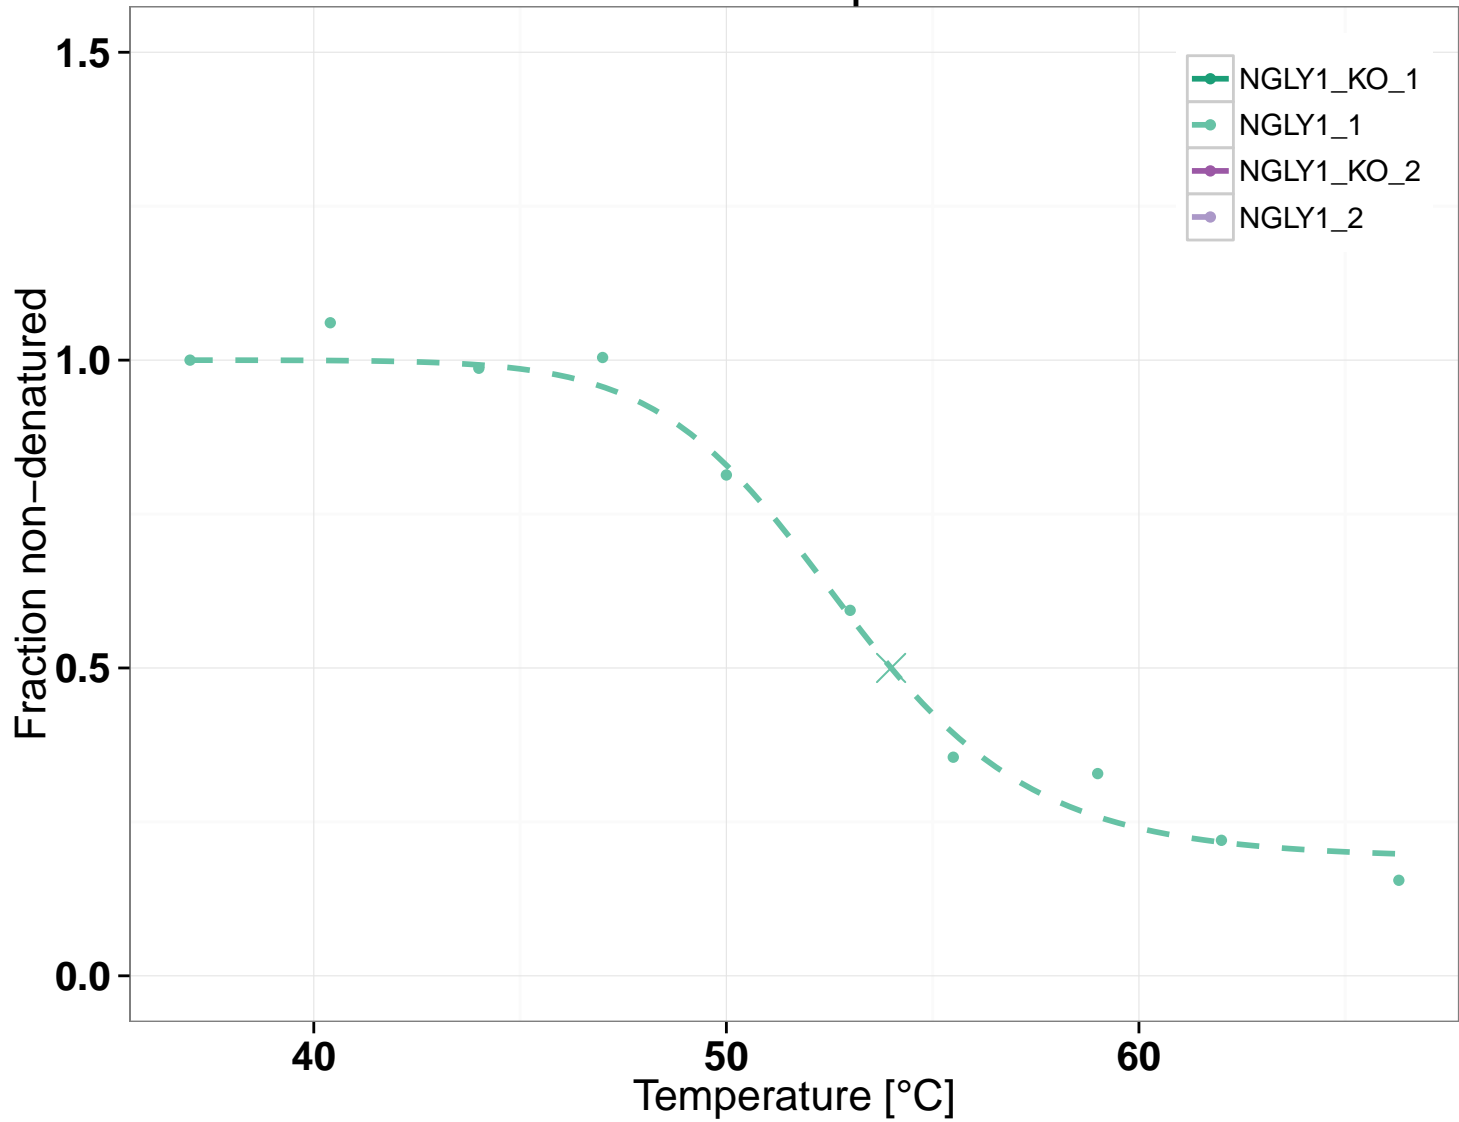

|            | meltPoint | slope  | plateau | R2   |
|------------|-----------|--------|---------|------|
| NGLY1_KO_1 | -         | -      | -       | -    |
| NGLY1_1    | 53.99     | -0.089 | 0.19    | 0.99 |
| NGLY1_KO_2 | -         | -      | -       | -    |
| NGLY1_2    | -         | -      | -       | -    |

Supplement: Supplementary file 6070 [file 1]

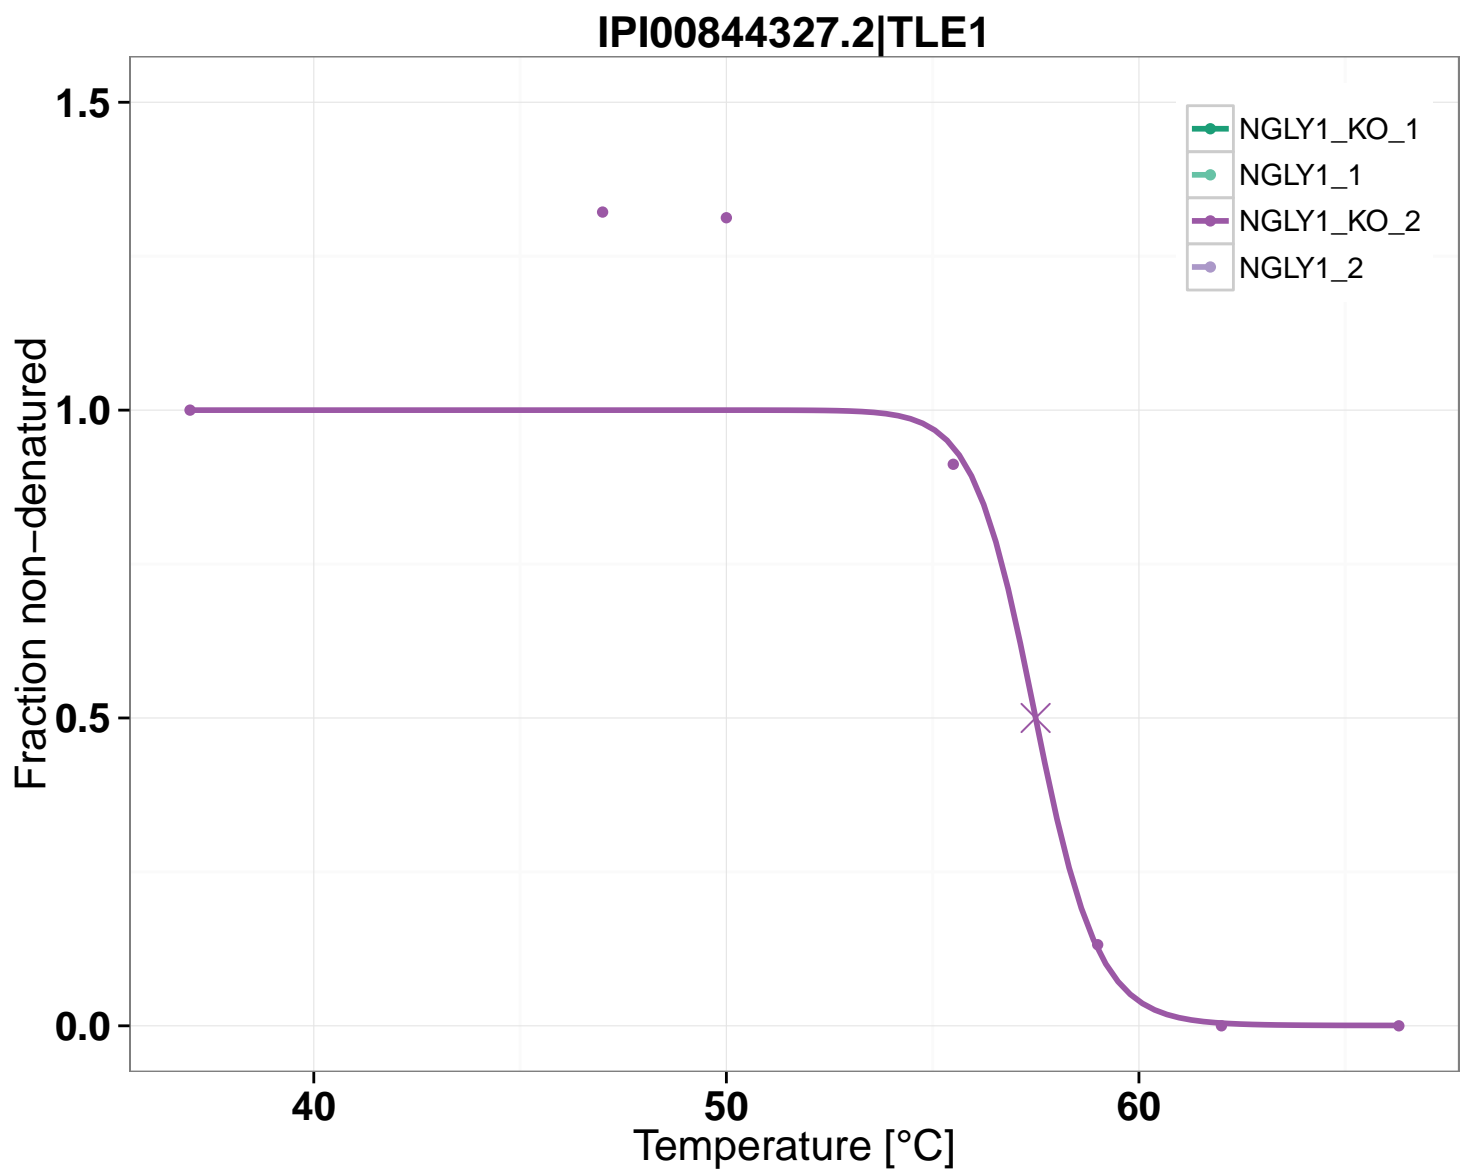

|            | meltPoint | slope | plateau | R2   |
|------------|-----------|-------|---------|------|
| NGLY1_KO_1 | —         | —     | —       | —    |
| NGLY1_1    | —         | —     | —       | —    |
| NGLY1_KO_2 | 57.5      | -0.33 | 0       | 0.67 |
| NGLY1_2    | —         | —     | —       | —    |

Supplement: Supplementary file 6071 [file 1]

IPI00514951.2|GOLPH3L

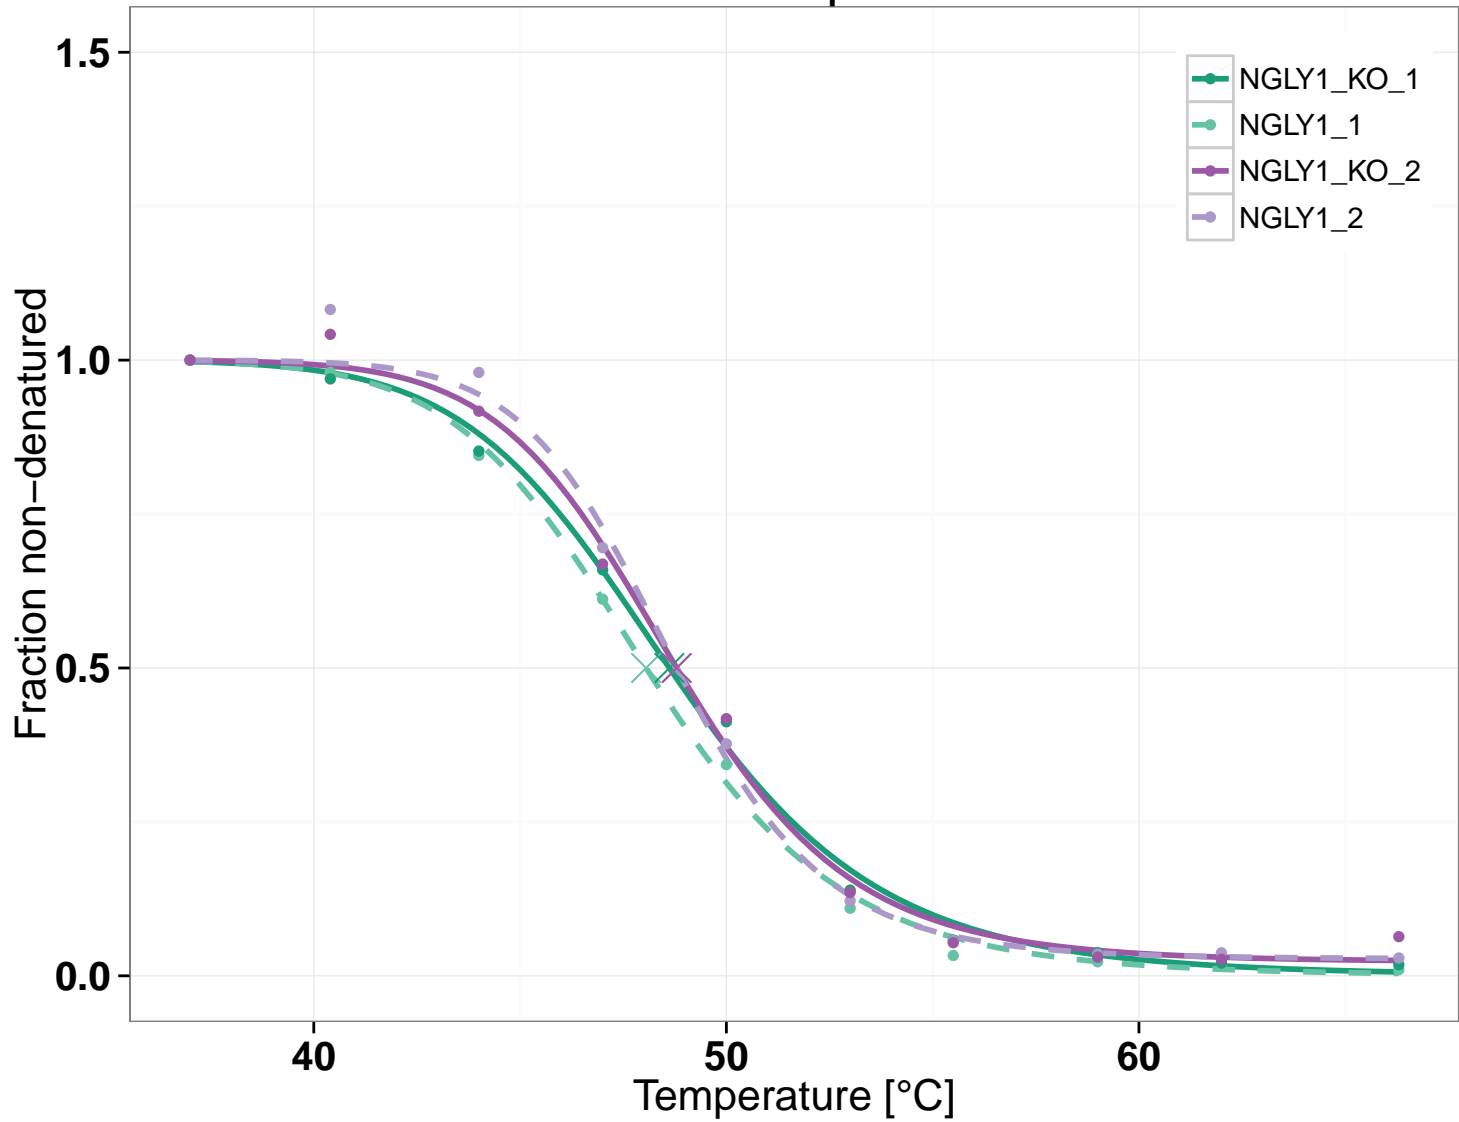

|            | meltPoint | slope  | plateau | R2   |
|------------|-----------|--------|---------|------|
| NGLY1_KO_1 | 48.62     | -0.099 | 0       | 1    |
| NGLY1_1    | 48.05     | -0.11  | 0       | 1    |
| NGLY1_KO_2 | 48.8      | -0.11  | 0.02    | 0.99 |
| NGLY1_2    | 48.8      | -0.13  | 0.03    | 0.99 |

Supplement: Supplementary file 6072 [file 1]

IPI00552279.5|ESCO1

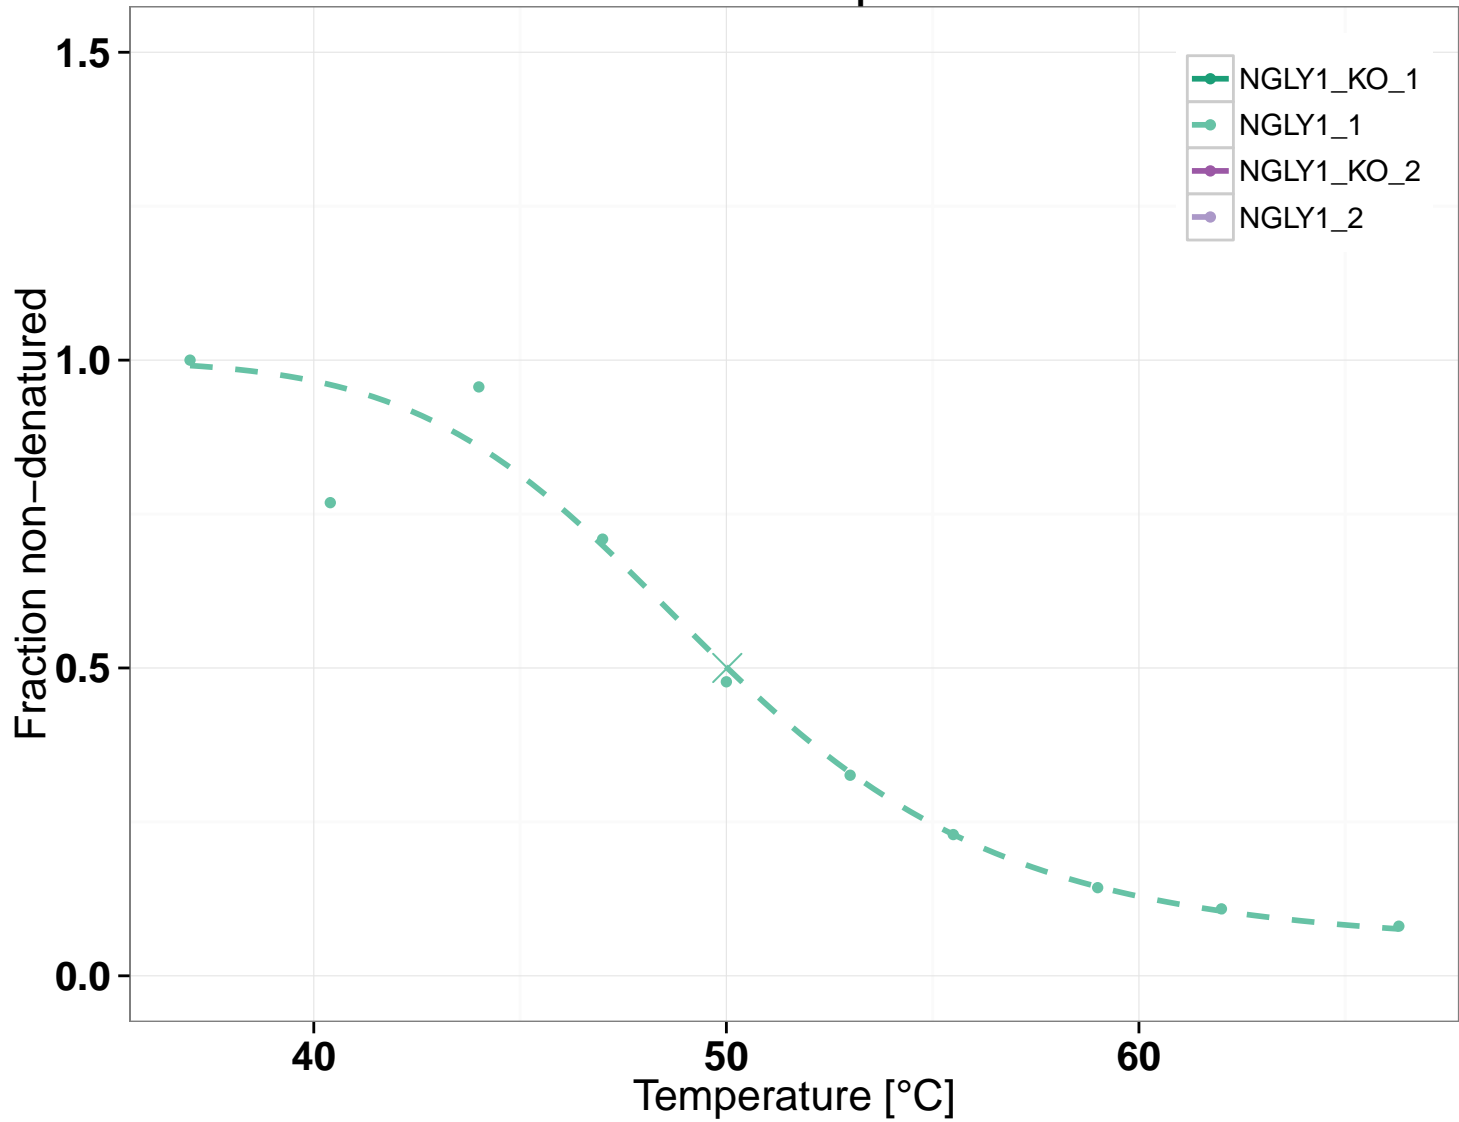

|            | meltPoint | slope  | plateau | R2   |
|------------|-----------|--------|---------|------|
| NGLY1_KO_1 | -         | -      | -       | -    |
| NGLY1_1    | 50.02     | -0.067 | 0.05    | 0.96 |
| NGLY1_KO_2 | -         | -      | -       | -    |
| NGLY1_2    | -         | -      | -       | -    |

Supplement: Supplementary file 6073 [file 1]

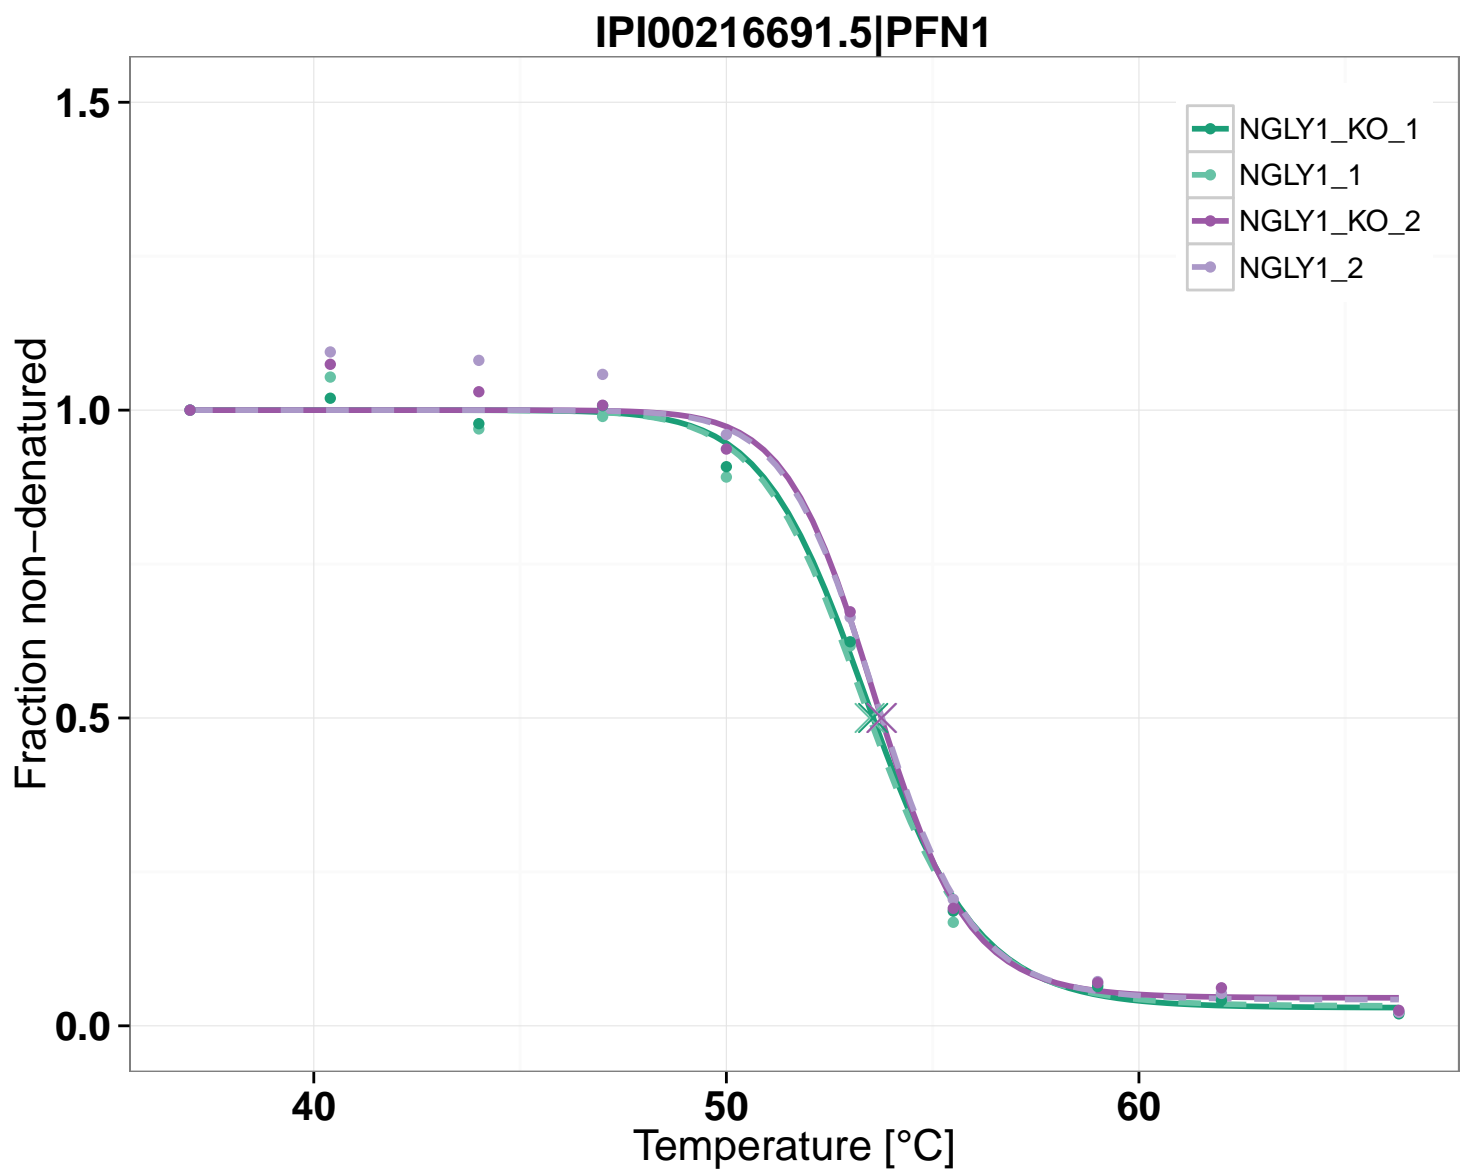

|            | meltPoint | slope | plateau | R2   |
|------------|-----------|-------|---------|------|
| NGLY1_KO_1 | 53.56     | -0.19 | 0.03    | 1    |
| NGLY1_1    | 53.47     | -0.19 | 0.03    | 1    |
| NGLY1_KO_2 | 53.76     | -0.22 | 0.05    | 1    |
| NGLY1_2    | 53.78     | -0.21 | 0.04    | 0.99 |

Supplement: Supplementary file 6074 [file 1]

IPI00877929.1|CASK

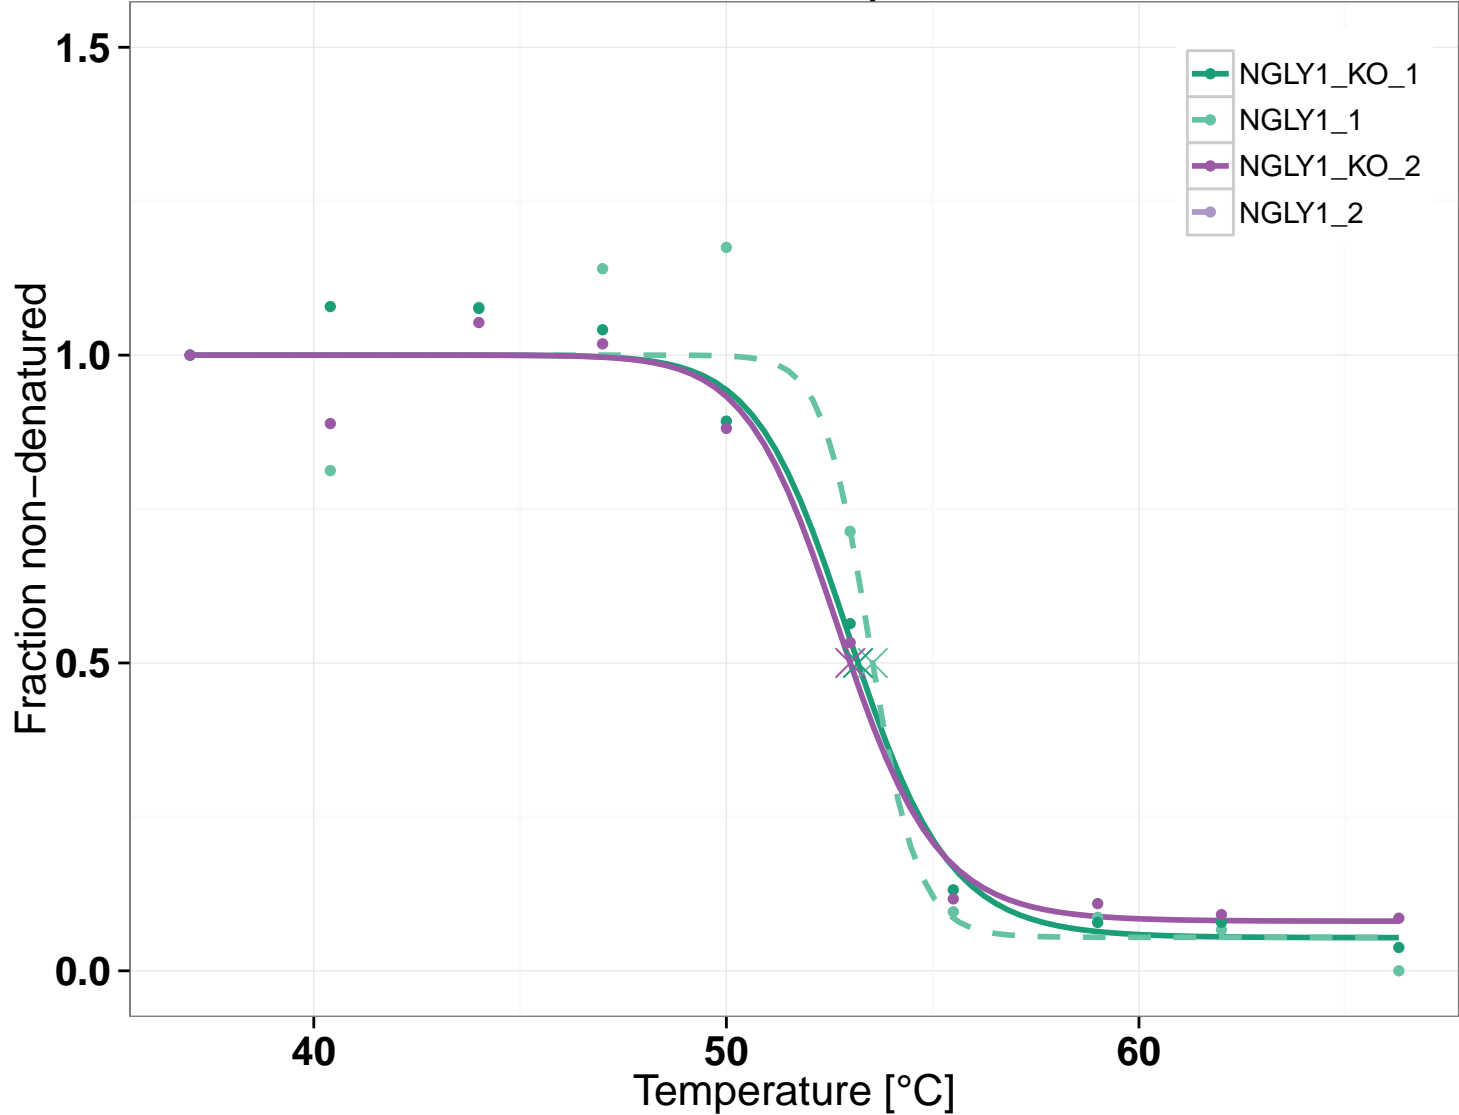

|            | meltPoint | slope | plateau | R2   |
|------------|-----------|-------|---------|------|
| NGLY1_KO_1 | 53.19     | -0.2  | 0.05    | 0.99 |
| NGLY1_1    | 53.55     | -0.41 | 0.05    | 0.96 |
| NGLY1_KO_2 | 53        | -0.2  | 0.08    | 0.99 |
| NGLY1_2    | -         | -     | -       | -    |

Supplement: Supplementary file 6075 [file 1]

# IPI00154515.3|SNIP1

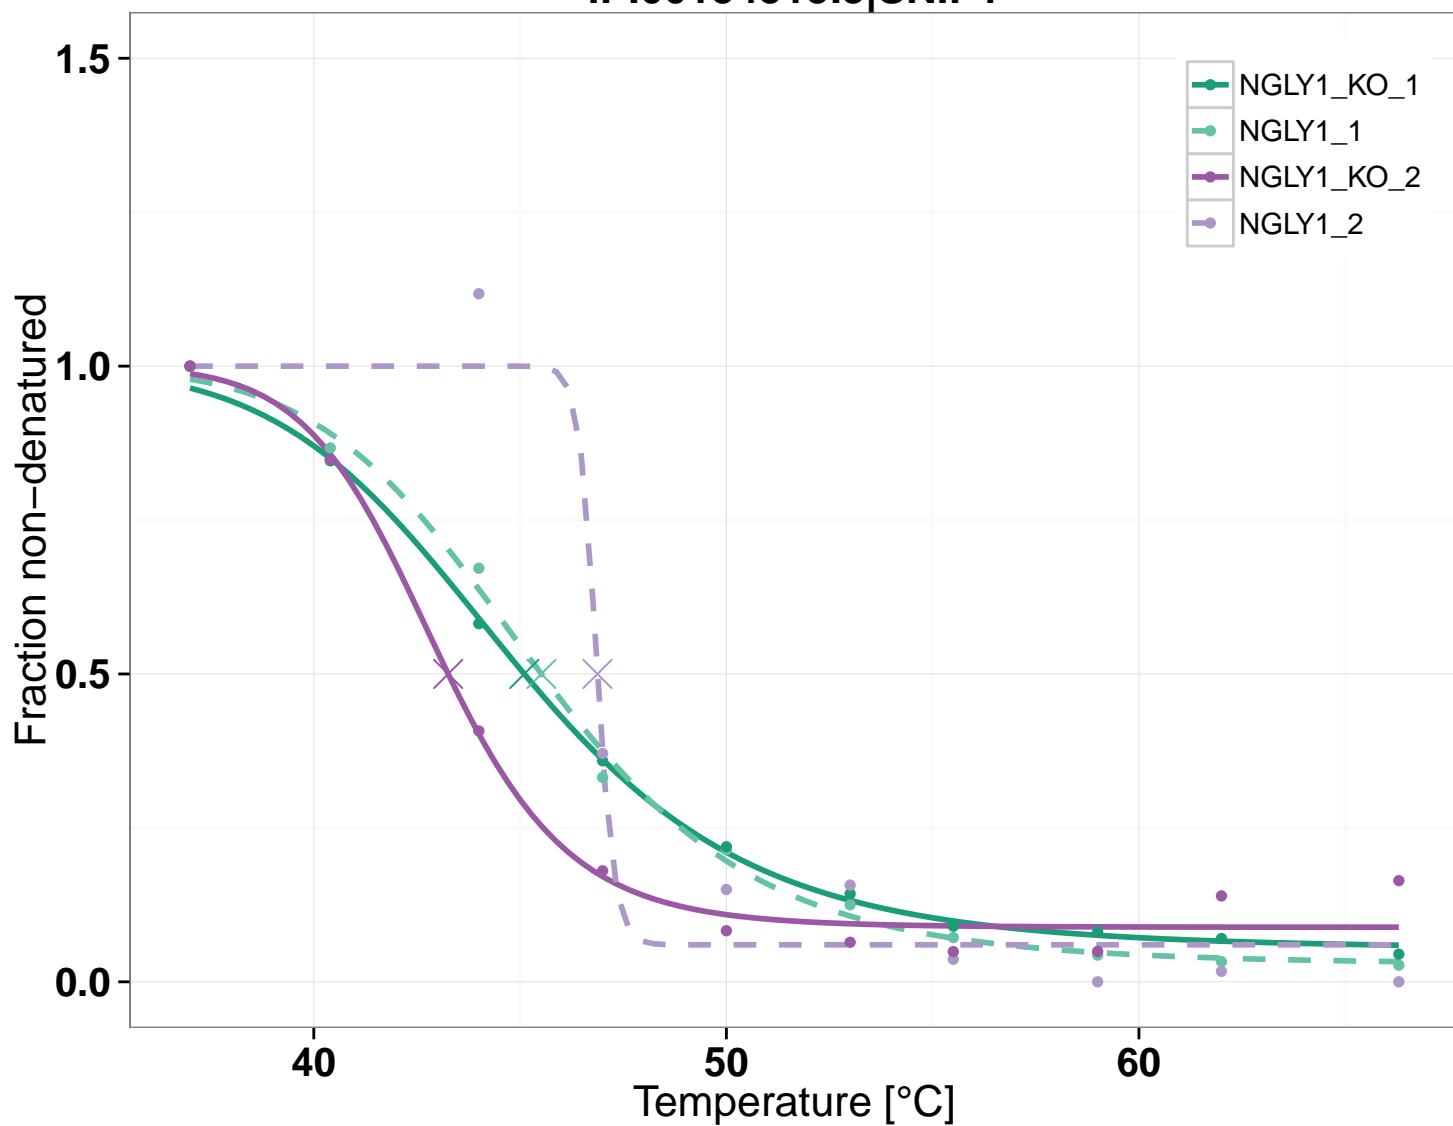

|            | meltPoint | slope  | plateau | R2   |
|------------|-----------|--------|---------|------|
| NGLY1_KO_1 | 45.1      | -0.083 | 0.05    | 1    |
| NGLY1_1    | 45.52     | -0.092 | 0.03    | 1    |
| NGLY1_KO_2 | 43.26     | -0.14  | 0.09    | 0.99 |
| NGLY1_2    | 46.88     | -1.1   | 0.06    | 0.73 |

Supplement: Supplementary file 6076 [file 1]

IPI00743862.2|PAAF1

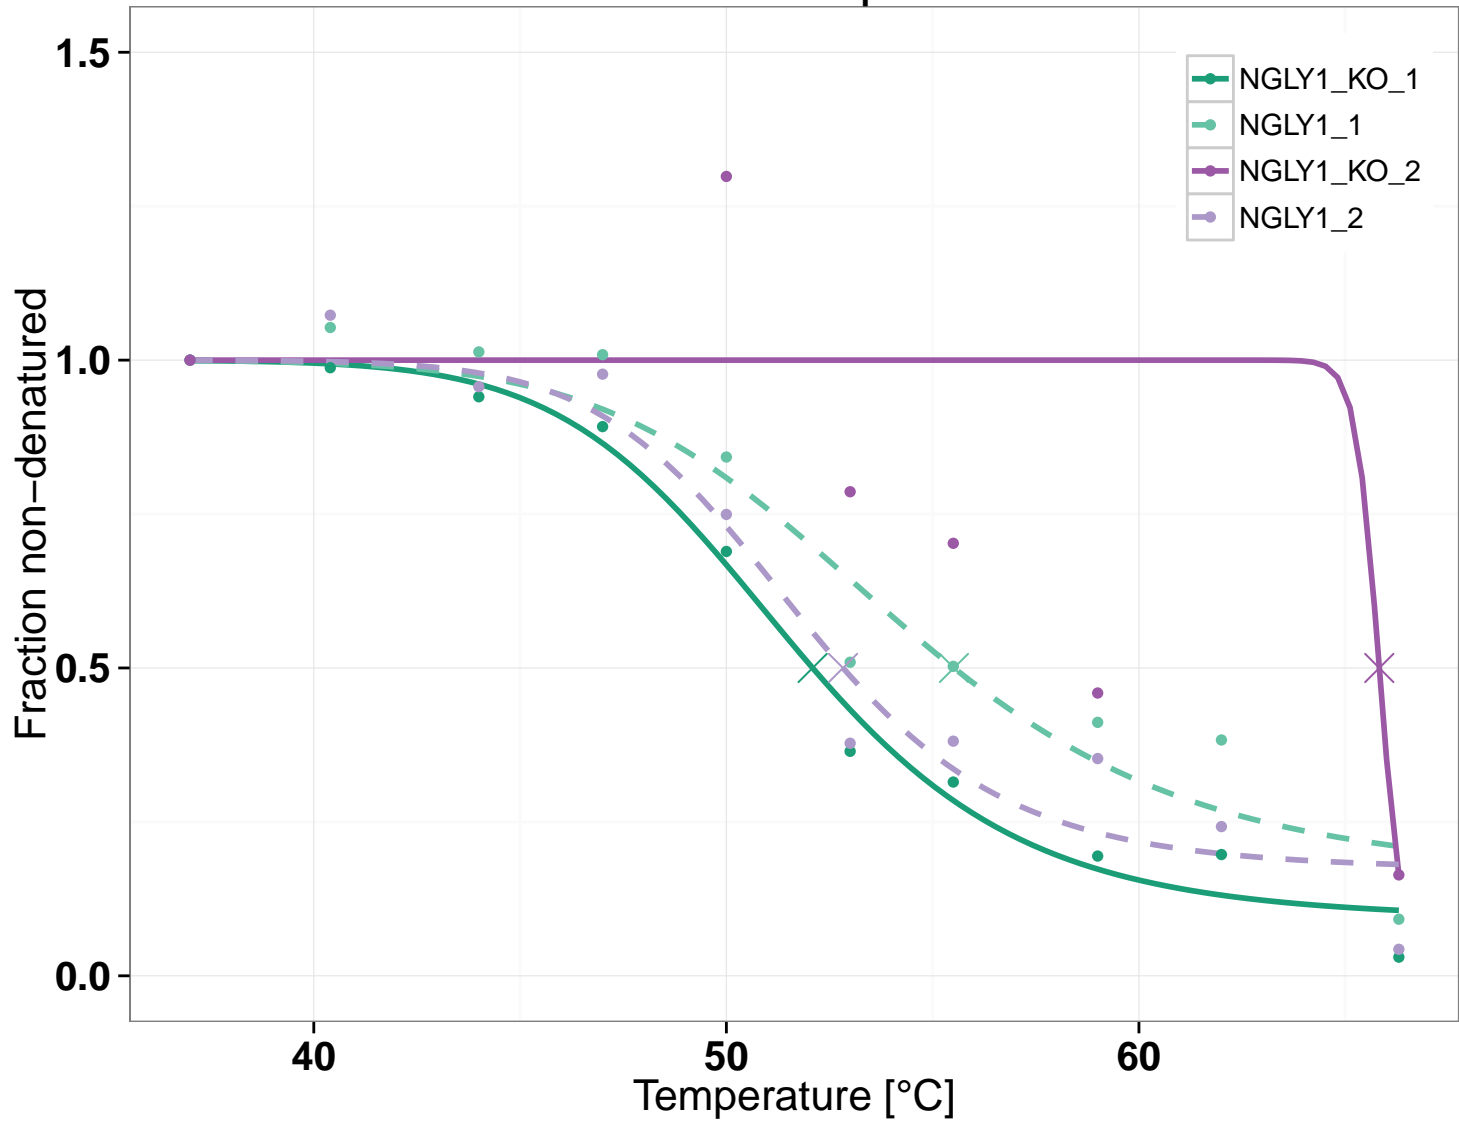

|            | meltPoint | slope  | plateau | R2    |
|------------|-----------|--------|---------|-------|
| NGLY1_KO_1 | 52.09     | -0.081 | 0.09    | 0.99  |
| NGLY1_1    | 55.52     | -0.059 | 0.16    | 0.94  |
| NGLY1_KO_2 | 65.83     | -0.87  | 0       | -0.01 |
| NGLY1_2    | 52.83     | -0.084 | 0.17    | 0.95  |

Supplement: Supplementary file 6077 [file 1]

# IPI00761160.1|CAST

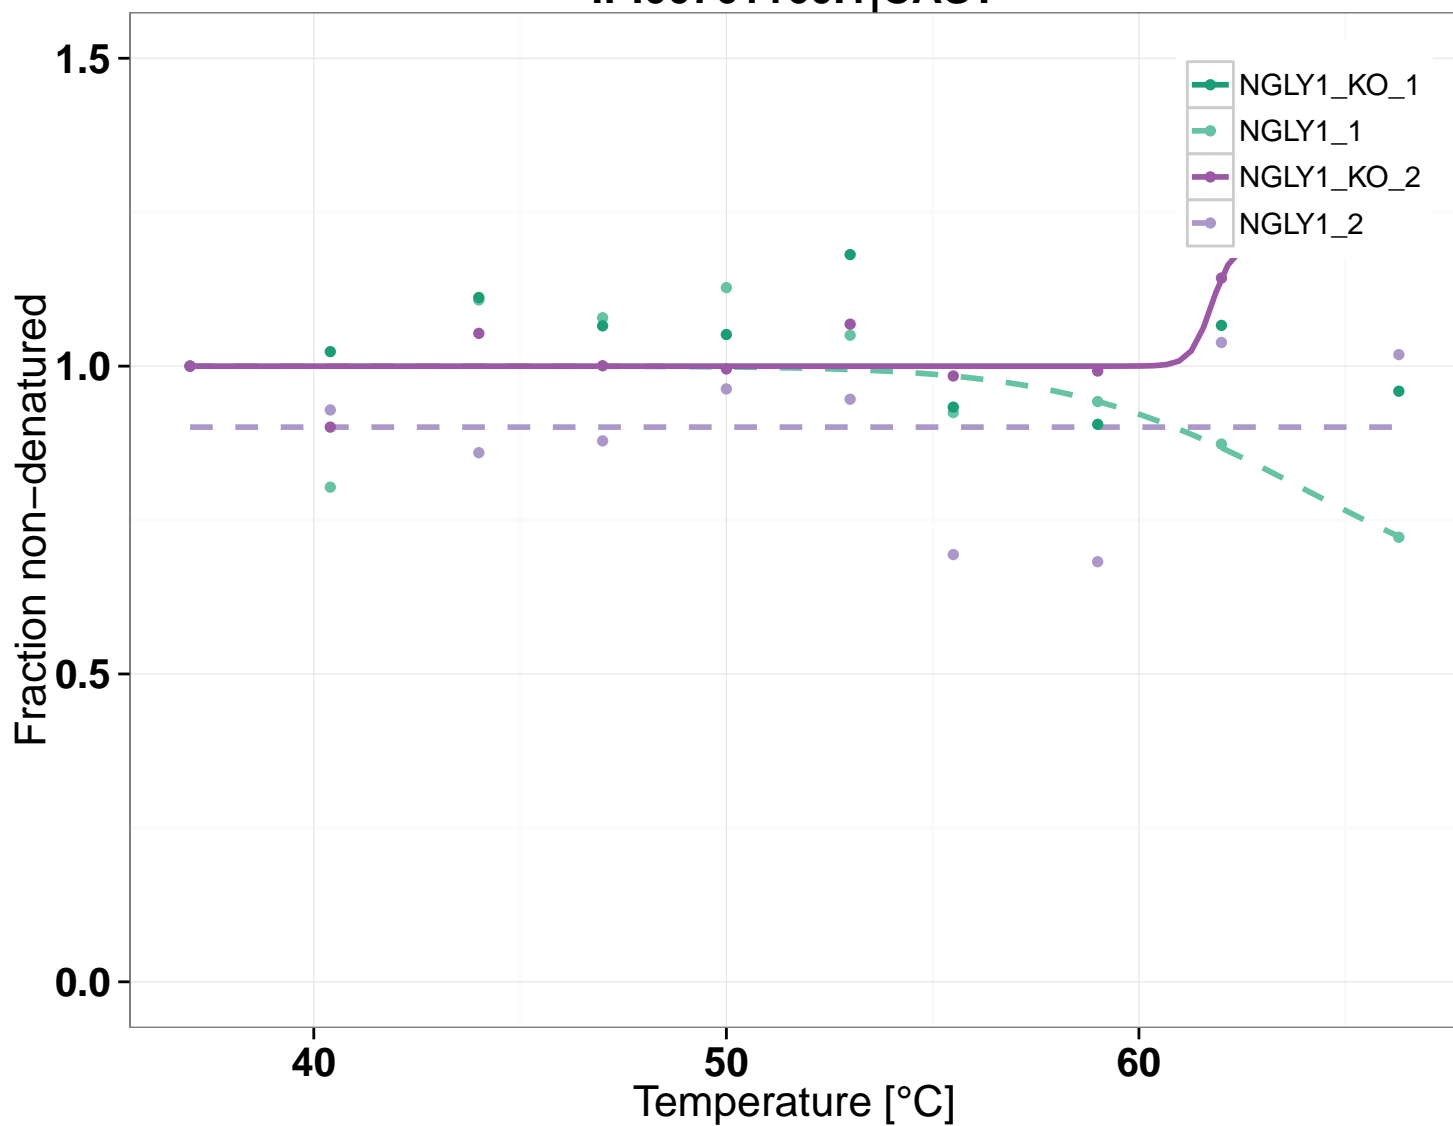

|            | meltPoint | slope  | plateau | R2   |
|------------|-----------|--------|---------|------|
| NGLY1_KO_1 | —         | —      | —       | —    |
| NGLY1_1    | —         | -0.035 | 0.55    | 0.51 |
| NGLY1_KO_2 | —         | 0.2    | 1.2     | 0.74 |
| NGLY1_2    | —         | —      | 0.8     | 0    |

Supplement: Supplementary file 6078 [file 1]

IPI00877726.2|LOC100133623

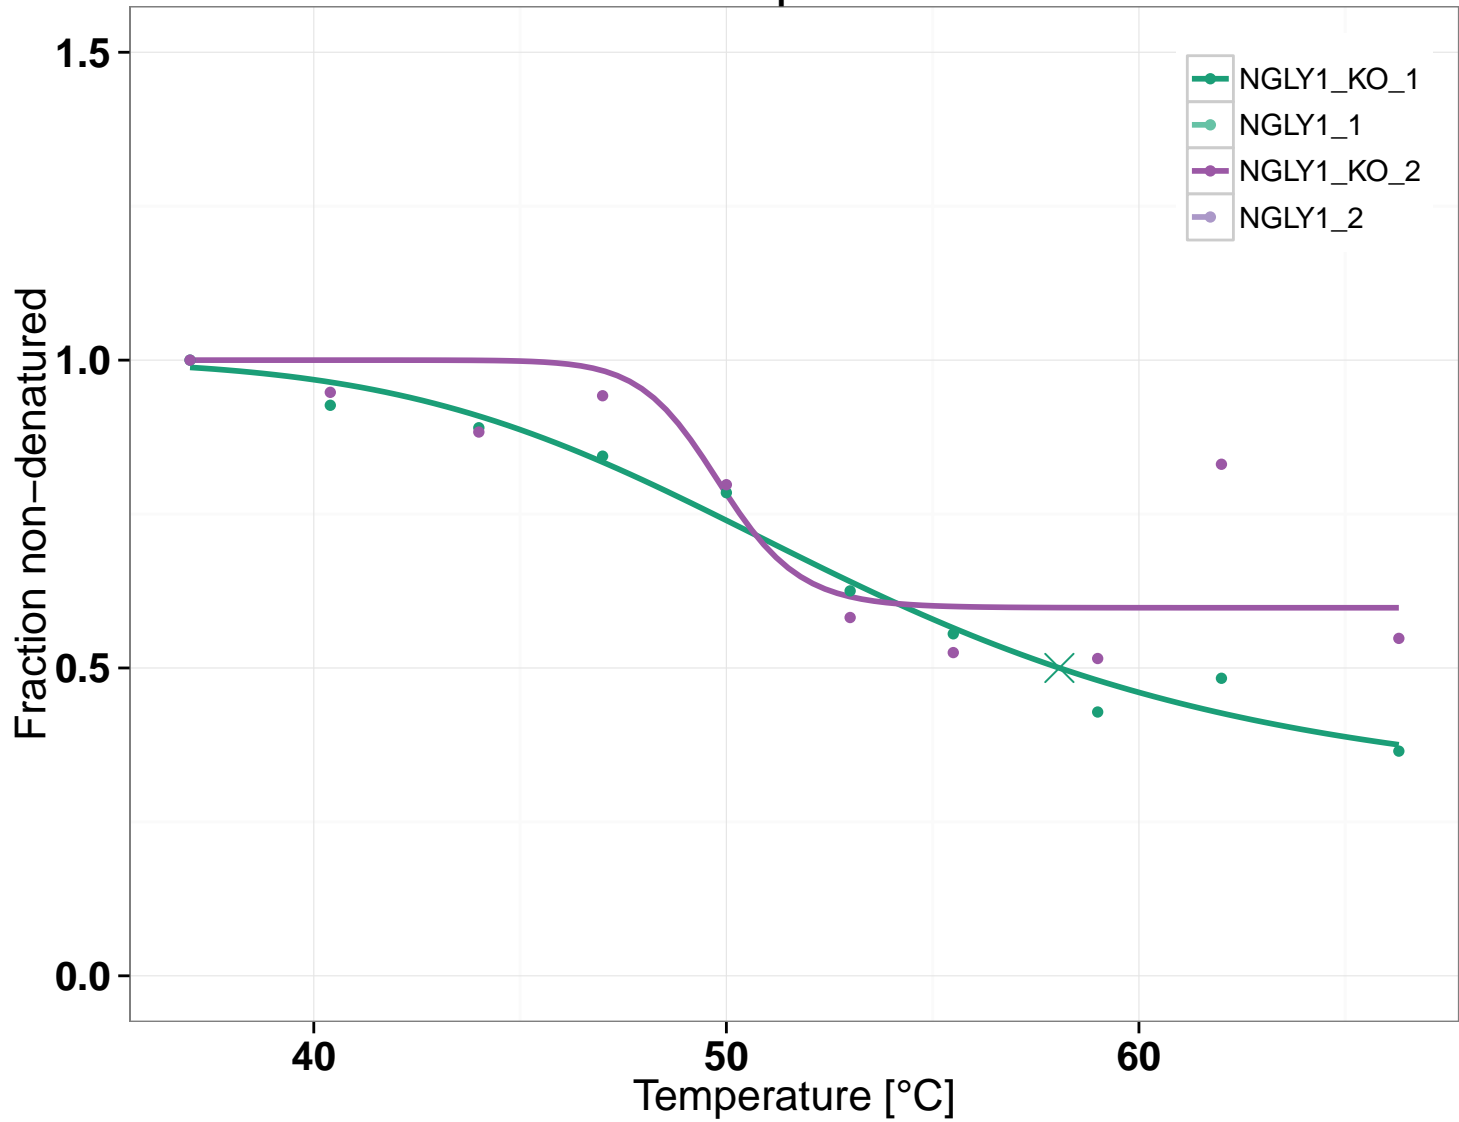

|            | meltPoint | slope  | plateau | R2   |
|------------|-----------|--------|---------|------|
| NGLY1_KO_1 | 58.07     | -0.033 | 0.28    | 0.98 |
| NGLY1_1    | -         | -      | -       | -    |
| NGLY1_KO_2 | -         | -0.1   | 0.6     | 0.74 |
| NGLY1_2    | -         | -      | -       | -    |

Supplement: Supplementary file 6079 [file 1]

IPI00873403.1|RPL24

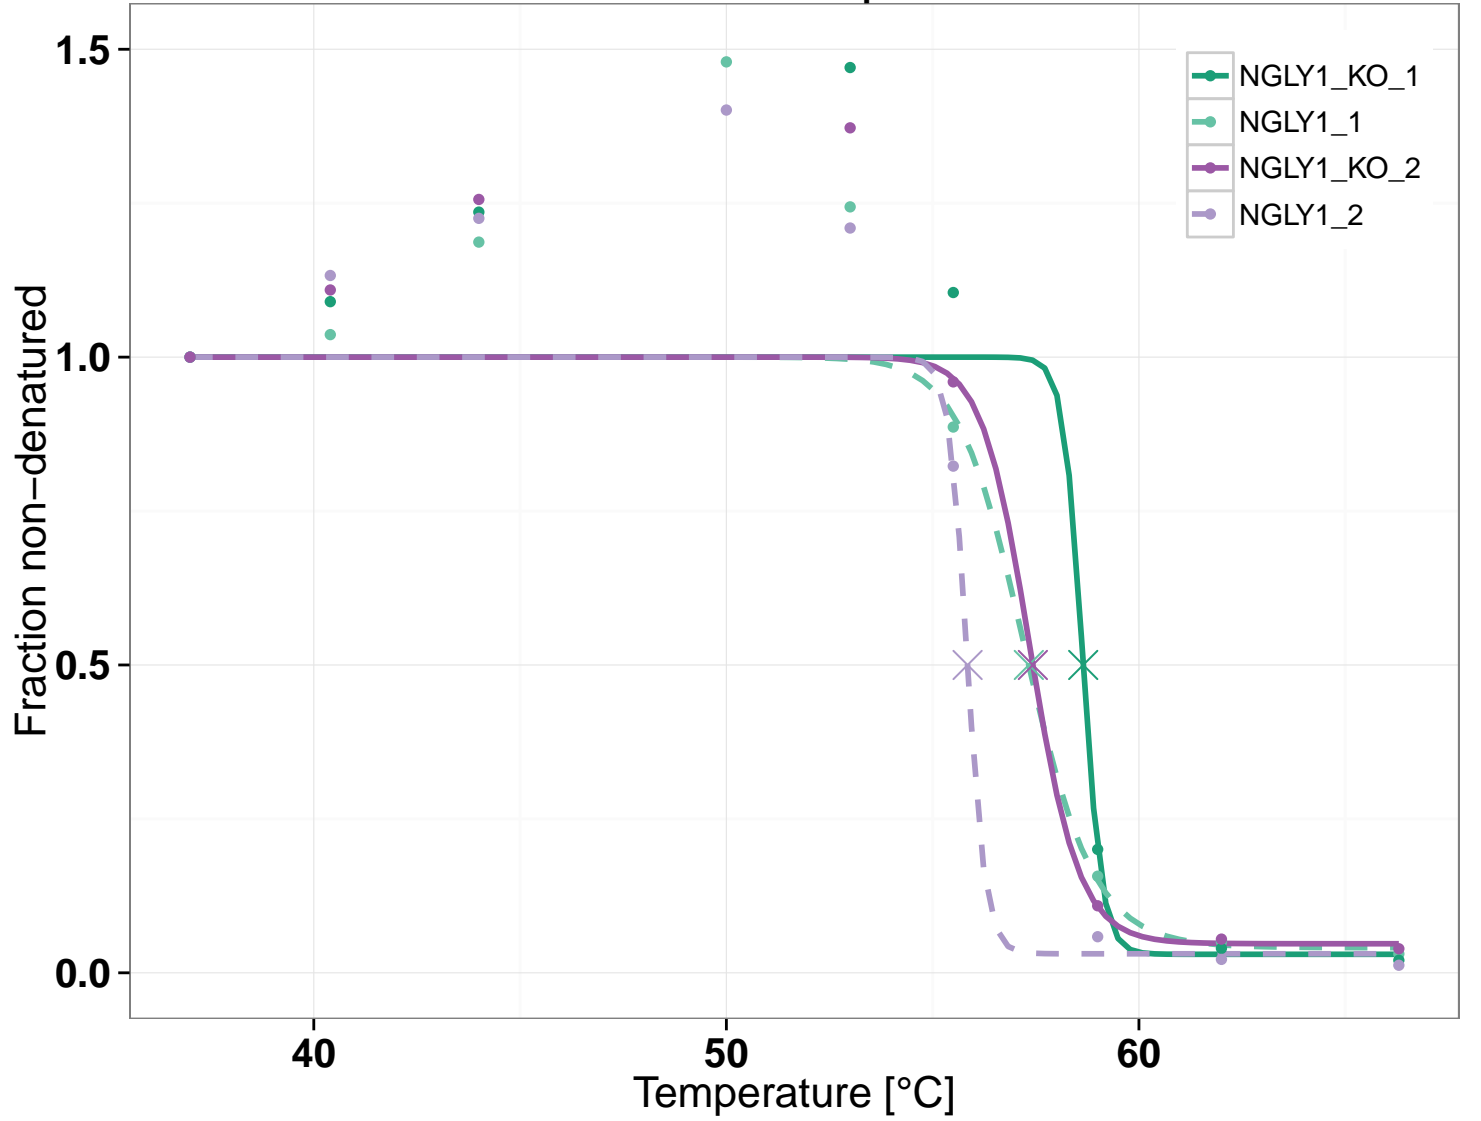

|            | meltPoint | slope | plateau | R2   |
|------------|-----------|-------|---------|------|
| NGLY1_KO_1 | 58.65     | -1    | 0.03    | 0.66 |
| NGLY1_1    | 57.33     | -0.29 | 0.04    | 0.8  |
| NGLY1_KO_2 | 57.43     | -0.41 | 0.05    | 0.69 |
| NGLY1_2    | 55.85     | -1.1  | 0.03    | 0.81 |

Supplement: Supplementary file 6080 [file 1]

# IPI00025176.1|SMNDC1

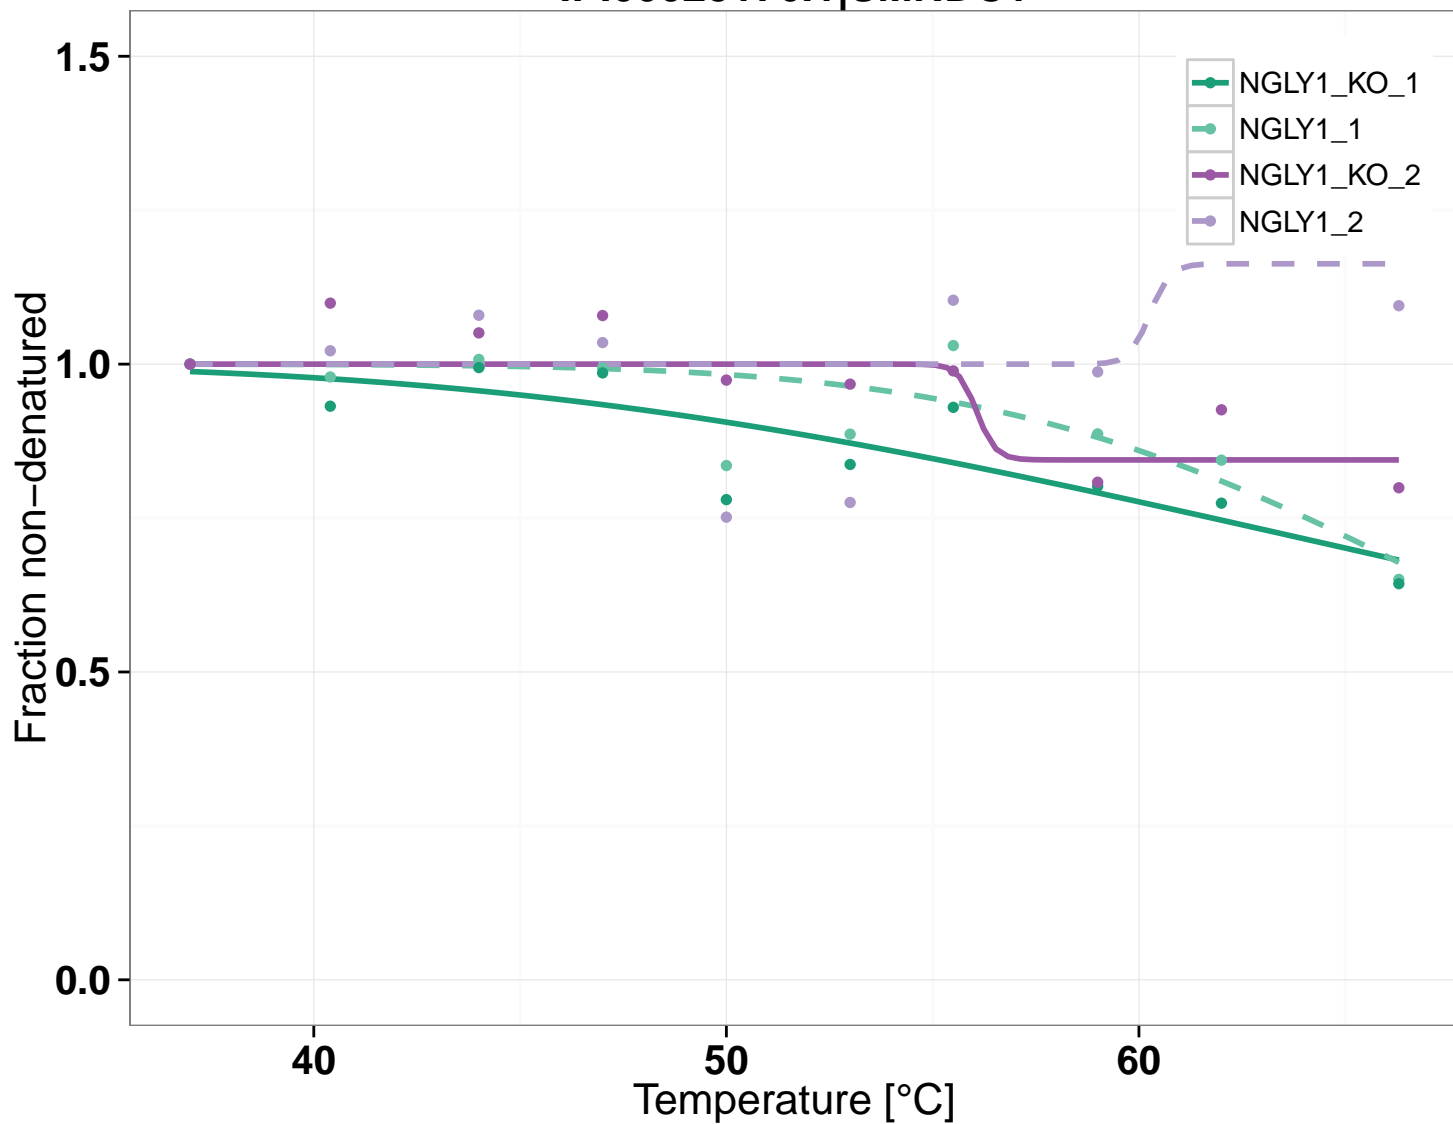

|            | meltPoint | slope  | plateau | R2   |
|------------|-----------|--------|---------|------|
| NGLY1_KO_1 | -         | -0.015 | 0       | 0.74 |
| NGLY1_1    | -         | -      | 0       | 0.68 |
| NGLY1_KO_2 | -         | -0.17  | 0.84    | 0.68 |
| NGLY1_2    | -         | 0.17   | 1.16    | 0.27 |

Supplement: Supplementary file 6081 [file 1]

IPI00328913.2|VPS28

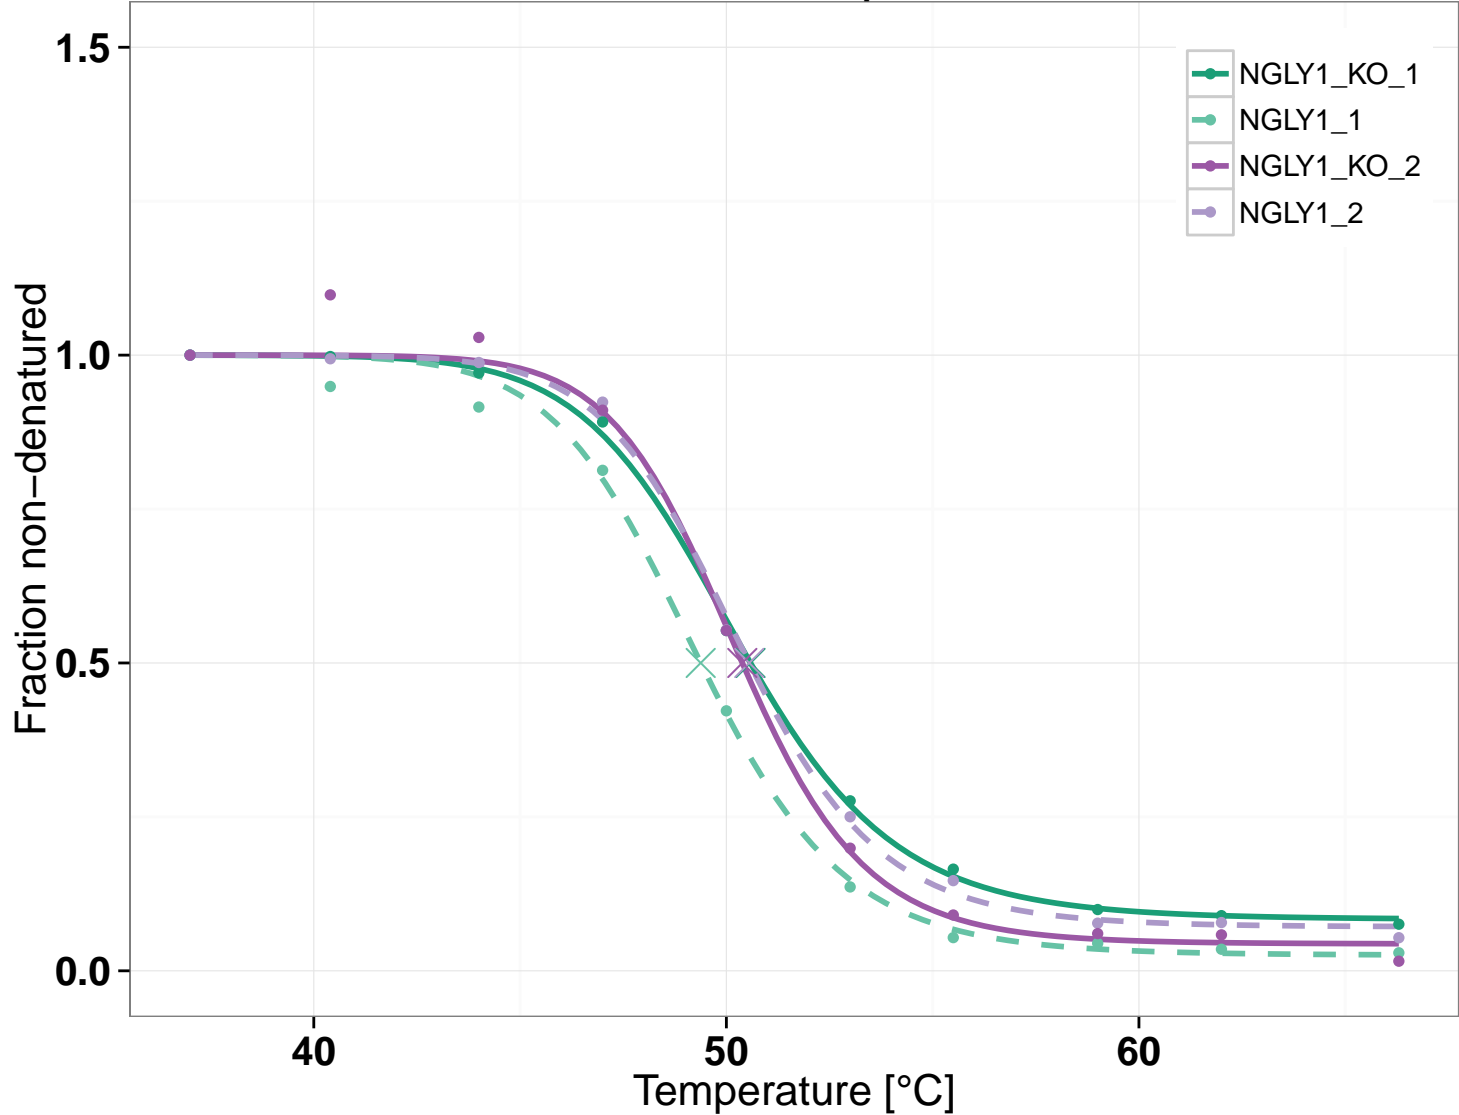

|            | meltPoint | slope | plateau | R2   |
|------------|-----------|-------|---------|------|
| NGLY1_KO_1 | 50.58     | -0.12 | 0.08    | 1    |
| NGLY1_1    | 49.38     | -0.14 | 0.03    | 1    |
| NGLY1_KO_2 | 50.39     | -0.15 | 0.04    | 0.99 |
| NGLY1_2    | 50.56     | -0.14 | 0.07    | 1    |

Supplement: Supplementary file 6082 [file 1]

IPI00006283.3|TAOK2

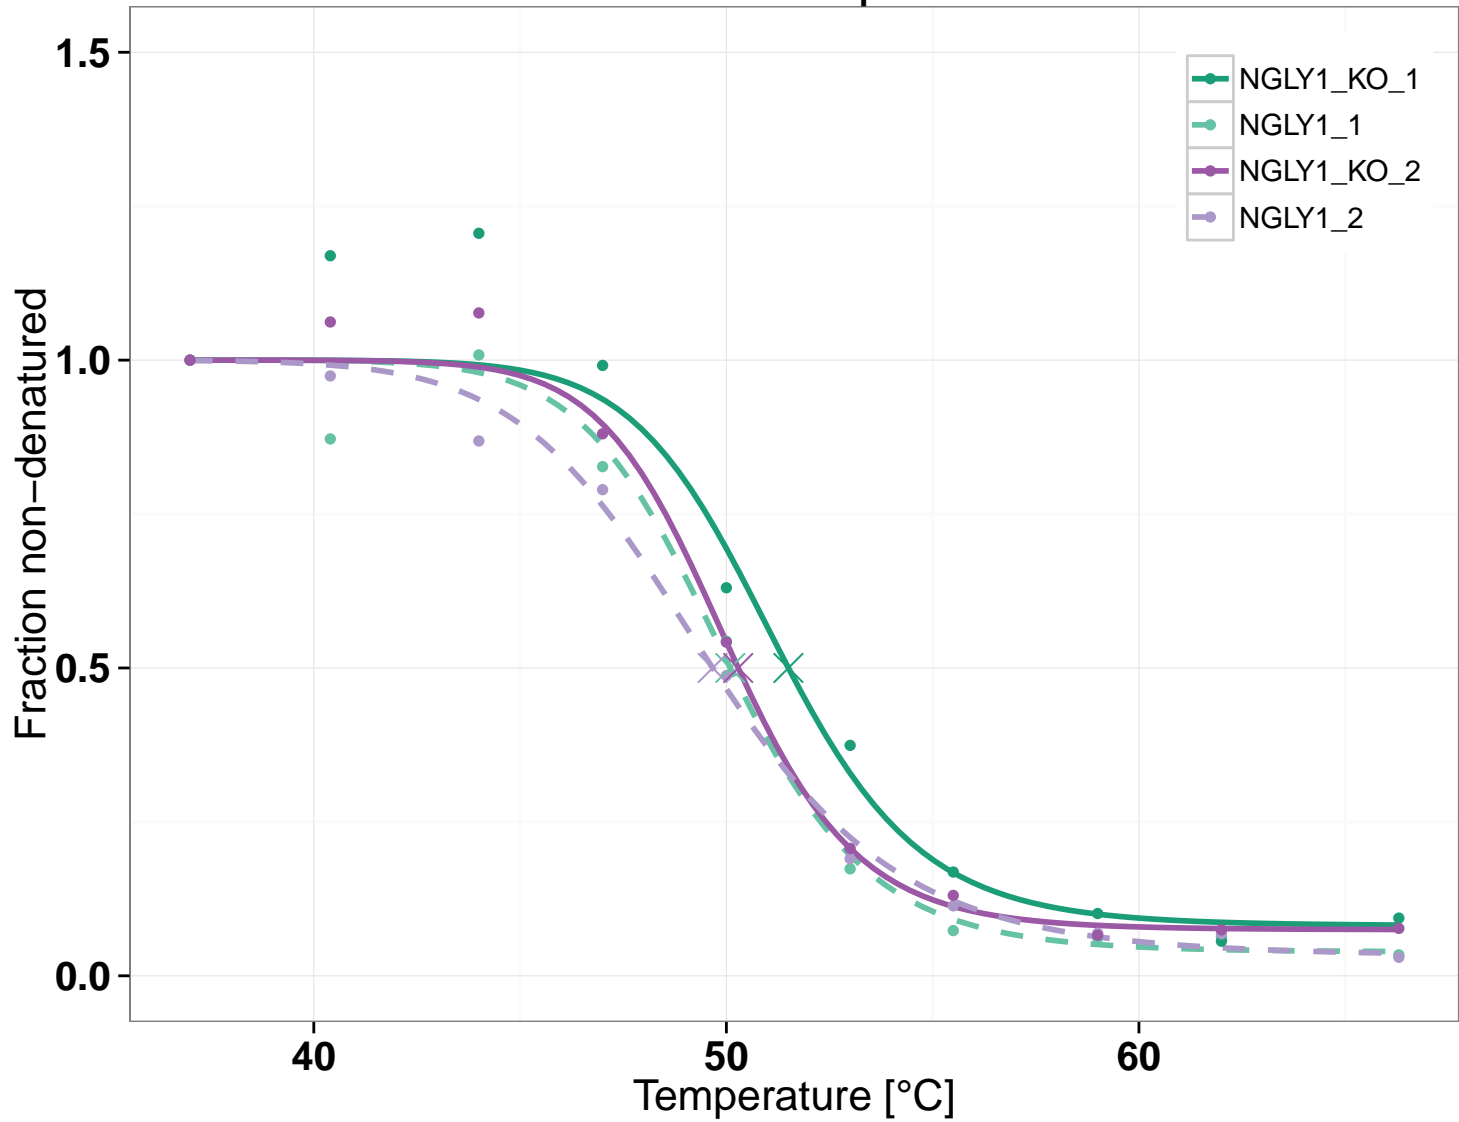

|            | meltPoint | slope | plateau | R2   |
|------------|-----------|-------|---------|------|
| NGLY1_KO_1 | 51.5      | -0.13 | 0.08    | 0.96 |
| NGLY1_1    | 50.1      | -0.14 | 0.04    | 0.99 |
| NGLY1_KO_2 | 50.29     | -0.15 | 0.07    | 0.99 |
| NGLY1_2    | 49.67     | -0.1  | 0.03    | 0.99 |

Supplement: Supplementary file 6083 [file 1]

IPI00410687.11|ZDHHC17

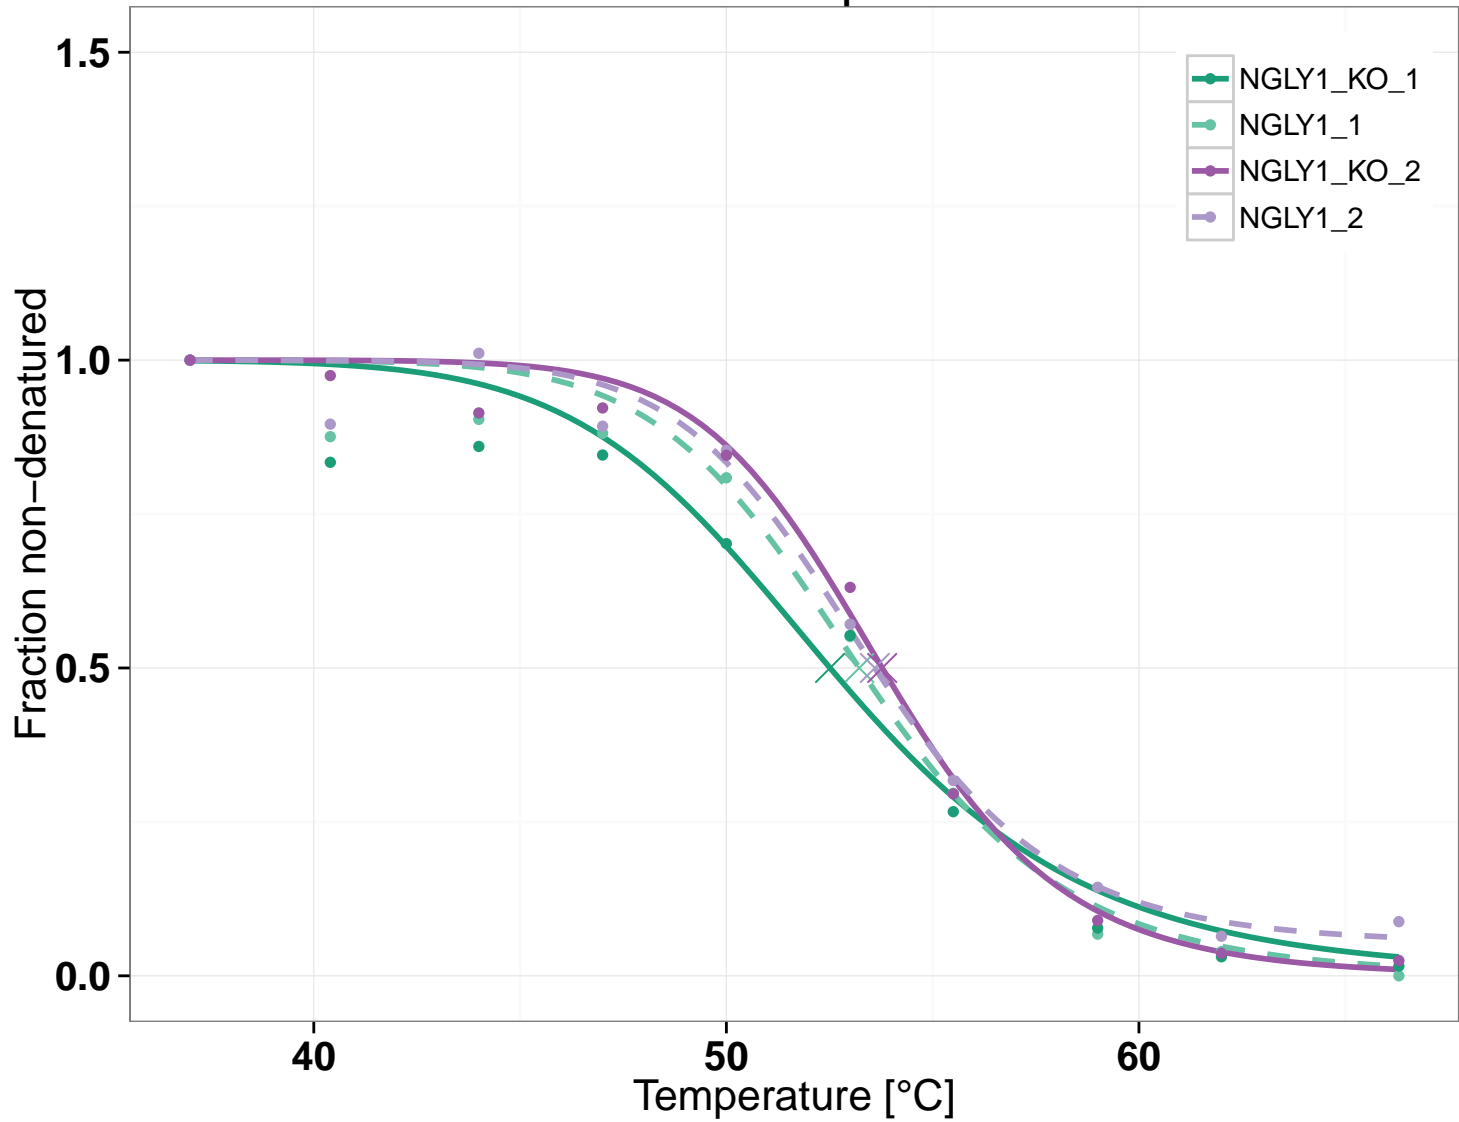

|            | meltPoint | slope | plateau | R2   |
|------------|-----------|-------|---------|------|
| NGLY1_KO_1 | 52.51     | -0.08 | 0       | 0.96 |
| NGLY1_1    | 53.22     | -0.1  | 0       | 0.98 |
| NGLY1_KO_2 | 53.78     | -0.11 | 0       | 0.99 |
| NGLY1_2    | 53.6      | -0.1  | 0.05    | 0.99 |

Supplement: Supplementary file 6084 [file 1]

IPI00384497.2|PTPLB

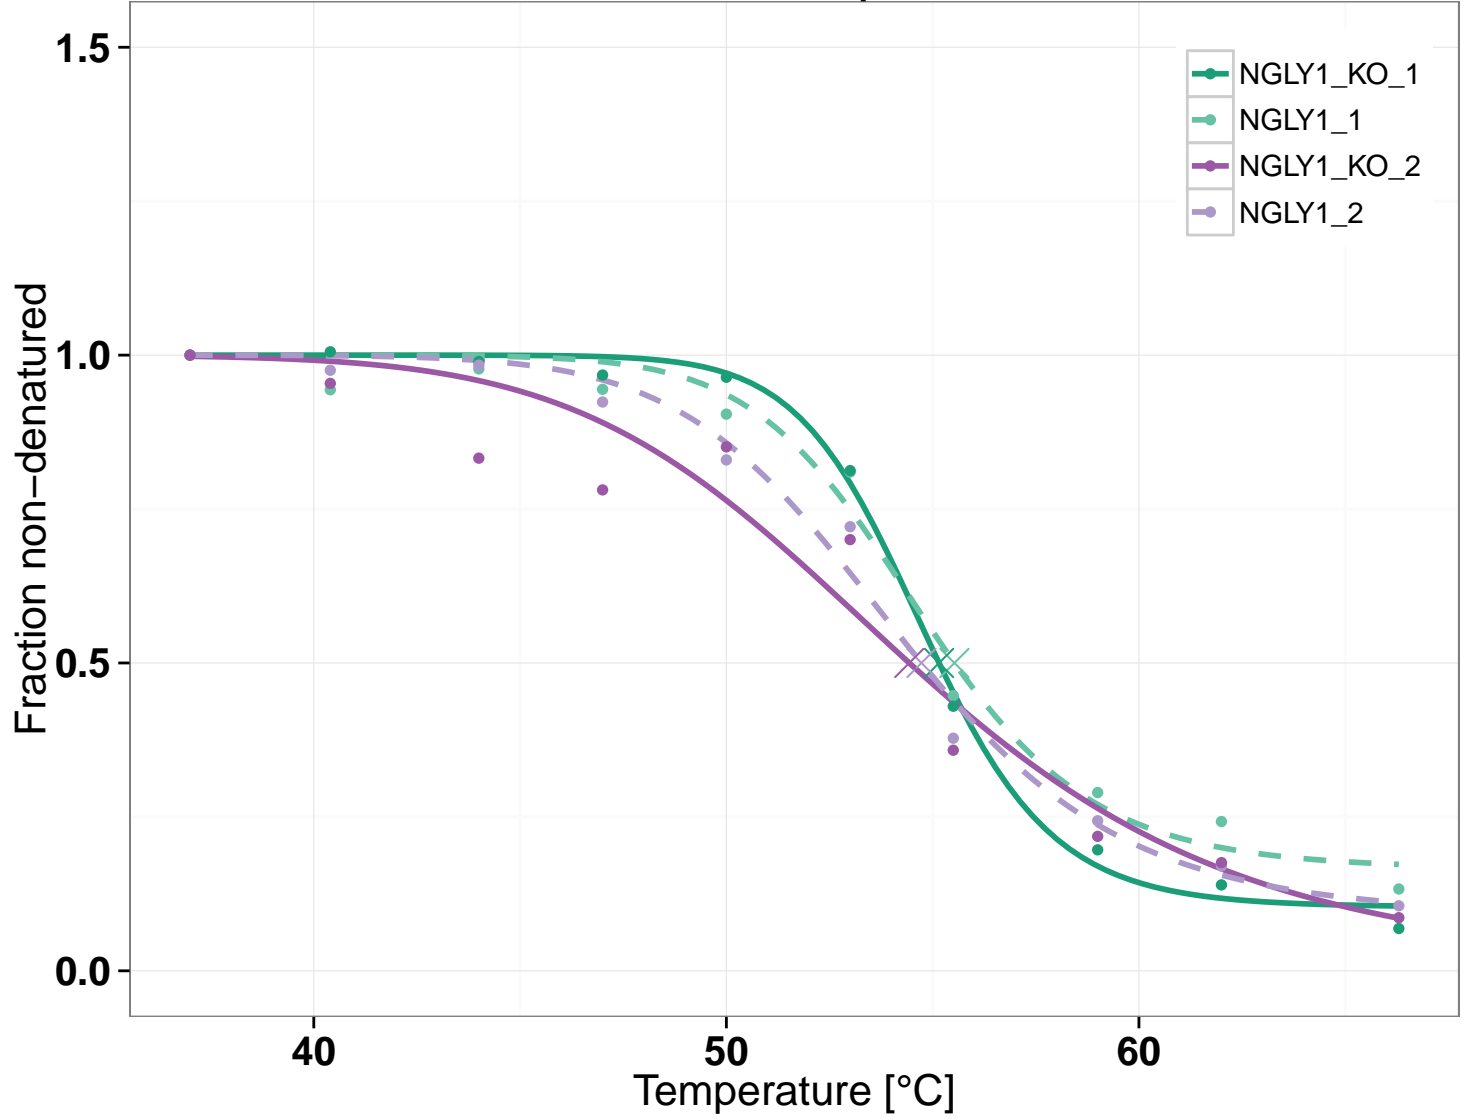

|            | meltPoint | slope  | plateau | R2   |
|------------|-----------|--------|---------|------|
| NGLY1_KO_1 | 55.16     | -0.15  | 0.1     | 1    |
| NGLY1_1    | 55.53     | -0.1   | 0.16    | 0.98 |
| NGLY1_KO_2 | 54.43     | -0.062 | 0       | 0.95 |
| NGLY1_2    | 54.73     | -0.085 | 0.09    | 0.99 |

Supplement: Supplementary file 6085 [file 1]

IPI00412499.1|RABEP2

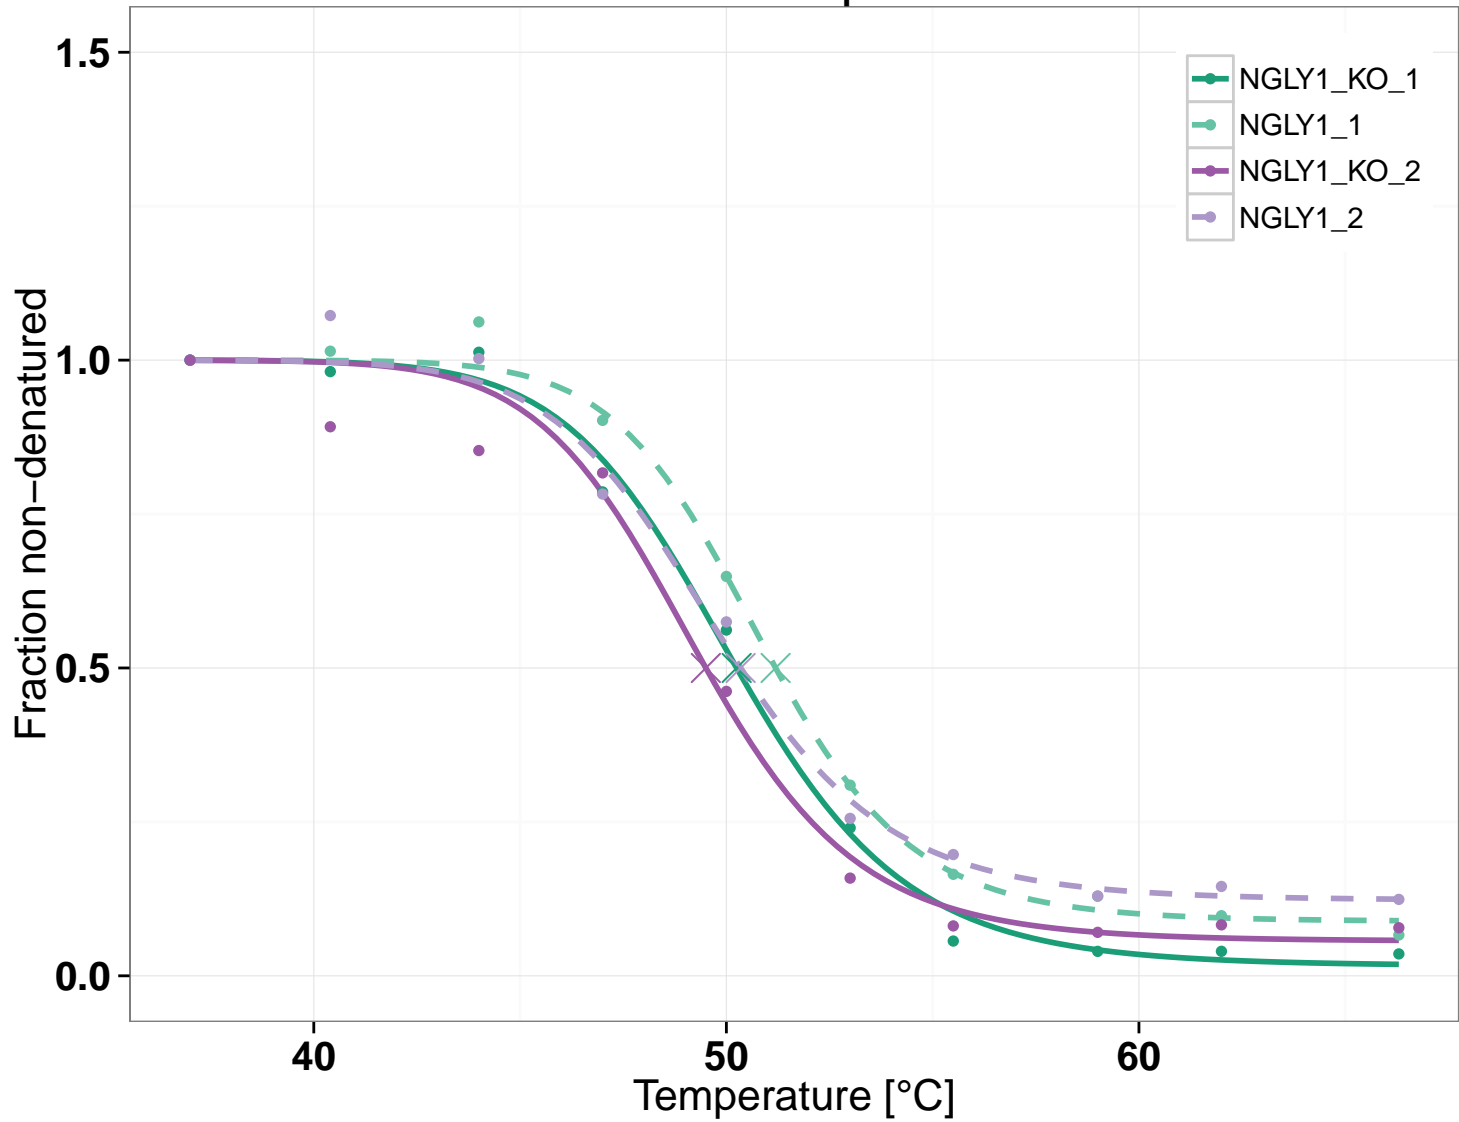

|            | meltPoint | slope | plateau | R2   |
|------------|-----------|-------|---------|------|
| NGLY1_KO_1 | 50.25     | -0.12 | 0.02    | 0.99 |
| NGLY1_1    | 51.19     | -0.13 | 0.09    | 1    |
| NGLY1_KO_2 | 49.5      | -0.12 | 0.06    | 0.98 |
| NGLY1_2    | 50.35     | -0.11 | 0.12    | 0.99 |

Supplement: Supplementary file 6086 [file 1]

# IPI00021956.1|LPIN2

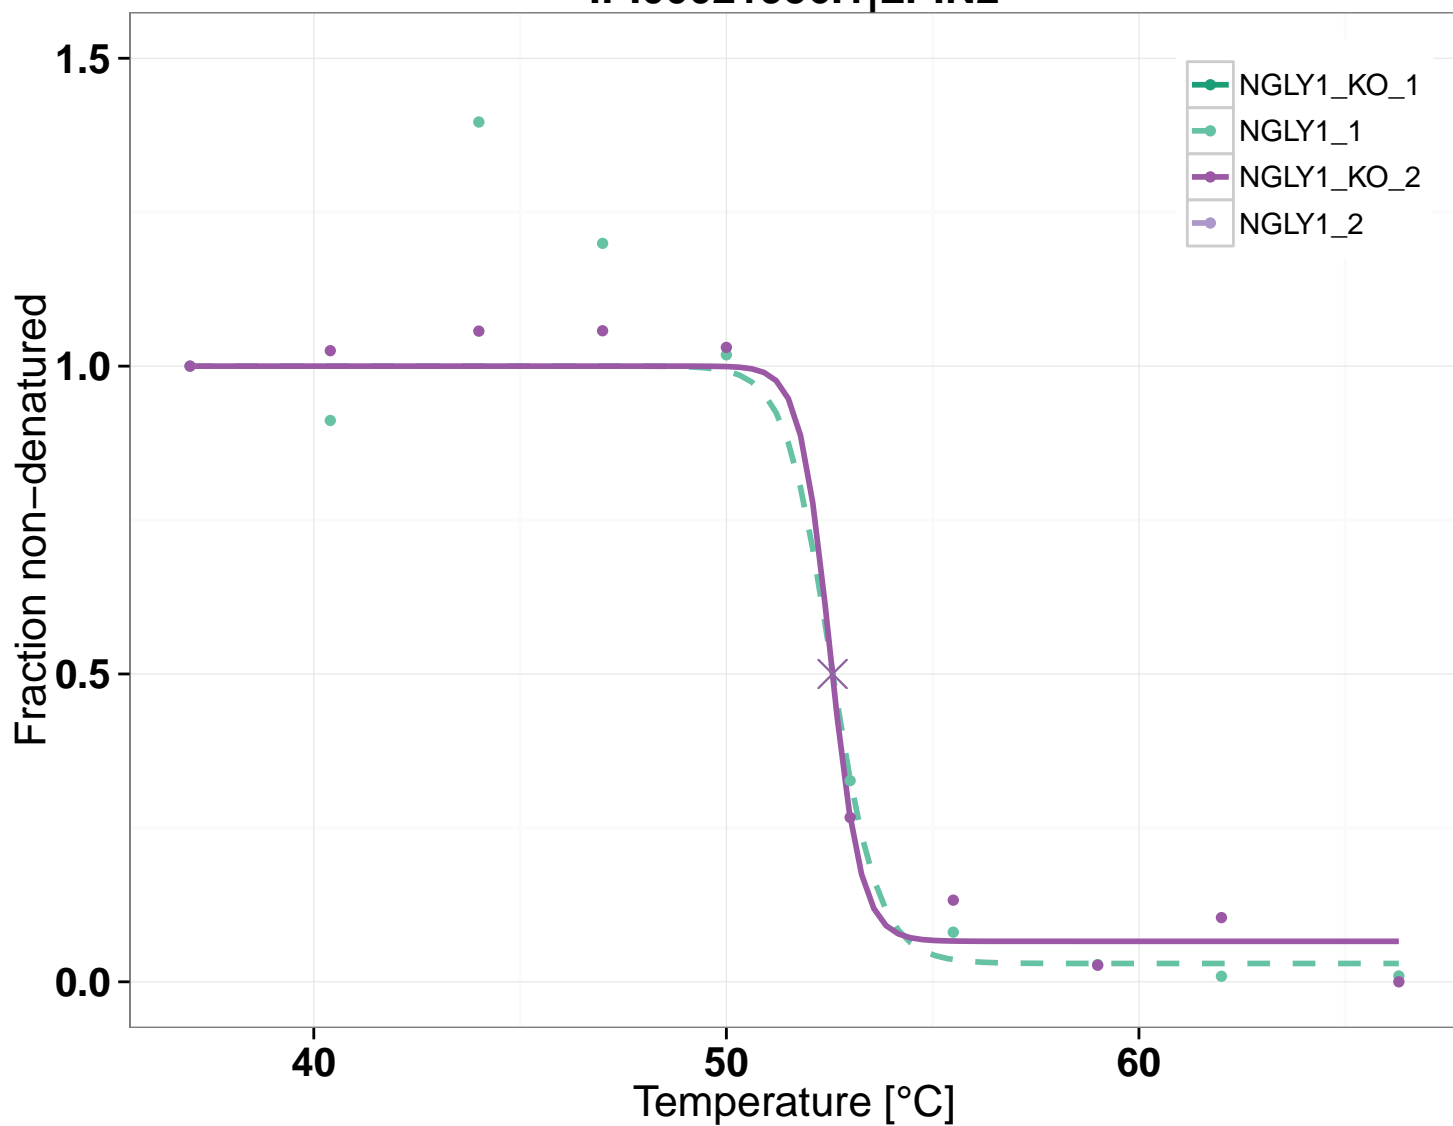

|            | meltPoint | slope | plateau | R2   |
|------------|-----------|-------|---------|------|
| NGLY1_KO_1 | -         | -     | -       | -    |
| NGLY1_1    | 52.58     | -0.44 | 0.03    | 0.93 |
| NGLY1_KO_2 | 52.57     | -0.63 | 0.07    | 0.99 |
| NGLY1_2    | -         | -     | -       | -    |

Supplement: Supplementary file 6087 [file 1]

IPI00845432.1|C5ORF33

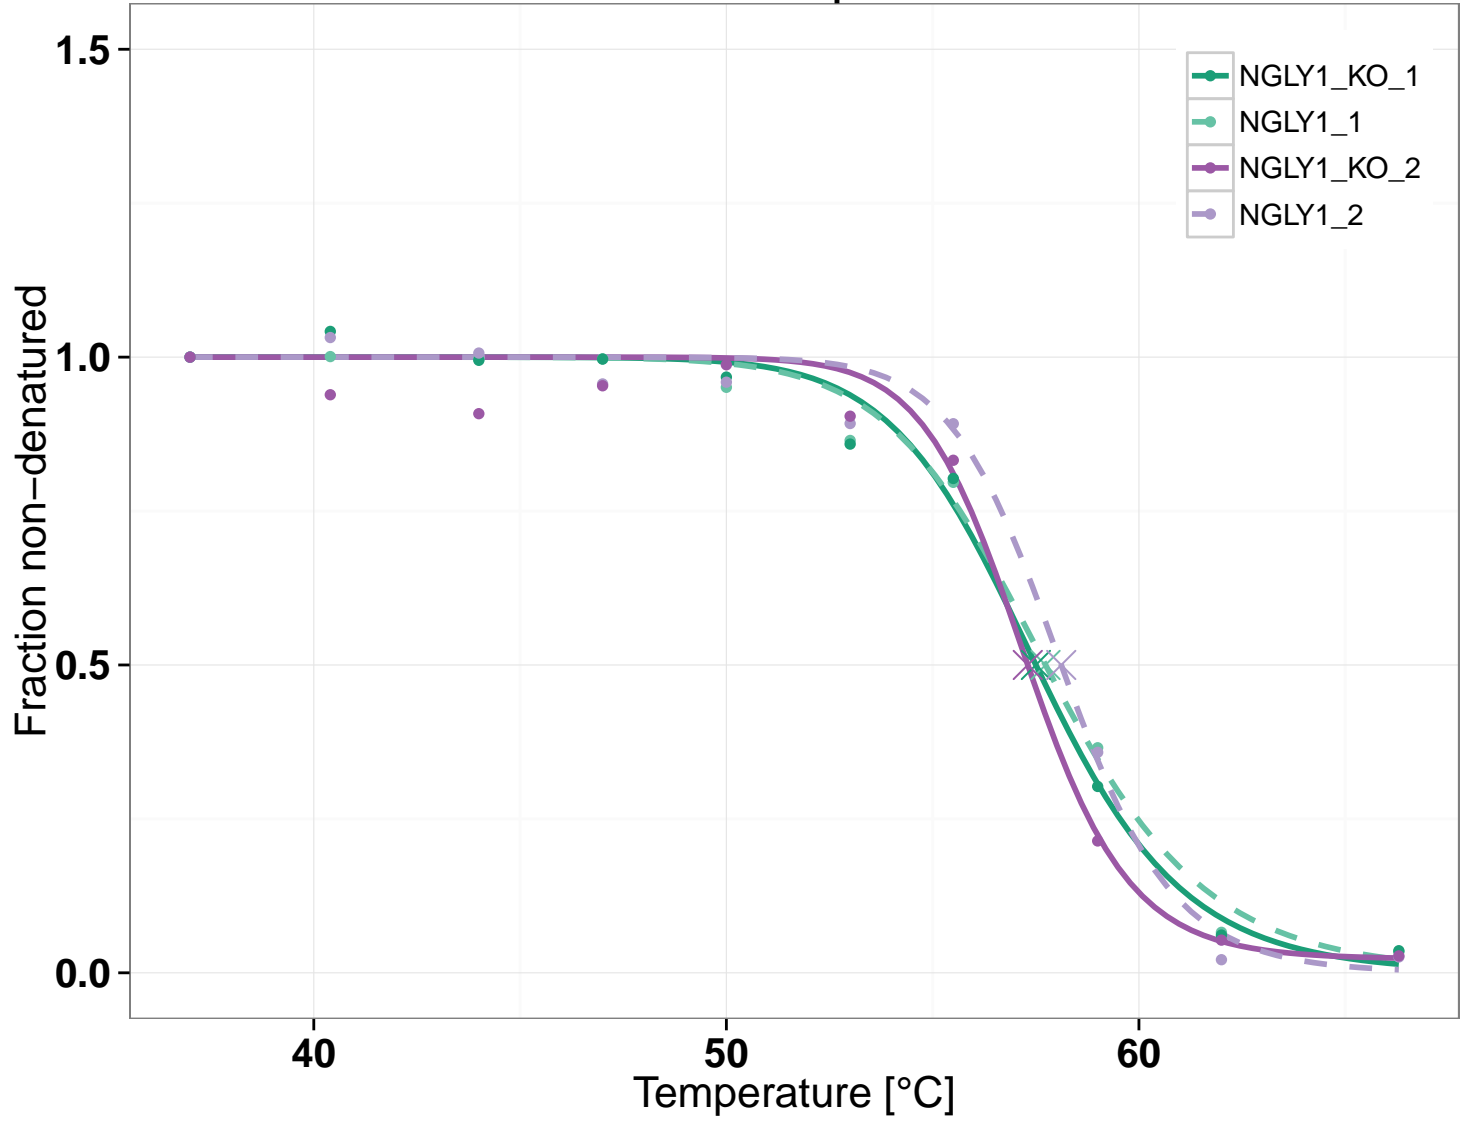

|            | meltPoint | slope | plateau | R2   |
|------------|-----------|-------|---------|------|
| NGLY1_KO_1 | 57.5      | -0.14 | 0       | 0.99 |
| NGLY1_1    | 57.74     | -0.13 | 0       | 0.99 |
| NGLY1_KO_2 | 57.31     | -0.19 | 0.02    | 0.99 |
| NGLY1_2    | 58.12     | -0.18 | 0       | 0.99 |

Supplement: Supplementary file 6088 [file 1]

IPI00642374.1|UCHL5

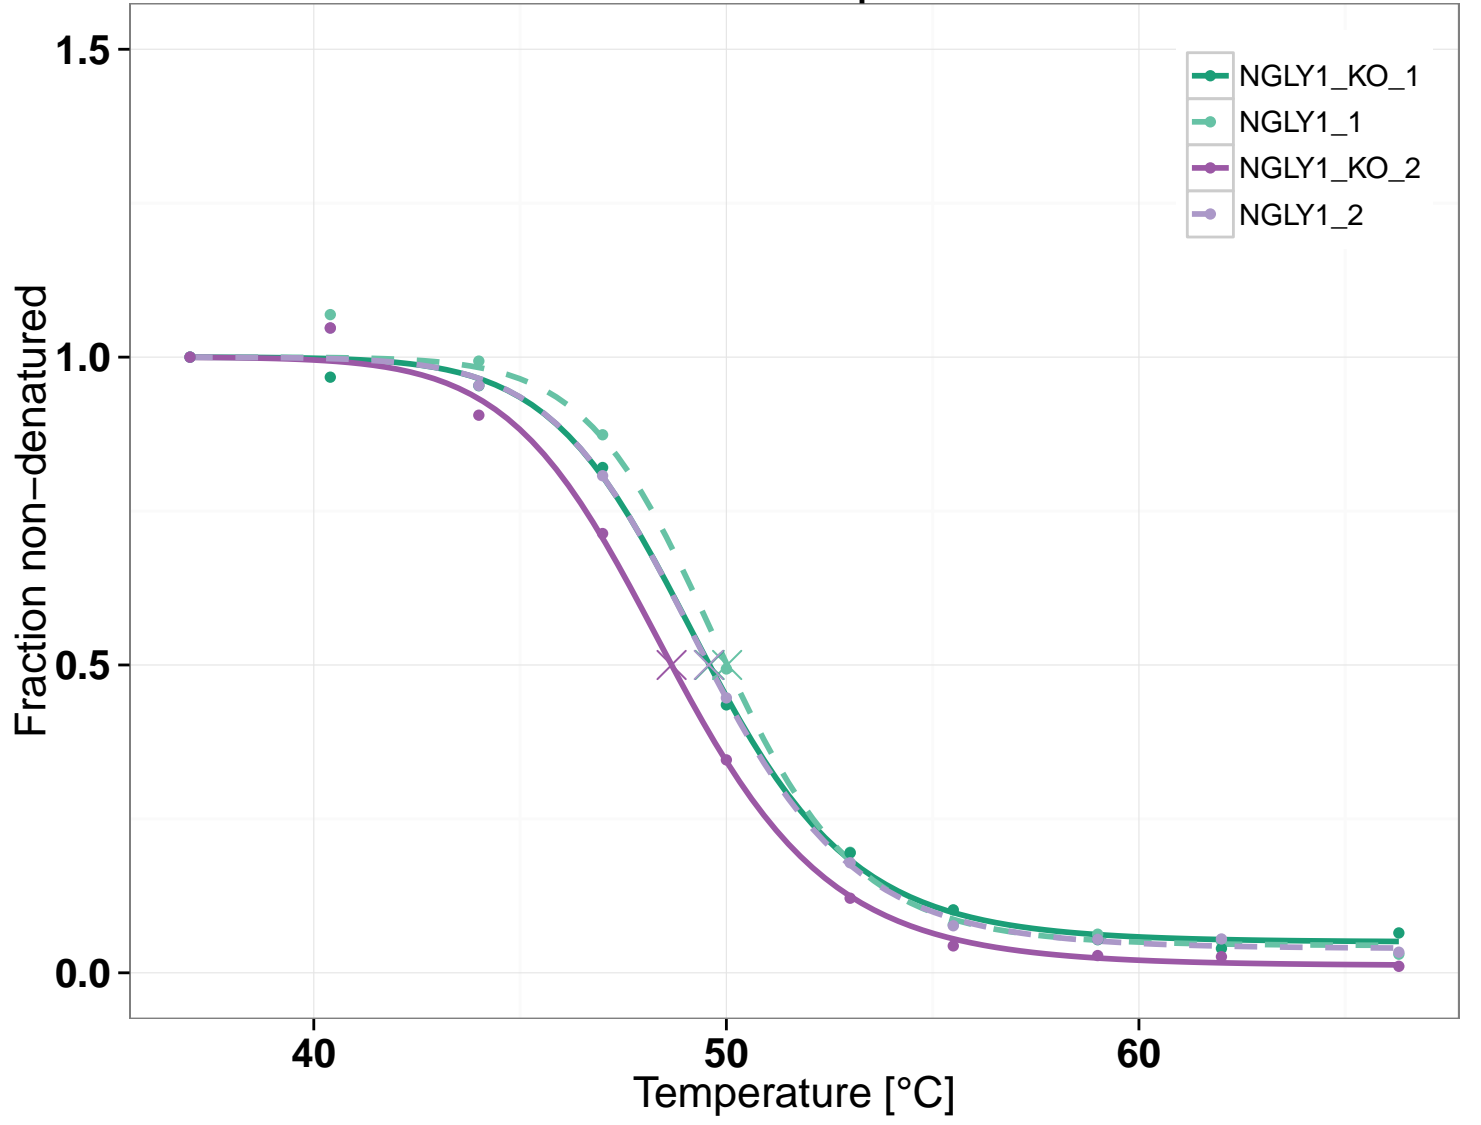

|            | meltPoint | slope | plateau | R2 |
|------------|-----------|-------|---------|----|
| NGLY1_KO_1 | 49.59     | -0.13 | 0.05    | 1  |
| NGLY1_1    | 50.02     | -0.15 | 0.04    | 1  |
| NGLY1_KO_2 | 48.67     | -0.13 | 0.01    | 1  |
| NGLY1_2    | 49.57     | -0.13 | 0.04    | 1  |

Supplement: Supplementary file 6089 [file 1]

IPI00037599.3|TFCP2

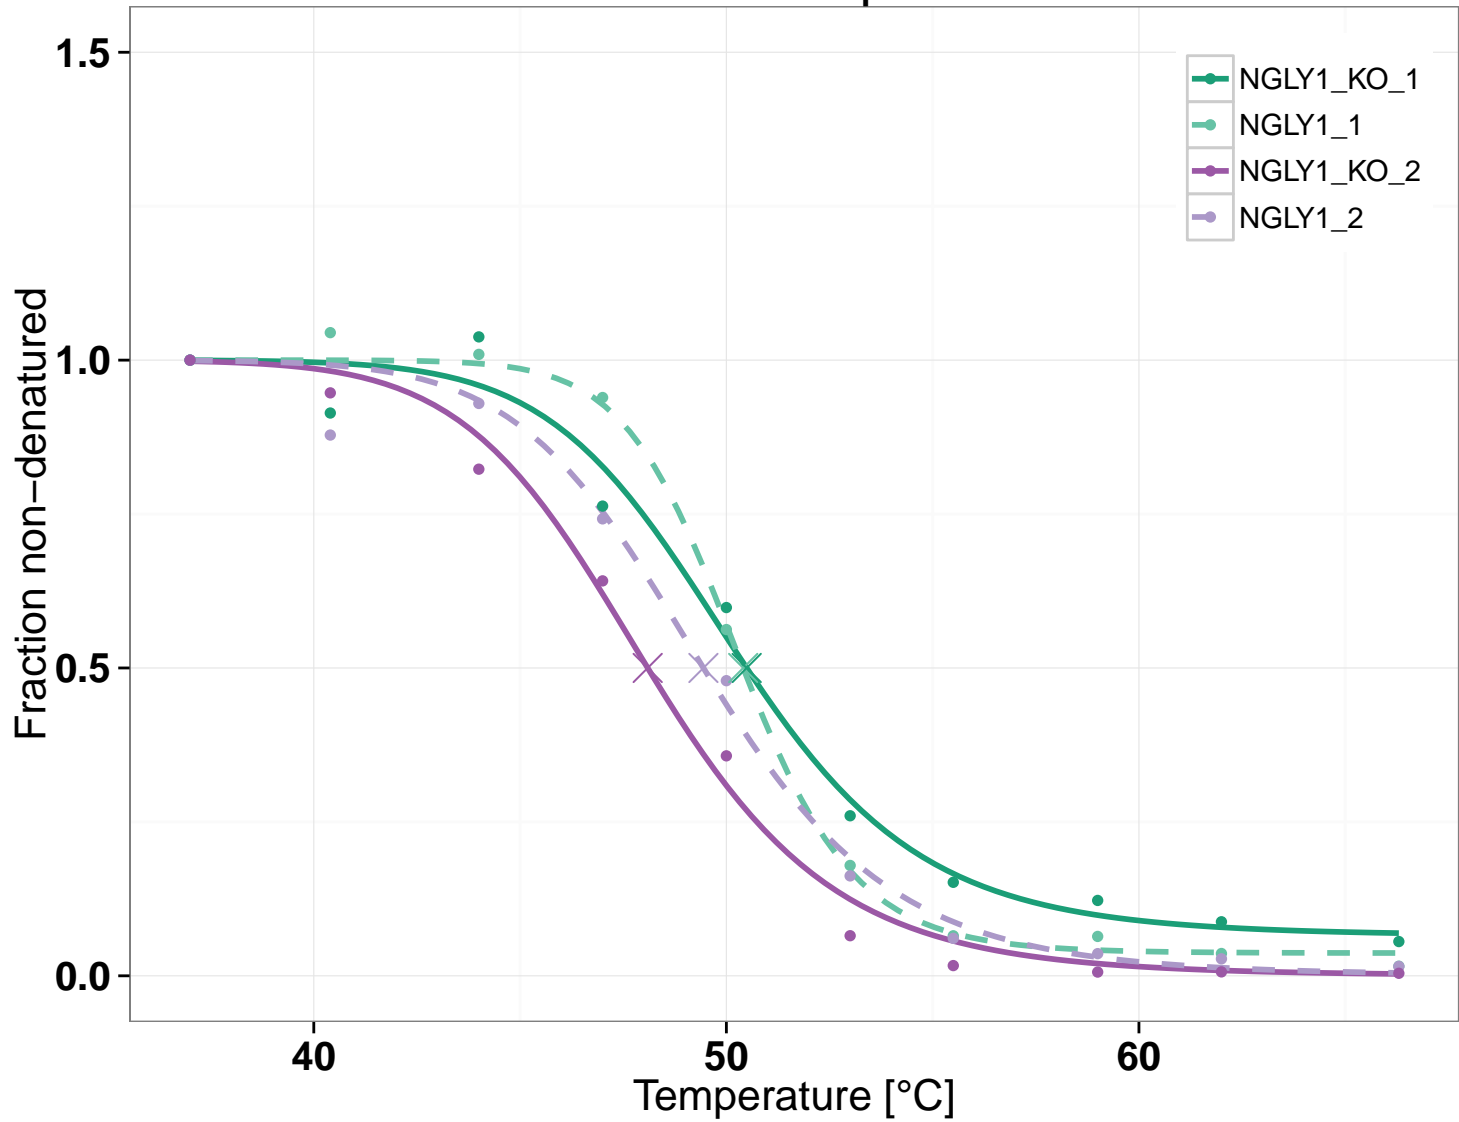

|            | meltPoint | slope | plateau | R2   |
|------------|-----------|-------|---------|------|
| NGLY1_KO_1 | 50.49     | -0.1  | 0.06    | 0.99 |
| NGLY1_1    | 50.41     | -0.17 | 0.04    | 1    |
| NGLY1_KO_2 | 48.09     | -0.11 | 0       | 0.99 |
| NGLY1_2    | 49.44     | -0.11 | 0       | 0.99 |

Supplement: Supplementary file 6090 [file 1]

IPI00059267.1|RERG

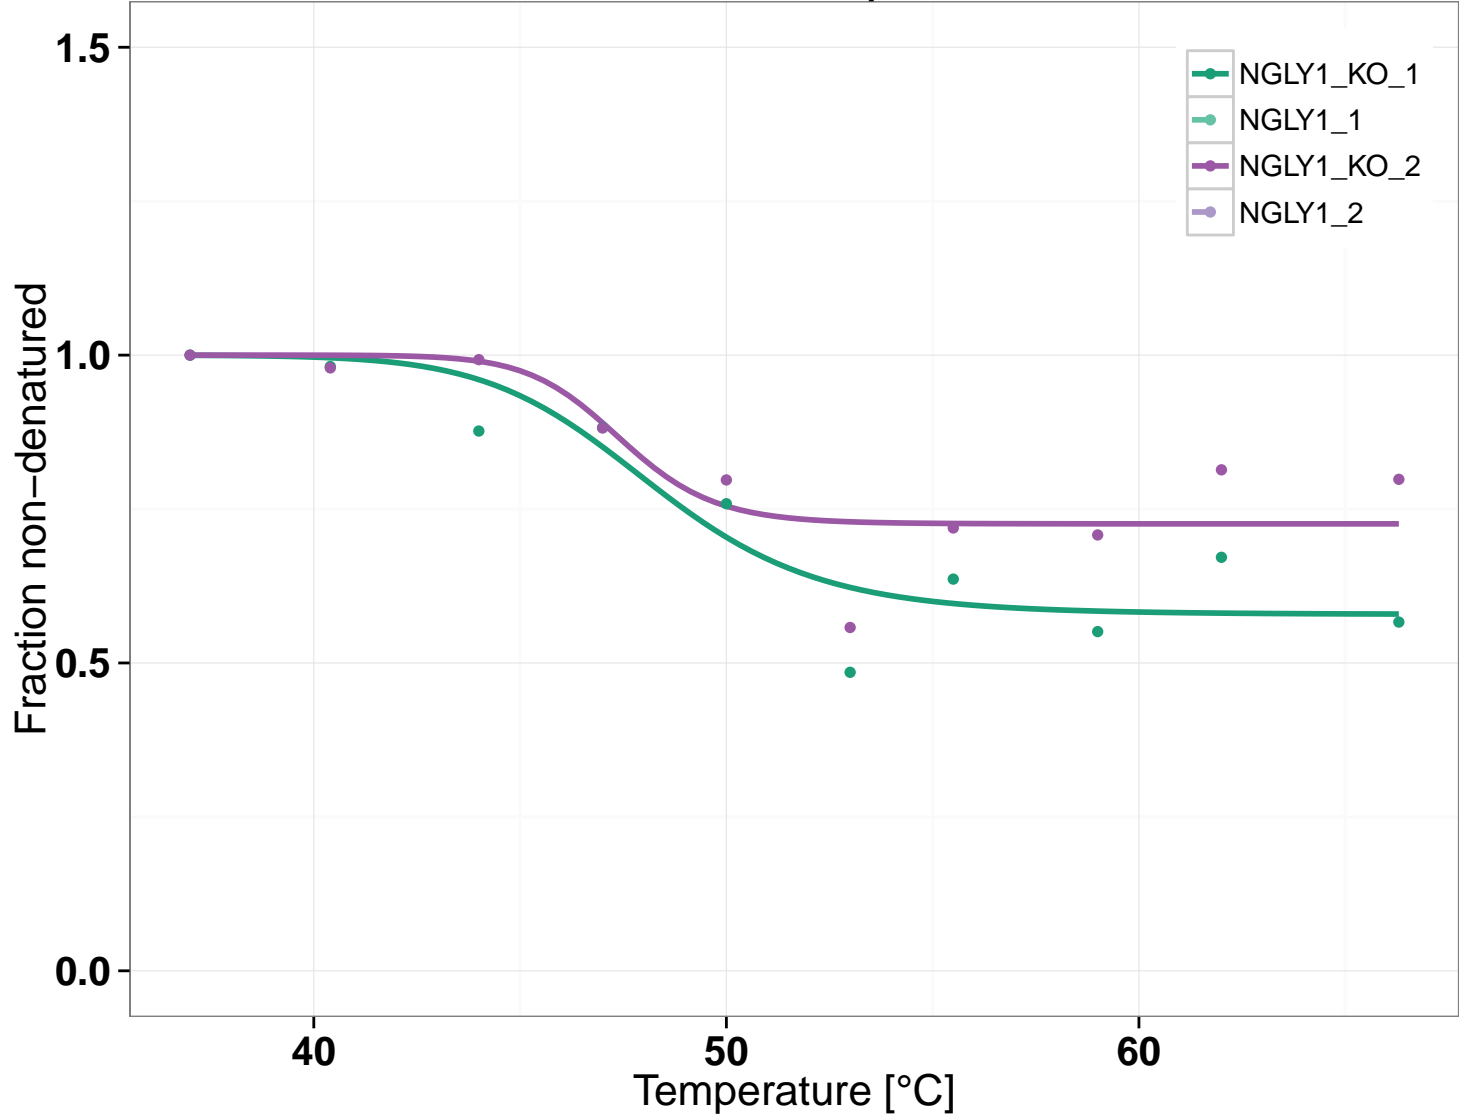

|            | meltPoint | slope  | plateau | R2   |
|------------|-----------|--------|---------|------|
| NGLY1_KO_1 | —         | -0.052 | 0.58    | 0.87 |
| NGLY1_1    | —         | —      | —       | —    |
| NGLY1_KO_2 | —         | -0.061 | 0.73    | 0.75 |
| NGLY1_2    | —         | —      | —       | —    |

Supplement: Supplementary file 6091 [file 1]

IPI00429538.1|YPEL5

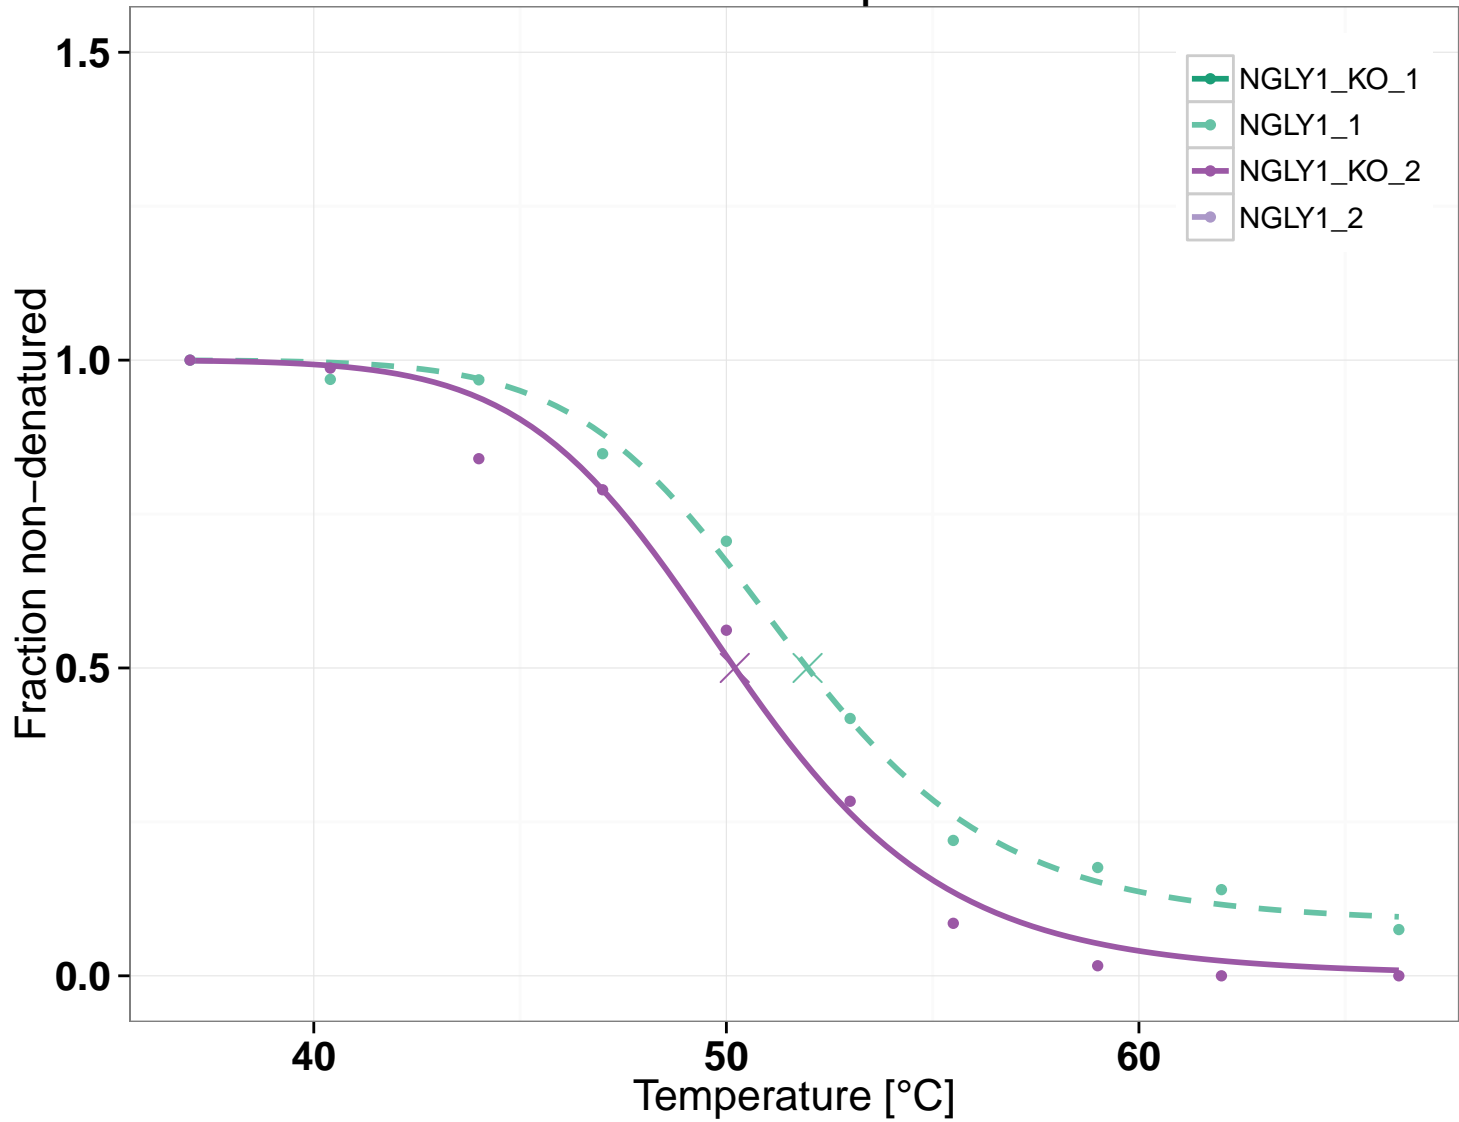

|            | meltPoint | slope  | plateau | R2   |
|------------|-----------|--------|---------|------|
| NGLY1_KO_1 | -         | -      | -       | -    |
| NGLY1_1    | 51.97     | -0.089 | 0.09    | 1    |
| NGLY1_KO_2 | 50.2      | -0.098 | 0       | 0.99 |
| NGLY1_2    | -         | -      | -       | -    |

Supplement: Supplementary file 6092 [file 1]

IPI00298738.3|POLRMT

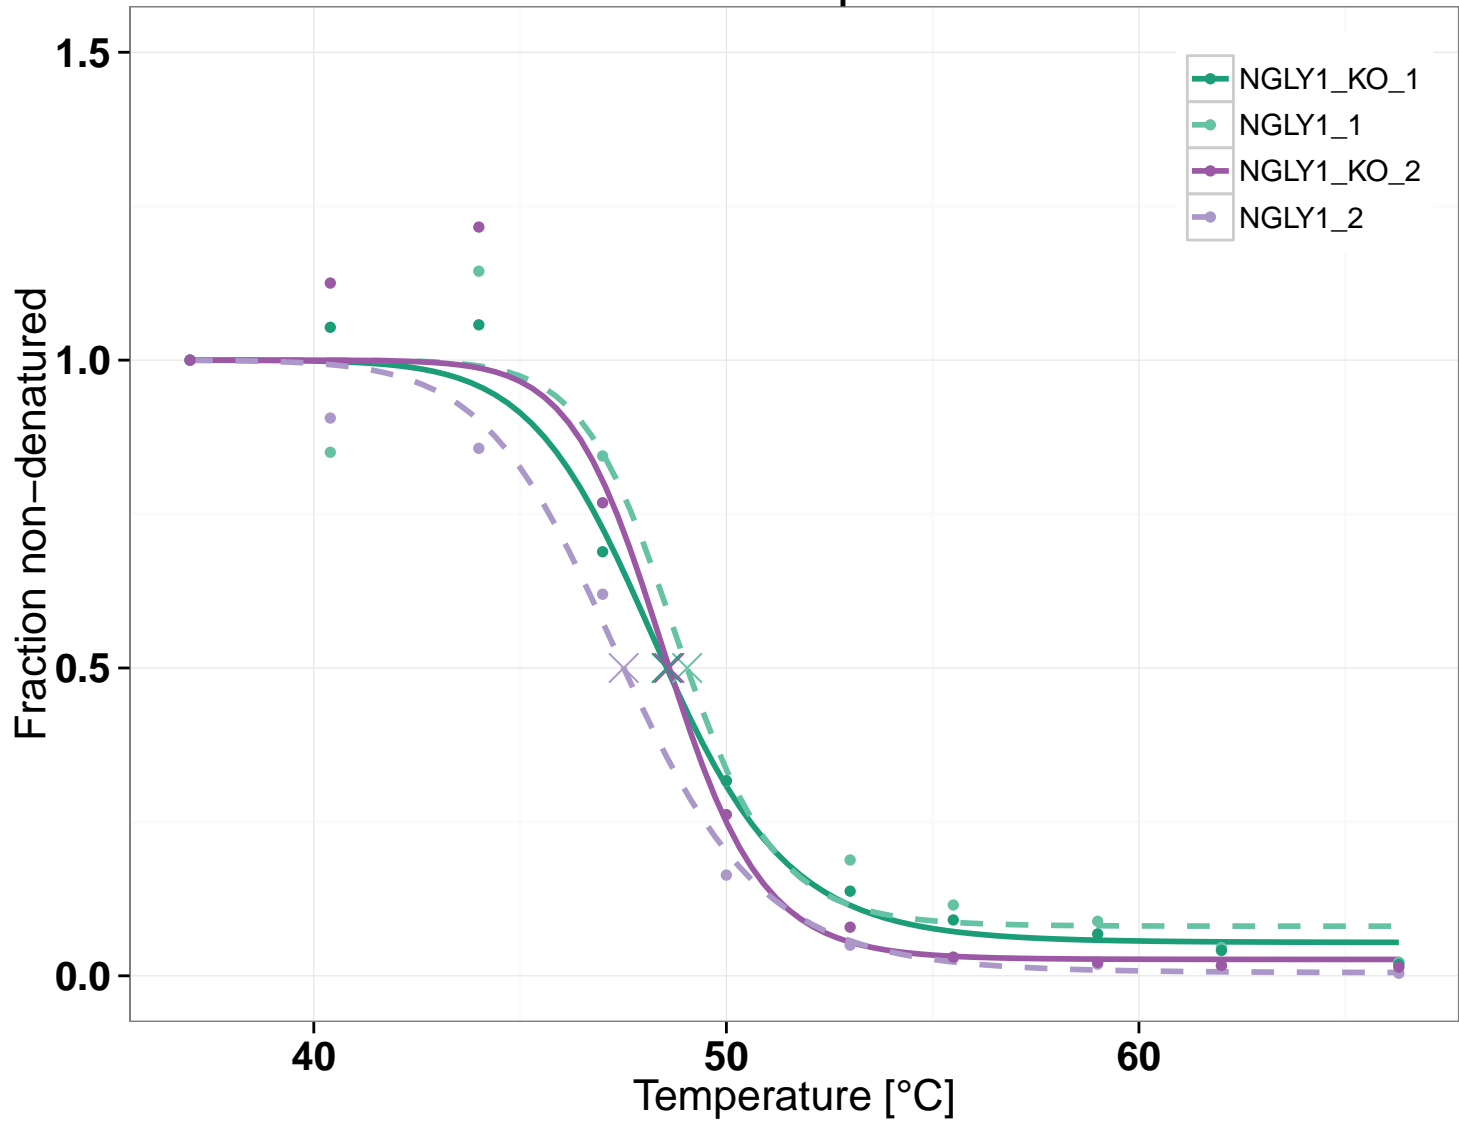

|            | meltPoint | slope | plateau | R2   |
|------------|-----------|-------|---------|------|
| NGLY1_KO_1 | 48.56     | -0.15 | 0.05    | 0.99 |
| NGLY1_1    | 49.05     | -0.2  | 0.08    | 0.97 |
| NGLY1_KO_2 | 48.61     | -0.21 | 0.03    | 0.97 |
| NGLY1_2    | 47.51     | -0.15 | 0.01    | 0.99 |

Supplement: Supplementary file 6093 [file 1]

# IPI00394838.3|ACLY

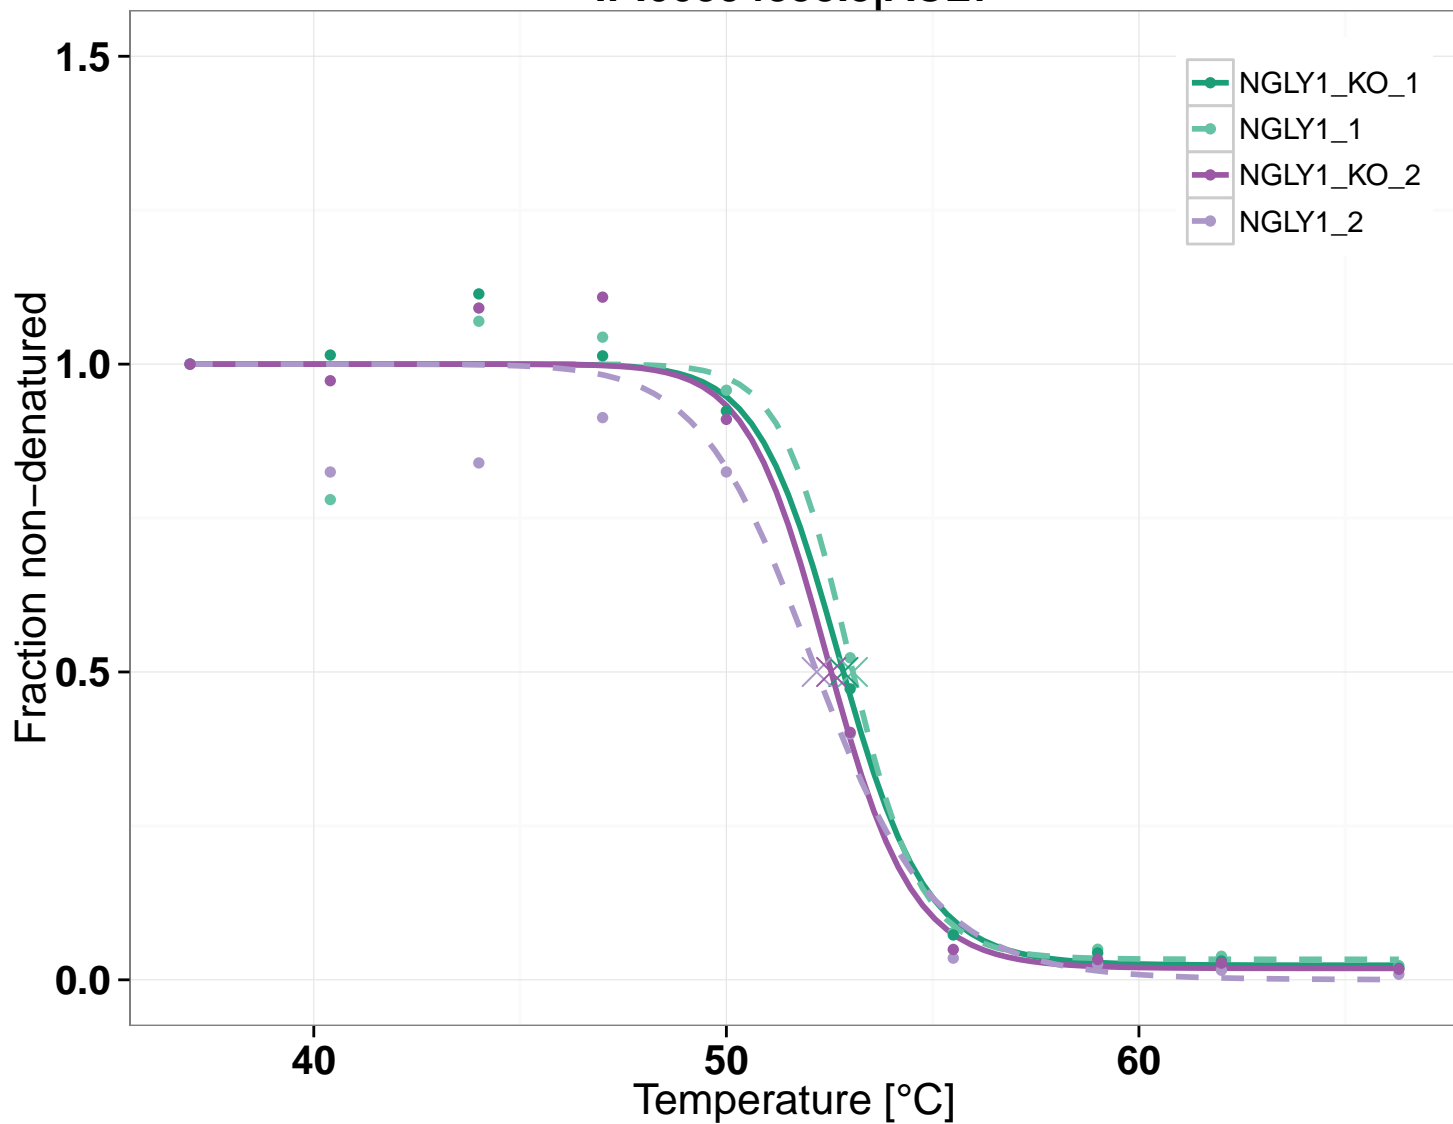

|            | meltPoint | slope | plateau | R2   |
|------------|-----------|-------|---------|------|
| NGLY1_KO_1 | 52.84     | -0.24 | 0.02    | 0.99 |
| NGLY1_1    | 53.07     | -0.29 | 0.03    | 0.97 |
| NGLY1_KO_2 | 52.54     | -0.24 | 0.02    | 0.99 |
| NGLY1_2    | 52.19     | -0.18 | 0       | 0.96 |

Supplement: Supplementary file 6094 [file 1]

# IPI00018195.3|MAPK3

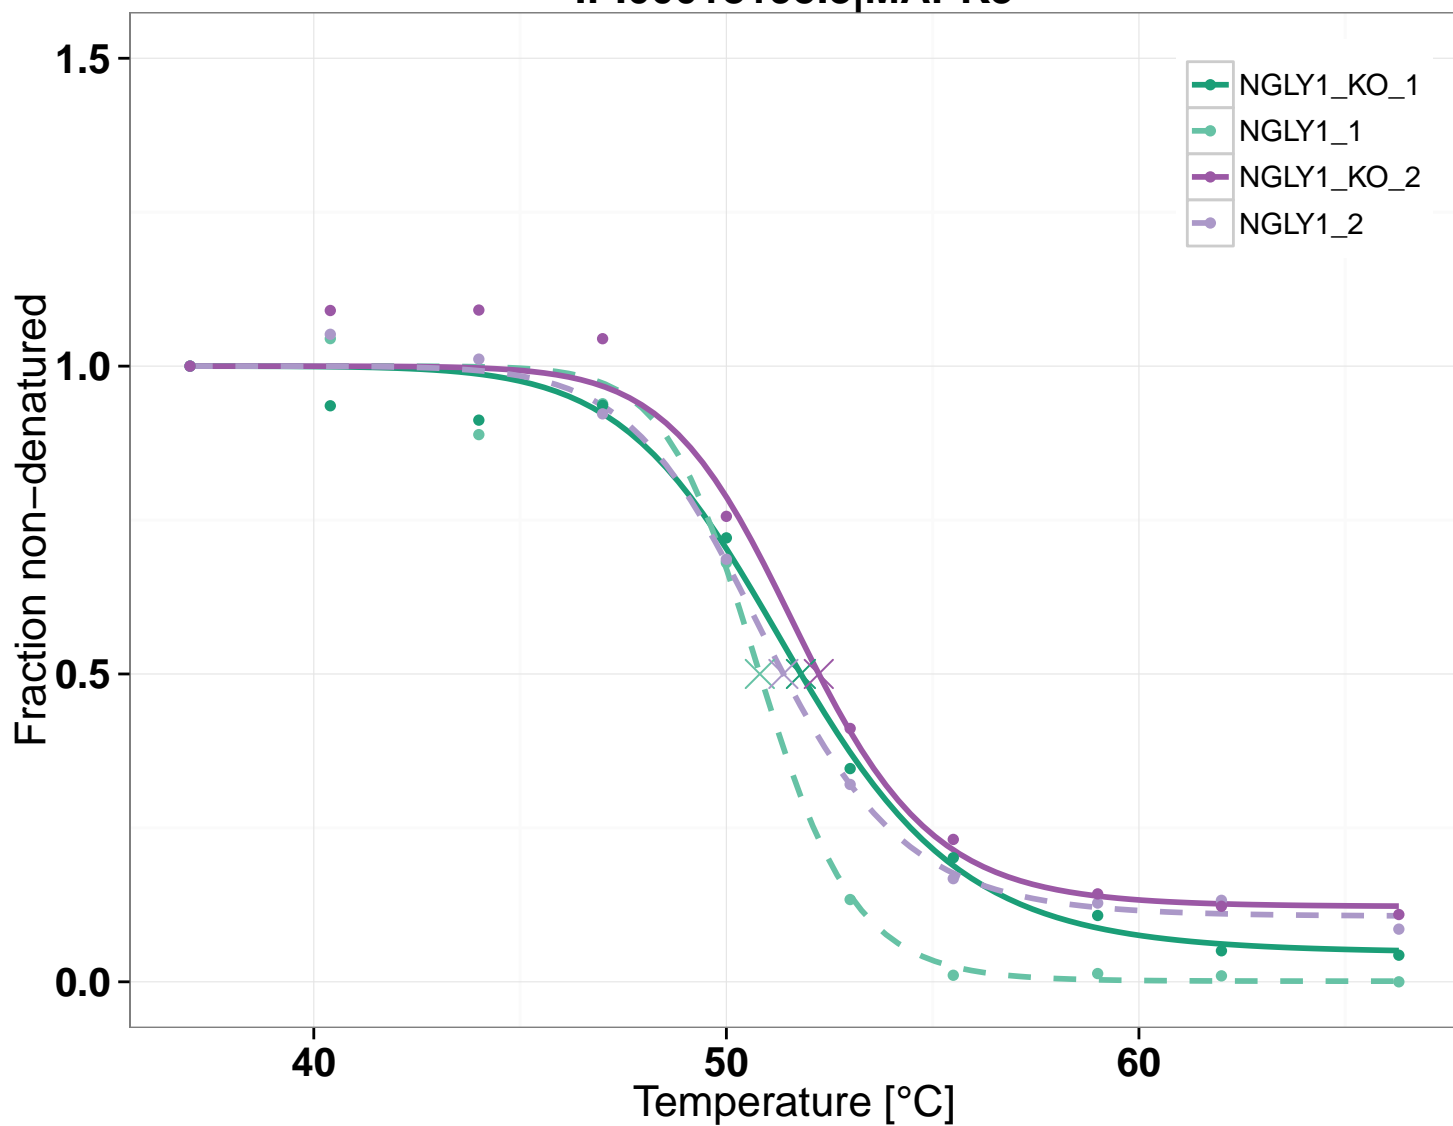

|            | meltPoint | slope | plateau | R2   |
|------------|-----------|-------|---------|------|
| NGLY1_KO_1 | 51.81     | -0.12 | 0.05    | 0.99 |
| NGLY1_1    | 50.81     | -0.22 | 0       | 0.99 |
| NGLY1_KO_2 | 52.24     | -0.14 | 0.12    | 0.99 |
| NGLY1_2    | 51.38     | -0.13 | 0.11    | 1    |

Supplement: Supplementary file 6095 [file 1]

# IPI00004860.2|RARS

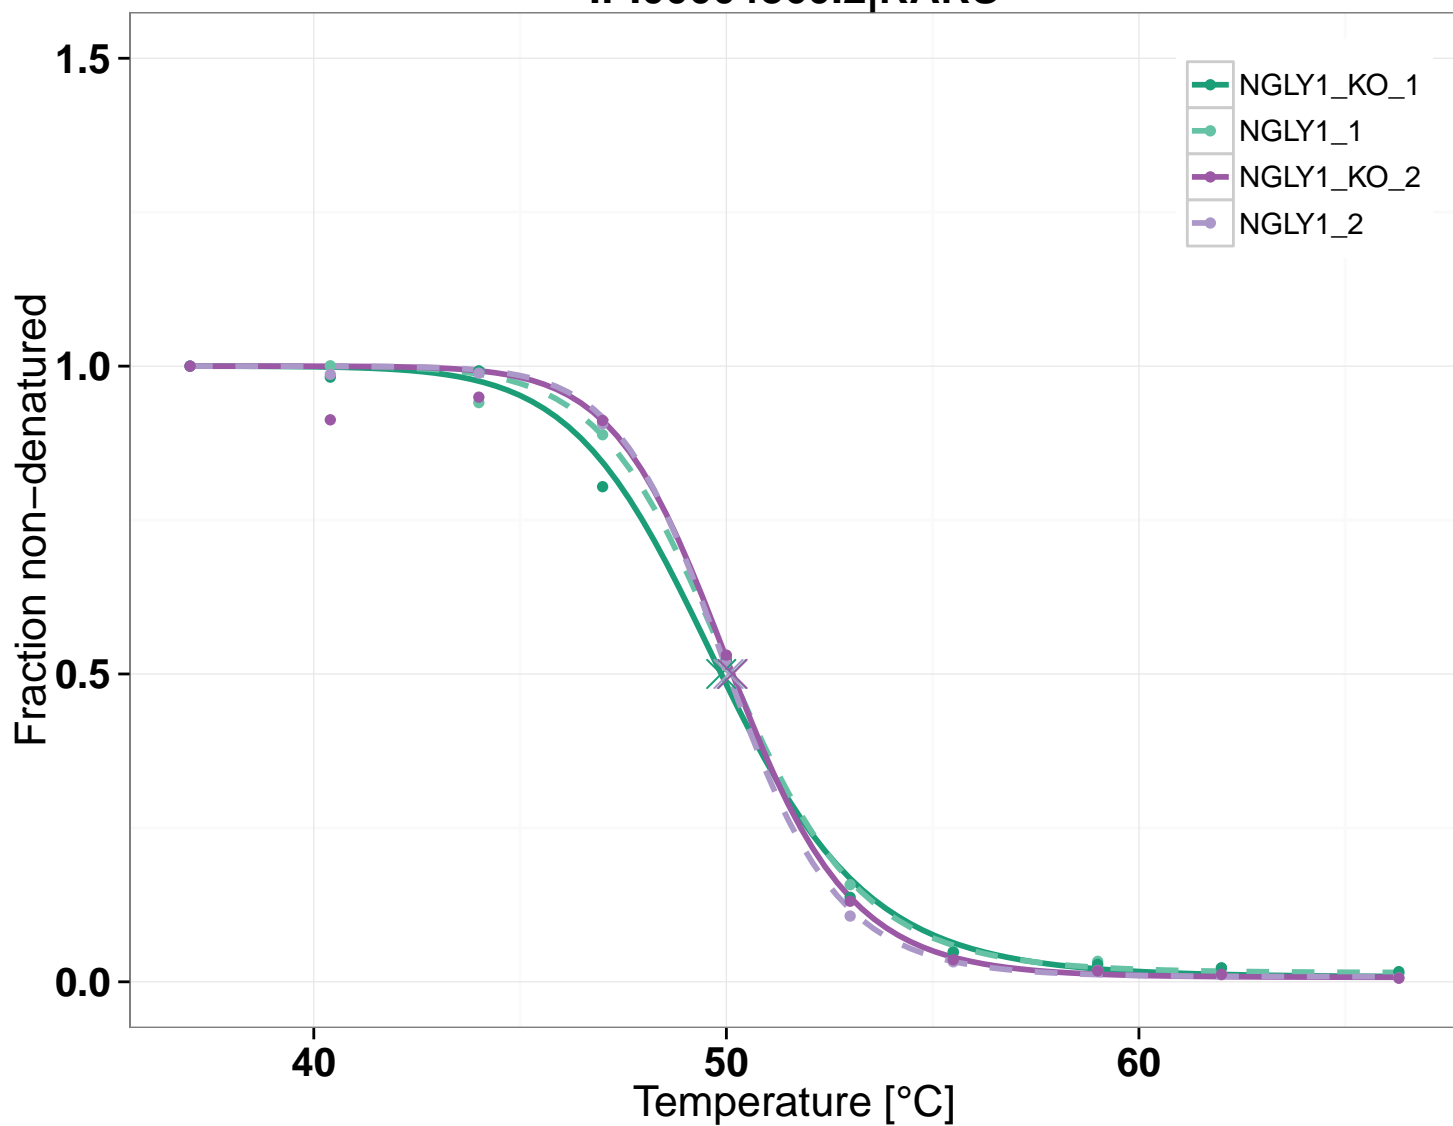

|            | meltPoint | slope | plateau | R2   |
|------------|-----------|-------|---------|------|
| NGLY1_KO_1 | 49.88     | -0.14 | 0.01    | 1    |
| NGLY1_1    | 50.13     | -0.15 | 0.01    | 1    |
| NGLY1_KO_2 | 50.15     | -0.17 | 0.01    | 0.99 |
| NGLY1_2    | 50.05     | -0.18 | 0.01    | 1    |

Supplement: Supplementary file 6096 [file 1]

IPI00005667.4|N4BP1

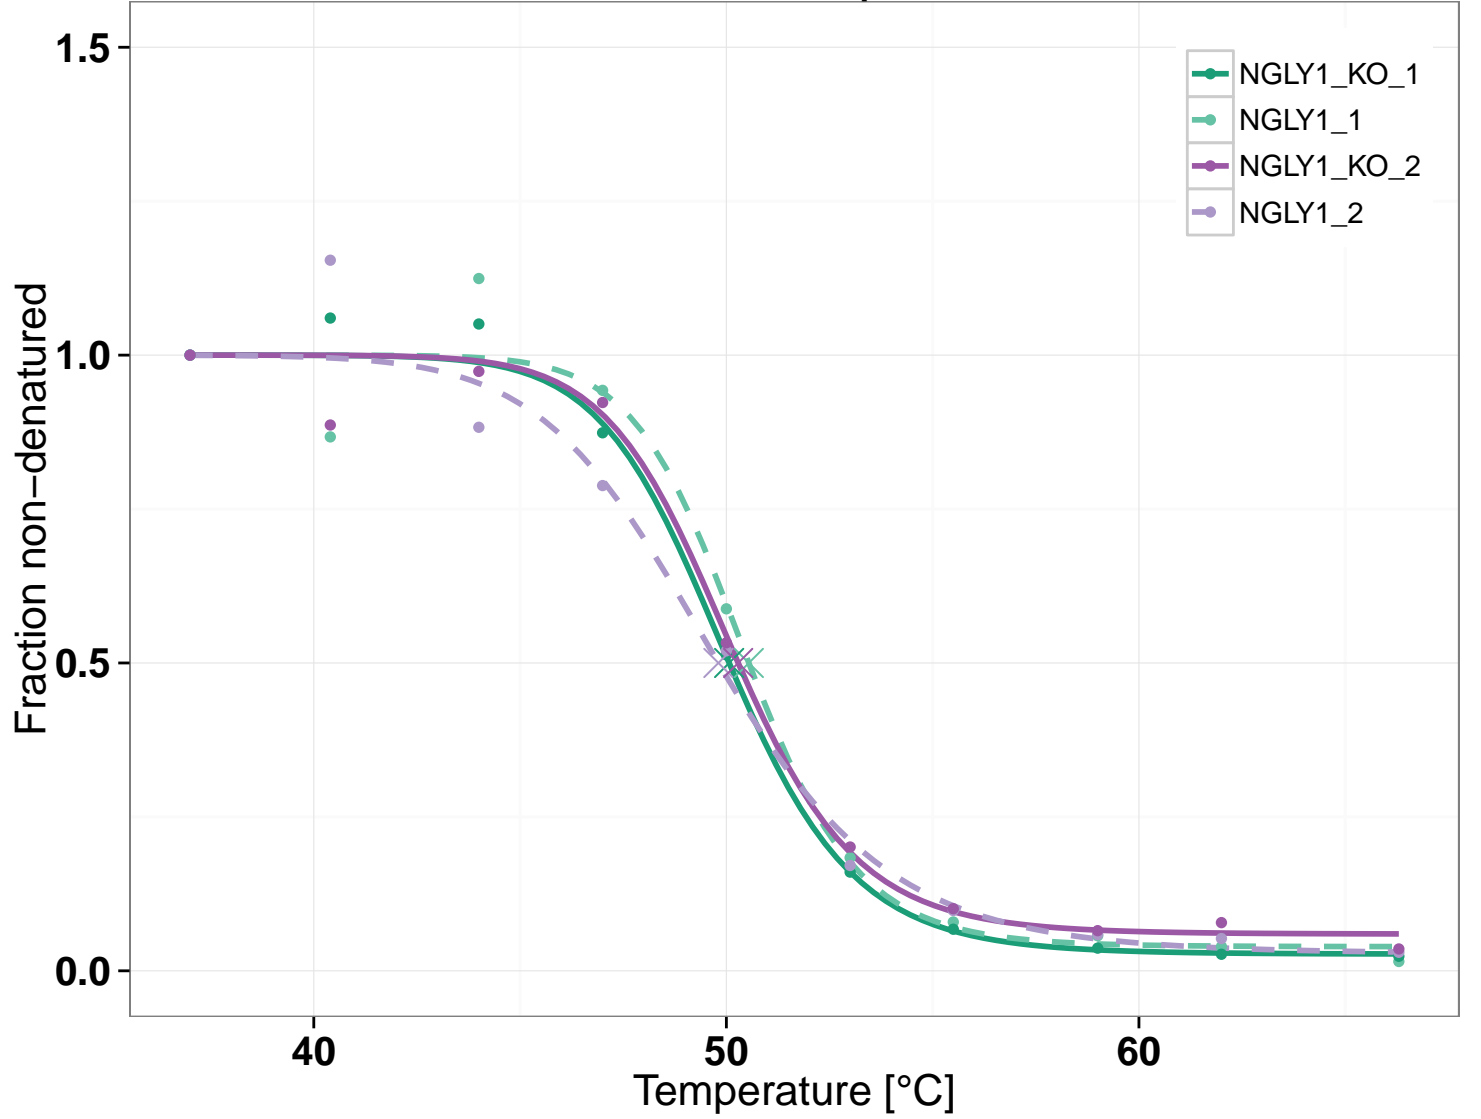

|            | meltPoint | slope | plateau | R2   |
|------------|-----------|-------|---------|------|
| NGLY1_KO_1 | 50.07     | -0.16 | 0.03    | 1    |
| NGLY1_1    | 50.54     | -0.18 | 0.04    | 0.98 |
| NGLY1_KO_2 | 50.29     | -0.16 | 0.06    | 0.99 |
| NGLY1_2    | 49.81     | -0.11 | 0.03    | 0.98 |

Supplement: Supplementary file 6097 [file 1]

IPI00914924.1|WWOX

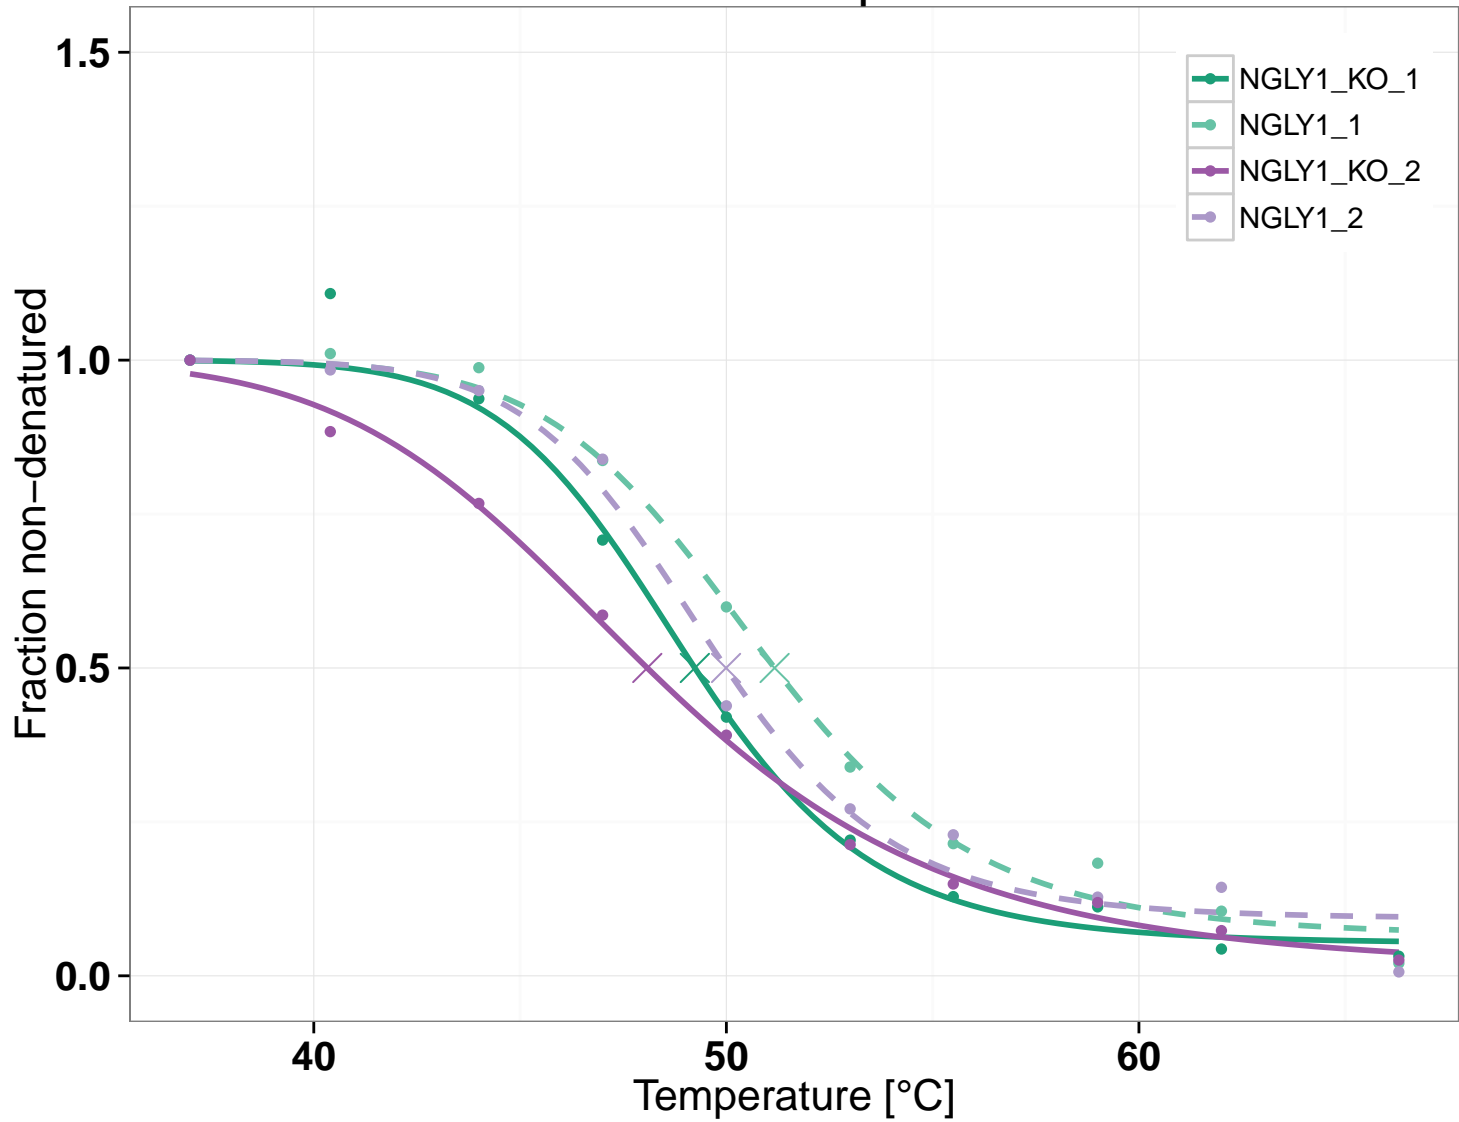

|            | meltPoint | slope  | plateau | R2   |
|------------|-----------|--------|---------|------|
| NGLY1_KO_1 | 49.24     | -0.1   | 0.05    | 0.99 |
| NGLY1_1    | 51.17     | -0.09  | 0.06    | 0.99 |
| NGLY1_KO_2 | 48.08     | -0.067 | 0.01    | 1    |
| NGLY1_2    | 49.99     | -0.1   | 0.09    | 0.99 |

Supplement: Supplementary file 6098 [file 1]

IPI00152898.1|AP1S1

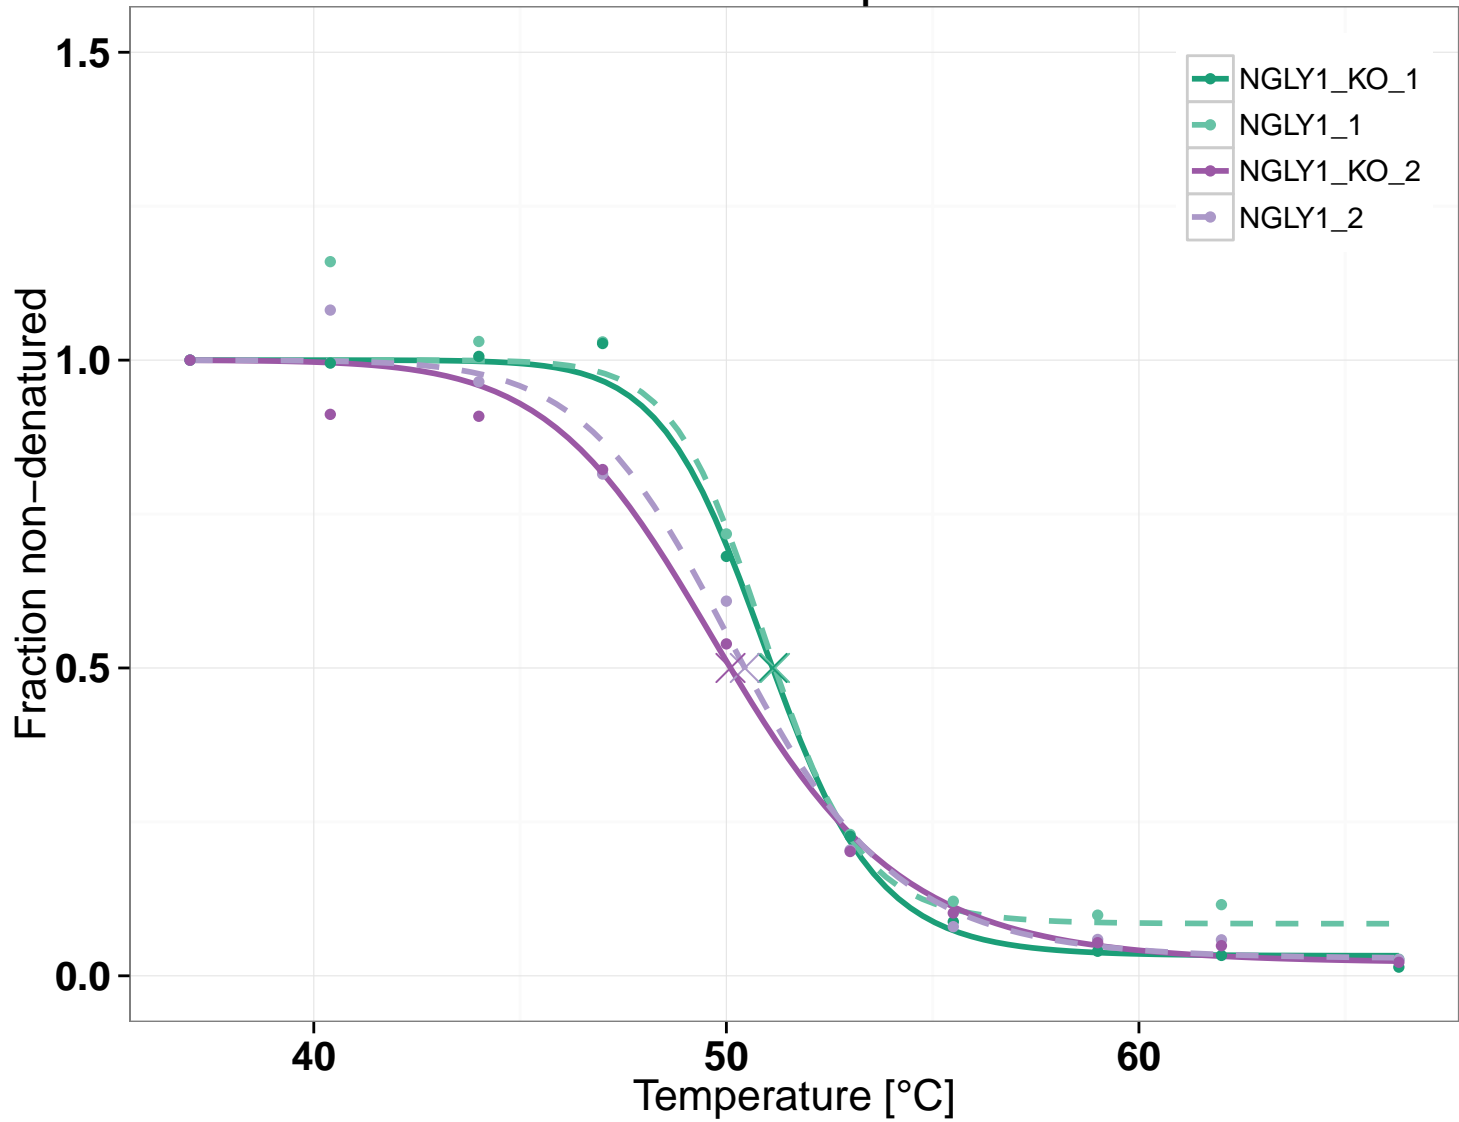

|            | meltPoint | slope | plateau | R2   |
|------------|-----------|-------|---------|------|
| NGLY1_KO_1 | 51.12     | -0.18 | 0.03    | 1    |
| NGLY1_1    | 51.18     | -0.2  | 0.08    | 0.98 |
| NGLY1_KO_2 | 50.1      | -0.11 | 0.02    | 0.99 |
| NGLY1_2    | 50.45     | -0.13 | 0.03    | 0.99 |

Supplement: Supplementary file 6099 [file 1]

IPI00174852.4|MED20

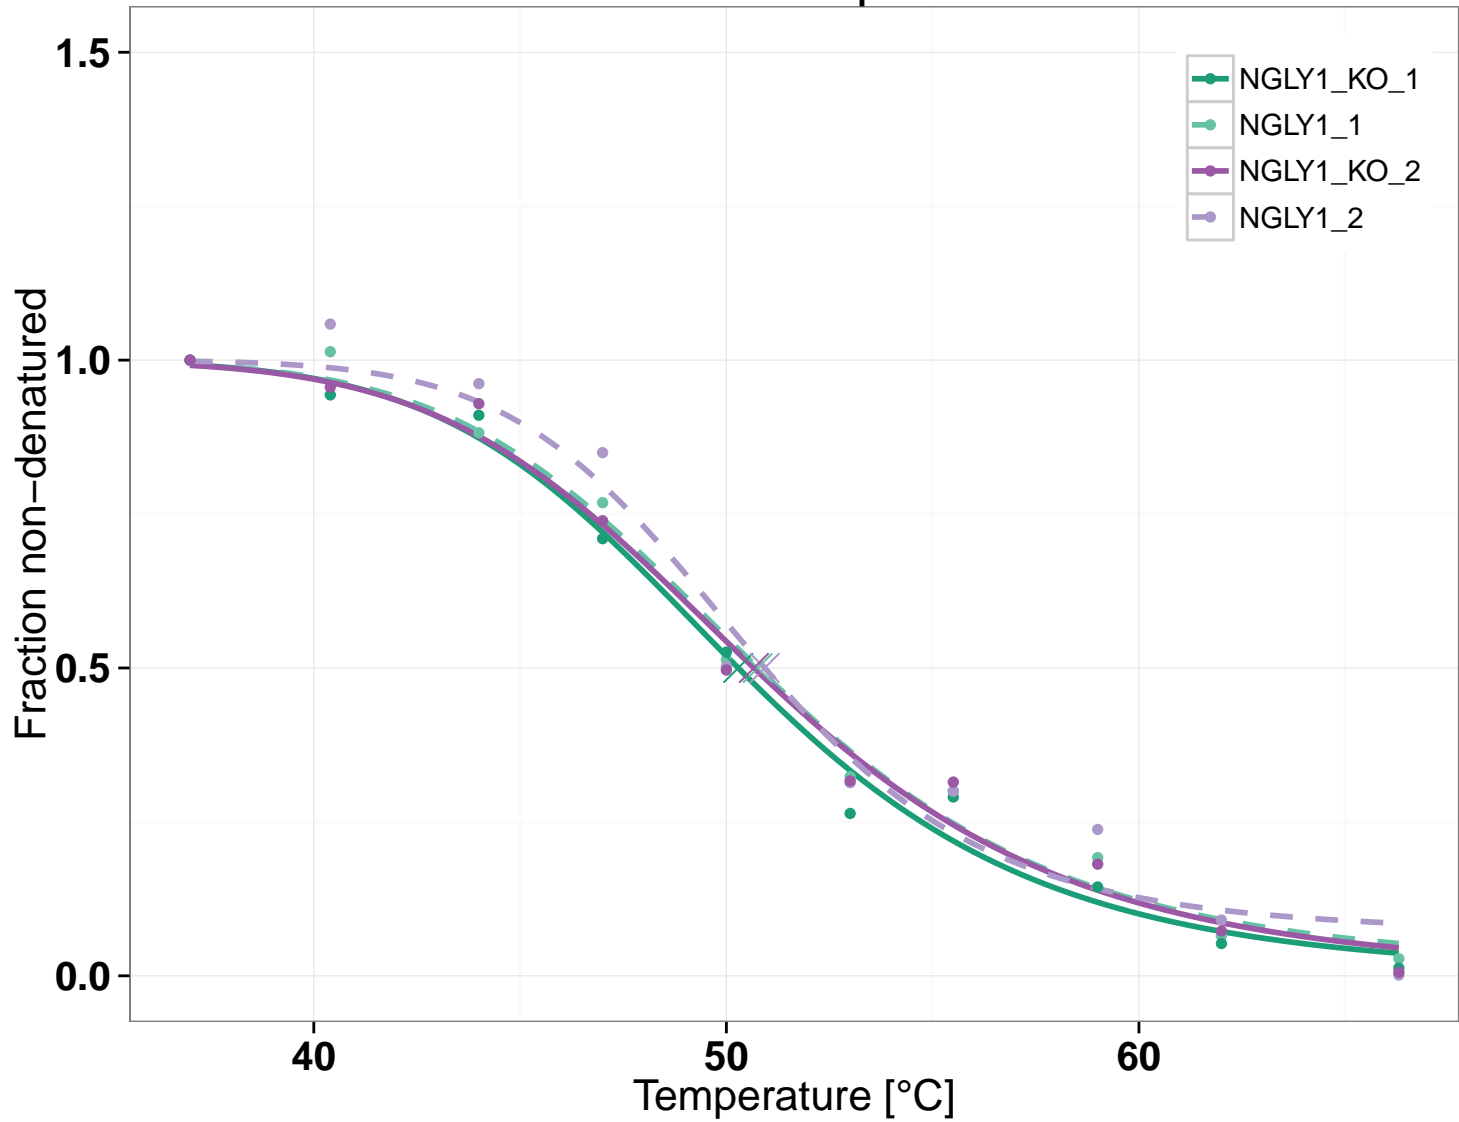

|            | meltPoint | slope  | plateau | R2   |
|------------|-----------|--------|---------|------|
| NGLY1_KO_1 | 50.29     | -0.069 | 0       | 0.99 |
| NGLY1_1    | 50.76     | -0.066 | 0.01    | 0.99 |
| NGLY1_KO_2 | 50.67     | -0.065 | 0       | 0.99 |
| NGLY1_2    | 50.93     | -0.08  | 0.07    | 0.97 |

Supplement: Supplementary file 6100 [file 1]

# IPI00655887.1|RGPD5

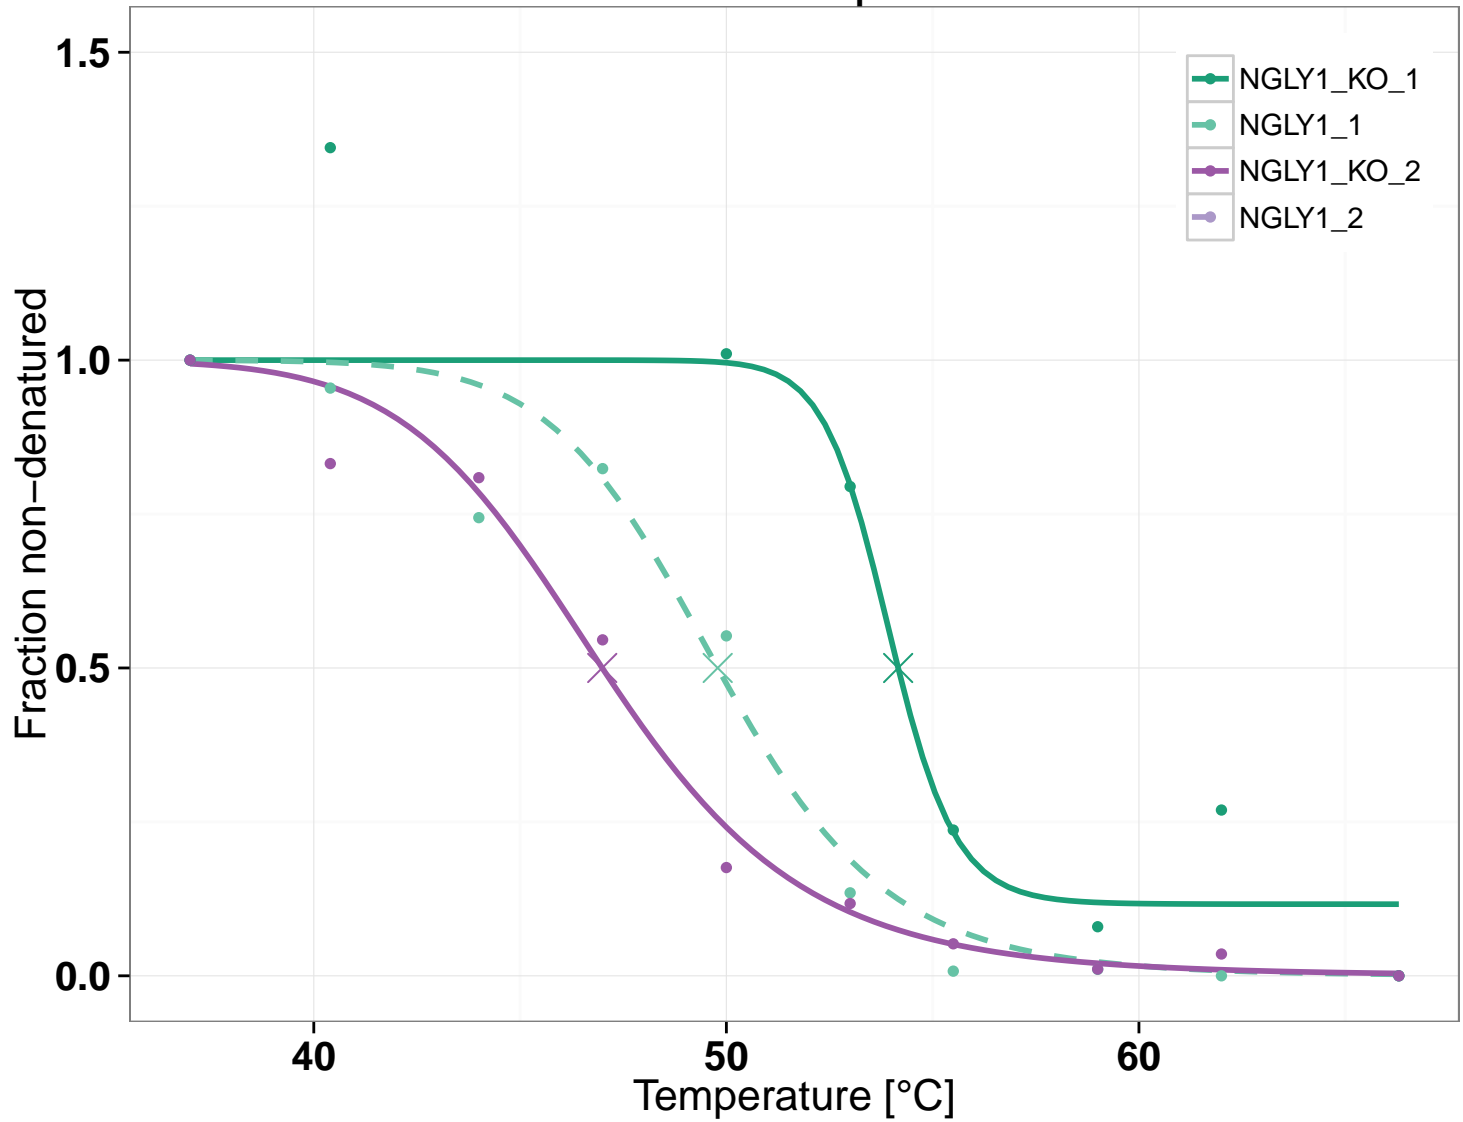

|            | meltPoint | slope | plateau | R2   |
|------------|-----------|-------|---------|------|
| NGLY1_KO_1 | 54.16     | -0.28 | 0.12    | 0.53 |
| NGLY1_1    | 49.79     | -0.12 | 0       | 0.96 |
| NGLY1_KO_2 | 46.99     | -0.1  | 0       | 0.98 |
| NGLY1_2    | -         | -     | -       | -    |

Supplement: Supplementary file 6101 [file 1]

IPI00329596.2|TXNDC14

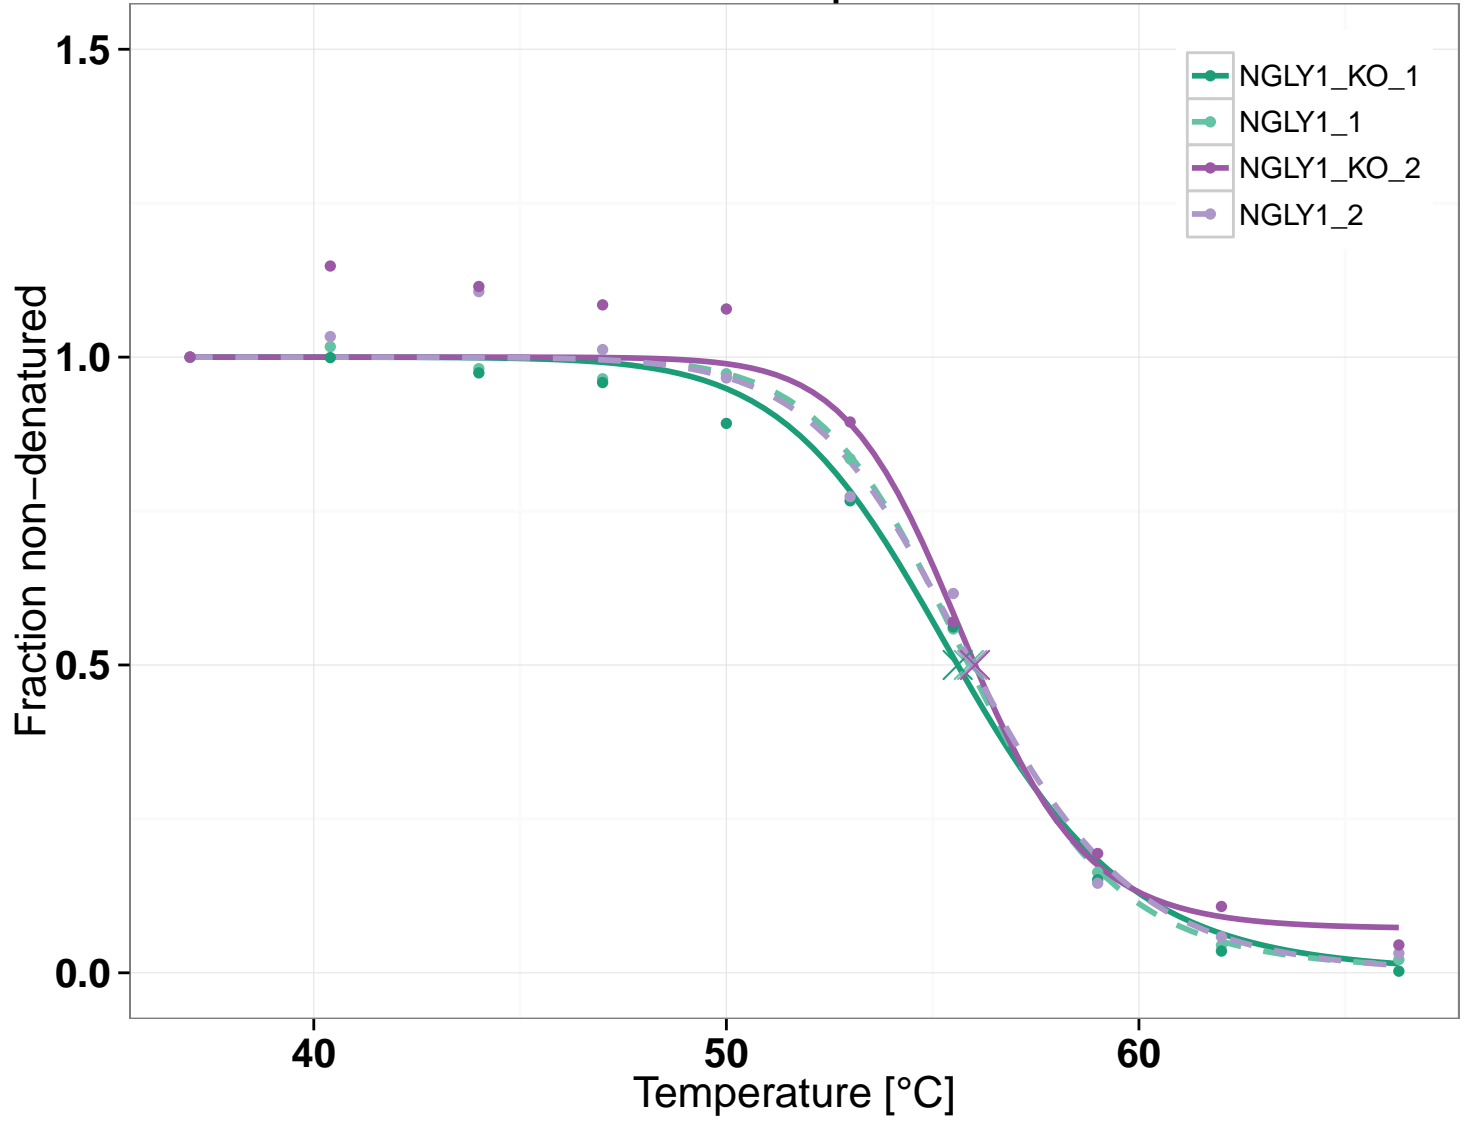

|            | meltPoint | slope | plateau | R2   |
|------------|-----------|-------|---------|------|
| NGLY1_KO_1 | 55.61     | -0.12 | 0       | 0.99 |
| NGLY1_1    | 55.88     | -0.14 | 0.01    | 1    |
| NGLY1_KO_2 | 56.03     | -0.16 | 0.07    | 0.97 |
| NGLY1_2    | 55.96     | -0.13 | 0       | 0.99 |

Supplement: Supplementary file 6102 [file 1]

IPI00743894.2|ZFC3H1

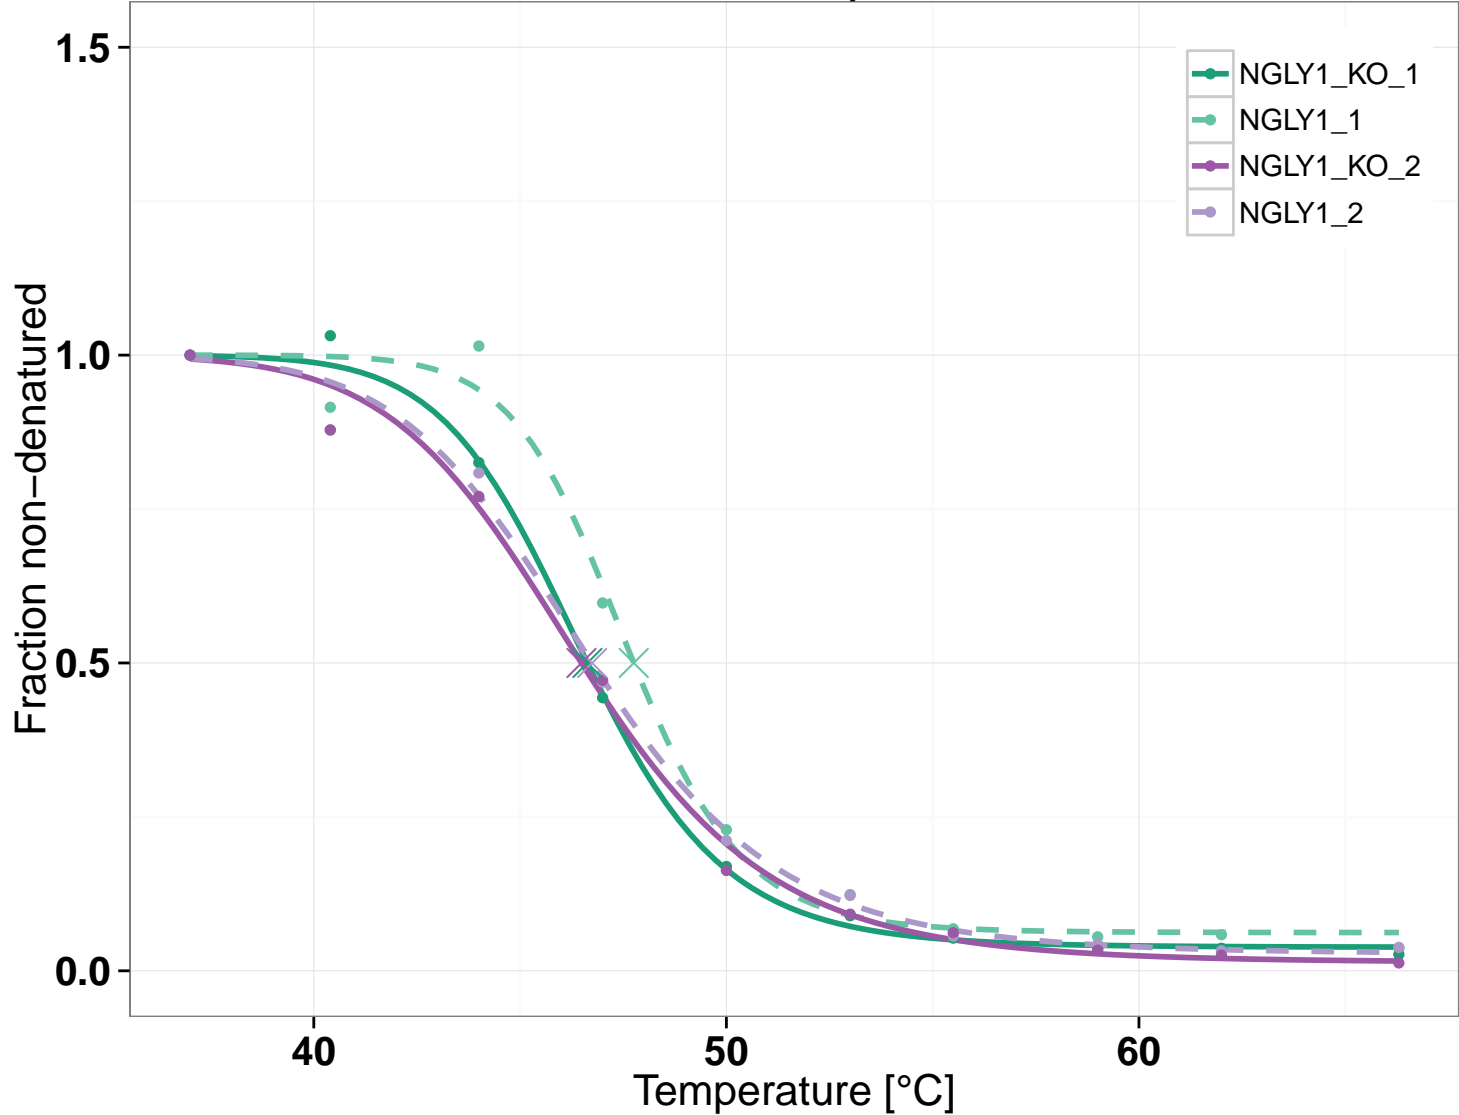

|            | meltPoint | slope | plateau | R2   |
|------------|-----------|-------|---------|------|
| NGLY1_KO_1 | 46.63     | -0.14 | 0.04    | 1    |
| NGLY1_1    | 47.76     | -0.17 | 0.06    | 0.99 |
| NGLY1_KO_2 | 46.49     | -0.11 | 0.01    | 0.99 |
| NGLY1_2    | 46.75     | -0.1  | 0.03    | 0.99 |

Supplement: Supplementary file 6103 [file 1]

IPI00410110.3|DHX40

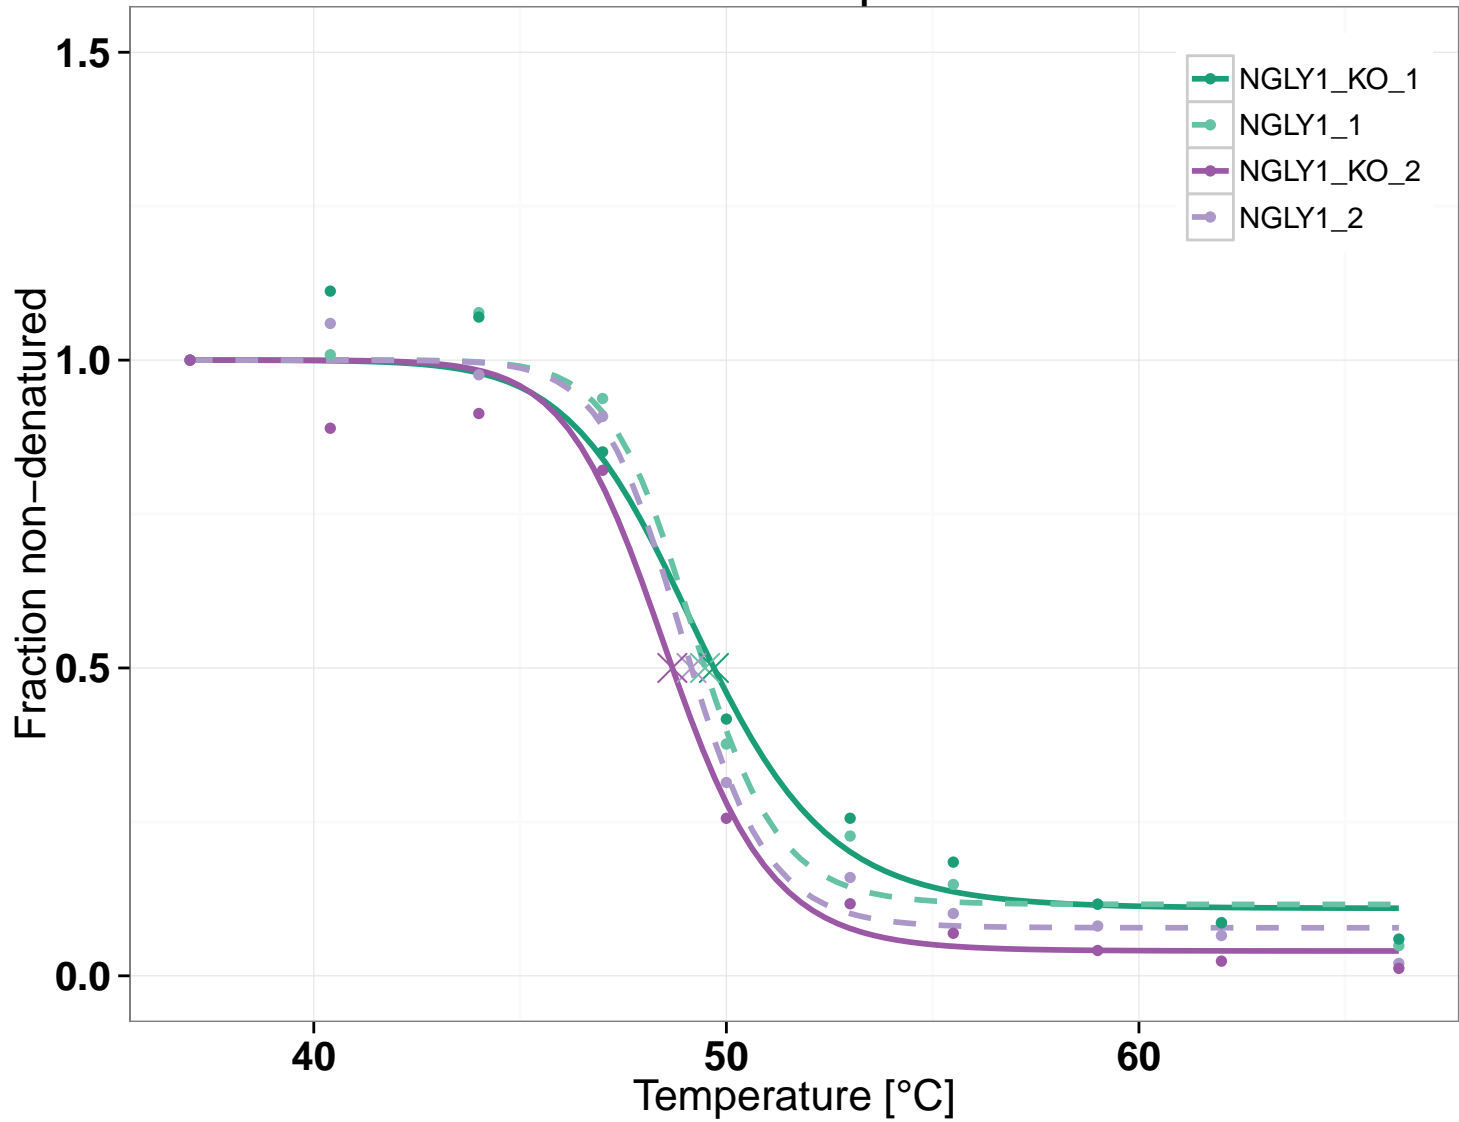

|            | meltPoint | slope | plateau | R2   |
|------------|-----------|-------|---------|------|
| NGLY1_KO_1 | 49.7      | -0.14 | 0.11    | 0.98 |
| NGLY1_1    | 49.48     | -0.22 | 0.12    | 0.99 |
| NGLY1_KO_2 | 48.69     | -0.19 | 0.04    | 0.99 |
| NGLY1_2    | 49.15     | -0.23 | 0.08    | 0.99 |

Supplement: Supplementary file 6104 [file 1]

IPI00293276.10|LOC284889

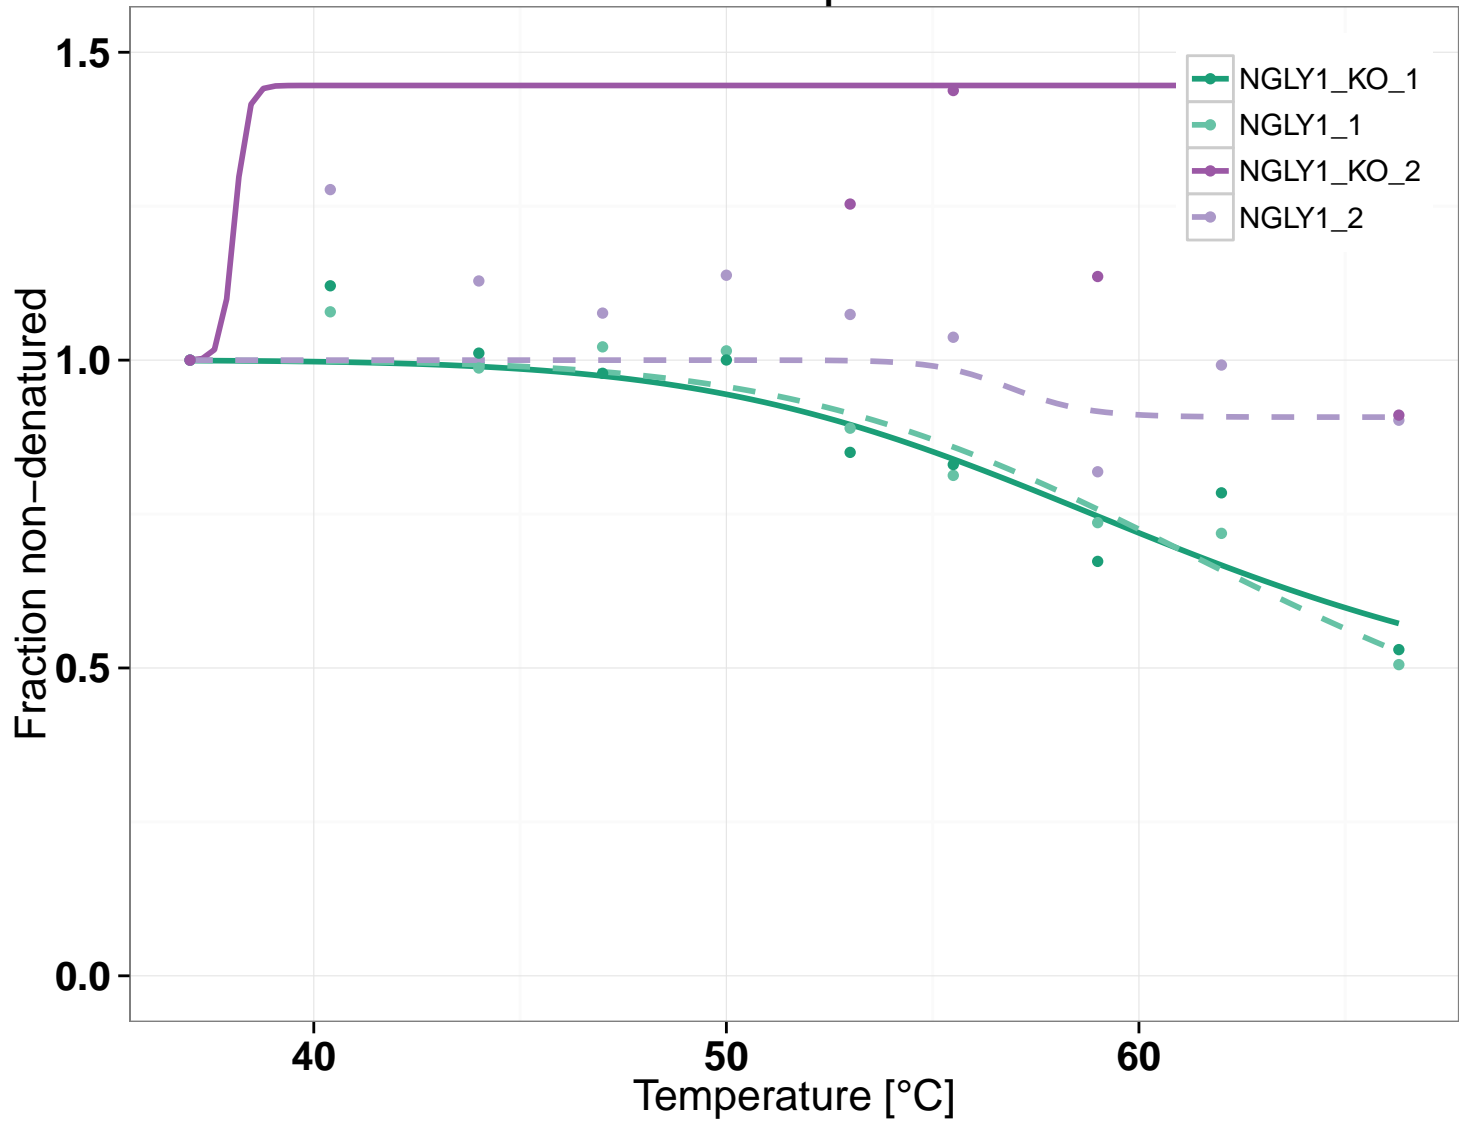

|            | meltPoint | slope  | plateau | R2   |
|------------|-----------|--------|---------|------|
| NGLY1_KO_1 | -         | -0.027 | 0.39    | 0.86 |
| NGLY1_1    | -         | -0.033 | 0.23    | 0.94 |
| NGLY1_KO_2 | -         | 0.73   | 1.45    | 0.2  |
| NGLY1_2    | -         | -0.025 | 0.91    | 0.03 |

Supplement: Supplementary file 6105 [file 1]

IPI00871743.1|RUNX1

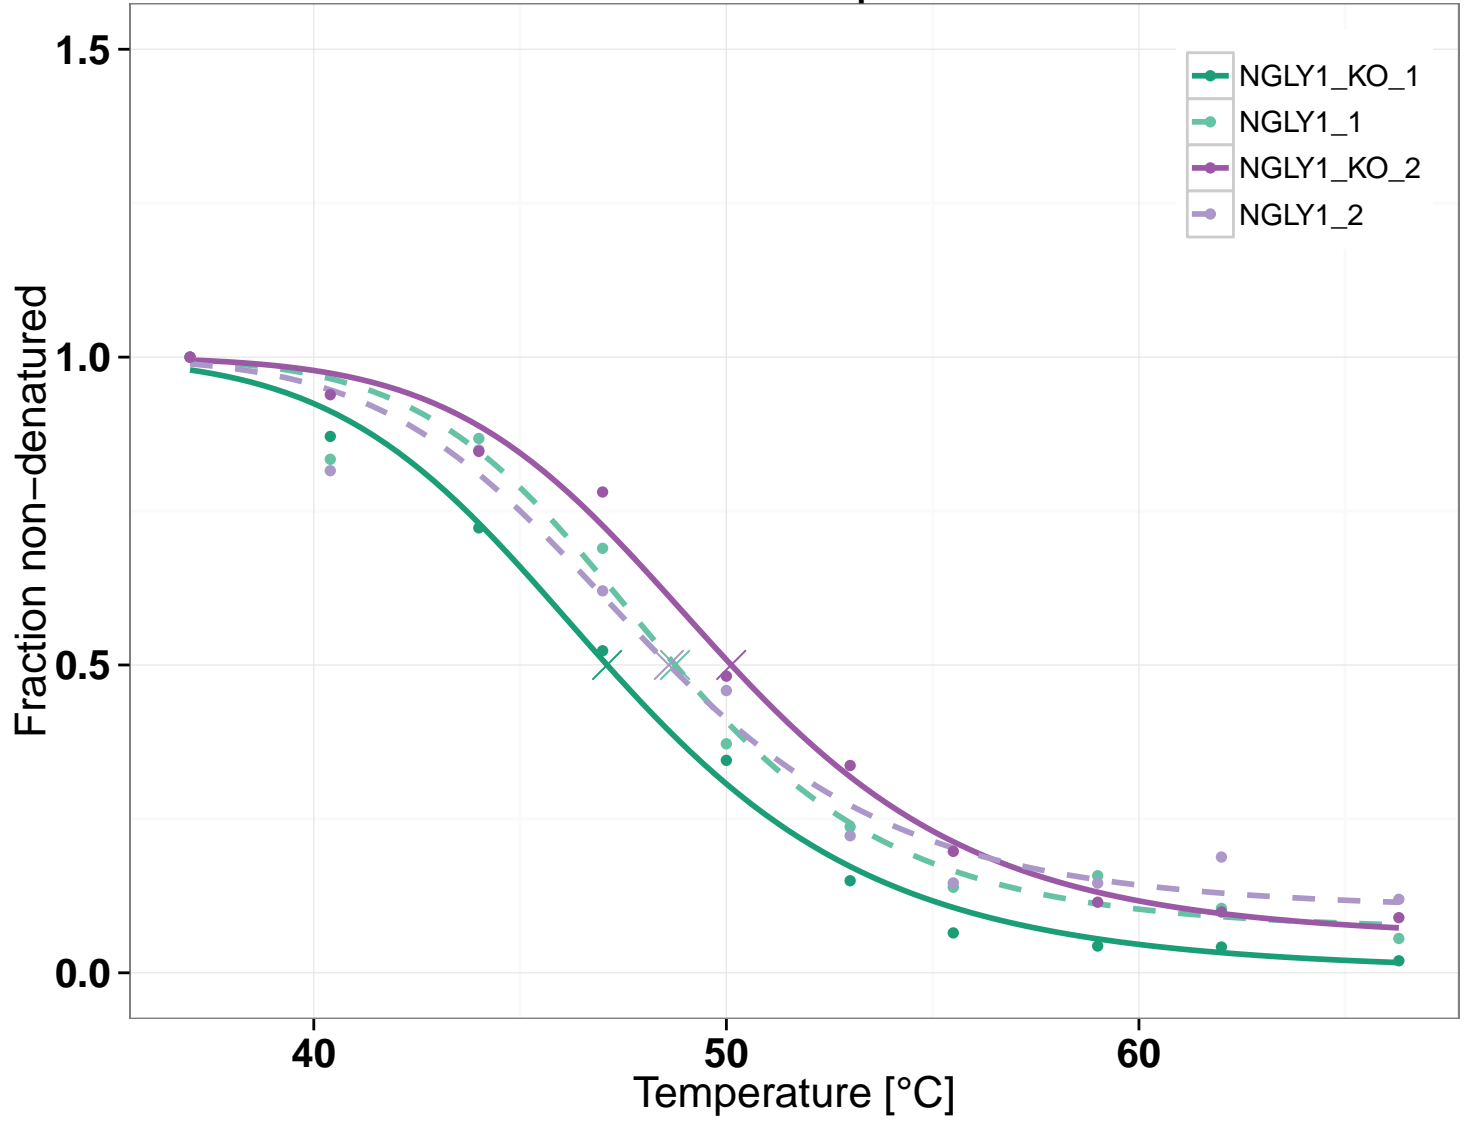

|            | meltPoint | slope  | plateau | R2   |
|------------|-----------|--------|---------|------|
| NGLY1_KO_1 | 47.11     | -0.076 | 0       | 1    |
| NGLY1_1    | 48.76     | -0.081 | 0.07    | 0.98 |
| NGLY1_KO_2 | 50.12     | -0.074 | 0.05    | 0.99 |
| NGLY1_2    | 48.61     | -0.071 | 0.1     | 0.97 |

Supplement: Supplementary file 6106 [file 1]

# IPI00106491.3|MRTO4

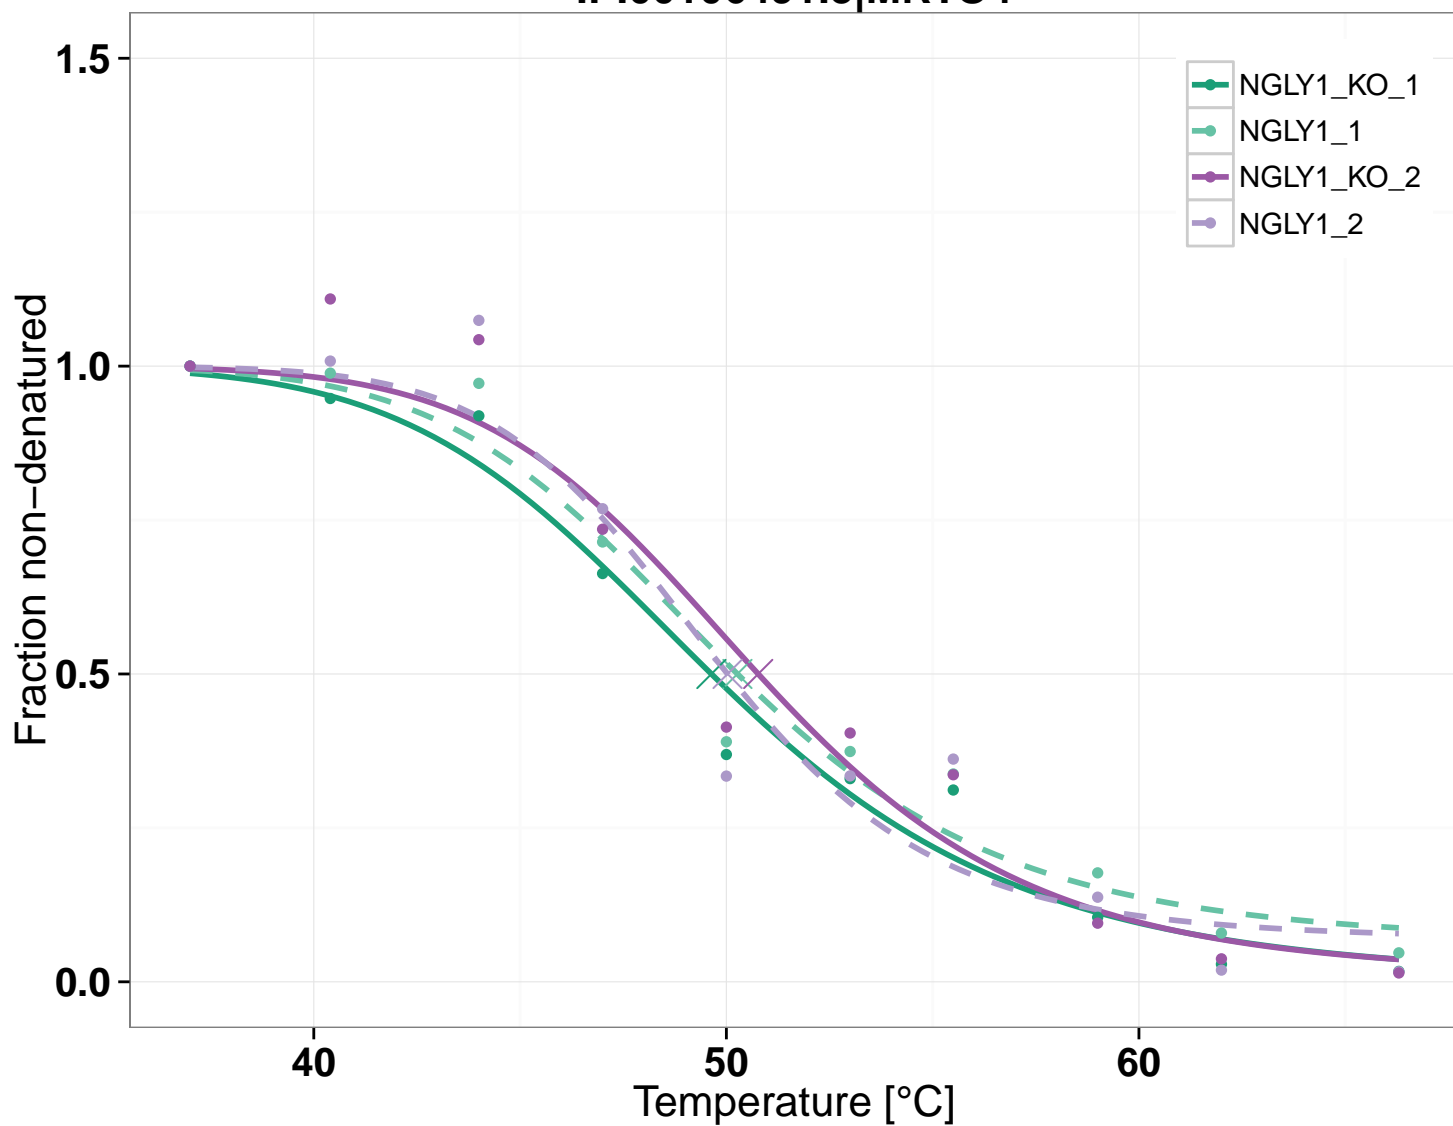

|            | meltPoint | slope  | plateau | R2   |
|------------|-----------|--------|---------|------|
| NGLY1_KO_1 | 49.64     | -0.067 | 0       | 0.98 |
| NGLY1_1    | 50.27     | -0.069 | 0.06    | 0.97 |
| NGLY1_KO_2 | 50.77     | -0.075 | 0.01    | 0.95 |
| NGLY1_2    | 50.03     | -0.087 | 0.07    | 0.94 |

Supplement: Supplementary file 6107 [file 1]

IPI00030380.1|GTF2H1

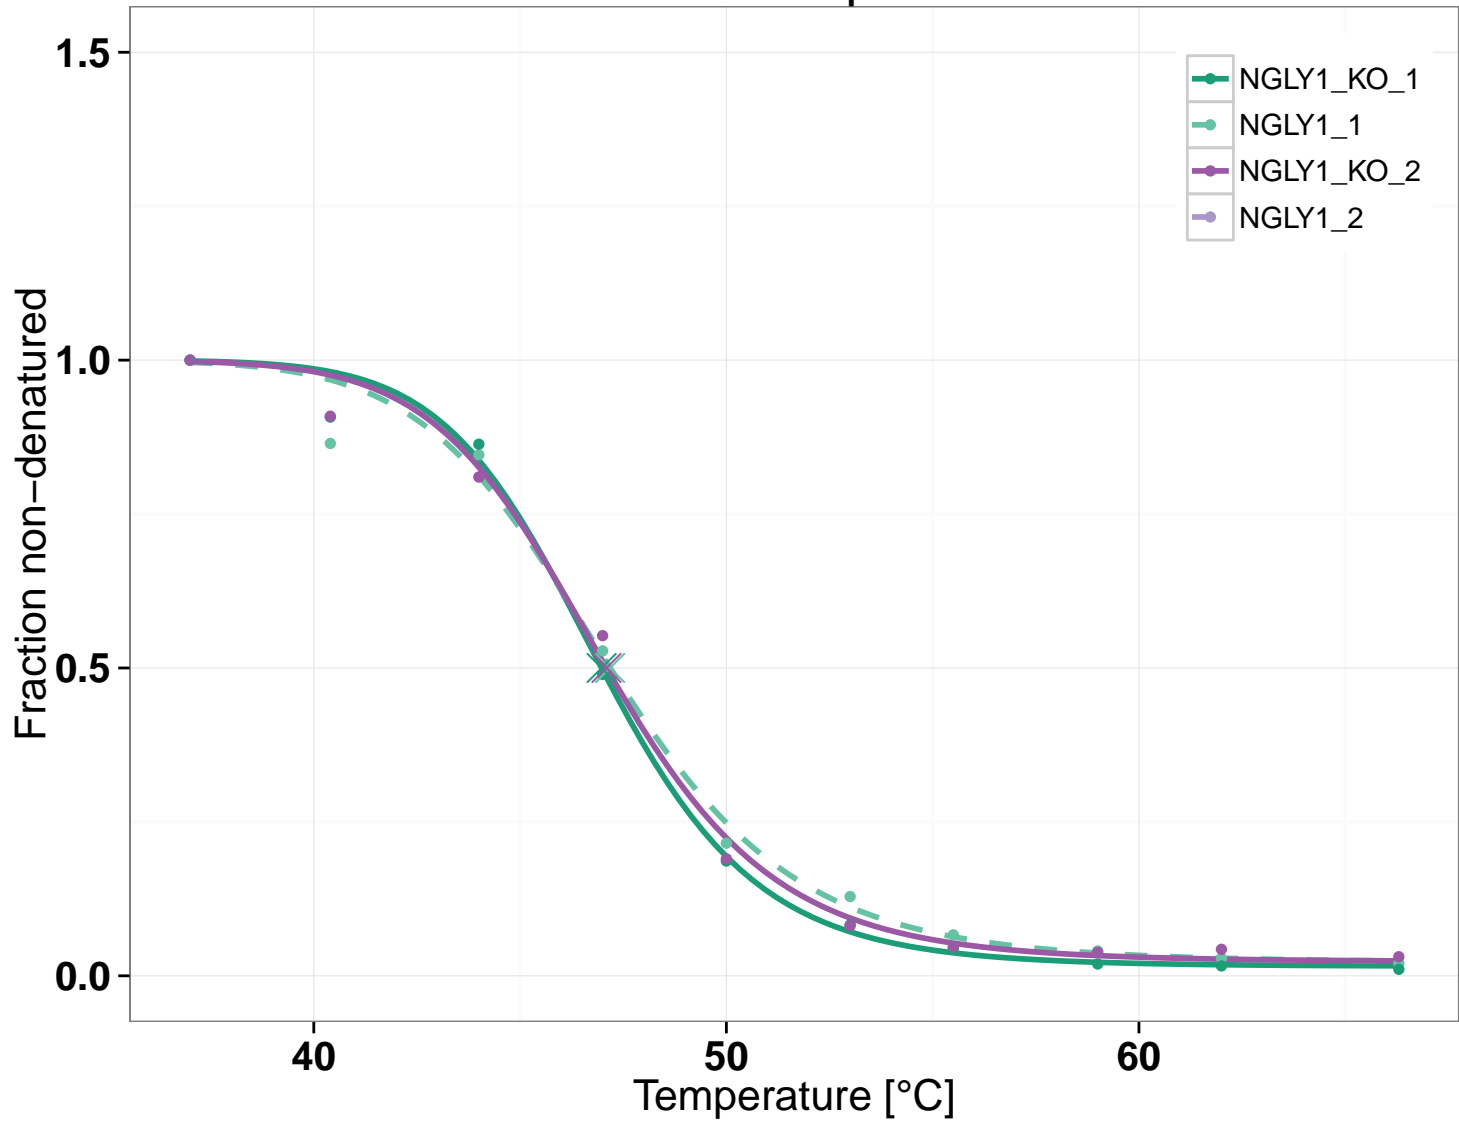

|            | meltPoint | slope | plateau | R2   |
|------------|-----------|-------|---------|------|
| NGLY1_KO_1 | 46.98     | -0.13 | 0.02    | 1    |
| NGLY1_1    | 47.18     | -0.11 | 0.02    | 0.99 |
| NGLY1_KO_2 | 47.09     | -0.12 | 0.02    | 0.99 |
| NGLY1_2    | -         | -     | -       | -    |

Supplement: Supplementary file 6108 [file 1]

IPI00012833.1|PPP4C

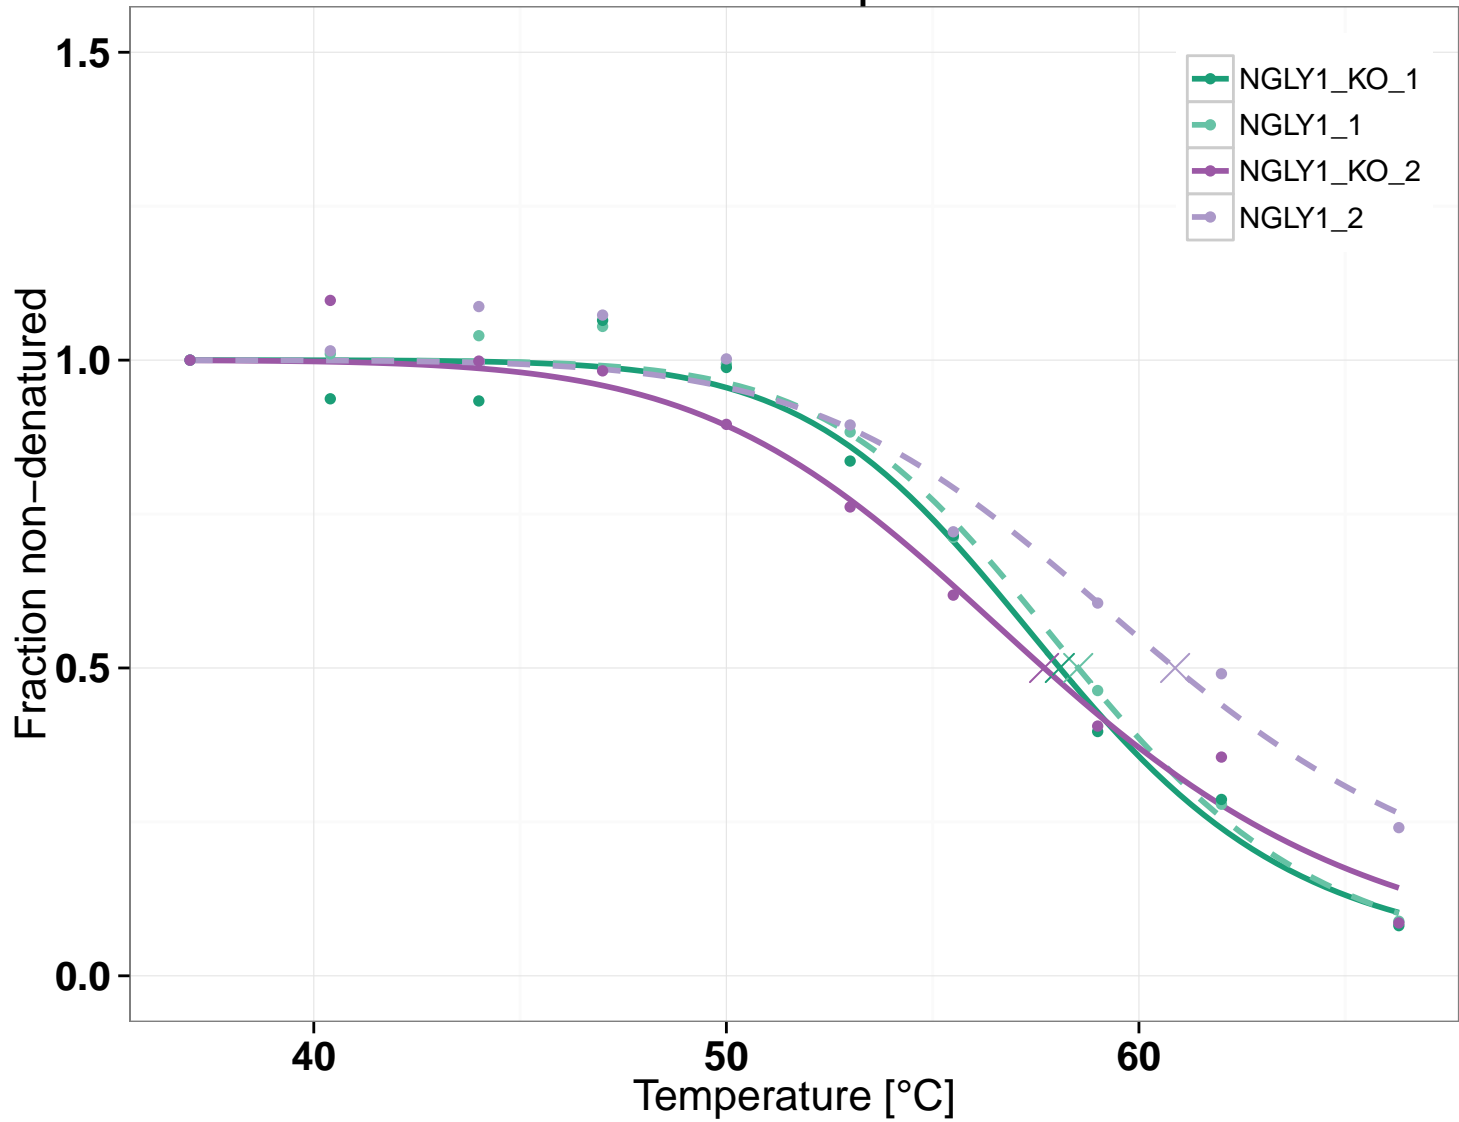

|            | meltPoint | slope  | plateau | R2   |
|------------|-----------|--------|---------|------|
| NGLY1_KO_1 | 58.08     | -0.082 | 0.02    | 0.98 |
| NGLY1_1    | 58.53     | -0.082 | 0.01    | 0.99 |
| NGLY1_KO_2 | 57.7      | -0.061 | 0       | 0.98 |
| NGLY1_2    | 60.88     | -0.057 | 0.07    | 0.96 |

Supplement: Supplementary file 6109 [file 1]

IPI00006433.6|DNAJC16

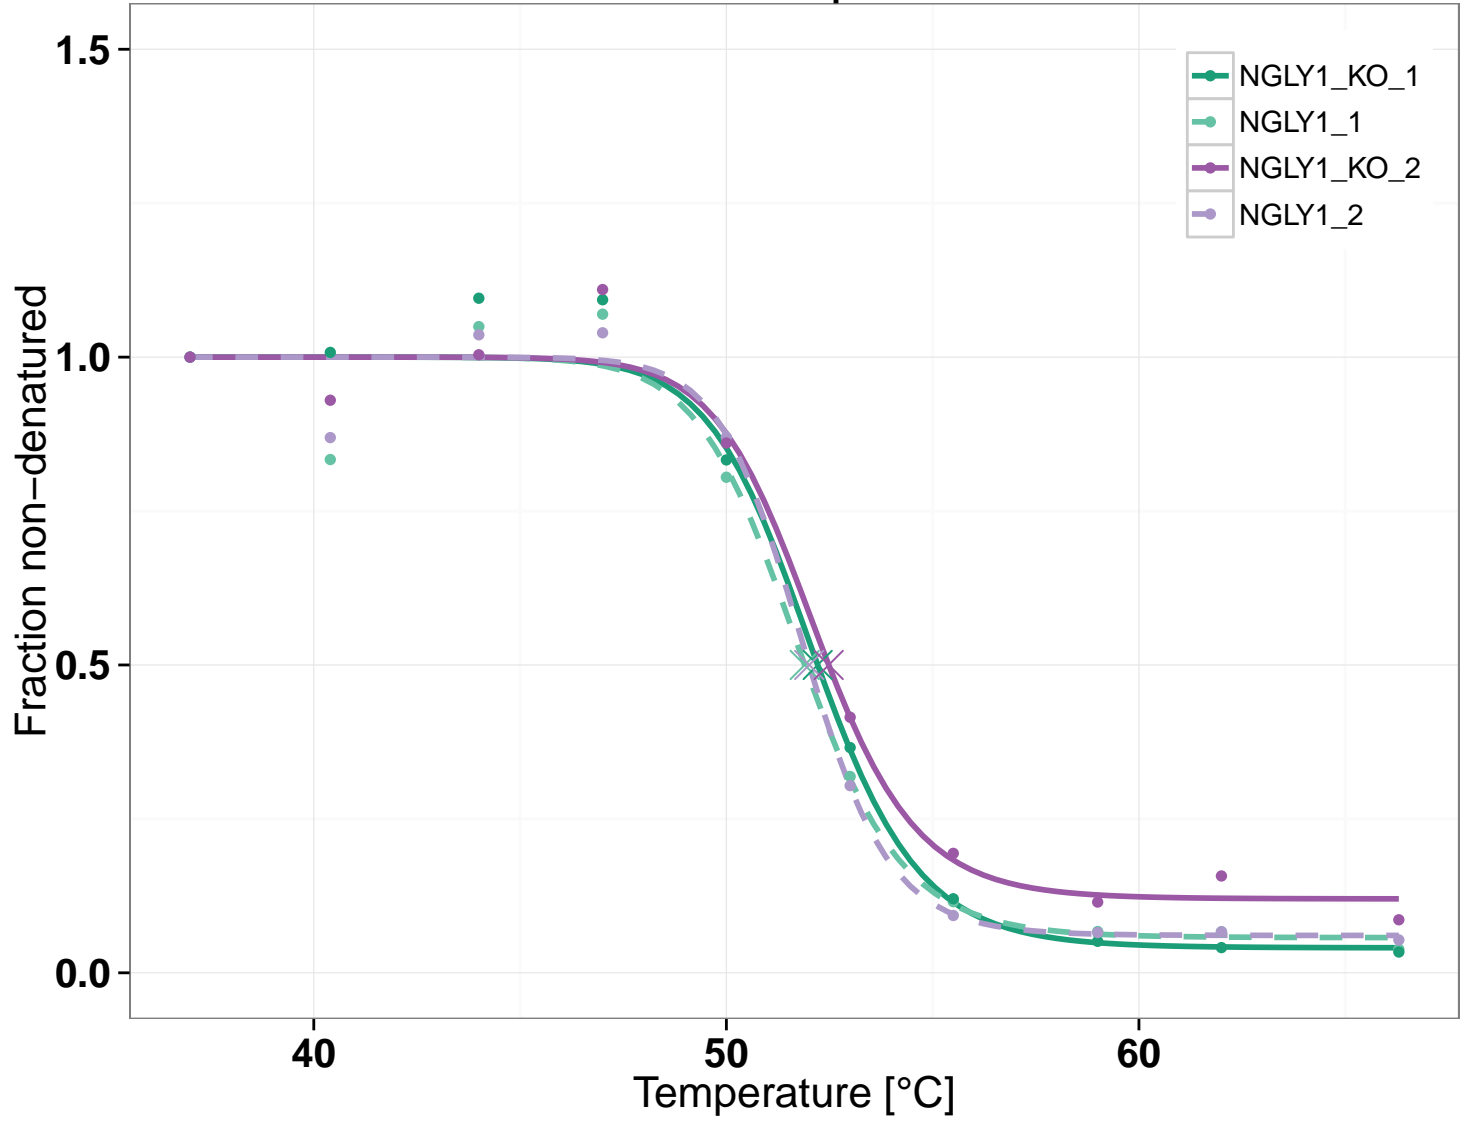

|            | meltPoint | slope | plateau | R2   |
|------------|-----------|-------|---------|------|
| NGLY1_KO_1 | 52.21     | -0.19 | 0.04    | 0.99 |
| NGLY1_1    | 51.9      | -0.19 | 0.06    | 0.98 |
| NGLY1_KO_2 | 52.48     | -0.18 | 0.12    | 0.99 |
| NGLY1_2    | 52.01     | -0.23 | 0.06    | 0.99 |

Supplement: Supplementary file 6110 [file 1]

# IPI00790776.2|EVI1

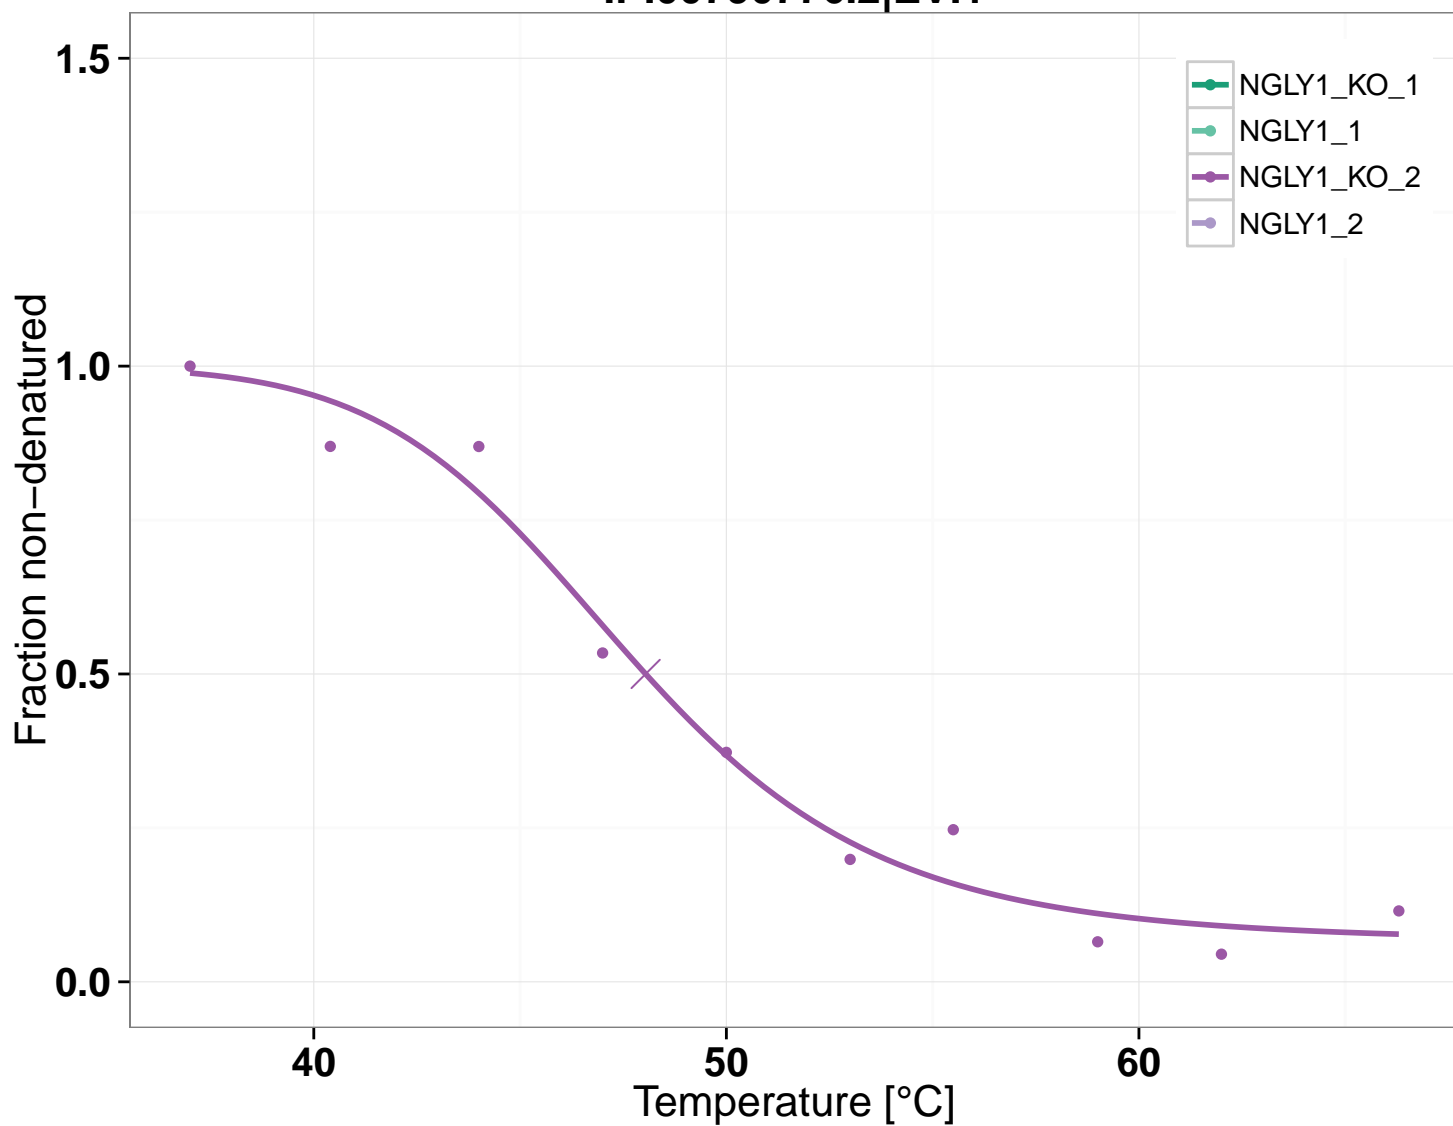

|            | meltPoint | slope  | plateau | R2   |
|------------|-----------|--------|---------|------|
| NGLY1_KO_1 | —         | —      | —       | —    |
| NGLY1_1    | —         | —      | —       | —    |
| NGLY1_KO_2 | 48.04     | -0.077 | 0.07    | 0.98 |
| NGLY1_2    | —         | —      | —       | —    |

Supplement: Supplementary file 6111 [file 1]

# IPI00747017.3|NEK1

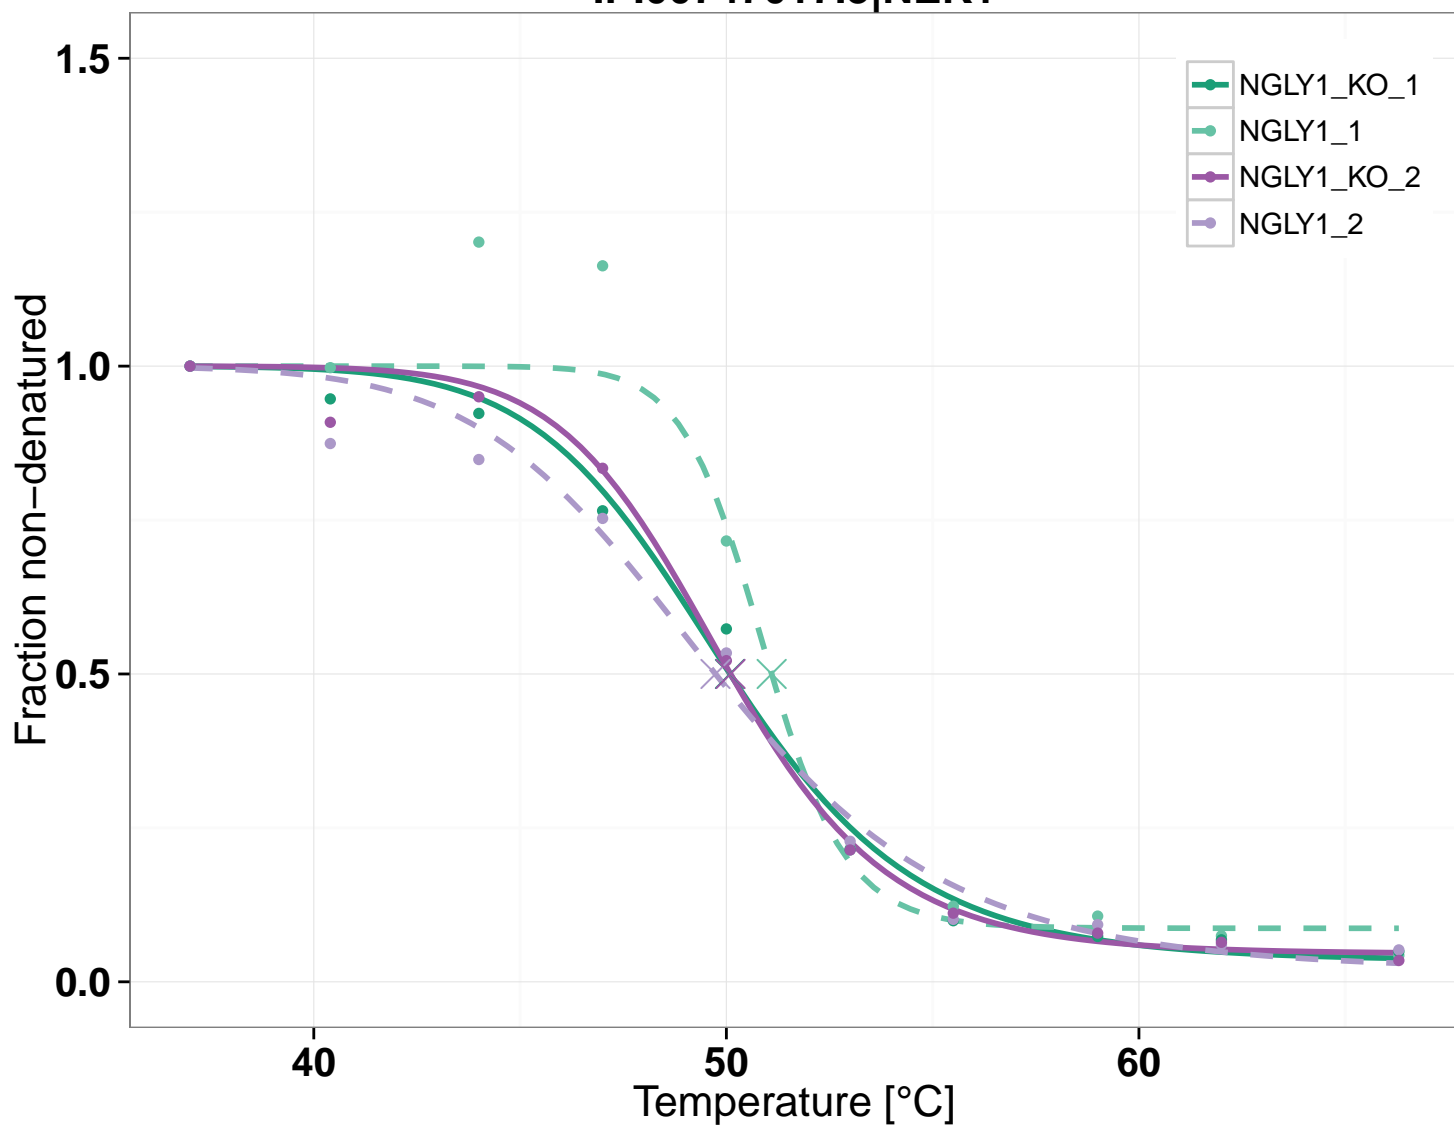

|            | meltPoint | slope  | plateau | R2   |
|------------|-----------|--------|---------|------|
| NGLY1_KO_1 | 50.09     | -0.1   | 0.03    | 0.99 |
| NGLY1_1    | 51.1      | -0.23  | 0.09    | 0.97 |
| NGLY1_KO_2 | 50.1      | -0.12  | 0.05    | 0.99 |
| NGLY1_2    | 49.74     | -0.085 | 0.02    | 0.98 |

Supplement: Supplementary file 6112 [file 1]

# IPI00002938.1|ABT1

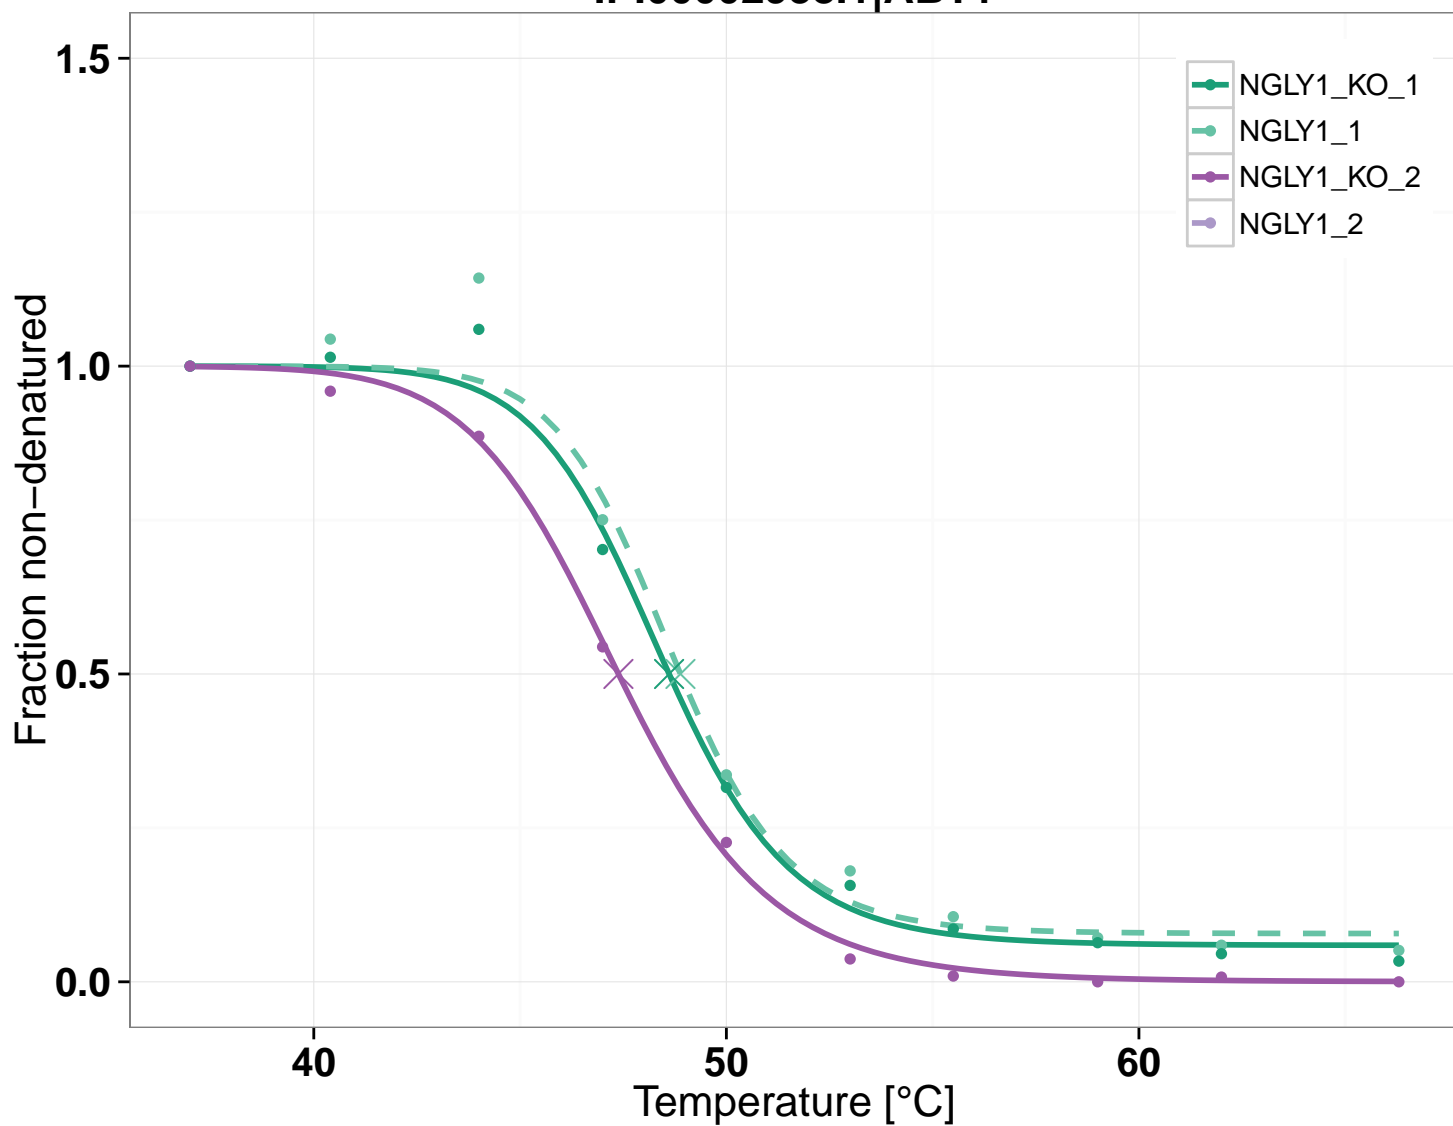

|            | meltPoint | slope | plateau | R2   |
|------------|-----------|-------|---------|------|
| NGLY1_KO_1 | 48.61     | -0.15 | 0.06    | 0.99 |
| NGLY1_1    | 48.89     | -0.16 | 0.08    | 0.98 |
| NGLY1_KO_2 | 47.38     | -0.14 | 0       | 1    |
| NGLY1_2    | -         | -     | -       | -    |

Supplement: Supplementary file 6113 [file 1]

# IPI00329605.4|MSH3

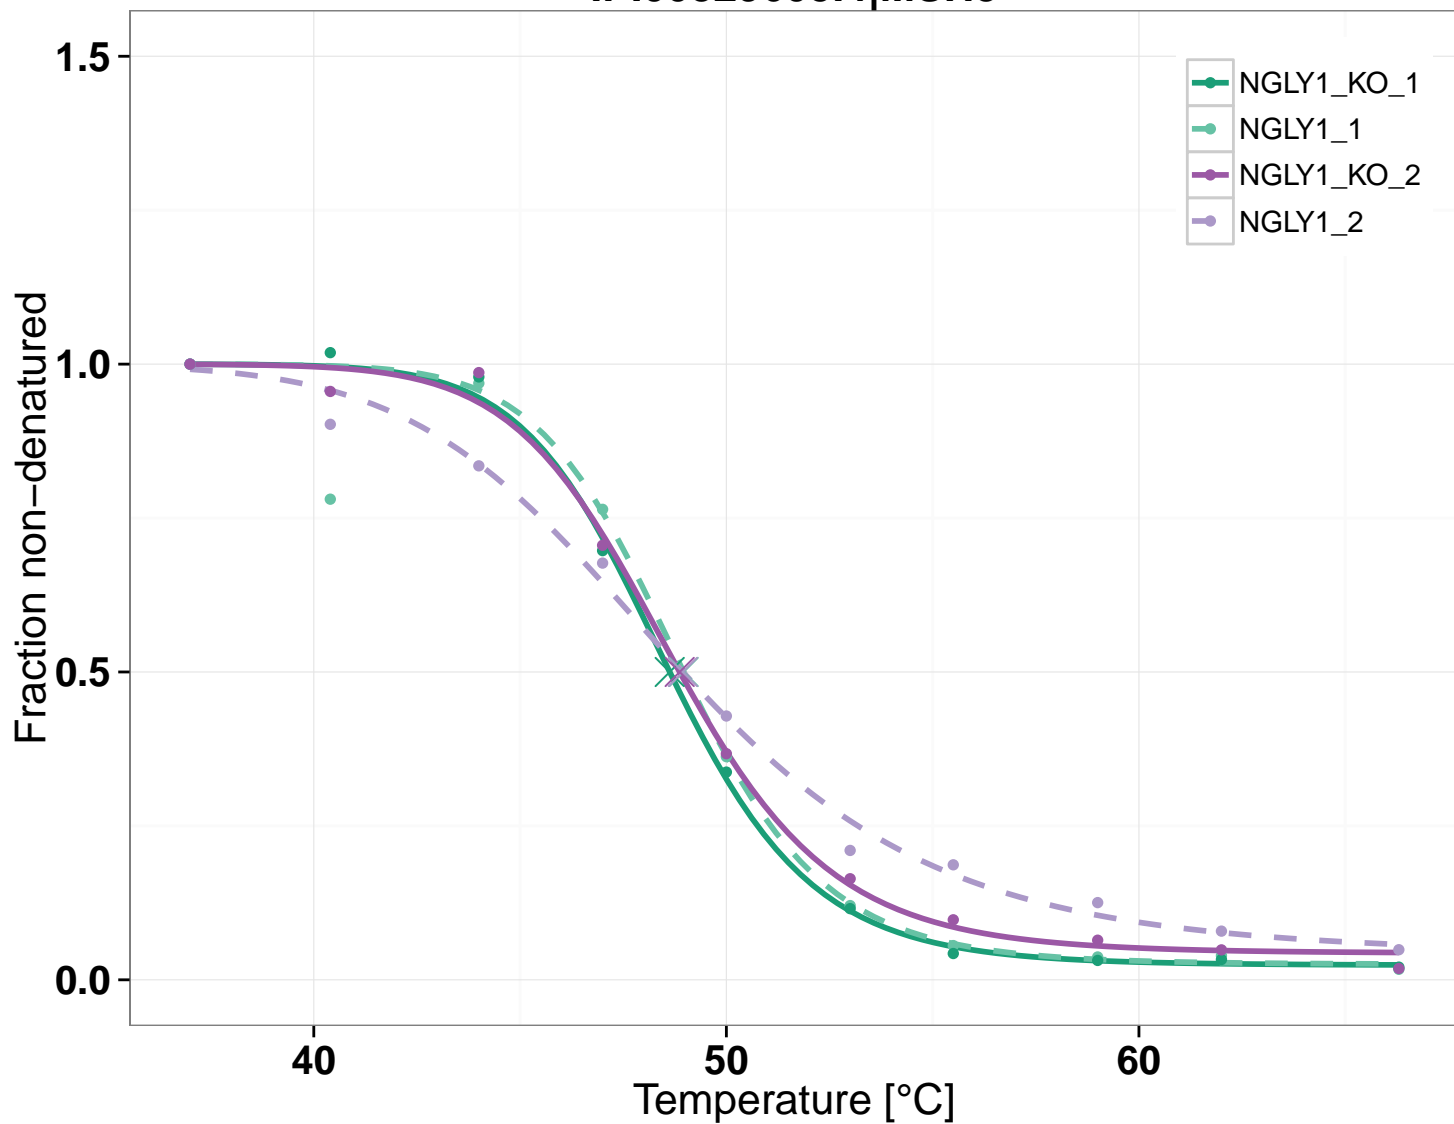

|            | meltPoint | slope  | plateau | R2   |
|------------|-----------|--------|---------|------|
| NGLY1_KO_1 | 48.63     | -0.14  | 0.02    | 1    |
| NGLY1_1    | 48.96     | -0.14  | 0.03    | 0.97 |
| NGLY1_KO_2 | 48.87     | -0.12  | 0.04    | 1    |
| NGLY1_2    | 48.95     | -0.075 | 0.04    | 0.99 |

Supplement: Supplementary file 6114 [file 1]

# IPI00856080.1|GPN3

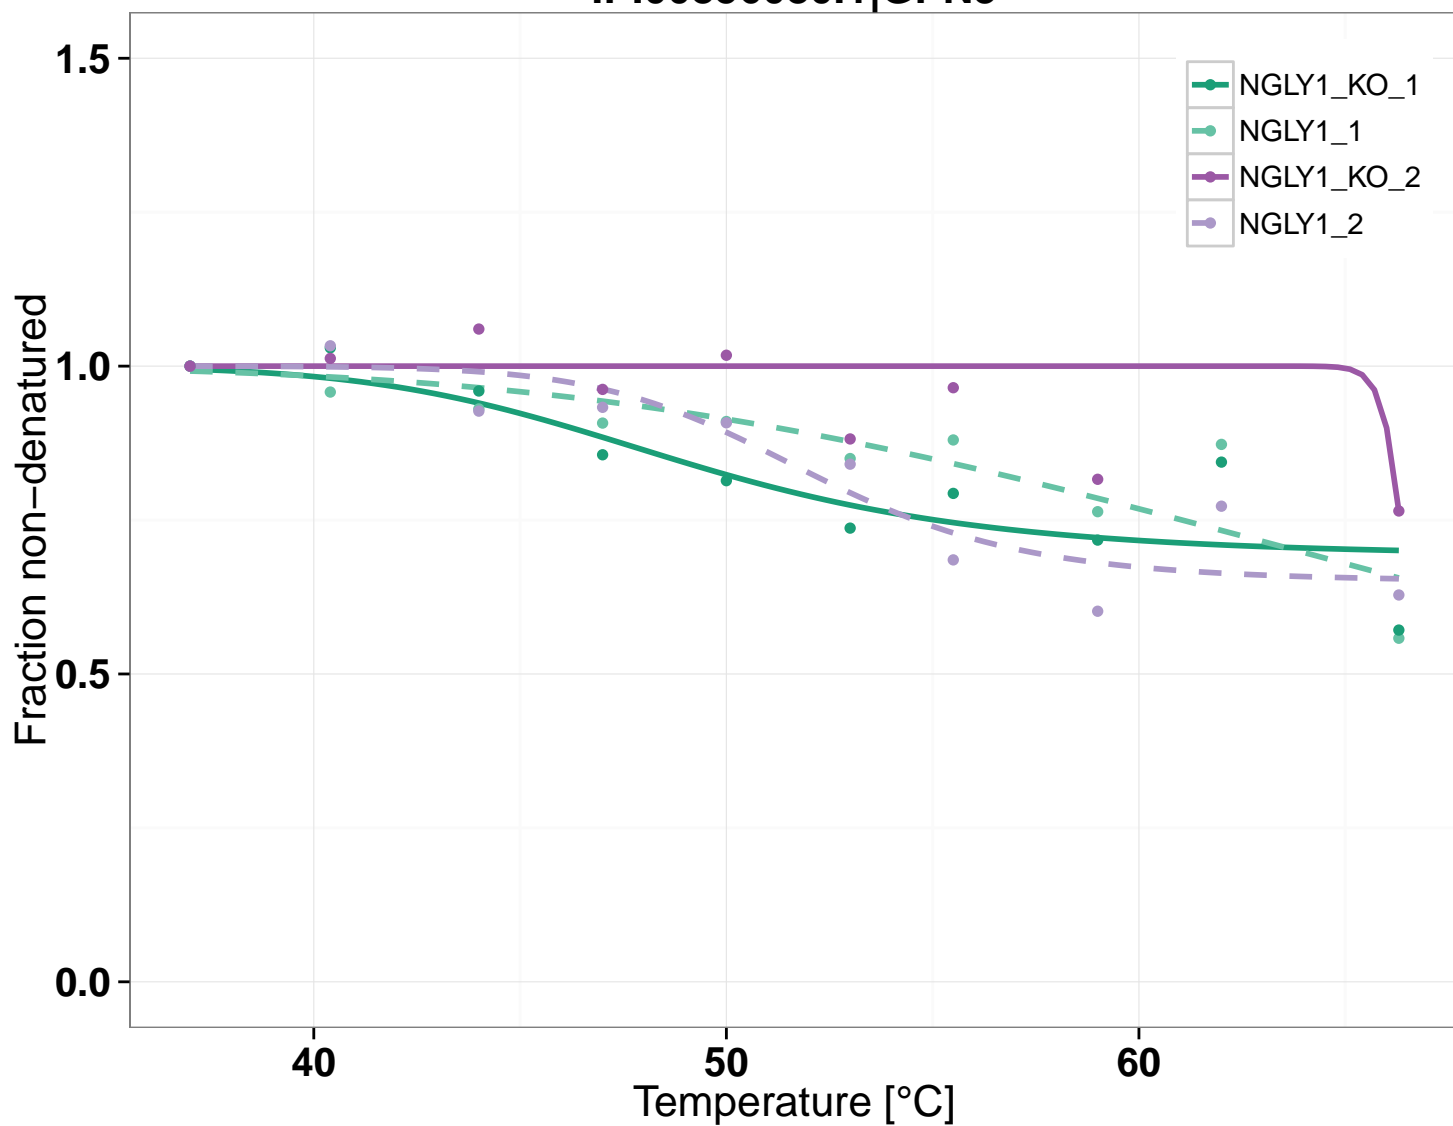

|            | meltPoint | slope  | plateau | R2   |
|------------|-----------|--------|---------|------|
| NGLY1_KO_1 | -         | -0.021 | 0.69    | 0.76 |
| NGLY1_1    | -         | -0.018 | 0       | 0.75 |
| NGLY1_KO_2 | -         | -      | 0       | 0.25 |
| NGLY1_2    | -         | -0.034 | 0.65    | 0.86 |

Supplement: Supplementary file 6115 [file 1]

IPI00414548.1|C7ORF44

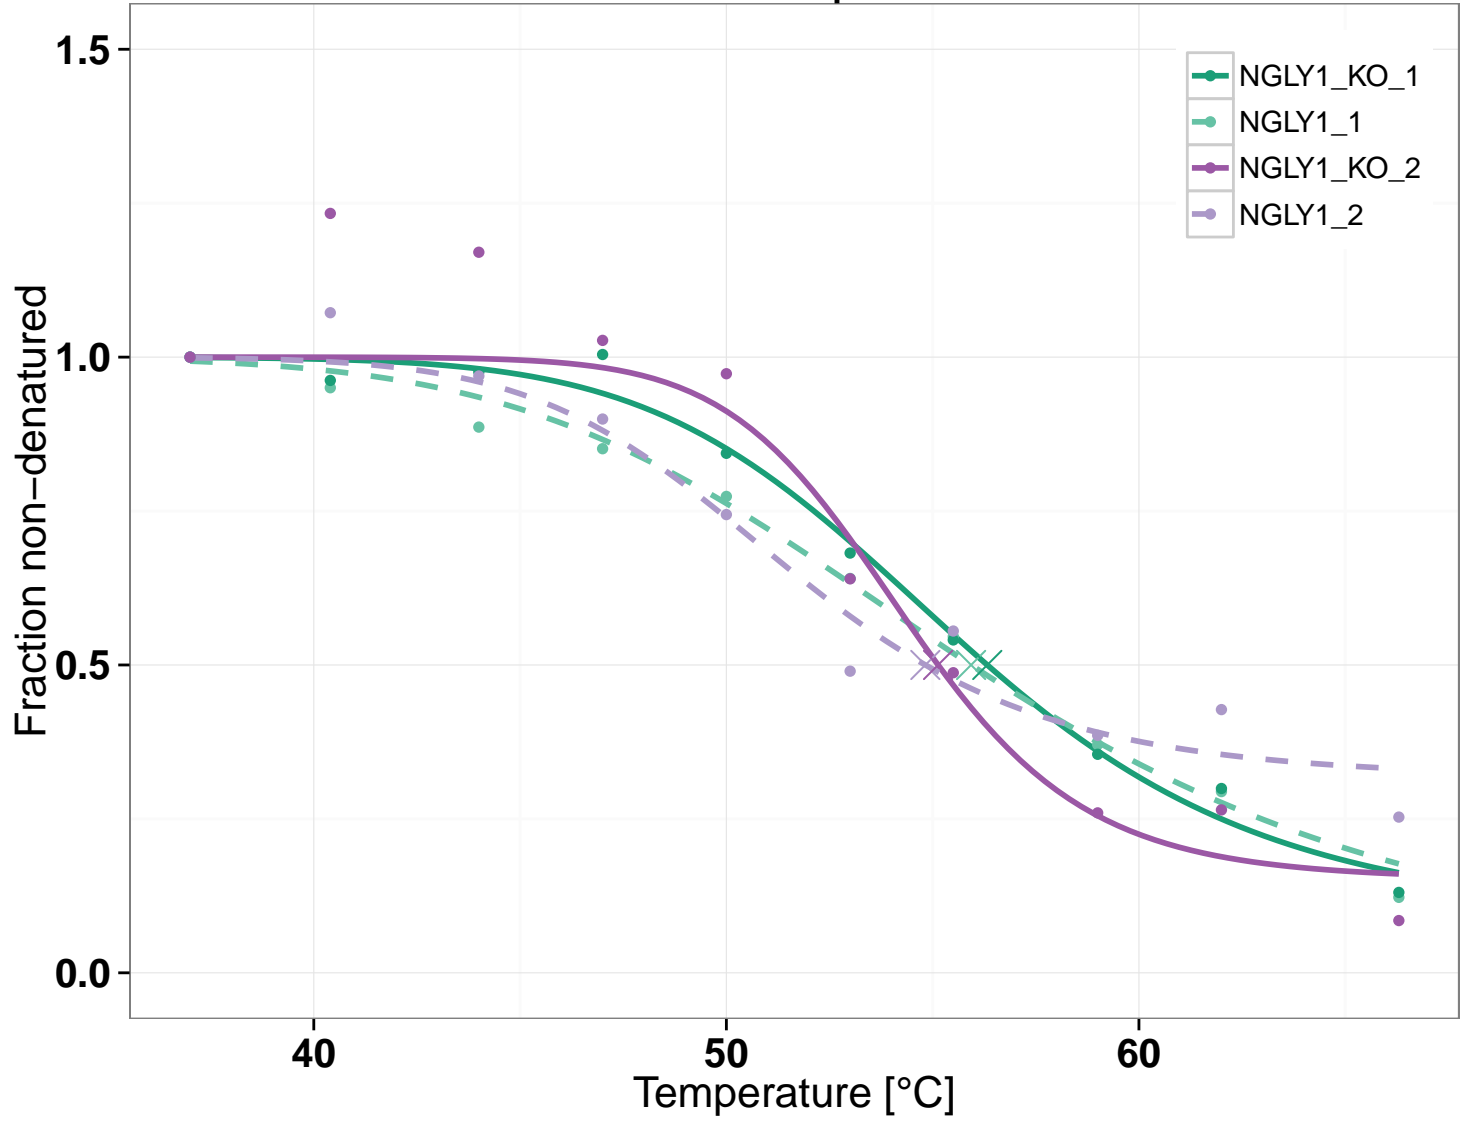

|            | meltPoint | slope  | plateau | R2   |
|------------|-----------|--------|---------|------|
| NGLY1_KO_1 | 56.32     | -0.061 | 0.08    | 0.99 |
| NGLY1_1    | 55.93     | -0.046 | 0       | 0.99 |
| NGLY1_KO_2 | 55.13     | -0.098 | 0.15    | 0.93 |
| NGLY1_2    | 54.82     | -0.055 | 0.31    | 0.96 |

Supplement: Supplementary file 6116 [file 1]

# IPI00218925.7|PXMP4

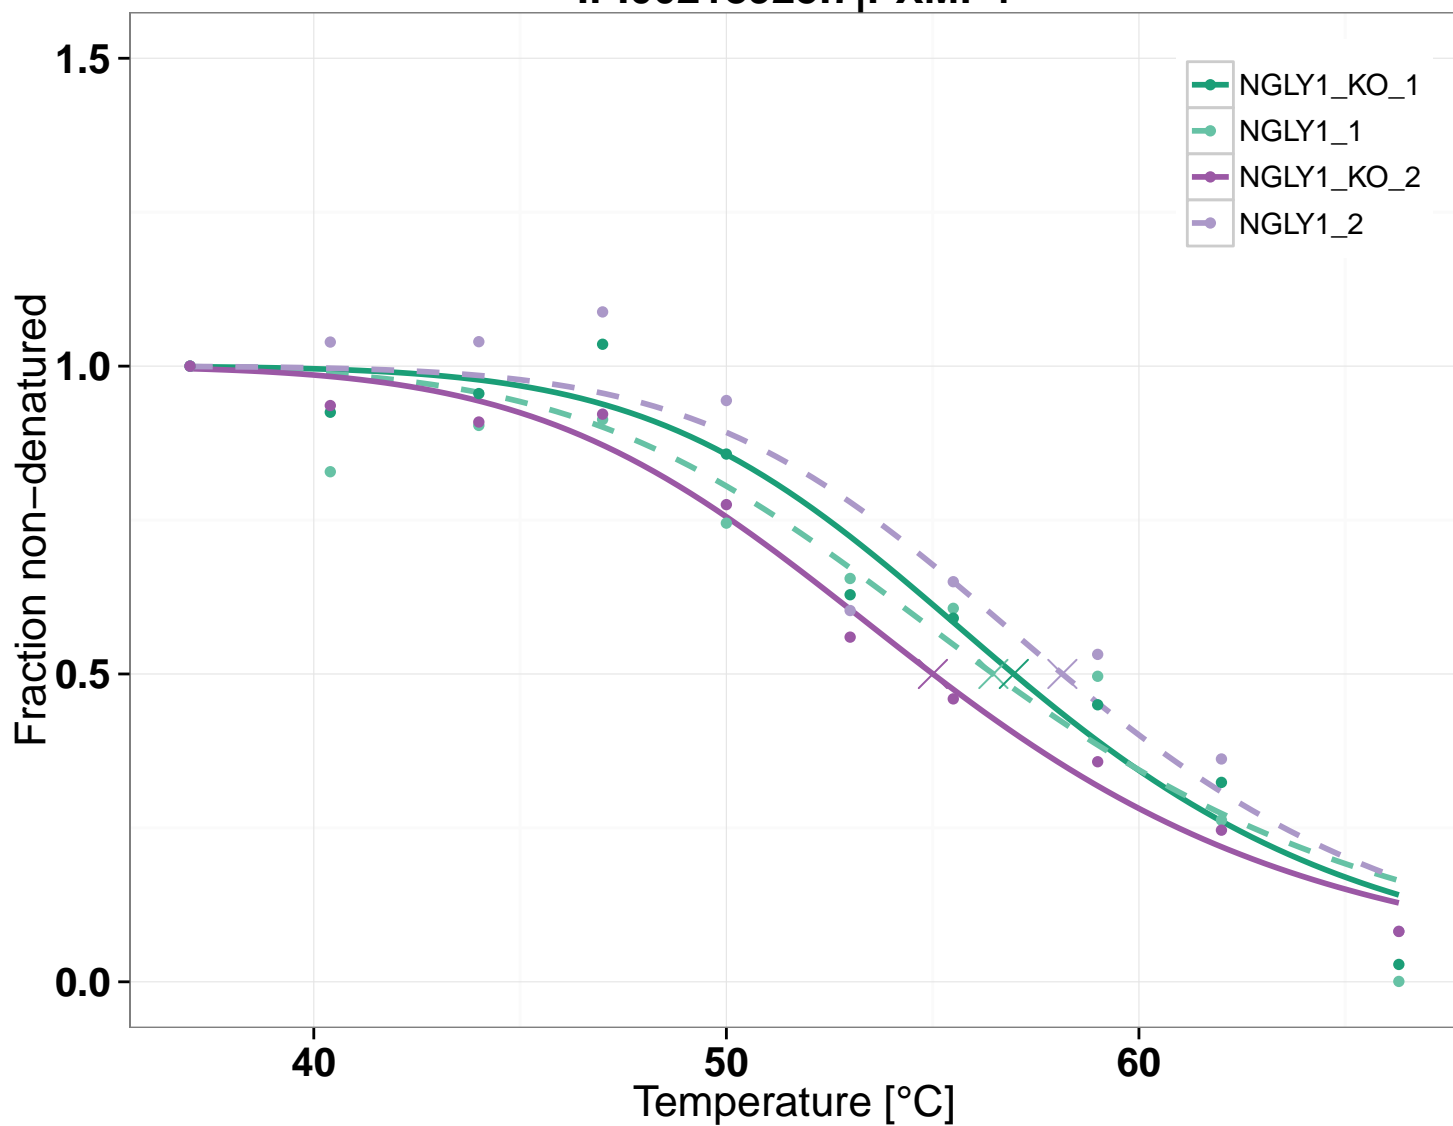

|            | meltPoint | slope  | plateau | R2   |
|------------|-----------|--------|---------|------|
| NGLY1_KO_1 | 56.97     | -0.058 | 0       | 0.96 |
| NGLY1_1    | 56.47     | -0.05  | 0       | 0.92 |
| NGLY1_KO_2 | 55.01     | -0.053 | 0       | 0.99 |
| NGLY1_2    | 58.14     | -0.057 | 0       | 0.93 |

Supplement: Supplementary file 6117 [file 1]

IPI00604590.3|NME1–NME2

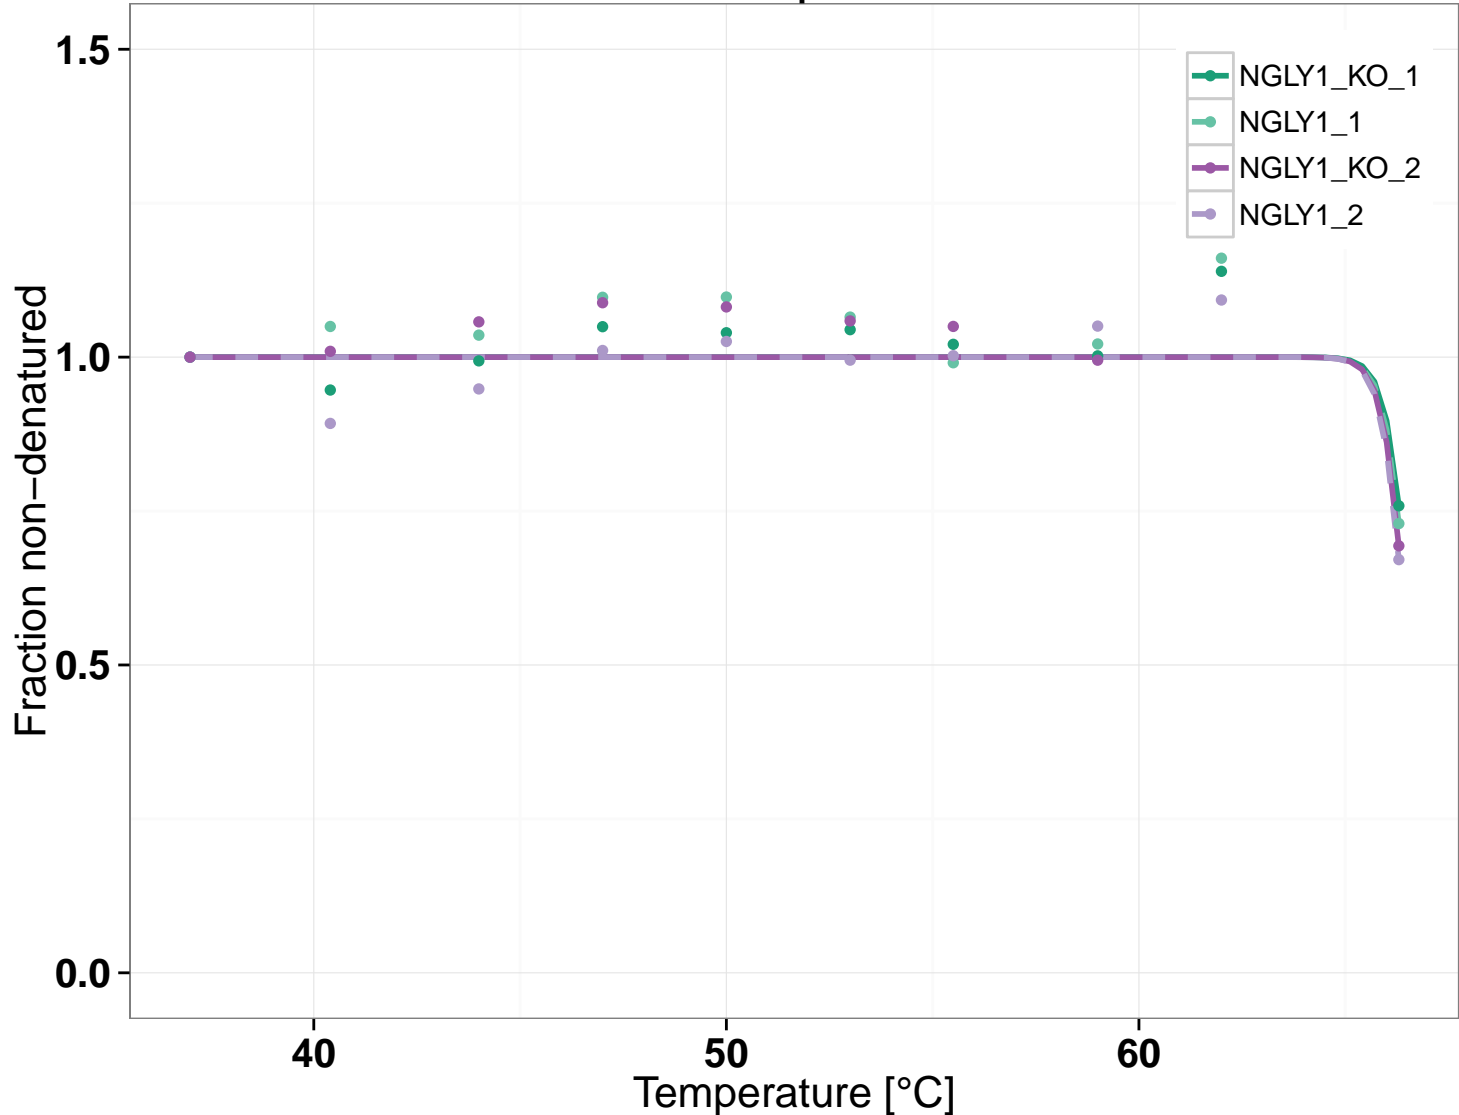

|            | meltPoint | slope | plateau | R2   |
|------------|-----------|-------|---------|------|
| NGLY1_KO_1 | —         | —     | 0       | 0.67 |
| NGLY1_1    | —         | —     | 0       | 0.56 |
| NGLY1_KO_2 | —         | —     | 0       | 0.39 |
| NGLY1_2    | —         | —     | 0       | 0.79 |

Supplement: Supplementary file 6118 [file 1]

IPI00216202.1|SH3GL3

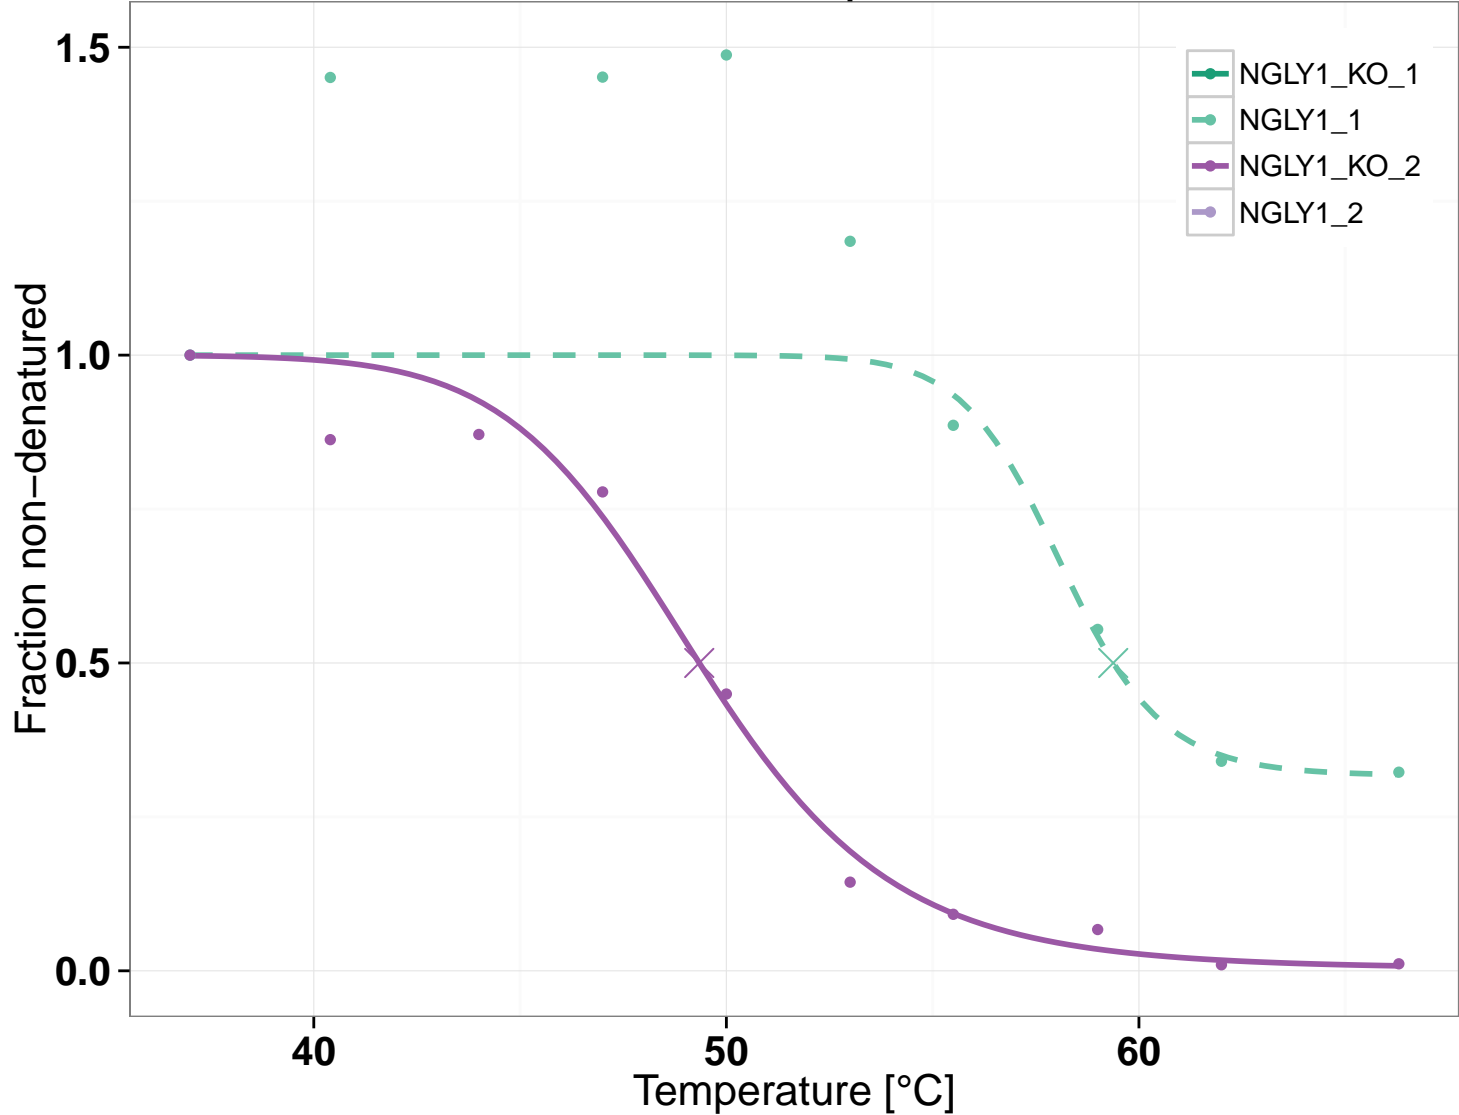

|            | meltPoint | slope | plateau | R2   |
|------------|-----------|-------|---------|------|
| NGLY1_KO_1 | -         | -     | -       | -    |
| NGLY1_1    | 59.38     | -0.14 | 0.32    | 0.5  |
| NGLY1_KO_2 | 49.34     | -0.11 | 0       | 0.98 |
| NGLY1_2    | -         | -     | -       | -    |

Supplement: Supplementary file 6119 [file 1]

# IPI00607848.1|BRMS1

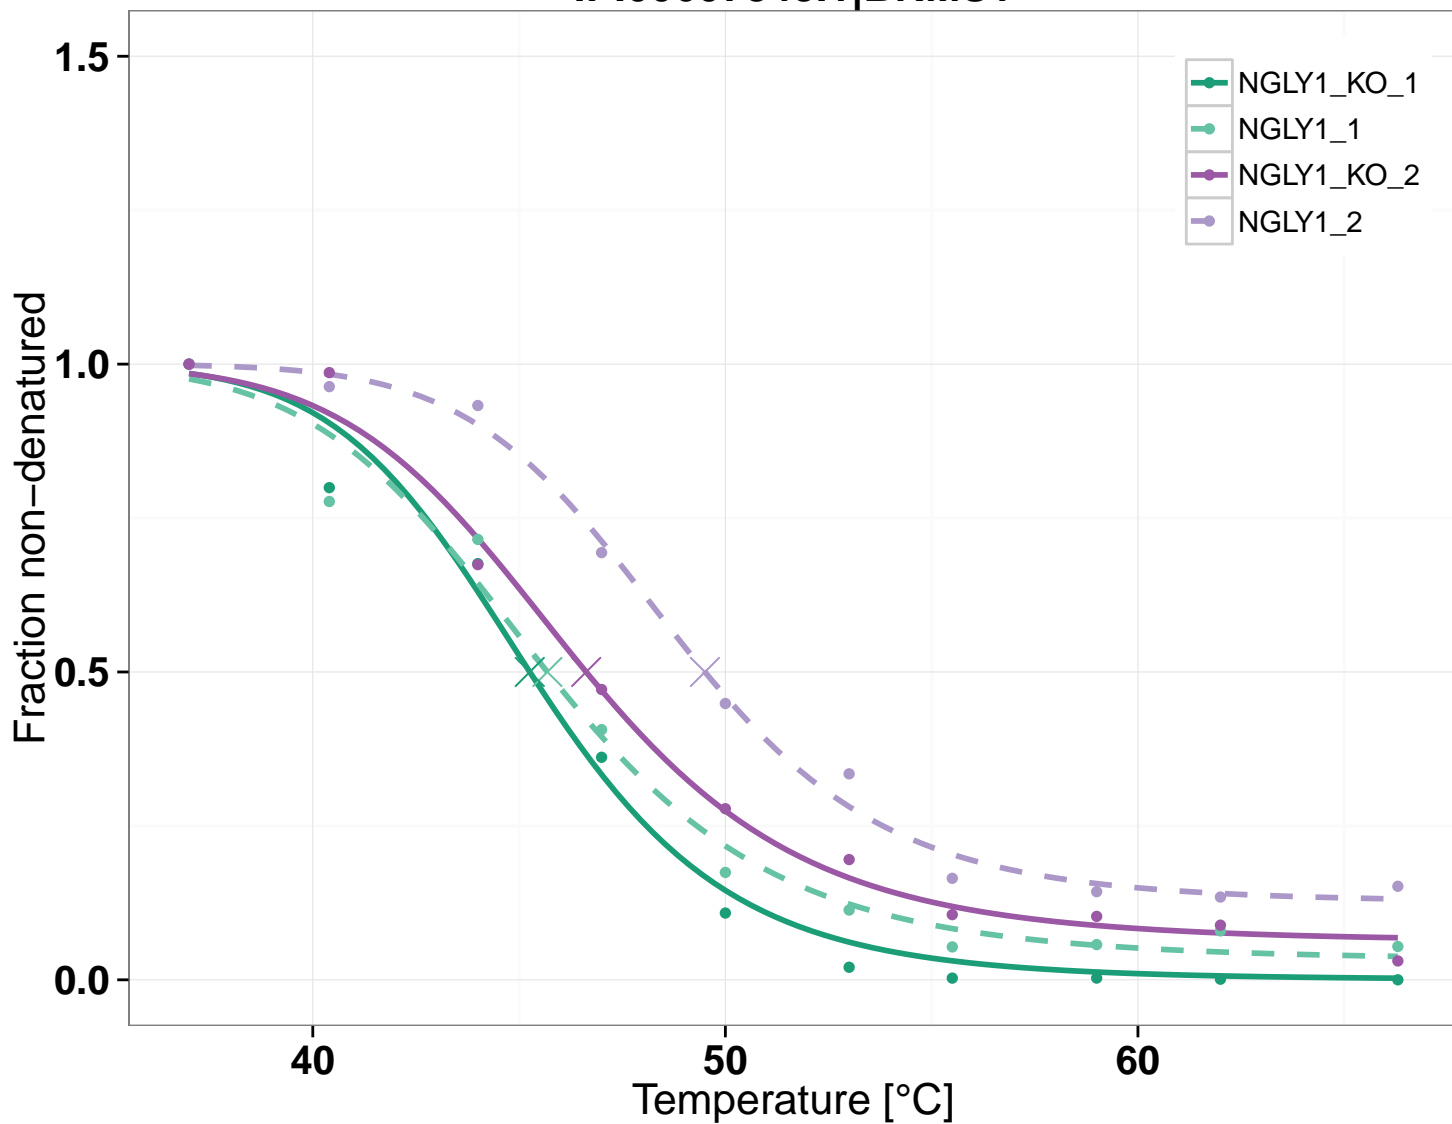

|            | meltPoint | slope  | plateau | R2   |
|------------|-----------|--------|---------|------|
| NGLY1_KO_1 | 45.26     | -0.1   | 0       | 0.99 |
| NGLY1_1    | 45.69     | -0.086 | 0.03    | 0.98 |
| NGLY1_KO_2 | 46.63     | -0.084 | 0.06    | 0.99 |
| NGLY1_2    | 49.5      | -0.087 | 0.13    | 0.99 |

Supplement: Supplementary file 6120 [file 1]

# IPI00298946.1|DSCR3

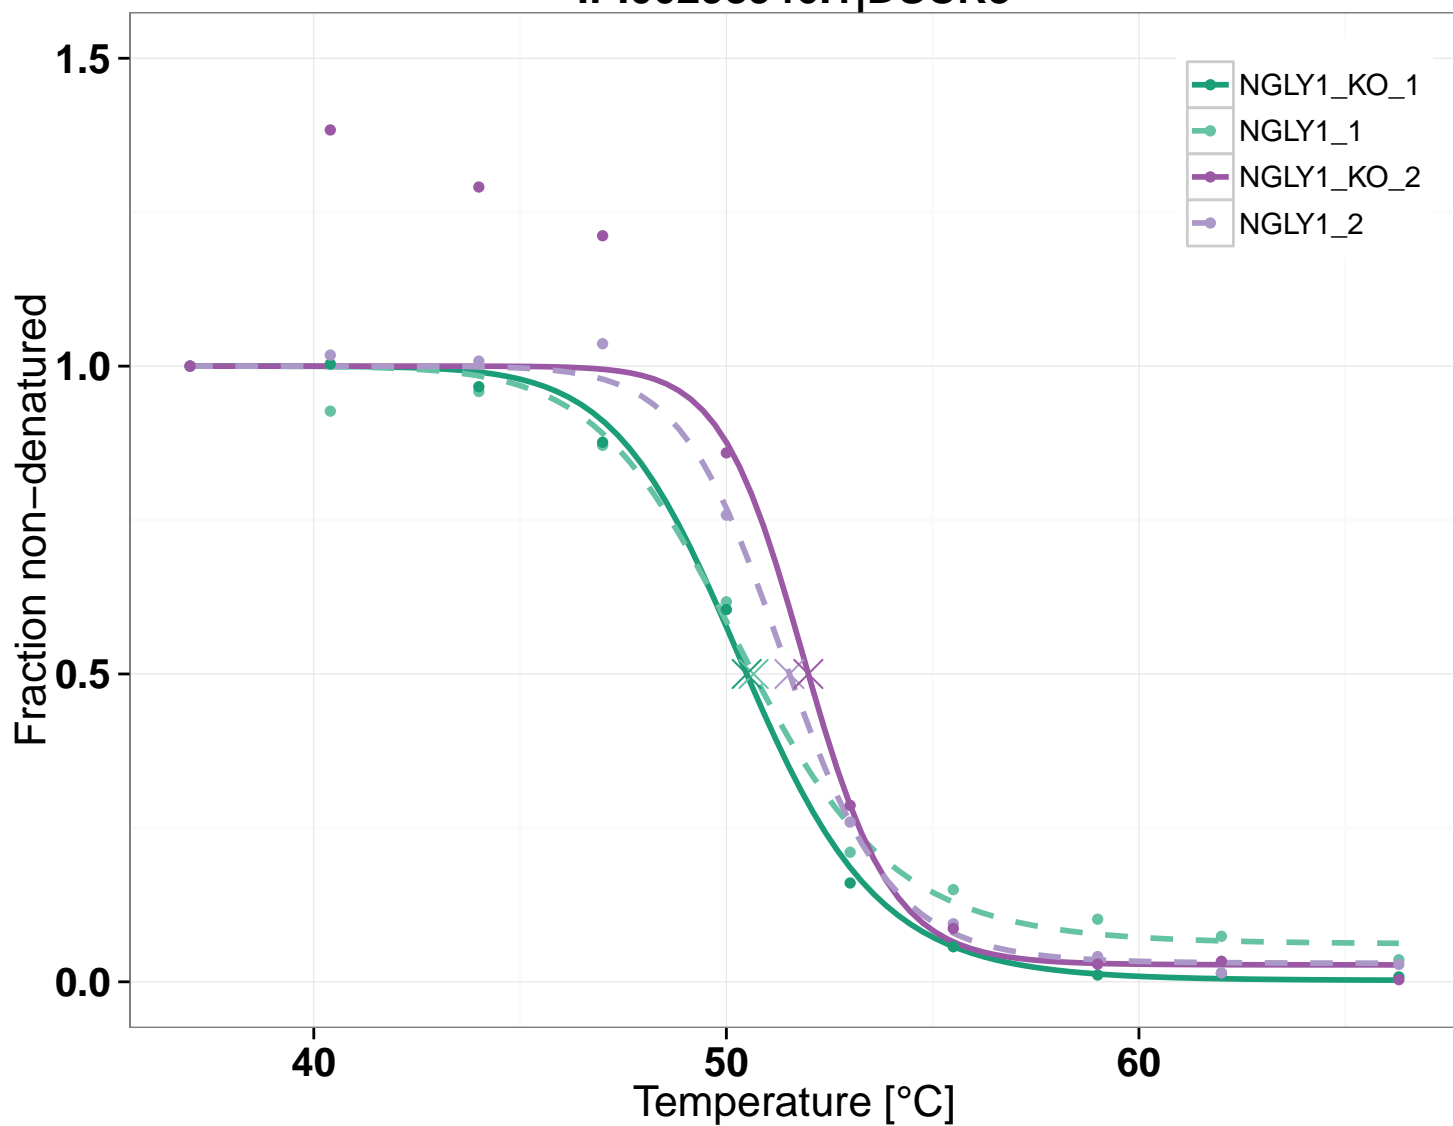

|            | meltPoint | slope | plateau | R2   |
|------------|-----------|-------|---------|------|
| NGLY1_KO_1 | 50.49     | -0.16 | 0       | 1    |
| NGLY1_1    | 50.66     | -0.13 | 0.06    | 0.99 |
| NGLY1_KO_2 | 51.99     | -0.23 | 0.03    | 0.91 |
| NGLY1_2    | 51.53     | -0.19 | 0.03    | 1    |

Supplement: Supplementary file 6121 [file 1]

IPI00478230.2|RBBP5

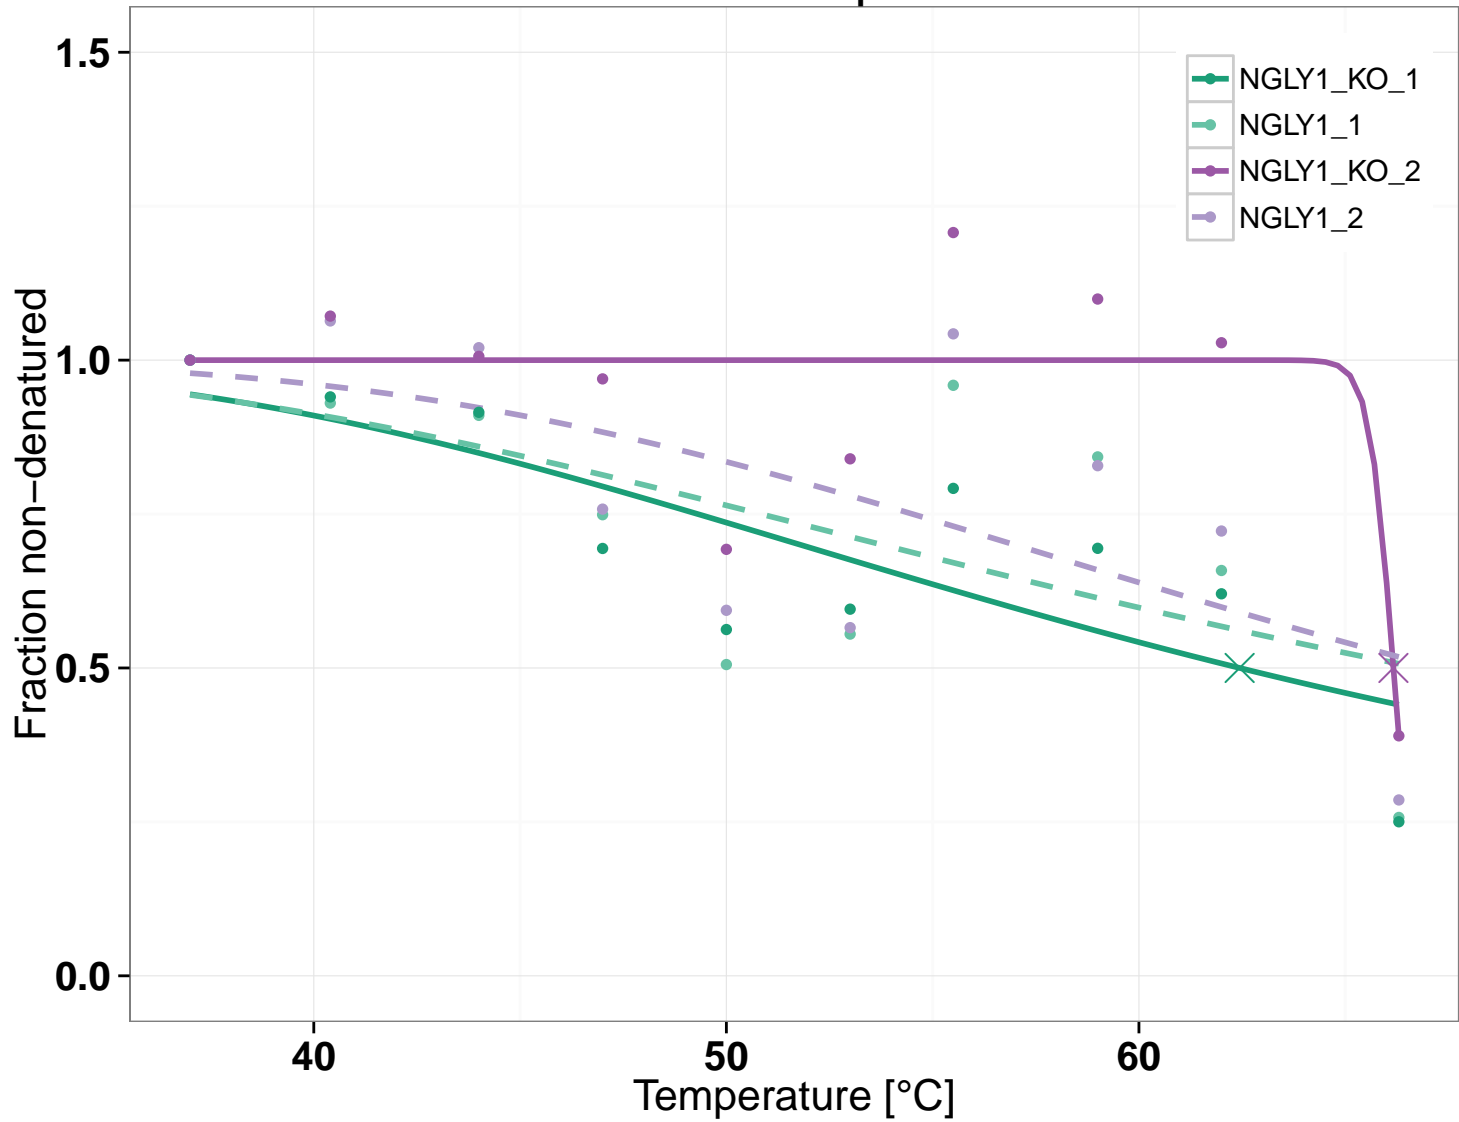

|            | meltPoint | slope  | plateau | R2   |
|------------|-----------|--------|---------|------|
| NGLY1_KO_1 | 62.44     | -0.02  | 0       | 0.66 |
| NGLY1_1    | -         | -0.017 | 0       | 0.41 |
| NGLY1_KO_2 | 66.17     | -0.86  | 0       | 0.64 |
| NGLY1_2    | -         | -0.02  | 0       | 0.43 |

Supplement: Supplementary file 6122 [file 1]

# IPI00914045.1|LOC221710

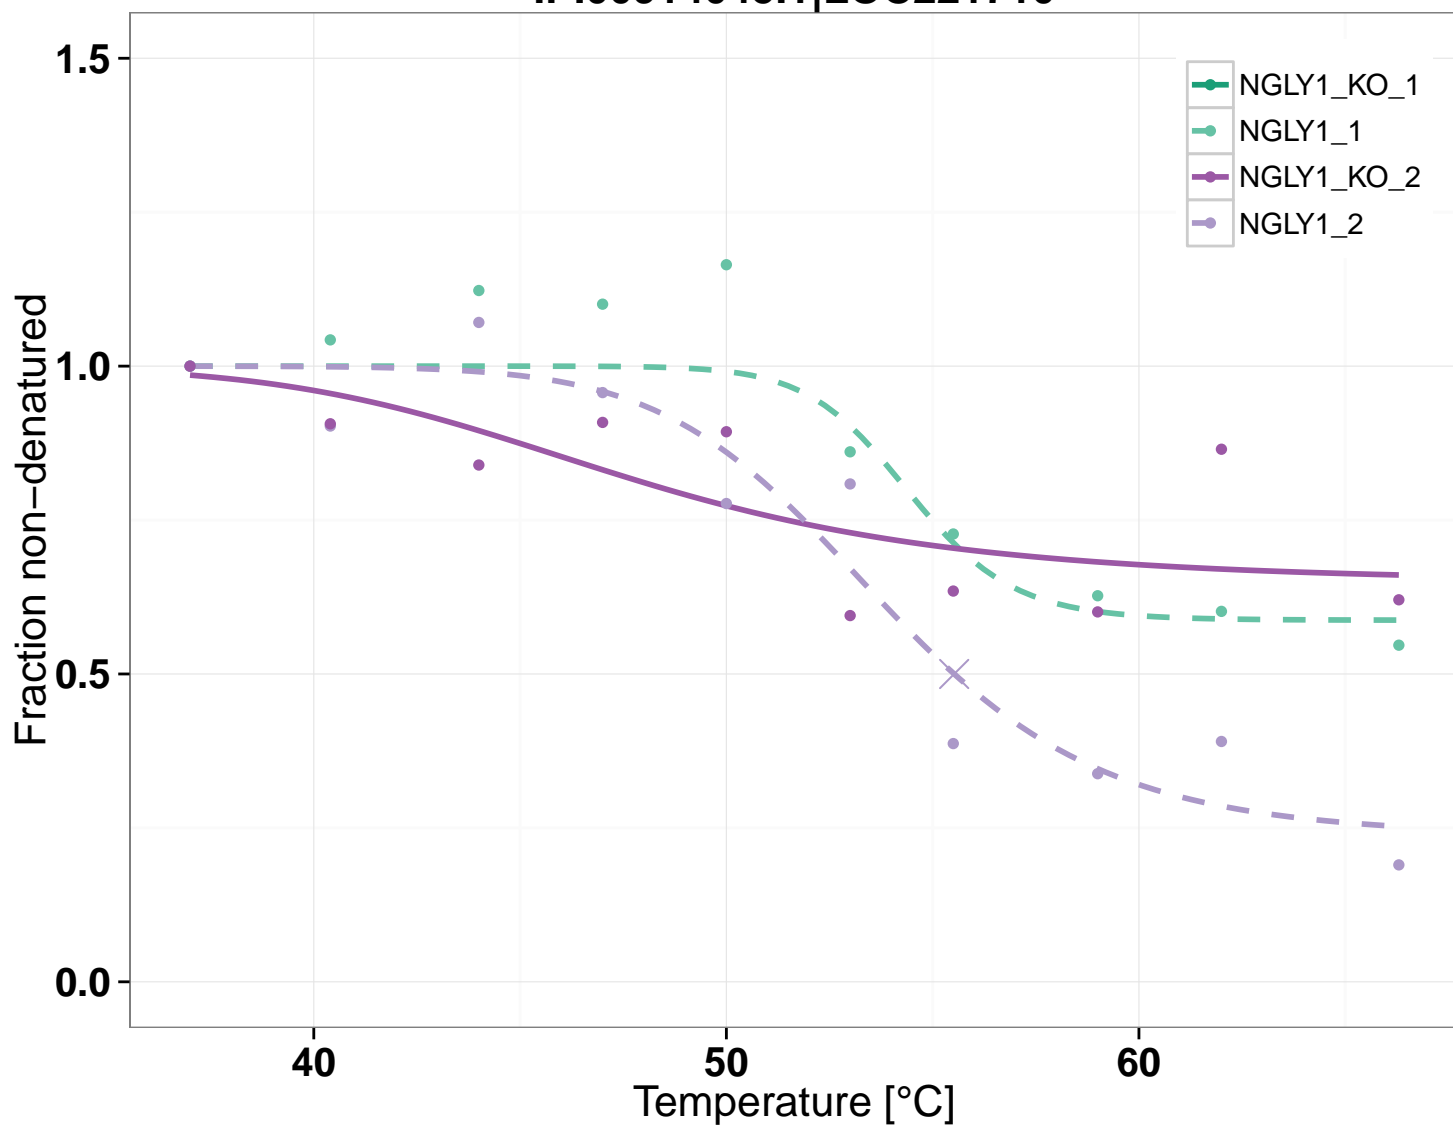

|            | meltPoint | slope  | plateau | R2   |
|------------|-----------|--------|---------|------|
| NGLY1_KO_1 | —         | —      | —       | —    |
| NGLY1_1    | —         | -0.082 | 0.59    | 0.88 |
| NGLY1_KO_2 | —         | -0.022 | 0.65    | 0.56 |
| NGLY1_2    | 55.52     | -0.072 | 0.24    | 0.93 |

Supplement: Supplementary file 6123 [file 1]

IPI00102897.4|RABL3

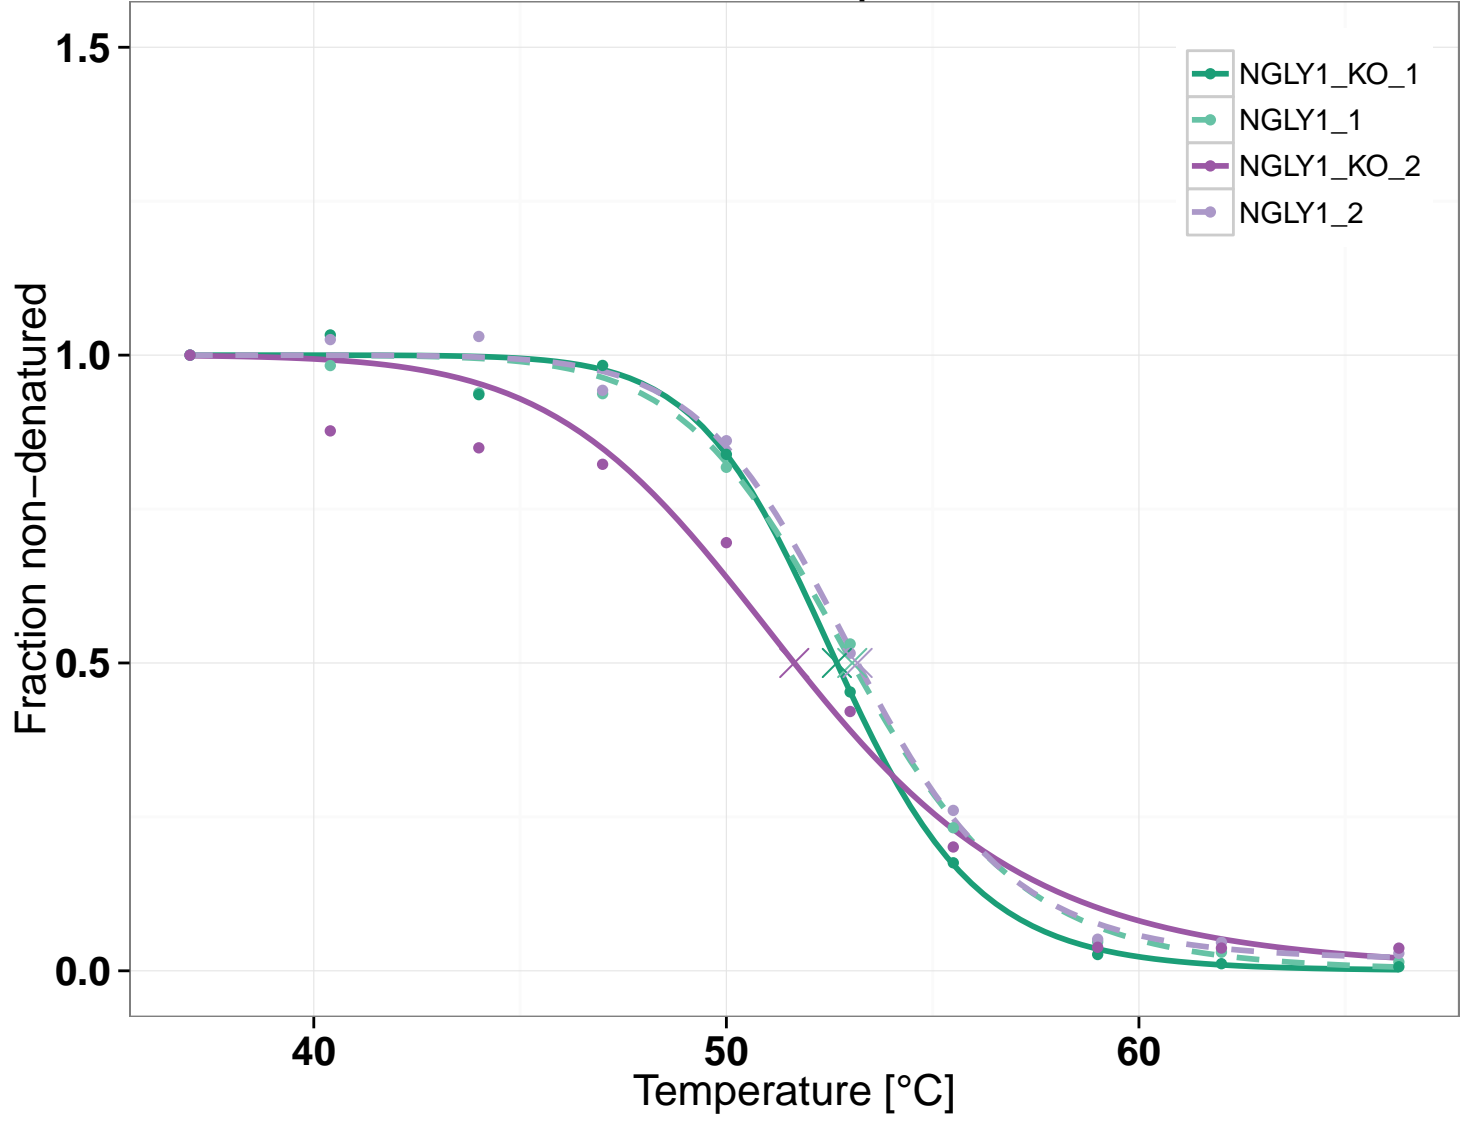

|            | meltPoint | slope  | plateau | R2   |
|------------|-----------|--------|---------|------|
| NGLY1_KO_1 | 52.68     | -0.15  | 0       | 1    |
| NGLY1_1    | 53.05     | -0.12  | 0       | 1    |
| NGLY1_KO_2 | 51.65     | -0.085 | 0       | 0.98 |
| NGLY1_2    | 53.18     | -0.13  | 0.02    | 1    |

Supplement: Supplementary file 6124 [file 1]

# IPI00550995.2|PIH1D1

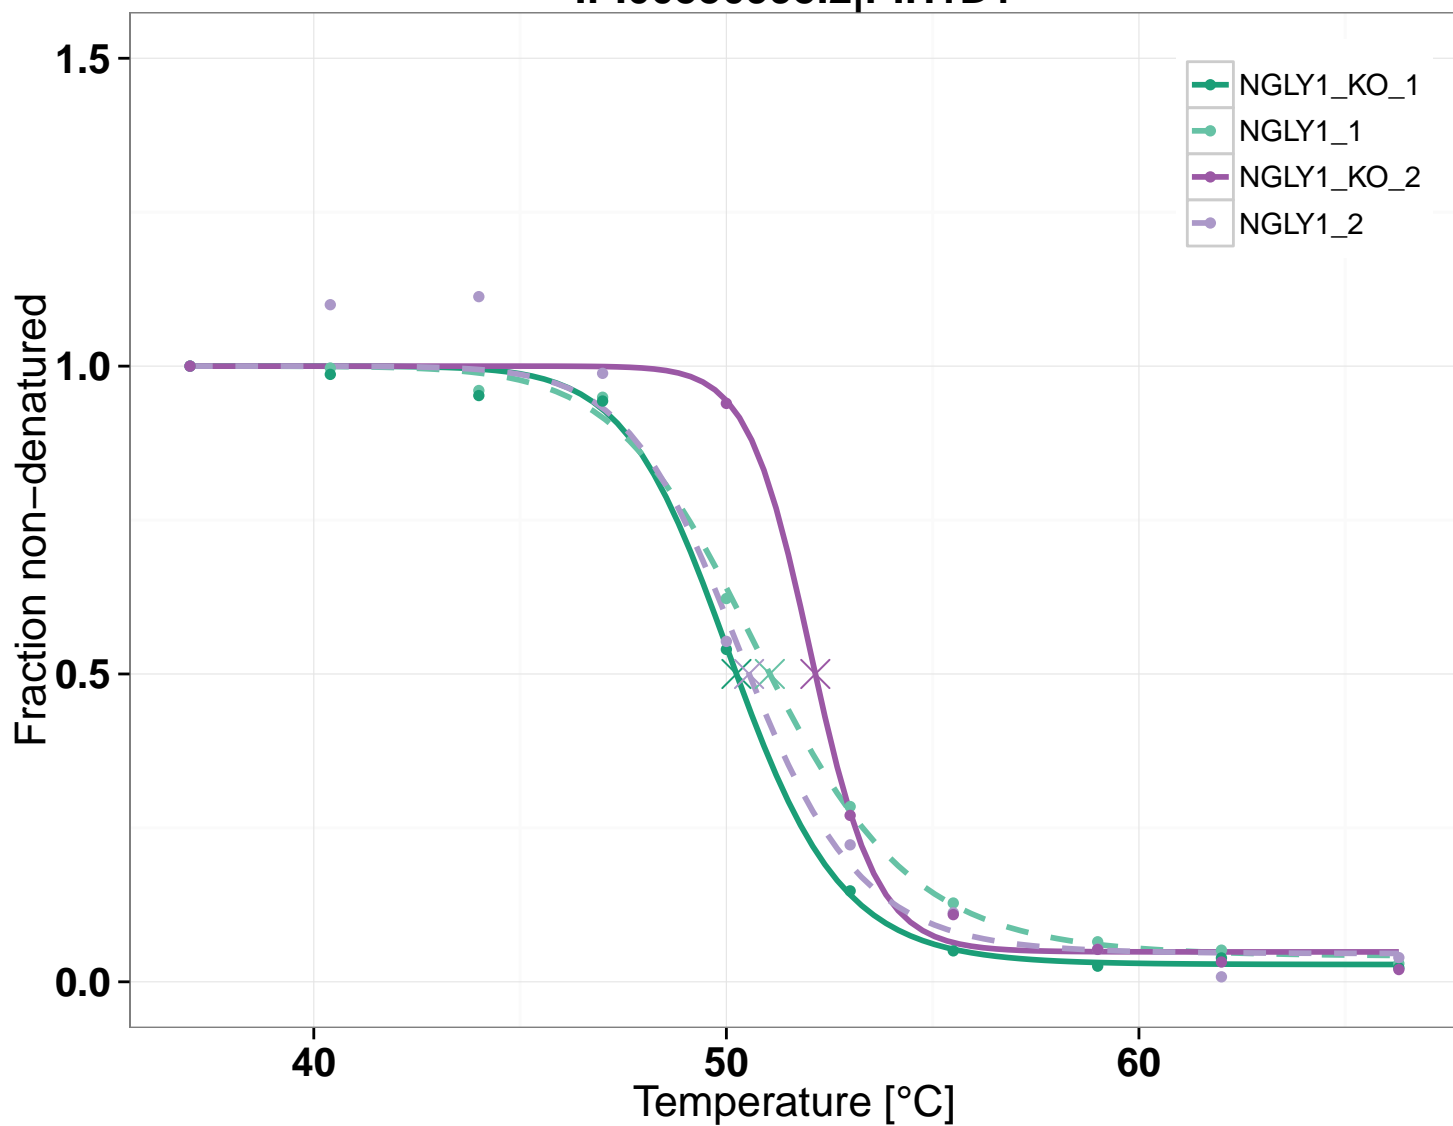

|            | meltPoint | slope | plateau | R2   |
|------------|-----------|-------|---------|------|
| NGLY1_KO_1 | 50.24     | -0.18 | 0.03    | 1    |
| NGLY1_1    | 51.05     | -0.13 | 0.04    | 1    |
| NGLY1_KO_2 | 52.16     | -0.31 | 0.05    | 0.74 |
| NGLY1_2    | 50.55     | -0.17 | 0.05    | 0.98 |

Supplement: Supplementary file 6125 [file 1]

IPI00455835.1|PLEKHA2

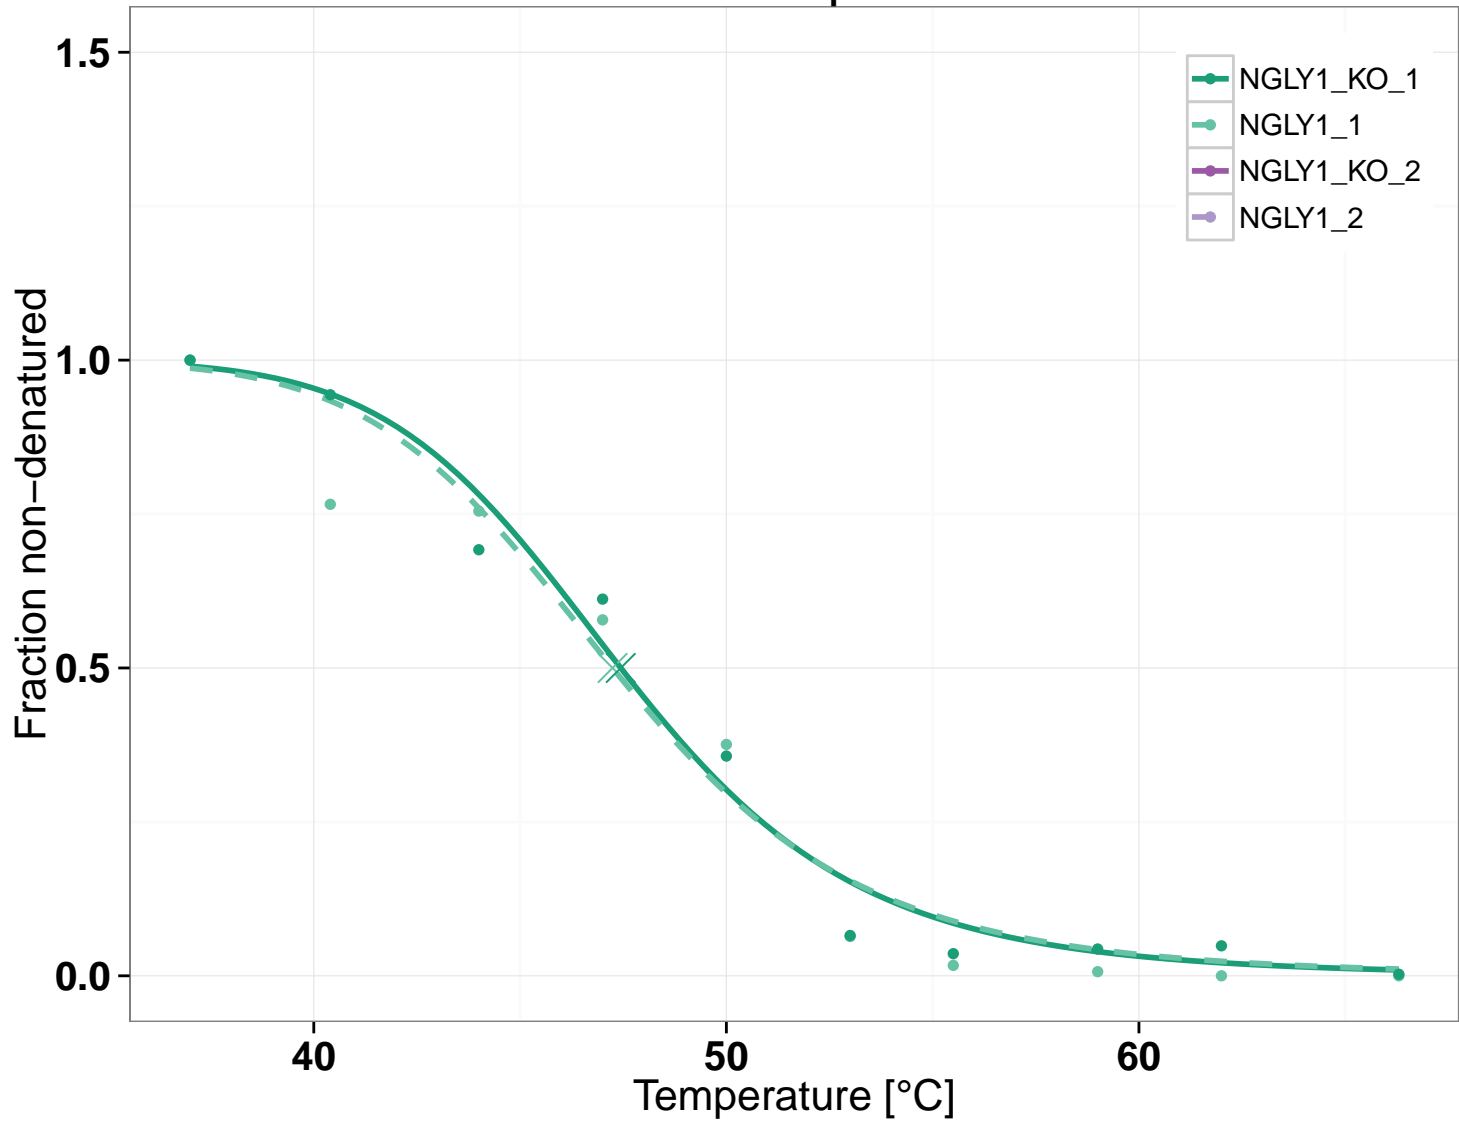

|            | meltPoint | slope  | plateau | R2   |
|------------|-----------|--------|---------|------|
| NGLY1_KO_1 | 47.44     | -0.087 | 0       | 0.98 |
| NGLY1_1    | 47.24     | -0.084 | 0       | 0.96 |
| NGLY1_KO_2 | -         | -      | -       | -    |
| NGLY1_2    | -         | -      | -       | -    |

Supplement: Supplementary file 6126 [file 1]
