# Supplementary material (part 62 of 85)
Source: publisher figshare collection journal article supplement (https://gsajournals.figshare.com/articles/dataset/_/12014913)

IPI00007676.3|HSD17B12

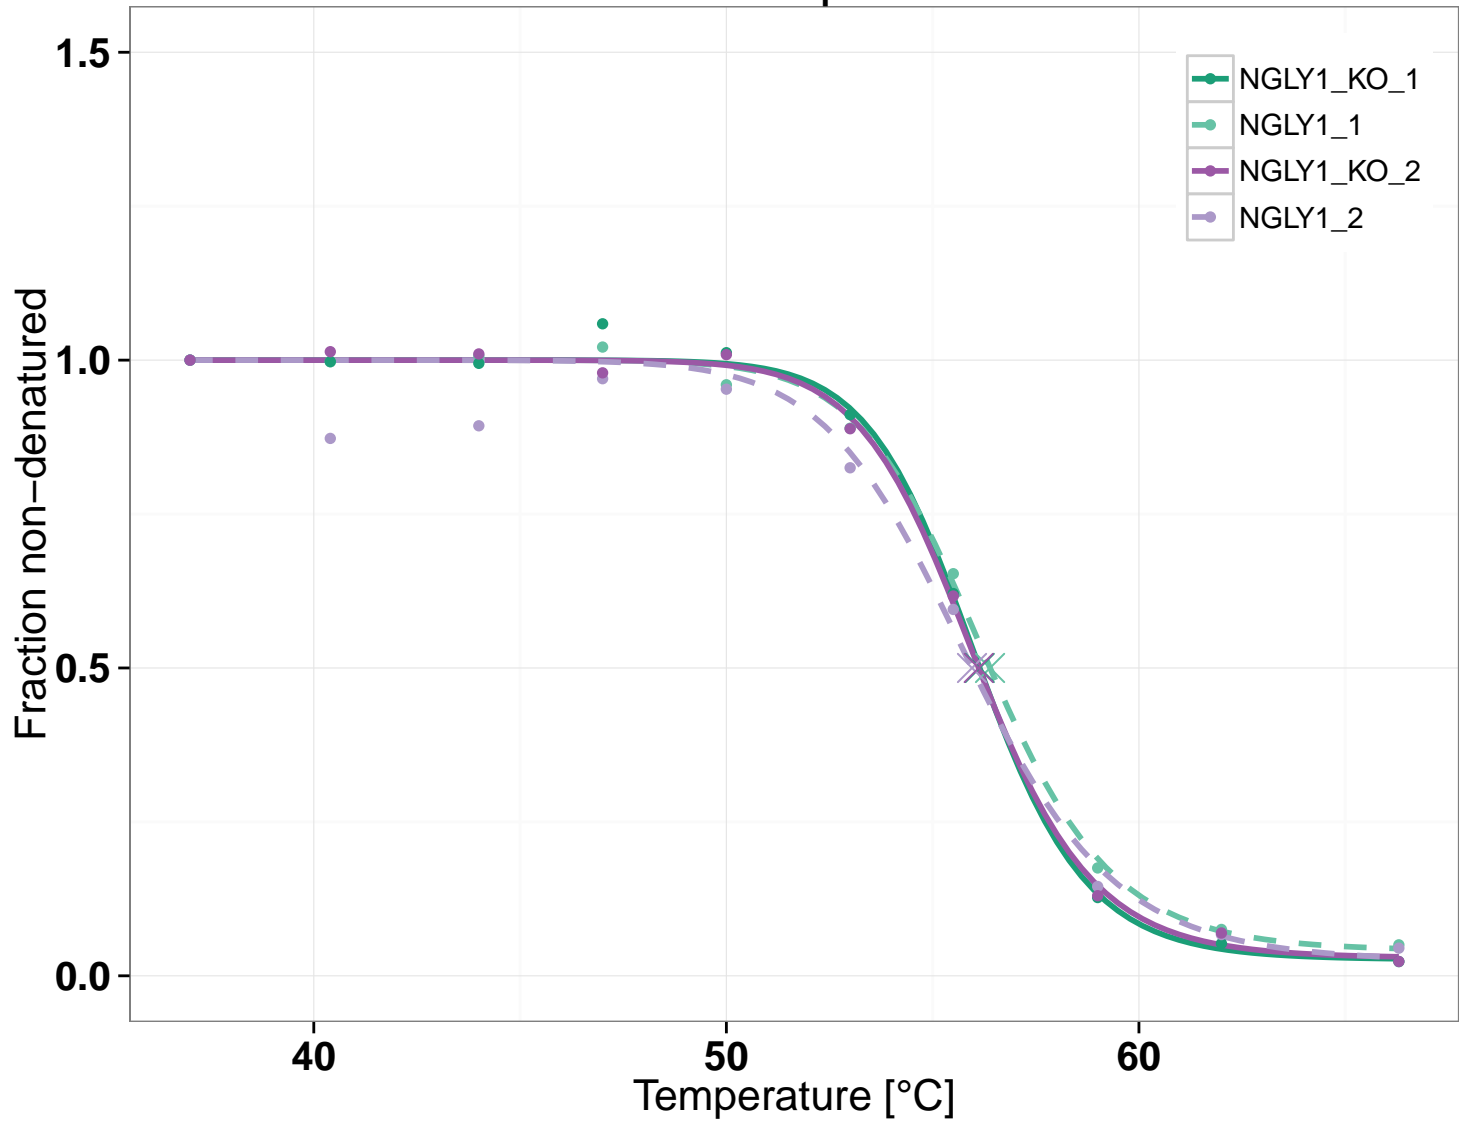

|            | meltPoint | slope | plateau | R2   |
|------------|-----------|-------|---------|------|
| NGLY1_KO_1 | 56.14     | -0.18 | 0.03    | 1    |
| NGLY1_1    | 56.39     | -0.16 | 0.04    | 1    |
| NGLY1_KO_2 | 56.12     | -0.17 | 0.03    | 1    |
| NGLY1_2    | 55.95     | -0.14 | 0.02    | 0.98 |

Supplement: Supplementary file 6127 [file 1]

# IPI00216886.4|LIAS

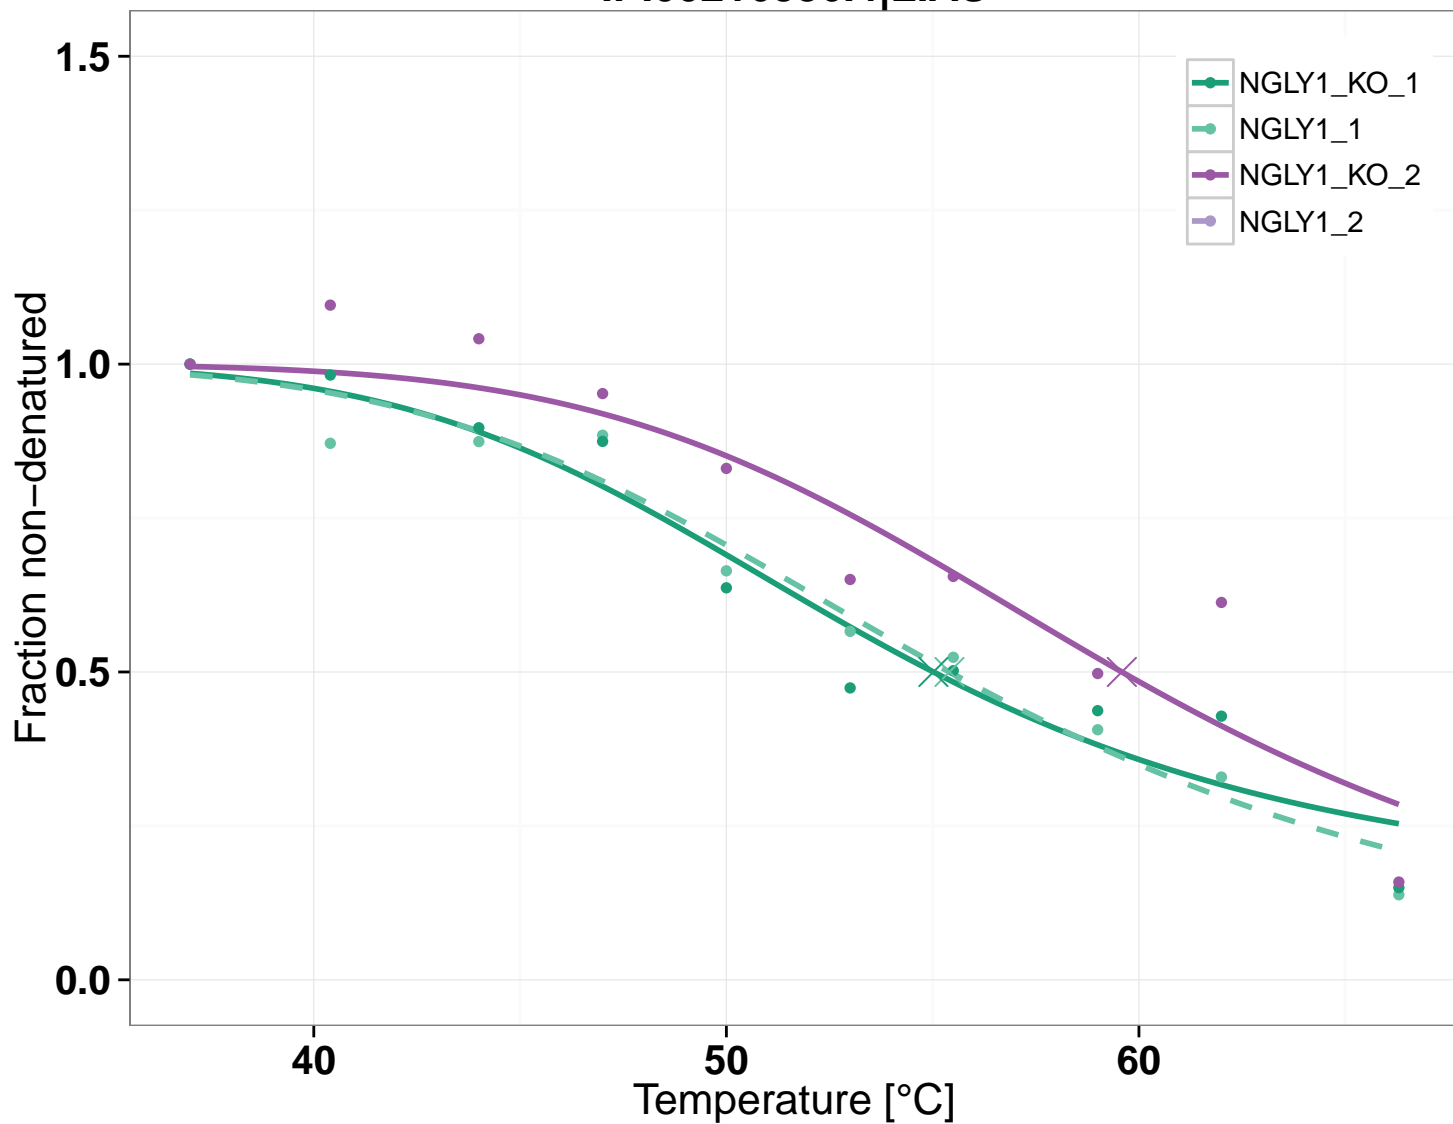

|            | meltPoint | slope  | plateau | R2   |
|------------|-----------|--------|---------|------|
| NGLY1_KO_1 | 55.02     | -0.039 | 0.13    | 0.94 |
| NGLY1_1    | 55.41     | -0.039 | 0       | 0.97 |
| NGLY1_KO_2 | 59.59     | -0.04  | 0       | 0.89 |
| NGLY1_2    | -         | -      | -       | -    |

Supplement: Supplementary file 6128 [file 1]

IPI00031023.1|FLII

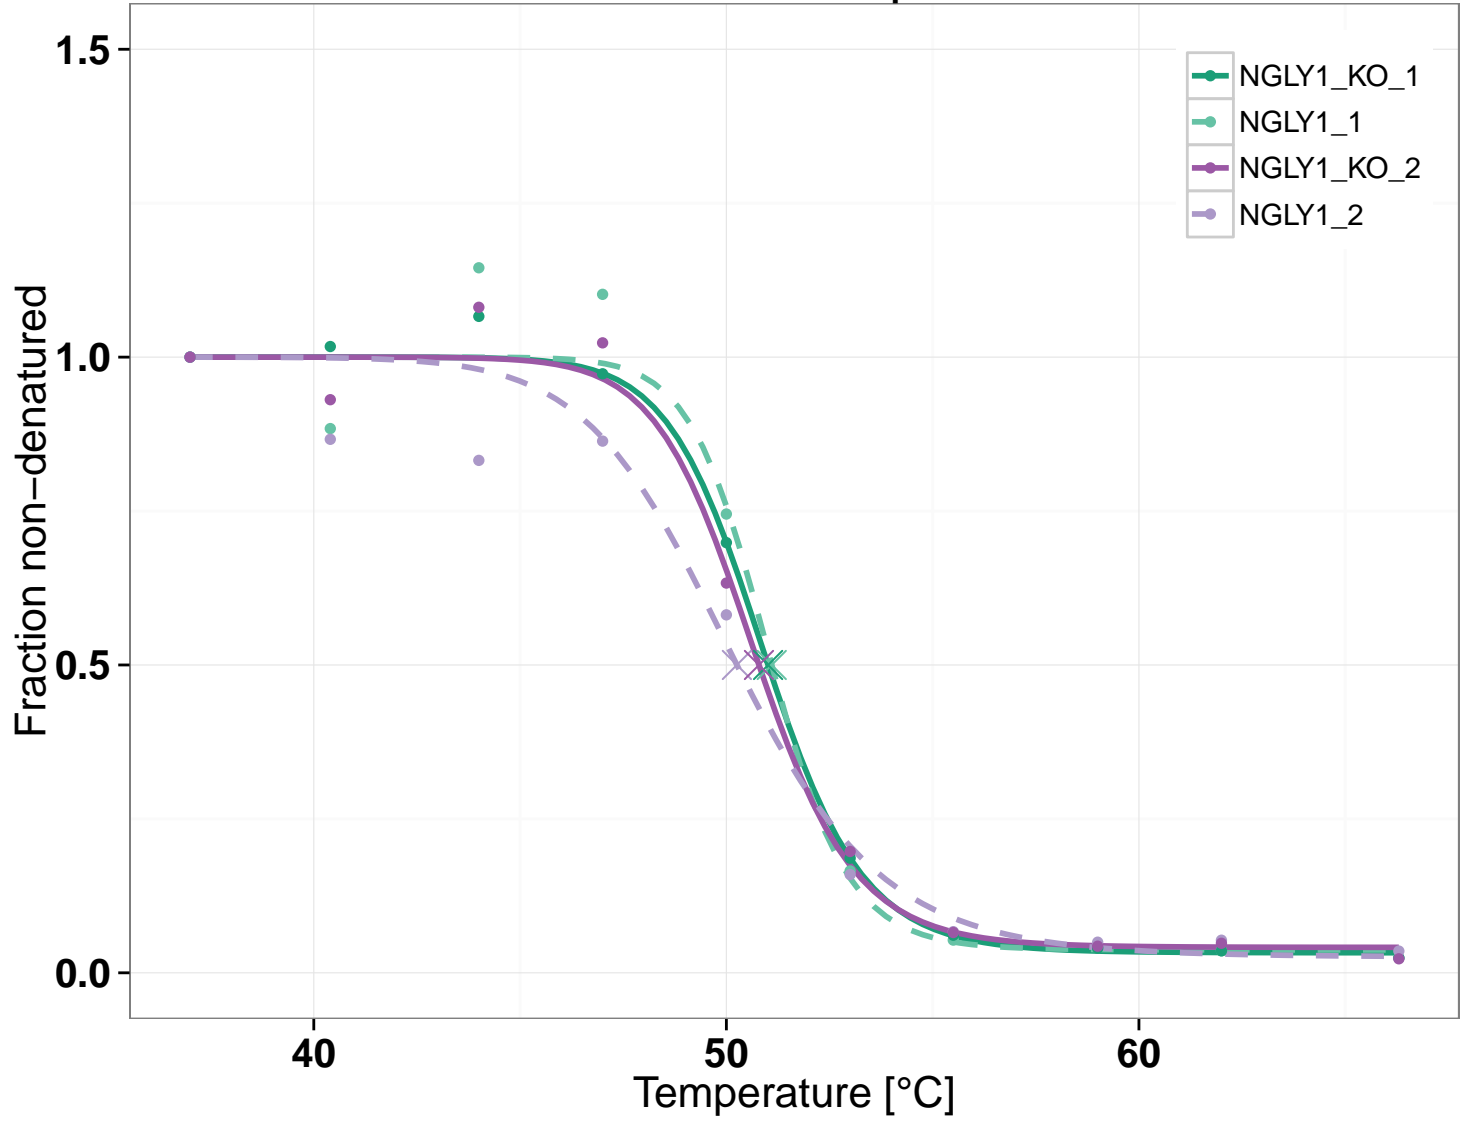

|            | meltPoint | slope | plateau | R2   |
|------------|-----------|-------|---------|------|
| NGLY1_KO_1 | 51.01     | -0.2  | 0.03    | 1    |
| NGLY1_1    | 51.1      | -0.25 | 0.04    | 0.98 |
| NGLY1_KO_2 | 50.79     | -0.2  | 0.04    | 0.99 |
| NGLY1_2    | 50.25     | -0.14 | 0.03    | 0.97 |

Supplement: Supplementary file 6129 [file 1]

# IPI00022254.4|ATG3

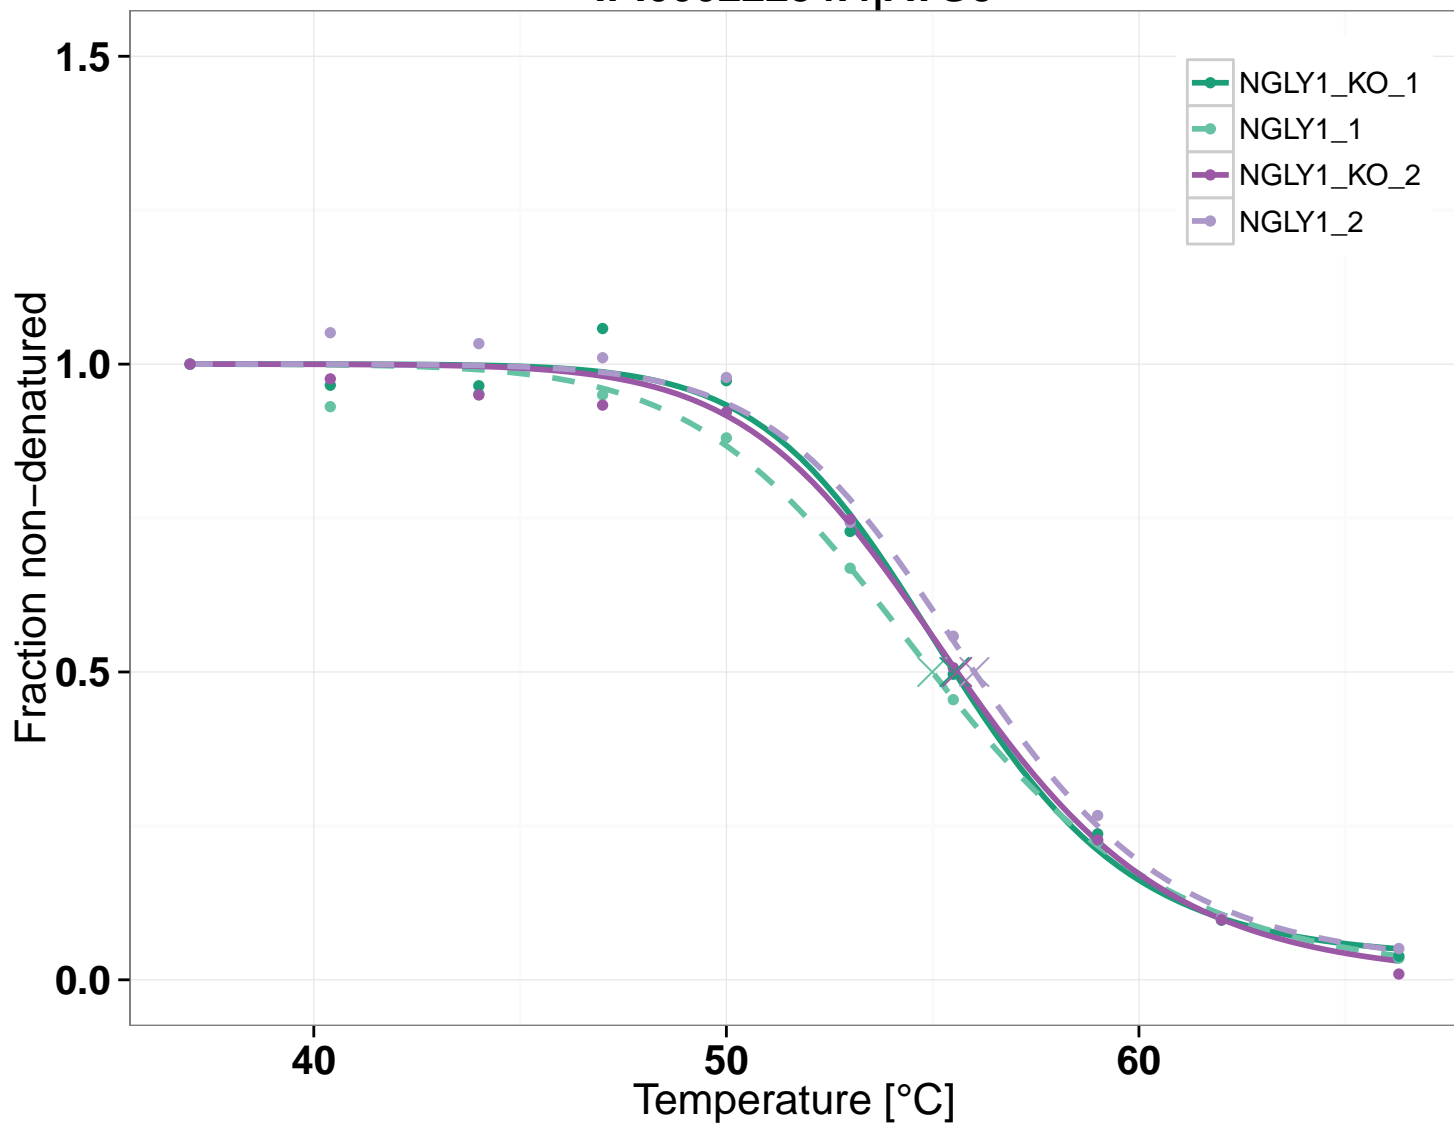

|            | meltPoint | slope  | plateau | R2   |
|------------|-----------|--------|---------|------|
| NGLY1_KO_1 | 55.53     | -0.11  | 0.03    | 0.99 |
| NGLY1_1    | 54.99     | -0.086 | 0       | 1    |
| NGLY1_KO_2 | 55.59     | -0.097 | 0       | 1    |
| NGLY1_2    | 56.01     | -0.1   | 0.02    | 0.99 |

Supplement: Supplementary file 6130 [file 1]

# IPI00745906.2|SUOX

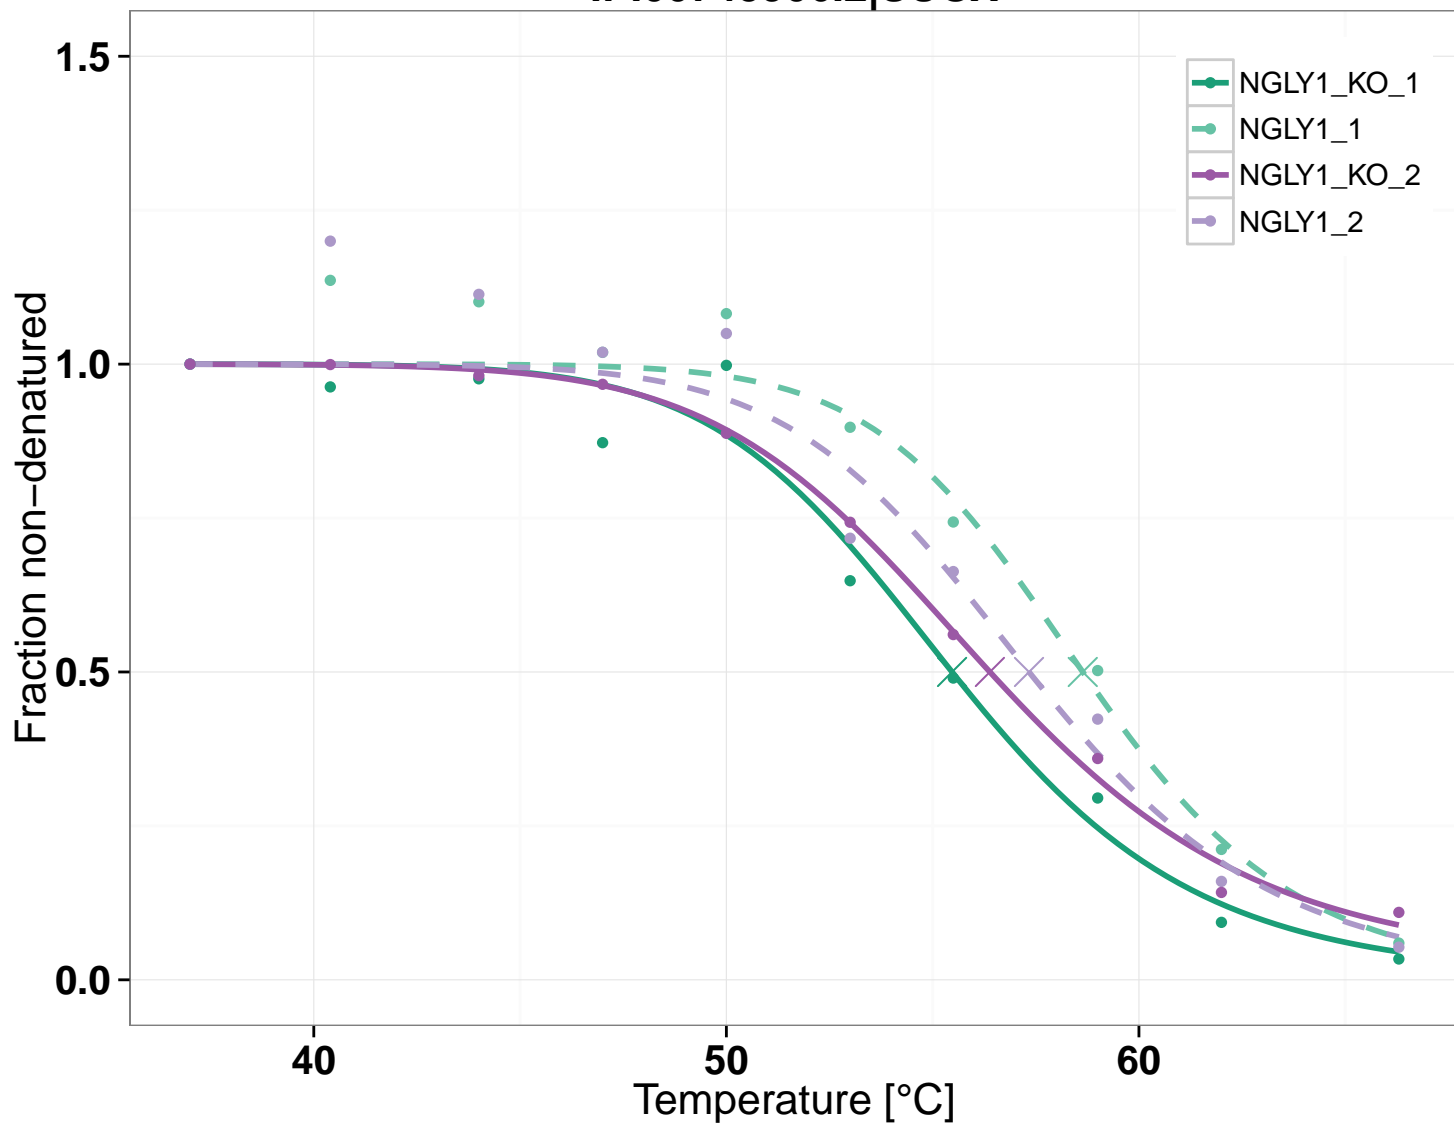

|            | meltPoint | slope  | plateau | R2   |
|------------|-----------|--------|---------|------|
| NGLY1_KO_1 | 55.47     | -0.085 | 0       | 0.98 |
| NGLY1_1    | 58.64     | -0.097 | 0       | 0.97 |
| NGLY1_KO_2 | 56.39     | -0.074 | 0.02    | 1    |
| NGLY1_2    | 57.34     | -0.085 | 0       | 0.95 |

Supplement: Supplementary file 6131 [file 1]

# IPI00798011.1|SUMO2

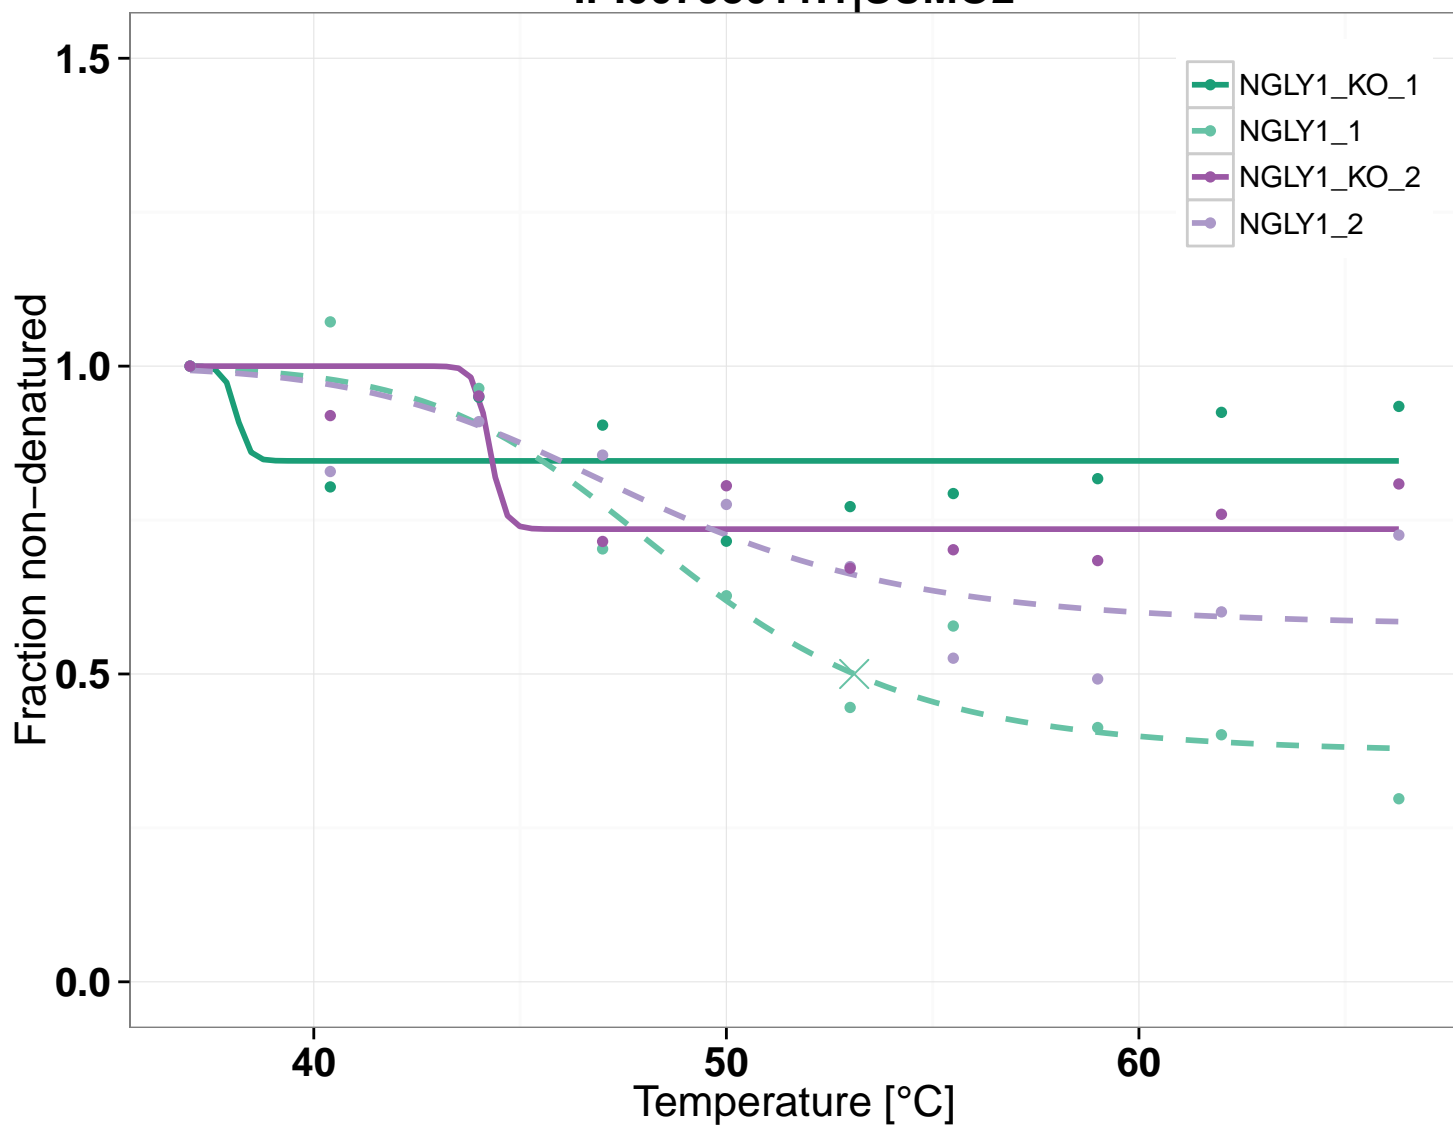

|            | meltPoint | slope  | plateau | R2   |
|------------|-----------|--------|---------|------|
| NGLY1_KO_1 | –         | –0.25  | 0.85    | 0.28 |
| NGLY1_1    | 53.1      | –0.053 | 0.37    | 0.94 |
| NGLY1_KO_2 | –         | –0.37  | 0.74    | 0.8  |
| NGLY1_2    | –         | –0.032 | 0.58    | 0.73 |

Supplement: Supplementary file 6132 [file 1]

# IPI00238688.2|RBPMS2

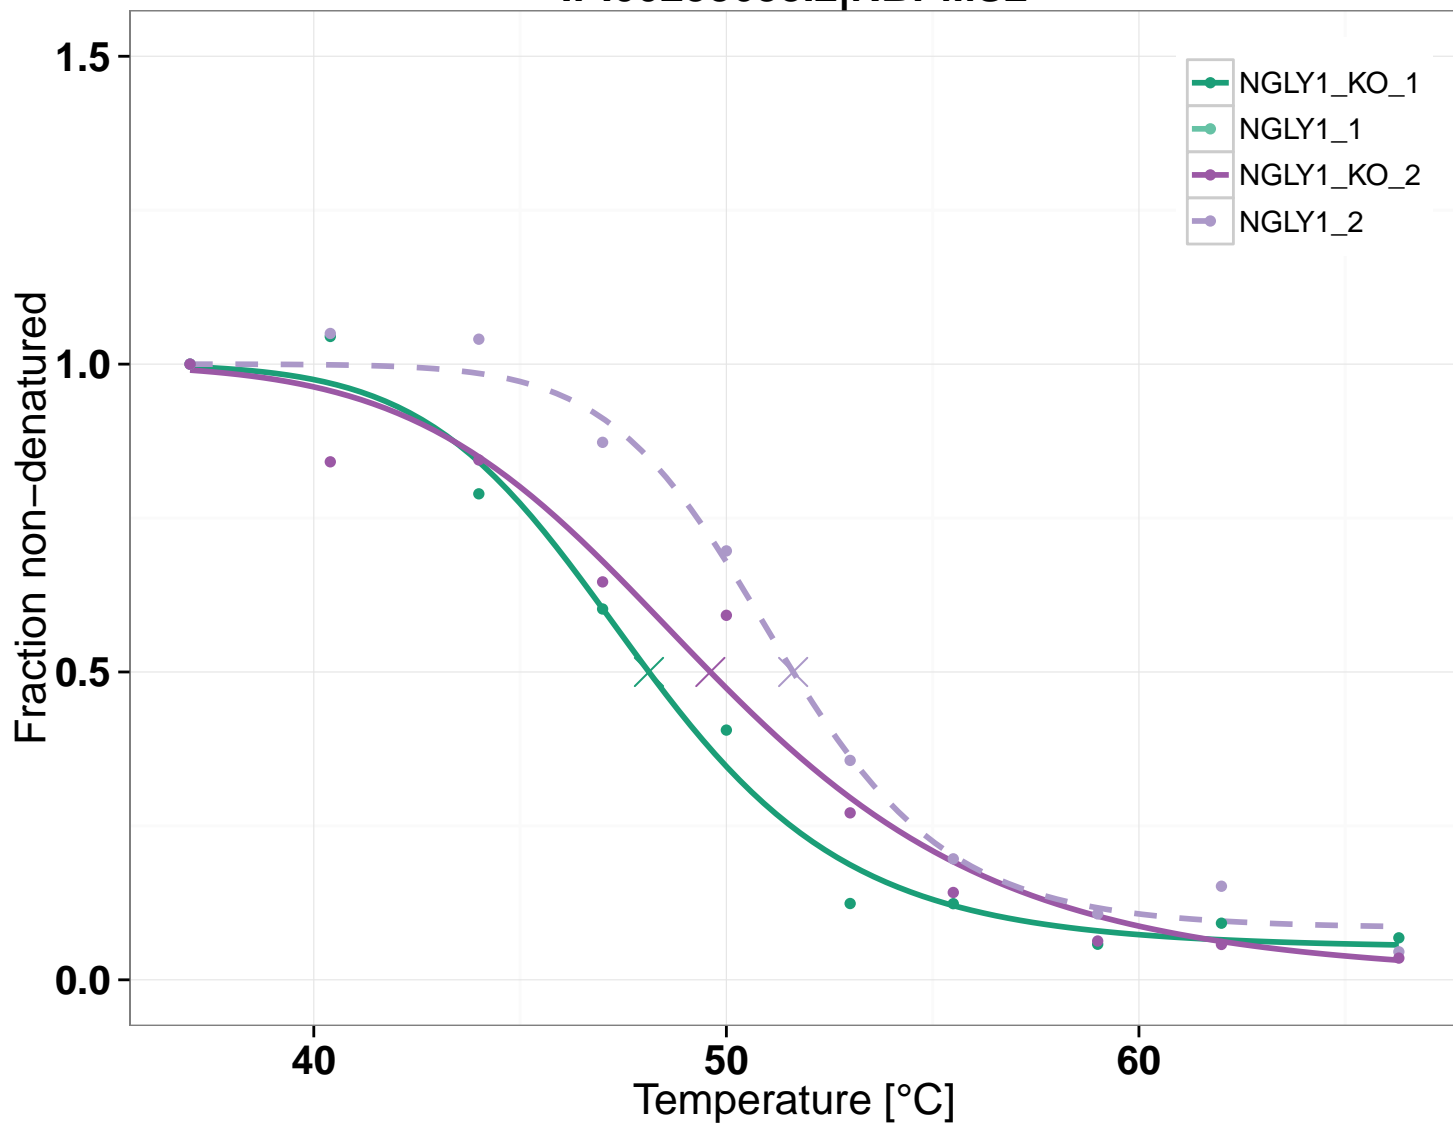

|            | meltPoint | slope  | plateau | R2   |
|------------|-----------|--------|---------|------|
| NGLY1_KO_1 | 48.12     | -0.092 | 0.05    | 0.99 |
| NGLY1_1    | —         | —      | —       | —    |
| NGLY1_KO_2 | 49.61     | -0.07  | 0       | 0.97 |
| NGLY1_2    | 51.62     | -0.11  | 0.08    | 0.99 |

Supplement: Supplementary file 6133 [file 1]

IPI00172580.4|NUP54

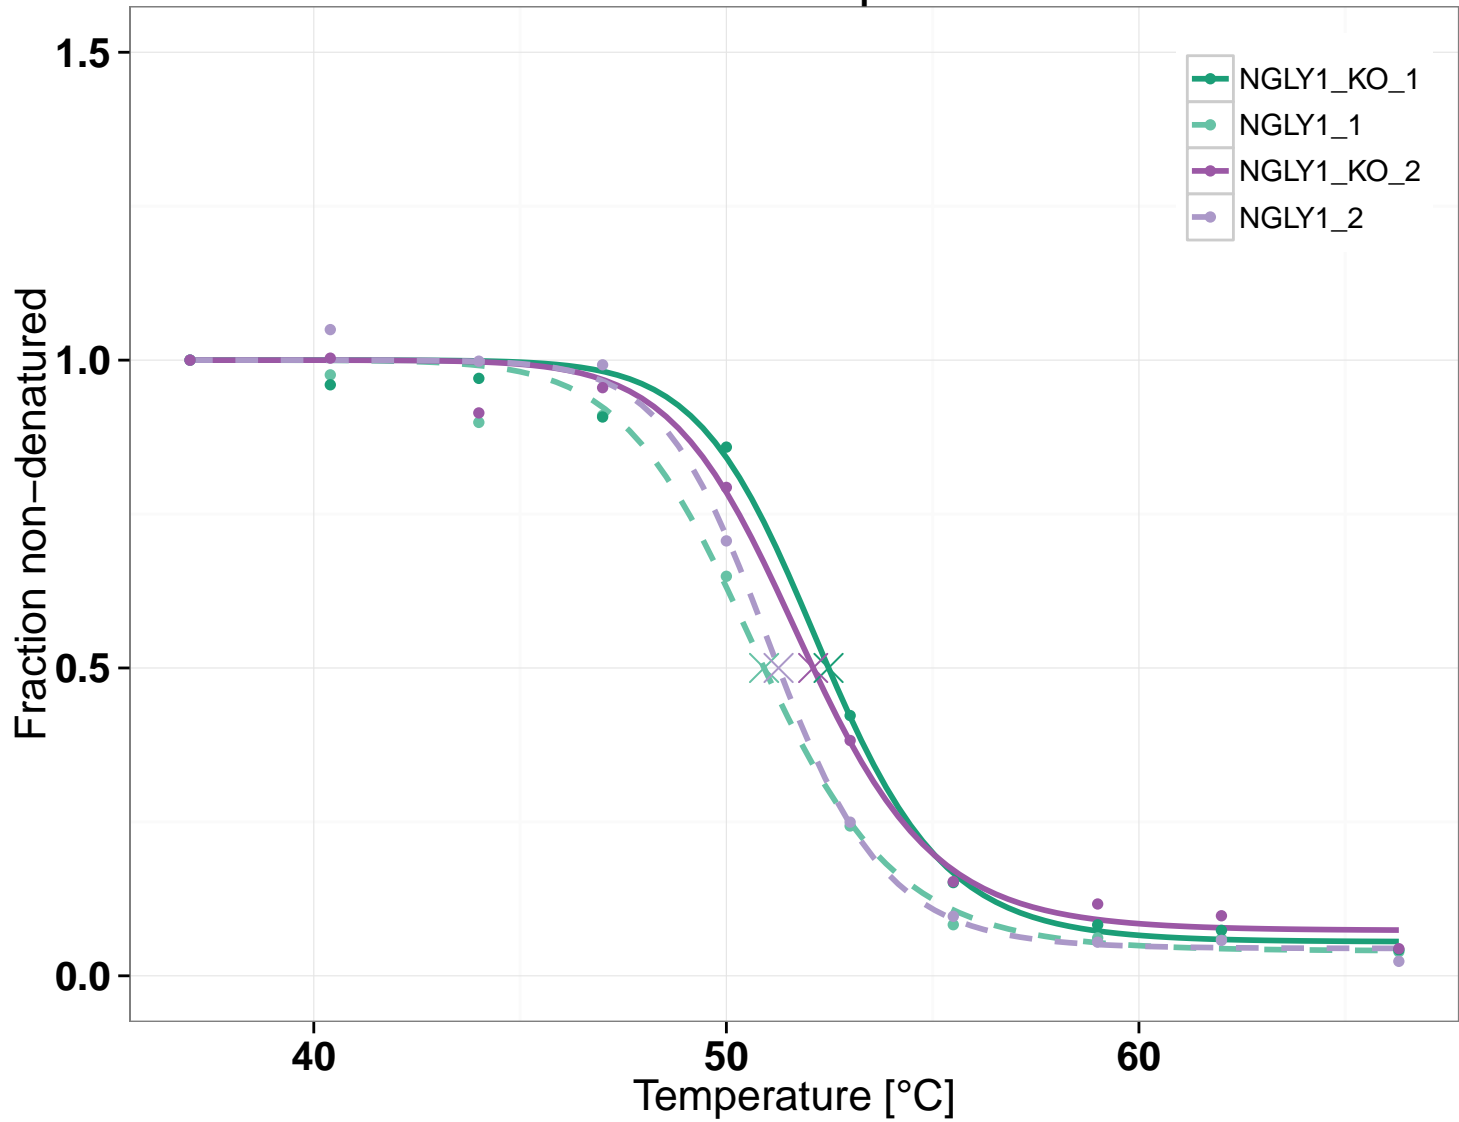

|            | meltPoint | slope | plateau | R2   |
|------------|-----------|-------|---------|------|
| NGLY1_KO_1 | 52.48     | -0.16 | 0.06    | 0.99 |
| NGLY1_1    | 50.91     | -0.14 | 0.04    | 0.99 |
| NGLY1_KO_2 | 52.1      | -0.15 | 0.07    | 0.99 |
| NGLY1_2    | 51.27     | -0.18 | 0.04    | 1    |

Supplement: Supplementary file 6134 [file 1]

# IPI00304483.1|PAIP2

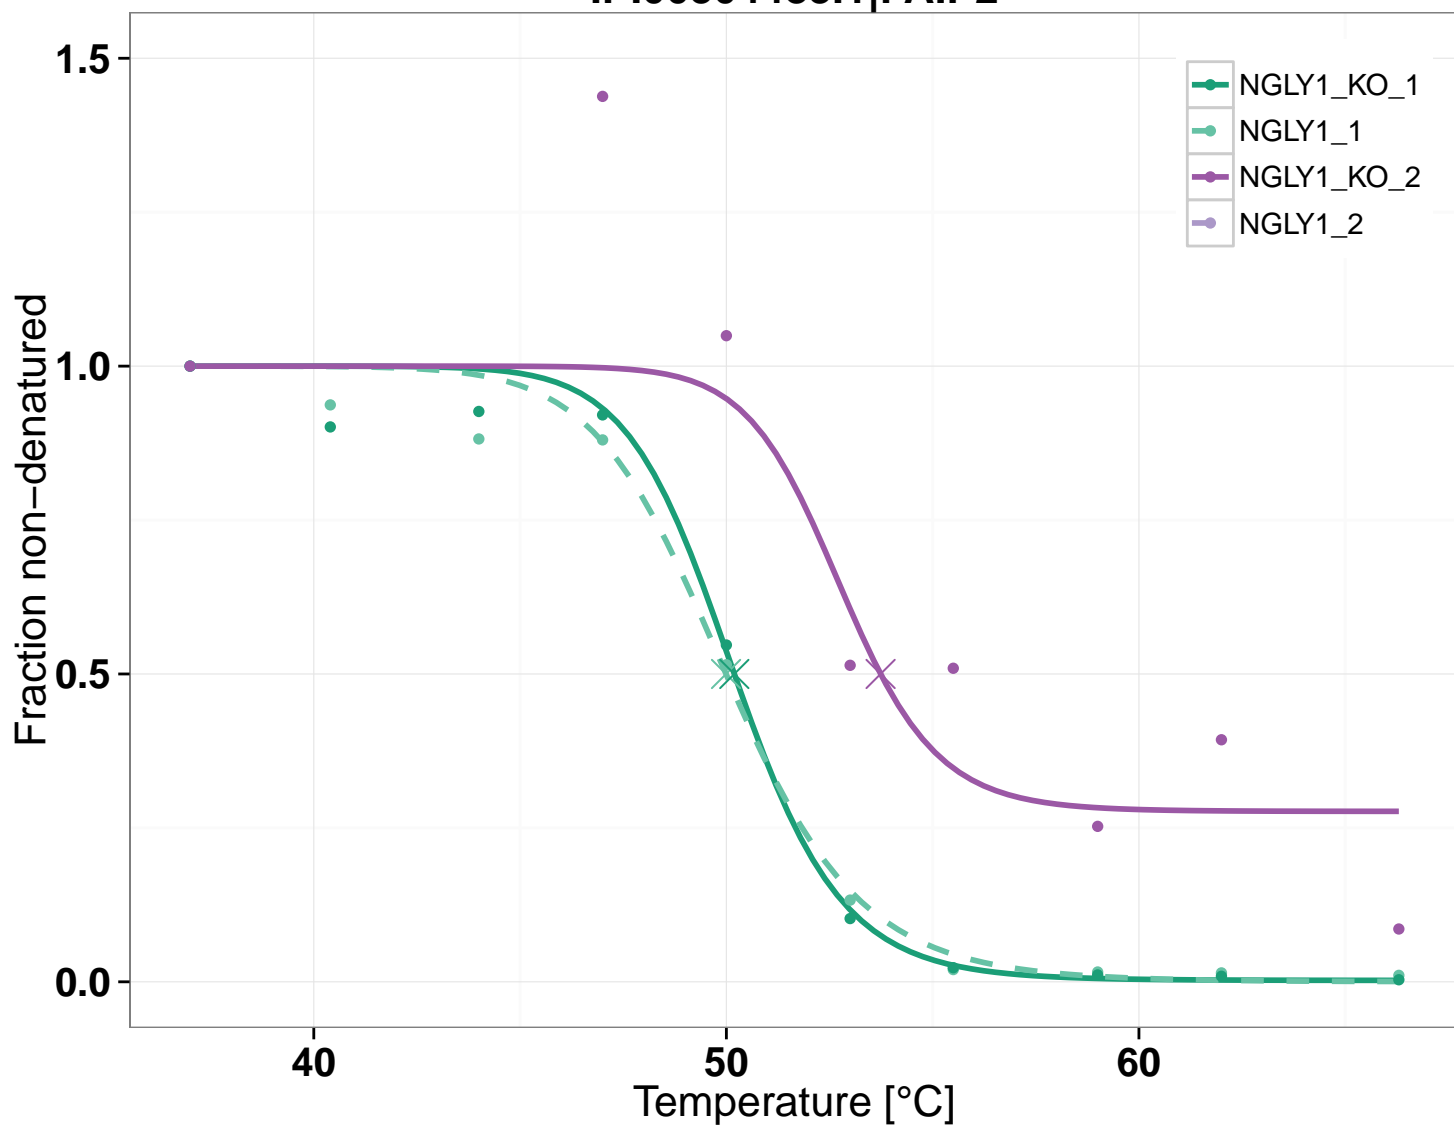

|            | meltPoint | slope | plateau | R2   |
|------------|-----------|-------|---------|------|
| NGLY1_KO_1 | 50.19     | -0.19 | 0       | 0.99 |
| NGLY1_1    | 49.99     | -0.16 | 0       | 0.99 |
| NGLY1_KO_2 | 53.74     | -0.16 | 0.28    | 0.56 |
| NGLY1_2    | -         | -     | -       | -    |

Supplement: Supplementary file 6135 [file 1]

IPI00760675.1|RUFY2

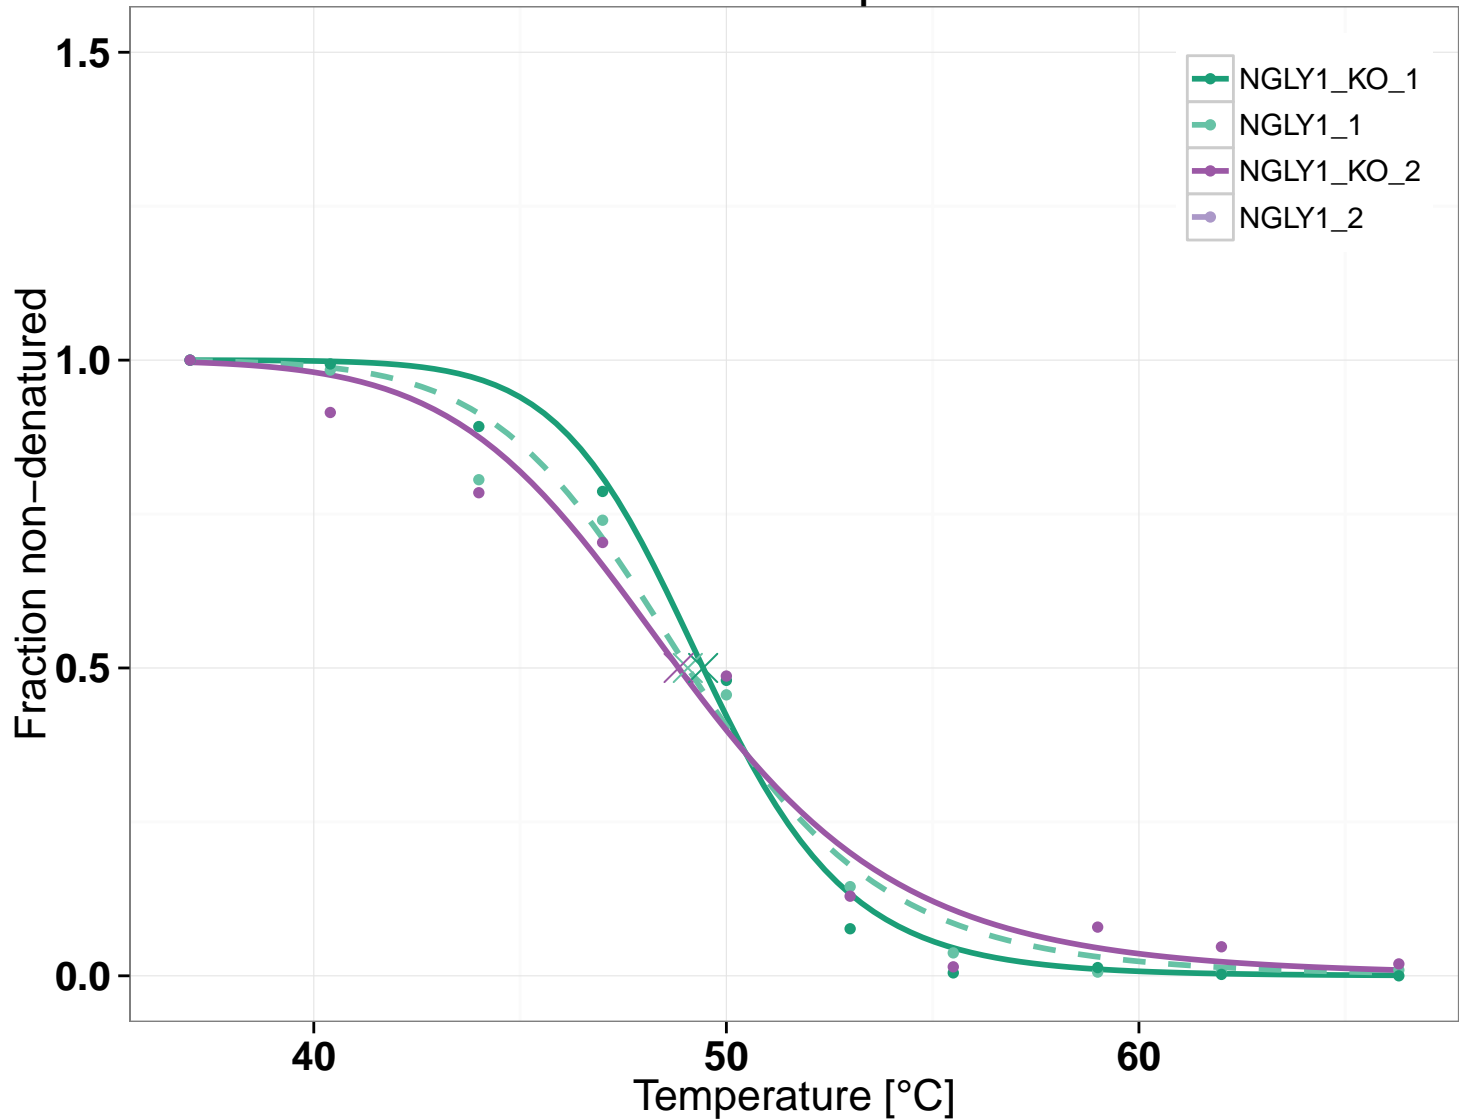

|            | meltPoint | slope  | plateau | R2   |
|------------|-----------|--------|---------|------|
| NGLY1_KO_1 | 49.44     | -0.14  | 0       | 0.99 |
| NGLY1_1    | 49.07     | -0.11  | 0       | 0.99 |
| NGLY1_KO_2 | 48.84     | -0.092 | 0       | 0.98 |
| NGLY1_2    | -         | -      | -       | -    |

Supplement: Supplementary file 6136 [file 1]

# IPI00065671.1|UCK2

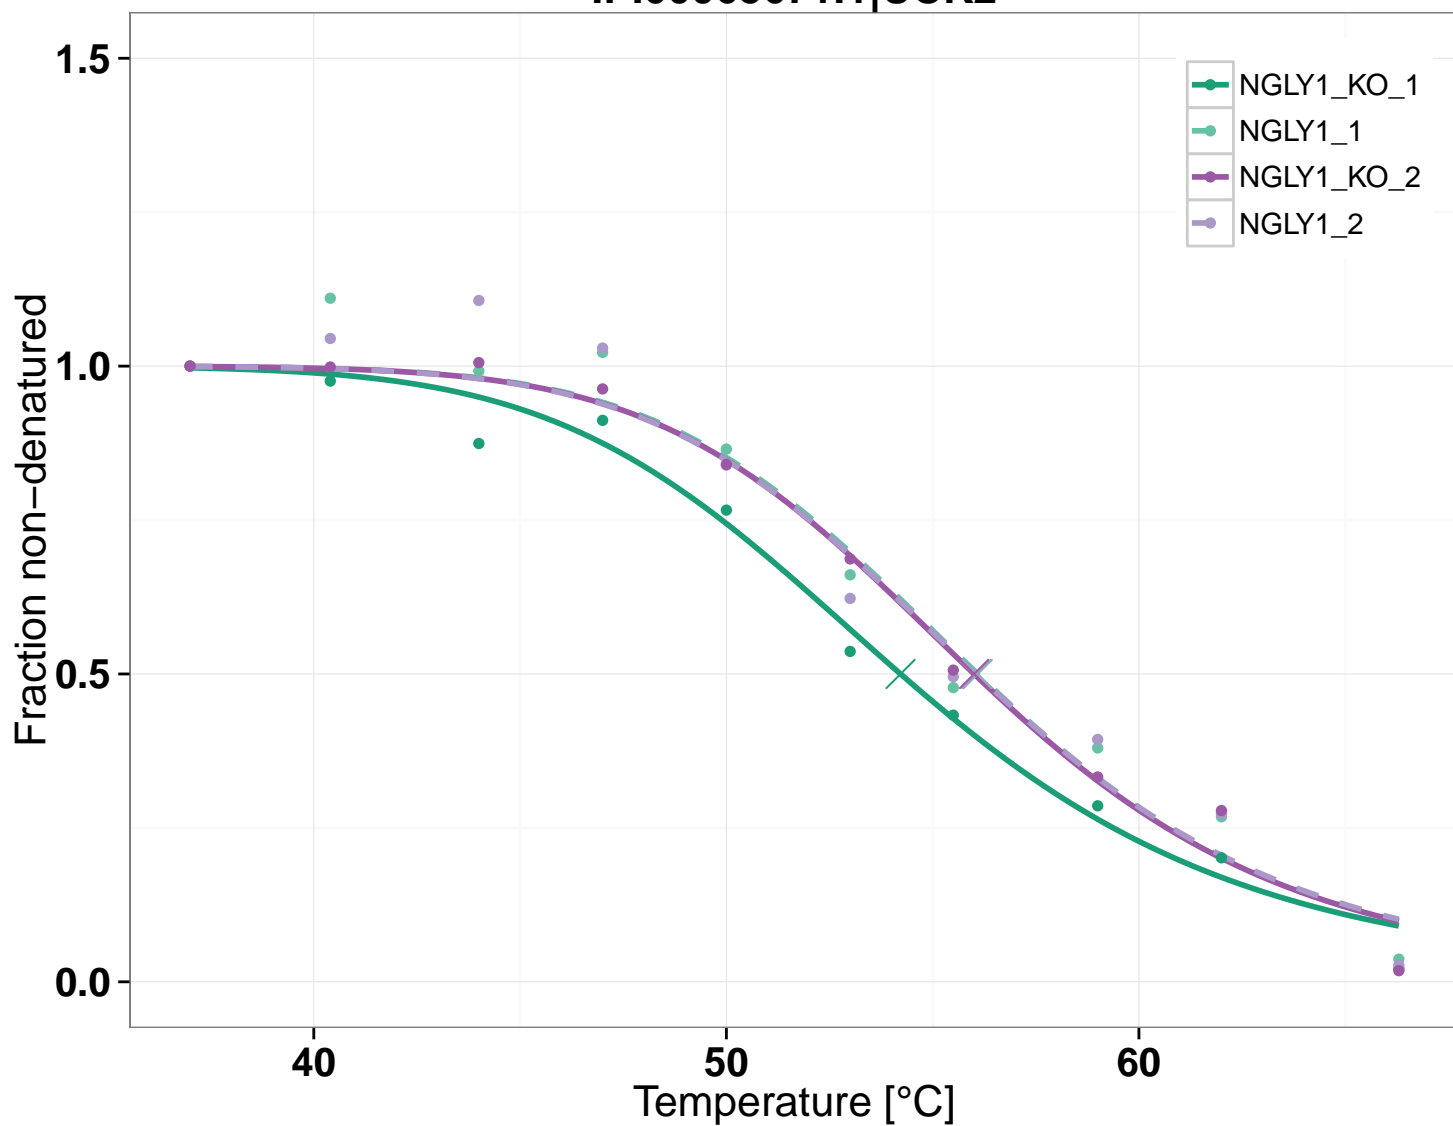

|            | meltPoint | slope  | plateau | R2   |
|------------|-----------|--------|---------|------|
| NGLY1_KO_1 | 54.22     | -0.06  | 0       | 0.99 |
| NGLY1_1    | 56.09     | -0.065 | 0       | 0.97 |
| NGLY1_KO_2 | 56.01     | -0.065 | 0       | 0.99 |
| NGLY1_2    | 56.06     | -0.064 | 0       | 0.96 |

Supplement: Supplementary file 6137 [file 1]

IPI00514340.1|KIAA0859

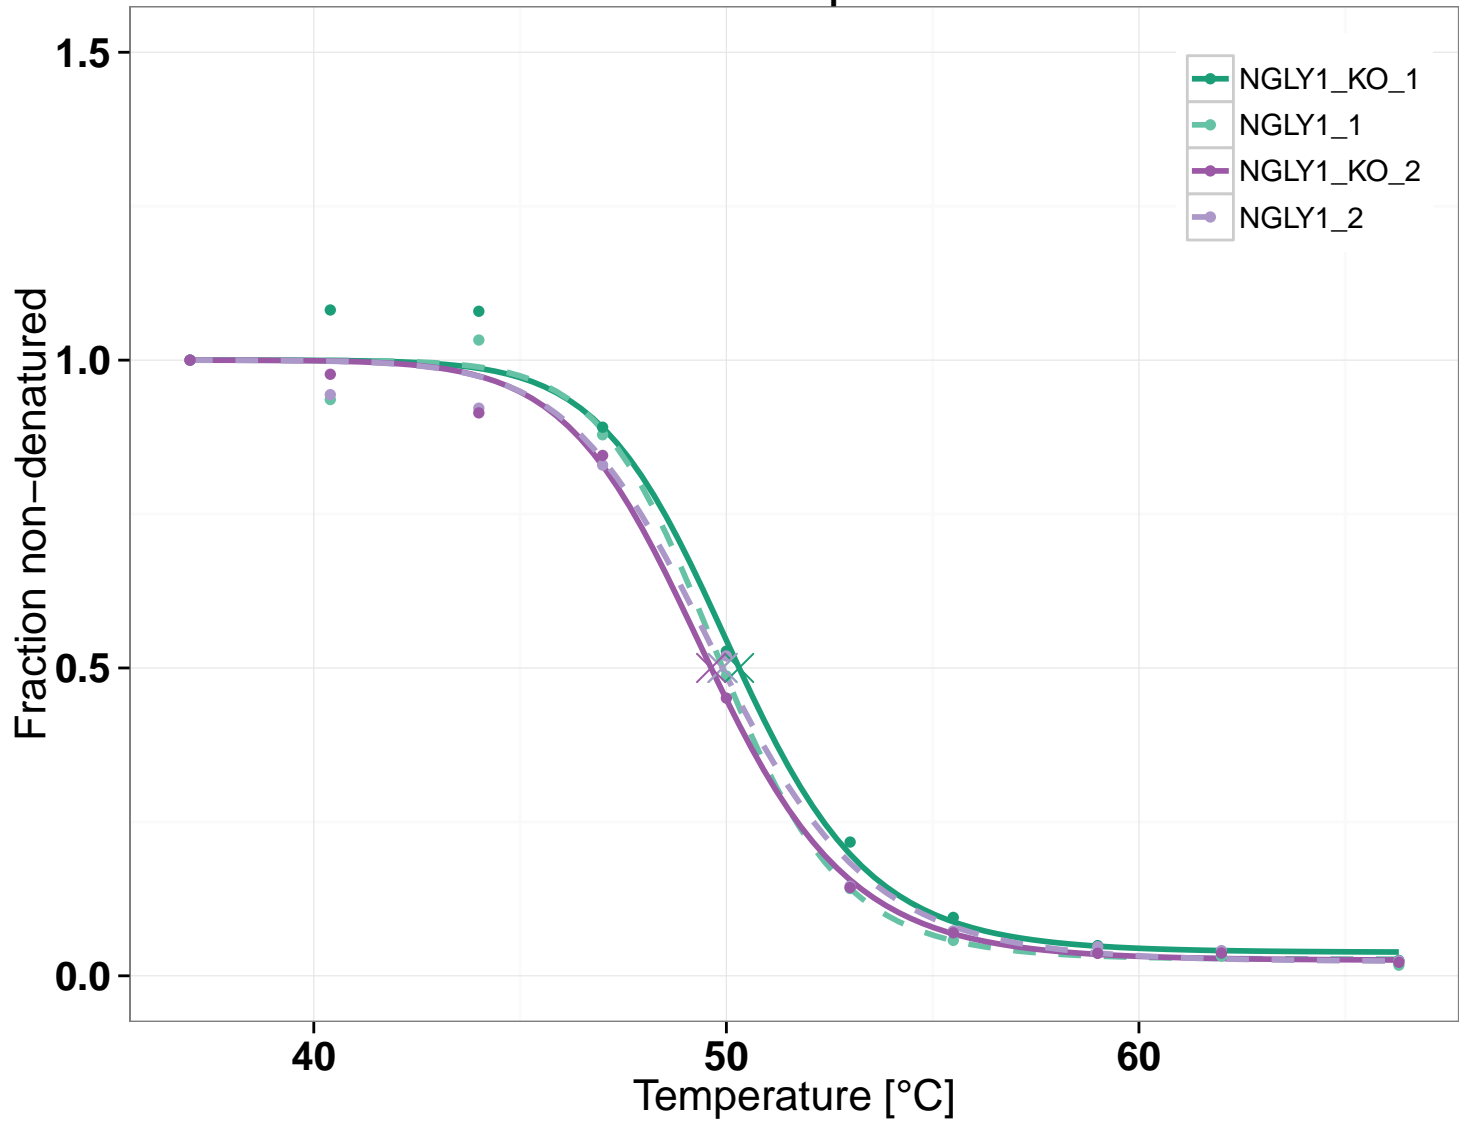

|            | meltPoint | slope | plateau | R2   |
|------------|-----------|-------|---------|------|
| NGLY1_KO_1 | 50.31     | -0.15 | 0.04    | 0.99 |
| NGLY1_1    | 49.91     | -0.16 | 0.03    | 1    |
| NGLY1_KO_2 | 49.63     | -0.14 | 0.03    | 1    |
| NGLY1_2    | 49.9      | -0.13 | 0.02    | 0.99 |

Supplement: Supplementary file 6138 [file 1]

IPI00021167.3|PRKRA

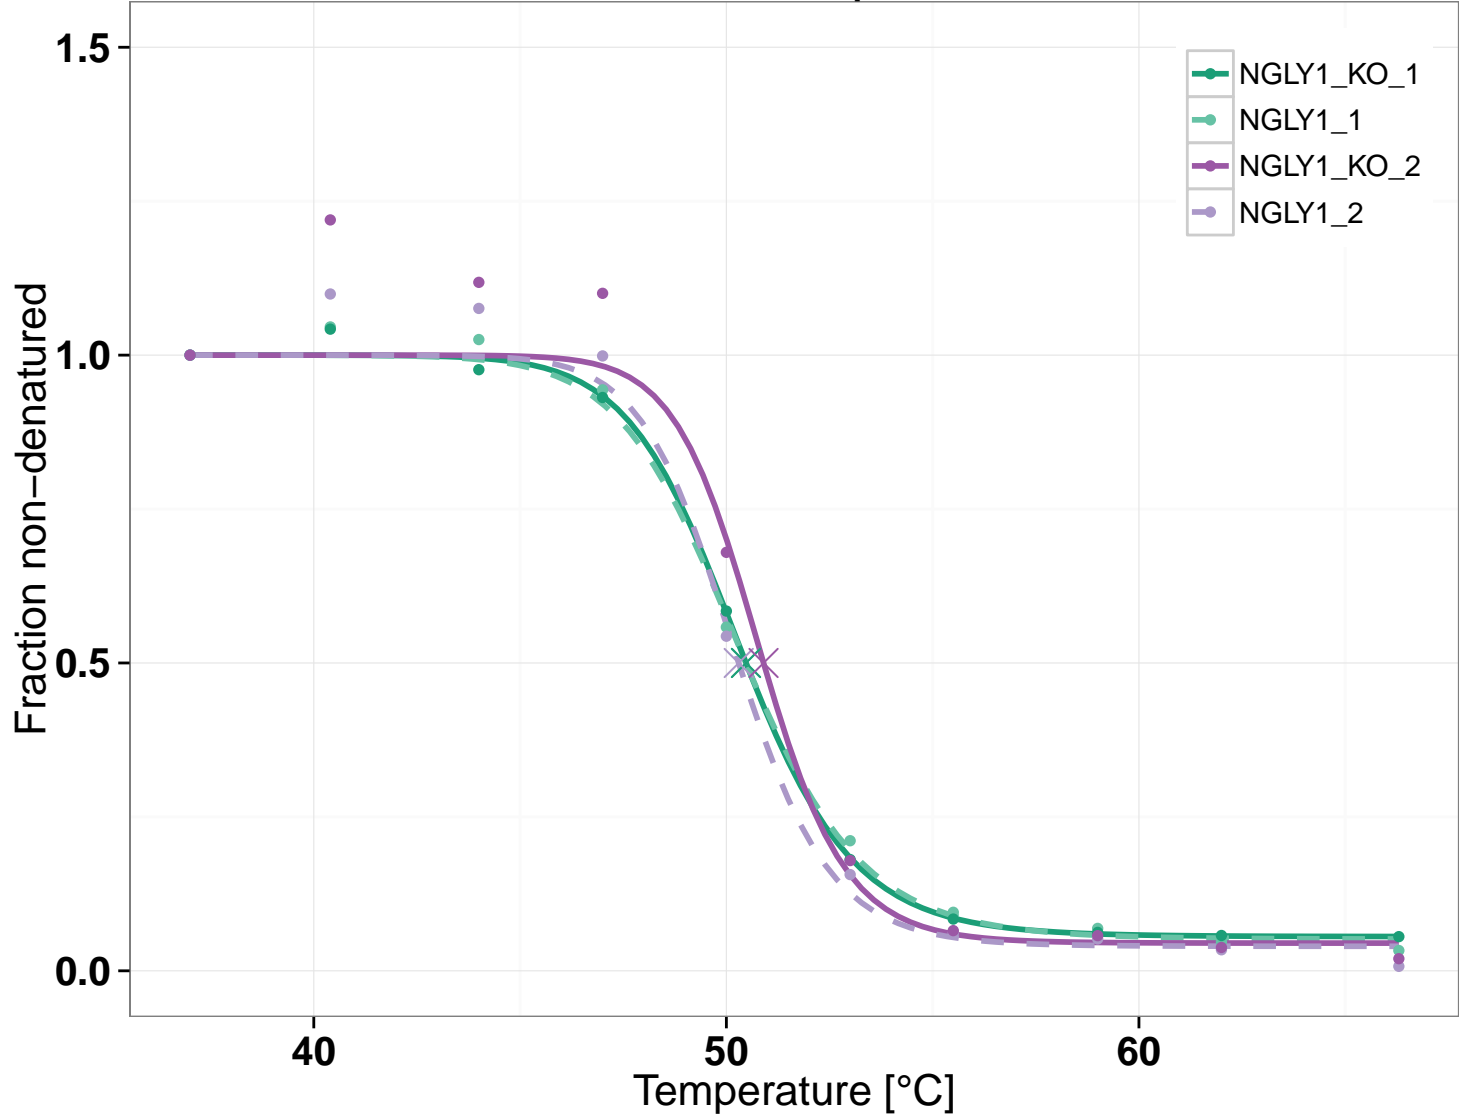

|            | meltPoint | slope | plateau | R2   |
|------------|-----------|-------|---------|------|
| NGLY1_KO_1 | 50.48     | -0.17 | 0.06    | 1    |
| NGLY1_1    | 50.47     | -0.16 | 0.05    | 1    |
| NGLY1_KO_2 | 50.9      | -0.23 | 0.04    | 0.97 |
| NGLY1_2    | 50.3      | -0.21 | 0.04    | 0.99 |

Supplement: Supplementary file 6139 [file 1]

# IPI00003562.1|MED7

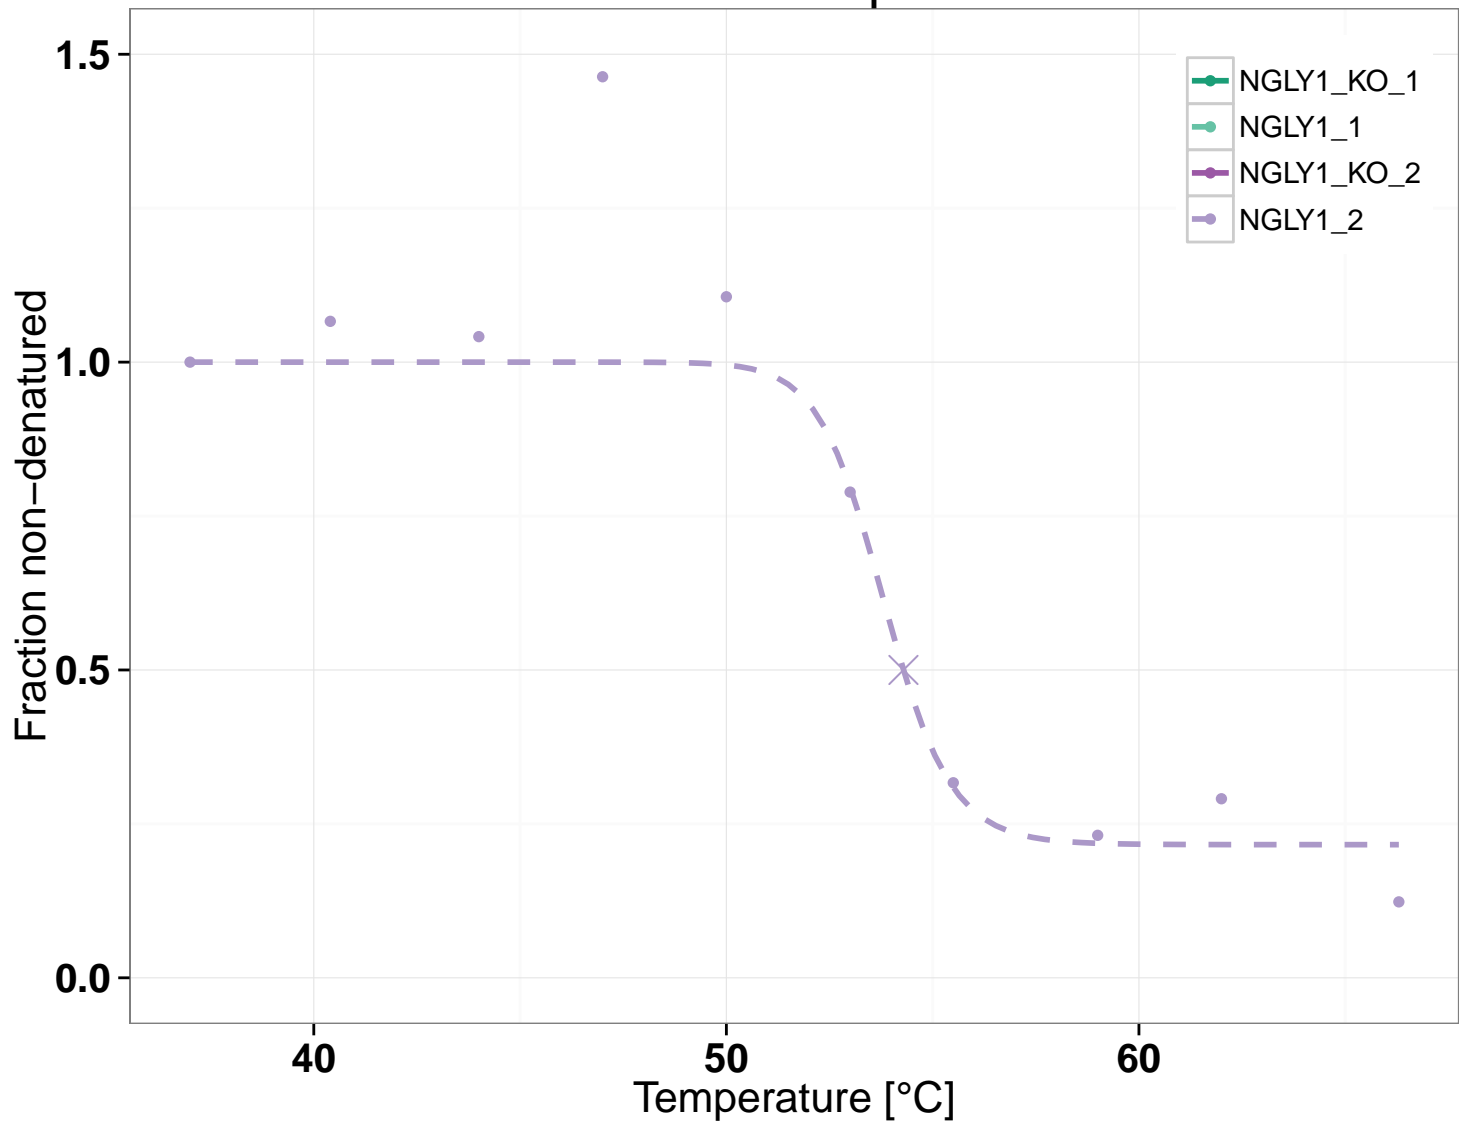

|            | meltPoint | slope | plateau | R2   |
|------------|-----------|-------|---------|------|
| NGLY1_KO_1 | -         | -     | -       | -    |
| NGLY1_1    | -         | -     | -       | -    |
| NGLY1_KO_2 | -         | -     | -       | -    |
| NGLY1_2    | 54.29     | -0.24 | 0.22    | 0.87 |

Supplement: Supplementary file 6140 [file 1]

# IPI00399158.4|RCCD1

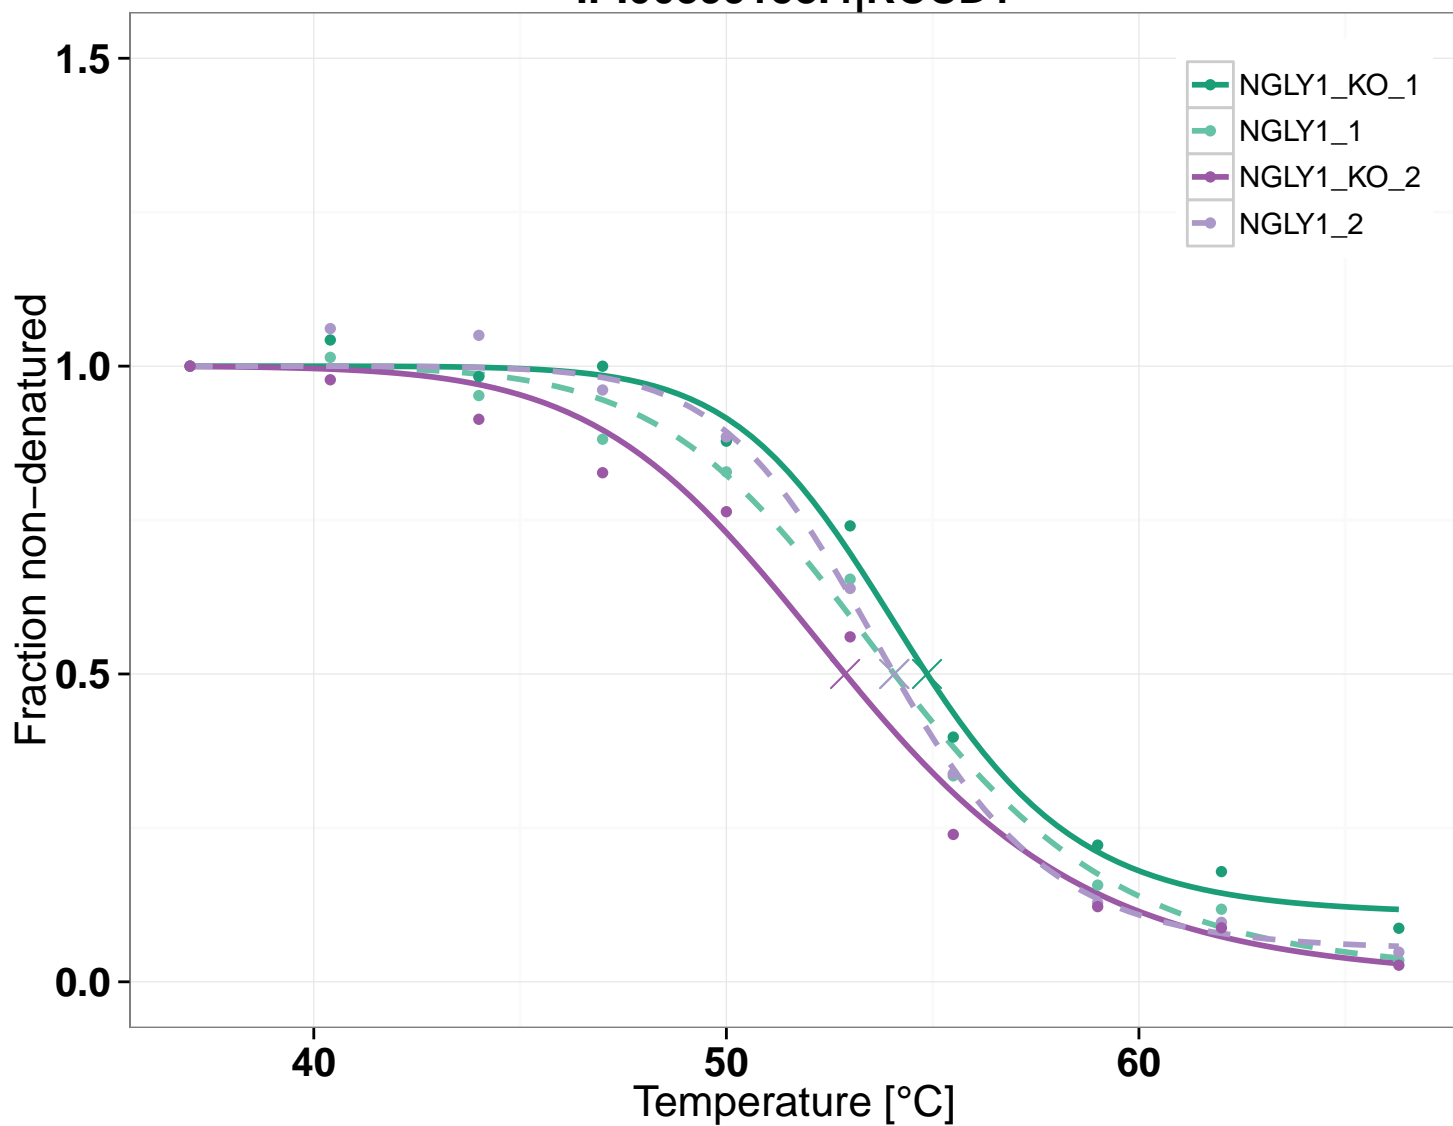

|            | meltPoint | slope  | plateau | R2   |
|------------|-----------|--------|---------|------|
| NGLY1_KO_1 | 54.86     | -0.11  | 0.11    | 0.99 |
| NGLY1_1    | 54.07     | -0.088 | 0.01    | 0.99 |
| NGLY1_KO_2 | 52.88     | -0.083 | 0       | 0.99 |
| NGLY1_2    | 54.07     | -0.12  | 0.05    | 1    |

Supplement: Supplementary file 6141 [file 1]

IPI00640603.2|RALGDS

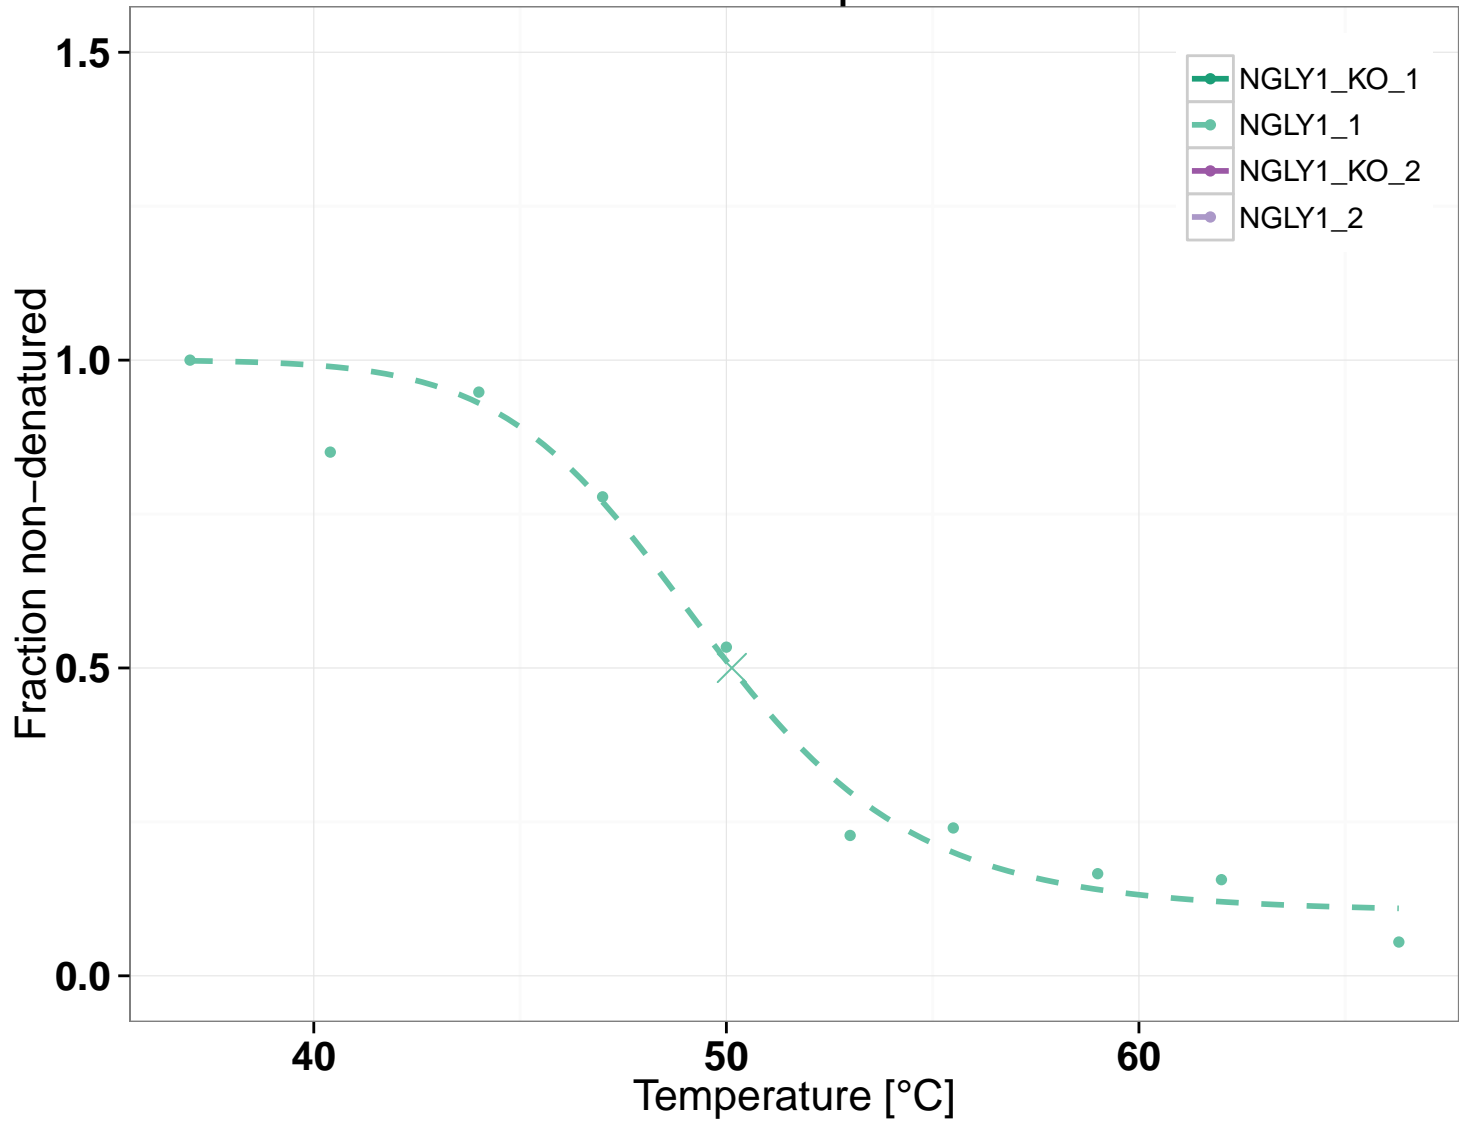

|            | meltPoint | slope | plateau | R2   |
|------------|-----------|-------|---------|------|
| NGLY1_KO_1 | –         | –     | –       | –    |
| NGLY1_1    | 50.13     | –0.09 | 0.1     | 0.97 |
| NGLY1_KO_2 | –         | –     | –       | –    |
| NGLY1_2    | –         | –     | –       | –    |

Supplement: Supplementary file 6142 [file 1]

IPI00101267.4|C19ORF60

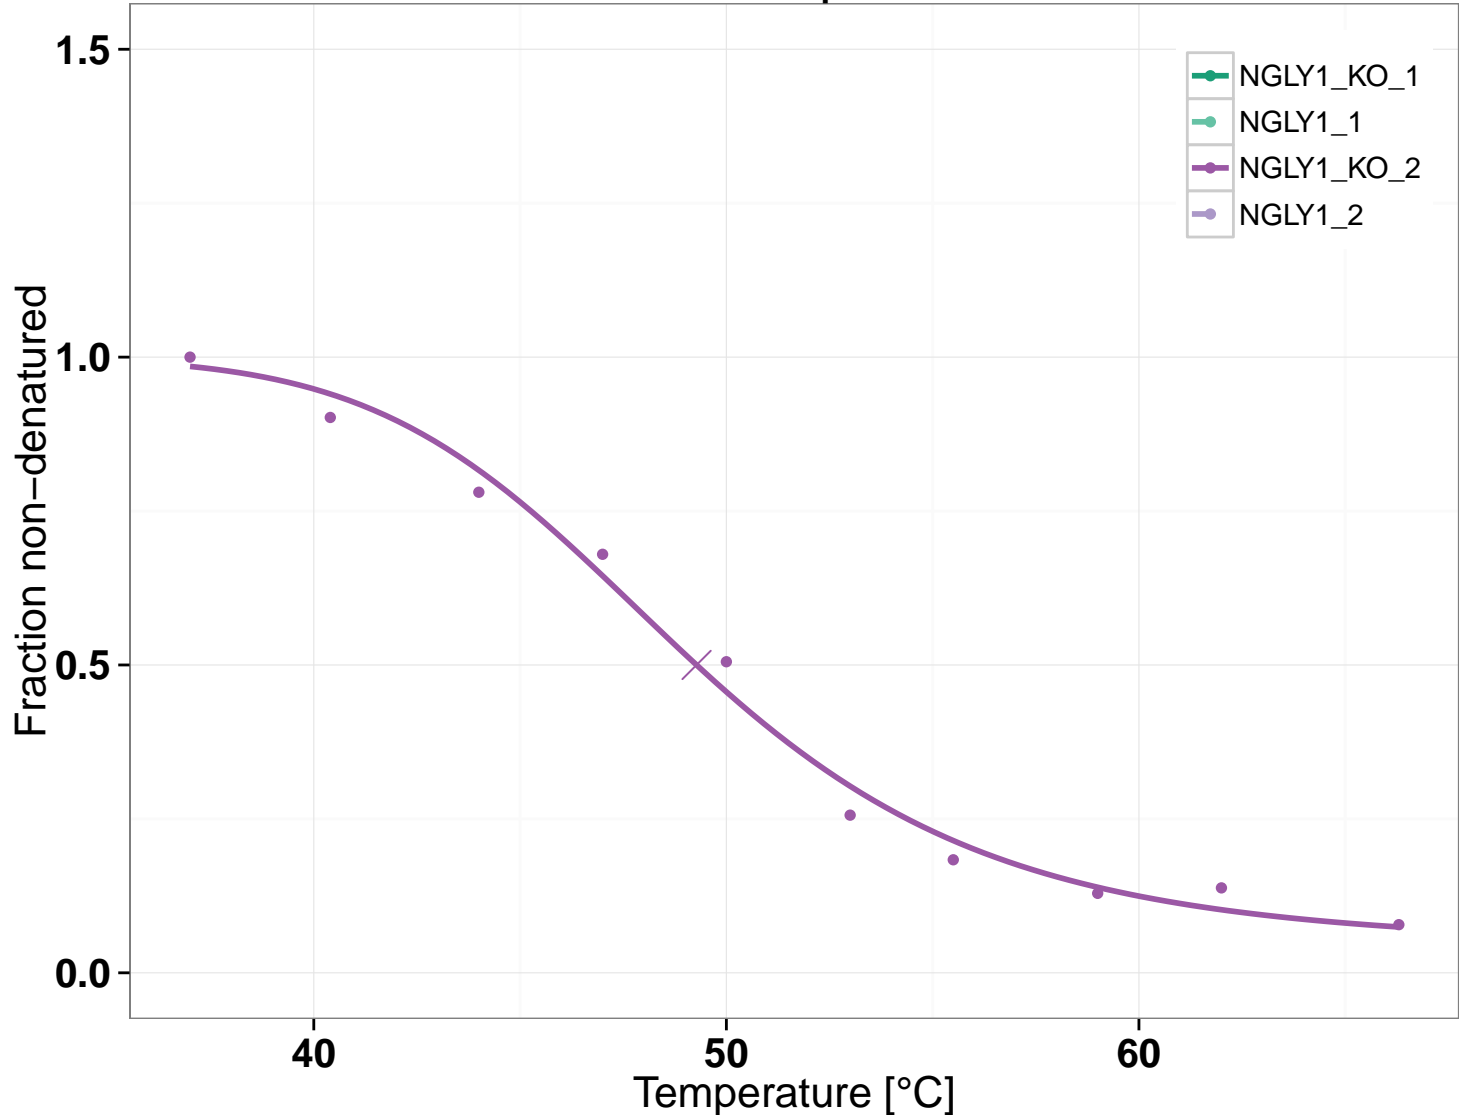

|            | meltPoint | slope  | plateau | R2   |
|------------|-----------|--------|---------|------|
| NGLY1_KO_1 | —         | —      | —       | —    |
| NGLY1_1    | —         | —      | —       | —    |
| NGLY1_KO_2 | 49.28     | -0.064 | 0.04    | 0.99 |
| NGLY1_2    | —         | —      | —       | —    |

Supplement: Supplementary file 6143 [file 1]

IPI00012856.1|FOXO3

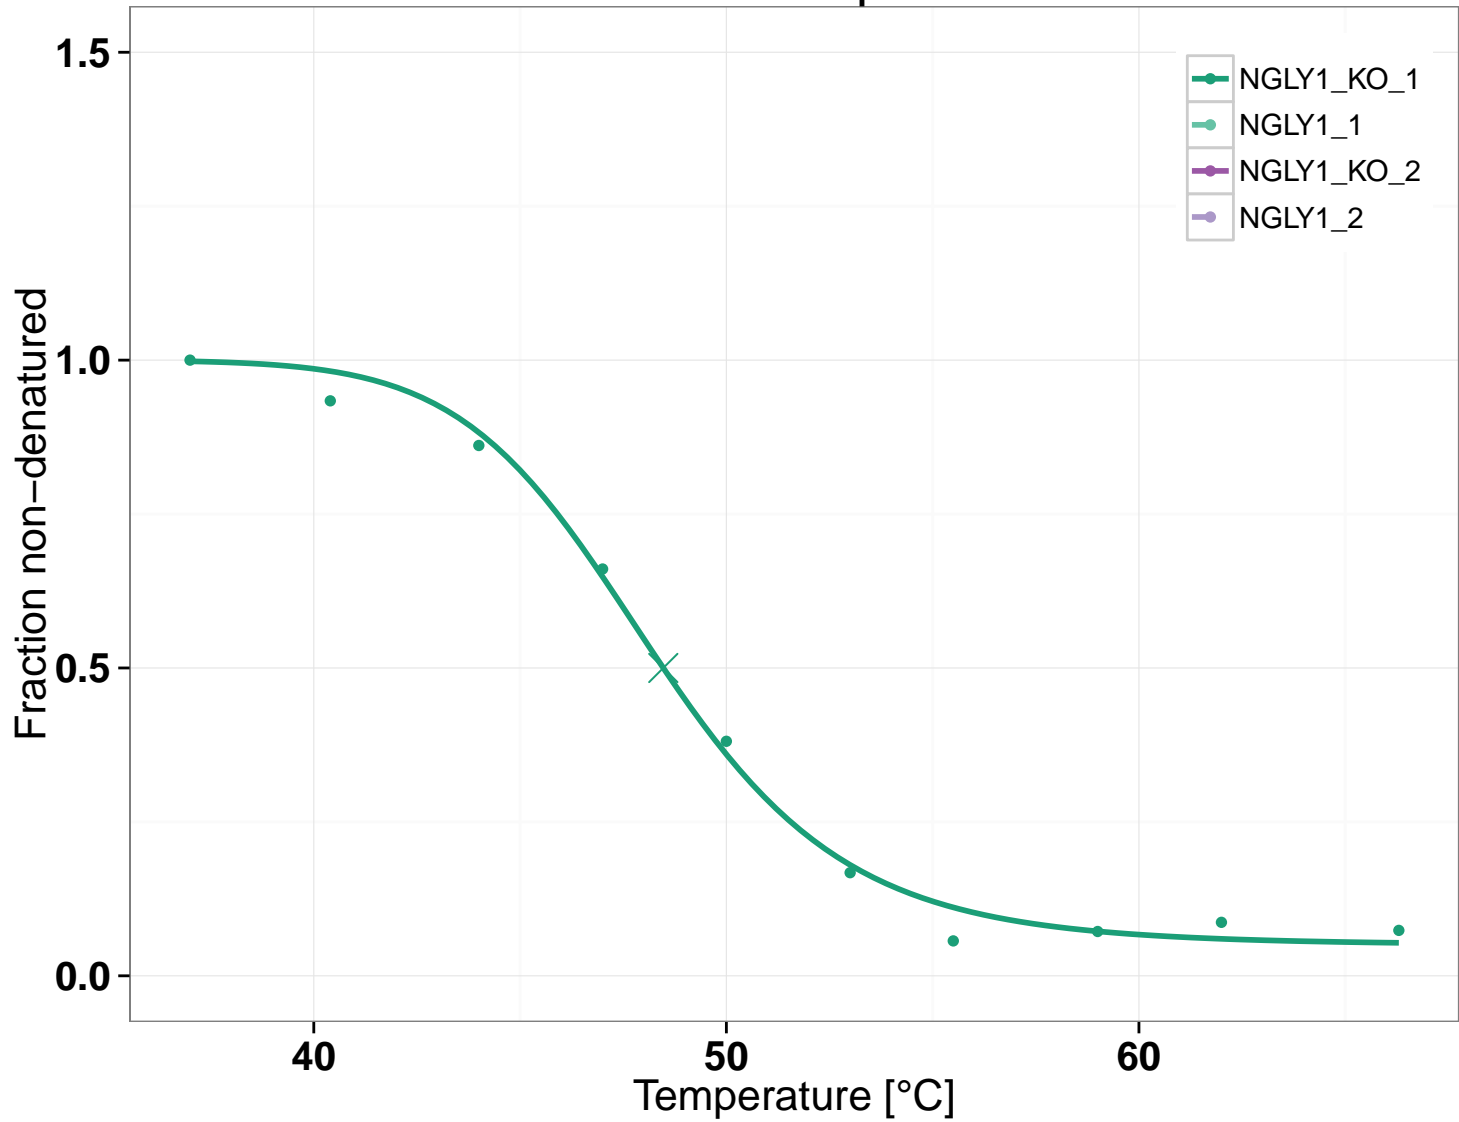

|            | meltPoint | slope | plateau | R2   |
|------------|-----------|-------|---------|------|
| NGLY1_KO_1 | 48.47     | -0.1  | 0.05    | 0.99 |
| NGLY1_1    | -         | -     | -       | -    |
| NGLY1_KO_2 | -         | -     | -       | -    |
| NGLY1_2    | -         | -     | -       | -    |

Supplement: Supplementary file 6144 [file 1]

IPI00455381.4|ZNF714

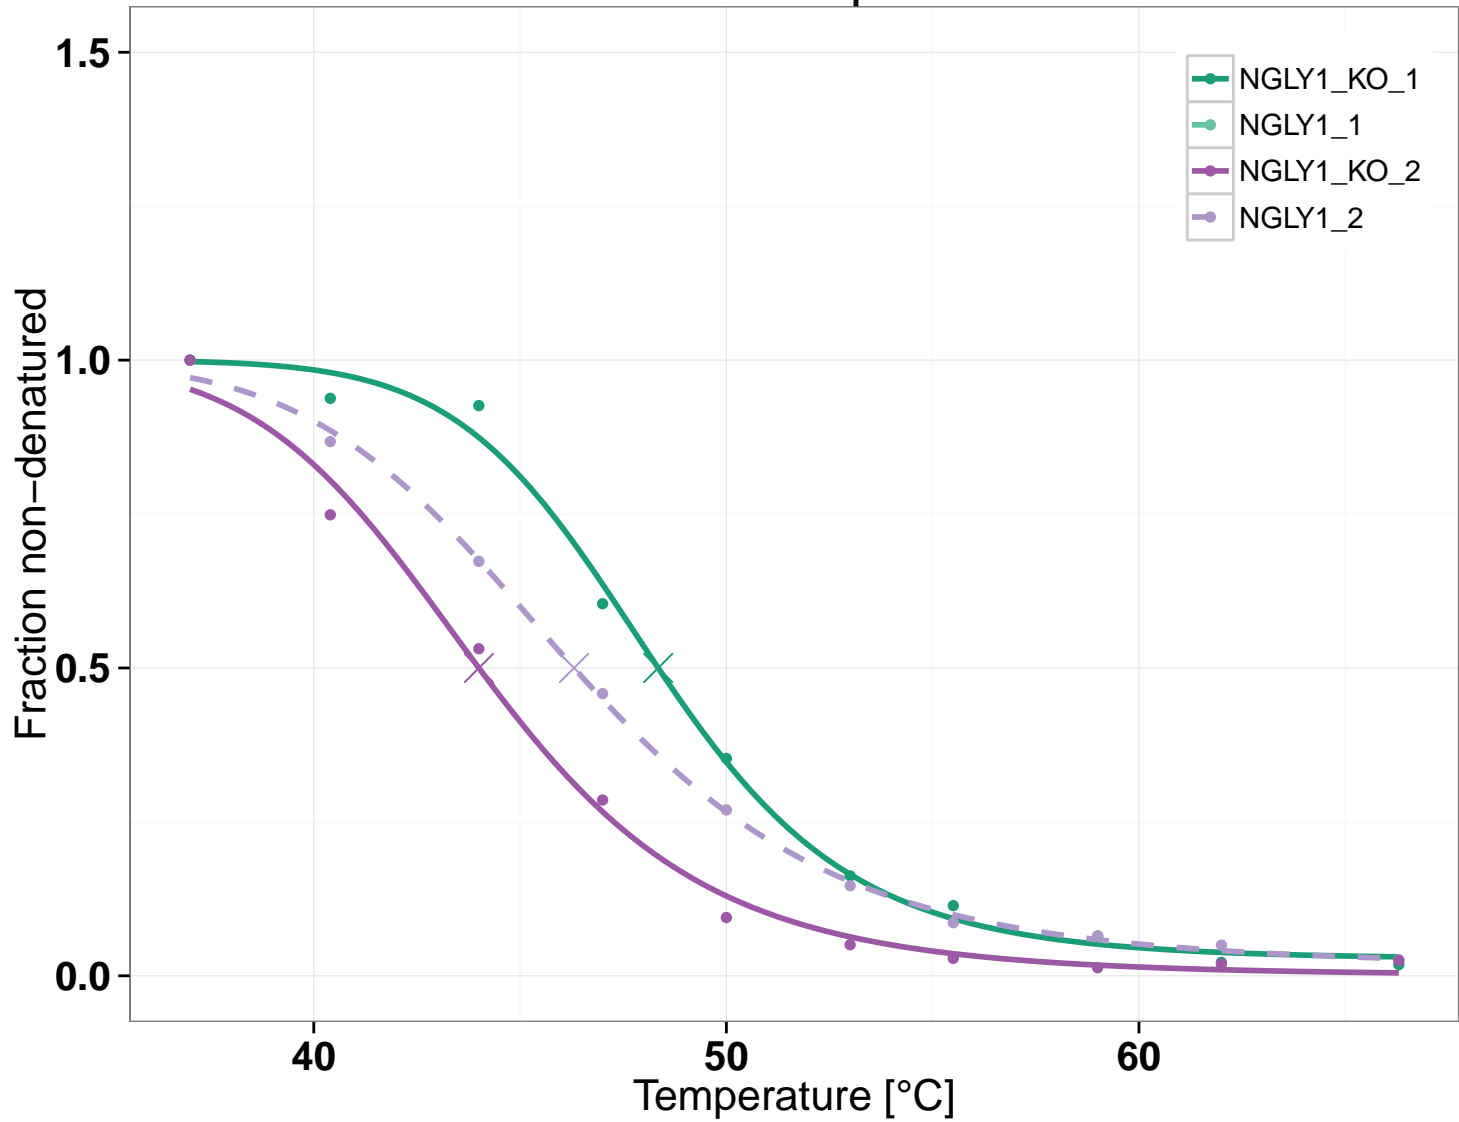

|            | meltPoint | slope  | plateau | R2   |
|------------|-----------|--------|---------|------|
| NGLY1_KO_1 | 48.35     | -0.1   | 0.03    | 1    |
| NGLY1_1    | -         | -      | -       | -    |
| NGLY1_KO_2 | 44        | -0.092 | 0       | 0.99 |
| NGLY1_2    | 46.31     | -0.077 | 0.01    | 1    |

Supplement: Supplementary file 6145 [file 1]

# IPI00028387.3|DDRGK1

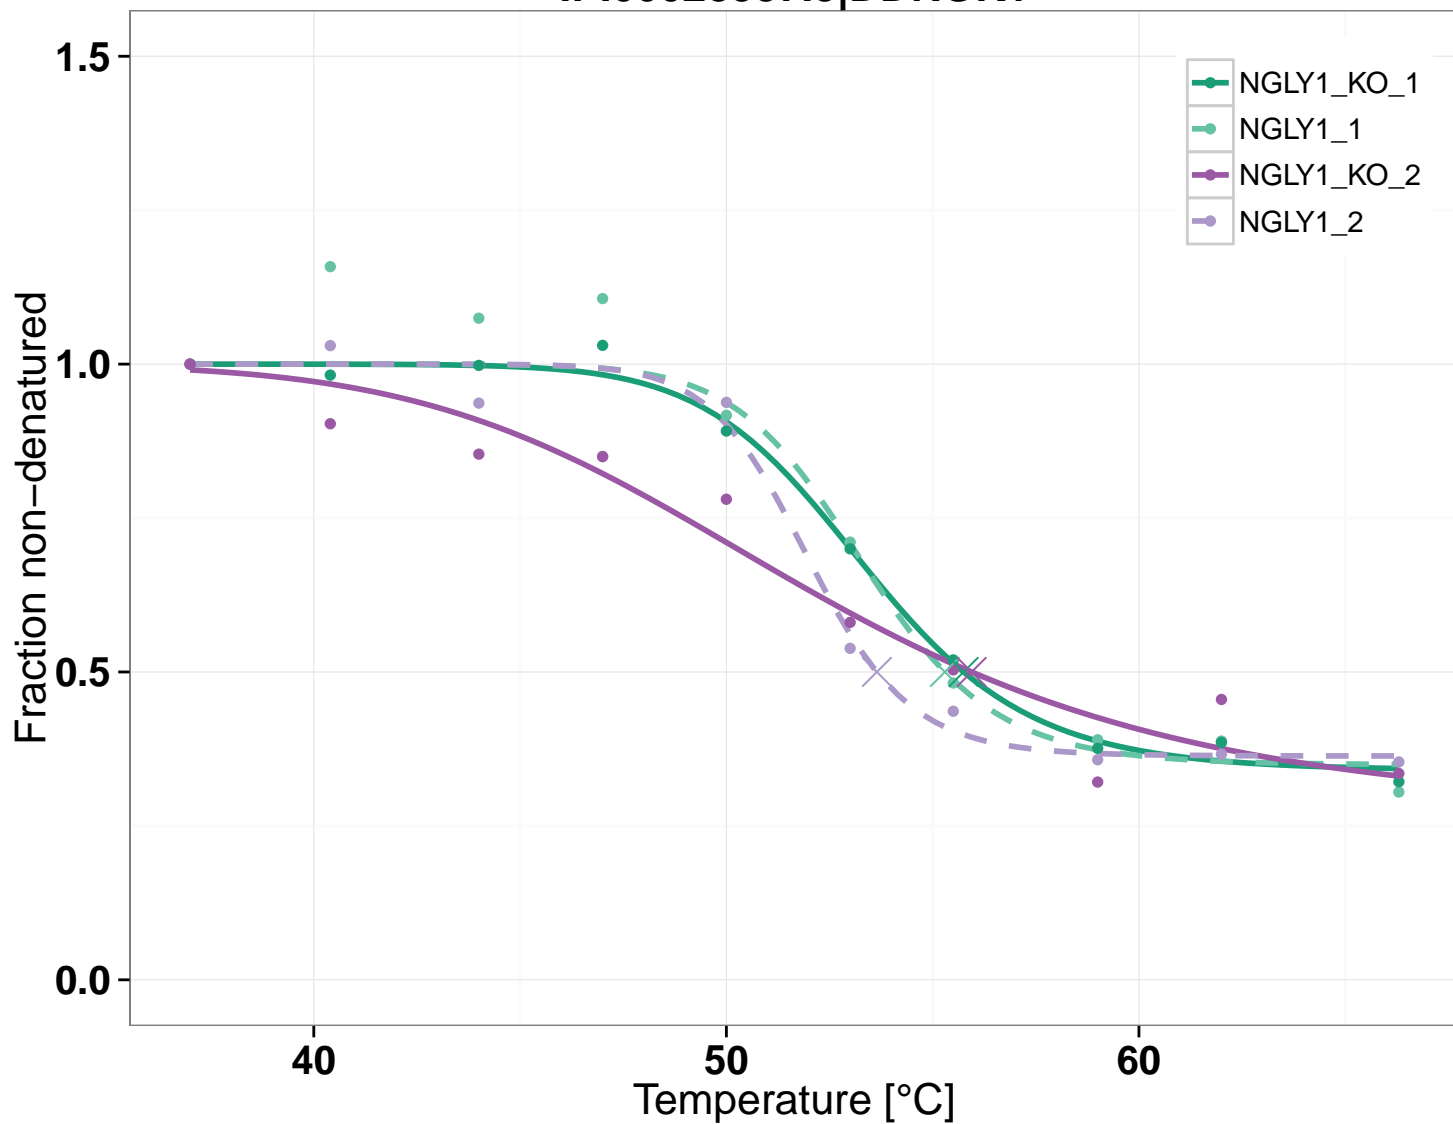

|            | meltPoint | slope  | plateau | R2   |
|------------|-----------|--------|---------|------|
| NGLY1_KO_1 | 55.75     | -0.083 | 0.34    | 0.99 |
| NGLY1_1    | 55.3      | -0.1   | 0.35    | 0.95 |
| NGLY1_KO_2 | 55.94     | -0.039 | 0.26    | 0.94 |
| NGLY1_2    | 53.65     | -0.13  | 0.36    | 0.96 |

Supplement: Supplementary file 6146 [file 1]

# IPI00871780.1|RBM12B

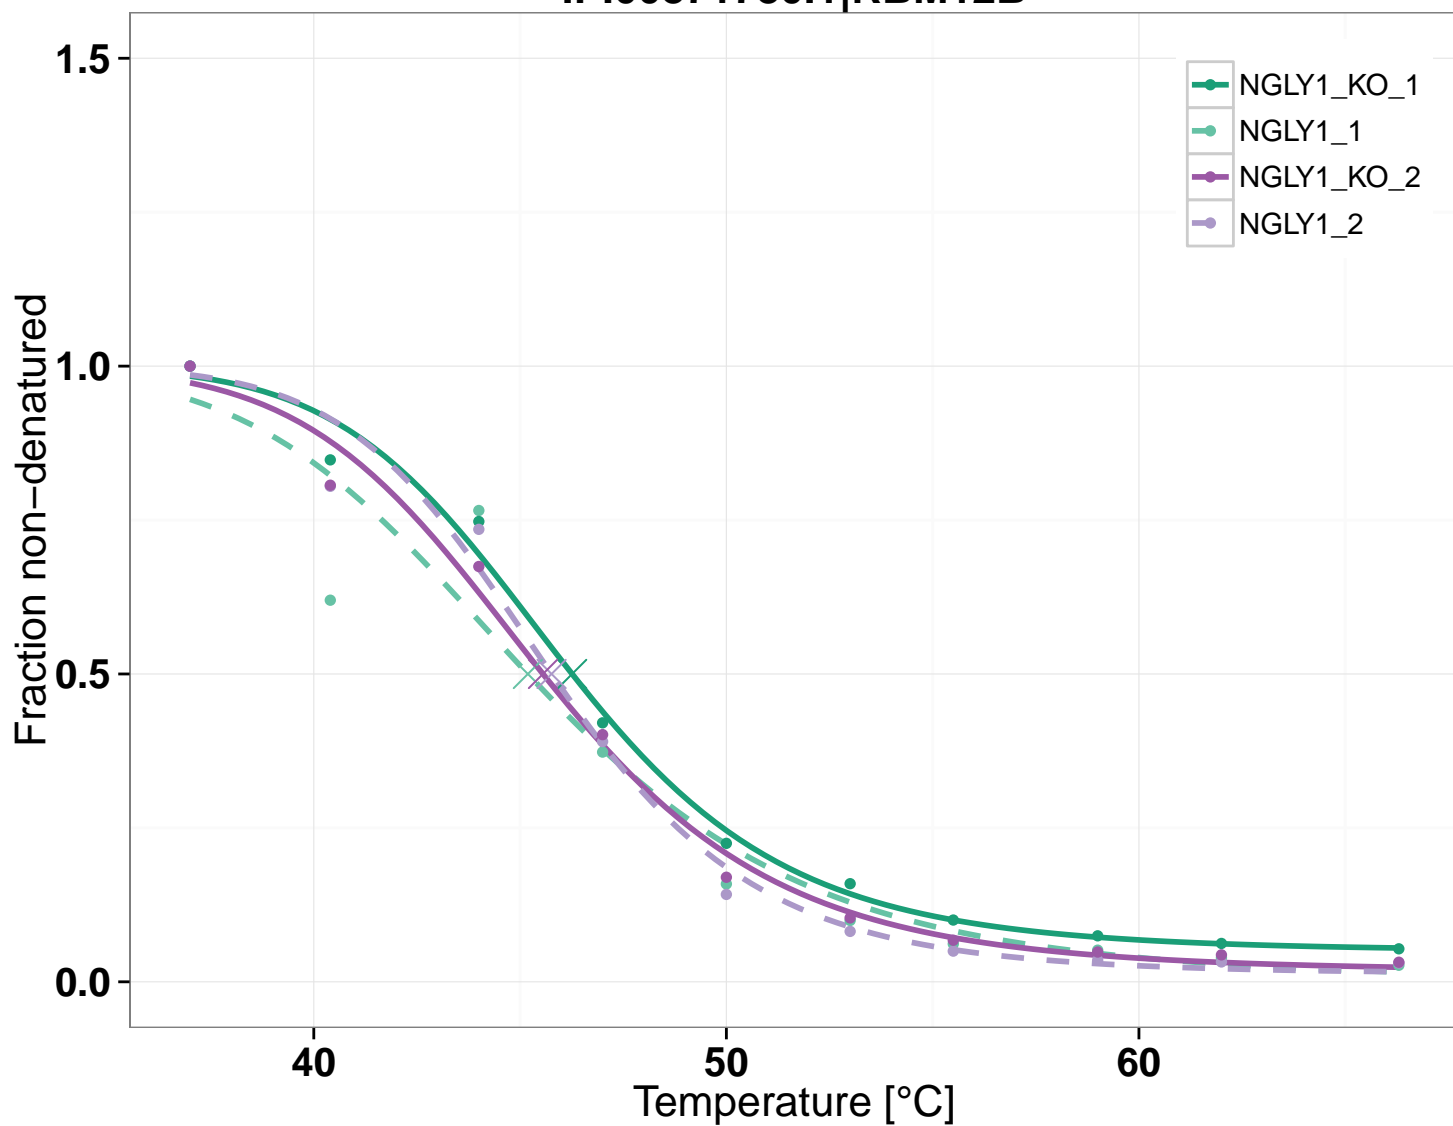

|            | meltPoint | slope  | plateau | R2   |
|------------|-----------|--------|---------|------|
| NGLY1_KO_1 | 46.26     | -0.088 | 0.05    | 0.99 |
| NGLY1_1    | 45.19     | -0.073 | 0       | 0.93 |
| NGLY1_KO_2 | 45.55     | -0.086 | 0.02    | 0.99 |
| NGLY1_2    | 45.76     | -0.098 | 0.01    | 0.99 |

Supplement: Supplementary file 6147 [file 1]

IPI00257239.1|B3GNT2

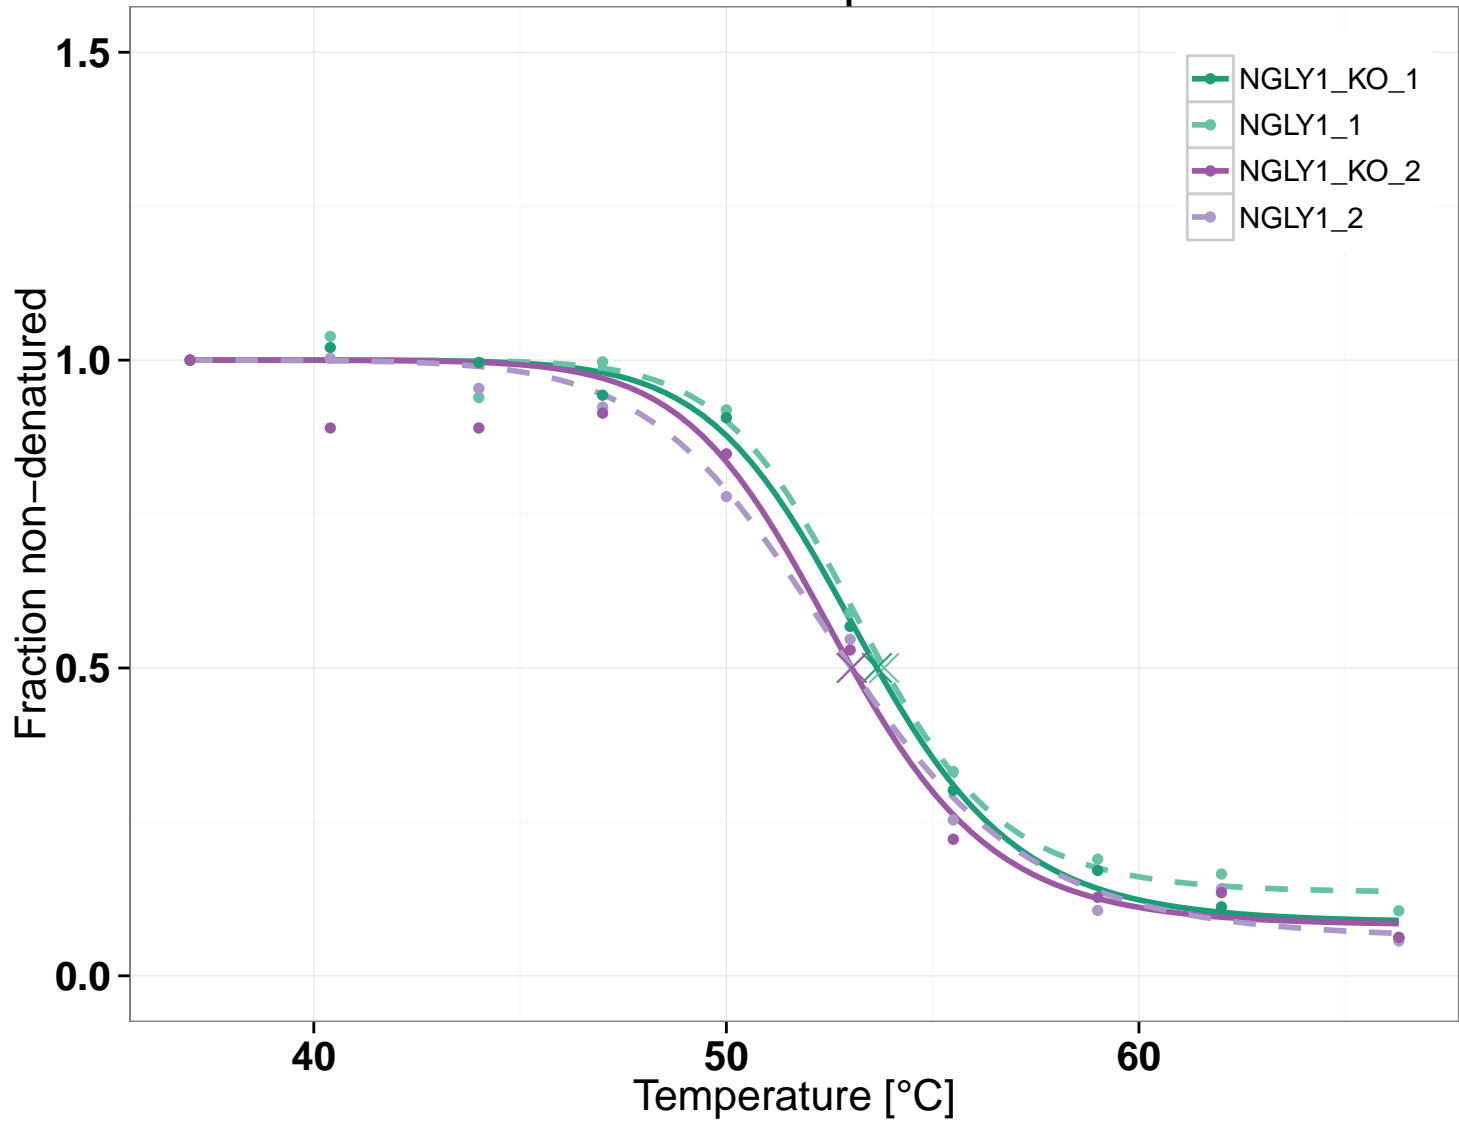

|            | meltPoint | slope | plateau | R2   |
|------------|-----------|-------|---------|------|
| NGLY1_KO_1 | 53.65     | -0.12 | 0.09    | 1    |
| NGLY1_1    | 53.82     | -0.13 | 0.14    | 0.99 |
| NGLY1_KO_2 | 53.04     | -0.12 | 0.08    | 0.98 |
| NGLY1_2    | 53.03     | -0.1  | 0.06    | 0.99 |

Supplement: Supplementary file 6148 [file 1]

IPI00409607.3|CAMSAP1L1

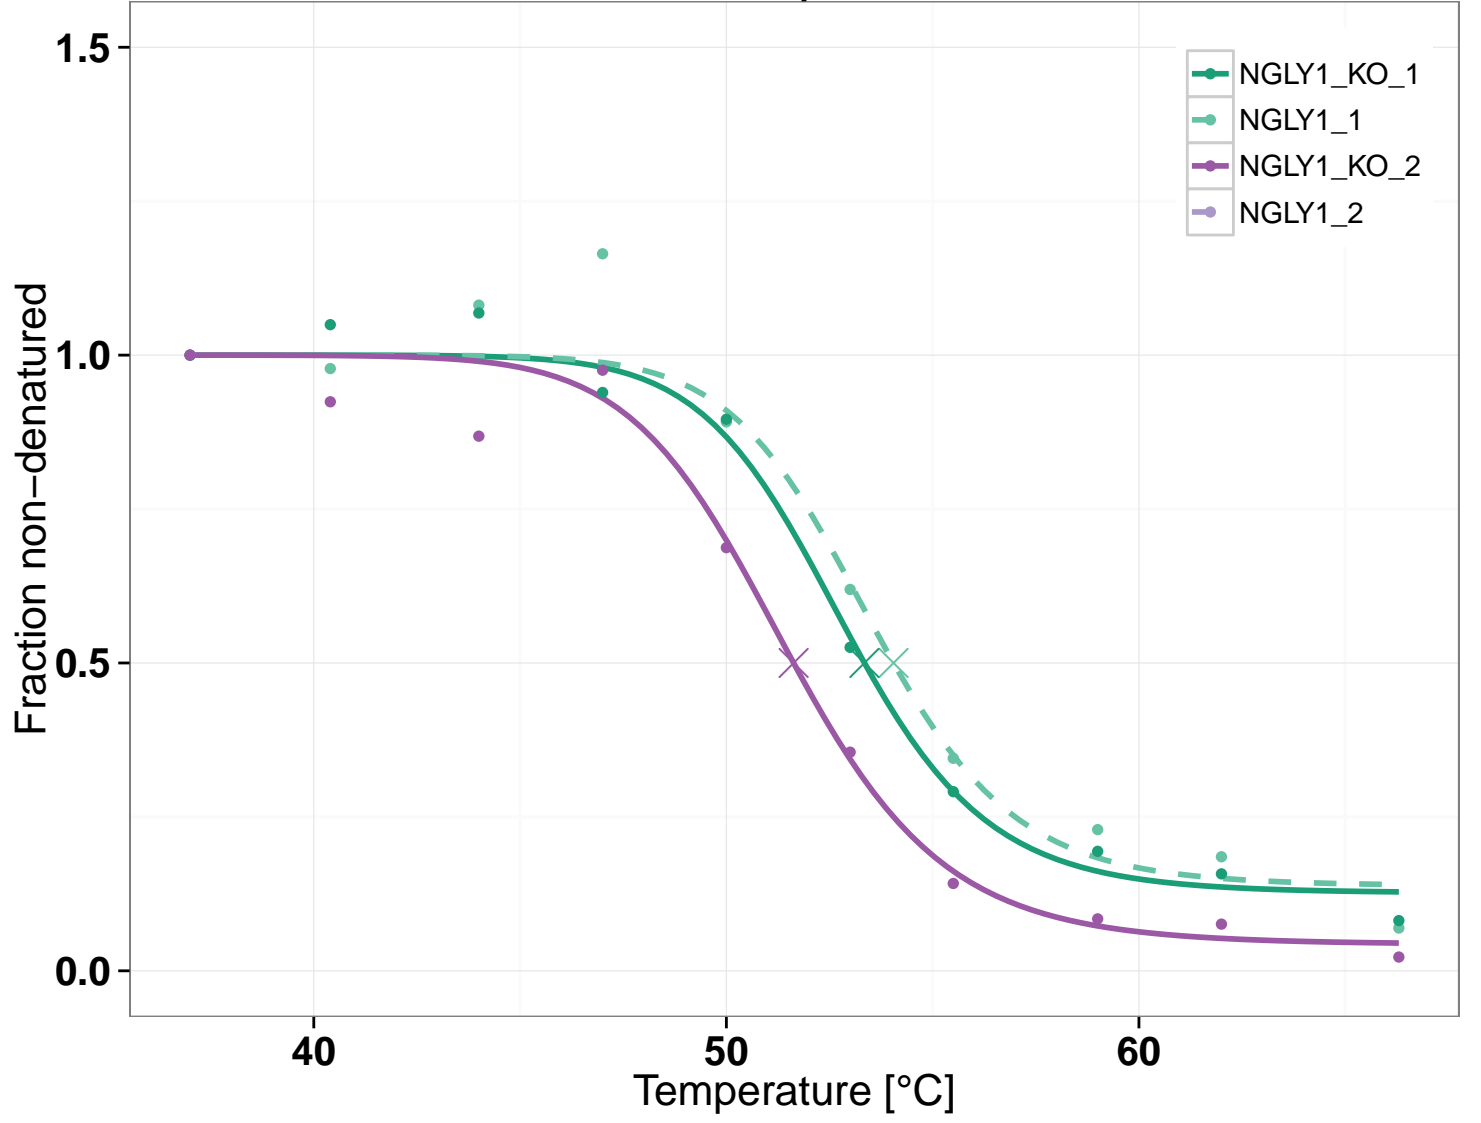

|            | meltPoint | slope | plateau | R2   |
|------------|-----------|-------|---------|------|
| NGLY1_KO_1 | 53.35     | -0.13 | 0.13    | 0.99 |
| NGLY1_1    | 54.05     | -0.12 | 0.14    | 0.97 |
| NGLY1_KO_2 | 51.63     | -0.13 | 0.04    | 0.98 |
| NGLY1_2    | -         | -     | -       | -    |

Supplement: Supplementary file 6149 [file 1]

IPI00069507.1|FBXO21

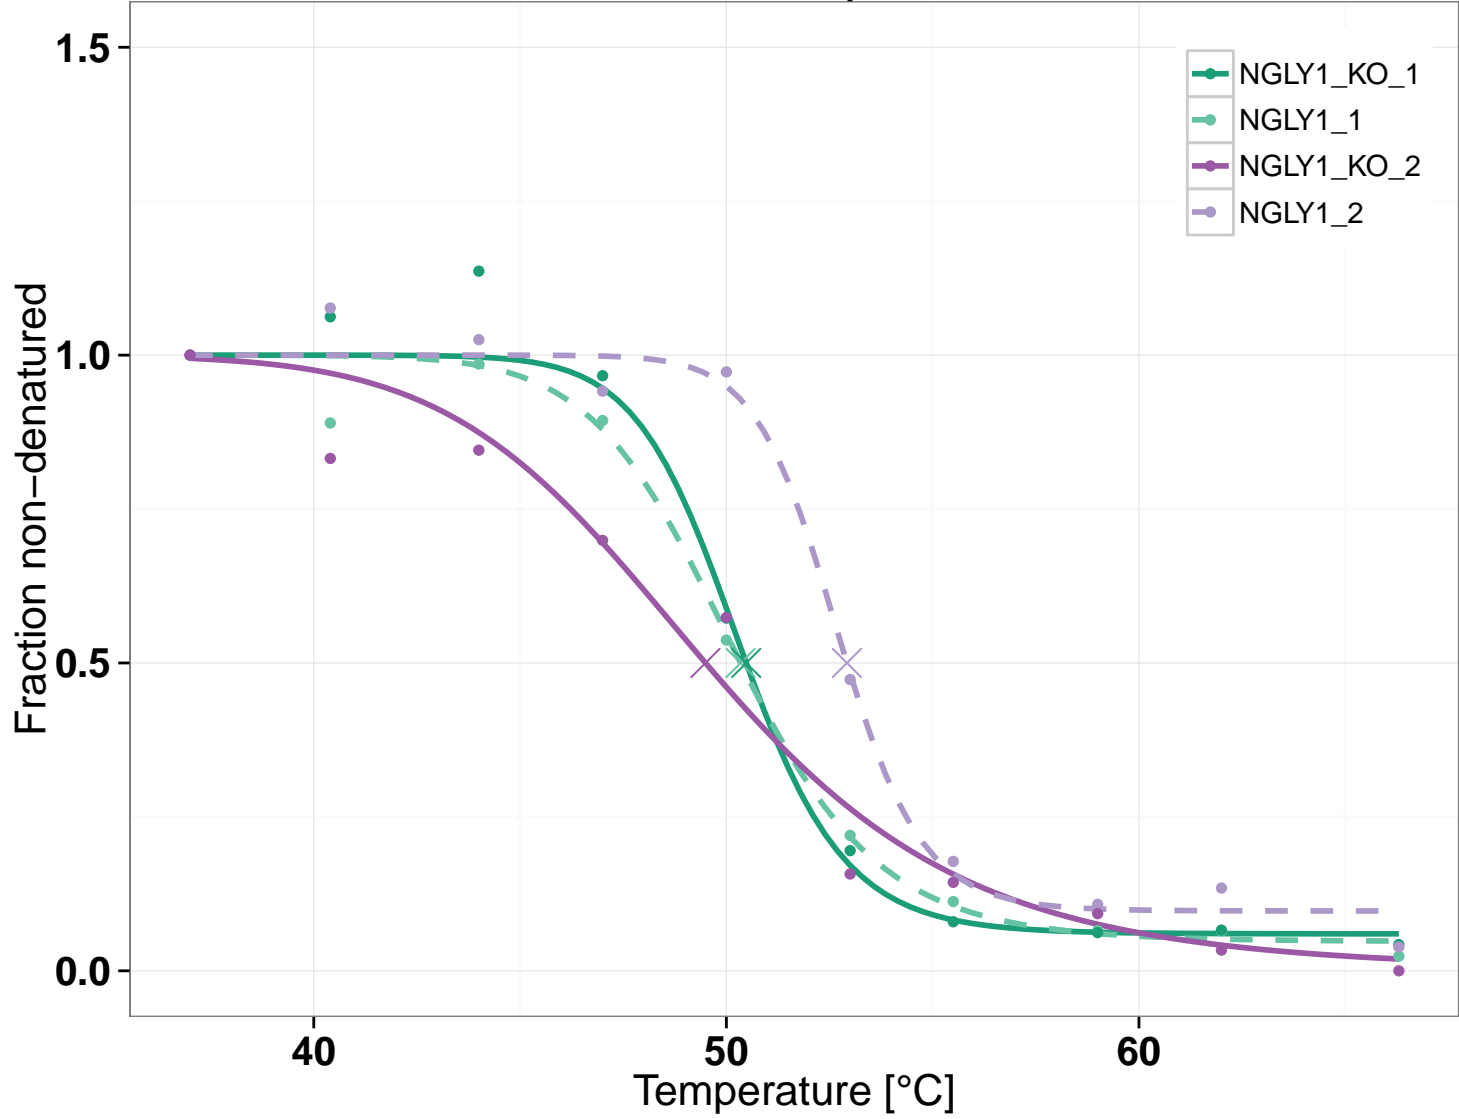

|            | meltPoint | slope | plateau | R2   |
|------------|-----------|-------|---------|------|
| NGLY1_KO_1 | 50.48     | -0.19 | 0.06    | 0.99 |
| NGLY1_1    | 50.35     | -0.14 | 0.05    | 0.99 |
| NGLY1_KO_2 | 49.49     | -0.08 | 0       | 0.97 |
| NGLY1_2    | 52.92     | -0.22 | 0.1     | 0.99 |

Supplement: Supplementary file 6150 [file 1]

# IPI00396077.4|TOPORS

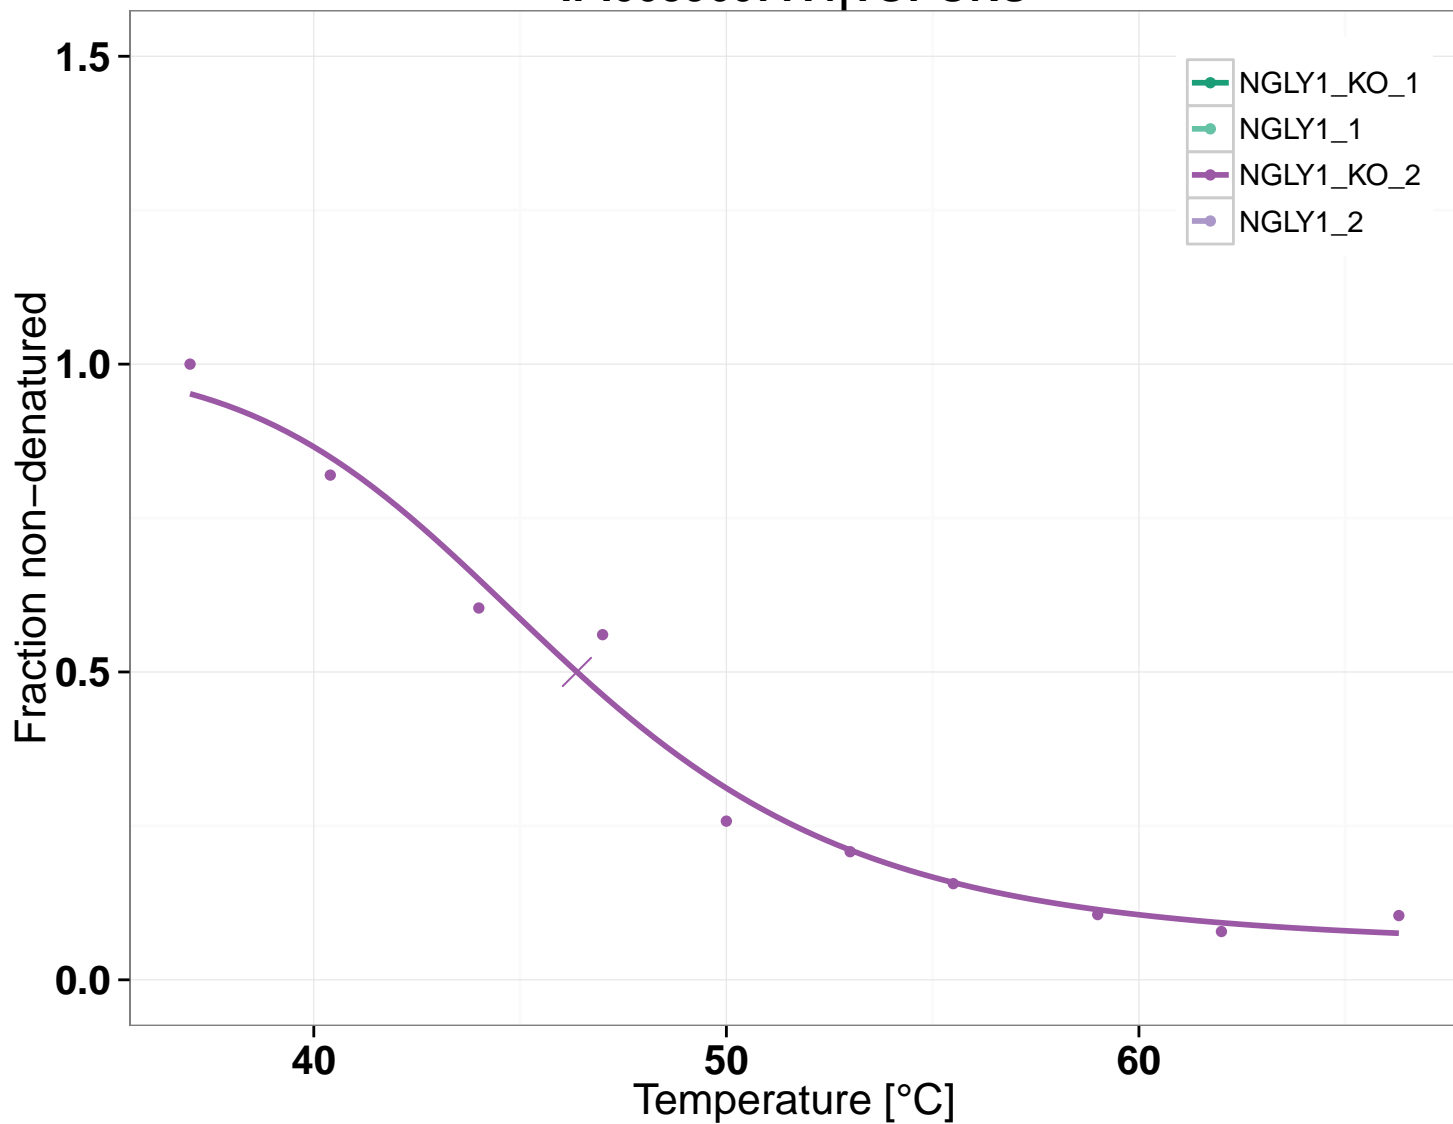

|            | meltPoint | slope  | plateau | R2   |
|------------|-----------|--------|---------|------|
| NGLY1_KO_1 | —         | —      | —       | —    |
| NGLY1_1    | —         | —      | —       | —    |
| NGLY1_KO_2 | 46.38     | -0.064 | 0.05    | 0.98 |
| NGLY1_2    | —         | —      | —       | —    |

Supplement: Supplementary file 6151 [file 1]

IPI00472207.2|ARL13B

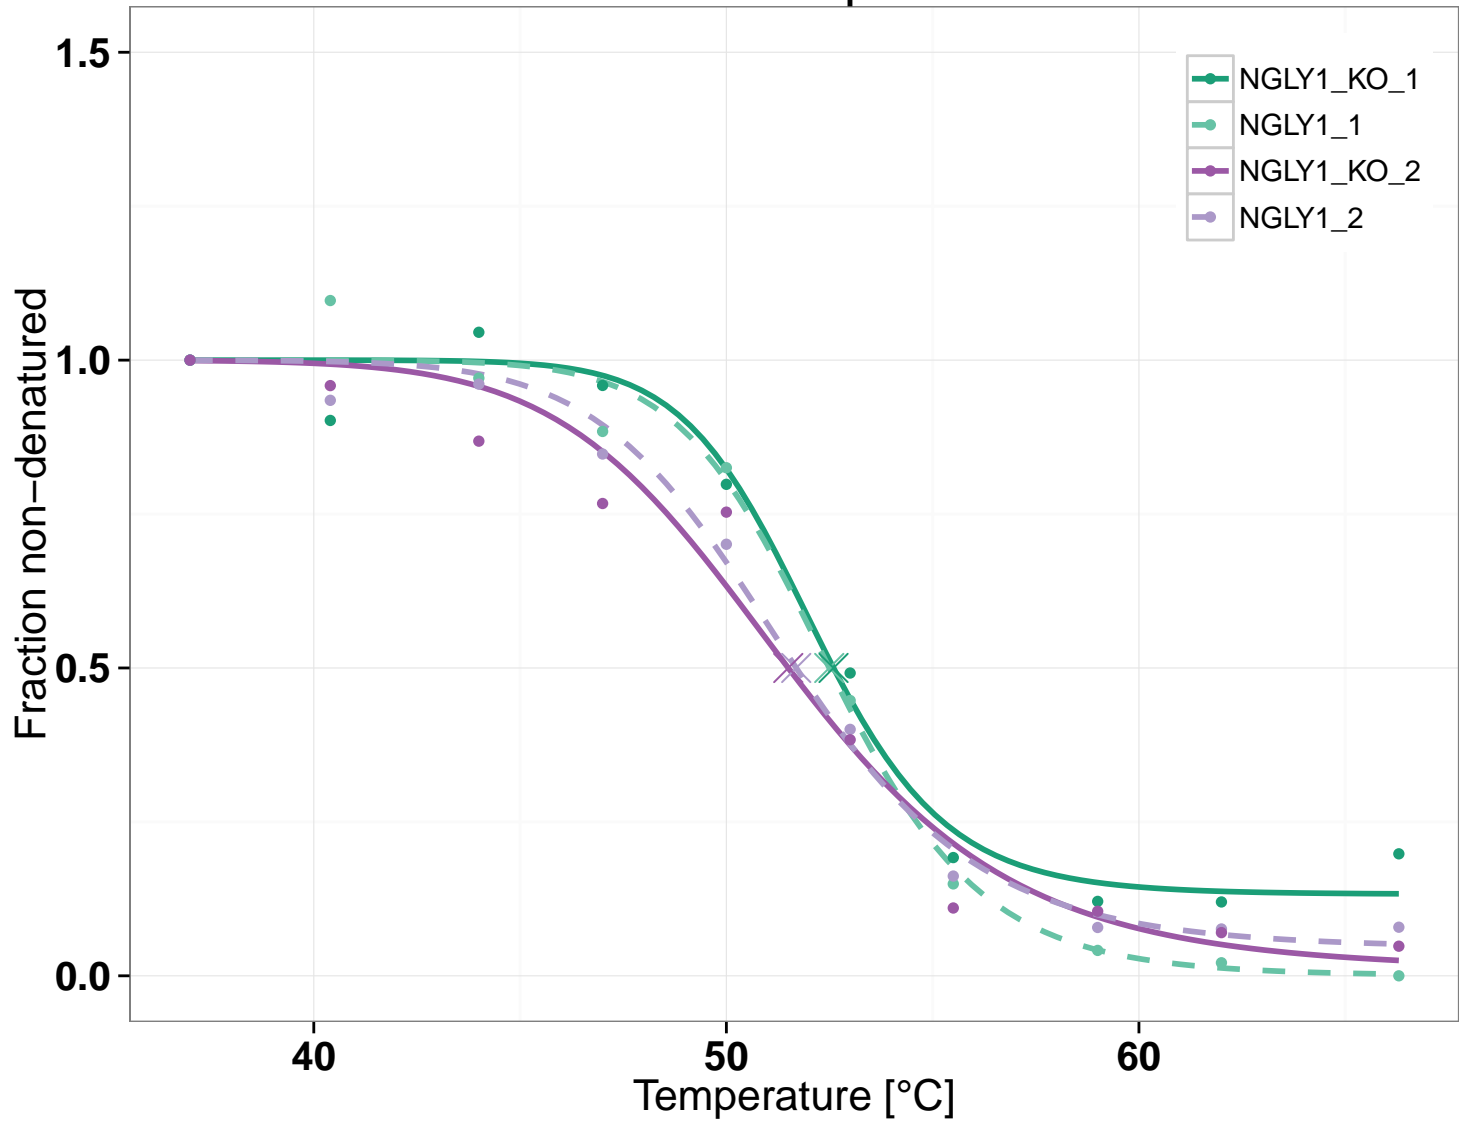

|            | meltPoint | slope  | plateau | R2   |
|------------|-----------|--------|---------|------|
| NGLY1_KO_1 | 52.6      | -0.14  | 0.13    | 0.98 |
| NGLY1_1    | 52.49     | -0.14  | 0       | 0.99 |
| NGLY1_KO_2 | 51.5      | -0.089 | 0.01    | 0.97 |
| NGLY1_2    | 51.69     | -0.1   | 0.04    | 0.99 |

Supplement: Supplementary file 6152 [file 1]

# IPI00010882.3|DFFA

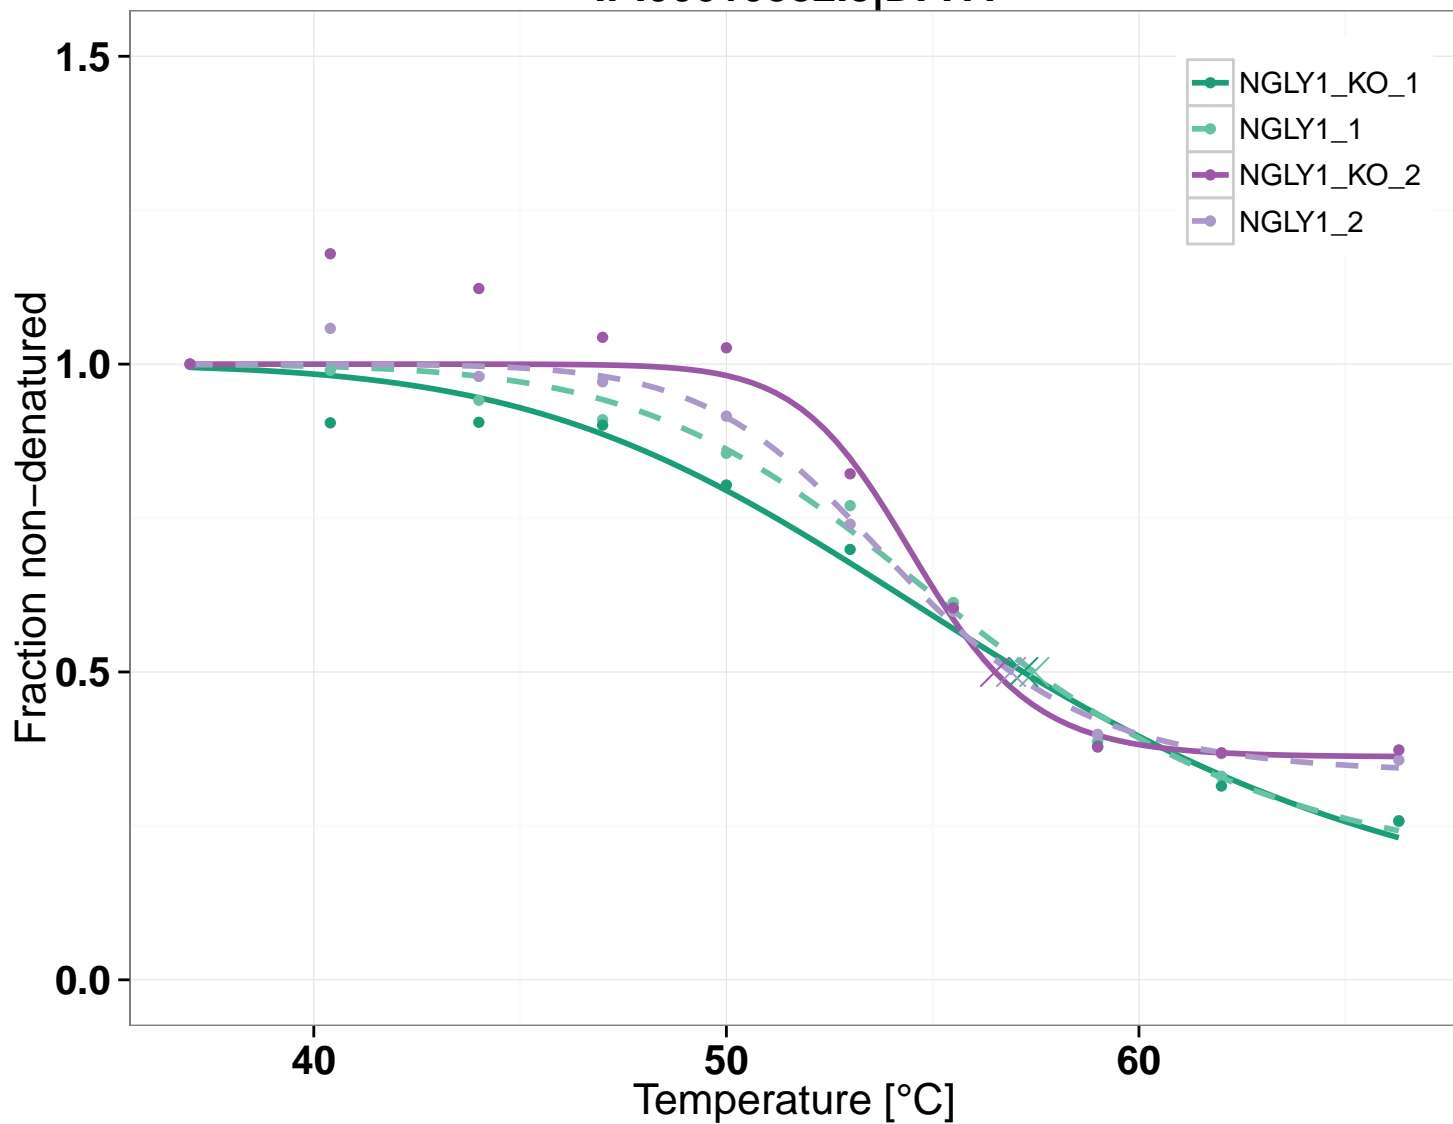

|            | meltPoint | slope  | plateau | R2   |
|------------|-----------|--------|---------|------|
| NGLY1_KO_1 | 57.2      | -0.043 | 0.04    | 0.98 |
| NGLY1_1    | 57.46     | -0.053 | 0.15    | 0.99 |
| NGLY1_KO_2 | 56.51     | -0.11  | 0.36    | 0.95 |
| NGLY1_2    | 56.9      | -0.071 | 0.33    | 0.99 |

Supplement: Supplementary file 6153 [file 1]

IPI00745613.2|EXOSC4

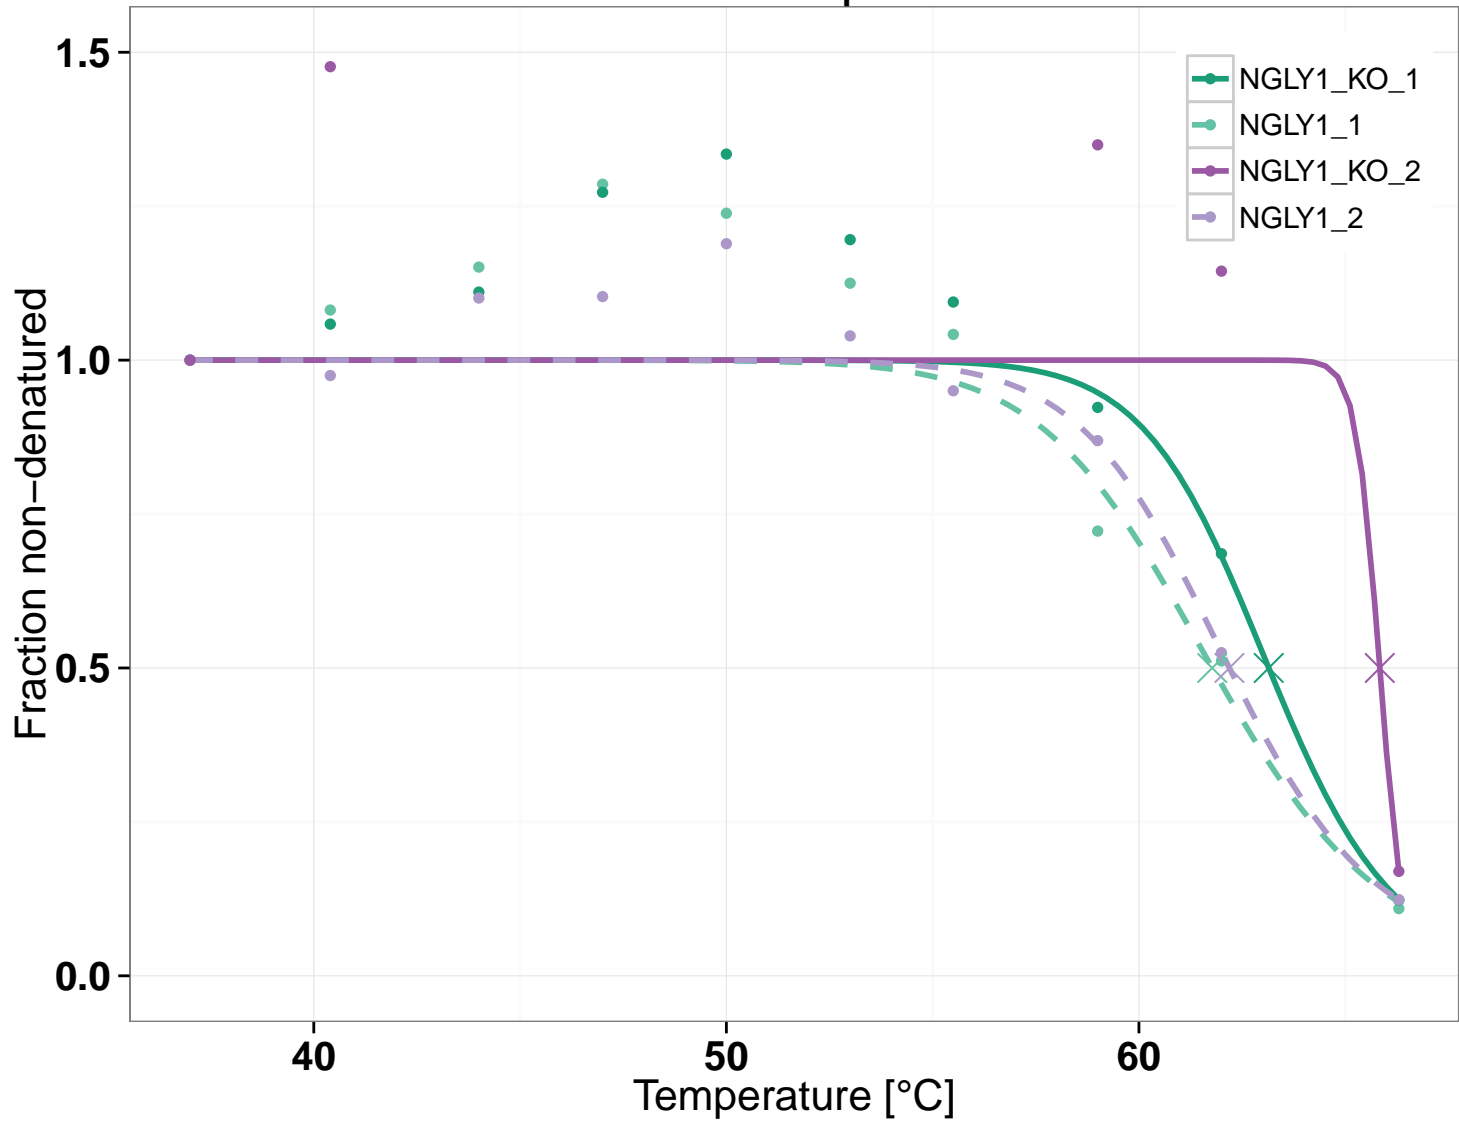

|            | meltPoint | slope | plateau | R2    |
|------------|-----------|-------|---------|-------|
| NGLY1_KO_1 | 63.15     | -0.16 | 0       | 0.78  |
| NGLY1_1    | 61.78     | -0.12 | 0       | 0.84  |
| NGLY1_KO_2 | 65.84     | -0.87 | 0       | -0.36 |
| NGLY1_2    | 62.19     | -0.14 | 0.03    | 0.94  |

Supplement: Supplementary file 6154 [file 1]

# IPI00791262.1|ICT1

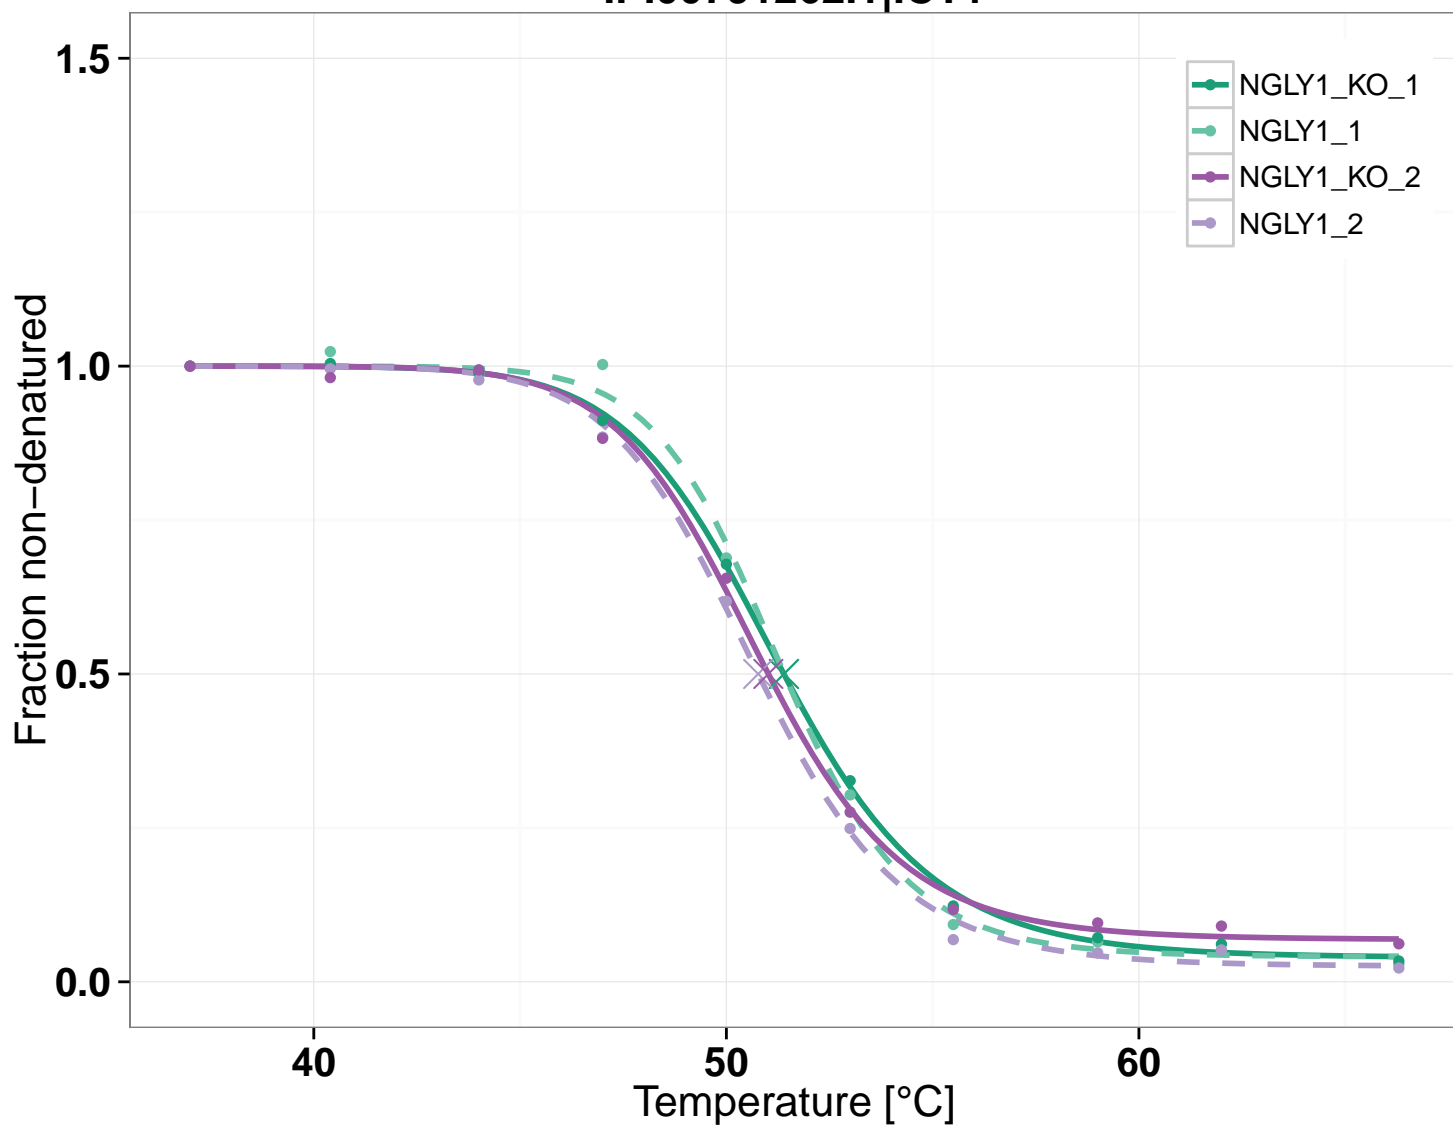

|            | meltPoint | slope | plateau | R2 |
|------------|-----------|-------|---------|----|
| NGLY1_KO_1 | 51.39     | -0.13 | 0.04    | 1  |
| NGLY1_1    | 51.4      | -0.16 | 0.04    | 1  |
| NGLY1_KO_2 | 51.02     | -0.13 | 0.07    | 1  |
| NGLY1_2    | 50.77     | -0.14 | 0.03    | 1  |

Supplement: Supplementary file 6155 [file 1]

# IPI00433284.2|GLCE

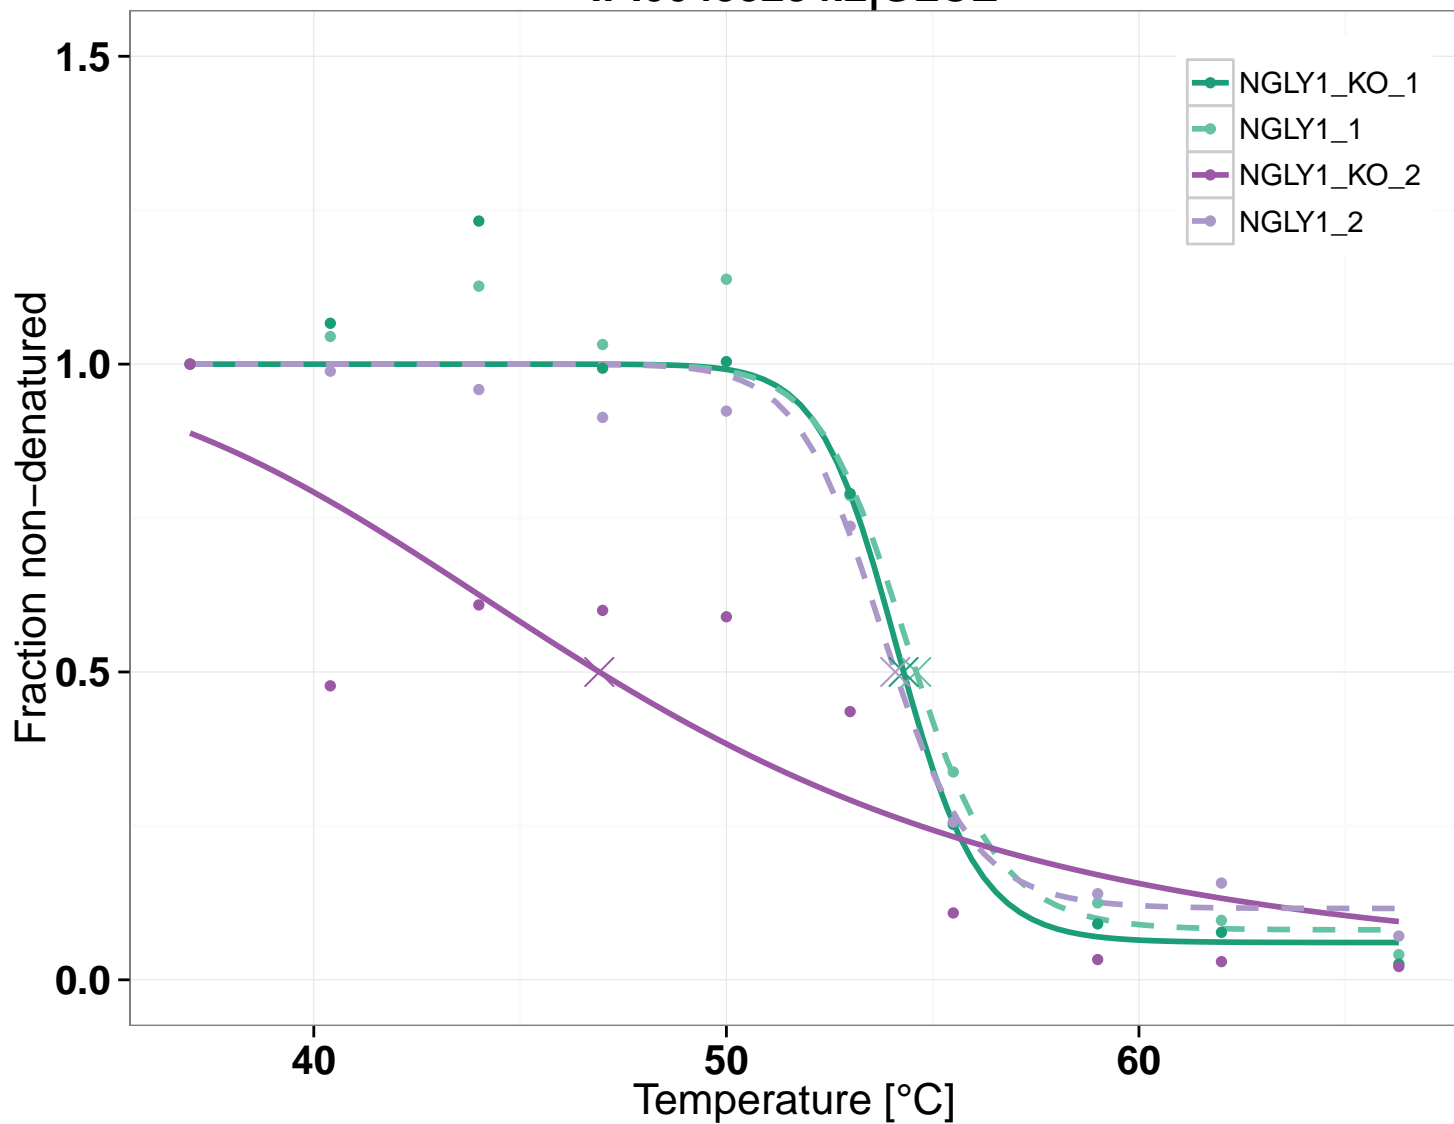

|            | meltPoint | slope  | plateau | R2   |
|------------|-----------|--------|---------|------|
| NGLY1_KO_1 | 54.3      | -0.24  | 0.06    | 0.97 |
| NGLY1_1    | 54.6      | -0.21  | 0.08    | 0.98 |
| NGLY1_KO_2 | 46.92     | -0.044 | 0       | 0.77 |
| NGLY1_2    | 54.09     | -0.21  | 0.12    | 0.99 |

Supplement: Supplementary file 6156 [file 1]

IPI00003827.1|PISD

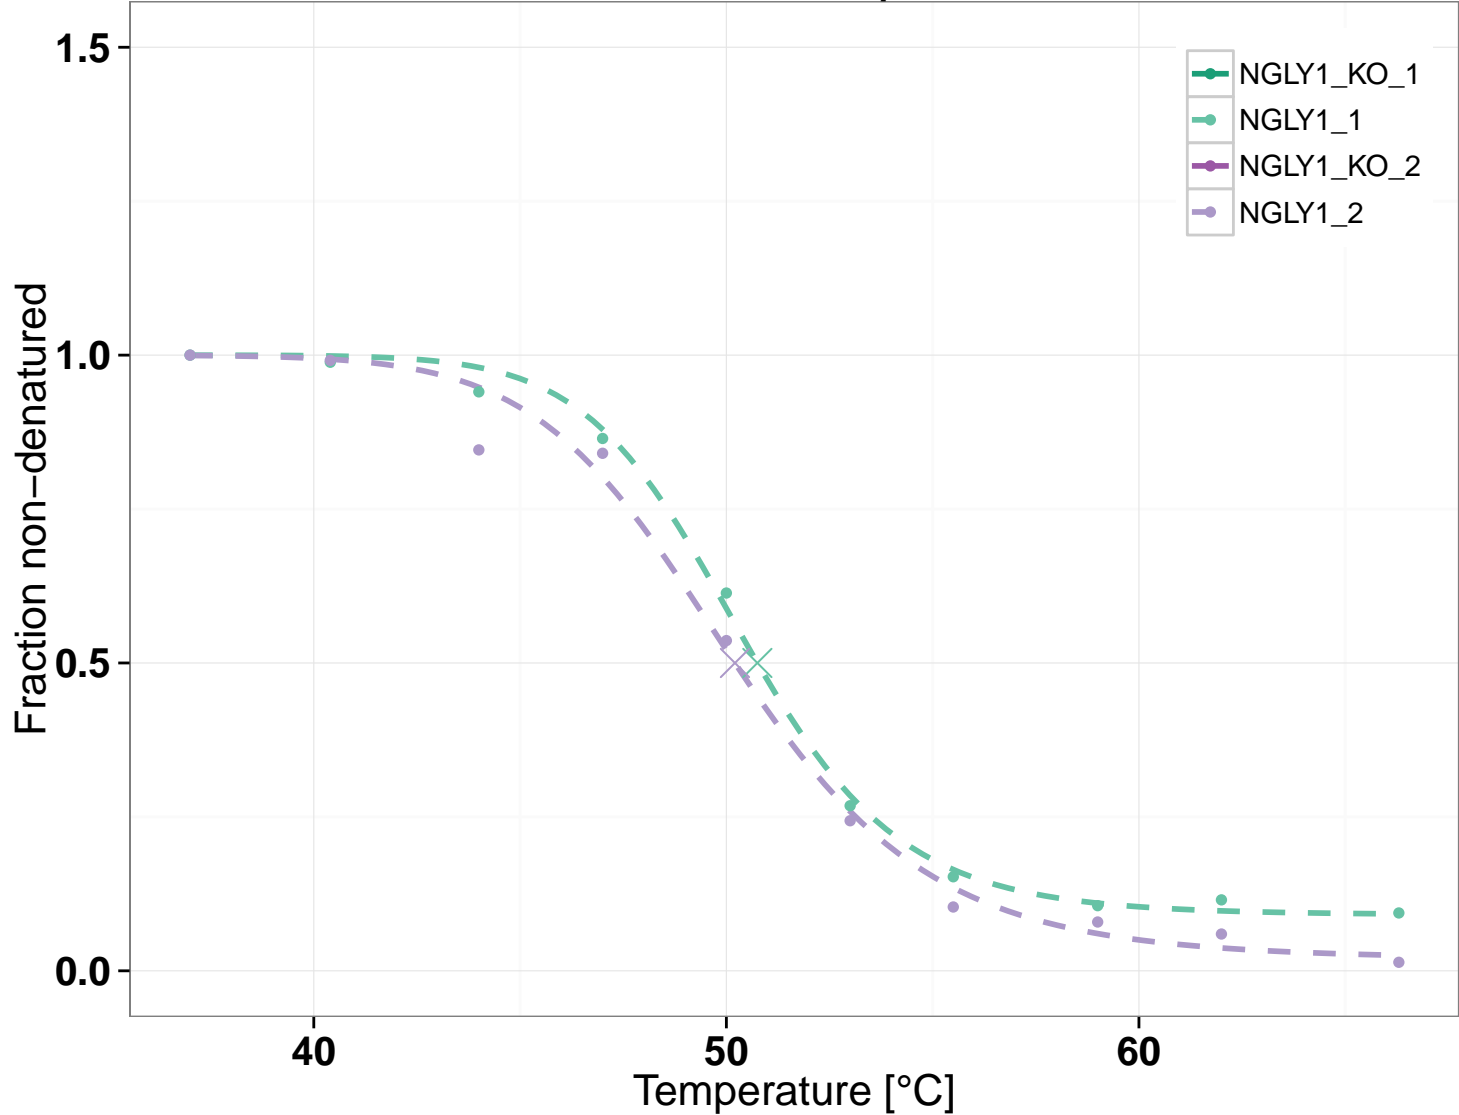

|            | meltPoint | slope | plateau | R2   |
|------------|-----------|-------|---------|------|
| NGLY1_KO_1 | -         | -     | -       | -    |
| NGLY1_1    | 50.75     | -0.12 | 0.09    | 1    |
| NGLY1_KO_2 | -         | -     | -       | -    |
| NGLY1_2    | 50.21     | -0.1  | 0.02    | 0.99 |

Supplement: Supplementary file 6157 [file 1]

IPI00300096.4|RAB35

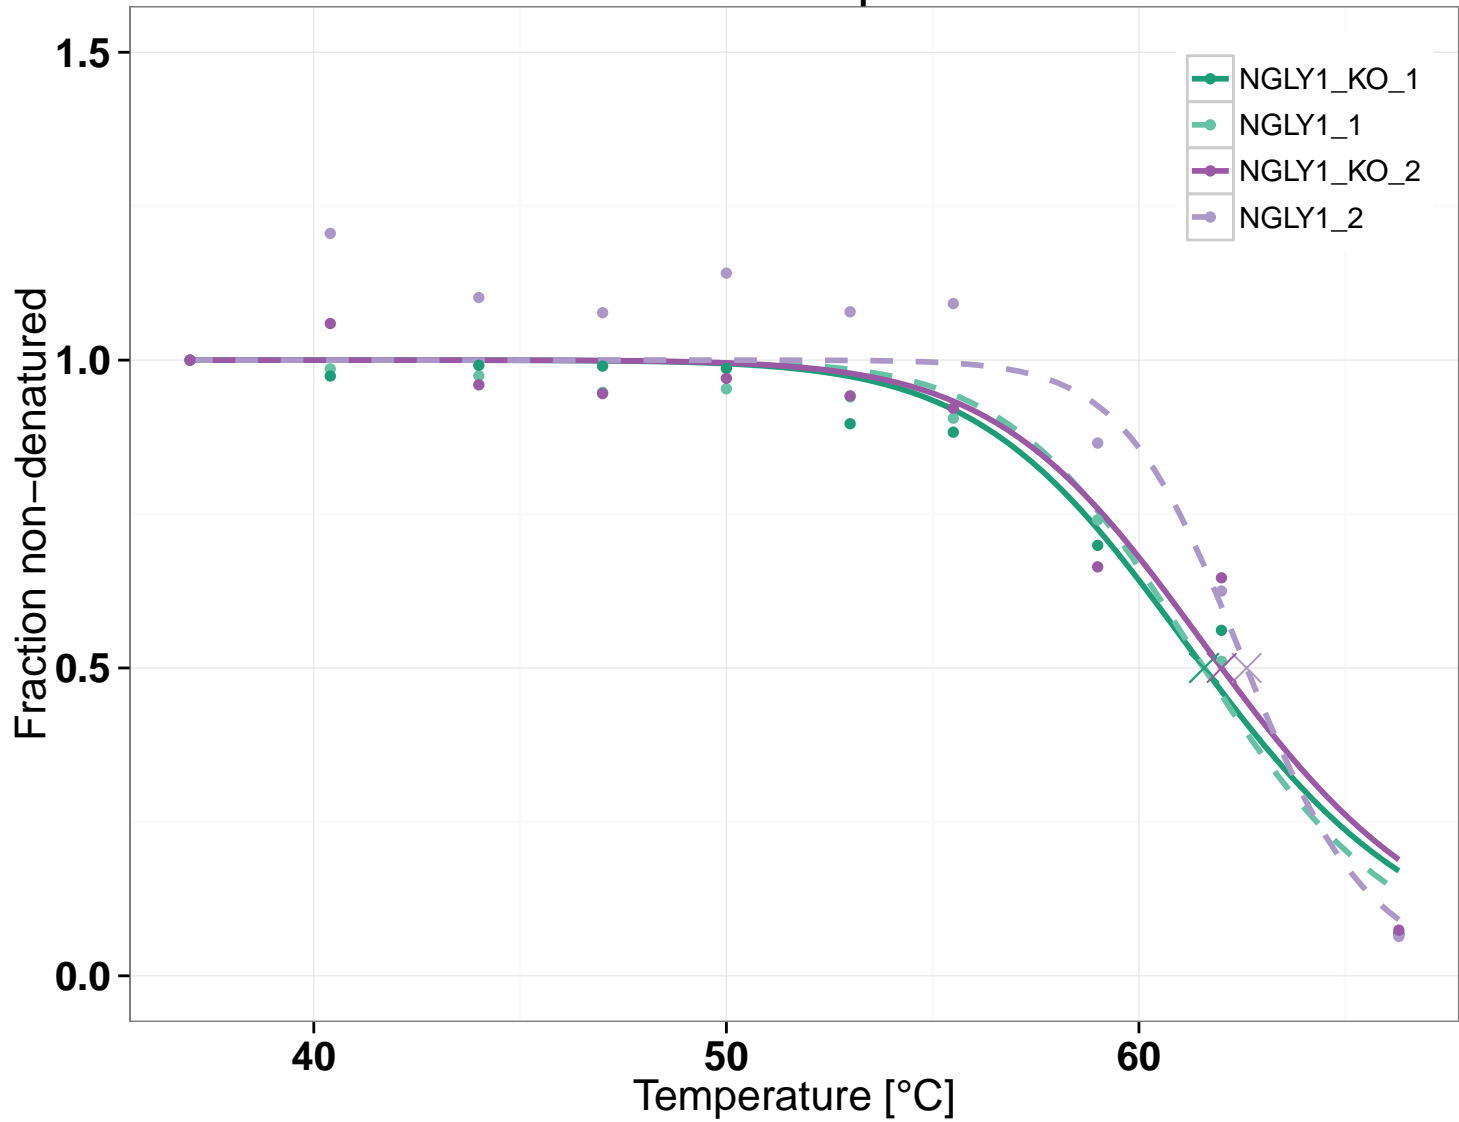

|            | meltPoint | slope  | plateau | R2   |
|------------|-----------|--------|---------|------|
| NGLY1_KO_1 | 61.58     | -0.091 | 0       | 0.96 |
| NGLY1_1    | 61.57     | -0.11  | 0       | 0.98 |
| NGLY1_KO_2 | 62.01     | -0.092 | 0       | 0.93 |
| NGLY1_2    | 62.61     | -0.17  | 0       | 0.91 |

Supplement: Supplementary file 6158 [file 1]

IPI00465147.4|C9ORF97

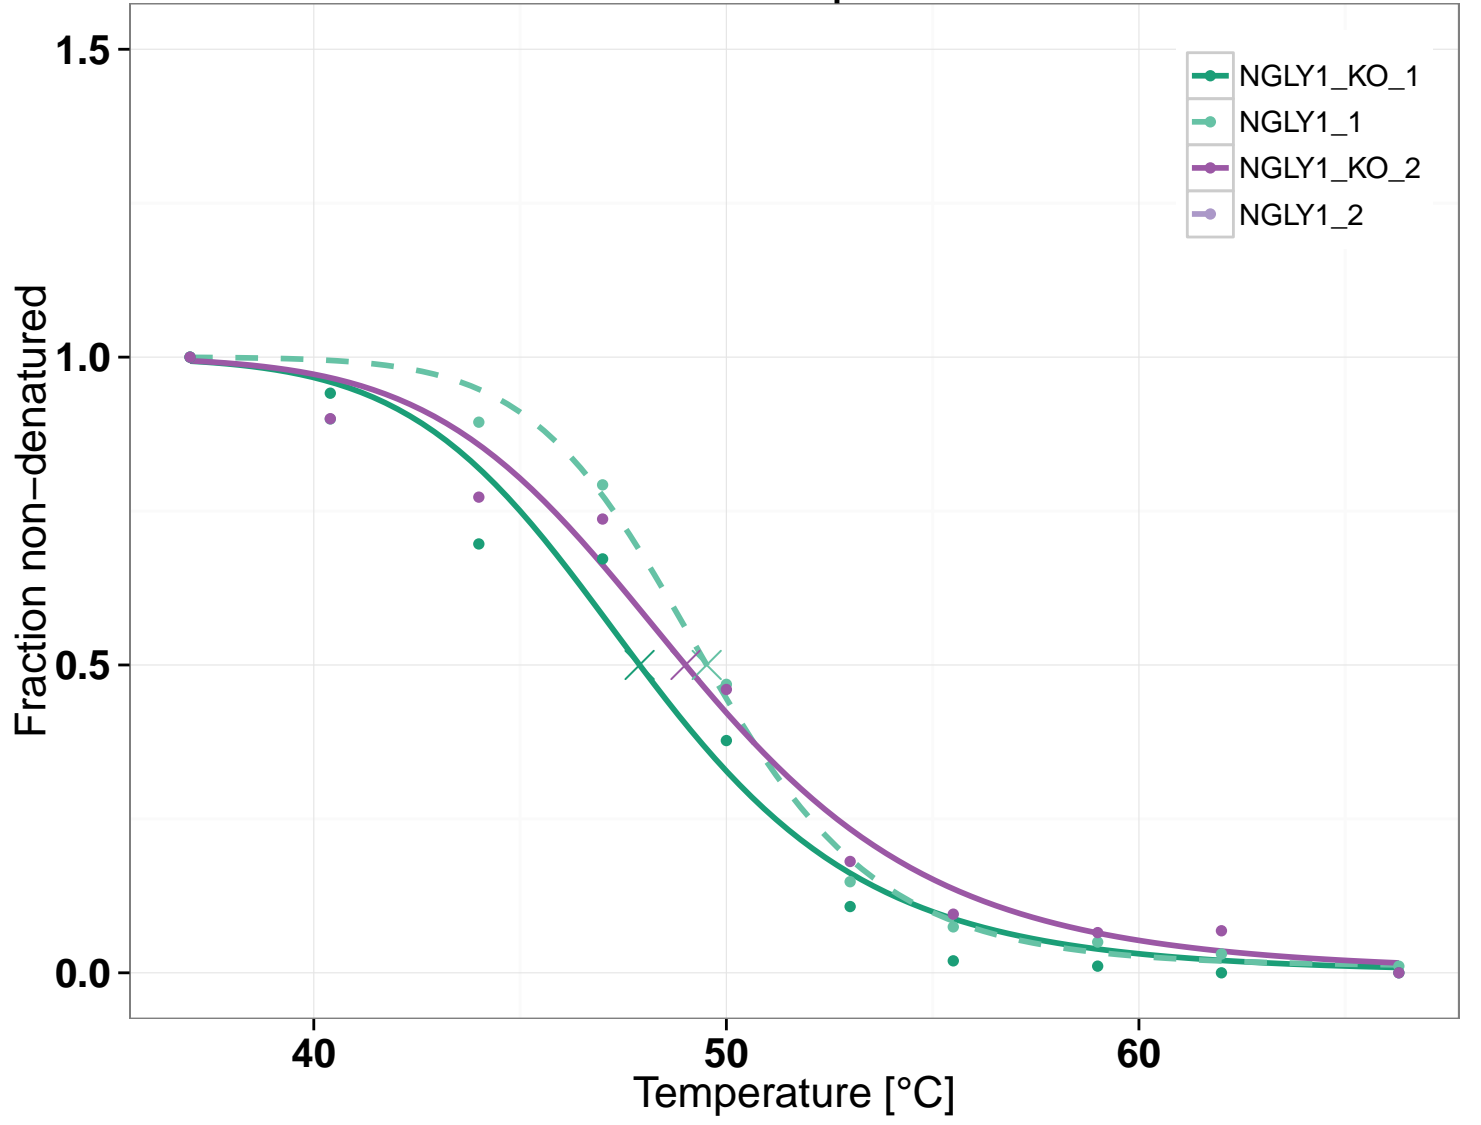

|            | meltPoint | slope  | plateau | R2   |
|------------|-----------|--------|---------|------|
| NGLY1_KO_1 | 47.9      | -0.09  | 0       | 0.98 |
| NGLY1_1    | 49.52     | -0.12  | 0.01    | 0.99 |
| NGLY1_KO_2 | 49.01     | -0.082 | 0       | 0.98 |
| NGLY1_2    | -         | -      | -       | -    |

Supplement: Supplementary file 6159 [file 1]

# IPI00018236.2|GM2A

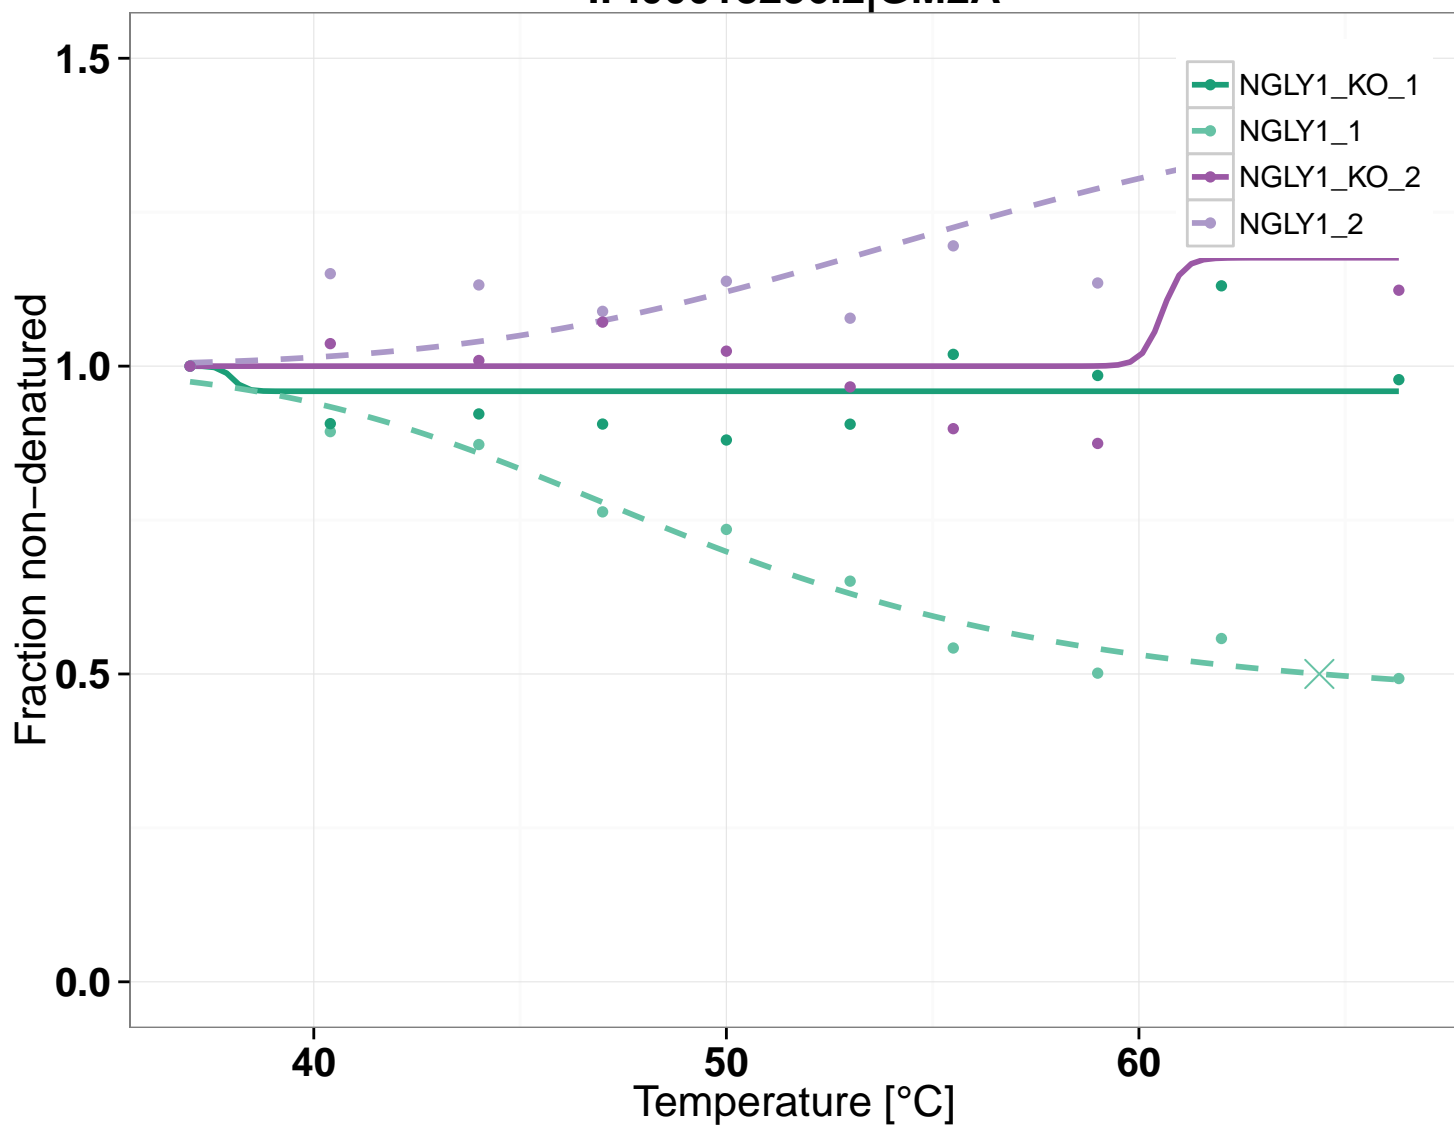

|            | meltPoint | slope  | plateau | R2   |
|------------|-----------|--------|---------|------|
| NGLY1_KO_1 | –         | –0.067 | 0.96    | 0.03 |
| NGLY1_1    | 64.37     | –0.028 | 0.45    | 0.97 |
| NGLY1_KO_2 | –         | 0.18   | 1.18    | 0.58 |
| NGLY1_2    | –         | 0.019  | 1.5     | 0.51 |

Supplement: Supplementary file 6160 [file 1]

# IPI00815770.2|SNX3

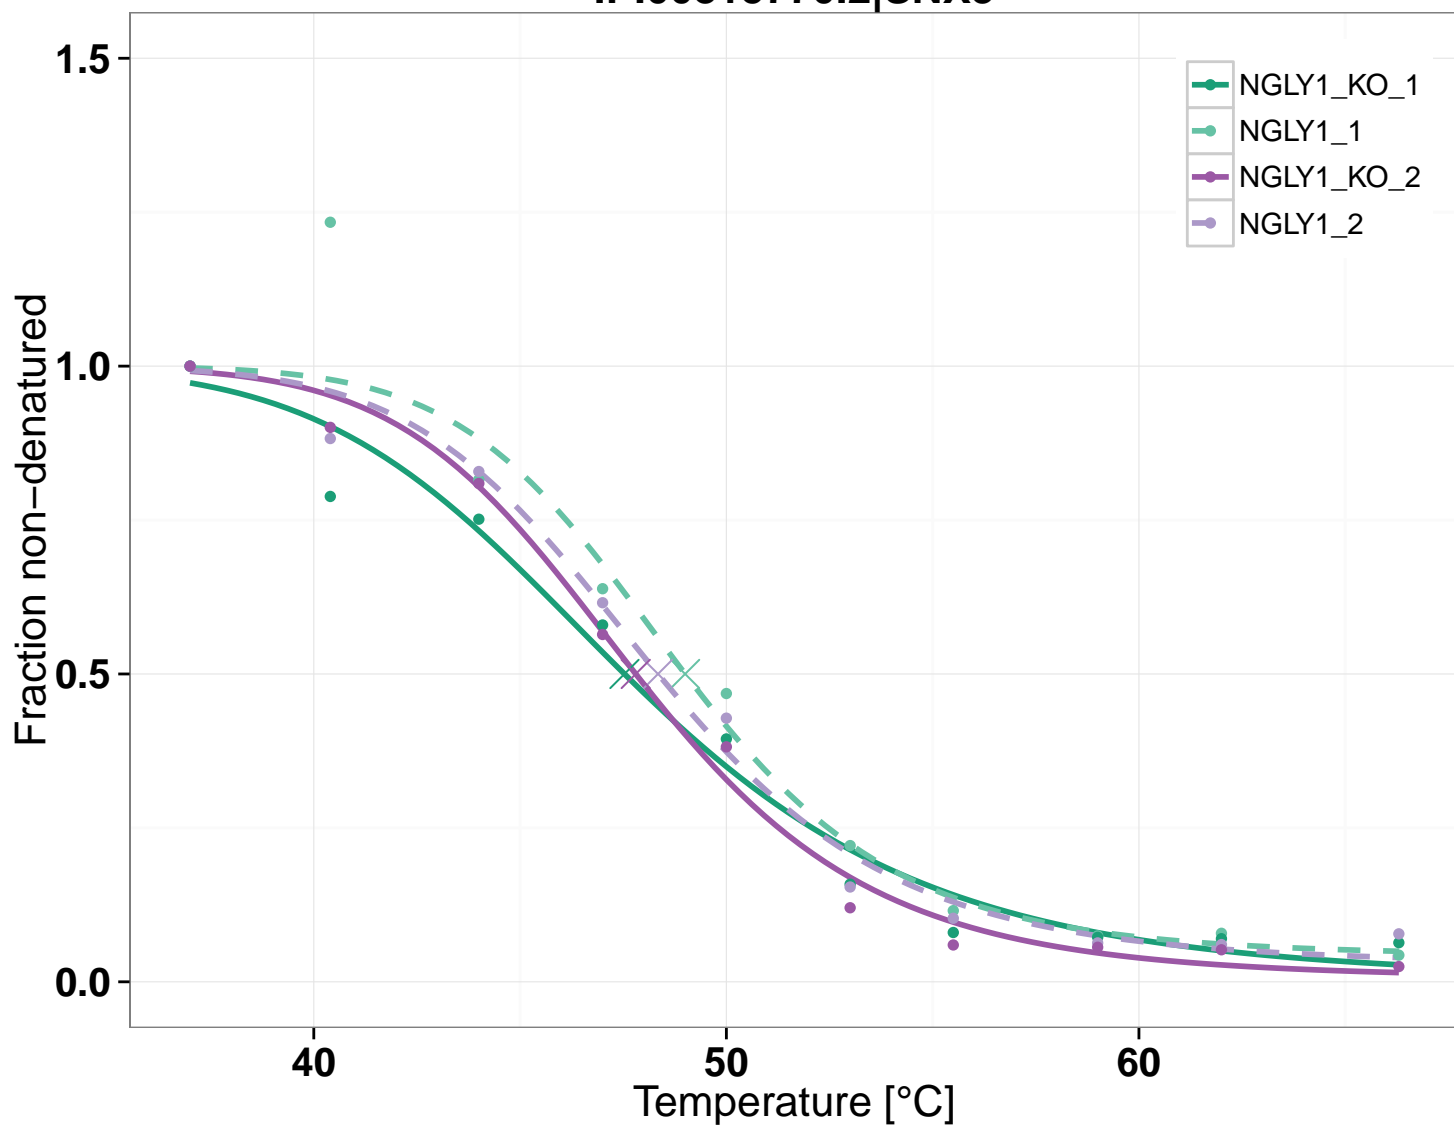

|            | meltPoint | slope  | plateau | R2   |
|------------|-----------|--------|---------|------|
| NGLY1_KO_1 | 47.53     | -0.068 | 0       | 0.98 |
| NGLY1_1    | 49        | -0.09  | 0.04    | 0.96 |
| NGLY1_KO_2 | 47.8      | -0.087 | 0       | 0.99 |
| NGLY1_2    | 48.34     | -0.083 | 0.03    | 0.99 |

Supplement: Supplementary file 6161 [file 1]

IPI00294610.3|DNAJA3

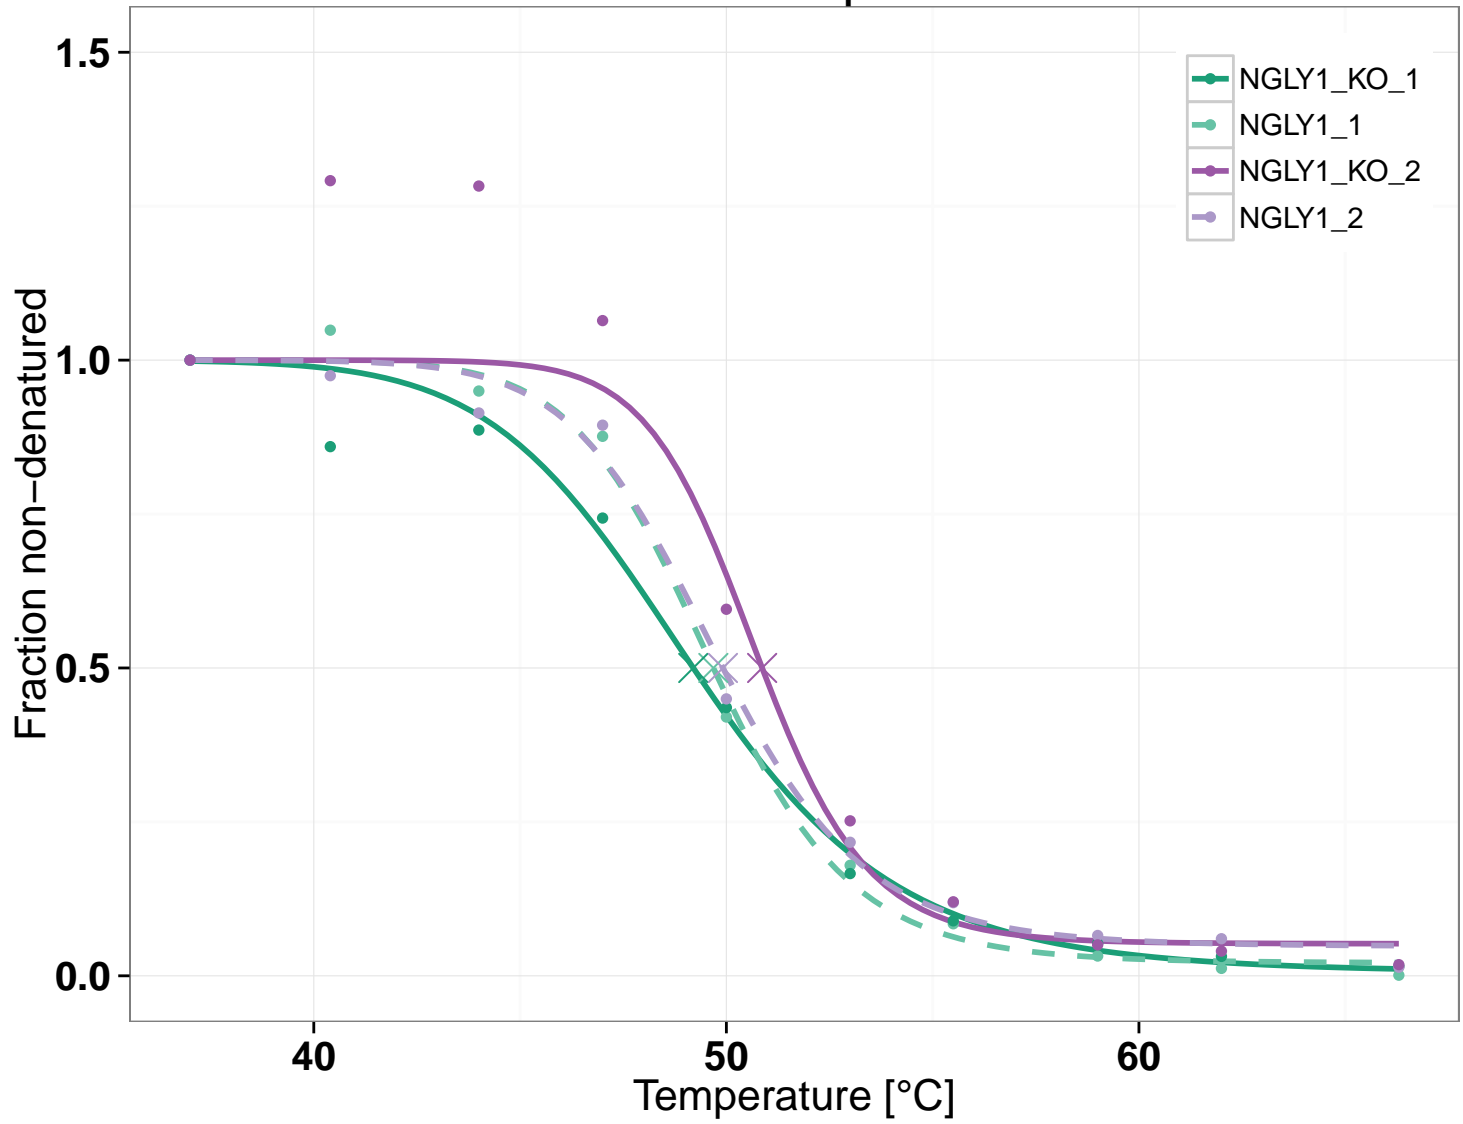

|            | meltPoint | slope | plateau | R2   |
|------------|-----------|-------|---------|------|
| NGLY1_KO_1 | 49.2      | -0.1  | 0       | 0.99 |
| NGLY1_1    | 49.69     | -0.14 | 0.02    | 1    |
| NGLY1_KO_2 | 50.87     | -0.18 | 0.05    | 0.93 |
| NGLY1_2    | 49.92     | -0.13 | 0.05    | 0.99 |

Supplement: Supplementary file 6162 [file 1]

IPI00909582.1|HSD17B4

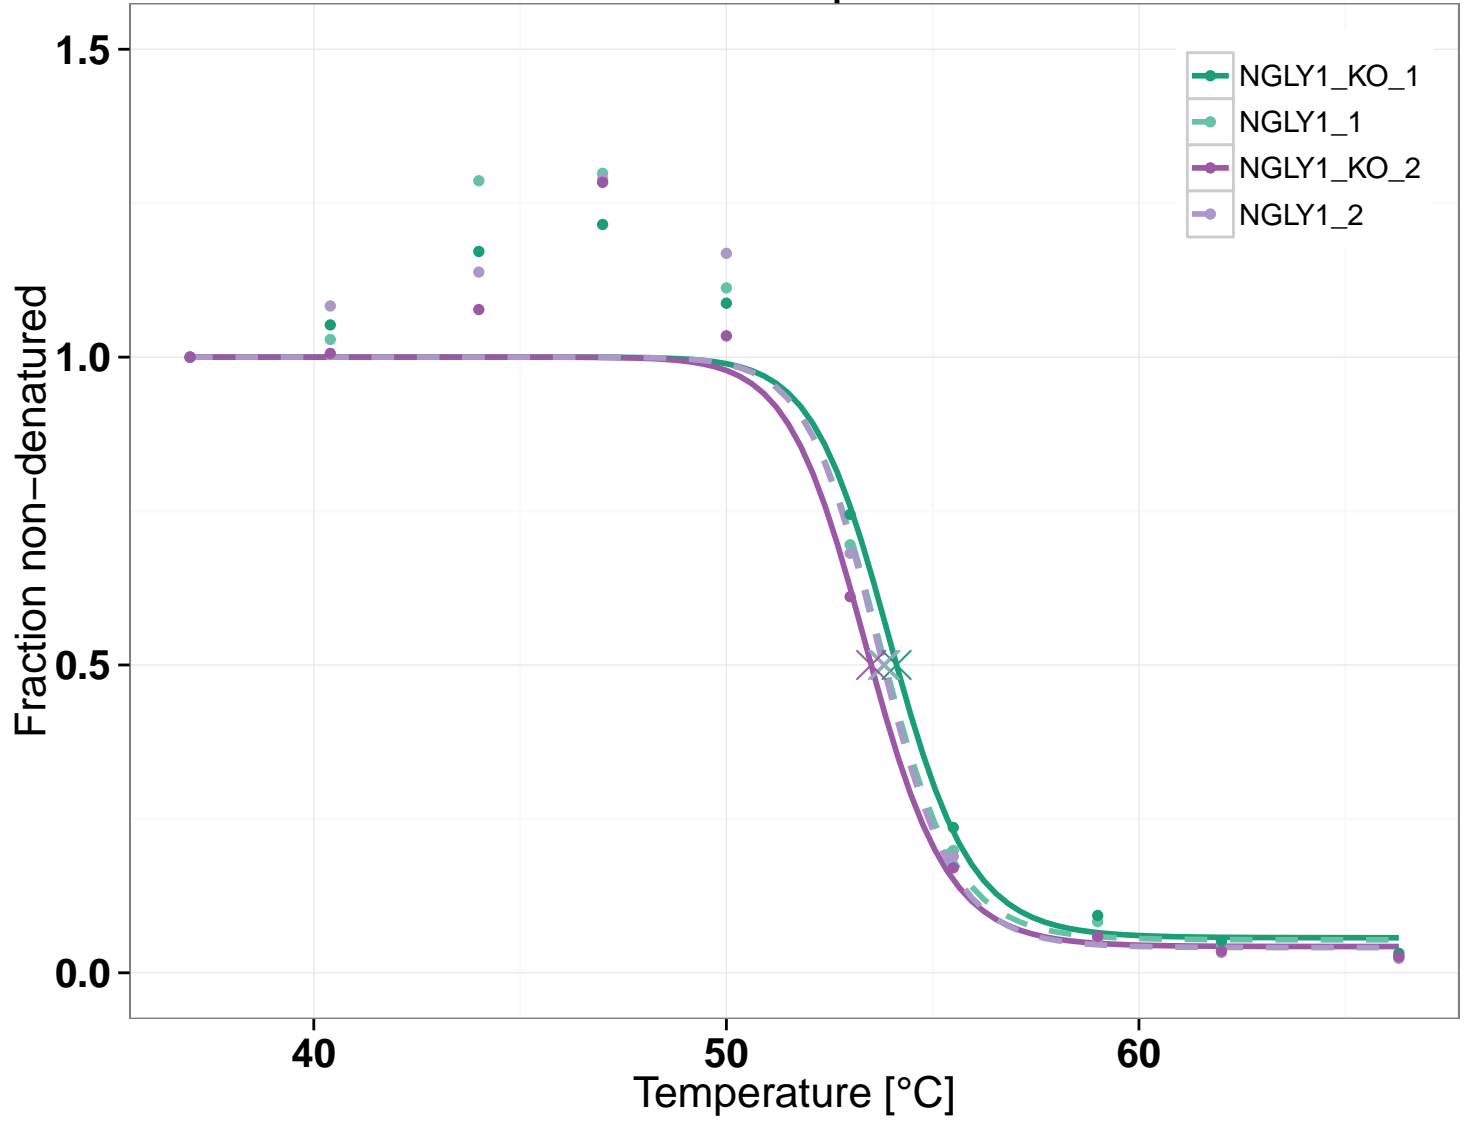

|            | meltPoint | slope | plateau | R2   |
|------------|-----------|-------|---------|------|
| NGLY1_KO_1 | 54.12     | -0.24 | 0.06    | 0.96 |
| NGLY1_1    | 53.85     | -0.26 | 0.05    | 0.93 |
| NGLY1_KO_2 | 53.51     | -0.25 | 0.04    | 0.96 |
| NGLY1_2    | 53.8      | -0.27 | 0.04    | 0.94 |

Supplement: Supplementary file 6163 [file 1]

# IPI00298292.2|PTK7

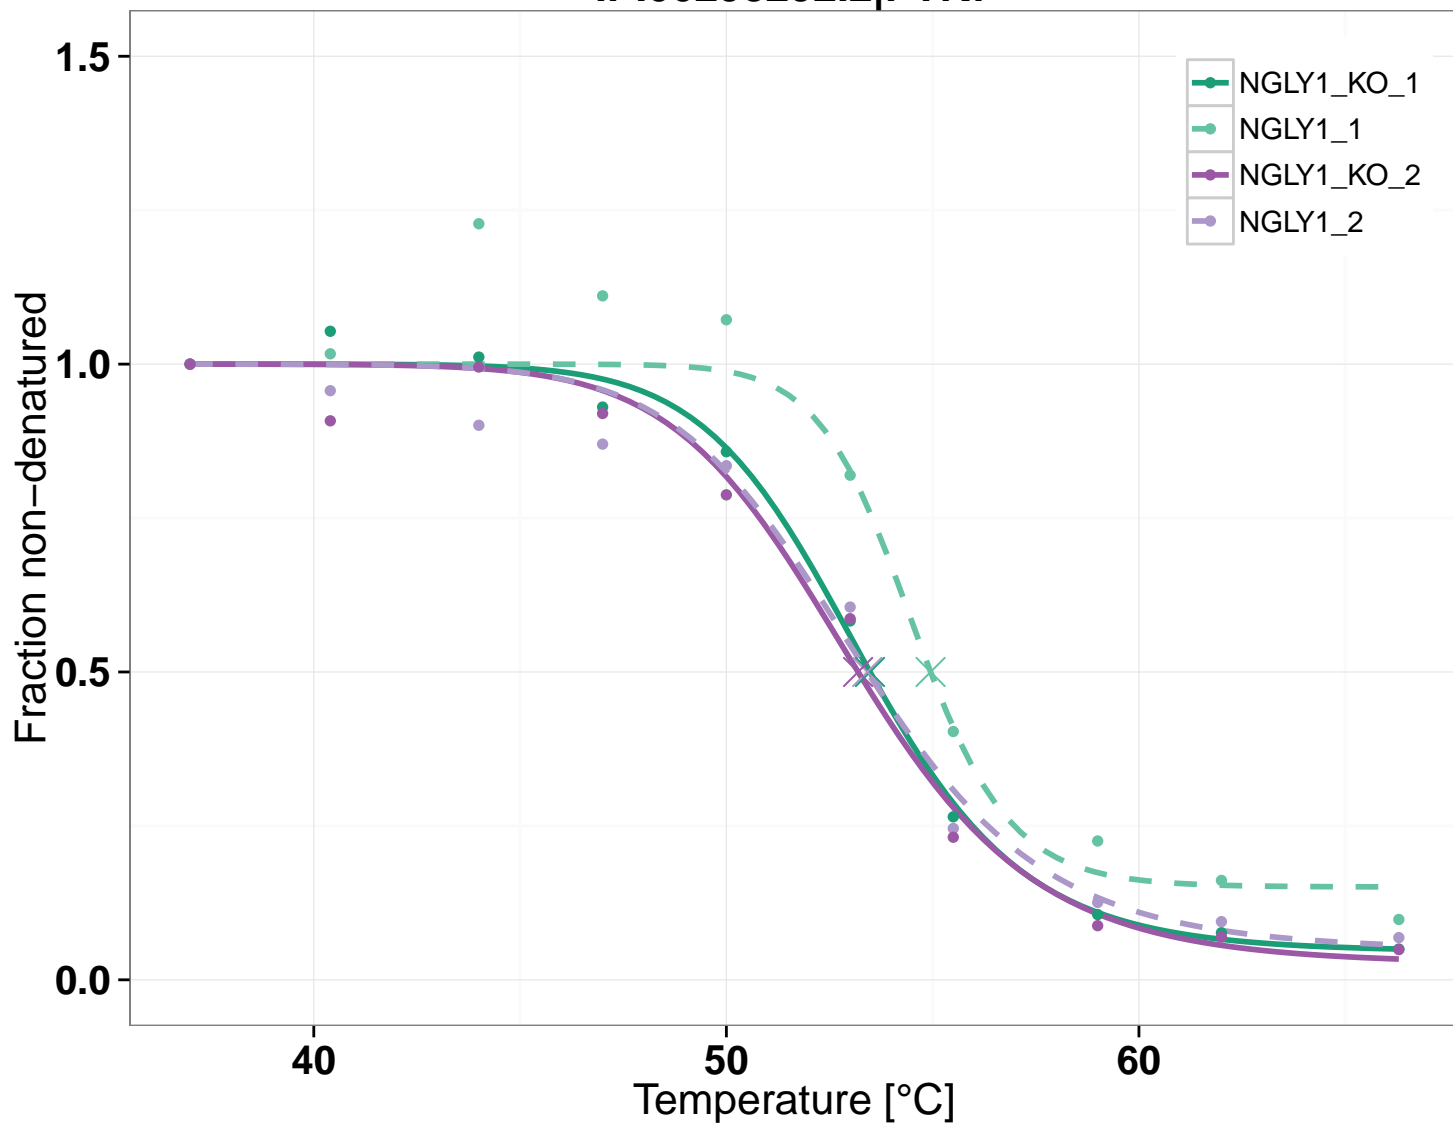

|            | meltPoint | slope | plateau | R2   |
|------------|-----------|-------|---------|------|
| NGLY1_KO_1 | 53.48     | -0.12 | 0.05    | 1    |
| NGLY1_1    | 54.95     | -0.18 | 0.15    | 0.96 |
| NGLY1_KO_2 | 53.19     | -0.11 | 0.03    | 0.99 |
| NGLY1_2    | 53.42     | -0.11 | 0.05    | 0.98 |

Supplement: Supplementary file 6164 [file 1]

# IPI00329512.3|SNRPB

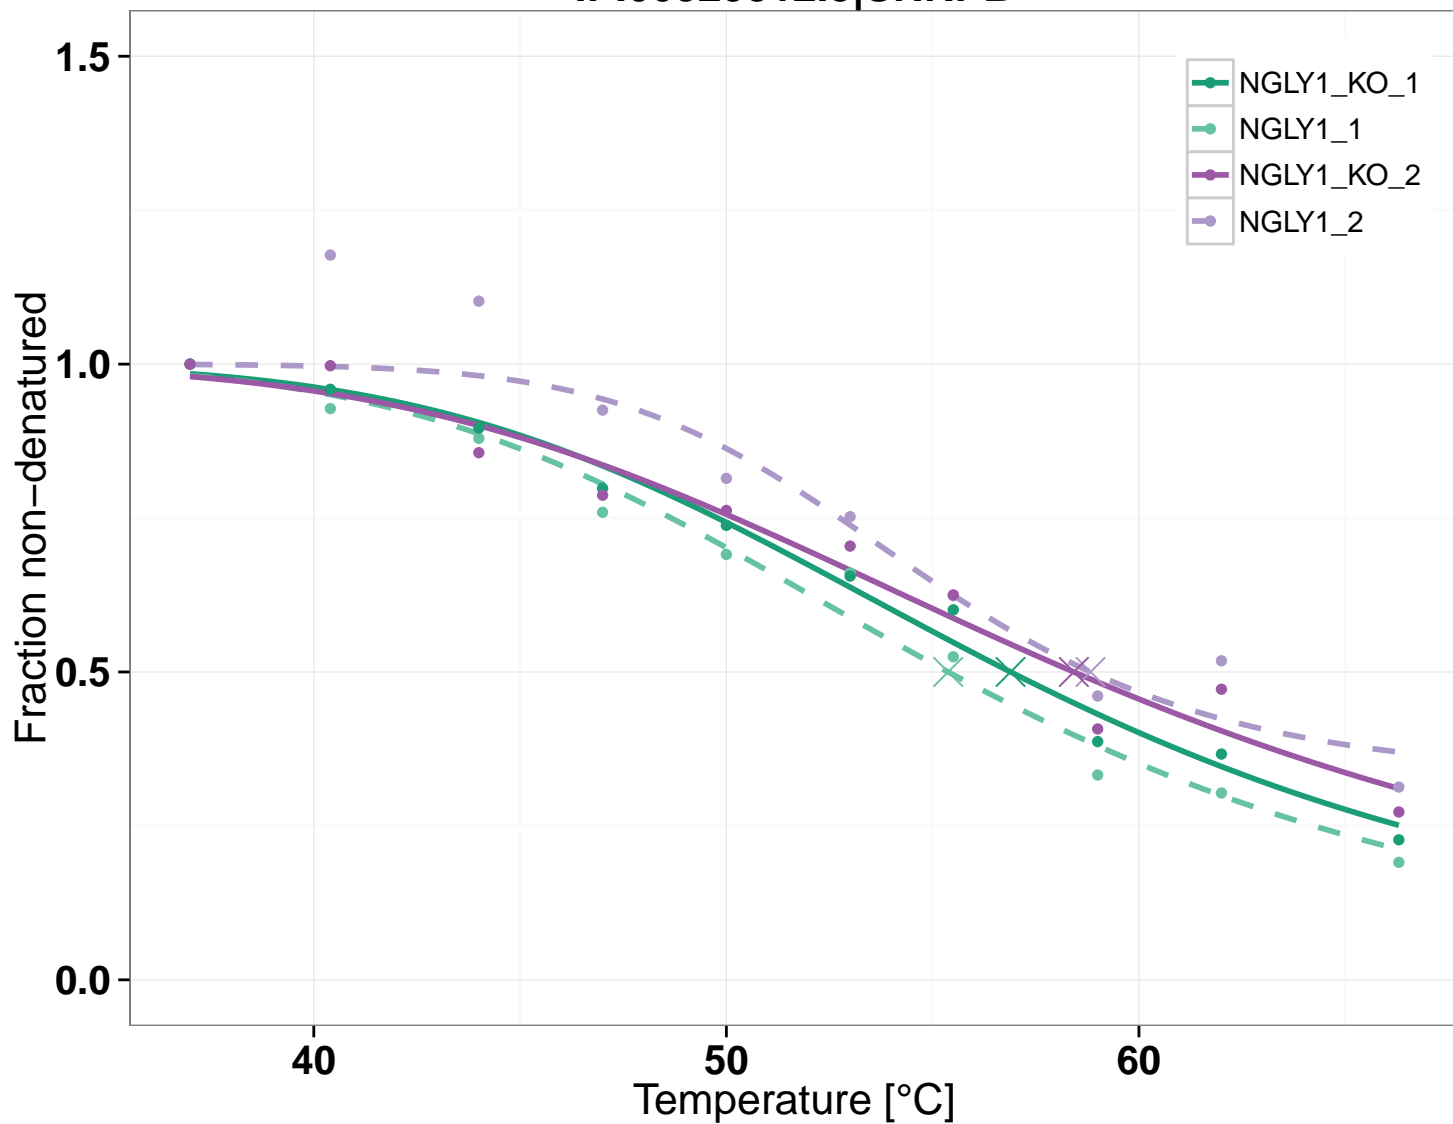

|            | meltPoint | slope  | plateau | R2   |
|------------|-----------|--------|---------|------|
| NGLY1_KO_1 | 56.89     | -0.036 | 0       | 0.99 |
| NGLY1_1    | 55.38     | -0.038 | 0       | 0.98 |
| NGLY1_KO_2 | 58.42     | -0.031 | 0       | 0.96 |
| NGLY1_2    | 58.83     | -0.046 | 0.32    | 0.91 |

Supplement: Supplementary file 6165 [file 1]

IPI00259113.1|KIAA1586

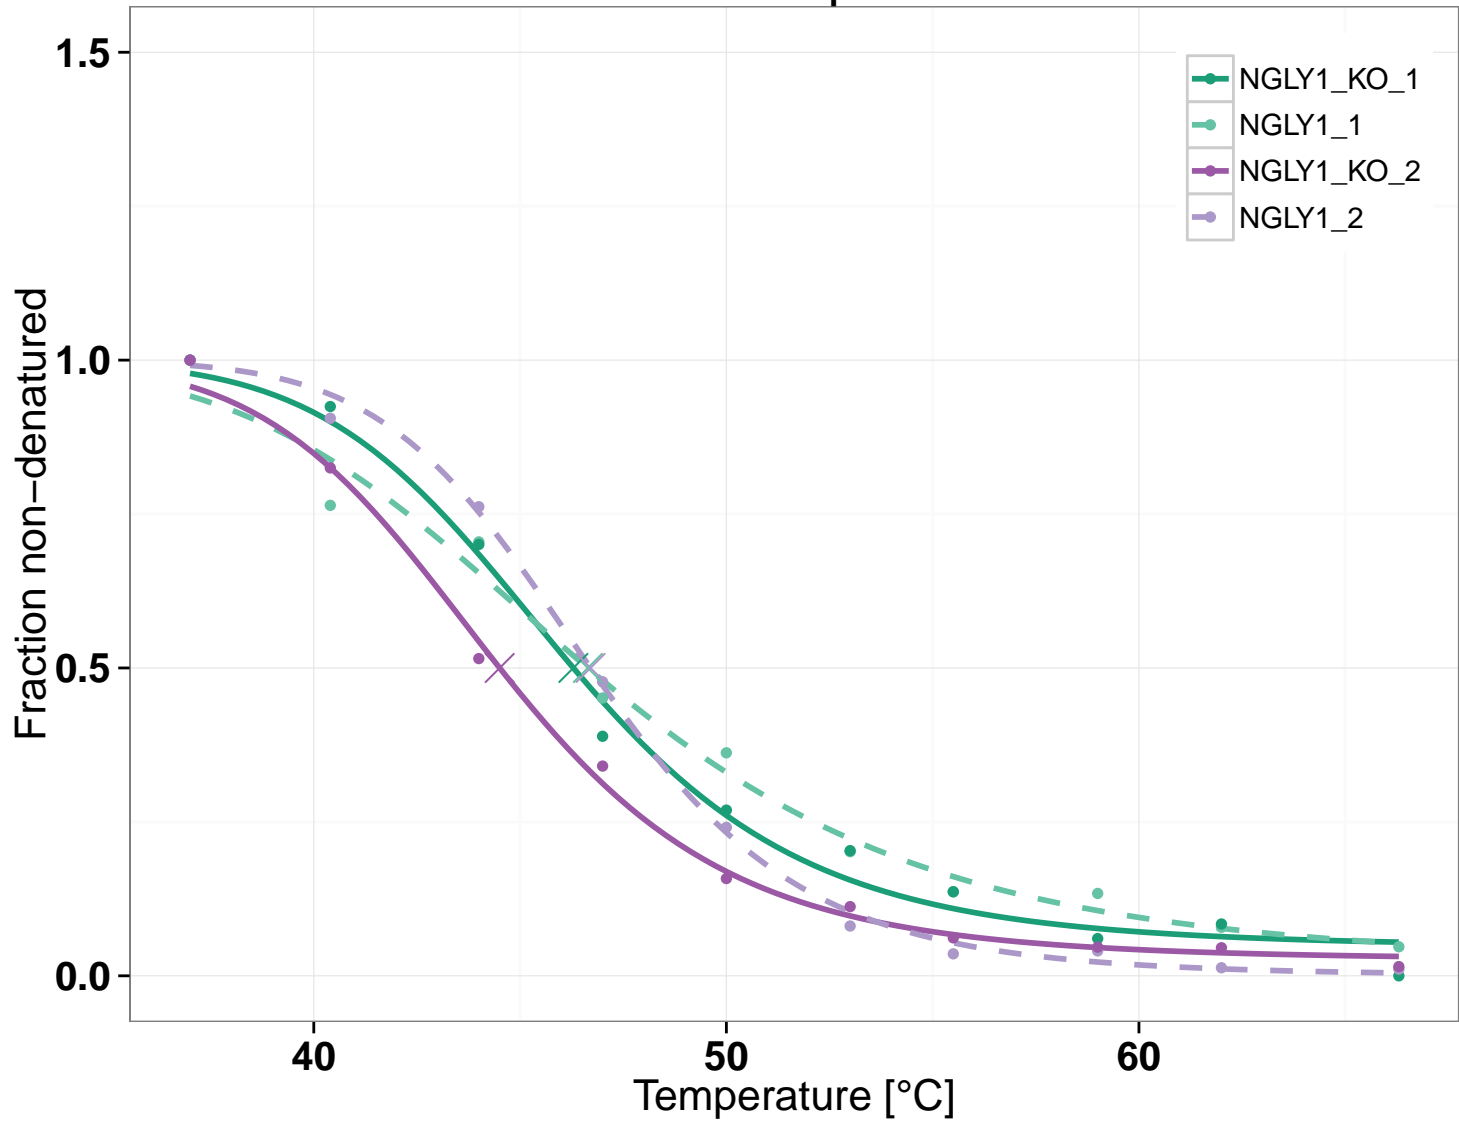

|            | meltPoint | slope  | plateau | R2   |
|------------|-----------|--------|---------|------|
| NGLY1_KO_1 | 46.29     | -0.082 | 0.05    | 0.99 |
| NGLY1_1    | 46.64     | -0.059 | 0.01    | 0.98 |
| NGLY1_KO_2 | 44.51     | -0.087 | 0.03    | 1    |
| NGLY1_2    | 46.71     | -0.098 | 0       | 1    |

Supplement: Supplementary file 6166 [file 1]

# IPI00641369.2|GTDC1

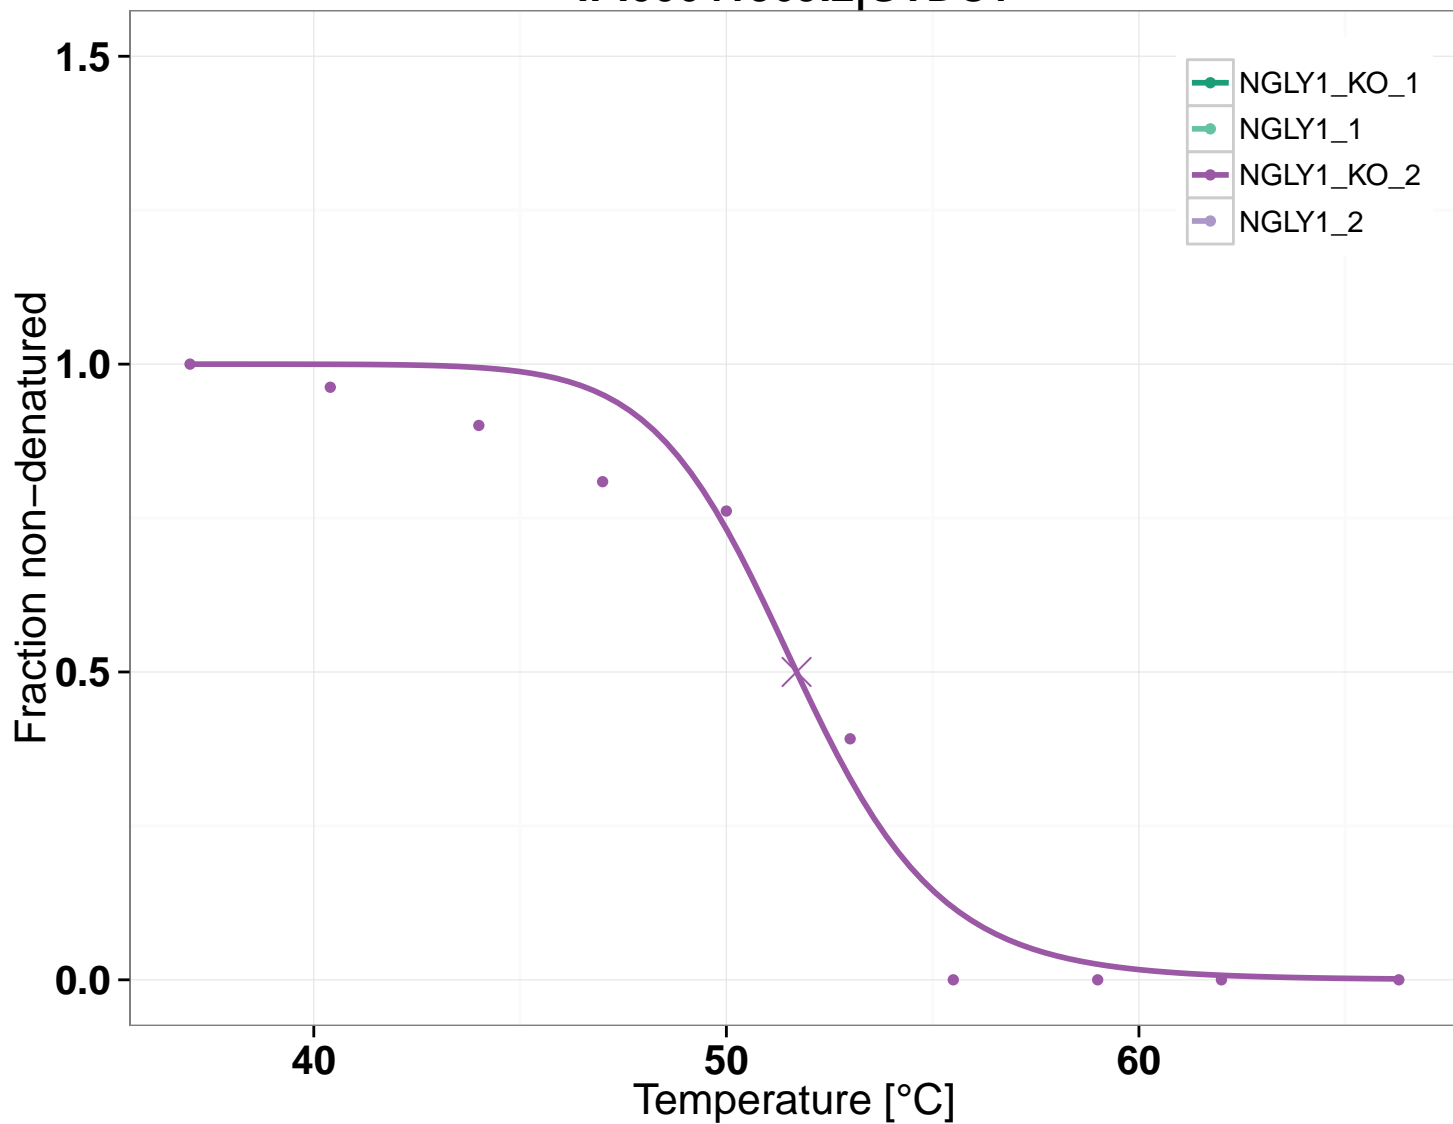

|            | meltPoint | slope | plateau | R2   |
|------------|-----------|-------|---------|------|
| NGLY1_KO_1 | —         | —     | —       | —    |
| NGLY1_1    | —         | —     | —       | —    |
| NGLY1_KO_2 | 51.7      | -0.14 | 0       | 0.97 |
| NGLY1_2    | —         | —     | —       | —    |

Supplement: Supplementary file 6167 [file 1]

IPI00010833.1|ZNF148

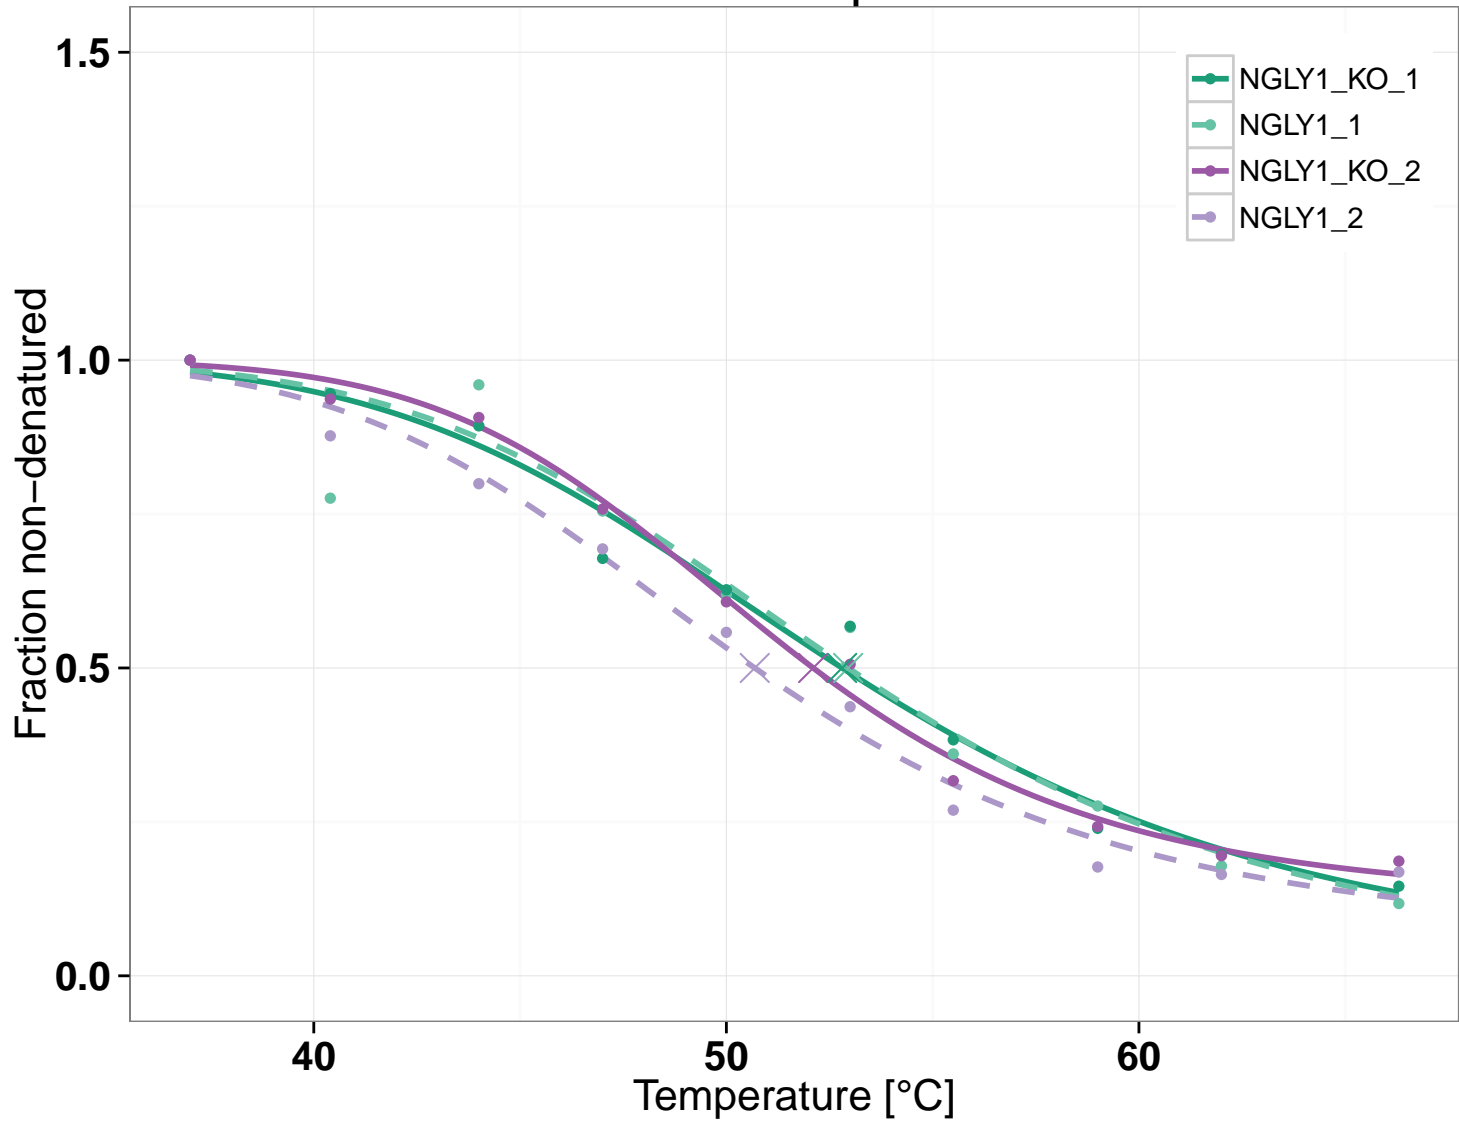

|            | meltPoint | slope  | plateau | R2   |
|------------|-----------|--------|---------|------|
| NGLY1_KO_1 | 52.81     | -0.045 | 0       | 0.98 |
| NGLY1_1    | 52.95     | -0.047 | 0       | 0.95 |
| NGLY1_KO_2 | 52.1      | -0.055 | 0.12    | 0.99 |
| NGLY1_2    | 50.69     | -0.05  | 0.05    | 0.99 |

Supplement: Supplementary file 6168 [file 1]

IPI00305438.3|VPS16

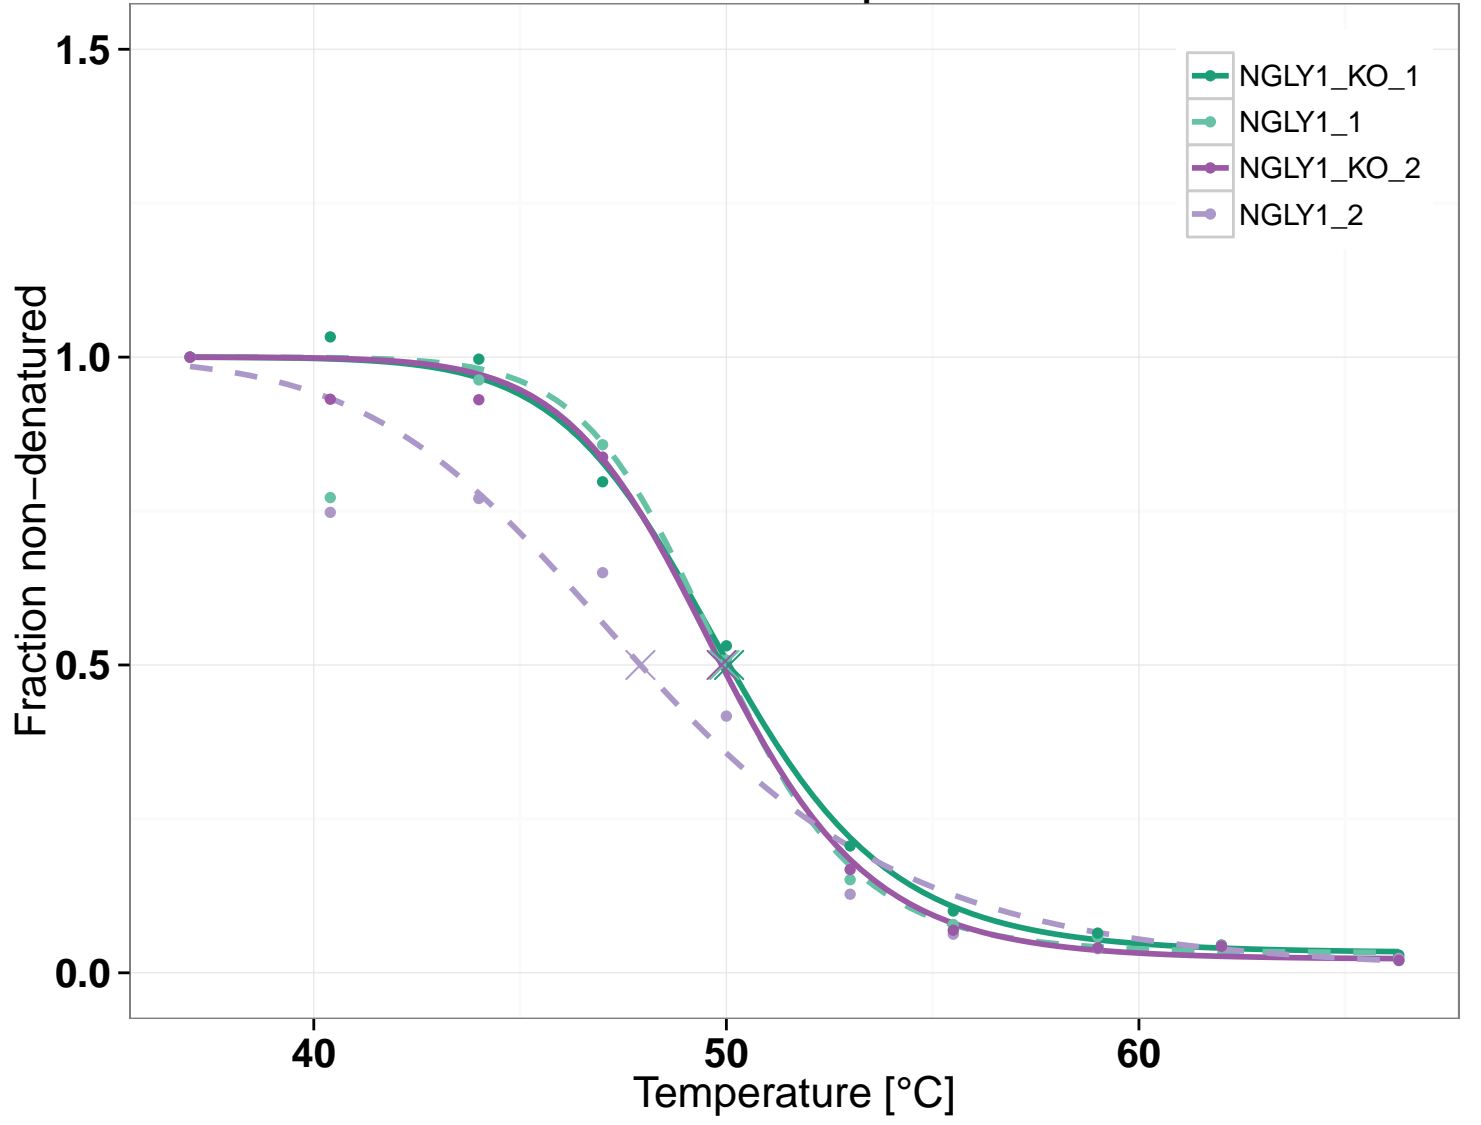

|            | meltPoint | slope  | plateau | R2   |
|------------|-----------|--------|---------|------|
| NGLY1_KO_1 | 50.07     | -0.12  | 0.03    | 1    |
| NGLY1_1    | 49.95     | -0.14  | 0.03    | 0.97 |
| NGLY1_KO_2 | 49.88     | -0.13  | 0.02    | 1    |
| NGLY1_2    | 47.92     | -0.075 | 0       | 0.96 |

Supplement: Supplementary file 6169 [file 1]

# IPI00791574.1|SLMAP

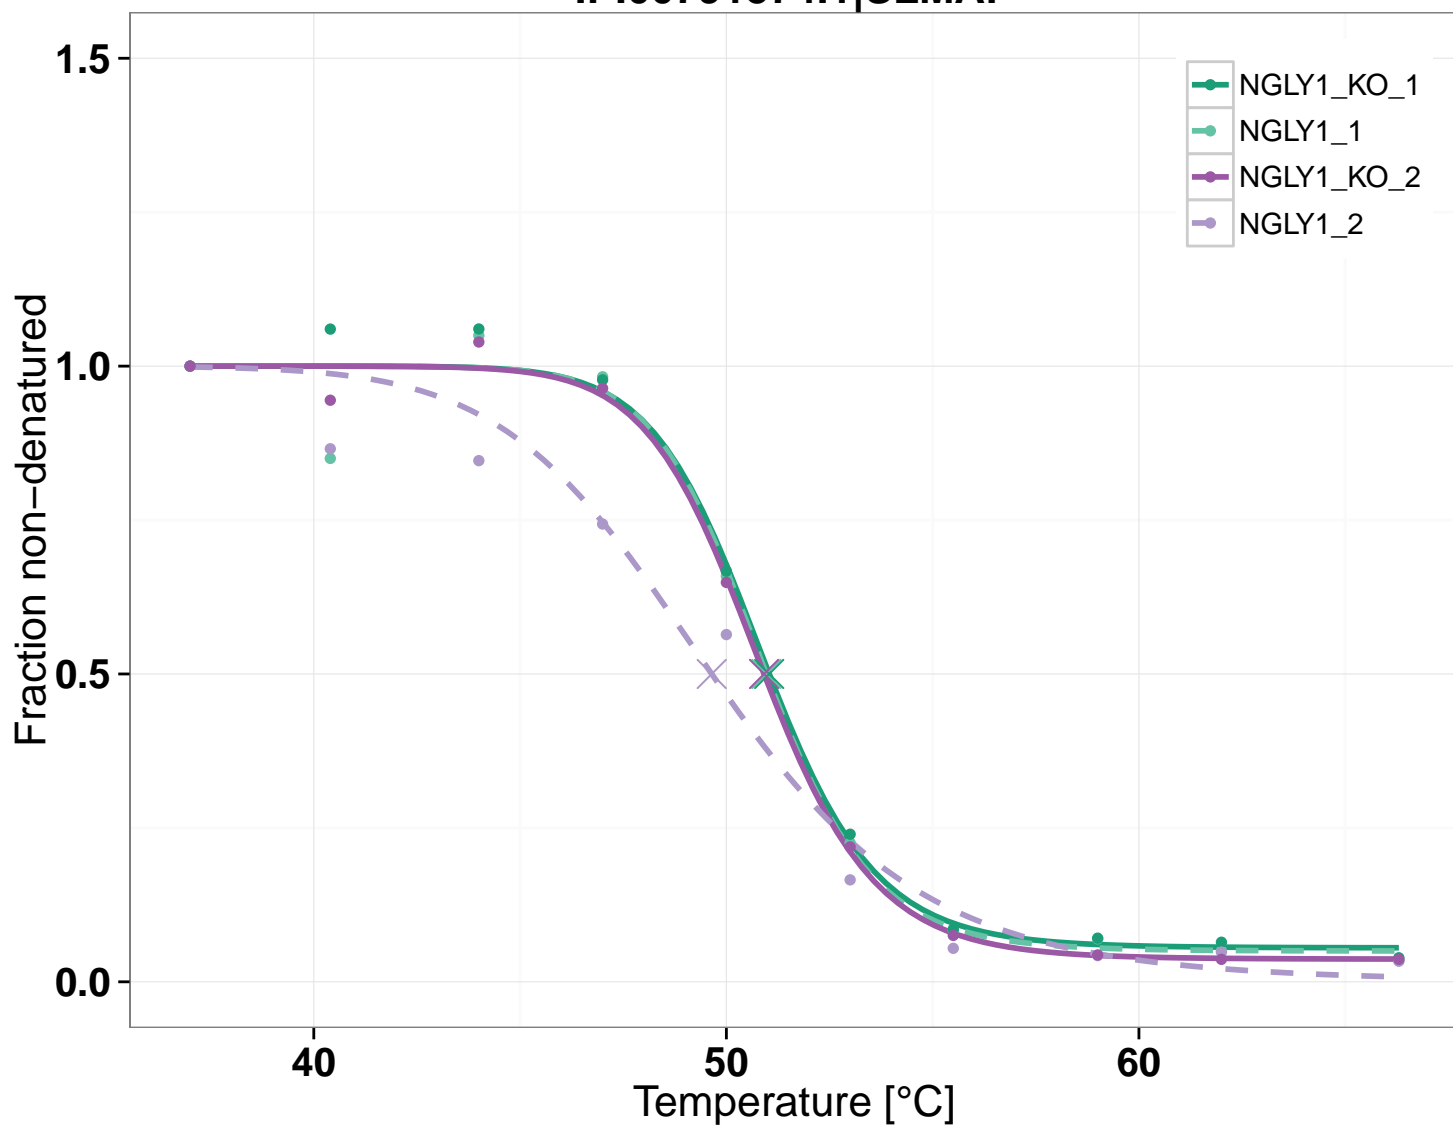

|            | meltPoint | slope  | plateau | R2   |
|------------|-----------|--------|---------|------|
| NGLY1_KO_1 | 51.04     | -0.17  | 0.06    | 1    |
| NGLY1_1    | 50.97     | -0.18  | 0.05    | 0.99 |
| NGLY1_KO_2 | 50.91     | -0.17  | 0.04    | 1    |
| NGLY1_2    | 49.65     | -0.098 | 0       | 0.97 |

Supplement: Supplementary file 6170 [file 1]

# IPI00333541.6|FLNA

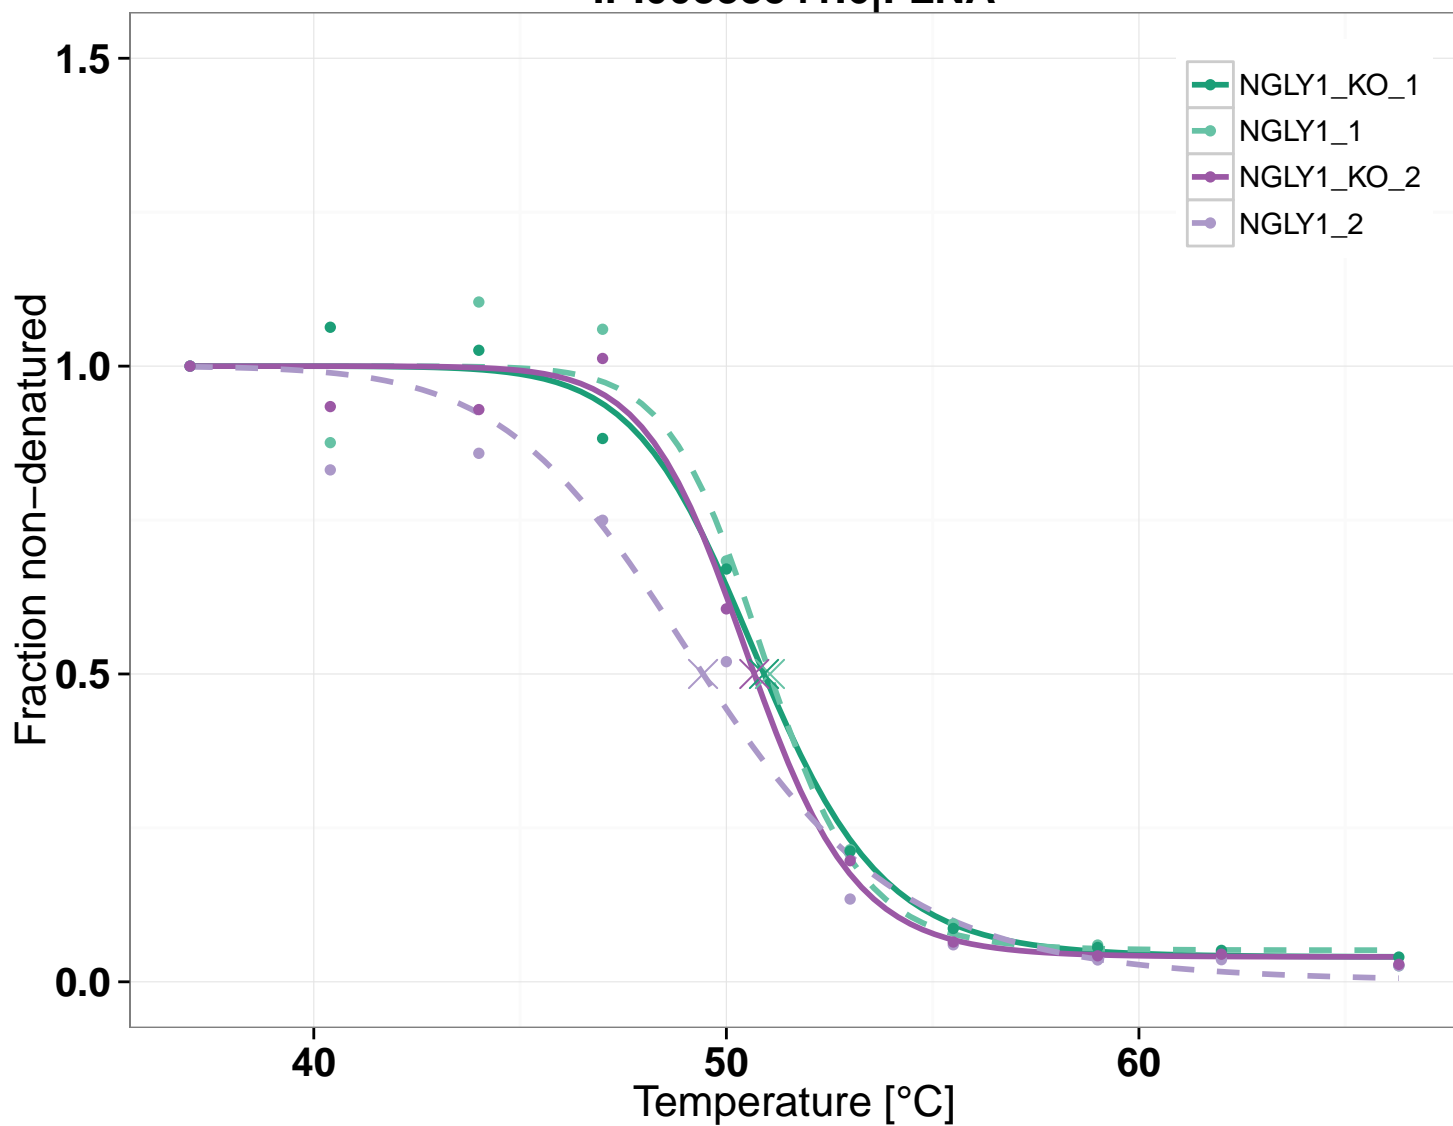

|            | meltPoint | slope | plateau | R2   |
|------------|-----------|-------|---------|------|
| NGLY1_KO_1 | 50.91     | -0.16 | 0.04    | 0.99 |
| NGLY1_1    | 51.06     | -0.2  | 0.05    | 0.98 |
| NGLY1_KO_2 | 50.68     | -0.19 | 0.04    | 0.99 |
| NGLY1_2    | 49.43     | -0.1  | 0       | 0.97 |

Supplement: Supplementary file 6171 [file 1]

IPI00009373.3|C1ORF149

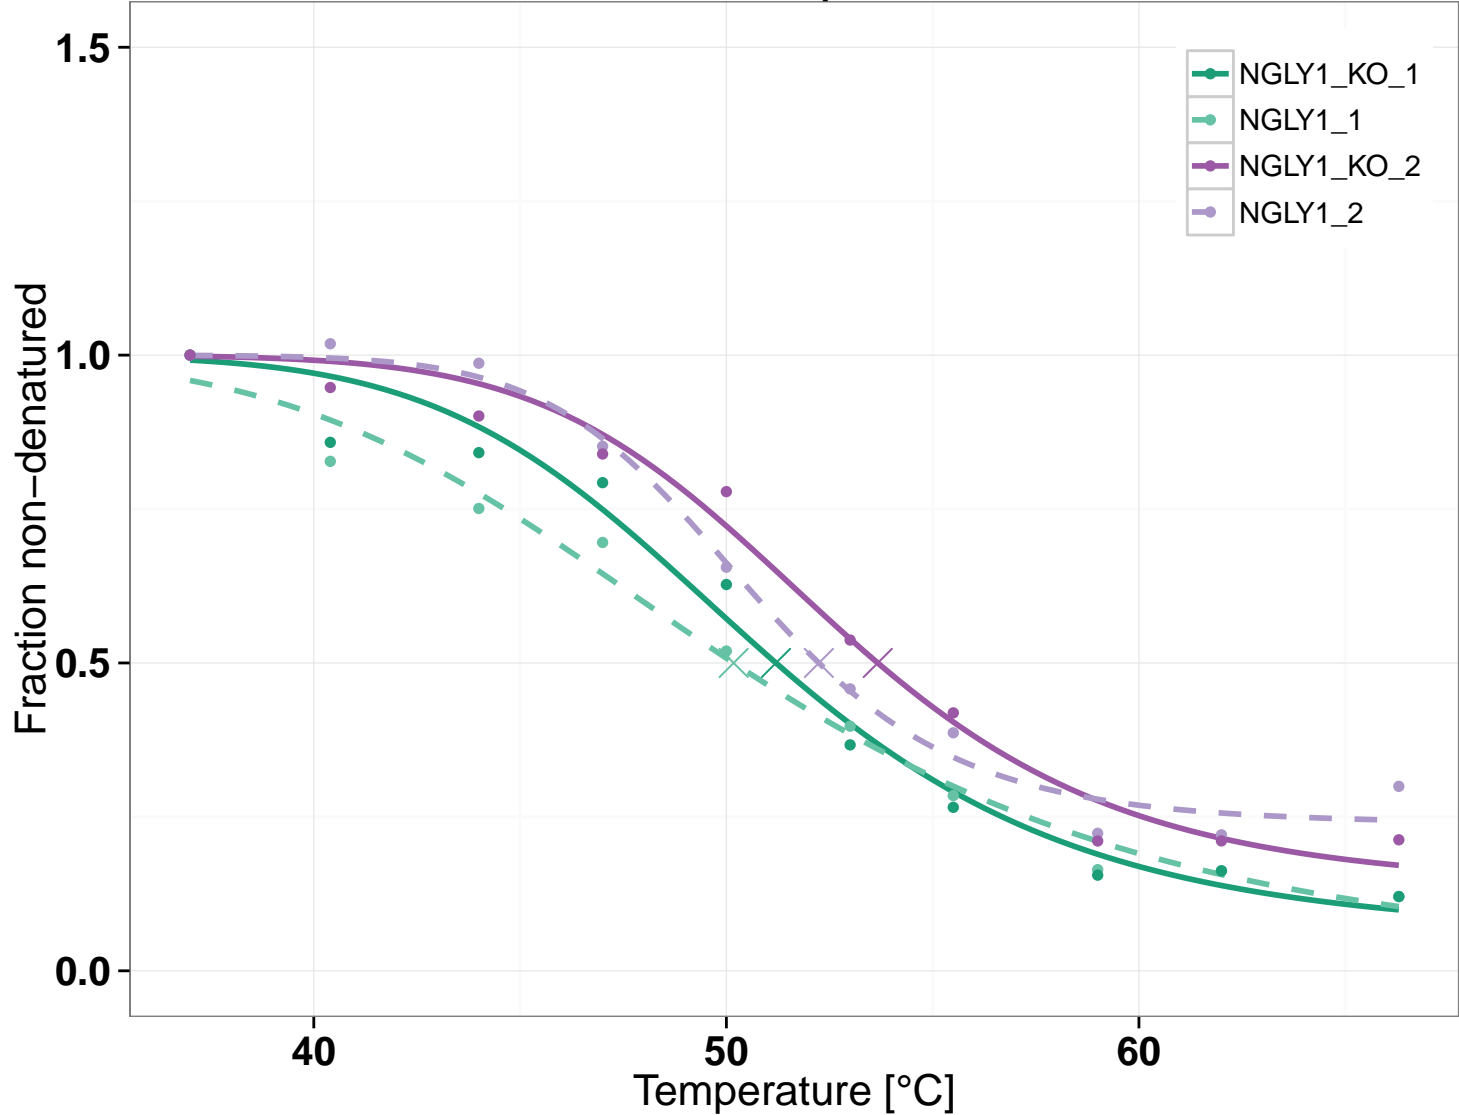

|            | meltPoint | slope  | plateau | R2   |
|------------|-----------|--------|---------|------|
| NGLY1_KO_1 | 51.2      | -0.061 | 0.05    | 0.98 |
| NGLY1_1    | 50.18     | -0.046 | 0       | 0.99 |
| NGLY1_KO_2 | 53.67     | -0.062 | 0.13    | 0.98 |
| NGLY1_2    | 52.24     | -0.077 | 0.24    | 0.99 |

Supplement: Supplementary file 6172 [file 1]

# IPI00218782.3|CAPZB

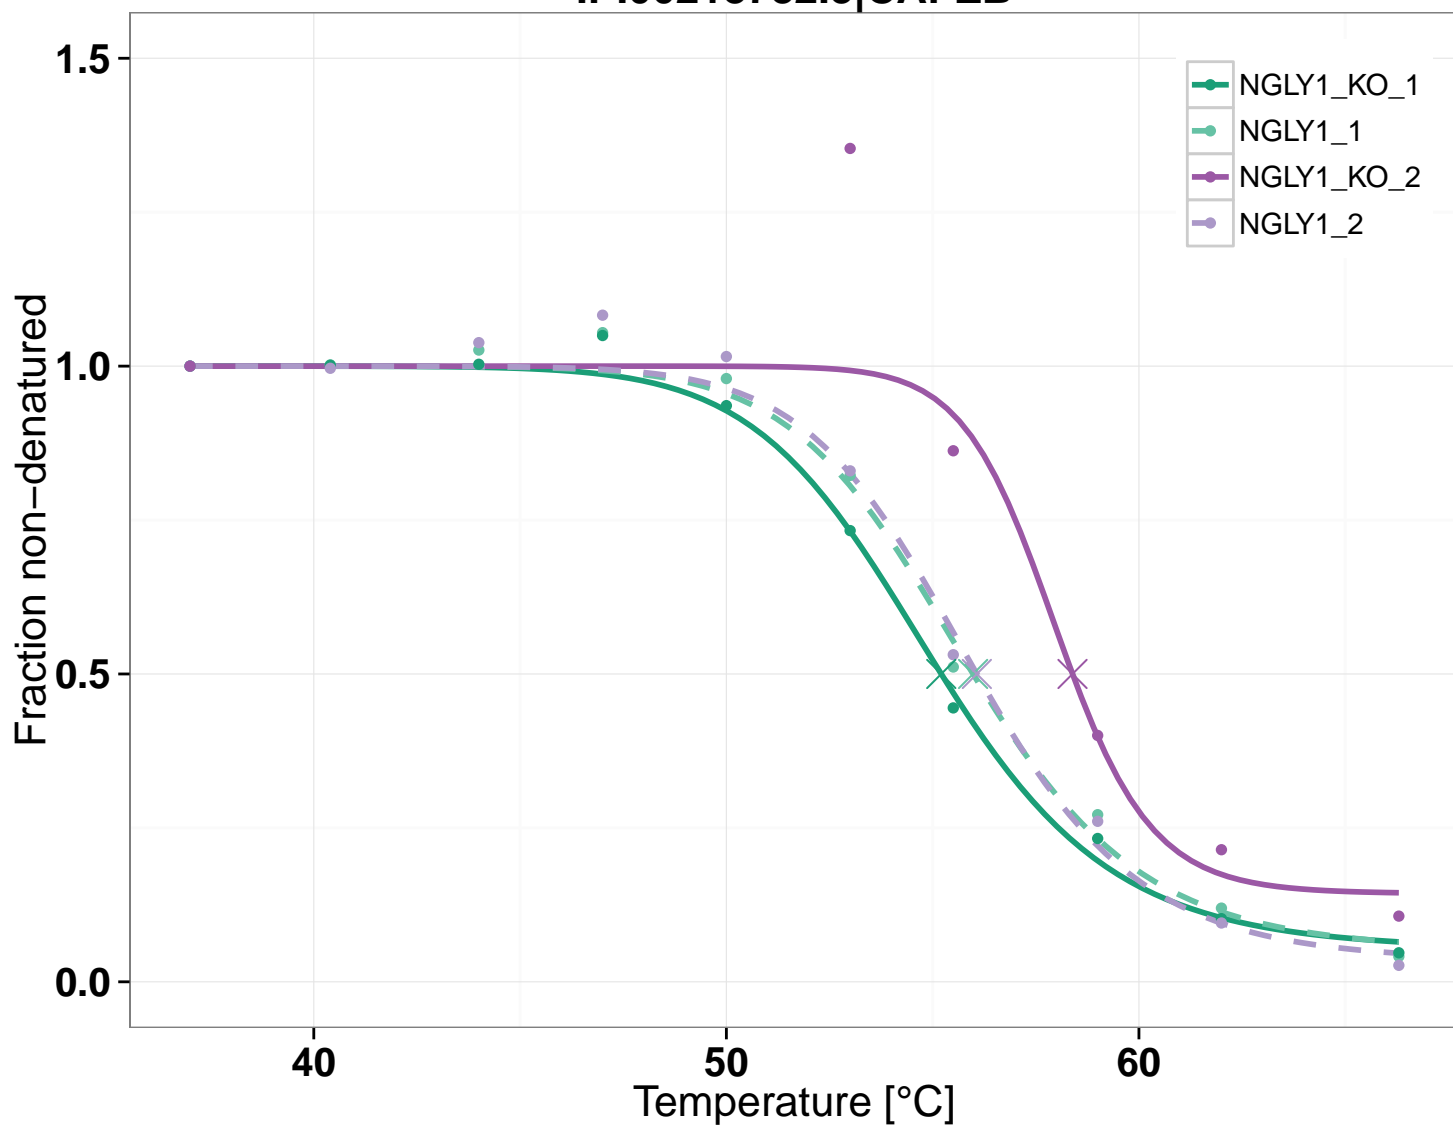

|            | meltPoint | slope | plateau | R2   |
|------------|-----------|-------|---------|------|
| NGLY1_KO_1 | 55.21     | -0.11 | 0.05    | 1    |
| NGLY1_1    | 55.98     | -0.11 | 0.05    | 0.99 |
| NGLY1_KO_2 | 58.39     | -0.19 | 0.14    | 0.43 |
| NGLY1_2    | 56.07     | -0.12 | 0.03    | 0.99 |

Supplement: Supplementary file 6173 [file 1]

IPI00023787.1|BCL2L2

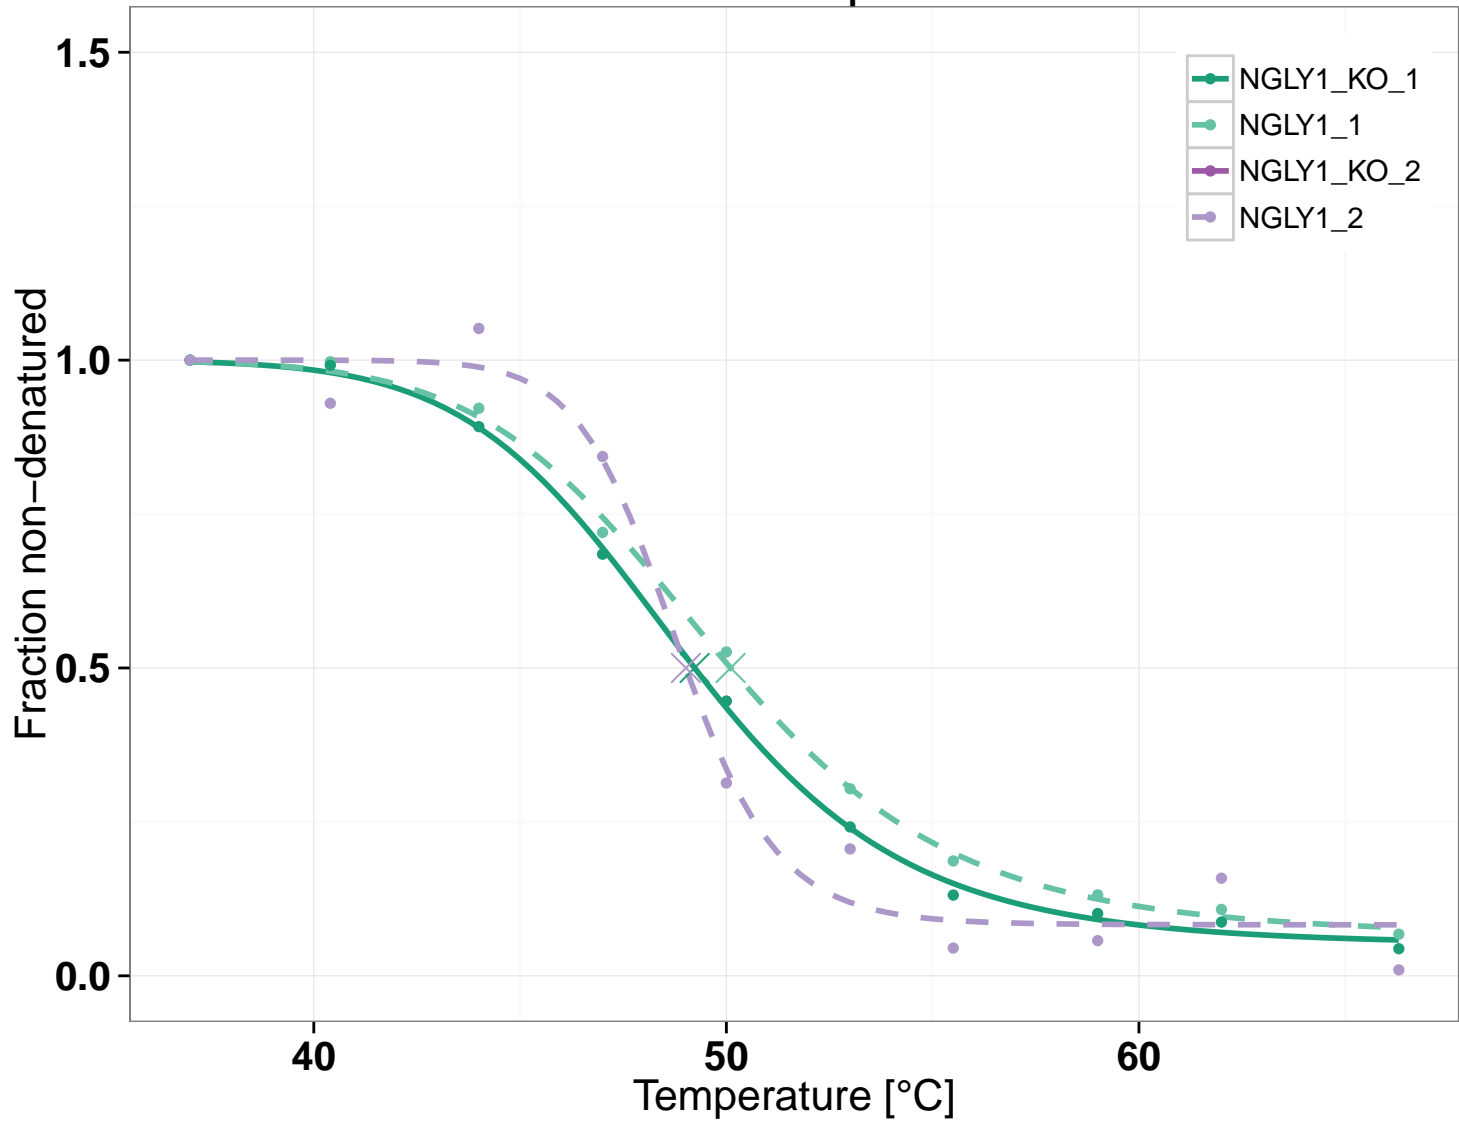

|            | meltPoint | slope  | plateau | R2   |
|------------|-----------|--------|---------|------|
| NGLY1_KO_1 | 49.23     | -0.089 | 0.05    | 1    |
| NGLY1_1    | 50.1      | -0.081 | 0.07    | 1    |
| NGLY1_KO_2 | -         | -      | -       | -    |
| NGLY1_2    | 49.02     | -0.19  | 0.08    | 0.98 |

Supplement: Supplementary file 6174 [file 1]

IPI00333770.6|DOCK10

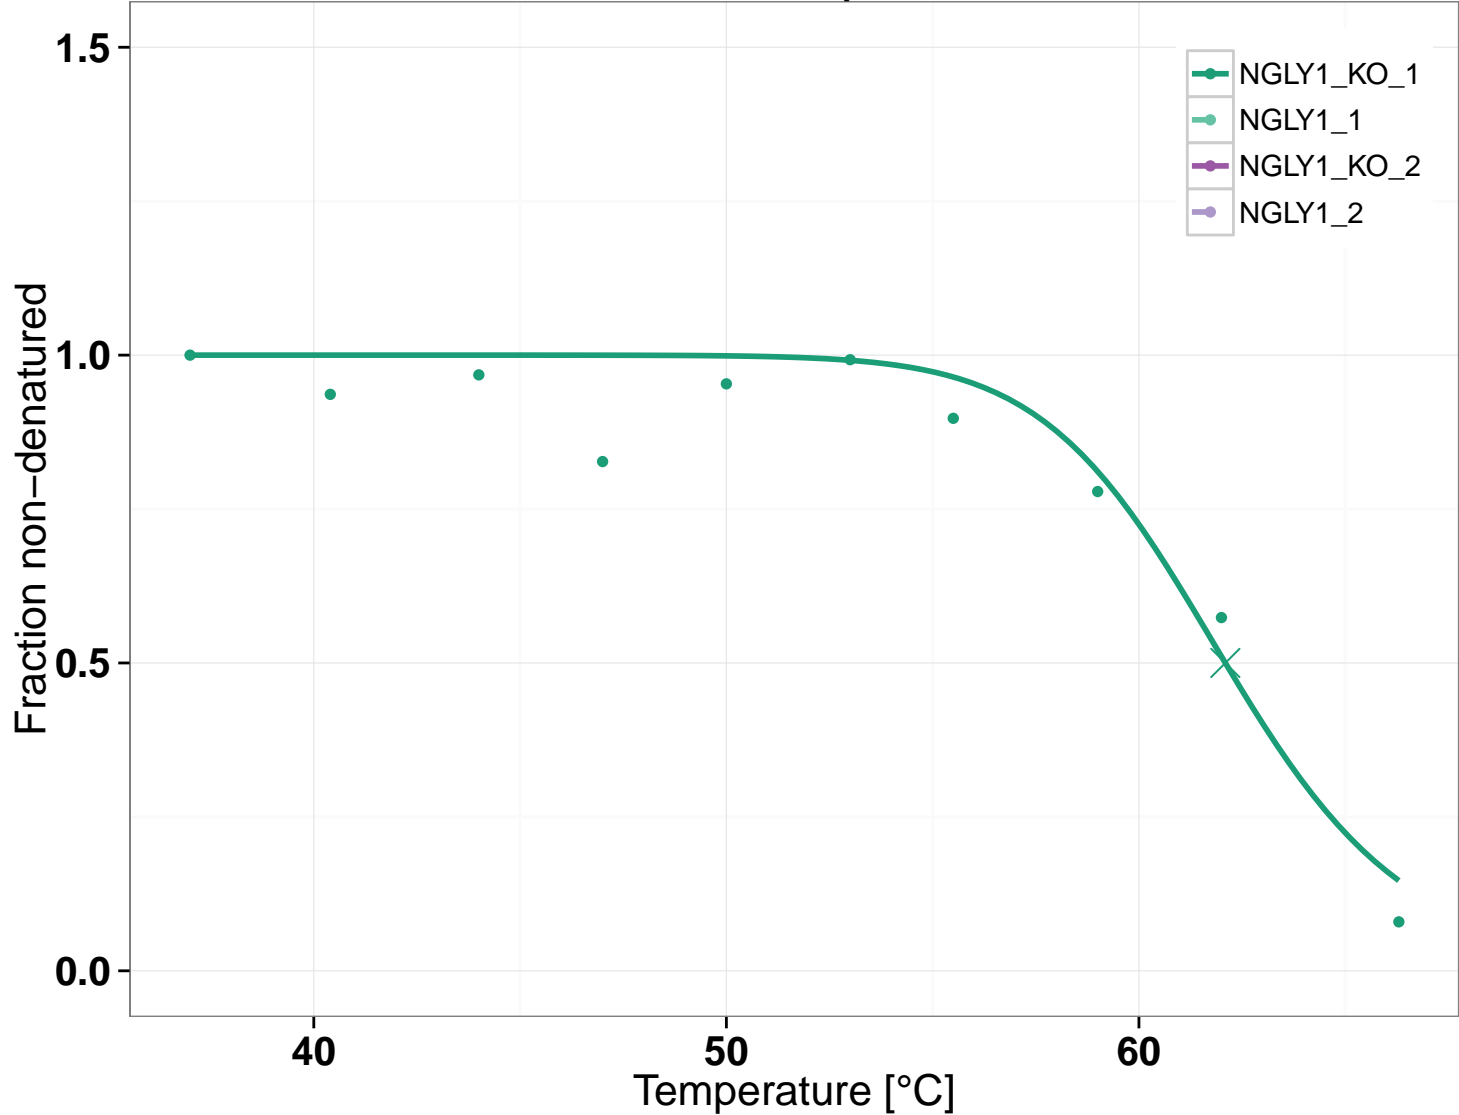

|            | meltPoint | slope | plateau | R2   |
|------------|-----------|-------|---------|------|
| NGLY1_KO_1 | 62.1      | -0.11 | 0       | 0.93 |
| NGLY1_1    | -         | -     | -       | -    |
| NGLY1_KO_2 | -         | -     | -       | -    |
| NGLY1_2    | -         | -     | -       | -    |

Supplement: Supplementary file 6175 [file 1]

IPI00157034.4|SLC10A4

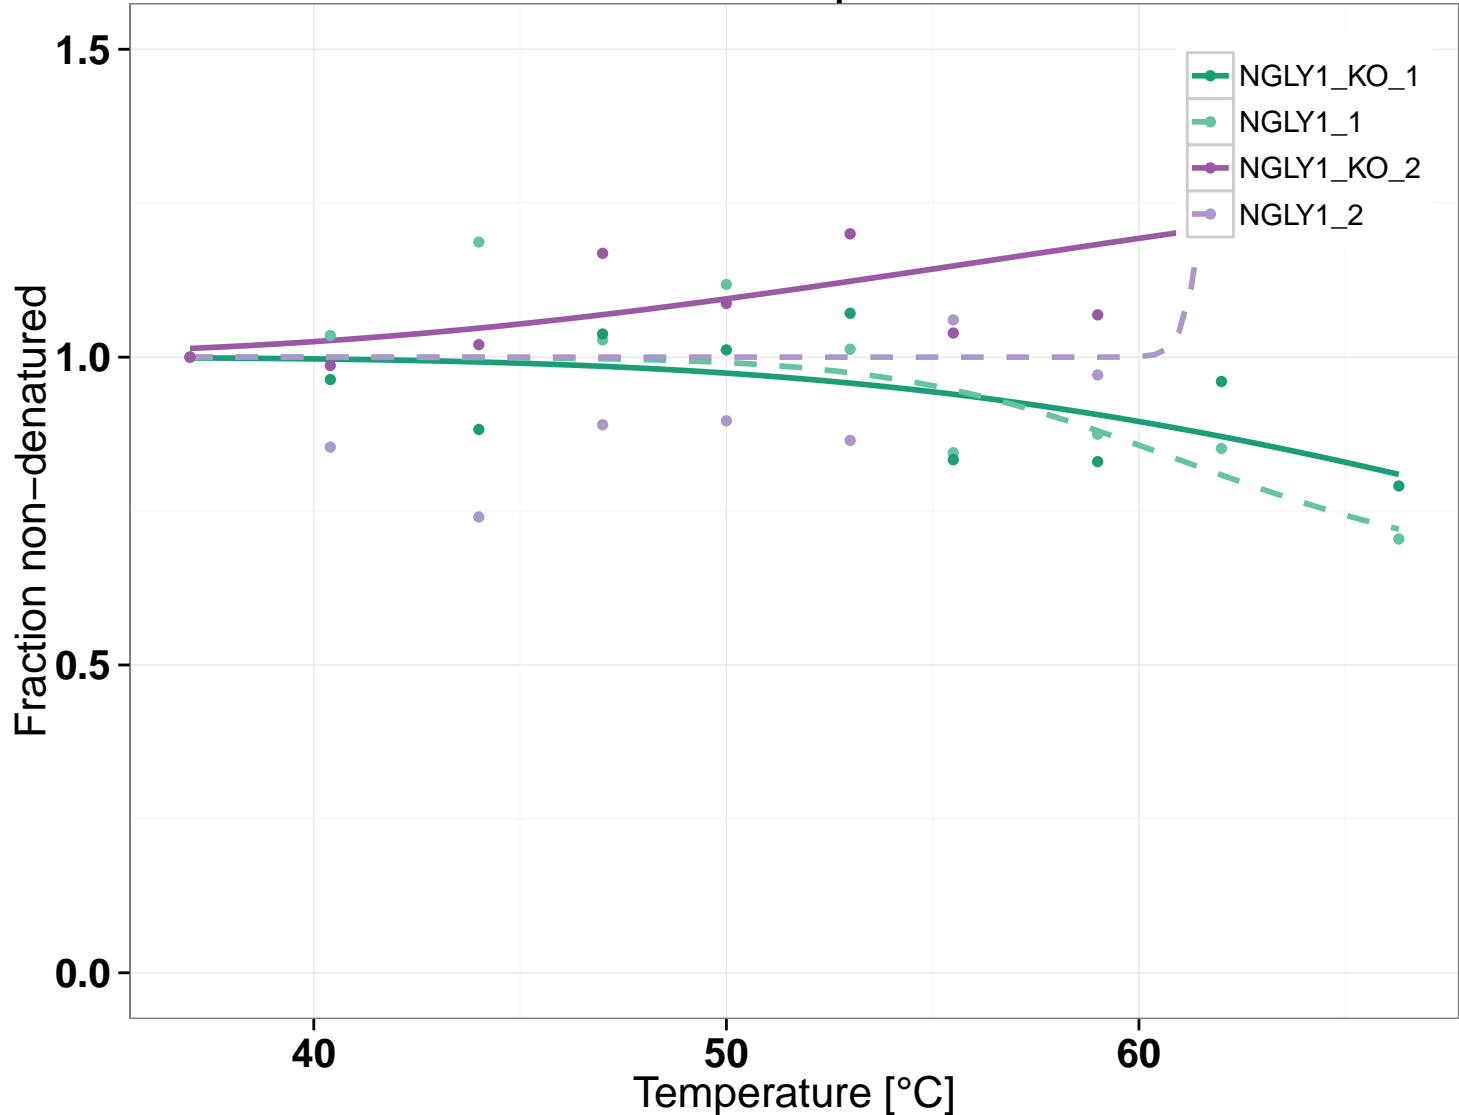

|            | meltPoint | slope  | plateau | R2   |
|------------|-----------|--------|---------|------|
| NGLY1_KO_1 | -         | -      | 0       | 0.35 |
| NGLY1_1    | -         | -0.024 | 0.62    | 0.64 |
| NGLY1_KO_2 | -         | 0.01   | 1.5     | 0.5  |
| NGLY1_2    | -         | 0.49   | 1.5     | 0.78 |

Supplement: Supplementary file 6176 [file 1]

IPI00107104.1|CXORF26

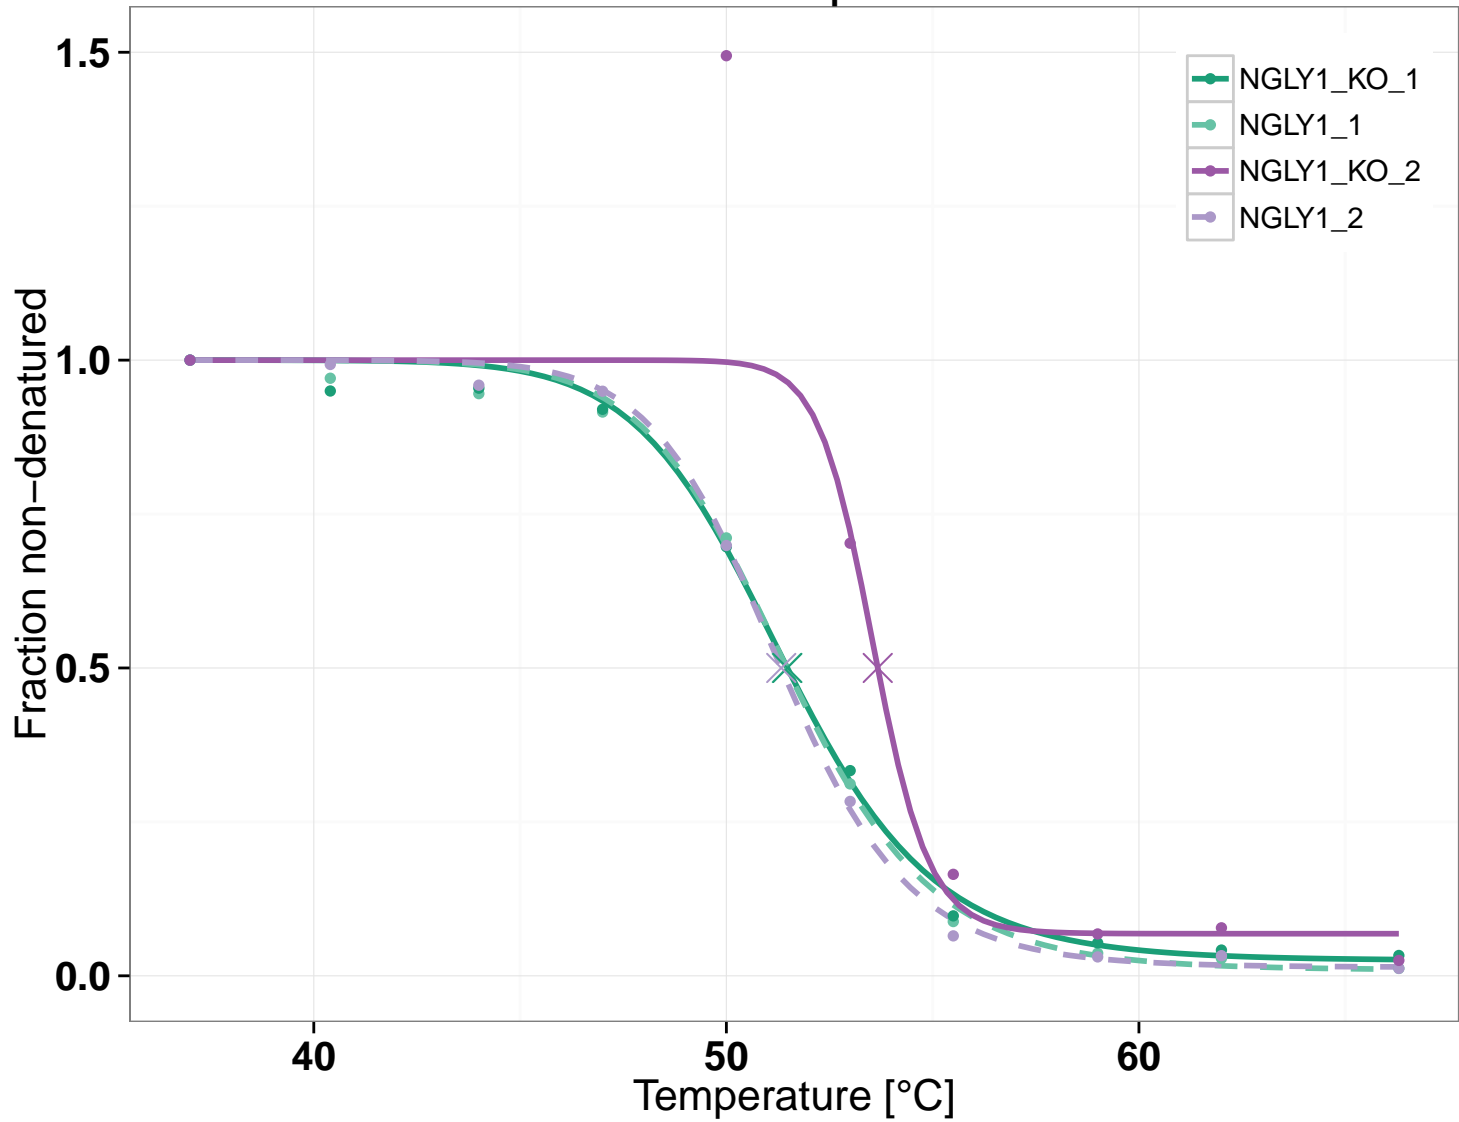

|            | meltPoint | slope | plateau | R2   |
|------------|-----------|-------|---------|------|
| NGLY1_KO_1 | 51.48     | -0.13 | 0.02    | 1    |
| NGLY1_1    | 51.46     | -0.14 | 0.01    | 1    |
| NGLY1_KO_2 | 53.67     | -0.35 | 0.07    | 0.53 |
| NGLY1_2    | 51.33     | -0.16 | 0.01    | 1    |

Supplement: Supplementary file 6177 [file 1]

IPI00017592.1|LETM1

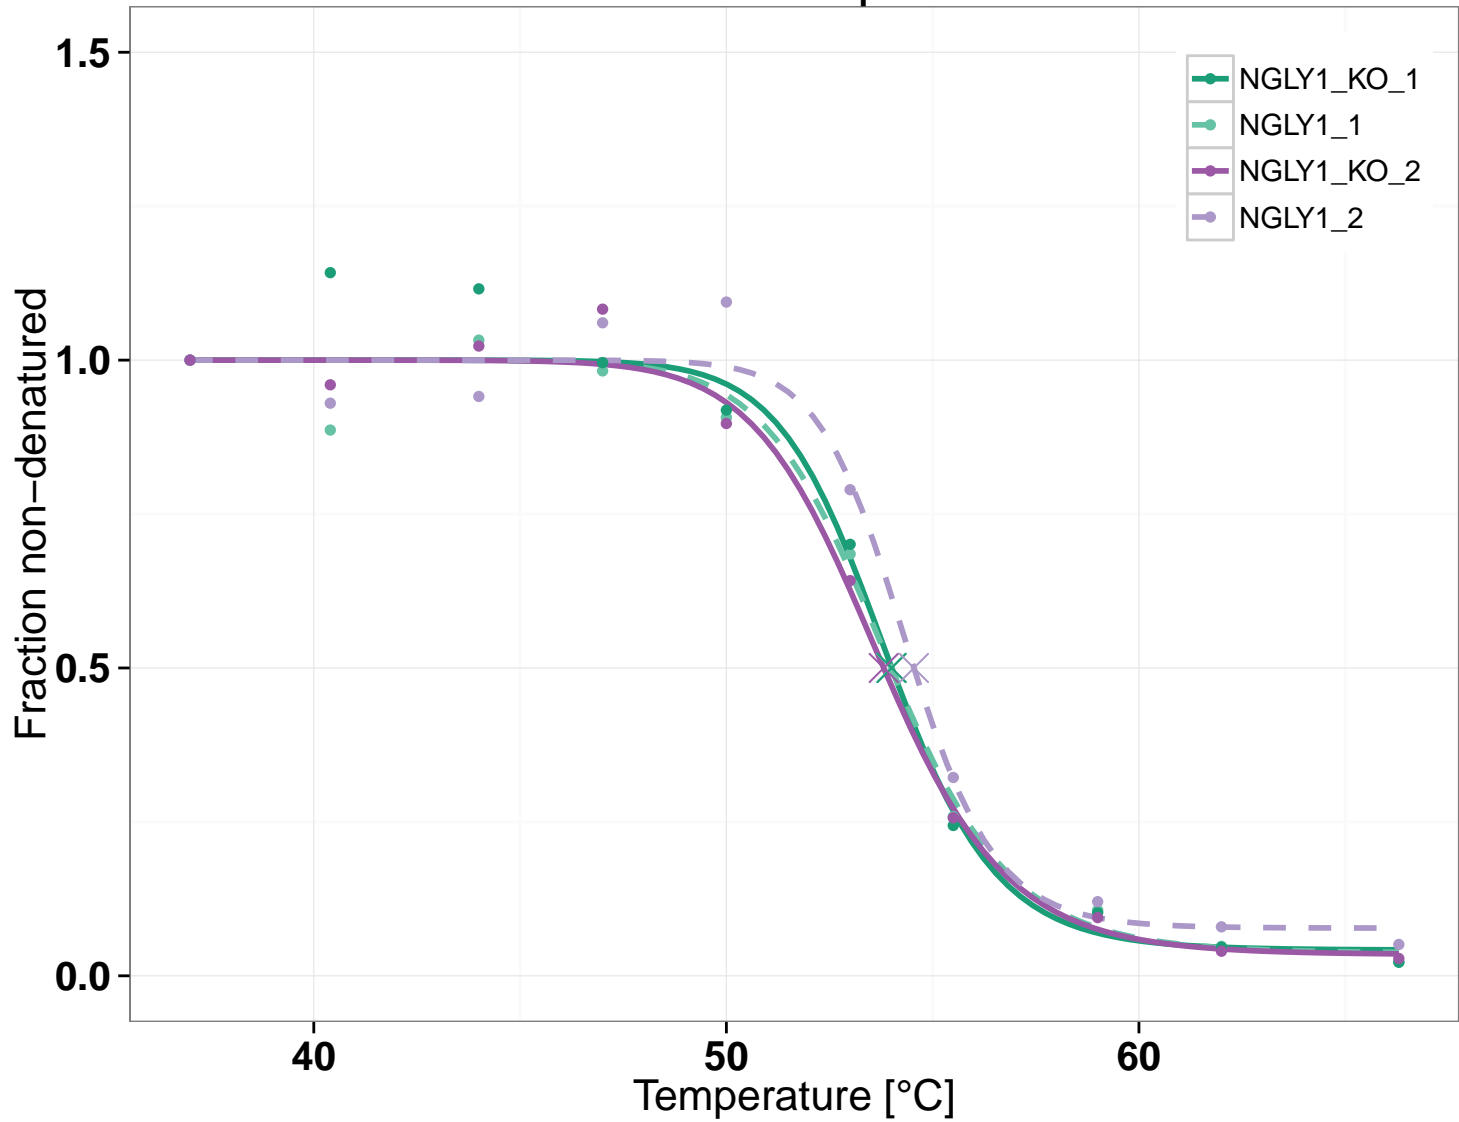

|            | meltPoint | slope | plateau | R2   |
|------------|-----------|-------|---------|------|
| NGLY1_KO_1 | 54.01     | -0.18 | 0.04    | 0.98 |
| NGLY1_1    | 53.99     | -0.16 | 0.04    | 0.99 |
| NGLY1_KO_2 | 53.81     | -0.16 | 0.03    | 0.99 |
| NGLY1_2    | 54.55     | -0.22 | 0.08    | 0.99 |

Supplement: Supplementary file 6178 [file 1]

IPI00874047.1|MRPS36

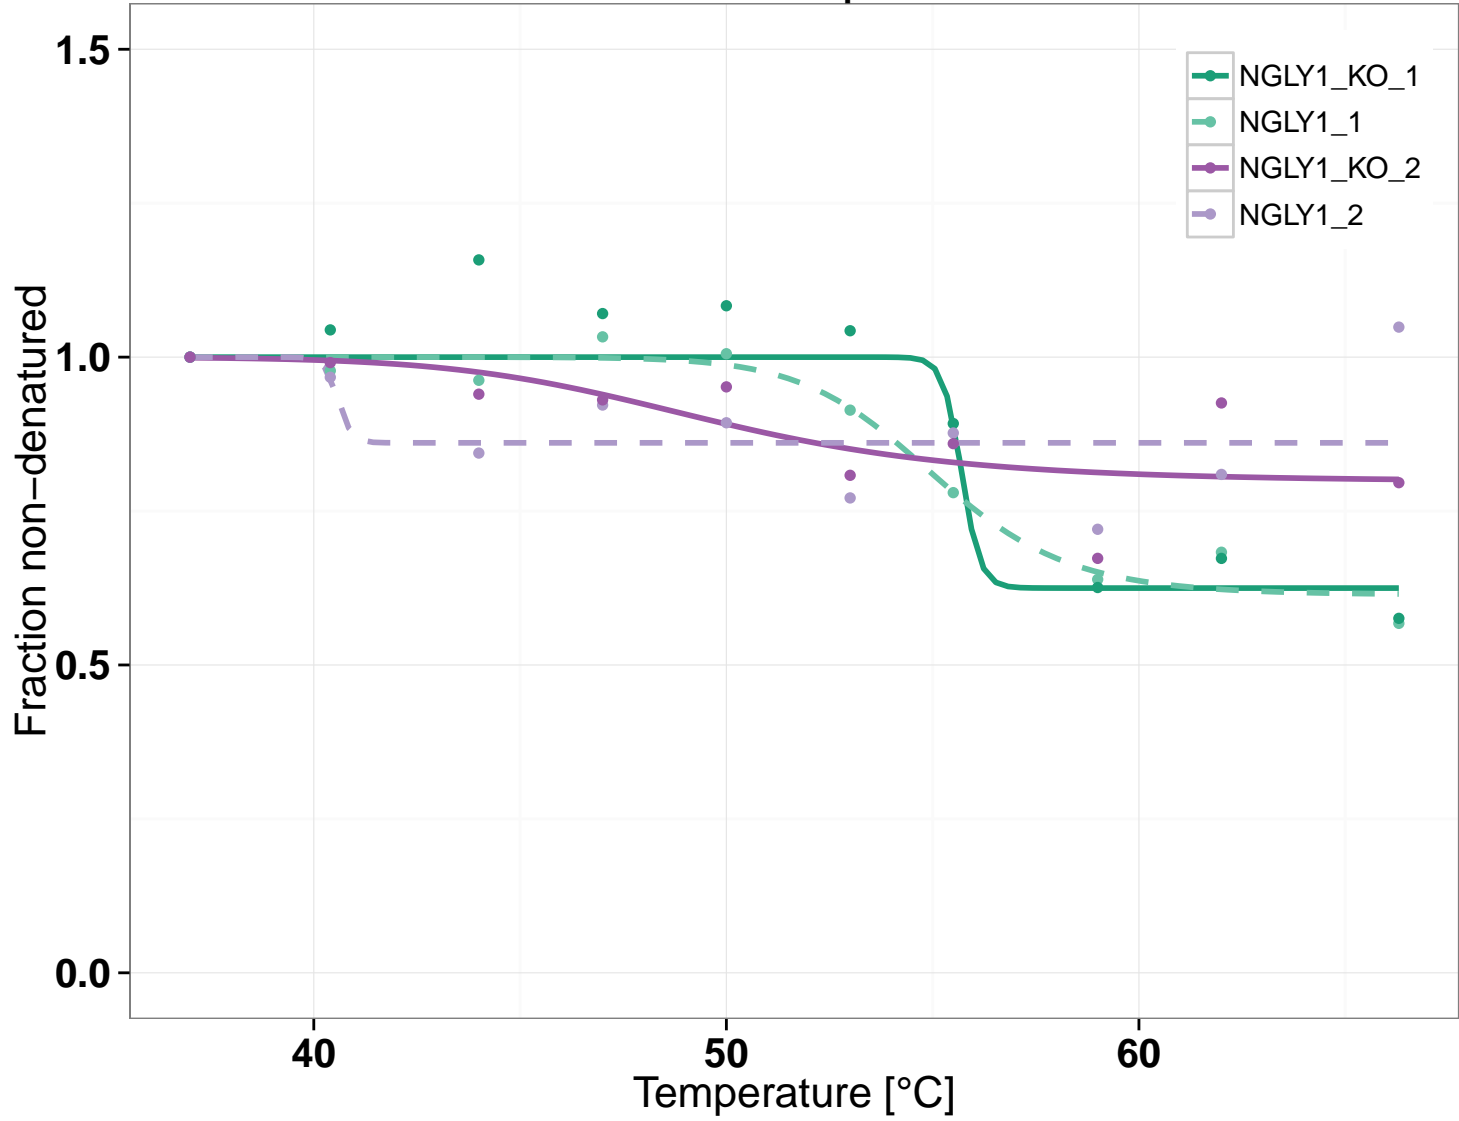

|            | meltPoint | slope  | plateau | R2   |
|------------|-----------|--------|---------|------|
| NGLY1_KO_1 | –         | –0.42  | 0.62    | 0.89 |
| NGLY1_1    | –         | –0.059 | 0.61    | 0.96 |
| NGLY1_KO_2 | –         | –0.016 | 0.8     | 0.56 |
| NGLY1_2    | –         | –0.21  | 0.86    | 0.26 |

Supplement: Supplementary file 6179 [file 1]

# IPI00399307.2|PRCP

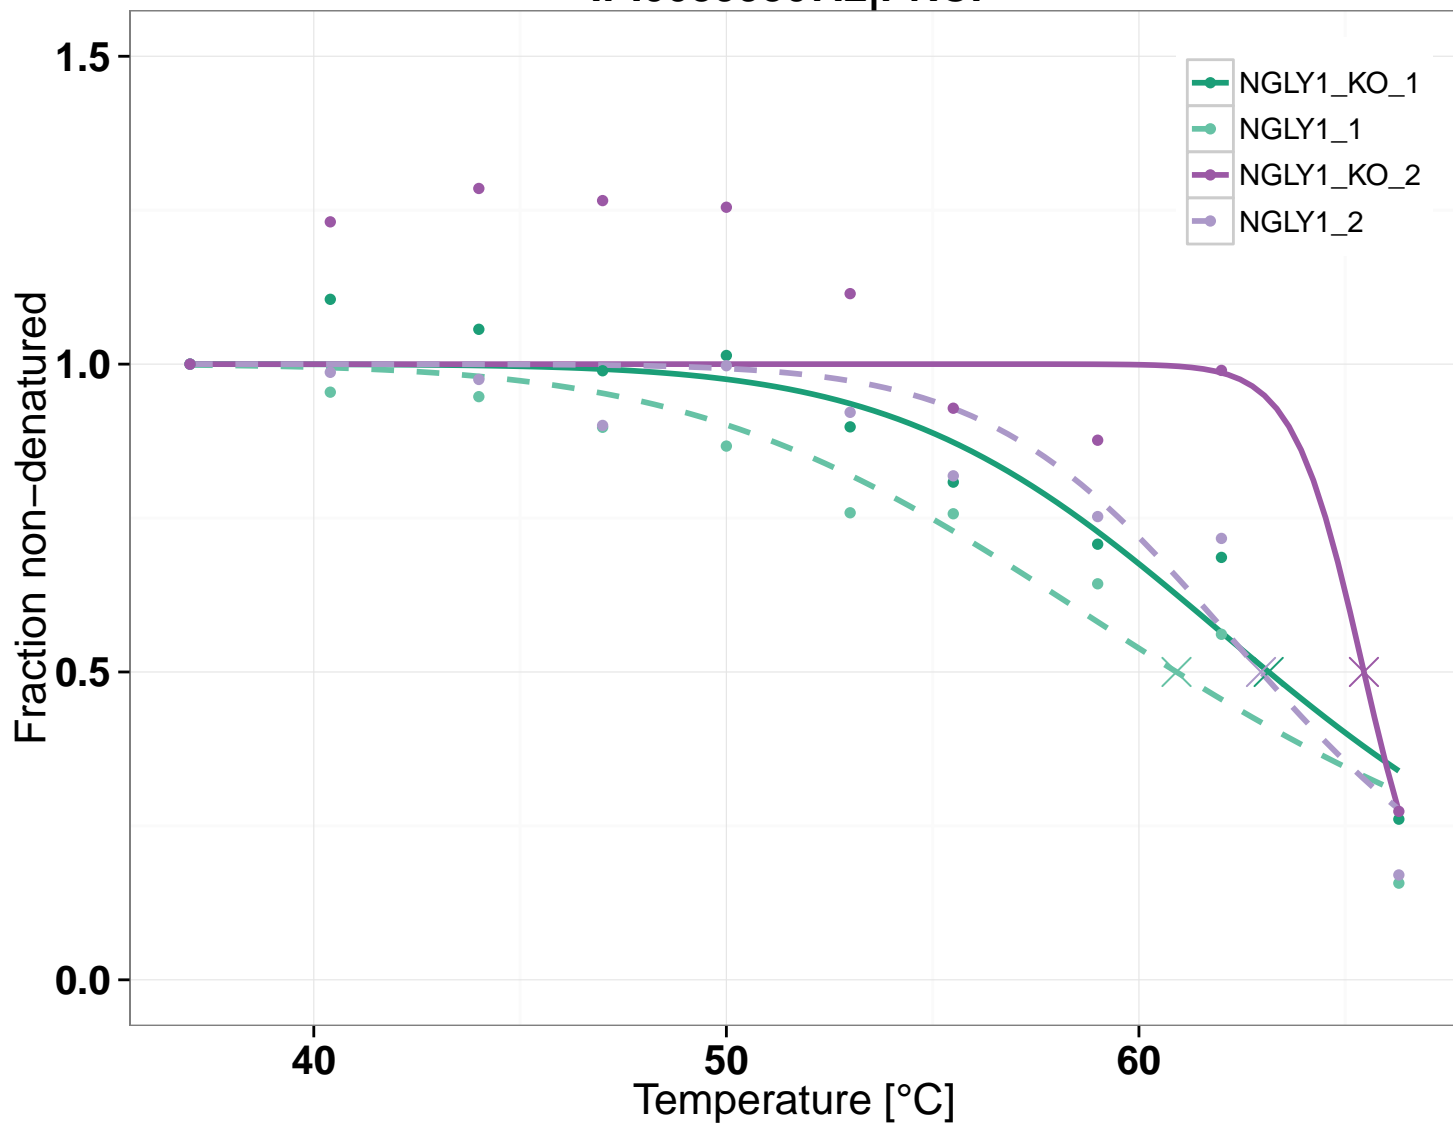

|            | meltPoint | slope  | plateau | R2   |
|------------|-----------|--------|---------|------|
| NGLY1_KO_1 | 63.14     | -0.057 | 0       | 0.92 |
| NGLY1_1    | 60.91     | -0.043 | 0       | 0.92 |
| NGLY1_KO_2 | 65.45     | -0.29  | 0       | 0.63 |
| NGLY1_2    | 62.96     | -0.076 | 0       | 0.9  |

Supplement: Supplementary file 6180 [file 1]

IPI00021143.1|BHLHE40

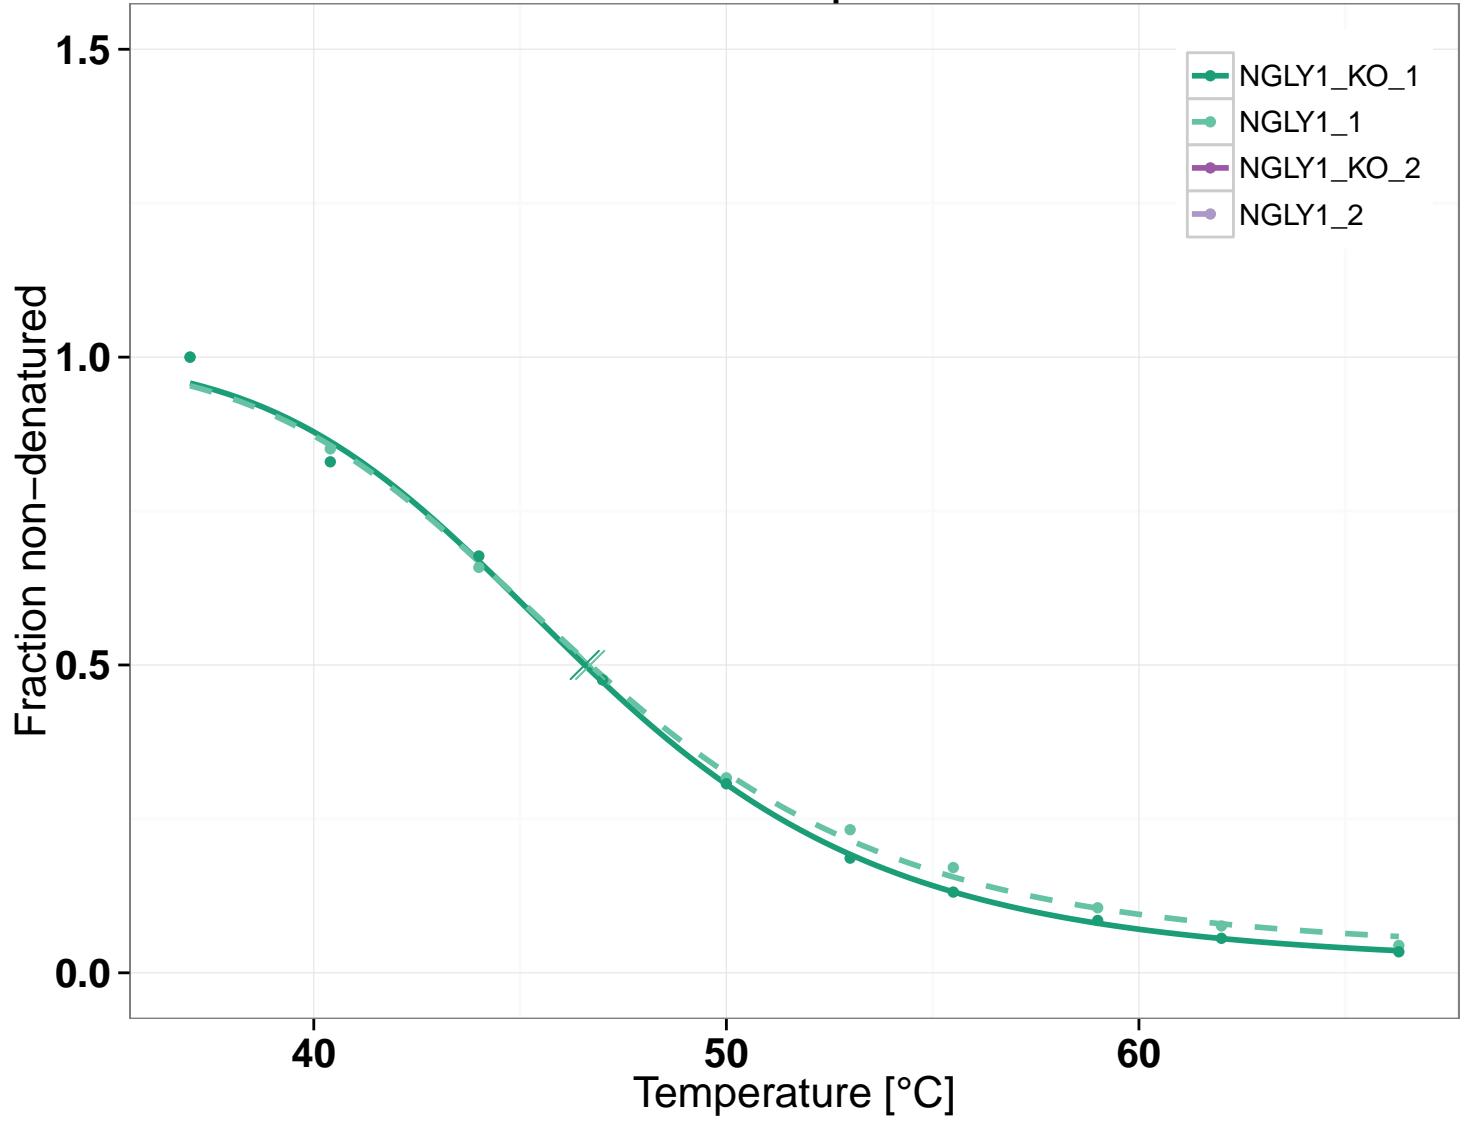

|            | meltPoint | slope  | plateau | R2 |
|------------|-----------|--------|---------|----|
| NGLY1_KO_1 | 46.57     | -0.066 | 0.01    | 1  |
| NGLY1_1    | 46.7      | -0.063 | 0.03    | 1  |
| NGLY1_KO_2 | -         | -      | -       | -  |
| NGLY1_2    | -         | -      | -       | -  |

Supplement: Supplementary file 6181 [file 1]

IPI00149094.4|MAP4K2

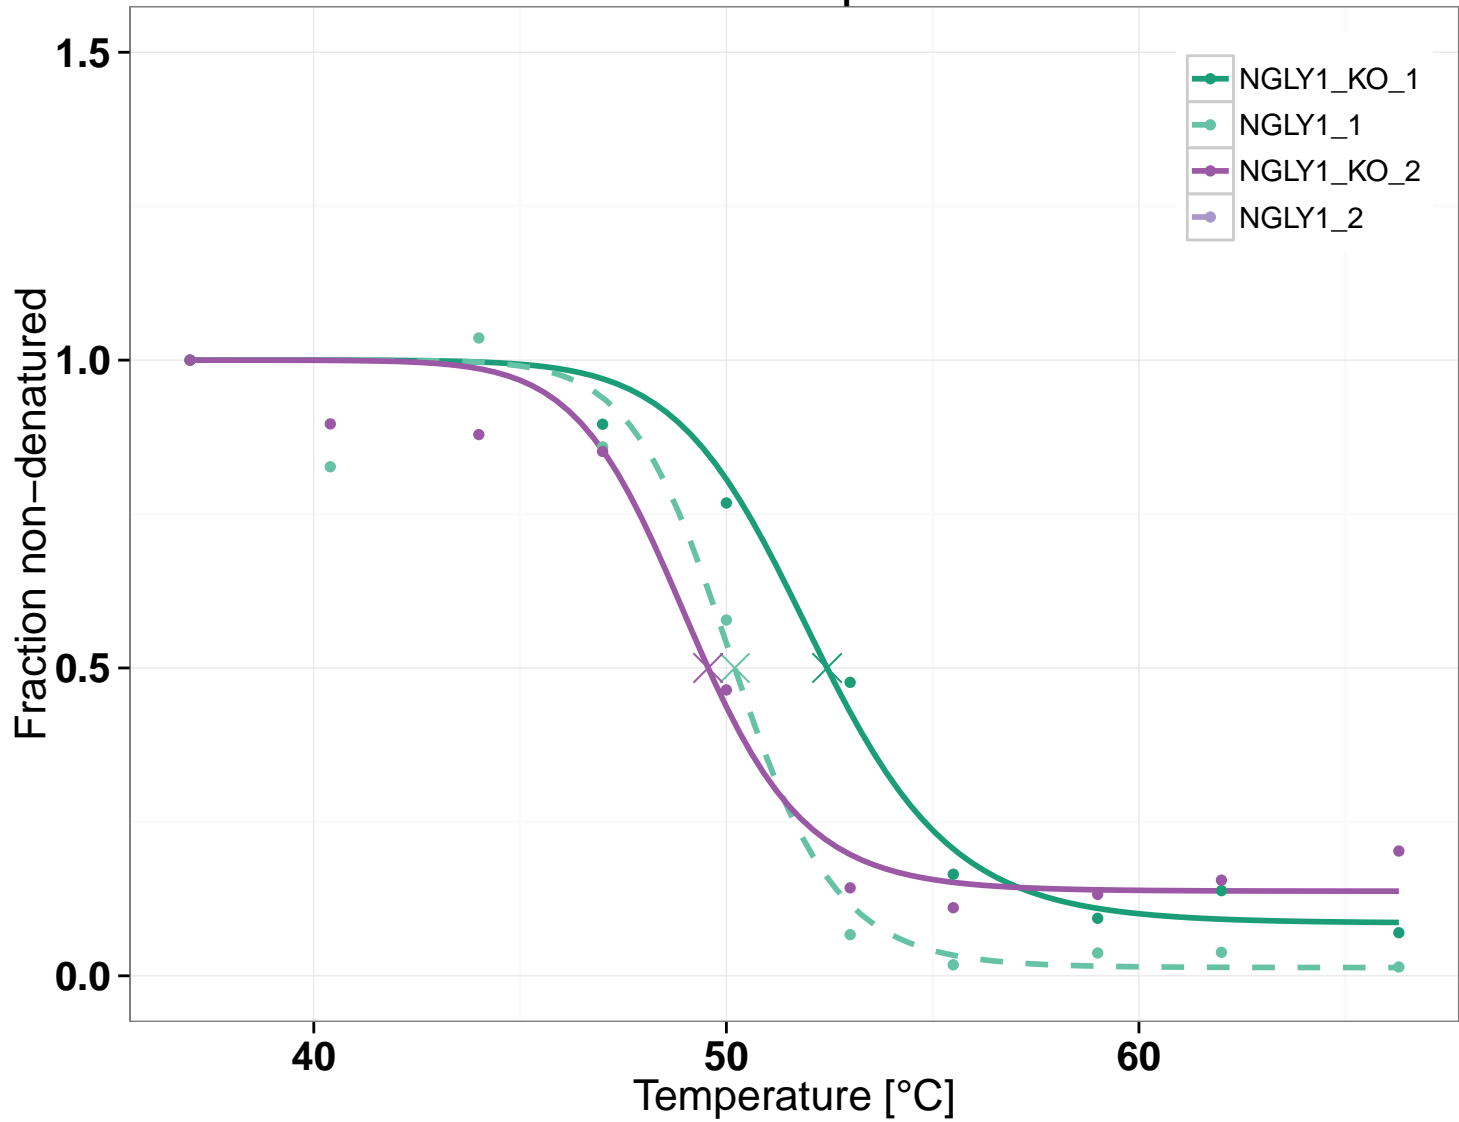

|            | meltPoint | slope | plateau | R2   |
|------------|-----------|-------|---------|------|
| NGLY1_KO_1 | 52.44     | -0.14 | 0.09    | 0.62 |
| NGLY1_1    | 50.2      | -0.2  | 0.01    | 0.98 |
| NGLY1_KO_2 | 49.56     | -0.16 | 0.14    | 0.98 |
| NGLY1_2    | -         | -     | -       | -    |

Supplement: Supplementary file 6182 [file 1]

# IPI00552115.1|ERGIC3

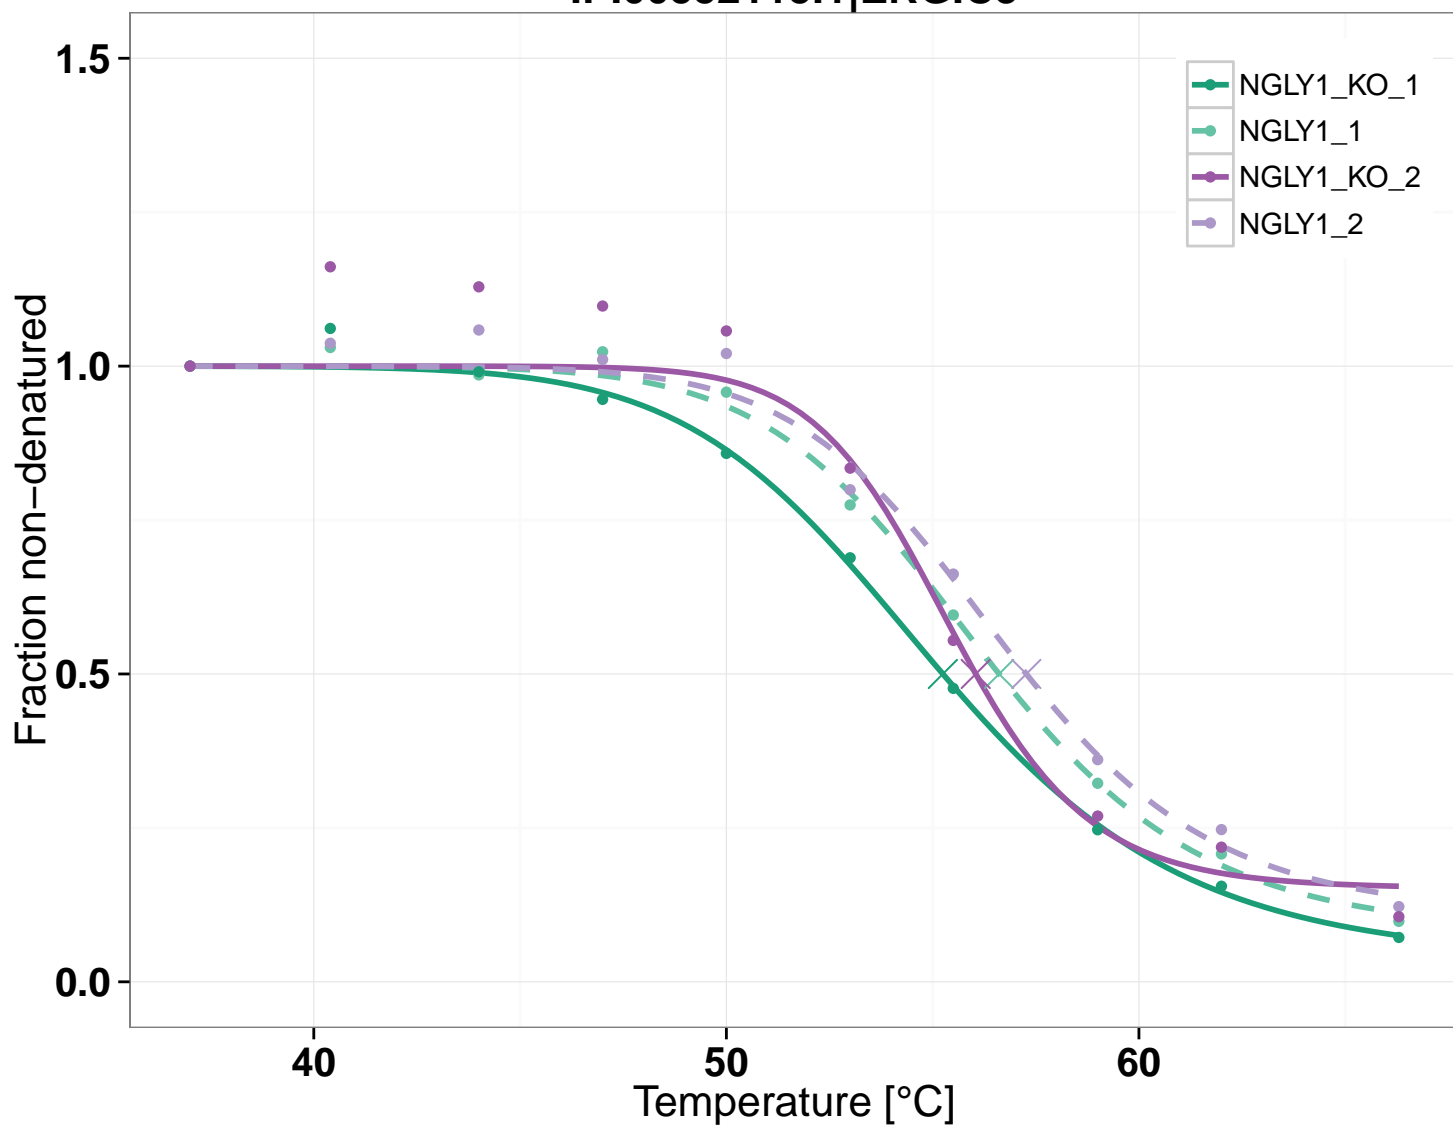

|            | meltPoint | slope  | plateau | R2   |
|------------|-----------|--------|---------|------|
| NGLY1_KO_1 | 55.25     | -0.08  | 0.03    | 1    |
| NGLY1_1    | 56.61     | -0.087 | 0.08    | 1    |
| NGLY1_KO_2 | 56.04     | -0.13  | 0.15    | 0.96 |
| NGLY1_2    | 57.27     | -0.088 | 0.11    | 0.99 |

Supplement: Supplementary file 6183 [file 1]

# IPI00646377.1|EIF4G3

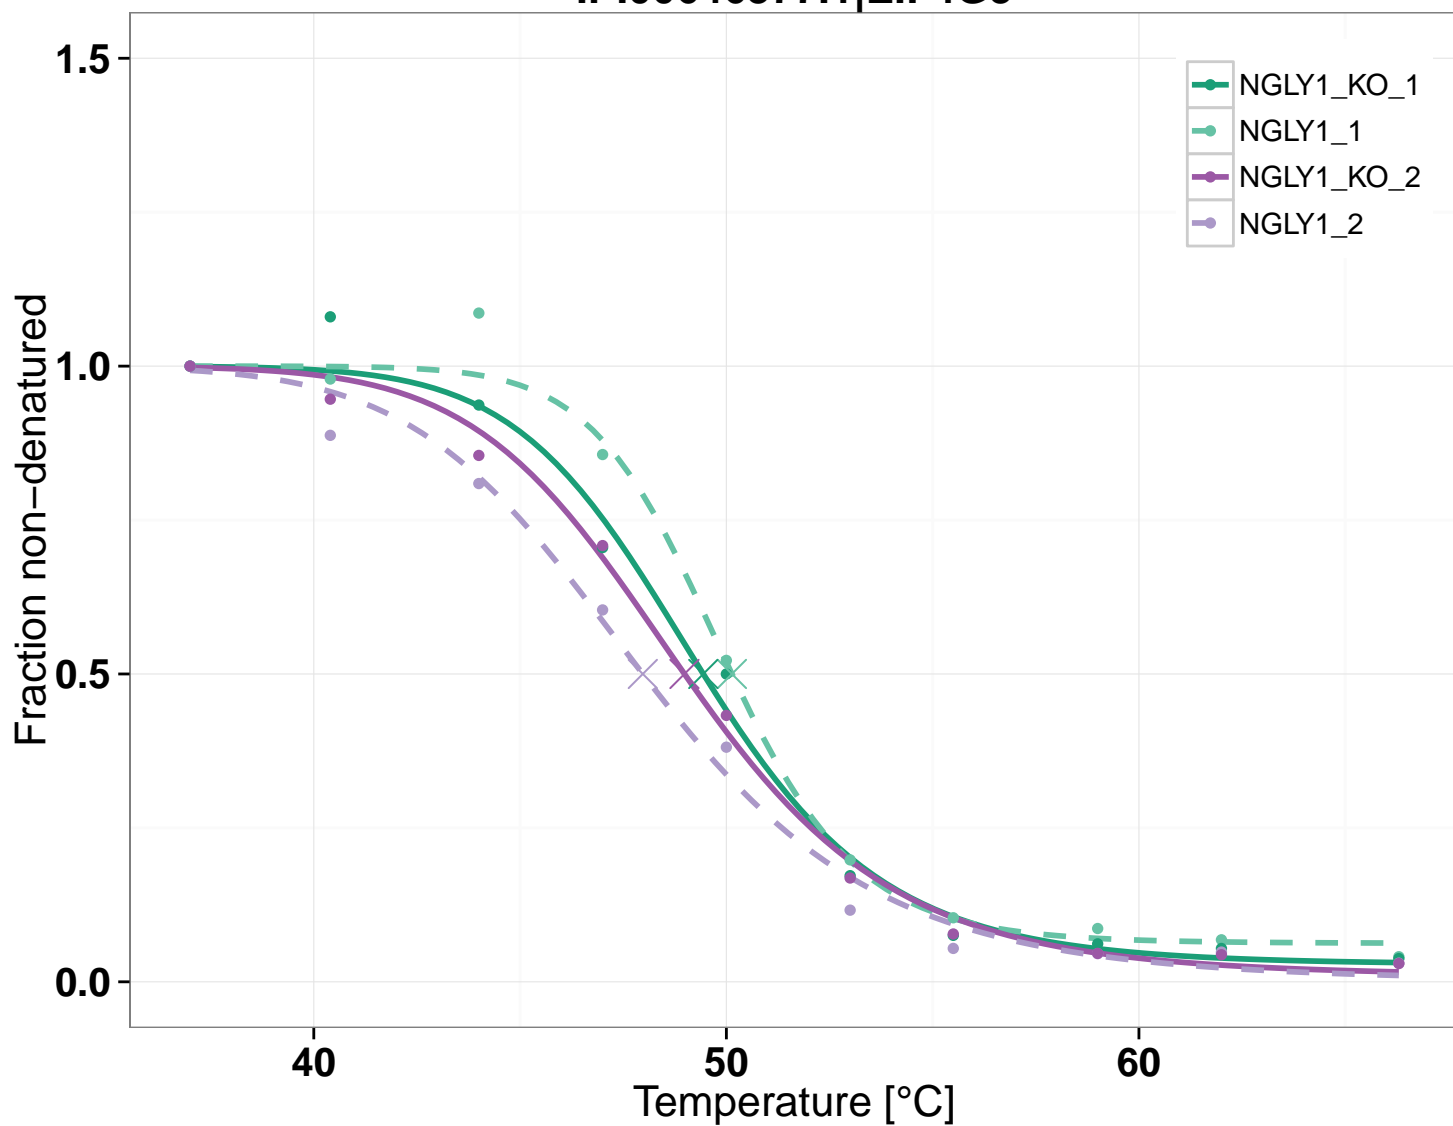

|            | meltPoint | slope  | plateau | R2   |
|------------|-----------|--------|---------|------|
| NGLY1_KO_1 | 49.44     | -0.11  | 0.03    | 0.99 |
| NGLY1_1    | 50.13     | -0.15  | 0.06    | 0.99 |
| NGLY1_KO_2 | 48.98     | -0.097 | 0.01    | 1    |
| NGLY1_2    | 47.97     | -0.089 | 0       | 0.99 |

Supplement: Supplementary file 6184 [file 1]

# IPI00452161.3|MCOLN1

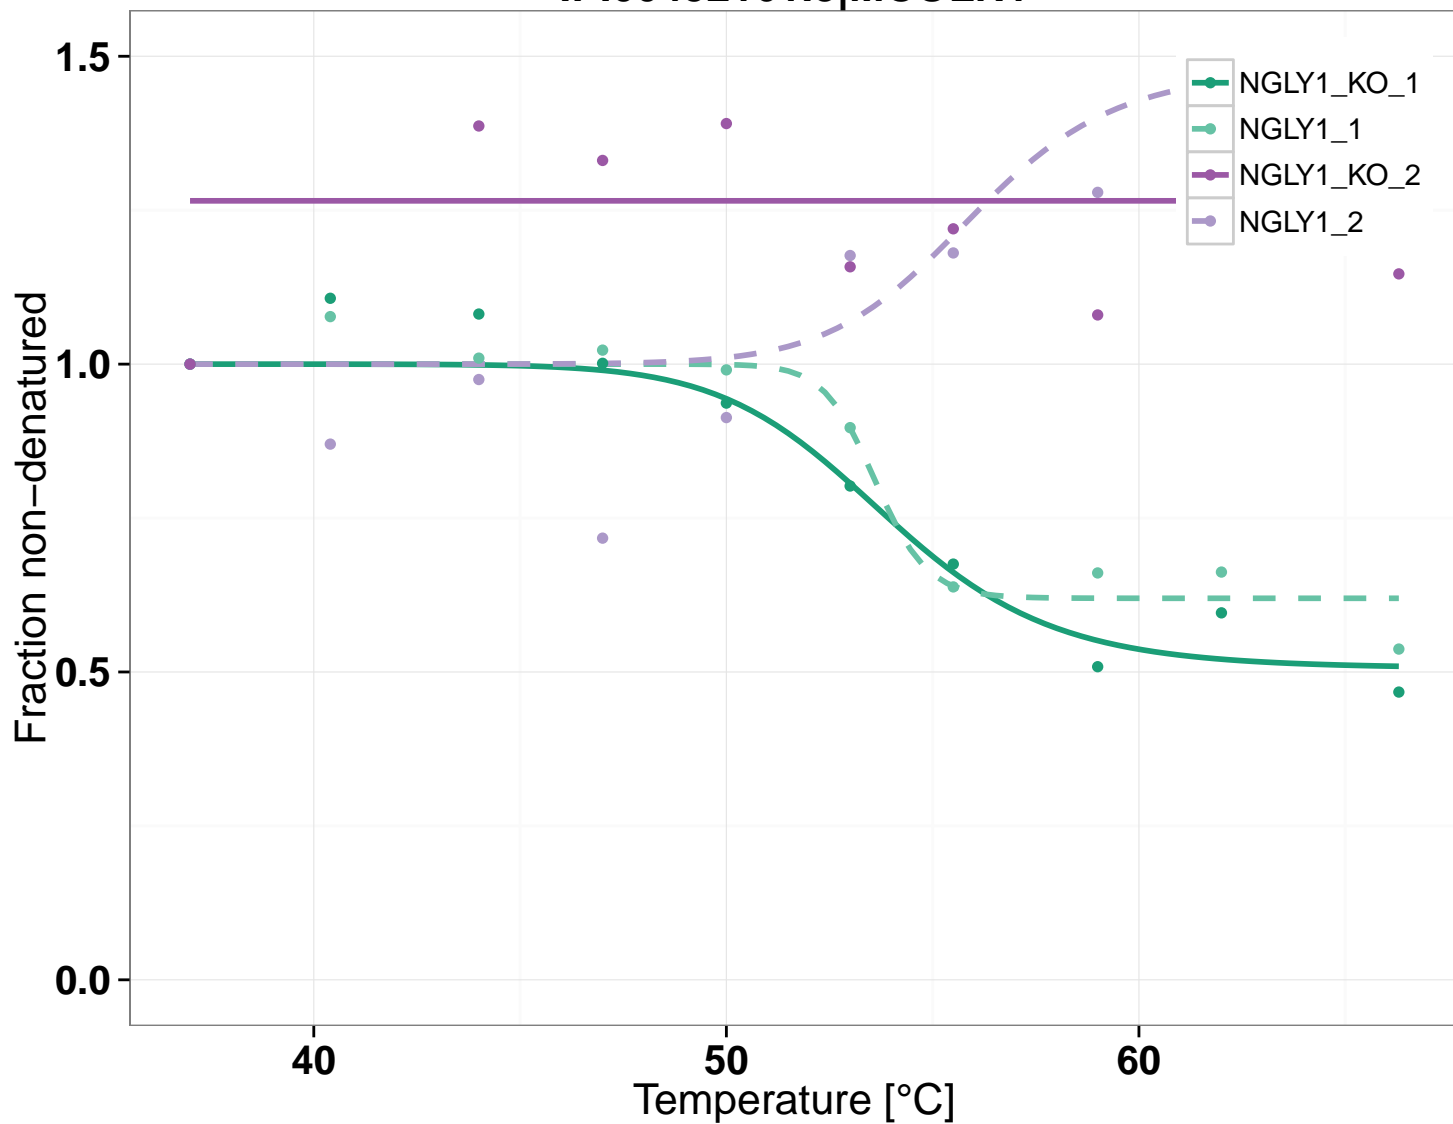

|            | meltPoint | slope  | plateau | R2   |
|------------|-----------|--------|---------|------|
| NGLY1_KO_1 | –         | –0.061 | 0.51    | 0.95 |
| NGLY1_1    | –         | –0.15  | 0.62    | 0.95 |
| NGLY1_KO_2 | –         | –      | 1.5     | 0    |
| NGLY1_2    | –         | 0.068  | 1.48    | 0.62 |

Supplement: Supplementary file 6185 [file 1]

# IPI00013241.1|UBL5

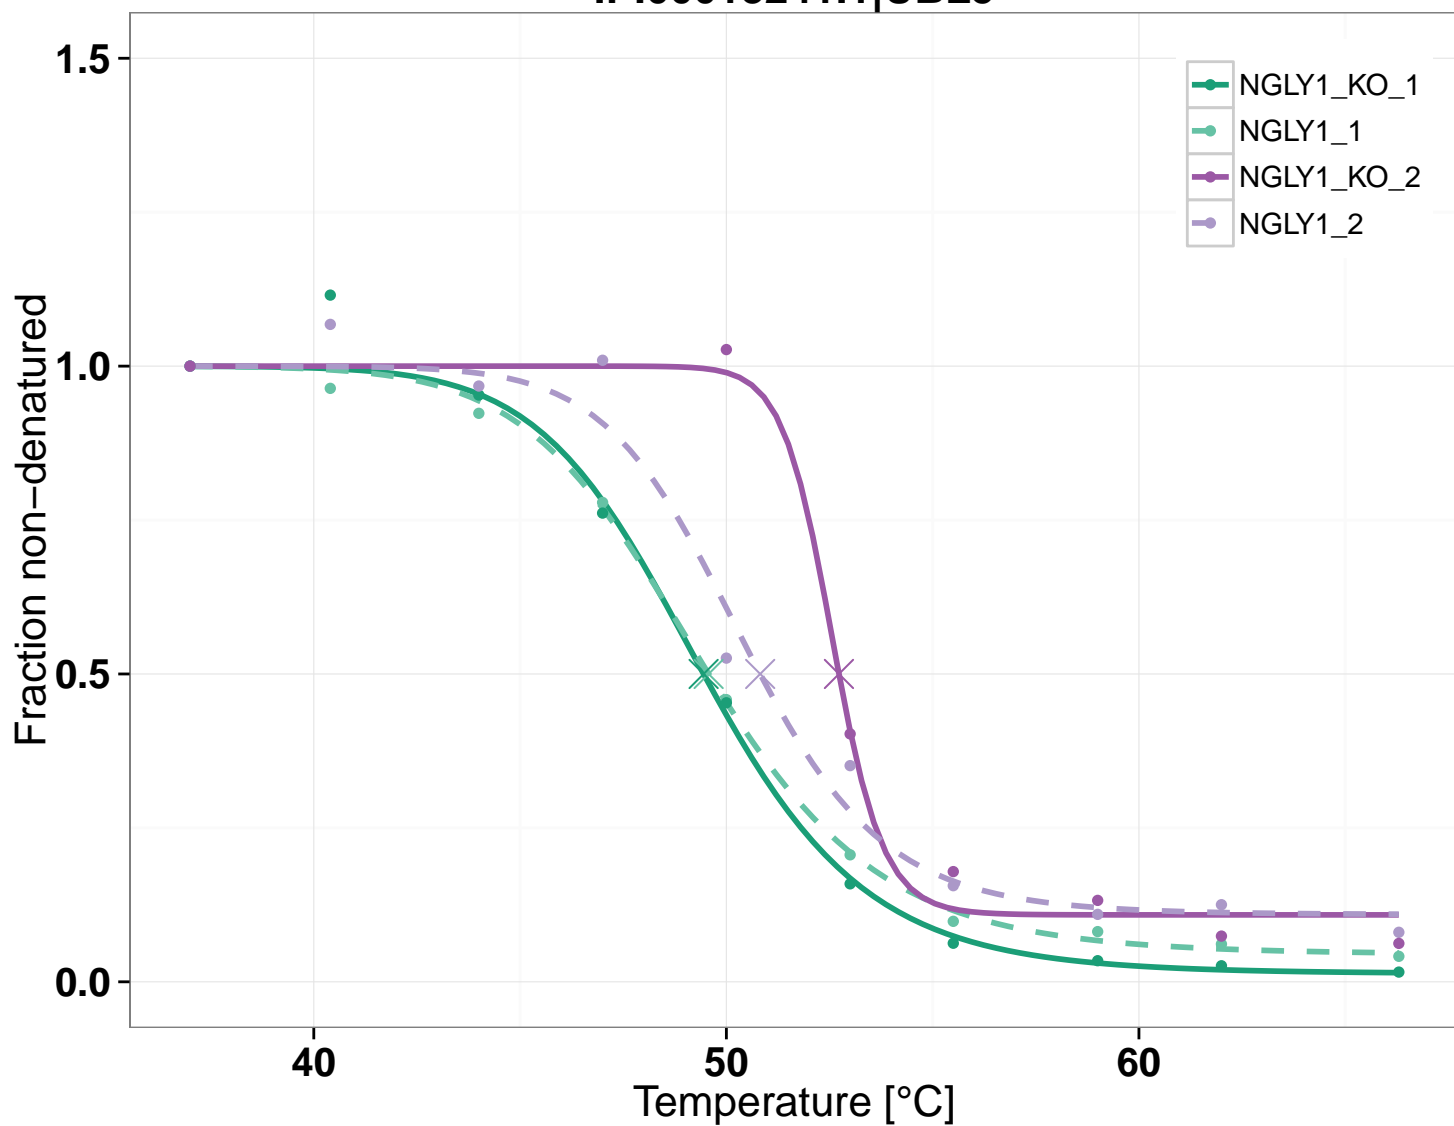

|            | meltPoint | slope | plateau | R2   |
|------------|-----------|-------|---------|------|
| NGLY1_KO_1 | 49.45     | -0.12 | 0.01    | 0.99 |
| NGLY1_1    | 49.57     | -0.11 | 0.04    | 1    |
| NGLY1_KO_2 | 52.73     | -0.36 | 0.11    | 0.47 |
| NGLY1_2    | 50.82     | -0.13 | 0.11    | 0.98 |

Supplement: Supplementary file 6186 [file 1]

IPI00305442.3|UBAC1

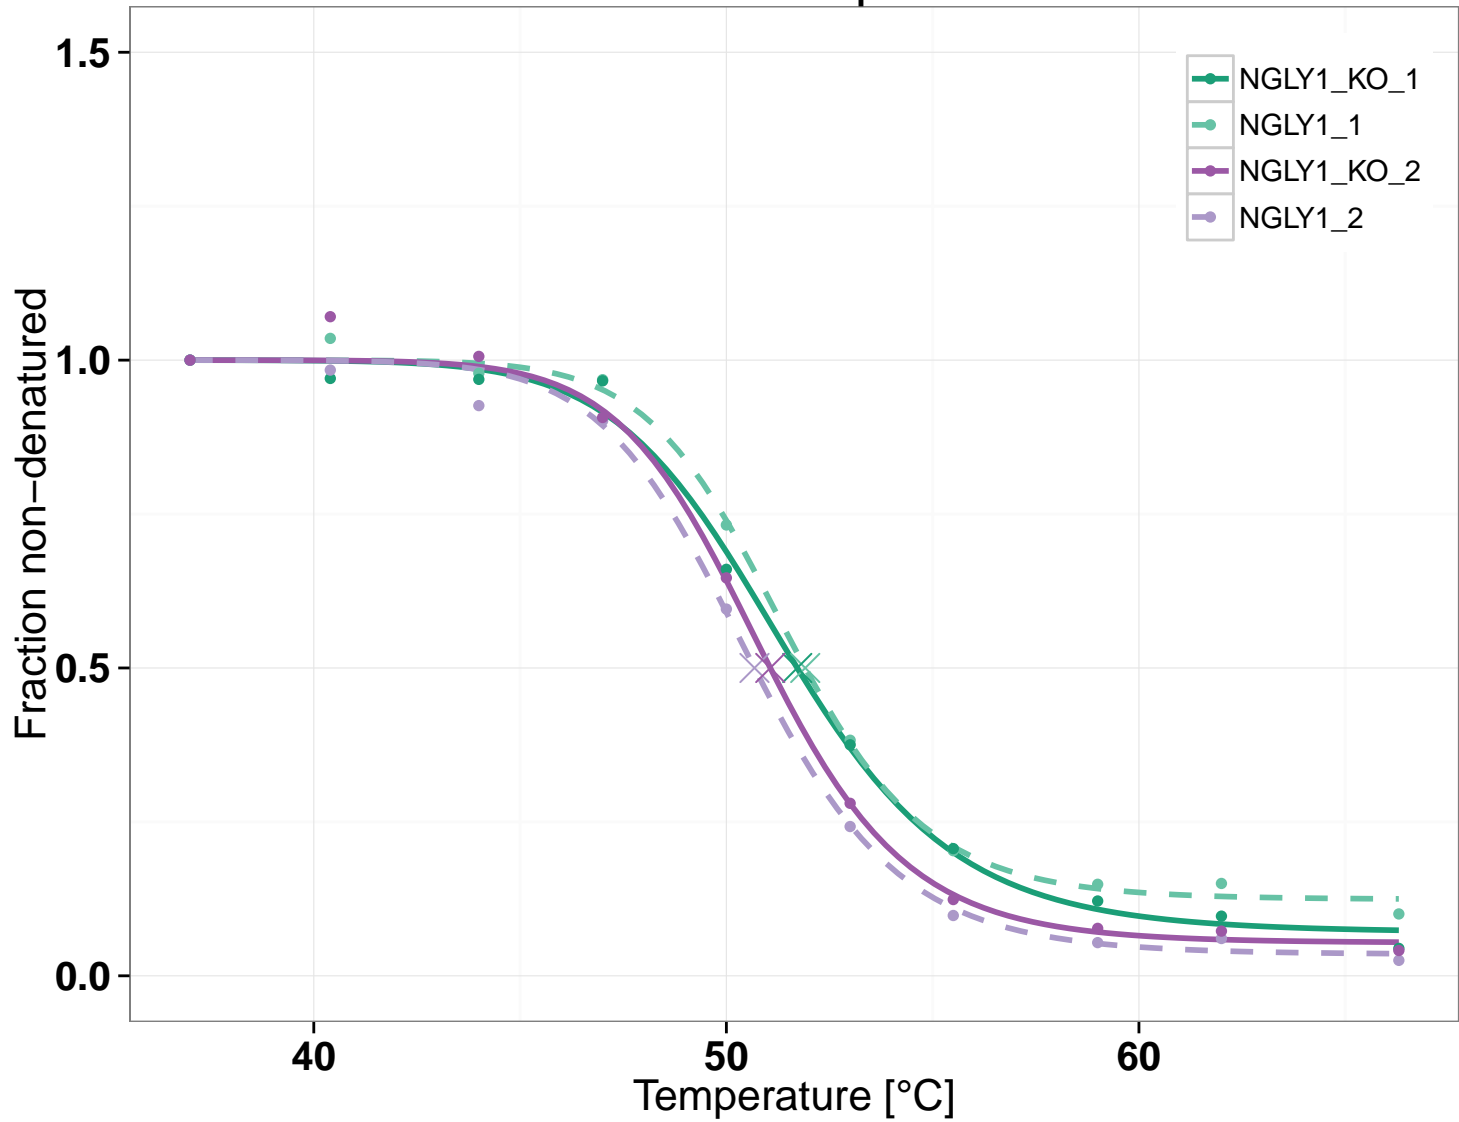

|            | meltPoint | slope | plateau | R2 |
|------------|-----------|-------|---------|----|
| NGLY1_KO_1 | 51.72     | -0.11 | 0.07    | 1  |
| NGLY1_1    | 51.91     | -0.13 | 0.12    | 1  |
| NGLY1_KO_2 | 51.06     | -0.13 | 0.05    | 1  |
| NGLY1_2    | 50.68     | -0.13 | 0.03    | 1  |

Supplement: Supplementary file 6187 [file 1]

# IPI00028160.1|HMBS

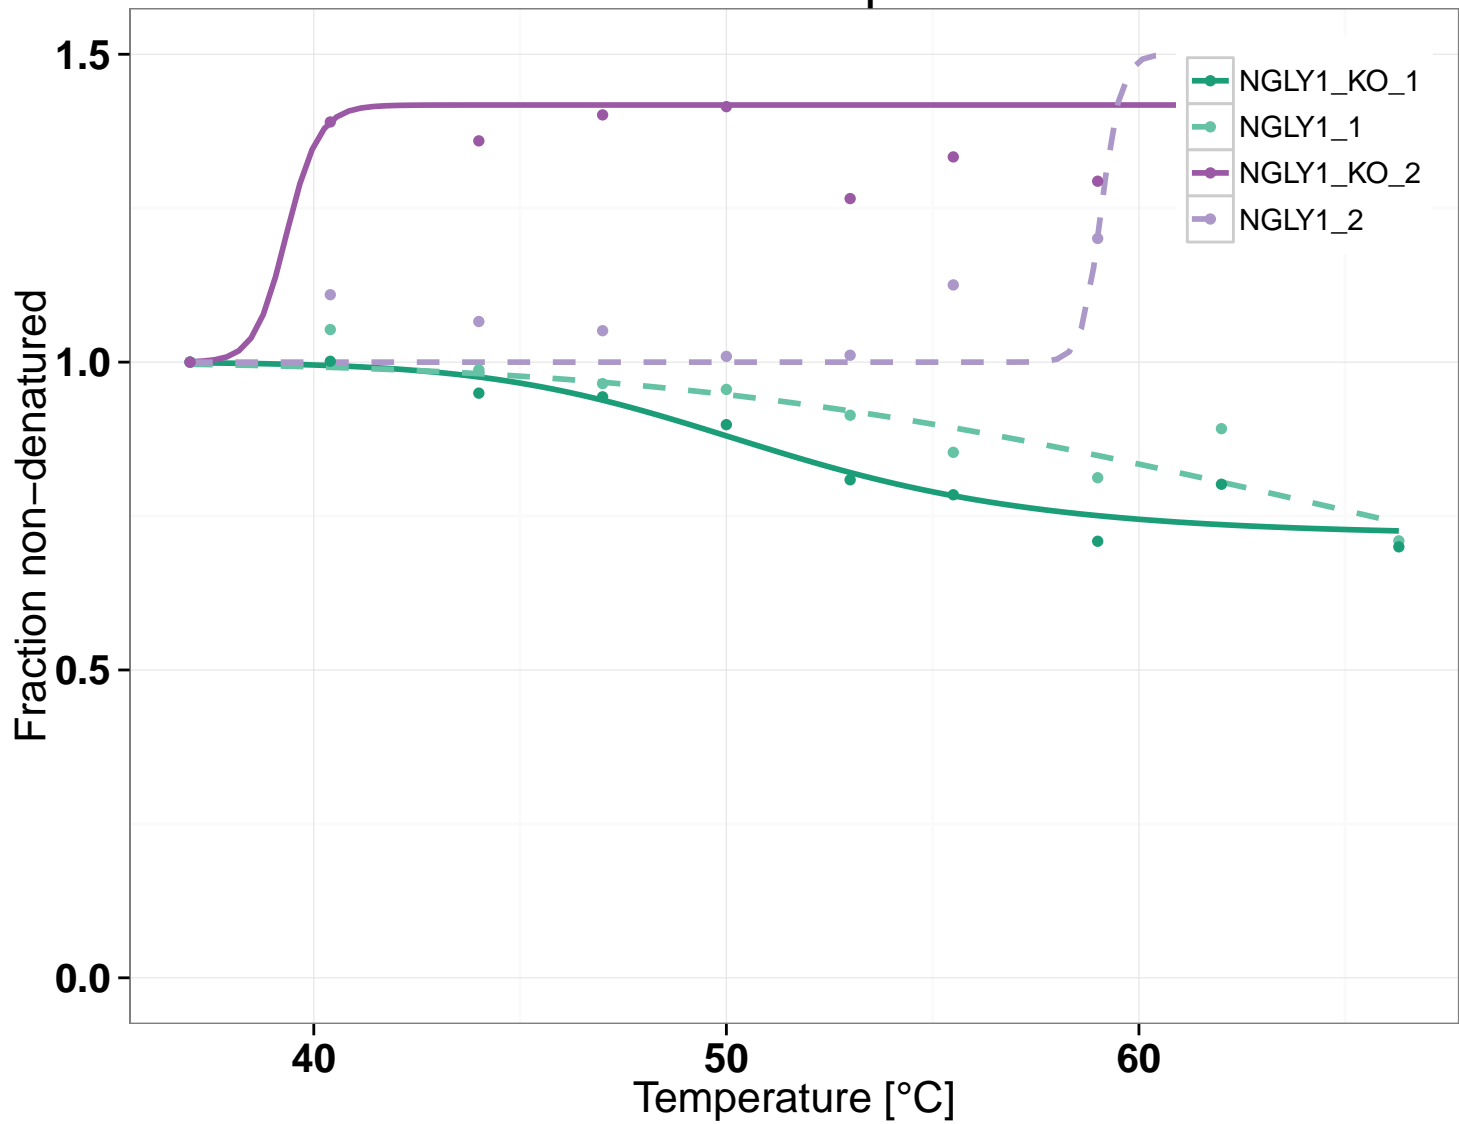

|            | meltPoint | slope  | plateau | R2   |
|------------|-----------|--------|---------|------|
| NGLY1_KO_1 | -         | -0.021 | 0.72    | 0.93 |
| NGLY1_1    | -         | -0.016 | 0.23    | 0.84 |
| NGLY1_KO_2 | -         | 0.27   | 1.42    | 0.4  |
| NGLY1_2    | -         | 0.53   | 1.5     | 0.87 |

Supplement: Supplementary file 6188 [file 1]

# IPI00150963.3|RPUSD2

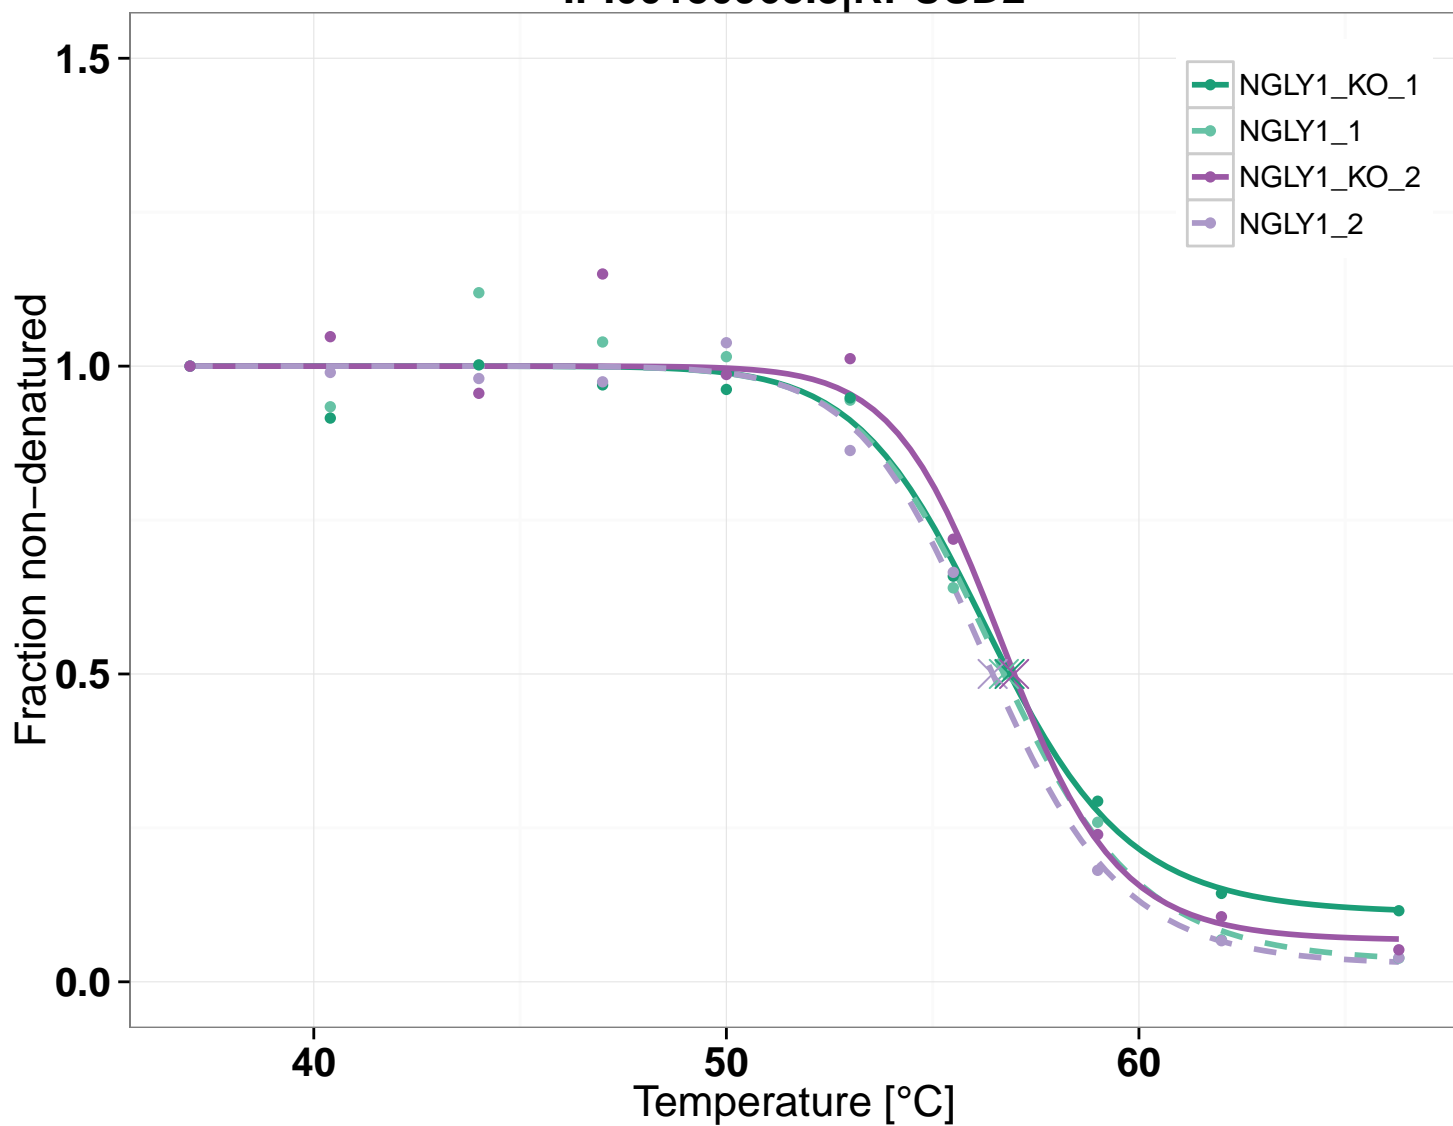

|            | meltPoint | slope | plateau | R2   |
|------------|-----------|-------|---------|------|
| NGLY1_KO_1 | 56.86     | -0.13 | 0.11    | 0.99 |
| NGLY1_1    | 56.73     | -0.14 | 0.03    | 0.99 |
| NGLY1_KO_2 | 56.97     | -0.17 | 0.07    | 0.98 |
| NGLY1_2    | 56.45     | -0.15 | 0.03    | 1    |

Supplement: Supplementary file 6189 [file 1]

# IPI00044842.1|RAB3IP

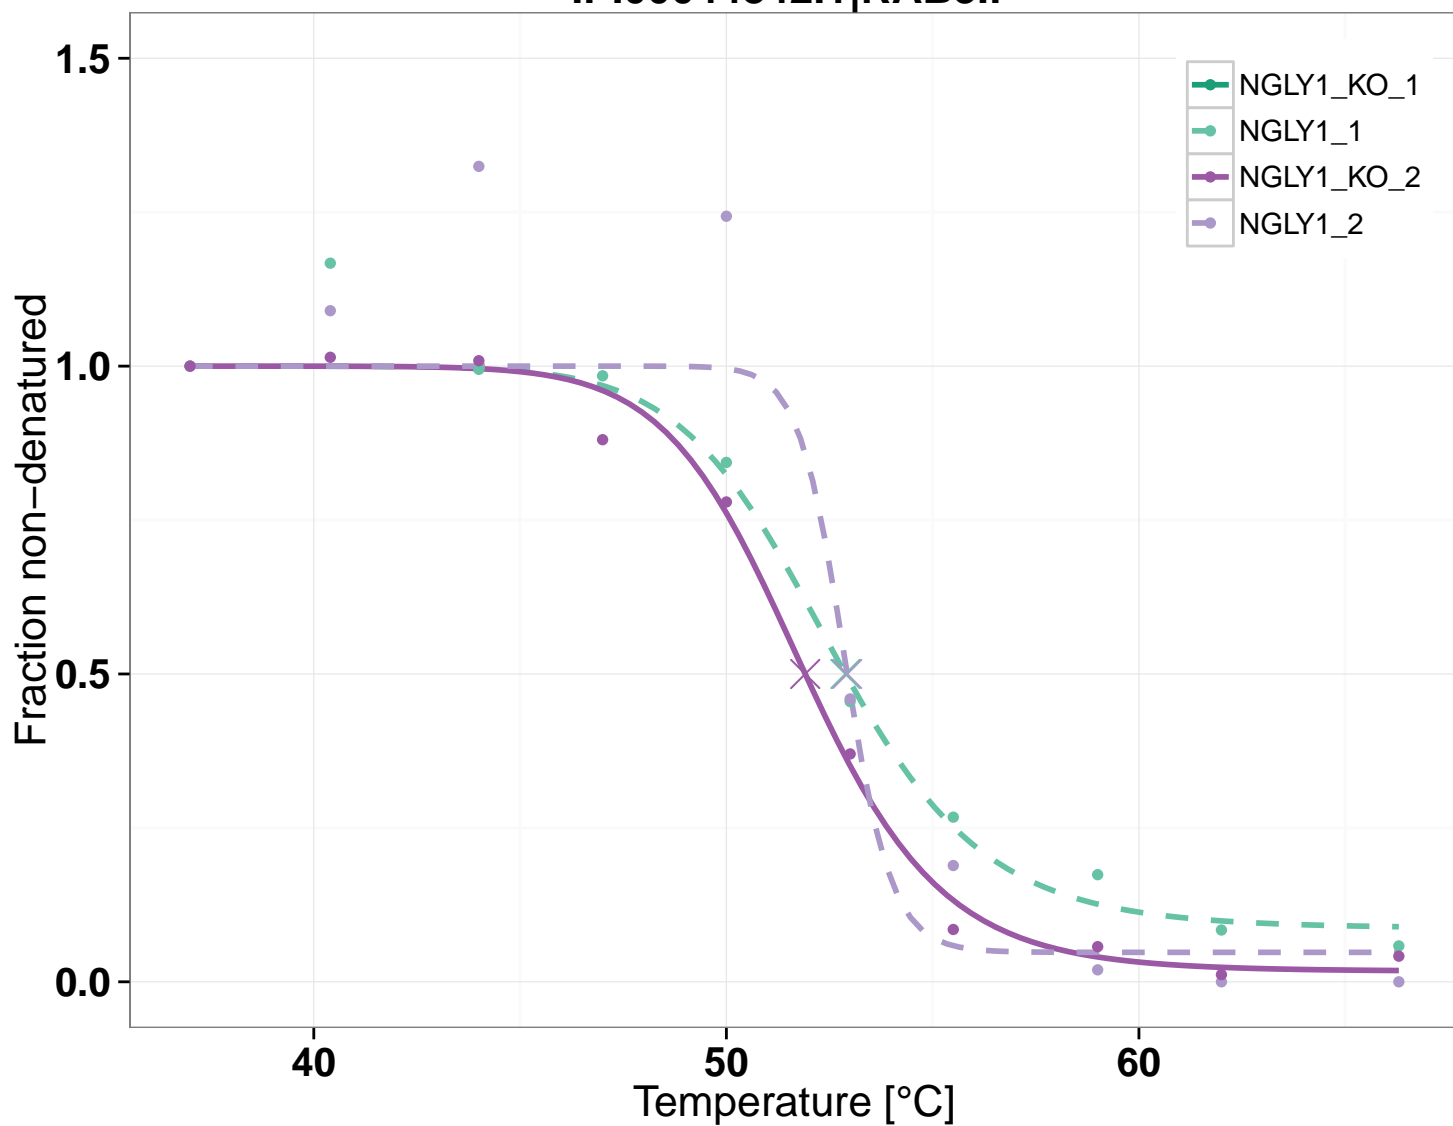

|            | meltPoint | slope | plateau | R2   |
|------------|-----------|-------|---------|------|
| NGLY1_KO_1 | —         | —     | —       | —    |
| NGLY1_1    | 52.89     | -0.12 | 0.09    | 0.98 |
| NGLY1_KO_2 | 51.91     | -0.15 | 0.02    | 0.99 |
| NGLY1_2    | 52.93     | -0.43 | 0.05    | 0.86 |

Supplement: Supplementary file 6190 [file 1]

# IPI00892784.1|ATP6V0A1

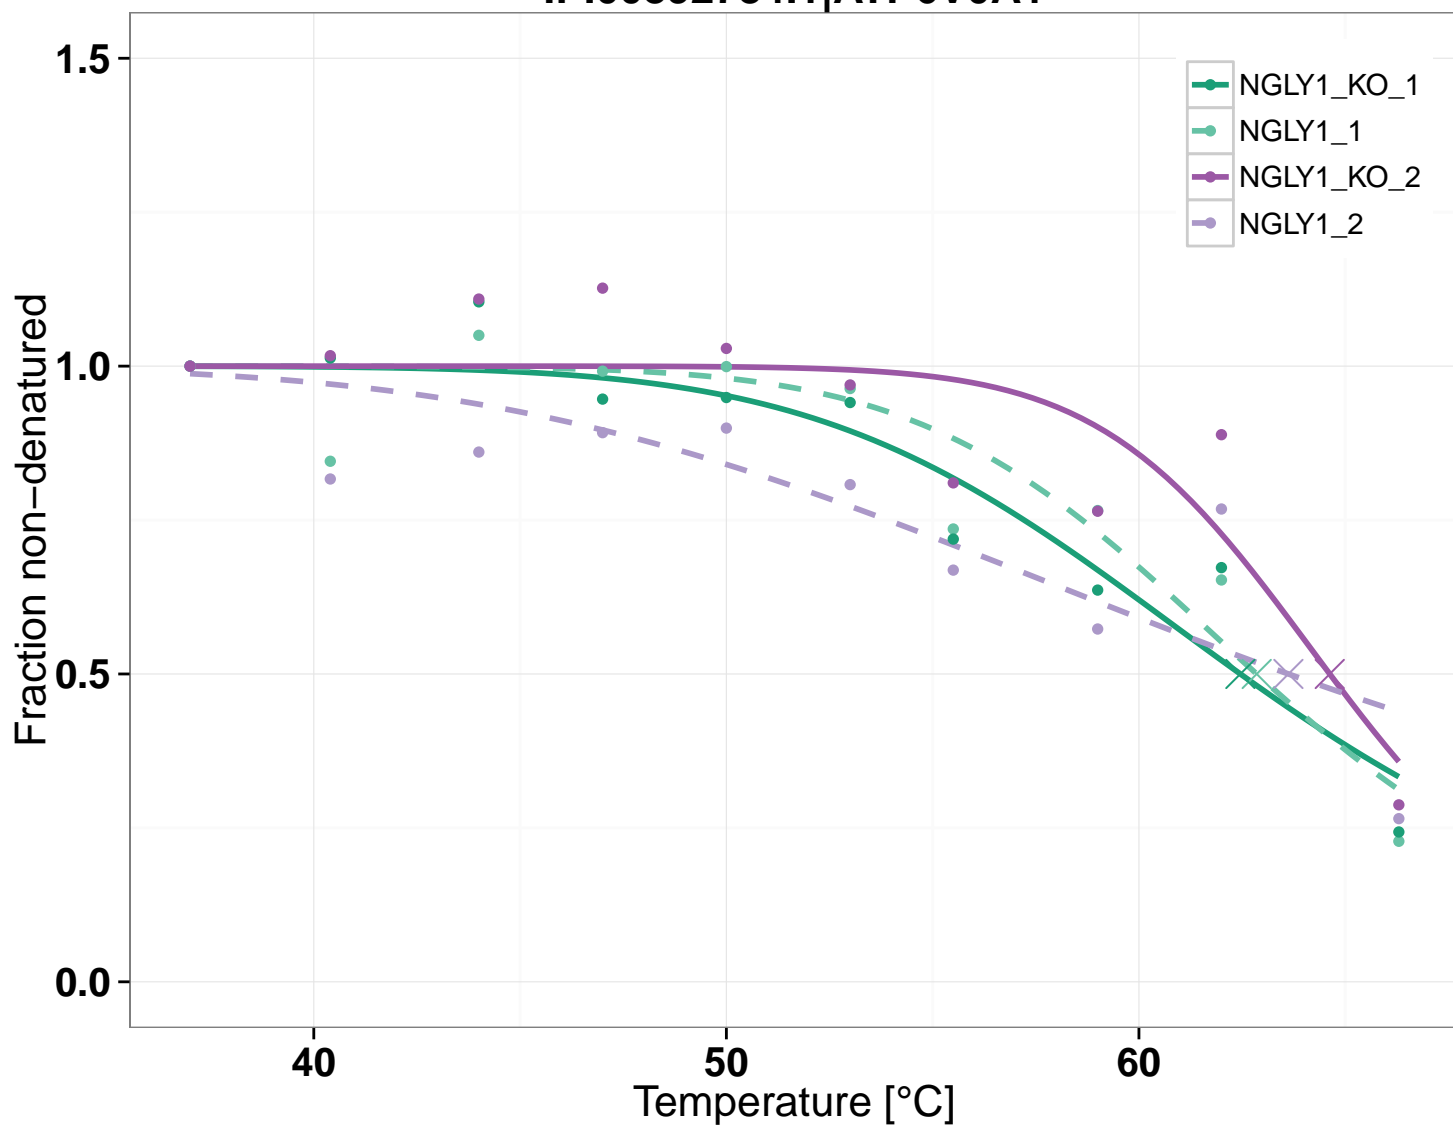

|            | meltPoint | slope  | plateau | R2   |
|------------|-----------|--------|---------|------|
| NGLY1_KO_1 | 62.46     | -0.049 | 0       | 0.9  |
| NGLY1_1    | 62.85     | -0.062 | 0       | 0.88 |
| NGLY1_KO_2 | 64.63     | -0.09  | 0       | 0.8  |
| NGLY1_2    | 63.62     | -0.026 | 0       | 0.7  |

Supplement: Supplementary file 6191 [file 1]

IPI00168388.1|SRP68

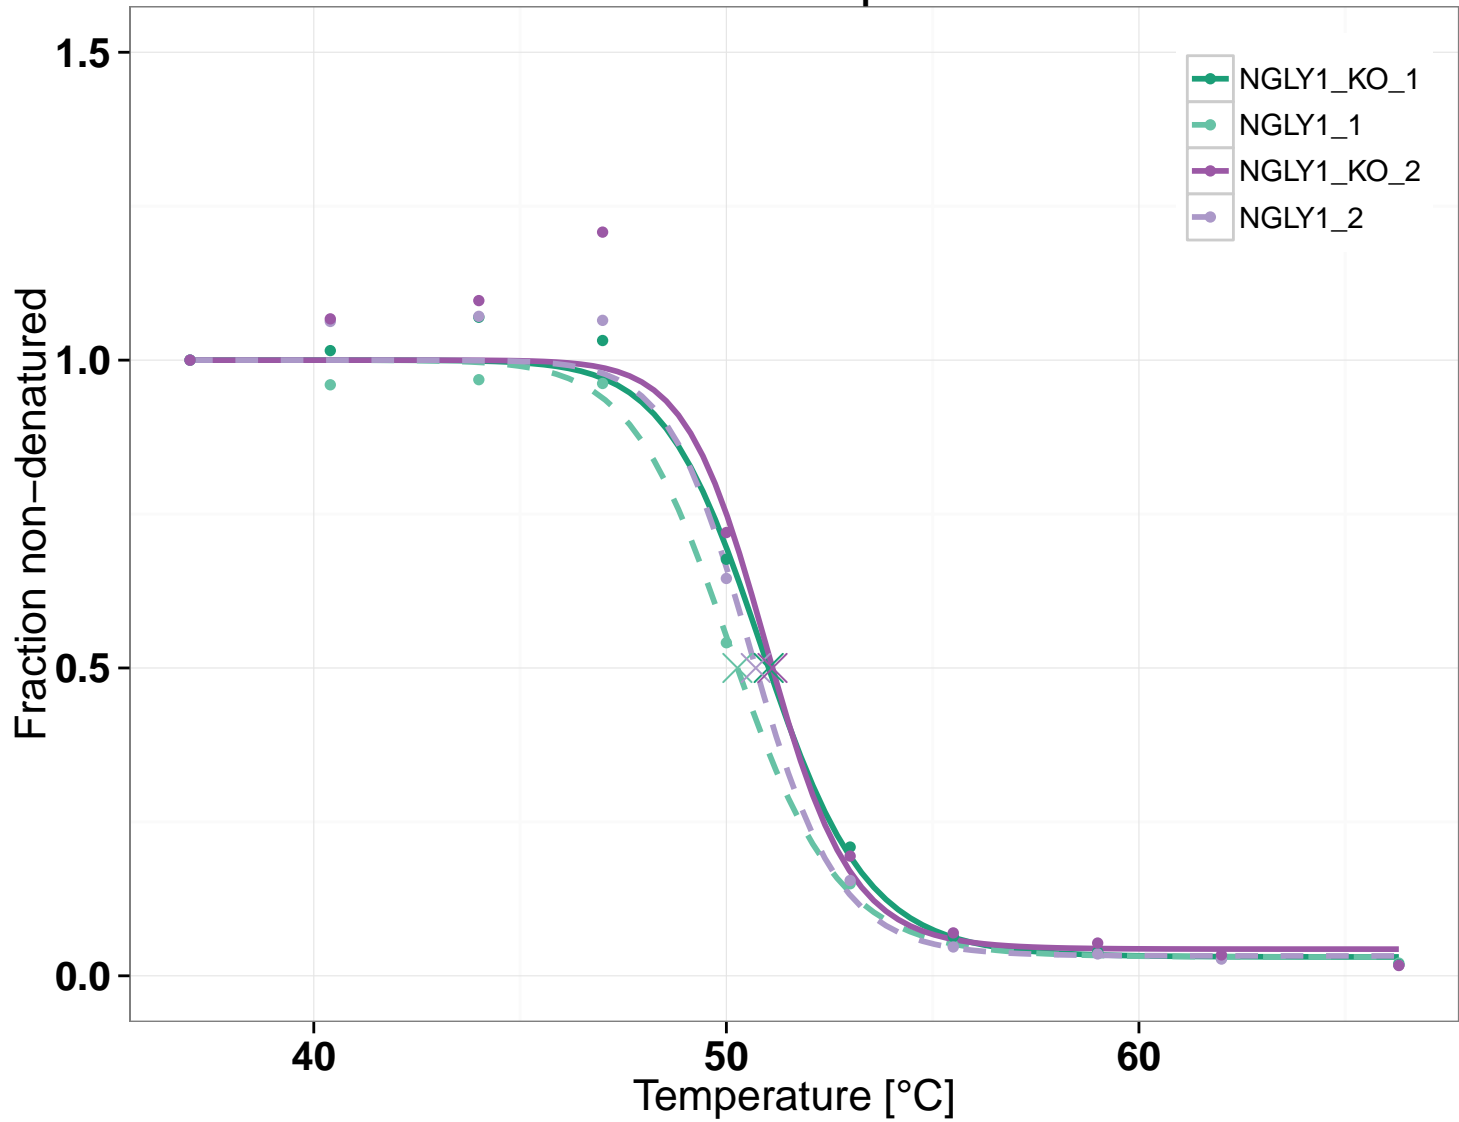

|            | meltPoint | slope | plateau | R2   |
|------------|-----------|-------|---------|------|
| NGLY1_KO_1 | 51.03     | -0.2  | 0.03    | 1    |
| NGLY1_1    | 50.27     | -0.19 | 0.03    | 1    |
| NGLY1_KO_2 | 51.12     | -0.24 | 0.04    | 0.97 |
| NGLY1_2    | 50.71     | -0.23 | 0.03    | 0.99 |

Supplement: Supplementary file 6192 [file 1]

IPI00013226.4|FEM1A

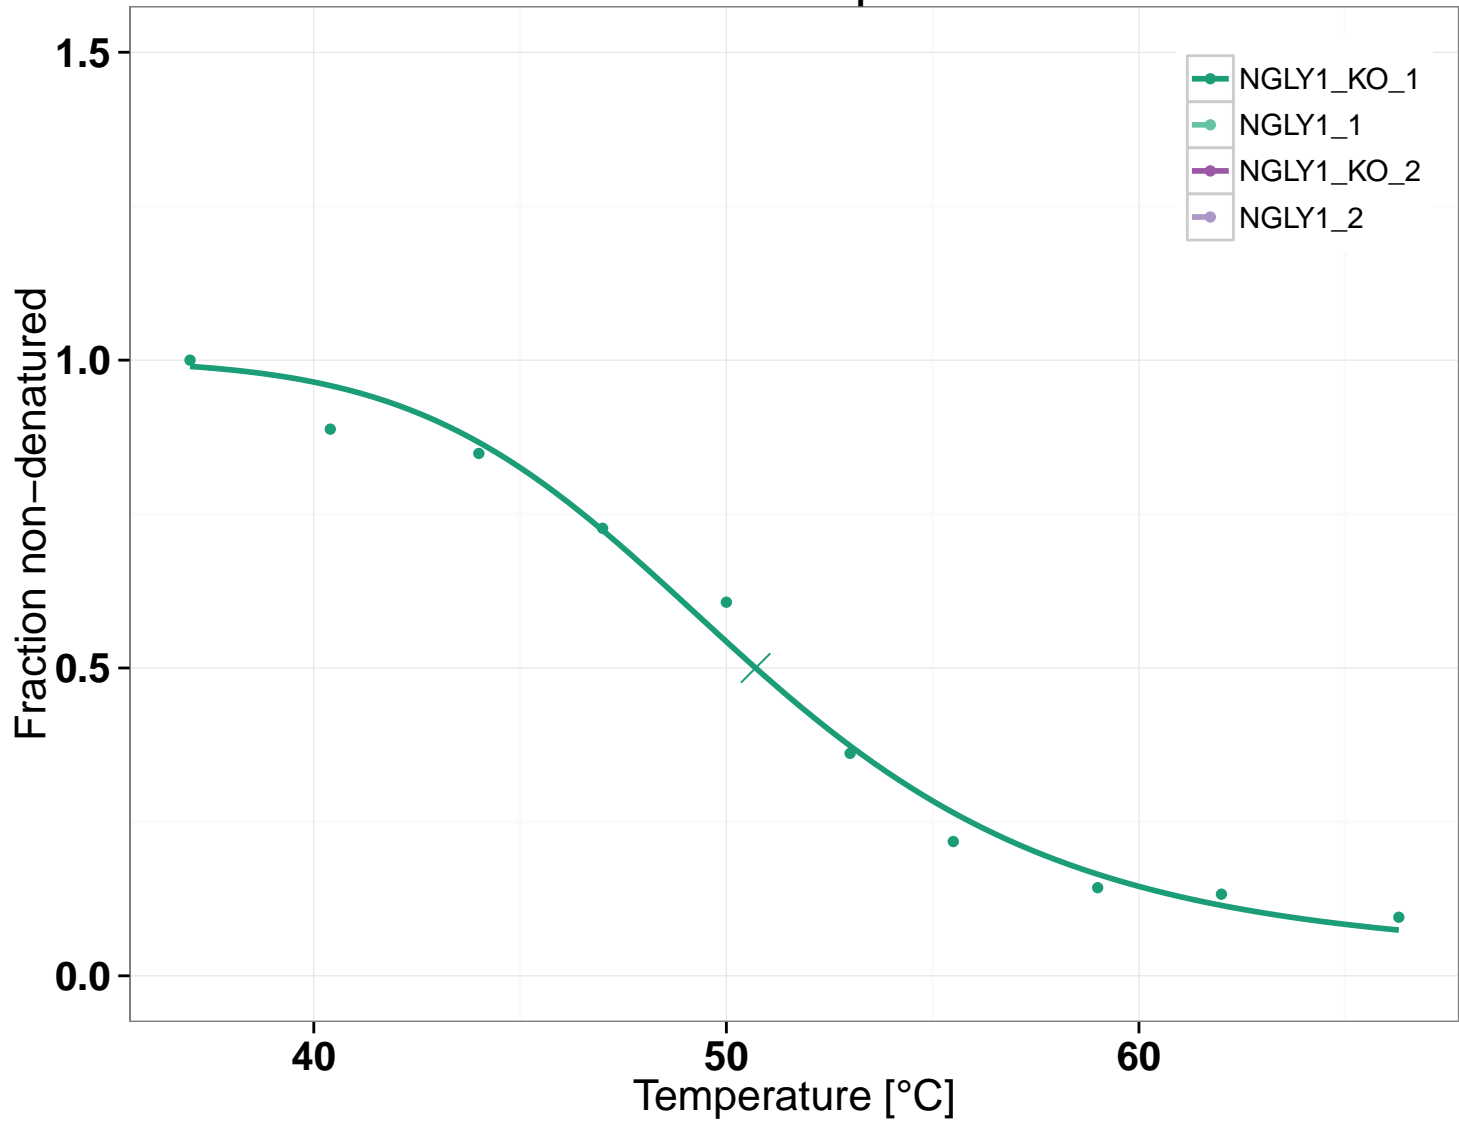

|            | meltPoint | slope  | plateau | R2   |
|------------|-----------|--------|---------|------|
| NGLY1_KO_1 | 50.71     | -0.062 | 0.03    | 0.99 |
| NGLY1_1    | —         | —      | —       | —    |
| NGLY1_KO_2 | —         | —      | —       | —    |
| NGLY1_2    | —         | —      | —       | —    |

Supplement: Supplementary file 6193 [file 1]

# IPI00025698.2|LIMK2

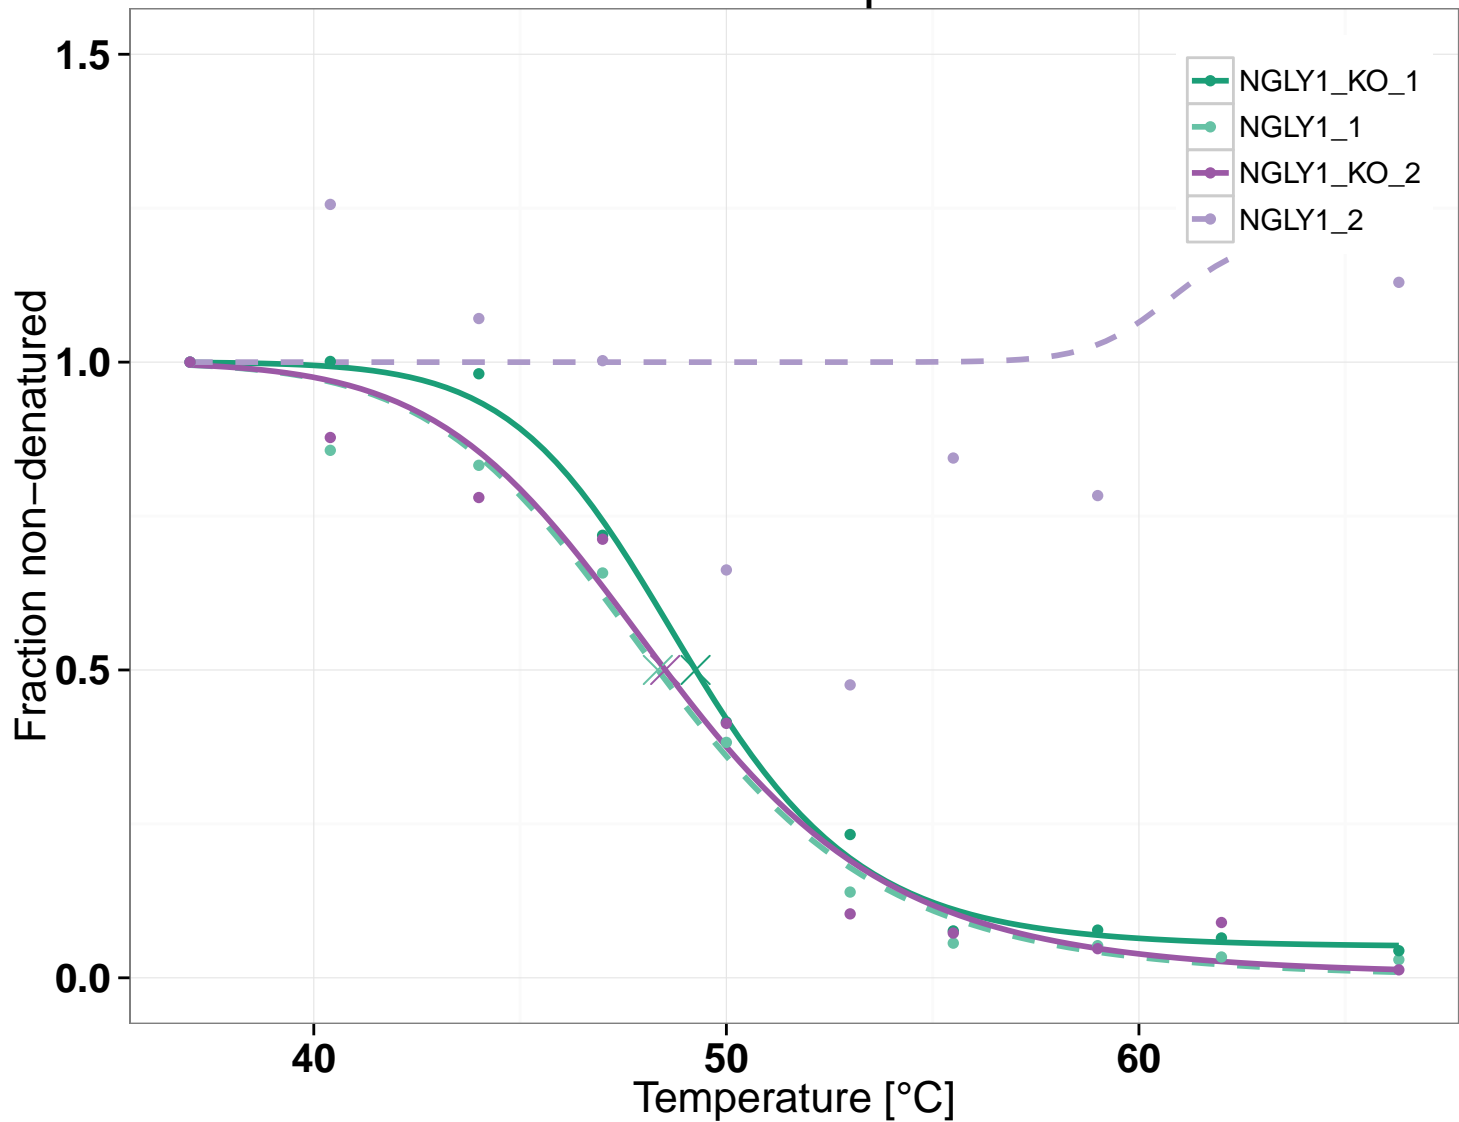

|            | meltPoint | slope  | plateau | R2   |
|------------|-----------|--------|---------|------|
| NGLY1_KO_1 | 49.25     | -0.11  | 0.05    | 1    |
| NGLY1_1    | 48.34     | -0.091 | 0       | 0.99 |
| NGLY1_KO_2 | 48.52     | -0.09  | 0       | 0.98 |
| NGLY1_2    | -         | 0.053  | 1.21    | 0.1  |

Supplement: Supplementary file 6194 [file 1]

# IPI00299608.3|PSMD1

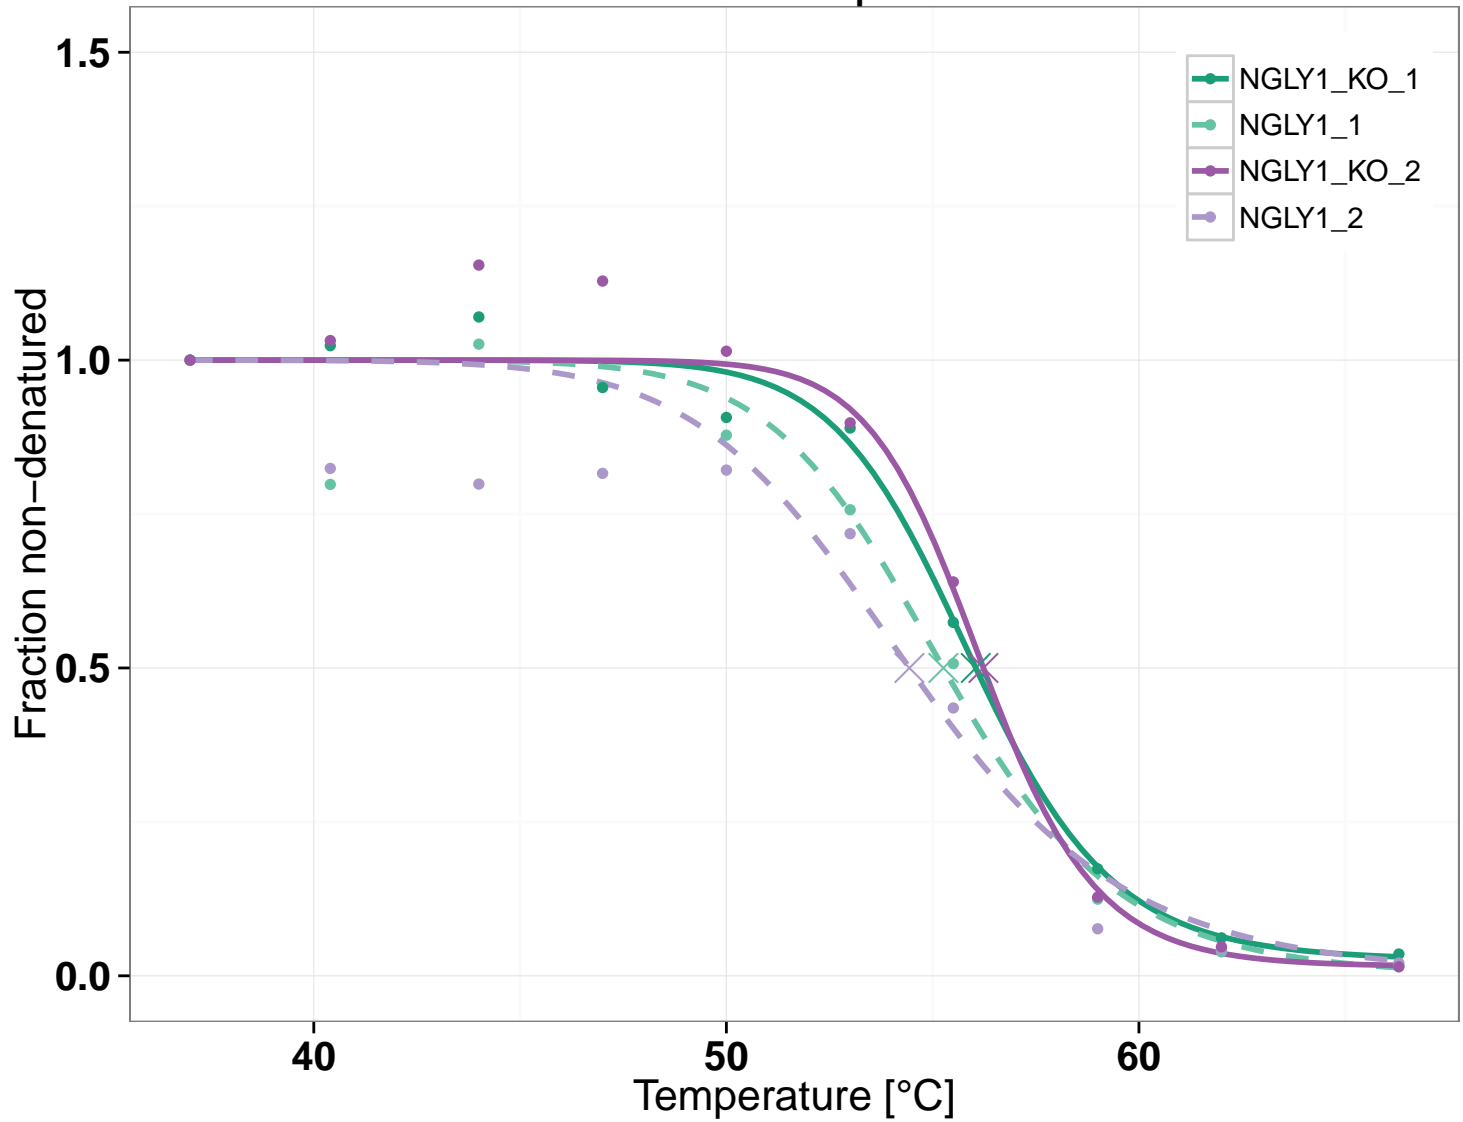

|            | meltPoint | slope  | plateau | R2   |
|------------|-----------|--------|---------|------|
| NGLY1_KO_1 | 56.05     | -0.14  | 0.02    | 0.99 |
| NGLY1_1    | 55.26     | -0.12  | 0       | 0.97 |
| NGLY1_KO_2 | 56.23     | -0.18  | 0.01    | 0.98 |
| NGLY1_2    | 54.44     | -0.096 | 0       | 0.92 |

Supplement: Supplementary file 6195 [file 1]

IPI00304267.3|NXN

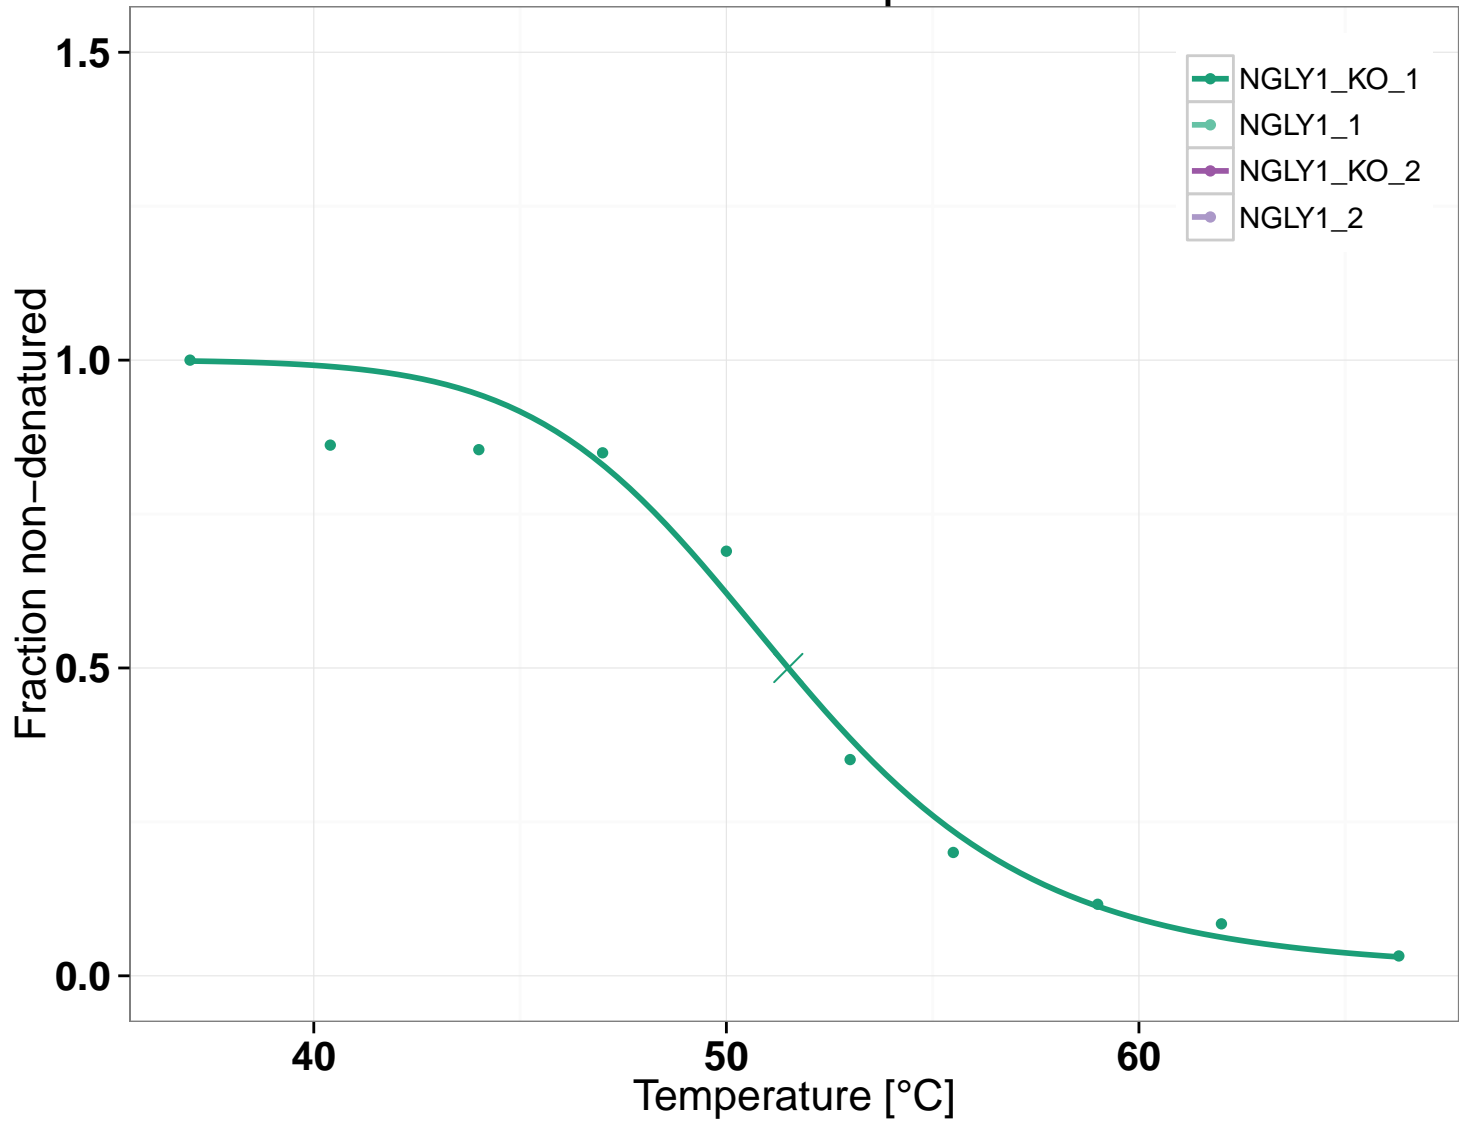

|            | meltPoint | slope  | plateau | R2   |
|------------|-----------|--------|---------|------|
| NGLY1_KO_1 | 51.5      | -0.081 | 0.01    | 0.98 |
| NGLY1_1    | -         | -      | -       | -    |
| NGLY1_KO_2 | -         | -      | -       | -    |
| NGLY1_2    | -         | -      | -       | -    |

Supplement: Supplementary file 6196 [file 1]

# IPI00413447.4|APOBEC3D

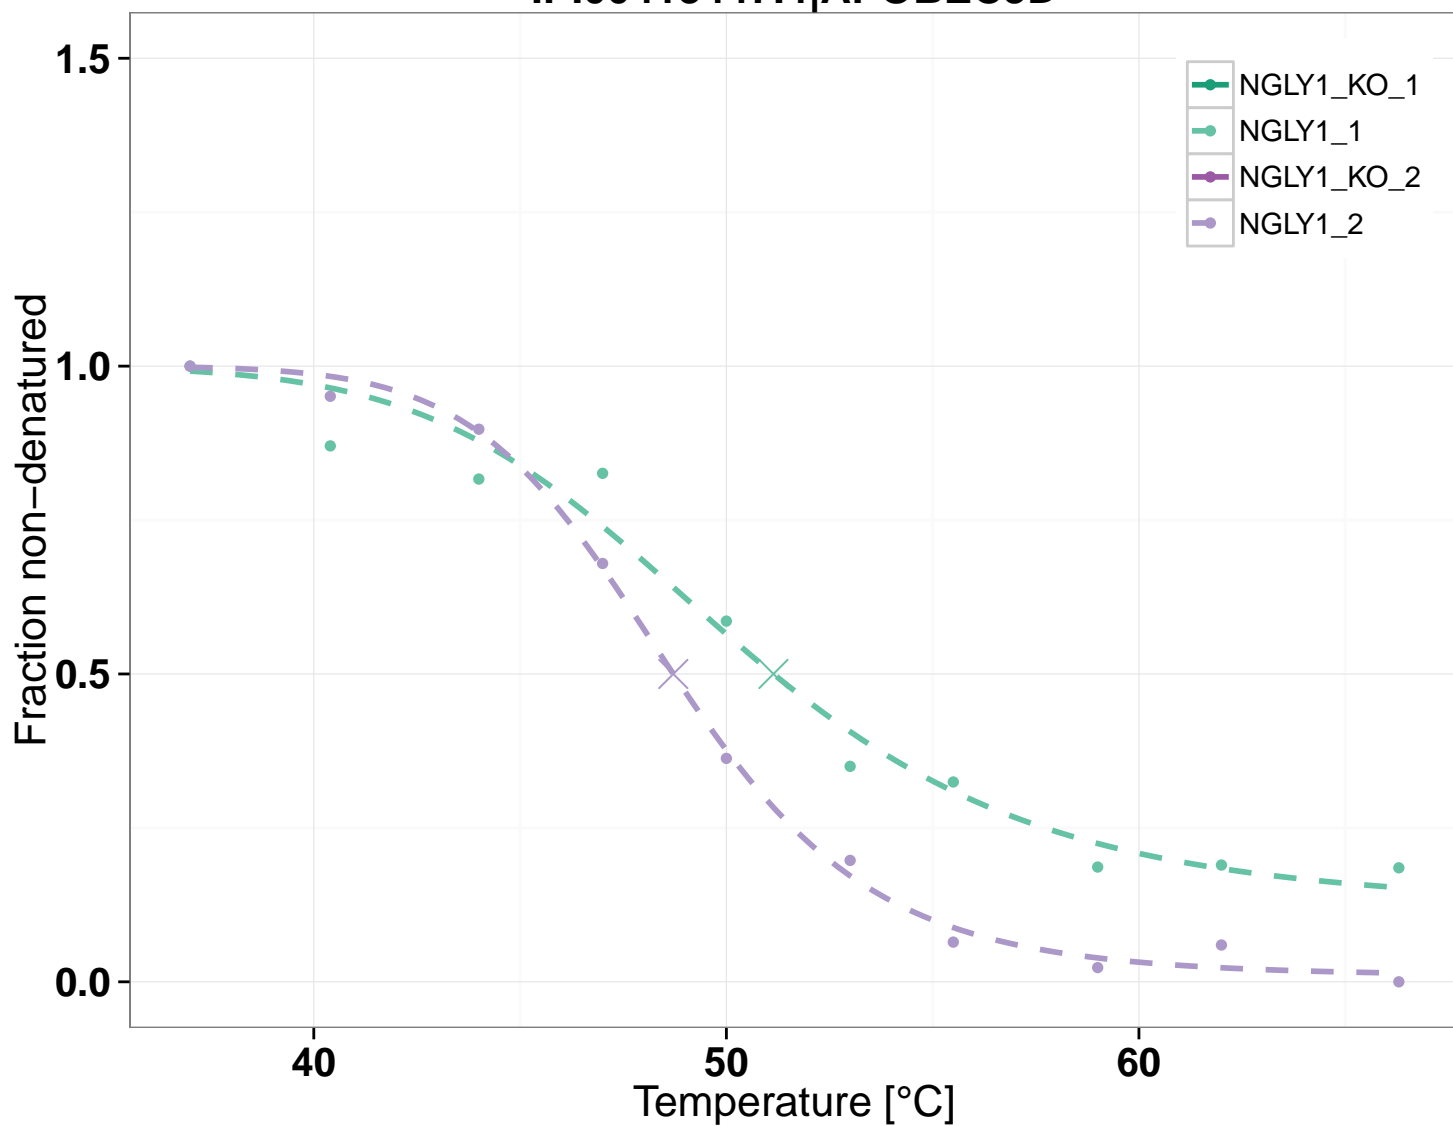

|            | meltPoint | slope  | plateau | R2   |
|------------|-----------|--------|---------|------|
| NGLY1_KO_1 | -         | -      | -       | -    |
| NGLY1_1    | 51.14     | -0.059 | 0.12    | 0.97 |
| NGLY1_KO_2 | -         | -      | -       | -    |
| NGLY1_2    | 48.71     | -0.1   | 0.01    | 1    |

Supplement: Supplementary file 6197 [file 1]

IPI00019004.1|SEC62

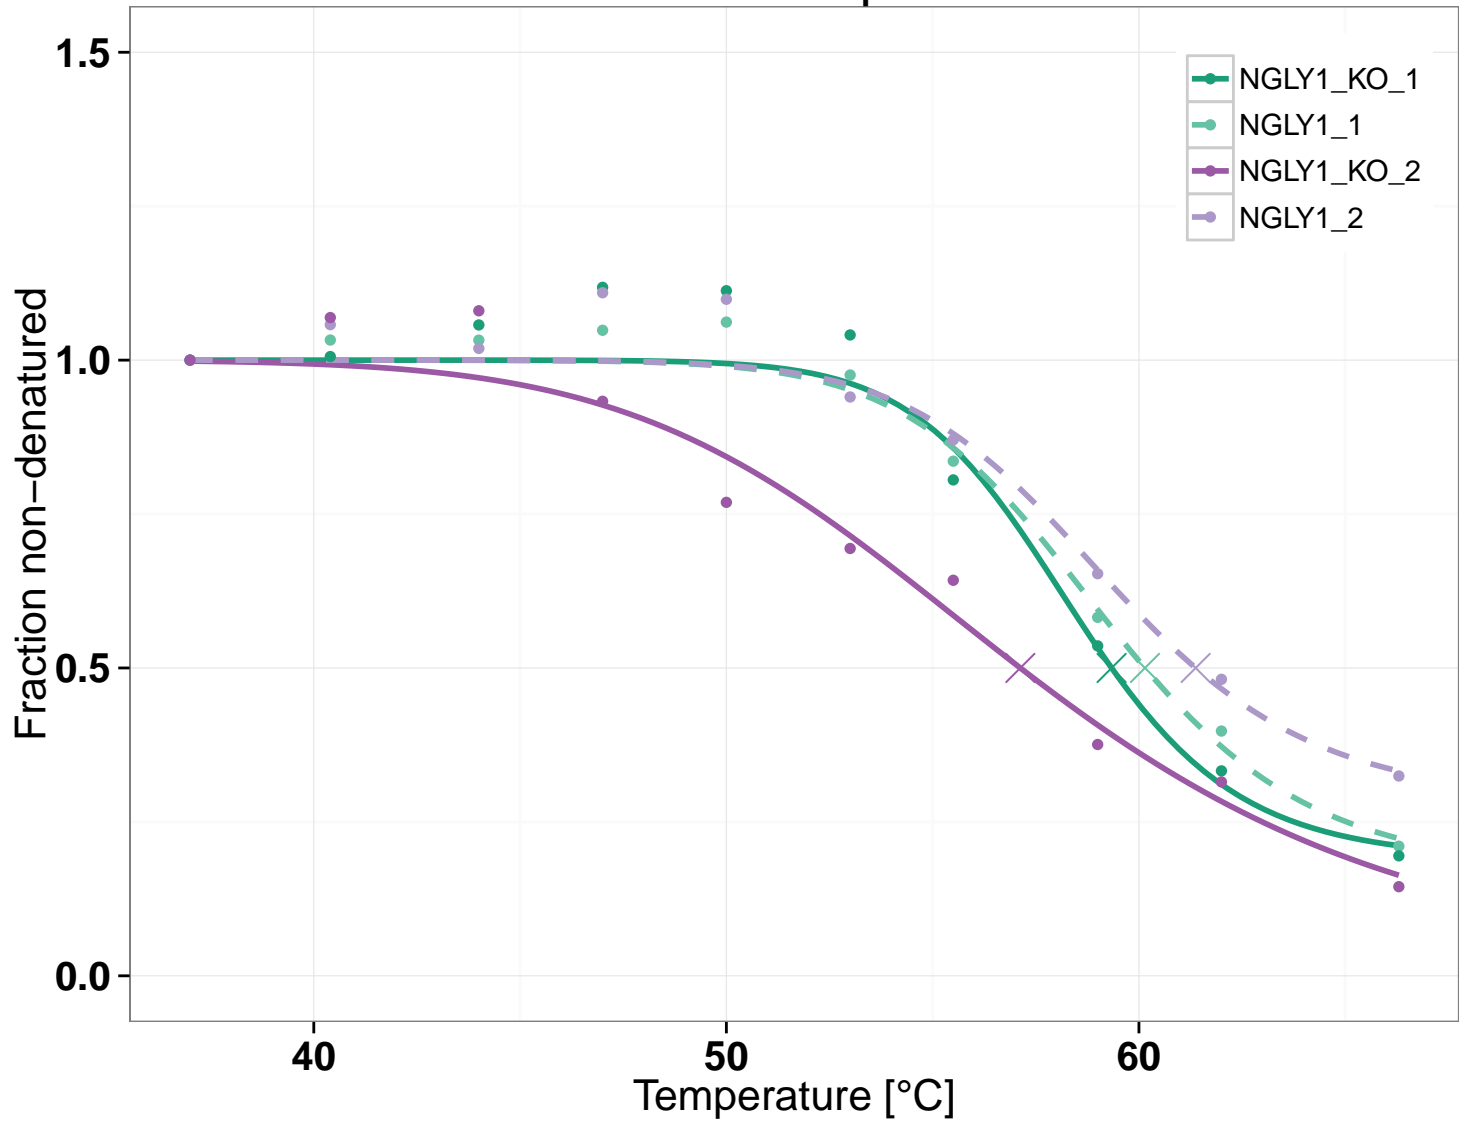

|            | meltPoint | slope  | plateau | R2   |
|------------|-----------|--------|---------|------|
| NGLY1_KO_1 | 59.34     | -0.1   | 0.19    | 0.96 |
| NGLY1_1    | 60.15     | -0.086 | 0.17    | 0.99 |
| NGLY1_KO_2 | 57.13     | -0.053 | 0       | 0.97 |
| NGLY1_2    | 61.37     | -0.073 | 0.28    | 0.96 |

Supplement: Supplementary file 6198 [file 1]

IPI00020436.4|RAB11B

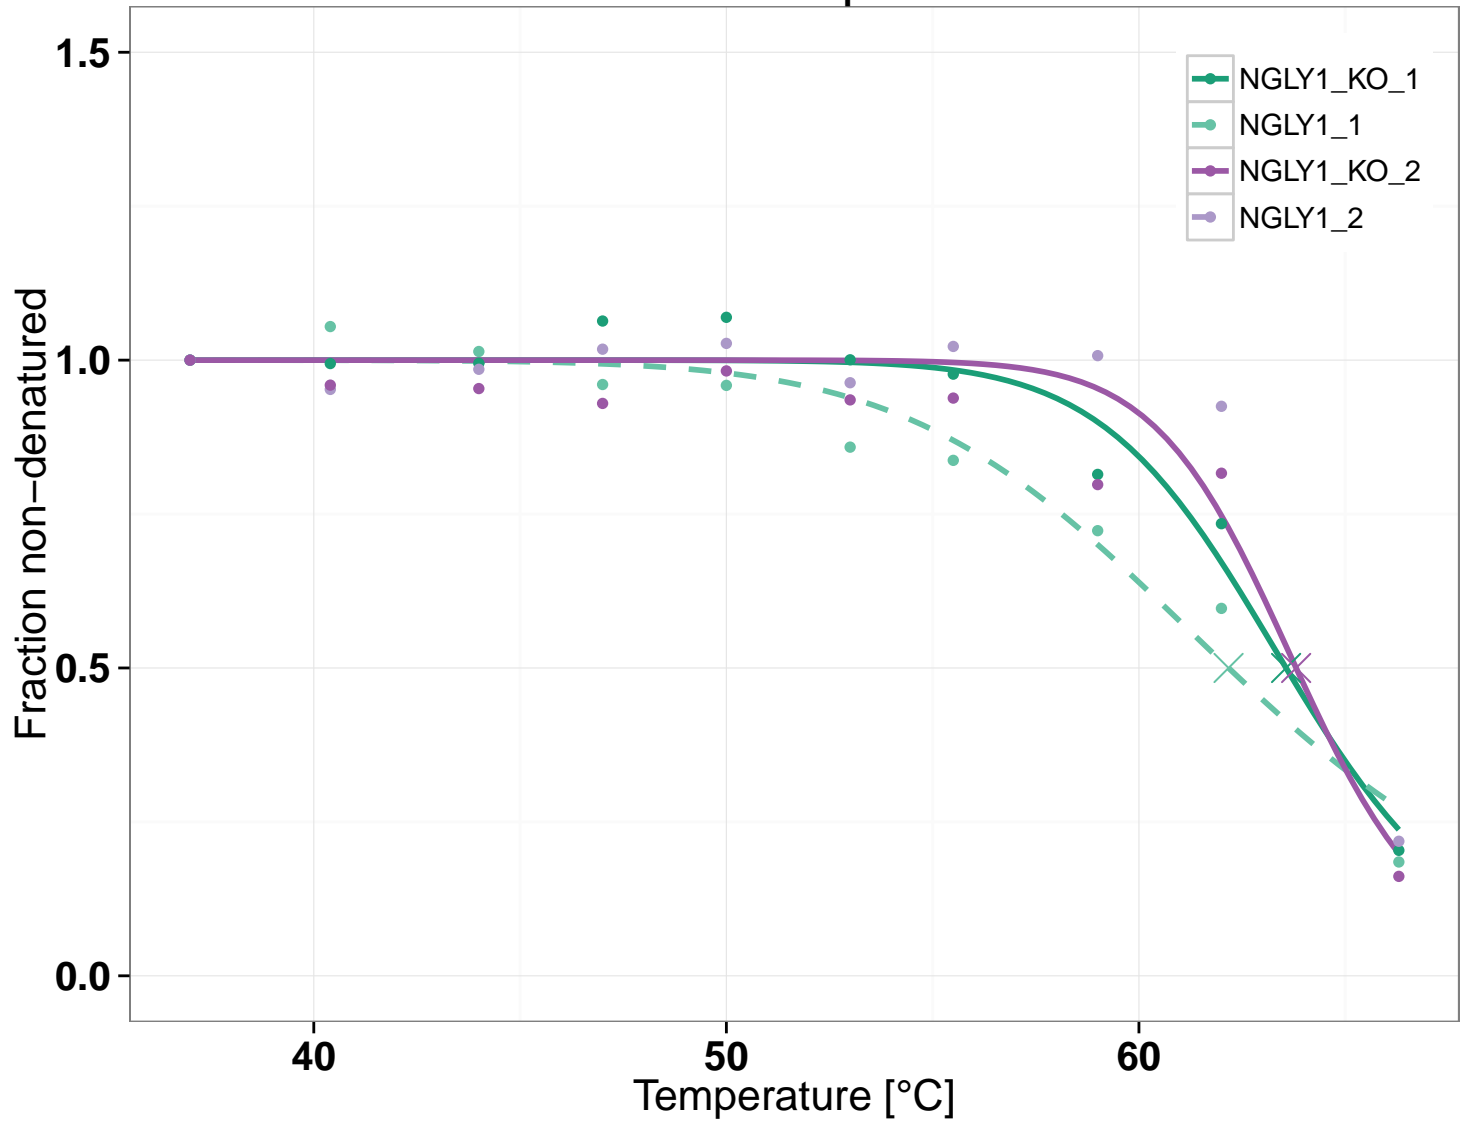

|            | meltPoint | slope  | plateau | R2   |
|------------|-----------|--------|---------|------|
| NGLY1_KO_1 | 63.57     | -0.11  | 0       | 0.97 |
| NGLY1_1    | 62.17     | -0.065 | 0       | 0.96 |
| NGLY1_KO_2 | 63.81     | -0.15  | 0       | 0.92 |
| NGLY1_2    | -         | -      | -       | -    |

Supplement: Supplementary file 6199 [file 1]

IPI00015195.1|CSTF3

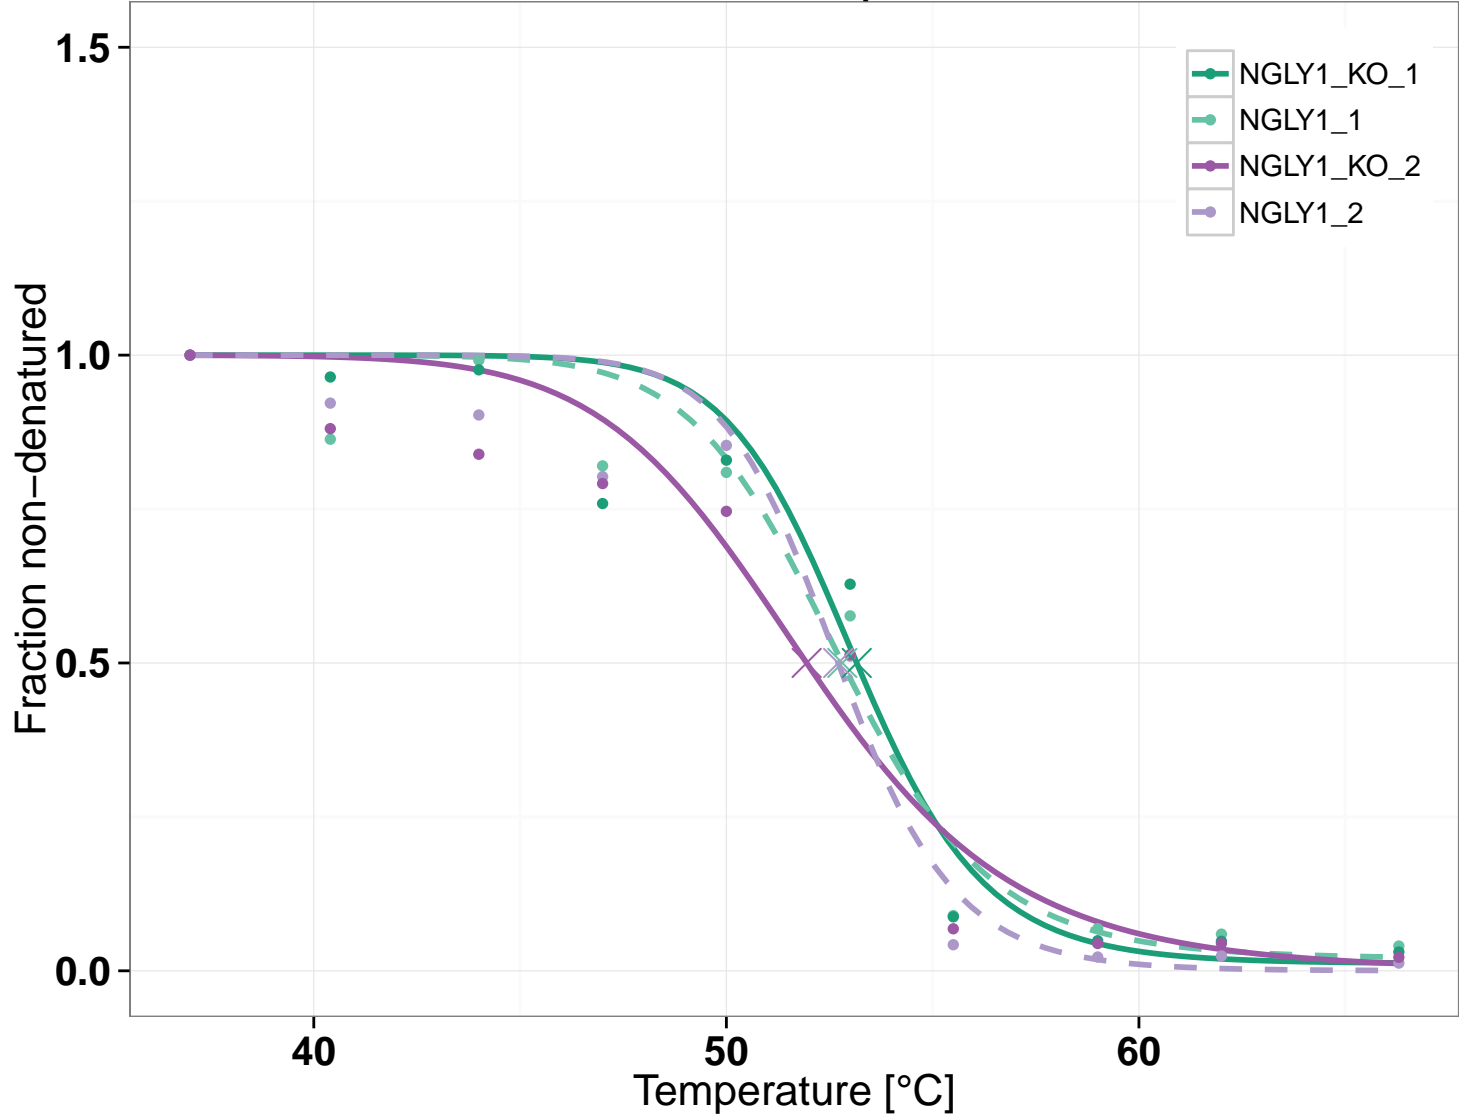

|            | meltPoint | slope  | plateau | R2   |
|------------|-----------|--------|---------|------|
| NGLY1_KO_1 | 53.16     | -0.16  | 0.01    | 0.95 |
| NGLY1_1    | 52.81     | -0.13  | 0.02    | 0.96 |
| NGLY1_KO_2 | 51.95     | -0.099 | 0       | 0.95 |
| NGLY1_2    | 52.71     | -0.18  | 0       | 0.96 |

Supplement: Supplementary file 6200 [file 1]

# IPI00017283.2|IARS2

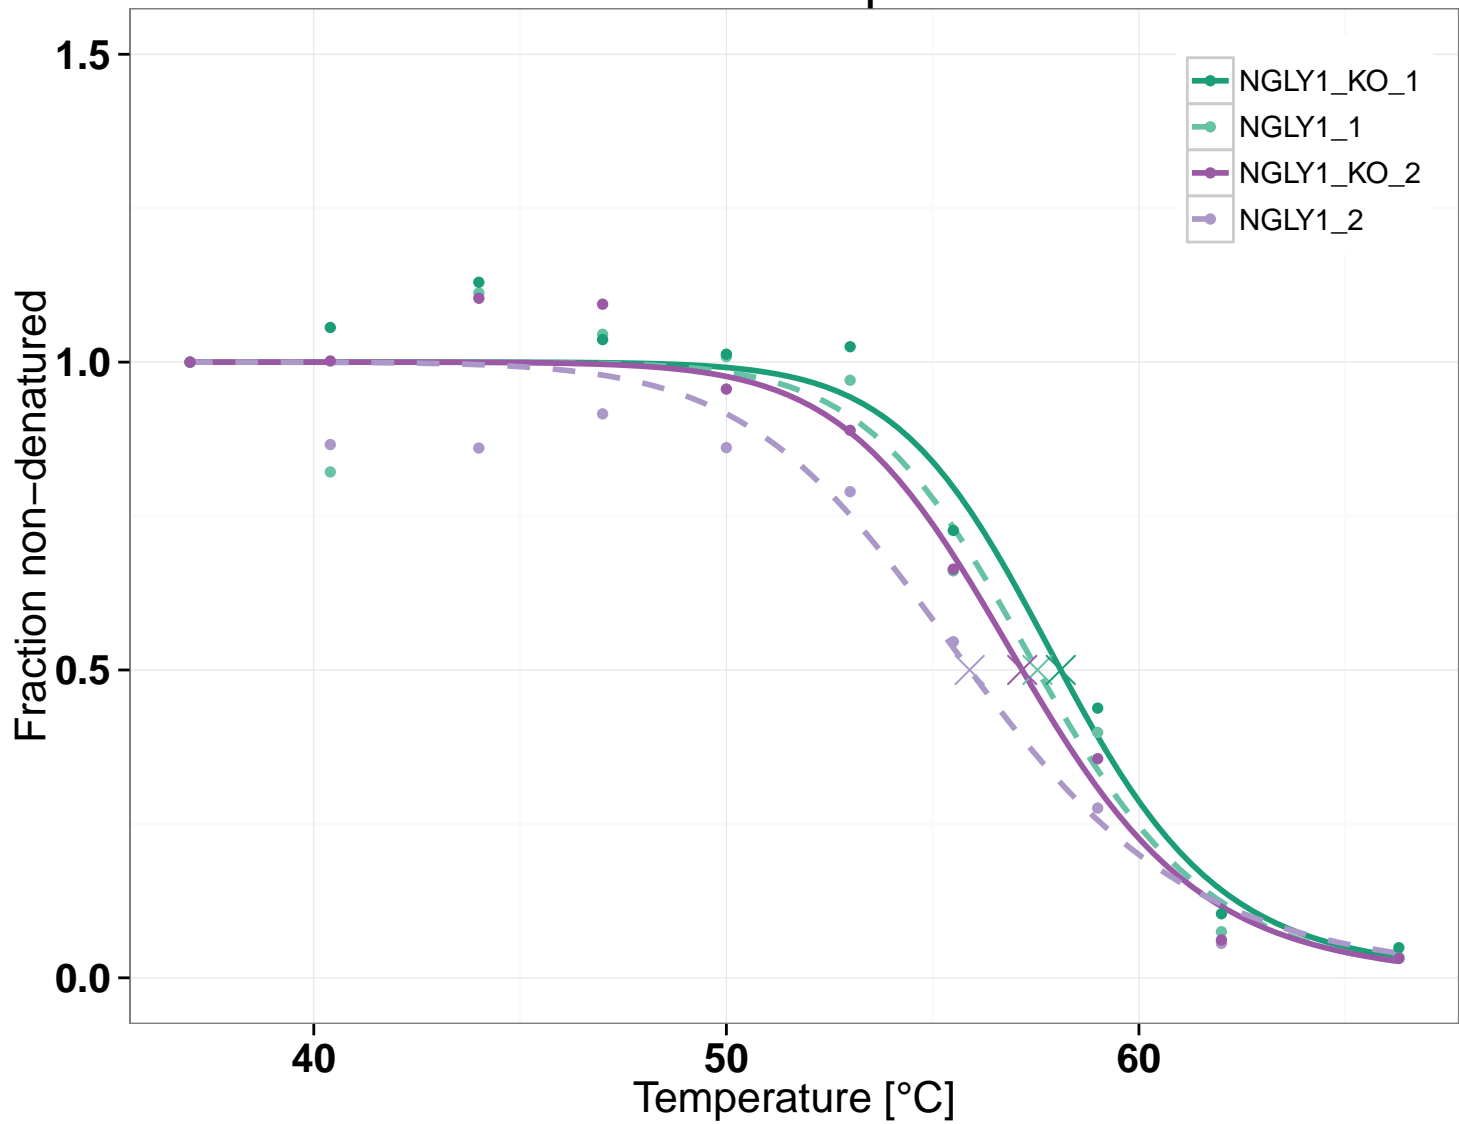

|            | meltPoint | slope  | plateau | R2   |
|------------|-----------|--------|---------|------|
| NGLY1_KO_1 | 58.1      | -0.13  | 0.01    | 0.98 |
| NGLY1_1    | 57.54     | -0.12  | 0       | 0.96 |
| NGLY1_KO_2 | 57.17     | -0.11  | 0       | 0.98 |
| NGLY1_2    | 55.9      | -0.092 | 0       | 0.96 |

Supplement: Supplementary file 6201 [file 1]

IPI00033561.3|RNPS1

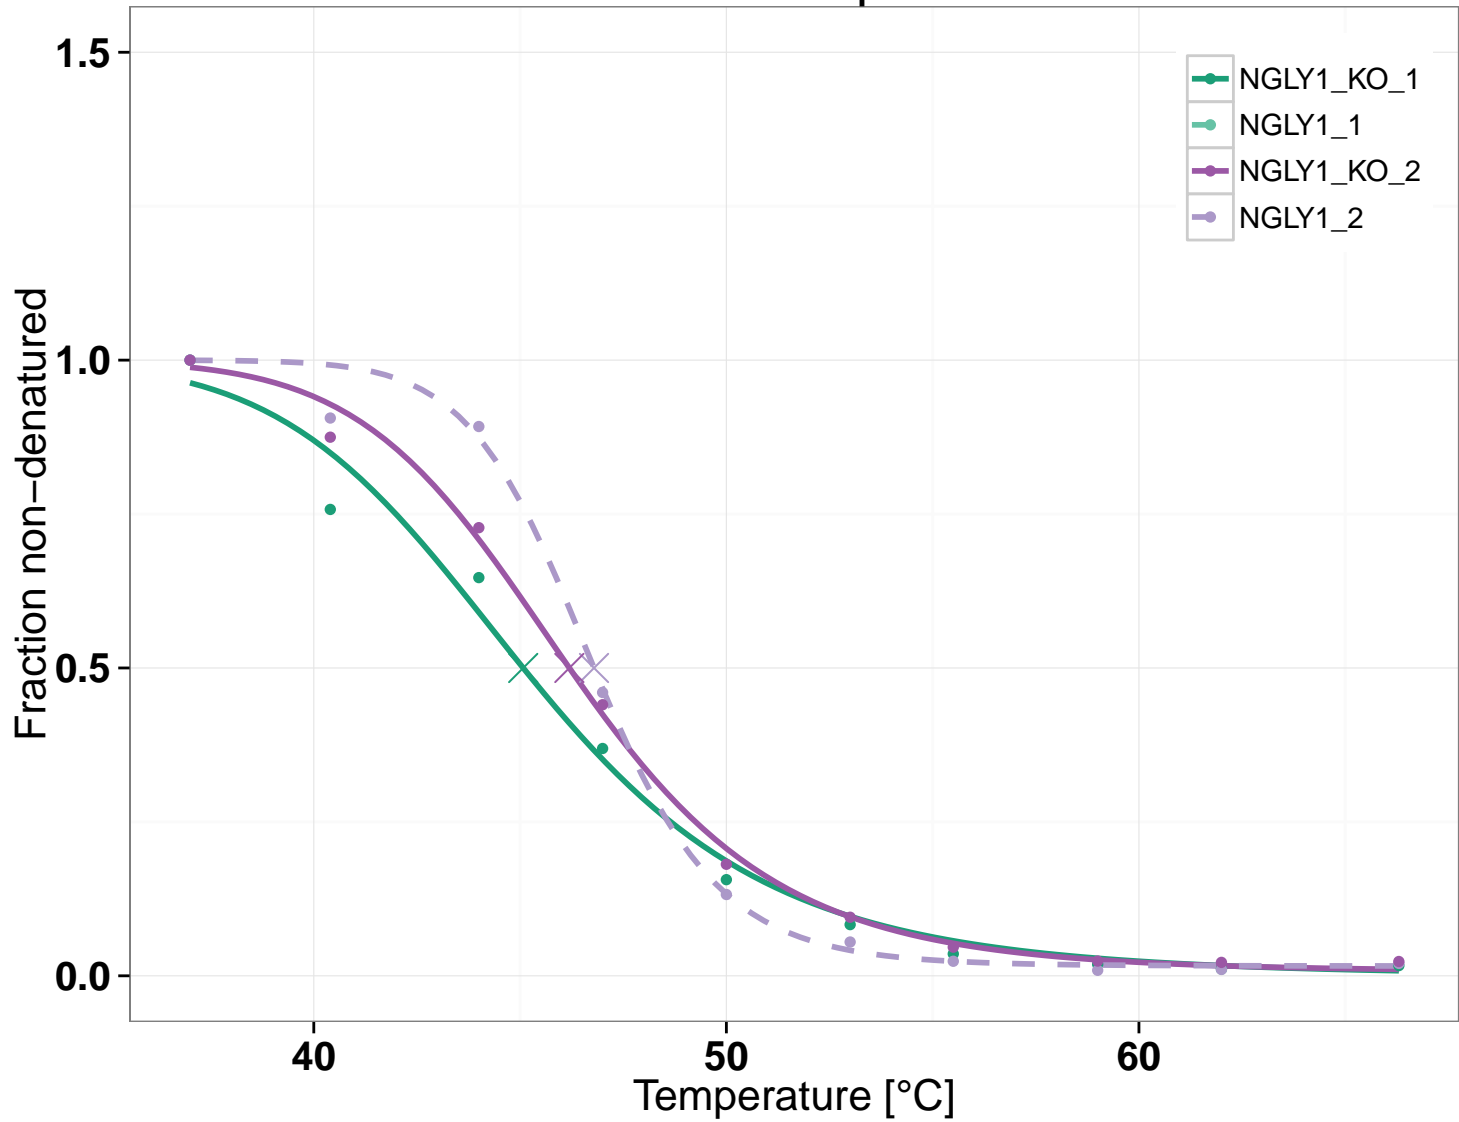

|            | meltPoint | slope  | plateau | R2   |
|------------|-----------|--------|---------|------|
| NGLY1_KO_1 | 45.08     | -0.084 | 0       | 0.99 |
| NGLY1_1    | -         | -      | -       | -    |
| NGLY1_KO_2 | 46.19     | -0.098 | 0.01    | 1    |
| NGLY1_2    | 46.79     | -0.16  | 0.02    | 0.99 |

Supplement: Supplementary file 6202 [file 1]

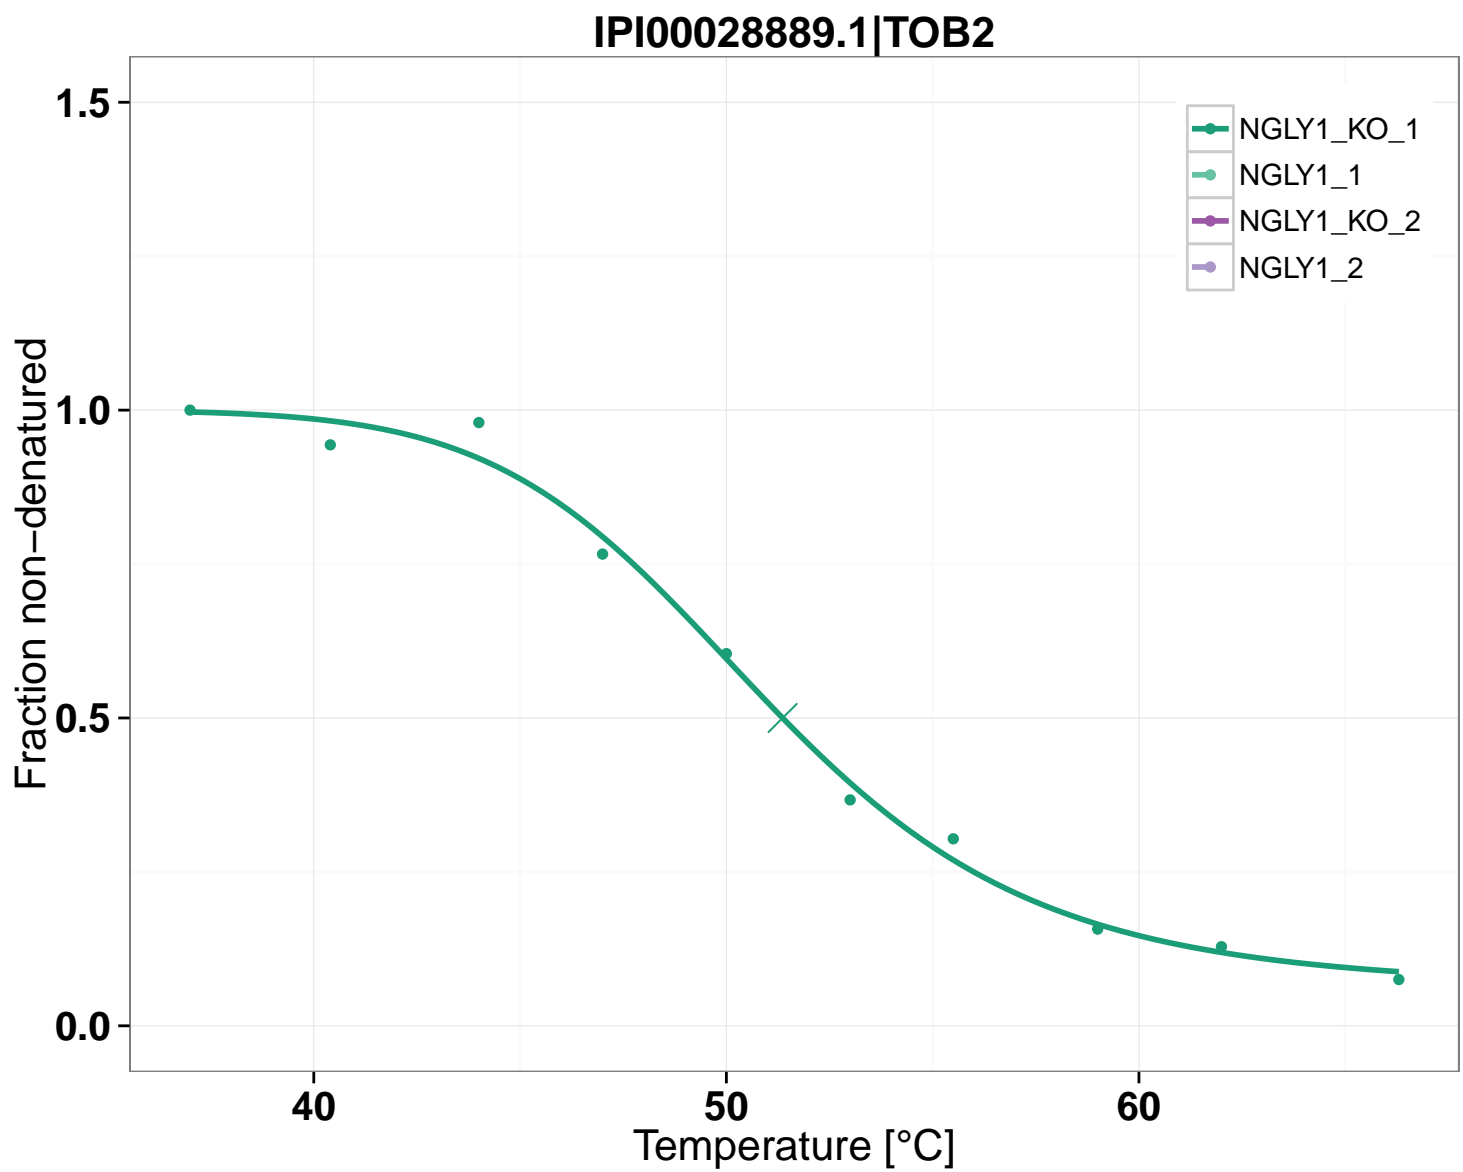

|            | meltPoint | slope  | plateau | R2   |
|------------|-----------|--------|---------|------|
| NGLY1_KO_1 | 51.36     | -0.071 | 0.06    | 0.99 |
| NGLY1_1    | —         | —      | —       | —    |
| NGLY1_KO_2 | —         | —      | —       | —    |
| NGLY1_2    | —         | —      | —       | —    |

Supplement: Supplementary file 6203 [file 1]

IPI00029733.1|AKR1C1

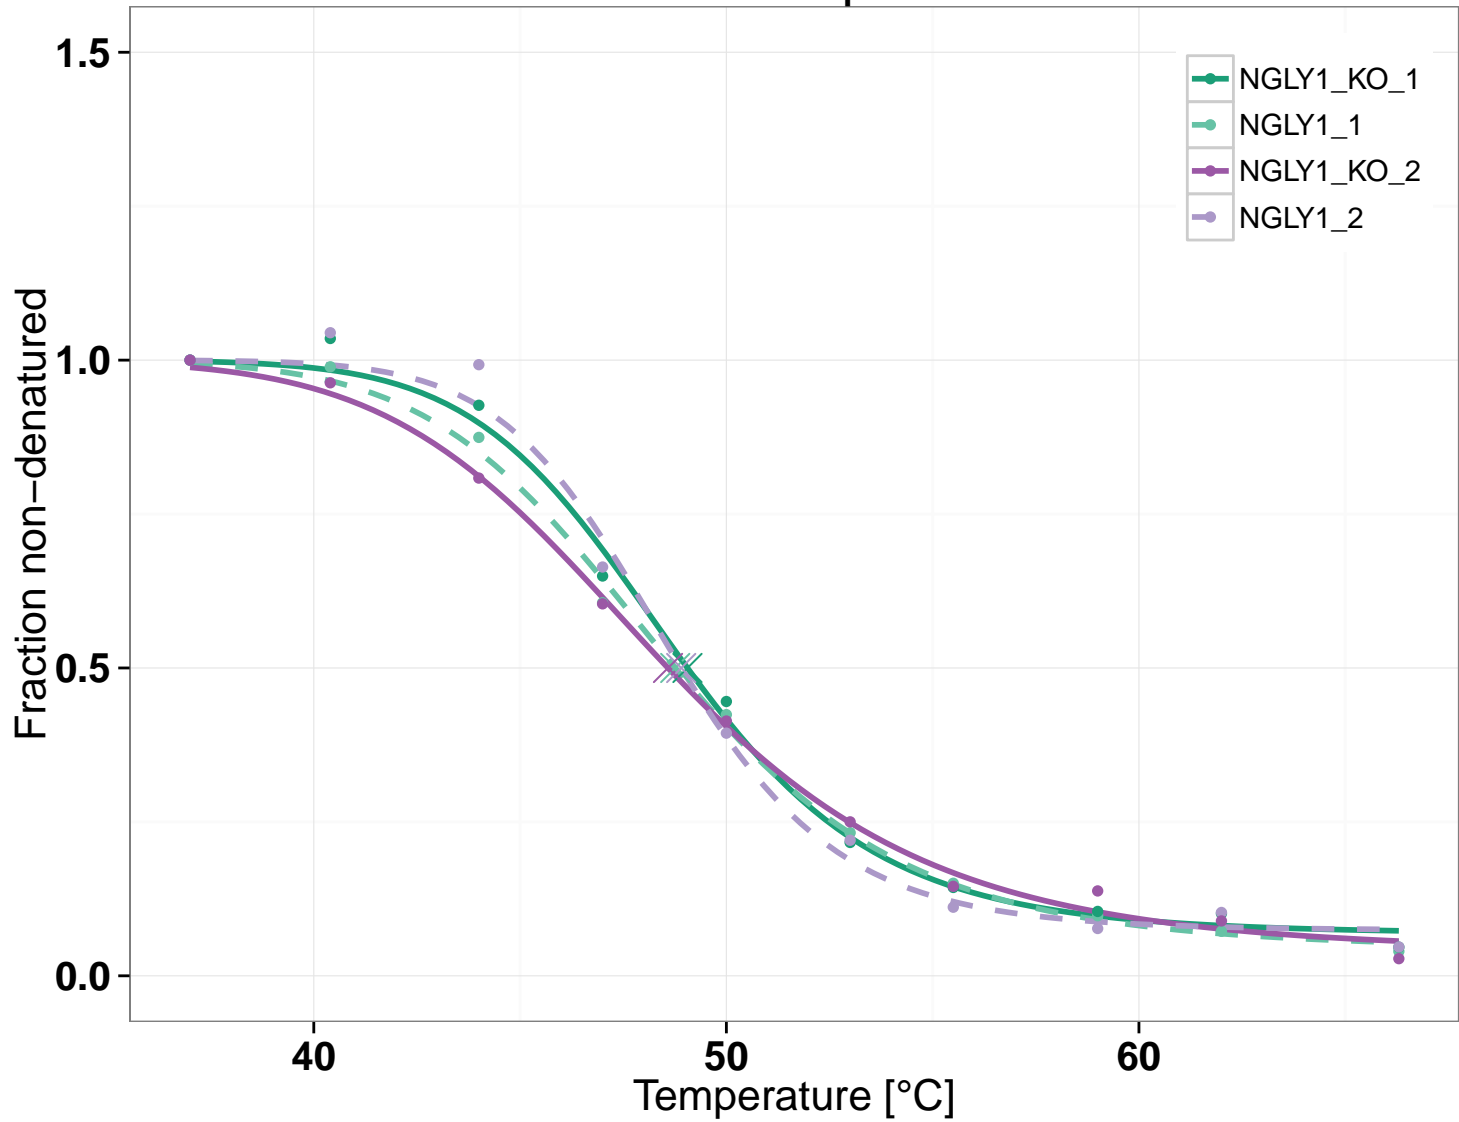

|            | meltPoint | slope  | plateau | R2   |
|------------|-----------|--------|---------|------|
| NGLY1_KO_1 | 49.06     | -0.095 | 0.07    | 0.99 |
| NGLY1_1    | 48.76     | -0.083 | 0.04    | 1    |
| NGLY1_KO_2 | 48.59     | -0.073 | 0.04    | 1    |
| NGLY1_2    | 48.91     | -0.11  | 0.07    | 0.99 |

Supplement: Supplementary file 6204 [file 1]

# IPI00384471.2|BRD1

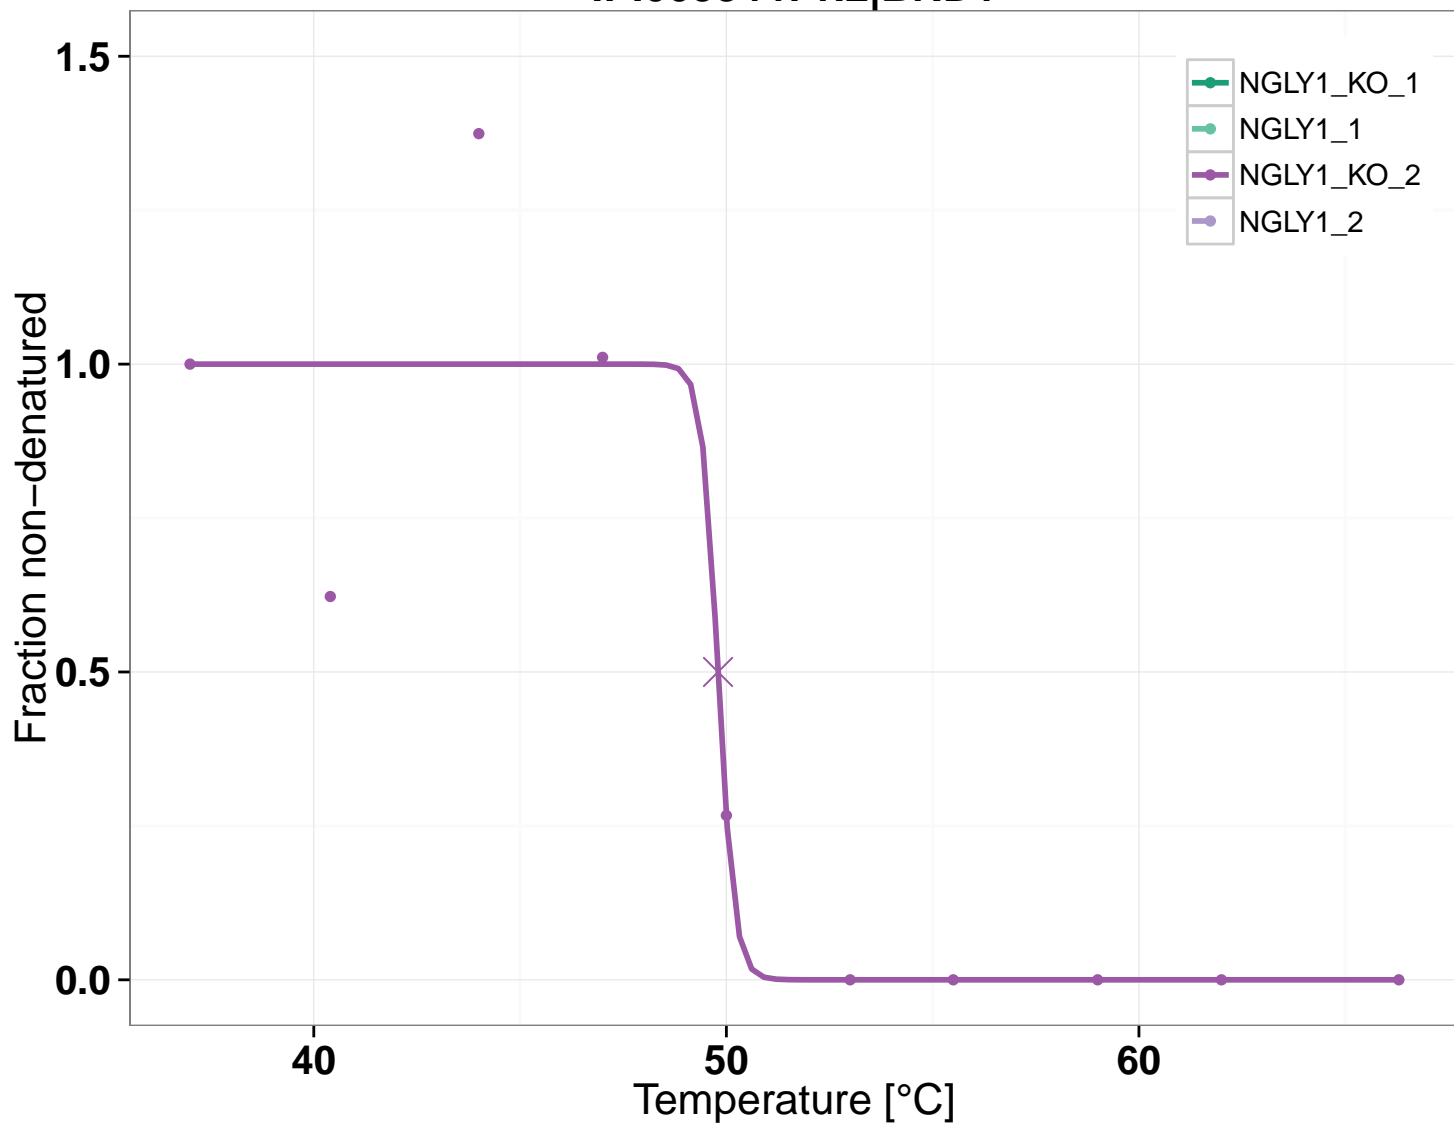

|            | meltPoint | slope | plateau | R2   |
|------------|-----------|-------|---------|------|
| NGLY1_KO_1 | —         | —     | —       | —    |
| NGLY1_1    | —         | —     | —       | —    |
| NGLY1_KO_2 | 49.8      | -1.3  | 0       | 0.89 |
| NGLY1_2    | —         | —     | —       | —    |

Supplement: Supplementary file 6205 [file 1]

# IPI00006440.6|MRPS7

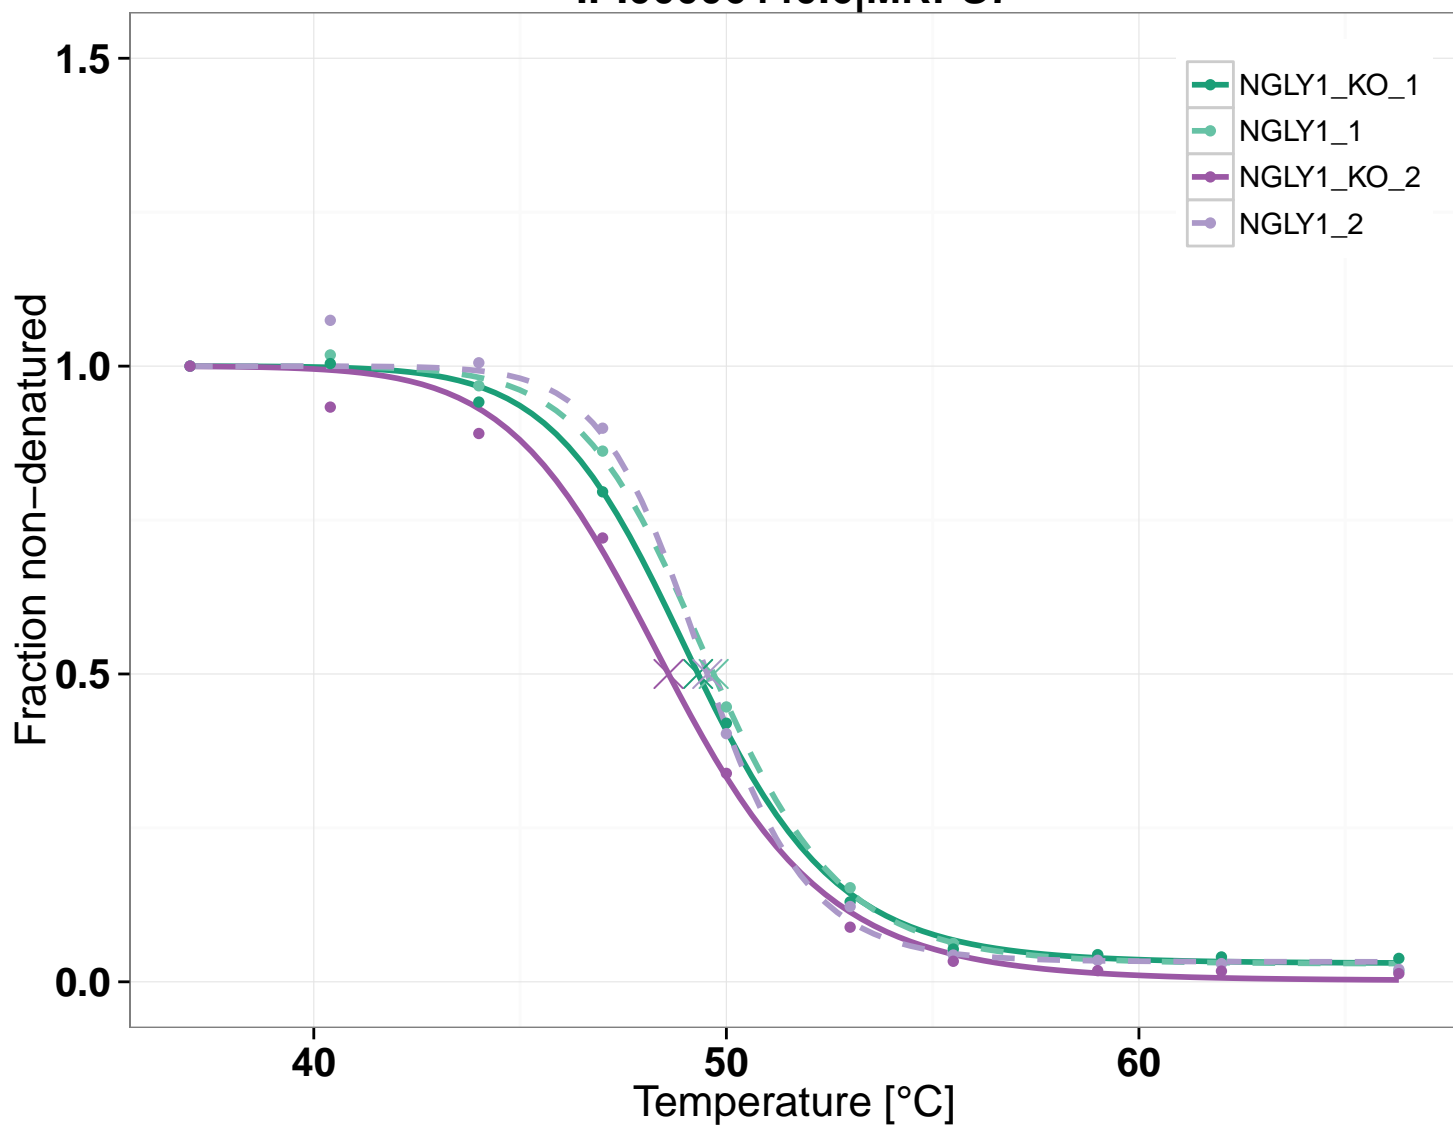

|            | meltPoint | slope | plateau | R2 |
|------------|-----------|-------|---------|----|
| NGLY1_KO_1 | 49.32     | -0.14 | 0.03    | 1  |
| NGLY1_1    | 49.69     | -0.15 | 0.03    | 1  |
| NGLY1_KO_2 | 48.6      | -0.13 | 0       | 1  |
| NGLY1_2    | 49.54     | -0.19 | 0.03    | 1  |

Supplement: Supplementary file 6206 [file 1]

IPI00478181.4|SNX13

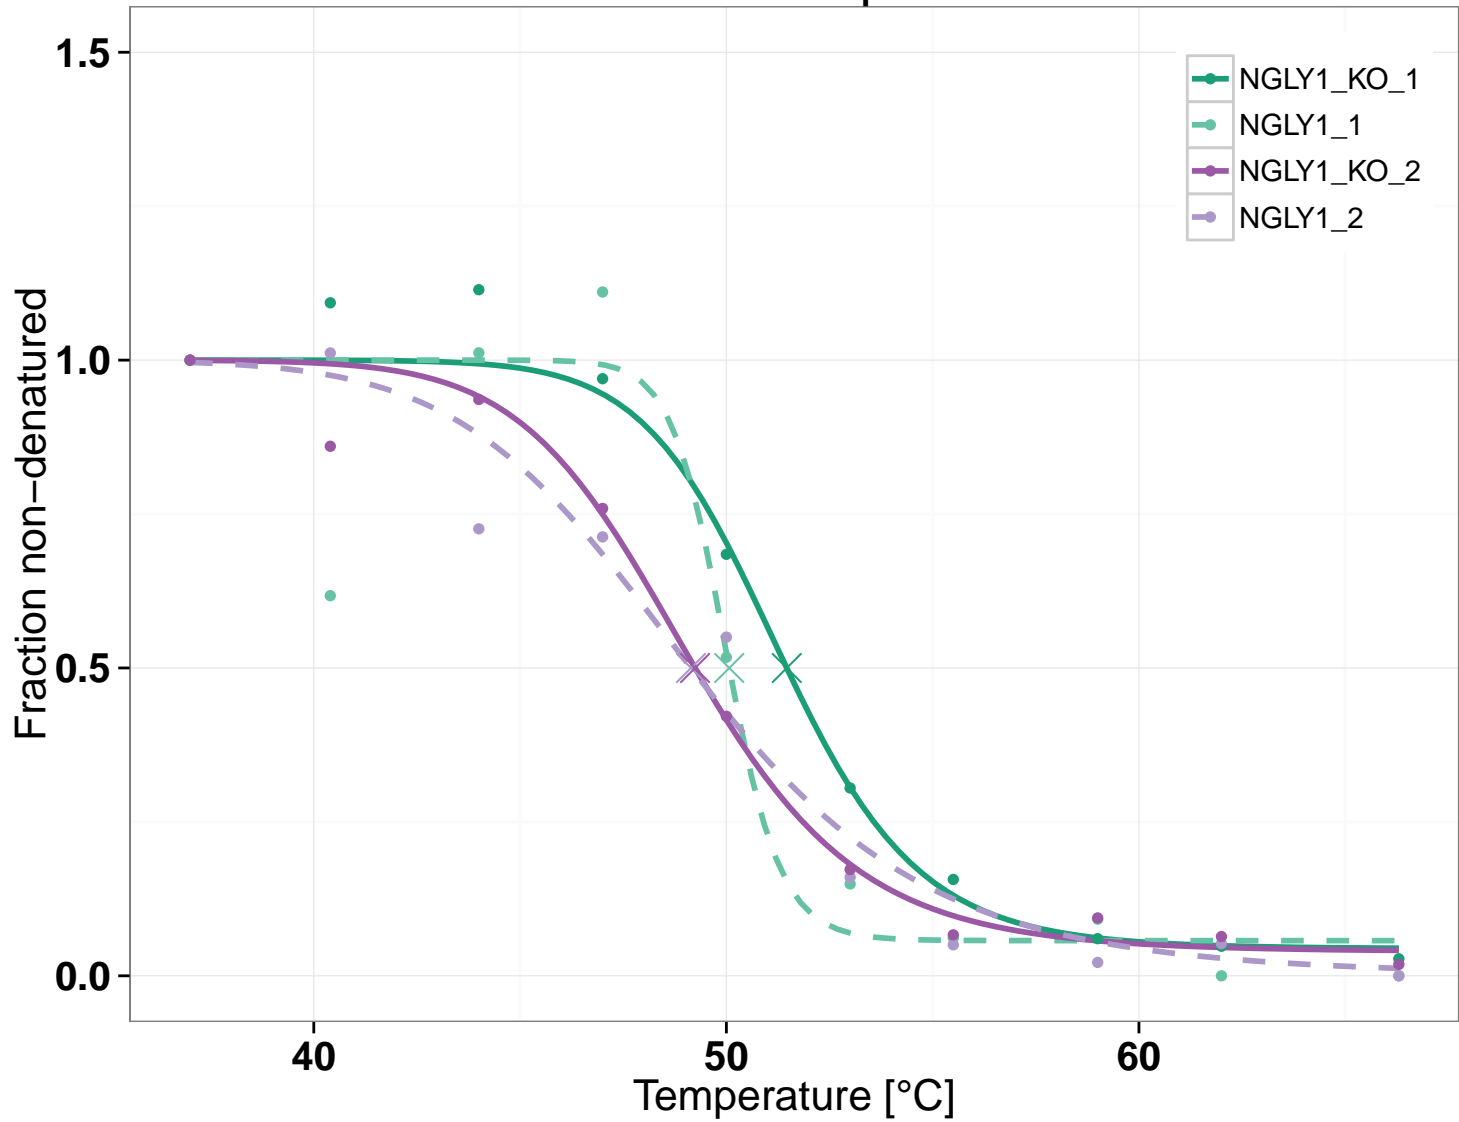

|            | meltPoint | slope  | plateau | R2   |
|------------|-----------|--------|---------|------|
| NGLY1_KO_1 | 51.46     | -0.14  | 0.04    | 0.99 |
| NGLY1_1    | 50.07     | -0.36  | 0.06    | 0.91 |
| NGLY1_KO_2 | 49.24     | -0.12  | 0.04    | 0.99 |
| NGLY1_2    | 49.14     | -0.088 | 0       | 0.97 |

Supplement: Supplementary file 6207 [file 1]

IPI00007122.7|KIAA1009

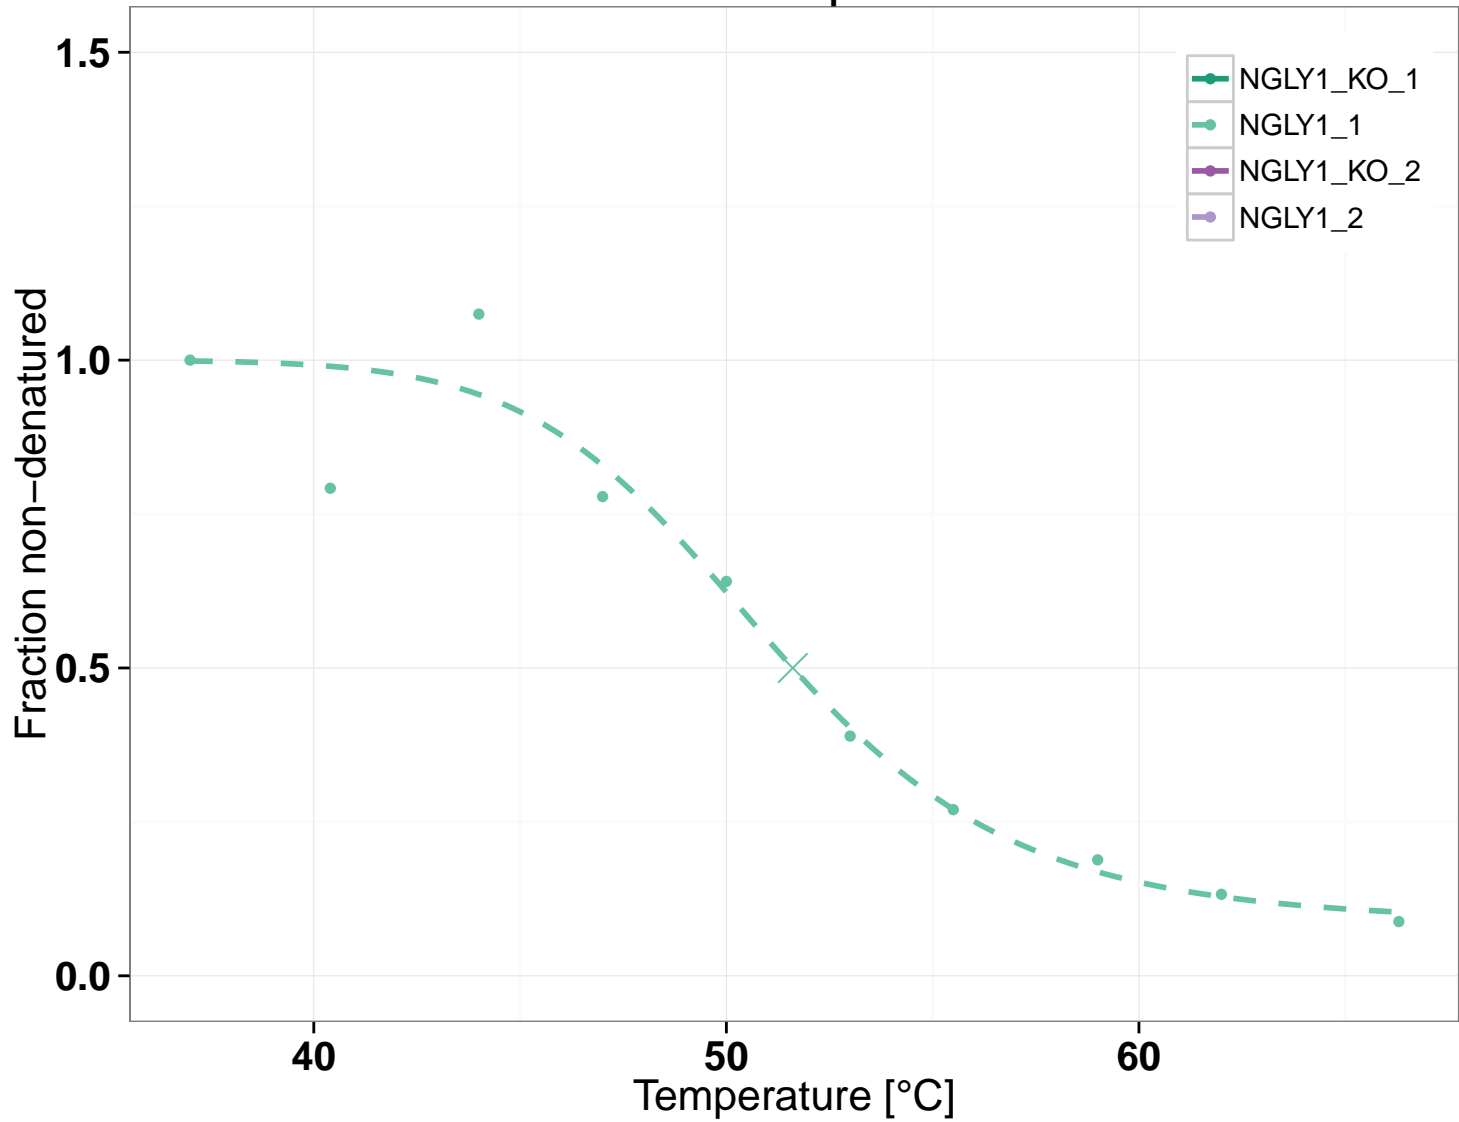

|            | meltPoint | slope  | plateau | R2   |
|------------|-----------|--------|---------|------|
| NGLY1_KO_1 | -         | -      | -       | -    |
| NGLY1_1    | 51.61     | -0.078 | 0.09    | 0.95 |
| NGLY1_KO_2 | -         | -      | -       | -    |
| NGLY1_2    | -         | -      | -       | -    |

Supplement: Supplementary file 6208 [file 1]

IPI00747193.1|FRAS1

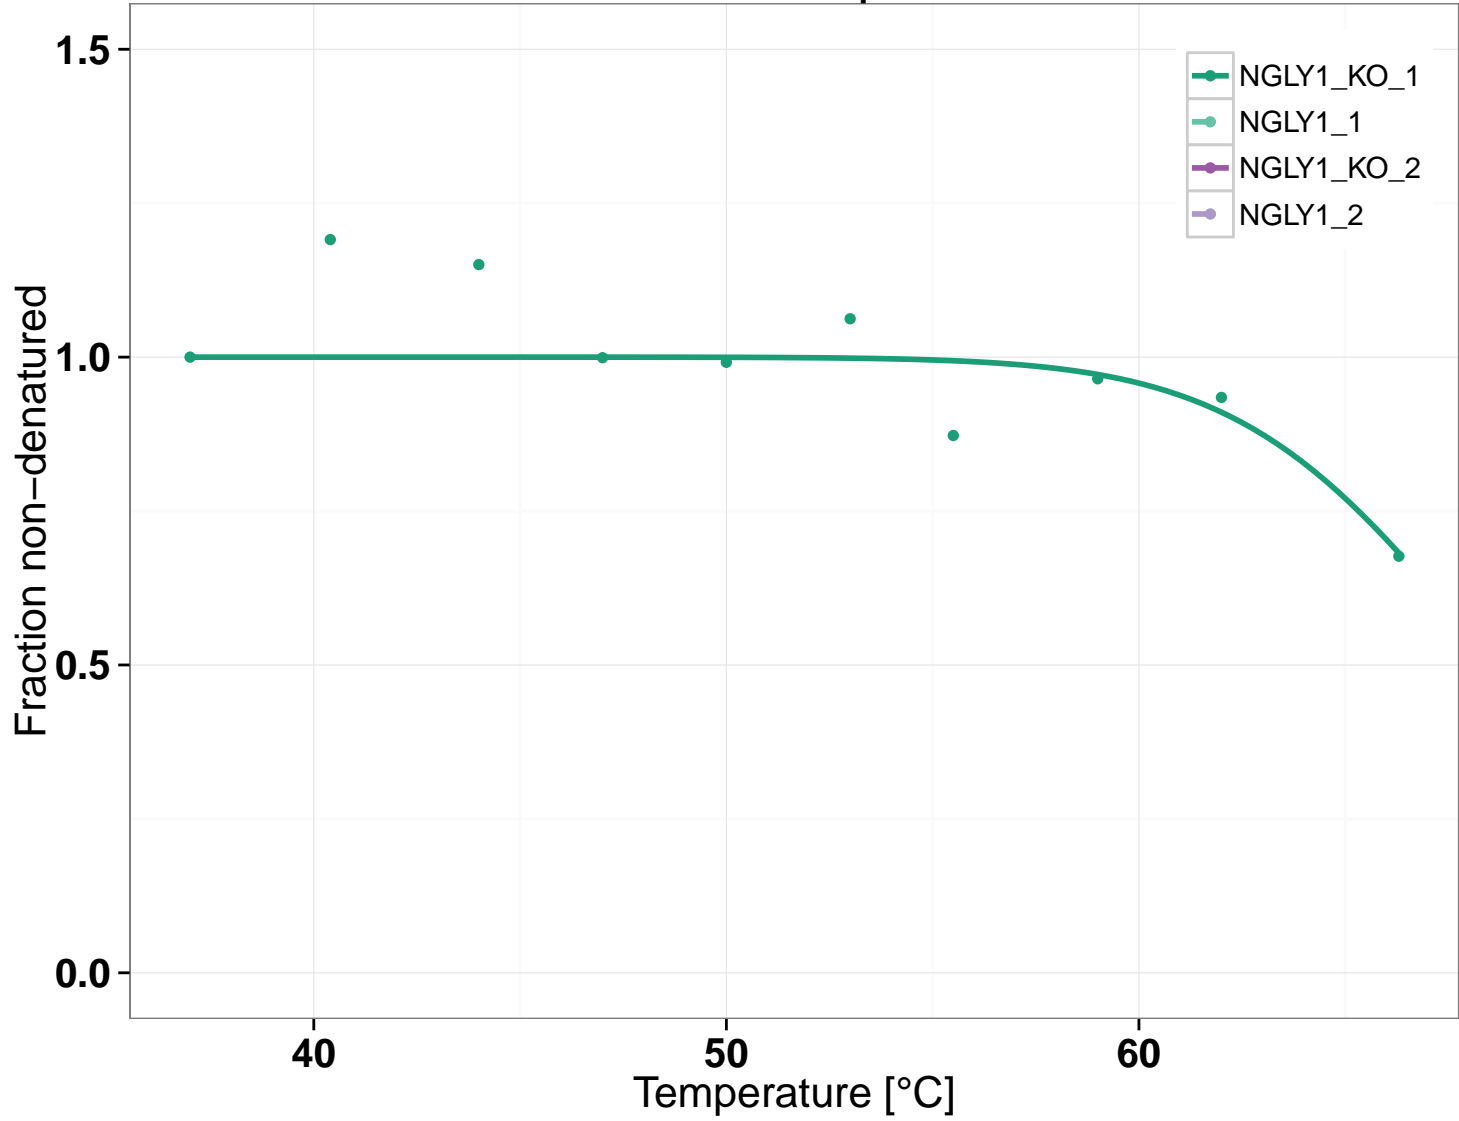

|            | meltPoint | slope | plateau | R2   |
|------------|-----------|-------|---------|------|
| NGLY1_KO_1 | -         | -     | 0       | 0.58 |
| NGLY1_1    | -         | -     | -       | -    |
| NGLY1_KO_2 | -         | -     | -       | -    |
| NGLY1_2    | -         | -     | -       | -    |

Supplement: Supplementary file 6209 [file 1]

IPI00787441.2|7 KDA PROTEIN.

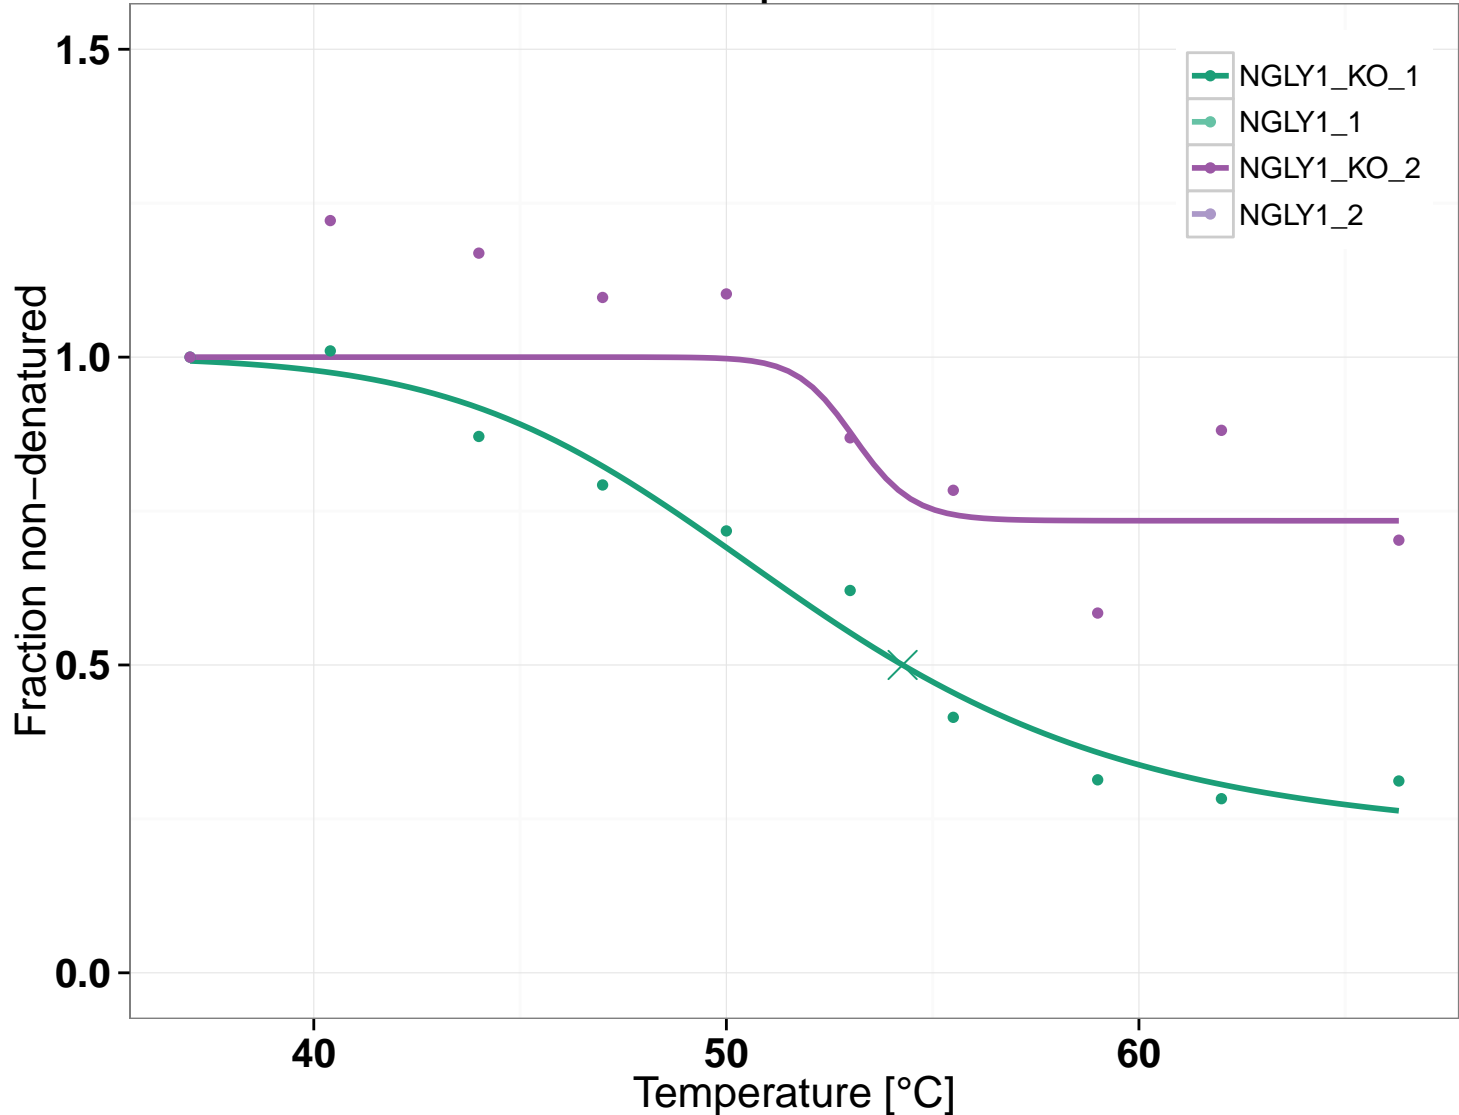

|            | meltPoint | slope  | plateau | R2   |
|------------|-----------|--------|---------|------|
| NGLY1_KO_1 | 54.27     | -0.047 | 0.21    | 0.98 |
| NGLY1_1    | -         | -      | -       | -    |
| NGLY1_KO_2 | -         | -0.095 | 0.73    | 0.64 |
| NGLY1_2    | -         | -      | -       | -    |

Supplement: Supplementary file 6210 [file 1]

# IPI00220459.2|KEL

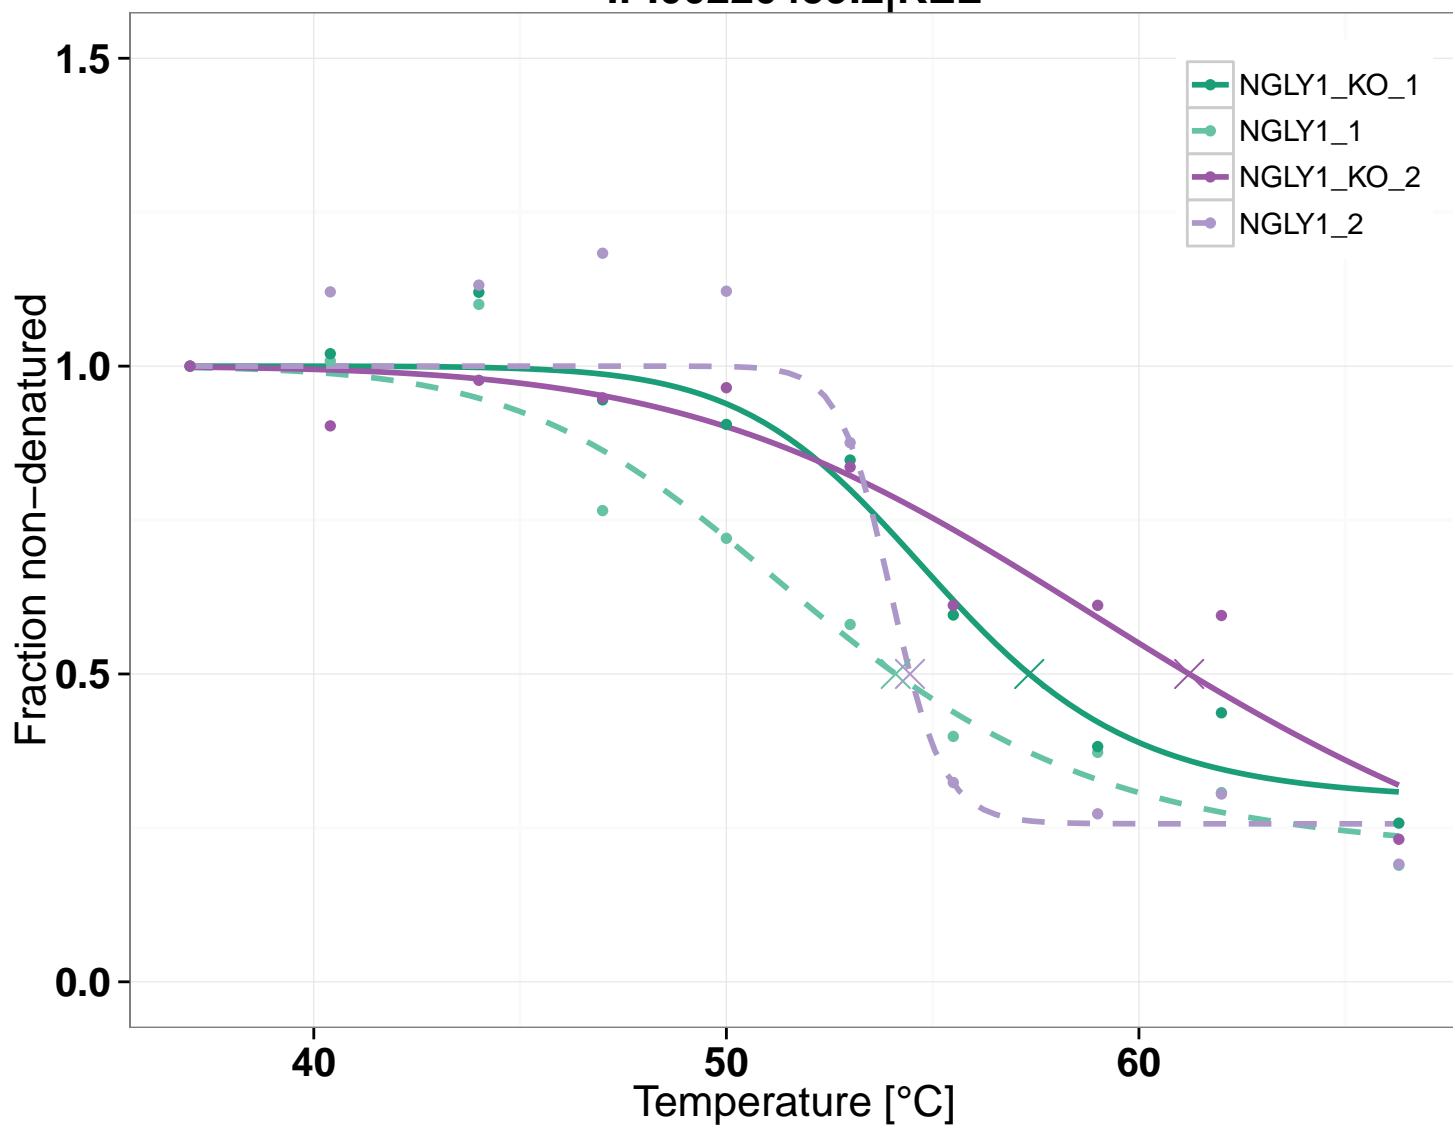

|            | meltPoint | slope  | plateau | R2   |
|------------|-----------|--------|---------|------|
| NGLY1_KO_1 | 57.34     | -0.074 | 0.29    | 0.96 |
| NGLY1_1    | 54.1      | -0.056 | 0.2     | 0.96 |
| NGLY1_KO_2 | 61.22     | -0.042 | 0       | 0.91 |
| NGLY1_2    | 54.45     | -0.3   | 0.26    | 0.95 |

Supplement: Supplementary file 6211 [file 1]

# IPI00001699.1|PYCARD

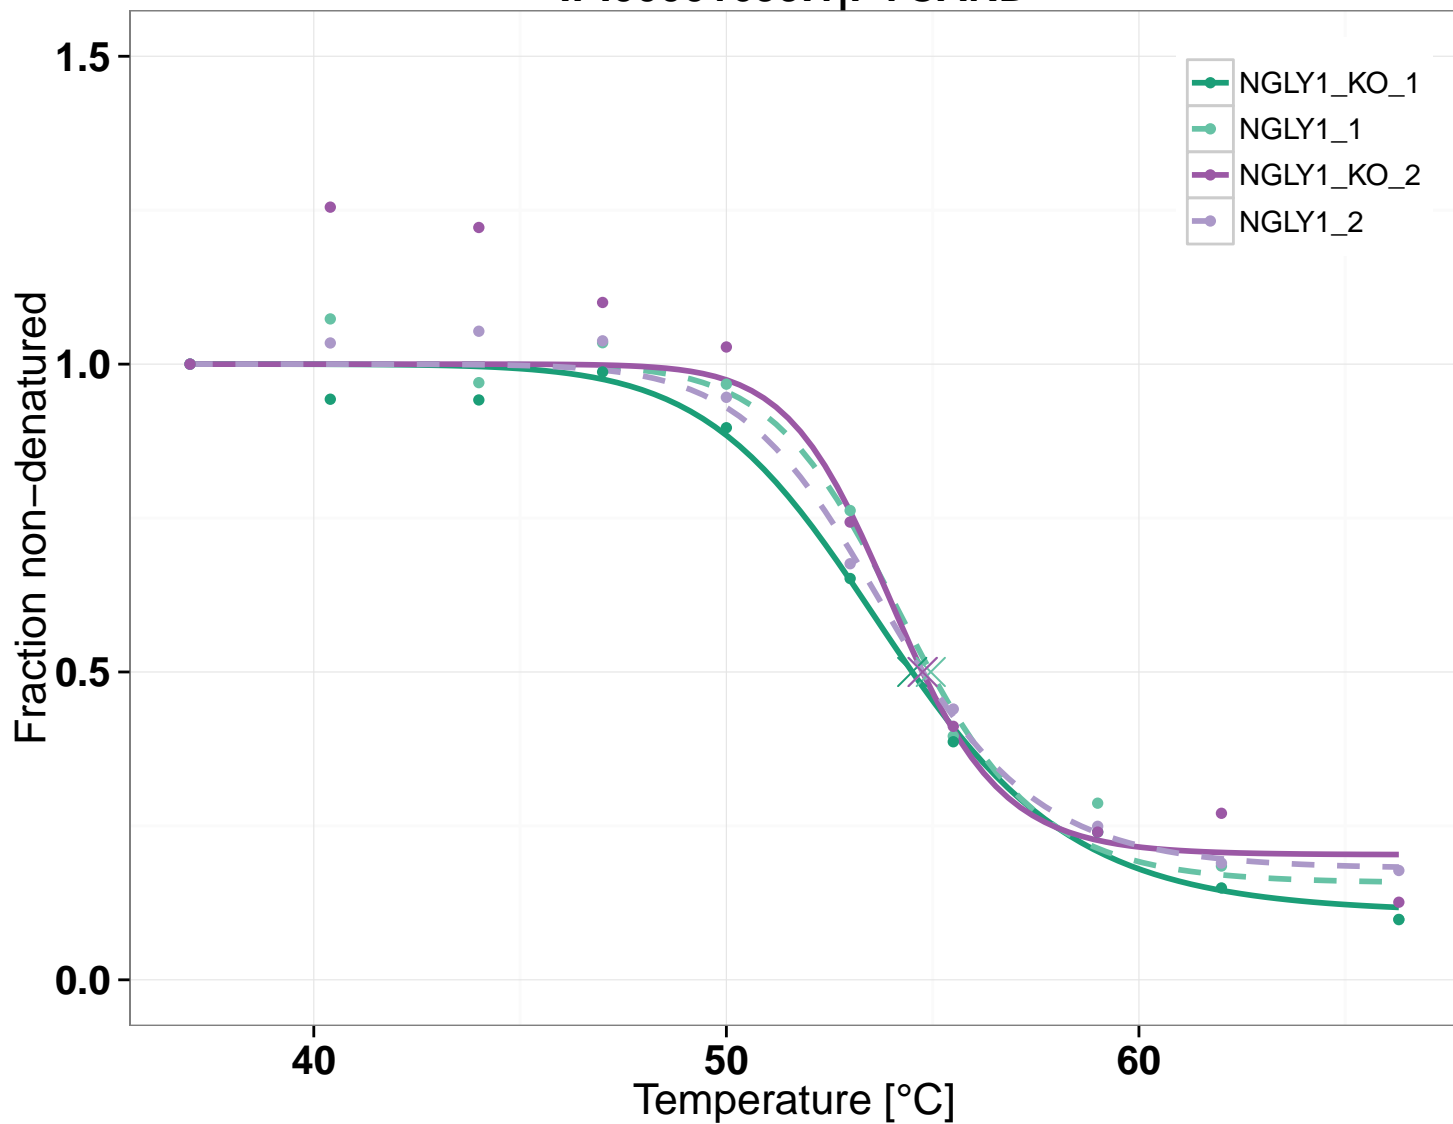

|            | meltPoint | slope | plateau | R2   |
|------------|-----------|-------|---------|------|
| NGLY1_KO_1 | 54.5      | -0.1  | 0.11    | 0.99 |
| NGLY1_1    | 54.95     | -0.13 | 0.16    | 0.99 |
| NGLY1_KO_2 | 54.75     | -0.15 | 0.2     | 0.92 |
| NGLY1_2    | 54.76     | -0.11 | 0.18    | 0.99 |

Supplement: Supplementary file 6212 [file 1]

IPI00178203.1|CHTF18

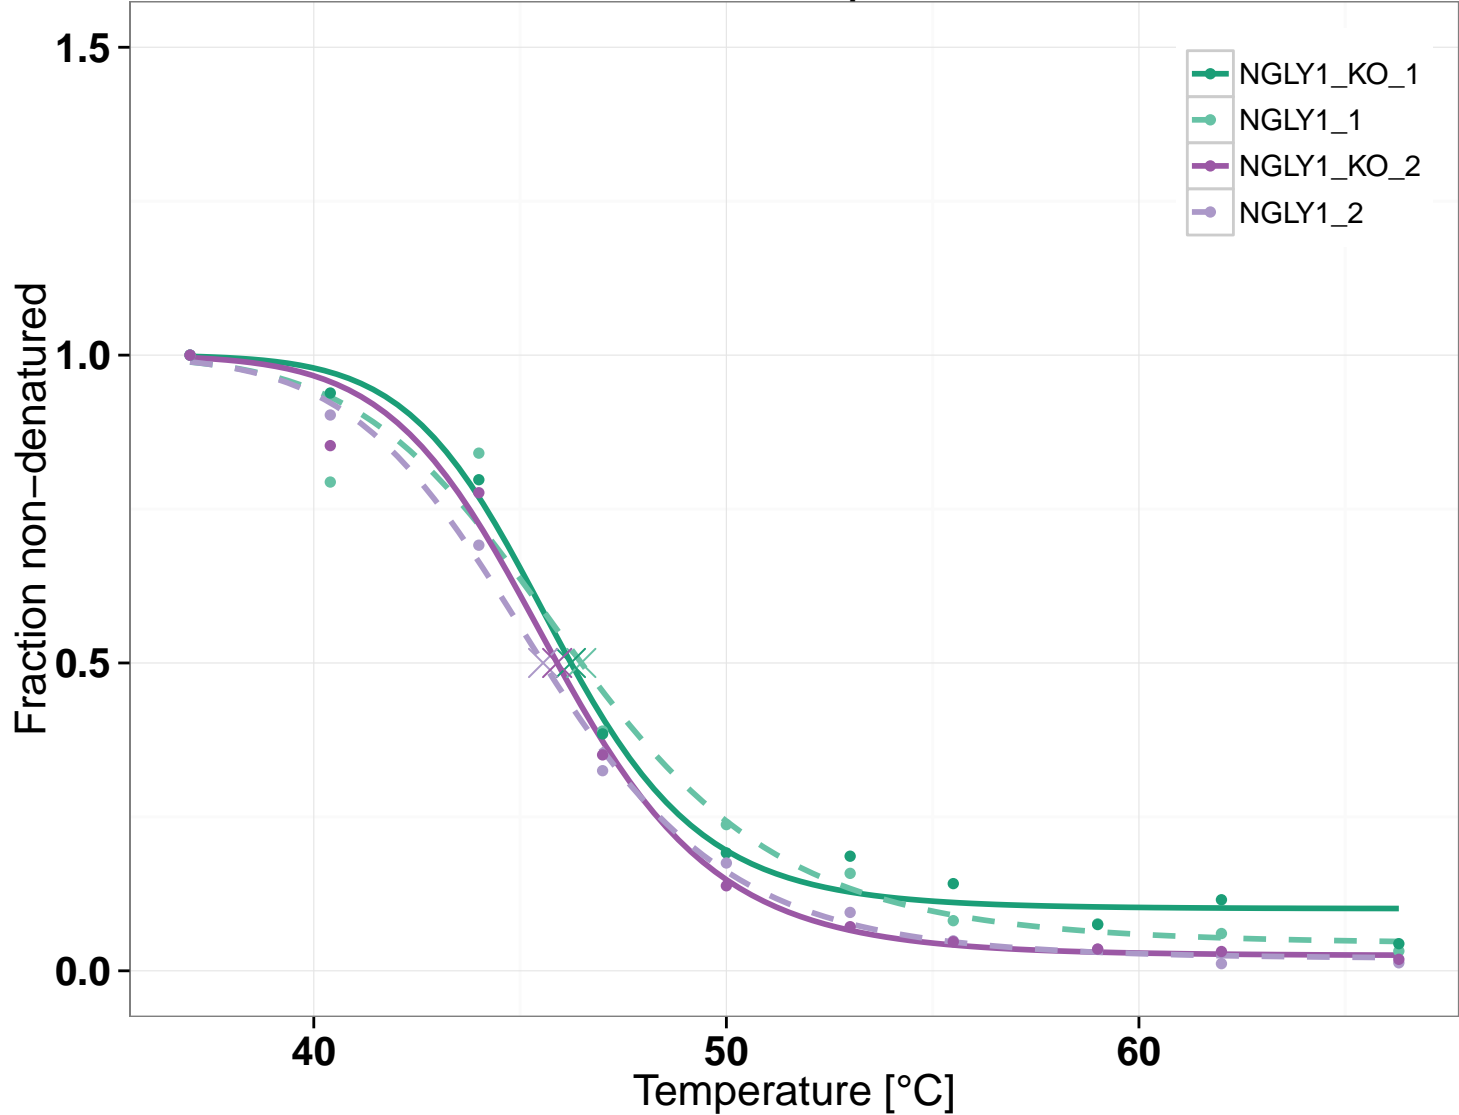

|            | meltPoint | slope  | plateau | R2   |
|------------|-----------|--------|---------|------|
| NGLY1_KO_1 | 46.23     | -0.13  | 0.1     | 0.99 |
| NGLY1_1    | 46.48     | -0.093 | 0.04    | 0.97 |
| NGLY1_KO_2 | 45.9      | -0.12  | 0.02    | 0.99 |
| NGLY1_2    | 45.56     | -0.11  | 0.02    | 1    |

Supplement: Supplementary file 6213 [file 1]

# IPI00479186.6|PKM2

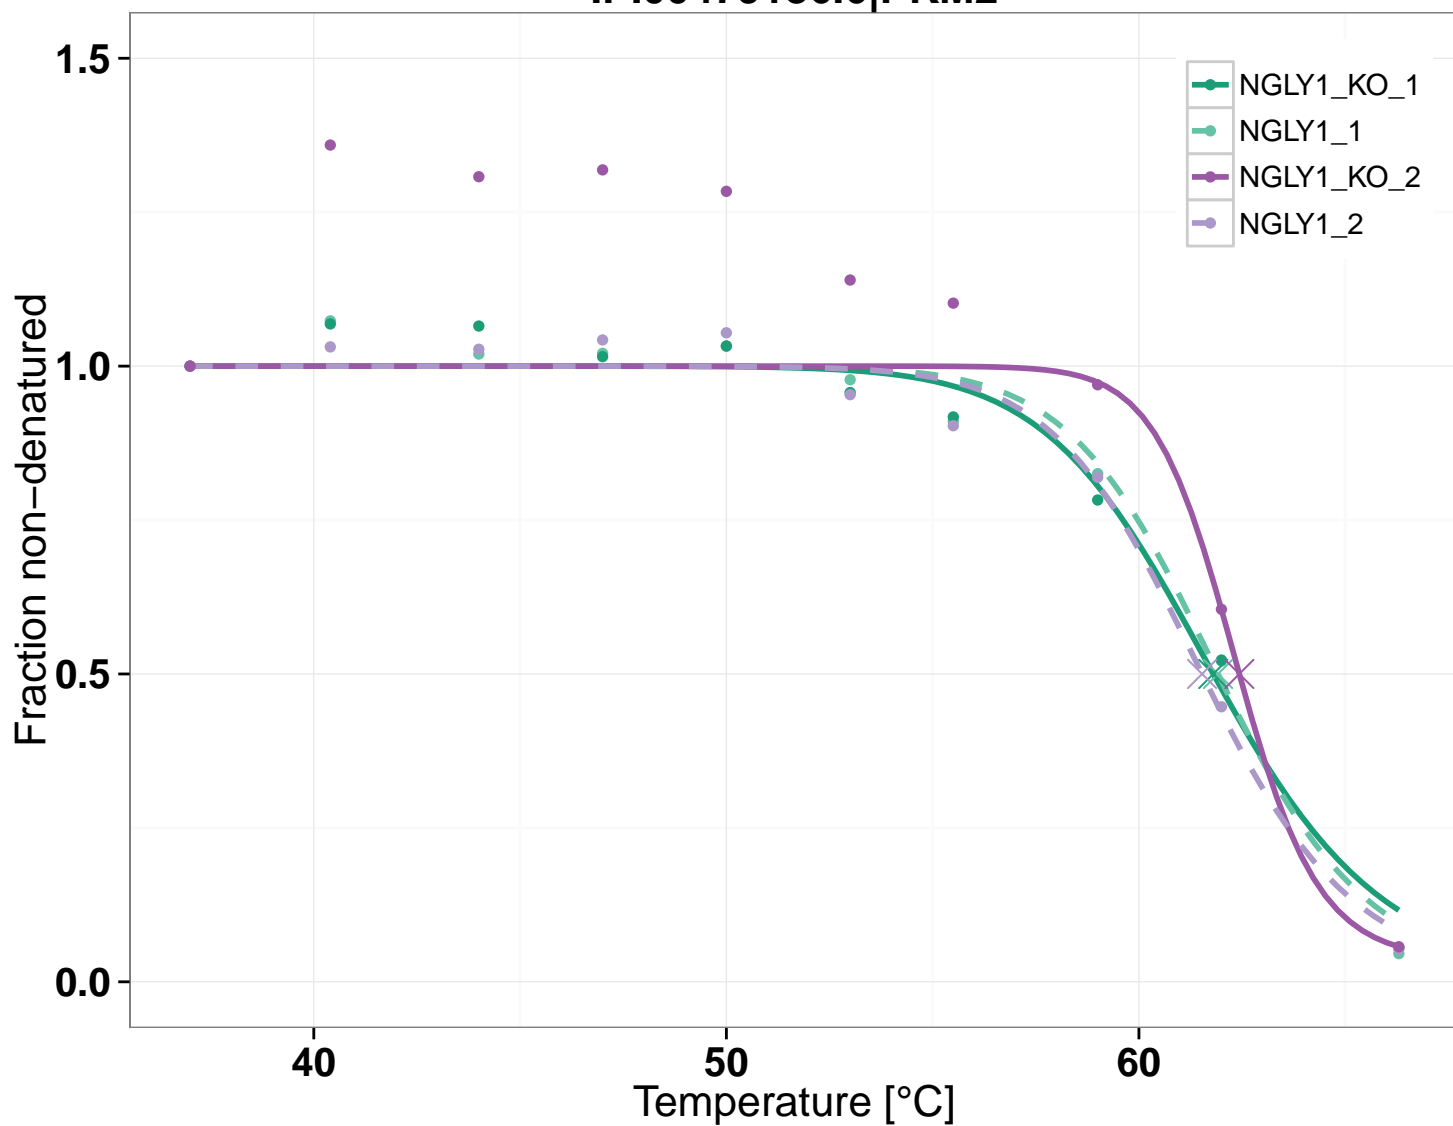

|            | meltPoint | slope | plateau | R2   |
|------------|-----------|-------|---------|------|
| NGLY1_KO_1 | 61.8      | -0.12 | 0       | 0.98 |
| NGLY1_1    | 61.92     | -0.14 | 0       | 0.98 |
| NGLY1_KO_2 | 62.43     | -0.24 | 0.03    | 0.71 |
| NGLY1_2    | 61.53     | -0.14 | 0       | 0.99 |

Supplement: Supplementary file 6214 [file 1]

# IPI00028266.1|CCNB2

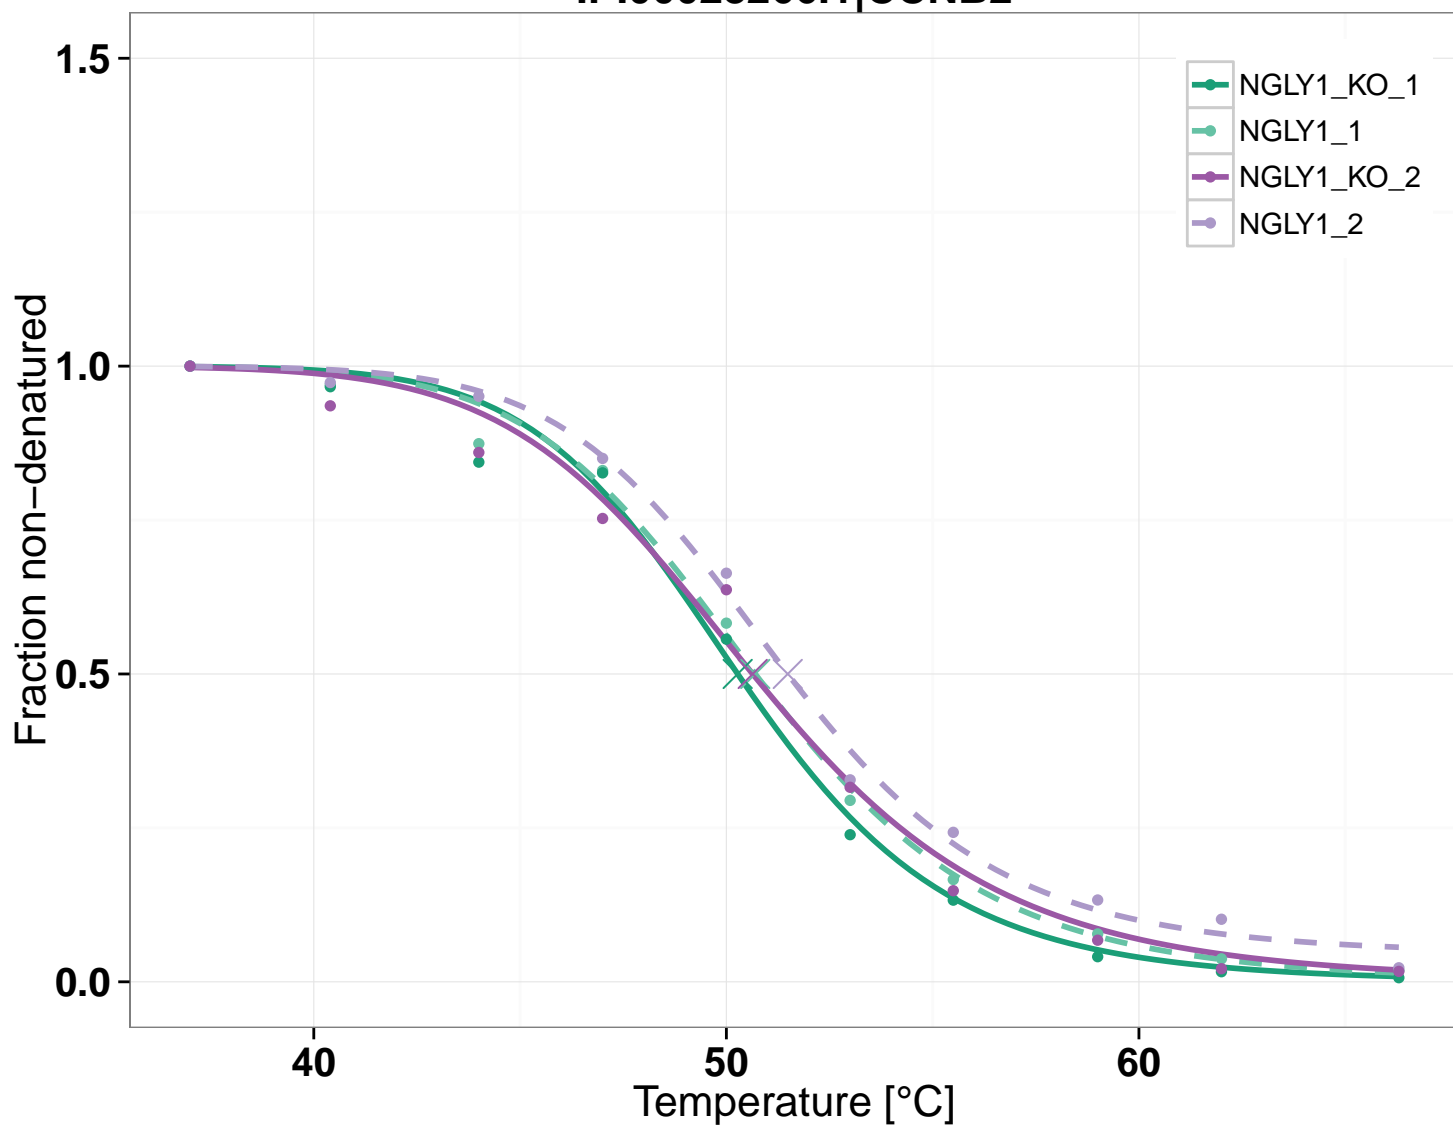

|            | meltPoint | slope  | plateau | R2   |
|------------|-----------|--------|---------|------|
| NGLY1_KO_1 | 50.27     | -0.099 | 0       | 0.99 |
| NGLY1_1    | 50.7      | -0.09  | 0       | 1    |
| NGLY1_KO_2 | 50.64     | -0.083 | 0       | 0.99 |
| NGLY1_2    | 51.49     | -0.089 | 0.04    | 1    |

Supplement: Supplementary file 6215 [file 1]

IPI00100674.1|REEP4

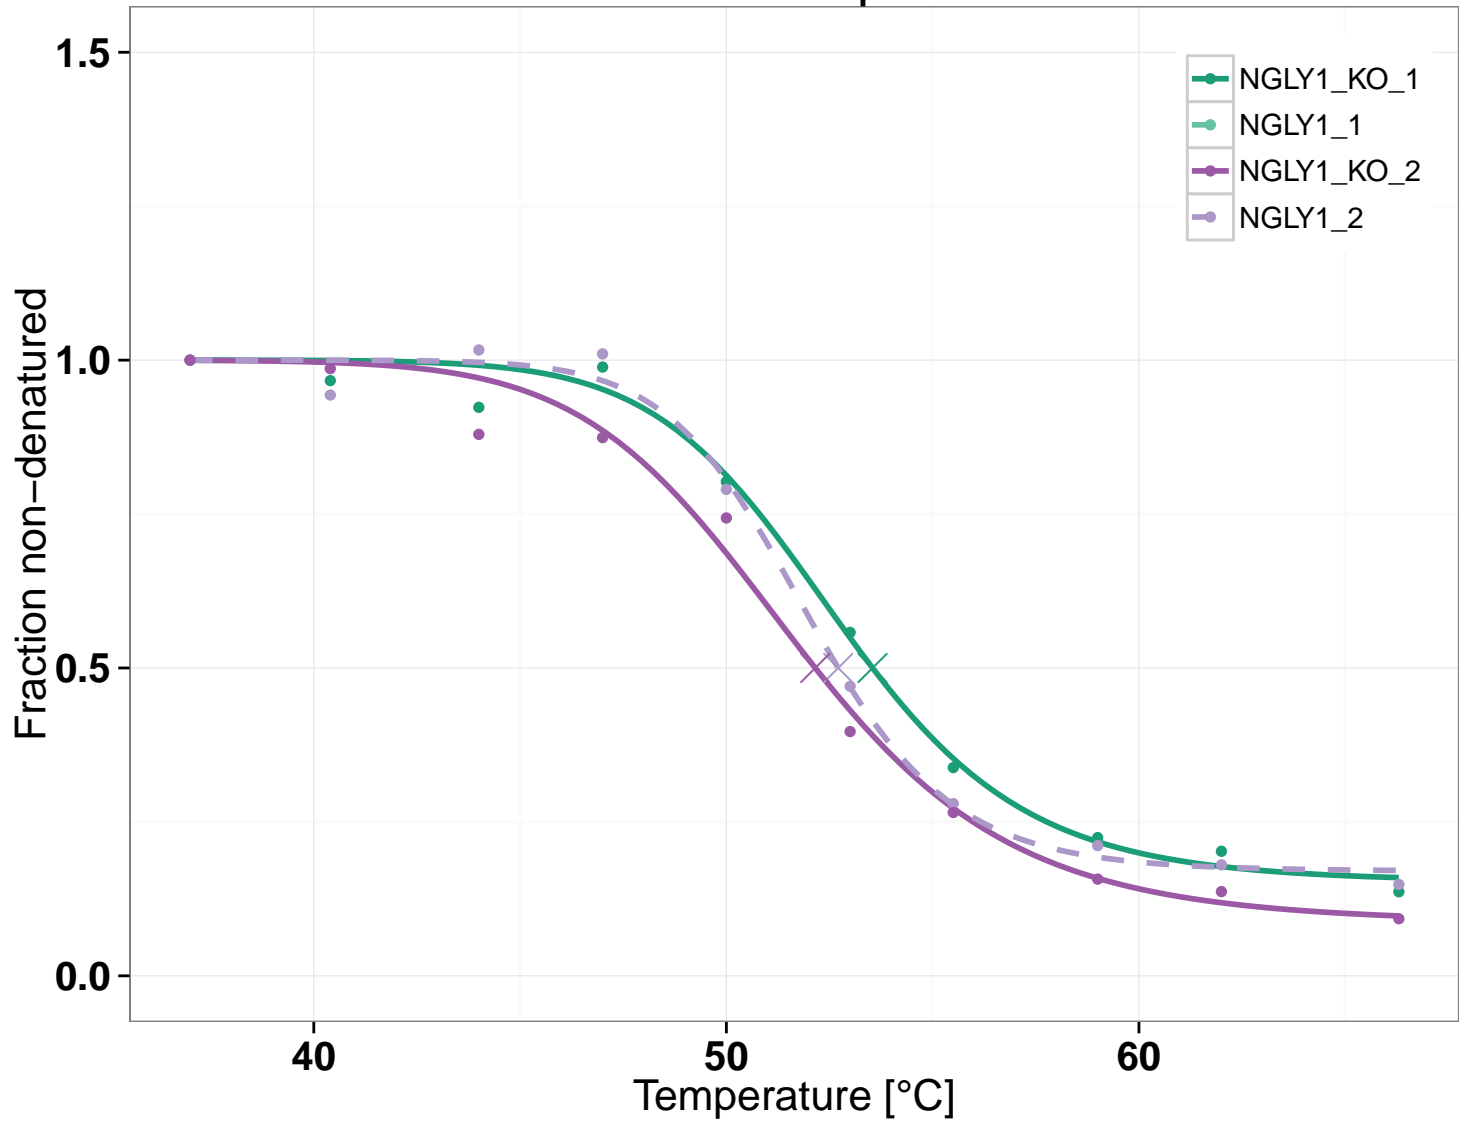

|            | meltPoint | slope  | plateau | R2   |
|------------|-----------|--------|---------|------|
| NGLY1_KO_1 | 53.54     | -0.094 | 0.15    | 0.99 |
| NGLY1_1    | -         | -      | -       | -    |
| NGLY1_KO_2 | 52.15     | -0.088 | 0.09    | 0.99 |
| NGLY1_2    | 52.71     | -0.12  | 0.17    | 0.99 |

Supplement: Supplementary file 6216 [file 1]

IPI00377030.3|SNRNP35

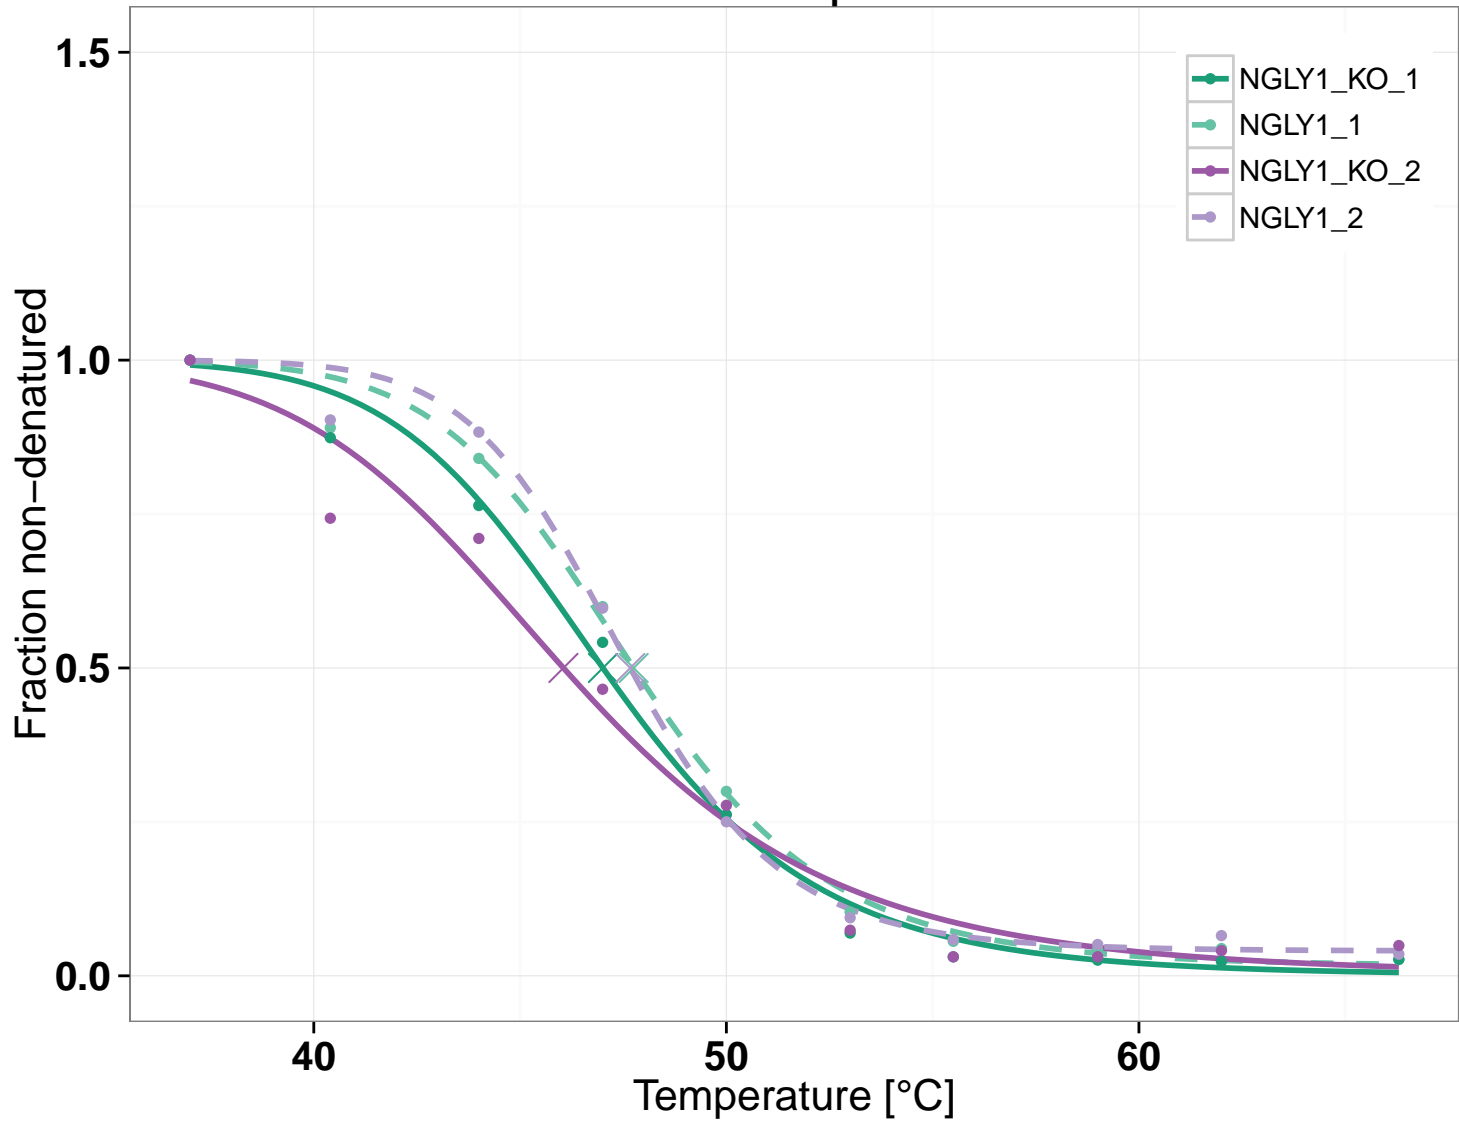

|            | meltPoint | slope  | plateau | R2   |
|------------|-----------|--------|---------|------|
| NGLY1_KO_1 | 47.01     | -0.096 | 0       | 0.99 |
| NGLY1_1    | 47.75     | -0.1   | 0.02    | 0.99 |
| NGLY1_KO_2 | 46.05     | -0.076 | 0       | 0.97 |
| NGLY1_2    | 47.67     | -0.13  | 0.04    | 0.99 |

Supplement: Supplementary file 6217 [file 1]

IPI00072044.3|C11ORF54

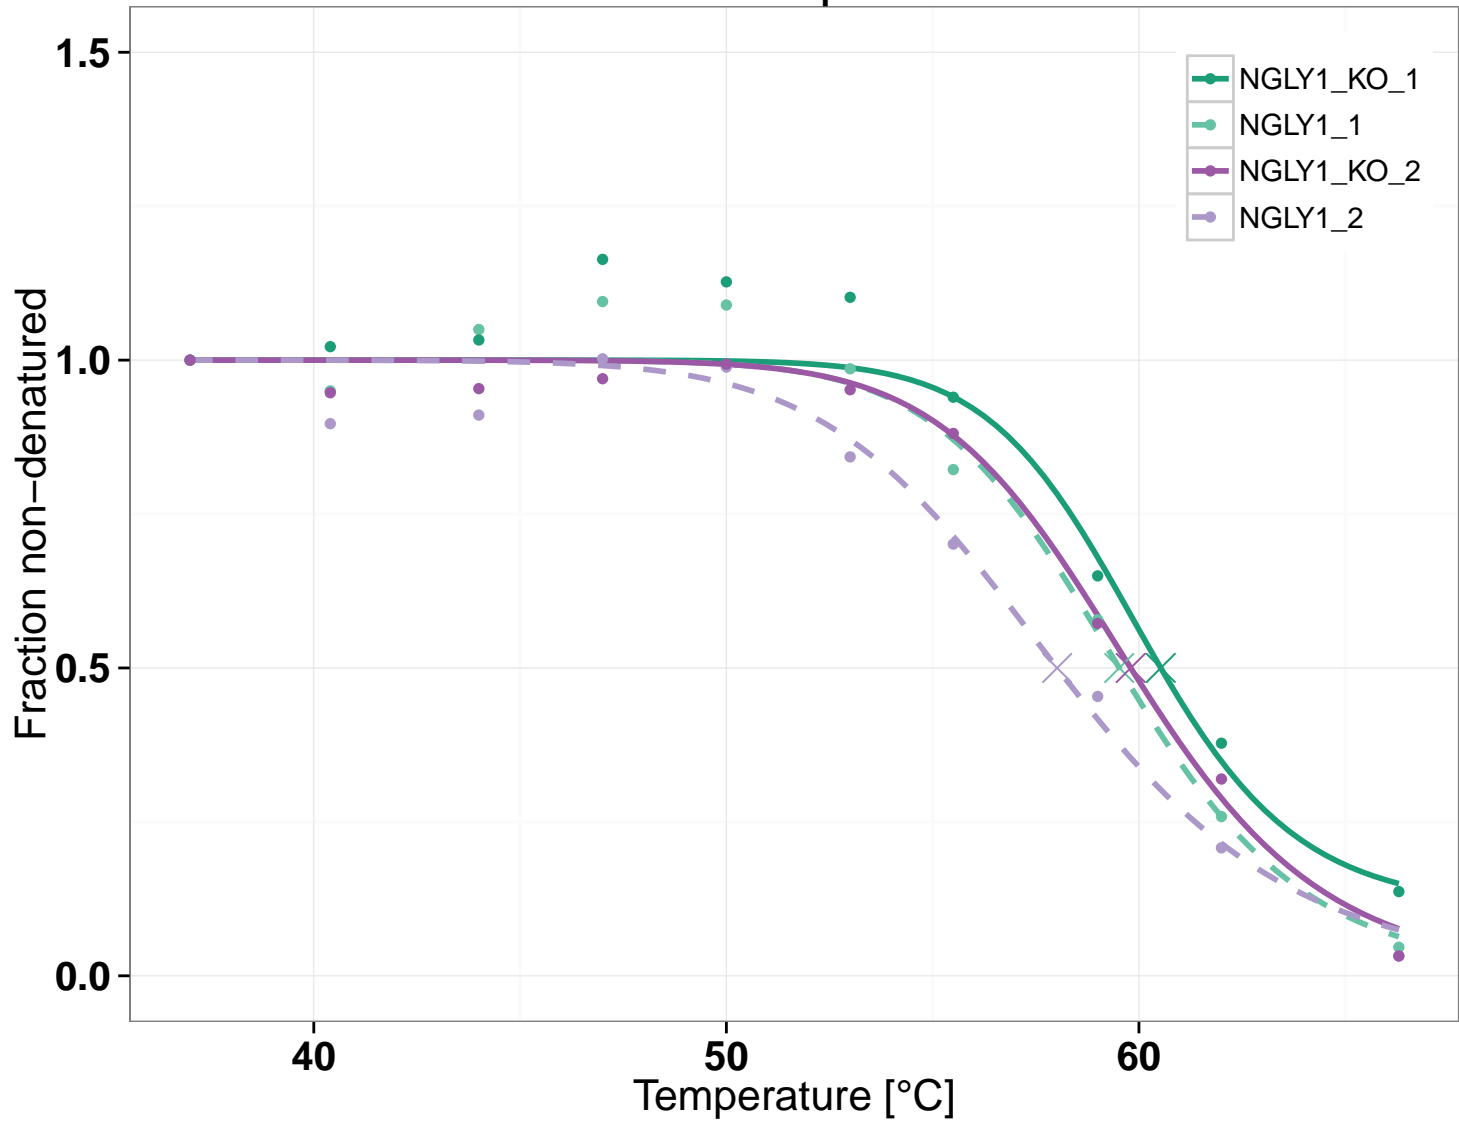

|            | meltPoint | slope  | plateau | R2   |
|------------|-----------|--------|---------|------|
| NGLY1_KO_1 | 60.53     | -0.12  | 0.11    | 0.95 |
| NGLY1_1    | 59.52     | -0.11  | 0       | 0.98 |
| NGLY1_KO_2 | 59.8      | -0.11  | 0       | 0.99 |
| NGLY1_2    | 58.02     | -0.088 | 0       | 0.98 |

Supplement: Supplementary file 6218 [file 1]

# IPI00307162.2|VCL

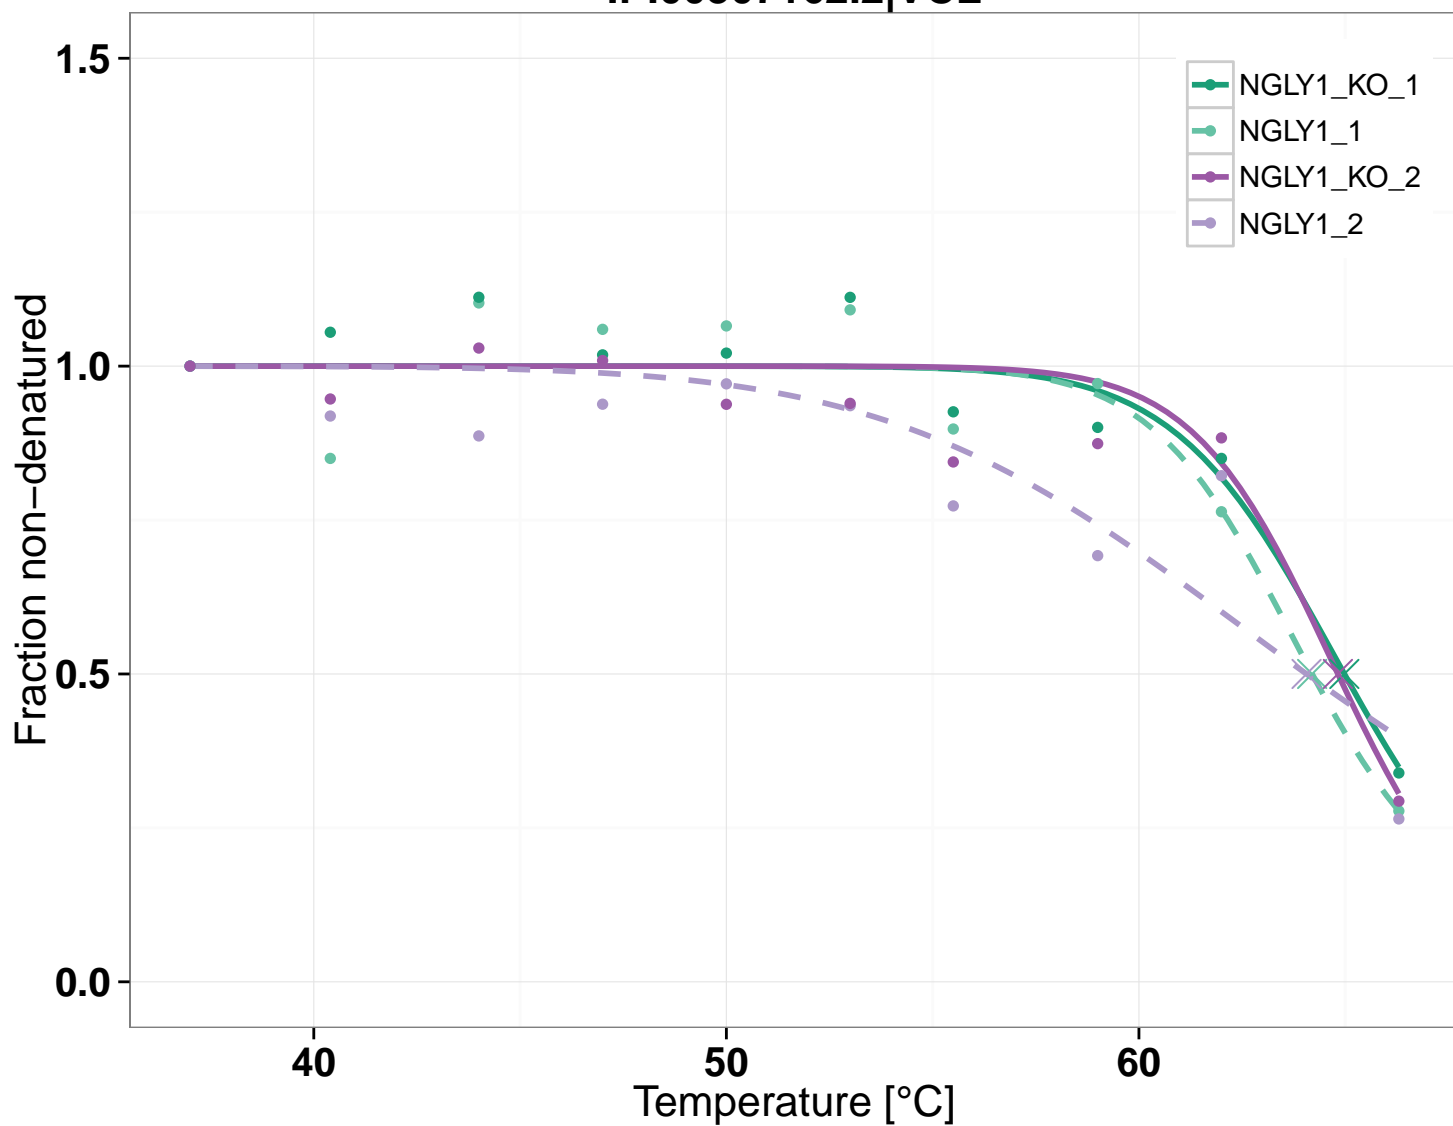

|            | meltPoint | slope  | plateau | R2   |
|------------|-----------|--------|---------|------|
| NGLY1_KO_1 | 64.98     | -0.12  | 0       | 0.92 |
| NGLY1_1    | 64.2      | -0.13  | 0.08    | 0.89 |
| NGLY1_KO_2 | 64.82     | -0.14  | 0       | 0.89 |
| NGLY1_2    | 64.06     | -0.049 | 0       | 0.77 |

Supplement: Supplementary file 6219 [file 1]

IPI00552569.1|ERCC6L

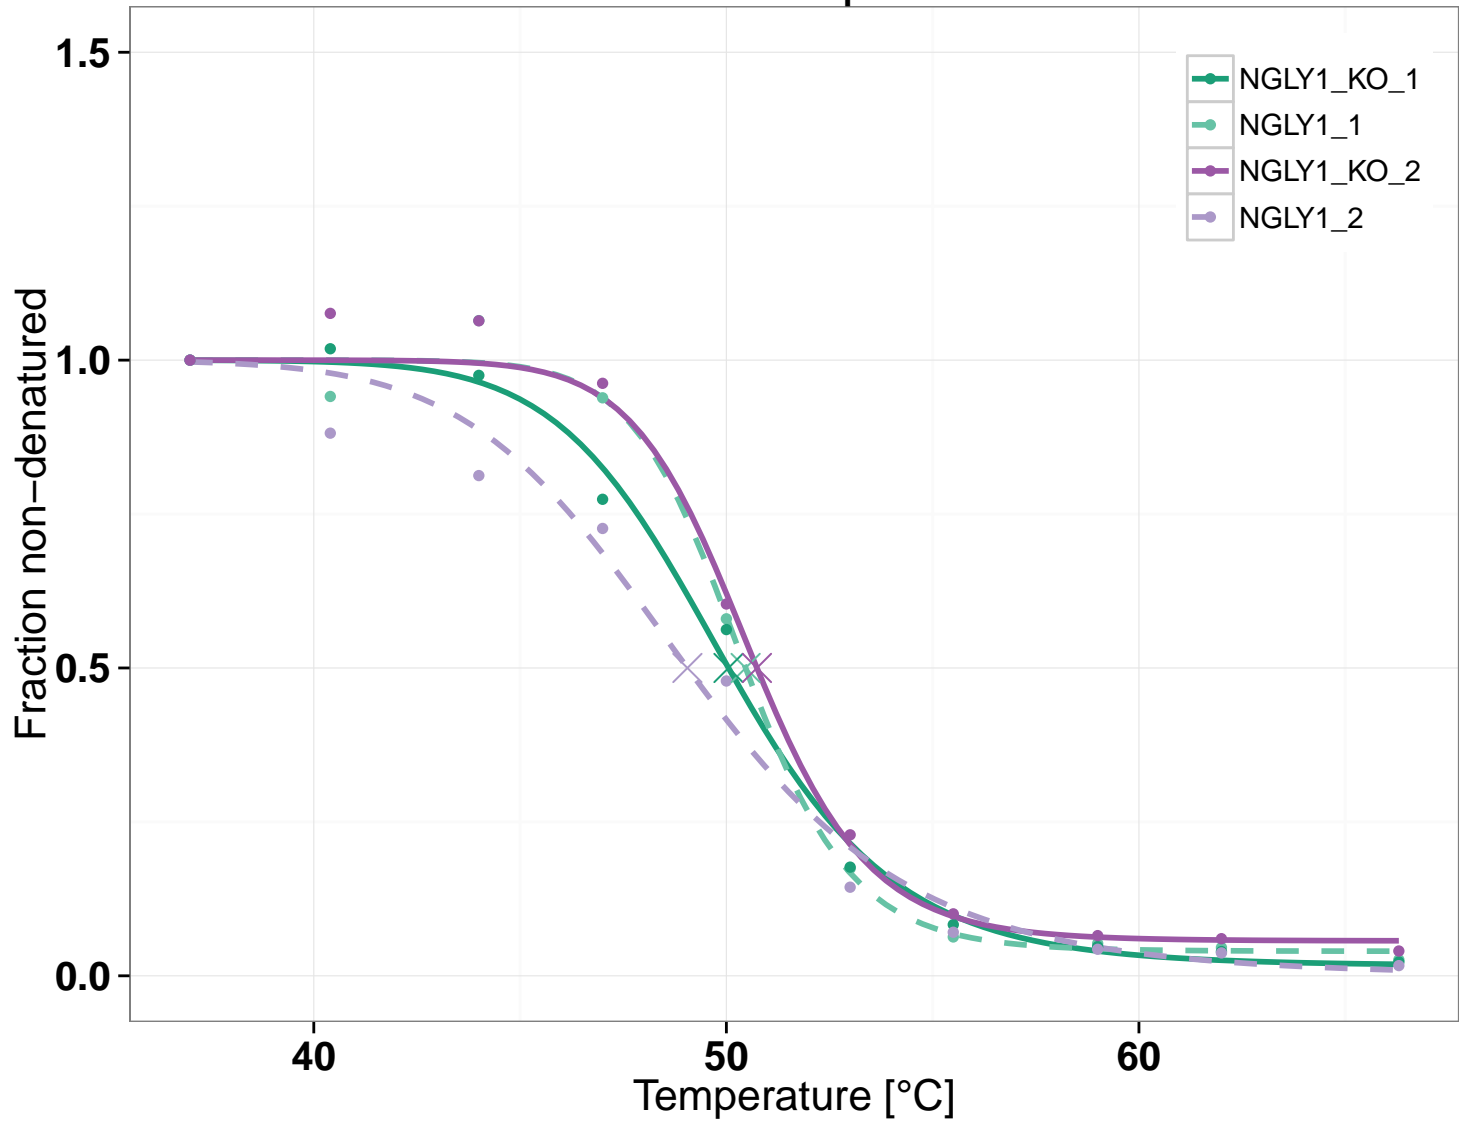

|            | meltPoint | slope  | plateau | R2   |
|------------|-----------|--------|---------|------|
| NGLY1_KO_1 | 50.05     | -0.12  | 0.02    | 1    |
| NGLY1_1    | 50.47     | -0.18  | 0.04    | 1    |
| NGLY1_KO_2 | 50.74     | -0.16  | 0.06    | 0.99 |
| NGLY1_2    | 49.06     | -0.092 | 0       | 0.98 |

Supplement: Supplementary file 6220 [file 1]

# IPI00418630.3|POLs

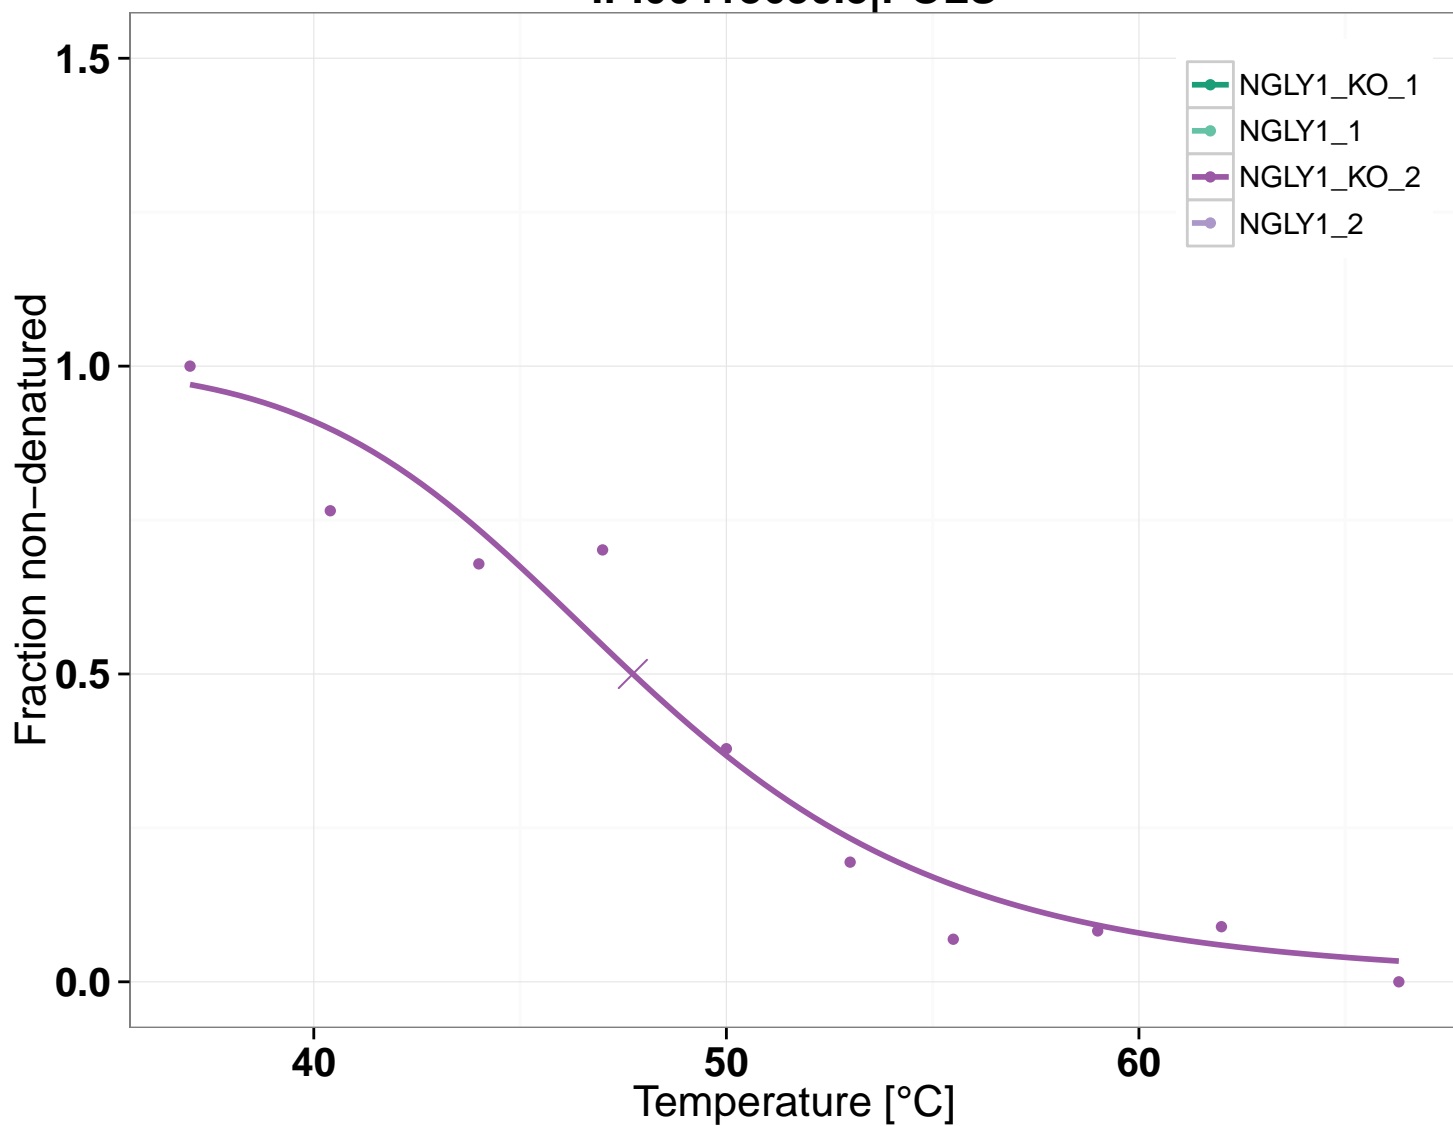

|            | meltPoint | slope  | plateau | R2   |
|------------|-----------|--------|---------|------|
| NGLY1_KO_1 | —         | —      | —       | —    |
| NGLY1_1    | —         | —      | —       | —    |
| NGLY1_KO_2 | 47.73     | -0.065 | 0       | 0.95 |
| NGLY1_2    | —         | —      | —       | —    |

Supplement: Supplementary file 6221 [file 1]

IPI00005194.1|UBFD1

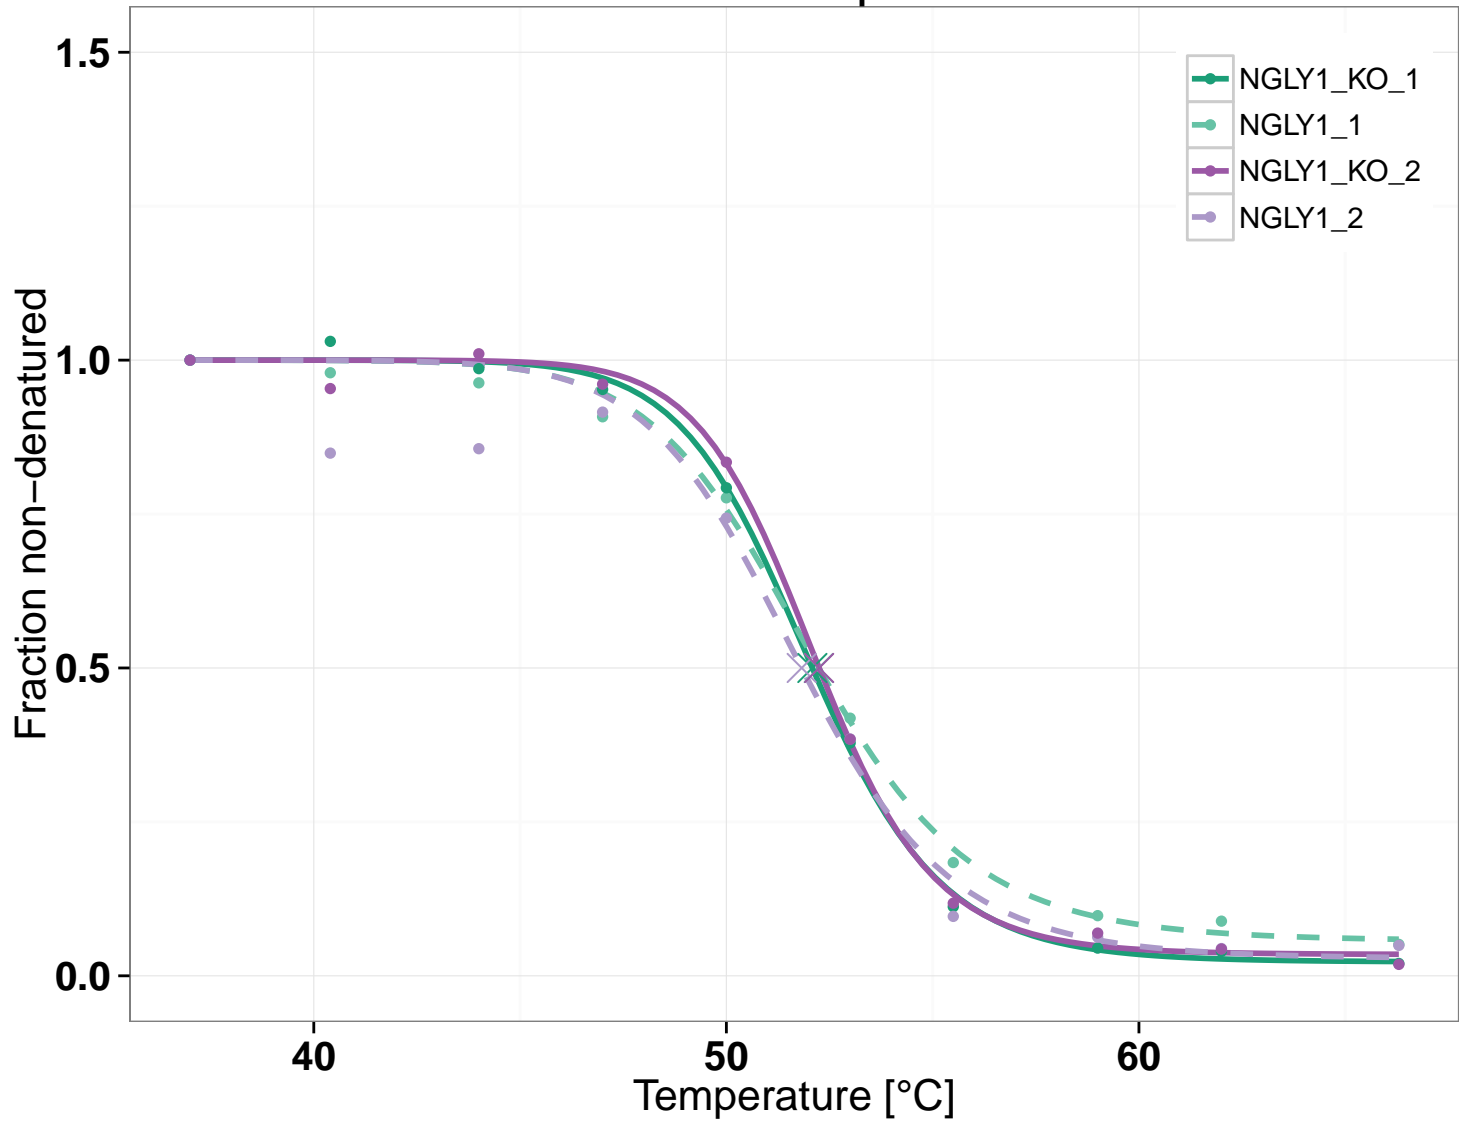

|            | meltPoint | slope | plateau | R2   |
|------------|-----------|-------|---------|------|
| NGLY1_KO_1 | 52.08     | -0.15 | 0.02    | 1    |
| NGLY1_1    | 52.24     | -0.12 | 0.06    | 1    |
| NGLY1_KO_2 | 52.25     | -0.17 | 0.03    | 1    |
| NGLY1_2    | 51.83     | -0.13 | 0.03    | 0.97 |

Supplement: Supplementary file 6222 [file 1]

IPI00221141.3|MAPK14

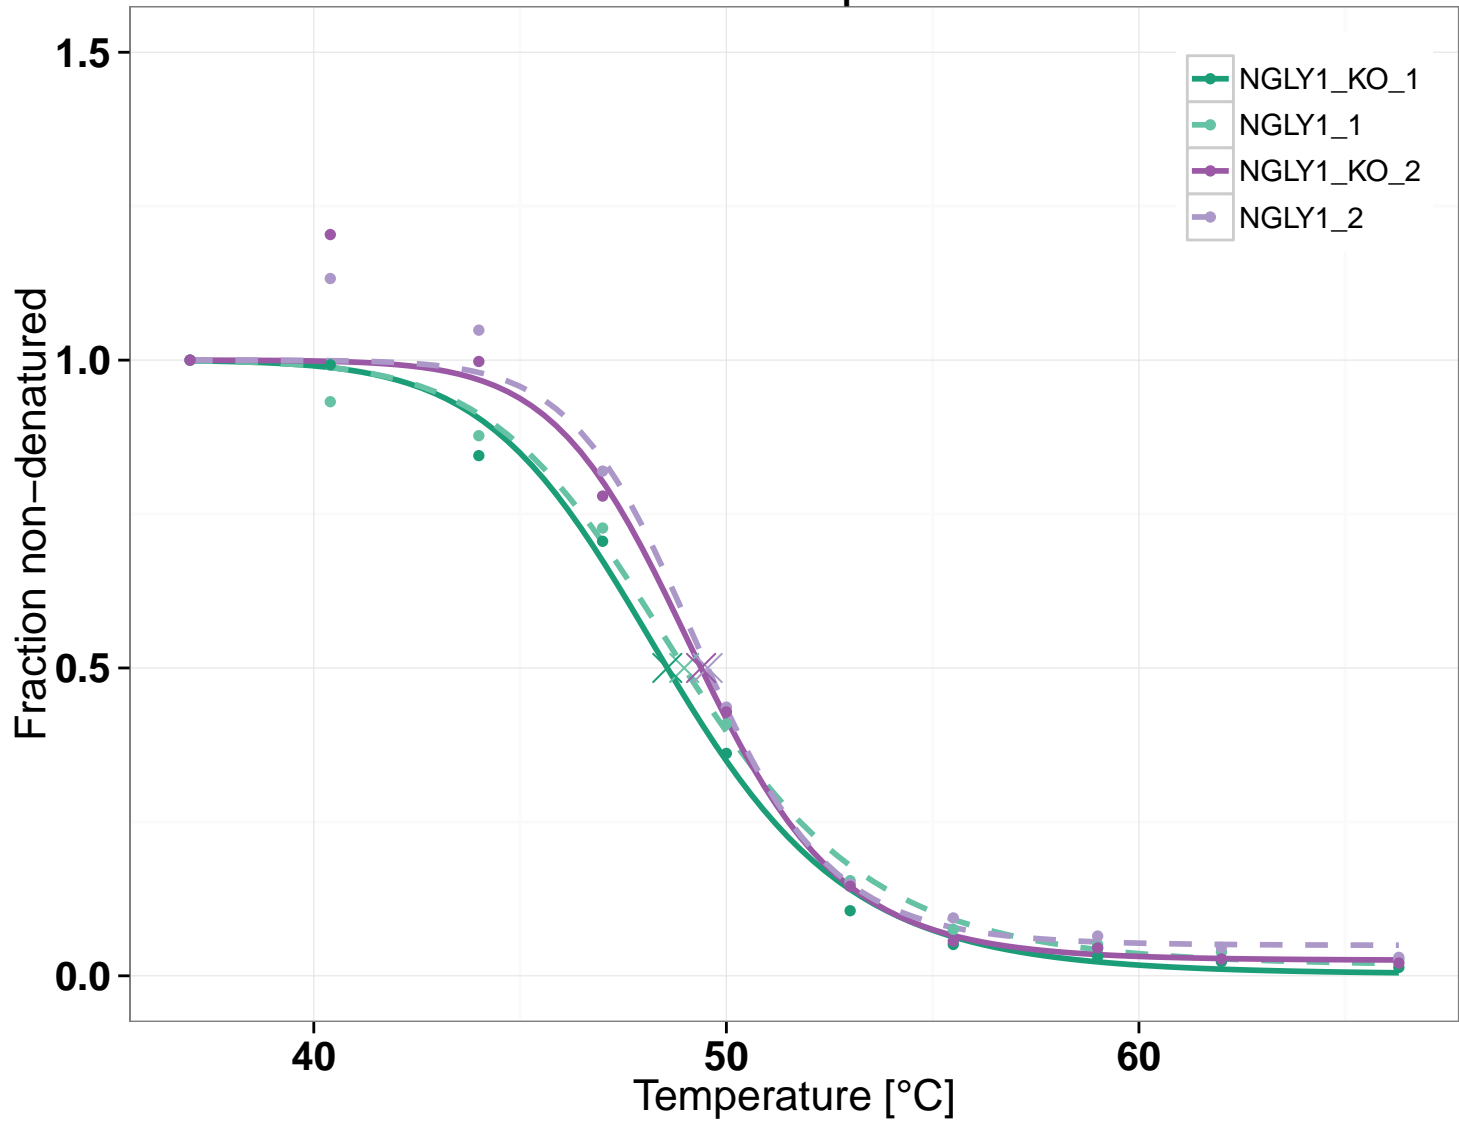

|            | meltPoint | slope | plateau | R2   |
|------------|-----------|-------|---------|------|
| NGLY1_KO_1 | 48.57     | -0.11 | 0       | 1    |
| NGLY1_1    | 48.98     | -0.11 | 0.02    | 1    |
| NGLY1_KO_2 | 49.39     | -0.14 | 0.03    | 0.98 |
| NGLY1_2    | 49.55     | -0.15 | 0.05    | 0.99 |

Supplement: Supplementary file 6223 [file 1]

IPI00303813.5|NOL11

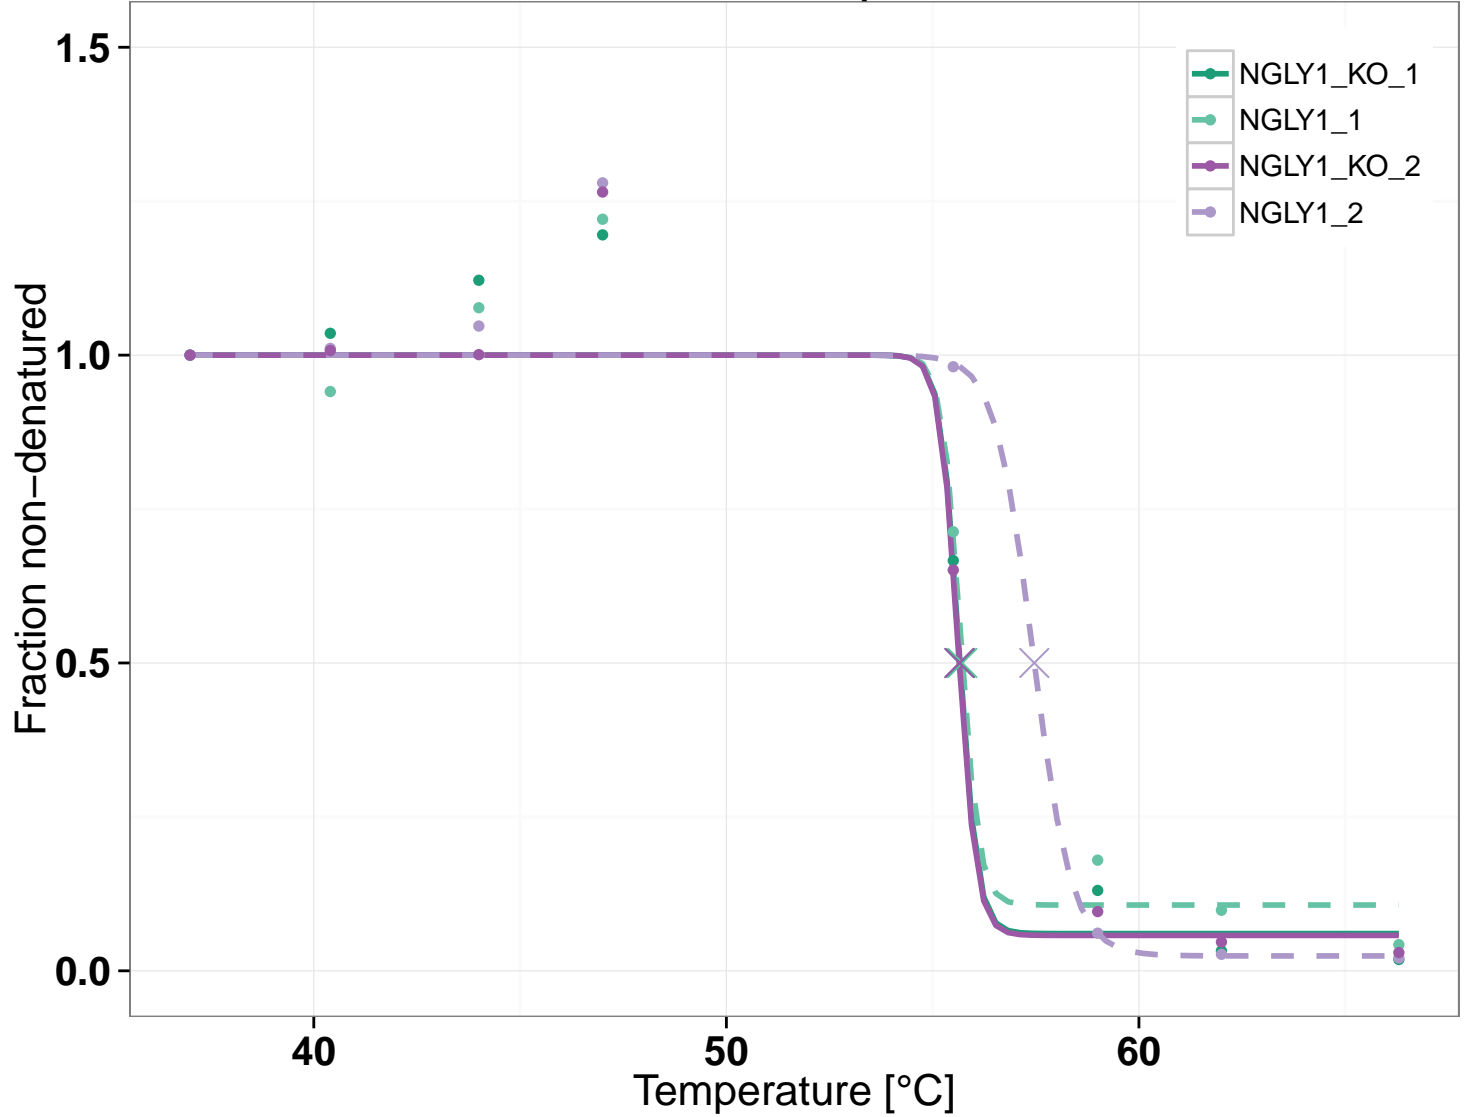

|            | meltPoint | slope | plateau | R2   |
|------------|-----------|-------|---------|------|
| NGLY1_KO_1 | 55.66     | -1.1  | 0.06    | 0.68 |
| NGLY1_1    | 55.72     | -1    | 0.11    | 0.65 |
| NGLY1_KO_2 | 55.65     | -1.1  | 0.06    | 0.72 |
| NGLY1_2    | 57.46     | -0.52 | 0.02    | 0.43 |

Supplement: Supplementary file 6224 [file 1]

IPI00175028.3|C9ORF41

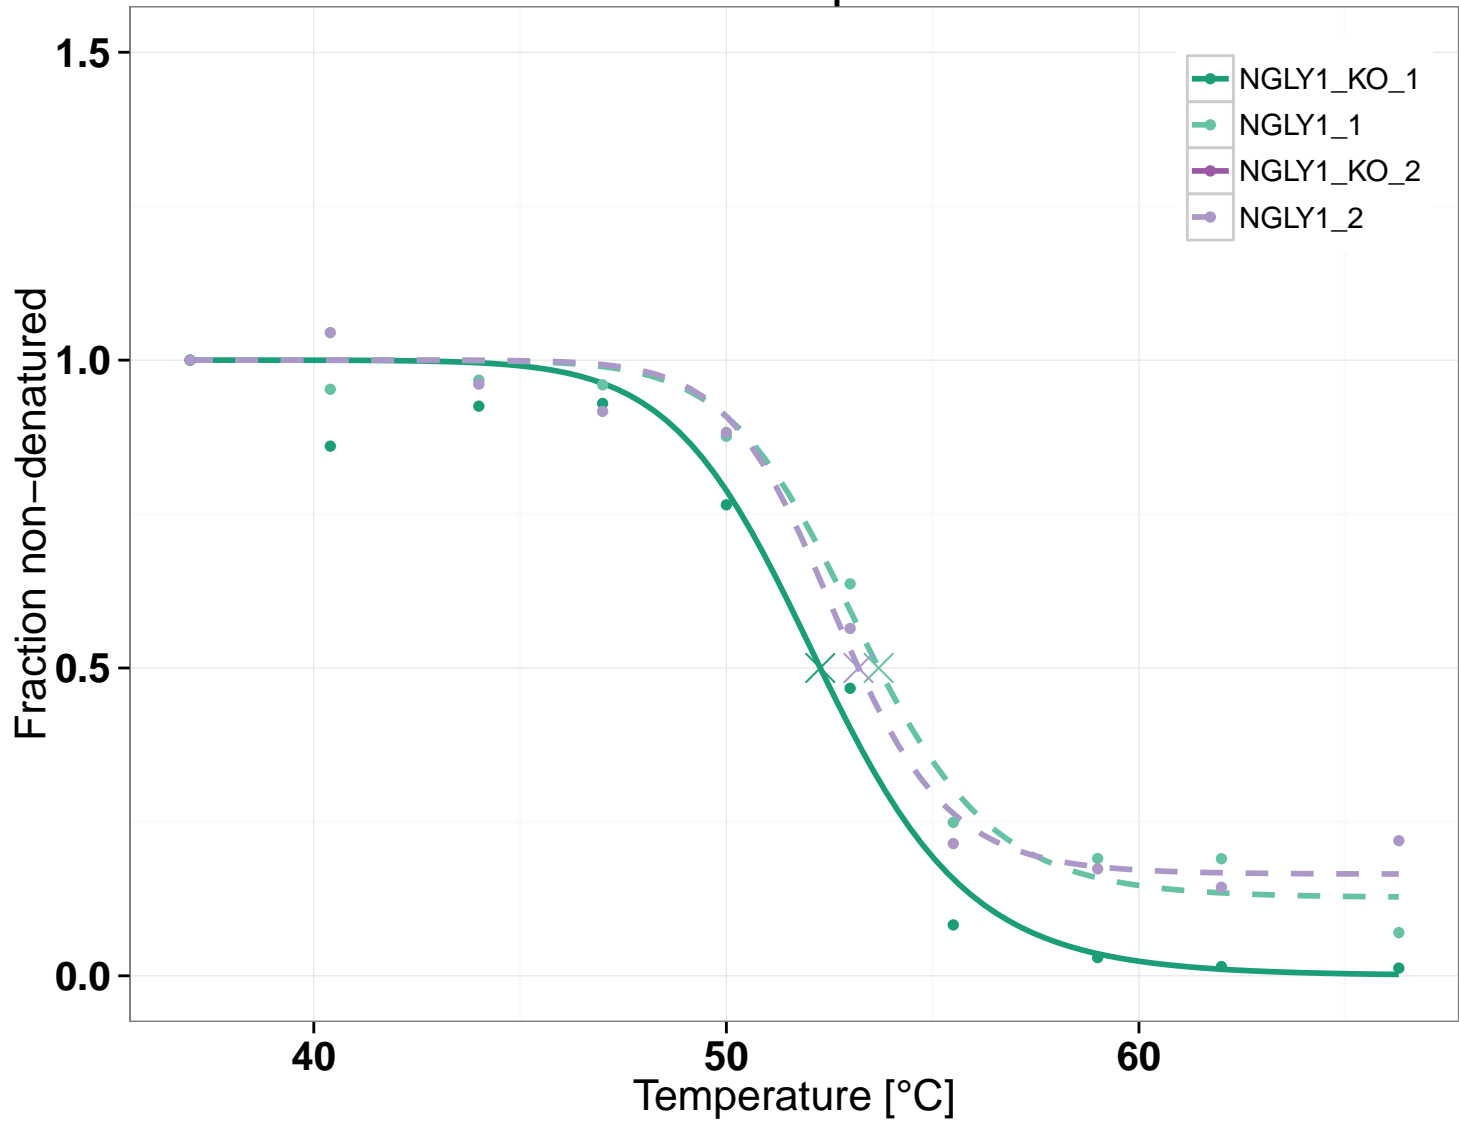

|            | meltPoint | slope | plateau | R2   |
|------------|-----------|-------|---------|------|
| NGLY1_KO_1 | 52.28     | -0.14 | 0       | 0.98 |
| NGLY1_1    | 53.69     | -0.14 | 0.13    | 0.99 |
| NGLY1_KO_2 | -         | -     | -       | -    |
| NGLY1_2    | 53.2      | -0.16 | 0.17    | 0.99 |

Supplement: Supplementary file 6225 [file 1]

# IPI00018368.2|BICD1

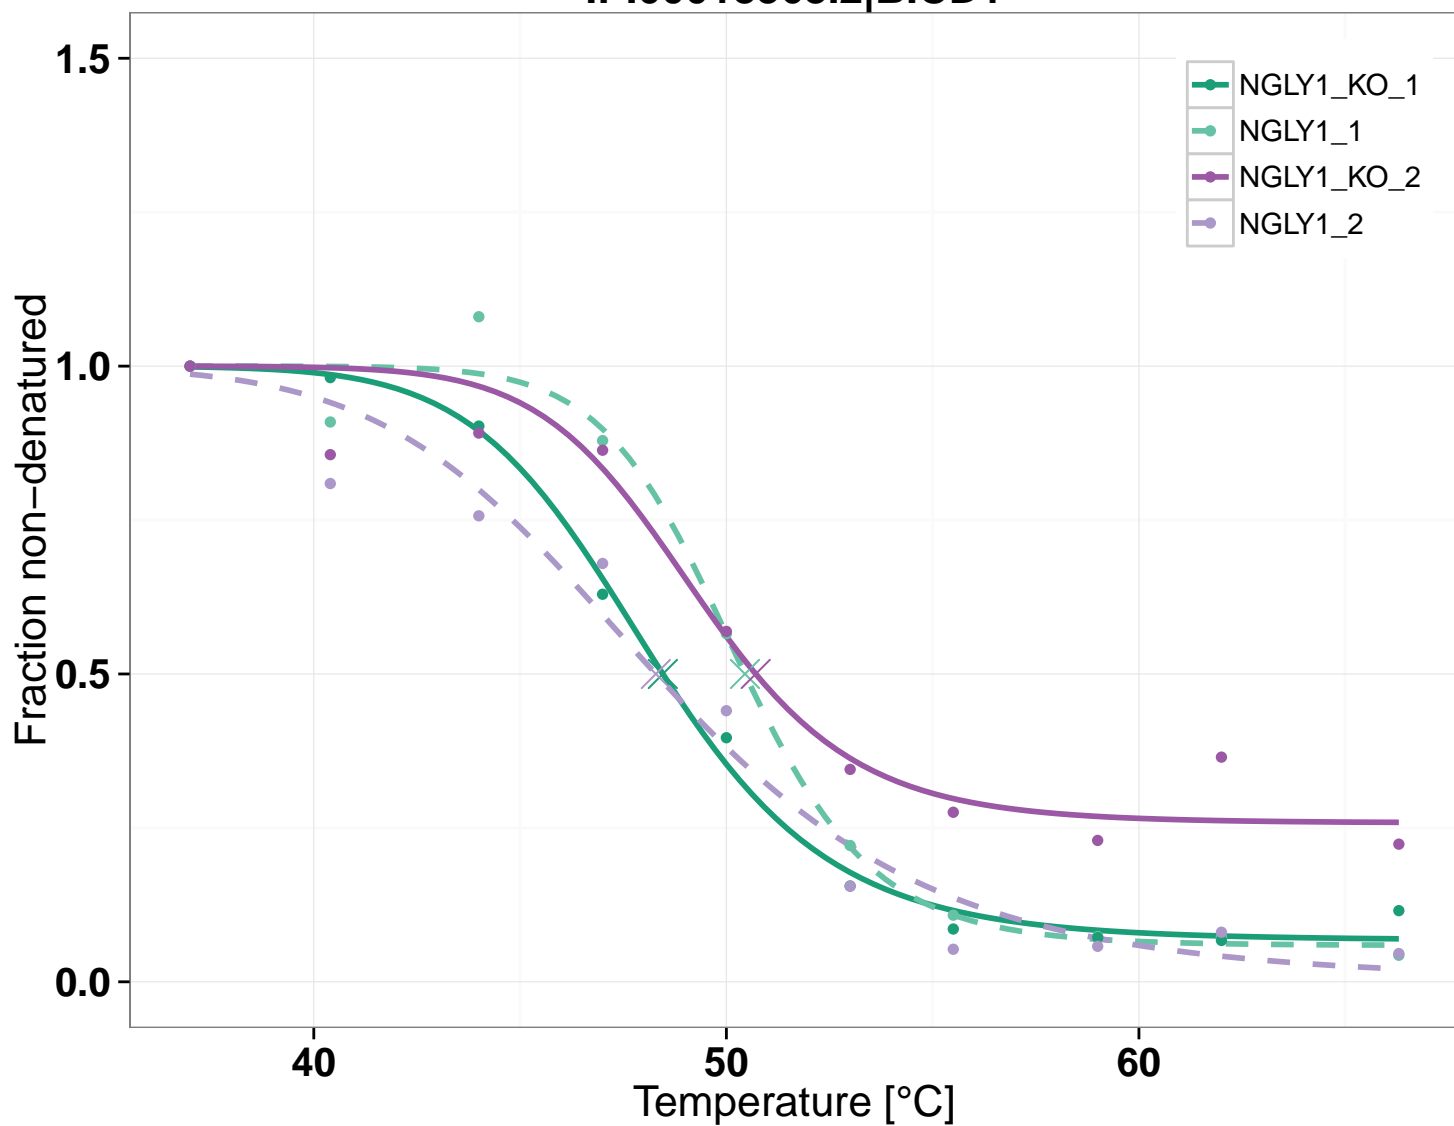

|            | meltPoint | slope  | plateau | R2   |
|------------|-----------|--------|---------|------|
| NGLY1_KO_1 | 48.46     | -0.11  | 0.07    | 1    |
| NGLY1_1    | 50.45     | -0.14  | 0.06    | 0.99 |
| NGLY1_KO_2 | 50.71     | -0.097 | 0.26    | 0.95 |
| NGLY1_2    | 48.29     | -0.075 | 0       | 0.97 |

Supplement: Supplementary file 6226 [file 1]
