# Supplementary material (part 63 of 85)
Source: publisher figshare collection journal article supplement (https://gsajournals.figshare.com/articles/dataset/_/12014913)

# IPI00299254.3|EIF5B

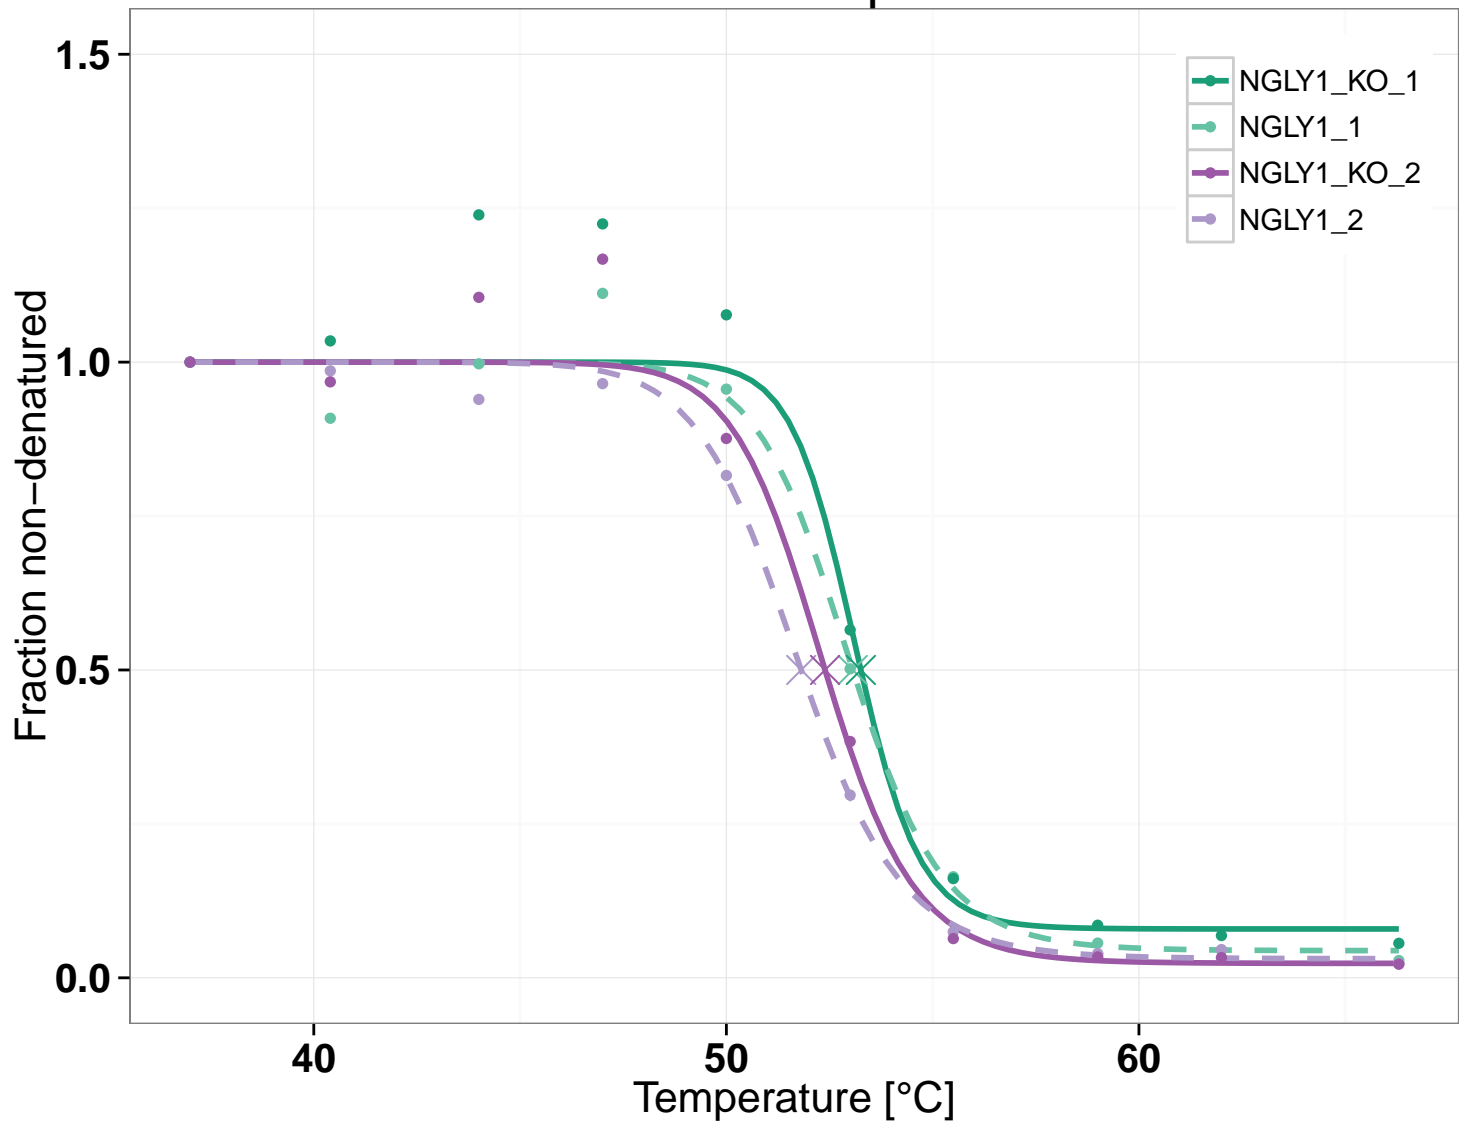

|            | meltPoint | slope | plateau | R2   |
|------------|-----------|-------|---------|------|
| NGLY1_KO_1 | 53.26     | -0.3  | 0.08    | 0.95 |
| NGLY1_1    | 53.06     | -0.21 | 0.04    | 0.99 |
| NGLY1_KO_2 | 52.39     | -0.22 | 0.02    | 0.98 |
| NGLY1_2    | 51.81     | -0.19 | 0.03    | 1    |

Supplement: Supplementary file 6227 [file 1]

IPI00448798.6|CSNK1A1

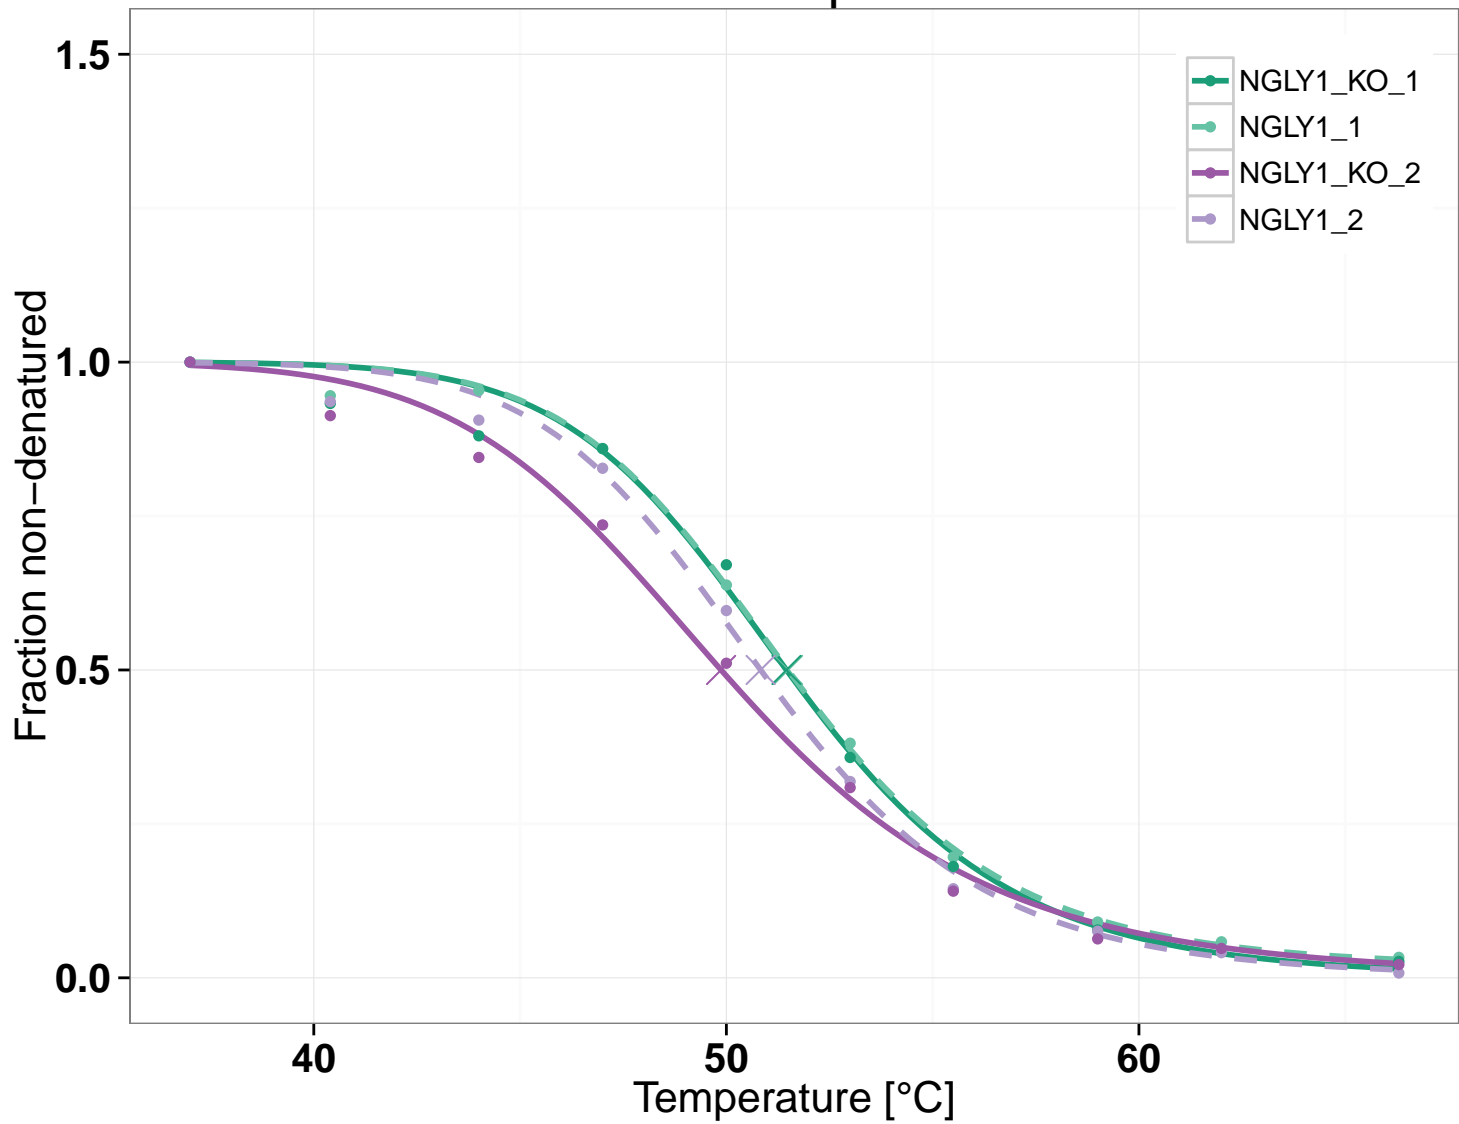

|            | meltPoint | slope  | plateau | R2   |
|------------|-----------|--------|---------|------|
| NGLY1_KO_1 | 51.46     | -0.092 | 0       | 0.99 |
| NGLY1_1    | 51.49     | -0.092 | 0.02    | 1    |
| NGLY1_KO_2 | 49.87     | -0.077 | 0       | 0.99 |
| NGLY1_2    | 50.83     | -0.093 | 0       | 1    |

Supplement: Supplementary file 6228 [file 1]

IPI00026108.1|PLA2G4A

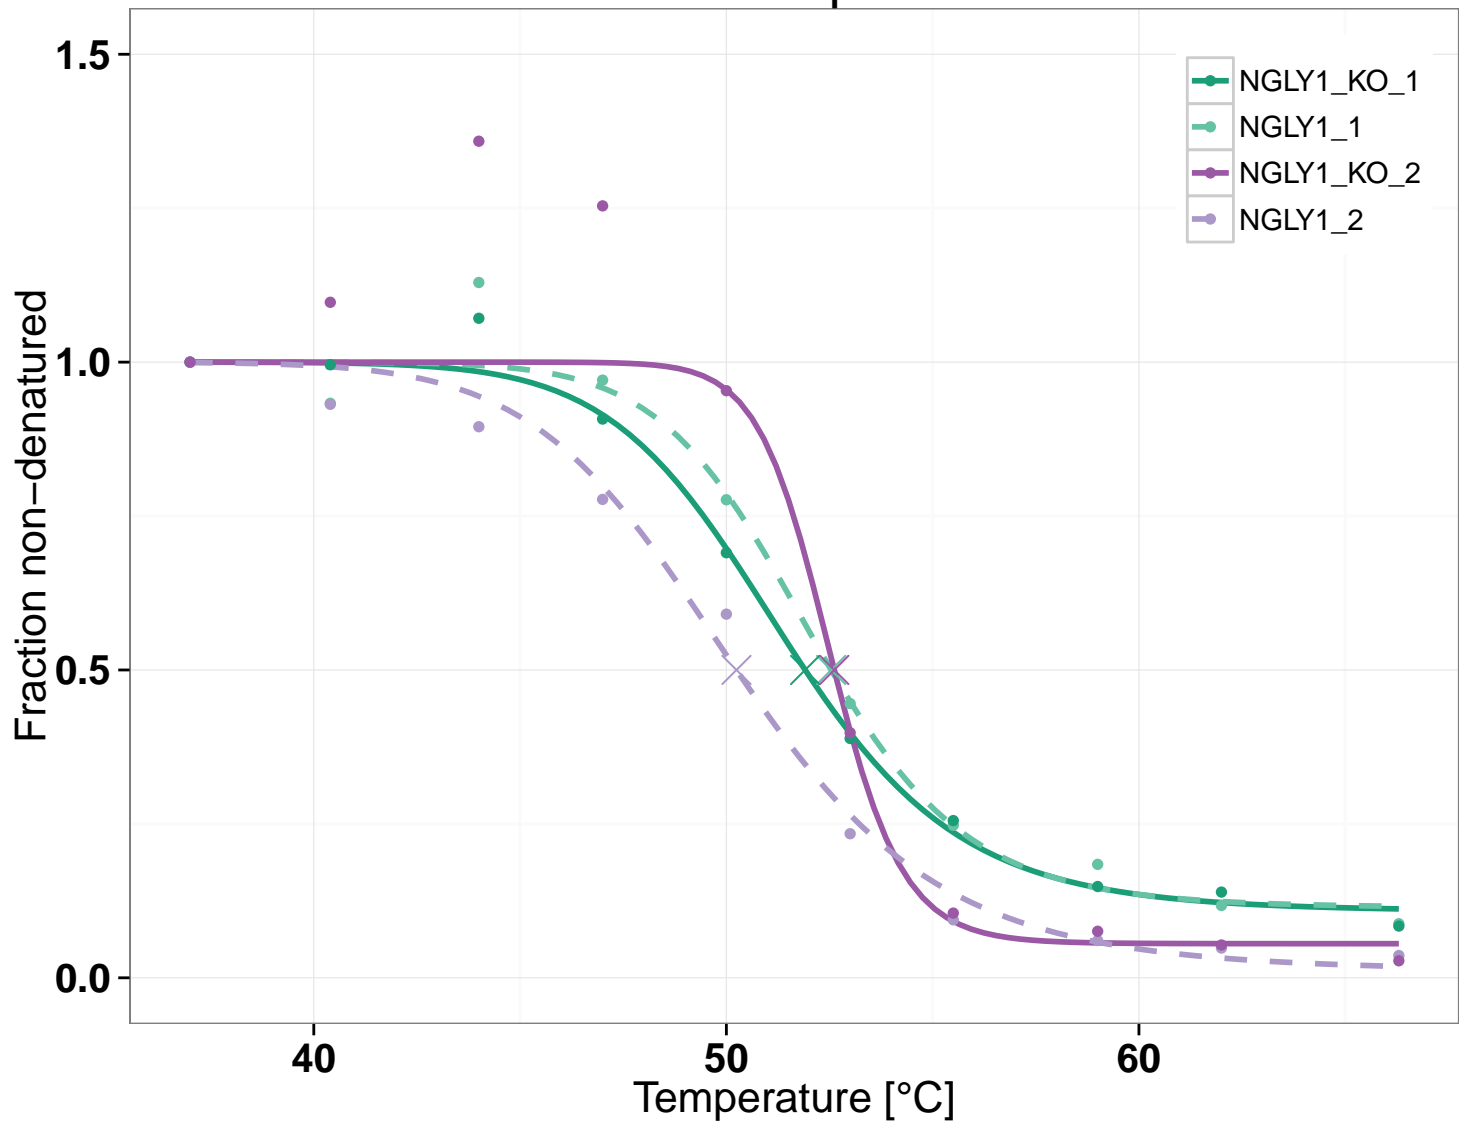

|            | meltPoint | slope | plateau | R2   |
|------------|-----------|-------|---------|------|
| NGLY1_KO_1 | 51.91     | -0.11 | 0.11    | 0.99 |
| NGLY1_1    | 52.54     | -0.12 | 0.11    | 0.98 |
| NGLY1_KO_2 | 52.62     | -0.27 | 0.06    | 0.92 |
| NGLY1_2    | 50.24     | -0.1  | 0.01    | 0.99 |

Supplement: Supplementary file 6229 [file 1]

IPI00032881.2|MRPS23

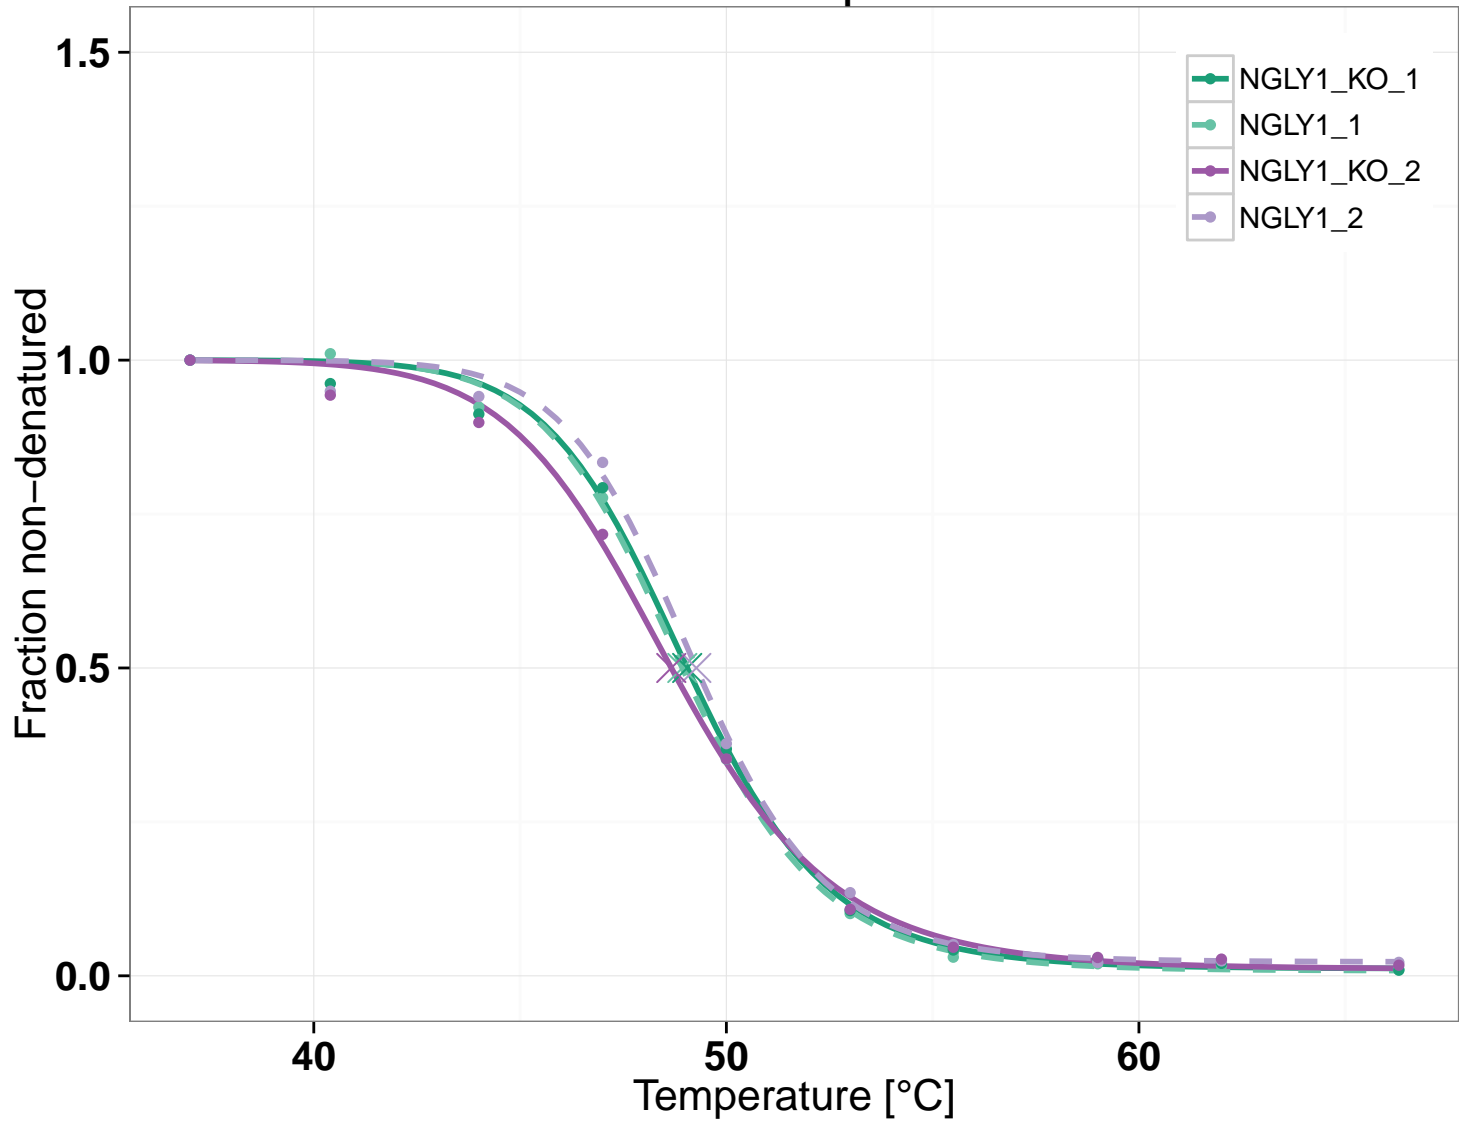

|            | meltPoint | slope | plateau | R2 |
|------------|-----------|-------|---------|----|
| NGLY1_KO_1 | 49.05     | -0.14 | 0.01    | 1  |
| NGLY1_1    | 48.93     | -0.15 | 0.01    | 1  |
| NGLY1_KO_2 | 48.66     | -0.12 | 0.01    | 1  |
| NGLY1_2    | 49.27     | -0.15 | 0.02    | 1  |

Supplement: Supplementary file 6230 [file 1]

IPI00384707.2|EARS2

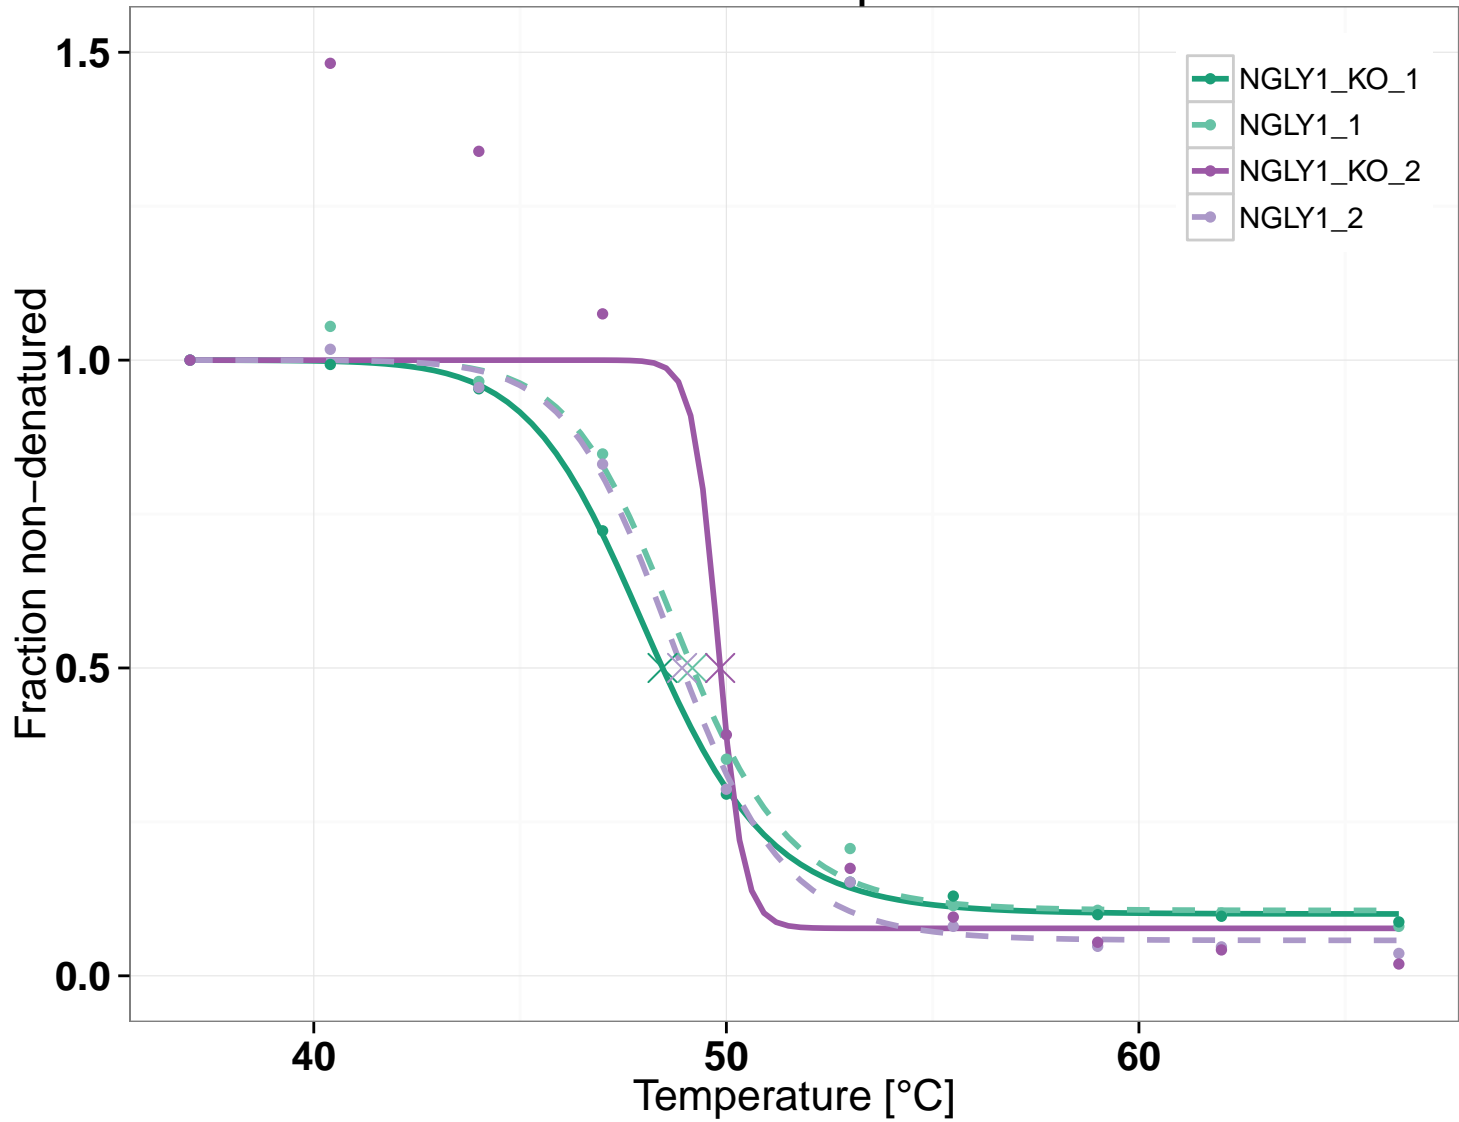

|            | meltPoint | slope | plateau | R2   |
|------------|-----------|-------|---------|------|
| NGLY1_KO_1 | 48.45     | -0.15 | 0.1     | 1    |
| NGLY1_1    | 49.18     | -0.17 | 0.11    | 1    |
| NGLY1_KO_2 | 49.85     | -0.76 | 0.08    | 0.88 |
| NGLY1_2    | 48.93     | -0.18 | 0.06    | 1    |

Supplement: Supplementary file 6231 [file 1]

IPI00107122.1|NUPL1

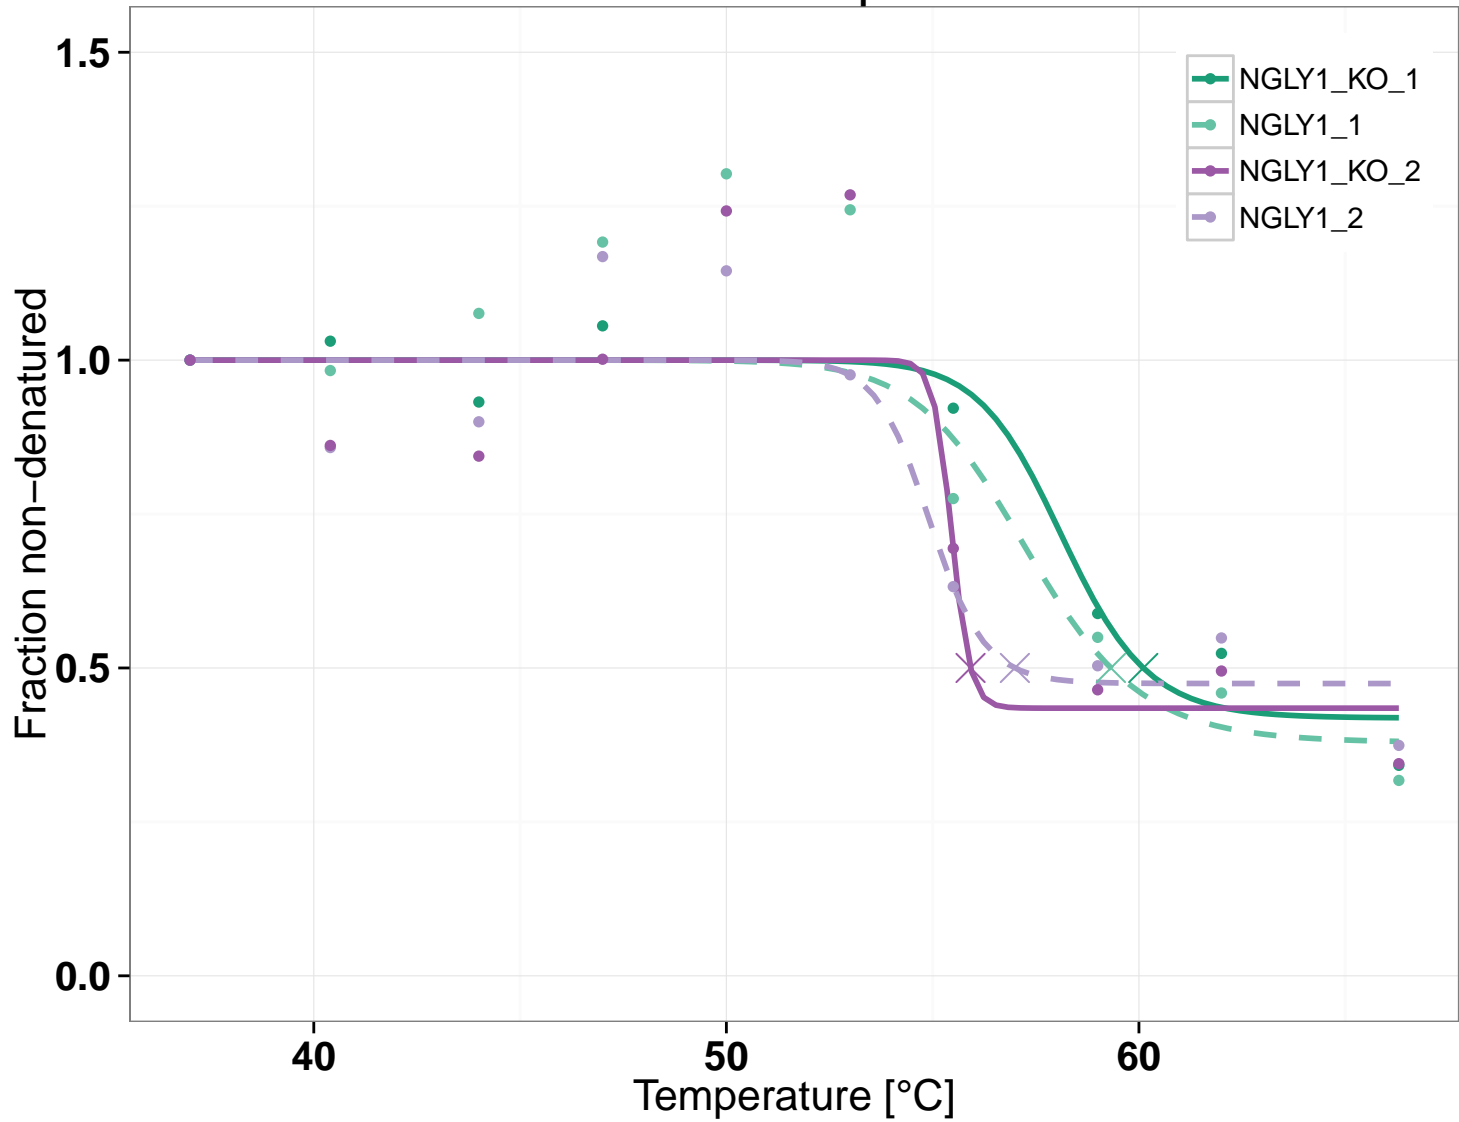

|            | meltPoint | slope | plateau | R2   |
|------------|-----------|-------|---------|------|
| NGLY1_KO_1 | 60.1      | -0.14 | 0.42    | 0.54 |
| NGLY1_1    | 59.32     | -0.11 | 0.38    | 0.79 |
| NGLY1_KO_2 | 55.92     | -0.64 | 0.43    | 0.8  |
| NGLY1_2    | 56.99     | -0.2  | 0.47    | 0.86 |

Supplement: Supplementary file 6232 [file 1]

# IPI00100939.1|MOAP1

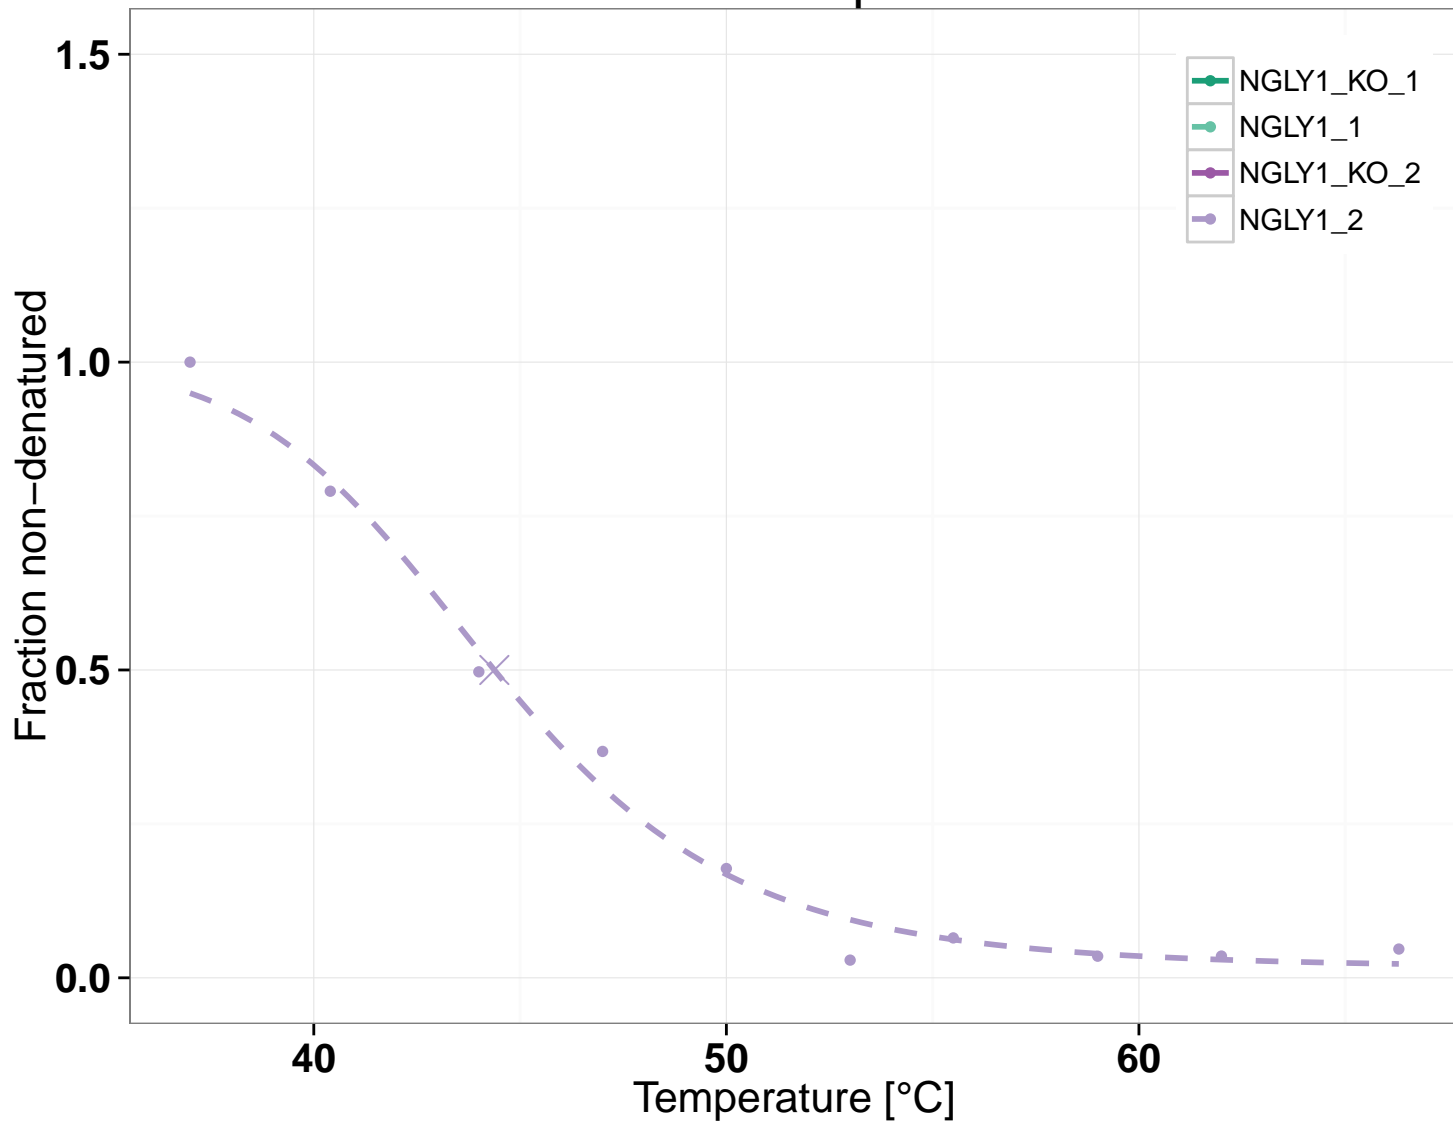

|            | meltPoint | slope  | plateau | R2   |
|------------|-----------|--------|---------|------|
| NGLY1_KO_1 | —         | —      | —       | —    |
| NGLY1_1    | —         | —      | —       | —    |
| NGLY1_KO_2 | —         | —      | —       | —    |
| NGLY1_2    | 44.38     | -0.084 | 0.02    | 0.99 |

Supplement: Supplementary file 6233 [file 1]

IPI00477388.5|RABGAP1L

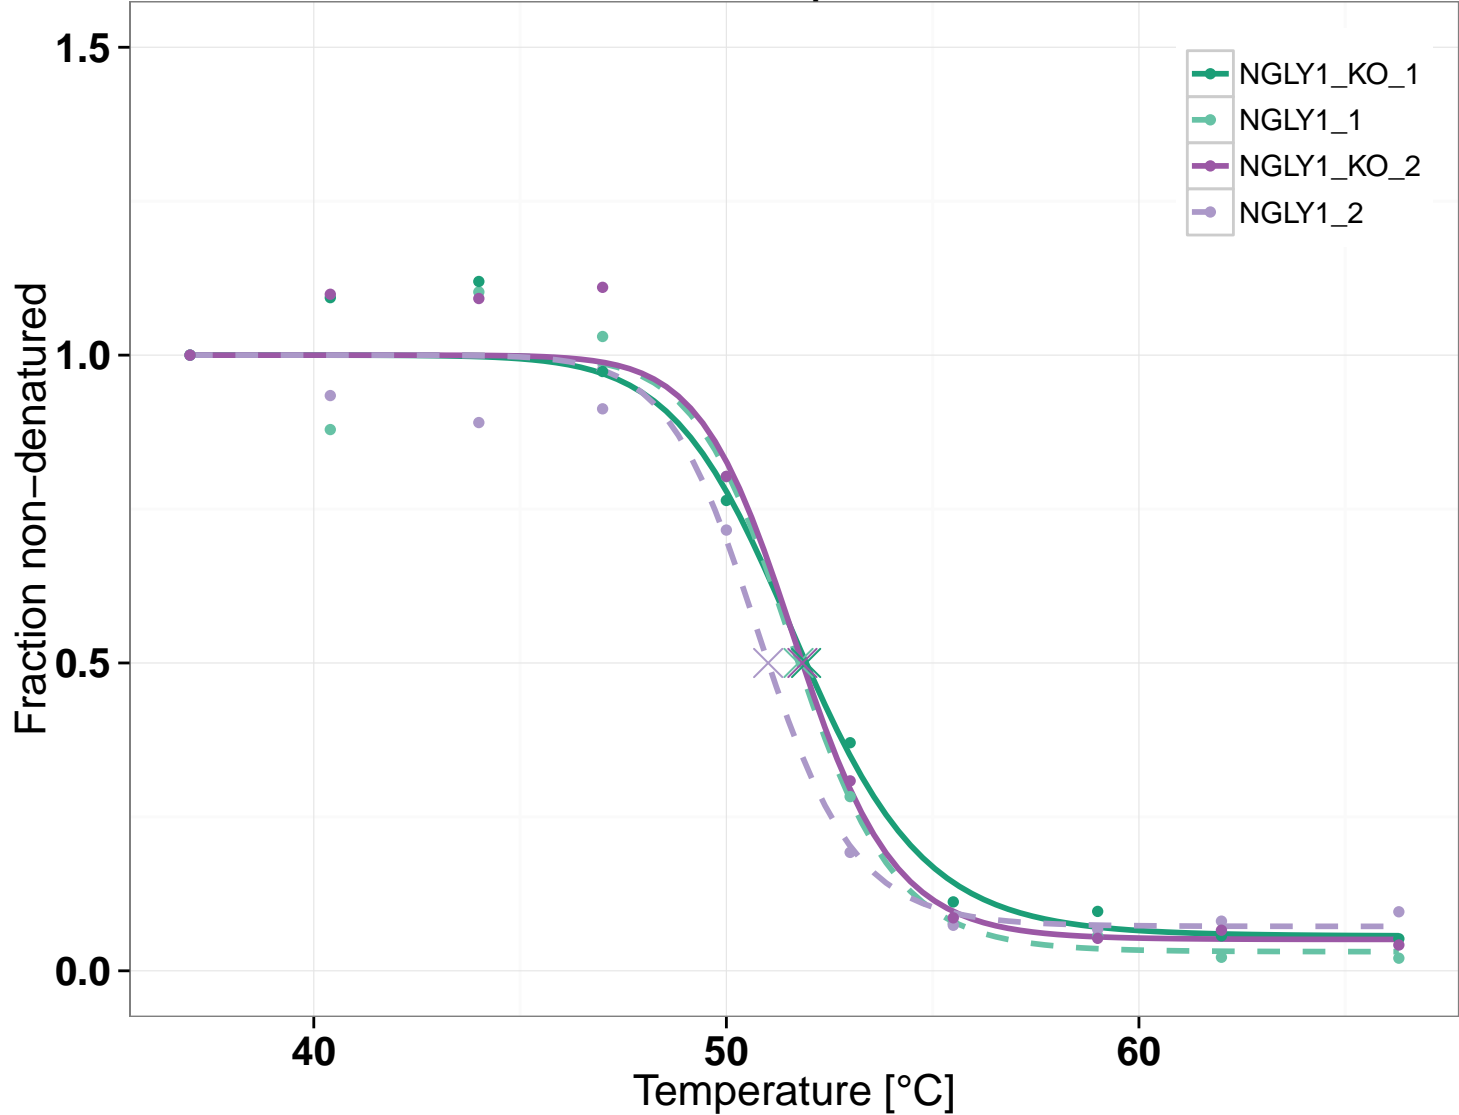

|            | meltPoint | slope | plateau | R2   |
|------------|-----------|-------|---------|------|
| NGLY1_KO_1 | 51.93     | -0.15 | 0.06    | 0.99 |
| NGLY1_1    | 51.75     | -0.2  | 0.03    | 0.99 |
| NGLY1_KO_2 | 51.84     | -0.2  | 0.05    | 0.98 |
| NGLY1_2    | 51.01     | -0.2  | 0.07    | 0.99 |

Supplement: Supplementary file 6234 [file 1]

# IPI00002236.3|MFGE8

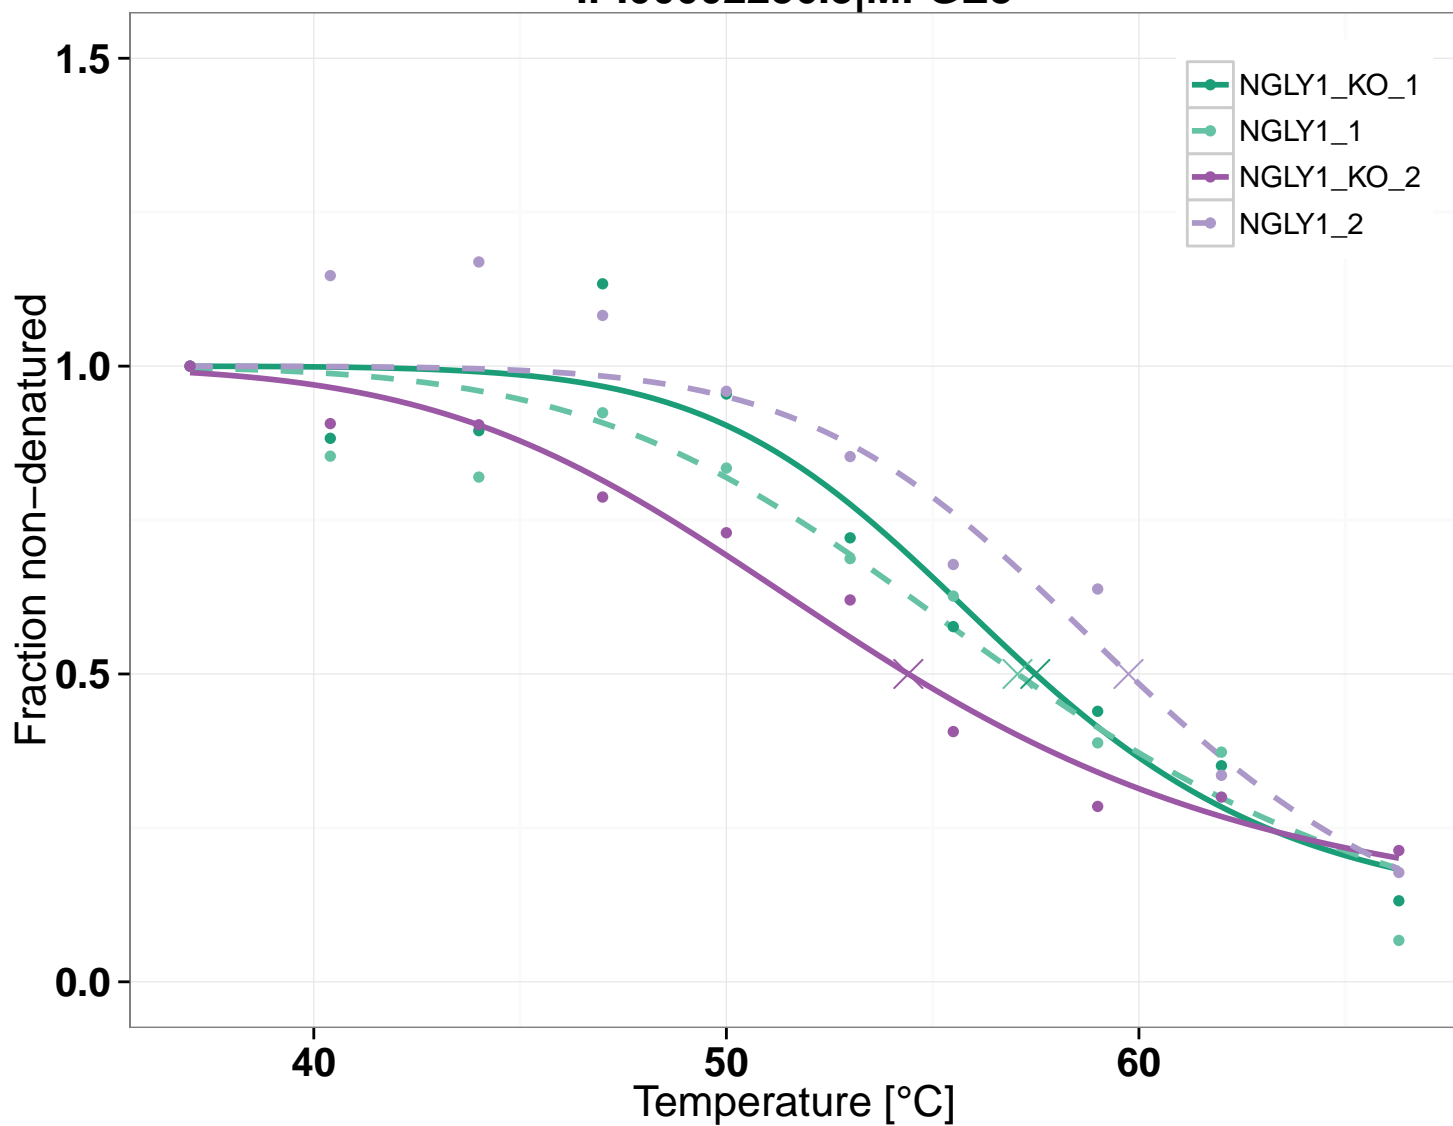

|            | meltPoint | slope  | plateau | R2   |
|------------|-----------|--------|---------|------|
| NGLY1_KO_1 | 57.49     | -0.064 | 0.1     | 0.93 |
| NGLY1_1    | 57.06     | -0.048 | 0       | 0.92 |
| NGLY1_KO_2 | 54.41     | -0.045 | 0.09    | 0.98 |
| NGLY1_2    | 59.75     | -0.064 | 0       | 0.93 |

Supplement: Supplementary file 6235 [file 1]

IPI00645782.2|SARS2

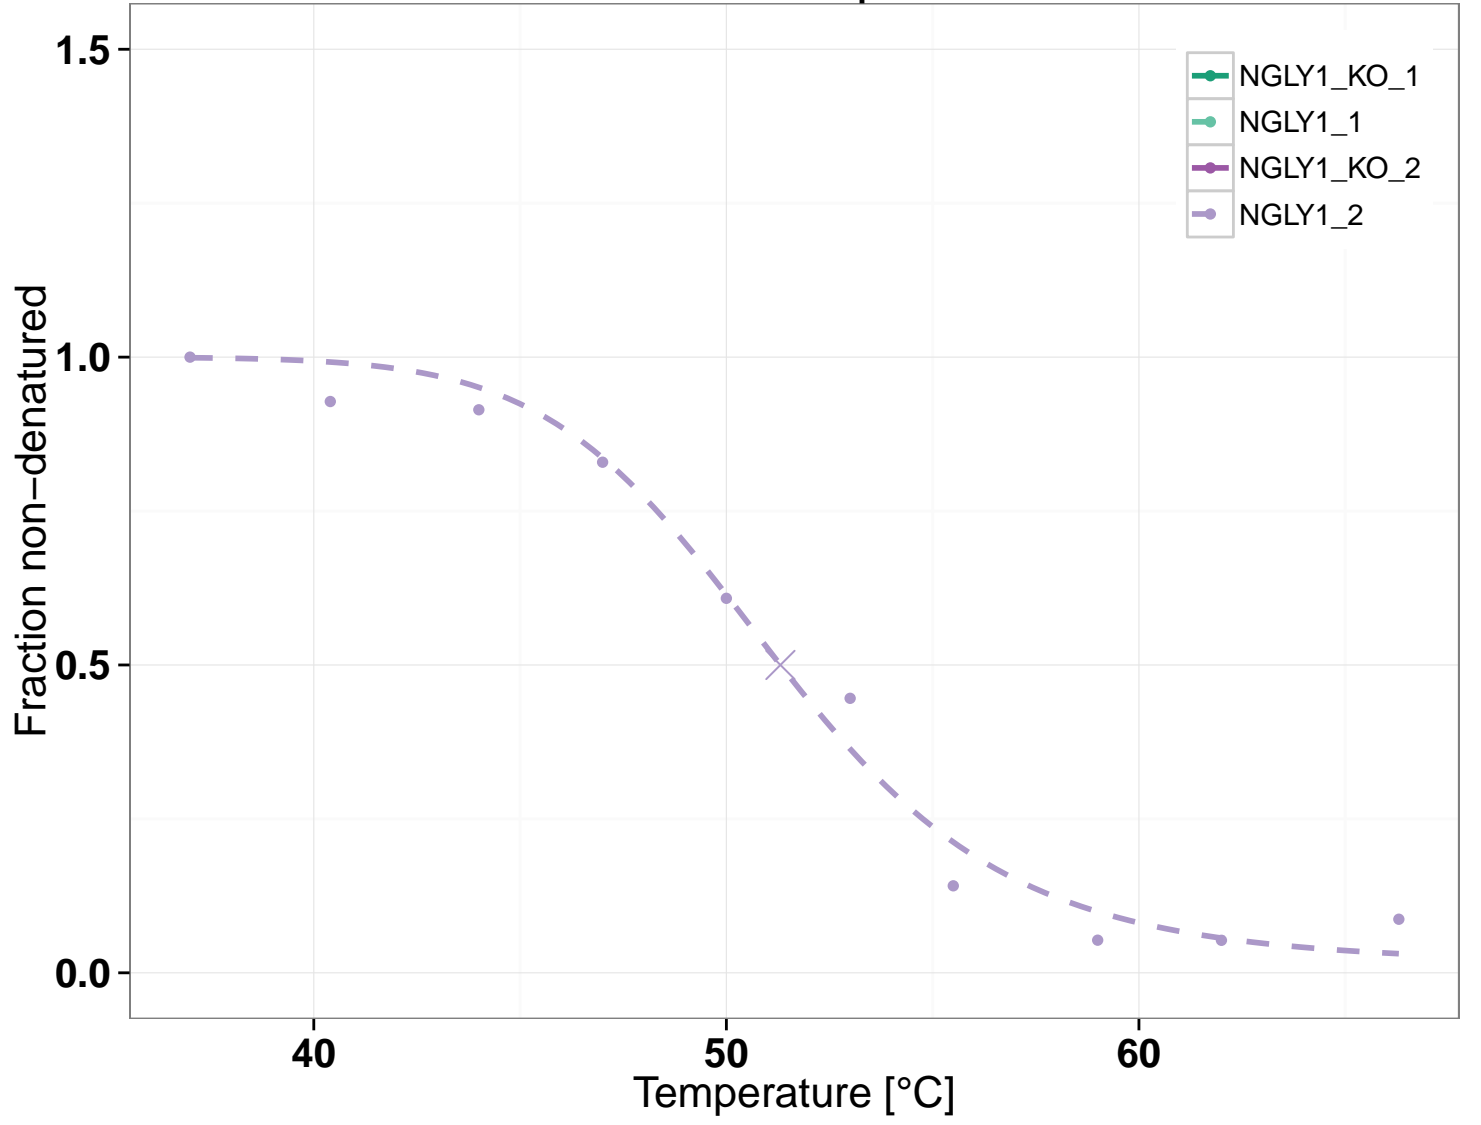

|            | meltPoint | slope  | plateau | R2   |
|------------|-----------|--------|---------|------|
| NGLY1_KO_1 | -         | -      | -       | -    |
| NGLY1_1    | -         | -      | -       | -    |
| NGLY1_KO_2 | -         | -      | -       | -    |
| NGLY1_2    | 51.31     | -0.087 | 0.01    | 0.98 |

Supplement: Supplementary file 6236 [file 1]

IPI00172487.2|ANP32D

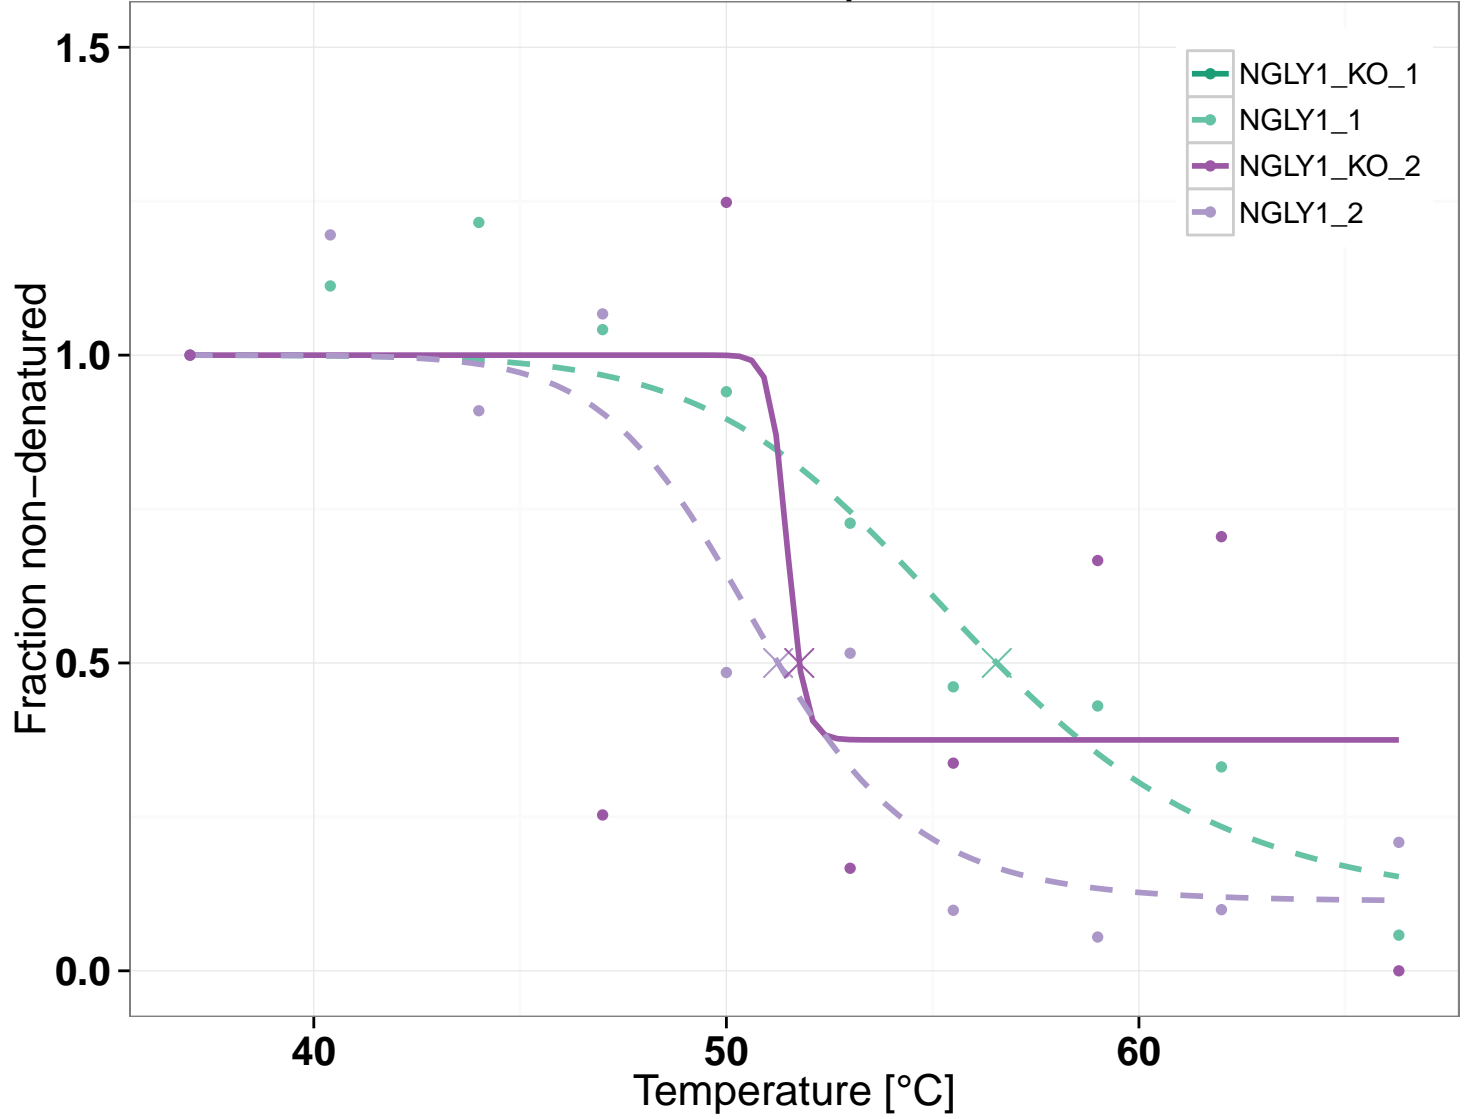

|            | meltPoint | slope  | plateau | R2   |
|------------|-----------|--------|---------|------|
| NGLY1_KO_1 | -         | -      | -       | -    |
| NGLY1_1    | 56.55     | -0.071 | 0.1     | 0.92 |
| NGLY1_KO_2 | 51.77     | -0.76  | 0.38    | 0.39 |
| NGLY1_2    | 51.25     | -0.12  | 0.11    | 0.91 |

Supplement: Supplementary file 6237 [file 1]

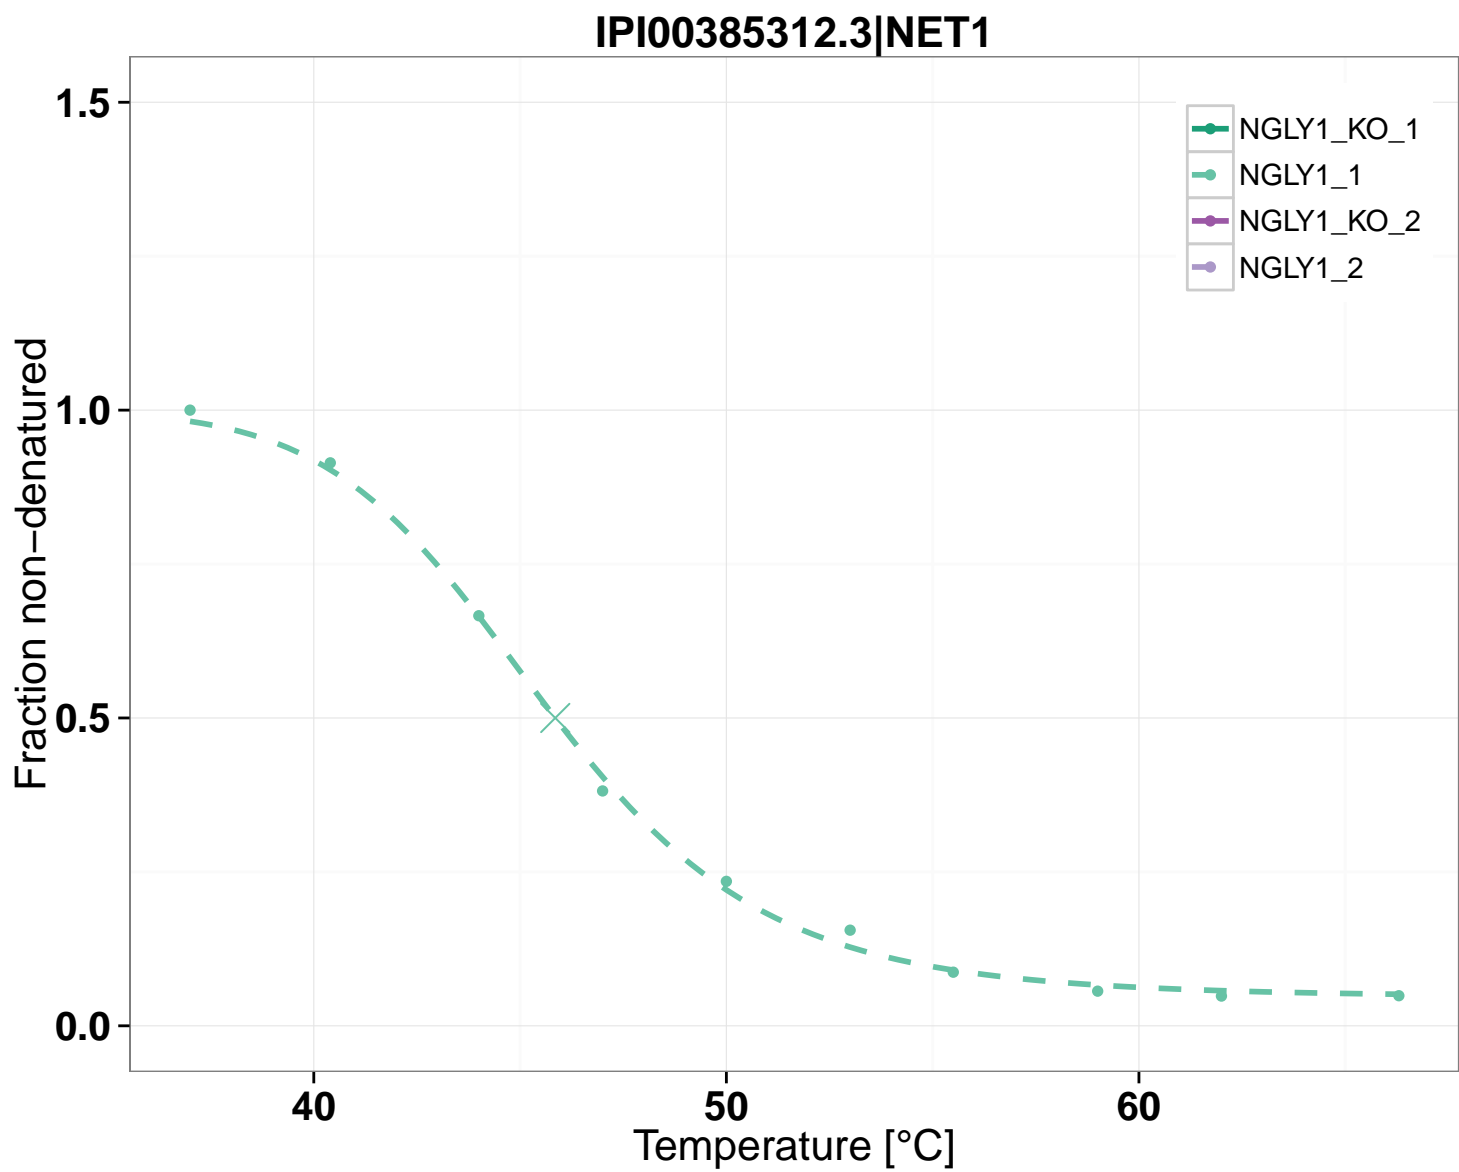

|            | meltPoint | slope | plateau | R2 |
|------------|-----------|-------|---------|----|
| NGLY1_KO_1 | -         | -     | -       | -  |
| NGLY1_1    | 45.85     | -0.09 | 0.05    | 1  |
| NGLY1_KO_2 | -         | -     | -       | -  |
| NGLY1_2    | -         | -     | -       | -  |

Supplement: Supplementary file 6238 [file 1]

IPI00909085.1|SMTN

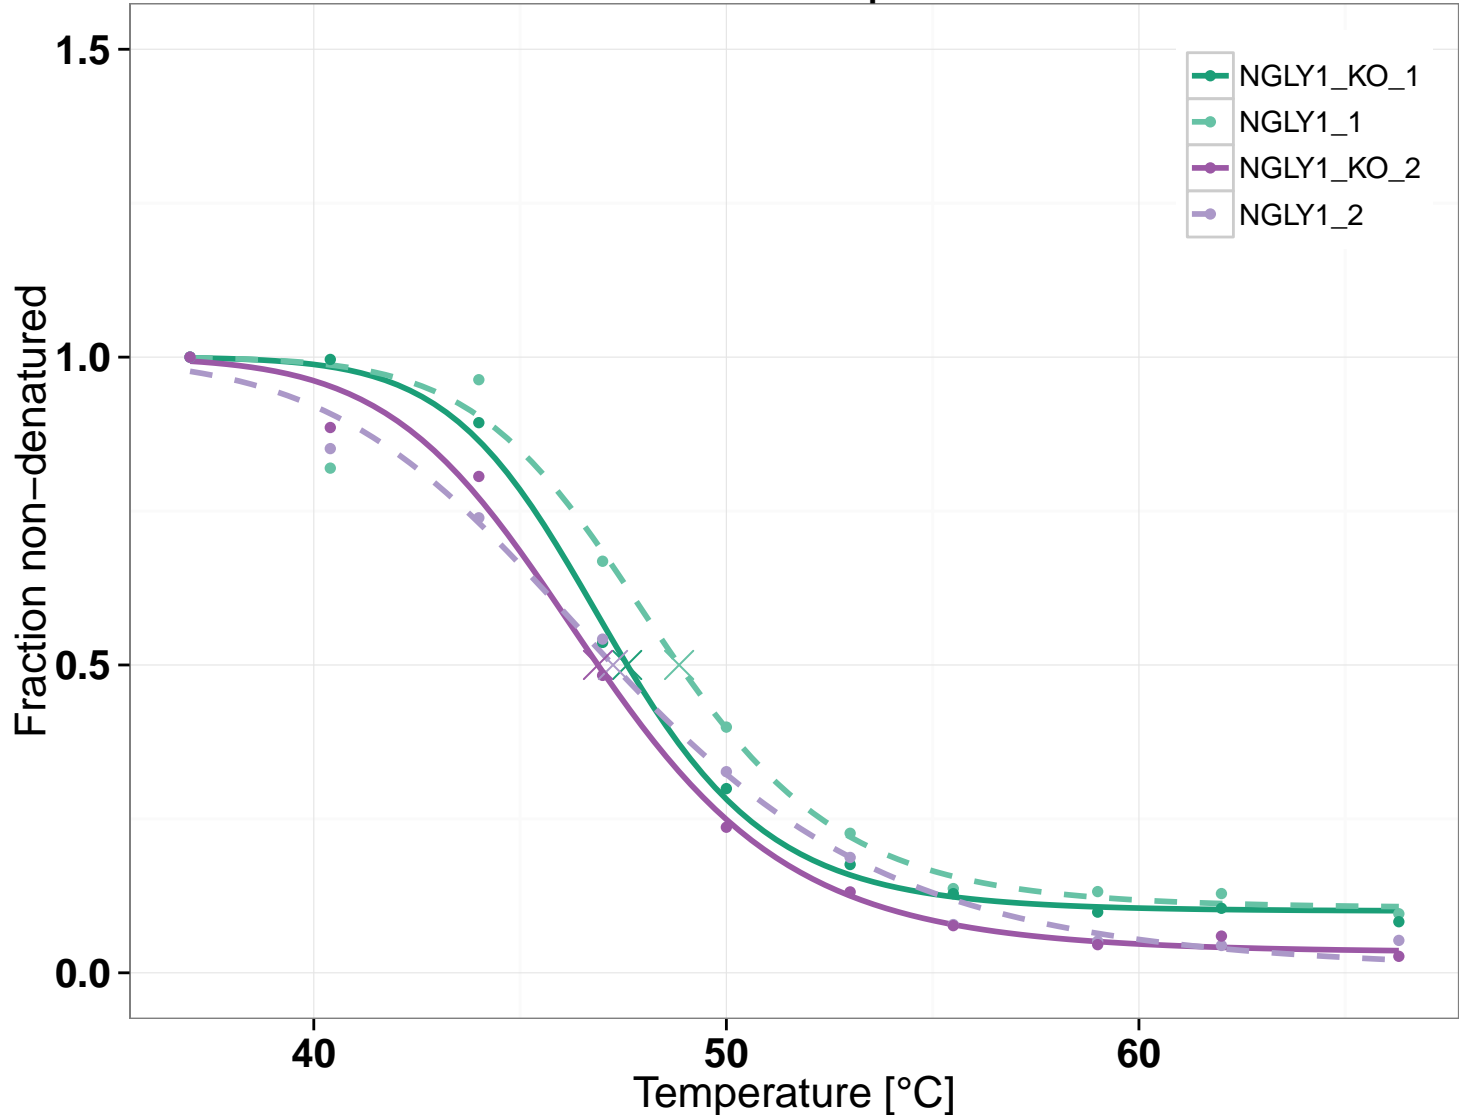

|            | meltPoint | slope  | plateau | R2   |
|------------|-----------|--------|---------|------|
| NGLY1_KO_1 | 47.6      | -0.12  | 0.1     | 1    |
| NGLY1_1    | 48.85     | -0.1   | 0.11    | 0.97 |
| NGLY1_KO_2 | 46.89     | -0.099 | 0.03    | 1    |
| NGLY1_2    | 47.25     | -0.073 | 0       | 0.99 |

Supplement: Supplementary file 6239 [file 1]

# IPI00414197.3|WDR26

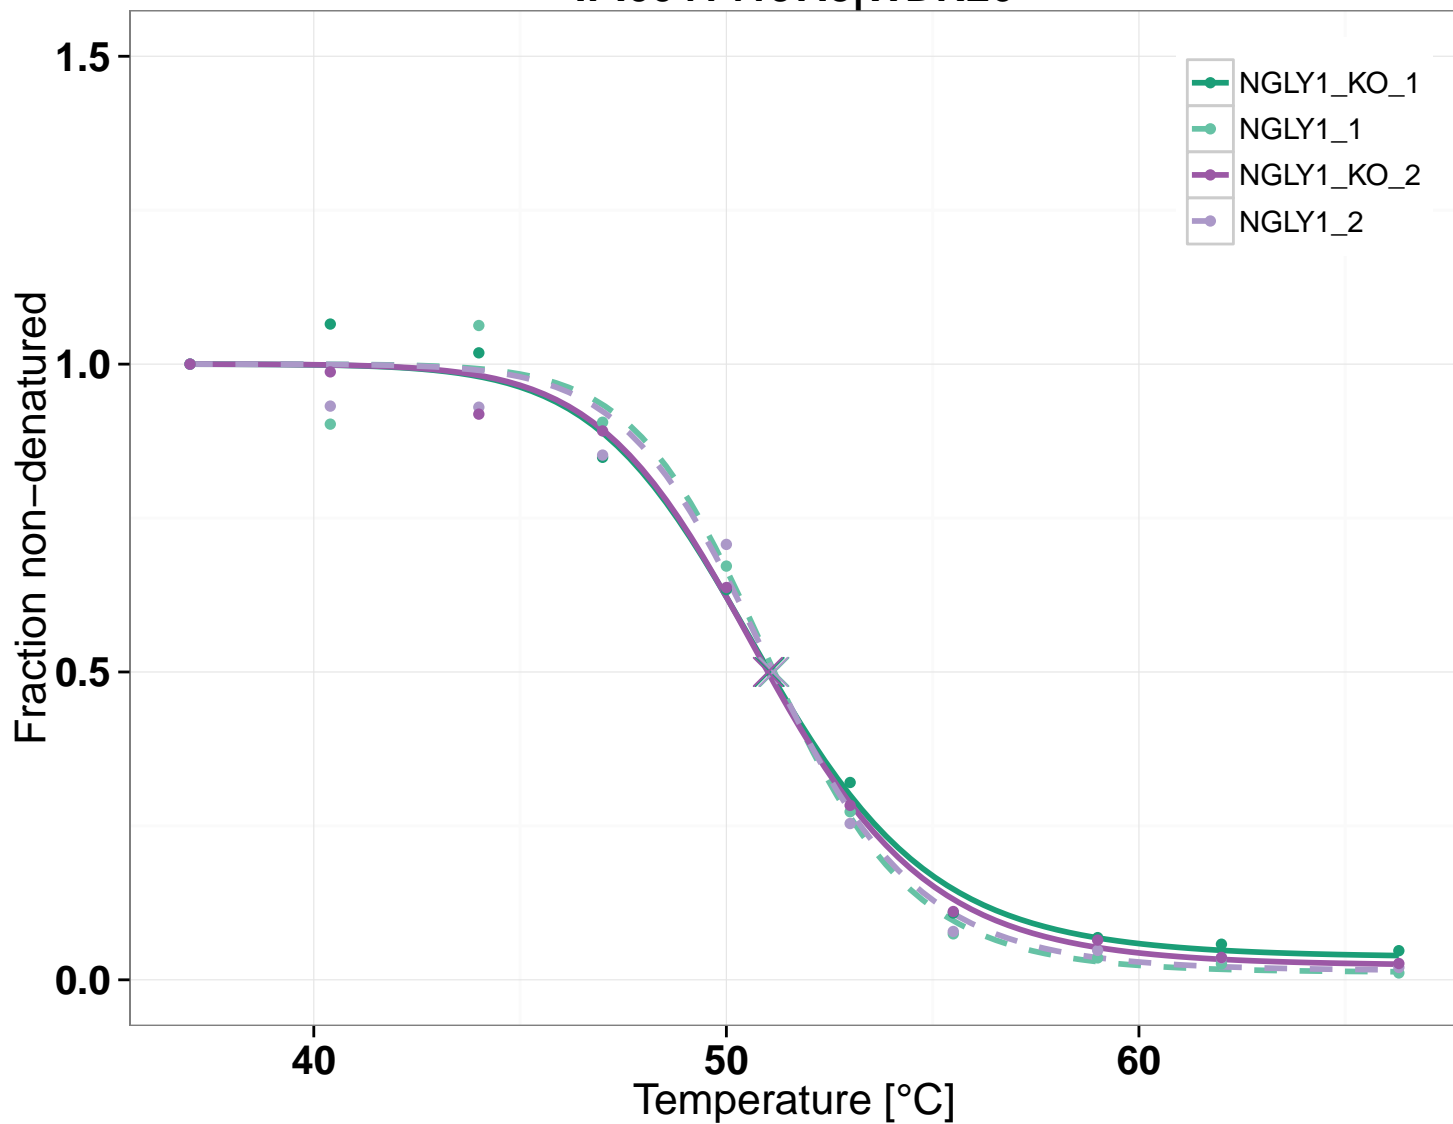

|            | meltPoint | slope | plateau | R2   |
|------------|-----------|-------|---------|------|
| NGLY1_KO_1 | 51.05     | -0.12 | 0.04    | 0.99 |
| NGLY1_1    | 51.16     | -0.15 | 0.01    | 0.99 |
| NGLY1_KO_2 | 51.01     | -0.12 | 0.02    | 1    |
| NGLY1_2    | 51.14     | -0.14 | 0.01    | 0.99 |

Supplement: Supplementary file 6240 [file 1]

IPI00029661.3|EVI5

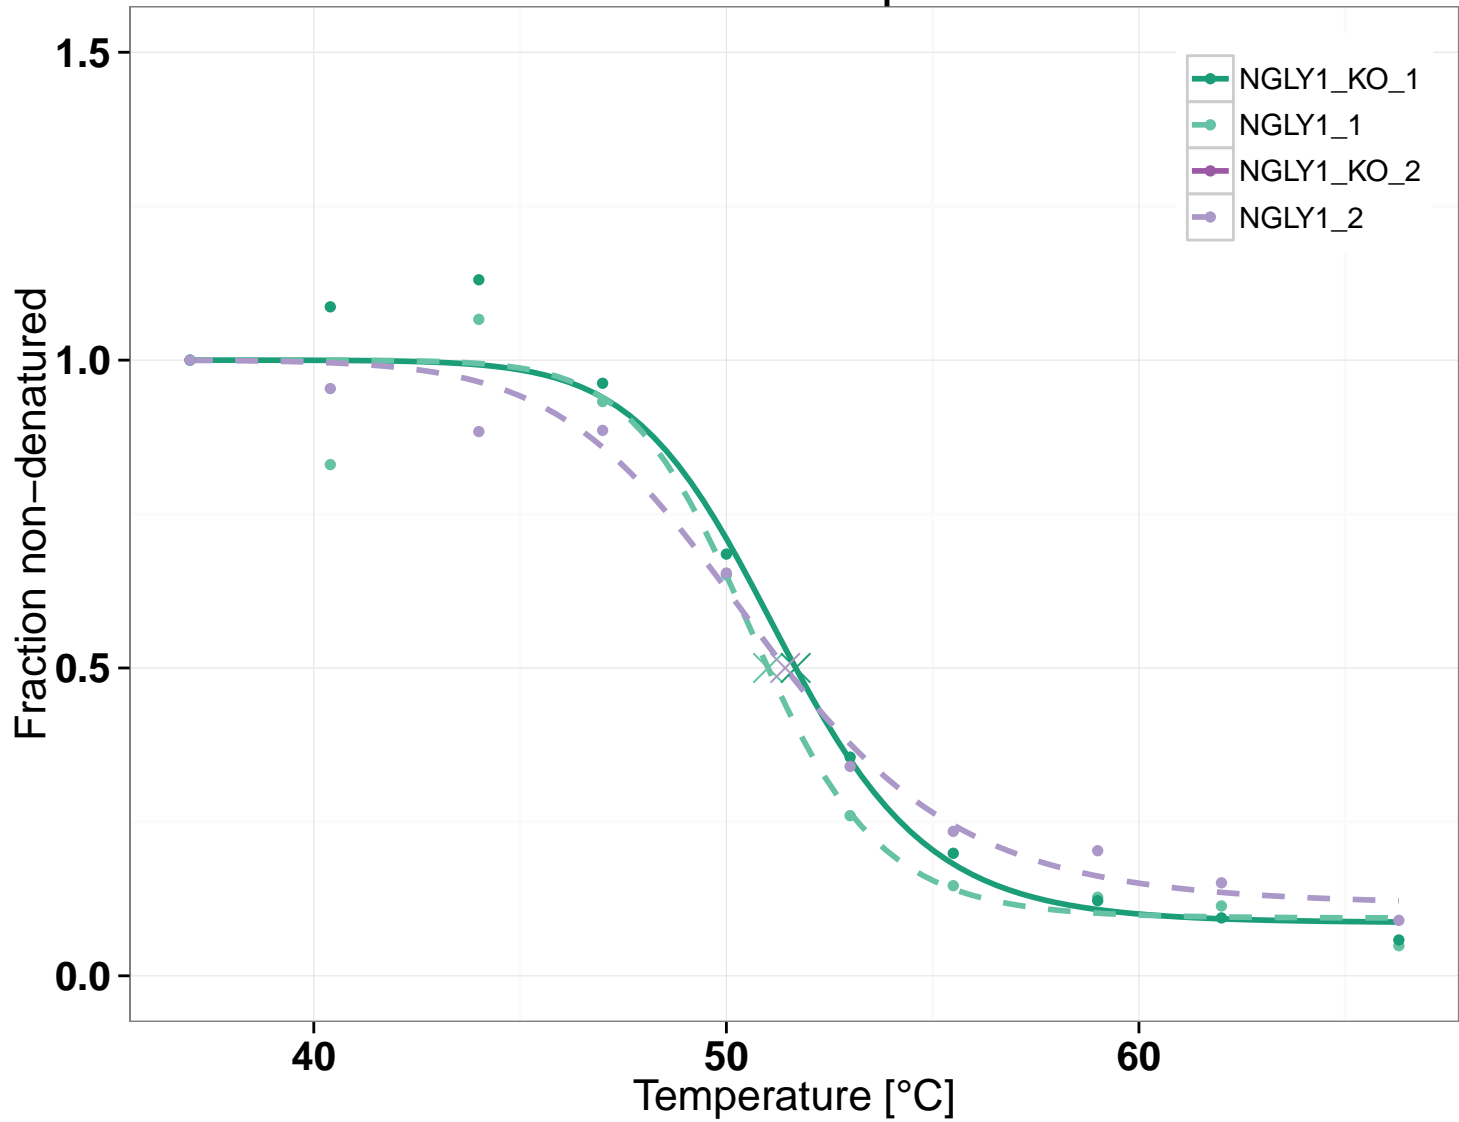

|            | meltPoint | slope  | plateau | R2   |
|------------|-----------|--------|---------|------|
| NGLY1_KO_1 | 51.68     | -0.13  | 0.09    | 0.98 |
| NGLY1_1    | 51.01     | -0.15  | 0.09    | 0.98 |
| NGLY1_KO_2 | -         | -      | -       | -    |
| NGLY1_2    | 51.43     | -0.091 | 0.12    | 0.99 |

Supplement: Supplementary file 6241 [file 1]

IPI00642611.7|COG6

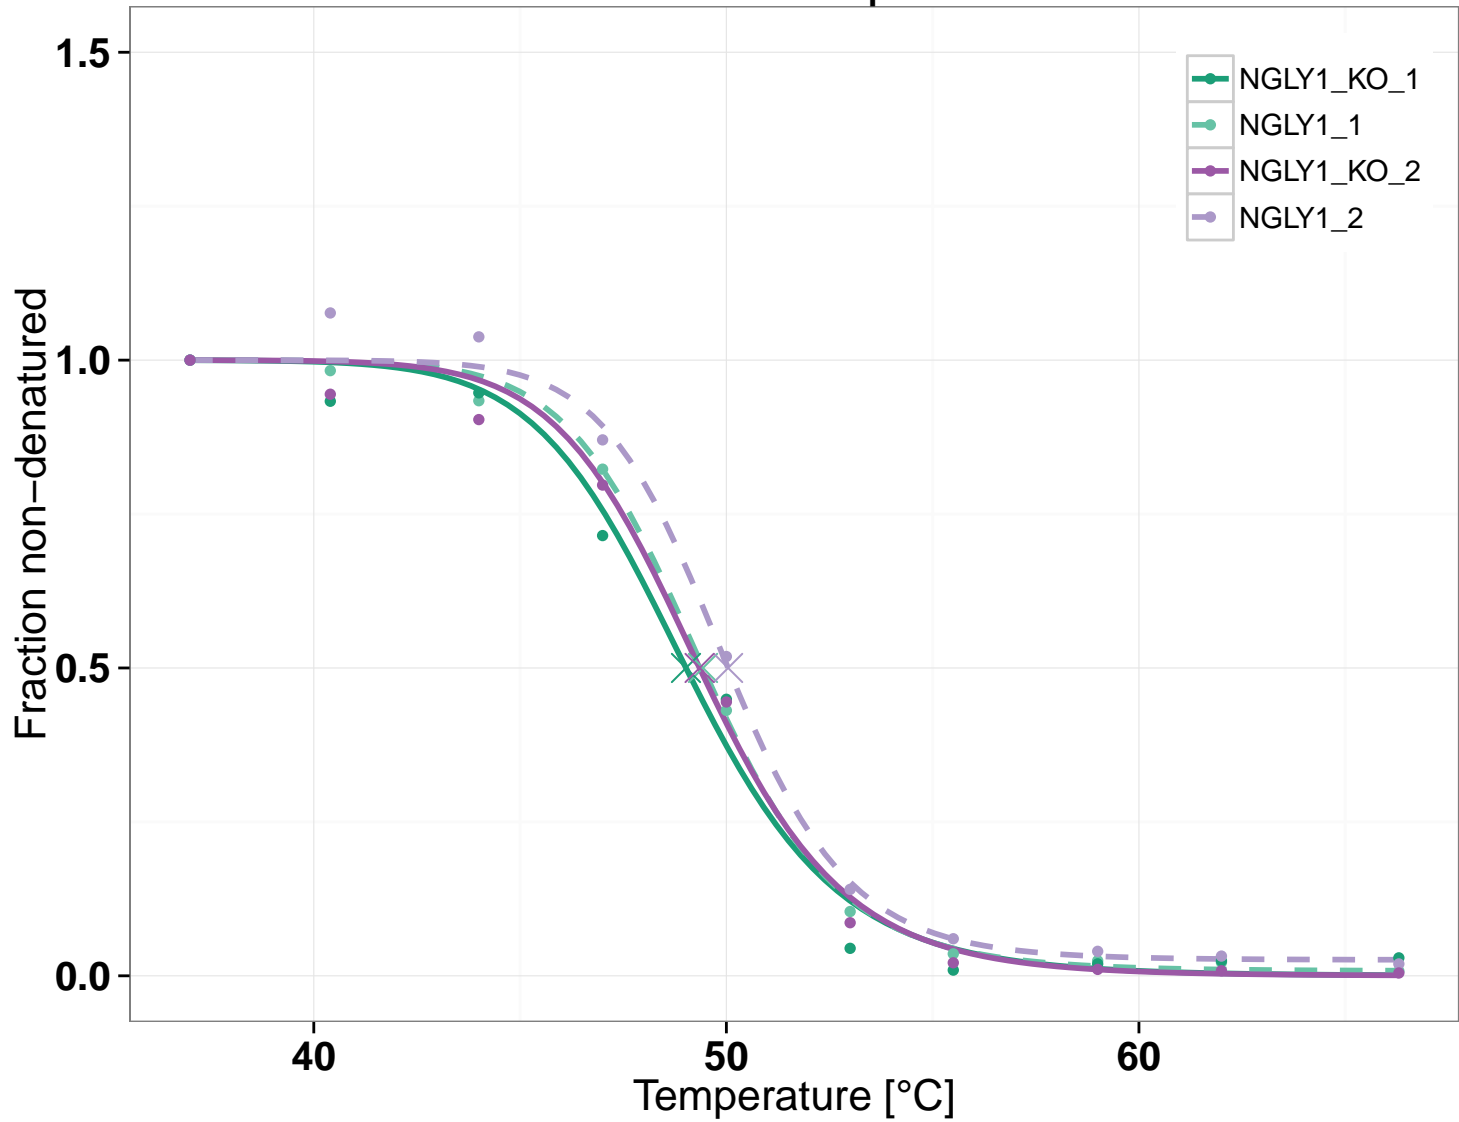

|            | meltPoint | slope | plateau | R2   |
|------------|-----------|-------|---------|------|
| NGLY1_KO_1 | 49.02     | -0.14 | 0       | 0.99 |
| NGLY1_1    | 49.43     | -0.15 | 0.01    | 1    |
| NGLY1_KO_2 | 49.35     | -0.14 | 0       | 0.99 |
| NGLY1_2    | 50.04     | -0.16 | 0.03    | 1    |

Supplement: Supplementary file 6242 [file 1]

IPI00164018.5|CYP2S1

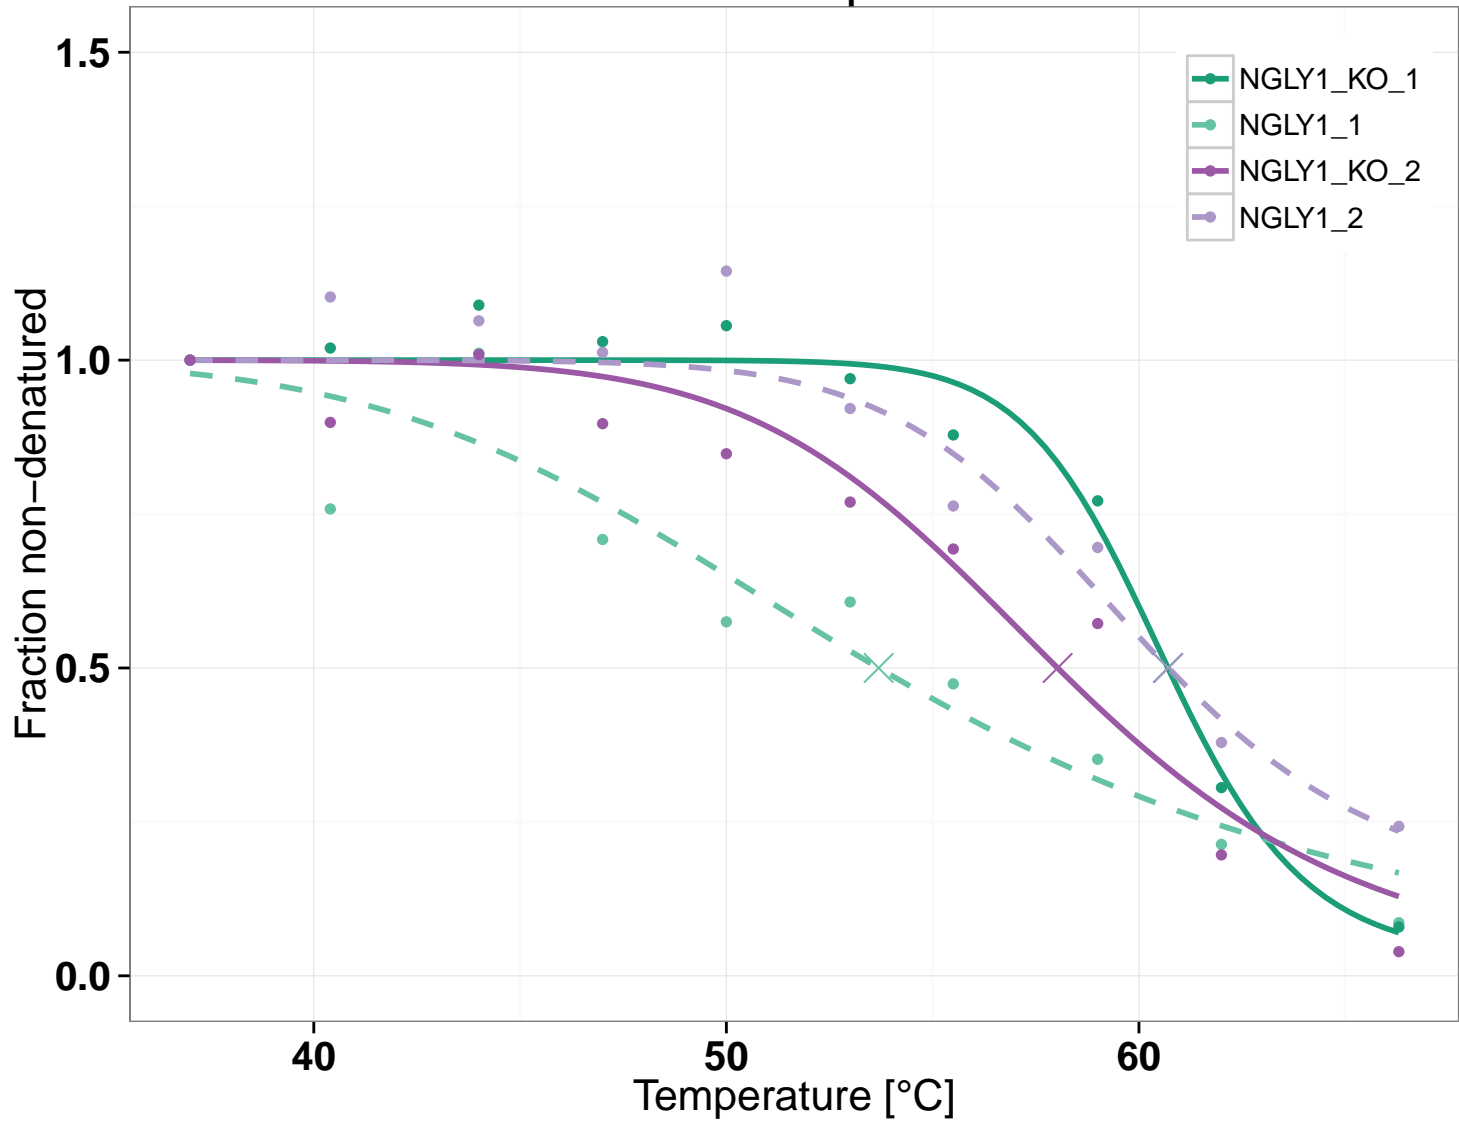

|            | meltPoint | slope  | plateau | R2   |
|------------|-----------|--------|---------|------|
| NGLY1_KO_1 | 60.7      | -0.14  | 0.03    | 0.98 |
| NGLY1_1    | 53.69     | -0.041 | 0       | 0.9  |
| NGLY1_KO_2 | 58.03     | -0.067 | 0       | 0.94 |
| NGLY1_2    | 60.71     | -0.074 | 0.13    | 0.94 |

Supplement: Supplementary file 6243 [file 1]

# IPI00396656.3|APOBEC3G

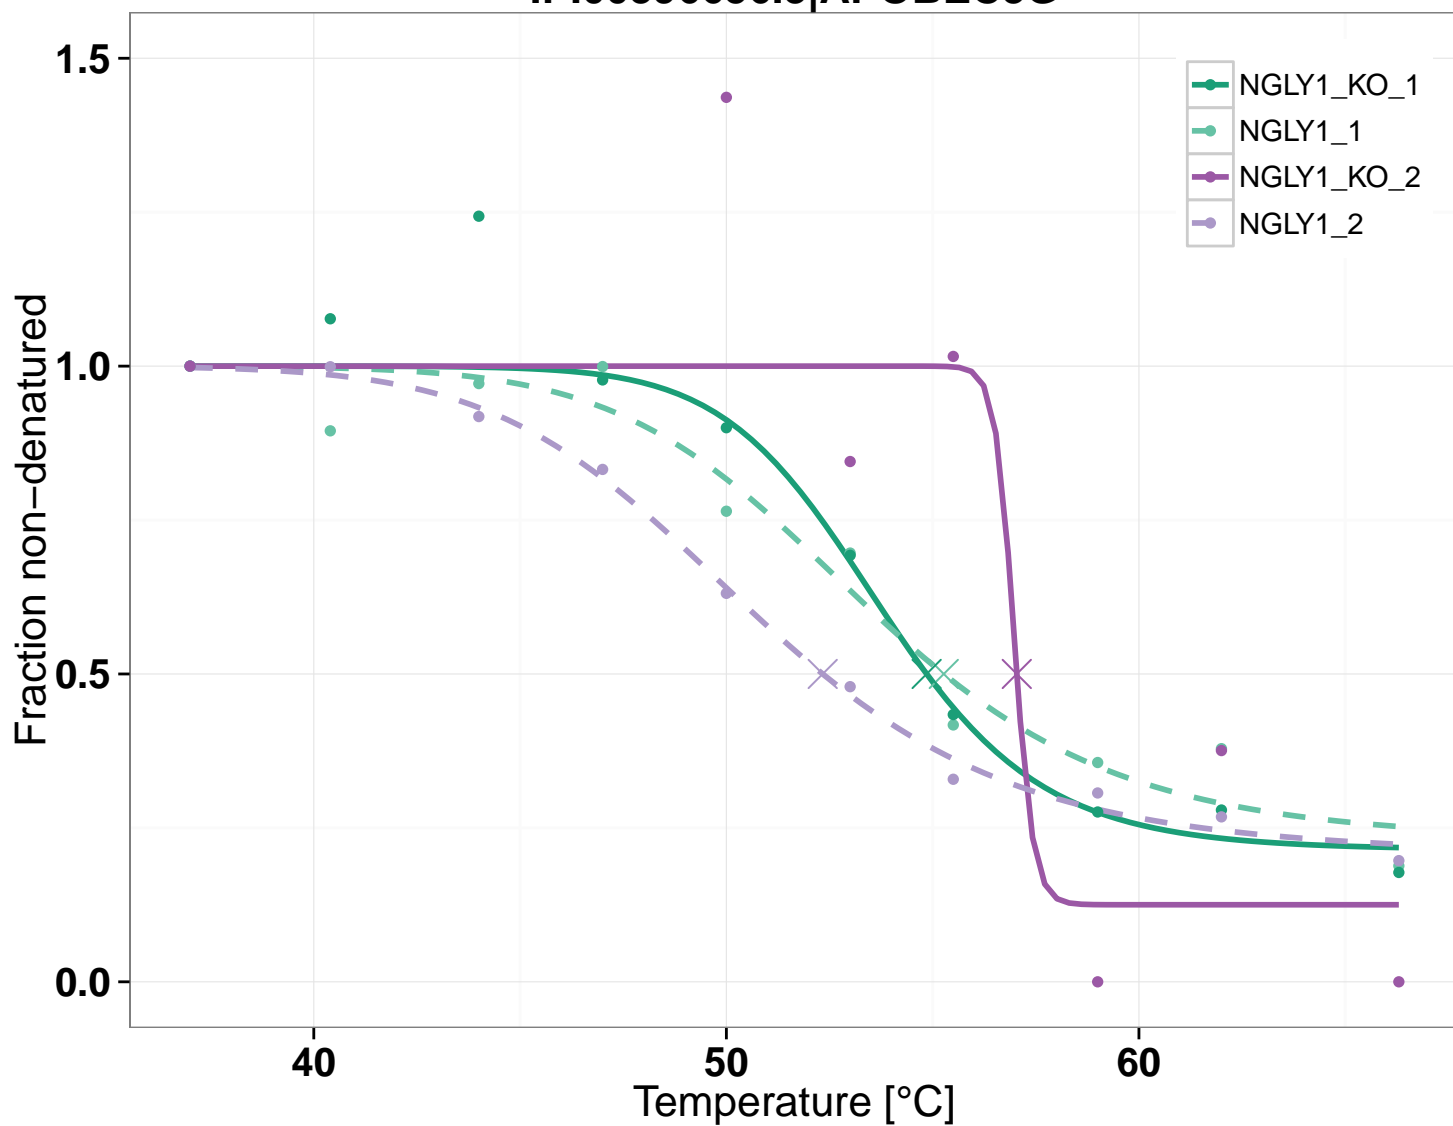

|            | meltPoint | slope  | plateau | R2   |
|------------|-----------|--------|---------|------|
| NGLY1_KO_1 | 54.85     | -0.1   | 0.21    | 0.95 |
| NGLY1_1    | 55.27     | -0.064 | 0.23    | 0.95 |
| NGLY1_KO_2 | 57.04     | -0.96  | 0.13    | 0.39 |
| NGLY1_2    | 52.33     | -0.063 | 0.21    | 1    |

Supplement: Supplementary file 6244 [file 1]

IPI00238220.2|KIAA2022

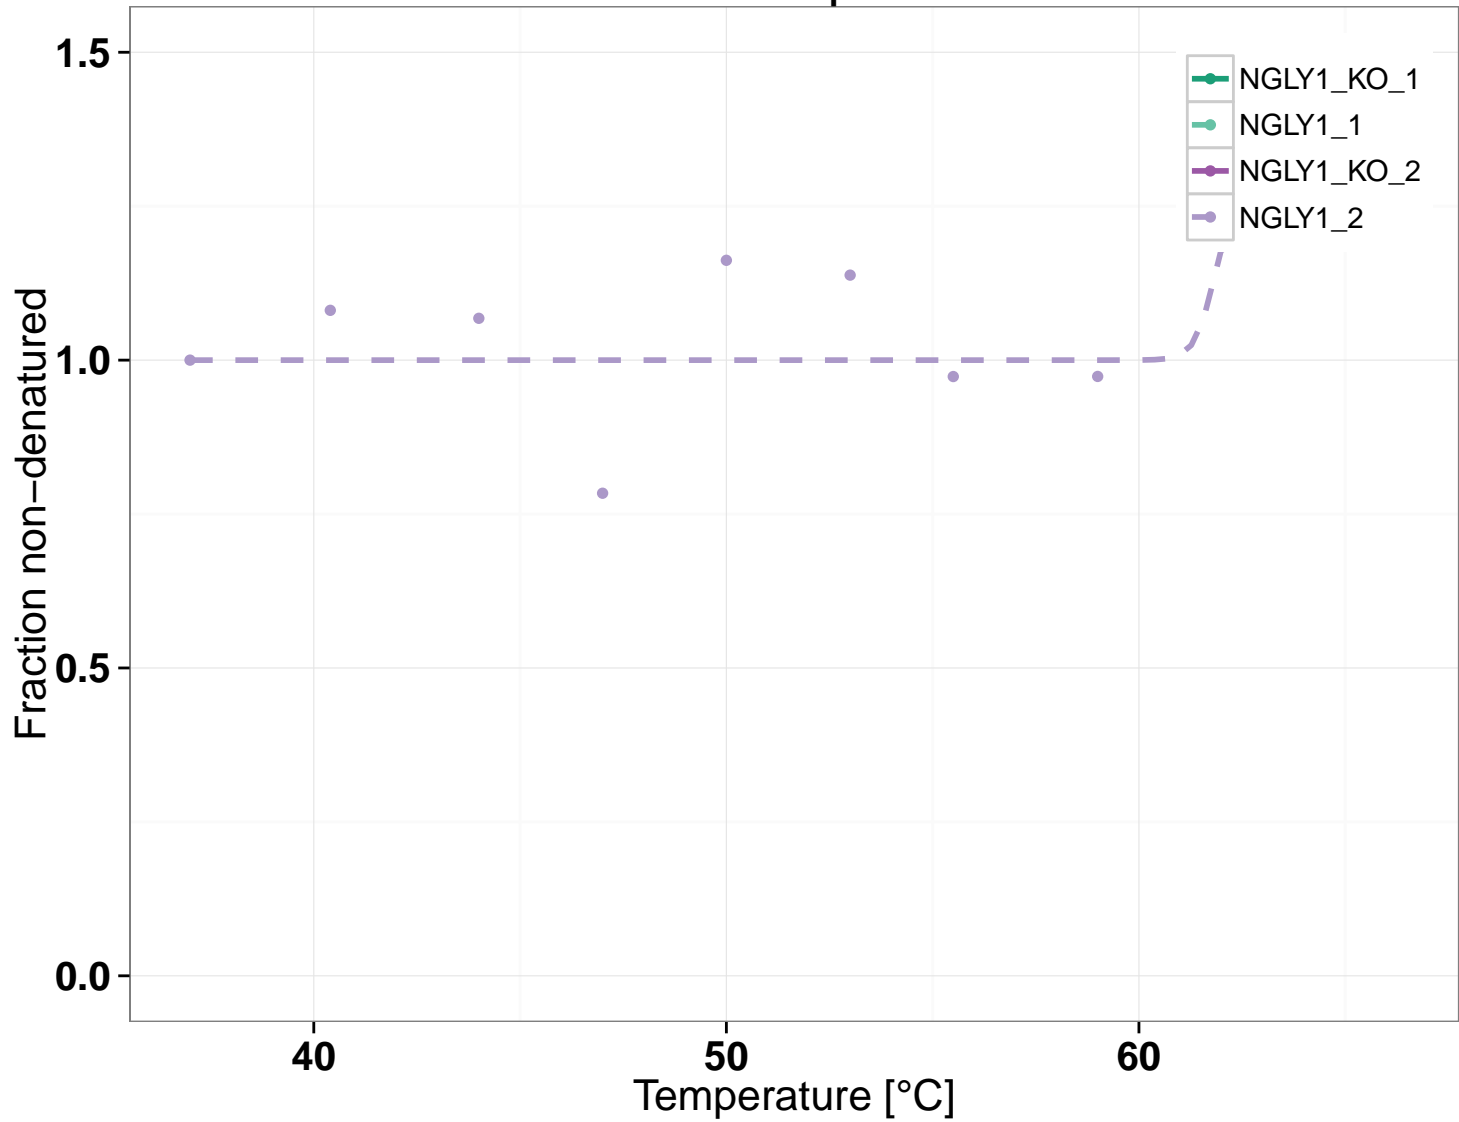

|            | meltPoint | slope | plateau | R2   |
|------------|-----------|-------|---------|------|
| NGLY1_KO_1 | —         | —     | —       | —    |
| NGLY1_1    | —         | —     | —       | —    |
| NGLY1_KO_2 | —         | —     | —       | —    |
| NGLY1_2    | —         | 0.29  | 1.3     | 0.43 |

Supplement: Supplementary file 6245 [file 1]

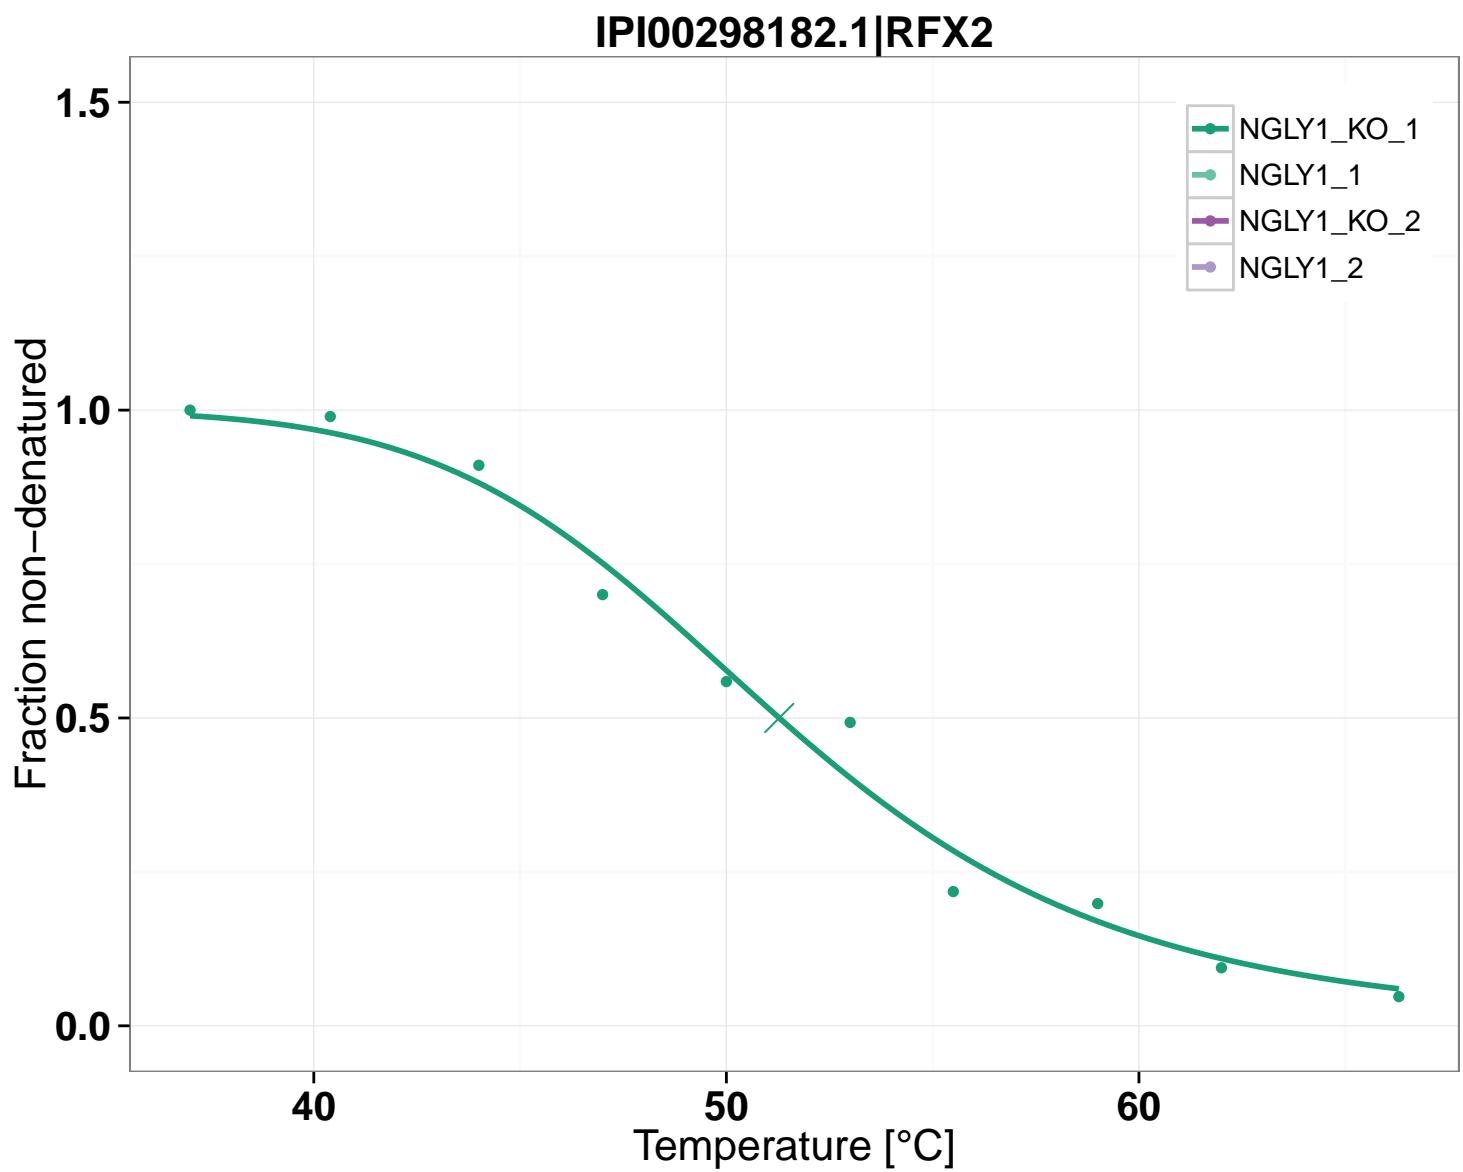

|            | meltPoint | slope  | plateau | R2   |
|------------|-----------|--------|---------|------|
| NGLY1_KO_1 | 51.28     | -0.061 | 0       | 0.99 |
| NGLY1_1    | -         | -      | -       | -    |
| NGLY1_KO_2 | -         | -      | -       | -    |
| NGLY1_2    | -         | -      | -       | -    |

Supplement: Supplementary file 6246 [file 1]

IPI00908736.1|YAF2

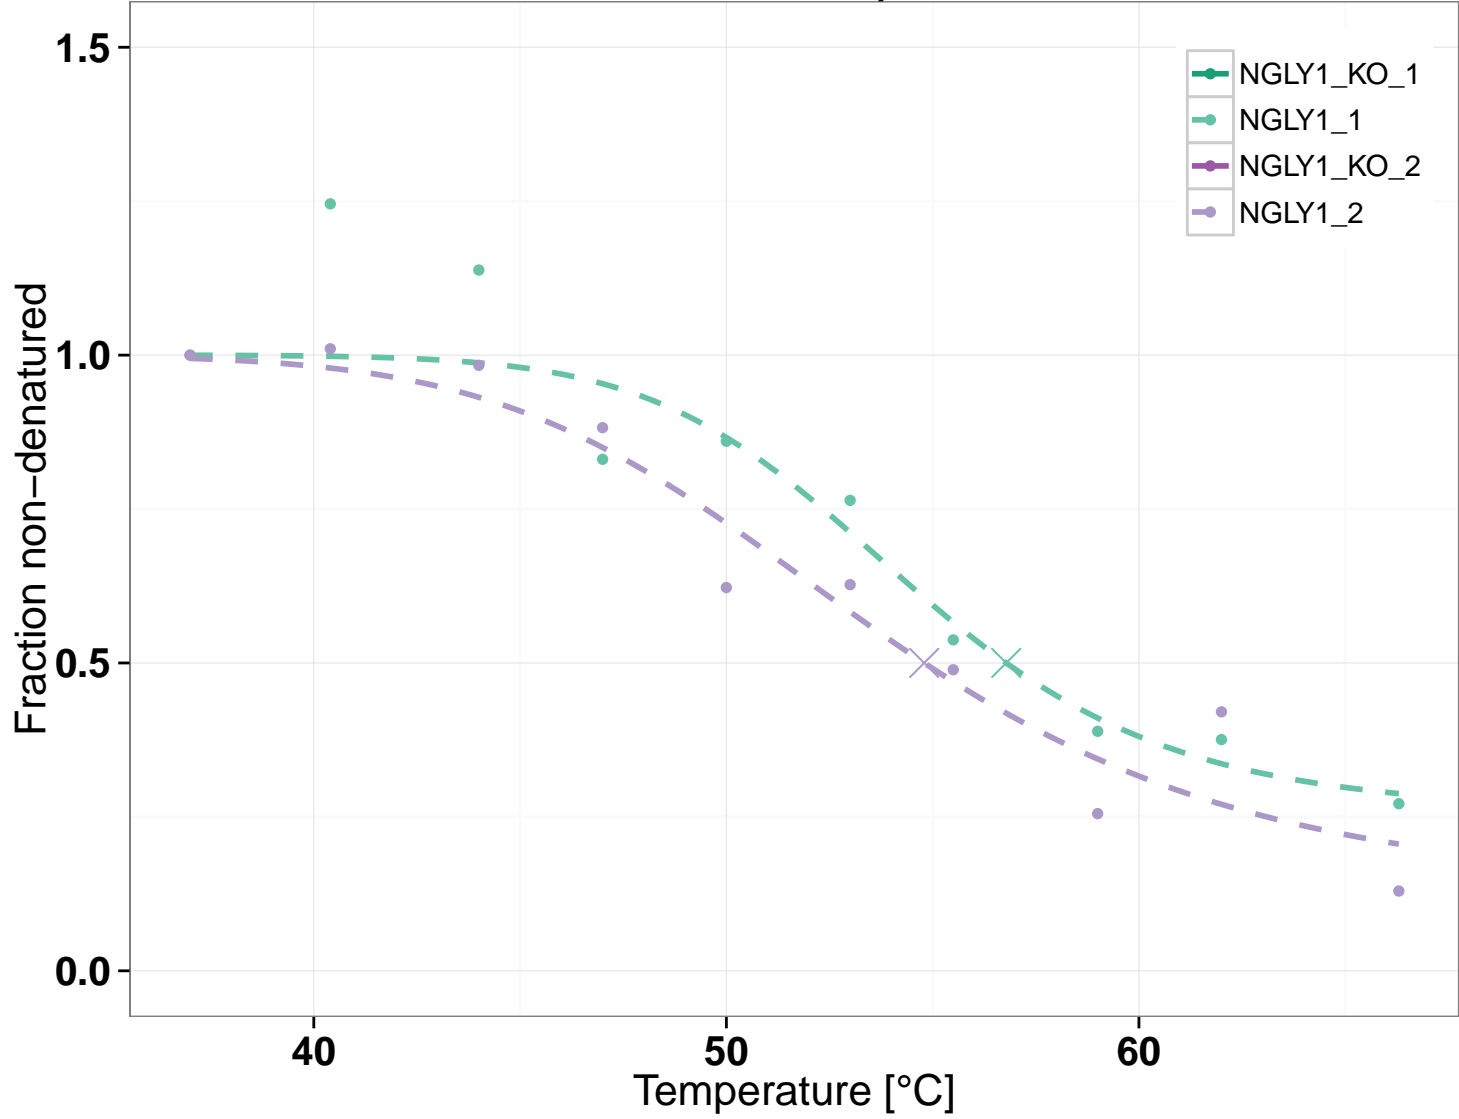

|            | meltPoint | slope  | plateau | R2   |
|------------|-----------|--------|---------|------|
| NGLY1_KO_1 | -         | -      | -       | -    |
| NGLY1_1    | 56.78     | -0.06  | 0.25    | 0.9  |
| NGLY1_KO_2 | -         | -      | -       | -    |
| NGLY1_2    | 54.79     | -0.049 | 0.12    | 0.94 |

Supplement: Supplementary file 6247 [file 1]

IPI00002214.1|KPNA2

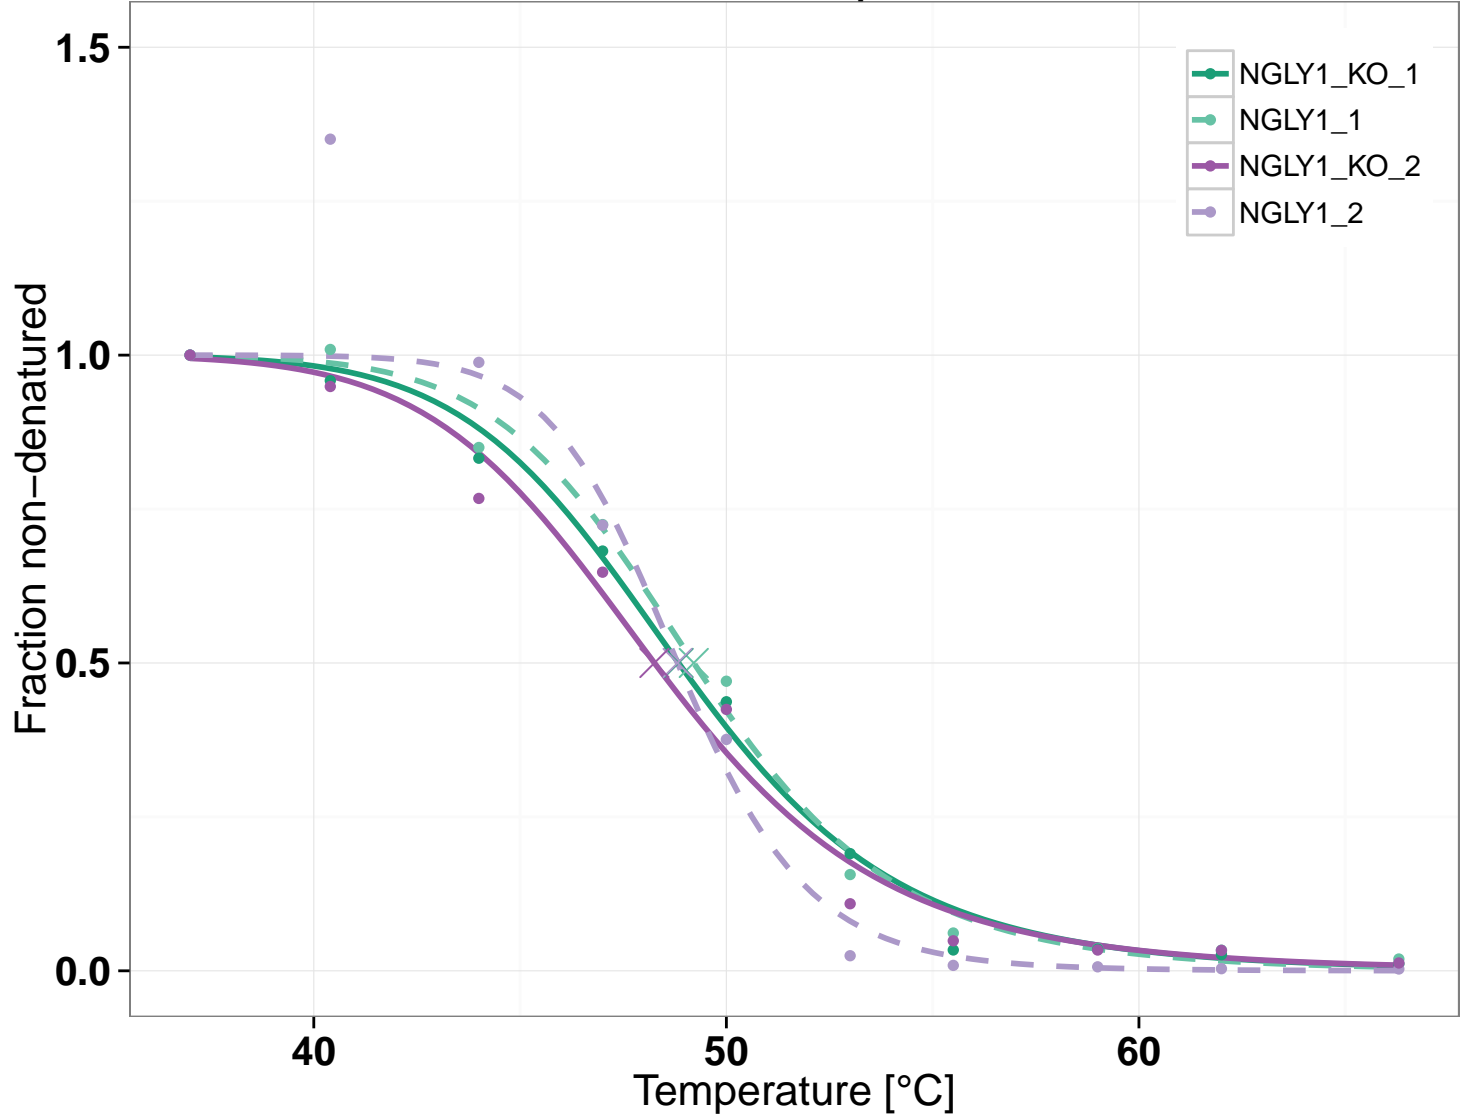

|            | meltPoint | slope  | plateau | R2   |
|------------|-----------|--------|---------|------|
| NGLY1_KO_1 | 48.84     | -0.094 | 0       | 0.99 |
| NGLY1_1    | 49.21     | -0.1   | 0       | 0.99 |
| NGLY1_KO_2 | 48.26     | -0.09  | 0       | 0.99 |
| NGLY1_2    | 48.82     | -0.16  | 0       | 0.95 |

Supplement: Supplementary file 6248 [file 1]

IPI00011970.3|HSD17B7

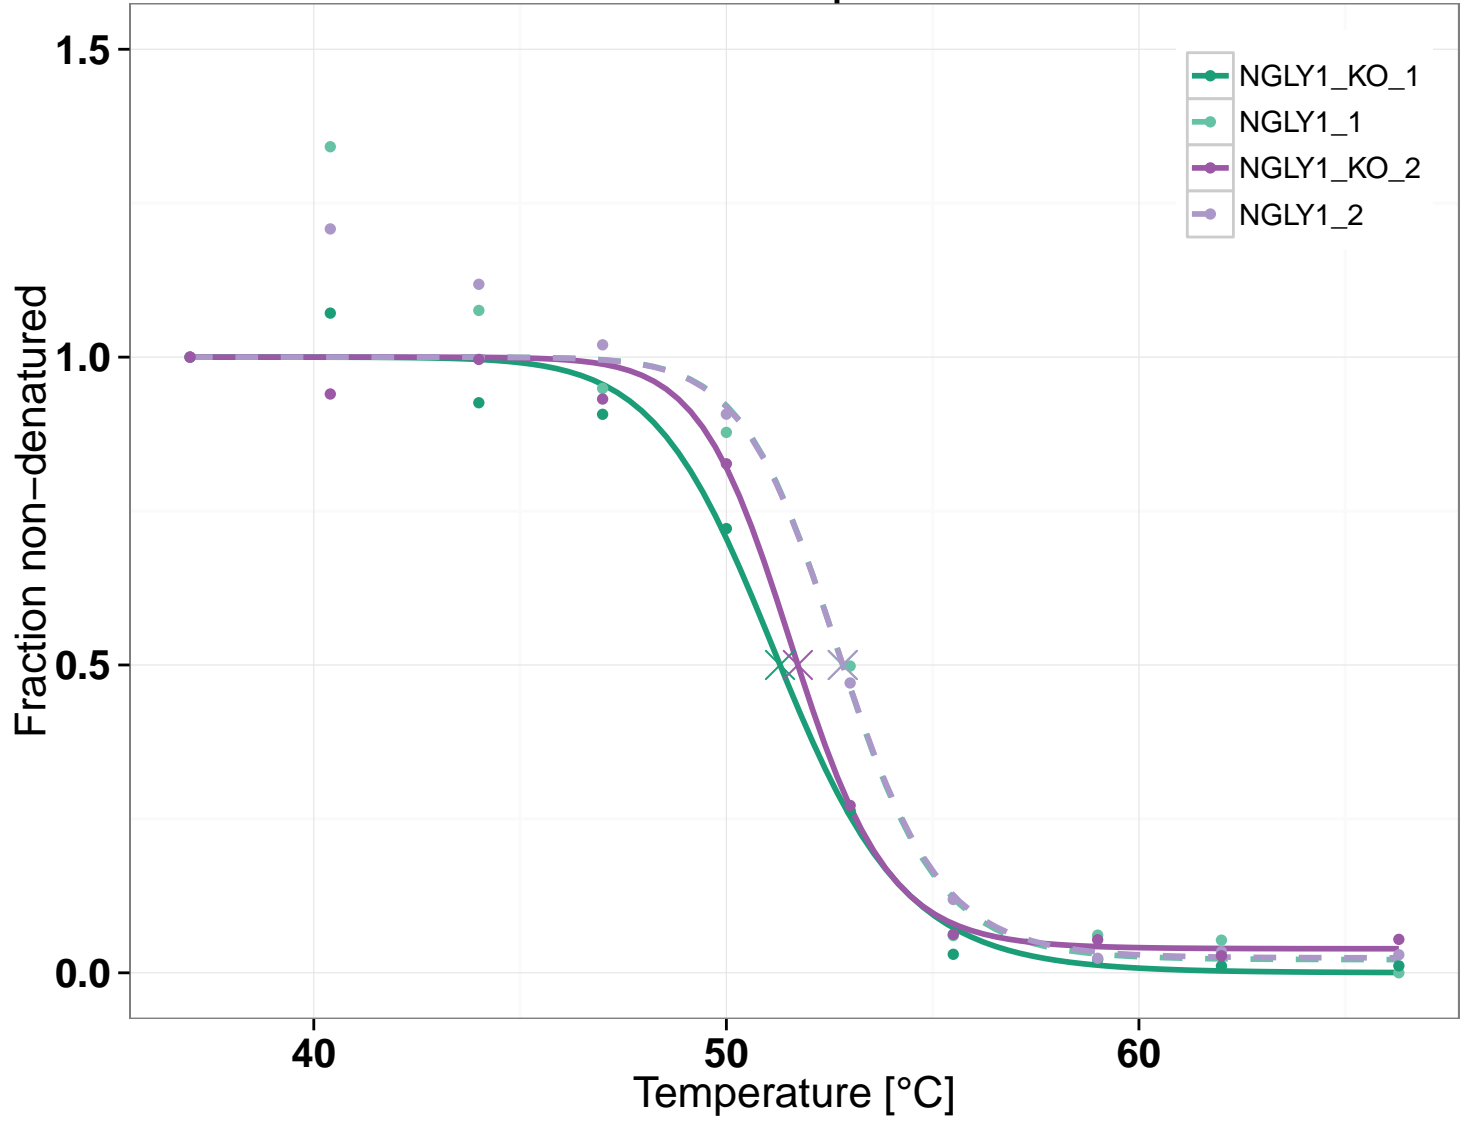

|            | meltPoint | slope | plateau | R2   |
|------------|-----------|-------|---------|------|
| NGLY1_KO_1 | 51.3      | -0.16 | 0       | 0.99 |
| NGLY1_1    | 52.82     | -0.2  | 0.02    | 0.94 |
| NGLY1_KO_2 | 51.73     | -0.21 | 0.04    | 1    |
| NGLY1_2    | 52.82     | -0.2  | 0.02    | 0.97 |

Supplement: Supplementary file 6249 [file 1]

IPI00032038.4|CPT1A

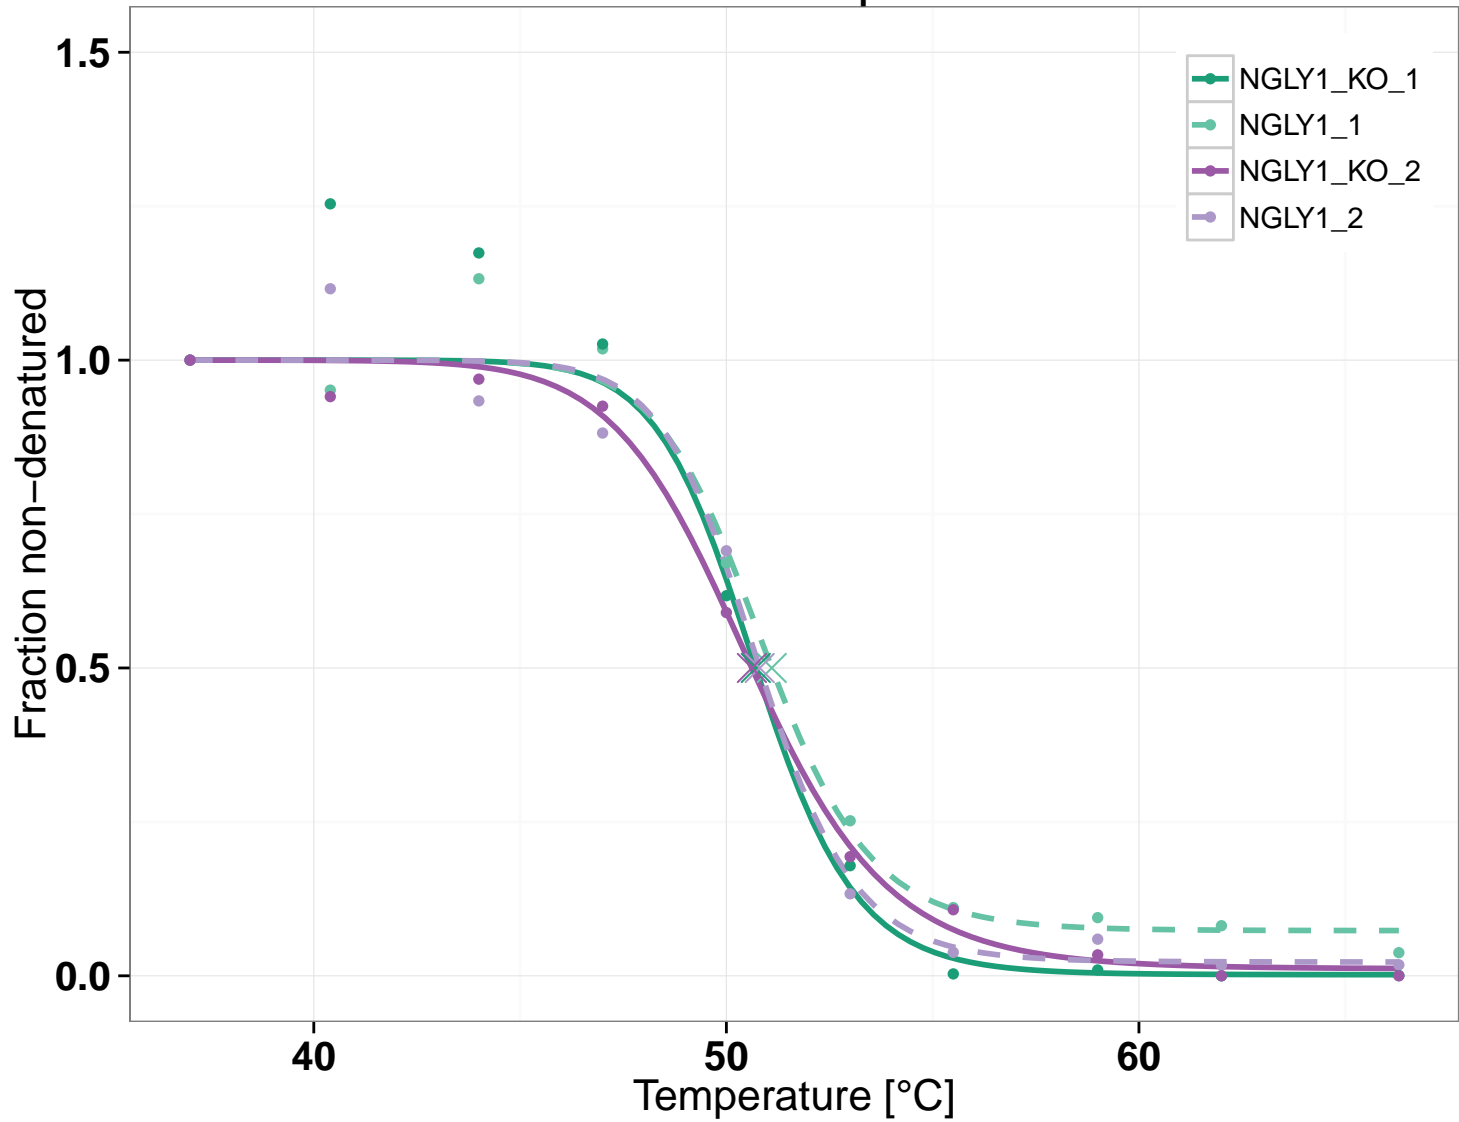

|            | meltPoint | slope | plateau | R2   |
|------------|-----------|-------|---------|------|
| NGLY1_KO_1 | 50.71     | -0.21 | 0       | 0.96 |
| NGLY1_1    | 51.1      | -0.18 | 0.07    | 0.99 |
| NGLY1_KO_2 | 50.62     | -0.15 | 0.01    | 1    |
| NGLY1_2    | 50.81     | -0.21 | 0.02    | 0.99 |

Supplement: Supplementary file 6250 [file 1]

IPI00100791.3|GTF2H3

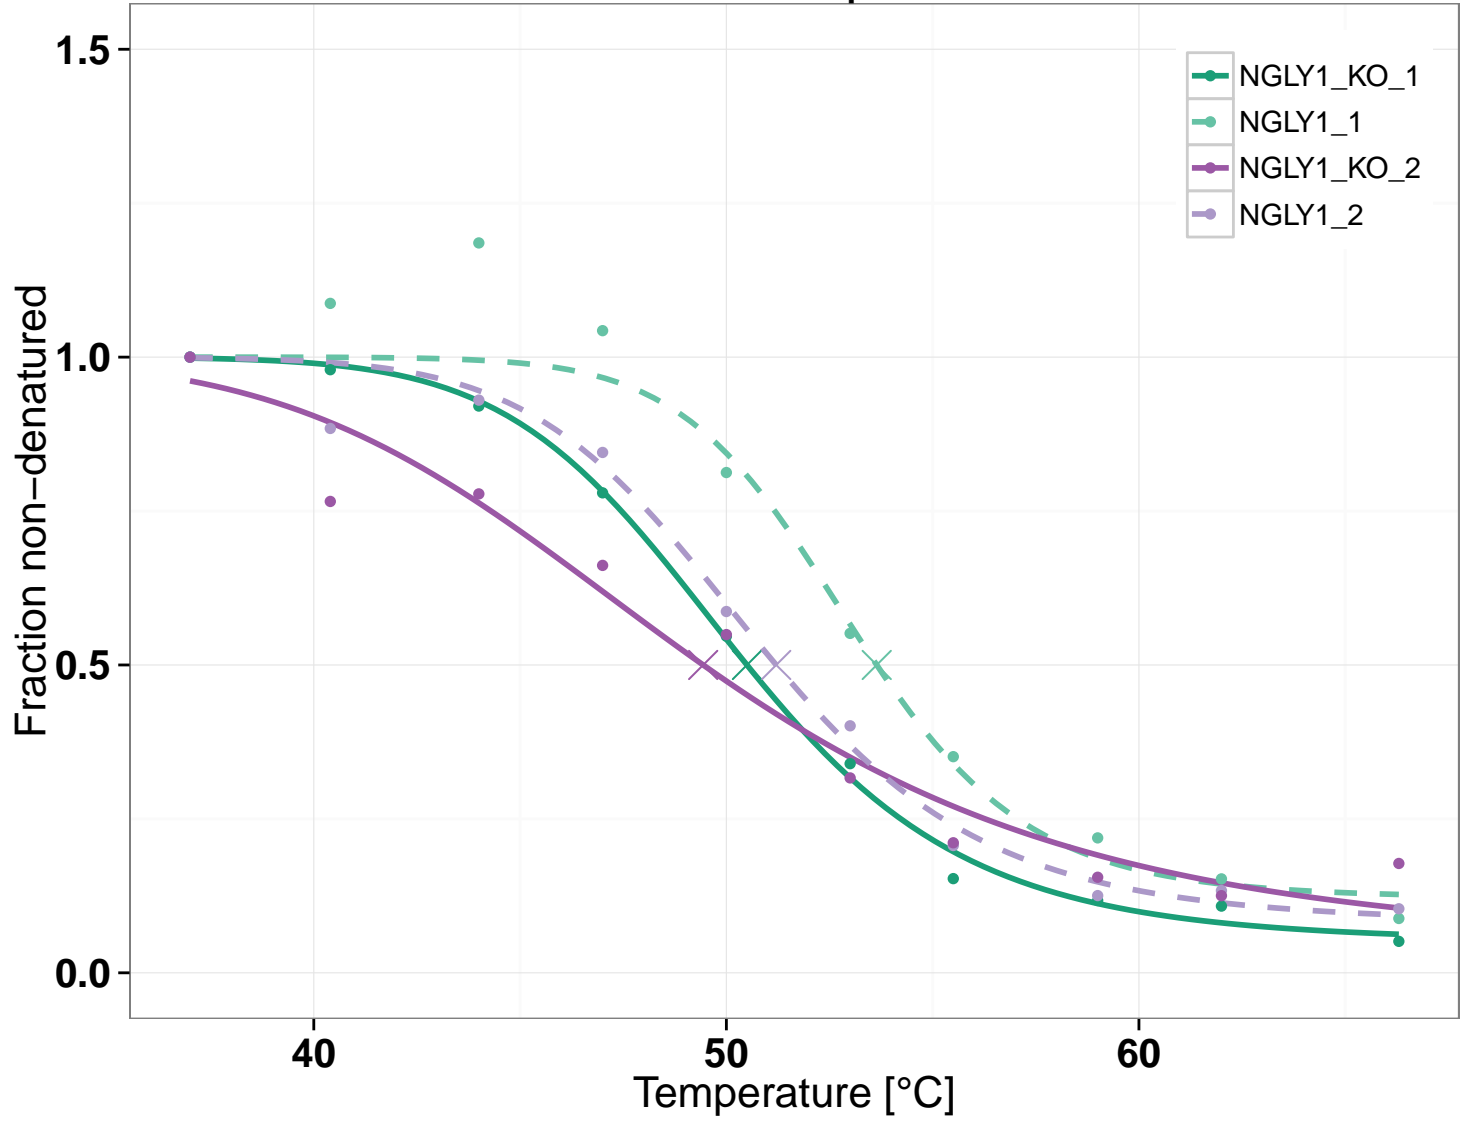

|            | meltPoint | slope  | plateau | R2   |
|------------|-----------|--------|---------|------|
| NGLY1_KO_1 | 50.5      | -0.085 | 0.05    | 1    |
| NGLY1_1    | 53.64     | -0.1   | 0.12    | 0.97 |
| NGLY1_KO_2 | 49.44     | -0.05  | 0.03    | 0.96 |
| NGLY1_2    | 51.21     | -0.083 | 0.08    | 0.99 |

Supplement: Supplementary file 6251 [file 1]

# IPI00900291.1|PPM1A

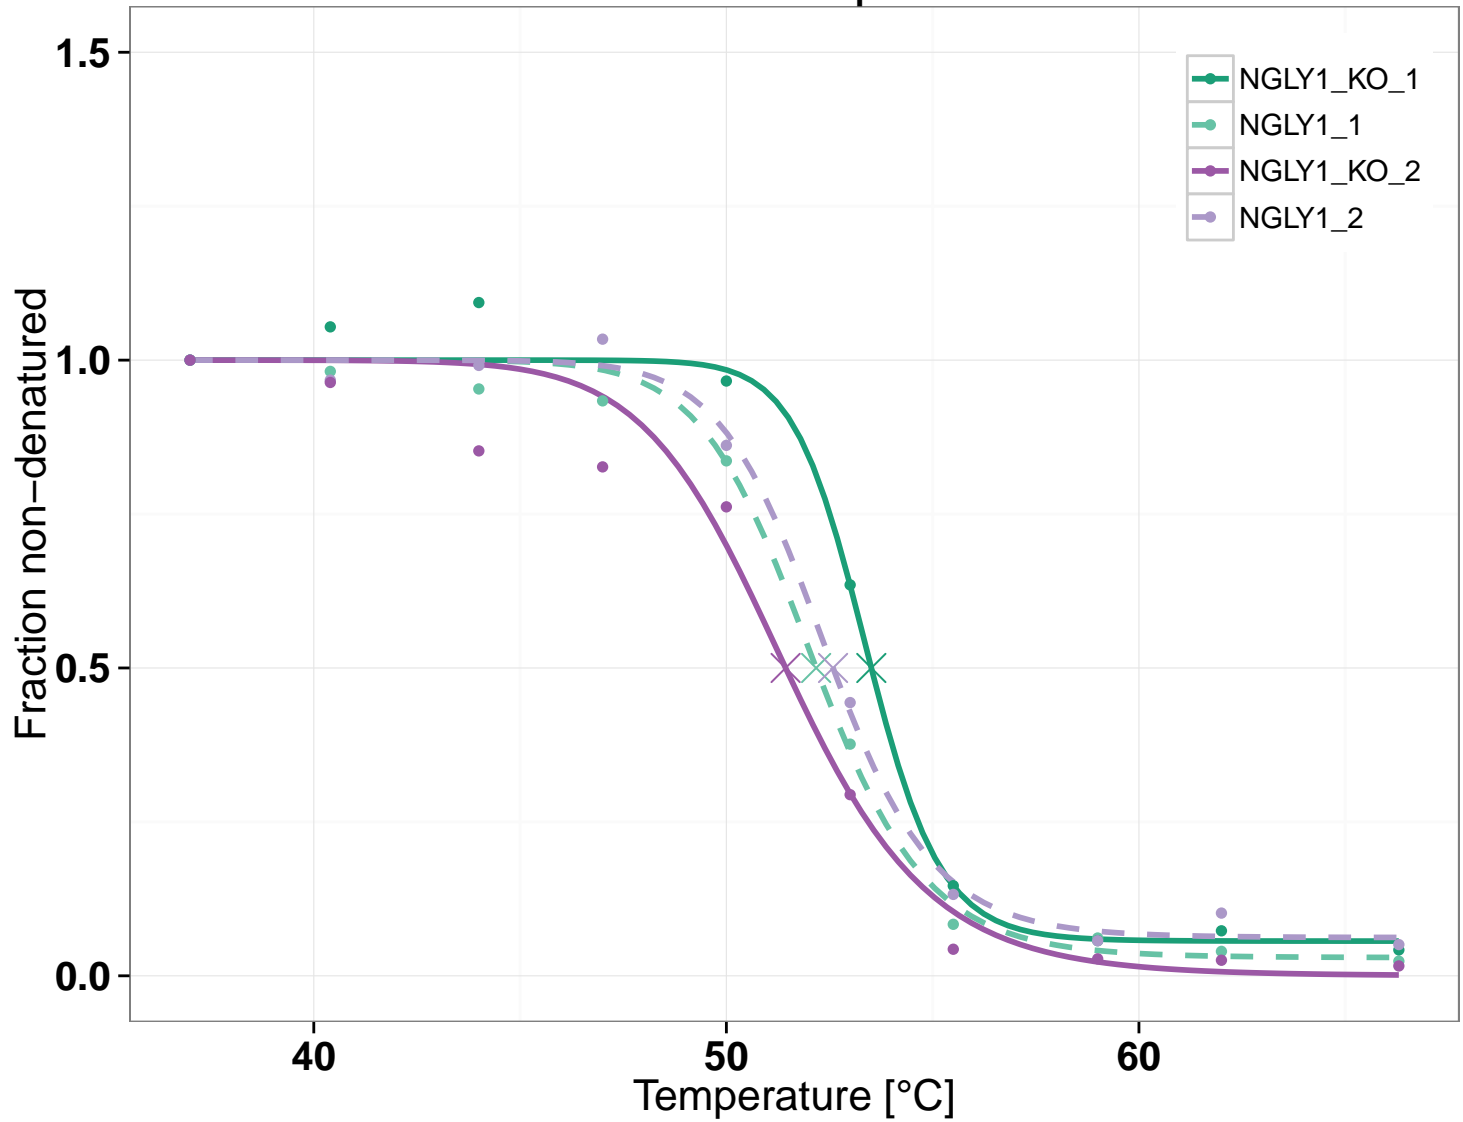

|            | meltPoint | slope | plateau | R2   |
|------------|-----------|-------|---------|------|
| NGLY1_KO_1 | 53.51     | -0.26 | 0.06    | 0.9  |
| NGLY1_1    | 52.18     | -0.18 | 0.03    | 1    |
| NGLY1_KO_2 | 51.44     | -0.14 | 0       | 0.97 |
| NGLY1_2    | 52.59     | -0.18 | 0.06    | 1    |

Supplement: Supplementary file 6252 [file 1]

# IPI00009480.1|COPS8

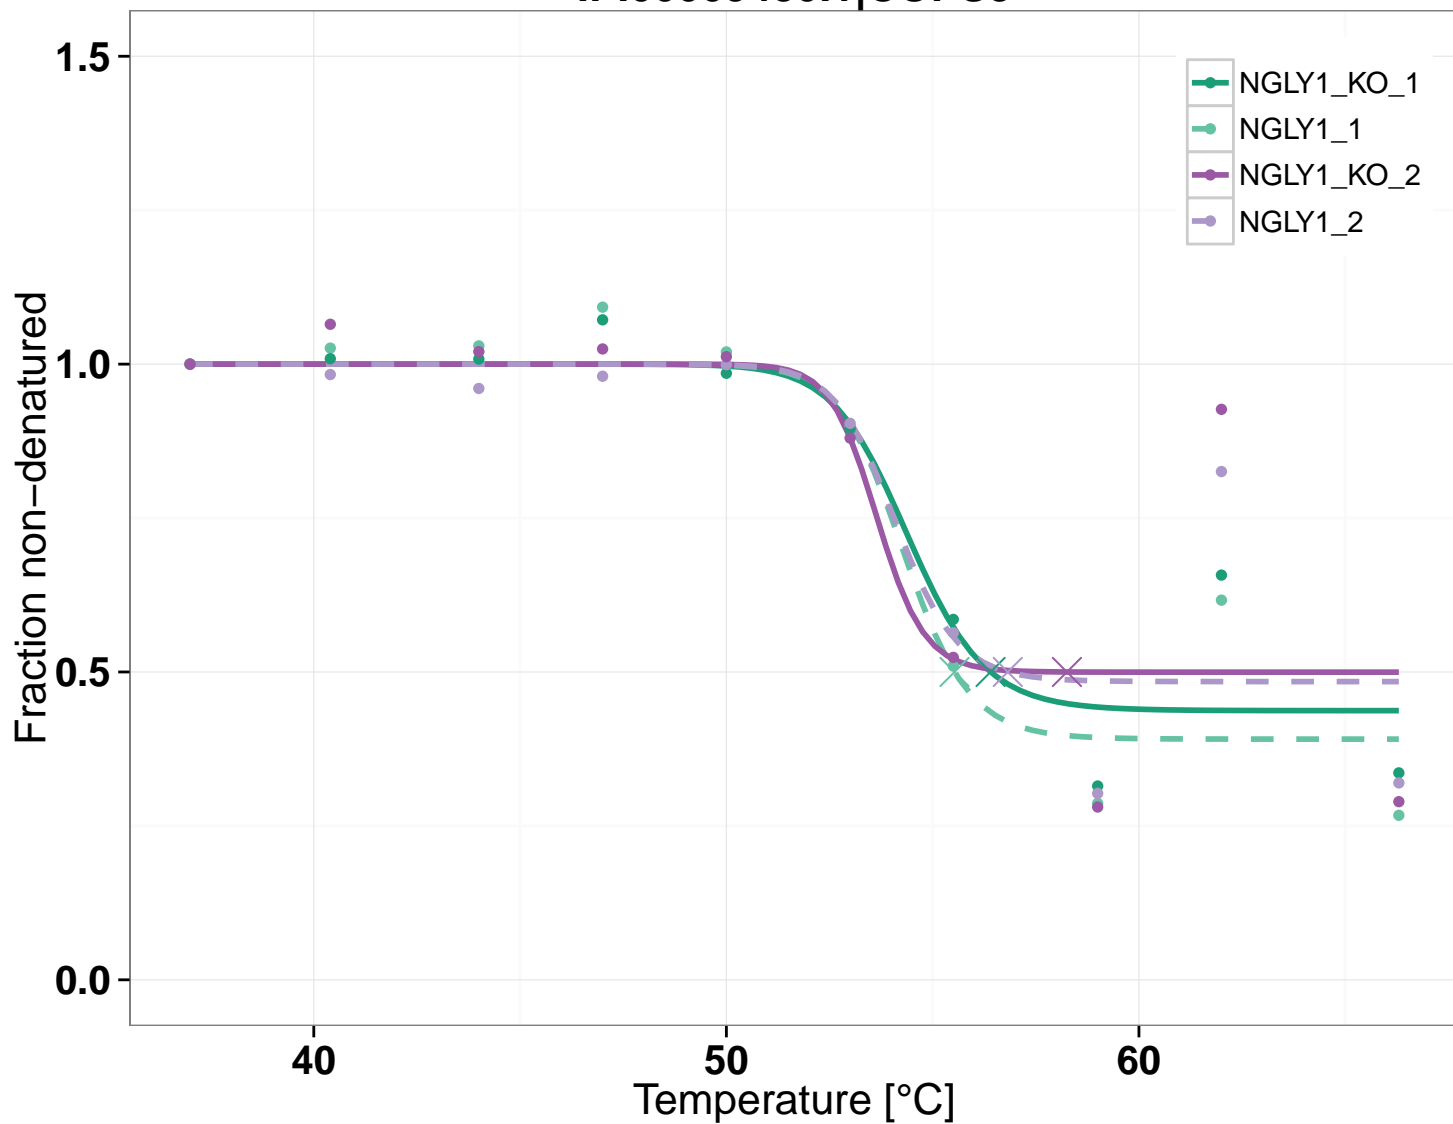

|            | meltPoint | slope | plateau | R2   |
|------------|-----------|-------|---------|------|
| NGLY1_KO_1 | 56.4      | -0.15 | 0.44    | 0.89 |
| NGLY1_1    | 55.53     | -0.19 | 0.39    | 0.91 |
| NGLY1_KO_2 | 58.26     | -0.22 | 0.5     | 0.68 |
| NGLY1_2    | 56.82     | -0.17 | 0.48    | 0.75 |

Supplement: Supplementary file 6253 [file 1]

# IPI00549516.3|TOE1

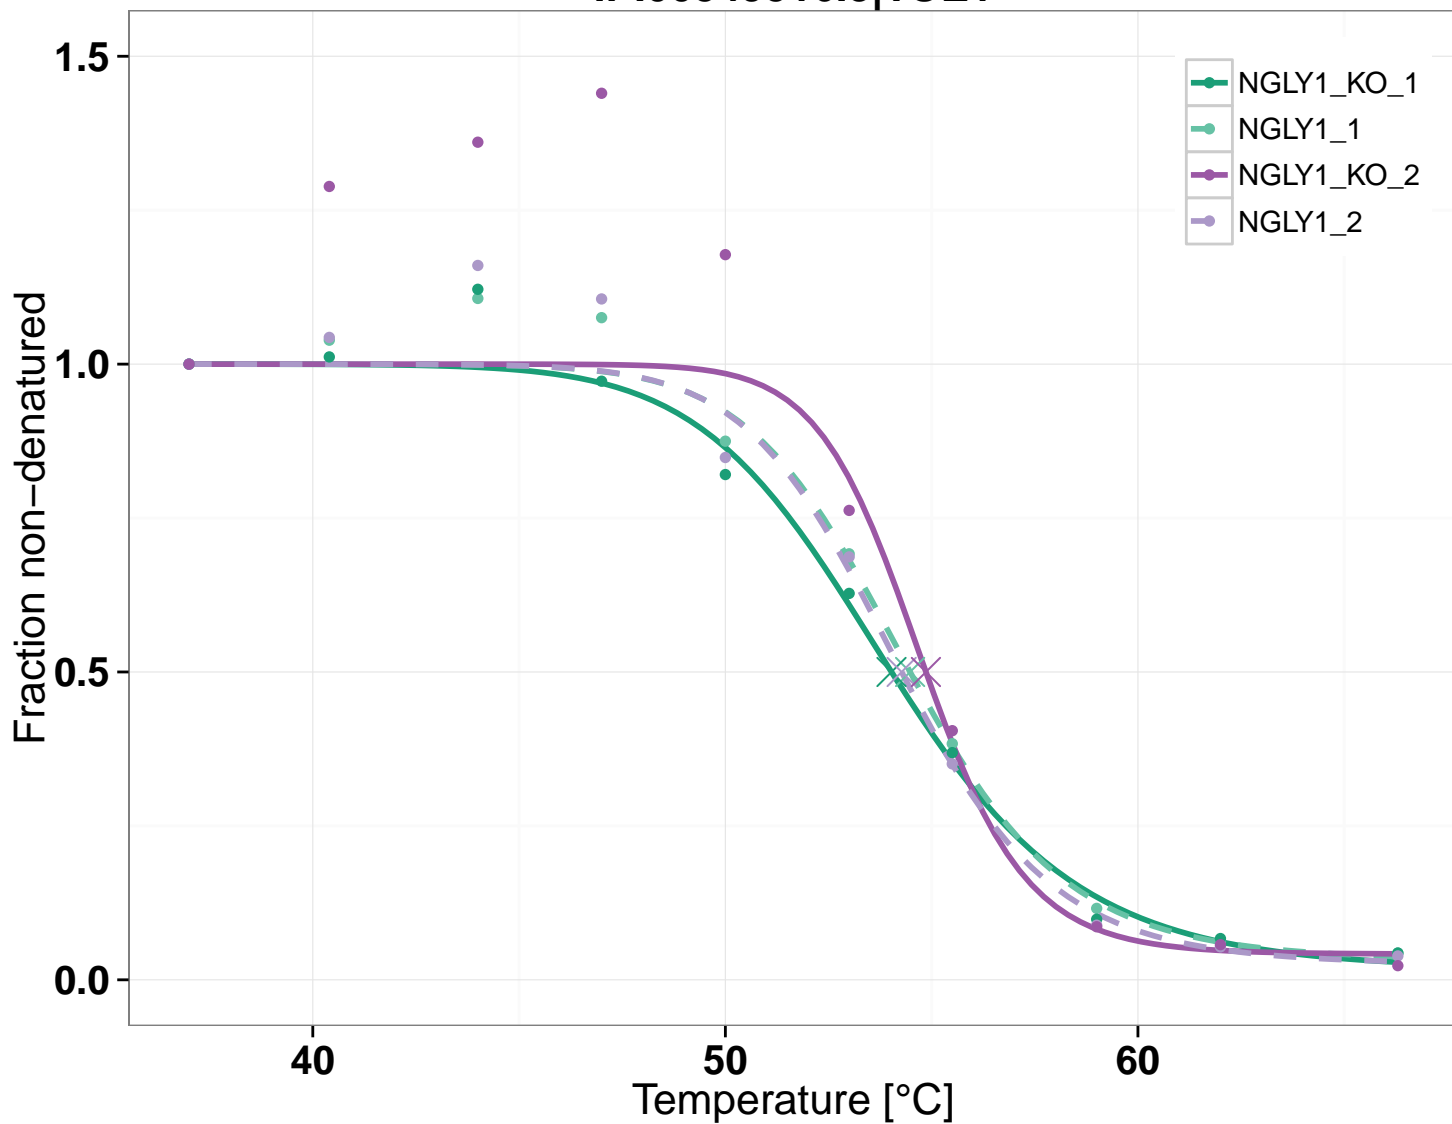

|            | meltPoint | slope | plateau | R2   |
|------------|-----------|-------|---------|------|
| NGLY1_KO_1 | 54.03     | -0.11 | 0.02    | 0.99 |
| NGLY1_1    | 54.48     | -0.13 | 0.03    | 0.99 |
| NGLY1_KO_2 | 54.86     | -0.19 | 0.04    | 0.85 |
| NGLY1_2    | 54.27     | -0.13 | 0.03    | 0.98 |

Supplement: Supplementary file 6254 [file 1]

IPI00008552.6|GLRX3

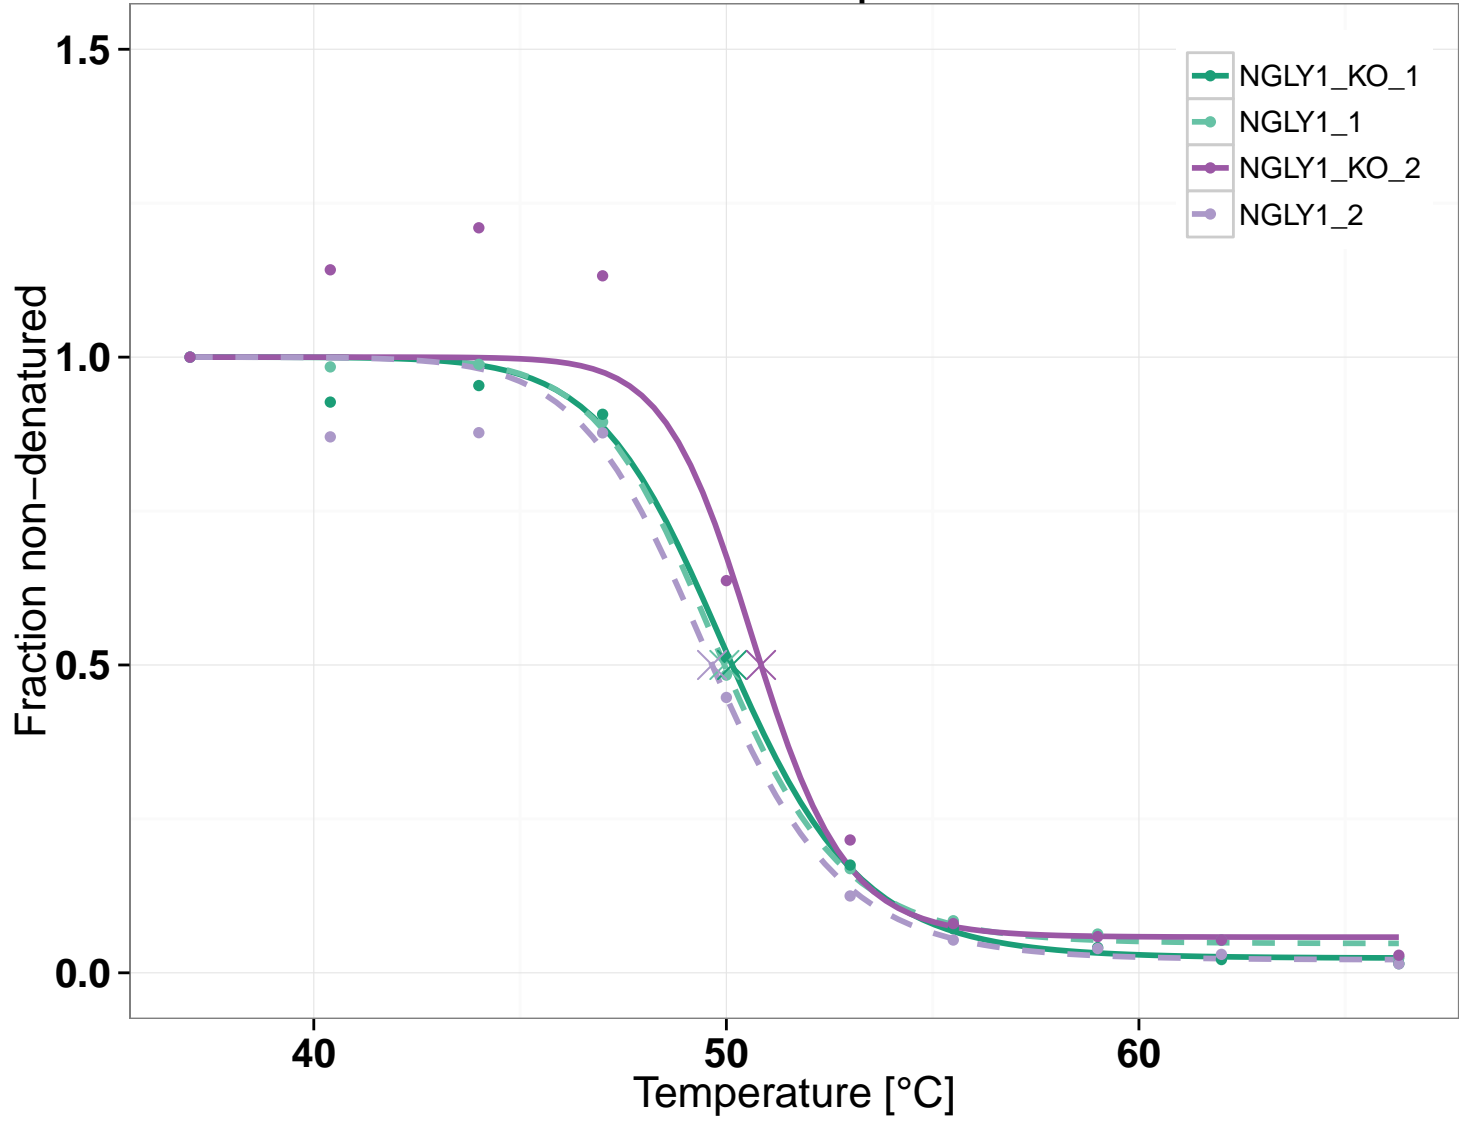

|            | meltPoint | slope | plateau | R2   |
|------------|-----------|-------|---------|------|
| NGLY1_KO_1 | 50.14     | -0.15 | 0.02    | 1    |
| NGLY1_1    | 49.95     | -0.16 | 0.05    | 1    |
| NGLY1_KO_2 | 50.84     | -0.21 | 0.06    | 0.96 |
| NGLY1_2    | 49.65     | -0.15 | 0.02    | 0.98 |

Supplement: Supplementary file 6255 [file 1]

# IPI00745171.2|ATP2C1

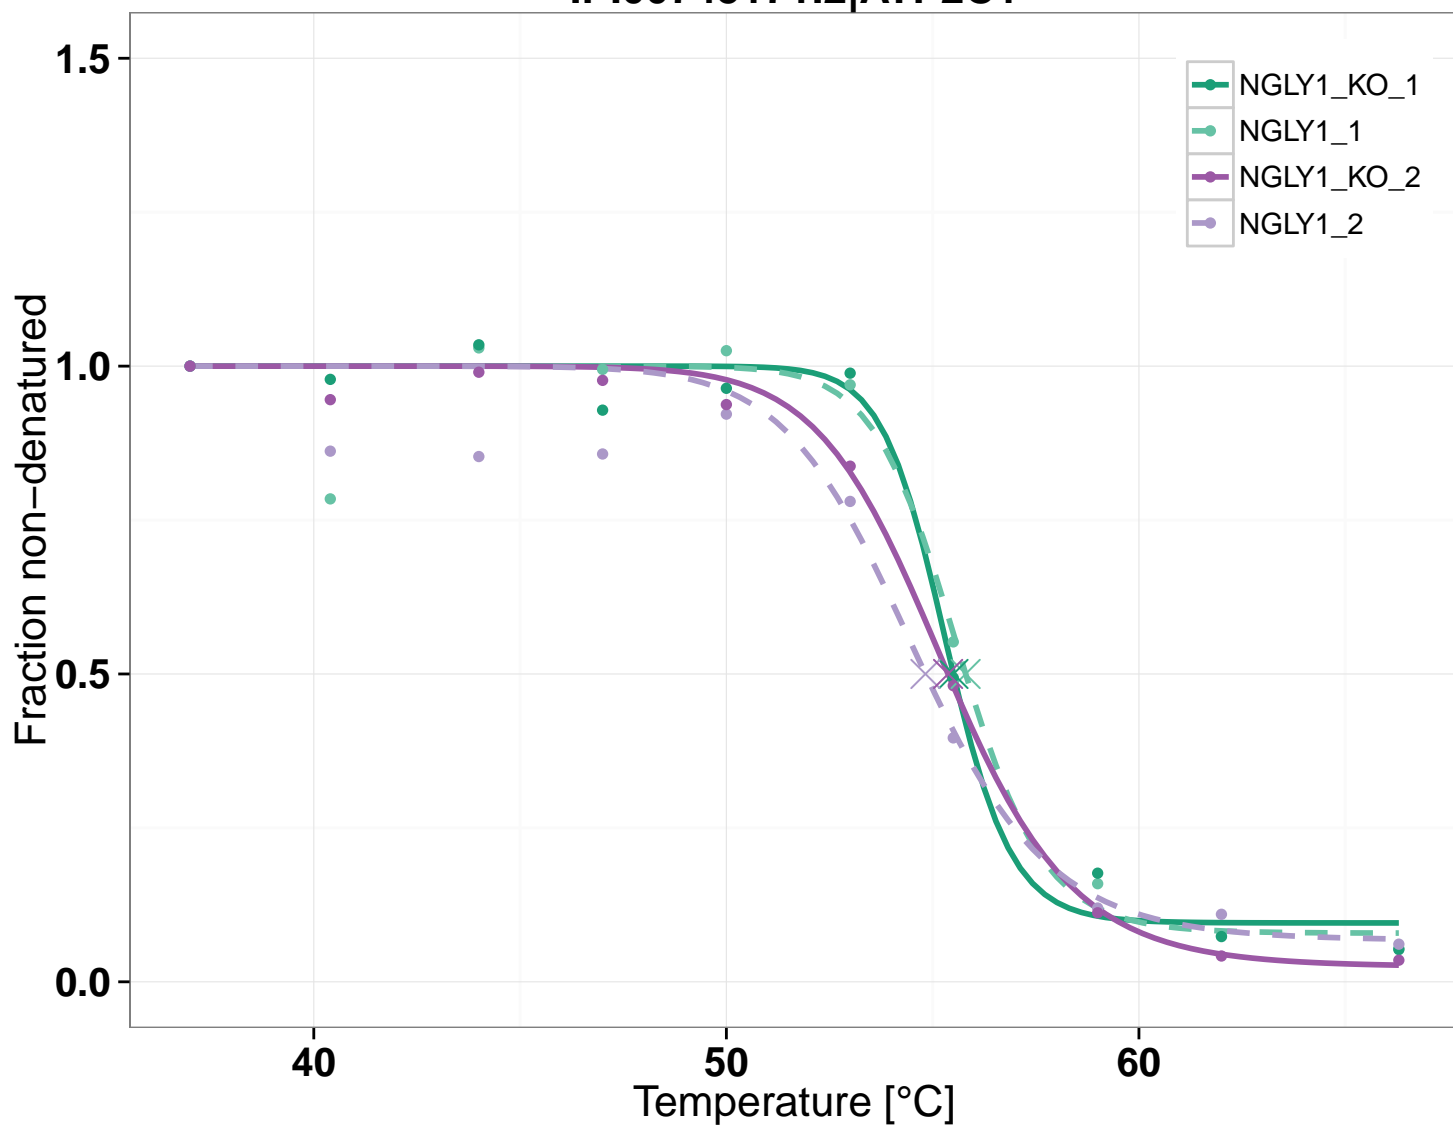

|            | meltPoint | slope | plateau | R2   |
|------------|-----------|-------|---------|------|
| NGLY1_KO_1 | 55.5      | -0.29 | 0.1     | 0.99 |
| NGLY1_1    | 55.8      | -0.22 | 0.08    | 0.97 |
| NGLY1_KO_2 | 55.37     | -0.16 | 0.02    | 1    |
| NGLY1_2    | 54.83     | -0.14 | 0.07    | 0.95 |

Supplement: Supplementary file 6256 [file 1]

IPI00303290.3|TMEM186

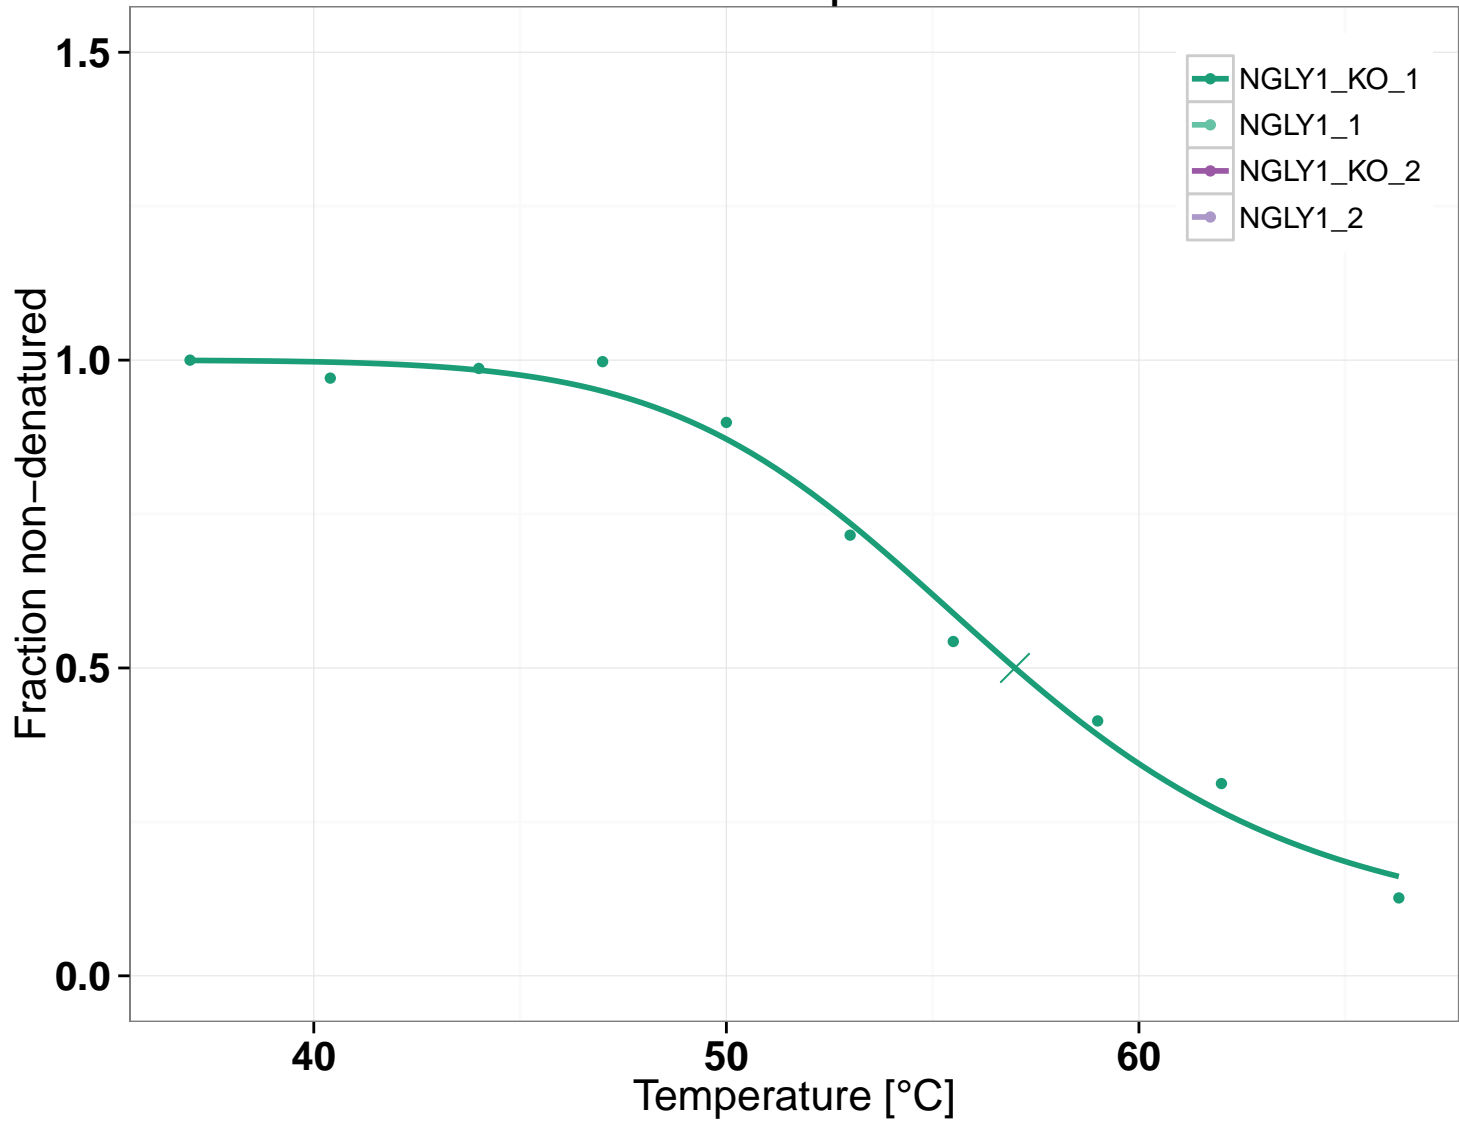

|            | meltPoint | slope | plateau | R2   |
|------------|-----------|-------|---------|------|
| NGLY1_KO_1 | 56.99     | -0.06 | 0.06    | 0.99 |
| NGLY1_1    | -         | -     | -       | -    |
| NGLY1_KO_2 | -         | -     | -       | -    |
| NGLY1_2    | -         | -     | -       | -    |

Supplement: Supplementary file 6257 [file 1]

# IPI00029817.1|NEU1

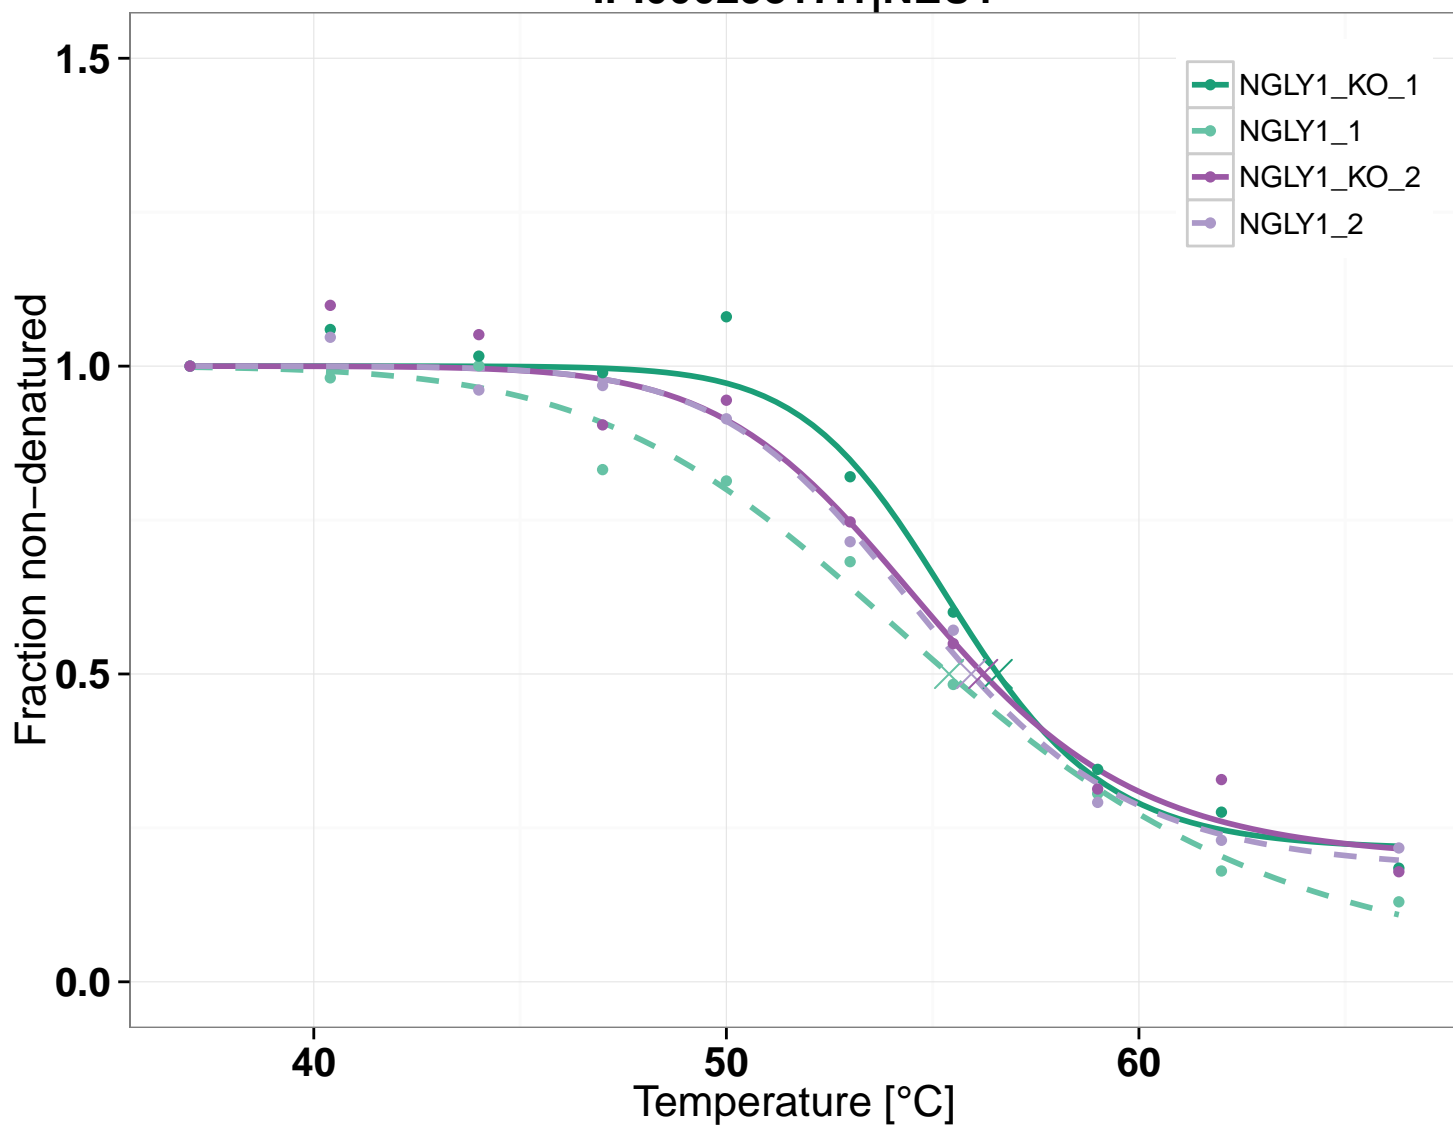

|            | meltPoint | slope  | plateau | R2   |
|------------|-----------|--------|---------|------|
| NGLY1_KO_1 | 56.58     | -0.11  | 0.21    | 0.98 |
| NGLY1_1    | 55.4      | -0.059 | 0       | 0.99 |
| NGLY1_KO_2 | 56.23     | -0.079 | 0.2     | 0.97 |
| NGLY1_2    | 55.94     | -0.083 | 0.18    | 0.99 |

Supplement: Supplementary file 6258 [file 1]

# IPI00021997.1|CREG1

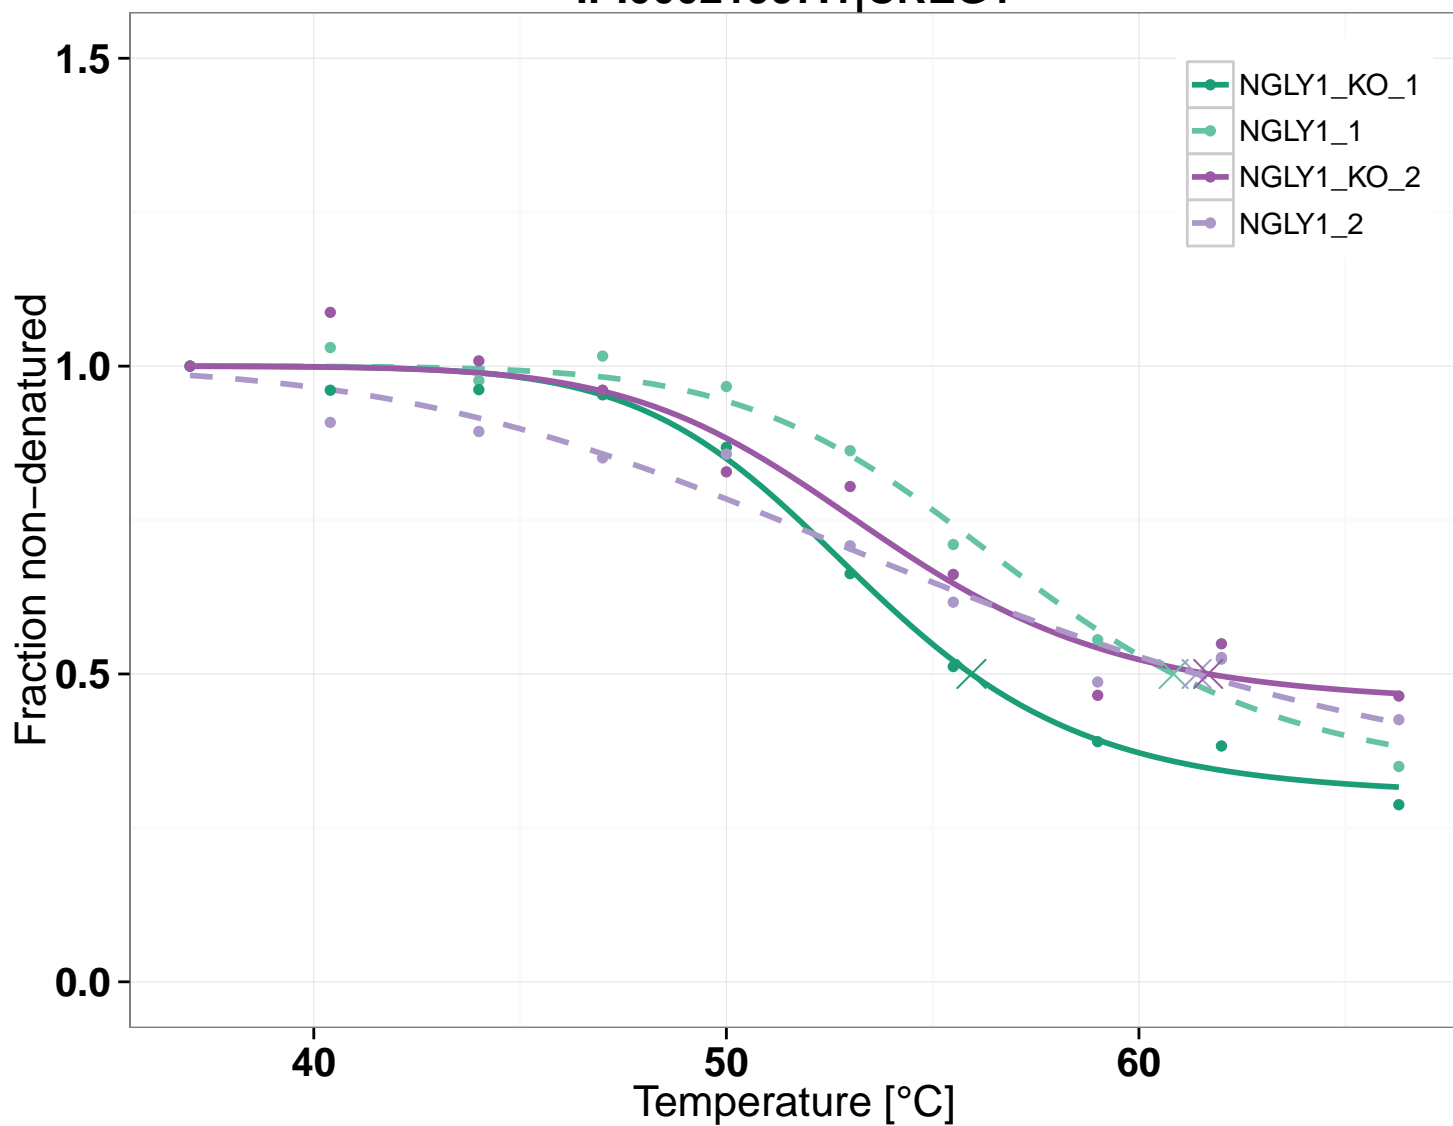

|            | meltPoint | slope  | plateau | R2   |
|------------|-----------|--------|---------|------|
| NGLY1_KO_1 | 55.94     | -0.065 | 0.3     | 0.99 |
| NGLY1_1    | 60.84     | -0.051 | 0.32    | 0.98 |
| NGLY1_KO_2 | 61.68     | -0.046 | 0.45    | 0.95 |
| NGLY1_2    | 61.4      | -0.027 | 0.24    | 0.96 |

Supplement: Supplementary file 6259 [file 1]

IPI00420065.3|ACAD11

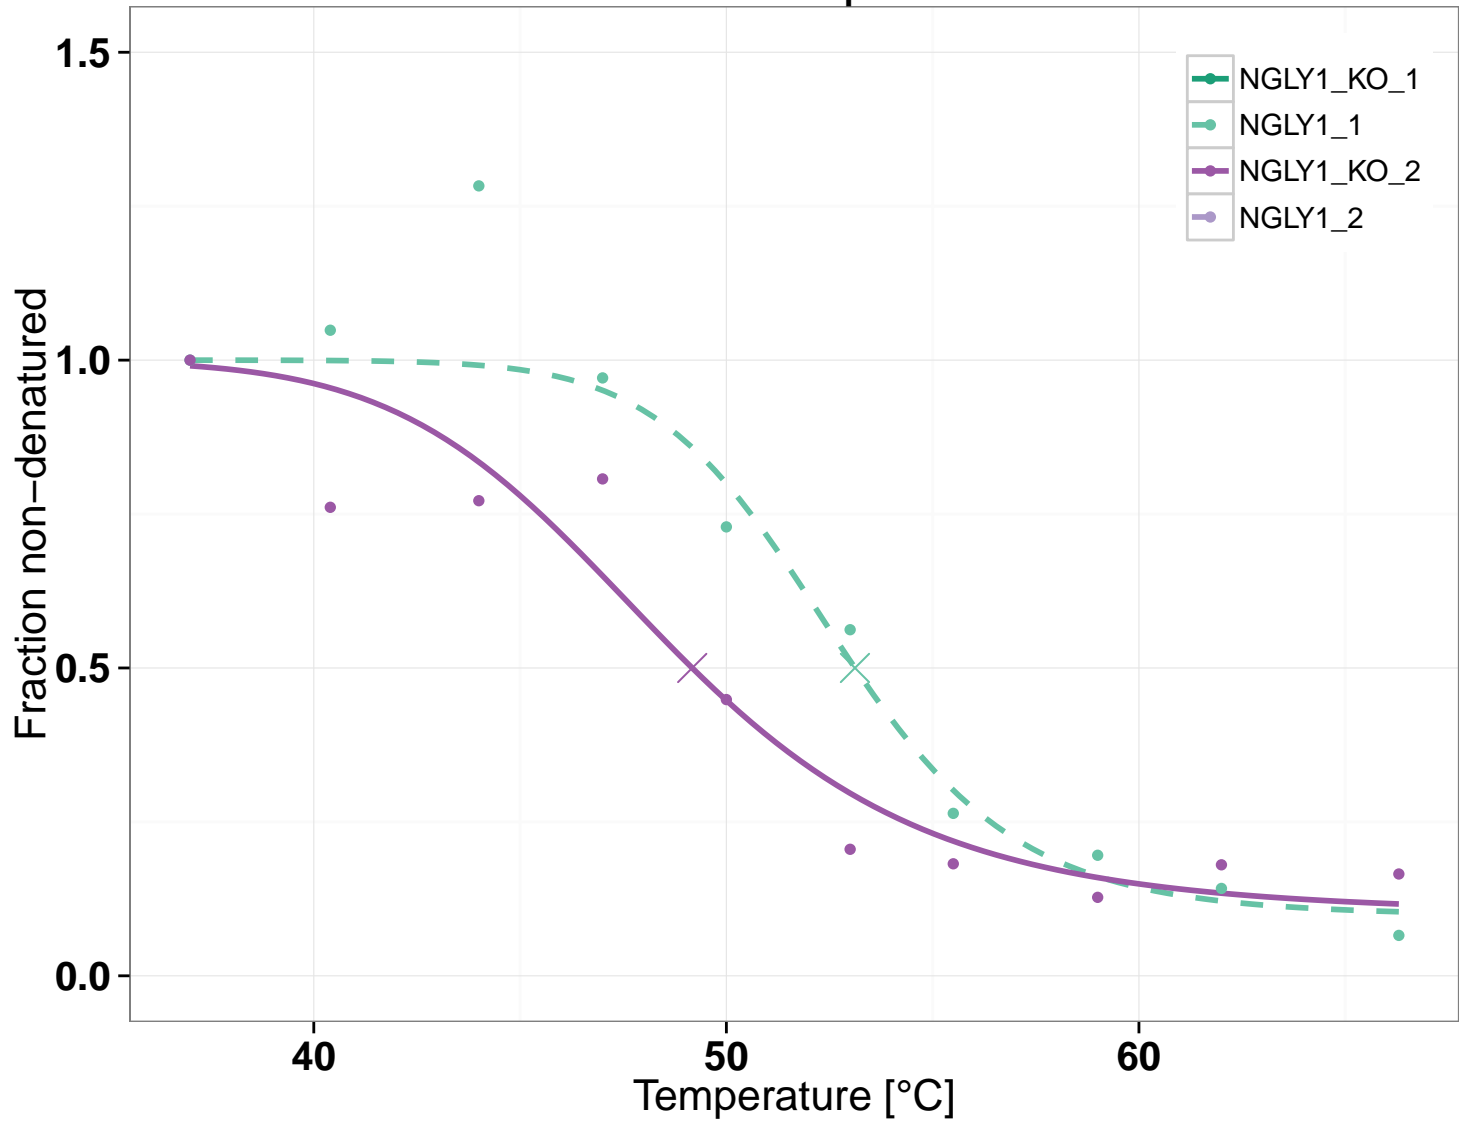

|            | meltPoint | slope | plateau | R2   |
|------------|-----------|-------|---------|------|
| NGLY1_KO_1 | -         | -     | -       | -    |
| NGLY1_1    | 53.12     | -0.1  | 0.1     | 0.94 |
| NGLY1_KO_2 | 49.17     | -0.07 | 0.1     | 0.92 |
| NGLY1_2    | -         | -     | -       | -    |

Supplement: Supplementary file 6260 [file 1]

IPI00903263.1|ZFPM2

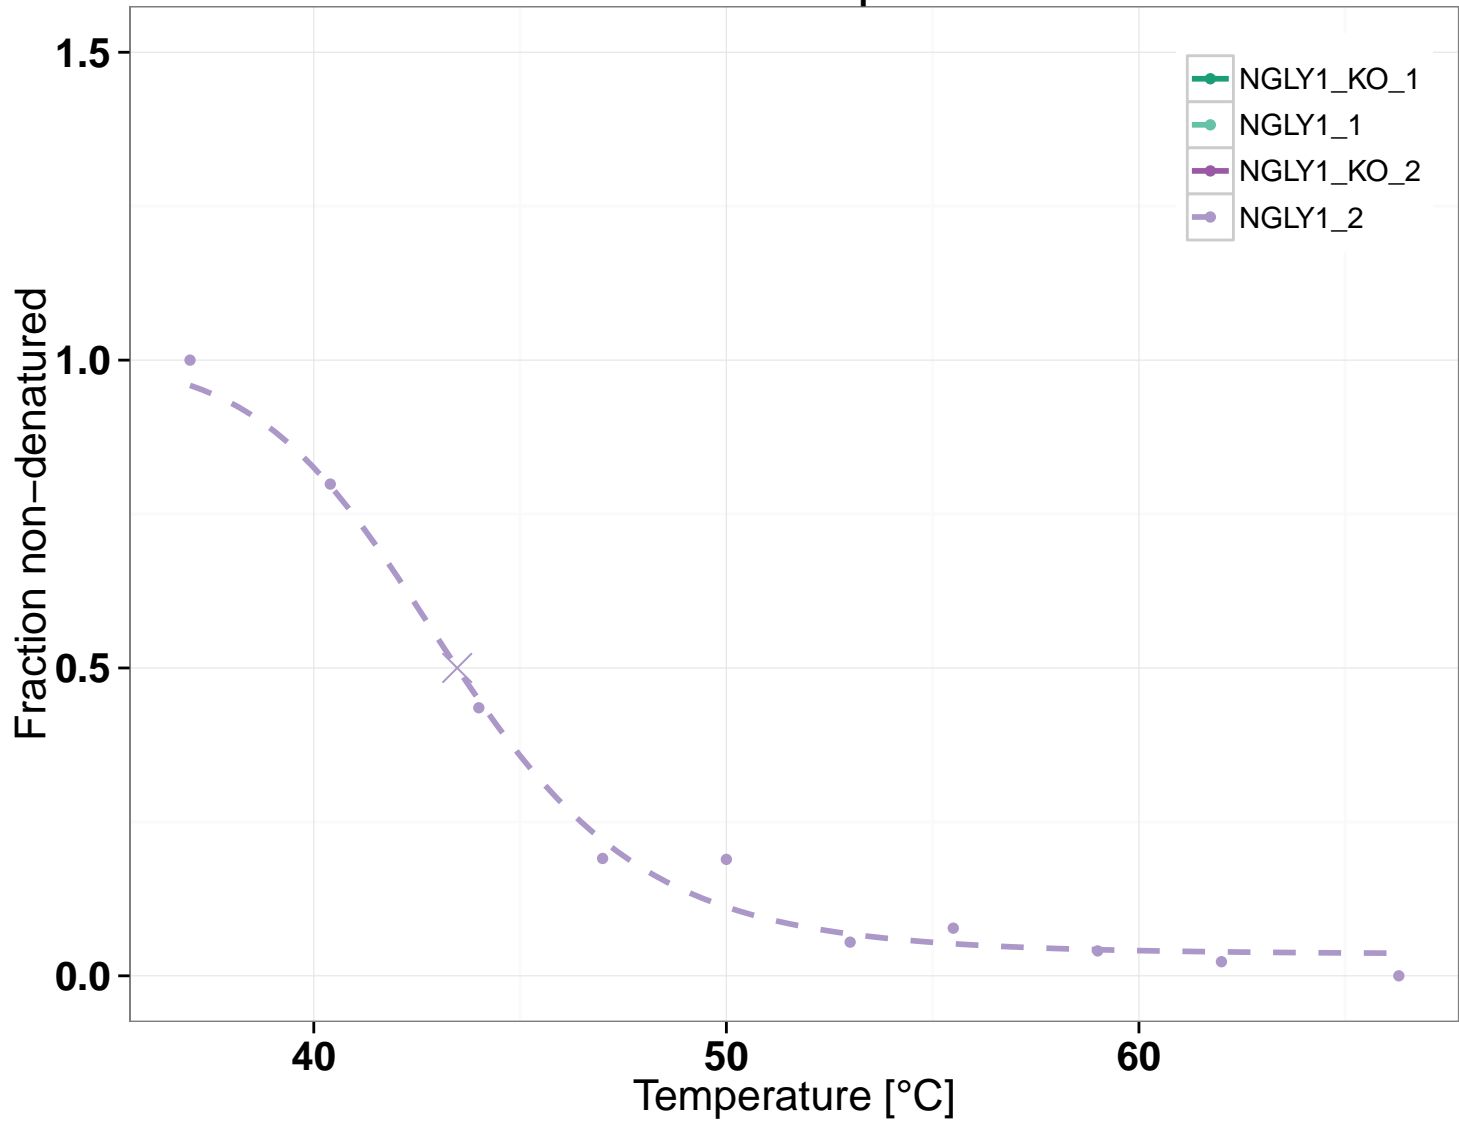

|            | meltPoint | slope | plateau | R2   |
|------------|-----------|-------|---------|------|
| NGLY1_KO_1 | -         | -     | -       | -    |
| NGLY1_1    | -         | -     | -       | -    |
| NGLY1_KO_2 | -         | -     | -       | -    |
| NGLY1_2    | 43.48     | -0.1  | 0.04    | 0.99 |

Supplement: Supplementary file 6261 [file 1]

# IPI00301459.2|PLA2G15

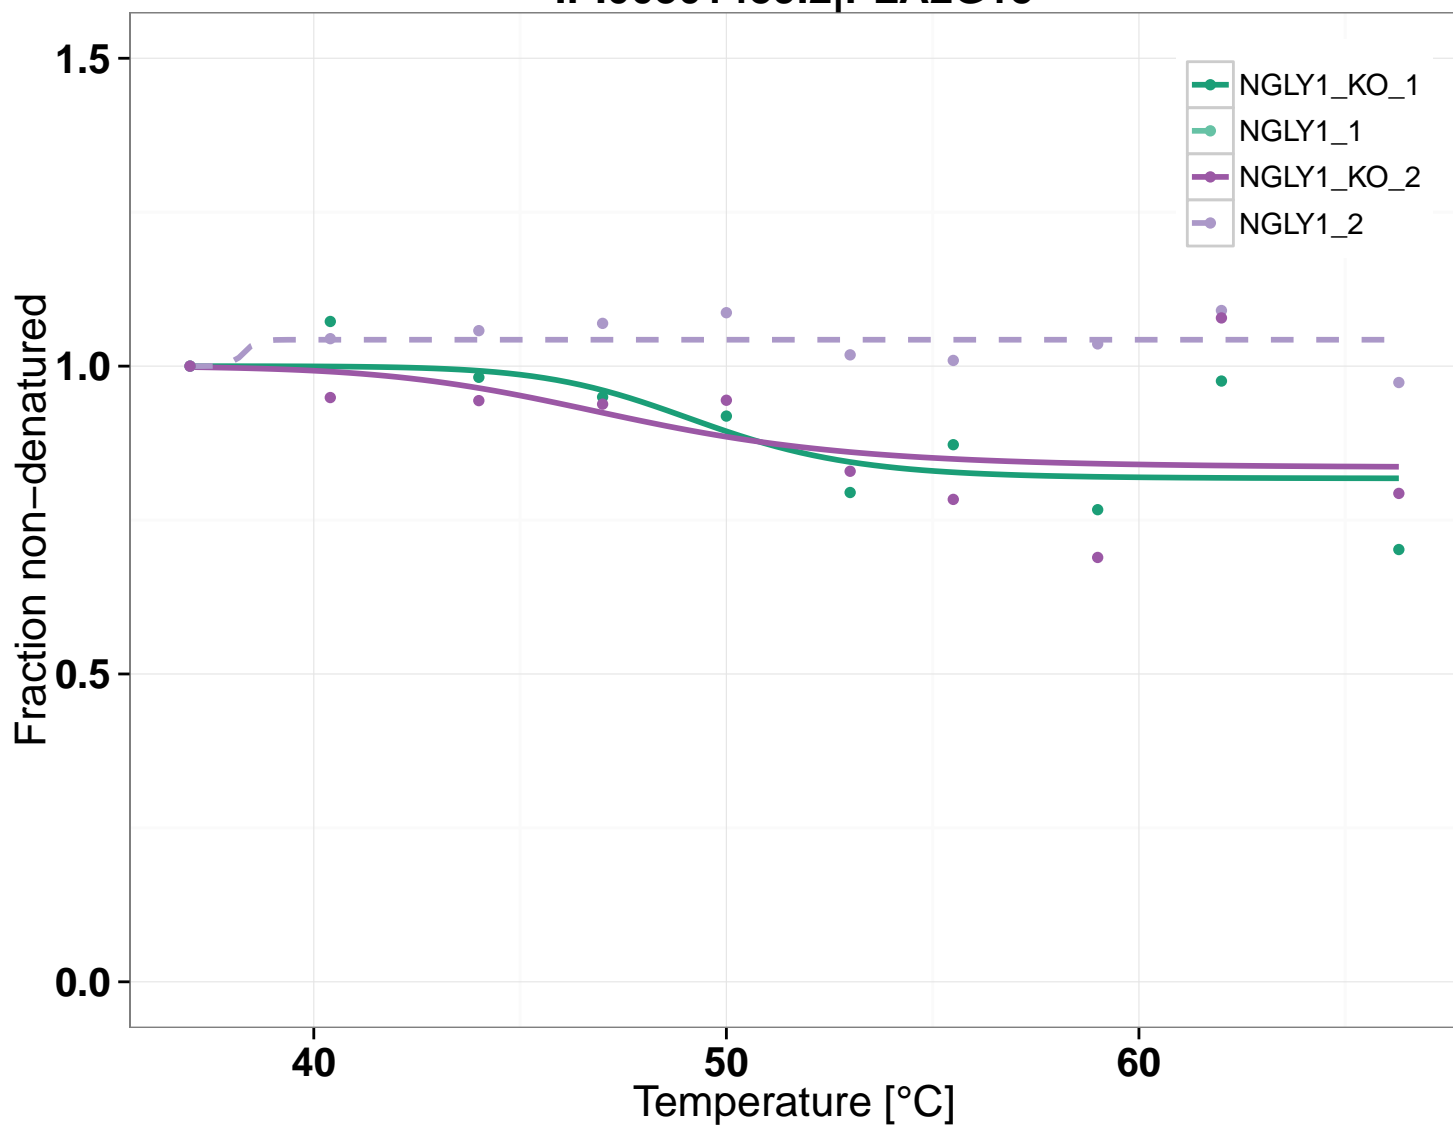

|            | meltPoint | slope  | plateau | R2   |
|------------|-----------|--------|---------|------|
| NGLY1_KO_1 | —         | -0.024 | 0.82    | 0.58 |
| NGLY1_1    | —         | —      | —       | —    |
| NGLY1_KO_2 | —         | -0.014 | 0.84    | 0.24 |
| NGLY1_2    | —         | 0.07   | 1.04    | 0.12 |

Supplement: Supplementary file 6262 [file 1]

IPI00006103.1|CD2BP2

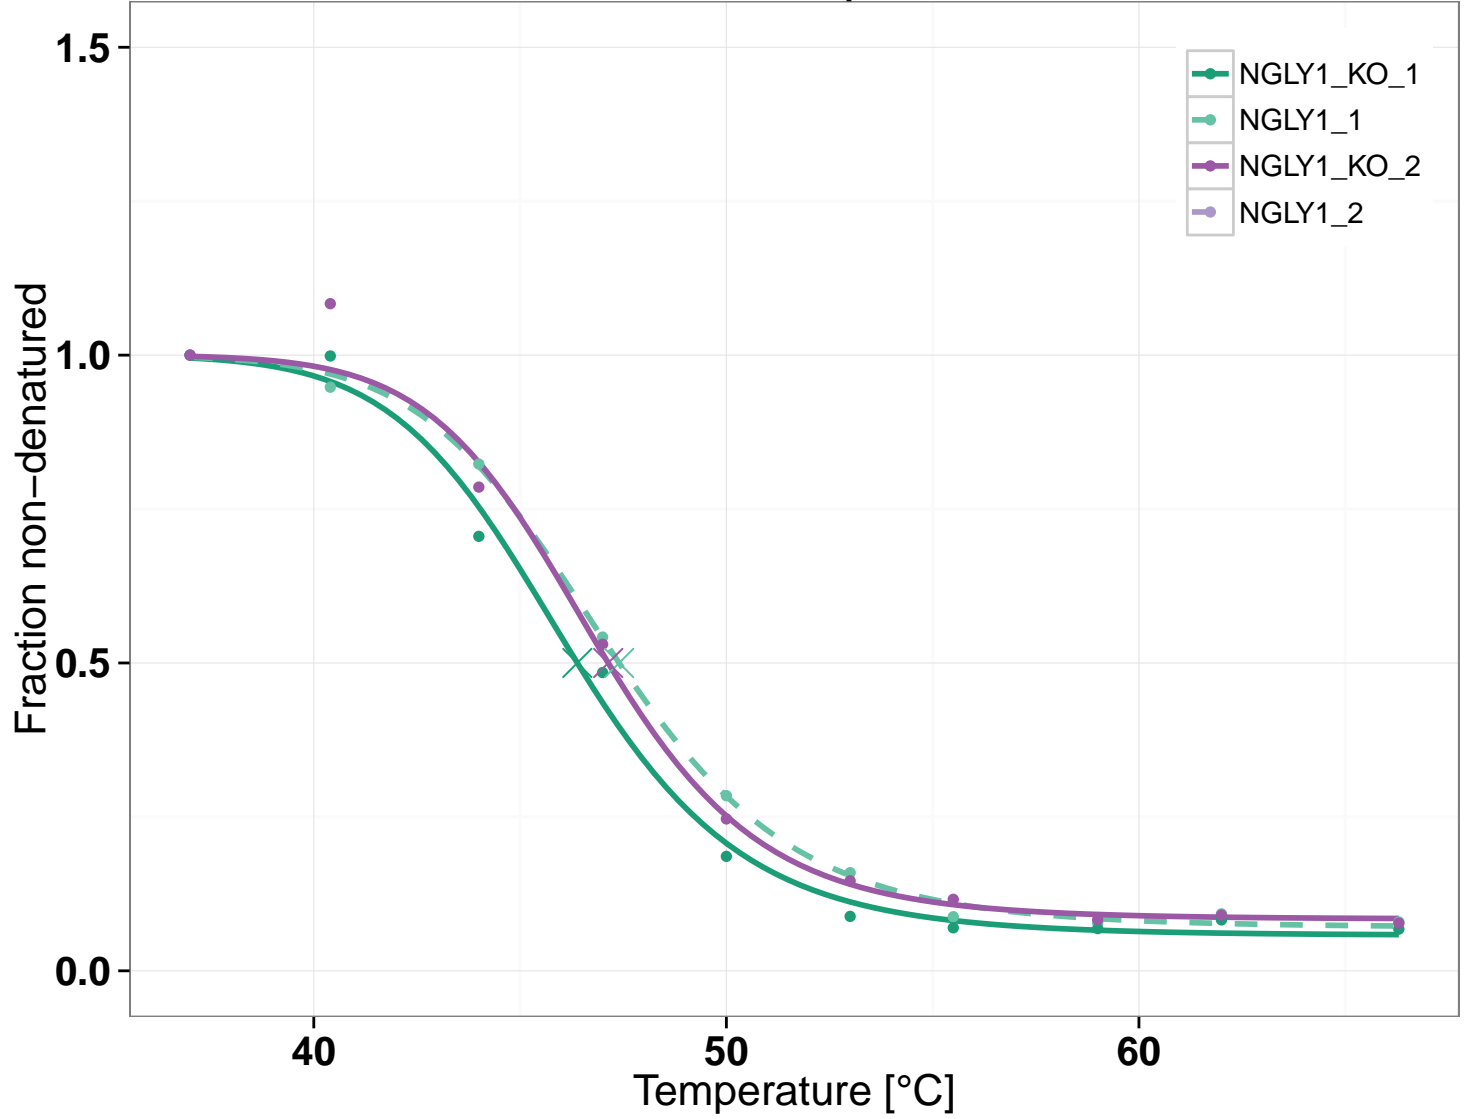

|            | meltPoint | slope | plateau | R2   |
|------------|-----------|-------|---------|------|
| NGLY1_KO_1 | 46.39     | -0.11 | 0.06    | 0.99 |
| NGLY1_1    | 47.4      | -0.1  | 0.07    | 1    |
| NGLY1_KO_2 | 47.14     | -0.11 | 0.08    | 0.99 |
| NGLY1_2    | -         | -     | -       | -    |

Supplement: Supplementary file 6263 [file 1]

IPI00328236.7|VPS39

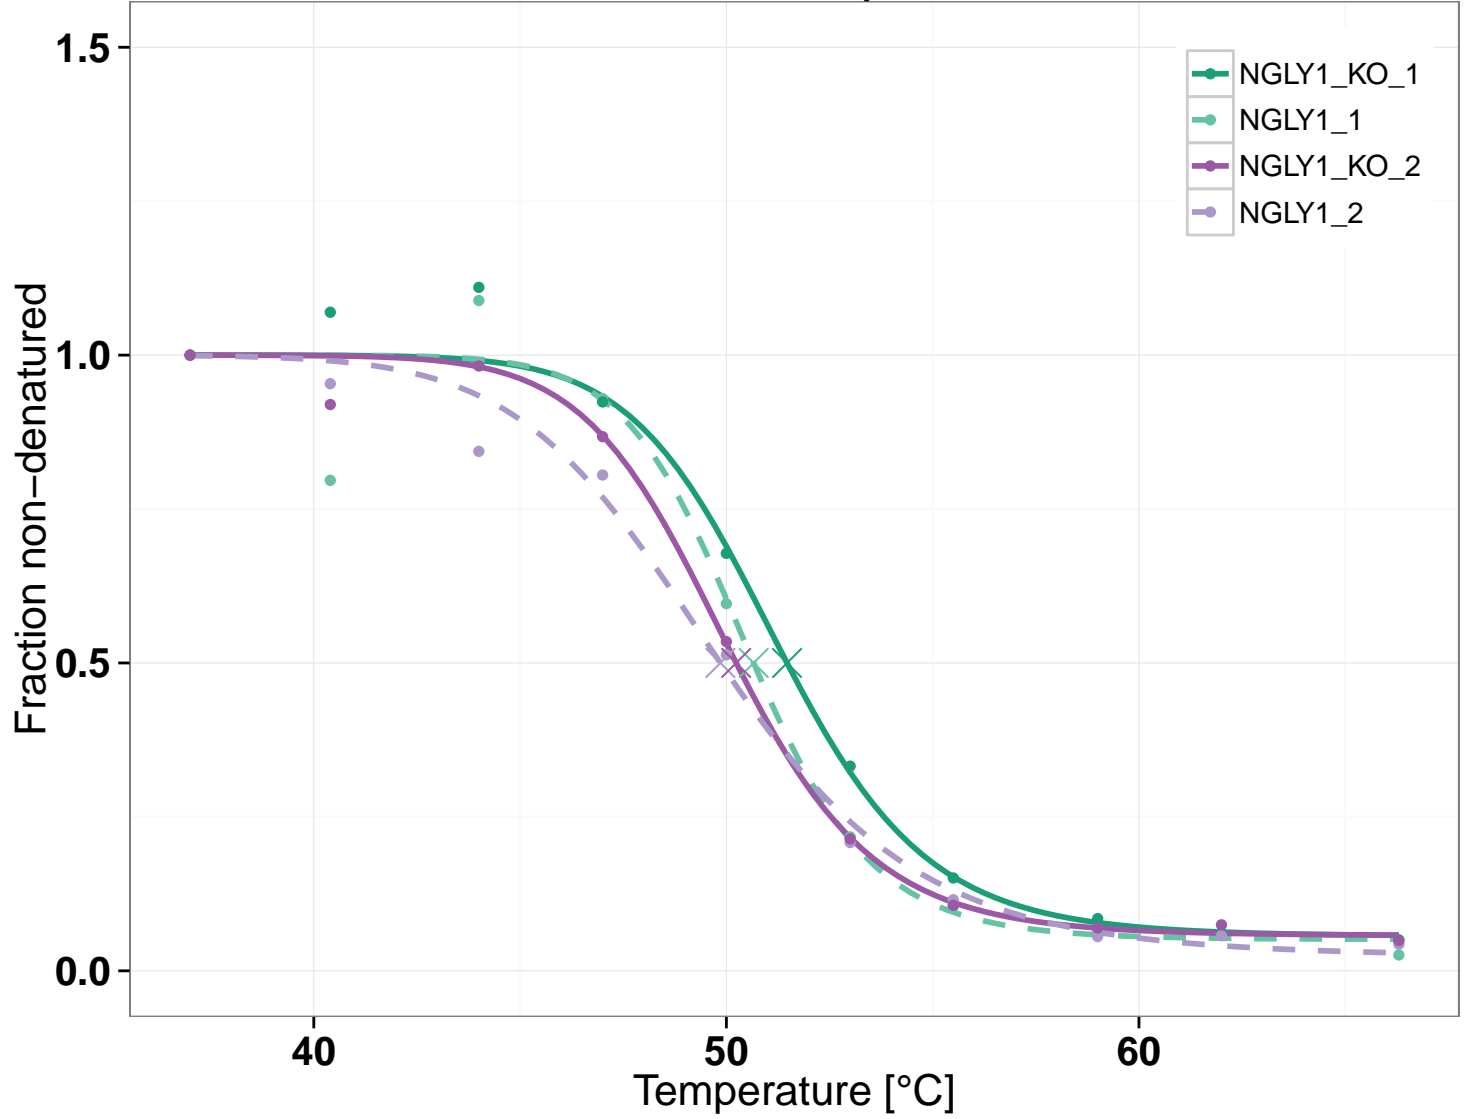

|            | meltPoint | slope | plateau | R2   |
|------------|-----------|-------|---------|------|
| NGLY1_KO_1 | 51.47     | -0.13 | 0.06    | 0.99 |
| NGLY1_1    | 50.66     | -0.16 | 0.05    | 0.97 |
| NGLY1_KO_2 | 50.24     | -0.13 | 0.06    | 1    |
| NGLY1_2    | 49.86     | -0.1  | 0.02    | 0.99 |

Supplement: Supplementary file 6264 [file 1]

IPI00641990.1|LAS1L

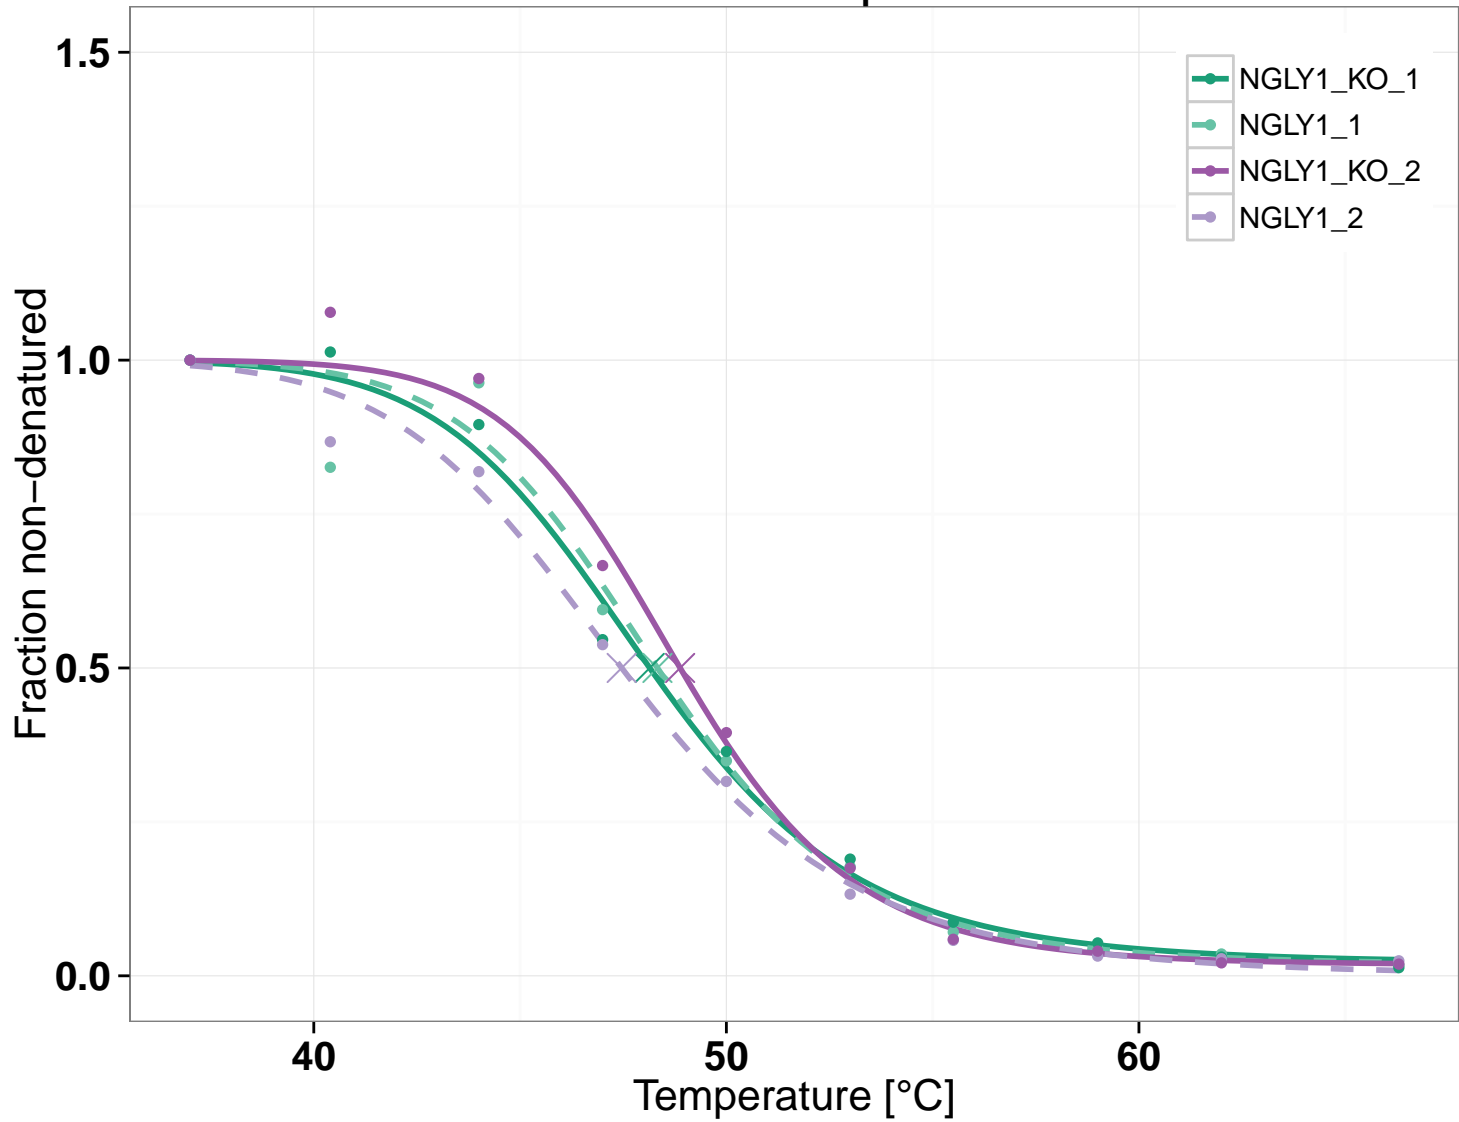

|            | meltPoint | slope  | plateau | R2   |
|------------|-----------|--------|---------|------|
| NGLY1_KO_1 | 48.14     | -0.096 | 0.02    | 0.99 |
| NGLY1_1    | 48.33     | -0.1   | 0.02    | 0.98 |
| NGLY1_KO_2 | 48.88     | -0.12  | 0.02    | 0.99 |
| NGLY1_2    | 47.46     | -0.089 | 0       | 0.99 |

Supplement: Supplementary file 6265 [file 1]

IPI00001618.2|RAB39

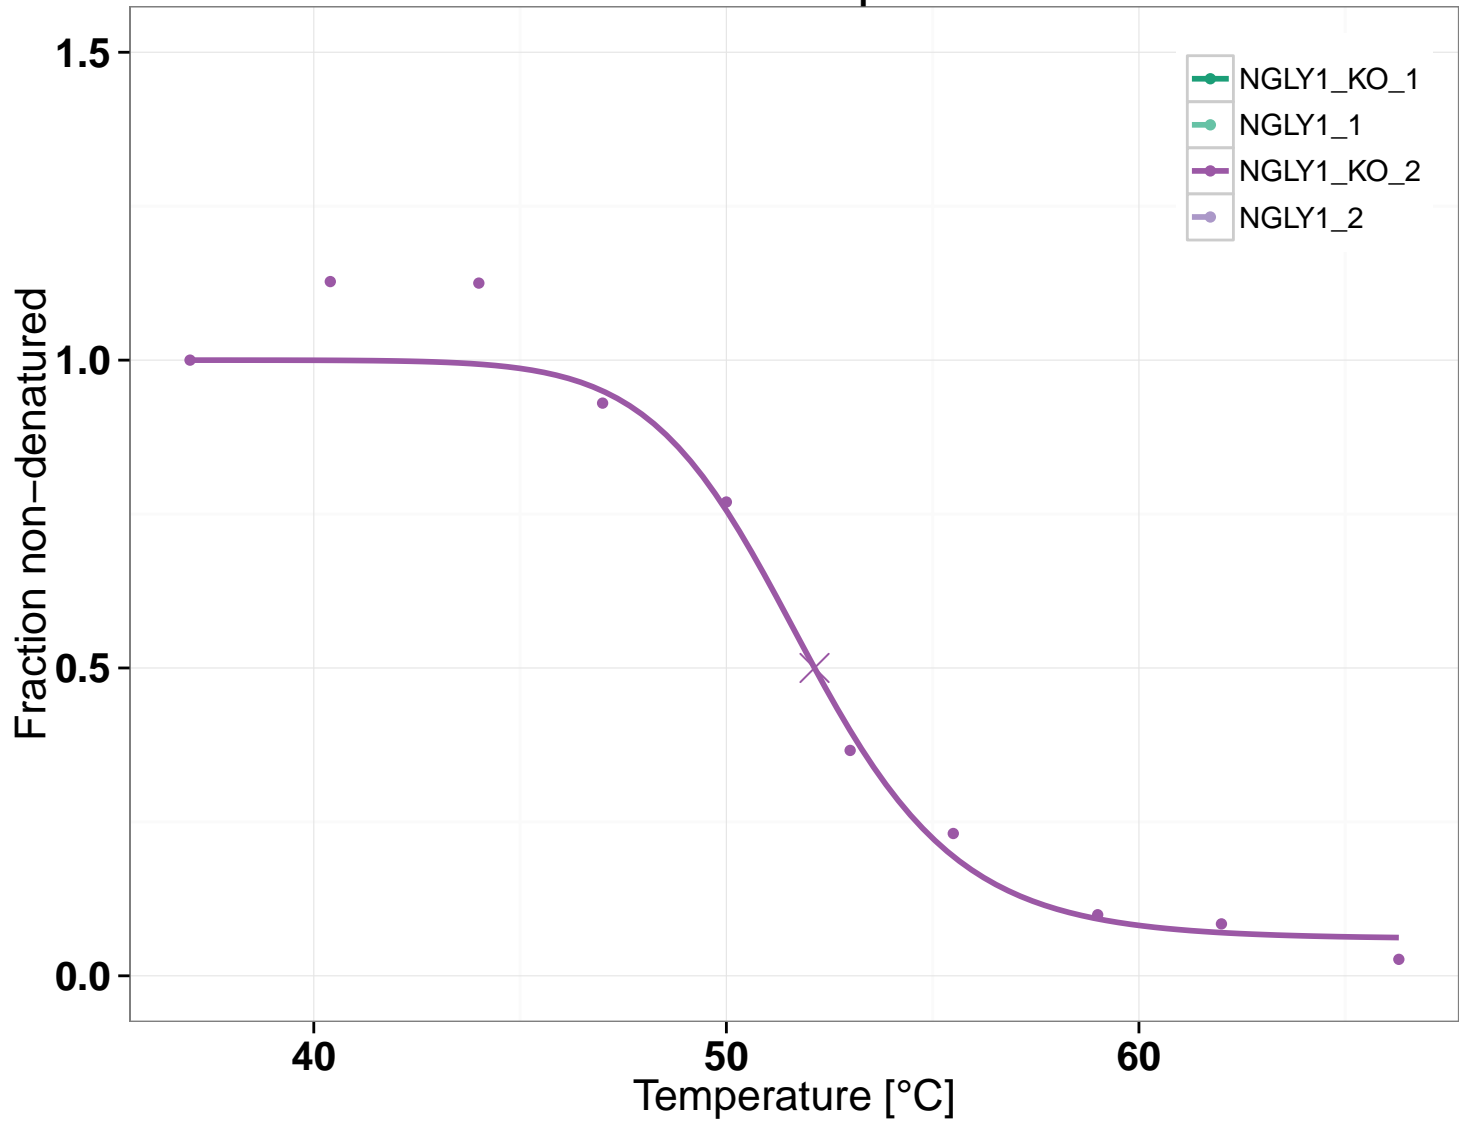

|            | meltPoint | slope | plateau | R2   |
|------------|-----------|-------|---------|------|
| NGLY1_KO_1 | —         | —     | —       | —    |
| NGLY1_1    | —         | —     | —       | —    |
| NGLY1_KO_2 | 52.14     | -0.13 | 0.06    | 0.98 |
| NGLY1_2    | —         | —     | —       | —    |

Supplement: Supplementary file 6266 [file 1]

# IPI00106549.1|DPH2

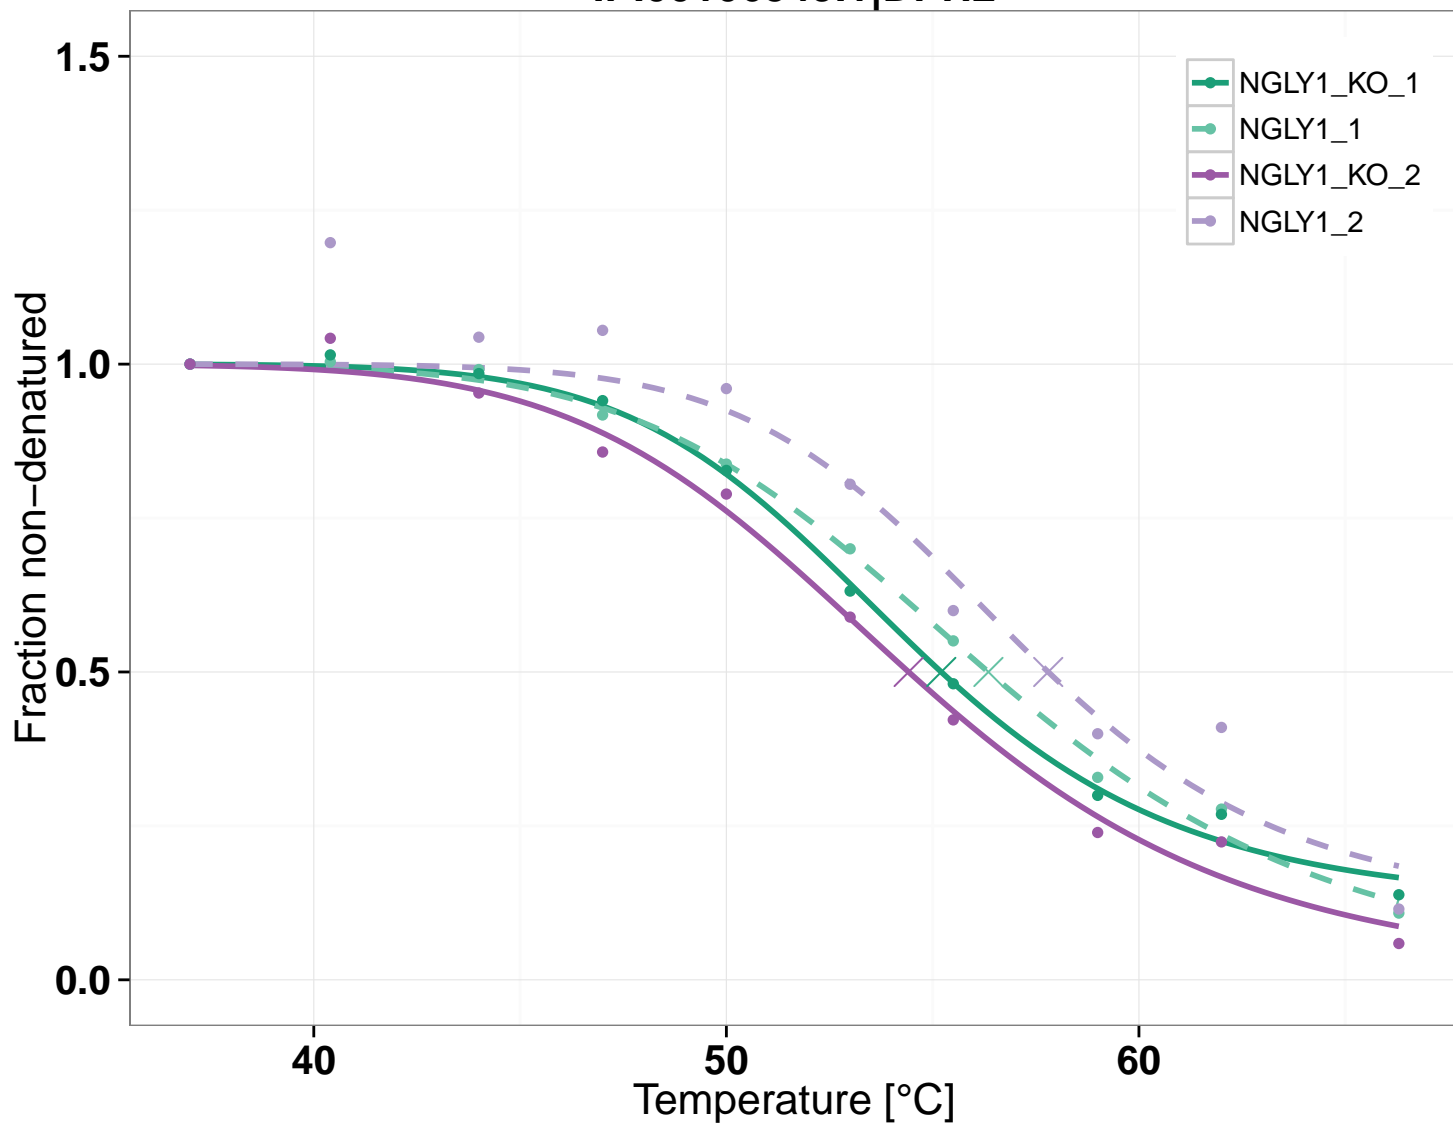

|            | meltPoint | slope  | plateau | R2   |
|------------|-----------|--------|---------|------|
| NGLY1_KO_1 | 55.21     | -0.066 | 0.12    | 1    |
| NGLY1_1    | 56.35     | -0.059 | 0       | 1    |
| NGLY1_KO_2 | 54.42     | -0.062 | 0       | 0.99 |
| NGLY1_2    | 57.8      | -0.068 | 0.11    | 0.94 |

Supplement: Supplementary file 6267 [file 1]

IPI00895871.1|MAGI3

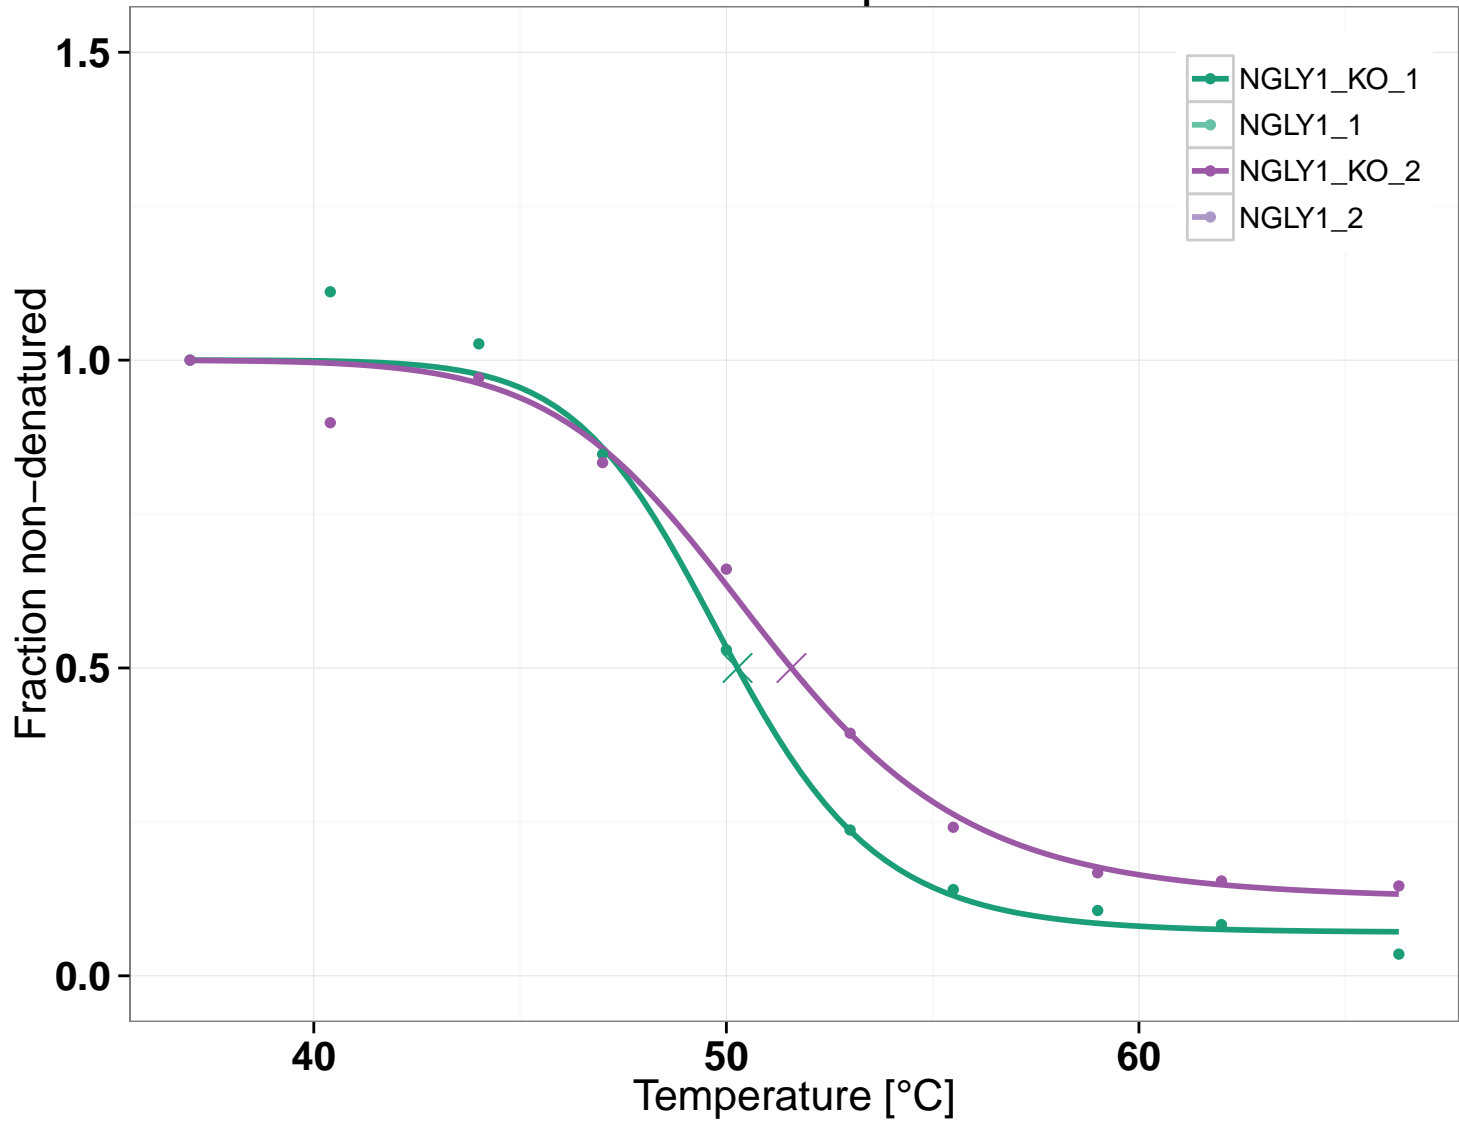

|            | meltPoint | slope  | plateau | R2   |
|------------|-----------|--------|---------|------|
| NGLY1_KO_1 | 50.27     | -0.13  | 0.07    | 0.99 |
| NGLY1_1    | -         | -      | -       | -    |
| NGLY1_KO_2 | 51.58     | -0.087 | 0.12    | 0.99 |
| NGLY1_2    | -         | -      | -       | -    |

Supplement: Supplementary file 6268 [file 1]

# IPI00760877.2|BDP1

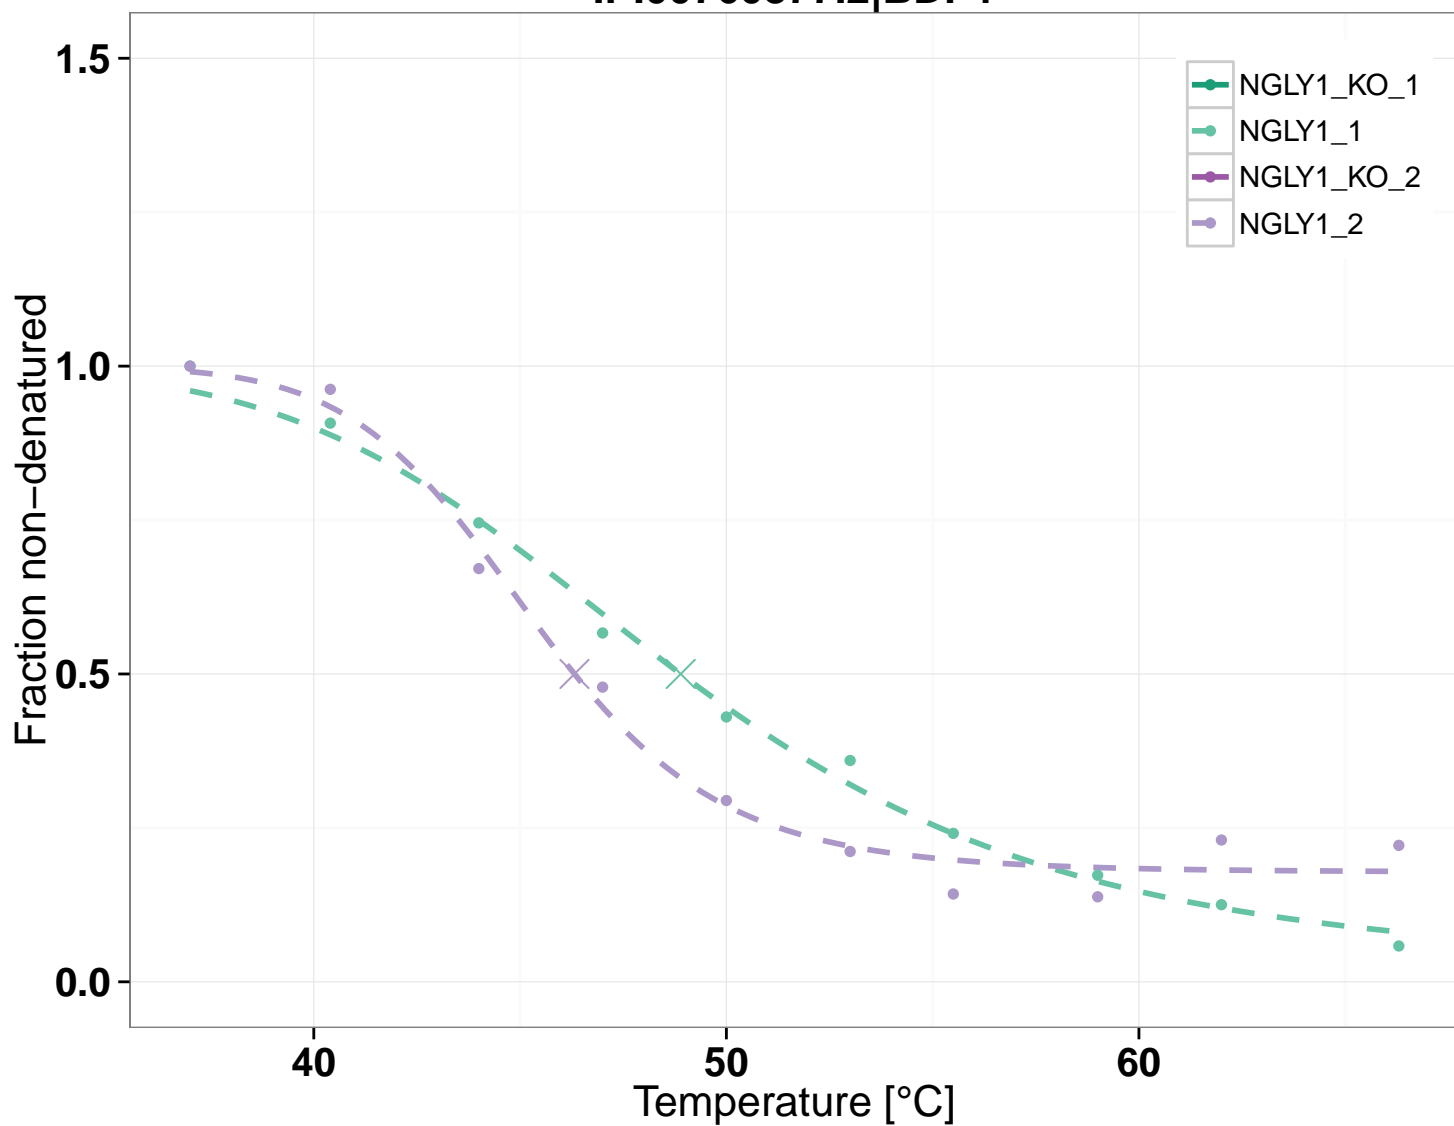

|            | meltPoint | slope  | plateau | R2   |
|------------|-----------|--------|---------|------|
| NGLY1_KO_1 | -         | -      | -       | -    |
| NGLY1_1    | 48.89     | -0.052 | 0.02    | 0.99 |
| NGLY1_KO_2 | -         | -      | -       | -    |
| NGLY1_2    | 46.32     | -0.092 | 0.18    | 0.99 |

Supplement: Supplementary file 6269 [file 1]

IPI00045207.2|NACC1

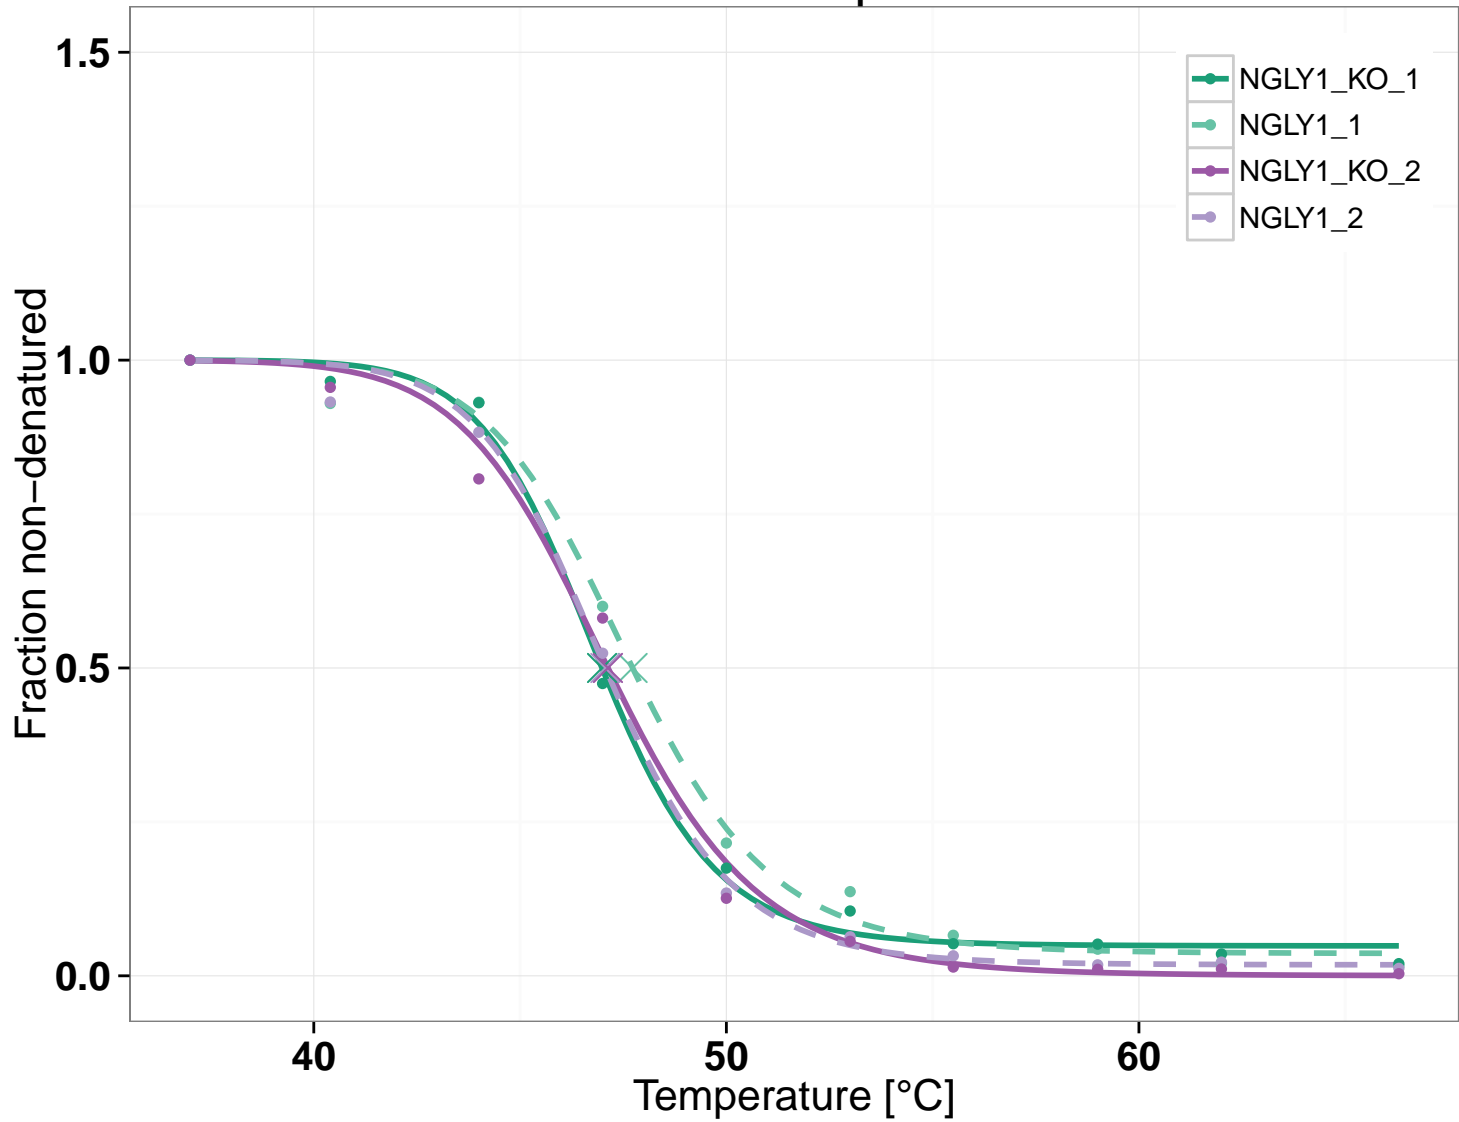

|            | meltPoint | slope | plateau | R2   |
|------------|-----------|-------|---------|------|
| NGLY1_KO_1 | 46.99     | -0.17 | 0.05    | 1    |
| NGLY1_1    | 47.73     | -0.14 | 0.04    | 0.99 |
| NGLY1_KO_2 | 47.13     | -0.14 | 0       | 0.99 |
| NGLY1_2    | 47.07     | -0.16 | 0.02    | 1    |

Supplement: Supplementary file 6270 [file 1]

IPI00887452.1|RP11-309M23 2

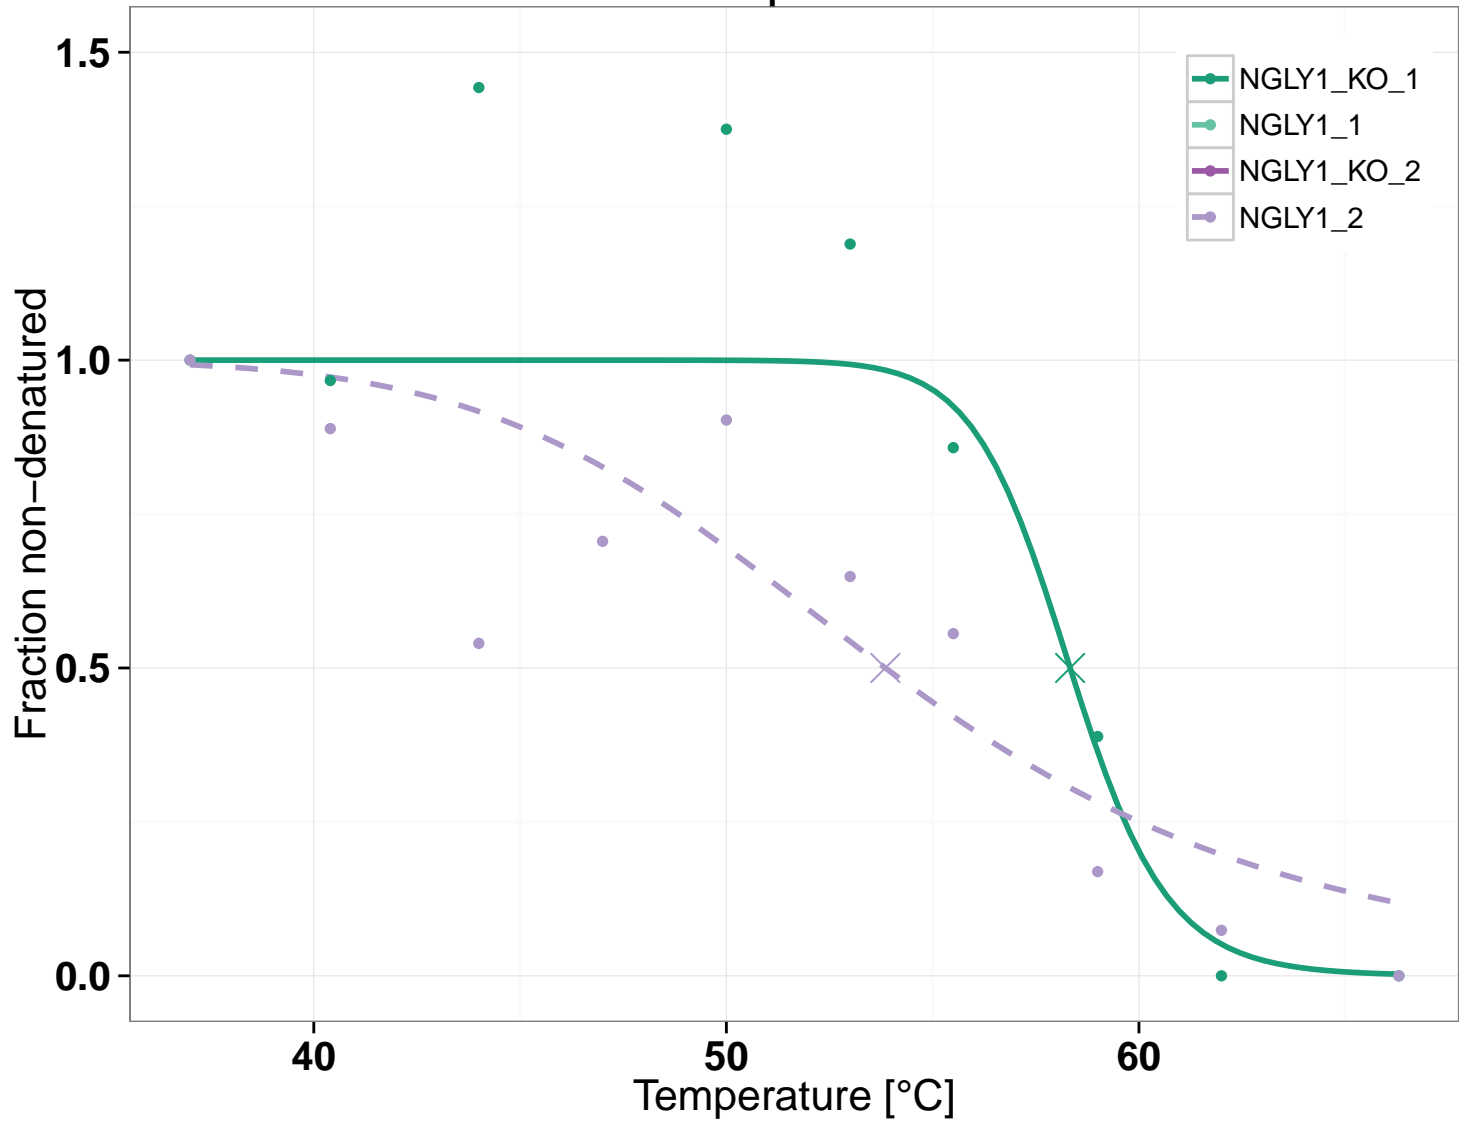

|            | meltPoint | slope  | plateau | R2   |
|------------|-----------|--------|---------|------|
| NGLY1_KO_1 | 58.33     | -0.21  | 0       | 0.74 |
| NGLY1_1    | -         | -      | -       | -    |
| NGLY1_KO_2 | -         | -      | -       | -    |
| NGLY1_2    | 53.85     | -0.051 | 0       | 0.76 |

Supplement: Supplementary file 6271 [file 1]

IPI00337608.1|RNF115

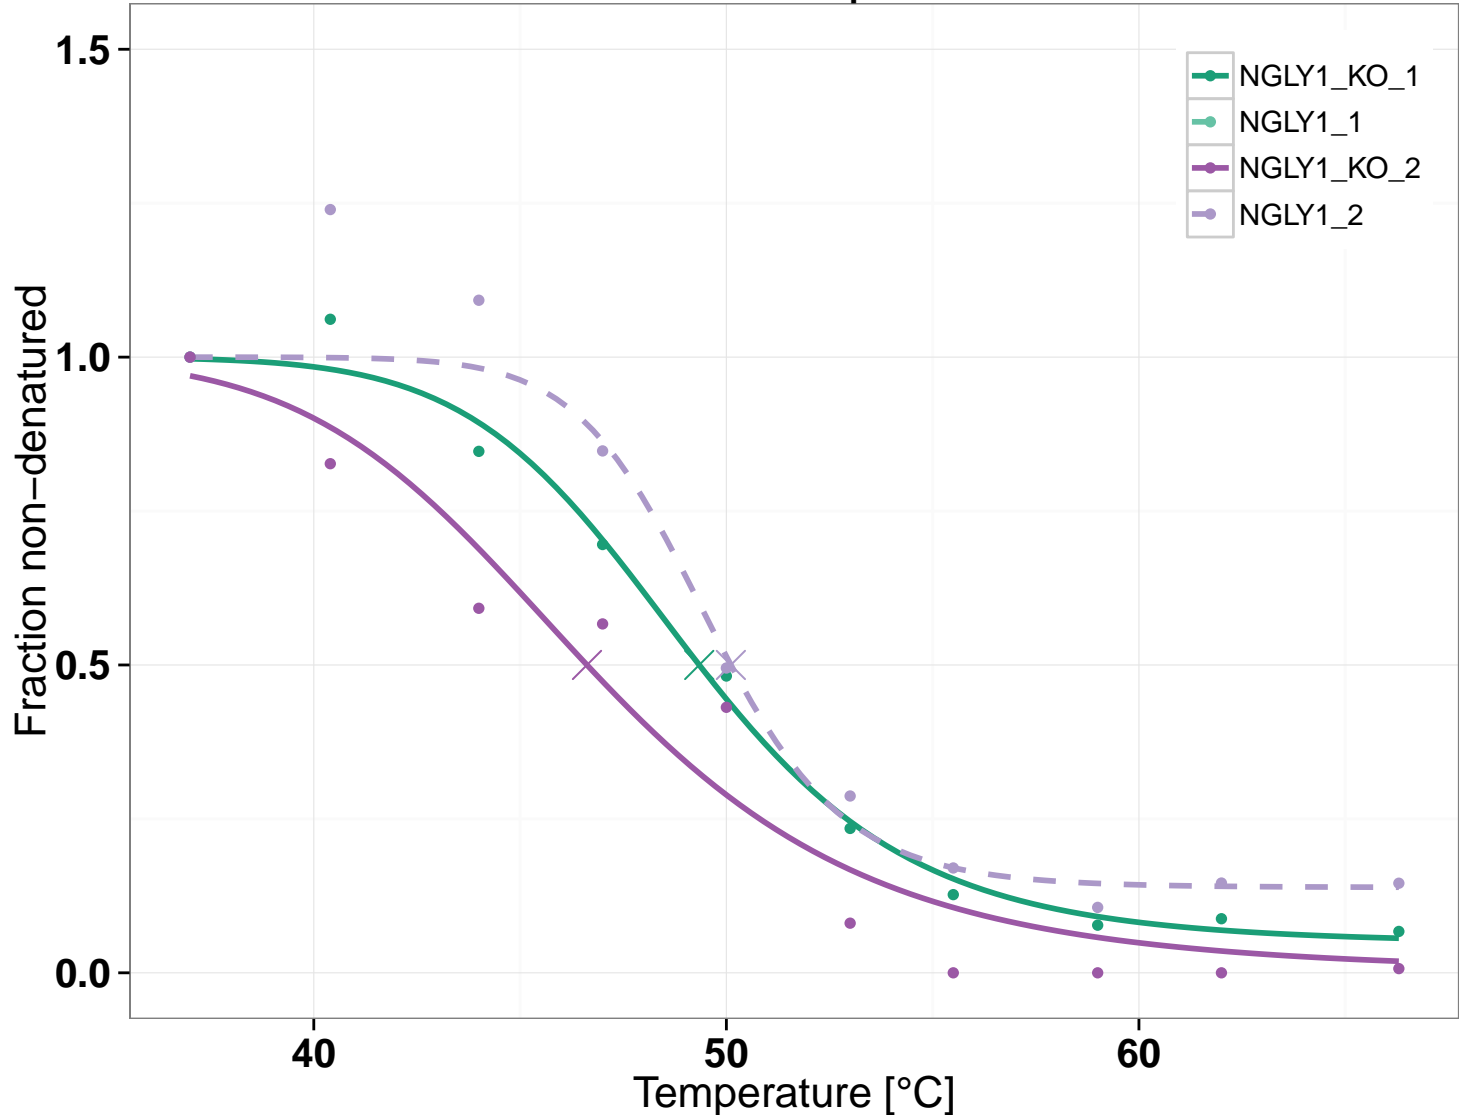

|            | meltPoint | slope  | plateau | R2   |
|------------|-----------|--------|---------|------|
| NGLY1_KO_1 | 49.34     | -0.088 | 0.05    | 0.99 |
| NGLY1_1    | -         | -      | -       | -    |
| NGLY1_KO_2 | 46.62     | -0.073 | 0       | 0.95 |
| NGLY1_2    | 50.11     | -0.13  | 0.14    | 0.96 |

Supplement: Supplementary file 6272 [file 1]

IPI00816564.1|CPEB1

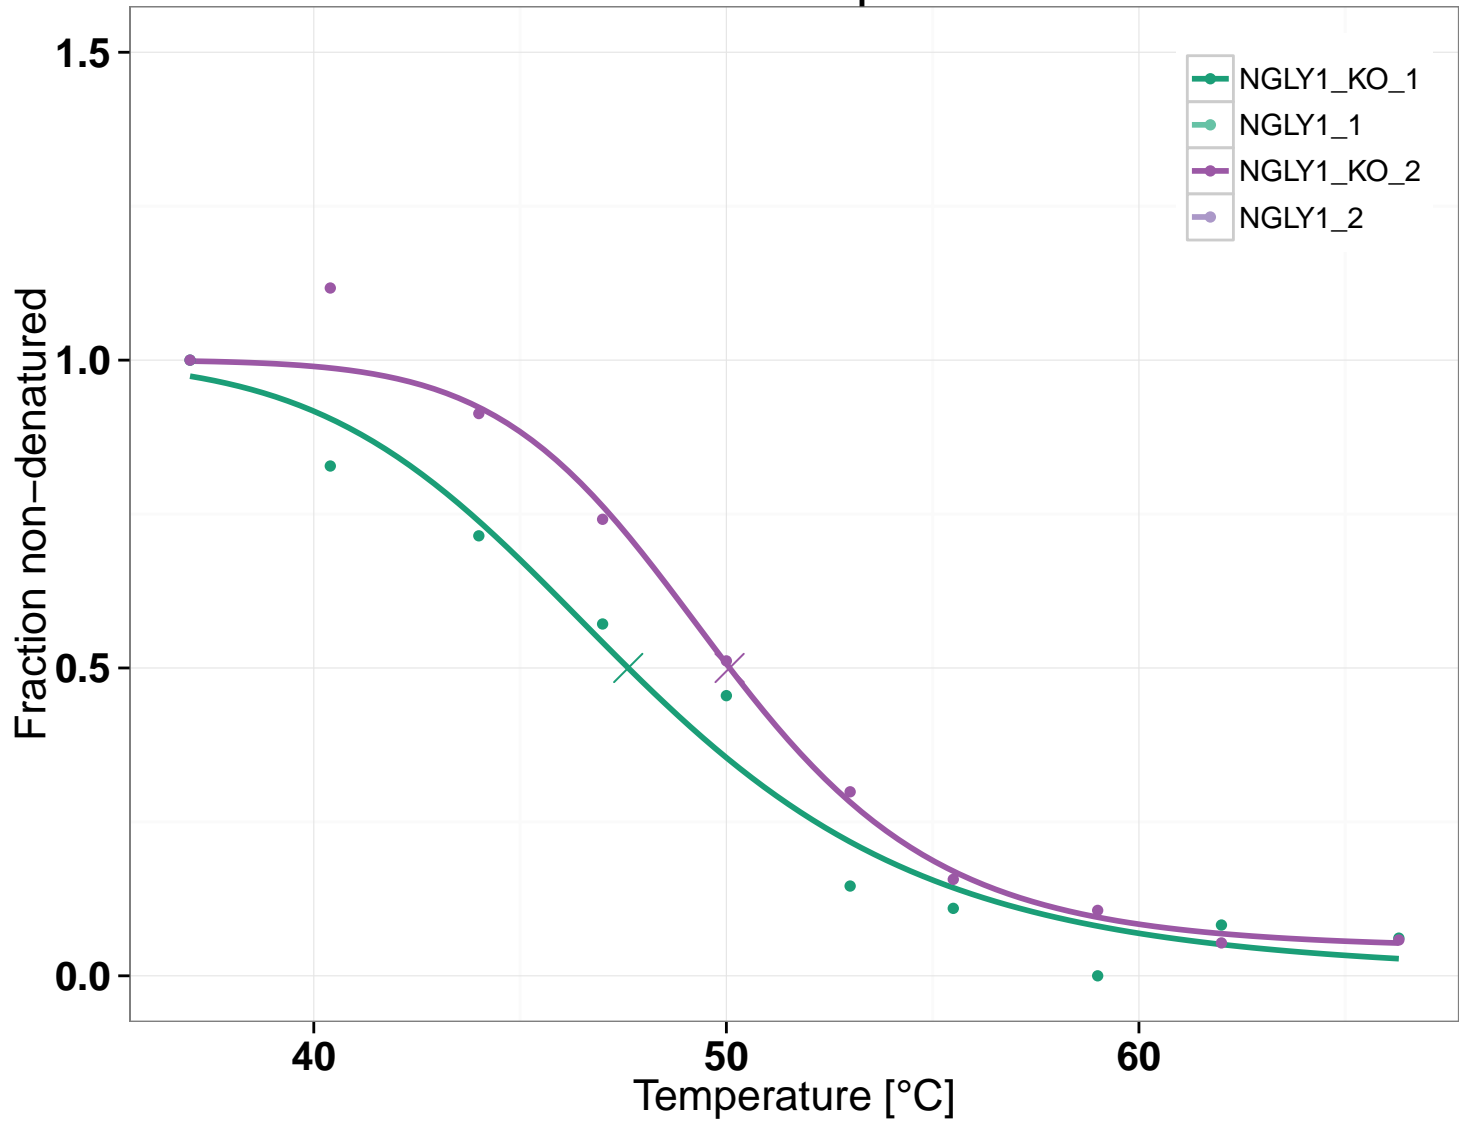

|            | meltPoint | slope  | plateau | R2   |
|------------|-----------|--------|---------|------|
| NGLY1_KO_1 | 47.62     | -0.068 | 0       | 0.97 |
| NGLY1_1    | -         | -      | -       | -    |
| NGLY1_KO_2 | 50.08     | -0.089 | 0.04    | 0.99 |
| NGLY1_2    | -         | -      | -       | -    |

Supplement: Supplementary file 6273 [file 1]

# IPI00017726.1|HSD17B10

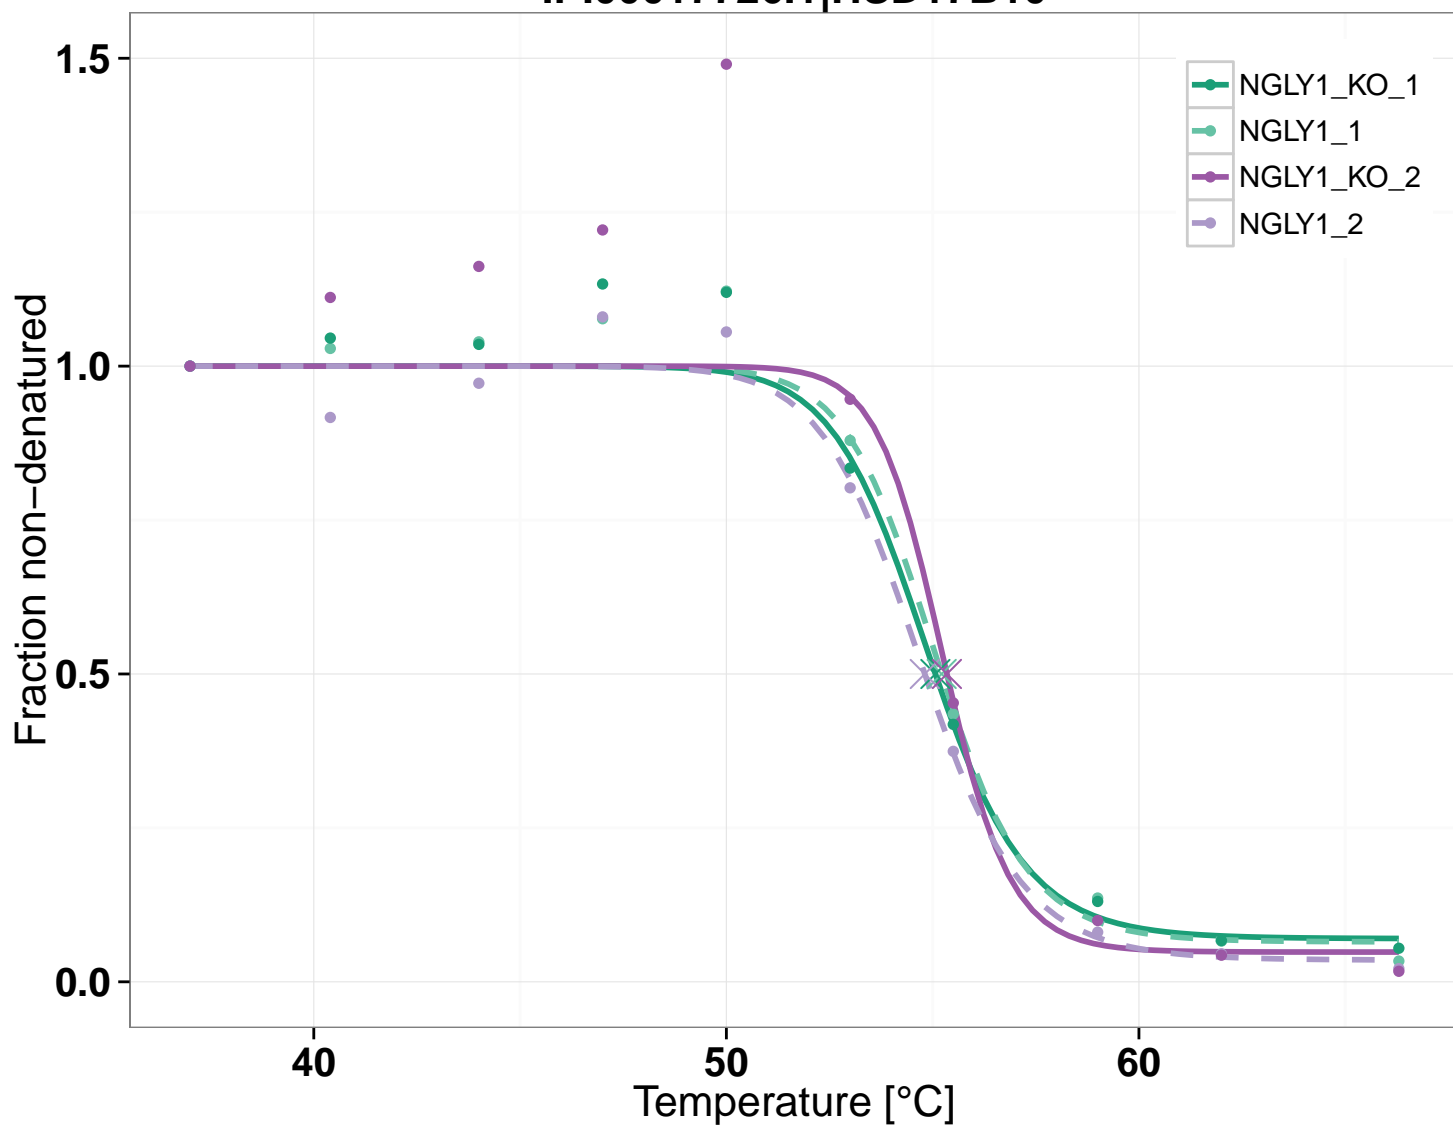

|            | meltPoint | slope | plateau | R2   |
|------------|-----------|-------|---------|------|
| NGLY1_KO_1 | 55.07     | -0.2  | 0.07    | 0.98 |
| NGLY1_1    | 55.22     | -0.21 | 0.06    | 0.99 |
| NGLY1_KO_2 | 55.35     | -0.29 | 0.05    | 0.88 |
| NGLY1_2    | 54.81     | -0.2  | 0.04    | 0.99 |

Supplement: Supplementary file 6274 [file 1]

IPI00797603.1|PRPSAP1

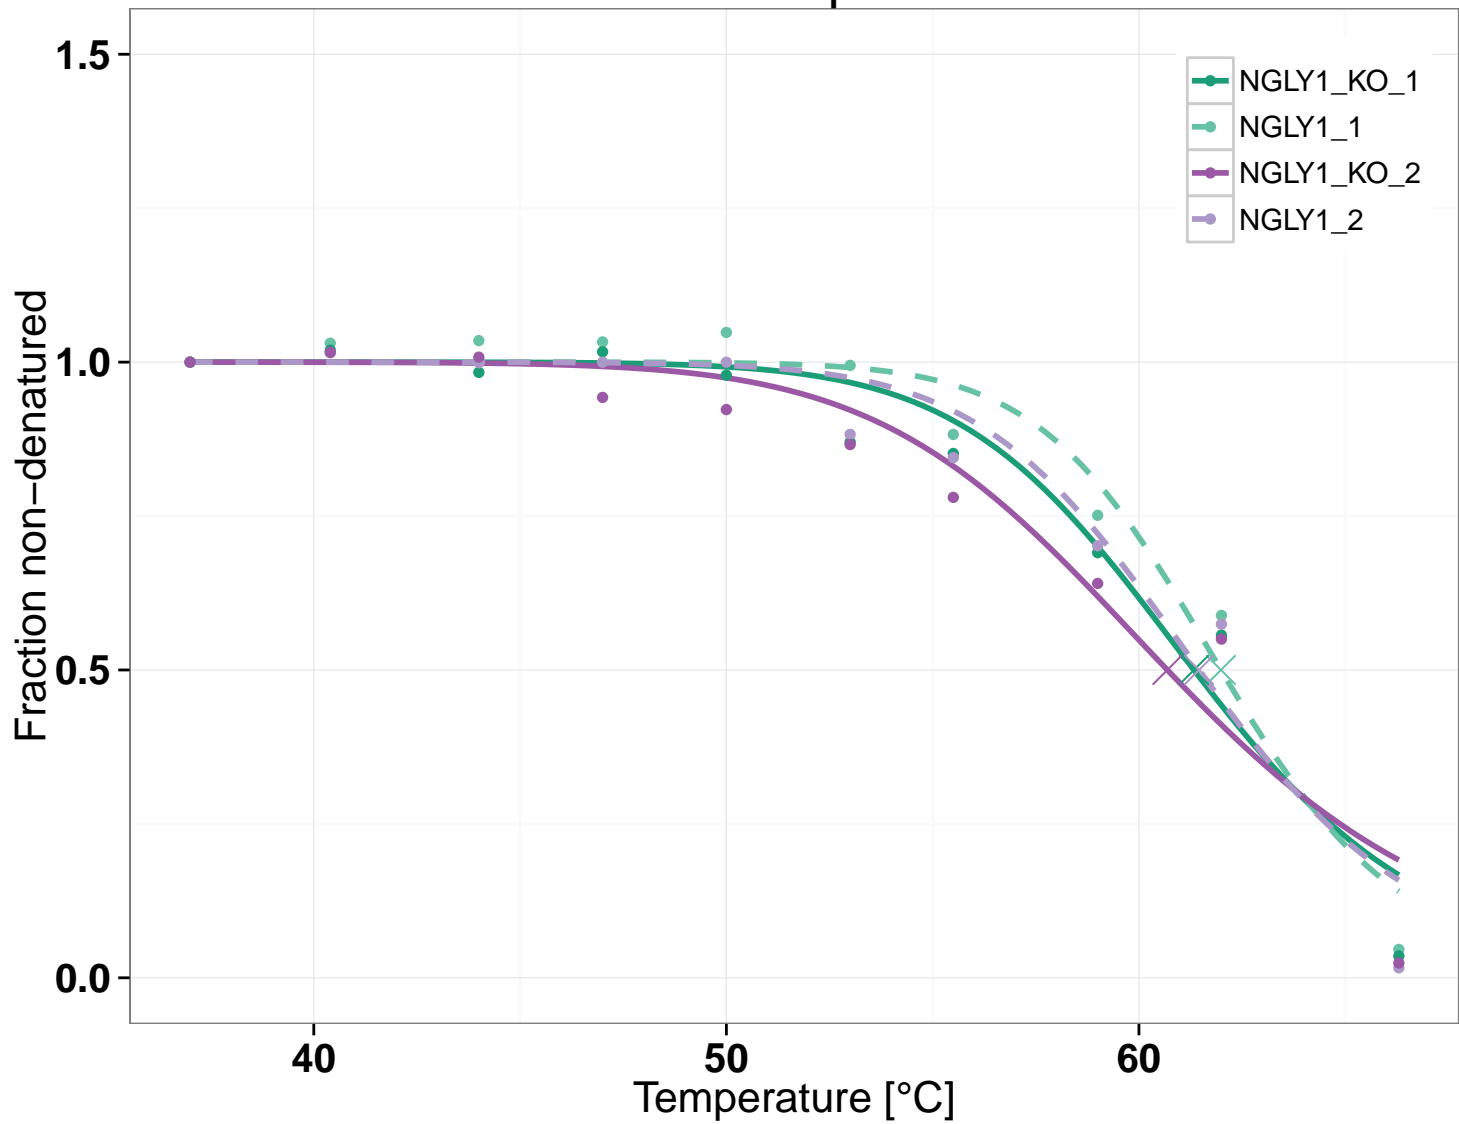

|            | meltPoint | slope  | plateau | R2   |
|------------|-----------|--------|---------|------|
| NGLY1_KO_1 | 61.33     | -0.088 | 0       | 0.95 |
| NGLY1_1    | 61.99     | -0.11  | 0       | 0.96 |
| NGLY1_KO_2 | 60.69     | -0.071 | 0       | 0.93 |
| NGLY1_2    | 61.46     | -0.094 | 0       | 0.94 |

Supplement: Supplementary file 6275 [file 1]

IPI00291064.4|ZFAND1

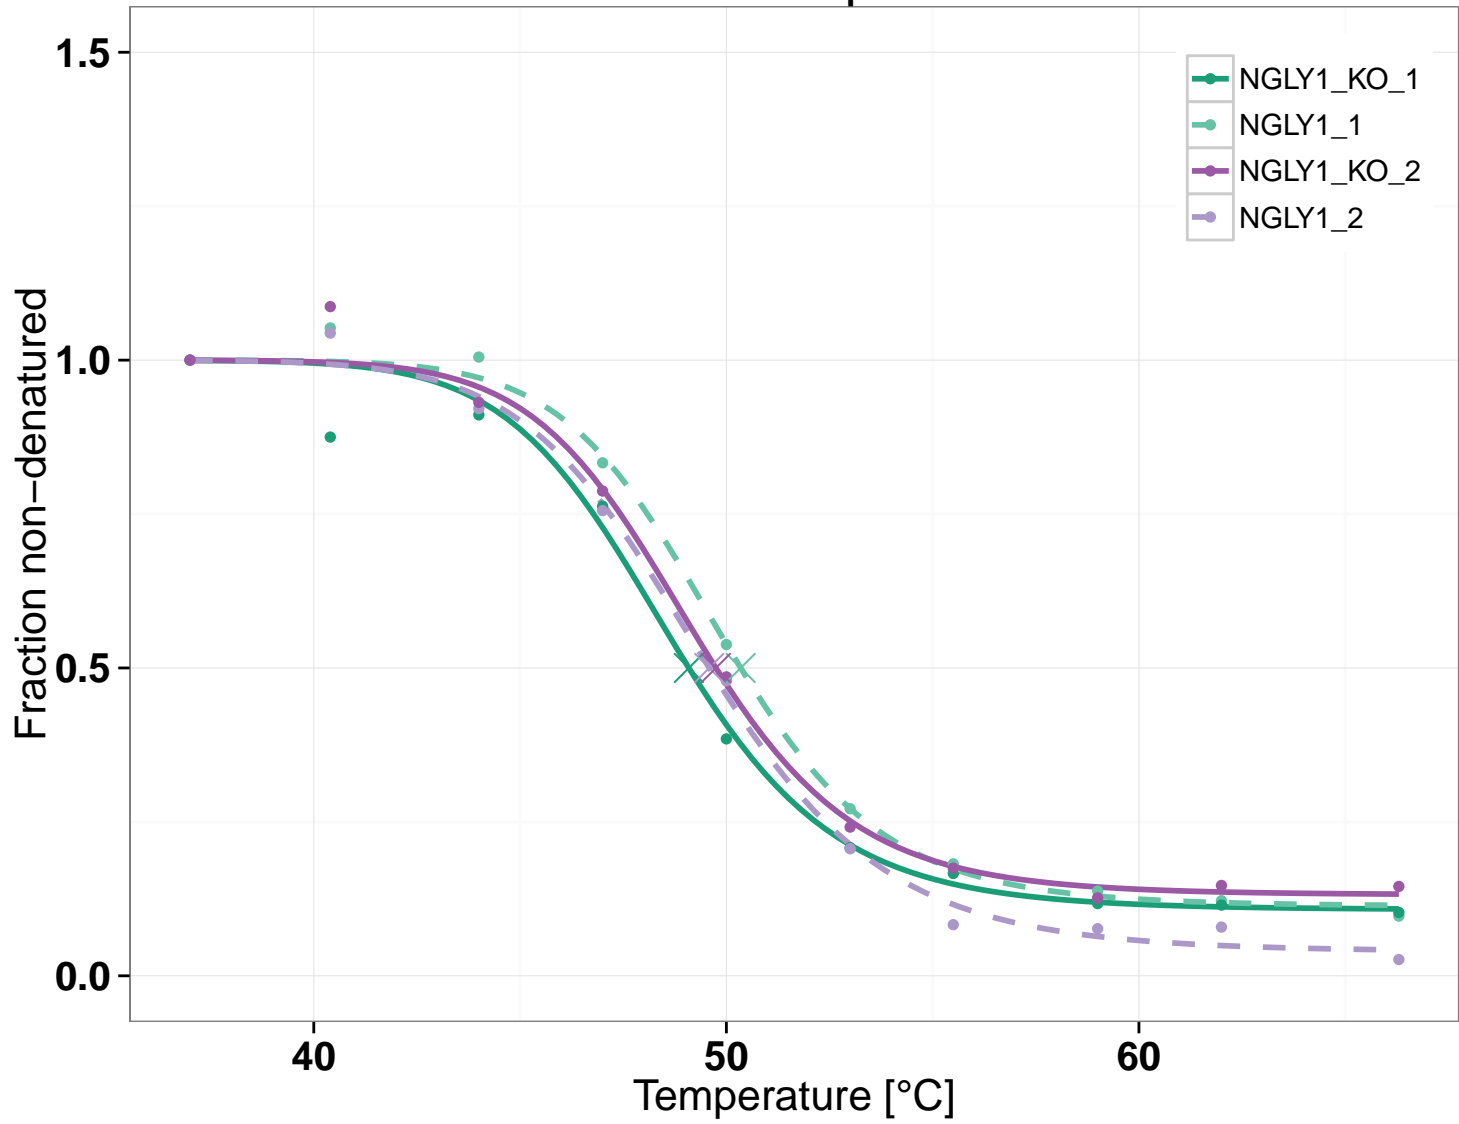

|            | meltPoint | slope | plateau | R2   |
|------------|-----------|-------|---------|------|
| NGLY1_KO_1 | 49.09     | -0.11 | 0.11    | 0.99 |
| NGLY1_1    | 50.35     | -0.11 | 0.11    | 1    |
| NGLY1_KO_2 | 49.75     | -0.11 | 0.13    | 0.99 |
| NGLY1_2    | 49.59     | -0.11 | 0.04    | 1    |

Supplement: Supplementary file 6276 [file 1]

IPI00218918.5|ANXA1

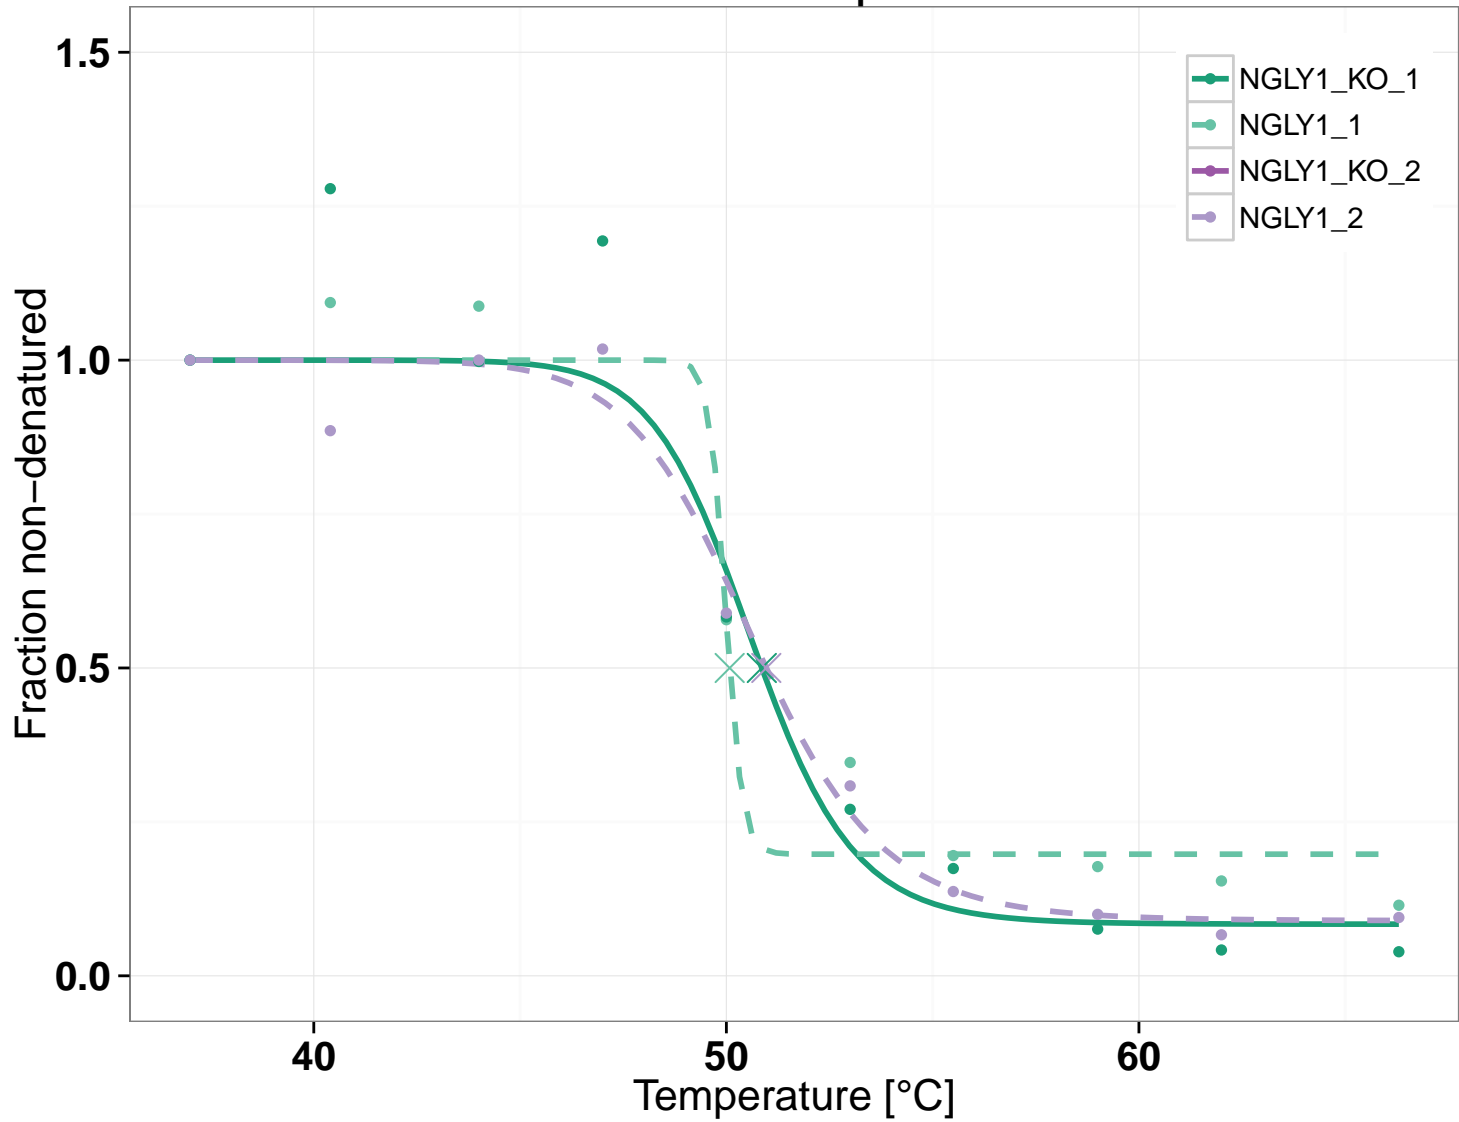

|            | meltPoint | slope | plateau | R2   |
|------------|-----------|-------|---------|------|
| NGLY1_KO_1 | 50.86     | -0.19 | 0.08    | 0.94 |
| NGLY1_1    | 50.08     | -1    | 0.2     | 0.71 |
| NGLY1_KO_2 | -         | -     | -       | -    |
| NGLY1_2    | 50.97     | -0.15 | 0.09    | 0.98 |

Supplement: Supplementary file 6277 [file 1]

# IPI00100213.2|RRM2B

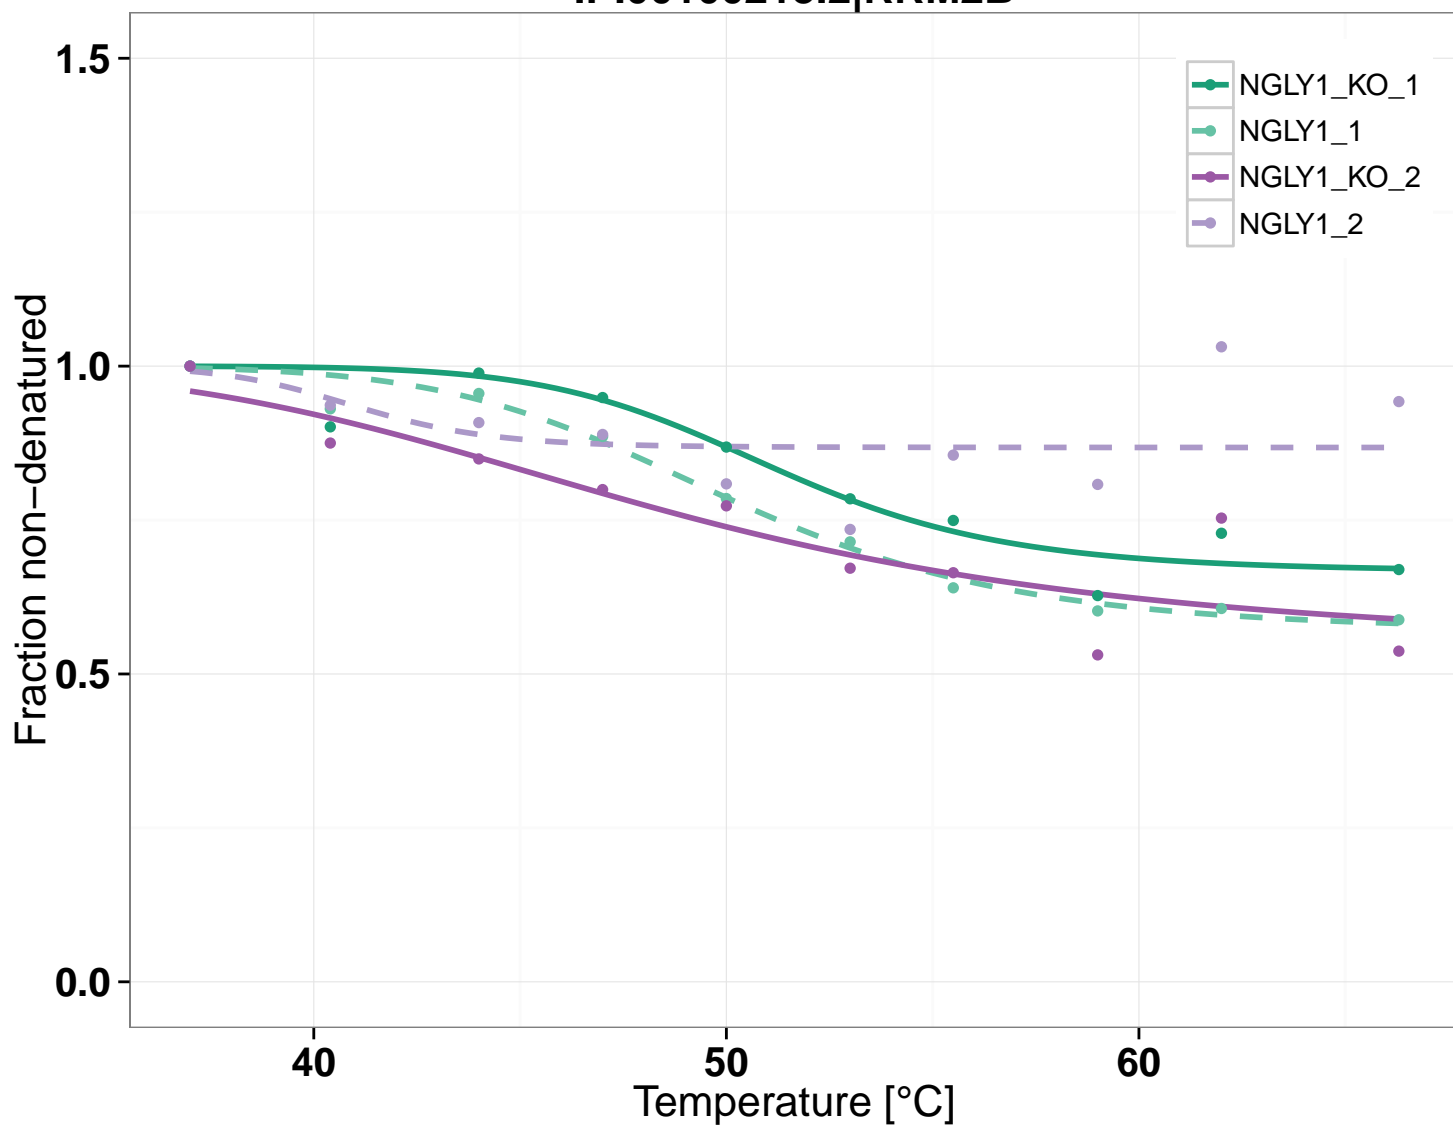

|            | meltPoint | slope  | plateau | R2   |
|------------|-----------|--------|---------|------|
| NGLY1_KO_1 | —         | −0.03  | 0.67    | 0.9  |
| NGLY1_1    | —         | −0.031 | 0.57    | 0.98 |
| NGLY1_KO_2 | —         | −0.02  | 0.54    | 0.81 |
| NGLY1_2    | —         | −0.02  | 0.87    | 0.23 |

Supplement: Supplementary file 6278 [file 1]

# IPI00000570.3|FMC1

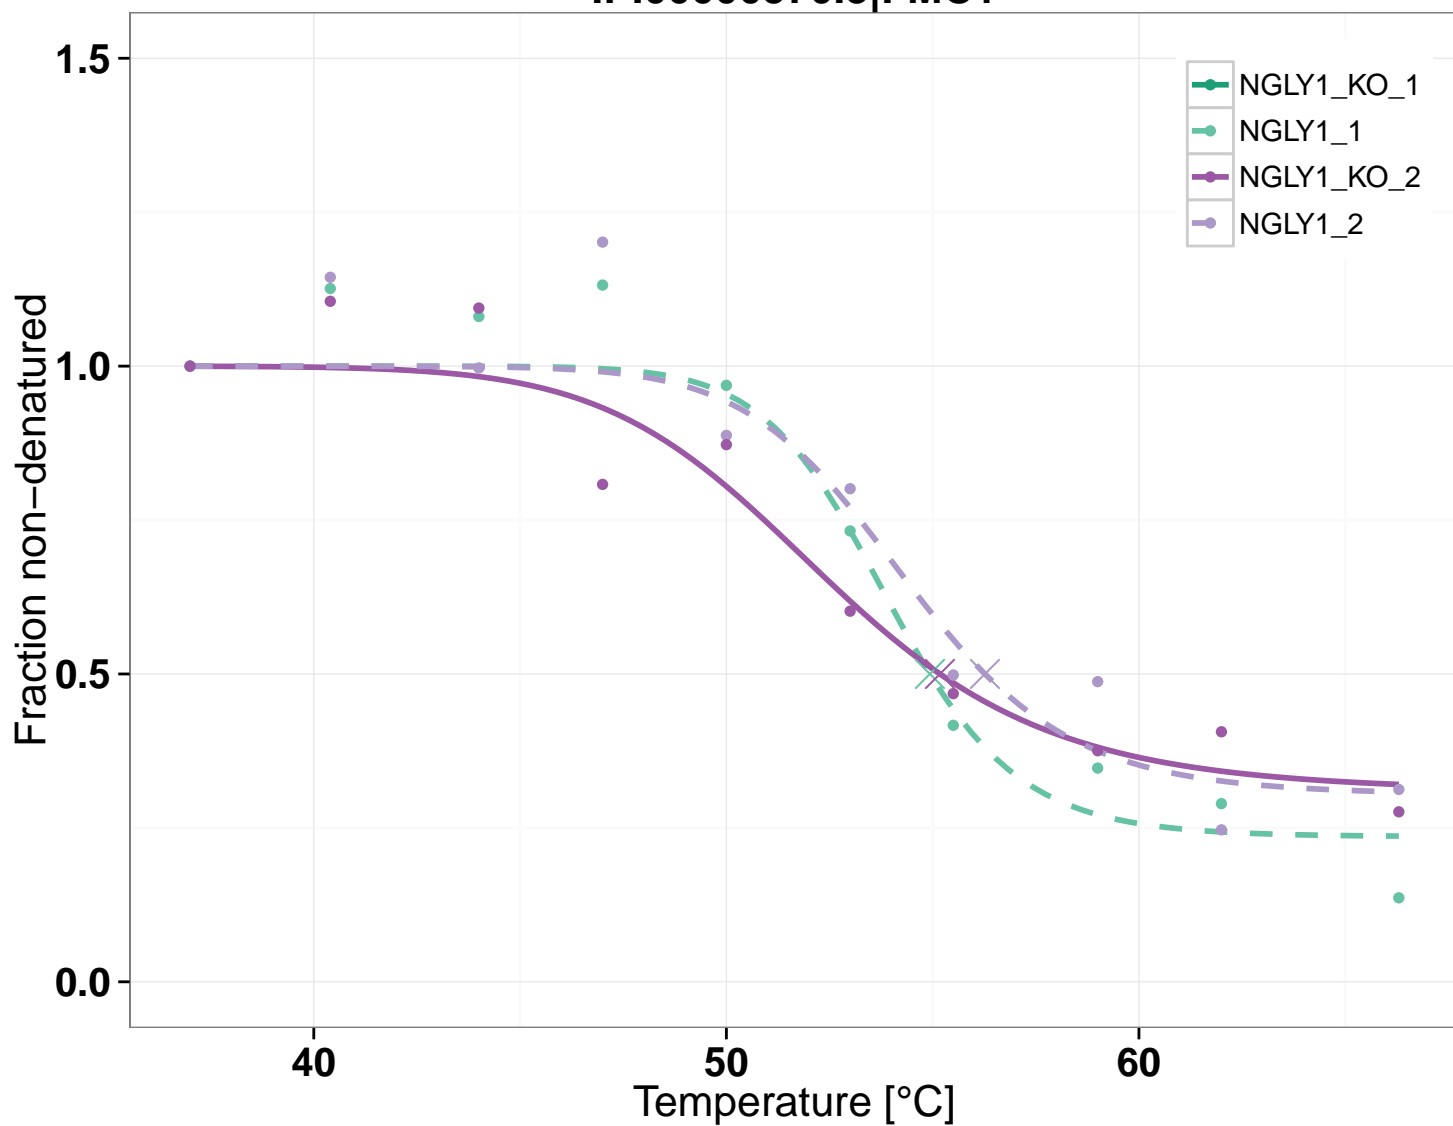

|            | meltPoint | slope  | plateau | R2   |
|------------|-----------|--------|---------|------|
| NGLY1_KO_1 | –         | –      | –       | –    |
| NGLY1_1    | 54.93     | -0.12  | 0.24    | 0.96 |
| NGLY1_KO_2 | 55.18     | -0.064 | 0.31    | 0.94 |
| NGLY1_2    | 56.27     | -0.089 | 0.3     | 0.92 |

Supplement: Supplementary file 6279 [file 1]

IPI00032533.3|WDR18

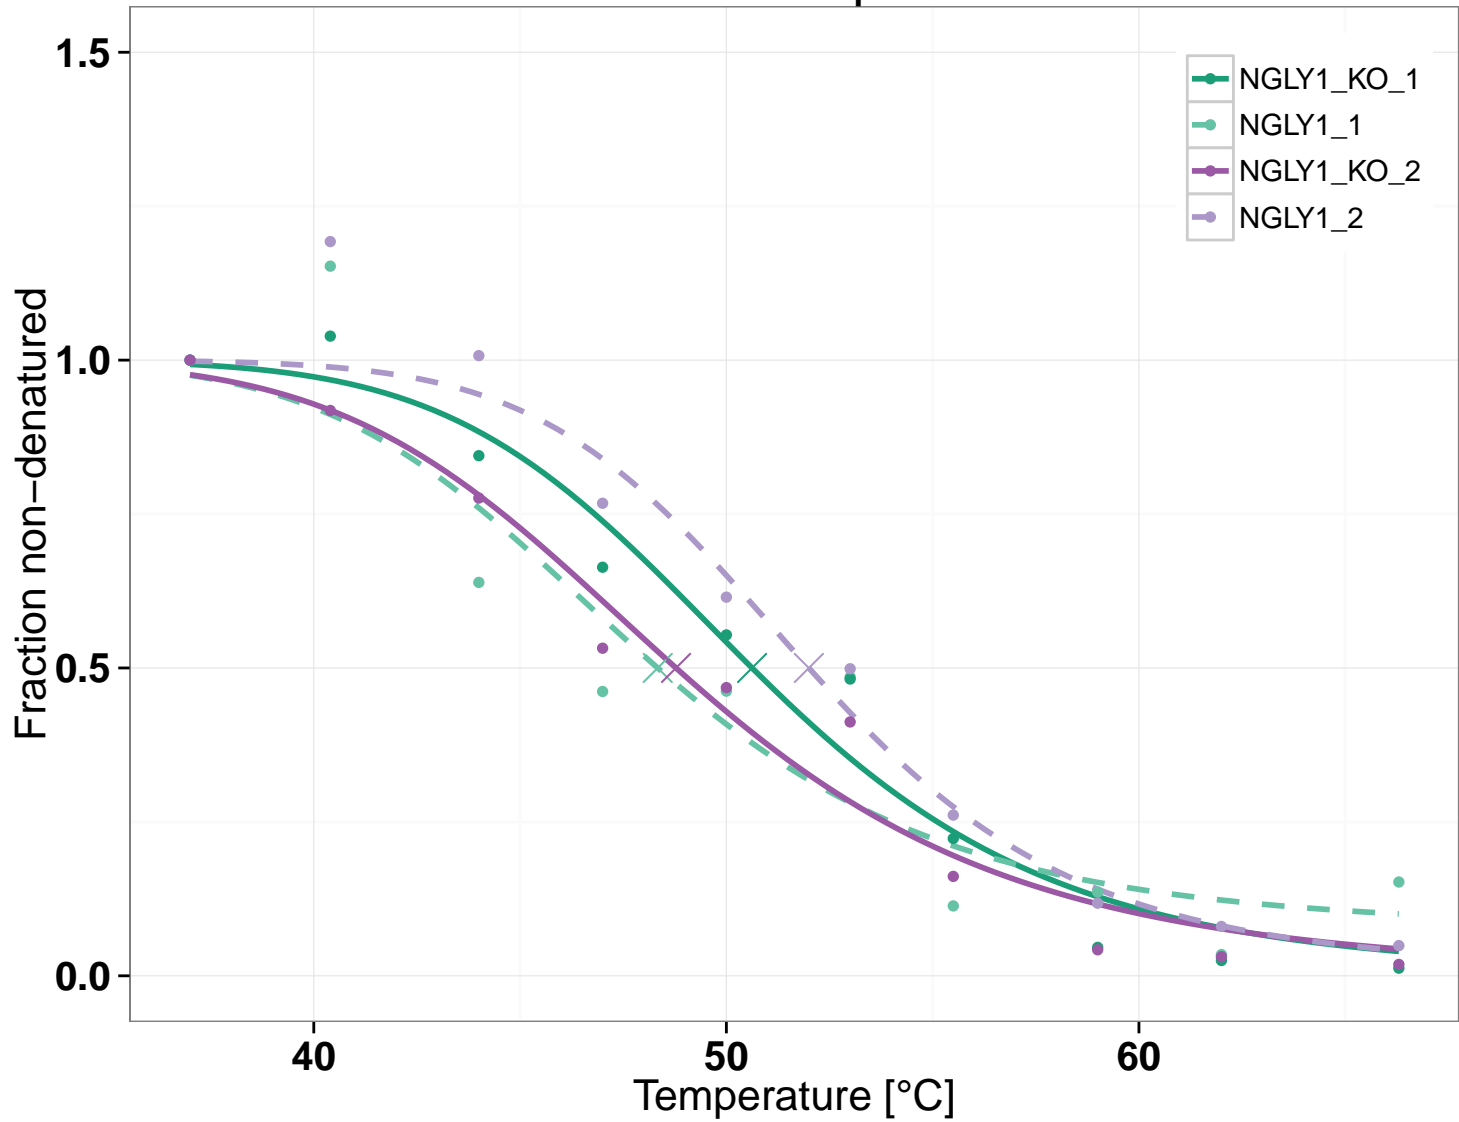

|            | meltPoint | slope  | plateau | R2   |
|------------|-----------|--------|---------|------|
| NGLY1_KO_1 | 50.62     | -0.068 | 0       | 0.97 |
| NGLY1_1    | 48.34     | -0.062 | 0.07    | 0.88 |
| NGLY1_KO_2 | 48.78     | -0.062 | 0       | 0.97 |
| NGLY1_2    | 52        | -0.076 | 0.01    | 0.96 |

Supplement: Supplementary file 6280 [file 1]

# IPI00007935.5|PDLIM5

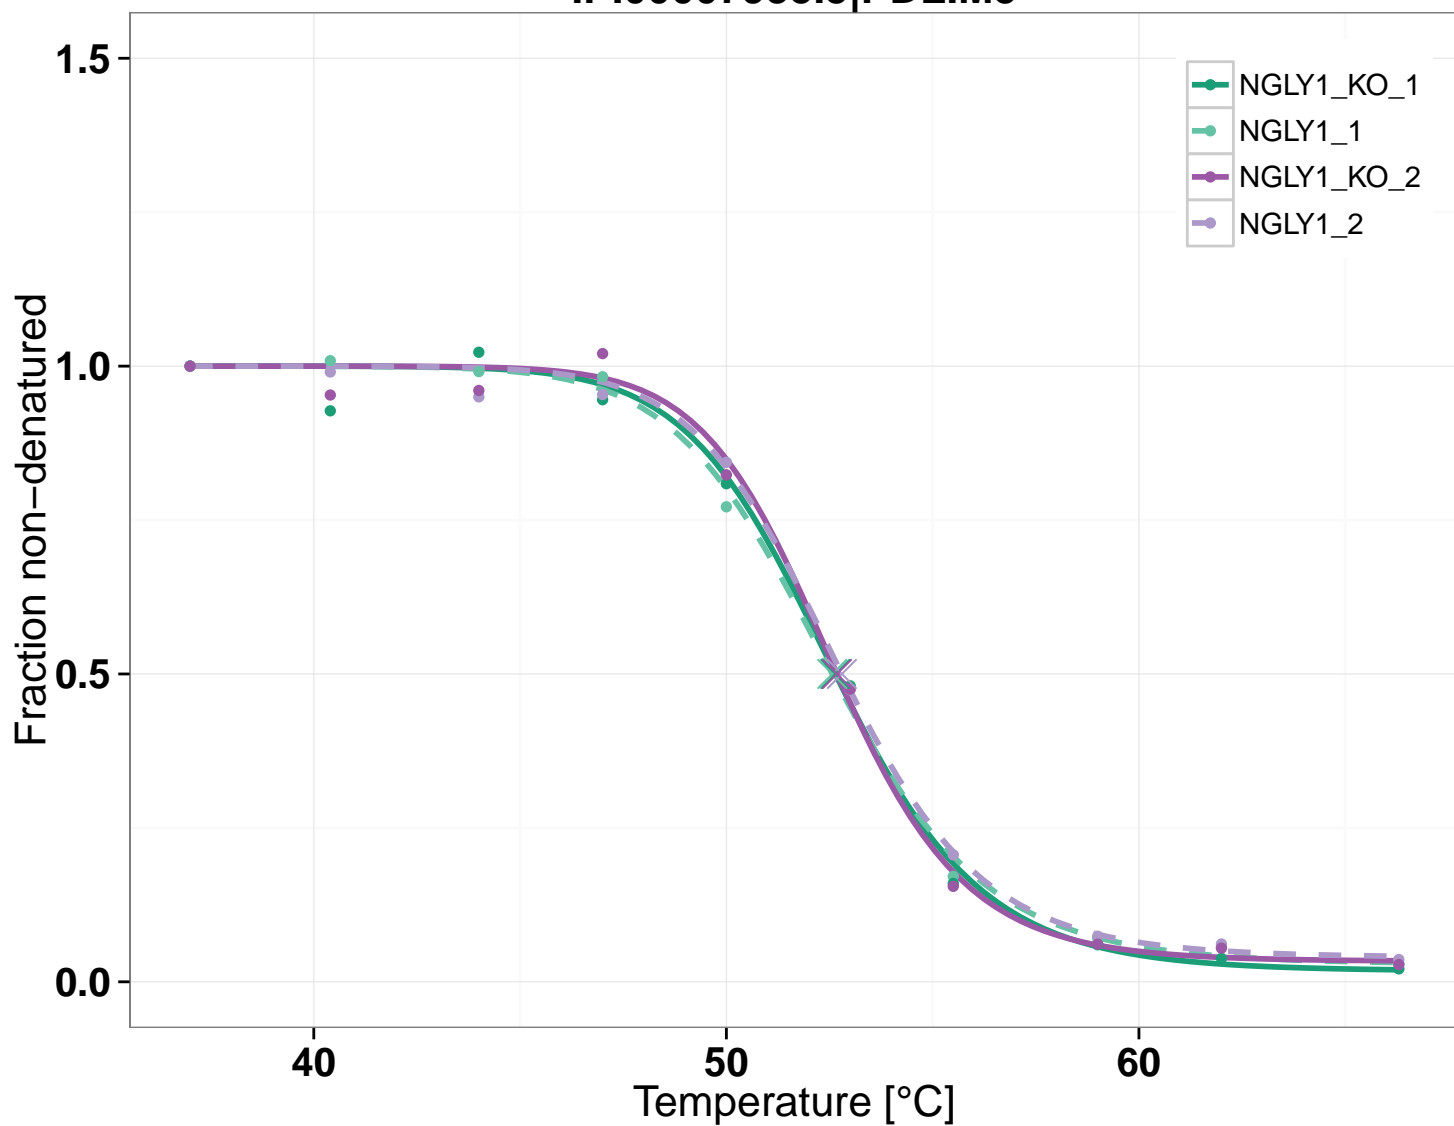

|            | meltPoint | slope | plateau | R2 |
|------------|-----------|-------|---------|----|
| NGLY1_KO_1 | 52.64     | -0.14 | 0.02    | 1  |
| NGLY1_1    | 52.57     | -0.13 | 0.03    | 1  |
| NGLY1_KO_2 | 52.68     | -0.15 | 0.03    | 1  |
| NGLY1_2    | 52.8      | -0.14 | 0.04    | 1  |

Supplement: Supplementary file 6281 [file 1]

IPI00007280.10|ARPC5

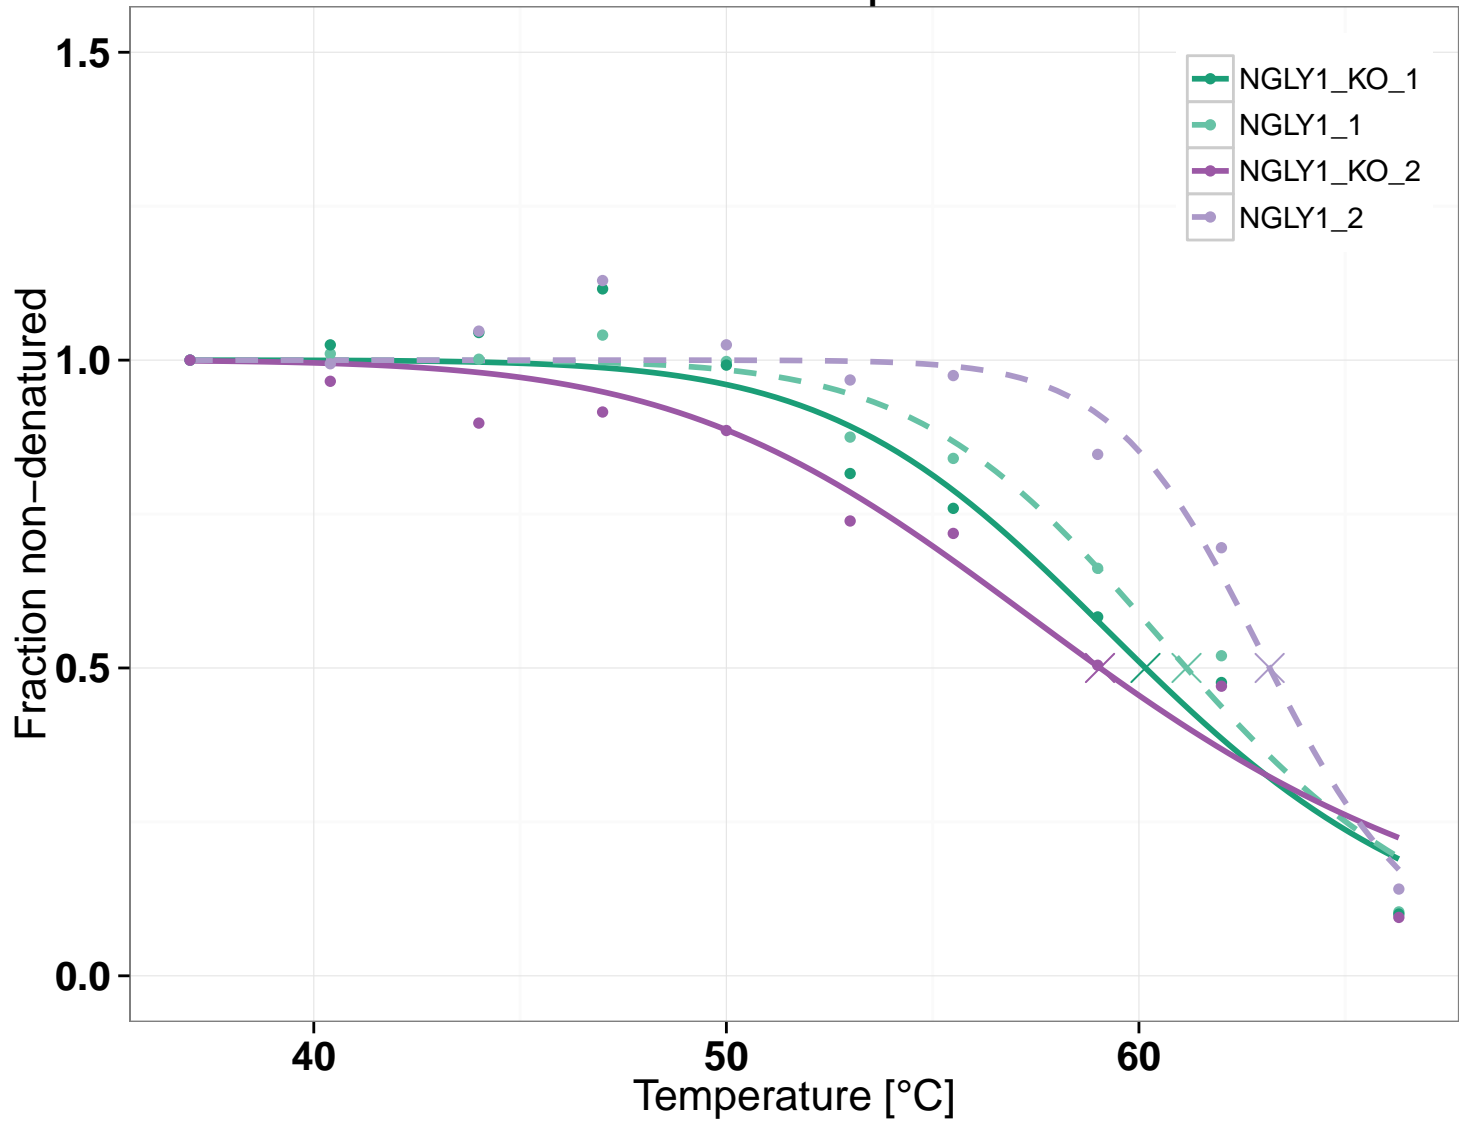

|            | meltPoint | slope  | plateau | R2   |
|------------|-----------|--------|---------|------|
| NGLY1_KO_1 | 60.16     | -0.066 | 0       | 0.95 |
| NGLY1_1    | 61.15     | -0.076 | 0       | 0.97 |
| NGLY1_KO_2 | 59.06     | -0.05  | 0       | 0.95 |
| NGLY1_2    | 63.17     | -0.13  | 0       | 0.96 |

Supplement: Supplementary file 6282 [file 1]

# IPI00026050.1|CLN5

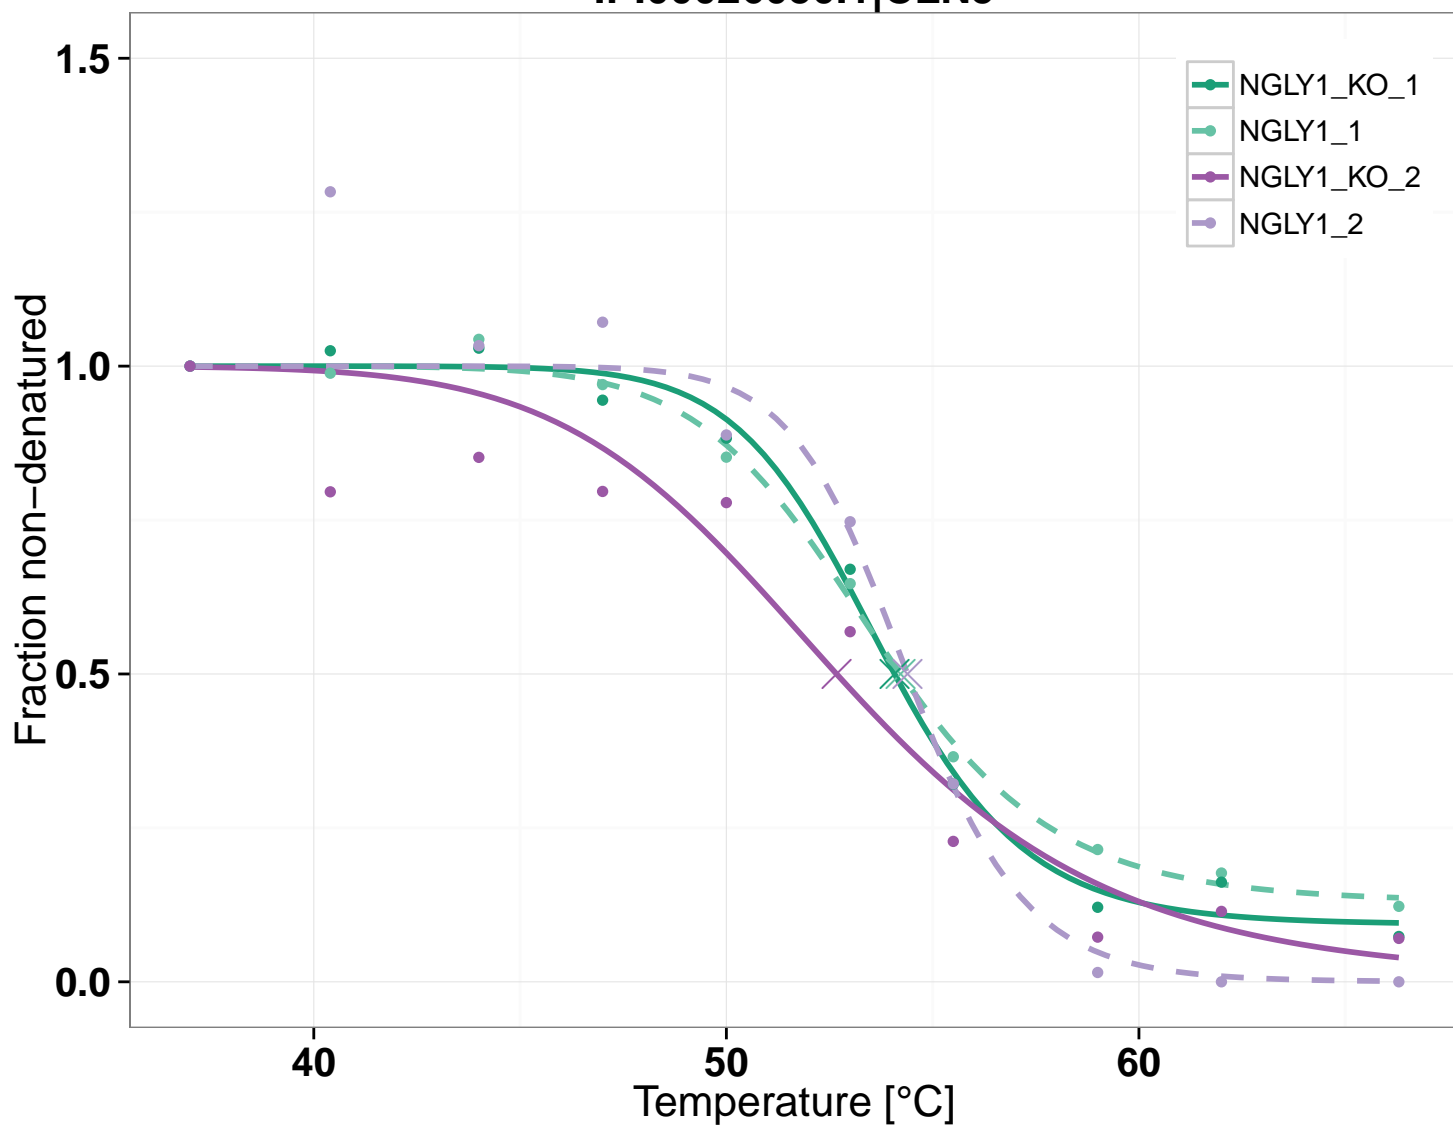

|            | meltPoint | slope  | plateau | R2   |
|------------|-----------|--------|---------|------|
| NGLY1_KO_1 | 54.08     | -0.13  | 0.09    | 0.99 |
| NGLY1_1    | 54.22     | -0.1   | 0.13    | 1    |
| NGLY1_KO_2 | 52.67     | -0.075 | 0       | 0.93 |
| NGLY1_2    | 54.39     | -0.18  | 0       | 0.96 |

Supplement: Supplementary file 6283 [file 1]

IPI00025831.1|CYP3A5

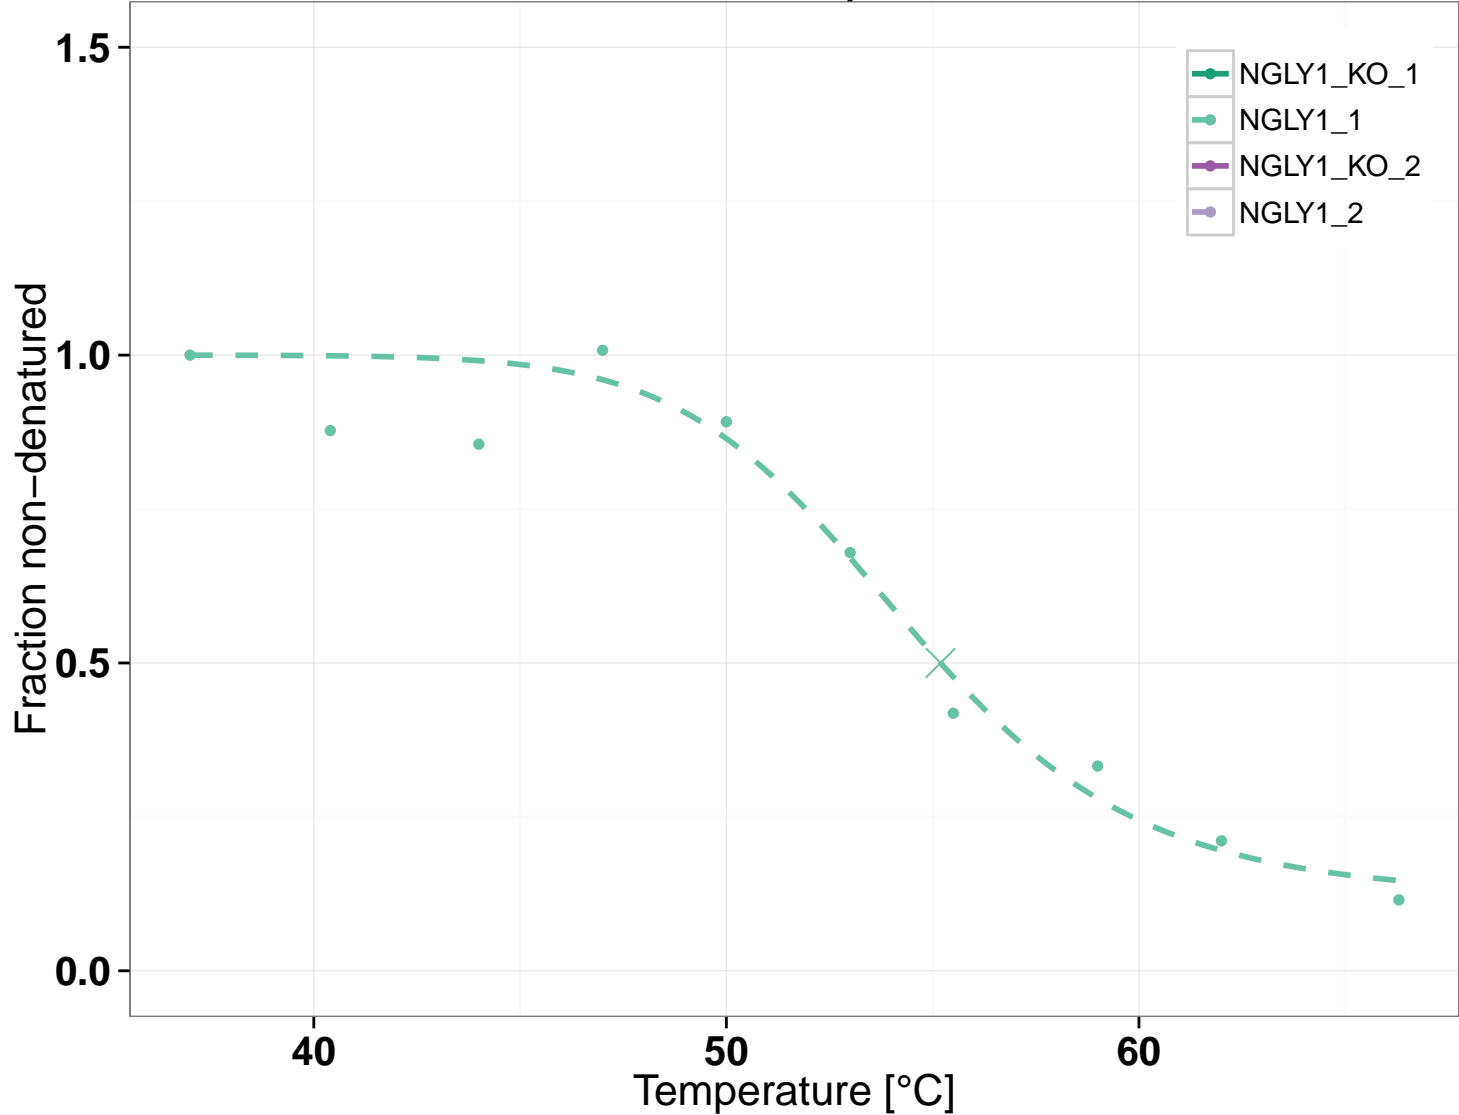

|            | meltPoint | slope  | plateau | R2   |
|------------|-----------|--------|---------|------|
| NGLY1_KO_1 | —         | —      | —       | —    |
| NGLY1_1    | 55.19     | -0.079 | 0.12    | 0.96 |
| NGLY1_KO_2 | —         | —      | —       | —    |
| NGLY1_2    | —         | —      | —       | —    |

Supplement: Supplementary file 6284 [file 1]

IPI00017966.1|SPA17

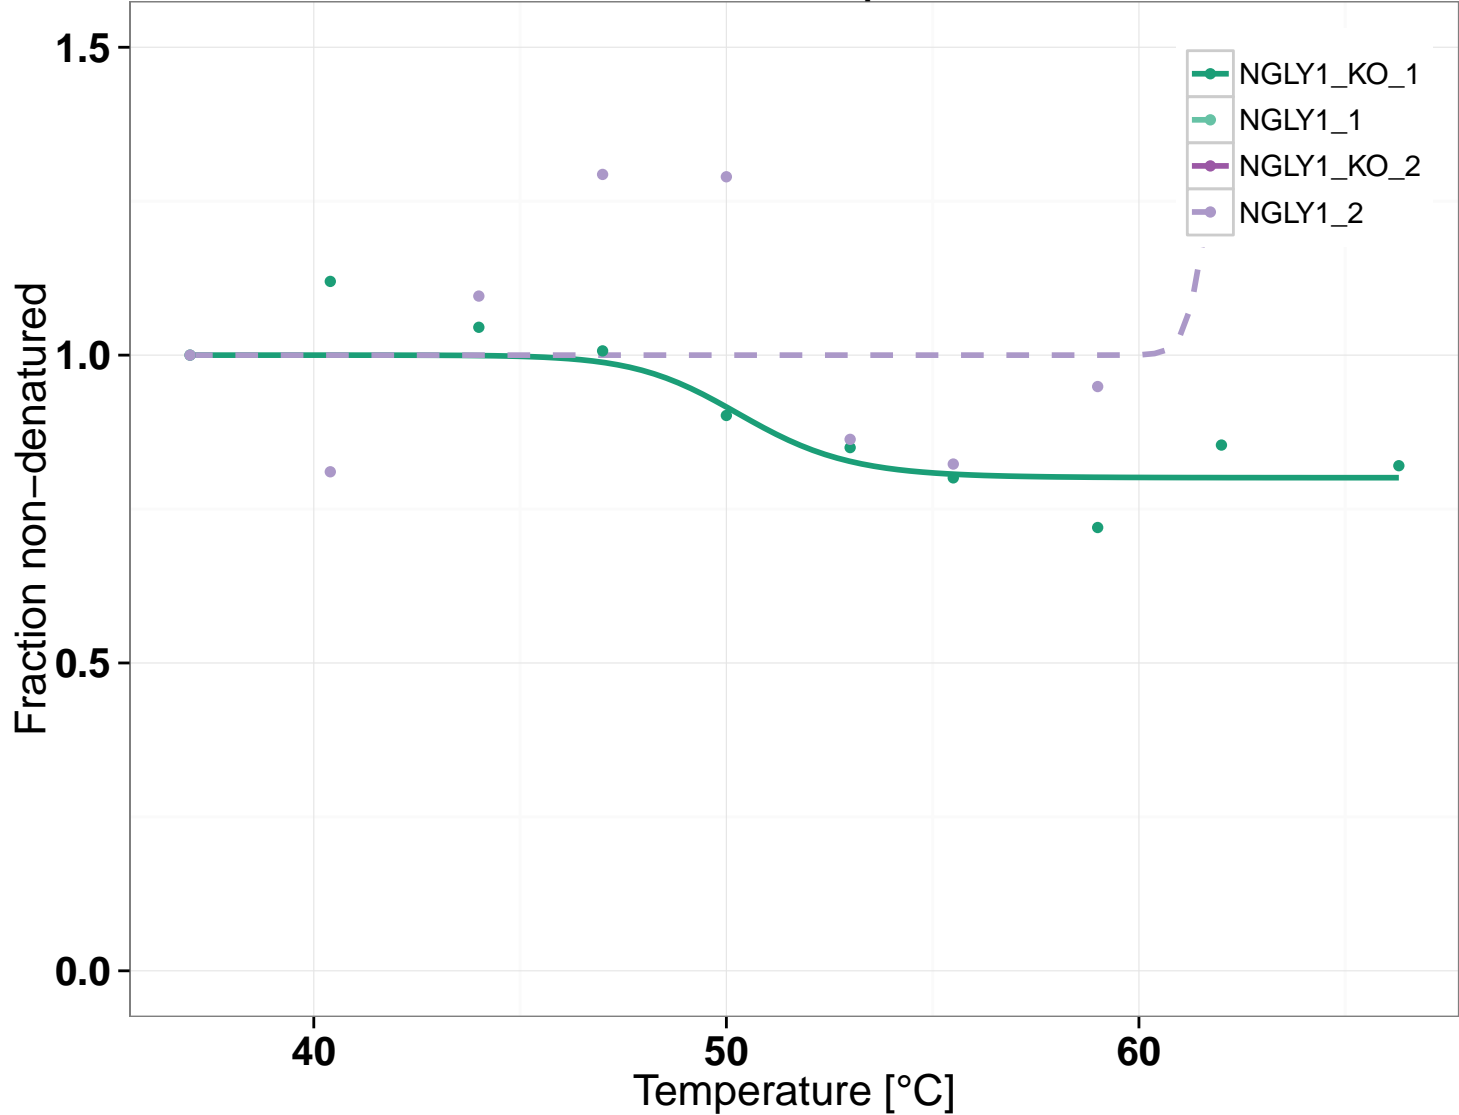

|            | meltPoint | slope  | plateau | R2   |
|------------|-----------|--------|---------|------|
| NGLY1_KO_1 | —         | −0.038 | 0.8     | 0.81 |
| NGLY1_1    | —         | —      | —       | —    |
| NGLY1_KO_2 | —         | —      | —       | —    |
| NGLY1_2    | —         | 0.49   | 1.5     | 0.59 |

Supplement: Supplementary file 6285 [file 1]

IPI00297900.4|DDX10

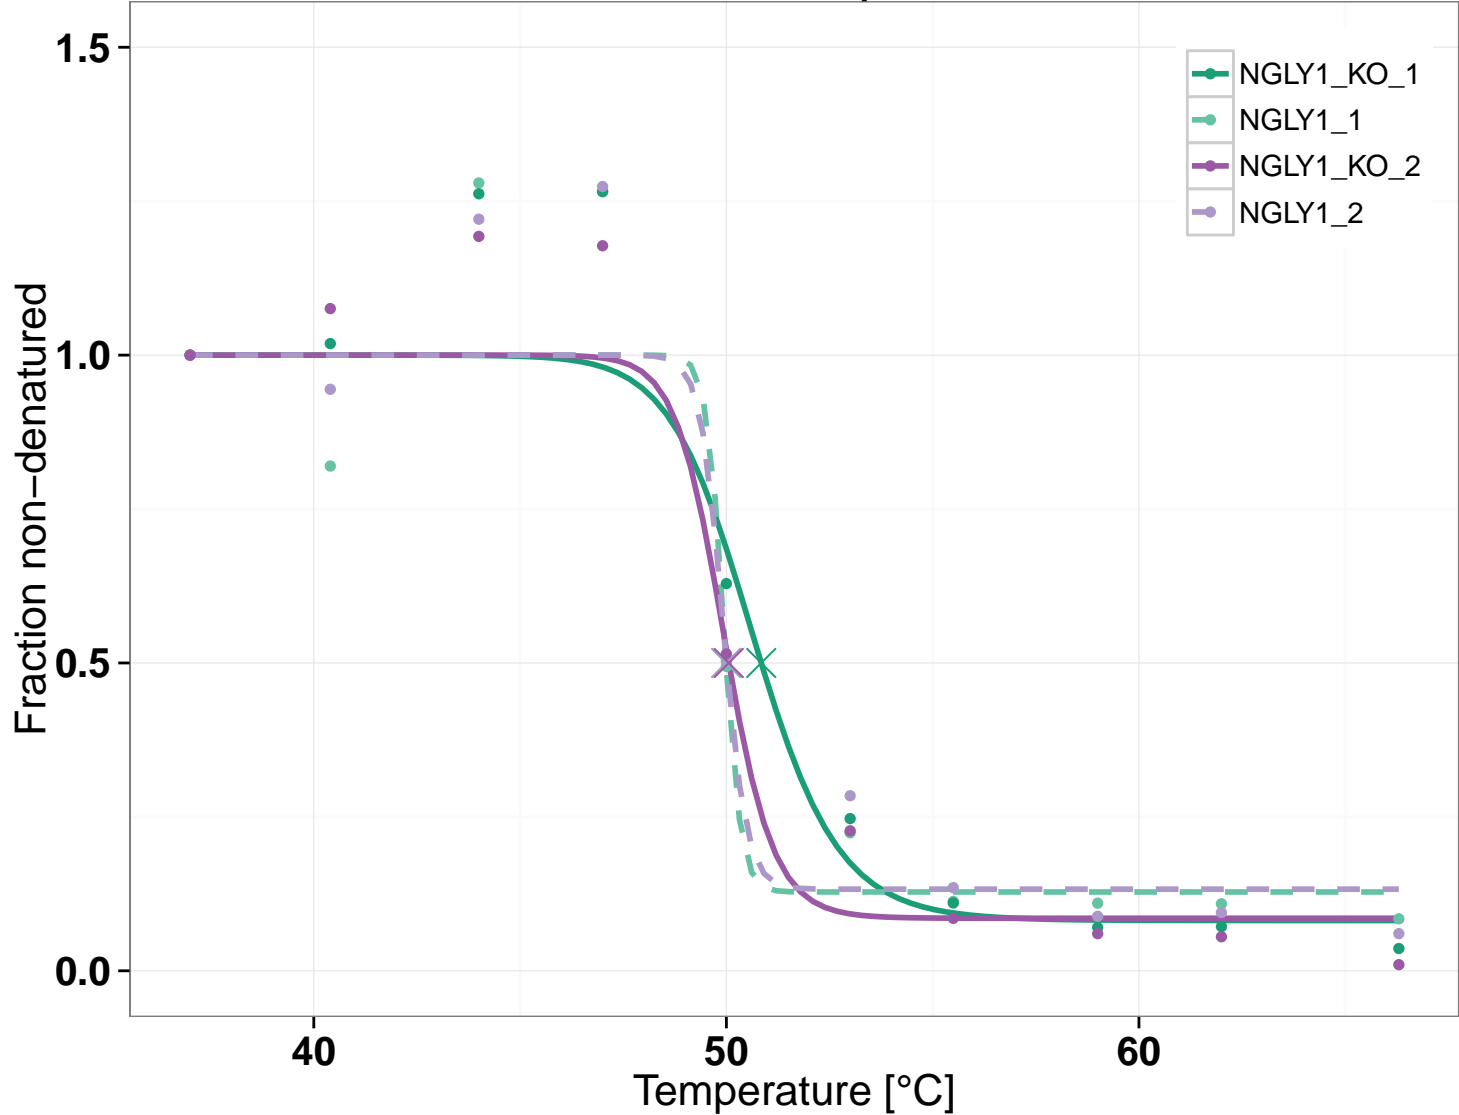

|            | meltPoint | slope | plateau | R2   |
|------------|-----------|-------|---------|------|
| NGLY1_KO_1 | 50.84     | -0.22 | 0.08    | 0.93 |
| NGLY1_1    | 49.99     | -1.1  | 0.13    | 0.91 |
| NGLY1_KO_2 | 50.06     | -0.39 | 0.09    | 0.96 |
| NGLY1_2    | 50        | -0.78 | 0.13    | 0.93 |

Supplement: Supplementary file 6286 [file 1]

IPI00007084.2|SLC25A13

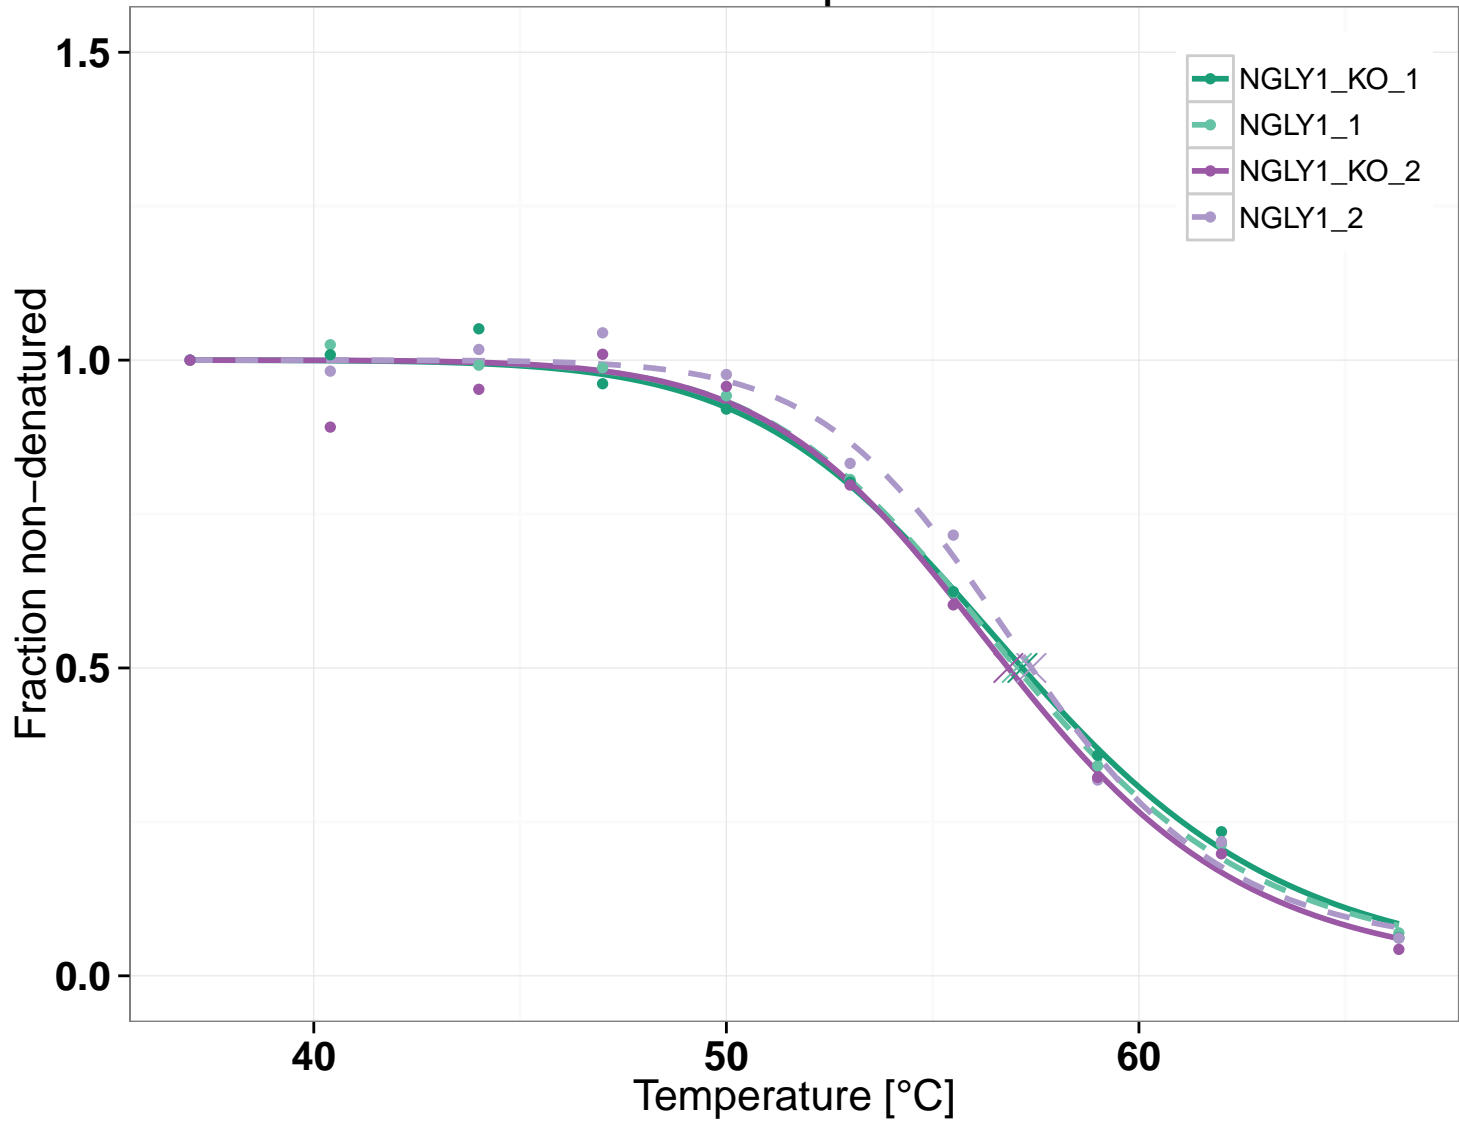

|            | meltPoint | slope  | plateau | R2   |
|------------|-----------|--------|---------|------|
| NGLY1_KO_1 | 57.17     | -0.077 | 0       | 1    |
| NGLY1_1    | 57.04     | -0.082 | 0.02    | 1    |
| NGLY1_KO_2 | 56.84     | -0.085 | 0       | 0.99 |
| NGLY1_2    | 57.39     | -0.098 | 0.04    | 0.99 |

Supplement: Supplementary file 6287 [file 1]

IPI00105827.4|ALG10B

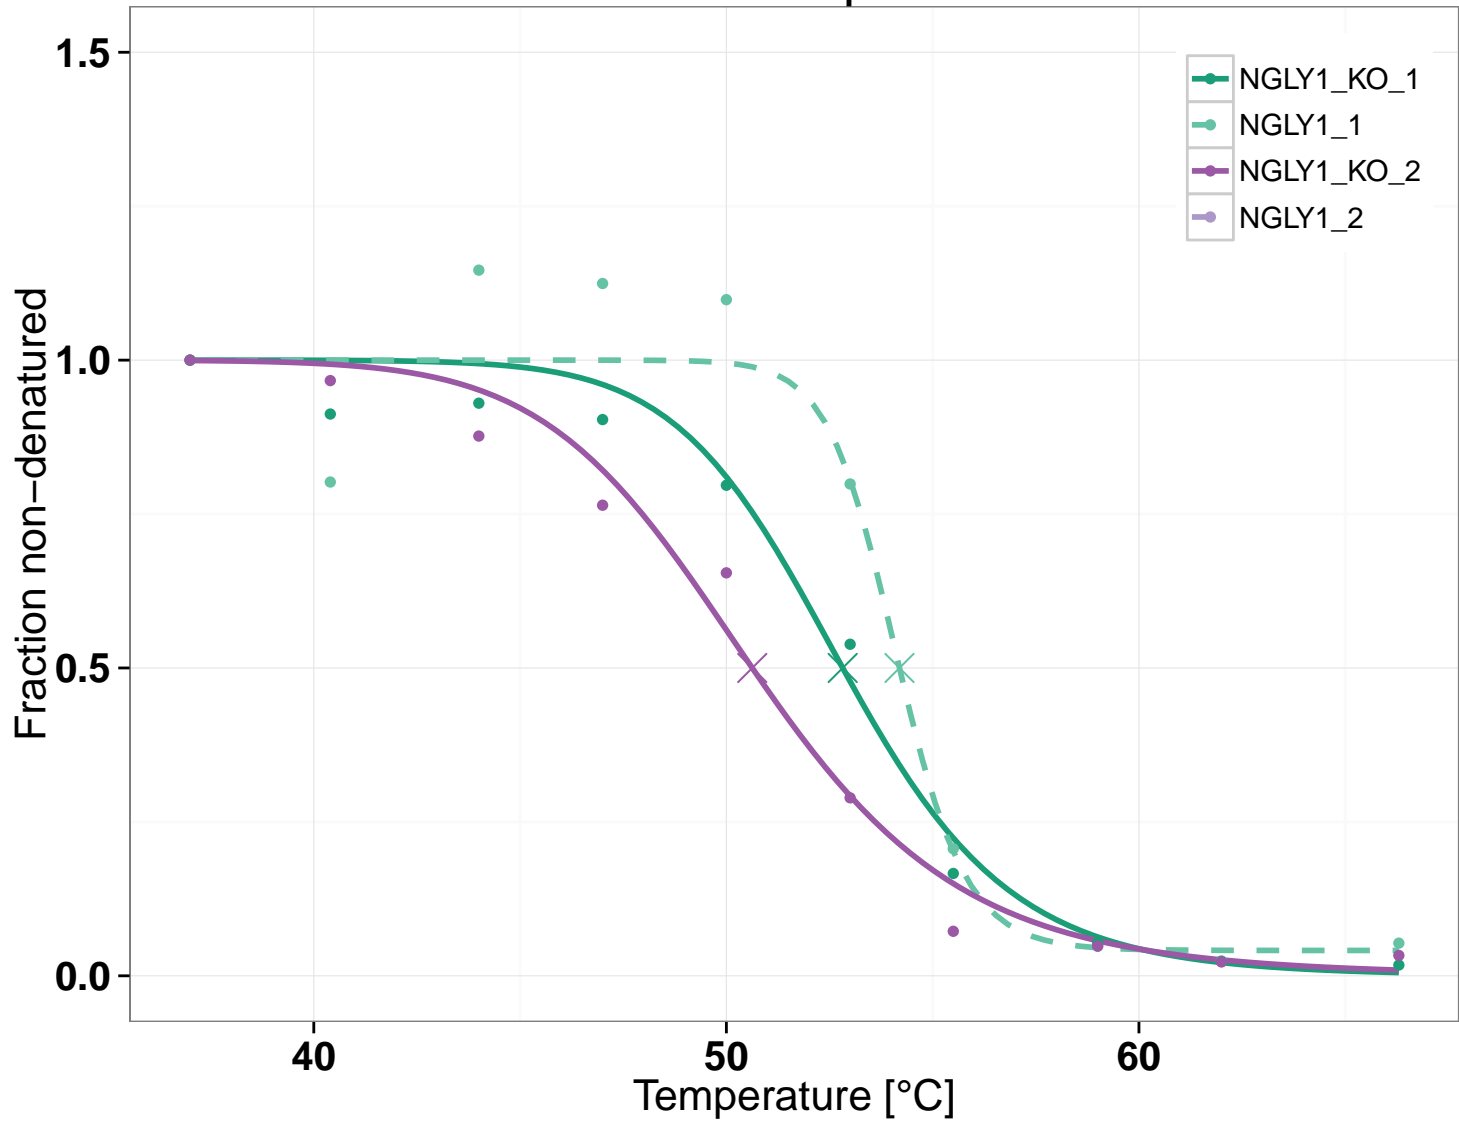

|            | meltPoint | slope  | plateau | R2   |
|------------|-----------|--------|---------|------|
| NGLY1_KO_1 | 52.82     | -0.12  | 0       | 0.99 |
| NGLY1_1    | 54.2      | -0.29  | 0.04    | 0.96 |
| NGLY1_KO_2 | 50.63     | -0.099 | 0       | 0.98 |
| NGLY1_2    | -         | -      | -       | -    |

Supplement: Supplementary file 6288 [file 1]

# IPI00296259.4|TMED4

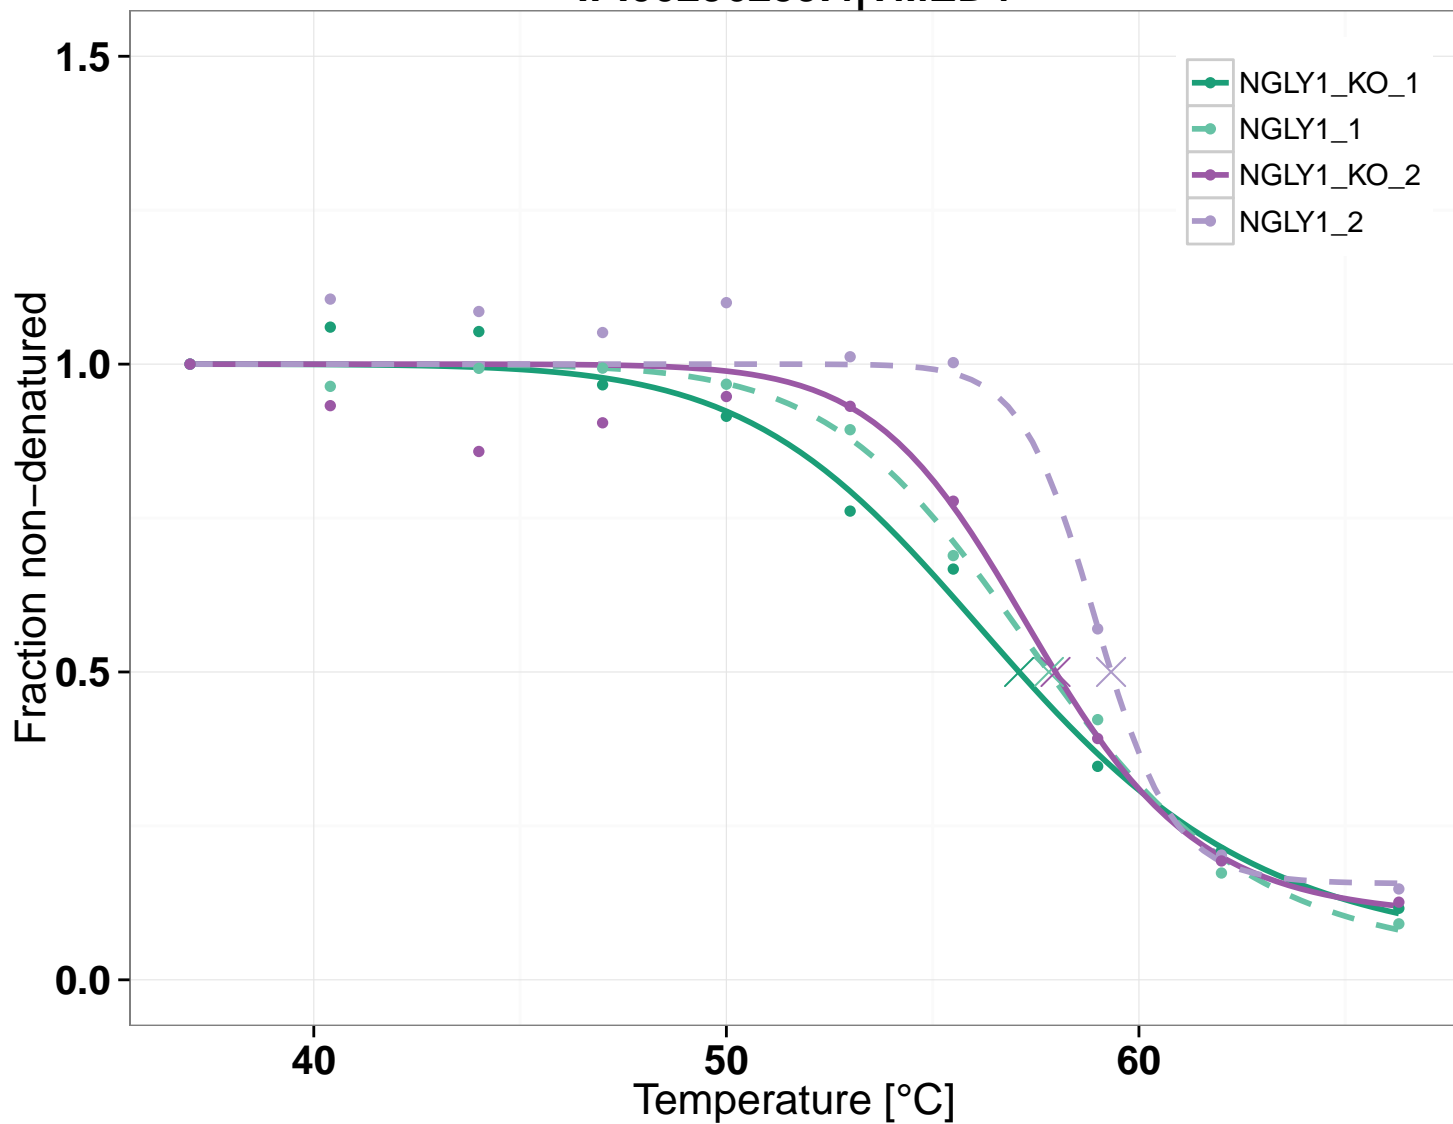

|            | meltPoint | slope  | plateau | R2   |
|------------|-----------|--------|---------|------|
| NGLY1_KO_1 | 57.1      | -0.077 | 0.04    | 0.99 |
| NGLY1_1    | 57.82     | -0.094 | 0.03    | 1    |
| NGLY1_KO_2 | 57.98     | -0.11  | 0.1     | 0.97 |
| NGLY1_2    | 59.32     | -0.23  | 0.16    | 0.98 |

Supplement: Supplementary file 6289 [file 1]

IPI00646224.1|FAM46C

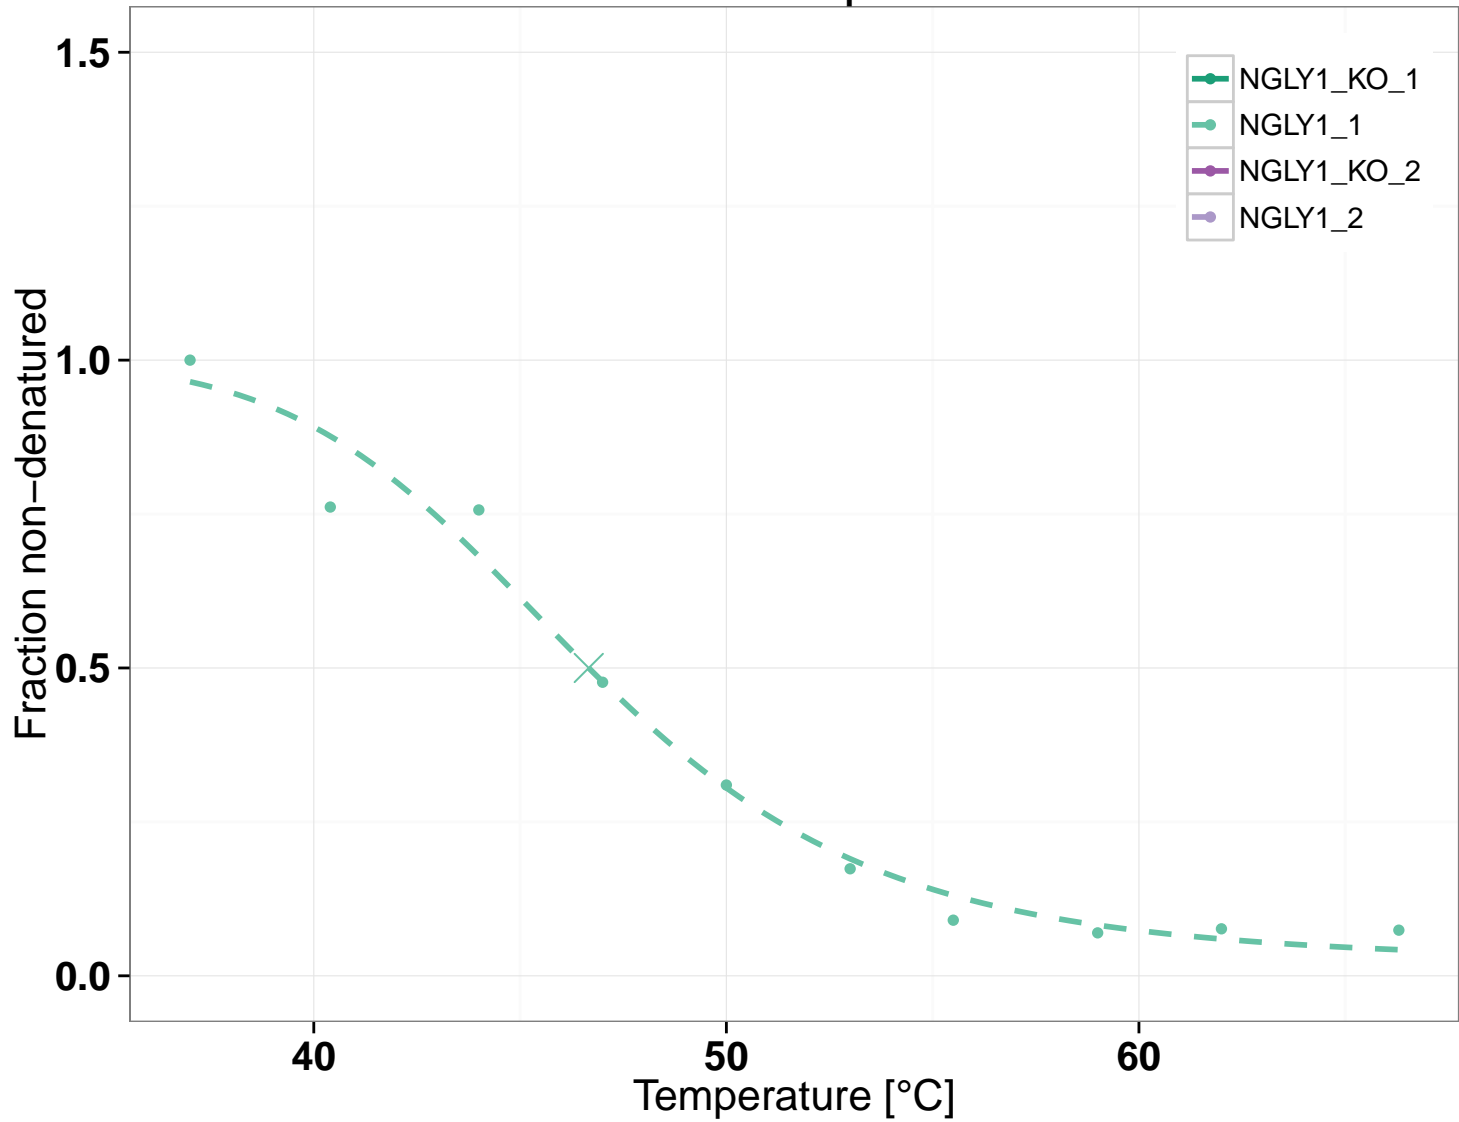

|            | meltPoint | slope  | plateau | R2   |
|------------|-----------|--------|---------|------|
| NGLY1_KO_1 | -         | -      | -       | -    |
| NGLY1_1    | 46.66     | -0.069 | 0.02    | 0.98 |
| NGLY1_KO_2 | -         | -      | -       | -    |
| NGLY1_2    | -         | -      | -       | -    |

Supplement: Supplementary file 6290 [file 1]

IPI00025512.2|HSPB1

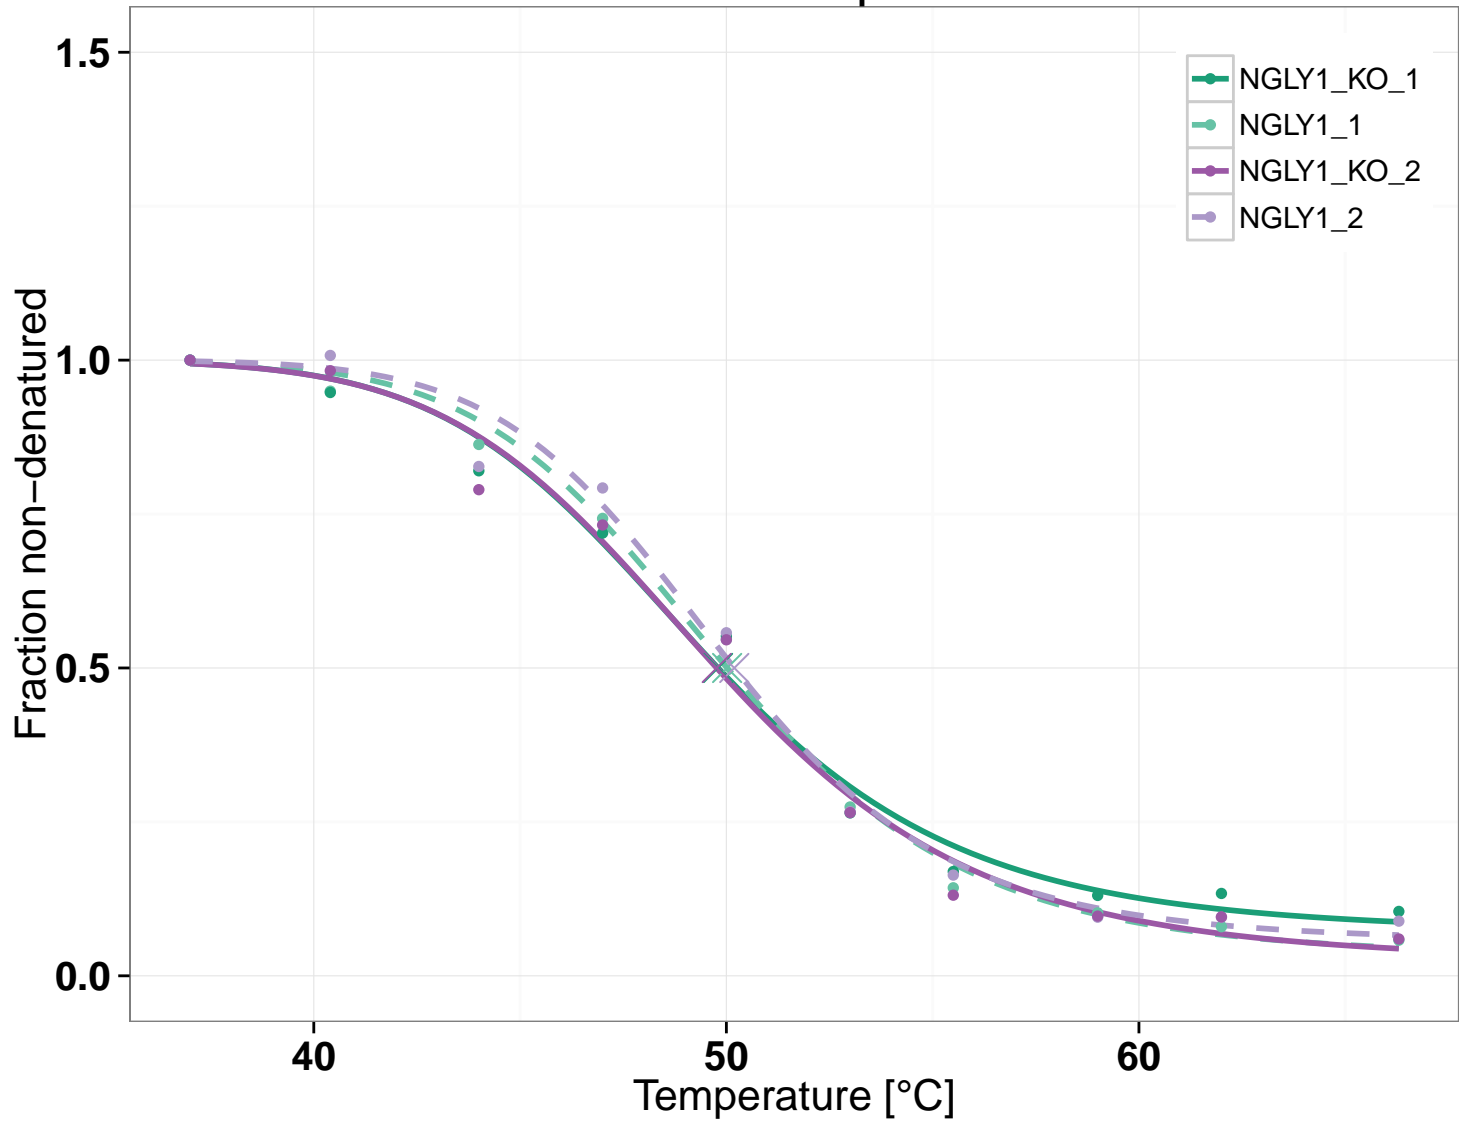

|            | meltPoint | slope  | plateau | R2   |
|------------|-----------|--------|---------|------|
| NGLY1_KO_1 | 49.8      | -0.074 | 0.07    | 0.99 |
| NGLY1_1    | 50.02     | -0.081 | 0.03    | 1    |
| NGLY1_KO_2 | 49.77     | -0.076 | 0.02    | 0.99 |
| NGLY1_2    | 50.19     | -0.087 | 0.06    | 0.99 |

Supplement: Supplementary file 6291 [file 1]

IPI00032561.1|CAB39

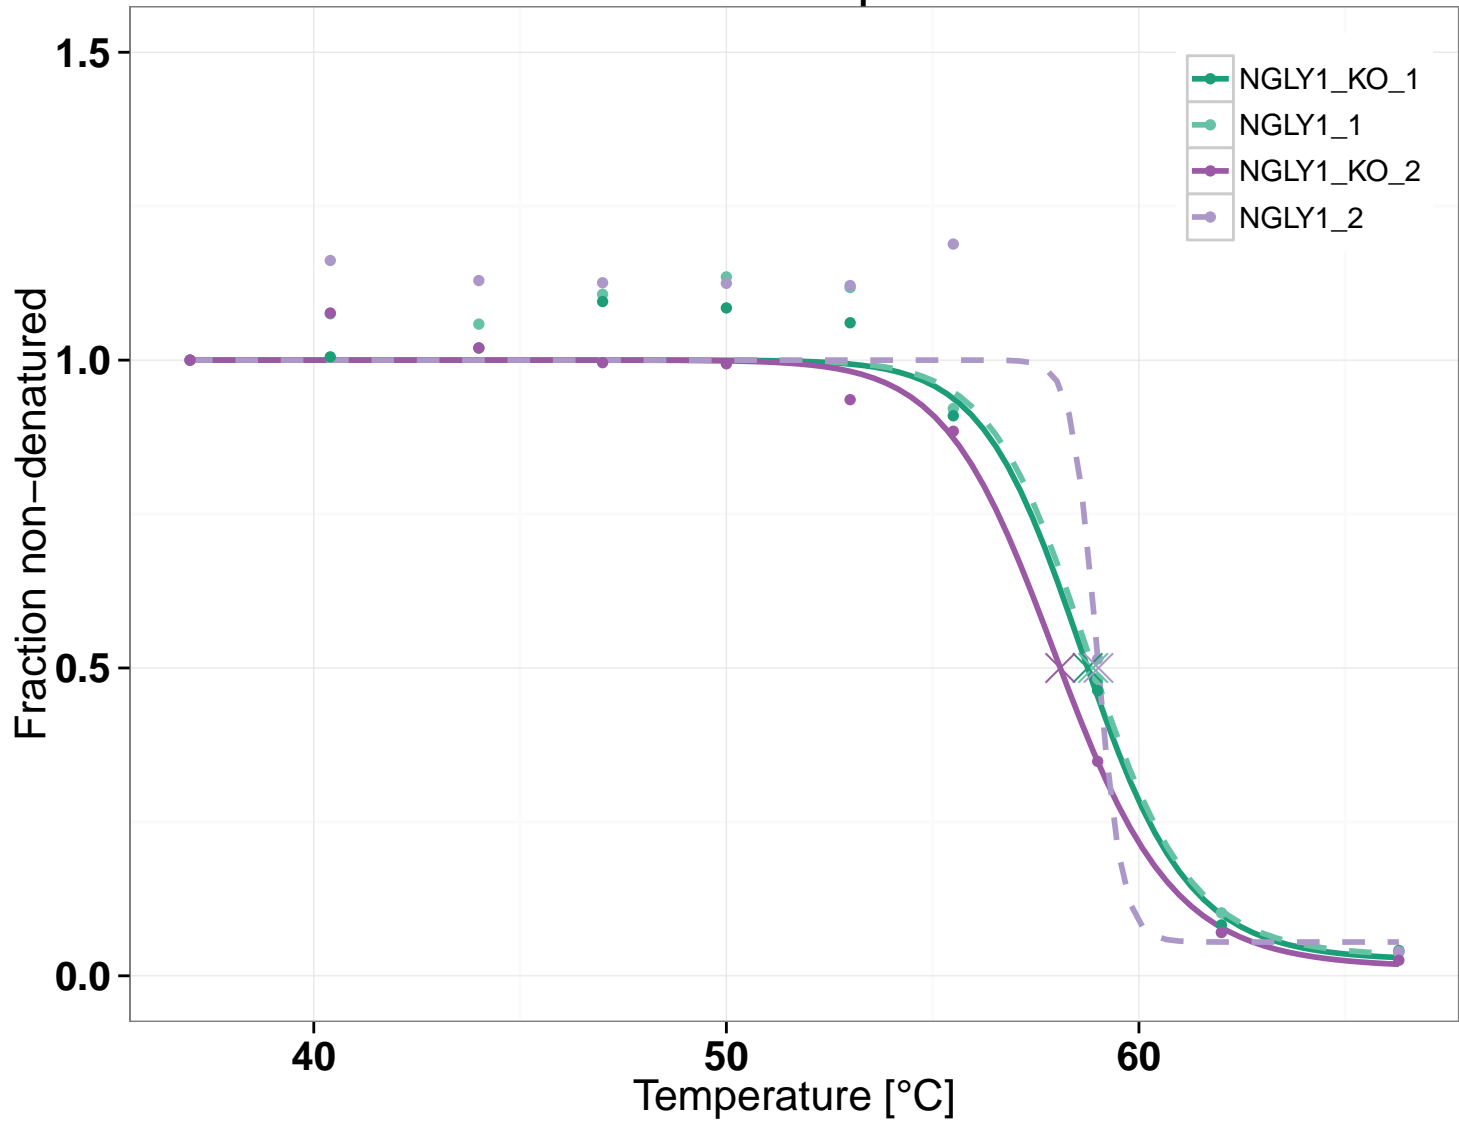

|            | meltPoint | slope | plateau | R2   |
|------------|-----------|-------|---------|------|
| NGLY1_KO_1 | 58.76     | -0.19 | 0.03    | 0.99 |
| NGLY1_1    | 58.89     | -0.2  | 0.03    | 0.97 |
| NGLY1_KO_2 | 58.09     | -0.18 | 0.01    | 0.99 |
| NGLY1_2    | 59.02     | -0.79 | 0.05    | 0.93 |

Supplement: Supplementary file 6292 [file 1]

# IPI00645994.2|BCAR1

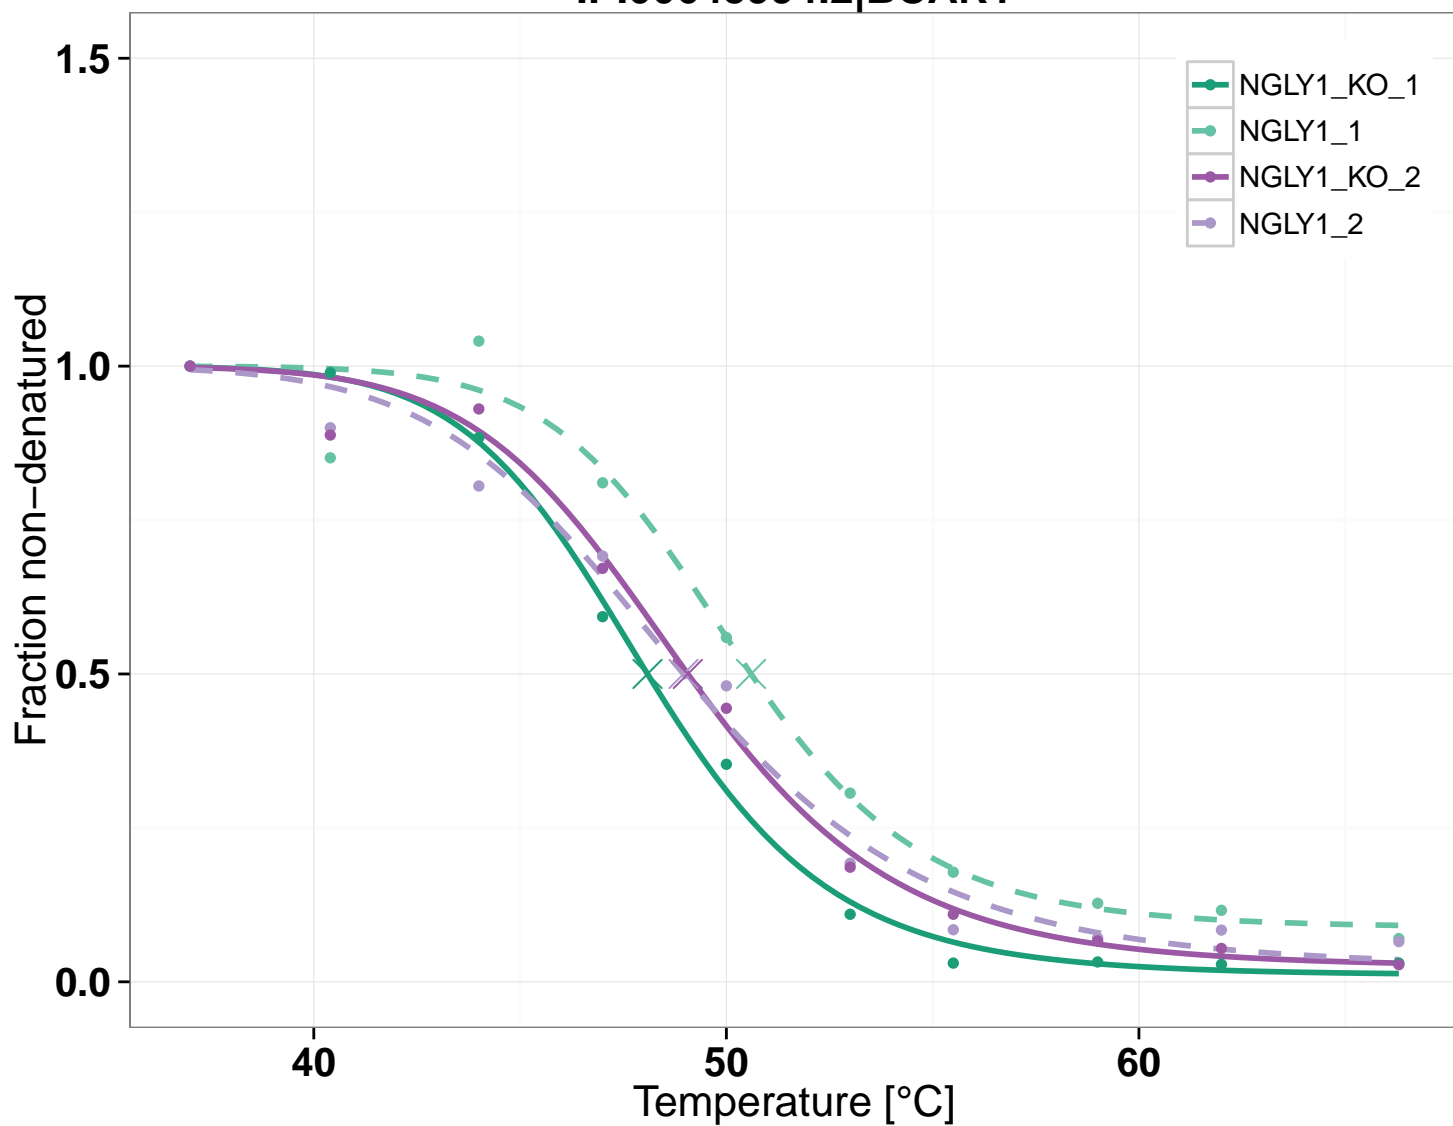

|            | meltPoint | slope  | plateau | R2   |
|------------|-----------|--------|---------|------|
| NGLY1_KO_1 | 48.09     | -0.11  | 0.01    | 1    |
| NGLY1_1    | 50.6      | -0.1   | 0.09    | 0.98 |
| NGLY1_KO_2 | 49.07     | -0.095 | 0.02    | 0.99 |
| NGLY1_2    | 48.96     | -0.082 | 0.02    | 0.99 |

Supplement: Supplementary file 6293 [file 1]

IPI00305945.2|ADAT1

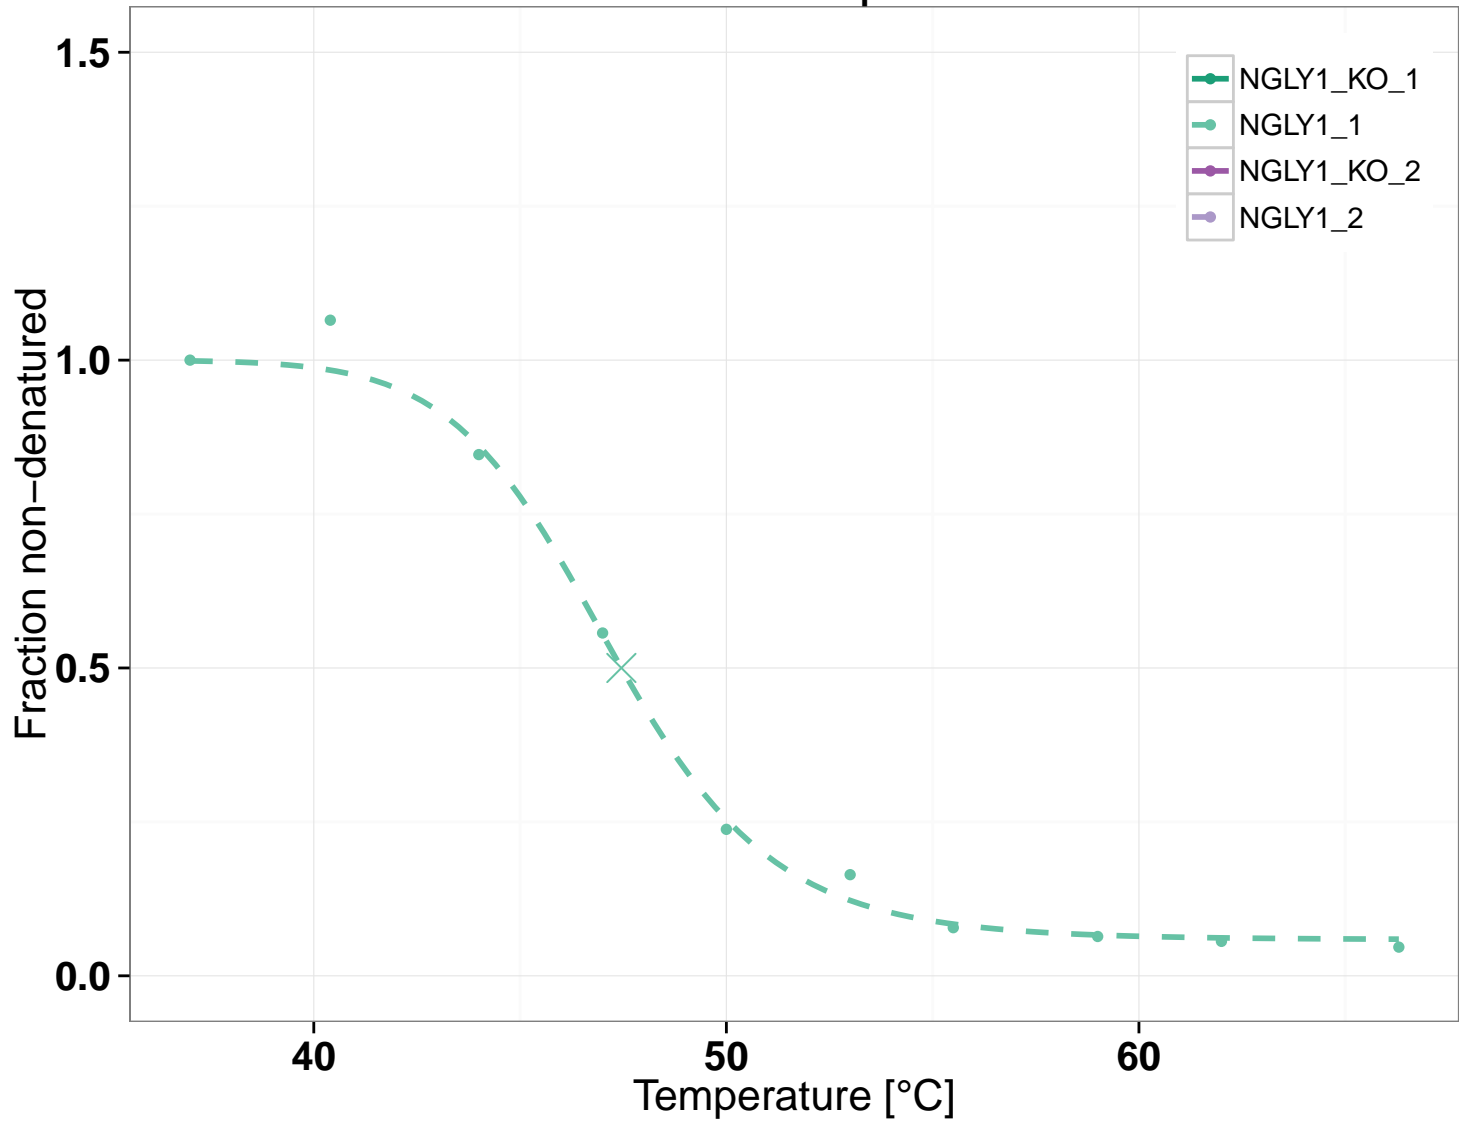

|            | meltPoint | slope | plateau | R2   |
|------------|-----------|-------|---------|------|
| NGLY1_KO_1 | -         | -     | -       | -    |
| NGLY1_1    | 47.46     | -0.12 | 0.06    | 0.99 |
| NGLY1_KO_2 | -         | -     | -       | -    |
| NGLY1_2    | -         | -     | -       | -    |

Supplement: Supplementary file 6294 [file 1]

IPI00001632.4|KIAA1522

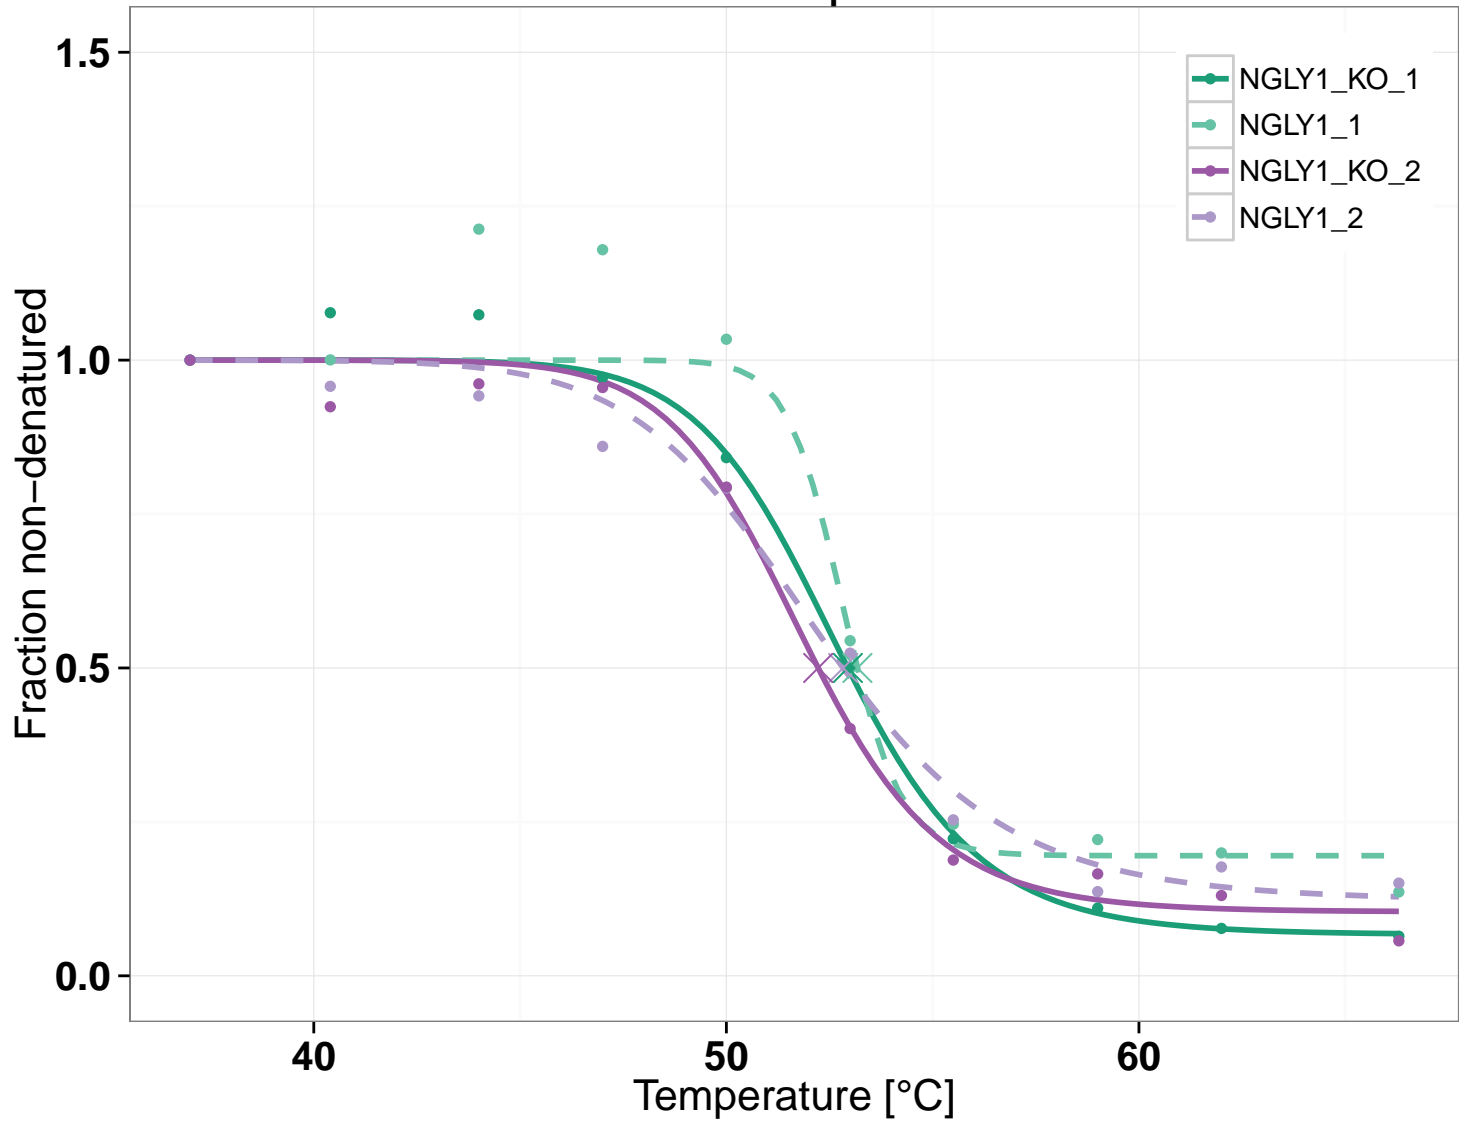

|            | meltPoint | slope  | plateau | R2   |
|------------|-----------|--------|---------|------|
| NGLY1_KO_1 | 52.94     | -0.14  | 0.07    | 0.99 |
| NGLY1_1    | 53.18     | -0.29  | 0.2     | 0.95 |
| NGLY1_KO_2 | 52.23     | -0.14  | 0.1     | 0.99 |
| NGLY1_2    | 52.83     | -0.097 | 0.12    | 0.99 |

Supplement: Supplementary file 6295 [file 1]

# IPI00016802.1|SIRT1

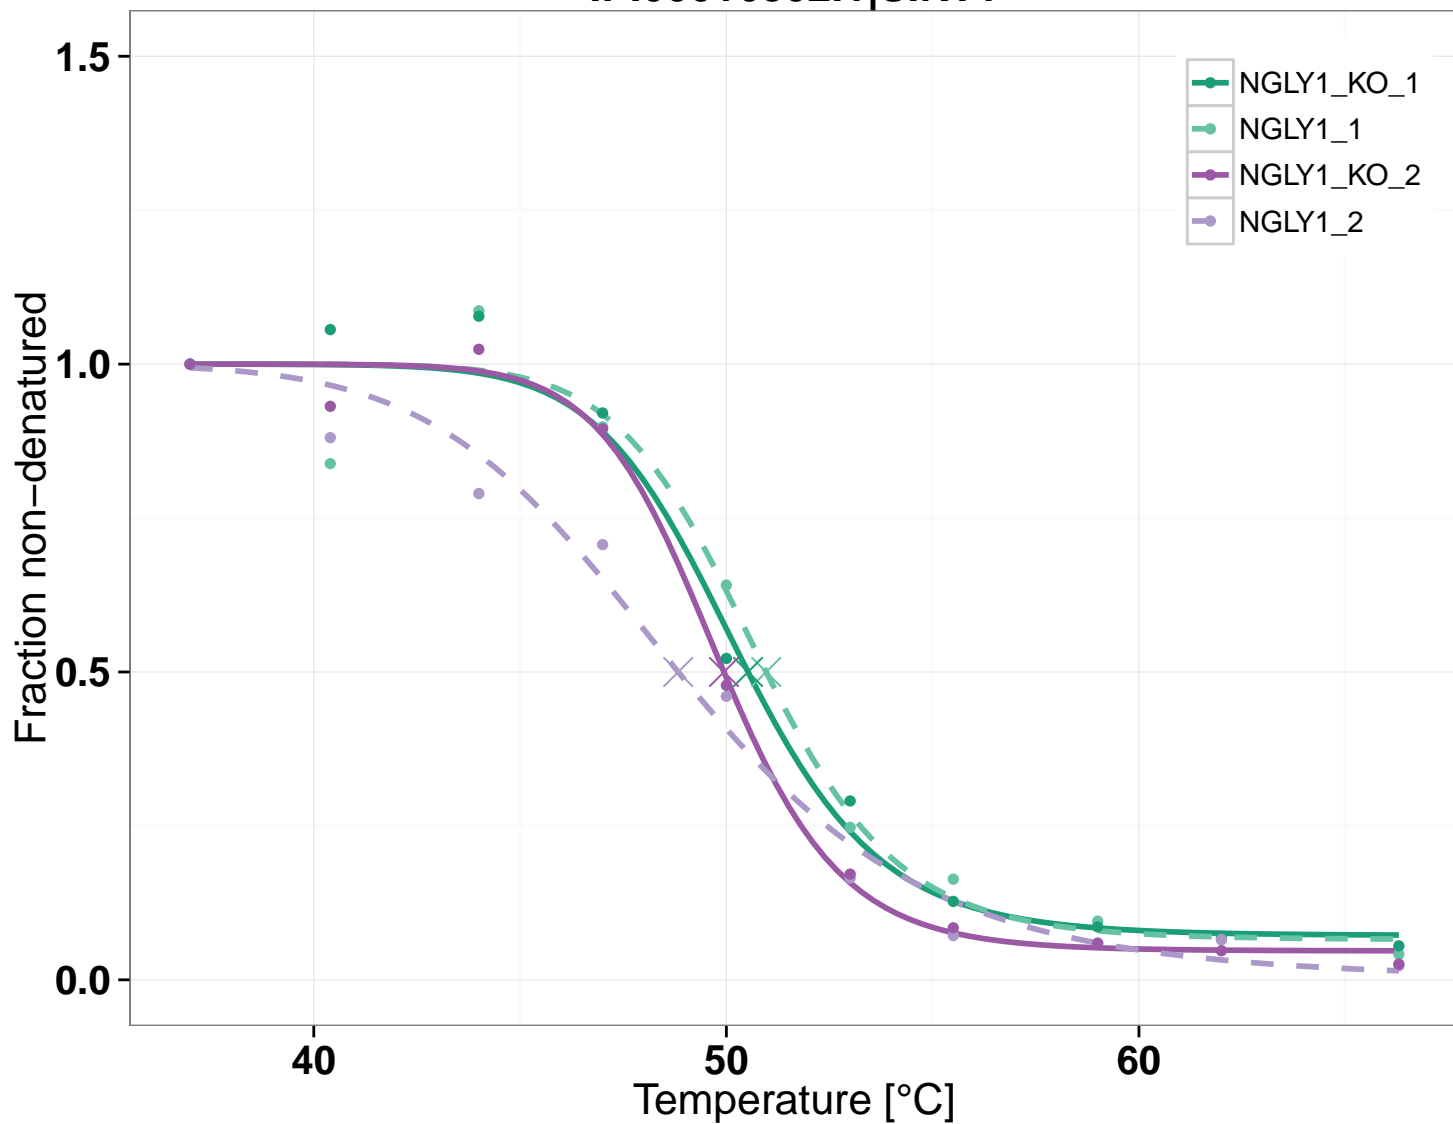

|            | meltPoint | slope  | plateau | R2   |
|------------|-----------|--------|---------|------|
| NGLY1_KO_1 | 50.52     | -0.13  | 0.07    | 0.99 |
| NGLY1_1    | 50.97     | -0.14  | 0.07    | 0.98 |
| NGLY1_KO_2 | 49.94     | -0.16  | 0.05    | 1    |
| NGLY1_2    | 48.83     | -0.083 | 0       | 0.98 |

Supplement: Supplementary file 6296 [file 1]

# IPI00289746.2|PAK1

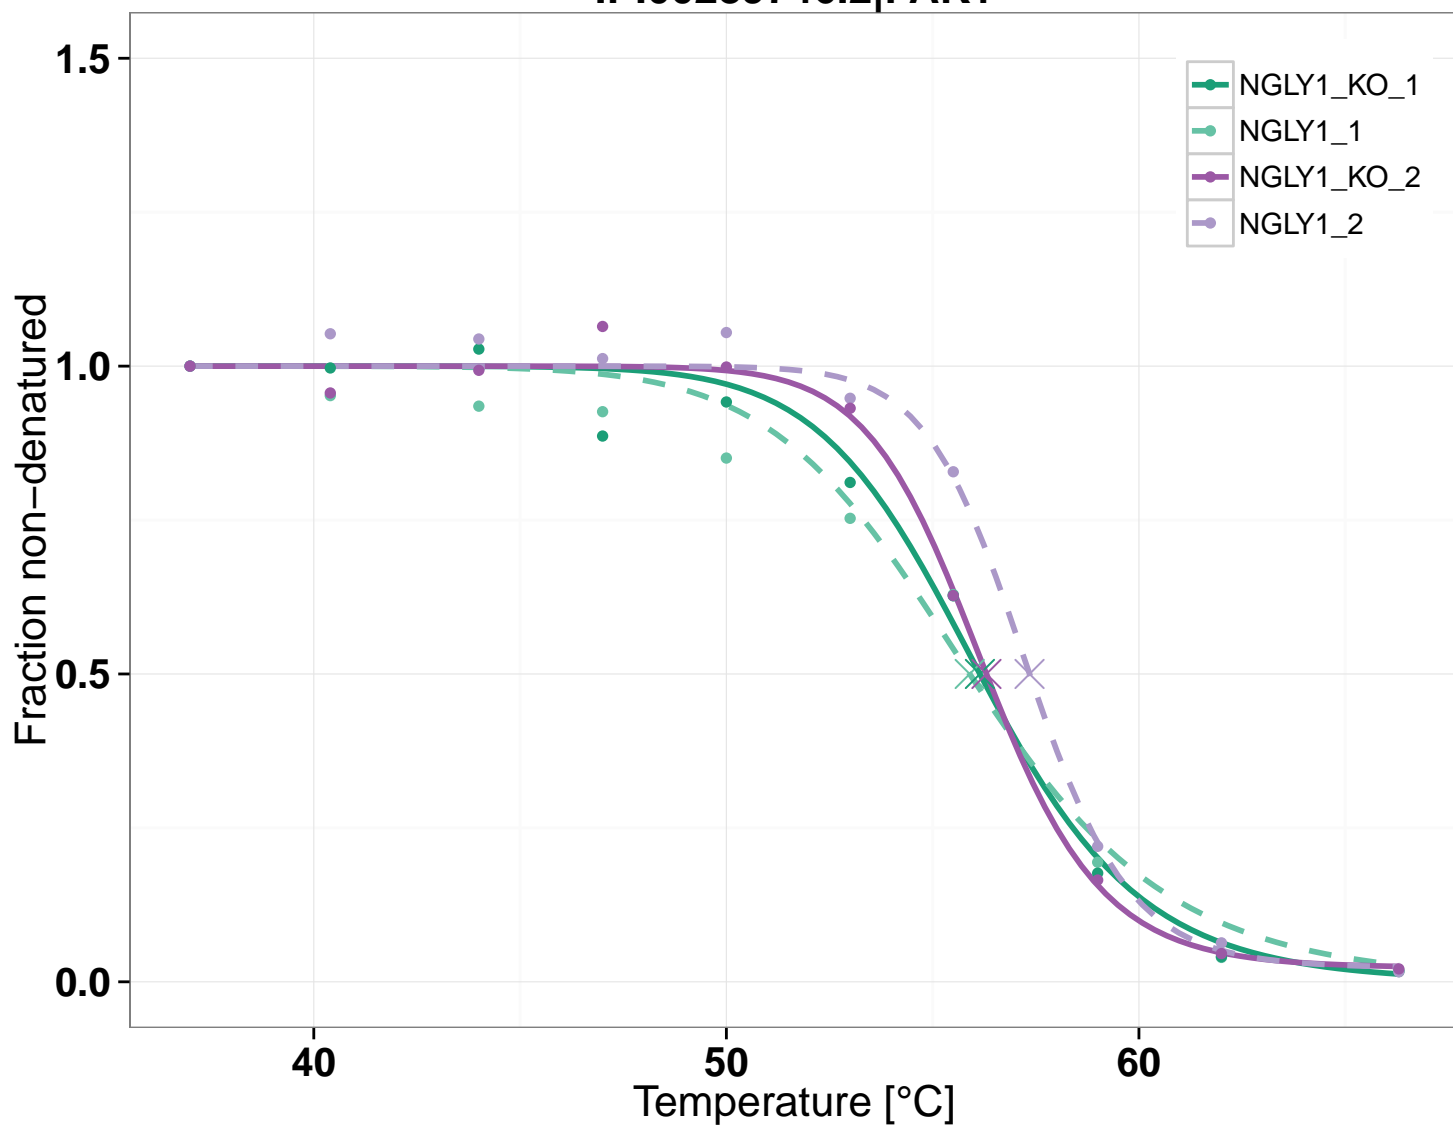

|            | meltPoint | slope | plateau | R2   |
|------------|-----------|-------|---------|------|
| NGLY1_KO_1 | 56.15     | -0.13 | 0       | 0.99 |
| NGLY1_1    | 55.9      | -0.1  | 0       | 0.98 |
| NGLY1_KO_2 | 56.3      | -0.17 | 0.02    | 1    |
| NGLY1_2    | 57.35     | -0.2  | 0.02    | 0.99 |

Supplement: Supplementary file 6297 [file 1]

# IPI00395463.3|CHMP7

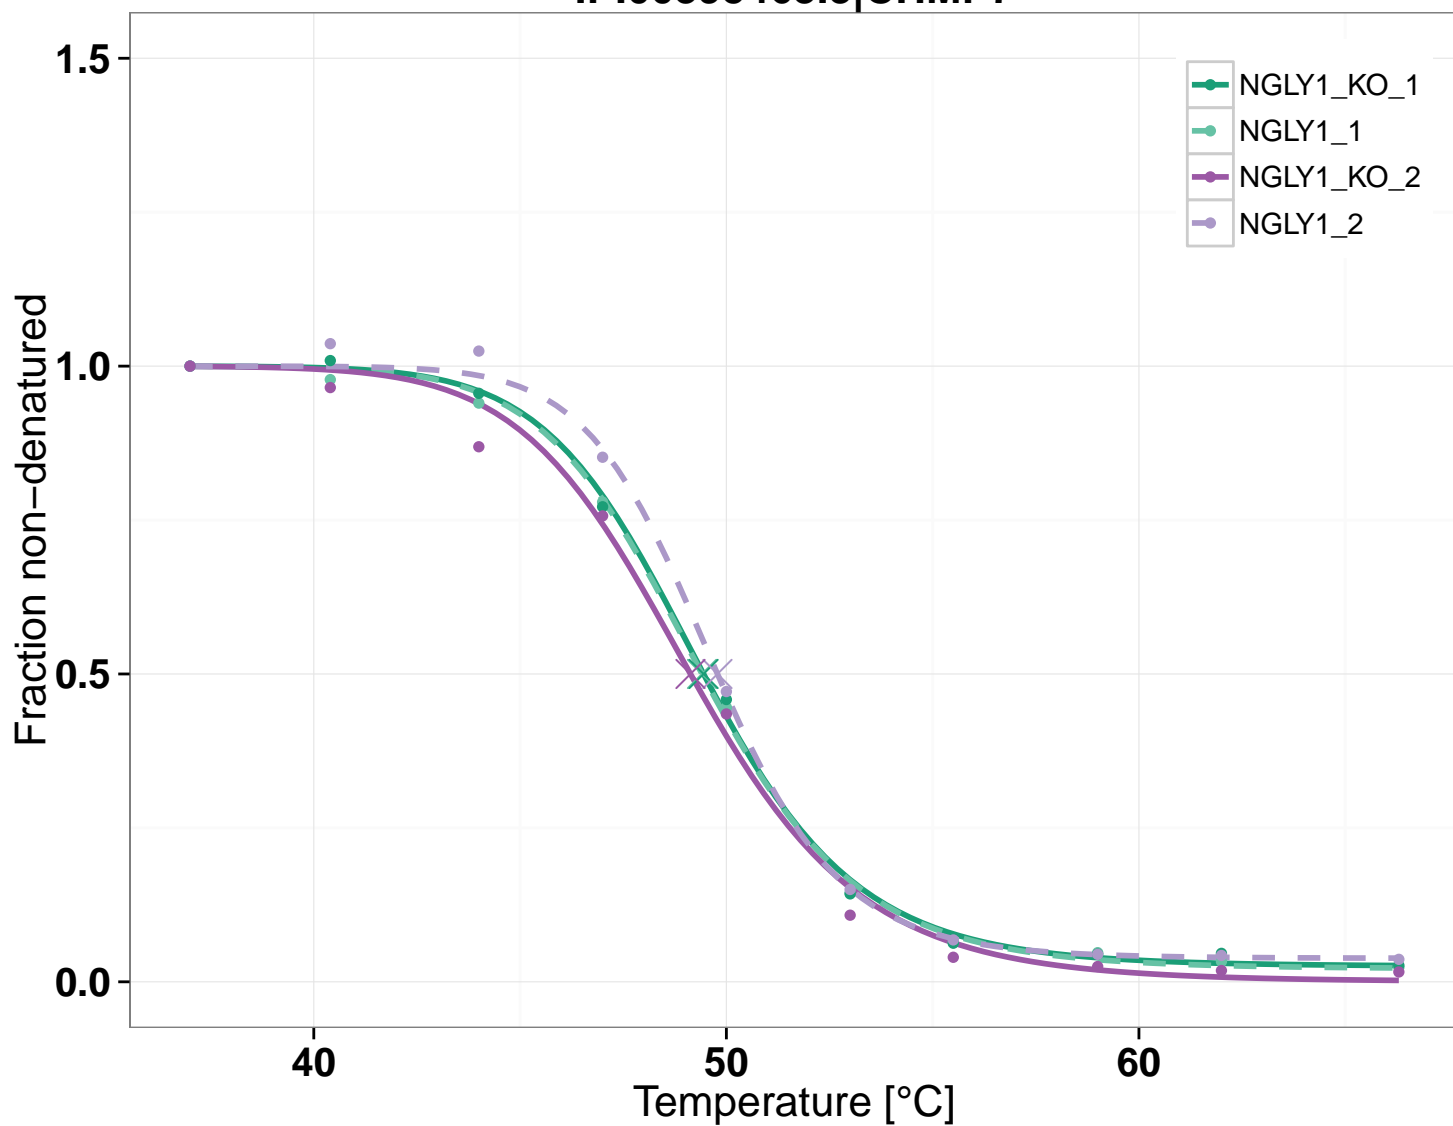

|            | meltPoint | slope | plateau | R2   |
|------------|-----------|-------|---------|------|
| NGLY1_KO_1 | 49.45     | -0.13 | 0.03    | 1    |
| NGLY1_1    | 49.41     | -0.13 | 0.02    | 1    |
| NGLY1_KO_2 | 49.13     | -0.12 | 0       | 0.99 |
| NGLY1_2    | 49.78     | -0.16 | 0.04    | 1    |

Supplement: Supplementary file 6298 [file 1]

IPI00915428.1|DNAH11

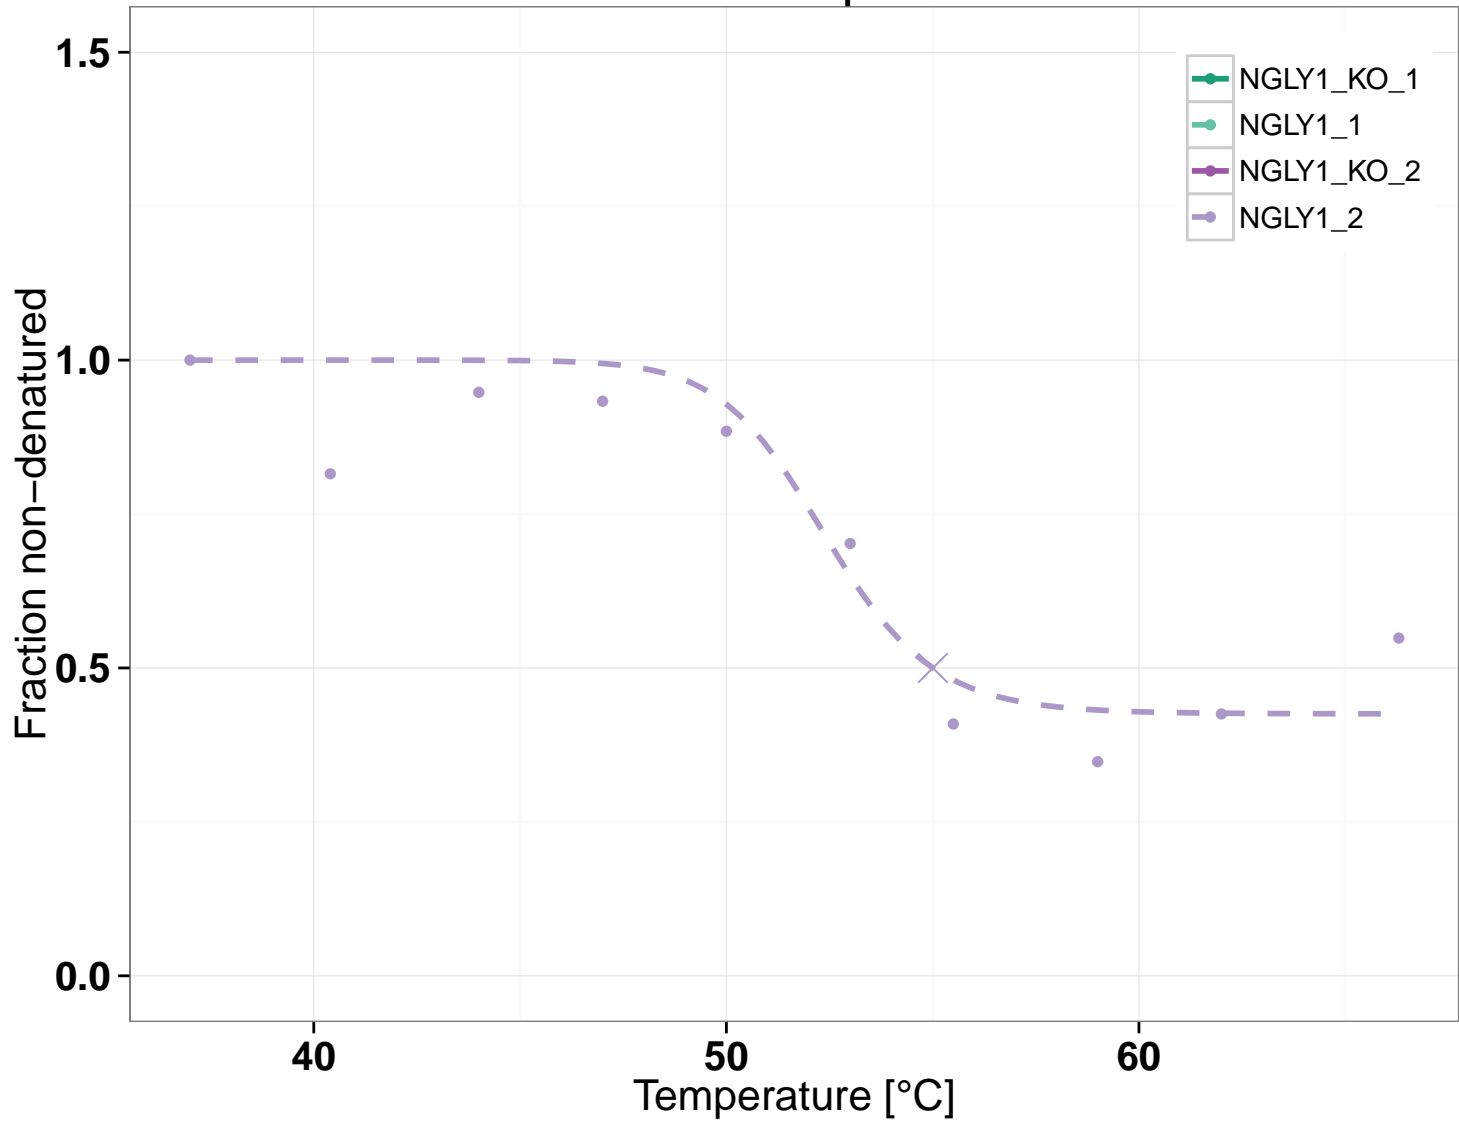

|            | meltPoint | slope | plateau | R2   |
|------------|-----------|-------|---------|------|
| NGLY1_KO_1 | -         | -     | -       | -    |
| NGLY1_1    | -         | -     | -       | -    |
| NGLY1_KO_2 | -         | -     | -       | -    |
| NGLY1_2    | 55.01     | -0.11 | 0.43    | 0.87 |

Supplement: Supplementary file 6299 [file 1]

# IPI00219078.5|ATP2A2

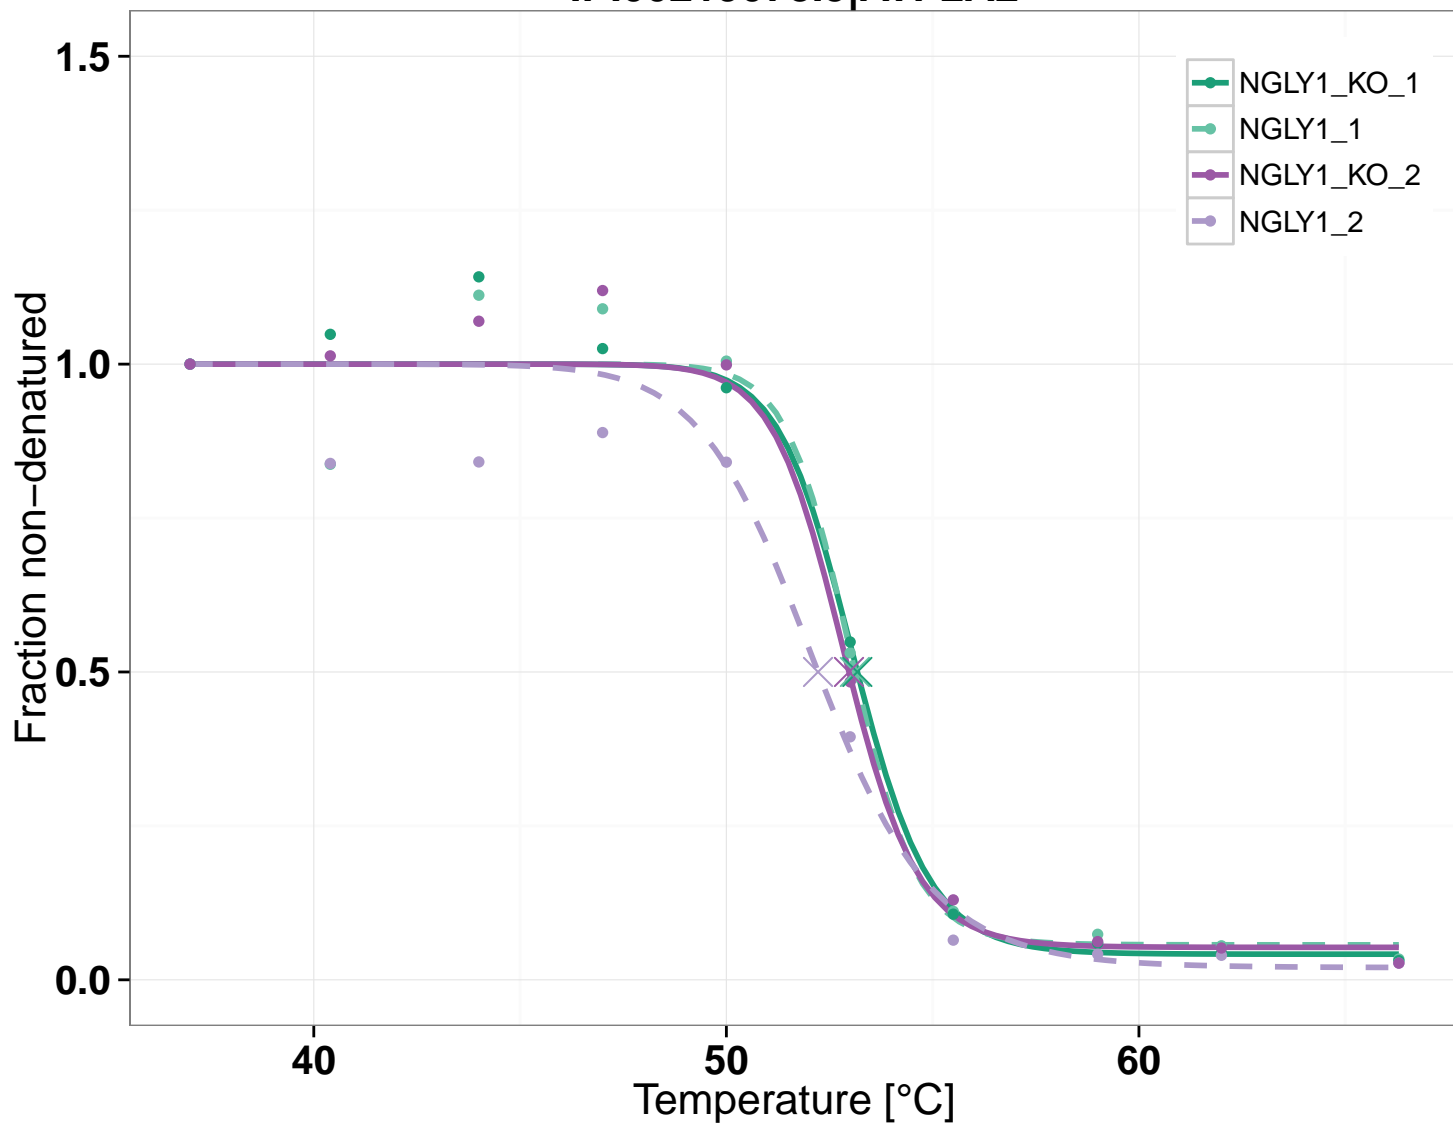

|            | meltPoint | slope | plateau | R2   |
|------------|-----------|-------|---------|------|
| NGLY1_KO_1 | 53.17     | -0.26 | 0.04    | 0.99 |
| NGLY1_1    | 53.12     | -0.3  | 0.06    | 0.98 |
| NGLY1_KO_2 | 52.97     | -0.27 | 0.05    | 0.99 |
| NGLY1_2    | 52.22     | -0.17 | 0.02    | 0.96 |

Supplement: Supplementary file 6300 [file 1]

IPI00298405.3|TMEM159

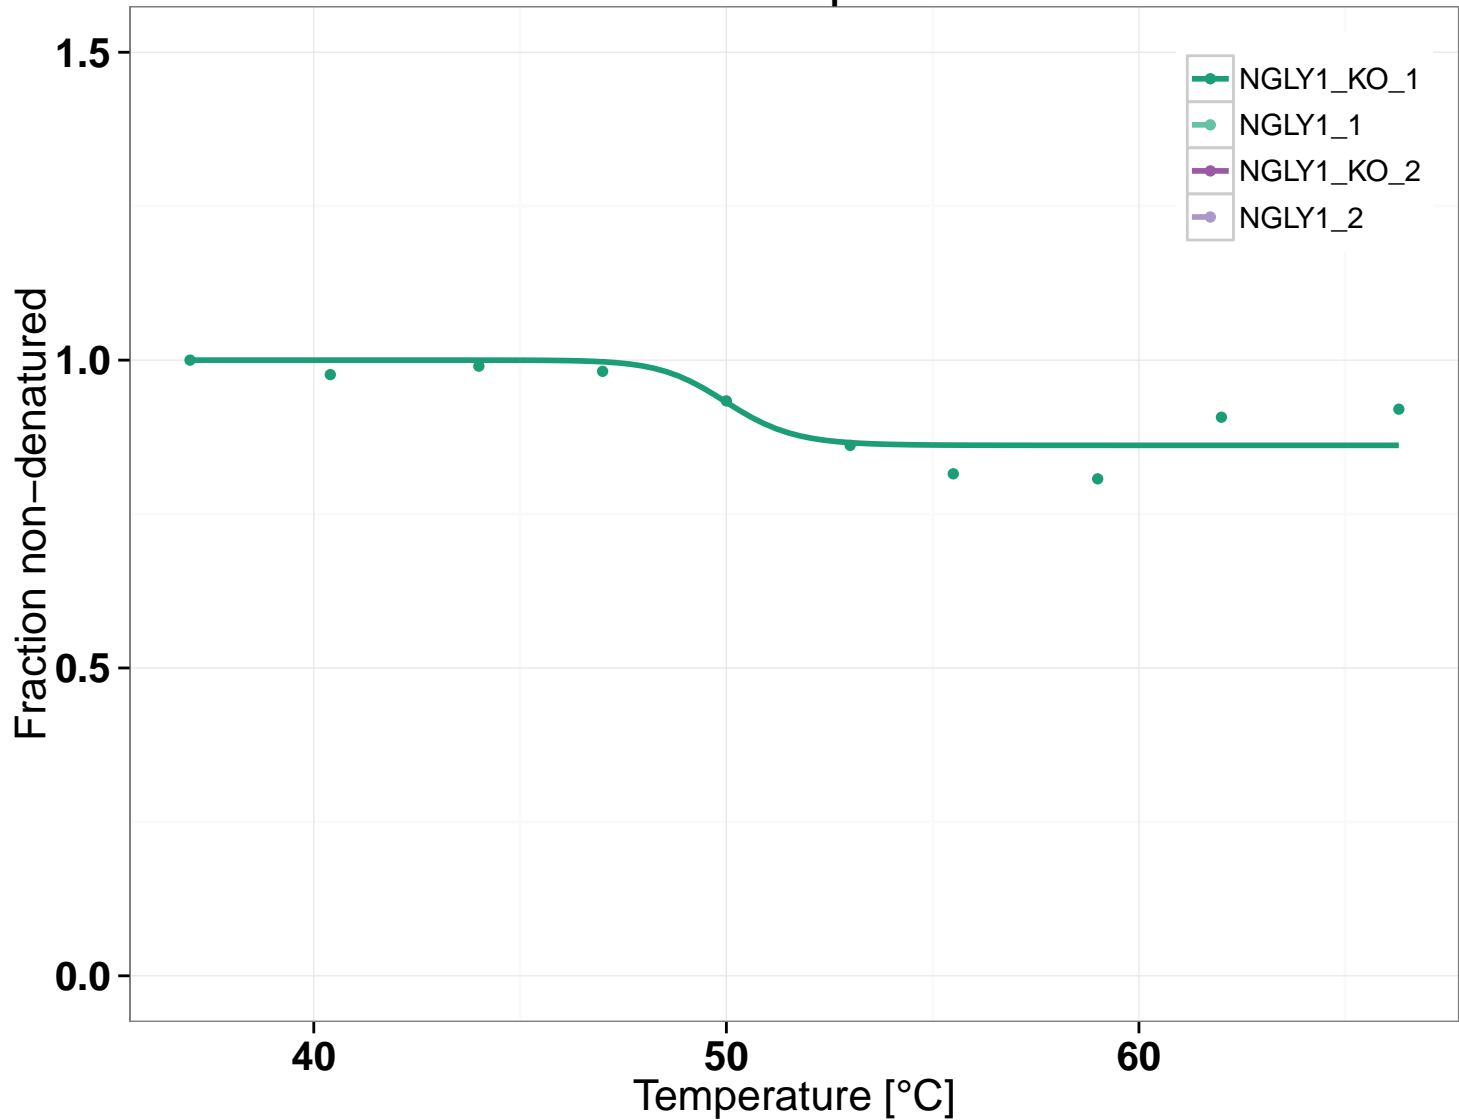

|            | meltPoint | slope  | plateau | R2   |
|------------|-----------|--------|---------|------|
| NGLY1_KO_1 | 40.8      | -0.042 | 0.86    | 0.75 |
| NGLY1_1    | -         | -      | -       | -    |
| NGLY1_KO_2 | -         | -      | -       | -    |
| NGLY1_2    | -         | -      | -       | -    |

Supplement: Supplementary file 6301 [file 1]

IPI00152420.2|ZNF398

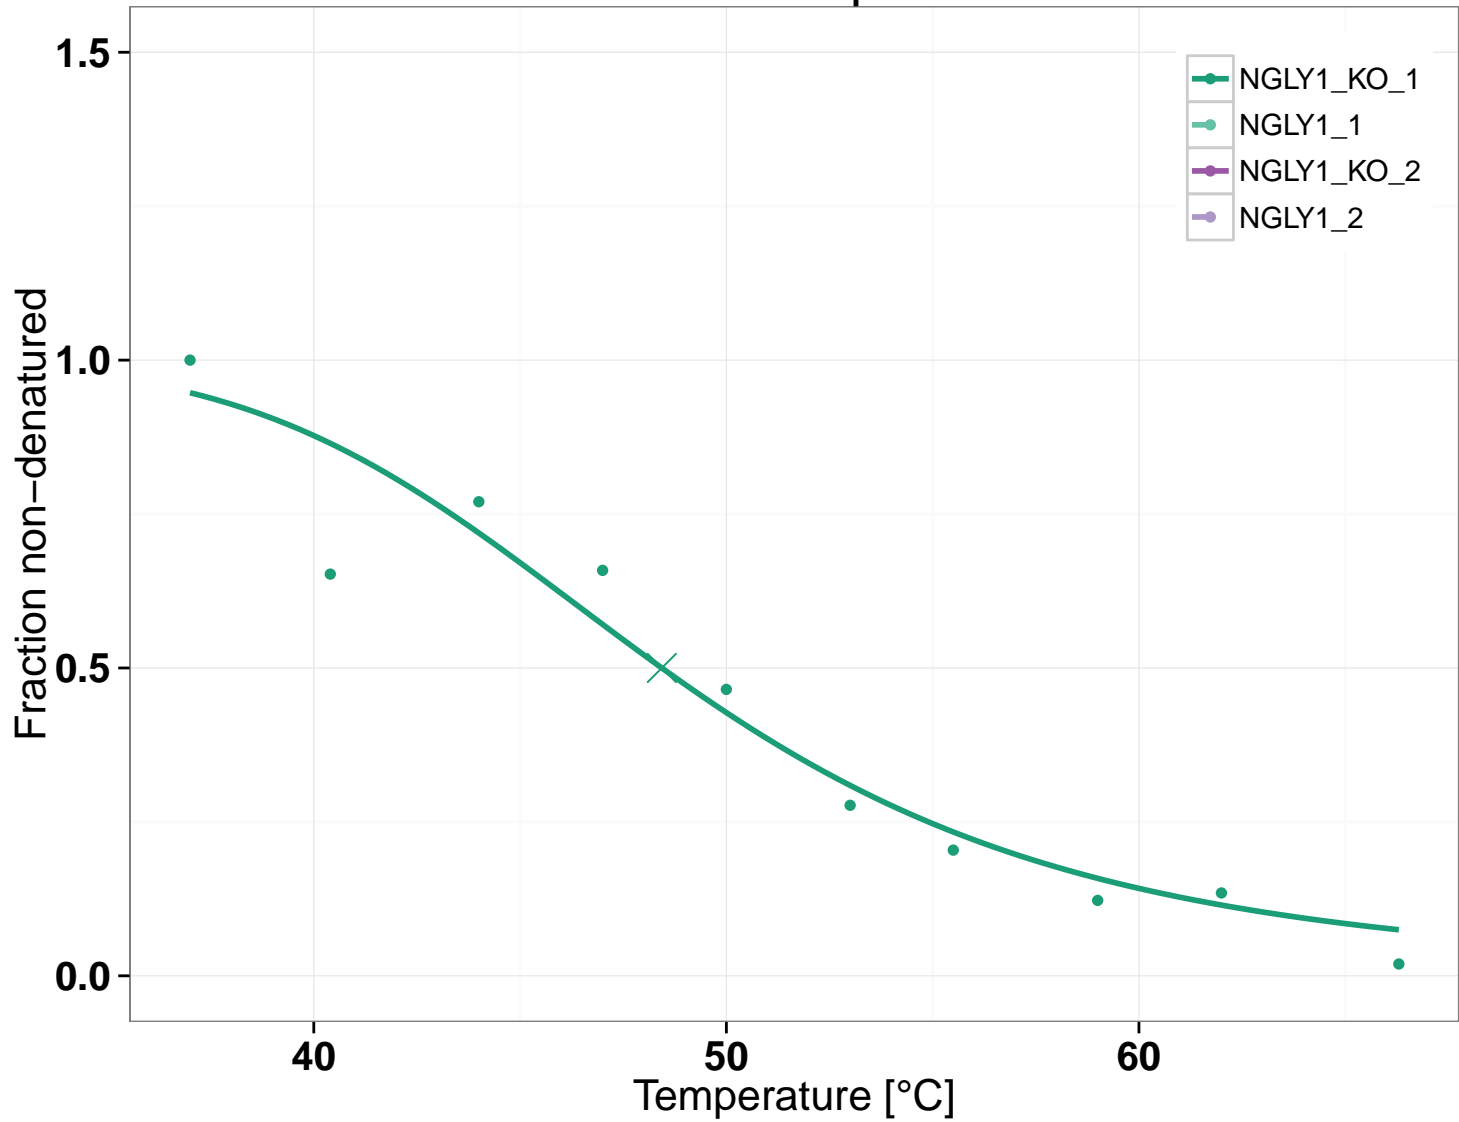

|            | meltPoint | slope | plateau | R2   |
|------------|-----------|-------|---------|------|
| NGLY1_KO_1 | 48.44     | -0.05 | 0       | 0.93 |
| NGLY1_1    | -         | -     | -       | -    |
| NGLY1_KO_2 | -         | -     | -       | -    |
| NGLY1_2    | -         | -     | -       | -    |

Supplement: Supplementary file 6302 [file 1]

IPI00549169.4|C7ORF36

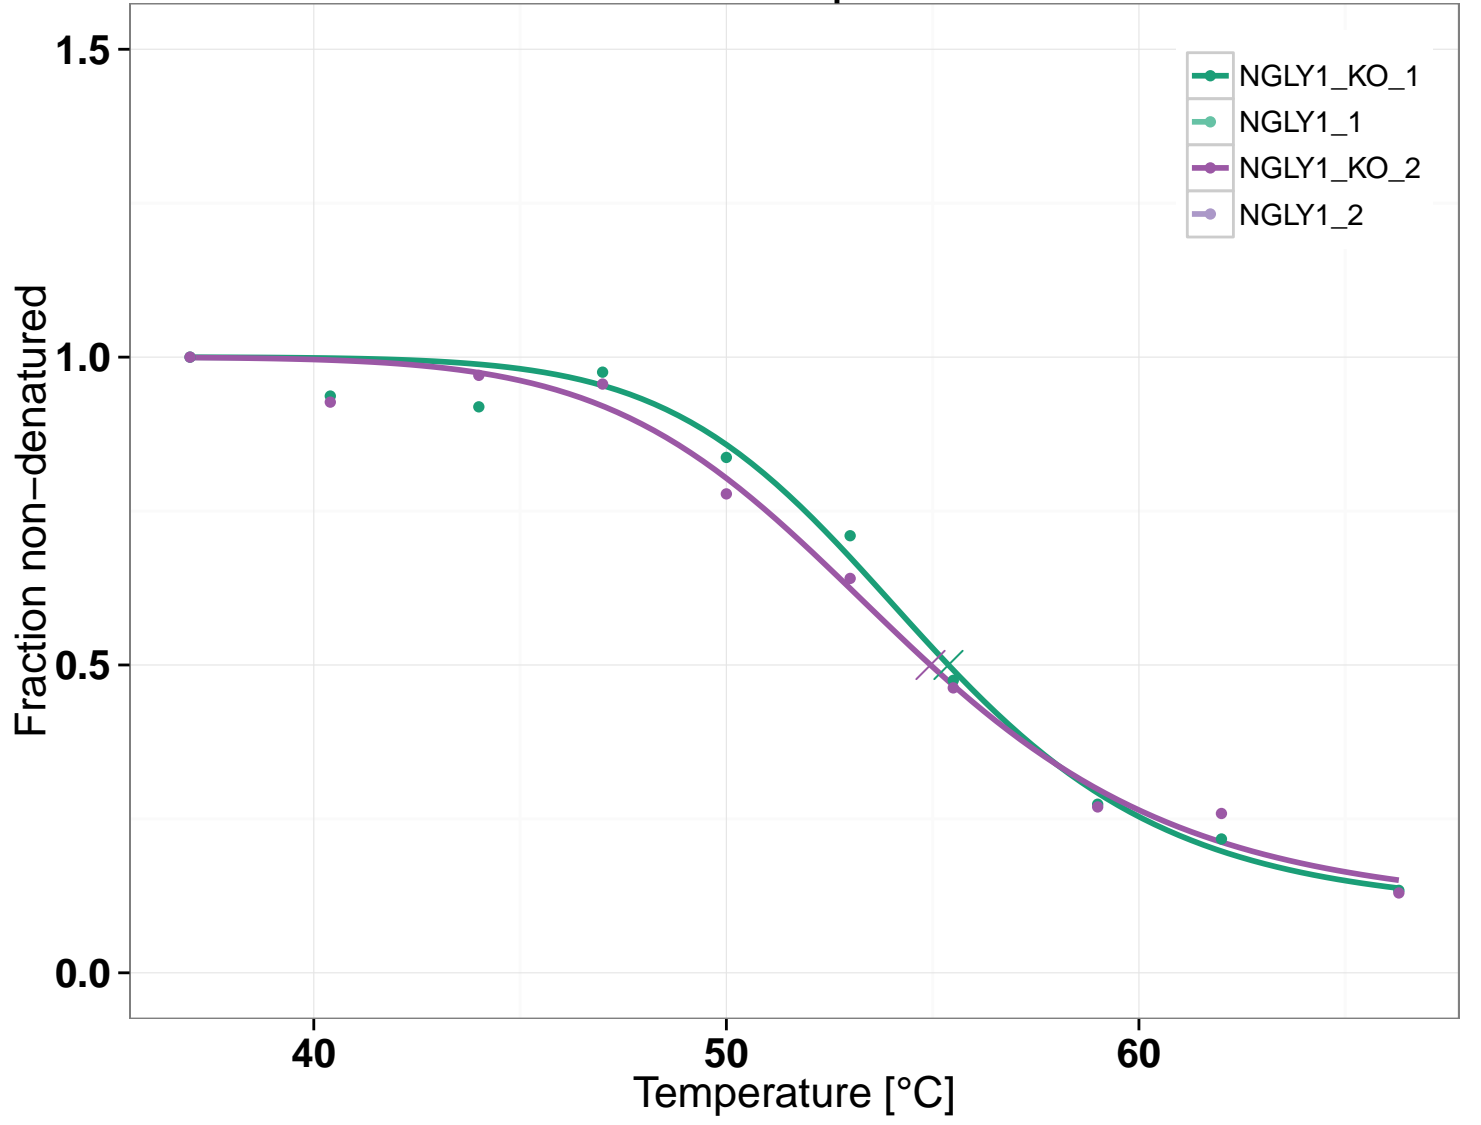

|            | meltPoint | slope  | plateau | R2   |
|------------|-----------|--------|---------|------|
| NGLY1_KO_1 | 55.38     | -0.074 | 0.1     | 0.99 |
| NGLY1_1    | -         | -      | -       | -    |
| NGLY1_KO_2 | 54.95     | -0.065 | 0.1     | 0.99 |
| NGLY1_2    | -         | -      | -       | -    |

Supplement: Supplementary file 6303 [file 1]

IPI00007191.1|IFITM1

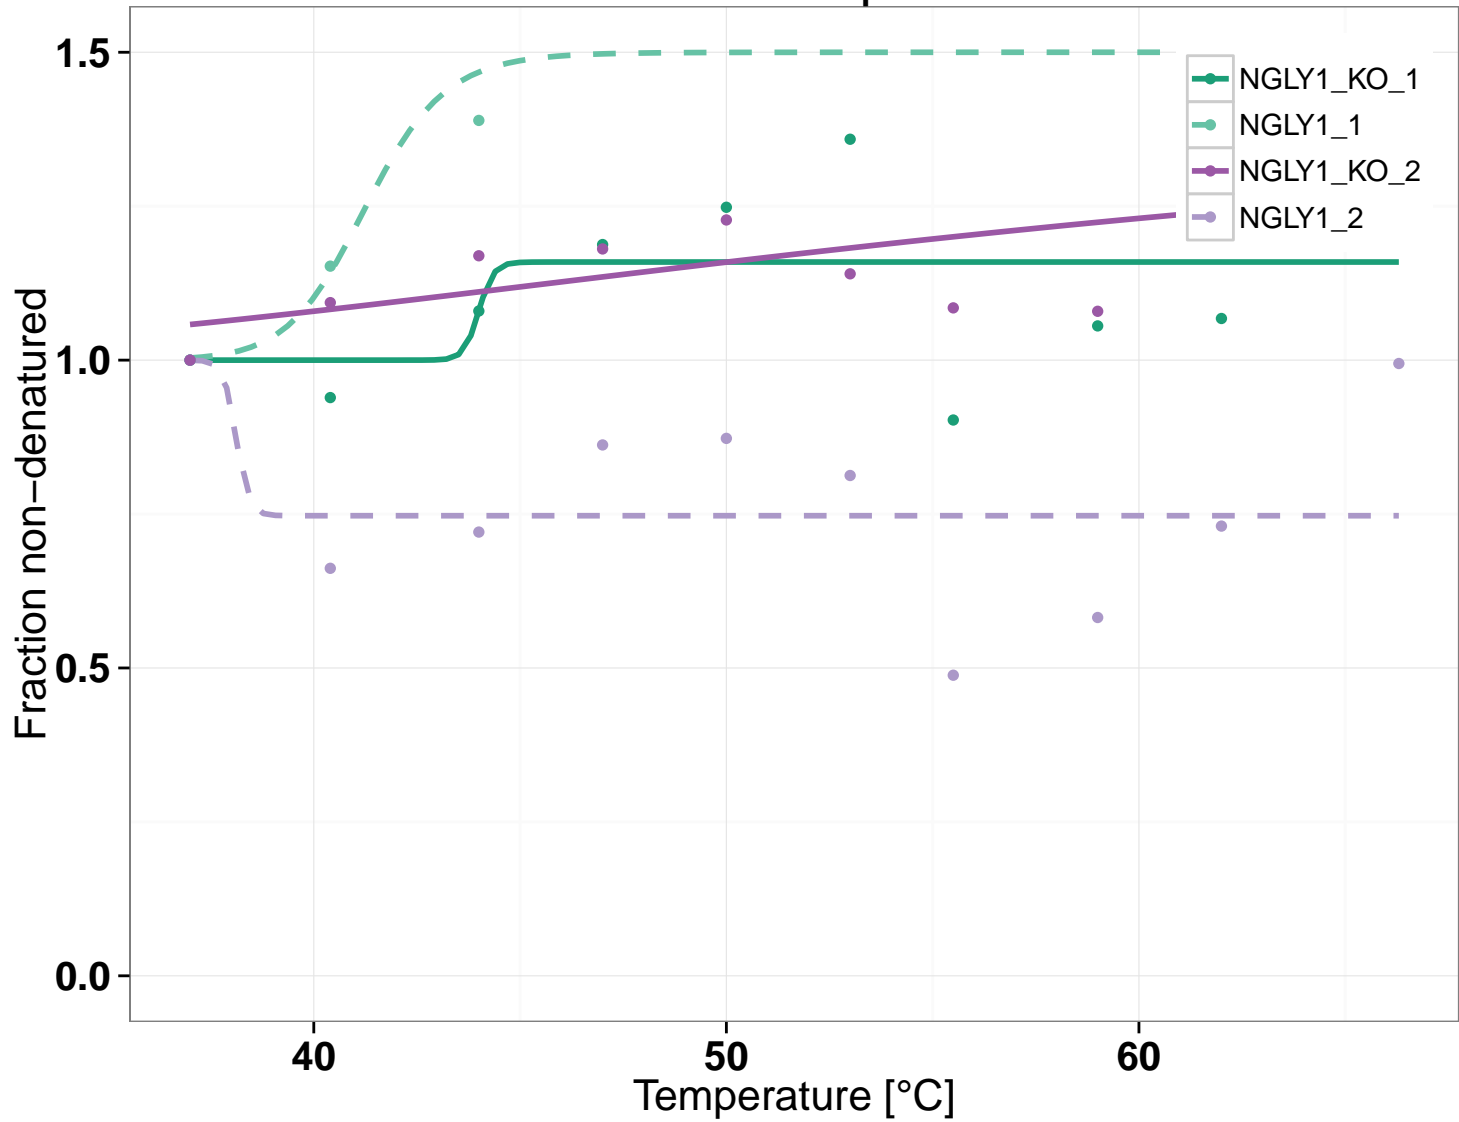

|            | meltPoint | slope  | plateau | R2    |
|------------|-----------|--------|---------|-------|
| NGLY1_KO_1 | -         | 0.23   | 1.16    | 0.26  |
| NGLY1_1    | -         | 0.13   | 1.5     | -0.39 |
| NGLY1_KO_2 | -         | 0.0081 | 1.5     | 0.4   |
| NGLY1_2    | -         | -0.41  | 0.75    | 0.23  |

Supplement: Supplementary file 6304 [file 1]

IPI00028276.5|UNK

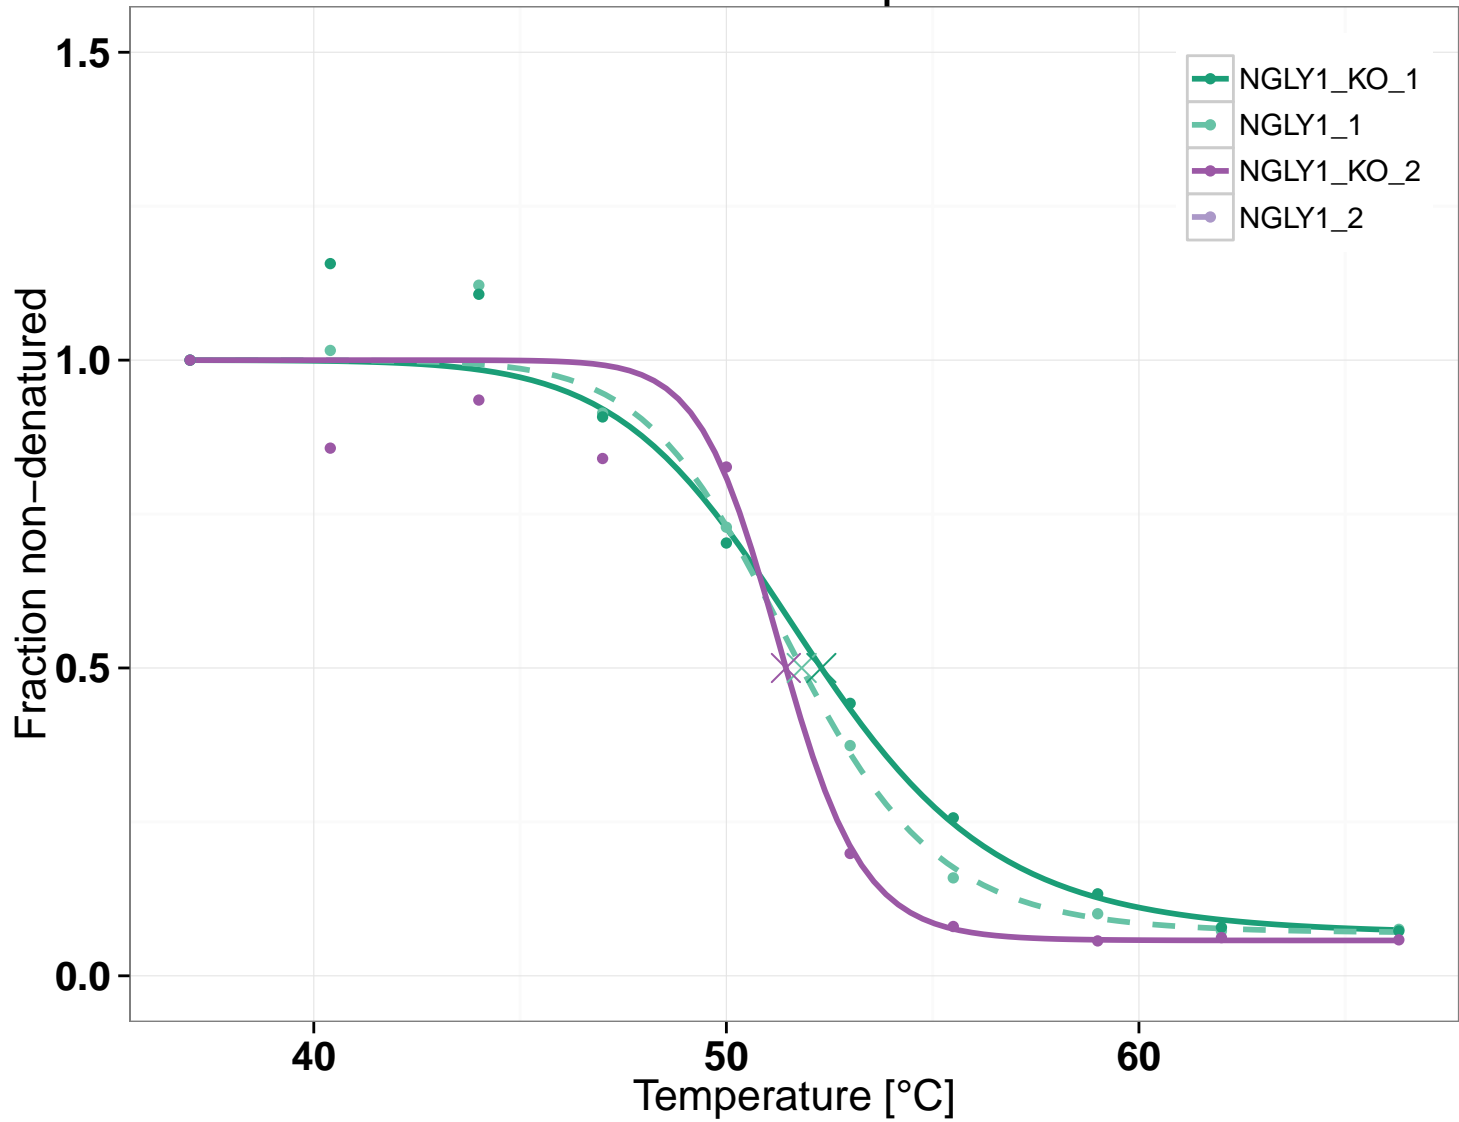

|            | meltPoint | slope | plateau | R2   |
|------------|-----------|-------|---------|------|
| NGLY1_KO_1 | 52.3      | -0.1  | 0.07    | 0.98 |
| NGLY1_1    | 51.83     | -0.13 | 0.07    | 0.99 |
| NGLY1_KO_2 | 51.44     | -0.24 | 0.06    | 0.97 |
| NGLY1_2    | -         | -     | -       | -    |

Supplement: Supplementary file 6305 [file 1]

# IPI00792743.1|SLTM

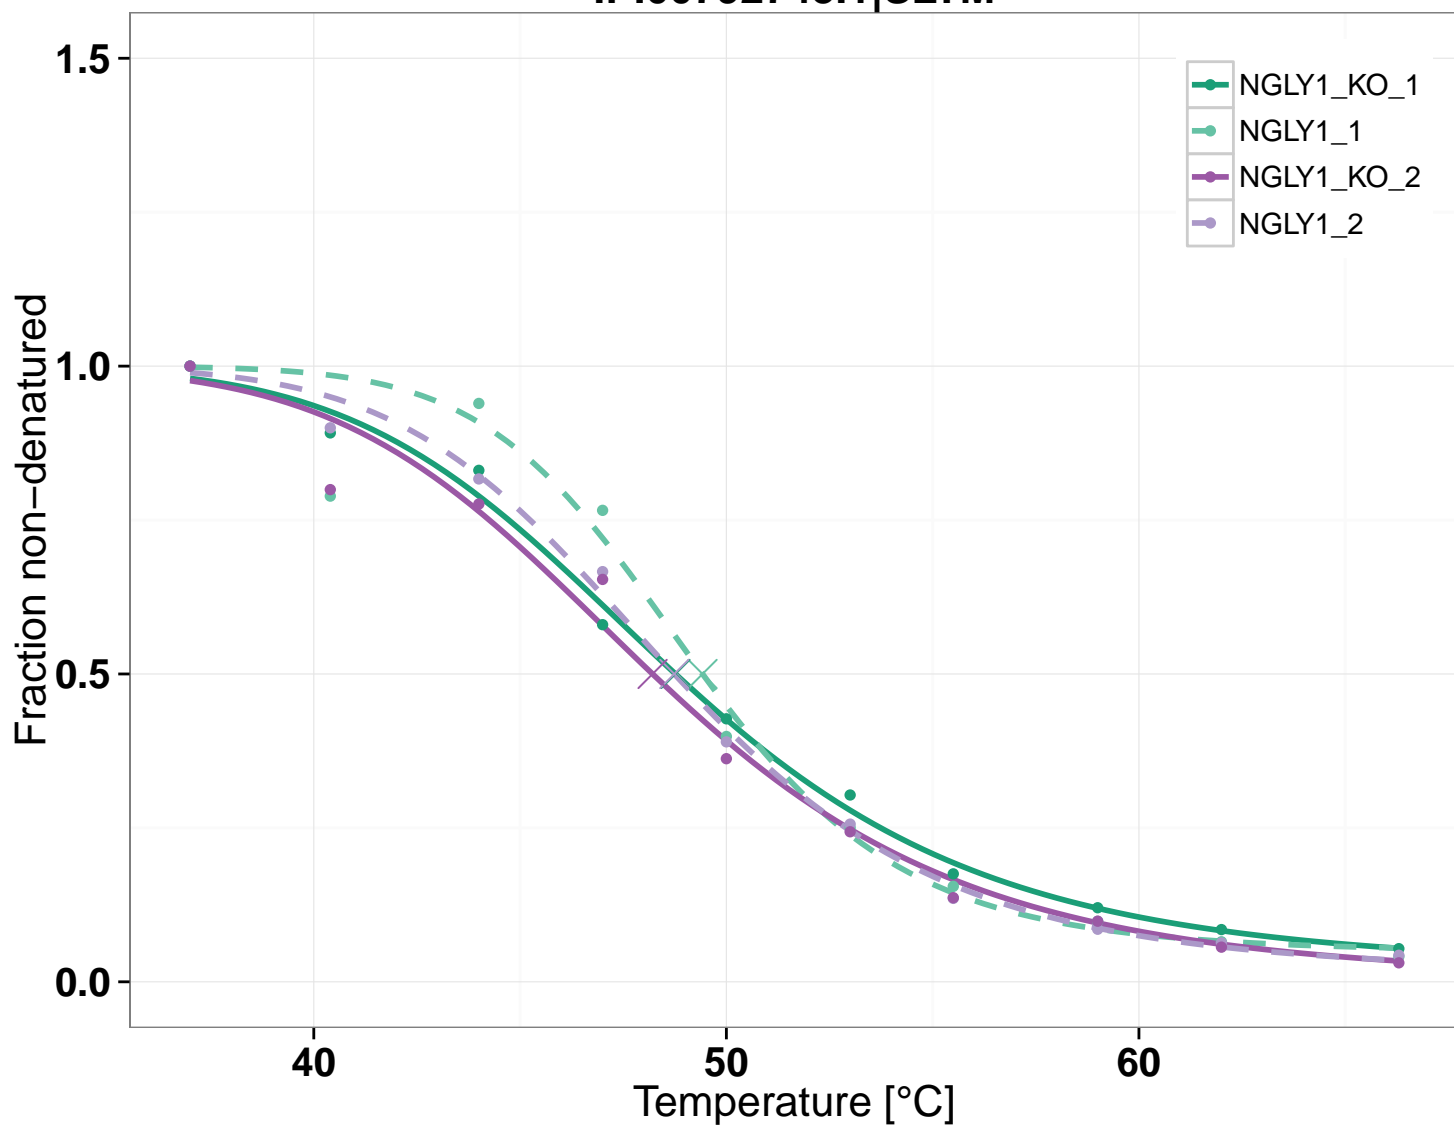

|            | meltPoint | slope  | plateau | R2   |
|------------|-----------|--------|---------|------|
| NGLY1_KO_1 | 48.77     | -0.064 | 0.02    | 1    |
| NGLY1_1    | 49.42     | -0.094 | 0.05    | 0.97 |
| NGLY1_KO_2 | 48.21     | -0.065 | 0       | 0.98 |
| NGLY1_2    | 48.74     | -0.074 | 0.01    | 1    |

Supplement: Supplementary file 6306 [file 1]

IPI00412441.4|WAPAL

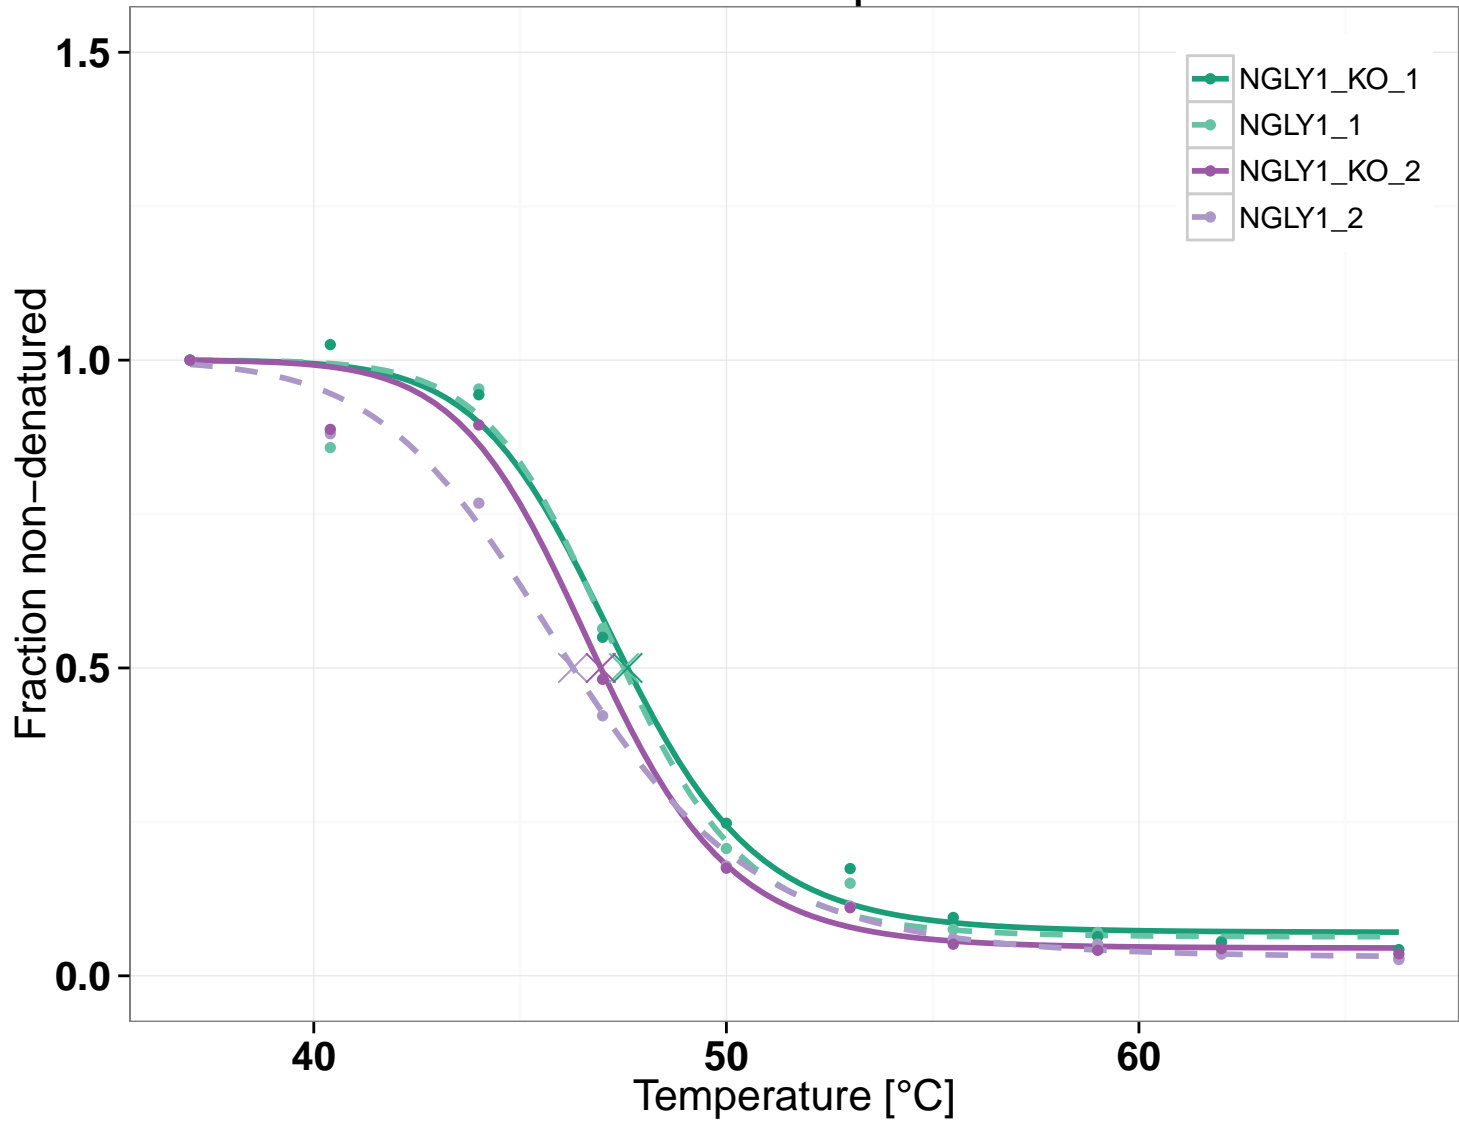

|            | meltPoint | slope | plateau | R2   |
|------------|-----------|-------|---------|------|
| NGLY1_KO_1 | 47.6      | -0.14 | 0.07    | 0.99 |
| NGLY1_1    | 47.52     | -0.15 | 0.06    | 0.98 |
| NGLY1_KO_2 | 46.96     | -0.14 | 0.05    | 0.99 |
| NGLY1_2    | 46.28     | -0.11 | 0.03    | 1    |

Supplement: Supplementary file 6307 [file 1]

IPI00010133.3|CORO1A

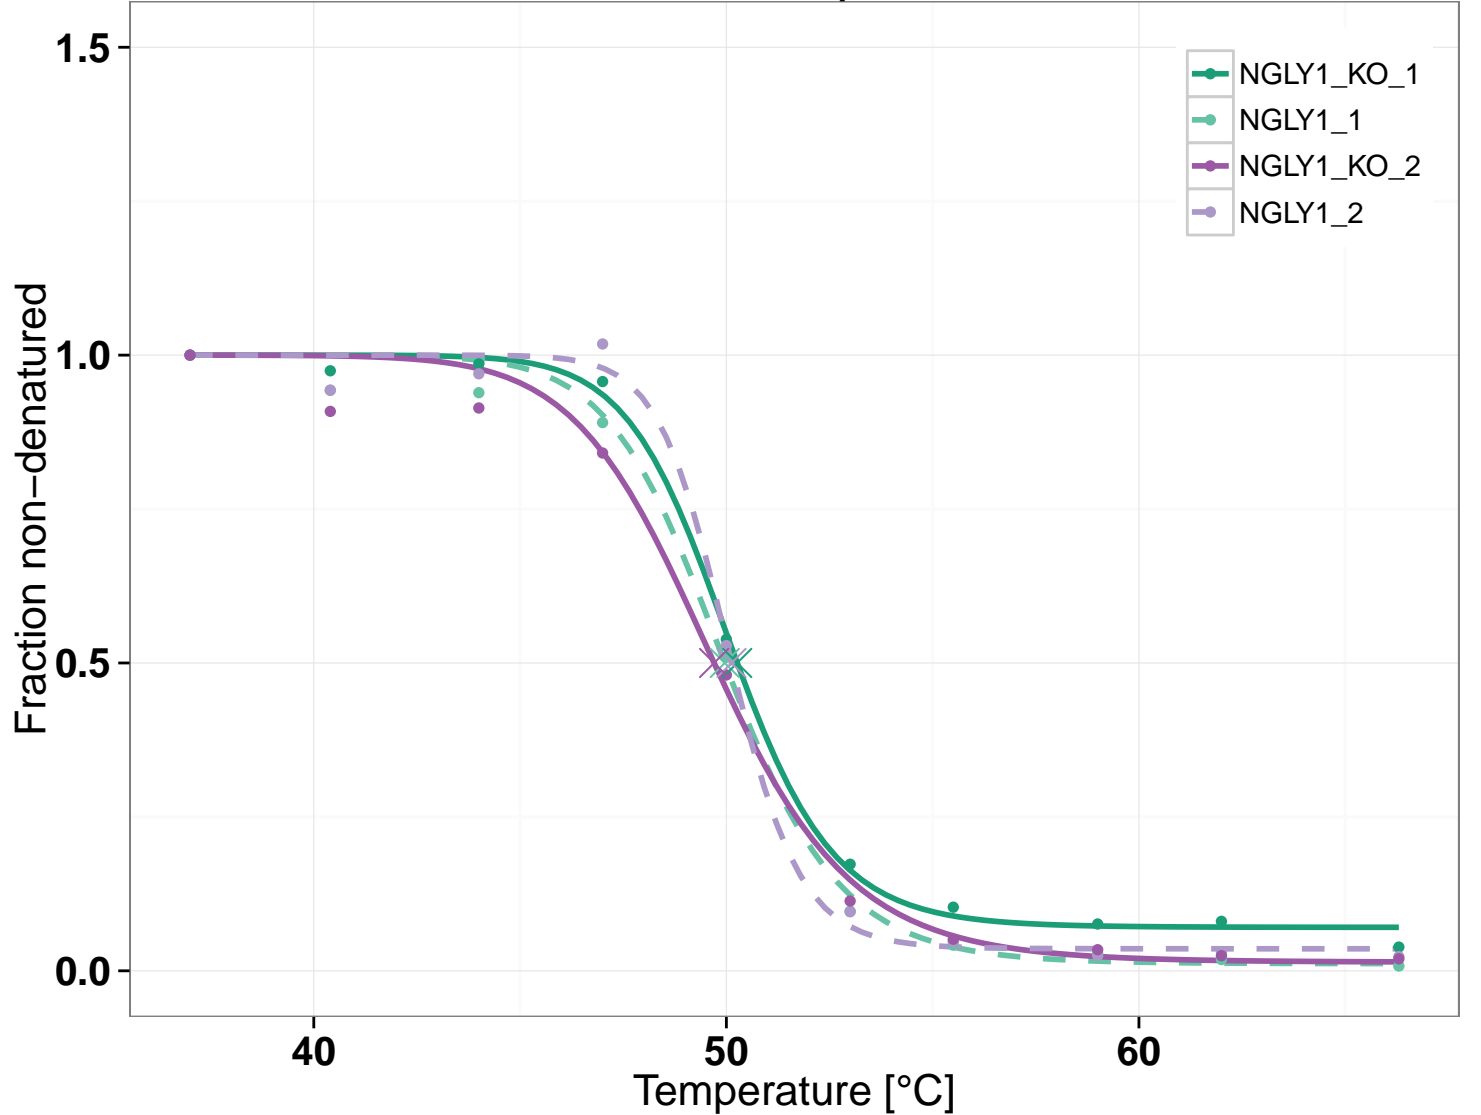

|            | meltPoint | slope | plateau | R2   |
|------------|-----------|-------|---------|------|
| NGLY1_KO_1 | 50.26     | -0.19 | 0.07    | 1    |
| NGLY1_1    | 49.96     | -0.18 | 0.01    | 1    |
| NGLY1_KO_2 | 49.7      | -0.15 | 0.01    | 0.99 |
| NGLY1_2    | 50.12     | -0.28 | 0.04    | 1    |

Supplement: Supplementary file 6308 [file 1]

IPI00303401.4|TMEM206

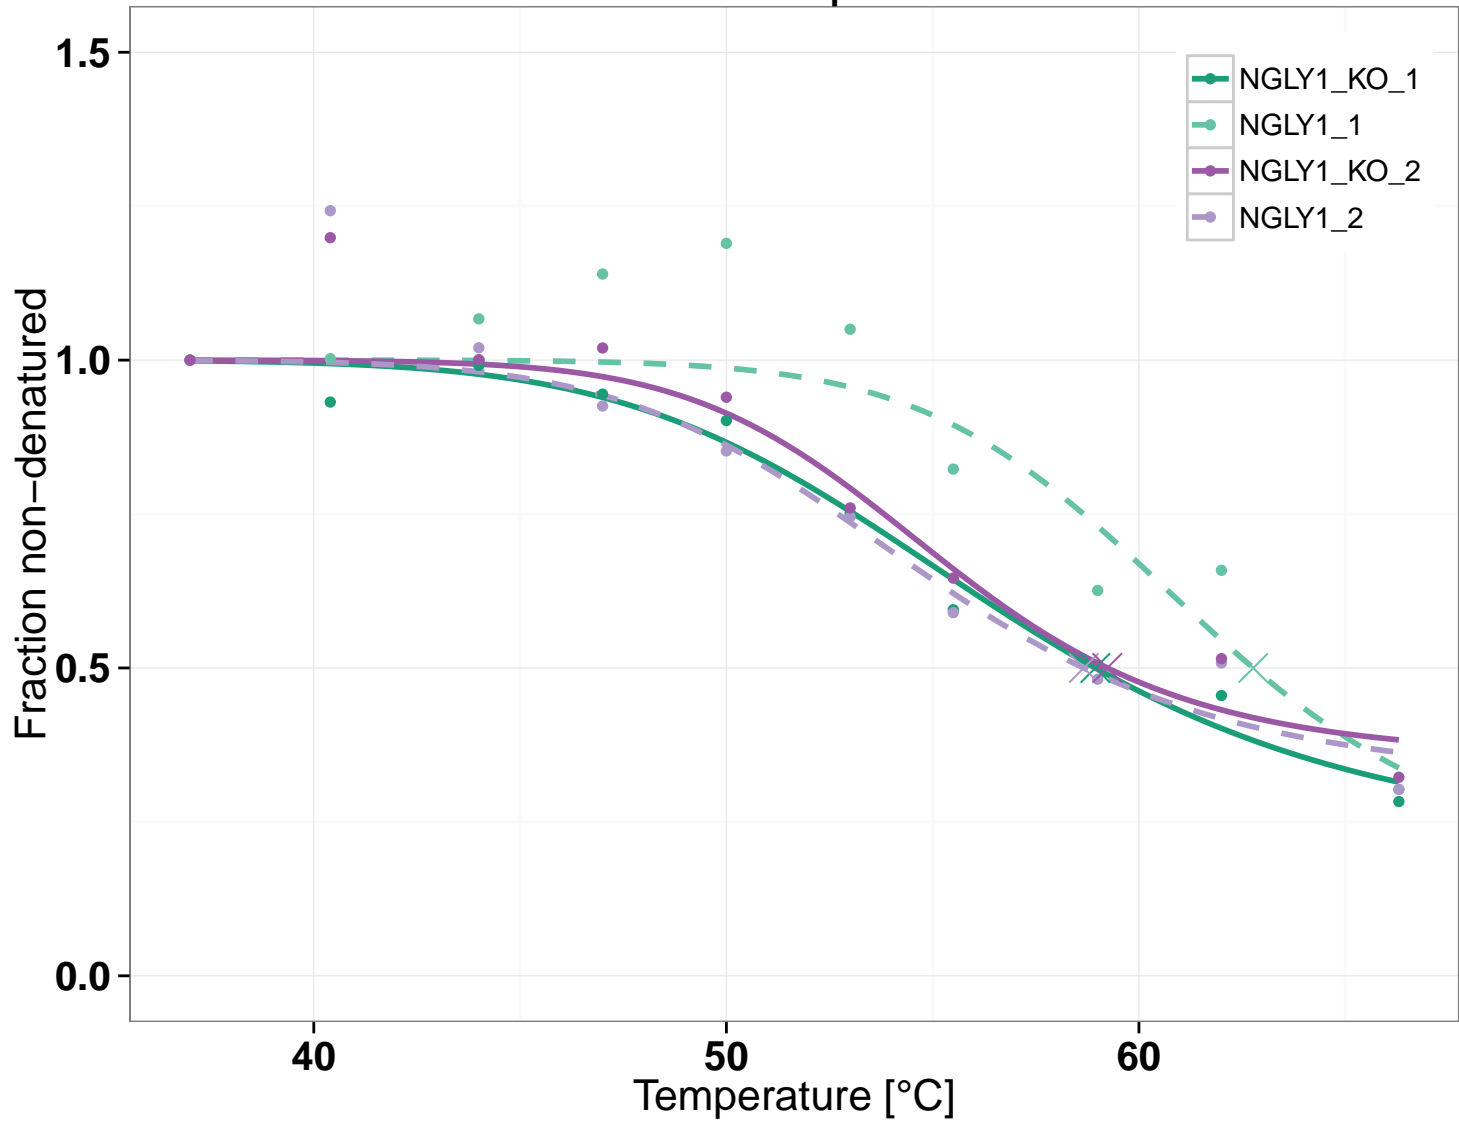

|            | meltPoint | slope  | plateau | R2   |
|------------|-----------|--------|---------|------|
| NGLY1_KO_1 | 58.94     | -0.045 | 0.21    | 0.98 |
| NGLY1_1    | 62.77     | -0.063 | 0.17    | 0.85 |
| NGLY1_KO_2 | 59.23     | -0.053 | 0.35    | 0.92 |
| NGLY1_2    | 58.66     | -0.047 | 0.31    | 0.9  |

Supplement: Supplementary file 6309 [file 1]

IPI00871704.1|DIAPH3

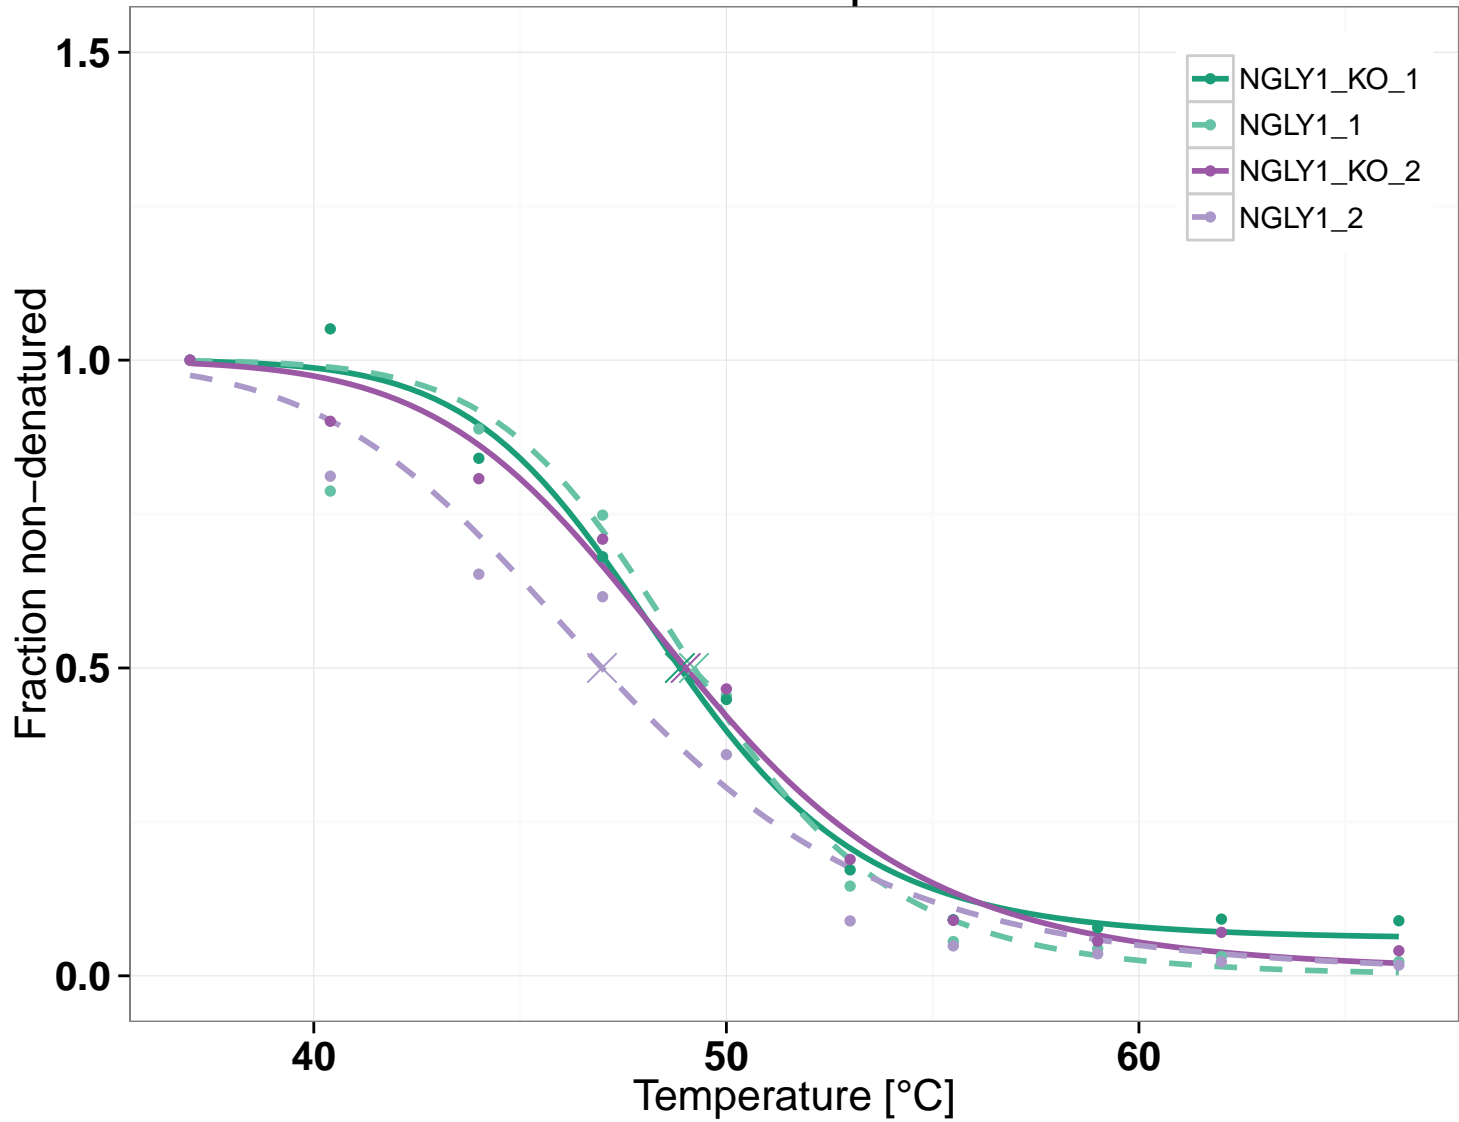

|            | meltPoint | slope  | plateau | R2   |
|------------|-----------|--------|---------|------|
| NGLY1_KO_1 | 48.87     | -0.098 | 0.06    | 0.99 |
| NGLY1_1    | 49.22     | -0.1   | 0       | 0.97 |
| NGLY1_KO_2 | 49.01     | -0.083 | 0.01    | 0.99 |
| NGLY1_2    | 46.98     | -0.074 | 0       | 0.97 |

Supplement: Supplementary file 6310 [file 1]

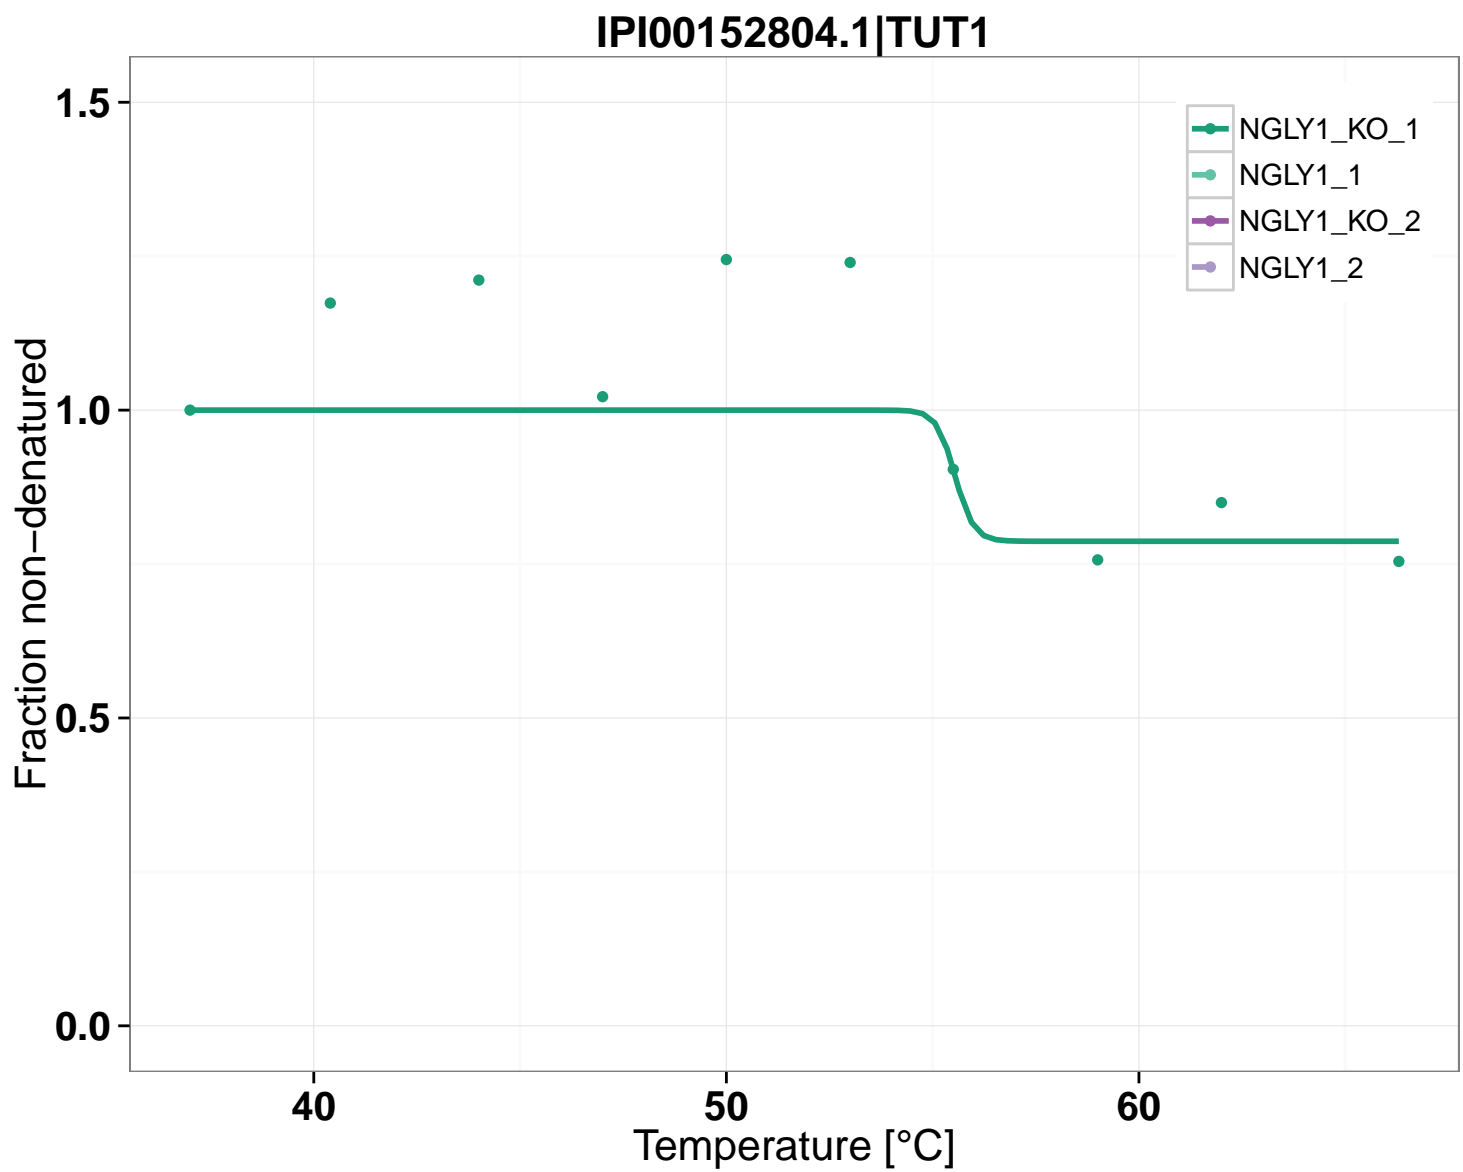

|            | meltPoint | slope | plateau | R2   |
|------------|-----------|-------|---------|------|
| NGLY1_KO_1 | —         | -0.24 | 0.79    | 0.42 |
| NGLY1_1    | —         | —     | —       | —    |
| NGLY1_KO_2 | —         | —     | —       | —    |
| NGLY1_2    | —         | —     | —       | —    |

Supplement: Supplementary file 6311 [file 1]

# IPI00028068.3|SLC25A19

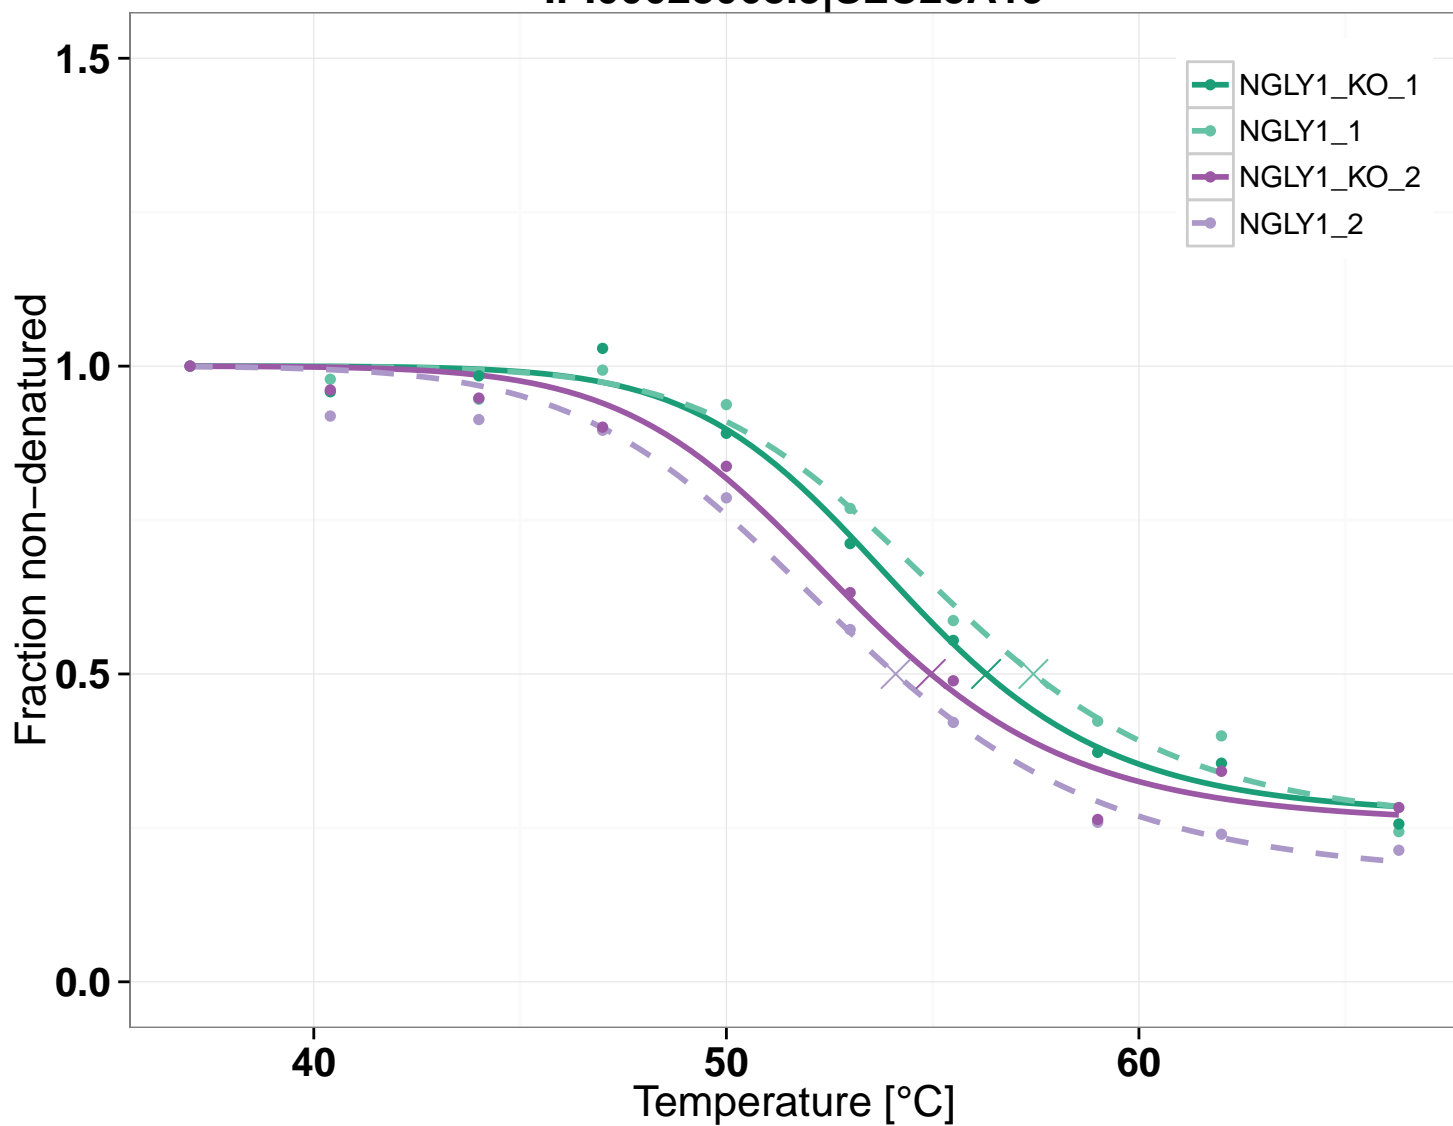

|            | meltPoint | slope  | plateau | R2   |
|------------|-----------|--------|---------|------|
| NGLY1_KO_1 | 56.3      | -0.072 | 0.27    | 0.99 |
| NGLY1_1    | 57.44     | -0.064 | 0.25    | 0.99 |
| NGLY1_KO_2 | 54.95     | -0.069 | 0.26    | 0.98 |
| NGLY1_2    | 54.1      | -0.065 | 0.17    | 0.99 |

Supplement: Supplementary file 6312 [file 1]

# IPI00008511.2|ND5

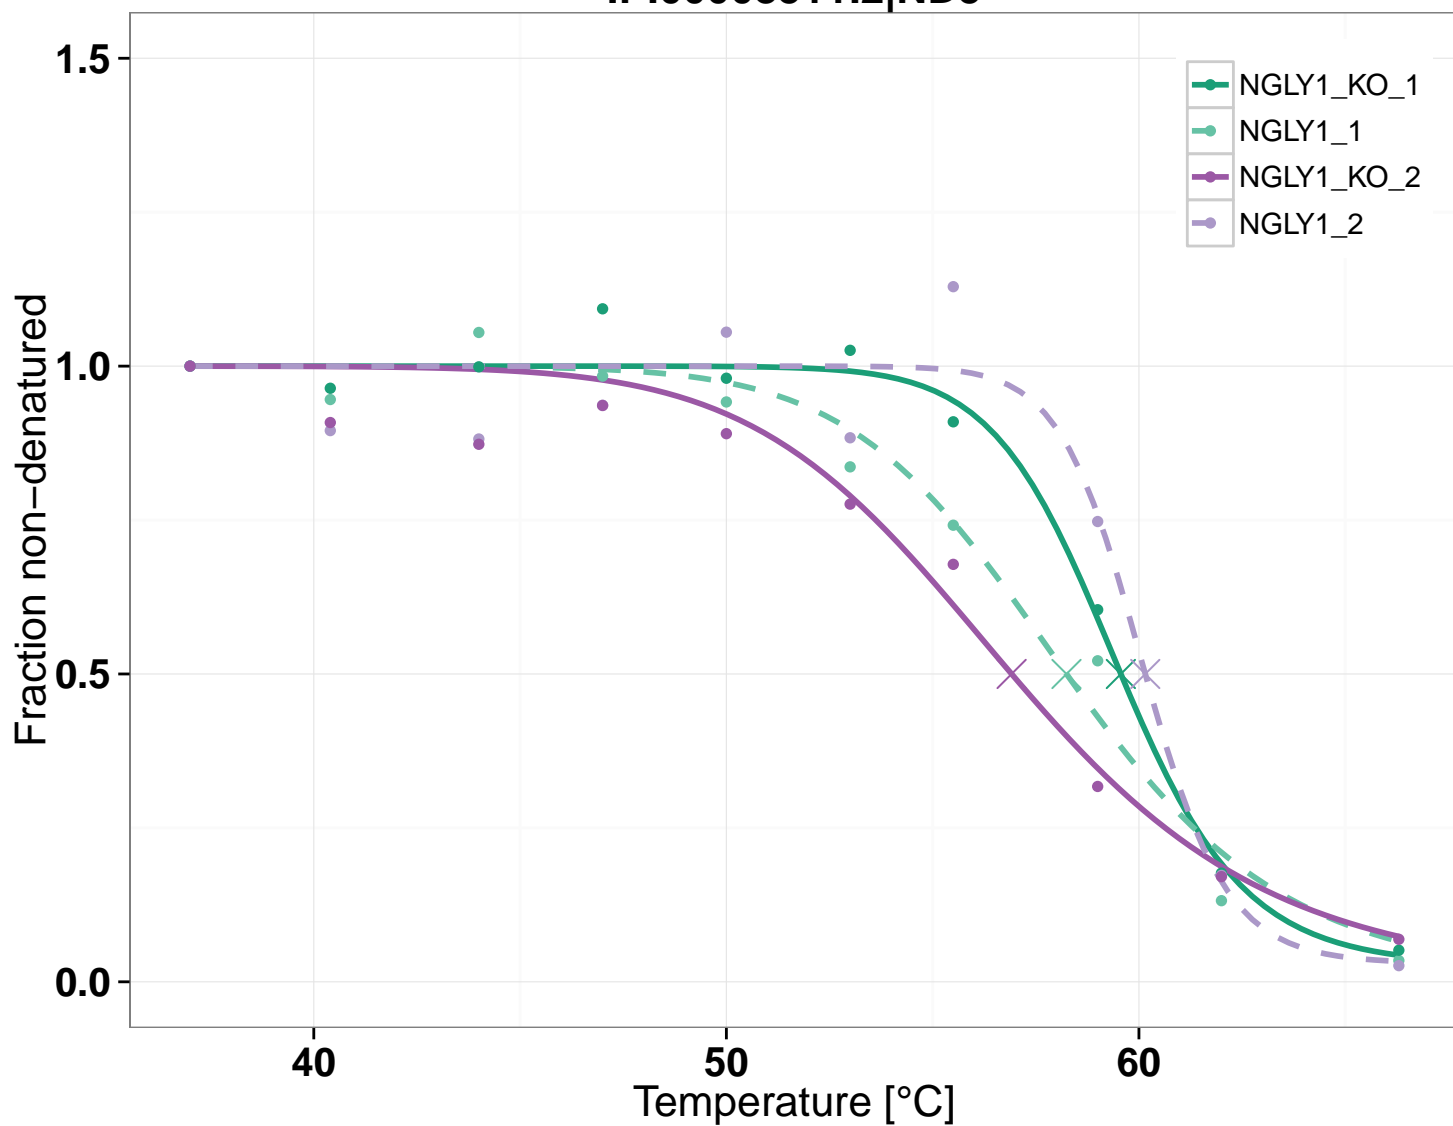

|            | meltPoint | slope  | plateau | R2   |
|------------|-----------|--------|---------|------|
| NGLY1_KO_1 | 59.56     | -0.16  | 0.03    | 0.99 |
| NGLY1_1    | 58.24     | -0.095 | 0       | 0.98 |
| NGLY1_KO_2 | 56.91     | -0.08  | 0       | 0.97 |
| NGLY1_2    | 60.15     | -0.24  | 0.03    | 0.95 |

Supplement: Supplementary file 6313 [file 1]

IPI00873435.1|UBE2G1

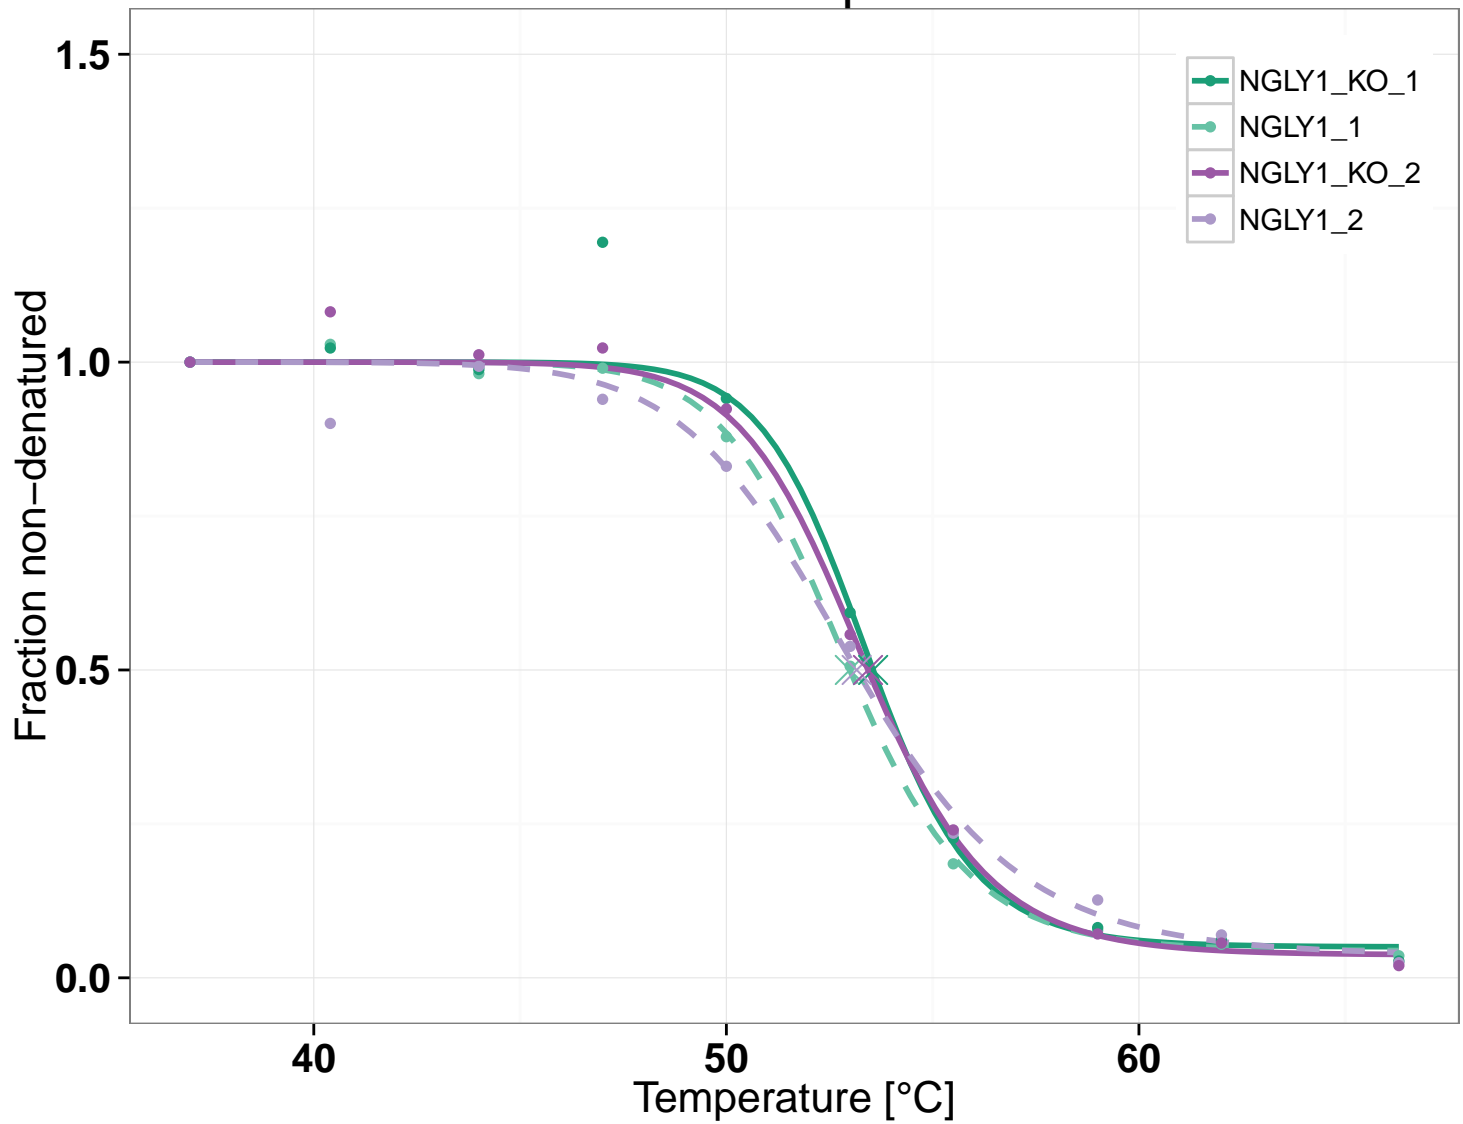

|            | meltPoint | slope | plateau | R2   |
|------------|-----------|-------|---------|------|
| NGLY1_KO_1 | 53.56     | -0.18 | 0.05    | 0.98 |
| NGLY1_1    | 52.99     | -0.16 | 0.04    | 1    |
| NGLY1_KO_2 | 53.43     | -0.16 | 0.04    | 1    |
| NGLY1_2    | 53.16     | -0.12 | 0.04    | 0.99 |

Supplement: Supplementary file 6314 [file 1]

# IPI00290614.7|ENDOG

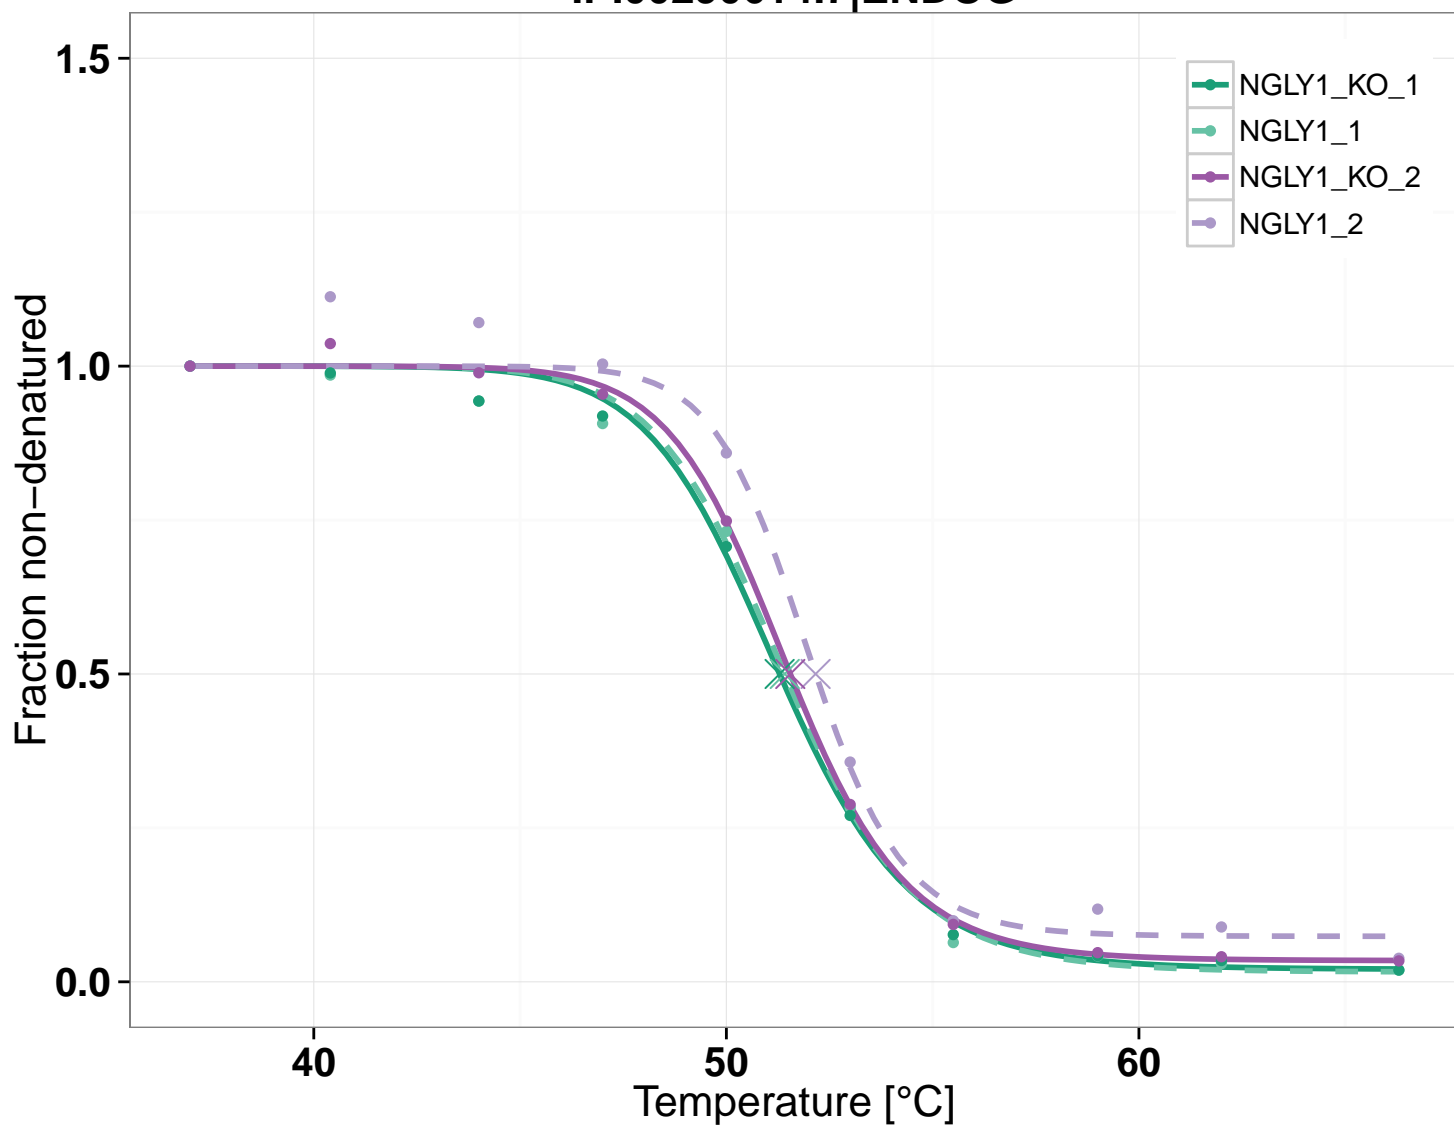

|            | meltPoint | slope | plateau | R2   |
|------------|-----------|-------|---------|------|
| NGLY1_KO_1 | 51.29     | -0.15 | 0.02    | 1    |
| NGLY1_1    | 51.41     | -0.16 | 0.02    | 1    |
| NGLY1_KO_2 | 51.55     | -0.17 | 0.03    | 1    |
| NGLY1_2    | 52.16     | -0.2  | 0.07    | 0.99 |

Supplement: Supplementary file 6315 [file 1]

IPI00217920.6|ALDH16A1

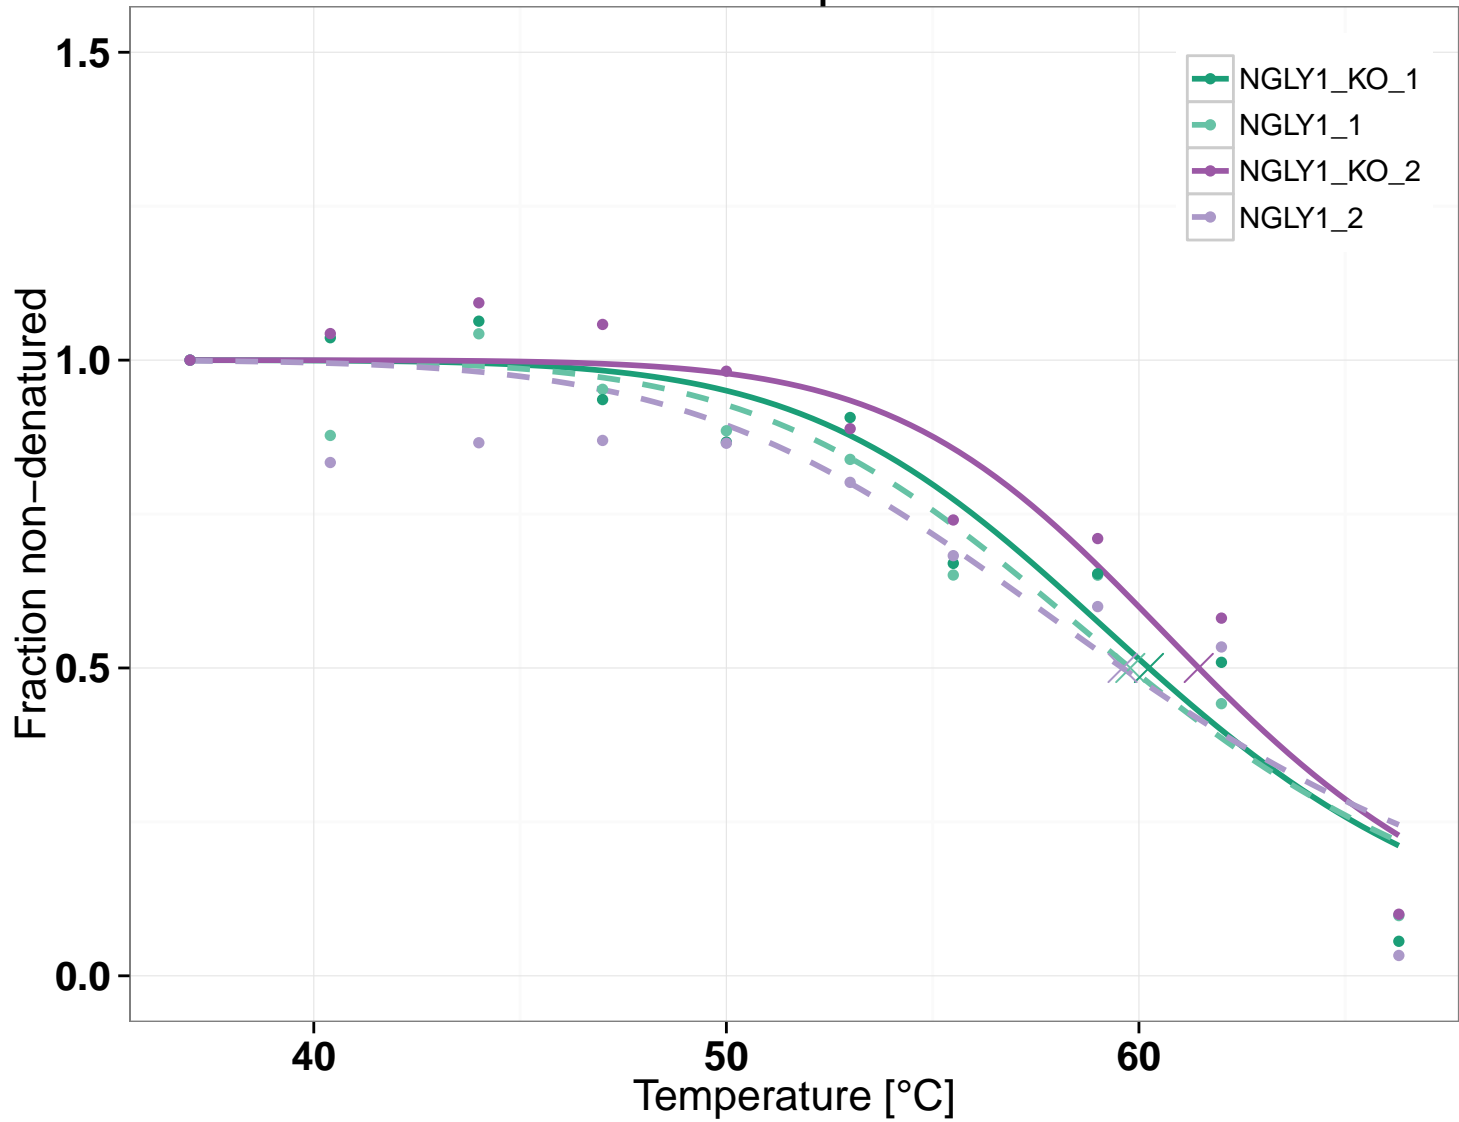

|            | meltPoint | slope  | plateau | R2   |
|------------|-----------|--------|---------|------|
| NGLY1_KO_1 | 60.24     | -0.061 | 0       | 0.92 |
| NGLY1_1    | 59.79     | -0.056 | 0       | 0.93 |
| NGLY1_KO_2 | 61.45     | -0.069 | 0       | 0.93 |
| NGLY1_2    | 59.6      | -0.048 | 0       | 0.83 |

Supplement: Supplementary file 6316 [file 1]

IPI00305267.2|GOLGA3

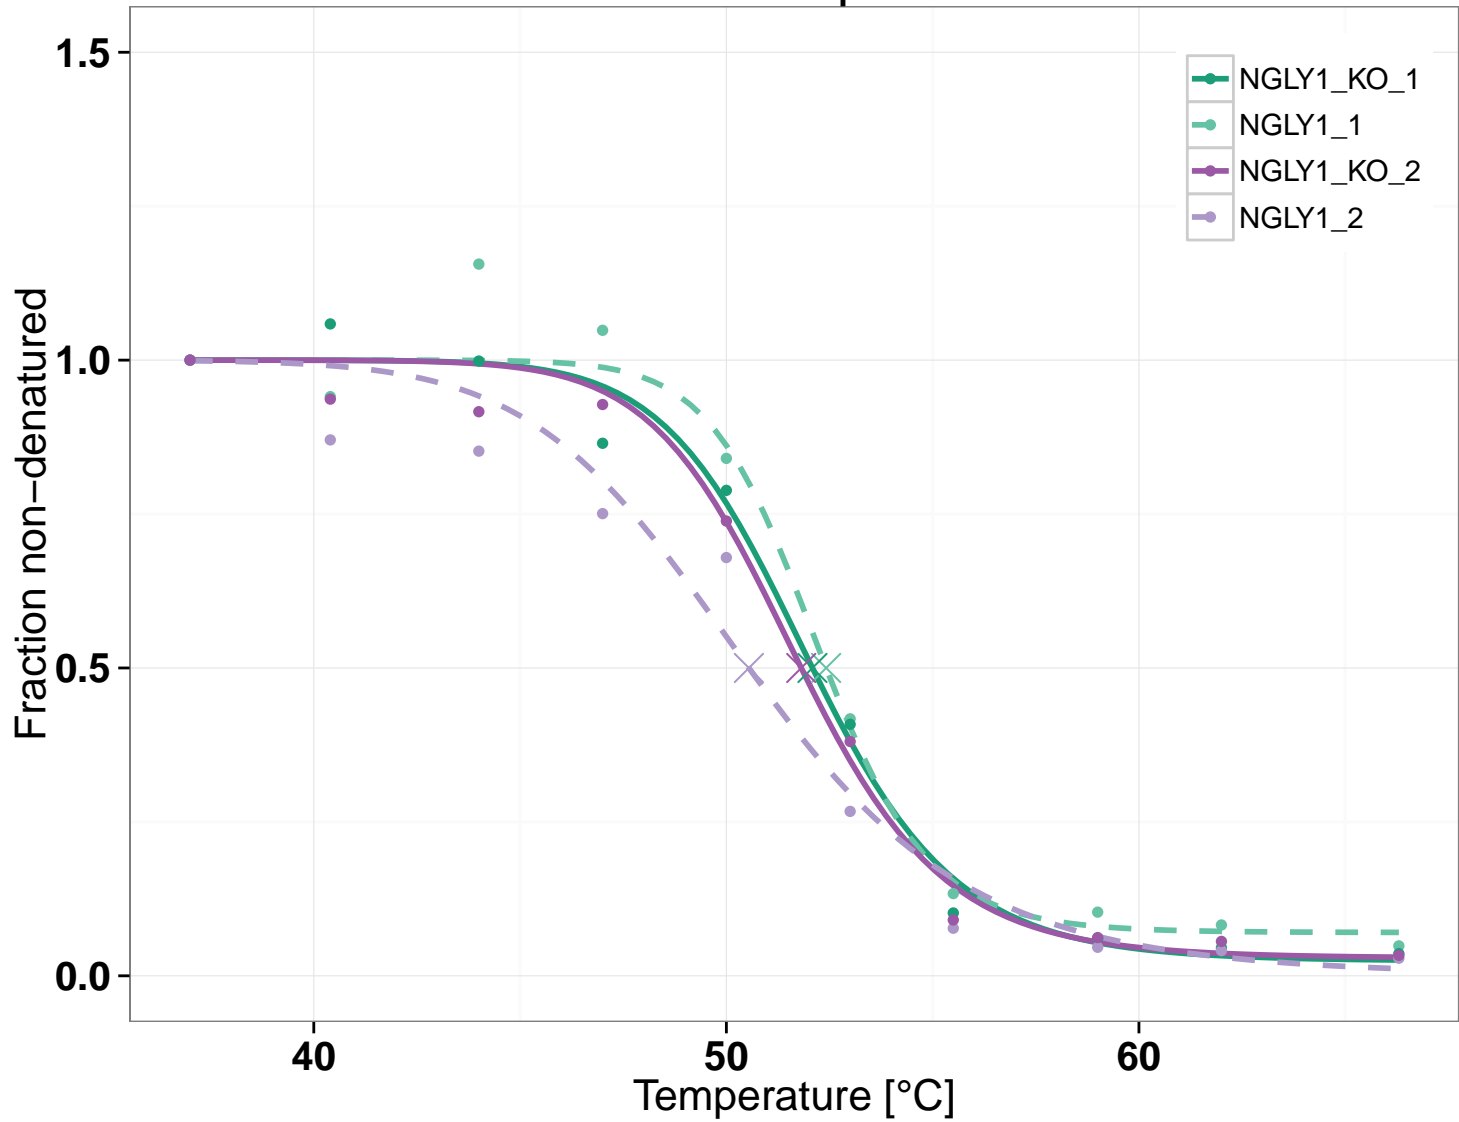

|            | meltPoint | slope  | plateau | R2   |
|------------|-----------|--------|---------|------|
| NGLY1_KO_1 | 52.09     | -0.14  | 0.02    | 0.99 |
| NGLY1_1    | 52.42     | -0.18  | 0.07    | 0.98 |
| NGLY1_KO_2 | 51.81     | -0.14  | 0.03    | 0.99 |
| NGLY1_2    | 50.55     | -0.094 | 0       | 0.97 |

Supplement: Supplementary file 6317 [file 1]

IPI00020258.3|MAP4K1

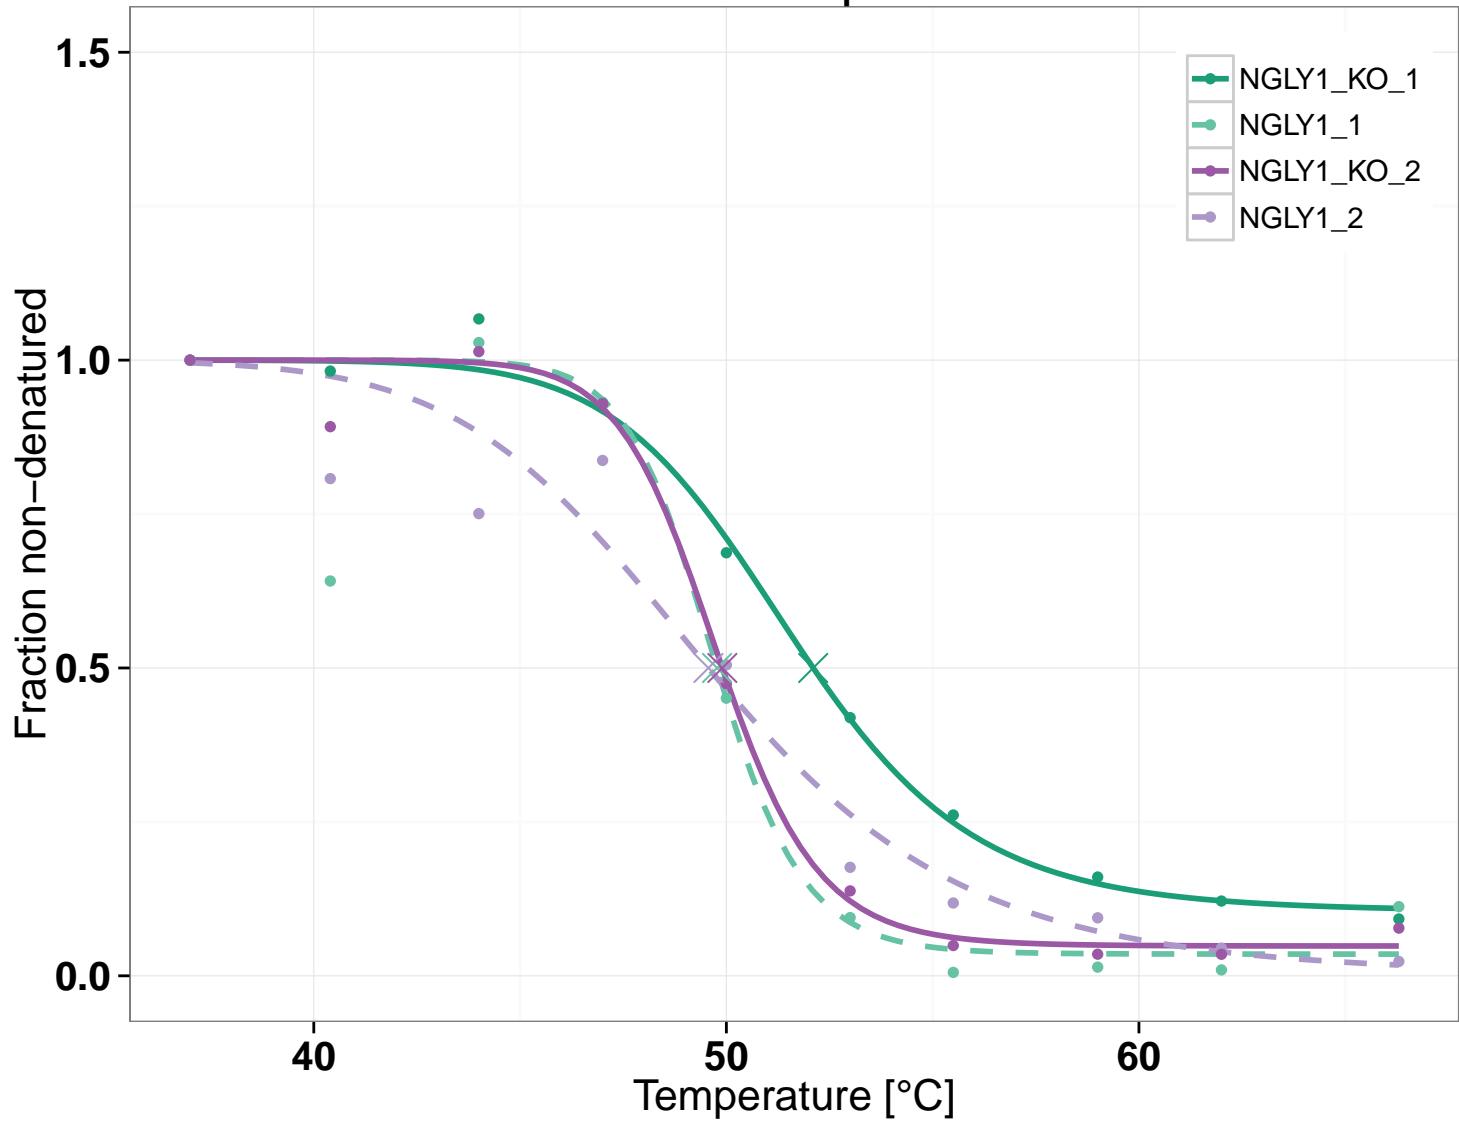

|            | meltPoint | slope  | plateau | R2   |
|------------|-----------|--------|---------|------|
| NGLY1_KO_1 | 52.1      | -0.1   | 0.1     | 0.99 |
| NGLY1_1    | 49.77     | -0.22  | 0.04    | 0.92 |
| NGLY1_KO_2 | 49.9      | -0.2   | 0.05    | 0.99 |
| NGLY1_2    | 49.57     | -0.082 | 0       | 0.94 |

Supplement: Supplementary file 6318 [file 1]

IPI00478862.4|BRP44L

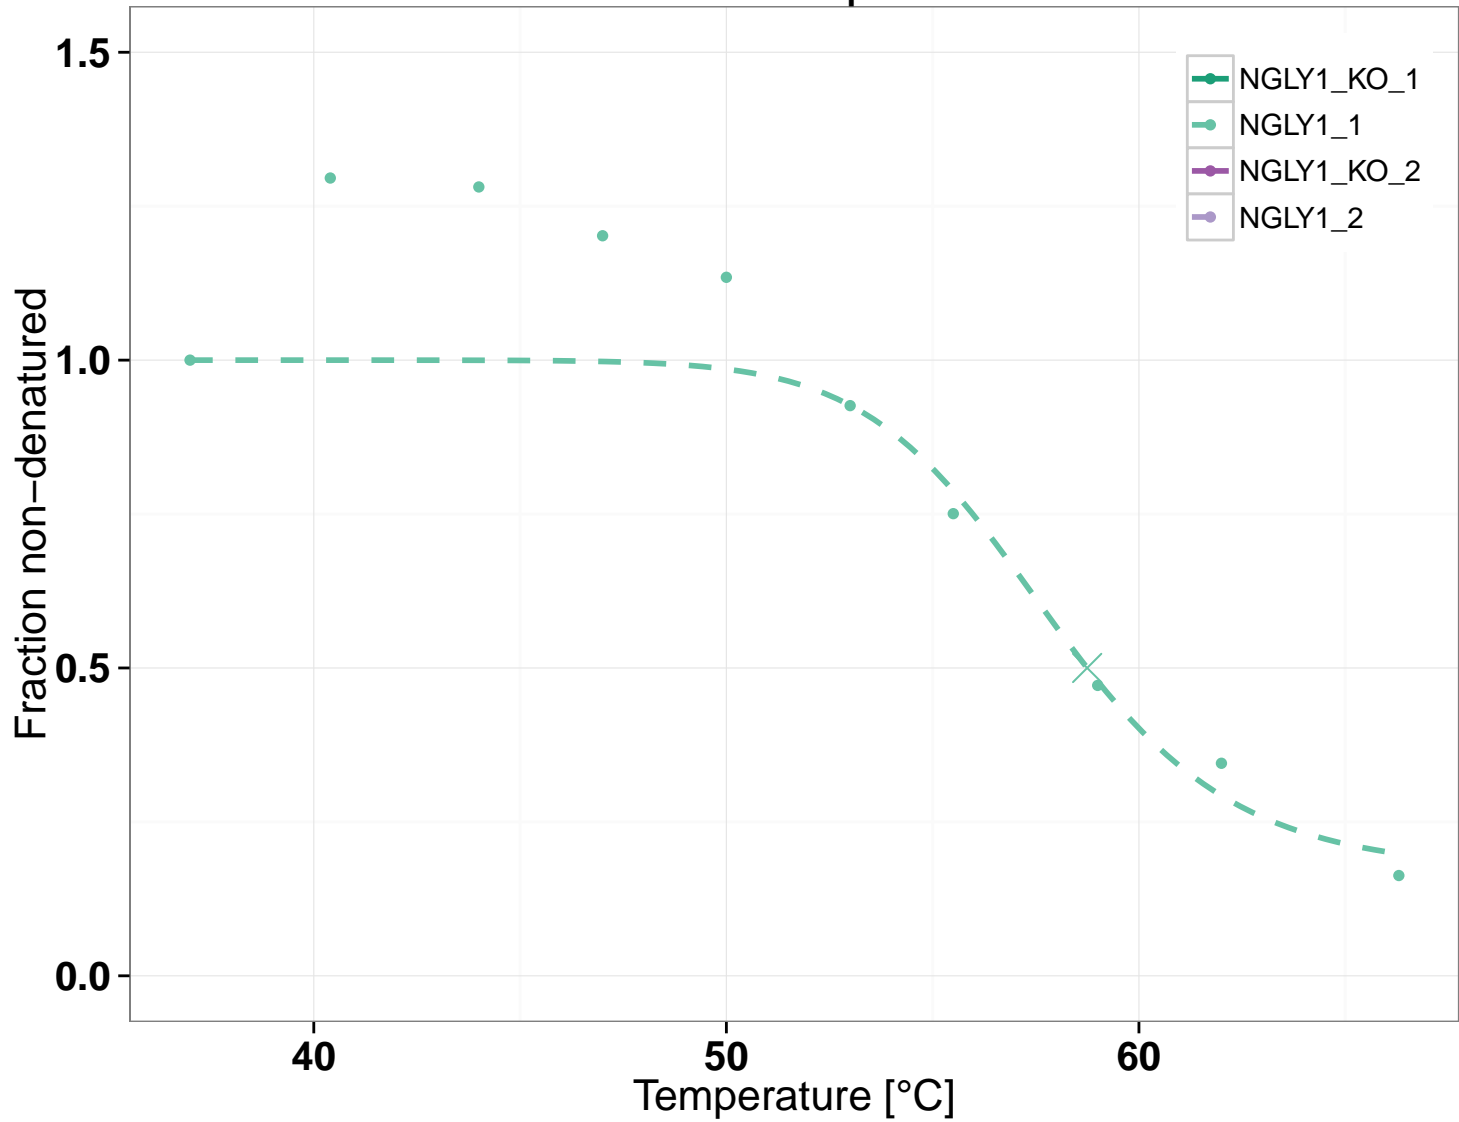

|            | meltPoint | slope  | plateau | R2   |
|------------|-----------|--------|---------|------|
| NGLY1_KO_1 | -         | -      | -       | -    |
| NGLY1_1    | 58.75     | -0.093 | 0.17    | 0.84 |
| NGLY1_KO_2 | -         | -      | -       | -    |
| NGLY1_2    | -         | -      | -       | -    |

Supplement: Supplementary file 6319 [file 1]

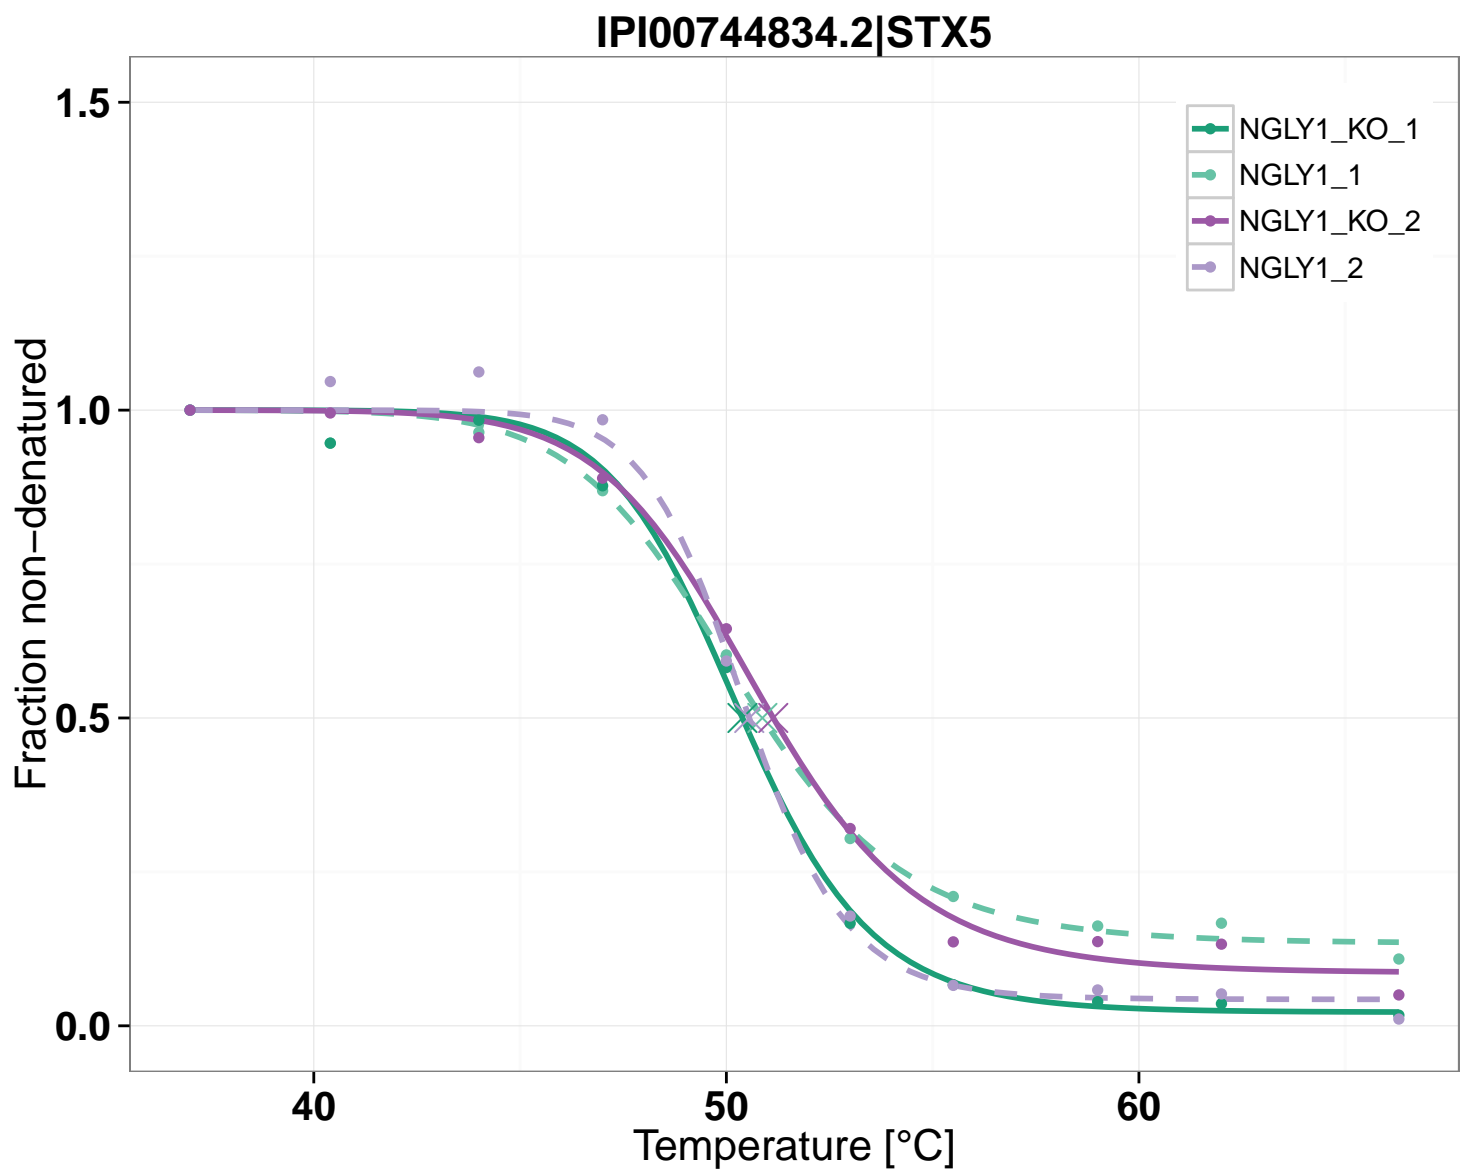

|            | meltPoint | slope | plateau | R2 |
|------------|-----------|-------|---------|----|
| NGLY1_KO_1 | 50.39     | -0.15 | 0.02    | 1  |
| NGLY1_1    | 50.87     | -0.11 | 0.13    | 1  |
| NGLY1_KO_2 | 51.14     | -0.12 | 0.09    | 1  |
| NGLY1_2    | 50.56     | -0.19 | 0.04    | 1  |

Supplement: Supplementary file 6320 [file 1]

# IPI00410351.2|NCOR1

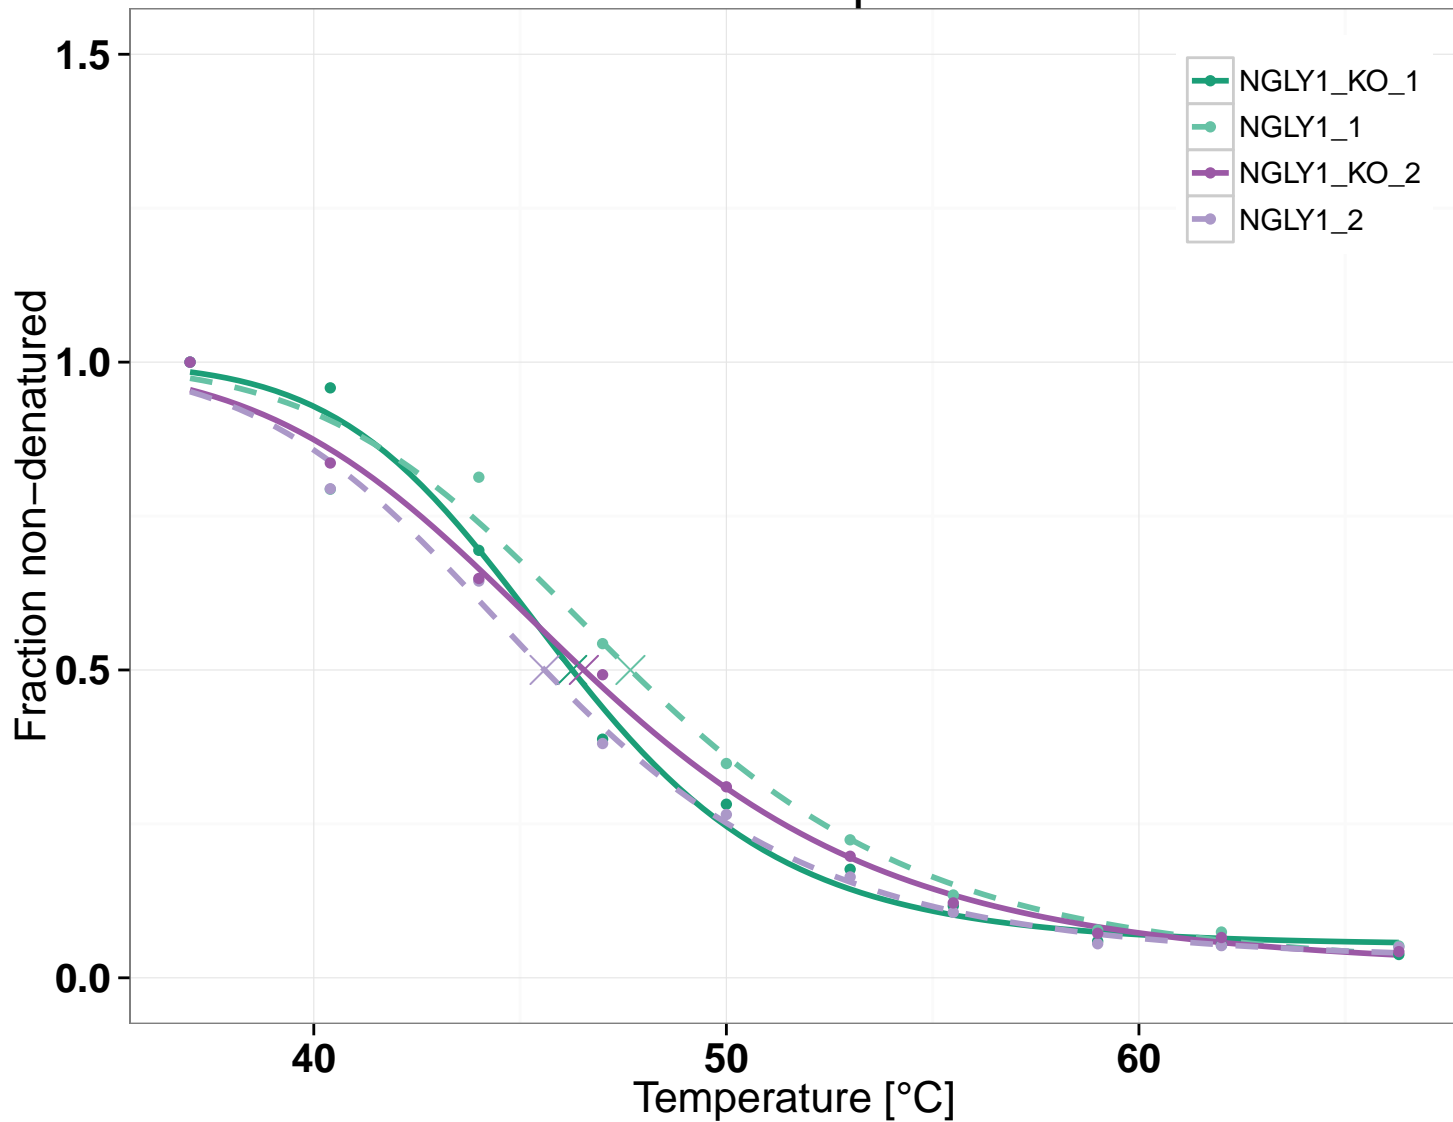

|            | meltPoint | slope  | plateau | R2   |
|------------|-----------|--------|---------|------|
| NGLY1_KO_1 | 46.26     | -0.088 | 0.05    | 0.99 |
| NGLY1_1    | 47.67     | -0.067 | 0.01    | 0.98 |
| NGLY1_KO_2 | 46.55     | -0.065 | 0.01    | 1    |
| NGLY1_2    | 45.59     | -0.072 | 0.02    | 0.99 |

Supplement: Supplementary file 6321 [file 1]

IPI00290928.2|GNA13

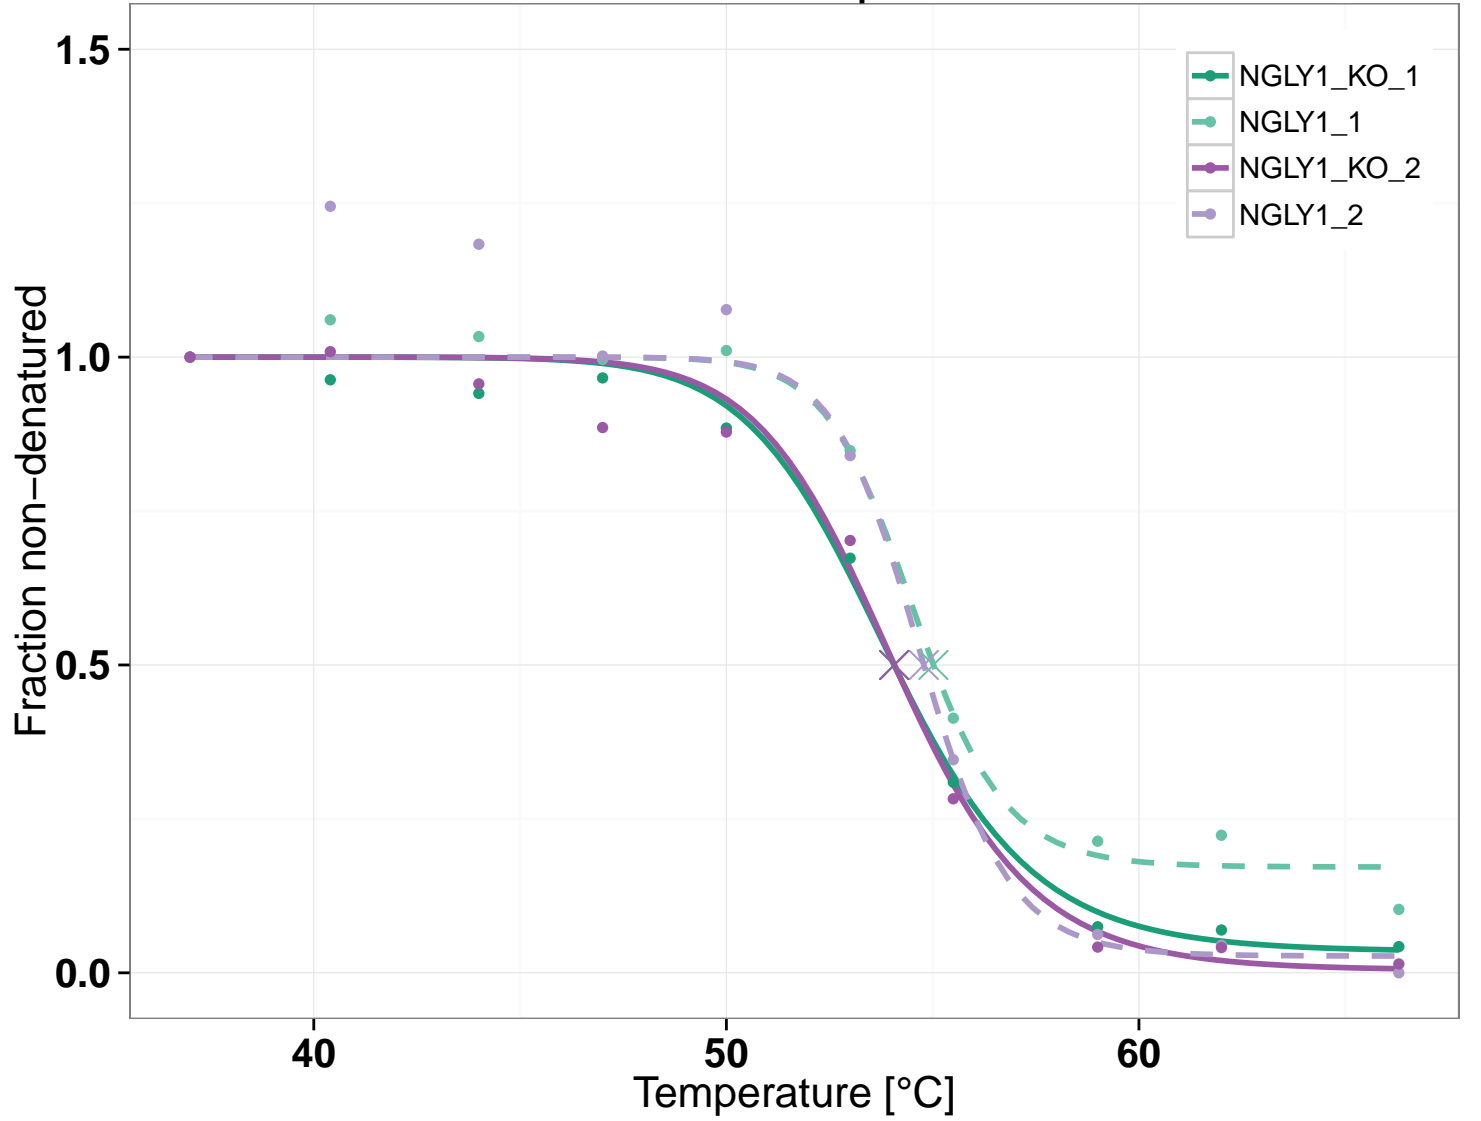

|            | meltPoint | slope | plateau | R2   |
|------------|-----------|-------|---------|------|
| NGLY1_KO_1 | 54.06     | -0.14 | 0.03    | 0.99 |
| NGLY1_1    | 55.02     | -0.19 | 0.17    | 0.99 |
| NGLY1_KO_2 | 54.07     | -0.15 | 0       | 0.99 |
| NGLY1_2    | 54.79     | -0.23 | 0.03    | 0.96 |

Supplement: Supplementary file 6322 [file 1]

IPI00395780.2|RASSF1

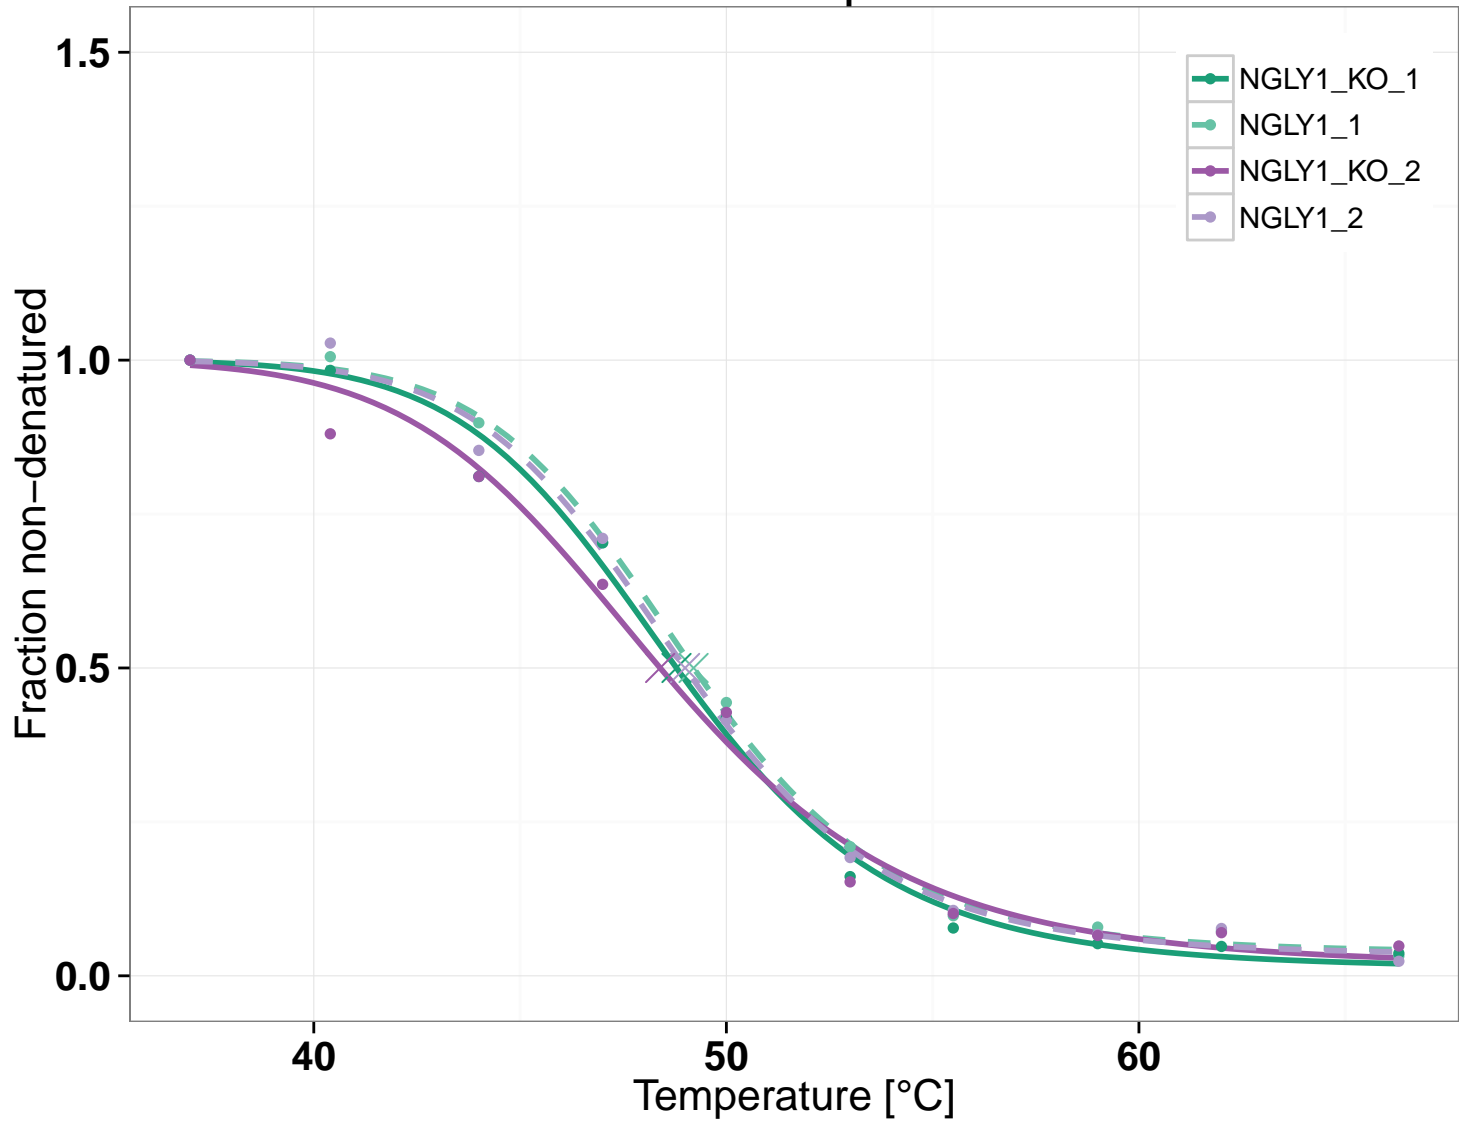

|            | meltPoint | slope  | plateau | R2   |
|------------|-----------|--------|---------|------|
| NGLY1_KO_1 | 48.79     | -0.094 | 0.01    | 0.99 |
| NGLY1_1    | 49.21     | -0.098 | 0.04    | 1    |
| NGLY1_KO_2 | 48.39     | -0.081 | 0.02    | 0.99 |
| NGLY1_2    | 49        | -0.097 | 0.03    | 1    |

Supplement: Supplementary file 6323 [file 1]

IPI00329338.3|PCYT1A

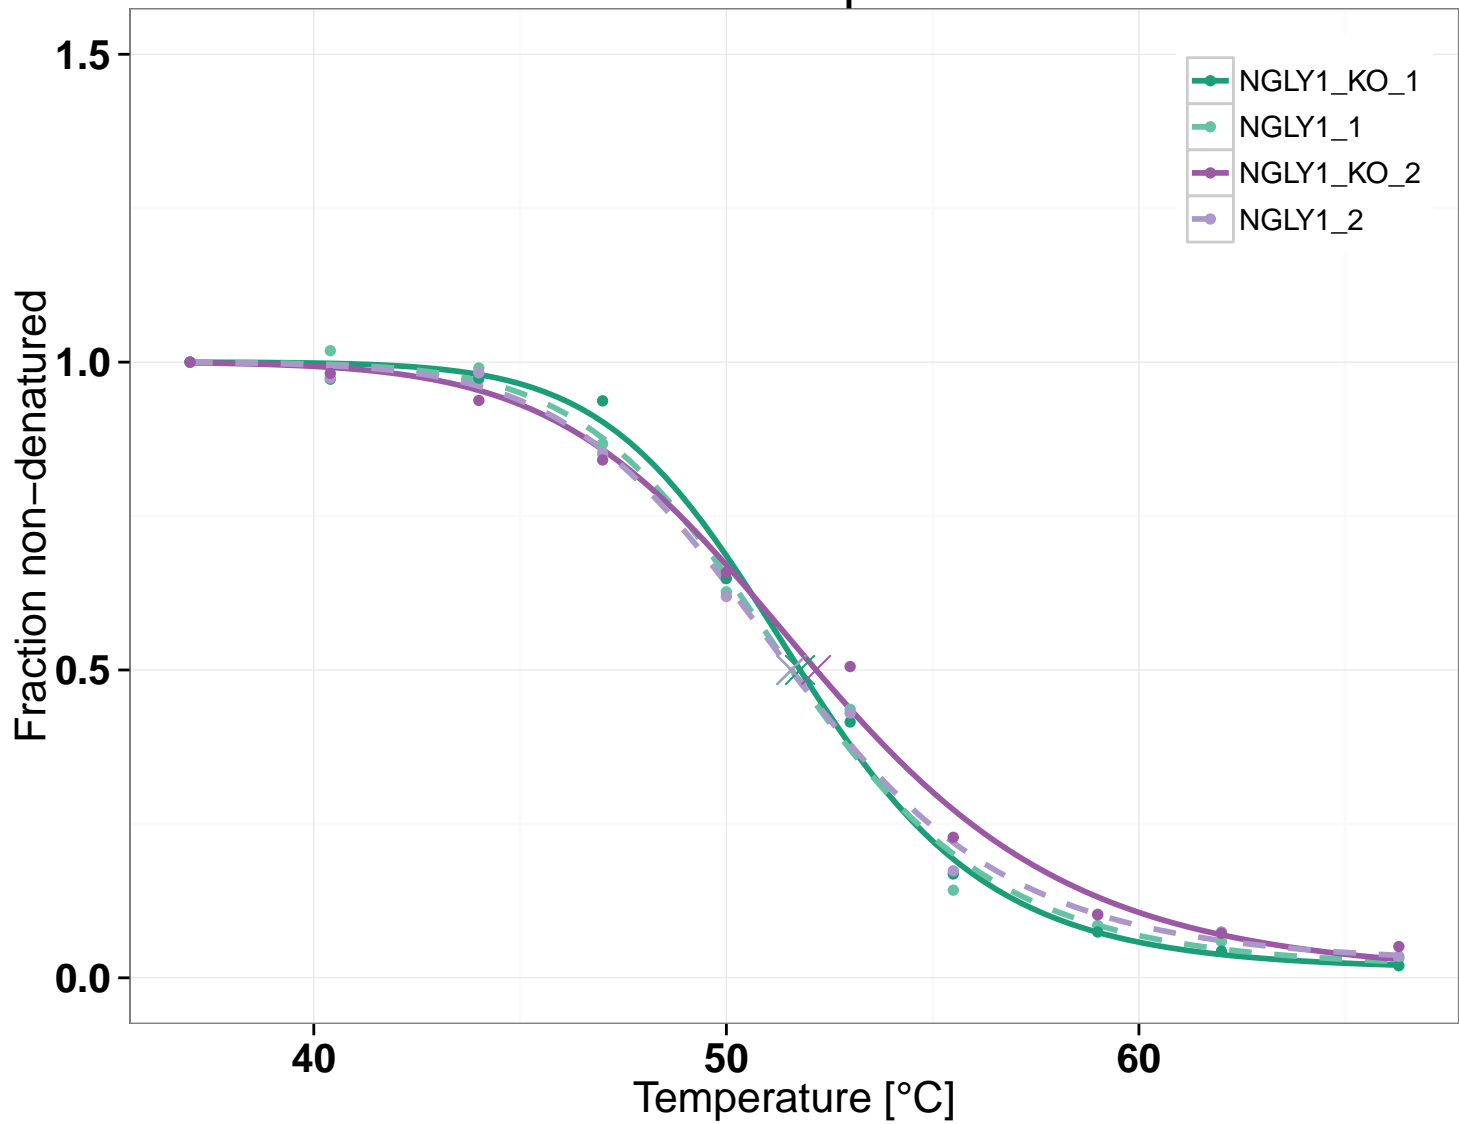

|            | meltPoint | slope  | plateau | R2   |
|------------|-----------|--------|---------|------|
| NGLY1_KO_1 | 51.79     | -0.11  | 0.01    | 1    |
| NGLY1_1    | 51.59     | -0.098 | 0.02    | 0.99 |
| NGLY1_KO_2 | 52.17     | -0.079 | 0       | 0.99 |
| NGLY1_2    | 51.56     | -0.09  | 0.02    | 1    |

Supplement: Supplementary file 6324 [file 1]

IPI00645478.1|LOC100130518

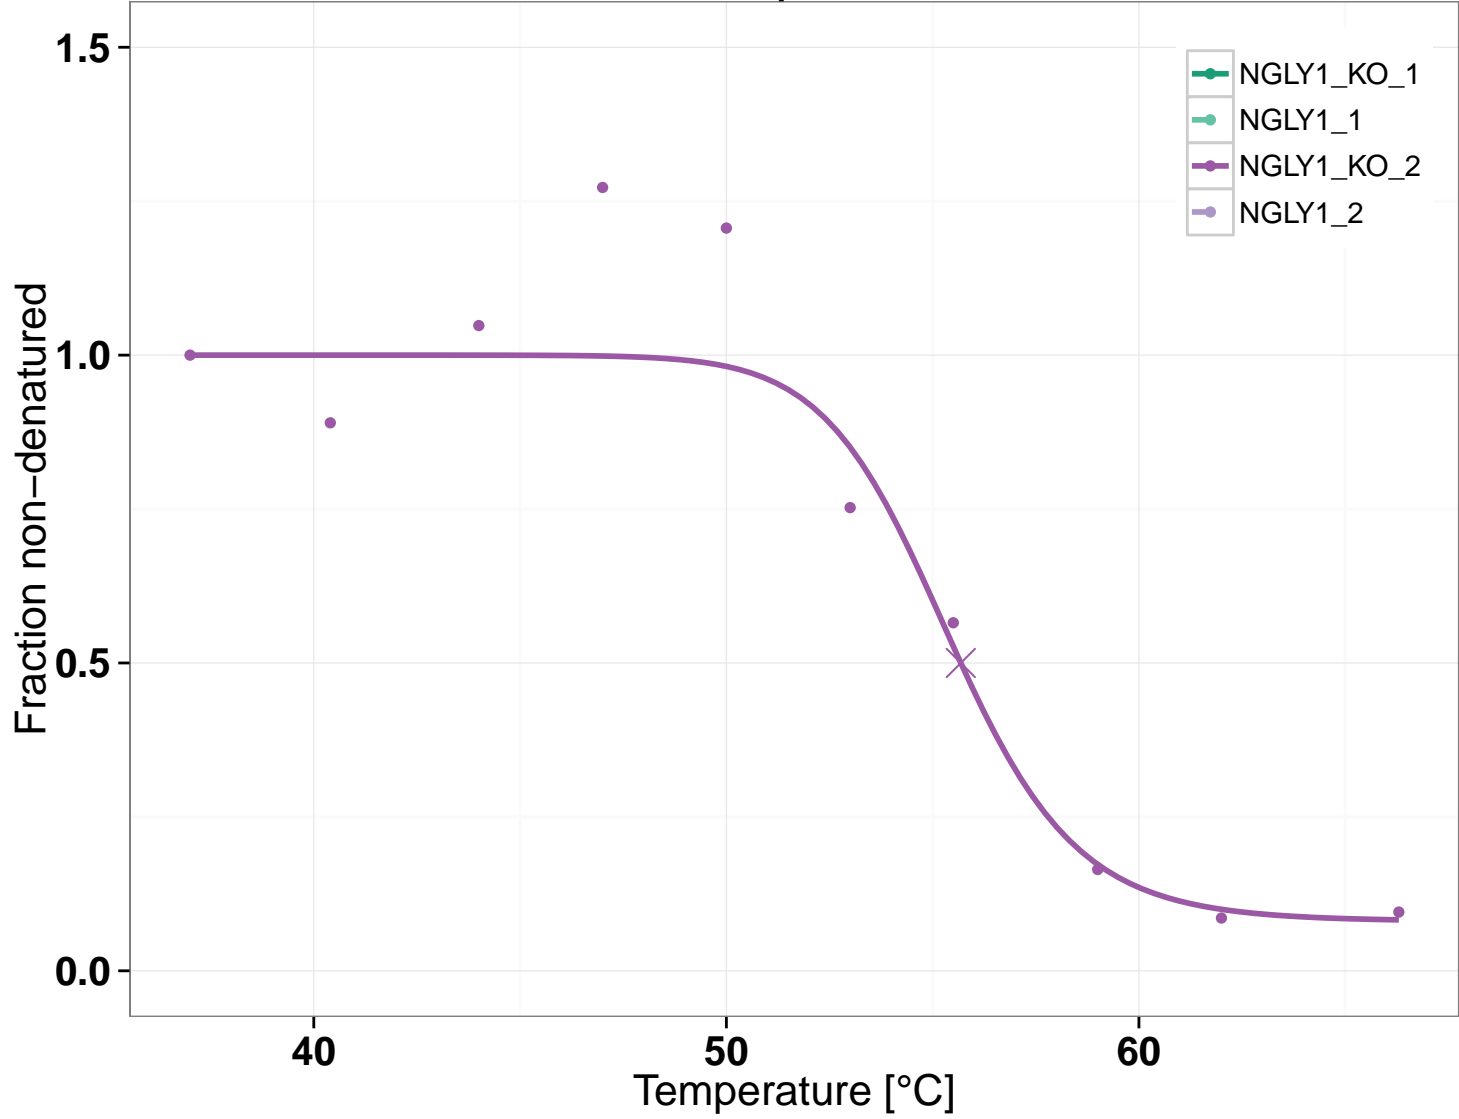

|            | meltPoint | slope | plateau | R2   |
|------------|-----------|-------|---------|------|
| NGLY1_KO_1 | —         | —     | —       | —    |
| NGLY1_1    | —         | —     | —       | —    |
| NGLY1_KO_2 | 55.68     | -0.15 | 0.08    | 0.92 |
| NGLY1_2    | —         | —     | —       | —    |

Supplement: Supplementary file 6325 [file 1]

# IPI00329591.3|RMND1

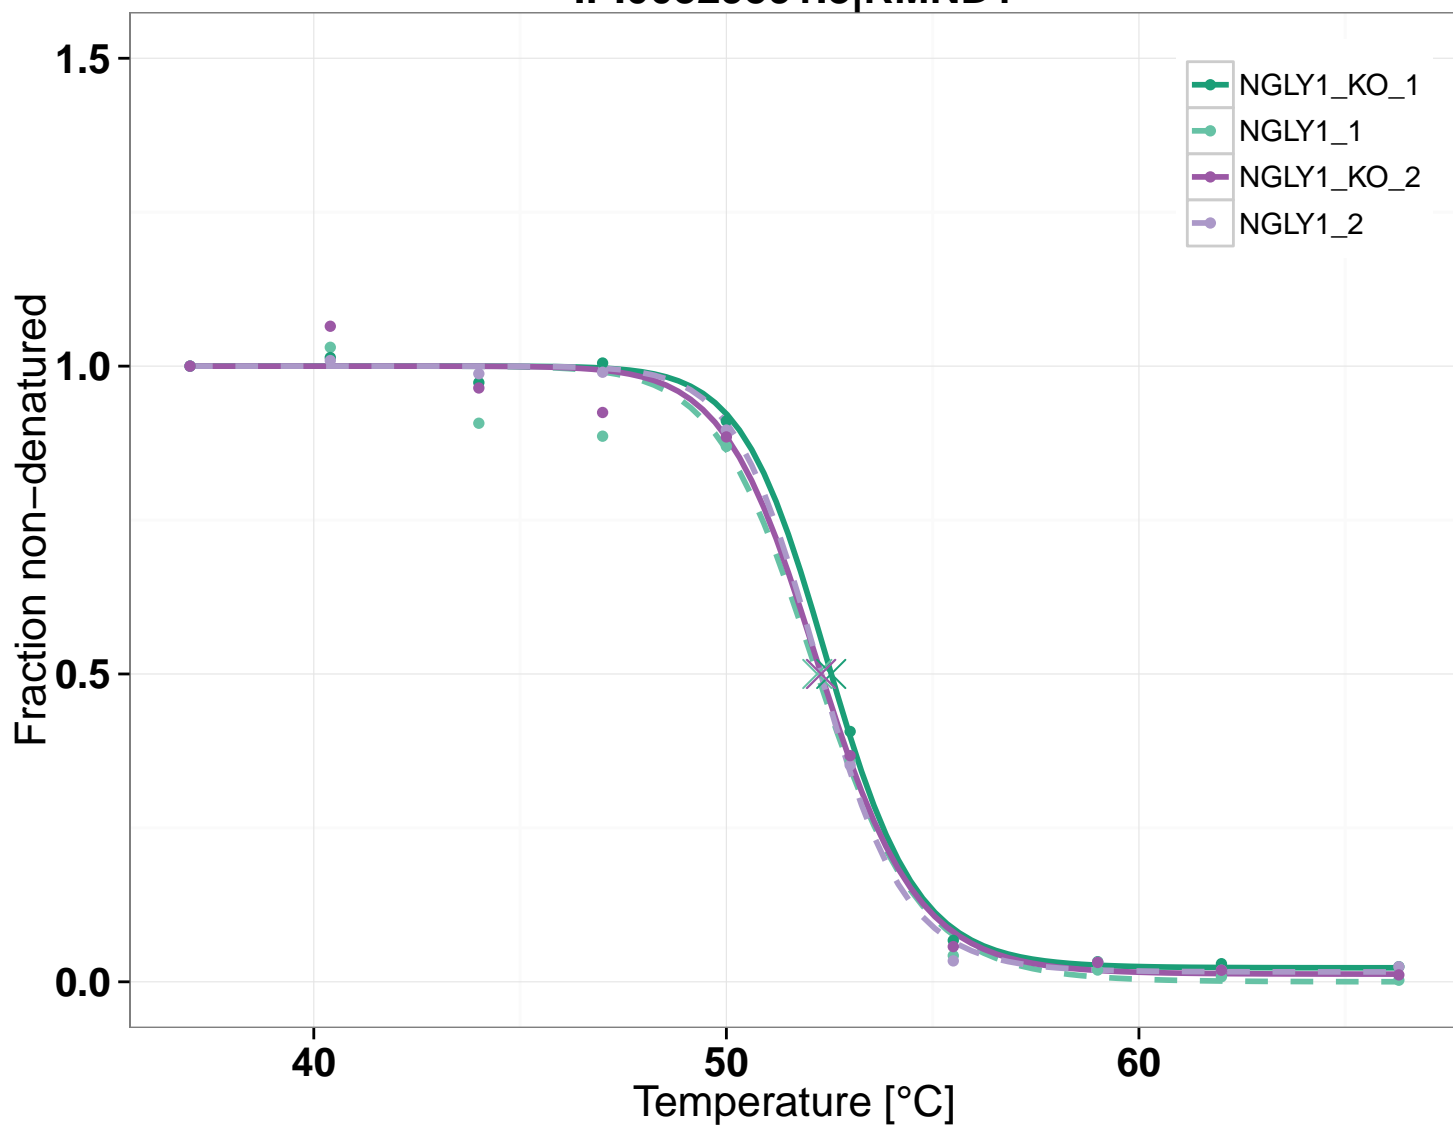

|            | meltPoint | slope | plateau | R2   |
|------------|-----------|-------|---------|------|
| NGLY1_KO_1 | 52.54     | -0.23 | 0.02    | 1    |
| NGLY1_1    | 52.2      | -0.2  | 0       | 0.99 |
| NGLY1_KO_2 | 52.3      | -0.21 | 0.01    | 0.99 |
| NGLY1_2    | 52.29     | -0.24 | 0.02    | 1    |

Supplement: Supplementary file 6326 [file 1]
