# Supplementary material (part 64 of 85)
Source: publisher figshare collection journal article supplement (https://gsajournals.figshare.com/articles/dataset/_/12014913)

IPI00007818.3|CPSF3

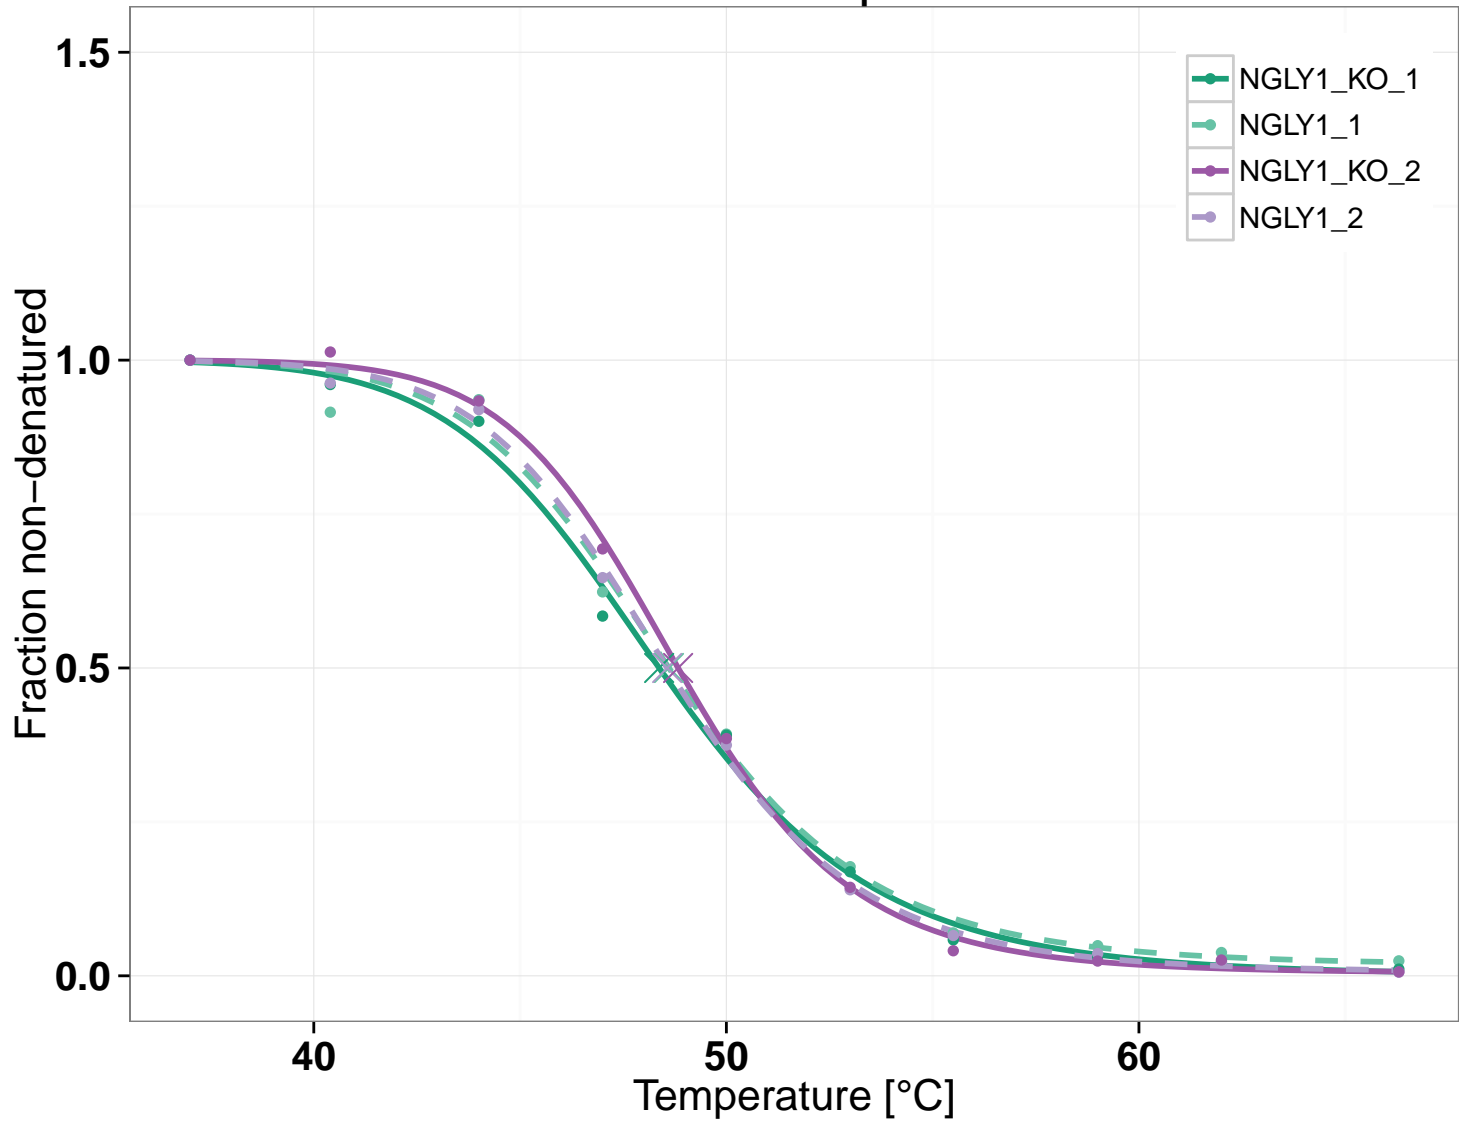

|            | meltPoint | slope  | plateau | R2   |
|------------|-----------|--------|---------|------|
| NGLY1_KO_1 | 48.37     | -0.097 | 0       | 1    |
| NGLY1_1    | 48.61     | -0.1   | 0.02    | 0.99 |
| NGLY1_KO_2 | 48.83     | -0.12  | 0       | 1    |
| NGLY1_2    | 48.57     | -0.11  | 0.01    | 1    |

Supplement: Supplementary file 6327 [file 1]

IPI00182903.1|IPI00182903.1

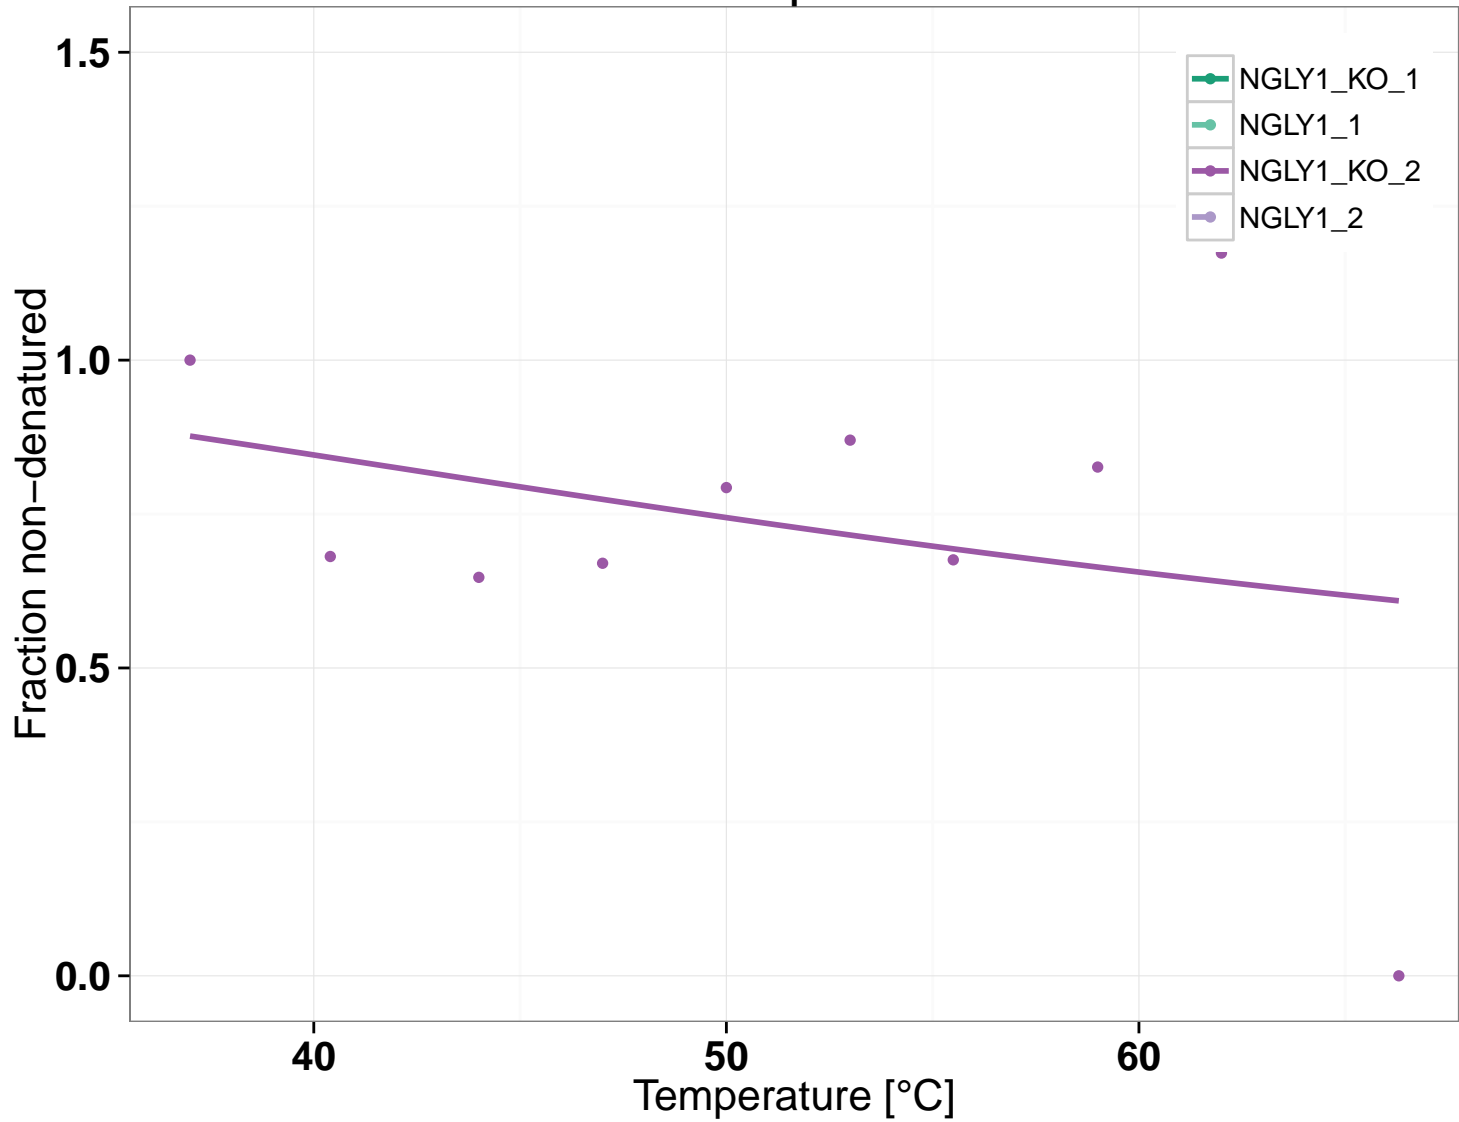

|            | meltPoint | slope | plateau | R2   |
|------------|-----------|-------|---------|------|
| NGLY1_KO_1 | -         | -     | -       | -    |
| NGLY1_1    | -         | -     | -       | -    |
| NGLY1_KO_2 | -         | -0.01 | 0       | 0.08 |
| NGLY1_2    | -         | -     | -       | -    |

Supplement: Supplementary file 6328 [file 1]

IPI00470606.3|TRMT11

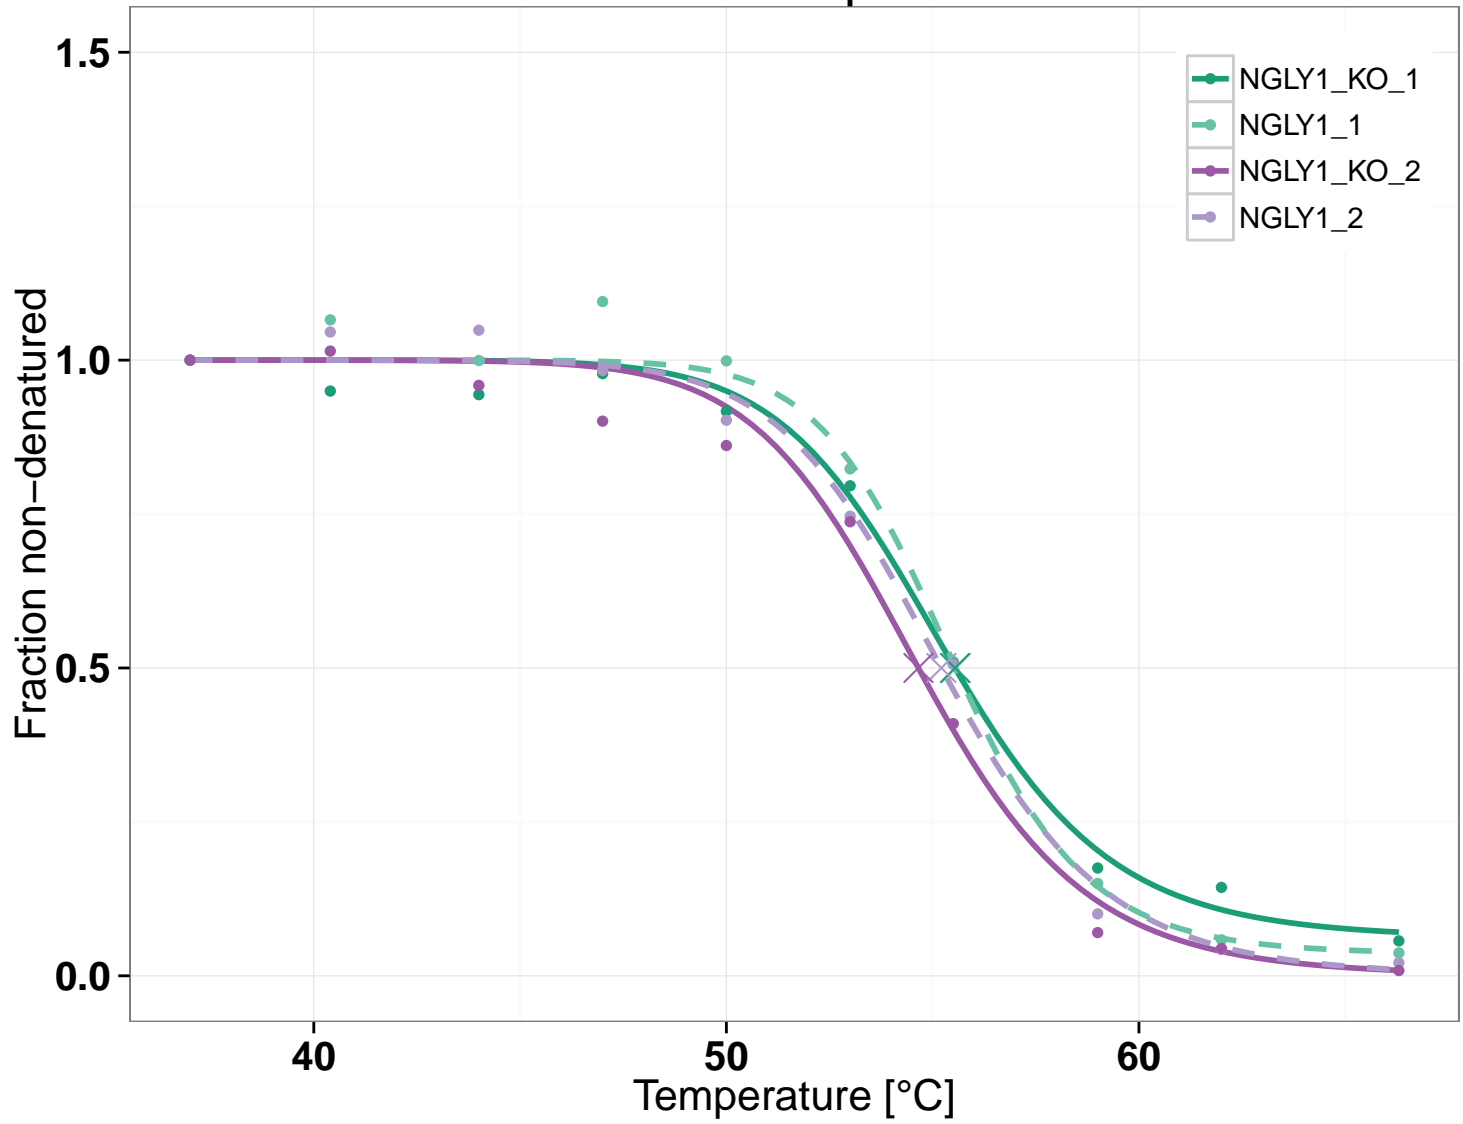

|            | meltPoint | slope | plateau | R2   |
|------------|-----------|-------|---------|------|
| NGLY1_KO_1 | 55.54     | -0.12 | 0.06    | 0.99 |
| NGLY1_1    | 55.56     | -0.15 | 0.04    | 0.99 |
| NGLY1_KO_2 | 54.65     | -0.12 | 0       | 0.99 |
| NGLY1_2    | 55.21     | -0.12 | 0       | 0.99 |

Supplement: Supplementary file 6329 [file 1]

# IPI00913889.1|HDHD1A

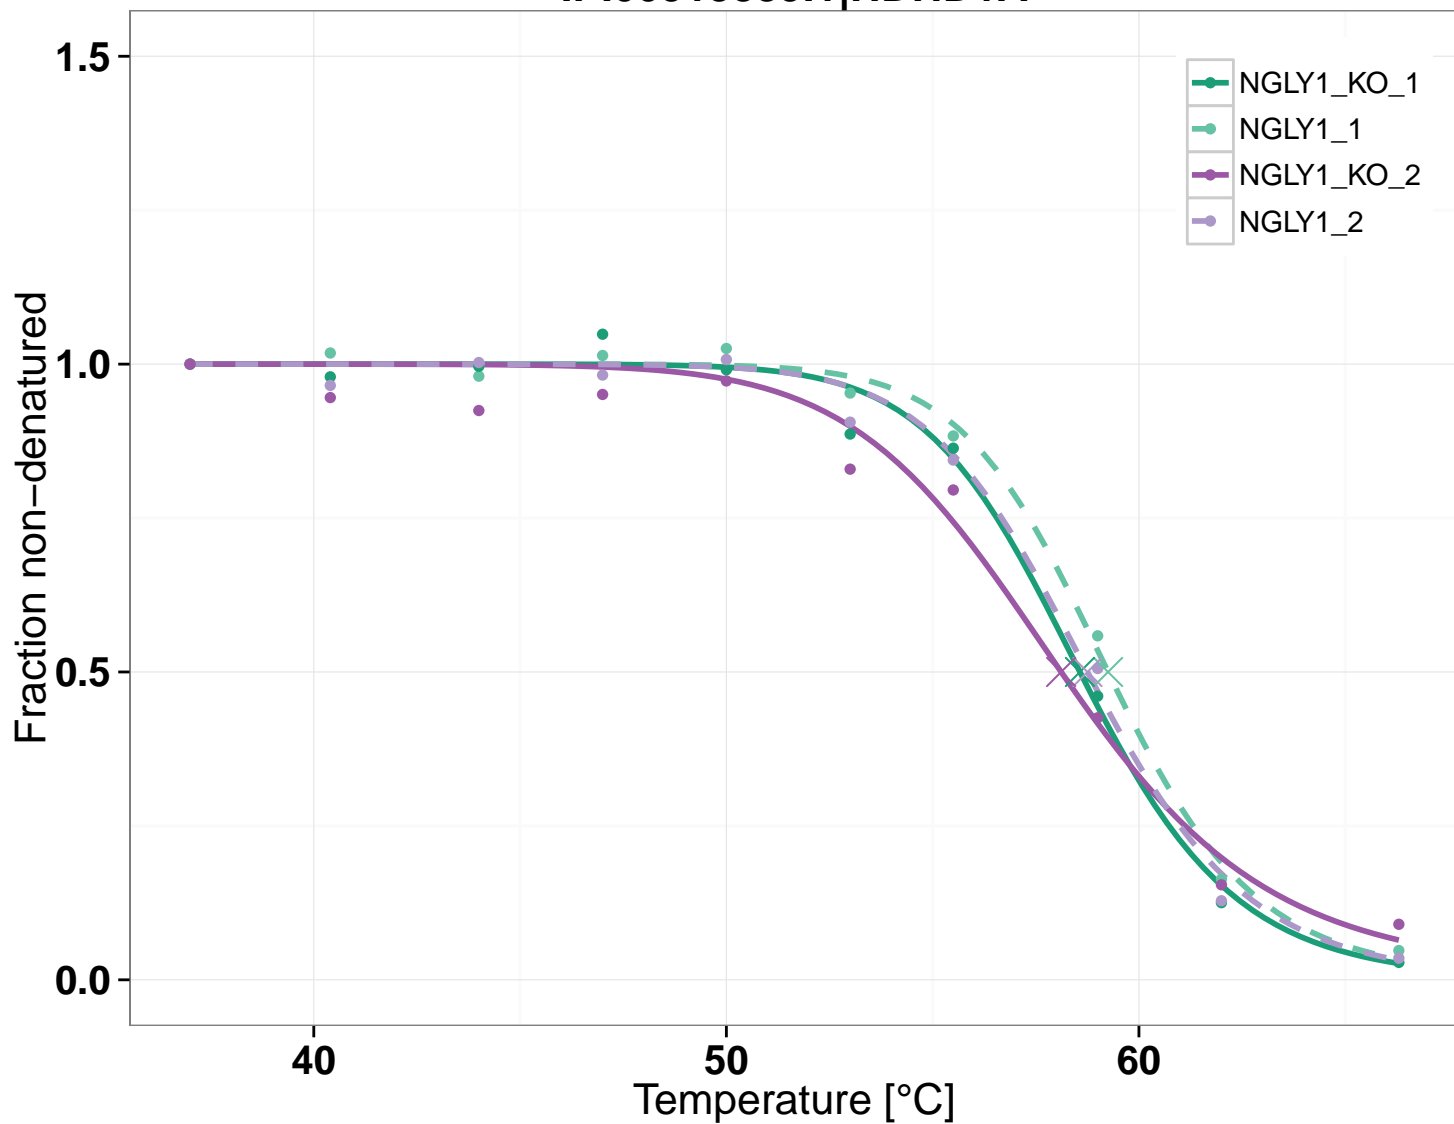

|            | meltPoint | slope  | plateau | R2   |
|------------|-----------|--------|---------|------|
| NGLY1_KO_1 | 58.57     | -0.13  | 0       | 0.99 |
| NGLY1_1    | 59.25     | -0.14  | 0.01    | 1    |
| NGLY1_KO_2 | 58.11     | -0.098 | 0.01    | 0.98 |
| NGLY1_2    | 58.75     | -0.13  | 0       | 0.99 |

Supplement: Supplementary file 6330 [file 1]

IPI00892998.1|FKBPL

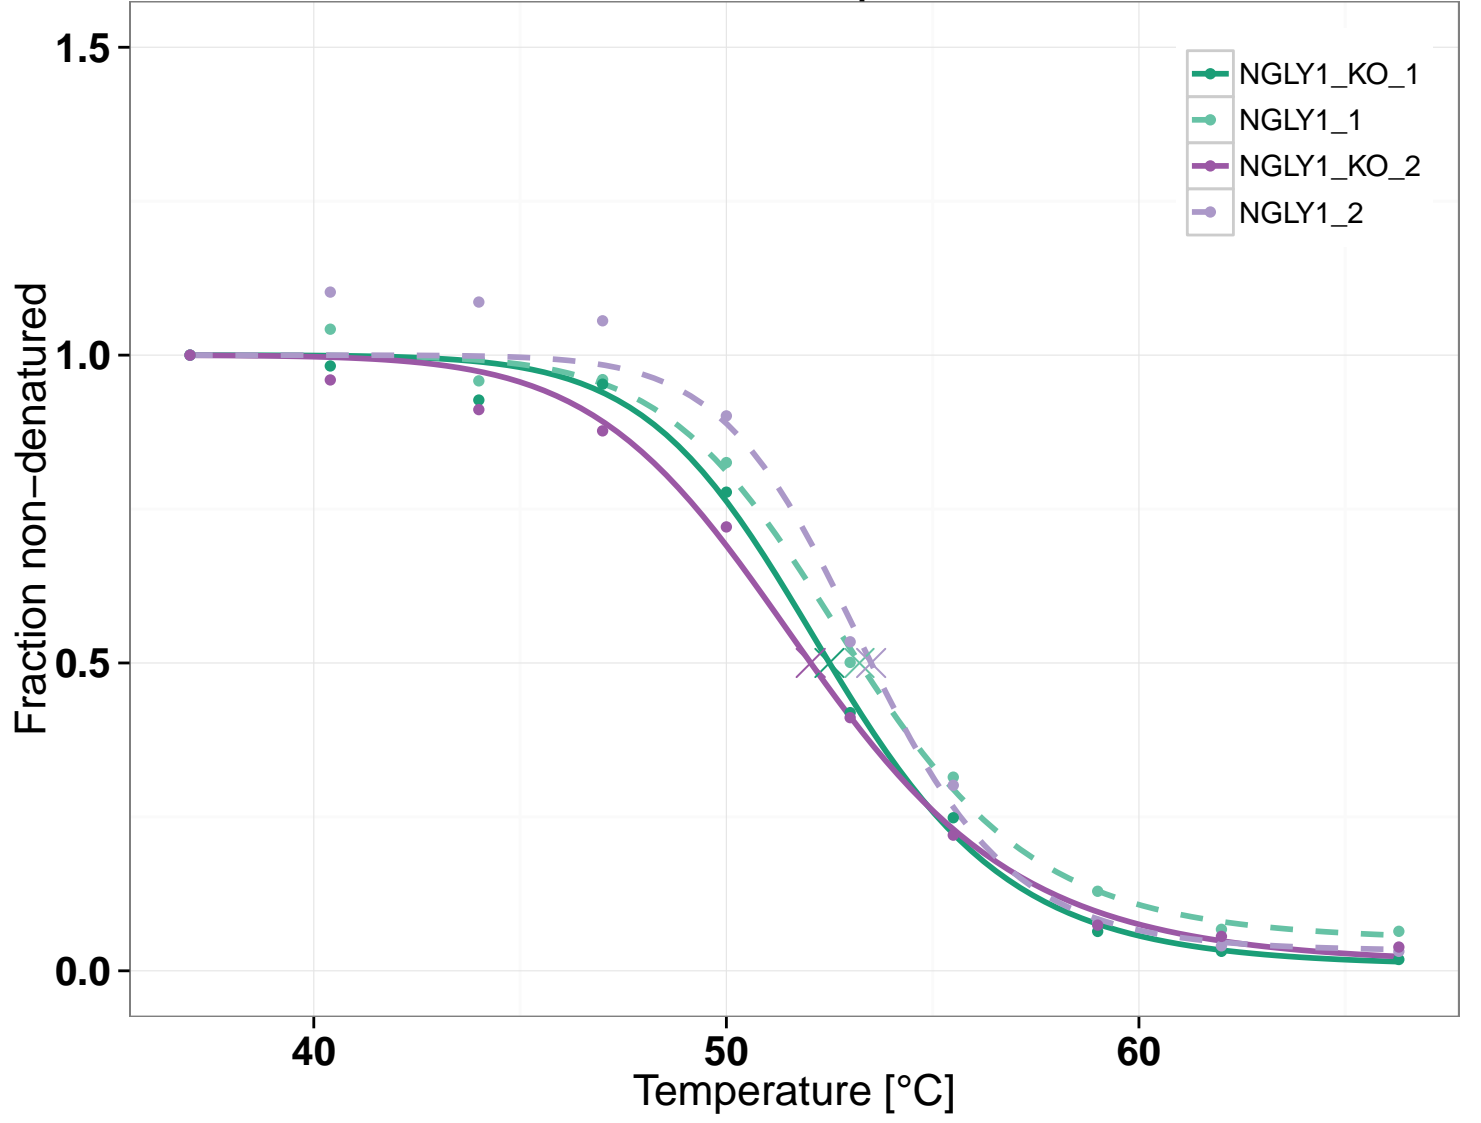

|            | meltPoint | slope  | plateau | R2   |
|------------|-----------|--------|---------|------|
| NGLY1_KO_1 | 52.5      | -0.11  | 0.01    | 1    |
| NGLY1_1    | 53.23     | -0.11  | 0.05    | 1    |
| NGLY1_KO_2 | 52.04     | -0.095 | 0.01    | 1    |
| NGLY1_2    | 53.51     | -0.14  | 0.03    | 0.99 |

Supplement: Supplementary file 6331 [file 1]

IPI00021569.1|MBTPS1

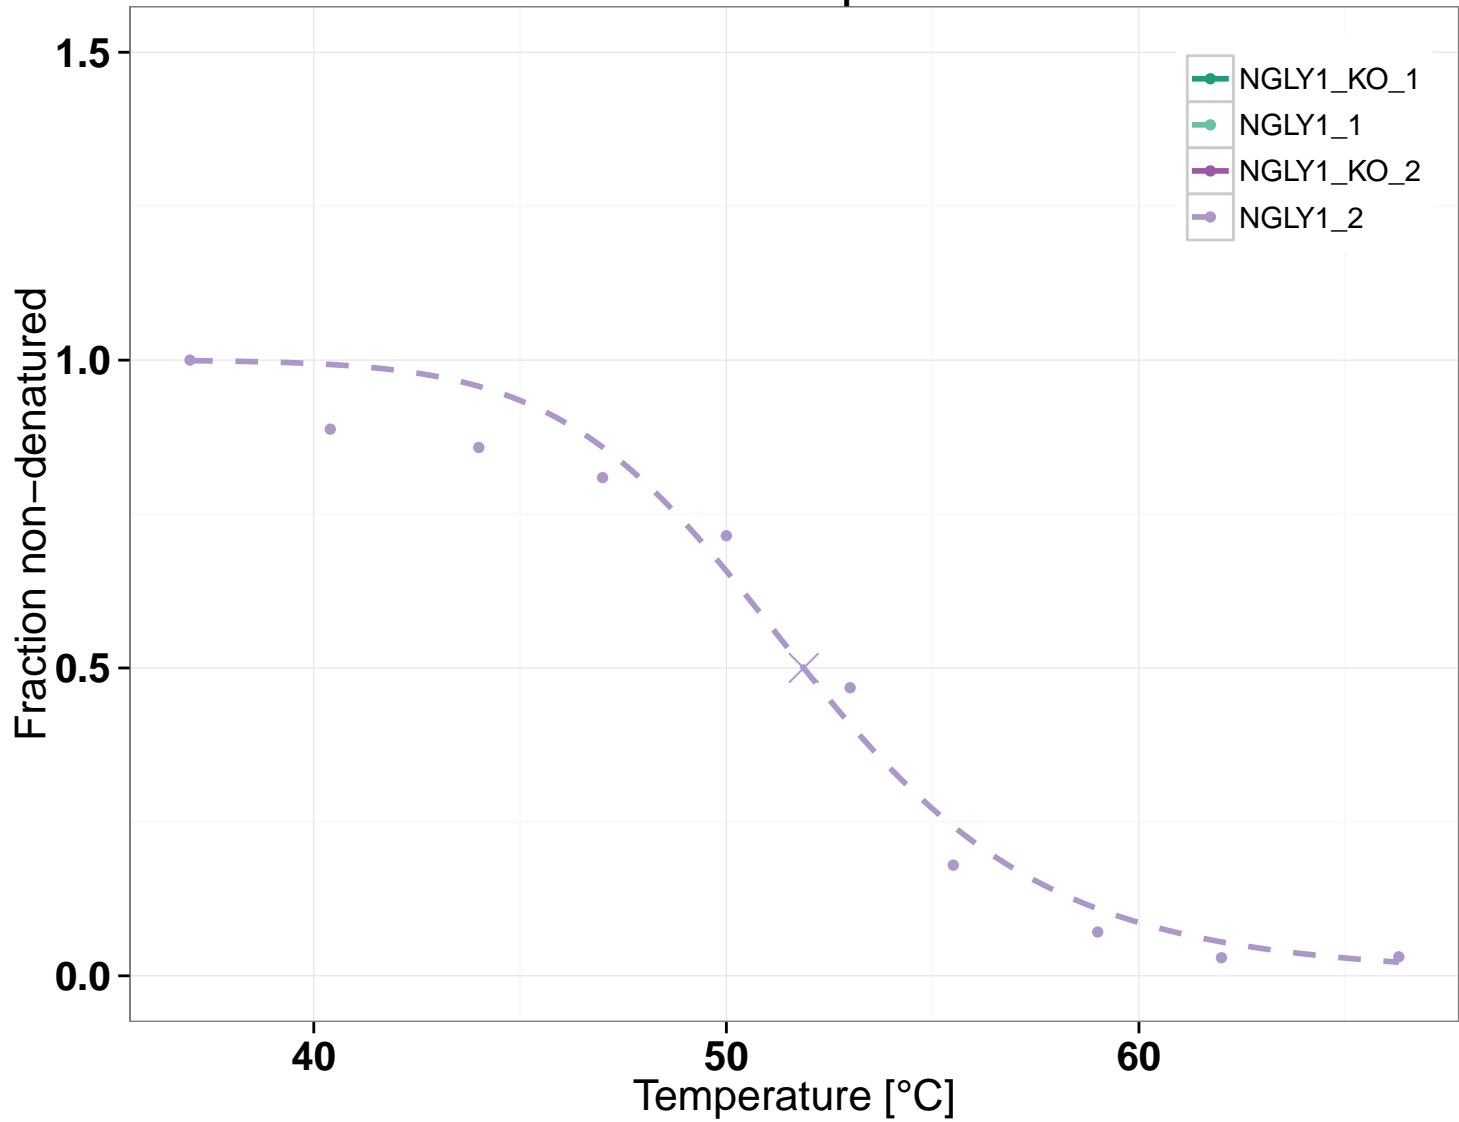

|            | meltPoint | slope  | plateau | R2   |
|------------|-----------|--------|---------|------|
| NGLY1_KO_1 | —         | —      | —       | —    |
| NGLY1_1    | —         | —      | —       | —    |
| NGLY1_KO_2 | —         | —      | —       | —    |
| NGLY1_2    | 51.87     | -0.085 | 0       | 0.97 |

Supplement: Supplementary file 6332 [file 1]

# IPI00177912.4|YIPF1

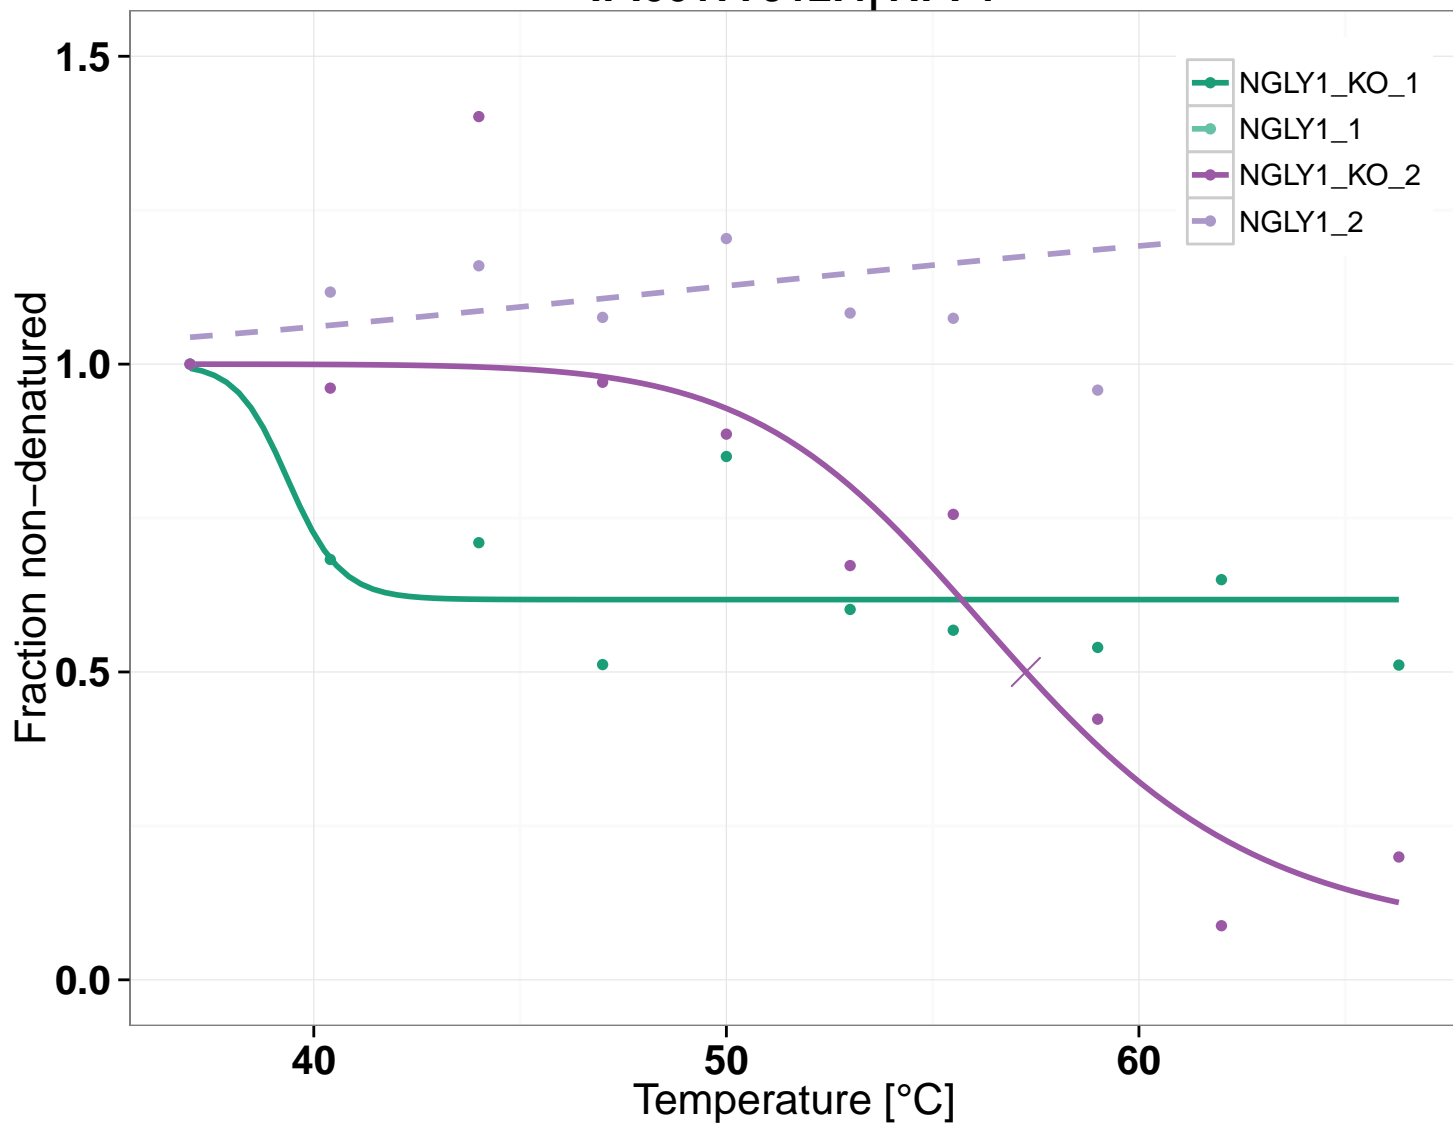

|            | meltPoint | slope  | plateau | R2   |
|------------|-----------|--------|---------|------|
| NGLY1_KO_1 | –         | –0.15  | 0.62    | 0.58 |
| NGLY1_1    | –         | –      | –       | –    |
| NGLY1_KO_2 | 57.26     | –0.076 | 0.06    | 0.84 |
| NGLY1_2    | –         | 0.0069 | 1.5     | 0.17 |

Supplement: Supplementary file 6333 [file 1]

IPI00169307.6|ARHGAP21

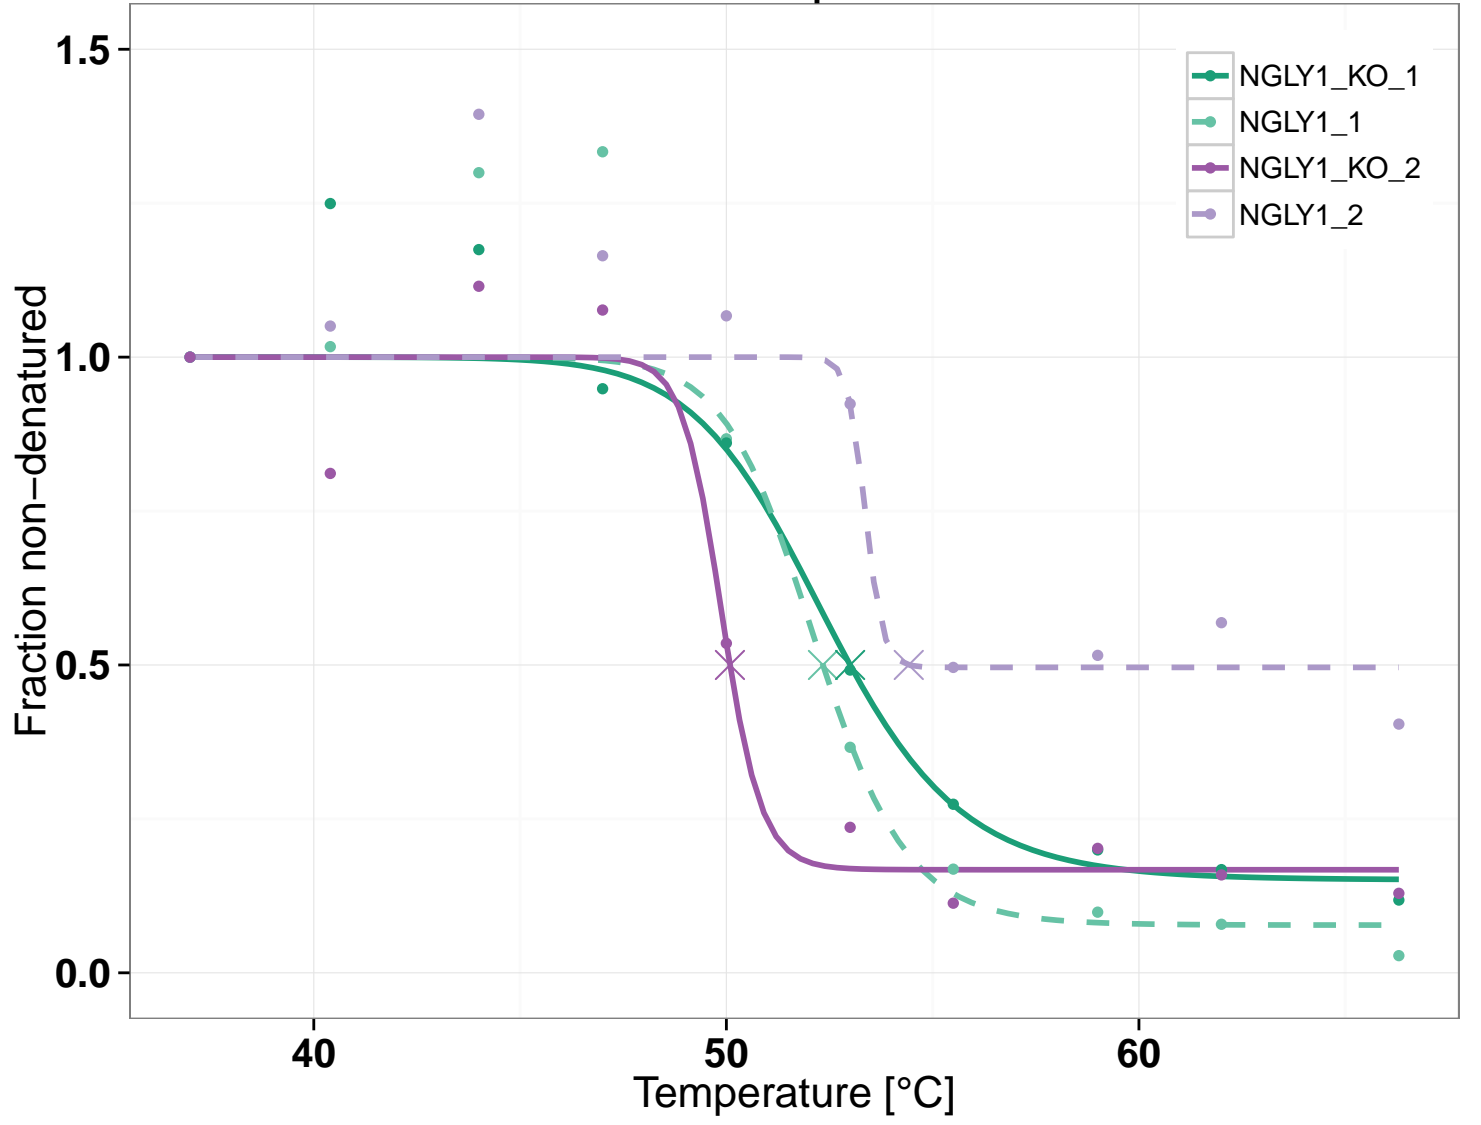

|            | meltPoint | slope | plateau | R2   |
|------------|-----------|-------|---------|------|
| NGLY1_KO_1 | 53        | -0.13 | 0.15    | 0.95 |
| NGLY1_1    | 52.34     | -0.21 | 0.08    | 0.92 |
| NGLY1_KO_2 | 50.09     | -0.43 | 0.17    | 0.96 |
| NGLY1_2    | 54.42     | -0.59 | 0.5     | 0.8  |

Supplement: Supplementary file 6334 [file 1]

# IPI00216230.3|TMPO

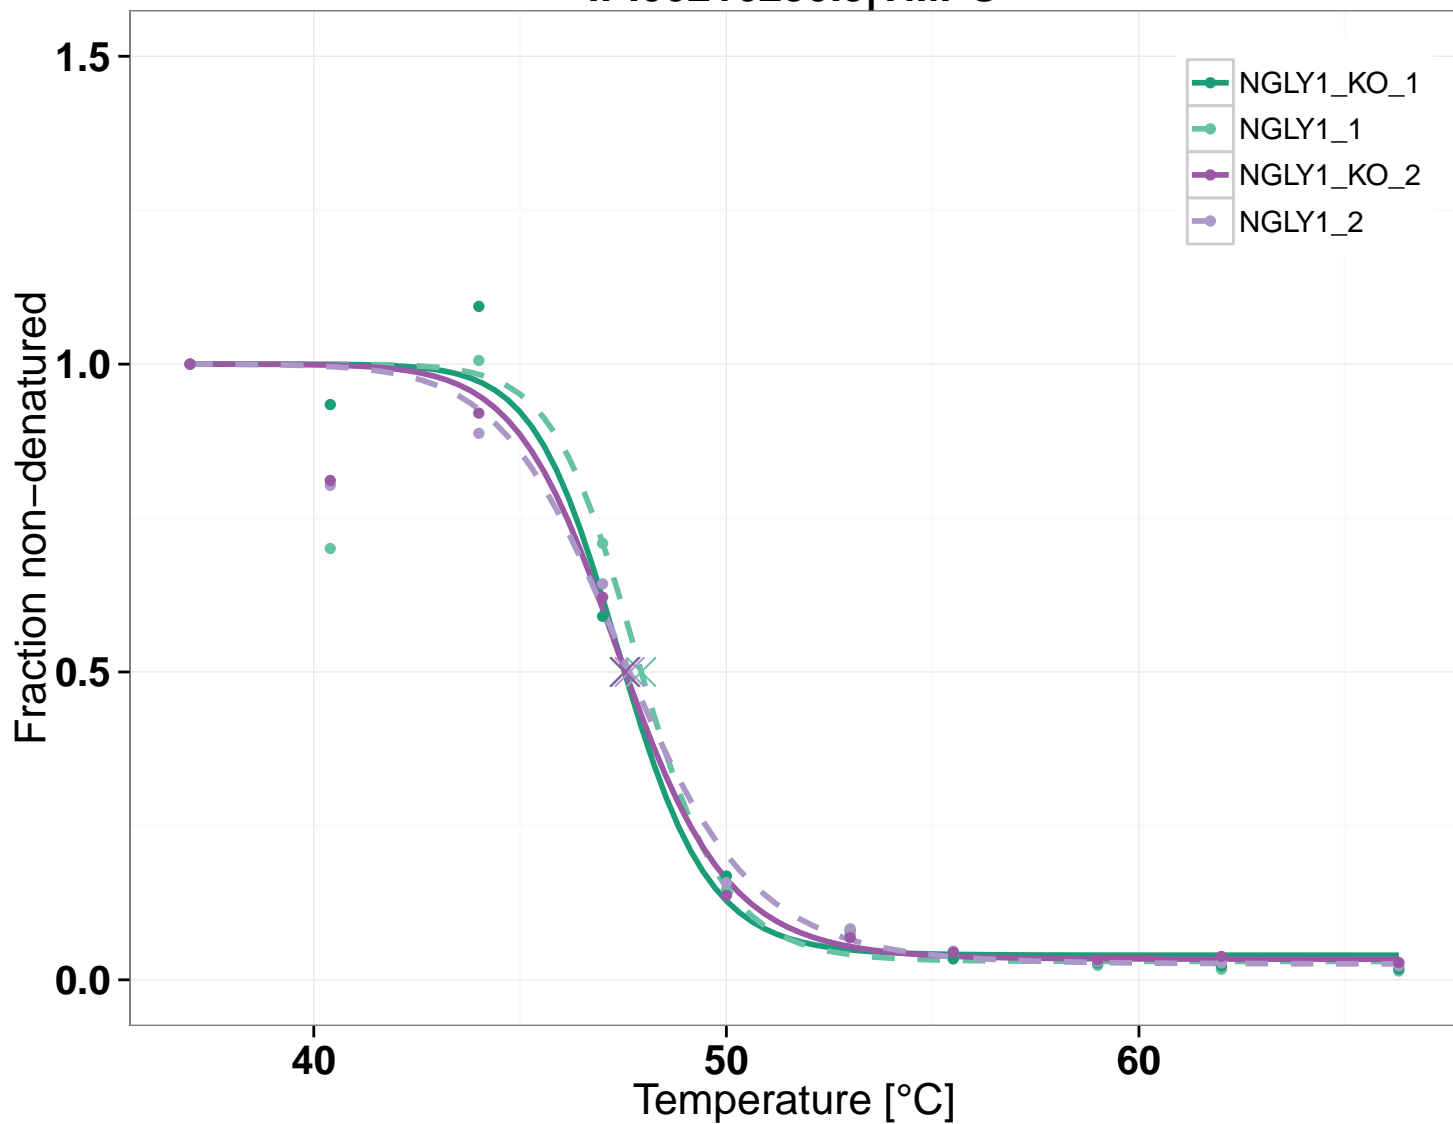

|            | meltPoint | slope | plateau | R2   |
|------------|-----------|-------|---------|------|
| NGLY1_KO_1 | 47.53     | -0.23 | 0.04    | 0.99 |
| NGLY1_1    | 47.94     | -0.23 | 0.03    | 0.94 |
| NGLY1_KO_2 | 47.55     | -0.19 | 0.03    | 0.98 |
| NGLY1_2    | 47.65     | -0.16 | 0.03    | 0.97 |

Supplement: Supplementary file 6335 [file 1]

IPI00000013.1|CTSL2

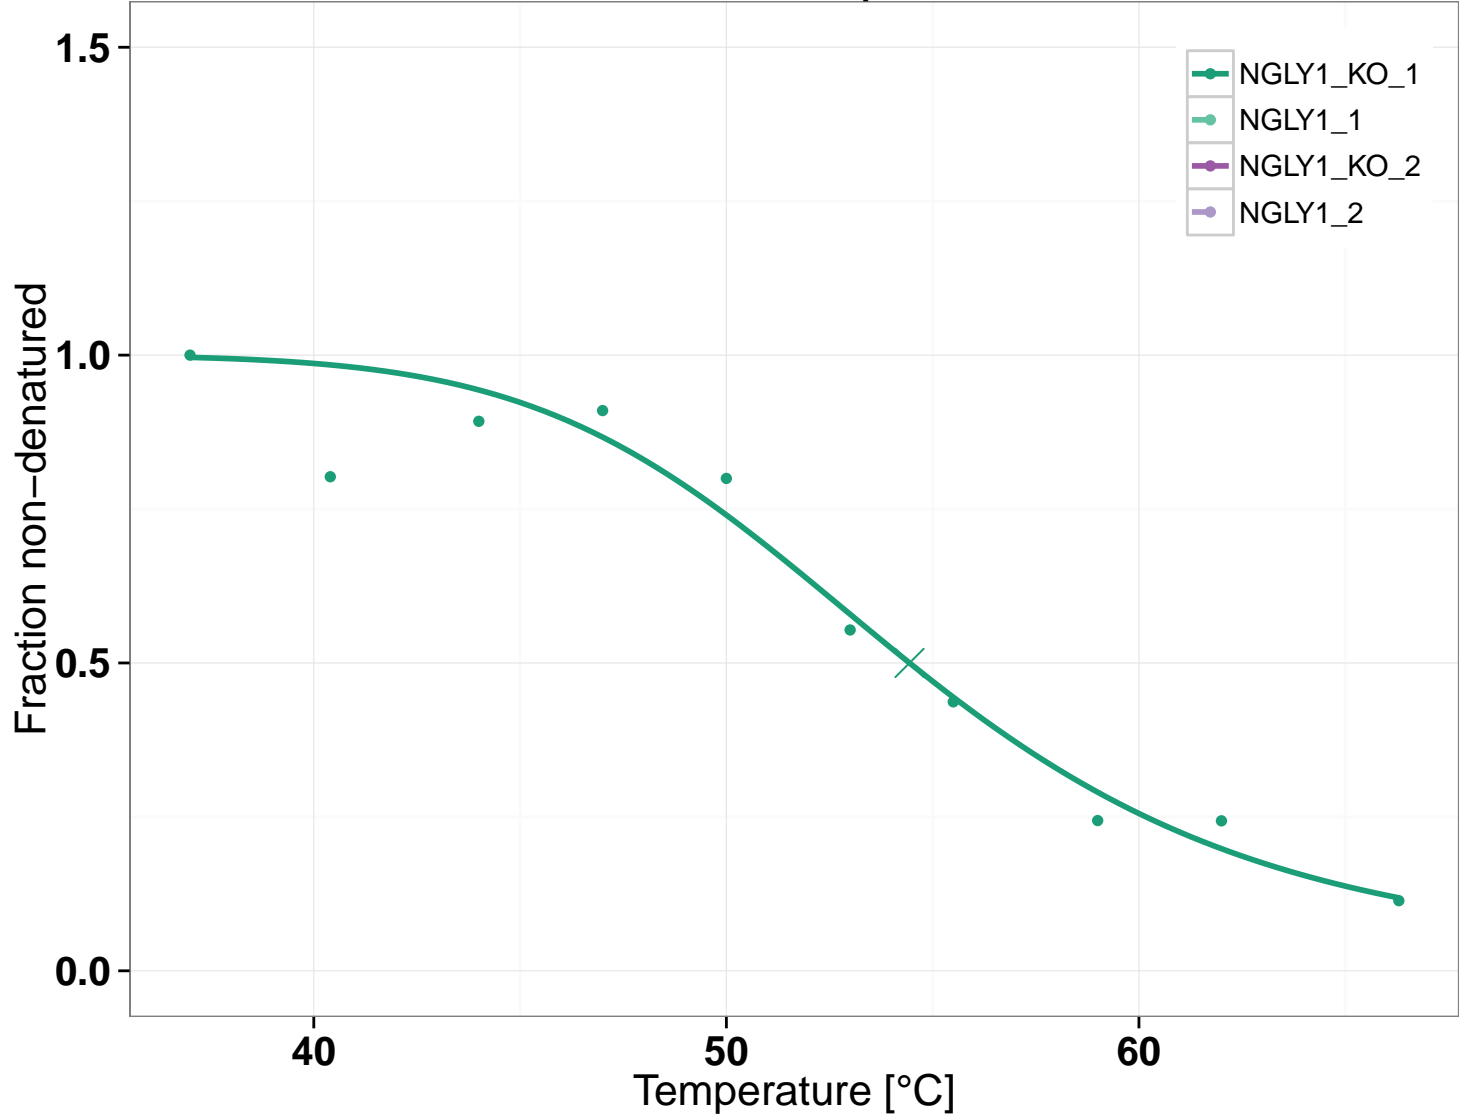

|            | meltPoint | slope  | plateau | R2   |
|------------|-----------|--------|---------|------|
| NGLY1_KO_1 | 54.44     | -0.056 | 0.02    | 0.95 |
| NGLY1_1    | -         | -      | -       | -    |
| NGLY1_KO_2 | -         | -      | -       | -    |
| NGLY1_2    | -         | -      | -       | -    |

Supplement: Supplementary file 6336 [file 1]

# IPI00845435.1|PPM1E

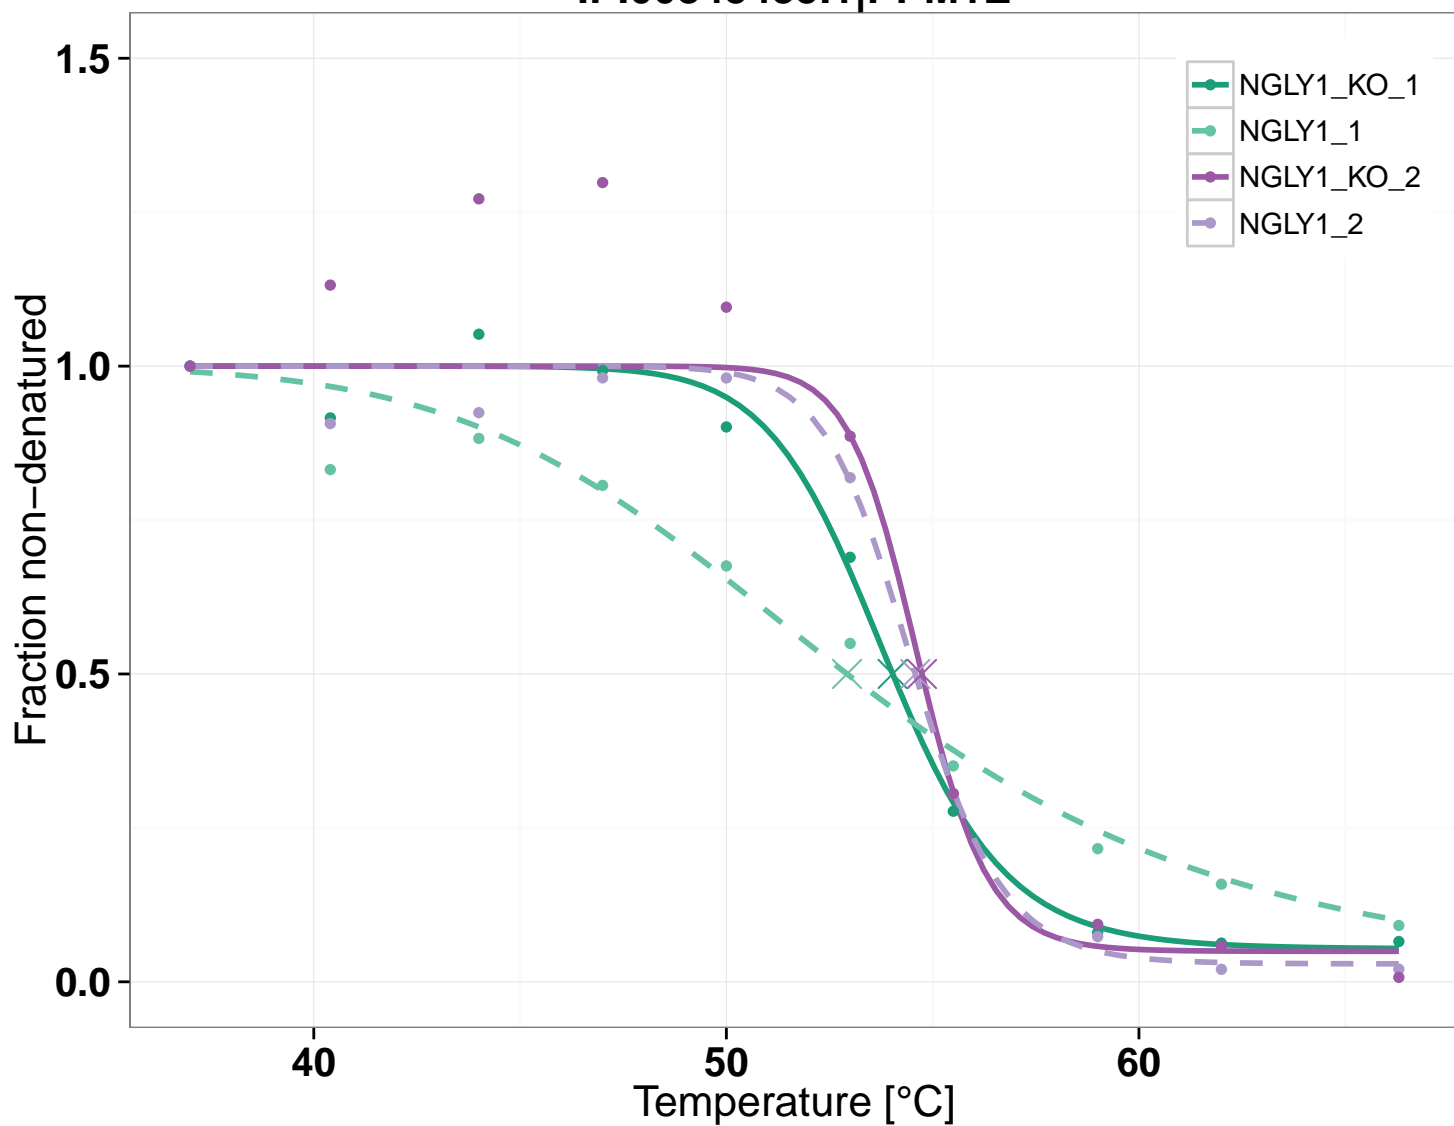

|            | meltPoint | slope  | plateau | R2   |
|------------|-----------|--------|---------|------|
| NGLY1_KO_1 | 54.03     | -0.16  | 0.05    | 0.99 |
| NGLY1_1    | 52.93     | -0.053 | 0       | 0.98 |
| NGLY1_KO_2 | 54.74     | -0.28  | 0.05    | 0.92 |
| NGLY1_2    | 54.58     | -0.22  | 0.03    | 0.99 |

Supplement: Supplementary file 6337 [file 1]

IPI00783982.1|COPG

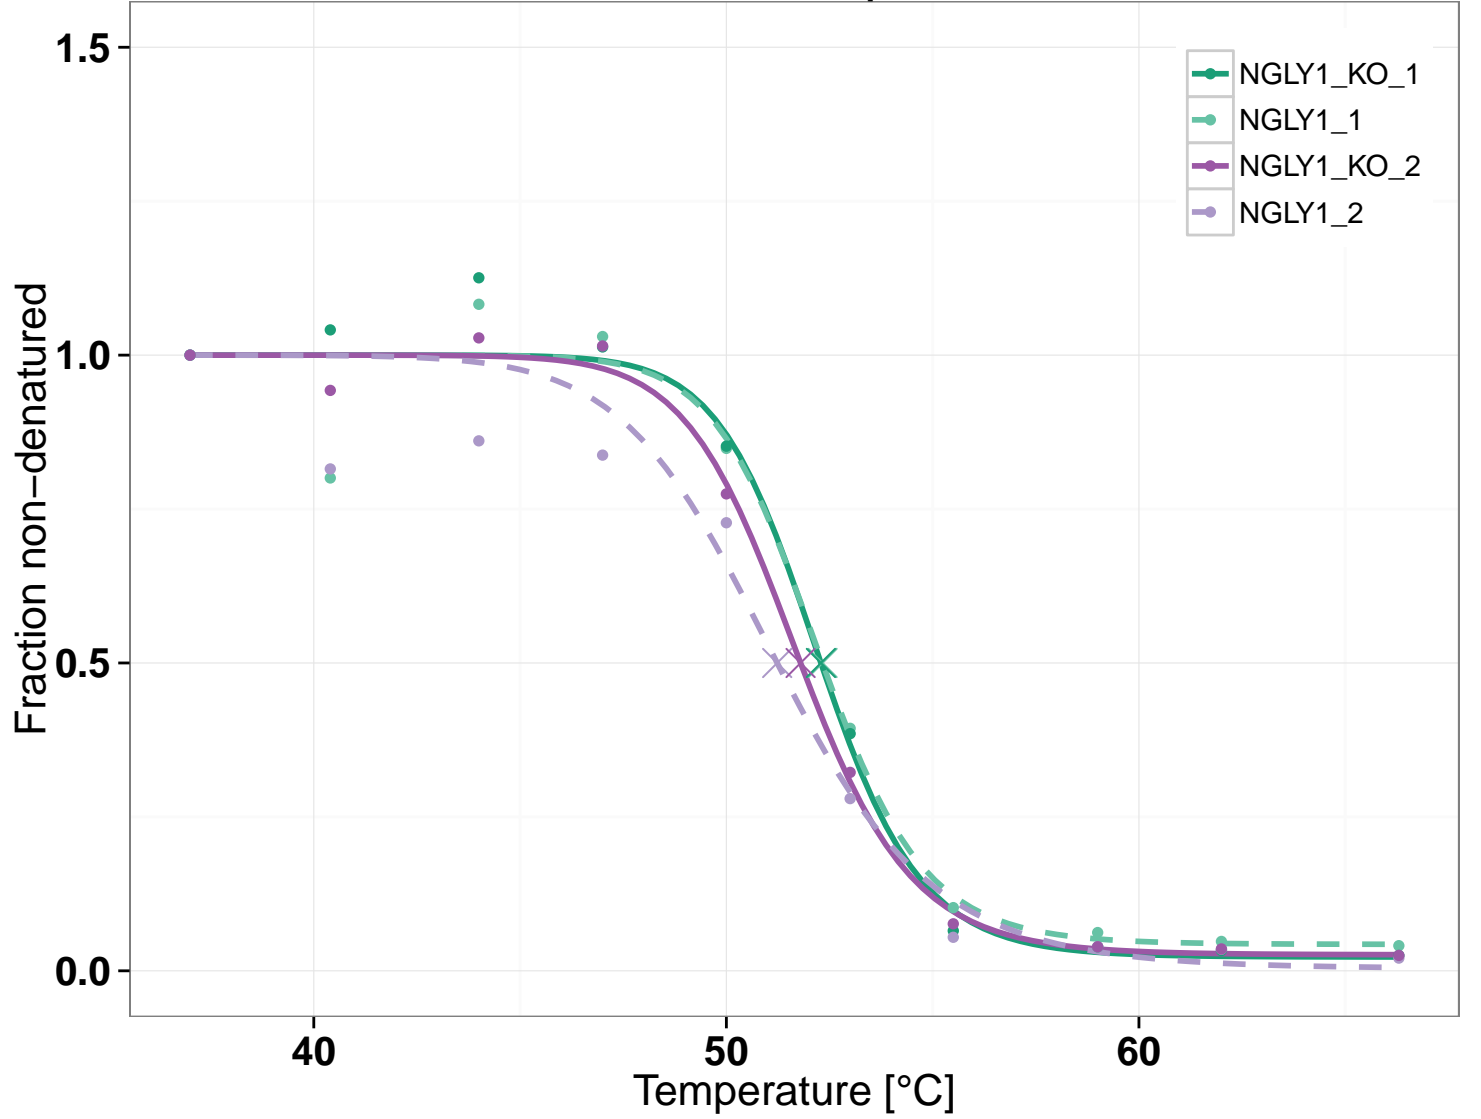

|            | meltPoint | slope | plateau | R2   |
|------------|-----------|-------|---------|------|
| NGLY1_KO_1 | 52.29     | -0.2  | 0.02    | 0.99 |
| NGLY1_1    | 52.33     | -0.19 | 0.04    | 0.97 |
| NGLY1_KO_2 | 51.8      | -0.18 | 0.03    | 1    |
| NGLY1_2    | 51.23     | -0.13 | 0       | 0.96 |

Supplement: Supplementary file 6338 [file 1]

IPI00099131.1|ZC3H7B

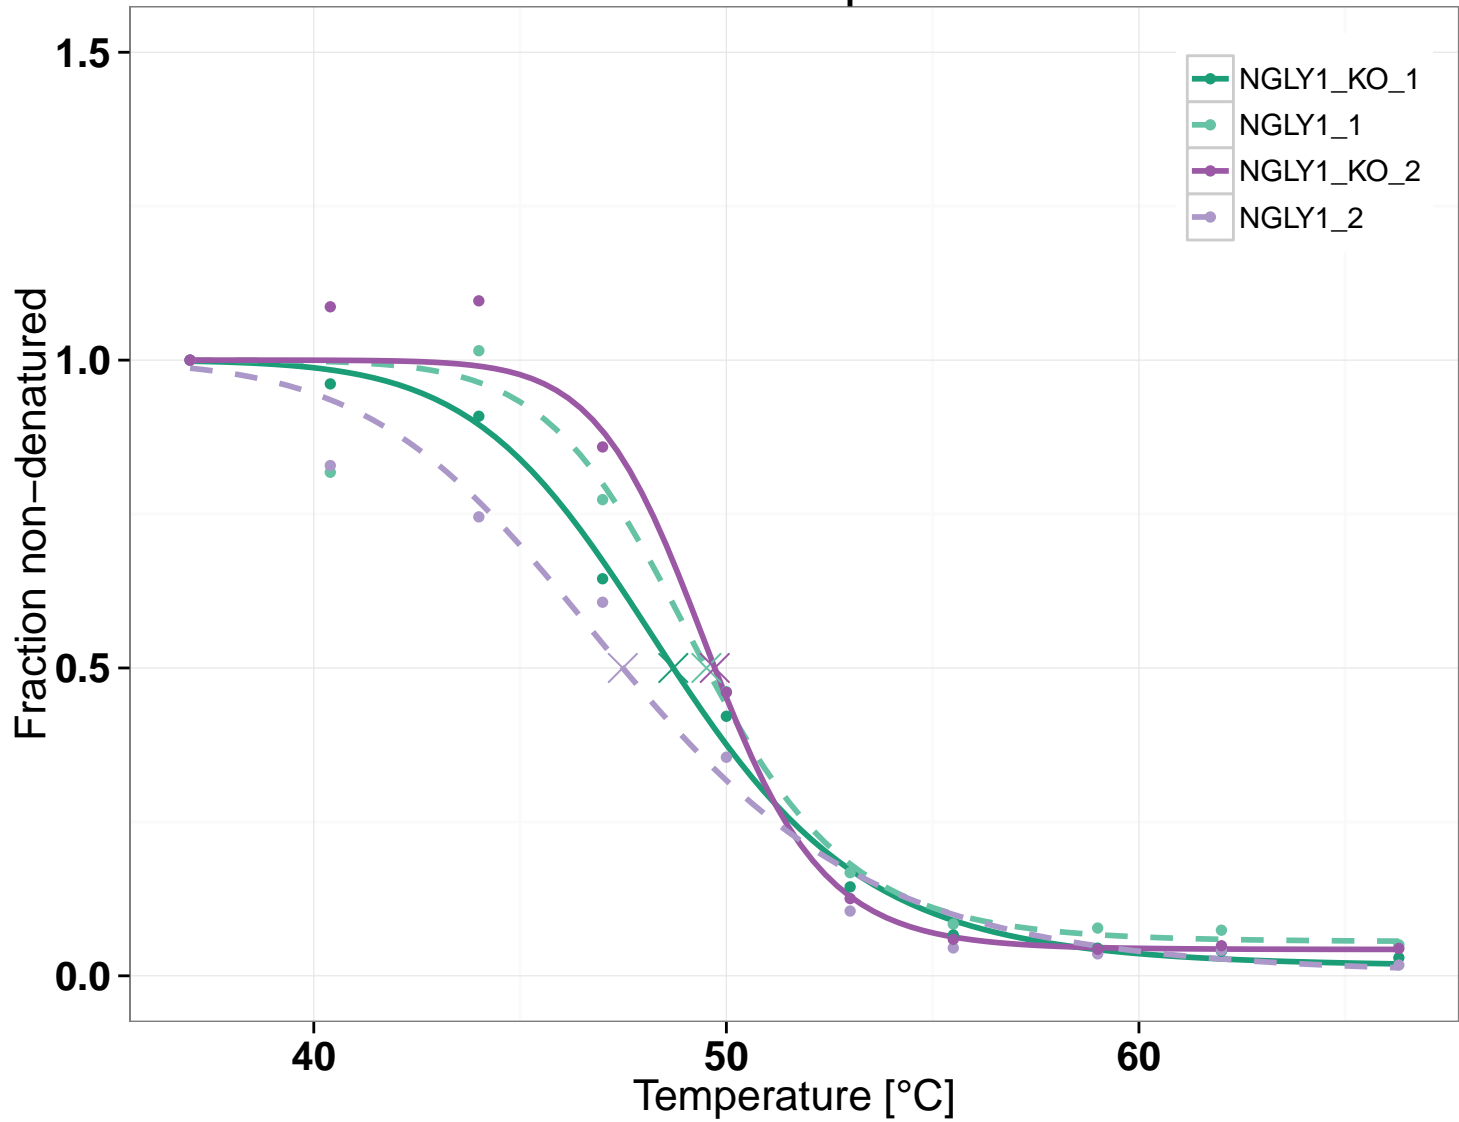

|            | meltPoint | slope  | plateau | R2   |
|------------|-----------|--------|---------|------|
| NGLY1_KO_1 | 48.71     | -0.1   | 0.01    | 1    |
| NGLY1_1    | 49.52     | -0.13  | 0.06    | 0.98 |
| NGLY1_KO_2 | 49.72     | -0.17  | 0.04    | 0.99 |
| NGLY1_2    | 47.49     | -0.082 | 0       | 0.98 |

Supplement: Supplementary file 6339 [file 1]

IPI00297767.3|CSNK1G2

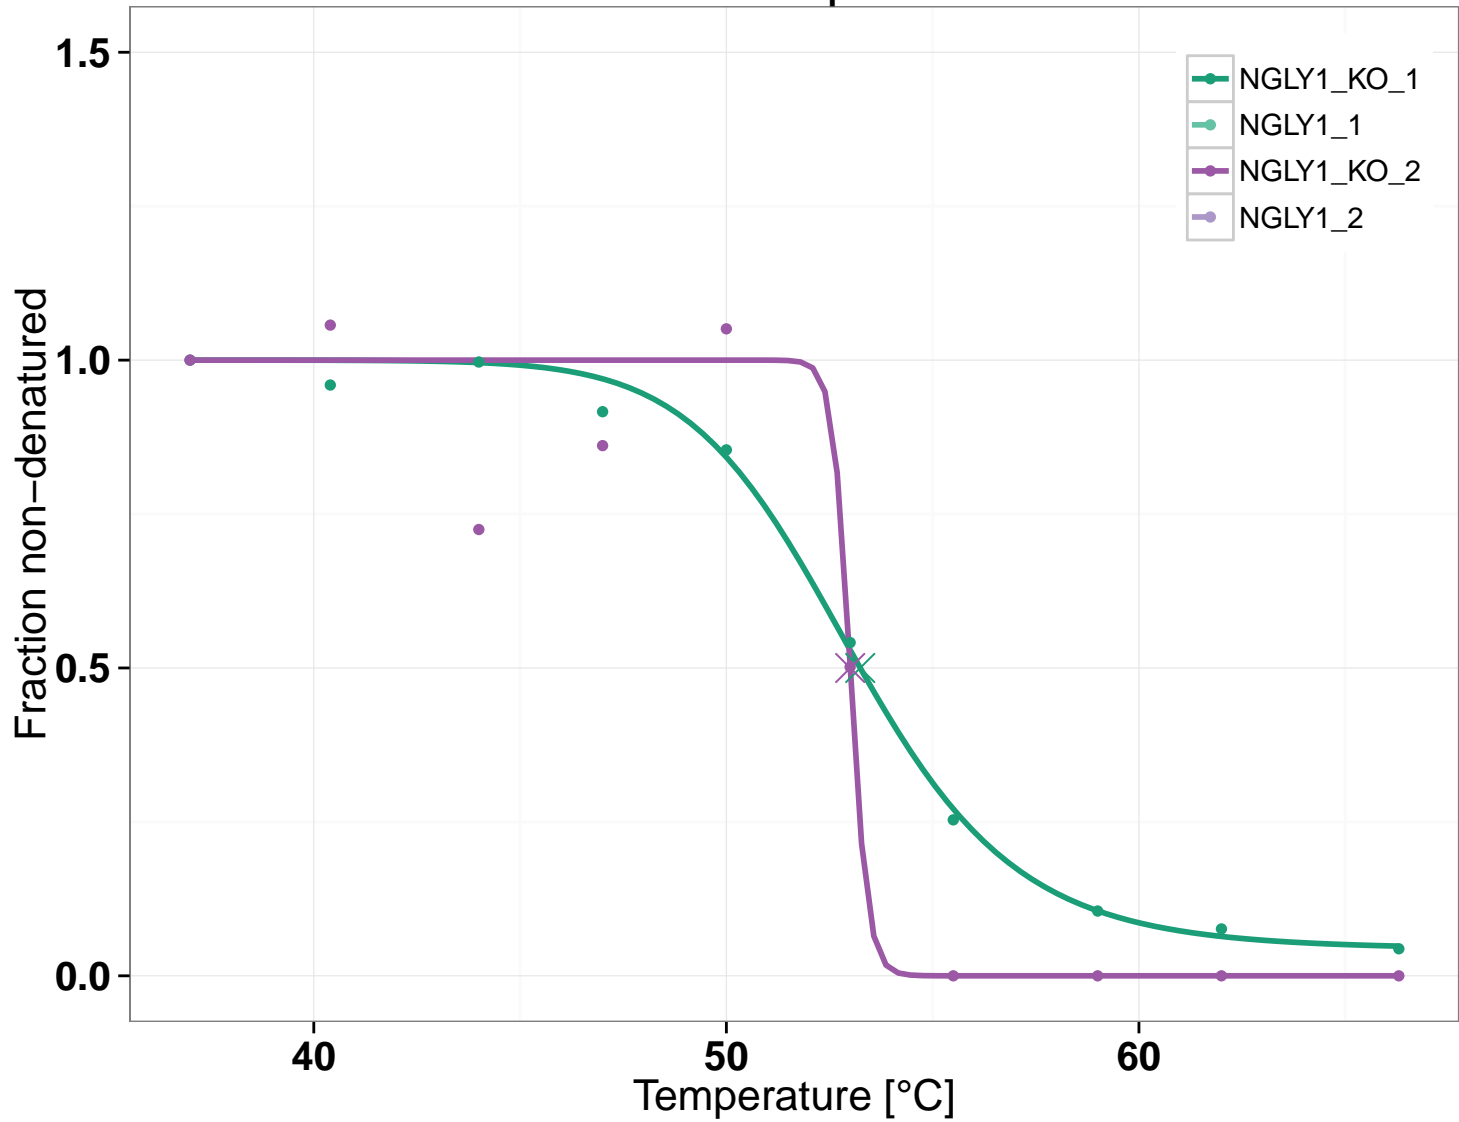

|            | meltPoint | slope | plateau | R2   |
|------------|-----------|-------|---------|------|
| NGLY1_KO_1 | 53.24     | -0.12 | 0.04    | 1    |
| NGLY1_1    | -         | -     | -       | -    |
| NGLY1_KO_2 | 53        | -1.2  | 0       | 0.95 |
| NGLY1_2    | -         | -     | -       | -    |

Supplement: Supplementary file 6340 [file 1]

IPI00166132.3|VPS52

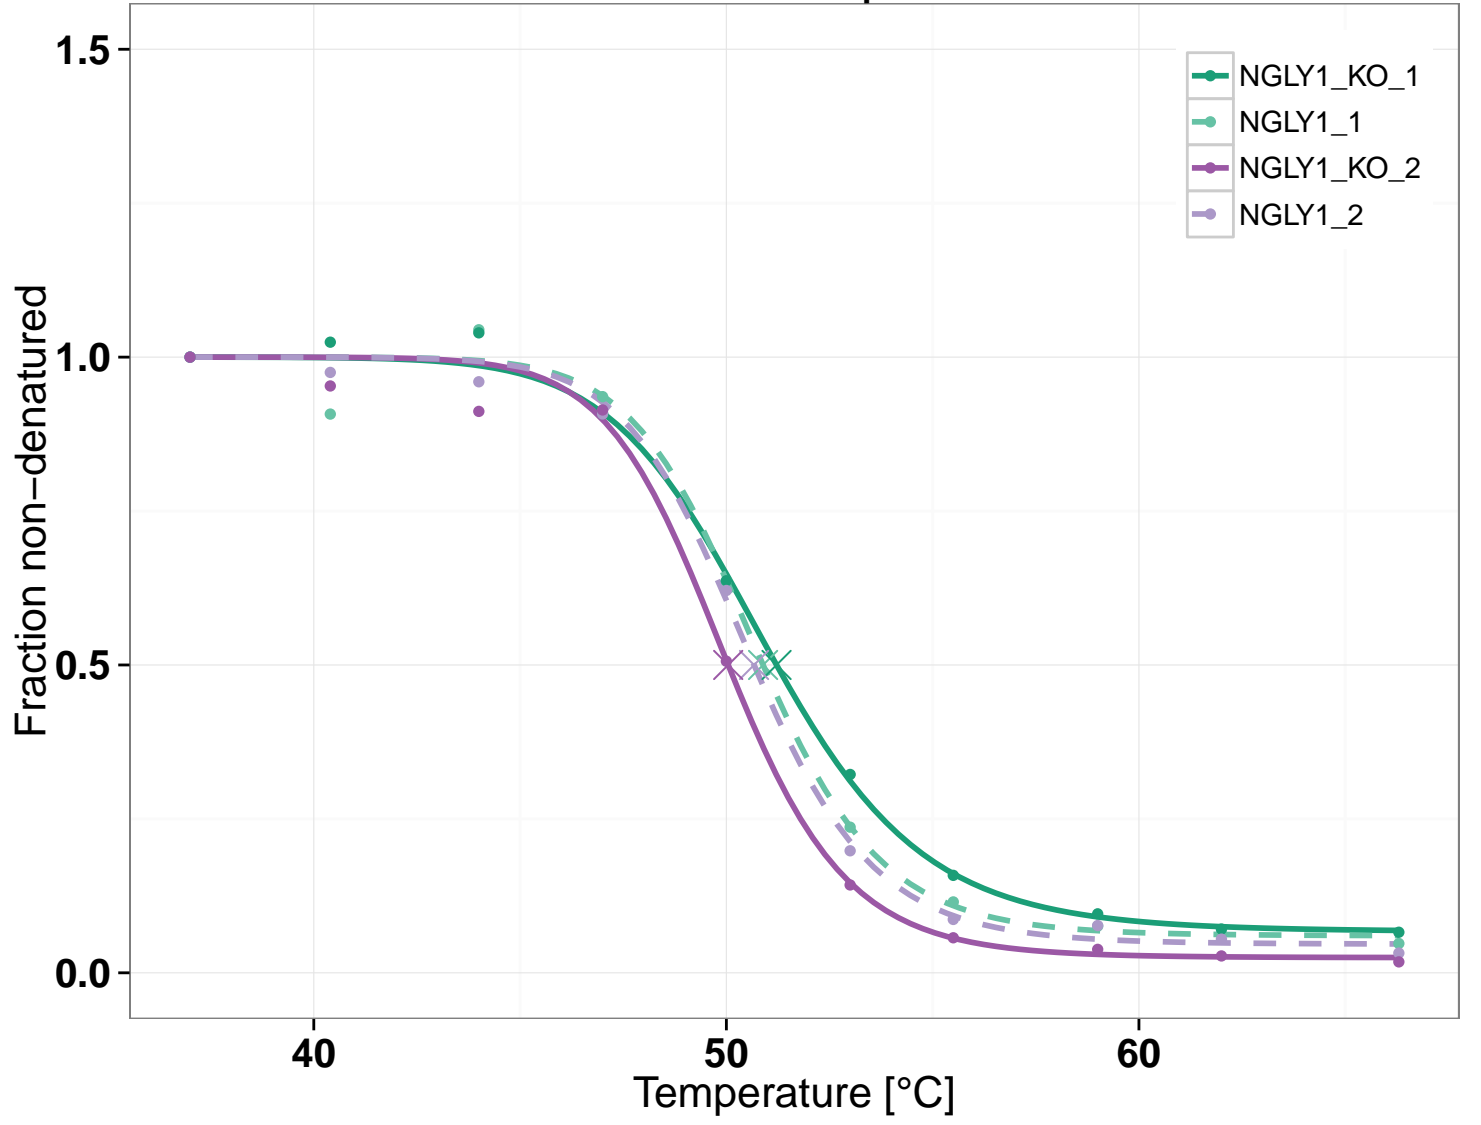

|            | meltPoint | slope | plateau | R2   |
|------------|-----------|-------|---------|------|
| NGLY1_KO_1 | 51.22     | -0.12 | 0.07    | 1    |
| NGLY1_1    | 50.89     | -0.16 | 0.06    | 0.99 |
| NGLY1_KO_2 | 50.04     | -0.17 | 0.02    | 1    |
| NGLY1_2    | 50.67     | -0.16 | 0.05    | 1    |

Supplement: Supplementary file 6341 [file 1]

IPI00794278.1|CDC27

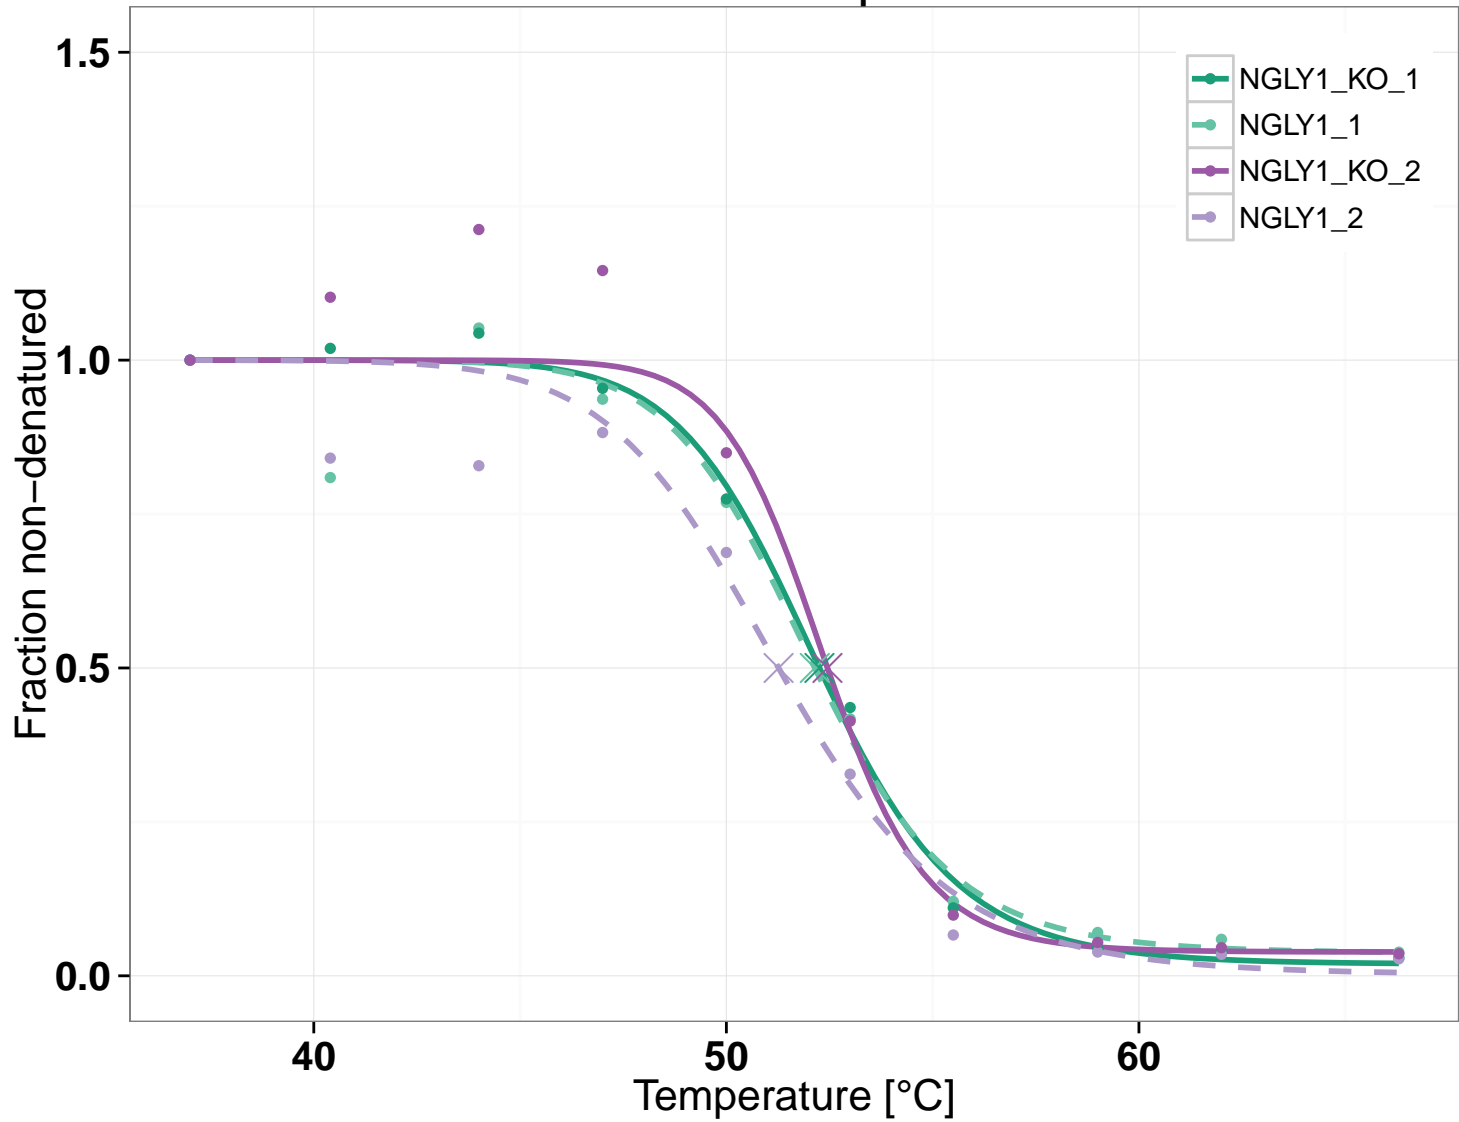

|            | meltPoint | slope | plateau | R2   |
|------------|-----------|-------|---------|------|
| NGLY1_KO_1 | 52.26     | -0.14 | 0.02    | 1    |
| NGLY1_1    | 52.14     | -0.14 | 0.04    | 0.97 |
| NGLY1_KO_2 | 52.45     | -0.2  | 0.04    | 0.97 |
| NGLY1_2    | 51.27     | -0.12 | 0       | 0.96 |

Supplement: Supplementary file 6342 [file 1]

IPI00383594.2|MUM1

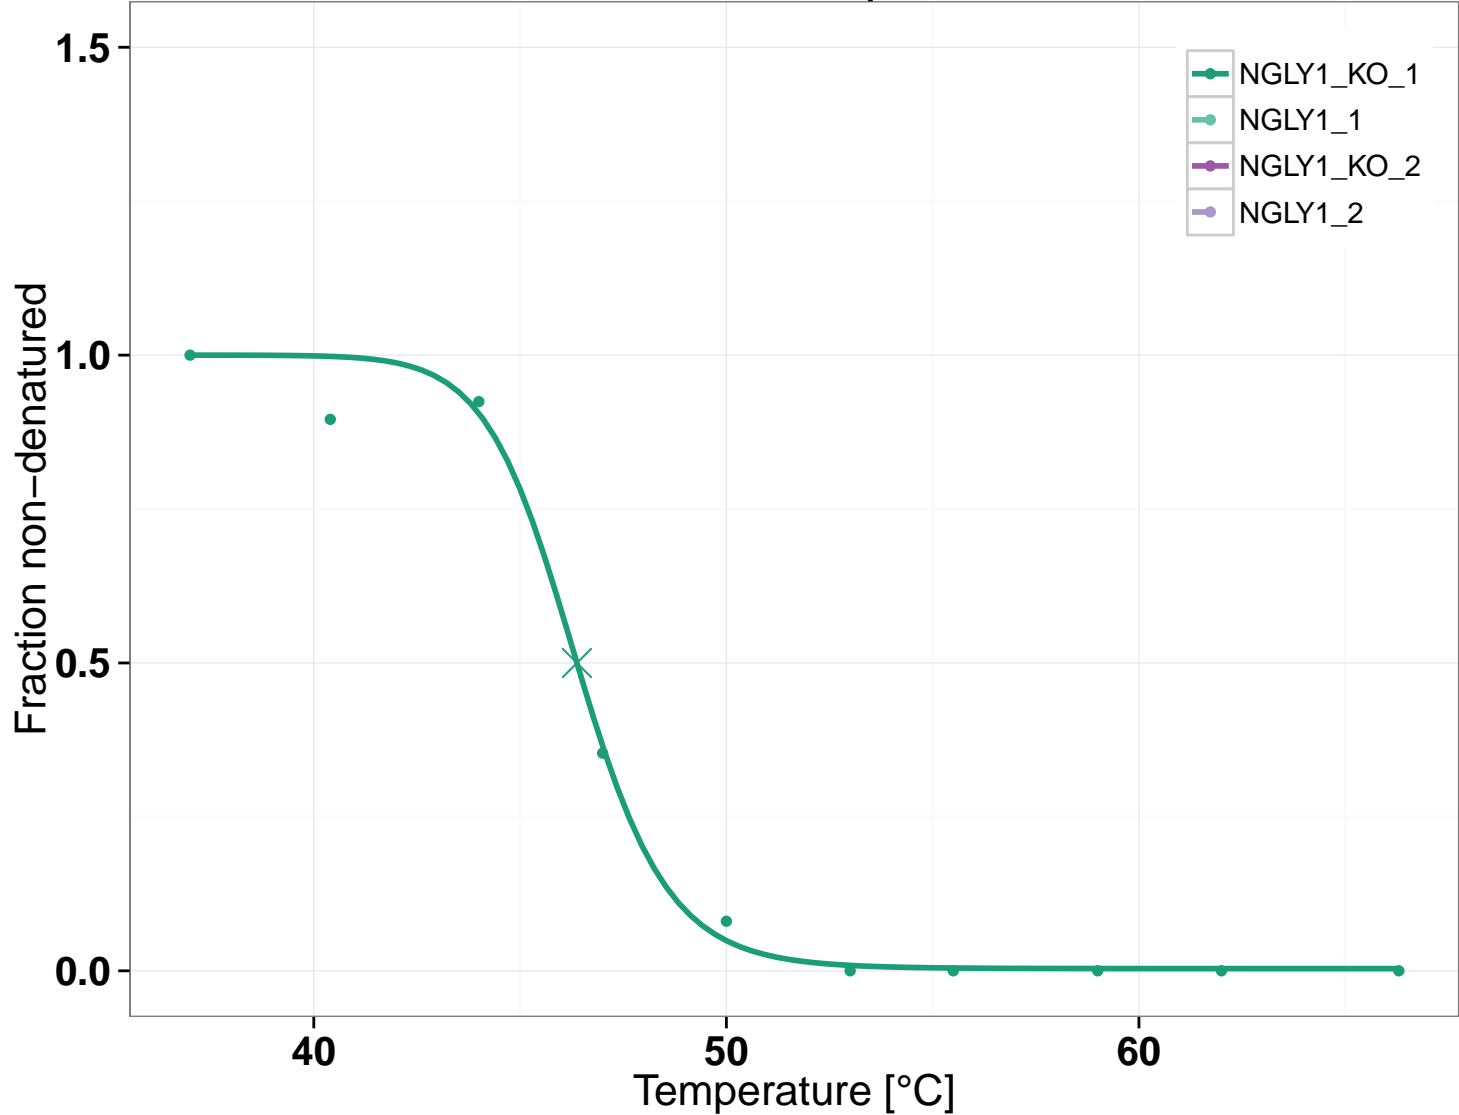

|            | meltPoint | slope | plateau | R2   |
|------------|-----------|-------|---------|------|
| NGLY1_KO_1 | 46.38     | -0.23 | 0       | 0.99 |
| NGLY1_1    | -         | -     | -       | -    |
| NGLY1_KO_2 | -         | -     | -       | -    |
| NGLY1_2    | -         | -     | -       | -    |

Supplement: Supplementary file 6343 [file 1]

IPI00008963.1|ISG20L2

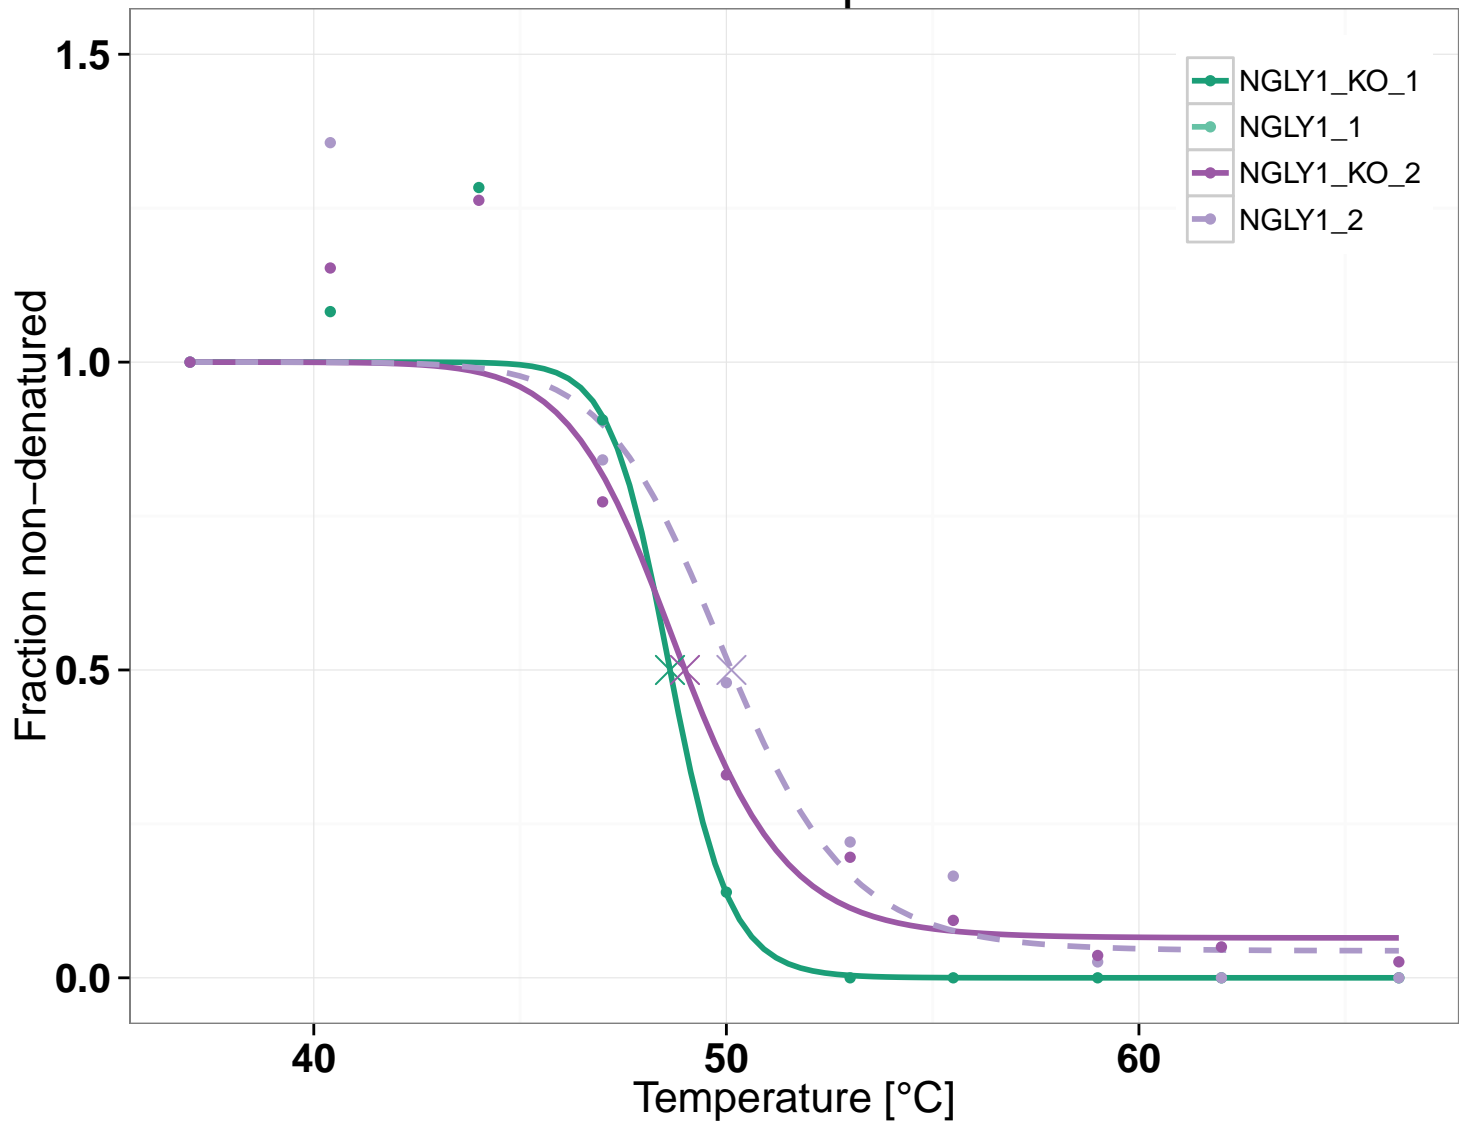

|            | meltPoint | slope | plateau | R2   |
|------------|-----------|-------|---------|------|
| NGLY1_KO_1 | 48.63     | -0.35 | 0       | 0.97 |
| NGLY1_1    | -         | -     | -       | -    |
| NGLY1_KO_2 | 49        | -0.18 | 0.06    | 0.95 |
| NGLY1_2    | 50.12     | -0.16 | 0.04    | 0.82 |

Supplement: Supplementary file 6344 [file 1]

# IPI00071334.4|ND3

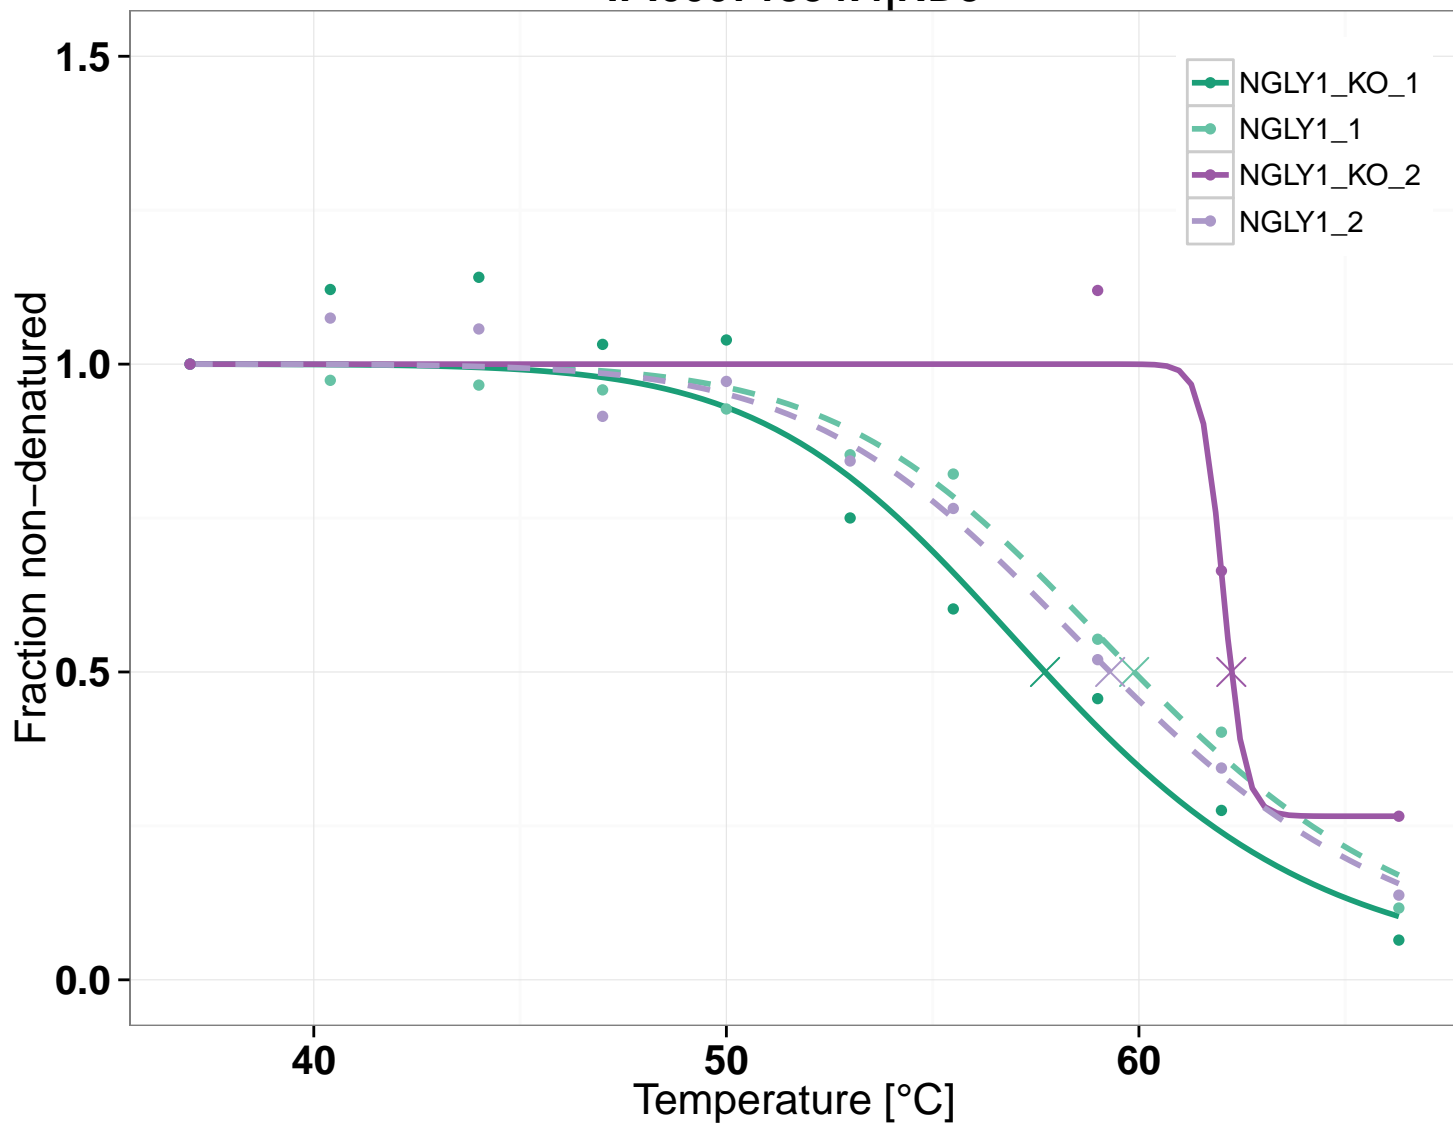

|            | meltPoint | slope  | plateau | R2    |
|------------|-----------|--------|---------|-------|
| NGLY1_KO_1 | 57.72     | -0.074 | 0       | 0.95  |
| NGLY1_1    | 59.88     | -0.069 | 0       | 0.99  |
| NGLY1_KO_2 | 62.24     | -0.72  | 0.27    | -0.51 |
| NGLY1_2    | 59.3      | -0.068 | 0       | 0.98  |

Supplement: Supplementary file 6345 [file 1]

# IPI00019332.3|THUMPD2

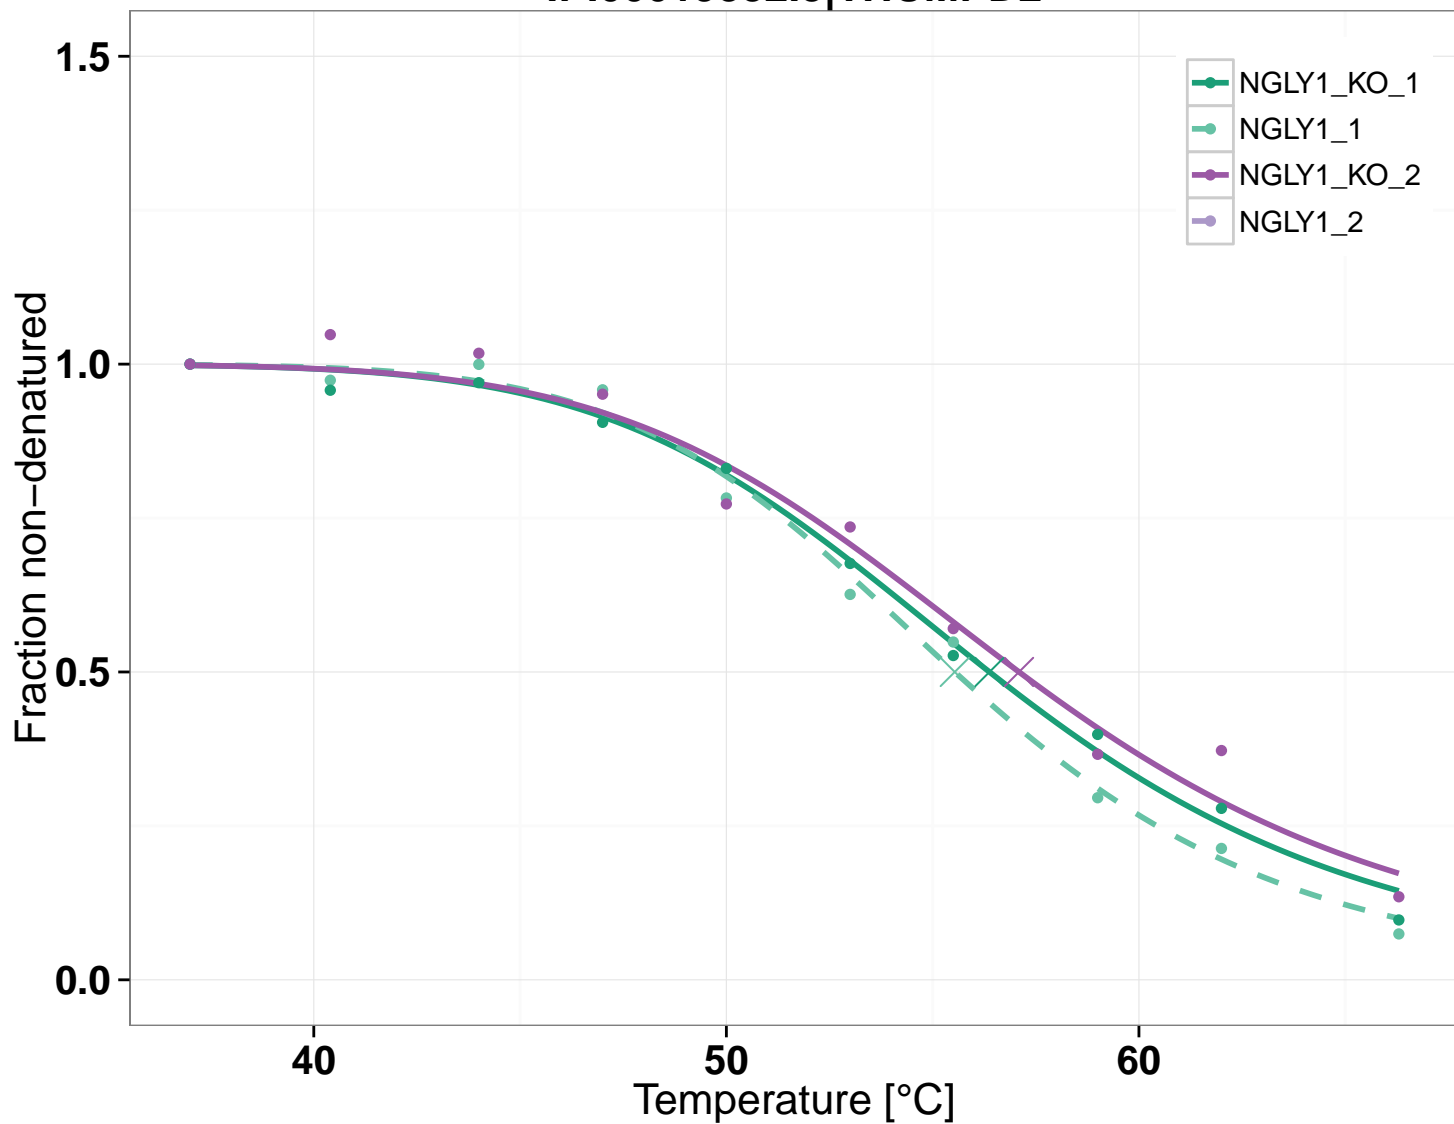

|            | meltPoint | slope  | plateau | R2   |
|------------|-----------|--------|---------|------|
| NGLY1_KO_1 | 56.38     | -0.054 | 0       | 0.99 |
| NGLY1_1    | 55.54     | -0.062 | 0       | 0.99 |
| NGLY1_KO_2 | 57.09     | -0.052 | 0.01    | 0.98 |
| NGLY1_2    | —         | —      | —       | —    |

Supplement: Supplementary file 6346 [file 1]

IPI00791891.2|RAD51L3

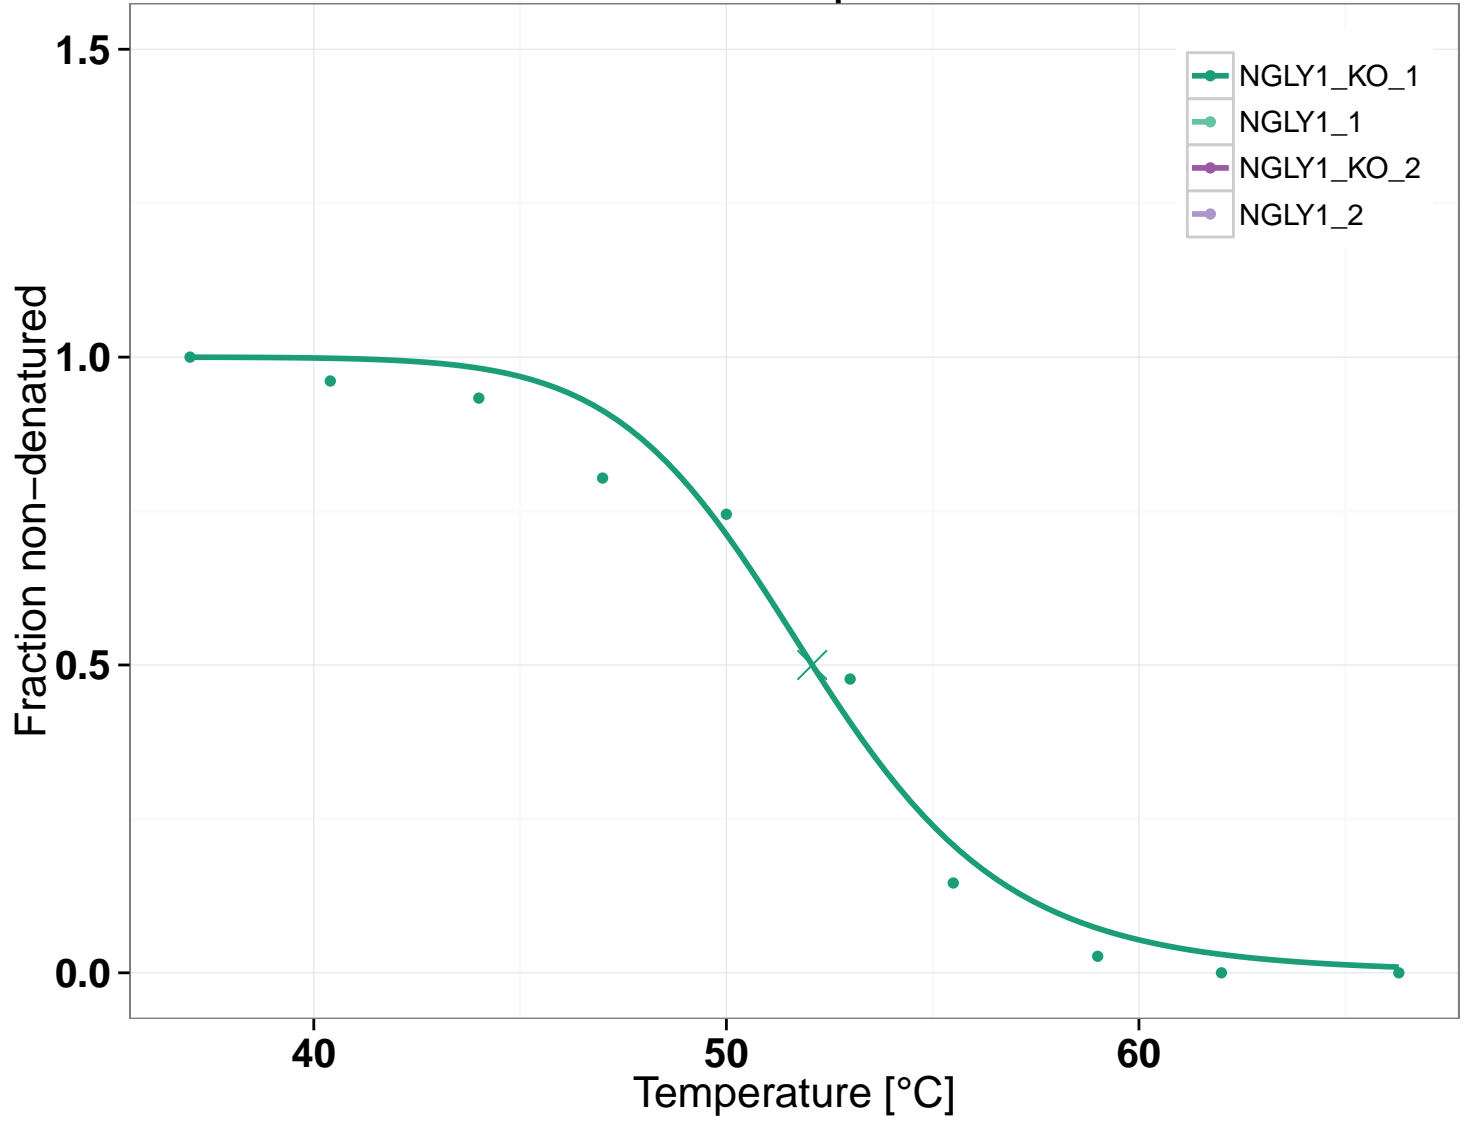

|            | meltPoint | slope | plateau | R2   |
|------------|-----------|-------|---------|------|
| NGLY1_KO_1 | 52.08     | -0.11 | 0       | 0.98 |
| NGLY1_1    | -         | -     | -       | -    |
| NGLY1_KO_2 | -         | -     | -       | -    |
| NGLY1_2    | -         | -     | -       | -    |

Supplement: Supplementary file 6347 [file 1]

# IPI00007607.6|YIF1A

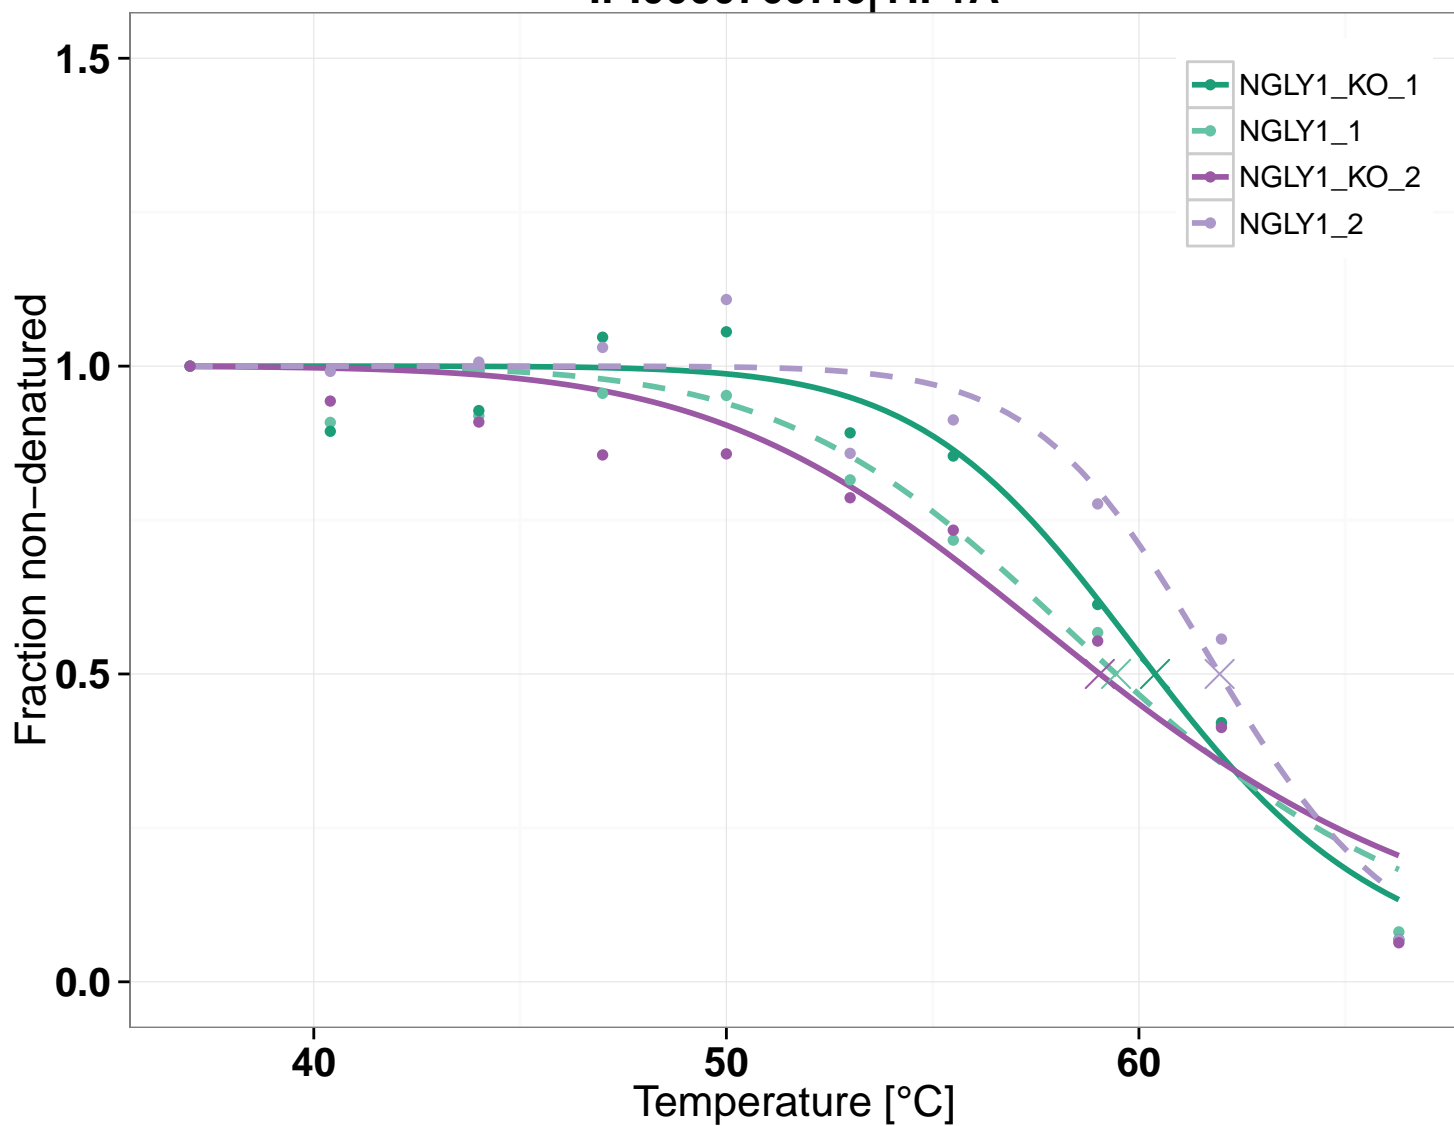

|            | meltPoint | slope  | plateau | R2   |
|------------|-----------|--------|---------|------|
| NGLY1_KO_1 | 60.39     | -0.088 | 0       | 0.96 |
| NGLY1_1    | 59.45     | -0.062 | 0       | 0.96 |
| NGLY1_KO_2 | 59.05     | -0.054 | 0       | 0.93 |
| NGLY1_2    | 61.96     | -0.11  | 0       | 0.95 |

Supplement: Supplementary file 6348 [file 1]

IPI00456589.1|GALNT11

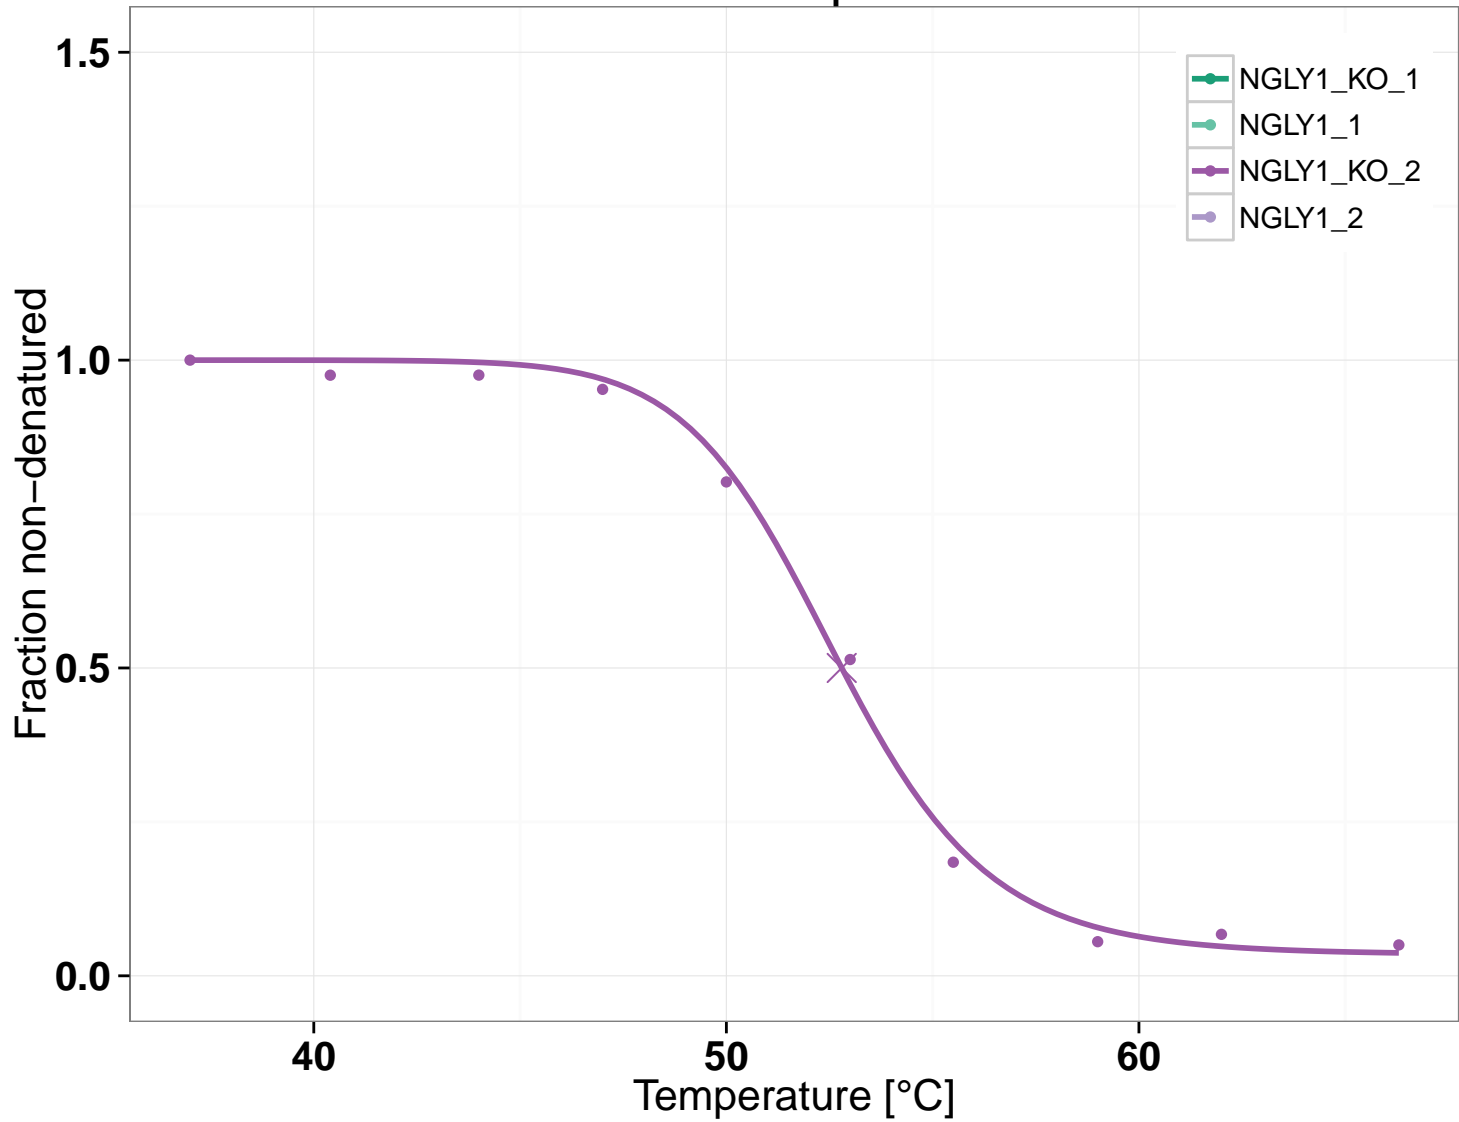

|            | meltPoint | slope | plateau | R2 |
|------------|-----------|-------|---------|----|
| NGLY1_KO_1 | —         | —     | —       | —  |
| NGLY1_1    | —         | —     | —       | —  |
| NGLY1_KO_2 | 52.8      | -0.13 | 0.03    | 1  |
| NGLY1_2    | —         | —     | —       | —  |

Supplement: Supplementary file 6349 [file 1]

IPI00658062.1|ZNF131

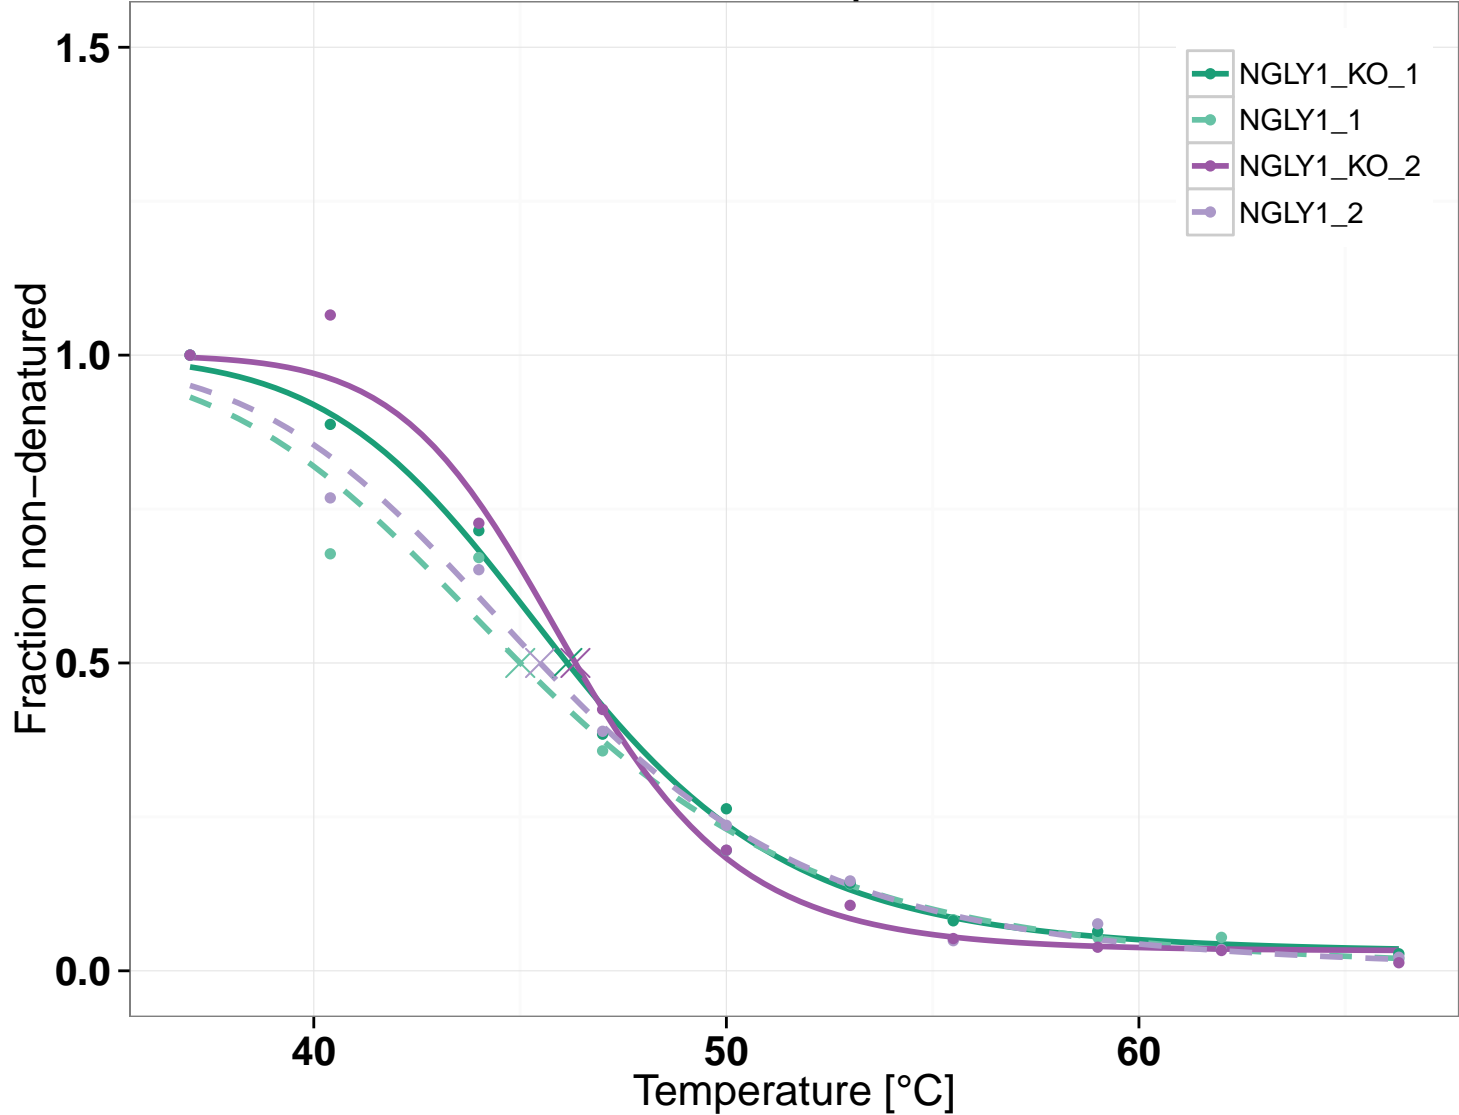

|            | meltPoint | slope  | plateau | R2   |
|------------|-----------|--------|---------|------|
| NGLY1_KO_1 | 46.15     | -0.086 | 0.03    | 1    |
| NGLY1_1    | 45        | -0.069 | 0       | 0.97 |
| NGLY1_KO_2 | 46.34     | -0.12  | 0.03    | 0.99 |
| NGLY1_2    | 45.49     | -0.073 | 0       | 0.99 |

Supplement: Supplementary file 6350 [file 1]

IPI00026848.3|LRPAP1

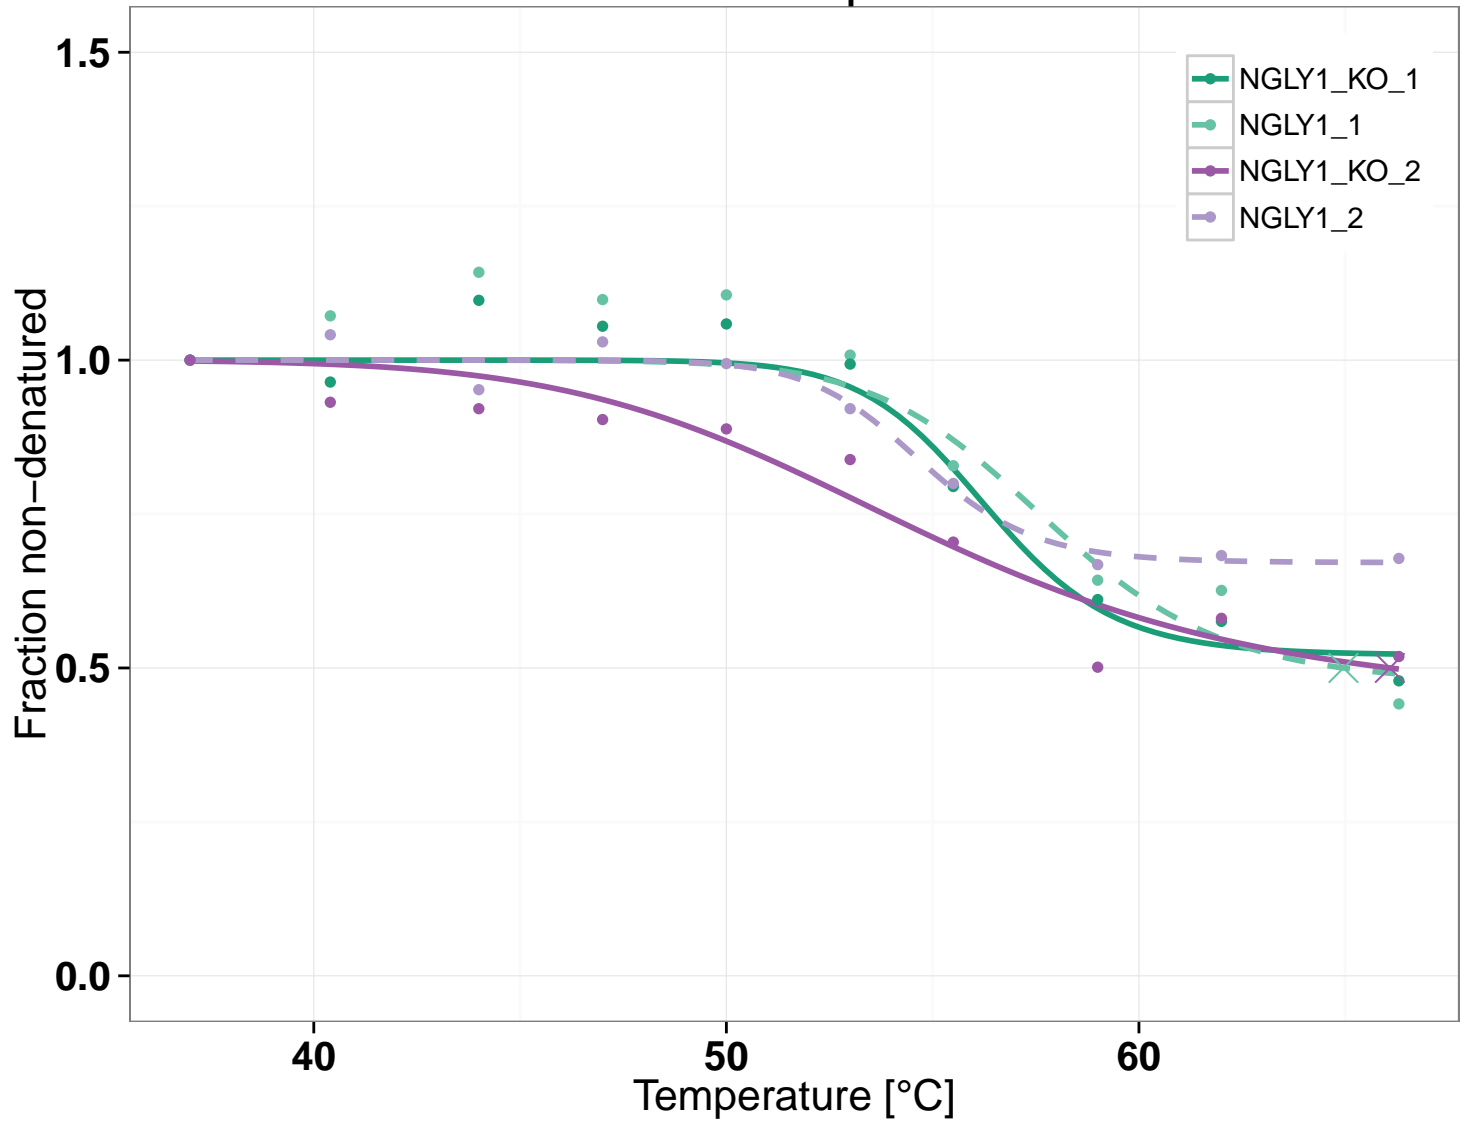

|            | meltPoint | slope  | plateau | R2   |
|------------|-----------|--------|---------|------|
| NGLY1_KO_1 | –         | –0.078 | 0.52    | 0.95 |
| NGLY1_1    | 64.96     | –0.061 | 0.47    | 0.89 |
| NGLY1_KO_2 | 66.08     | –0.033 | 0.44    | 0.92 |
| NGLY1_2    | –         | –0.06  | 0.67    | 0.97 |

Supplement: Supplementary file 6351 [file 1]

IPI00031581.5|MORG1

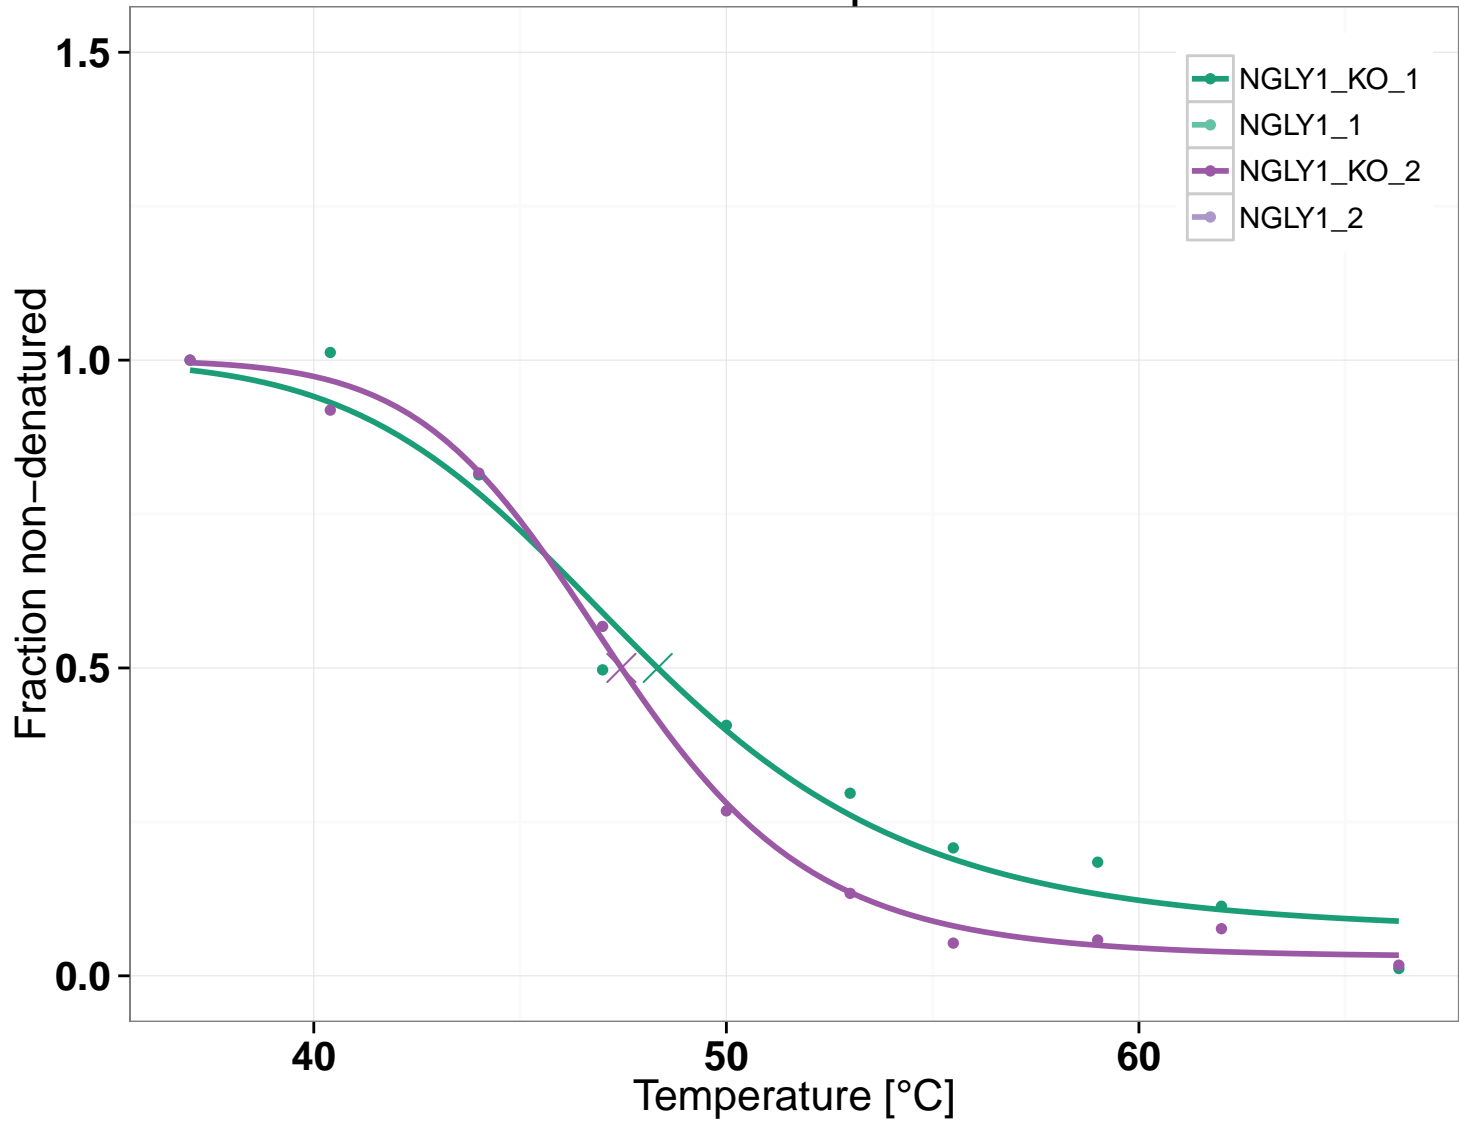

|            | meltPoint | slope  | plateau | R2   |
|------------|-----------|--------|---------|------|
| NGLY1_KO_1 | 48.34     | -0.068 | 0.07    | 0.98 |
| NGLY1_1    | -         | -      | -       | -    |
| NGLY1_KO_2 | 47.46     | -0.1   | 0.03    | 1    |
| NGLY1_2    | -         | -      | -       | -    |

Supplement: Supplementary file 6352 [file 1]

IPI00888745.1|LOC100134235

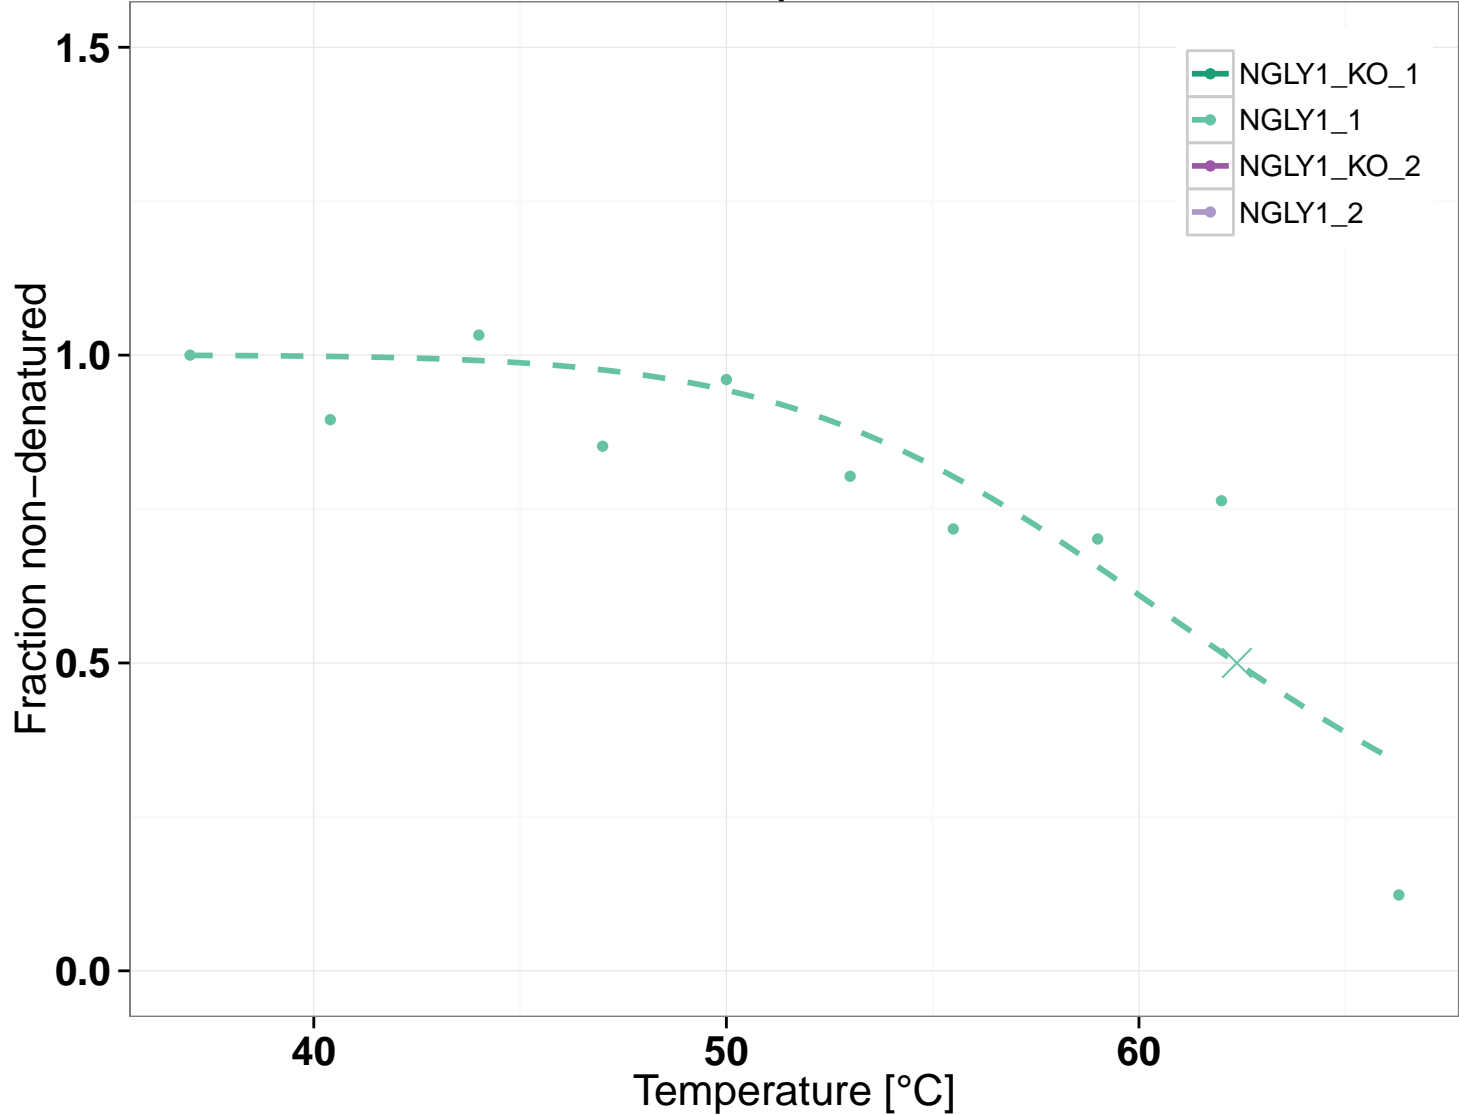

|            | meltPoint | slope  | plateau | R2   |
|------------|-----------|--------|---------|------|
| NGLY1_KO_1 | -         | -      | -       | -    |
| NGLY1_1    | 62.37     | -0.047 | 0       | 0.75 |
| NGLY1_KO_2 | -         | -      | -       | -    |
| NGLY1_2    | -         | -      | -       | -    |

Supplement: Supplementary file 6353 [file 1]

# IPI00005129.8|SCAMP1

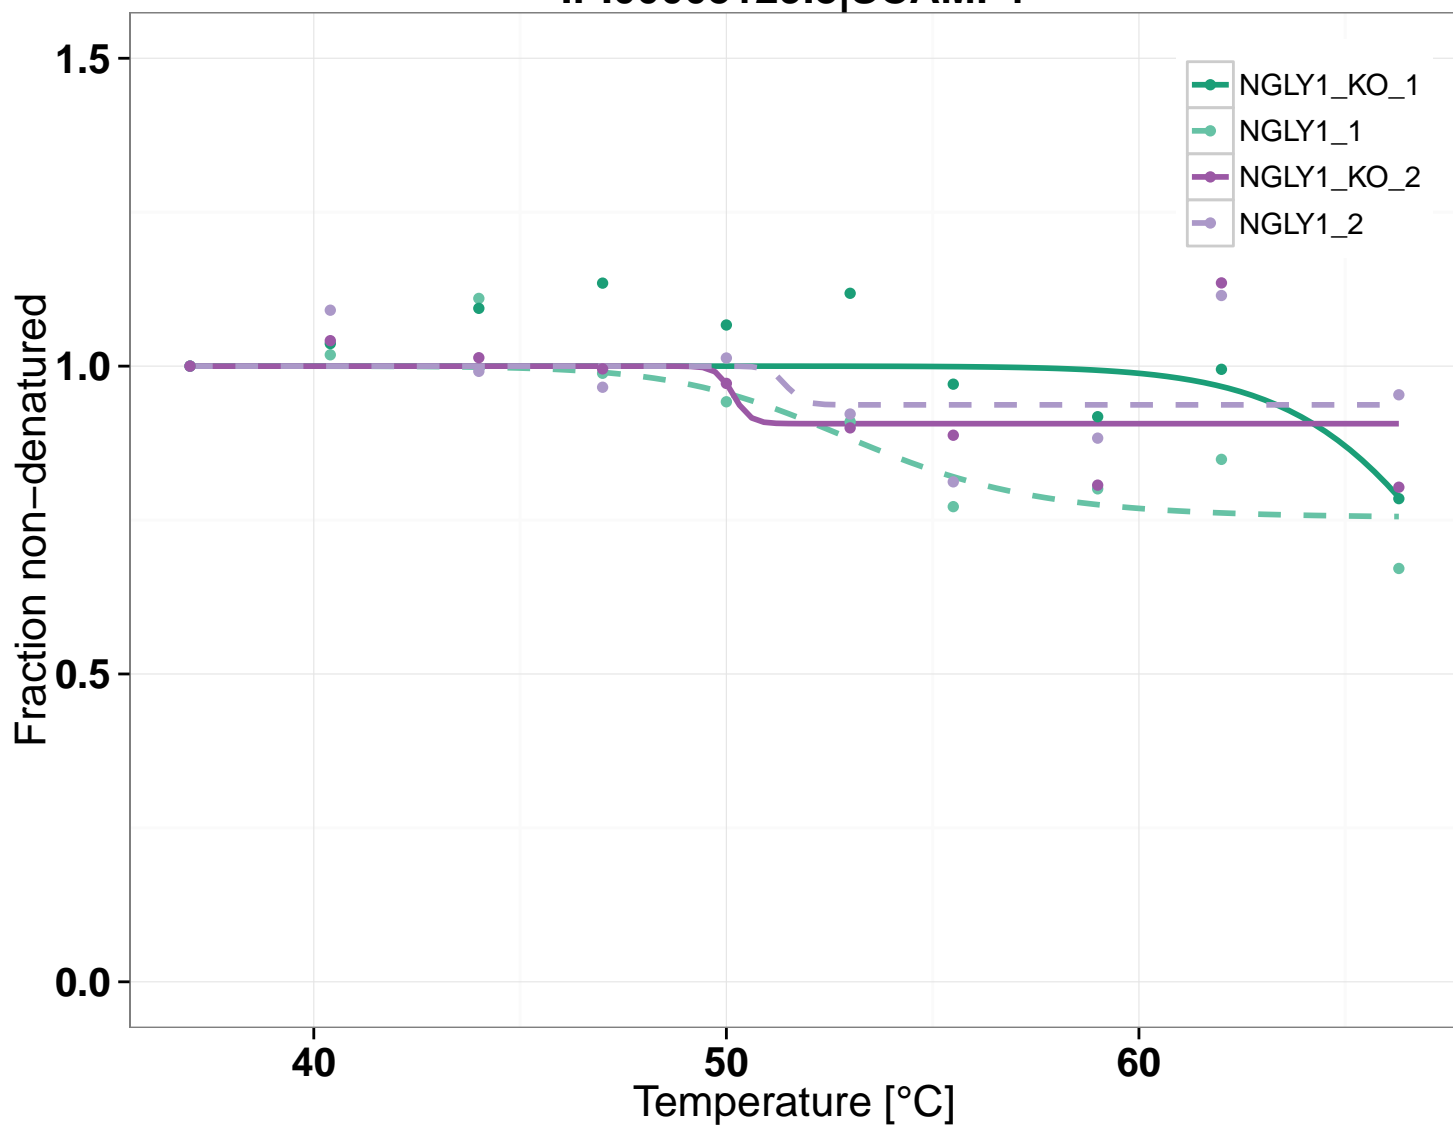

|            | meltPoint | slope  | plateau | R2   |
|------------|-----------|--------|---------|------|
| NGLY1_KO_1 | –         | –      | 0       | 0.46 |
| NGLY1_1    | –         | –0.028 | 0.75    | 0.8  |
| NGLY1_KO_2 | –         | –0.12  | 0.91    | 0.25 |
| NGLY1_2    | –         | –0.076 | 0.94    | 0.18 |

Supplement: Supplementary file 6354 [file 1]

IPI00022022.1|FIG4

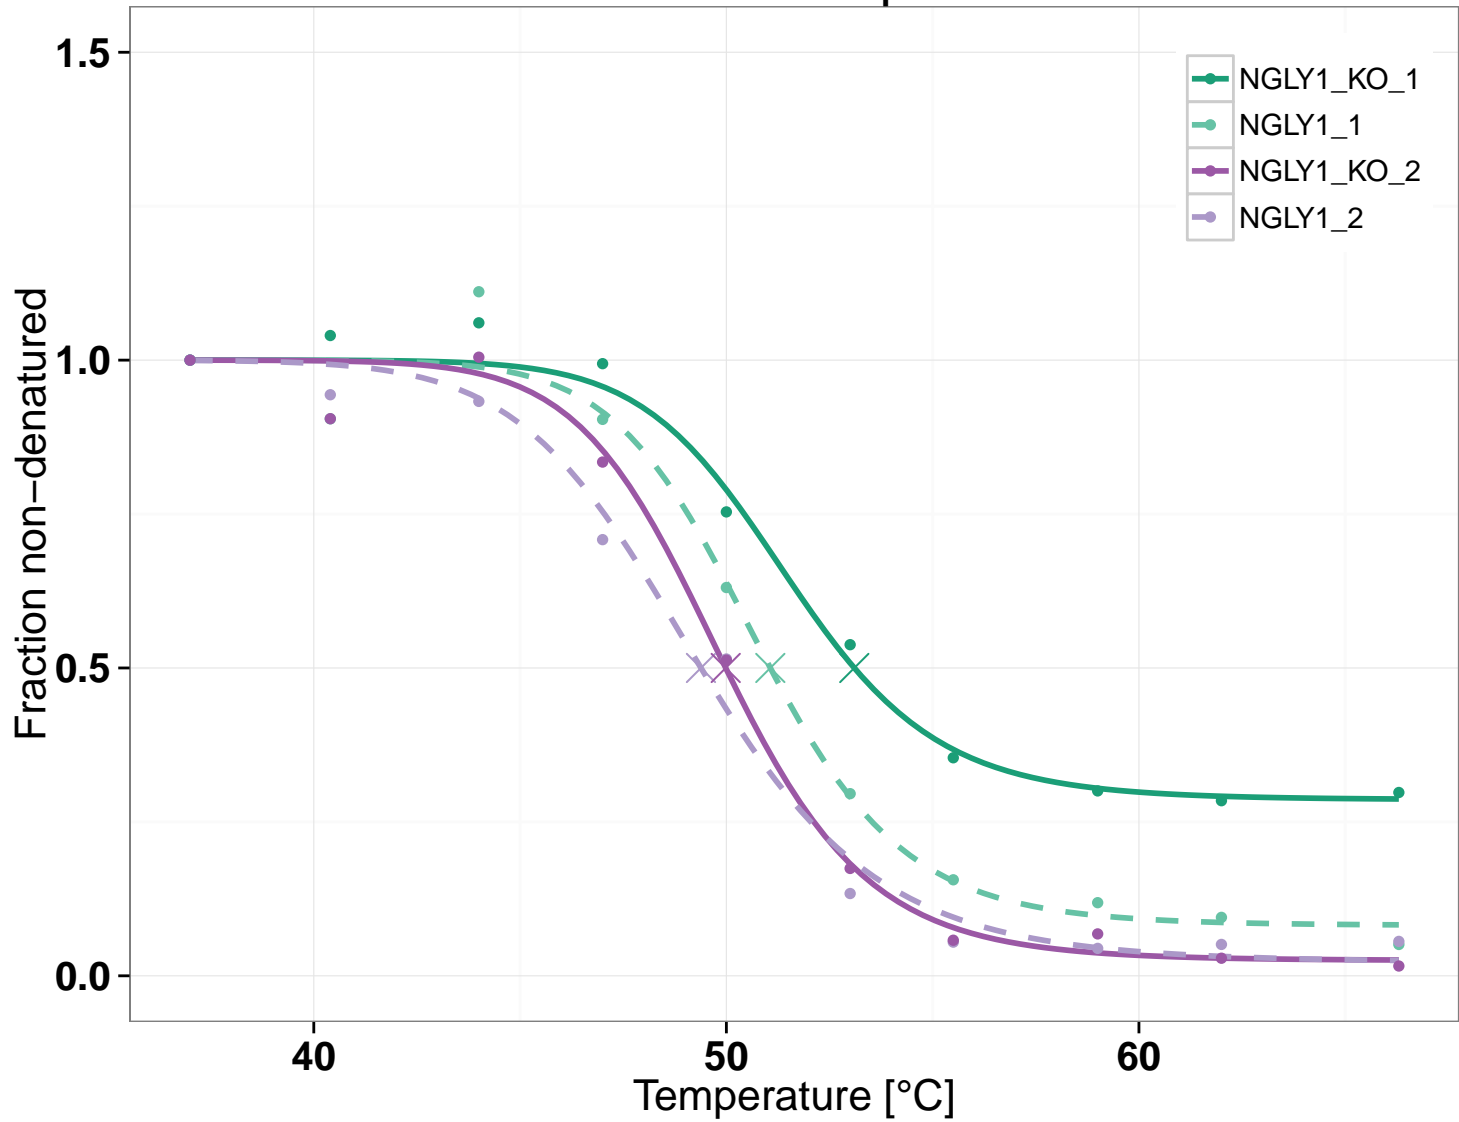

|            | meltPoint | slope | plateau | R2   |
|------------|-----------|-------|---------|------|
| NGLY1_KO_1 | 53.1      | -0.1  | 0.29    | 0.99 |
| NGLY1_1    | 51.07     | -0.13 | 0.08    | 0.98 |
| NGLY1_KO_2 | 49.98     | -0.14 | 0.02    | 0.99 |
| NGLY1_2    | 49.38     | -0.11 | 0.02    | 0.99 |

Supplement: Supplementary file 6355 [file 1]

IPI00179437.6|ARHGEF18

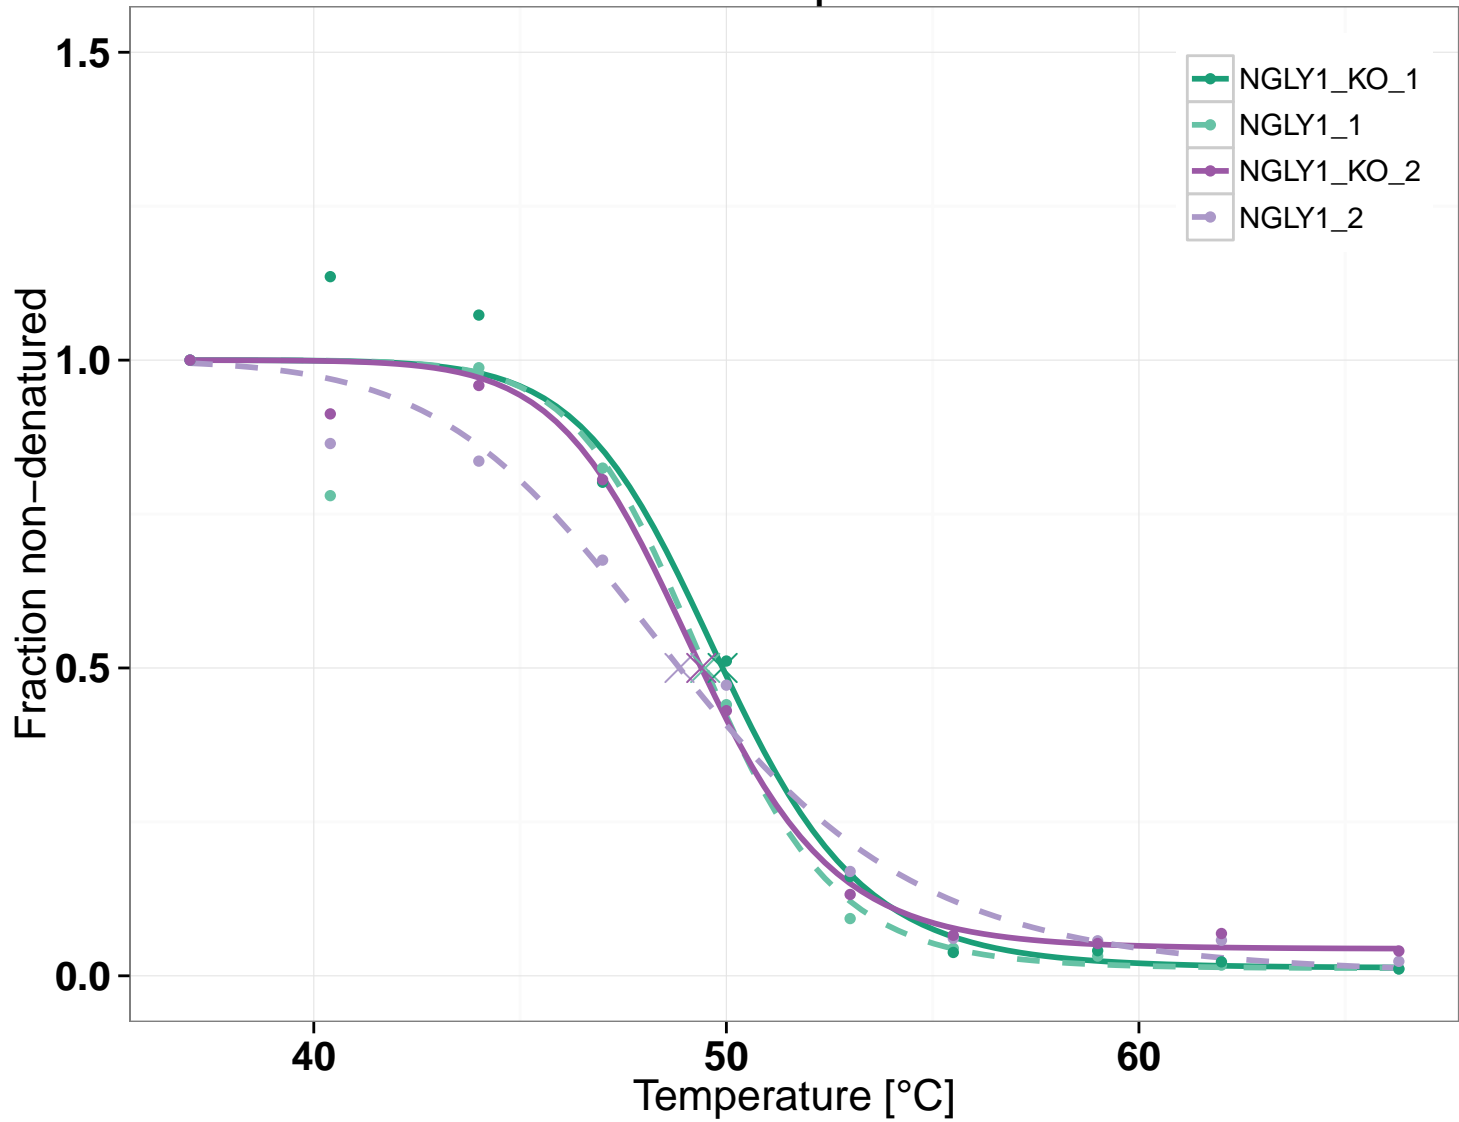

|            | meltPoint | slope  | plateau | R2   |
|------------|-----------|--------|---------|------|
| NGLY1_KO_1 | 49.91     | -0.14  | 0.01    | 0.98 |
| NGLY1_1    | 49.49     | -0.16  | 0.01    | 0.97 |
| NGLY1_KO_2 | 49.39     | -0.14  | 0.04    | 0.99 |
| NGLY1_2    | 48.86     | -0.086 | 0       | 0.98 |

Supplement: Supplementary file 6356 [file 1]

# IPI00026824.2|HMOX2

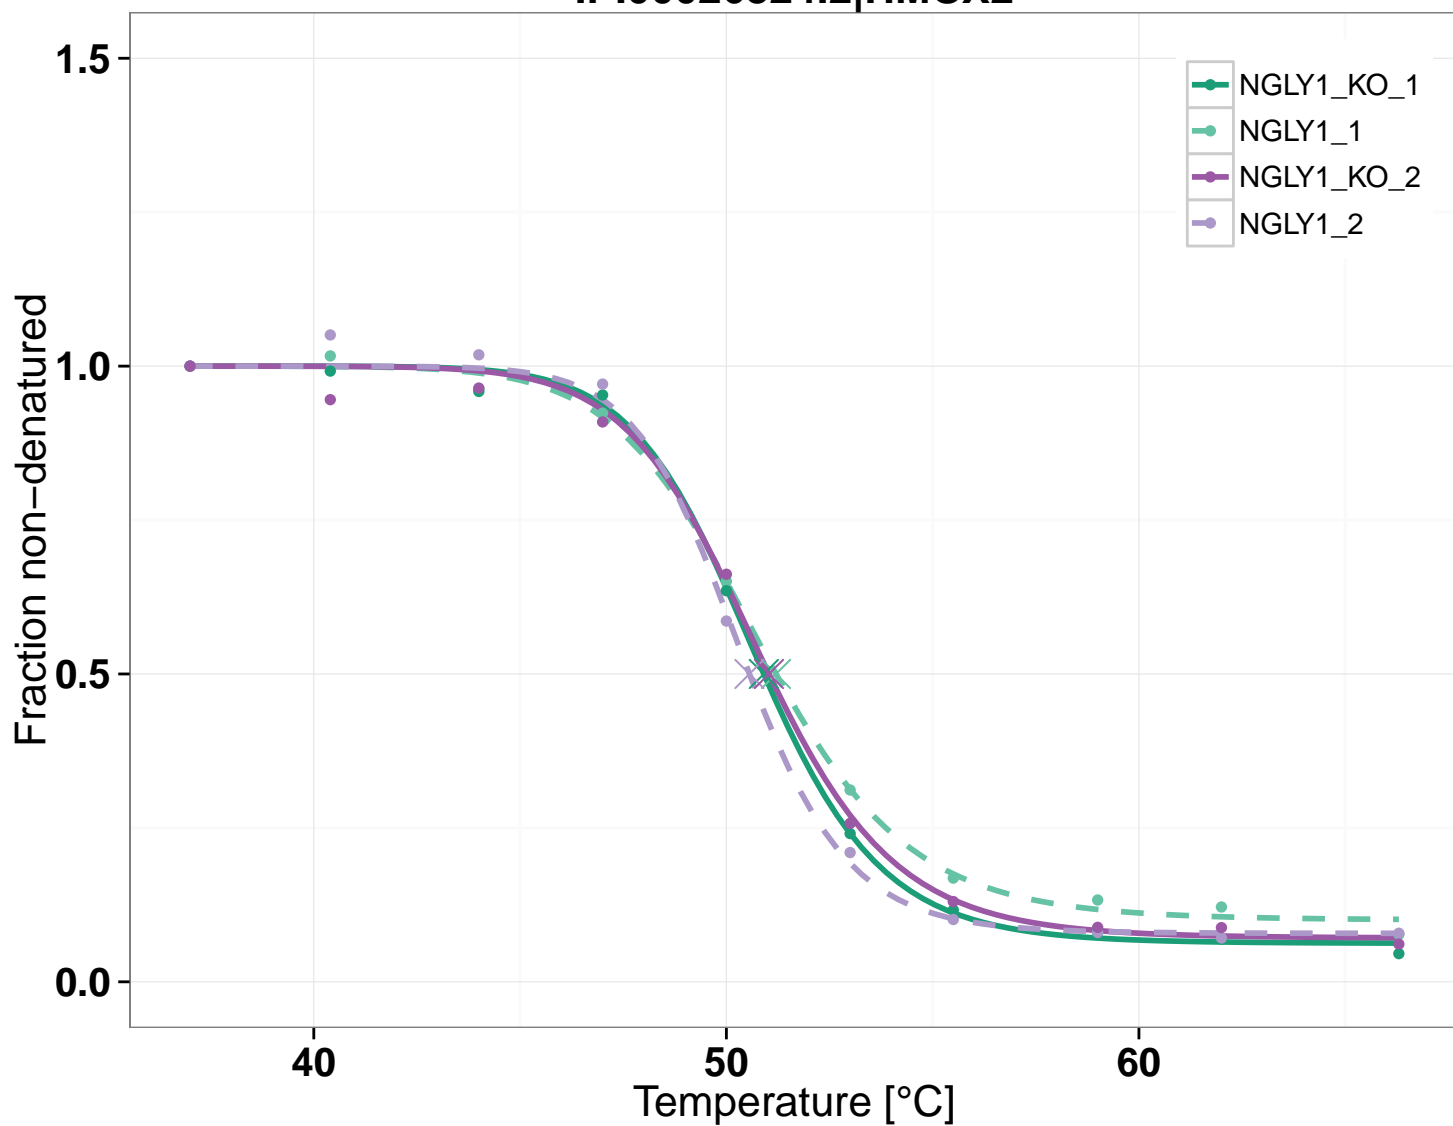

|            | meltPoint | slope | plateau | R2 |
|------------|-----------|-------|---------|----|
| NGLY1_KO_1 | 50.91     | -0.16 | 0.06    | 1  |
| NGLY1_1    | 51.2      | -0.13 | 0.1     | 1  |
| NGLY1_KO_2 | 51.03     | -0.14 | 0.07    | 1  |
| NGLY1_2    | 50.56     | -0.18 | 0.08    | 1  |

Supplement: Supplementary file 6357 [file 1]

IPI00007211.3|KIAA0831

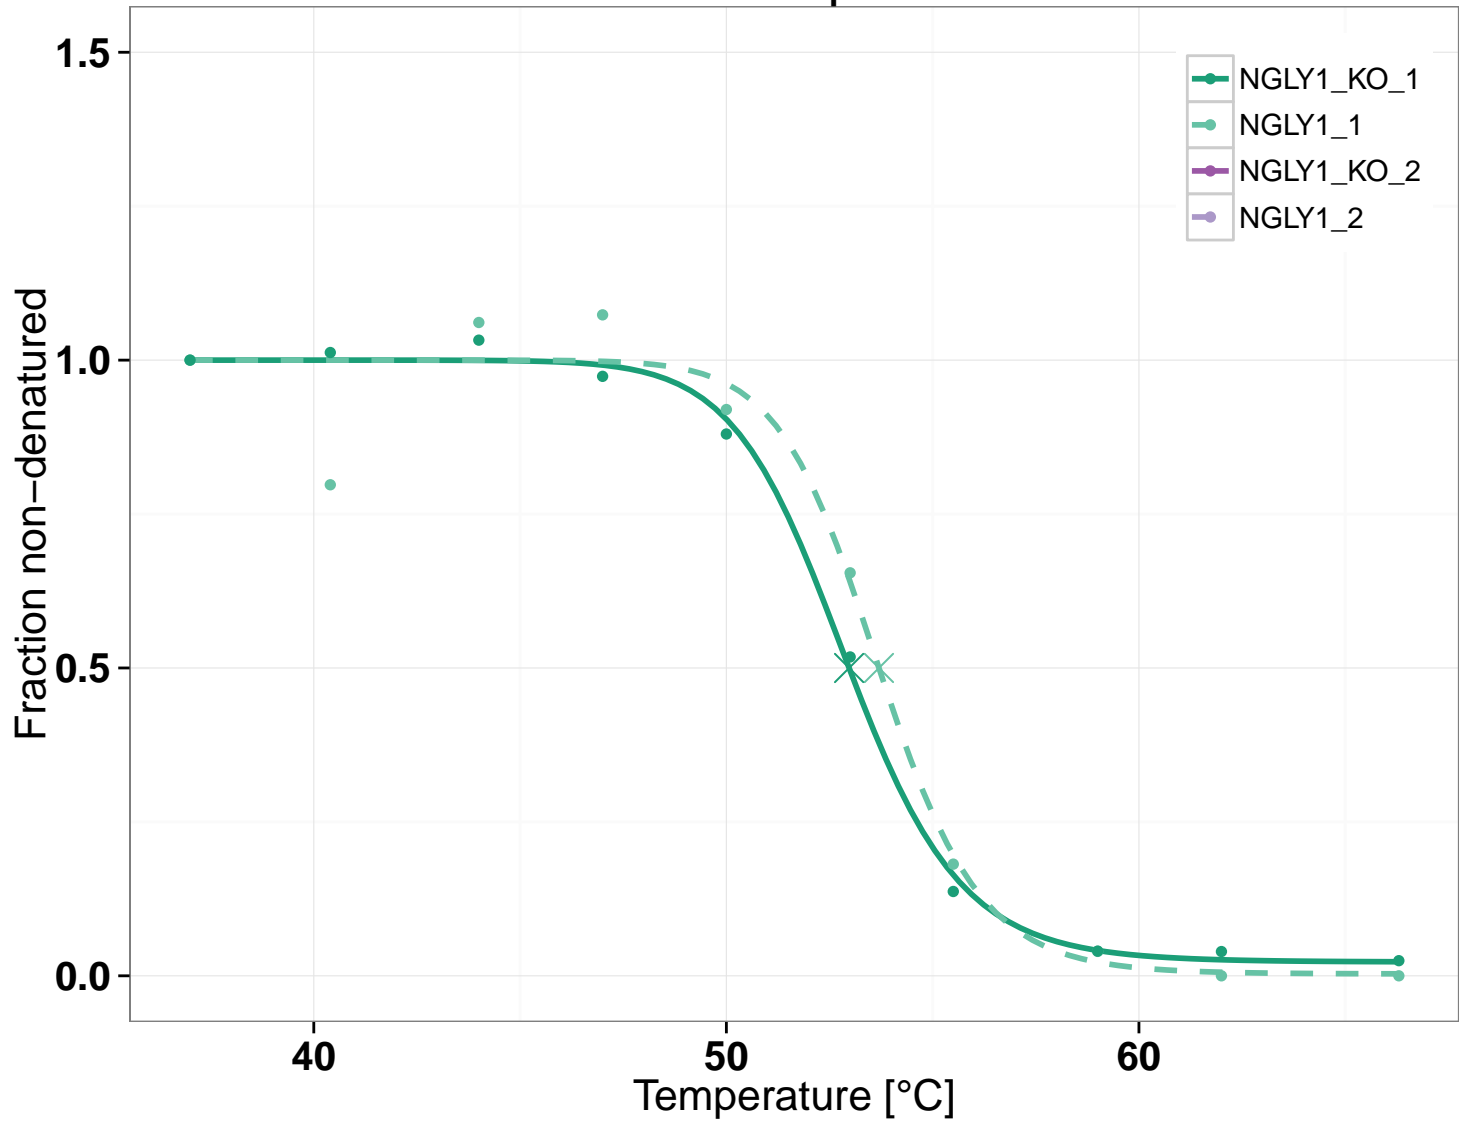

|            | meltPoint | slope | plateau | R2   |
|------------|-----------|-------|---------|------|
| NGLY1_KO_1 | 52.98     | -0.18 | 0.02    | 1    |
| NGLY1_1    | 53.7      | -0.2  | 0       | 0.97 |
| NGLY1_KO_2 | -         | -     | -       | -    |
| NGLY1_2    | -         | -     | -       | -    |

Supplement: Supplementary file 6358 [file 1]

# IPI00306057.2|RBM38

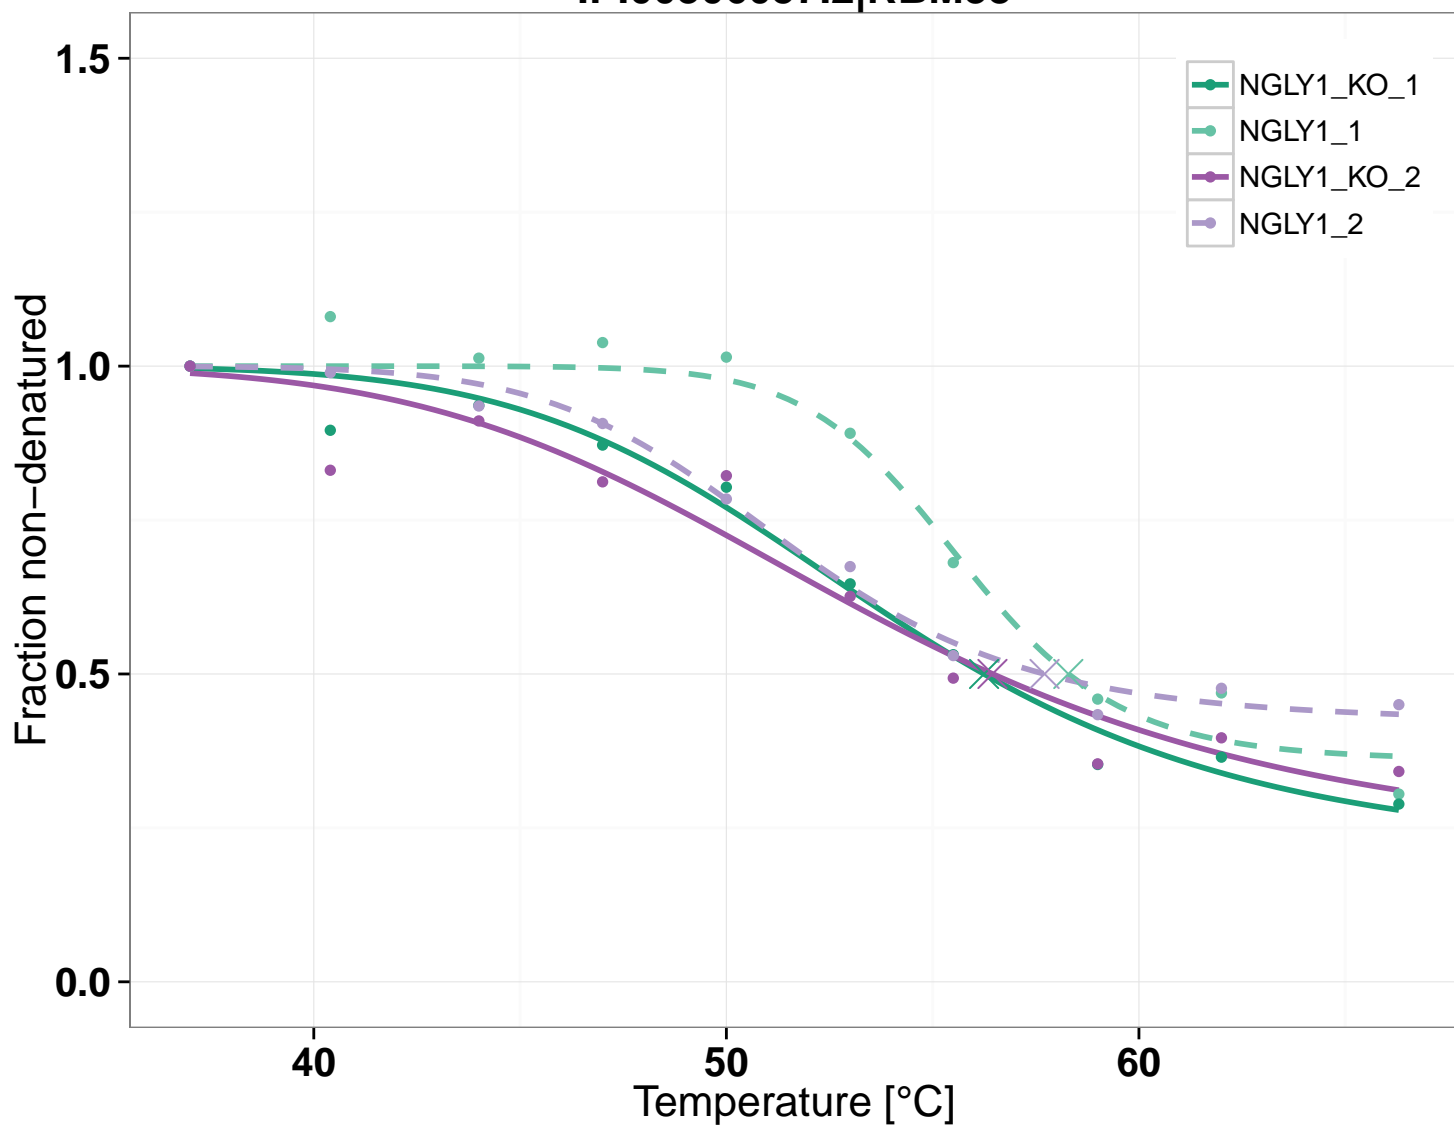

|            | meltPoint | slope  | plateau | R2   |
|------------|-----------|--------|---------|------|
| NGLY1_KO_1 | 56.25     | -0.045 | 0.2     | 0.98 |
| NGLY1_1    | 58.29     | -0.084 | 0.36    | 0.97 |
| NGLY1_KO_2 | 56.45     | -0.037 | 0.21    | 0.93 |
| NGLY1_2    | 57.71     | -0.049 | 0.42    | 0.99 |

Supplement: Supplementary file 6359 [file 1]

IPI00296311.1|SLC5A3

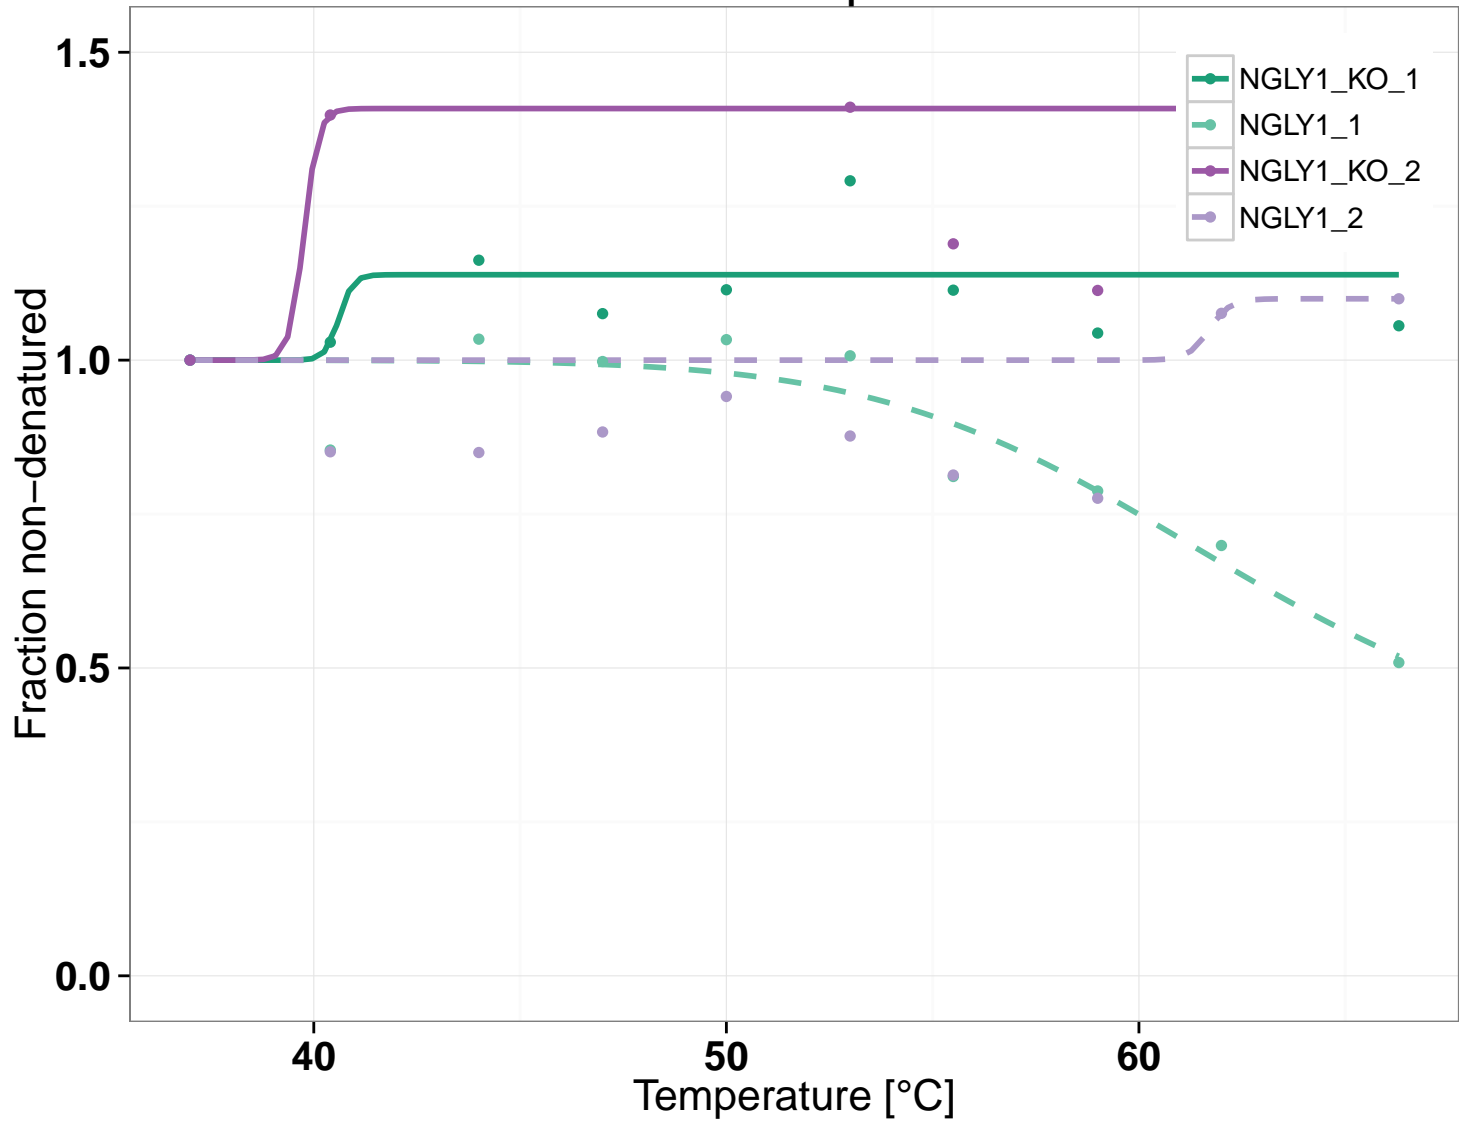

|            | meltPoint | slope | plateau | R2   |
|------------|-----------|-------|---------|------|
| NGLY1_KO_1 | –         | 0.21  | 1.14    | 0.3  |
| NGLY1_1    | –         | −0.04 | 0.3     | 0.86 |
| NGLY1_KO_2 | –         | 0.59  | 1.41    | 0.39 |
| NGLY1_2    | –         | 0.098 | 1.1     | −0.5 |

Supplement: Supplementary file 6360 [file 1]

IPI00643720.3|OGDHL

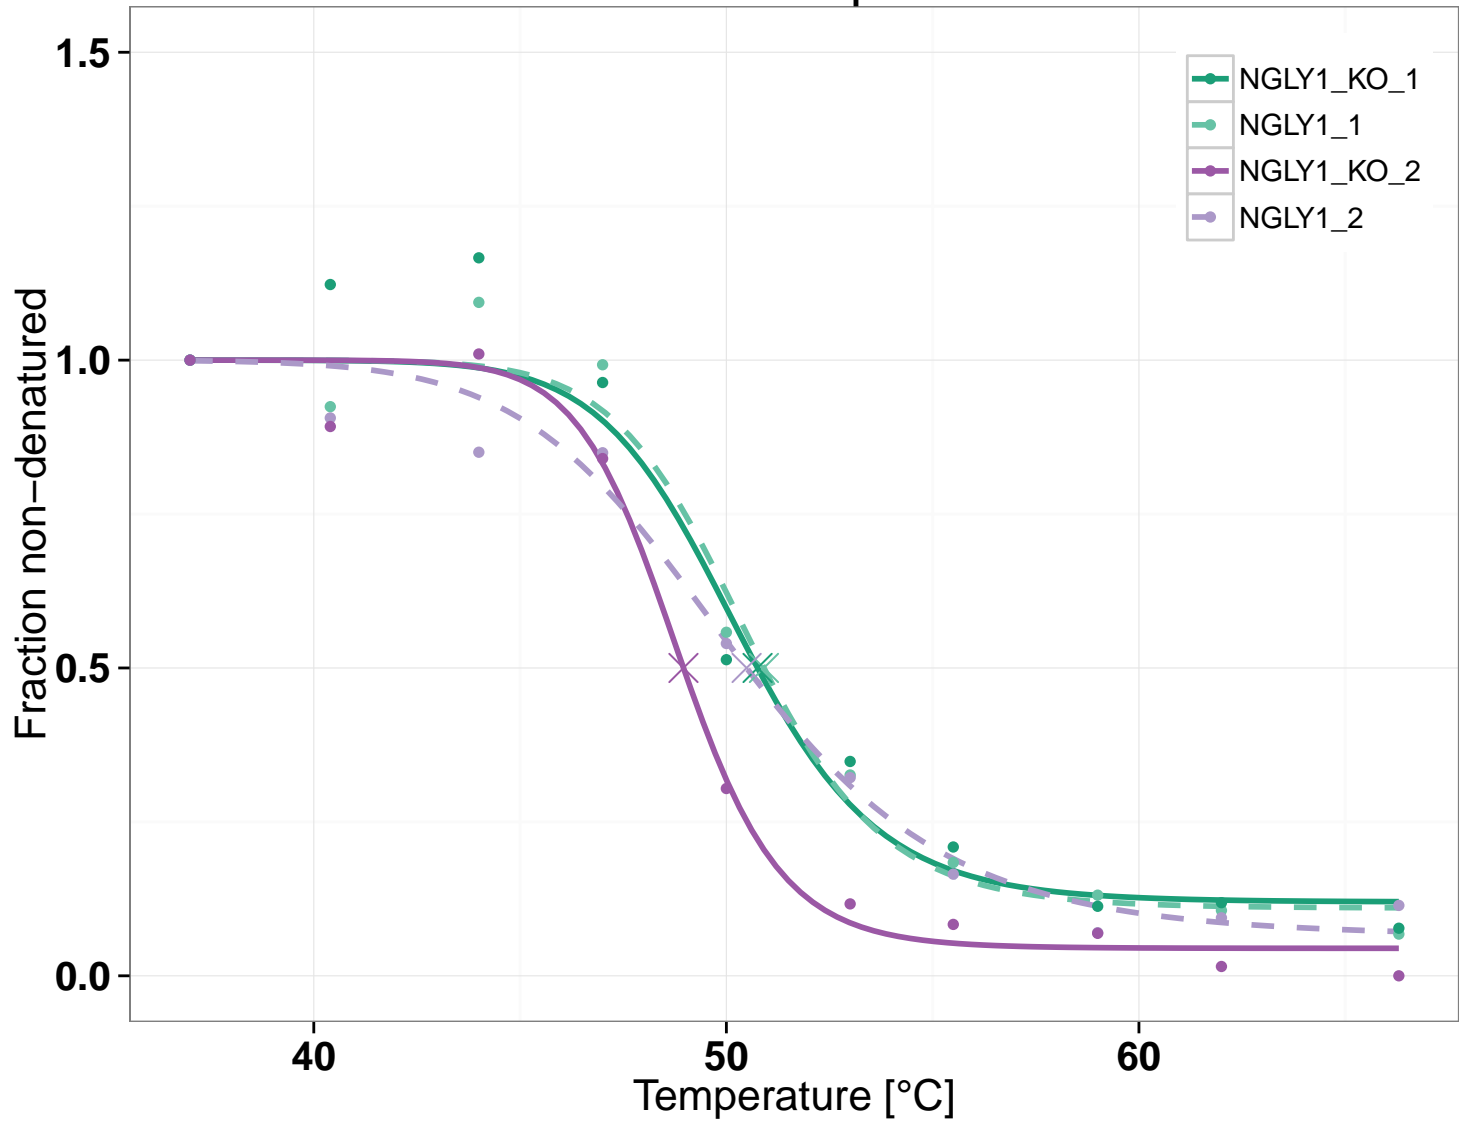

|            | meltPoint | slope | plateau | R2   |
|------------|-----------|-------|---------|------|
| NGLY1_KO_1 | 50.76     | -0.13 | 0.12    | 0.96 |
| NGLY1_1    | 50.91     | -0.14 | 0.11    | 0.98 |
| NGLY1_KO_2 | 48.96     | -0.19 | 0.04    | 0.99 |
| NGLY1_2    | 50.49     | -0.09 | 0.06    | 0.98 |

Supplement: Supplementary file 6361 [file 1]

IPI00908345.1|C21ORF56

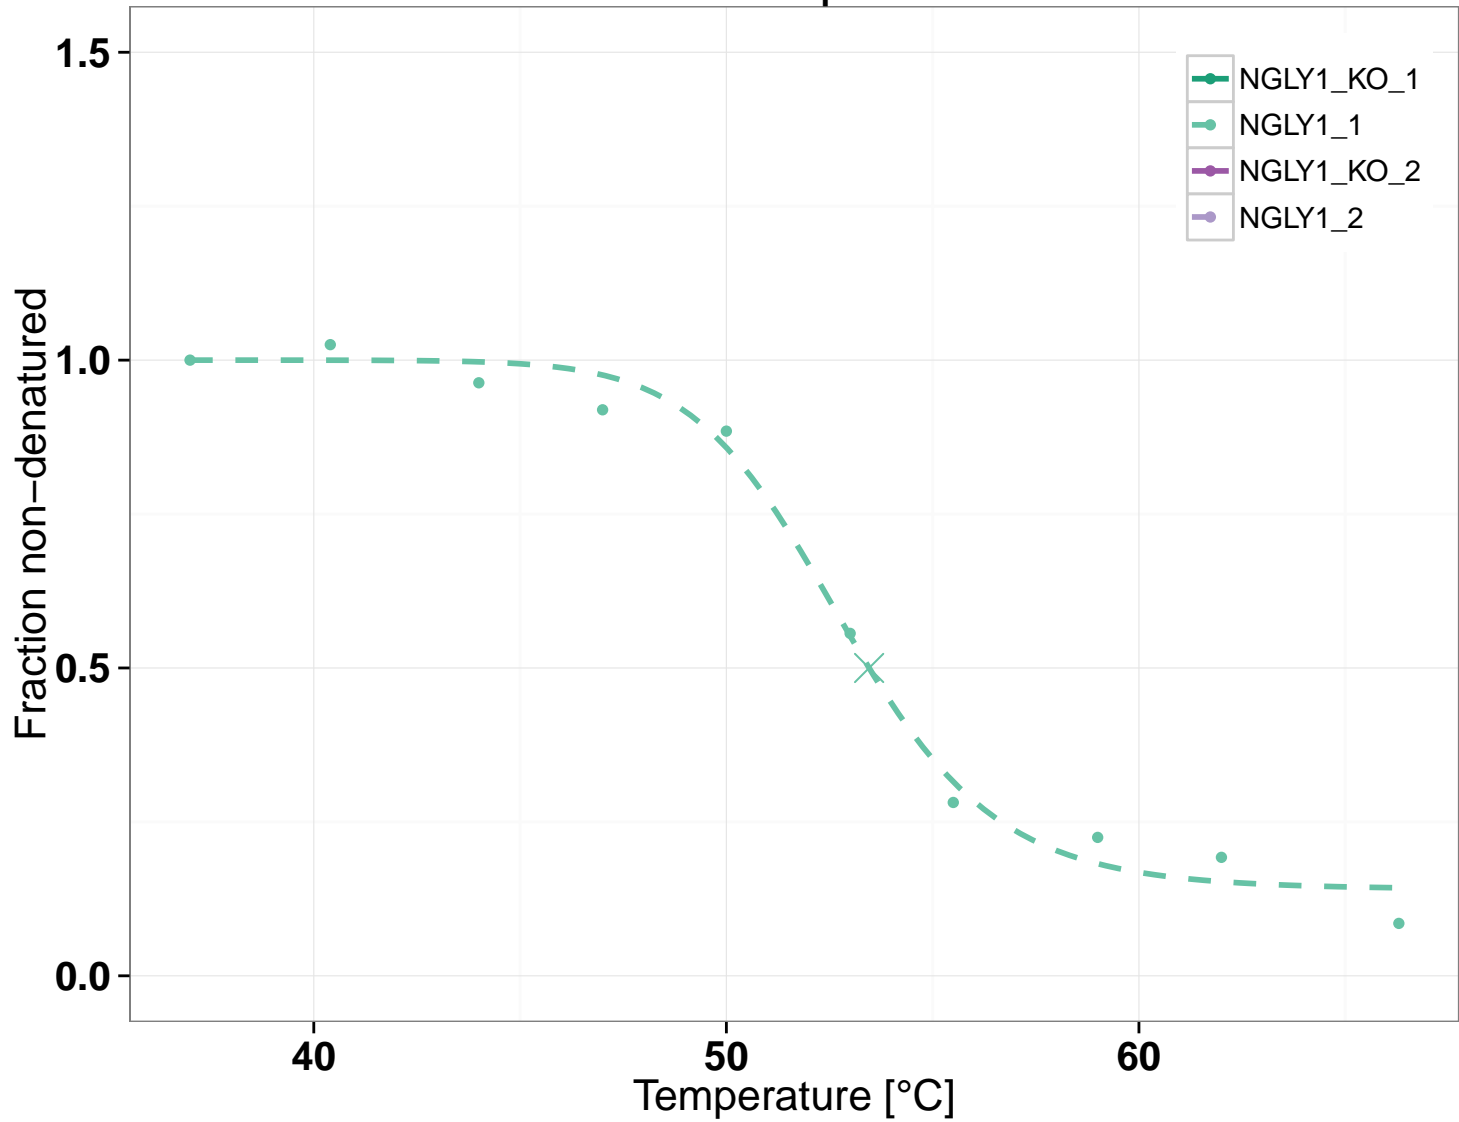

|            | meltPoint | slope | plateau | R2   |
|------------|-----------|-------|---------|------|
| NGLY1_KO_1 | -         | -     | -       | -    |
| NGLY1_1    | 53.46     | -0.12 | 0.14    | 0.99 |
| NGLY1_KO_2 | -         | -     | -       | -    |
| NGLY1_2    | -         | -     | -       | -    |

Supplement: Supplementary file 6362 [file 1]

# IPI00102069.5|EIF3M

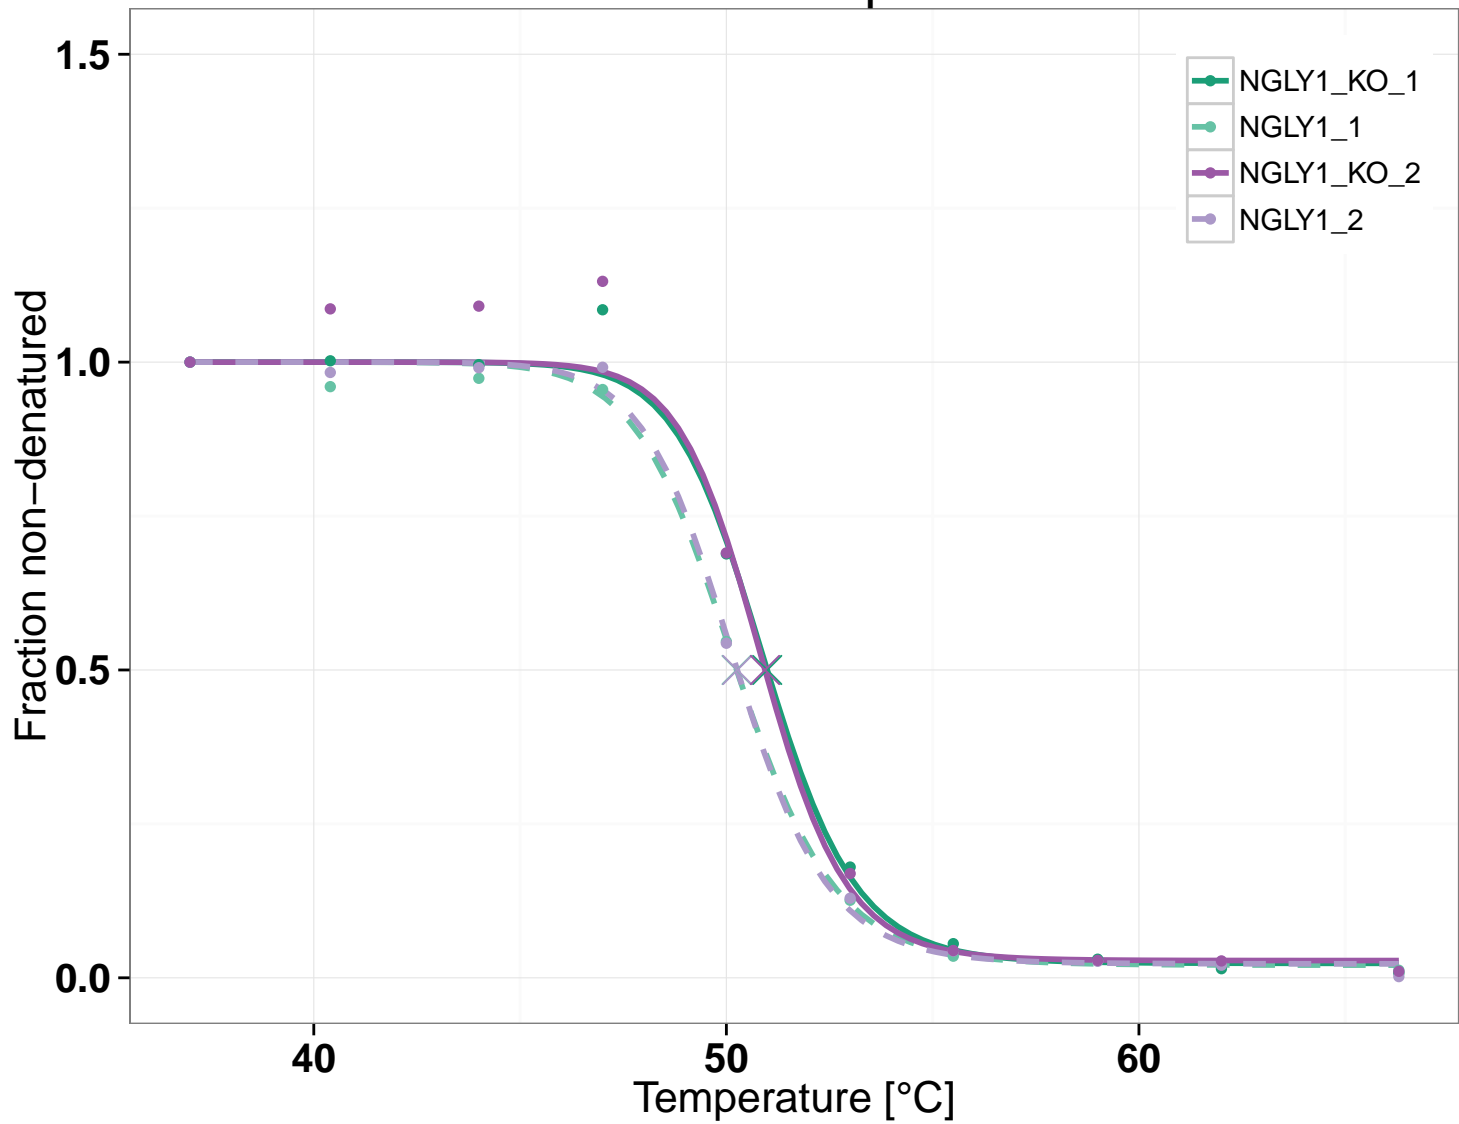

|            | meltPoint | slope | plateau | R2   |
|------------|-----------|-------|---------|------|
| NGLY1_KO_1 | 50.99     | -0.22 | 0.02    | 0.99 |
| NGLY1_1    | 50.25     | -0.2  | 0.02    | 1    |
| NGLY1_KO_2 | 50.94     | -0.24 | 0.03    | 0.98 |
| NGLY1_2    | 50.26     | -0.22 | 0.02    | 1    |

Supplement: Supplementary file 6363 [file 1]

IPI00015953.3|DDX21

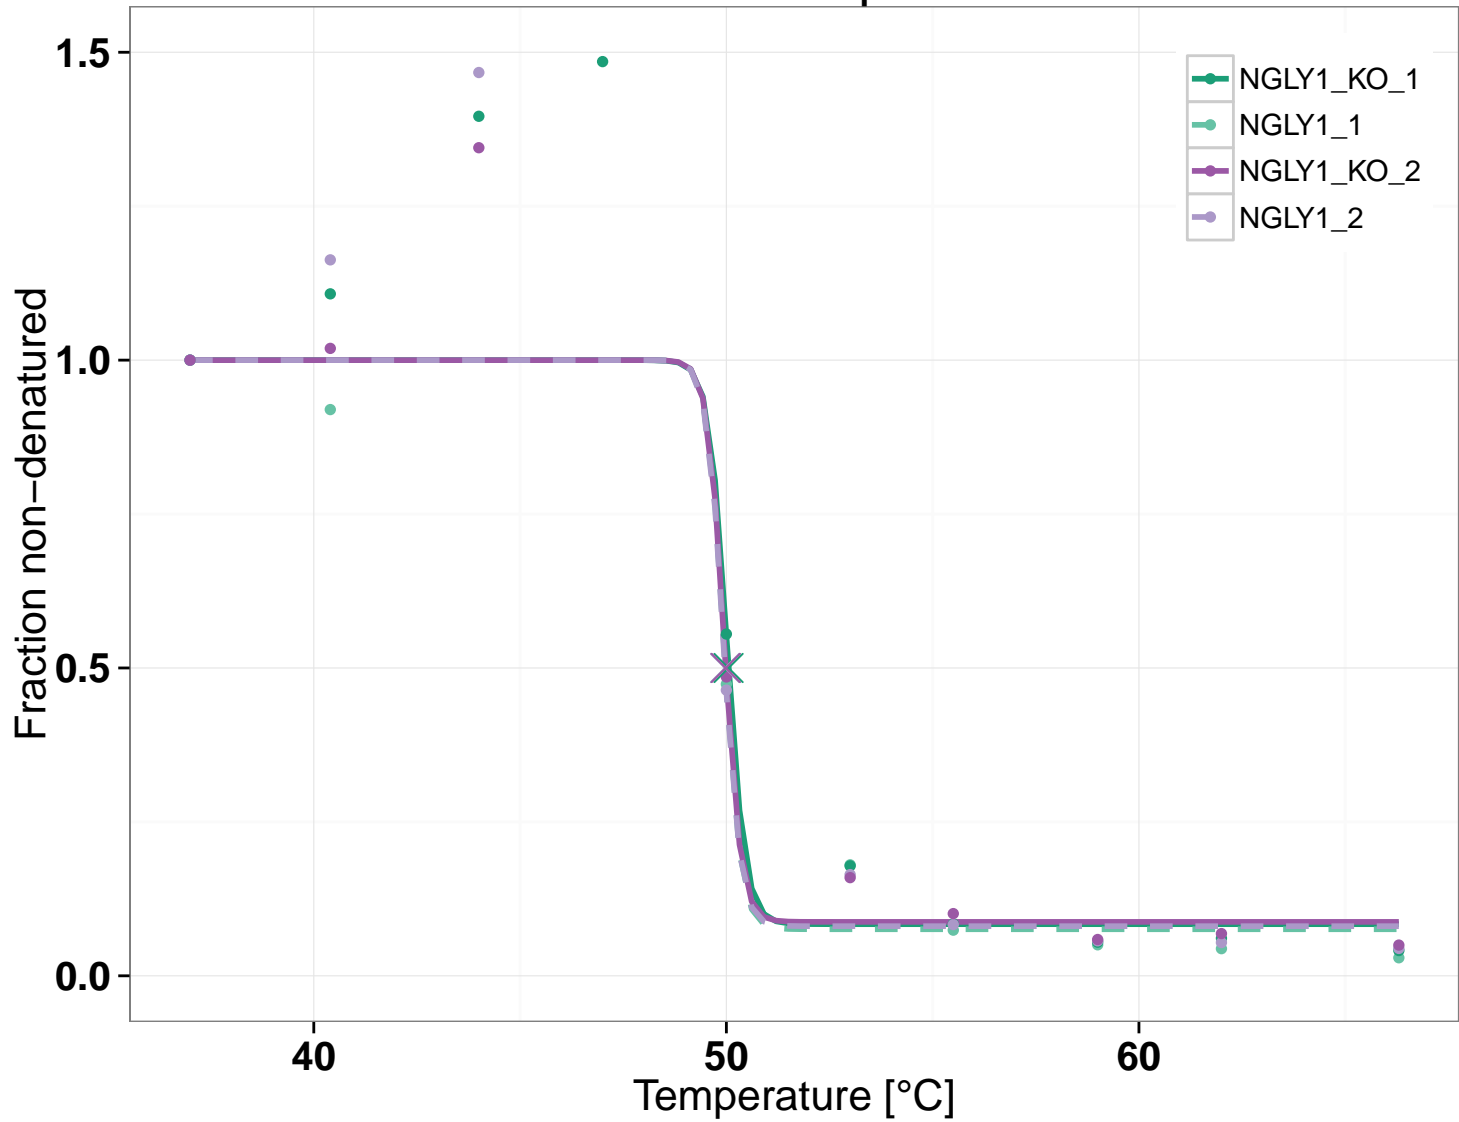

|            | meltPoint | slope | plateau | R2   |
|------------|-----------|-------|---------|------|
| NGLY1_KO_1 | 50.05     | -1    | 0.08    | 0.87 |
| NGLY1_1    | 49.98     | -1.2  | 0.08    | 0.78 |
| NGLY1_KO_2 | 49.99     | -1.1  | 0.09    | 0.85 |
| NGLY1_2    | 49.97     | -1.2  | 0.08    | 0.81 |

Supplement: Supplementary file 6364 [file 1]

IPI00746183.2|UEVLD

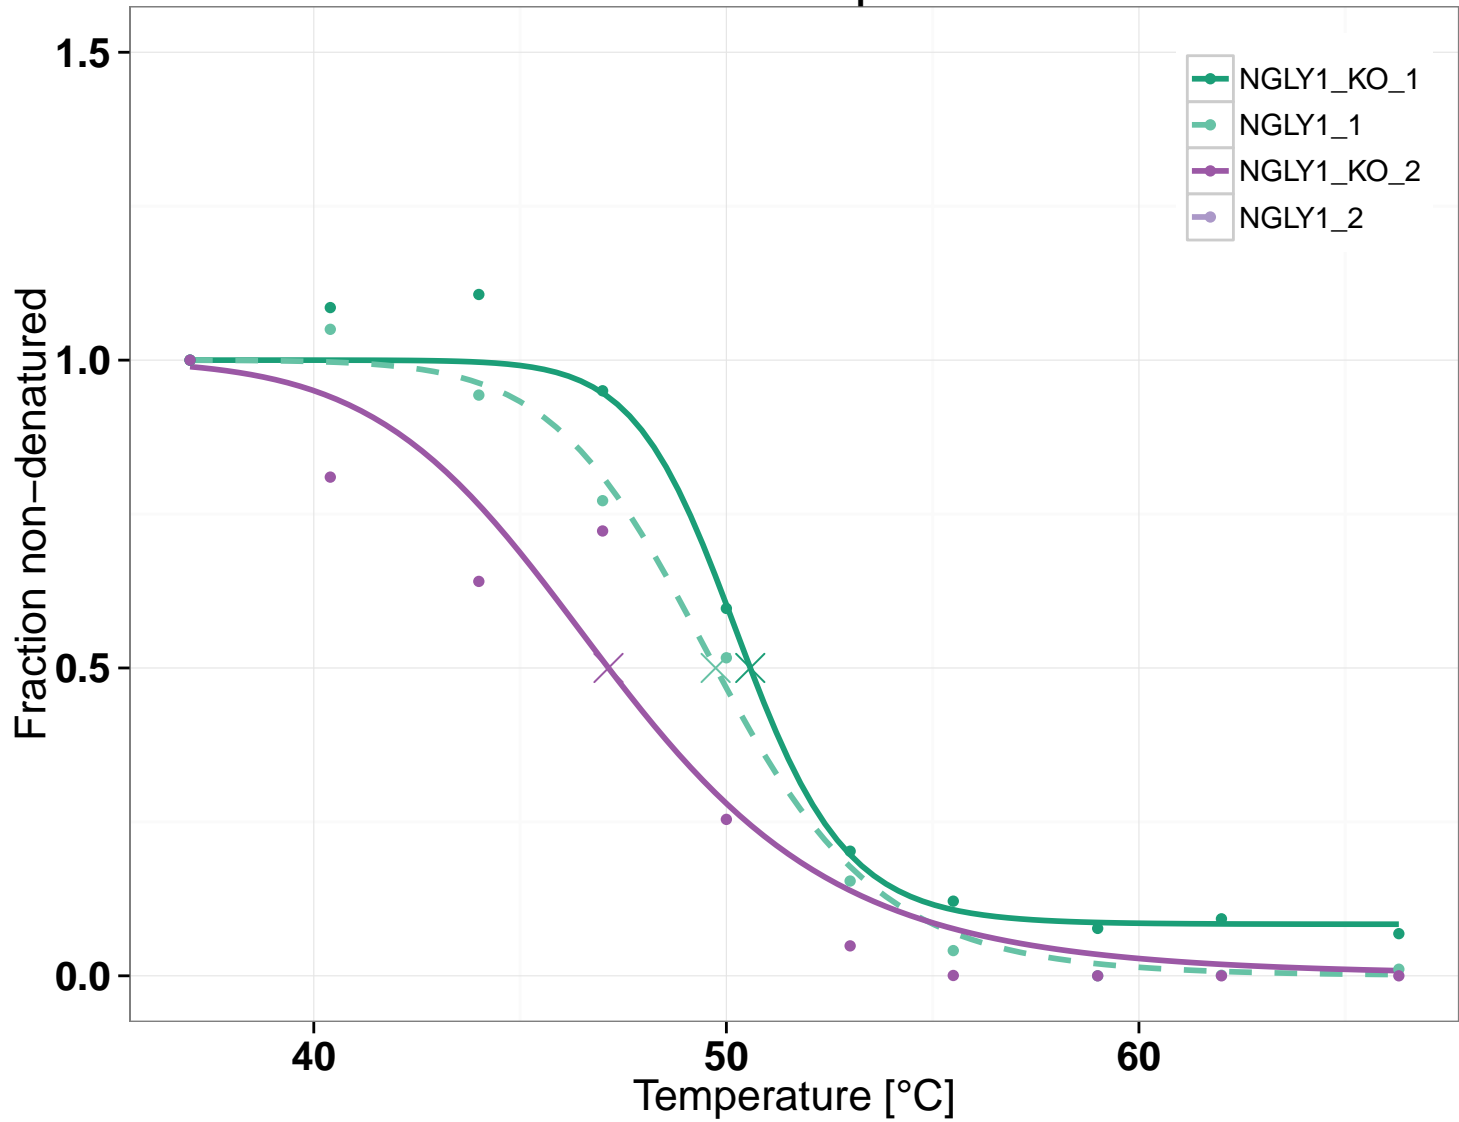

|            | meltPoint | slope  | plateau | R2   |
|------------|-----------|--------|---------|------|
| NGLY1_KO_1 | 50.58     | -0.18  | 0.08    | 0.99 |
| NGLY1_1    | 49.74     | -0.13  | 0       | 1    |
| NGLY1_KO_2 | 47.14     | -0.089 | 0       | 0.94 |
| NGLY1_2    | -         | -      | -       | -    |

Supplement: Supplementary file 6365 [file 1]

IPI00873253.1|SEC11A

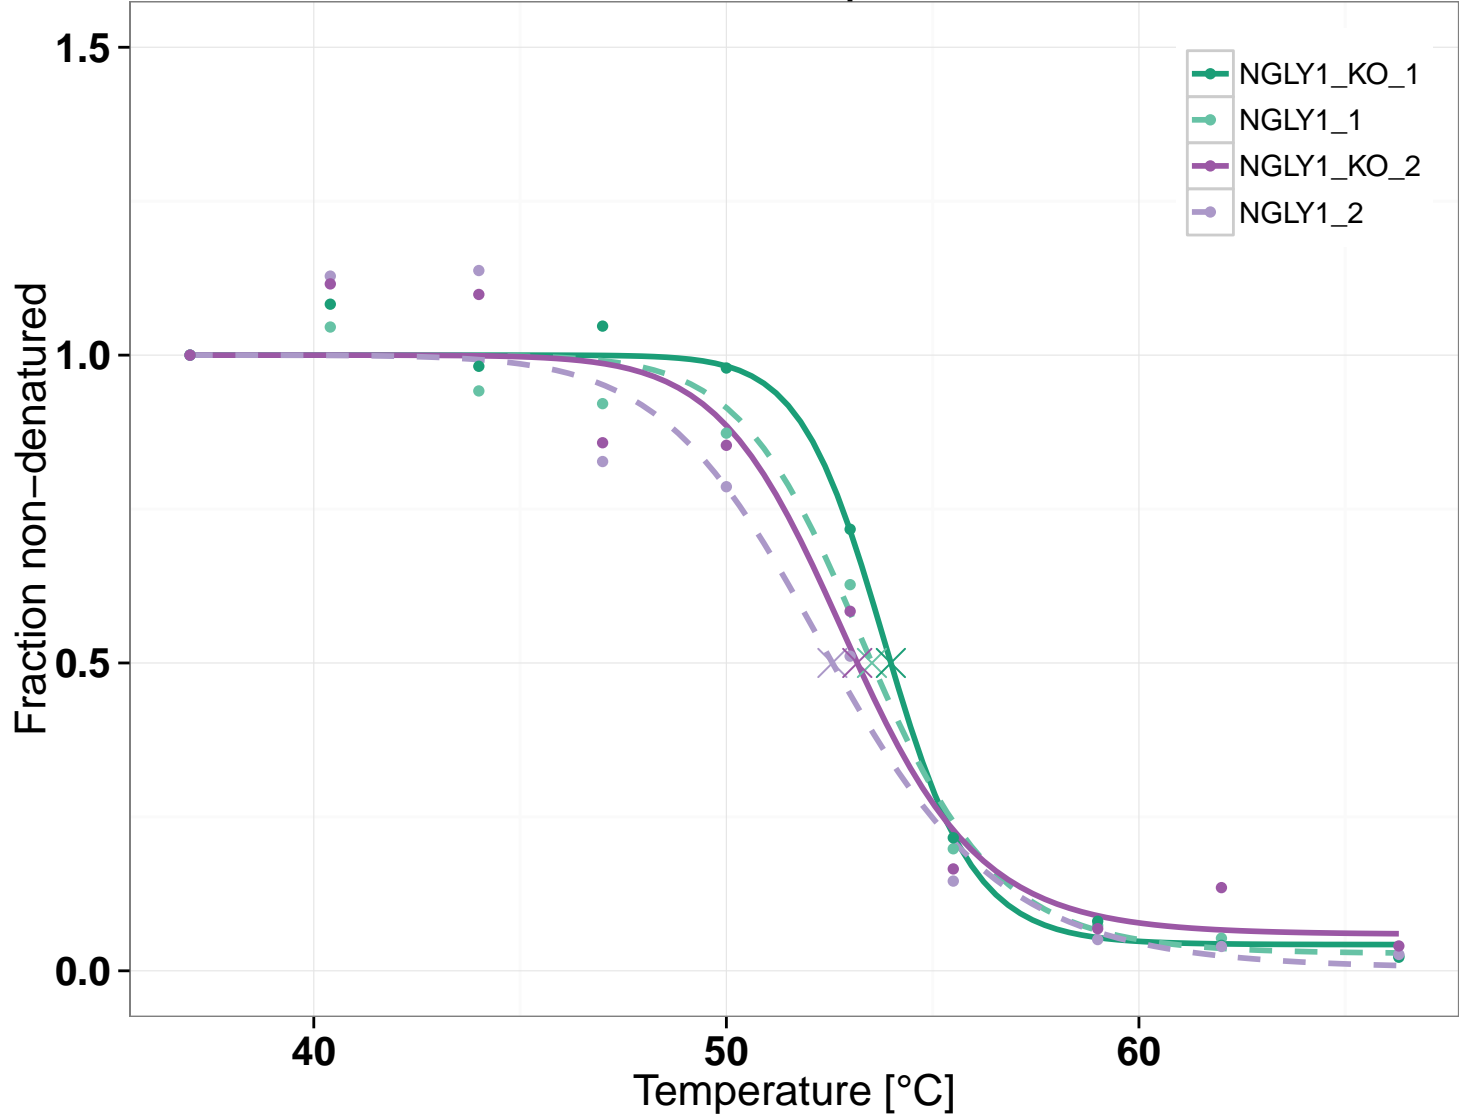

|            | meltPoint | slope | plateau | R2   |
|------------|-----------|-------|---------|------|
| NGLY1_KO_1 | 53.99     | -0.23 | 0.04    | 0.99 |
| NGLY1_1    | 53.53     | -0.16 | 0.03    | 0.99 |
| NGLY1_KO_2 | 53.17     | -0.15 | 0.06    | 0.97 |
| NGLY1_2    | 52.57     | -0.12 | 0       | 0.97 |

Supplement: Supplementary file 6366 [file 1]

IPI00031680.3|ACBD6

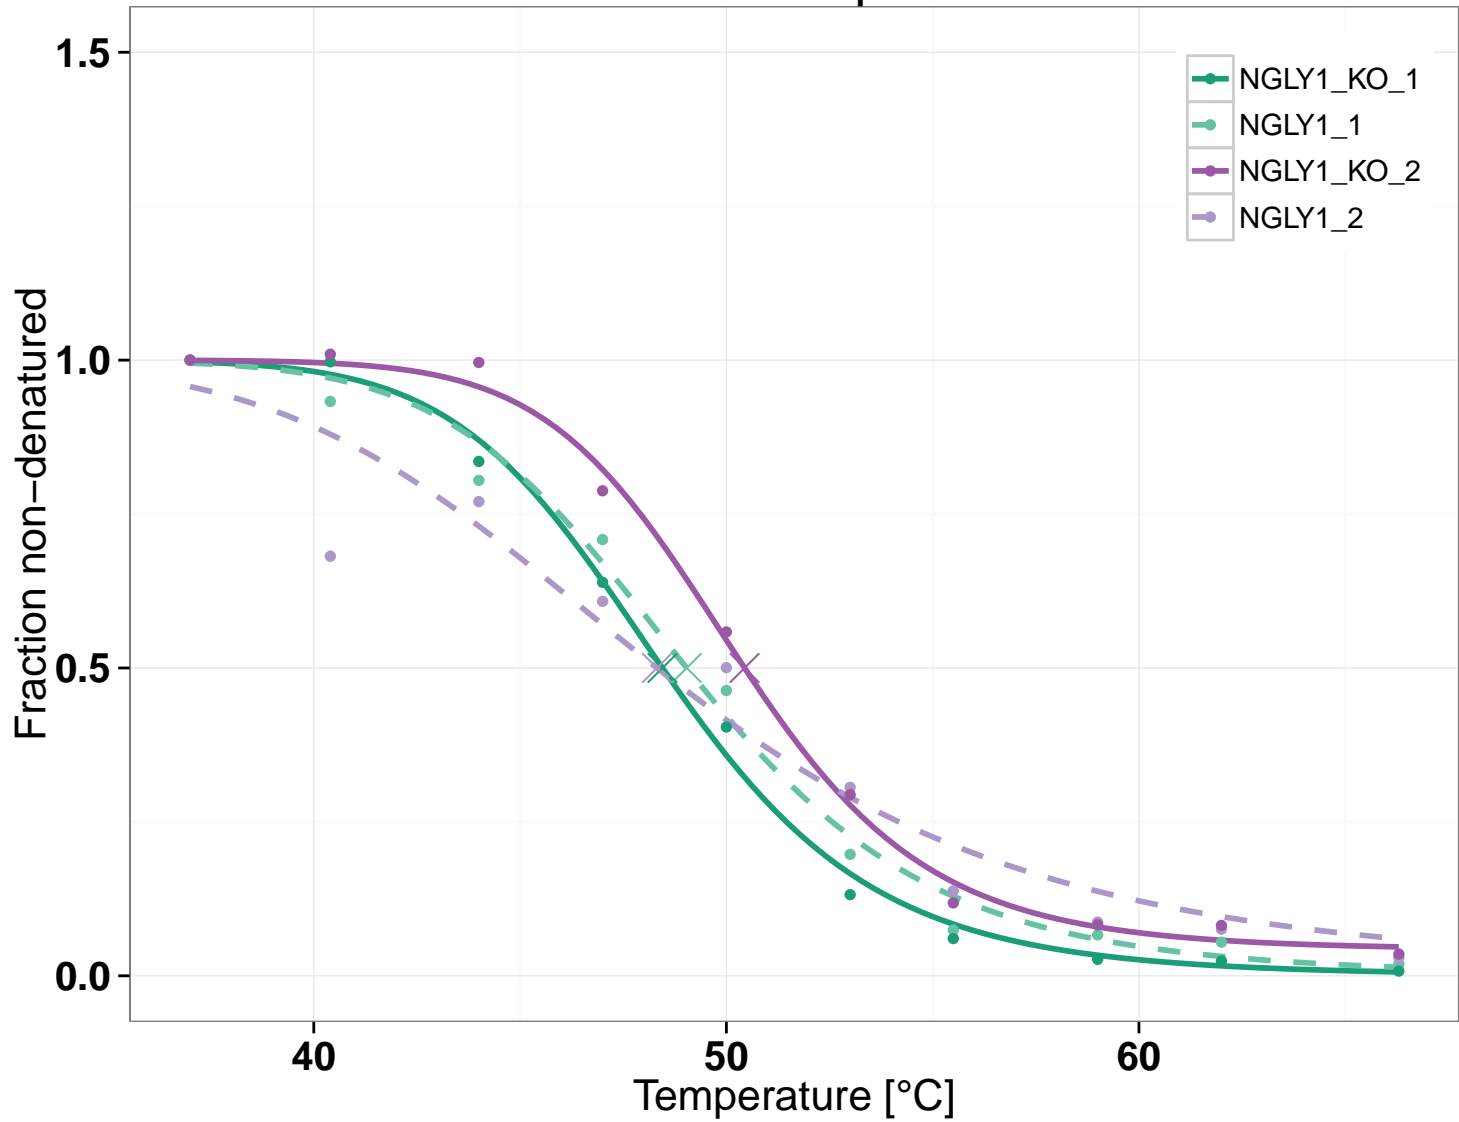

|            | meltPoint | slope  | plateau | R2   |
|------------|-----------|--------|---------|------|
| NGLY1_KO_1 | 48.45     | -0.098 | 0       | 1    |
| NGLY1_1    | 49.04     | -0.085 | 0       | 0.99 |
| NGLY1_KO_2 | 50.44     | -0.1   | 0.04    | 1    |
| NGLY1_2    | 48.32     | -0.055 | 0       | 0.94 |

Supplement: Supplementary file 6367 [file 1]

# IPI00299554.3|KIF14

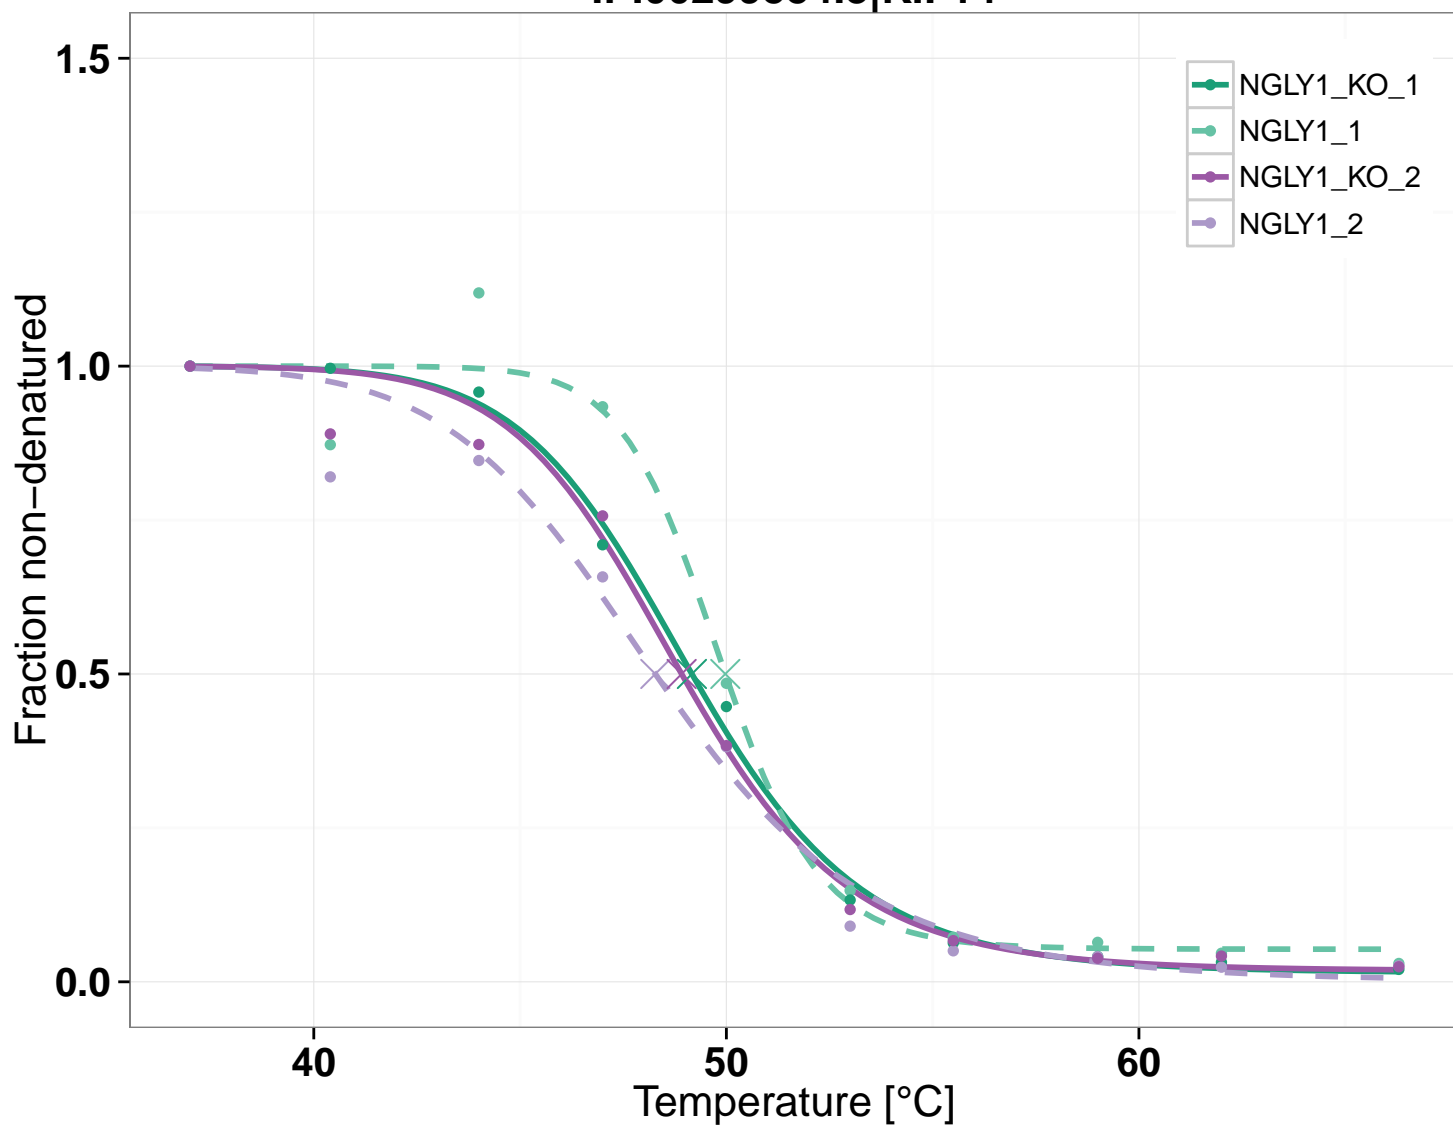

|            | meltPoint | slope  | plateau | R2   |
|------------|-----------|--------|---------|------|
| NGLY1_KO_1 | 49.16     | -0.12  | 0.01    | 1    |
| NGLY1_1    | 49.97     | -0.2   | 0.05    | 0.98 |
| NGLY1_KO_2 | 48.92     | -0.12  | 0.02    | 0.99 |
| NGLY1_2    | 48.28     | -0.098 | 0       | 0.98 |

Supplement: Supplementary file 6368 [file 1]

# IPI00745568.2|TIPRL

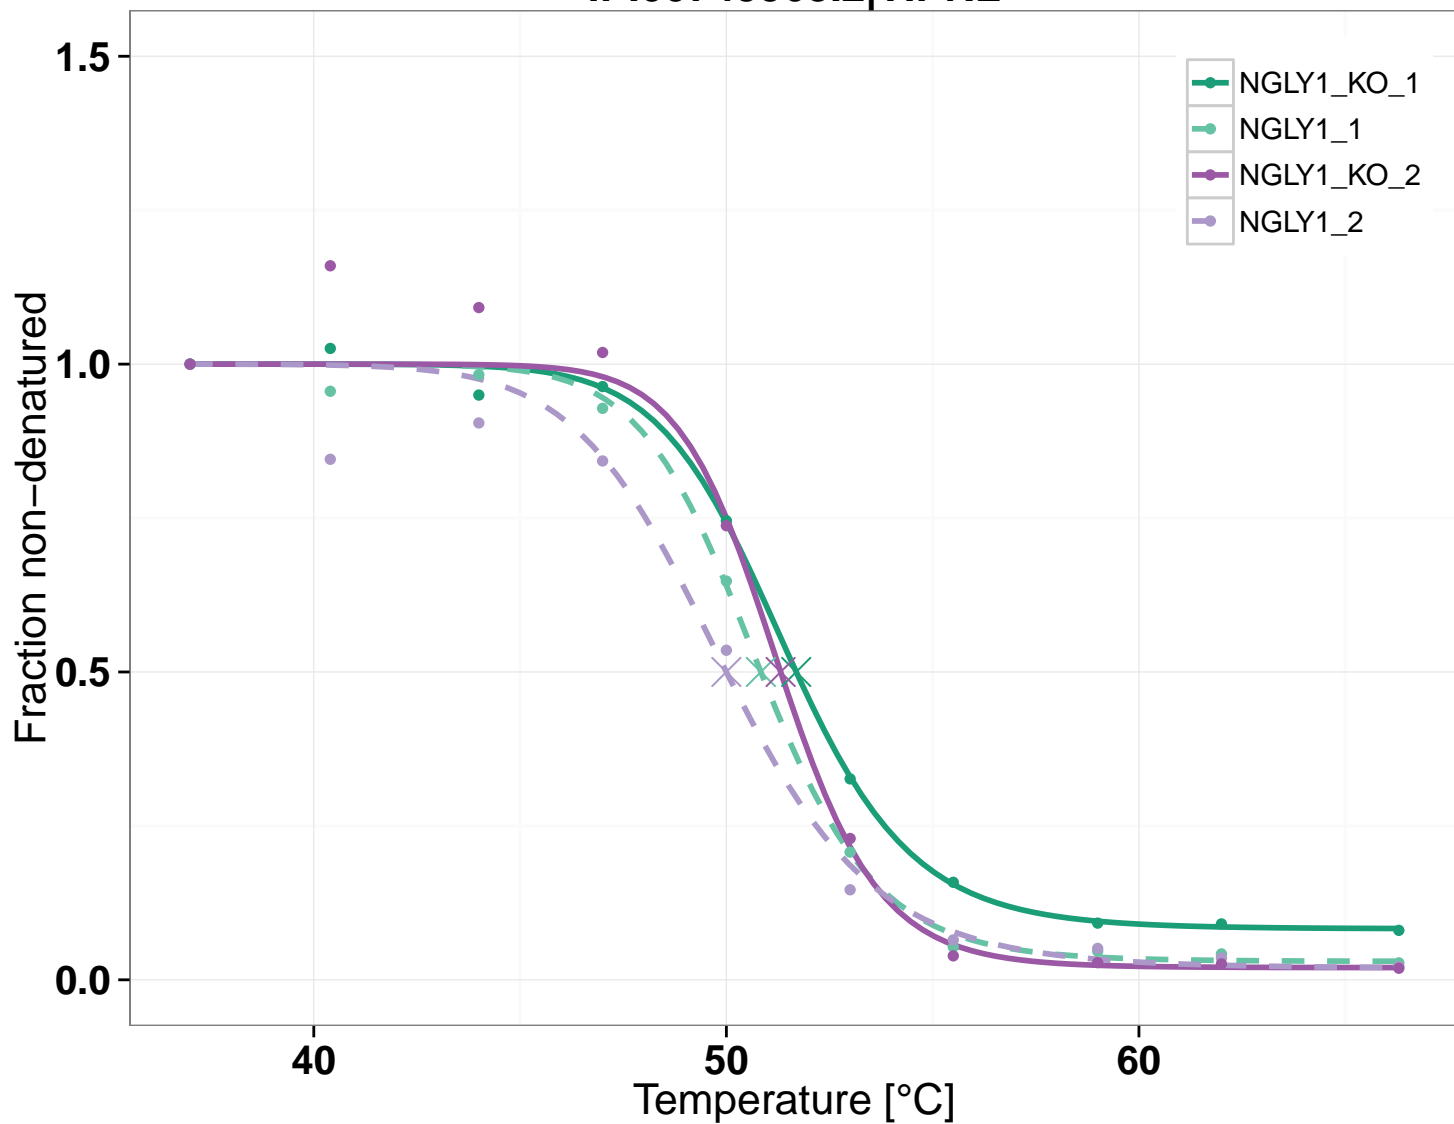

|            | meltPoint | slope | plateau | R2   |
|------------|-----------|-------|---------|------|
| NGLY1_KO_1 | 51.69     | -0.15 | 0.08    | 1    |
| NGLY1_1    | 50.84     | -0.17 | 0.03    | 1    |
| NGLY1_KO_2 | 51.32     | -0.2  | 0.02    | 0.98 |
| NGLY1_2    | 50        | -0.13 | 0.02    | 0.98 |

Supplement: Supplementary file 6369 [file 1]

# IPI00163185.8|AGAP3

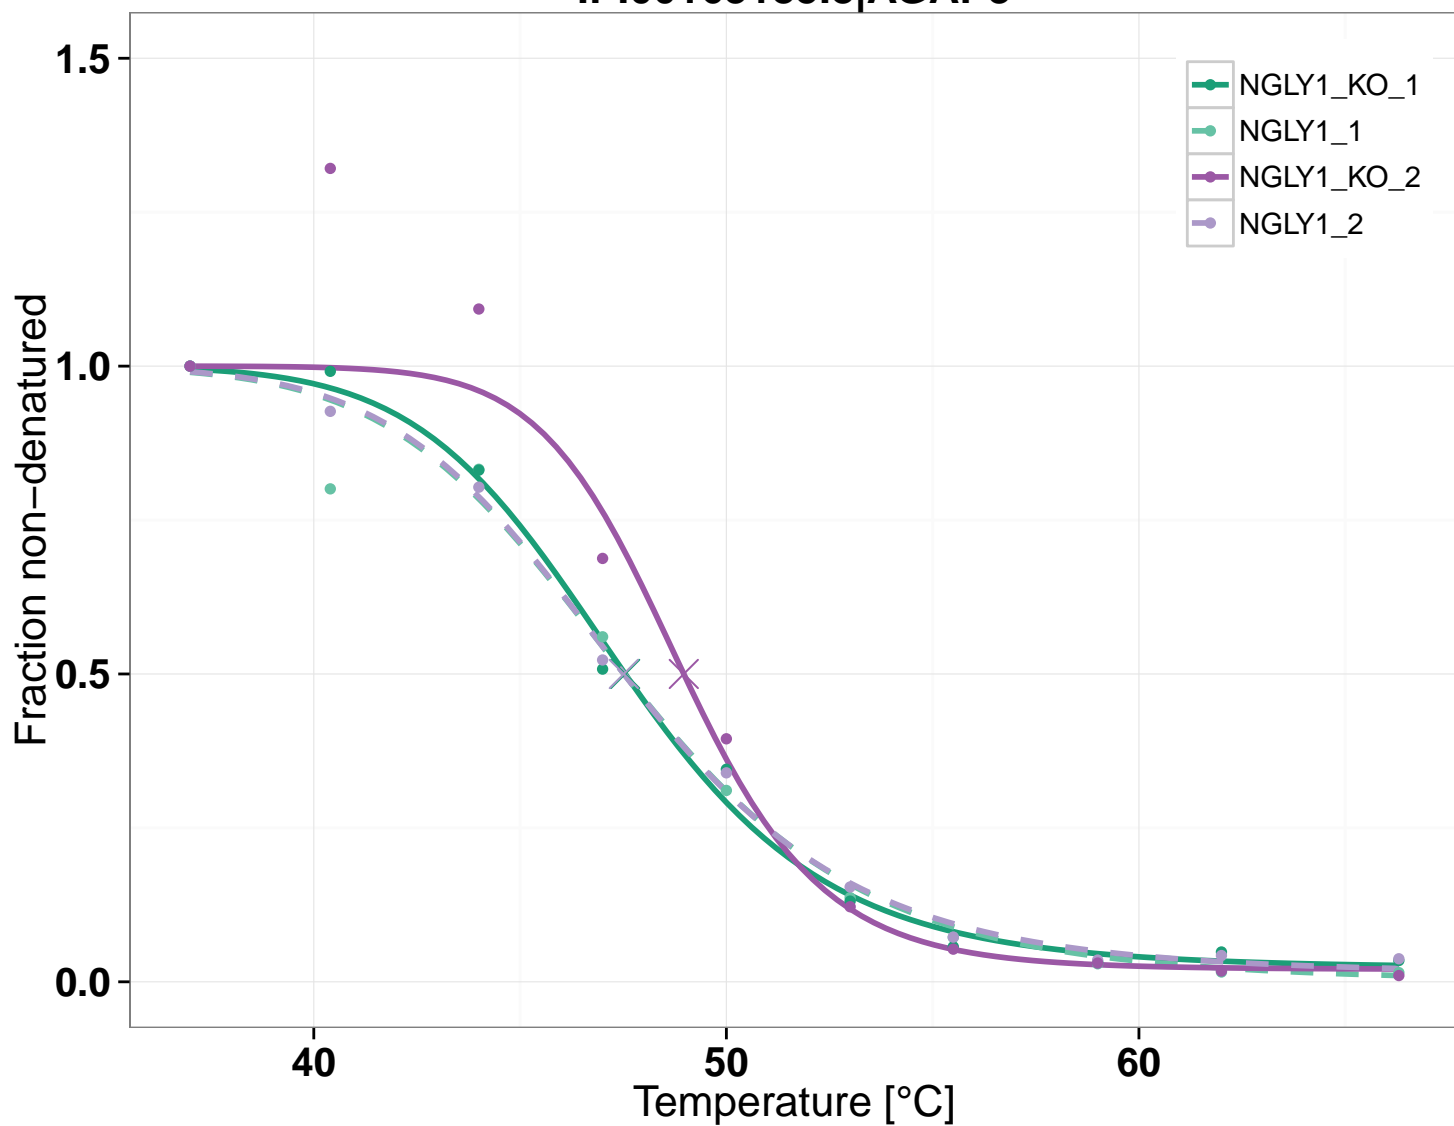

|            | meltPoint | slope  | plateau | R2   |
|------------|-----------|--------|---------|------|
| NGLY1_KO_1 | 47.55     | -0.098 | 0.02    | 1    |
| NGLY1_1    | 47.52     | -0.086 | 0       | 0.98 |
| NGLY1_KO_2 | 48.97     | -0.14  | 0.02    | 0.94 |
| NGLY1_2    | 47.51     | -0.087 | 0.01    | 1    |

Supplement: Supplementary file 6370 [file 1]

# IPI00878984.1|DDT

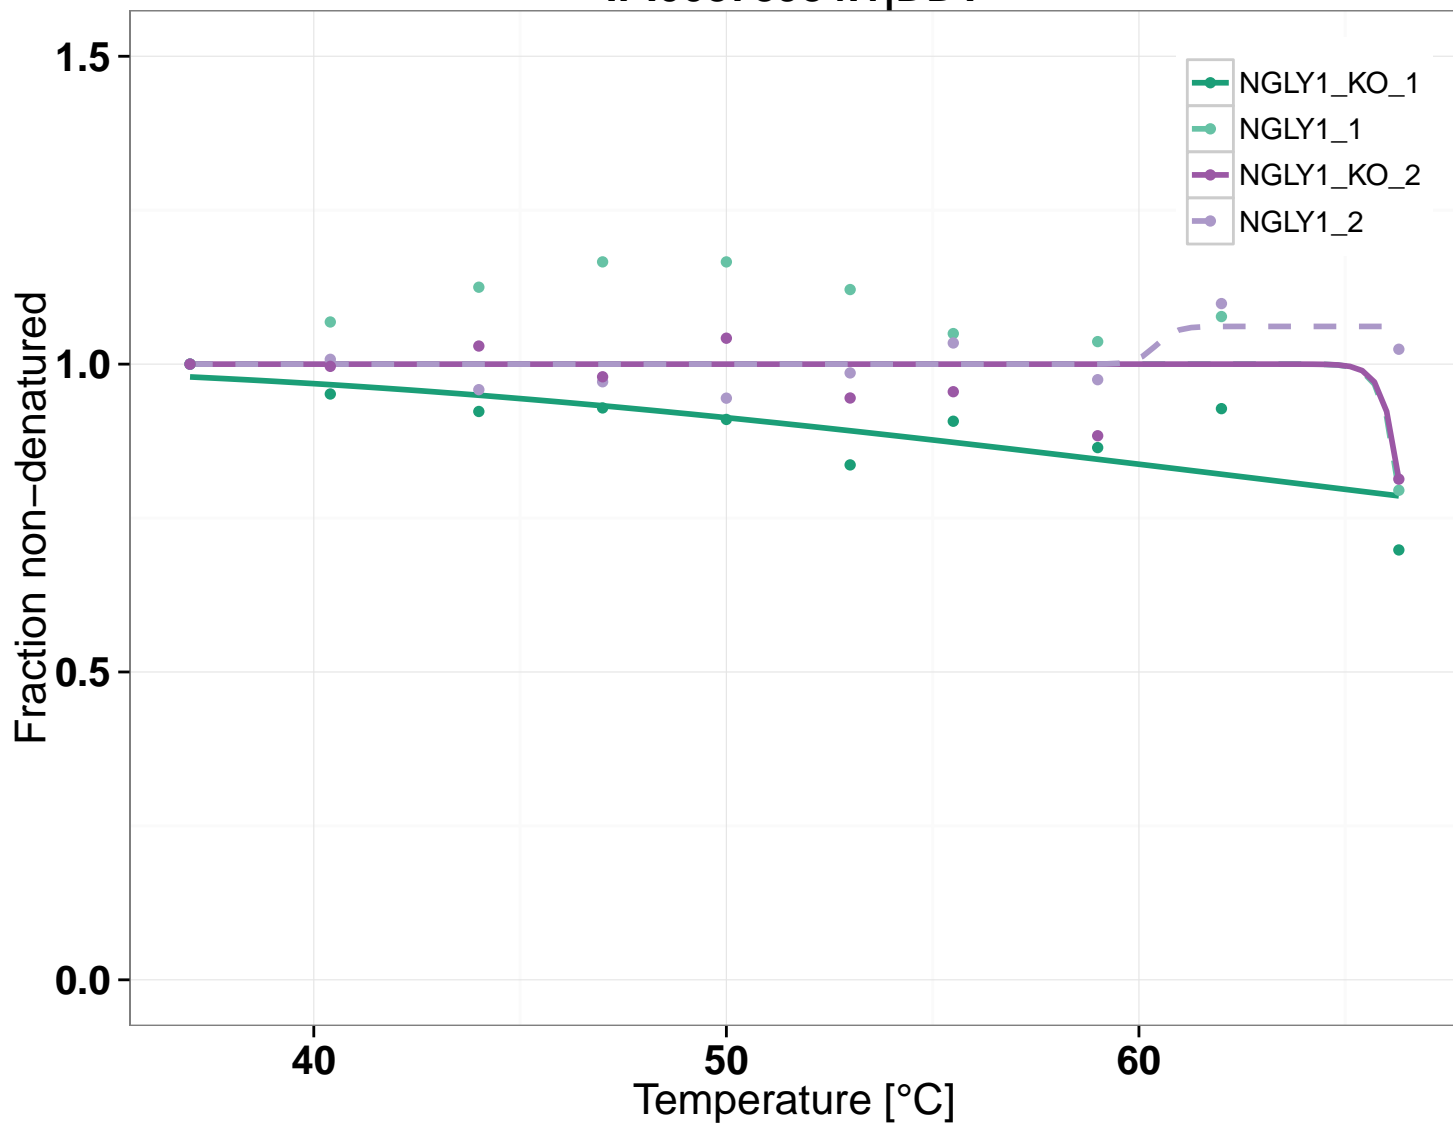

|            | meltPoint | slope   | plateau | R2   |
|------------|-----------|---------|---------|------|
| NGLY1_KO_1 | —         | -0.0082 | 0       | 0.59 |
| NGLY1_1    | —         | —       | 0       | 0.05 |
| NGLY1_KO_2 | —         | —       | 0       | 0.24 |
| NGLY1_2    | —         | 0.063   | 1.06    | 0.42 |

Supplement: Supplementary file 6371 [file 1]

IPI00007253.3|KIAA1012

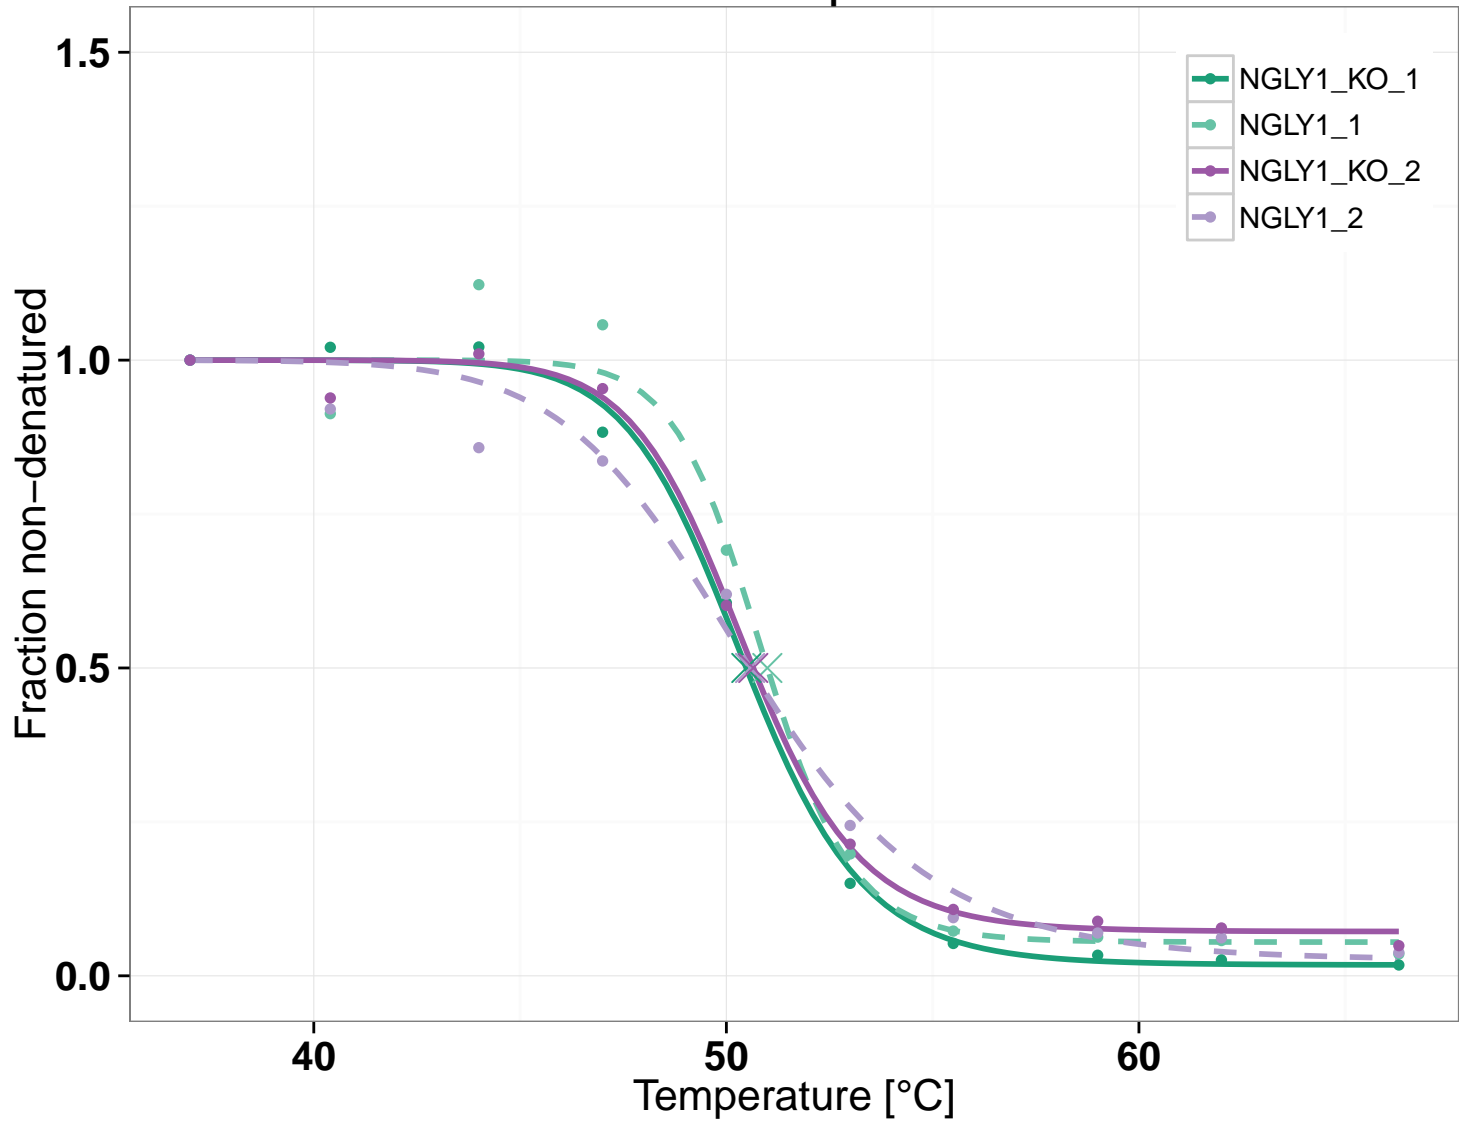

|            | meltPoint | slope | plateau | R2   |
|------------|-----------|-------|---------|------|
| NGLY1_KO_1 | 50.48     | -0.17 | 0.02    | 1    |
| NGLY1_1    | 50.99     | -0.22 | 0.05    | 0.99 |
| NGLY1_KO_2 | 50.65     | -0.17 | 0.07    | 1    |
| NGLY1_2    | 50.58     | -0.11 | 0.02    | 0.98 |

Supplement: Supplementary file 6372 [file 1]

# IPI00478410.2|ATP5C1

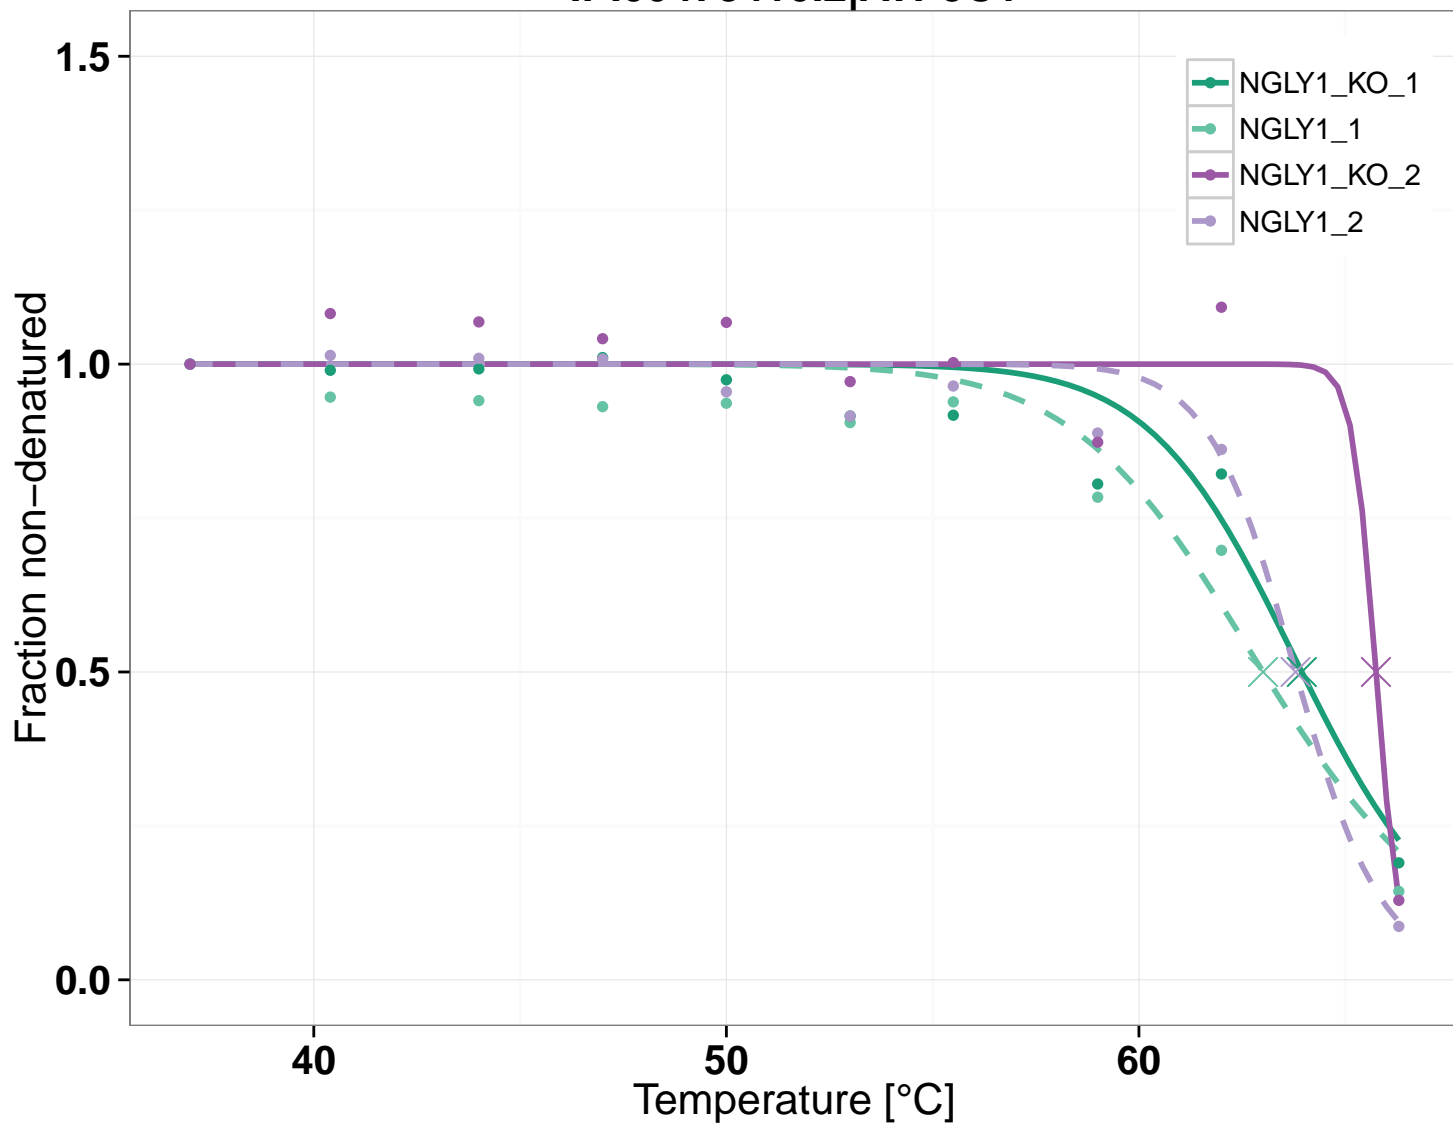

|            | meltPoint | slope | plateau | R2   |
|------------|-----------|-------|---------|------|
| NGLY1_KO_1 | 63.95     | -0.14 | 0       | 0.93 |
| NGLY1_1    | 63.01     | -0.11 | 0       | 0.93 |
| NGLY1_KO_2 | 65.75     | -0.87 | 0       | 0.94 |
| NGLY1_2    | 63.8      | -0.24 | 0       | 0.97 |

Supplement: Supplementary file 6373 [file 1]

IPI00444937.3|TRAPPC2L

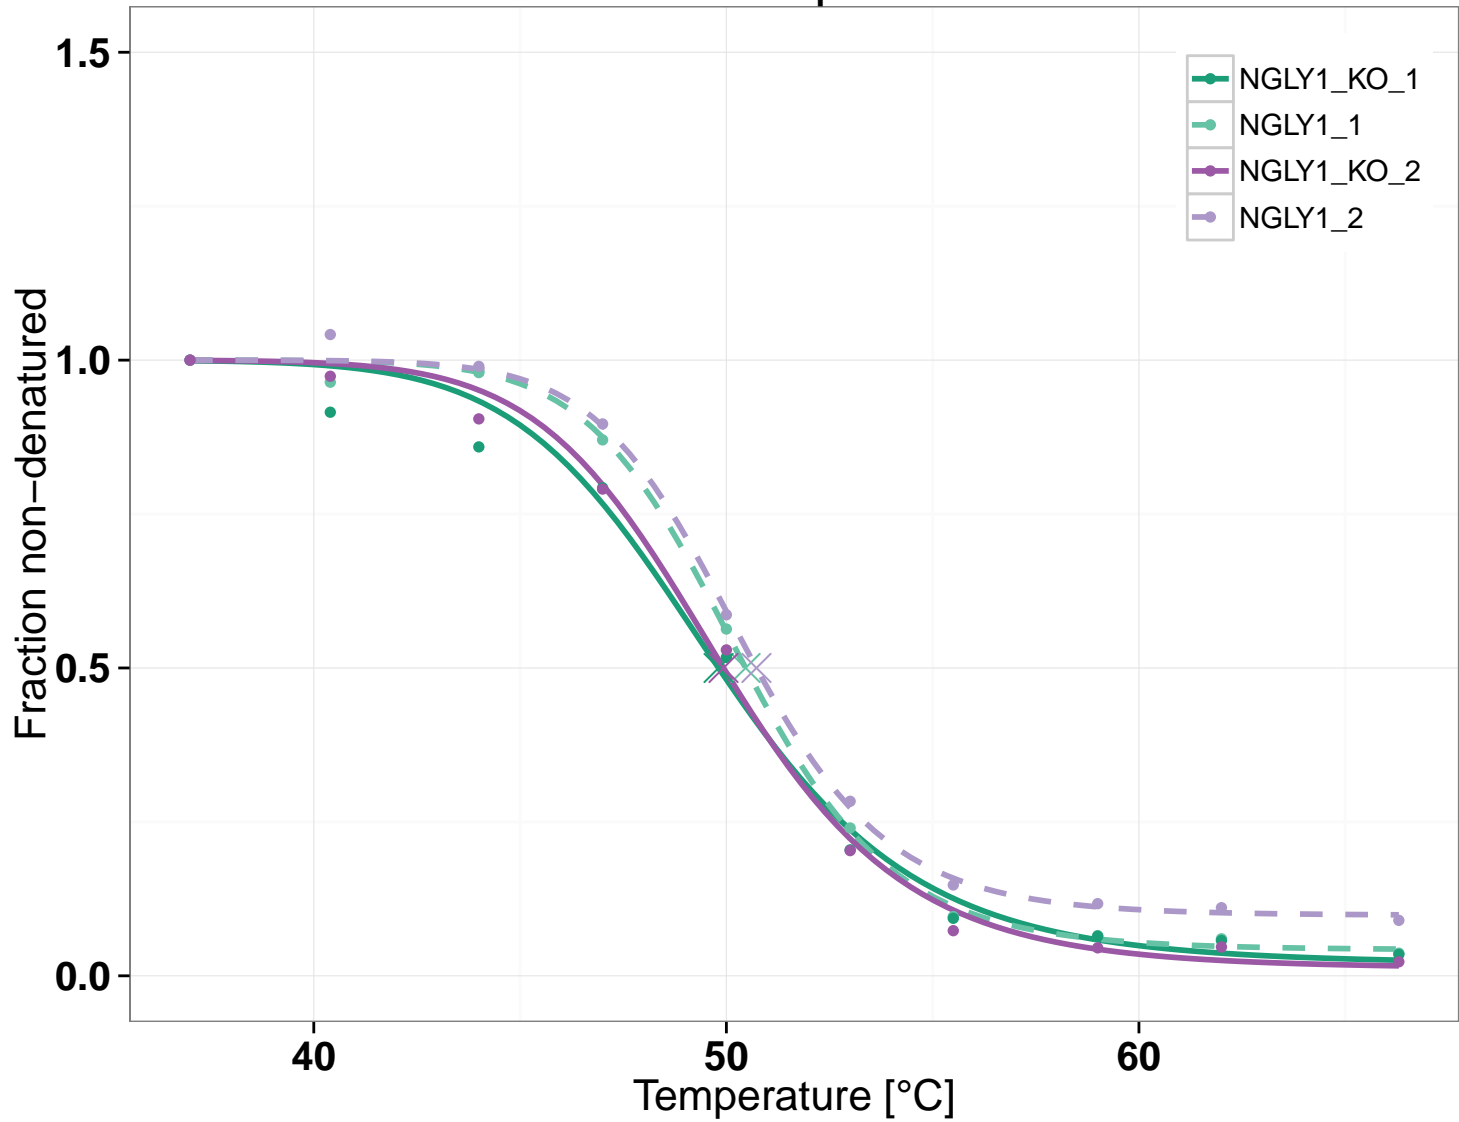

|            | meltPoint | slope | plateau | R2   |
|------------|-----------|-------|---------|------|
| NGLY1_KO_1 | 49.81     | -0.1  | 0.02    | 0.99 |
| NGLY1_1    | 50.47     | -0.13 | 0.04    | 1    |
| NGLY1_KO_2 | 49.93     | -0.11 | 0.01    | 1    |
| NGLY1_2    | 50.73     | -0.13 | 0.1     | 1    |

Supplement: Supplementary file 6374 [file 1]

IPI00644772.1|C9ORF25

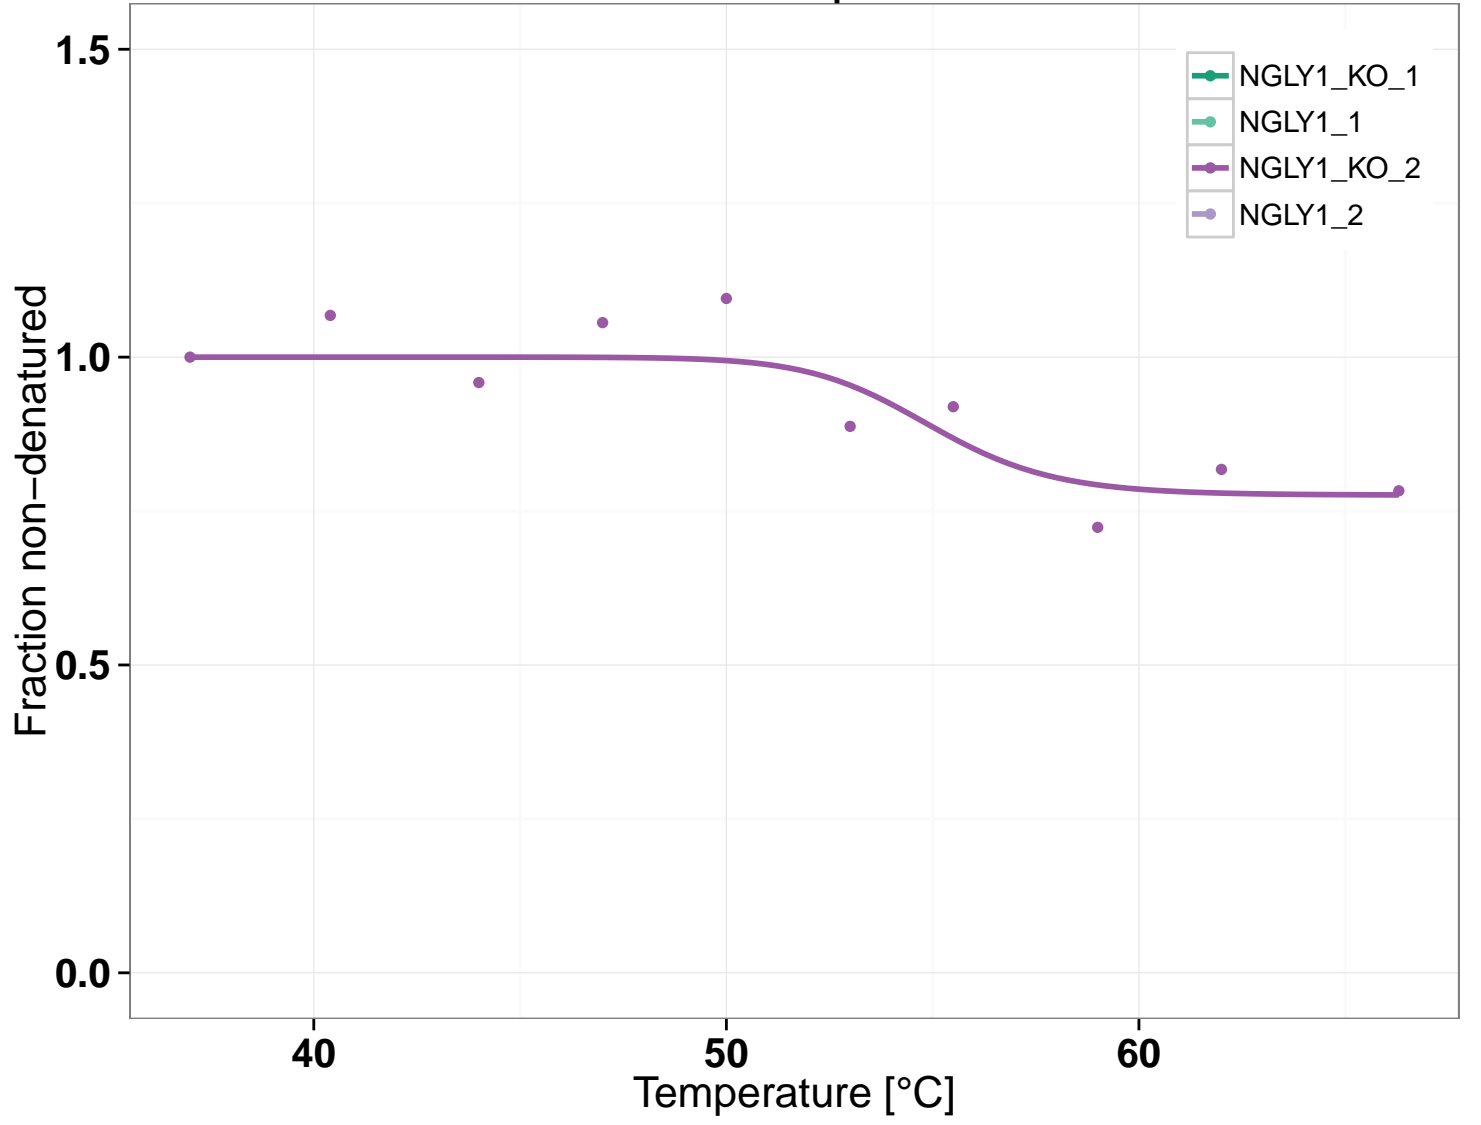

|            | meltPoint | slope  | plateau | R2   |
|------------|-----------|--------|---------|------|
| NGLY1_KO_1 | -         | -      | -       | -    |
| NGLY1_1    | -         | -      | -       | -    |
| NGLY1_KO_2 | -         | -0.038 | 0.78    | 0.77 |
| NGLY1_2    | -         | -      | -       | -    |

Supplement: Supplementary file 6375 [file 1]

# IPI00152527.6|HEL308

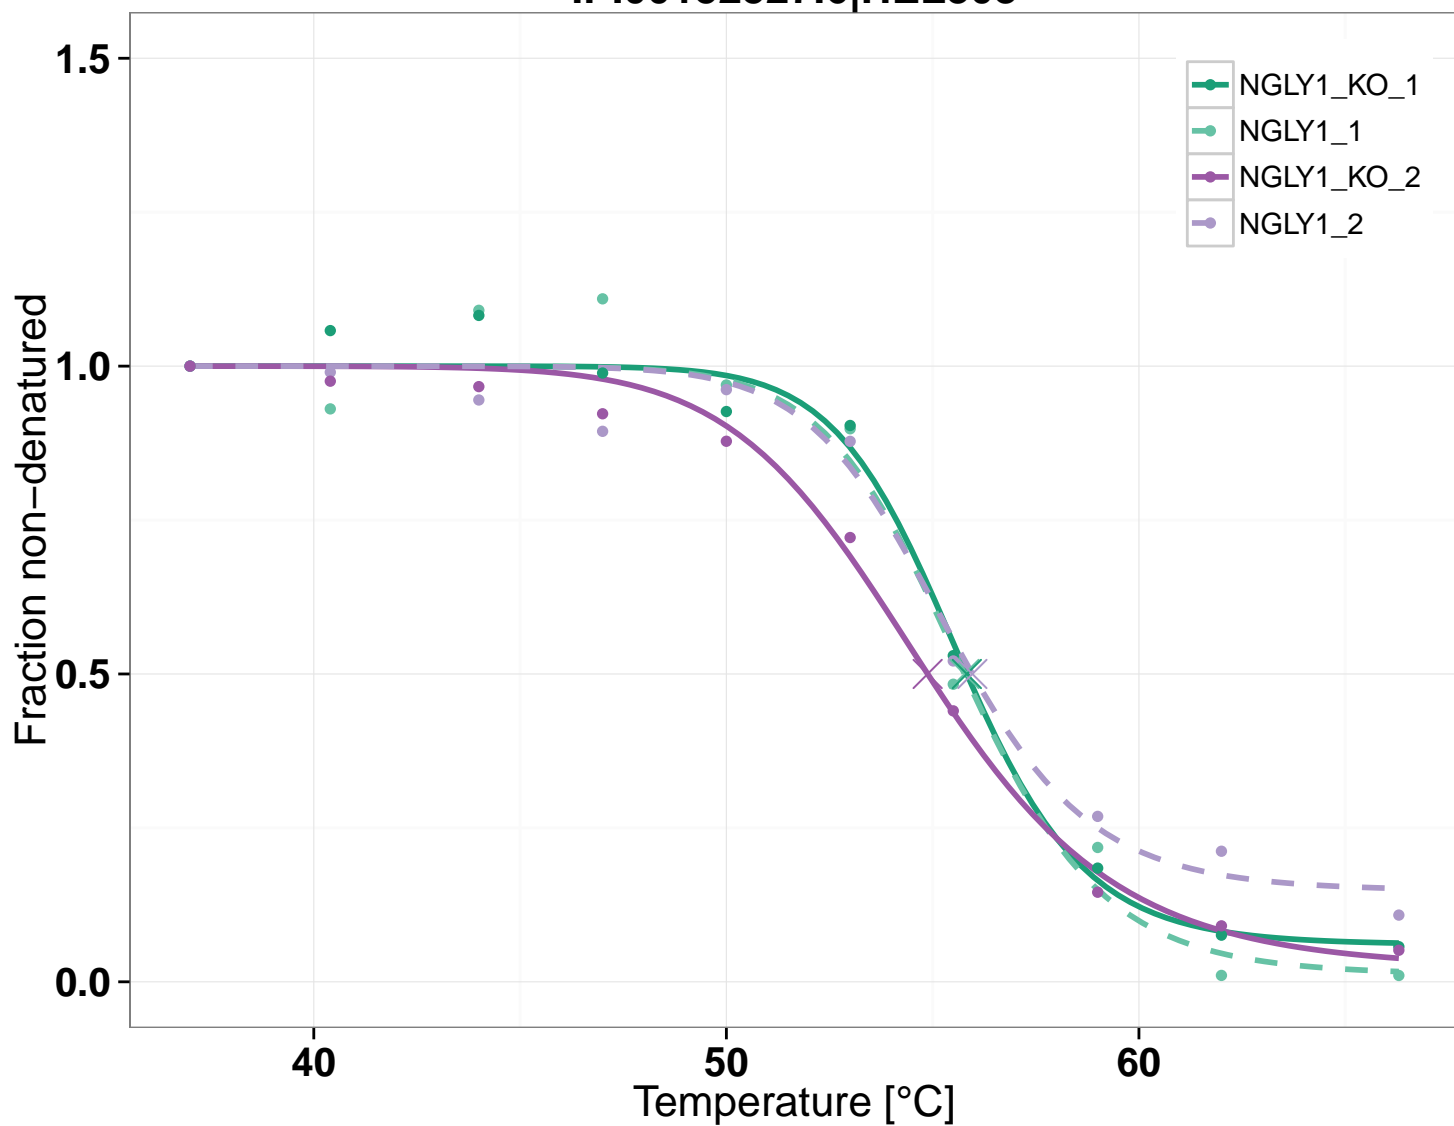

|            | meltPoint | slope | plateau | R2   |
|------------|-----------|-------|---------|------|
| NGLY1_KO_1 | 55.83     | -0.15 | 0.06    | 0.99 |
| NGLY1_1    | 55.77     | -0.15 | 0.01    | 0.98 |
| NGLY1_KO_2 | 54.88     | -0.1  | 0.02    | 0.99 |
| NGLY1_2    | 55.96     | -0.12 | 0.15    | 0.98 |

Supplement: Supplementary file 6376 [file 1]

# IPI00220302.1|WTAP

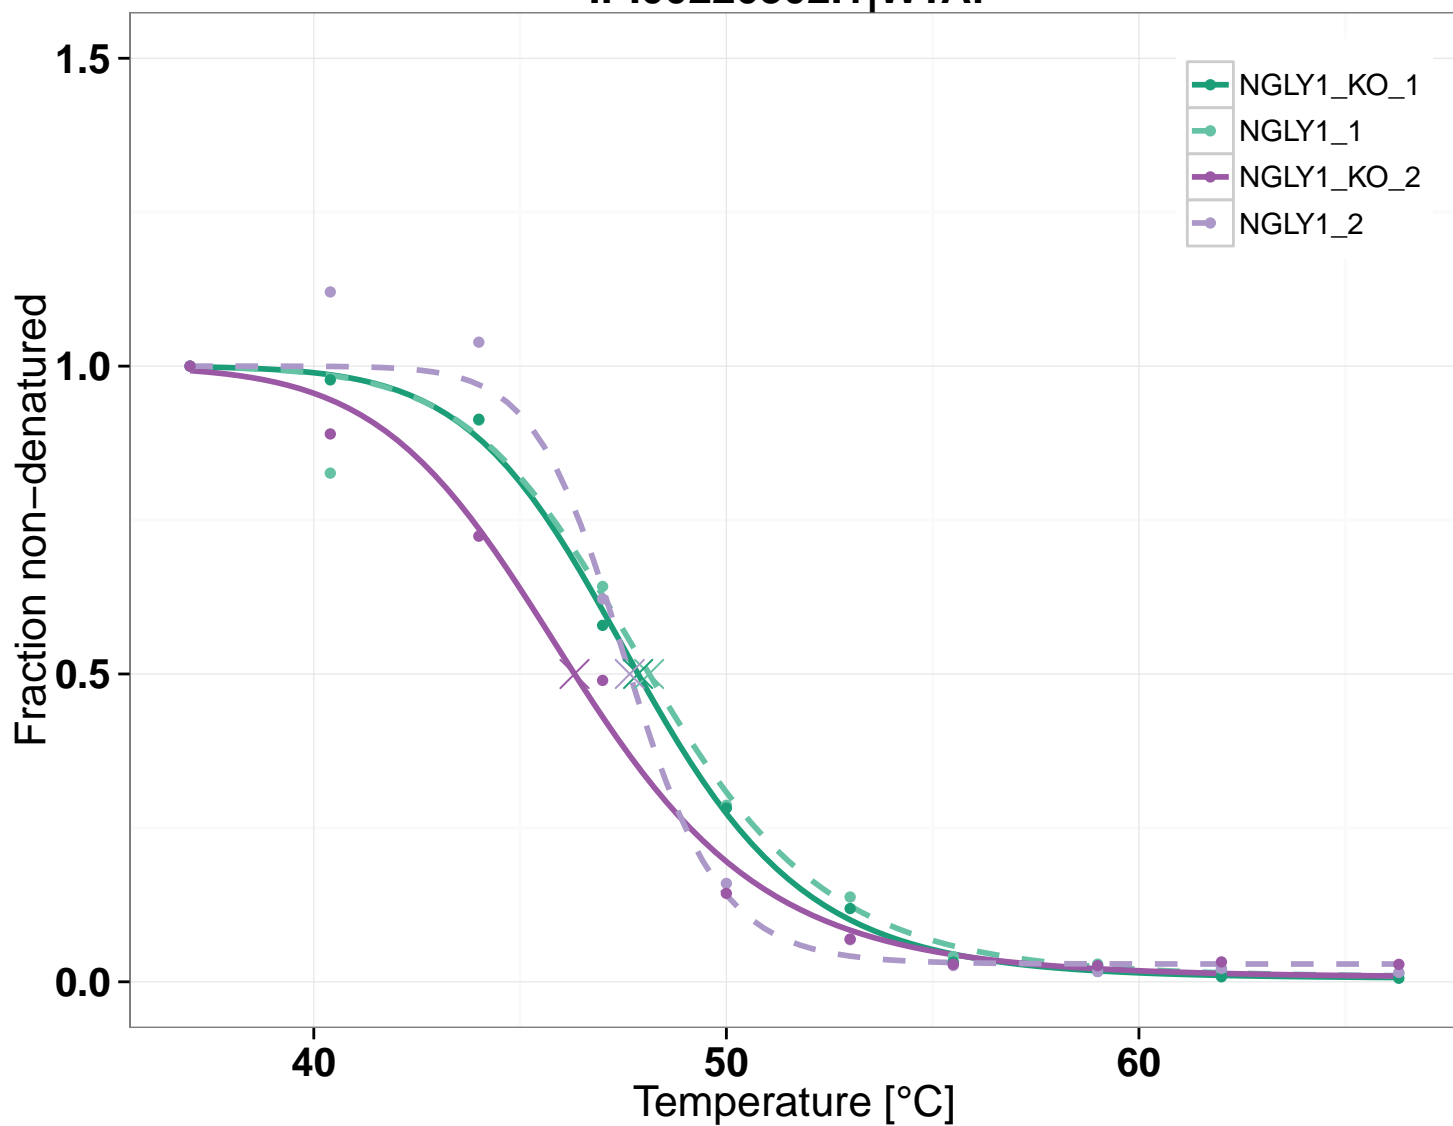

|            | meltPoint | slope | plateau | R2   |
|------------|-----------|-------|---------|------|
| NGLY1_KO_1 | 47.86     | -0.12 | 0.01    | 1    |
| NGLY1_1    | 48.13     | -0.11 | 0.01    | 0.98 |
| NGLY1_KO_2 | 46.32     | -0.11 | 0.01    | 0.99 |
| NGLY1_2    | 47.66     | -0.22 | 0.03    | 0.99 |

Supplement: Supplementary file 6377 [file 1]

# IPI00647707.3|ADCK4

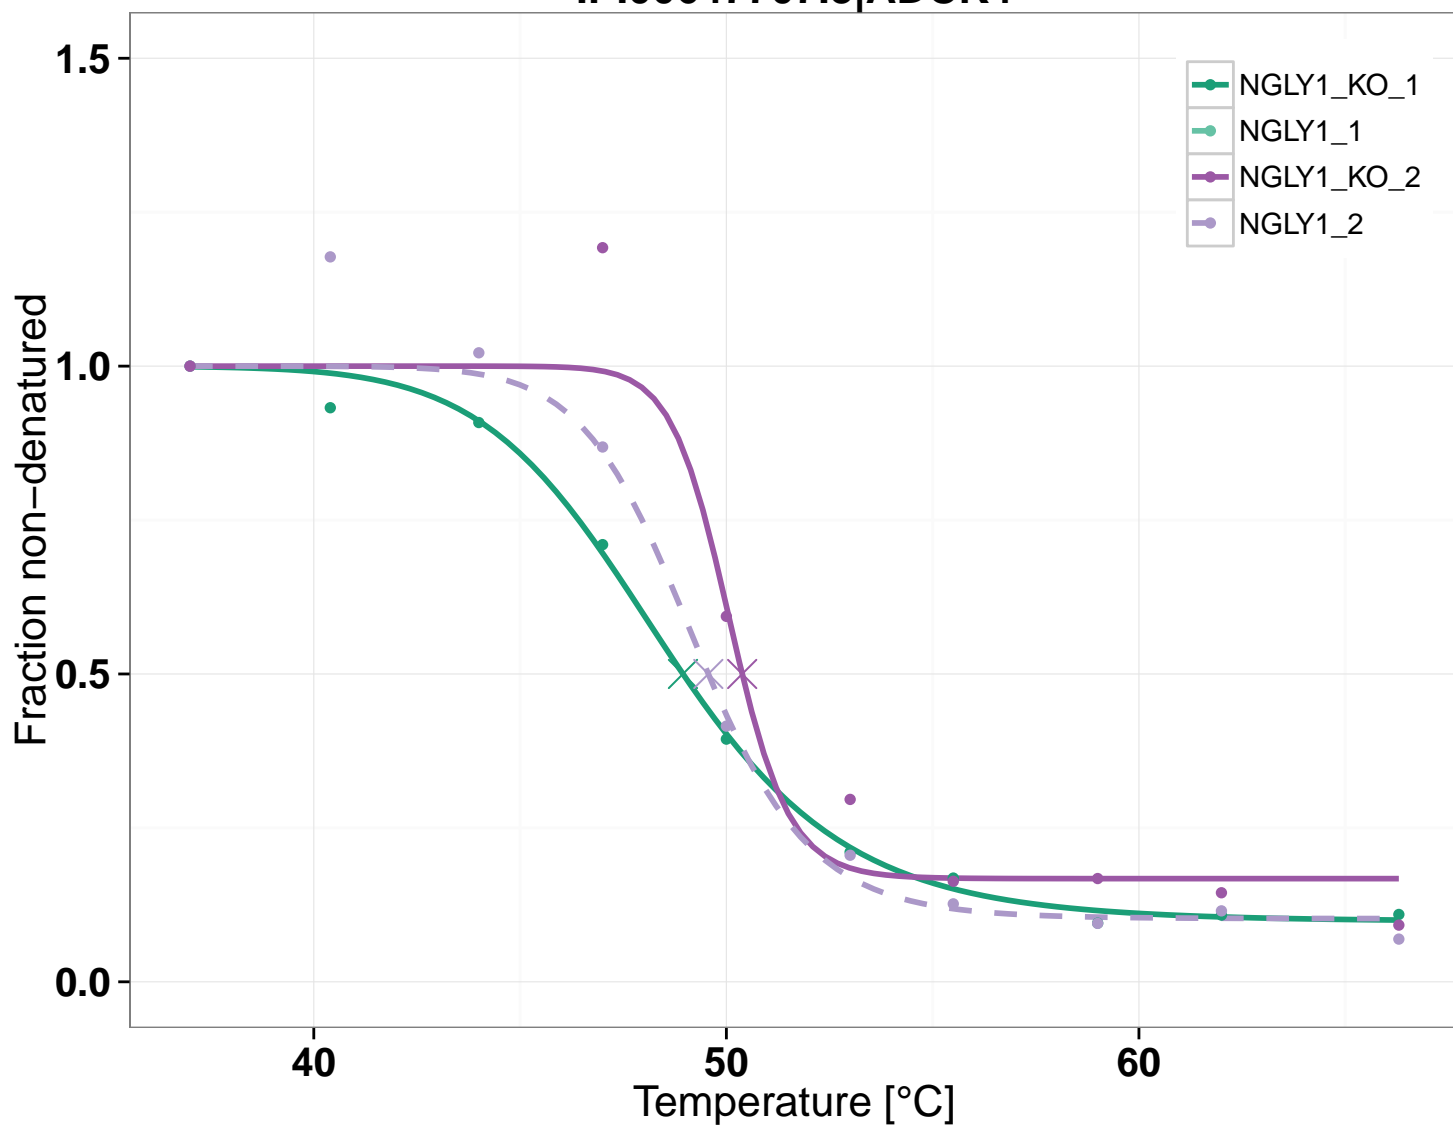

|            | meltPoint | slope | plateau | R2   |
|------------|-----------|-------|---------|------|
| NGLY1_KO_1 | 48.95     | -0.1  | 0.1     | 1    |
| NGLY1_1    | -         | -     | -       | -    |
| NGLY1_KO_2 | 50.38     | -0.29 | 0.17    | 0.76 |
| NGLY1_2    | 49.56     | -0.16 | 0.1     | 0.98 |

Supplement: Supplementary file 6378 [file 1]

IPI00002203.6|BCCIP

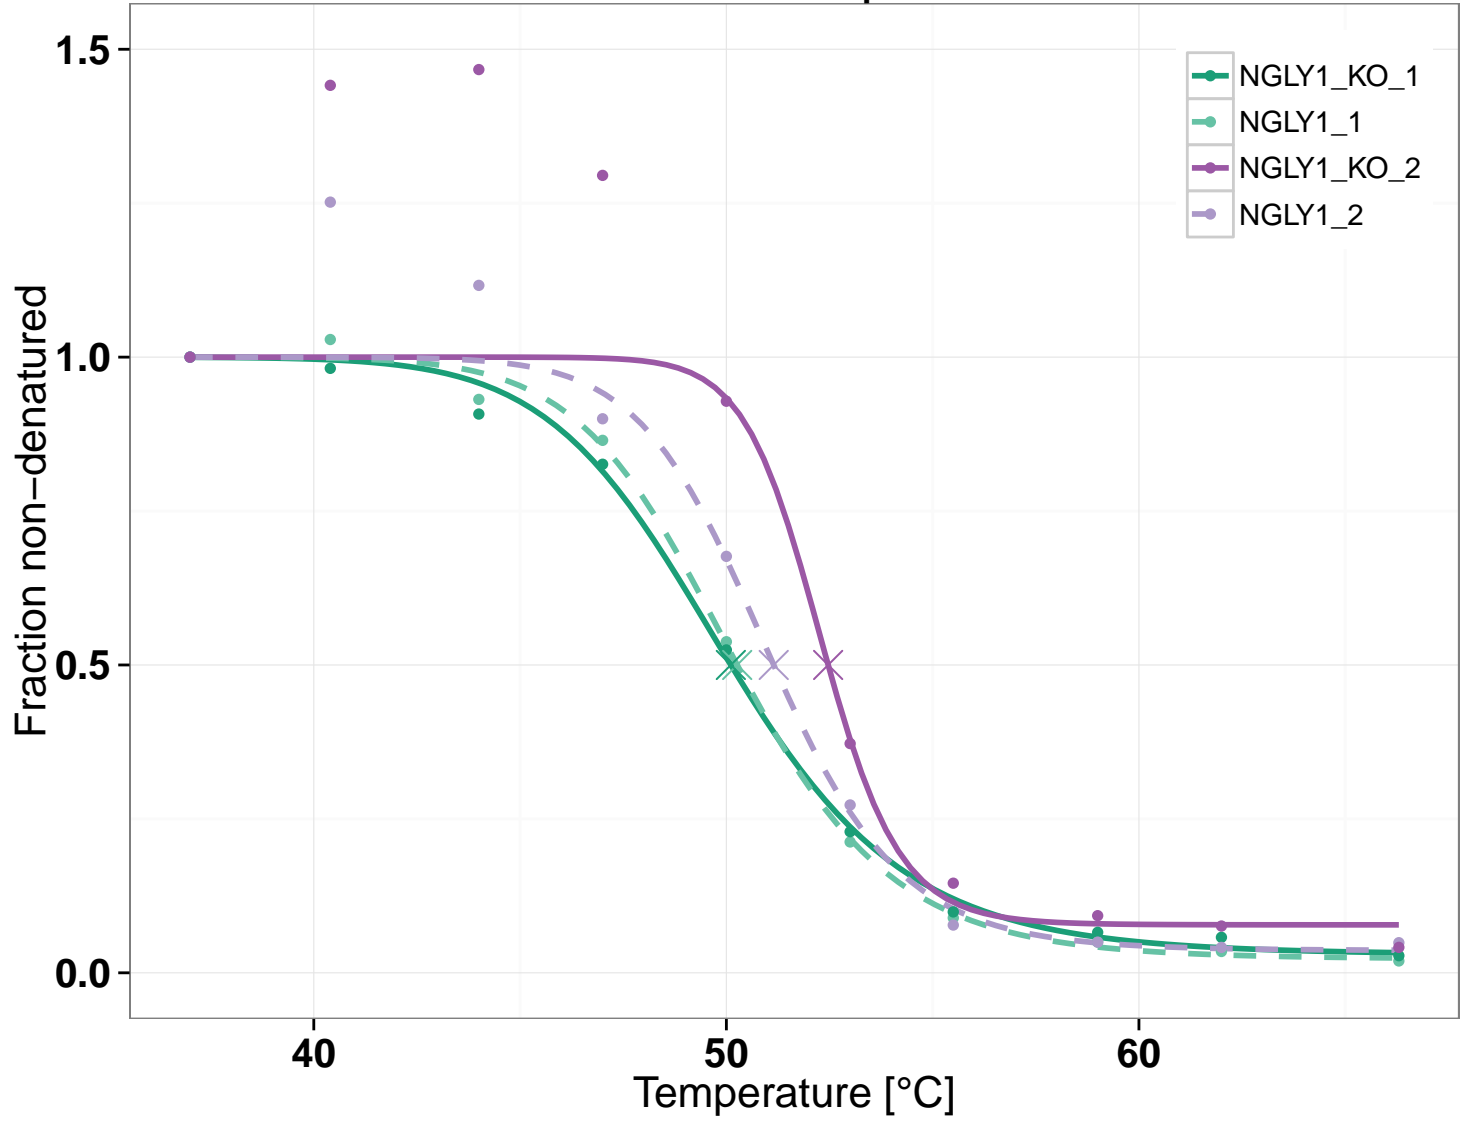

|            | meltPoint | slope | plateau | R2   |
|------------|-----------|-------|---------|------|
| NGLY1_KO_1 | 50.11     | -0.11 | 0.03    | 1    |
| NGLY1_1    | 50.26     | -0.13 | 0.02    | 1    |
| NGLY1_KO_2 | 52.47     | -0.24 | 0.08    | 0.84 |
| NGLY1_2    | 51.15     | -0.15 | 0.04    | 0.96 |

Supplement: Supplementary file 6379 [file 1]

# IPI00902597.1|TOP1

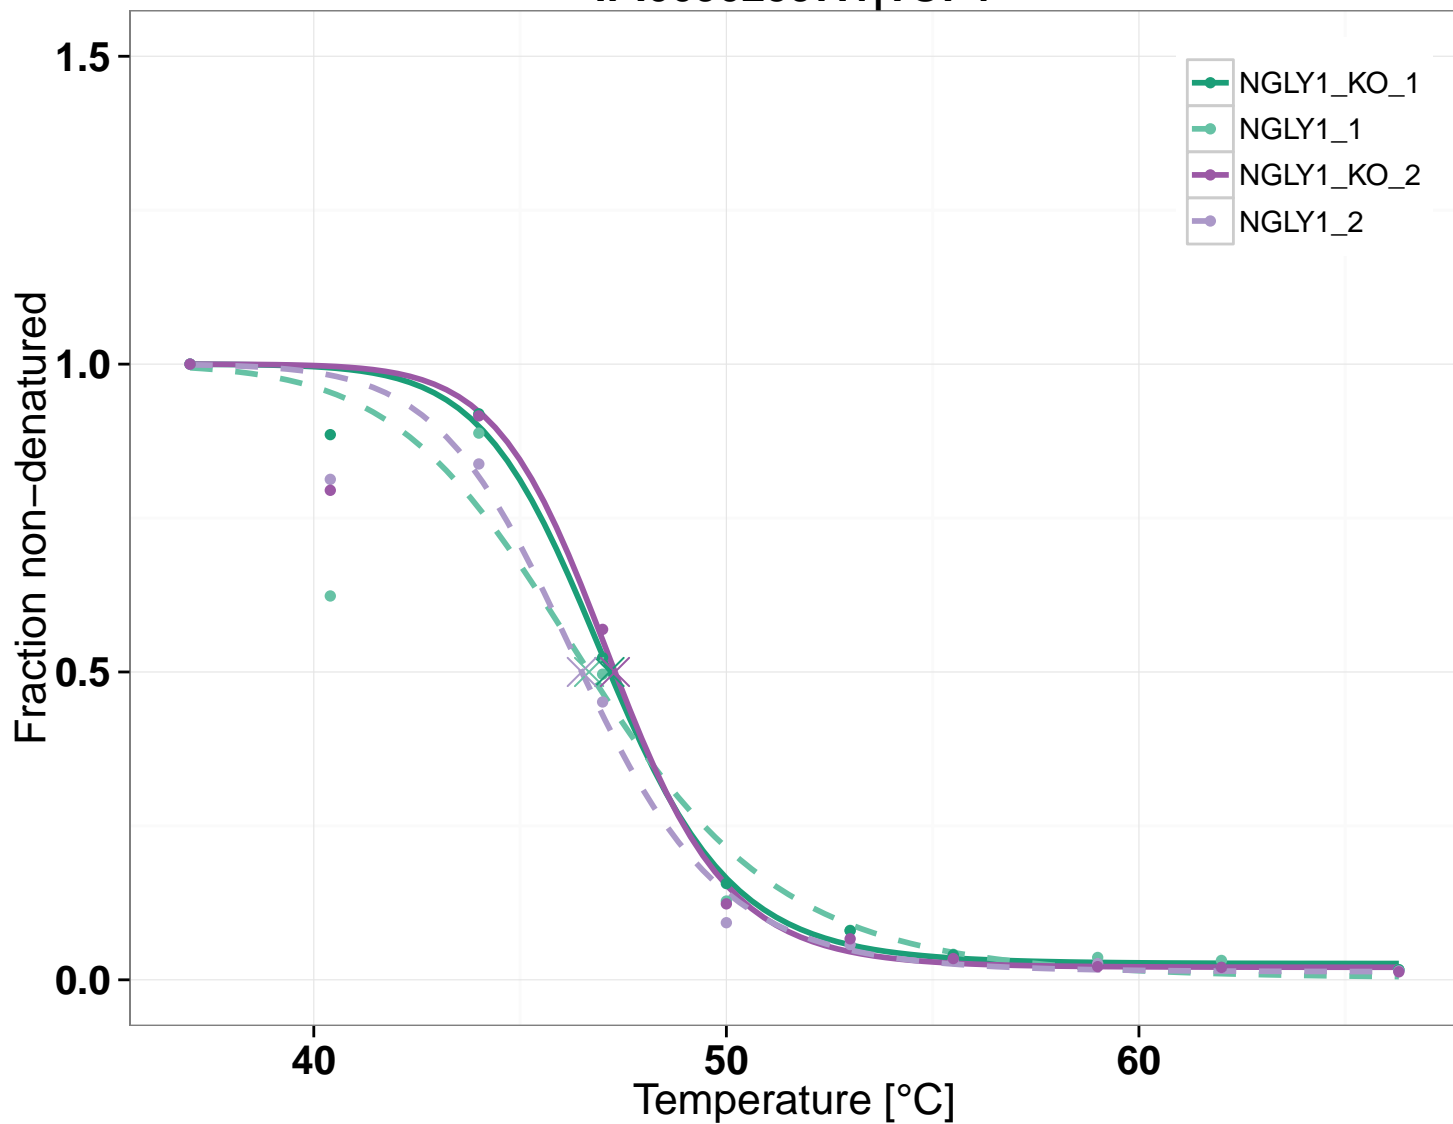

|            | meltPoint | slope | plateau | R2   |
|------------|-----------|-------|---------|------|
| NGLY1_KO_1 | 47.17     | -0.16 | 0.03    | 0.99 |
| NGLY1_1    | 46.67     | -0.11 | 0       | 0.9  |
| NGLY1_KO_2 | 47.3      | -0.17 | 0.02    | 0.97 |
| NGLY1_2    | 46.5      | -0.14 | 0.01    | 0.98 |

Supplement: Supplementary file 6380 [file 1]

IPI00550228.3|PPP2R3C

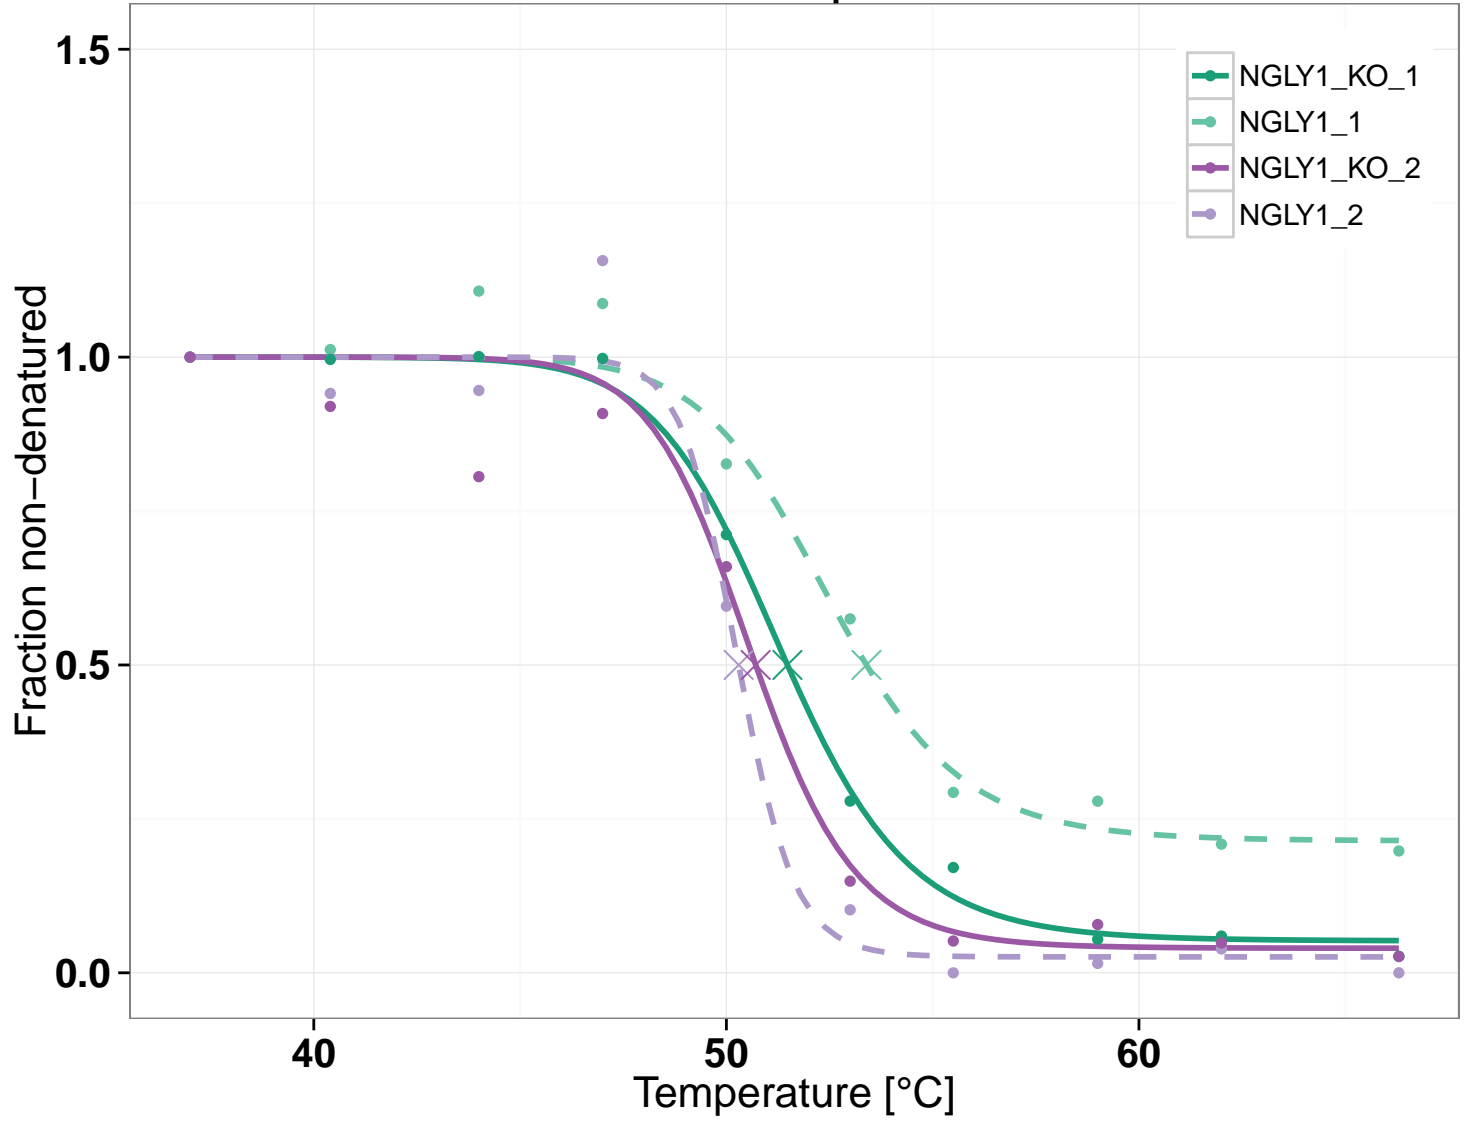

|            | meltPoint | slope | plateau | R2   |
|------------|-----------|-------|---------|------|
| NGLY1_KO_1 | 51.48     | -0.15 | 0.05    | 1    |
| NGLY1_1    | 53.4      | -0.12 | 0.21    | 0.98 |
| NGLY1_KO_2 | 50.71     | -0.19 | 0.04    | 0.97 |
| NGLY1_2    | 50.3      | -0.35 | 0.03    | 0.98 |

Supplement: Supplementary file 6381 [file 1]

IPI00328932.5|VPS36

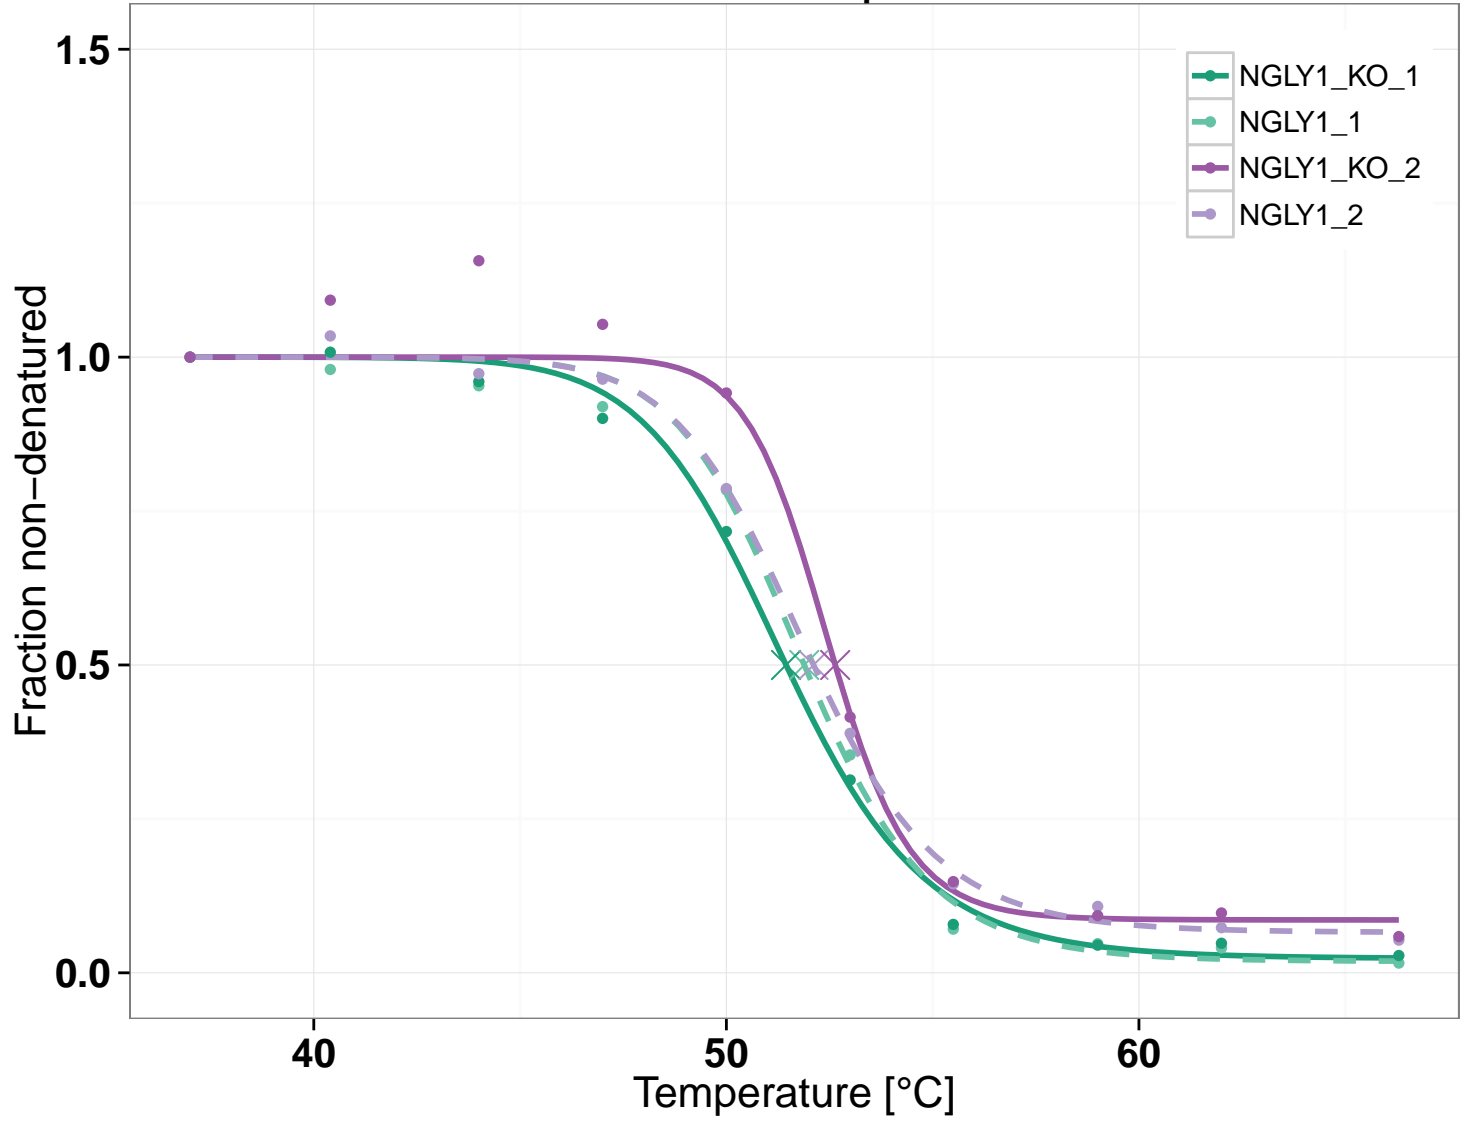

|            | meltPoint | slope | plateau | R2   |
|------------|-----------|-------|---------|------|
| NGLY1_KO_1 | 51.45     | -0.14 | 0.02    | 1    |
| NGLY1_1    | 51.89     | -0.16 | 0.02    | 1    |
| NGLY1_KO_2 | 52.64     | -0.23 | 0.09    | 0.98 |
| NGLY1_2    | 52.11     | -0.15 | 0.07    | 1    |

Supplement: Supplementary file 6382 [file 1]

IPI00657798.2|CC85C\_HUMAN

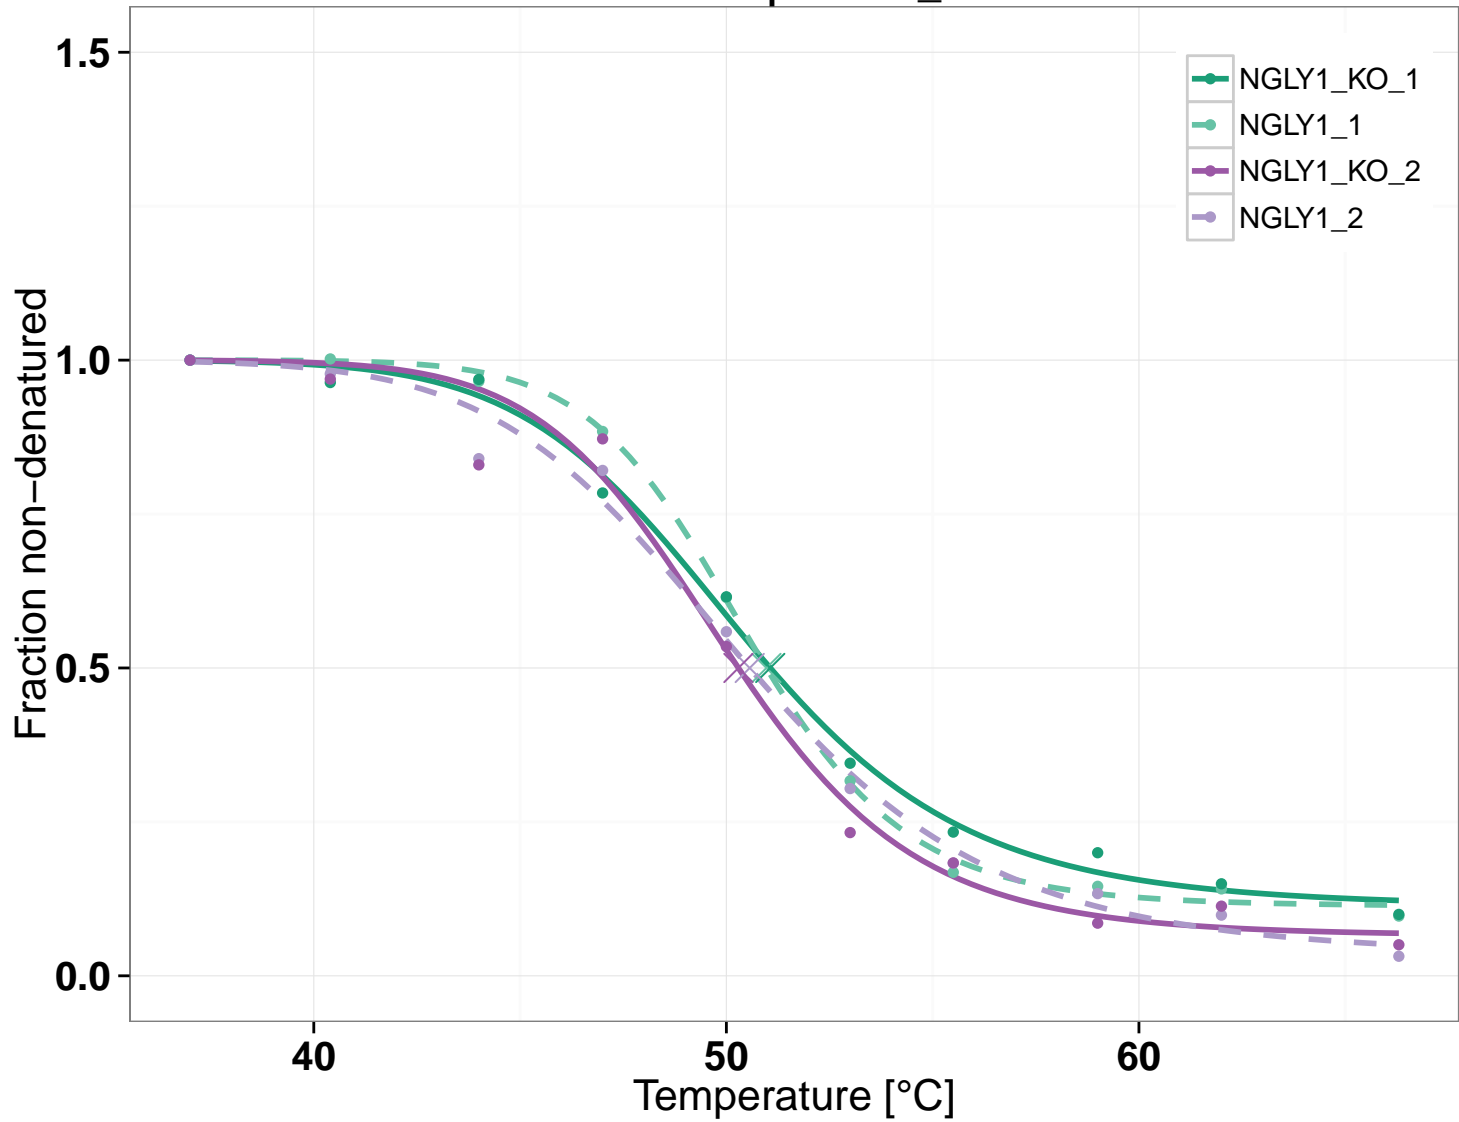

|            | meltPoint | slope  | plateau | R2   |
|------------|-----------|--------|---------|------|
| NGLY1_KO_1 | 51.06     | -0.082 | 0.11    | 1    |
| NGLY1_1    | 50.97     | -0.11  | 0.11    | 1    |
| NGLY1_KO_2 | 50.29     | -0.1   | 0.06    | 0.98 |
| NGLY1_2    | 50.57     | -0.08  | 0.03    | 0.99 |

Supplement: Supplementary file 6383 [file 1]

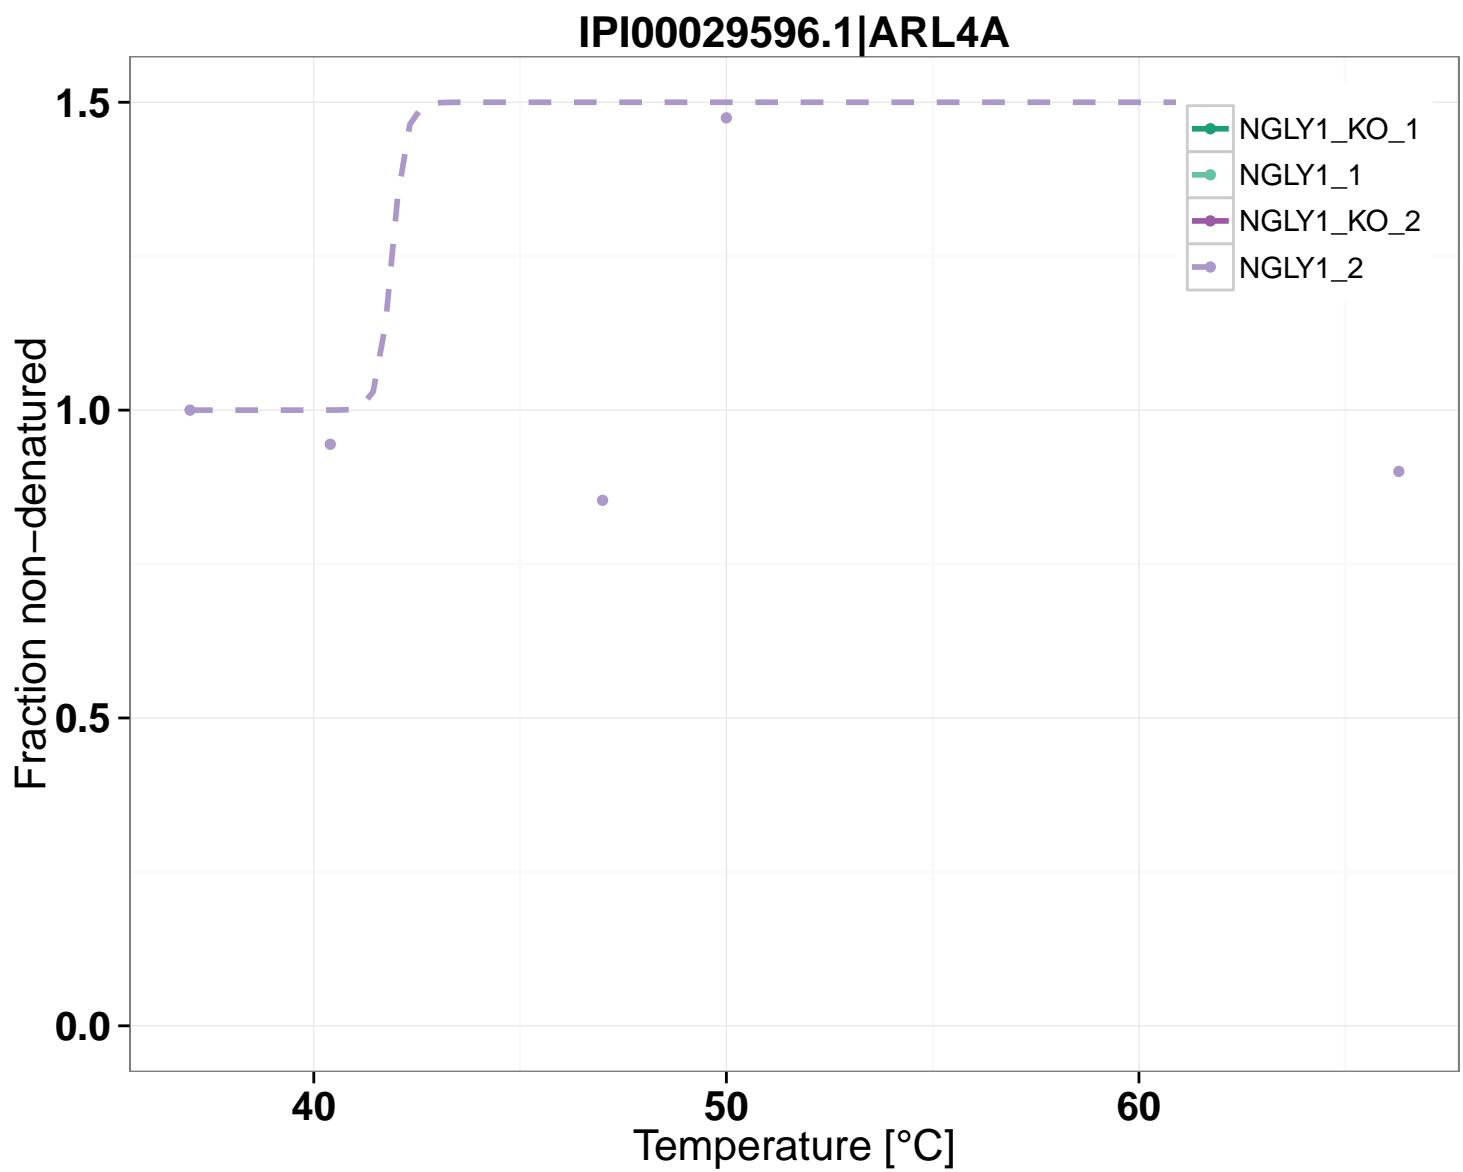

|            | meltPoint | slope | plateau | R2   |
|------------|-----------|-------|---------|------|
| NGLY1_KO_1 | —         | —     | —       | —    |
| NGLY1_1    | —         | —     | —       | —    |
| NGLY1_KO_2 | —         | —     | —       | —    |
| NGLY1_2    | —         | 0.75  | 1.5     | 0.03 |

Supplement: Supplementary file 6384 [file 1]

IPI00410237.4|SYCE1

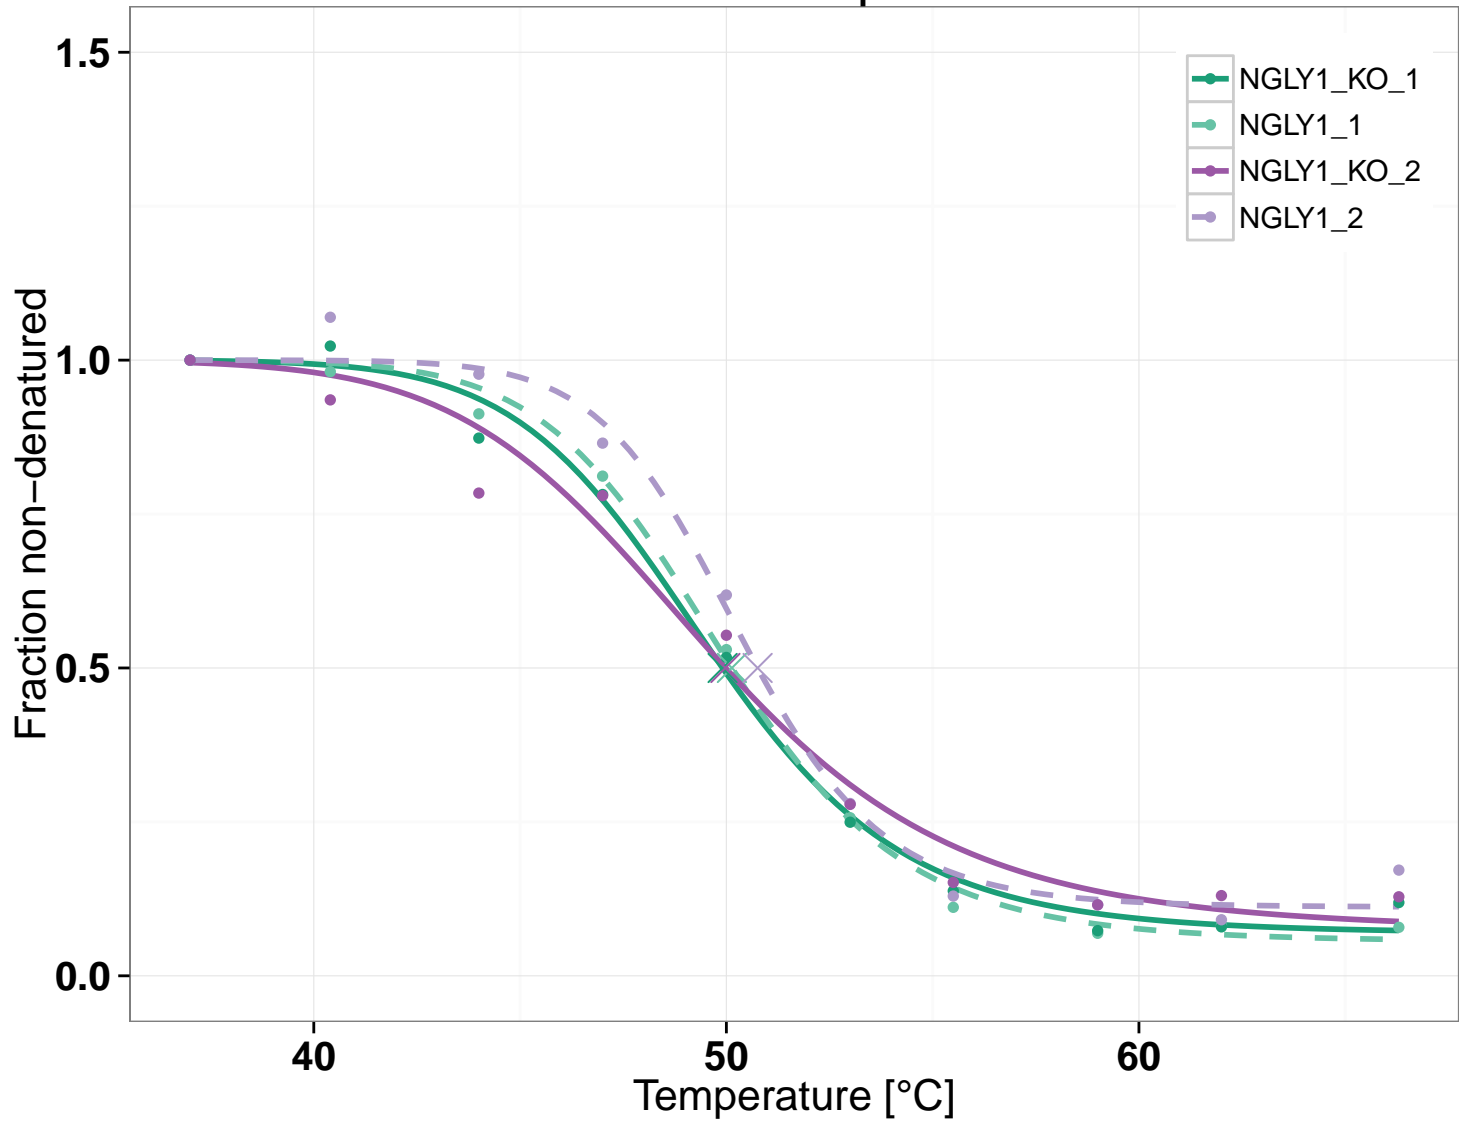

|            | meltPoint | slope  | plateau | R2   |
|------------|-----------|--------|---------|------|
| NGLY1_KO_1 | 49.91     | -0.099 | 0.07    | 0.99 |
| NGLY1_1    | 50.13     | -0.11  | 0.06    | 1    |
| NGLY1_KO_2 | 49.98     | -0.077 | 0.07    | 0.98 |
| NGLY1_2    | 50.76     | -0.13  | 0.11    | 0.99 |

Supplement: Supplementary file 6385 [file 1]

# IPI00410192.3|SMYD4

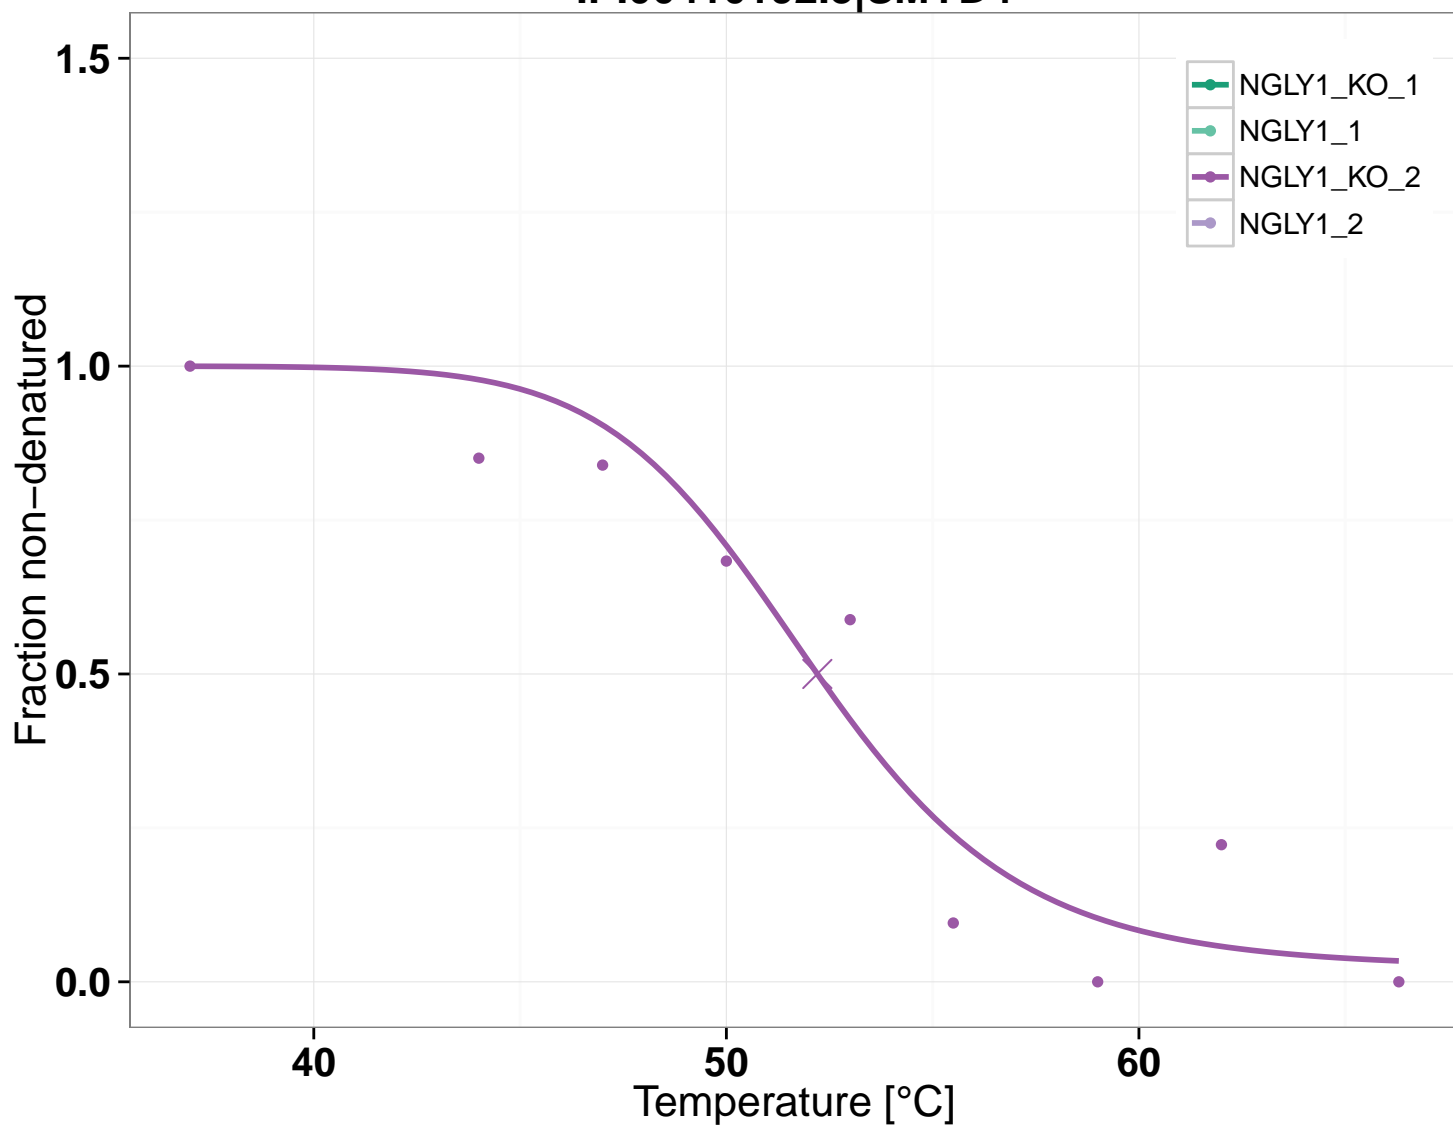

|            | meltPoint | slope  | plateau | R2   |
|------------|-----------|--------|---------|------|
| NGLY1_KO_1 | —         | —      | —       | —    |
| NGLY1_1    | —         | —      | —       | —    |
| NGLY1_KO_2 | 52.21     | -0.097 | 0.02    | 0.81 |
| NGLY1_2    | —         | —      | —       | —    |

Supplement: Supplementary file 6386 [file 1]

IPI00442165.1|ZNF346

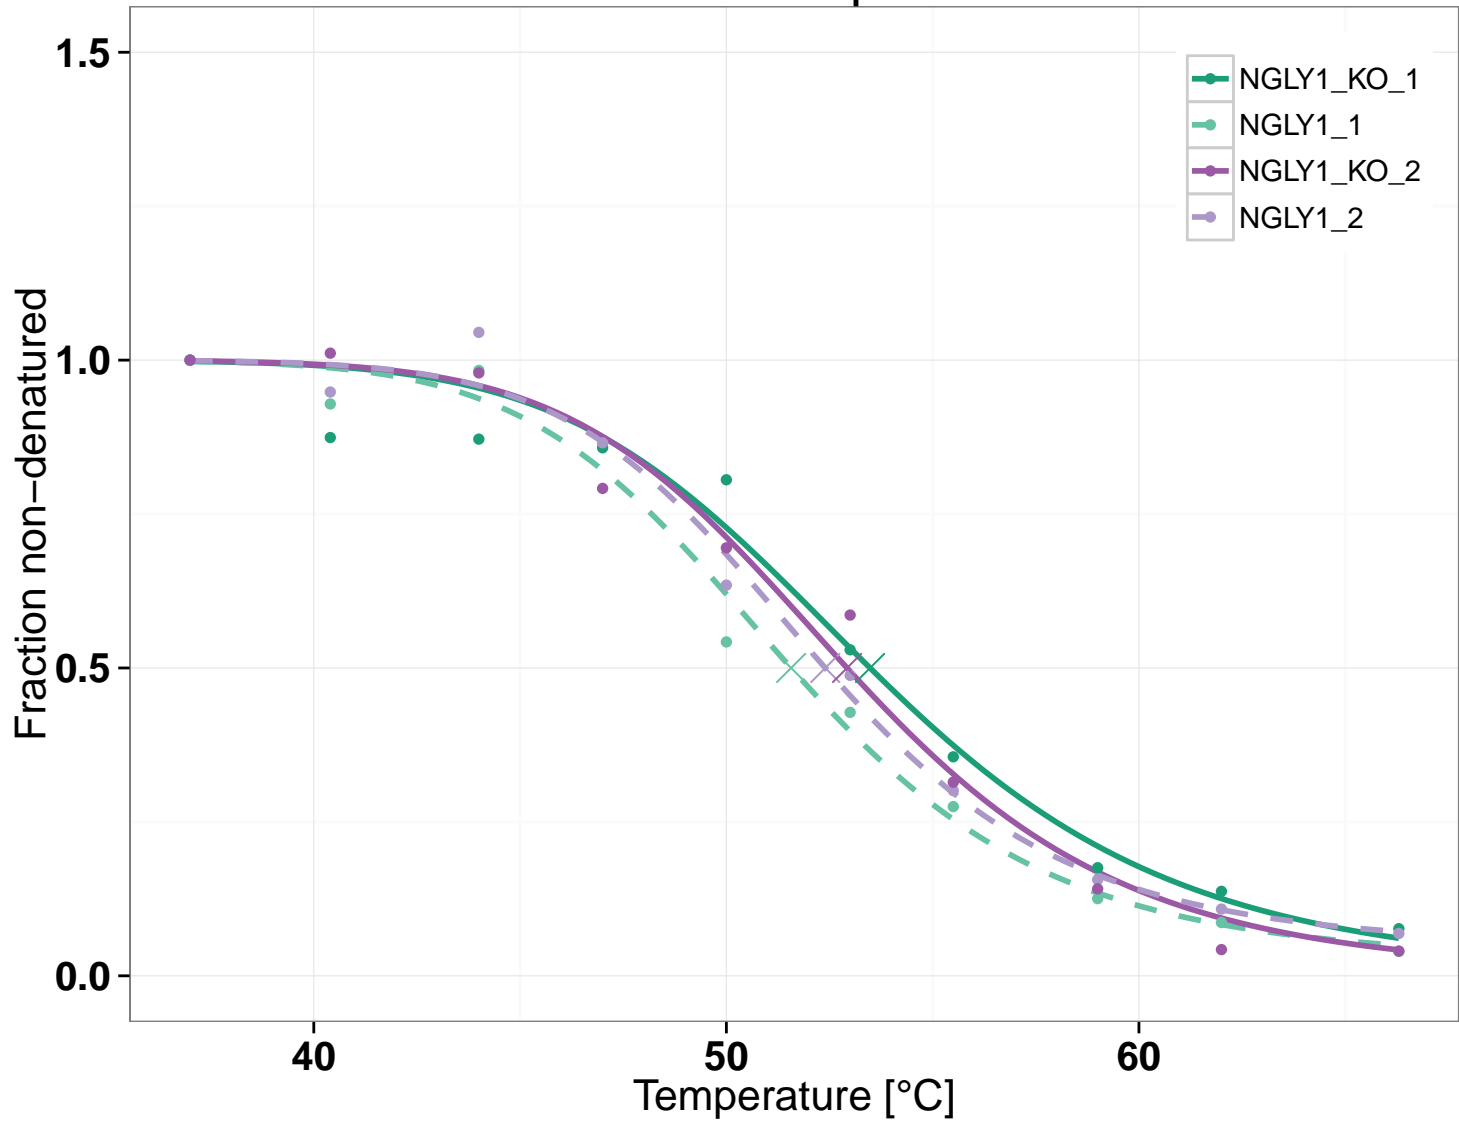

|            | meltPoint | slope  | plateau | R2   |
|------------|-----------|--------|---------|------|
| NGLY1_KO_1 | 53.48     | -0.067 | 0       | 0.97 |
| NGLY1_1    | 51.57     | -0.077 | 0.02    | 0.99 |
| NGLY1_KO_2 | 52.93     | -0.074 | 0       | 0.99 |
| NGLY1_2    | 52.4      | -0.078 | 0.05    | 0.99 |

Supplement: Supplementary file 6387 [file 1]

# IPI00011836.2|USP4

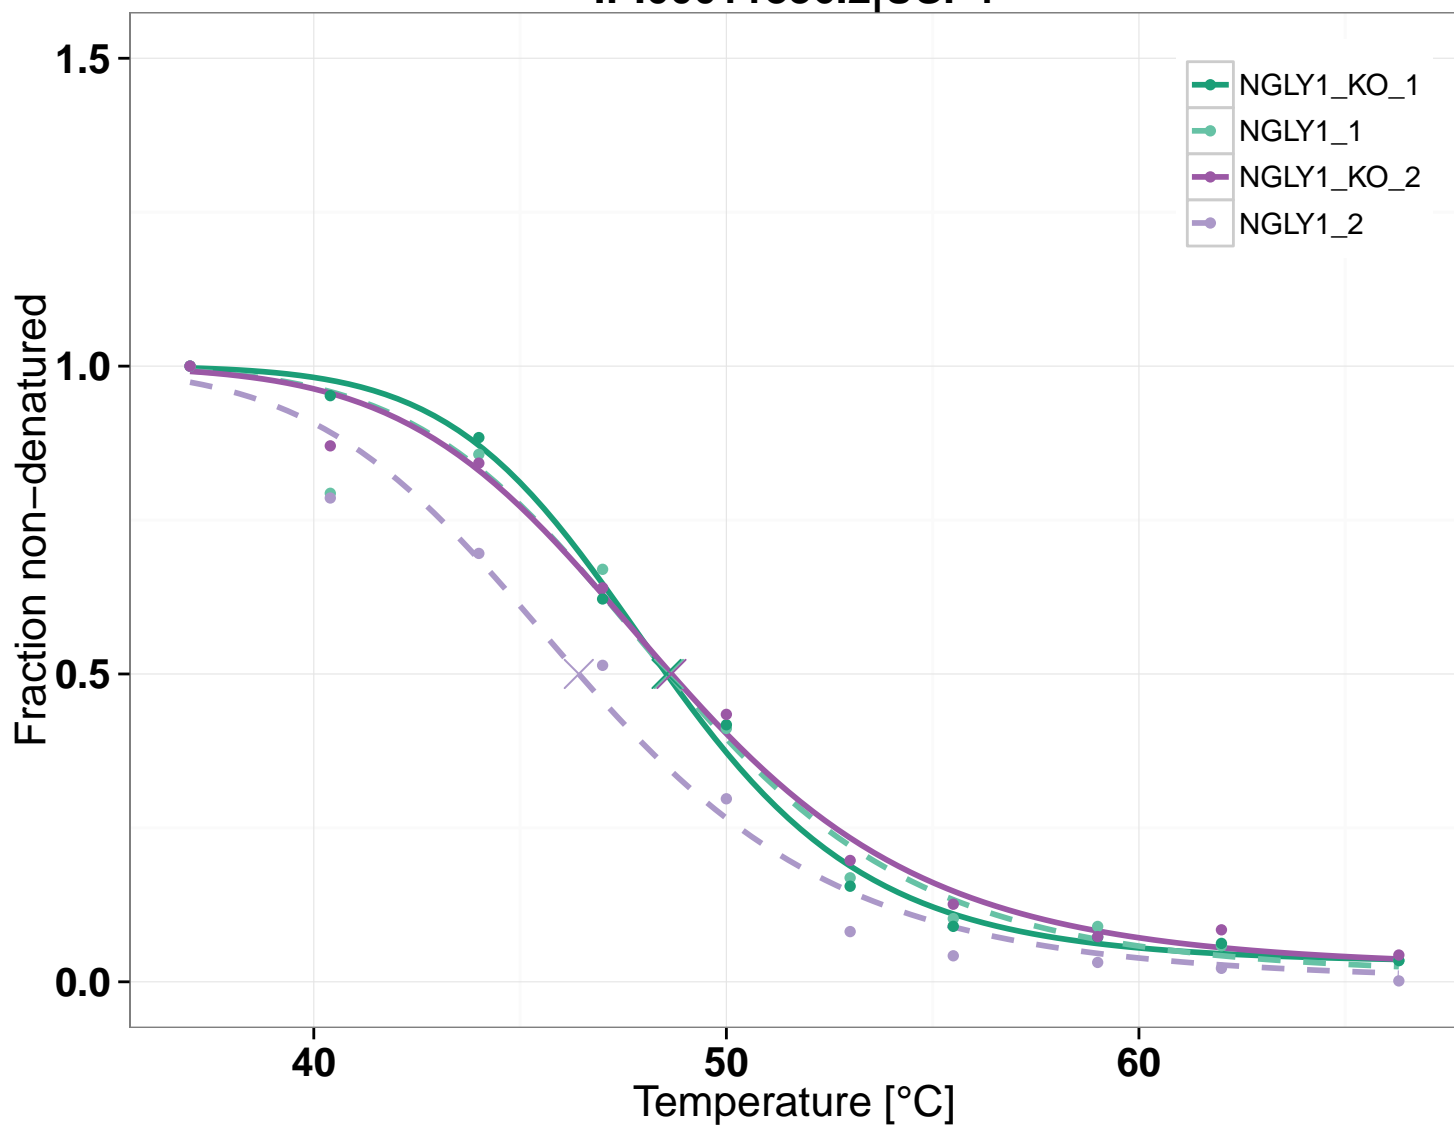

|            | meltPoint | slope  | plateau | R2   |
|------------|-----------|--------|---------|------|
| NGLY1_KO_1 | 48.55     | -0.095 | 0.03    | 1    |
| NGLY1_1    | 48.61     | -0.081 | 0.01    | 0.97 |
| NGLY1_KO_2 | 48.67     | -0.078 | 0.02    | 0.99 |
| NGLY1_2    | 46.42     | -0.078 | 0       | 0.98 |

Supplement: Supplementary file 6388 [file 1]

IPI00893324.2|COLEC11

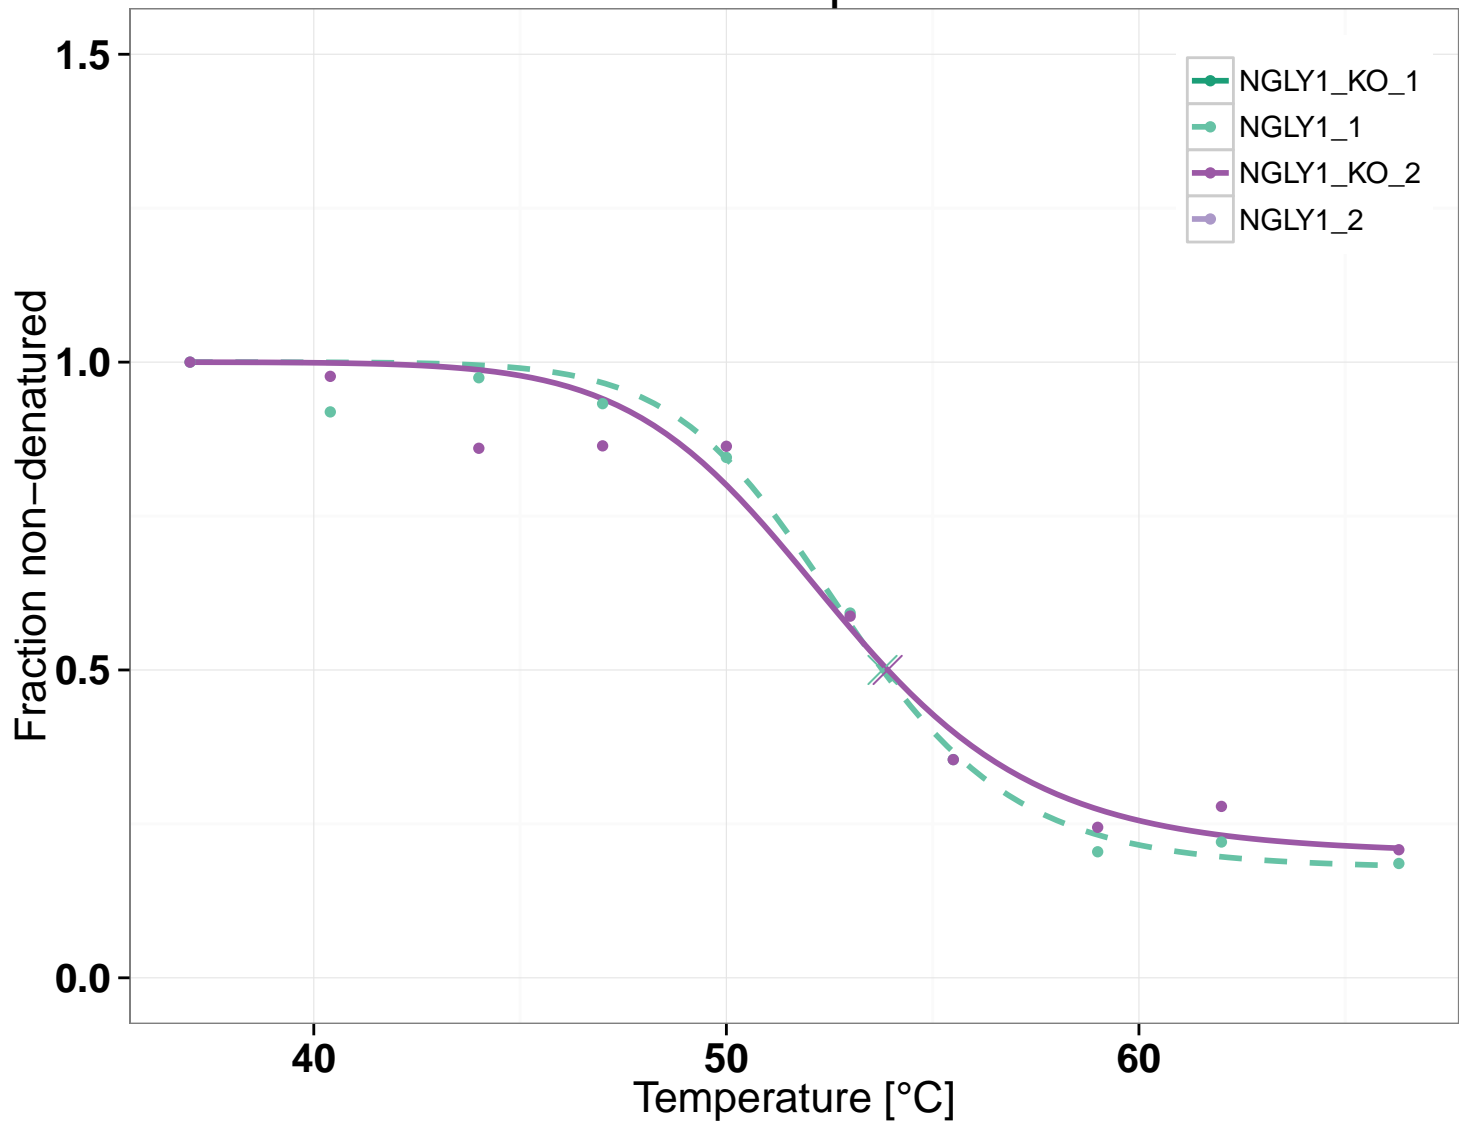

|            | meltPoint | slope  | plateau | R2   |
|------------|-----------|--------|---------|------|
| NGLY1_KO_1 | -         | -      | -       | -    |
| NGLY1_1    | 53.78     | -0.099 | 0.18    | 0.99 |
| NGLY1_KO_2 | 53.91     | -0.081 | 0.2     | 0.97 |
| NGLY1_2    | -         | -      | -       | -    |

Supplement: Supplementary file 6389 [file 1]

IPI00010200.3|YTHDC2

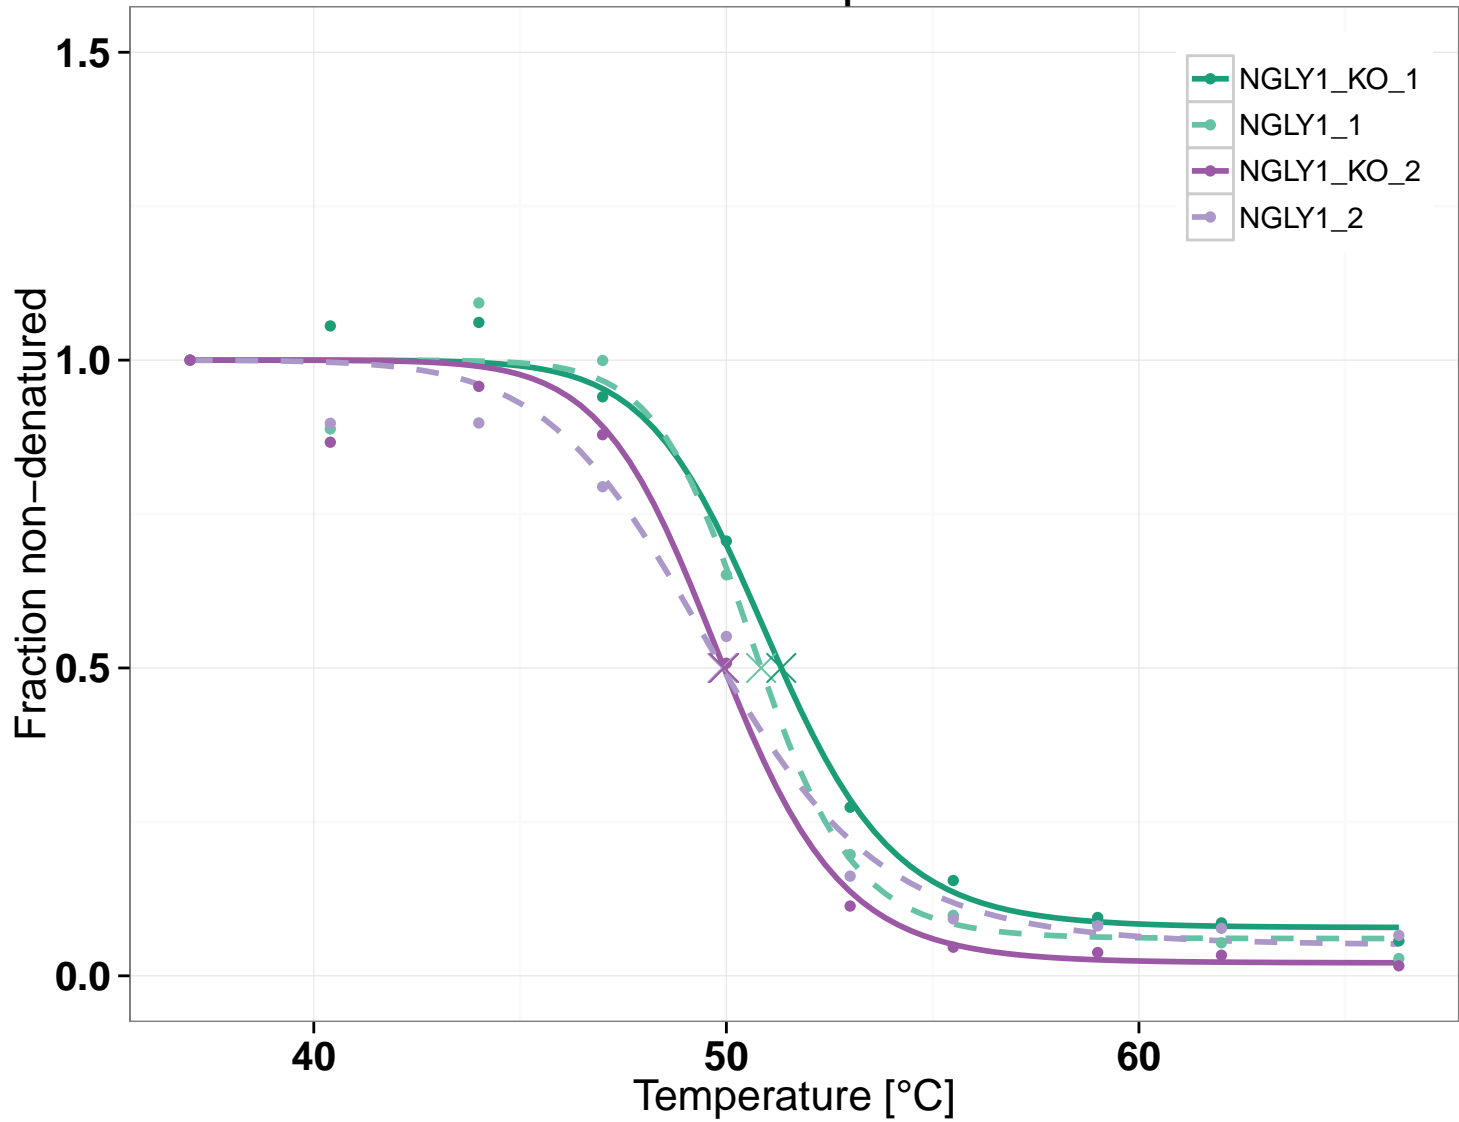

|            | meltPoint | slope | plateau | R2   |
|------------|-----------|-------|---------|------|
| NGLY1_KO_1 | 51.33     | -0.15 | 0.08    | 1    |
| NGLY1_1    | 50.84     | -0.2  | 0.06    | 0.99 |
| NGLY1_KO_2 | 49.94     | -0.17 | 0.02    | 0.99 |
| NGLY1_2    | 49.9      | -0.12 | 0.05    | 0.98 |

Supplement: Supplementary file 6390 [file 1]

# IPI00169430.2|STRBP

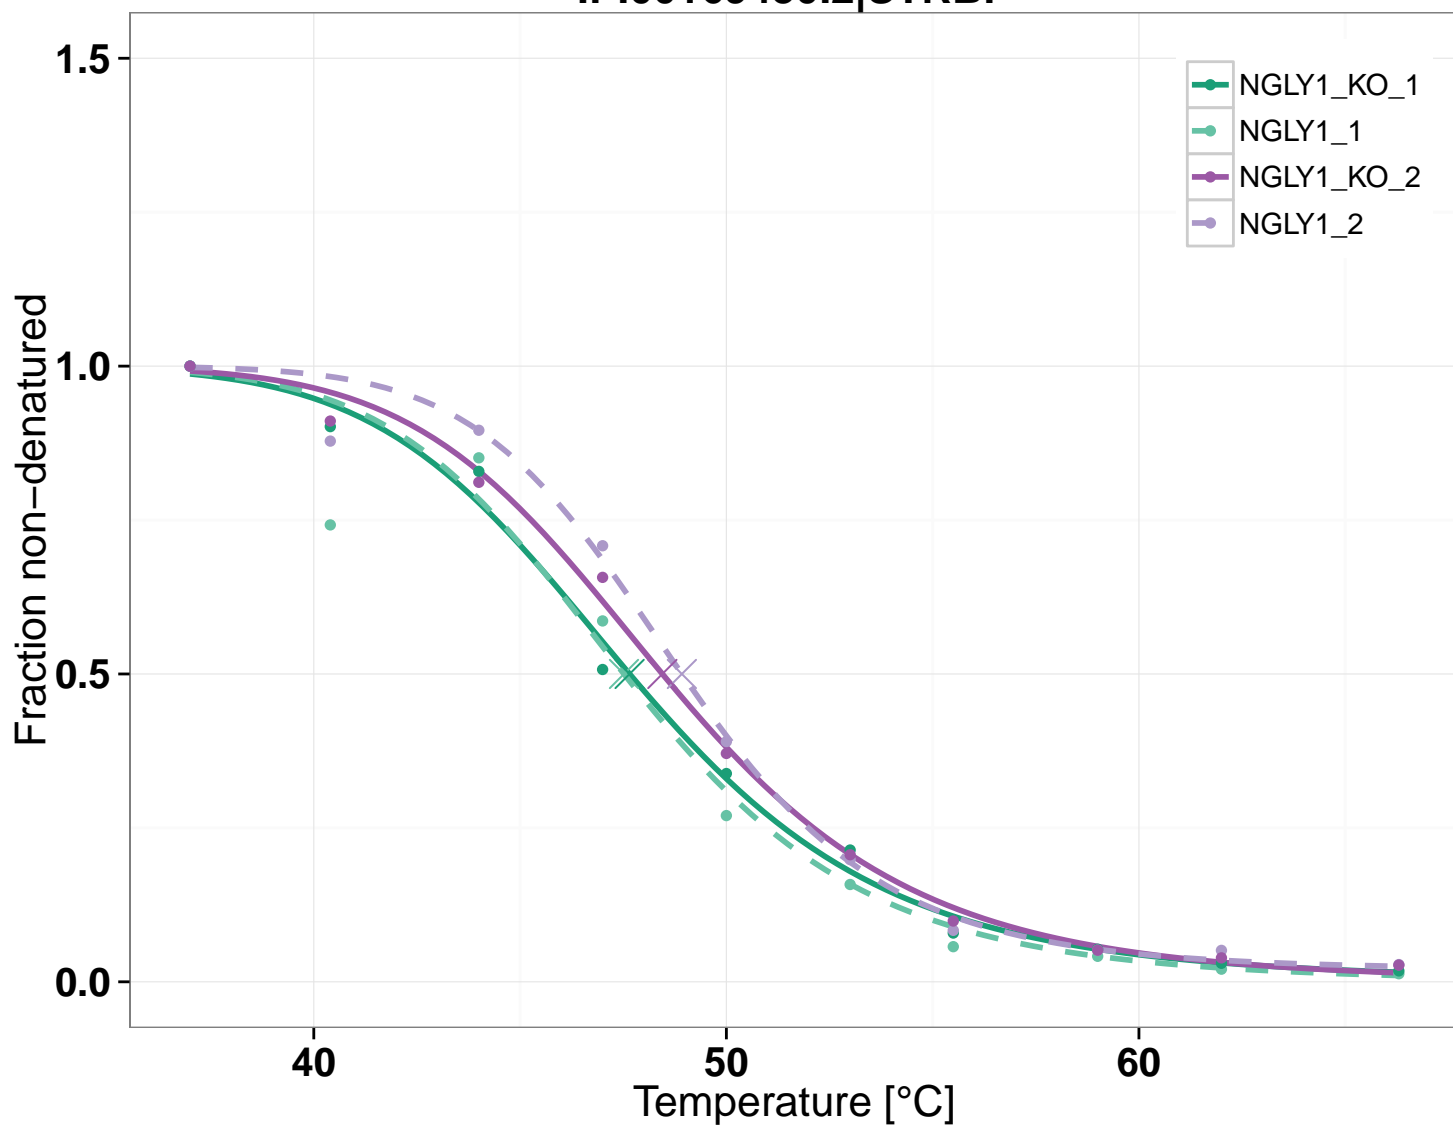

|            | meltPoint | slope  | plateau | R2   |
|------------|-----------|--------|---------|------|
| NGLY1_KO_1 | 47.65     | -0.081 | 0       | 0.99 |
| NGLY1_1    | 47.52     | -0.086 | 0       | 0.96 |
| NGLY1_KO_2 | 48.45     | -0.082 | 0       | 1    |
| NGLY1_2    | 48.92     | -0.098 | 0.02    | 0.99 |

Supplement: Supplementary file 6391 [file 1]

IPI00784739.1|MIDEAS

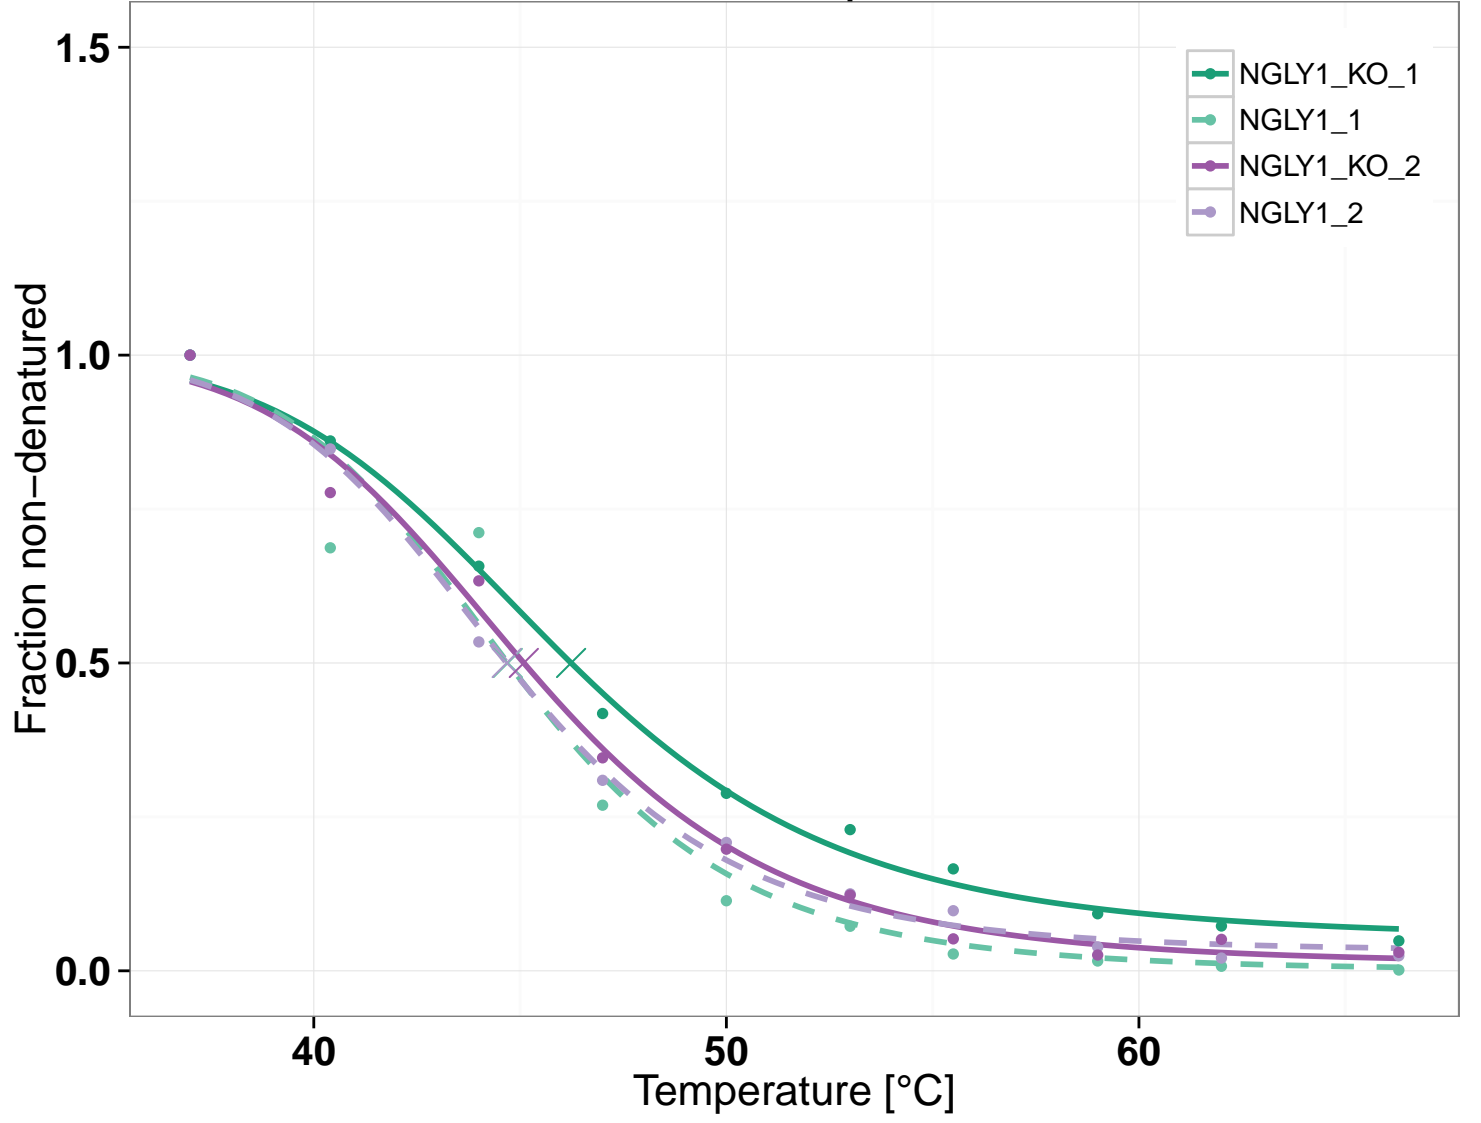

|            | meltPoint | slope  | plateau | R2   |
|------------|-----------|--------|---------|------|
| NGLY1_KO_1 | 46.24     | -0.069 | 0.05    | 0.99 |
| NGLY1_1    | 44.7      | -0.09  | 0       | 0.96 |
| NGLY1_KO_2 | 45.09     | -0.08  | 0.01    | 0.99 |
| NGLY1_2    | 44.68     | -0.086 | 0.03    | 1    |

Supplement: Supplementary file 6392 [file 1]

# IPI00554589.3|FECH

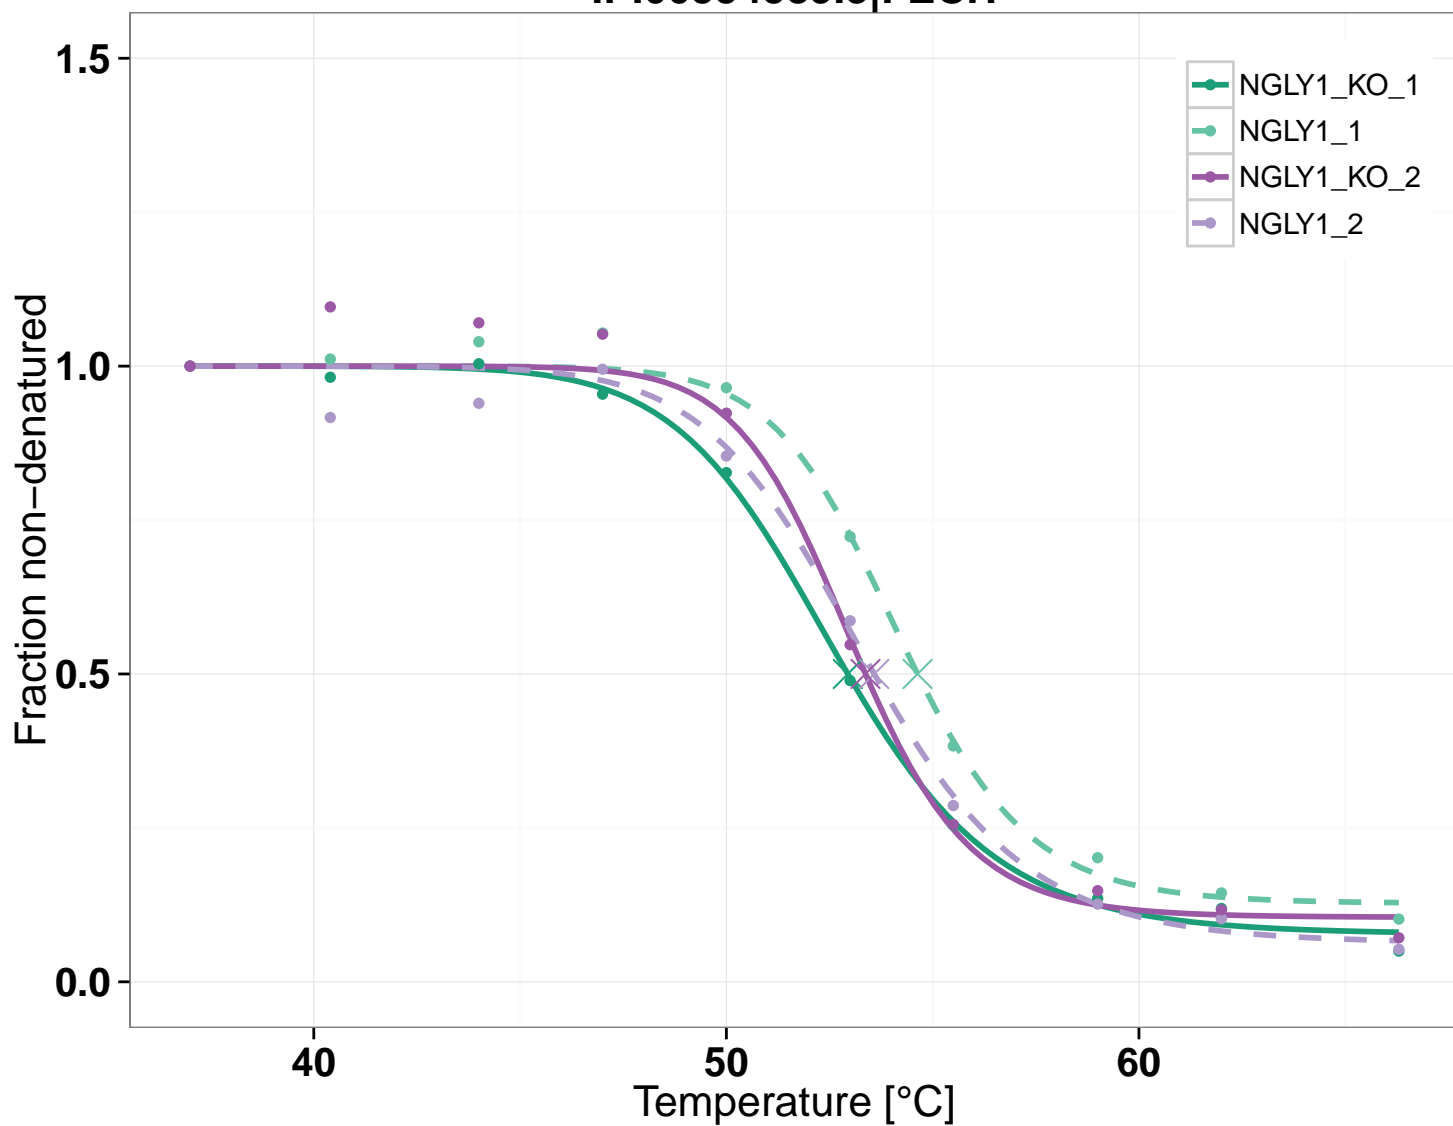

|            | meltPoint | slope | plateau | R2   |
|------------|-----------|-------|---------|------|
| NGLY1_KO_1 | 52.94     | -0.12 | 0.08    | 1    |
| NGLY1_1    | 54.63     | -0.14 | 0.13    | 1    |
| NGLY1_KO_2 | 53.37     | -0.16 | 0.1     | 0.99 |
| NGLY1_2    | 53.59     | -0.12 | 0.06    | 0.99 |

Supplement: Supplementary file 6393 [file 1]

IPI00181728.1|BXDC2

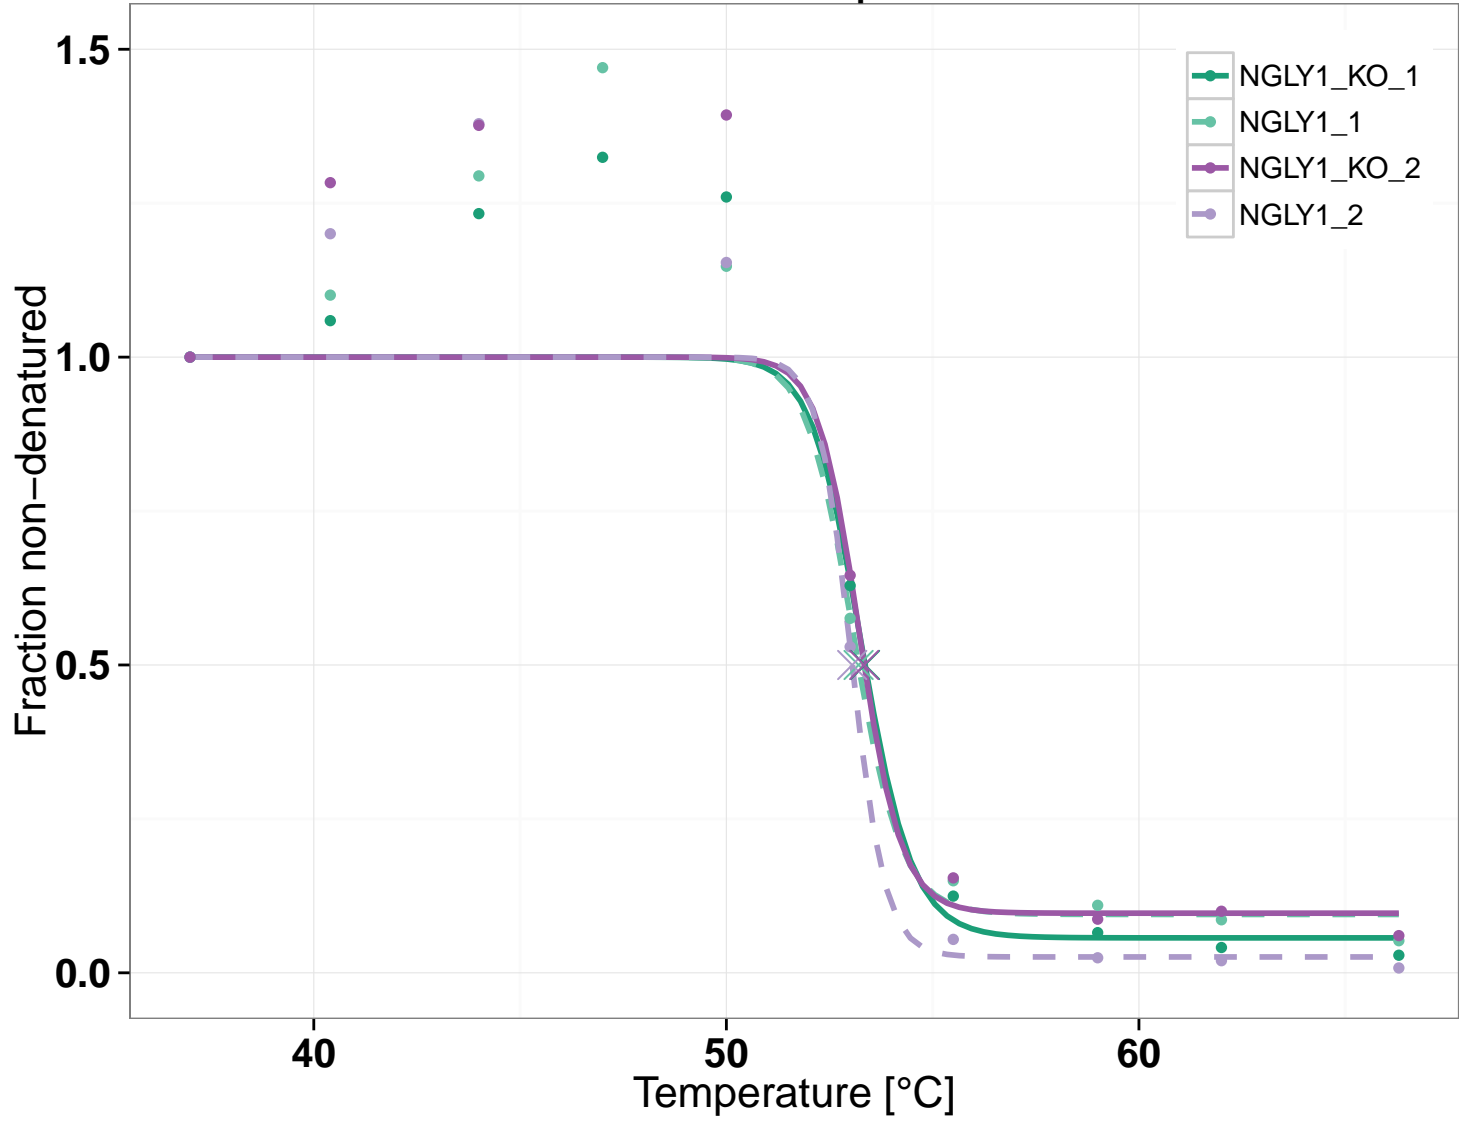

|            | meltPoint | slope | plateau | R2   |
|------------|-----------|-------|---------|------|
| NGLY1_KO_1 | 53.36     | -0.38 | 0.06    | 0.92 |
| NGLY1_1    | 53.2      | -0.39 | 0.09    | 0.88 |
| NGLY1_KO_2 | 53.34     | -0.44 | 0.1     | 0.78 |
| NGLY1_2    | 53.05     | -0.6  | 0.03    | 0.85 |

Supplement: Supplementary file 6394 [file 1]

IPI00749011.1|AGPAT3

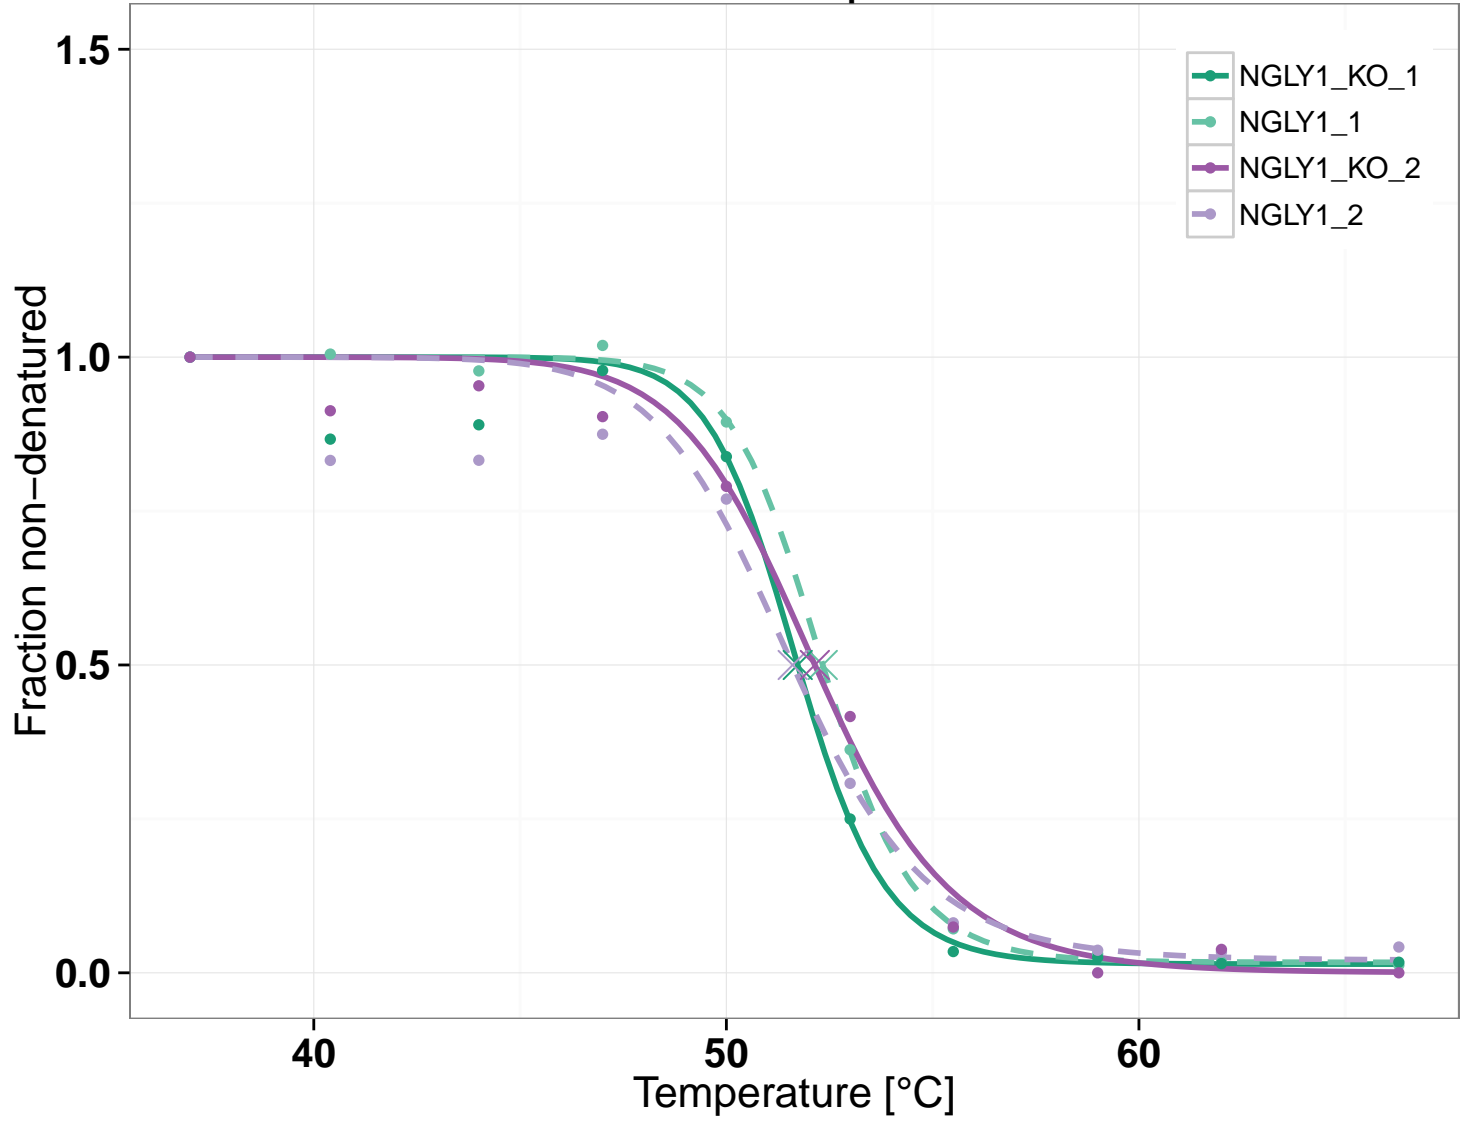

|            | meltPoint | slope | plateau | R2   |
|------------|-----------|-------|---------|------|
| NGLY1_KO_1 | 51.73     | -0.23 | 0.01    | 0.98 |
| NGLY1_1    | 52.34     | -0.22 | 0.02    | 1    |
| NGLY1_KO_2 | 52.15     | -0.15 | 0       | 0.99 |
| NGLY1_2    | 51.61     | -0.15 | 0.02    | 0.96 |

Supplement: Supplementary file 6395 [file 1]

# IPI00022977.1|CKB

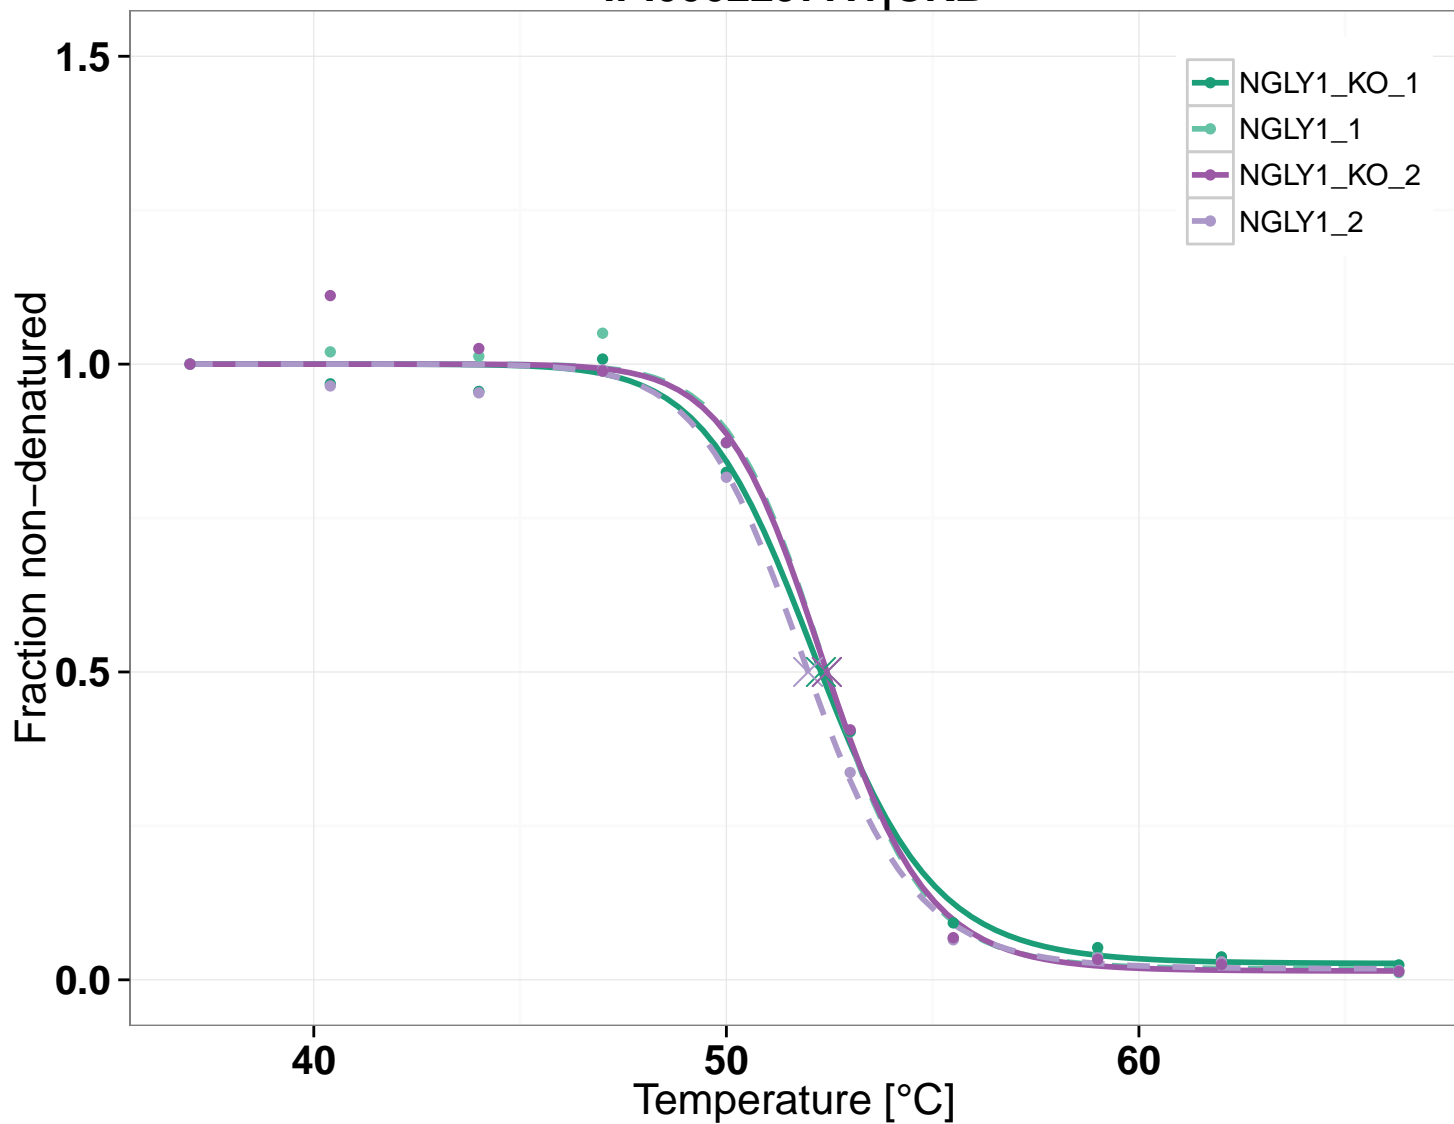

|            | meltPoint | slope | plateau | R2   |
|------------|-----------|-------|---------|------|
| NGLY1_KO_1 | 52.29     | -0.17 | 0.03    | 1    |
| NGLY1_1    | 52.44     | -0.21 | 0.02    | 1    |
| NGLY1_KO_2 | 52.44     | -0.2  | 0.01    | 0.99 |
| NGLY1_2    | 51.98     | -0.19 | 0.02    | 1    |

Supplement: Supplementary file 6396 [file 1]

IPI00746351.2|DIS3

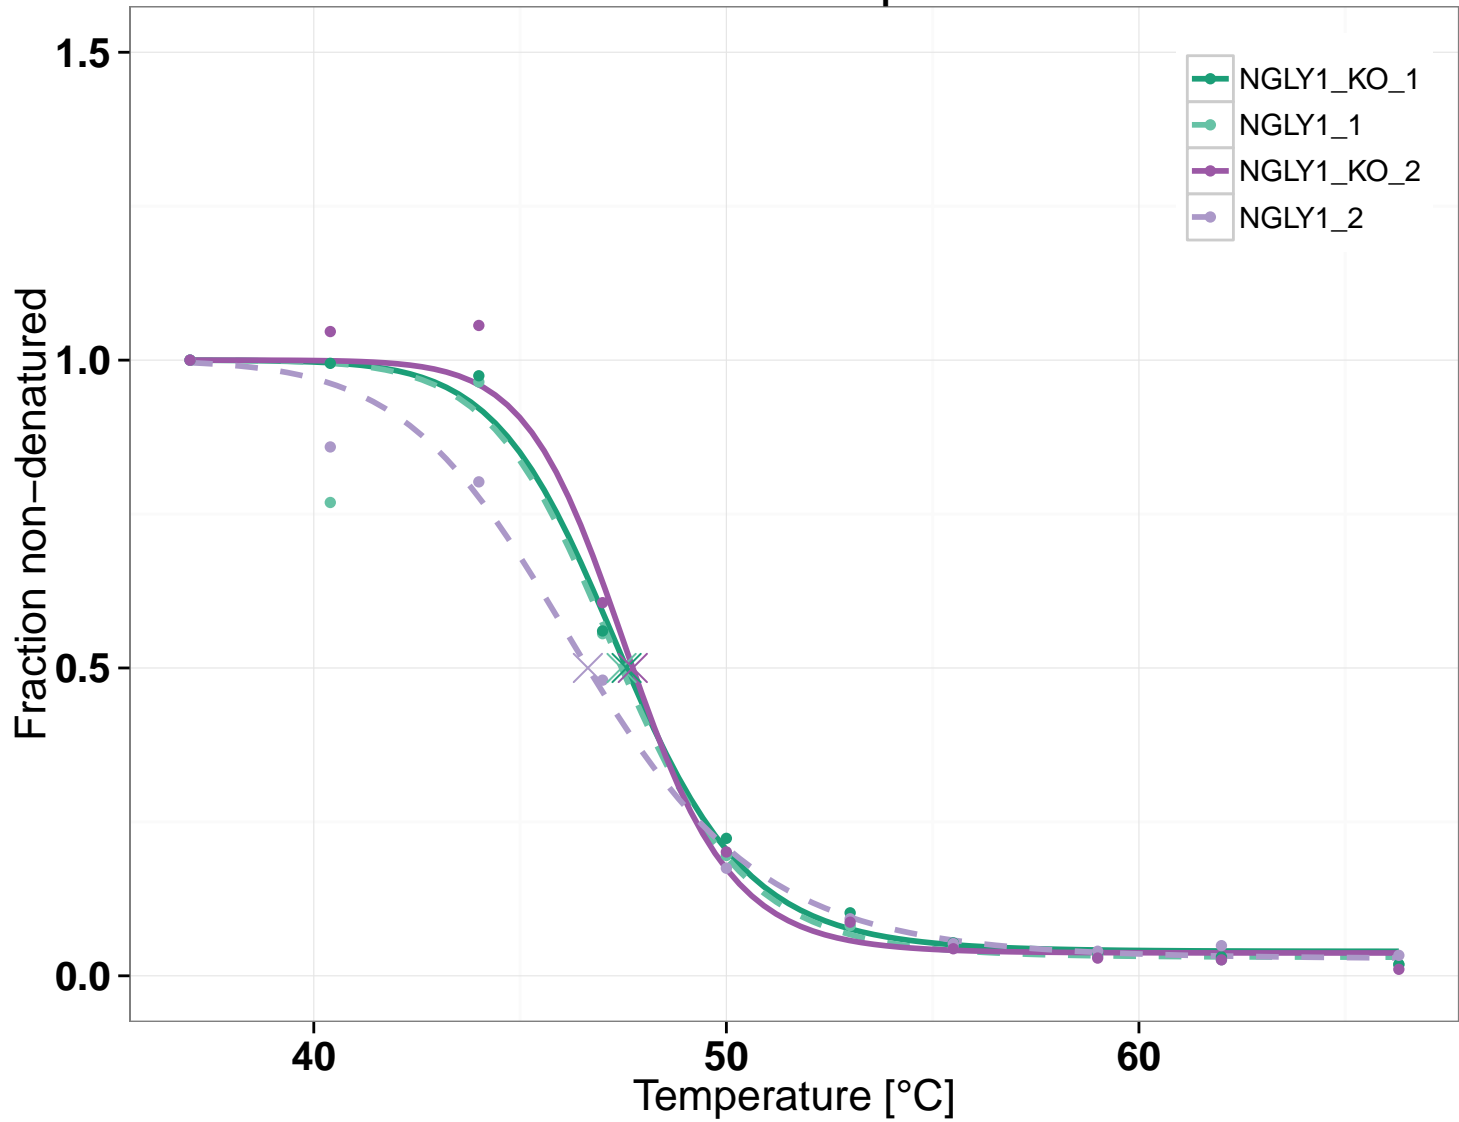

|            | meltPoint | slope | plateau | R2   |
|------------|-----------|-------|---------|------|
| NGLY1_KO_1 | 47.58     | -0.16 | 0.04    | 1    |
| NGLY1_1    | 47.46     | -0.16 | 0.03    | 0.96 |
| NGLY1_KO_2 | 47.73     | -0.19 | 0.04    | 0.99 |
| NGLY1_2    | 46.64     | -0.11 | 0.03    | 0.99 |

Supplement: Supplementary file 6397 [file 1]

IPI00454907.3|LOC283412

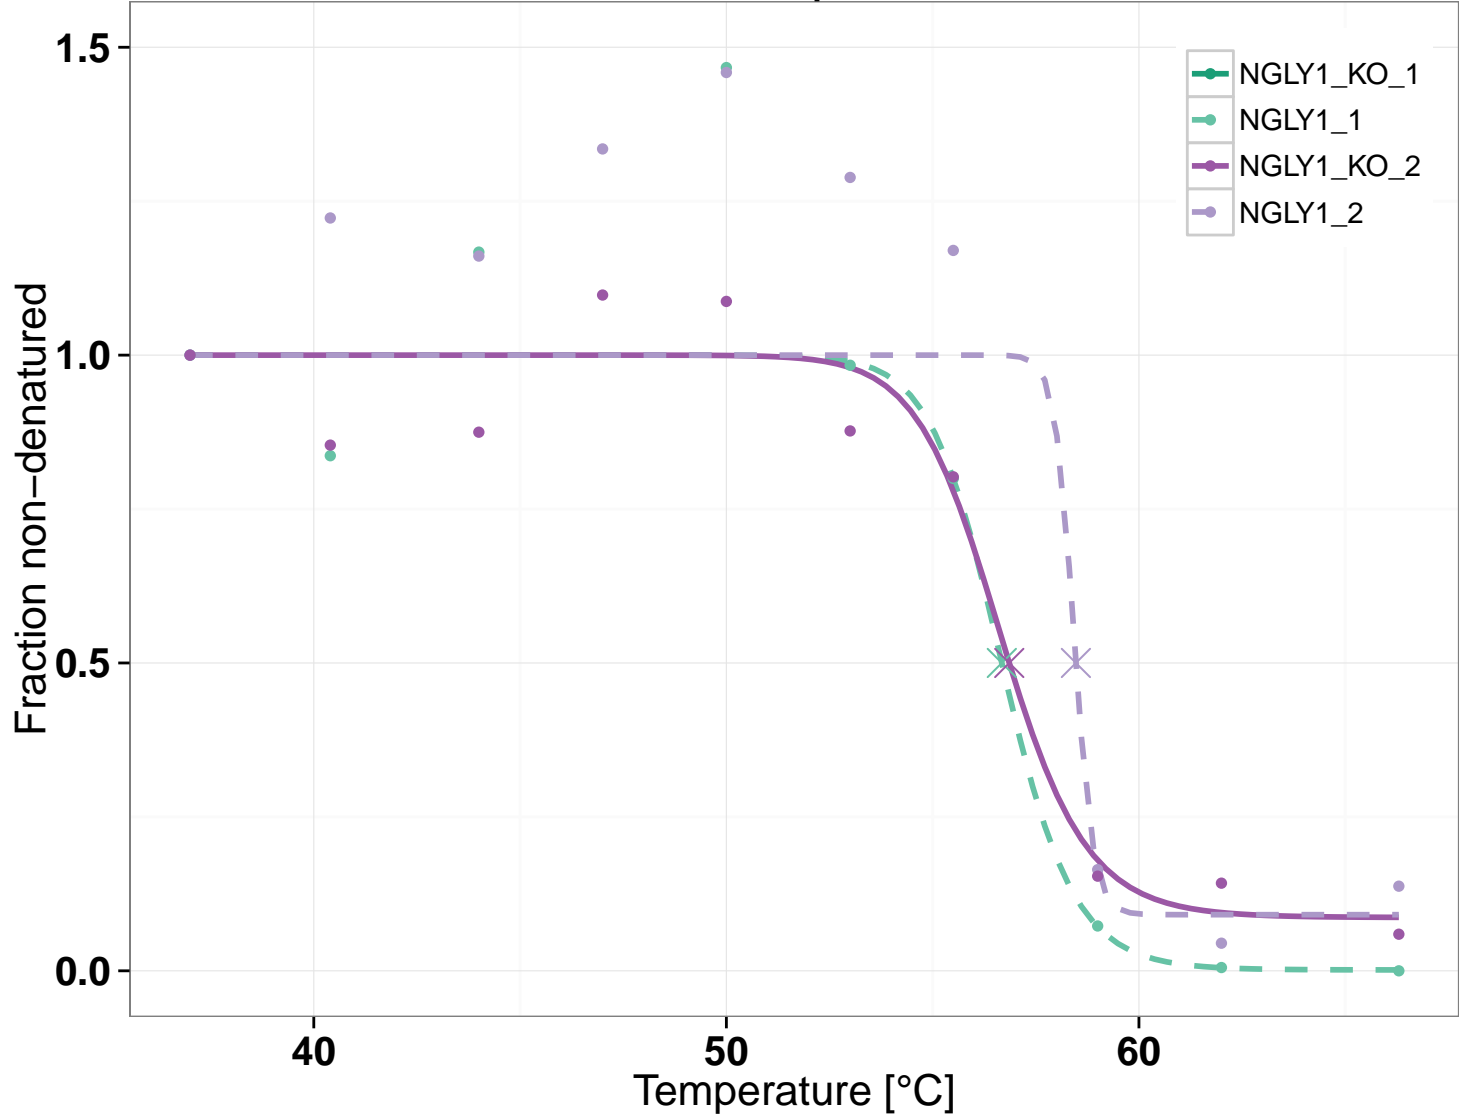

|            | meltPoint | slope | plateau | R2   |
|------------|-----------|-------|---------|------|
| NGLY1_KO_1 | -         | -     | -       | -    |
| NGLY1_1    | 56.68     | -0.29 | 0       | 0.77 |
| NGLY1_KO_2 | 56.86     | -0.22 | 0.09    | 0.95 |
| NGLY1_2    | 58.47     | -0.97 | 0.09    | 0.81 |

Supplement: Supplementary file 6398 [file 1]

IPI00010463.5|GTPBP1

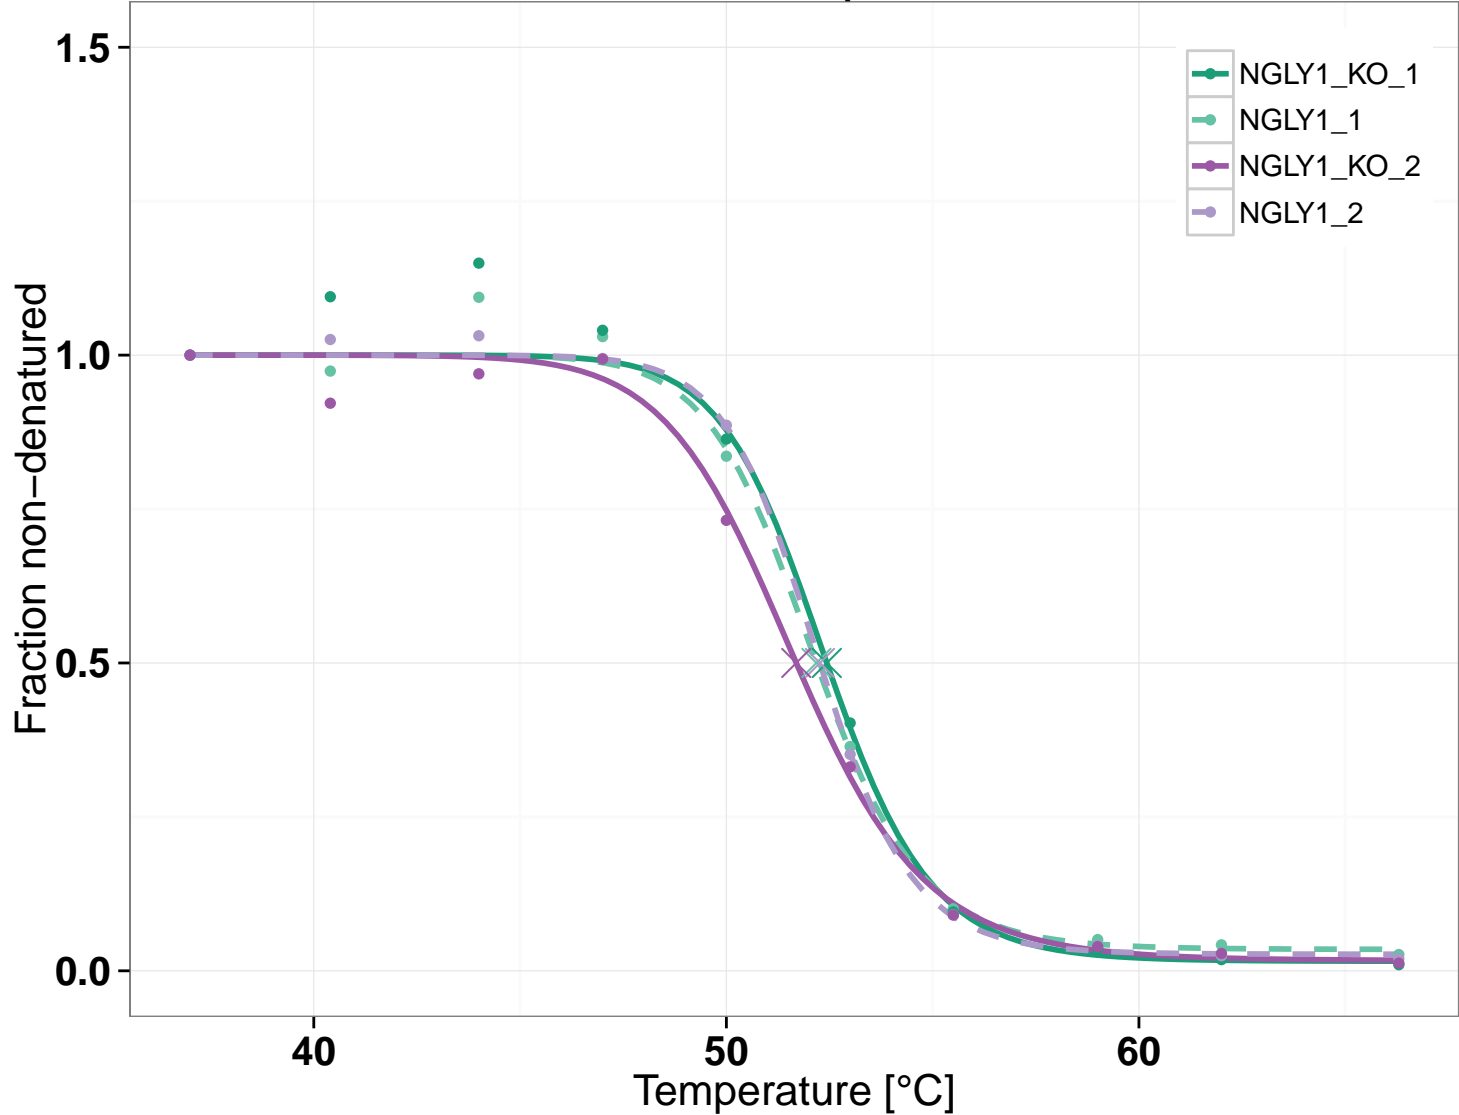

|            | meltPoint | slope | plateau | R2   |
|------------|-----------|-------|---------|------|
| NGLY1_KO_1 | 52.43     | -0.19 | 0.02    | 0.98 |
| NGLY1_1    | 52.18     | -0.19 | 0.03    | 0.99 |
| NGLY1_KO_2 | 51.69     | -0.16 | 0.02    | 1    |
| NGLY1_2    | 52.27     | -0.21 | 0.03    | 1    |

Supplement: Supplementary file 6399 [file 1]

# IPI00645446.1|MCTS1

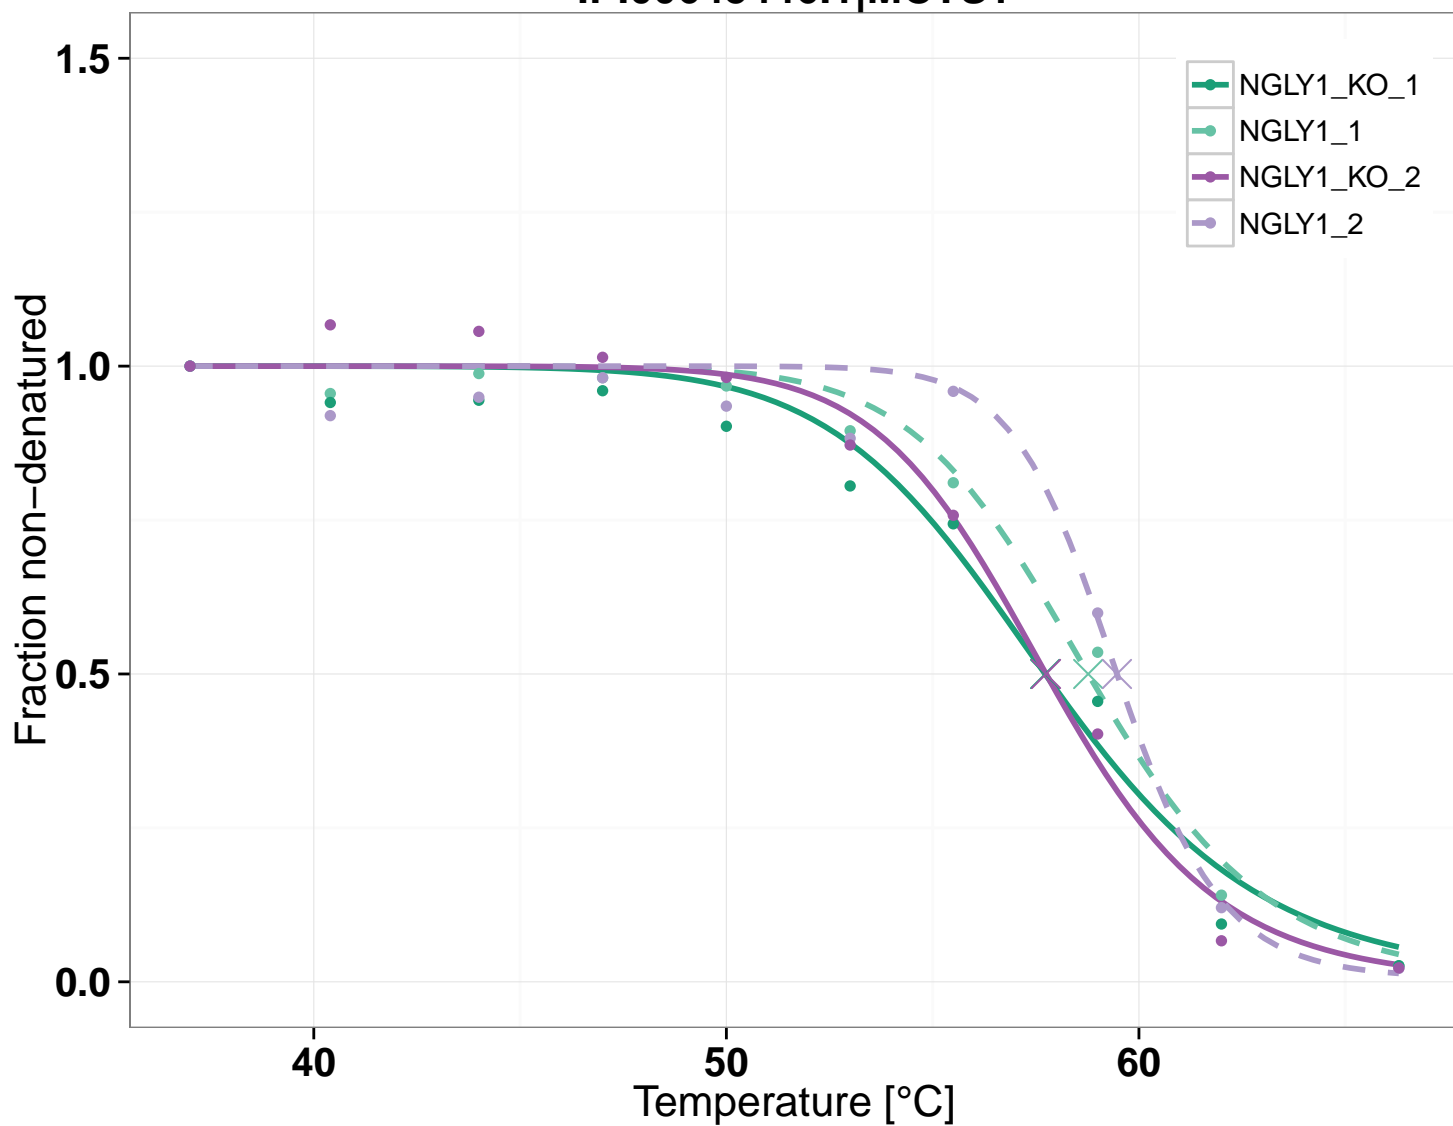

|            | meltPoint | slope  | plateau | R2   |
|------------|-----------|--------|---------|------|
| NGLY1_KO_1 | 57.73     | -0.095 | 0       | 0.97 |
| NGLY1_1    | 58.77     | -0.12  | 0       | 0.99 |
| NGLY1_KO_2 | 57.75     | -0.12  | 0       | 0.99 |
| NGLY1_2    | 59.47     | -0.2   | 0.01    | 0.98 |

Supplement: Supplementary file 6400 [file 1]

# IPI00007175.3|NIP7

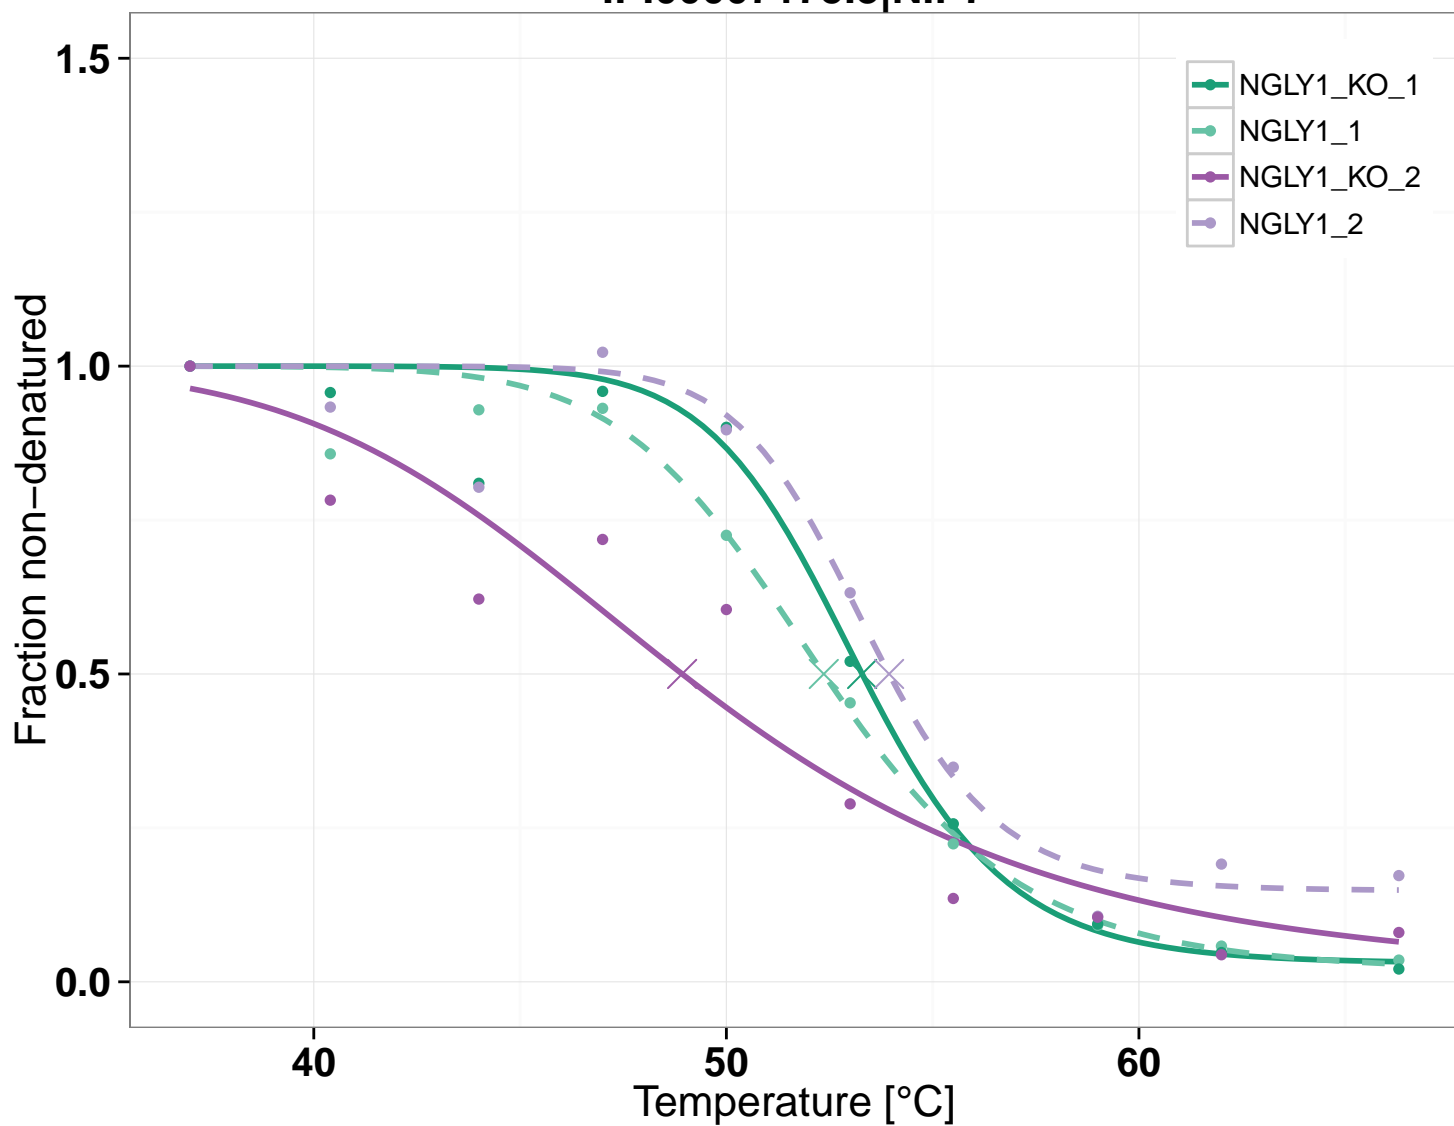

|            | meltPoint | slope  | plateau | R2   |
|------------|-----------|--------|---------|------|
| NGLY1_KO_1 | 53.29     | -0.13  | 0.03    | 0.97 |
| NGLY1_1    | 52.36     | -0.1   | 0.02    | 0.98 |
| NGLY1_KO_2 | 48.93     | -0.054 | 0       | 0.92 |
| NGLY1_2    | 53.94     | -0.13  | 0.15    | 0.96 |

Supplement: Supplementary file 6401 [file 1]

IPI00878826.1|29 KDA PROTEIN.

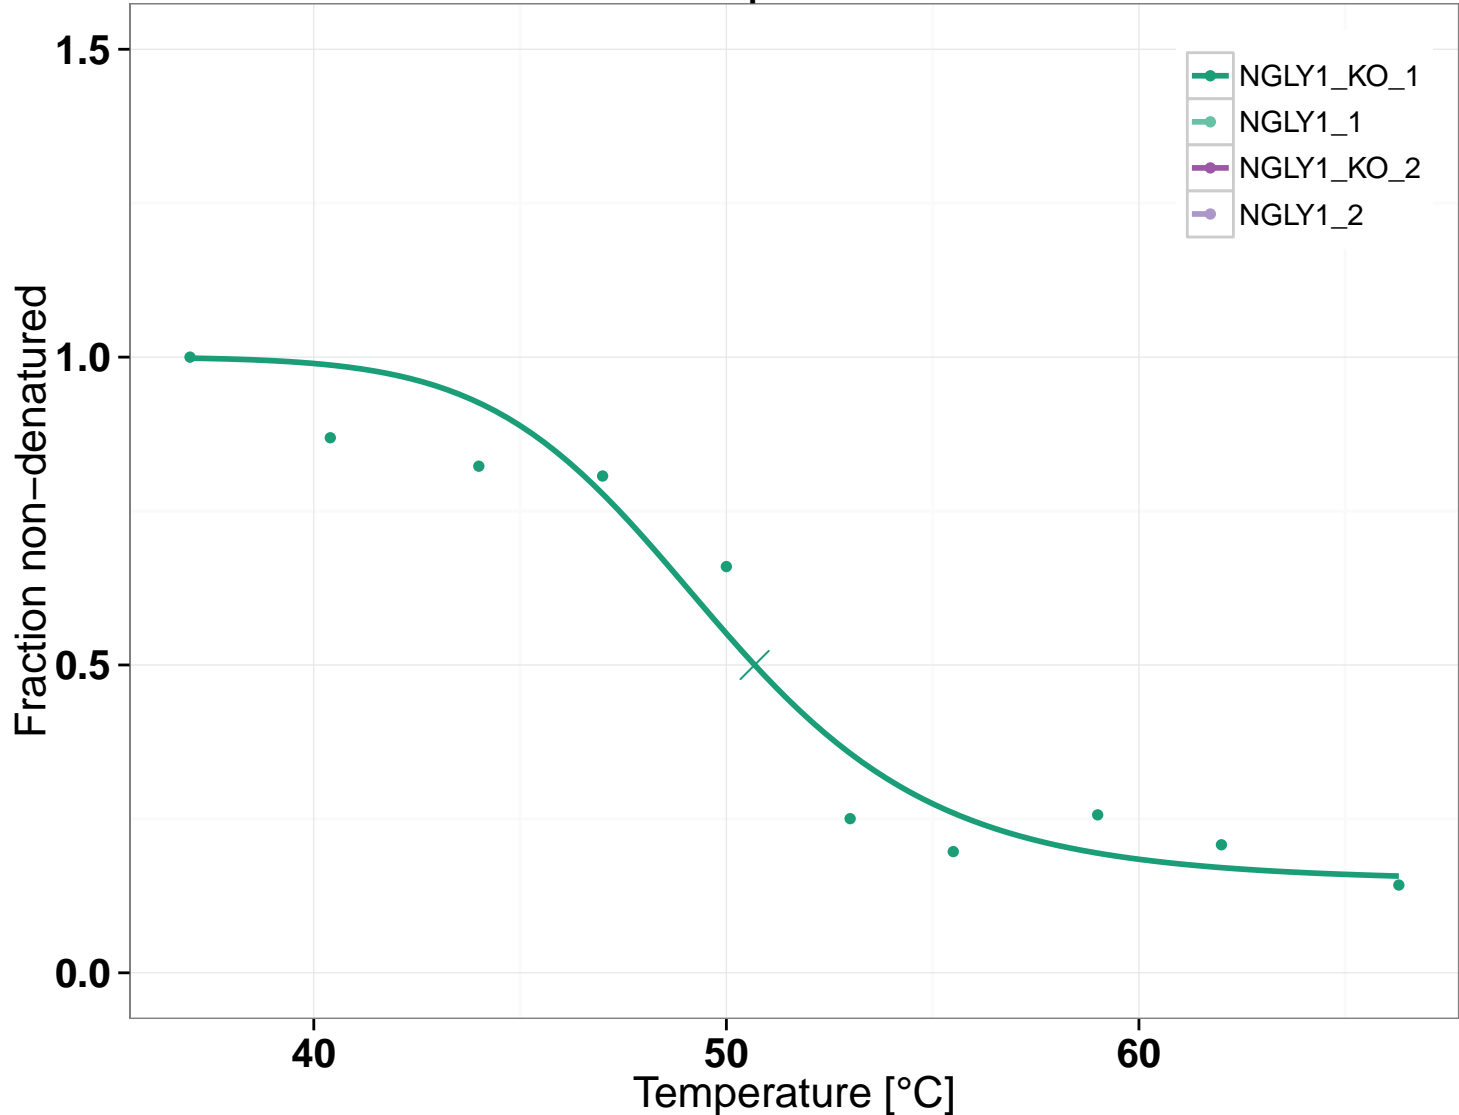

|            | meltPoint | slope  | plateau | R2   |
|------------|-----------|--------|---------|------|
| NGLY1_KO_1 | 50.69     | -0.079 | 0.15    | 0.94 |
| NGLY1_1    | -         | -      | -       | -    |
| NGLY1_KO_2 | -         | -      | -       | -    |
| NGLY1_2    | -         | -      | -       | -    |

Supplement: Supplementary file 6402 [file 1]

IPI00165361.3|DCUN1D5

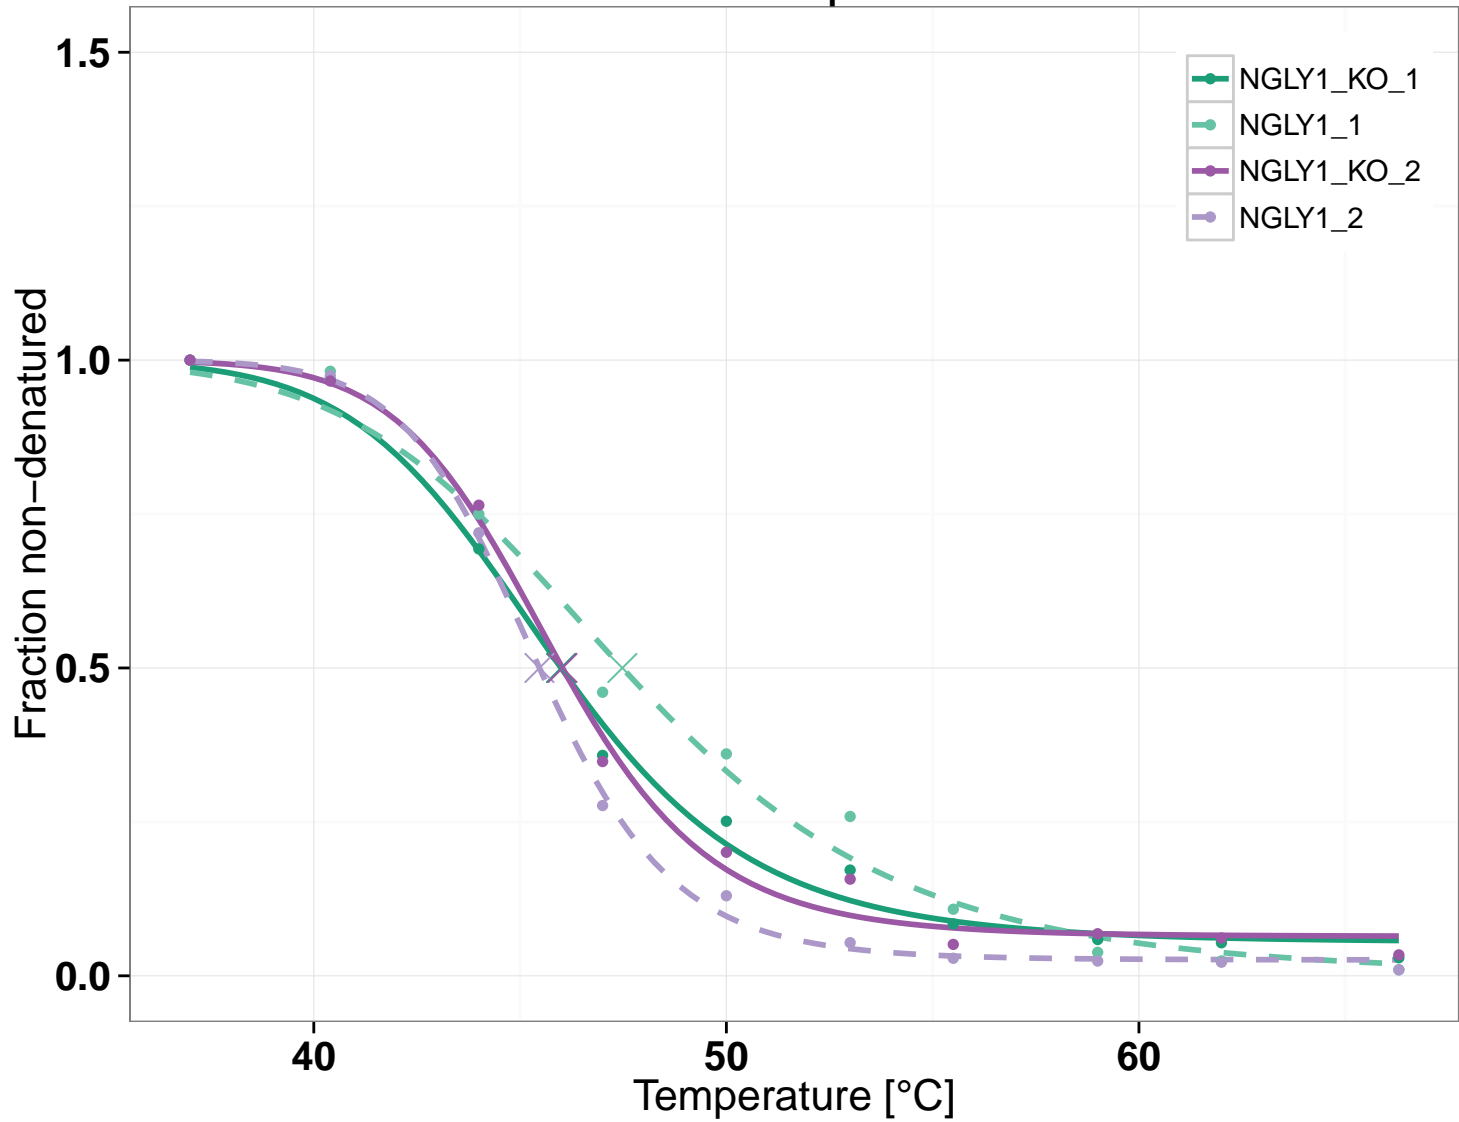

|            | meltPoint | slope  | plateau | R2   |
|------------|-----------|--------|---------|------|
| NGLY1_KO_1 | 45.99     | -0.097 | 0.05    | 0.99 |
| NGLY1_1    | 47.48     | -0.074 | 0       | 0.99 |
| NGLY1_KO_2 | 46.03     | -0.12  | 0.06    | 0.99 |
| NGLY1_2    | 45.47     | -0.15  | 0.03    | 1    |

Supplement: Supplementary file 6403 [file 1]

# IPI00549566.4|RARS2

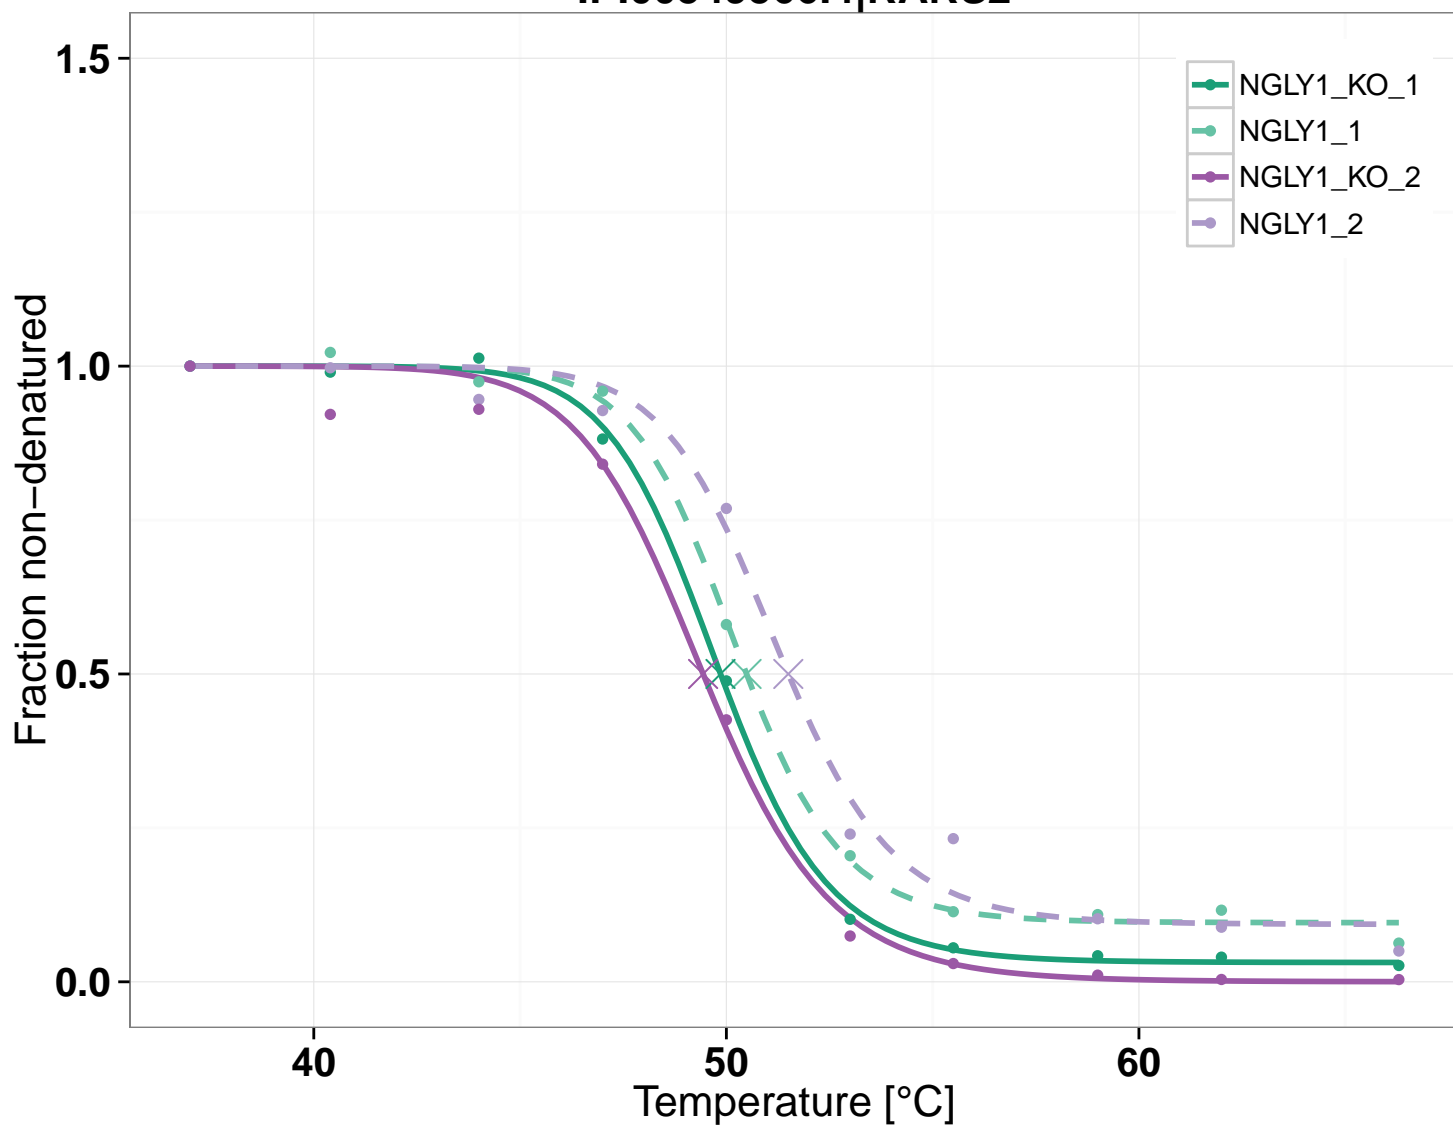

|            | meltPoint | slope | plateau | R2   |
|------------|-----------|-------|---------|------|
| NGLY1_KO_1 | 49.86     | -0.18 | 0.03    | 1    |
| NGLY1_1    | 50.49     | -0.18 | 0.1     | 1    |
| NGLY1_KO_2 | 49.44     | -0.16 | 0       | 0.99 |
| NGLY1_2    | 51.5      | -0.16 | 0.09    | 0.99 |

Supplement: Supplementary file 6404 [file 1]

IPI00004068.2|MED12

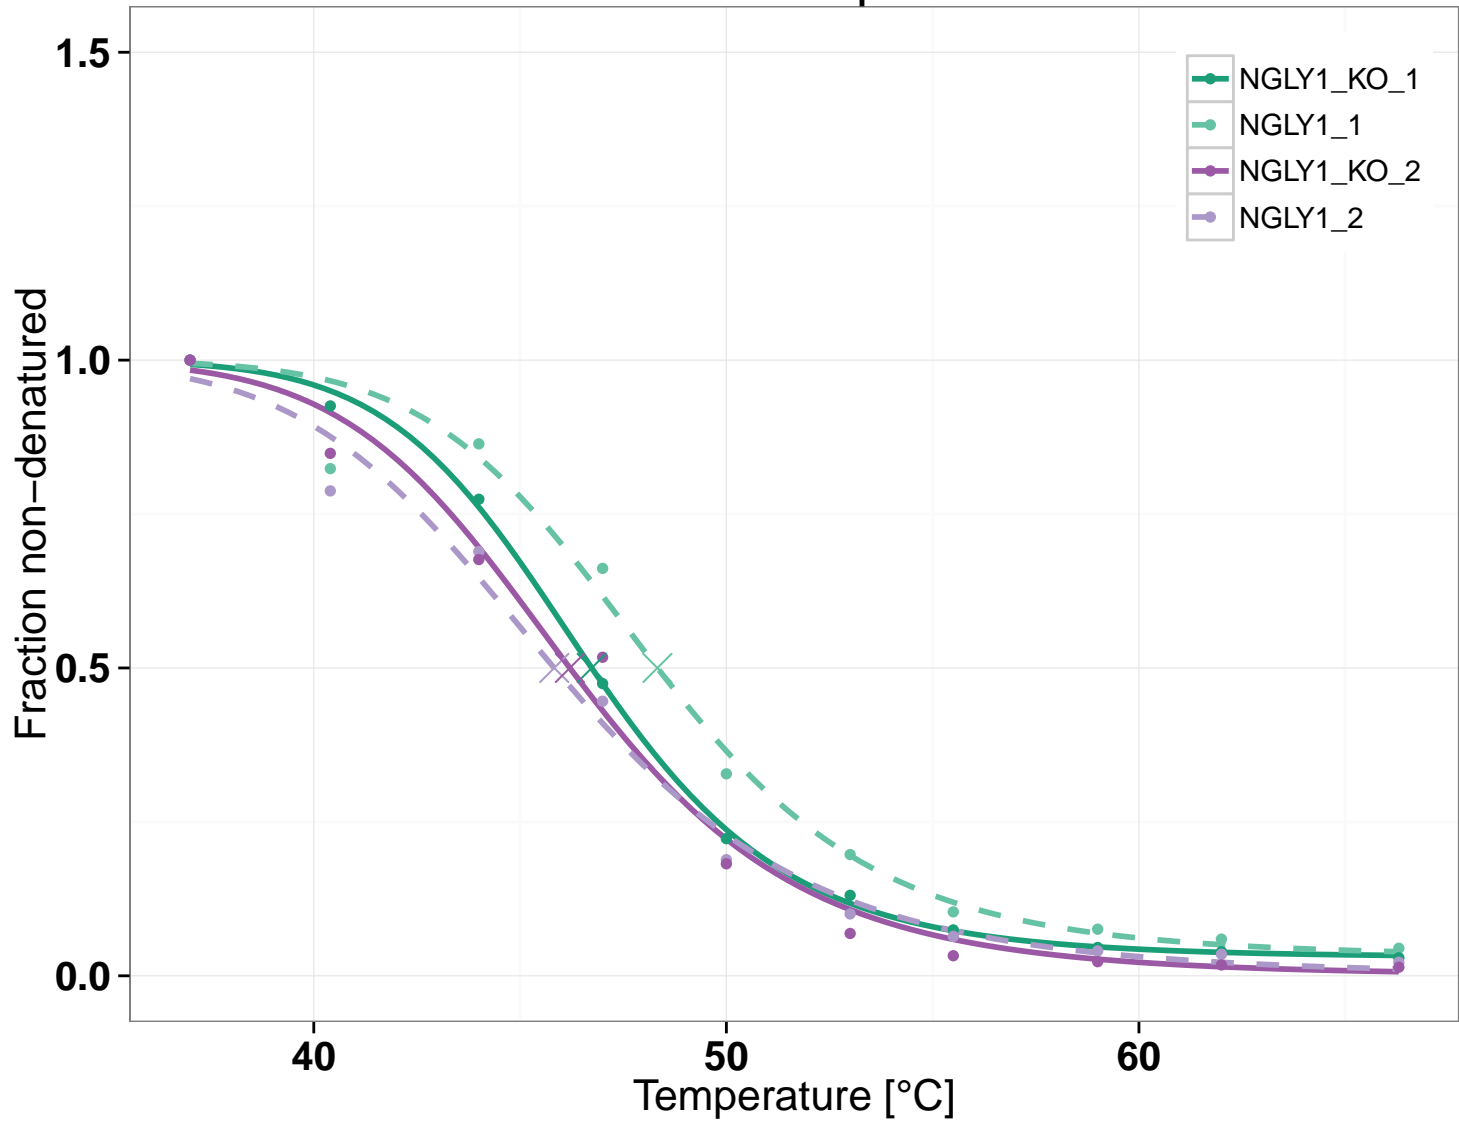

|            | meltPoint | slope  | plateau | R2   |
|------------|-----------|--------|---------|------|
| NGLY1_KO_1 | 46.74     | -0.1   | 0.03    | 1    |
| NGLY1_1    | 48.33     | -0.088 | 0.03    | 0.98 |
| NGLY1_KO_2 | 46.21     | -0.091 | 0       | 0.99 |
| NGLY1_2    | 45.83     | -0.081 | 0       | 0.99 |

Supplement: Supplementary file 6405 [file 1]

# IPI00011219.2|ARHGAP6

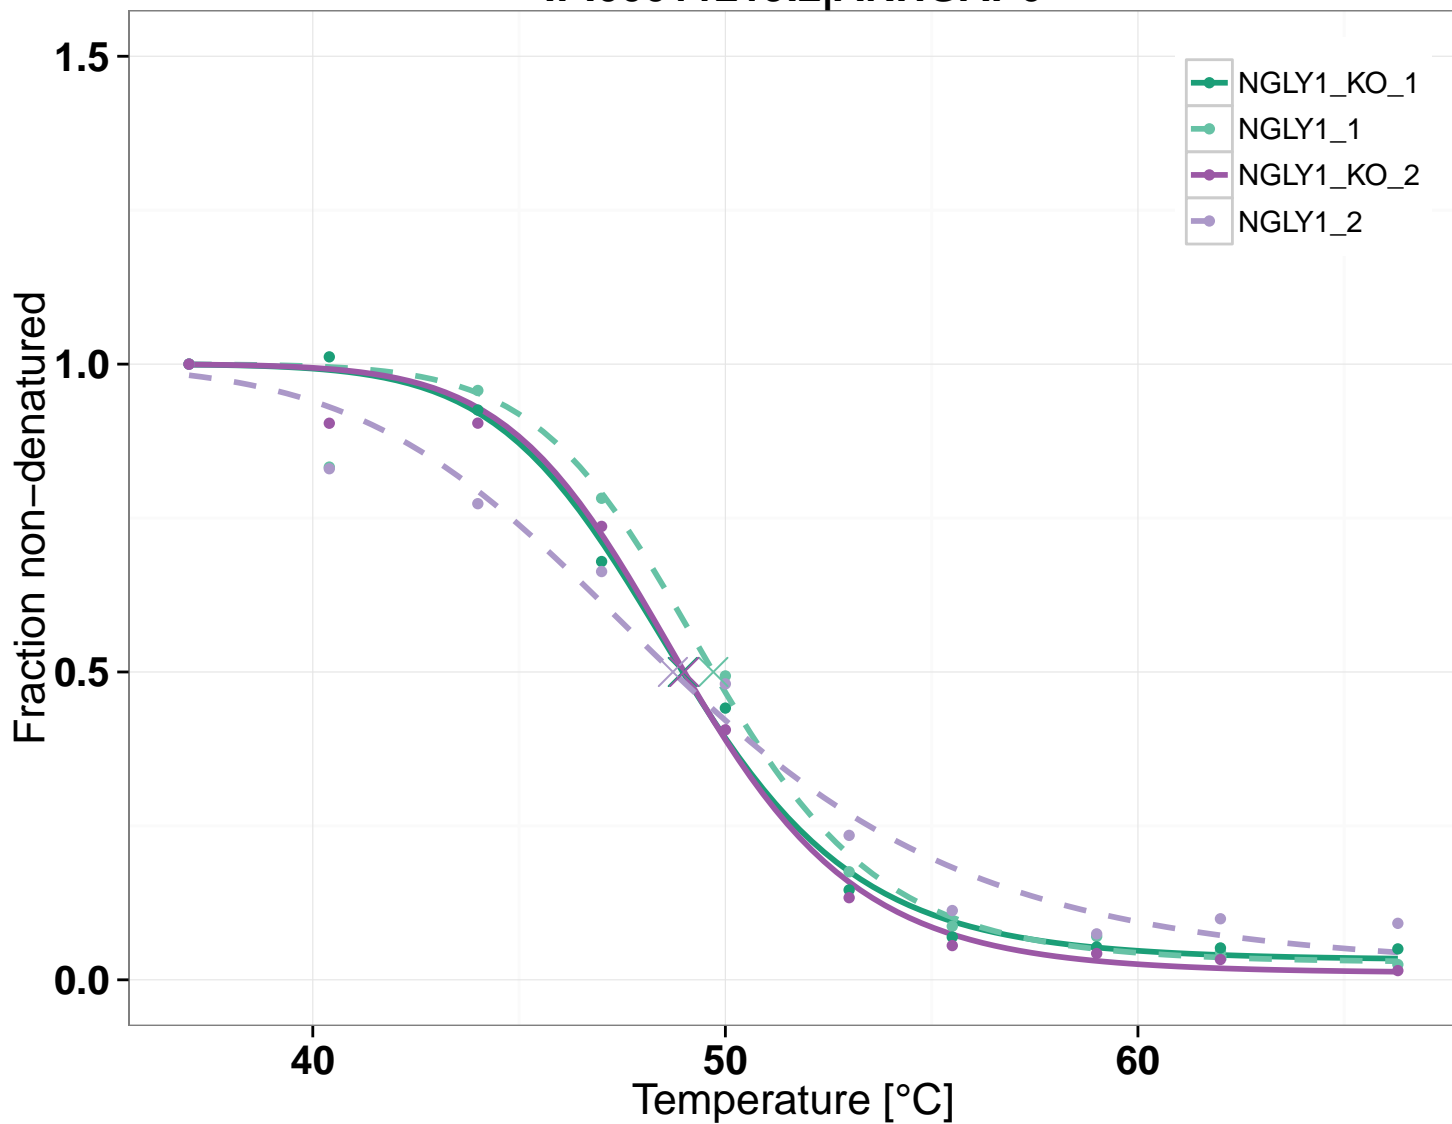

|            | meltPoint | slope  | plateau | R2   |
|------------|-----------|--------|---------|------|
| NGLY1_KO_1 | 48.97     | -0.11  | 0.03    | 1    |
| NGLY1_1    | 49.71     | -0.12  | 0.03    | 0.98 |
| NGLY1_KO_2 | 49        | -0.12  | 0.01    | 0.99 |
| NGLY1_2    | 48.73     | -0.066 | 0.01    | 0.98 |

Supplement: Supplementary file 6406 [file 1]

IPI00007087.4|FBXO2

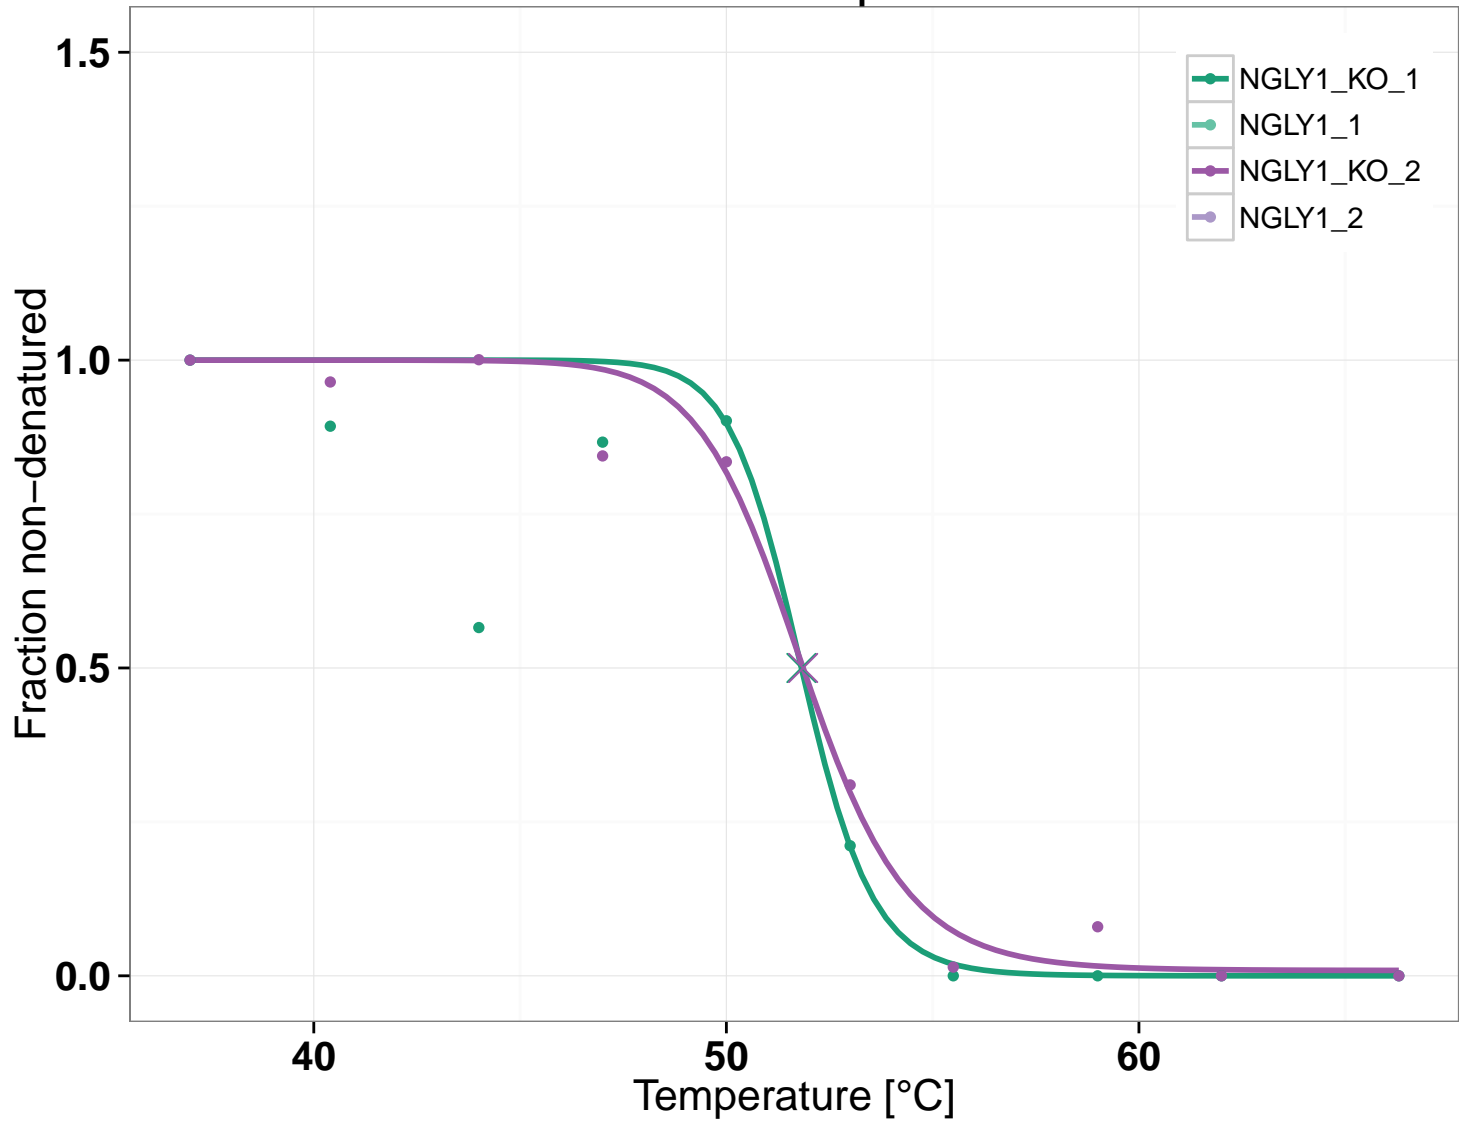

|            | meltPoint | slope | plateau | R2   |
|------------|-----------|-------|---------|------|
| NGLY1_KO_1 | 51.82     | -0.29 | 0       | 0.88 |
| NGLY1_1    | -         | -     | -       | -    |
| NGLY1_KO_2 | 51.86     | -0.19 | 0.01    | 0.98 |
| NGLY1_2    | -         | -     | -       | -    |

Supplement: Supplementary file 6407 [file 1]

# IPI00219006.5|RPS19BP1

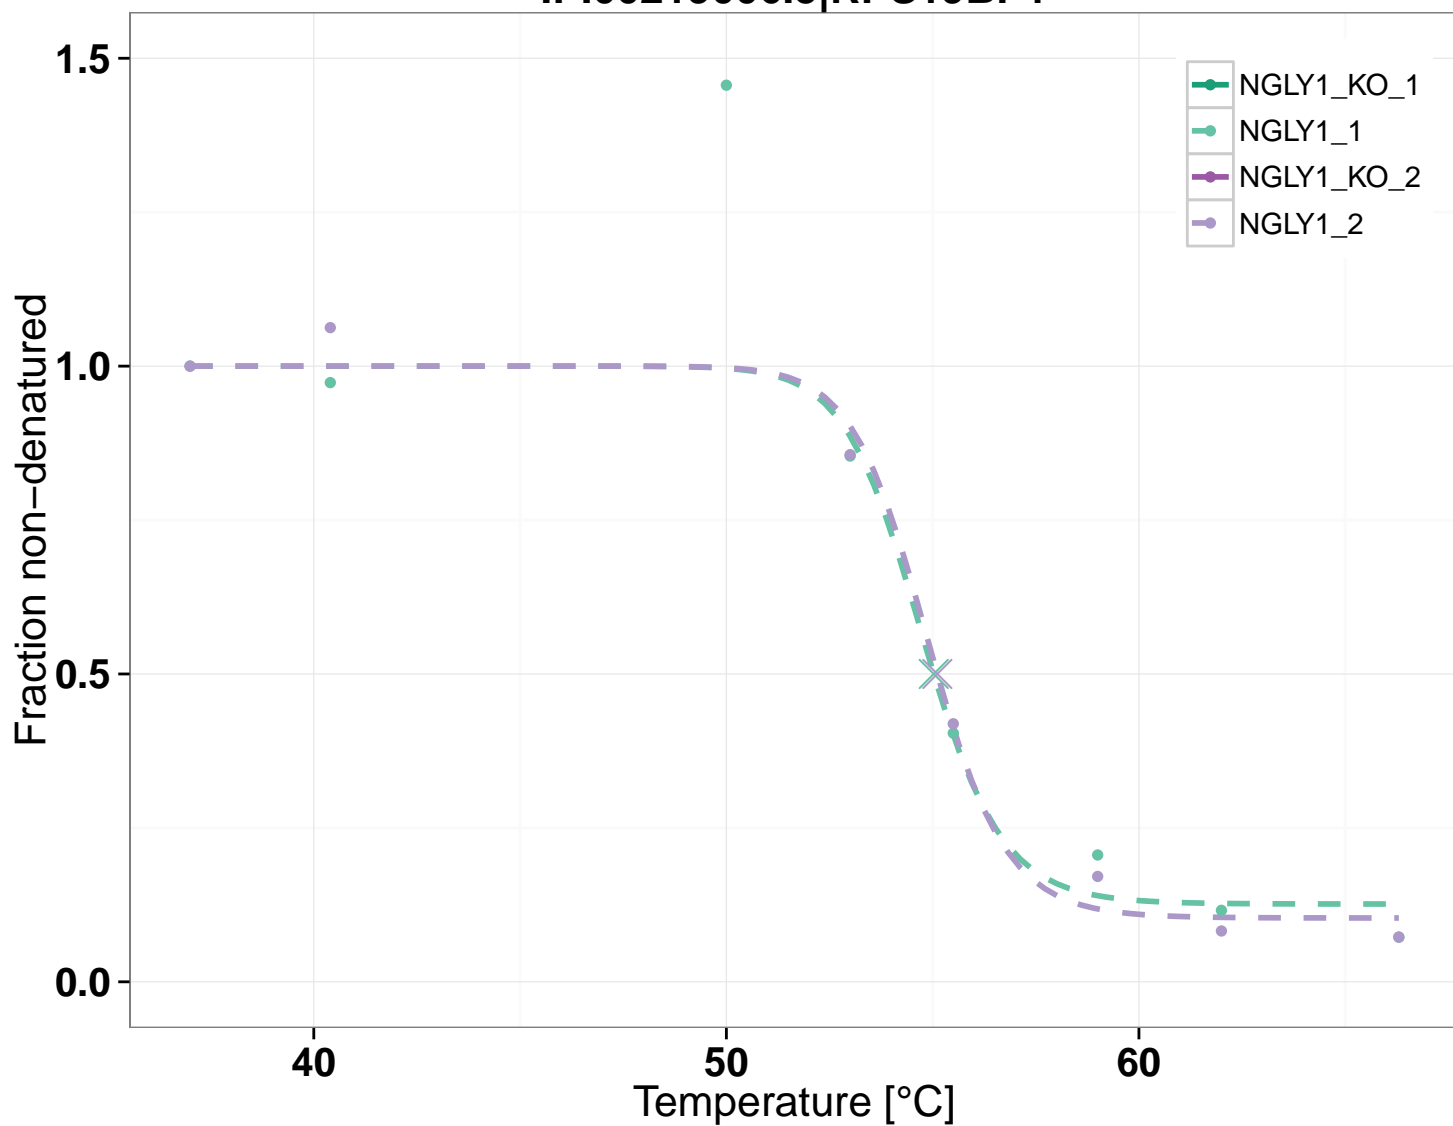

|            | meltPoint | slope | plateau | R2   |
|------------|-----------|-------|---------|------|
| NGLY1_KO_1 | –         | –     | –       | –    |
| NGLY1_1    | 55.03     | –0.23 | 0.13    | 0.52 |
| NGLY1_KO_2 | –         | –     | –       | –    |
| NGLY1_2    | 55.11     | –0.24 | 0.1     | 0.39 |

Supplement: Supplementary file 6408 [file 1]

IPI00456157.5|PDSS1

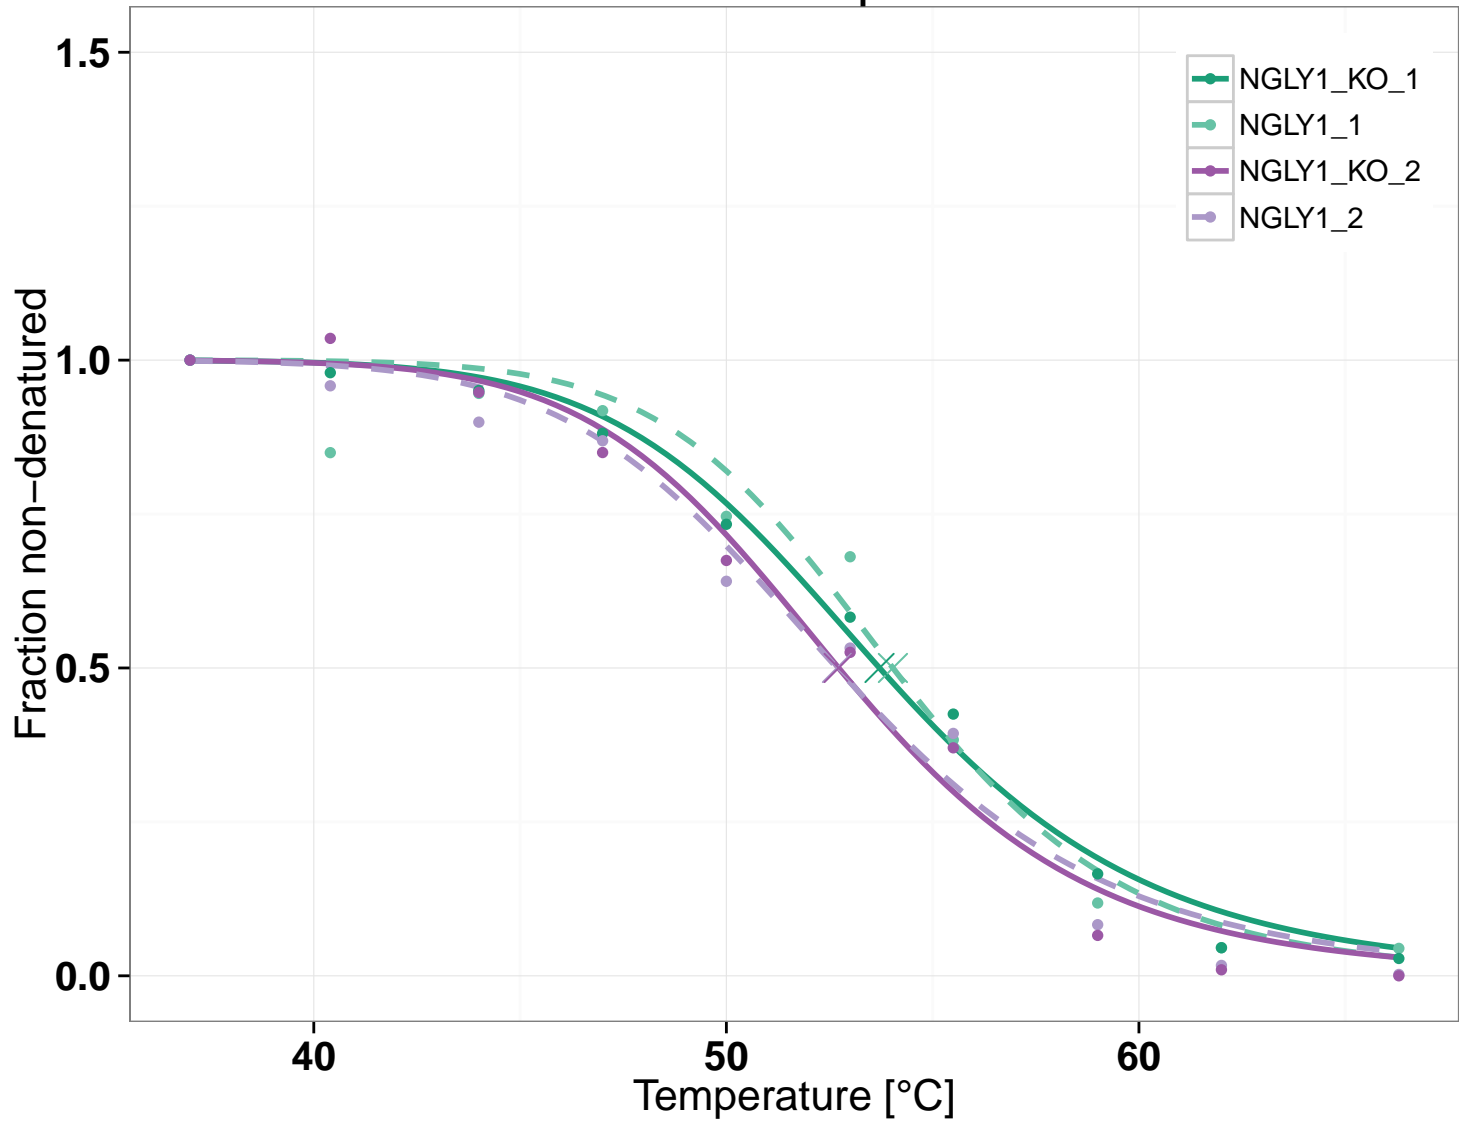

|            | meltPoint | slope  | plateau | R2   |
|------------|-----------|--------|---------|------|
| NGLY1_KO_1 | 53.71     | -0.076 | 0       | 0.99 |
| NGLY1_1    | 54.04     | -0.088 | 0       | 0.97 |
| NGLY1_KO_2 | 52.72     | -0.082 | 0       | 0.99 |
| NGLY1_2    | 52.68     | -0.075 | 0       | 0.98 |

Supplement: Supplementary file 6409 [file 1]

# IPI00853454.1|LAMB1

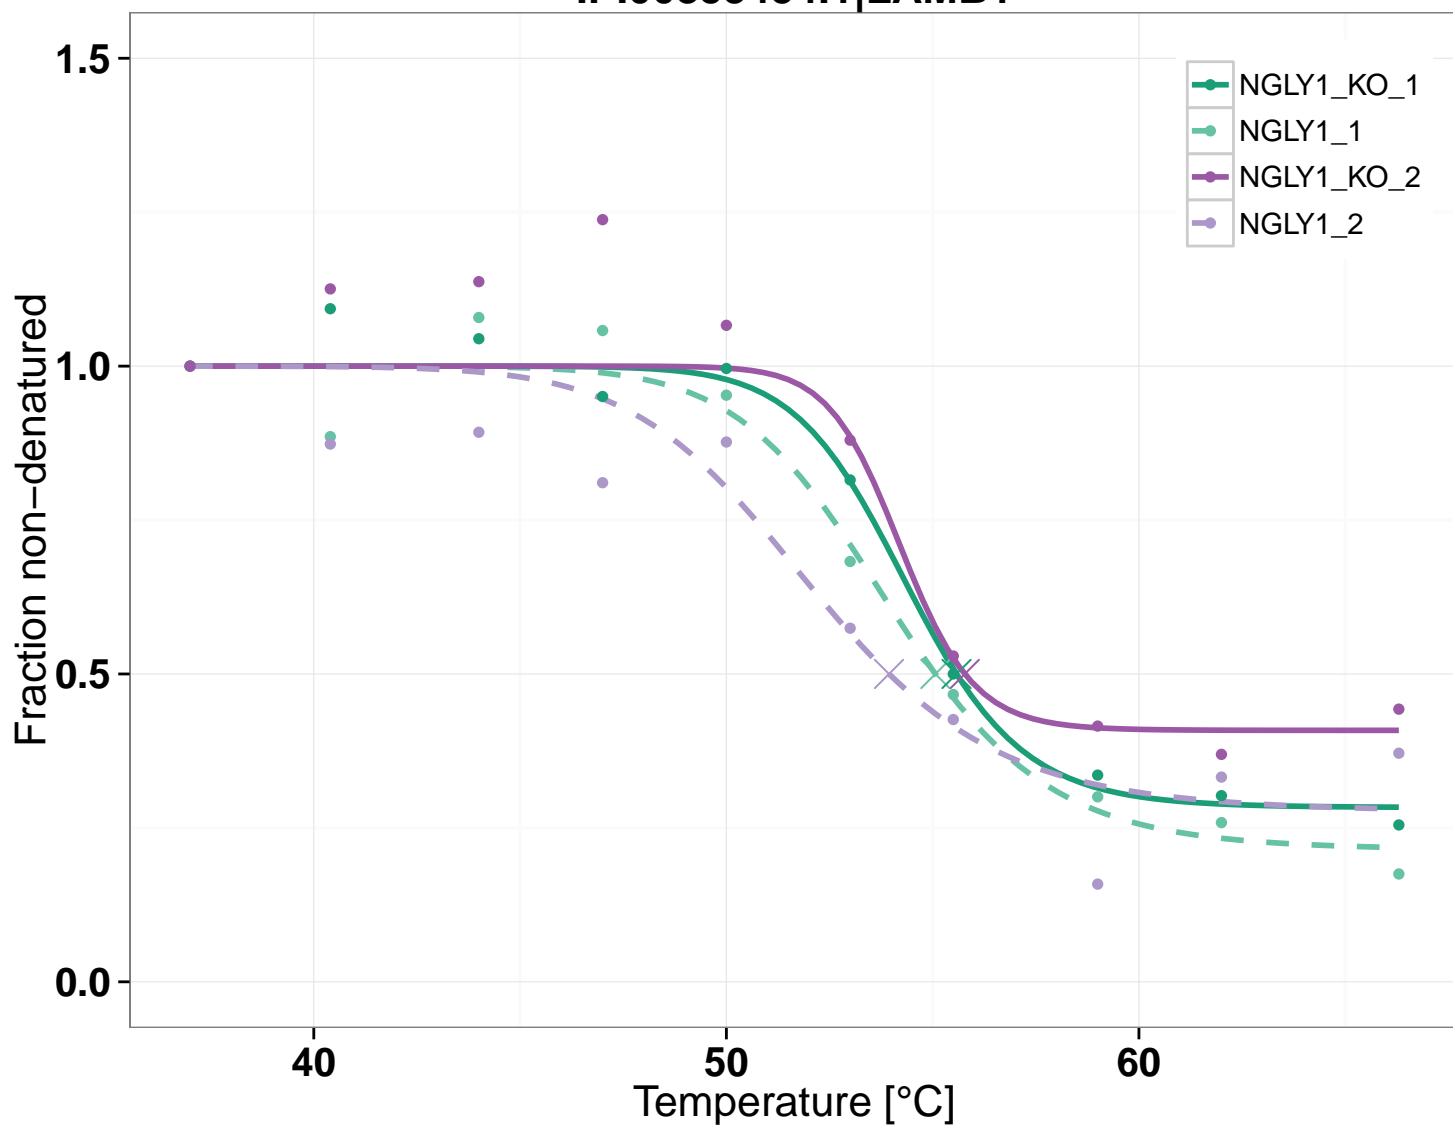

|            | meltPoint | slope  | plateau | R2   |
|------------|-----------|--------|---------|------|
| NGLY1_KO_1 | 55.58     | -0.13  | 0.28    | 0.99 |
| NGLY1_1    | 55.07     | -0.1   | 0.21    | 0.97 |
| NGLY1_KO_2 | 55.78     | -0.17  | 0.41    | 0.91 |
| NGLY1_2    | 53.94     | -0.082 | 0.28    | 0.89 |

Supplement: Supplementary file 6410 [file 1]

IPI00871646.1|RPLP0-LIKE

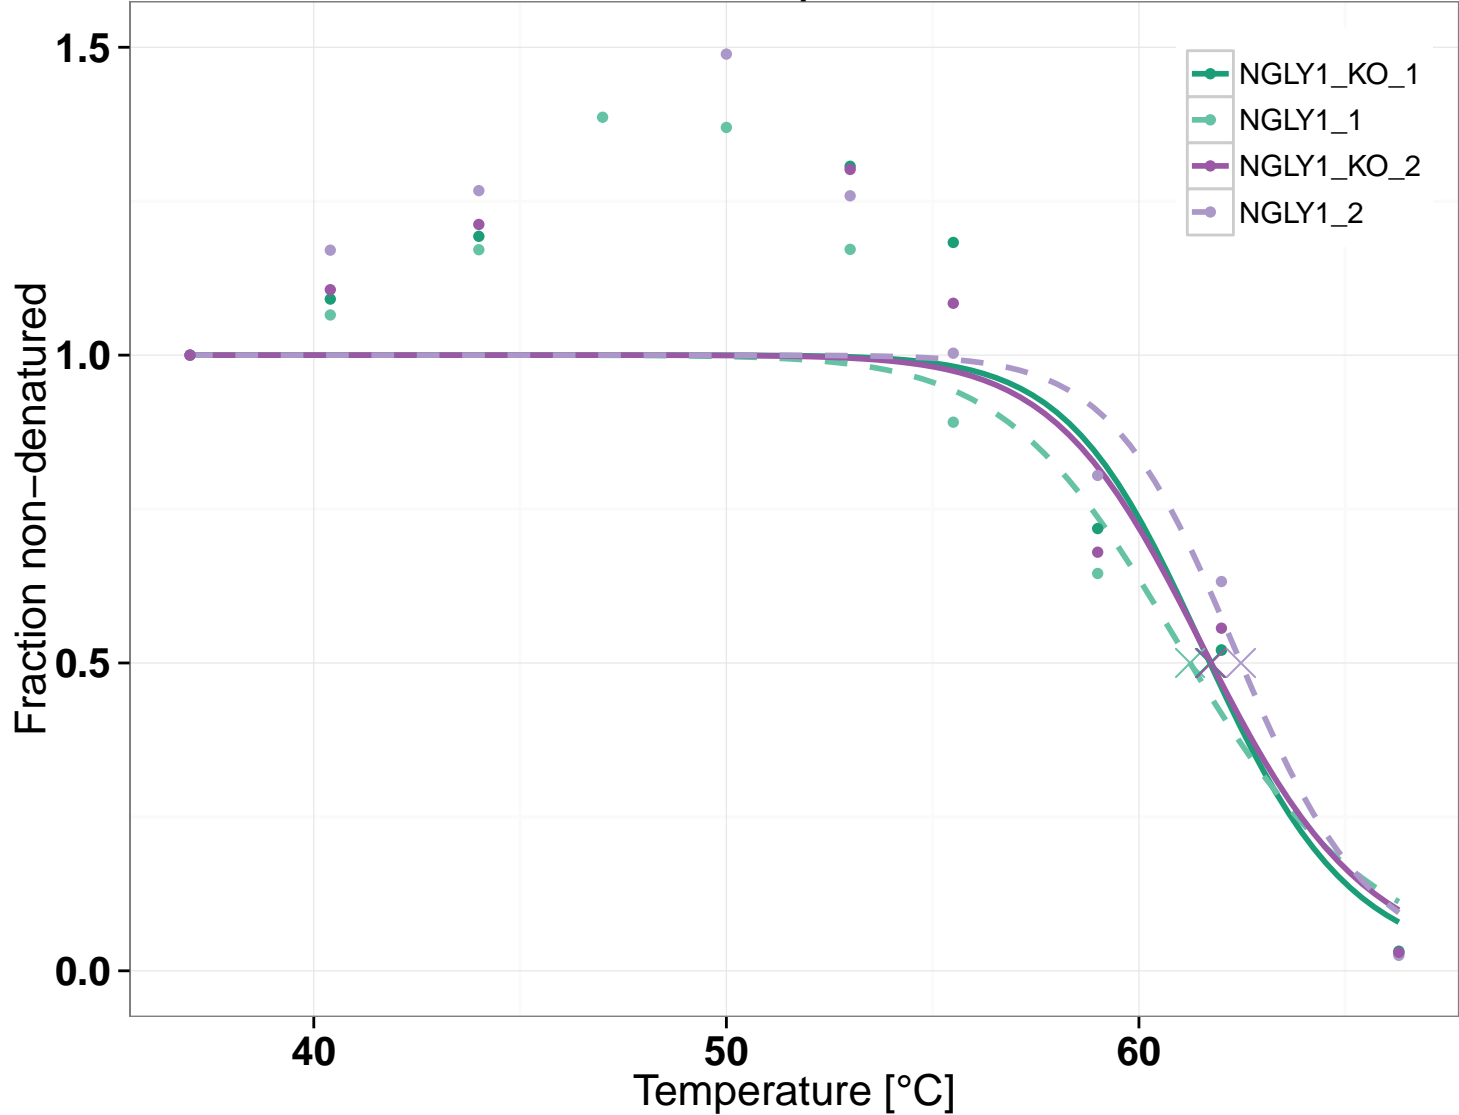

|            | meltPoint | slope | plateau | R2   |
|------------|-----------|-------|---------|------|
| NGLY1_KO_1 | 61.72     | -0.14 | 0       | 0.56 |
| NGLY1_1    | 61.24     | -0.11 | 0       | 0.76 |
| NGLY1_KO_2 | 61.75     | -0.13 | 0       | 0.58 |
| NGLY1_2    | 62.47     | -0.16 | 0       | 0.55 |

Supplement: Supplementary file 6411 [file 1]

IPI00795287.1|C12ORF29

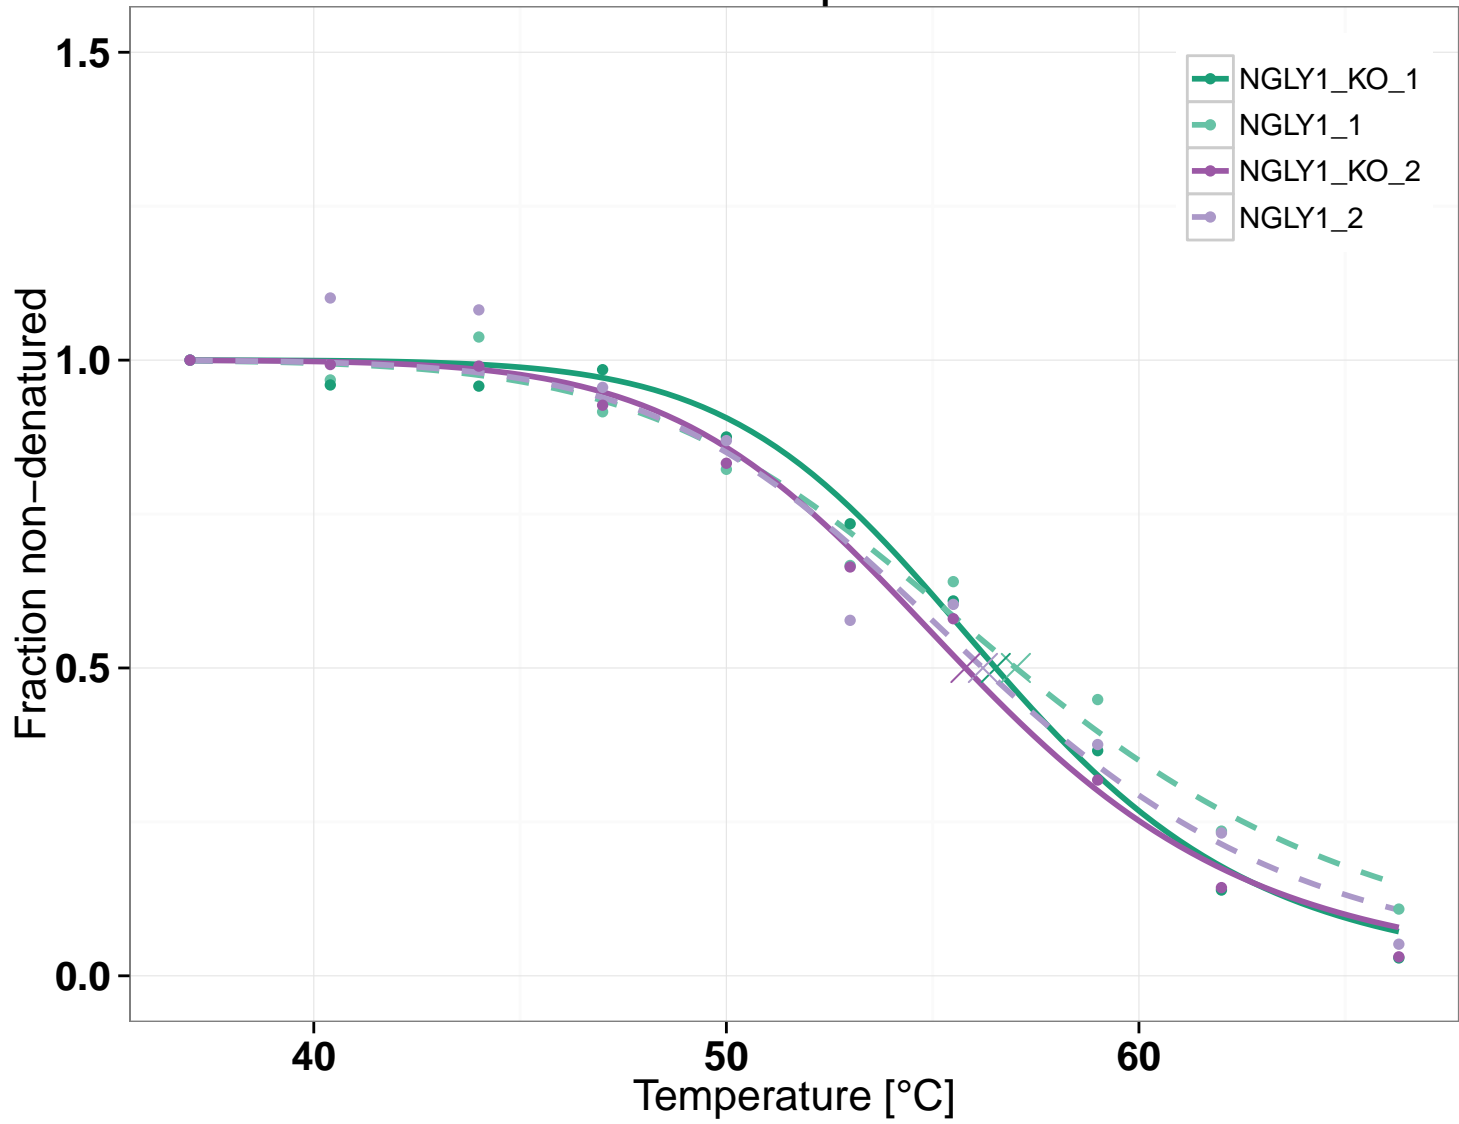

|            | meltPoint | slope  | plateau | R2   |
|------------|-----------|--------|---------|------|
| NGLY1_KO_1 | 56.53     | -0.078 | 0       | 0.99 |
| NGLY1_1    | 57.02     | -0.056 | 0       | 0.98 |
| NGLY1_KO_2 | 55.8      | -0.071 | 0       | 0.99 |
| NGLY1_2    | 56.22     | -0.063 | 0       | 0.96 |

Supplement: Supplementary file 6412 [file 1]

# IPI00398749.1|PUM2

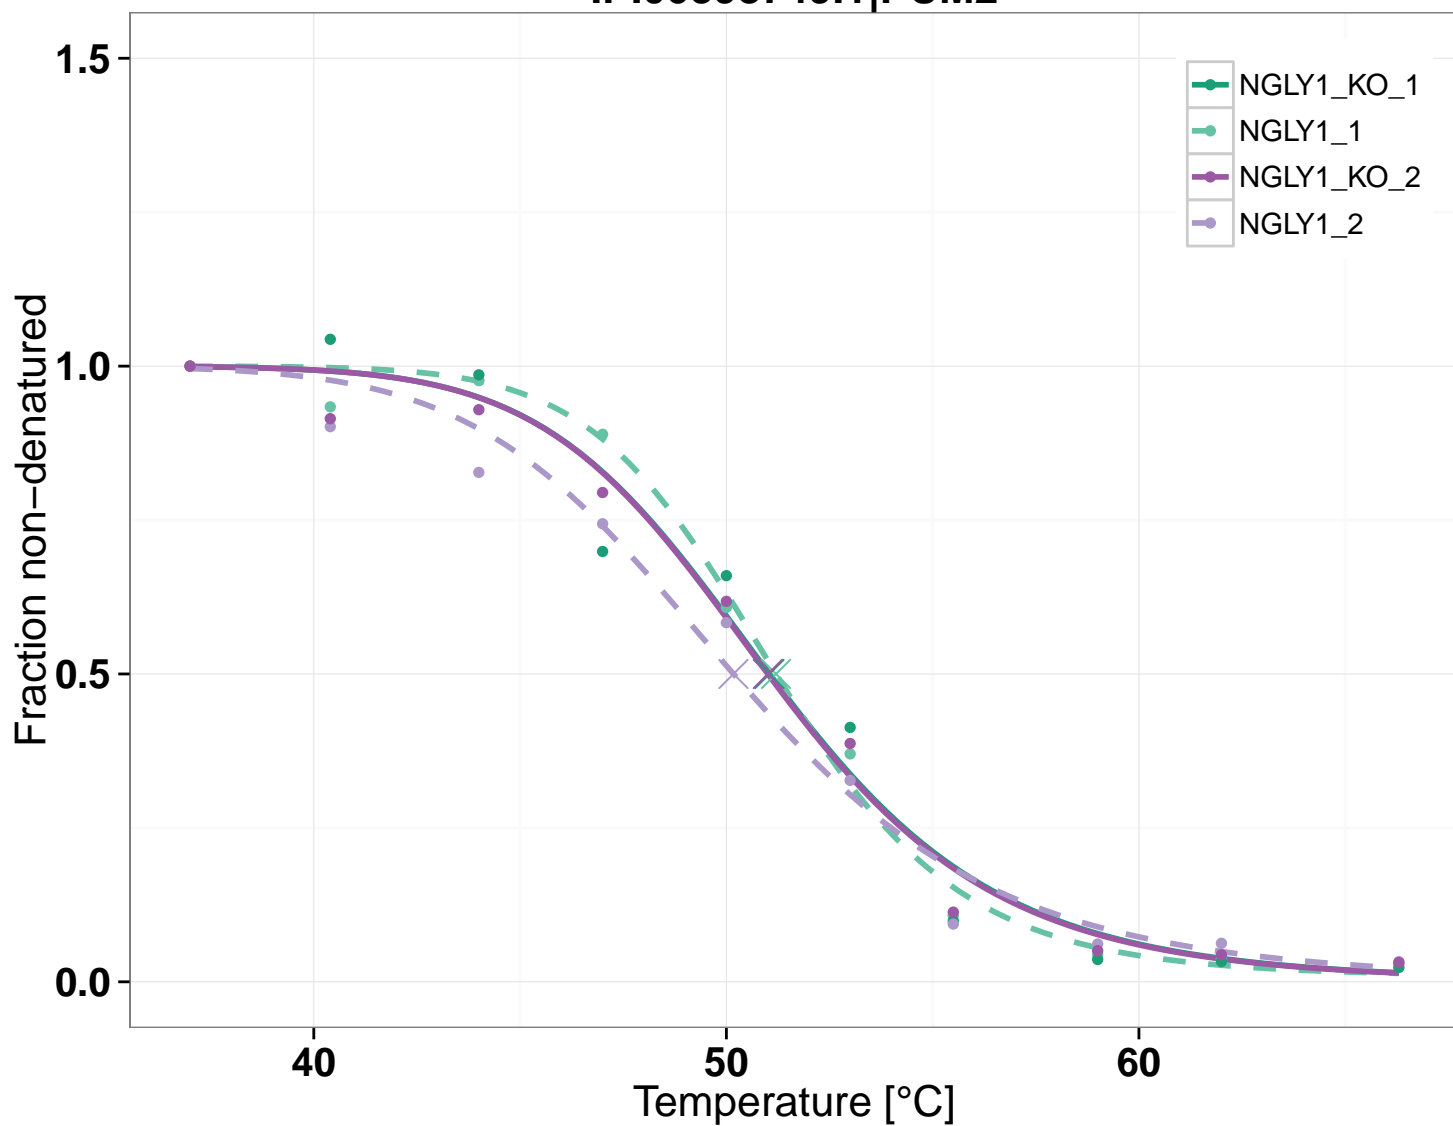

|            | meltPoint | slope  | plateau | R2   |
|------------|-----------|--------|---------|------|
| NGLY1_KO_1 | 51.04     | -0.091 | 0       | 0.98 |
| NGLY1_1    | 51.2      | -0.11  | 0.01    | 0.99 |
| NGLY1_KO_2 | 51.01     | -0.091 | 0       | 0.99 |
| NGLY1_2    | 50.17     | -0.079 | 0       | 0.98 |

Supplement: Supplementary file 6413 [file 1]

IPI00916271.1|B4DHG2\_HUMAN

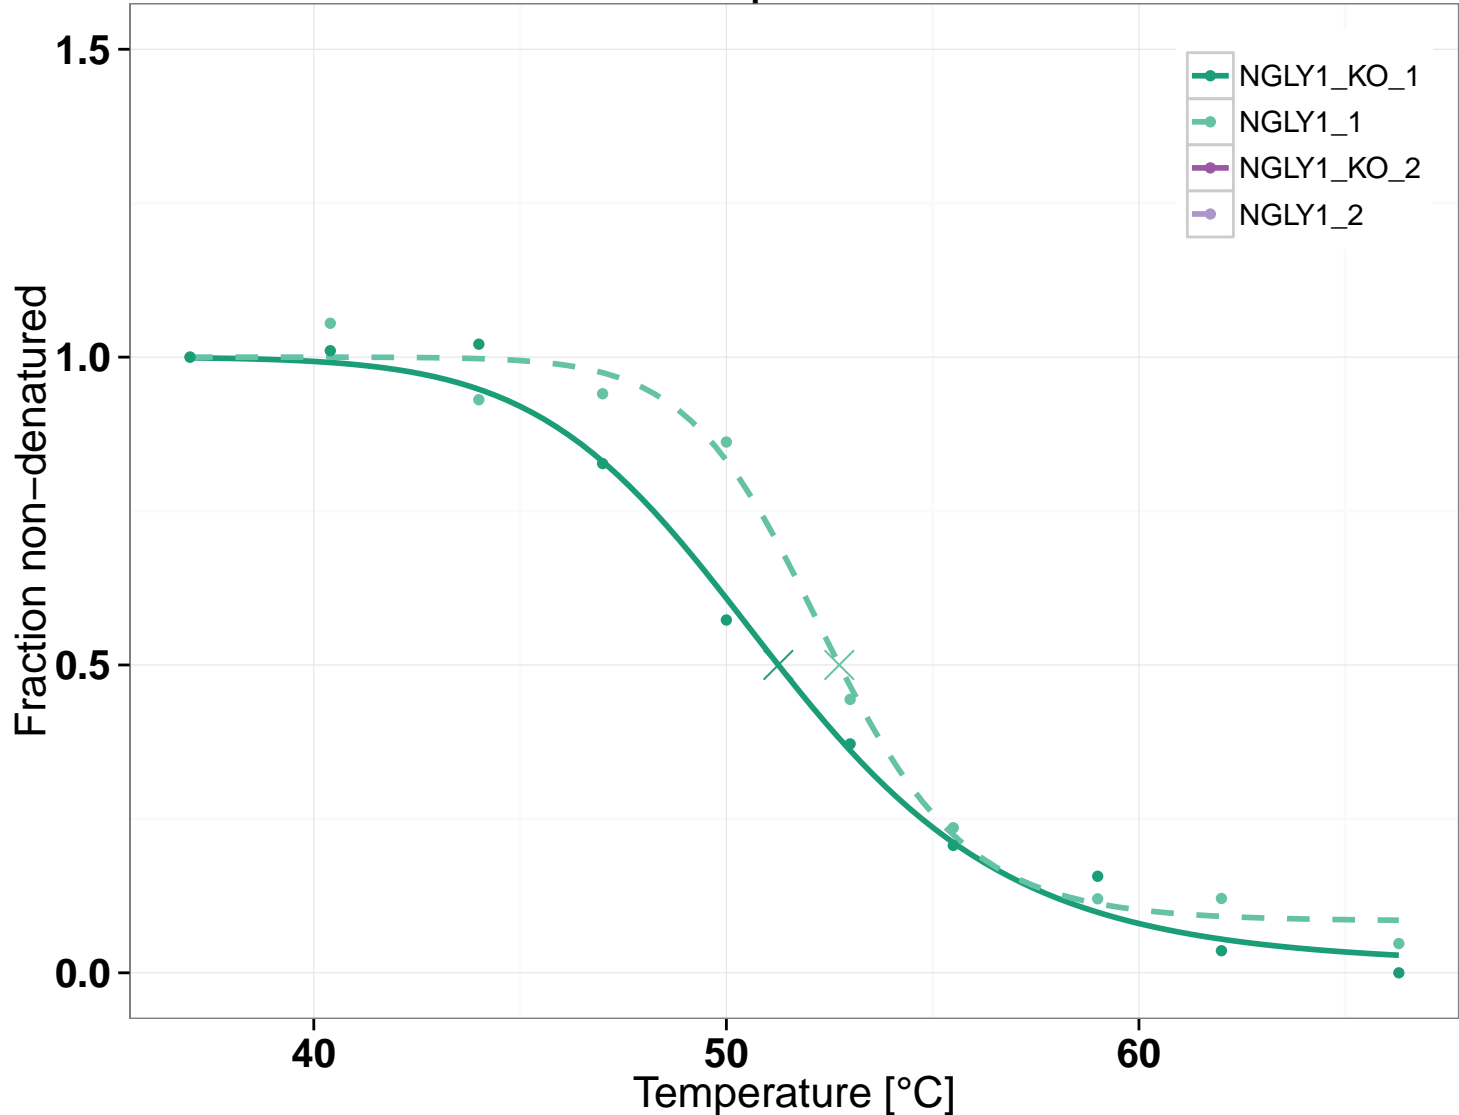

|            | meltPoint | slope  | plateau | R2   |
|------------|-----------|--------|---------|------|
| NGLY1_KO_1 | 51.26     | -0.086 | 0.01    | 0.99 |
| NGLY1_1    | 52.74     | -0.14  | 0.08    | 0.99 |
| NGLY1_KO_2 | -         | -      | -       | -    |
| NGLY1_2    | -         | -      | -       | -    |

Supplement: Supplementary file 6414 [file 1]

# IPI00007956.4|TXNIP

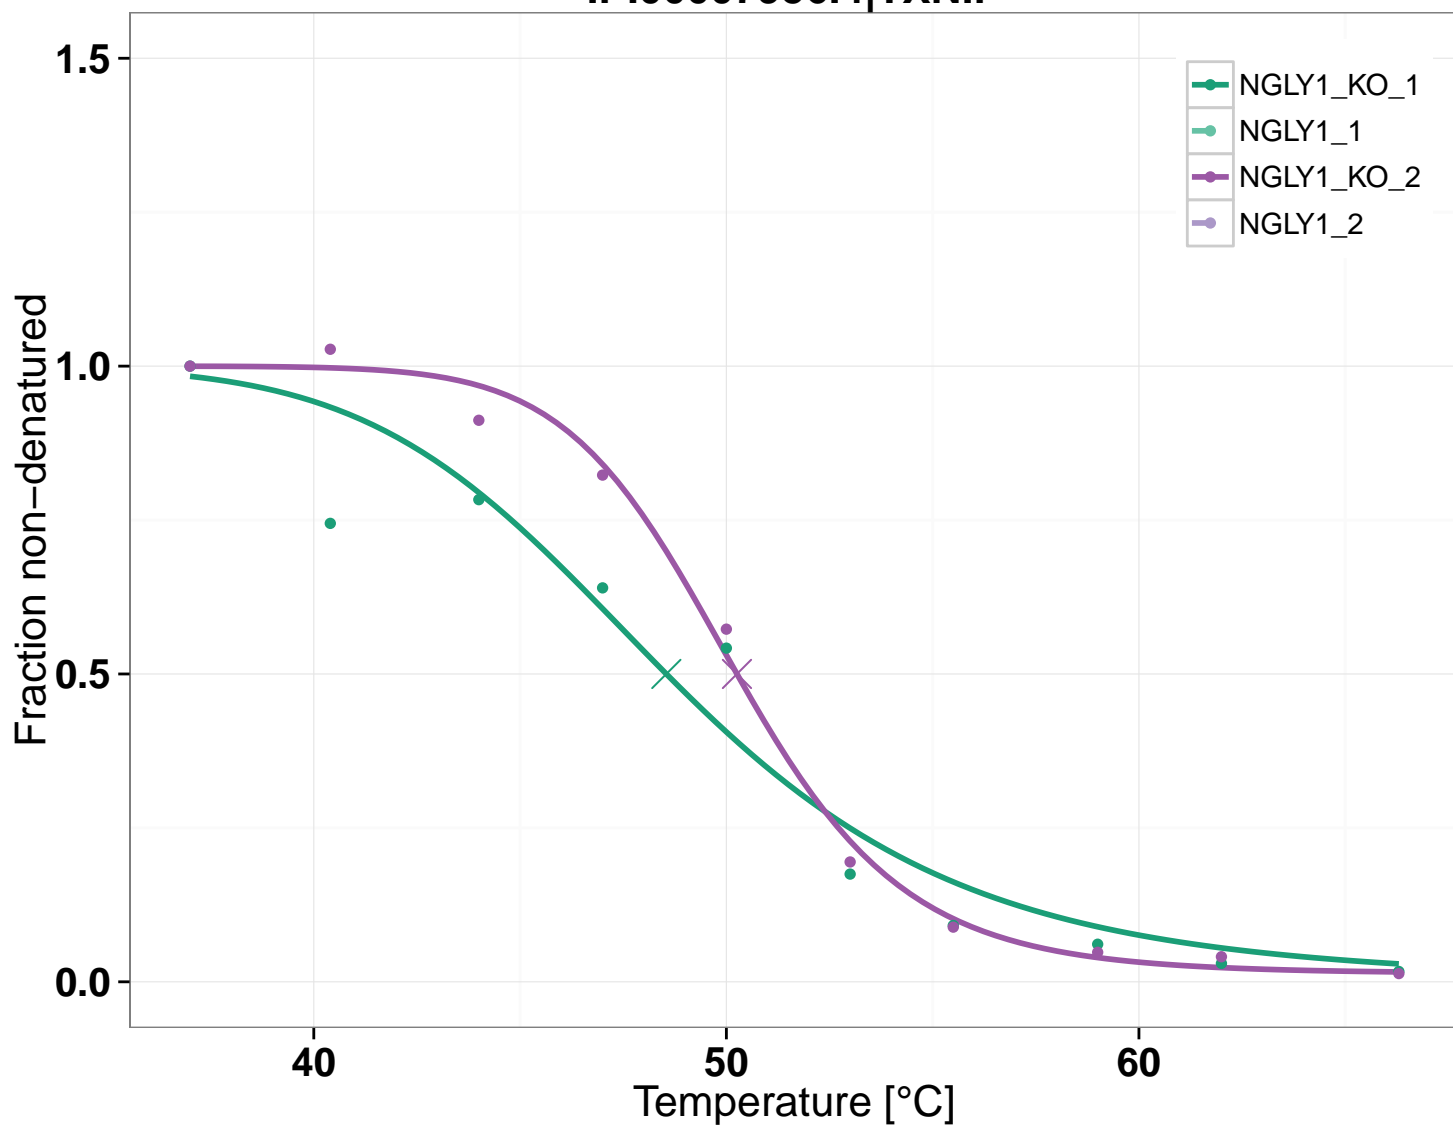

|            | meltPoint | slope  | plateau | R2   |
|------------|-----------|--------|---------|------|
| NGLY1_KO_1 | 48.55     | -0.069 | 0       | 0.95 |
| NGLY1_1    | -         | -      | -       | -    |
| NGLY1_KO_2 | 50.26     | -0.12  | 0.01    | 1    |
| NGLY1_2    | -         | -      | -       | -    |

Supplement: Supplementary file 6415 [file 1]

IPI00305186.5|RP5-1000E10 4

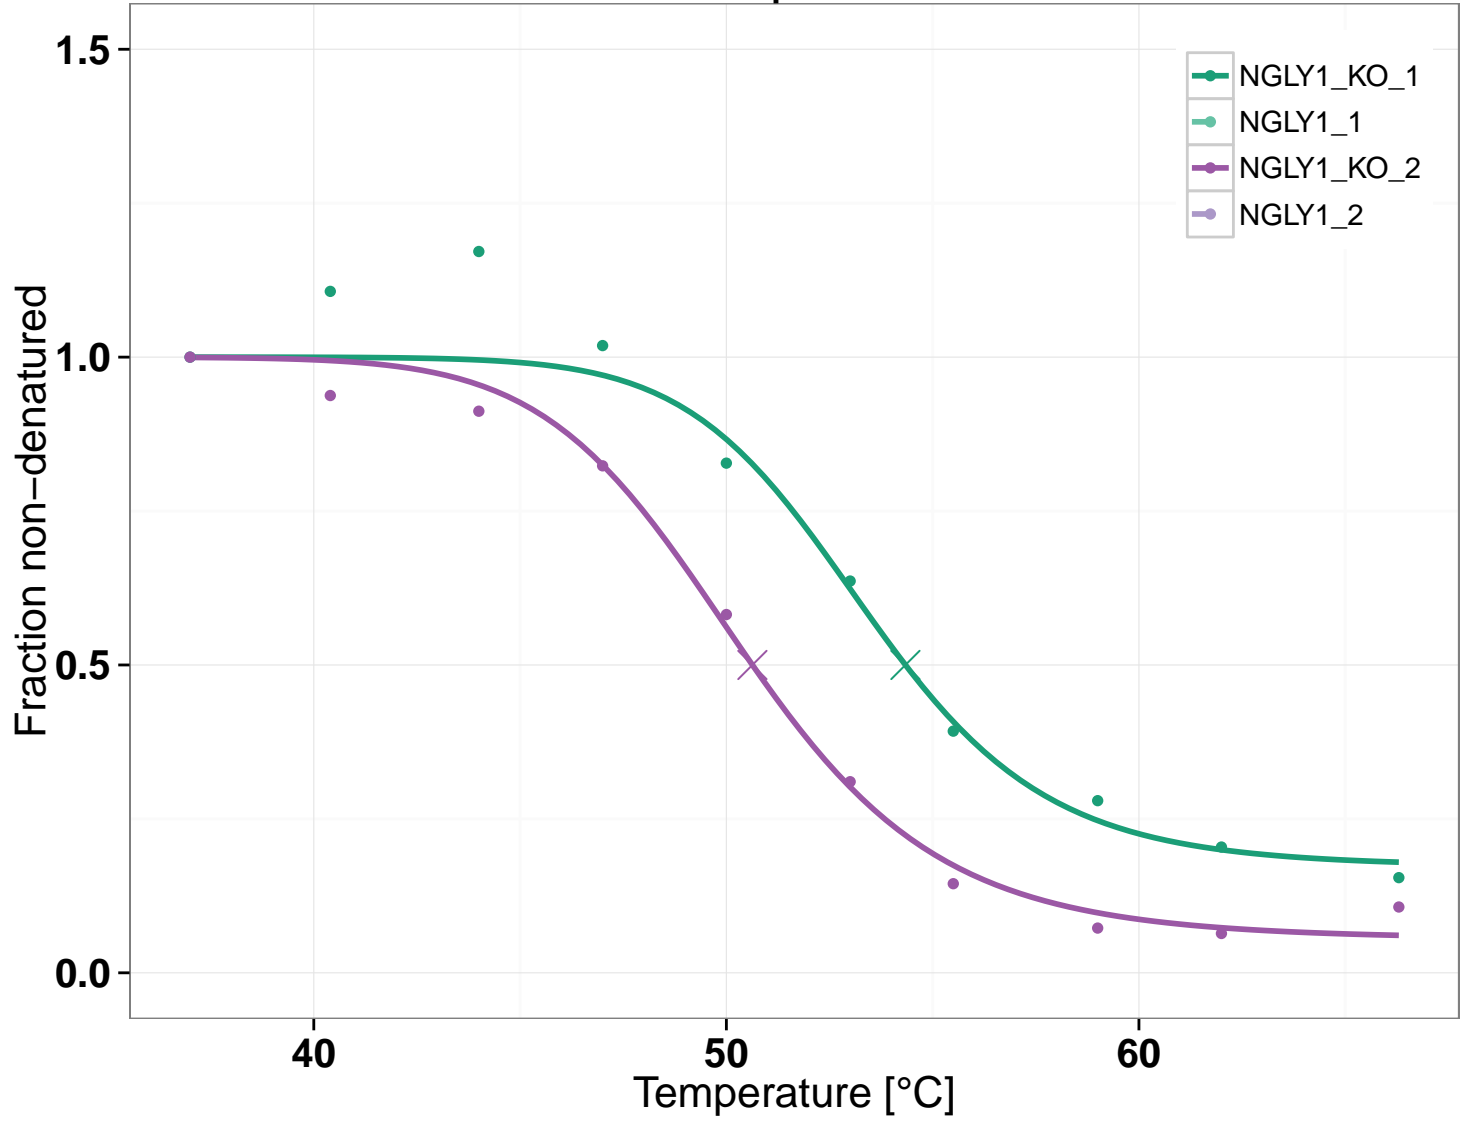

|            | meltPoint | slope  | plateau | R2   |
|------------|-----------|--------|---------|------|
| NGLY1_KO_1 | 54.34     | -0.095 | 0.17    | 0.97 |
| NGLY1_1    | -         | -      | -       | -    |
| NGLY1_KO_2 | 50.63     | -0.098 | 0.05    | 0.99 |
| NGLY1_2    | -         | -      | -       | -    |

Supplement: Supplementary file 6416 [file 1]

IPI00017341.3|SF3A2

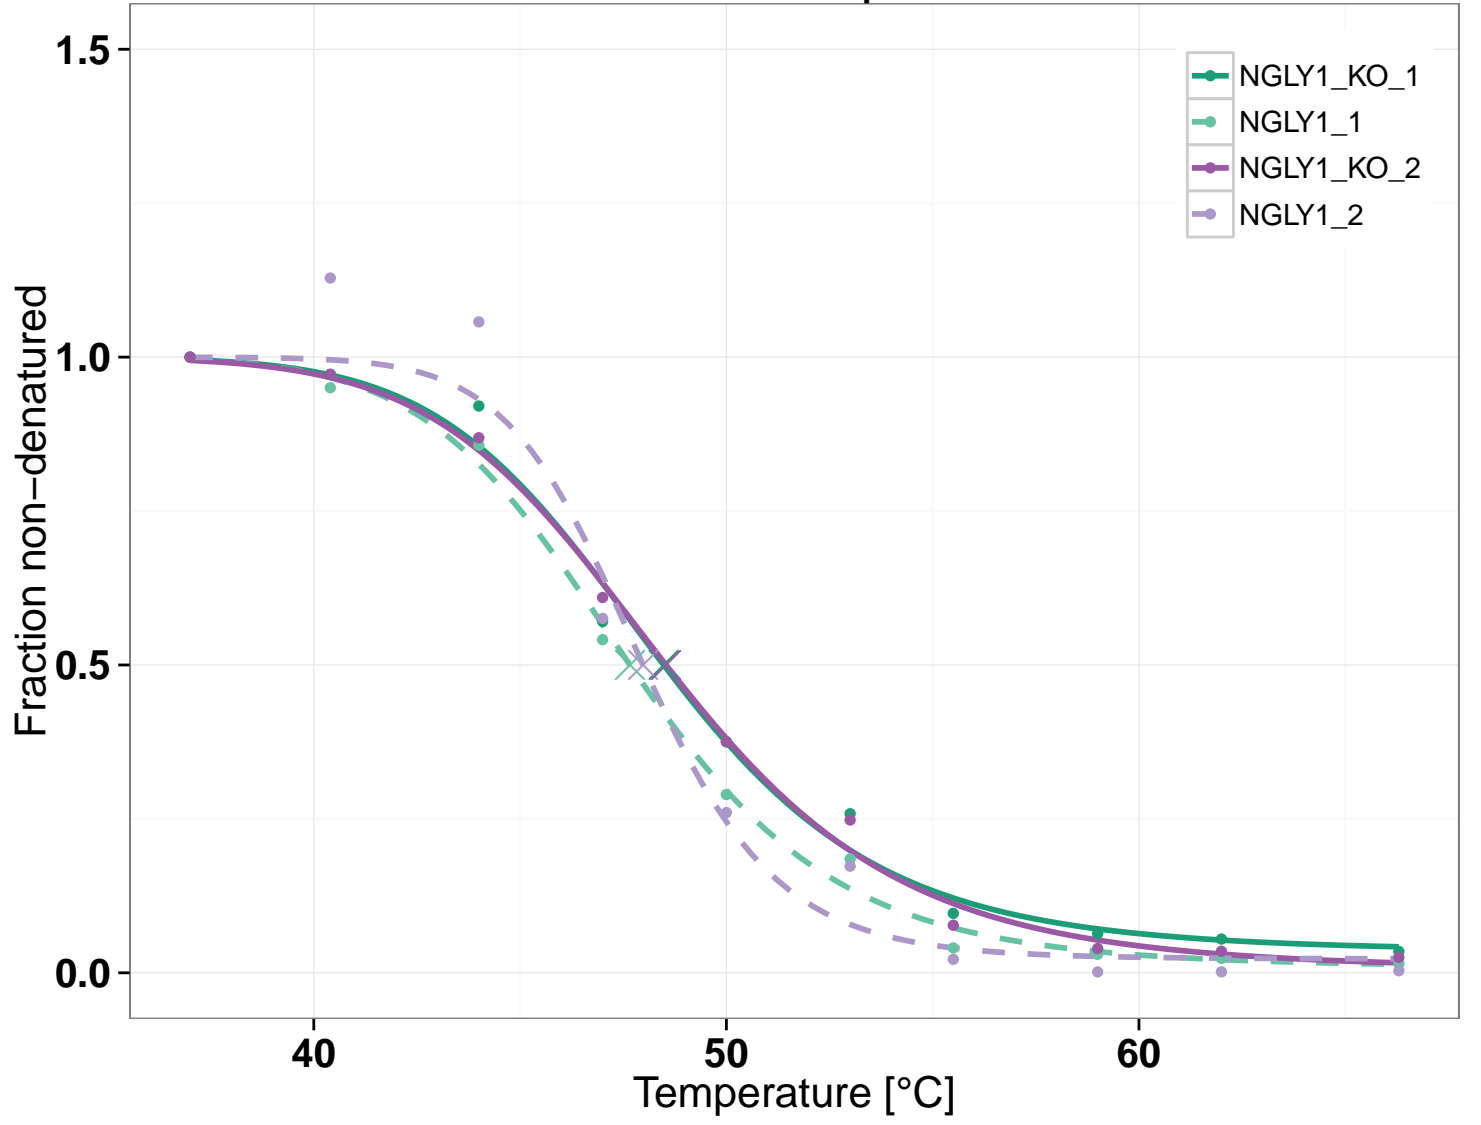

|            | meltPoint | slope  | plateau | R2   |
|------------|-----------|--------|---------|------|
| NGLY1_KO_1 | 48.48     | -0.09  | 0.03    | 0.99 |
| NGLY1_1    | 47.66     | -0.099 | 0.01    | 1    |
| NGLY1_KO_2 | 48.54     | -0.087 | 0.01    | 1    |
| NGLY1_2    | 47.98     | -0.15  | 0.02    | 0.98 |

Supplement: Supplementary file 6417 [file 1]

# IPI00177543.6|PAM

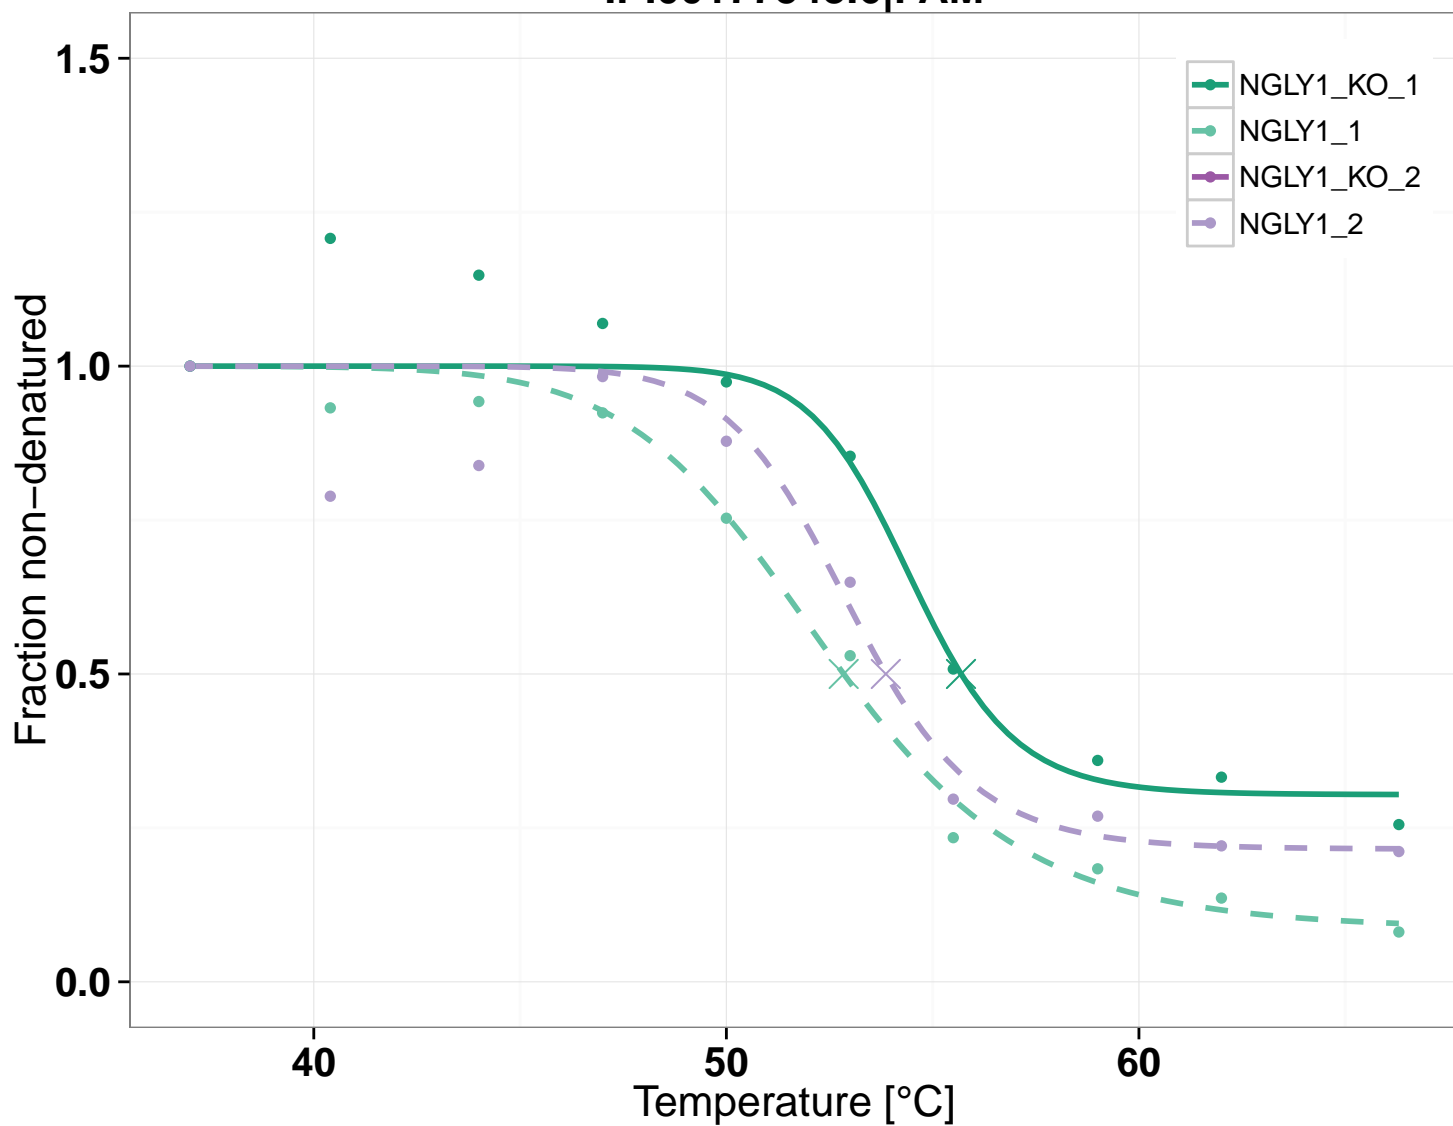

|            | meltPoint | slope  | plateau | R2   |
|------------|-----------|--------|---------|------|
| NGLY1_KO_1 | 55.69     | -0.14  | 0.3     | 0.94 |
| NGLY1_1    | 52.84     | -0.094 | 0.08    | 0.99 |
| NGLY1_KO_2 | -         | -      | -       | -    |
| NGLY1_2    | 53.86     | -0.13  | 0.22    | 0.92 |

Supplement: Supplementary file 6418 [file 1]

IPI00470573.1|ACTR2

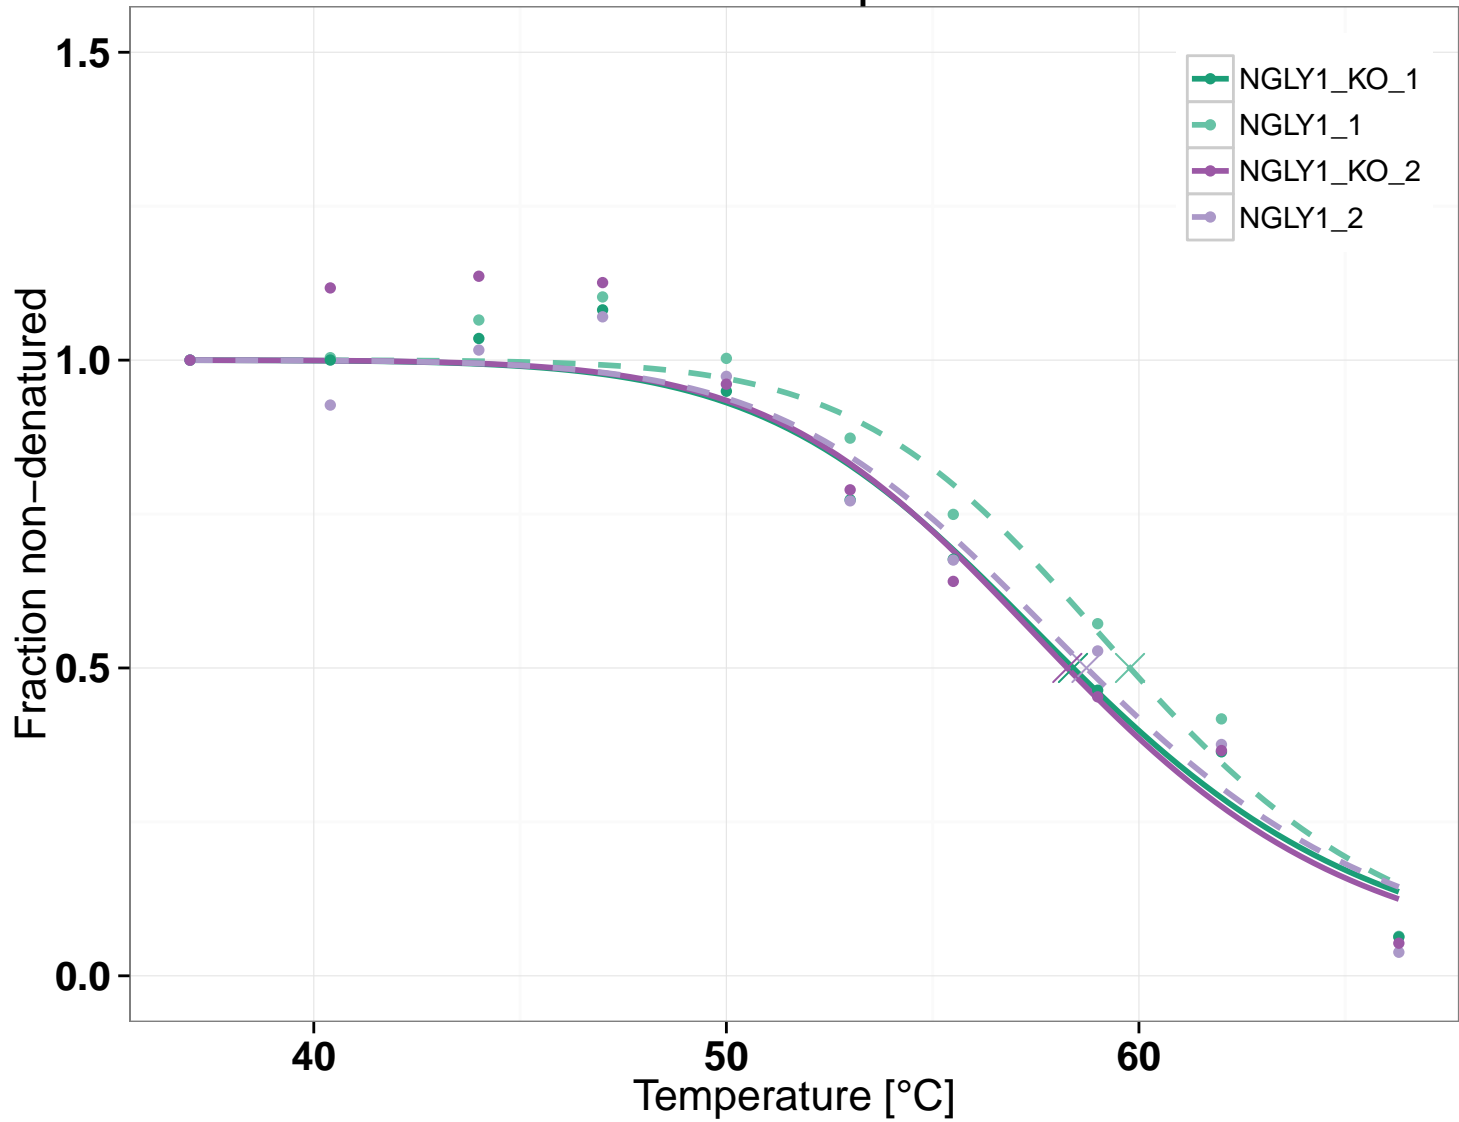

|            | meltPoint | slope  | plateau | R2   |
|------------|-----------|--------|---------|------|
| NGLY1_KO_1 | 58.4      | -0.067 | 0       | 0.97 |
| NGLY1_1    | 59.78     | -0.075 | 0       | 0.97 |
| NGLY1_KO_2 | 58.26     | -0.07  | 0       | 0.94 |
| NGLY1_2    | 58.73     | -0.067 | 0       | 0.96 |

Supplement: Supplementary file 6419 [file 1]

IPI00328276.1|CDK5RAP1

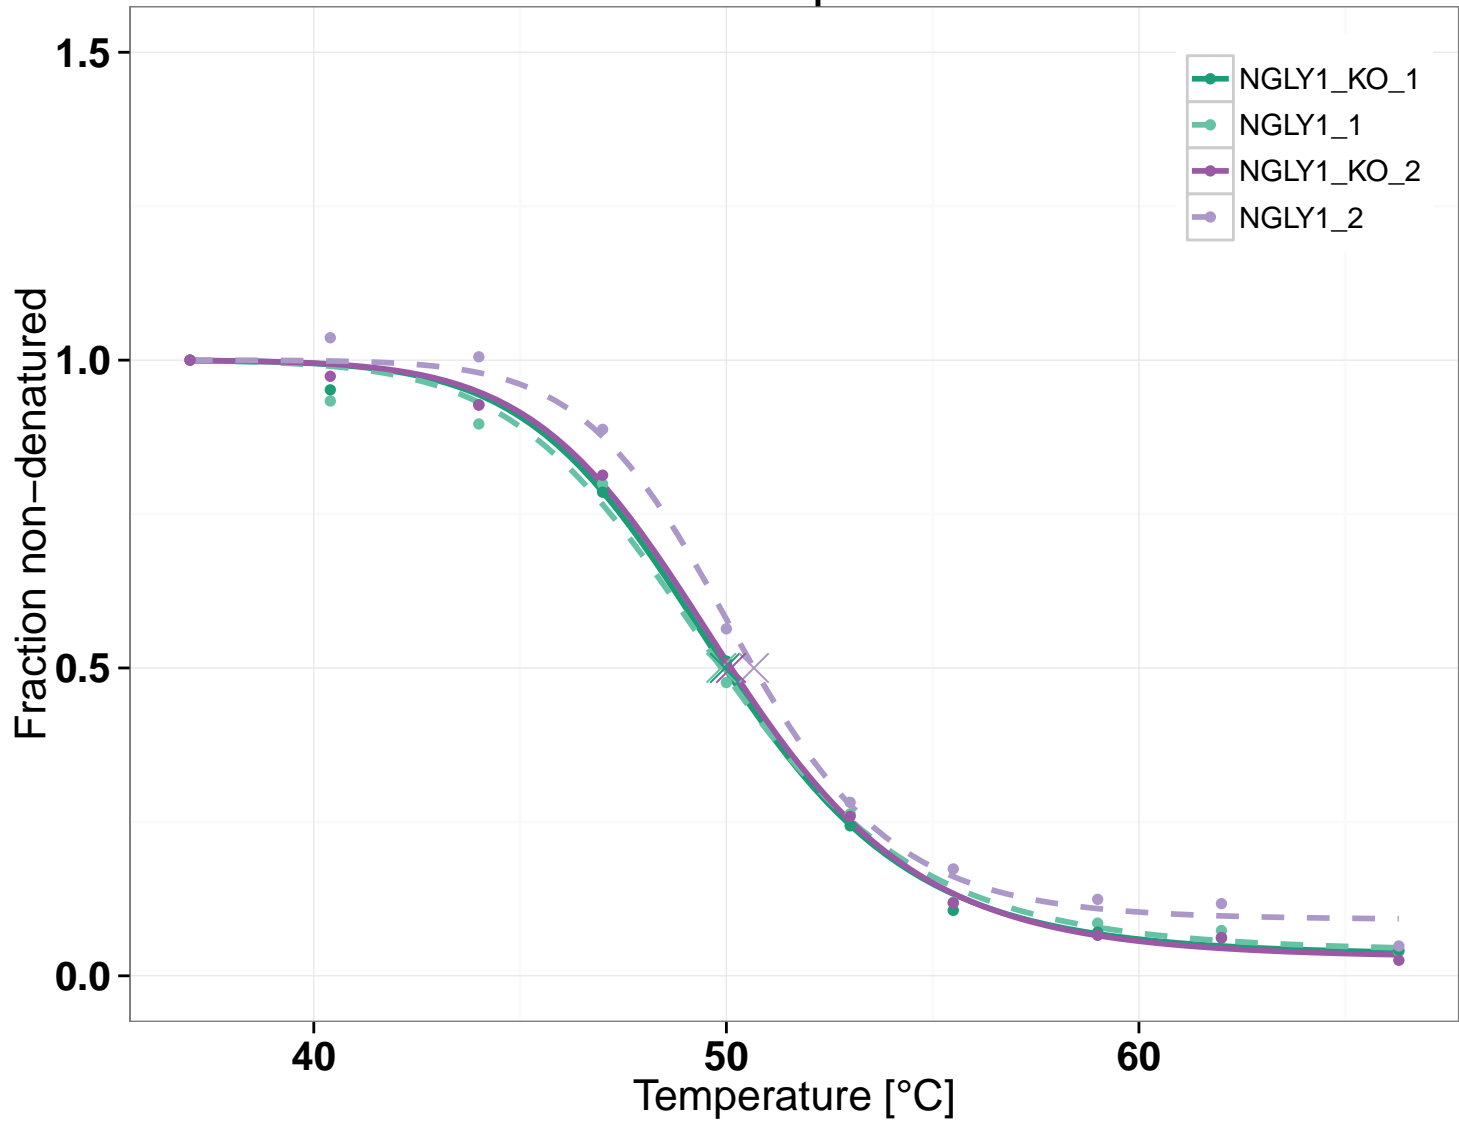

|            | meltPoint | slope  | plateau | R2 |
|------------|-----------|--------|---------|----|
| NGLY1_KO_1 | 49.97     | -0.1   | 0.03    | 1  |
| NGLY1_1    | 49.88     | -0.097 | 0.04    | 1  |
| NGLY1_KO_2 | 50.11     | -0.1   | 0.03    | 1  |
| NGLY1_2    | 50.67     | -0.12  | 0.09    | 1  |

Supplement: Supplementary file 6420 [file 1]

# IPI00645739.1|FUK

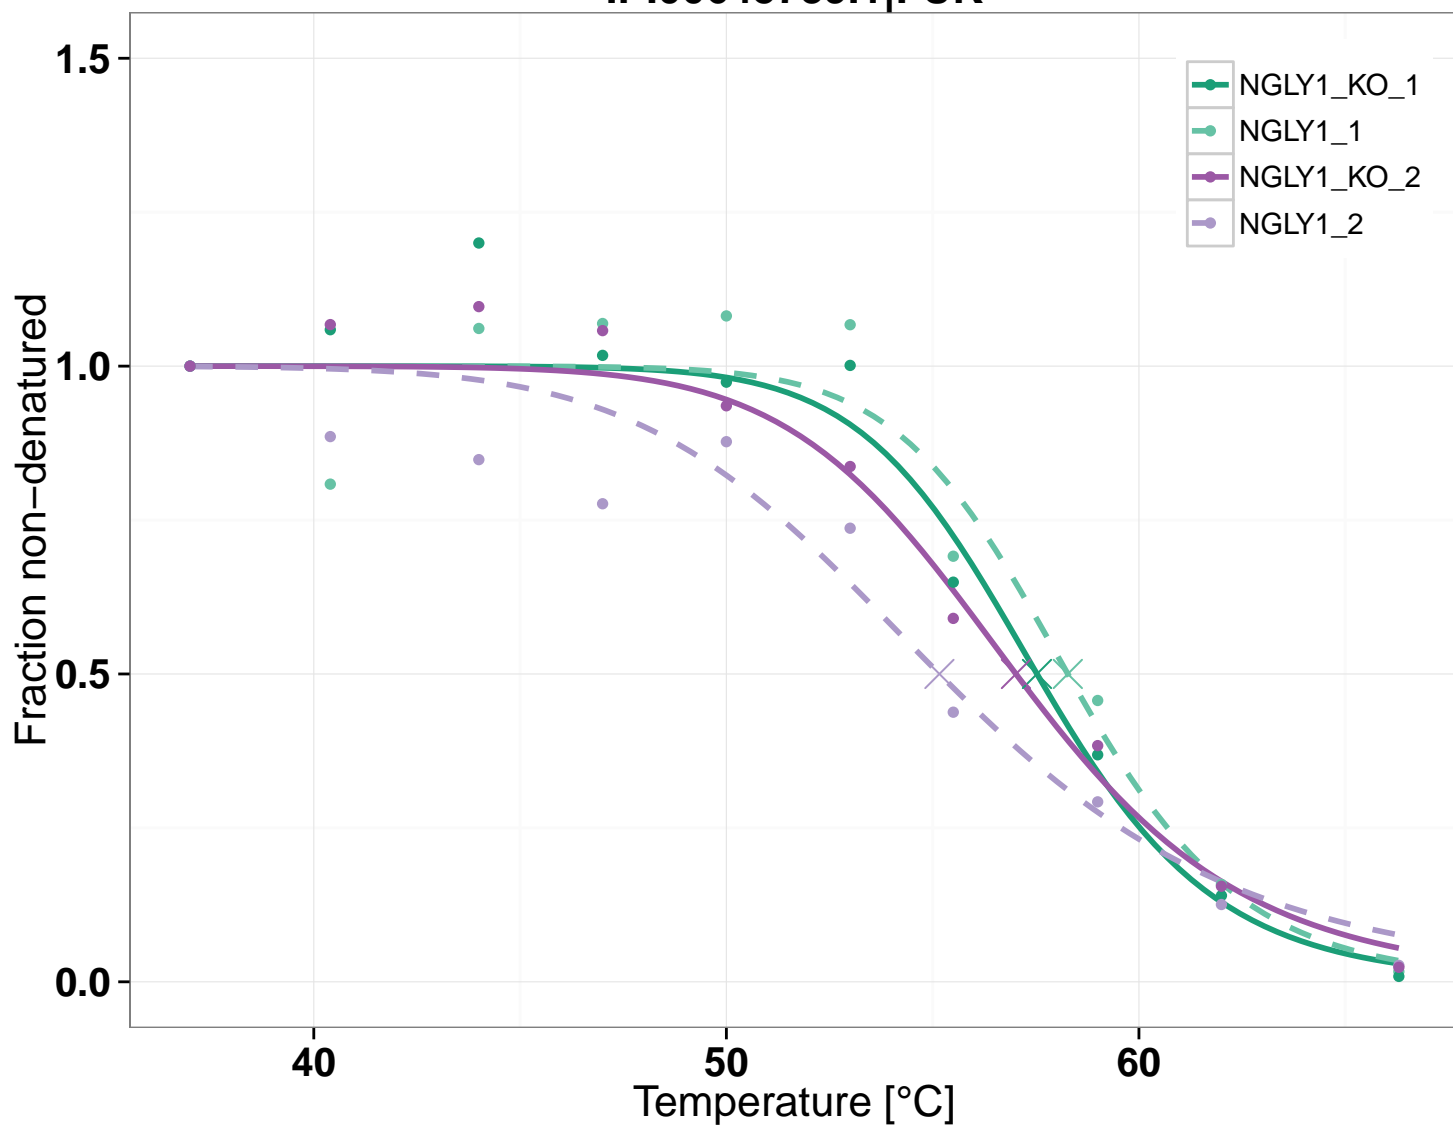

|            | meltPoint | slope  | plateau | R2   |
|------------|-----------|--------|---------|------|
| NGLY1_KO_1 | 57.53     | -0.12  | 0       | 0.96 |
| NGLY1_1    | 58.28     | -0.12  | 0       | 0.94 |
| NGLY1_KO_2 | 57.02     | -0.09  | 0       | 0.98 |
| NGLY1_2    | 55.16     | -0.069 | 0       | 0.94 |

Supplement: Supplementary file 6421 [file 1]

IPI00878867.1|27 KDA PROTEIN.

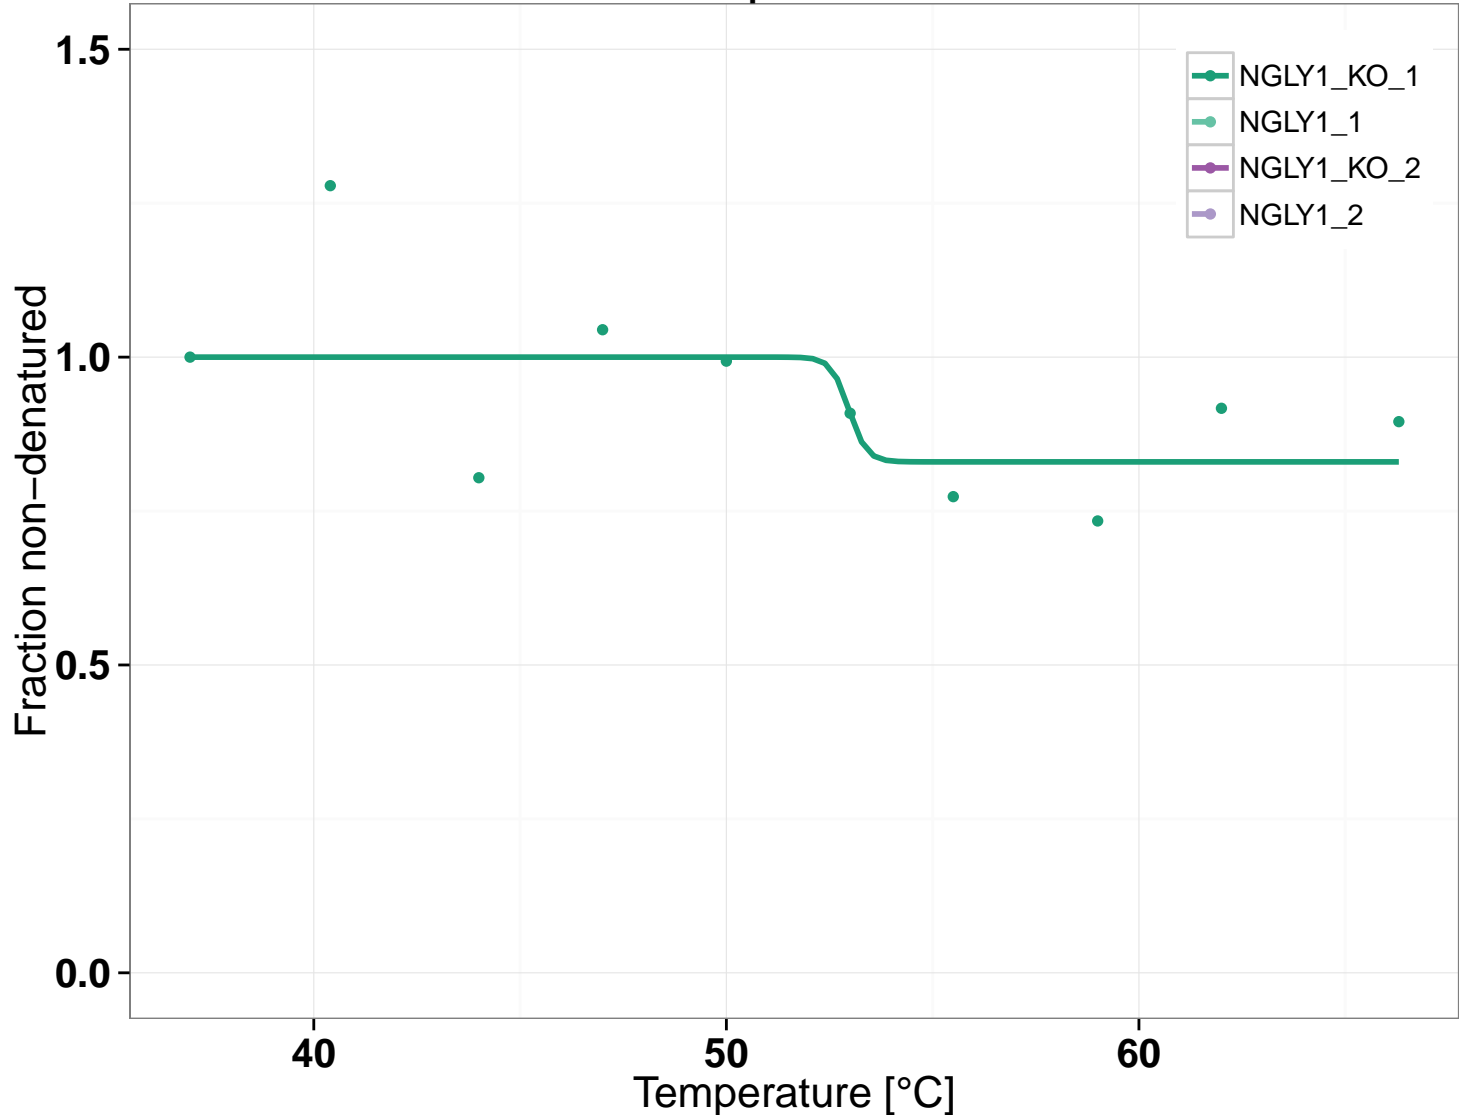

|            | meltPoint | slope | plateau | R2   |
|------------|-----------|-------|---------|------|
| NGLY1_KO_1 | —         | −0.2  | 0.83    | 0.36 |
| NGLY1_1    | —         | —     | —       | —    |
| NGLY1_KO_2 | —         | —     | —       | —    |
| NGLY1_2    | —         | —     | —       | —    |

Supplement: Supplementary file 6422 [file 1]

# IPI00333568.1|NFYA

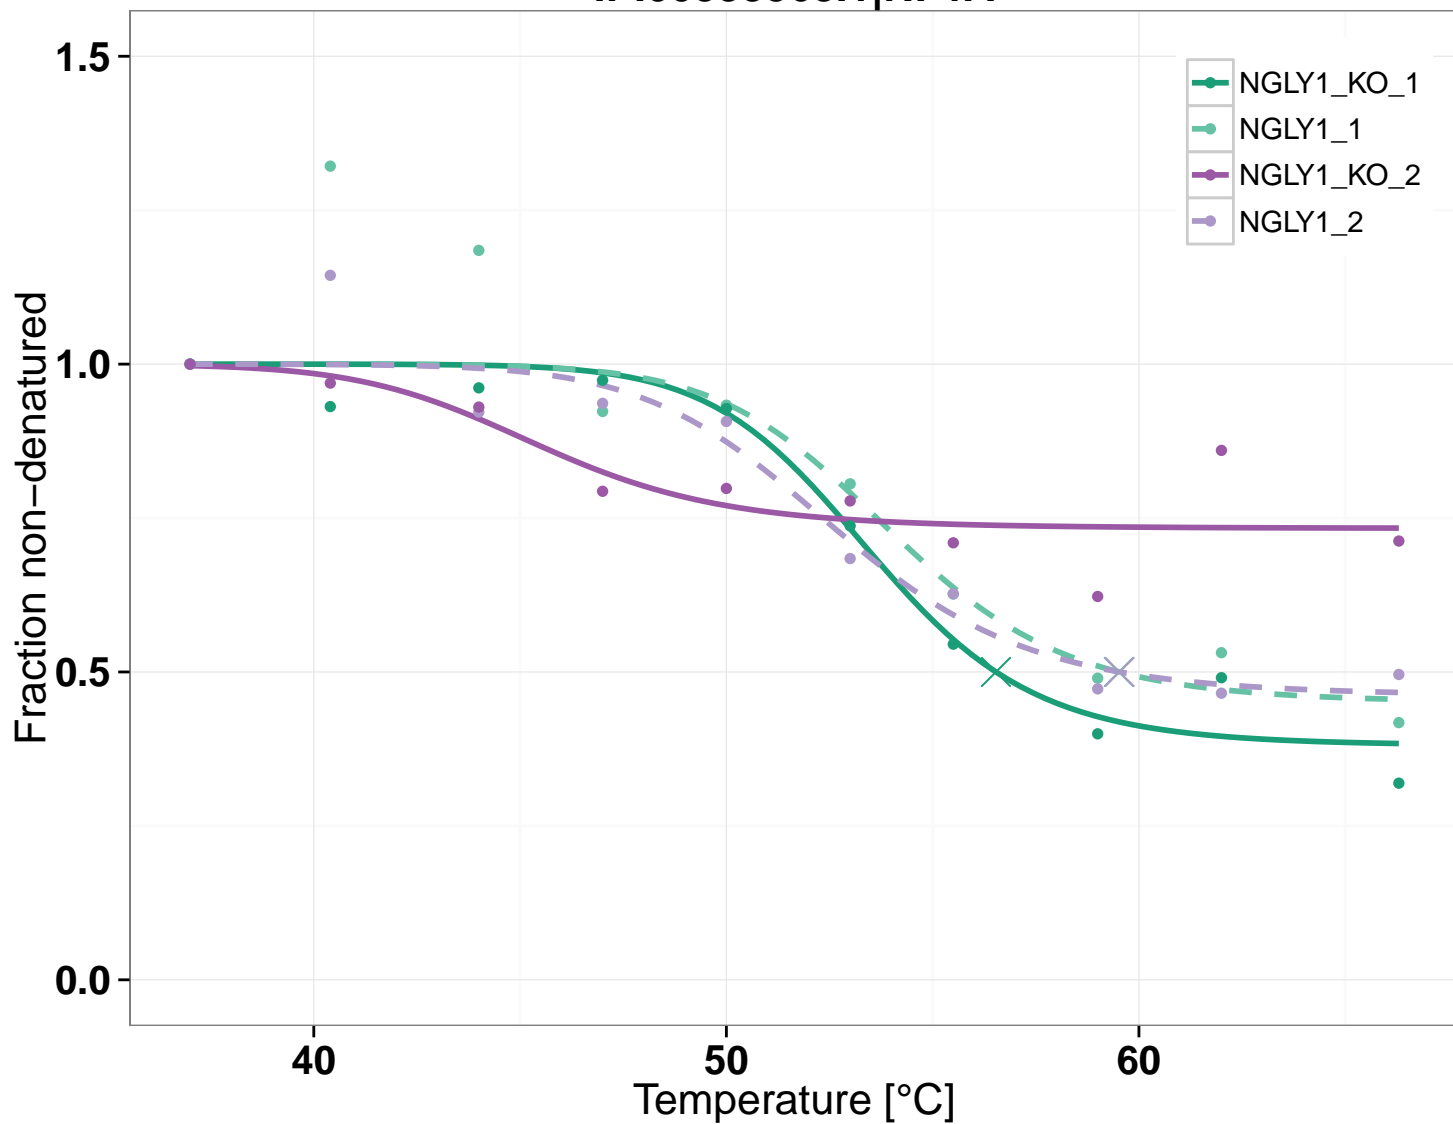

|            | meltPoint | slope  | plateau | R2   |
|------------|-----------|--------|---------|------|
| NGLY1_KO_1 | 56.53     | -0.079 | 0.38    | 0.97 |
| NGLY1_1    | 59.51     | -0.064 | 0.45    | 0.82 |
| NGLY1_KO_2 | -         | -0.03  | 0.73    | 0.75 |
| NGLY1_2    | 59.53     | -0.057 | 0.46    | 0.94 |

Supplement: Supplementary file 6423 [file 1]

IPI00329014.2|ANKRD46

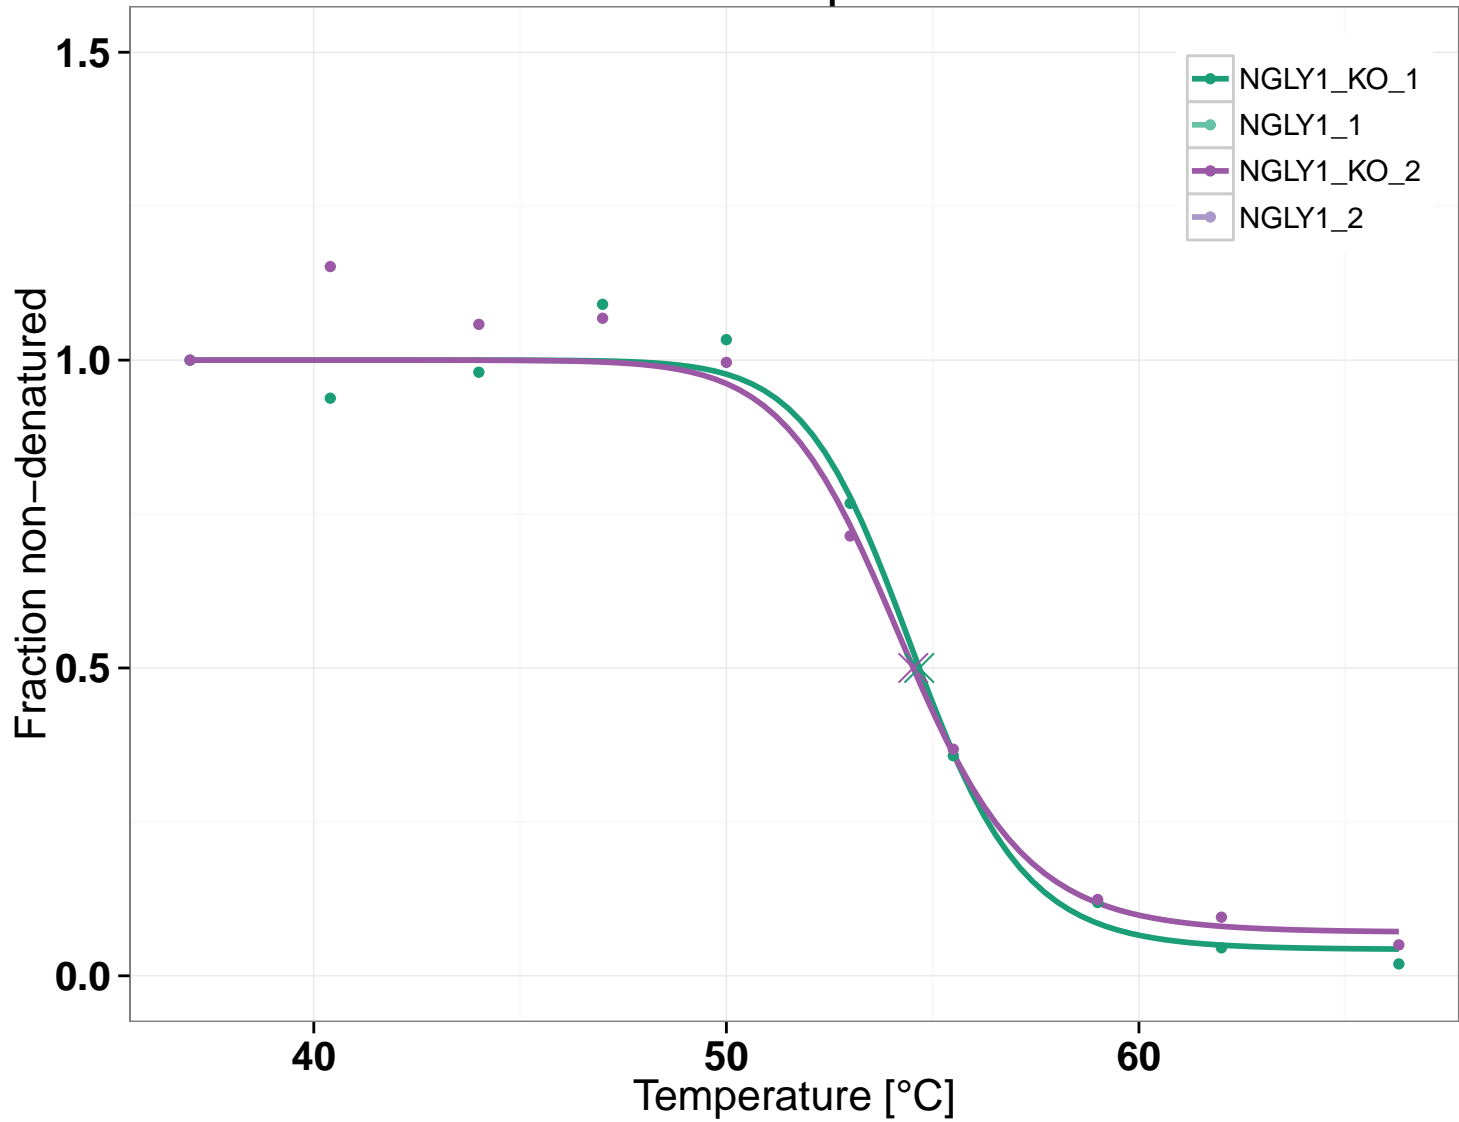

|            | meltPoint | slope | plateau | R2   |
|------------|-----------|-------|---------|------|
| NGLY1_KO_1 | 54.68     | -0.18 | 0.04    | 0.99 |
| NGLY1_1    | -         | -     | -       | -    |
| NGLY1_KO_2 | 54.53     | -0.16 | 0.07    | 0.98 |
| NGLY1_2    | -         | -     | -       | -    |

Supplement: Supplementary file 6424 [file 1]

IPI00643554.1|RGS10

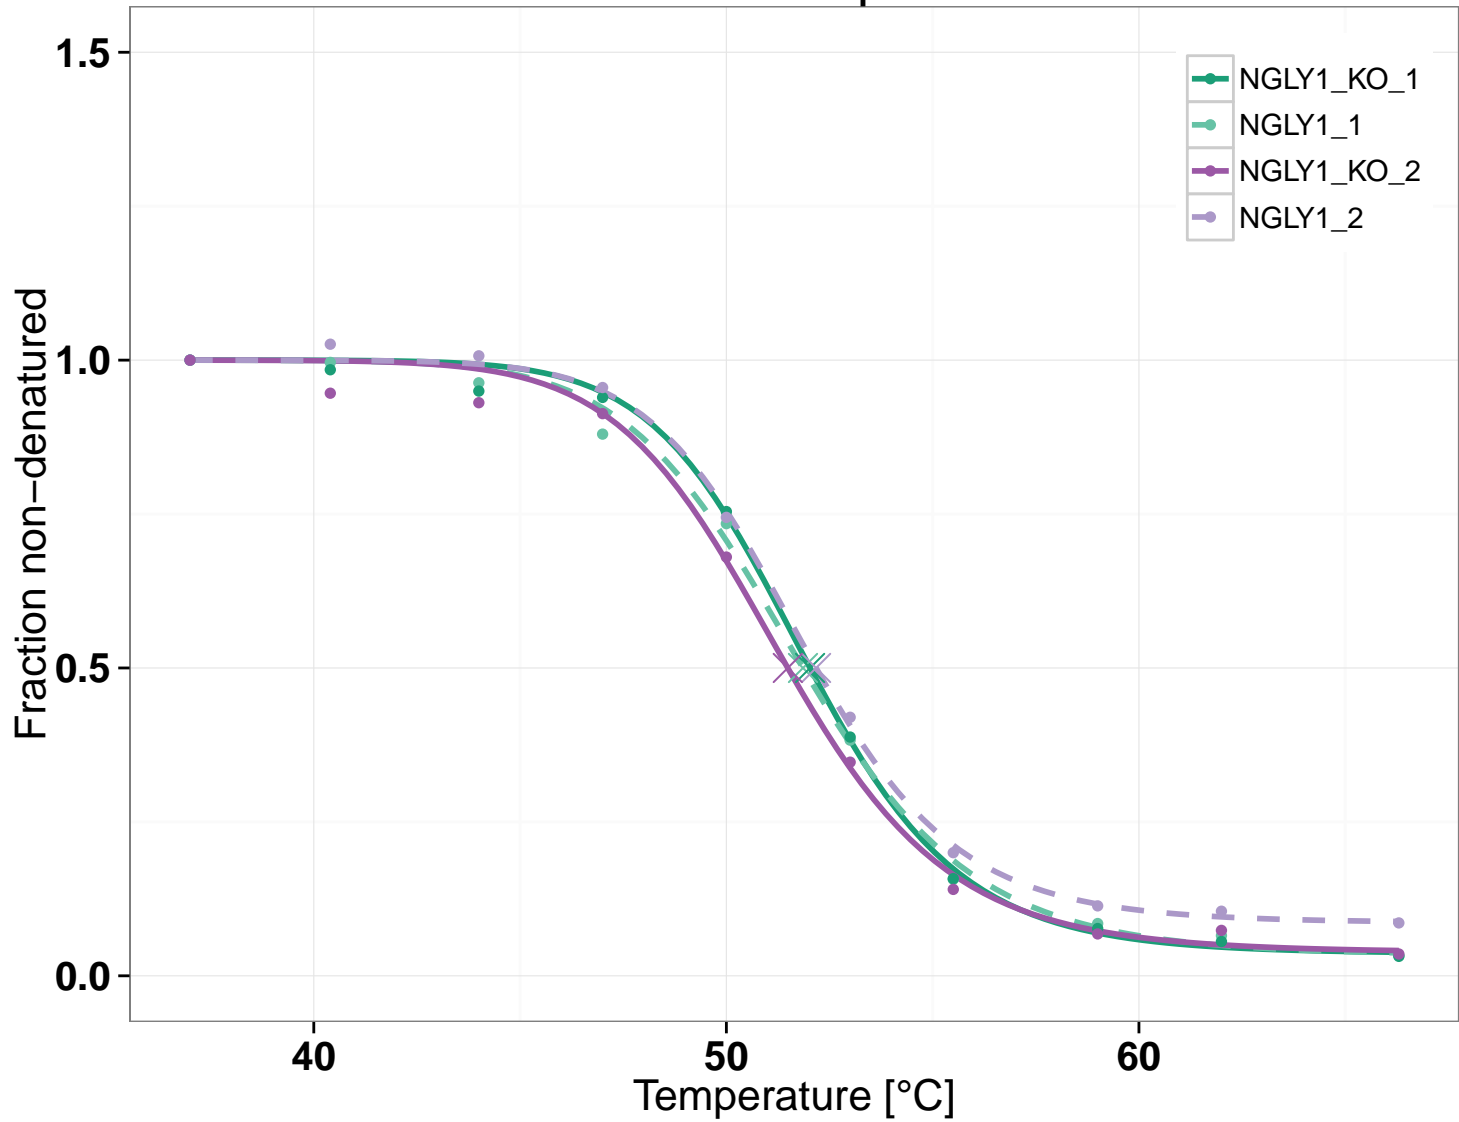

|            | meltPoint | slope | plateau | R2 |
|------------|-----------|-------|---------|----|
| NGLY1_KO_1 | 52.03     | -0.13 | 0.04    | 1  |
| NGLY1_1    | 51.86     | -0.11 | 0.03    | 1  |
| NGLY1_KO_2 | 51.49     | -0.12 | 0.04    | 1  |
| NGLY1_2    | 52.17     | -0.12 | 0.09    | 1  |

Supplement: Supplementary file 6425 [file 1]

IPI00549389.3|METTL11A

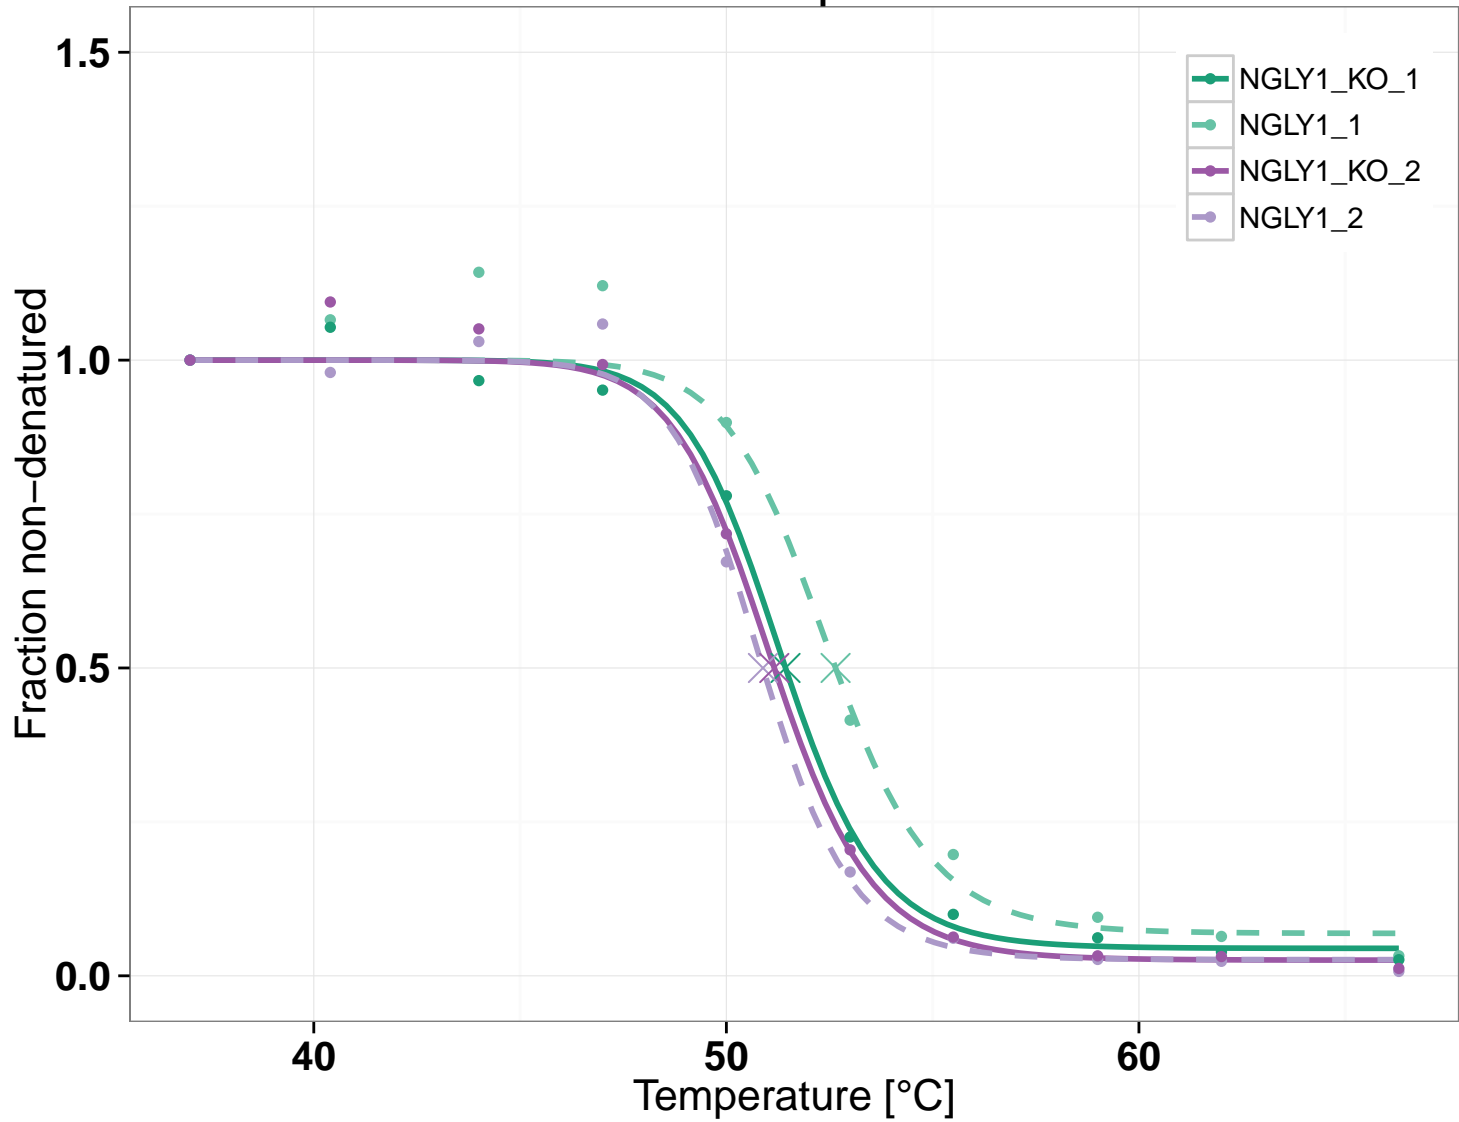

|            | meltPoint | slope | plateau | R2   |
|------------|-----------|-------|---------|------|
| NGLY1_KO_1 | 51.43     | -0.2  | 0.04    | 1    |
| NGLY1_1    | 52.65     | -0.18 | 0.07    | 0.98 |
| NGLY1_KO_2 | 51.16     | -0.2  | 0.03    | 0.99 |
| NGLY1_2    | 50.89     | -0.22 | 0.03    | 1    |

Supplement: Supplementary file 6426 [file 1]
