# Supplementary material (part 65 of 85)
Source: publisher figshare collection journal article supplement (https://gsajournals.figshare.com/articles/dataset/_/12014913)

# IPI00023987.5|PPCS

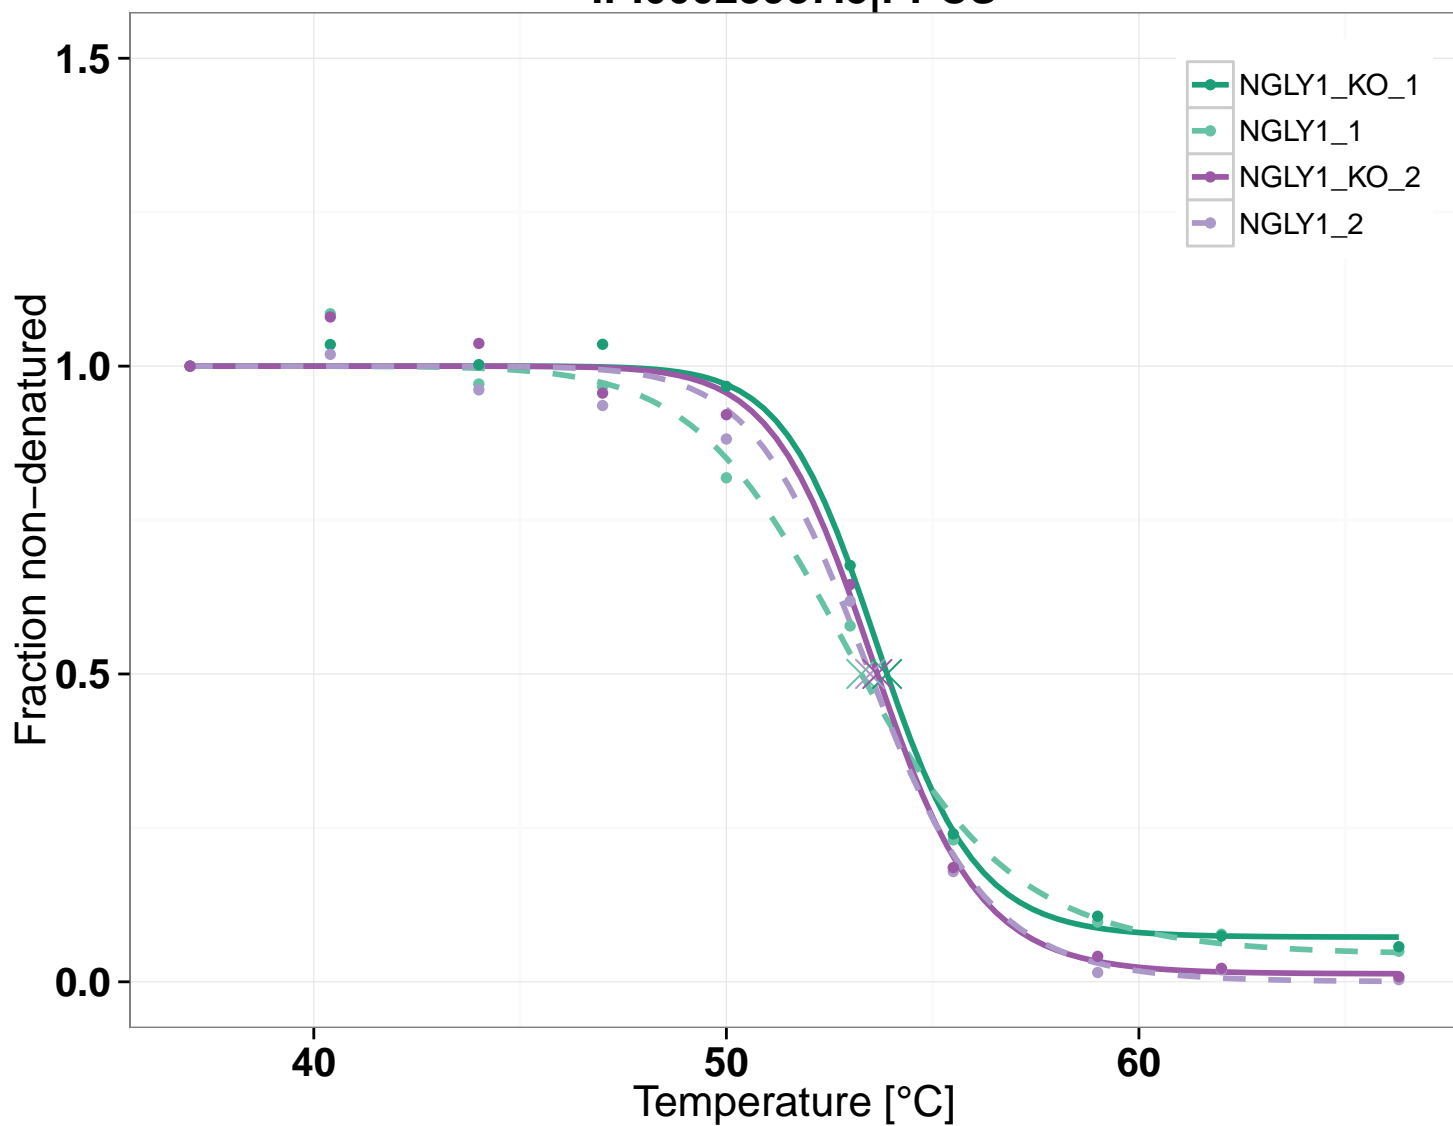

|            | meltPoint | slope | plateau | R2   |
|------------|-----------|-------|---------|------|
| NGLY1_KO_1 | 53.89     | -0.2  | 0.07    | 1    |
| NGLY1_1    | 53.27     | -0.12 | 0.04    | 0.99 |
| NGLY1_KO_2 | 53.66     | -0.2  | 0.01    | 0.99 |
| NGLY1_2    | 53.48     | -0.17 | 0       | 0.99 |

Supplement: Supplementary file 6427 [file 1]

IPI00385992.4|SPRYD3

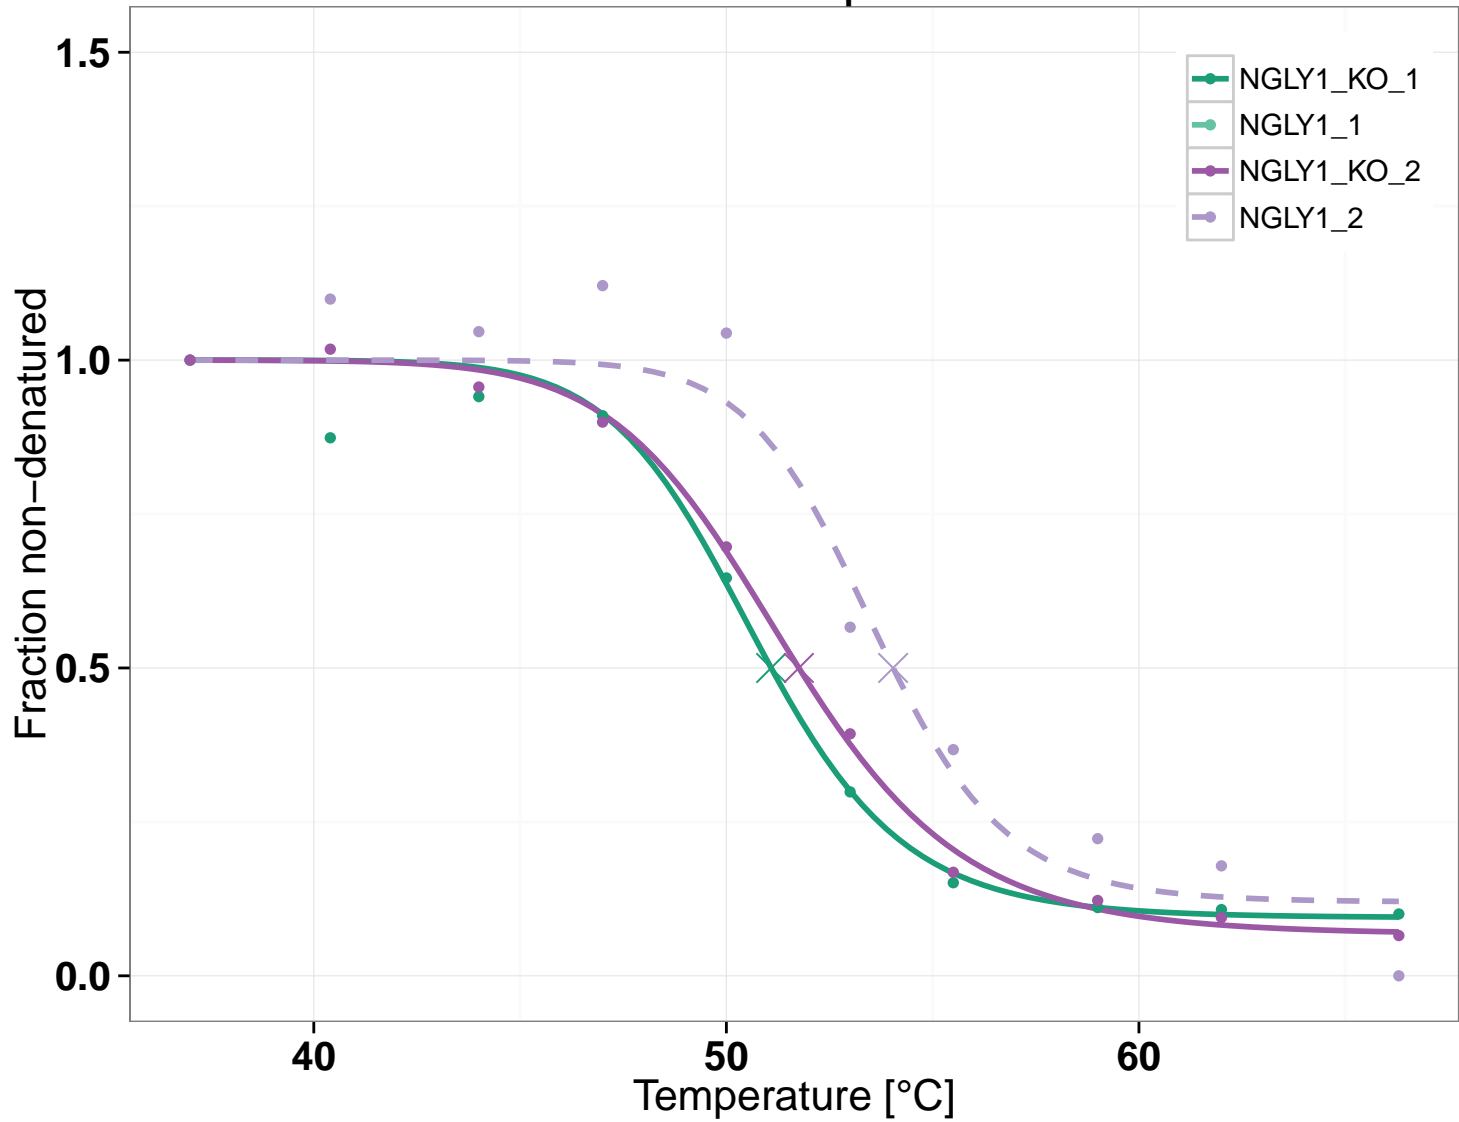

|            | meltPoint | slope | plateau | R2   |
|------------|-----------|-------|---------|------|
| NGLY1_KO_1 | 51.09     | -0.13 | 0.09    | 0.99 |
| NGLY1_1    | -         | -     | -       | -    |
| NGLY1_KO_2 | 51.76     | -0.11 | 0.07    | 1    |
| NGLY1_2    | 54.04     | -0.14 | 0.12    | 0.96 |

Supplement: Supplementary file 6428 [file 1]

IPI00303059.3|TSPAN14

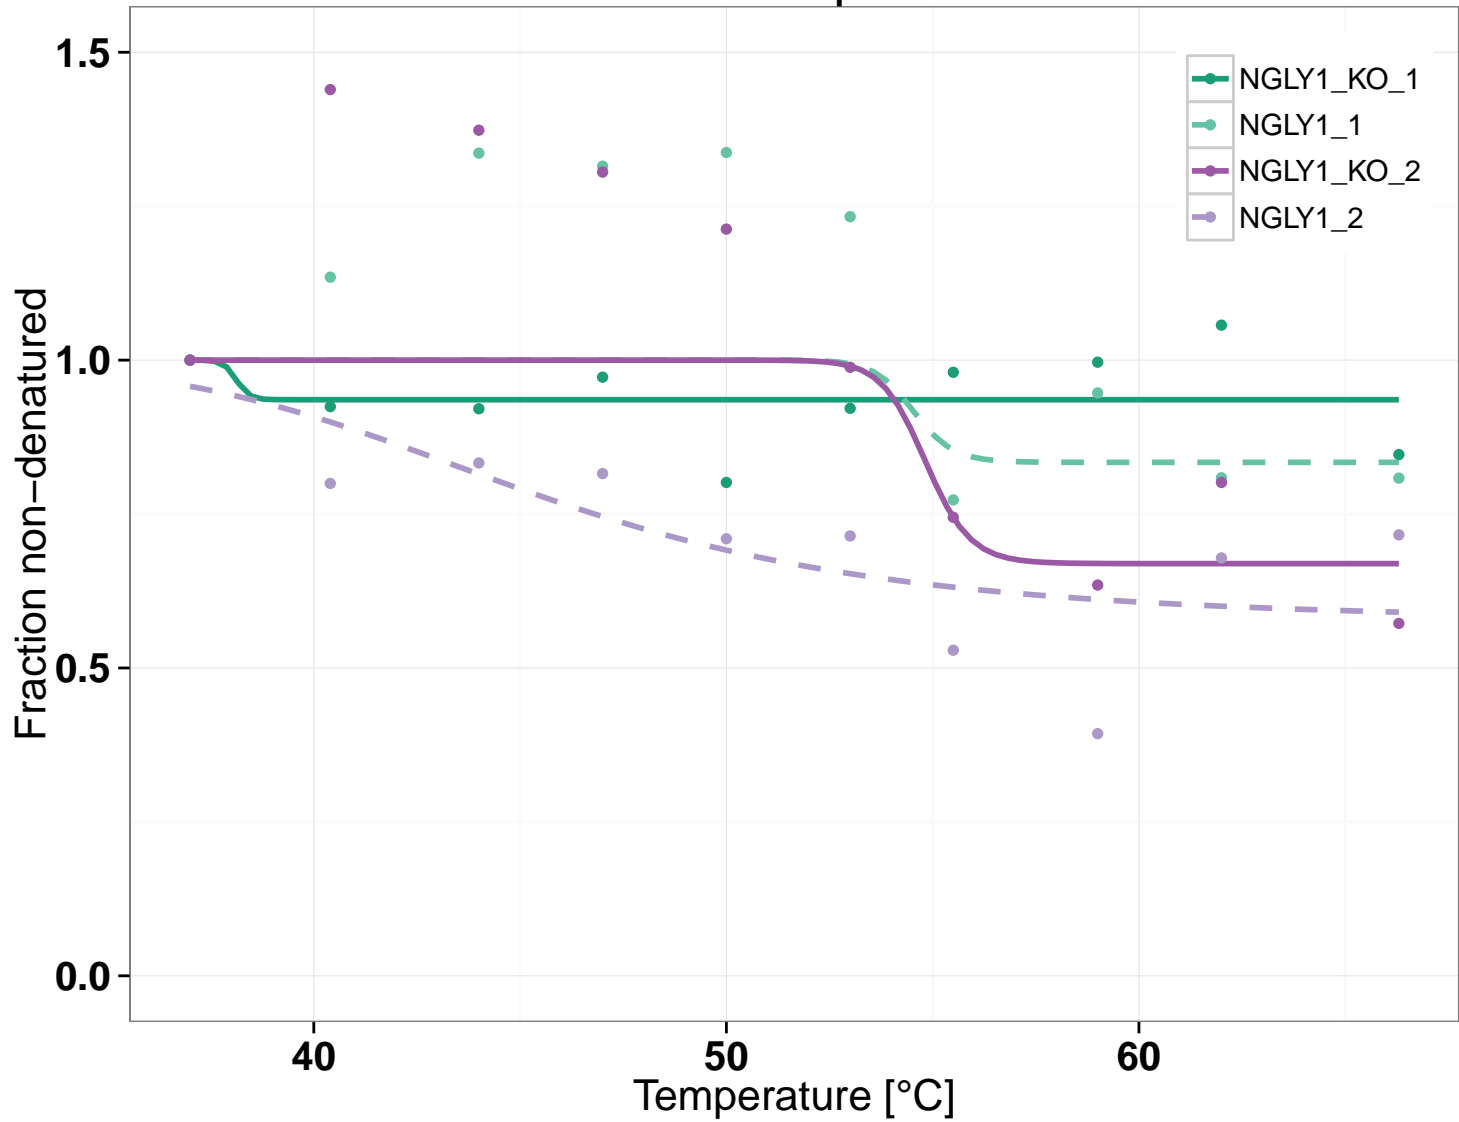

|            | meltPoint | slope  | plateau | R2   |
|------------|-----------|--------|---------|------|
| NGLY1_KO_1 | -         | -0.11  | 0.94    | 0.07 |
| NGLY1_1    | -         | -0.086 | 0.83    | 0.12 |
| NGLY1_KO_2 | -         | -0.15  | 0.67    | 0.44 |
| NGLY1_2    | -         | -0.024 | 0.57    | 0.6  |

Supplement: Supplementary file 6429 [file 1]

IPI00003309.4|POLR2H

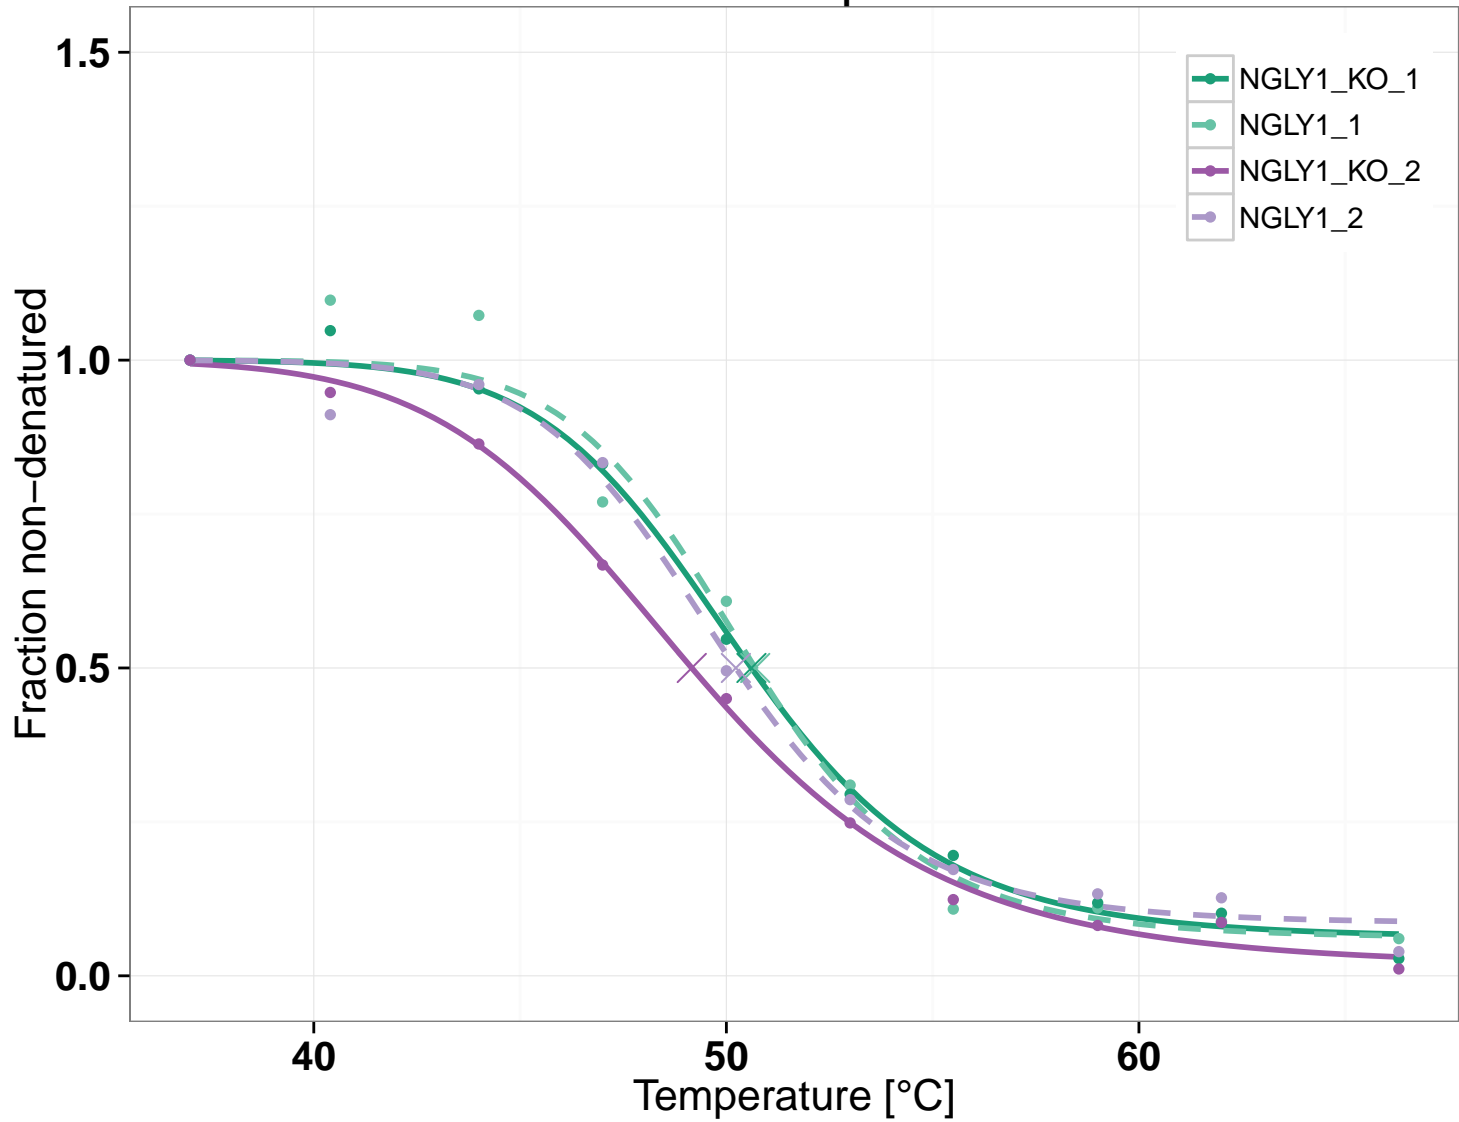

|            | meltPoint | slope  | plateau | R2   |
|------------|-----------|--------|---------|------|
| NGLY1_KO_1 | 50.61     | -0.097 | 0.06    | 1    |
| NGLY1_1    | 50.7      | -0.11  | 0.06    | 0.98 |
| NGLY1_KO_2 | 49.16     | -0.08  | 0.01    | 1    |
| NGLY1_2    | 50.23     | -0.1   | 0.08    | 0.99 |

Supplement: Supplementary file 6430 [file 1]

IPI00001053.4|MMACHC

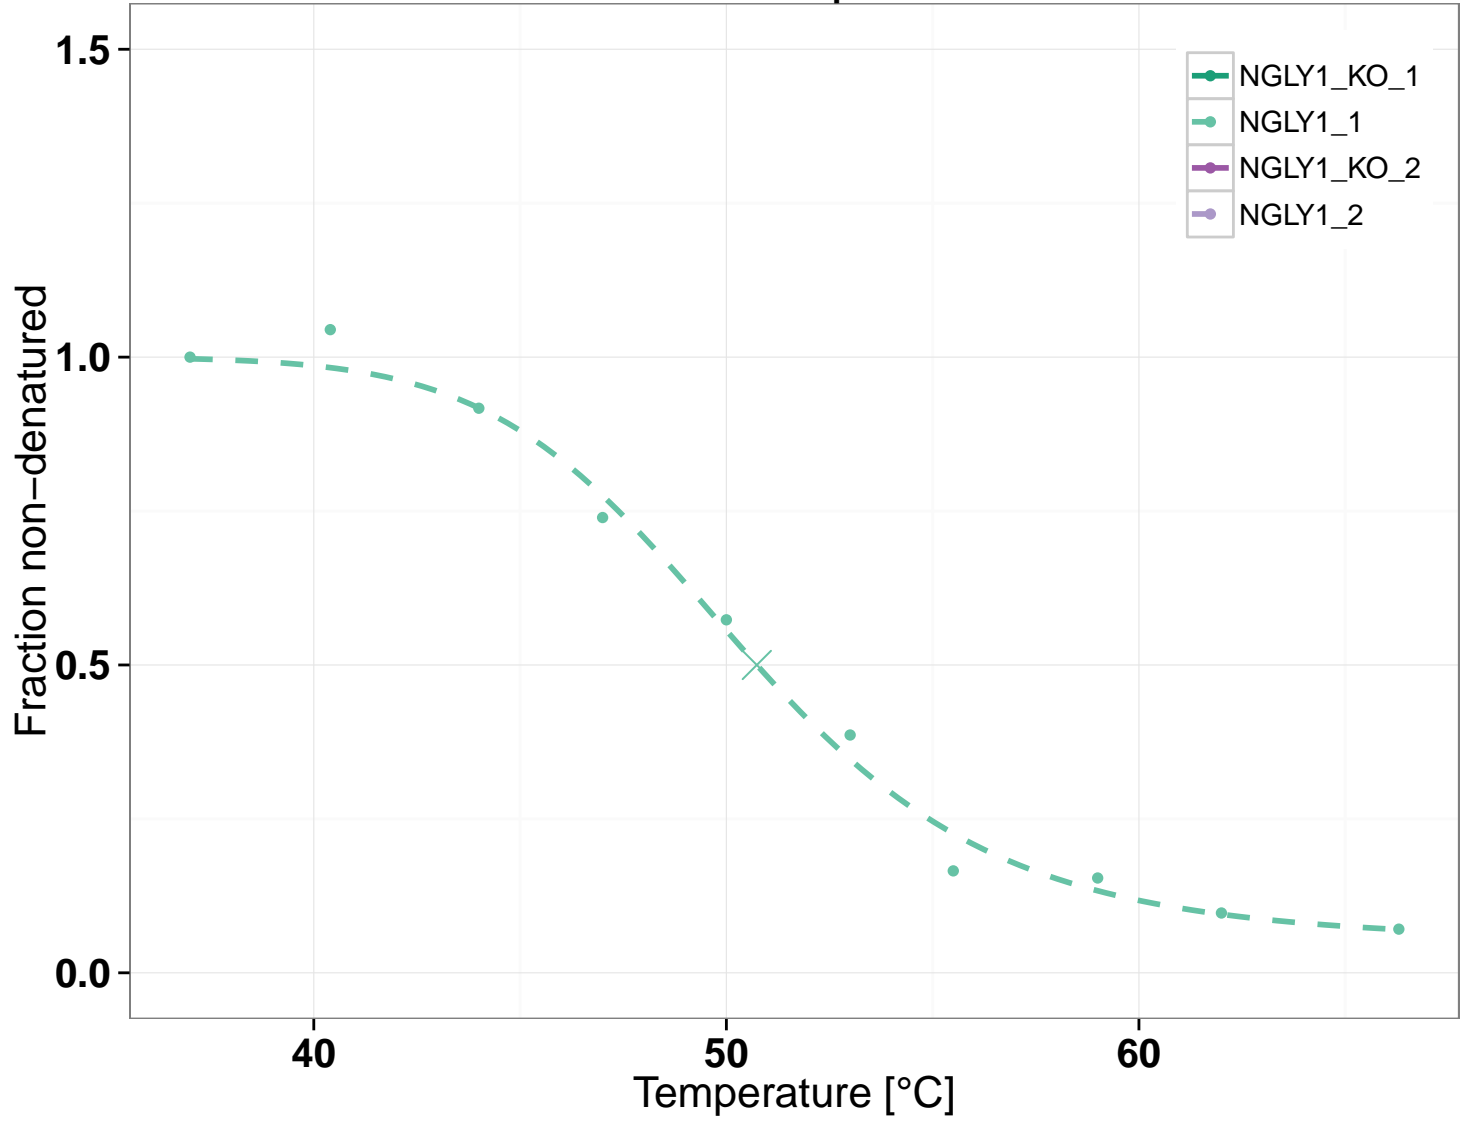

|            | meltPoint | slope  | plateau | R2   |
|------------|-----------|--------|---------|------|
| NGLY1_KO_1 | -         | -      | -       | -    |
| NGLY1_1    | 50.74     | -0.077 | 0.05    | 0.99 |
| NGLY1_KO_2 | -         | -      | -       | -    |
| NGLY1_2    | -         | -      | -       | -    |

Supplement: Supplementary file 6431 [file 1]

IPI00104050.3|THRAP3

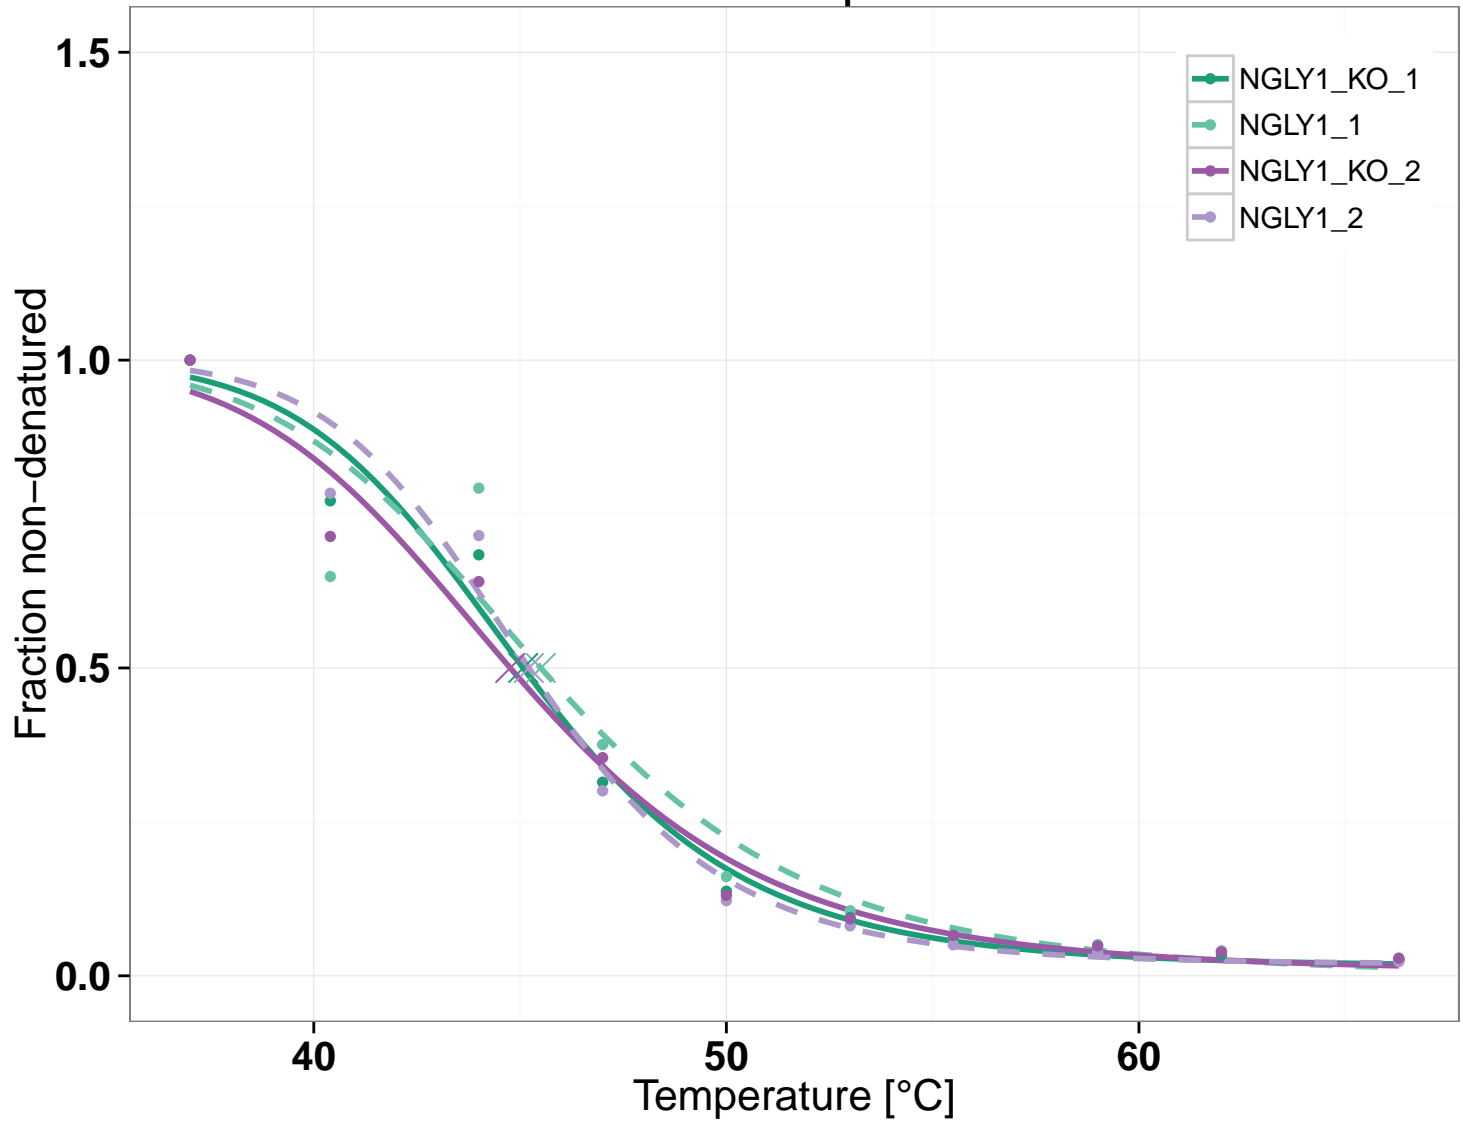

|            | meltPoint | slope  | plateau | R2   |
|------------|-----------|--------|---------|------|
| NGLY1_KO_1 | 45.07     | -0.091 | 0.01    | 0.98 |
| NGLY1_1    | 45.5      | -0.077 | 0       | 0.93 |
| NGLY1_KO_2 | 44.76     | -0.079 | 0.01    | 0.98 |
| NGLY1_2    | 45.21     | -0.1   | 0.02    | 0.98 |

Supplement: Supplementary file 6432 [file 1]

IPI00419721.1|EPM2AIP1

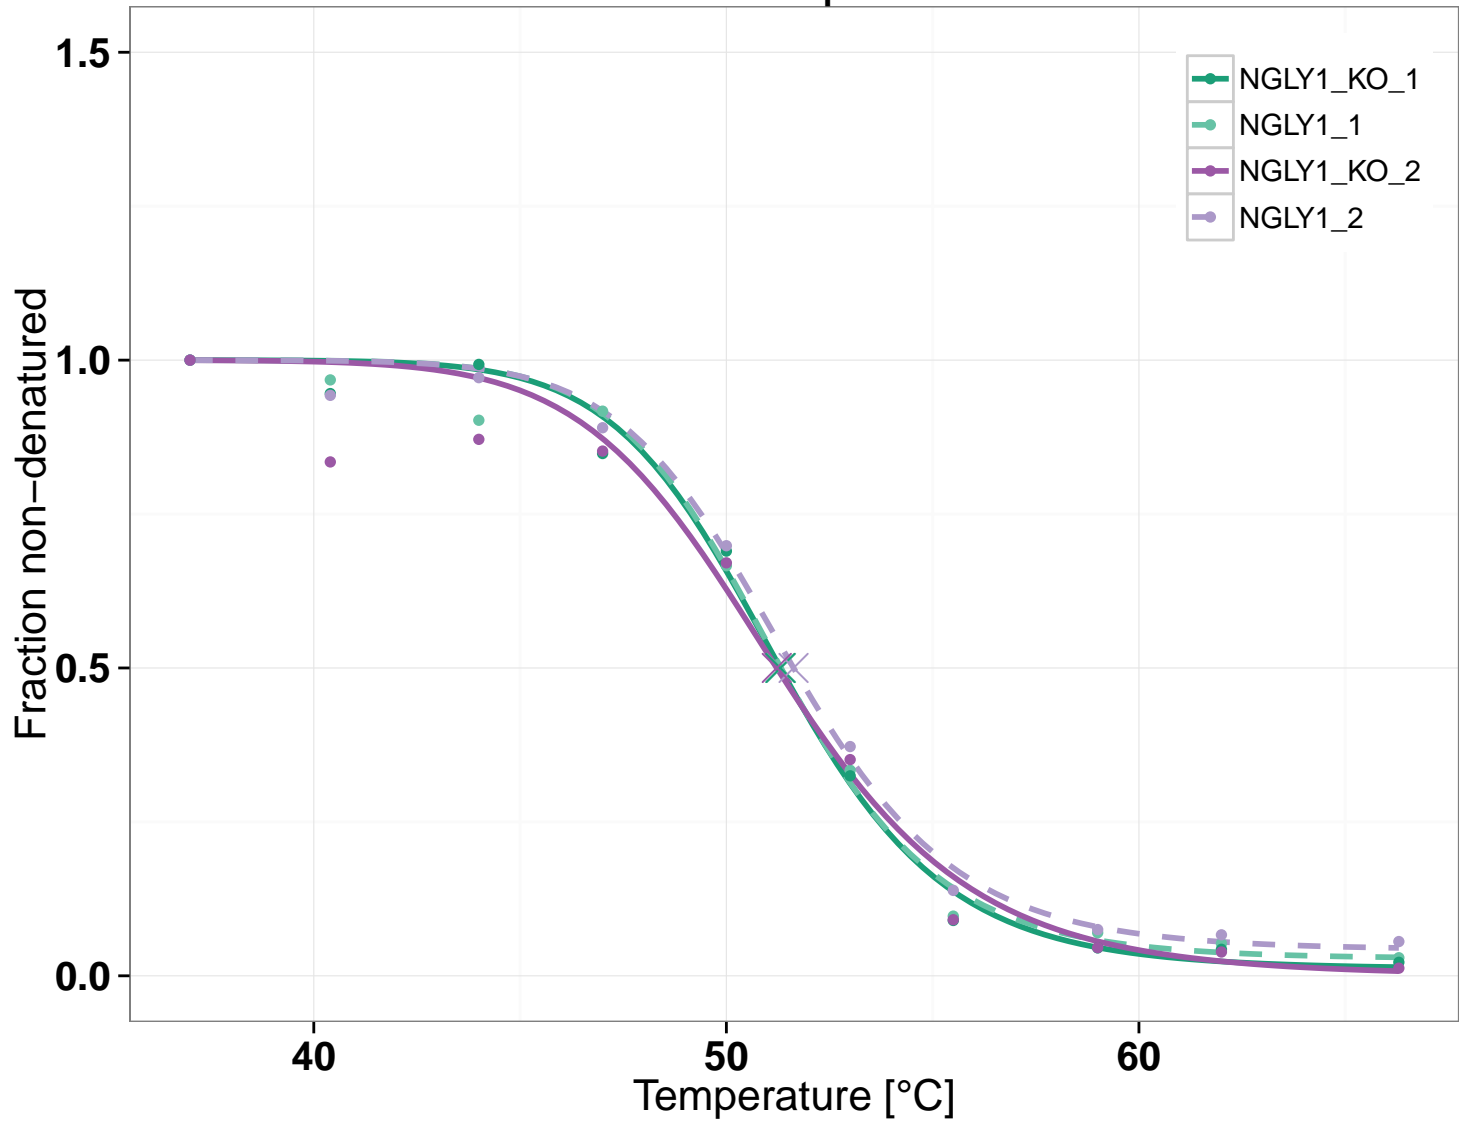

|            | meltPoint | slope | plateau | R2   |
|------------|-----------|-------|---------|------|
| NGLY1_KO_1 | 51.31     | -0.12 | 0.01    | 0.99 |
| NGLY1_1    | 51.32     | -0.12 | 0.03    | 0.99 |
| NGLY1_KO_2 | 51.22     | -0.11 | 0       | 0.97 |
| NGLY1_2    | 51.63     | -0.12 | 0.04    | 1    |

Supplement: Supplementary file 6433 [file 1]

IPI00183054.1|MIB1

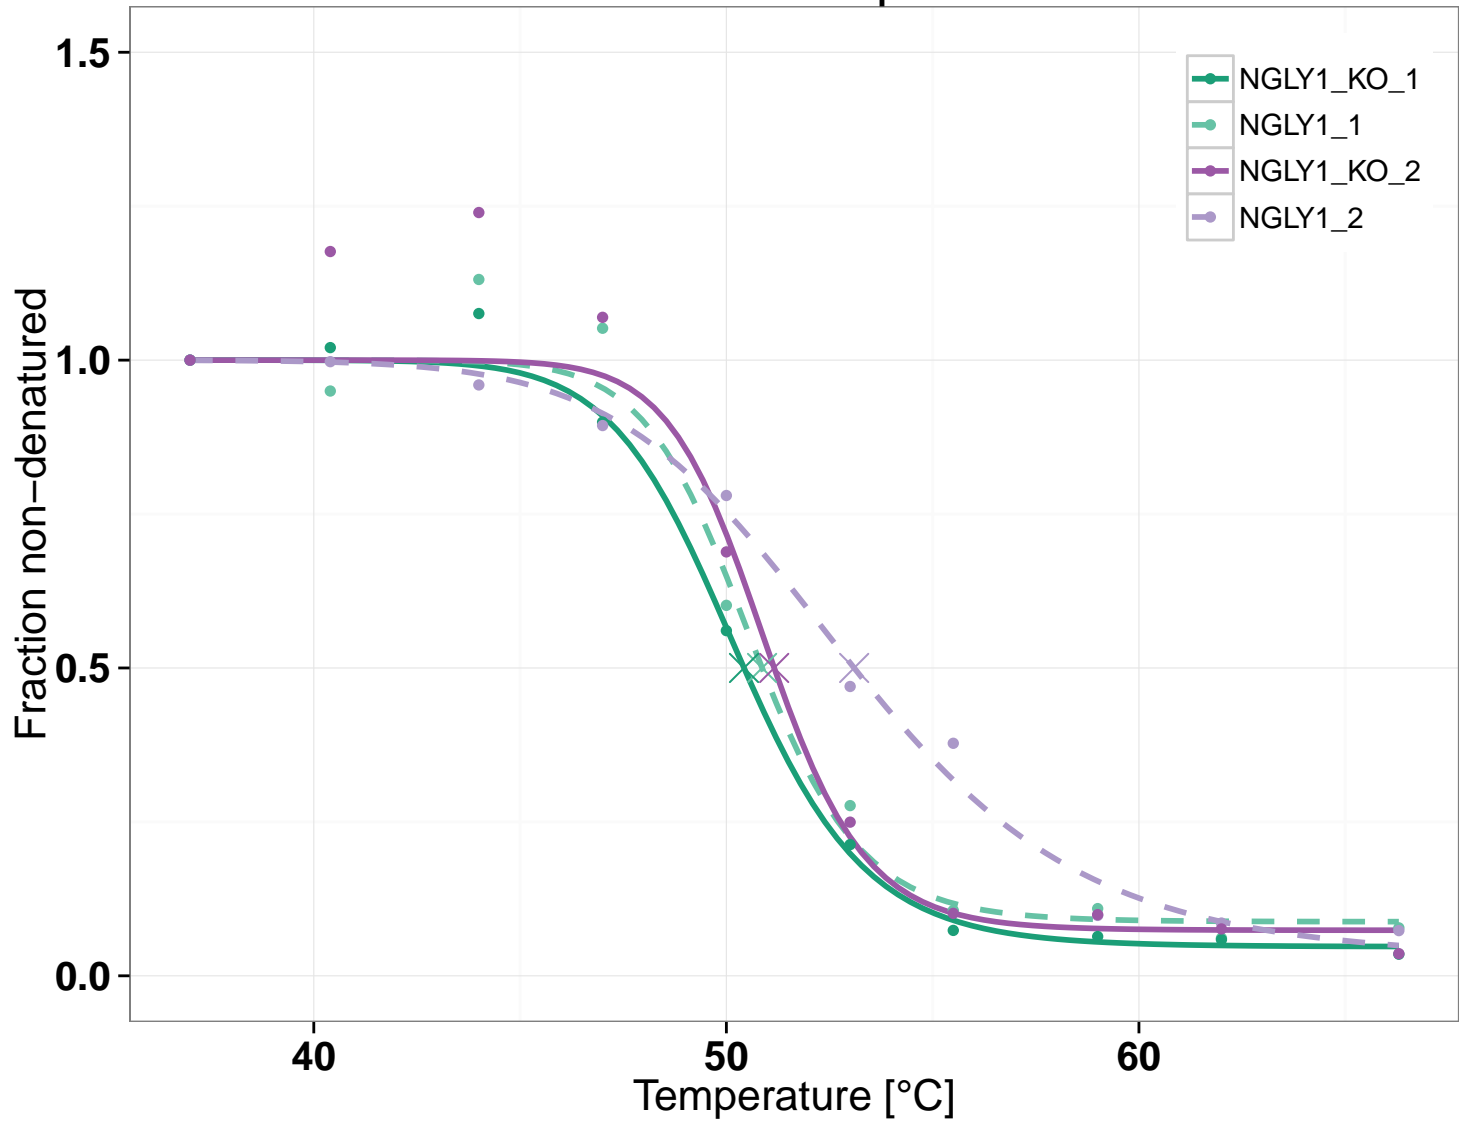

|            | meltPoint | slope  | plateau | R2   |
|------------|-----------|--------|---------|------|
| NGLY1_KO_1 | 50.43     | -0.15  | 0.05    | 1    |
| NGLY1_1    | 50.87     | -0.17  | 0.09    | 0.98 |
| NGLY1_KO_2 | 51.16     | -0.19  | 0.07    | 0.96 |
| NGLY1_2    | 53.1      | -0.086 | 0.03    | 0.99 |

Supplement: Supplementary file 6434 [file 1]

# IPI00759695.1|RHBDD2

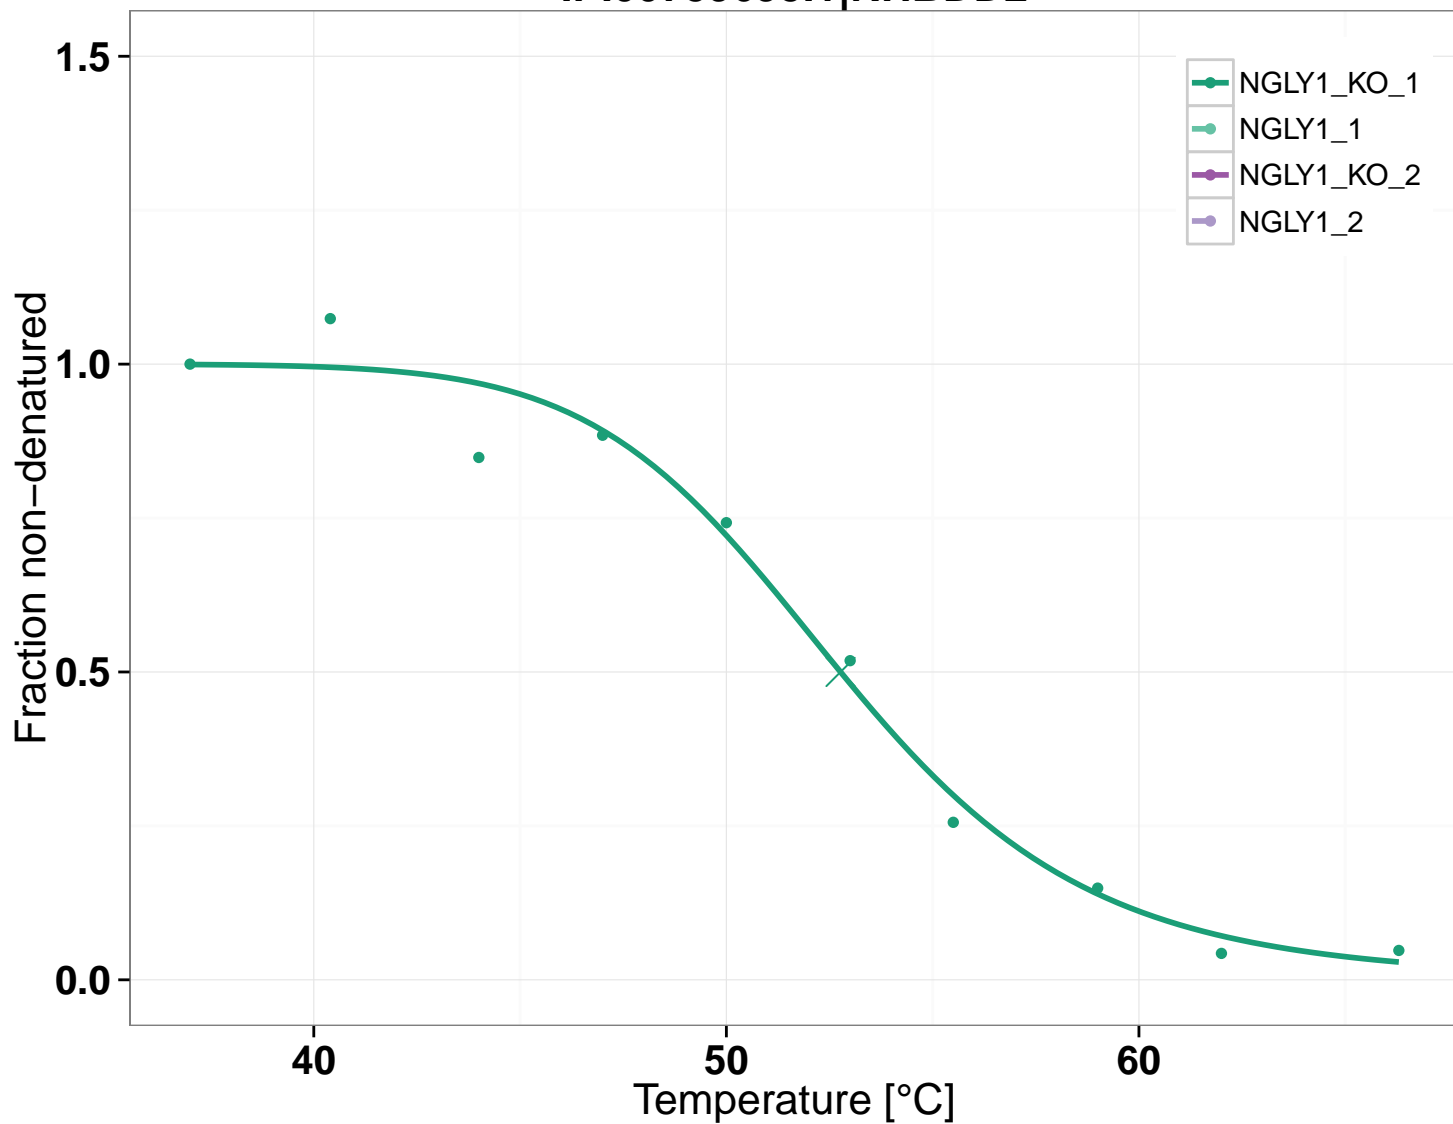

|            | meltPoint | slope  | plateau | R2   |
|------------|-----------|--------|---------|------|
| NGLY1_KO_1 | 52.77     | -0.083 | 0       | 0.98 |
| NGLY1_1    | —         | —      | —       | —    |
| NGLY1_KO_2 | —         | —      | —       | —    |
| NGLY1_2    | —         | —      | —       | —    |

Supplement: Supplementary file 6435 [file 1]

IPI00164246.2|IQWD1

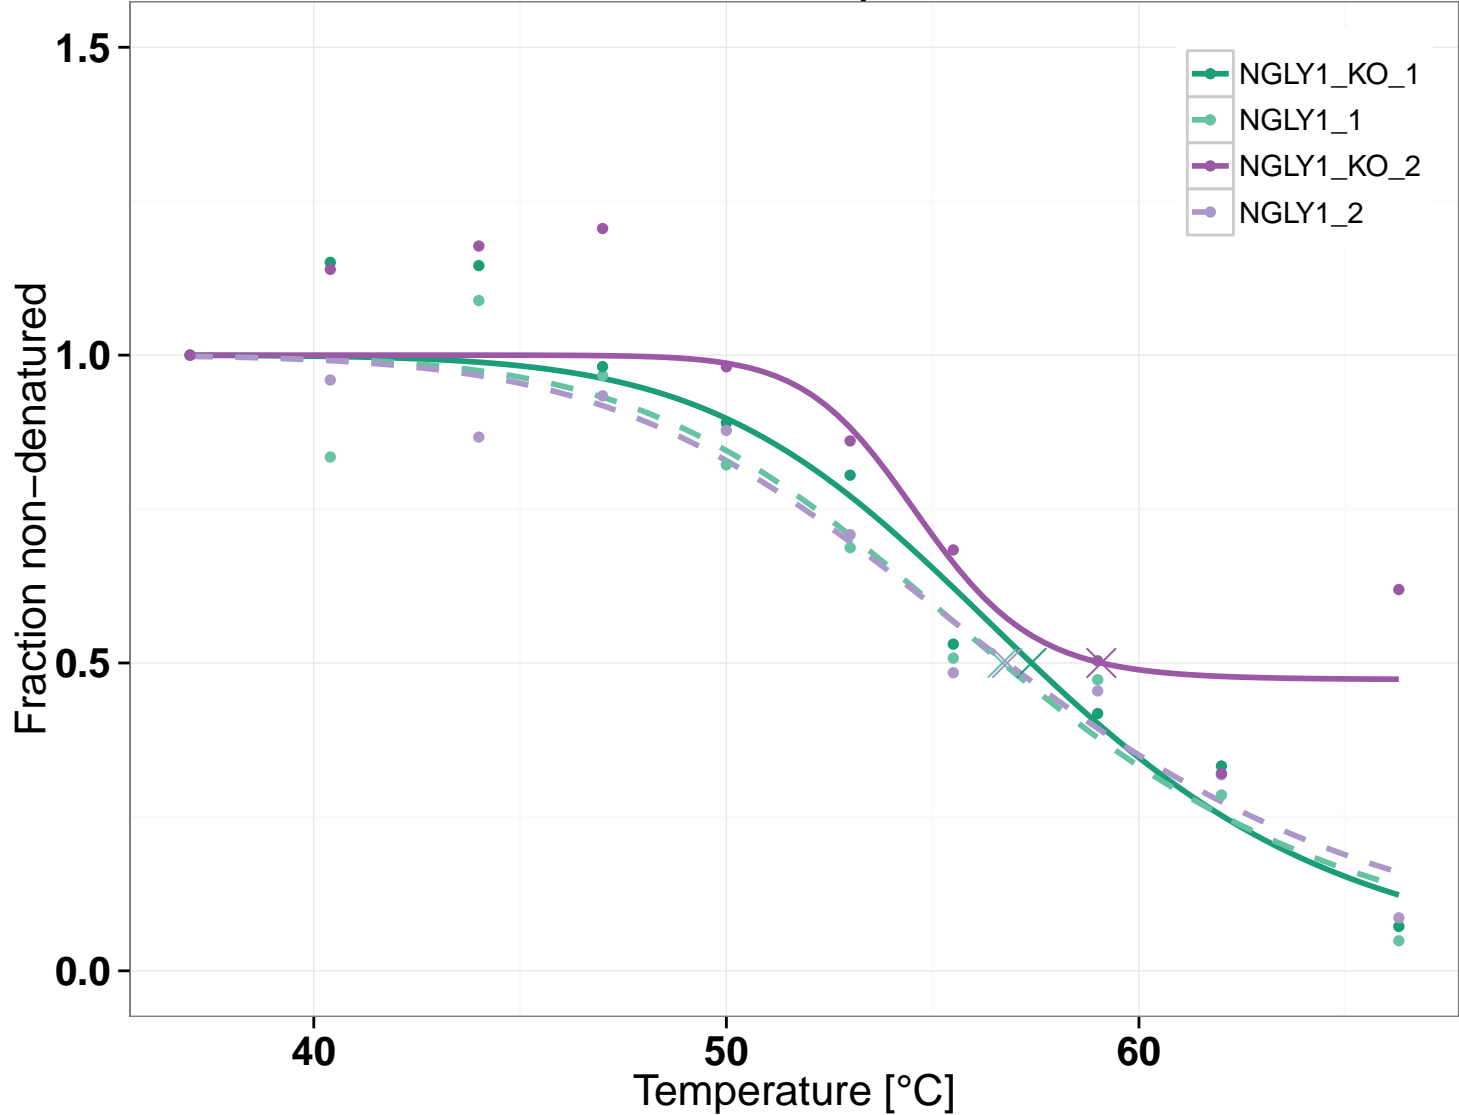

|            | meltPoint | slope  | plateau | R2   |
|------------|-----------|--------|---------|------|
| NGLY1_KO_1 | 57.4      | -0.065 | 0       | 0.95 |
| NGLY1_1    | 56.69     | -0.057 | 0       | 0.94 |
| NGLY1_KO_2 | 59.09     | -0.095 | 0.47    | 0.83 |
| NGLY1_2    | 56.8      | -0.052 | 0       | 0.96 |

Supplement: Supplementary file 6436 [file 1]

IPI00004567.1|PRMT7

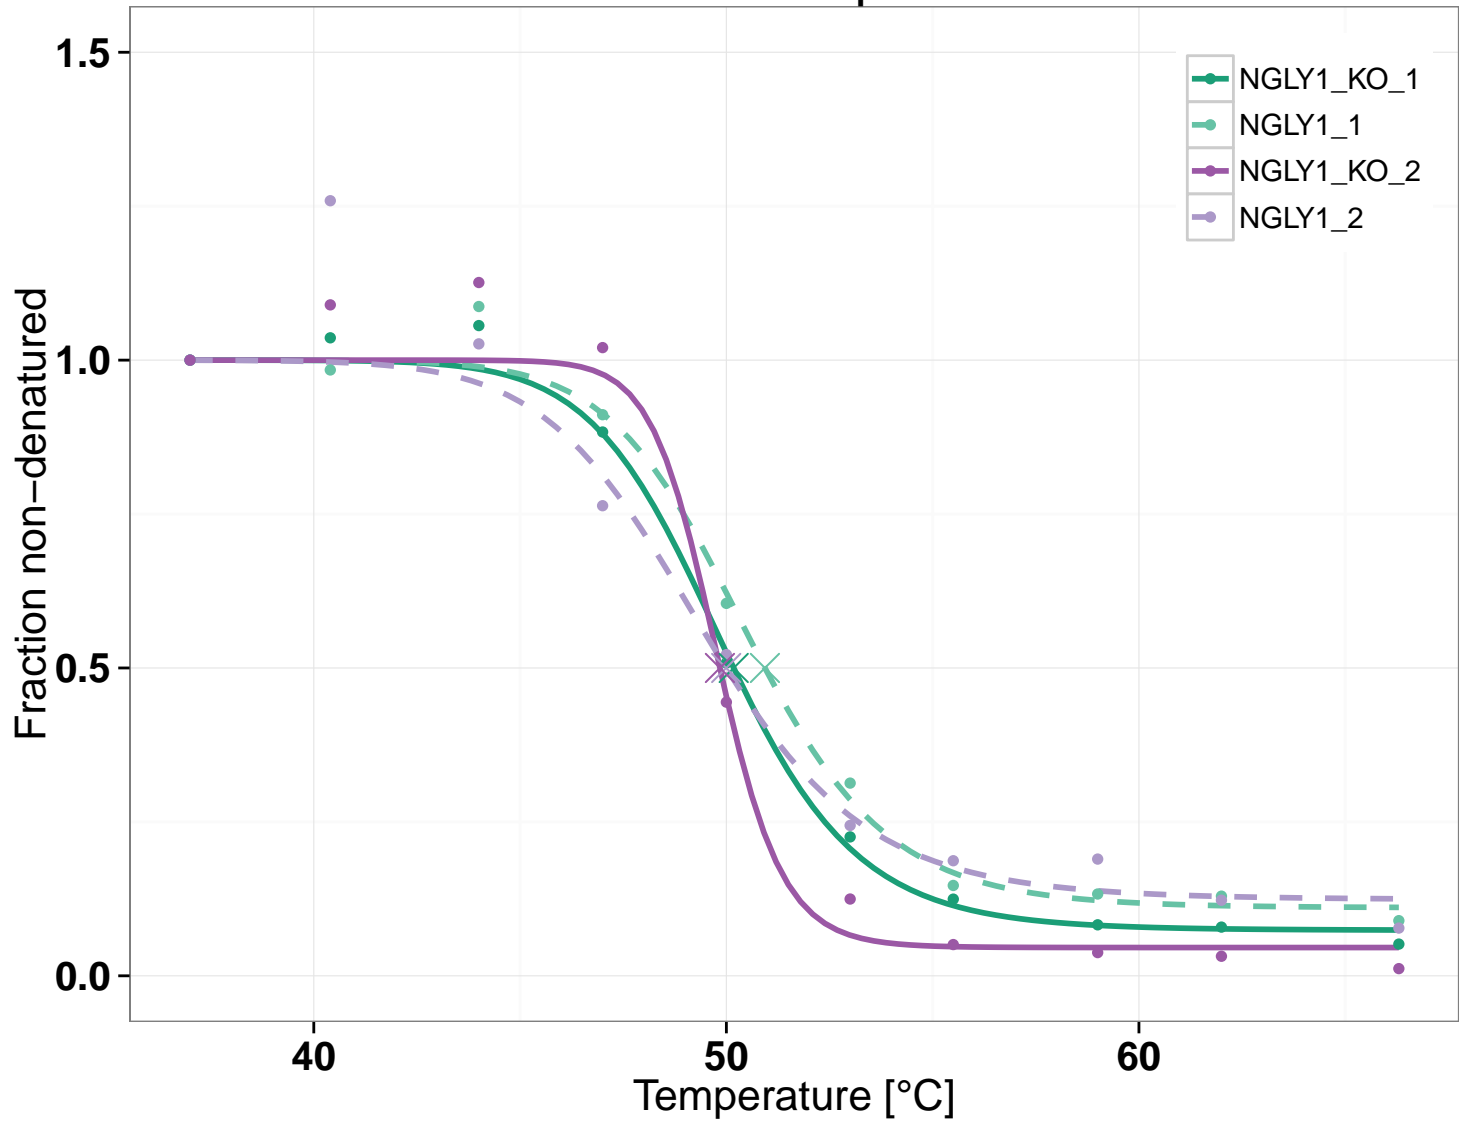

Supplement: Supplementary file 6437 [file 1]

# IPI00829707.1|C17ORF81

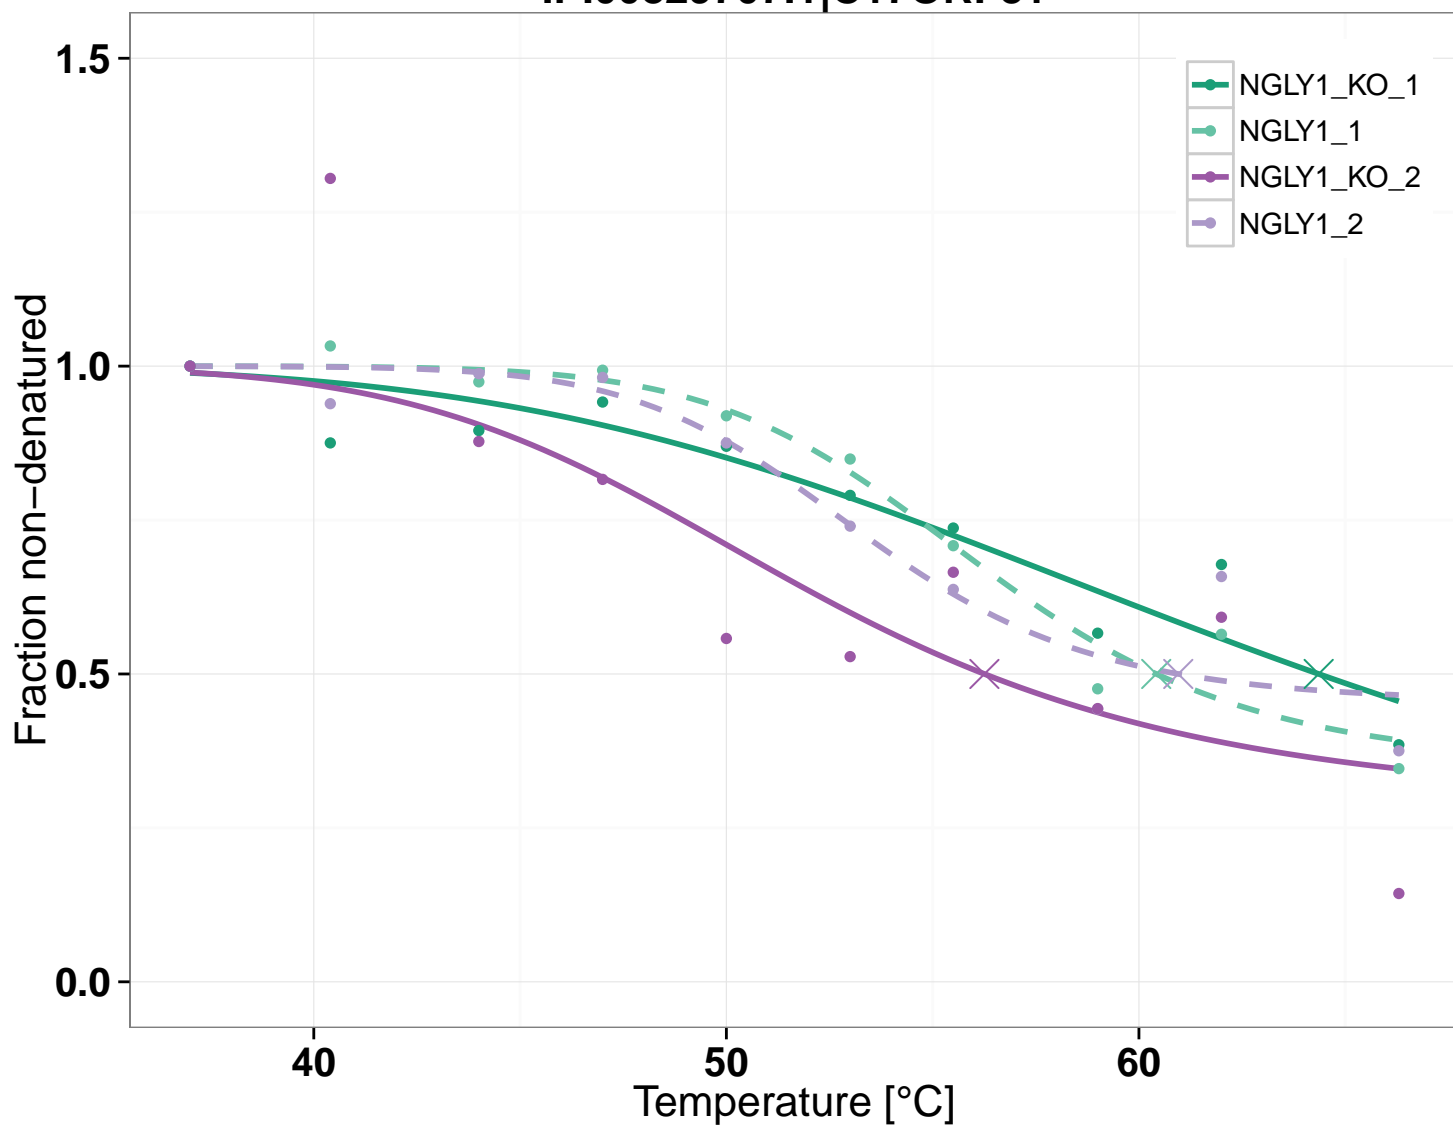

|            | meltPoint | slope  | plateau | R2   |
|------------|-----------|--------|---------|------|
| NGLY1_KO_1 | 64.36     | -0.026 | 0       | 0.88 |
| NGLY1_1    | 60.42     | -0.05  | 0.35    | 0.96 |
| NGLY1_KO_2 | 56.25     | -0.038 | 0.28    | 0.74 |
| NGLY1_2    | 60.95     | -0.049 | 0.45    | 0.9  |

Supplement: Supplementary file 6438 [file 1]

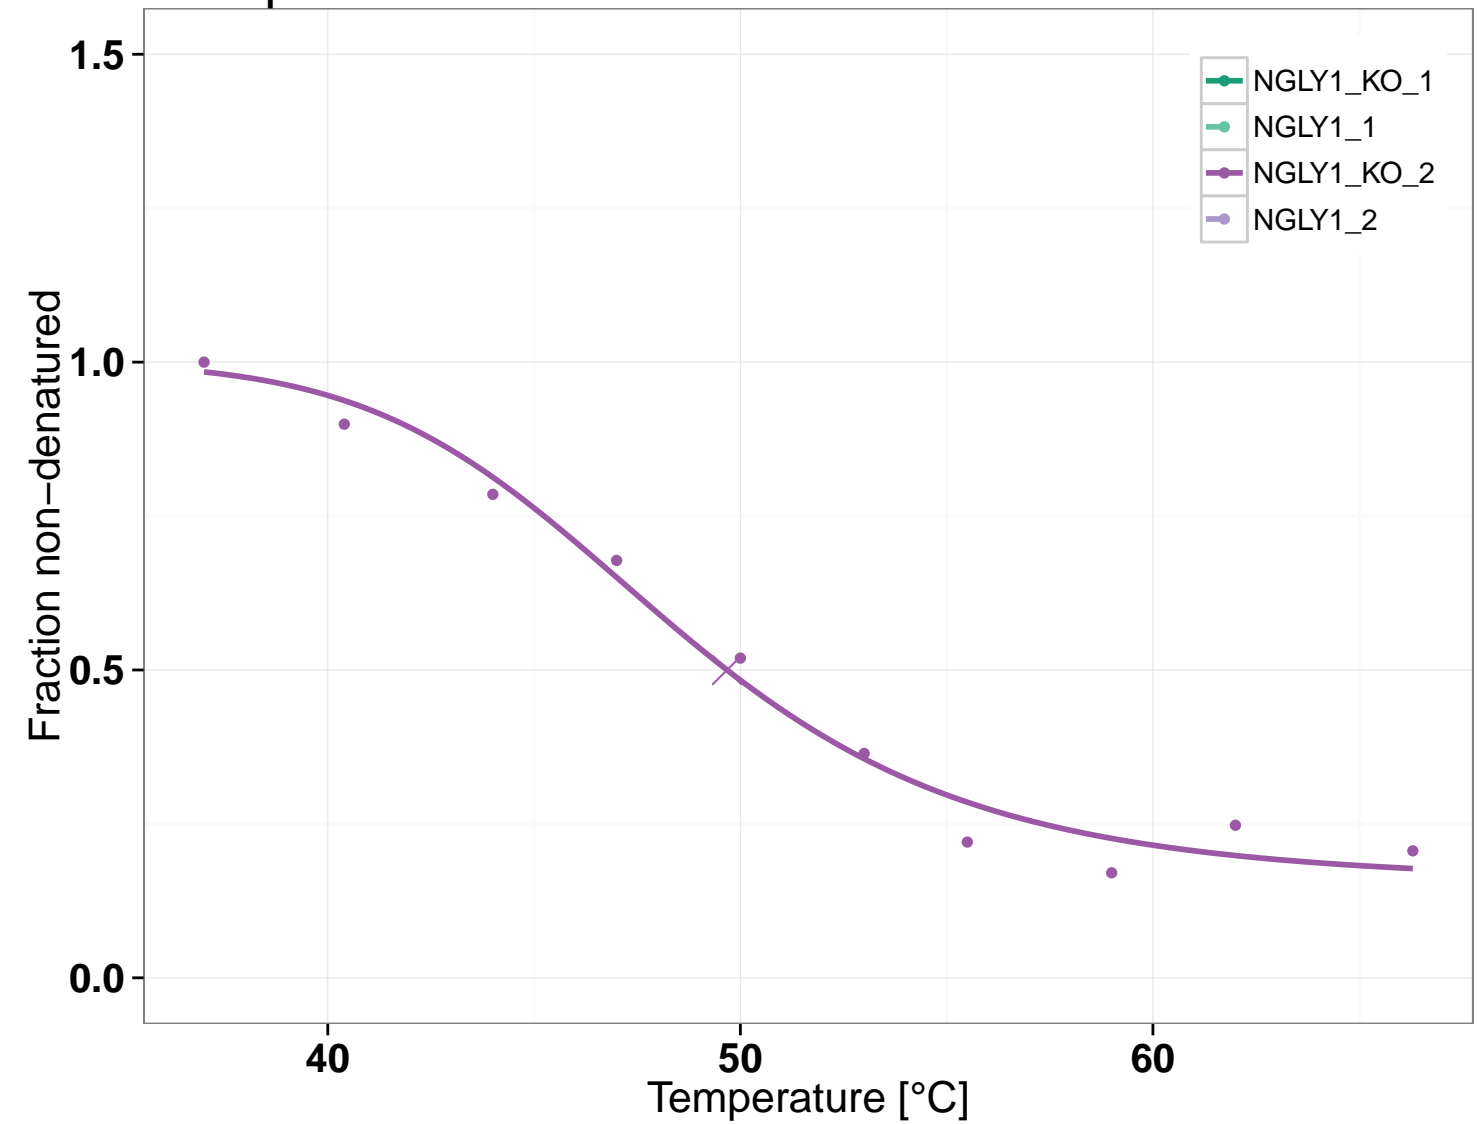

|            | meltPoint | slope  | plateau | R2   |
|------------|-----------|--------|---------|------|
| NGLY1_KO_1 | —         | —      | —       | —    |
| NGLY1_1    | —         | —      | —       | —    |
| NGLY1_KO_2 | 49.68     | -0.058 | 0.15    | 0.98 |
| NGLY1_2    | —         | —      | —       | —    |

Supplement: Supplementary file 6439 [file 1]

IPI00873466.1|HPRT1

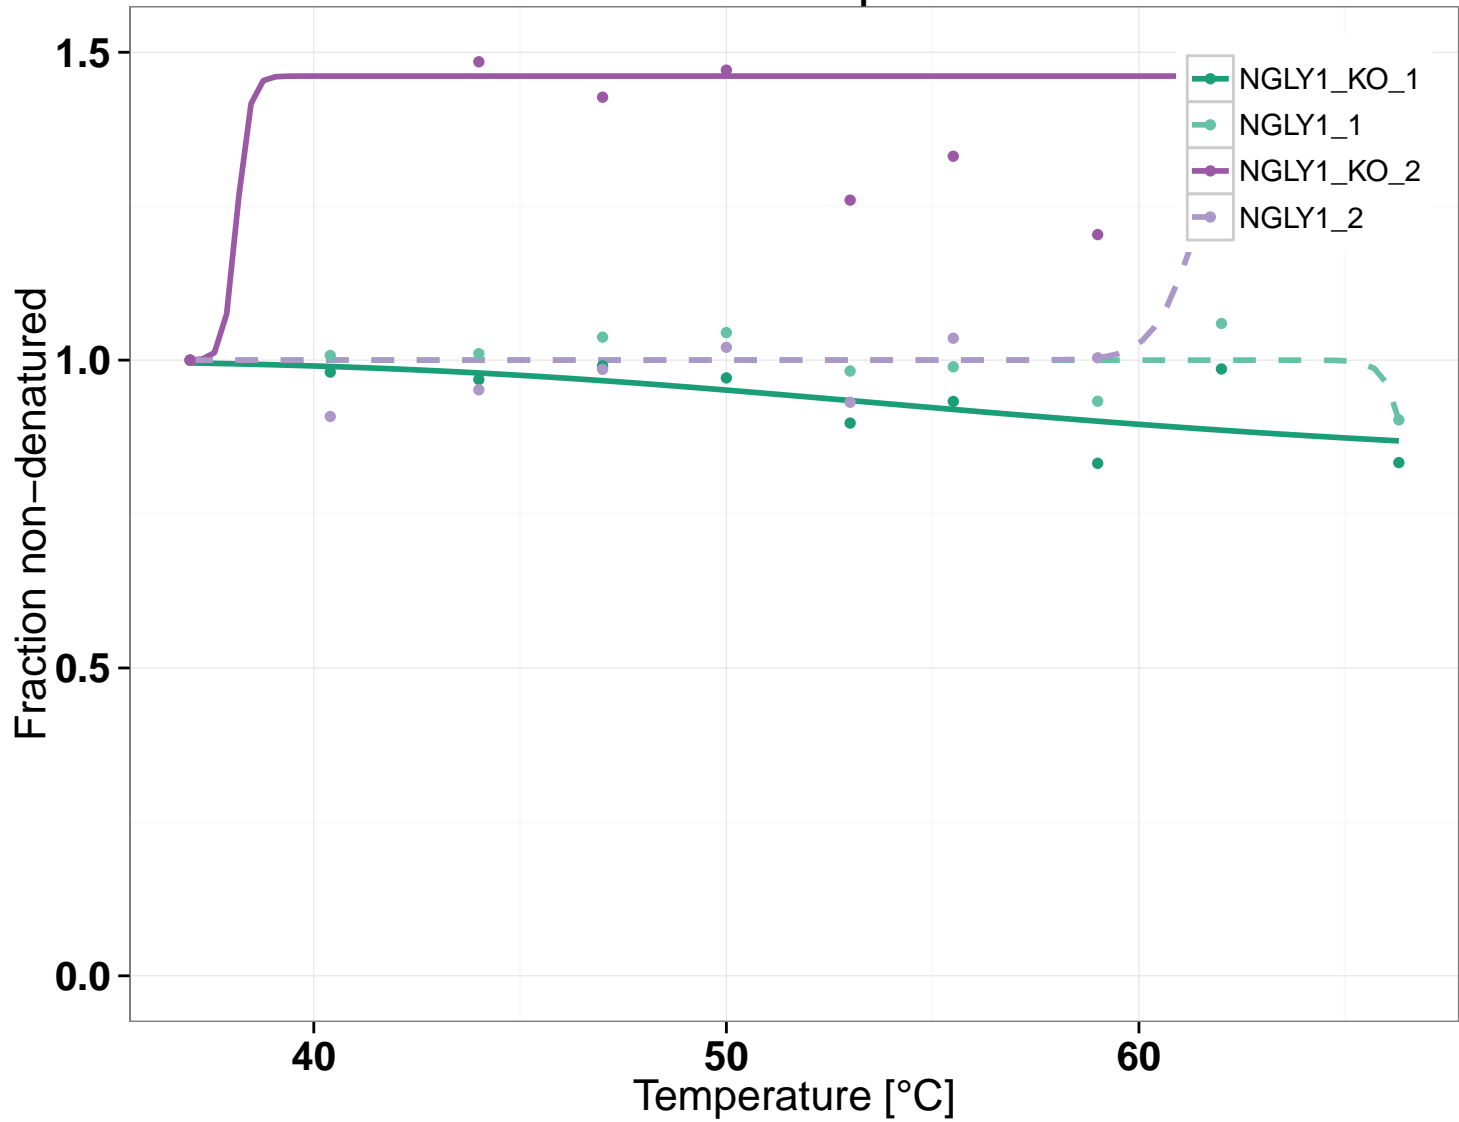

|            | meltPoint | slope   | plateau | R2   |
|------------|-----------|---------|---------|------|
| NGLY1_KO_1 | -         | -0.0058 | 0.81    | 0.49 |
| NGLY1_1    | -         | -       | 0       | 0.44 |
| NGLY1_KO_2 | -         | 0.76    | 1.46    | 0.35 |
| NGLY1_2    | -         | 0.19    | 1.4     | 0.93 |

Supplement: Supplementary file 6440 [file 1]

IPI00179700.3|HMGA1

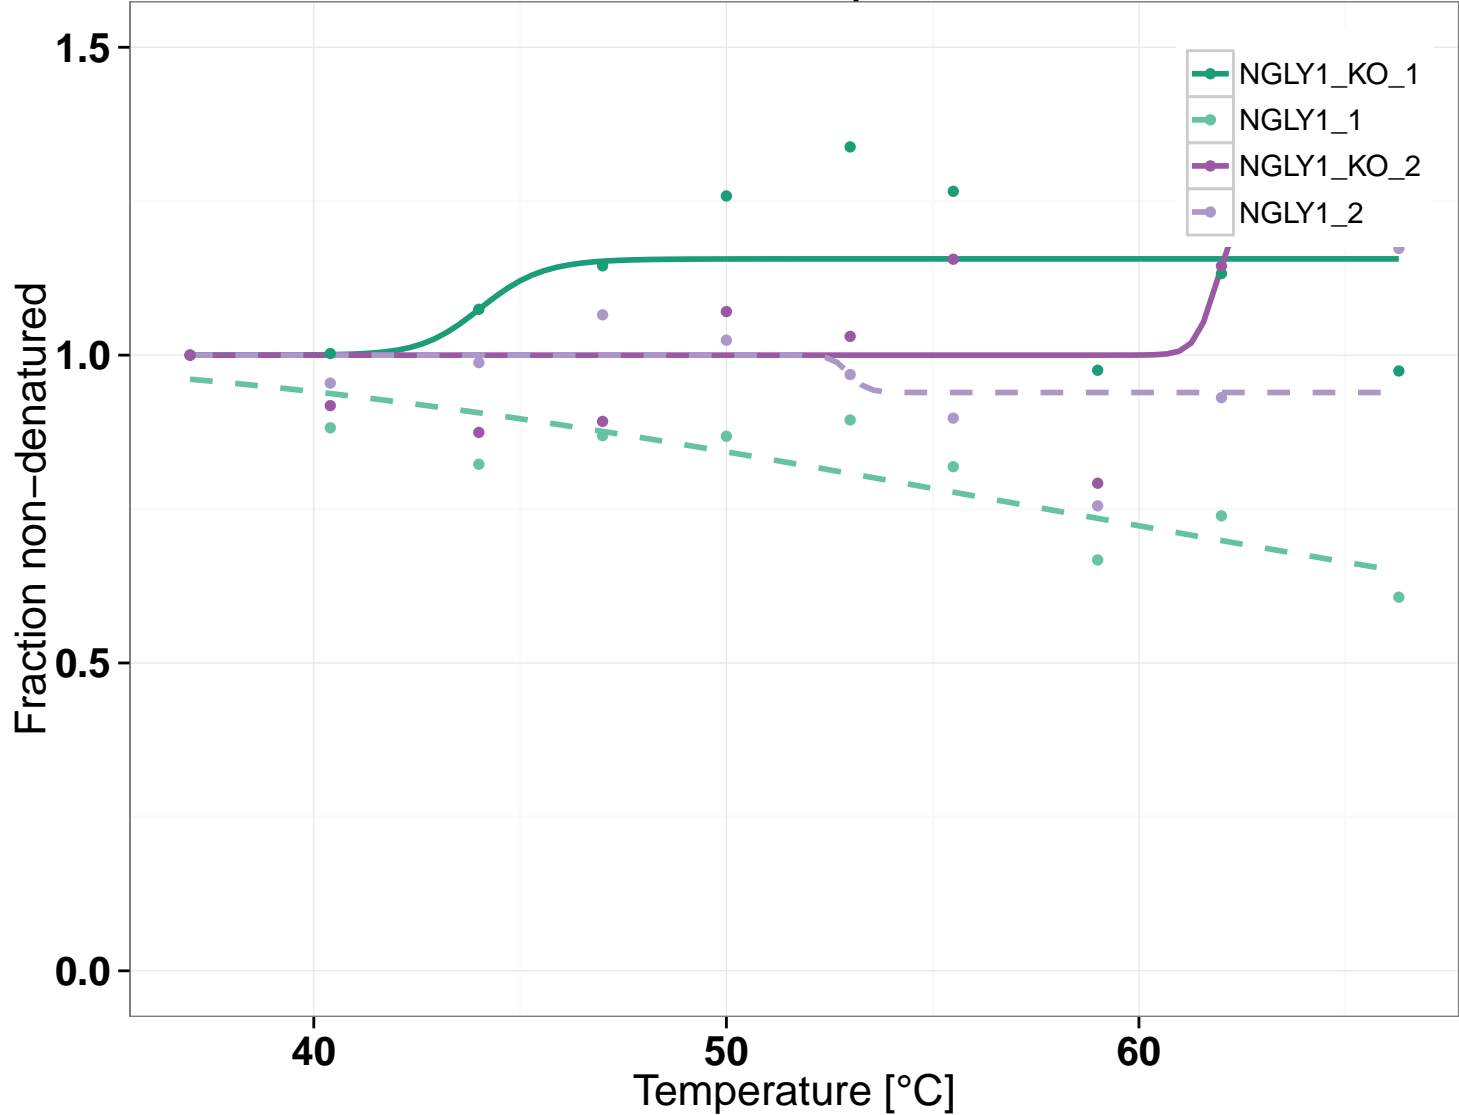

|            | meltPoint | slope  | plateau | R2   |
|------------|-----------|--------|---------|------|
| NGLY1_KO_1 | —         | 0.053  | 1.16    | 0.24 |
| NGLY1_1    | —         | -0.012 | 0       | 0.76 |
| NGLY1_KO_2 | —         | 0.23   | 1.23    | 0.41 |
| NGLY1_2    | —         | -0.072 | 0.94    | 0.09 |

Supplement: Supplementary file 6441 [file 1]

# IPI00300700.4|STRADA

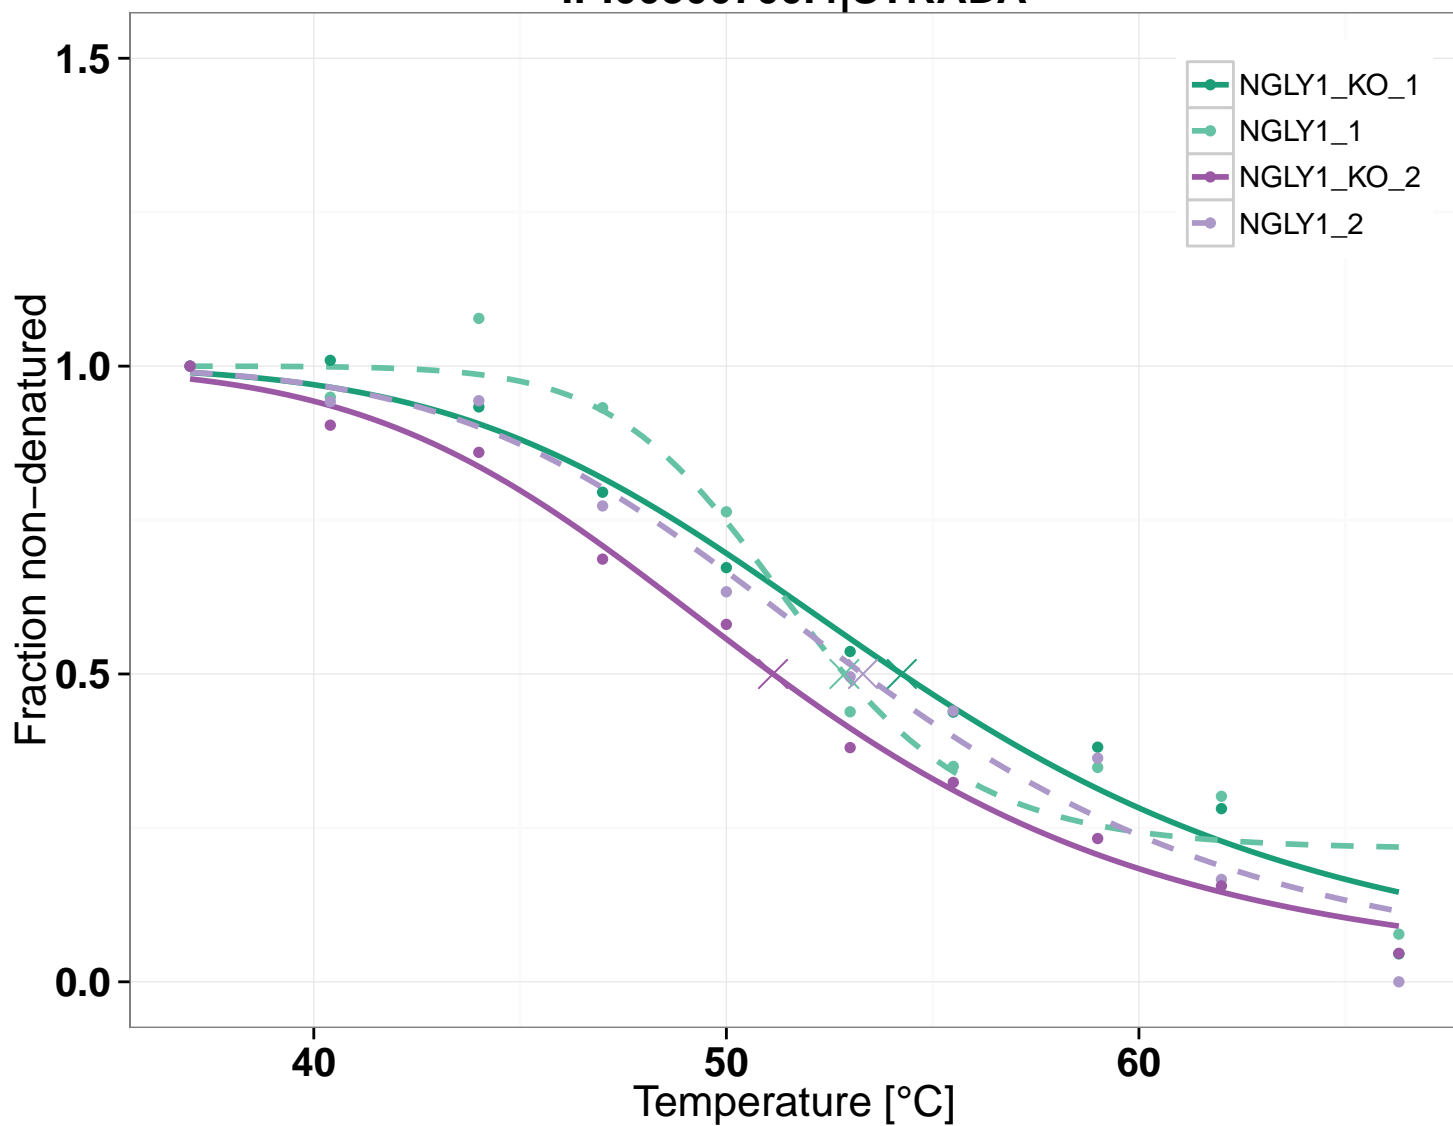

|            | meltPoint | slope  | plateau | R2   |
|------------|-----------|--------|---------|------|
| NGLY1_KO_1 | 54.25     | -0.047 | 0       | 0.98 |
| NGLY1_1    | 52.86     | -0.09  | 0.21    | 0.96 |
| NGLY1_KO_2 | 51.13     | -0.051 | 0       | 0.99 |
| NGLY1_2    | 53.31     | -0.051 | 0       | 0.97 |

Supplement: Supplementary file 6442 [file 1]

IPI00003110.2|GFI1B

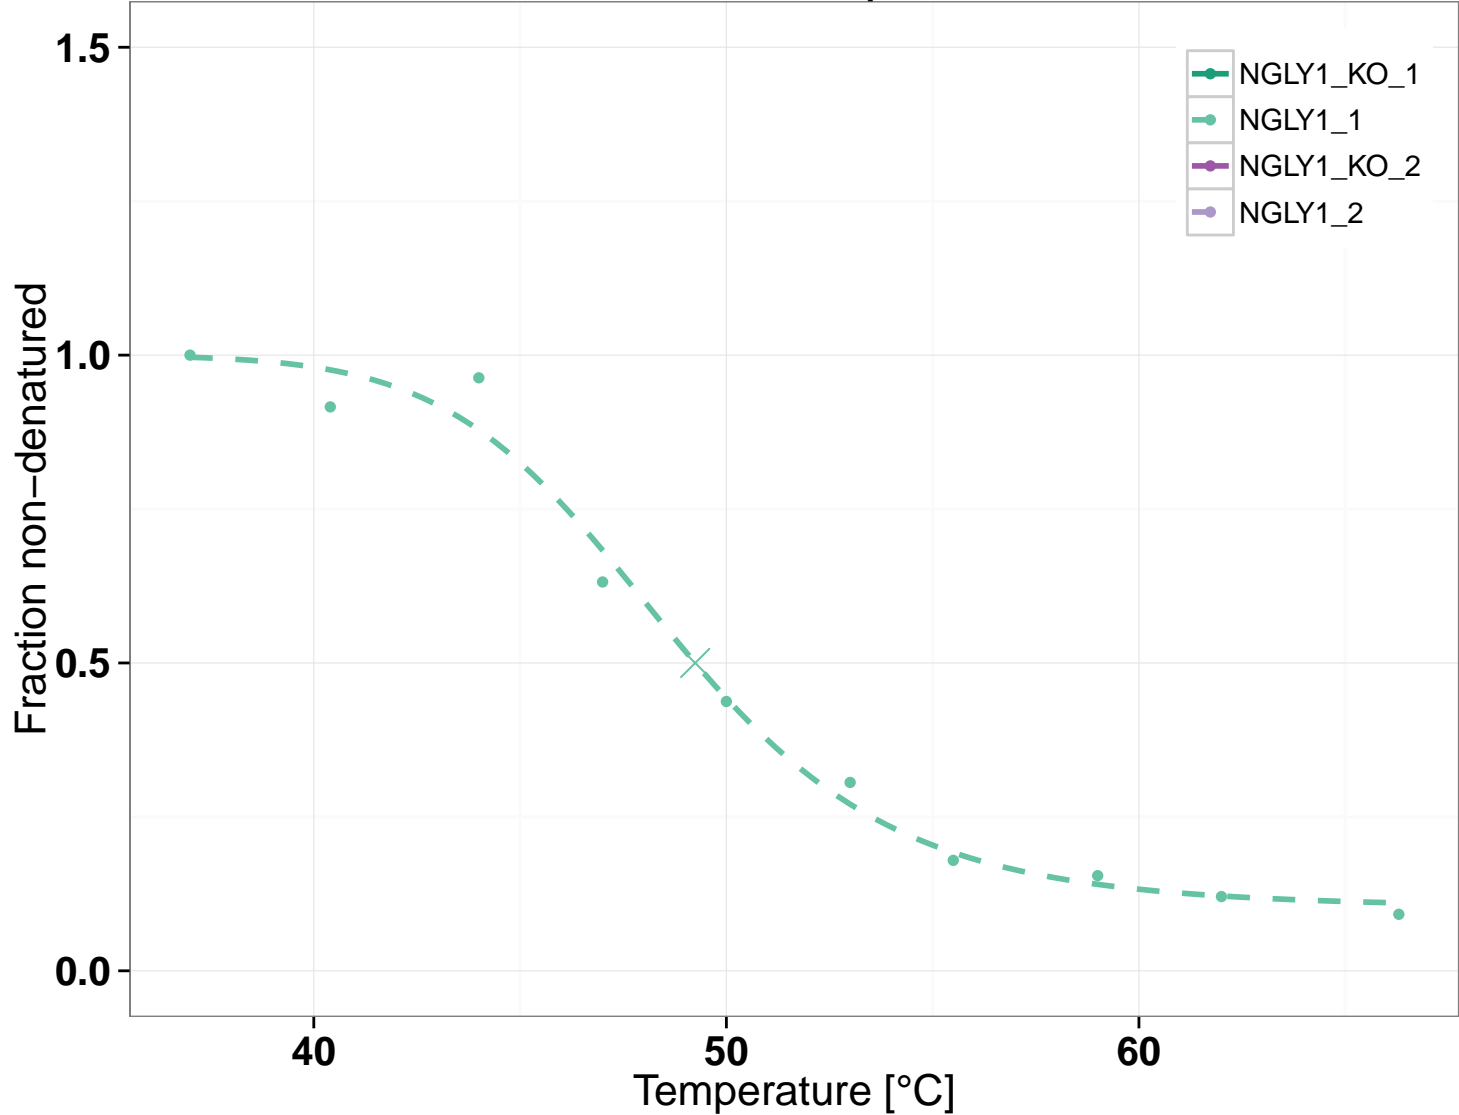

|            | meltPoint | slope  | plateau | R2   |
|------------|-----------|--------|---------|------|
| NGLY1_KO_1 | -         | -      | -       | -    |
| NGLY1_1    | 49.24     | -0.083 | 0.1     | 0.99 |
| NGLY1_KO_2 | -         | -      | -       | -    |
| NGLY1_2    | -         | -      | -       | -    |

Supplement: Supplementary file 6443 [file 1]

IPI00003798.2|ZNF282

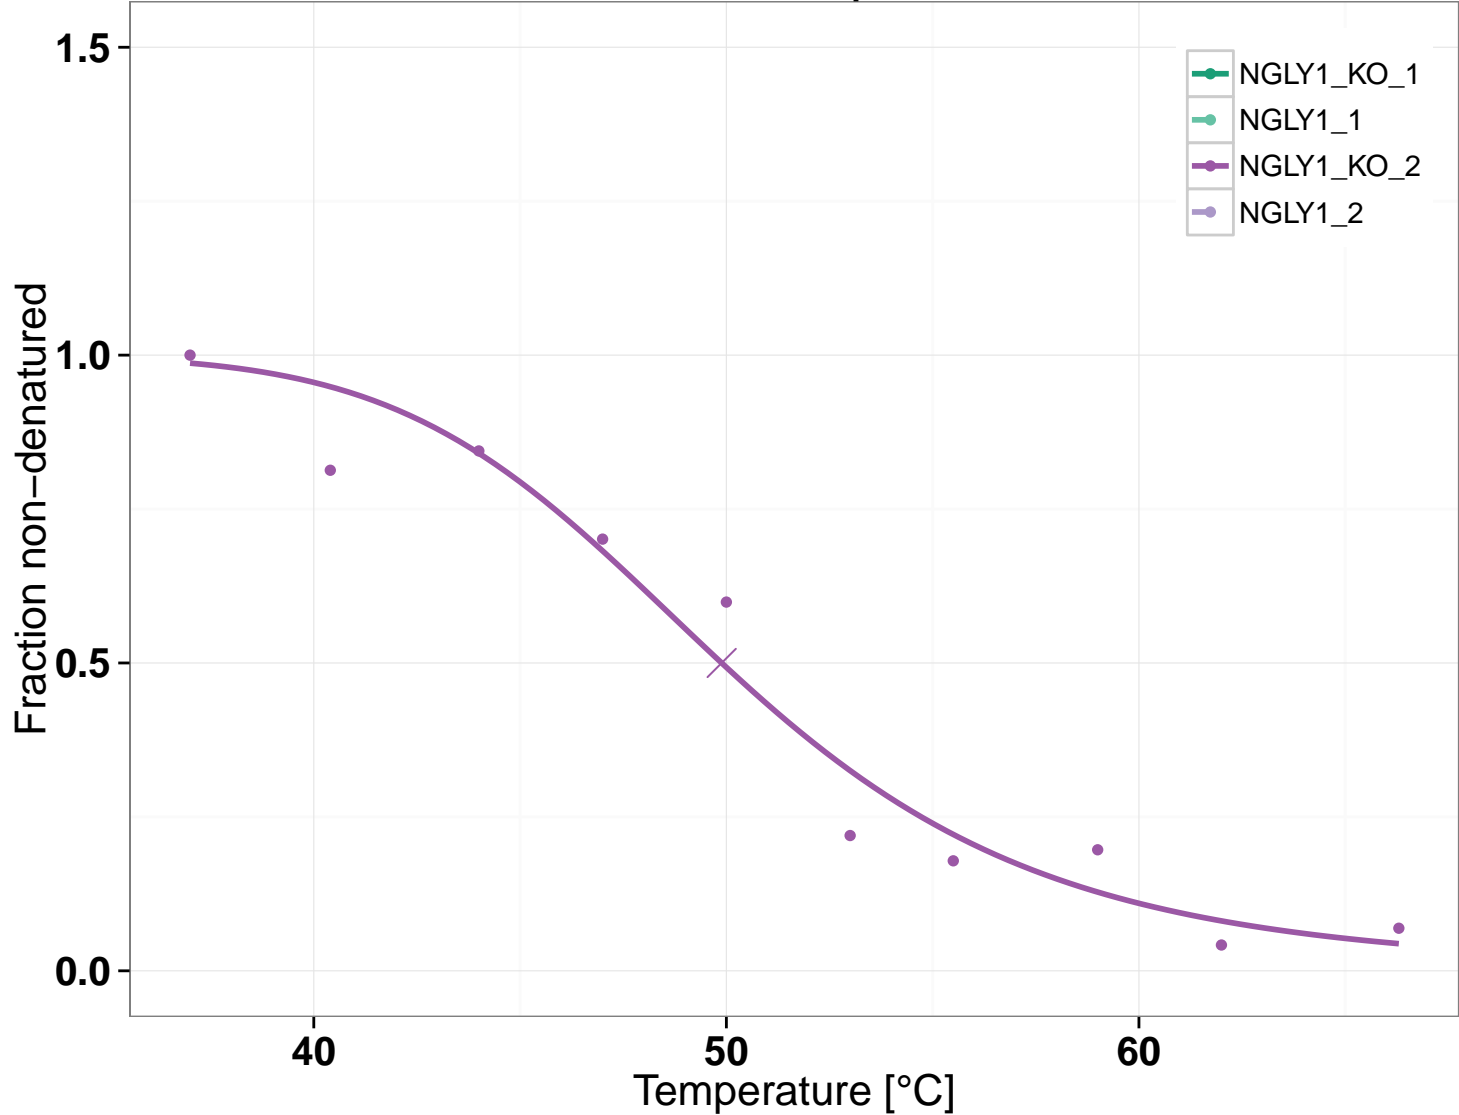

|            | meltPoint | slope  | plateau | R2   |
|------------|-----------|--------|---------|------|
| NGLY1_KO_1 | —         | —      | —       | —    |
| NGLY1_1    | —         | —      | —       | —    |
| NGLY1_KO_2 | 49.89     | -0.064 | 0       | 0.96 |
| NGLY1_2    | —         | —      | —       | —    |

Supplement: Supplementary file 6444 [file 1]

# IPI00031801.4|CSDA

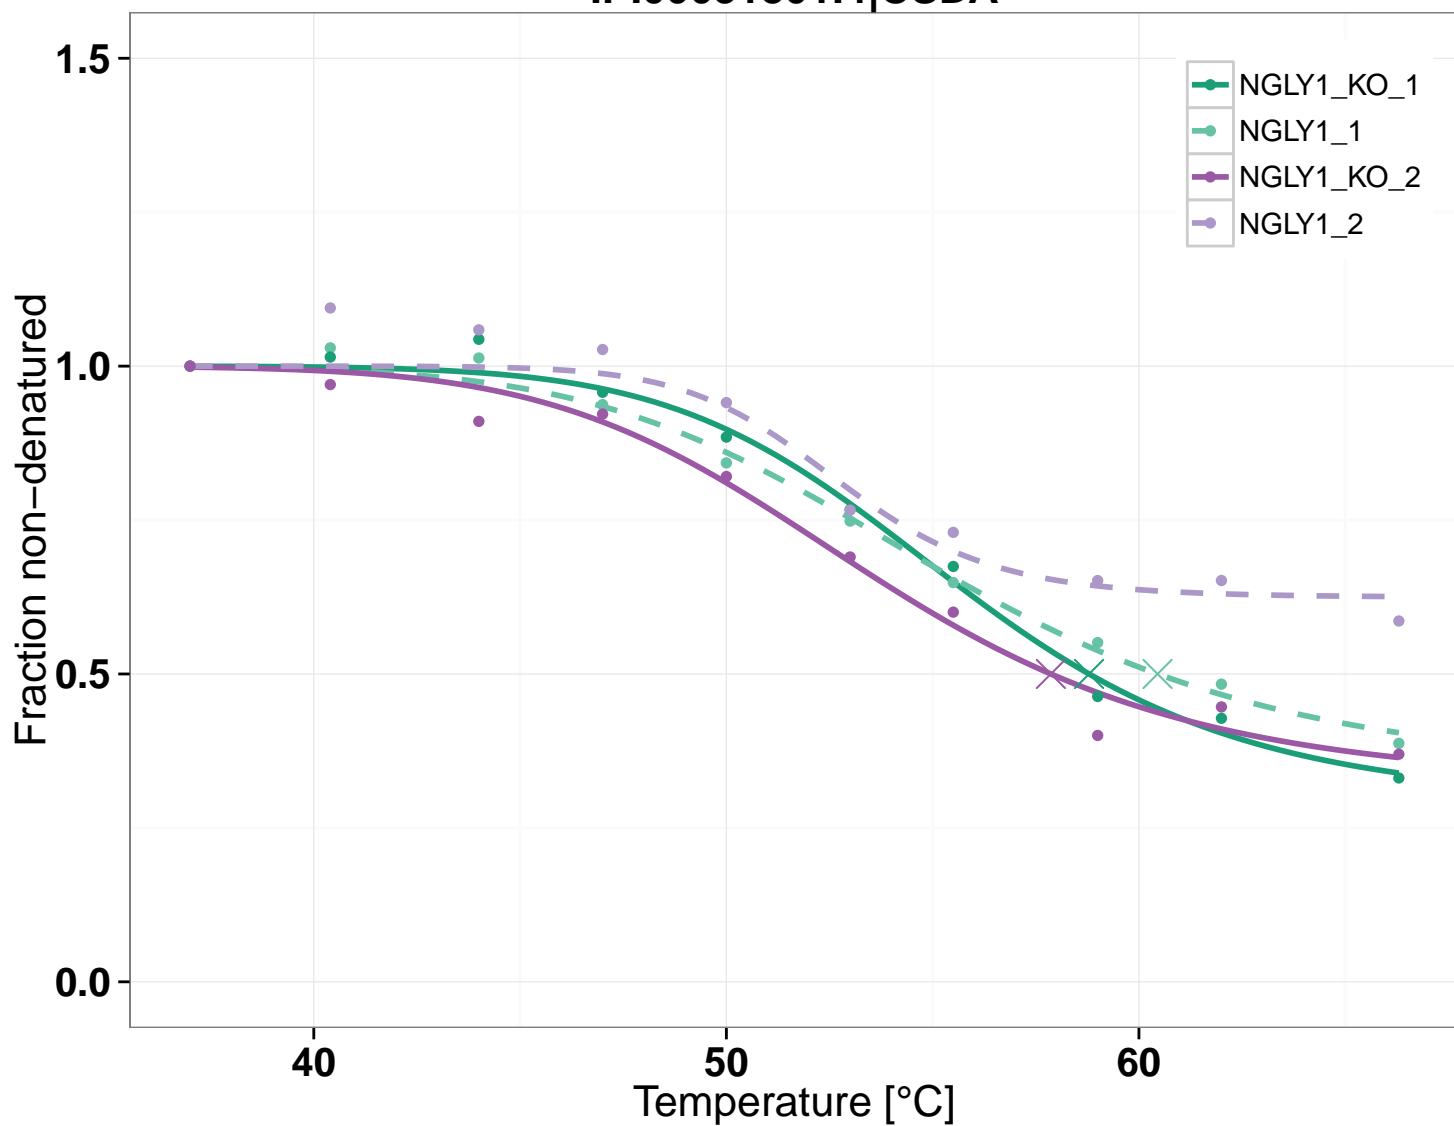

|            | meltPoint | slope  | plateau | R2   |
|------------|-----------|--------|---------|------|
| NGLY1_KO_1 | 58.79     | -0.052 | 0.29    | 0.99 |
| NGLY1_1    | 60.45     | -0.039 | 0.33    | 0.99 |
| NGLY1_KO_2 | 57.87     | -0.044 | 0.32    | 0.98 |
| NGLY1_2    | –         | -0.05  | 0.62    | 0.95 |

Supplement: Supplementary file 6445 [file 1]

IPI00029629.3|TRIM25

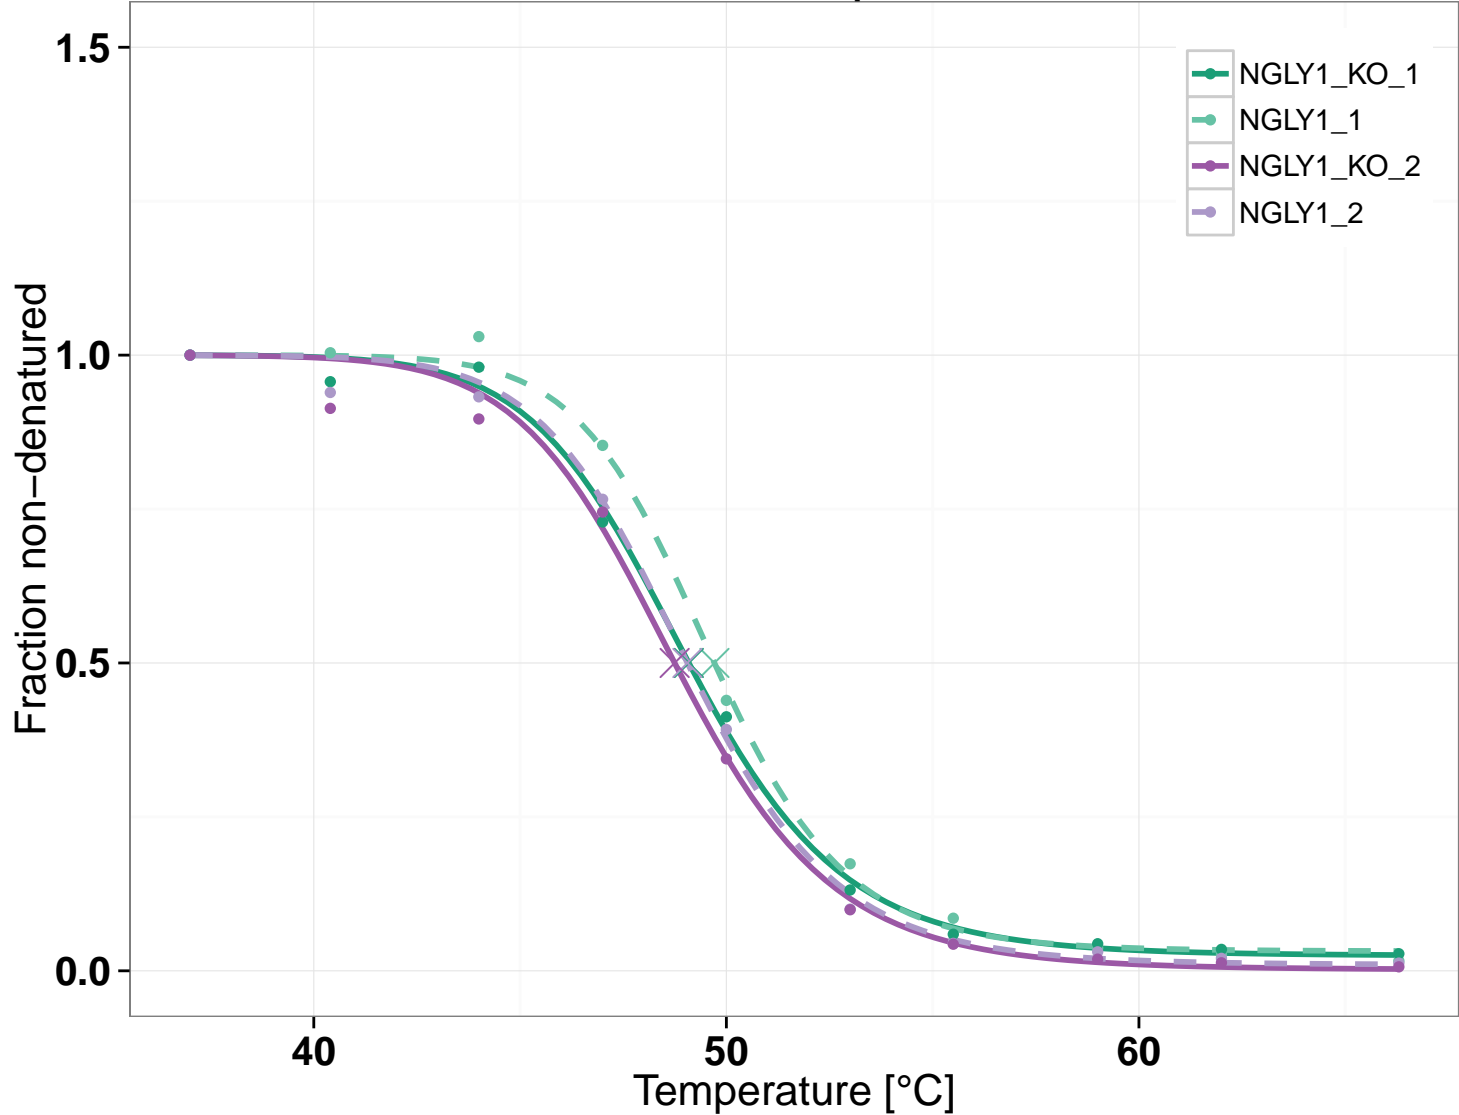

|            | meltPoint | slope | plateau | R2   |
|------------|-----------|-------|---------|------|
| NGLY1_KO_1 | 49.09     | -0.13 | 0.02    | 1    |
| NGLY1_1    | 49.71     | -0.15 | 0.03    | 1    |
| NGLY1_KO_2 | 48.75     | -0.13 | 0       | 0.99 |
| NGLY1_2    | 49.06     | -0.14 | 0.01    | 1    |

Supplement: Supplementary file 6446 [file 1]

# IPI00071696.2|CUX1

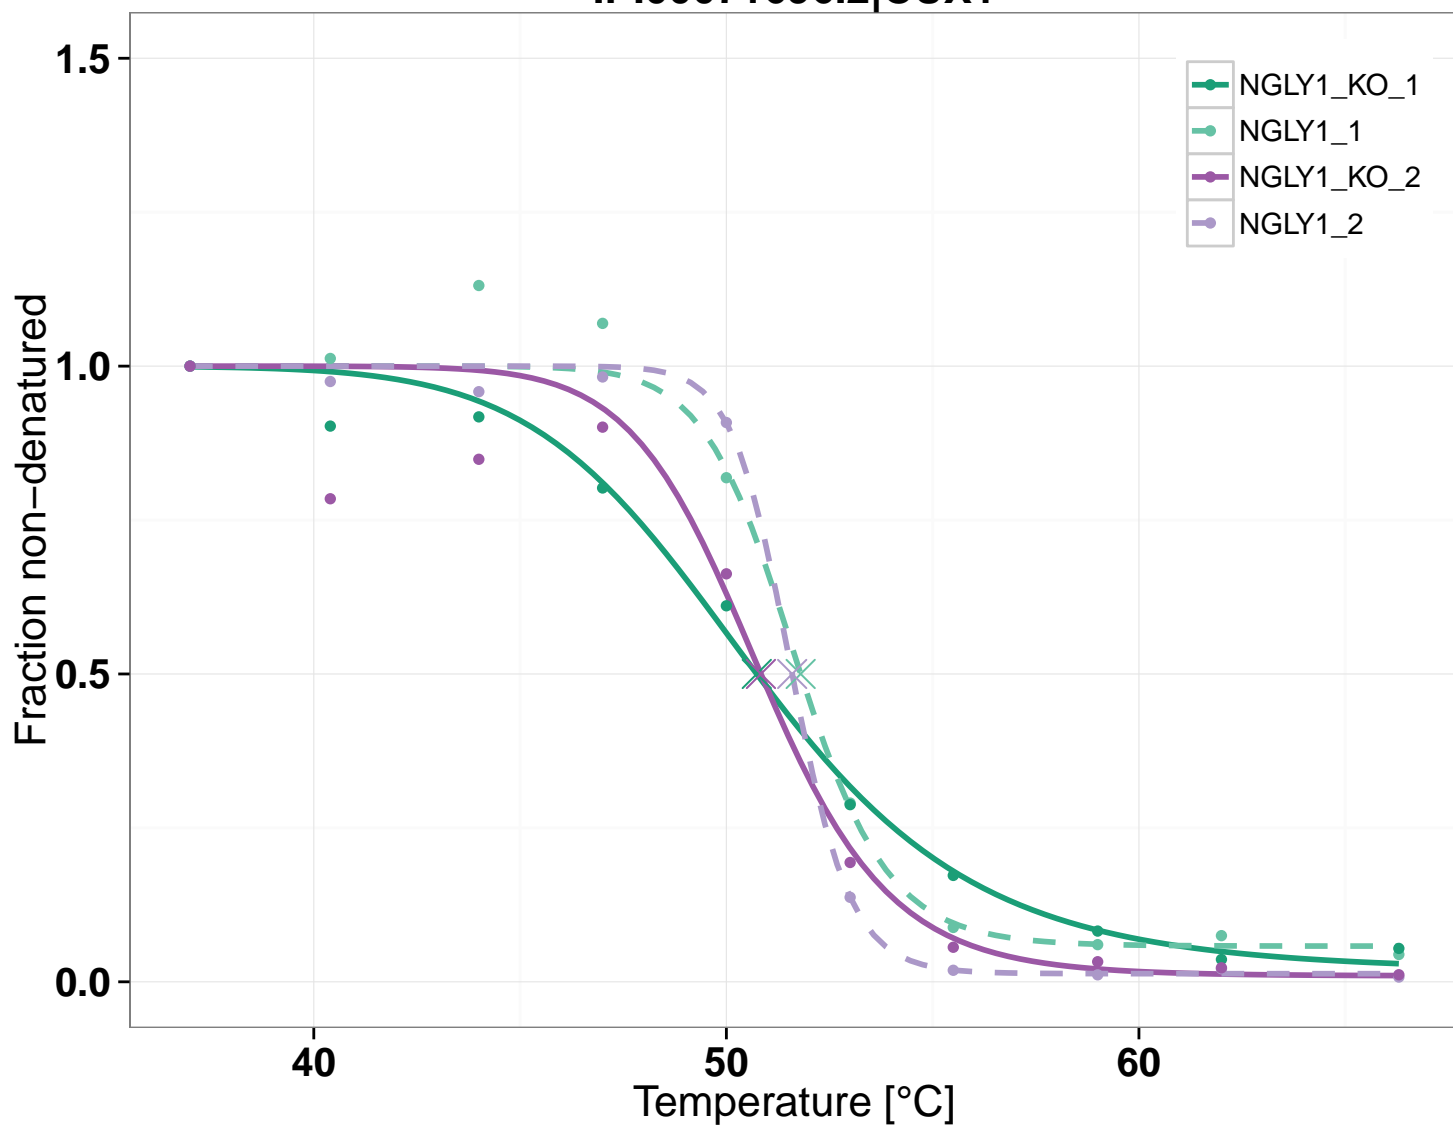

|            | meltPoint | slope  | plateau | R2   |
|------------|-----------|--------|---------|------|
| NGLY1_KO_1 | 50.74     | -0.091 | 0.02    | 0.99 |
| NGLY1_1    | 51.8      | -0.21  | 0.06    | 0.99 |
| NGLY1_KO_2 | 50.84     | -0.16  | 0.01    | 0.96 |
| NGLY1_2    | 51.6      | -0.35  | 0.01    | 1    |

Supplement: Supplementary file 6447 [file 1]

IPI00409675.1|MORF4L1

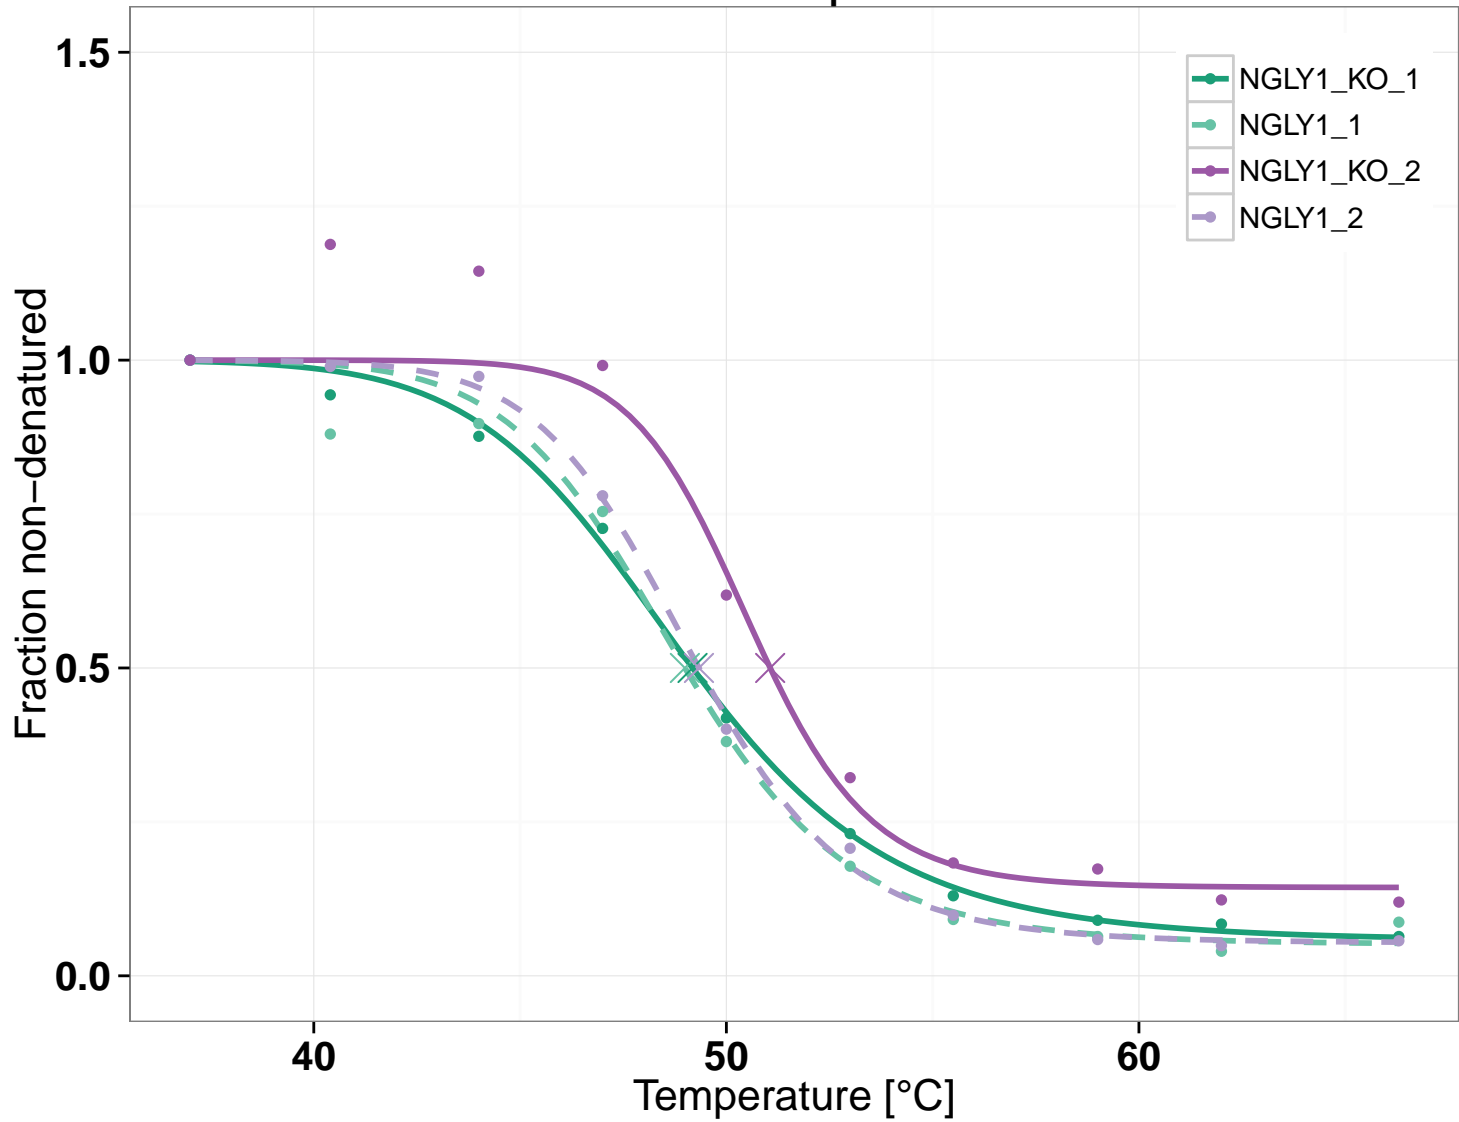

|            | meltPoint | slope  | plateau | R2   |
|------------|-----------|--------|---------|------|
| NGLY1_KO_1 | 49.18     | -0.093 | 0.06    | 1    |
| NGLY1_1    | 48.99     | -0.11  | 0.05    | 0.99 |
| NGLY1_KO_2 | 51.06     | -0.15  | 0.14    | 0.97 |
| NGLY1_2    | 49.34     | -0.13  | 0.05    | 1    |

Supplement: Supplementary file 6448 [file 1]

# IPI00020454.1|DCK

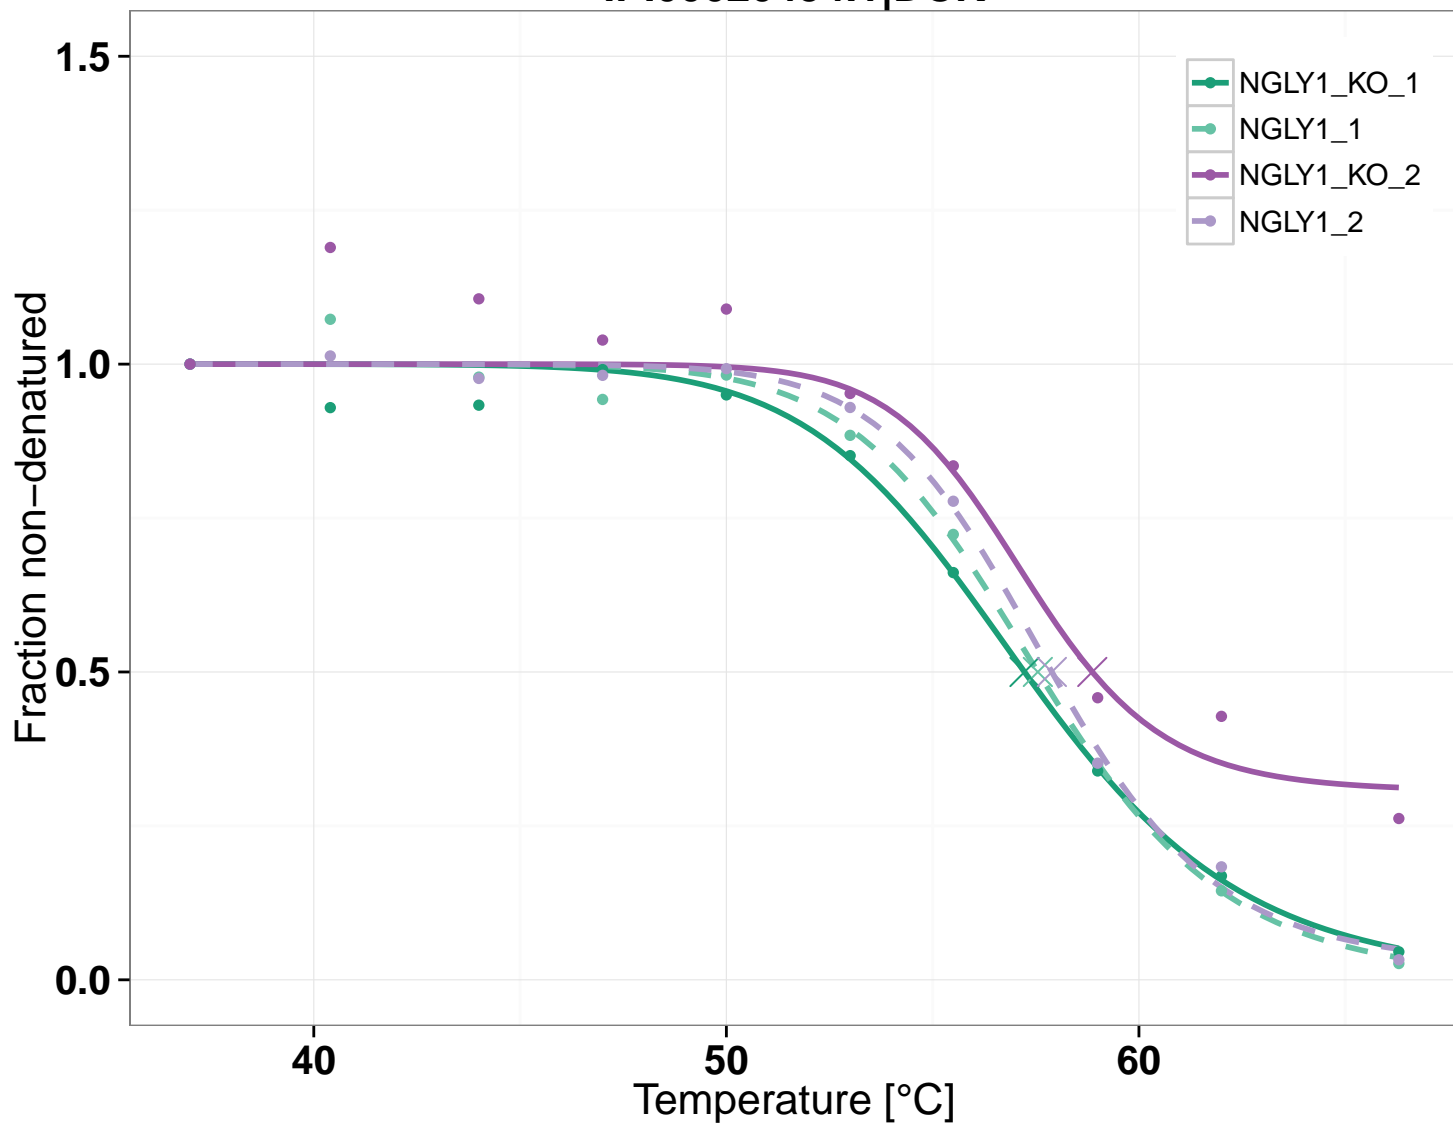

|            | meltPoint | slope  | plateau | R2   |
|------------|-----------|--------|---------|------|
| NGLY1_KO_1 | 57.23     | -0.094 | 0       | 0.99 |
| NGLY1_1    | 57.55     | -0.11  | 0       | 0.99 |
| NGLY1_KO_2 | 58.87     | -0.11  | 0.31    | 0.93 |
| NGLY1_2    | 57.89     | -0.12  | 0.02    | 1    |

Supplement: Supplementary file 6449 [file 1]

IPI00397904.6|NUP93

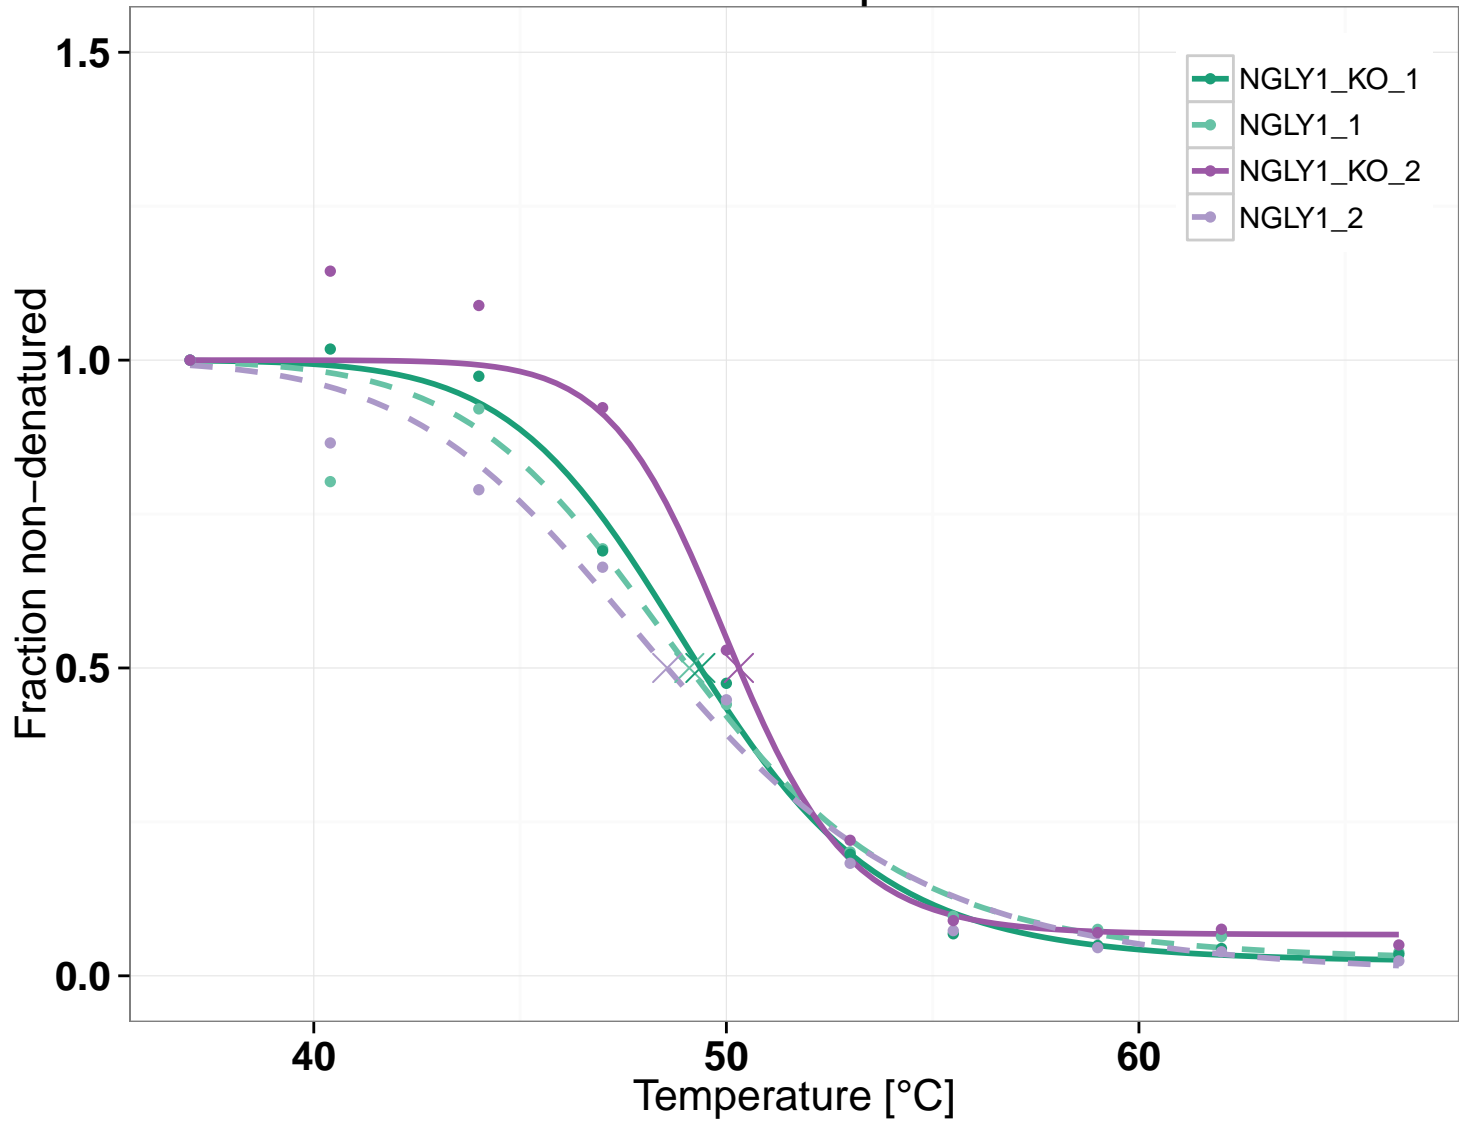

|            | meltPoint | slope  | plateau | R2   |
|------------|-----------|--------|---------|------|
| NGLY1_KO_1 | 49.37     | -0.11  | 0.02    | 0.99 |
| NGLY1_1    | 49.1      | -0.091 | 0.02    | 0.97 |
| NGLY1_KO_2 | 50.3      | -0.16  | 0.07    | 0.98 |
| NGLY1_2    | 48.57     | -0.08  | 0       | 0.99 |

Supplement: Supplementary file 6450 [file 1]

IPI00456262.1|PACS1

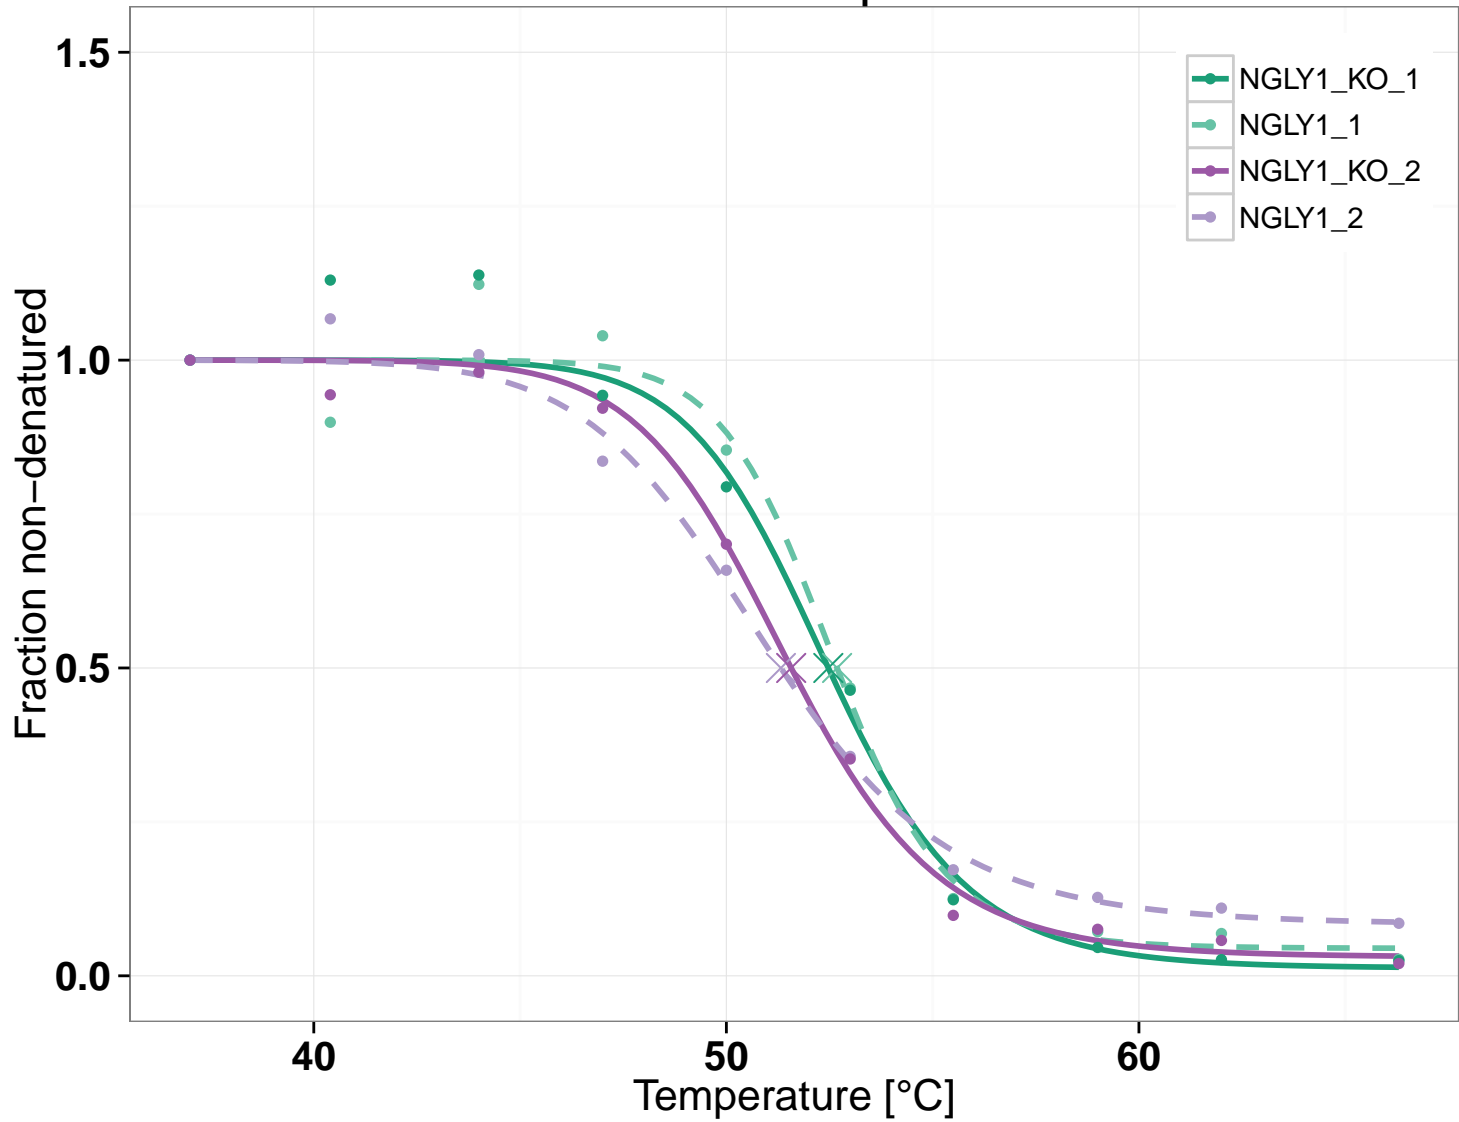

|            | meltPoint | slope | plateau | R2   |
|------------|-----------|-------|---------|------|
| NGLY1_KO_1 | 52.47     | -0.14 | 0.01    | 0.98 |
| NGLY1_1    | 52.68     | -0.18 | 0.04    | 0.98 |
| NGLY1_KO_2 | 51.57     | -0.13 | 0.03    | 1    |
| NGLY1_2    | 51.32     | -0.1  | 0.08    | 0.99 |

Supplement: Supplementary file 6451 [file 1]

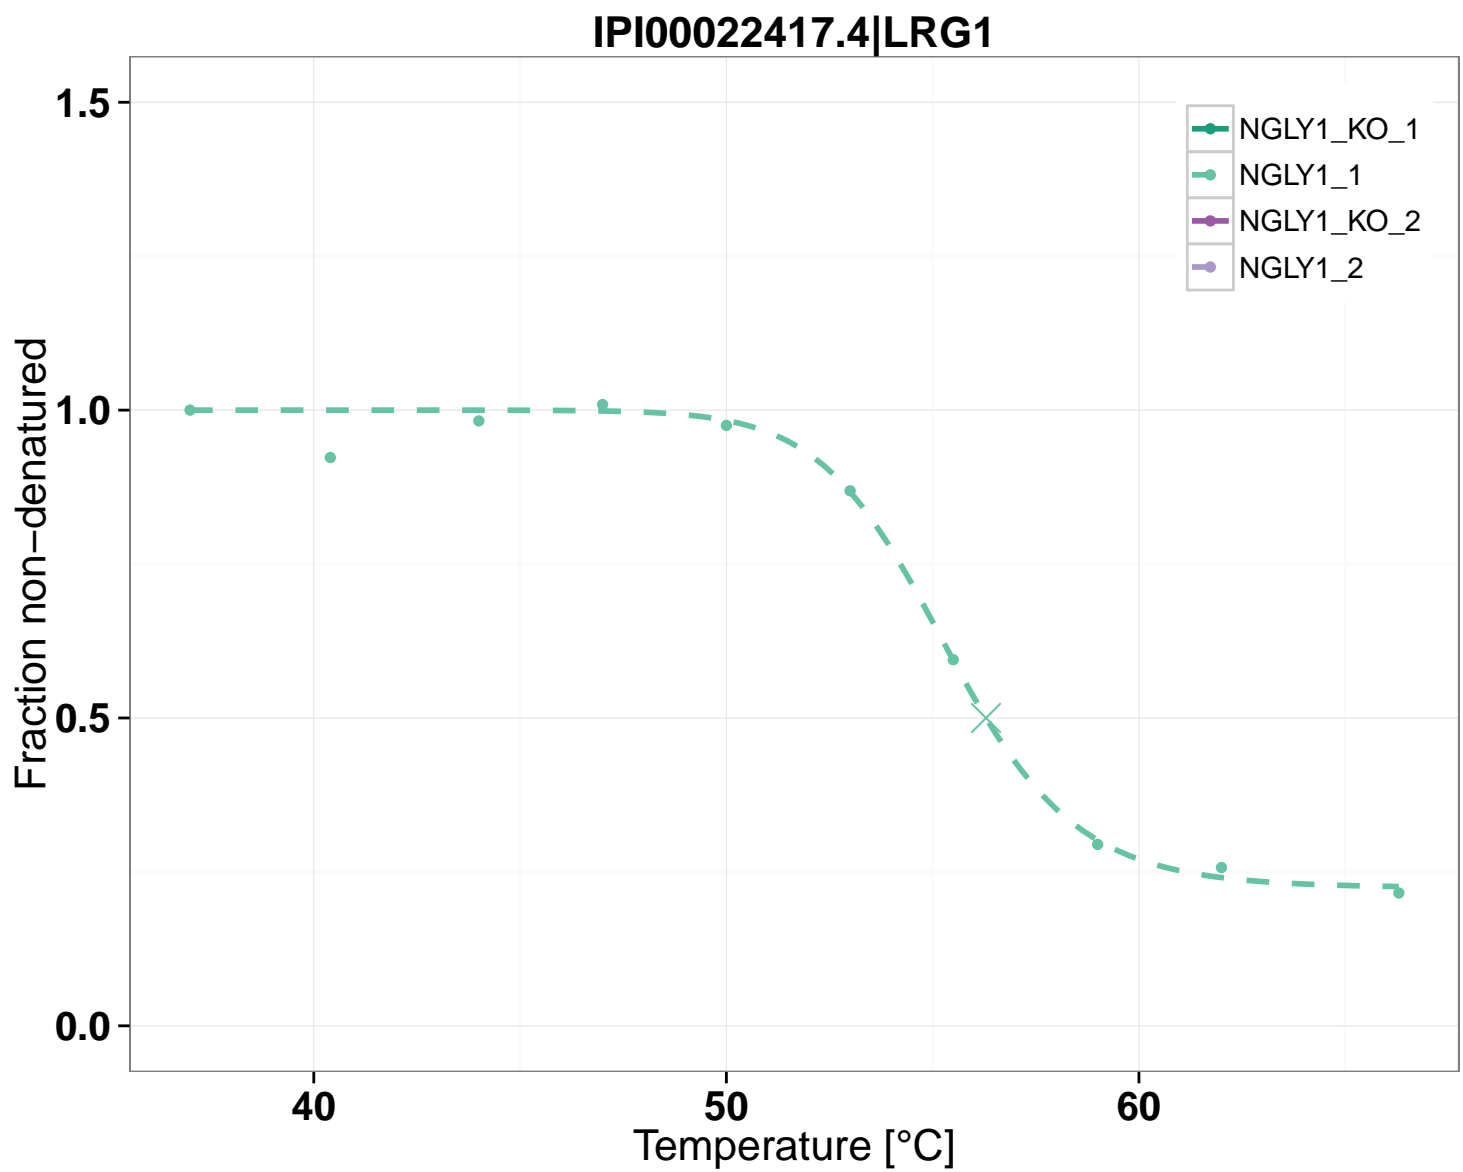

|            | meltPoint | slope | plateau | R2   |
|------------|-----------|-------|---------|------|
| NGLY1_KO_1 | —         | —     | —       | —    |
| NGLY1_1    | 56.29     | -0.13 | 0.22    | 0.99 |
| NGLY1_KO_2 | —         | —     | —       | —    |
| NGLY1_2    | —         | —     | —       | —    |

Supplement: Supplementary file 6452 [file 1]

# IPI00514587.1|SARS

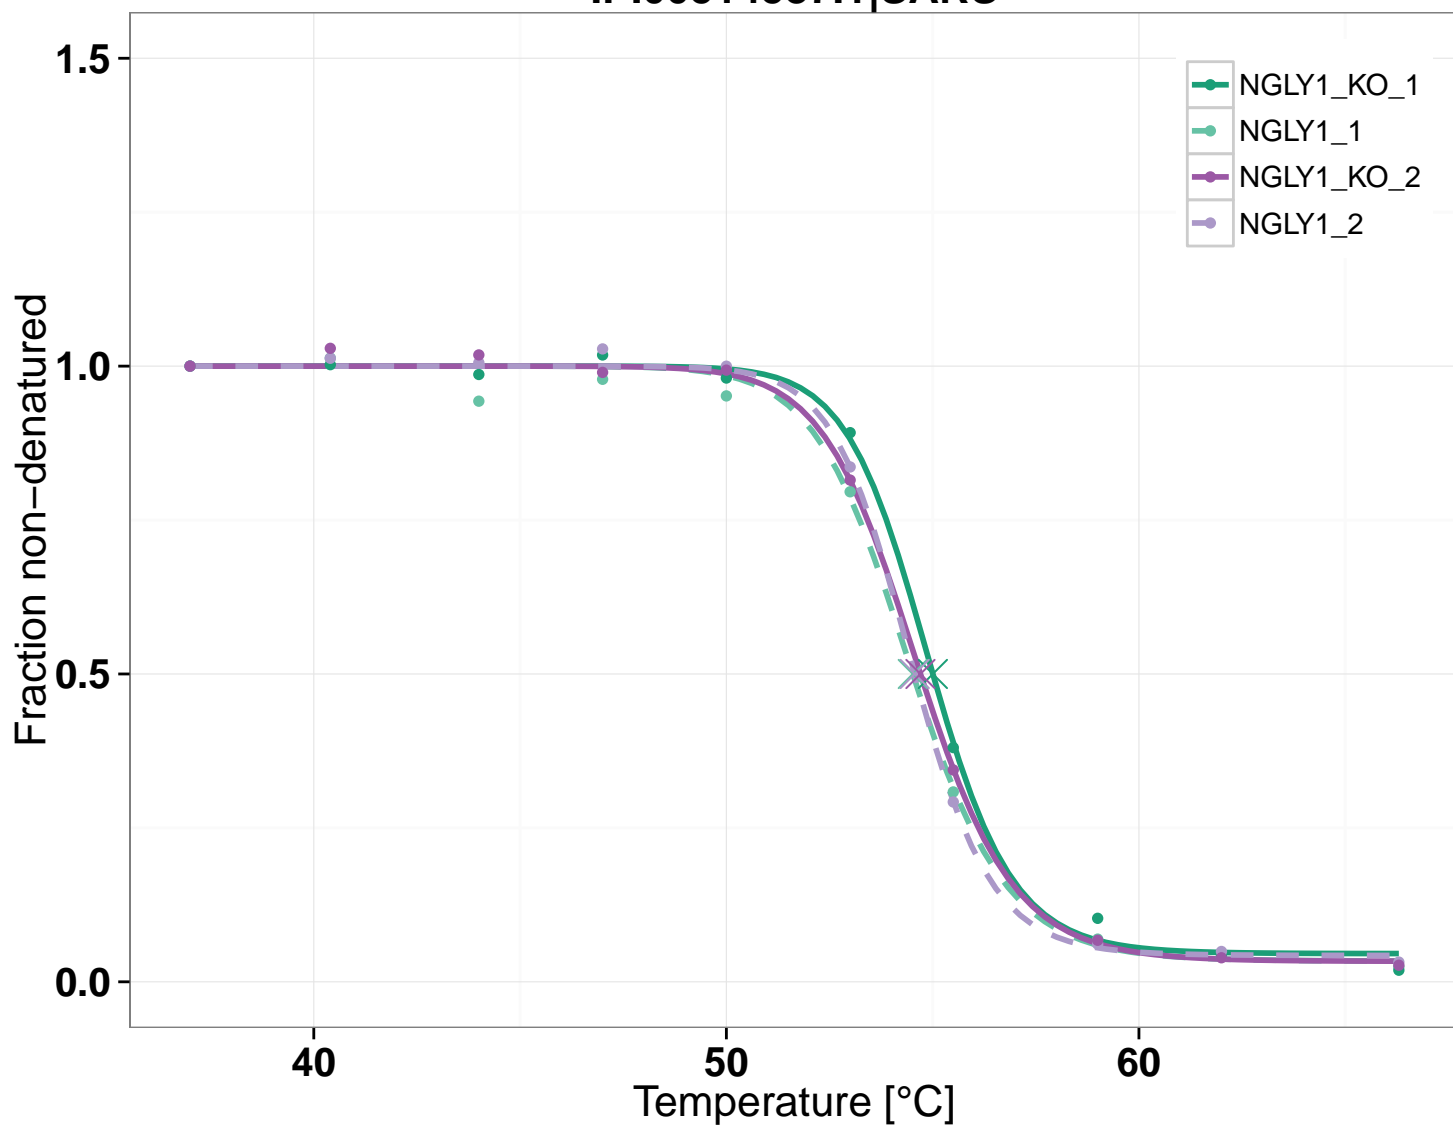

|            | meltPoint | slope | plateau | R2 |
|------------|-----------|-------|---------|----|
| NGLY1_KO_1 | 55        | -0.24 | 0.05    | 1  |
| NGLY1_1    | 54.52     | -0.21 | 0.03    | 1  |
| NGLY1_KO_2 | 54.7      | -0.21 | 0.03    | 1  |
| NGLY1_2    | 54.57     | -0.25 | 0.04    | 1  |

Supplement: Supplementary file 6453 [file 1]

# IPI00032900.1|BOLA1

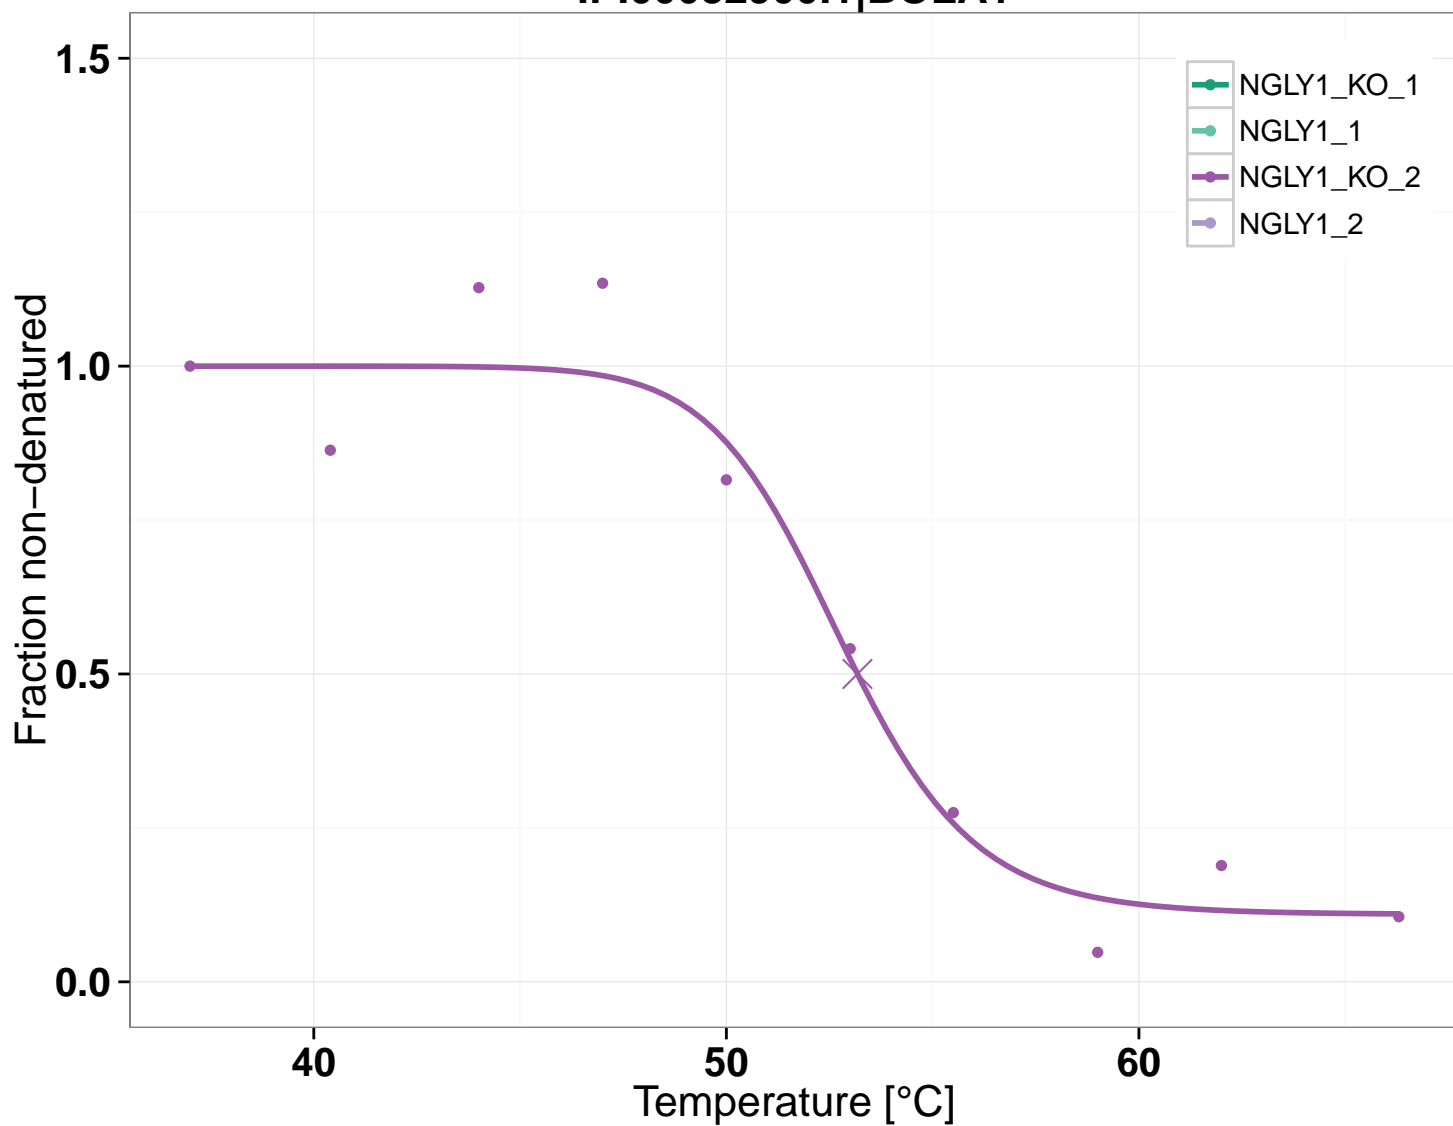

|            | meltPoint | slope | plateau | R2   |
|------------|-----------|-------|---------|------|
| NGLY1_KO_1 | —         | —     | —       | —    |
| NGLY1_1    | —         | —     | —       | —    |
| NGLY1_KO_2 | 53.18     | -0.14 | 0.11    | 0.95 |
| NGLY1_2    | —         | —     | —       | —    |

Supplement: Supplementary file 6454 [file 1]

IPI00291525.1|TFB1M

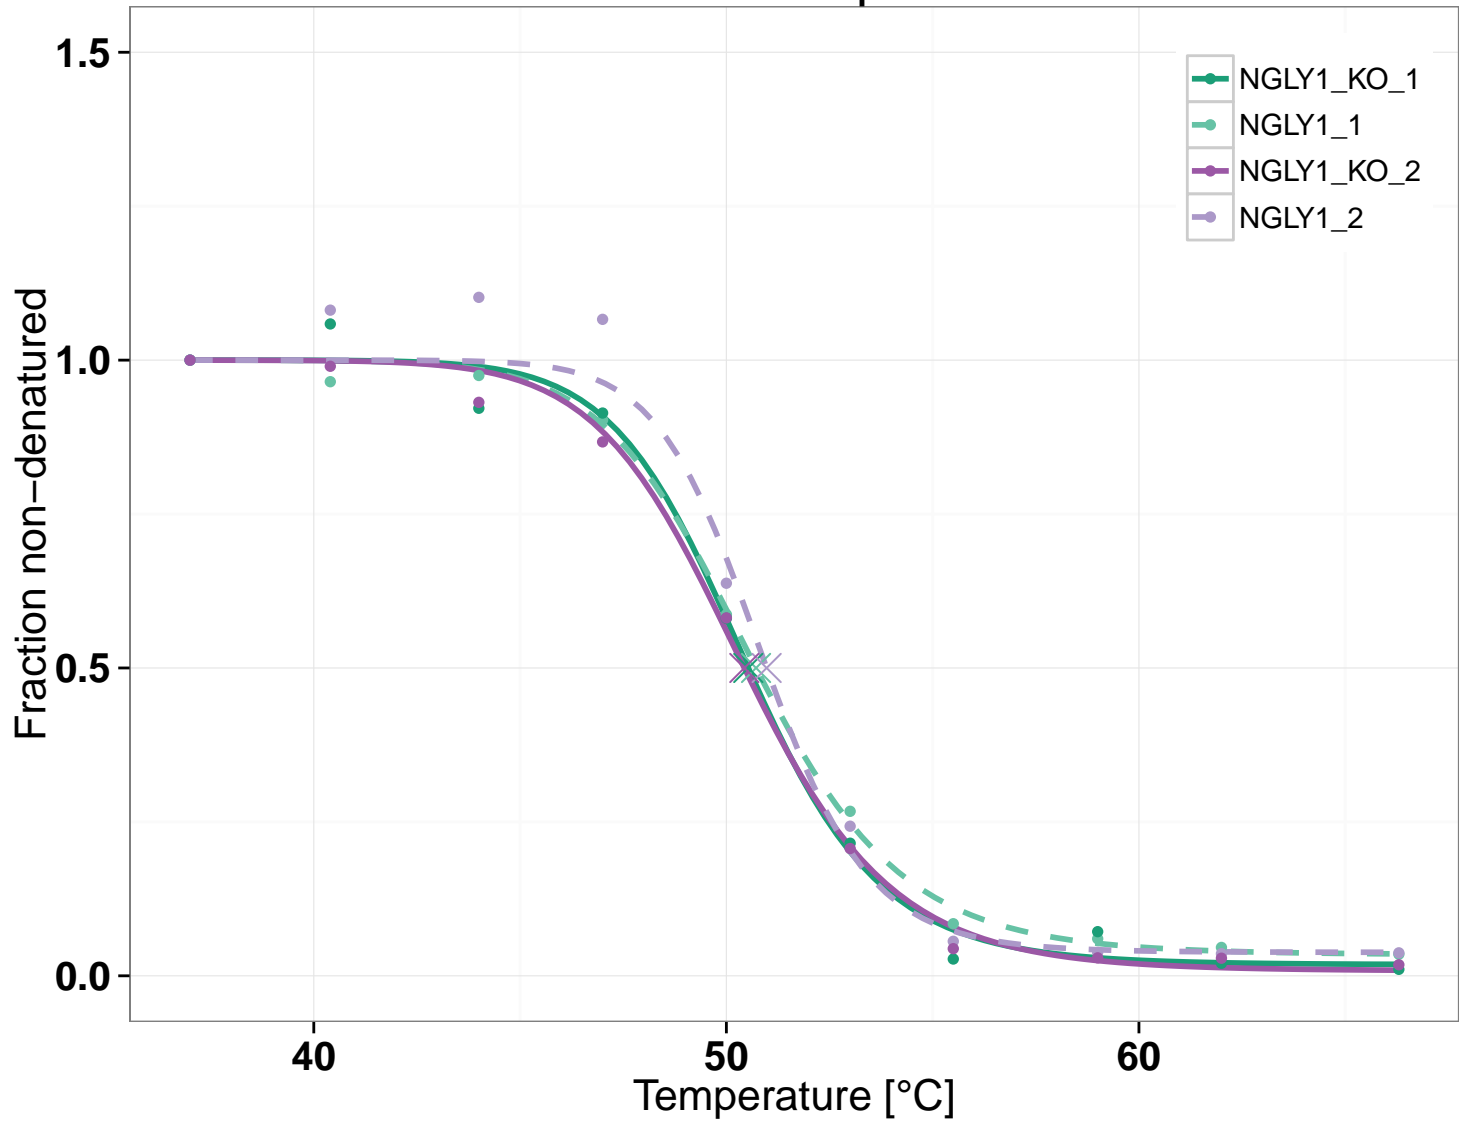

|            | meltPoint | slope | plateau | R2   |
|------------|-----------|-------|---------|------|
| NGLY1_KO_1 | 50.53     | -0.15 | 0.02    | 0.99 |
| NGLY1_1    | 50.72     | -0.13 | 0.03    | 1    |
| NGLY1_KO_2 | 50.44     | -0.14 | 0.01    | 1    |
| NGLY1_2    | 50.98     | -0.19 | 0.04    | 0.99 |

Supplement: Supplementary file 6455 [file 1]

IPI00032069.1|NFATC1

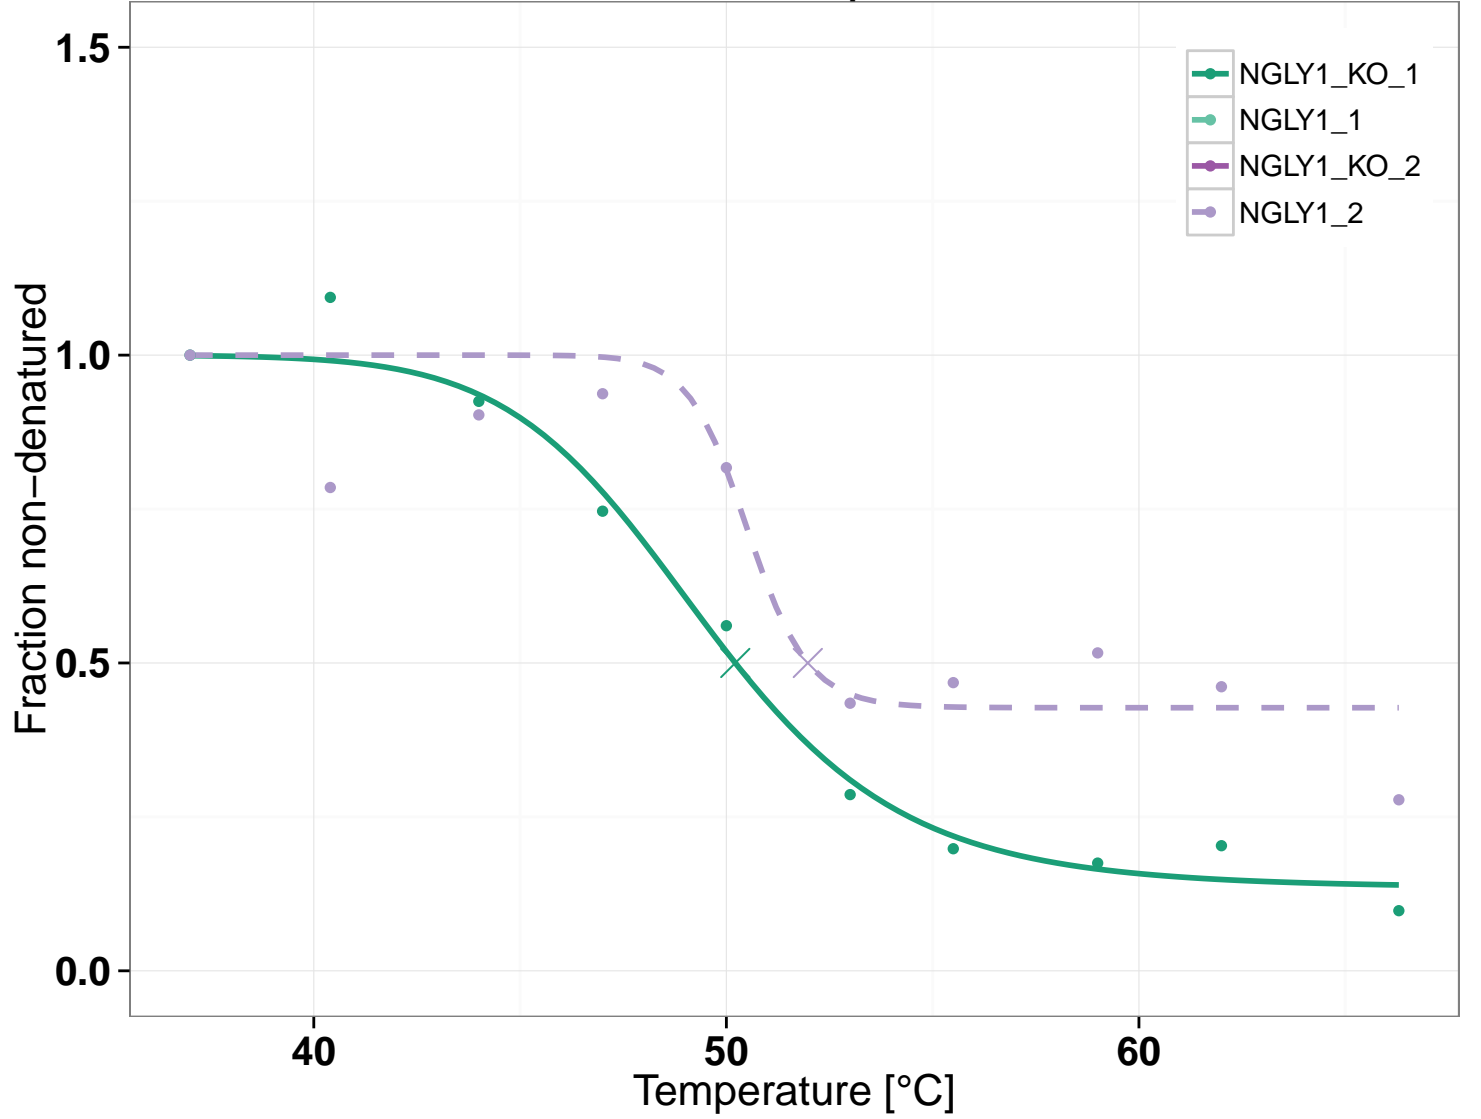

|            | meltPoint | slope | plateau | R2   |
|------------|-----------|-------|---------|------|
| NGLY1_KO_1 | 50.22     | -0.09 | 0.13    | 0.99 |
| NGLY1_1    | -         | -     | -       | -    |
| NGLY1_KO_2 | -         | -     | -       | -    |
| NGLY1_2    | 51.97     | -0.2  | 0.43    | 0.84 |

Supplement: Supplementary file 6456 [file 1]

# IPI00300886.5|SLC25A32

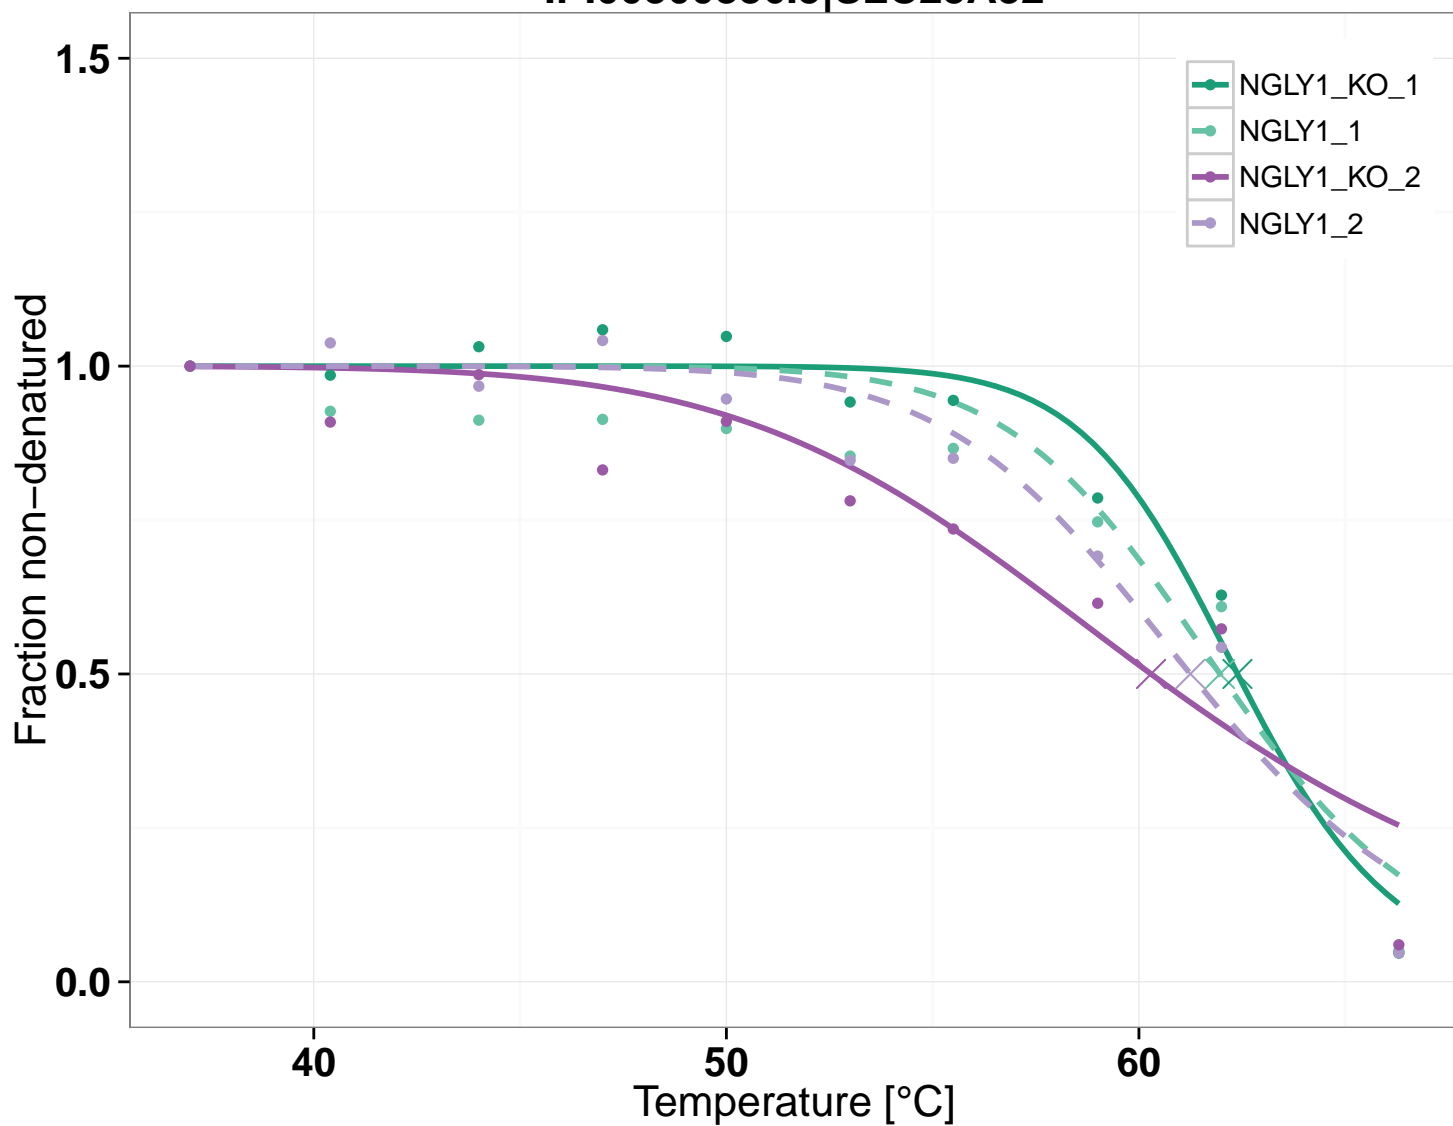

|            | meltPoint | slope  | plateau | R2   |
|------------|-----------|--------|---------|------|
| NGLY1_KO_1 | 62.39     | -0.13  | 0       | 0.96 |
| NGLY1_1    | 61.97     | -0.097 | 0       | 0.88 |
| NGLY1_KO_2 | 60.29     | -0.051 | 0       | 0.87 |
| NGLY1_2    | 61.25     | -0.084 | 0       | 0.94 |

Supplement: Supplementary file 6457 [file 1]

# IPI00409566.1|PKD1

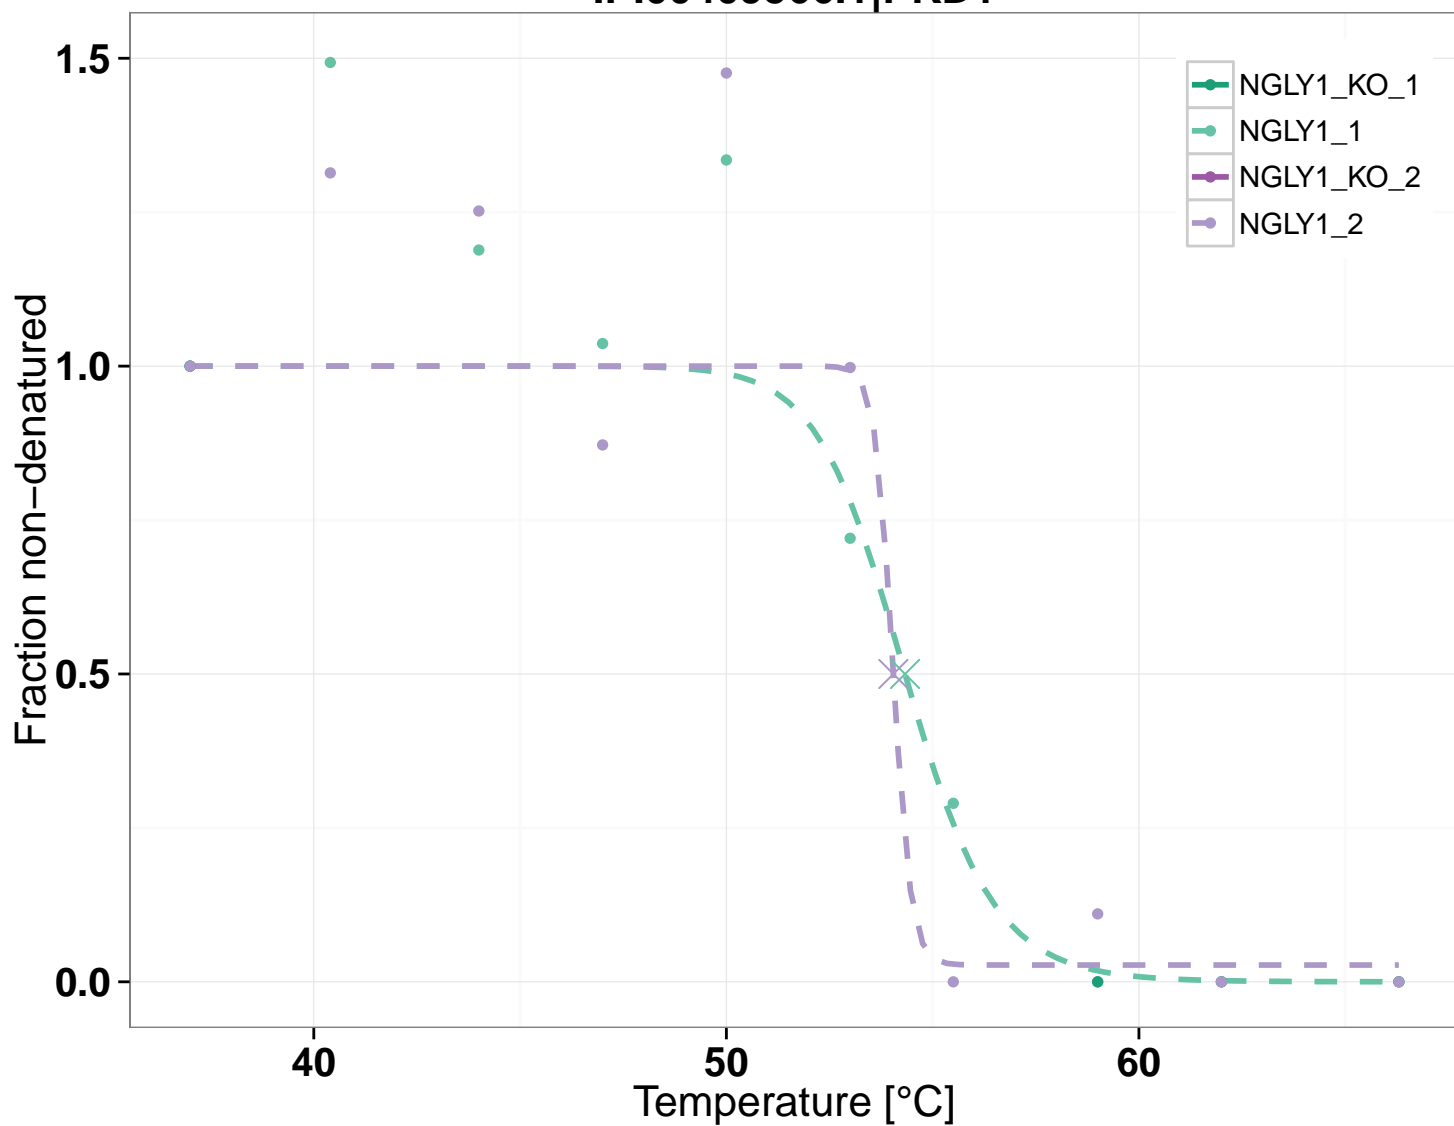

|            | meltPoint | slope | plateau | R2   |
|------------|-----------|-------|---------|------|
| NGLY1_KO_1 | —         | —     | —       | —    |
| NGLY1_1    | 54.33     | -0.23 | 0       | 0.87 |
| NGLY1_KO_2 | —         | —     | —       | —    |
| NGLY1_2    | 54.05     | -1.1  | 0.03    | 0.87 |

Supplement: Supplementary file 6458 [file 1]

IPI00419678.5|SNX14

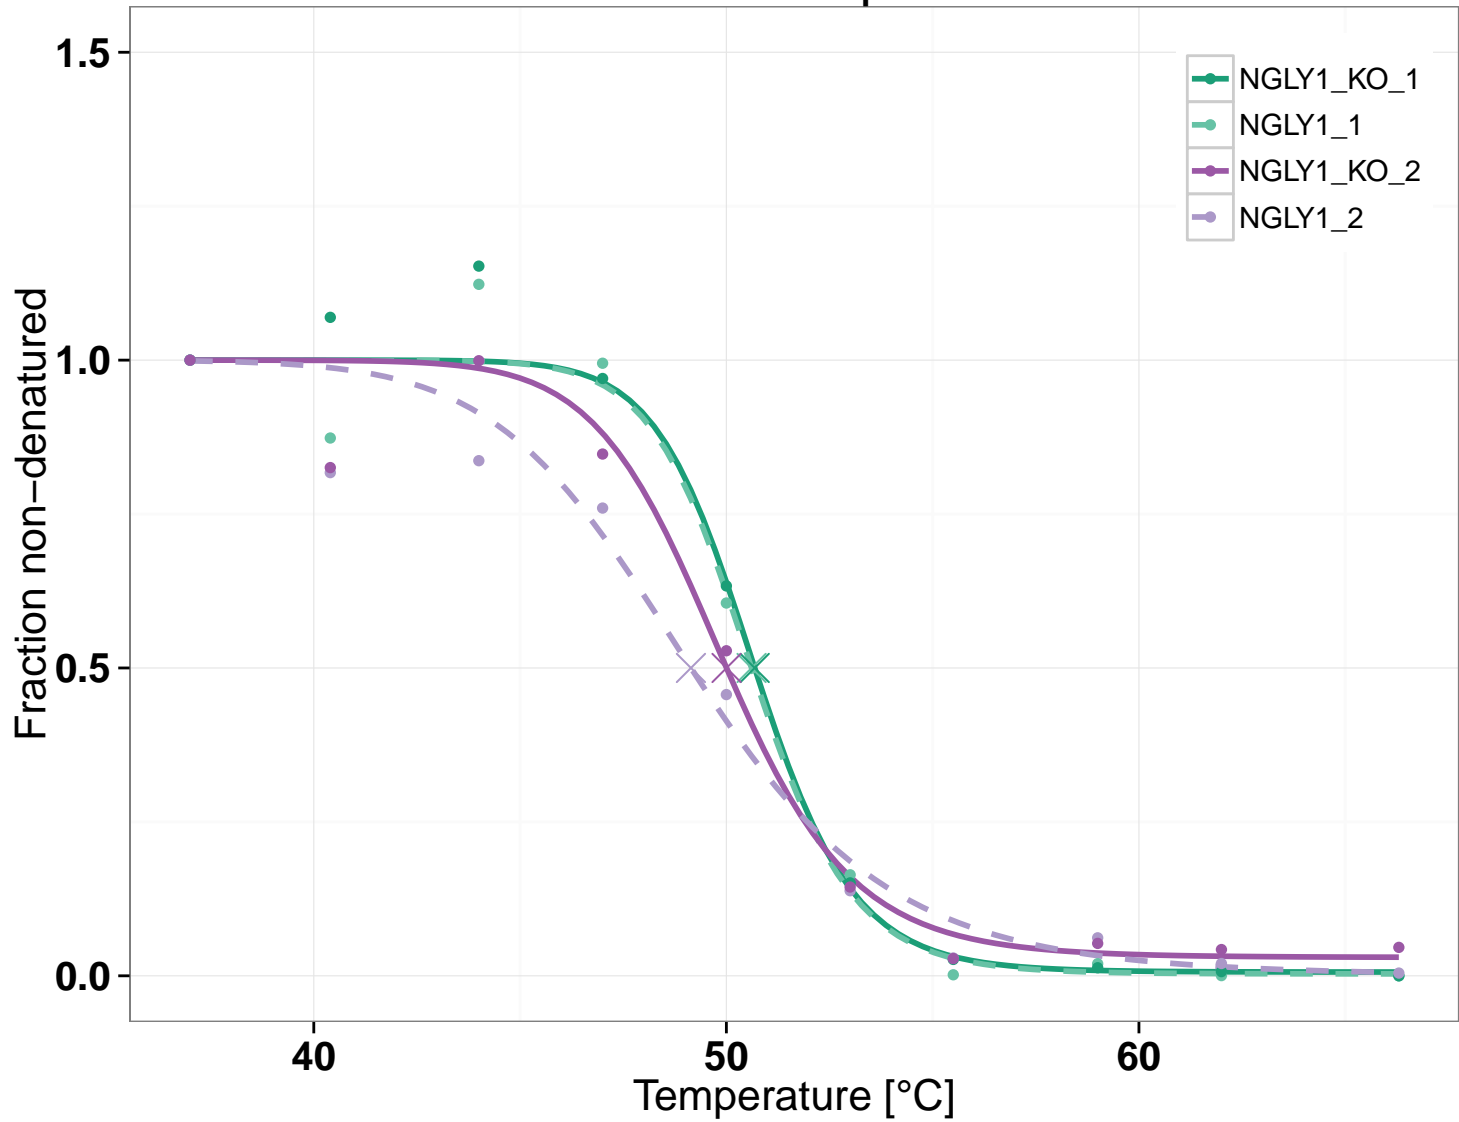

|            | meltPoint | slope | plateau | R2   |
|------------|-----------|-------|---------|------|
| NGLY1_KO_1 | 50.69     | -0.21 | 0.01    | 0.99 |
| NGLY1_1    | 50.61     | -0.2  | 0       | 0.98 |
| NGLY1_KO_2 | 50        | -0.16 | 0.03    | 0.98 |
| NGLY1_2    | 49.14     | -0.1  | 0       | 0.97 |

Supplement: Supplementary file 6459 [file 1]

IPI00027981.4|RAB38

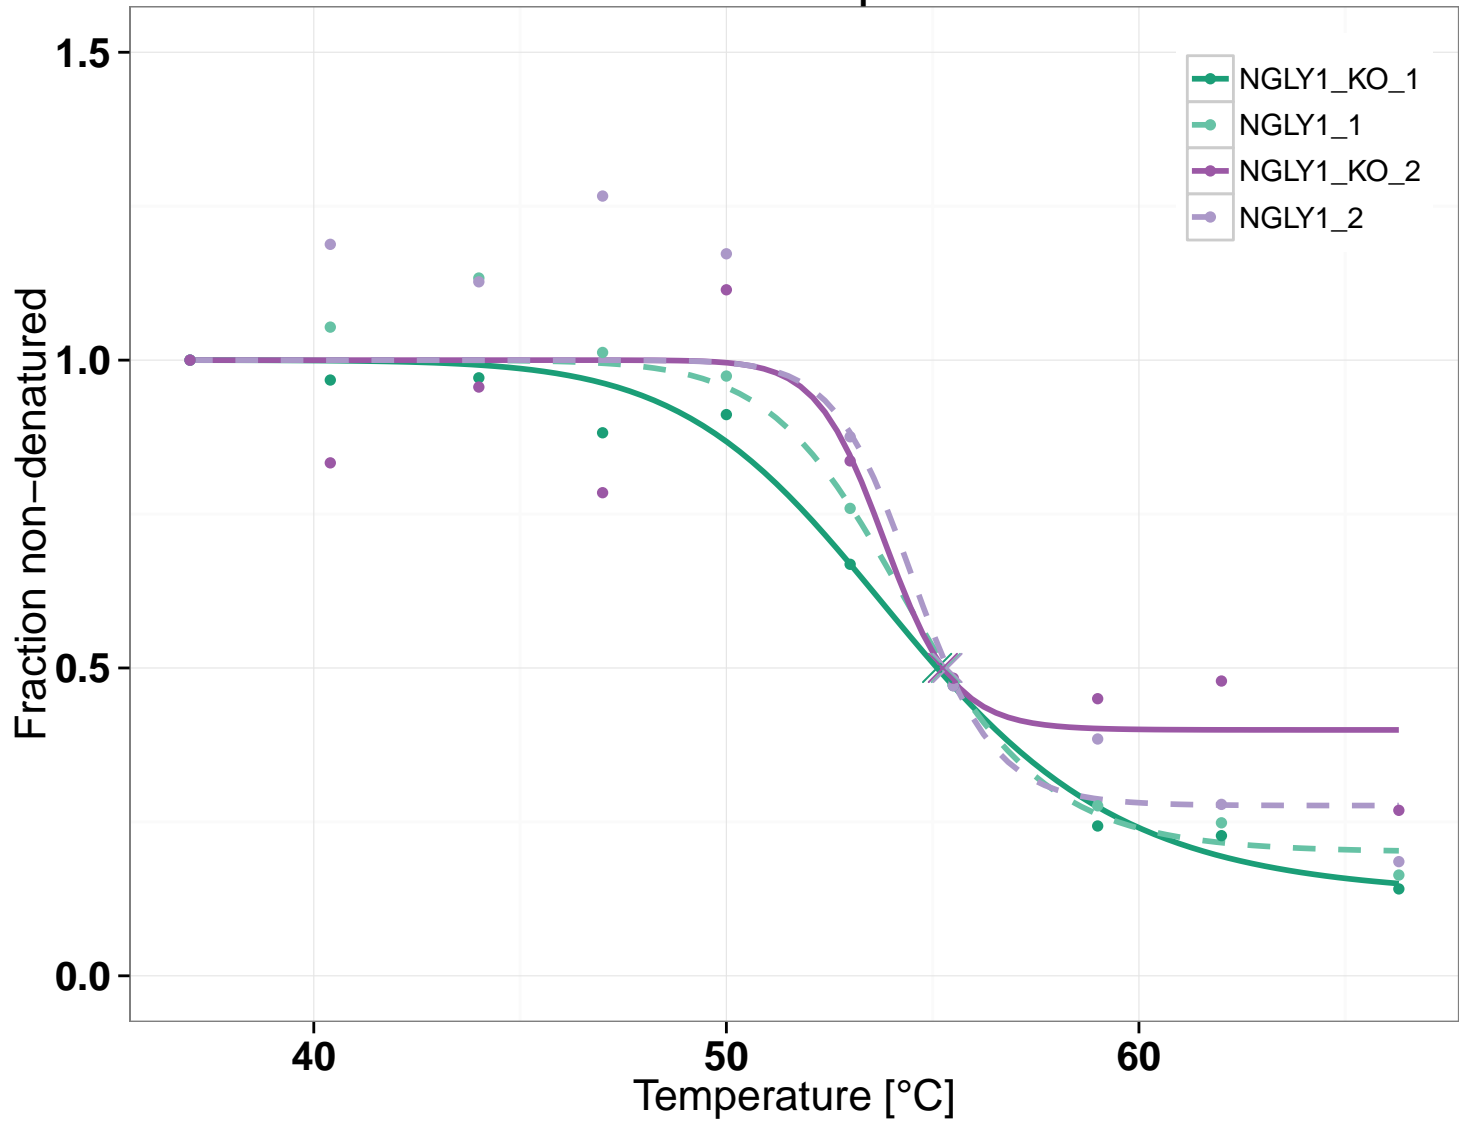

|            | meltPoint | slope  | plateau | R2   |
|------------|-----------|--------|---------|------|
| NGLY1_KO_1 | 55.11     | -0.081 | 0.13    | 0.99 |
| NGLY1_1    | 55.32     | -0.12  | 0.2     | 0.98 |
| NGLY1_KO_2 | 55.25     | -0.18  | 0.4     | 0.84 |
| NGLY1_2    | 55.36     | -0.18  | 0.28    | 0.89 |

Supplement: Supplementary file 6460 [file 1]

# IPI00478231.2|RHOA

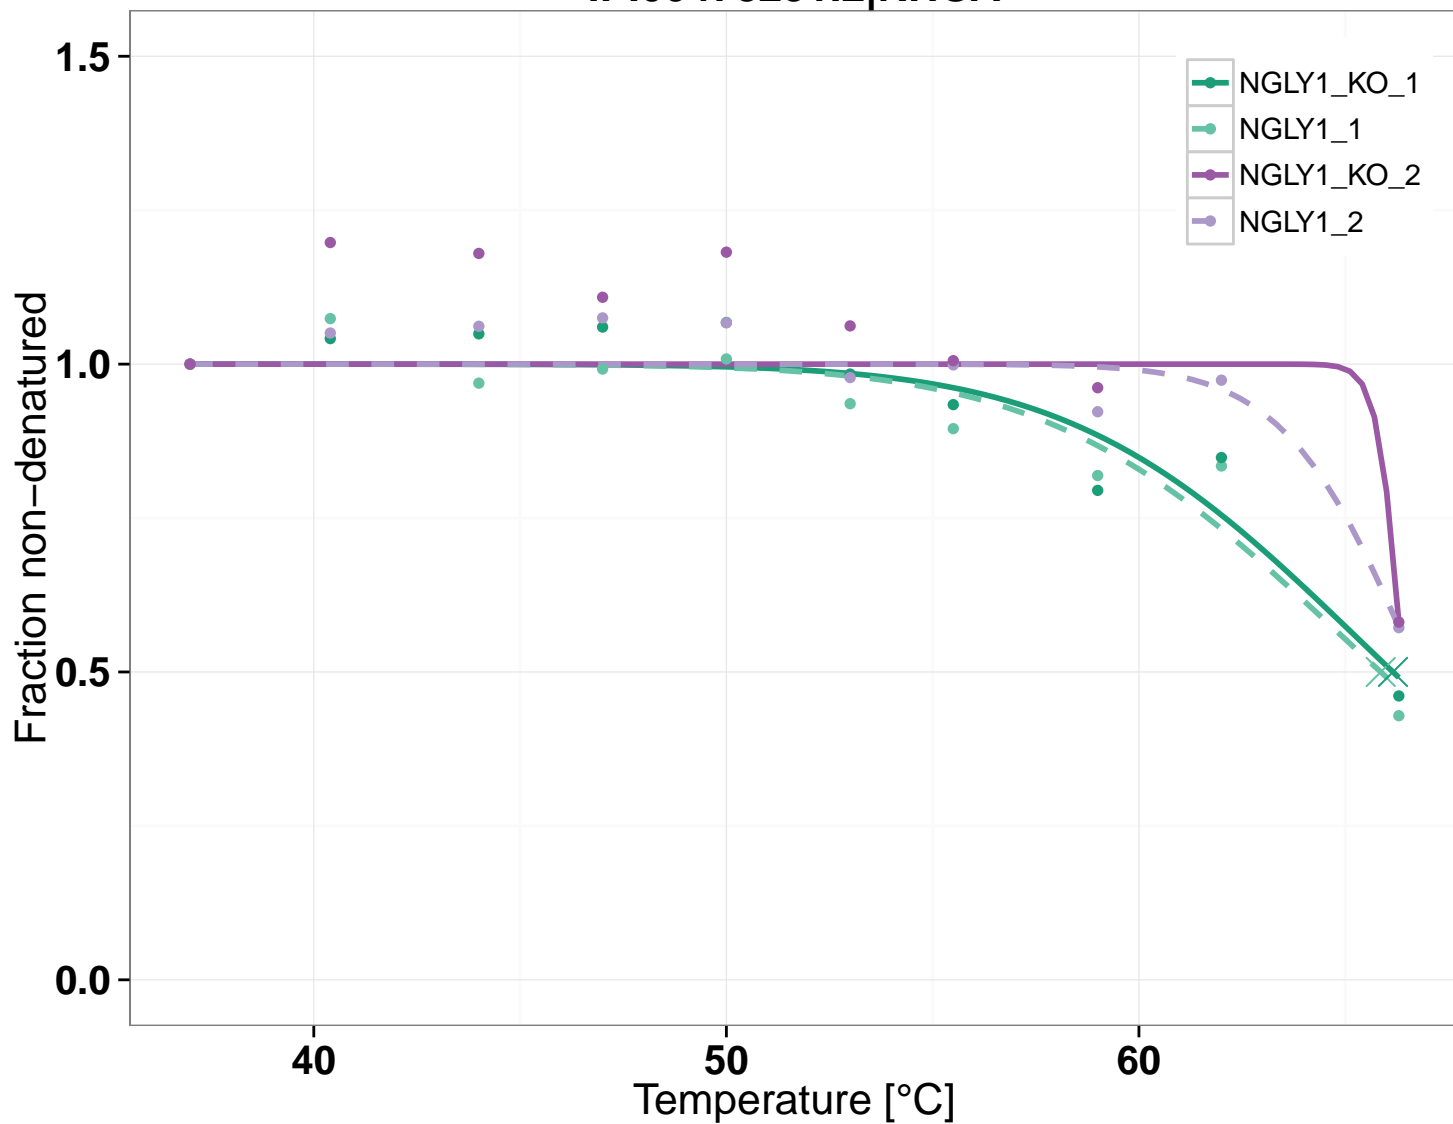

|            | meltPoint | slope  | plateau | R2   |
|------------|-----------|--------|---------|------|
| NGLY1_KO_1 | 66.16     | -0.064 | 0       | 0.9  |
| NGLY1_1    | 65.86     | -0.062 | 0       | 0.91 |
| NGLY1_KO_2 | -         | -      | 0       | 0.43 |
| NGLY1_2    | -         | -      | 0       | 0.89 |

Supplement: Supplementary file 6461 [file 1]

# IPI00171087.7|SRBD1

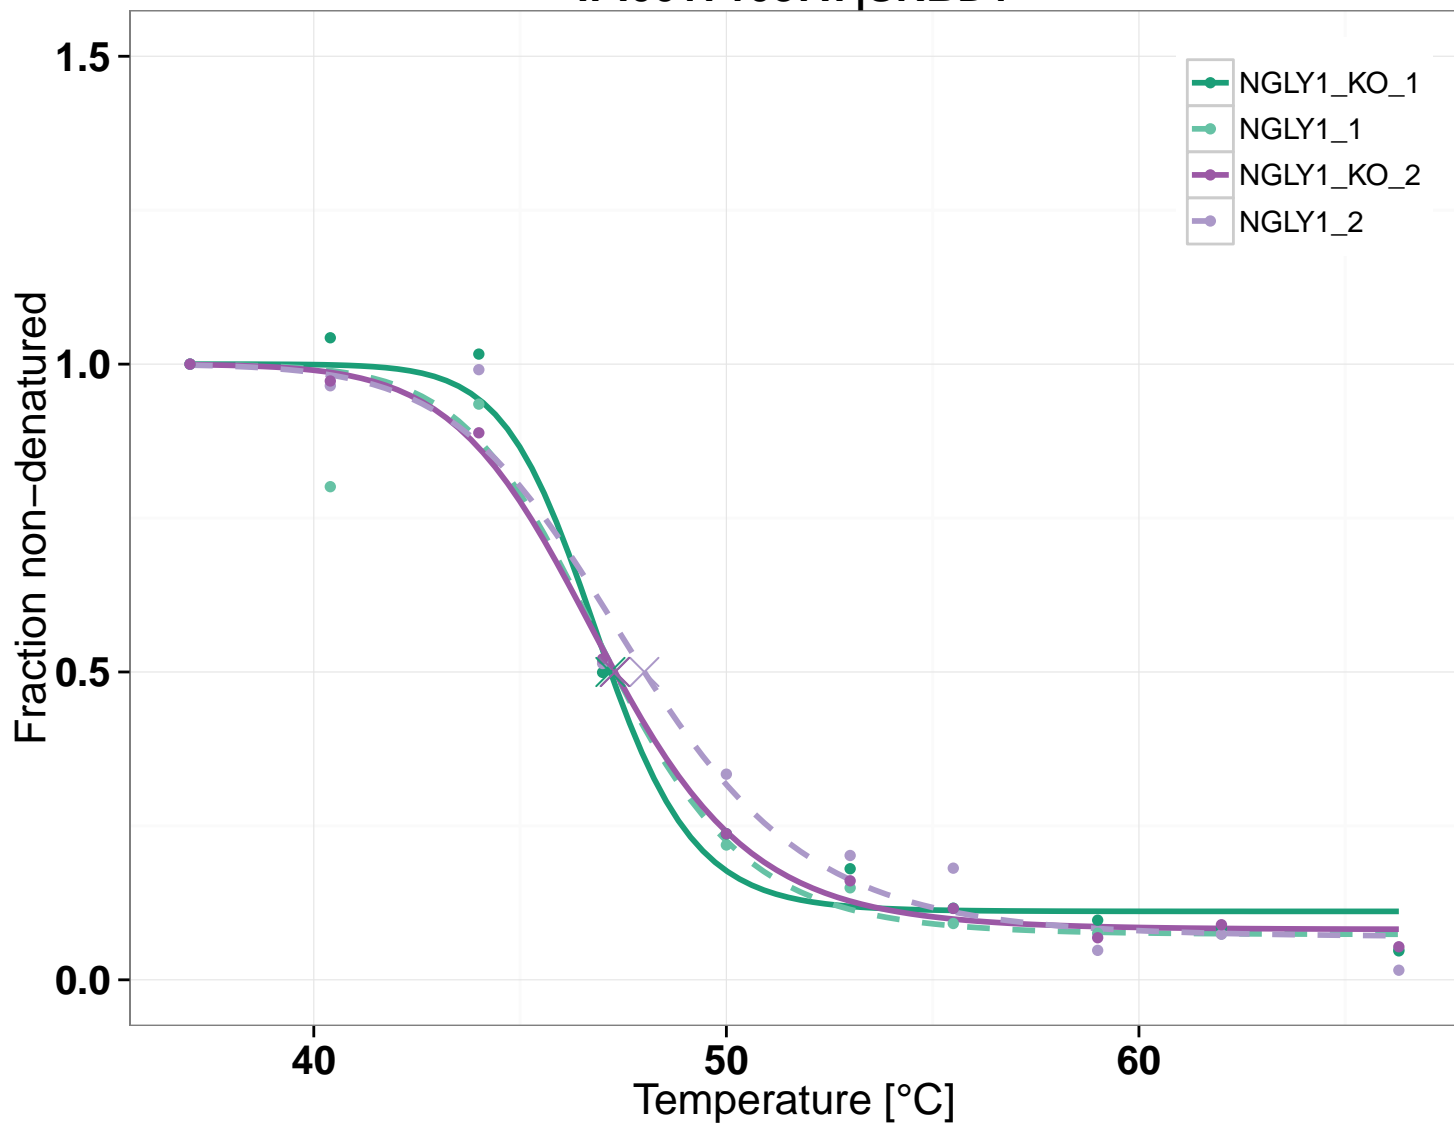

|            | meltPoint | slope | plateau | R2   |
|------------|-----------|-------|---------|------|
| NGLY1_KO_1 | 47.19     | -0.19 | 0.11    | 0.99 |
| NGLY1_1    | 47.29     | -0.14 | 0.07    | 0.97 |
| NGLY1_KO_2 | 47.3      | -0.13 | 0.08    | 1    |
| NGLY1_2    | 48.01     | -0.11 | 0.07    | 0.98 |

Supplement: Supplementary file 6462 [file 1]

# IPI00329760.7|OS9

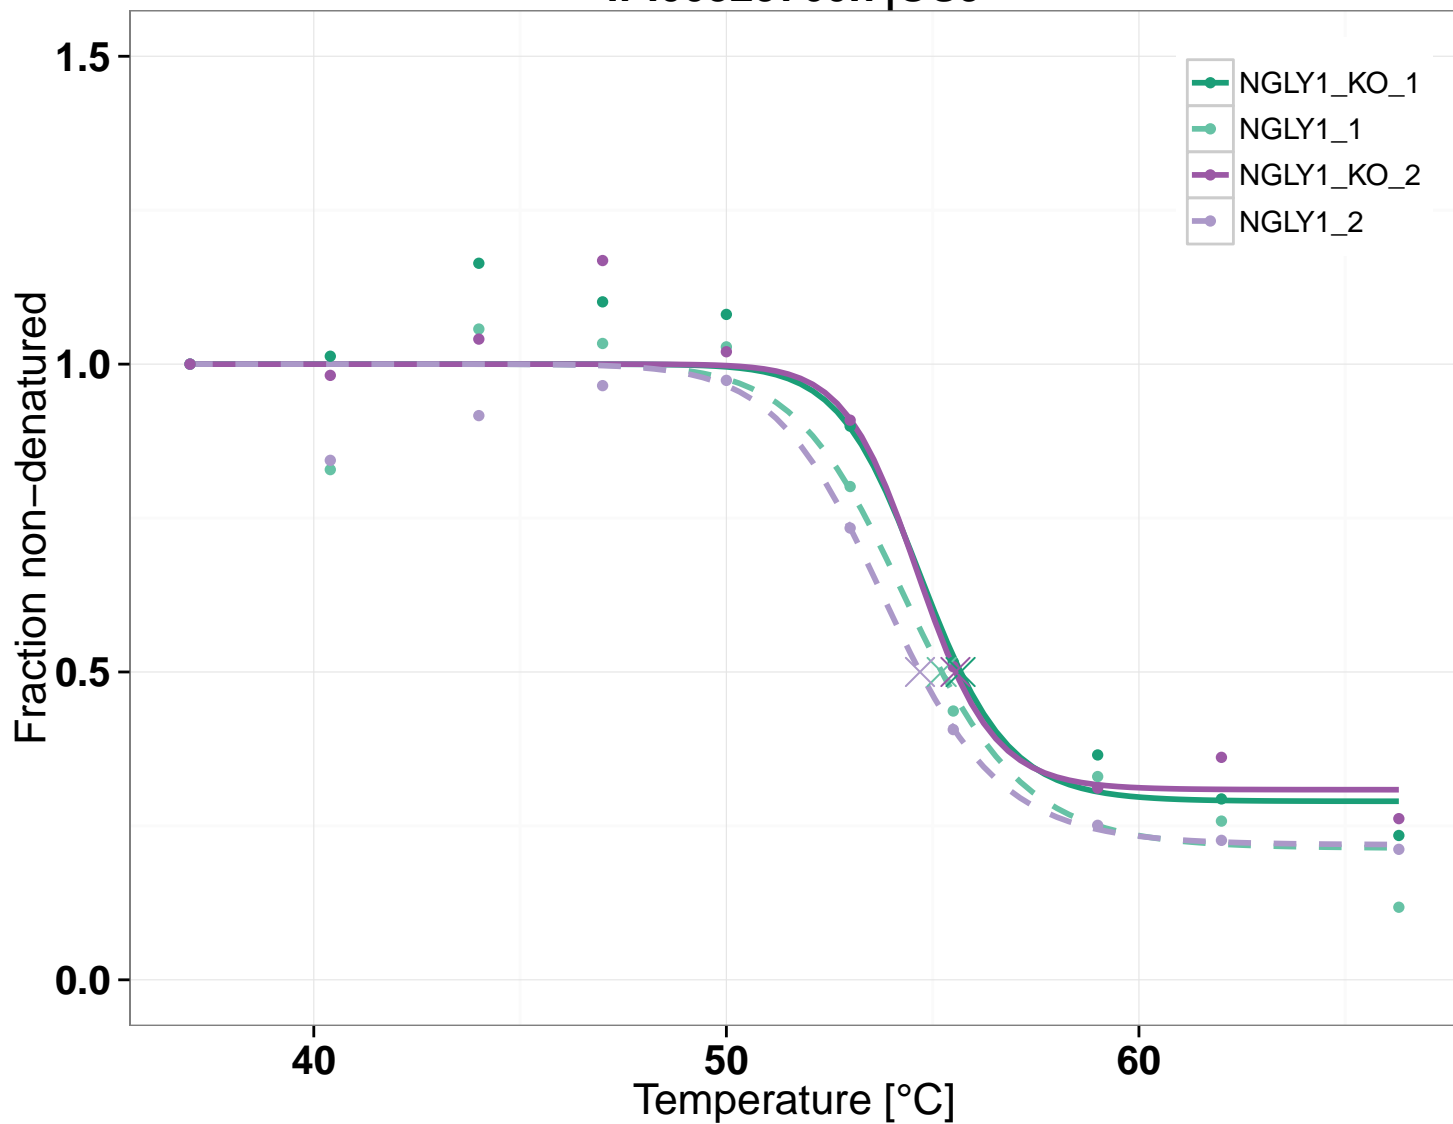

|            | meltPoint | slope | plateau | R2   |
|------------|-----------|-------|---------|------|
| NGLY1_KO_1 | 55.68     | -0.17 | 0.29    | 0.96 |
| NGLY1_1    | 55.22     | -0.14 | 0.21    | 0.95 |
| NGLY1_KO_2 | 55.55     | -0.19 | 0.31    | 0.97 |
| NGLY1_2    | 54.69     | -0.14 | 0.22    | 0.97 |

Supplement: Supplementary file 6463 [file 1]

IPI00644431.2|DDX39

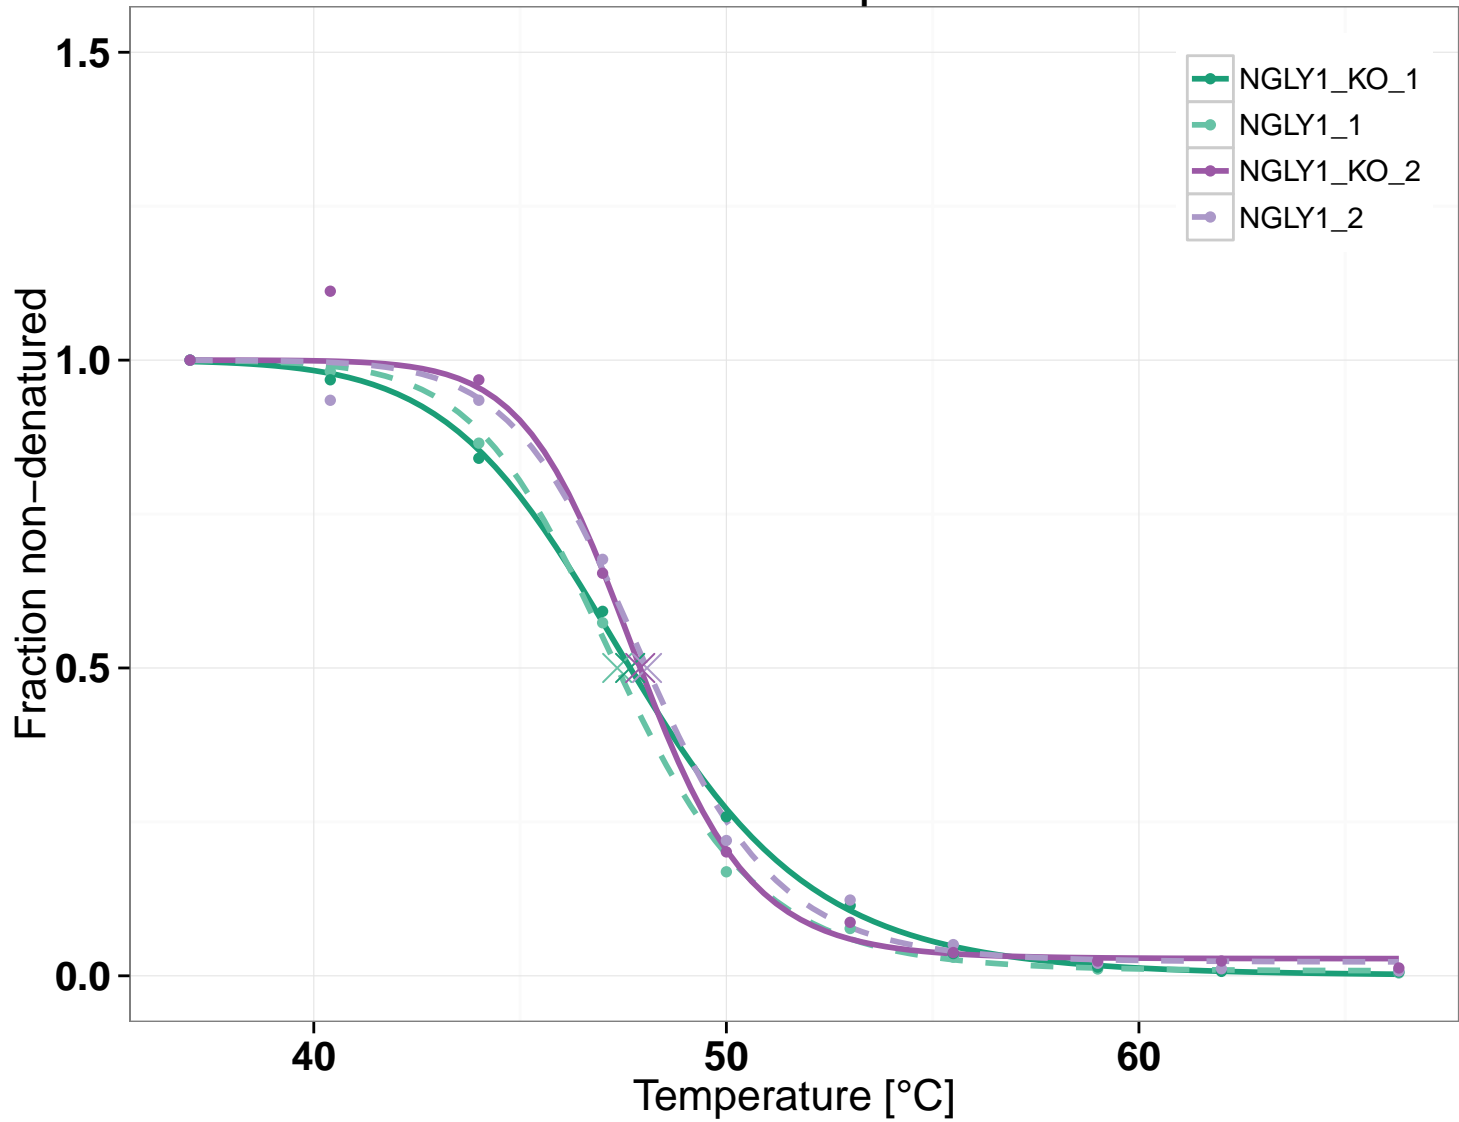

|            | meltPoint | slope | plateau | R2   |
|------------|-----------|-------|---------|------|
| NGLY1_KO_1 | 47.67     | -0.11 | 0       | 1    |
| NGLY1_1    | 47.35     | -0.14 | 0.01    | 1    |
| NGLY1_KO_2 | 47.91     | -0.18 | 0.03    | 0.99 |
| NGLY1_2    | 48.08     | -0.15 | 0.02    | 1    |

Supplement: Supplementary file 6464 [file 1]

# IPI00291006.2|MDH2

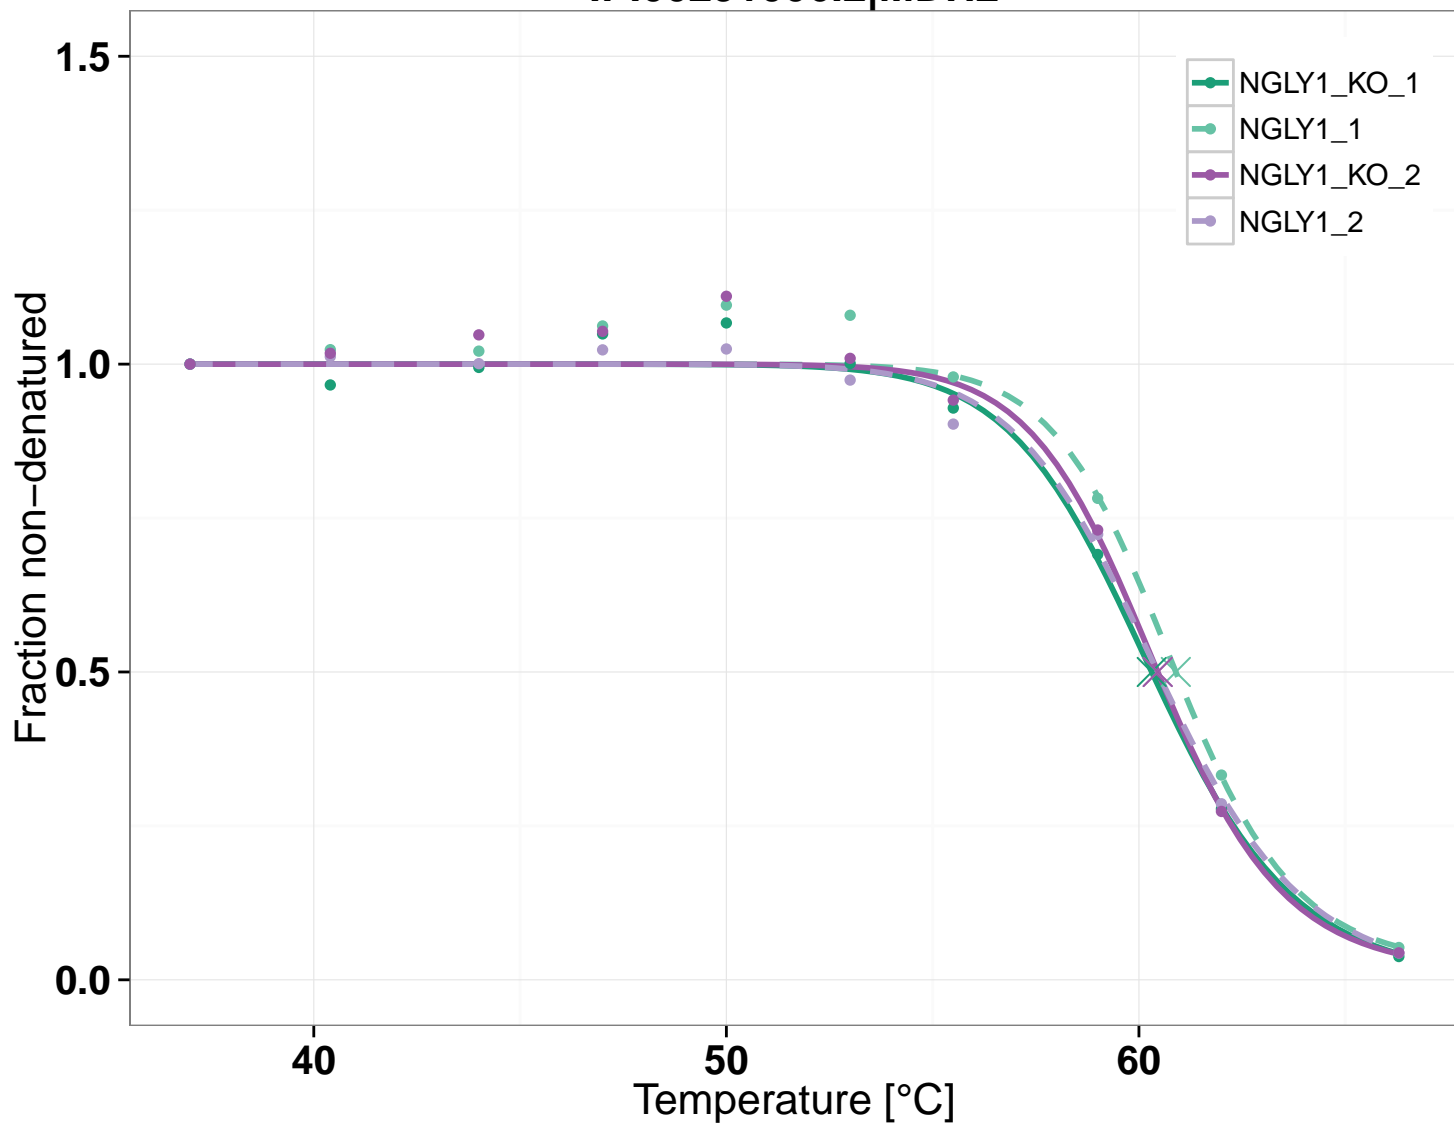

|            | meltPoint | slope | plateau | R2   |
|------------|-----------|-------|---------|------|
| NGLY1_KO_1 | 60.31     | -0.14 | 0       | 0.99 |
| NGLY1_1    | 60.89     | -0.17 | 0.02    | 0.98 |
| NGLY1_KO_2 | 60.46     | -0.16 | 0.01    | 0.98 |
| NGLY1_2    | 60.45     | -0.14 | 0       | 1    |

Supplement: Supplementary file 6465 [file 1]

IPI00914048.1|C11ORF68

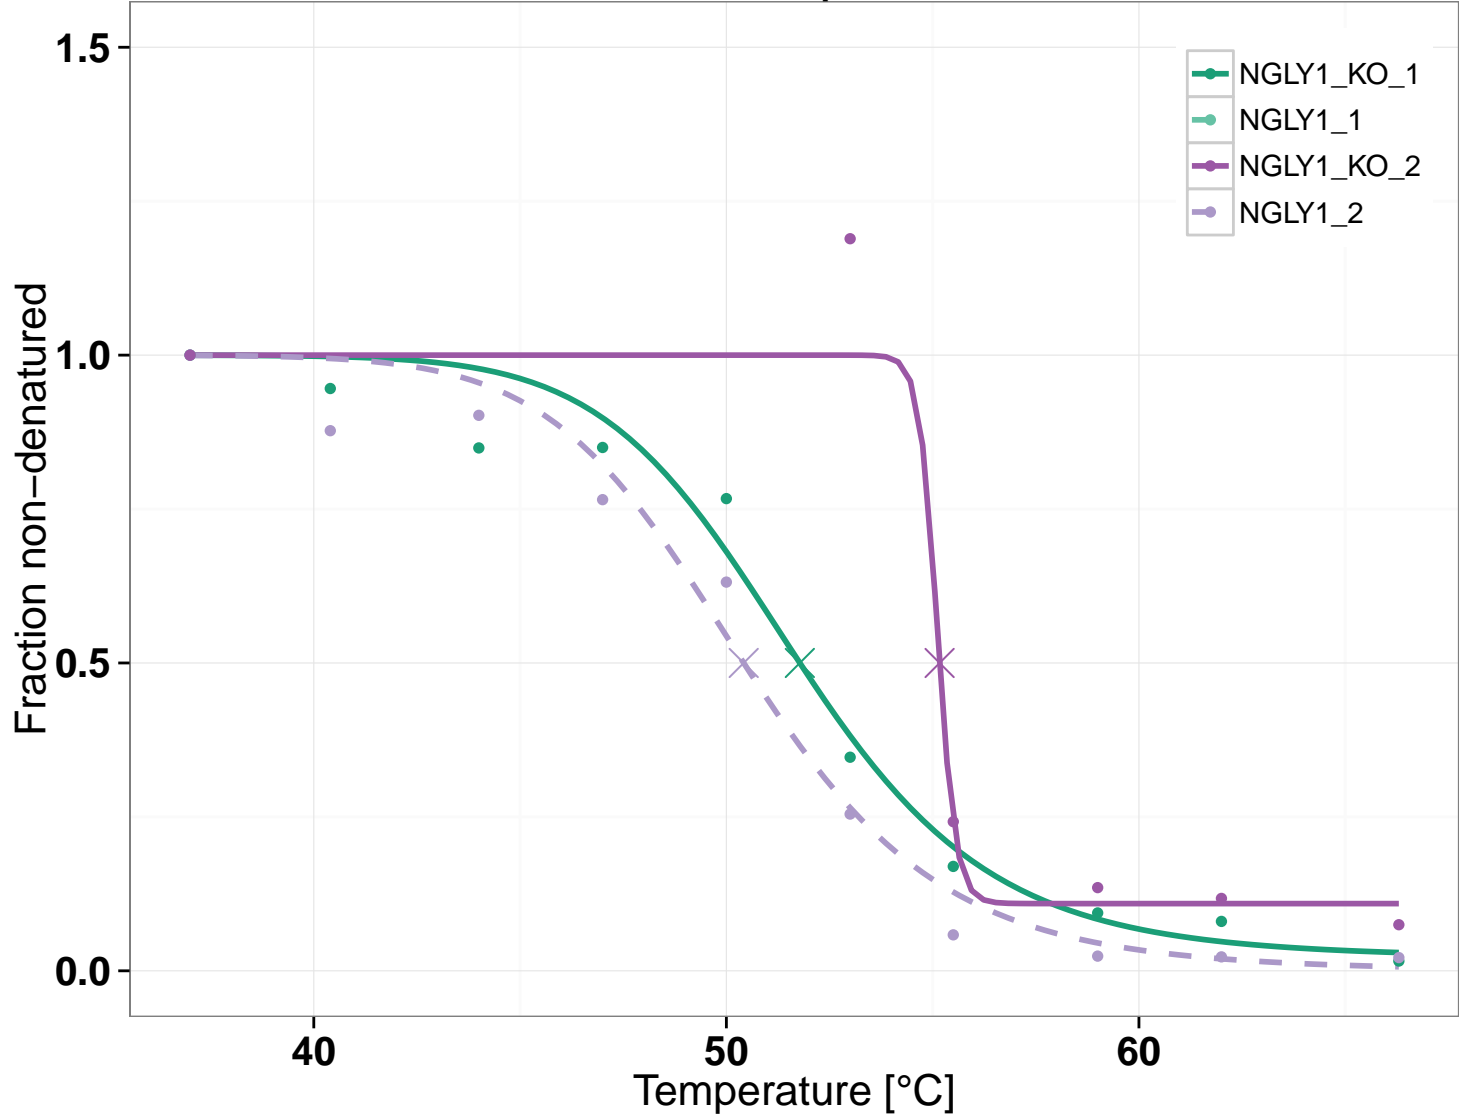

|            | meltPoint | slope | plateau | R2   |
|------------|-----------|-------|---------|------|
| NGLY1_KO_1 | 51.78     | -0.1  | 0.02    | 0.98 |
| NGLY1_1    | -         | -     | -       | -    |
| NGLY1_KO_2 | 55.17     | -1    | 0.11    | 0.09 |
| NGLY1_2    | 50.42     | -0.1  | 0       | 0.98 |

Supplement: Supplementary file 6466 [file 1]

# IPI00063434.2|PHF23

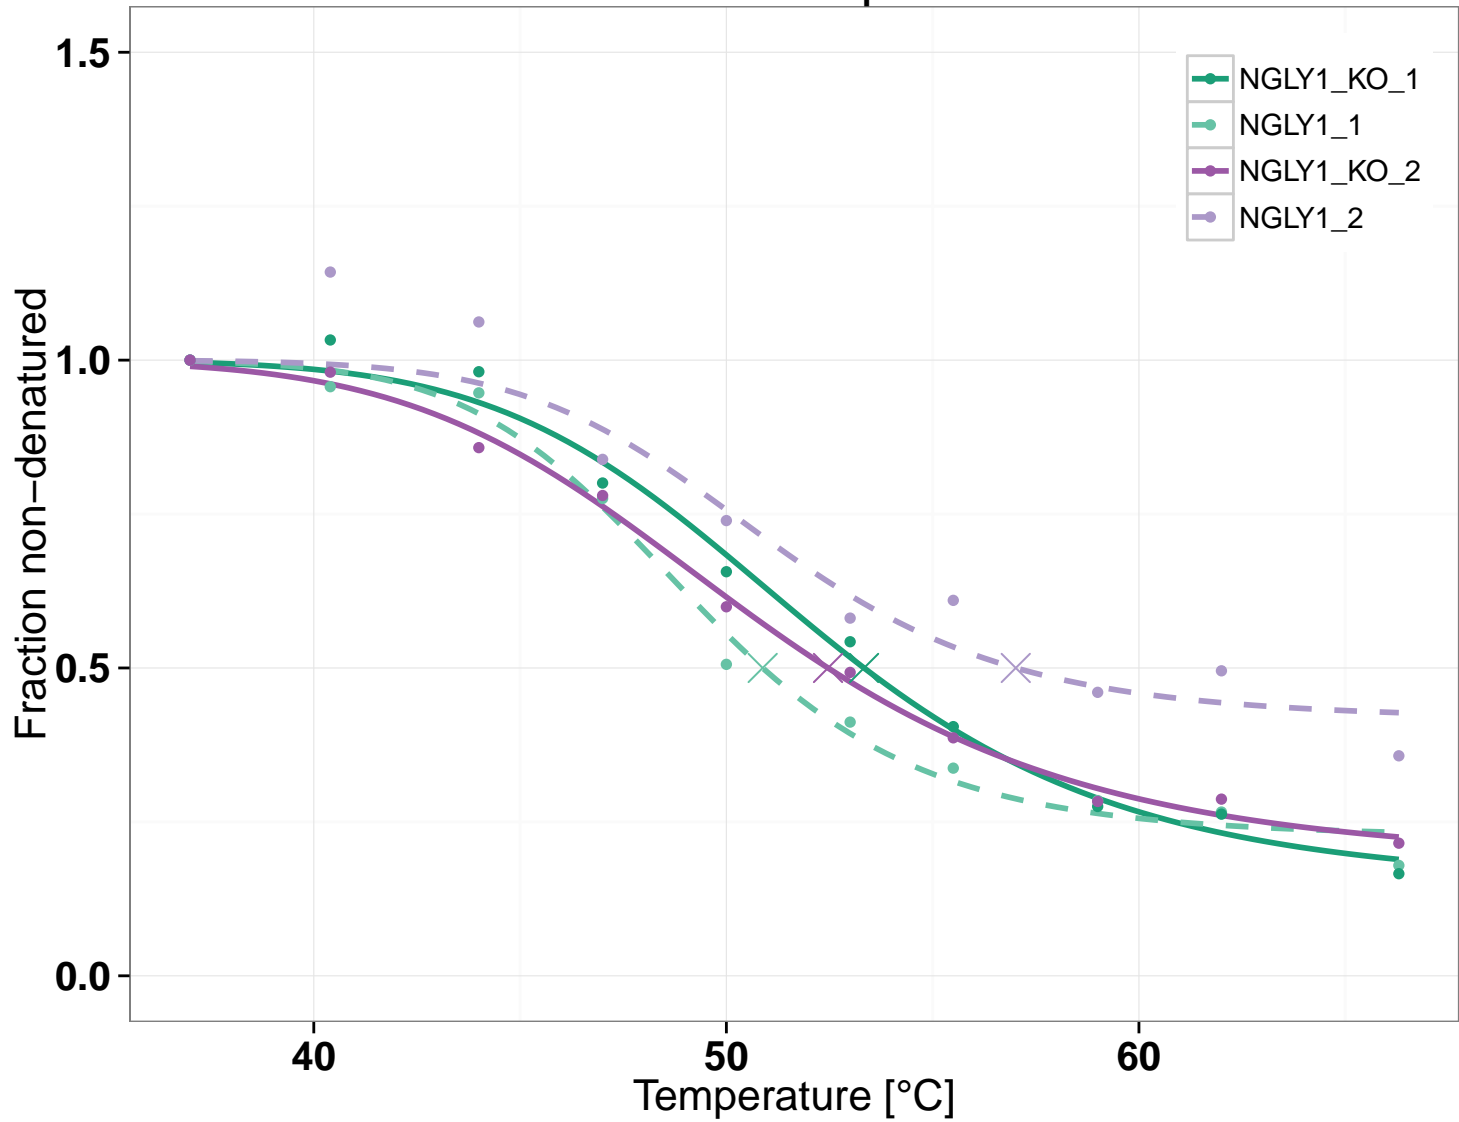

|            | meltPoint | slope  | plateau | R2   |
|------------|-----------|--------|---------|------|
| NGLY1_KO_1 | 53.34     | -0.056 | 0.14    | 0.99 |
| NGLY1_1    | 50.88     | -0.07  | 0.23    | 0.99 |
| NGLY1_KO_2 | 52.46     | -0.05  | 0.18    | 1    |
| NGLY1_2    | 57.02     | -0.049 | 0.42    | 0.93 |

Supplement: Supplementary file 6467 [file 1]

# IPI00477523.5|SLFN14

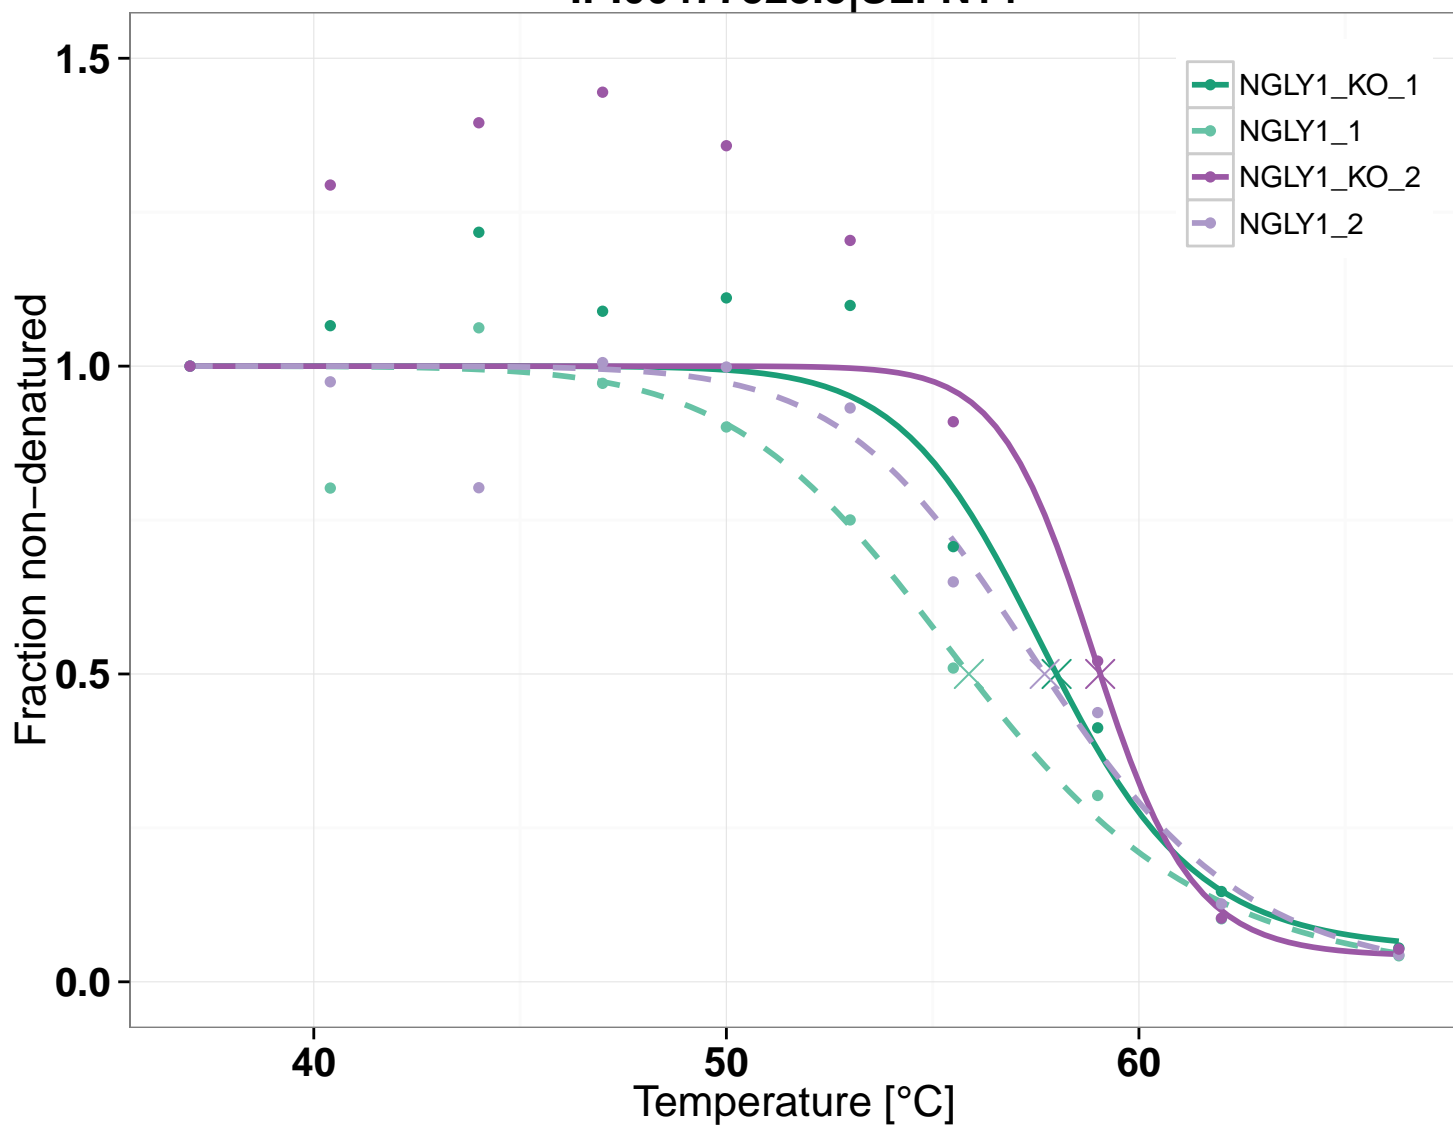

|            | meltPoint | slope  | plateau | R2   |
|------------|-----------|--------|---------|------|
| NGLY1_KO_1 | 58        | -0.13  | 0.05    | 0.94 |
| NGLY1_1    | 55.88     | -0.087 | 0       | 0.96 |
| NGLY1_KO_2 | 59.06     | -0.21  | 0.04    | 0.75 |
| NGLY1_2    | 57.71     | -0.1   | 0       | 0.96 |

Supplement: Supplementary file 6468 [file 1]

# IPI00290555.3|ABHD4

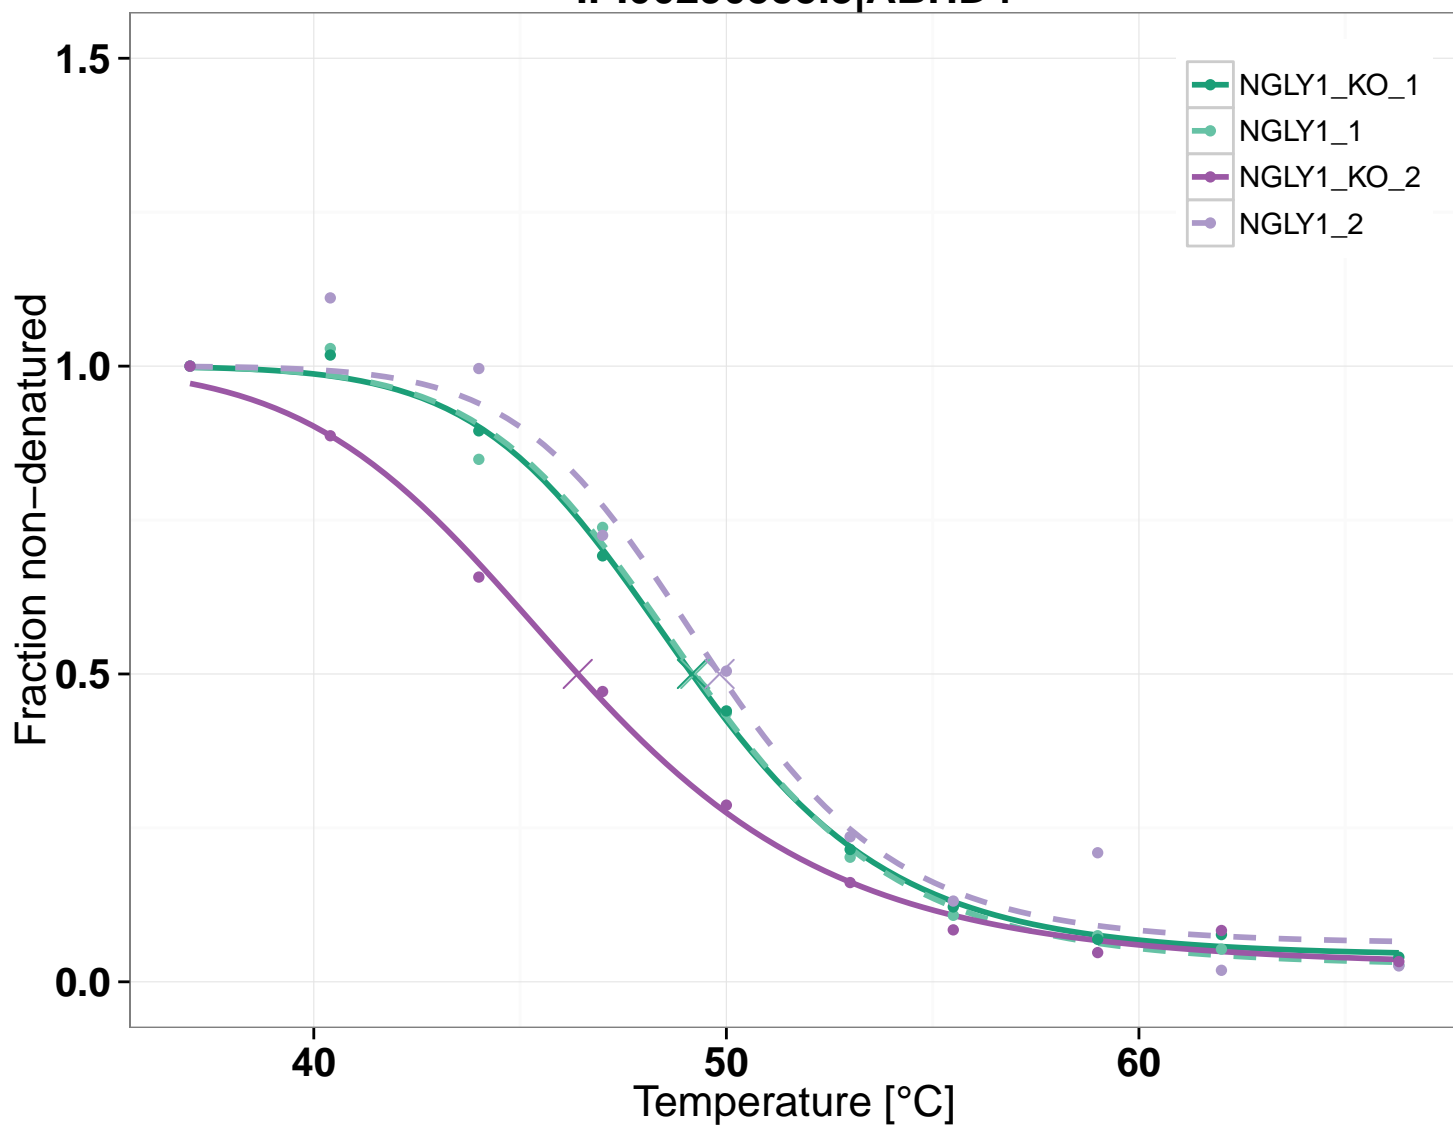

|            | meltPoint | slope  | plateau | R2   |
|------------|-----------|--------|---------|------|
| NGLY1_KO_1 | 49.17     | -0.095 | 0.04    | 1    |
| NGLY1_1    | 49.25     | -0.096 | 0.03    | 1    |
| NGLY1_KO_2 | 46.4      | -0.076 | 0.02    | 1    |
| NGLY1_2    | 49.84     | -0.1   | 0.06    | 0.98 |

Supplement: Supplementary file 6469 [file 1]

IPI00045491.3|TUBGCP6

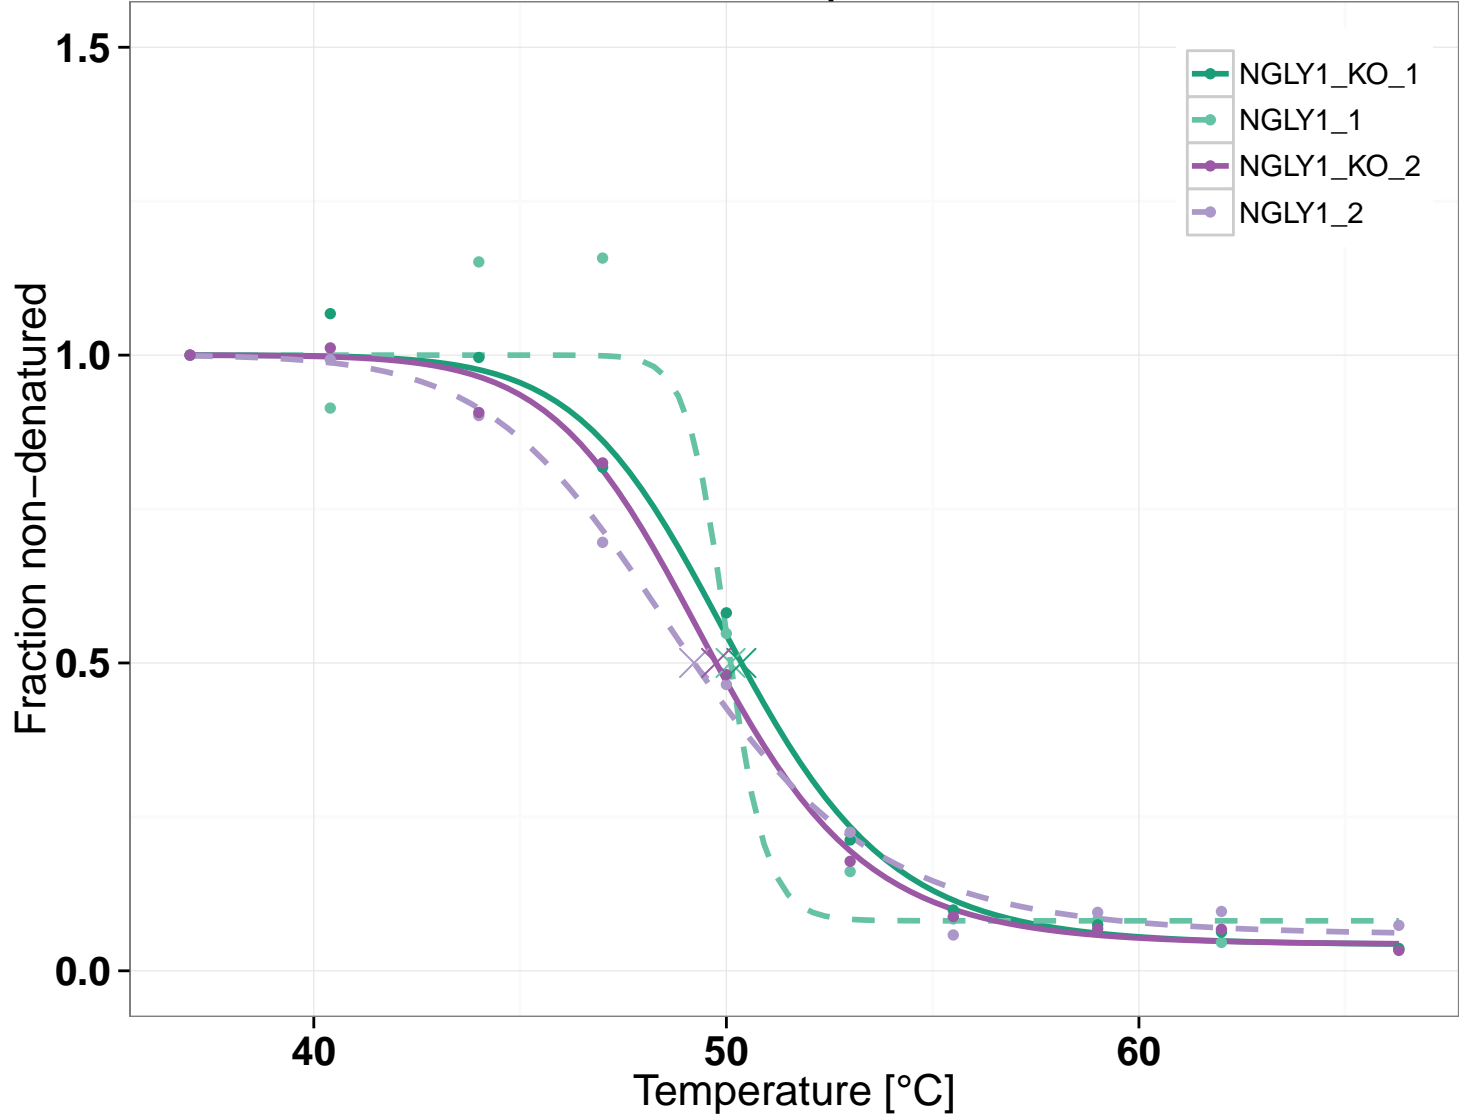

|            | meltPoint | slope | plateau | R2   |
|------------|-----------|-------|---------|------|
| NGLY1_KO_1 | 50.36     | -0.13 | 0.04    | 0.99 |
| NGLY1_1    | 50.1      | -0.48 | 0.08    | 0.97 |
| NGLY1_KO_2 | 49.75     | -0.13 | 0.04    | 1    |
| NGLY1_2    | 49.22     | -0.1  | 0.06    | 0.99 |

Supplement: Supplementary file 6470 [file 1]

IPI00410401.2|NUP210L

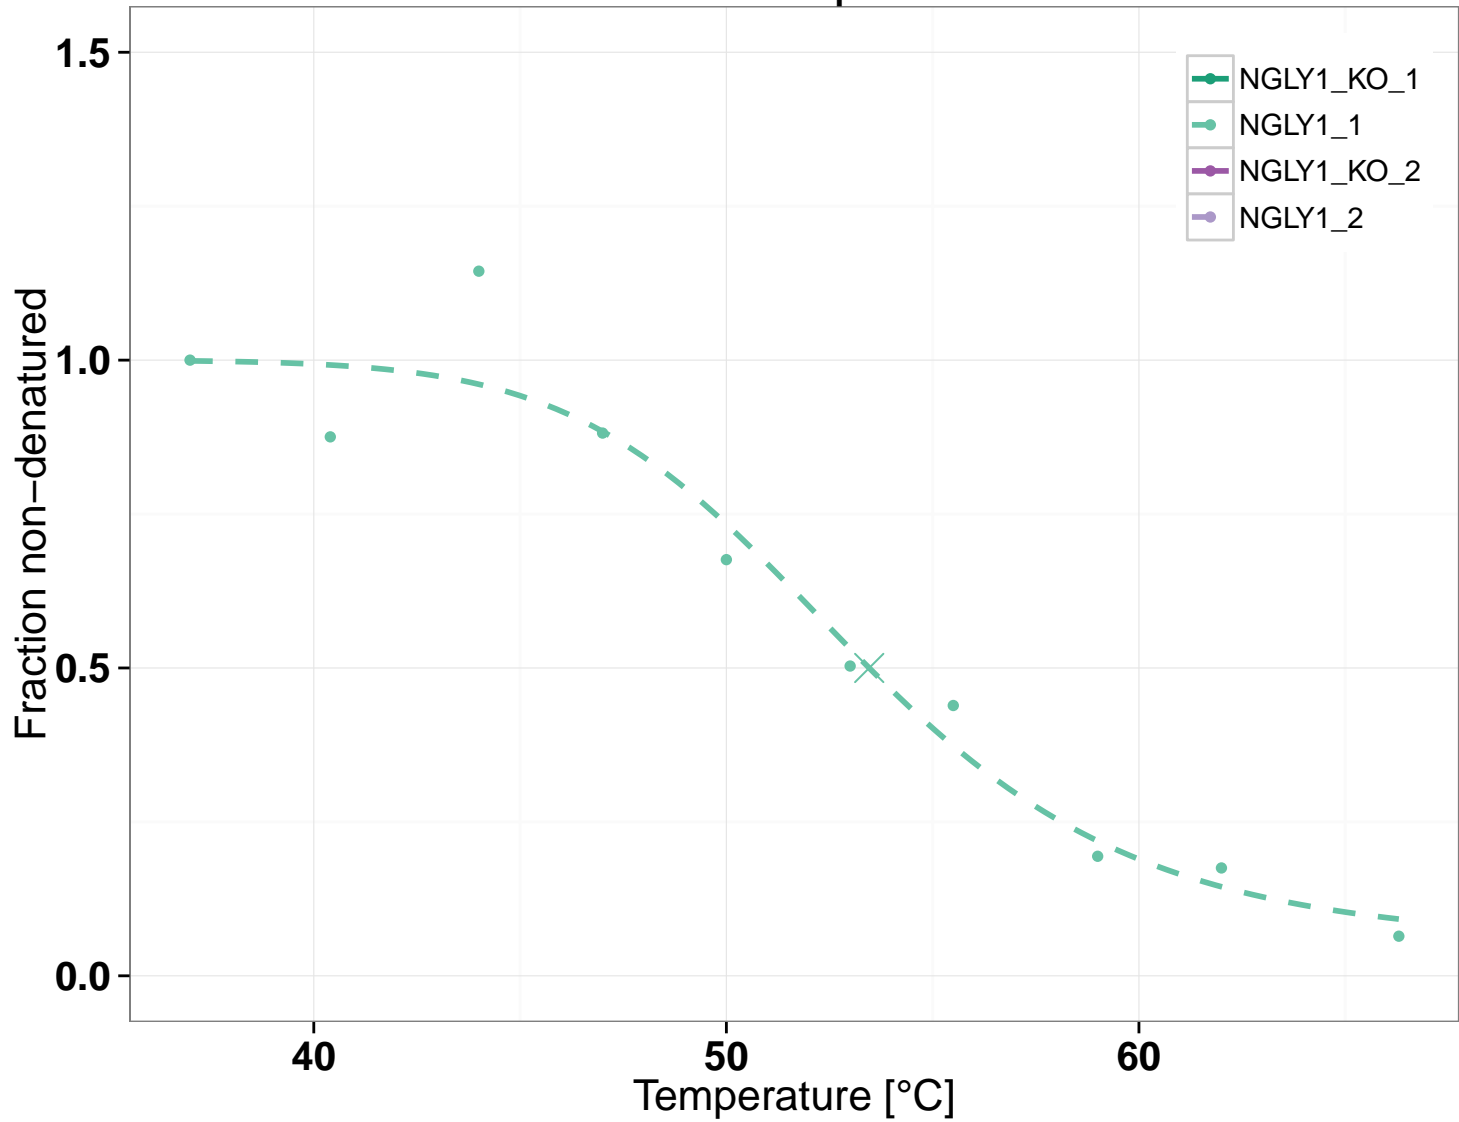

|            | meltPoint | slope  | plateau | R2   |
|------------|-----------|--------|---------|------|
| NGLY1_KO_1 | —         | —      | —       | —    |
| NGLY1_1    | 53.46     | -0.069 | 0.05    | 0.95 |
| NGLY1_KO_2 | —         | —      | —       | —    |
| NGLY1_2    | —         | —      | —       | —    |

Supplement: Supplementary file 6471 [file 1]

IPI00747053.2|ERCC3

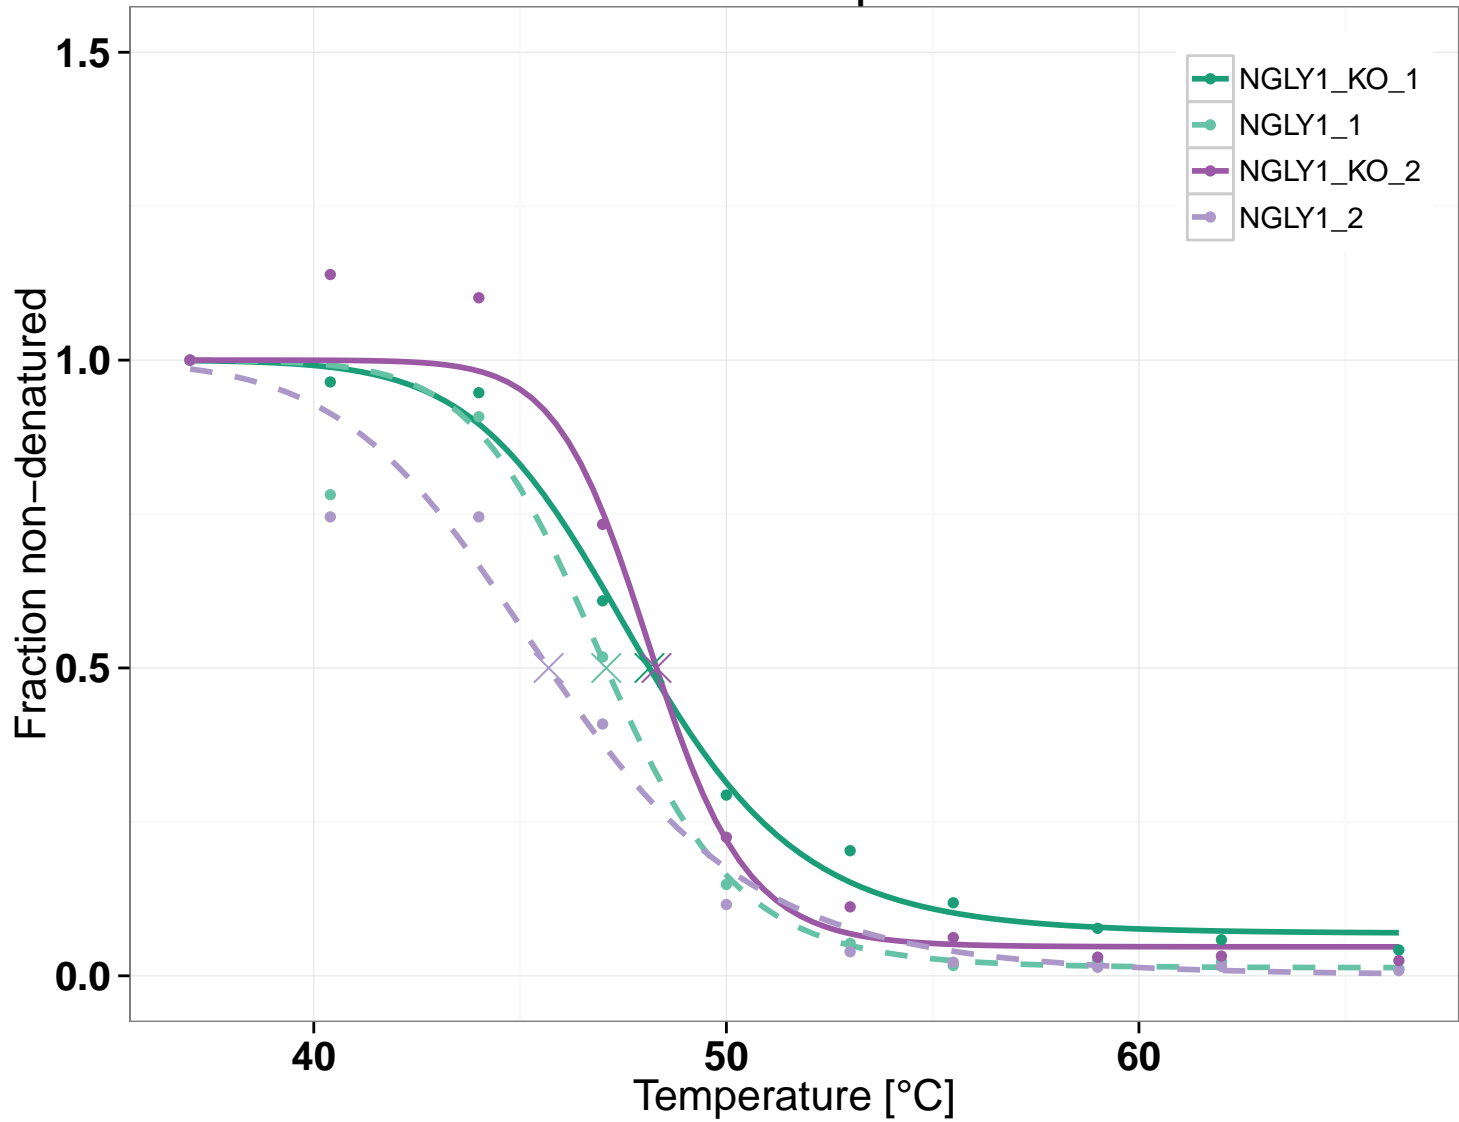

|            | meltPoint | slope | plateau | R2   |
|------------|-----------|-------|---------|------|
| NGLY1_KO_1 | 48.14     | -0.12 | 0.07    | 0.99 |
| NGLY1_1    | 47.09     | -0.15 | 0.01    | 0.97 |
| NGLY1_KO_2 | 48.31     | -0.21 | 0.05    | 0.98 |
| NGLY1_2    | 45.69     | -0.1  | 0       | 0.97 |

Supplement: Supplementary file 6472 [file 1]

IPI00026277.7|ZBTB7B

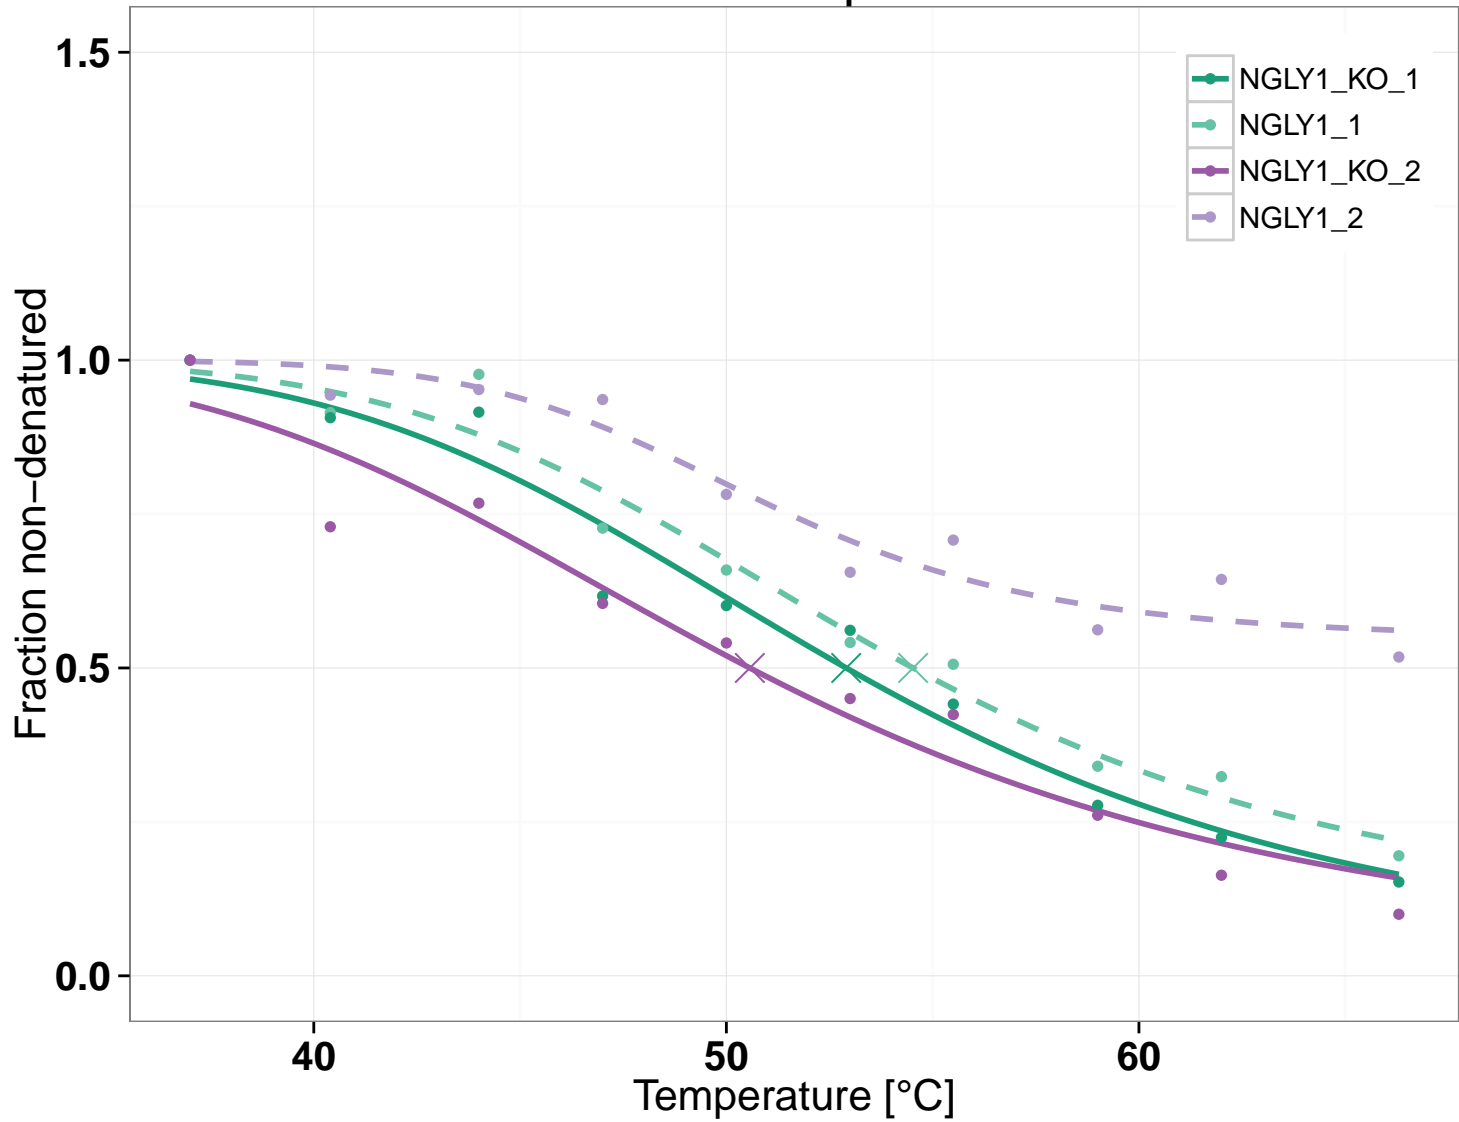

|            | meltPoint | slope  | plateau | R2   |
|------------|-----------|--------|---------|------|
| NGLY1_KO_1 | 52.91     | -0.04  | 0       | 0.97 |
| NGLY1_1    | 54.53     | -0.04  | 0.07    | 0.97 |
| NGLY1_KO_2 | 50.57     | -0.037 | 0       | 0.95 |
| NGLY1_2    | -         | -0.033 | 0.55    | 0.94 |

Supplement: Supplementary file 6473 [file 1]

IPI00910791.2|FCHSD2

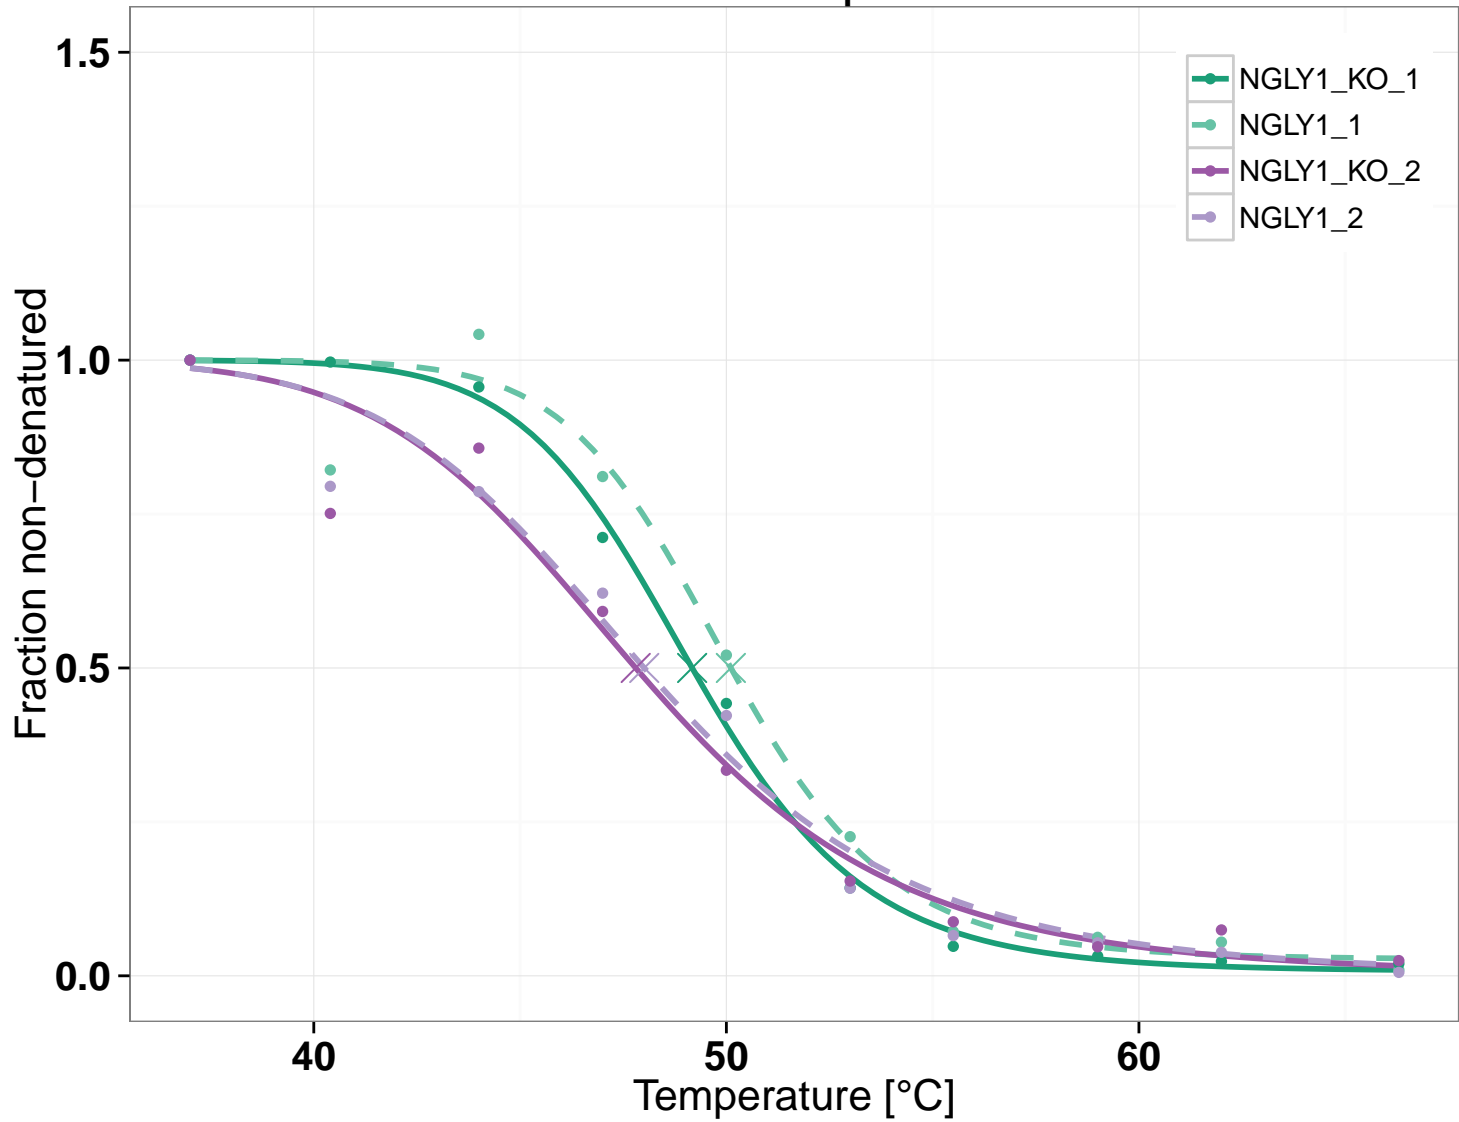

|            | meltPoint | slope  | plateau | R2   |
|------------|-----------|--------|---------|------|
| NGLY1_KO_1 | 49.17     | -0.12  | 0.01    | 1    |
| NGLY1_1    | 50.11     | -0.12  | 0.03    | 0.98 |
| NGLY1_KO_2 | 47.8      | -0.079 | 0       | 0.96 |
| NGLY1_2    | 48.01     | -0.077 | 0       | 0.97 |

Supplement: Supplementary file 6474 [file 1]

IPI00007611.1|ATP5O

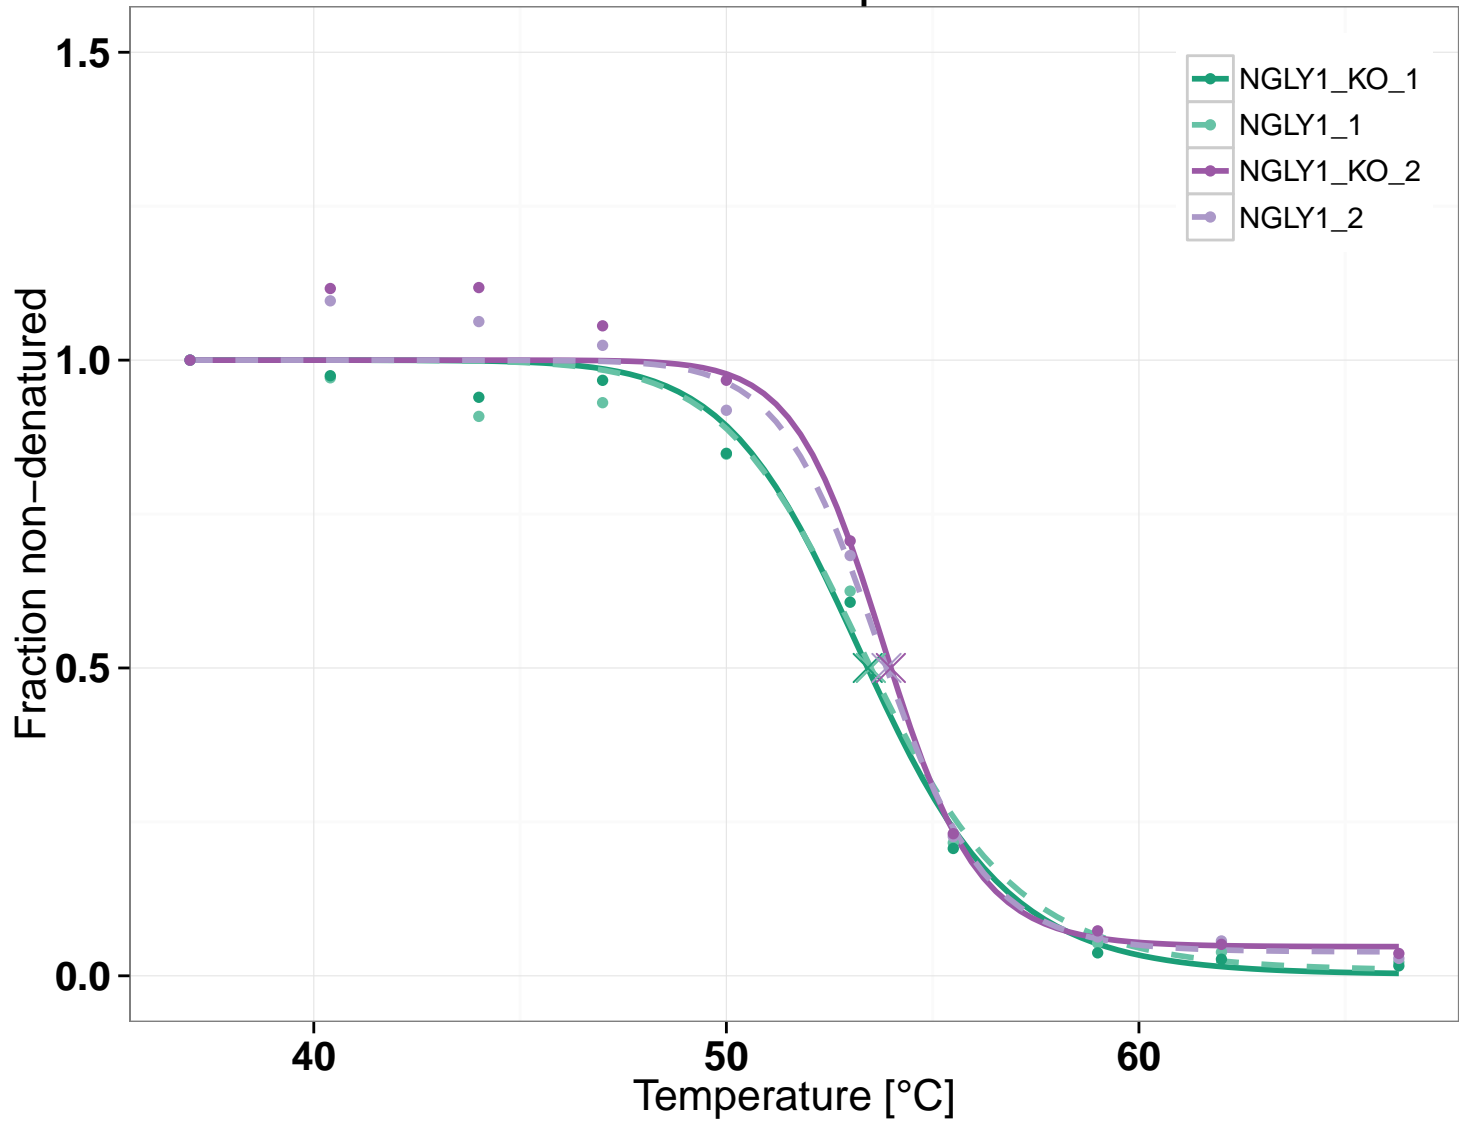

|            | meltPoint | slope | plateau | R2   |
|------------|-----------|-------|---------|------|
| NGLY1_KO_1 | 53.43     | -0.15 | 0       | 0.99 |
| NGLY1_1    | 53.5      | -0.14 | 0.01    | 0.99 |
| NGLY1_KO_2 | 53.99     | -0.21 | 0.05    | 0.99 |
| NGLY1_2    | 53.88     | -0.19 | 0.04    | 0.99 |

Supplement: Supplementary file 6475 [file 1]

# IPI00024067.4|CLTC

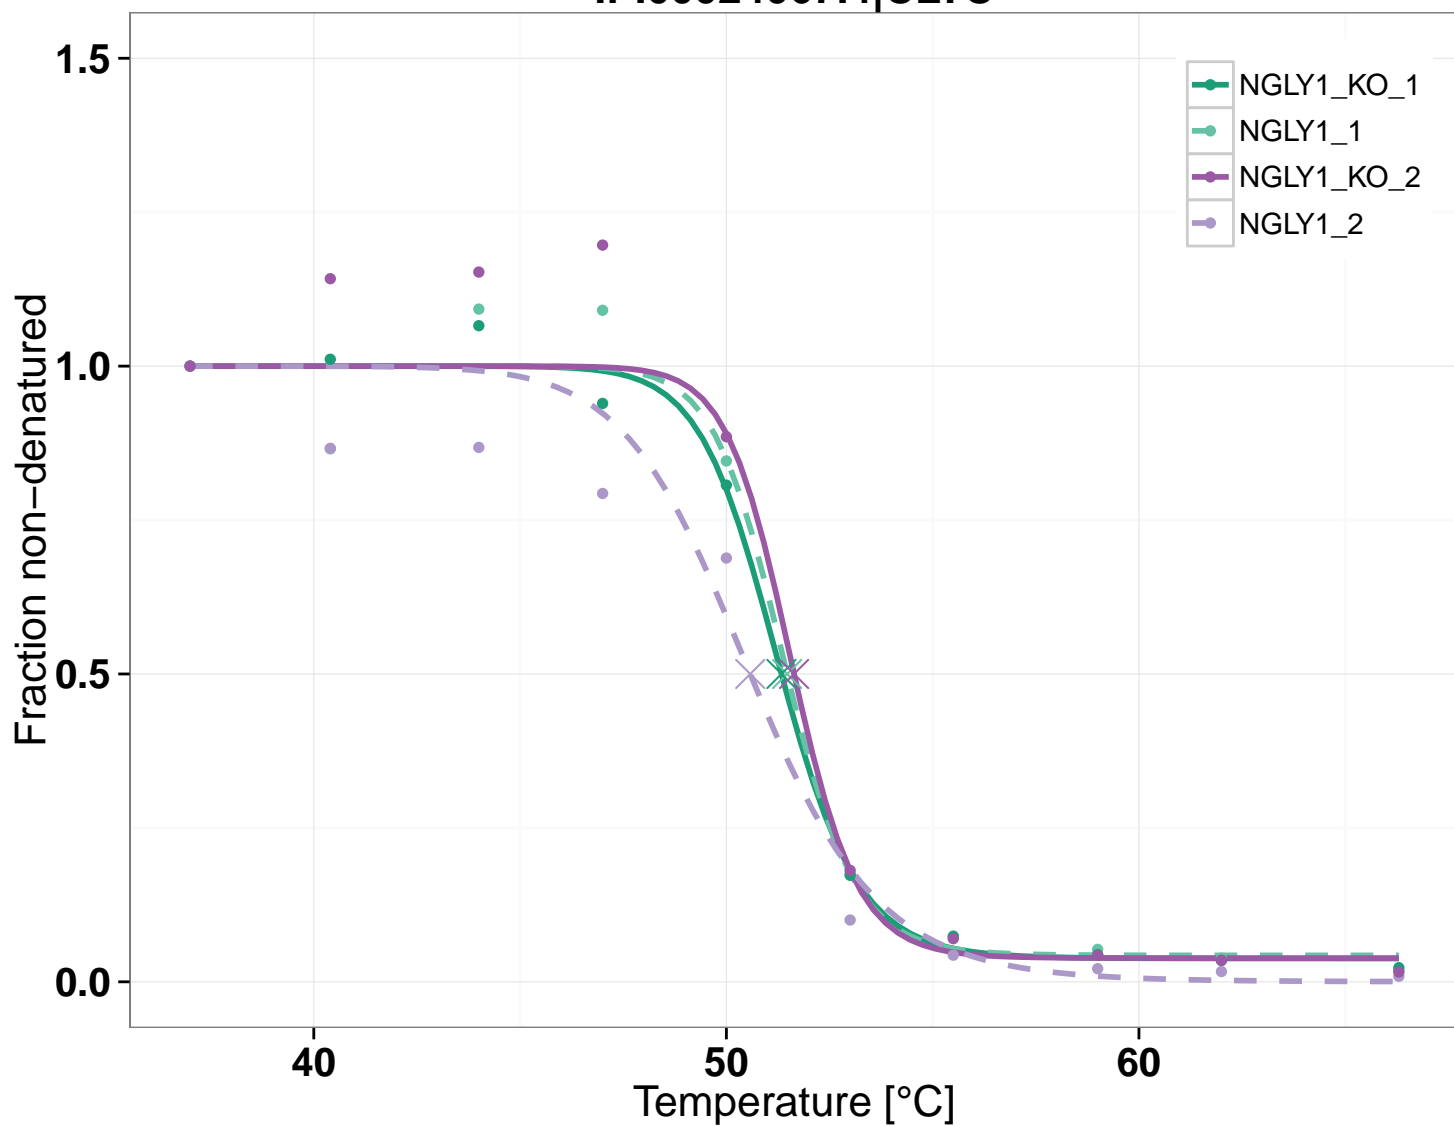

|            | meltPoint | slope | plateau | R2   |
|------------|-----------|-------|---------|------|
| NGLY1_KO_1 | 51.34     | -0.25 | 0.04    | 1    |
| NGLY1_1    | 51.47     | -0.28 | 0.04    | 0.98 |
| NGLY1_KO_2 | 51.64     | -0.3  | 0.04    | 0.97 |
| NGLY1_2    | 50.58     | -0.16 | 0       | 0.96 |

Supplement: Supplementary file 6476 [file 1]

# IPI00414858.3|COG3

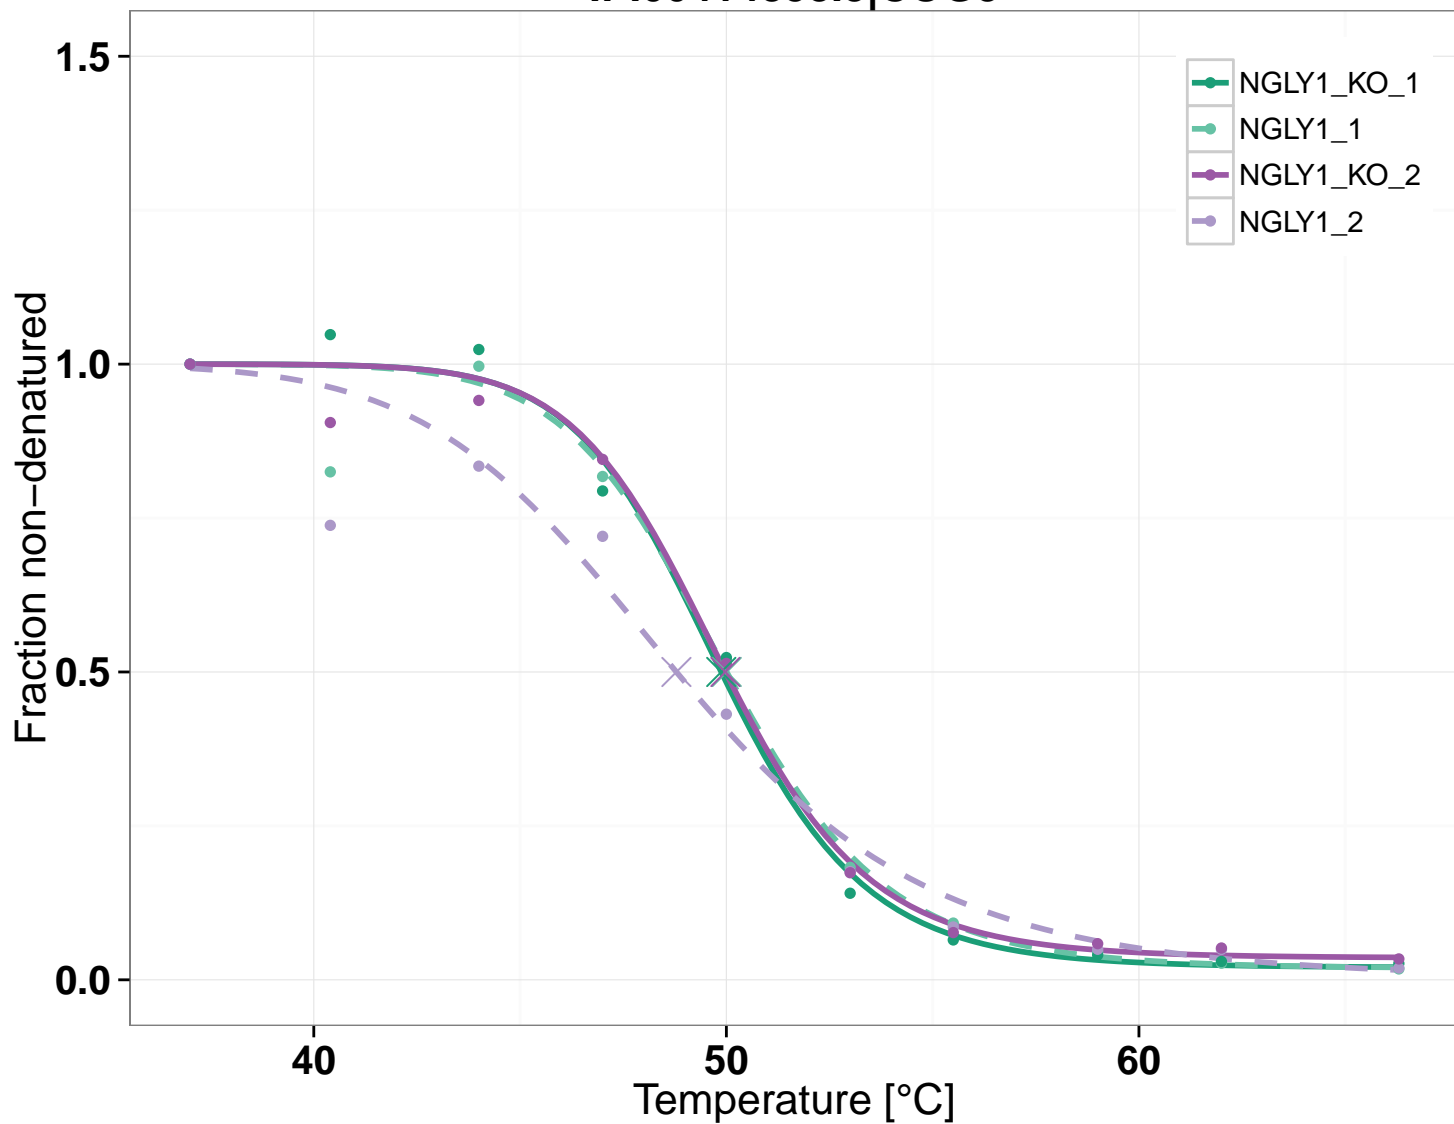

|            | meltPoint | slope  | plateau | R2   |
|------------|-----------|--------|---------|------|
| NGLY1_KO_1 | 49.88     | -0.14  | 0.02    | 0.99 |
| NGLY1_1    | 50.01     | -0.13  | 0.02    | 0.98 |
| NGLY1_KO_2 | 49.98     | -0.13  | 0.04    | 0.99 |
| NGLY1_2    | 48.79     | -0.081 | 0       | 0.95 |

Supplement: Supplementary file 6477 [file 1]

# IPI00477563.2|MATK

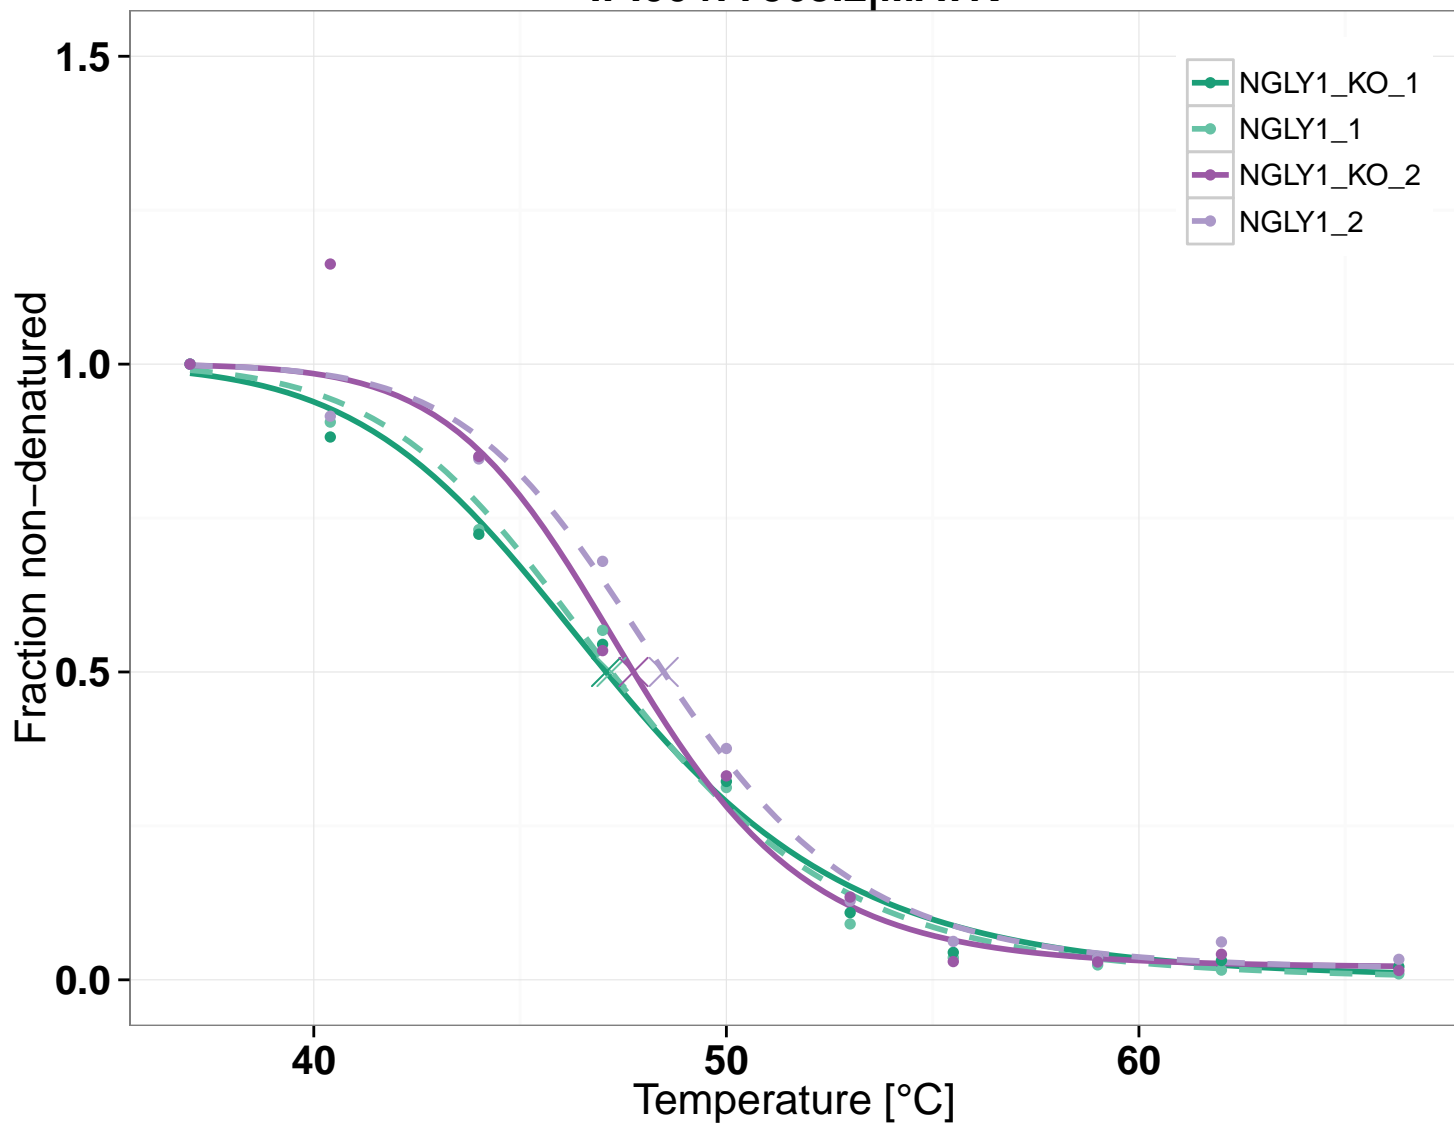

Supplement: Supplementary file 6478 [file 1]

# IPI00152627.4|C11ORF30

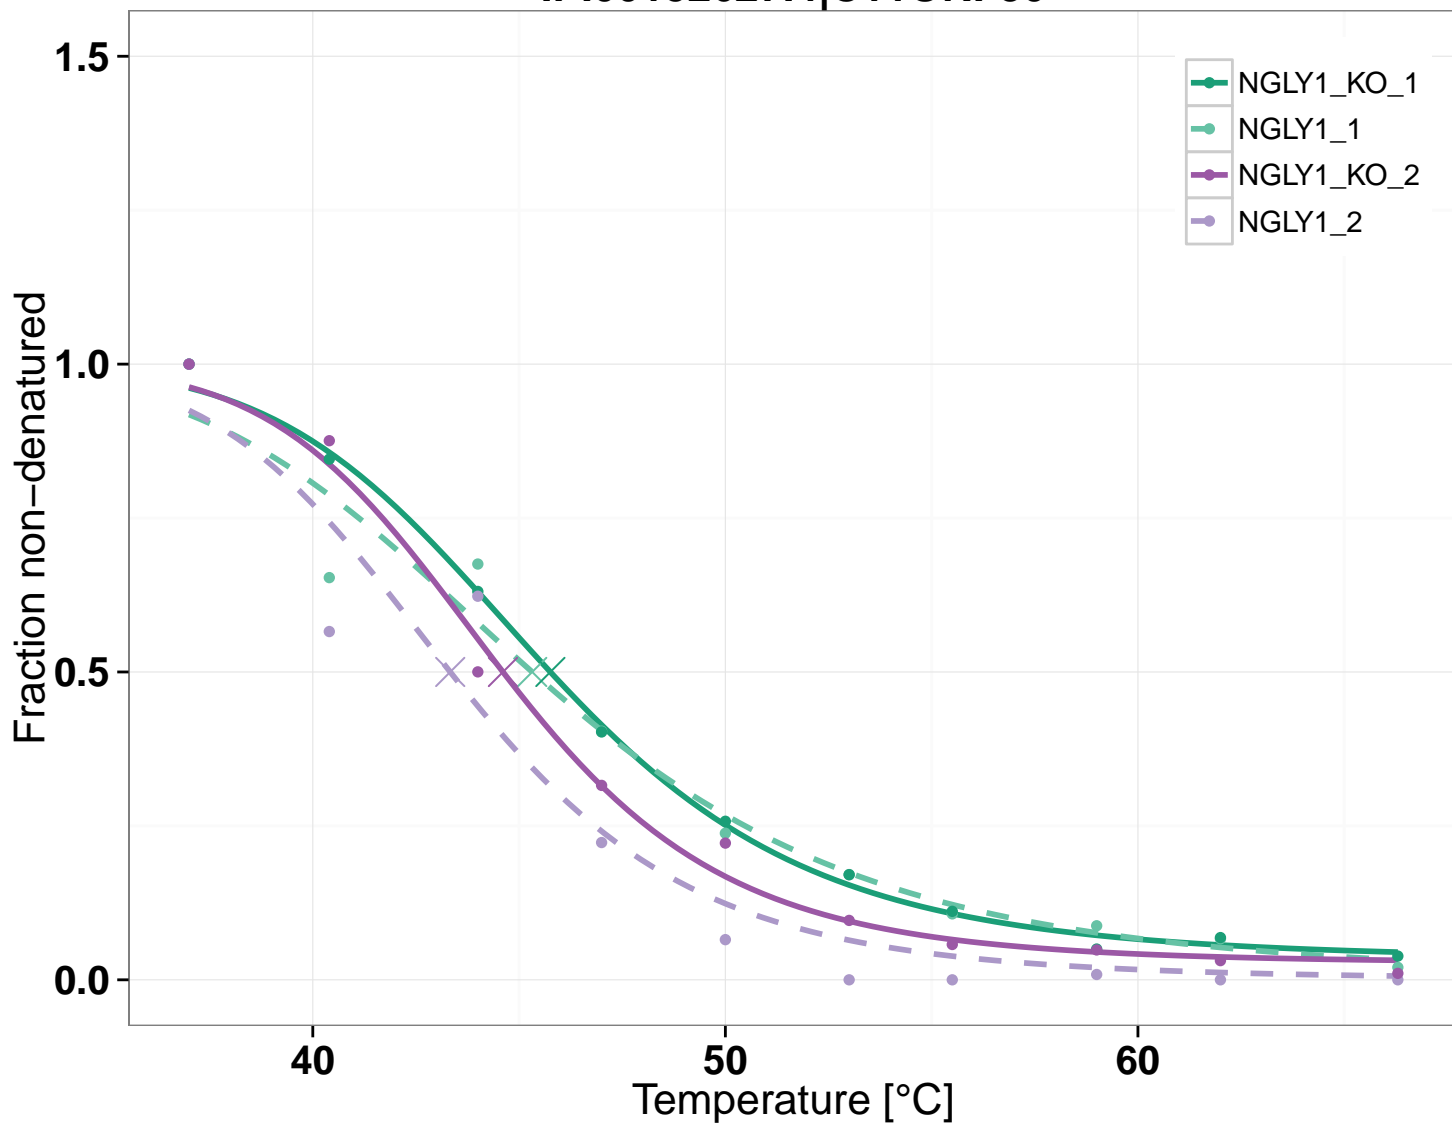

|            | meltPoint | slope  | plateau | R2   |
|------------|-----------|--------|---------|------|
| NGLY1_KO_1 | 45.76     | -0.075 | 0.03    | 1    |
| NGLY1_1    | 45.32     | -0.061 | 0       | 0.96 |
| NGLY1_KO_2 | 44.61     | -0.089 | 0.03    | 0.99 |
| NGLY1_2    | 43.33     | -0.086 | 0       | 0.93 |

Supplement: Supplementary file 6479 [file 1]

# IPI00556553.1|ABCB7

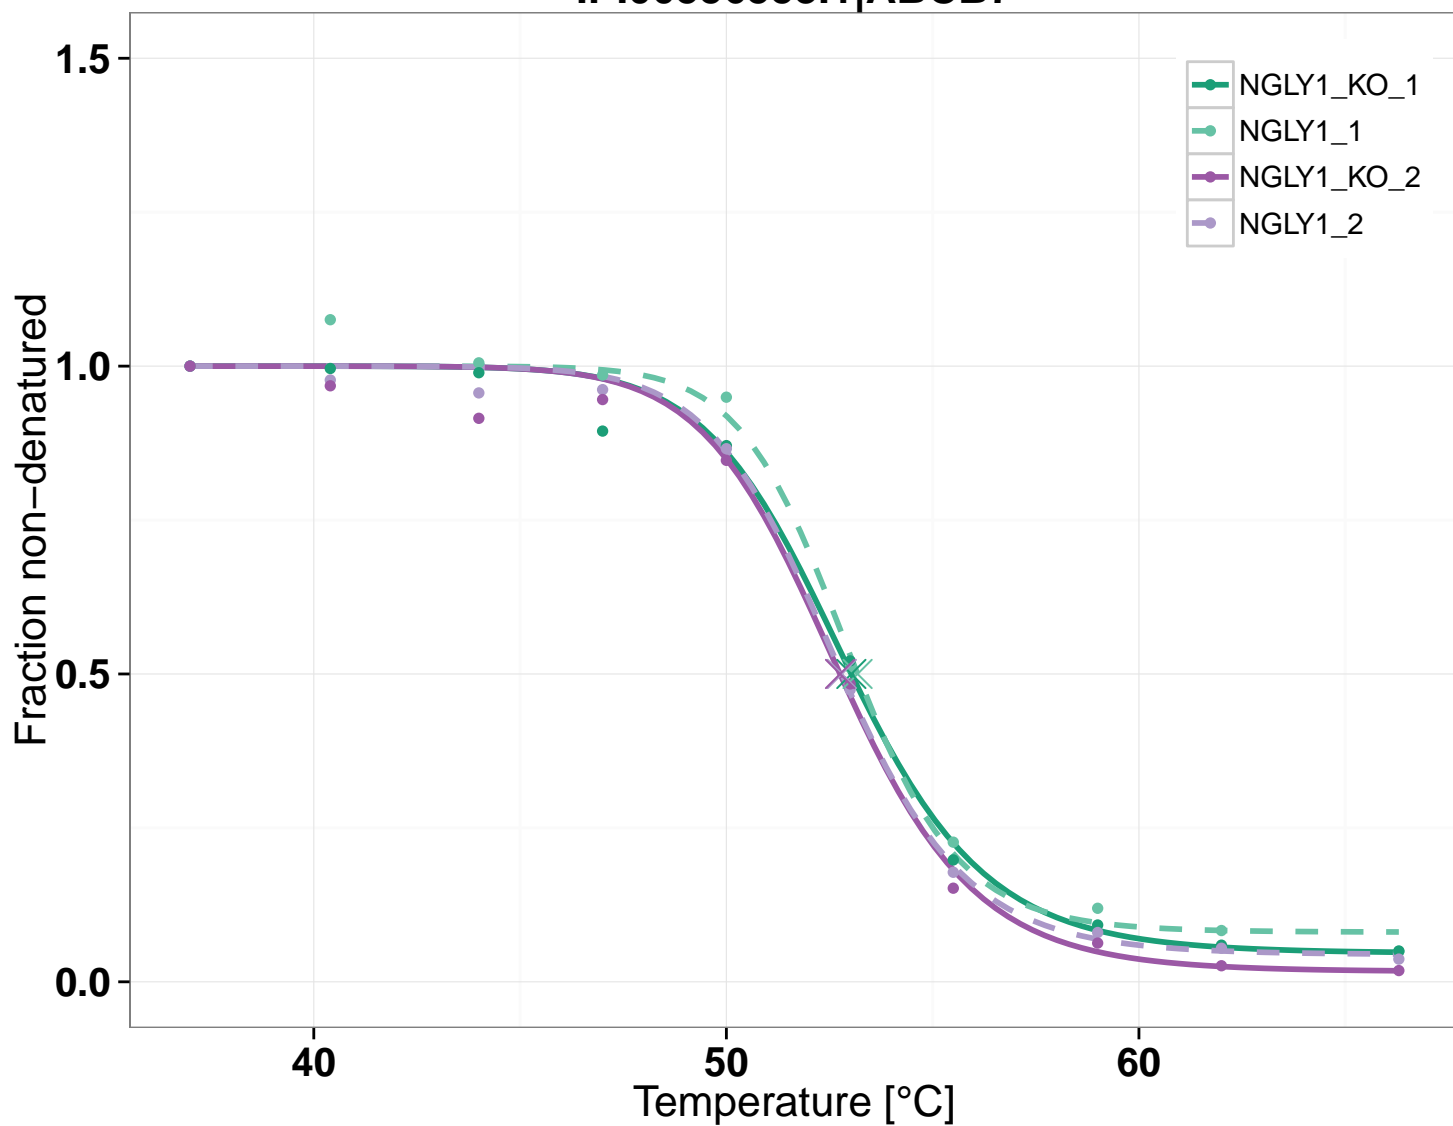

|            | meltPoint | slope | plateau | R2   |
|------------|-----------|-------|---------|------|
| NGLY1_KO_1 | 53.03     | -0.14 | 0.05    | 0.99 |
| NGLY1_1    | 53.18     | -0.17 | 0.08    | 0.99 |
| NGLY1_KO_2 | 52.76     | -0.15 | 0.02    | 0.99 |
| NGLY1_2    | 52.8      | -0.15 | 0.04    | 1    |

Supplement: Supplementary file 6480 [file 1]

IPI00010213.3|AP4E1

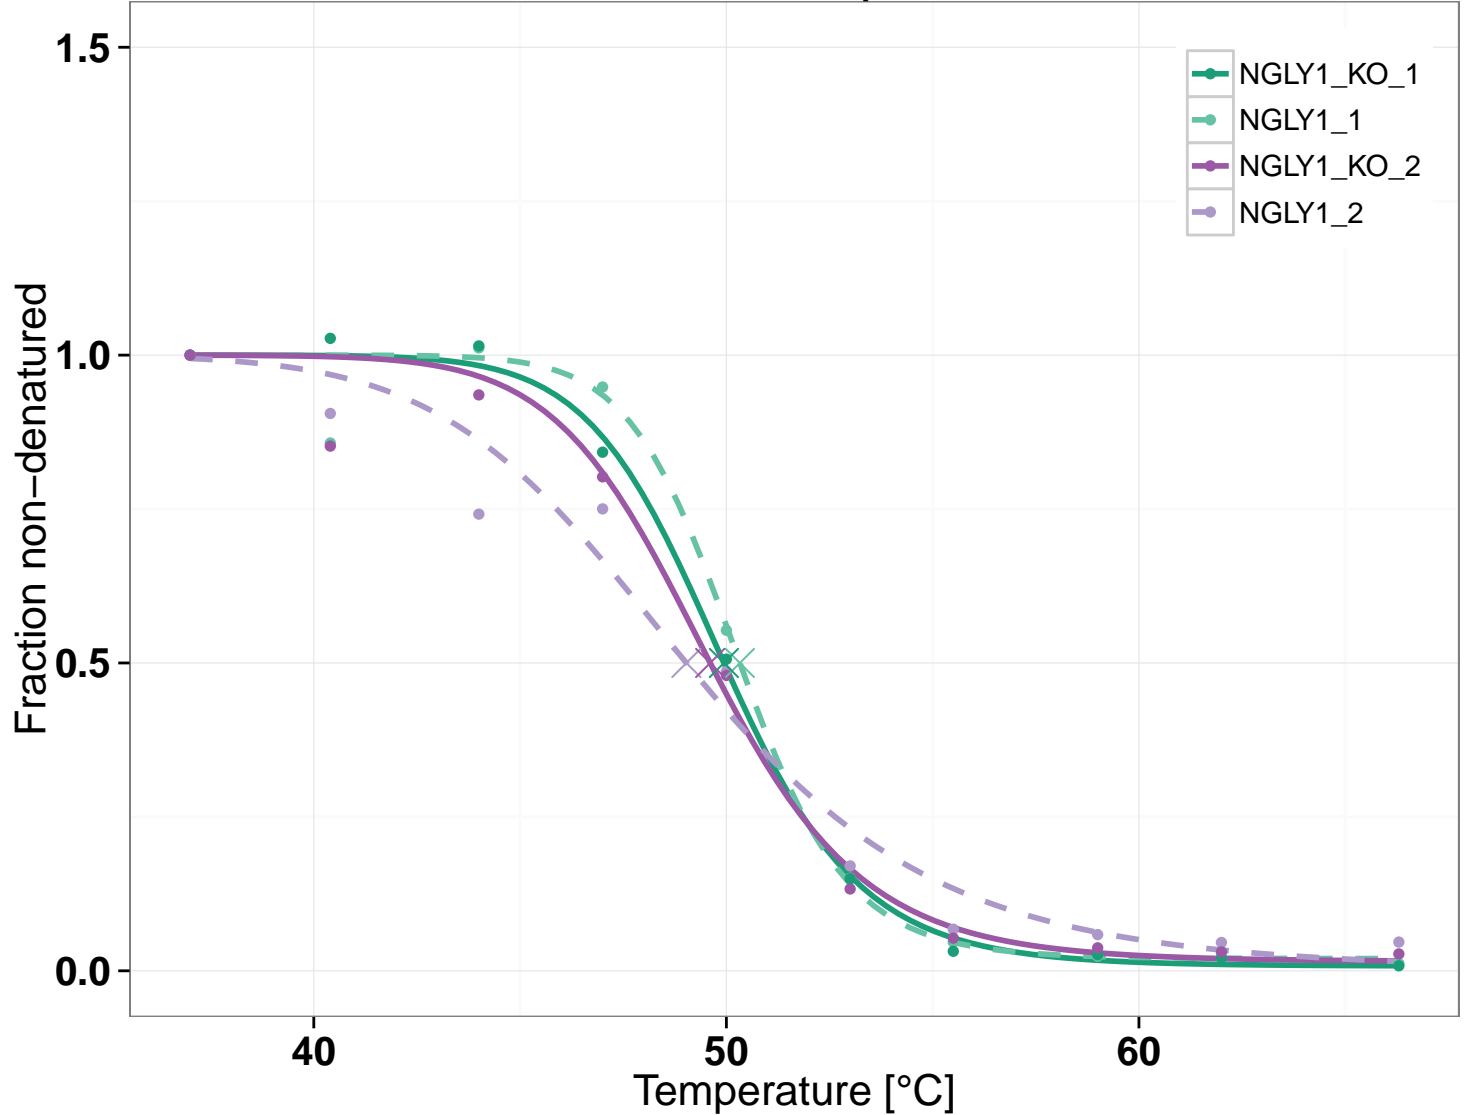

|            | meltPoint | slope  | plateau | R2   |
|------------|-----------|--------|---------|------|
| NGLY1_KO_1 | 49.94     | -0.15  | 0.01    | 1    |
| NGLY1_1    | 50.33     | -0.19  | 0.02    | 0.99 |
| NGLY1_KO_2 | 49.61     | -0.13  | 0.01    | 0.98 |
| NGLY1_2    | 49.03     | -0.083 | 0       | 0.97 |

Supplement: Supplementary file 6481 [file 1]

IPI00012340.1|SFRS9

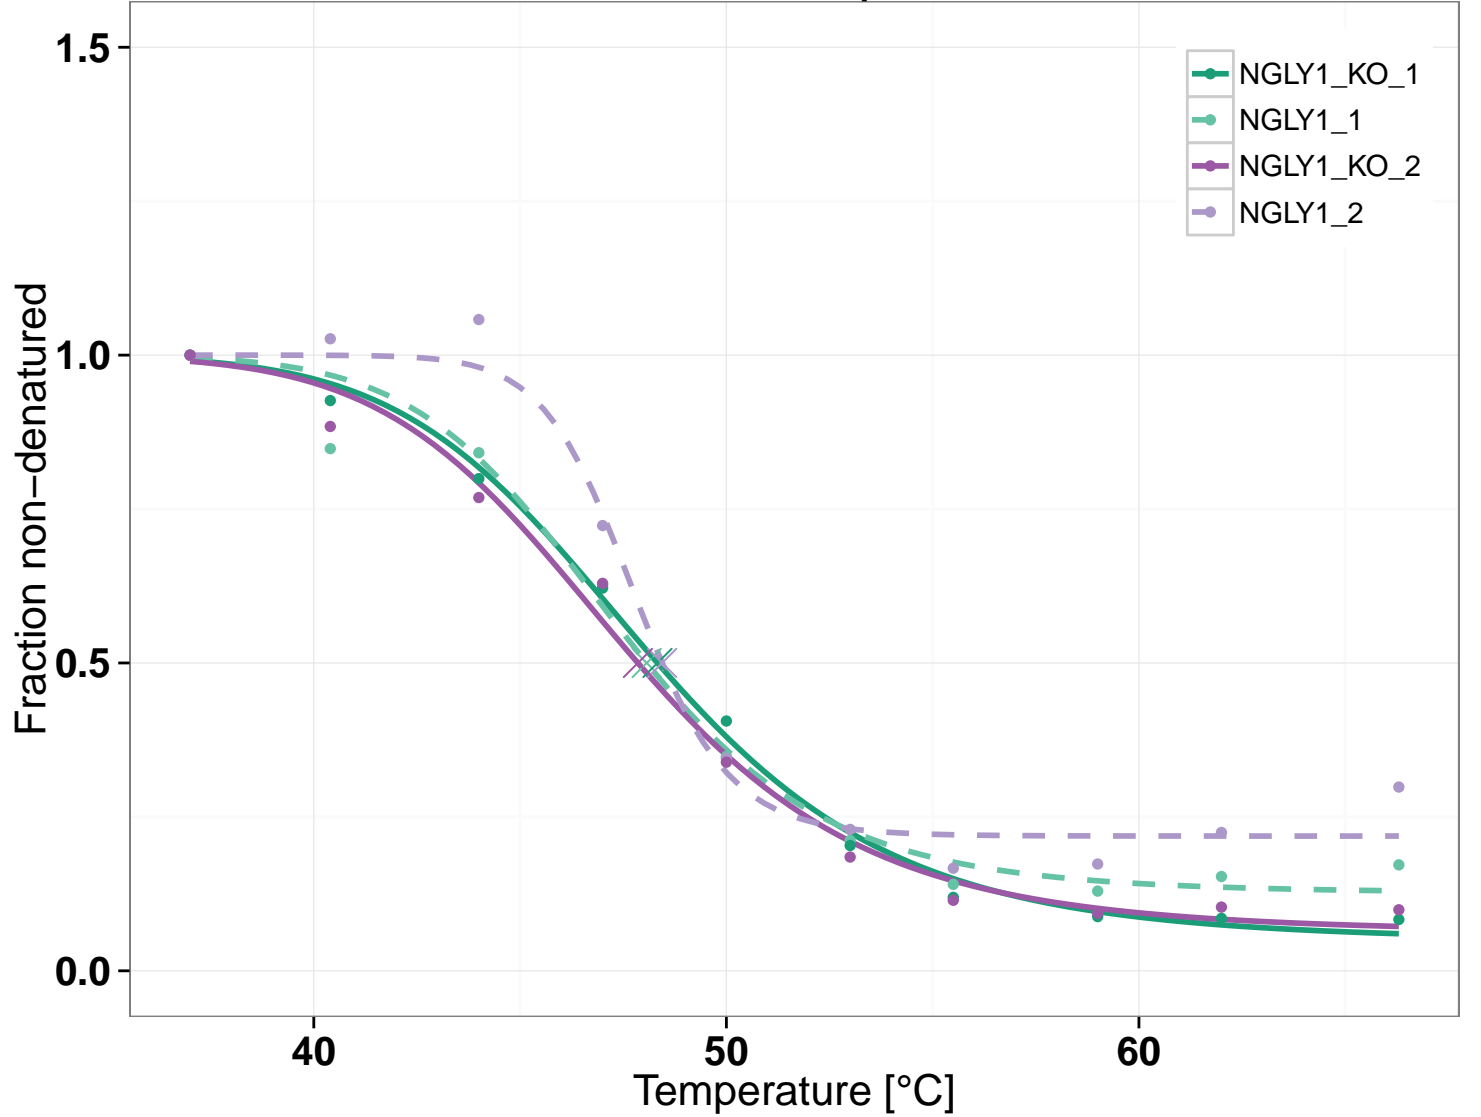

|            | meltPoint | slope  | plateau | R2   |
|------------|-----------|--------|---------|------|
| NGLY1_KO_1 | 48.33     | -0.079 | 0.05    | 1    |
| NGLY1_1    | 48.07     | -0.088 | 0.13    | 0.98 |
| NGLY1_KO_2 | 47.86     | -0.08  | 0.06    | 0.99 |
| NGLY1_2    | 48.44     | -0.17  | 0.22    | 0.99 |

Supplement: Supplementary file 6482 [file 1]

IPI00456744.1|SH3BP1

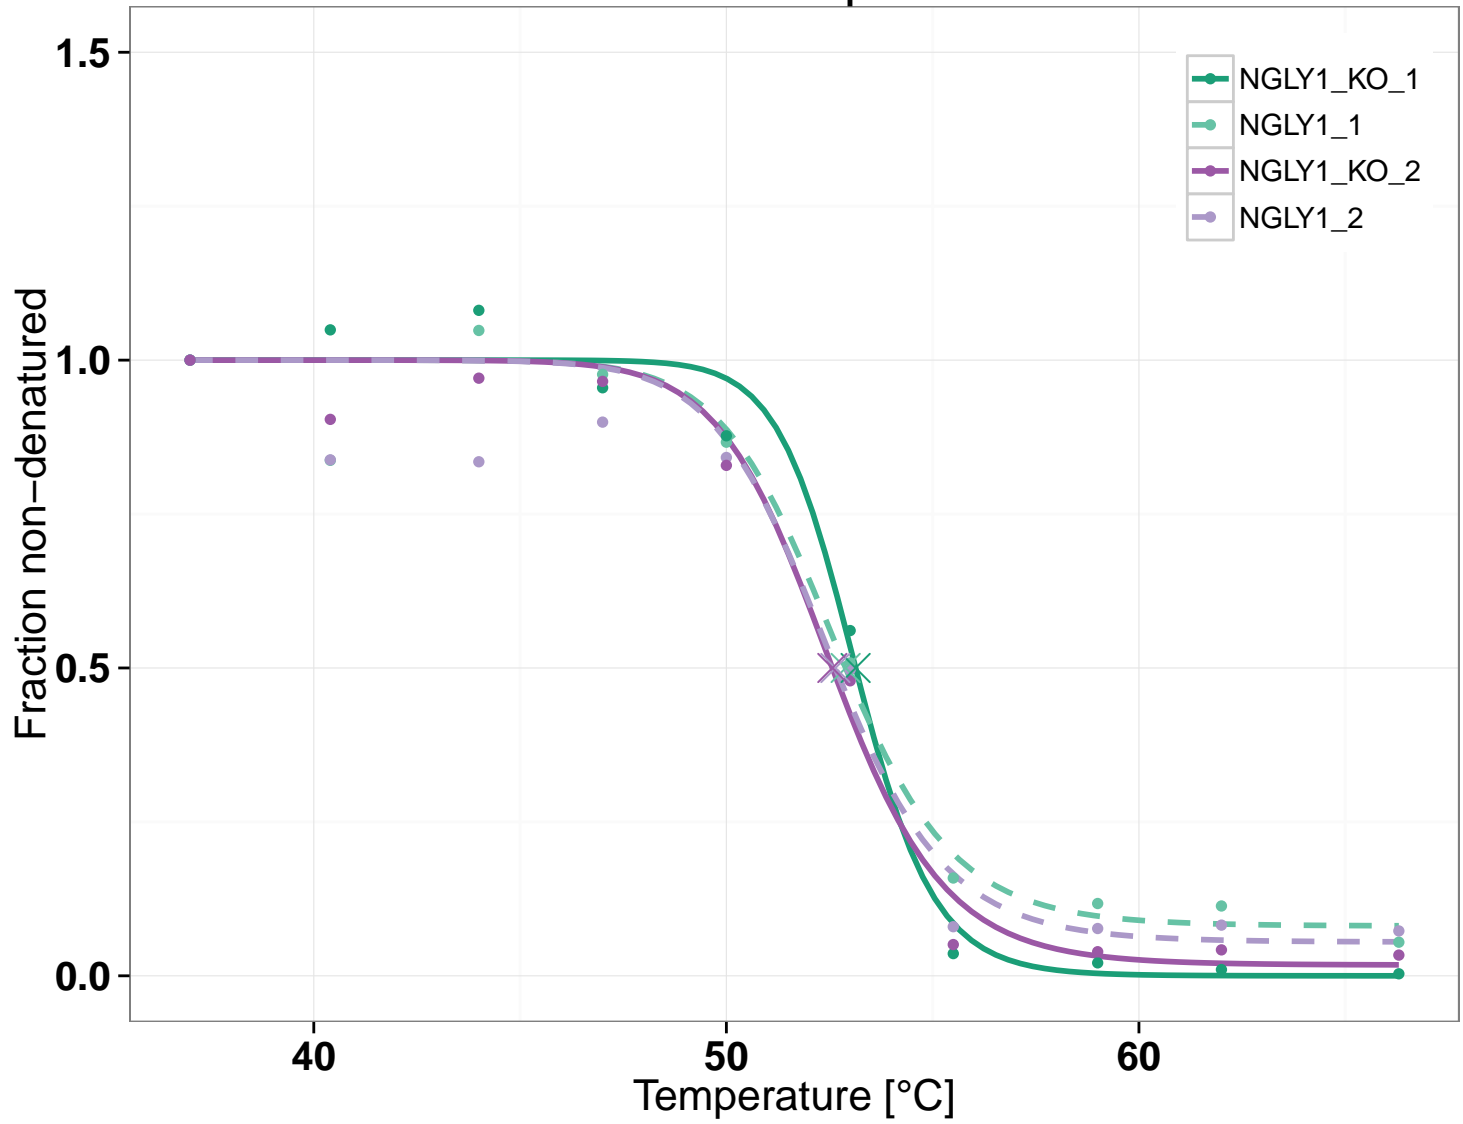

|            | meltPoint | slope | plateau | R2   |
|------------|-----------|-------|---------|------|
| NGLY1_KO_1 | 53.13     | -0.26 | 0       | 0.99 |
| NGLY1_1    | 52.89     | -0.16 | 0.08    | 0.98 |
| NGLY1_KO_2 | 52.57     | -0.18 | 0.02    | 0.99 |
| NGLY1_2    | 52.64     | -0.17 | 0.05    | 0.95 |

Supplement: Supplementary file 6483 [file 1]

# IPI00016346.1|PROSC

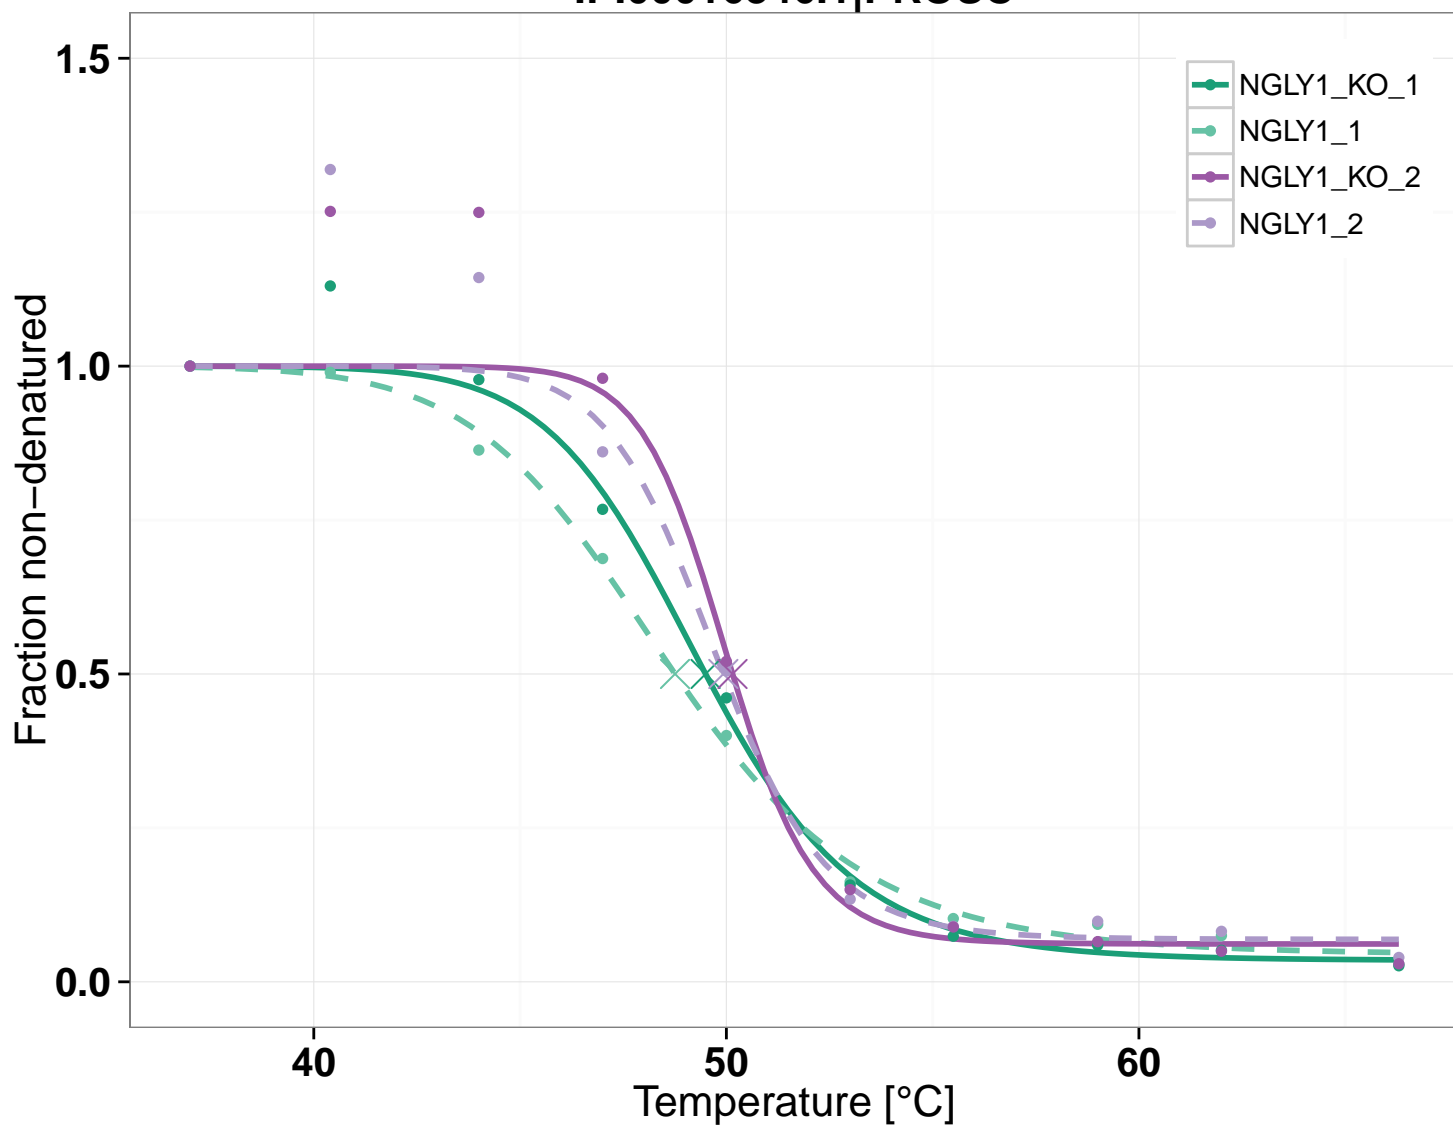

|            | meltPoint | slope | plateau | R2   |
|------------|-----------|-------|---------|------|
| NGLY1_KO_1 | 49.5      | -0.13 | 0.03    | 0.99 |
| NGLY1_1    | 48.76     | -0.1  | 0.04    | 1    |
| NGLY1_KO_2 | 50.15     | -0.22 | 0.06    | 0.95 |
| NGLY1_2    | 49.93     | -0.17 | 0.07    | 0.94 |

Supplement: Supplementary file 6484 [file 1]

# IPI00026337.1|RANBP3

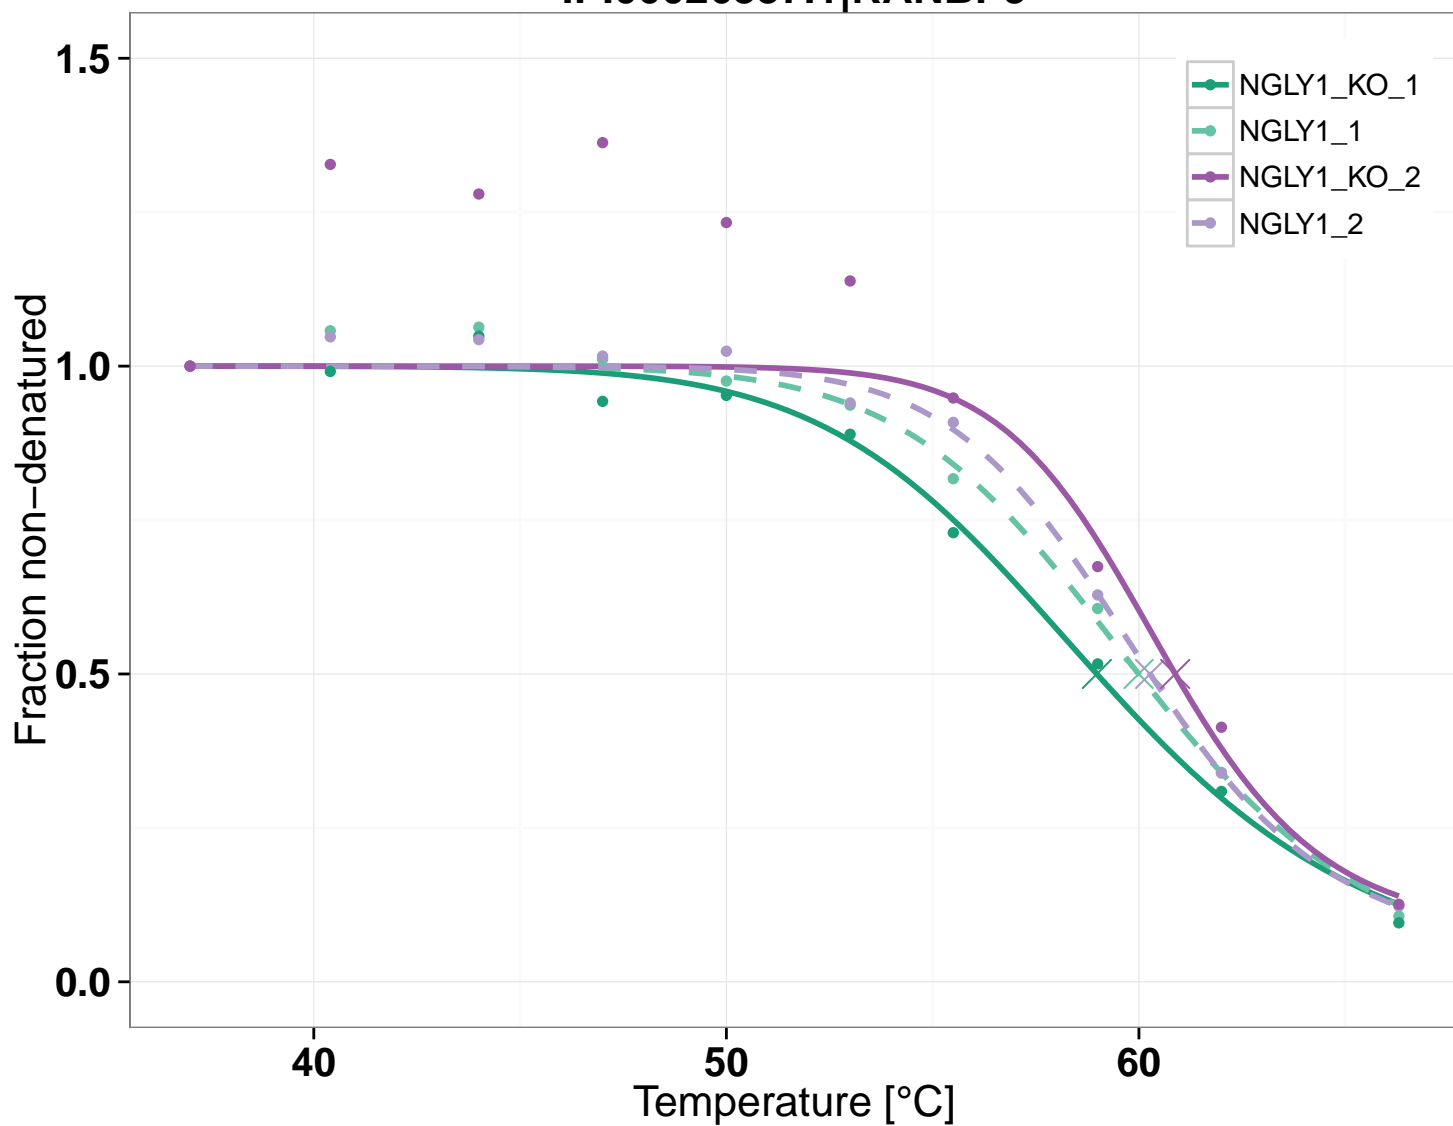

|            | meltPoint | slope  | plateau | R2   |
|------------|-----------|--------|---------|------|
| NGLY1_KO_1 | 58.98     | -0.075 | 0       | 0.99 |
| NGLY1_1    | 59.99     | -0.086 | 0       | 0.99 |
| NGLY1_KO_2 | 60.88     | -0.12  | 0.08    | 0.75 |
| NGLY1_2    | 60.27     | -0.1   | 0.05    | 0.99 |

Supplement: Supplementary file 6485 [file 1]

# IPI00470361.1|KIRREL

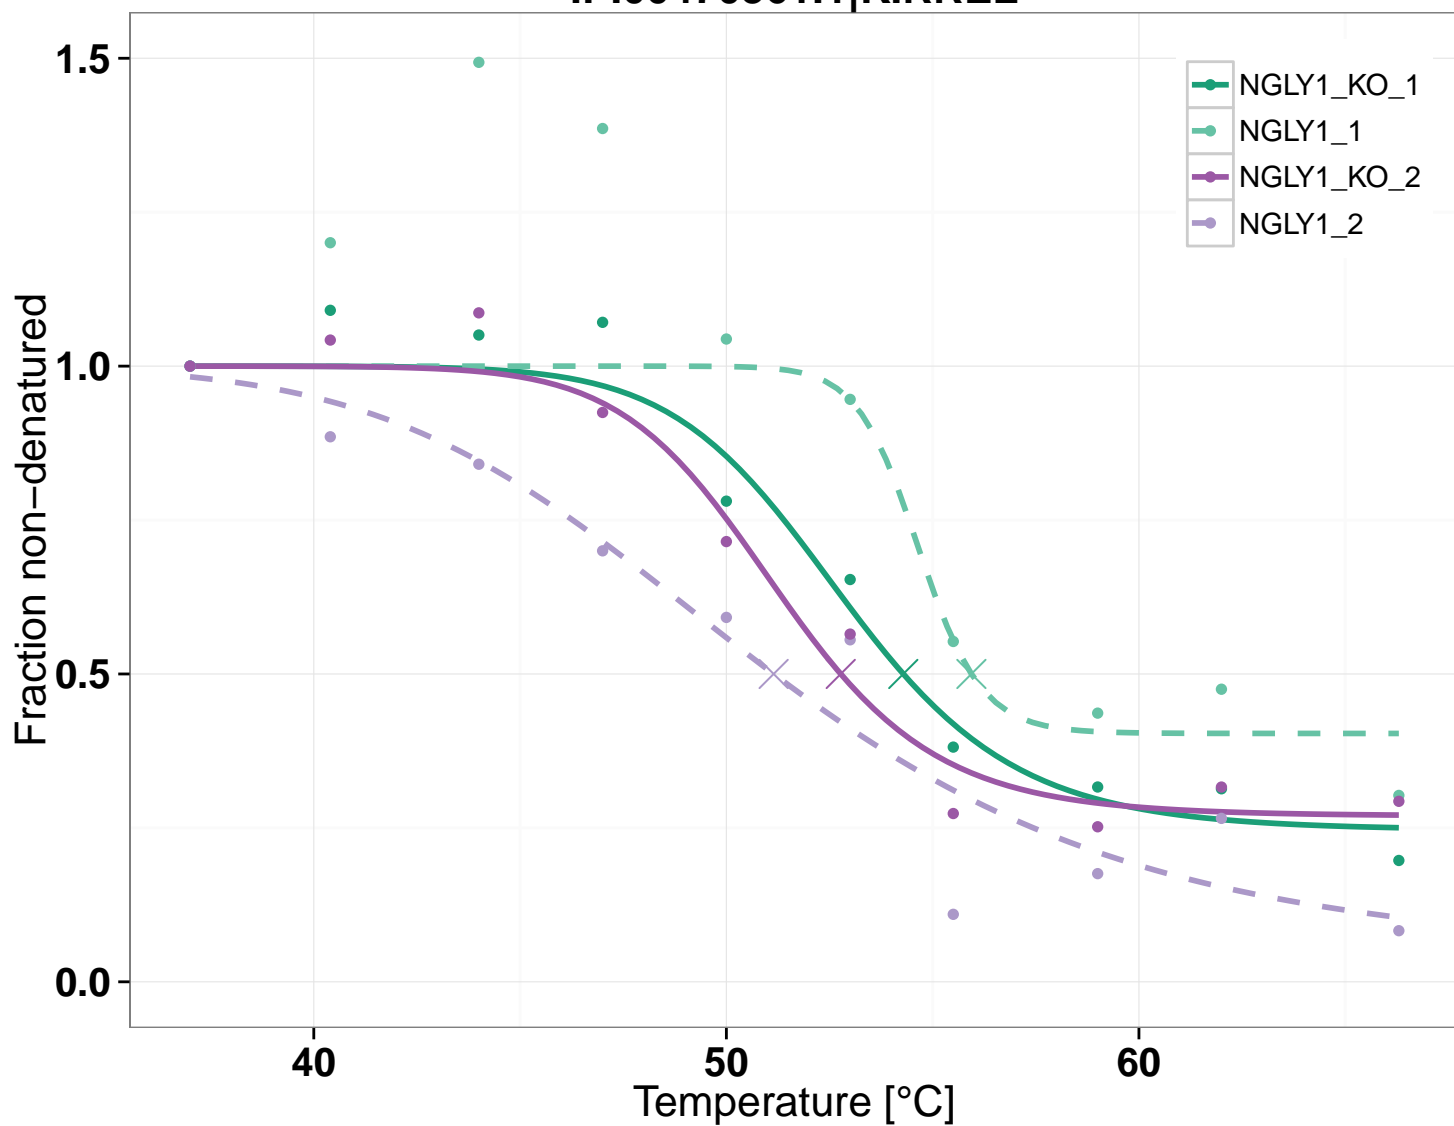

|            | meltPoint | slope  | plateau | R2   |
|------------|-----------|--------|---------|------|
| NGLY1_KO_1 | 54.29     | -0.09  | 0.25    | 0.97 |
| NGLY1_1    | 55.94     | -0.2   | 0.4     | 0.71 |
| NGLY1_KO_2 | 52.77     | -0.096 | 0.27    | 0.97 |
| NGLY1_2    | 51.15     | -0.053 | 0.03    | 0.92 |

Supplement: Supplementary file 6486 [file 1]

IPI00219037.5|H2AFX

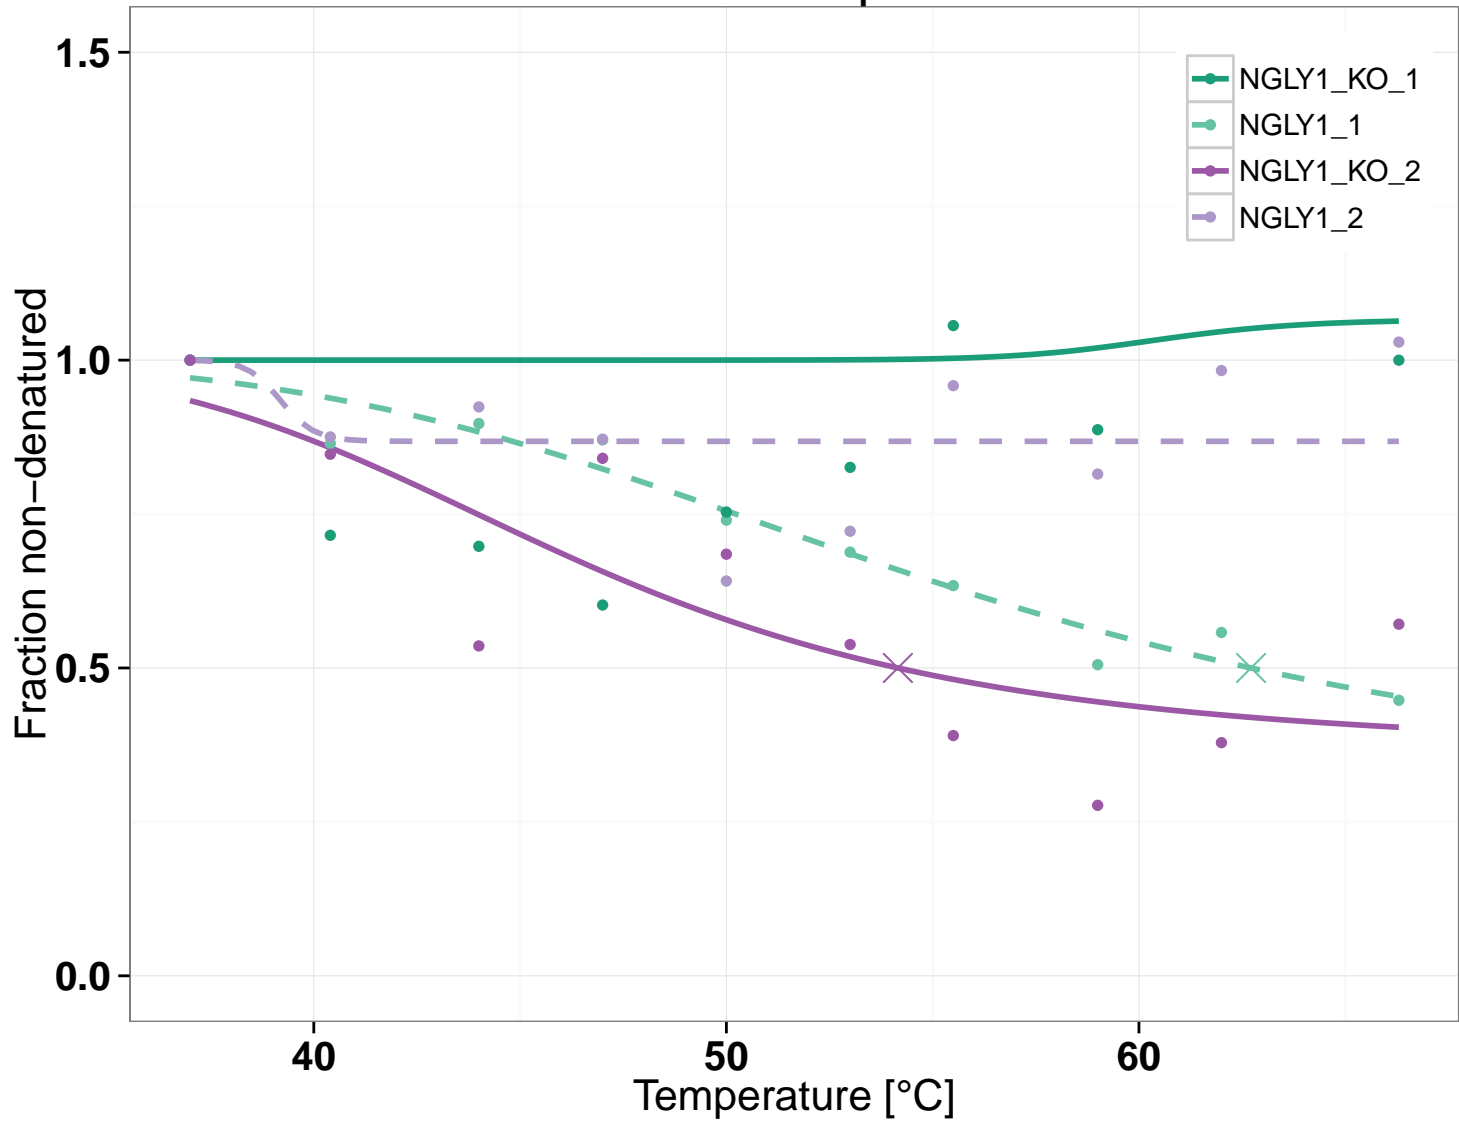

|            | meltPoint | slope  | plateau | R2    |
|------------|-----------|--------|---------|-------|
| NGLY1_KO_1 | -         | 0.0094 | 1.07    | -0.49 |
| NGLY1_1    | 62.72     | -0.023 | 0.26    | 0.95  |
| NGLY1_KO_2 | 54.16     | -0.032 | 0.36    | 0.67  |
| NGLY1_2    | -         | -0.081 | 0.87    | 0.11  |

Supplement: Supplementary file 6487 [file 1]

# IPI00027240.7|GNG5

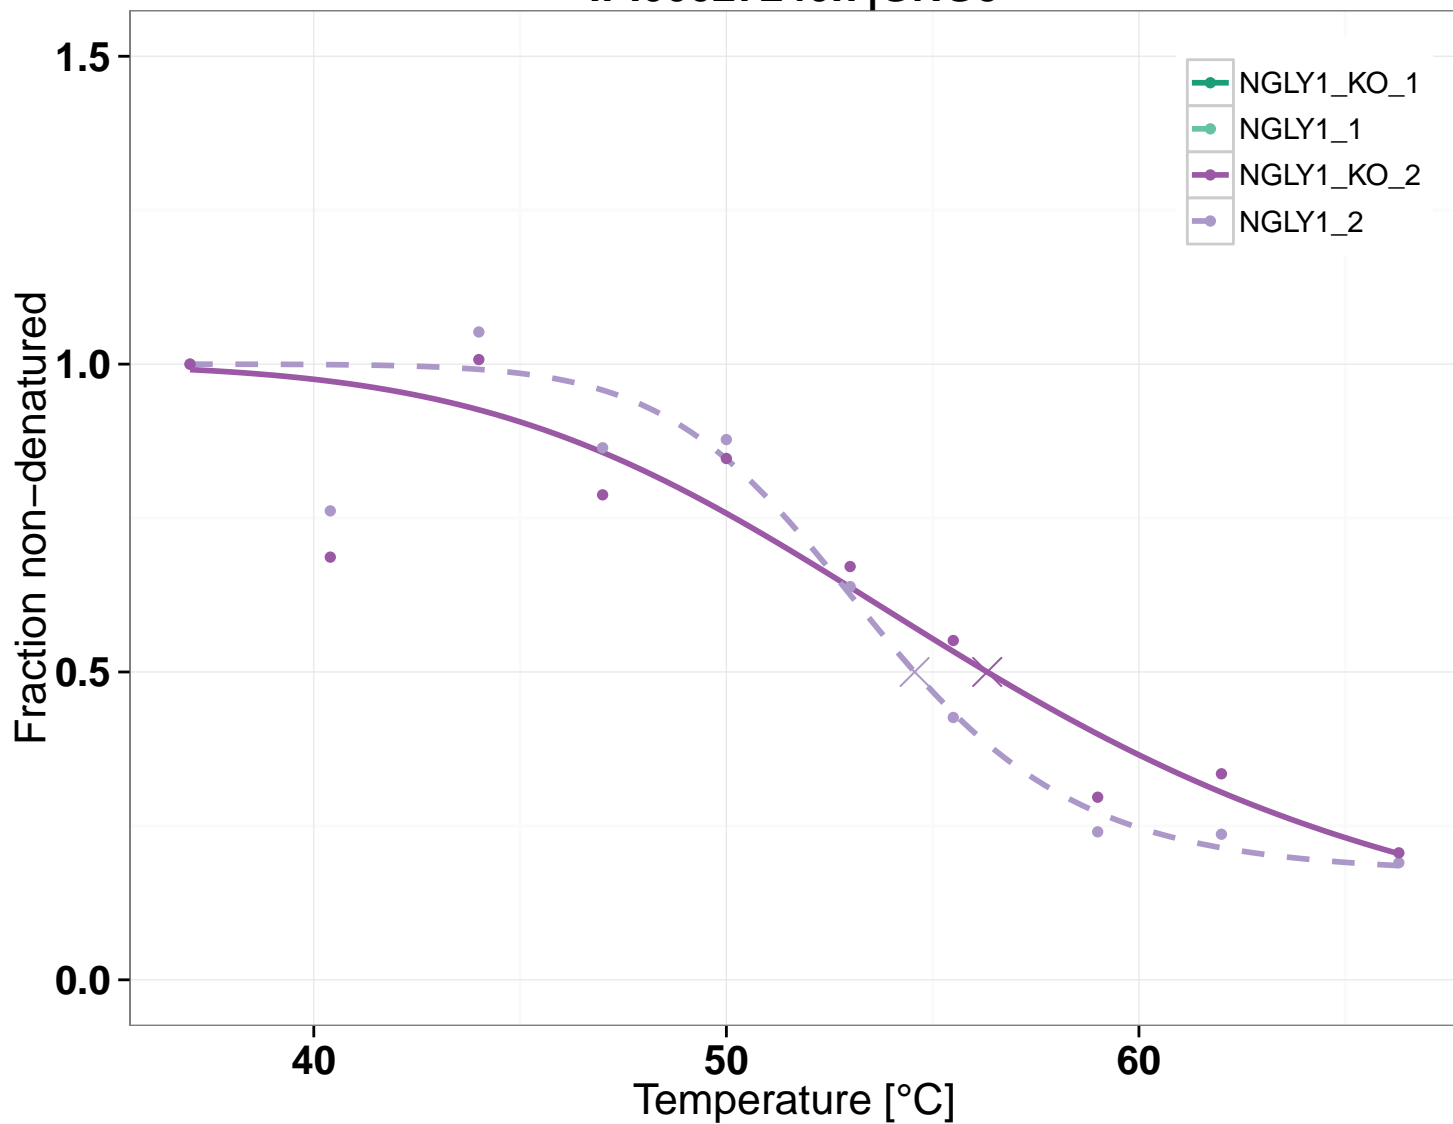

|            | meltPoint | slope  | plateau | R2   |
|------------|-----------|--------|---------|------|
| NGLY1_KO_1 | —         | —      | —       | —    |
| NGLY1_1    | —         | —      | —       | —    |
| NGLY1_KO_2 | 56.32     | -0.042 | 0       | 0.85 |
| NGLY1_2    | 54.56     | -0.083 | 0.17    | 0.93 |

Supplement: Supplementary file 6488 [file 1]

IPI00007948.2|POLR3C

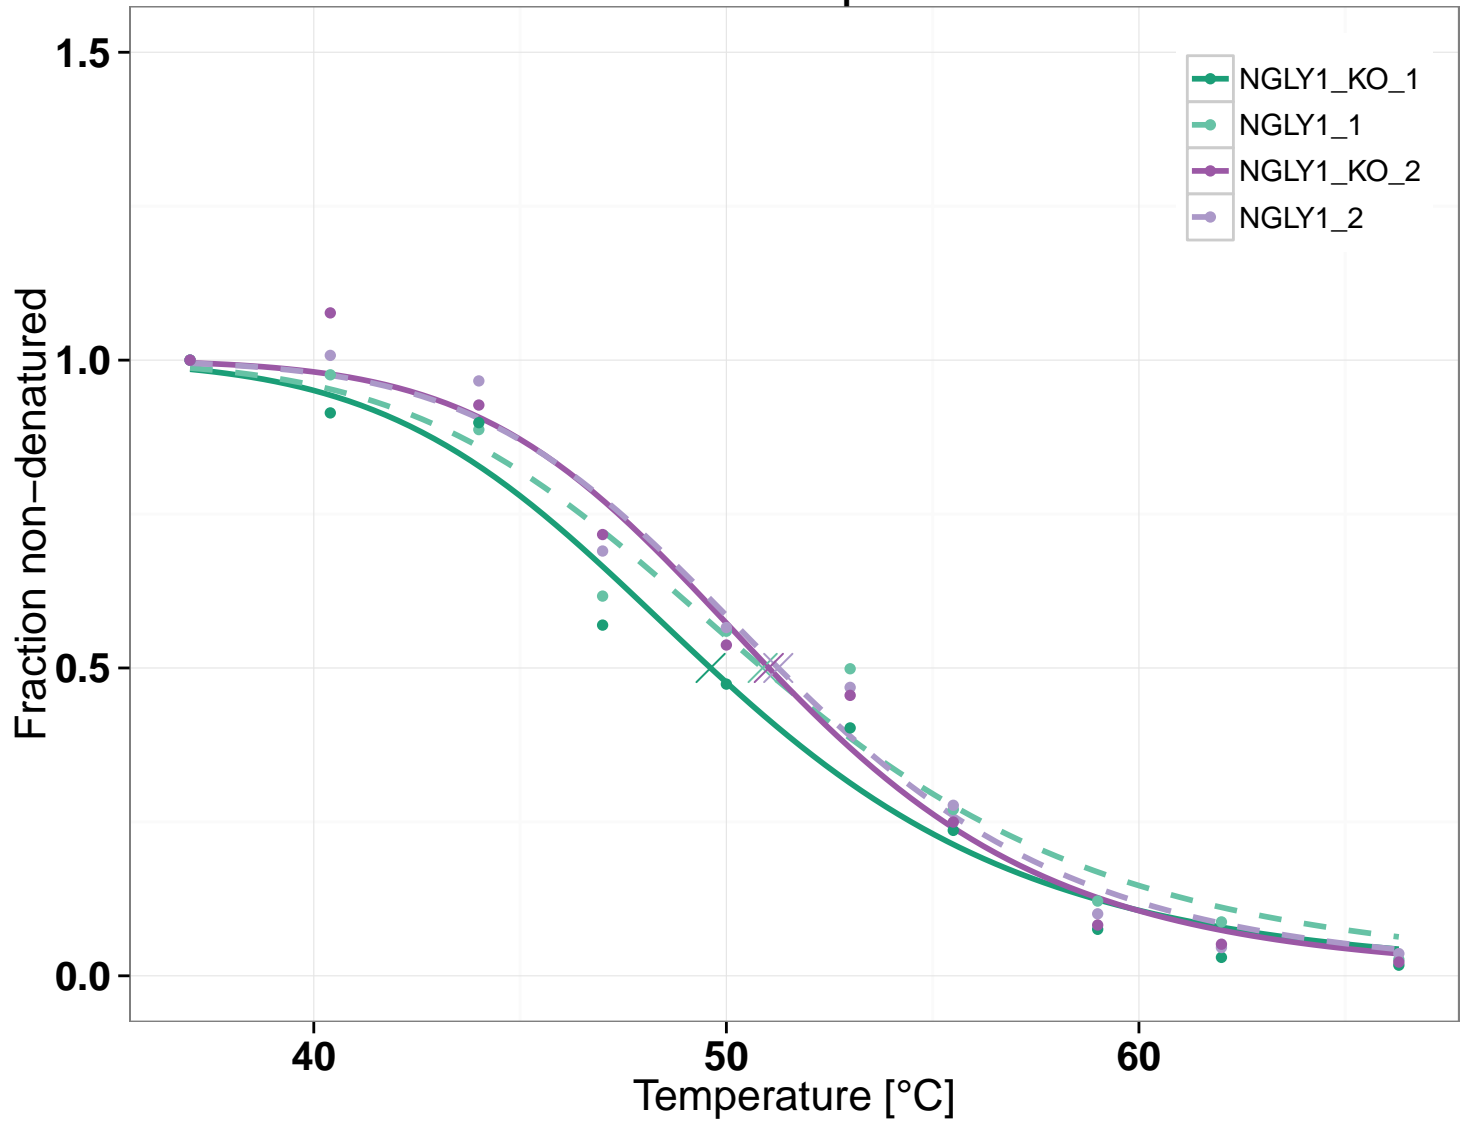

|            | meltPoint | slope  | plateau | R2   |
|------------|-----------|--------|---------|------|
| NGLY1_KO_1 | 49.62     | -0.064 | 0       | 0.98 |
| NGLY1_1    | 50.88     | -0.059 | 0       | 0.98 |
| NGLY1_KO_2 | 51.03     | -0.071 | 0       | 0.98 |
| NGLY1_2    | 51.26     | -0.068 | 0       | 0.98 |

Supplement: Supplementary file 6489 [file 1]

IPI00013999.1|GATA1

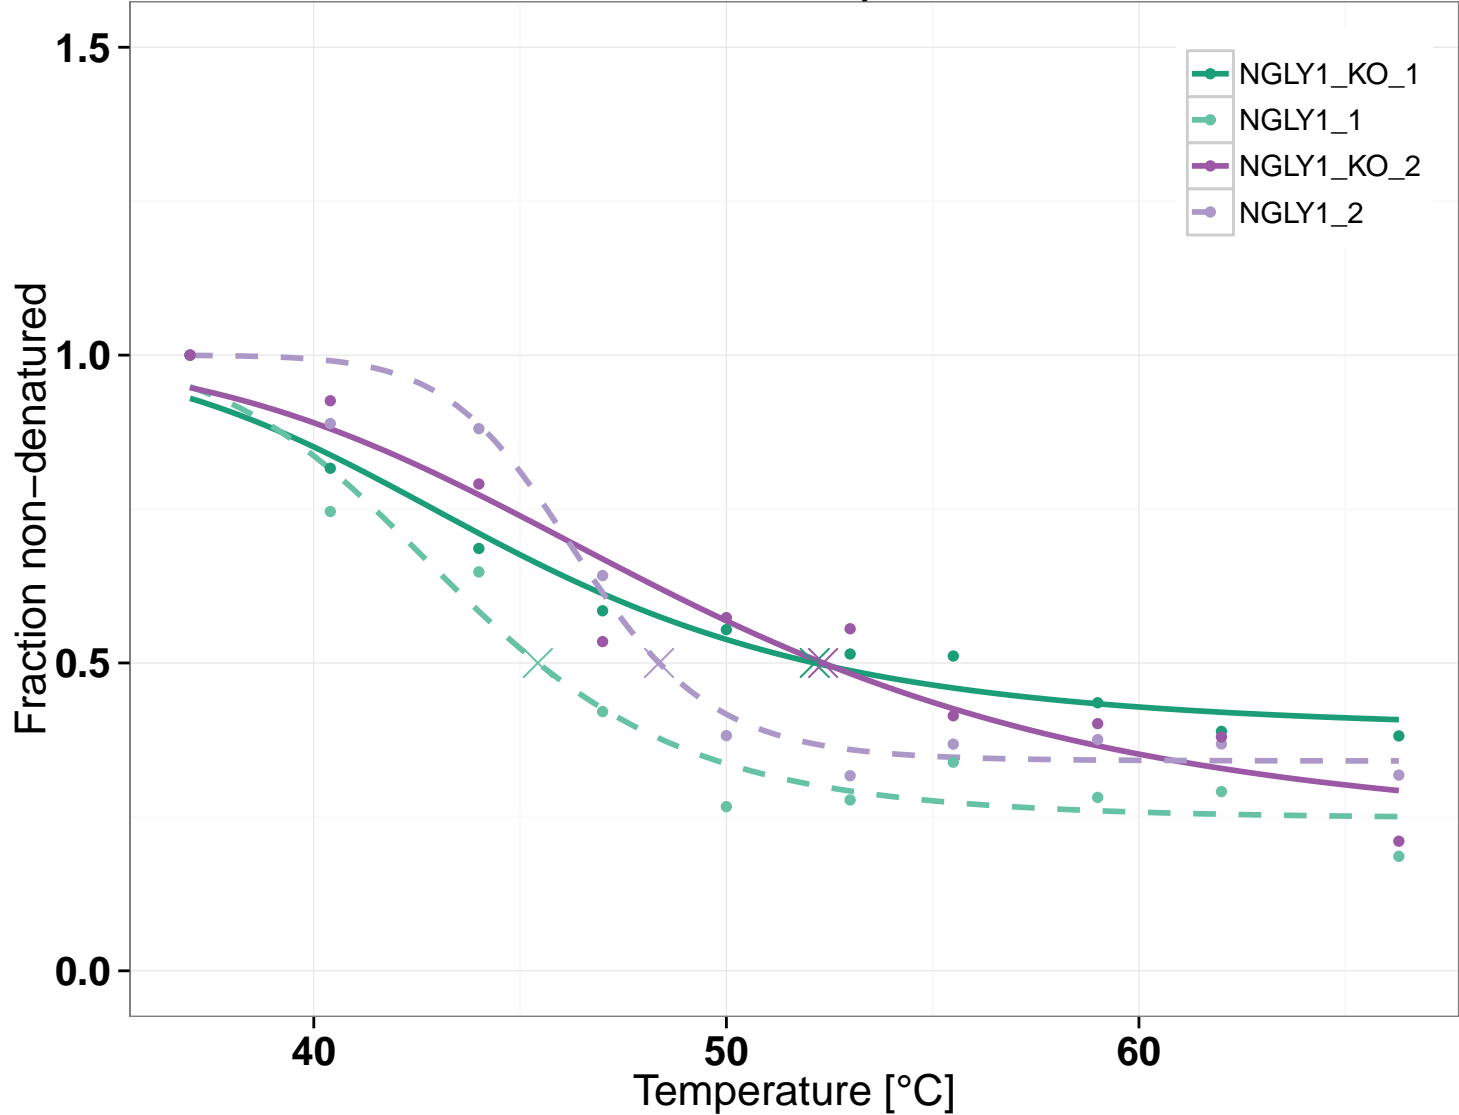

|            | meltPoint | slope  | plateau | R2   |
|------------|-----------|--------|---------|------|
| NGLY1_KO_1 | 52.14     | -0.036 | 0.39    | 0.97 |
| NGLY1_1    | 45.43     | -0.067 | 0.25    | 0.96 |
| NGLY1_KO_2 | 52.35     | -0.035 | 0.21    | 0.93 |
| NGLY1_2    | 48.37     | -0.1   | 0.34    | 0.97 |

Supplement: Supplementary file 6490 [file 1]

# IPI00394901.1|NIPA1

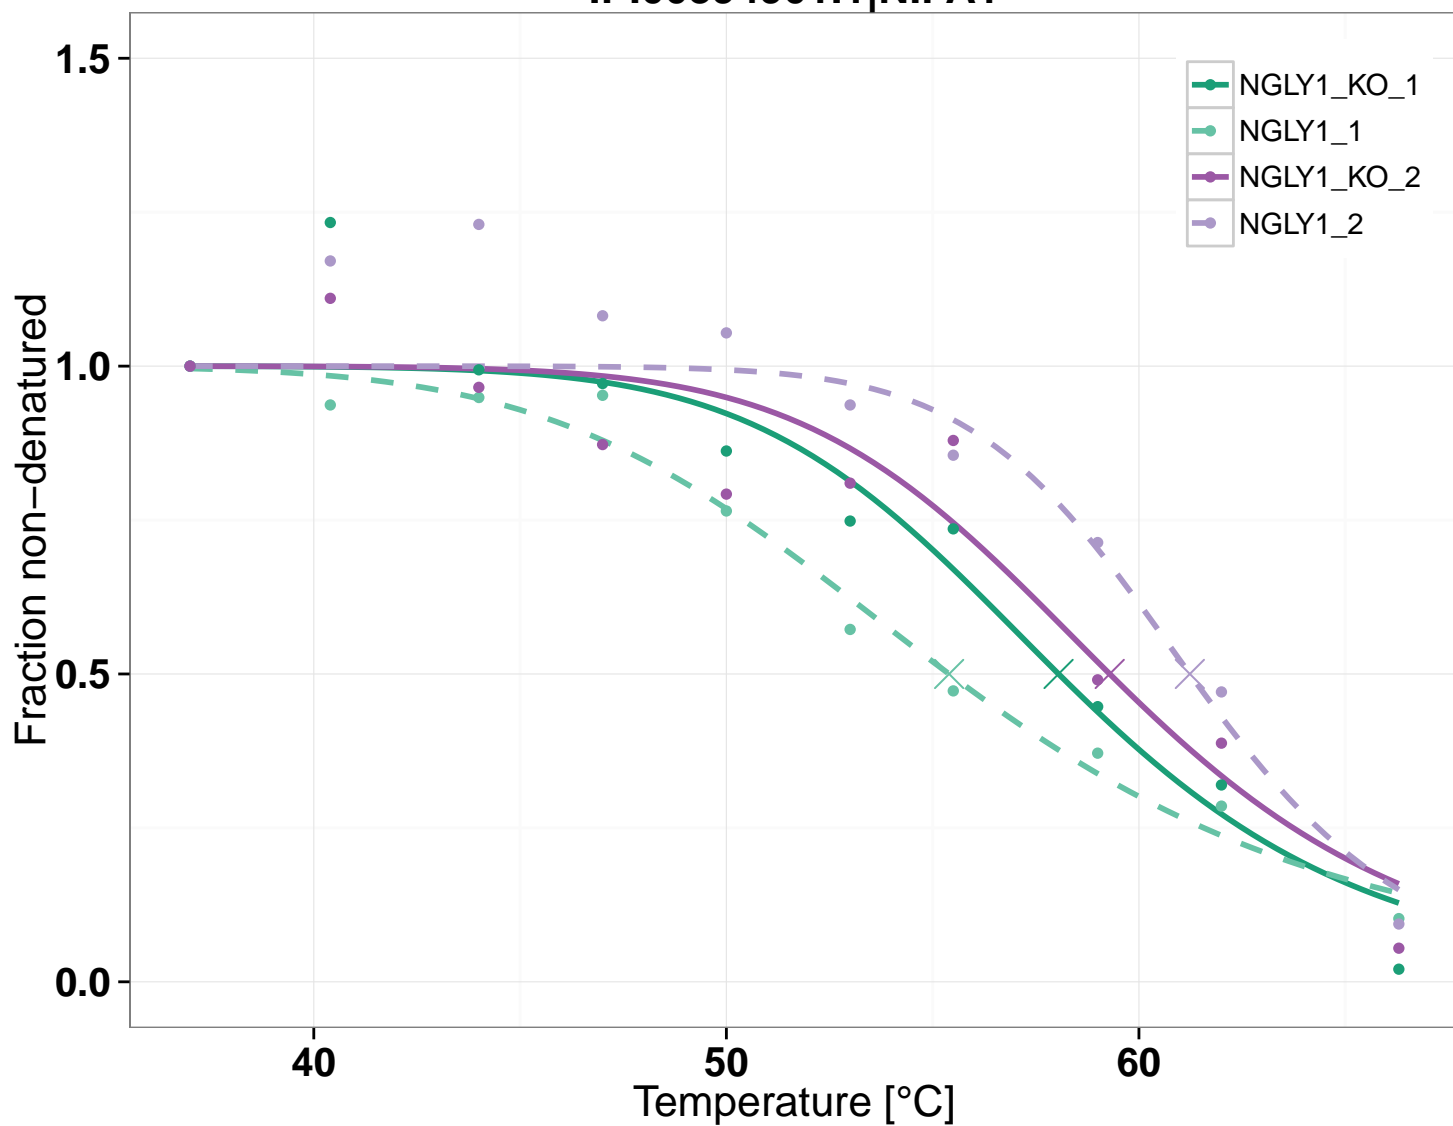

|            | meltPoint | slope  | plateau | R2   |
|------------|-----------|--------|---------|------|
| NGLY1_KO_1 | 58.05     | -0.068 | 0       | 0.93 |
| NGLY1_1    | 55.4      | -0.052 | 0.01    | 0.98 |
| NGLY1_KO_2 | 59.29     | -0.067 | 0       | 0.91 |
| NGLY1_2    | 61.23     | -0.094 | 0       | 0.91 |

Supplement: Supplementary file 6491 [file 1]

IPI00294159.3|SLC25A1

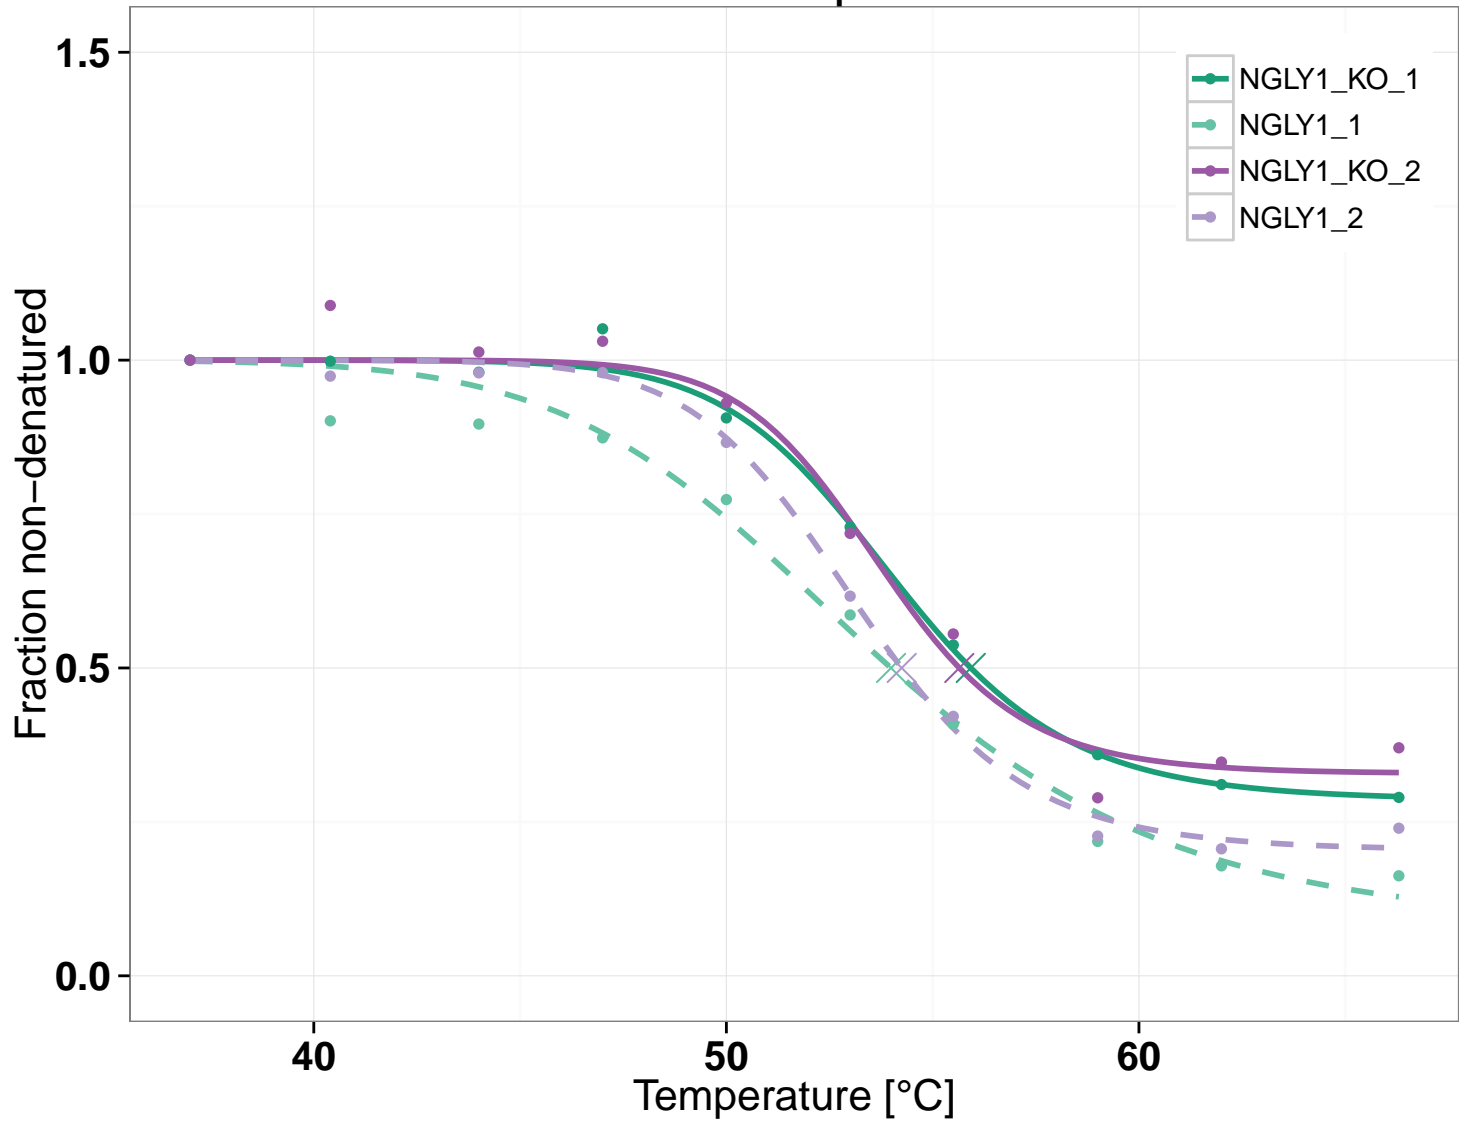

|            | meltPoint | slope  | plateau | R2   |
|------------|-----------|--------|---------|------|
| NGLY1_KO_1 | 55.92     | -0.085 | 0.28    | 0.99 |
| NGLY1_1    | 53.99     | -0.063 | 0.07    | 0.98 |
| NGLY1_KO_2 | 55.65     | -0.098 | 0.33    | 0.98 |
| NGLY1_2    | 54.25     | -0.099 | 0.2     | 1    |

Supplement: Supplementary file 6492 [file 1]

IPI00333014.3|C13ORF3

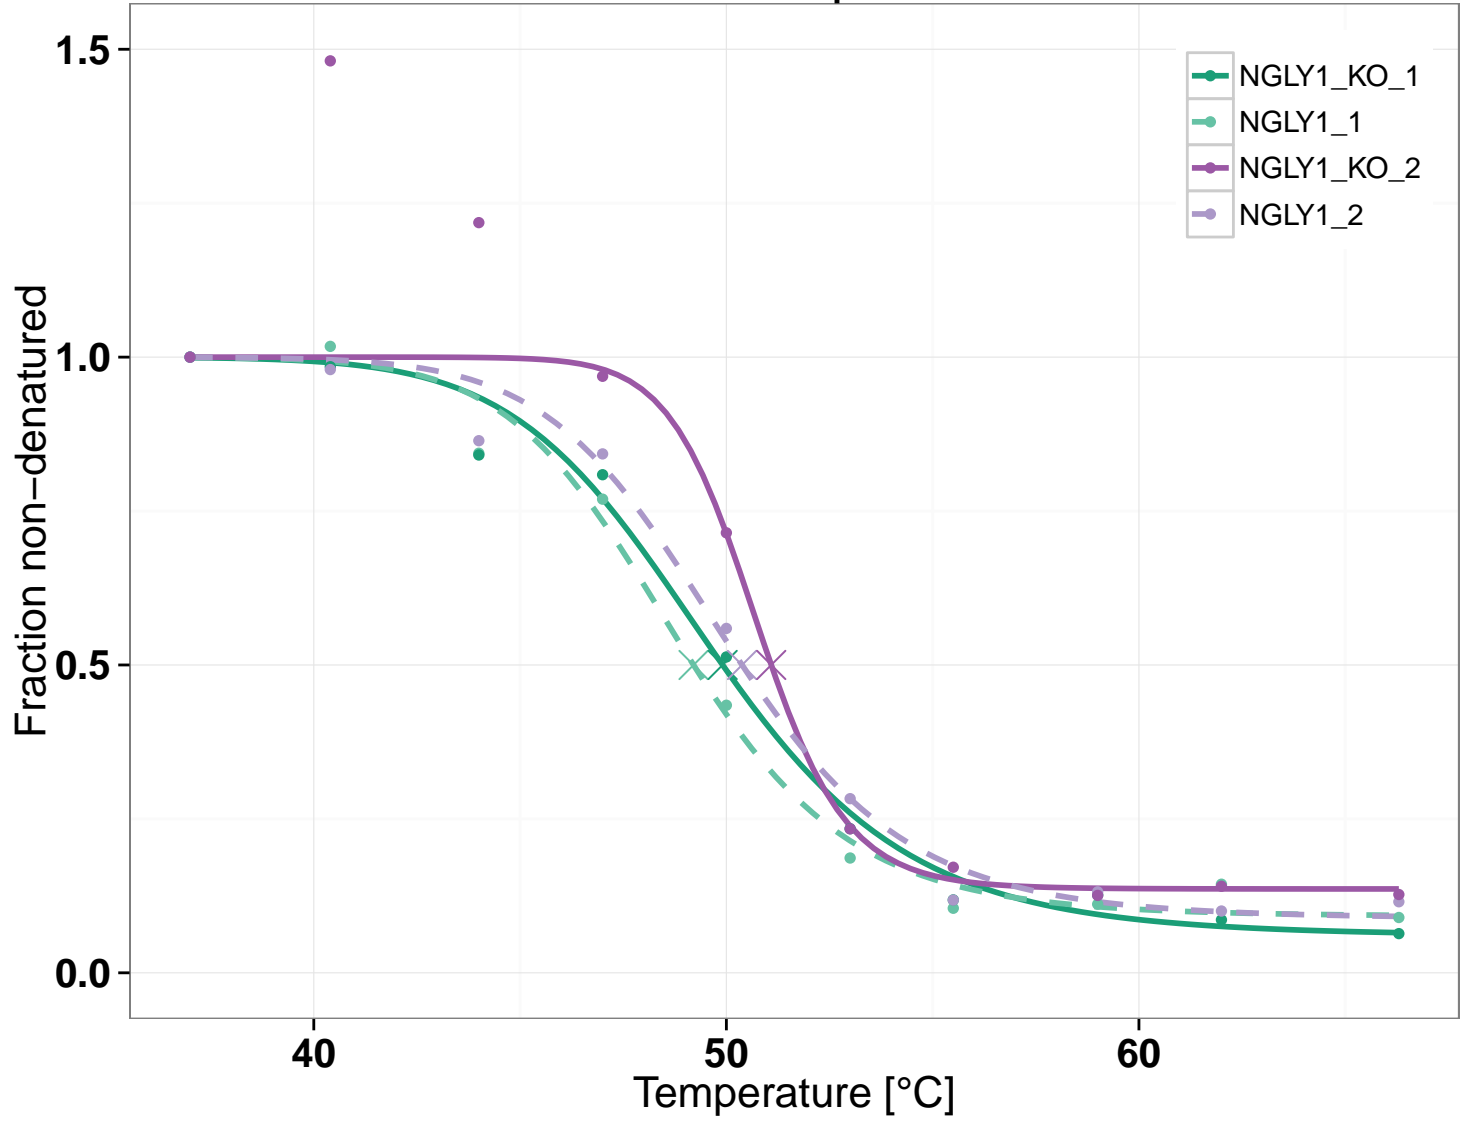

|            | meltPoint | slope  | plateau | R2   |
|------------|-----------|--------|---------|------|
| NGLY1_KO_1 | 49.91     | -0.098 | 0.06    | 0.99 |
| NGLY1_1    | 49.2      | -0.11  | 0.09    | 0.99 |
| NGLY1_KO_2 | 51.09     | -0.2   | 0.14    | 0.89 |
| NGLY1_2    | 50.38     | -0.1   | 0.09    | 0.99 |

Supplement: Supplementary file 6493 [file 1]

IPI00783004.2|PLCB4

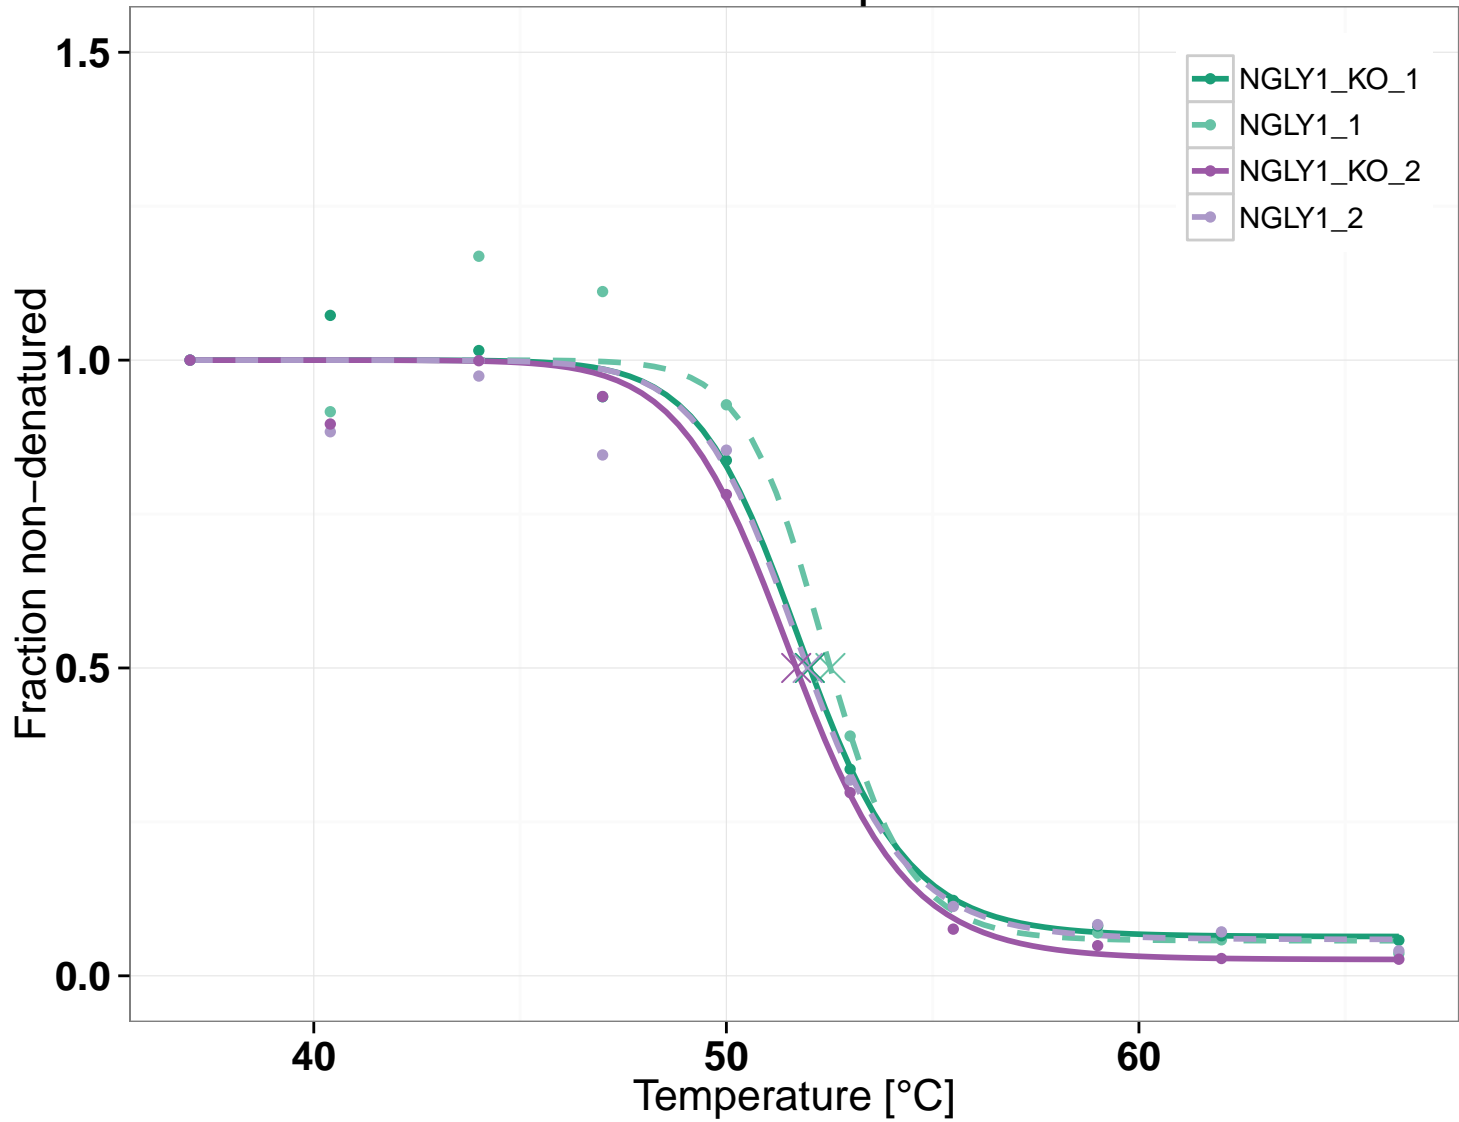

|            | meltPoint | slope | plateau | R2   |
|------------|-----------|-------|---------|------|
| NGLY1_KO_1 | 52.02     | -0.18 | 0.06    | 1    |
| NGLY1_1    | 52.52     | -0.24 | 0.06    | 0.98 |
| NGLY1_KO_2 | 51.69     | -0.18 | 0.03    | 0.99 |
| NGLY1_2    | 51.97     | -0.18 | 0.06    | 0.98 |

Supplement: Supplementary file 6494 [file 1]

IPI00023299.6|DDX12

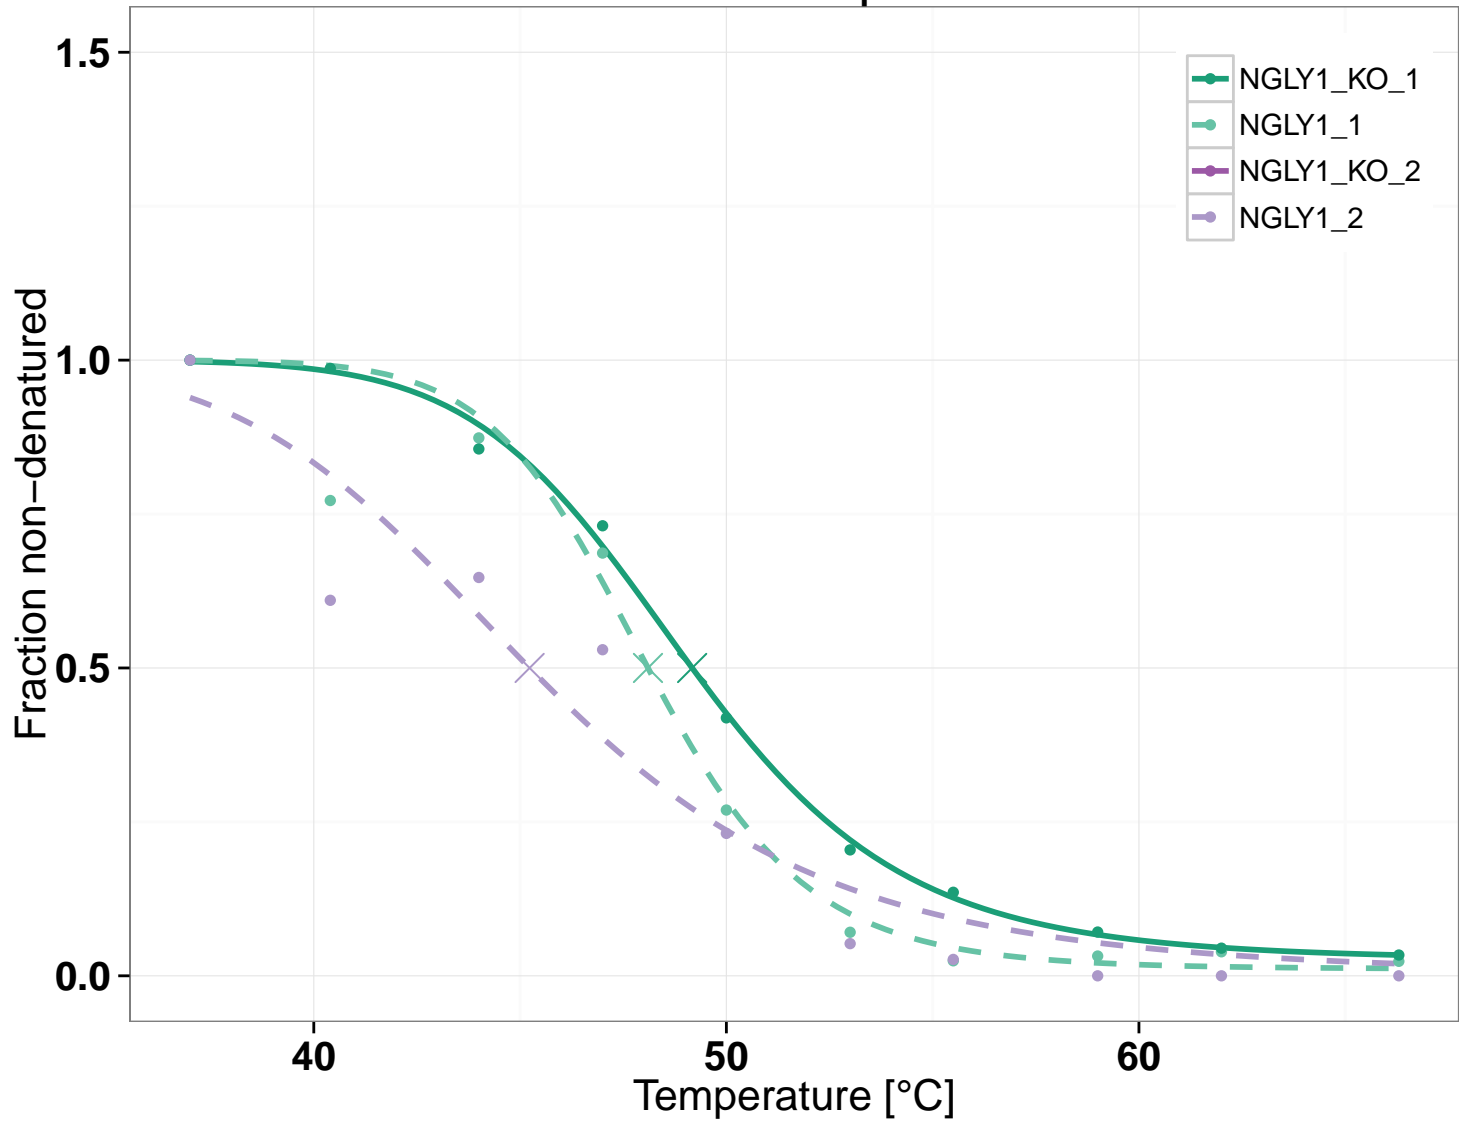

Supplement: Supplementary file 6495 [file 1]

# IPI00005161.3|ARPC2

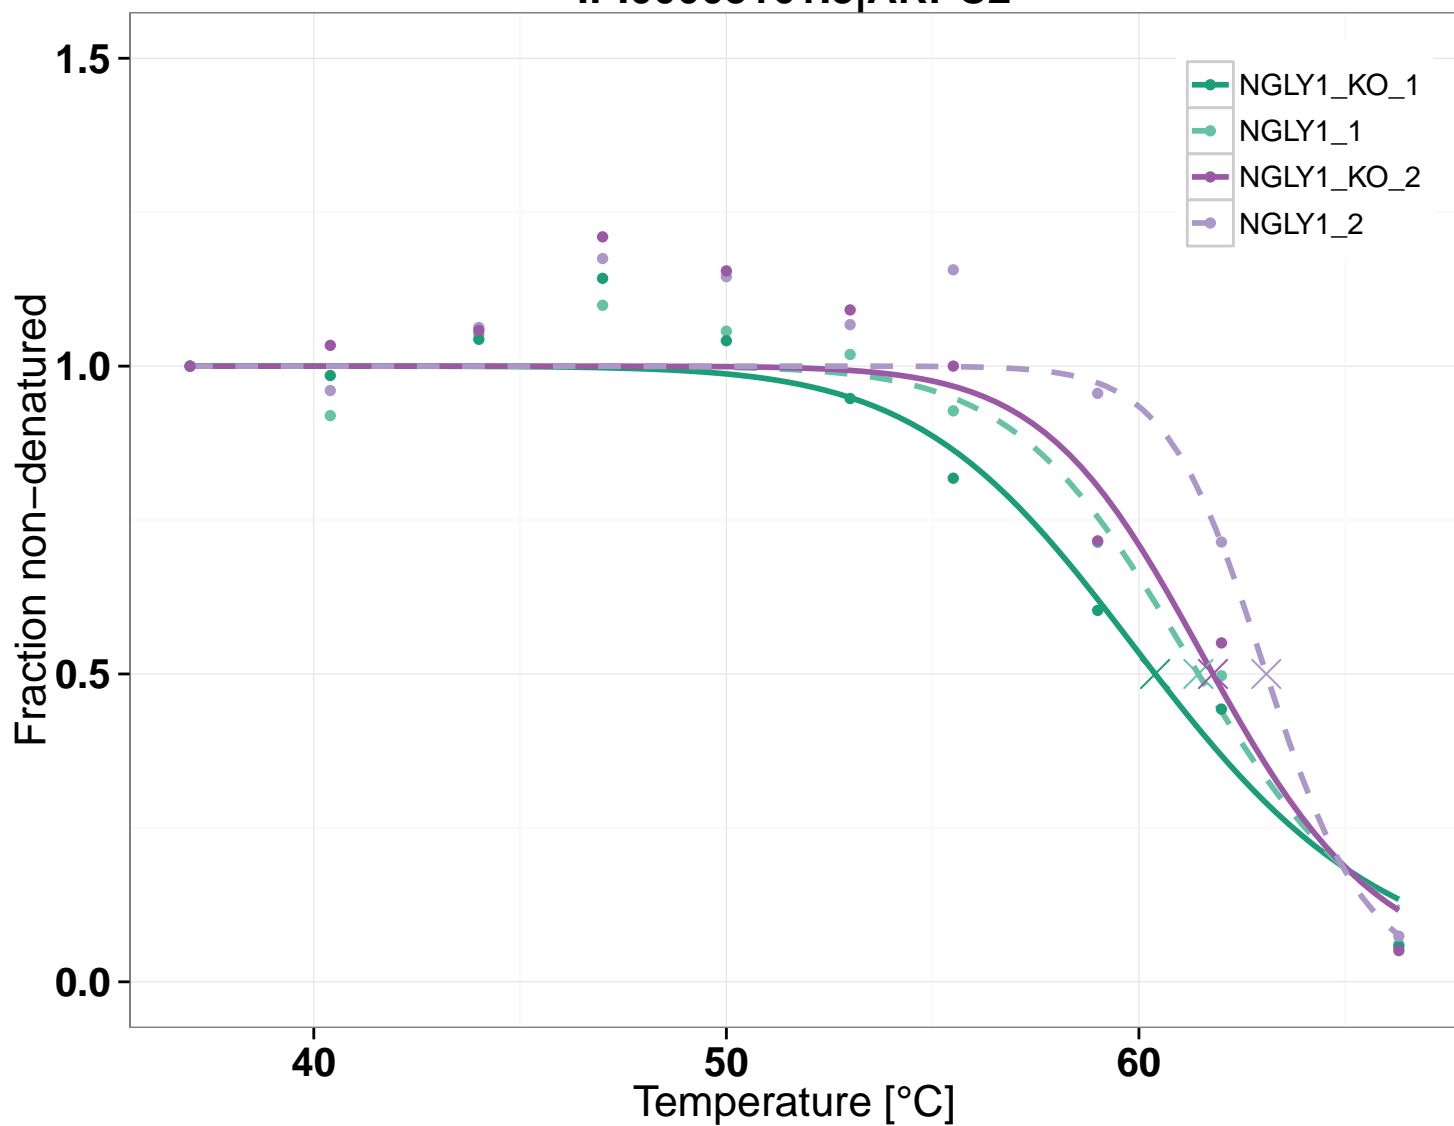

|            | meltPoint | slope  | plateau | R2   |
|------------|-----------|--------|---------|------|
| NGLY1_KO_1 | 60.39     | -0.088 | 0       | 0.96 |
| NGLY1_1    | 61.44     | -0.11  | 0       | 0.97 |
| NGLY1_KO_2 | 61.79     | -0.12  | 0       | 0.91 |
| NGLY1_2    | 63.09     | -0.21  | 0       | 0.91 |

Supplement: Supplementary file 6496 [file 1]

IPI00748577.2|SLC26A6

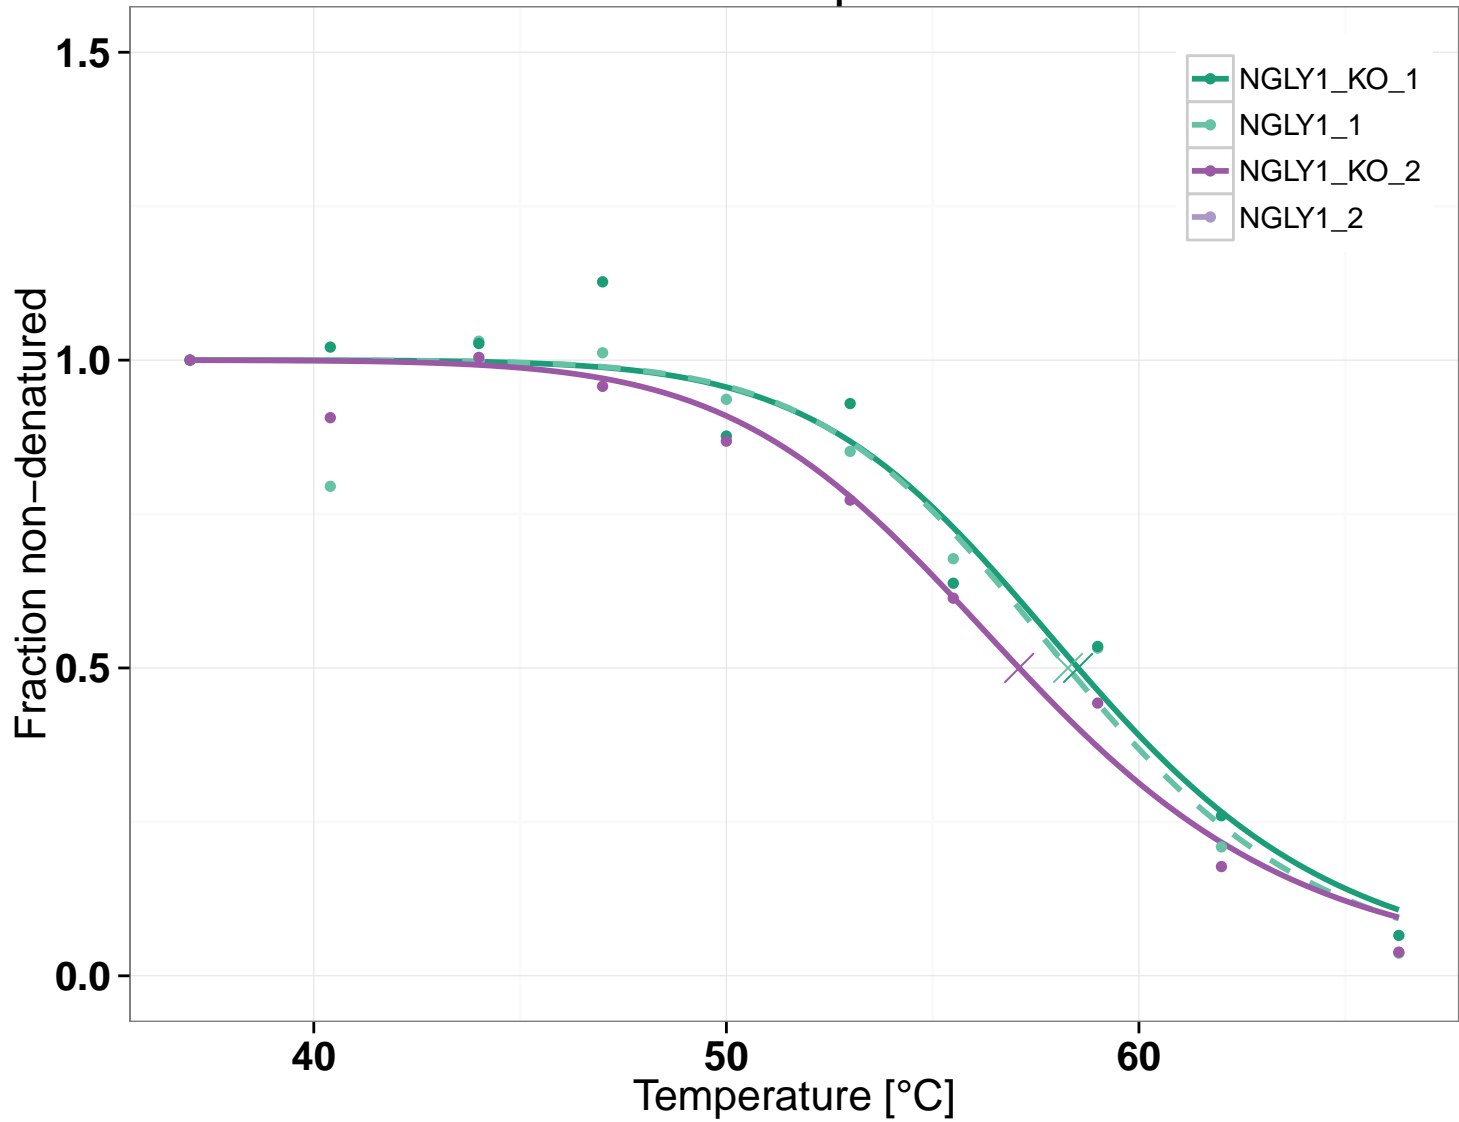

|            | meltPoint | slope  | plateau | R2   |
|------------|-----------|--------|---------|------|
| NGLY1_KO_1 | 58.52     | -0.078 | 0       | 0.96 |
| NGLY1_1    | 58.28     | -0.082 | 0       | 0.95 |
| NGLY1_KO_2 | 57.1      | -0.072 | 0       | 0.98 |
| NGLY1_2    | -         | -      | -       | -    |

Supplement: Supplementary file 6497 [file 1]

IPI00658155.1|MRPS34

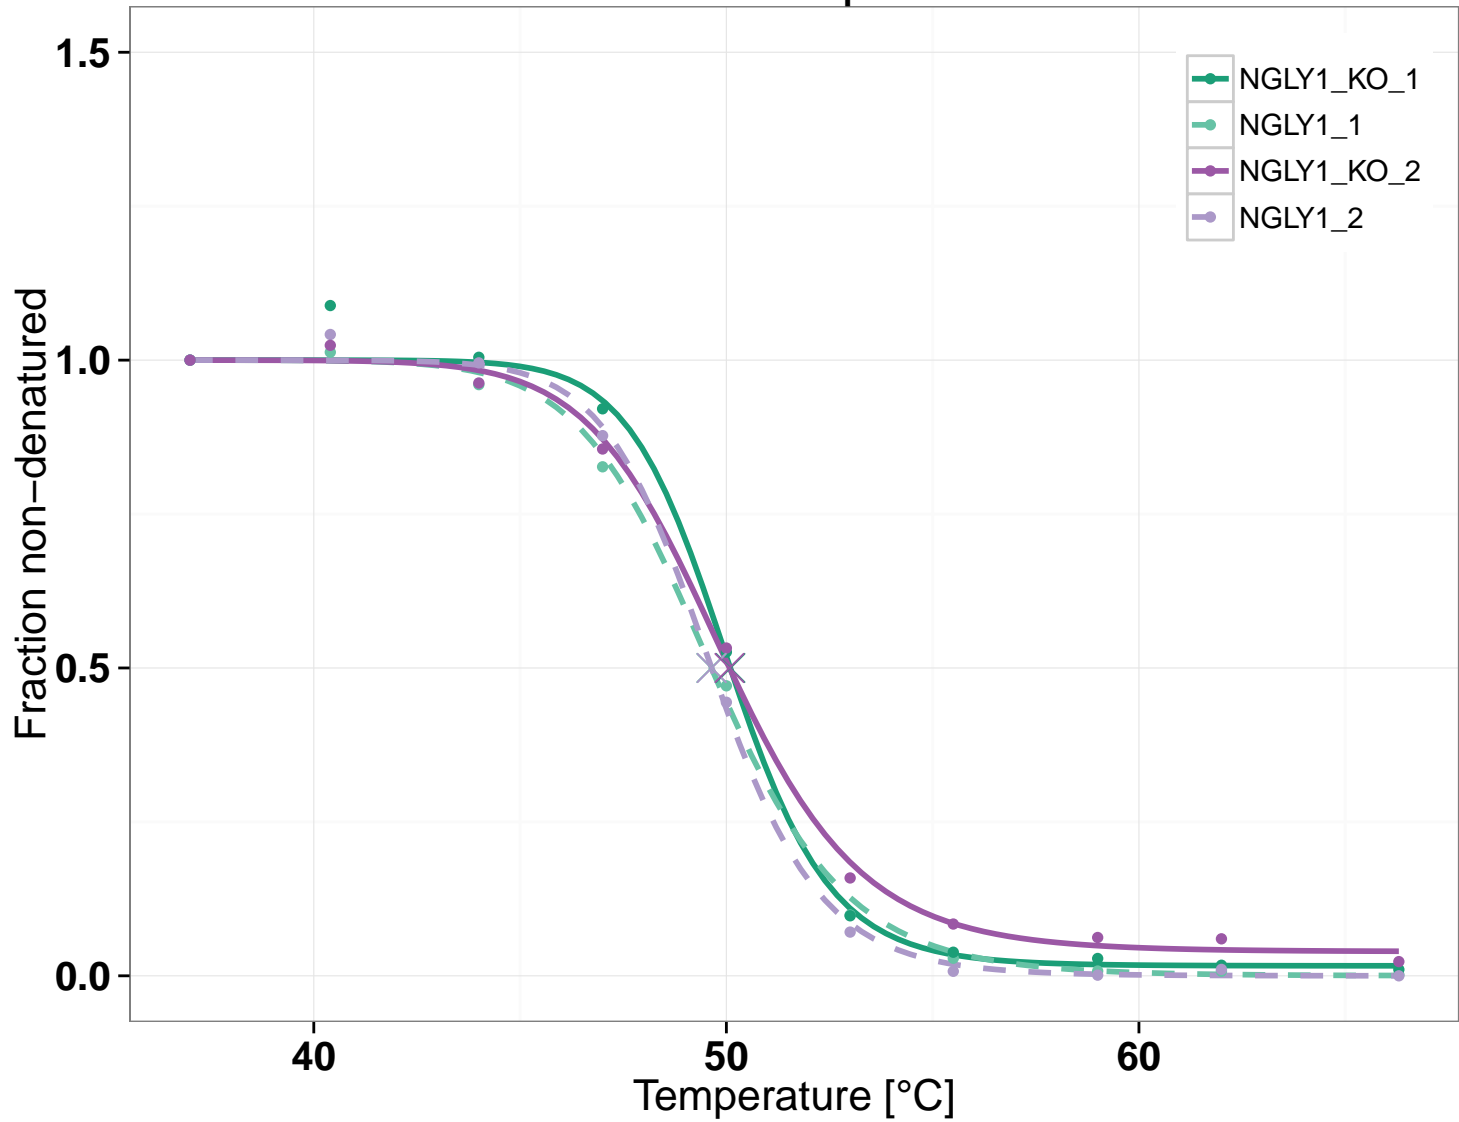

|            | meltPoint | slope | plateau | R2 |
|------------|-----------|-------|---------|----|
| NGLY1_KO_1 | 50.09     | -0.2  | 0.02    | 1  |
| NGLY1_1    | 49.64     | -0.15 | 0       | 1  |
| NGLY1_KO_2 | 50.08     | -0.14 | 0.04    | 1  |
| NGLY1_2    | 49.64     | -0.19 | 0       | 1  |

Supplement: Supplementary file 6498 [file 1]

IPI00879214.1|ING2

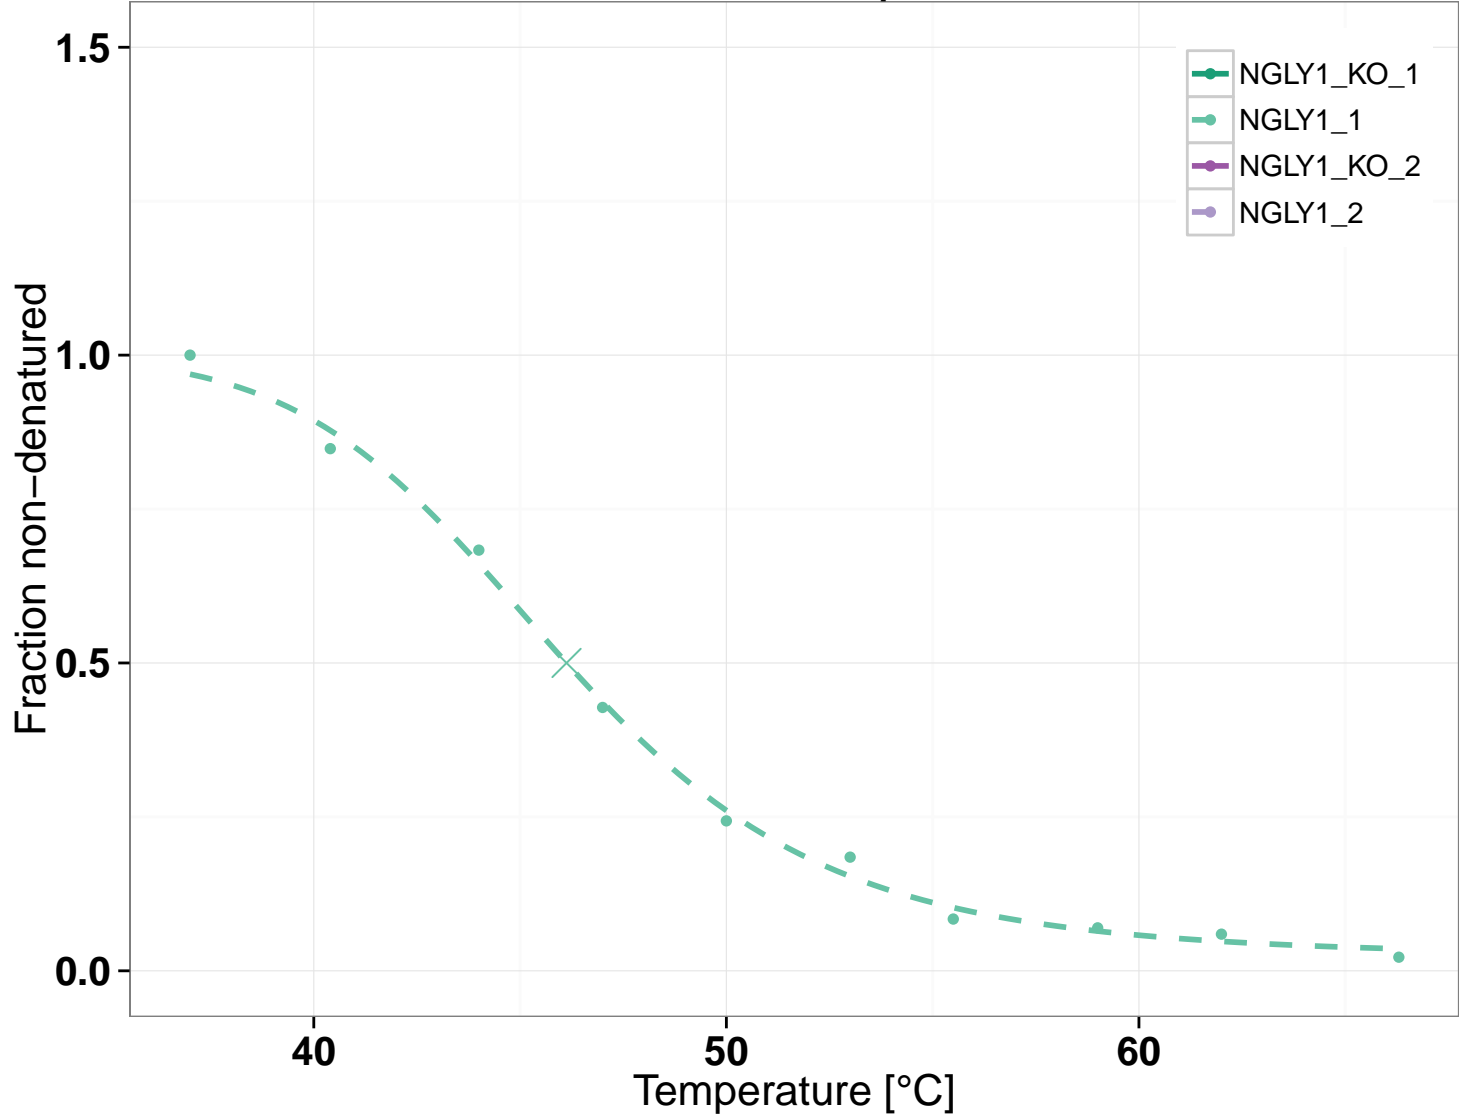

|            | meltPoint | slope  | plateau | R2 |
|------------|-----------|--------|---------|----|
| NGLY1_KO_1 | -         | -      | -       | -  |
| NGLY1_1    | 46.13     | -0.076 | 0.02    | 1  |
| NGLY1_KO_2 | -         | -      | -       | -  |
| NGLY1_2    | -         | -      | -       | -  |

Supplement: Supplementary file 6499 [file 1]

# IPI00915466.1|EPN2

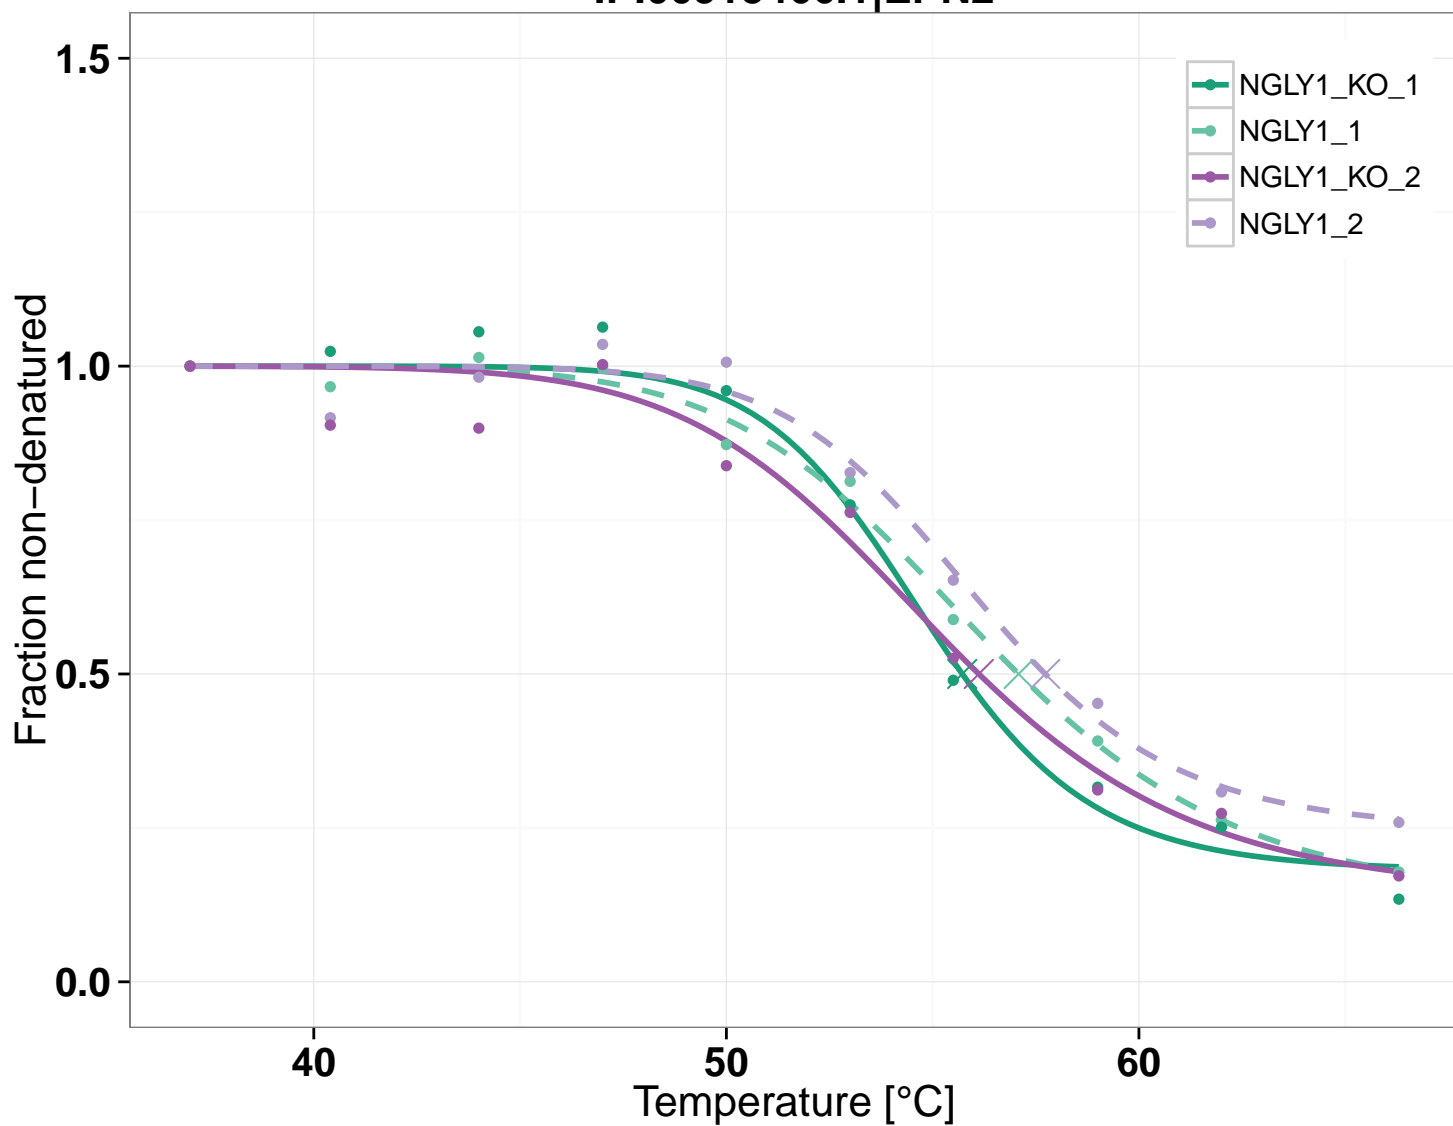

|            | meltPoint | slope  | plateau | R2   |
|------------|-----------|--------|---------|------|
| NGLY1_KO_1 | 55.72     | -0.1   | 0.18    | 0.99 |
| NGLY1_1    | 57.08     | -0.071 | 0.13    | 0.99 |
| NGLY1_KO_2 | 56.12     | -0.07  | 0.14    | 0.97 |
| NGLY1_2    | 57.73     | -0.08  | 0.24    | 0.98 |

Supplement: Supplementary file 6500 [file 1]

IPI00152091.1|FAM100A

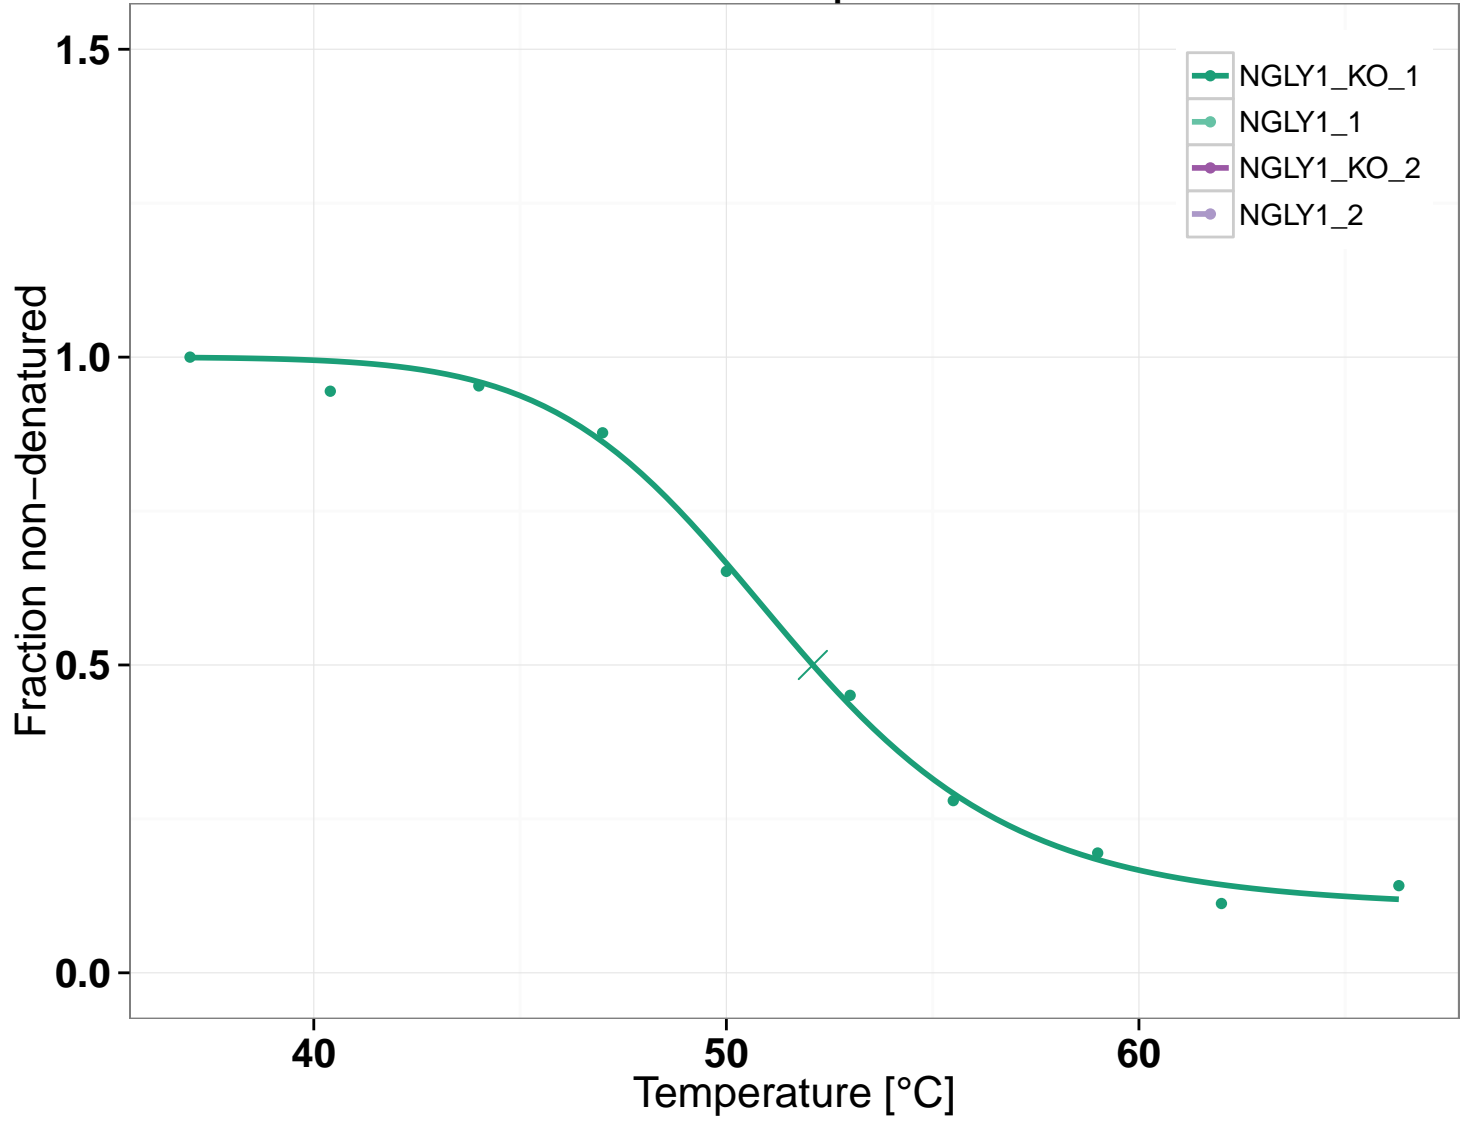

|            | meltPoint | slope | plateau | R2 |
|------------|-----------|-------|---------|----|
| NGLY1_KO_1 | 52.1      | -0.08 | 0.1     | 1  |
| NGLY1_1    | -         | -     | -       | -  |
| NGLY1_KO_2 | -         | -     | -       | -  |
| NGLY1_2    | -         | -     | -       | -  |

Supplement: Supplementary file 6501 [file 1]

IPI00016610.2|PCBP1

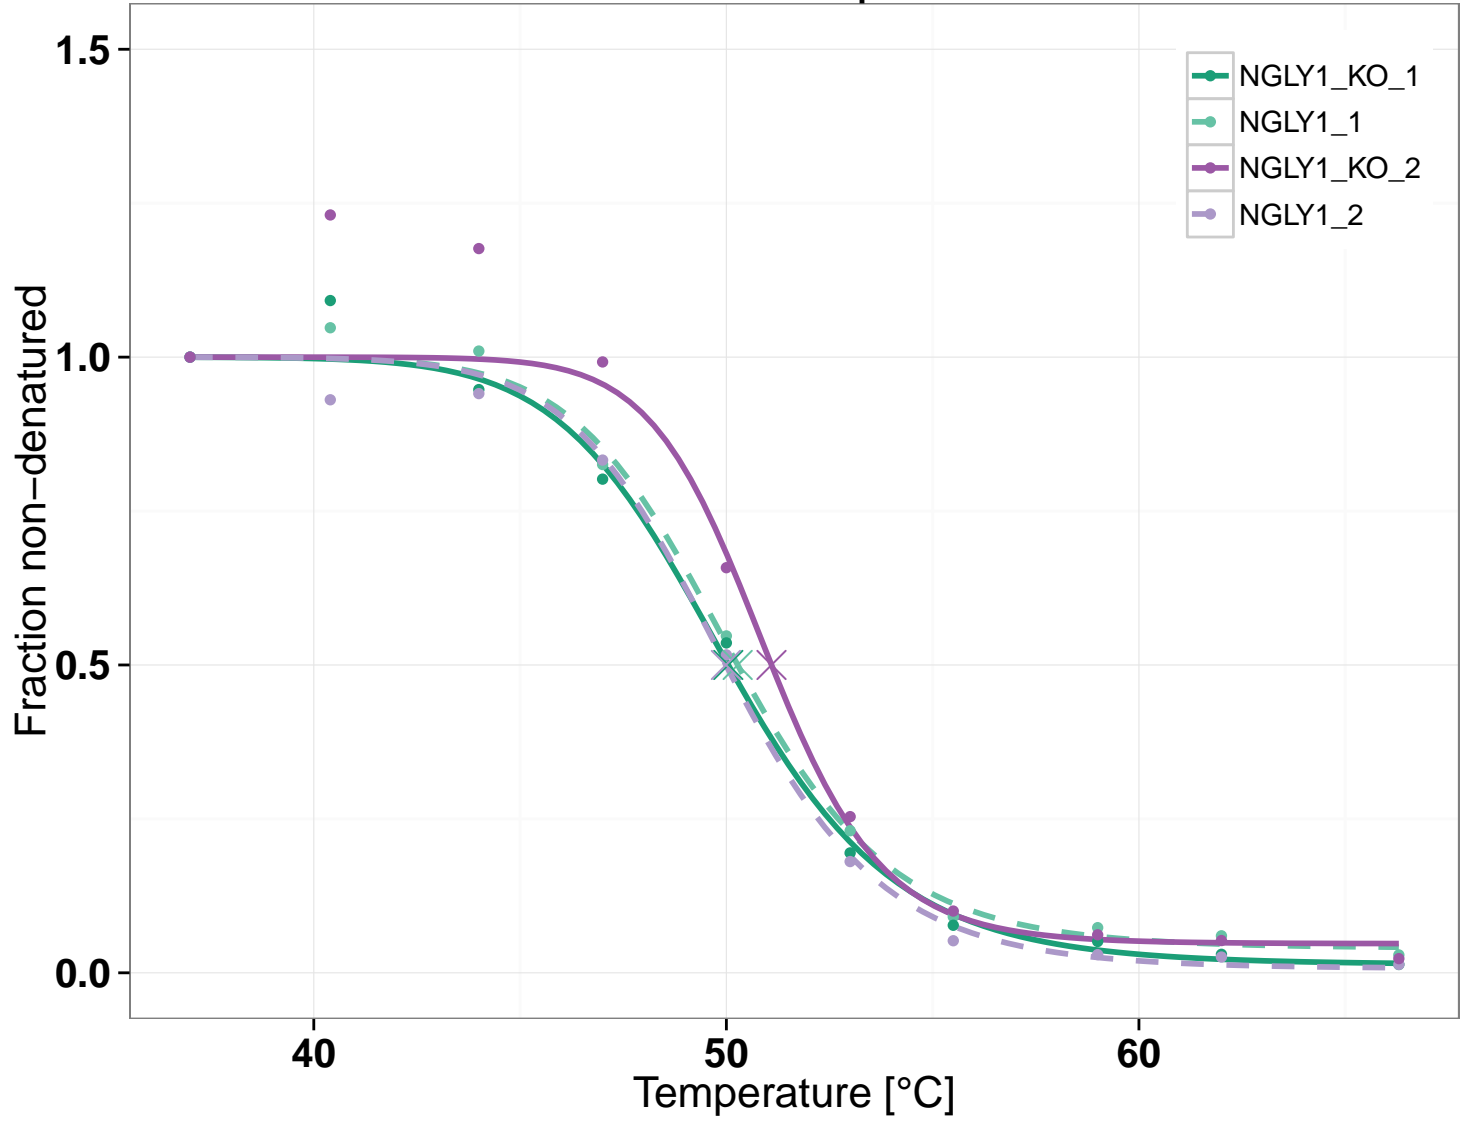

|            | meltPoint | slope | plateau | R2   |
|------------|-----------|-------|---------|------|
| NGLY1_KO_1 | 50.05     | -0.12 | 0.01    | 0.99 |
| NGLY1_1    | 50.27     | -0.12 | 0.04    | 1    |
| NGLY1_KO_2 | 51.09     | -0.17 | 0.05    | 0.96 |
| NGLY1_2    | 49.99     | -0.13 | 0.01    | 1    |

Supplement: Supplementary file 6502 [file 1]

IPI00410347.5|SLC22A18

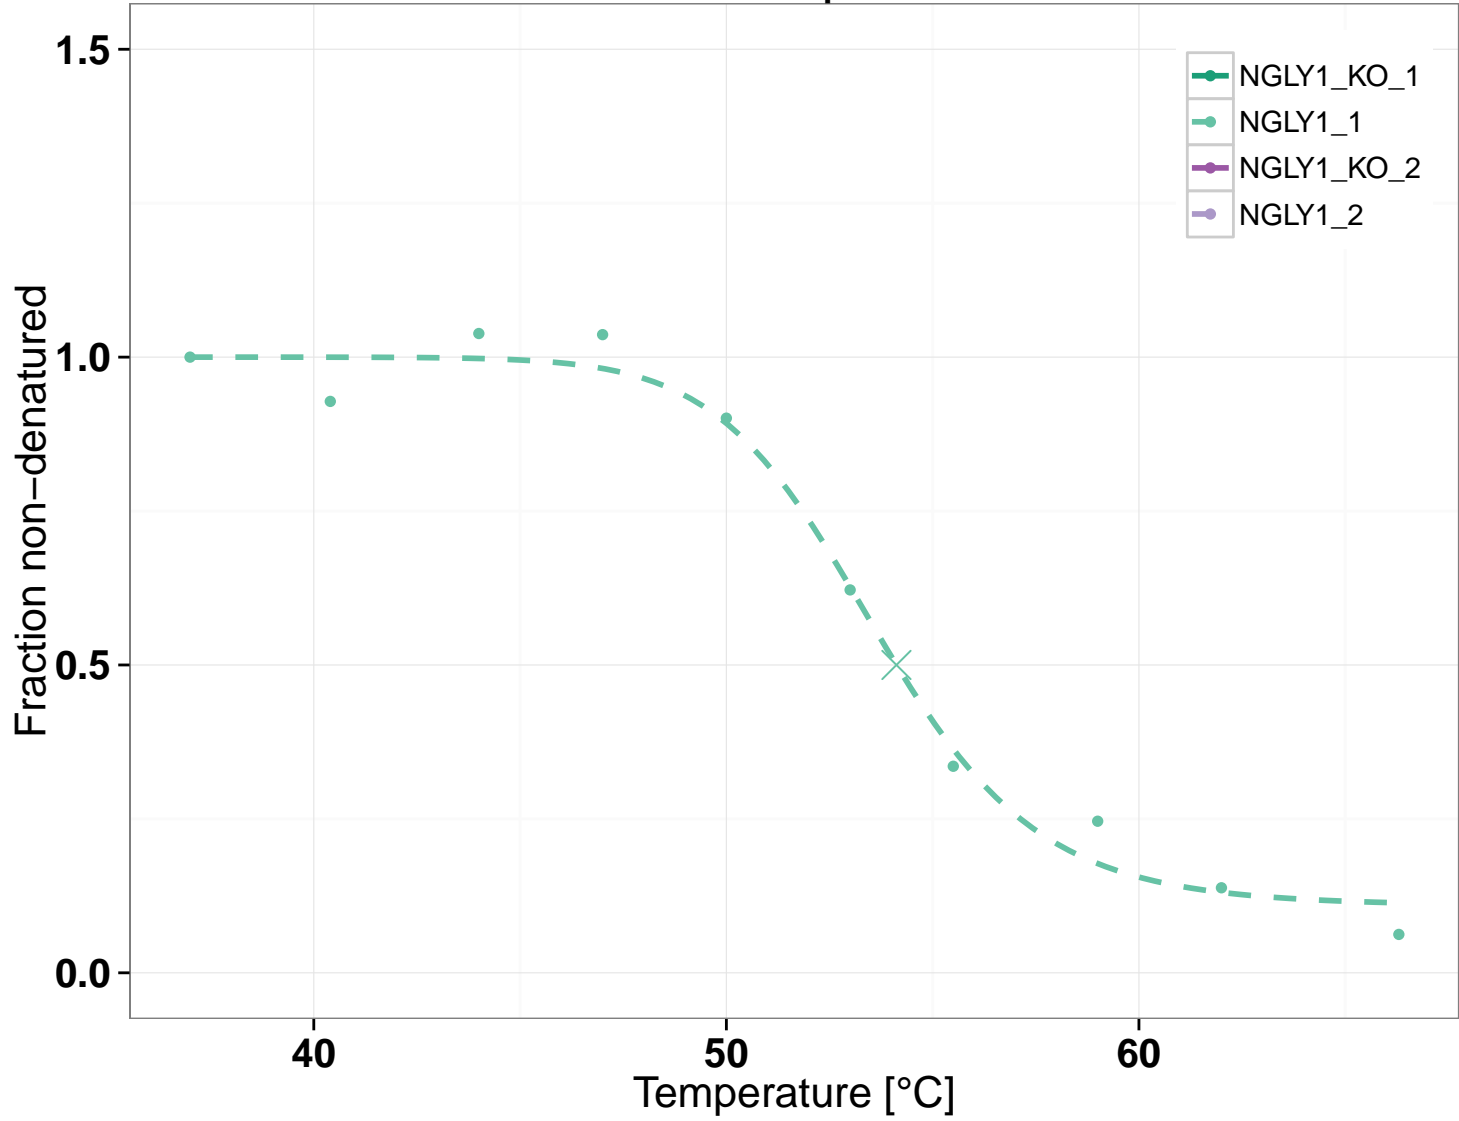

|            | meltPoint | slope | plateau | R2   |
|------------|-----------|-------|---------|------|
| NGLY1_KO_1 | -         | -     | -       | -    |
| NGLY1_1    | 54.12     | -0.11 | 0.11    | 0.99 |
| NGLY1_KO_2 | -         | -     | -       | -    |
| NGLY1_2    | -         | -     | -       | -    |

Supplement: Supplementary file 6503 [file 1]

# IPI00031681.1|CDK2

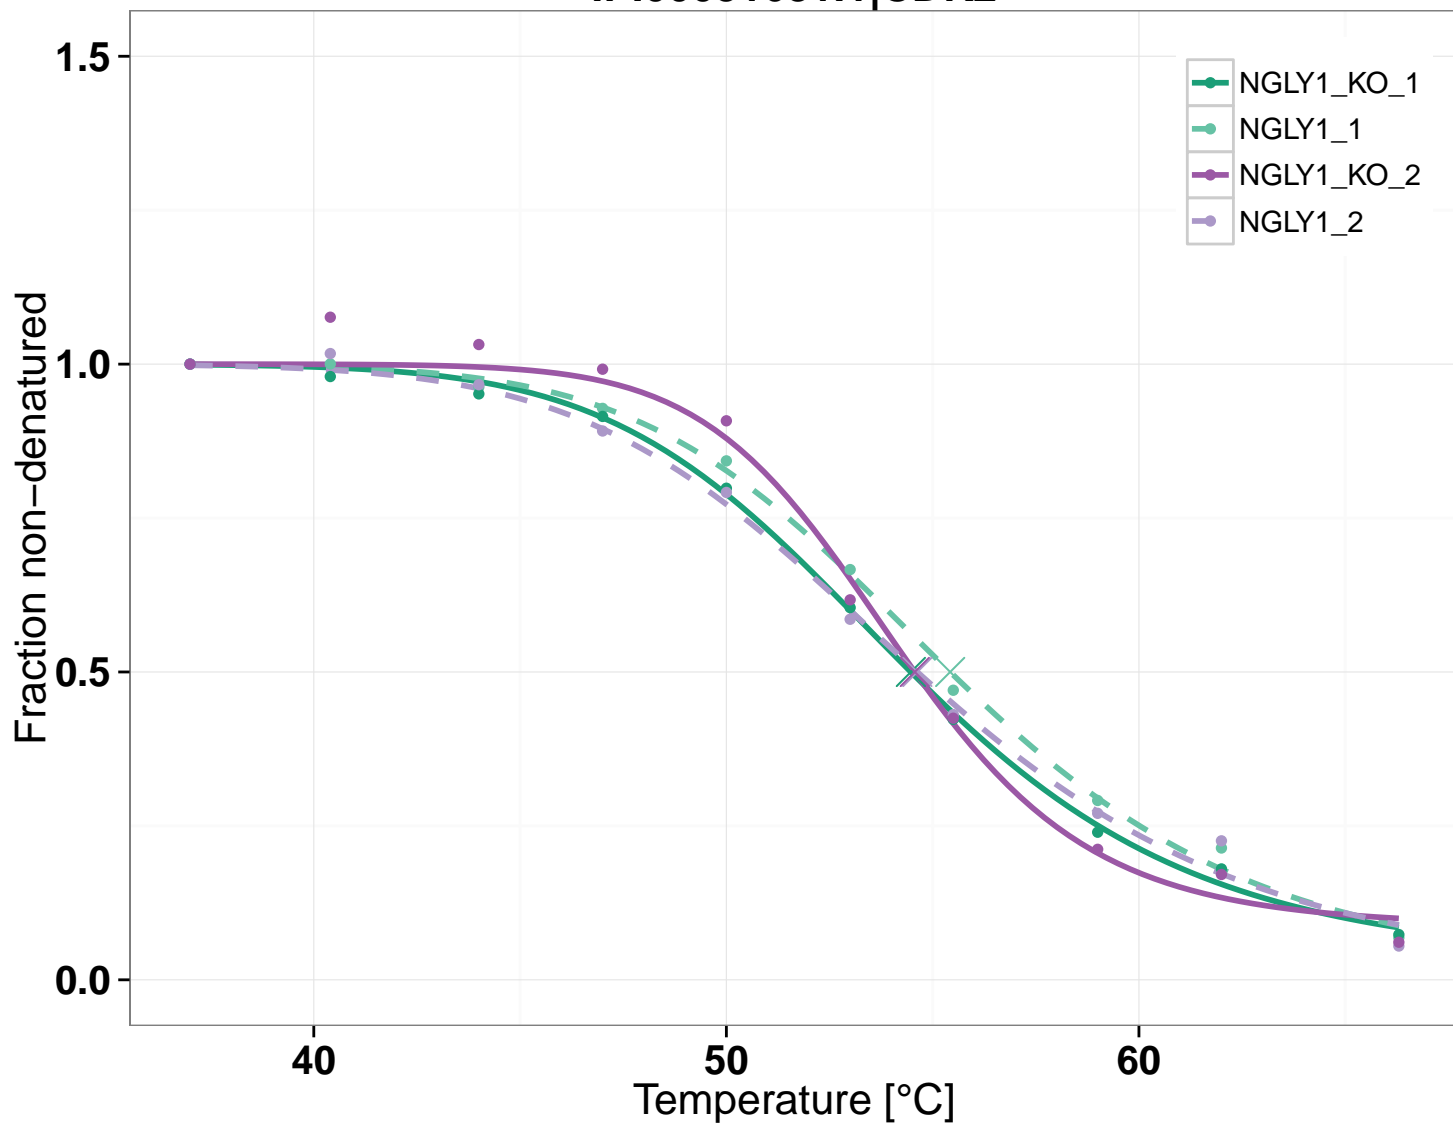

|            | meltPoint | slope  | plateau | R2   |
|------------|-----------|--------|---------|------|
| NGLY1_KO_1 | 54.47     | -0.069 | 0.02    | 1    |
| NGLY1_1    | 55.42     | -0.066 | 0       | 1    |
| NGLY1_KO_2 | 54.57     | -0.097 | 0.09    | 0.99 |
| NGLY1_2    | 54.63     | -0.062 | 0       | 1    |

Supplement: Supplementary file 6504 [file 1]

IPI00641524.2|BTN2A1

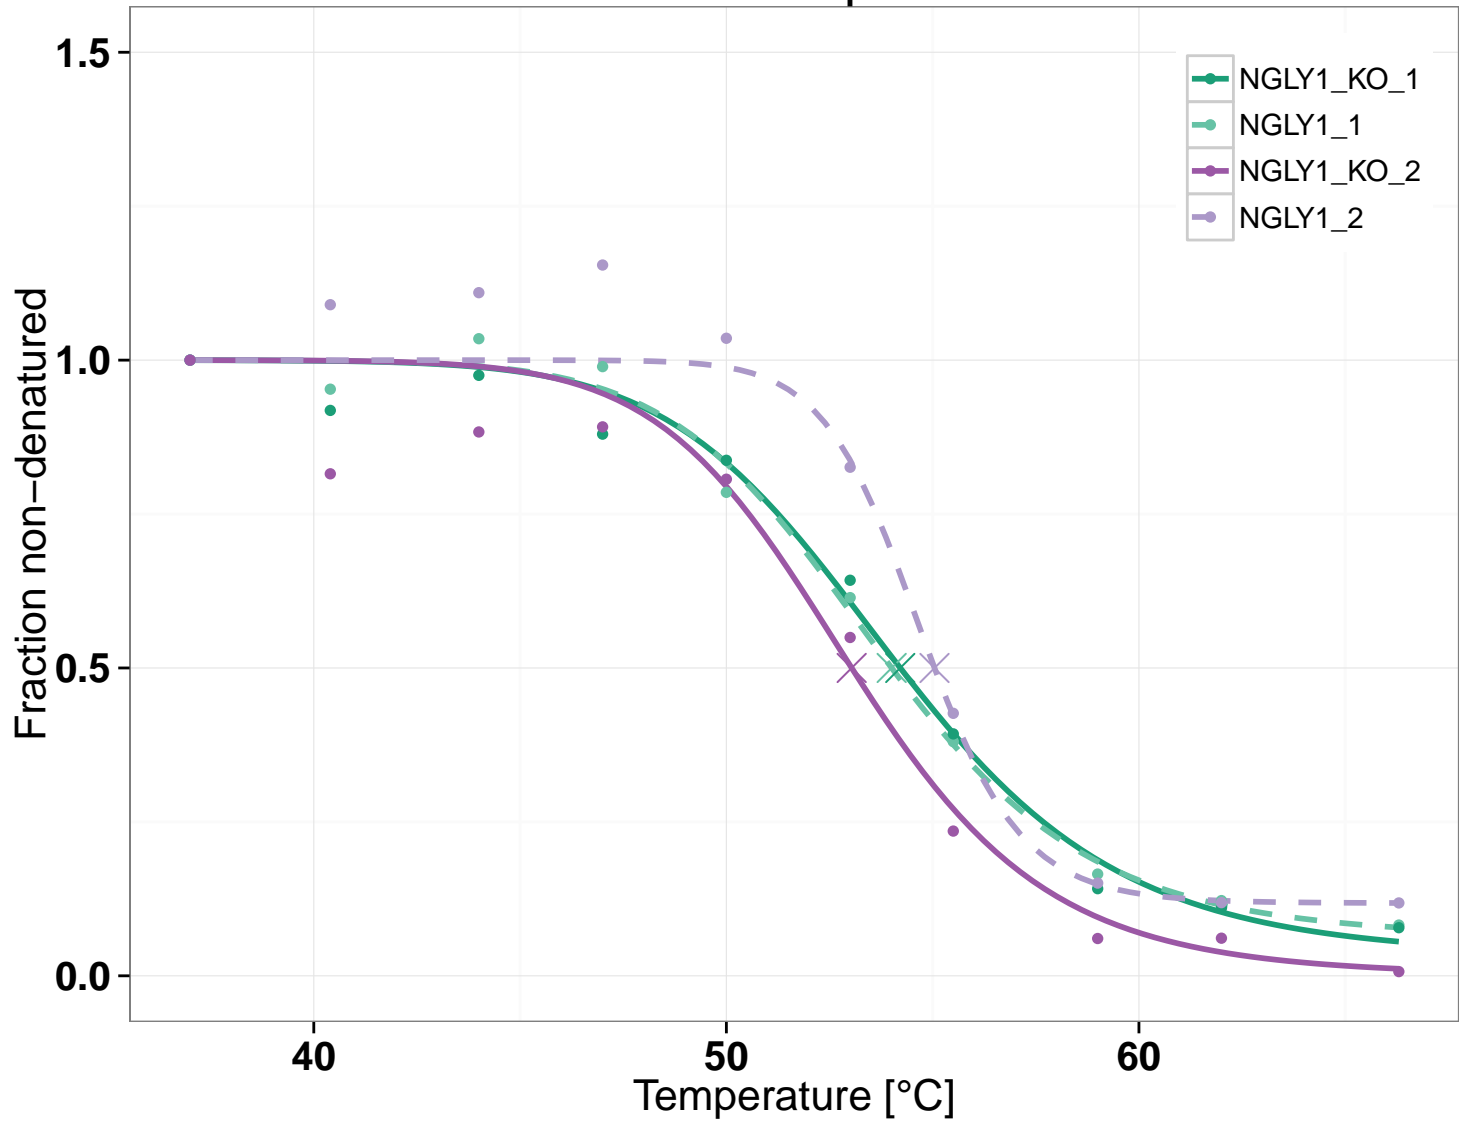

|            | meltPoint | slope  | plateau | R2   |
|------------|-----------|--------|---------|------|
| NGLY1_KO_1 | 54.21     | -0.088 | 0.03    | 0.99 |
| NGLY1_1    | 54.01     | -0.092 | 0.06    | 0.99 |
| NGLY1_KO_2 | 53.04     | -0.11  | 0       | 0.96 |
| NGLY1_2    | 55.05     | -0.18  | 0.12    | 0.97 |

Supplement: Supplementary file 6505 [file 1]

# IPI00178072.7|CYTSA

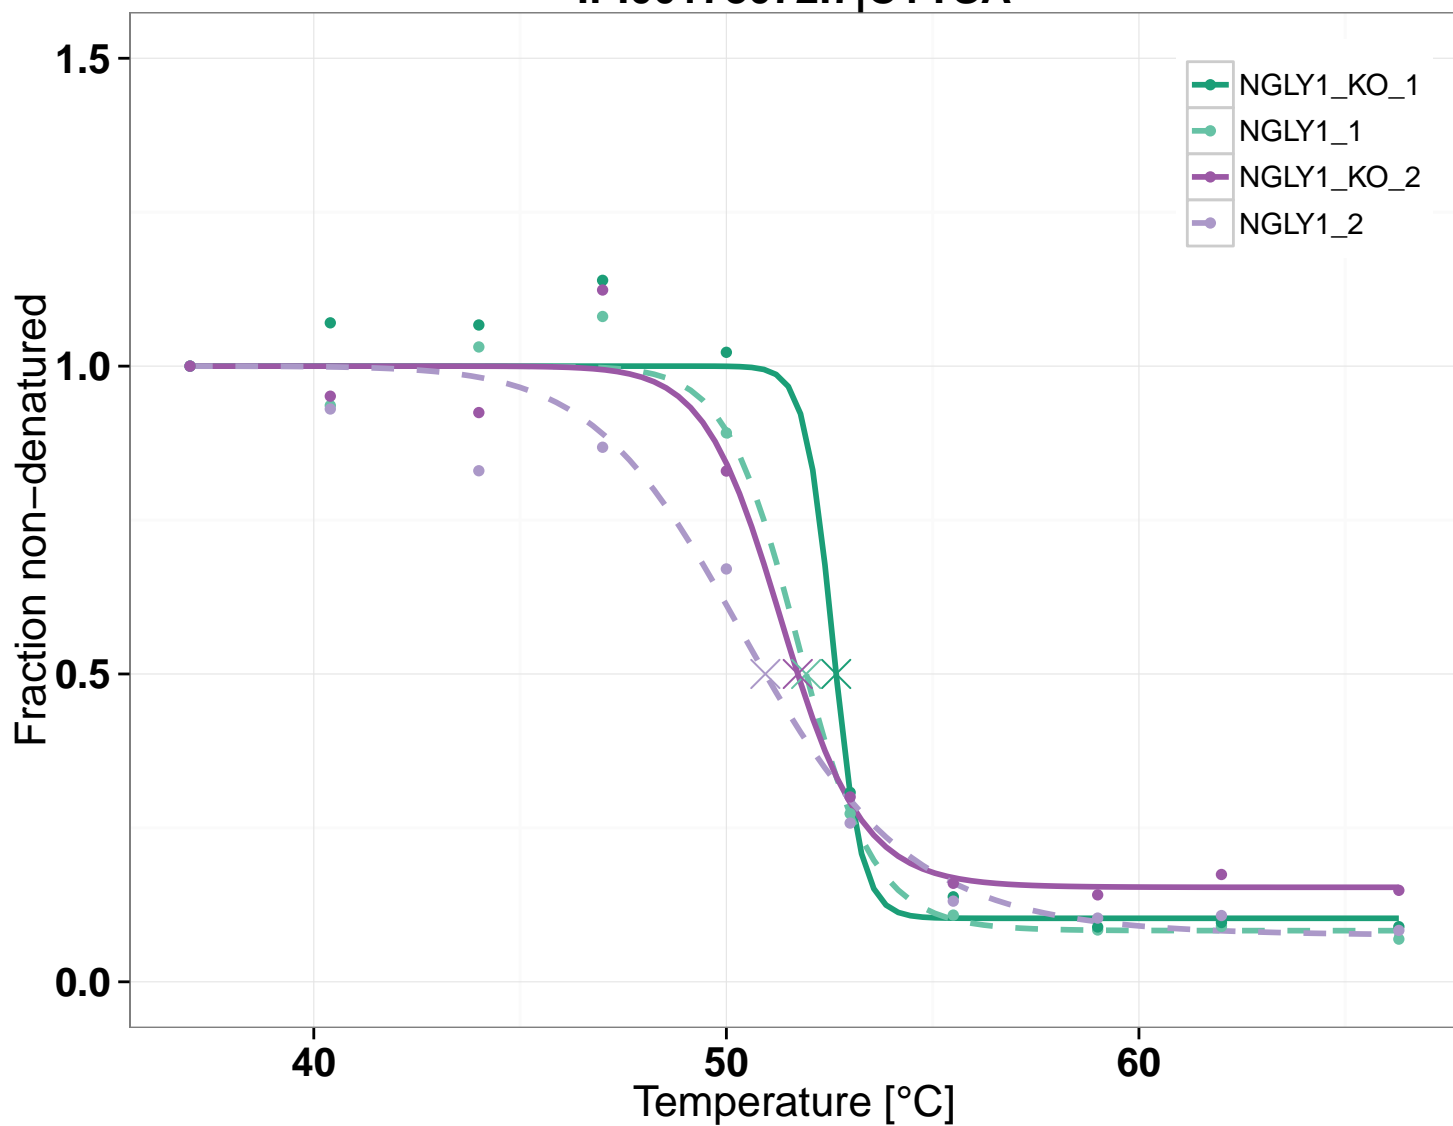

|            | meltPoint | slope | plateau | R2   |
|------------|-----------|-------|---------|------|
| NGLY1_KO_1 | 52.66     | -0.66 | 0.1     | 0.99 |
| NGLY1_1    | 51.93     | -0.26 | 0.08    | 0.99 |
| NGLY1_KO_2 | 51.73     | -0.22 | 0.15    | 0.98 |
| NGLY1_2    | 50.95     | -0.12 | 0.08    | 0.98 |

Supplement: Supplementary file 6506 [file 1]

IPI00398922.4|PPP1R14B

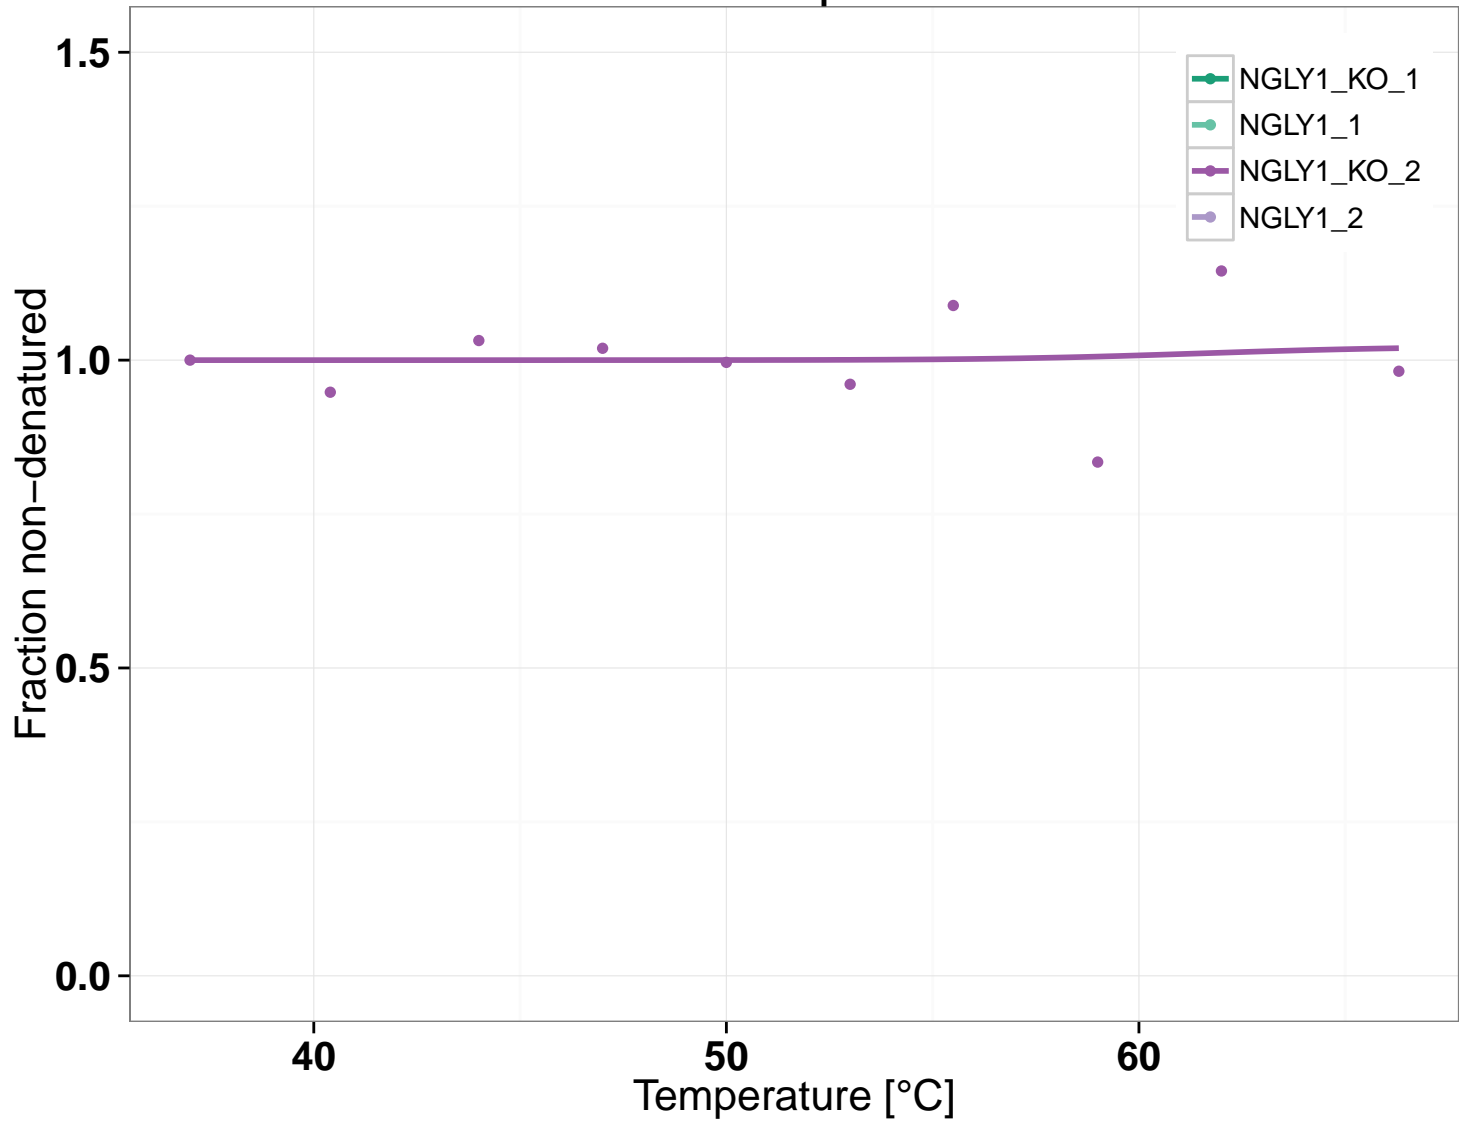

|            | meltPoint | slope  | plateau | R2   |
|------------|-----------|--------|---------|------|
| NGLY1_KO_1 | —         | —      | —       | —    |
| NGLY1_1    | —         | —      | —       | —    |
| NGLY1_KO_2 | —         | 0.0022 | 1.02    | 0.01 |
| NGLY1_2    | —         | —      | —       | —    |

Supplement: Supplementary file 6507 [file 1]

IPI00784612.3|USP42

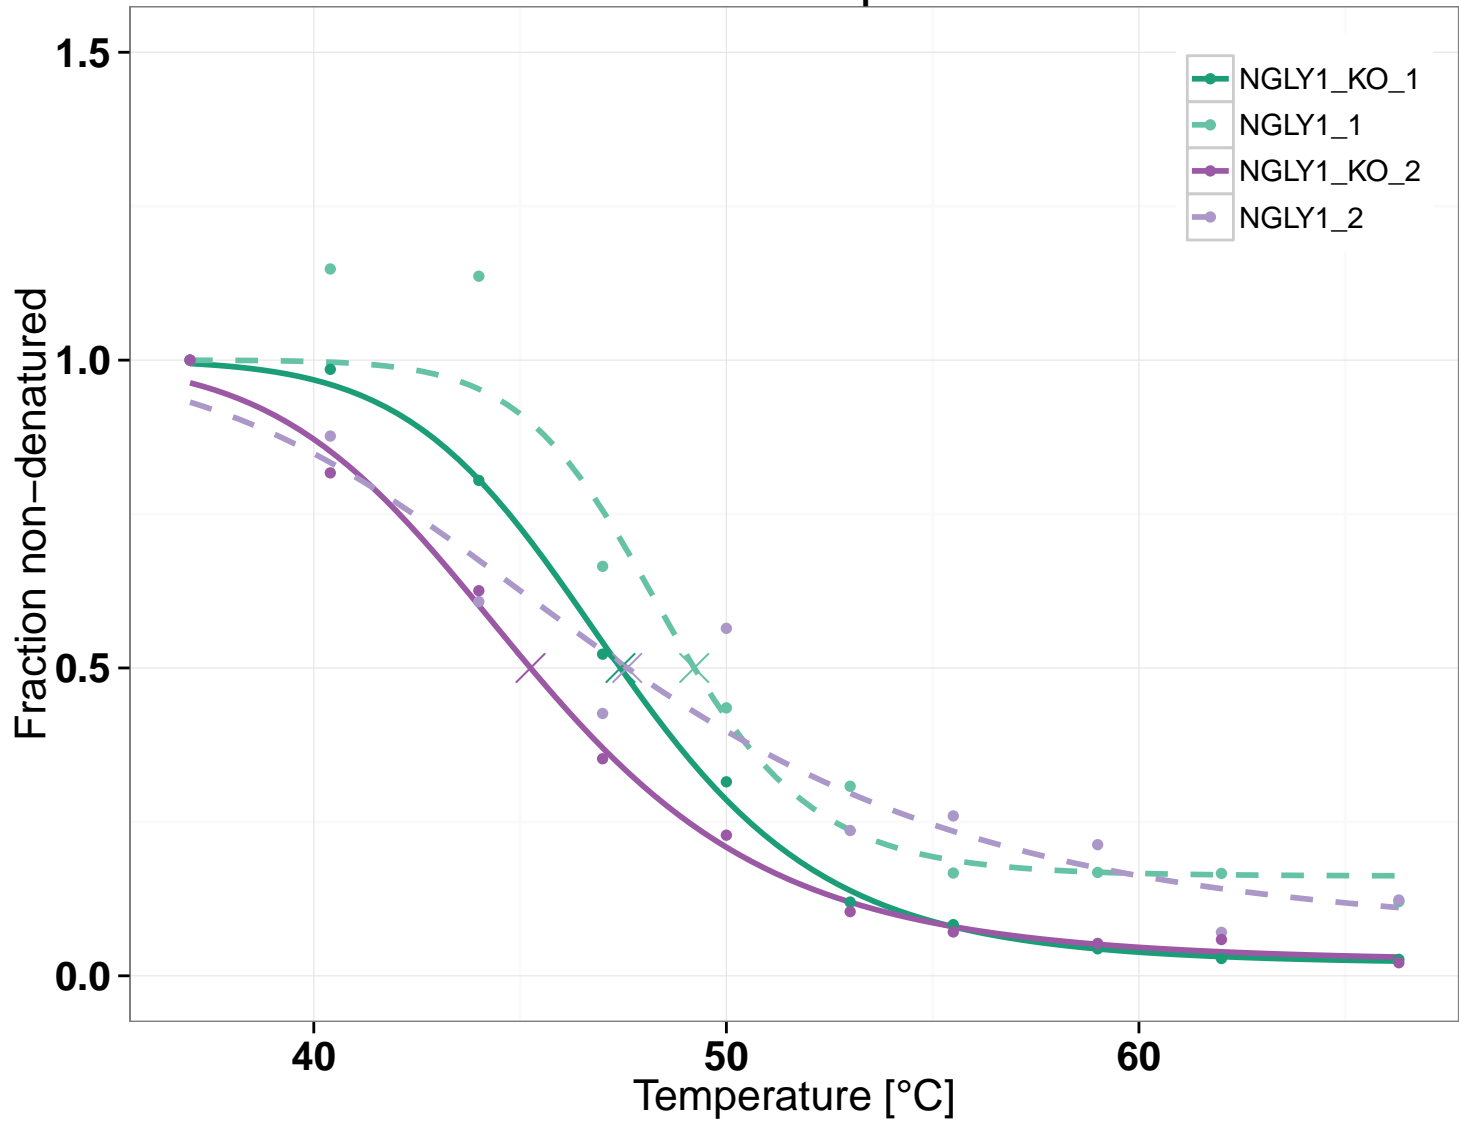

|            | meltPoint | slope  | plateau | R2   |
|------------|-----------|--------|---------|------|
| NGLY1_KO_1 | 47.43     | -0.097 | 0.02    | 1    |
| NGLY1_1    | 49.22     | -0.12  | 0.16    | 0.96 |
| NGLY1_KO_2 | 45.25     | -0.082 | 0.02    | 1    |
| NGLY1_2    | 47.6      | -0.05  | 0.05    | 0.93 |

Supplement: Supplementary file 6508 [file 1]

IPI00894461.2|HCG\_1745121

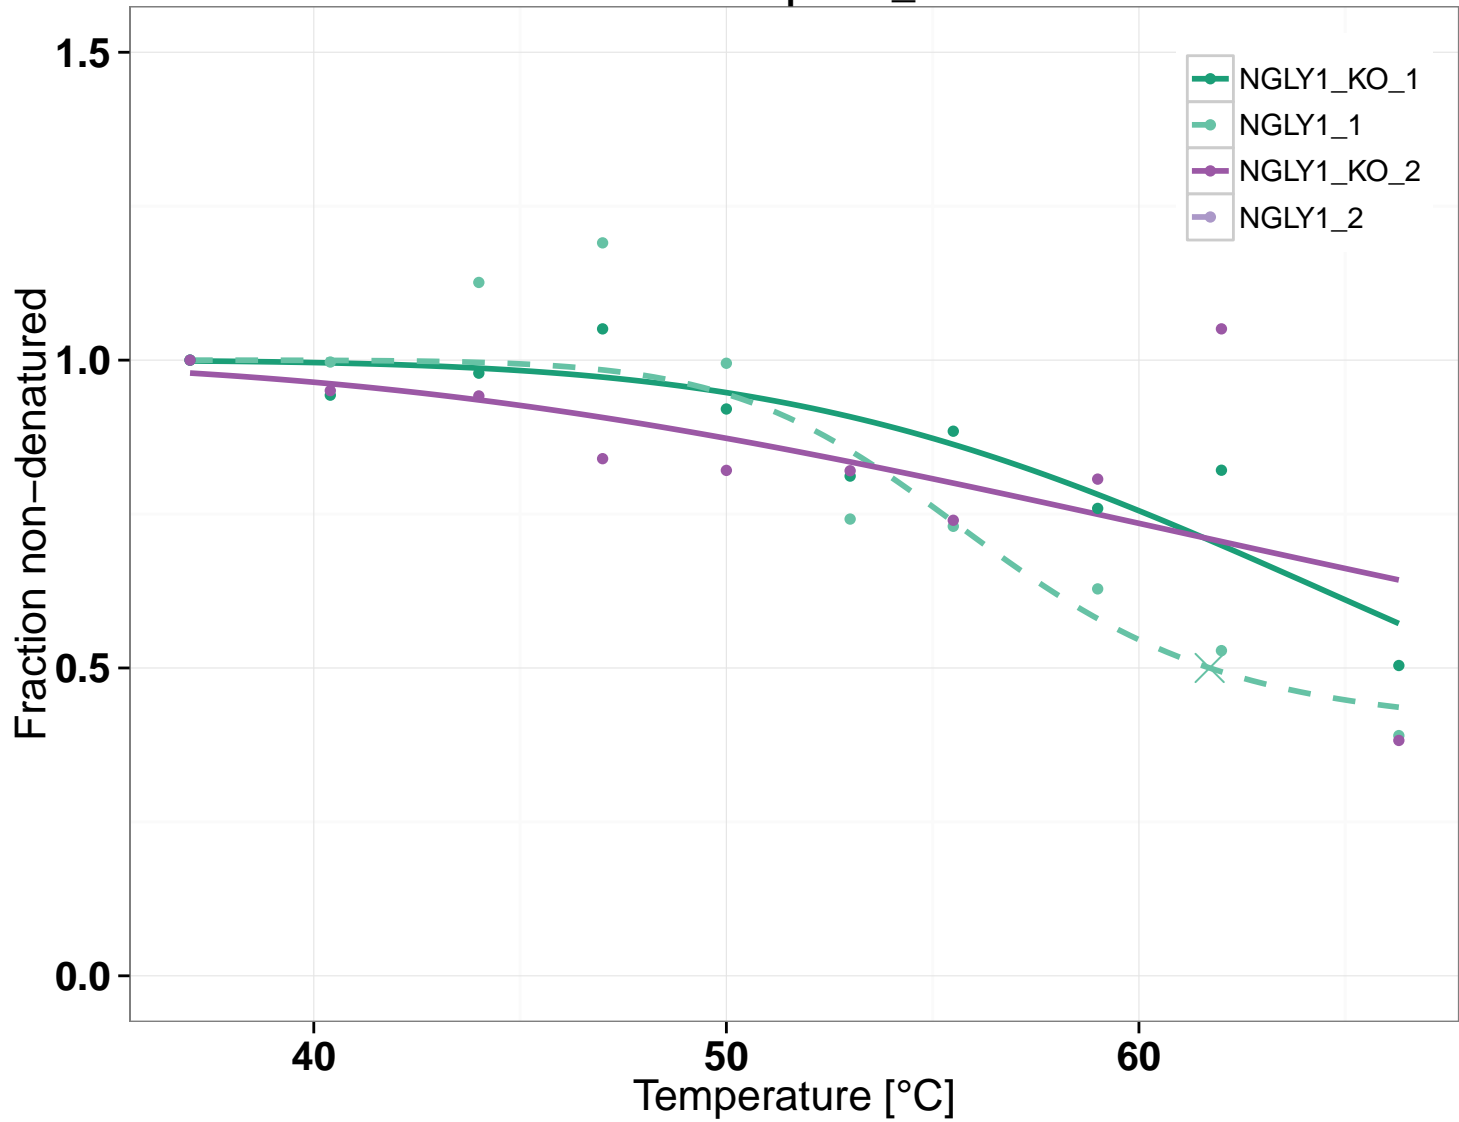

|            | meltPoint | slope  | plateau | R2   |
|------------|-----------|--------|---------|------|
| NGLY1_KO_1 | -         | -0.03  | 0       | 0.82 |
| NGLY1_1    | 61.71     | -0.049 | 0.4     | 0.88 |
| NGLY1_KO_2 | -         | -0.015 | 0       | 0.36 |
| NGLY1_2    | -         | -      | -       | -    |

Supplement: Supplementary file 6509 [file 1]

# IPI00062419.2|SDSL

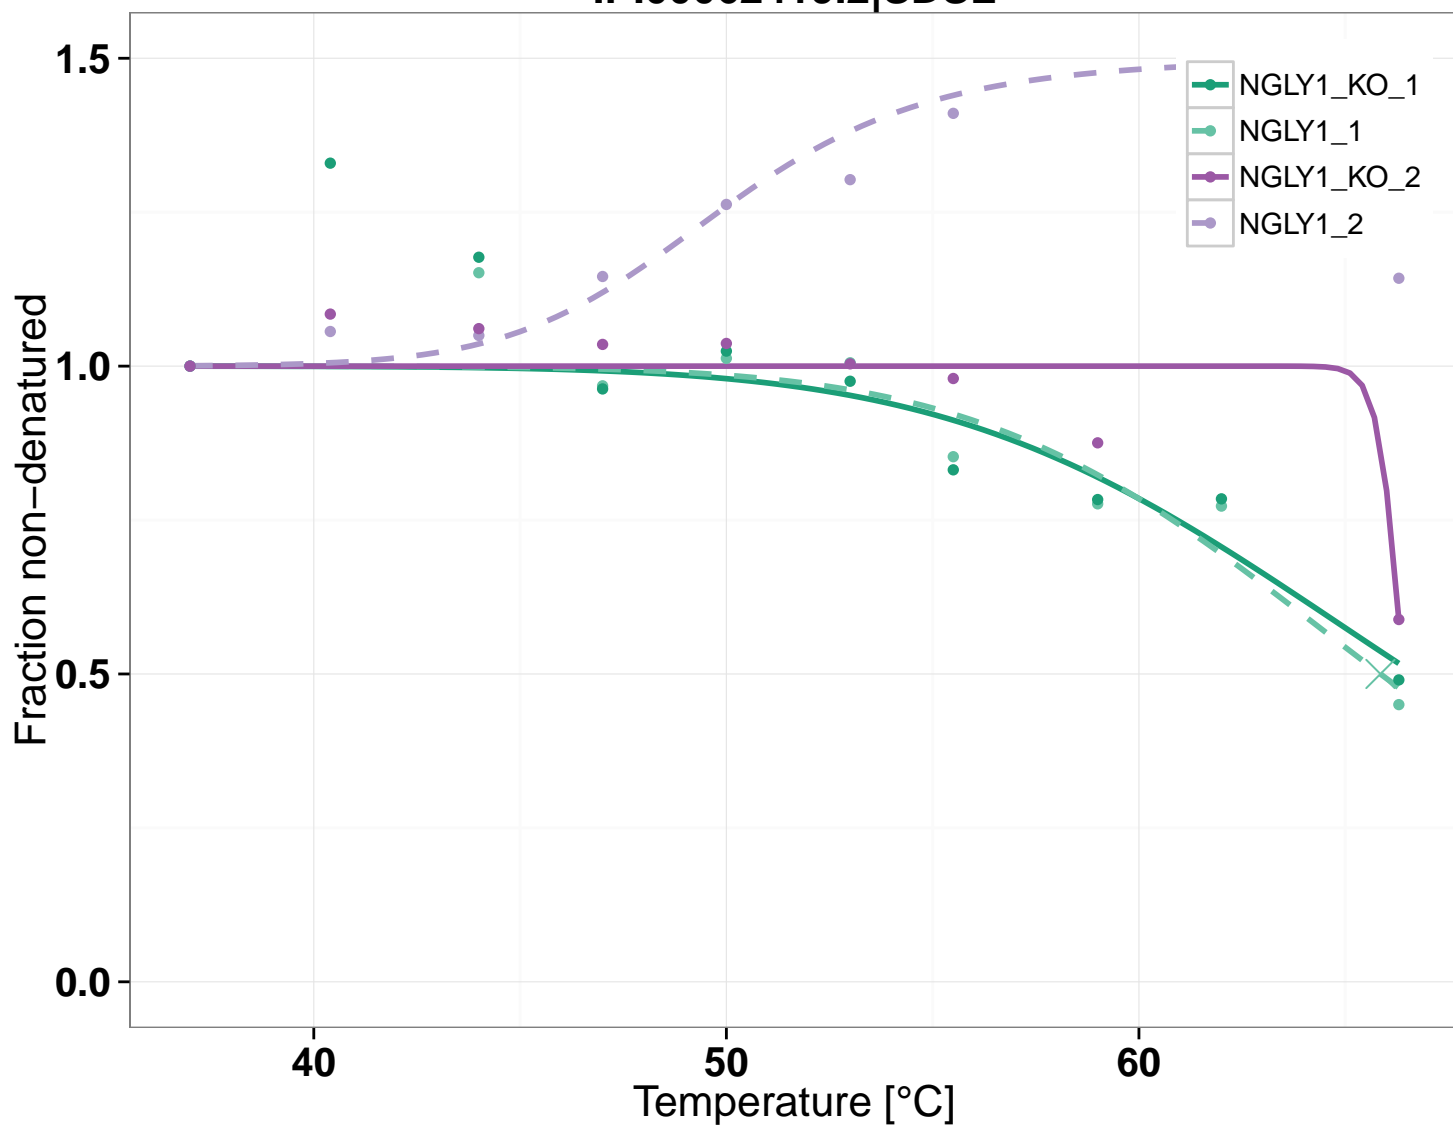

|            | meltPoint | slope  | plateau | R2   |
|------------|-----------|--------|---------|------|
| NGLY1_KO_1 | –         | –0.045 | 0       | 0.67 |
| NGLY1_1    | 65.85     | –0.051 | 0       | 0.54 |
| NGLY1_KO_2 | –         | –      | 0       | 0.72 |
| NGLY1_2    | –         | 0.049  | 1.5     | 0.56 |

Supplement: Supplementary file 6510 [file 1]

IPI00007049.1|MRPS18C

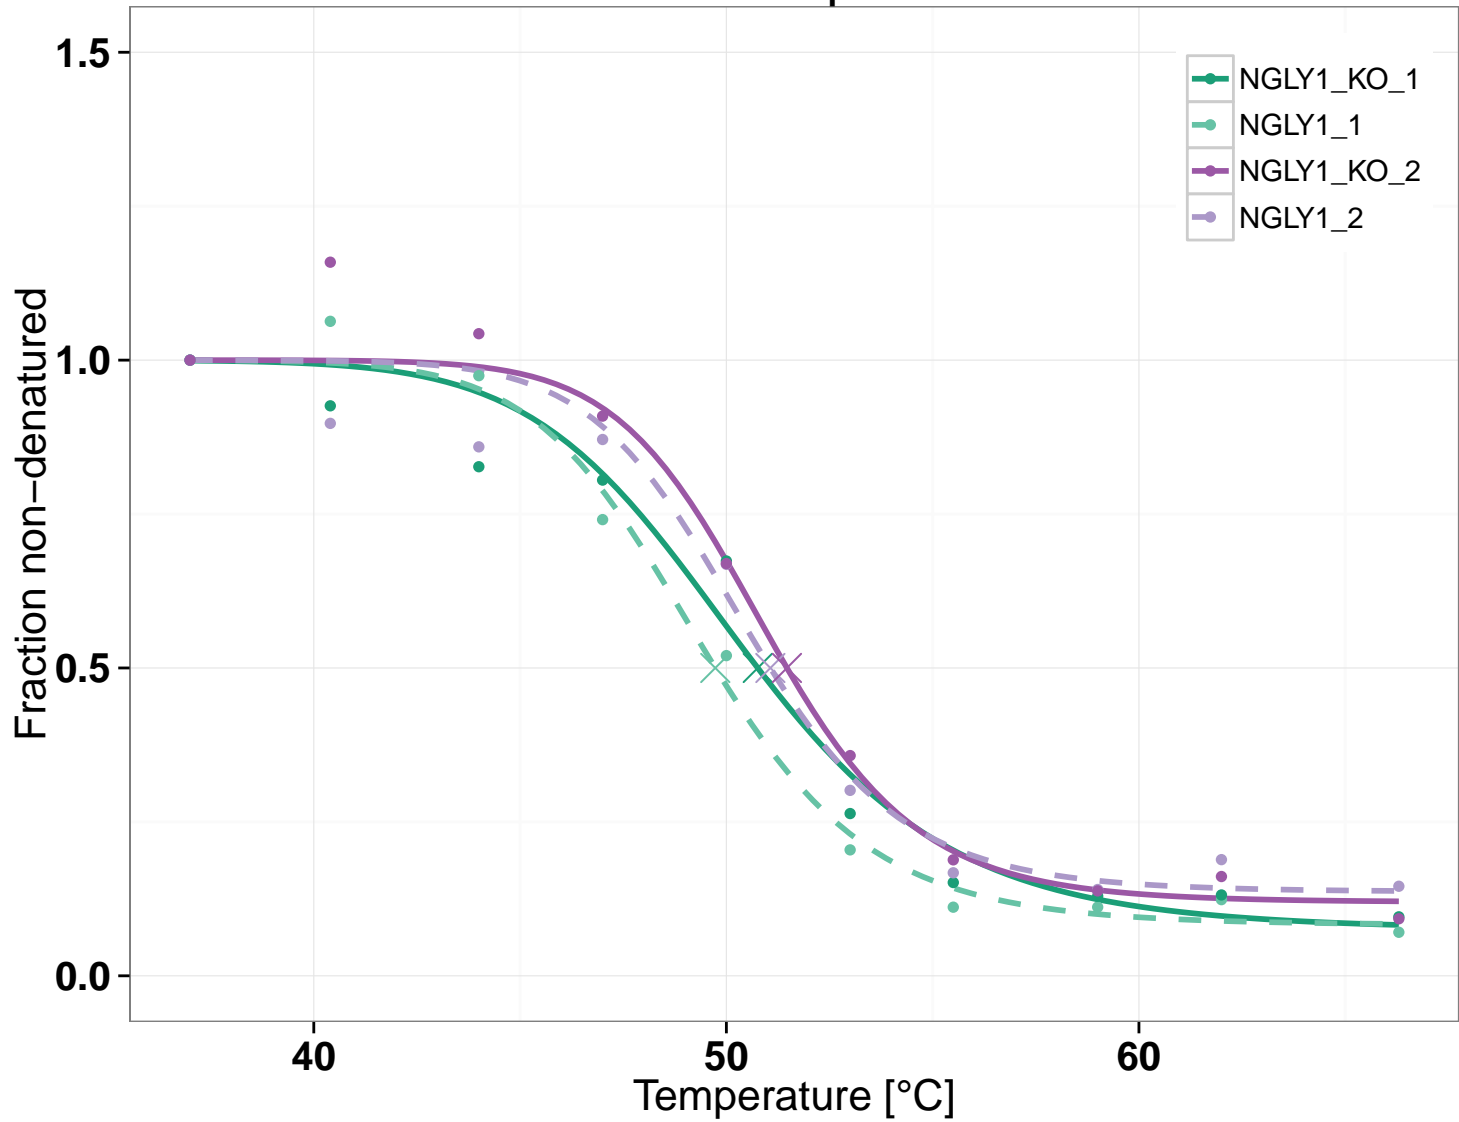

|            | meltPoint | slope  | plateau | R2   |
|------------|-----------|--------|---------|------|
| NGLY1_KO_1 | 50.76     | -0.091 | 0.07    | 0.97 |
| NGLY1_1    | 49.73     | -0.11  | 0.08    | 0.99 |
| NGLY1_KO_2 | 51.47     | -0.12  | 0.12    | 0.98 |
| NGLY1_2    | 51.07     | -0.11  | 0.14    | 0.97 |

Supplement: Supplementary file 6511 [file 1]

IPI00072534.2|UNC45A

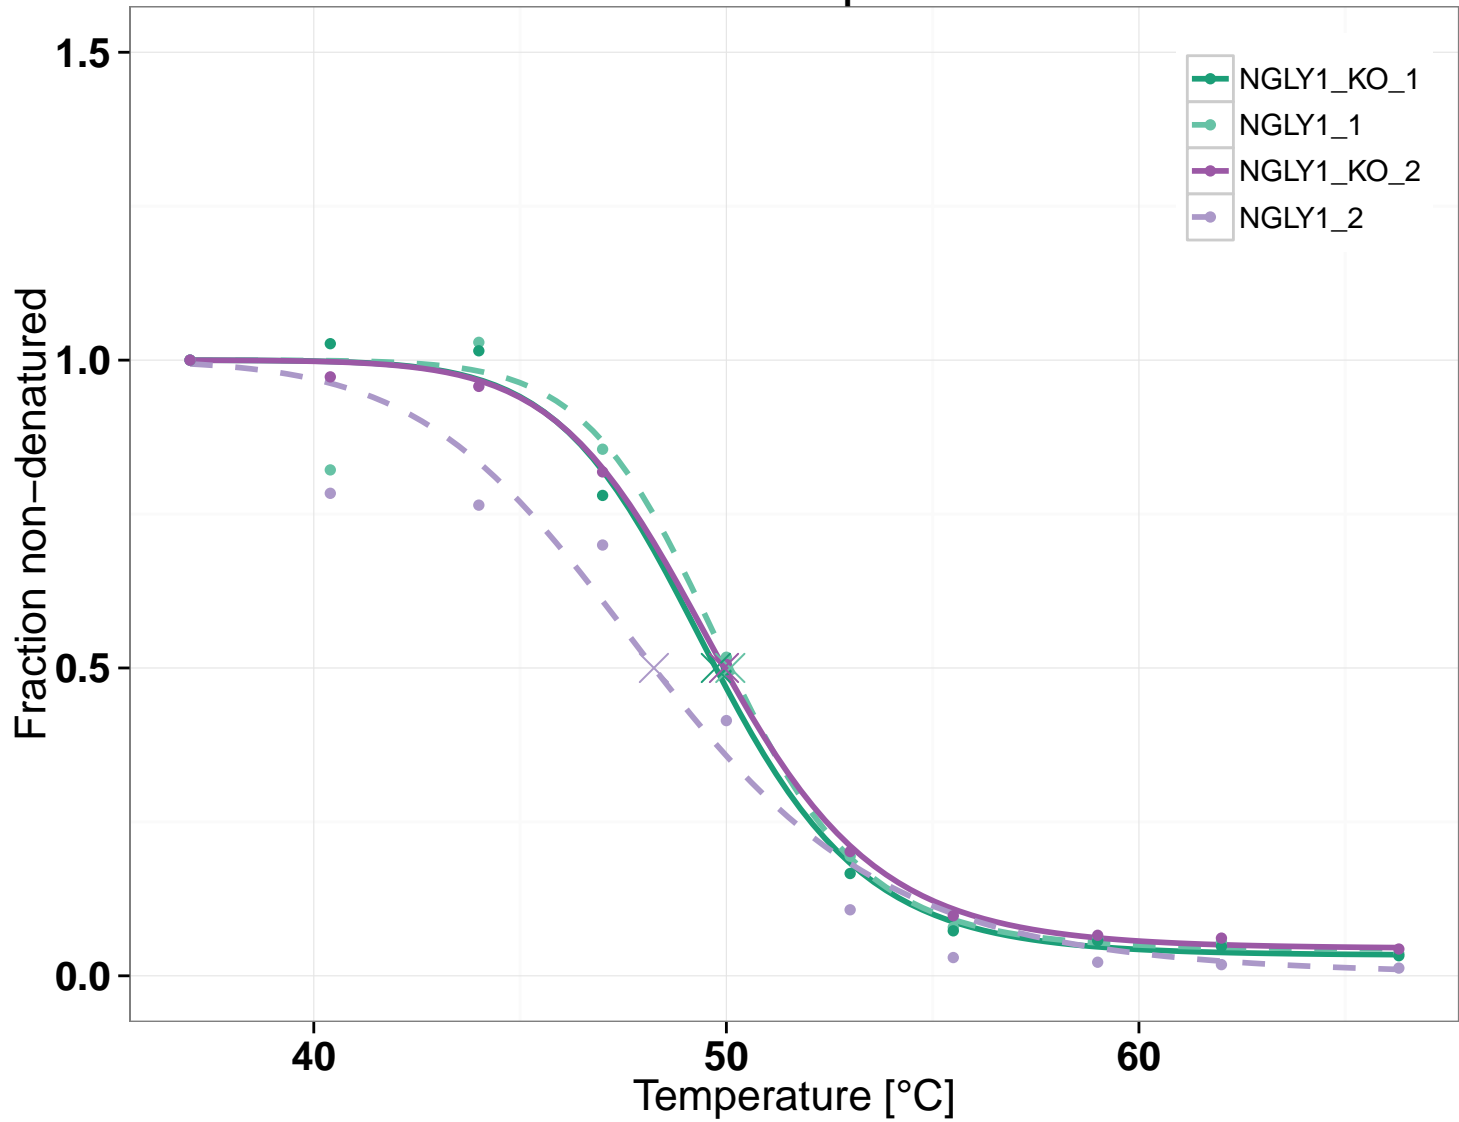

|            | meltPoint | slope  | plateau | R2   |
|------------|-----------|--------|---------|------|
| NGLY1_KO_1 | 49.74     | -0.13  | 0.03    | 1    |
| NGLY1_1    | 50.1      | -0.14  | 0.04    | 0.98 |
| NGLY1_KO_2 | 49.94     | -0.12  | 0.04    | 1    |
| NGLY1_2    | 48.24     | -0.088 | 0       | 0.96 |

Supplement: Supplementary file 6512 [file 1]

IPI00916491.1|KIAA1545

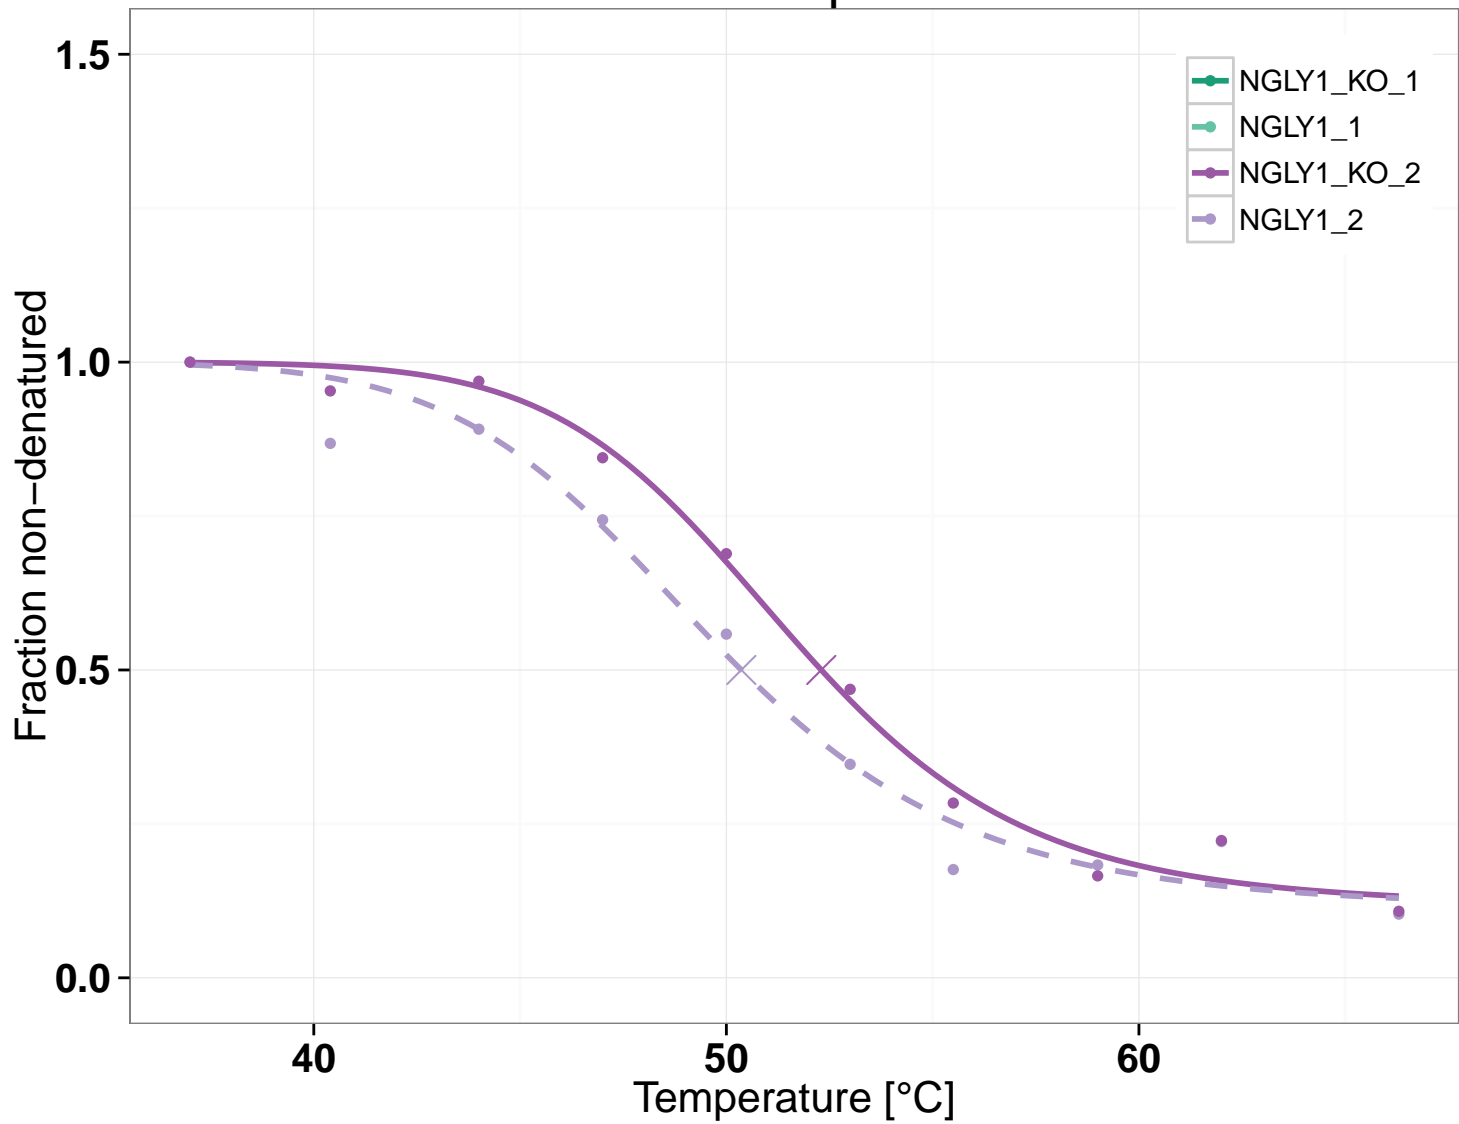

|            | meltPoint | slope  | plateau | R2   |
|------------|-----------|--------|---------|------|
| NGLY1_KO_1 | —         | —      | —       | —    |
| NGLY1_1    | —         | —      | —       | —    |
| NGLY1_KO_2 | 52.3      | -0.077 | 0.12    | 0.99 |
| NGLY1_2    | 50.36     | -0.071 | 0.11    | 0.98 |

Supplement: Supplementary file 6513 [file 1]

# IPI00017802.1|AUH

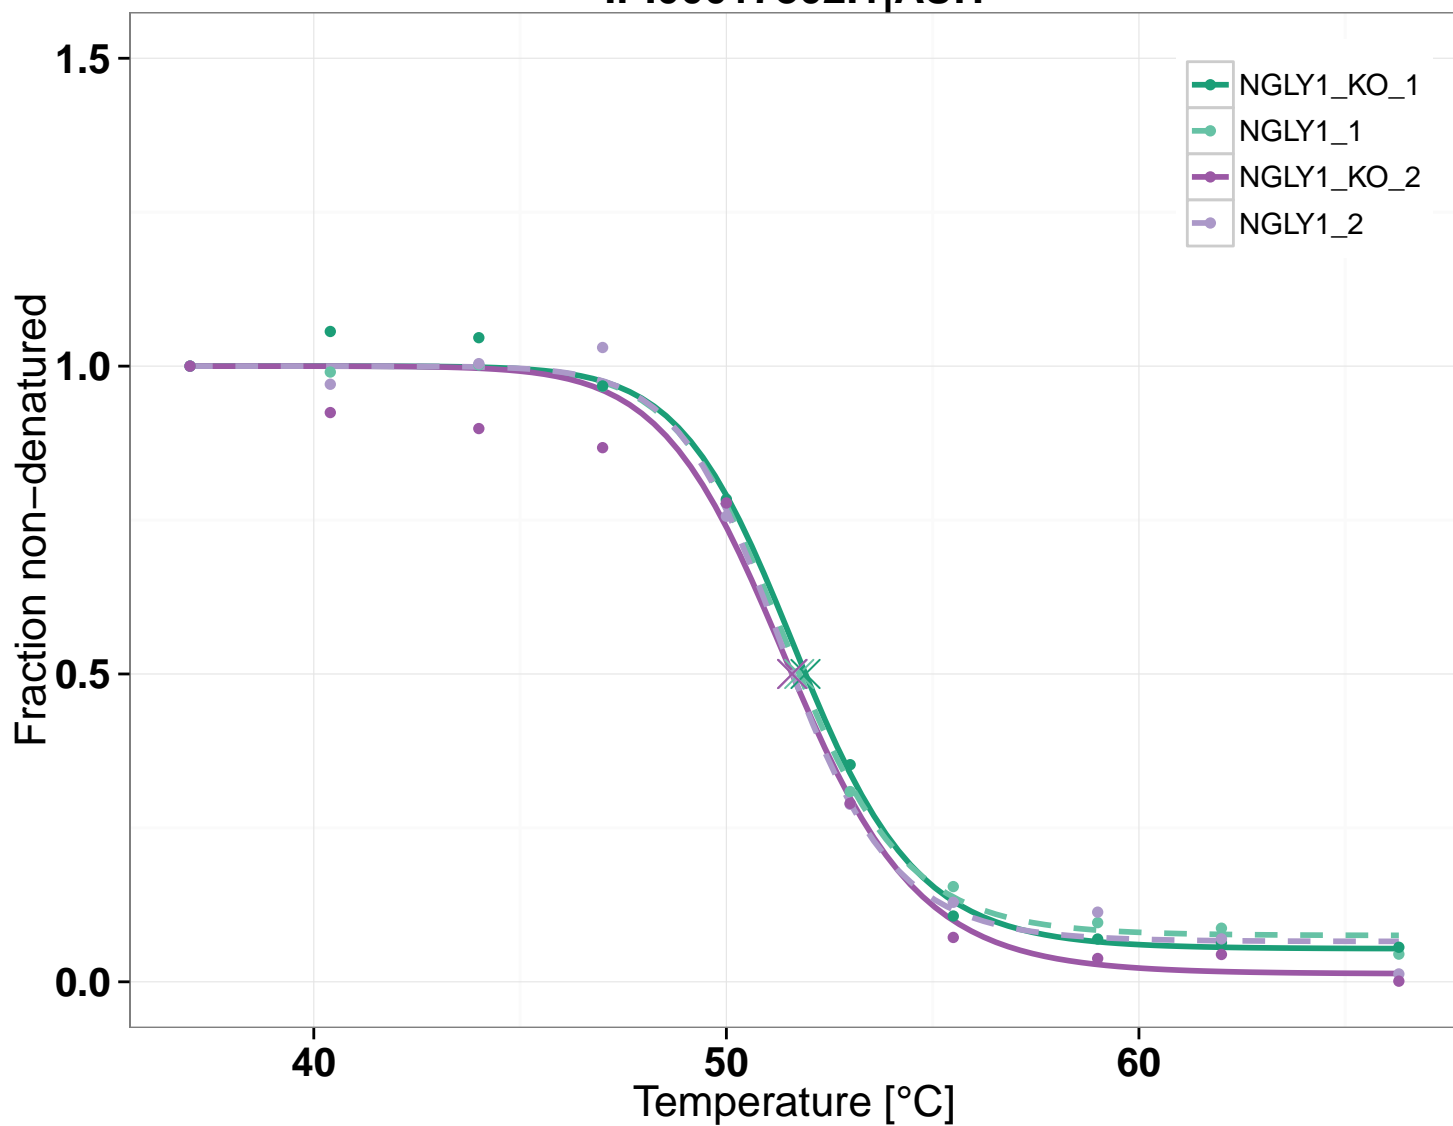

|            | meltPoint | slope | plateau | R2   |
|------------|-----------|-------|---------|------|
| NGLY1_KO_1 | 51.92     | -0.16 | 0.05    | 1    |
| NGLY1_1    | 51.77     | -0.17 | 0.08    | 1    |
| NGLY1_KO_2 | 51.59     | -0.16 | 0.01    | 0.98 |
| NGLY1_2    | 51.61     | -0.18 | 0.07    | 1    |

Supplement: Supplementary file 6514 [file 1]

IPI00220362.5|HSPE1

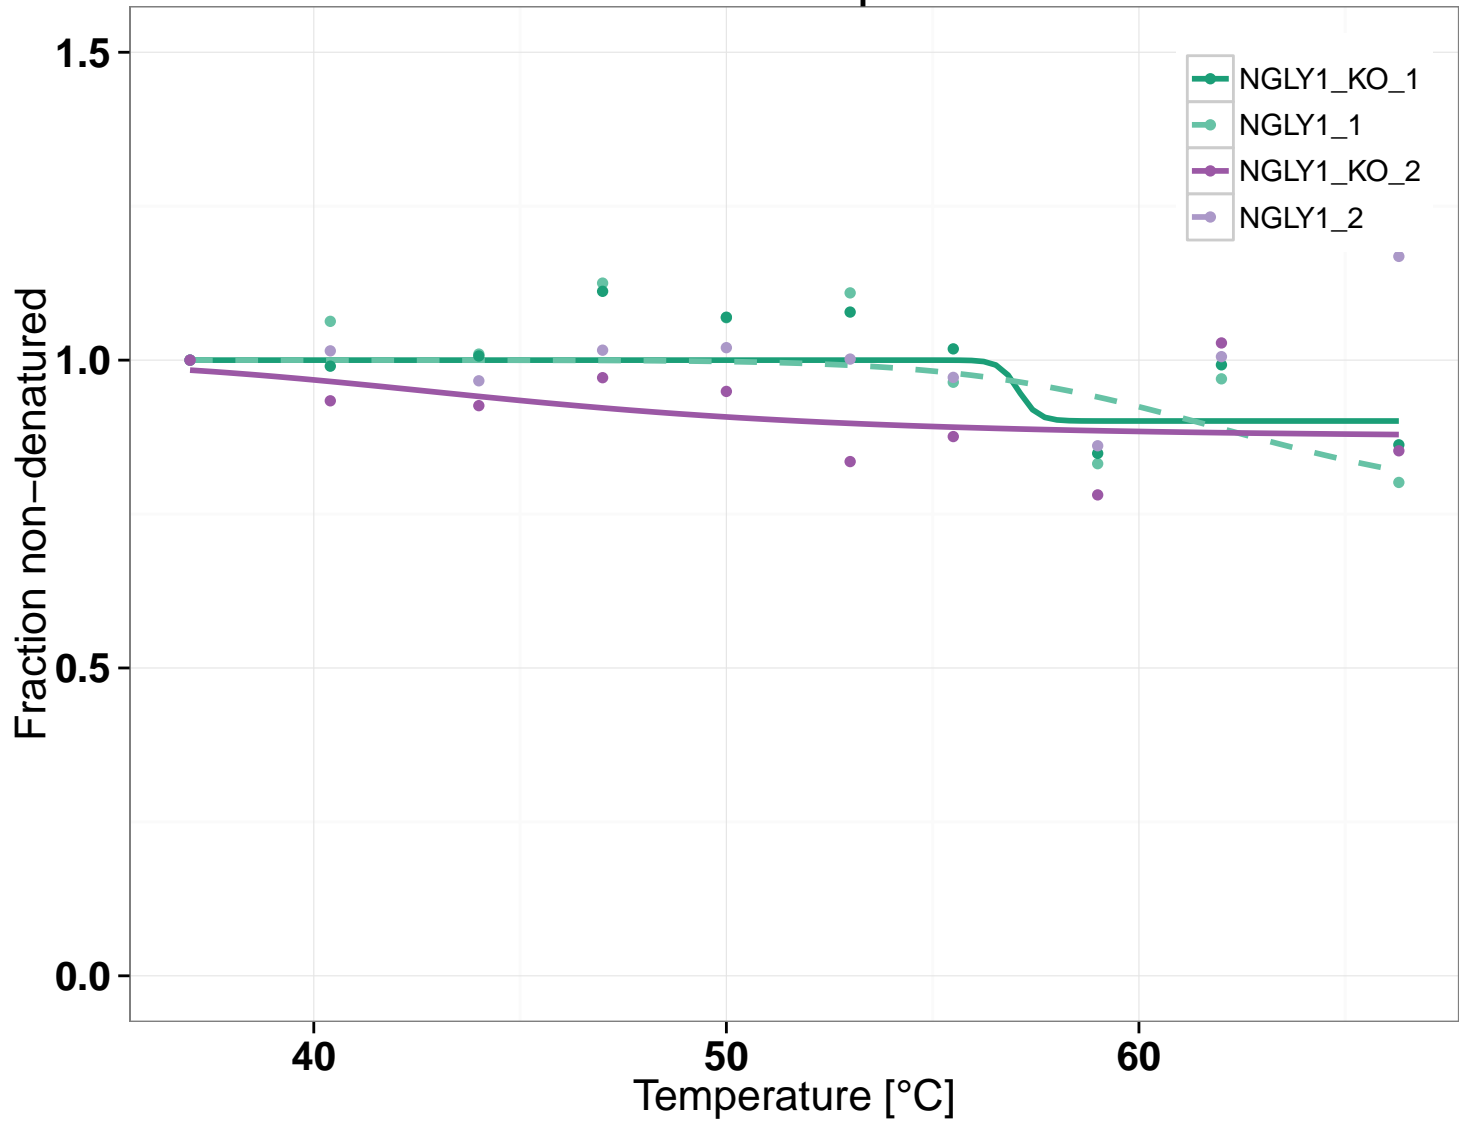

|            | meltPoint | slope   | plateau | R2   |
|------------|-----------|---------|---------|------|
| NGLY1_KO_1 | -         | -0.11   | 0.9     | 0.45 |
| NGLY1_1    | -         | -0.018  | 0.76    | 0.46 |
| NGLY1_KO_2 | -         | -0.0069 | 0.87    | 0.22 |
| NGLY1_2    | -         | -       | -       | -    |

Supplement: Supplementary file 6515 [file 1]

# IPI00873223.2|UGP2

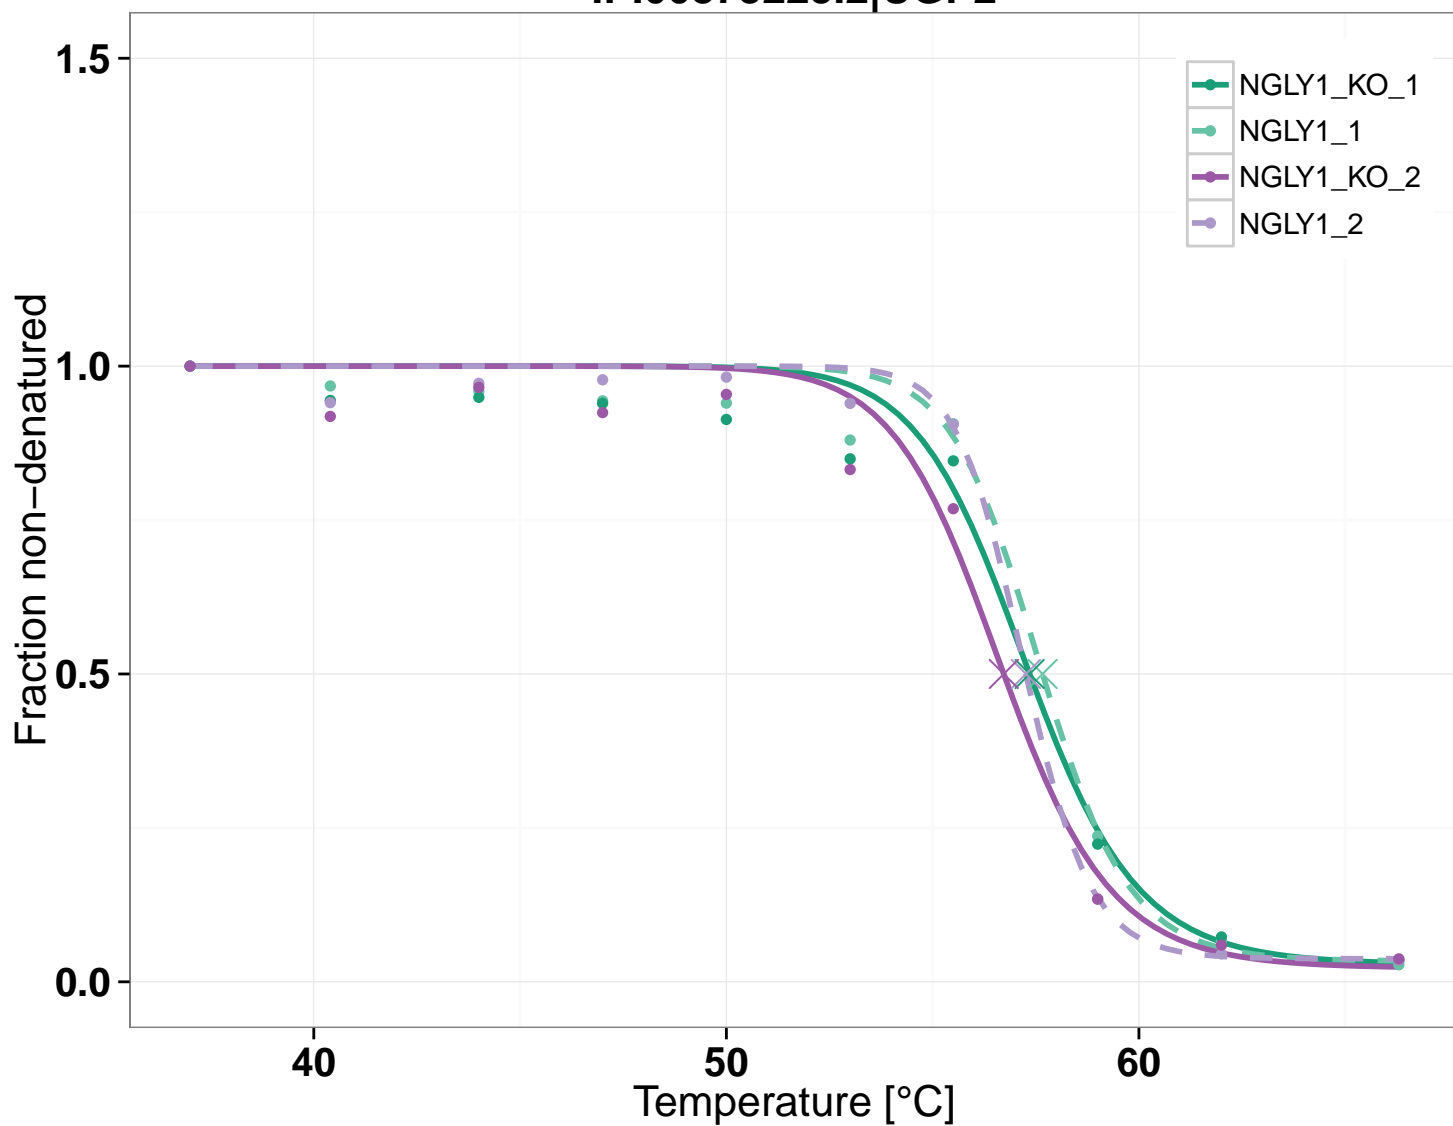

|            | meltpoint | slope | plateau | R2   |
|------------|-----------|-------|---------|------|
| NGLY1_KO_1 | 57.35     | -0.18 | 0.03    | 0.98 |
| NGLY1_1    | 57.66     | -0.22 | 0.03    | 0.98 |
| NGLY1_KO_2 | 56.72     | -0.18 | 0.02    | 0.98 |
| NGLY1_2    | 57.26     | -0.3  | 0.04    | 0.99 |

Supplement: Supplementary file 6516 [file 1]

IPI00162563.5|RNF40

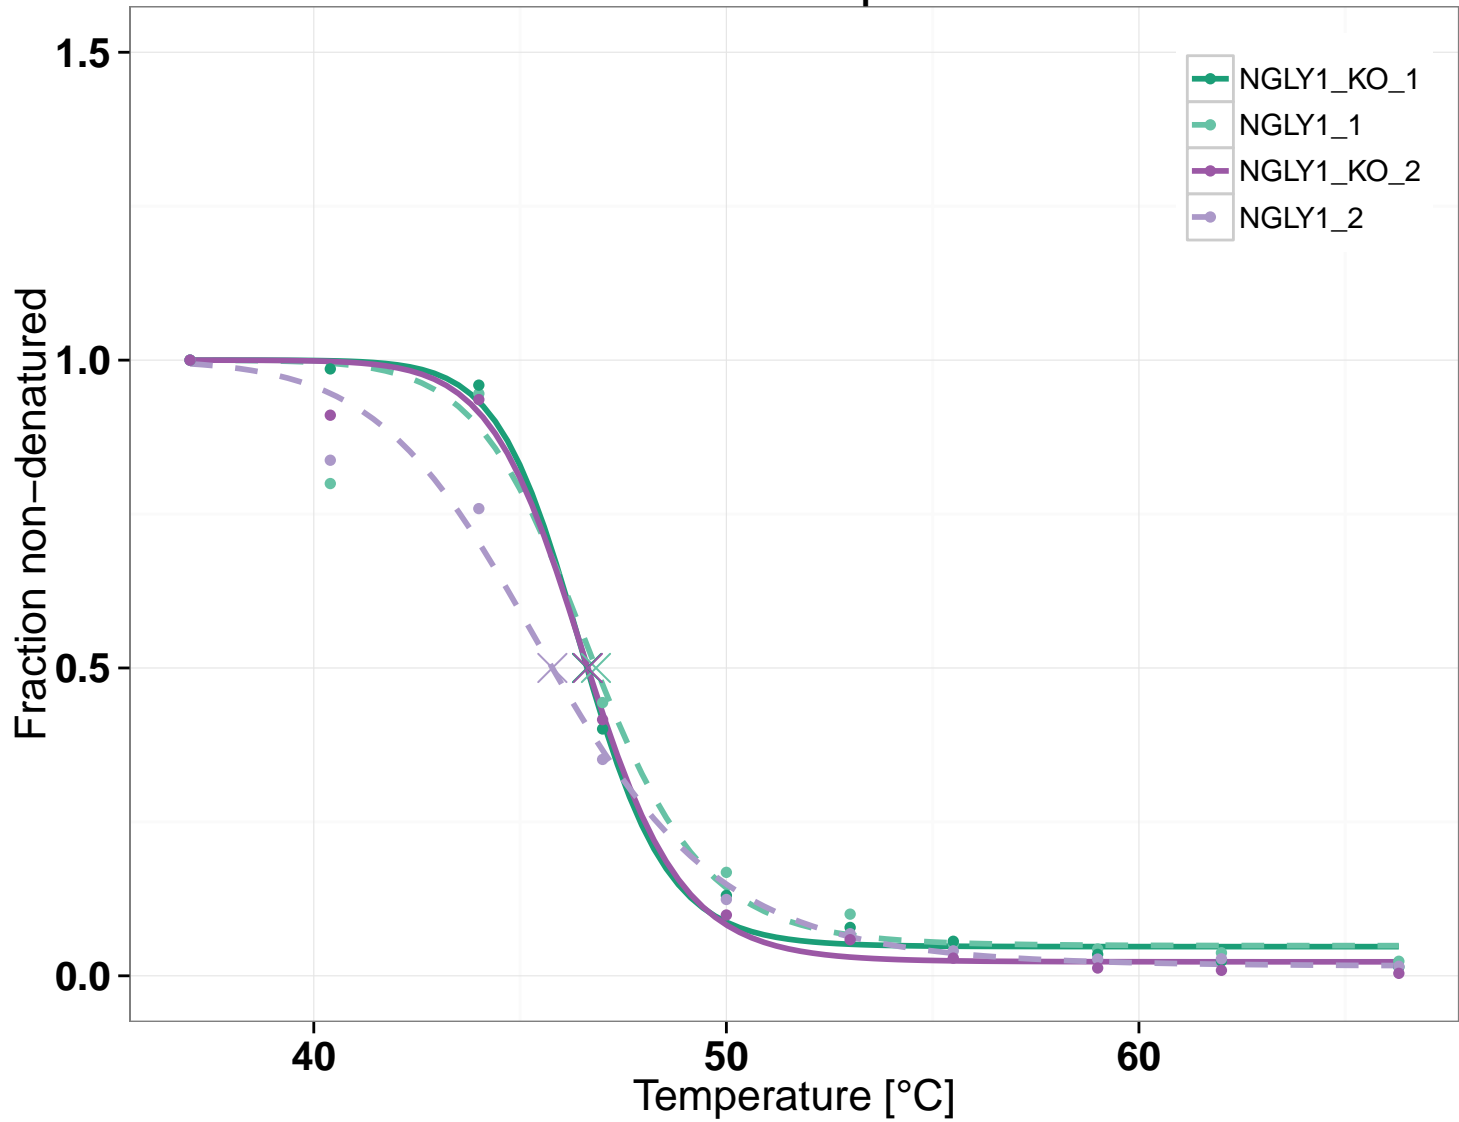

|            | meltPoint | slope | plateau | R2   |
|------------|-----------|-------|---------|------|
| NGLY1_KO_1 | 46.62     | -0.23 | 0.05    | 1    |
| NGLY1_1    | 46.84     | -0.17 | 0.05    | 0.97 |
| NGLY1_KO_2 | 46.64     | -0.21 | 0.02    | 0.99 |
| NGLY1_2    | 45.78     | -0.12 | 0.02    | 0.99 |

Supplement: Supplementary file 6517 [file 1]

IPI00300789.1|STAU2

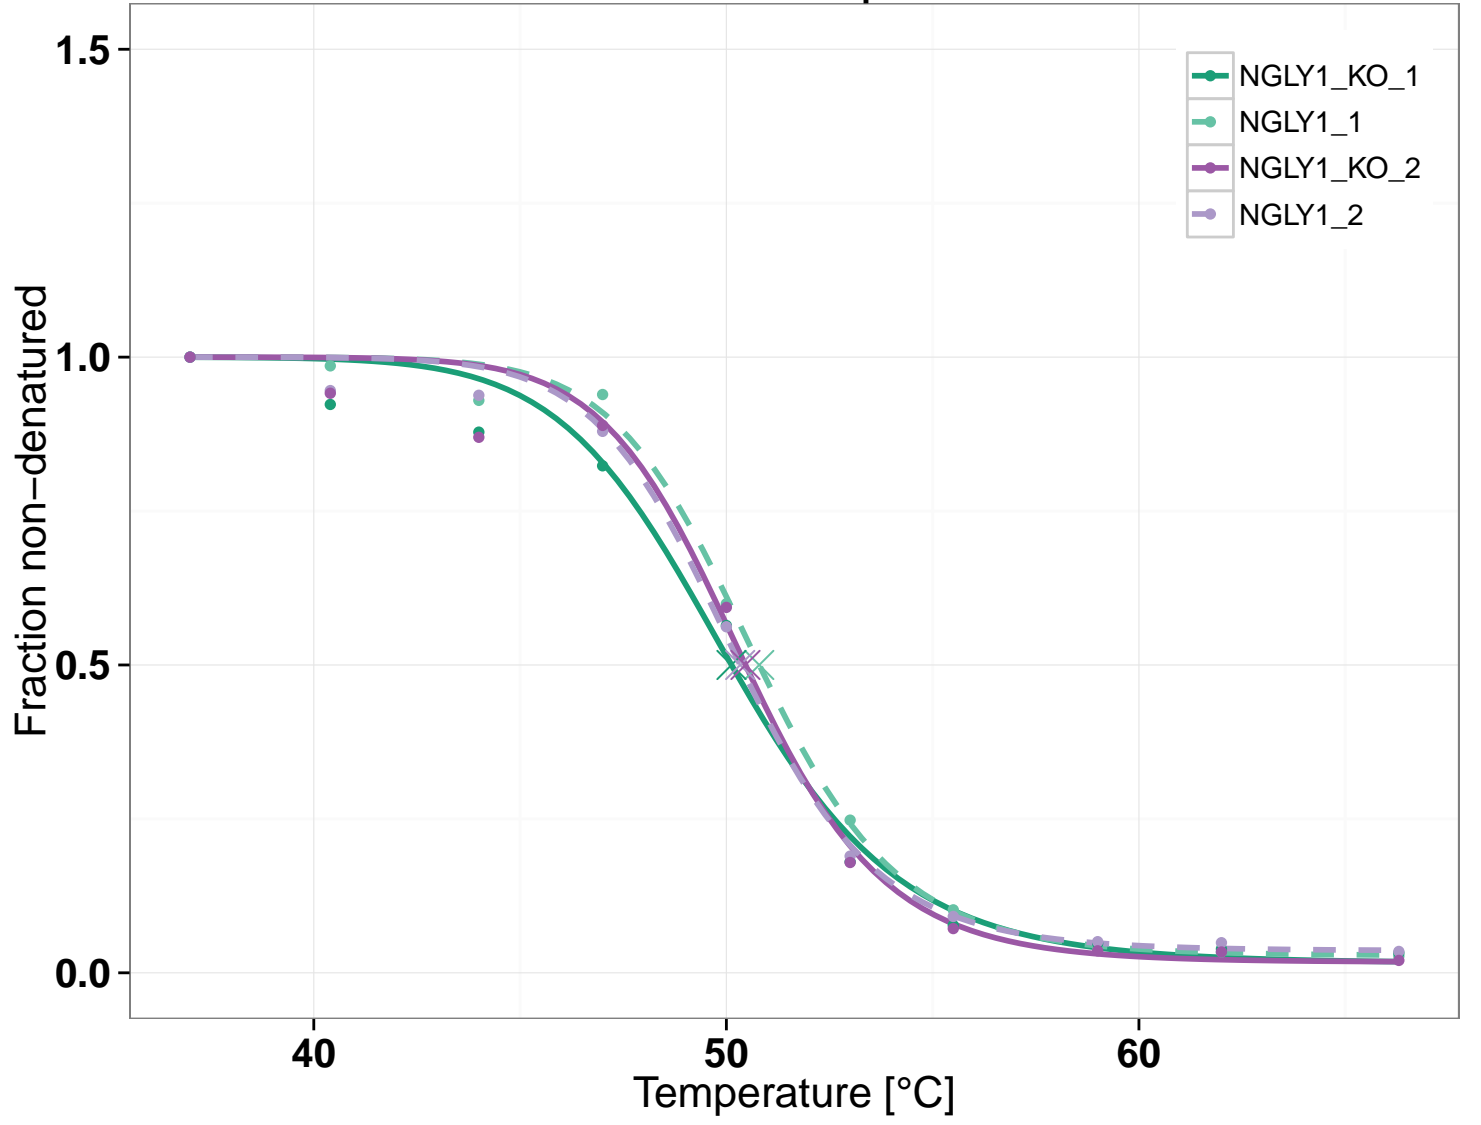

|            | meltPoint | slope | plateau | R2   |
|------------|-----------|-------|---------|------|
| NGLY1_KO_1 | 50.12     | -0.12 | 0.02    | 0.99 |
| NGLY1_1    | 50.8      | -0.14 | 0.03    | 1    |
| NGLY1_KO_2 | 50.46     | -0.14 | 0.02    | 0.99 |
| NGLY1_2    | 50.34     | -0.14 | 0.04    | 1    |

Supplement: Supplementary file 6518 [file 1]

IPI00027248.4|TUSC2

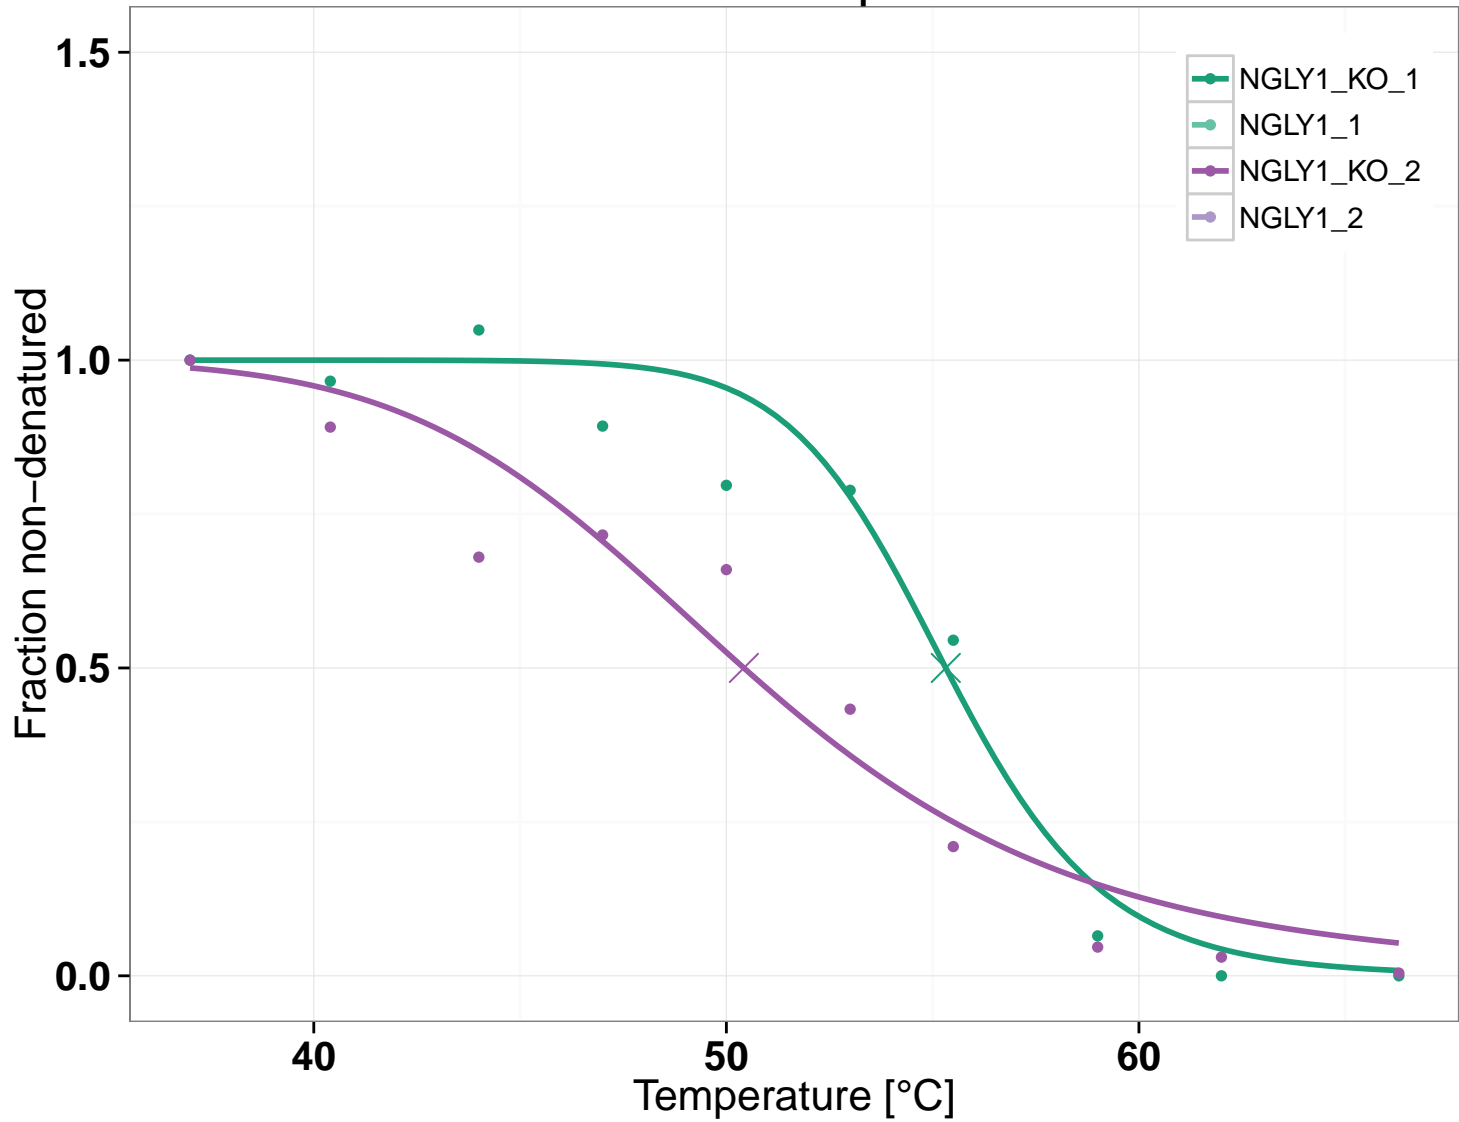

|            | meltPoint | slope  | plateau | R2   |
|------------|-----------|--------|---------|------|
| NGLY1_KO_1 | 55.32     | -0.13  | 0       | 0.97 |
| NGLY1_1    | -         | -      | -       | -    |
| NGLY1_KO_2 | 50.42     | -0.061 | 0       | 0.94 |
| NGLY1_2    | -         | -      | -       | -    |

Supplement: Supplementary file 6519 [file 1]

IPI00847504.1|PLCL2

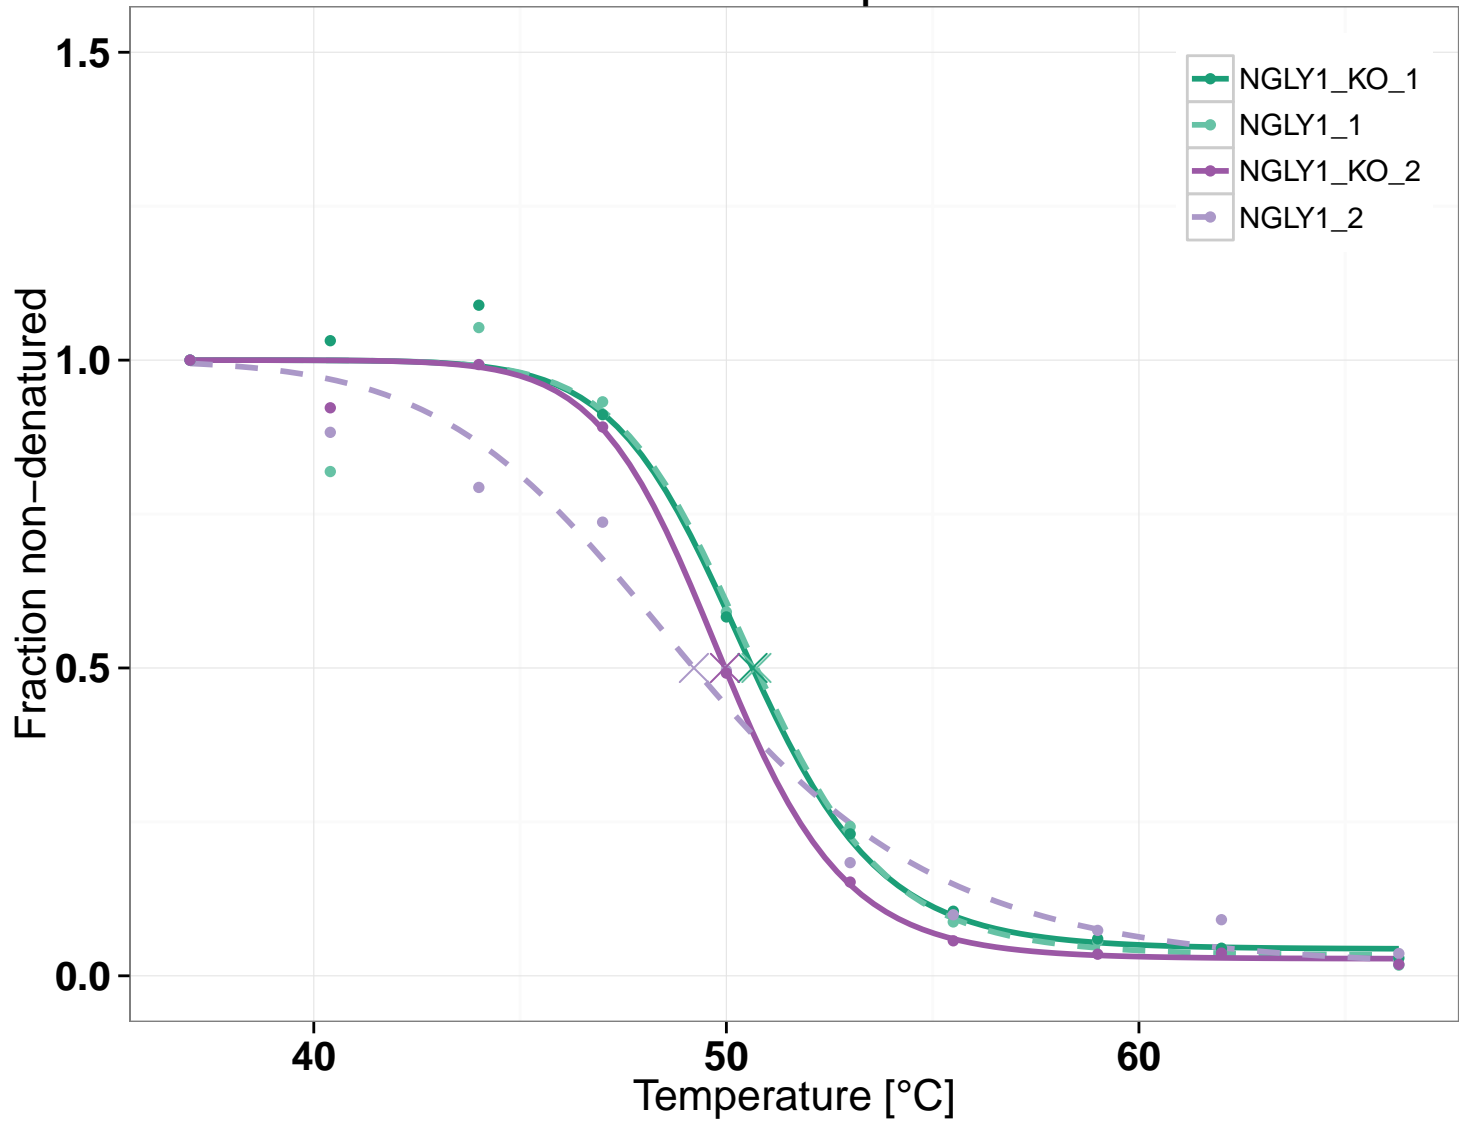

|            | meltPoint | slope  | plateau | R2   |
|------------|-----------|--------|---------|------|
| NGLY1_KO_1 | 50.63     | -0.15  | 0.04    | 0.99 |
| NGLY1_1    | 50.73     | -0.15  | 0.03    | 0.98 |
| NGLY1_KO_2 | 49.97     | -0.16  | 0.03    | 1    |
| NGLY1_2    | 49.21     | -0.081 | 0.01    | 0.98 |

Supplement: Supplementary file 6520 [file 1]

IPI00917323.1|B4YC28\_HUMAN

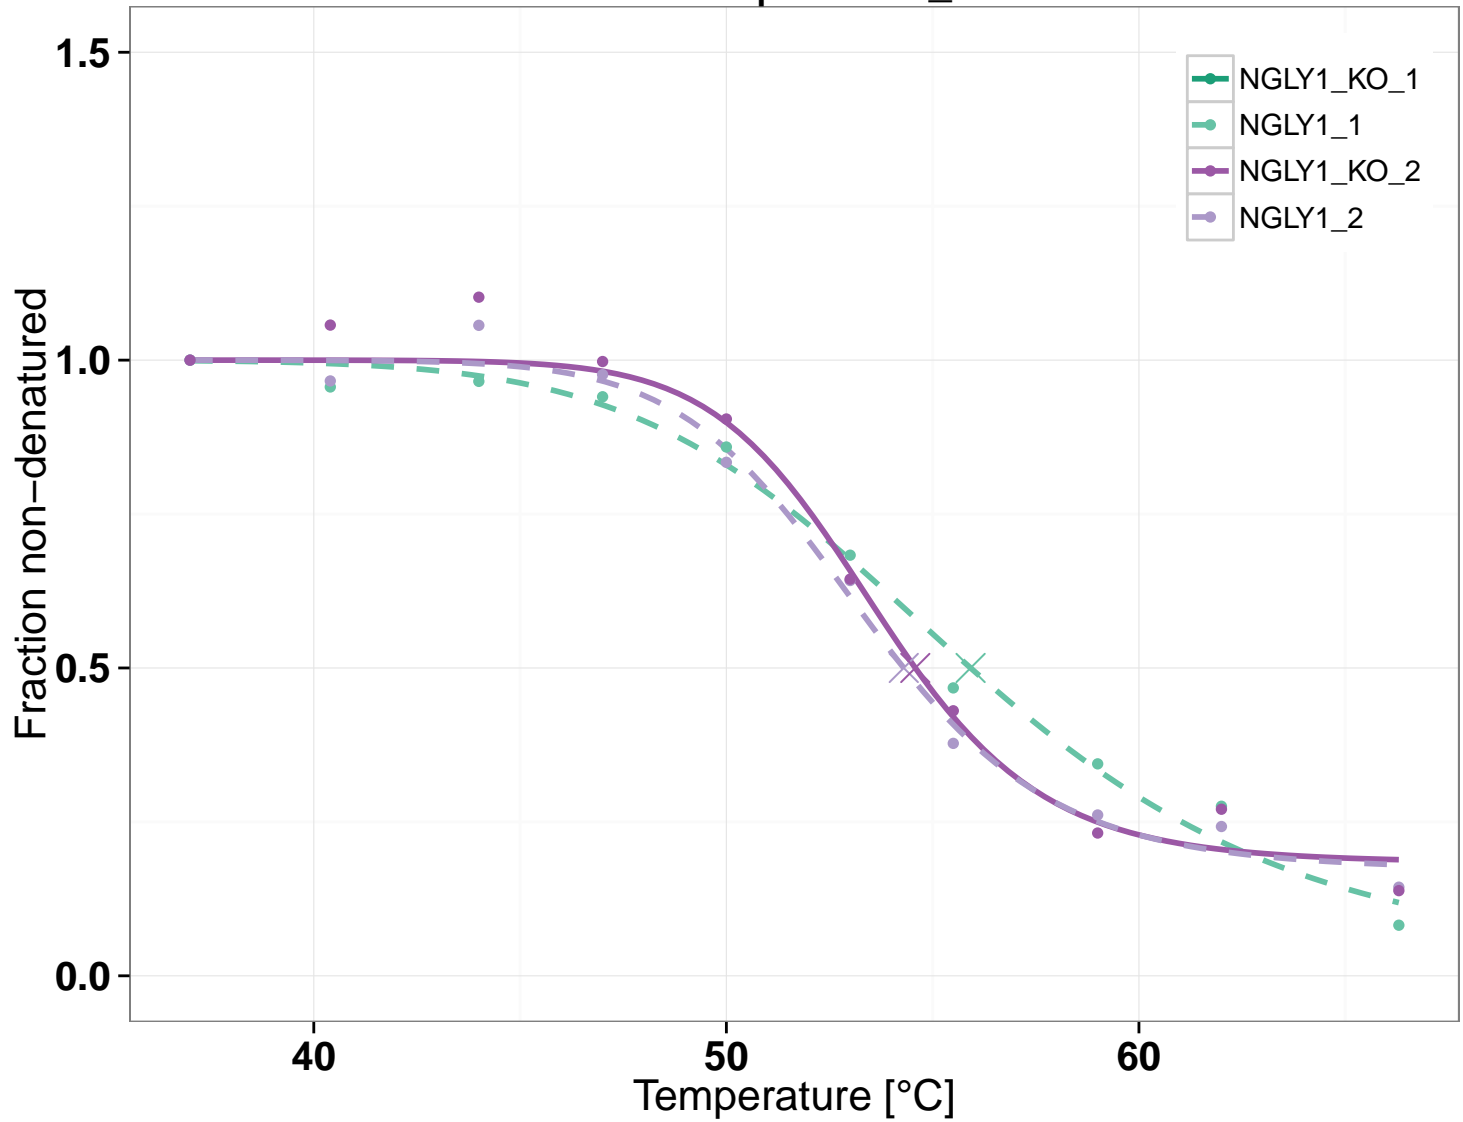

|            | meltPoint | slope  | plateau | R2   |
|------------|-----------|--------|---------|------|
| NGLY1_KO_1 | -         | -      | -       | -    |
| NGLY1_1    | 55.92     | -0.061 | 0.02    | 0.99 |
| NGLY1_KO_2 | 54.58     | -0.1   | 0.18    | 0.98 |
| NGLY1_2    | 54.3      | -0.092 | 0.17    | 0.99 |

Supplement: Supplementary file 6521 [file 1]

IPI00886905.1|RP11-345P4 4

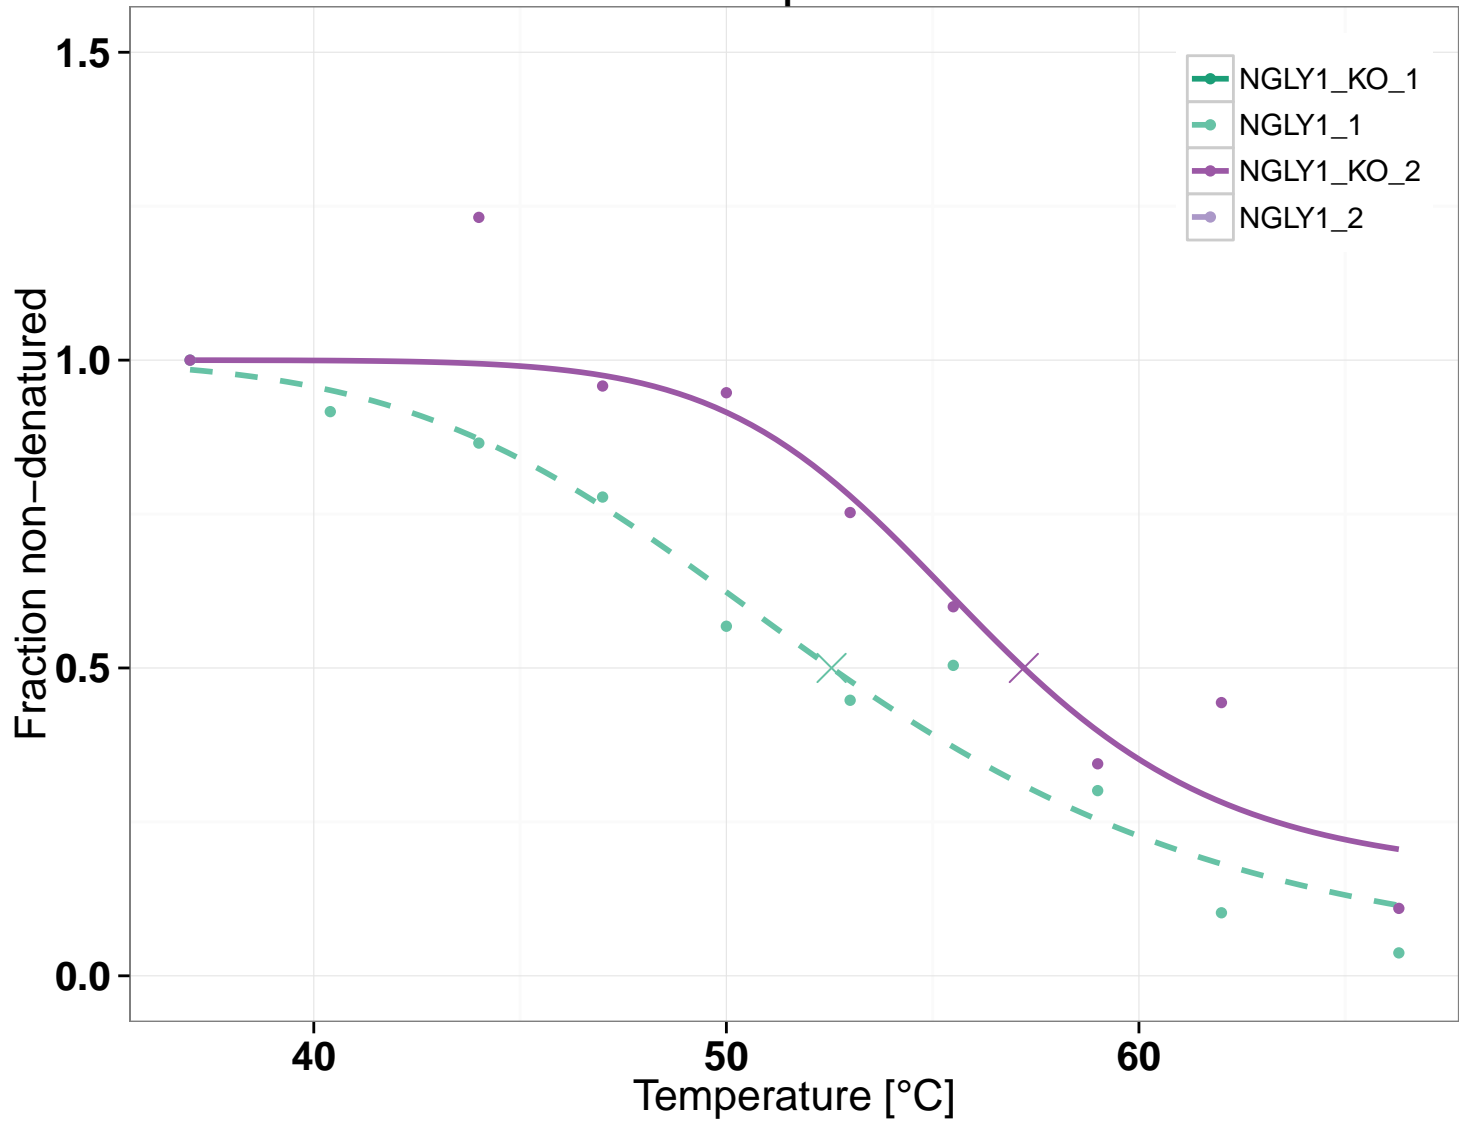

|            | meltPoint | slope  | plateau | R2   |
|------------|-----------|--------|---------|------|
| NGLY1_KO_1 | -         | -      | -       | -    |
| NGLY1_1    | 52.55     | -0.049 | 0       | 0.96 |
| NGLY1_KO_2 | 57.21     | -0.069 | 0.16    | 0.67 |
| NGLY1_2    | -         | -      | -       | -    |

Supplement: Supplementary file 6522 [file 1]

IPI00387077.2|SLC12A9

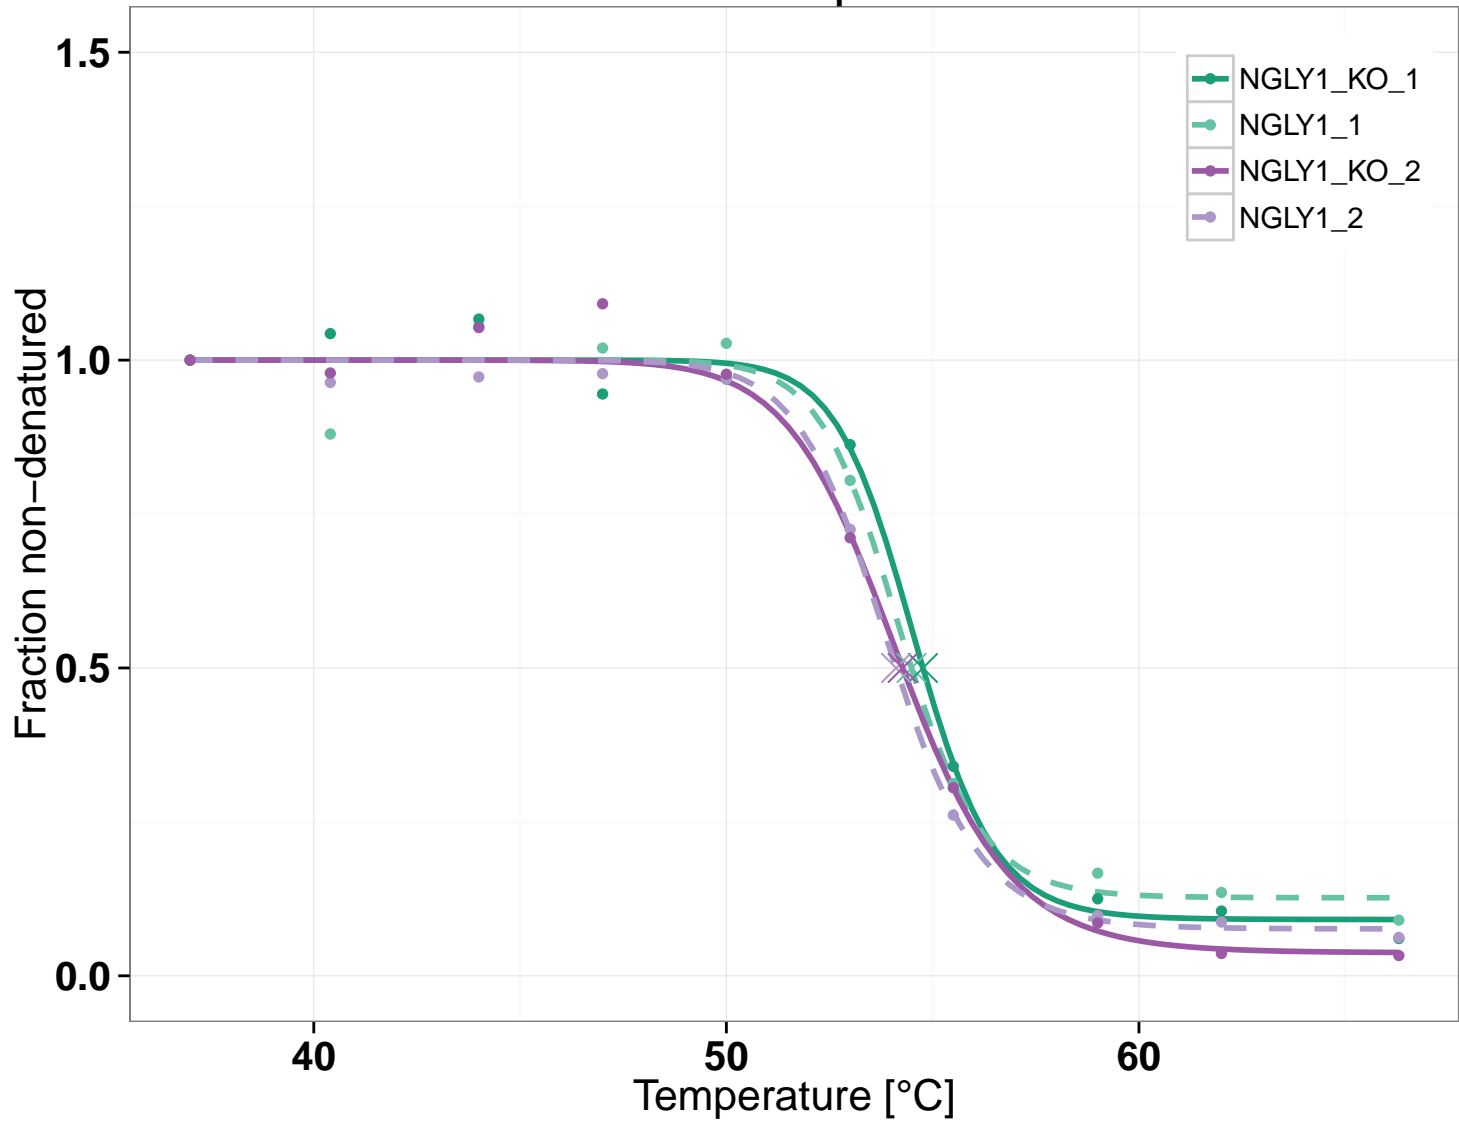

|            | meltPoint | slope | plateau | R2   |
|------------|-----------|-------|---------|------|
| NGLY1_KO_1 | 54.76     | -0.24 | 0.09    | 0.99 |
| NGLY1_1    | 54.49     | -0.22 | 0.13    | 0.99 |
| NGLY1_KO_2 | 54.27     | -0.18 | 0.04    | 0.99 |
| NGLY1_2    | 54.11     | -0.21 | 0.08    | 1    |

Supplement: Supplementary file 6523 [file 1]

# IPI00829826.1|MED1

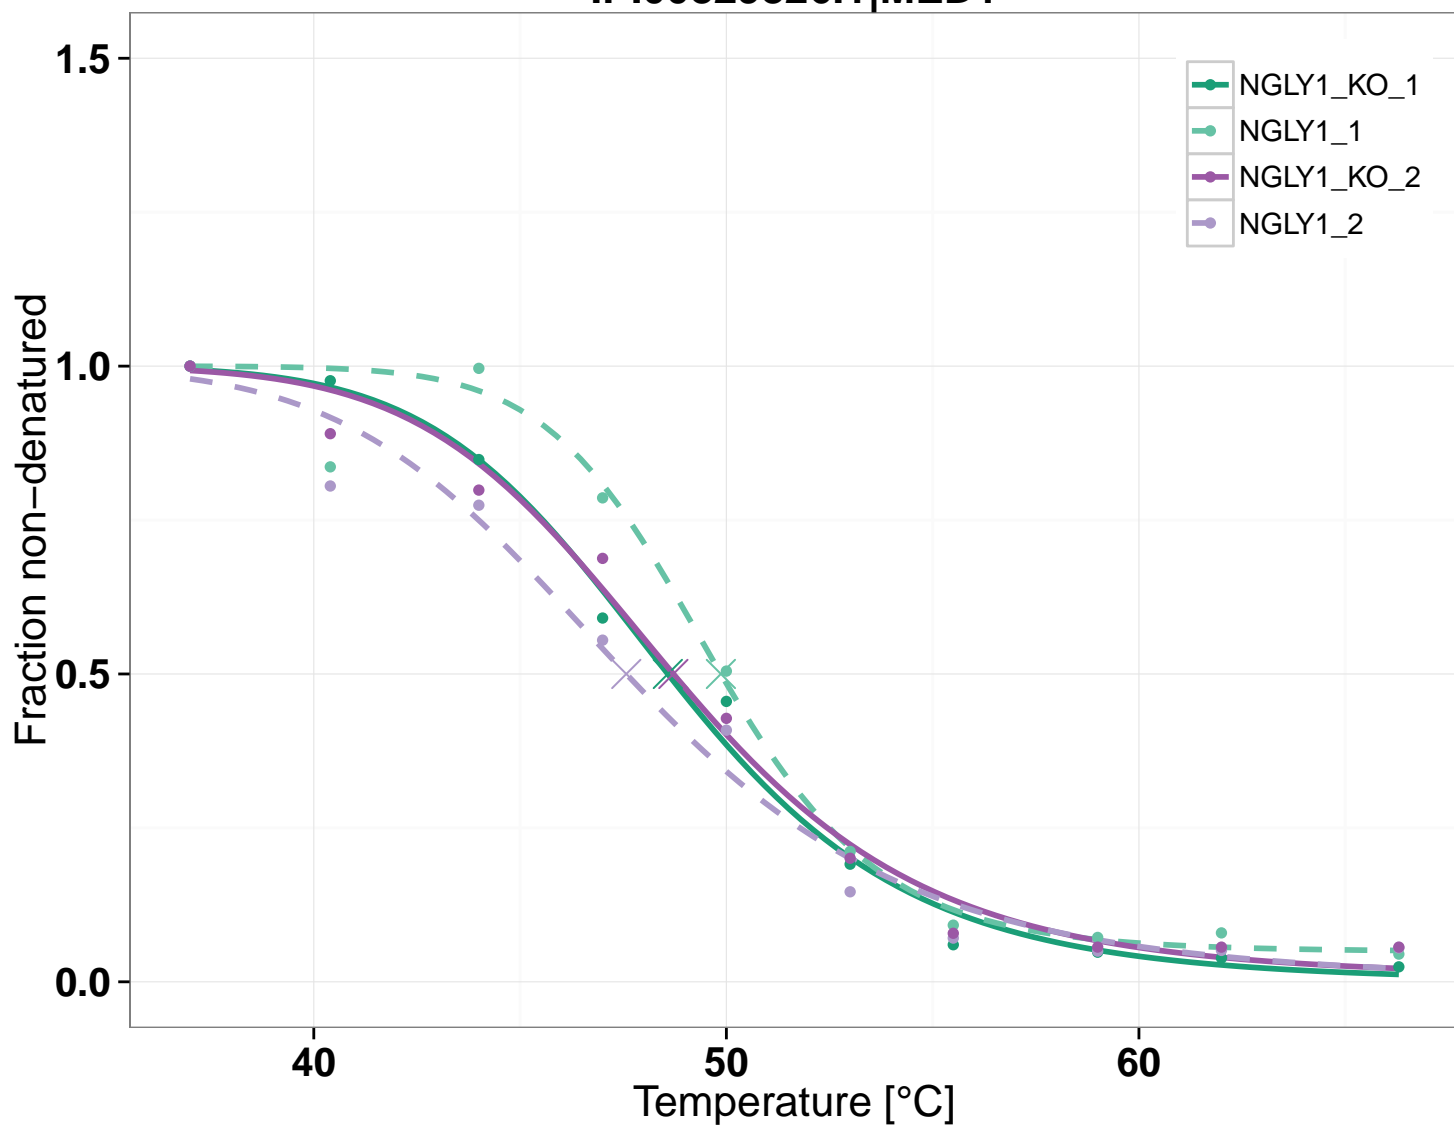

|            | meltPoint | slope  | plateau | R2   |
|------------|-----------|--------|---------|------|
| NGLY1_KO_1 | 48.58     | -0.086 | 0       | 0.99 |
| NGLY1_1    | 49.87     | -0.12  | 0.05    | 0.98 |
| NGLY1_KO_2 | 48.72     | -0.081 | 0.01    | 0.99 |
| NGLY1_2    | 47.57     | -0.073 | 0       | 0.98 |

Supplement: Supplementary file 6524 [file 1]

IPI00001914.1|FKBP7

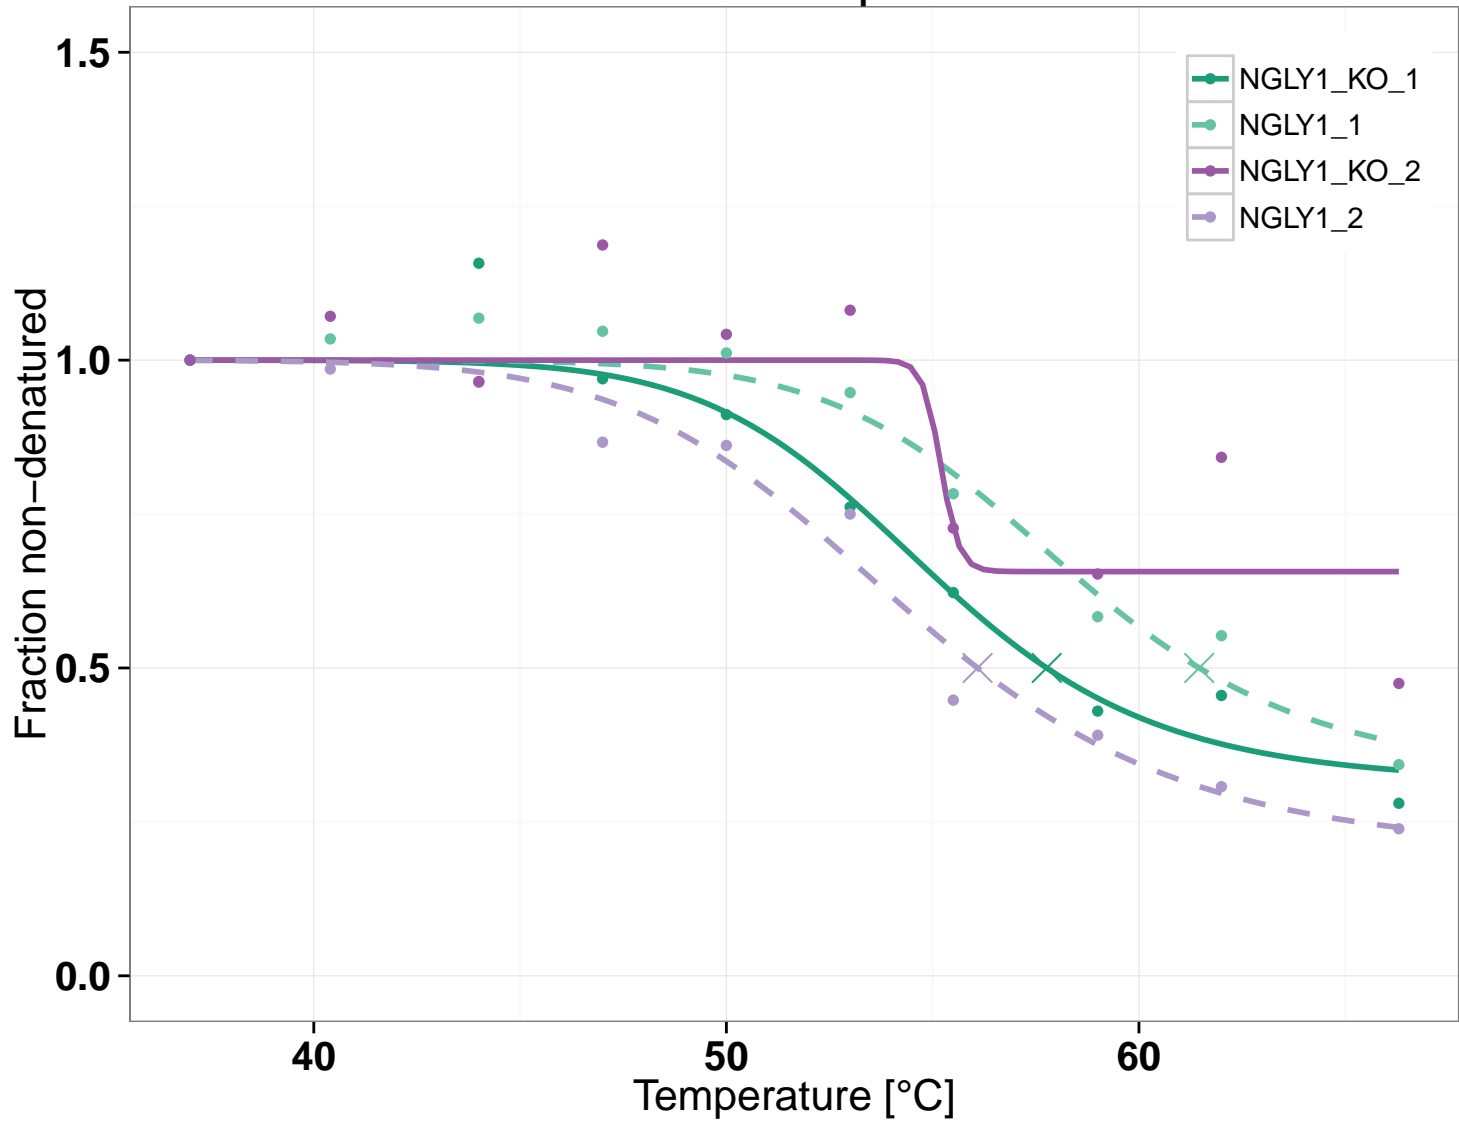

|            | meltPoint | slope  | plateau | R2   |
|------------|-----------|--------|---------|------|
| NGLY1_KO_1 | 57.76     | -0.063 | 0.31    | 0.74 |
| NGLY1_1    | 61.46     | -0.058 | 0.32    | 0.97 |
| NGLY1_KO_2 | -         | -0.39  | 0.66    | 0.74 |
| NGLY1_2    | 56.09     | -0.059 | 0.2     | 0.98 |

Supplement: Supplementary file 6525 [file 1]

IPI00294211.2|DHX38

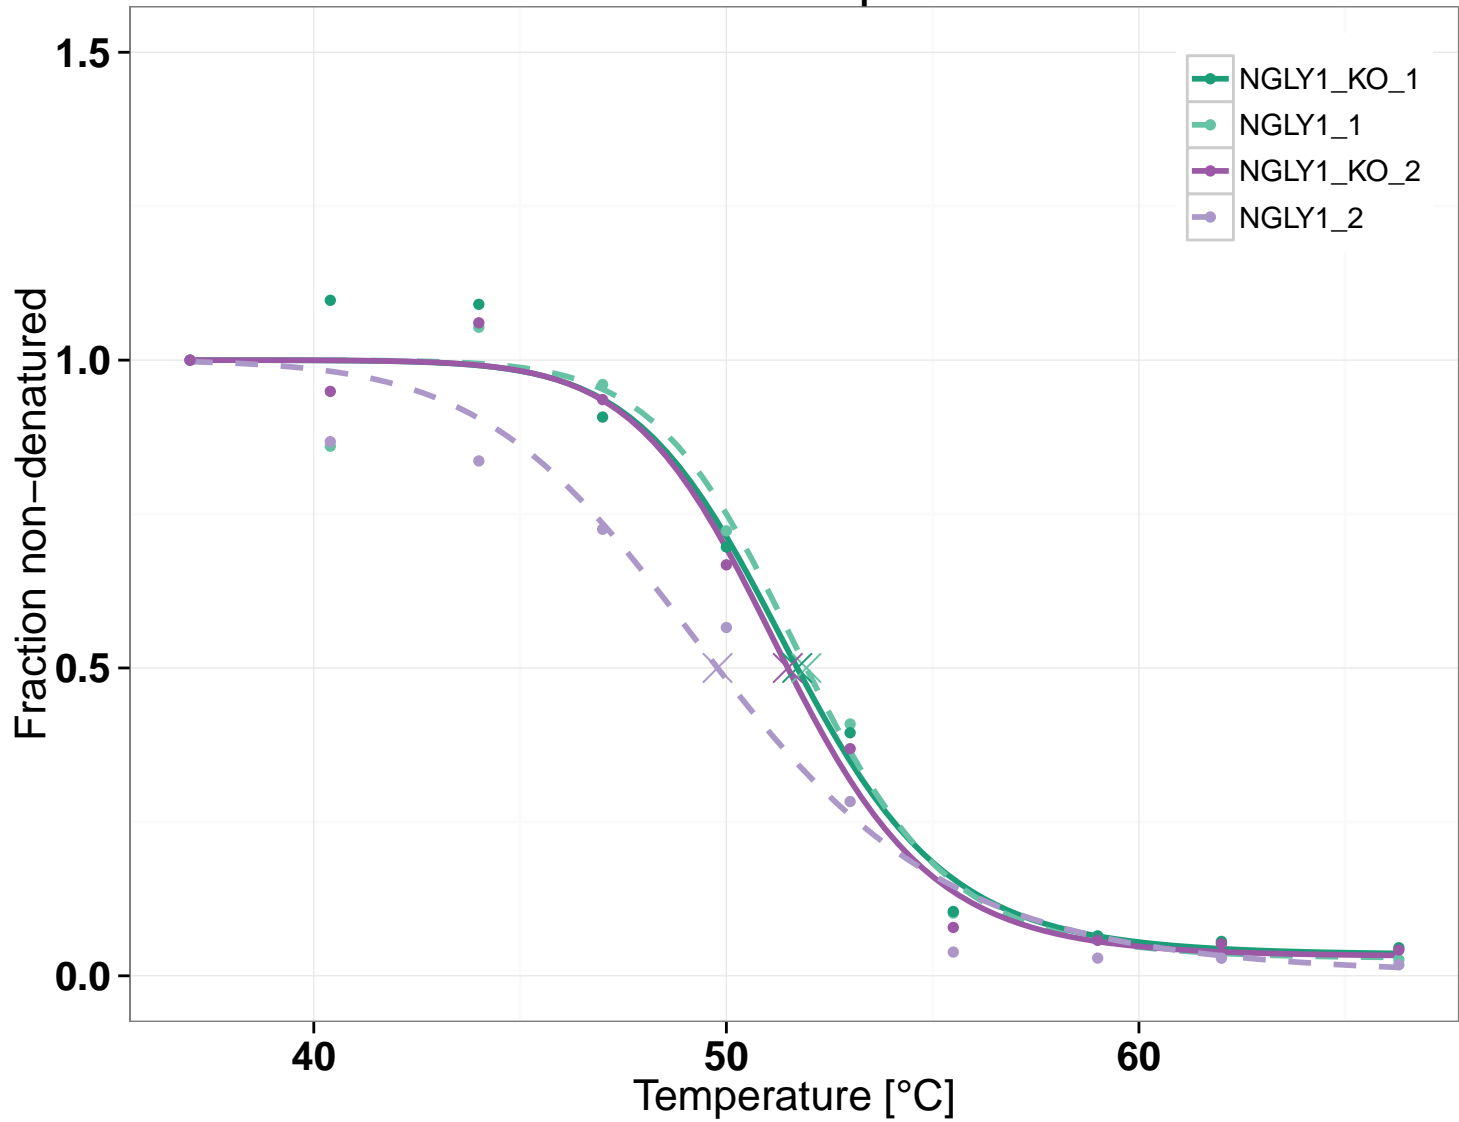

|            | meltPoint | slope  | plateau | R2   |
|------------|-----------|--------|---------|------|
| NGLY1_KO_1 | 51.72     | -0.13  | 0.03    | 0.99 |
| NGLY1_1    | 51.94     | -0.14  | 0.03    | 0.98 |
| NGLY1_KO_2 | 51.49     | -0.13  | 0.03    | 0.99 |
| NGLY1_2    | 49.79     | -0.087 | 0       | 0.97 |

Supplement: Supplementary file 6526 [file 1]
