# Supplementary material (part 66 of 85)
Source: publisher figshare collection journal article supplement (https://gsajournals.figshare.com/articles/dataset/_/12014913)

IPI00295595.2|CERCAM

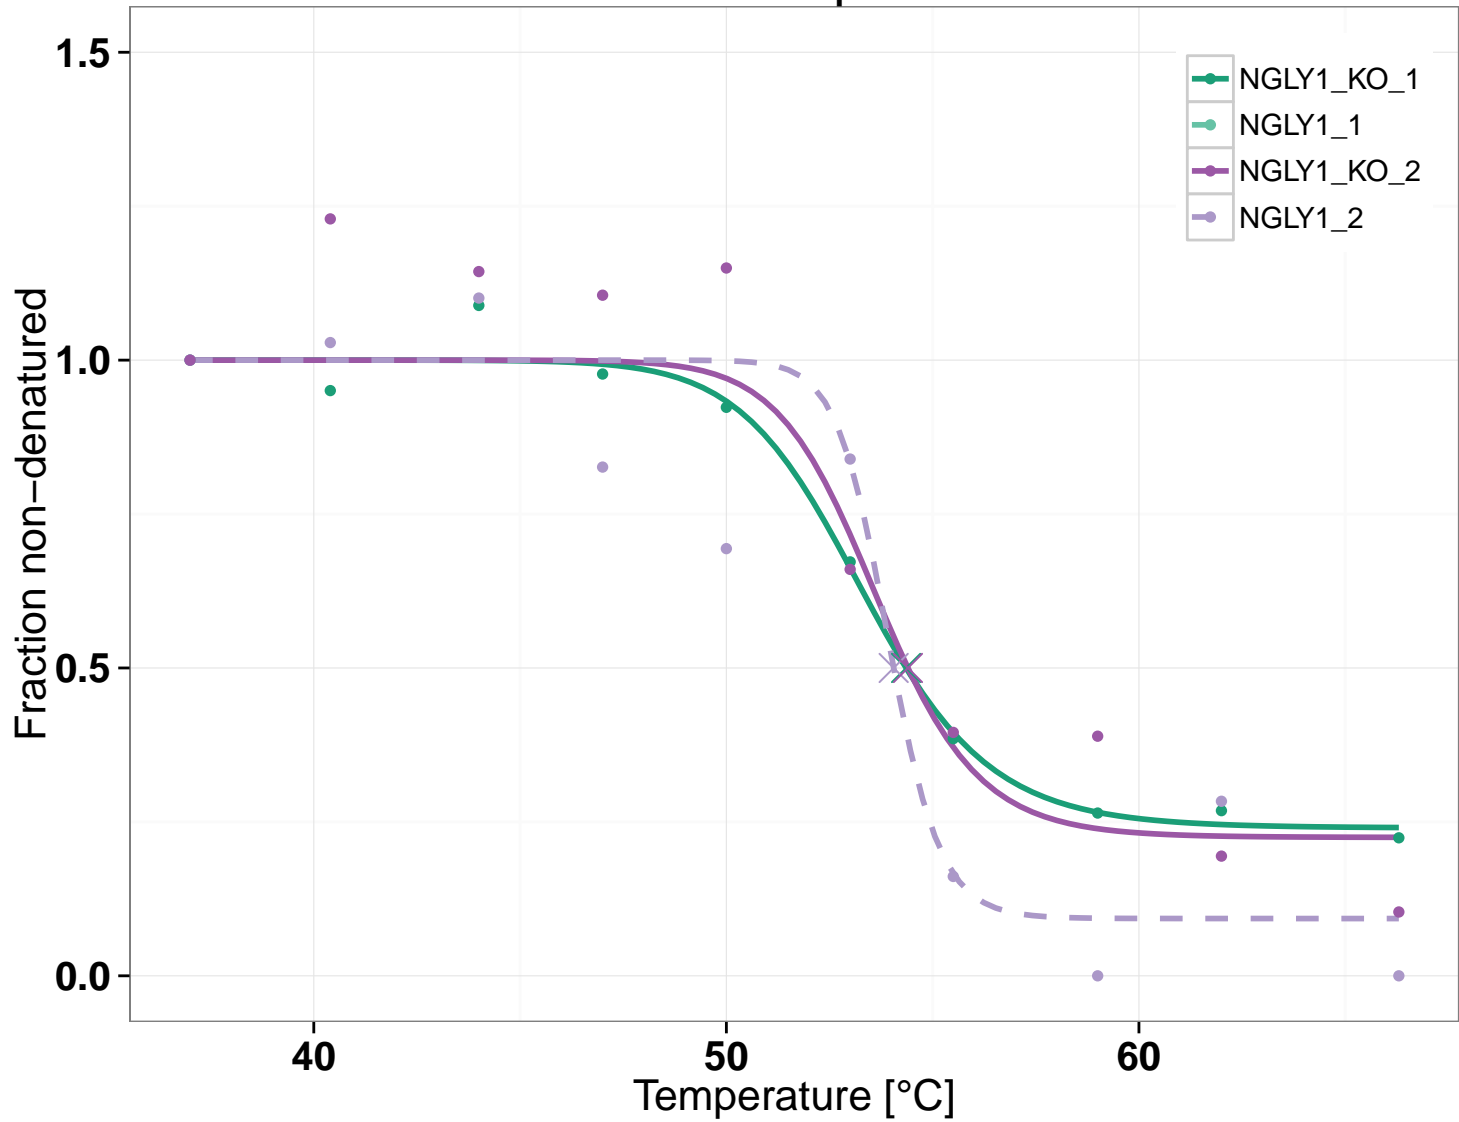

|            | meltPoint | slope | plateau | R2   |
|------------|-----------|-------|---------|------|
| NGLY1_KO_1 | 54.36     | -0.13 | 0.24    | 0.99 |
| NGLY1_1    | -         | -     | -       | -    |
| NGLY1_KO_2 | 54.4      | -0.16 | 0.22    | 0.91 |
| NGLY1_2    | 54.06     | -0.36 | 0.09    | 0.89 |

Supplement: Supplementary file 6527 [file 1]

# IPI00016597.3|CLN6

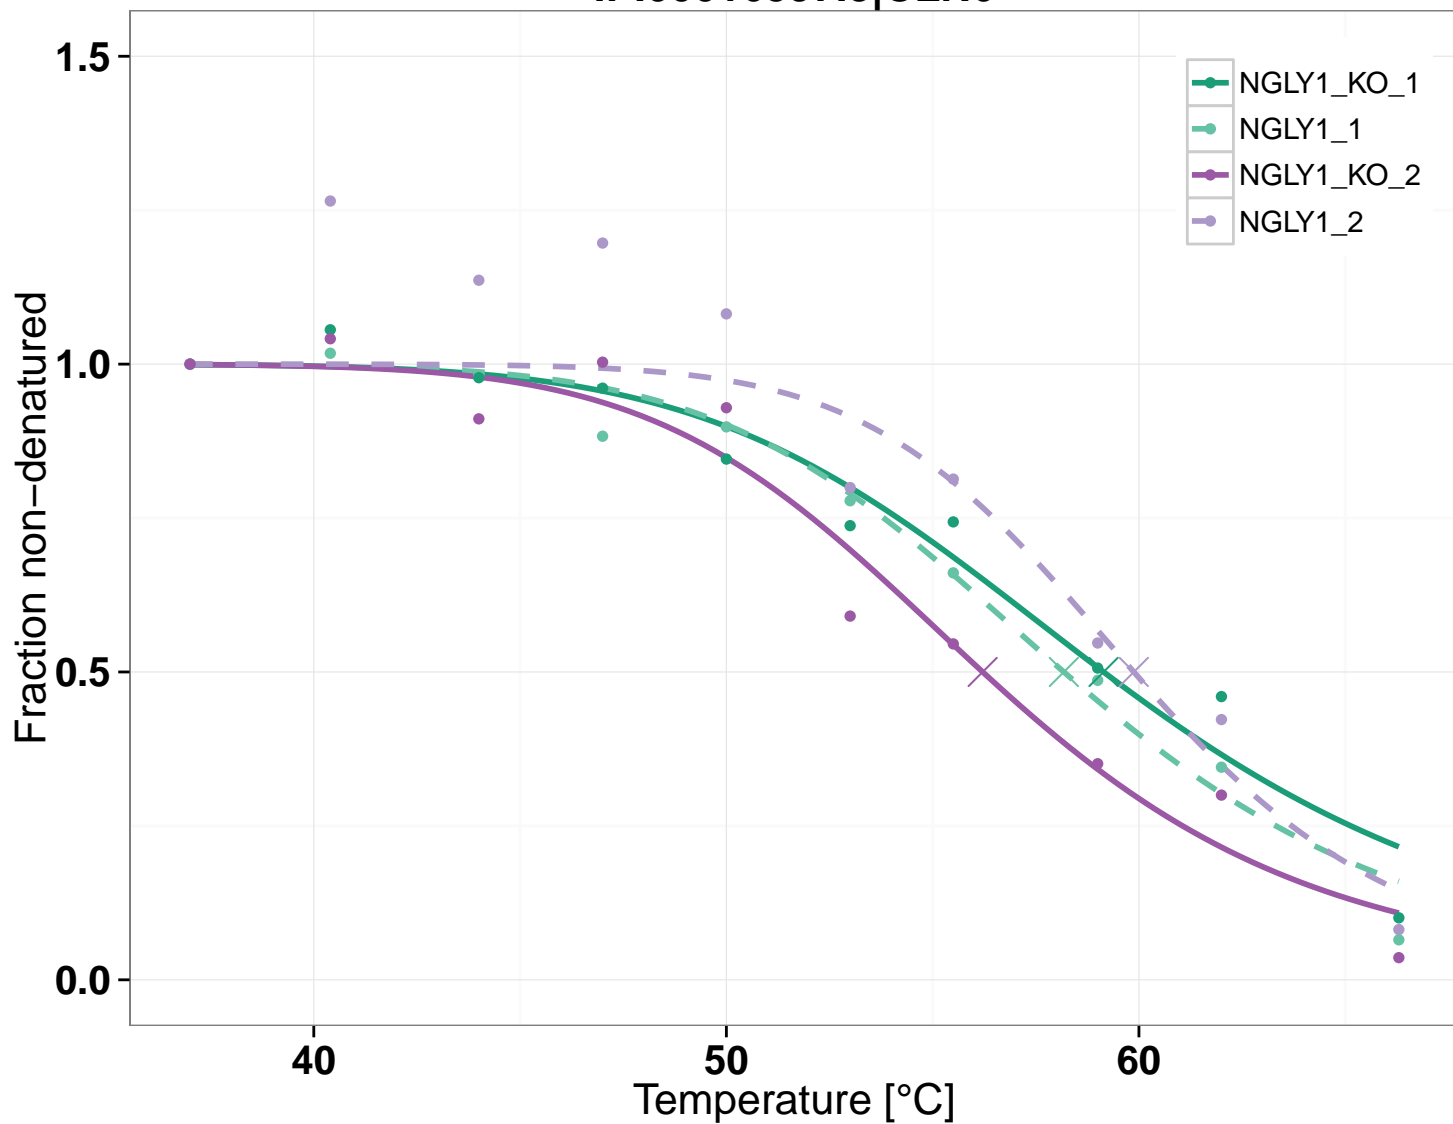

|            | meltPoint | slope  | plateau | R2   |
|------------|-----------|--------|---------|------|
| NGLY1_KO_1 | 59.14     | -0.052 | 0       | 0.96 |
| NGLY1_1    | 58.18     | -0.059 | 0       | 0.98 |
| NGLY1_KO_2 | 56.21     | -0.063 | 0       | 0.96 |
| NGLY1_2    | 59.88     | -0.077 | 0       | 0.87 |

Supplement: Supplementary file 6528 [file 1]

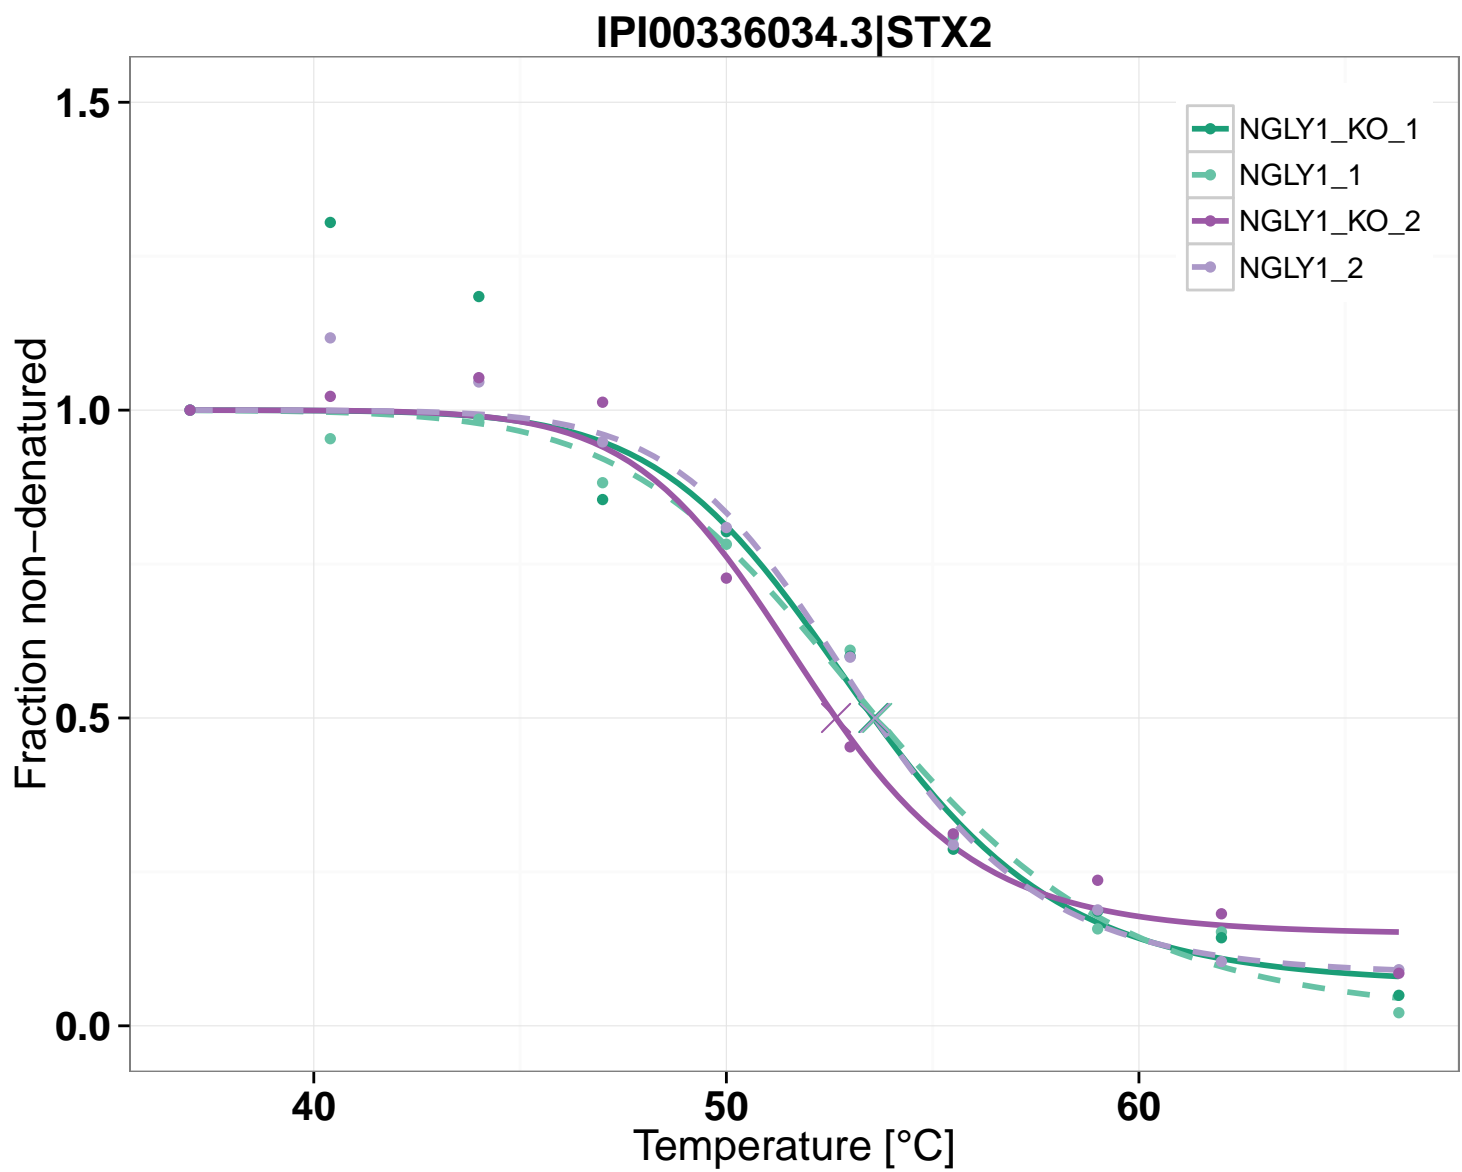

|            | meltPoint | slope  | plateau | R2   |
|------------|-----------|--------|---------|------|
| NGLY1_KO_1 | 53.56     | -0.095 | 0.07    | 0.92 |
| NGLY1_1    | 53.66     | -0.082 | 0.01    | 0.99 |
| NGLY1_KO_2 | 52.66     | -0.1   | 0.15    | 0.99 |
| NGLY1_2    | 53.6      | -0.1   | 0.08    | 0.99 |

Supplement: Supplementary file 6529 [file 1]

# IPI00411375.3|MAP4

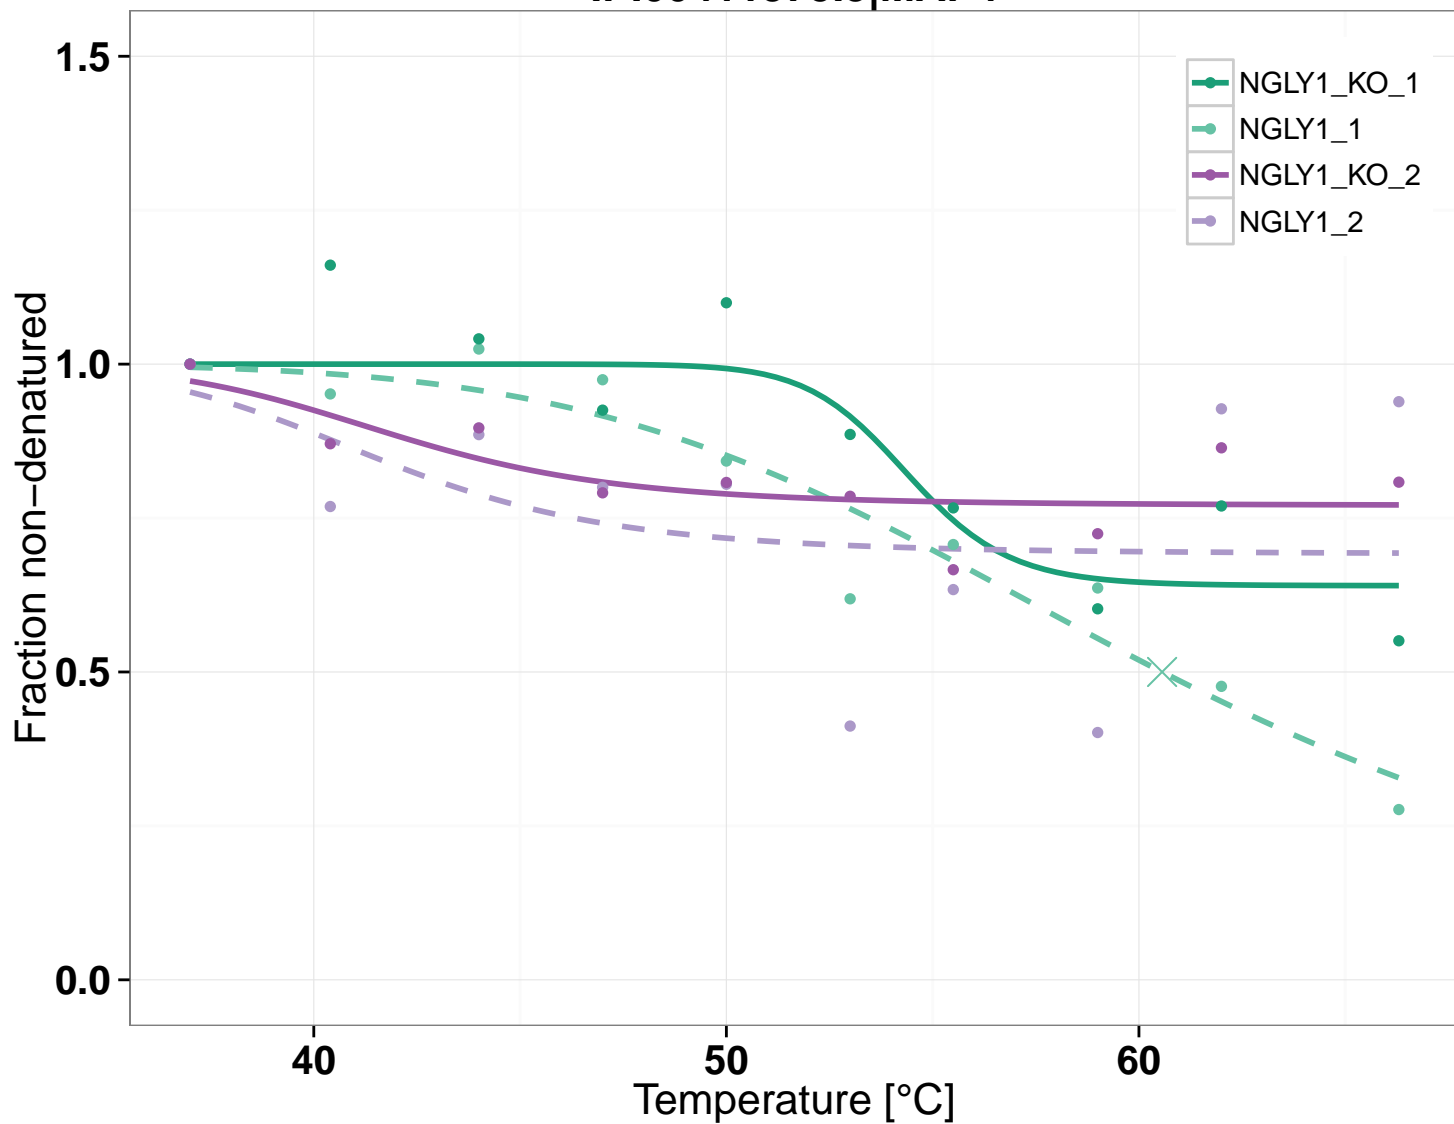

|            | meltPoint | slope  | plateau | R2   |
|------------|-----------|--------|---------|------|
| NGLY1_KO_1 | –         | –0.073 | 0.64    | 0.81 |
| NGLY1_1    | 60.56     | –0.036 | 0       | 0.93 |
| NGLY1_KO_2 | –         | –0.021 | 0.77    | 0.61 |
| NGLY1_2    | –         | –0.027 | 0.69    | 0.19 |

Supplement: Supplementary file 6530 [file 1]

# IPI00852968.1|VTI1A

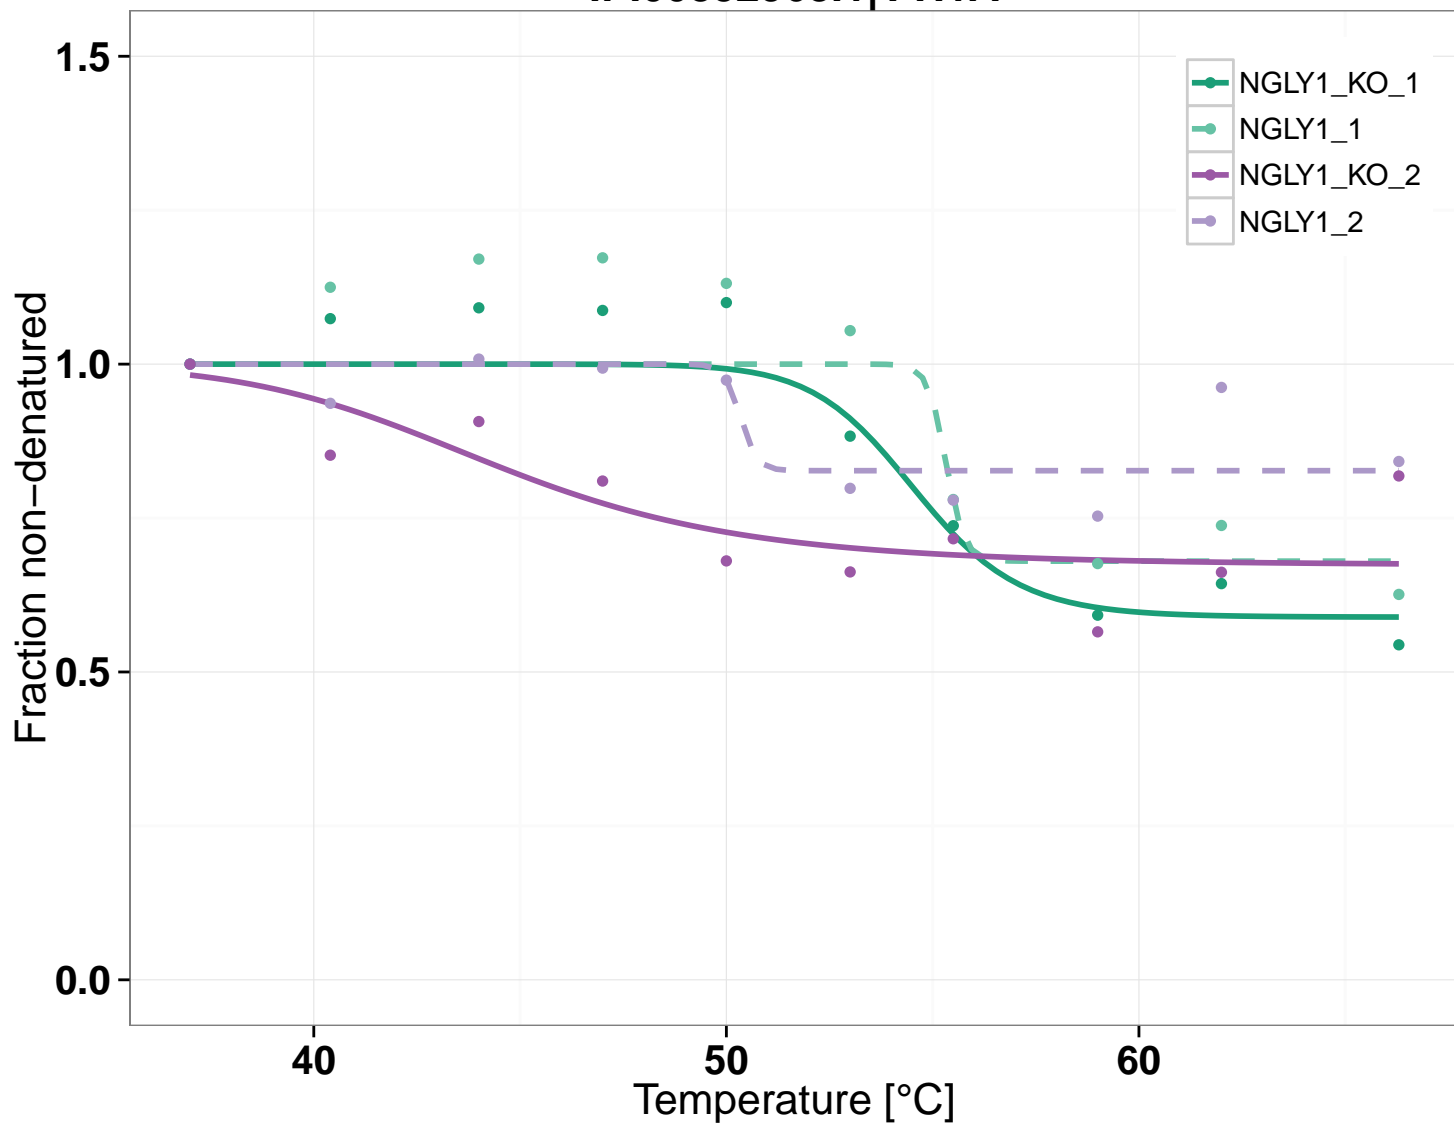

|            | meltPoint | slope  | plateau | R2   |
|------------|-----------|--------|---------|------|
| NGLY1_KO_1 | —         | -0.082 | 0.59    | 0.92 |
| NGLY1_1    | —         | -0.36  | 0.68    | 0.76 |
| NGLY1_KO_2 | —         | -0.027 | 0.67    | 0.68 |
| NGLY1_2    | —         | -0.21  | 0.83    | 0.66 |

Supplement: Supplementary file 6531 [file 1]

IPI00004969.3|NSUN3

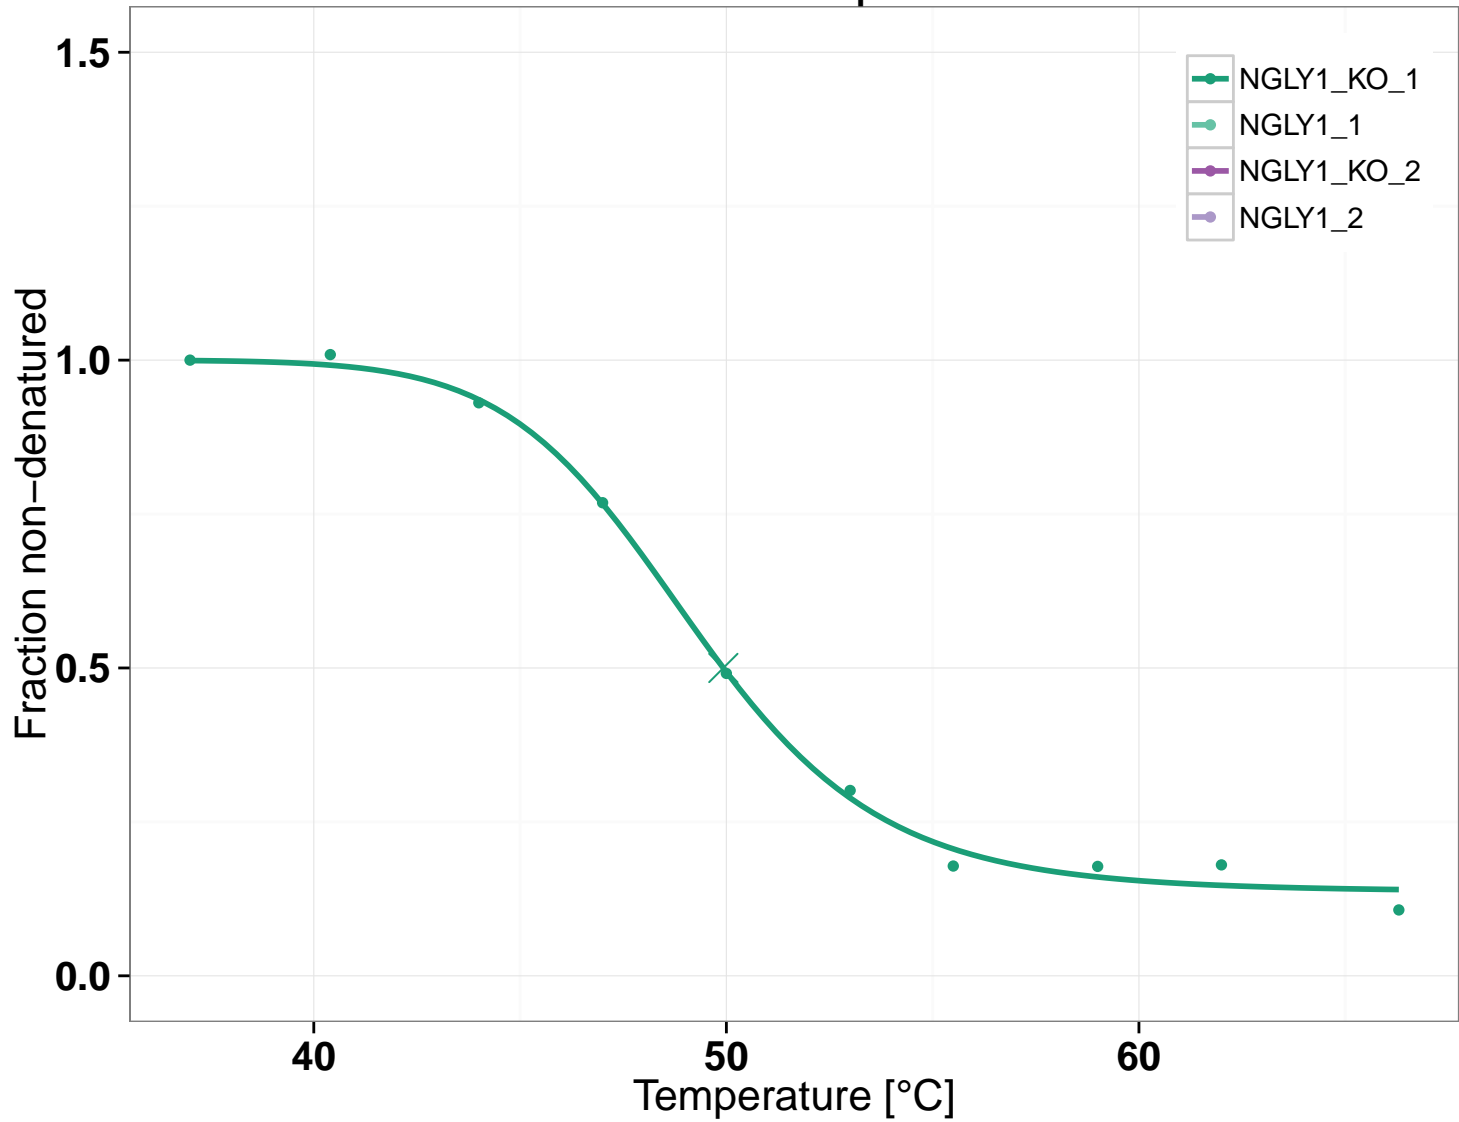

|            | meltPoint | slope  | plateau | R2 |
|------------|-----------|--------|---------|----|
| NGLY1_KO_1 | 49.93     | -0.095 | 0.14    | 1  |
| NGLY1_1    | -         | -      | -       | -  |
| NGLY1_KO_2 | -         | -      | -       | -  |
| NGLY1_2    | -         | -      | -       | -  |

Supplement: Supplementary file 6532 [file 1]

IPI00021941.1|DLGAP1

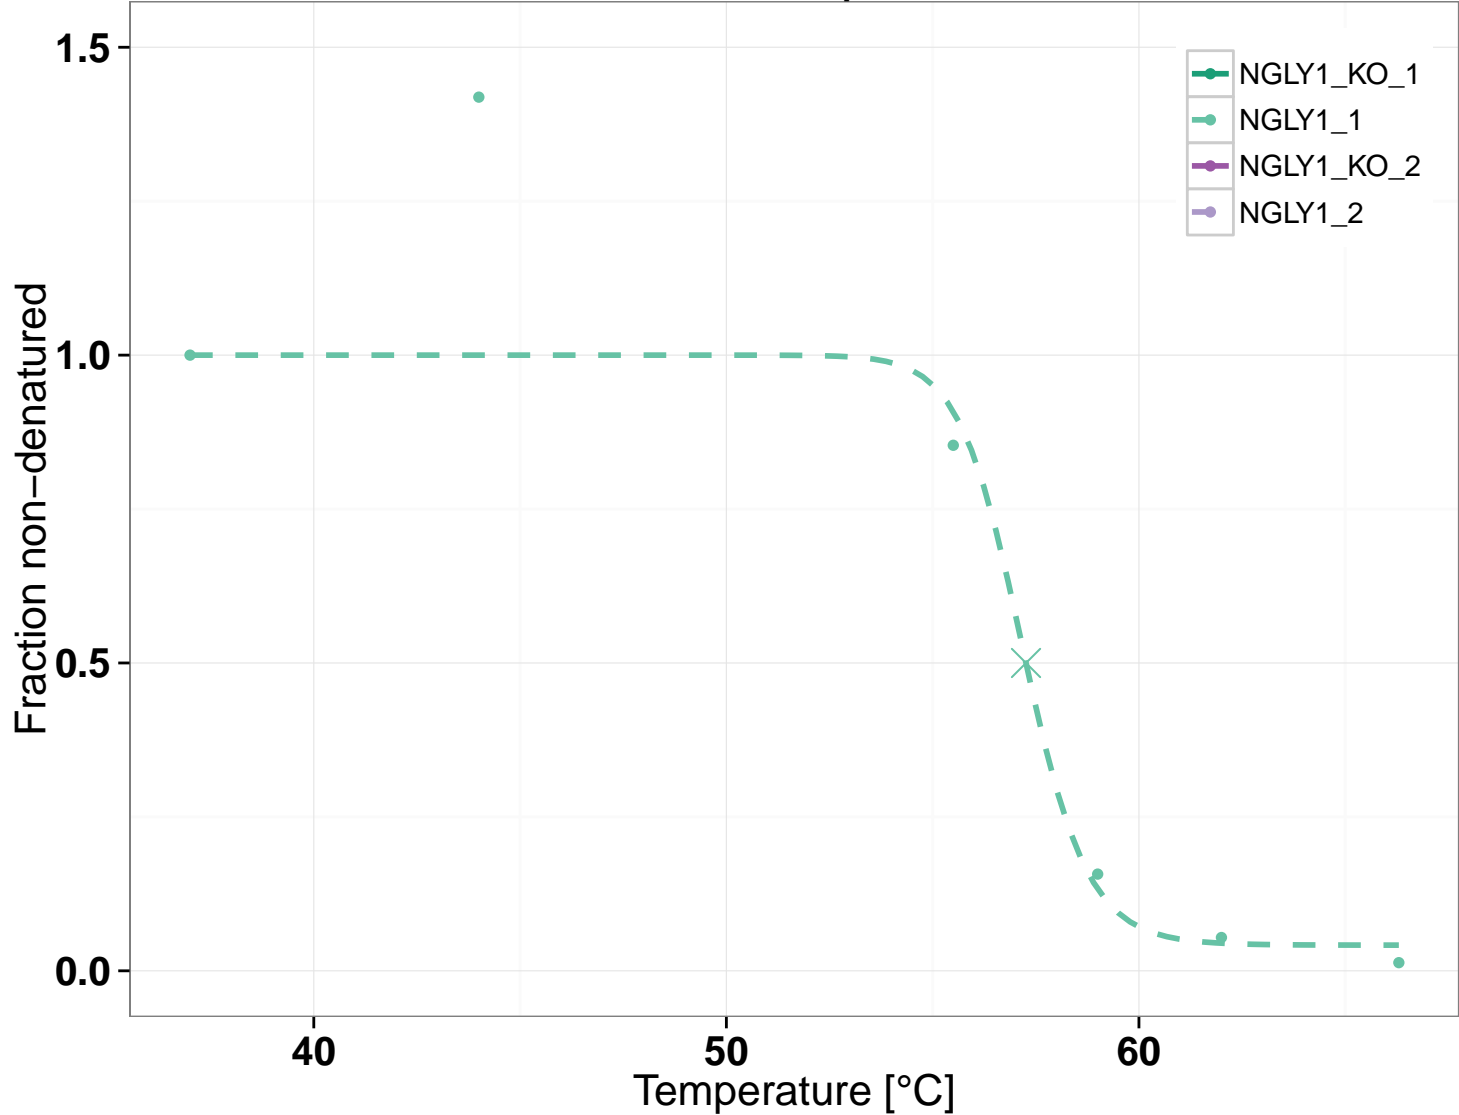

|            | meltPoint | slope | plateau | R2   |
|------------|-----------|-------|---------|------|
| NGLY1_KO_1 | -         | -     | -       | -    |
| NGLY1_1    | 57.26     | -0.31 | 0.04    | 0.24 |
| NGLY1_KO_2 | -         | -     | -       | -    |
| NGLY1_2    | -         | -     | -       | -    |

Supplement: Supplementary file 6533 [file 1]

IPI00009346.1|TMEM14C

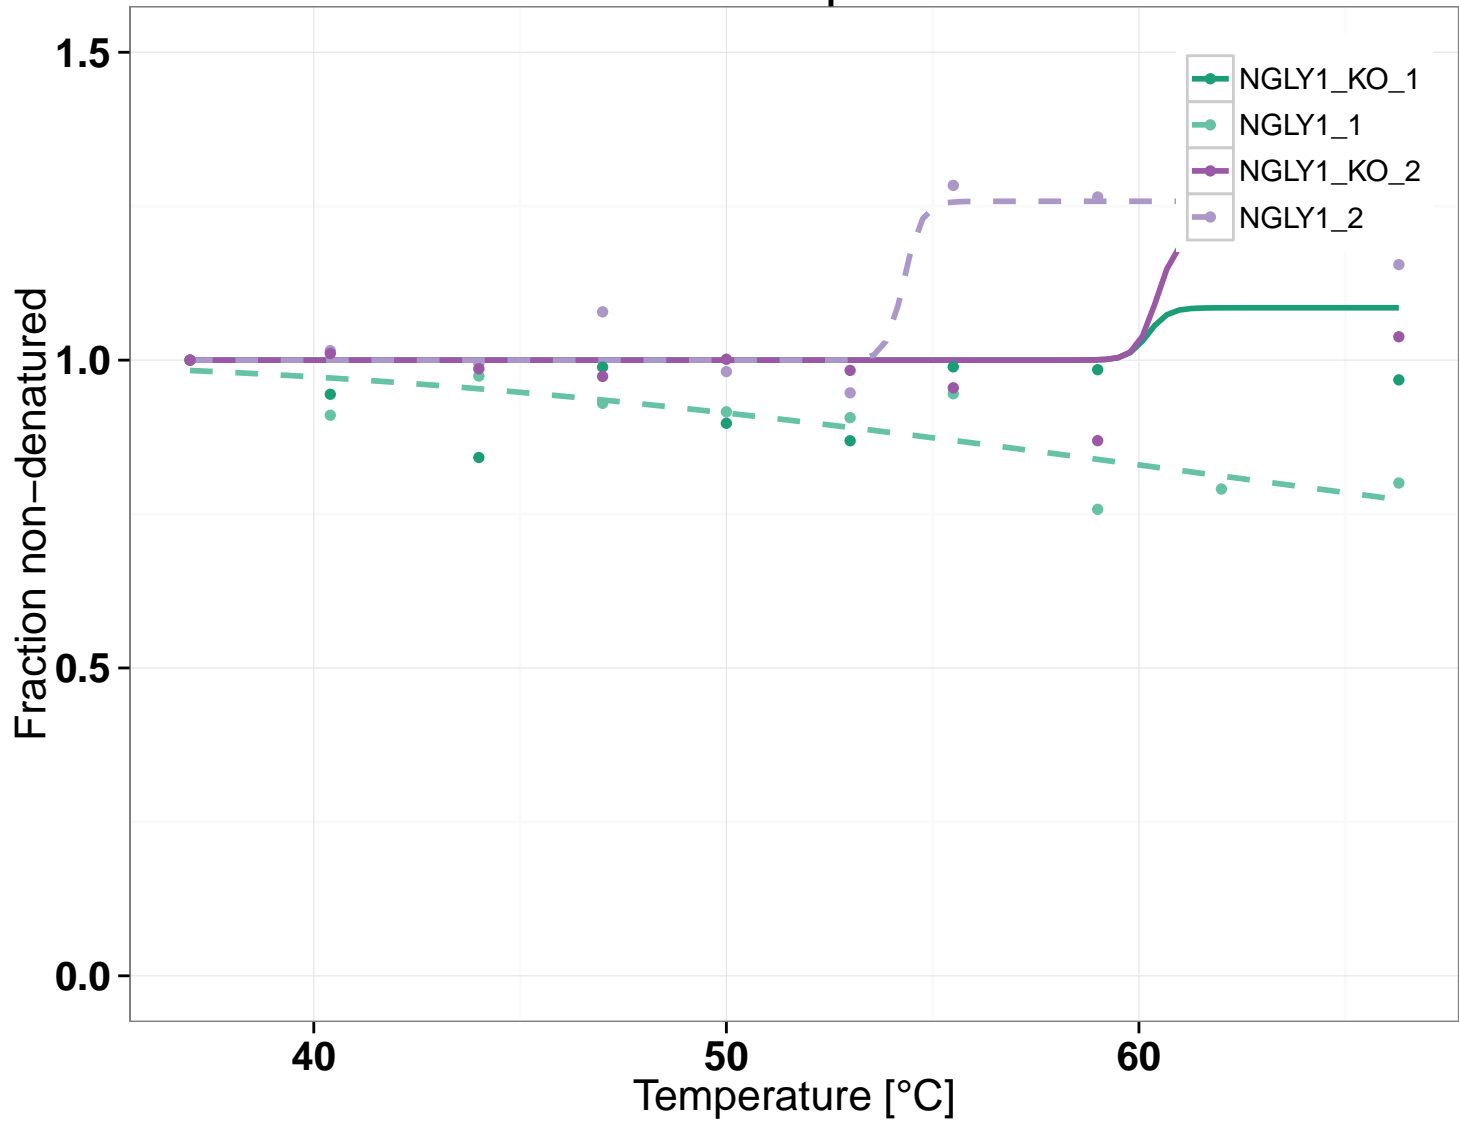

|            | meltPoint | slope  | plateau | R2   |
|------------|-----------|--------|---------|------|
| NGLY1_KO_1 | —         | 0.088  | 1.09    | 0.05 |
| NGLY1_1    | —         | -0.009 | 0.25    | 0.7  |
| NGLY1_KO_2 | —         | 0.21   | 1.2     | 0.51 |
| NGLY1_2    | —         | 0.3    | 1.26    | 0.86 |

Supplement: Supplementary file 6534 [file 1]

# IPI00031530.4|SCNM1

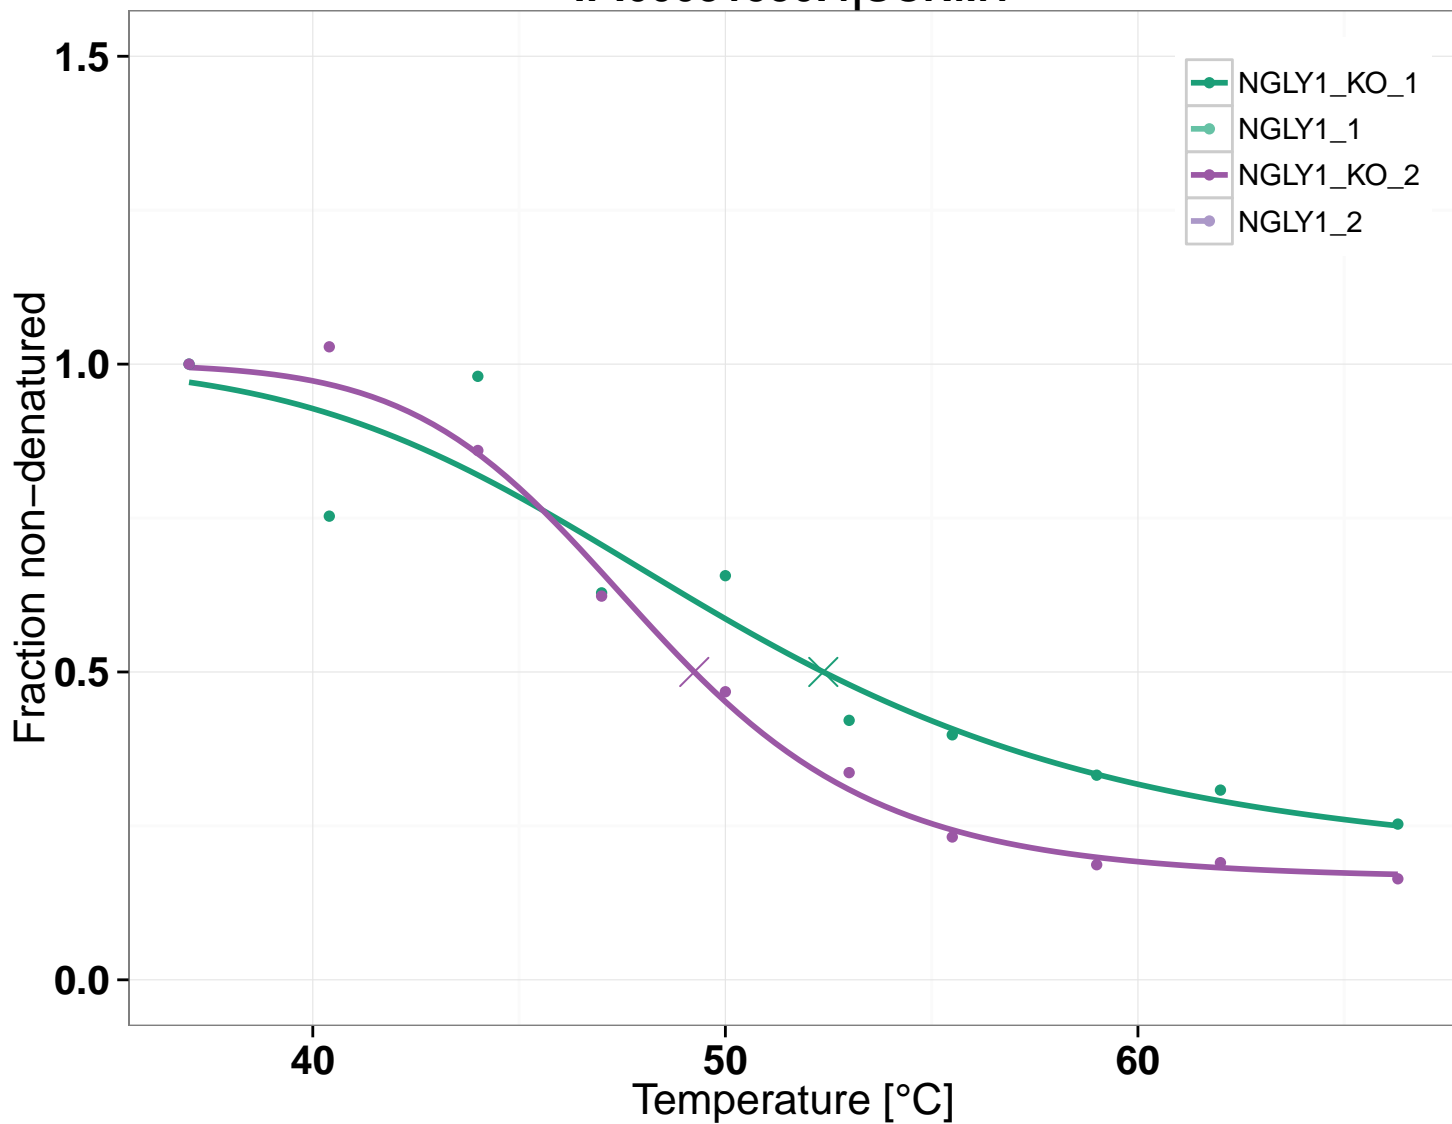

|            | meltPoint | slope  | plateau | R2   |
|------------|-----------|--------|---------|------|
| NGLY1_KO_1 | 52.37     | -0.041 | 0.18    | 0.9  |
| NGLY1_1    | -         | -      | -       | -    |
| NGLY1_KO_2 | 49.25     | -0.074 | 0.16    | 0.99 |
| NGLY1_2    | -         | -      | -       | -    |

Supplement: Supplementary file 6535 [file 1]

# IPI00002220.3|SAP130

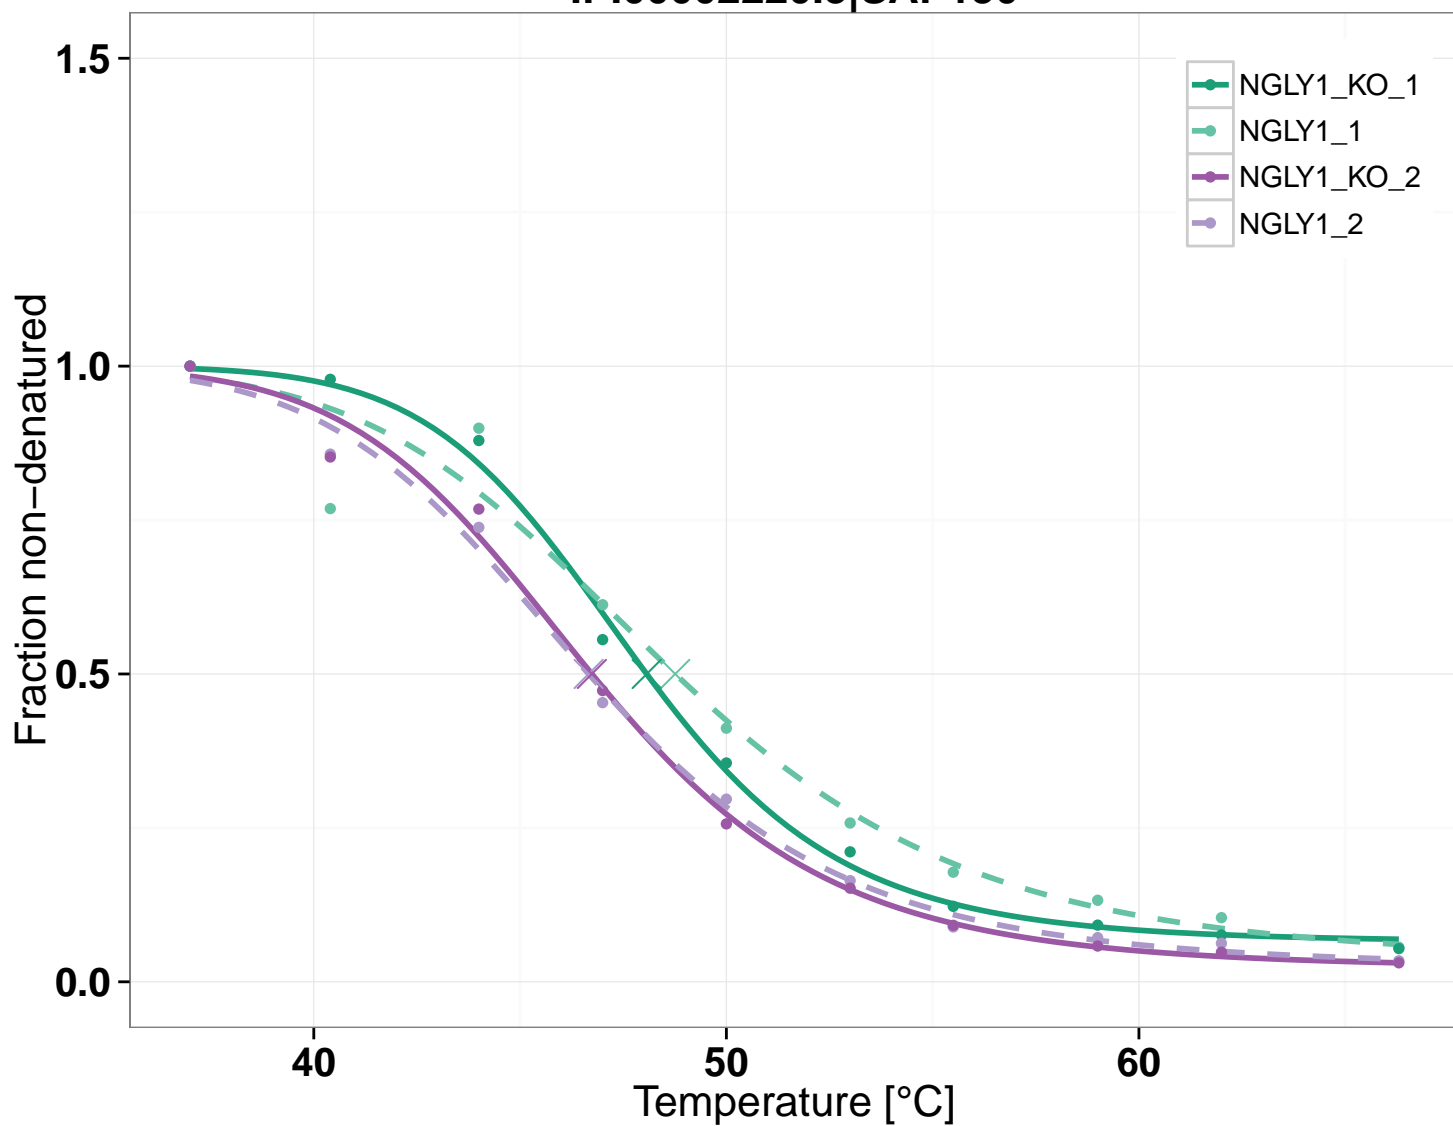

|            | meltPoint | slope  | plateau | R2   |
|------------|-----------|--------|---------|------|
| NGLY1_KO_1 | 48.07     | -0.093 | 0.06    | 1    |
| NGLY1_1    | 48.76     | -0.065 | 0.03    | 0.97 |
| NGLY1_KO_2 | 46.74     | -0.084 | 0.02    | 0.99 |
| NGLY1_2    | 46.66     | -0.077 | 0.02    | 1    |

Supplement: Supplementary file 6536 [file 1]

IPI00419847.3|SORBS3

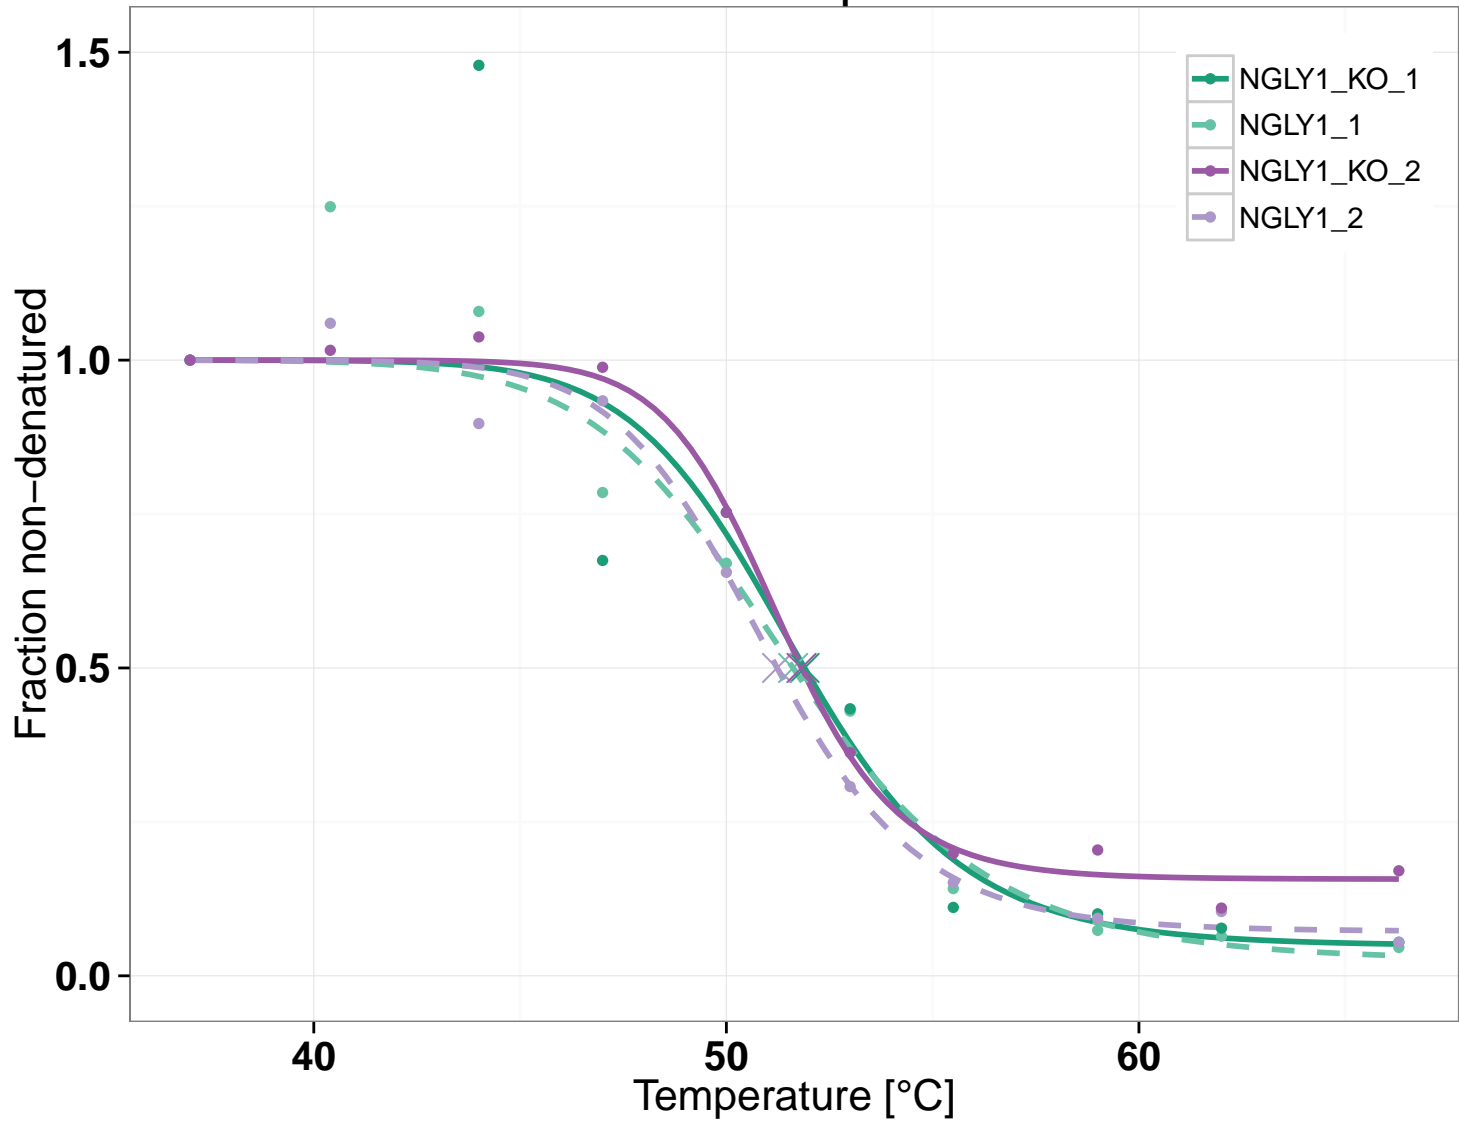

|            | meltPoint | slope | plateau | R2   |
|------------|-----------|-------|---------|------|
| NGLY1_KO_1 | 51.9      | -0.12 | 0.05    | 0.63 |
| NGLY1_1    | 51.62     | -0.1  | 0.02    | 0.95 |
| NGLY1_KO_2 | 51.82     | -0.15 | 0.16    | 1    |
| NGLY1_2    | 51.23     | -0.13 | 0.07    | 0.99 |

Supplement: Supplementary file 6537 [file 1]

IPI00014305.2|ZNF146

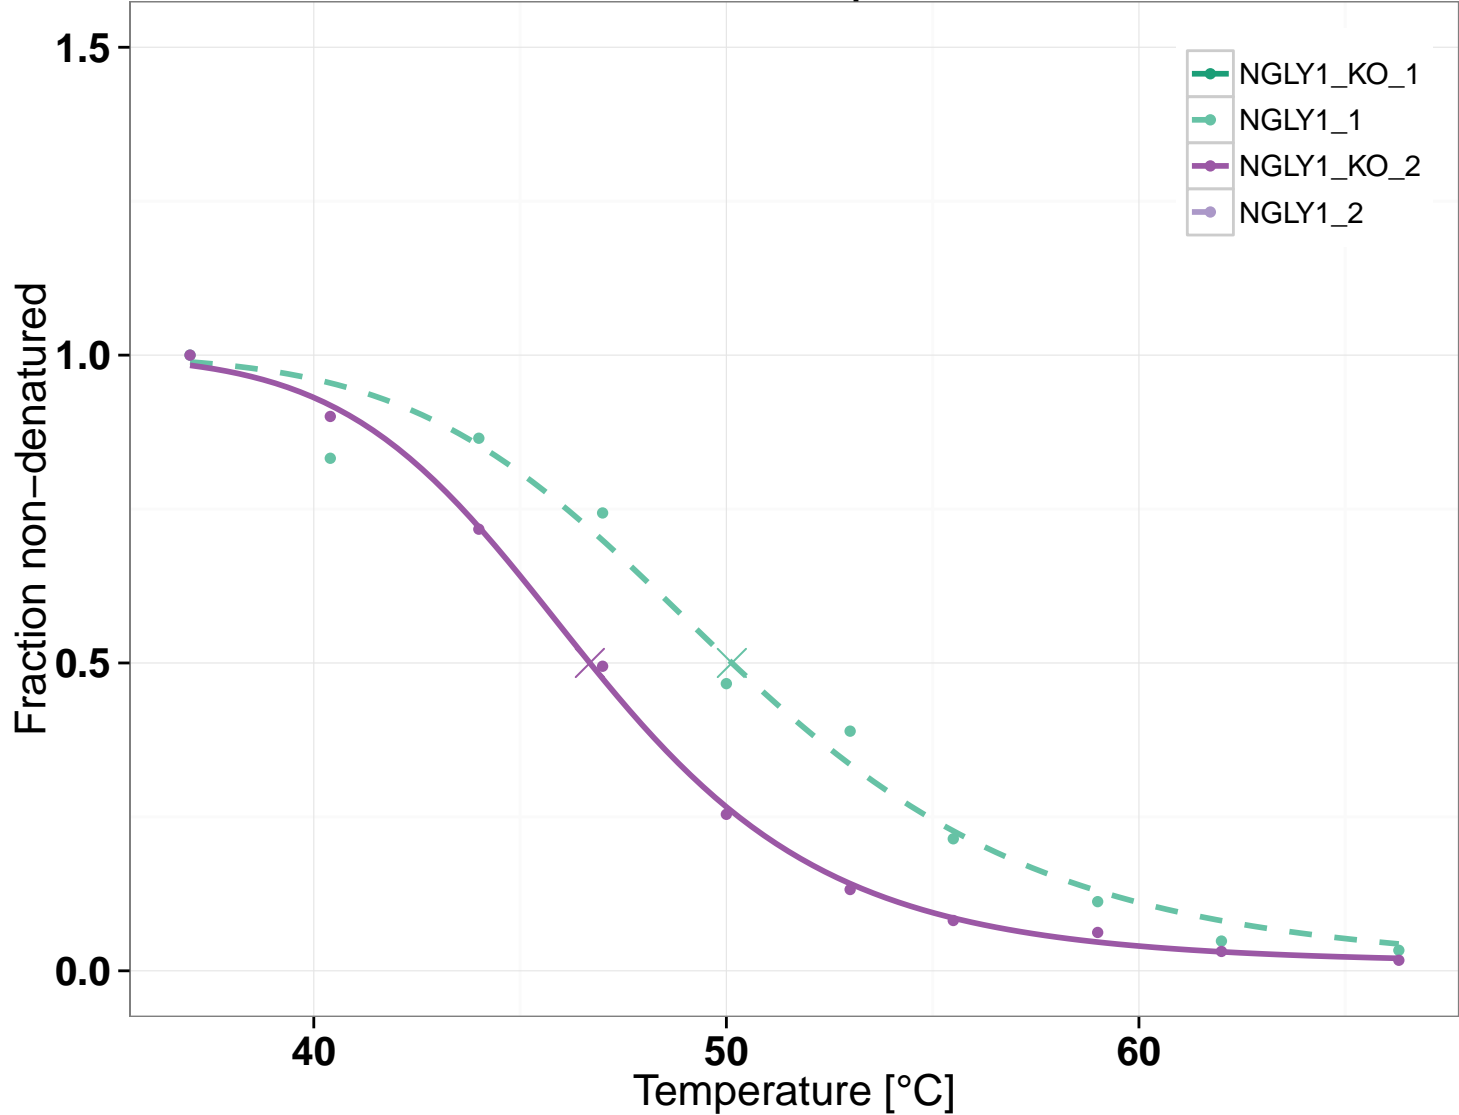

|            | meltPoint | slope  | plateau | R2   |
|------------|-----------|--------|---------|------|
| NGLY1_KO_1 | -         | -      | -       | -    |
| NGLY1_1    | 50.13     | -0.065 | 0       | 0.98 |
| NGLY1_KO_2 | 46.69     | -0.084 | 0.01    | 1    |
| NGLY1_2    | -         | -      | -       | -    |

Supplement: Supplementary file 6538 [file 1]

IPI00874030.3|HNRNPA2B1

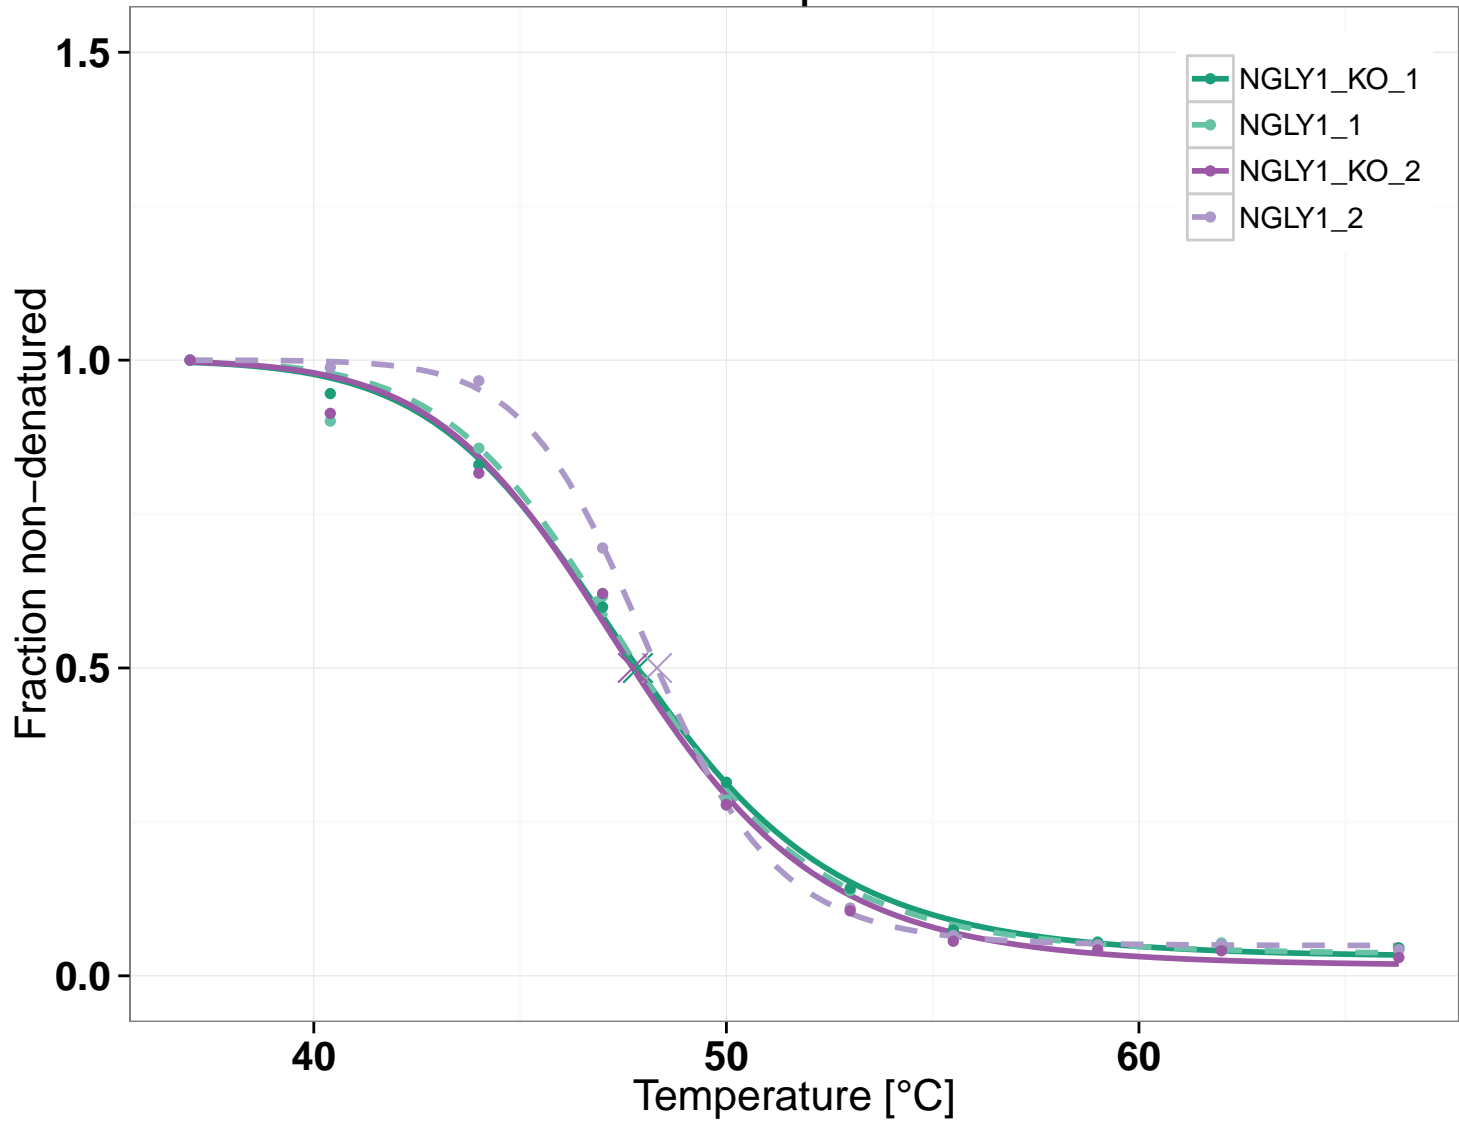

|            | meltPoint | slope  | plateau | R2   |
|------------|-----------|--------|---------|------|
| NGLY1_KO_1 | 47.85     | -0.099 | 0.03    | 1    |
| NGLY1_1    | 47.87     | -0.11  | 0.03    | 0.99 |
| NGLY1_KO_2 | 47.73     | -0.1   | 0.02    | 0.99 |
| NGLY1_2    | 48.32     | -0.15  | 0.05    | 1    |

Supplement: Supplementary file 6539 [file 1]

IPI00007940.6|ERLIN1

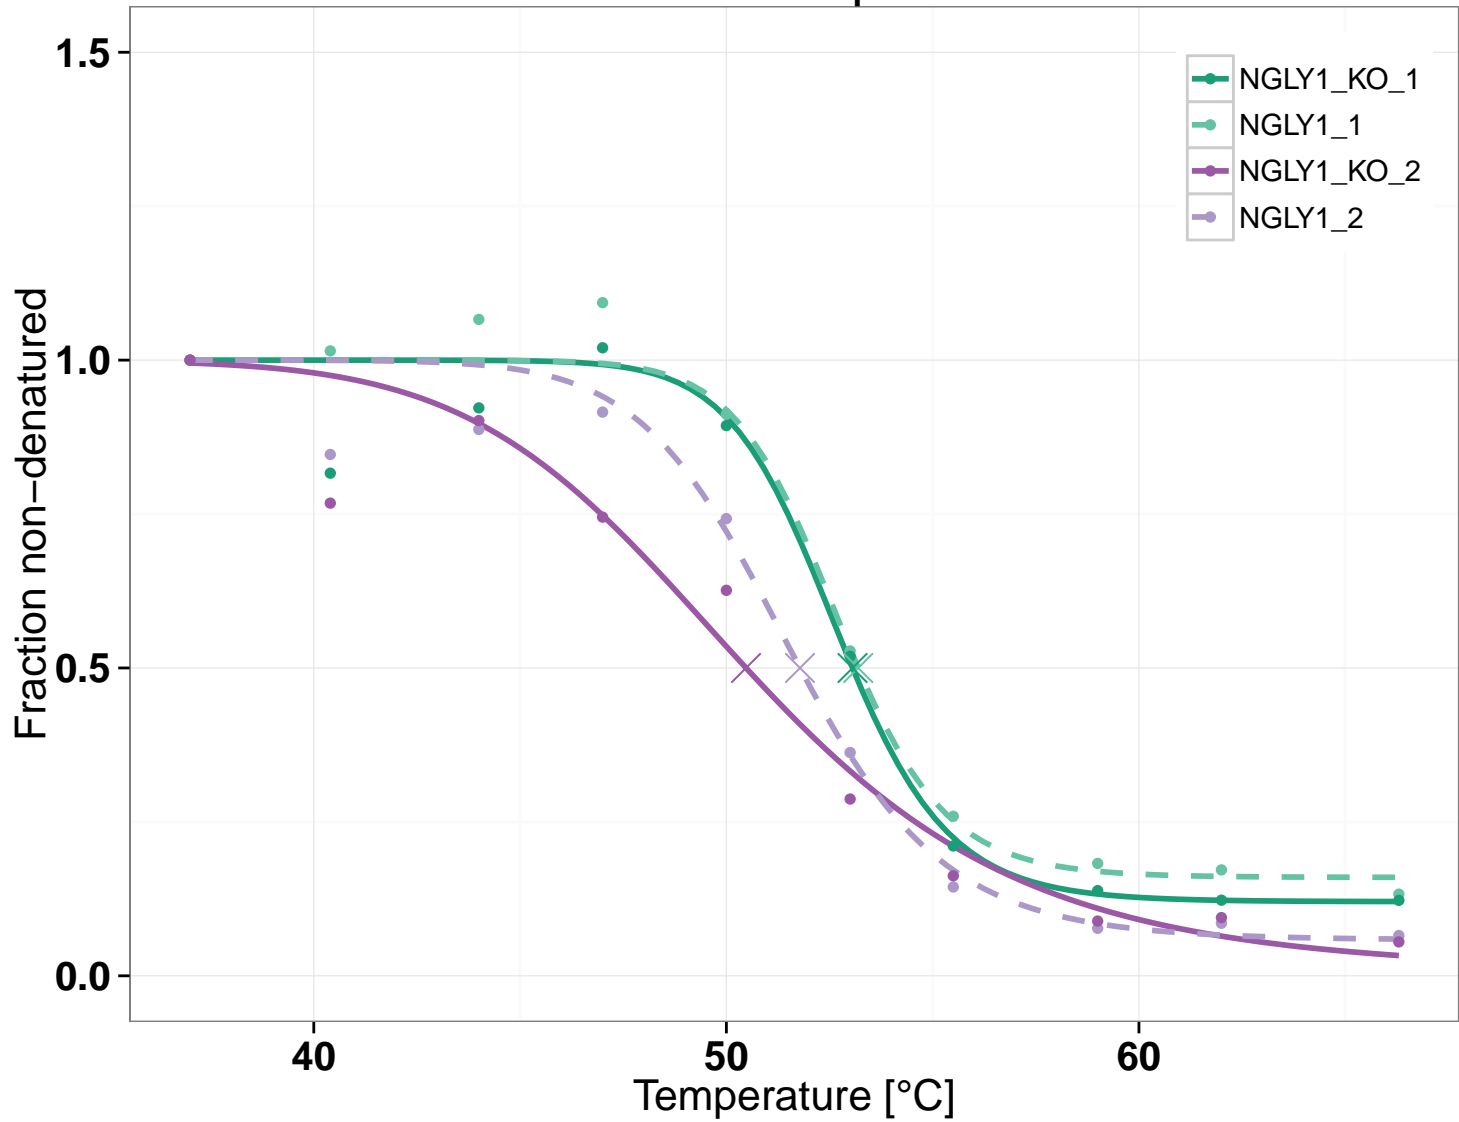

|            | meltPoint | slope  | plateau | R2   |
|------------|-----------|--------|---------|------|
| NGLY1_KO_1 | 53.06     | -0.17  | 0.12    | 0.97 |
| NGLY1_1    | 53.2      | -0.17  | 0.16    | 0.99 |
| NGLY1_KO_2 | 50.48     | -0.074 | 0       | 0.95 |
| NGLY1_2    | 51.78     | -0.13  | 0.06    | 0.97 |

Supplement: Supplementary file 6540 [file 1]

IPI00479592.3|MED25

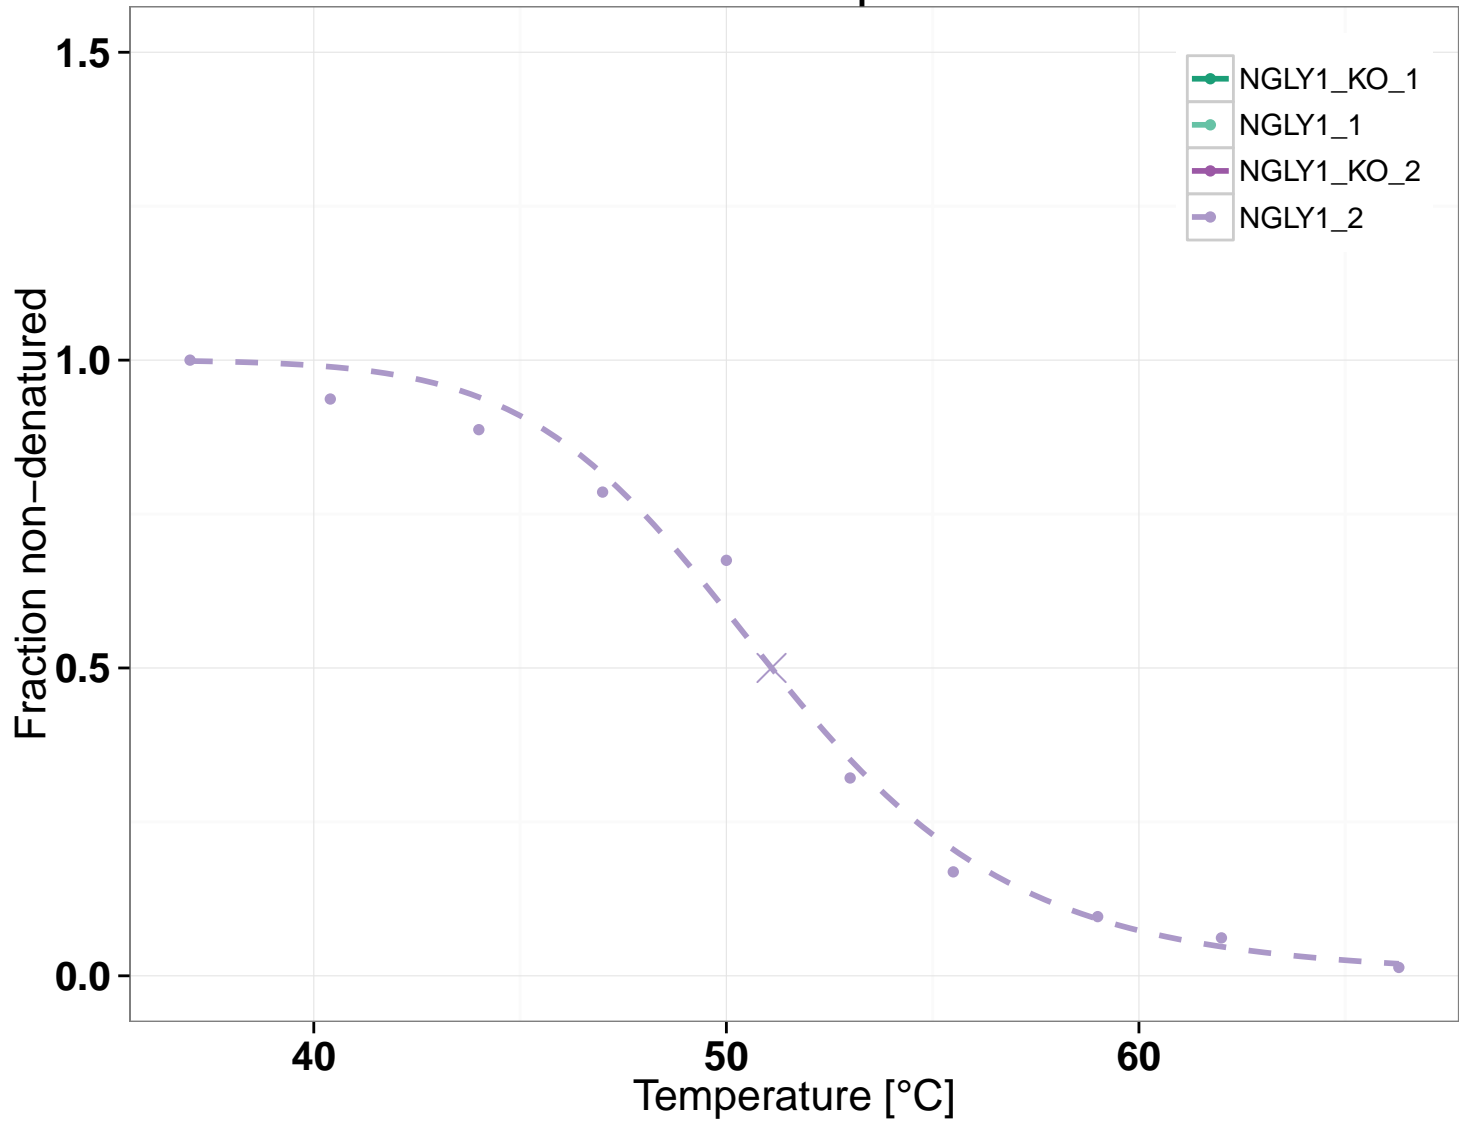

|            | meltPoint | slope  | plateau | R2   |
|------------|-----------|--------|---------|------|
| NGLY1_KO_1 | -         | -      | -       | -    |
| NGLY1_1    | -         | -      | -       | -    |
| NGLY1_KO_2 | -         | -      | -       | -    |
| NGLY1_2    | 51.09     | -0.085 | 0       | 0.99 |

Supplement: Supplementary file 6541 [file 1]

IPI00643722.1|ARID1A

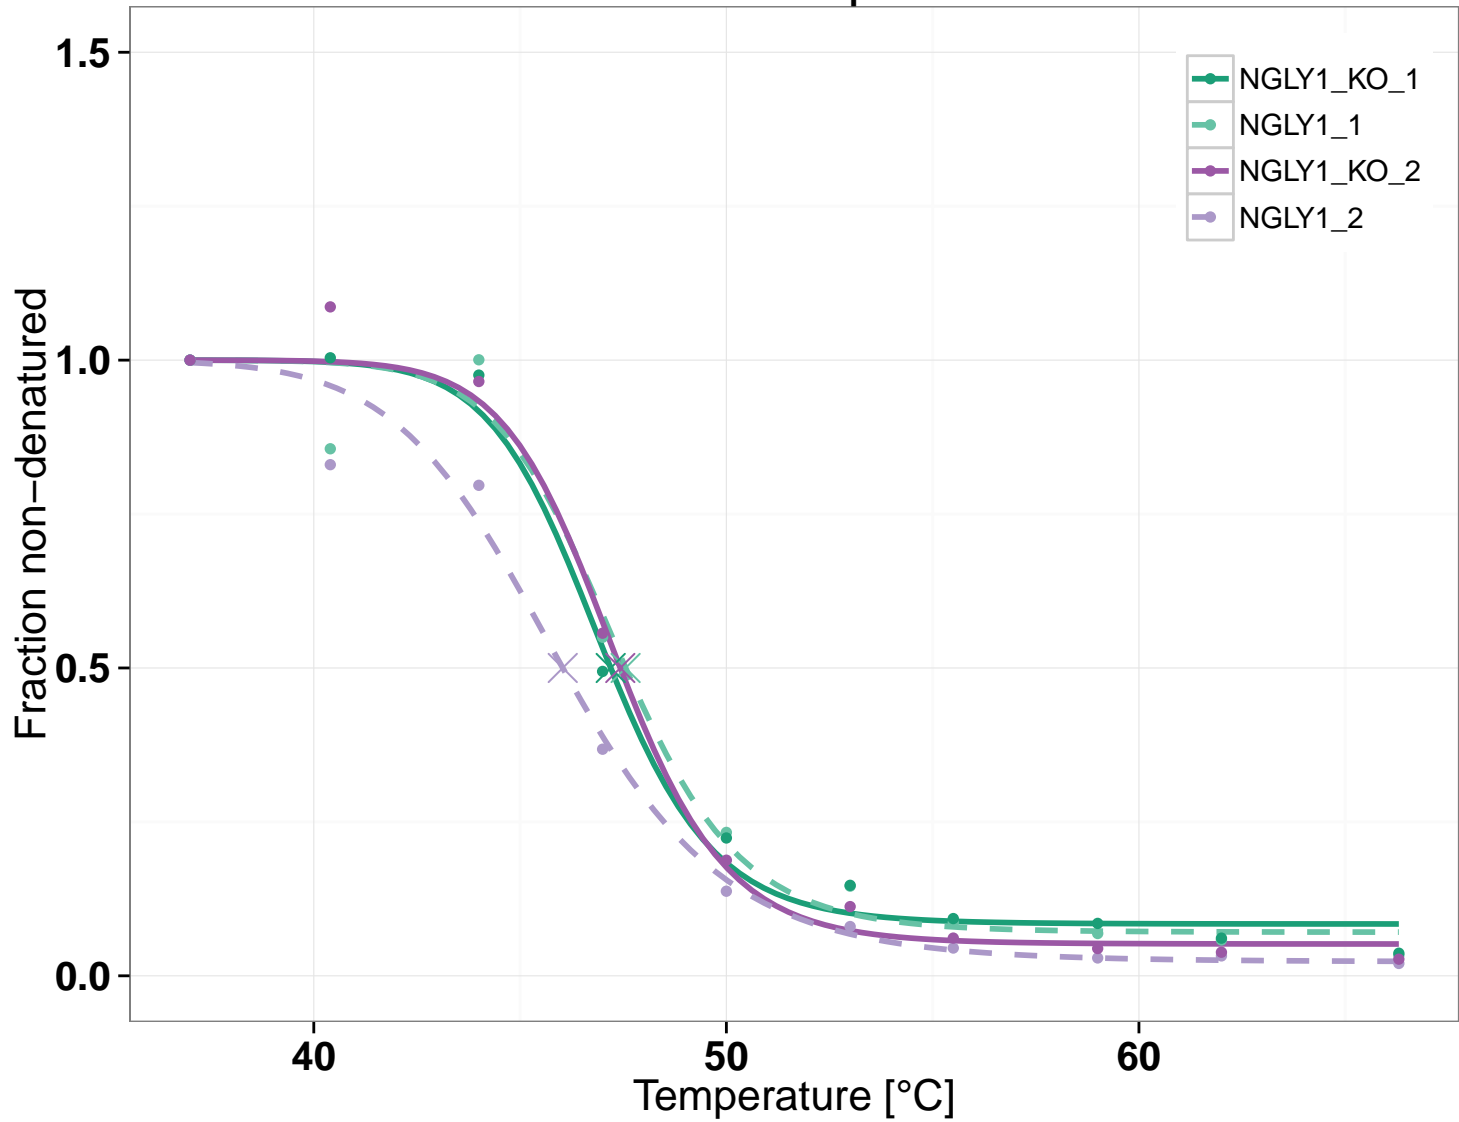

|            | meltPoint | slope | plateau | R2   |
|------------|-----------|-------|---------|------|
| NGLY1_KO_1 | 47.2      | -0.17 | 0.08    | 0.99 |
| NGLY1_1    | 47.56     | -0.16 | 0.07    | 0.98 |
| NGLY1_KO_2 | 47.43     | -0.17 | 0.05    | 0.99 |
| NGLY1_2    | 46.03     | -0.12 | 0.02    | 0.98 |

Supplement: Supplementary file 6542 [file 1]

IPI00550361.7|LOC100134303

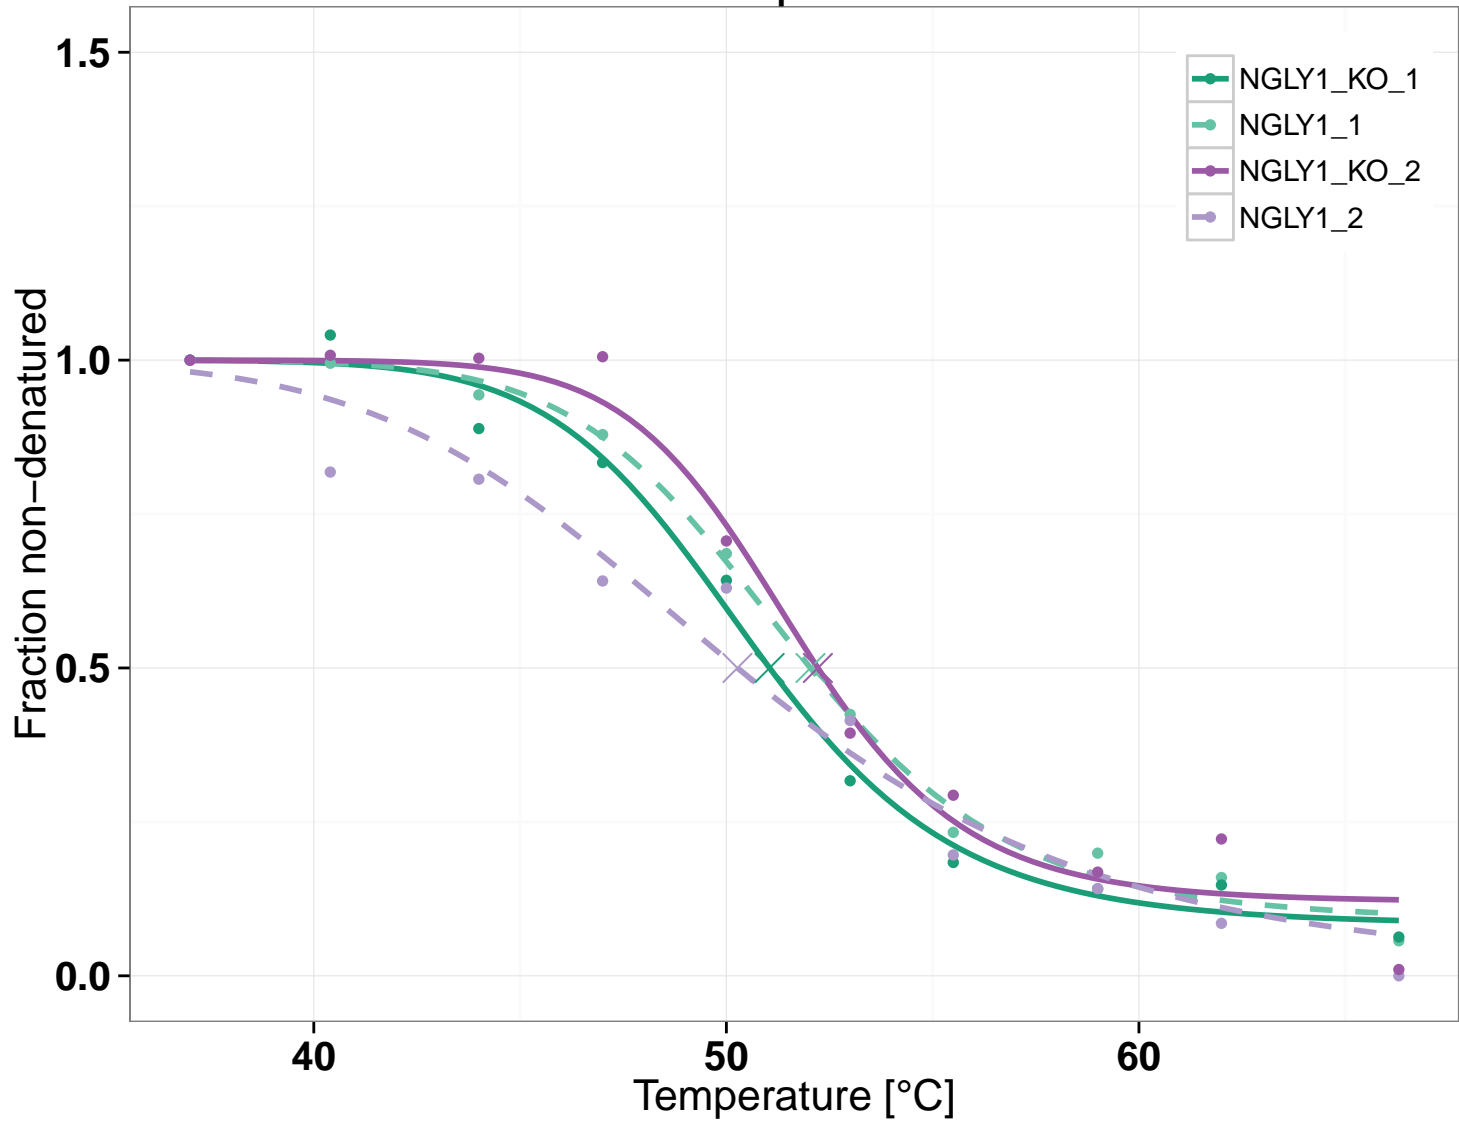

|            | meltPoint | slope  | plateau | R2   |
|------------|-----------|--------|---------|------|
| NGLY1_KO_1 | 51.05     | -0.093 | 0.08    | 0.99 |
| NGLY1_1    | 52.04     | -0.086 | 0.09    | 0.99 |
| NGLY1_KO_2 | 52.22     | -0.11  | 0.12    | 0.98 |
| NGLY1_2    | 50.27     | -0.056 | 0       | 0.96 |

Supplement: Supplementary file 6543 [file 1]

IPI00374364.3|C7ORF59

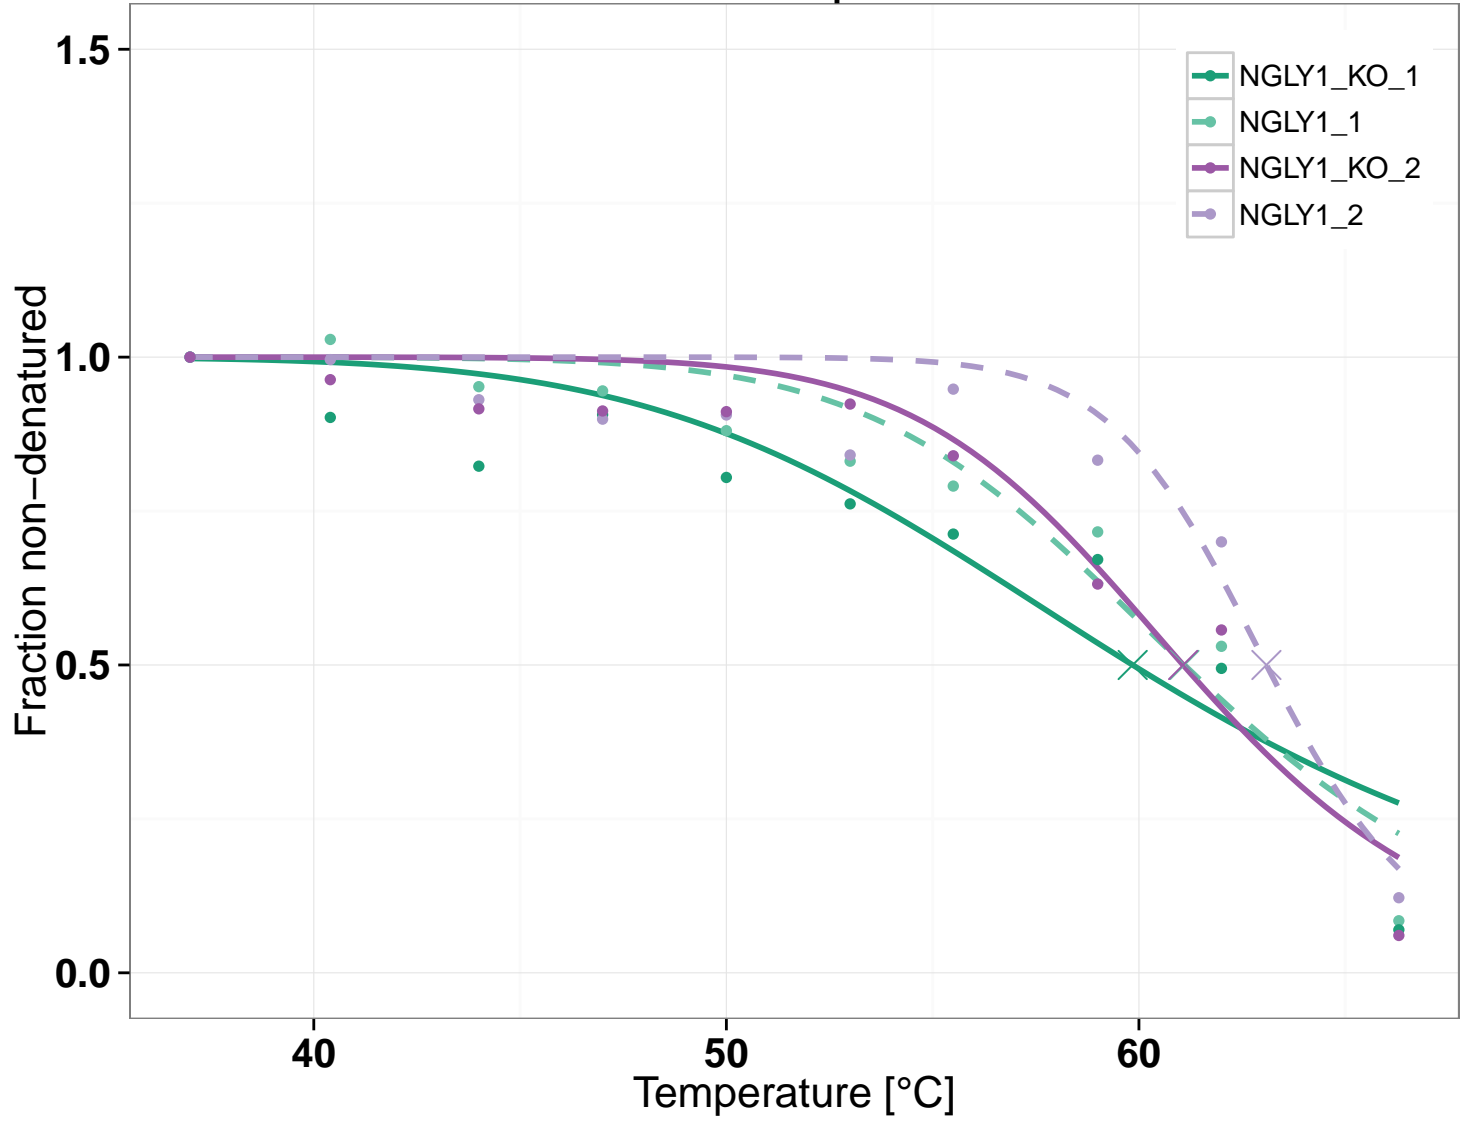

|            | meltPoint | slope  | plateau | R2   |
|------------|-----------|--------|---------|------|
| NGLY1_KO_1 | 59.85     | -0.043 | 0       | 0.84 |
| NGLY1_1    | 61.1      | -0.065 | 0       | 0.92 |
| NGLY1_KO_2 | 61.07     | -0.077 | 0       | 0.93 |
| NGLY1_2    | 63.09     | -0.13  | 0       | 0.9  |

Supplement: Supplementary file 6544 [file 1]

IPI00219757.13|GSTP1

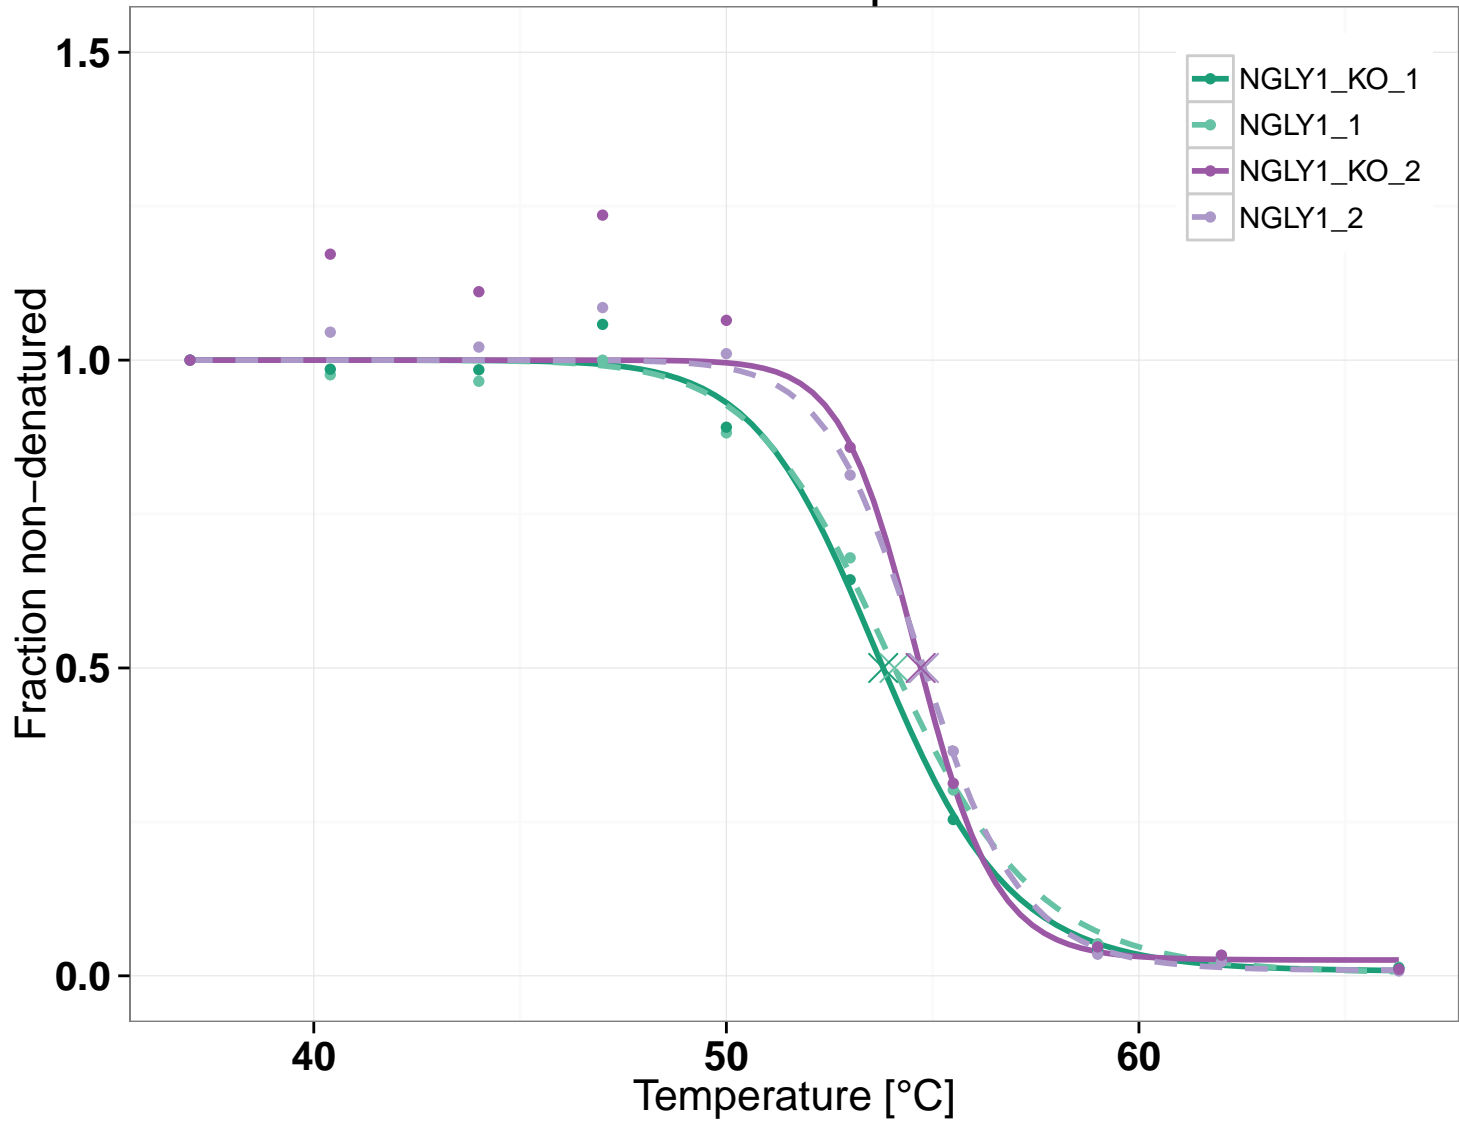

|            | meltPoint | slope | plateau | R2   |
|------------|-----------|-------|---------|------|
| NGLY1_KO_1 | 53.8      | -0.16 | 0.01    | 1    |
| NGLY1_1    | 54.08     | -0.14 | 0       | 1    |
| NGLY1_KO_2 | 54.71     | -0.26 | 0.03    | 0.96 |
| NGLY1_2    | 54.79     | -0.21 | 0.01    | 0.99 |

Supplement: Supplementary file 6545 [file 1]

# IPI00145593.7|NOM1

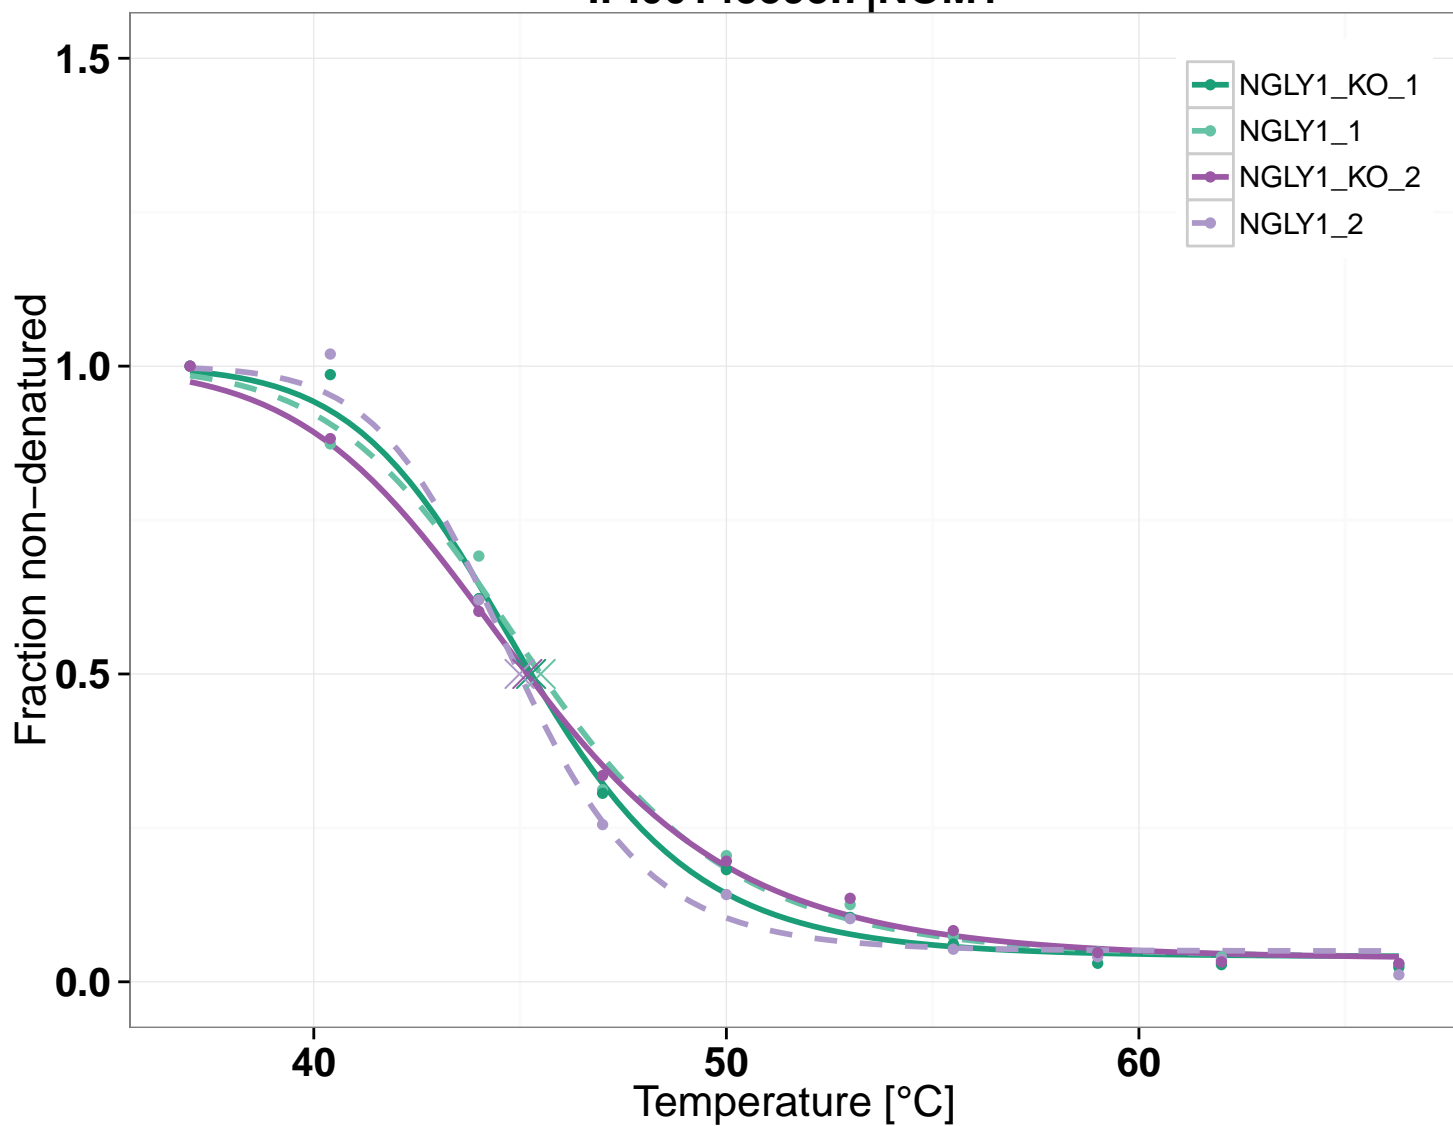

|            | meltPoint | slope  | plateau | R2   |
|------------|-----------|--------|---------|------|
| NGLY1_KO_1 | 45.27     | -0.12  | 0.04    | 0.99 |
| NGLY1_1    | 45.5      | -0.098 | 0.04    | 0.99 |
| NGLY1_KO_2 | 45.18     | -0.091 | 0.04    | 1    |
| NGLY1_2    | 44.99     | -0.14  | 0.05    | 0.99 |

Supplement: Supplementary file 6546 [file 1]

IPI00168262.2|GLT25D1

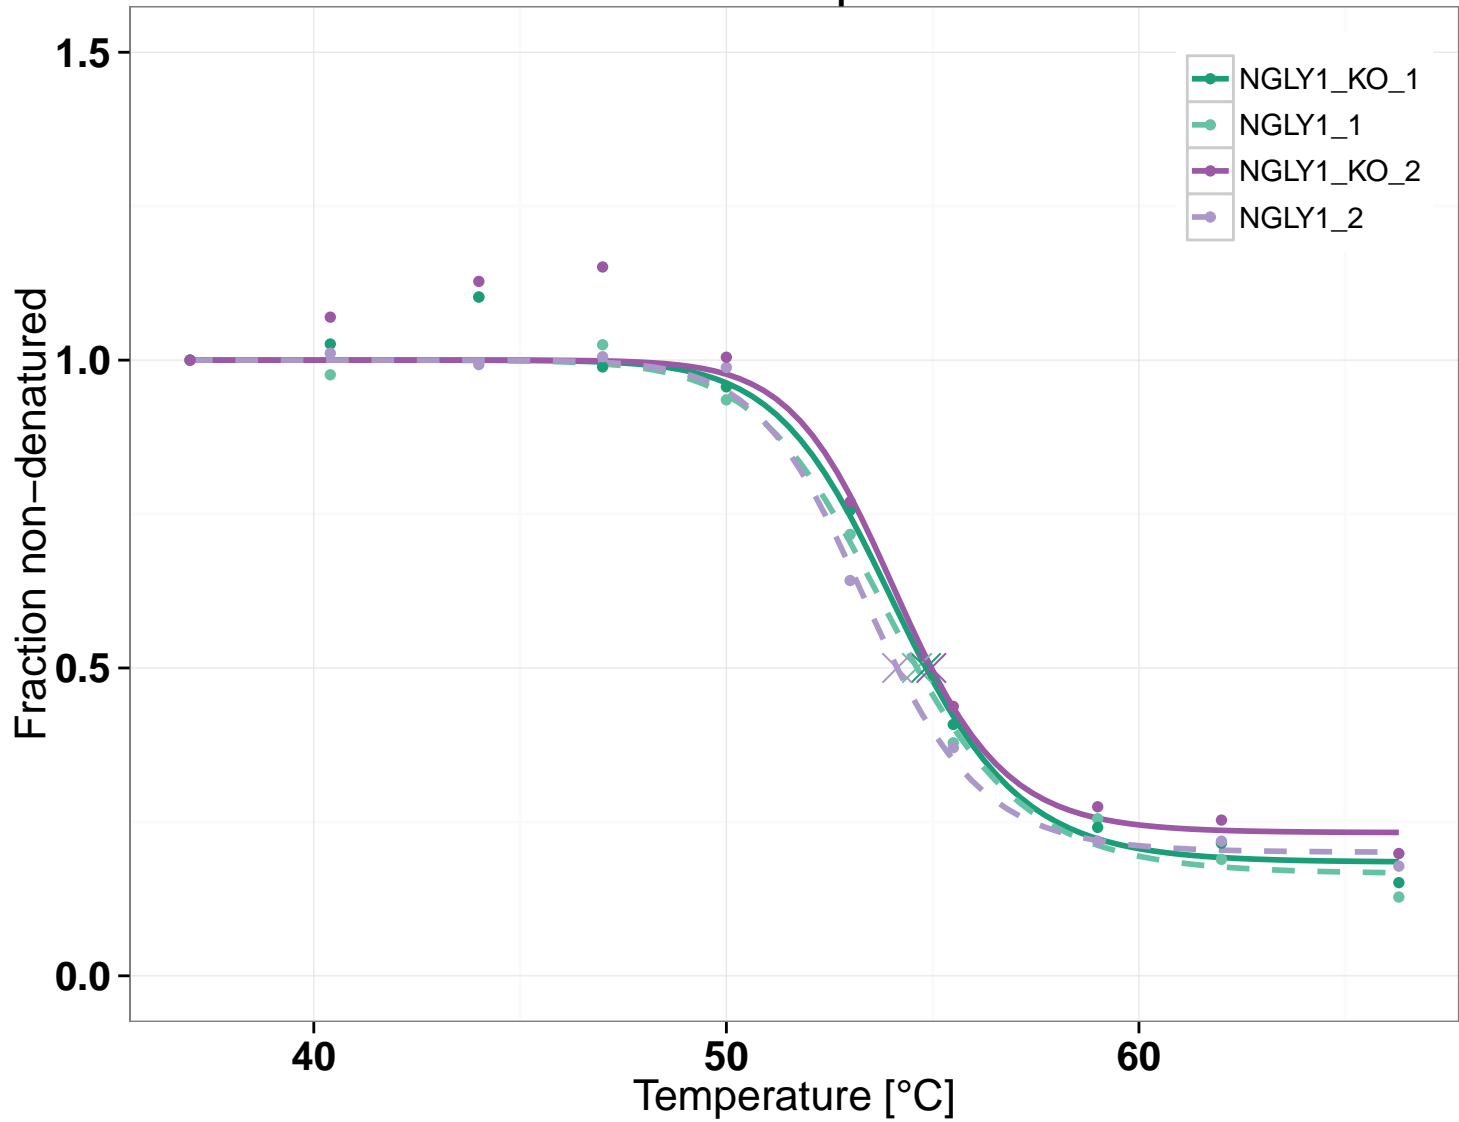

|            | meltPoint | slope | plateau | R2   |
|------------|-----------|-------|---------|------|
| NGLY1_KO_1 | 54.84     | -0.14 | 0.18    | 0.99 |
| NGLY1_1    | 54.62     | -0.13 | 0.17    | 0.99 |
| NGLY1_KO_2 | 54.97     | -0.15 | 0.23    | 0.97 |
| NGLY1_2    | 54.14     | -0.15 | 0.2     | 1    |

Supplement: Supplementary file 6547 [file 1]

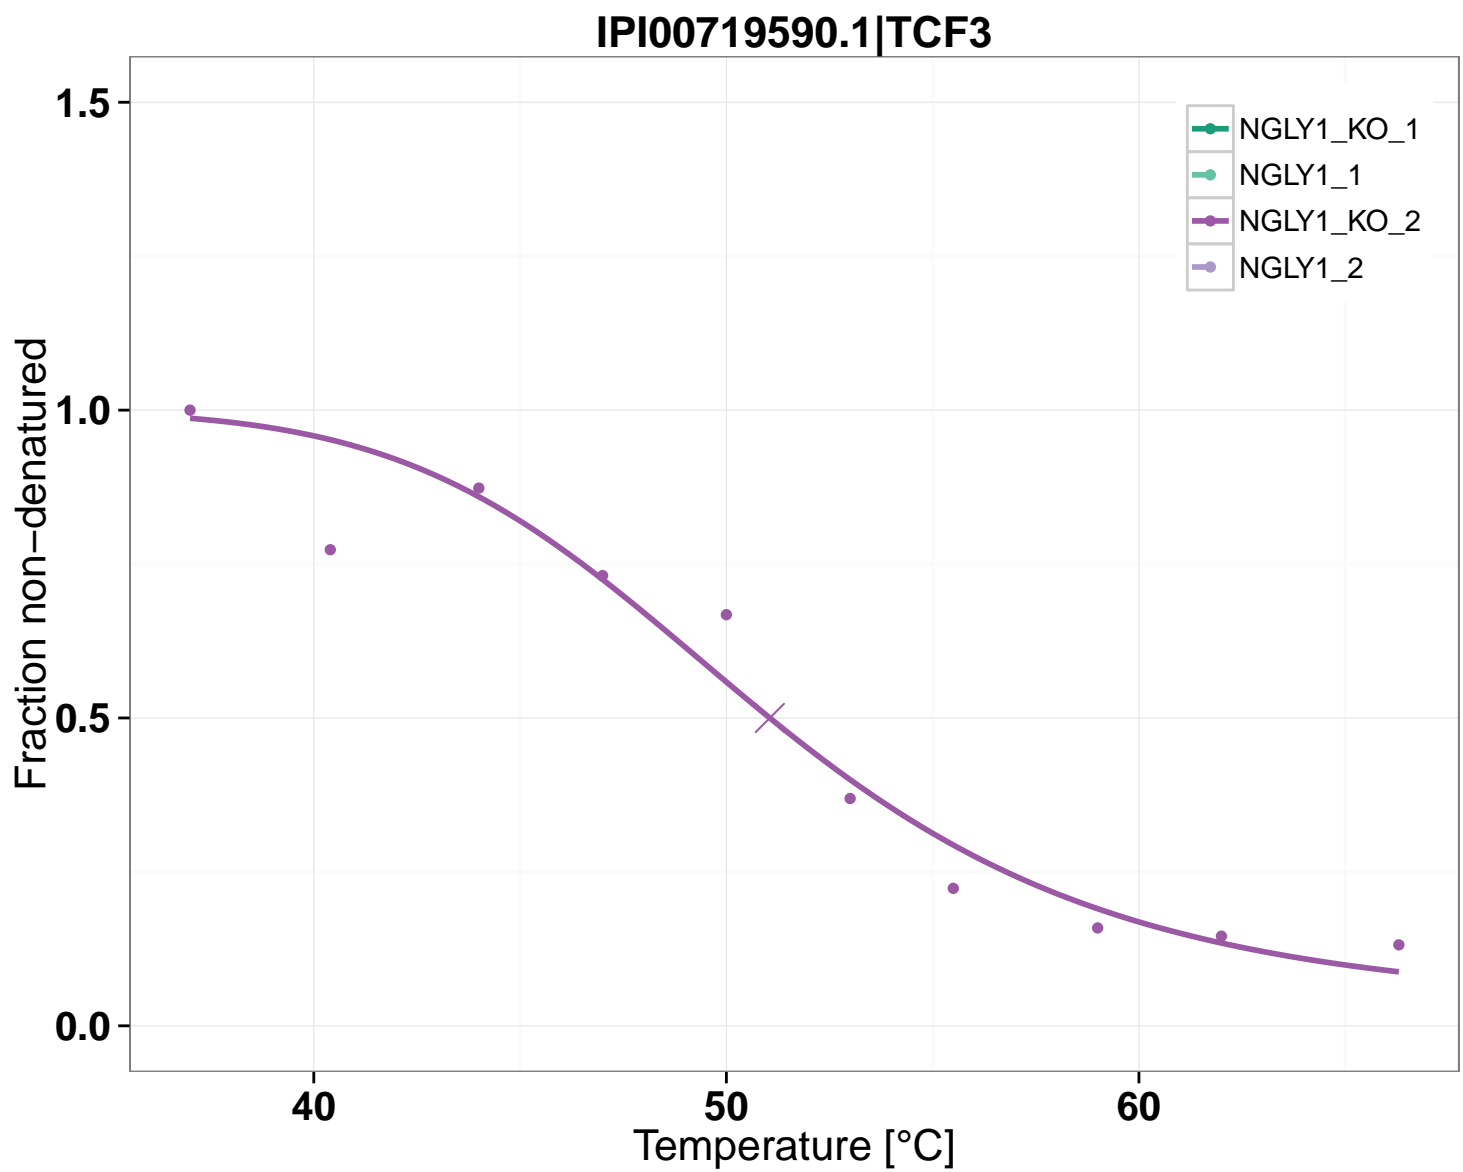

|            | meltPoint | slope  | plateau | R2   |
|------------|-----------|--------|---------|------|
| NGLY1_KO_1 | —         | —      | —       | —    |
| NGLY1_1    | —         | —      | —       | —    |
| NGLY1_KO_2 | 51.05     | −0.057 | 0.03    | 0.95 |
| NGLY1_2    | —         | —      | —       | —    |

Supplement: Supplementary file 6548 [file 1]

# IPI00186384.3|WDTC1

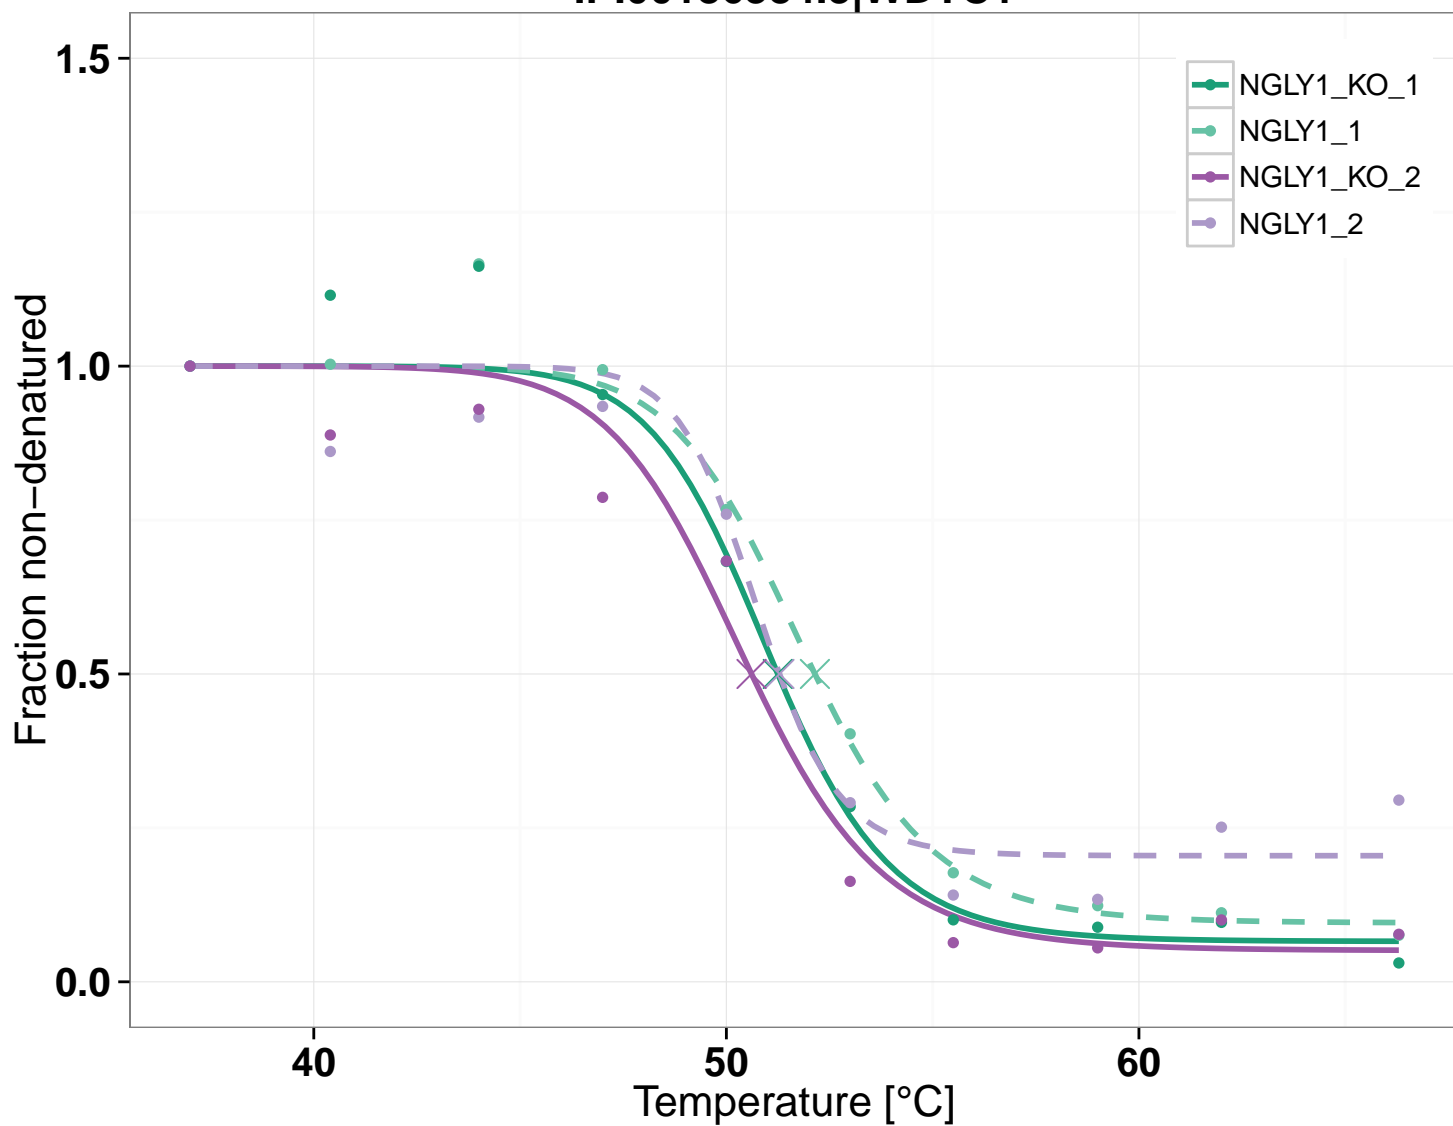

|            | meltPoint | slope | plateau | R2   |
|------------|-----------|-------|---------|------|
| NGLY1_KO_1 | 51.25     | -0.16 | 0.07    | 0.98 |
| NGLY1_1    | 52.15     | -0.14 | 0.1     | 0.98 |
| NGLY1_KO_2 | 50.61     | -0.14 | 0.05    | 0.97 |
| NGLY1_2    | 51.29     | -0.21 | 0.2     | 0.96 |

Supplement: Supplementary file 6549 [file 1]

IPI00215952.4|ENTPD5

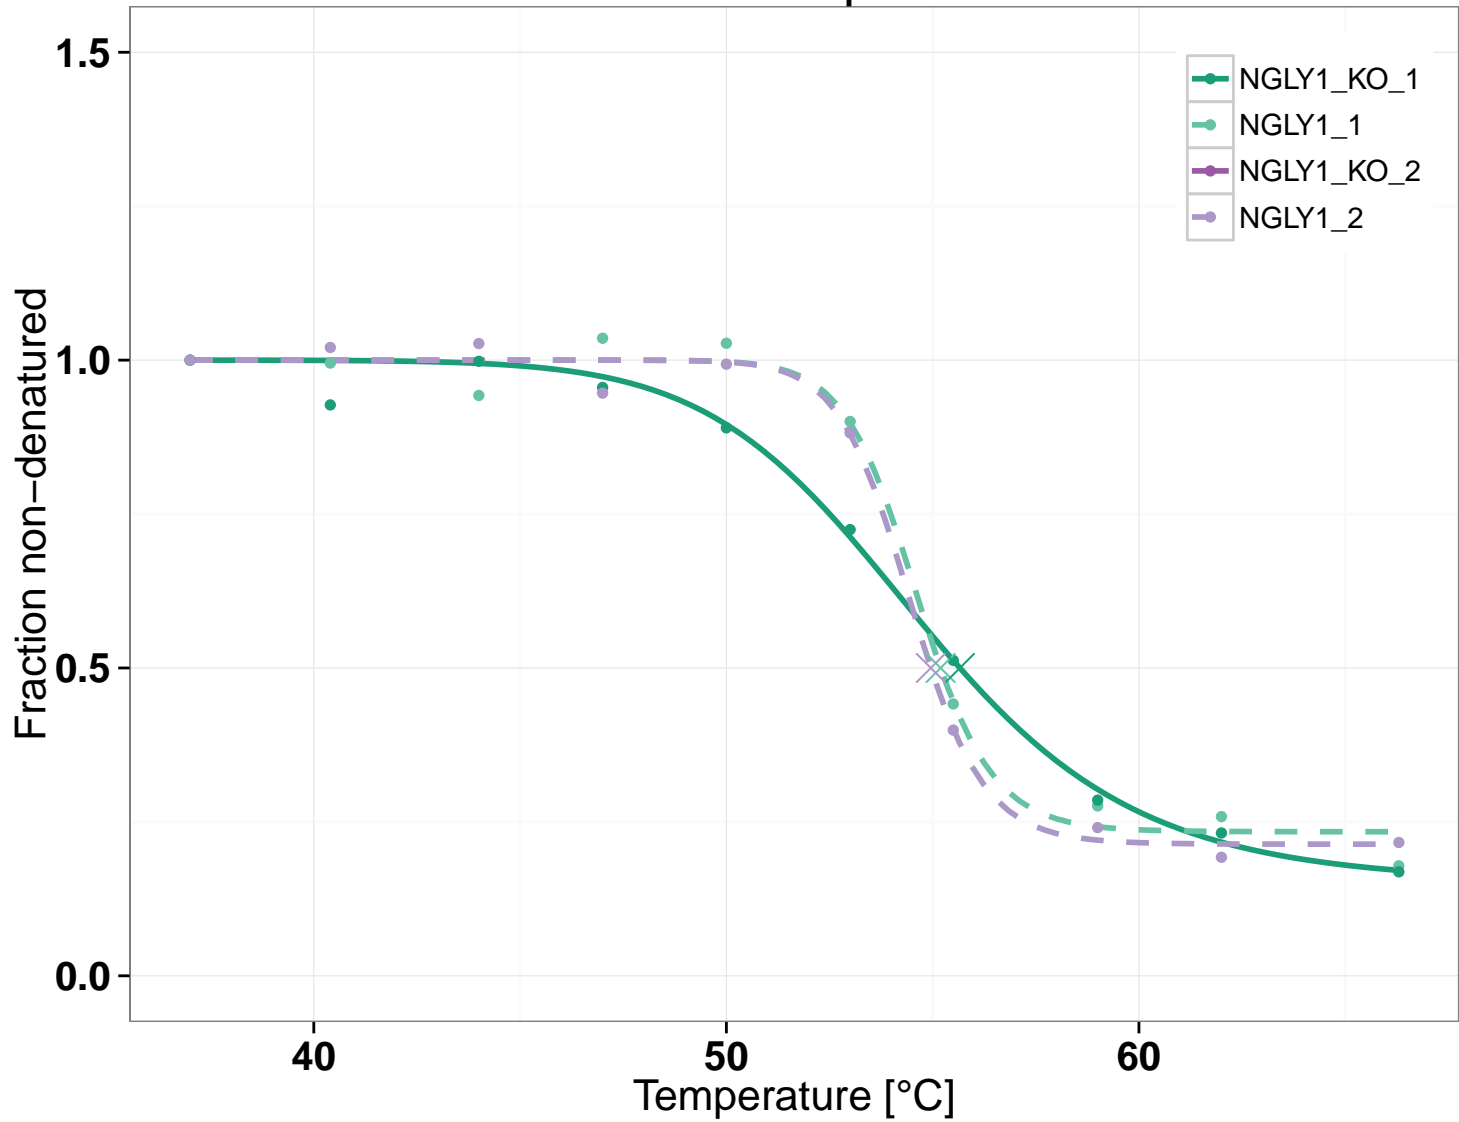

|            | meltPoint | slope  | plateau | R2   |
|------------|-----------|--------|---------|------|
| NGLY1_KO_1 | 55.66     | -0.082 | 0.15    | 0.99 |
| NGLY1_1    | 55.19     | -0.21  | 0.23    | 0.99 |
| NGLY1_KO_2 | -         | -      | -       | -    |
| NGLY1_2    | 54.96     | -0.22  | 0.21    | 1    |

Supplement: Supplementary file 6550 [file 1]

# IPI00884192.1|GPX4

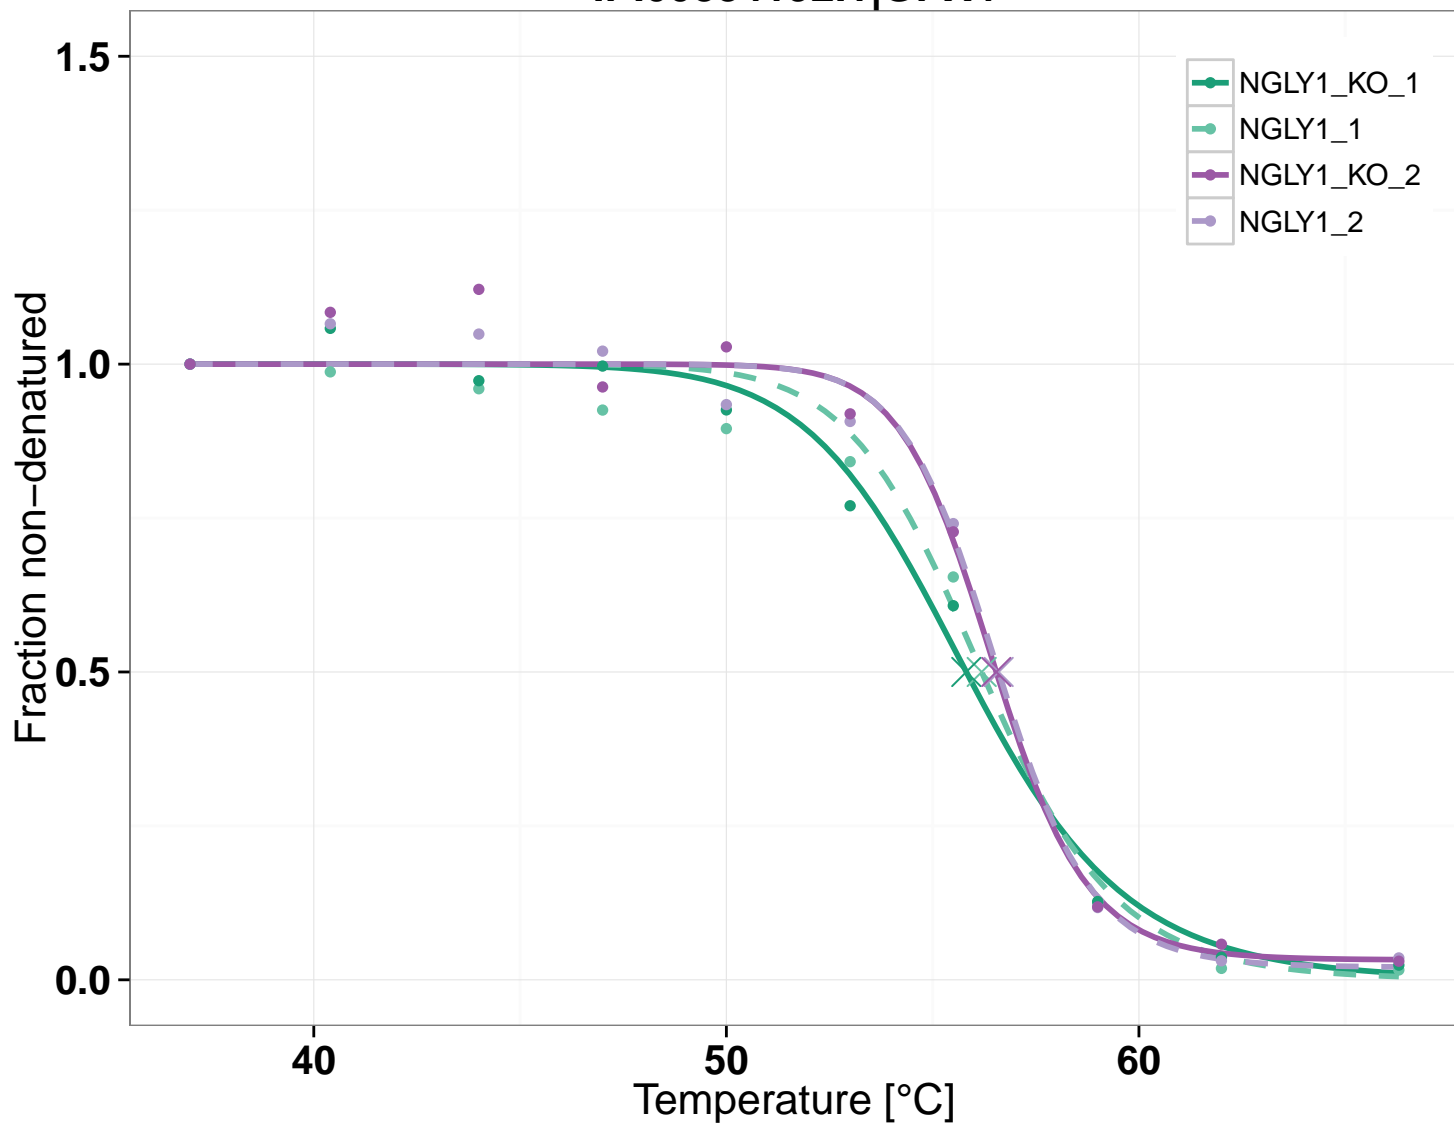

|            | meltPoint | slope | plateau | R2   |
|------------|-----------|-------|---------|------|
| NGLY1_KO_1 | 55.82     | -0.13 | 0       | 0.99 |
| NGLY1_1    | 56.19     | -0.15 | 0       | 0.99 |
| NGLY1_KO_2 | 56.54     | -0.21 | 0.03    | 0.99 |
| NGLY1_2    | 56.6      | -0.21 | 0.02    | 0.99 |

Supplement: Supplementary file 6551 [file 1]

IPI00397191.4|LOC650157

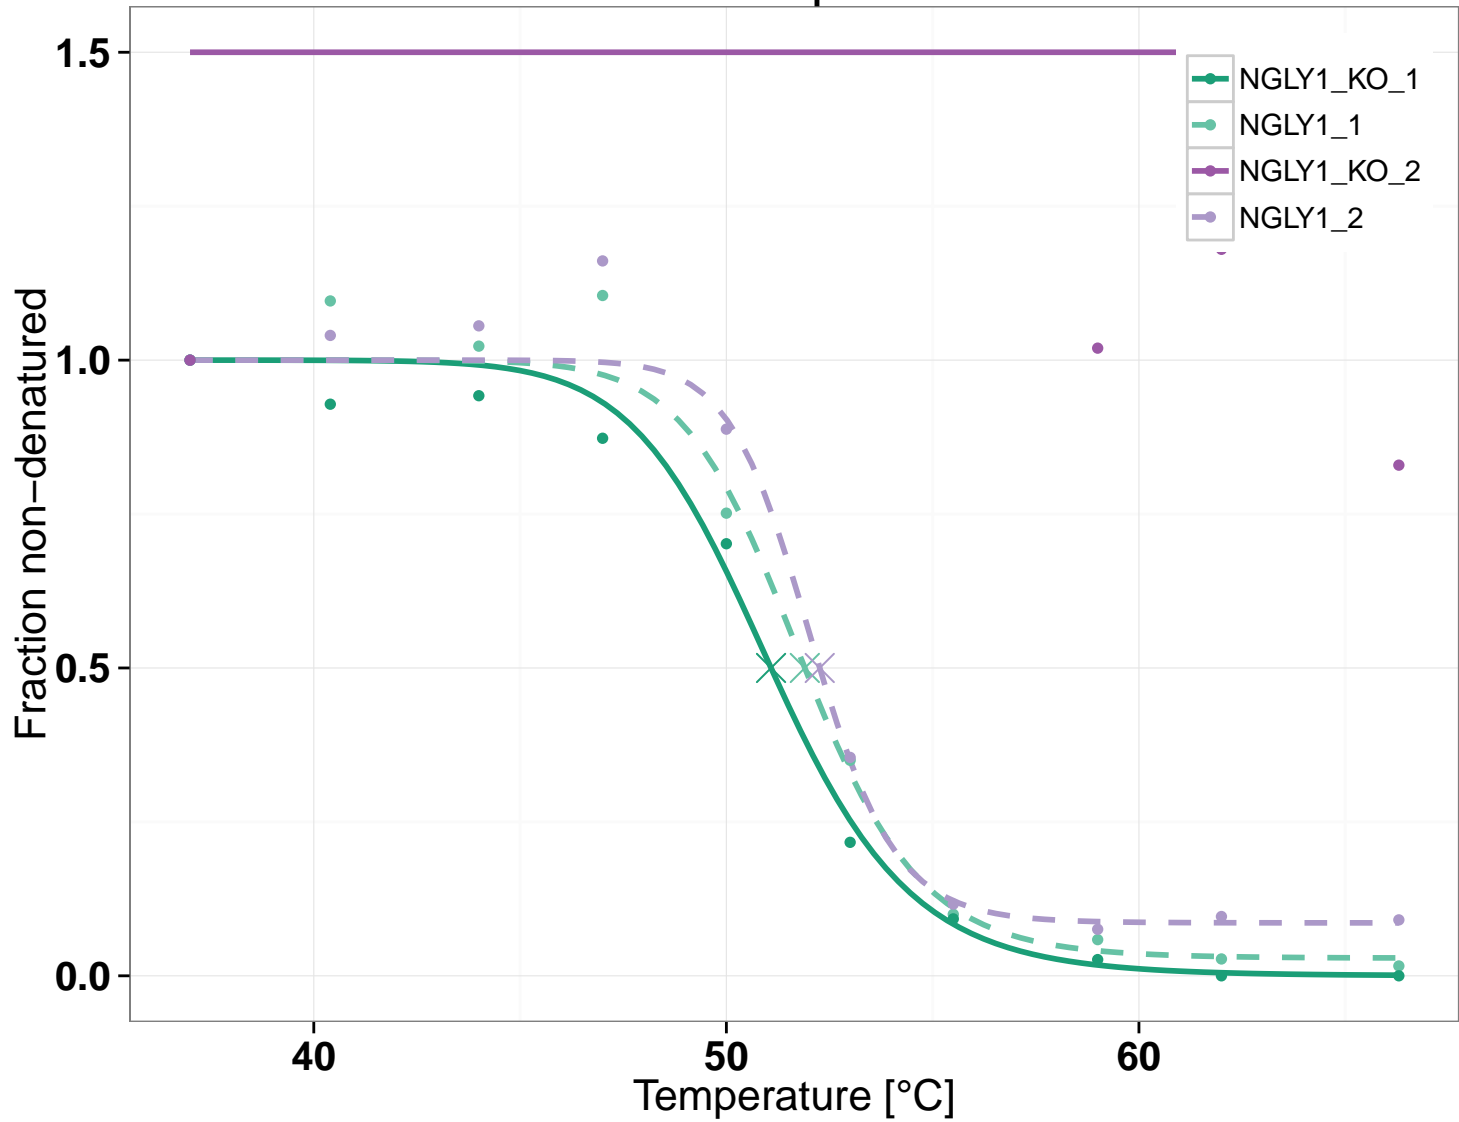

|            | meltPoint | slope | plateau | R2    |
|------------|-----------|-------|---------|-------|
| NGLY1_KO_1 | 51.08     | -0.15 | 0       | 0.99  |
| NGLY1_1    | 51.9      | -0.17 | 0.03    | 0.99  |
| NGLY1_KO_2 | -         | -     | 1.5     | -0.73 |
| NGLY1_2    | 52.26     | -0.23 | 0.09    | 0.98  |

Supplement: Supplementary file 6552 [file 1]

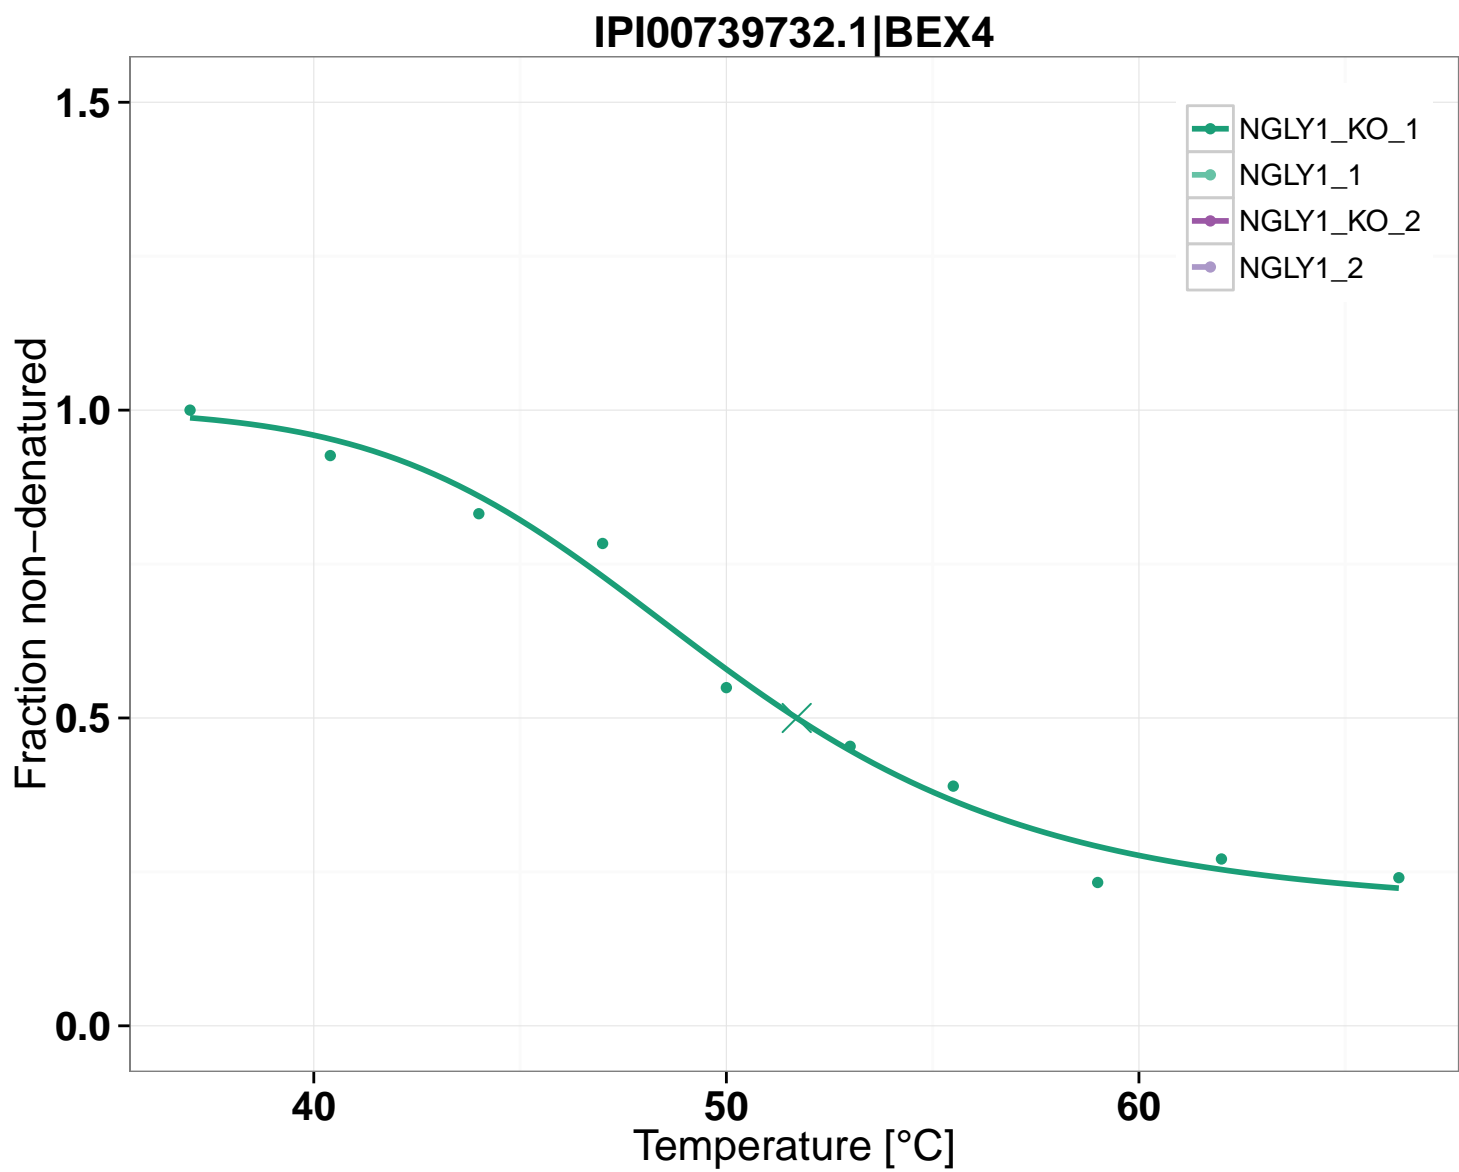

|            | meltPoint | slope  | plateau | R2   |
|------------|-----------|--------|---------|------|
| NGLY1_KO_1 | 51.71     | -0.051 | 0.19    | 0.99 |
| NGLY1_1    | —         | —      | —       | —    |
| NGLY1_KO_2 | —         | —      | —       | —    |
| NGLY1_2    | —         | —      | —       | —    |

Supplement: Supplementary file 6553 [file 1]

IPI00298308.7|ALDH1L2

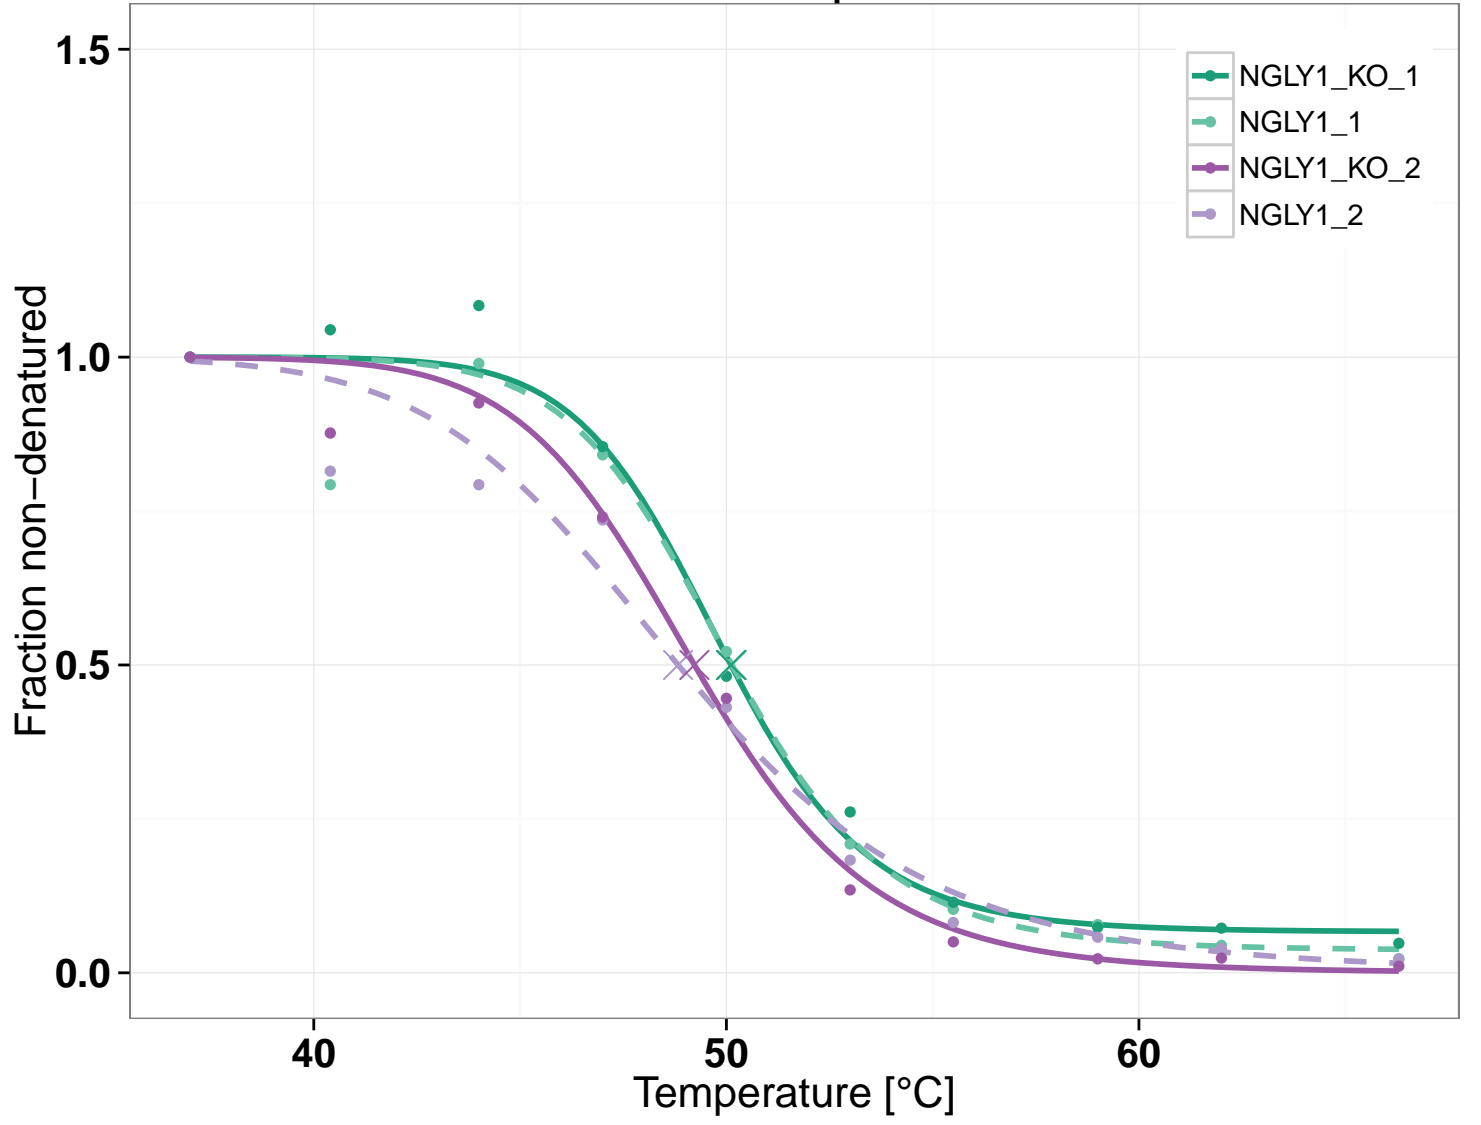

|            | meltPoint | slope  | plateau | R2   |
|------------|-----------|--------|---------|------|
| NGLY1_KO_1 | 50.11     | -0.13  | 0.07    | 0.99 |
| NGLY1_1    | 50.13     | -0.12  | 0.04    | 0.97 |
| NGLY1_KO_2 | 49.23     | -0.12  | 0       | 0.99 |
| NGLY1_2    | 48.83     | -0.082 | 0       | 0.97 |

Supplement: Supplementary file 6554 [file 1]

IPI00297860.1|CCNF

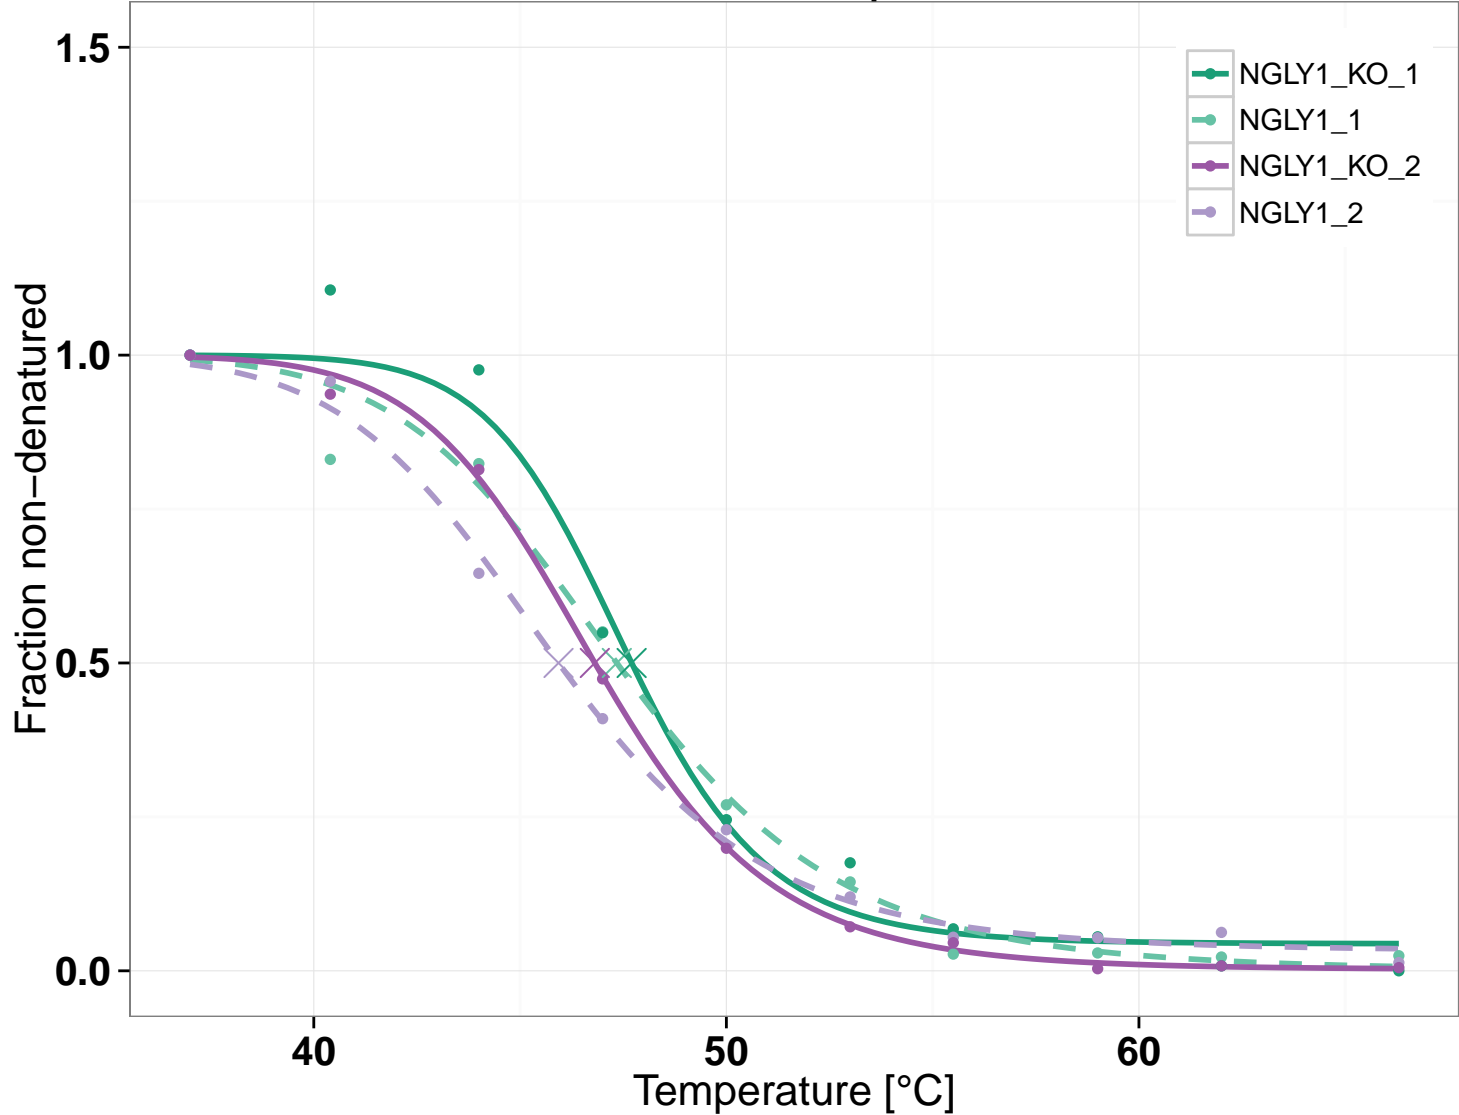

|            | meltPoint | slope  | plateau | R2   |
|------------|-----------|--------|---------|------|
| NGLY1_KO_1 | 47.7      | -0.14  | 0.04    | 0.98 |
| NGLY1_1    | 47.34     | -0.093 | 0       | 0.99 |
| NGLY1_KO_2 | 46.81     | -0.12  | 0       | 1    |
| NGLY1_2    | 45.93     | -0.094 | 0.03    | 1    |

Supplement: Supplementary file 6555 [file 1]

IPI00008248.4|ANAPC7

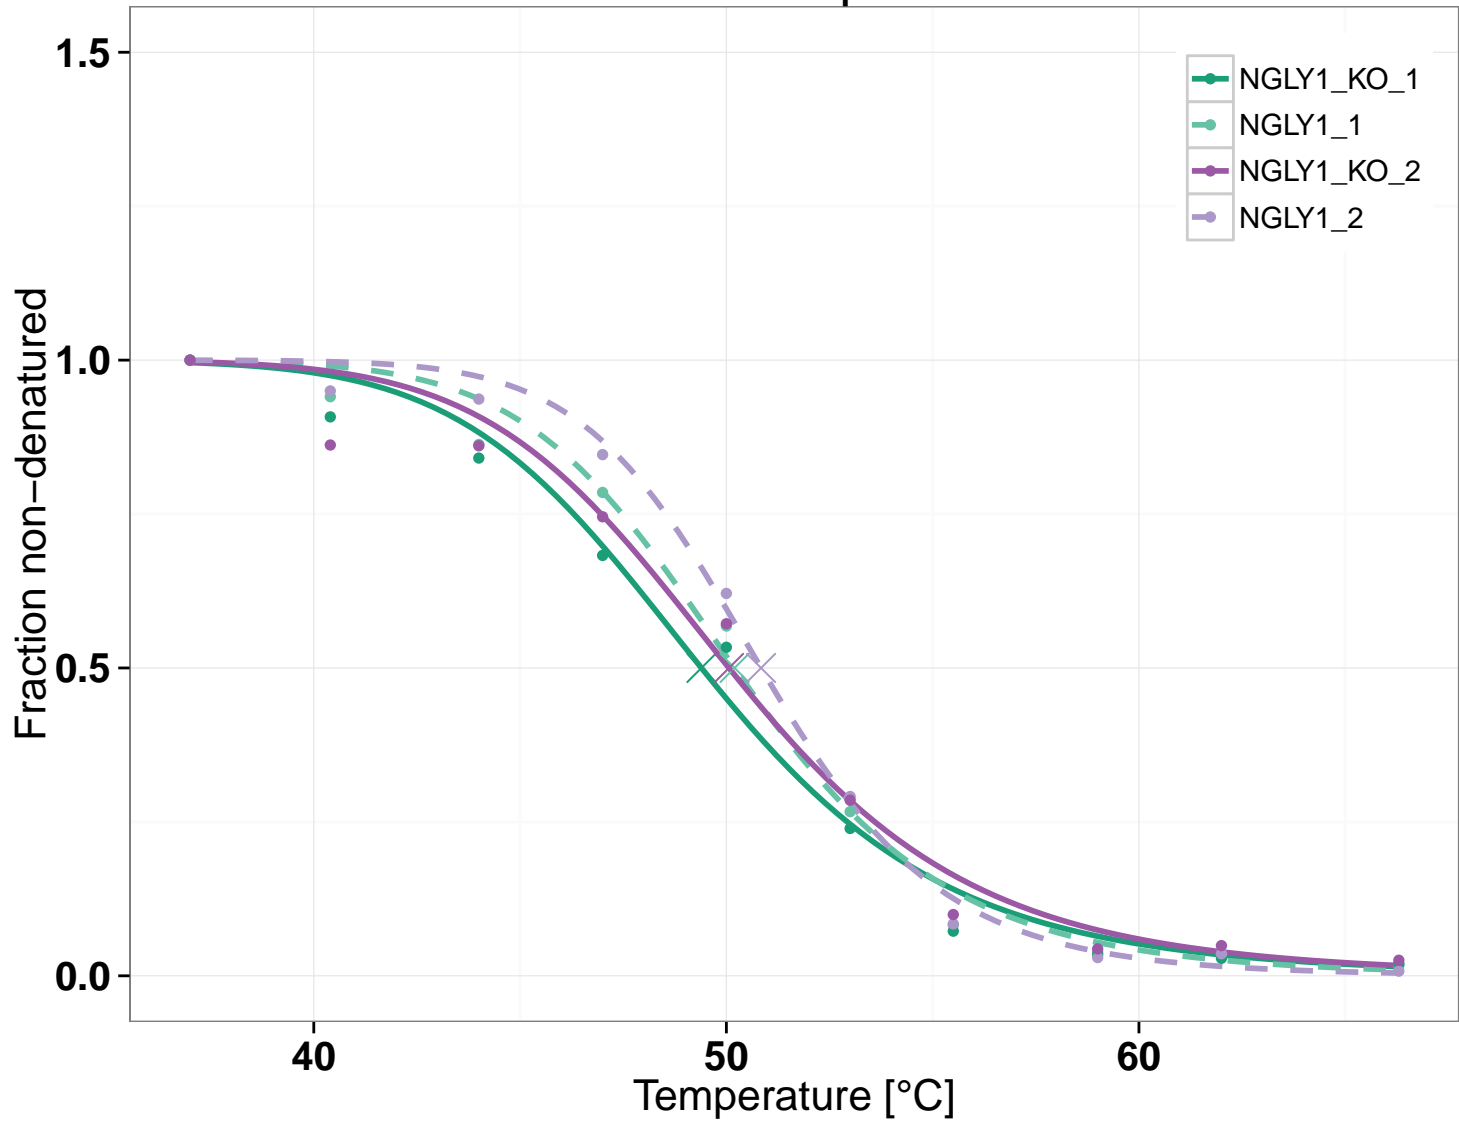

|            | meltPoint | slope  | plateau | R2   |
|------------|-----------|--------|---------|------|
| NGLY1_KO_1 | 49.4      | -0.084 | 0       | 0.99 |
| NGLY1_1    | 50.2      | -0.096 | 0       | 0.99 |
| NGLY1_KO_2 | 50.06     | -0.084 | 0       | 0.98 |
| NGLY1_2    | 50.84     | -0.11  | 0       | 1    |

Supplement: Supplementary file 6556 [file 1]

# IPI00019533.3|CHI3L2

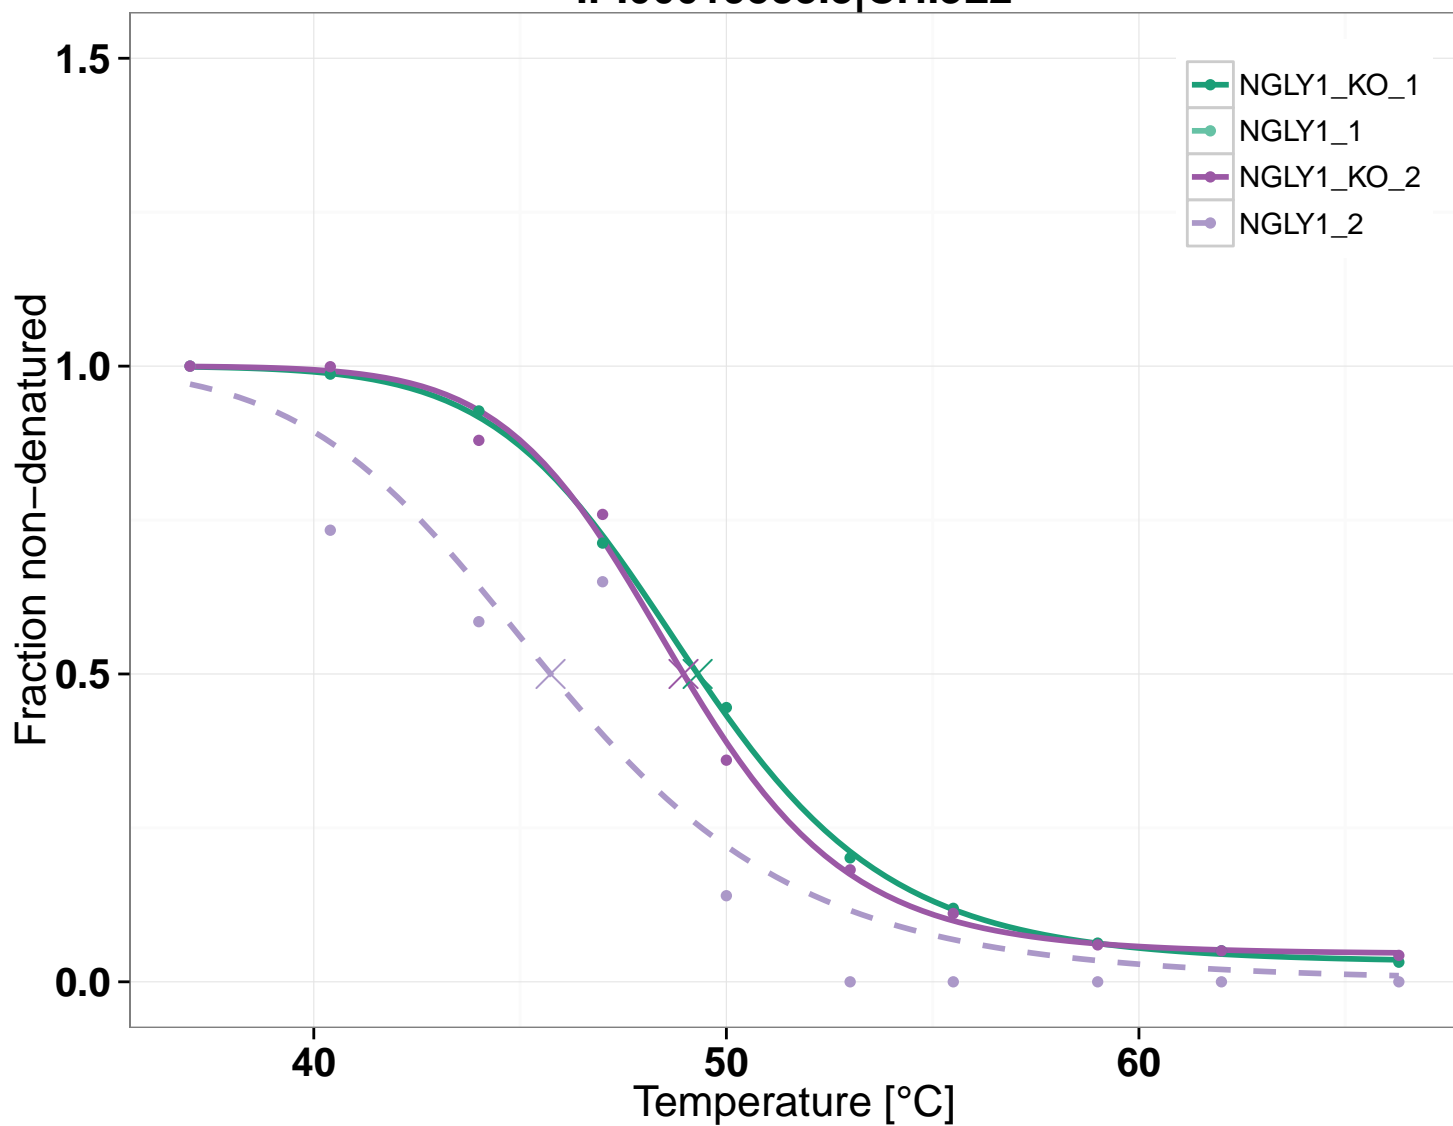

|            | meltPoint | slope  | plateau | R2   |
|------------|-----------|--------|---------|------|
| NGLY1_KO_1 | 49.3      | -0.1   | 0.03    | 1    |
| NGLY1_1    | -         | -      | -       | -    |
| NGLY1_KO_2 | 48.96     | -0.11  | 0.05    | 1    |
| NGLY1_2    | 45.74     | -0.083 | 0       | 0.92 |

Supplement: Supplementary file 6557 [file 1]

IPI00006907.1|C12ORF5

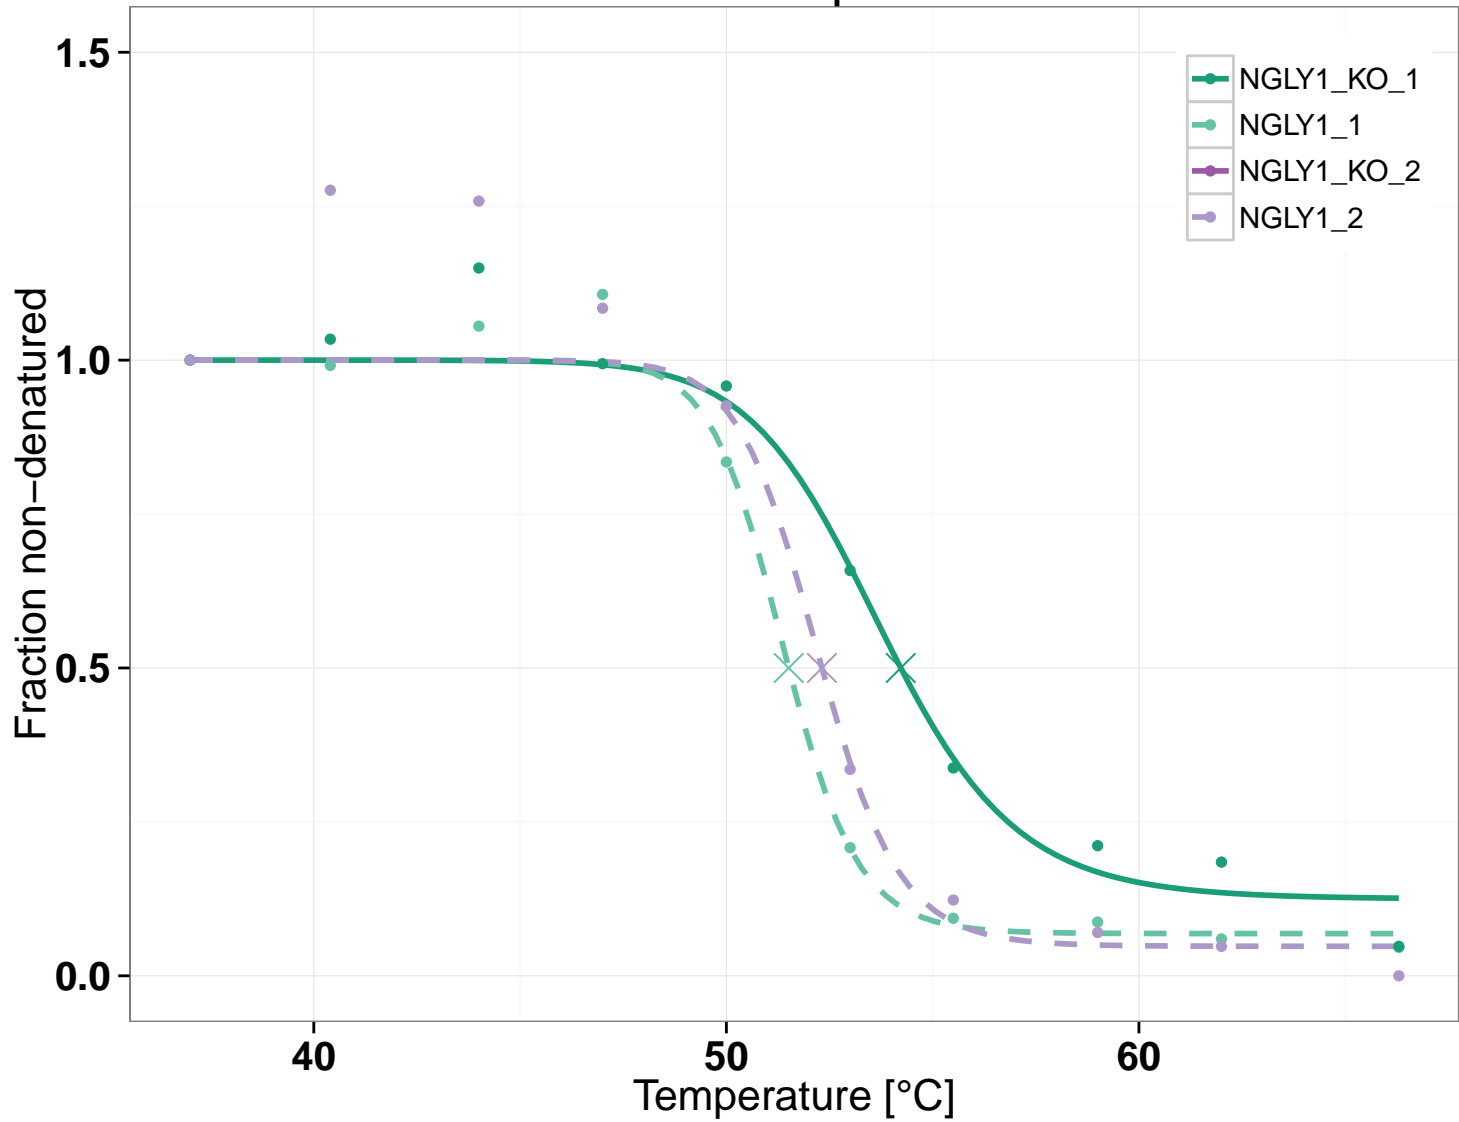

|            | meltPoint | slope | plateau | R2   |
|------------|-----------|-------|---------|------|
| NGLY1_KO_1 | 54.23     | -0.14 | 0.12    | 0.98 |
| NGLY1_1    | 51.51     | -0.26 | 0.07    | 0.99 |
| NGLY1_KO_2 | -         | -     | -       | -    |
| NGLY1_2    | 52.32     | -0.24 | 0.05    | 0.94 |

Supplement: Supplementary file 6558 [file 1]

# IPI00013212.1|CSK

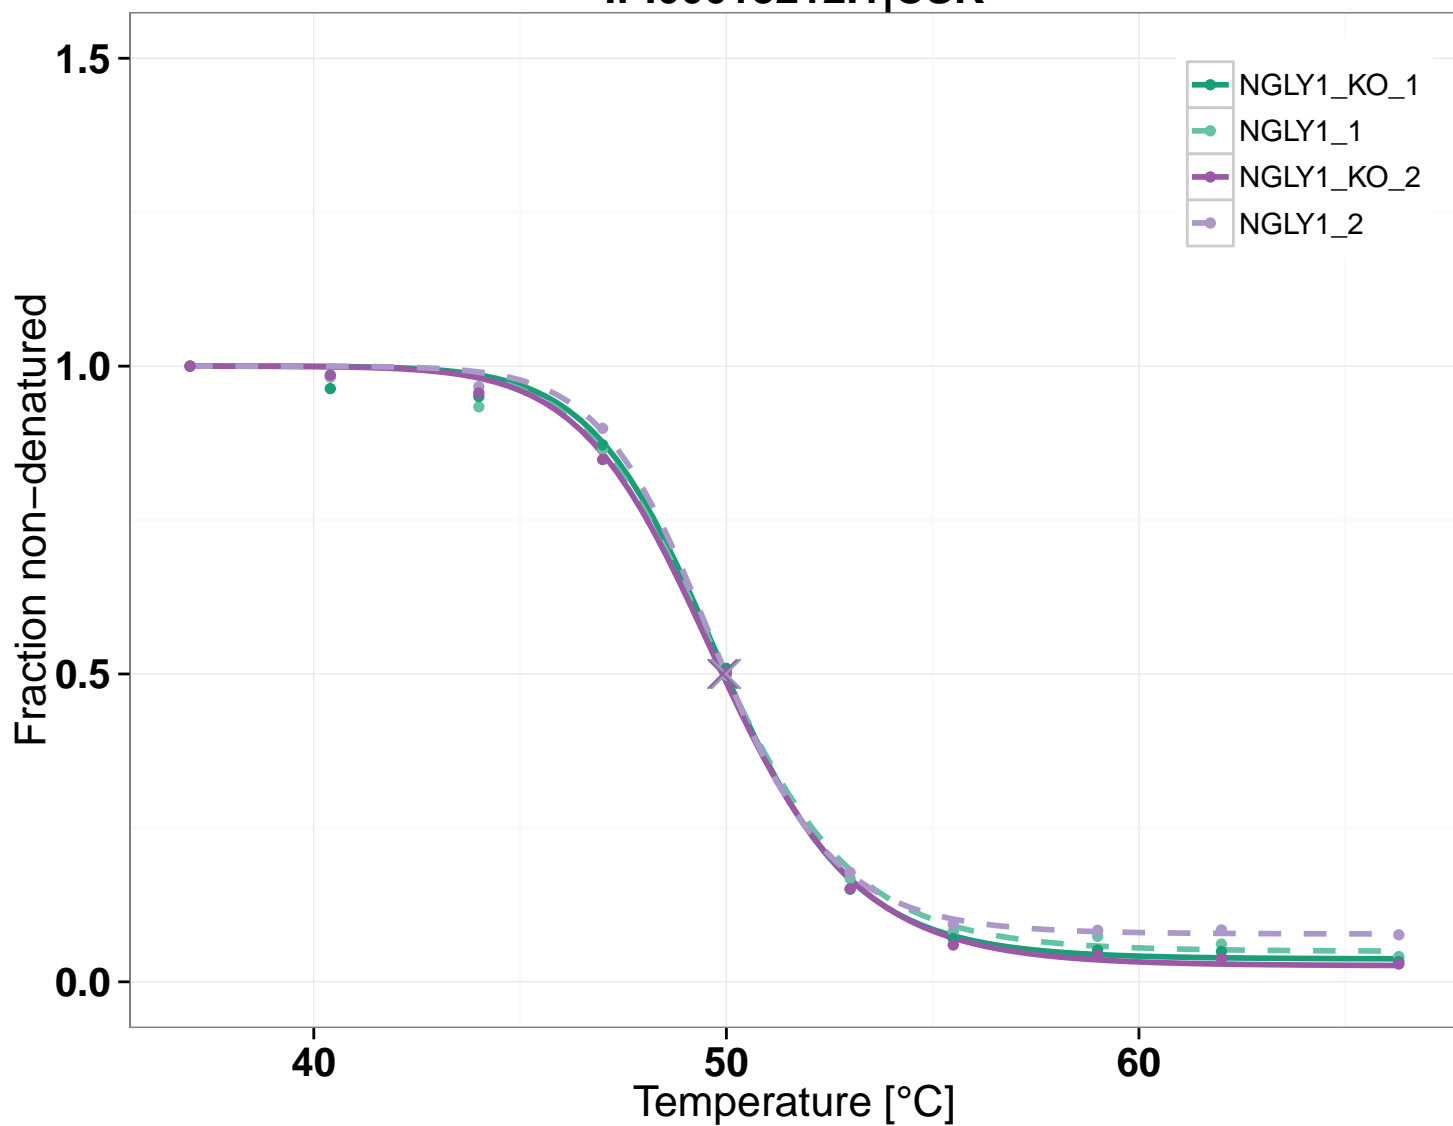

|            | meltPoint | slope | plateau | R2 |
|------------|-----------|-------|---------|----|
| NGLY1_KO_1 | 49.98     | -0.15 | 0.04    | 1  |
| NGLY1_1    | 49.97     | -0.14 | 0.05    | 1  |
| NGLY1_KO_2 | 49.9      | -0.15 | 0.03    | 1  |
| NGLY1_2    | 50        | -0.16 | 0.08    | 1  |

Supplement: Supplementary file 6559 [file 1]

IPI00465294.2|CDC5L

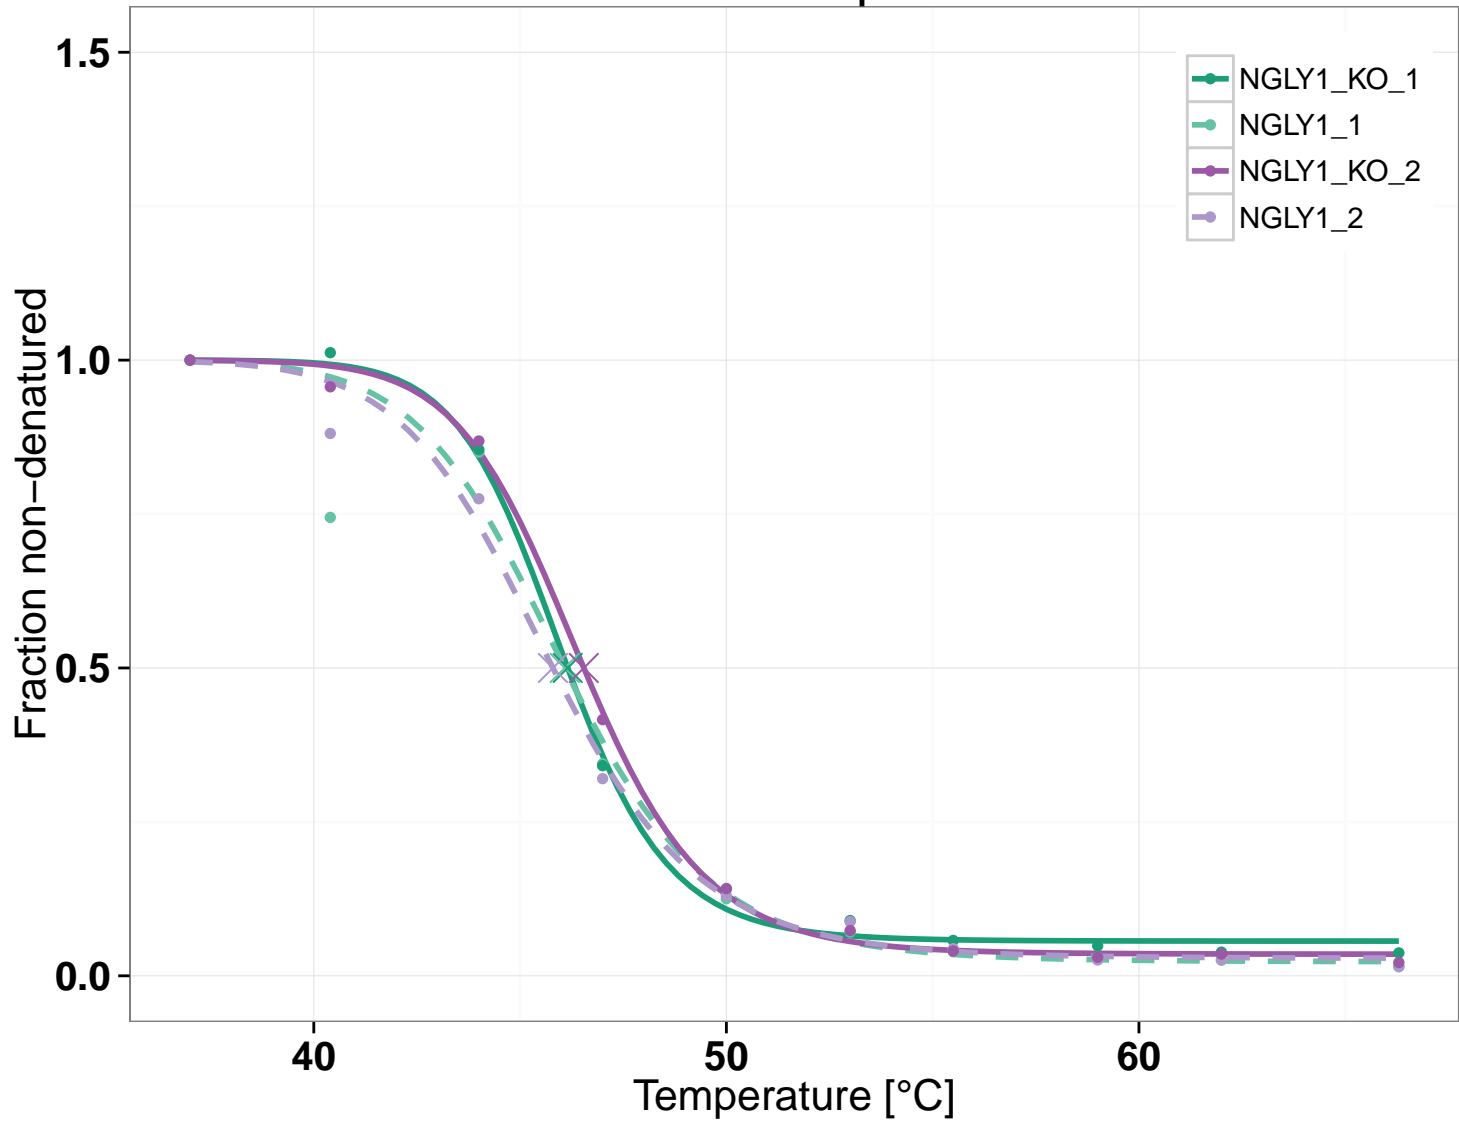

|            | meltPoint | slope | plateau | R2   |
|------------|-----------|-------|---------|------|
| NGLY1_KO_1 | 46.15     | -0.18 | 0.06    | 1    |
| NGLY1_1    | 46.08     | -0.14 | 0.02    | 0.96 |
| NGLY1_KO_2 | 46.54     | -0.16 | 0.04    | 1    |
| NGLY1_2    | 45.8      | -0.13 | 0.03    | 0.99 |

Supplement: Supplementary file 6560 [file 1]

IPI00006157.1|NSBP1

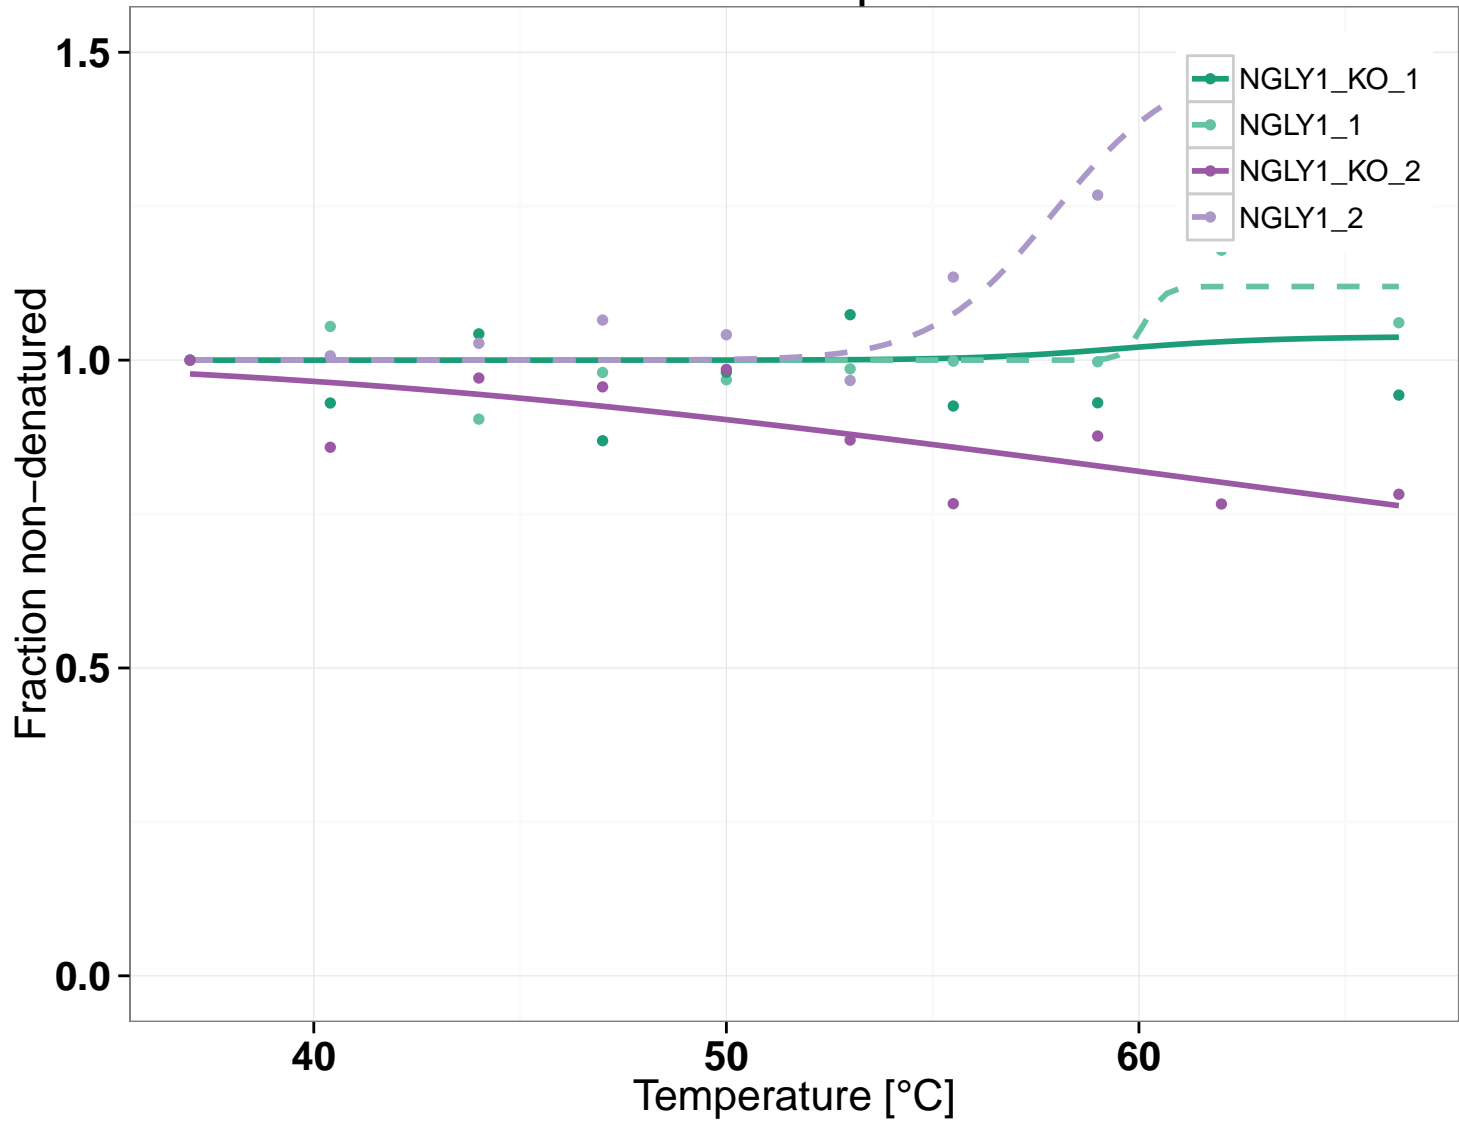

|            | meltPoint | slope   | plateau | R2   |
|------------|-----------|---------|---------|------|
| NGLY1_KO_1 | —         | 0.0052  | 1.04    | 0.02 |
| NGLY1_1    | —         | 0.12    | 1.12    | 0.56 |
| NGLY1_KO_2 | —         | -0.0089 | 0.1     | 0.57 |
| NGLY1_2    | —         | 0.081   | 1.5     | 0.92 |

Supplement: Supplementary file 6561 [file 1]

# IPI00307409.6|MRPL9

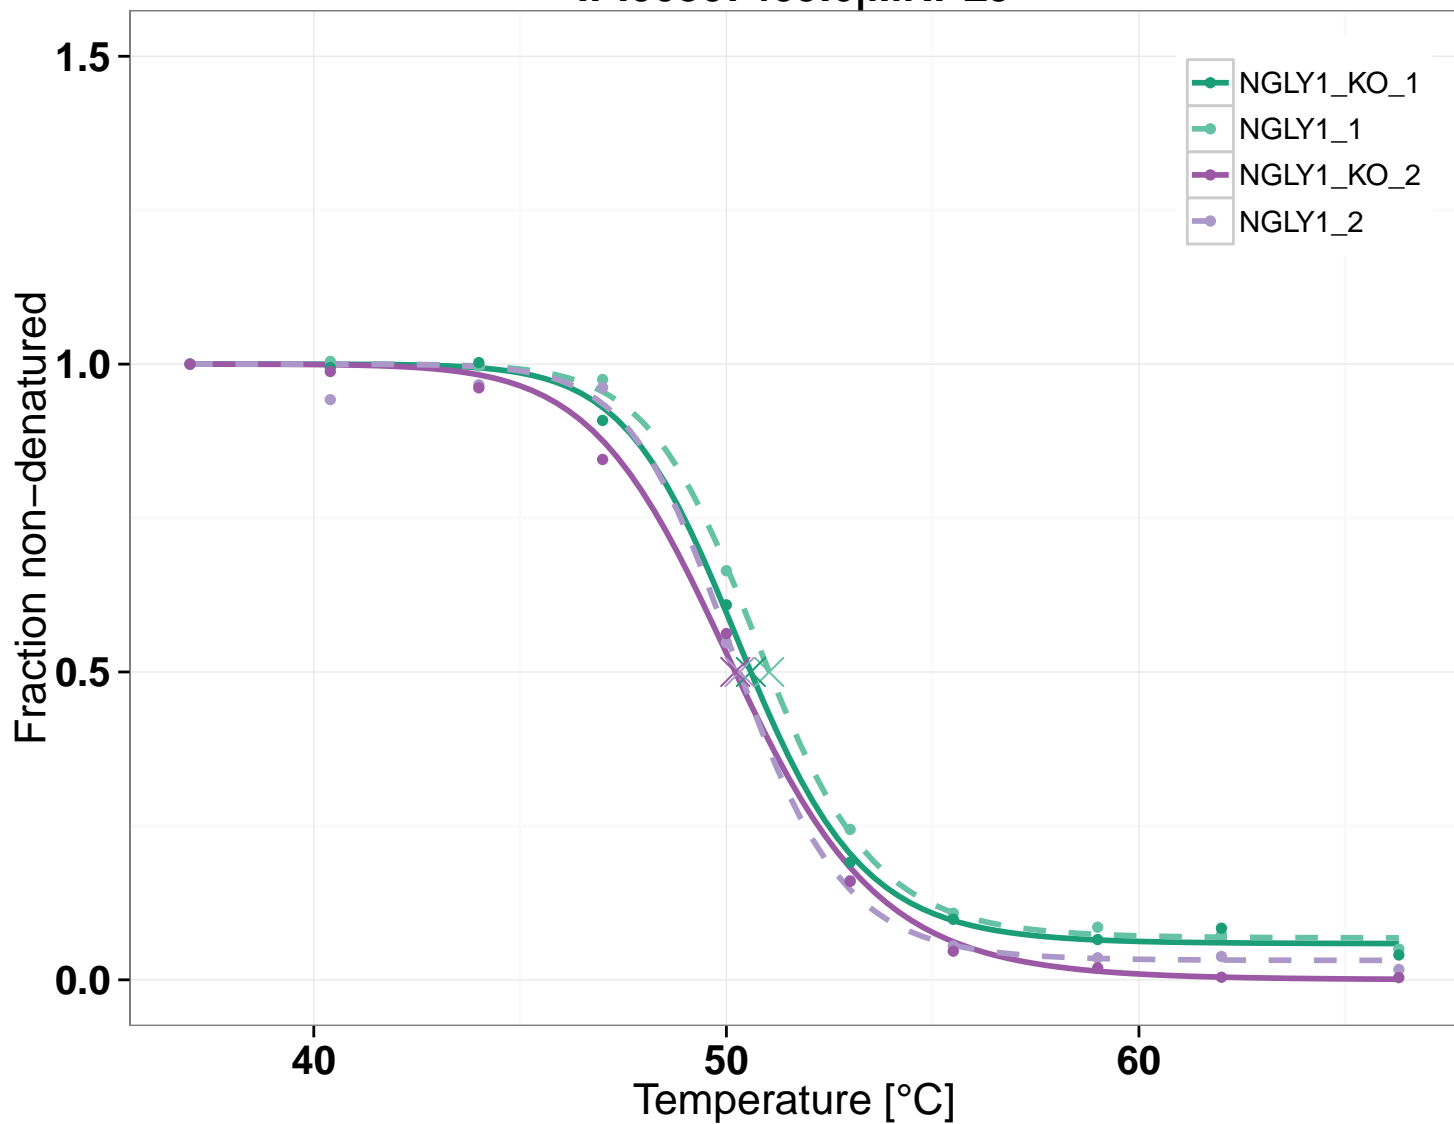

|            | meltPoint | slope | plateau | R2 |
|------------|-----------|-------|---------|----|
| NGLY1_KO_1 | 50.59     | -0.16 | 0.06    | 1  |
| NGLY1_1    | 51.04     | -0.17 | 0.07    | 1  |
| NGLY1_KO_2 | 50.22     | -0.14 | 0       | 1  |
| NGLY1_2    | 50.32     | -0.19 | 0.03    | 1  |

Supplement: Supplementary file 6562 [file 1]

IPI00300956.3|RNA SEN

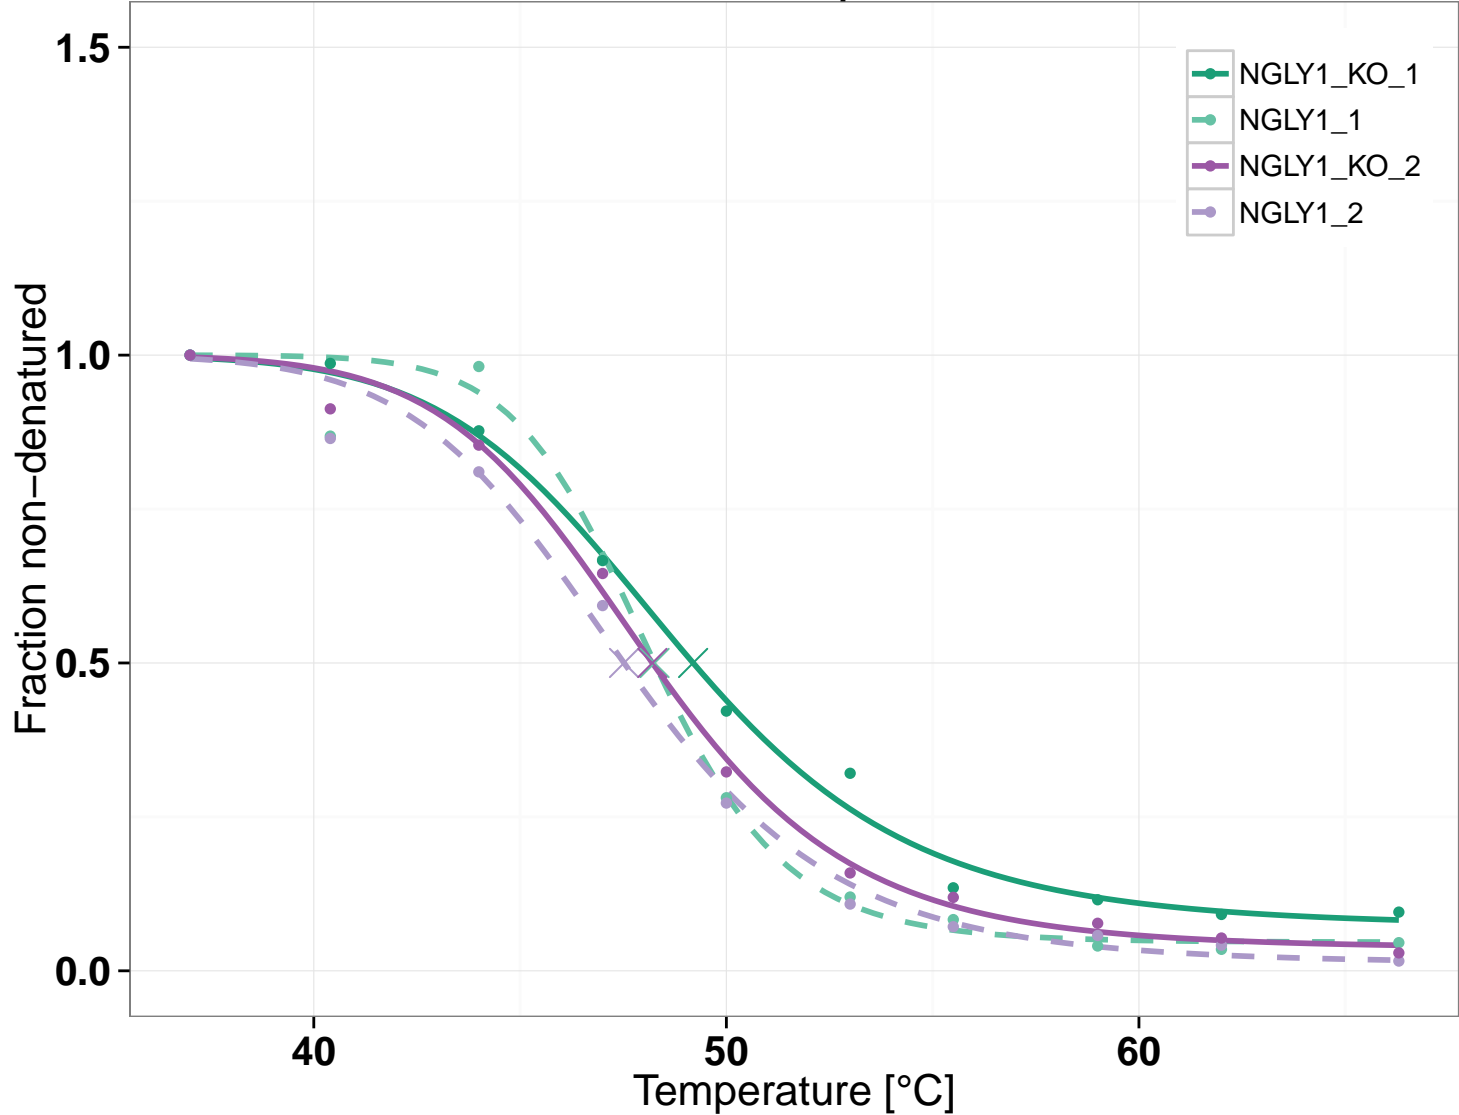

|            | meltPoint | slope  | plateau | R2   |
|------------|-----------|--------|---------|------|
| NGLY1_KO_1 | 49.19     | -0.081 | 0.07    | 1    |
| NGLY1_1    | 48.26     | -0.14  | 0.05    | 0.99 |
| NGLY1_KO_2 | 48.21     | -0.097 | 0.04    | 1    |
| NGLY1_2    | 47.52     | -0.096 | 0.01    | 0.99 |

Supplement: Supplementary file 6563 [file 1]

IPI00398926.6|LOC387787

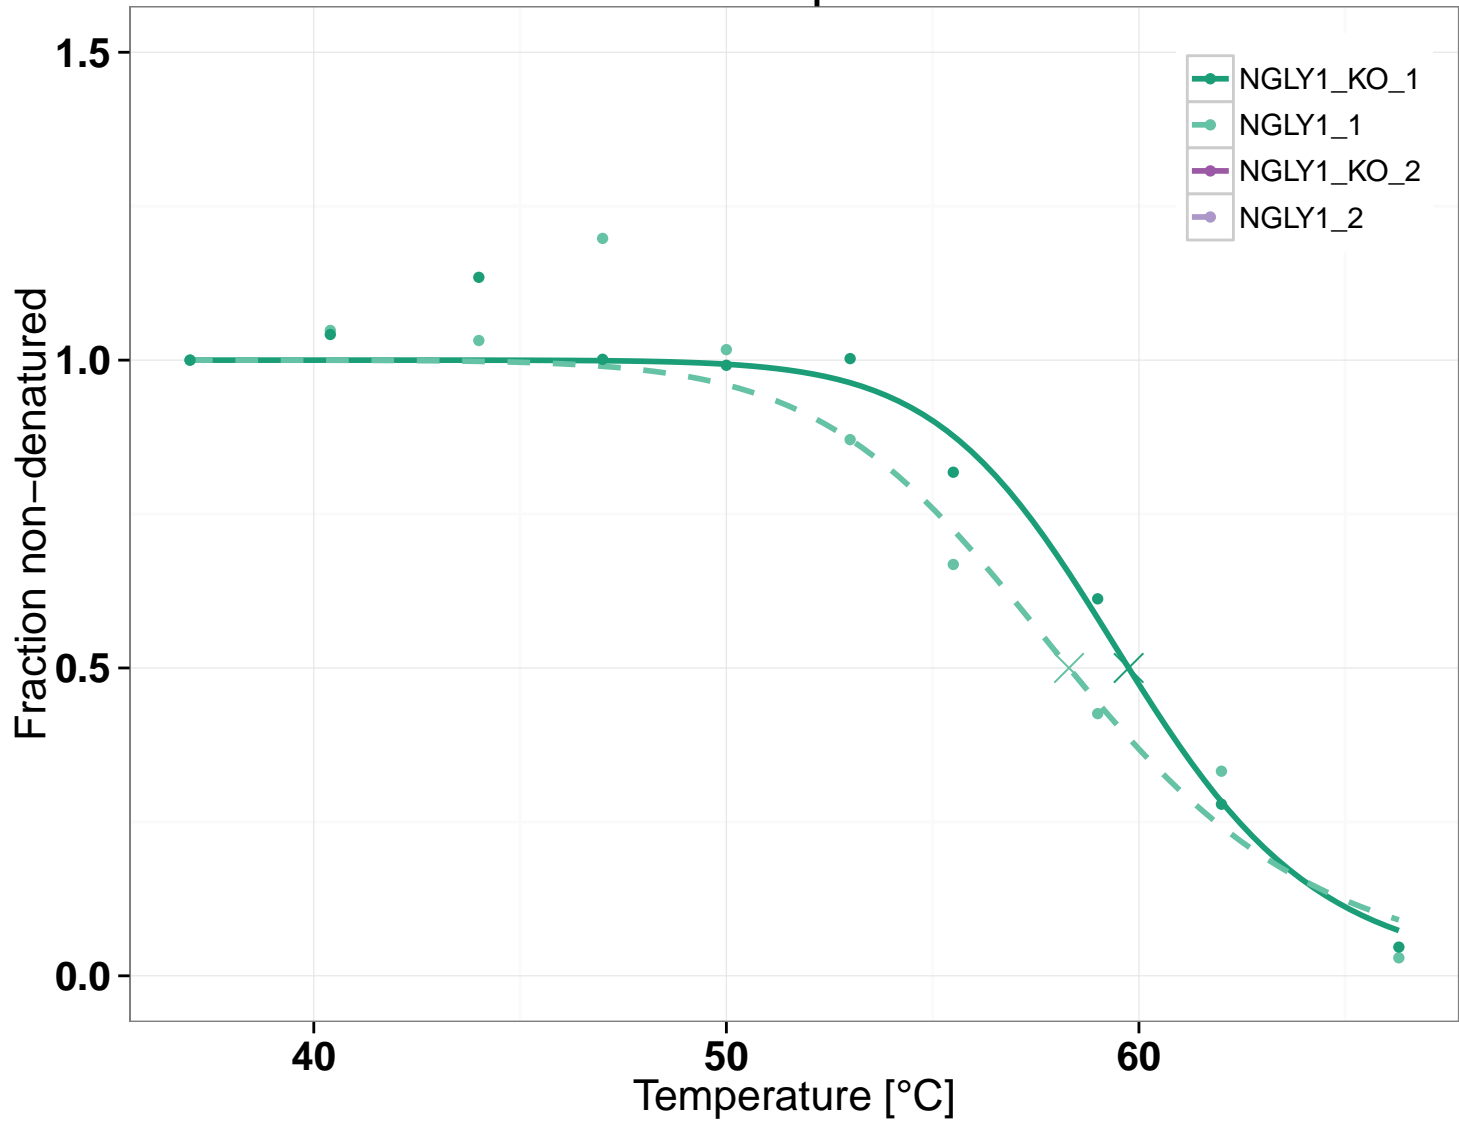

|            | meltPoint | slope  | plateau | R2   |
|------------|-----------|--------|---------|------|
| NGLY1_KO_1 | 59.75     | -0.11  | 0       | 0.98 |
| NGLY1_1    | 58.31     | -0.083 | 0       | 0.95 |
| NGLY1_KO_2 | -         | -      | -       | -    |
| NGLY1_2    | -         | -      | -       | -    |

Supplement: Supplementary file 6564 [file 1]

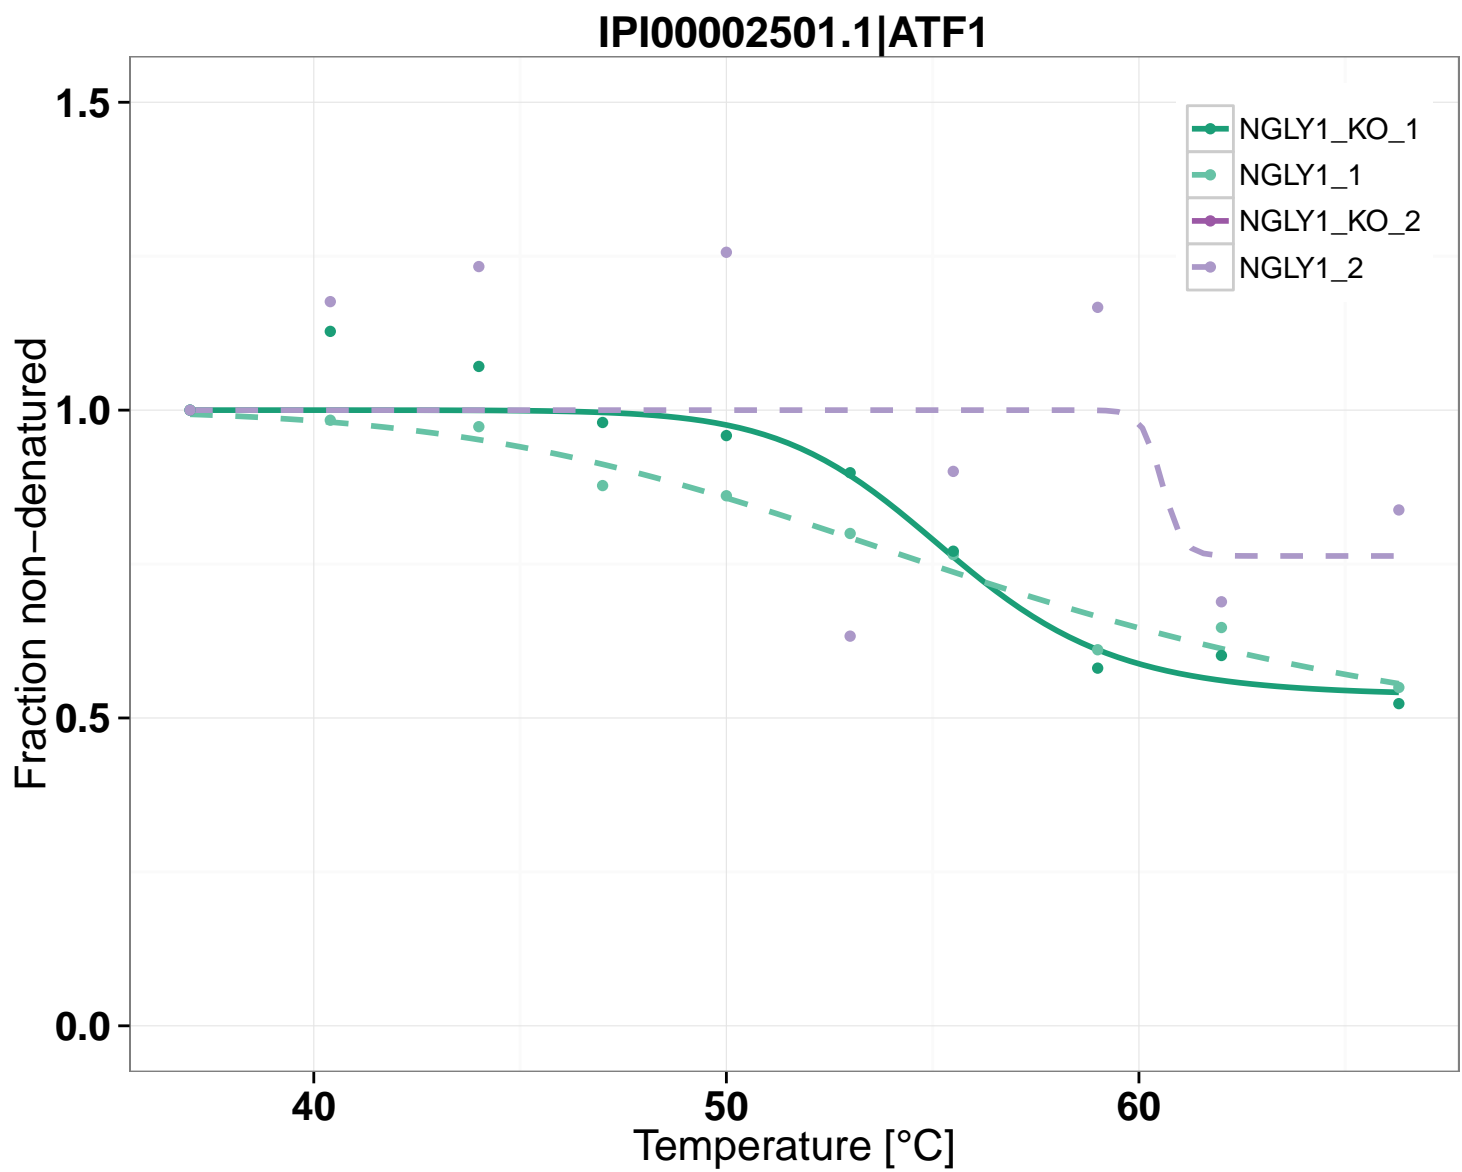

|            | meltPoint | slope  | plateau | R2   |
|------------|-----------|--------|---------|------|
| NGLY1_KO_1 | —         | −0.057 | 0.54    | 0.94 |
| NGLY1_1    | —         | −0.022 | 0.42    | 0.97 |
| NGLY1_KO_2 | —         | —      | —       | —    |
| NGLY1_2    | —         | −0.24  | 0.76    | 0.04 |

Supplement: Supplementary file 6565 [file 1]

IPI00100329.7|ITPK1

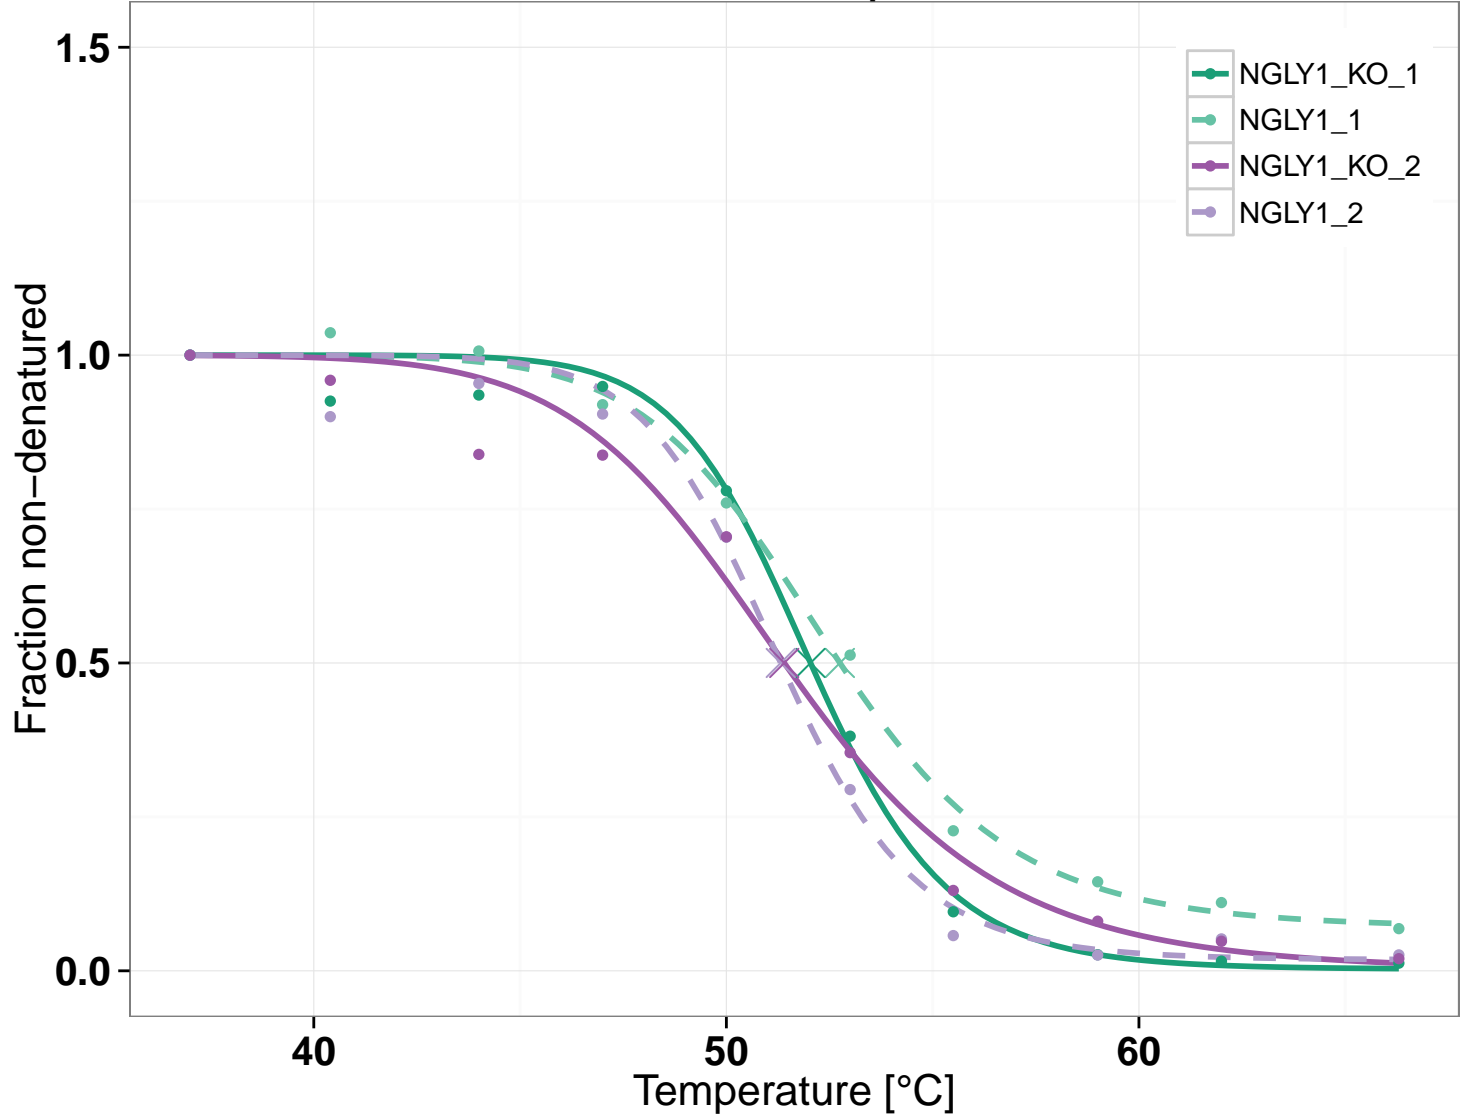

|            | meltPoint | slope  | plateau | R2   |
|------------|-----------|--------|---------|------|
| NGLY1_KO_1 | 52.04     | -0.15  | 0       | 0.99 |
| NGLY1_1    | 52.75     | -0.1   | 0.07    | 1    |
| NGLY1_KO_2 | 51.4      | -0.096 | 0       | 0.98 |
| NGLY1_2    | 51.32     | -0.15  | 0.02    | 0.99 |

Supplement: Supplementary file 6566 [file 1]

IPI00399053.4|C3ORF60

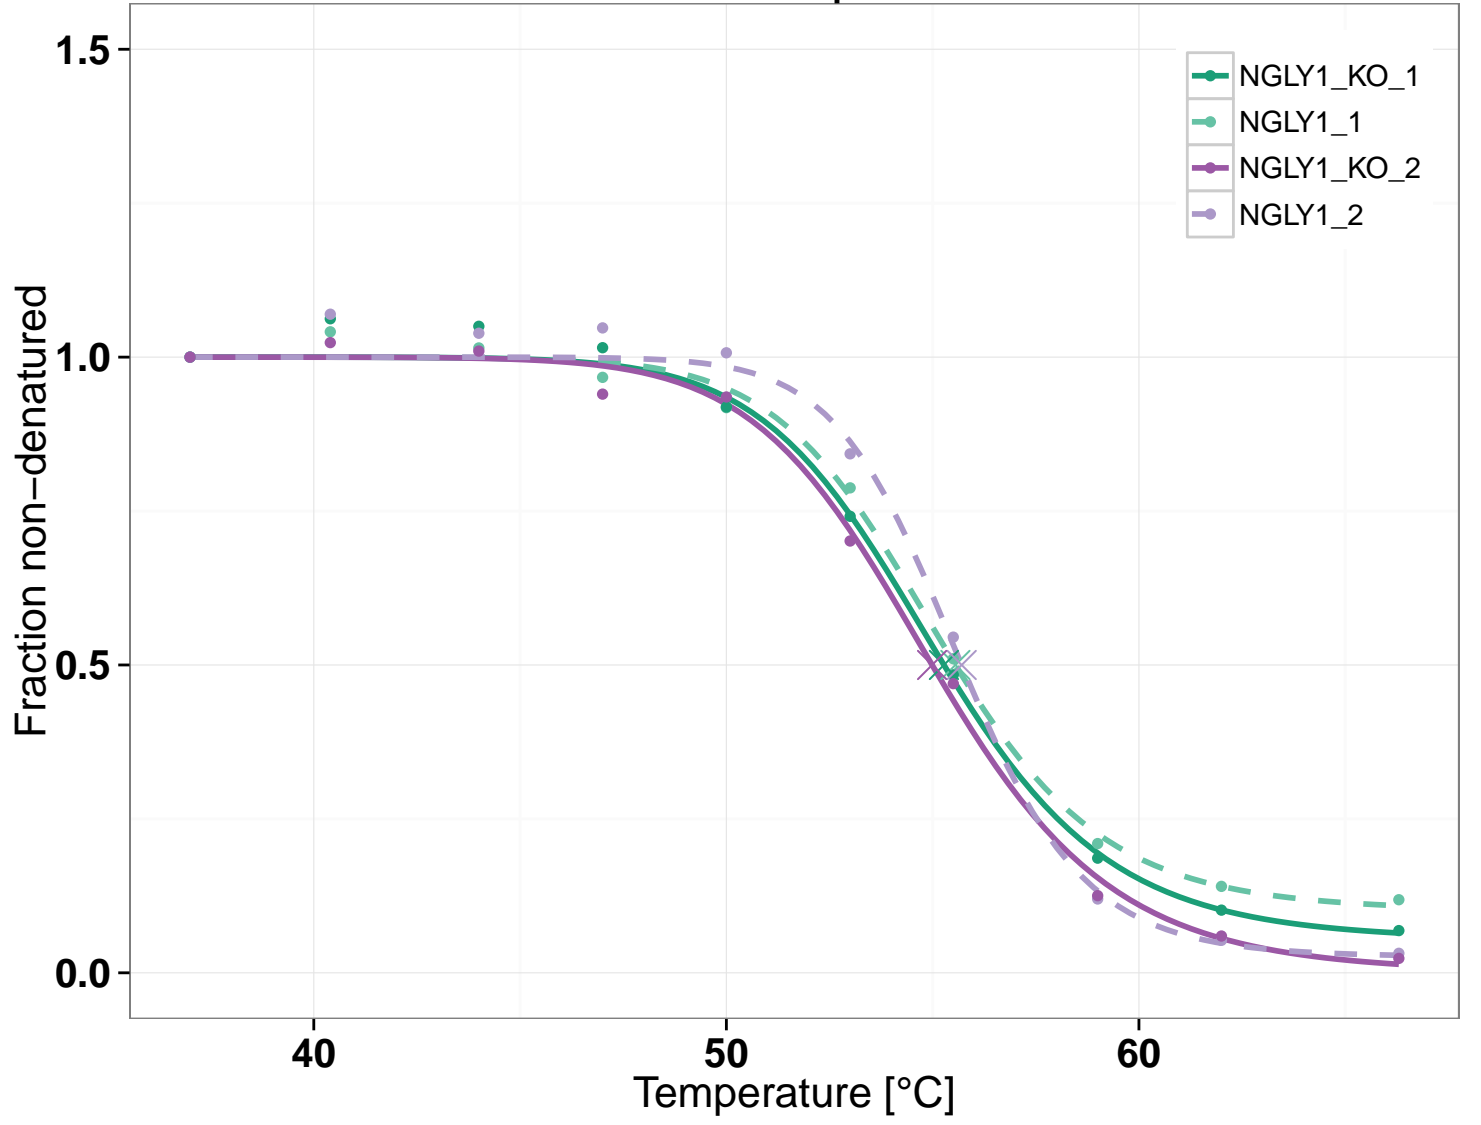

|            | meltPoint | slope | plateau | R2   |
|------------|-----------|-------|---------|------|
| NGLY1_KO_1 | 55.27     | -0.11 | 0.05    | 1    |
| NGLY1_1    | 55.55     | -0.11 | 0.1     | 1    |
| NGLY1_KO_2 | 54.99     | -0.11 | 0       | 1    |
| NGLY1_2    | 55.7      | -0.16 | 0.03    | 0.99 |

Supplement: Supplementary file 6567 [file 1]

# IPI00300408.3|CUTC

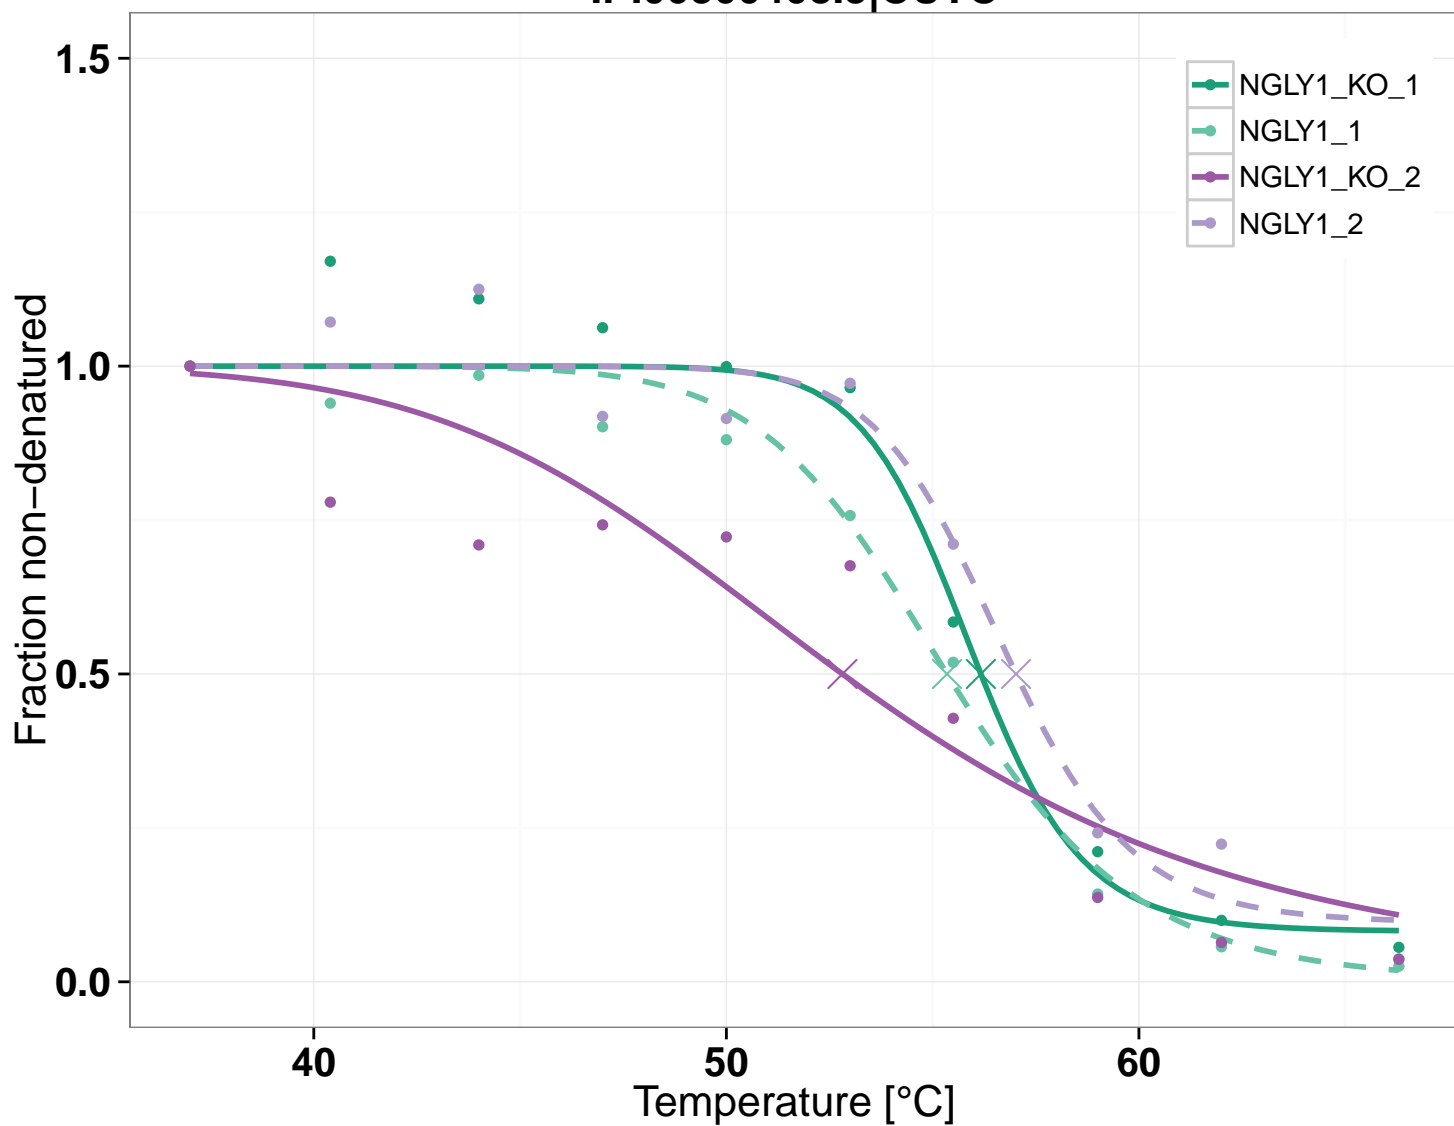

|            | meltPoint | slope  | plateau | R2   |
|------------|-----------|--------|---------|------|
| NGLY1_KO_1 | 56.17     | -0.17  | 0.08    | 0.97 |
| NGLY1_1    | 55.35     | -0.11  | 0       | 0.99 |
| NGLY1_KO_2 | 52.81     | -0.051 | 0       | 0.86 |
| NGLY1_2    | 57.02     | -0.14  | 0.1     | 0.97 |

Supplement: Supplementary file 6568 [file 1]

# IPI00008569.1|YKT6

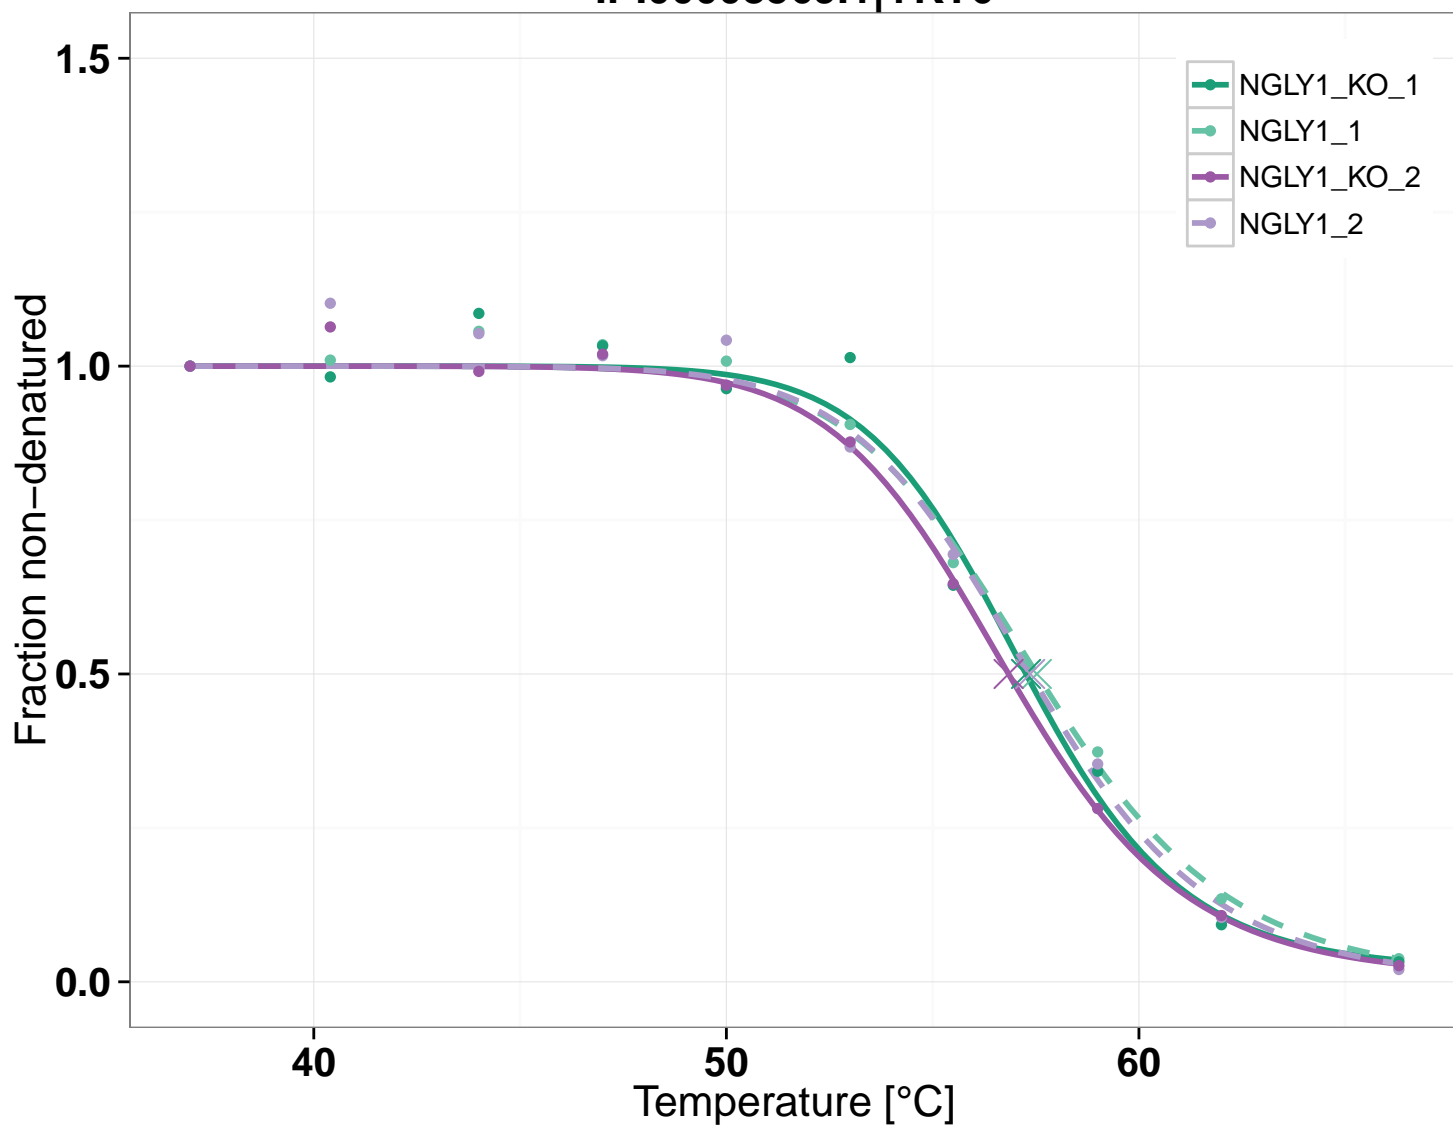

|            | meltPoint | slope | plateau | R2   |
|------------|-----------|-------|---------|------|
| NGLY1_KO_1 | 57.26     | -0.13 | 0.02    | 0.98 |
| NGLY1_1    | 57.53     | -0.11 | 0       | 0.99 |
| NGLY1_KO_2 | 56.84     | -0.12 | 0.01    | 1    |
| NGLY1_2    | 57.36     | -0.11 | 0       | 0.99 |

Supplement: Supplementary file 6569 [file 1]

IPI00640747.3|TIMM23B

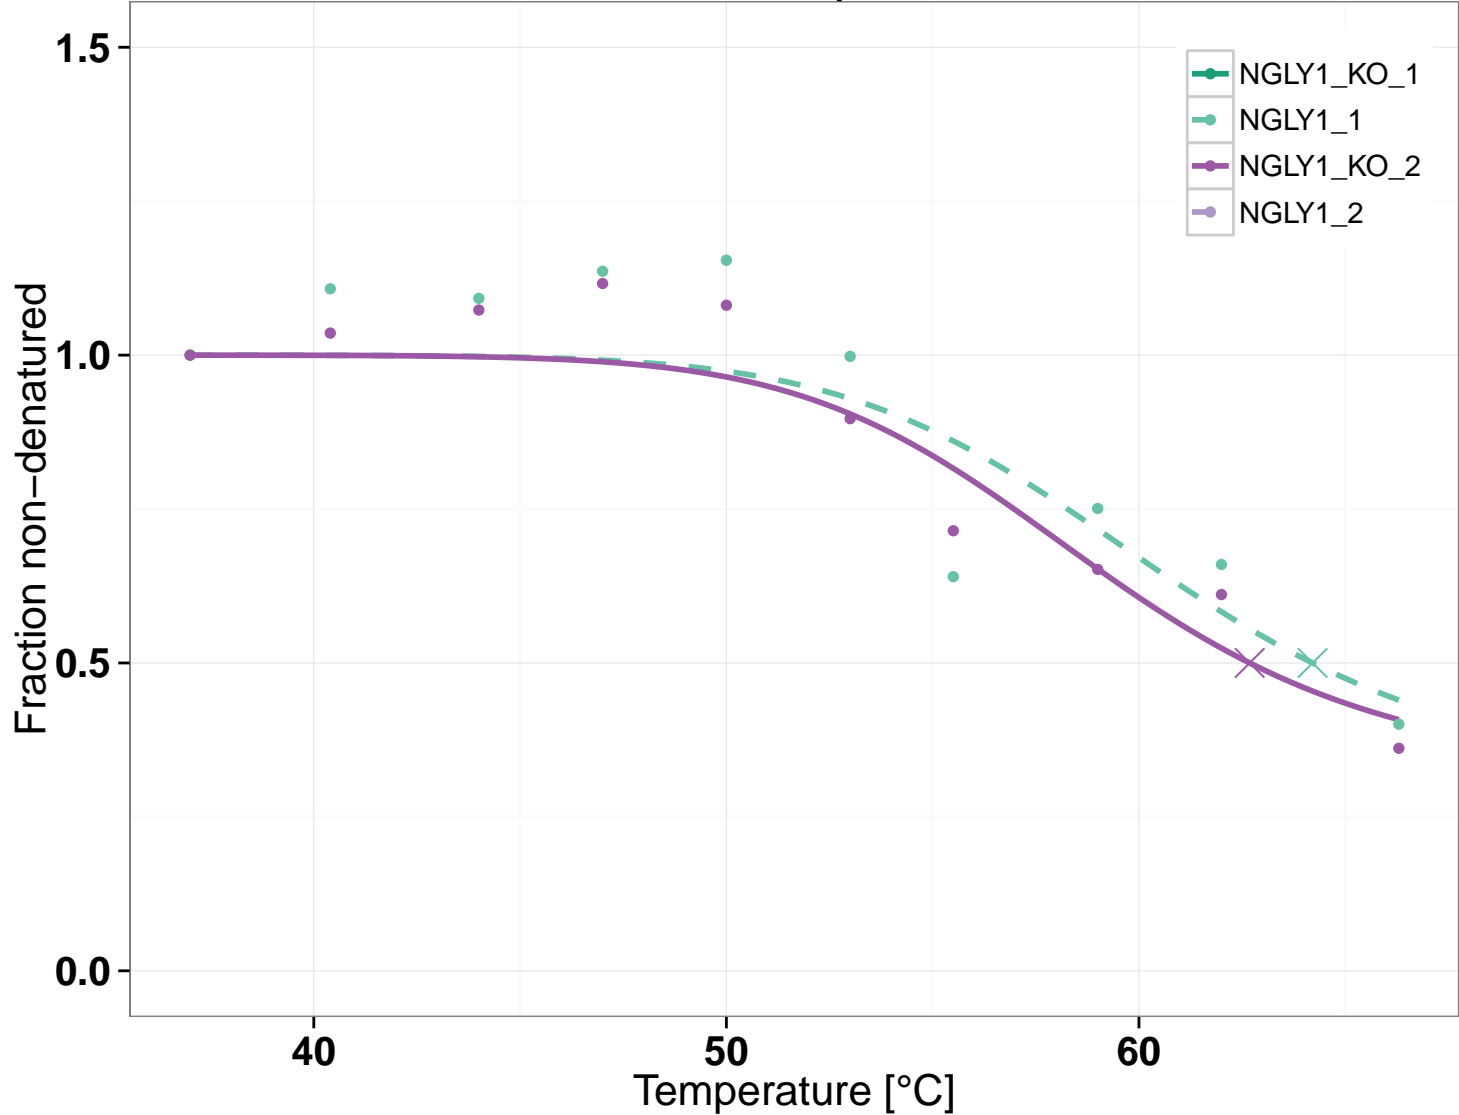

|            | meltPoint | slope  | plateau | R2   |
|------------|-----------|--------|---------|------|
| NGLY1_KO_1 | —         | —      | —       | —    |
| NGLY1_1    | 64.21     | −0.046 | 0.29    | 0.78 |
| NGLY1_KO_2 | 62.68     | −0.048 | 0.31    | 0.9  |
| NGLY1_2    | —         | —      | —       | —    |

Supplement: Supplementary file 6570 [file 1]

# IPI00289501.2|VGF

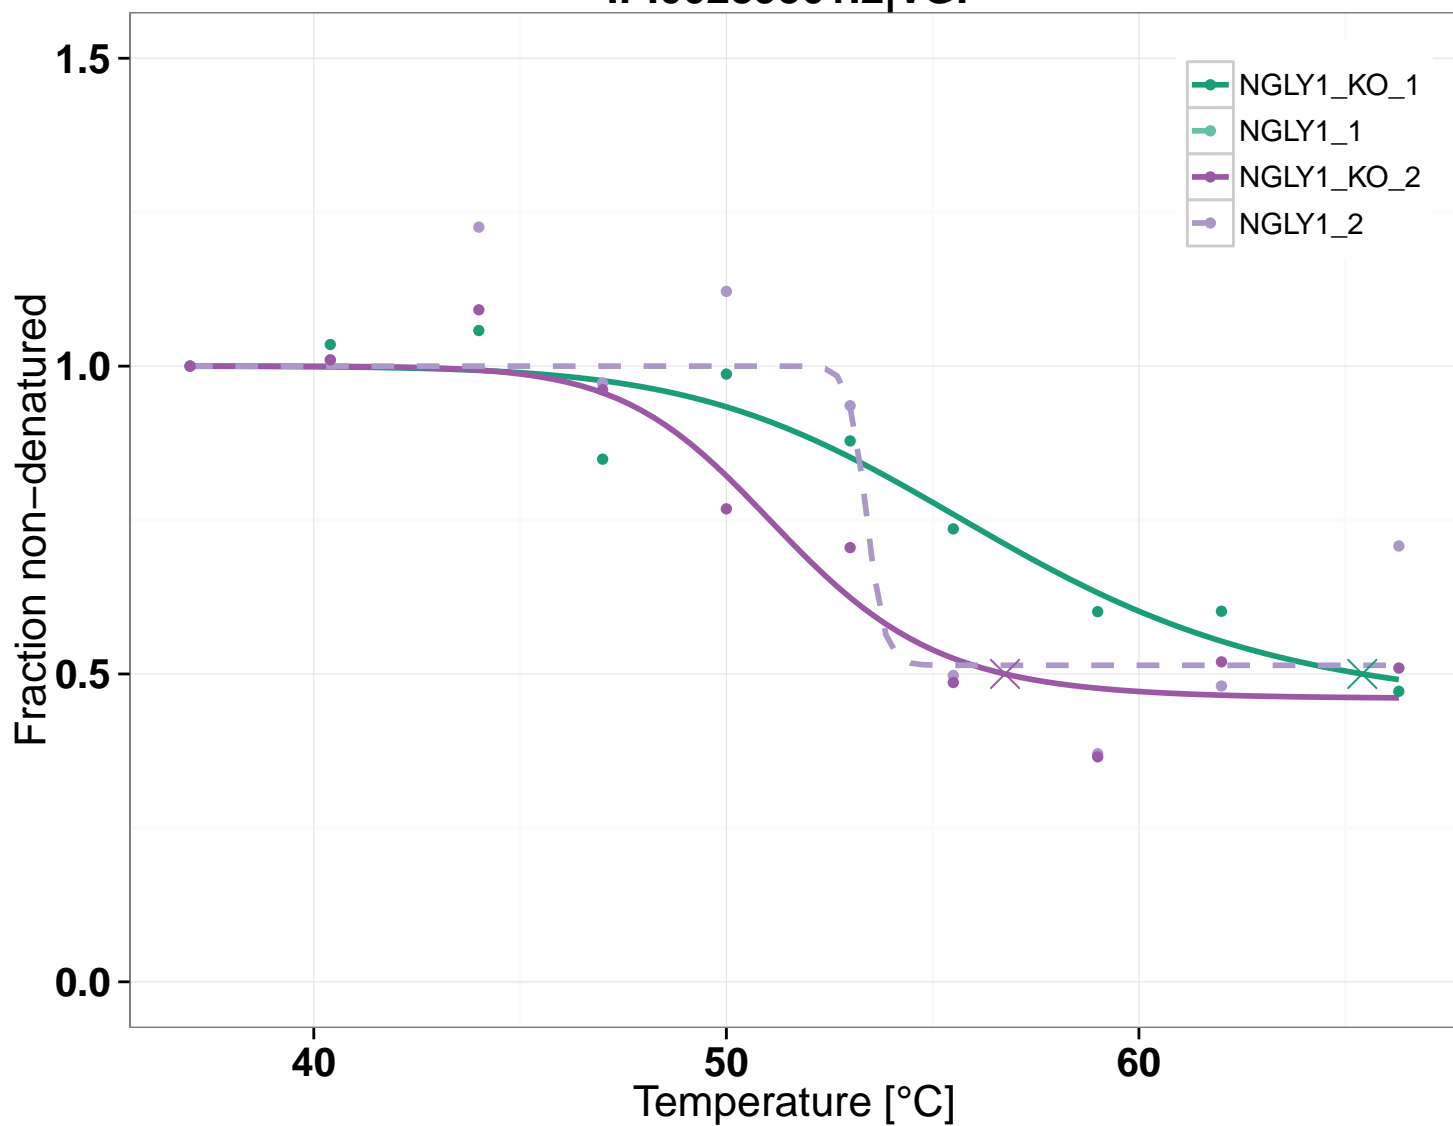

|            | meltPoint | slope  | plateau | R2   |
|------------|-----------|--------|---------|------|
| NGLY1_KO_1 | 65.41     | -0.039 | 0.44    | 0.92 |
| NGLY1_1    | -         | -      | -       | -    |
| NGLY1_KO_2 | 56.75     | -0.07  | 0.46    | 0.94 |
| NGLY1_2    | -         | -0.57  | 0.51    | 0.84 |

Supplement: Supplementary file 6571 [file 1]

# IPI00293895.4|ABCA7

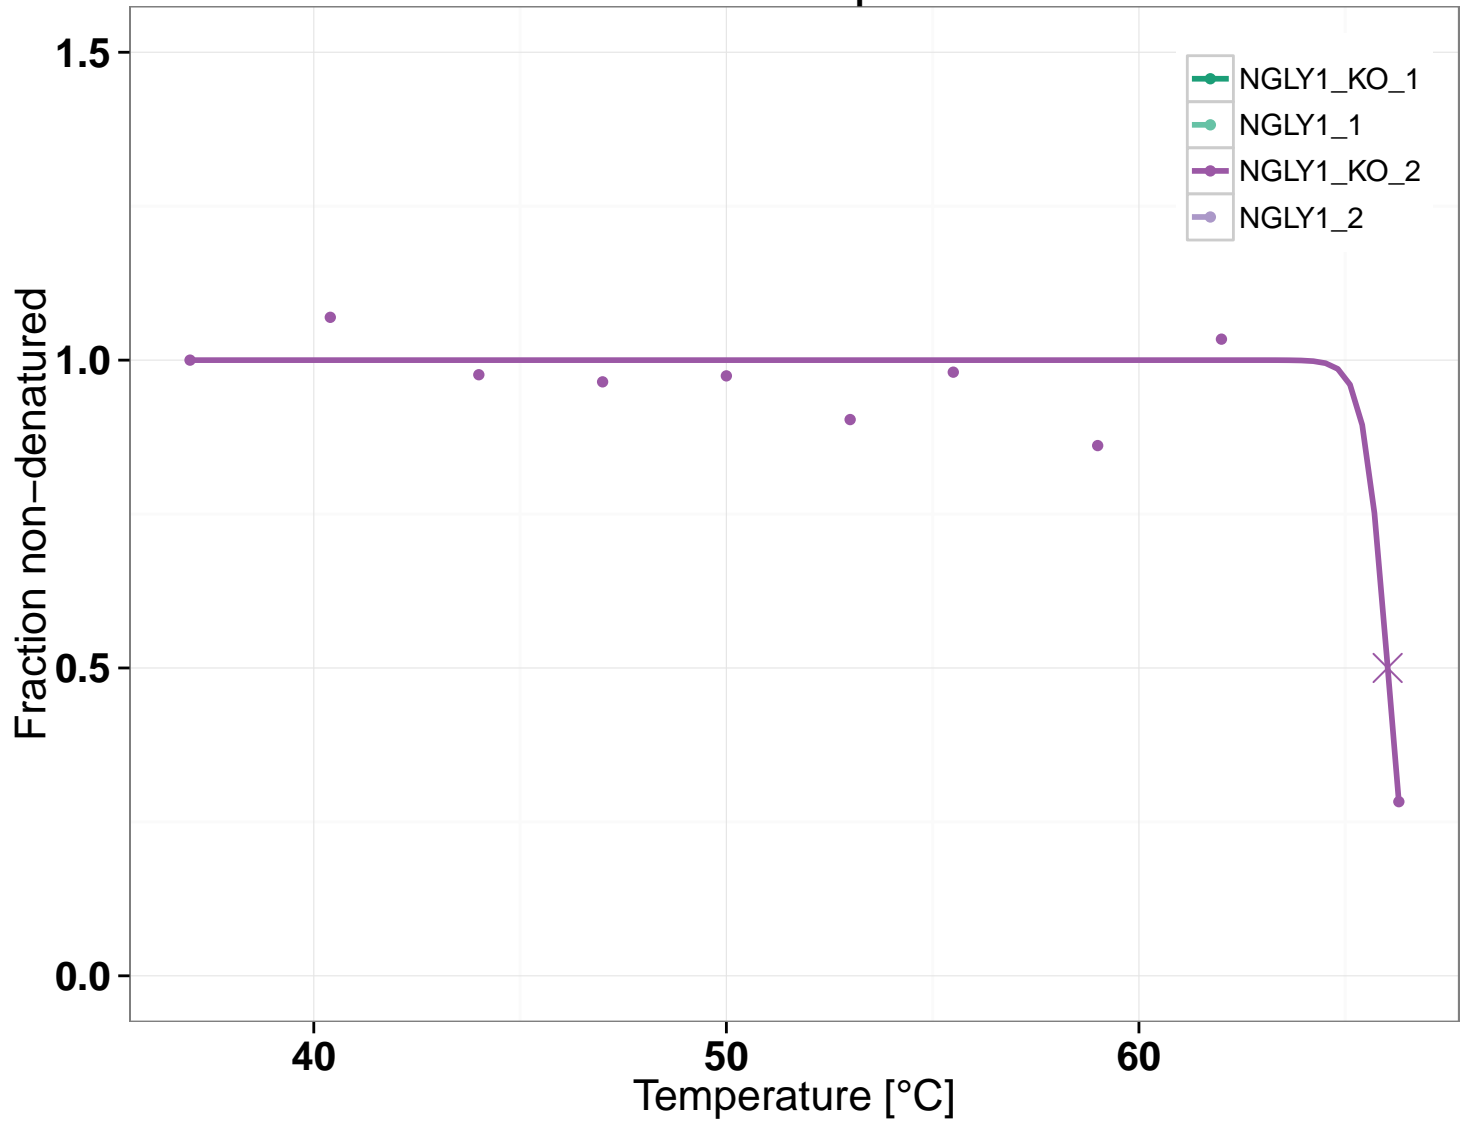

|            | meltPoint | slope | plateau | R2   |
|------------|-----------|-------|---------|------|
| NGLY1_KO_1 | —         | —     | —       | —    |
| NGLY1_1    | —         | —     | —       | —    |
| NGLY1_KO_2 | 66.03     | -0.86 | 0       | 0.92 |
| NGLY1_2    | —         | —     | —       | —    |

Supplement: Supplementary file 6572 [file 1]

# IPI00021106.4|EXOG

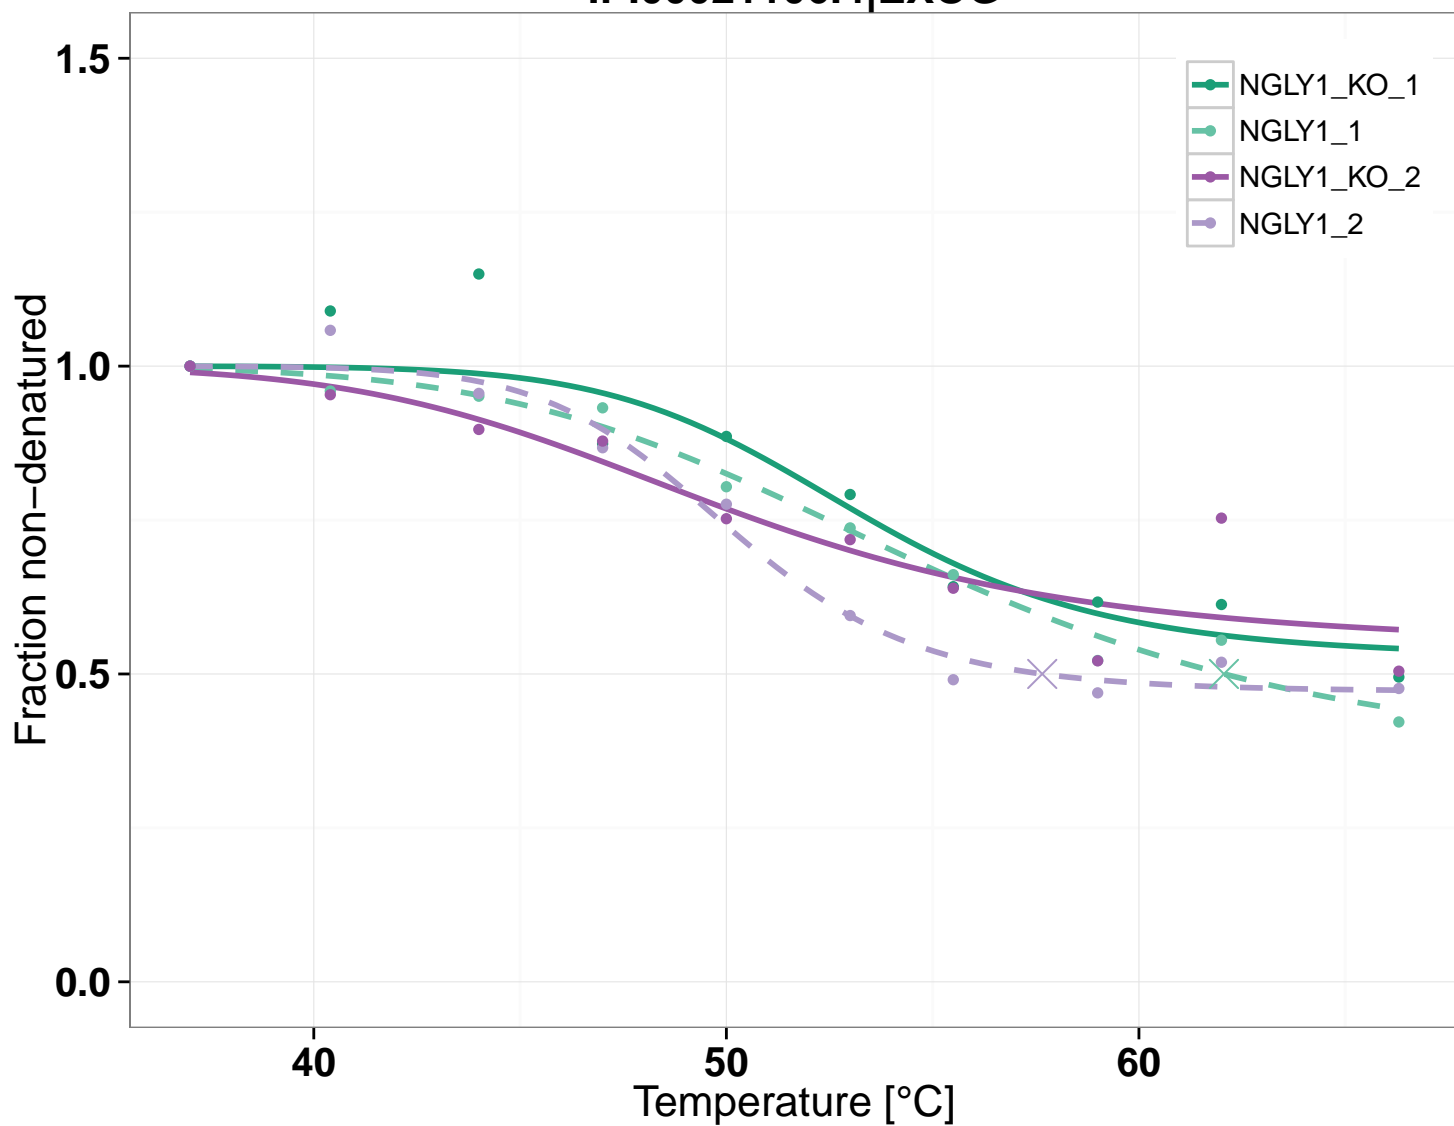

|            | meltPoint | slope  | plateau | R2   |
|------------|-----------|--------|---------|------|
| NGLY1_KO_1 | -         | -0.039 | 0.53    | 0.89 |
| NGLY1_1    | 62.06     | -0.032 | 0.35    | 0.98 |
| NGLY1_KO_2 | -         | -0.026 | 0.54    | 0.84 |
| NGLY1_2    | 57.66     | -0.058 | 0.47    | 0.98 |

Supplement: Supplementary file 6573 [file 1]

IPI00217560.3|HIRA

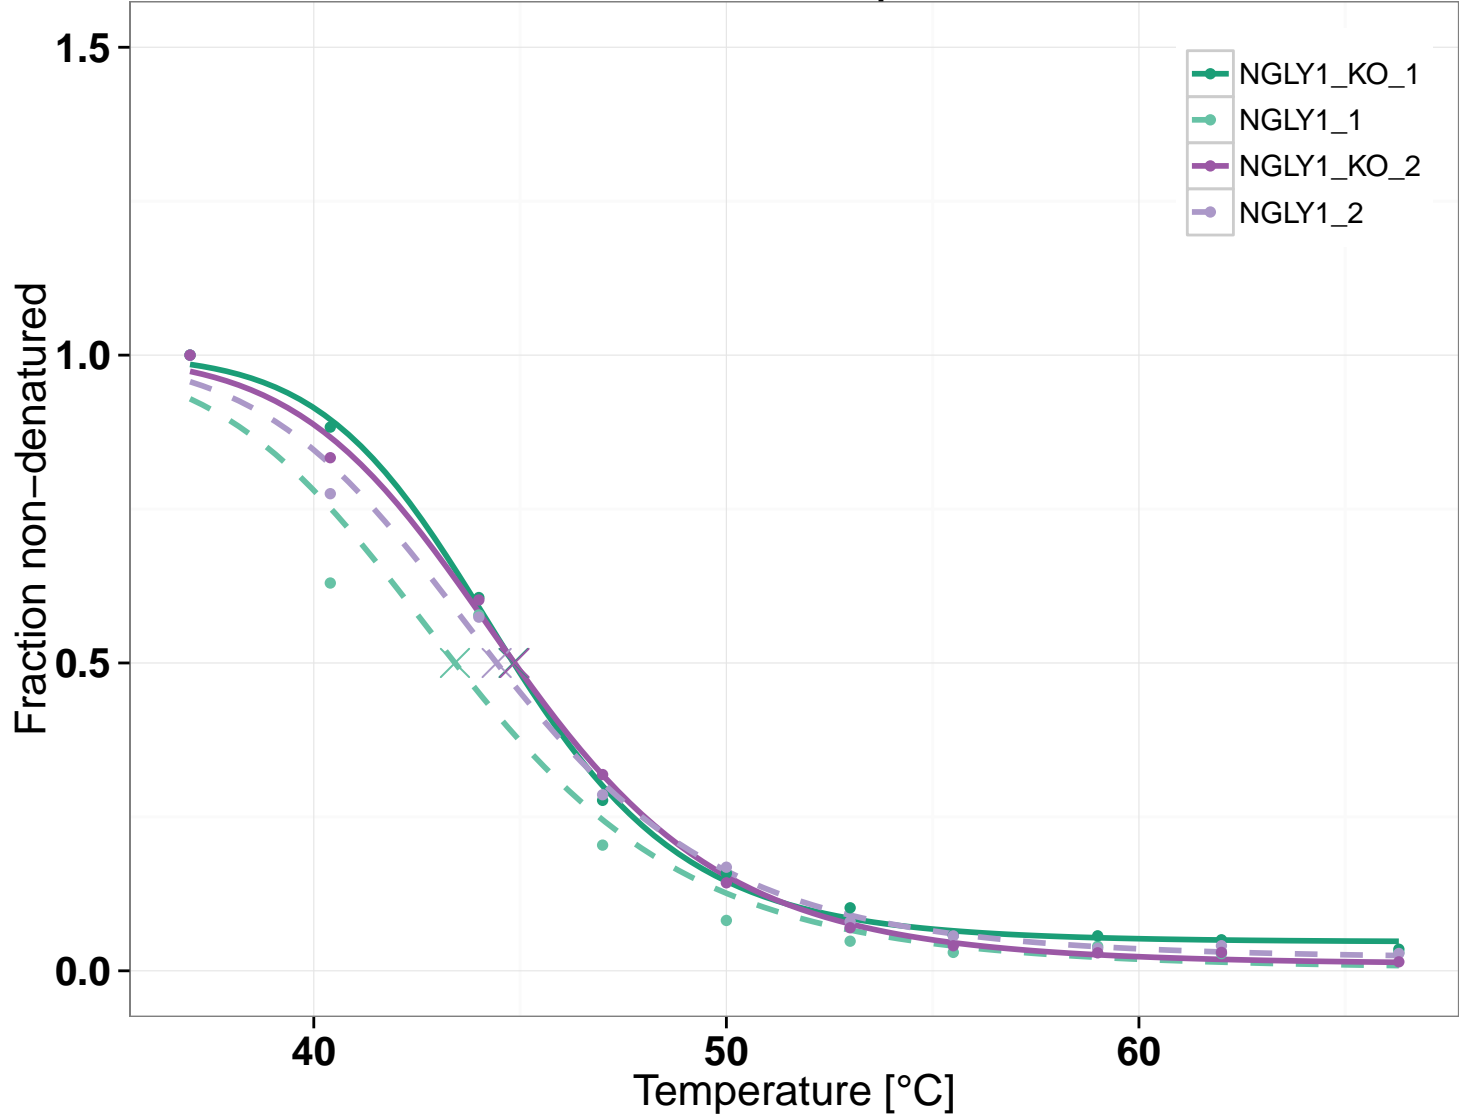

|            | meltPoint | slope  | plateau | R2   |
|------------|-----------|--------|---------|------|
| NGLY1_KO_1 | 44.84     | -0.11  | 0.05    | 1    |
| NGLY1_1    | 43.42     | -0.087 | 0       | 0.96 |
| NGLY1_KO_2 | 44.86     | -0.095 | 0.01    | 1    |
| NGLY1_2    | 44.43     | -0.088 | 0.02    | 0.99 |

Supplement: Supplementary file 6574 [file 1]

IPI00016807.1|SIRT5

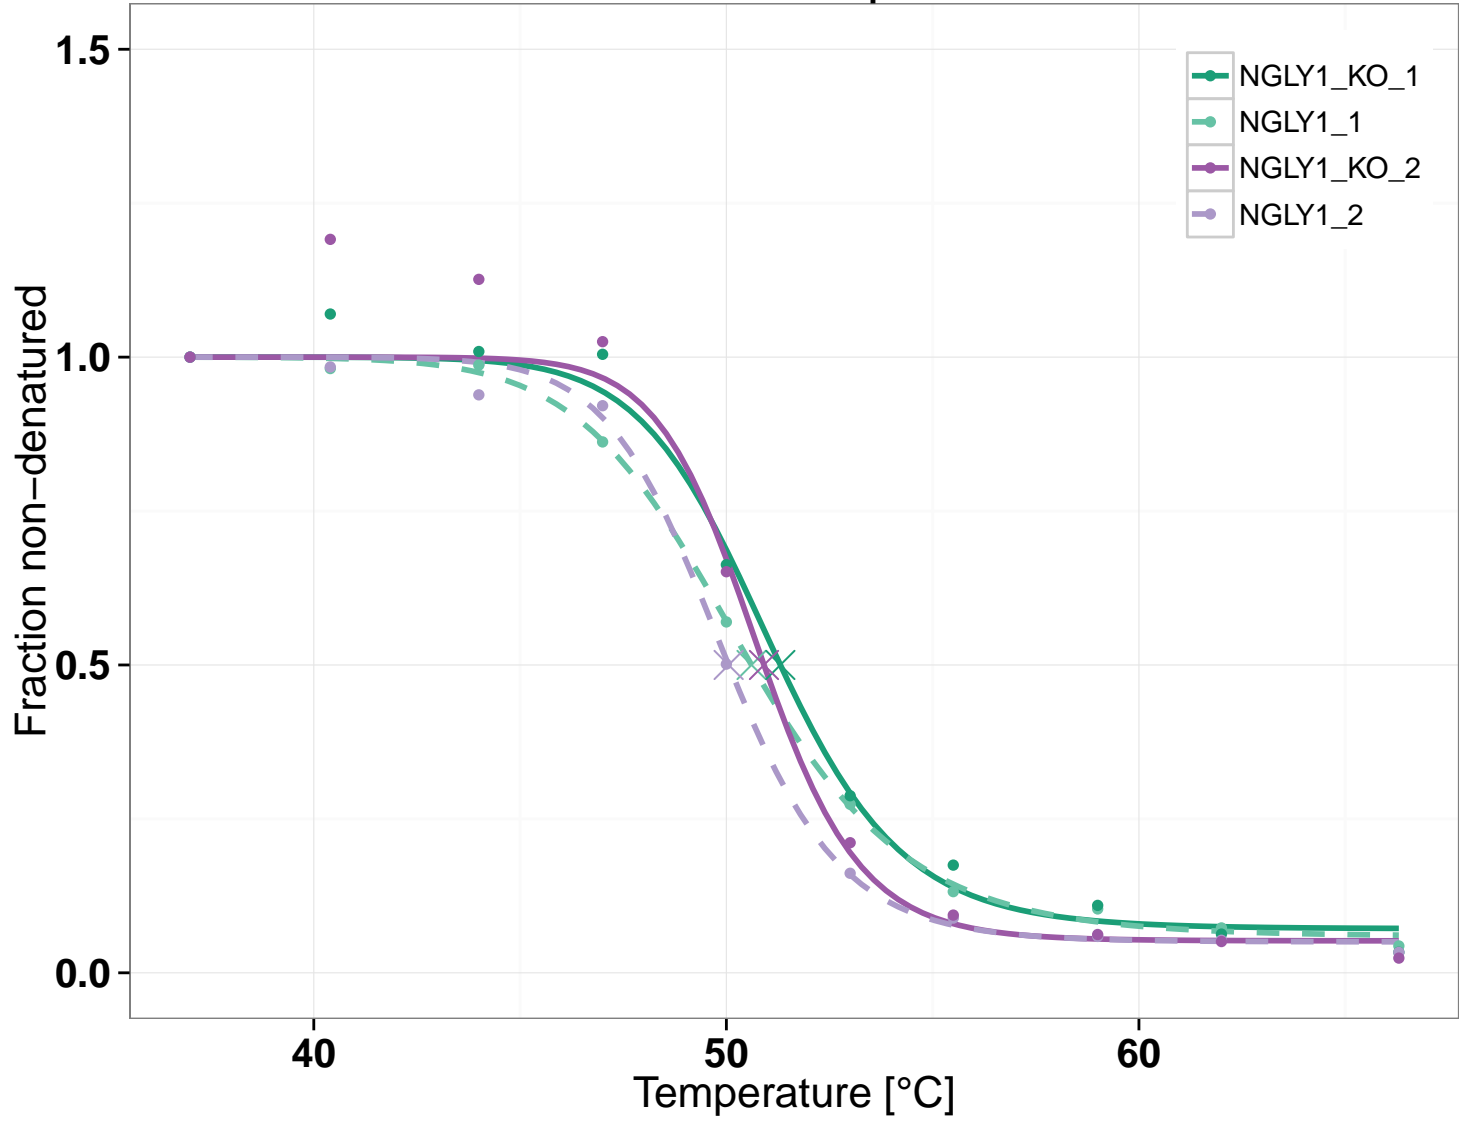

|            | meltPoint | slope | plateau | R2   |
|------------|-----------|-------|---------|------|
| NGLY1_KO_1 | 51.31     | -0.15 | 0.07    | 0.99 |
| NGLY1_1    | 50.61     | -0.12 | 0.06    | 1    |
| NGLY1_KO_2 | 50.91     | -0.19 | 0.05    | 0.97 |
| NGLY1_2    | 50.05     | -0.17 | 0.05    | 1    |

Supplement: Supplementary file 6575 [file 1]

IPI00010438.2|SNAP23

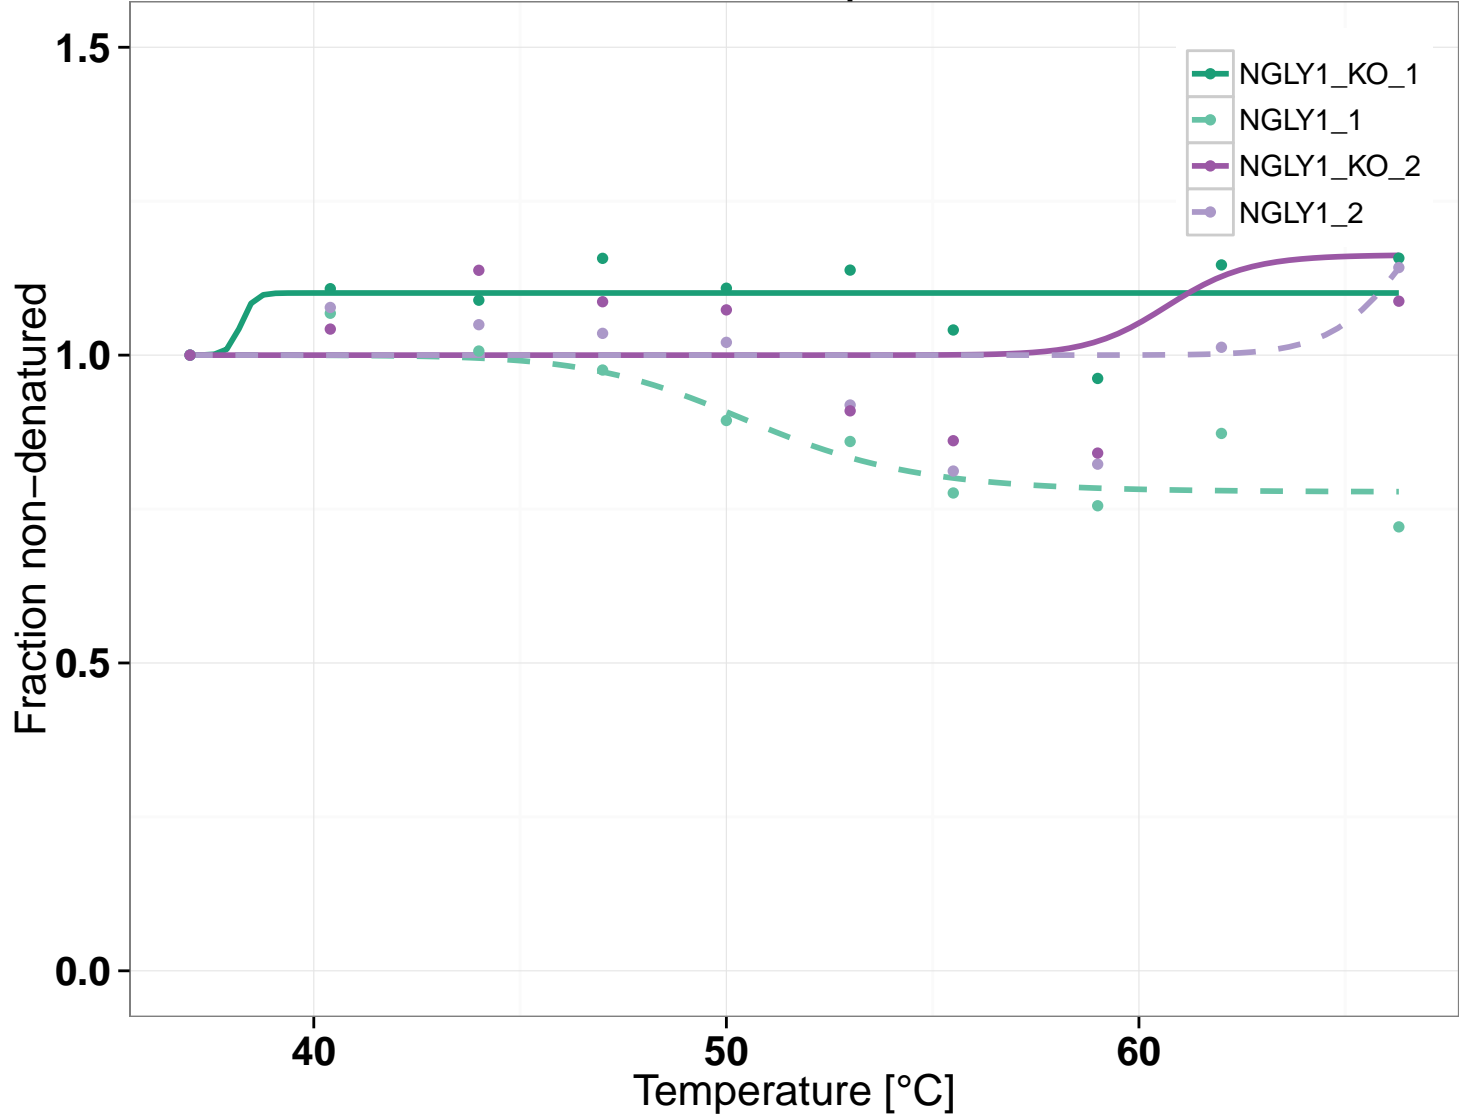

|            | meltPoint | slope  | plateau | R2   |
|------------|-----------|--------|---------|------|
| NGLY1_KO_1 | —         | 0.16   | 1.1     | 0.22 |
| NGLY1_1    | —         | -0.028 | 0.78    | 0.85 |
| NGLY1_KO_2 | —         | 0.042  | 1.16    | 0.23 |
| NGLY1_2    | —         | —      | 1.37    | 0.19 |

Supplement: Supplementary file 6576 [file 1]

IPI00797574.3|FAM44A

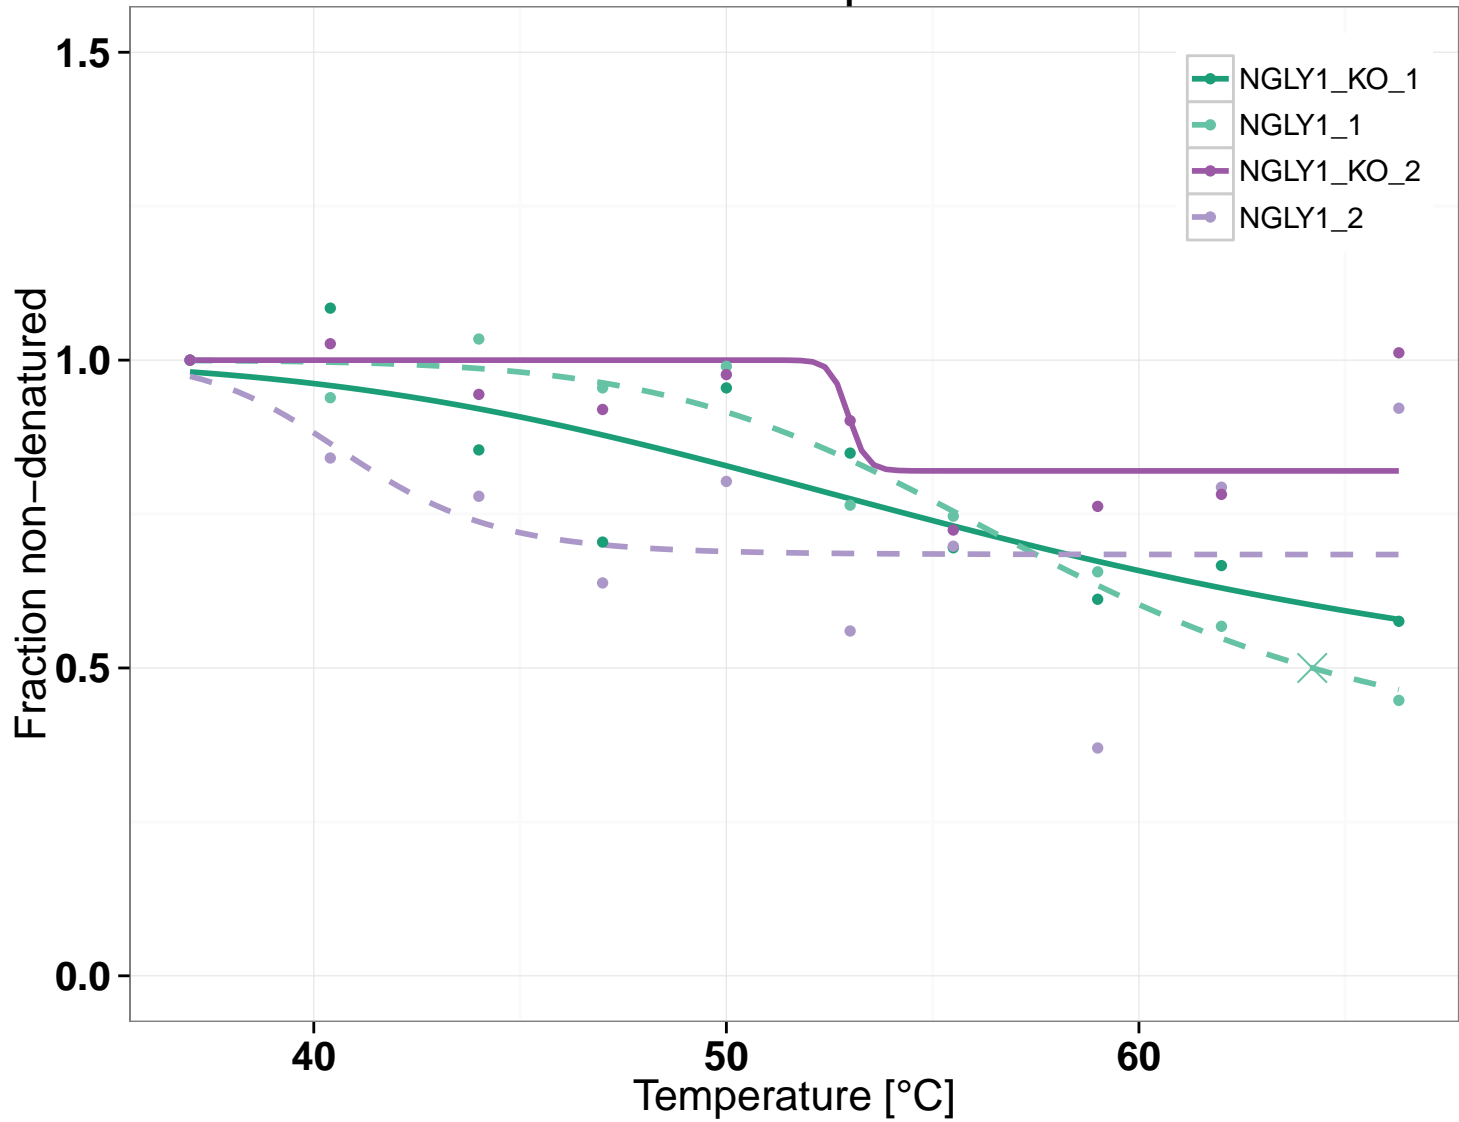

|            | meltPoint | slope  | plateau | R2   |
|------------|-----------|--------|---------|------|
| NGLY1_KO_1 | -         | -0.018 | 0.39    | 0.71 |
| NGLY1_1    | 64.2      | -0.035 | 0.36    | 0.95 |
| NGLY1_KO_2 | -         | -0.21  | 0.82    | 0.44 |
| NGLY1_2    | -         | -0.044 | 0.68    | 0.32 |

Supplement: Supplementary file 6577 [file 1]

IPI00642041.1|COMTD1

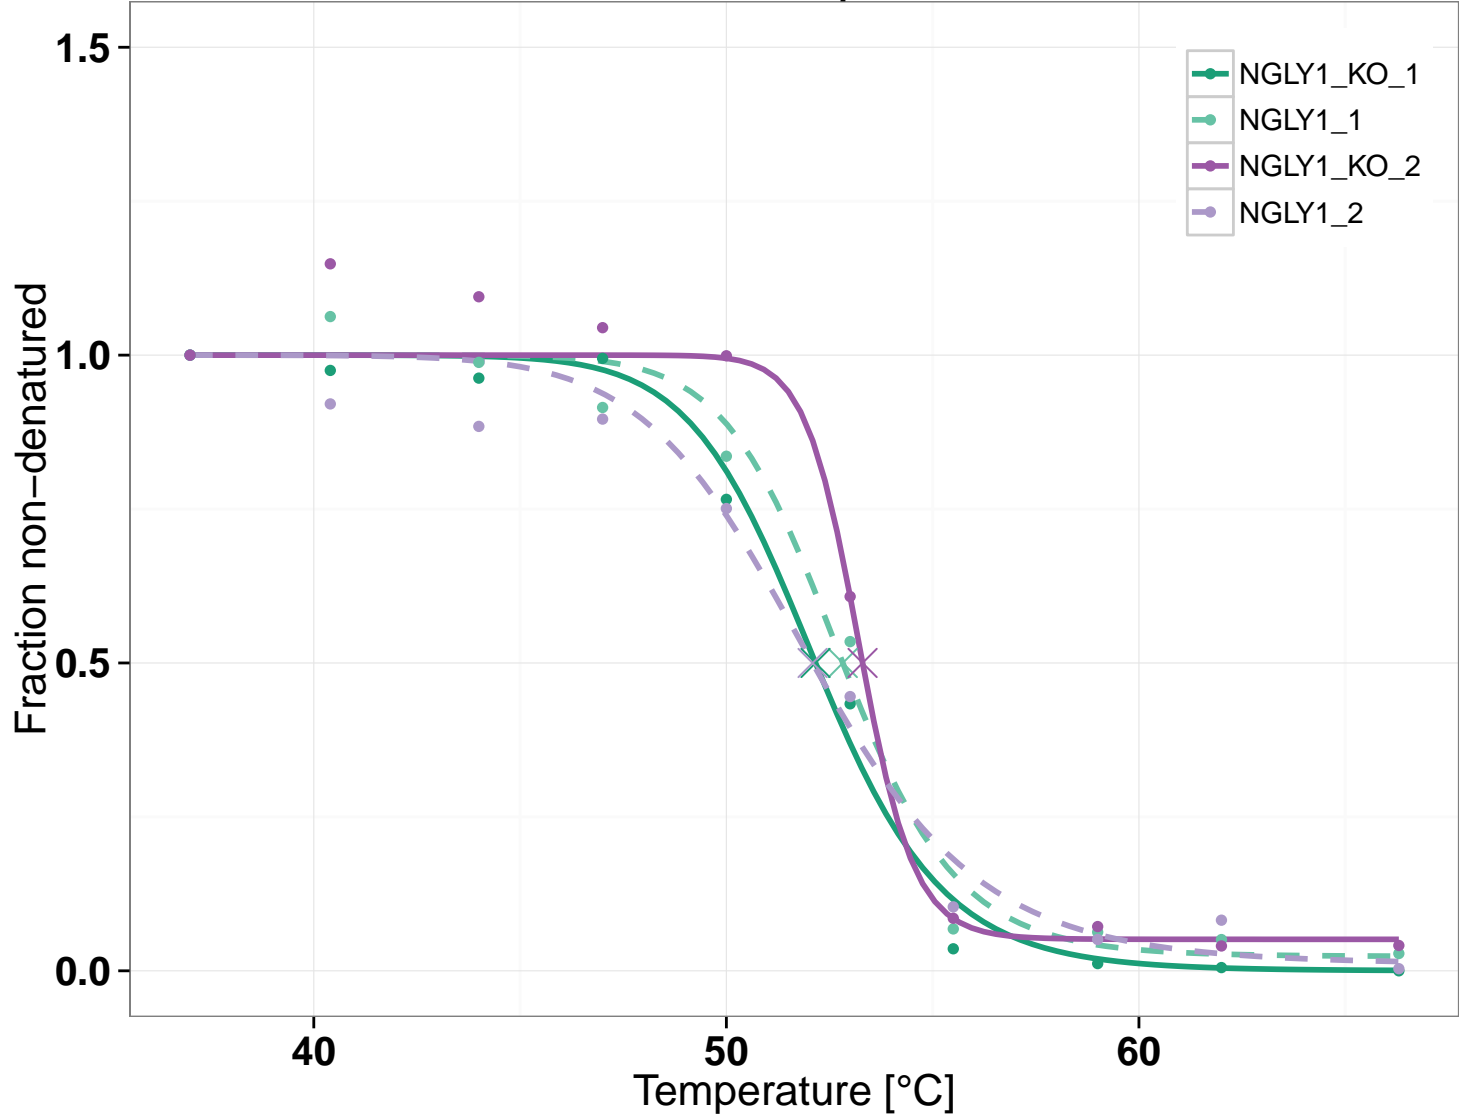

|            | meltPoint | slope | plateau | R2   |
|------------|-----------|-------|---------|------|
| NGLY1_KO_1 | 52.16     | -0.16 | 0       | 0.99 |
| NGLY1_1    | 52.82     | -0.17 | 0.02    | 0.99 |
| NGLY1_KO_2 | 53.3      | -0.36 | 0.05    | 0.98 |
| NGLY1_2    | 52.09     | -0.12 | 0.01    | 0.98 |

Supplement: Supplementary file 6578 [file 1]

IPI00002408.4|RPAP3

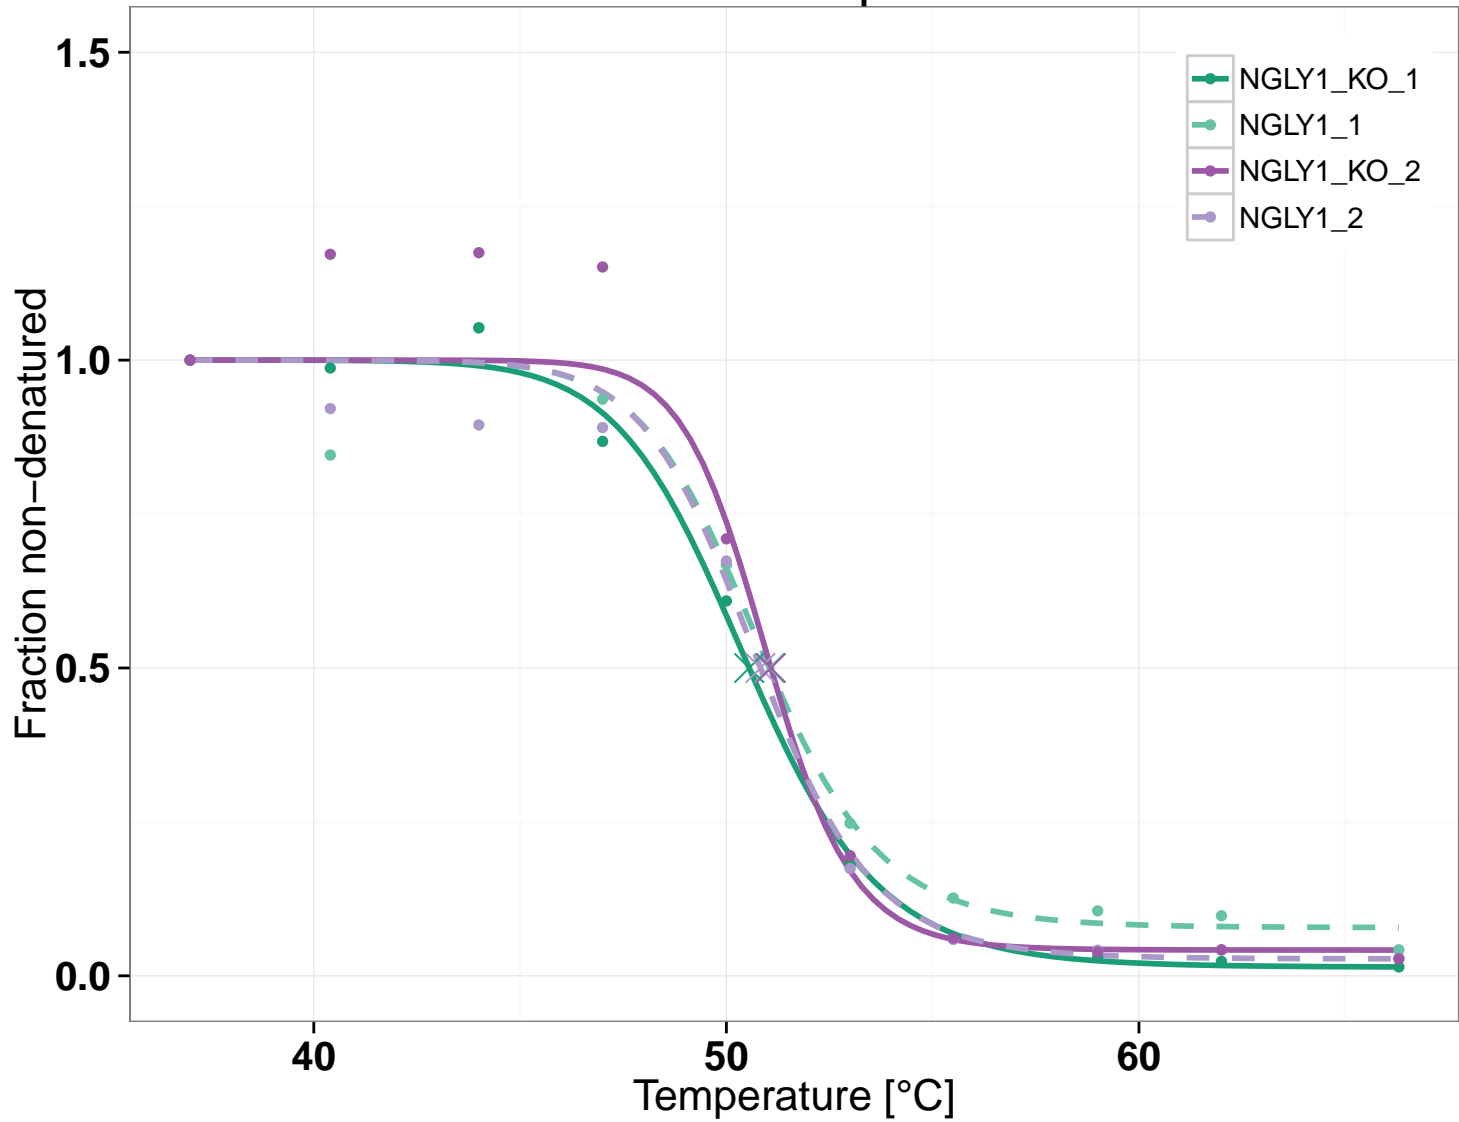

|            | meltPoint | slope | plateau | R2   |
|------------|-----------|-------|---------|------|
| NGLY1_KO_1 | 50.55     | -0.15 | 0.01    | 1    |
| NGLY1_1    | 51.04     | -0.16 | 0.08    | 0.98 |
| NGLY1_KO_2 | 51.08     | -0.23 | 0.04    | 0.96 |
| NGLY1_2    | 50.83     | -0.17 | 0.03    | 0.99 |

Supplement: Supplementary file 6579 [file 1]

IPI00297056.2|CRNN

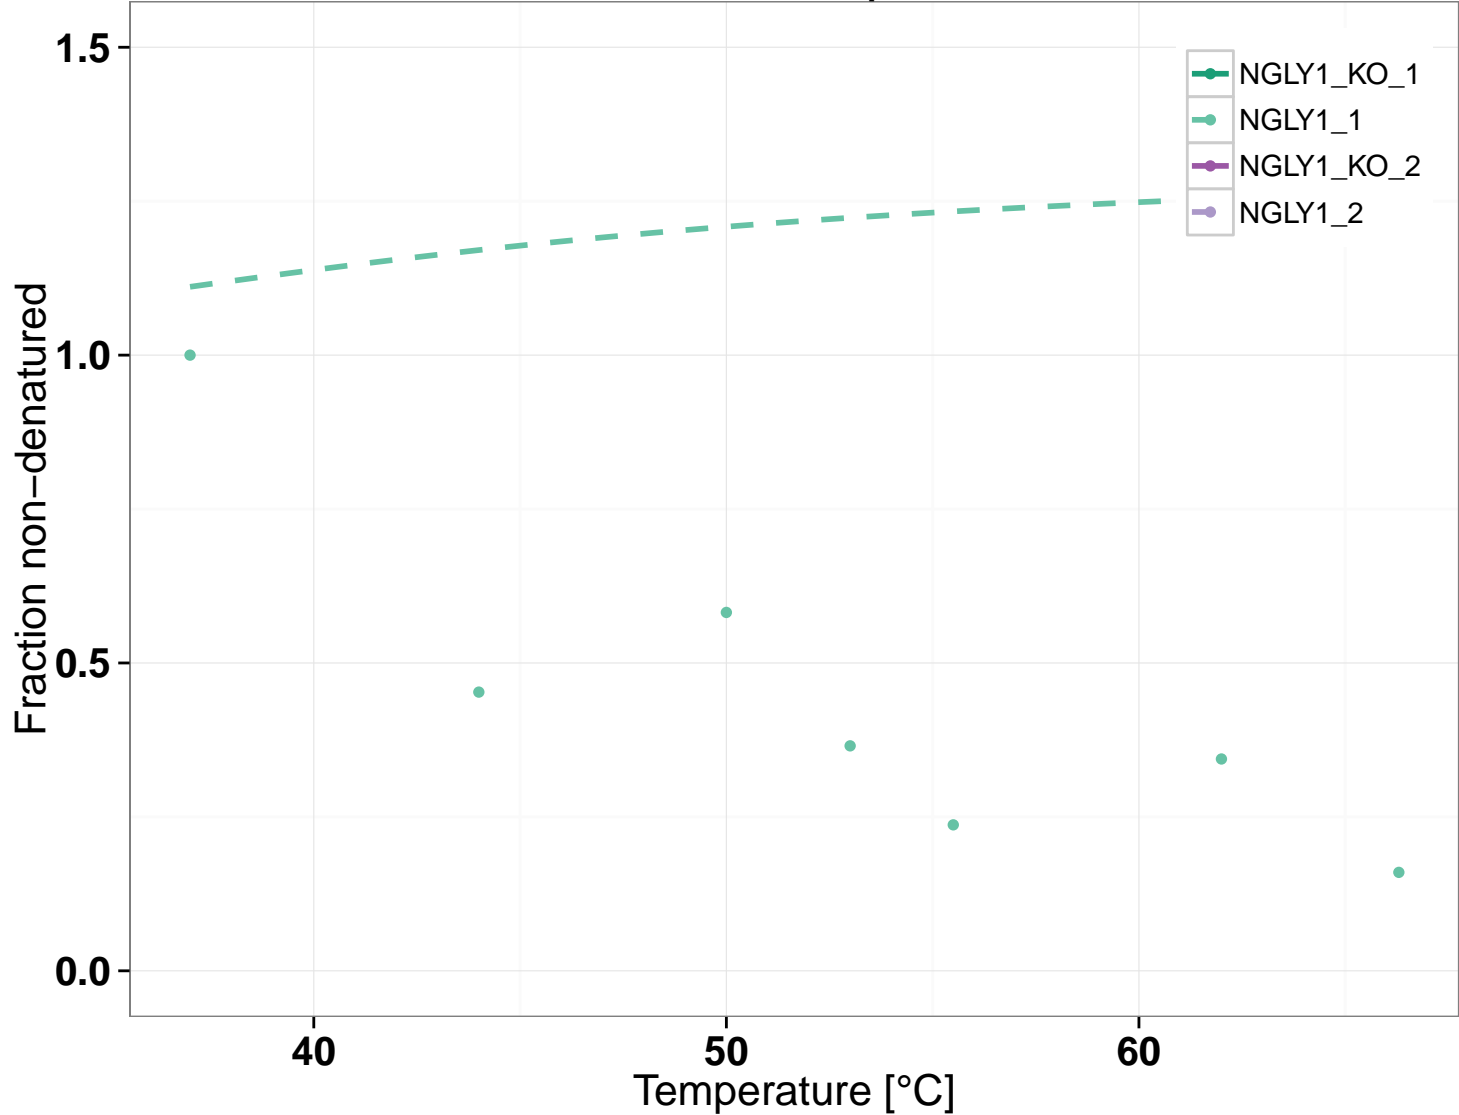

|            | meltPoint | slope | plateau | R2 |
|------------|-----------|-------|---------|----|
| NGLY1_KO_1 | -         | -     | -       | -  |
| NGLY1_1    | -         | -     | 1.33    | 0  |
| NGLY1_KO_2 | -         | -     | -       | -  |
| NGLY1_2    | -         | -     | -       | -  |

Supplement: Supplementary file 6580 [file 1]

IPI00031370.3|TUBB2B

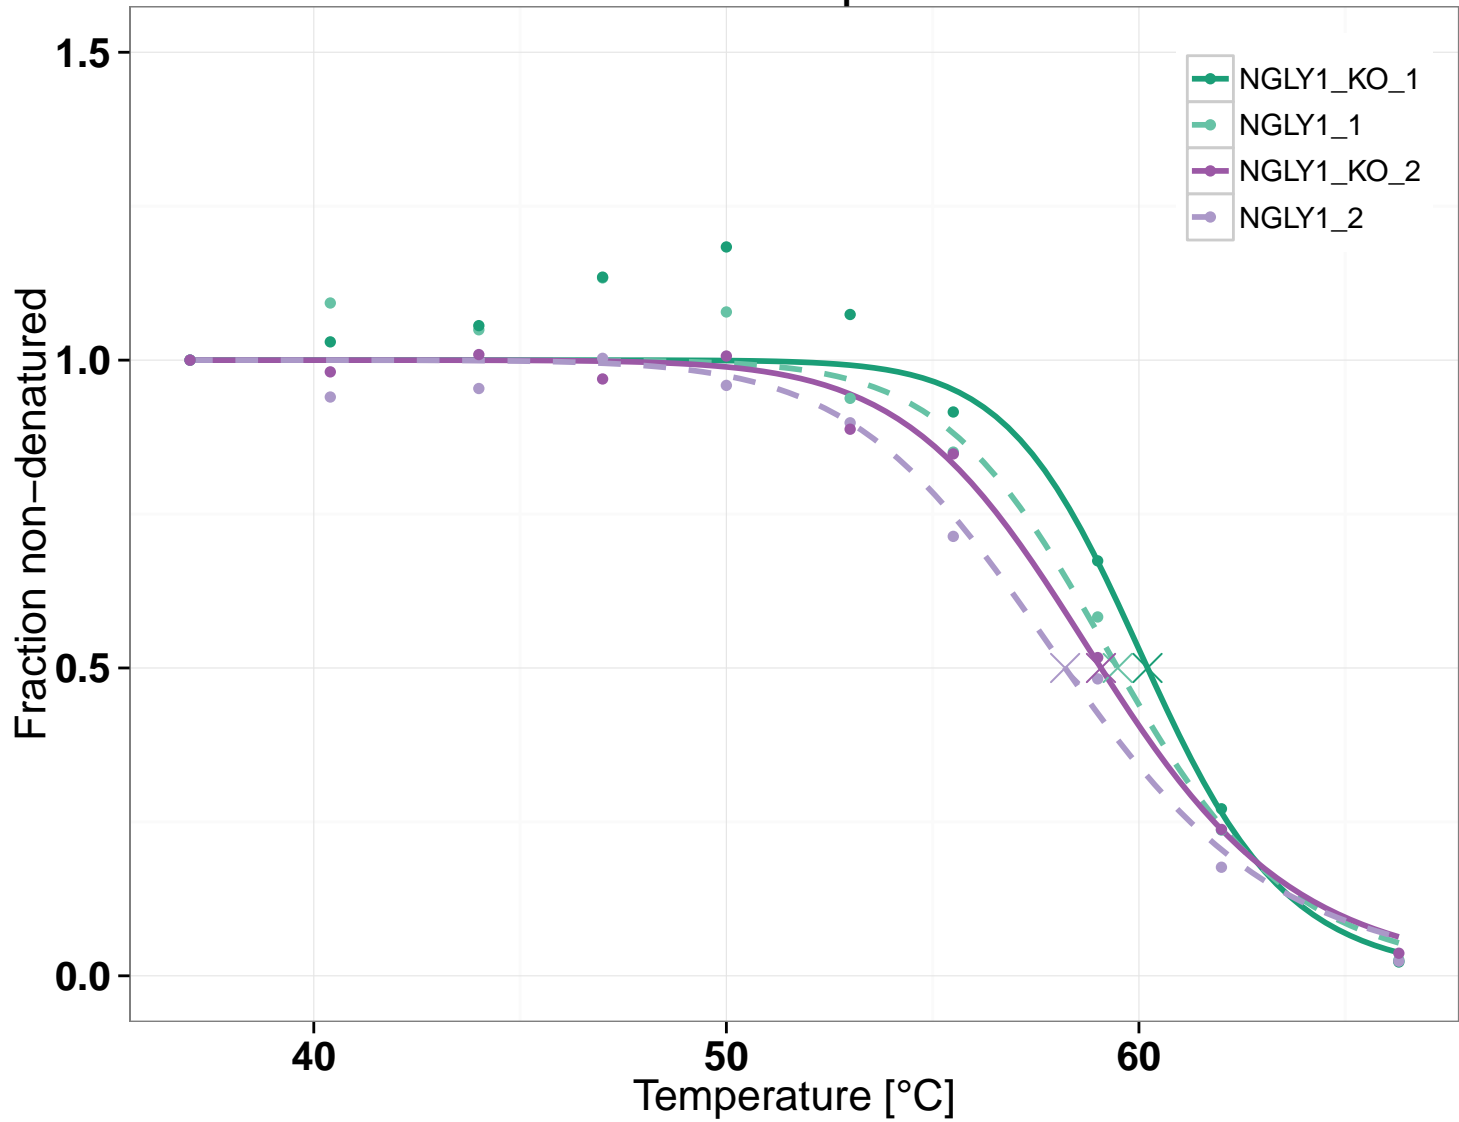

|            | meltPoint | slope  | plateau | R2   |
|------------|-----------|--------|---------|------|
| NGLY1_KO_1 | 60.21     | -0.15  | 0       | 0.95 |
| NGLY1_1    | 59.49     | -0.12  | 0       | 0.97 |
| NGLY1_KO_2 | 59.08     | -0.11  | 0       | 0.99 |
| NGLY1_2    | 58.21     | -0.096 | 0       | 0.99 |

Supplement: Supplementary file 6581 [file 1]

# IPI00074258.3|MASTL

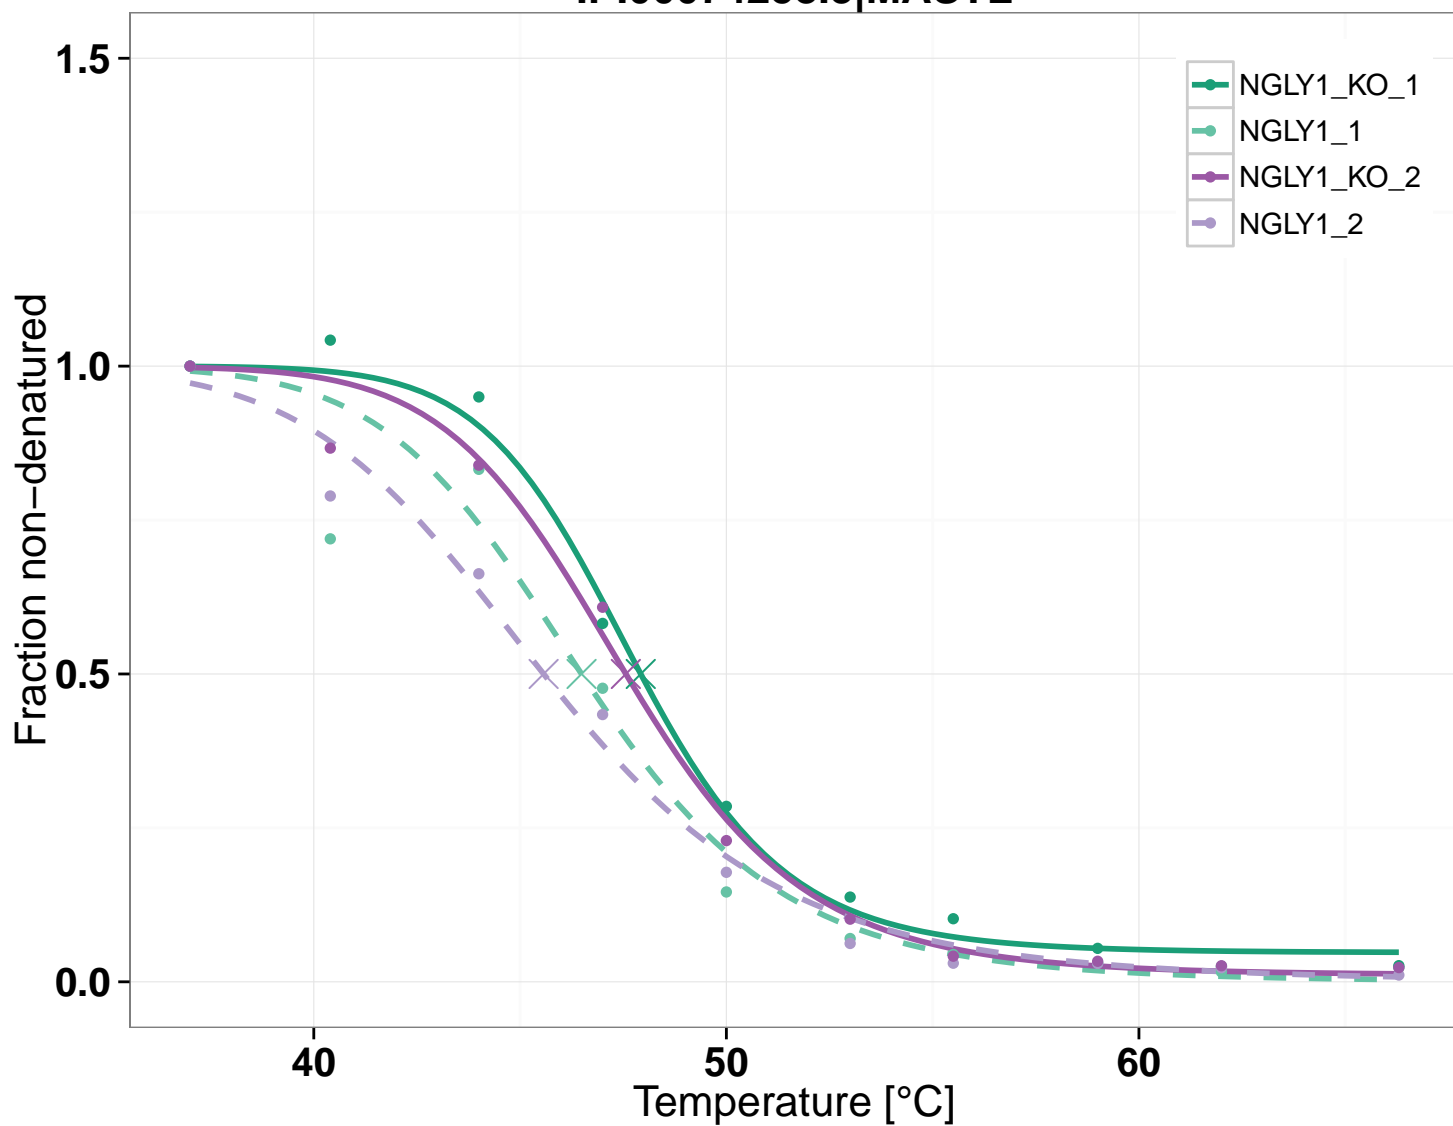

|            | meltPoint | slope  | plateau | R2   |
|------------|-----------|--------|---------|------|
| NGLY1_KO_1 | 47.92     | -0.13  | 0.05    | 0.99 |
| NGLY1_1    | 46.49     | -0.1   | 0       | 0.95 |
| NGLY1_KO_2 | 47.56     | -0.11  | 0.01    | 0.99 |
| NGLY1_2    | 45.57     | -0.086 | 0       | 0.99 |

Supplement: Supplementary file 6582 [file 1]

IPI00396231.3|C3ORF64

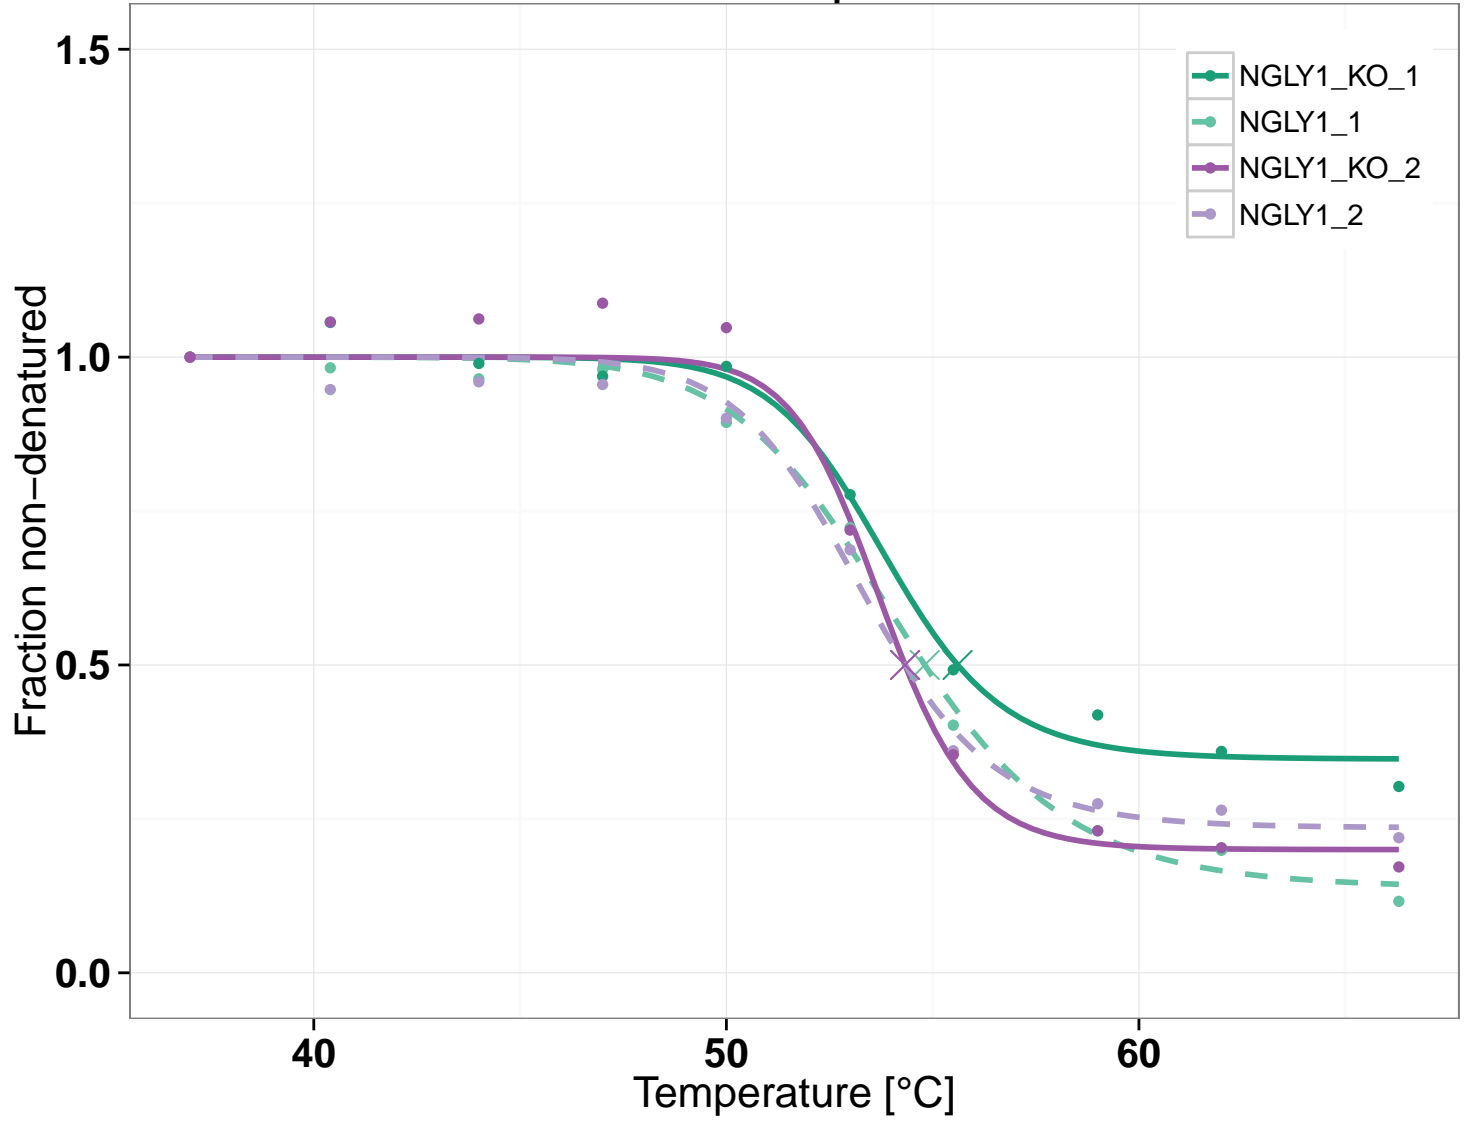

|            | meltPoint | slope | plateau | R2   |
|------------|-----------|-------|---------|------|
| NGLY1_KO_1 | 55.6      | -0.12 | 0.35    | 0.99 |
| NGLY1_1    | 54.81     | -0.11 | 0.14    | 1    |
| NGLY1_KO_2 | 54.33     | -0.18 | 0.2     | 0.99 |
| NGLY1_2    | 54.33     | -0.12 | 0.24    | 0.99 |

Supplement: Supplementary file 6583 [file 1]

# IPI00305383.1|UQCRC2

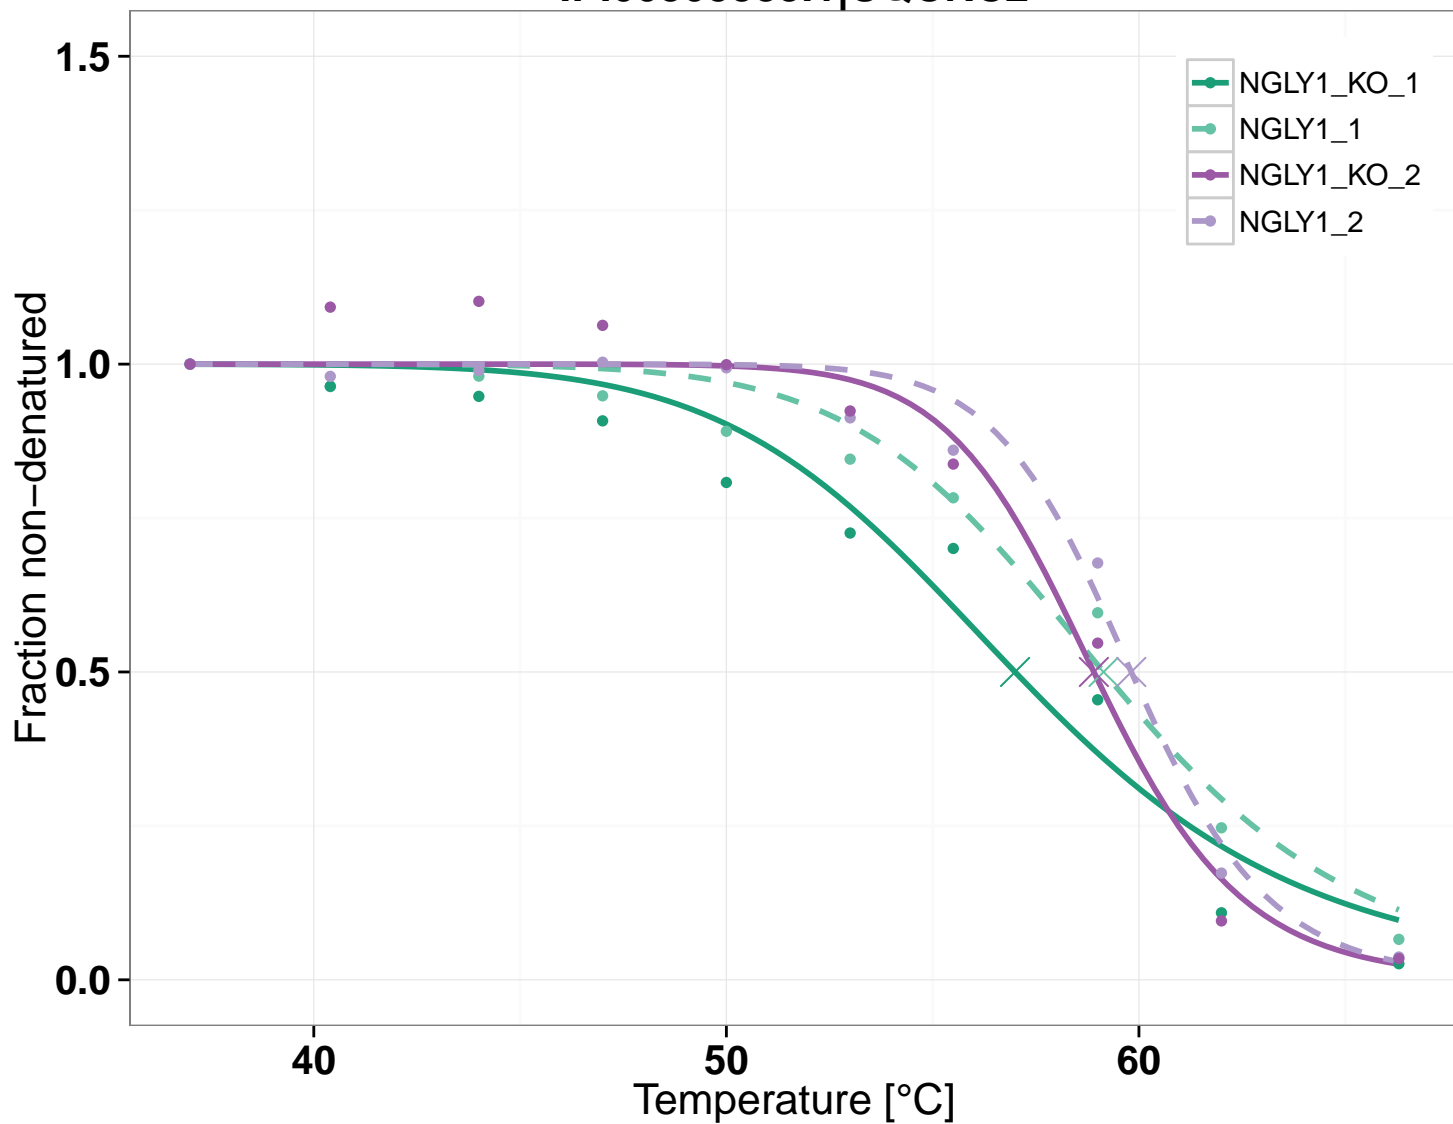

|            | meltPoint | slope  | plateau | R2   |
|------------|-----------|--------|---------|------|
| NGLY1_KO_1 | 57        | -0.071 | 0       | 0.96 |
| NGLY1_1    | 59.14     | -0.081 | 0       | 0.97 |
| NGLY1_KO_2 | 58.91     | -0.14  | 0       | 0.98 |
| NGLY1_2    | 59.81     | -0.15  | 0       | 0.98 |

Supplement: Supplementary file 6584 [file 1]

IPI00719752.2|EIF3B

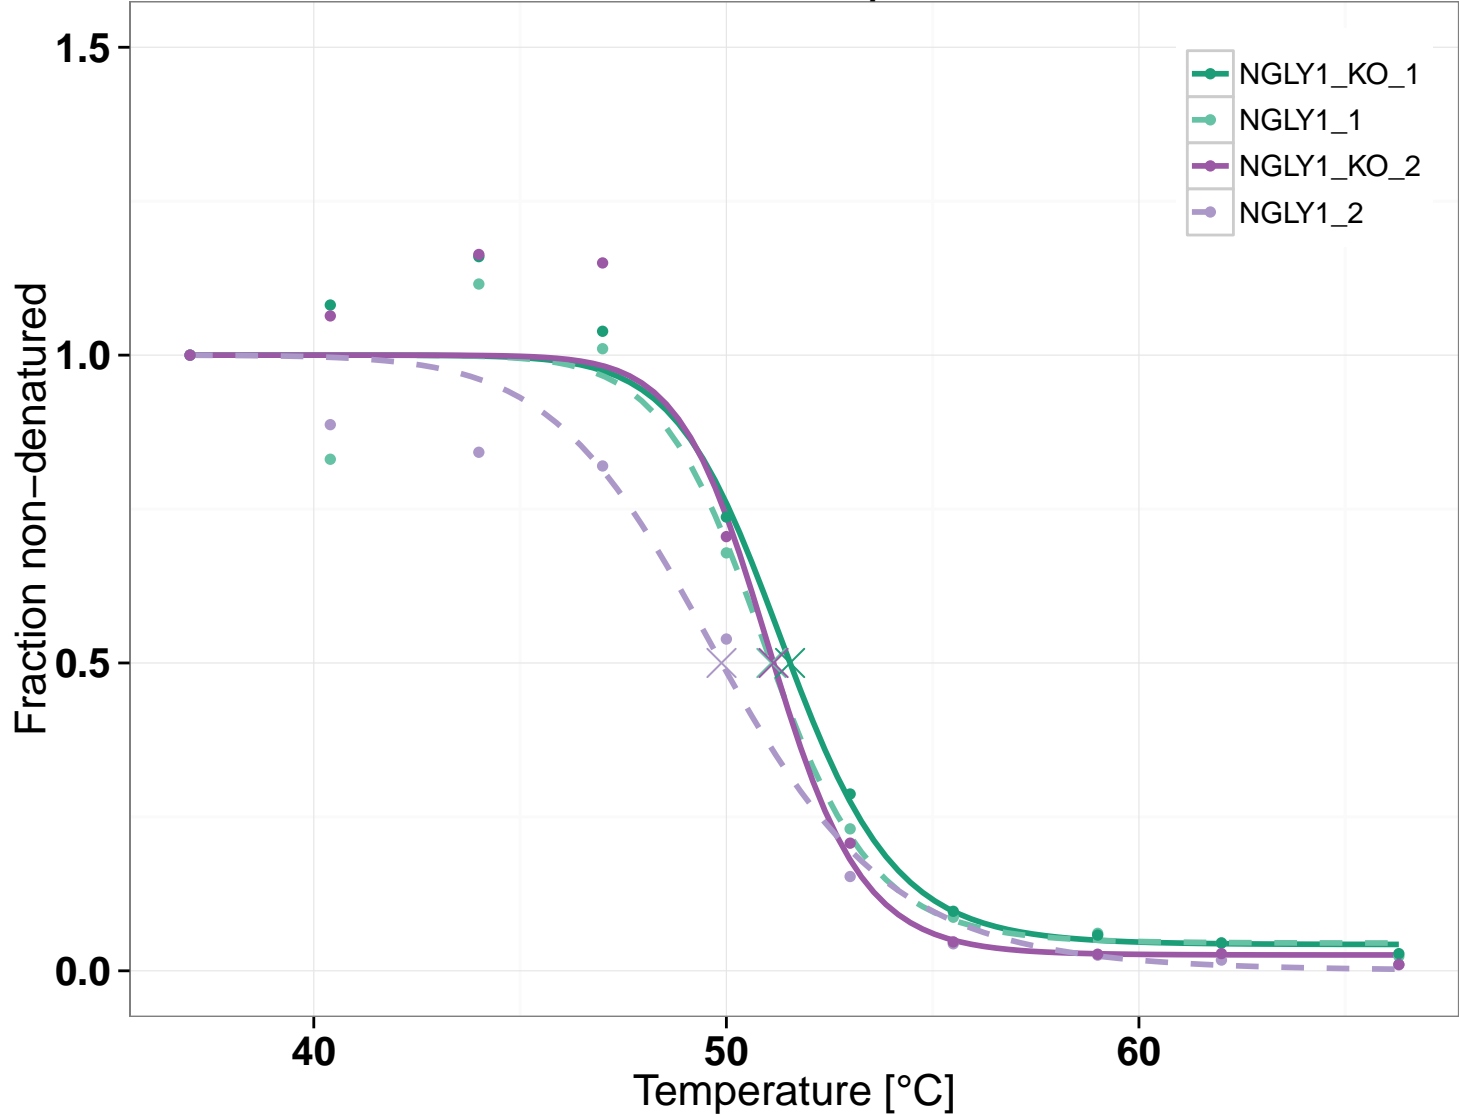

|            | meltPoint | slope | plateau | R2   |
|------------|-----------|-------|---------|------|
| NGLY1_KO_1 | 51.54     | -0.18 | 0.04    | 0.98 |
| NGLY1_1    | 51.09     | -0.18 | 0.05    | 0.98 |
| NGLY1_KO_2 | 51.14     | -0.22 | 0.03    | 0.97 |
| NGLY1_2    | 49.88     | -0.12 | 0       | 0.98 |

Supplement: Supplementary file 6585 [file 1]

IPI00887027.1|DKFZP686O24166

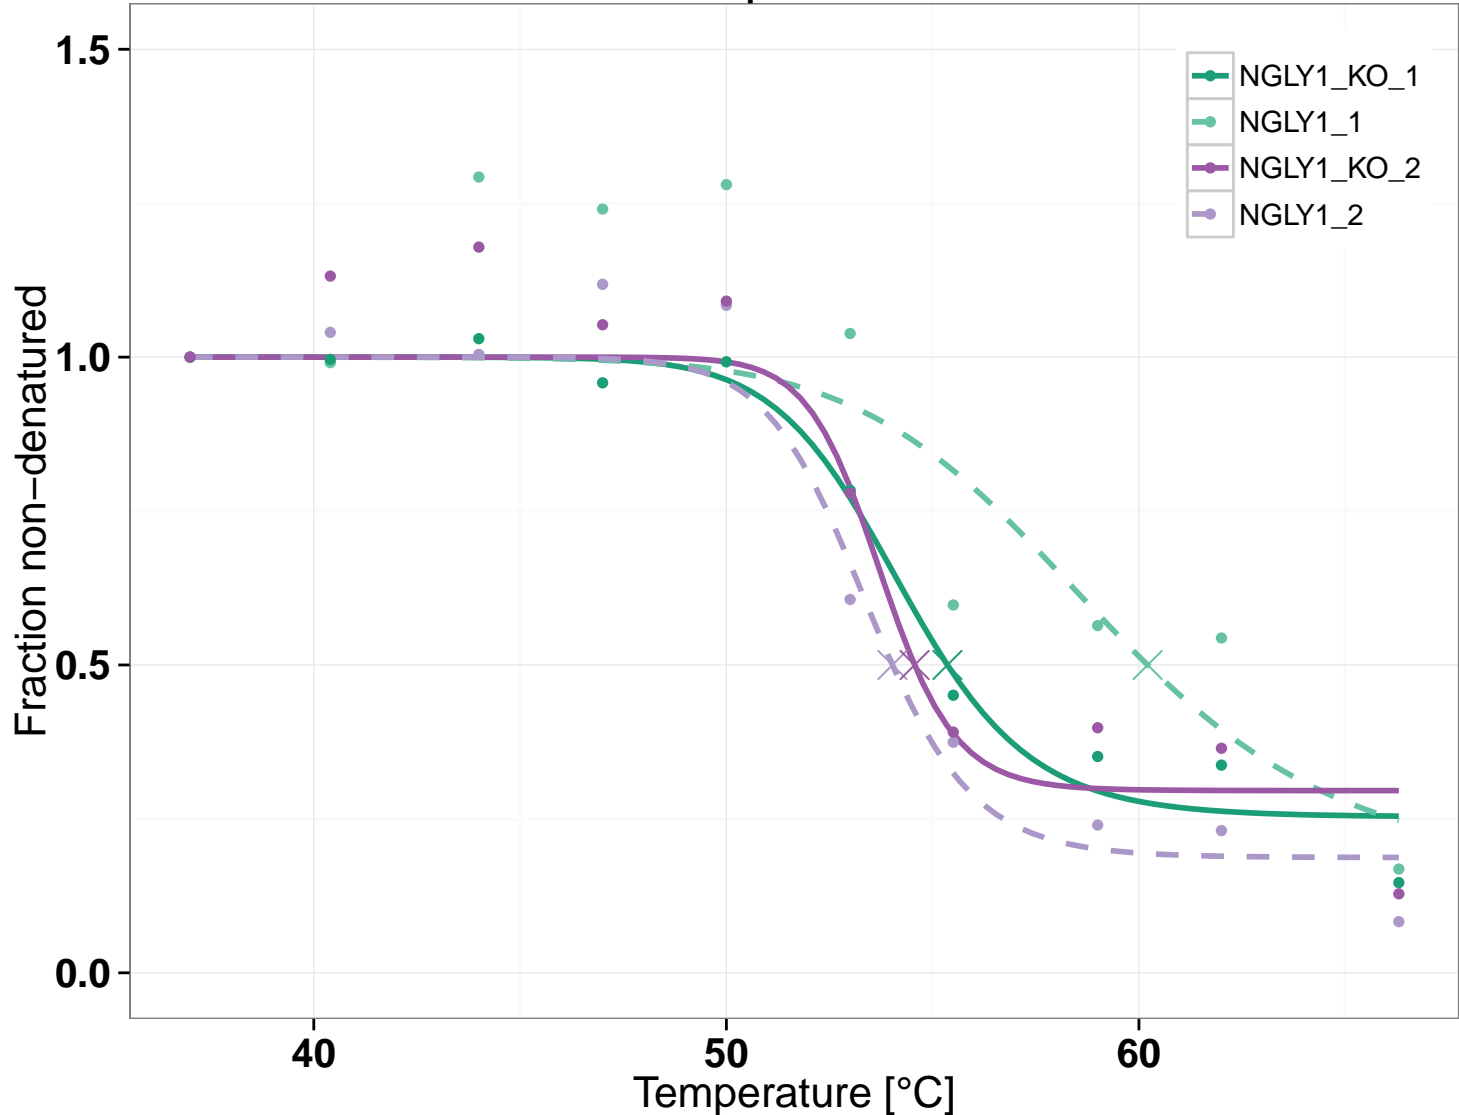

|            | meltPoint | slope  | plateau | R2   |
|------------|-----------|--------|---------|------|
| NGLY1_KO_1 | 55.36     | -0.12  | 0.25    | 0.98 |
| NGLY1_1    | 60.21     | -0.071 | 0.16    | 0.75 |
| NGLY1_KO_2 | 54.56     | -0.2   | 0.3     | 0.92 |
| NGLY1_2    | 54.02     | -0.16  | 0.19    | 0.97 |

Supplement: Supplementary file 6586 [file 1]

IPI00062839.4|MARS2

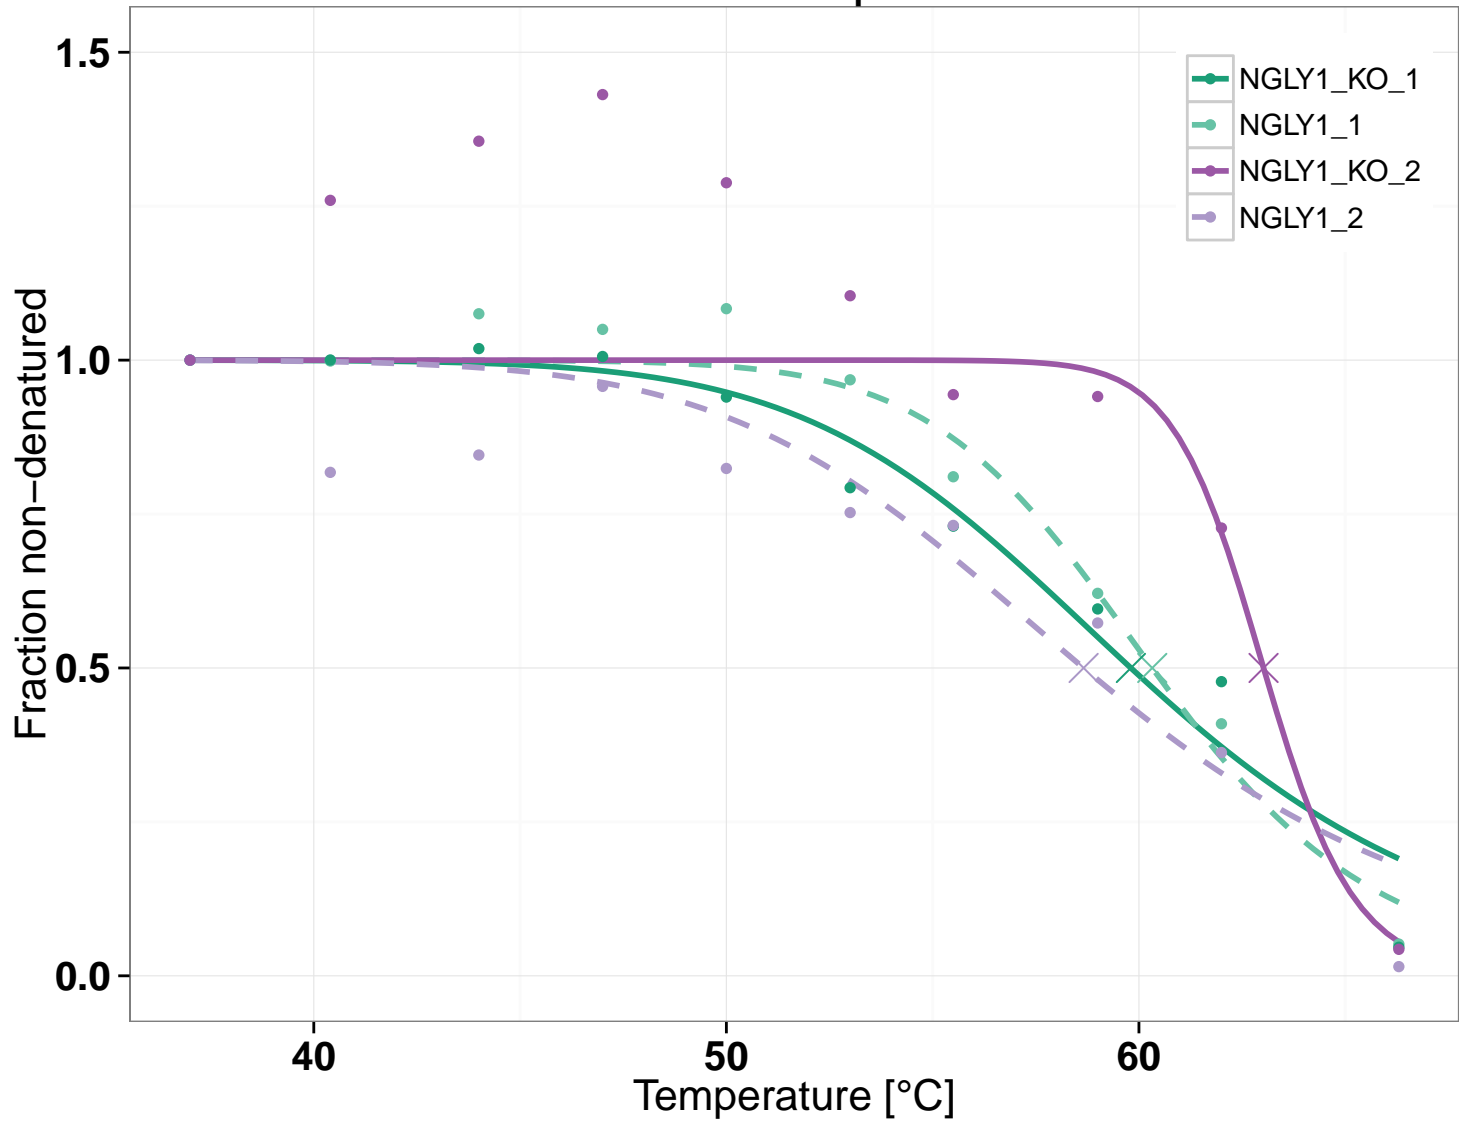

|            | meltPoint | slope  | plateau | R2   |
|------------|-----------|--------|---------|------|
| NGLY1_KO_1 | 59.81     | -0.063 | 0       | 0.95 |
| NGLY1_1    | 60.32     | -0.093 | 0       | 0.97 |
| NGLY1_KO_2 | 63.02     | -0.23  | 0       | 0.67 |
| NGLY1_2    | 58.66     | -0.058 | 0       | 0.87 |

Supplement: Supplementary file 6587 [file 1]

IPI00175793.2|VMAC

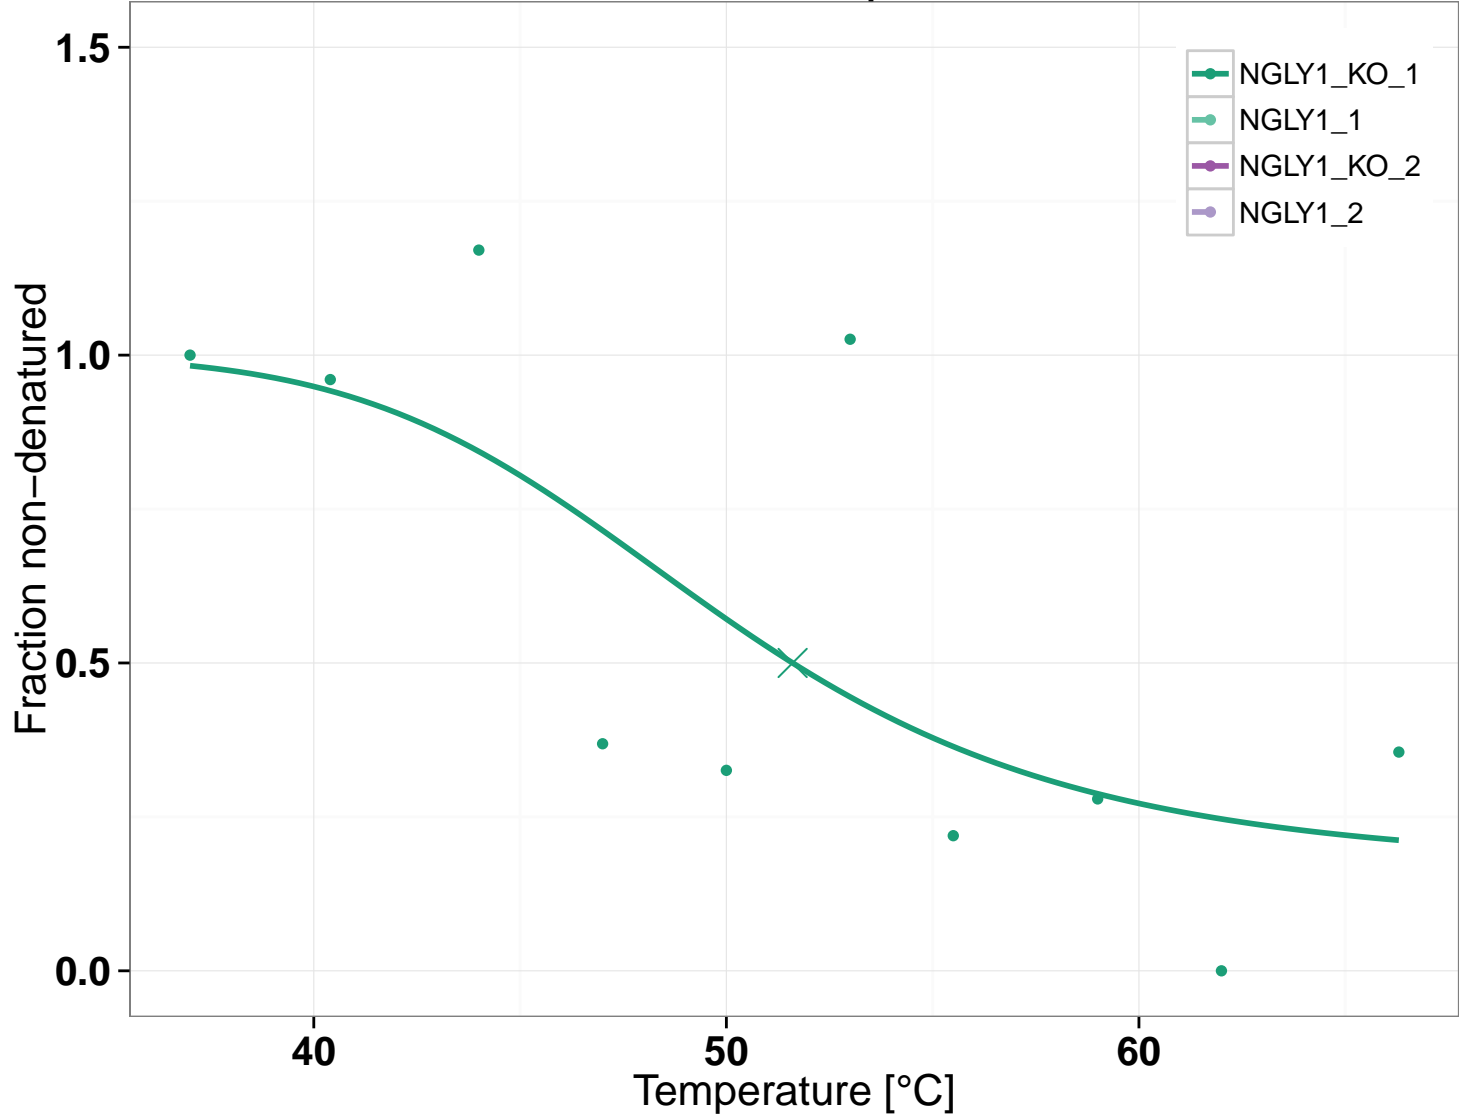

|            | meltPoint | slope  | plateau | R2   |
|------------|-----------|--------|---------|------|
| NGLY1_KO_1 | 51.61     | -0.048 | 0.16    | 0.54 |
| NGLY1_1    | -         | -      | -       | -    |
| NGLY1_KO_2 | -         | -      | -       | -    |
| NGLY1_2    | -         | -      | -       | -    |

Supplement: Supplementary file 6588 [file 1]

IPI00018786.1|C2ORF44

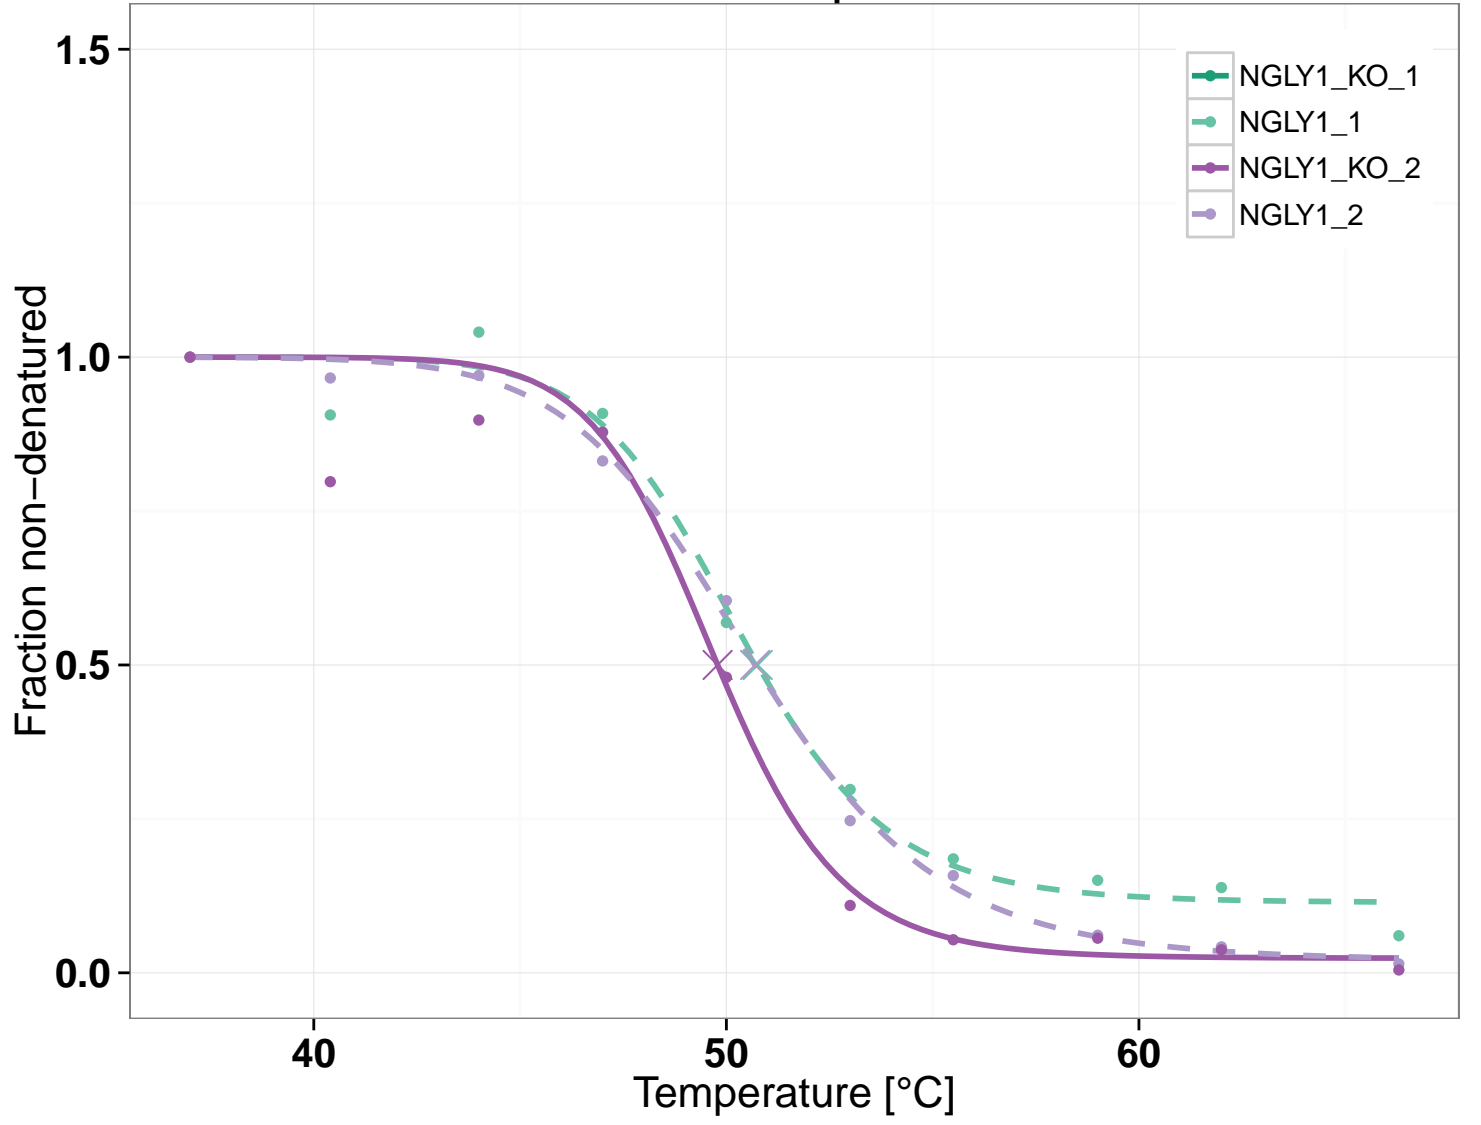

|            | meltPoint | slope | plateau | R2   |
|------------|-----------|-------|---------|------|
| NGLY1_KO_1 | -         | -     | -       | -    |
| NGLY1_1    | 50.76     | -0.12 | 0.11    | 0.99 |
| NGLY1_KO_2 | 49.79     | -0.16 | 0.02    | 0.97 |
| NGLY1_2    | 50.7      | -0.11 | 0.02    | 1    |

Supplement: Supplementary file 6589 [file 1]

IPI00334579.2|MRPL43

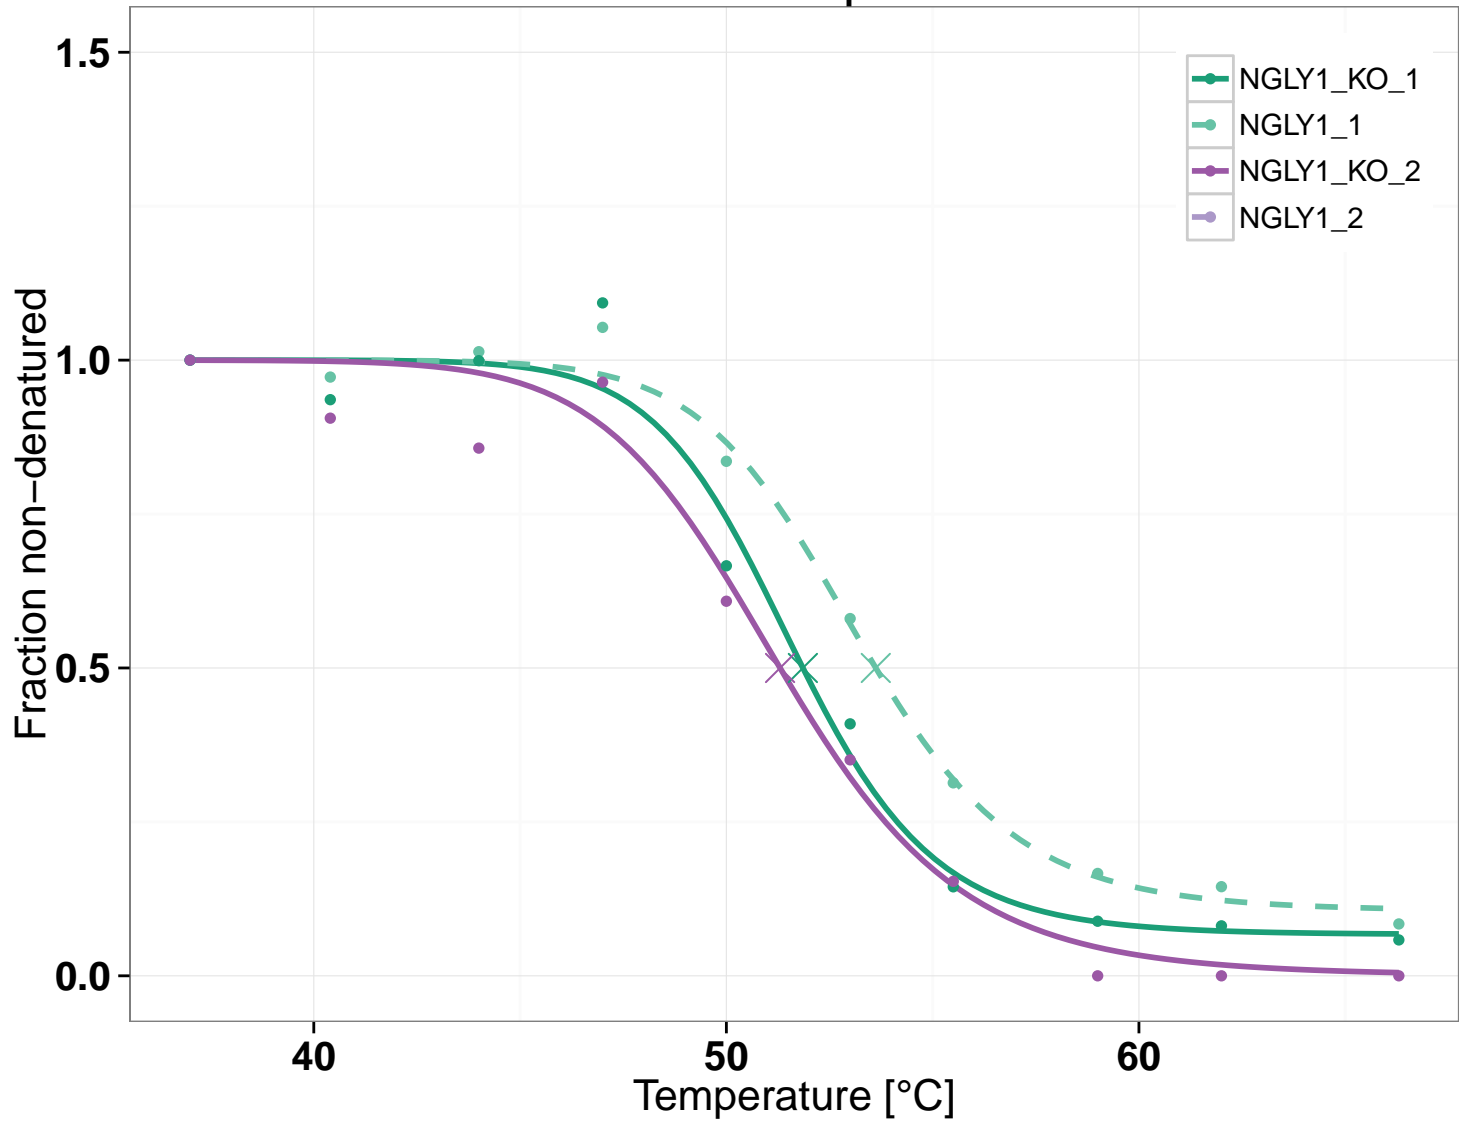

|            | meltPoint | slope | plateau | R2   |
|------------|-----------|-------|---------|------|
| NGLY1_KO_1 | 51.85     | -0.14 | 0.07    | 0.98 |
| NGLY1_1    | 53.62     | -0.12 | 0.11    | 0.99 |
| NGLY1_KO_2 | 51.3      | -0.11 | 0       | 0.98 |
| NGLY1_2    | -         | -     | -       | -    |

Supplement: Supplementary file 6590 [file 1]

IPI00384708.2|PDSS2

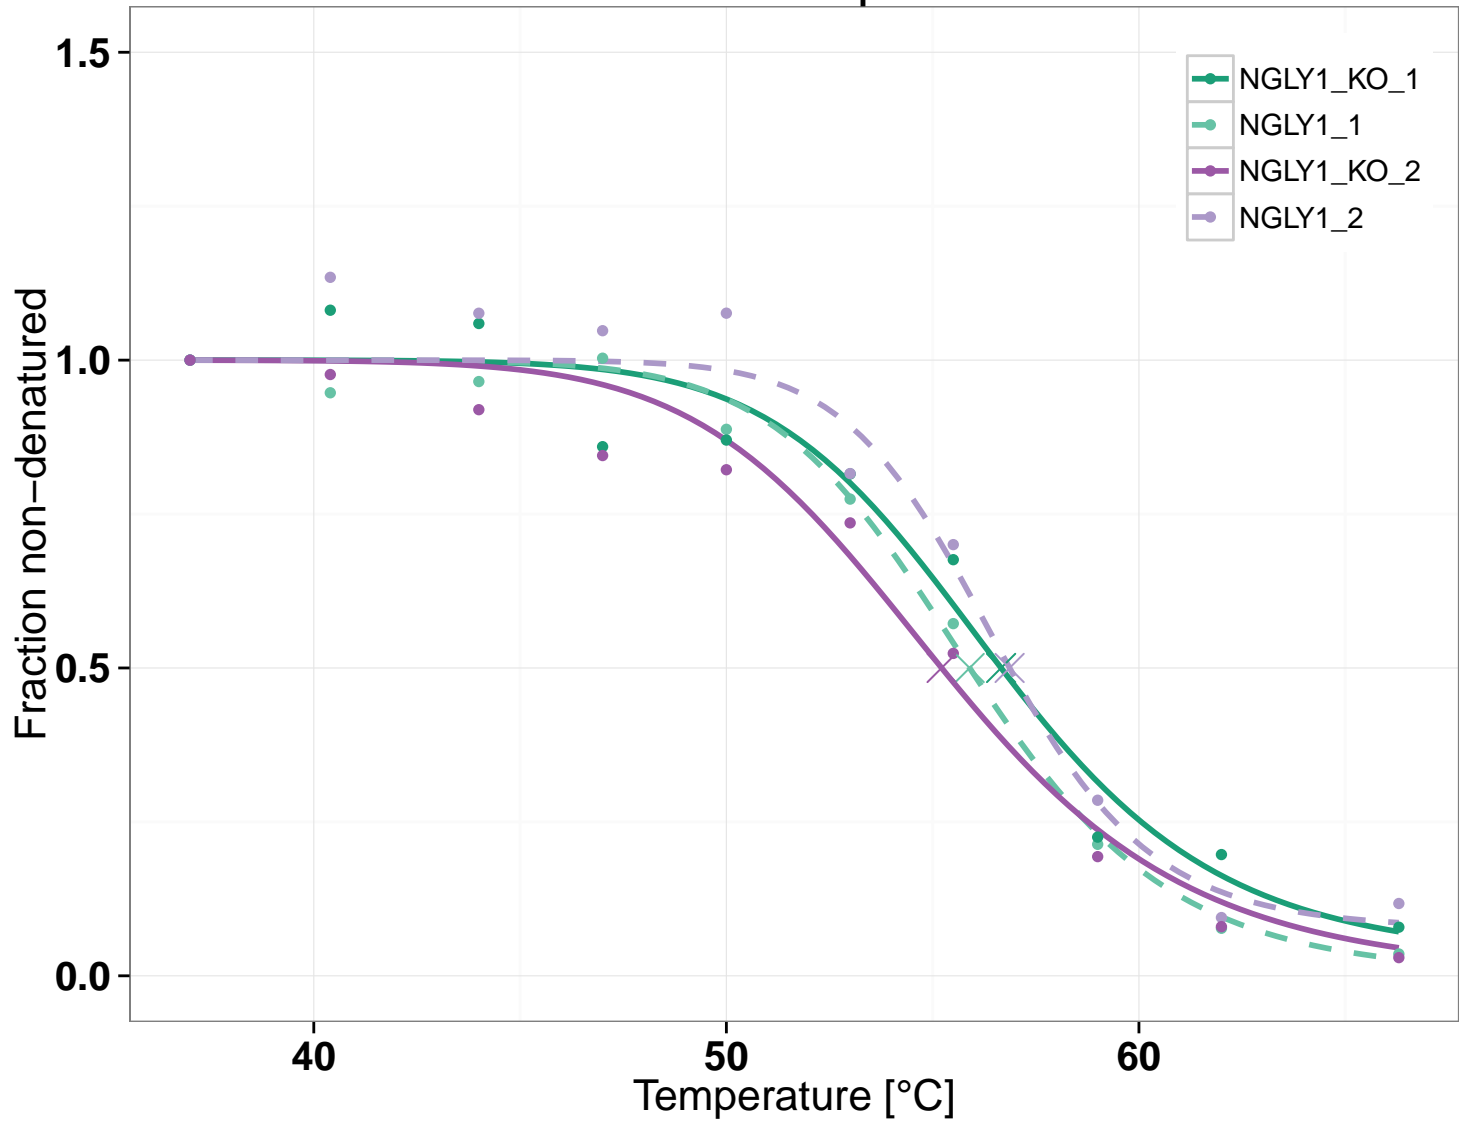

|            | meltPoint | slope  | plateau | R2   |
|------------|-----------|--------|---------|------|
| NGLY1_KO_1 | 56.66     | -0.089 | 0.03    | 0.96 |
| NGLY1_1    | 55.9      | -0.1   | 0       | 0.99 |
| NGLY1_KO_2 | 55.22     | -0.083 | 0       | 0.98 |
| NGLY1_2    | 56.87     | -0.12  | 0.08    | 0.97 |

Supplement: Supplementary file 6591 [file 1]

IPI00184119.6|DNAJC6

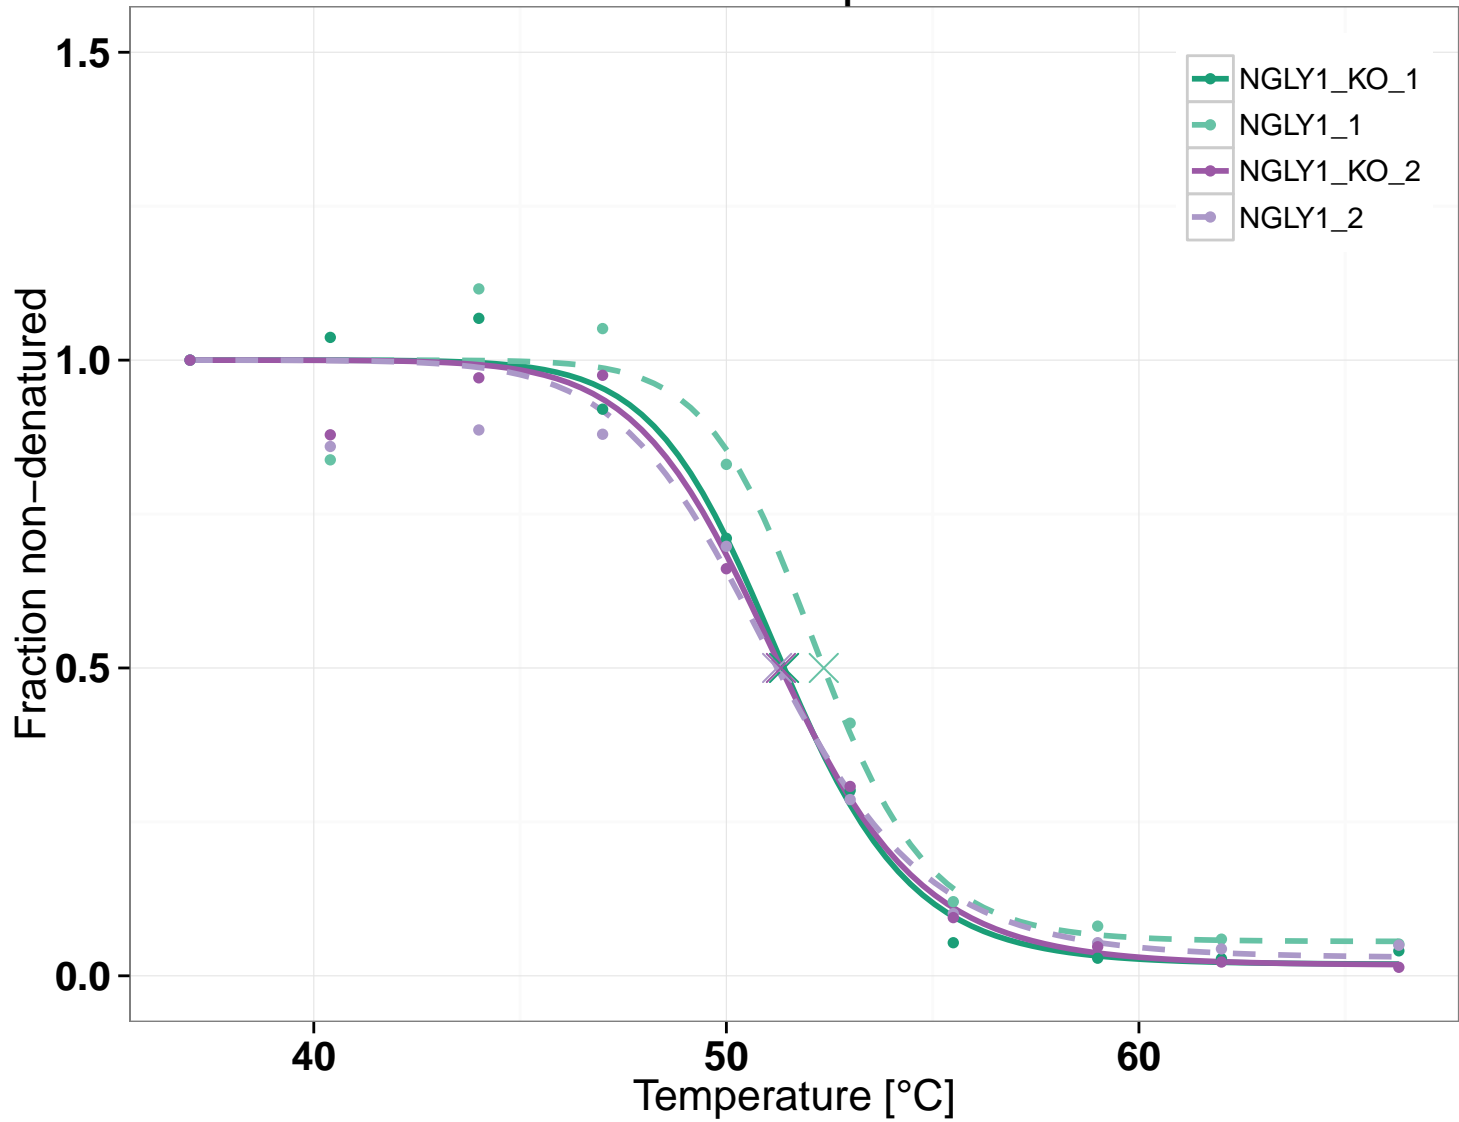

|            | meltPoint | slope | plateau | R2   |
|------------|-----------|-------|---------|------|
| NGLY1_KO_1 | 51.4      | -0.16 | 0.02    | 0.99 |
| NGLY1_1    | 52.36     | -0.18 | 0.06    | 0.98 |
| NGLY1_KO_2 | 51.32     | -0.14 | 0.02    | 0.99 |
| NGLY1_2    | 51.23     | -0.13 | 0.03    | 0.98 |

Supplement: Supplementary file 6592 [file 1]

# IPI00152564.2|RNF141

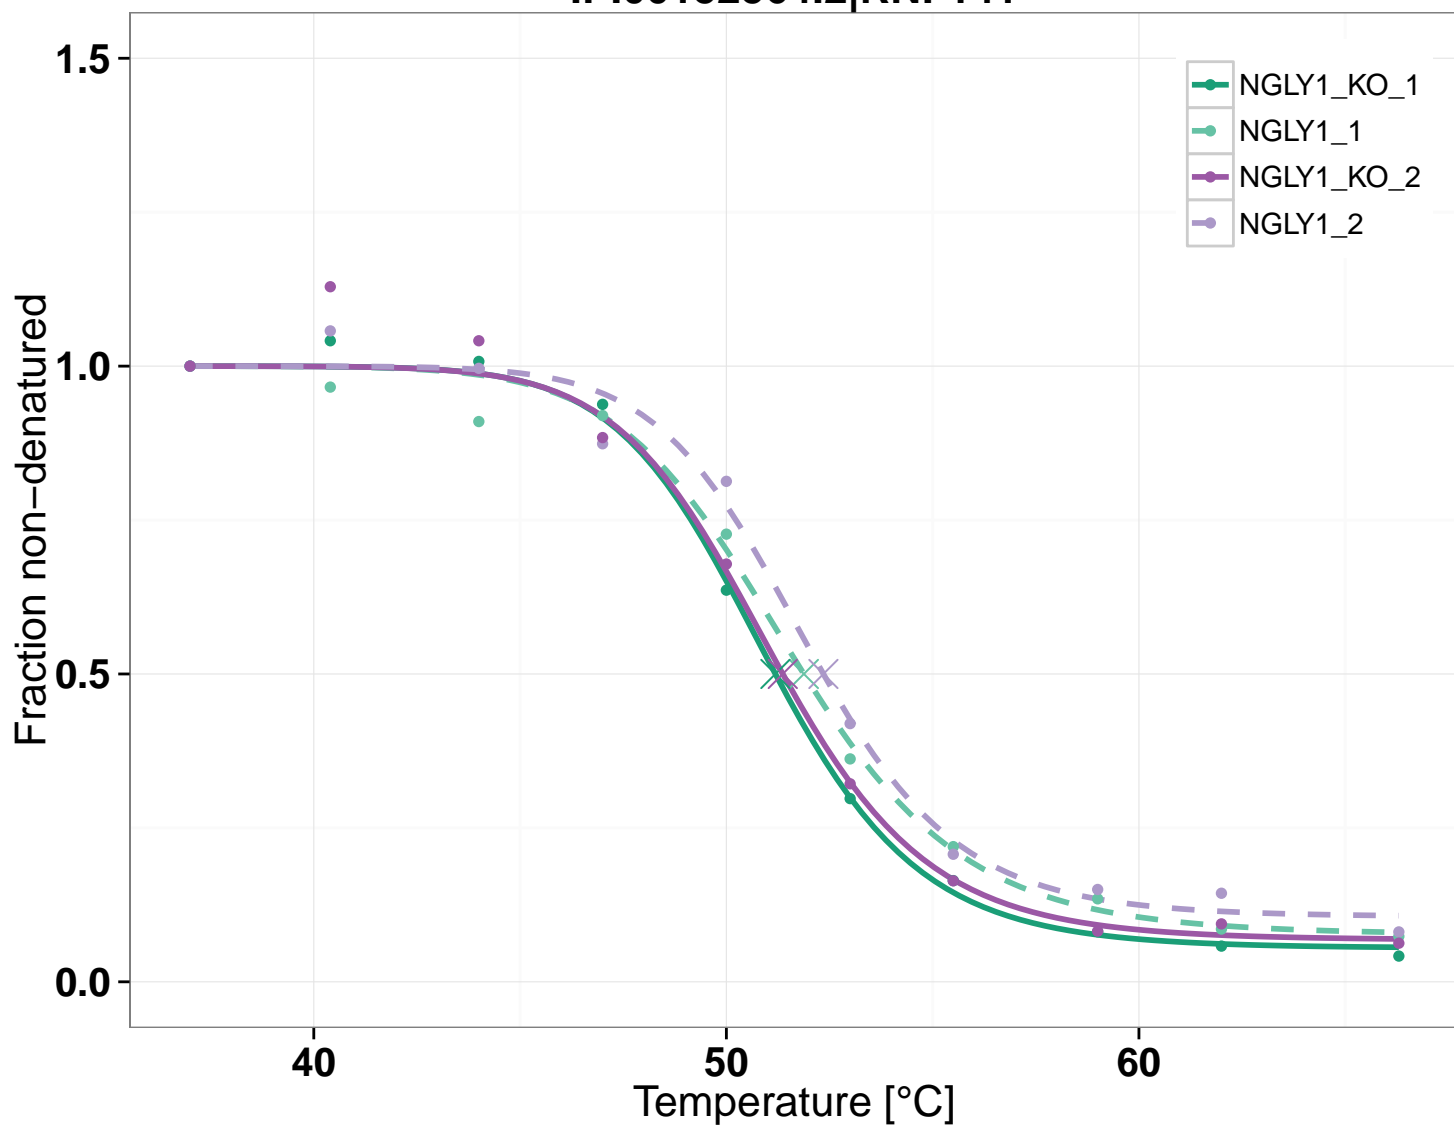

|            | meltPoint | slope | plateau | R2   |
|------------|-----------|-------|---------|------|
| NGLY1_KO_1 | 51.19     | -0.13 | 0.05    | 1    |
| NGLY1_1    | 51.88     | -0.11 | 0.08    | 0.99 |
| NGLY1_KO_2 | 51.37     | -0.12 | 0.07    | 0.99 |
| NGLY1_2    | 52.35     | -0.12 | 0.11    | 0.99 |

Supplement: Supplementary file 6593 [file 1]

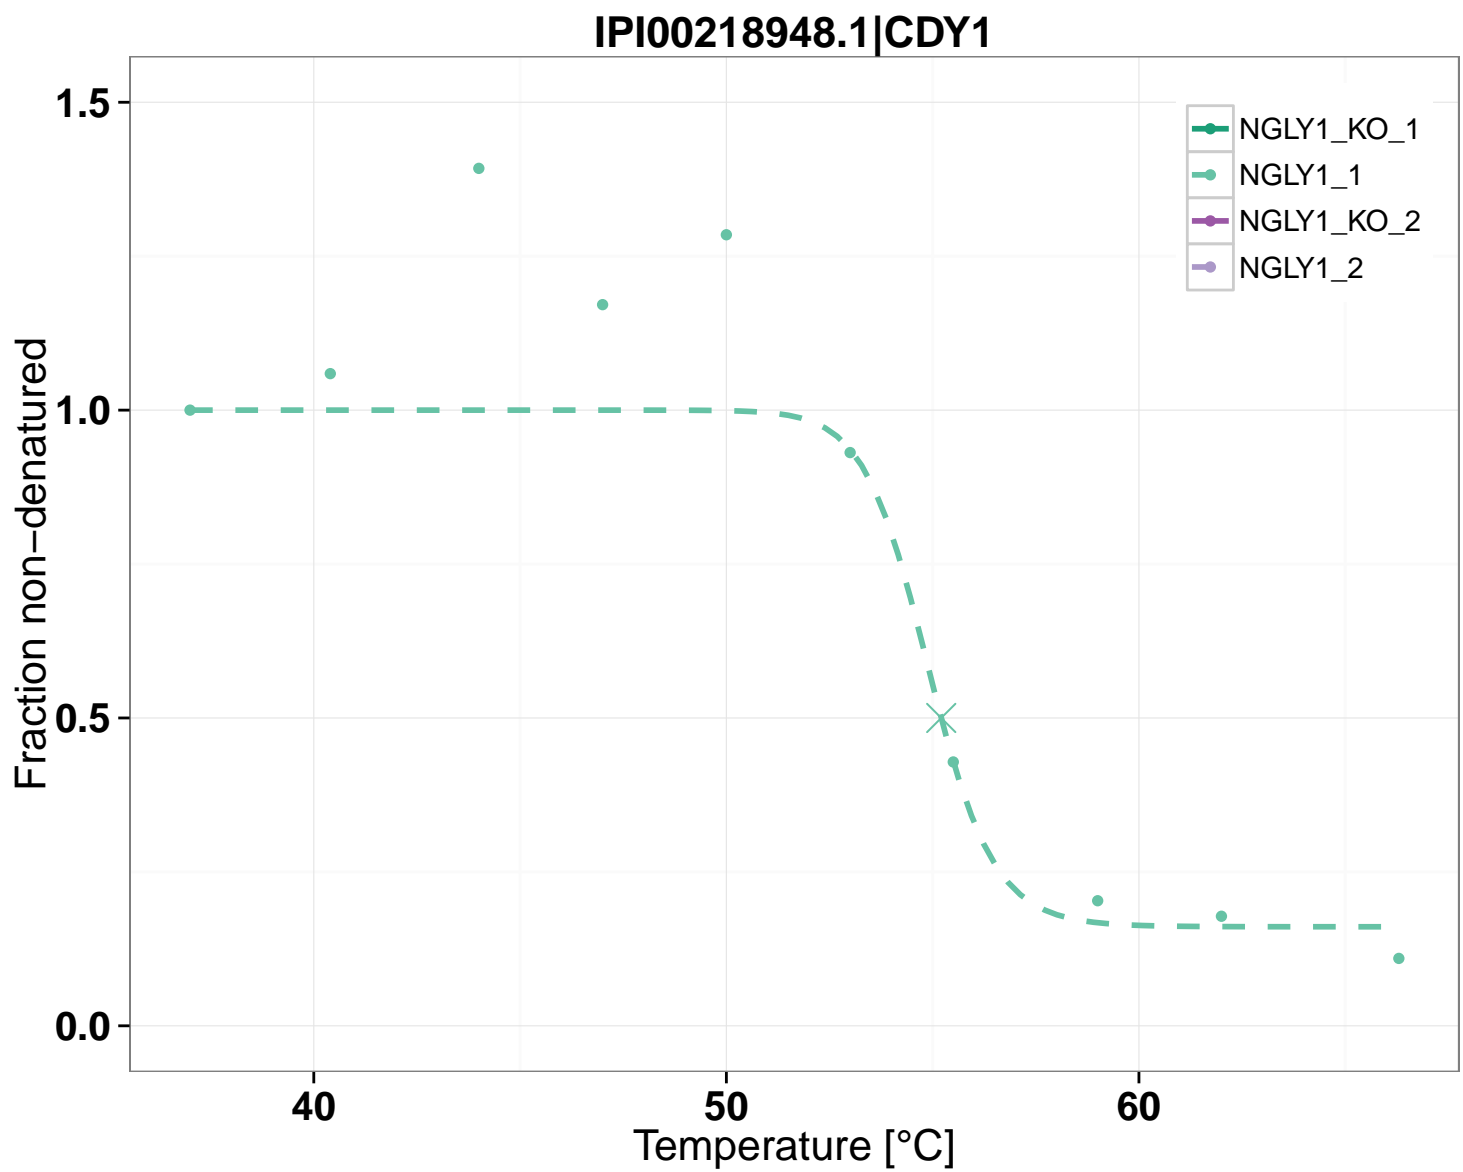

|            | meltPoint | slope | plateau | R2   |
|------------|-----------|-------|---------|------|
| NGLY1_KO_1 | —         | —     | —       | —    |
| NGLY1_1    | 55.21     | -0.27 | 0.16    | 0.88 |
| NGLY1_KO_2 | —         | —     | —       | —    |
| NGLY1_2    | —         | —     | —       | —    |

Supplement: Supplementary file 6594 [file 1]

IPI00007047.1|S100A8

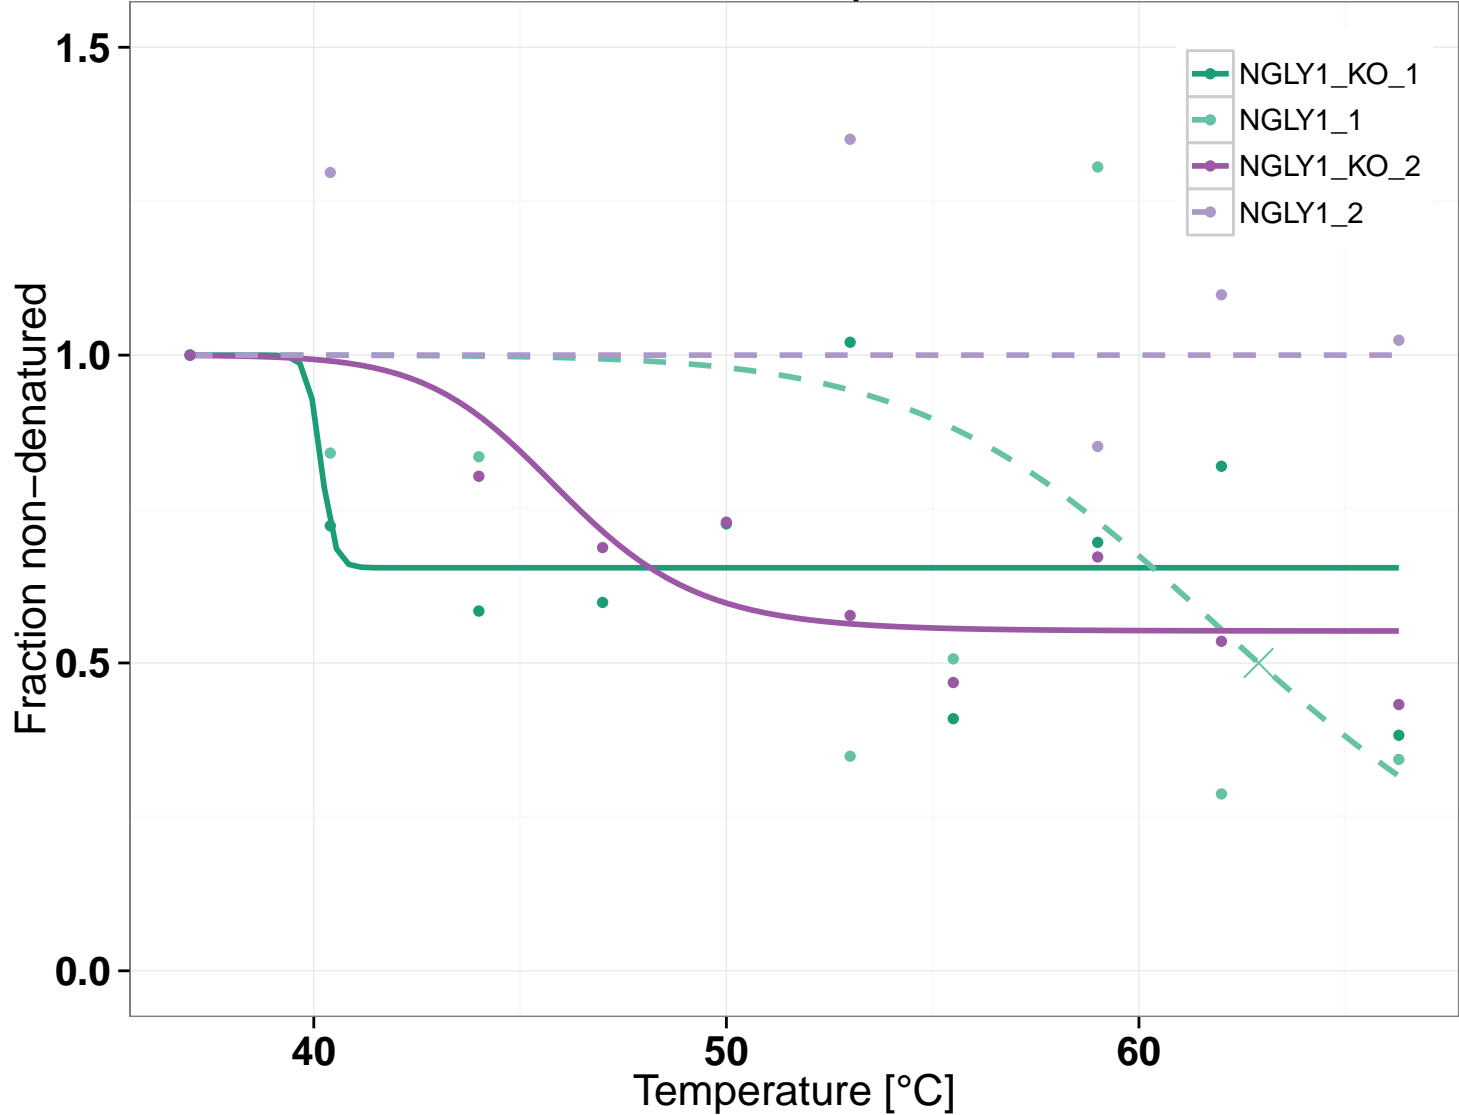

|            | meltPoint | slope  | plateau | R2    |
|------------|-----------|--------|---------|-------|
| NGLY1_KO_1 | –         | –0.54  | 0.65    | 0.26  |
| NGLY1_1    | 62.9      | –0.061 | 0       | 0.24  |
| NGLY1_KO_2 | –         | –0.067 | 0.55    | 0.62  |
| NGLY1_2    | –         | –      | 1.31    | –0.71 |

Supplement: Supplementary file 6595 [file 1]

IPI00177605.6|AMBRA1

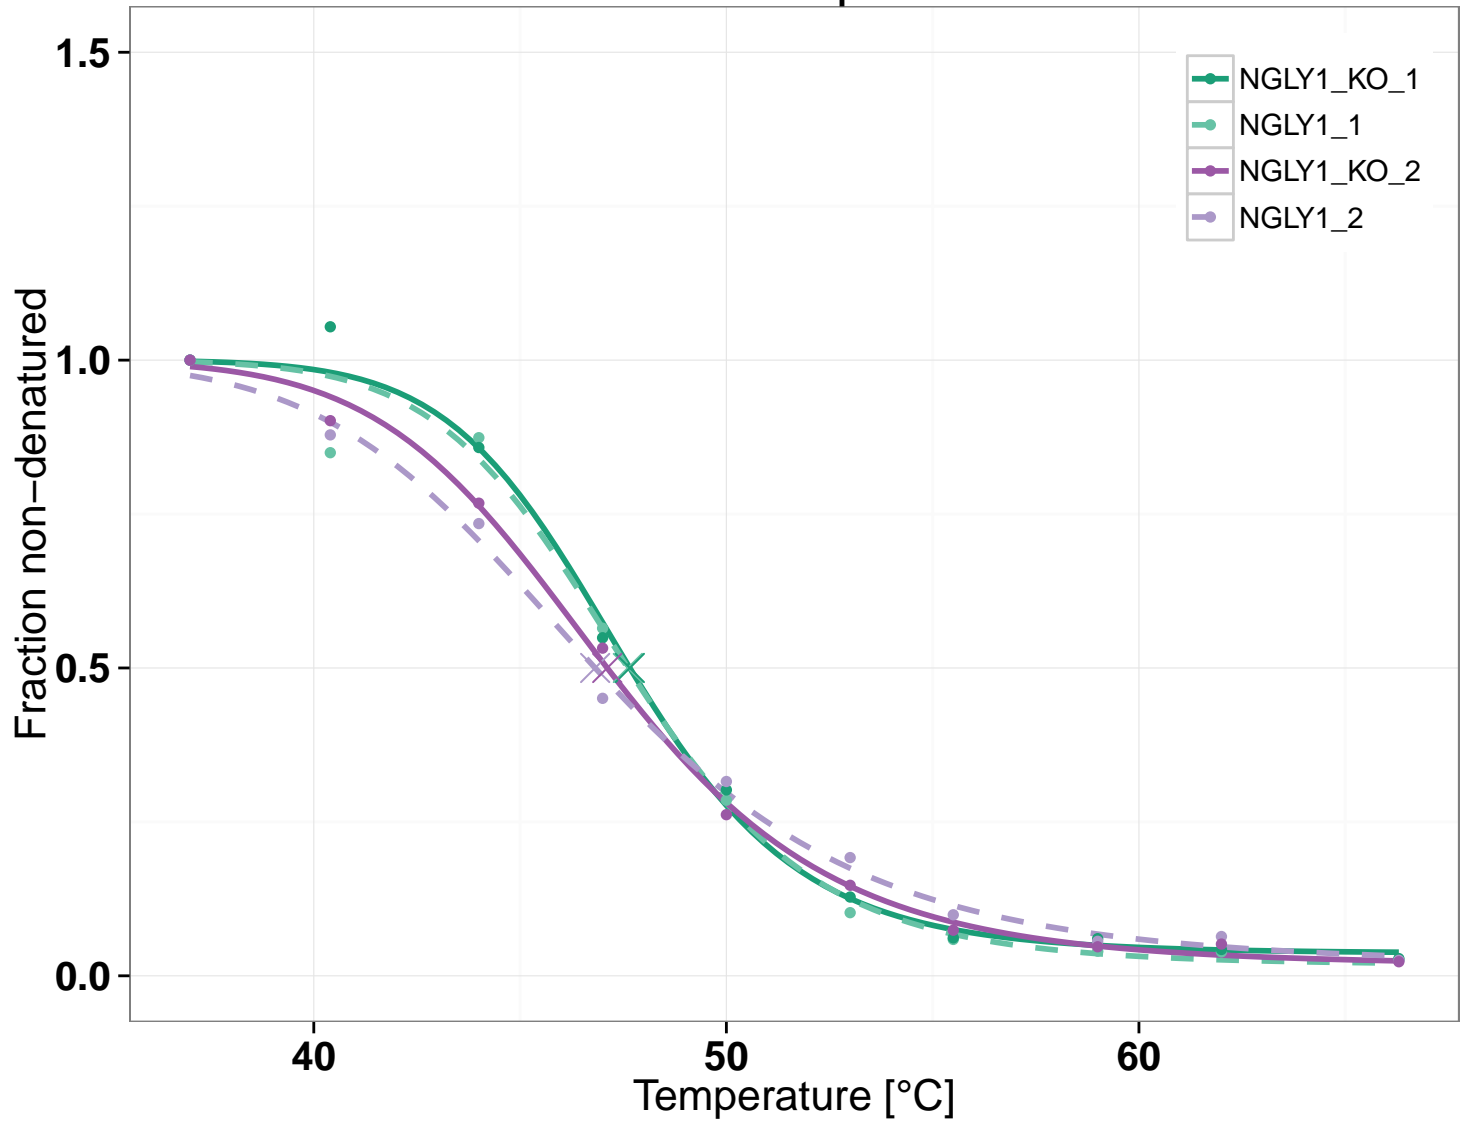

|            | meltPoint | slope  | plateau | R2   |
|------------|-----------|--------|---------|------|
| NGLY1_KO_1 | 47.66     | -0.11  | 0.04    | 1    |
| NGLY1_1    | 47.61     | -0.11  | 0.02    | 0.99 |
| NGLY1_KO_2 | 47.11     | -0.089 | 0.02    | 1    |
| NGLY1_2    | 46.82     | -0.075 | 0.02    | 1    |

Supplement: Supplementary file 6596 [file 1]

IPI00158847.4|DNAJC14

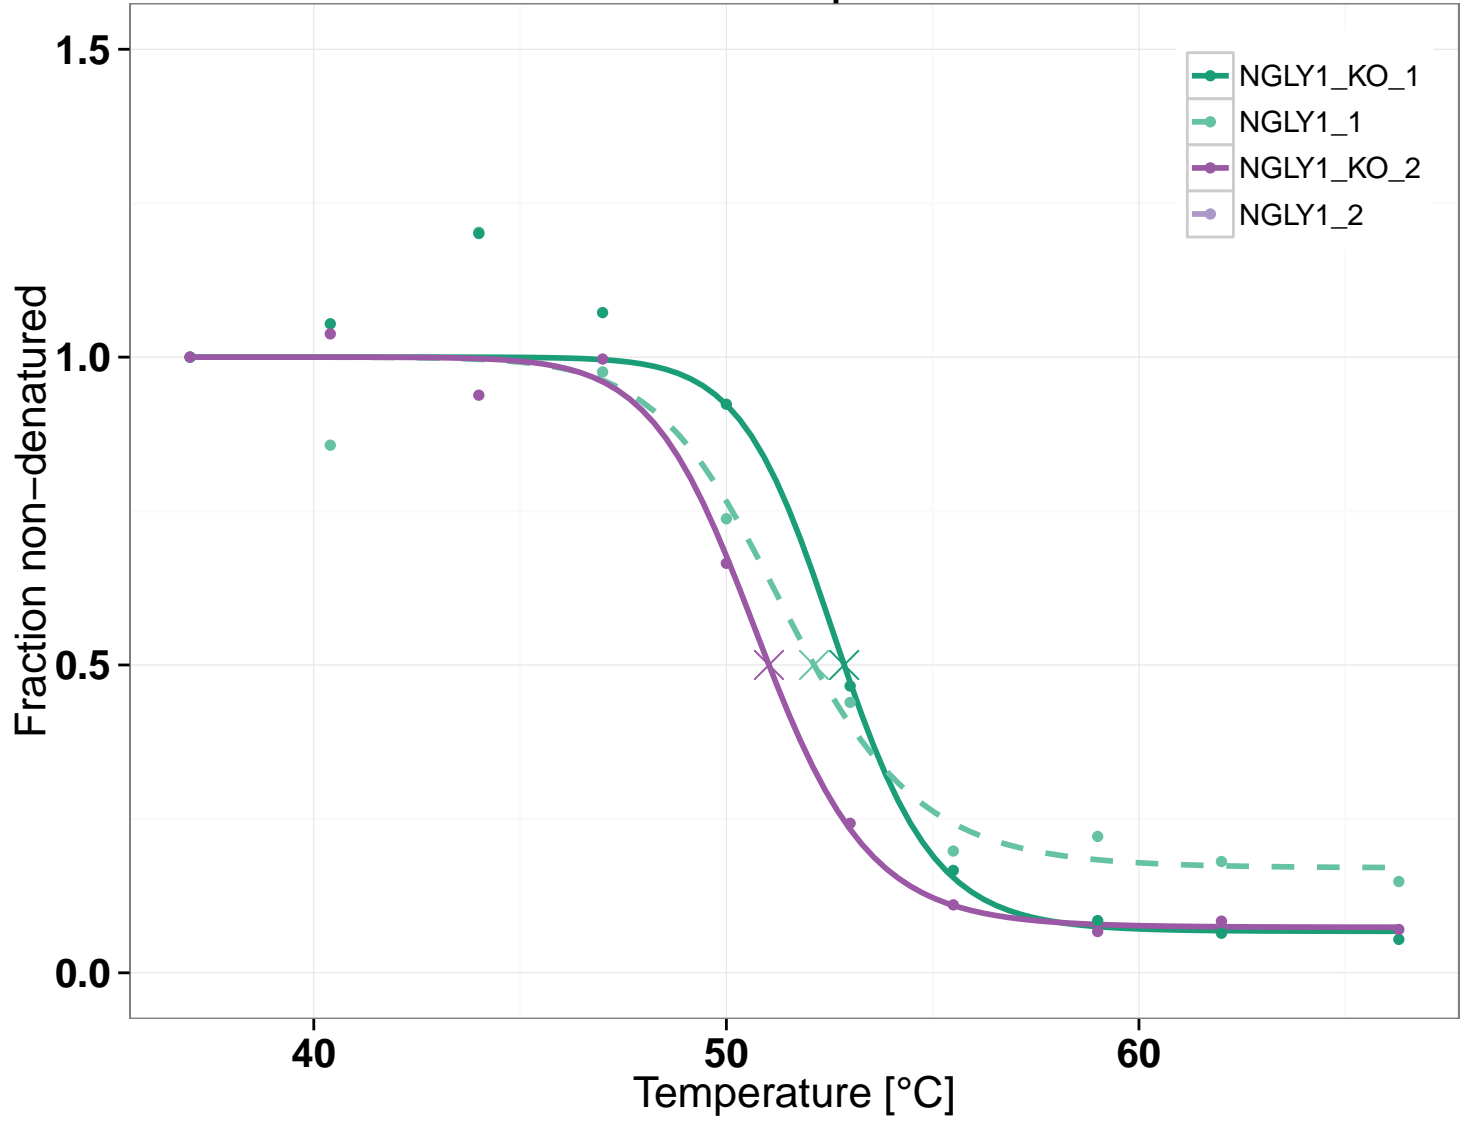

|            | meltPoint | slope | plateau | R2   |
|------------|-----------|-------|---------|------|
| NGLY1_KO_1 | 52.86     | -0.2  | 0.07    | 0.98 |
| NGLY1_1    | 52.12     | -0.13 | 0.17    | 0.95 |
| NGLY1_KO_2 | 51.03     | -0.17 | 0.07    | 1    |
| NGLY1_2    | -         | -     | -       | -    |

Supplement: Supplementary file 6597 [file 1]

IPI00021728.3|EIF2S2

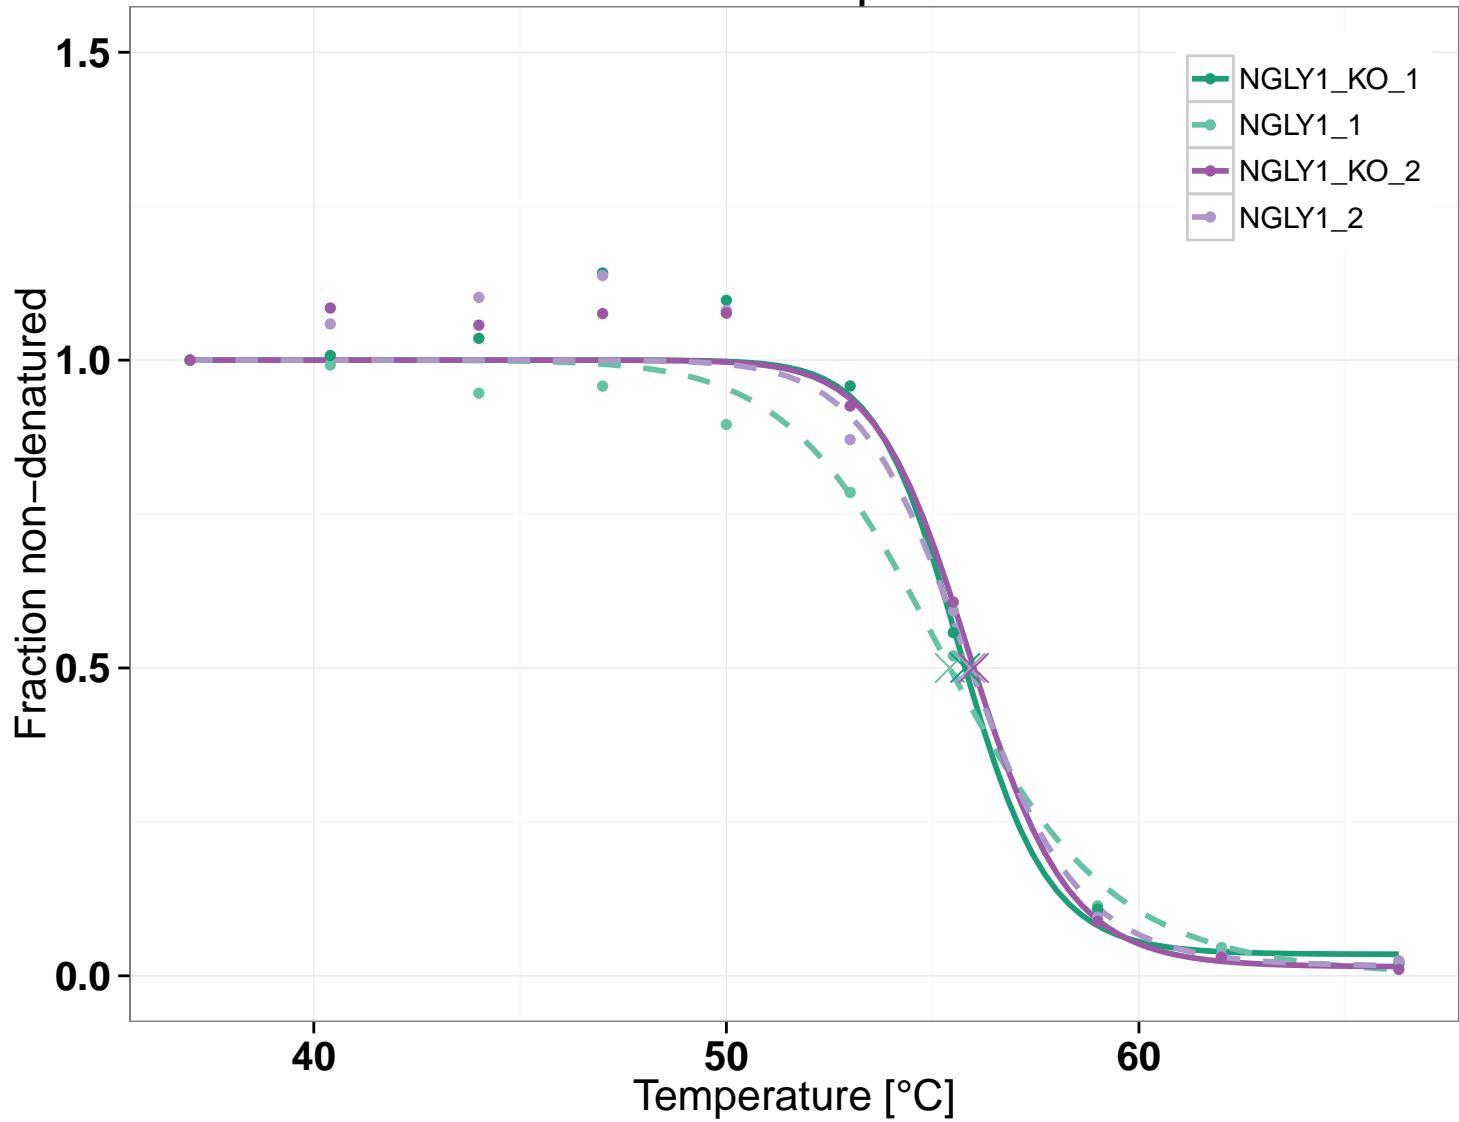

|            | meltPoint | slope | plateau | R2   |
|------------|-----------|-------|---------|------|
| NGLY1_KO_1 | 55.79     | -0.23 | 0.03    | 0.98 |
| NGLY1_1    | 55.42     | -0.13 | 0       | 0.99 |
| NGLY1_KO_2 | 56        | -0.21 | 0.01    | 0.99 |
| NGLY1_2    | 55.92     | -0.19 | 0.02    | 0.98 |

Supplement: Supplementary file 6598 [file 1]

IPI00171127.1|UBAP2

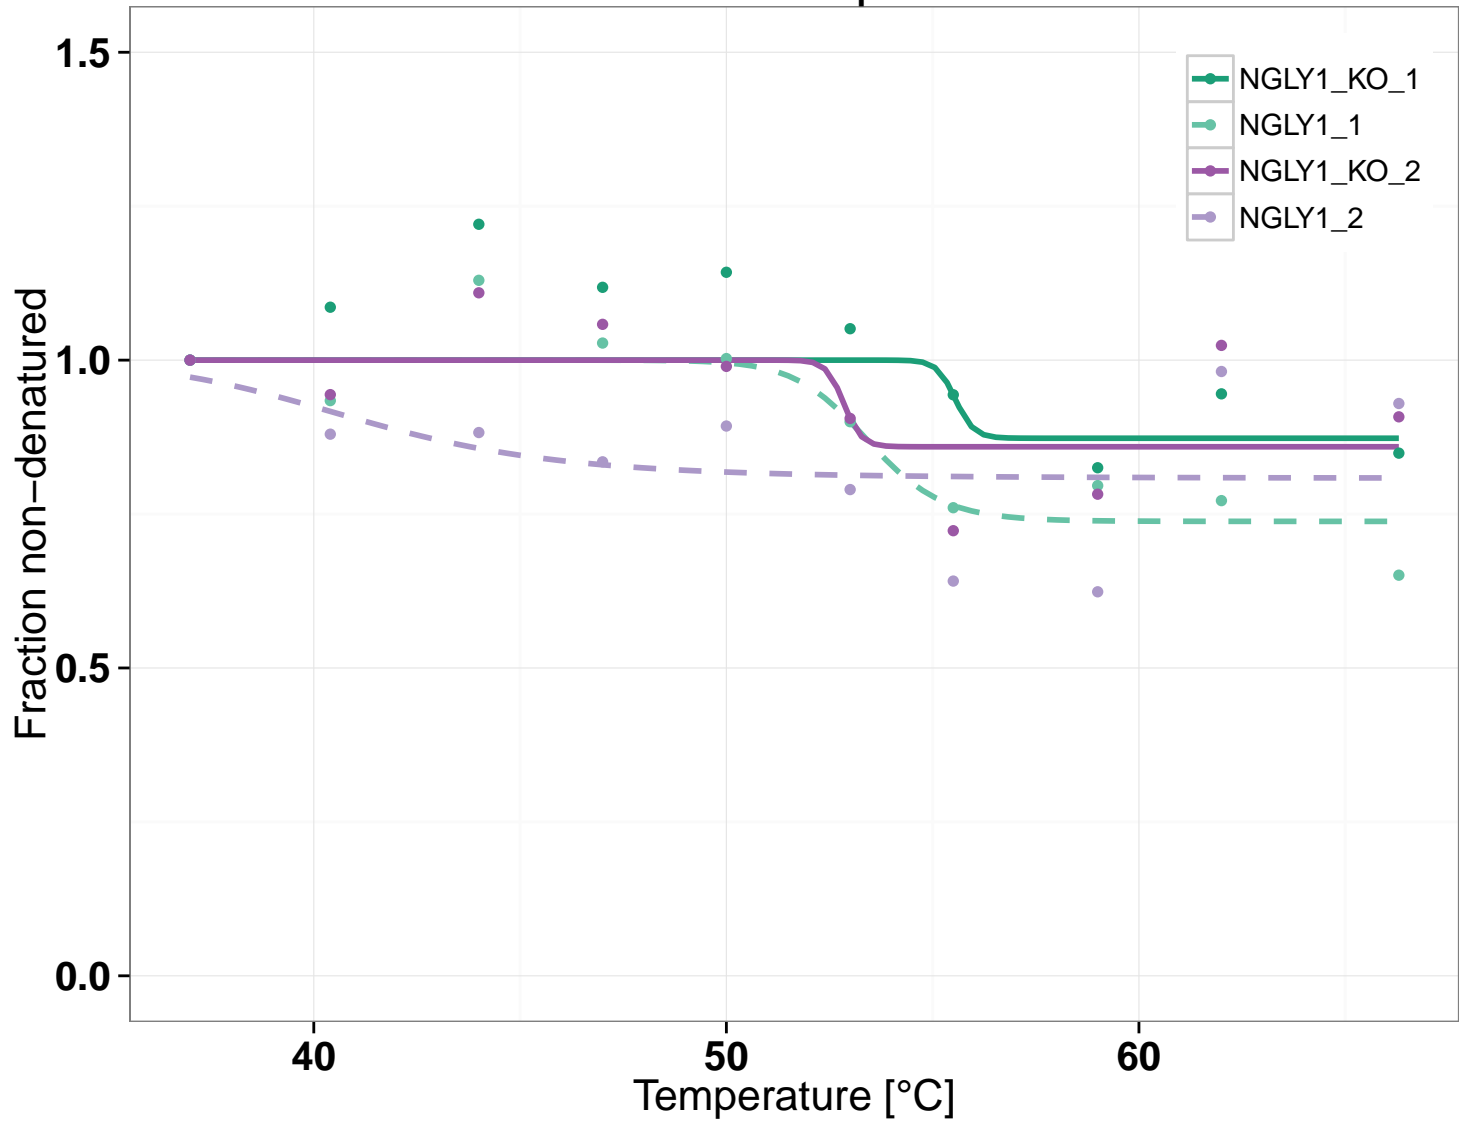

|            | meltPoint | slope  | plateau | R2   |
|------------|-----------|--------|---------|------|
| NGLY1_KO_1 | —         | -0.14  | 0.87    | 0.32 |
| NGLY1_1    | —         | -0.073 | 0.74    | 0.83 |
| NGLY1_KO_2 | —         | -0.17  | 0.86    | 0.44 |
| NGLY1_2    | —         | -0.019 | 0.81    | 0.21 |

Supplement: Supplementary file 6599 [file 1]

# IPI00022443.1|AFP

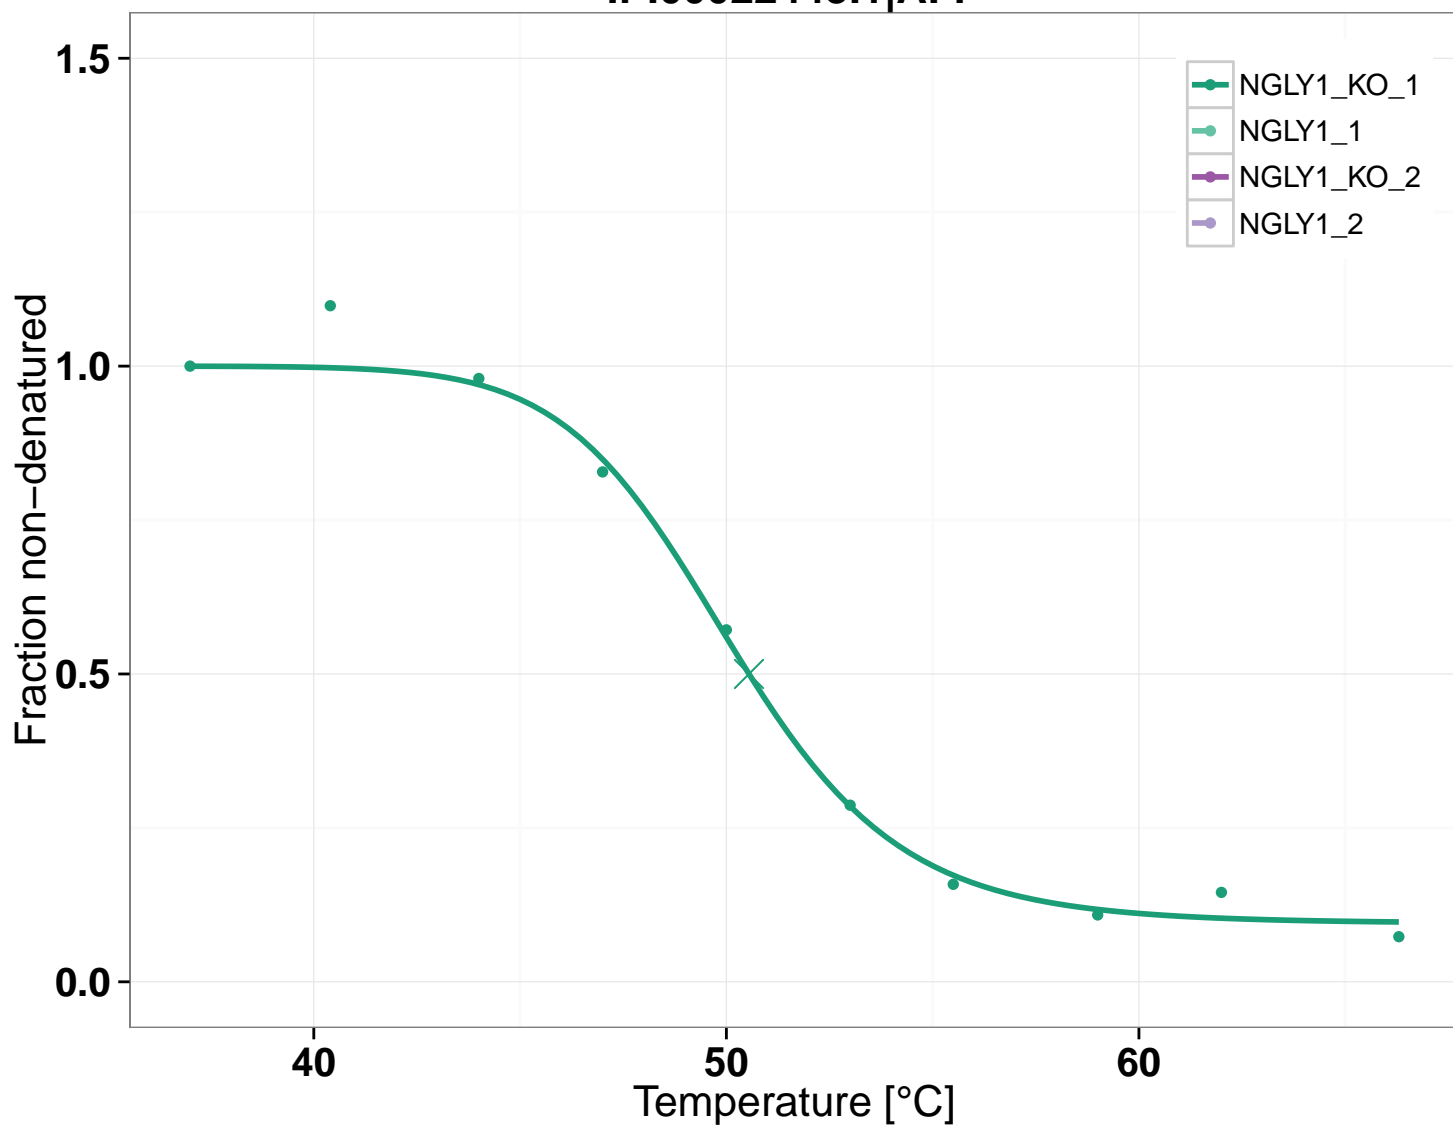

|            | meltPoint | slope | plateau | R2   |
|------------|-----------|-------|---------|------|
| NGLY1_KO_1 | 50.55     | -0.11 | 0.09    | 0.99 |
| NGLY1_1    | —         | —     | —       | —    |
| NGLY1_KO_2 | —         | —     | —       | —    |
| NGLY1_2    | —         | —     | —       | —    |

Supplement: Supplementary file 6600 [file 1]

IPI00010890.1|RFXAP

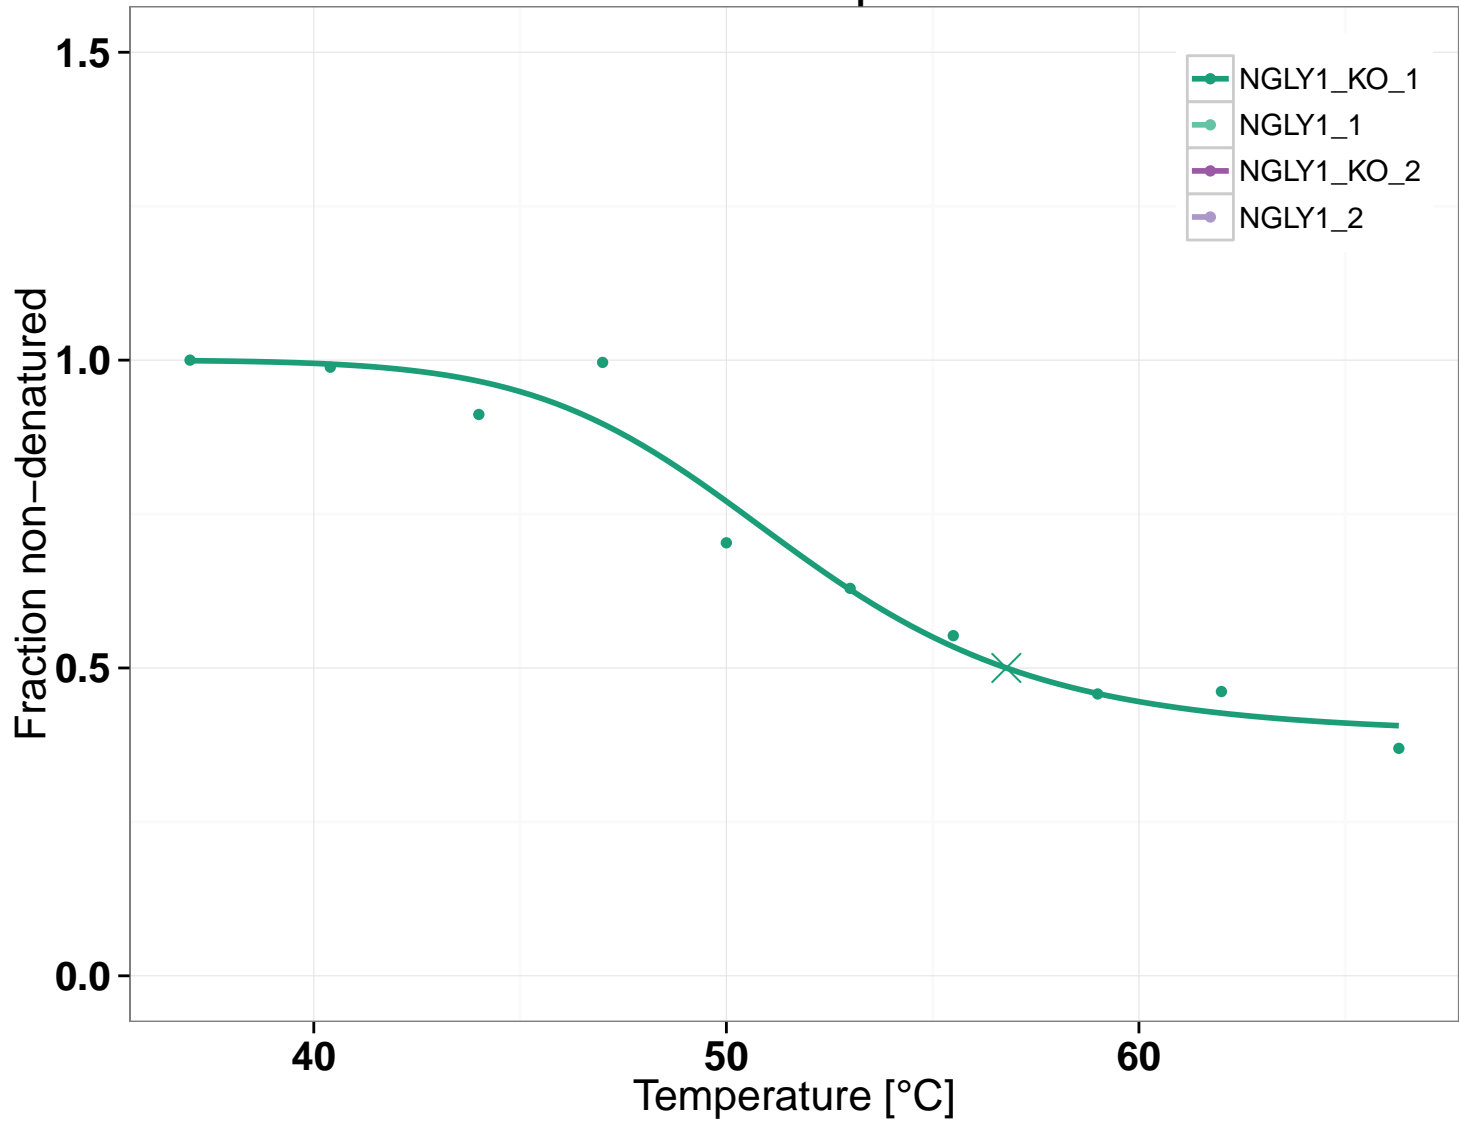

|            | meltPoint | slope  | plateau | R2   |
|------------|-----------|--------|---------|------|
| NGLY1_KO_1 | 56.79     | -0.049 | 0.39    | 0.96 |
| NGLY1_1    | -         | -      | -       | -    |
| NGLY1_KO_2 | -         | -      | -       | -    |
| NGLY1_2    | -         | -      | -       | -    |

Supplement: Supplementary file 6601 [file 1]

IPI00102054.1|A6NDU0\_HUMAN

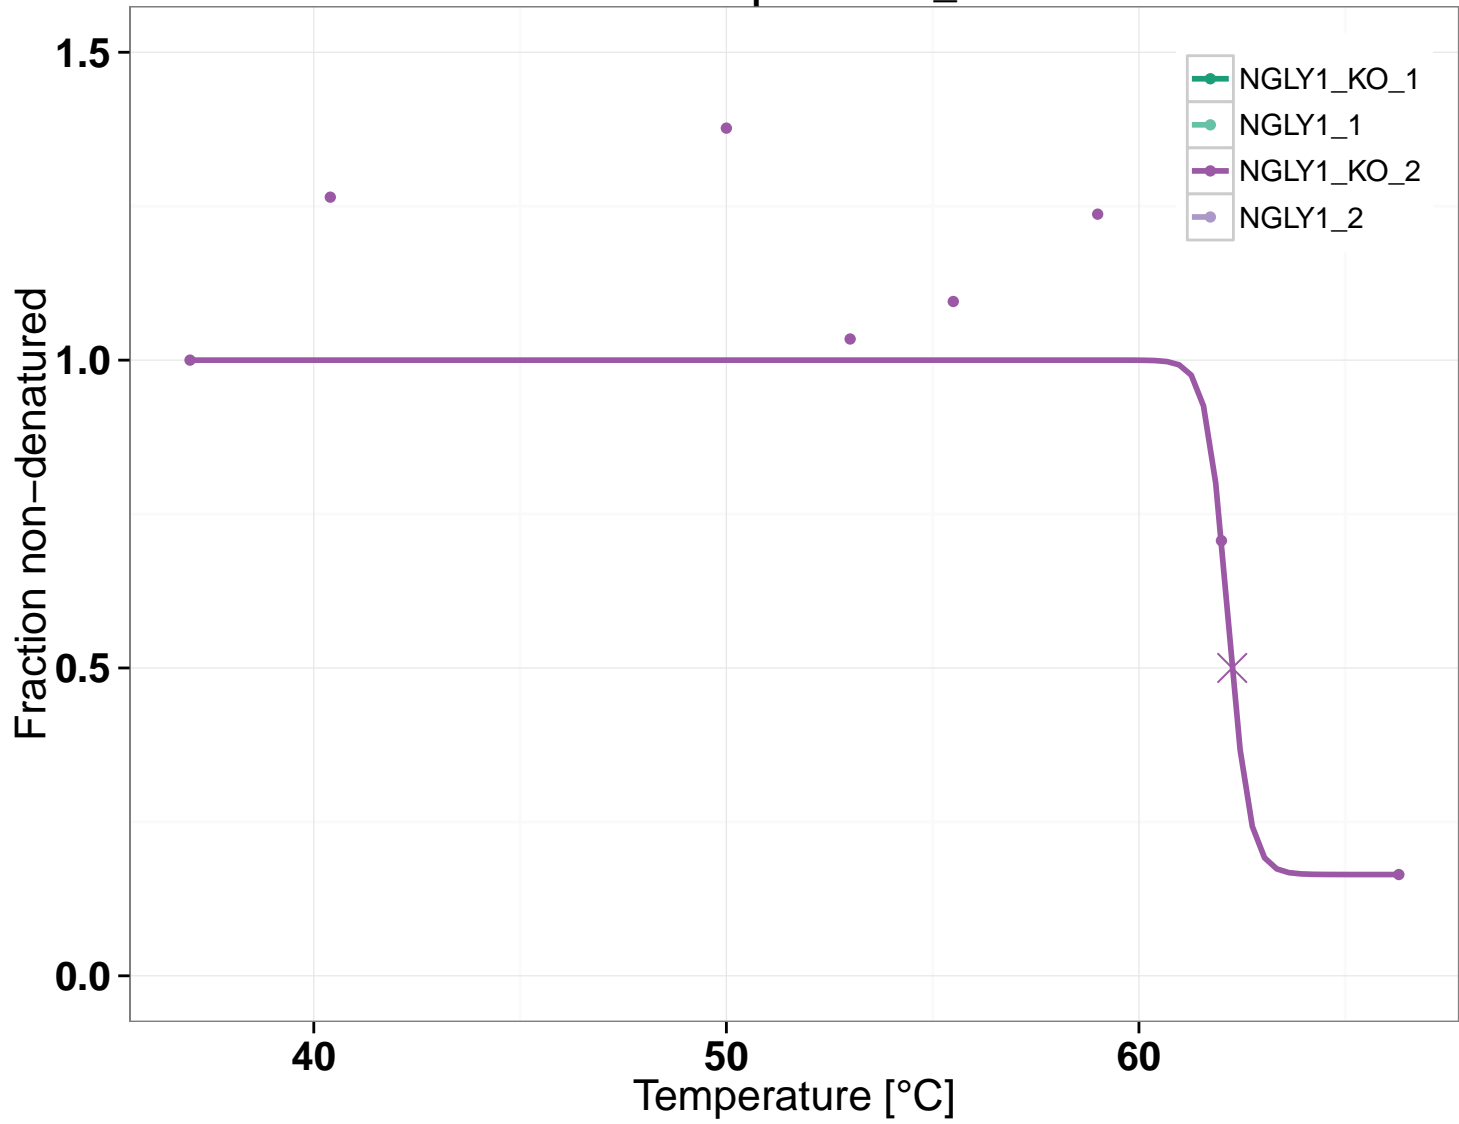

|            | meltPoint | slope | plateau | R2   |
|------------|-----------|-------|---------|------|
| NGLY1_KO_1 | —         | —     | —       | —    |
| NGLY1_1    | —         | —     | —       | —    |
| NGLY1_KO_2 | 62.26     | -0.81 | 0.16    | 0.43 |
| NGLY1_2    | —         | —     | —       | —    |

Supplement: Supplementary file 6602 [file 1]

IPI00410685.3|CNOT4

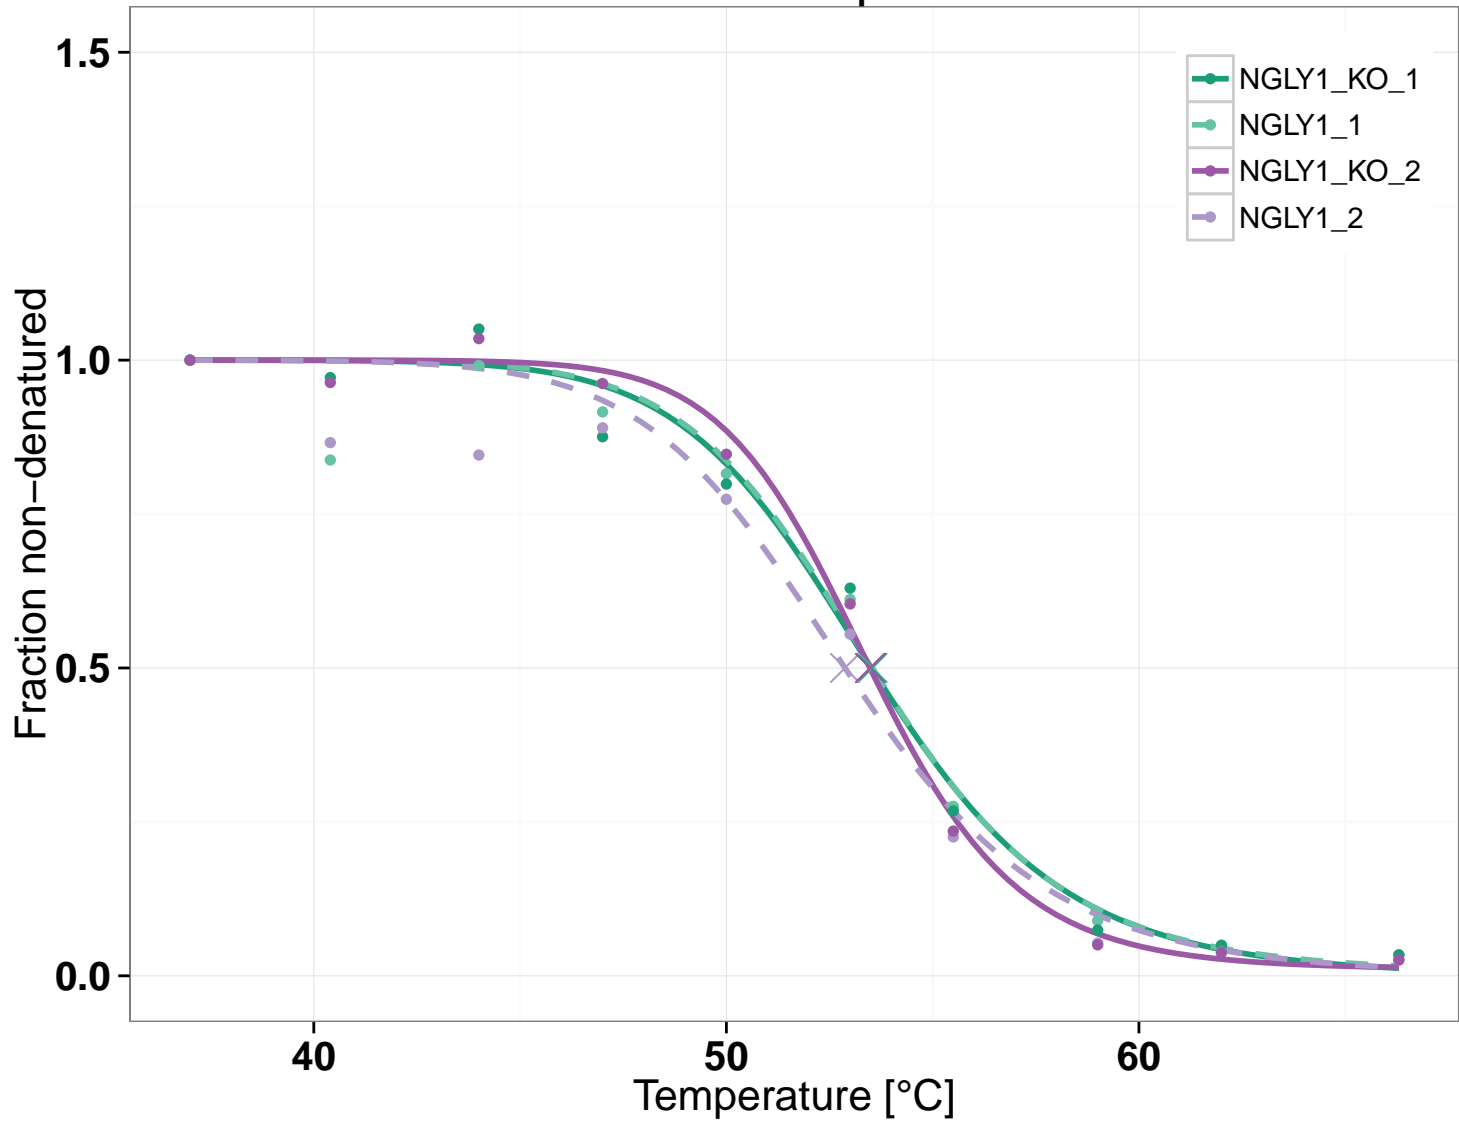

|            | meltPoint | slope | plateau | R2   |
|------------|-----------|-------|---------|------|
| NGLY1_KO_1 | 53.51     | -0.11 | 0       | 0.99 |
| NGLY1_1    | 53.54     | -0.11 | 0       | 0.98 |
| NGLY1_KO_2 | 53.48     | -0.14 | 0.01    | 1    |
| NGLY1_2    | 52.87     | -0.1  | 0       | 0.97 |

Supplement: Supplementary file 6603 [file 1]

IPI00027968.3|FOXN2

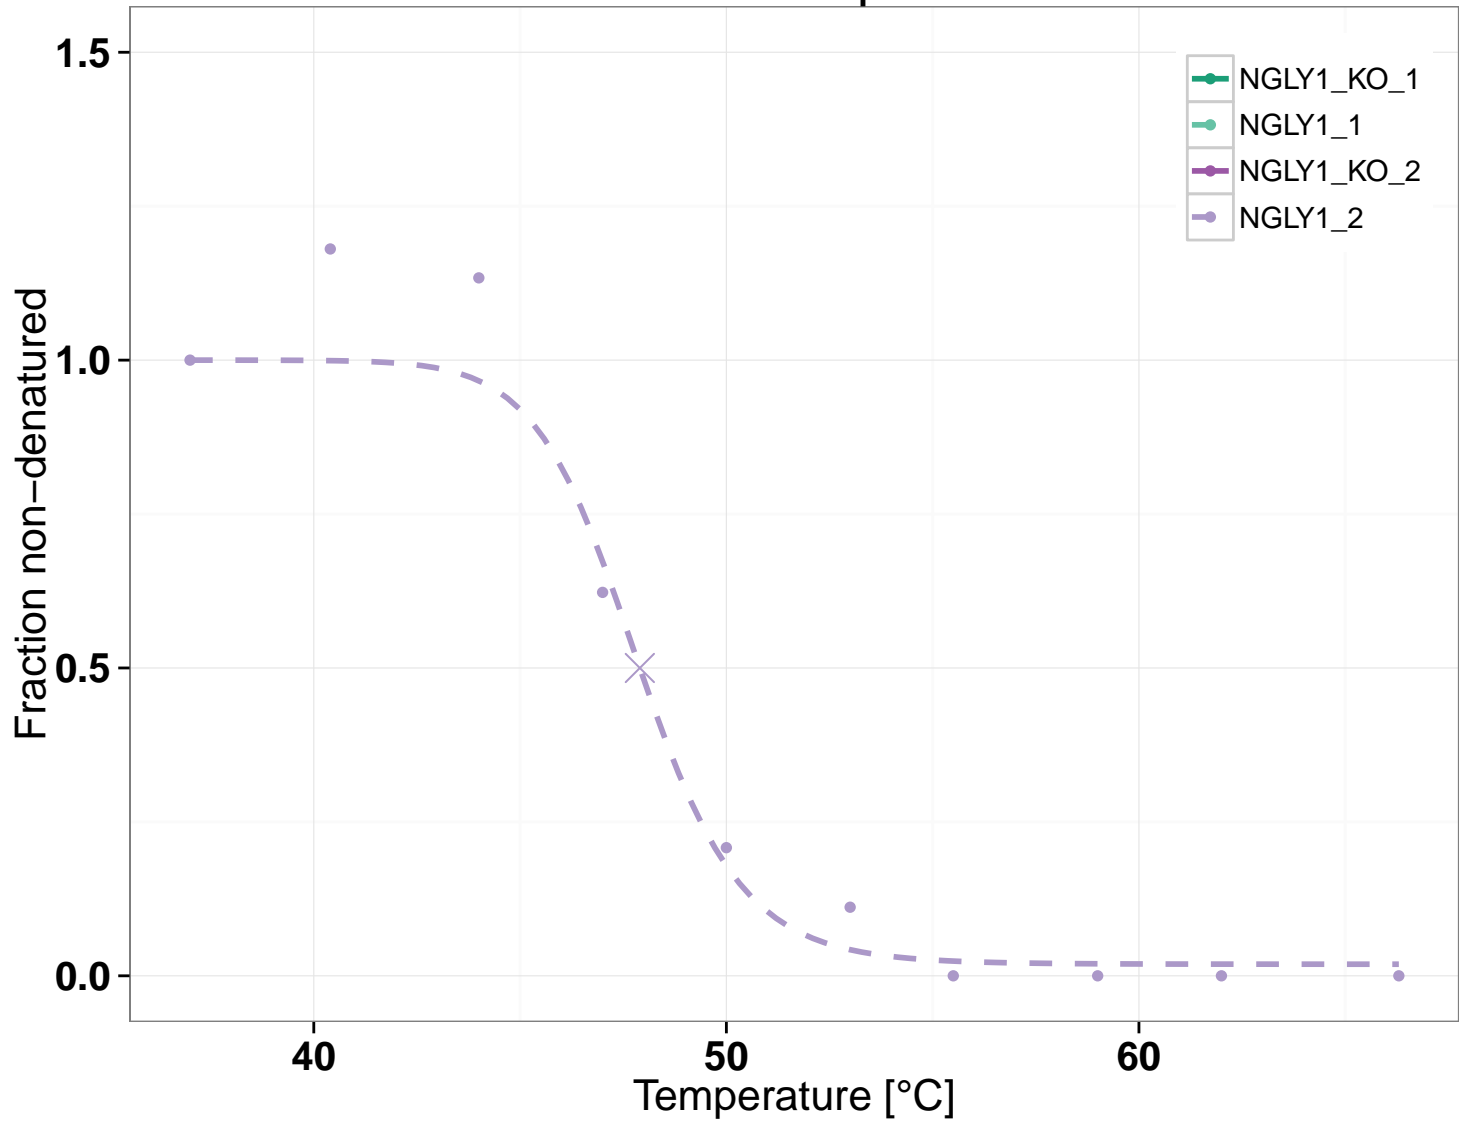

|            | meltPoint | slope | plateau | R2   |
|------------|-----------|-------|---------|------|
| NGLY1_KO_1 | -         | -     | -       | -    |
| NGLY1_1    | -         | -     | -       | -    |
| NGLY1_KO_2 | -         | -     | -       | -    |
| NGLY1_2    | 47.9      | -0.2  | 0.02    | 0.97 |

Supplement: Supplementary file 6604 [file 1]

# IPI00396185.2|MAK10

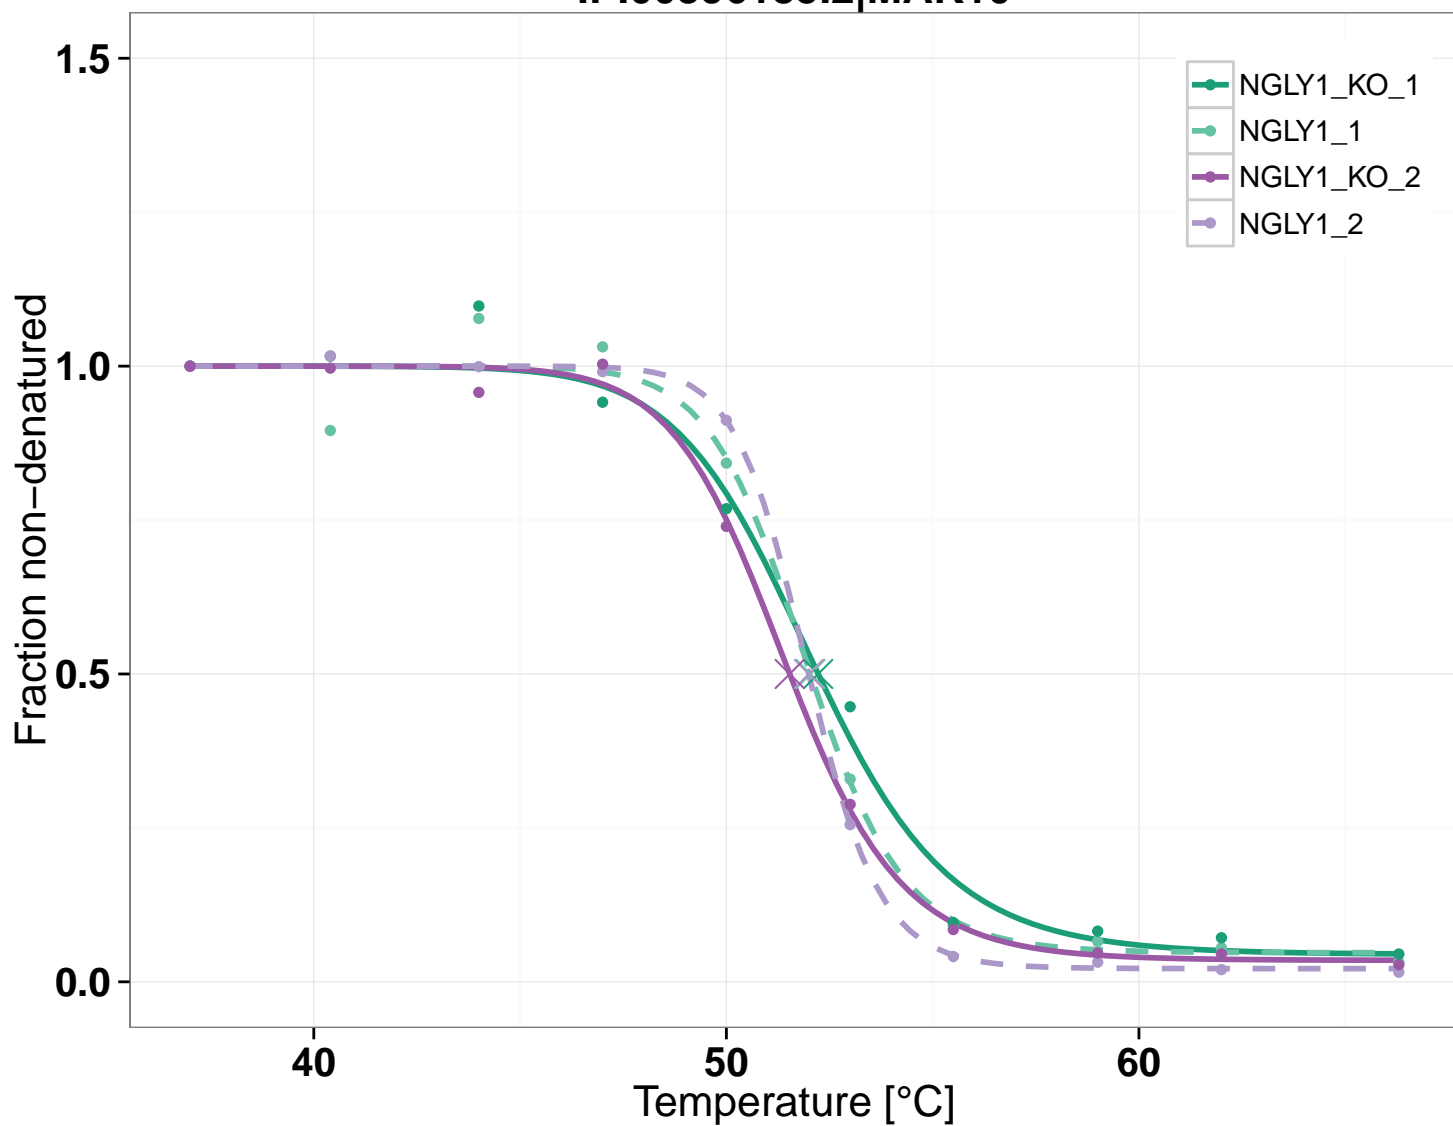

|            | meltPoint | slope | plateau | R2   |
|------------|-----------|-------|---------|------|
| NGLY1_KO_1 | 52.23     | -0.14 | 0.04    | 0.99 |
| NGLY1_1    | 52.04     | -0.2  | 0.05    | 0.99 |
| NGLY1_KO_2 | 51.54     | -0.17 | 0.03    | 1    |
| NGLY1_2    | 52        | -0.28 | 0.02    | 1    |

Supplement: Supplementary file 6605 [file 1]

IPI00064797.1|MARK4

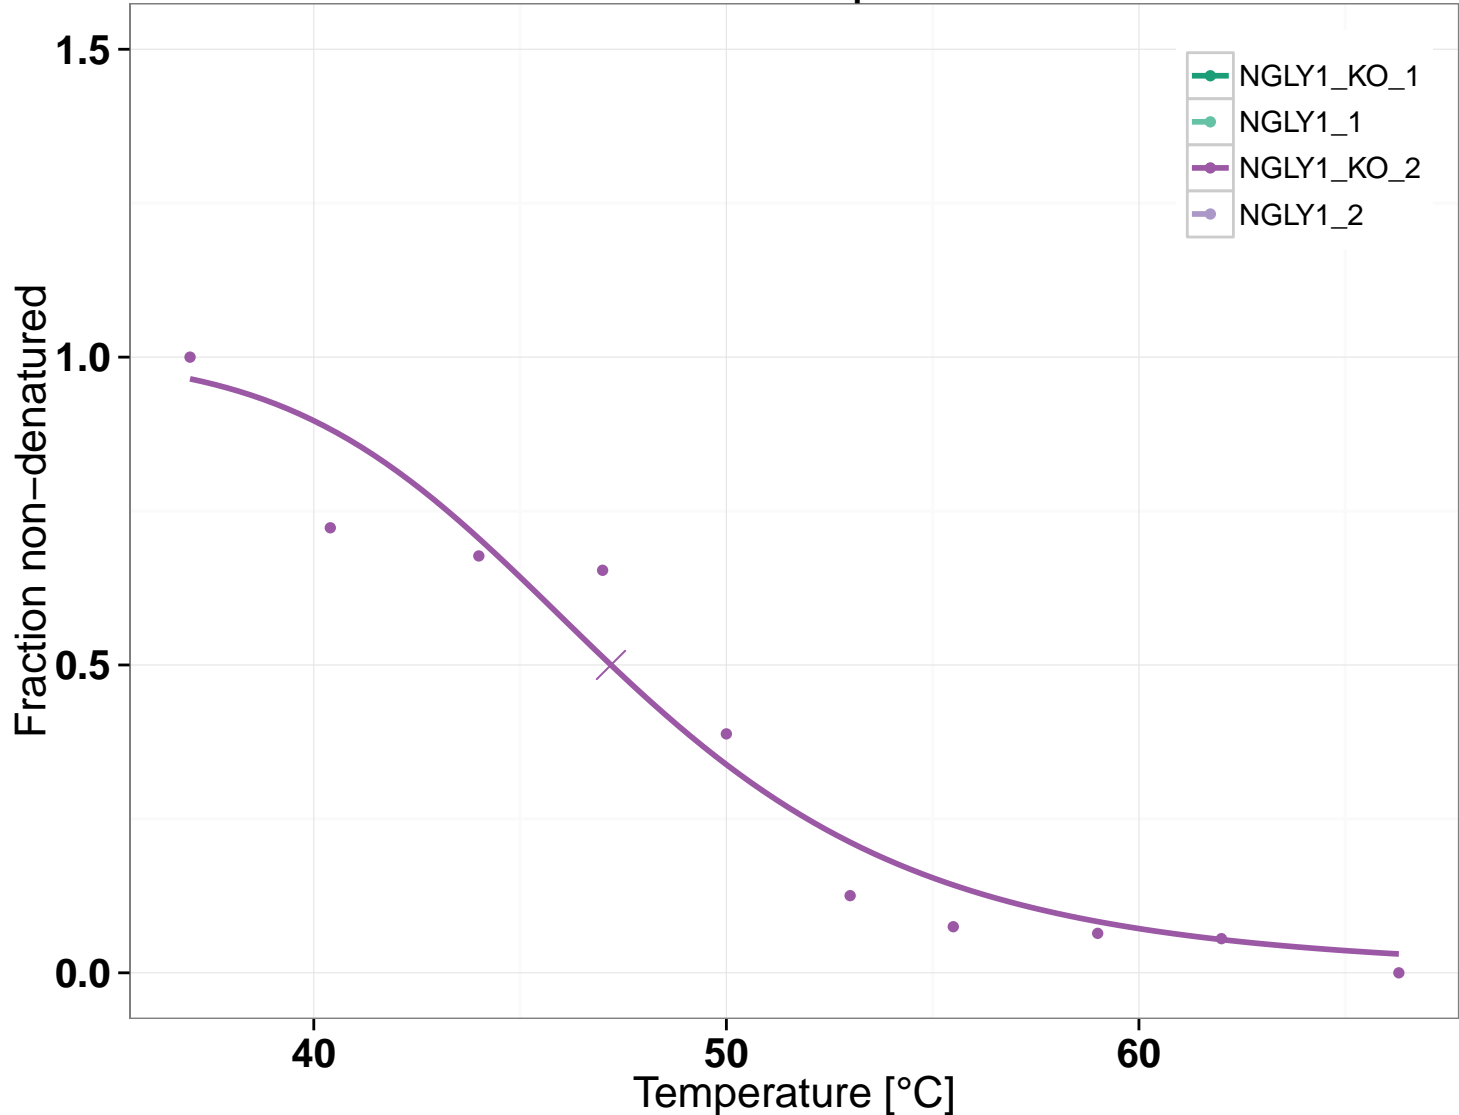

|            | meltPoint | slope  | plateau | R2   |
|------------|-----------|--------|---------|------|
| NGLY1_KO_1 | -         | -      | -       | -    |
| NGLY1_1    | -         | -      | -       | -    |
| NGLY1_KO_2 | 47.2      | -0.065 | 0       | 0.95 |
| NGLY1_2    | -         | -      | -       | -    |

Supplement: Supplementary file 6606 [file 1]

# IPI00296258.2|MFSD8

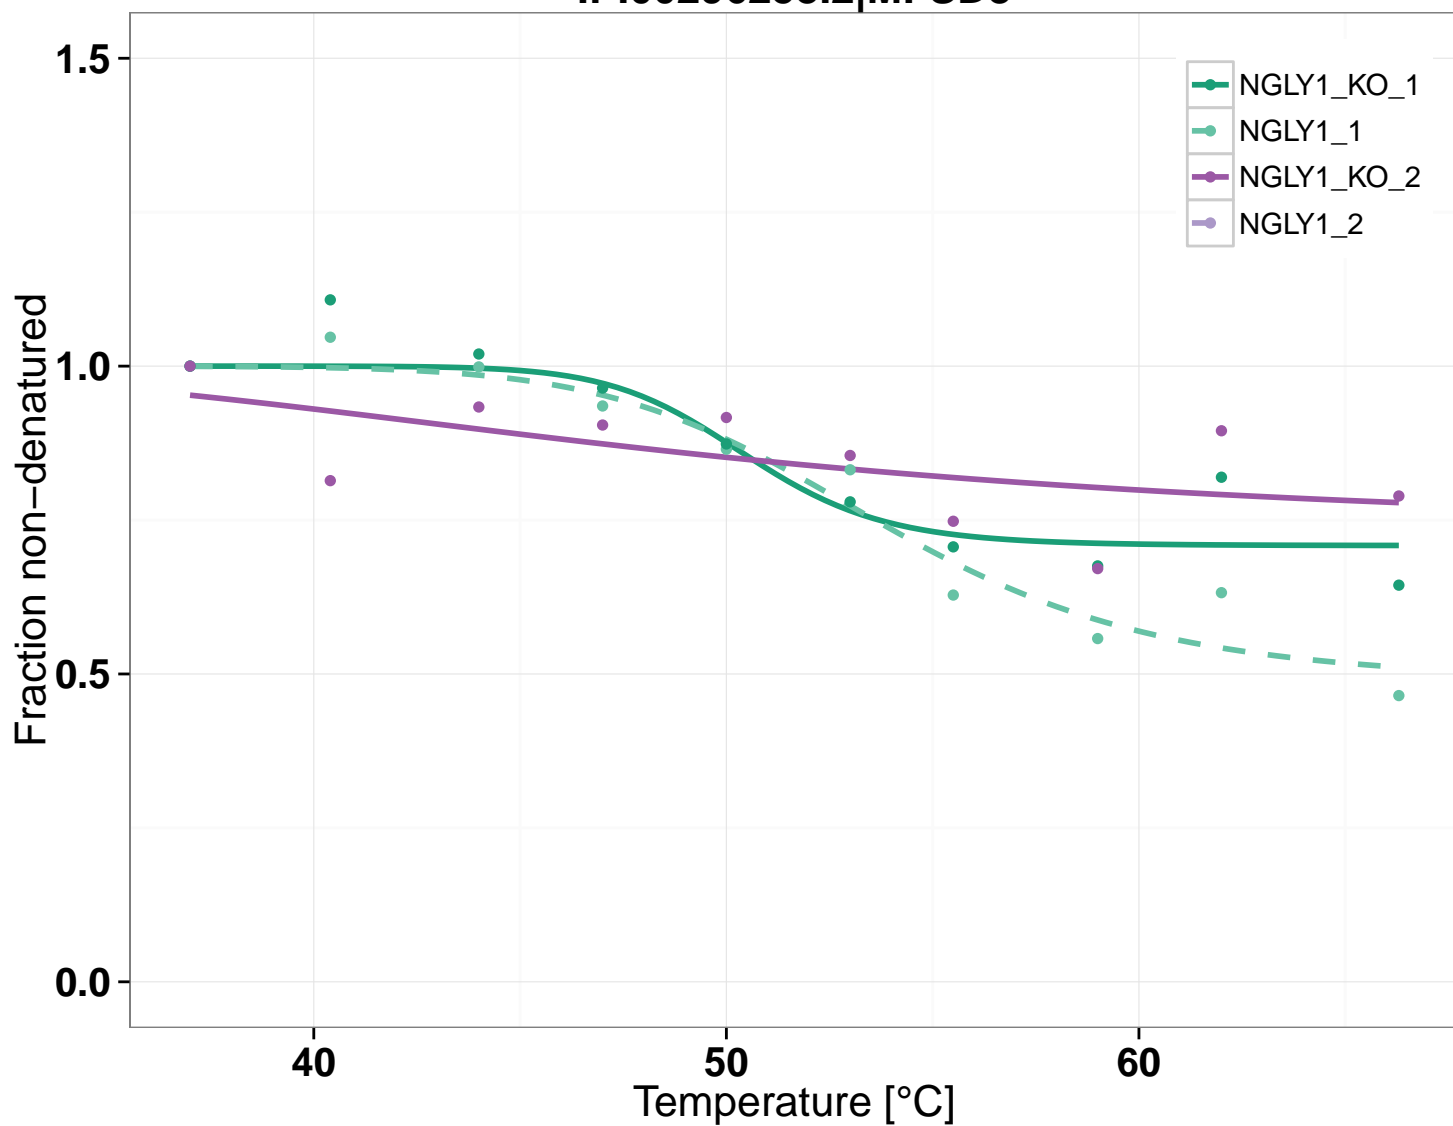

|            | meltPoint | slope   | plateau | R2   |
|------------|-----------|---------|---------|------|
| NGLY1_KO_1 | —         | −0.044  | 0.71    | 0.87 |
| NGLY1_1    | —         | −0.039  | 0.49    | 0.95 |
| NGLY1_KO_2 | —         | −0.0082 | 0.72    | 0.36 |
| NGLY1_2    | —         | —       | —       | —    |

Supplement: Supplementary file 6607 [file 1]

IPI00003793.1|KLHDC2

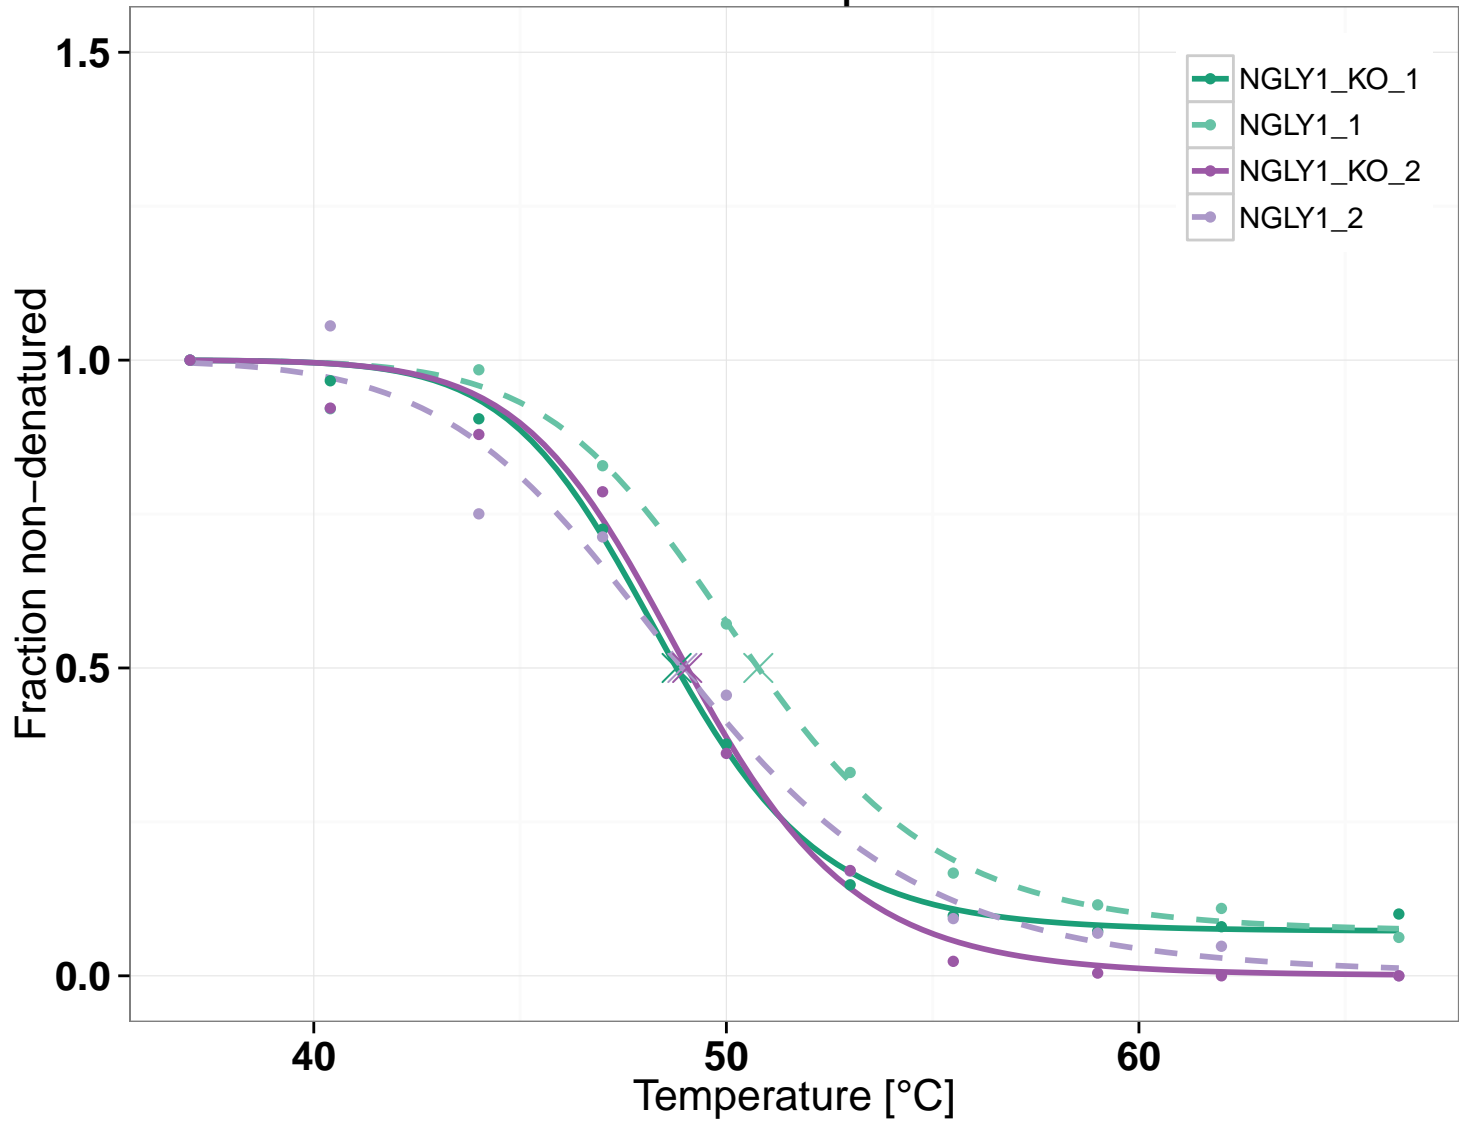

|            | meltPoint | slope  | plateau | R2   |
|------------|-----------|--------|---------|------|
| NGLY1_KO_1 | 48.79     | -0.12  | 0.07    | 1    |
| NGLY1_1    | 50.77     | -0.098 | 0.07    | 0.99 |
| NGLY1_KO_2 | 49.05     | -0.12  | 0       | 0.99 |
| NGLY1_2    | 48.93     | -0.086 | 0       | 0.98 |

Supplement: Supplementary file 6608 [file 1]

IPI00885108.1|PATL1

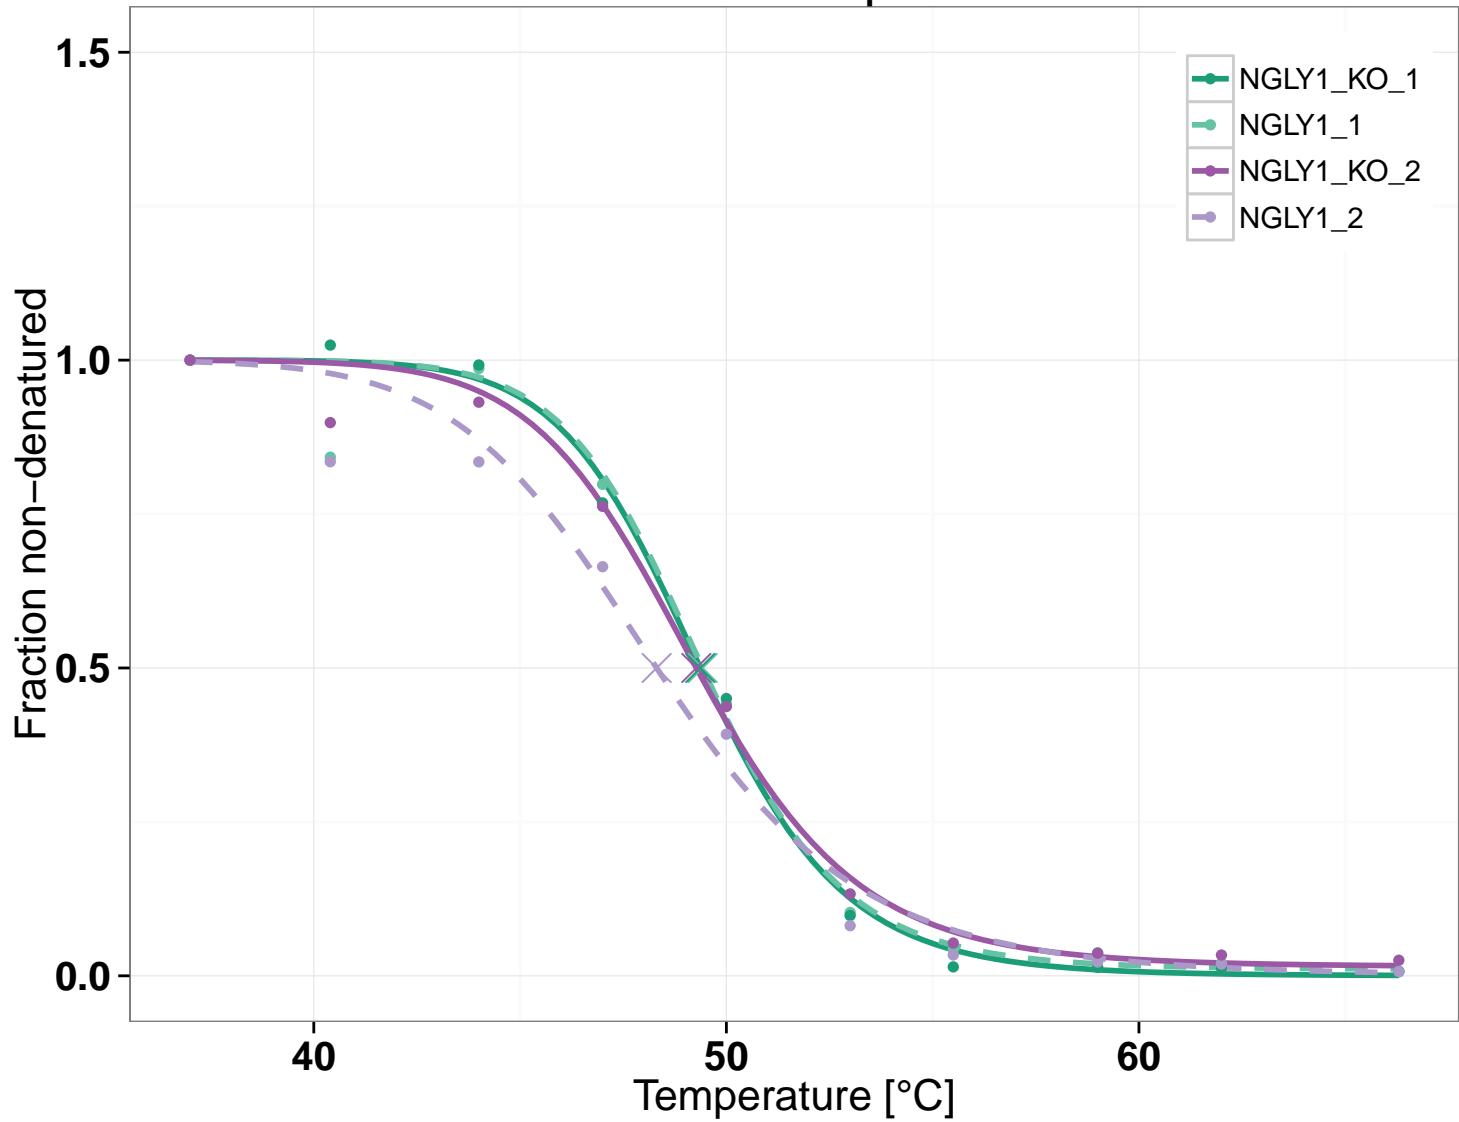

|            | meltPoint | slope | plateau | R2   |
|------------|-----------|-------|---------|------|
| NGLY1_KO_1 | 49.37     | -0.14 | 0       | 1    |
| NGLY1_1    | 49.43     | -0.15 | 0.01    | 0.98 |
| NGLY1_KO_2 | 49.27     | -0.12 | 0.01    | 0.99 |
| NGLY1_2    | 48.31     | -0.1  | 0       | 0.98 |

Supplement: Supplementary file 6609 [file 1]

# IPI00797126.1|NACA

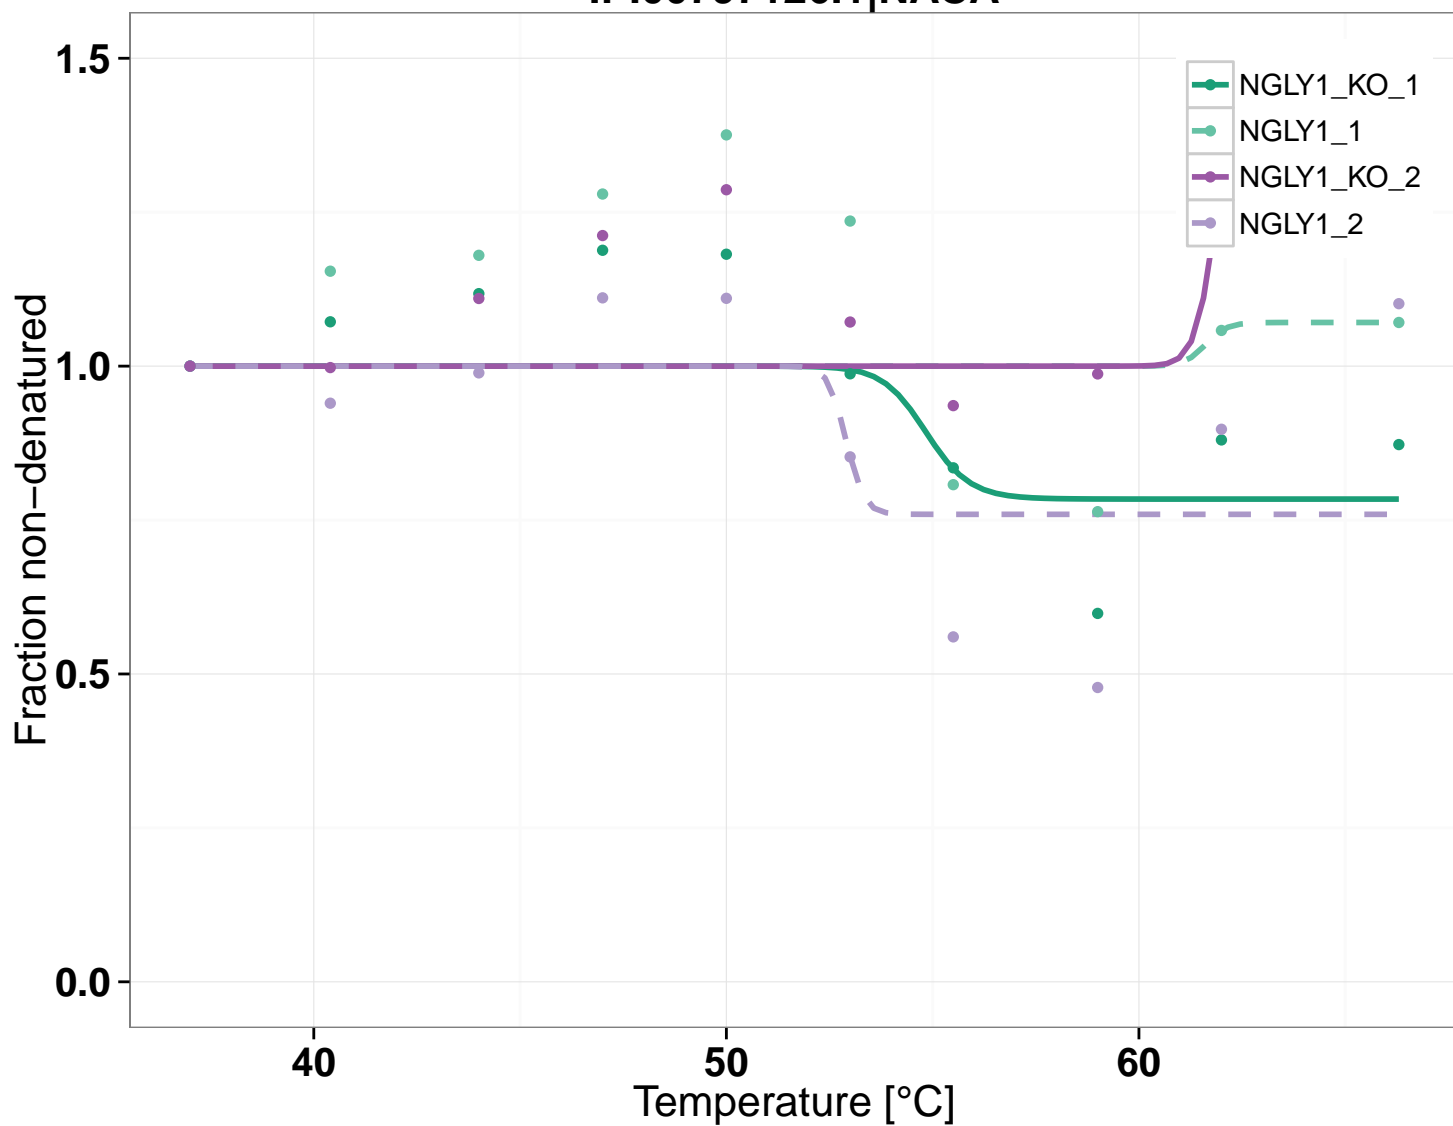

|            | meltPoint | slope | plateau | R2    |
|------------|-----------|-------|---------|-------|
| NGLY1_KO_1 | -         | -0.1  | 0.78    | 0.54  |
| NGLY1_1    | -         | 0.07  | 1.07    | -0.22 |
| NGLY1_KO_2 | -         | 0.49  | 1.5     | 0.6   |
| NGLY1_2    | -         | -0.28 | 0.76    | 0.36  |

Supplement: Supplementary file 6610 [file 1]

IPI00007675.6|DYNC1LI1

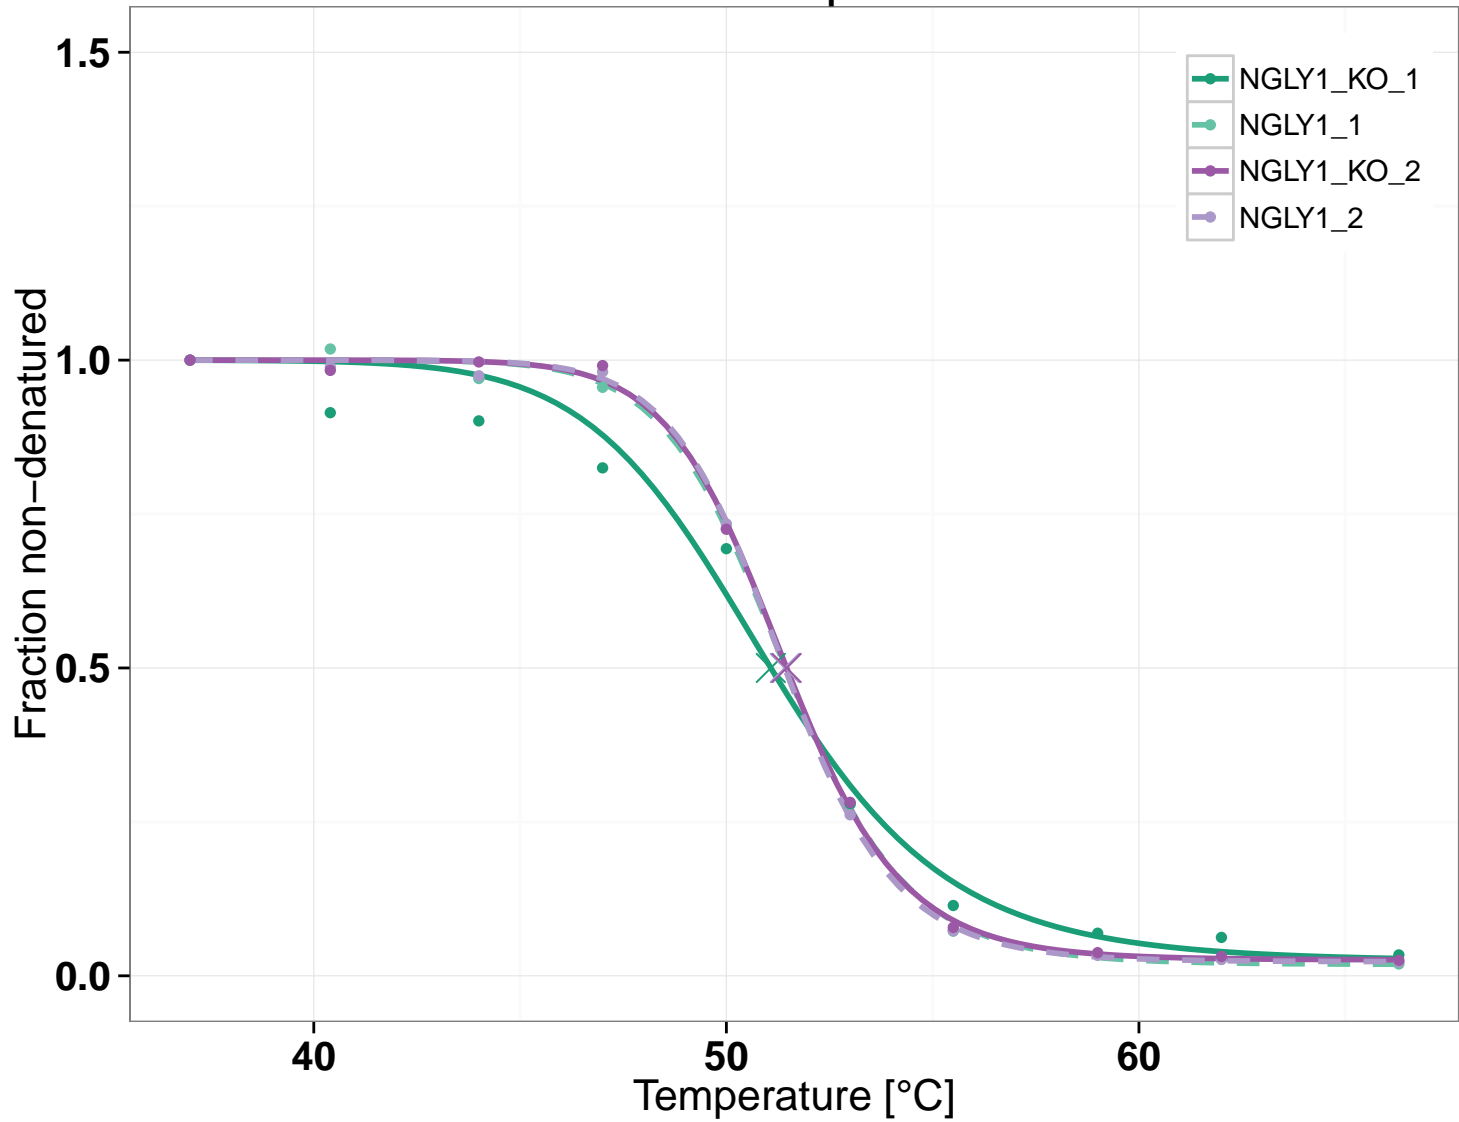

|            | meltPoint | slope | plateau | R2   |
|------------|-----------|-------|---------|------|
| NGLY1_KO_1 | 51.08     | -0.11 | 0.02    | 0.98 |
| NGLY1_1    | 51.43     | -0.17 | 0.02    | 1    |
| NGLY1_KO_2 | 51.46     | -0.17 | 0.03    | 1    |
| NGLY1_2    | 51.42     | -0.18 | 0.02    | 1    |

Supplement: Supplementary file 6611 [file 1]

IPI00642491.1|LOC644096

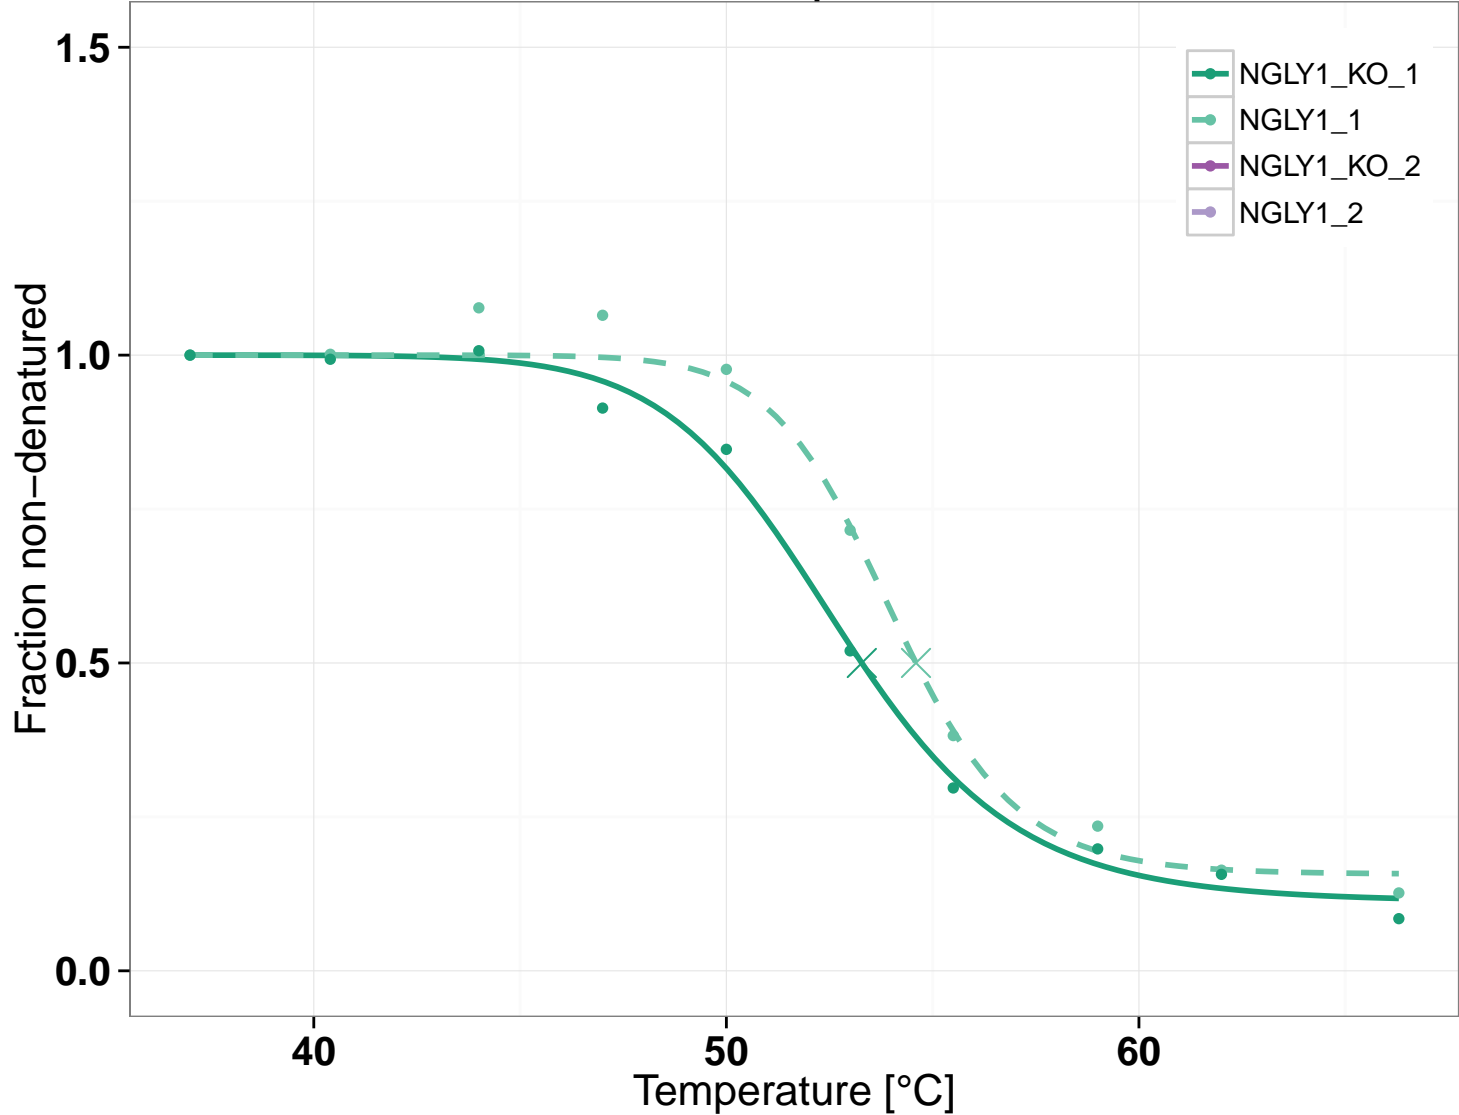

|            | meltPoint | slope | plateau | R2   |
|------------|-----------|-------|---------|------|
| NGLY1_KO_1 | 53.28     | -0.1  | 0.11    | 1    |
| NGLY1_1    | 54.6      | -0.14 | 0.16    | 0.99 |
| NGLY1_KO_2 | -         | -     | -       | -    |
| NGLY1_2    | -         | -     | -       | -    |

Supplement: Supplementary file 6612 [file 1]

# IPI00472442.4|PSMA1

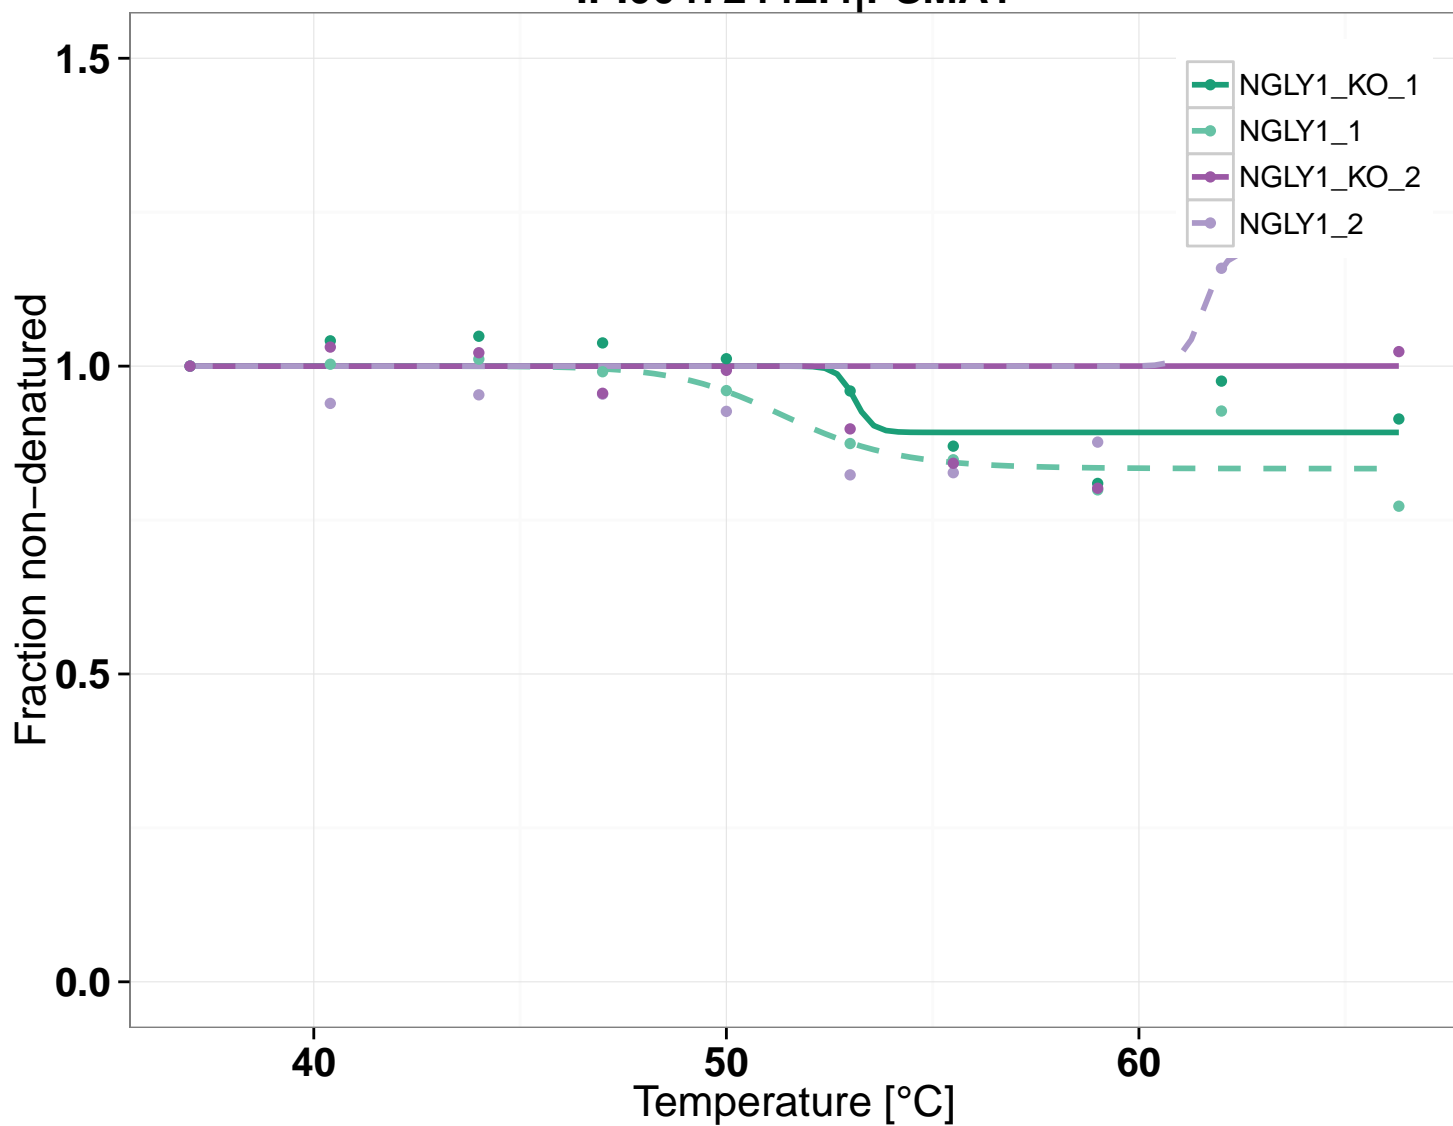

|            | meltPoint | slope  | plateau | R2    |
|------------|-----------|--------|---------|-------|
| NGLY1_KO_1 | —         | −0.13  | 0.89    | 0.64  |
| NGLY1_1    | —         | −0.031 | 0.83    | 0.81  |
| NGLY1_KO_2 | —         | —      | 1.5     | −0.05 |
| NGLY1_2    | —         | 0.19   | 1.19    | 0.35  |

Supplement: Supplementary file 6613 [file 1]

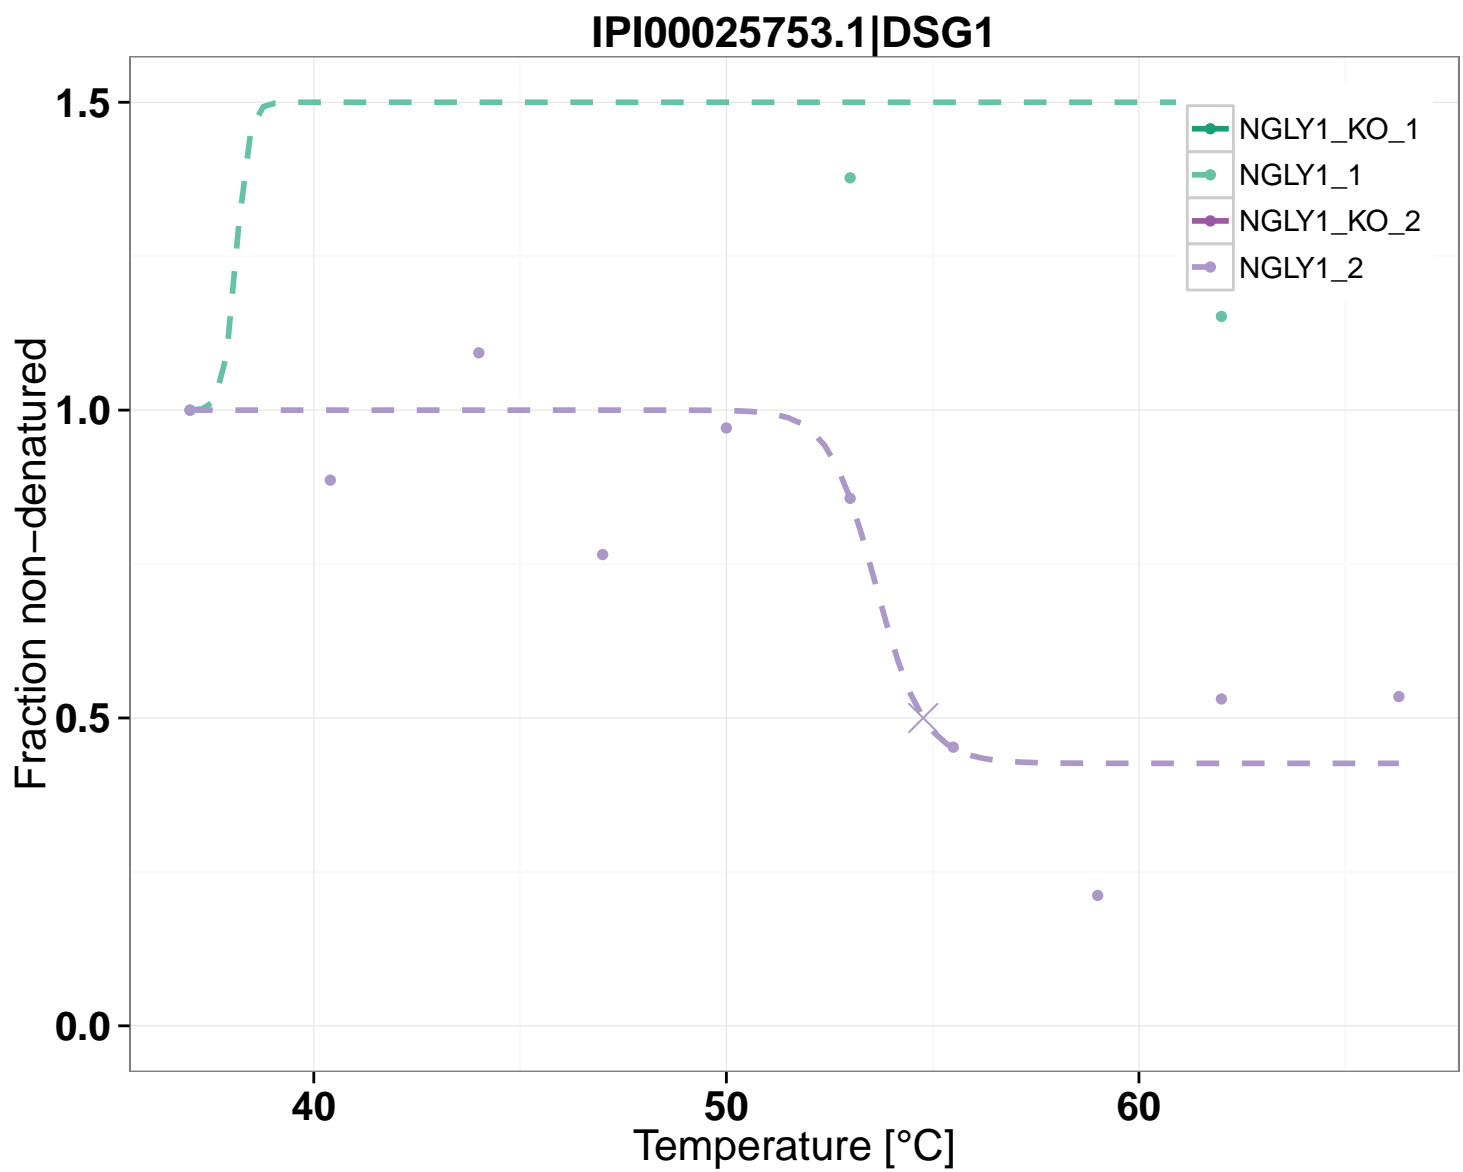

|            | meltPoint | slope | plateau | R2    |
|------------|-----------|-------|---------|-------|
| NGLY1_KO_1 | —         | —     | —       | —     |
| NGLY1_1    | —         | 0.82  | 1.5     | -0.14 |
| NGLY1_KO_2 | —         | —     | —       | —     |
| NGLY1_2    | 54.77     | -0.25 | 0.43    | 0.8   |

Supplement: Supplementary file 6614 [file 1]

IPI00479877.4|ALDH9A1

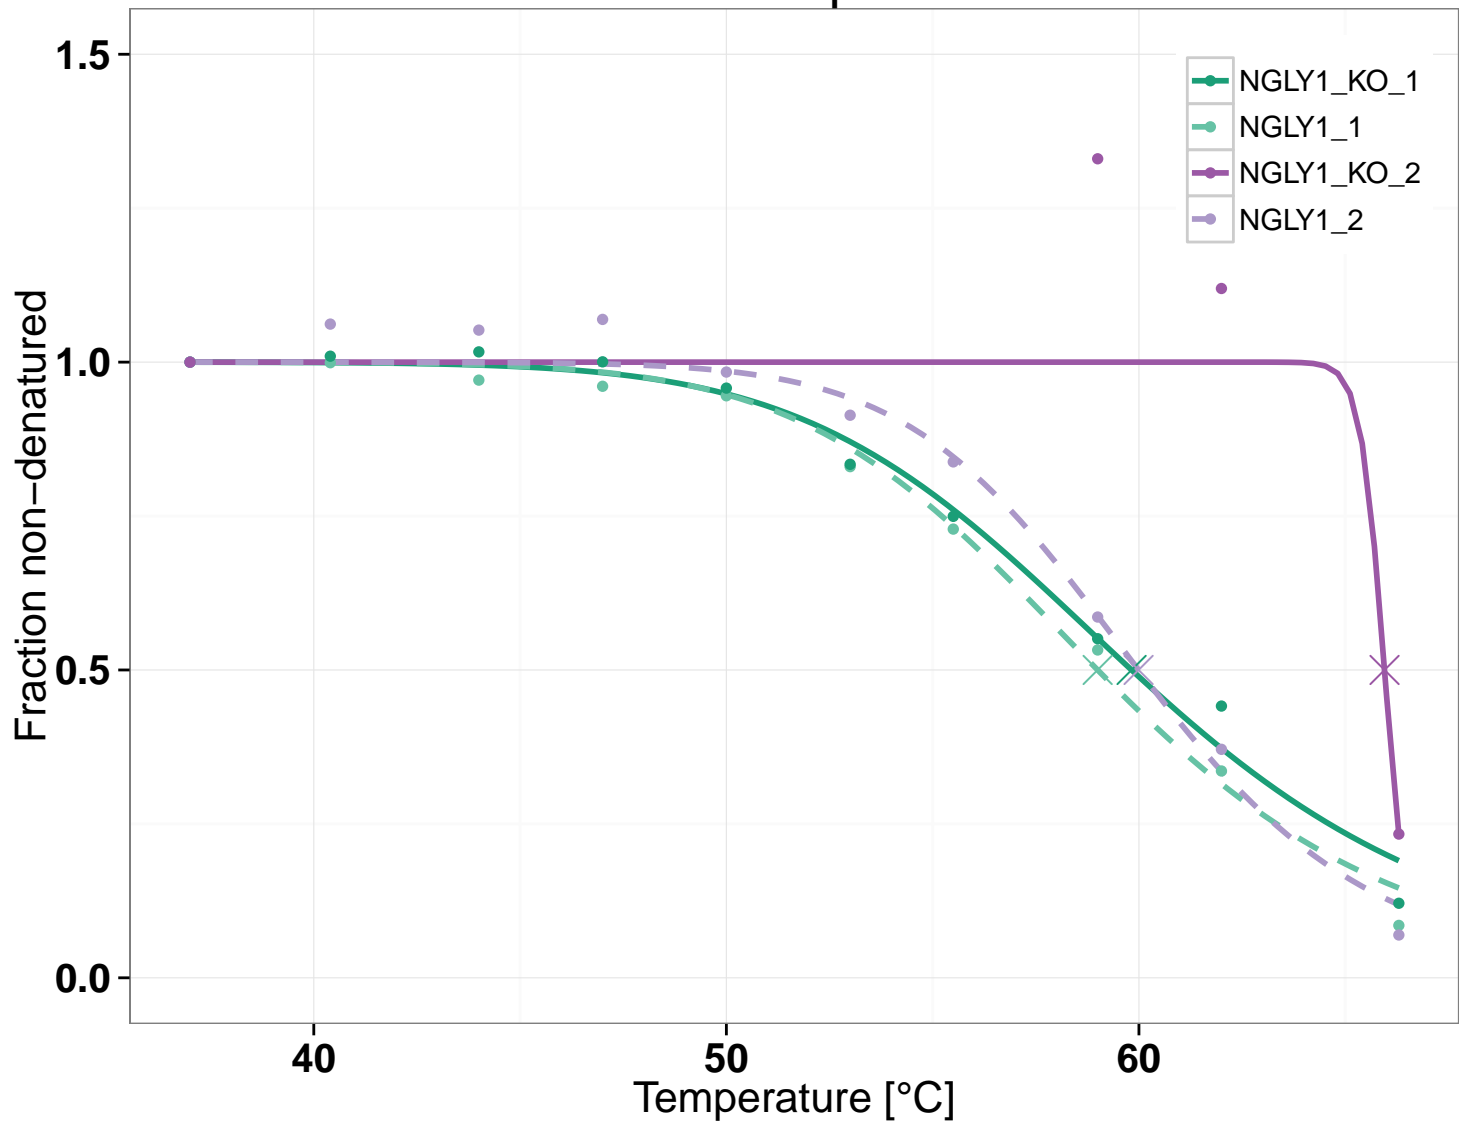

|            | meltPoint | slope  | plateau | R2    |
|------------|-----------|--------|---------|-------|
| NGLY1_KO_1 | 59.82     | -0.063 | 0       | 0.99  |
| NGLY1_1    | 59        | -0.069 | 0       | 0.99  |
| NGLY1_KO_2 | 65.95     | -0.86  | 0       | -0.87 |
| NGLY1_2    | 59.99     | -0.089 | 0       | 0.98  |

Supplement: Supplementary file 6615 [file 1]

IPI00853404.1|KIAA0226

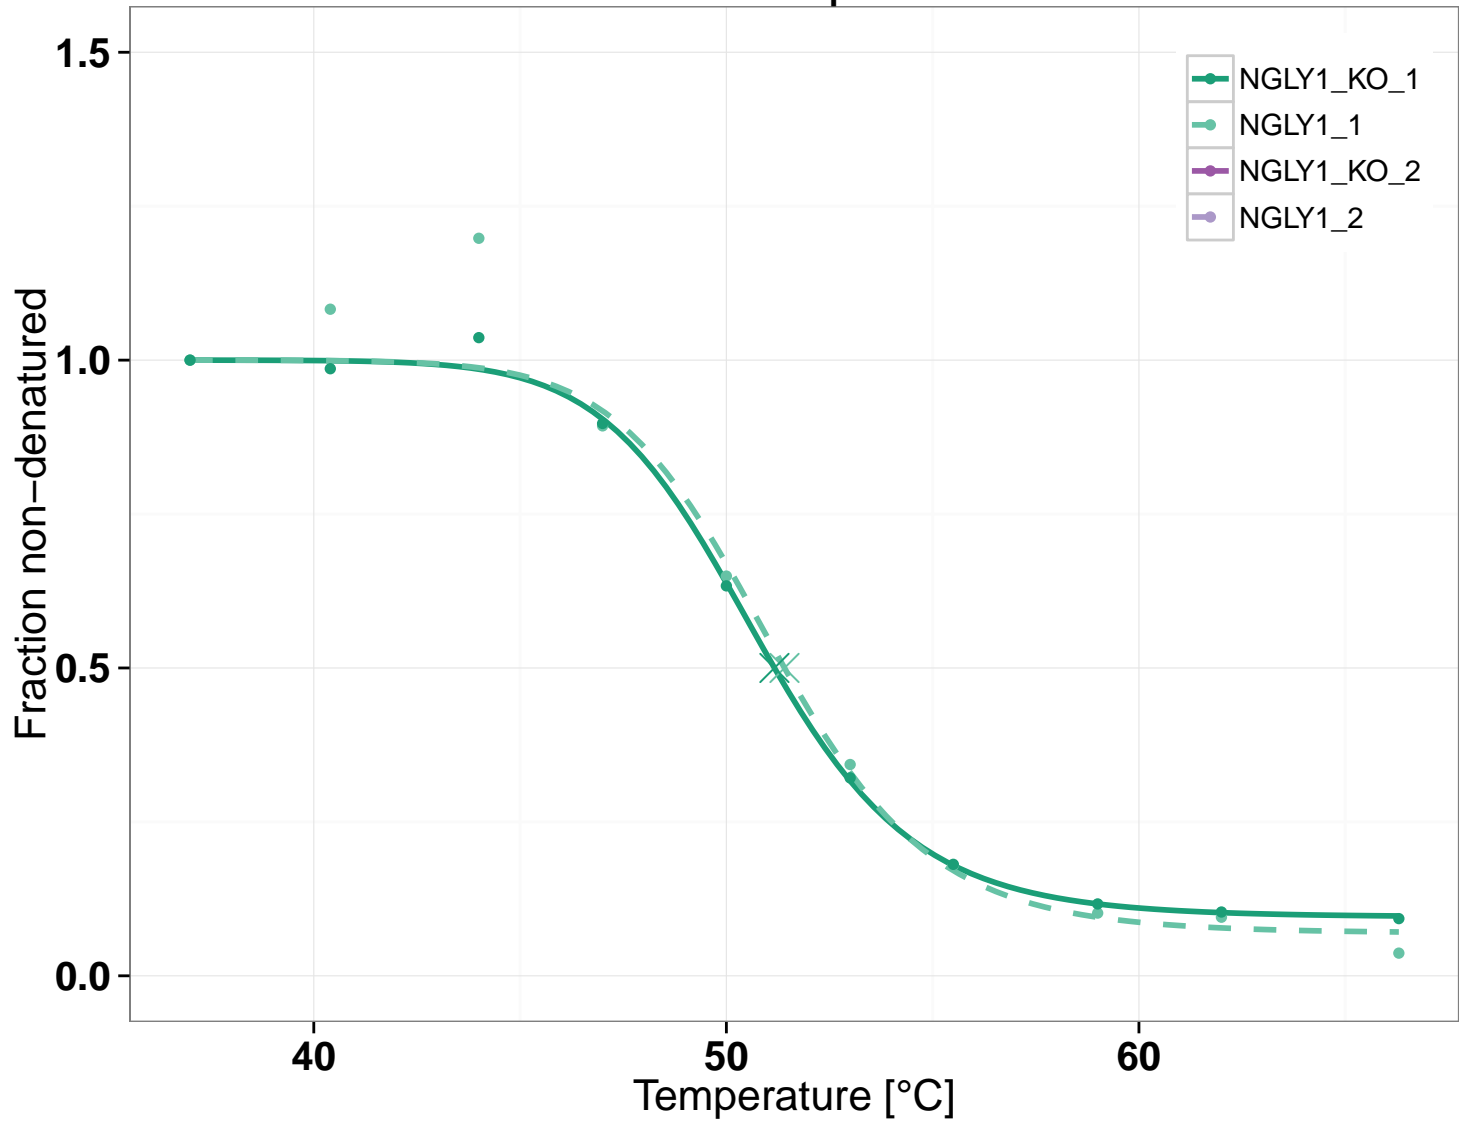

|            | meltPoint | slope | plateau | R2   |
|------------|-----------|-------|---------|------|
| NGLY1_KO_1 | 51.17     | -0.12 | 0.1     | 1    |
| NGLY1_1    | 51.41     | -0.12 | 0.07    | 0.97 |
| NGLY1_KO_2 | -         | -     | -       | -    |
| NGLY1_2    | -         | -     | -       | -    |

Supplement: Supplementary file 6616 [file 1]

# IPI00418471.6|VIM

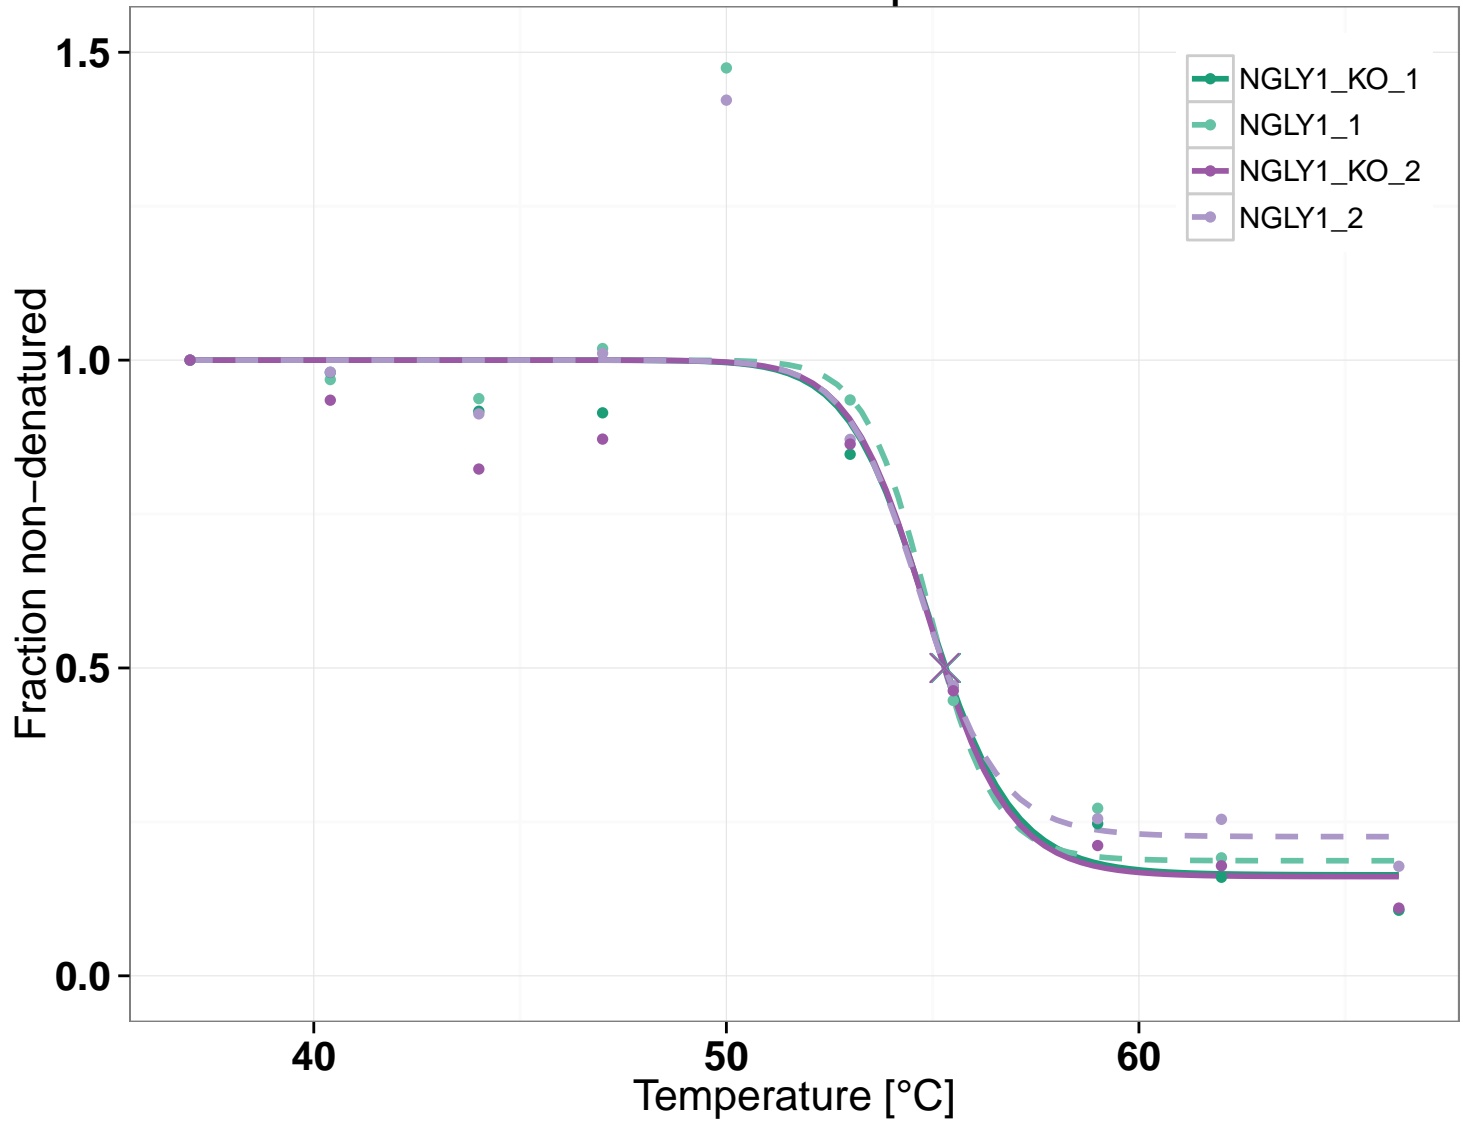

|            | meltPoint | slope | plateau | R2   |
|------------|-----------|-------|---------|------|
| NGLY1_KO_1 | 55.32     | -0.21 | 0.16    | 0.78 |
| NGLY1_1    | 55.29     | -0.26 | 0.19    | 0.87 |
| NGLY1_KO_2 | 55.29     | -0.22 | 0.16    | 0.8  |
| NGLY1_2    | 55.3      | -0.21 | 0.23    | 0.88 |

Supplement: Supplementary file 6617 [file 1]

# IPI00007256.1|ZHX2

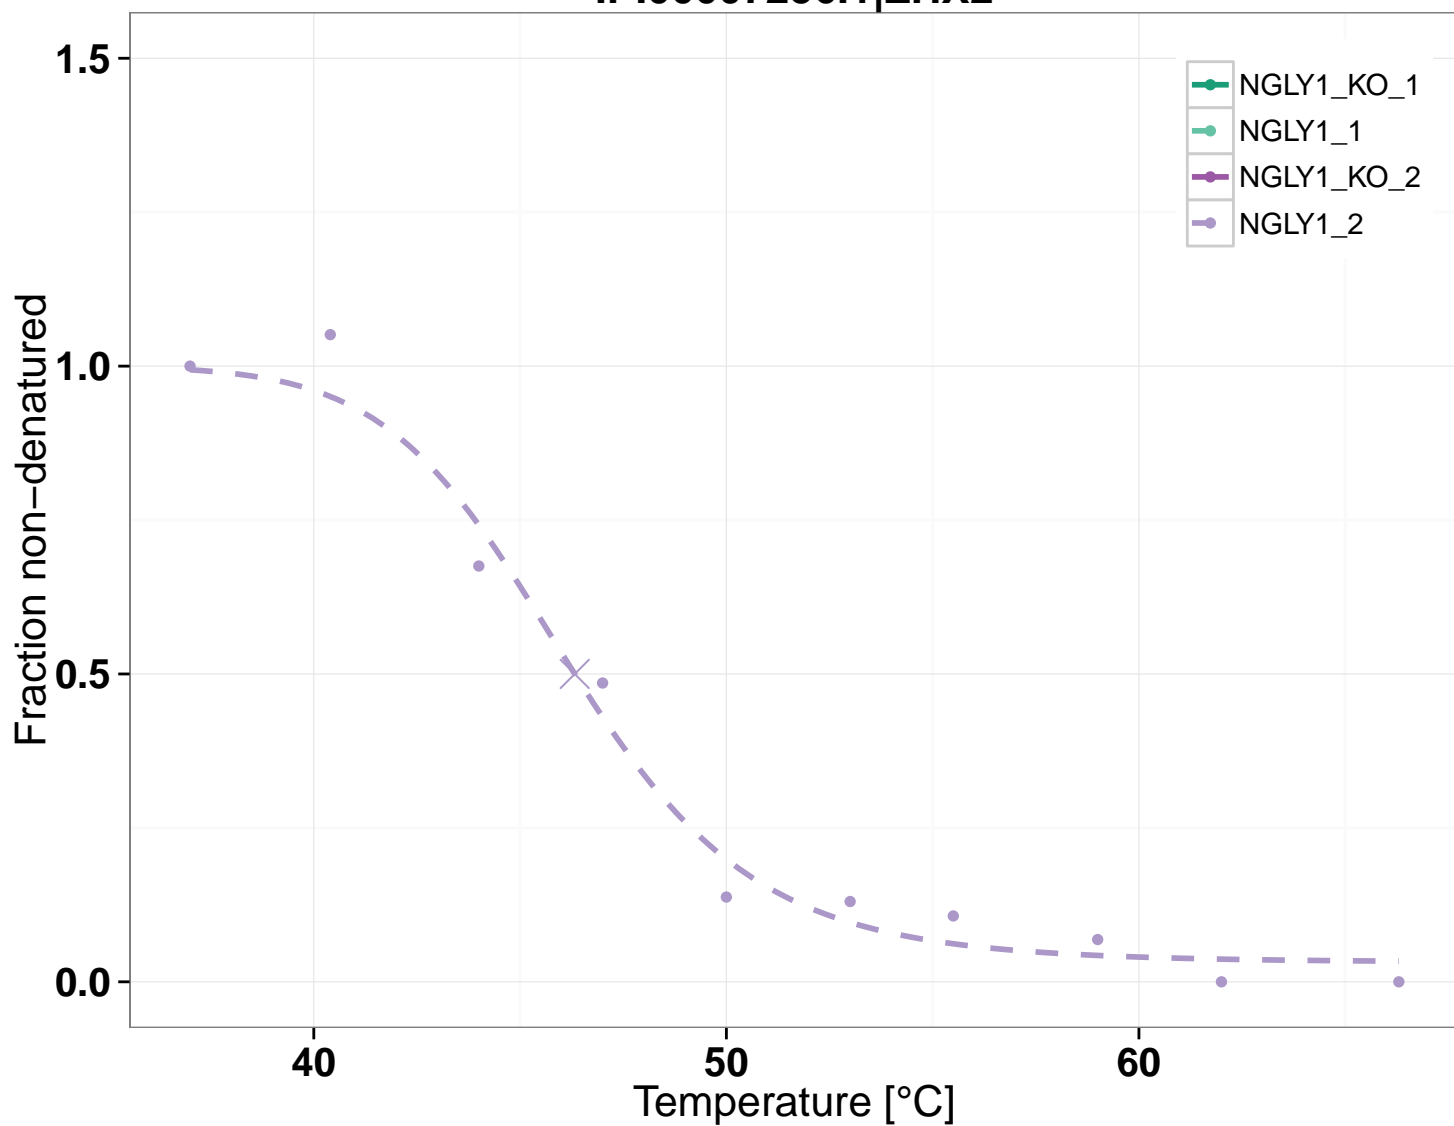

|            | meltPoint | slope | plateau | R2   |
|------------|-----------|-------|---------|------|
| NGLY1_KO_1 | —         | —     | —       | —    |
| NGLY1_1    | —         | —     | —       | —    |
| NGLY1_KO_2 | —         | —     | —       | —    |
| NGLY1_2    | 46.32     | -0.11 | 0.03    | 0.98 |

Supplement: Supplementary file 6618 [file 1]

IPI00012149.1|MPHOSPH10

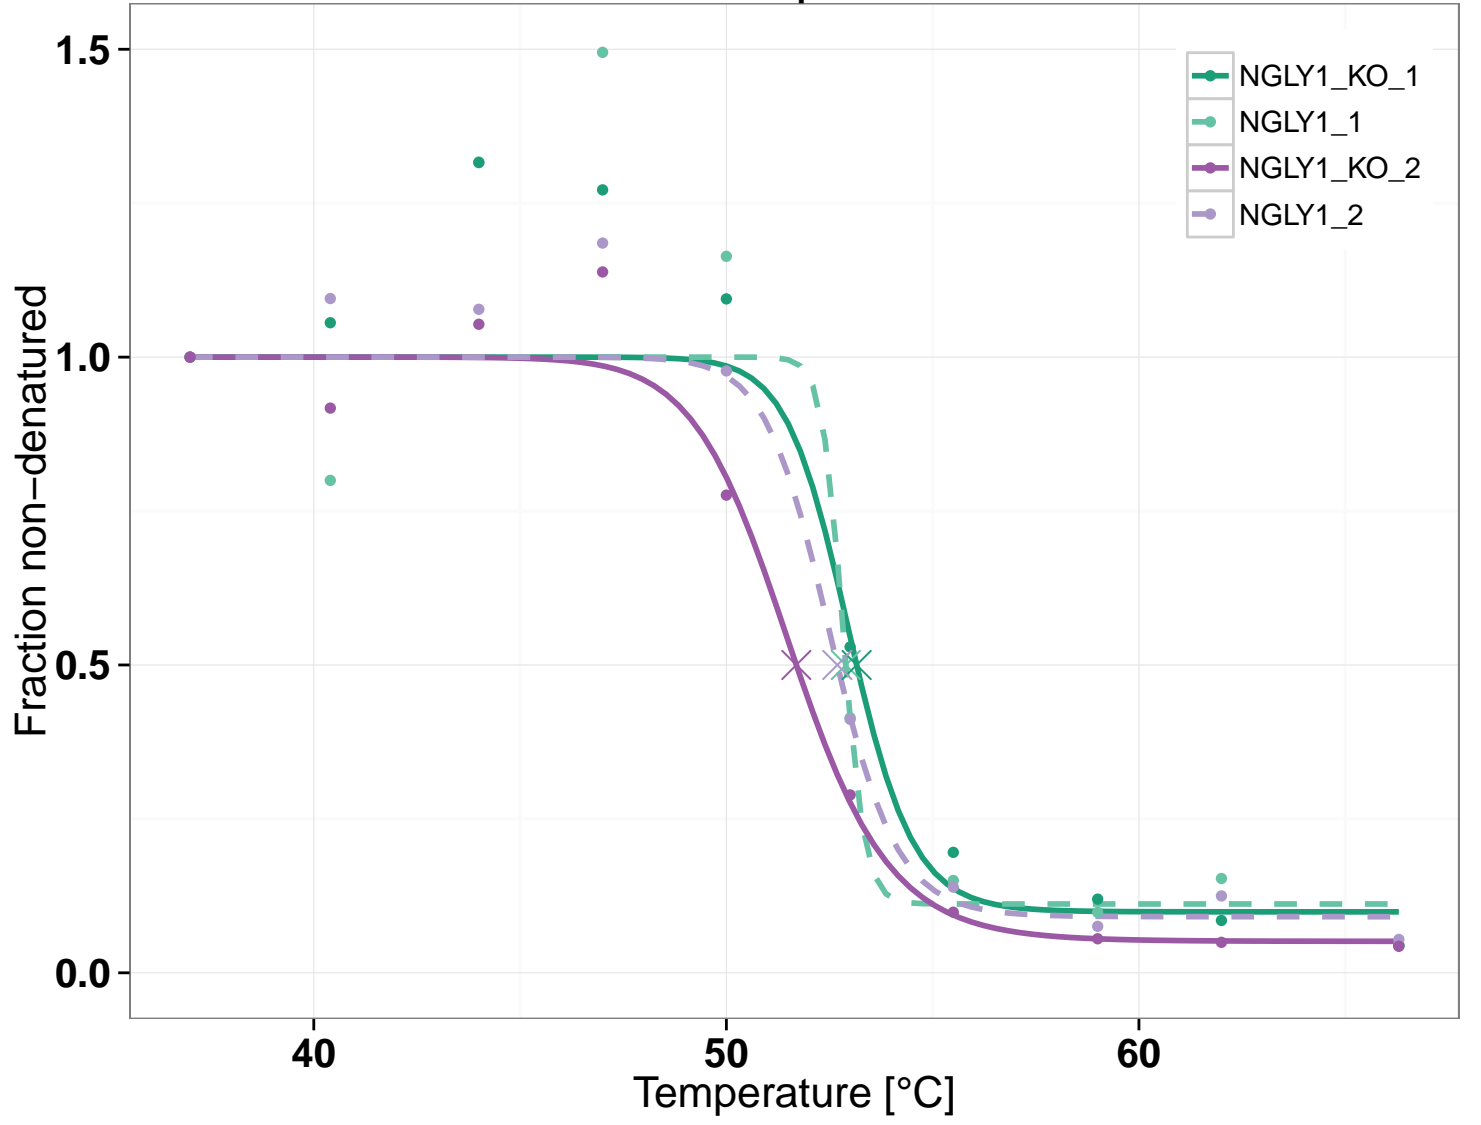

|            | meltPoint | slope | plateau | R2   |
|------------|-----------|-------|---------|------|
| NGLY1_KO_1 | 53.16     | -0.29 | 0.1     | 0.92 |
| NGLY1_1    | 52.89     | -0.87 | 0.11    | 0.85 |
| NGLY1_KO_2 | 51.7      | -0.2  | 0.05    | 0.98 |
| NGLY1_2    | 52.69     | -0.29 | 0.09    | 0.98 |

Supplement: Supplementary file 6619 [file 1]

IPI00031589.4|ZNF354A

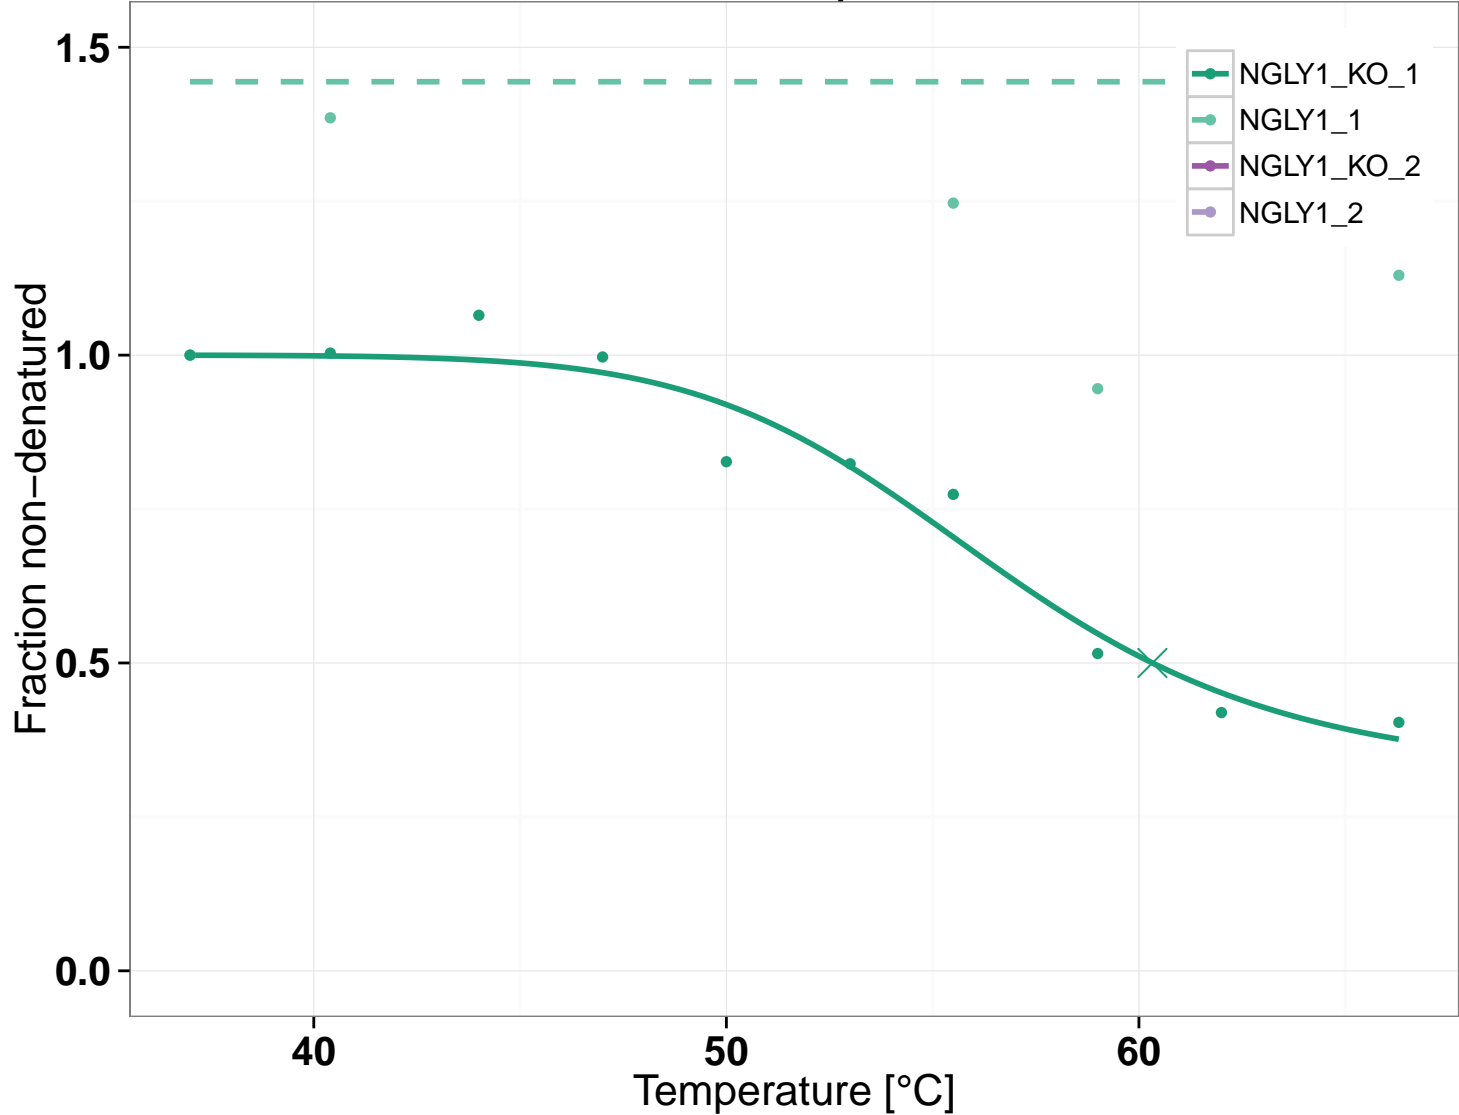

|            | meltPoint | slope  | plateau | R2   |
|------------|-----------|--------|---------|------|
| NGLY1_KO_1 | 60.33     | -0.048 | 0.31    | 0.96 |
| NGLY1_1    | -         | -      | 1.5     | 0    |
| NGLY1_KO_2 | -         | -      | -       | -    |
| NGLY1_2    | -         | -      | -       | -    |

Supplement: Supplementary file 6620 [file 1]

IPI00219420.3|SMC3

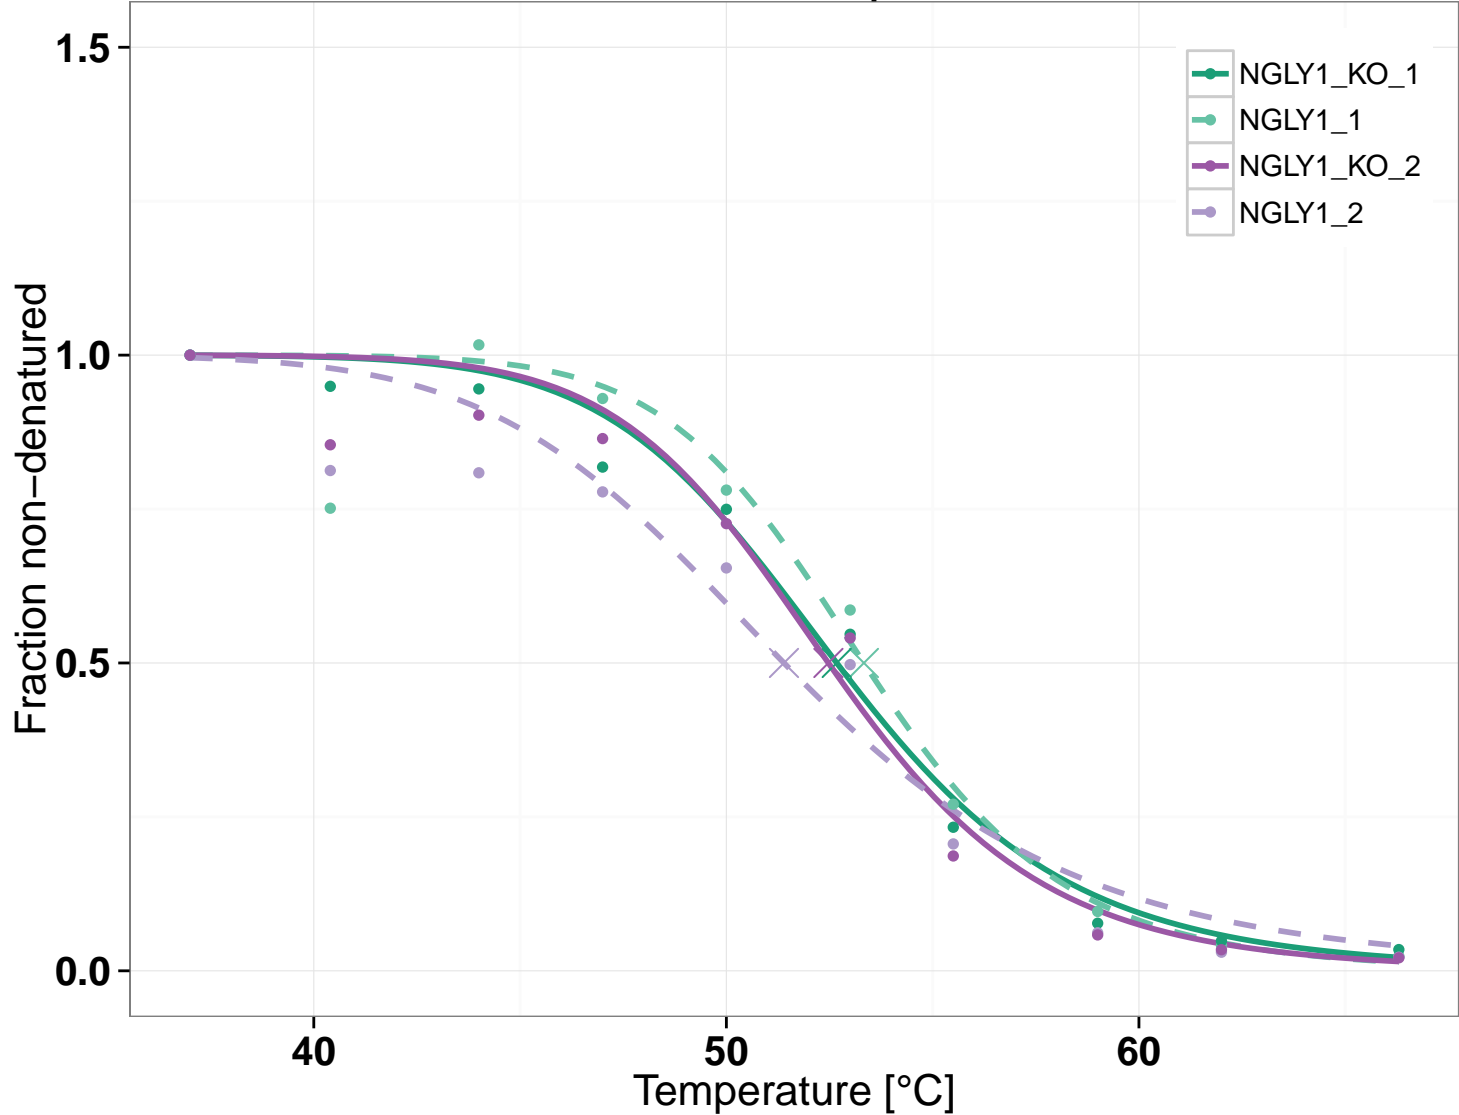

|            | meltPoint | slope  | plateau | R2   |
|------------|-----------|--------|---------|------|
| NGLY1_KO_1 | 52.68     | -0.089 | 0       | 0.99 |
| NGLY1_1    | 53.33     | -0.1   | 0       | 0.95 |
| NGLY1_KO_2 | 52.47     | -0.096 | 0       | 0.97 |
| NGLY1_2    | 51.4      | -0.07  | 0       | 0.95 |

Supplement: Supplementary file 6621 [file 1]

IPI00218086.2|RDH10

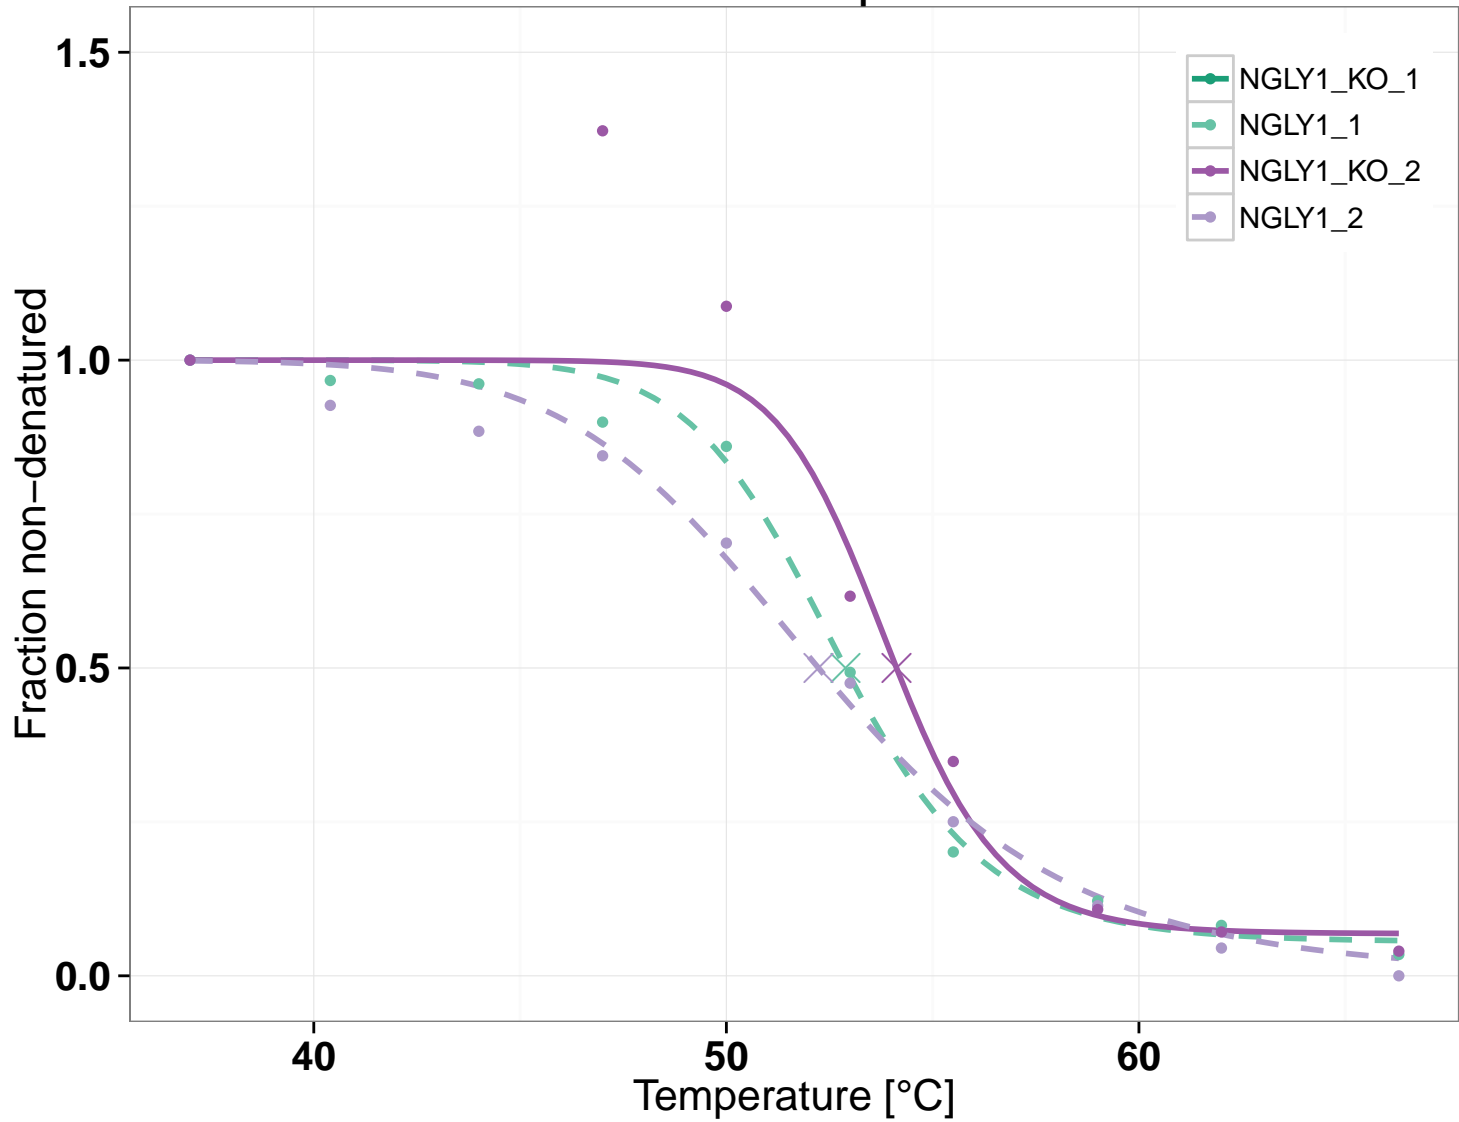

|            | meltPoint | slope  | plateau | R2   |
|------------|-----------|--------|---------|------|
| NGLY1_KO_1 | –         | –      | –       | –    |
| NGLY1_1    | 52.89     | –0.13  | 0.05    | 0.99 |
| NGLY1_KO_2 | 54.12     | –0.17  | 0.07    | 0.76 |
| NGLY1_2    | 52.23     | –0.081 | 0       | 0.99 |

Supplement: Supplementary file 6622 [file 1]

IPI00008202.1|HECA

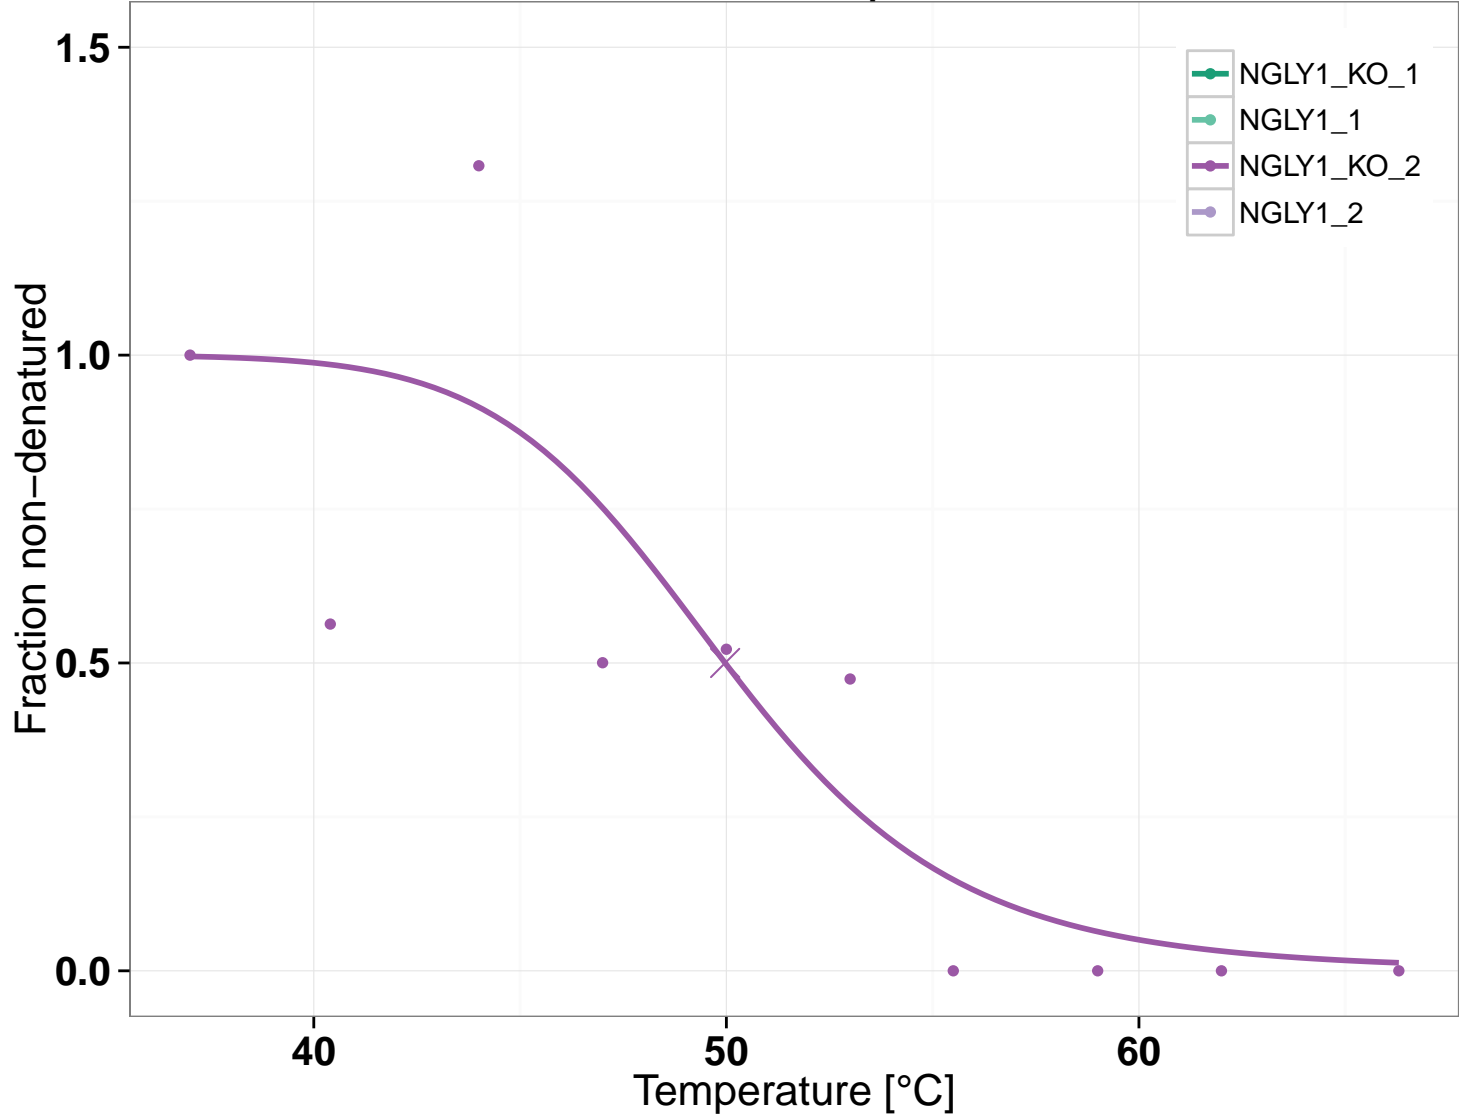

|            | meltPoint | slope  | plateau | R2   |
|------------|-----------|--------|---------|------|
| NGLY1_KO_1 | —         | —      | —       | —    |
| NGLY1_1    | —         | —      | —       | —    |
| NGLY1_KO_2 | 49.97     | -0.089 | 0       | 0.75 |
| NGLY1_2    | —         | —      | —       | —    |

Supplement: Supplementary file 6623 [file 1]

# IPI00000690.1|AIFM1

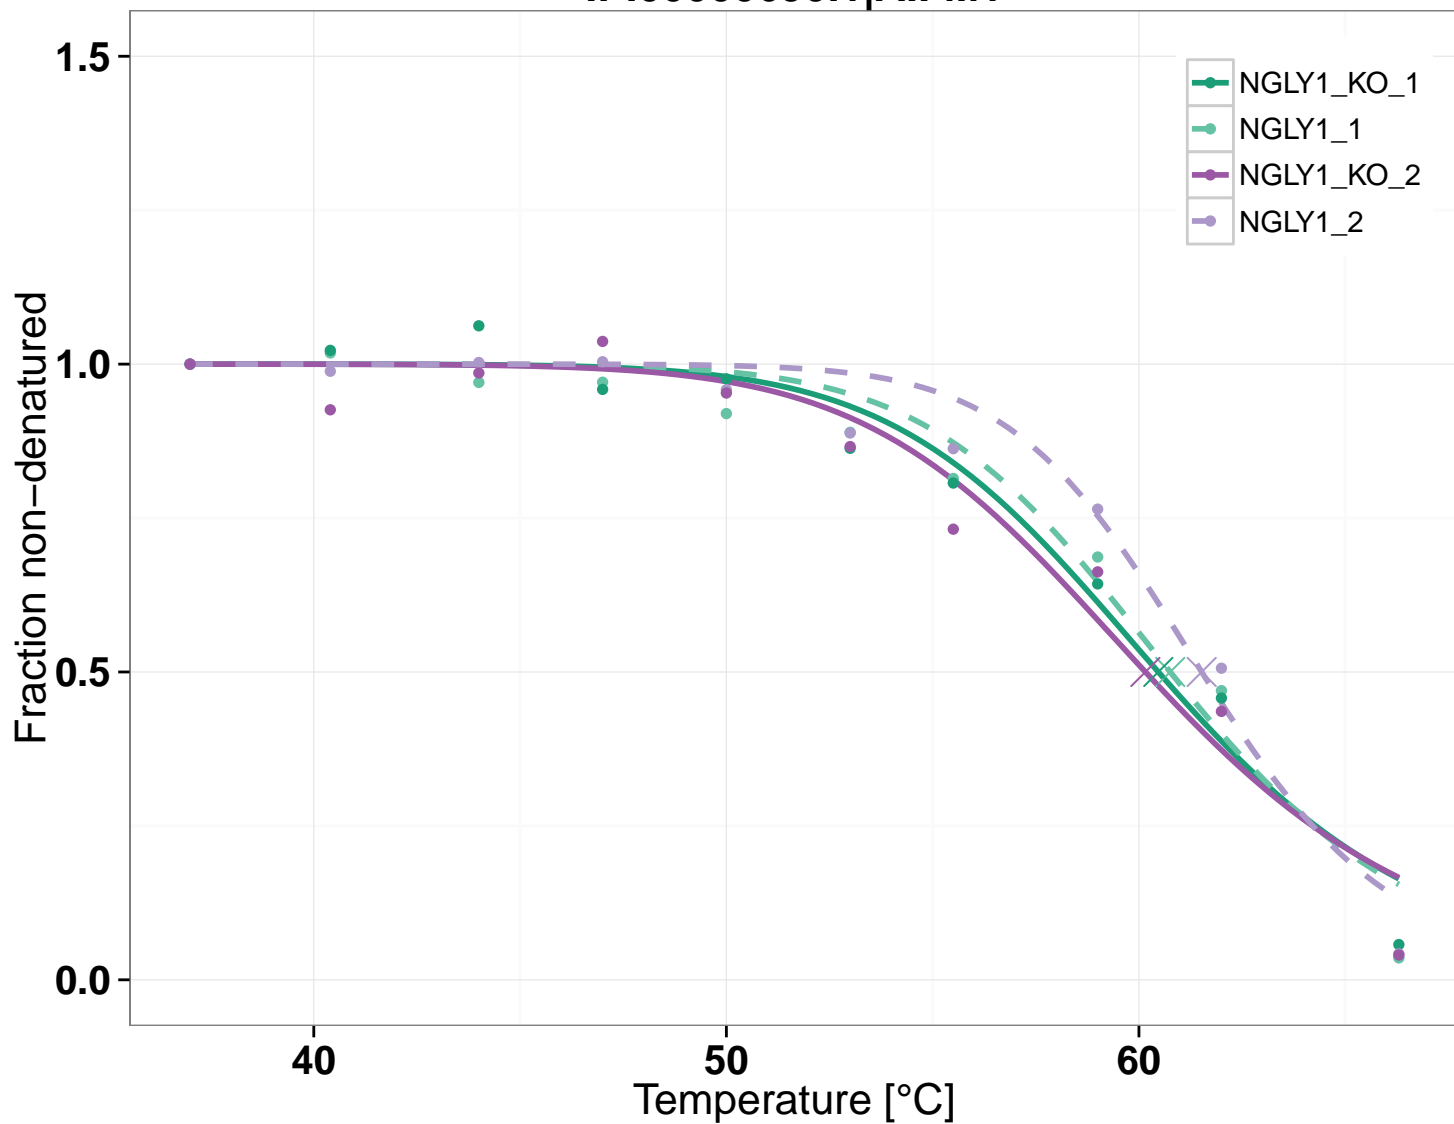

|            | meltPoint | slope  | plateau | R2   |
|------------|-----------|--------|---------|------|
| NGLY1_KO_1 | 60.47     | -0.077 | 0       | 0.97 |
| NGLY1_1    | 60.76     | -0.084 | 0       | 0.96 |
| NGLY1_KO_2 | 60.16     | -0.073 | 0       | 0.95 |
| NGLY1_2    | 61.52     | -0.11  | 0       | 0.97 |

Supplement: Supplementary file 6624 [file 1]

IPI00021092.1|DONSON

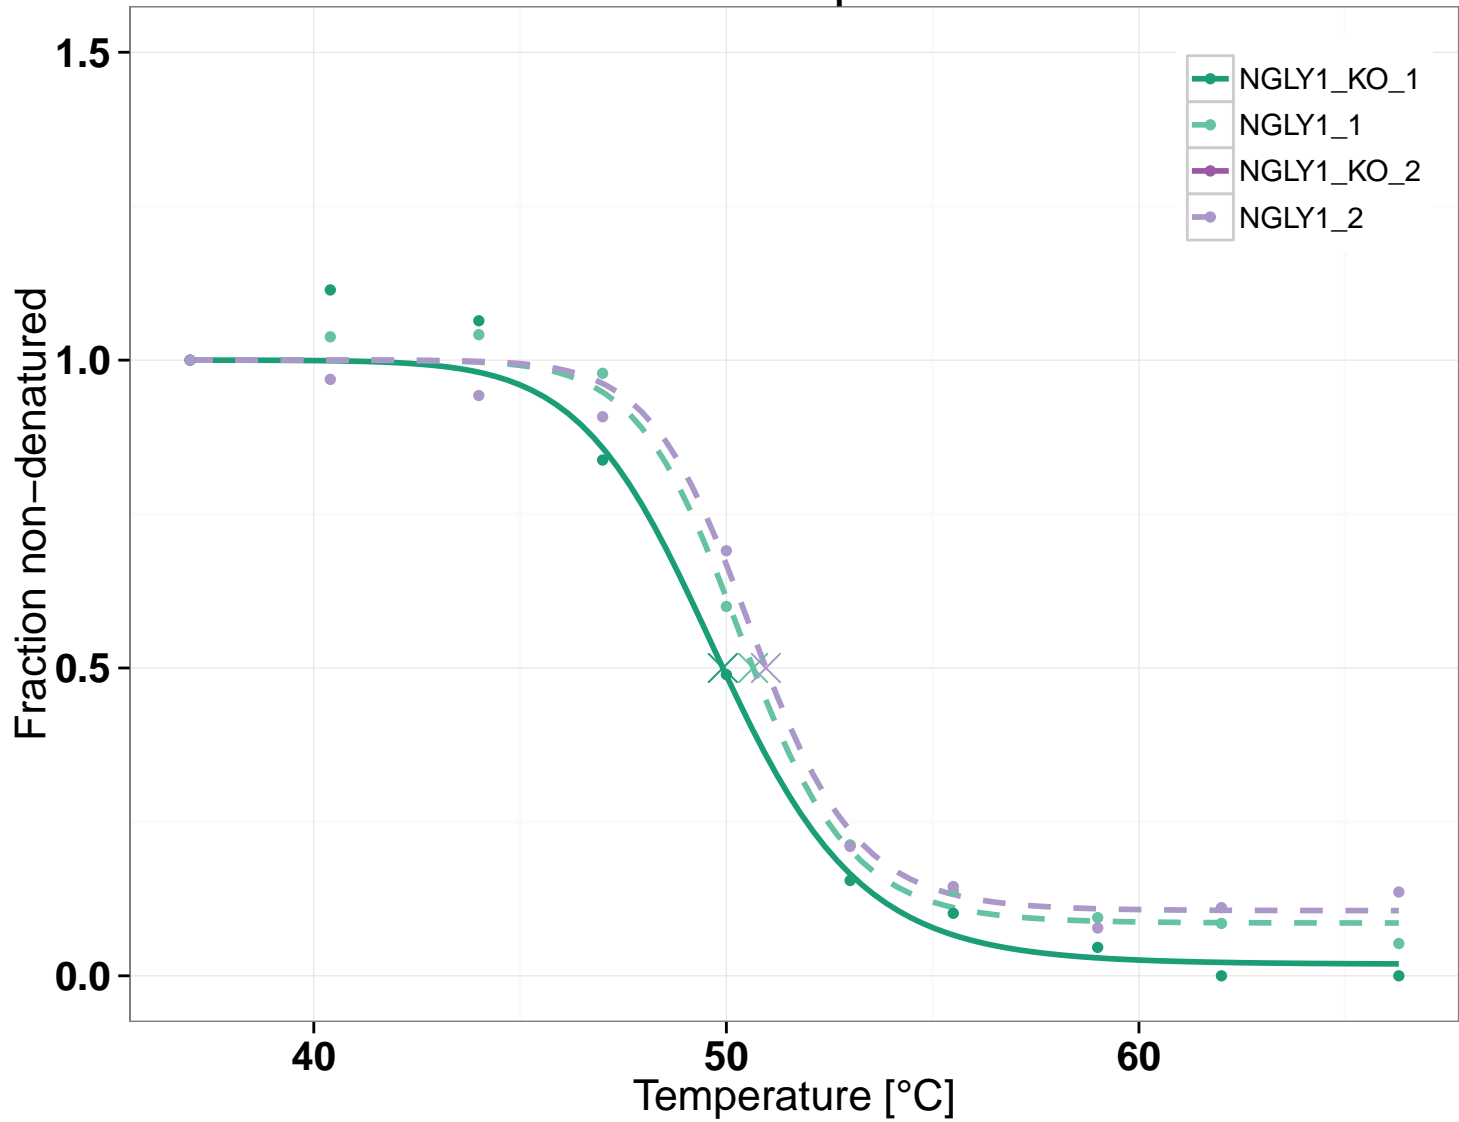

|            | meltPoint | slope | plateau | R2   |
|------------|-----------|-------|---------|------|
| NGLY1_KO_1 | 49.92     | -0.14 | 0.02    | 0.99 |
| NGLY1_1    | 50.65     | -0.18 | 0.09    | 1    |
| NGLY1_KO_2 | -         | -     | -       | -    |
| NGLY1_2    | 50.96     | -0.18 | 0.11    | 0.99 |

Supplement: Supplementary file 6625 [file 1]

# IPI00293655.3|DDX1

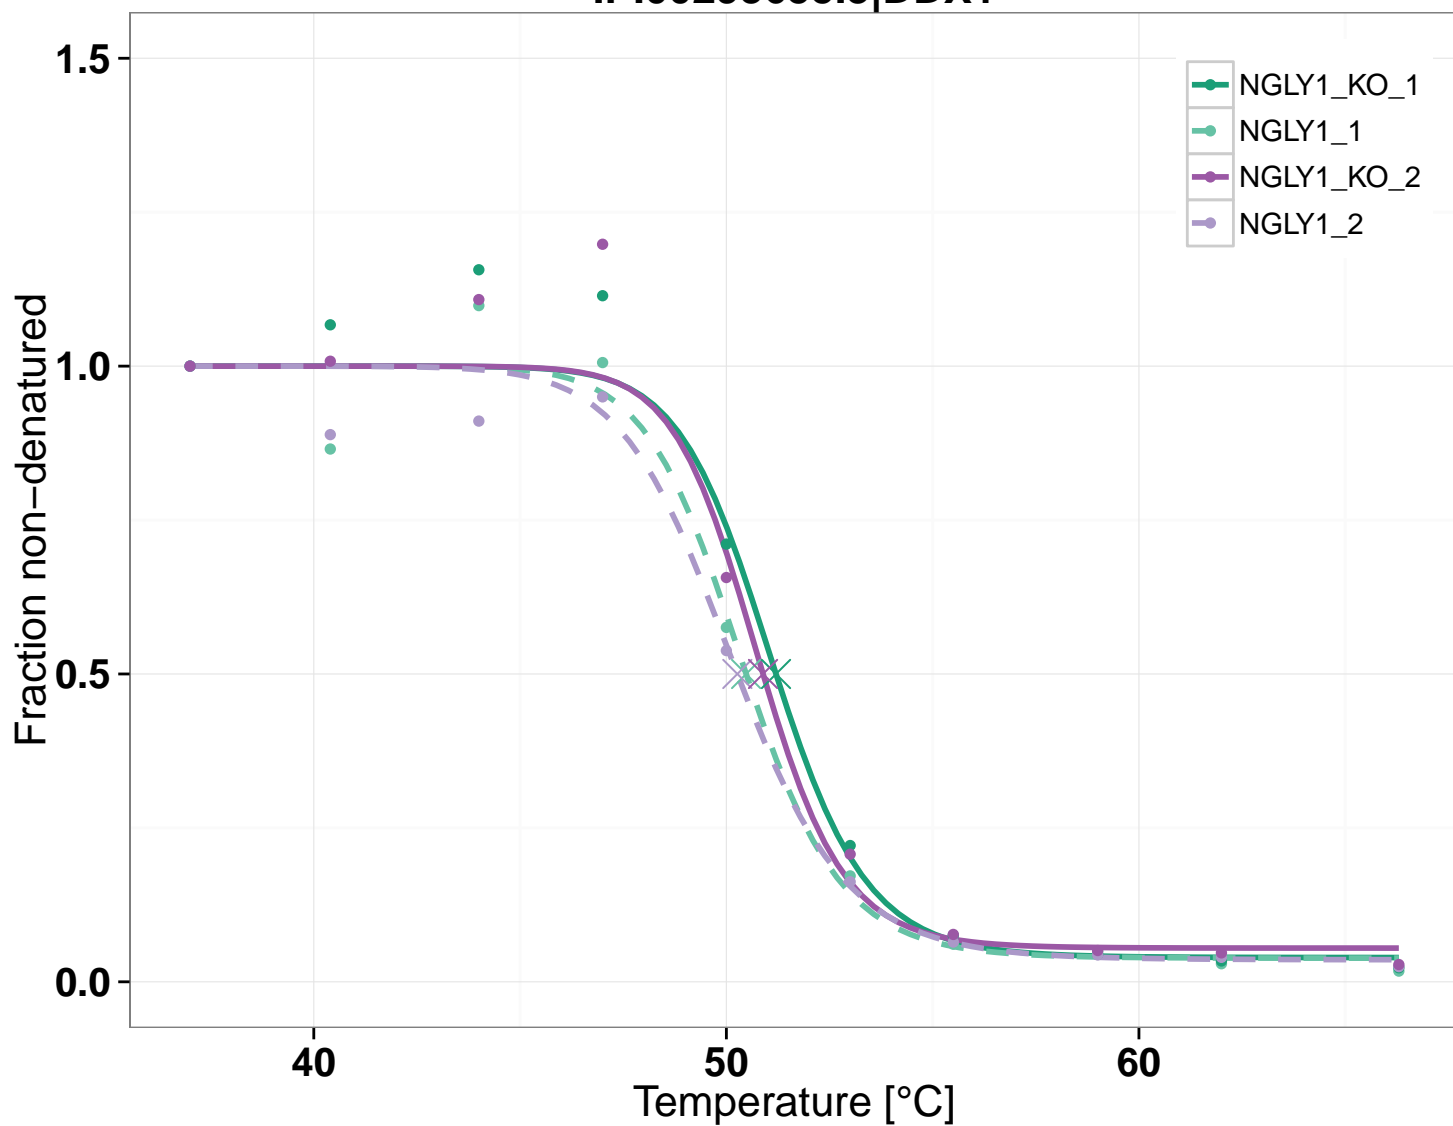

|            | meltPoint | slope | plateau | R2   |
|------------|-----------|-------|---------|------|
| NGLY1_KO_1 | 51.2      | -0.21 | 0.04    | 0.98 |
| NGLY1_1    | 50.48     | -0.2  | 0.04    | 0.98 |
| NGLY1_KO_2 | 50.89     | -0.23 | 0.05    | 0.97 |
| NGLY1_2    | 50.27     | -0.18 | 0.04    | 0.99 |

Supplement: Supplementary file 6627 [file 1]
