# Supplementary material (part 67 of 85)
Source: publisher figshare collection journal article supplement (https://gsajournals.figshare.com/articles/dataset/_/12014913)

# IPI00011603.2|PSMD3

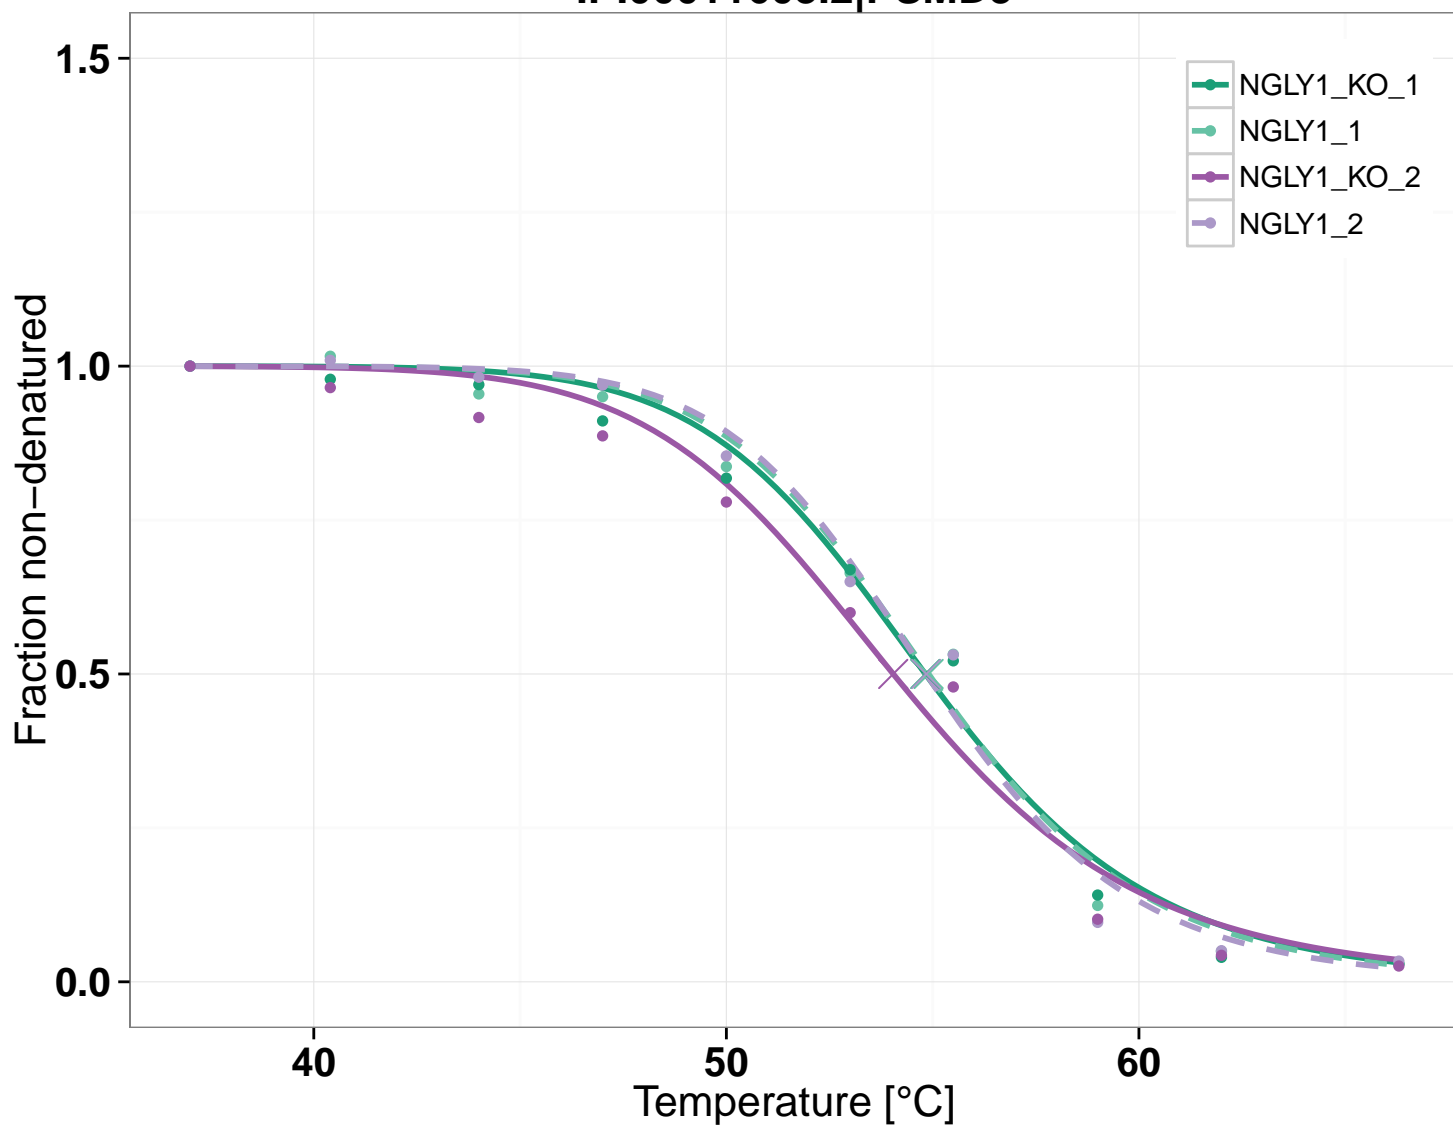

|            | meltPoint | slope  | plateau | R2   |
|------------|-----------|--------|---------|------|
| NGLY1_KO_1 | 54.82     | -0.091 | 0       | 0.99 |
| NGLY1_1    | 54.9      | -0.096 | 0       | 0.99 |
| NGLY1_KO_2 | 54.04     | -0.083 | 0       | 0.98 |
| NGLY1_2    | 54.84     | -0.1   | 0       | 0.99 |

Supplement: Supplementary file 6628 [file 1]

IPI00334280.4|SLC46A3

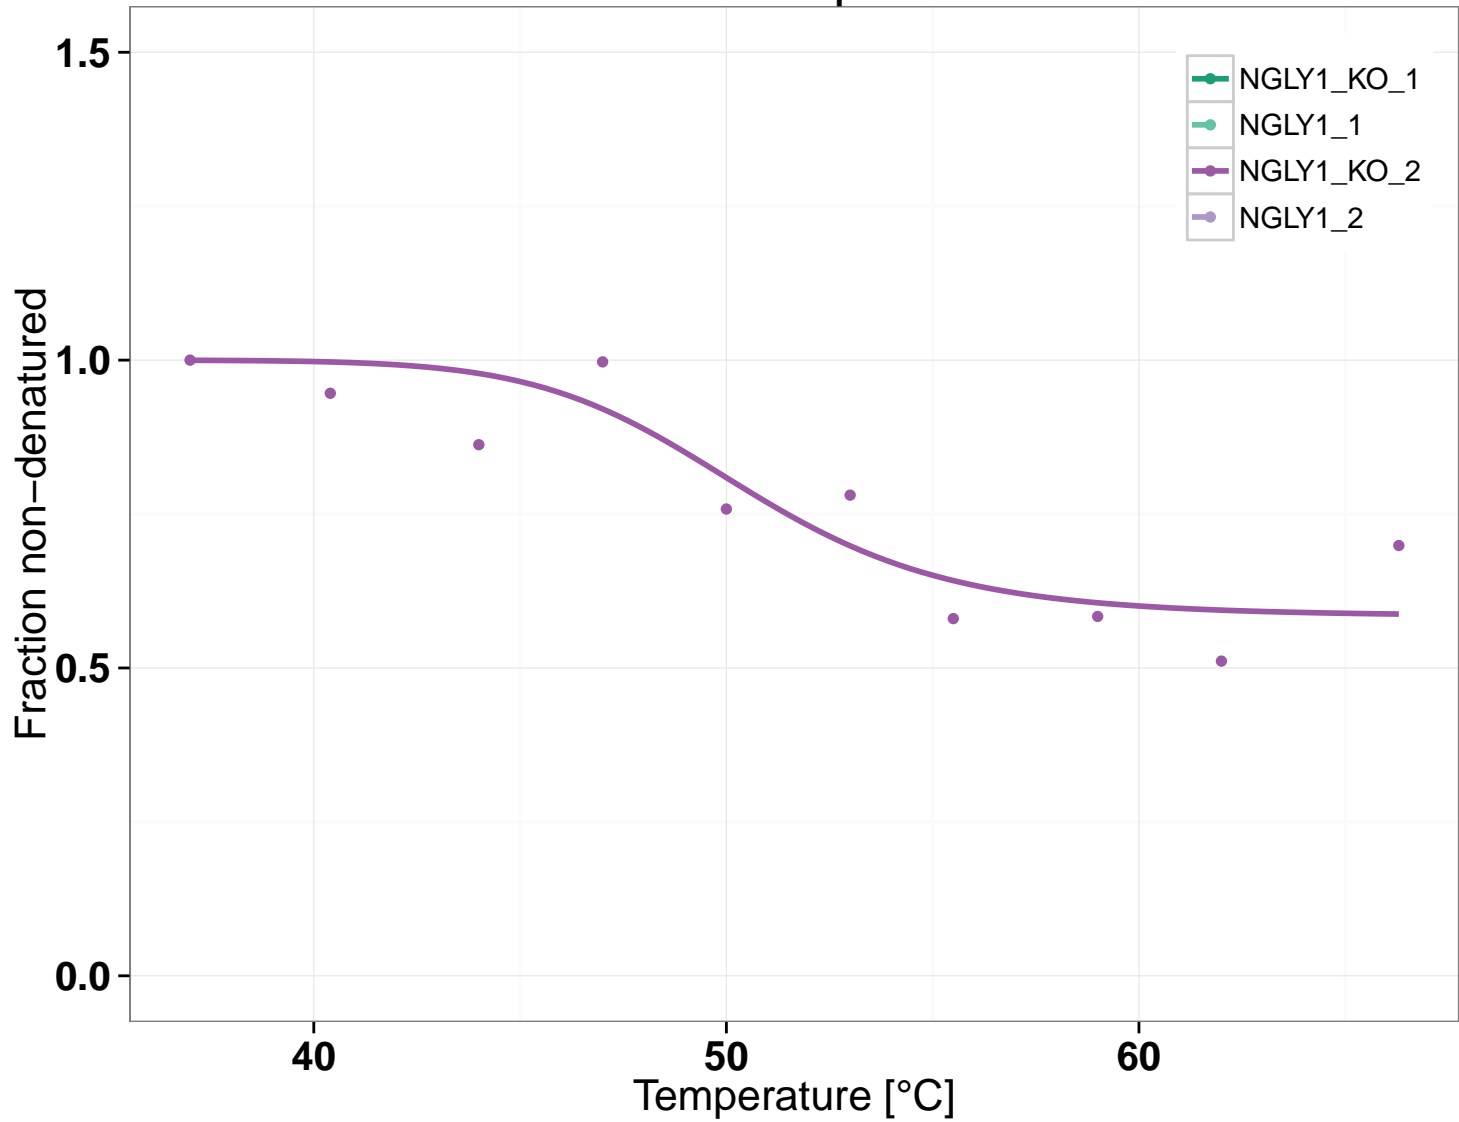

|            | meltPoint | slope  | plateau | R2   |
|------------|-----------|--------|---------|------|
| NGLY1_KO_1 | —         | —      | —       | —    |
| NGLY1_1    | —         | —      | —       | —    |
| NGLY1_KO_2 | —         | -0.041 | 0.58    | 0.81 |
| NGLY1_2    | —         | —      | —       | —    |

Supplement: Supplementary file 6629 [file 1]

IPI00386891.4|C17ORF53

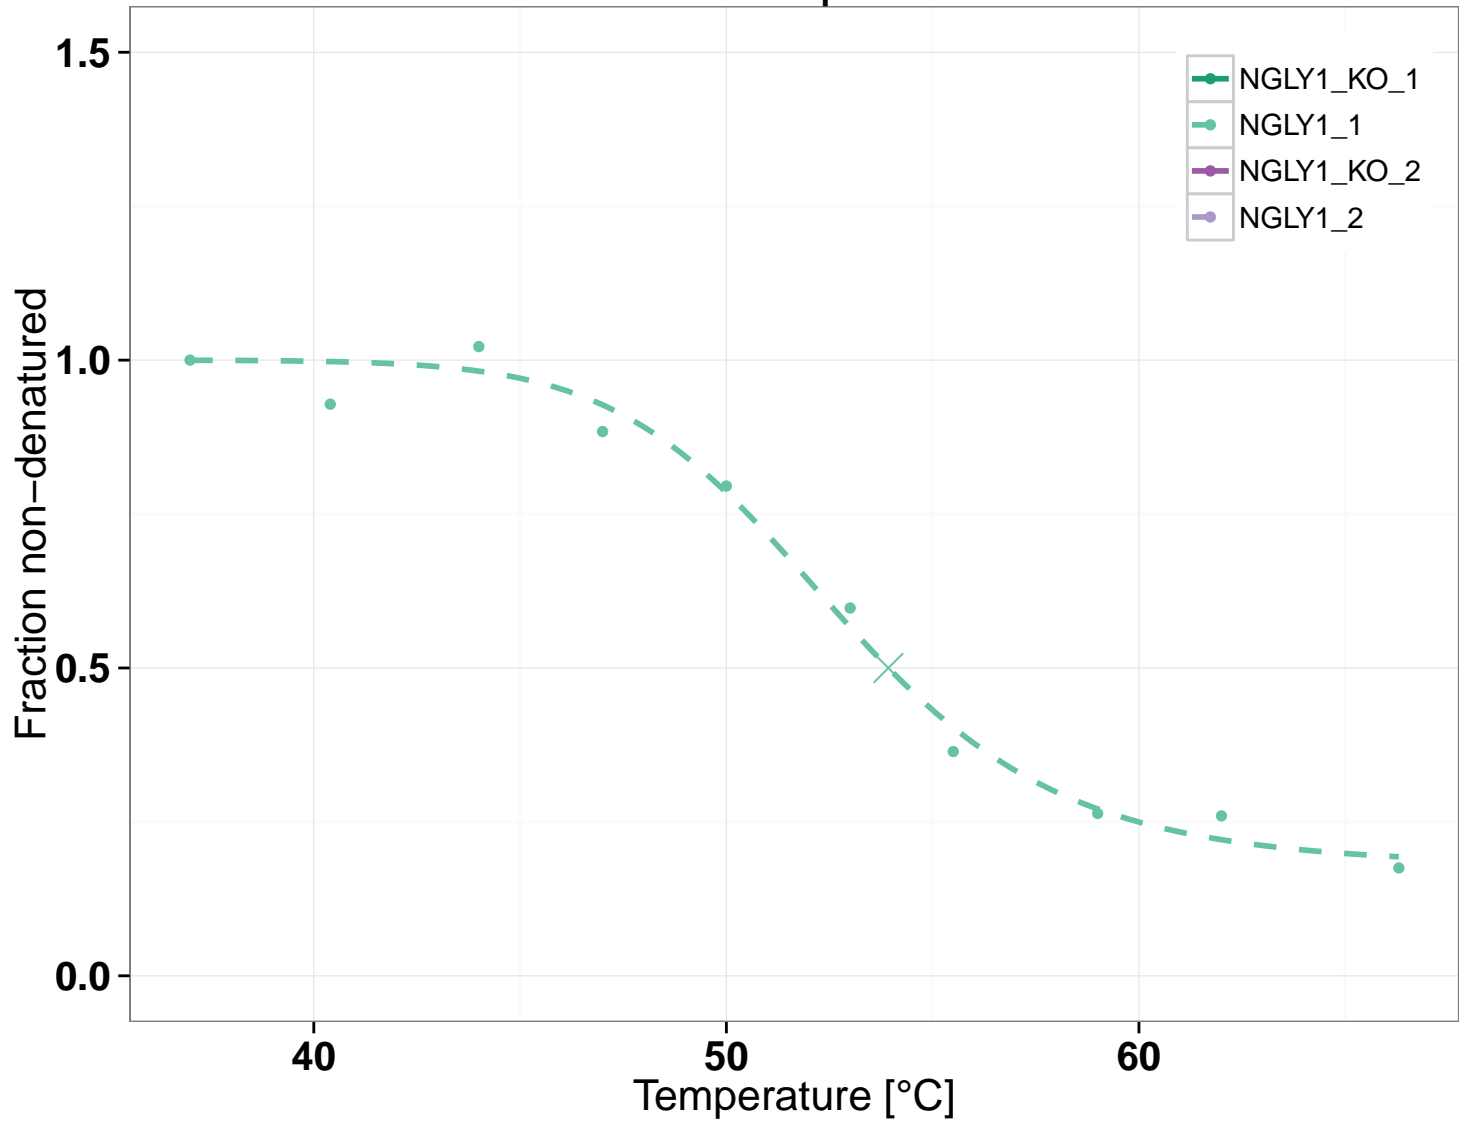

|            | meltPoint | slope  | plateau | R2   |
|------------|-----------|--------|---------|------|
| NGLY1_KO_1 | –         | –      | –       | –    |
| NGLY1_1    | 53.93     | –0.076 | 0.18    | 0.99 |
| NGLY1_KO_2 | –         | –      | –       | –    |
| NGLY1_2    | –         | –      | –       | –    |

Supplement: Supplementary file 6630 [file 1]

IPI00419595.2|PODXL2

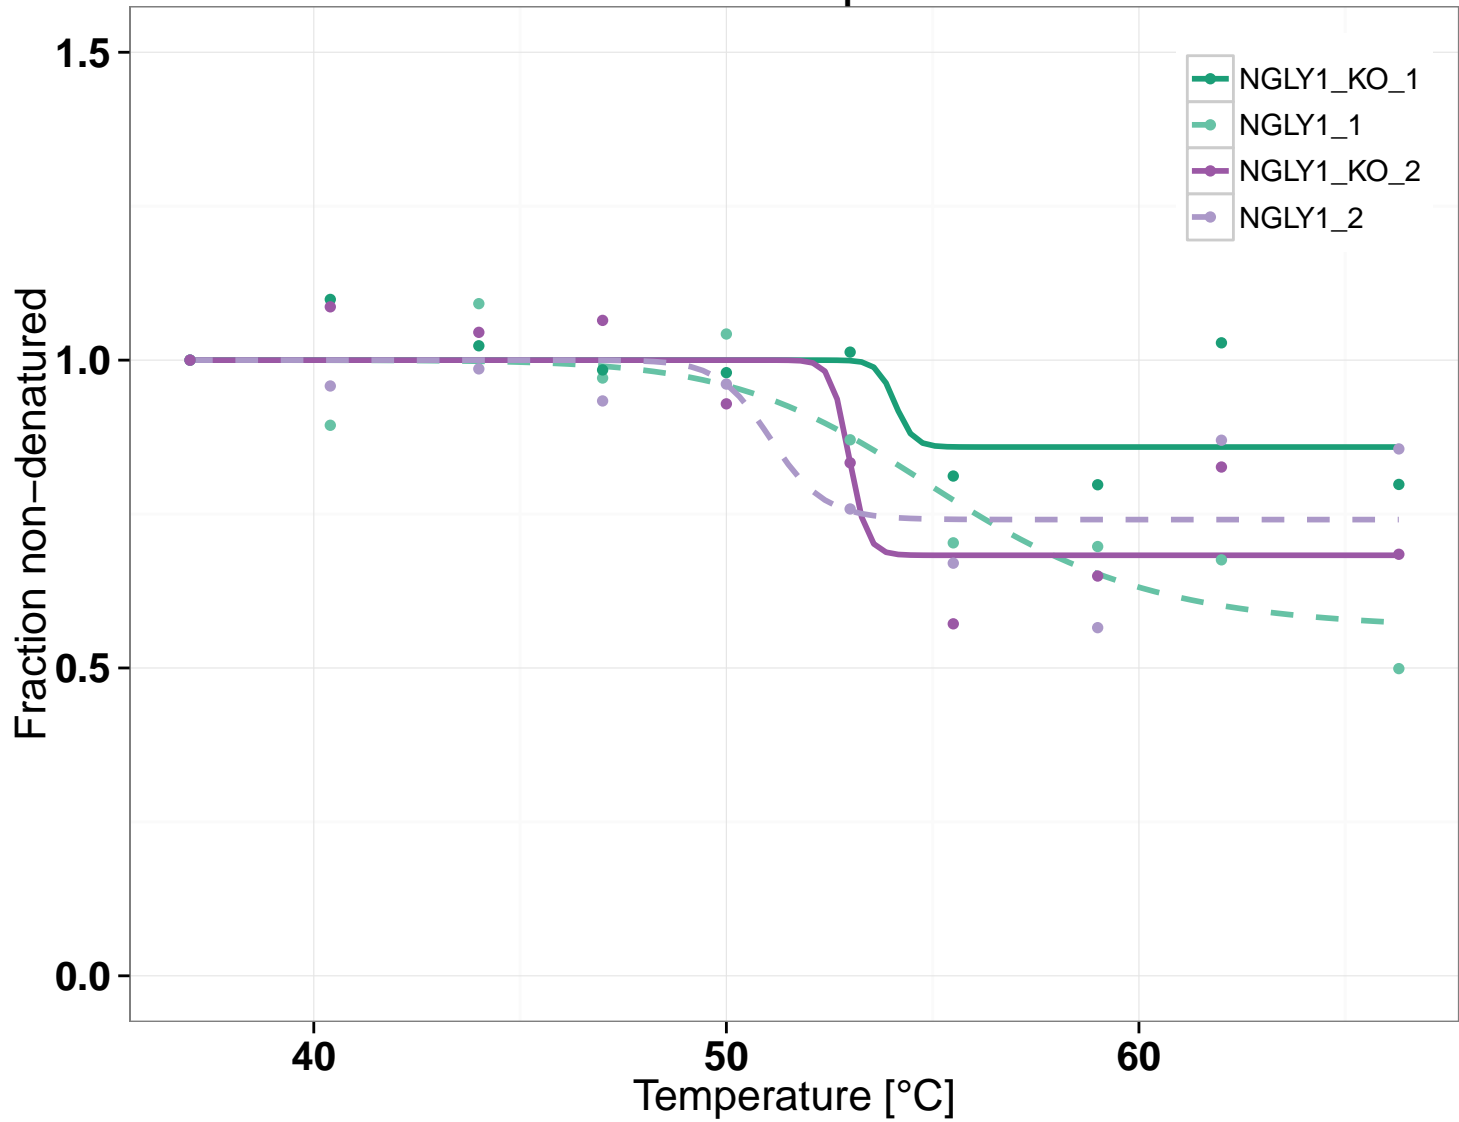

|            | meltPoint | slope  | plateau | R2   |
|------------|-----------|--------|---------|------|
| NGLY1_KO_1 | 53.5      | -0.16  | 0.86    | 0.54 |
| NGLY1_1    | 53.0      | -0.043 | 0.56    | 0.86 |
| NGLY1_KO_2 | 52.5      | -0.37  | 0.68    | 0.83 |
| NGLY1_2    | 52.0      | -0.1   | 0.74    | 0.63 |

Supplement: Supplementary file 6631 [file 1]

# IPI00013461.1|NDUFC1

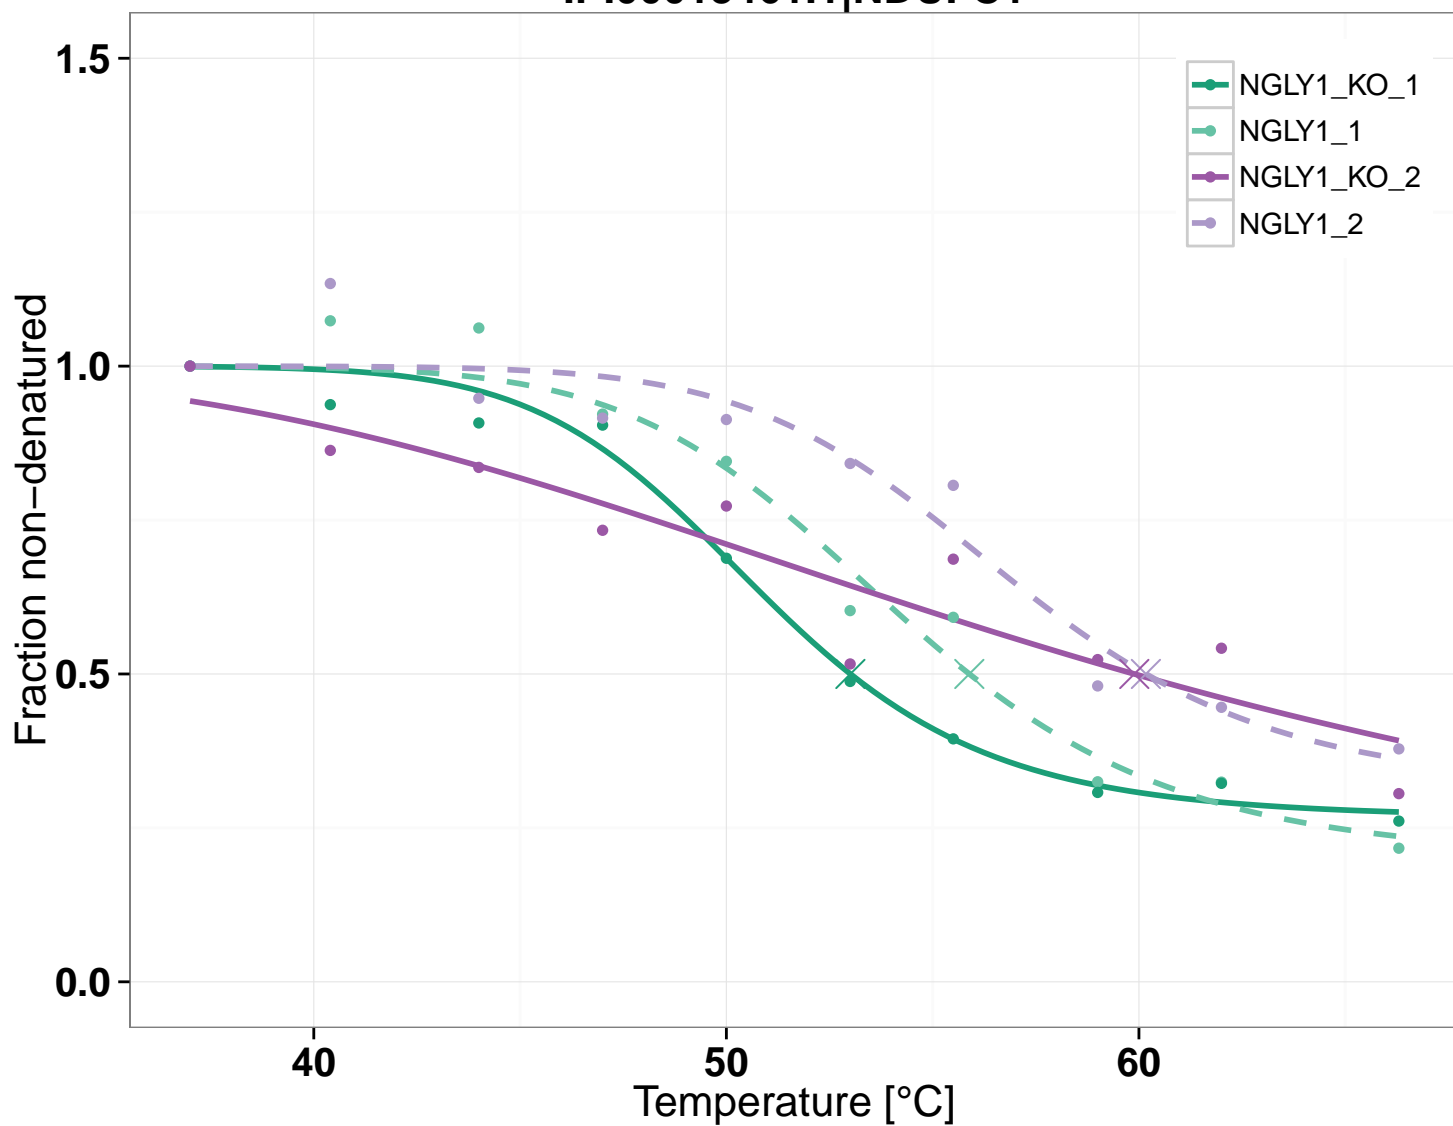

|            | meltPoint | slope  | plateau | R2   |
|------------|-----------|--------|---------|------|
| NGLY1_KO_1 | 53.01     | -0.067 | 0.27    | 0.99 |
| NGLY1_1    | 55.89     | -0.061 | 0.2     | 0.97 |
| NGLY1_KO_2 | 59.89     | -0.022 | 0       | 0.87 |
| NGLY1_2    | 60.17     | -0.054 | 0.31    | 0.94 |

Supplement: Supplementary file 6632 [file 1]

# IPI00644361.2|NAT1

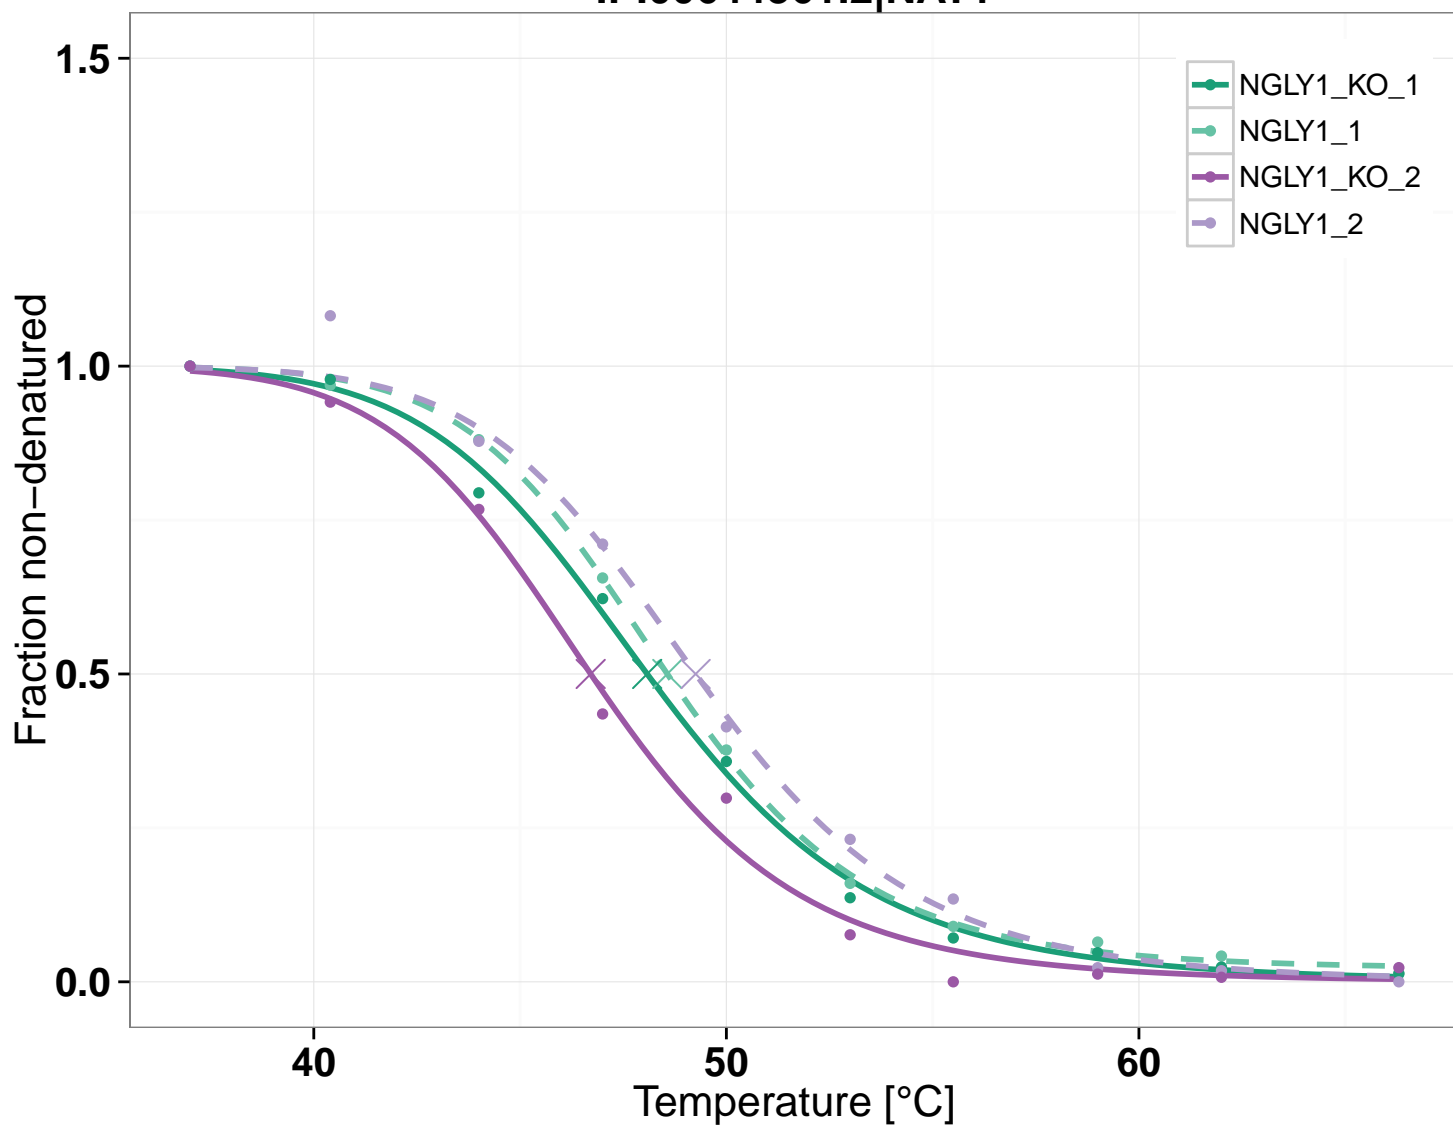

|            | meltPoint | slope  | plateau | R2   |
|------------|-----------|--------|---------|------|
| NGLY1_KO_1 | 48.08     | -0.092 | 0       | 1    |
| NGLY1_1    | 48.57     | -0.1   | 0.02    | 1    |
| NGLY1_KO_2 | 46.71     | -0.1   | 0       | 0.99 |
| NGLY1_2    | 49.26     | -0.094 | 0       | 0.99 |

Supplement: Supplementary file 6633 [file 1]

# IPI00000897.2|HELZ

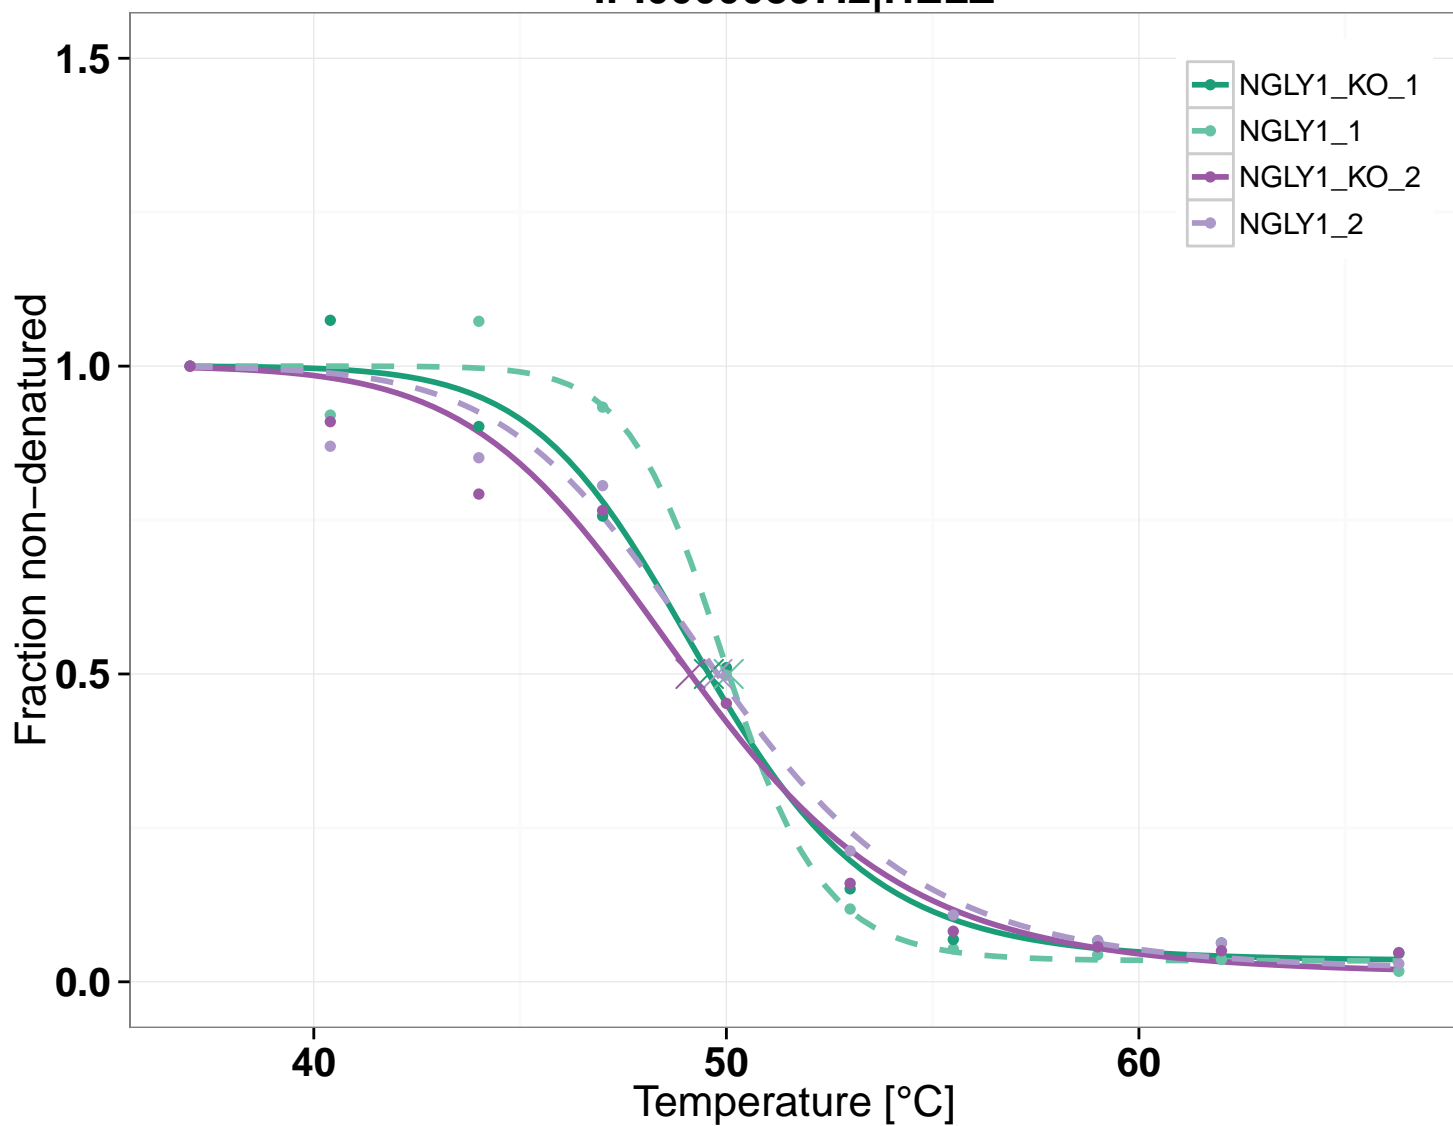

|            | meltPoint | slope  | plateau | R2   |
|------------|-----------|--------|---------|------|
| NGLY1_KO_1 | 49.58     | -0.12  | 0.03    | 0.99 |
| NGLY1_1    | 50.06     | -0.2   | 0.03    | 0.99 |
| NGLY1_KO_2 | 49.13     | -0.093 | 0.01    | 0.98 |
| NGLY1_2    | 49.78     | -0.096 | 0.02    | 0.98 |

Supplement: Supplementary file 6634 [file 1]

IPI00747261.3|HIPK1

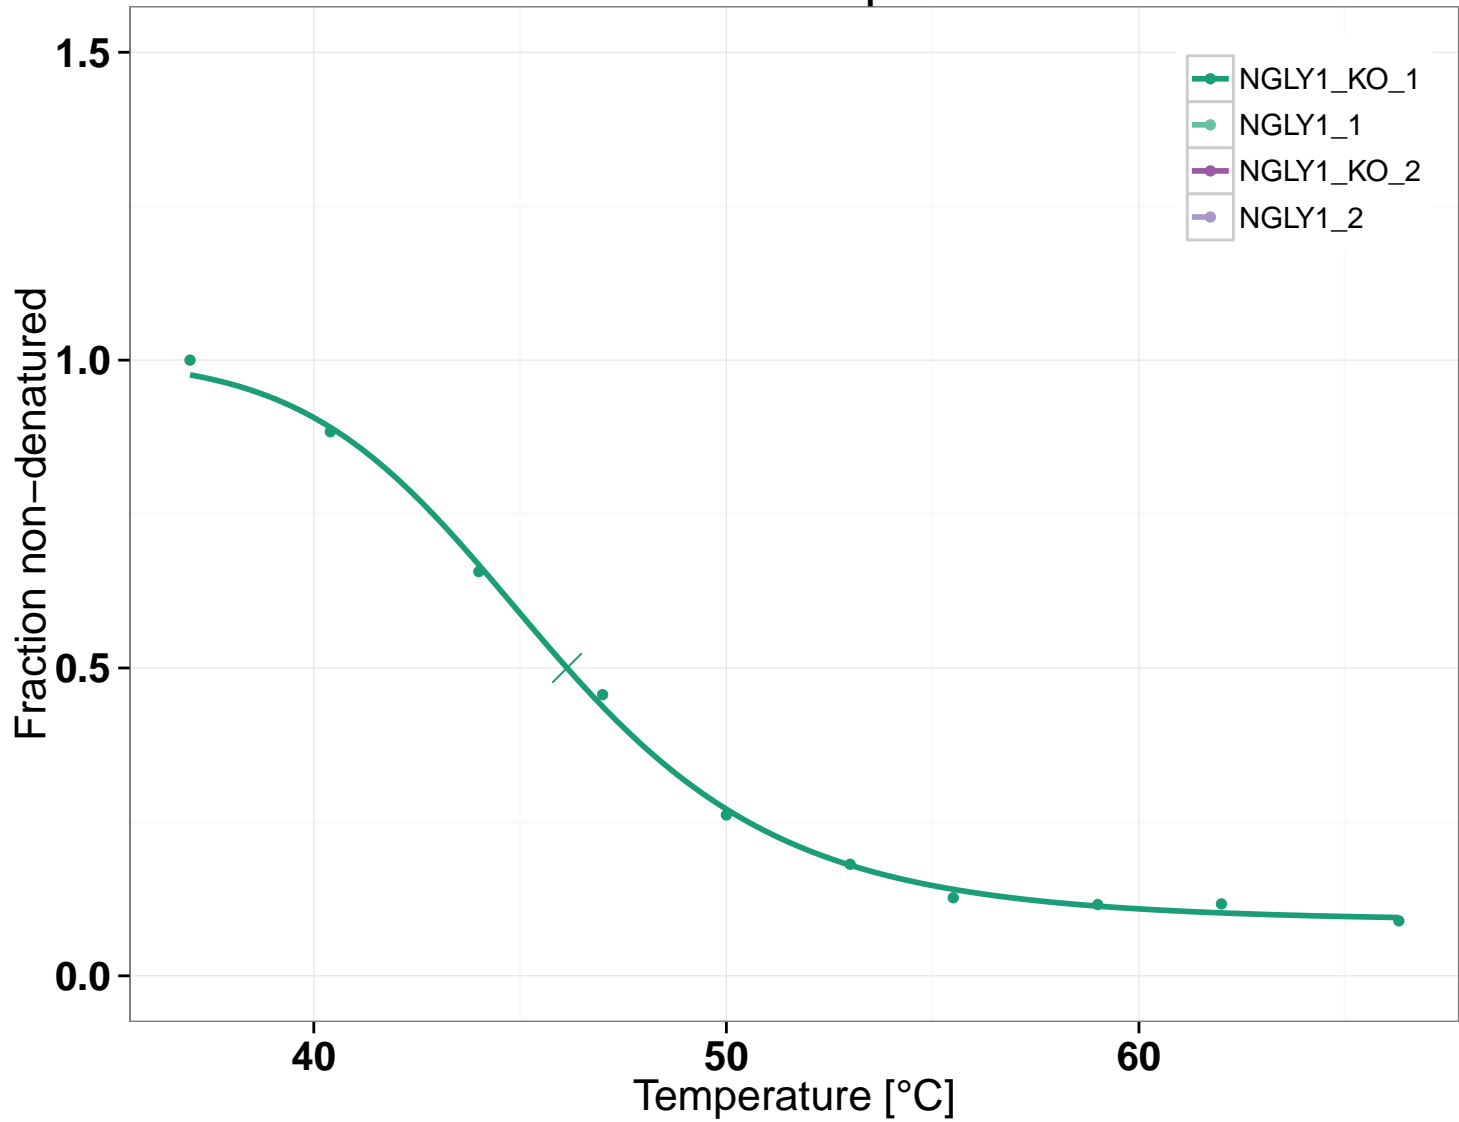

|            | meltPoint | slope  | plateau | R2 |
|------------|-----------|--------|---------|----|
| NGLY1_KO_1 | 46.14     | -0.079 | 0.09    | 1  |
| NGLY1_1    | -         | -      | -       | -  |
| NGLY1_KO_2 | -         | -      | -       | -  |
| NGLY1_2    | -         | -      | -       | -  |

Supplement: Supplementary file 6635 [file 1]

IPI00550191.2|C9ORF78

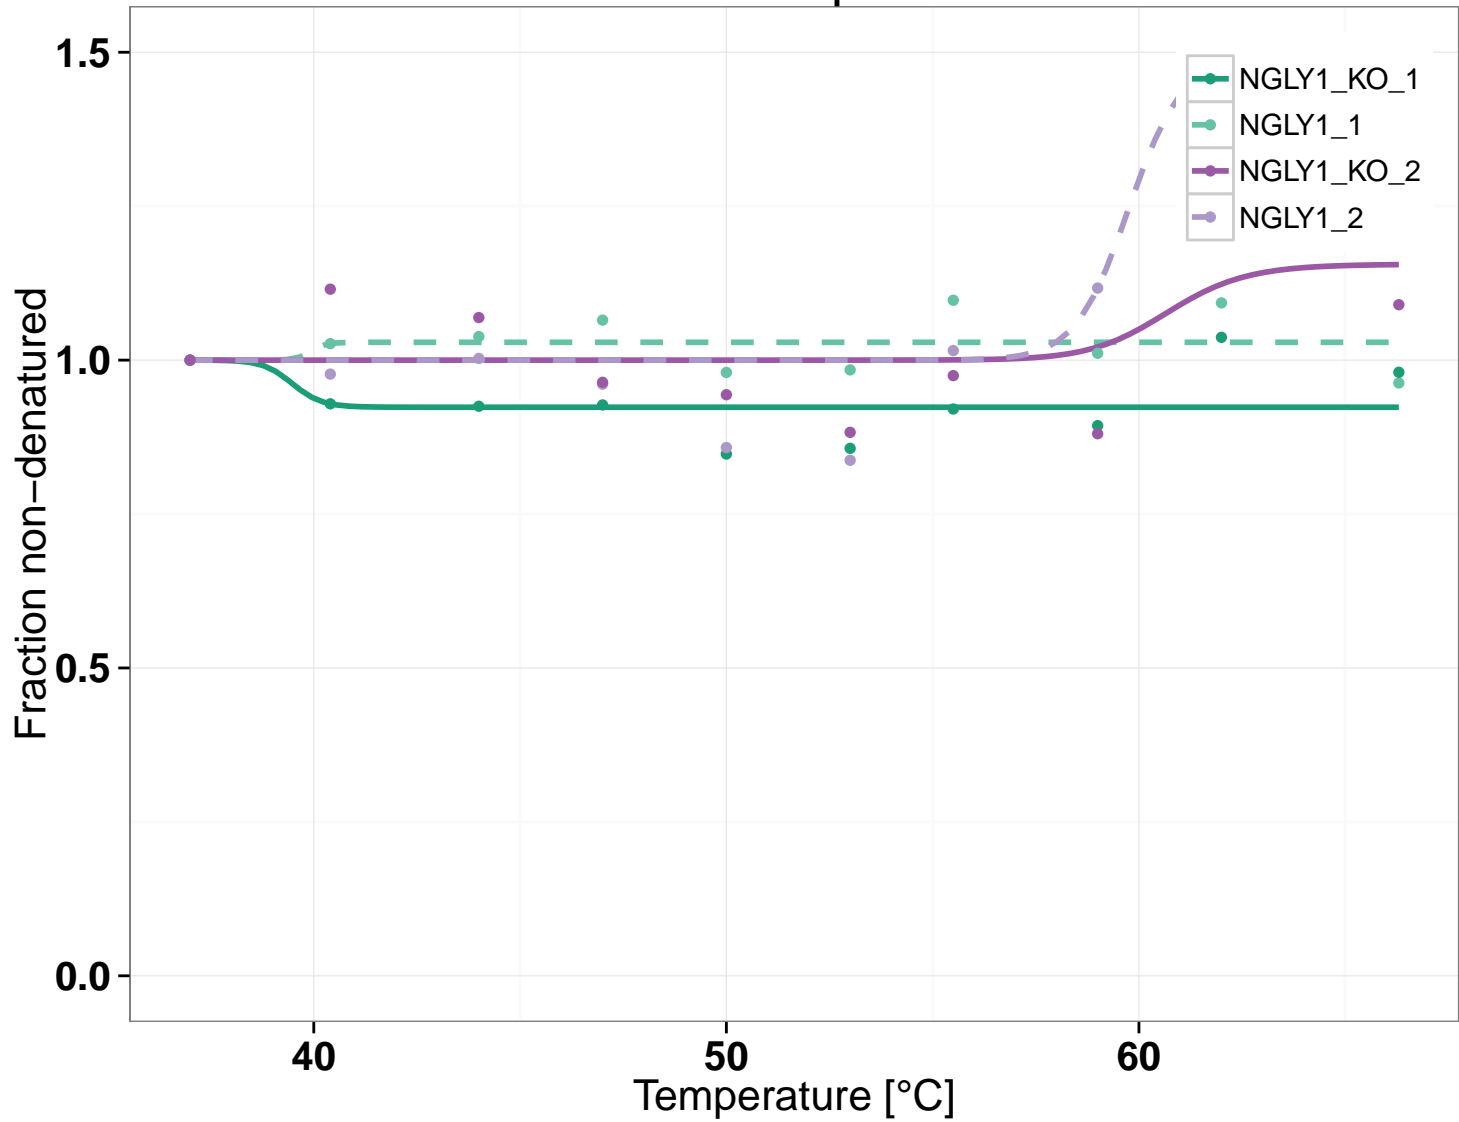

|            | meltPoint | slope  | plateau | R2   |
|------------|-----------|--------|---------|------|
| NGLY1_KO_1 | –         | –0.054 | 0.92    | 0.16 |
| NGLY1_1    | –         | 0.04   | 1.03    | 0.04 |
| NGLY1_KO_2 | –         | 0.041  | 1.16    | 0.34 |
| NGLY1_2    | –         | 0.19   | 1.5     | 0.9  |

Supplement: Supplementary file 6636 [file 1]

# IPI00103065.4|MITD1

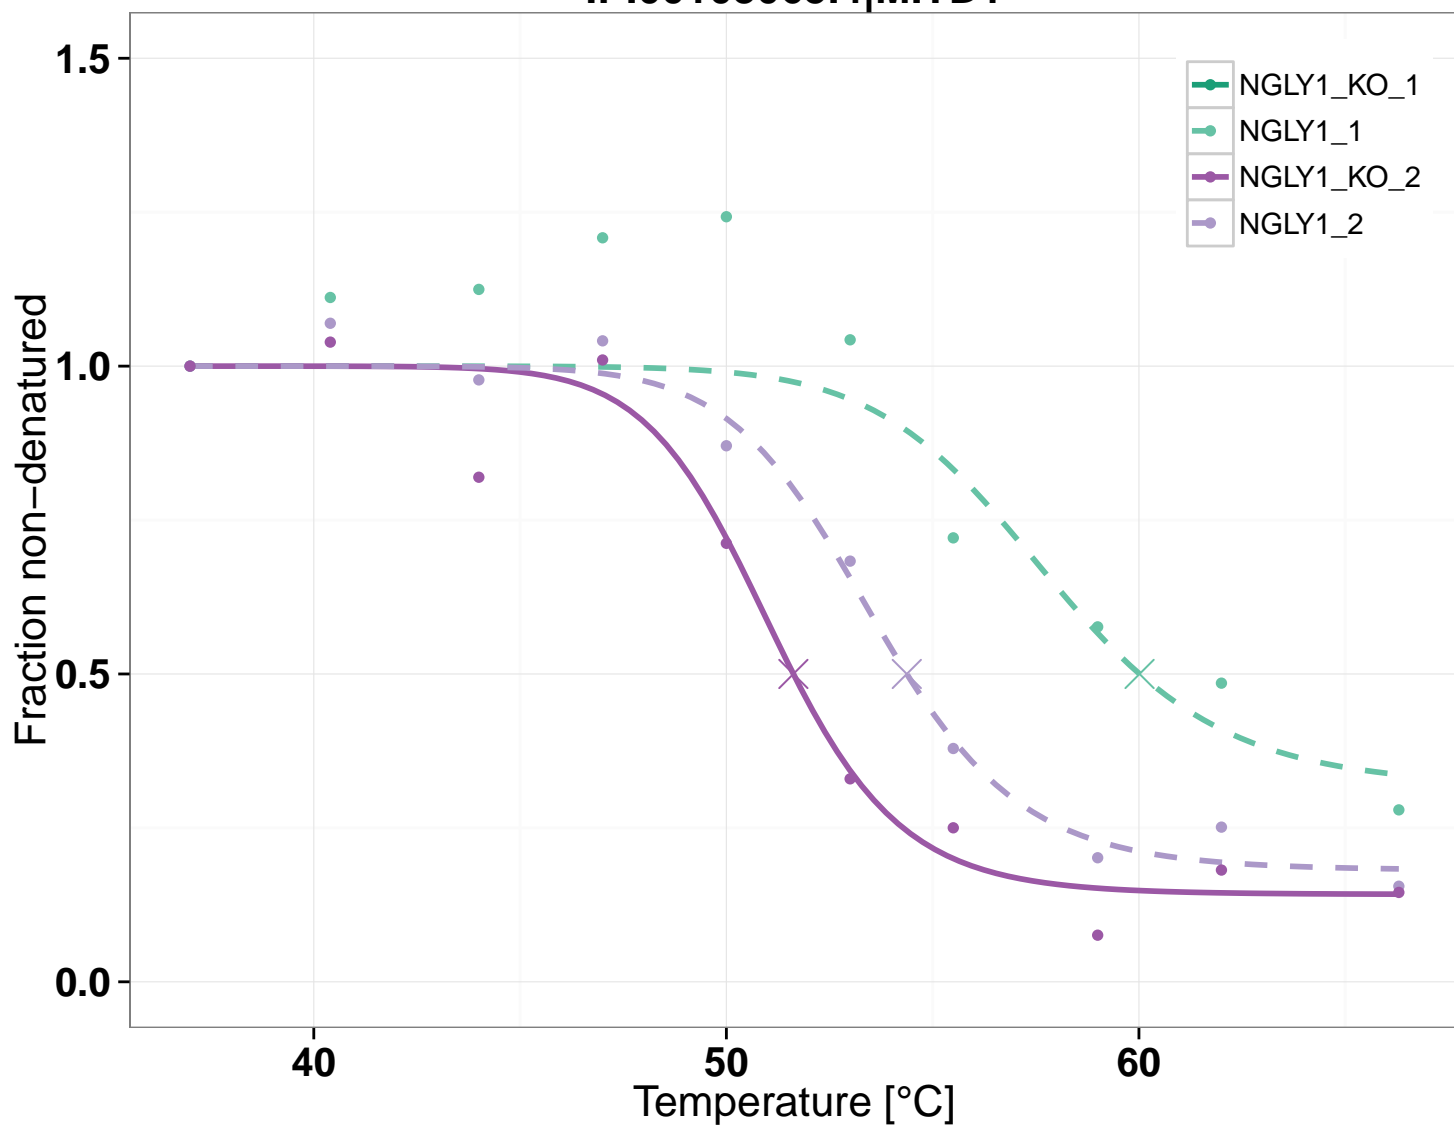

|            | meltPoint | slope  | plateau | R2   |
|------------|-----------|--------|---------|------|
| NGLY1_KO_1 | –         | –      | –       | –    |
| NGLY1_1    | 60.02     | –0.081 | 0.32    | 0.84 |
| NGLY1_KO_2 | 51.62     | –0.14  | 0.14    | 0.97 |
| NGLY1_2    | 54.37     | –0.12  | 0.18    | 0.99 |

Supplement: Supplementary file 6637 [file 1]

# IPI00292354.8|RNF181

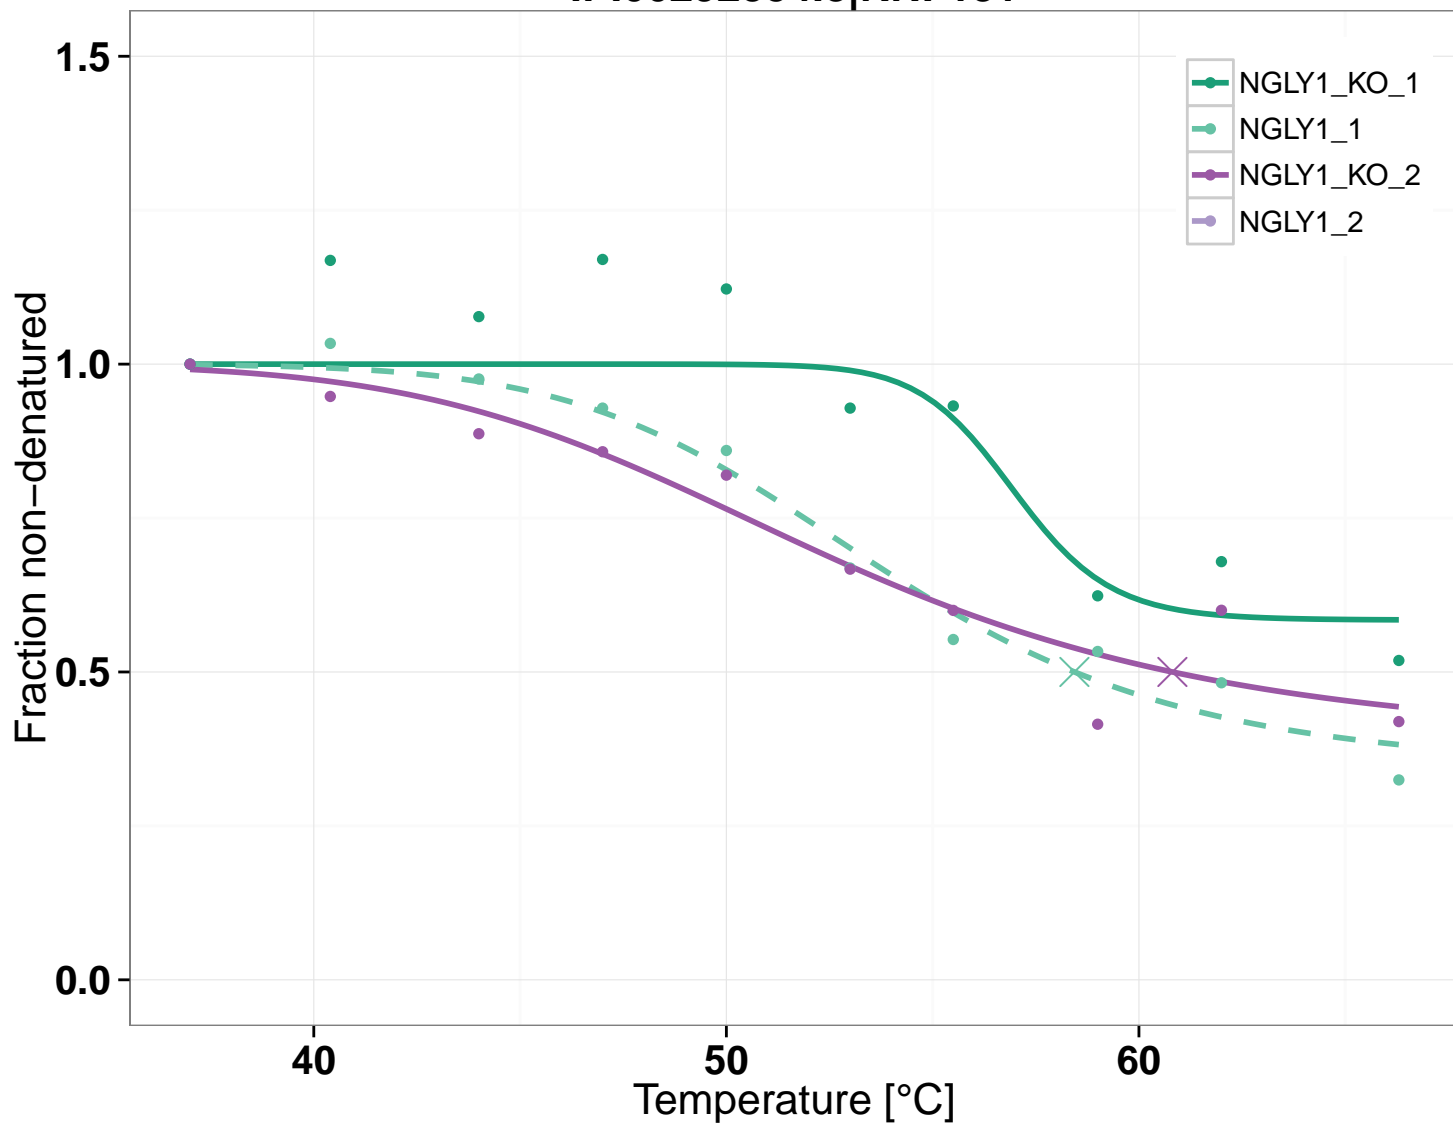

|            | meltPoint | slope  | plateau | R2   |
|------------|-----------|--------|---------|------|
| NGLY1_KO_1 | –         | –0.089 | 0.58    | 0.81 |
| NGLY1_1    | 58.44     | –0.044 | 0.34    | 0.98 |
| NGLY1_KO_2 | 60.81     | –0.032 | 0.38    | 0.92 |
| NGLY1_2    | –         | –      | –       | –    |

Supplement: Supplementary file 6638 [file 1]

IPI00009005.1|TFAP4

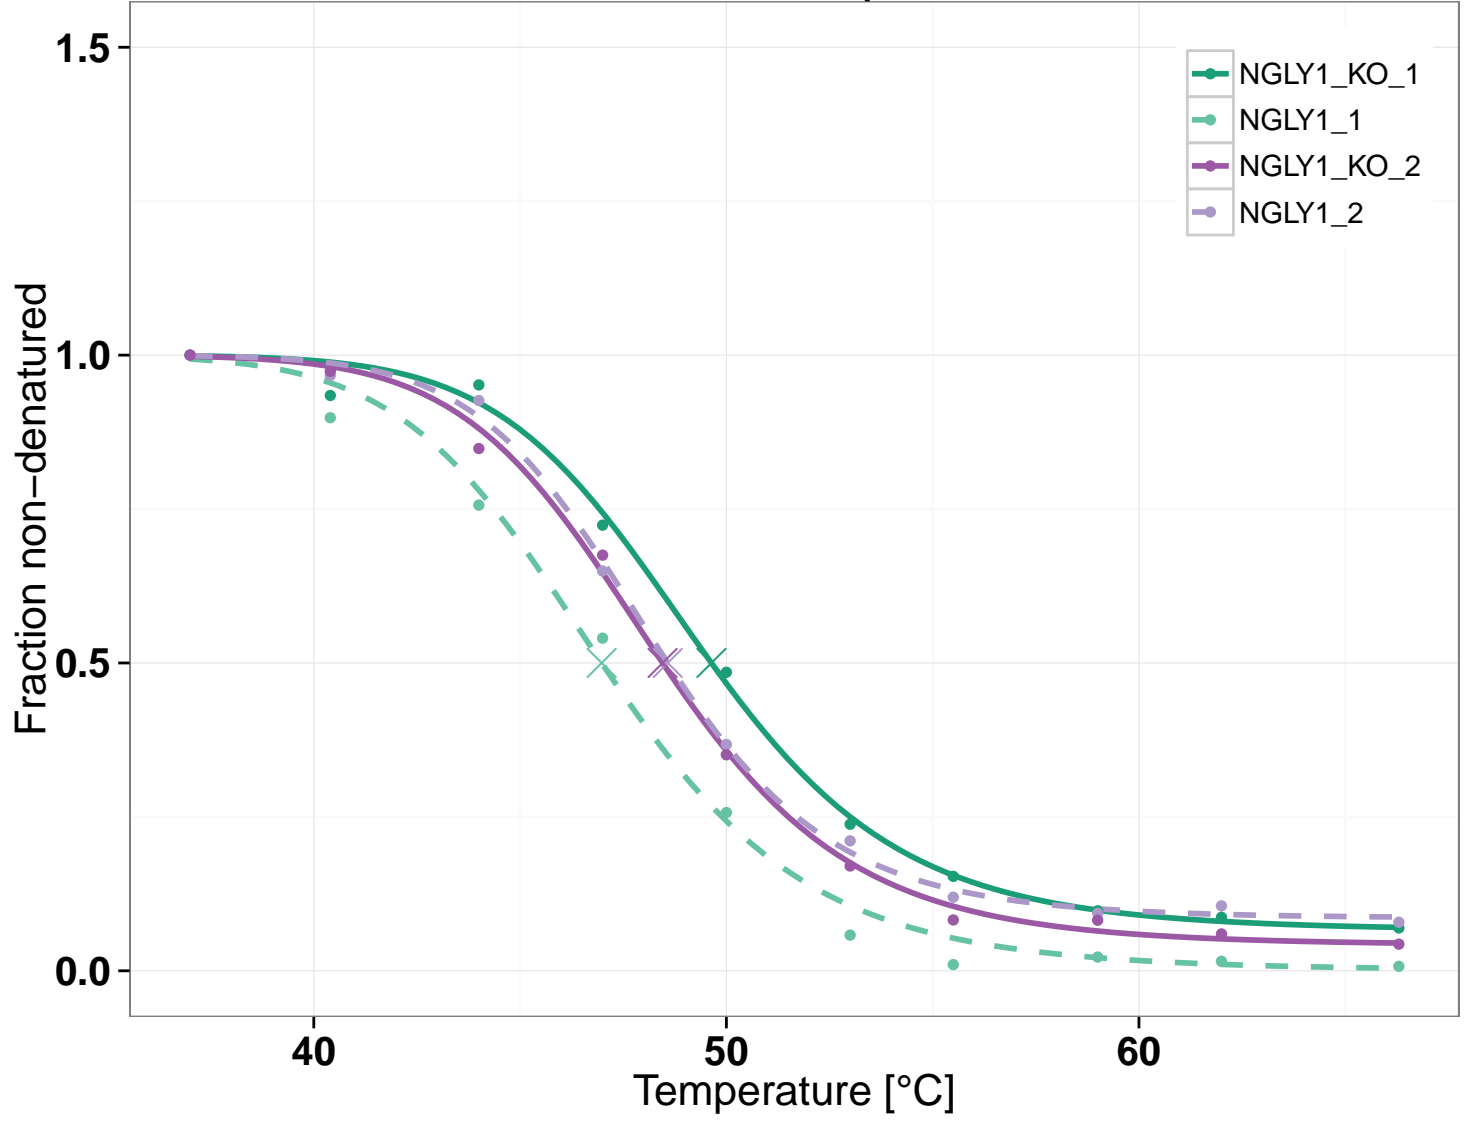

|            | meltPoint | slope  | plateau | R2   |
|------------|-----------|--------|---------|------|
| NGLY1_KO_1 | 49.64     | -0.096 | 0.07    | 1    |
| NGLY1_1    | 46.98     | -0.1   | 0       | 0.99 |
| NGLY1_KO_2 | 48.45     | -0.1   | 0.04    | 1    |
| NGLY1_2    | 48.58     | -0.11  | 0.09    | 1    |

Supplement: Supplementary file 6639 [file 1]

IPI00027809.2|PPP3CB

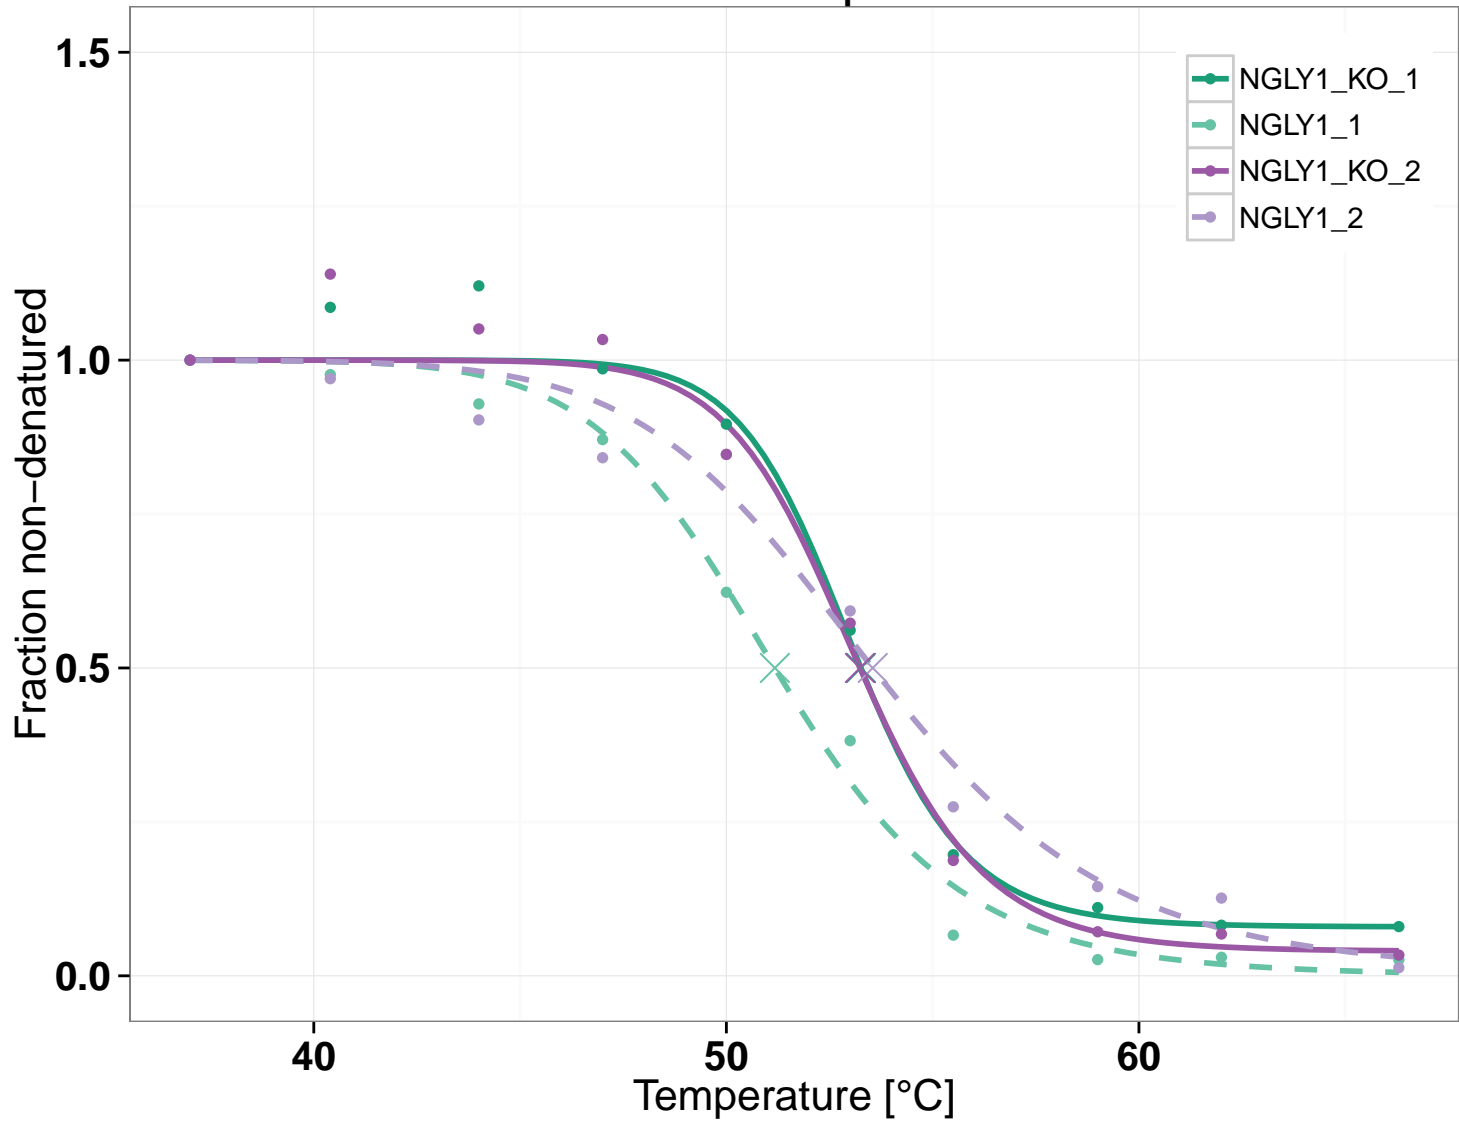

|            | meltPoint | slope  | plateau | R2   |
|------------|-----------|--------|---------|------|
| NGLY1_KO_1 | 53.26     | -0.17  | 0.08    | 0.99 |
| NGLY1_1    | 51.17     | -0.11  | 0       | 0.99 |
| NGLY1_KO_2 | 53.24     | -0.15  | 0.04    | 0.98 |
| NGLY1_2    | 53.55     | -0.087 | 0       | 0.98 |

Supplement: Supplementary file 6640 [file 1]

# IPI00288941.1|NCOA5

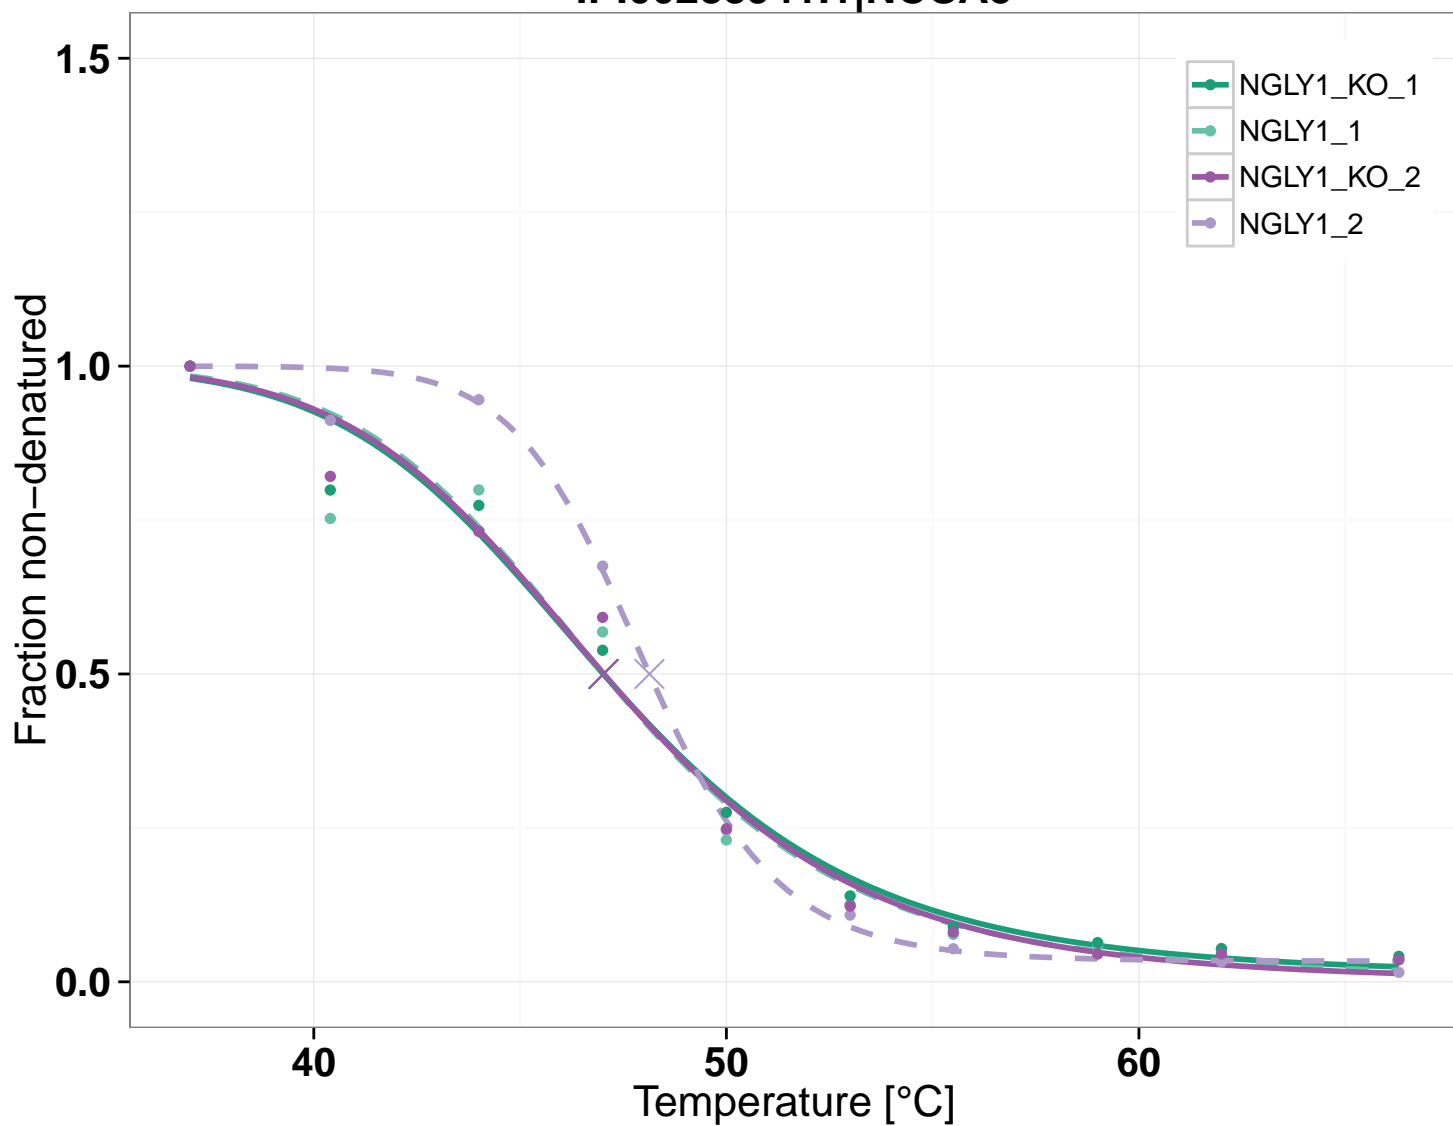

|            | meltPoint | slope  | plateau | R2   |
|------------|-----------|--------|---------|------|
| NGLY1_KO_1 | 47.02     | -0.078 | 0.01    | 0.98 |
| NGLY1_1    | 47.02     | -0.082 | 0.01    | 0.97 |
| NGLY1_KO_2 | 47.03     | -0.08  | 0       | 0.98 |
| NGLY1_2    | 48.14     | -0.15  | 0.03    | 0.99 |

Supplement: Supplementary file 6641 [file 1]

IPI00294779.1|VDAC3

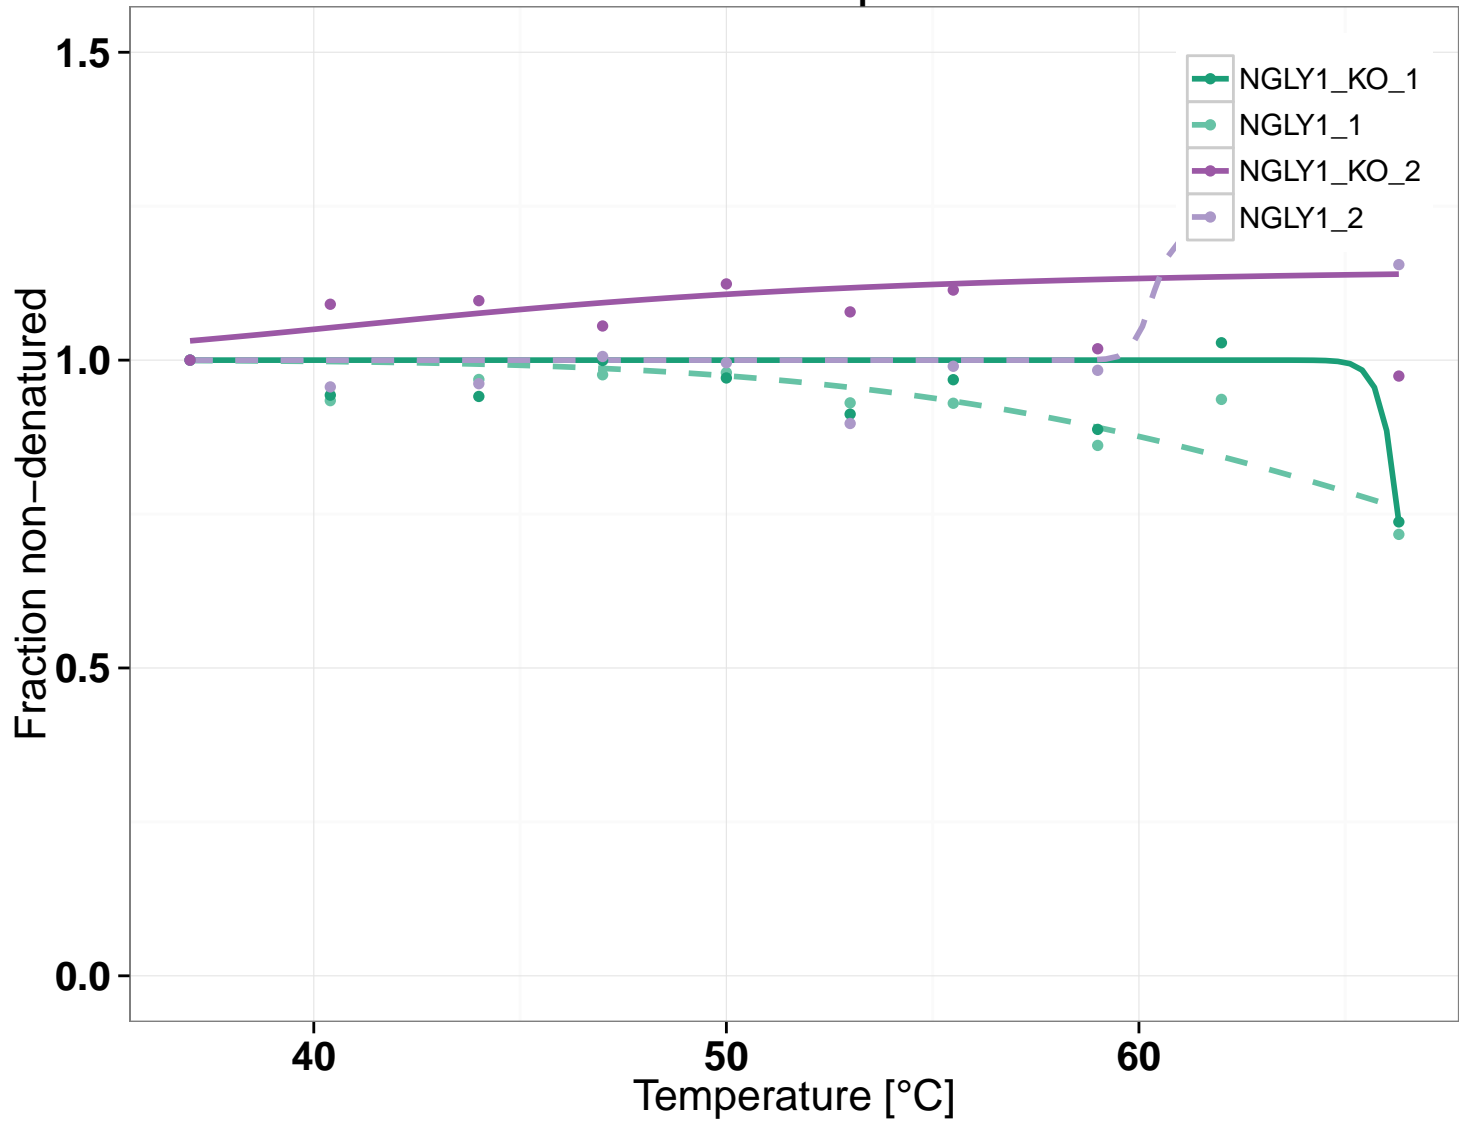

|            | meltPoint | slope  | plateau | R2   |
|------------|-----------|--------|---------|------|
| NGLY1_KO_1 | -         | -      | 0       | 0.52 |
| NGLY1_1    | -         | -      | 0       | 0.72 |
| NGLY1_KO_2 | -         | 0.0067 | 1.15    | 0.08 |
| NGLY1_2    | -         | 0.21   | 1.21    | 0.8  |

Supplement: Supplementary file 6642 [file 1]

IPI00418754.3|FLJ45032

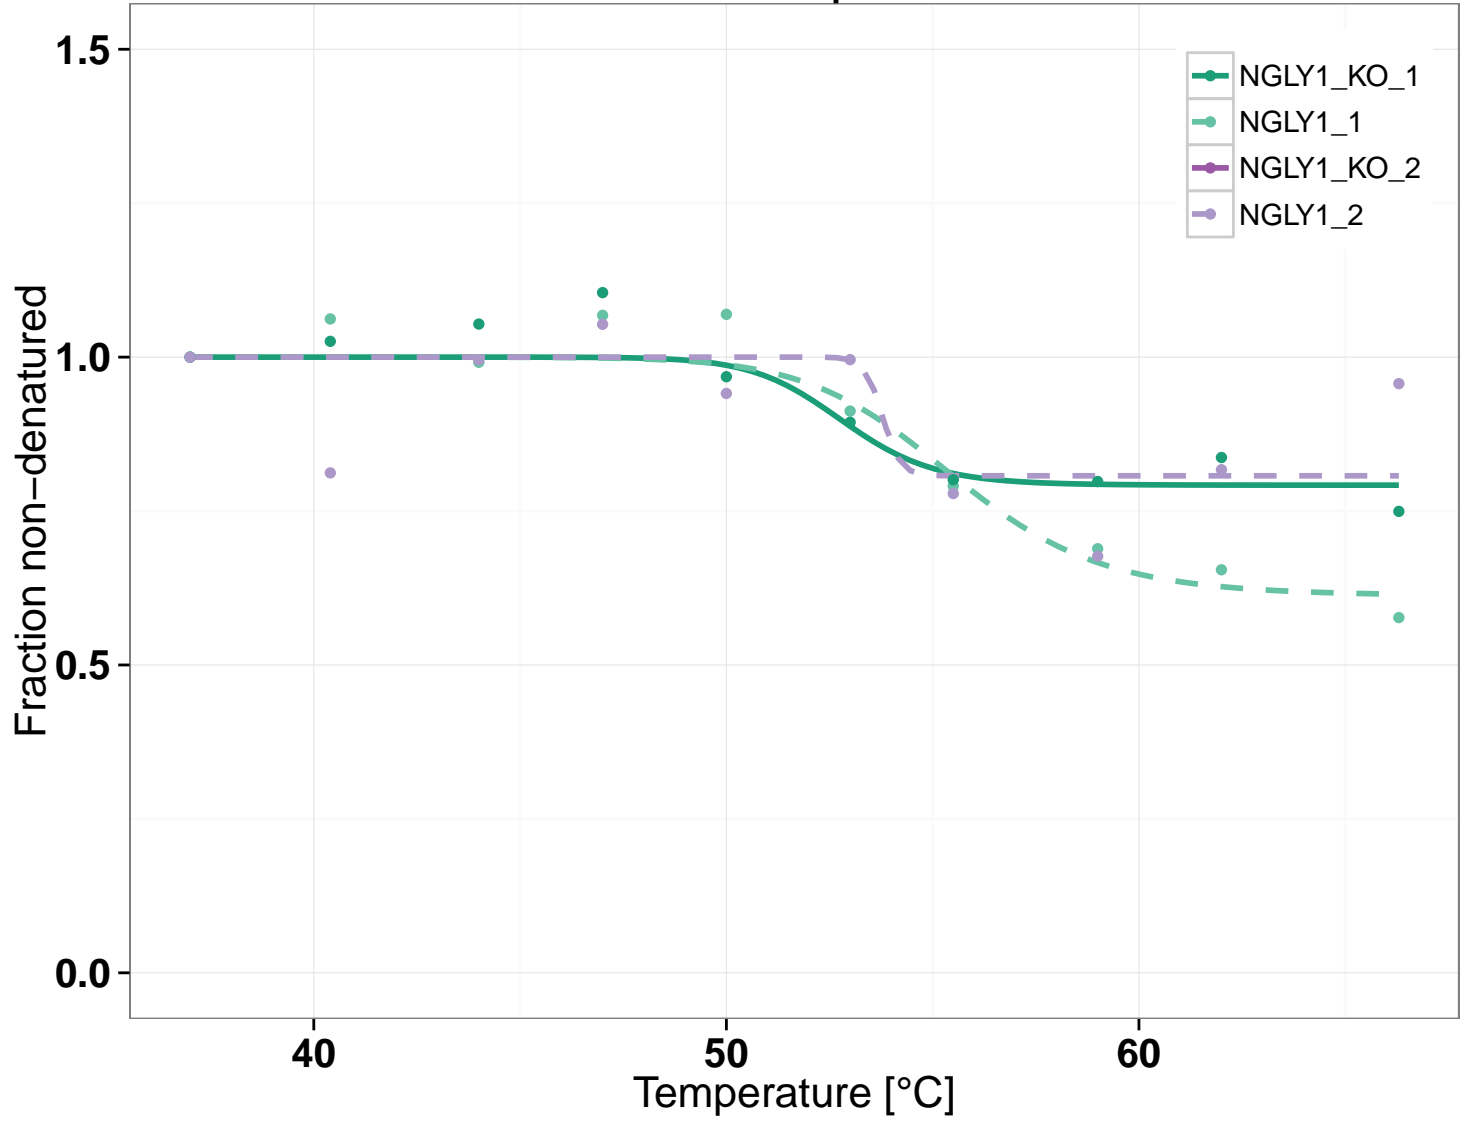

|            | meltPoint | slope  | plateau | R2   |
|------------|-----------|--------|---------|------|
| NGLY1_KO_1 | —         | −0.047 | 0.79    | 0.86 |
| NGLY1_1    | —         | −0.054 | 0.61    | 0.94 |
| NGLY1_KO_2 | —         | —      | —       | —    |
| NGLY1_2    | —         | −0.22  | 0.81    | 0.4  |

Supplement: Supplementary file 6643 [file 1]

# IPI00007009.5|C6ORF162

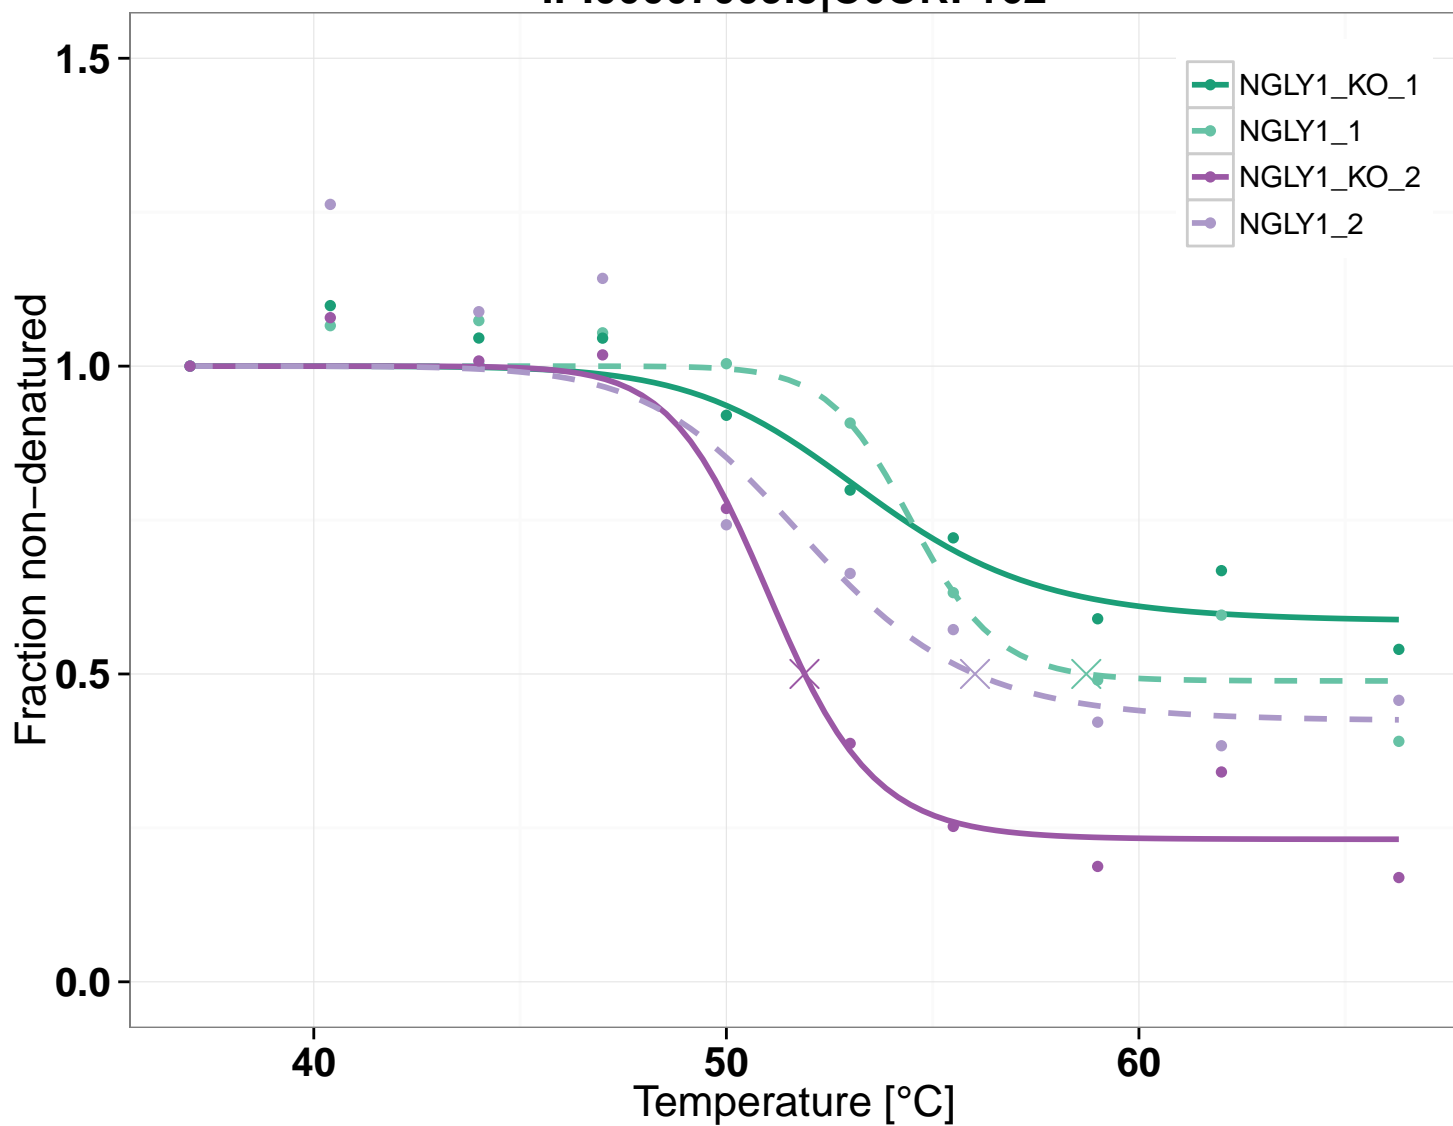

|            | meltPoint | slope  | plateau | R2   |
|------------|-----------|--------|---------|------|
| NGLY1_KO_1 | –         | –0.049 | 0.59    | 0.94 |
| NGLY1_1    | 58.72     | –0.12  | 0.49    | 0.95 |
| NGLY1_KO_2 | 51.89     | –0.16  | 0.23    | 0.98 |
| NGLY1_2    | 56.03     | –0.073 | 0.42    | 0.87 |

Supplement: Supplementary file 6644 [file 1]

# IPI00294891.5|NOP2

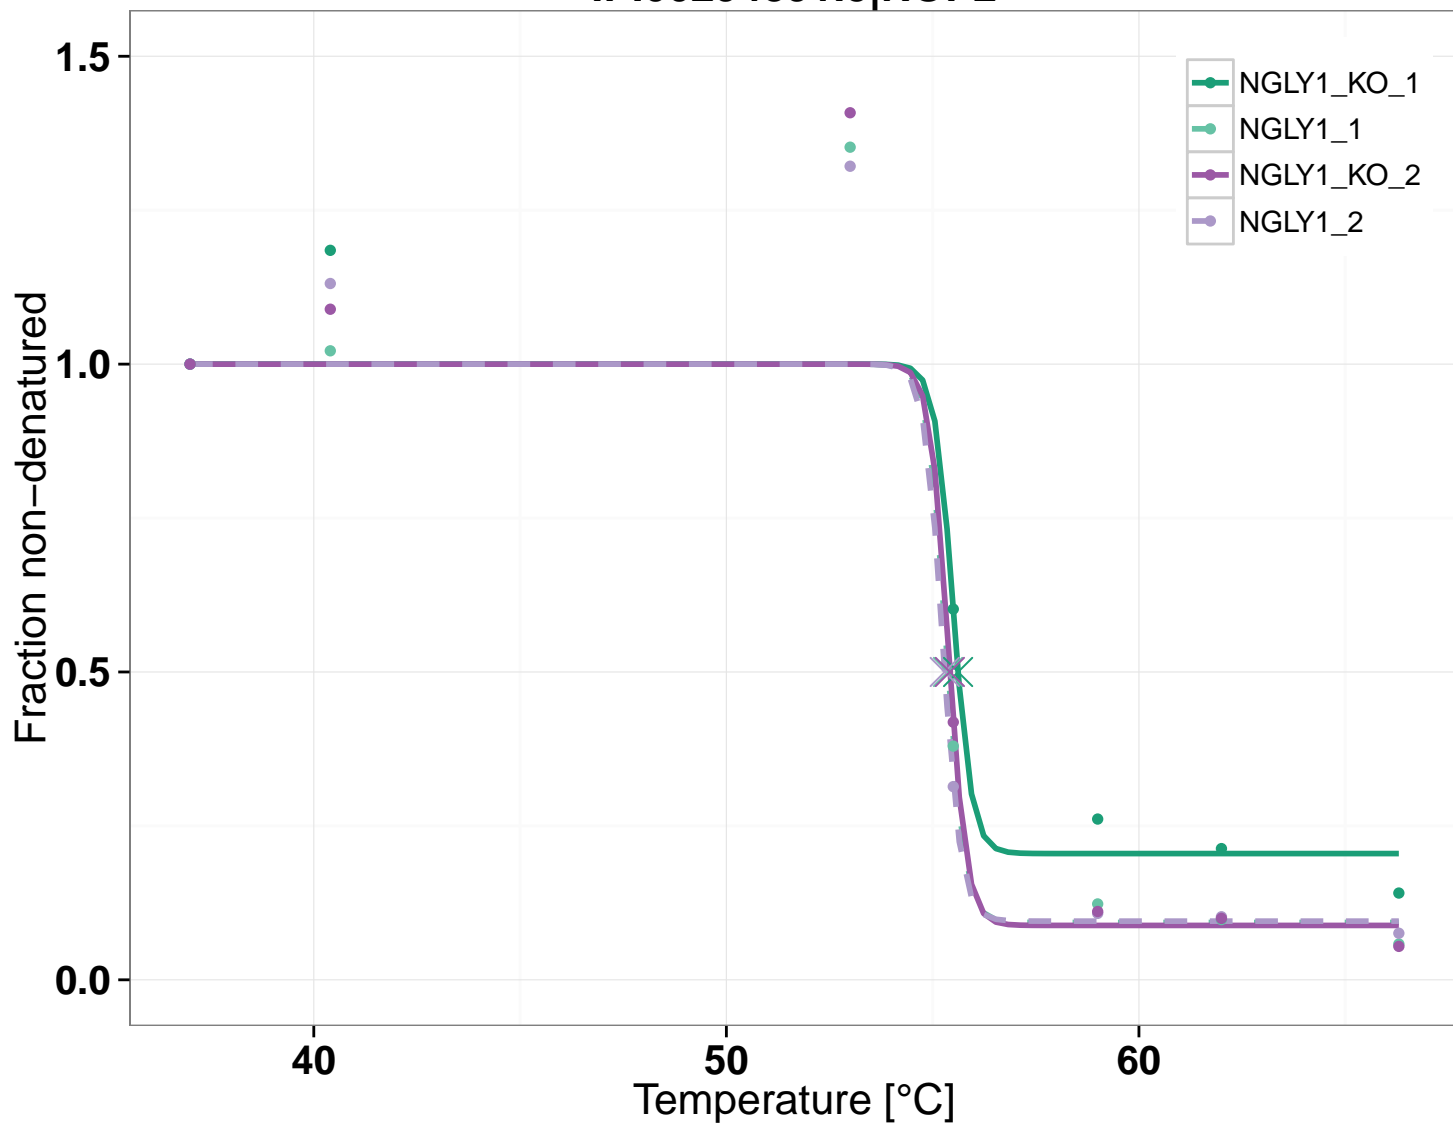

|            | meltPoint | slope | plateau | R2   |
|------------|-----------|-------|---------|------|
| NGLY1_KO_1 | 55.62     | -0.9  | 0.21    | 0.2  |
| NGLY1_1    | 55.37     | -1    | 0.09    | 0.29 |
| NGLY1_KO_2 | 55.42     | -1    | 0.09    | 0.23 |
| NGLY1_2    | 55.29     | -1    | 0.1     | 0.3  |

Supplement: Supplementary file 6645 [file 1]

IPI00001867.1|SNX11

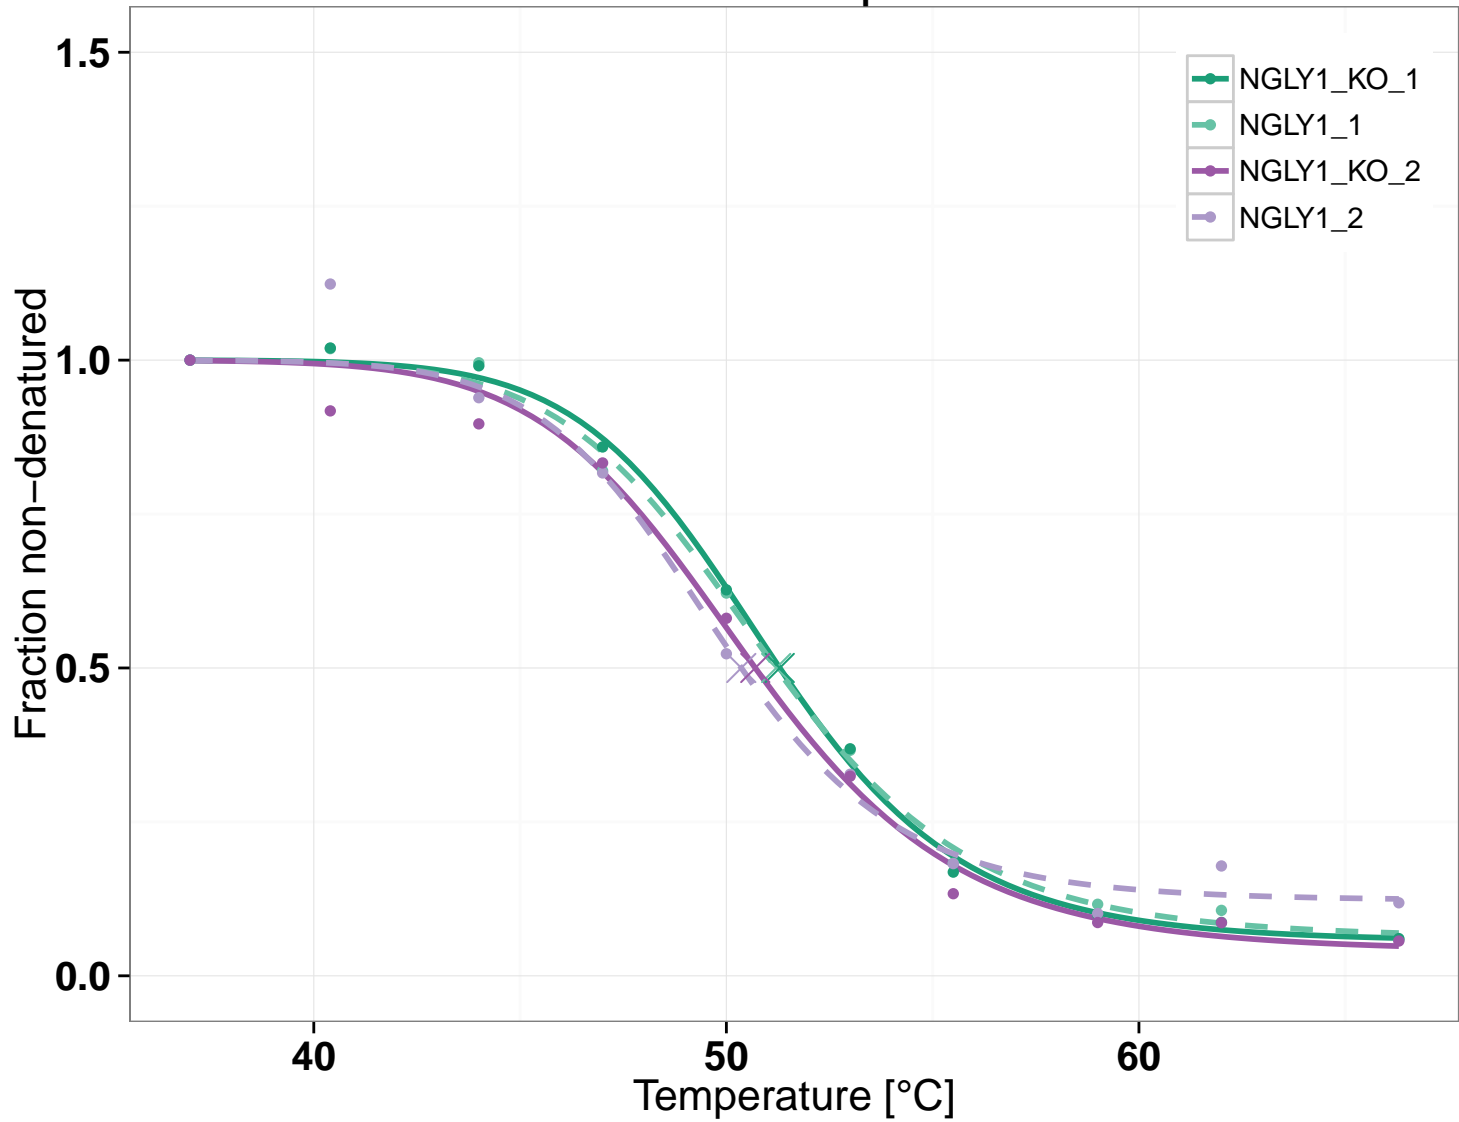

|            | meltPoint | slope  | plateau | R2   |
|------------|-----------|--------|---------|------|
| NGLY1_KO_1 | 51.29     | -0.1   | 0.06    | 1    |
| NGLY1_1    | 51.21     | -0.094 | 0.06    | 1    |
| NGLY1_KO_2 | 50.7      | -0.094 | 0.04    | 0.99 |
| NGLY1_2    | 50.36     | -0.1   | 0.12    | 0.98 |

Supplement: Supplementary file 6646 [file 1]

# IPI00021751.5|NEFH

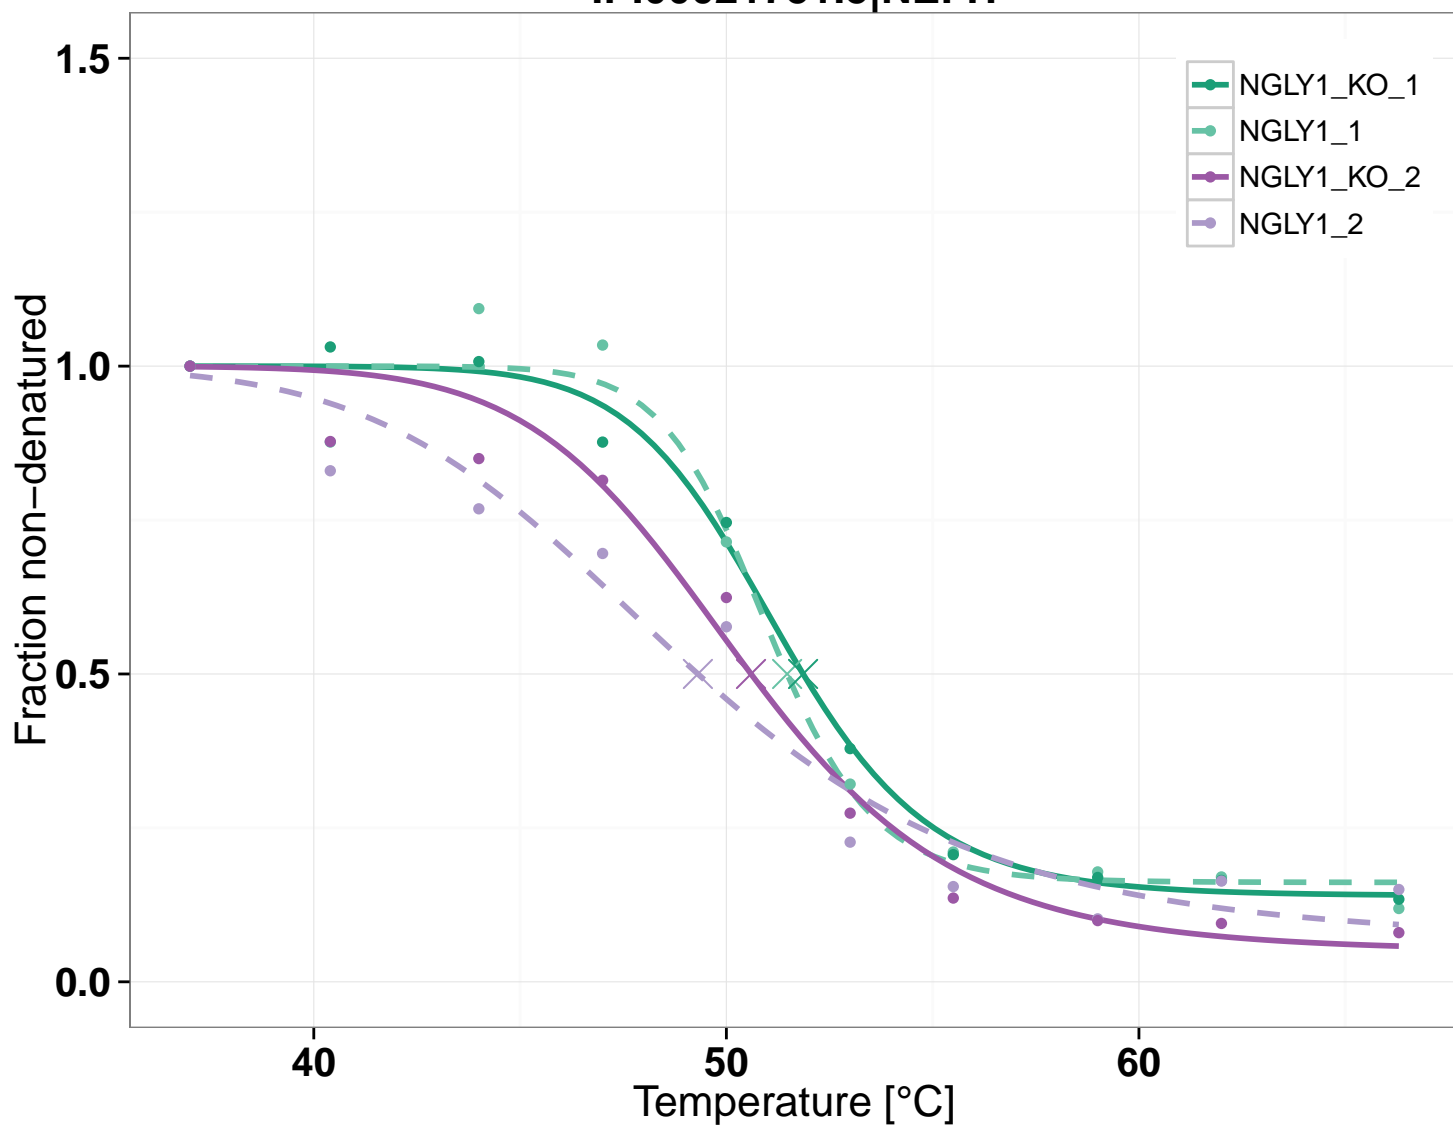

|            | meltPoint | slope  | plateau | R2   |
|------------|-----------|--------|---------|------|
| NGLY1_KO_1 | 51.86     | -0.12  | 0.14    | 1    |
| NGLY1_1    | 51.47     | -0.16  | 0.16    | 0.98 |
| NGLY1_KO_2 | 50.6      | -0.092 | 0.05    | 0.98 |
| NGLY1_2    | 49.31     | -0.063 | 0.06    | 0.95 |

Supplement: Supplementary file 6647 [file 1]

# IPI00182739.5|JMY

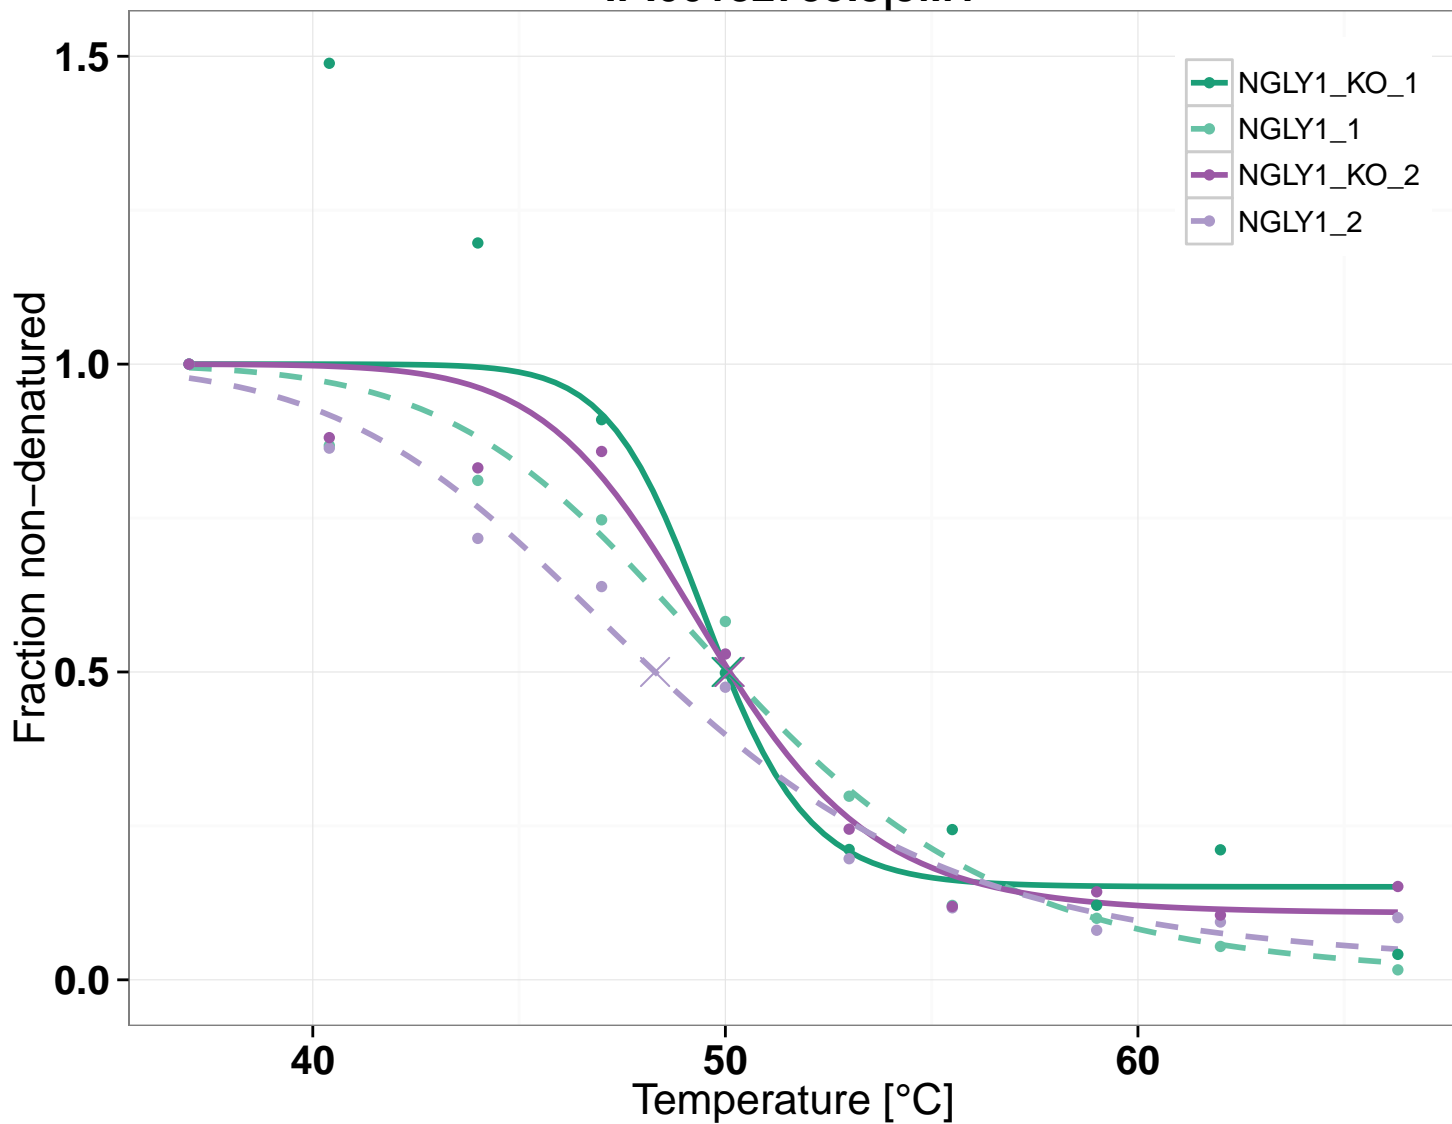

|            | meltPoint | slope  | plateau | R2   |
|------------|-----------|--------|---------|------|
| NGLY1_KO_1 | 50.03     | -0.18  | 0.15    | 0.87 |
| NGLY1_1    | 50.07     | -0.074 | 0       | 0.98 |
| NGLY1_KO_2 | 50.1      | -0.11  | 0.11    | 0.97 |
| NGLY1_2    | 48.3      | -0.065 | 0.02    | 0.98 |

Supplement: Supplementary file 6648 [file 1]

# IPI00915456.1|DAXX

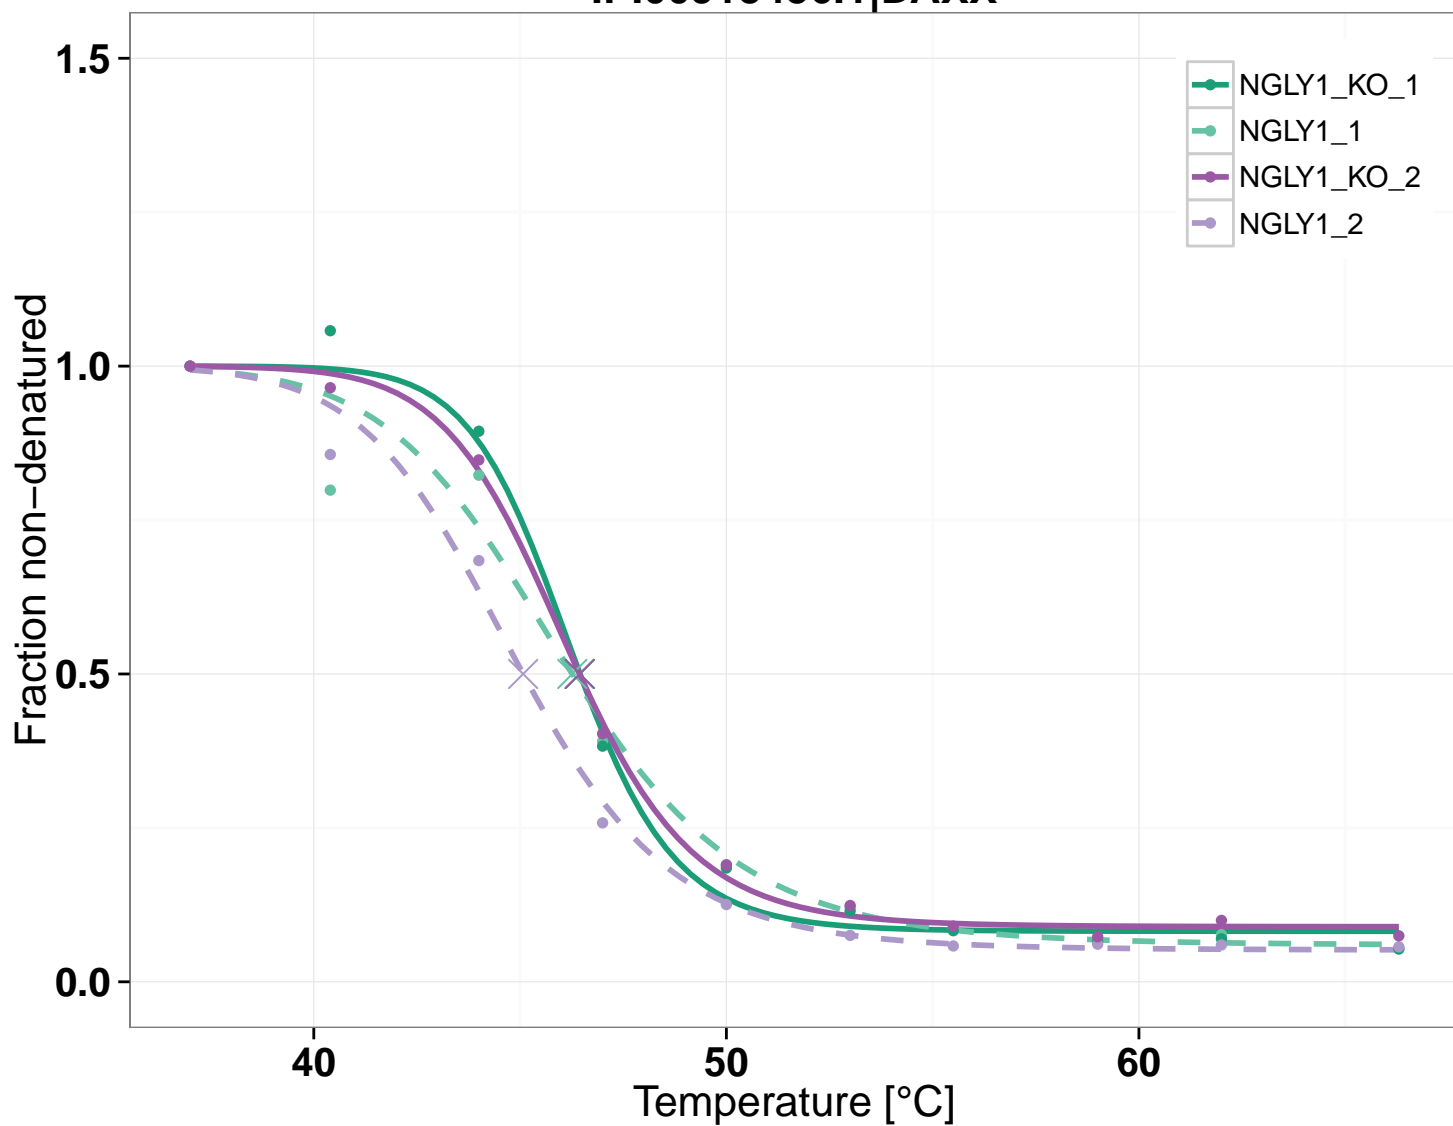

|            | meltPoint | slope | plateau | R2   |
|------------|-----------|-------|---------|------|
| NGLY1_KO_1 | 46.45     | -0.18 | 0.08    | 0.99 |
| NGLY1_1    | 46.26     | -0.11 | 0.06    | 0.97 |
| NGLY1_KO_2 | 46.44     | -0.15 | 0.09    | 1    |
| NGLY1_2    | 45.07     | -0.13 | 0.05    | 0.99 |

Supplement: Supplementary file 6649 [file 1]

IPI00164336.1|FBXL3

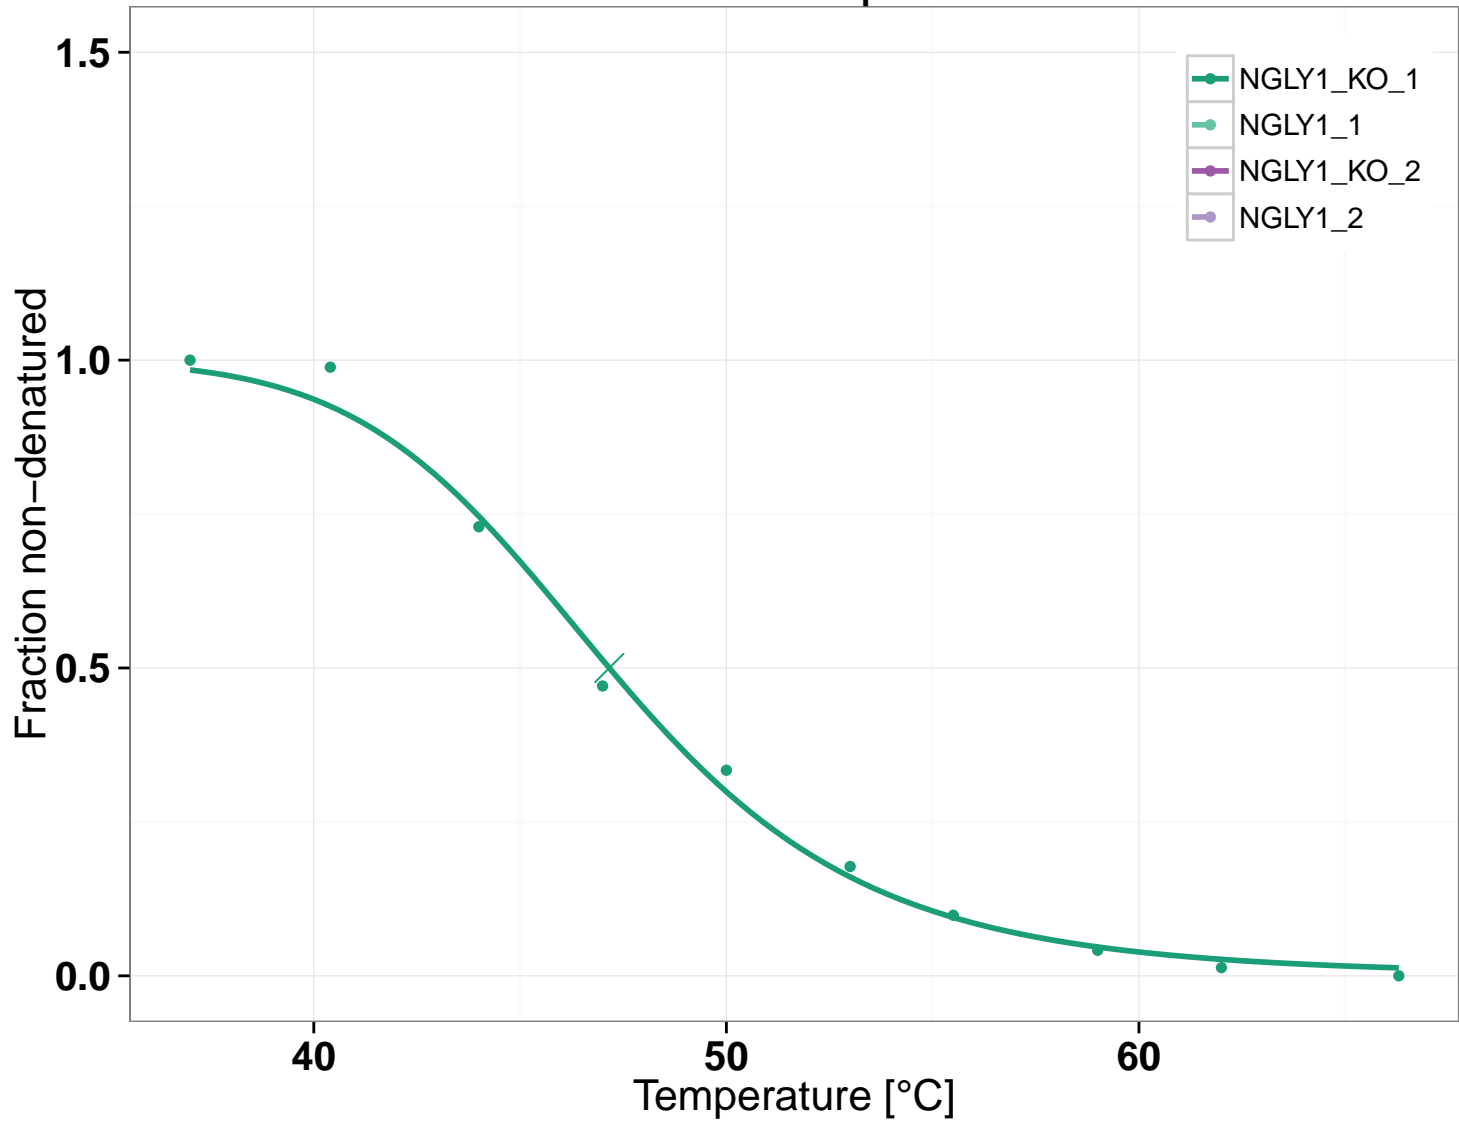

|            | meltPoint | slope  | plateau | R2   |
|------------|-----------|--------|---------|------|
| NGLY1_KO_1 | 47.16     | -0.081 | 0       | 0.99 |
| NGLY1_1    | -         | -      | -       | -    |
| NGLY1_KO_2 | -         | -      | -       | -    |
| NGLY1_2    | -         | -      | -       | -    |

Supplement: Supplementary file 6650 [file 1]

# IPI00023095.1|MLF2

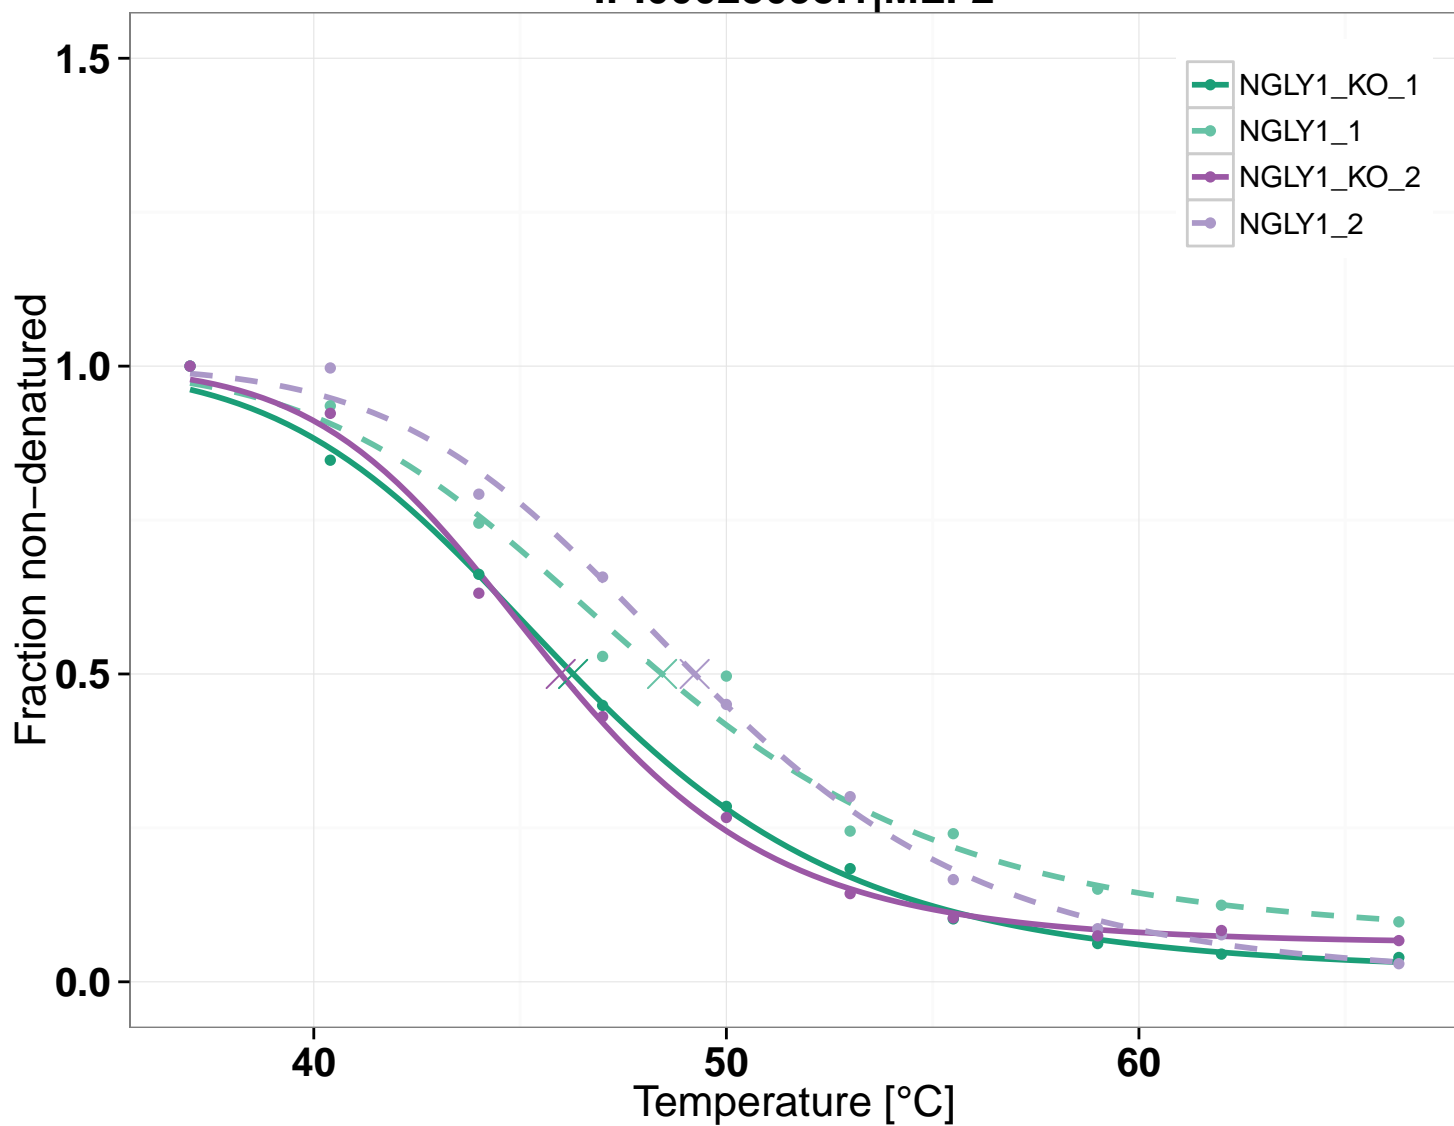

|            | meltPoint | slope  | plateau | R2   |
|------------|-----------|--------|---------|------|
| NGLY1_KO_1 | 46.29     | -0.071 | 0.01    | 1    |
| NGLY1_1    | 48.44     | -0.06  | 0.07    | 0.99 |
| NGLY1_KO_2 | 45.99     | -0.084 | 0.06    | 1    |
| NGLY1_2    | 49.23     | -0.069 | 0       | 1    |

Supplement: Supplementary file 6651 [file 1]

# IPI00007729.1|NOL7

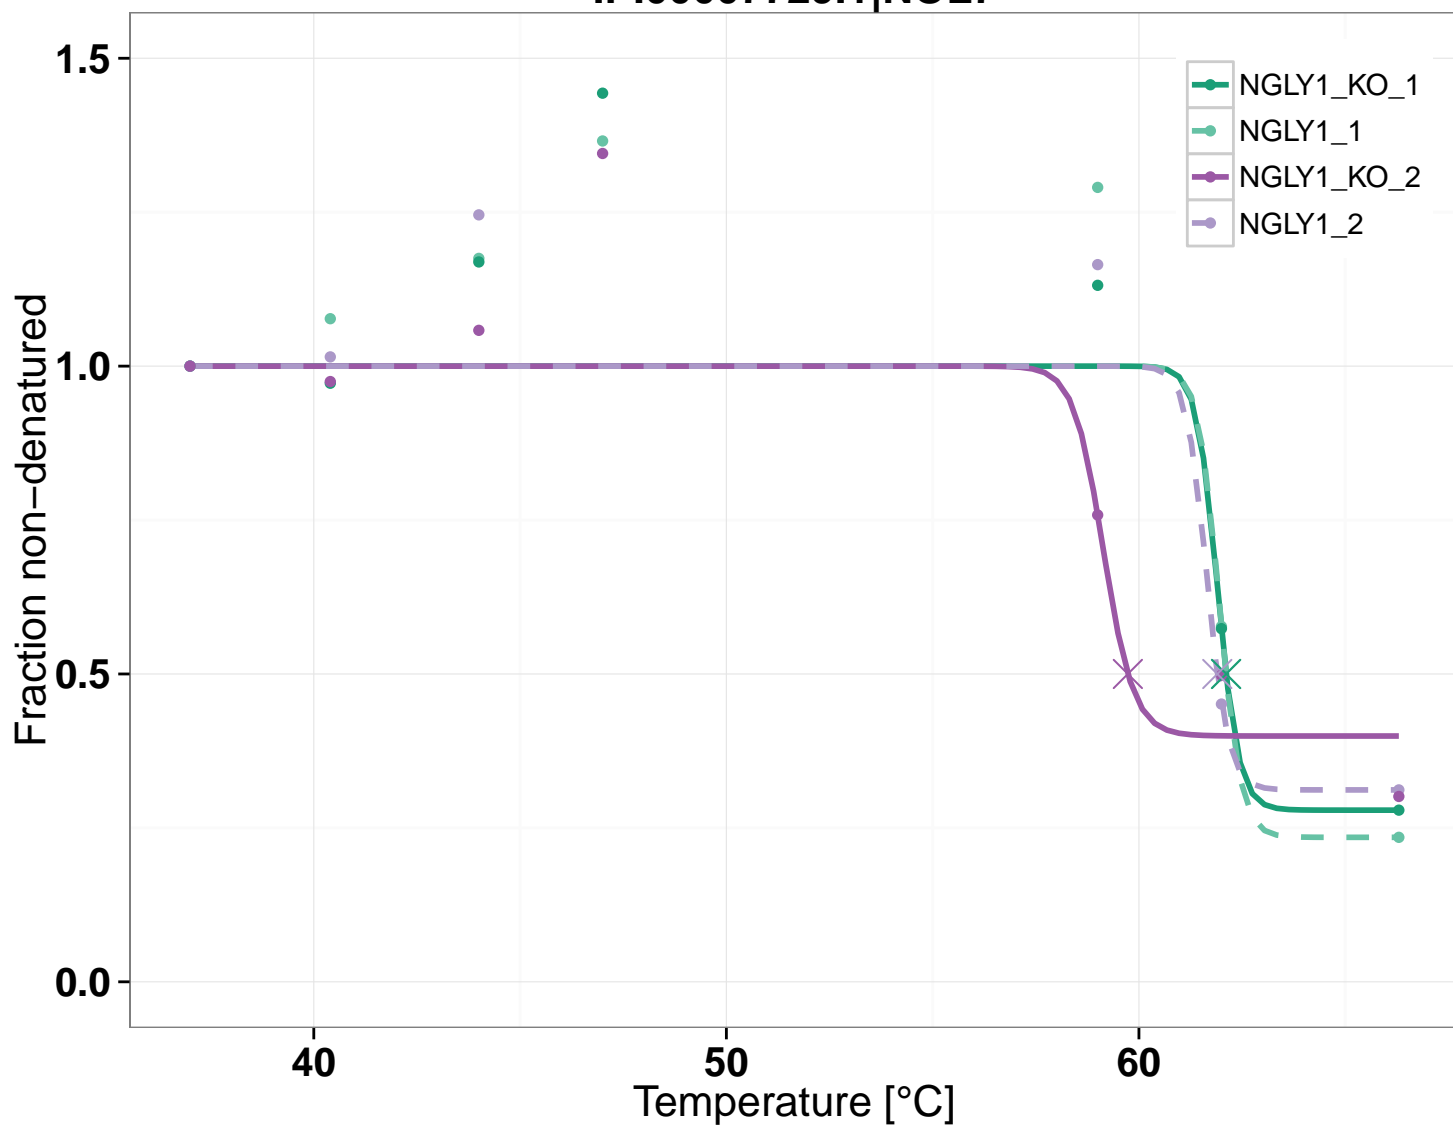

|            | meltPoint | slope | plateau | R2    |
|------------|-----------|-------|---------|-------|
| NGLY1_KO_1 | 62.11     | -0.71 | 0.28    | -0.1  |
| NGLY1_1    | 62.11     | -0.75 | 0.23    | -0.12 |
| NGLY1_KO_2 | 59.73     | -0.41 | 0.4     | -0.04 |
| NGLY1_2    | 61.9      | -0.68 | 0.31    | -0.15 |

Supplement: Supplementary file 6652 [file 1]

# IPI00328266.4|ARID3B

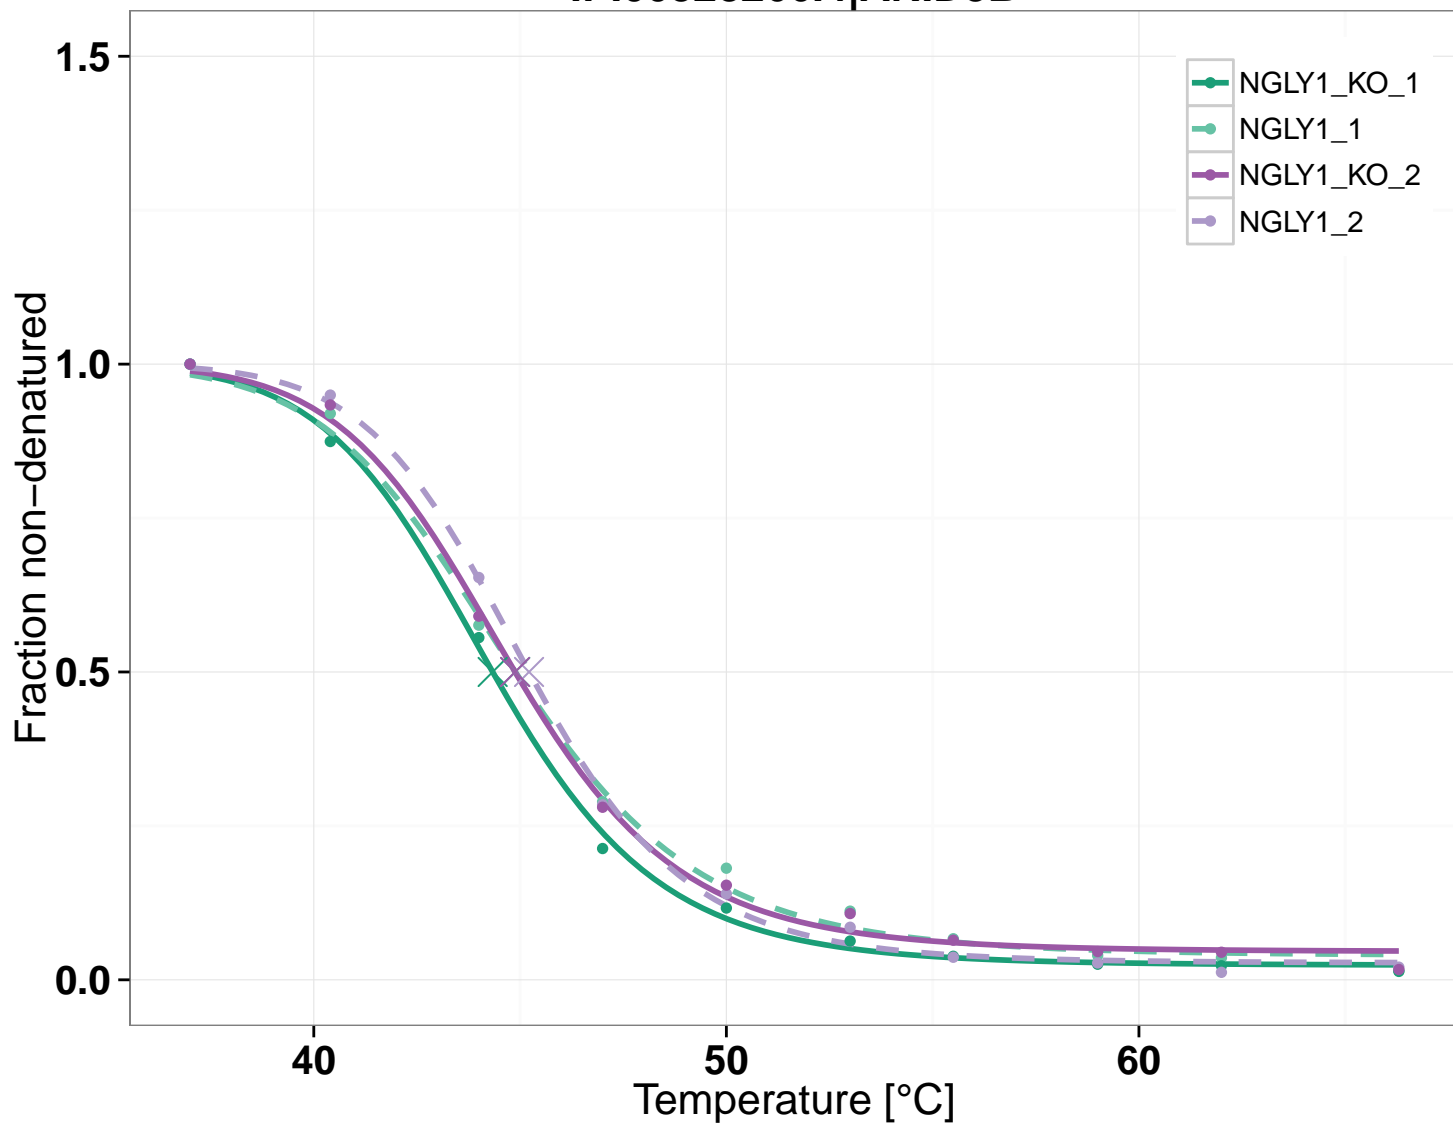

|            | meltPoint | slope | plateau | R2 |
|------------|-----------|-------|---------|----|
| NGLY1_KO_1 | 44.34     | -0.12 | 0.02    | 1  |
| NGLY1_1    | 44.88     | -0.1  | 0.04    | 1  |
| NGLY1_KO_2 | 44.88     | -0.12 | 0.05    | 1  |
| NGLY1_2    | 45.22     | -0.12 | 0.03    | 1  |

Supplement: Supplementary file 6653 [file 1]

IPI00004838.2|CRK

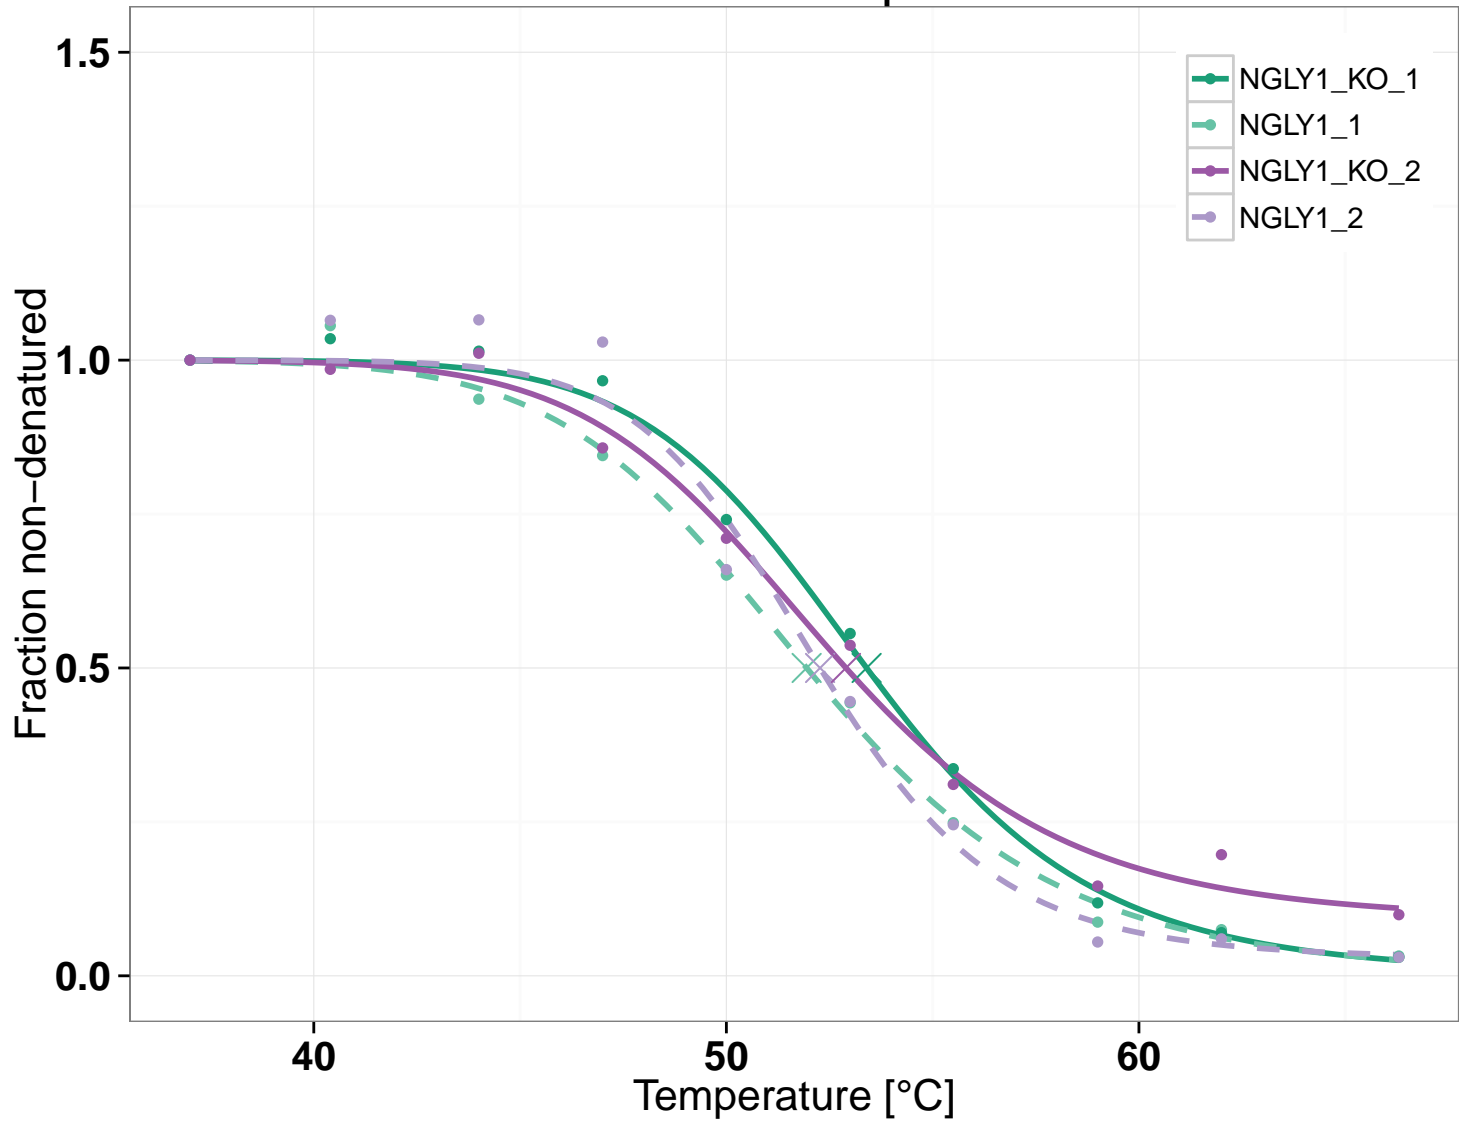

|            | meltPoint | slope  | plateau | R2   |
|------------|-----------|--------|---------|------|
| NGLY1_KO_1 | 53.4      | -0.091 | 0       | 1    |
| NGLY1_1    | 51.95     | -0.082 | 0       | 1    |
| NGLY1_KO_2 | 52.9      | -0.078 | 0.09    | 0.99 |
| NGLY1_2    | 52.27     | -0.11  | 0.03    | 0.98 |

Supplement: Supplementary file 6654 [file 1]

IPI00744211.2|EIF4E2

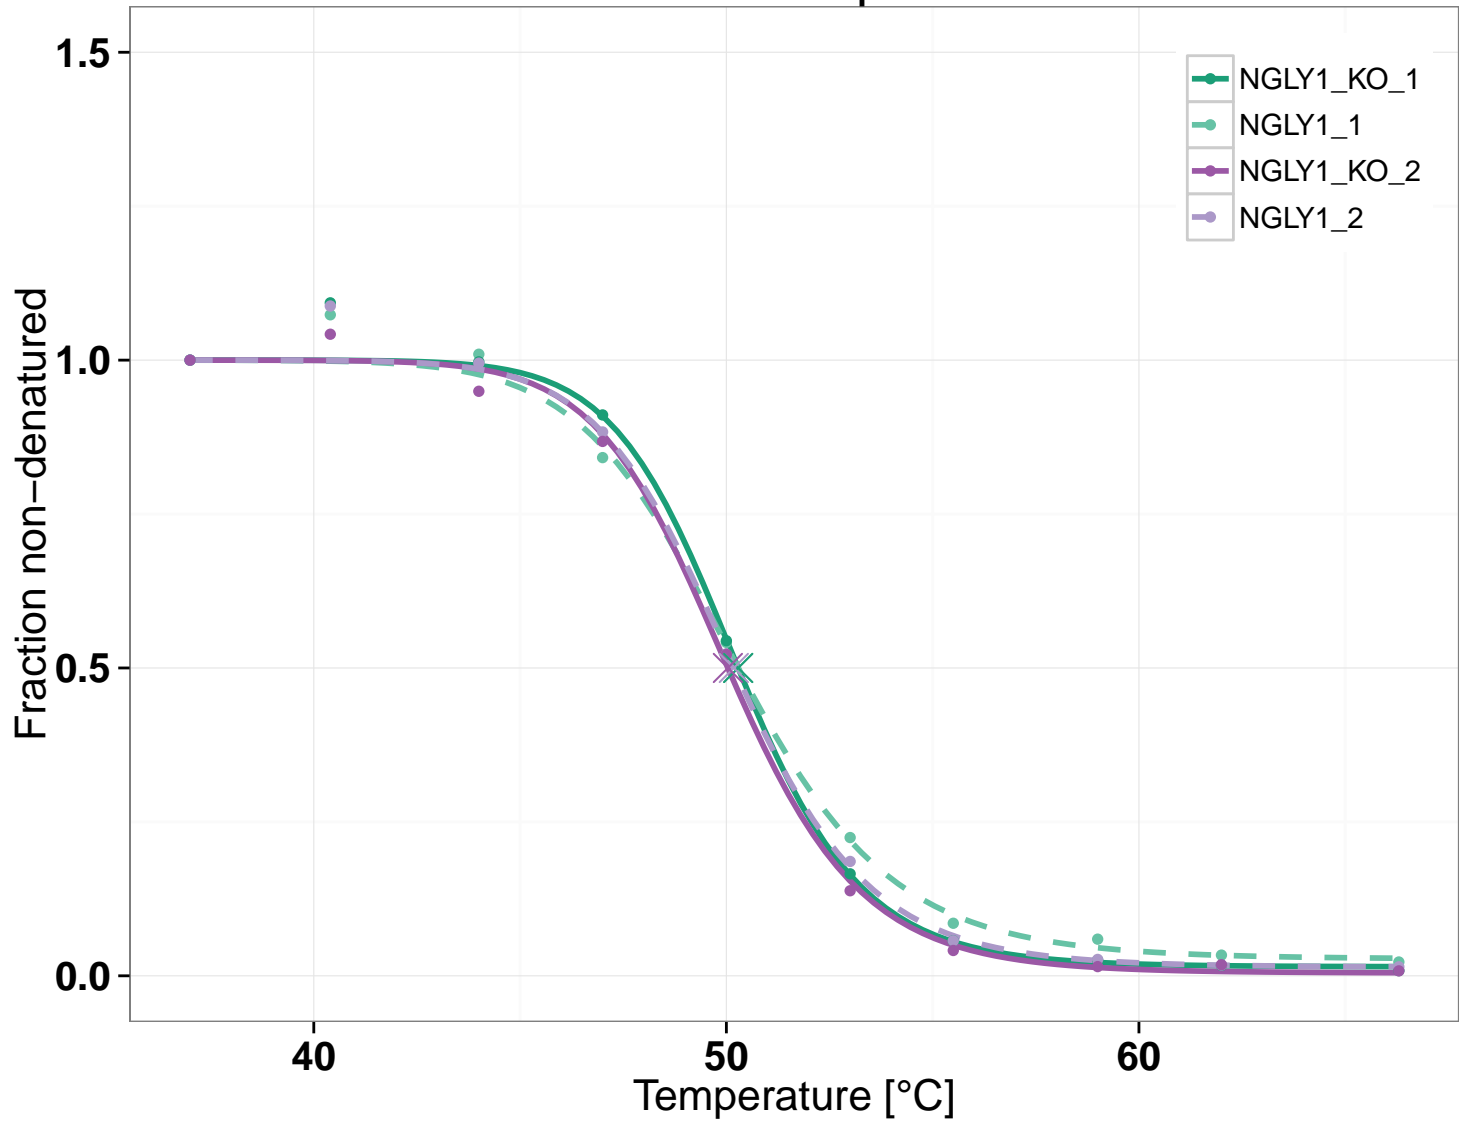

|            | meltPoint | slope | plateau | R2 |
|------------|-----------|-------|---------|----|
| NGLY1_KO_1 | 50.29     | -0.16 | 0.01    | 1  |
| NGLY1_1    | 50.29     | -0.13 | 0.03    | 1  |
| NGLY1_KO_2 | 50.04     | -0.15 | 0       | 1  |
| NGLY1_2    | 50.18     | -0.15 | 0.01    | 1  |

Supplement: Supplementary file 6655 [file 1]

# IPI00002551.4|ANAPC4

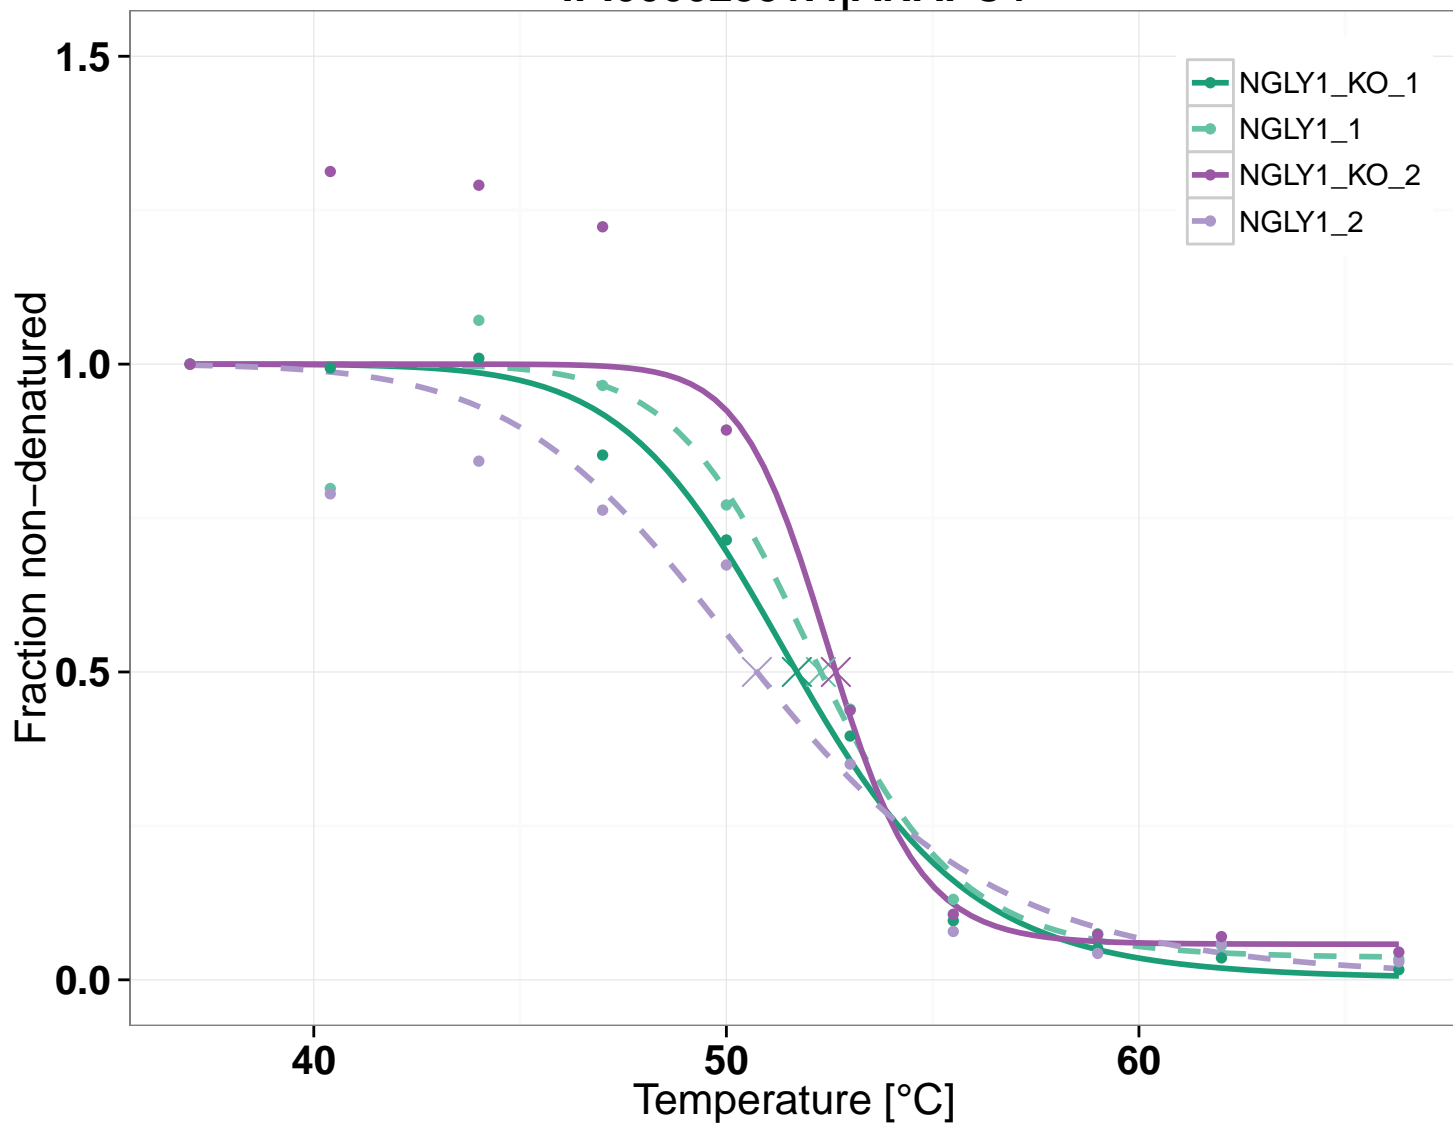

|            | meltPoint | slope  | plateau | R2   |
|------------|-----------|--------|---------|------|
| NGLY1_KO_1 | 51.71     | -0.12  | 0       | 0.99 |
| NGLY1_1    | 52.29     | -0.14  | 0.04    | 0.97 |
| NGLY1_KO_2 | 52.65     | -0.22  | 0.06    | 0.91 |
| NGLY1_2    | 50.74     | -0.085 | 0       | 0.94 |

Supplement: Supplementary file 6656 [file 1]

IPI00184227.3|RELL2

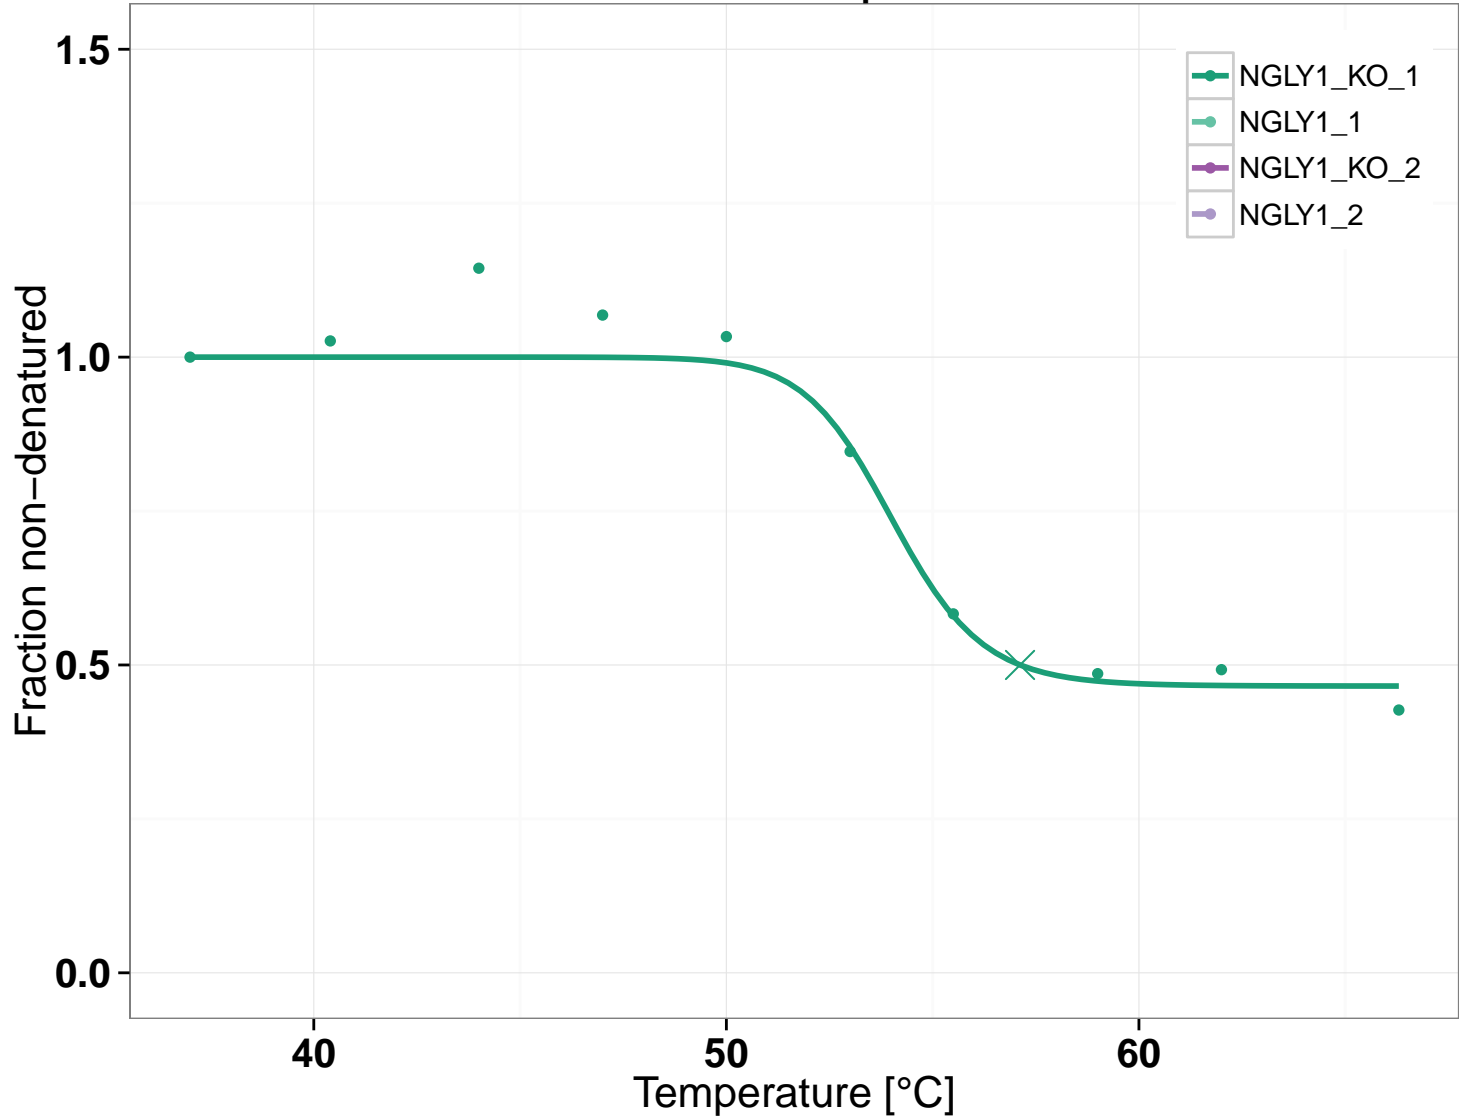

|            | meltPoint | slope | plateau | R2   |
|------------|-----------|-------|---------|------|
| NGLY1_KO_1 | 57.12     | -0.12 | 0.47    | 0.96 |
| NGLY1_1    | -         | -     | -       | -    |
| NGLY1_KO_2 | -         | -     | -       | -    |
| NGLY1_2    | -         | -     | -       | -    |

Supplement: Supplementary file 6657 [file 1]

IPI00026052.3|HSBP1

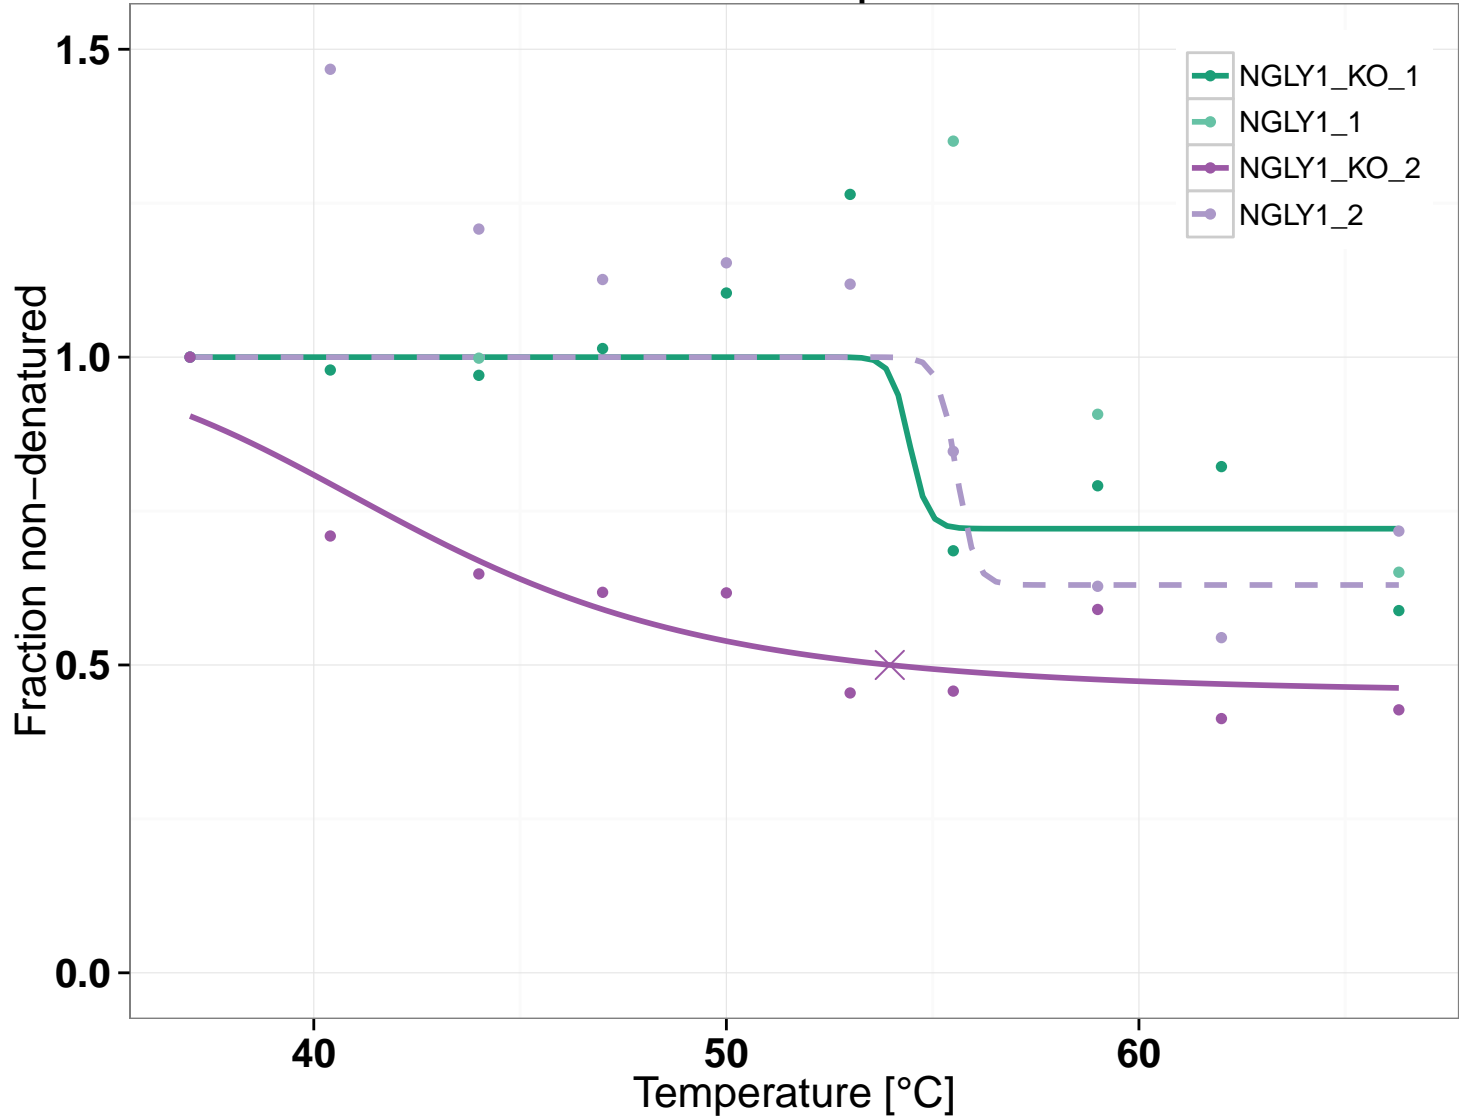

|            | meltPoint | slope  | plateau | R2   |
|------------|-----------|--------|---------|------|
| NGLY1_KO_1 | -         | -0.32  | 0.72    | 0.68 |
| NGLY1_1    | -         | -      | -       | -    |
| NGLY1_KO_2 | 53.96     | -0.036 | 0.45    | 0.84 |
| NGLY1_2    | -         | -0.42  | 0.63    | 0.57 |

Supplement: Supplementary file 6658 [file 1]

IPI00847759.2|DENND4B

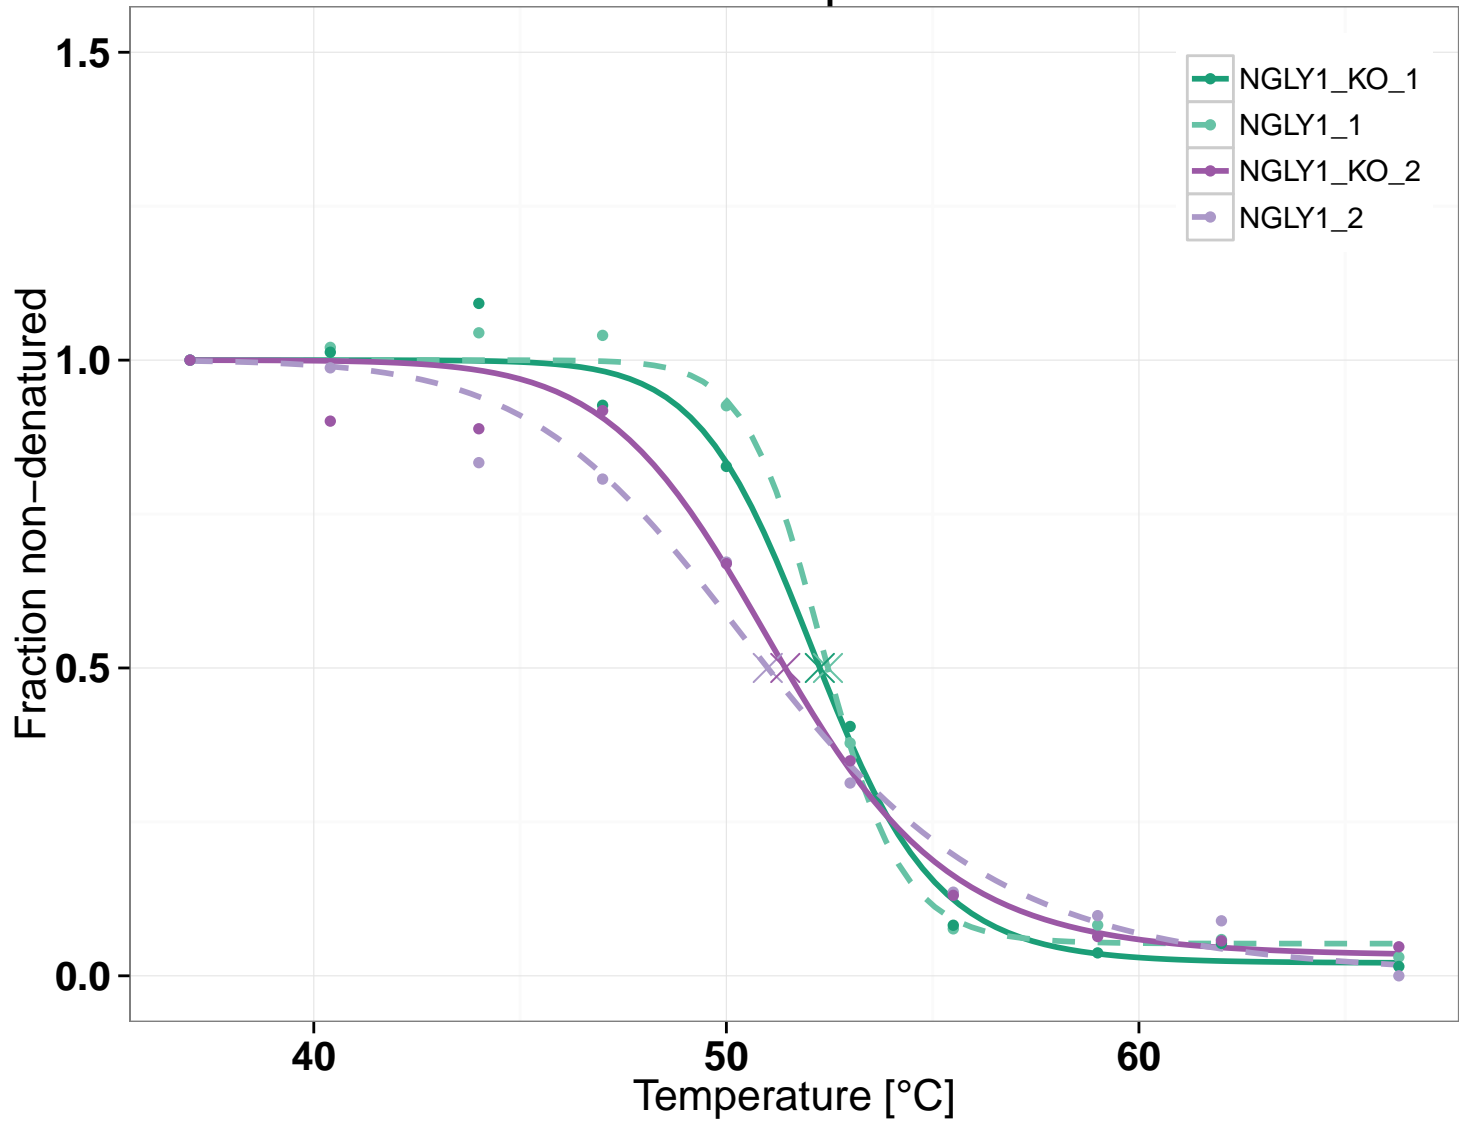

|            | meltPoint | slope  | plateau | R2   |
|------------|-----------|--------|---------|------|
| NGLY1_KO_1 | 52.27     | -0.17  | 0.02    | 0.99 |
| NGLY1_1    | 52.46     | -0.25  | 0.05    | 1    |
| NGLY1_KO_2 | 51.43     | -0.12  | 0.03    | 0.99 |
| NGLY1_2    | 51        | -0.086 | 0       | 0.98 |

Supplement: Supplementary file 6659 [file 1]

# IPI00386448.4|RELA

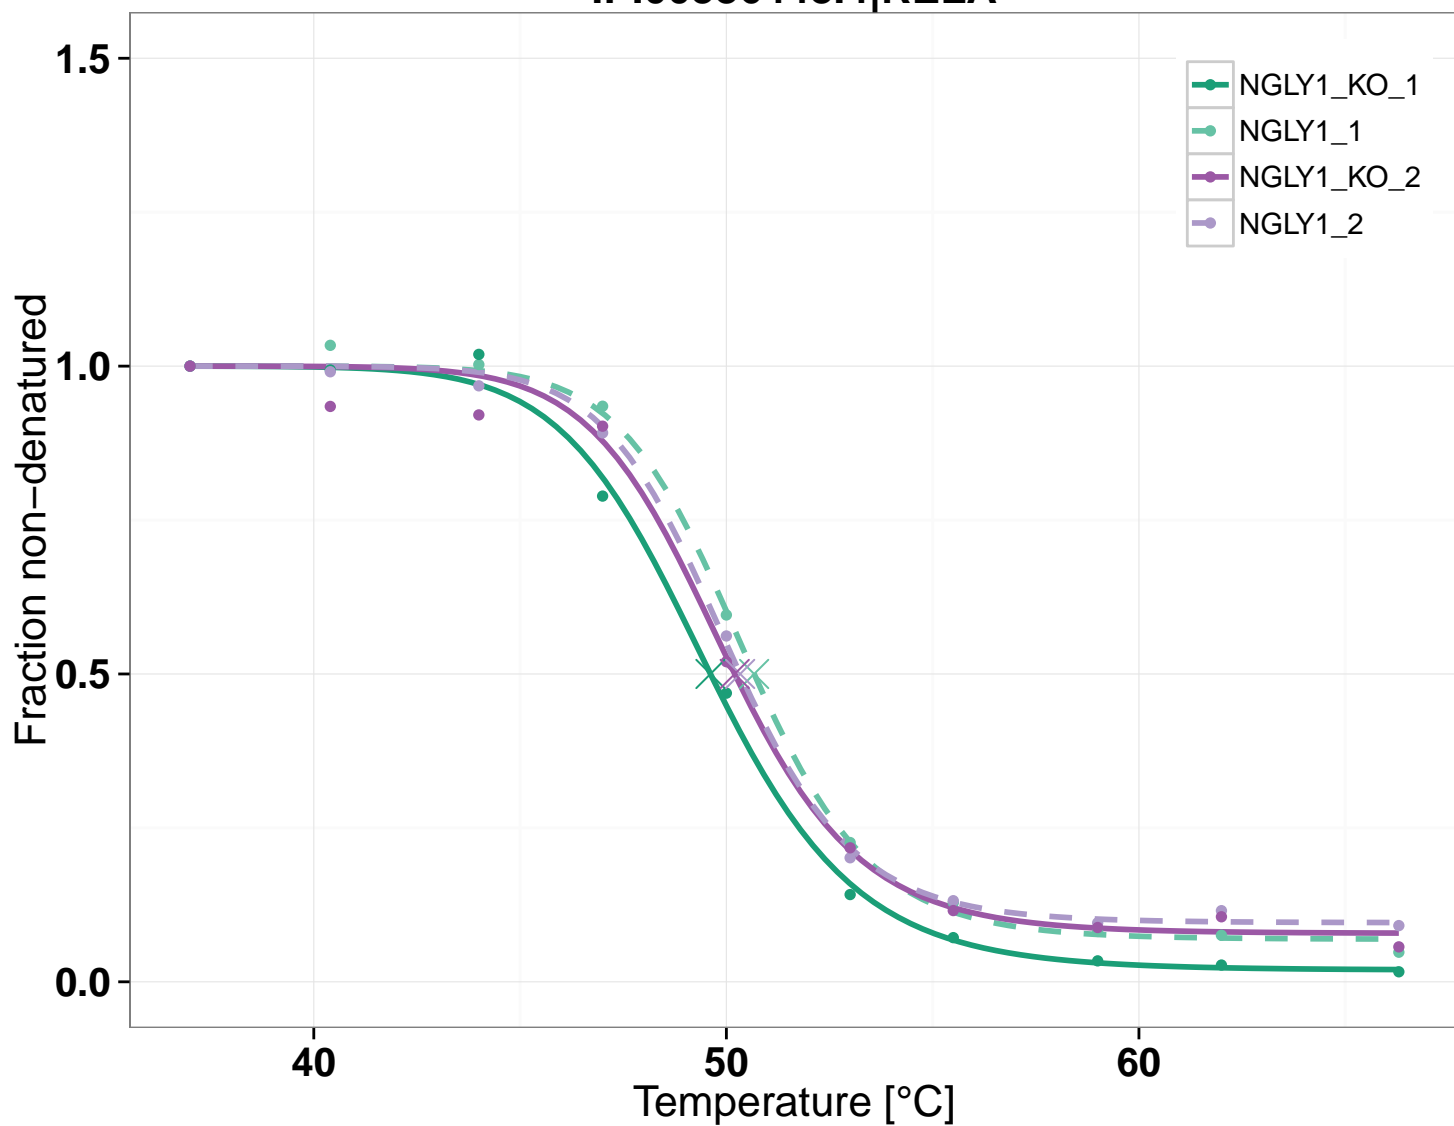

|            | meltPoint | slope | plateau | R2   |
|------------|-----------|-------|---------|------|
| NGLY1_KO_1 | 49.61     | -0.14 | 0.02    | 1    |
| NGLY1_1    | 50.67     | -0.15 | 0.07    | 1    |
| NGLY1_KO_2 | 50.2      | -0.14 | 0.08    | 0.99 |
| NGLY1_2    | 50.33     | -0.15 | 0.1     | 1    |

Supplement: Supplementary file 6660 [file 1]

# IPI00641496.2|CARD9

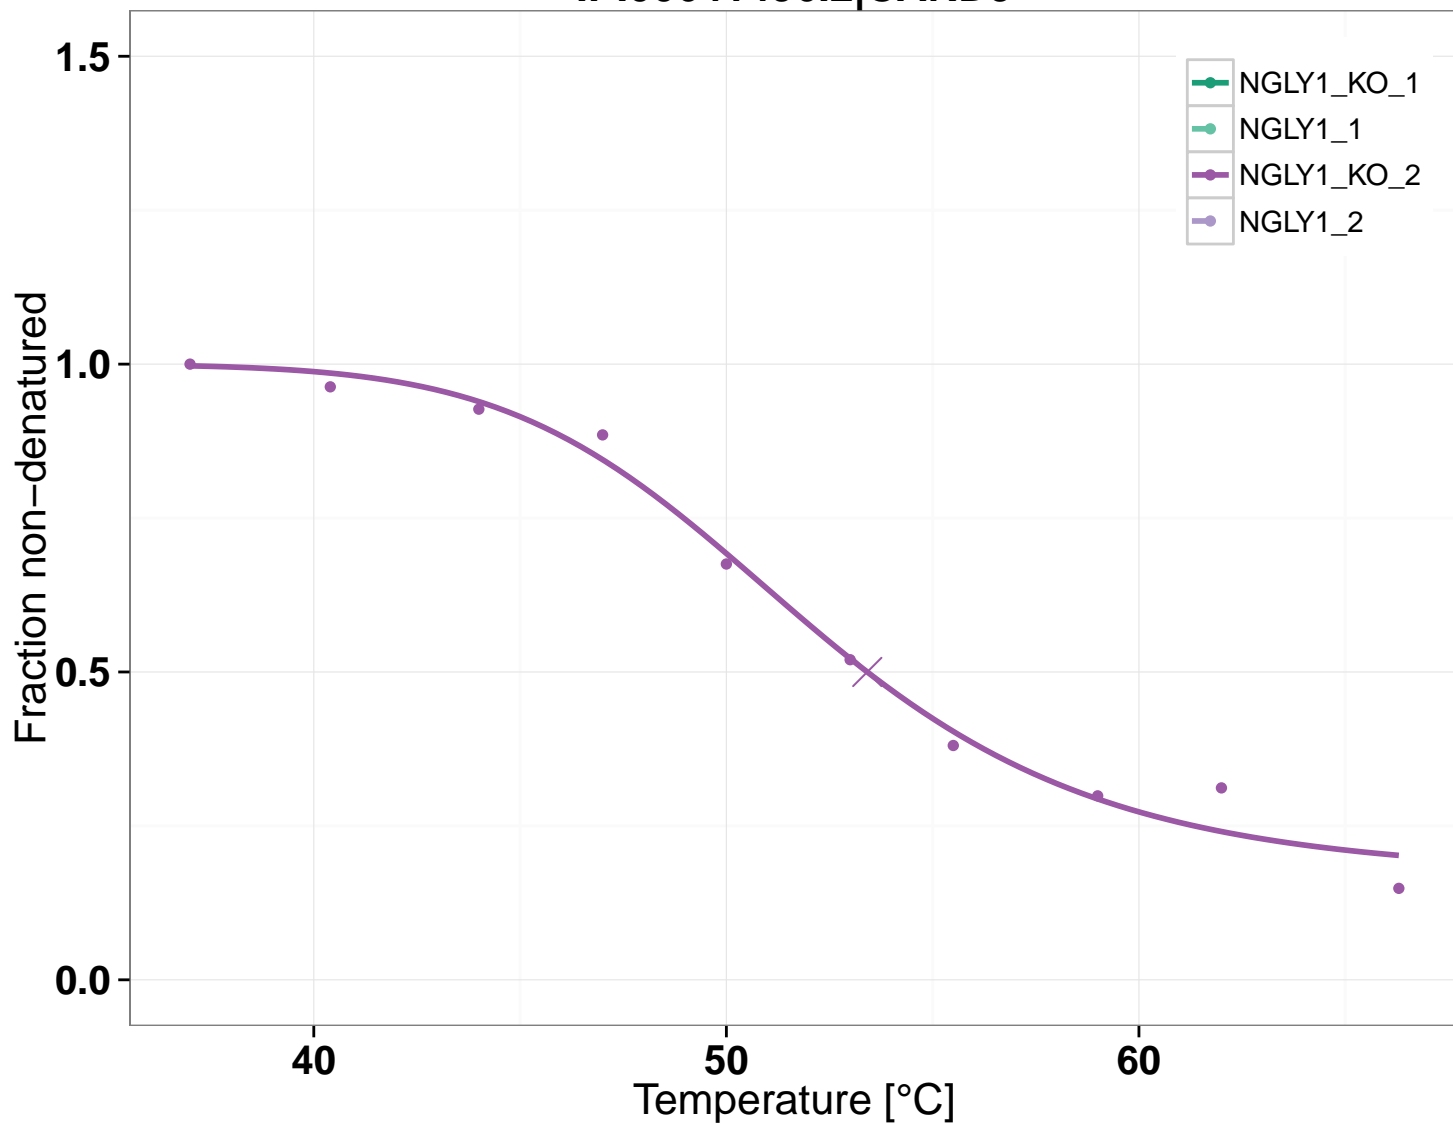

|            | meltPoint | slope  | plateau | R2   |
|------------|-----------|--------|---------|------|
| NGLY1_KO_1 | —         | —      | —       | —    |
| NGLY1_1    | —         | —      | —       | —    |
| NGLY1_KO_2 | 53.42     | -0.058 | 0.17    | 0.99 |
| NGLY1_2    | —         | —      | —       | —    |

Supplement: Supplementary file 6661 [file 1]

# IPI00014575.1|CDC6

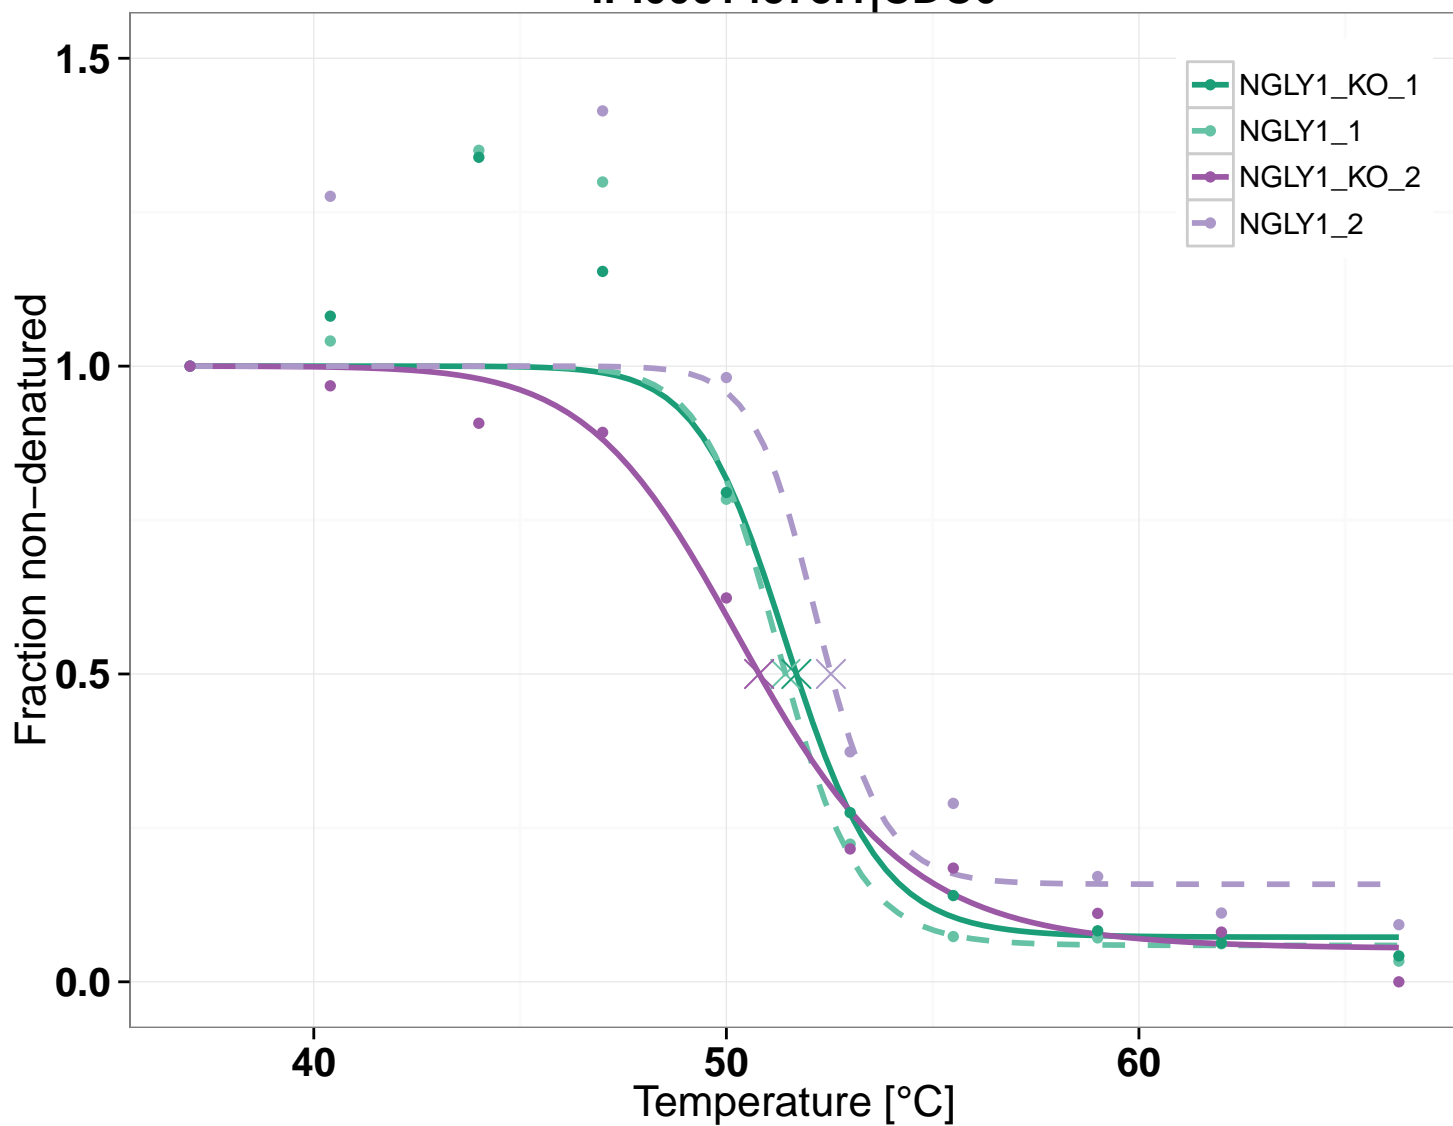

|            | meltPoint | slope | plateau | R2   |
|------------|-----------|-------|---------|------|
| NGLY1_KO_1 | 51.7      | -0.21 | 0.07    | 0.94 |
| NGLY1_1    | 51.43     | -0.25 | 0.06    | 0.92 |
| NGLY1_KO_2 | 50.79     | -0.12 | 0.05    | 0.99 |
| NGLY1_2    | 52.53     | -0.27 | 0.16    | 0.78 |

Supplement: Supplementary file 6662 [file 1]

# IPI00296365.4|CENPE

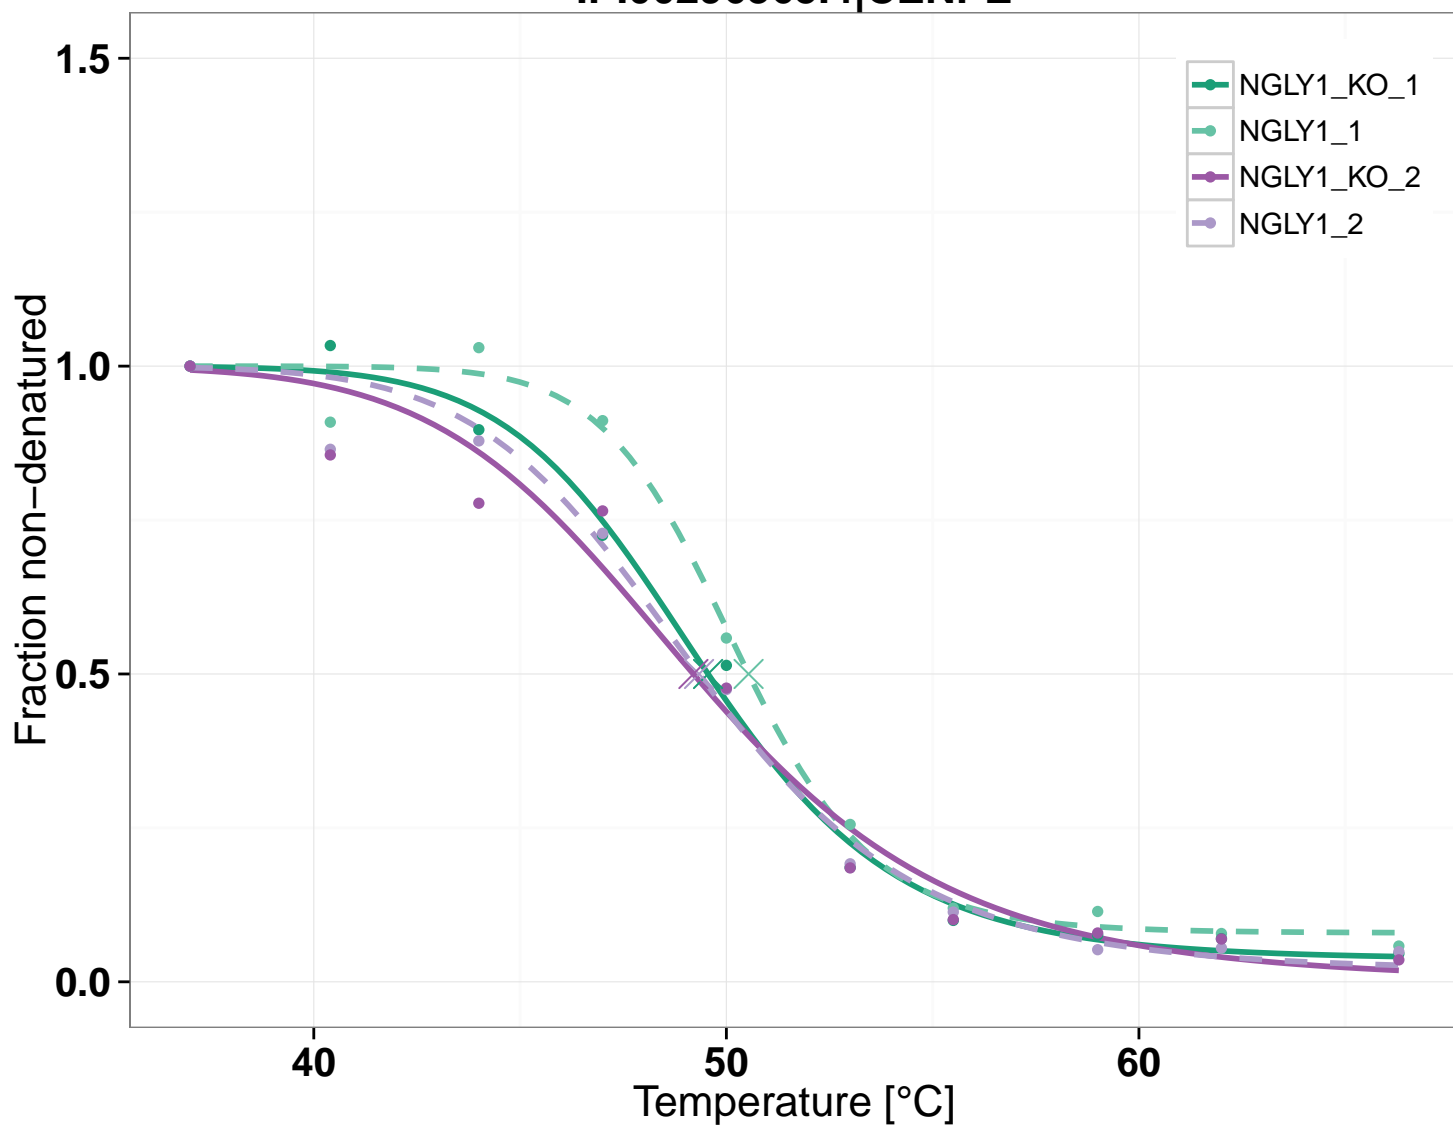

|            | meltPoint | slope  | plateau | R2   |
|------------|-----------|--------|---------|------|
| NGLY1_KO_1 | 49.56     | -0.1   | 0.04    | 0.99 |
| NGLY1_1    | 50.54     | -0.14  | 0.08    | 0.99 |
| NGLY1_KO_2 | 49.2      | -0.079 | 0       | 0.97 |
| NGLY1_2    | 49.34     | -0.092 | 0.02    | 0.99 |

Supplement: Supplementary file 6663 [file 1]

IPI00009148.1|NUDT3

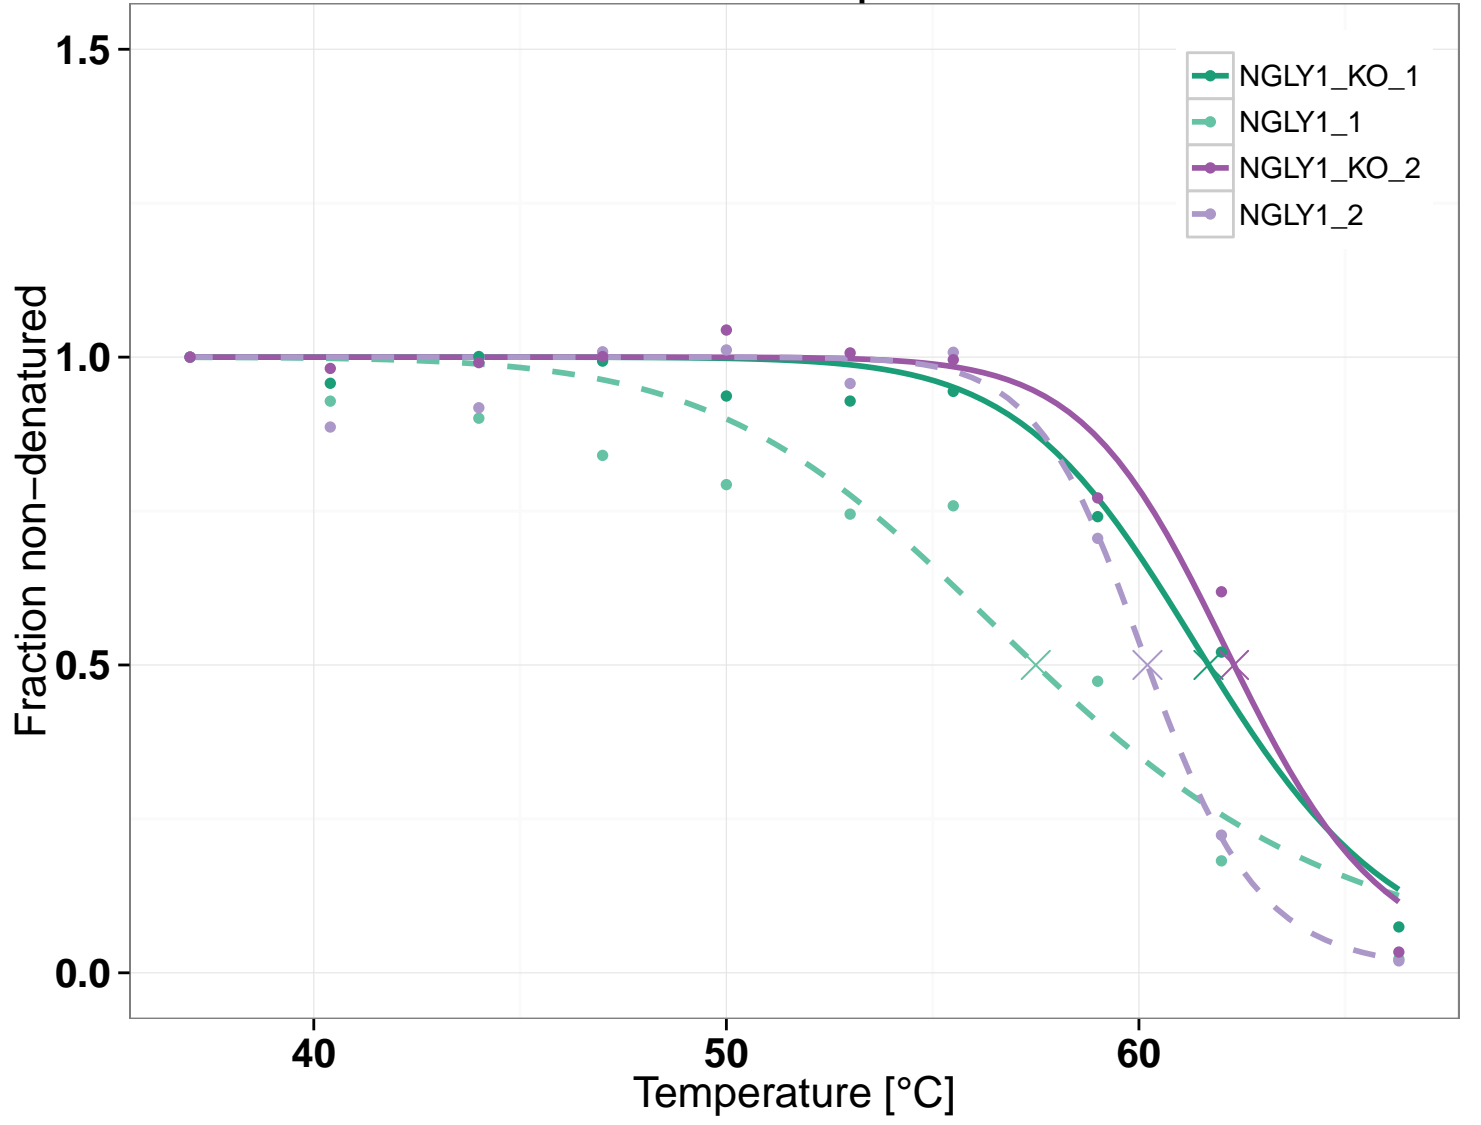

|            | meltPoint | slope  | plateau | R2   |
|------------|-----------|--------|---------|------|
| NGLY1_KO_1 | 61.69     | -0.11  | 0       | 0.98 |
| NGLY1_1    | 57.5      | -0.065 | 0       | 0.92 |
| NGLY1_KO_2 | 62.3      | -0.14  | 0       | 0.97 |
| NGLY1_2    | 60.21     | -0.18  | 0.01    | 0.98 |

Supplement: Supplementary file 6664 [file 1]

IPI00295737.4|MTRF1L

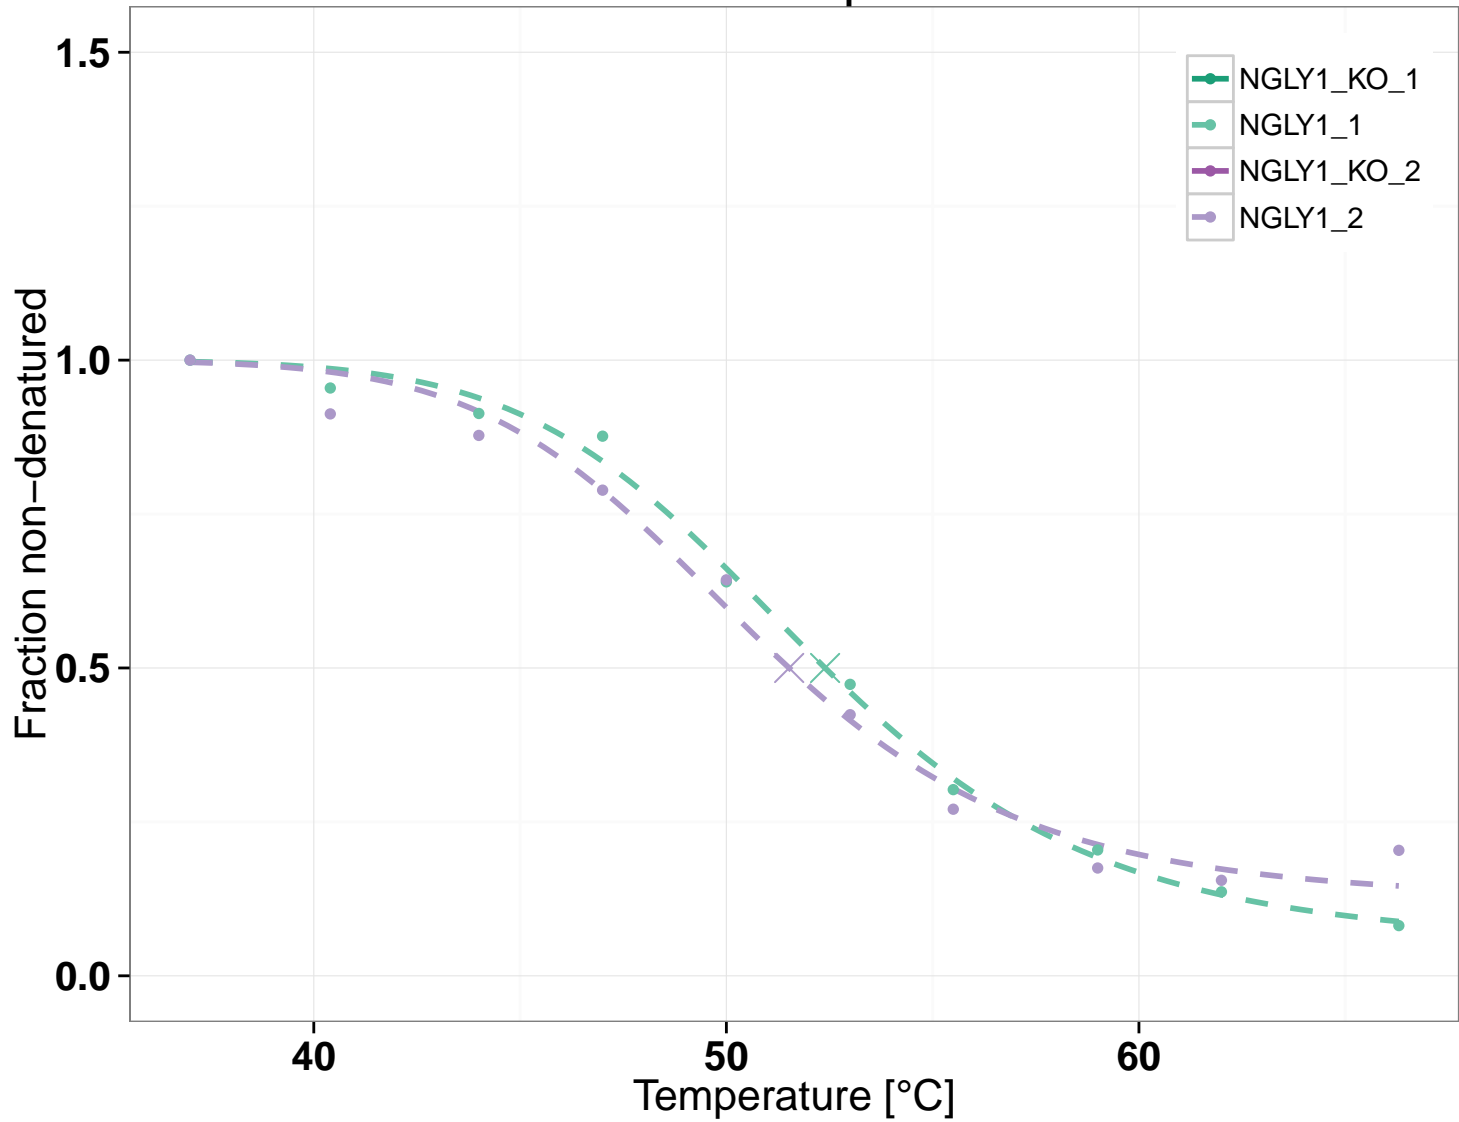

|            | meltPoint | slope  | plateau | R2   |
|------------|-----------|--------|---------|------|
| NGLY1_KO_1 | -         | -      | -       | -    |
| NGLY1_1    | 52.39     | -0.068 | 0.05    | 1    |
| NGLY1_KO_2 | -         | -      | -       | -    |
| NGLY1_2    | 51.52     | -0.067 | 0.12    | 0.99 |

Supplement: Supplementary file 6665 [file 1]

# IPI00298423.3|PDHX

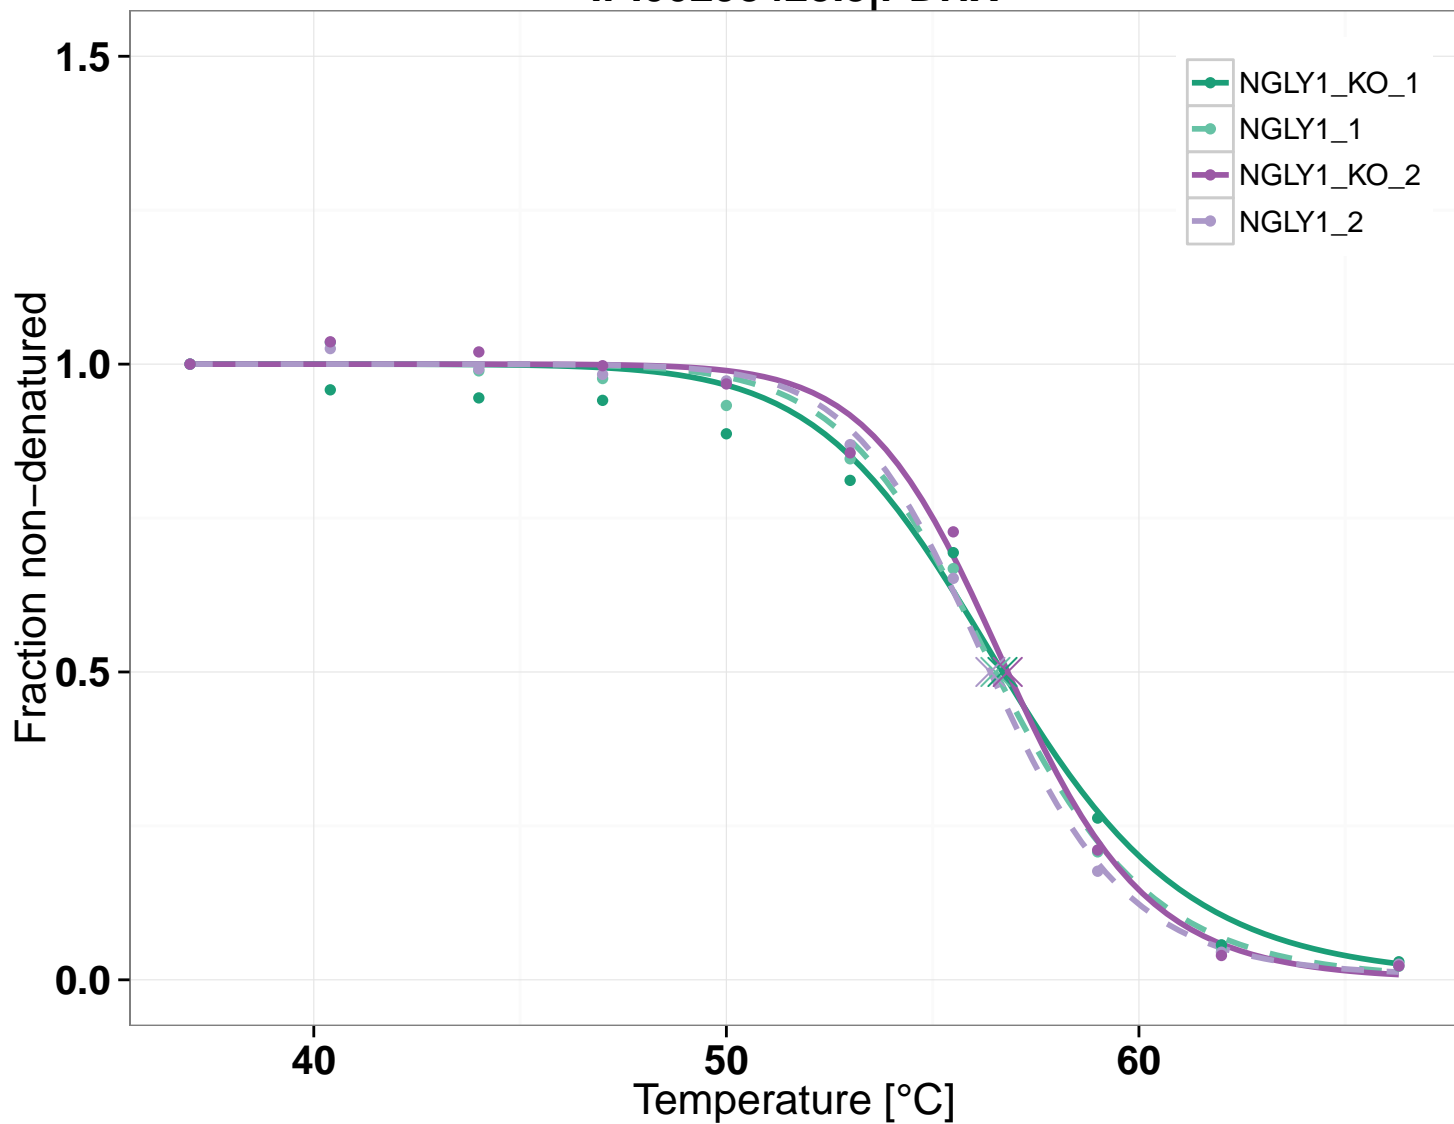

|            | meltPoint | slope | plateau | R2   |
|------------|-----------|-------|---------|------|
| NGLY1_KO_1 | 56.69     | -0.11 | 0       | 0.98 |
| NGLY1_1    | 56.52     | -0.13 | 0       | 1    |
| NGLY1_KO_2 | 56.82     | -0.15 | 0       | 0.99 |
| NGLY1_2    | 56.4      | -0.15 | 0.01    | 1    |

Supplement: Supplementary file 6666 [file 1]

IPI00022316.3|MRPS18B

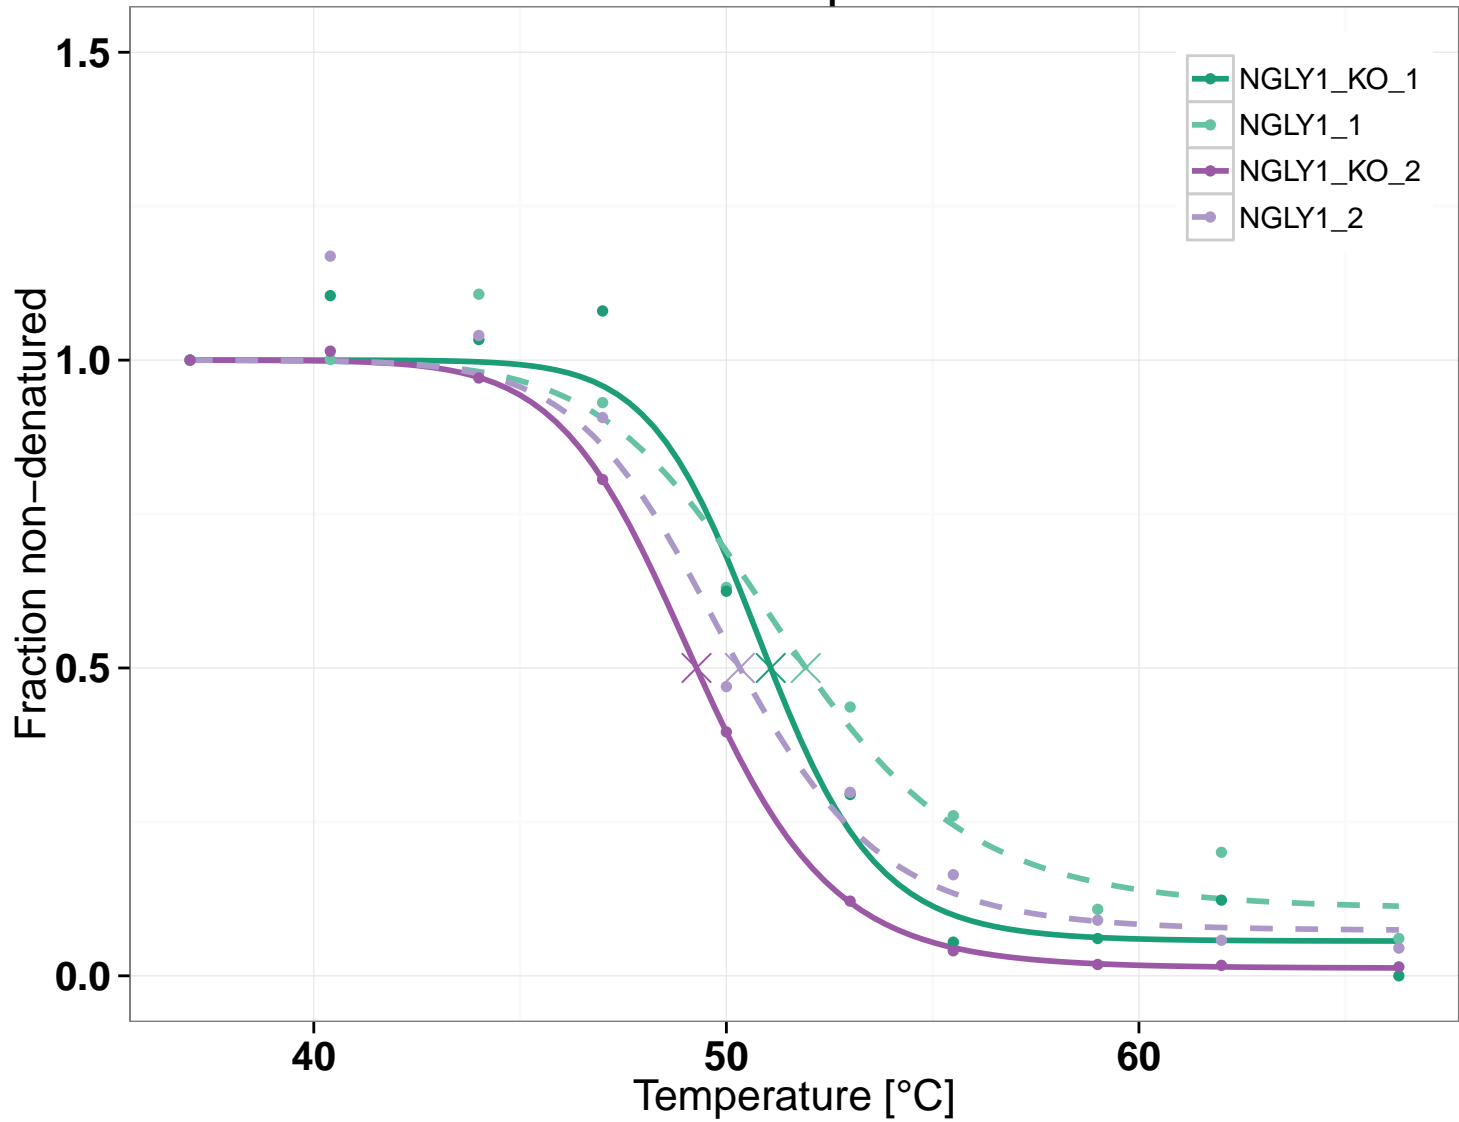

|            | meltPoint | slope | plateau | R2   |
|------------|-----------|-------|---------|------|
| NGLY1_KO_1 | 51.07     | -0.17 | 0.06    | 0.98 |
| NGLY1_1    | 51.92     | -0.1  | 0.11    | 0.98 |
| NGLY1_KO_2 | 49.28     | -0.15 | 0.01    | 1    |
| NGLY1_2    | 50.33     | -0.13 | 0.07    | 0.98 |

Supplement: Supplementary file 6667 [file 1]

IPI00022305.4|BZW2

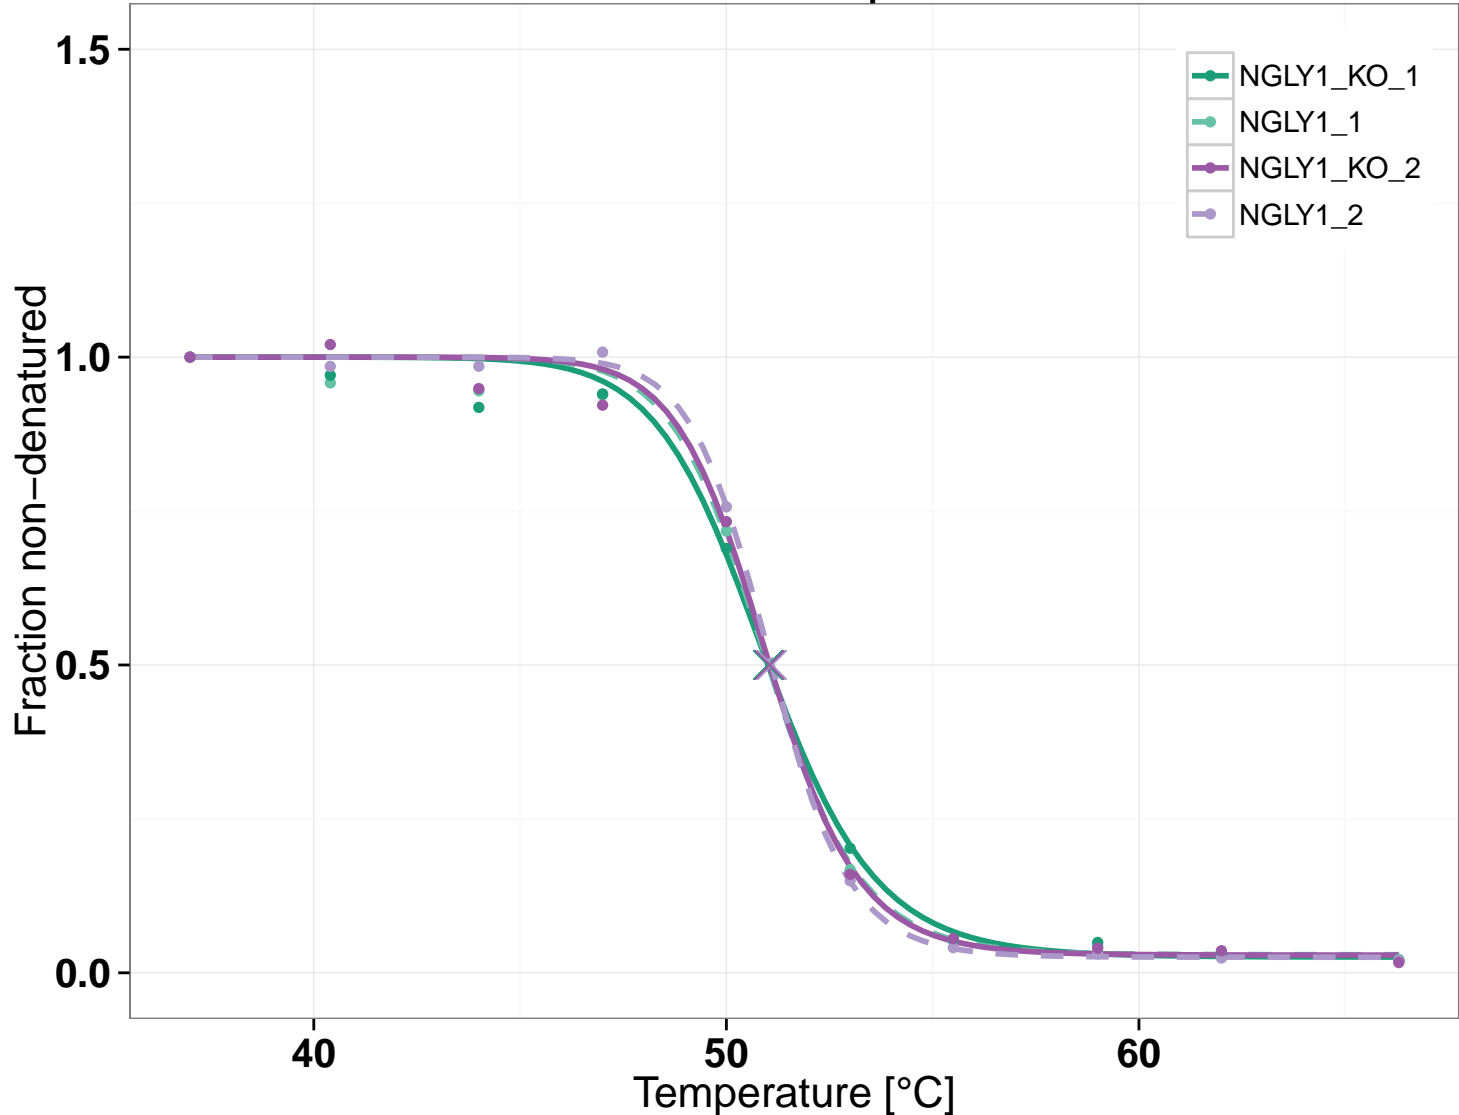

|            | meltPoint | slope | plateau | R2 |
|------------|-----------|-------|---------|----|
| NGLY1_KO_1 | 51.01     | -0.18 | 0.03    | 1  |
| NGLY1_1    | 51.02     | -0.21 | 0.03    | 1  |
| NGLY1_KO_2 | 51.05     | -0.22 | 0.03    | 1  |
| NGLY1_2    | 51.1      | -0.25 | 0.03    | 1  |

Supplement: Supplementary file 6668 [file 1]

IPI00294008.4|ZWINT

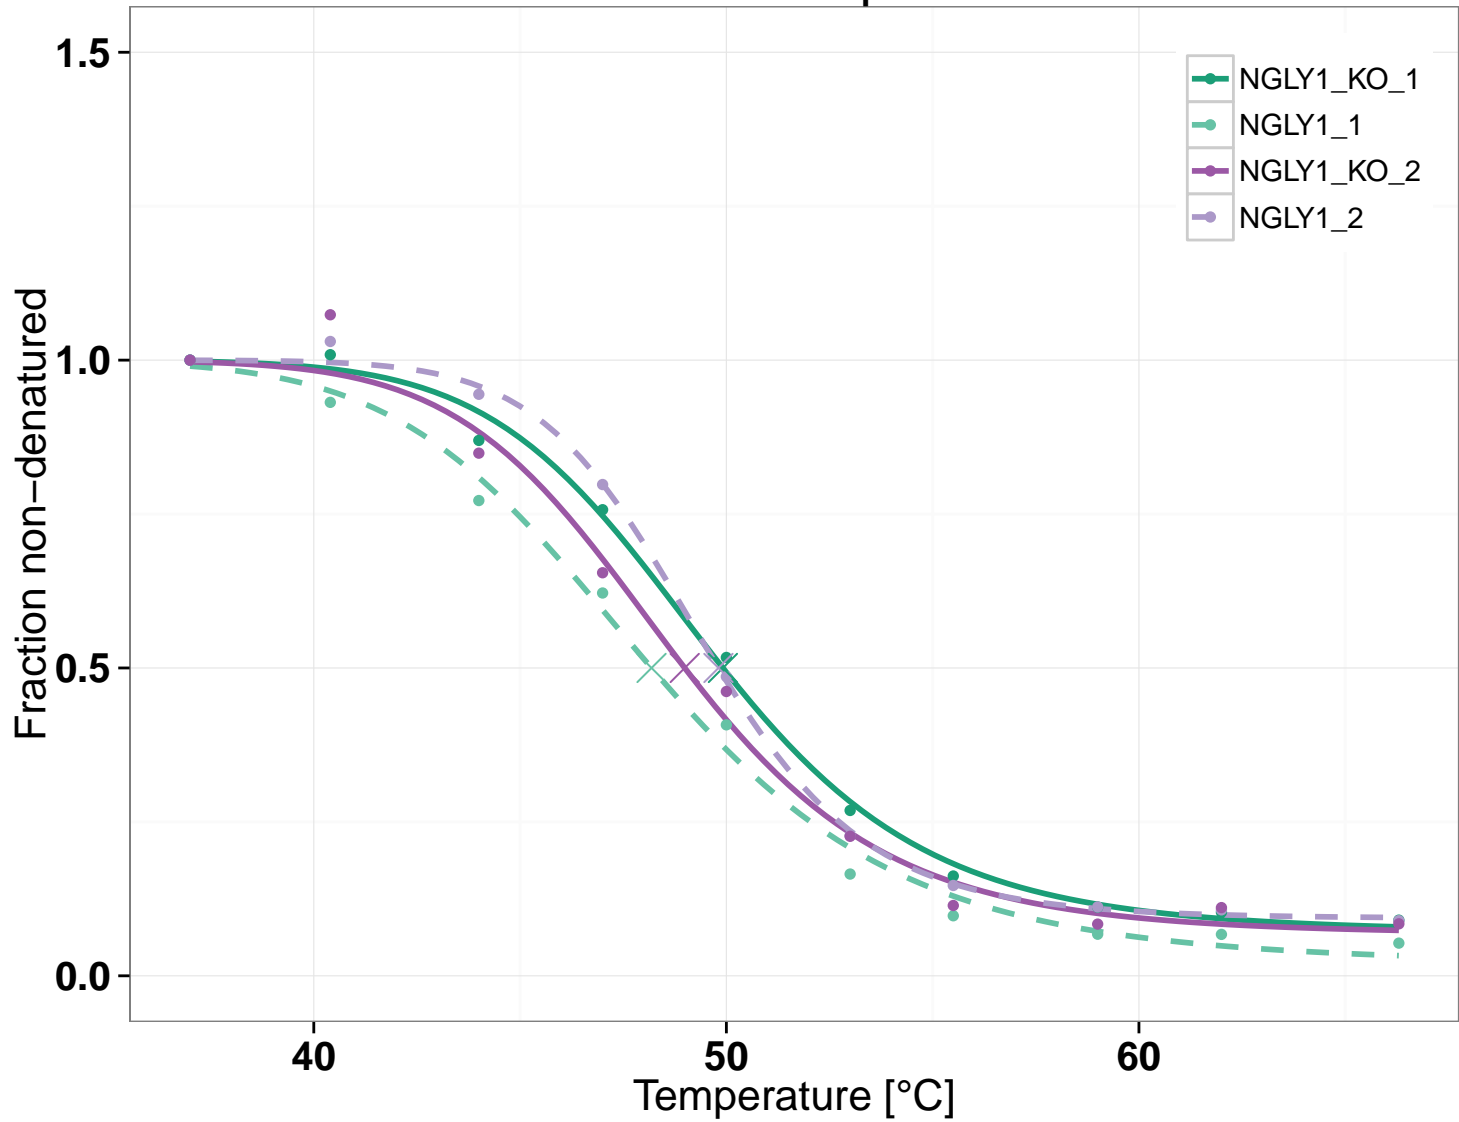

|            | meltPoint | slope  | plateau | R2   |
|------------|-----------|--------|---------|------|
| NGLY1_KO_1 | 49.92     | -0.088 | 0.07    | 1    |
| NGLY1_1    | 48.19     | -0.08  | 0.02    | 0.99 |
| NGLY1_KO_2 | 48.99     | -0.09  | 0.07    | 0.99 |
| NGLY1_2    | 49.81     | -0.11  | 0.09    | 1    |

Supplement: Supplementary file 6669 [file 1]

# IPI00883925.2|ARL6IP4

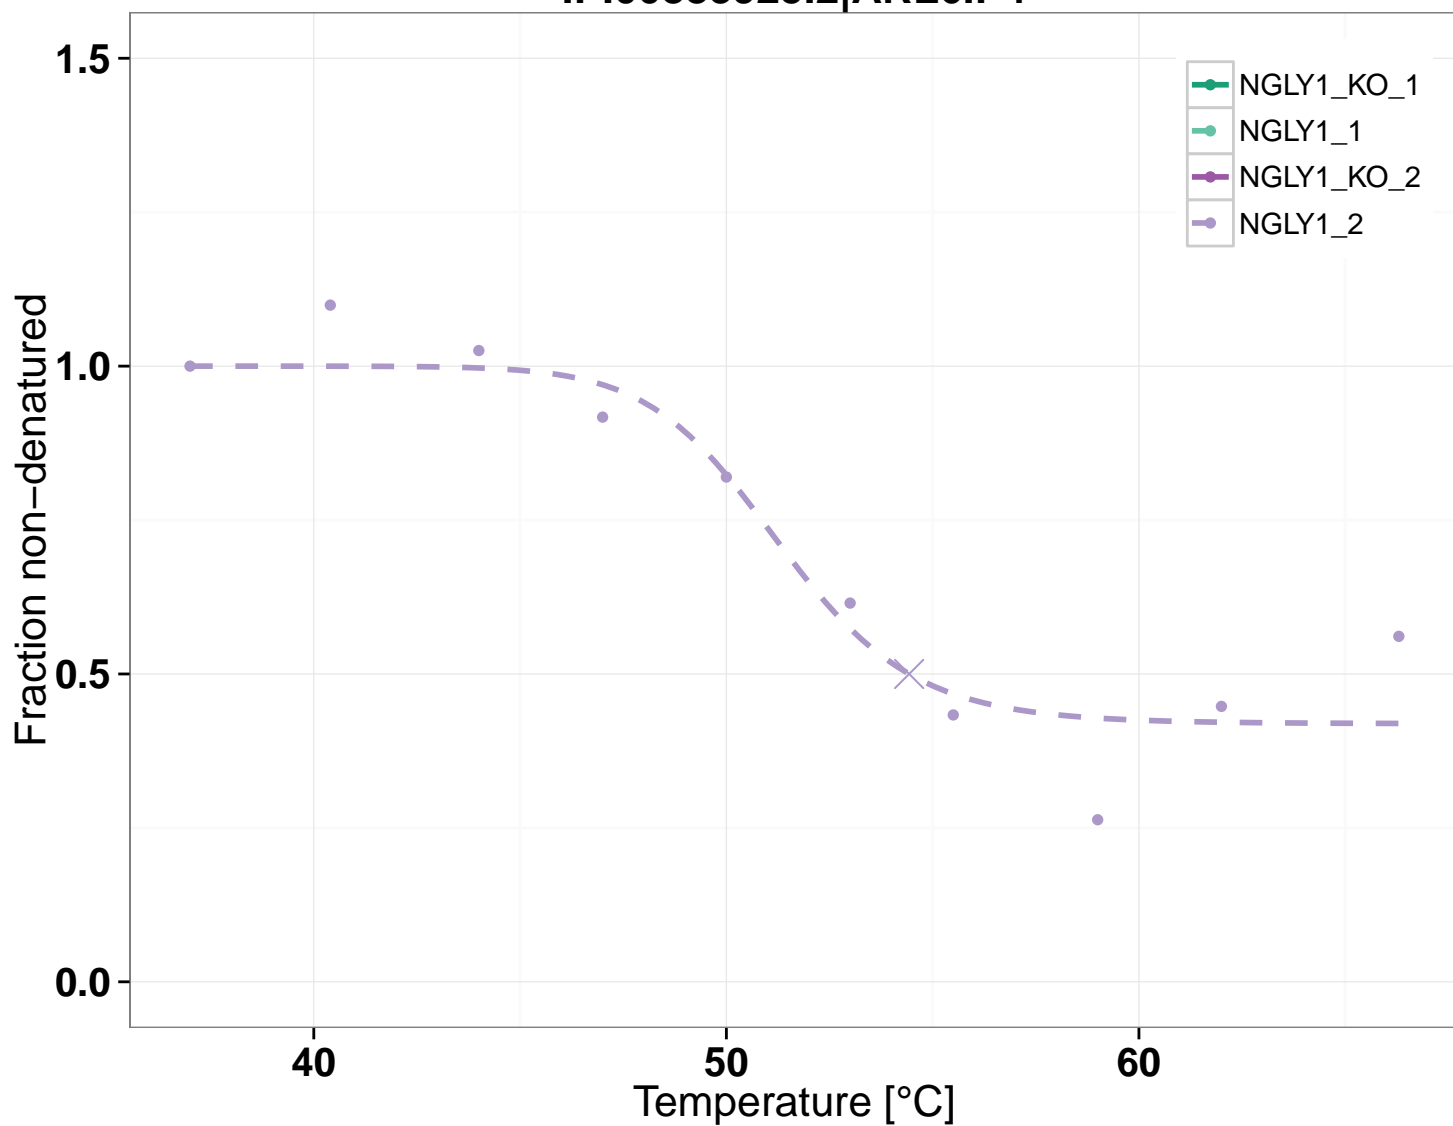

|            | meltPoint | slope | plateau | R2   |
|------------|-----------|-------|---------|------|
| NGLY1_KO_1 | —         | —     | —       | —    |
| NGLY1_1    | —         | —     | —       | —    |
| NGLY1_KO_2 | —         | —     | —       | —    |
| NGLY1_2    | 54.43     | -0.09 | 0.42    | 0.92 |

Supplement: Supplementary file 6670 [file 1]

# IPI00012386.1|COCH

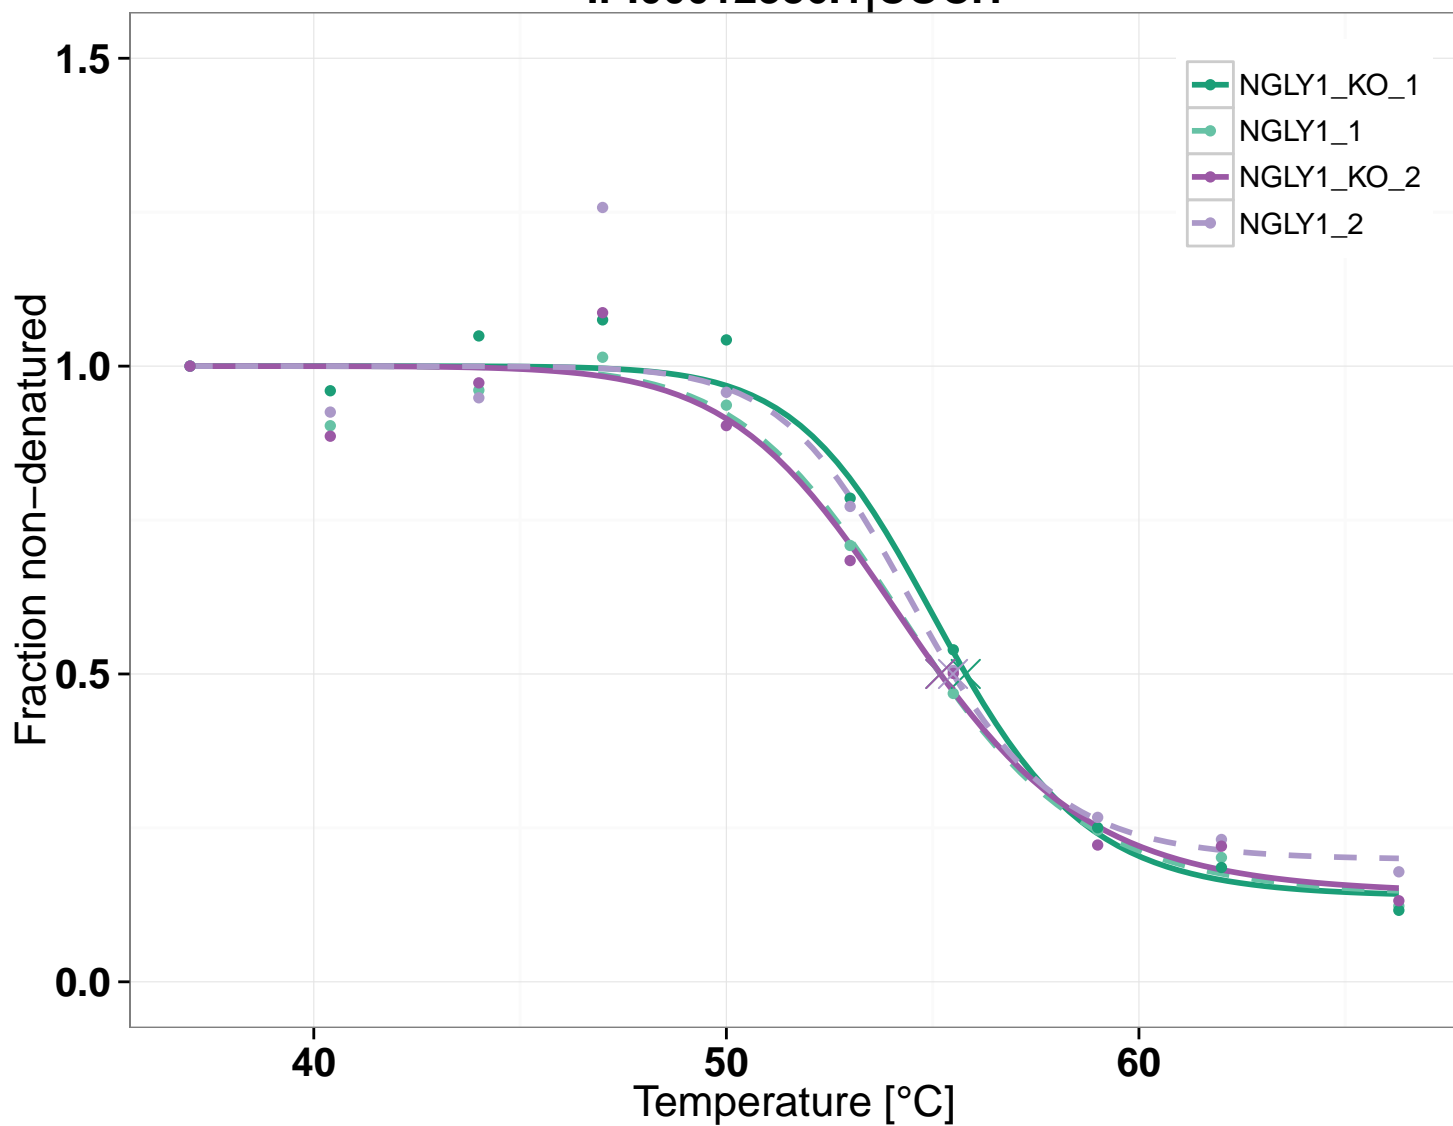

|            | meltPoint | slope  | plateau | R2   |
|------------|-----------|--------|---------|------|
| NGLY1_KO_1 | 55.8      | -0.12  | 0.14    | 0.99 |
| NGLY1_1    | 55.18     | -0.1   | 0.14    | 0.99 |
| NGLY1_KO_2 | 55.19     | -0.098 | 0.14    | 0.98 |
| NGLY1_2    | 55.49     | -0.12  | 0.2     | 0.94 |

Supplement: Supplementary file 6671 [file 1]

IPI00718888.1|PRPS2

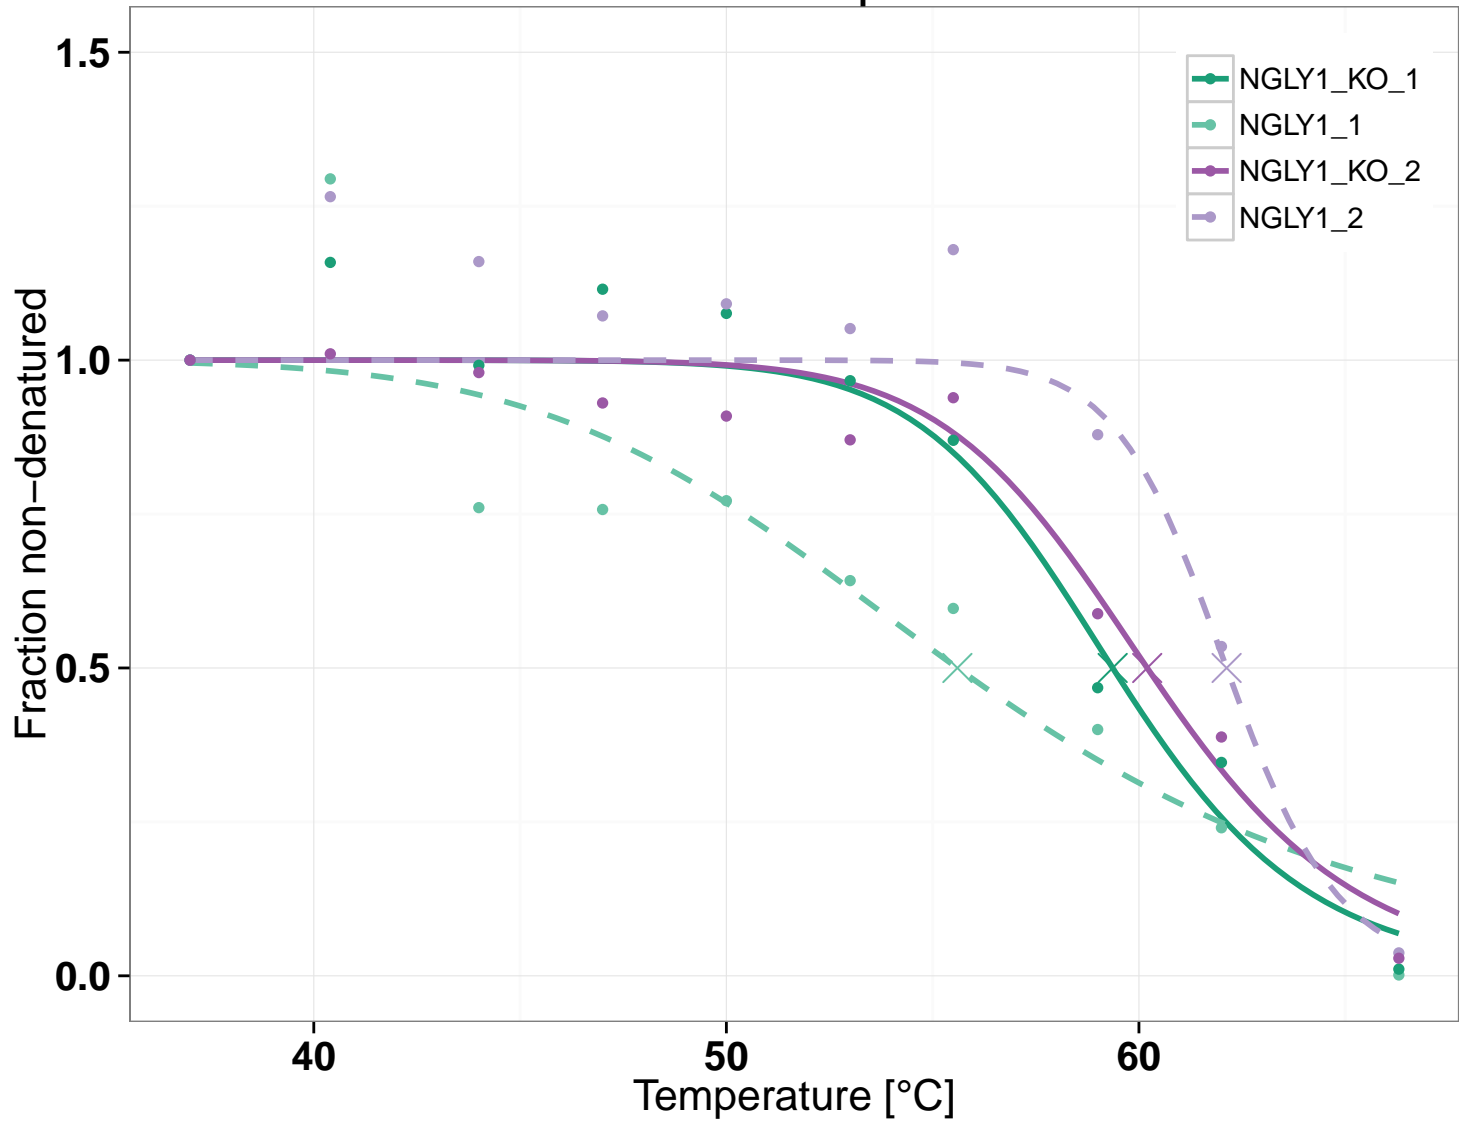

|            | meltPoint | slope  | plateau | R2   |
|------------|-----------|--------|---------|------|
| NGLY1_KO_1 | 59.36     | -0.11  | 0       | 0.95 |
| NGLY1_1    | 55.6      | -0.05  | 0       | 0.85 |
| NGLY1_KO_2 | 60.2      | -0.099 | 0       | 0.97 |
| NGLY1_2    | 62.13     | -0.18  | 0       | 0.88 |

Supplement: Supplementary file 6672 [file 1]

# IPI00513945.2|C6ORF129

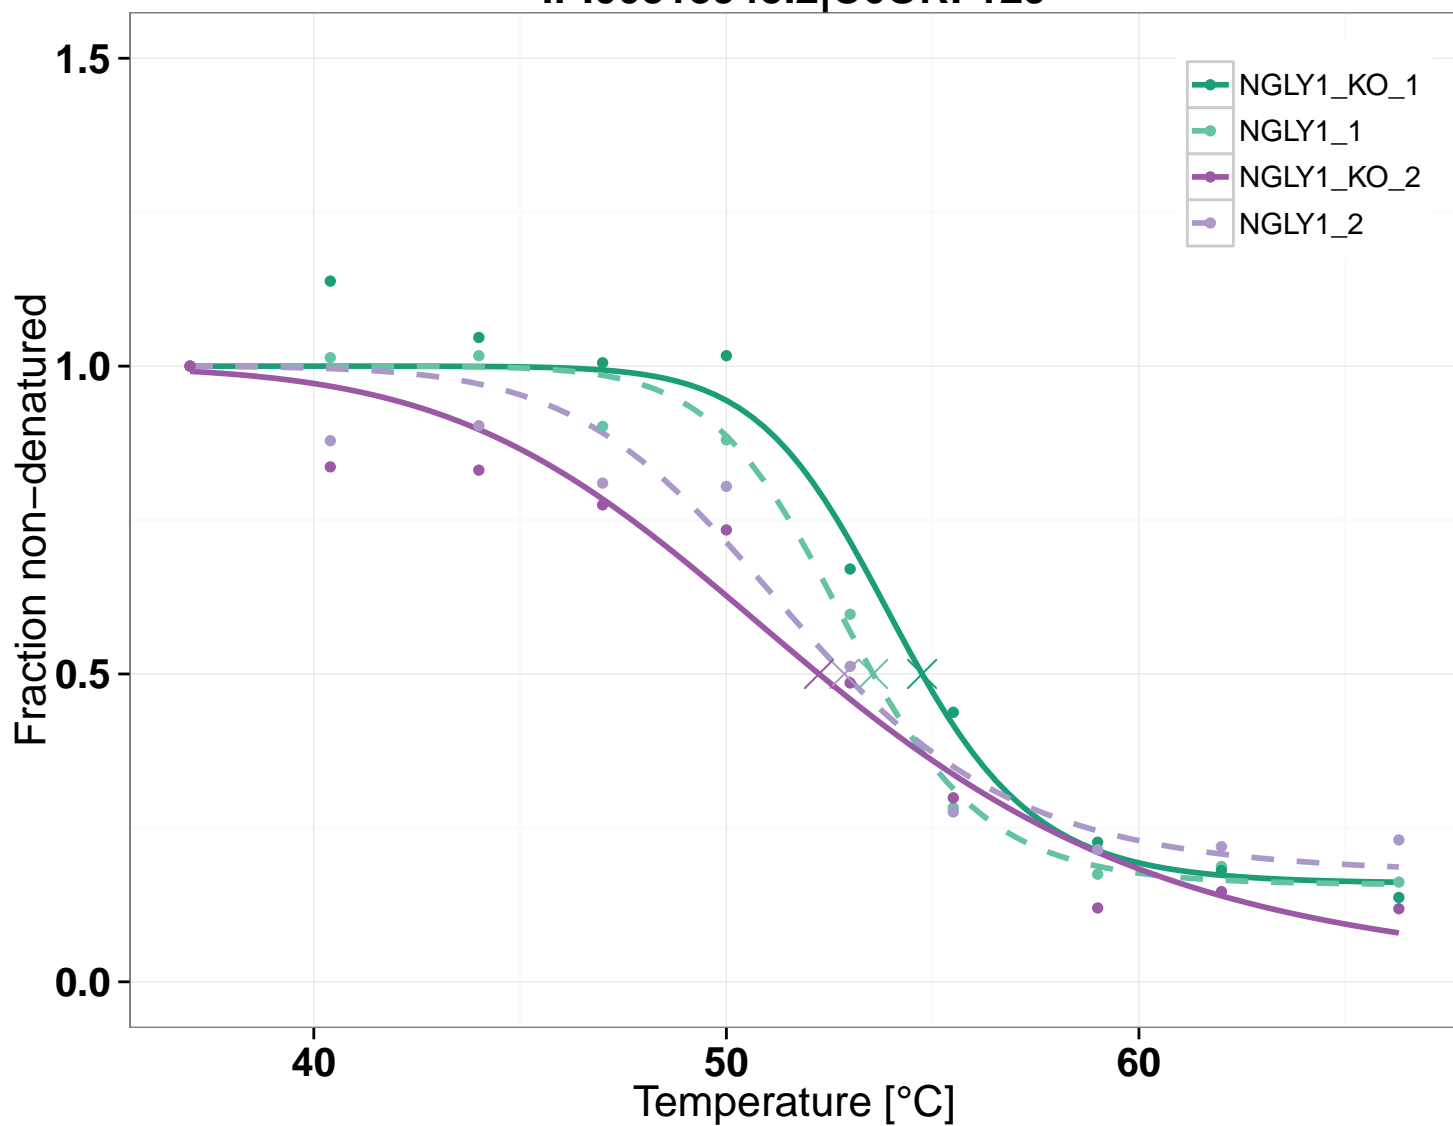

|            | meltPoint | slope  | plateau | R2   |
|------------|-----------|--------|---------|------|
| NGLY1_KO_1 | 54.74     | -0.13  | 0.16    | 0.98 |
| NGLY1_1    | 53.56     | -0.13  | 0.16    | 0.99 |
| NGLY1_KO_2 | 52.25     | -0.057 | 0       | 0.96 |
| NGLY1_2    | 52.86     | -0.077 | 0.17    | 0.96 |

Supplement: Supplementary file 6673 [file 1]

# IPI00221325.3|RANBP2

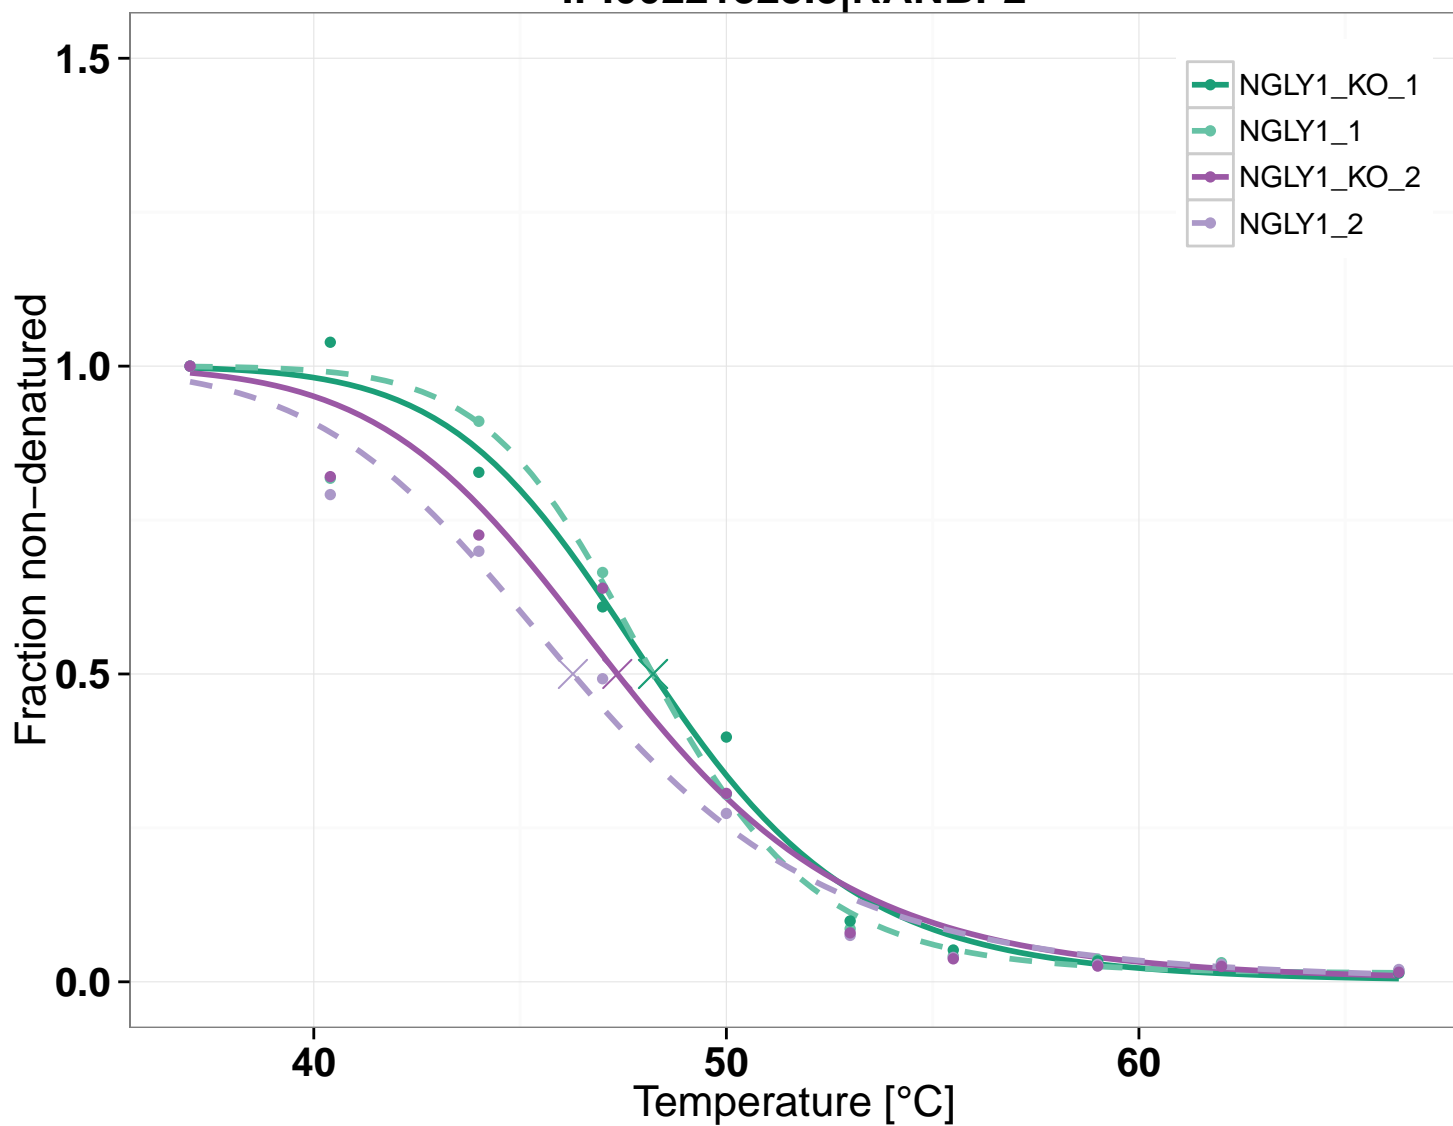

|            | meltPoint | slope  | plateau | R2   |
|------------|-----------|--------|---------|------|
| NGLY1_KO_1 | 48.23     | -0.1   | 0       | 0.99 |
| NGLY1_1    | 48.22     | -0.12  | 0.01    | 0.98 |
| NGLY1_KO_2 | 47.36     | -0.086 | 0       | 0.97 |
| NGLY1_2    | 46.28     | -0.08  | 0       | 0.98 |

Supplement: Supplementary file 6674 [file 1]

# IPI00306576.1|ARSB

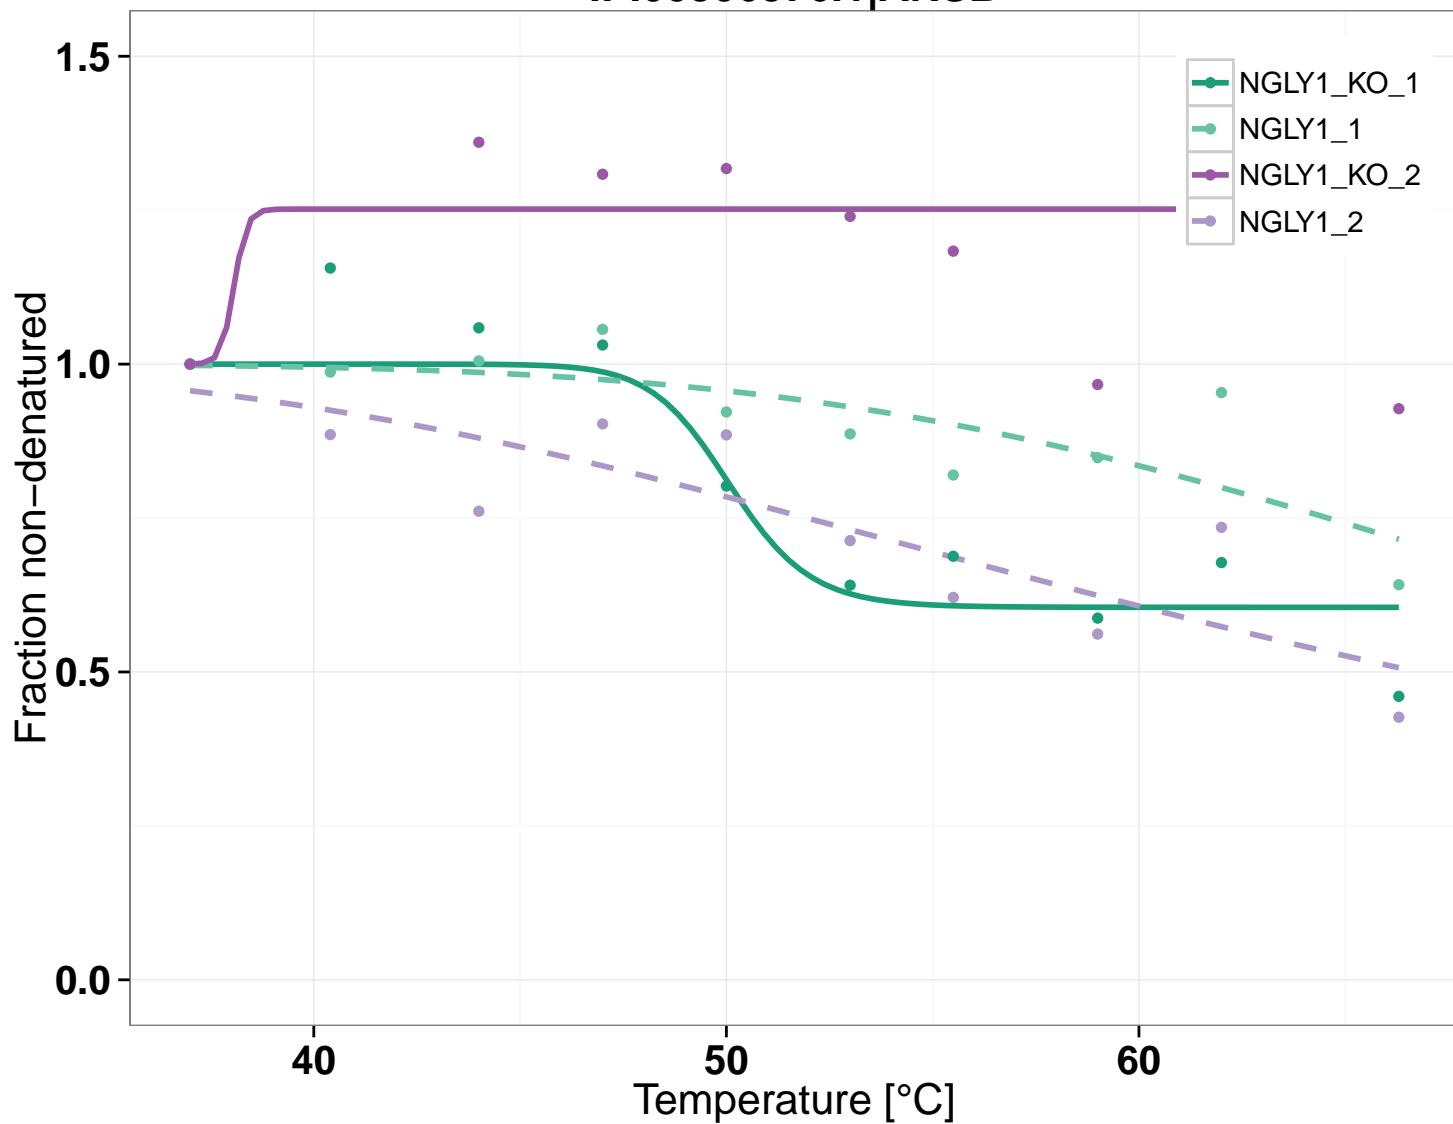

|            | meltPoint | slope  | plateau | R2   |
|------------|-----------|--------|---------|------|
| NGLY1_KO_1 | -         | -0.1   | 0.6     | 0.87 |
| NGLY1_1    | -         | -      | 0       | 0.65 |
| NGLY1_KO_2 | -         | 0.41   | 1.25    | 0.15 |
| NGLY1_2    | -         | -0.018 | 0       | 0.74 |

Supplement: Supplementary file 6675 [file 1]

IPI00221226.7|ANXA6

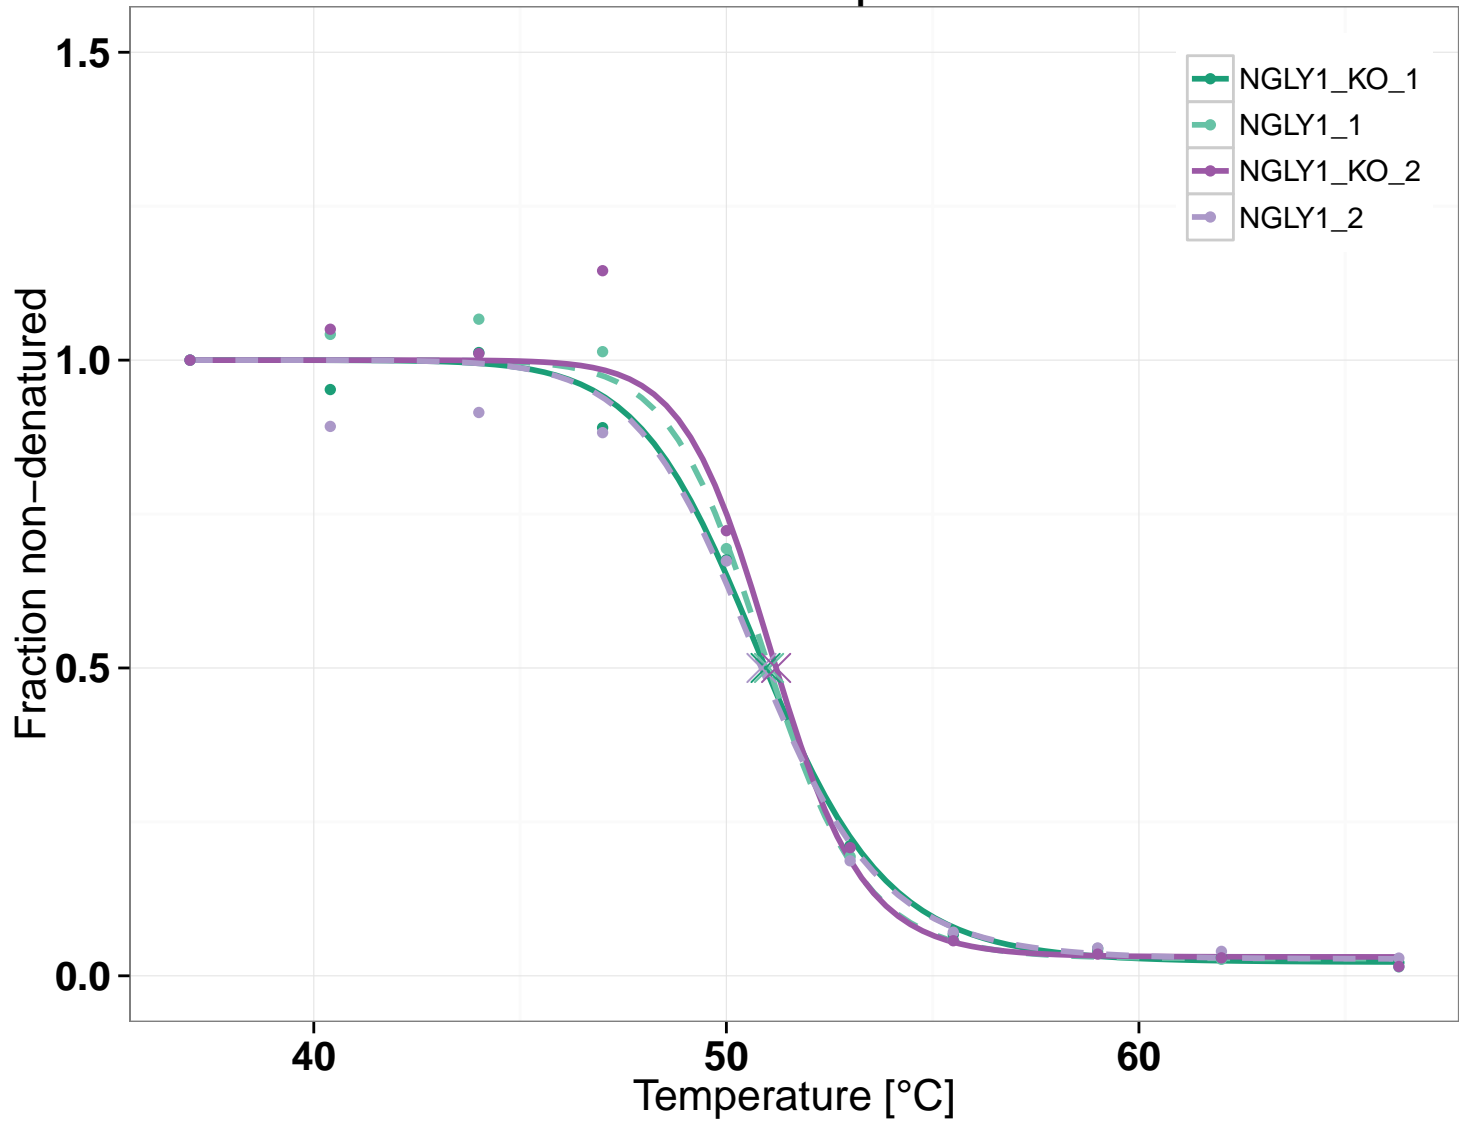

|            | meltPoint | slope | plateau | R2   |
|------------|-----------|-------|---------|------|
| NGLY1_KO_1 | 50.95     | -0.16 | 0.02    | 1    |
| NGLY1_1    | 51.04     | -0.2  | 0.03    | 1    |
| NGLY1_KO_2 | 51.21     | -0.22 | 0.03    | 0.99 |
| NGLY1_2    | 50.85     | -0.16 | 0.03    | 0.99 |

Supplement: Supplementary file 6676 [file 1]

IPI00031775.1|ANGPT4

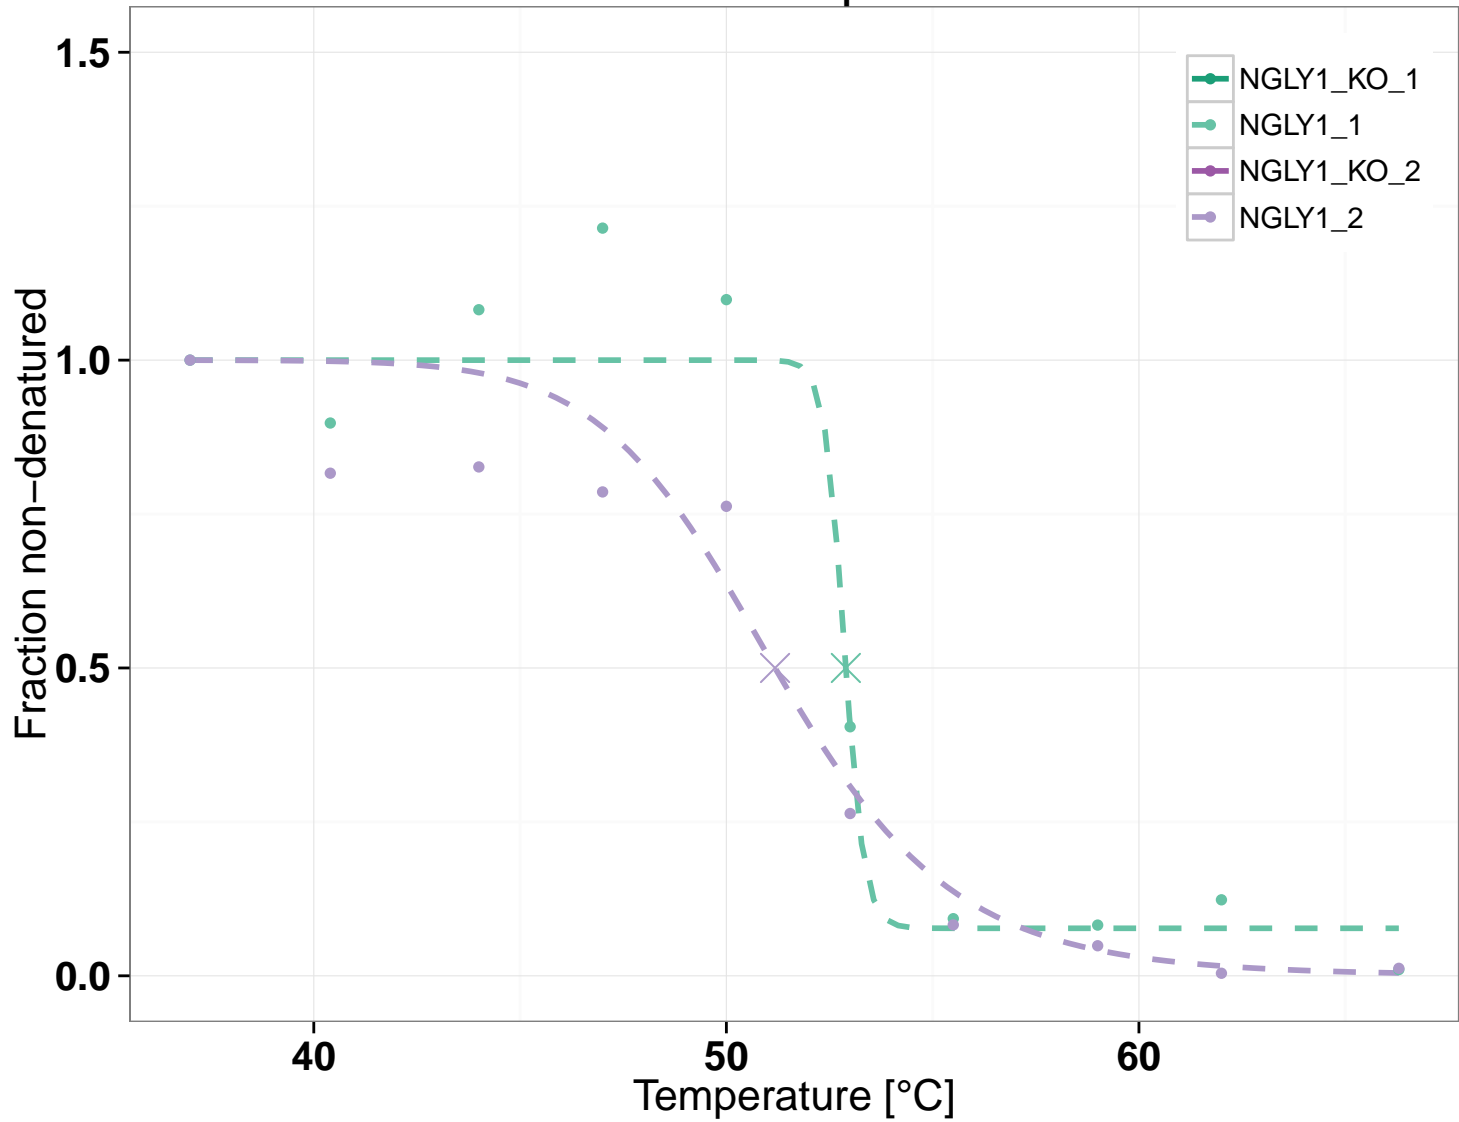

|            | meltPoint | slope | plateau | R2   |
|------------|-----------|-------|---------|------|
| NGLY1_KO_1 | -         | -     | -       | -    |
| NGLY1_1    | 52.9      | -0.96 | 0.08    | 0.96 |
| NGLY1_KO_2 | -         | -     | -       | -    |
| NGLY1_2    | 51.18     | -0.12 | 0       | 0.94 |

Supplement: Supplementary file 6677 [file 1]

# IPI00031489.1|EIF1B

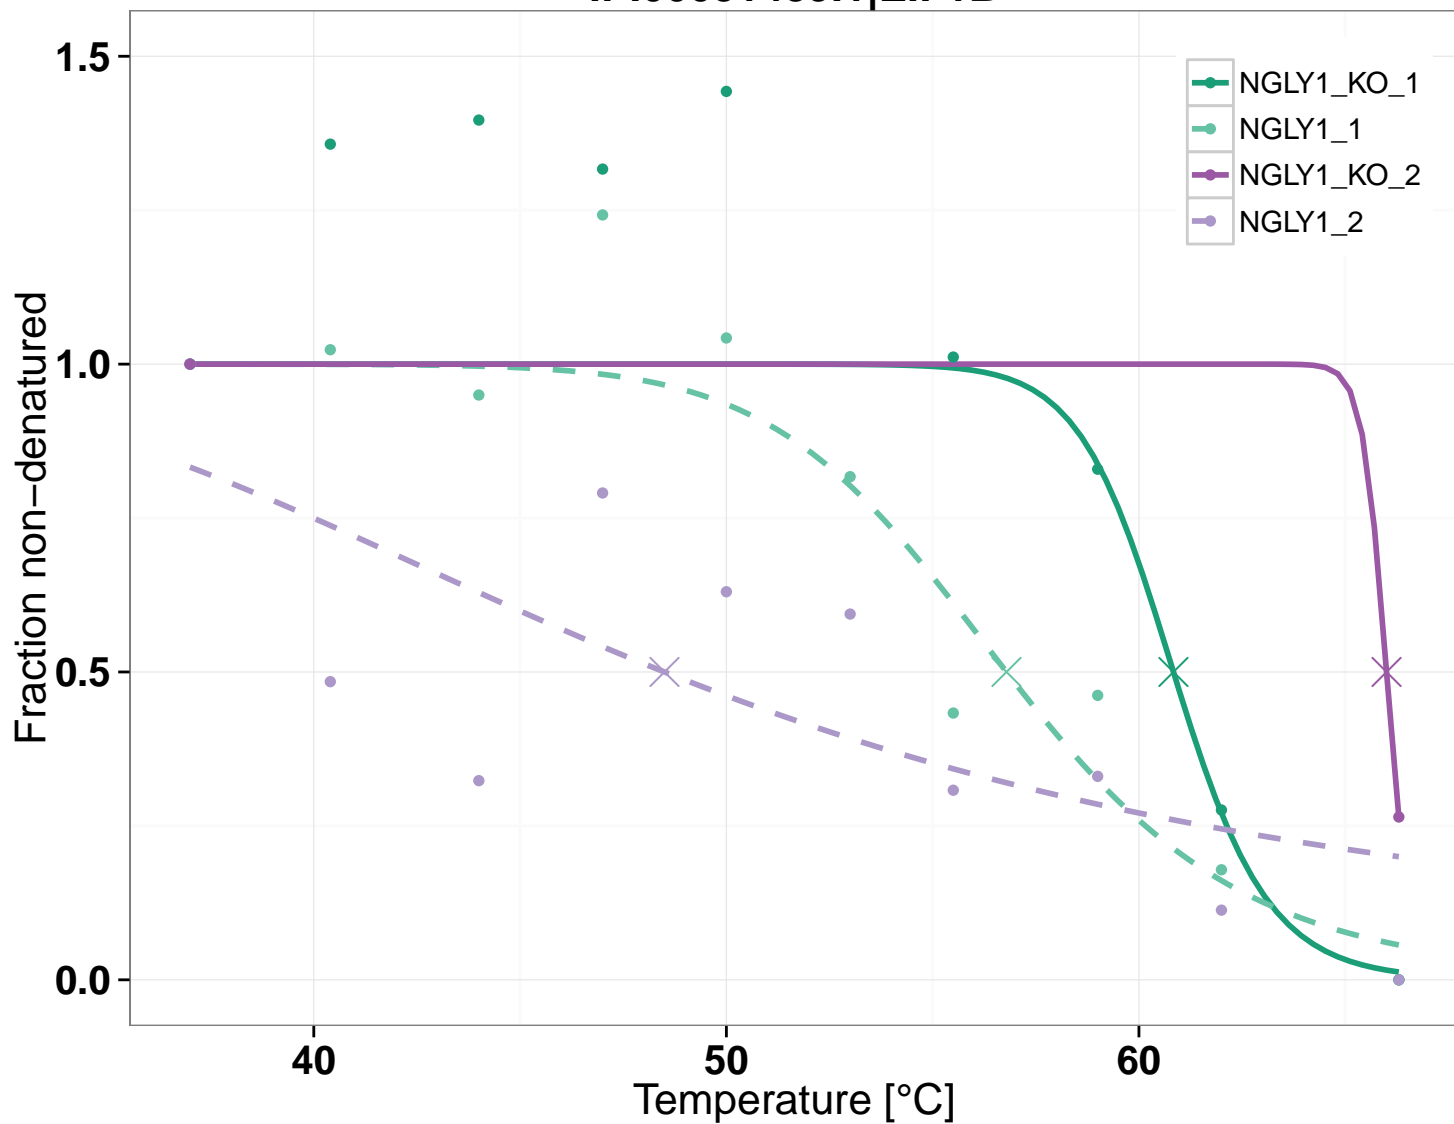

|            | meltPoint | slope  | plateau | R2   |
|------------|-----------|--------|---------|------|
| NGLY1_KO_1 | 60.84     | -0.22  | 0       | 0.64 |
| NGLY1_1    | 56.79     | -0.087 | 0       | 0.91 |
| NGLY1_KO_2 | 66        | -0.86  | 0       | -1.5 |
| NGLY1_2    | 48.5      | -0.03  | 0       | 0.55 |

Supplement: Supplementary file 6678 [file 1]

IPI00795221.1|PTPN6

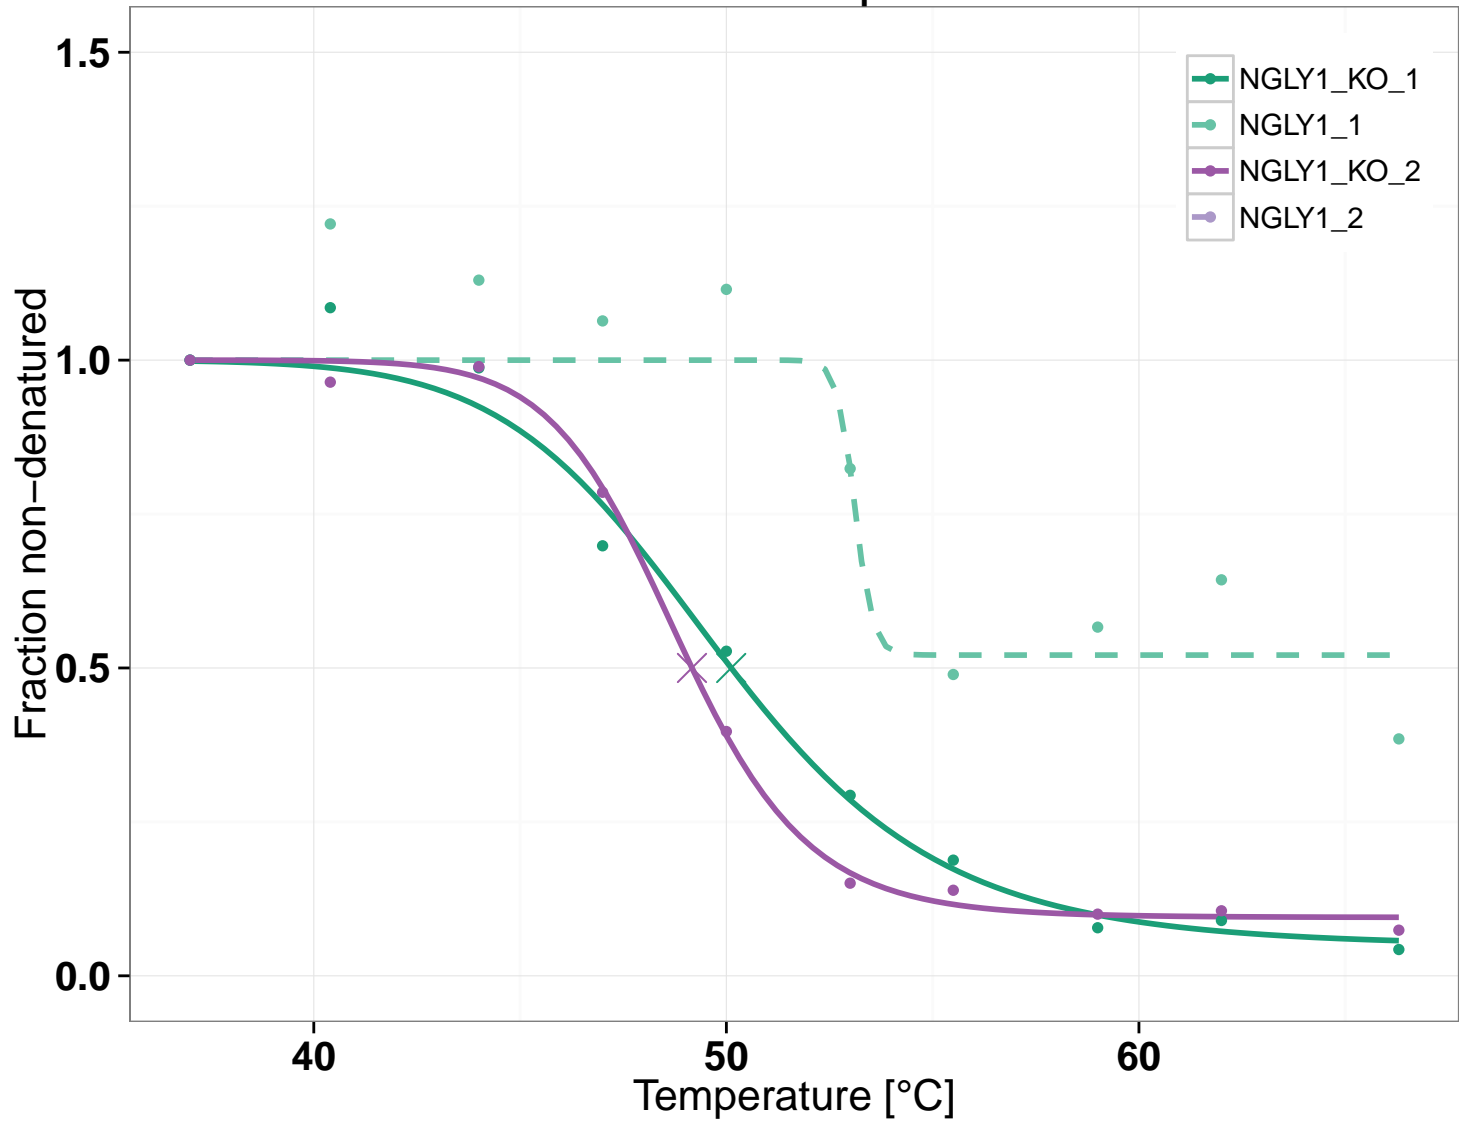

|            | meltPoint | slope  | plateau | R2   |
|------------|-----------|--------|---------|------|
| NGLY1_KO_1 | 50.12     | -0.089 | 0.05    | 0.99 |
| NGLY1_1    | -         | -0.56  | 0.52    | 0.85 |
| NGLY1_KO_2 | 49.17     | -0.14  | 0.09    | 1    |
| NGLY1_2    | -         | -      | -       | -    |

Supplement: Supplementary file 6679 [file 1]

IPI00413263.3|TMEM39B

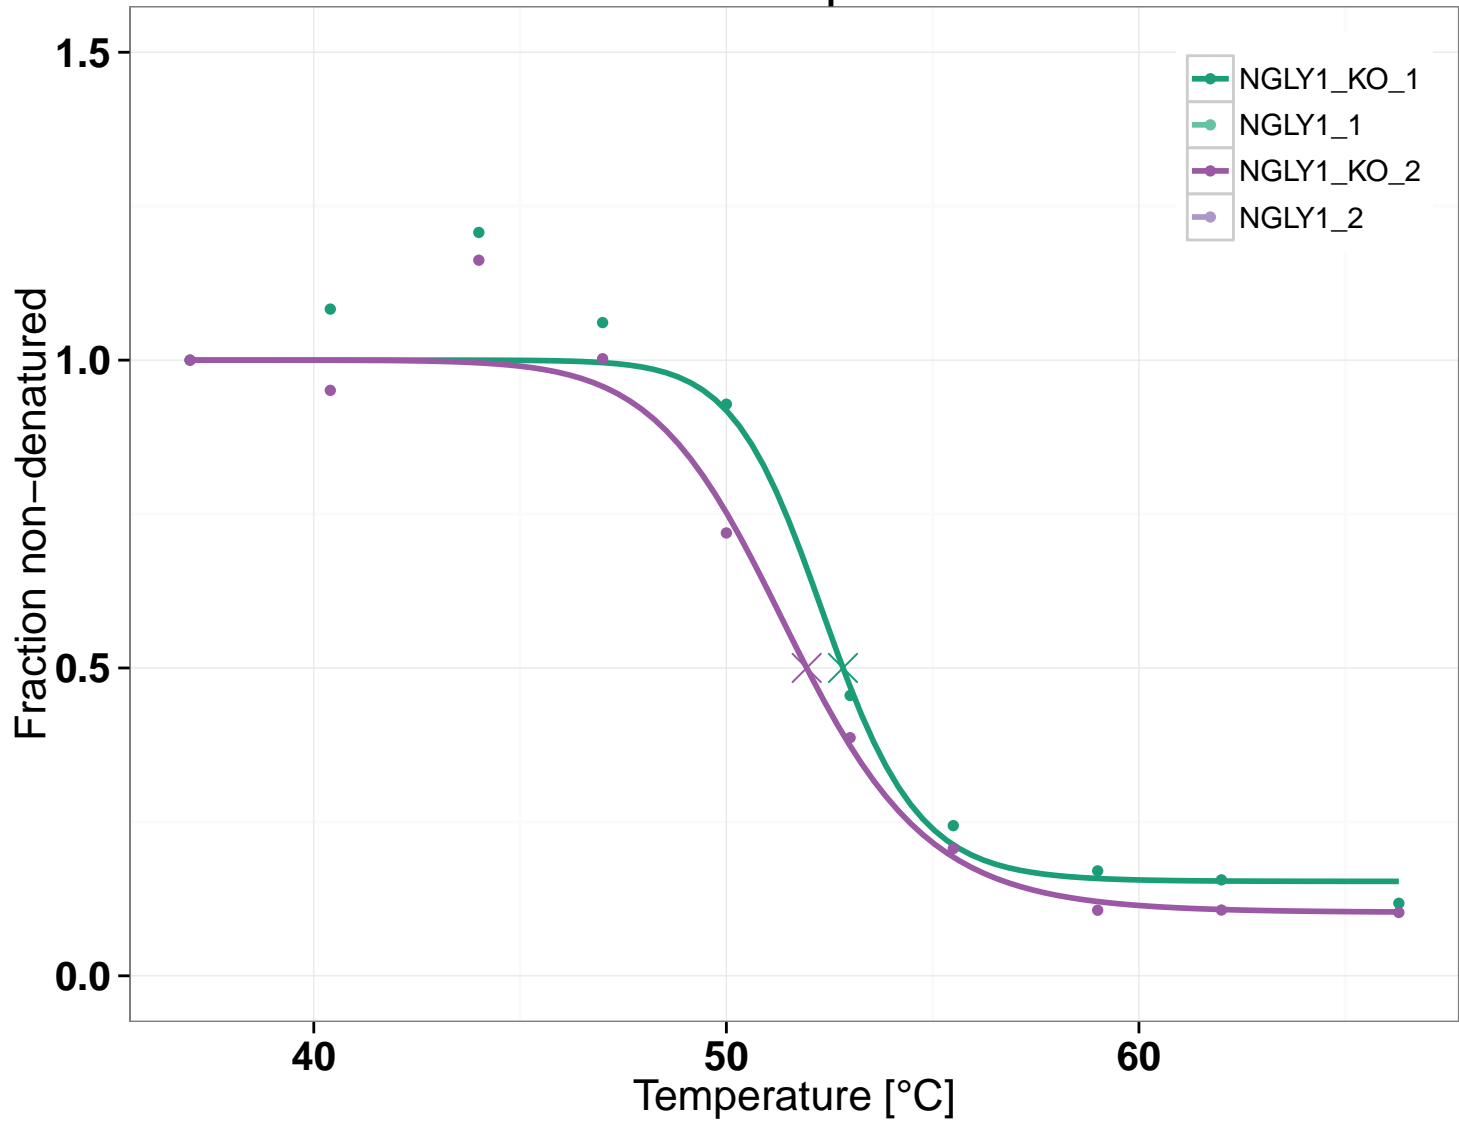

|            | meltPoint | slope | plateau | R2   |
|------------|-----------|-------|---------|------|
| NGLY1_KO_1 | 52.83     | -0.19 | 0.15    | 0.97 |
| NGLY1_1    | -         | -     | -       | -    |
| NGLY1_KO_2 | 51.95     | -0.13 | 0.1     | 0.98 |
| NGLY1_2    | -         | -     | -       | -    |

Supplement: Supplementary file 6680 [file 1]

IPI00297211.1|SMARCA5

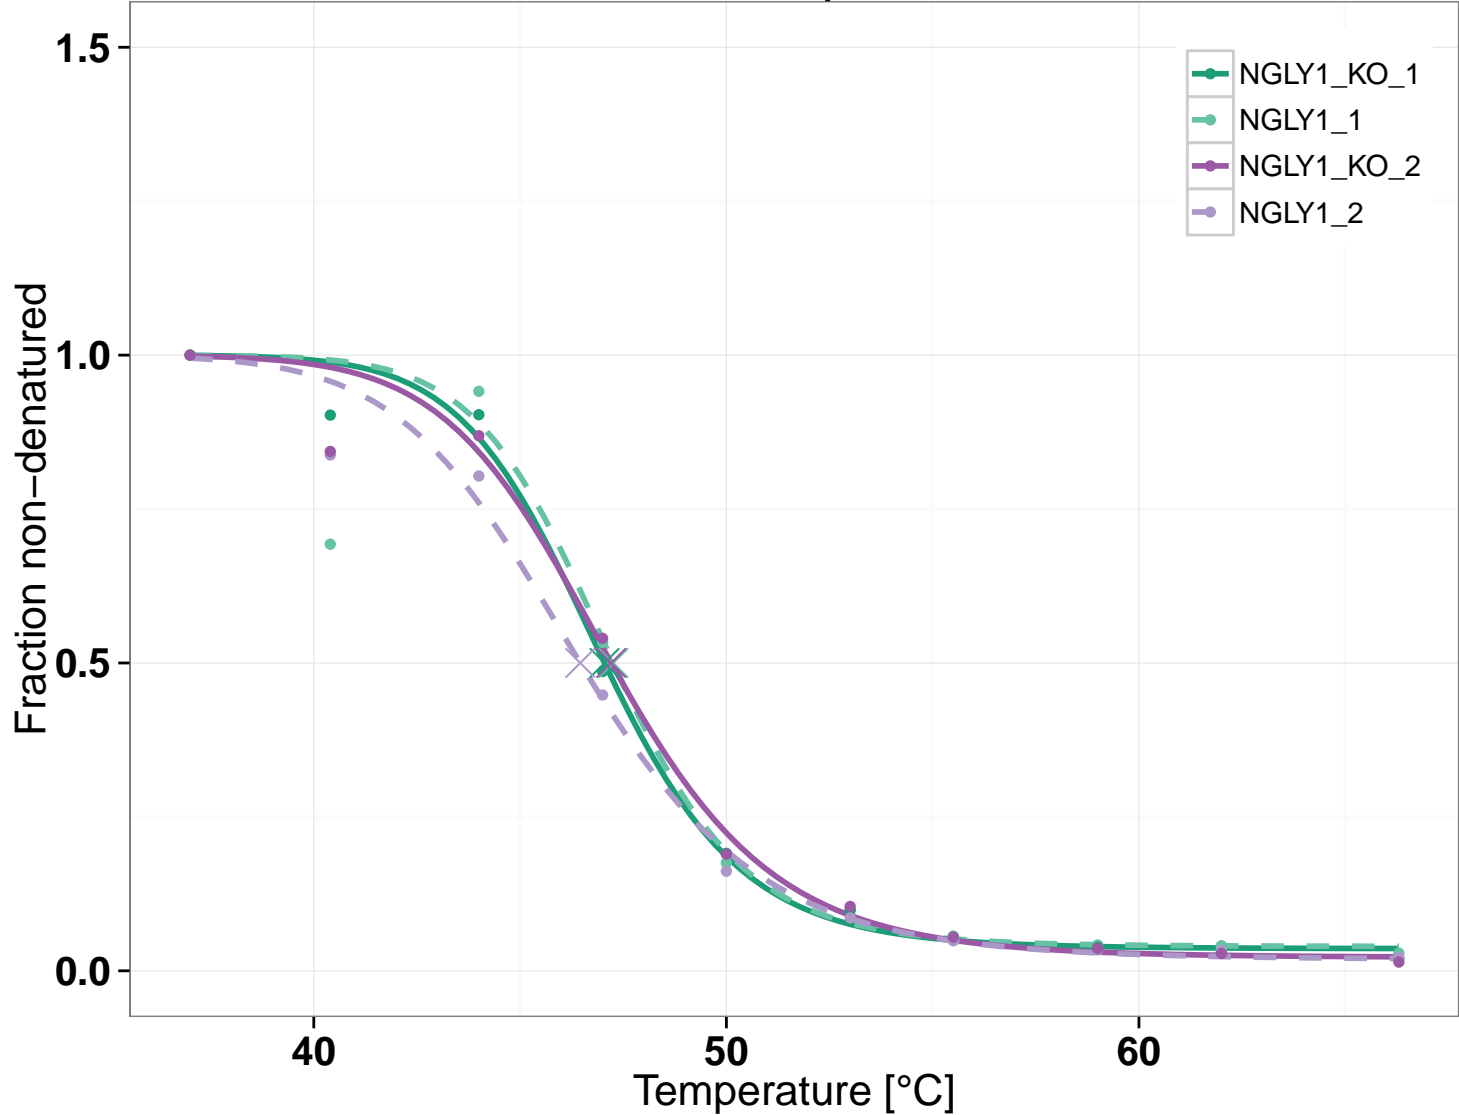

|            | meltPoint | slope | plateau | R2   |
|------------|-----------|-------|---------|------|
| NGLY1_KO_1 | 47.05     | -0.14 | 0.04    | 0.99 |
| NGLY1_1    | 47.26     | -0.15 | 0.04    | 0.93 |
| NGLY1_KO_2 | 47.21     | -0.12 | 0.02    | 0.99 |
| NGLY1_2    | 46.46     | -0.11 | 0.02    | 0.99 |

Supplement: Supplementary file 6681 [file 1]

IPI00178832.1|IPI00178832.1

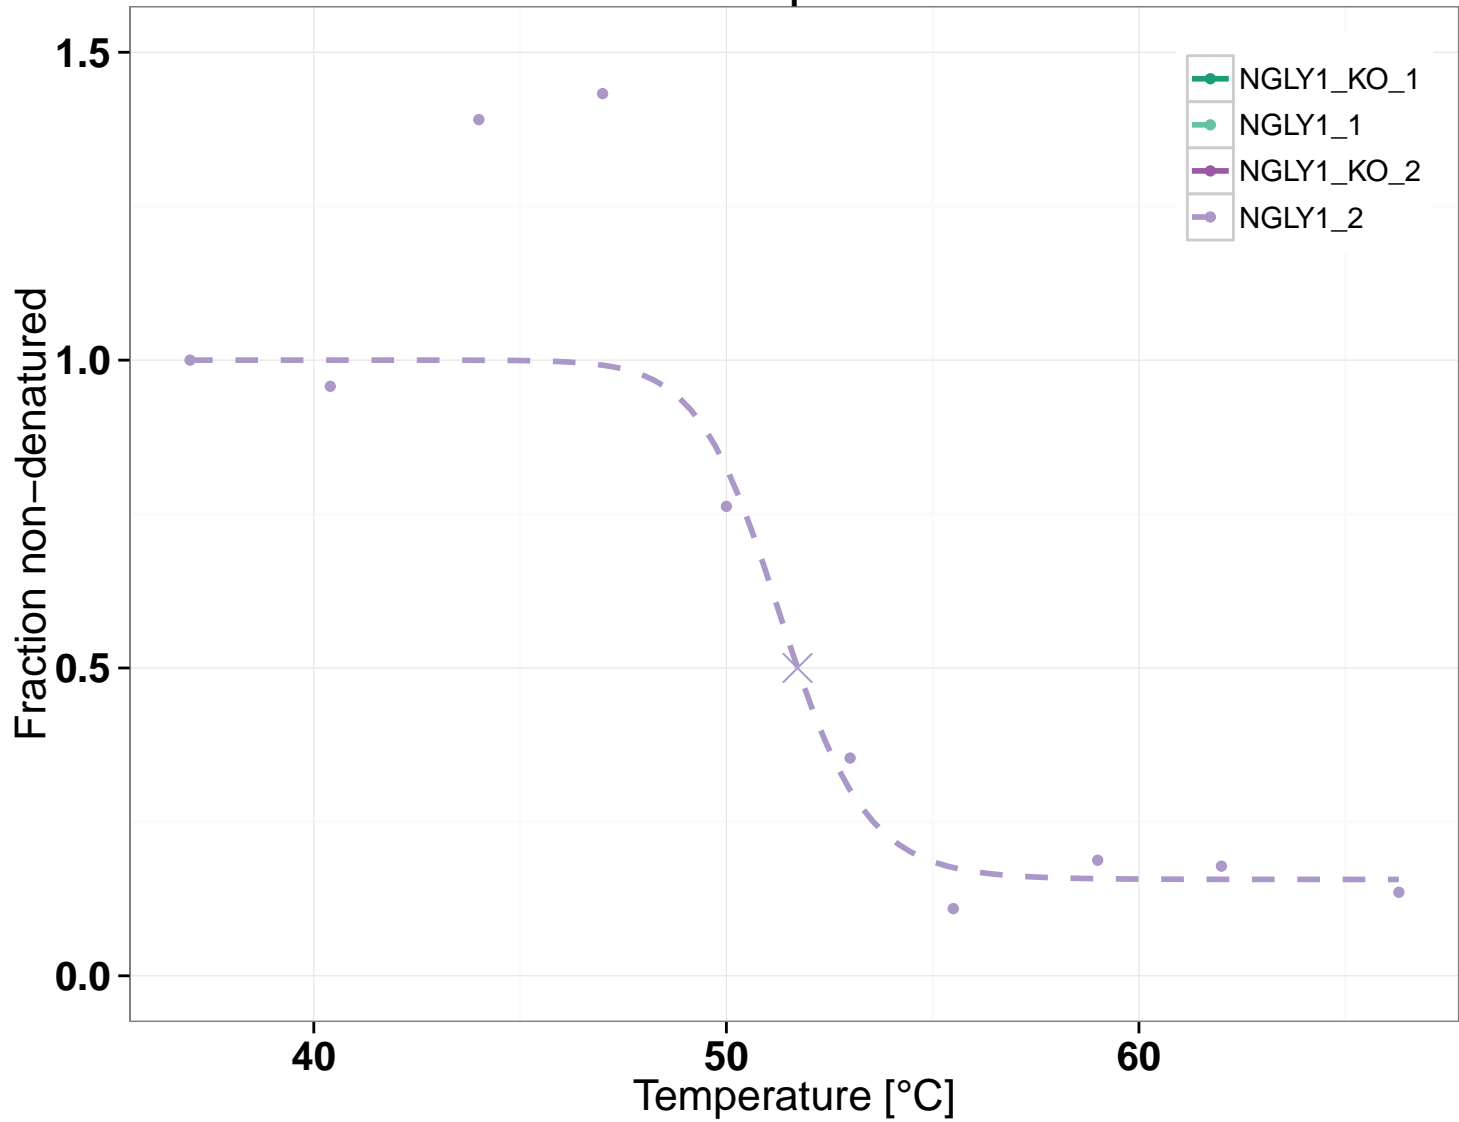

|            | meltPoint | slope | plateau | R2   |
|------------|-----------|-------|---------|------|
| NGLY1_KO_1 | -         | -     | -       | -    |
| NGLY1_1    | -         | -     | -       | -    |
| NGLY1_KO_2 | -         | -     | -       | -    |
| NGLY1_2    | 51.73     | -0.21 | 0.16    | 0.85 |

Supplement: Supplementary file 6682 [file 1]

IPI00256605.5|WAC

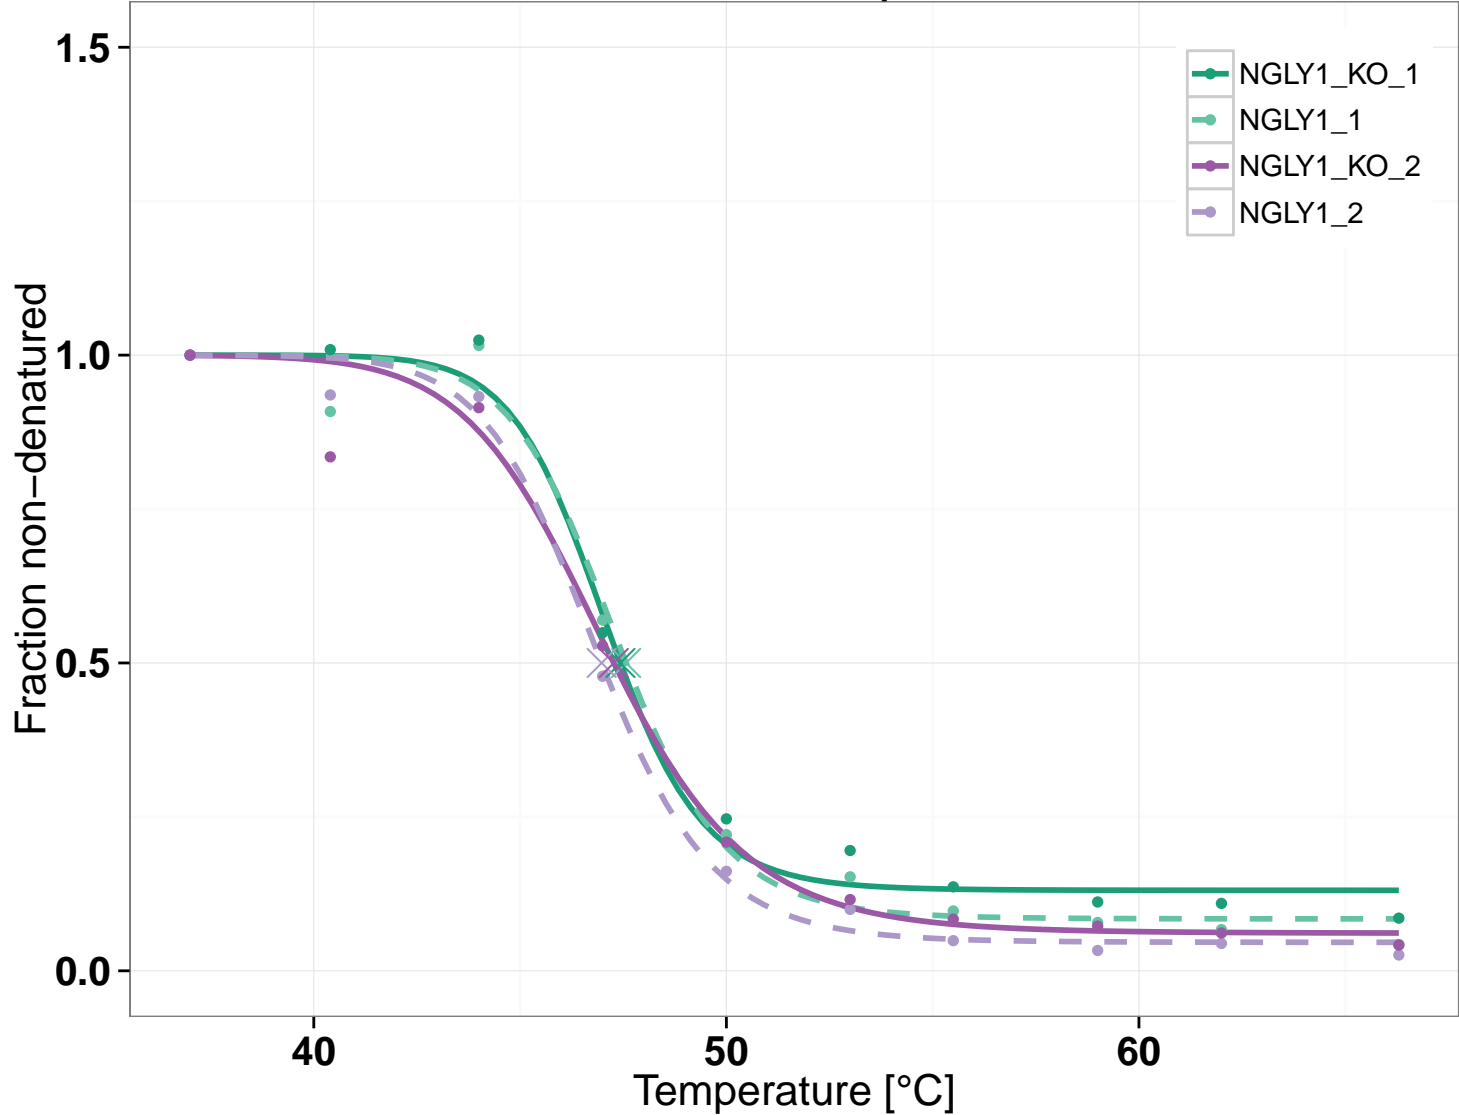

|            | meltPoint | slope | plateau | R2   |
|------------|-----------|-------|---------|------|
| NGLY1_KO_1 | 47.43     | -0.19 | 0.13    | 0.99 |
| NGLY1_1    | 47.57     | -0.17 | 0.08    | 0.99 |
| NGLY1_KO_2 | 47.27     | -0.14 | 0.06    | 0.98 |
| NGLY1_2    | 46.98     | -0.17 | 0.05    | 1    |

Supplement: Supplementary file 6683 [file 1]

IPI00385950.7|PYROXD1

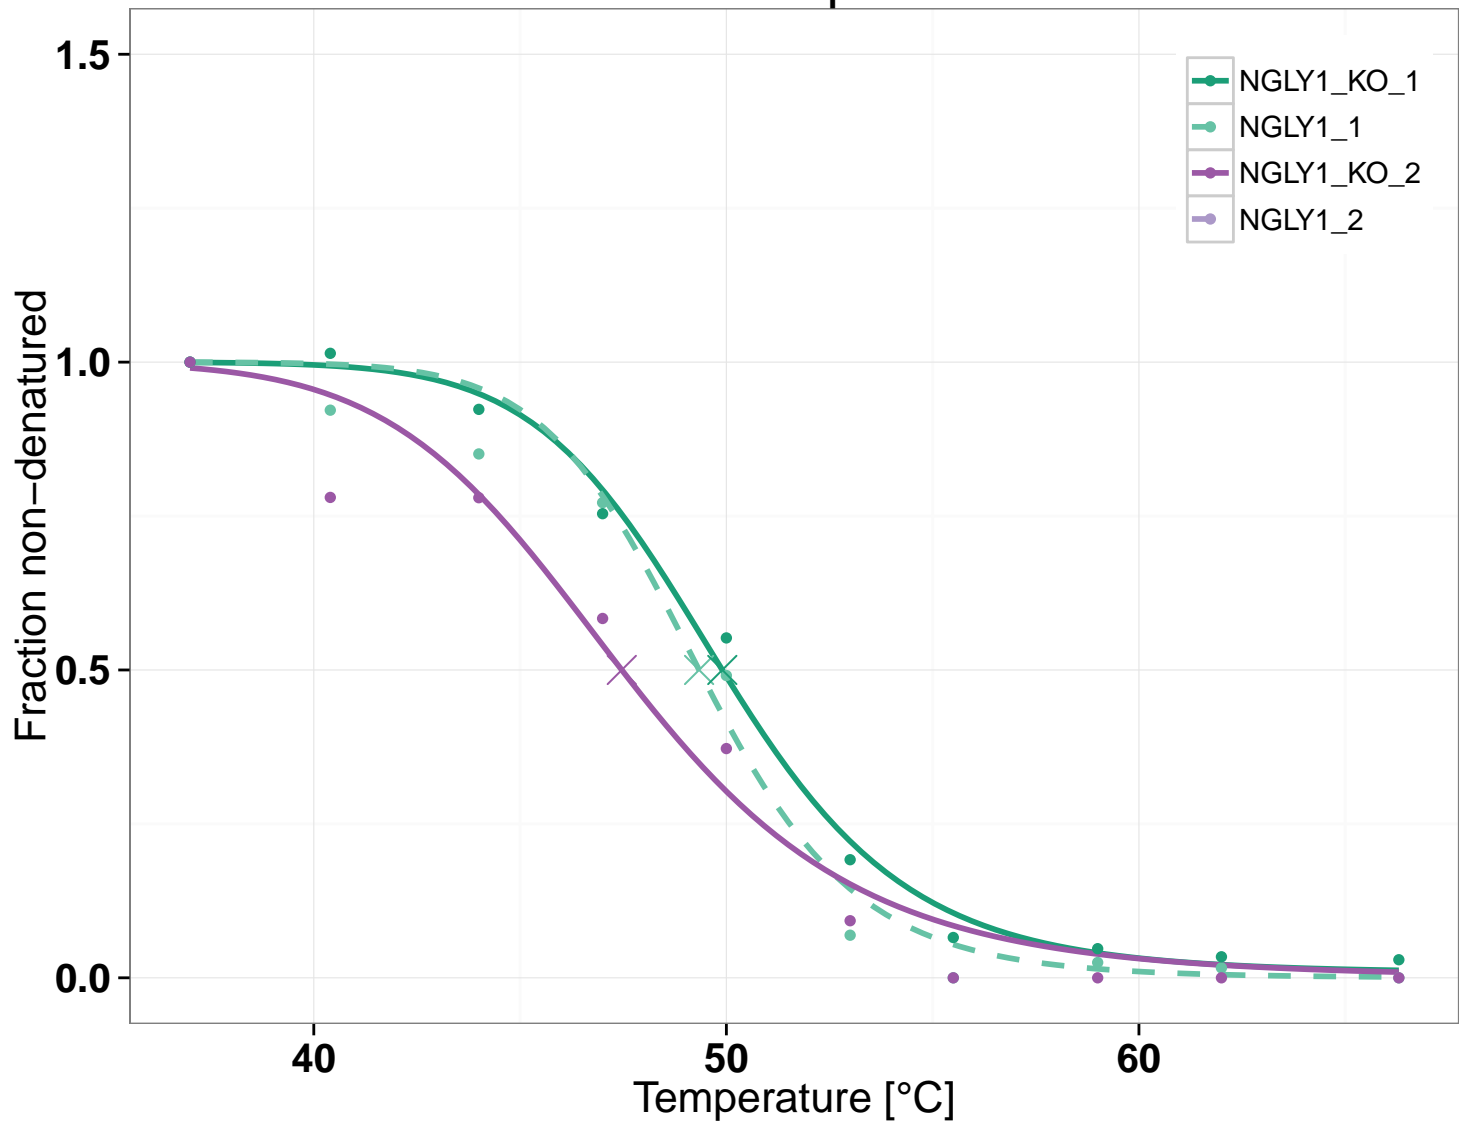

|            | meltPoint | slope  | plateau | R2   |
|------------|-----------|--------|---------|------|
| NGLY1_KO_1 | 49.9      | -0.11  | 0.01    | 0.99 |
| NGLY1_1    | 49.34     | -0.13  | 0       | 0.98 |
| NGLY1_KO_2 | 47.46     | -0.088 | 0       | 0.97 |
| NGLY1_2    | -         | -      | -       | -    |

Supplement: Supplementary file 6684 [file 1]

IPI00026299.1|GYPC

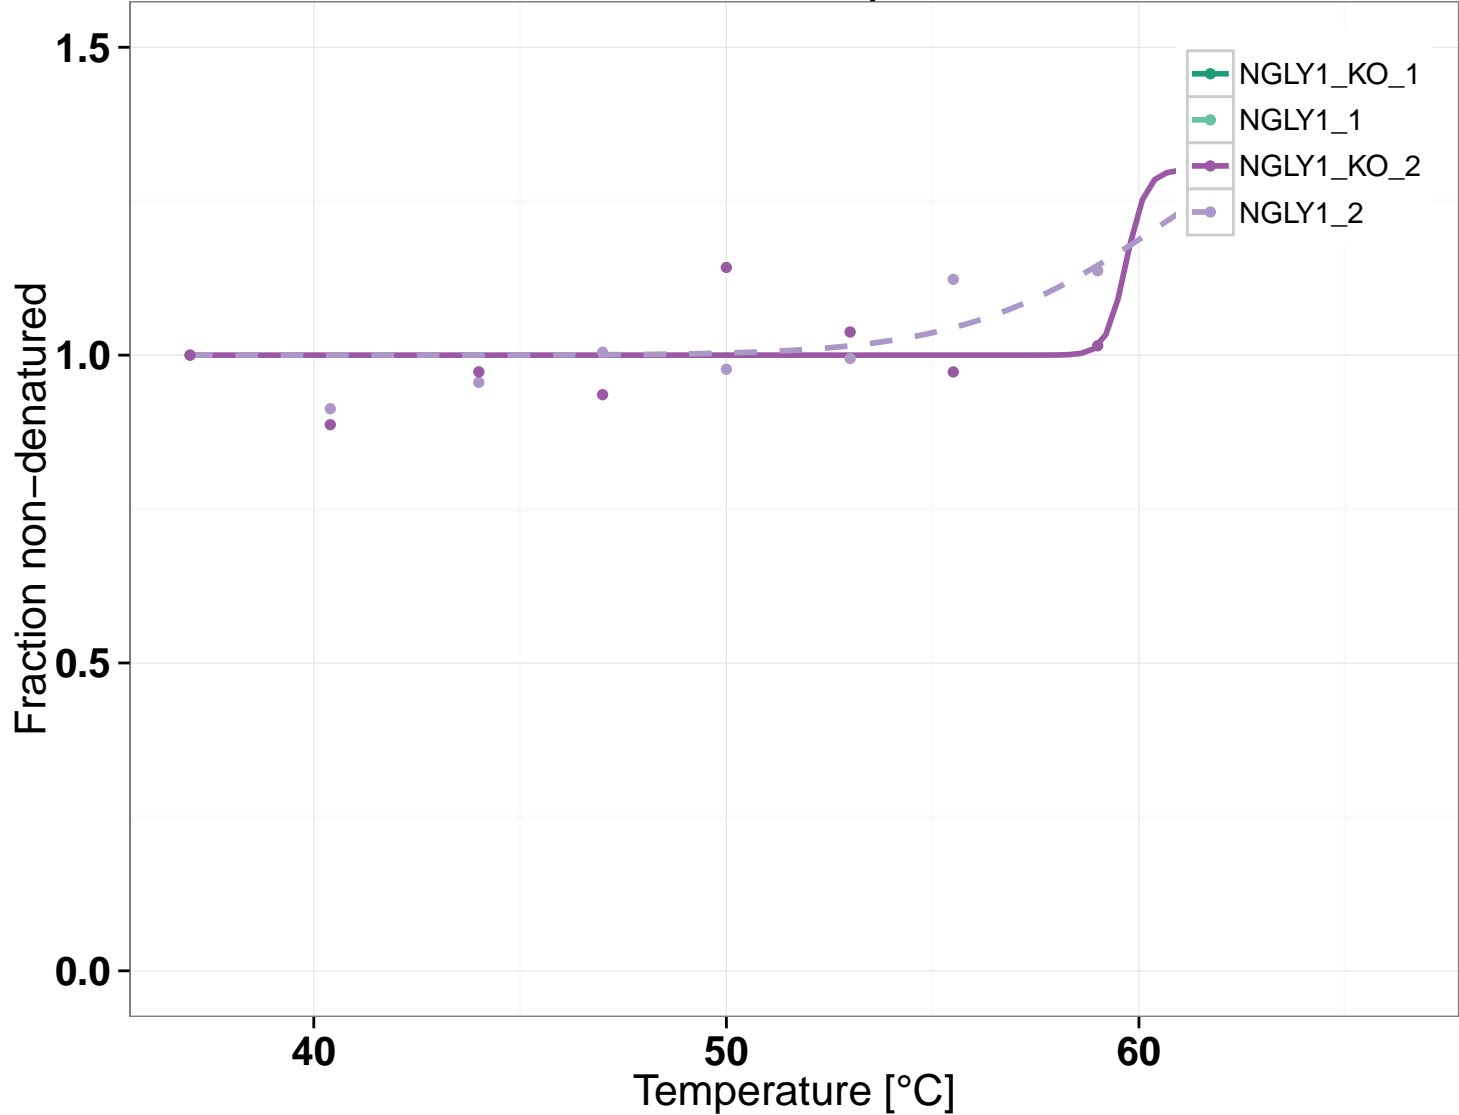

|            | meltPoint | slope | plateau | R2   |
|------------|-----------|-------|---------|------|
| NGLY1_KO_1 | —         | —     | —       | —    |
| NGLY1_1    | —         | —     | —       | —    |
| NGLY1_KO_2 | —         | 0.32  | 1.3     | 0.77 |
| NGLY1_2    | —         | 0.045 | 1.5     | 0.91 |

Supplement: Supplementary file 6685 [file 1]

# IPI00914949.1|SPTB

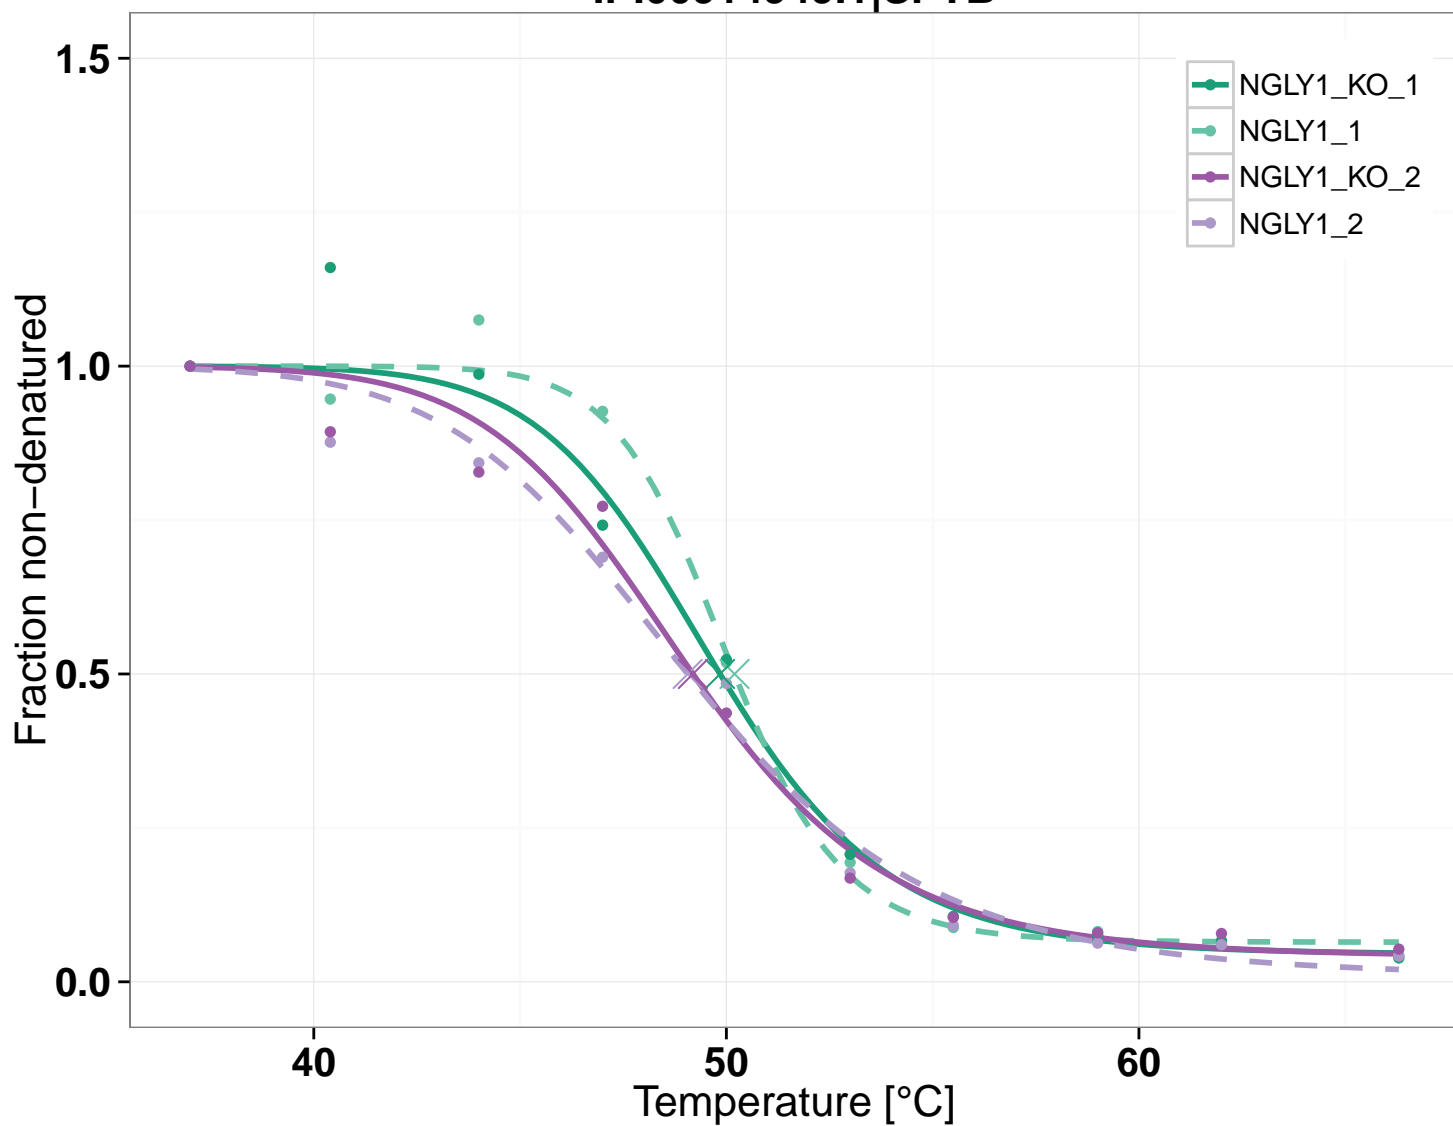

|            | meltPoint | slope  | plateau | R2   |
|------------|-----------|--------|---------|------|
| NGLY1_KO_1 | 49.85     | -0.11  | 0.04    | 0.98 |
| NGLY1_1    | 50.2      | -0.17  | 0.06    | 0.99 |
| NGLY1_KO_2 | 49.19     | -0.098 | 0.04    | 0.98 |
| NGLY1_2    | 49.06     | -0.085 | 0.01    | 0.99 |

Supplement: Supplementary file 6687 [file 1]

IPI00025478.1|IRF9

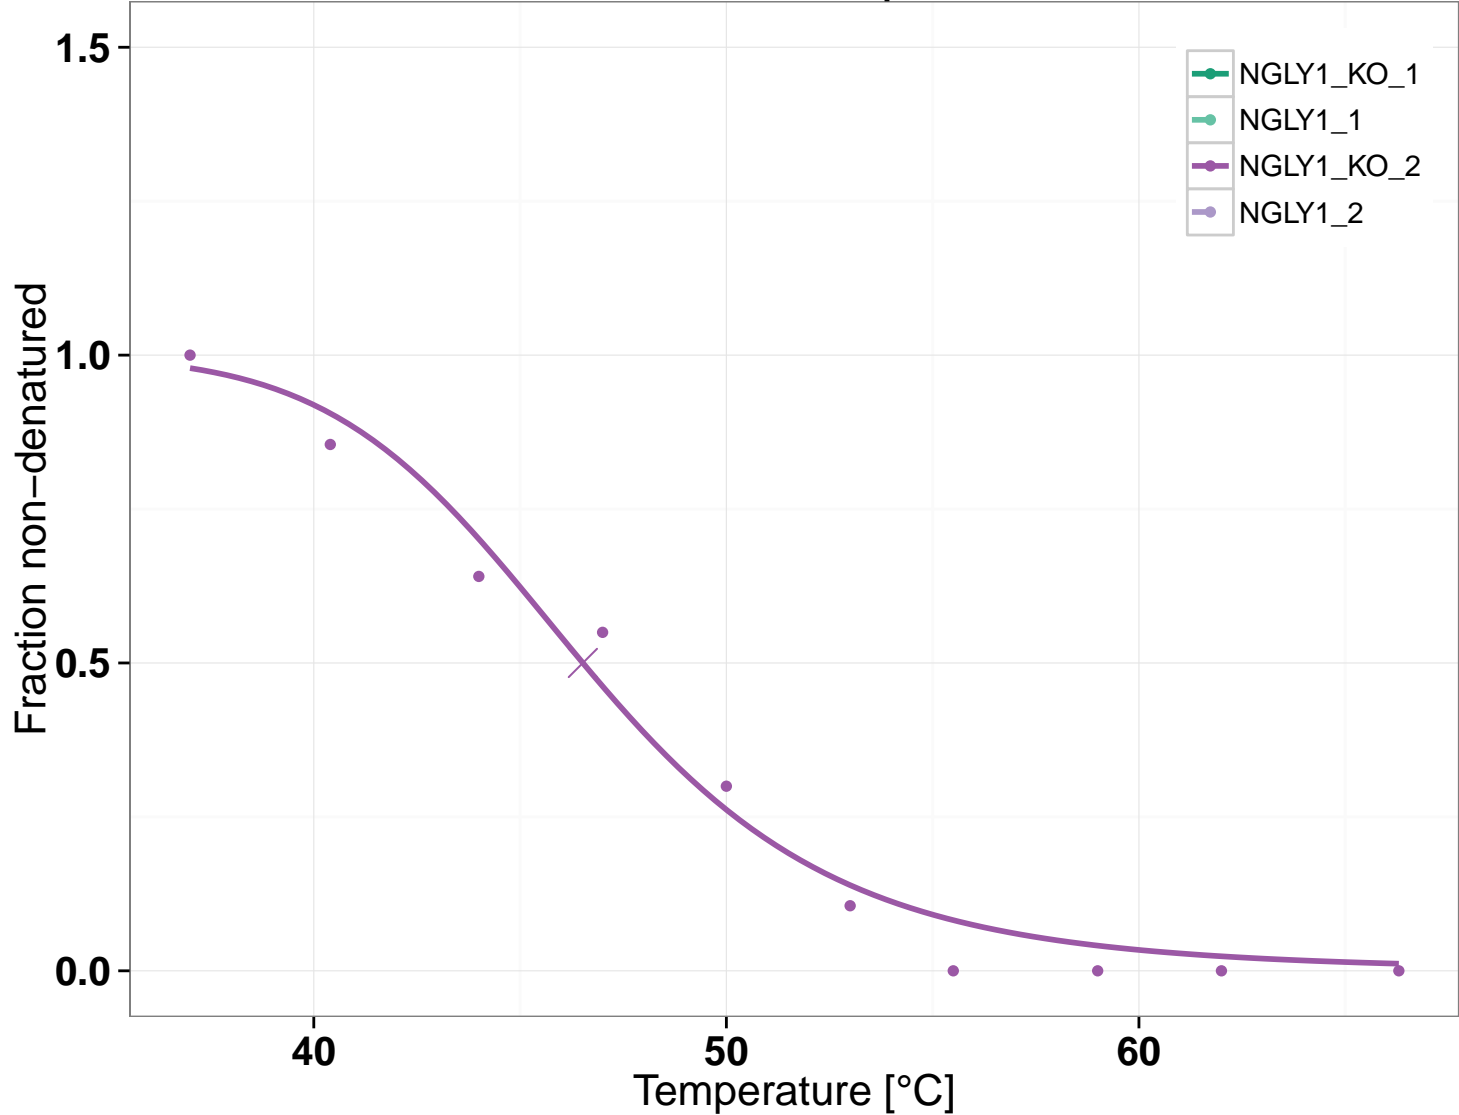

|            | meltPoint | slope  | plateau | R2   |
|------------|-----------|--------|---------|------|
| NGLY1_KO_1 | —         | —      | —       | —    |
| NGLY1_1    | —         | —      | —       | —    |
| NGLY1_KO_2 | 46.52     | -0.082 | 0       | 0.98 |
| NGLY1_2    | —         | —      | —       | —    |

Supplement: Supplementary file 6688 [file 1]

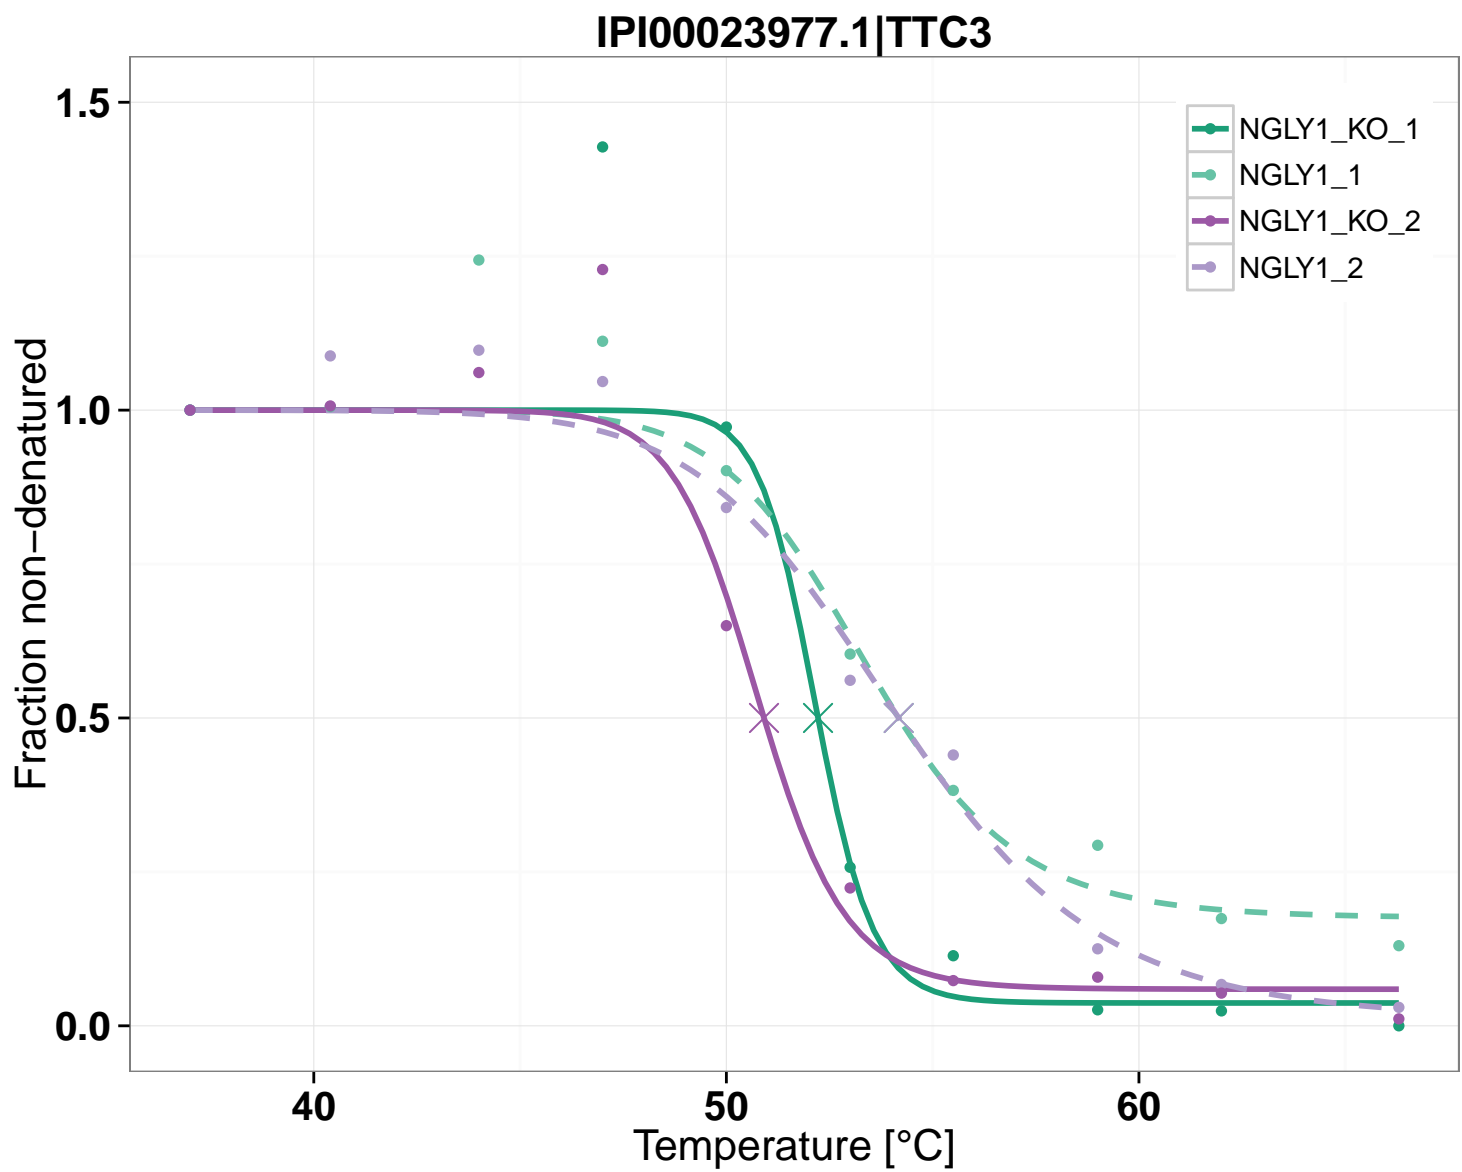

|            | meltPoint | slope | plateau | R2   |
|------------|-----------|-------|---------|------|
| NGLY1_KO_1 | 52.22     | -0.35 | 0.04    | 0.82 |
| NGLY1_1    | 54.18     | -0.11 | 0.18    | 0.95 |
| NGLY1_KO_2 | 50.91     | -0.22 | 0.06    | 0.97 |
| NGLY1_2    | 54.18     | -0.1  | 0.01    | 0.98 |

Supplement: Supplementary file 6689 [file 1]

# IPI00304232.1|WDR12

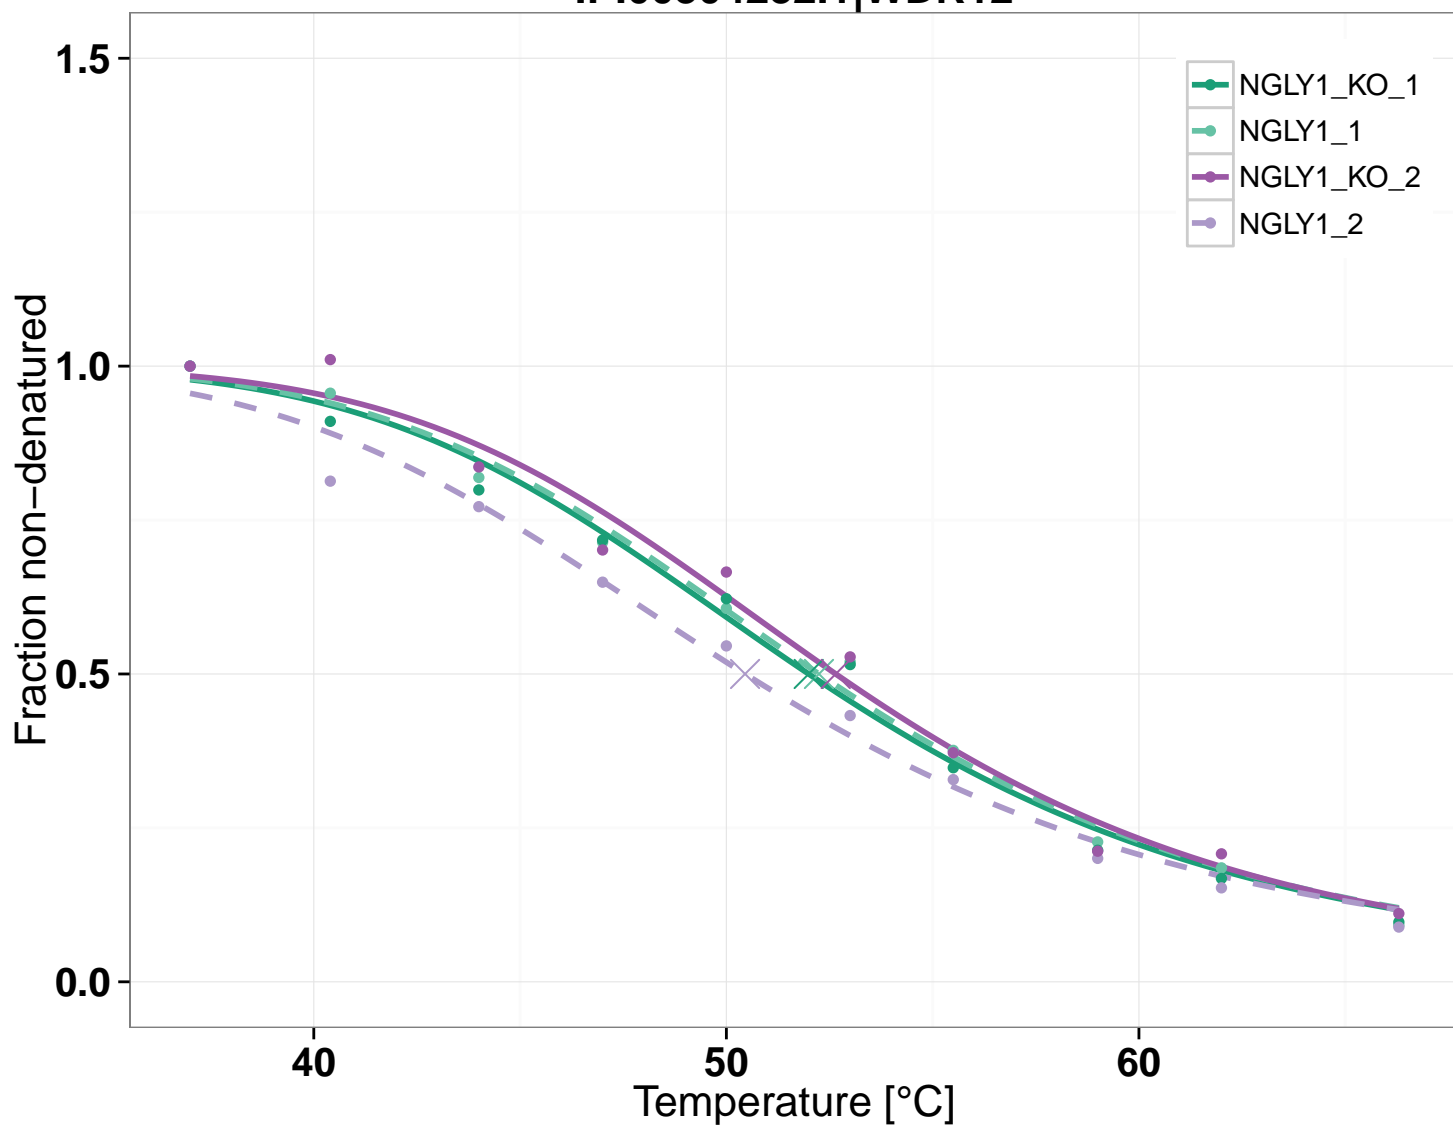

|            | meltPoint | slope  | plateau | R2   |
|------------|-----------|--------|---------|------|
| NGLY1_KO_1 | 52        | -0.047 | 0       | 0.99 |
| NGLY1_1    | 52.24     | -0.047 | 0       | 0.99 |
| NGLY1_KO_2 | 52.65     | -0.048 | 0       | 0.98 |
| NGLY1_2    | 50.45     | -0.044 | 0       | 0.99 |

Supplement: Supplementary file 6690 [file 1]

# IPI00827591.1|ISCA1L

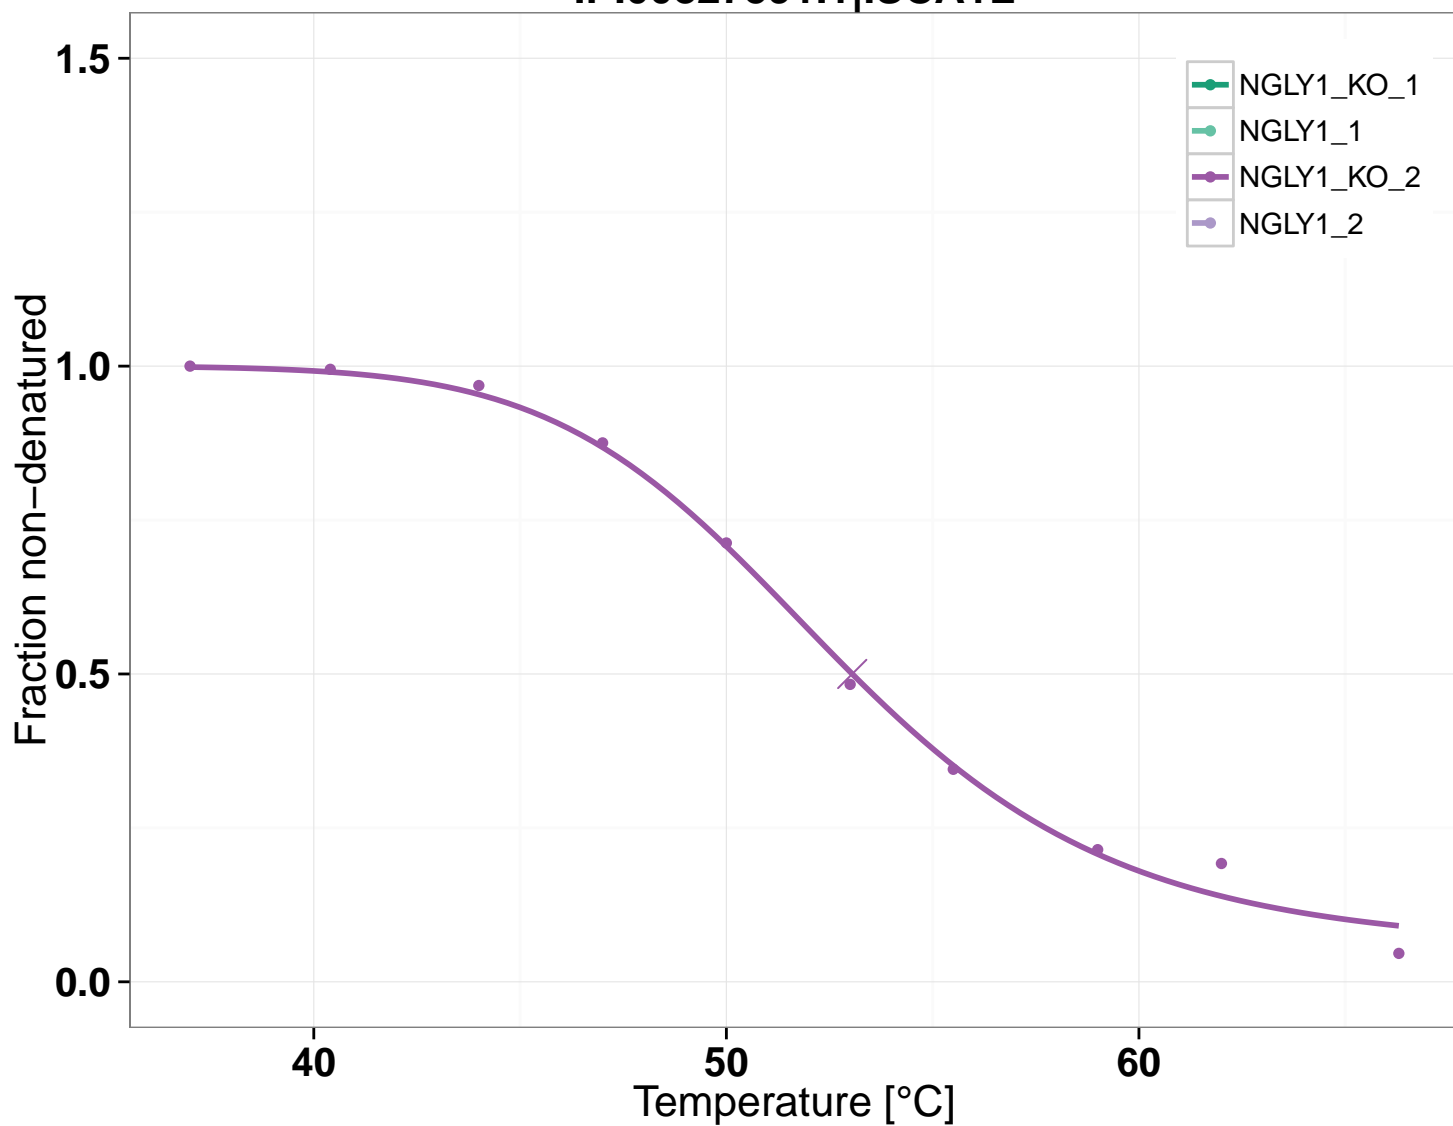

|            | meltPoint | slope  | plateau | R2 |
|------------|-----------|--------|---------|----|
| NGLY1_KO_1 | —         | —      | —       | —  |
| NGLY1_1    | —         | —      | —       | —  |
| NGLY1_KO_2 | 53.05     | -0.069 | 0.05    | 1  |
| NGLY1_2    | —         | —      | —       | —  |

Supplement: Supplementary file 6691 [file 1]

IPI00024972.1|CDC42SE1

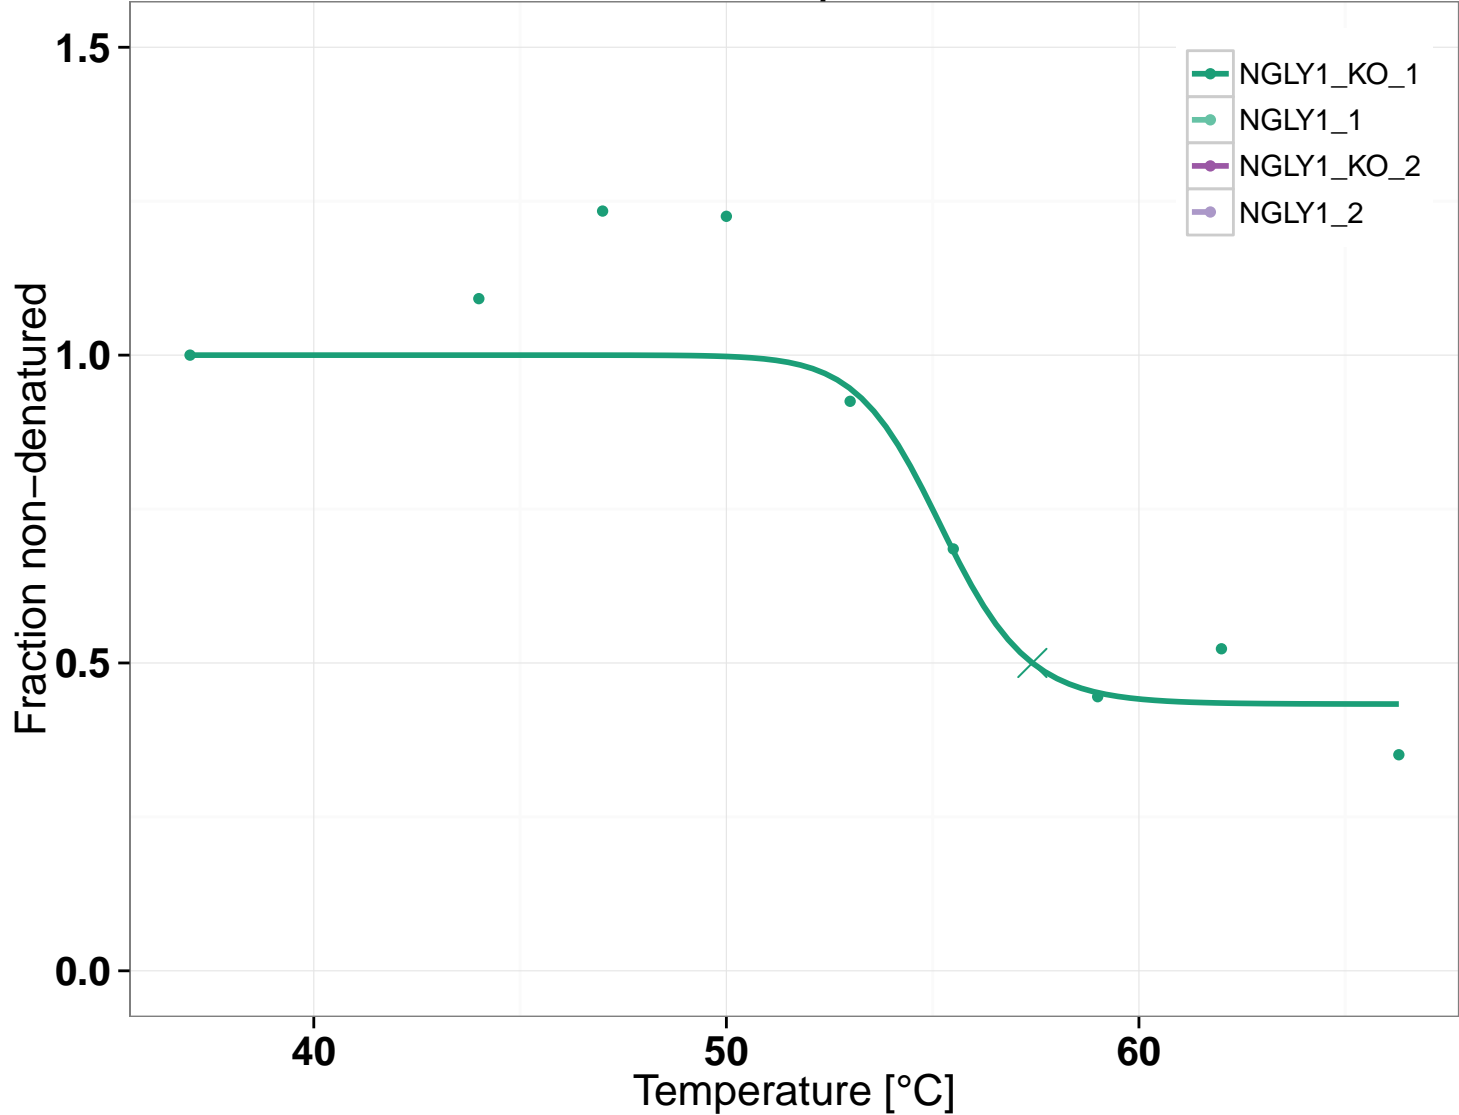

|            | meltPoint | slope | plateau | R2   |
|------------|-----------|-------|---------|------|
| NGLY1_KO_1 | 57.42     | -0.14 | 0.43    | 0.67 |
| NGLY1_1    | -         | -     | -       | -    |
| NGLY1_KO_2 | -         | -     | -       | -    |
| NGLY1_2    | -         | -     | -       | -    |

Supplement: Supplementary file 6692 [file 1]

# IPI00385095.1|C19ORF50

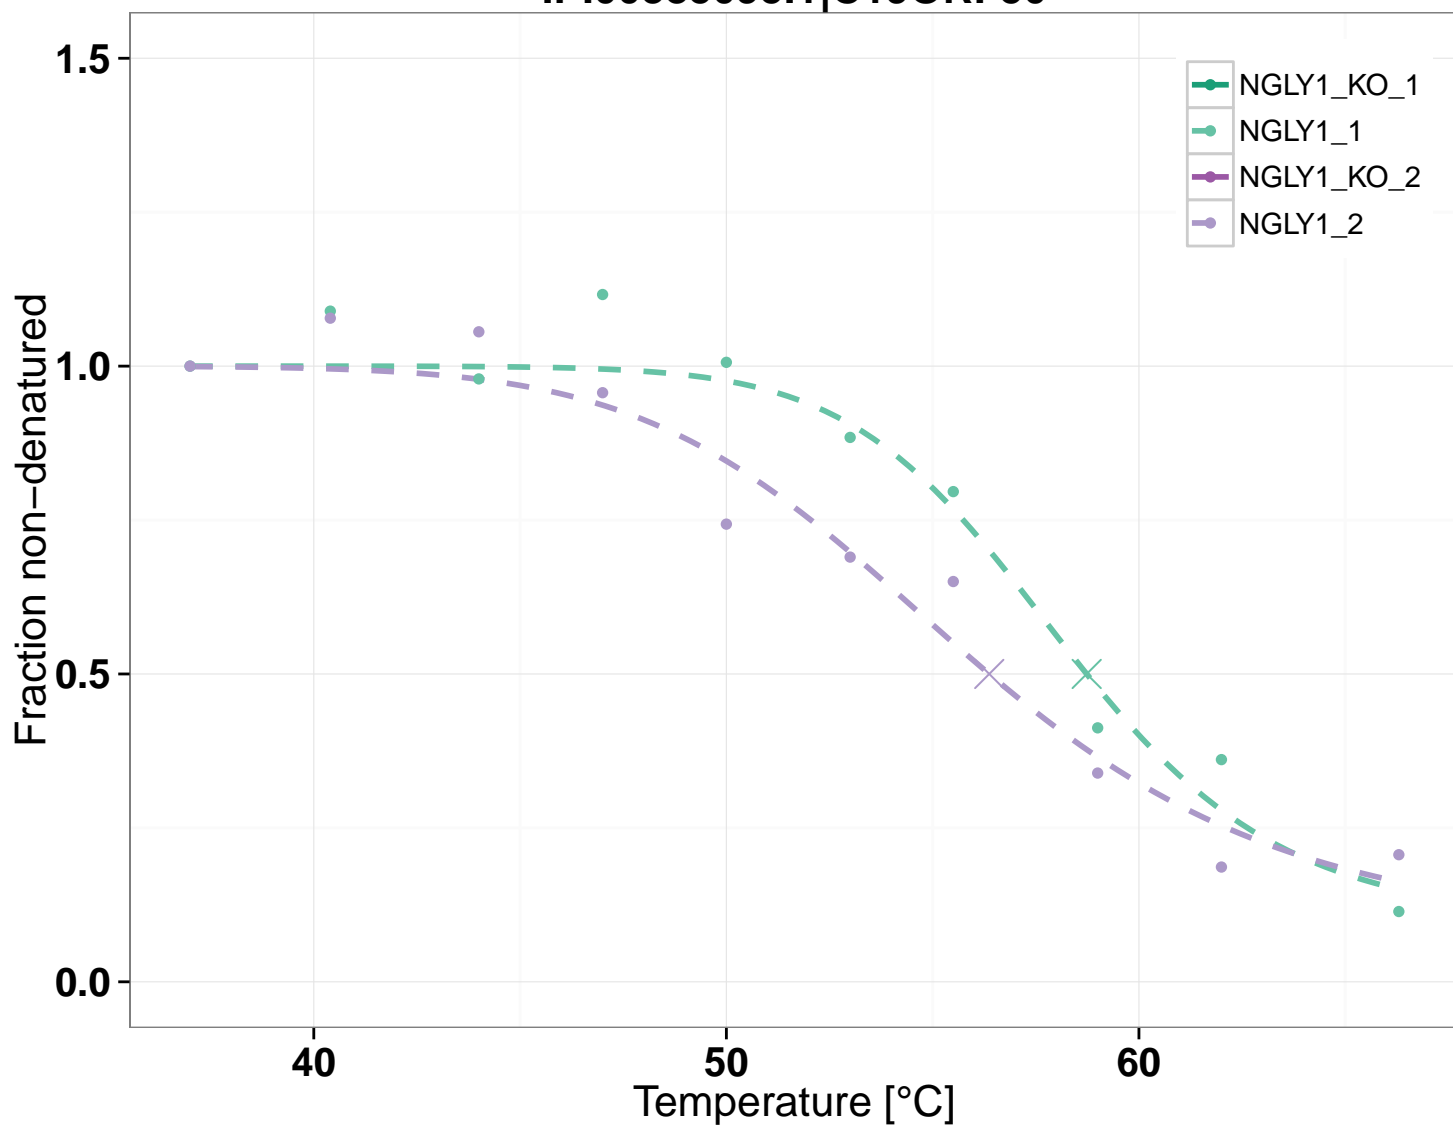

|            | meltPoint | slope  | plateau | R2   |
|------------|-----------|--------|---------|------|
| NGLY1_KO_1 | -         | -      | -       | -    |
| NGLY1_1    | 58.73     | -0.087 | 0.09    | 0.97 |
| NGLY1_KO_2 | -         | -      | -       | -    |
| NGLY1_2    | 56.37     | -0.06  | 0.07    | 0.96 |

Supplement: Supplementary file 6693 [file 1]

# IPI00299524.1|NCAPD2

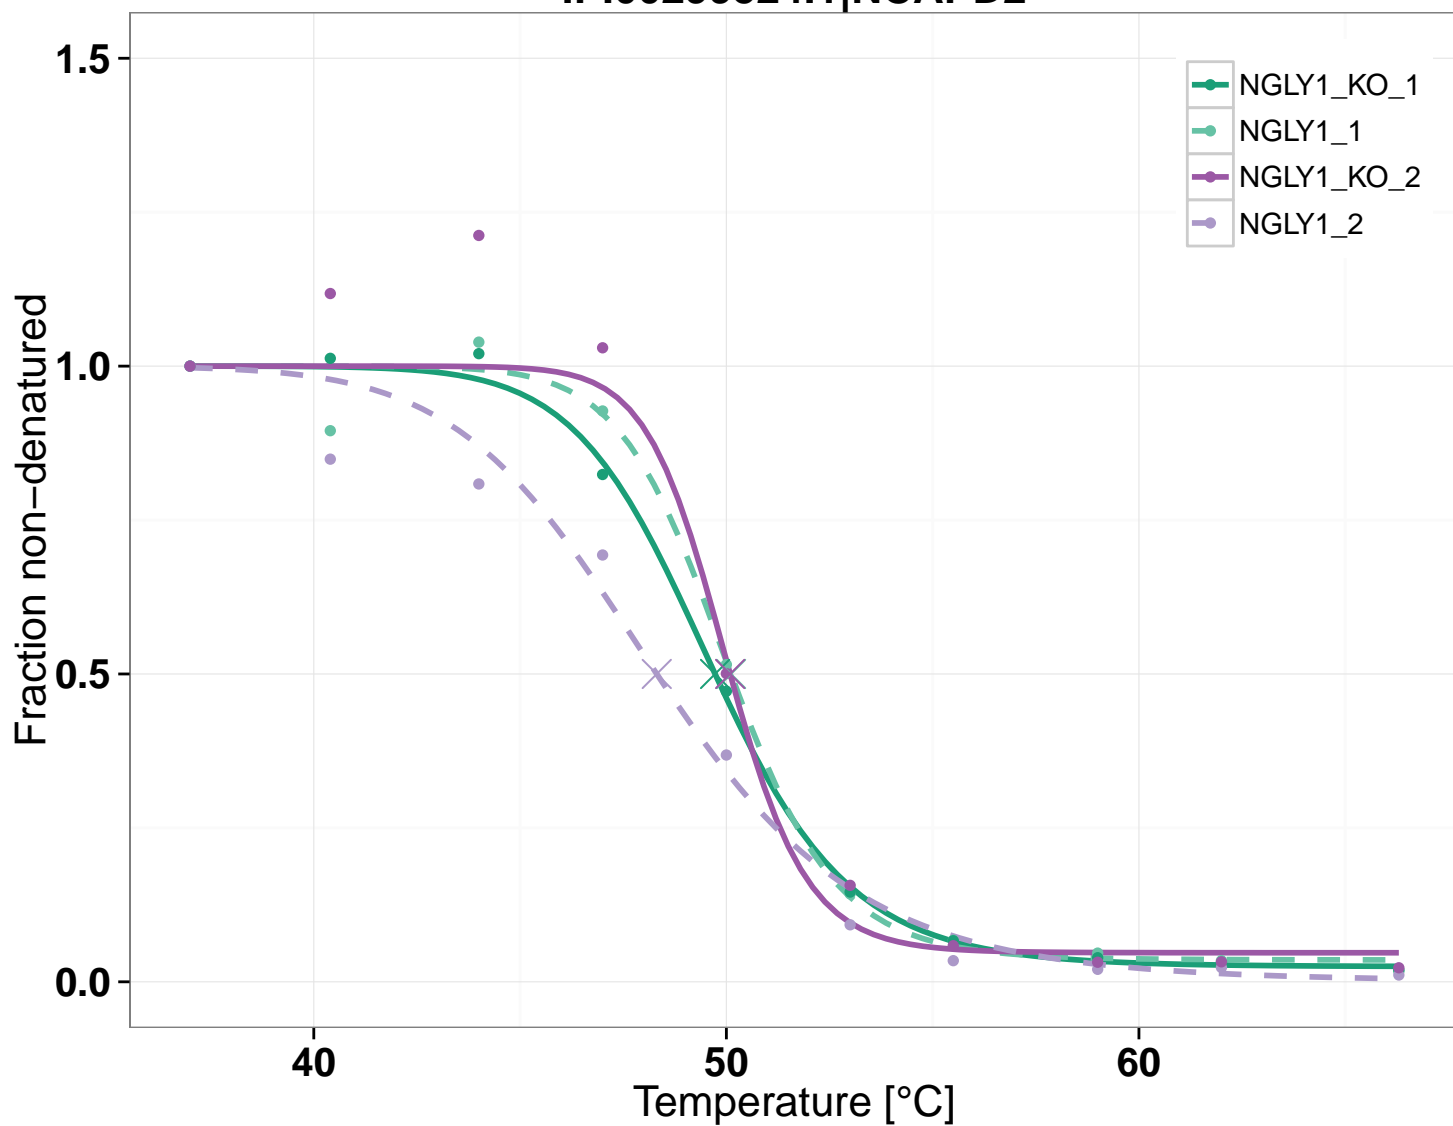

|            | meltPoint | slope | plateau | R2   |
|------------|-----------|-------|---------|------|
| NGLY1_KO_1 | 49.73     | -0.15 | 0.02    | 1    |
| NGLY1_1    | 50.11     | -0.18 | 0.04    | 0.99 |
| NGLY1_KO_2 | 50.09     | -0.25 | 0.05    | 0.97 |
| NGLY1_2    | 48.31     | -0.1  | 0       | 0.98 |

Supplement: Supplementary file 6694 [file 1]

# IPI00554494.3|FBXL19

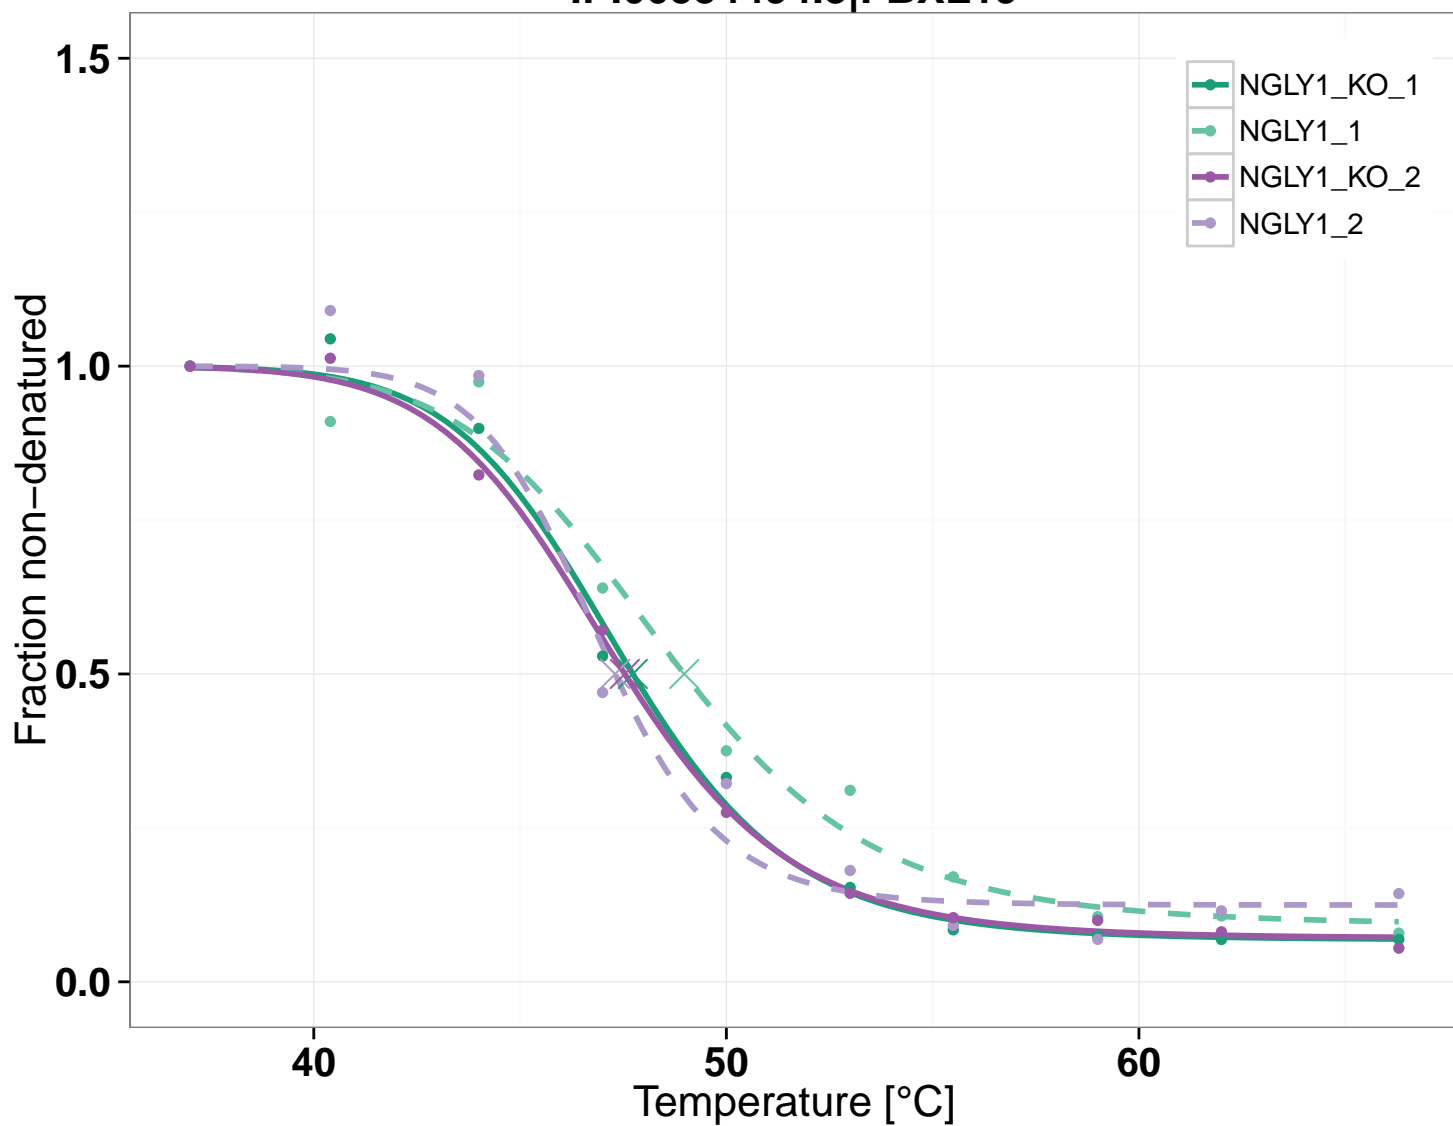

|            | meltPoint | slope | plateau | R2   |
|------------|-----------|-------|---------|------|
| NGLY1_KO_1 | 47.73     | -0.11 | 0.07    | 0.99 |
| NGLY1_1    | 48.98     | -0.09 | 0.09    | 0.98 |
| NGLY1_KO_2 | 47.54     | -0.11 | 0.07    | 1    |
| NGLY1_2    | 47.3      | -0.15 | 0.12    | 0.98 |

Supplement: Supplementary file 6695 [file 1]

IPI00787449.1|LOC729789

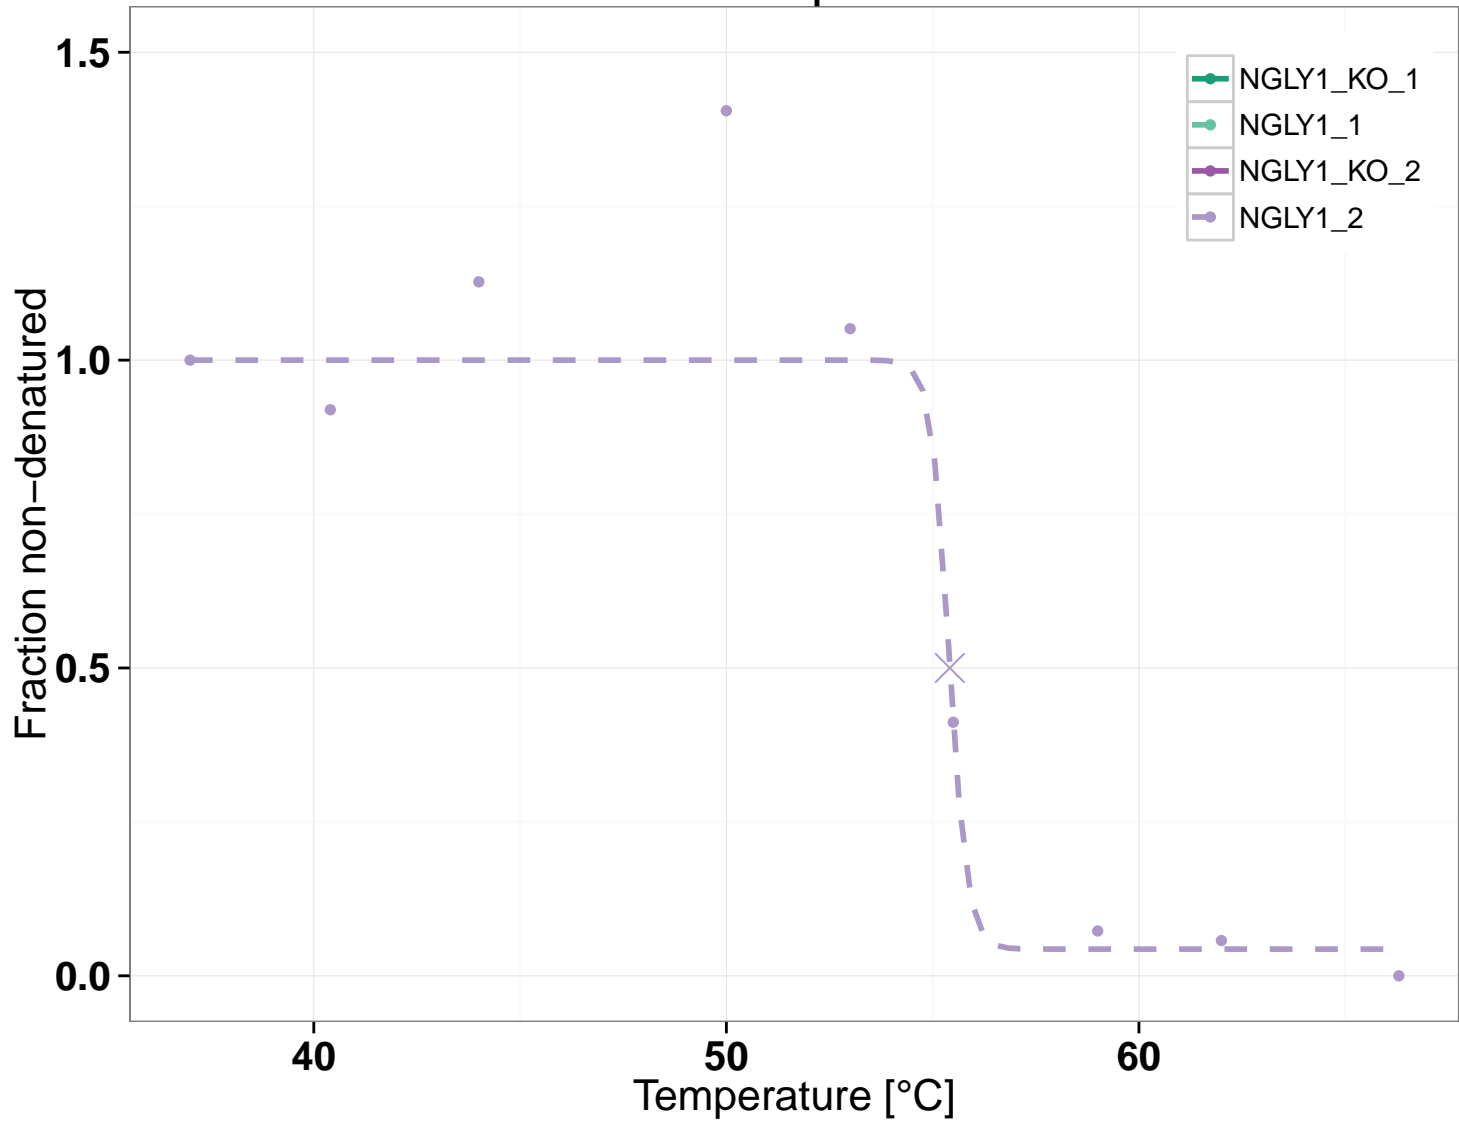

|            | meltPoint | slope | plateau | R2   |
|------------|-----------|-------|---------|------|
| NGLY1_KO_1 | -         | -     | -       | -    |
| NGLY1_1    | -         | -     | -       | -    |
| NGLY1_KO_2 | -         | -     | -       | -    |
| NGLY1_2    | 55.42     | -1.1  | 0.04    | 0.82 |

Supplement: Supplementary file 6696 [file 1]

# IPI00023549.5|HSPC159

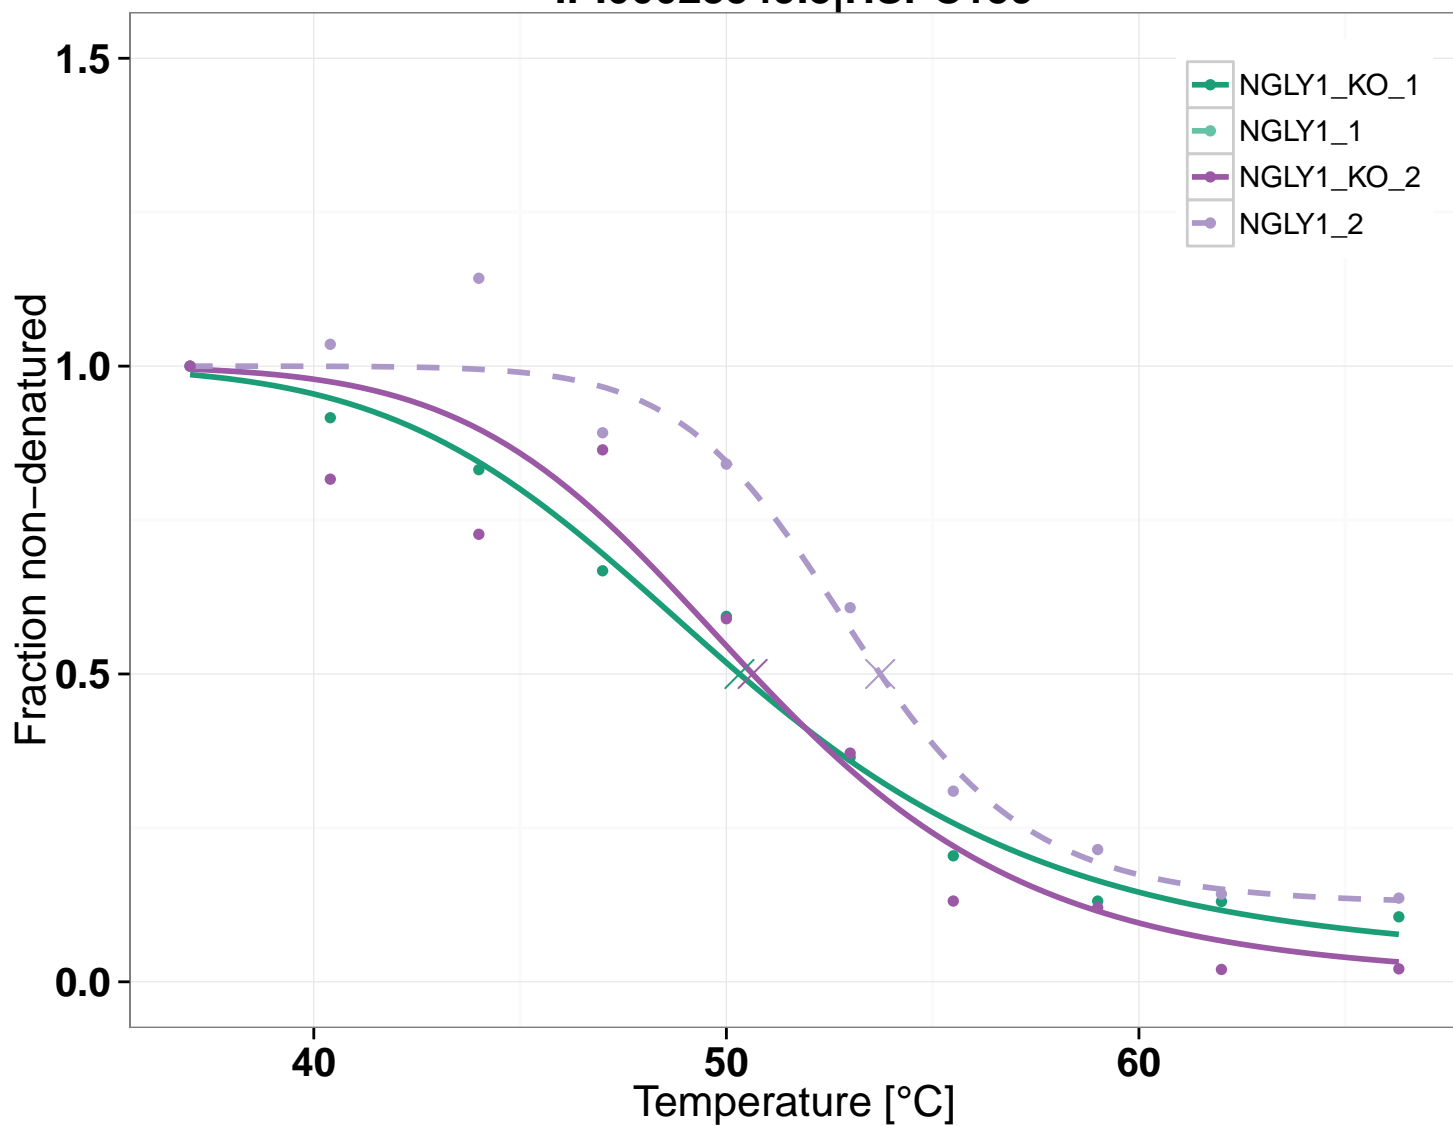

|            | meltPoint | slope  | plateau | R2   |
|------------|-----------|--------|---------|------|
| NGLY1_KO_1 | 50.32     | -0.06  | 0.03    | 0.99 |
| NGLY1_1    | -         | -      | -       | -    |
| NGLY1_KO_2 | 50.64     | -0.072 | 0       | 0.94 |
| NGLY1_2    | 53.73     | -0.1   | 0.13    | 0.98 |

Supplement: Supplementary file 6697 [file 1]

IPI00023832.4|SH3PXD2B

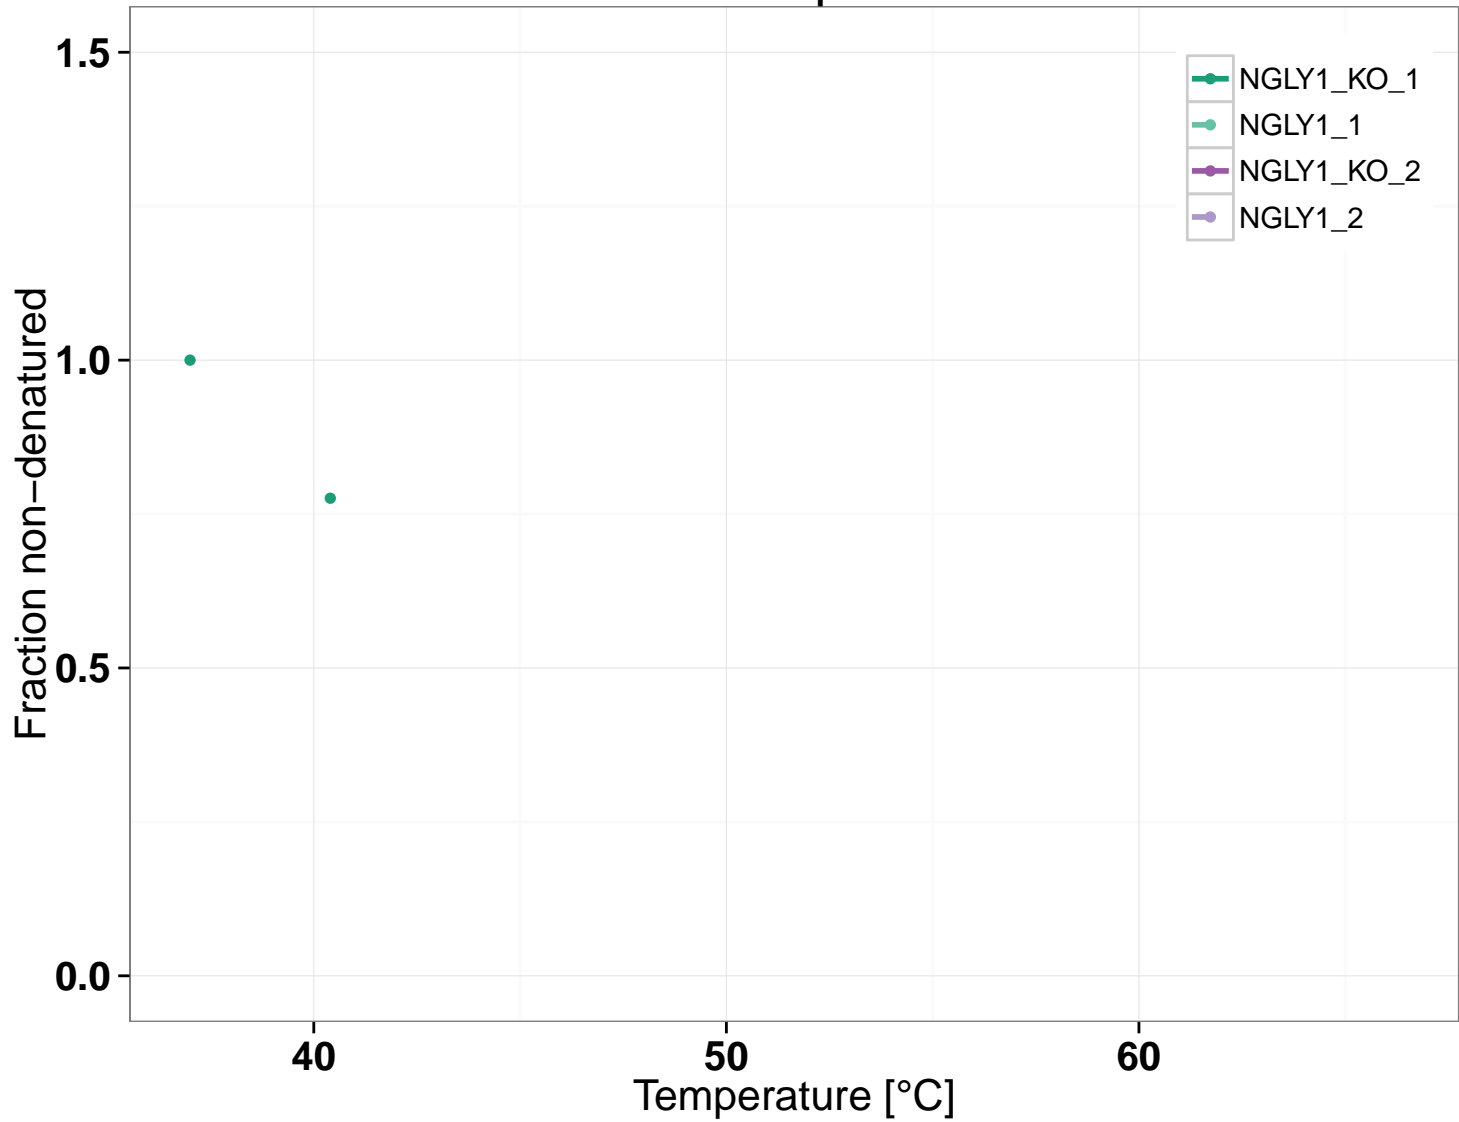

|            | meltPoint | slope | plateau | R2 |
|------------|-----------|-------|---------|----|
| NGLY1_KO_1 | -         | -     | -       | -  |
| NGLY1_1    | -         | -     | -       | -  |
| NGLY1_KO_2 | -         | -     | -       | -  |
| NGLY1_2    | -         | -     | -       | -  |

Supplement: Supplementary file 6698 [file 1]

IPI00027517.1|UBA52

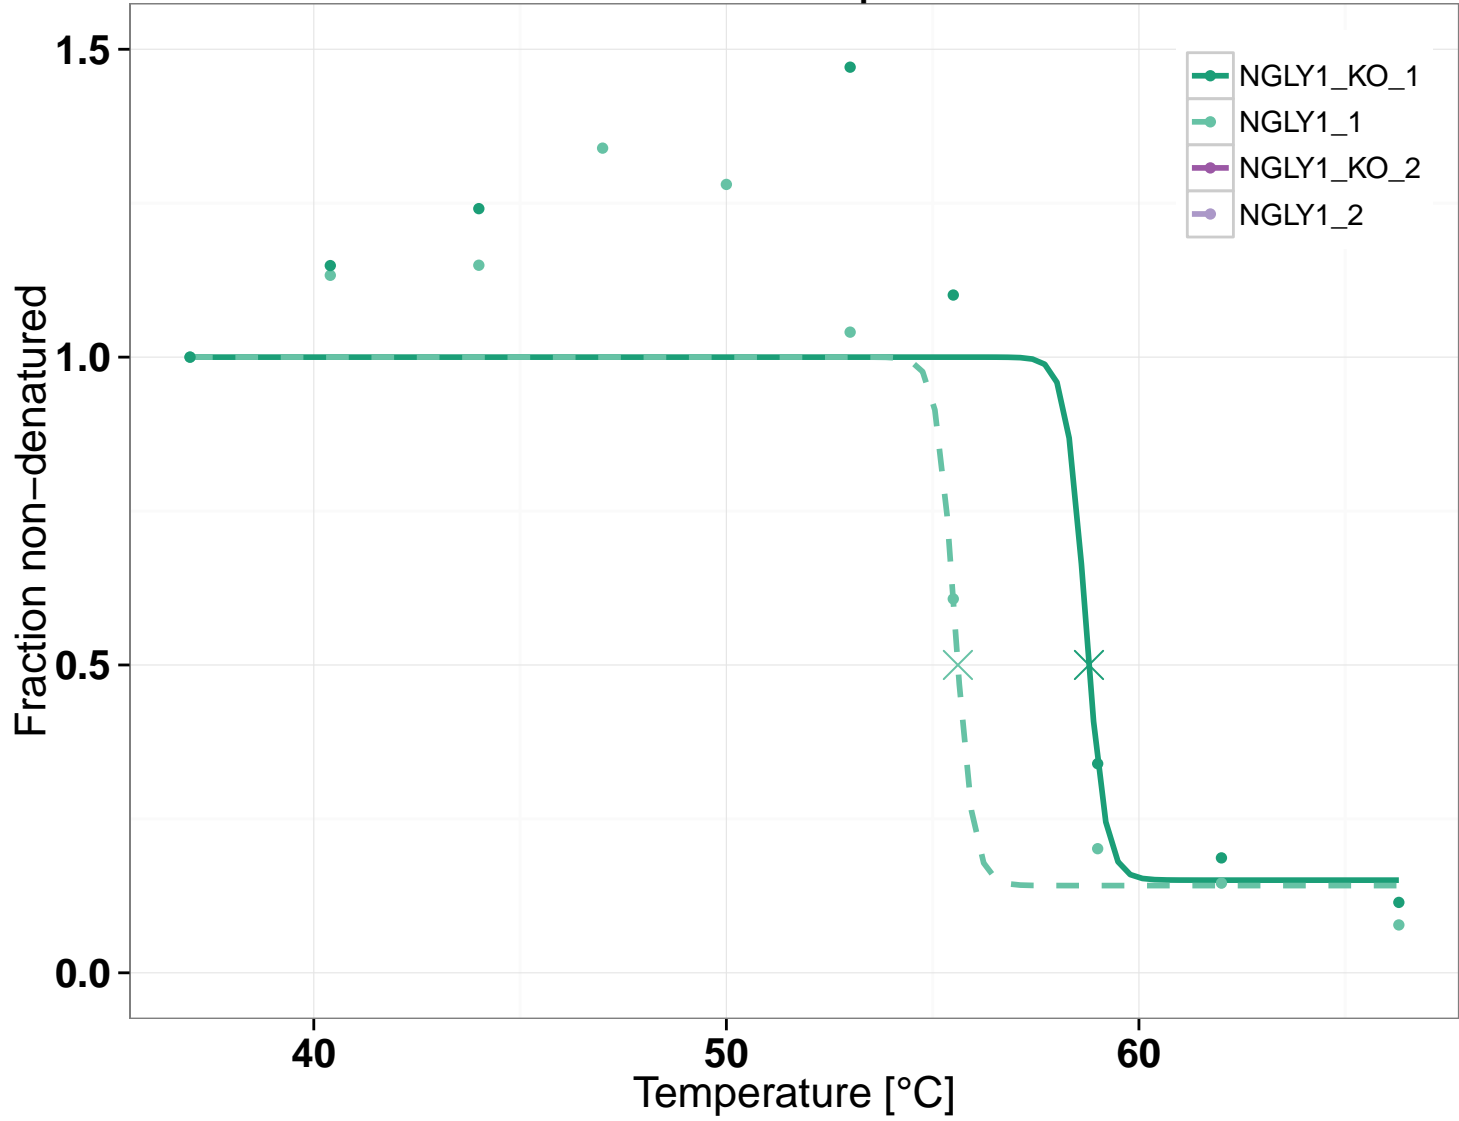

|            | meltPoint | slope | plateau | R2   |
|------------|-----------|-------|---------|------|
| NGLY1_KO_1 | 58.79     | -0.9  | 0.15    | 0.58 |
| NGLY1_1    | 55.61     | -0.97 | 0.14    | 0.89 |
| NGLY1_KO_2 | -         | -     | -       | -    |
| NGLY1_2    | -         | -     | -       | -    |

Supplement: Supplementary file 6699 [file 1]

# IPI00006592.1|MSRA

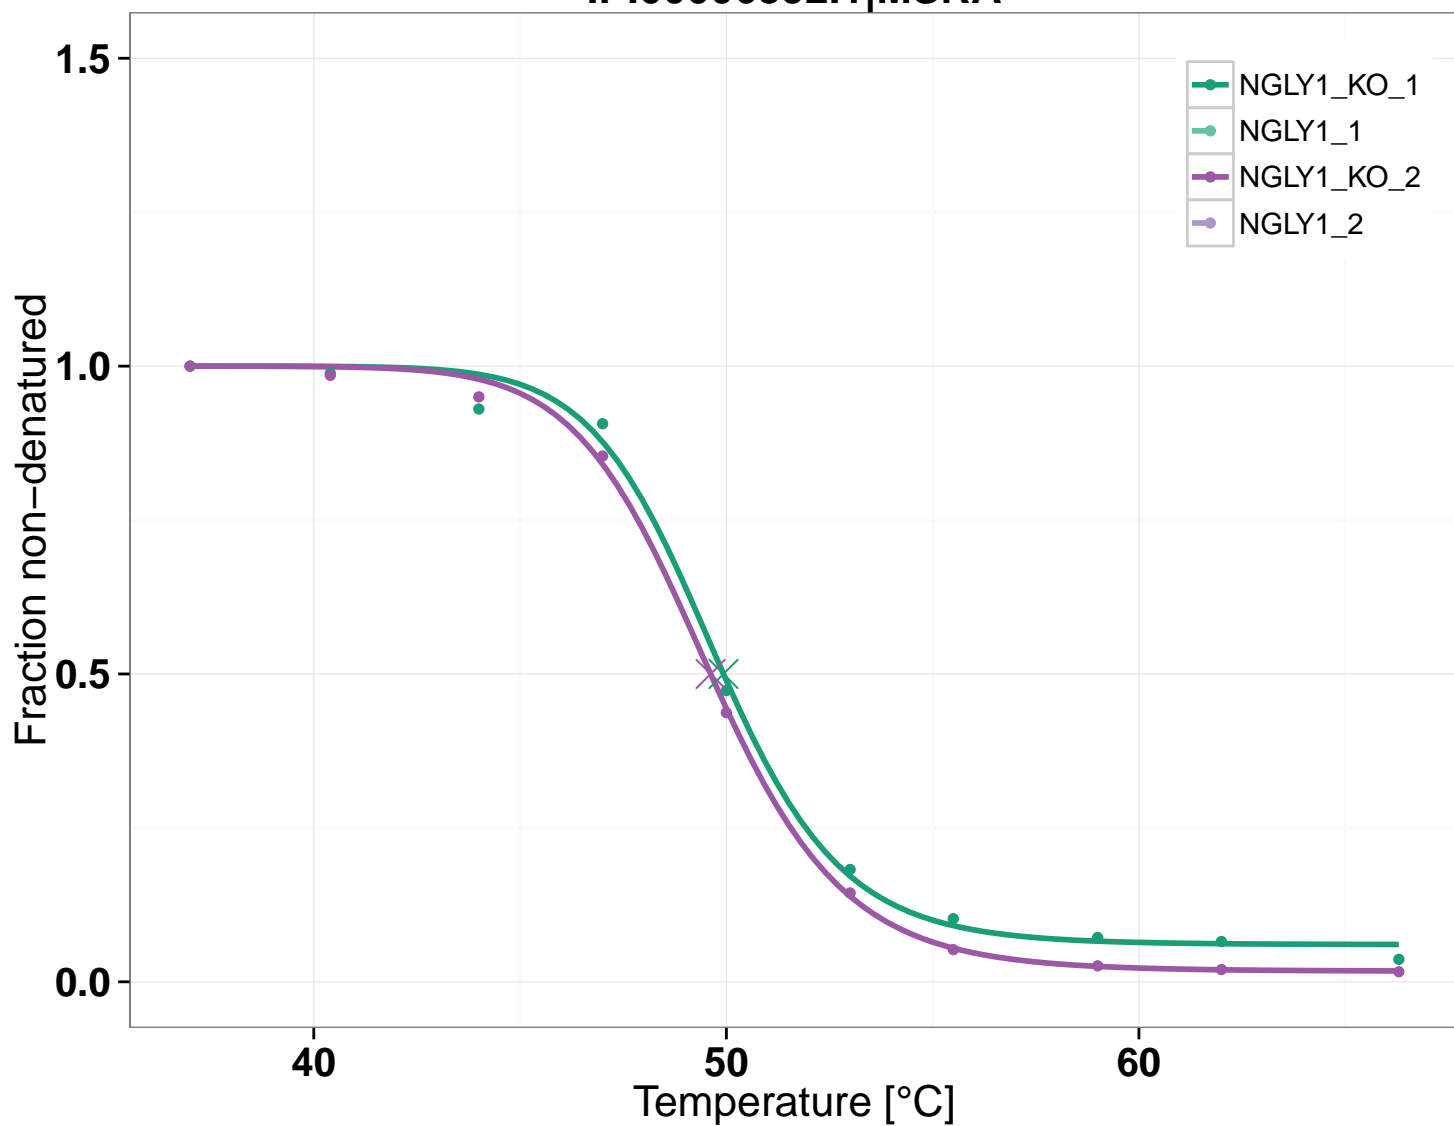

|            | meltPoint | slope | plateau | R2 |
|------------|-----------|-------|---------|----|
| NGLY1_KO_1 | 49.93     | -0.15 | 0.06    | 1  |
| NGLY1_1    | -         | -     | -       | -  |
| NGLY1_KO_2 | 49.62     | -0.15 | 0.02    | 1  |
| NGLY1_2    | -         | -     | -       | -  |

Supplement: Supplementary file 6700 [file 1]

# IPI00012587.1|PTEN

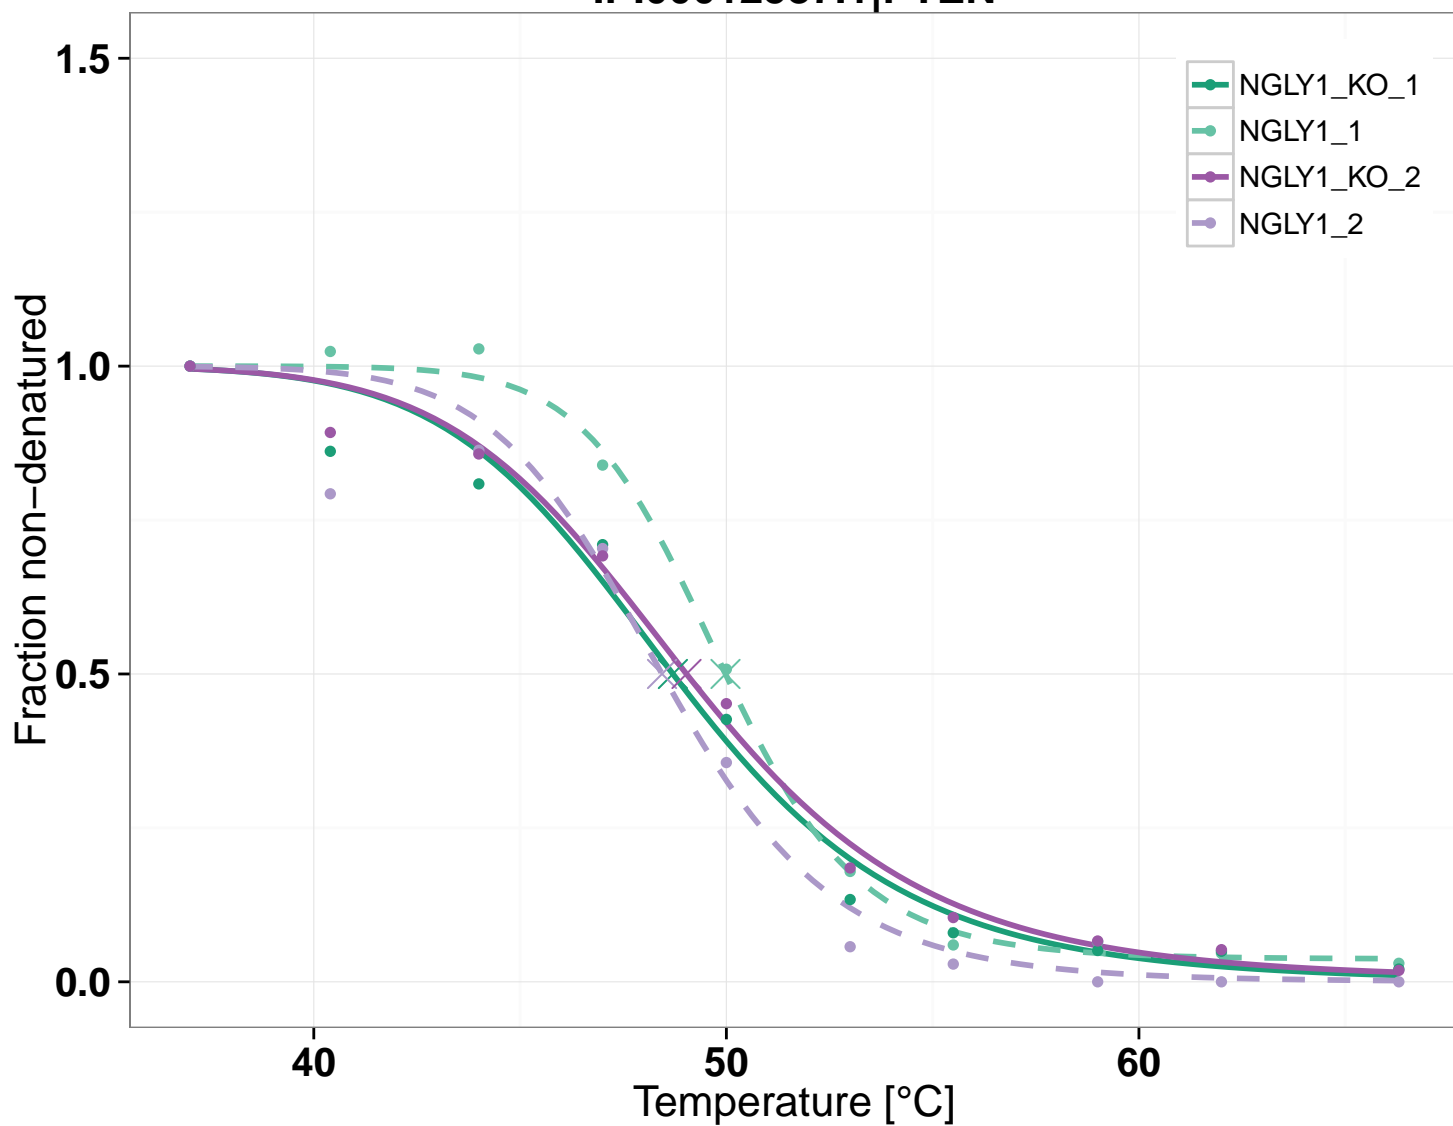

|            | meltPoint | slope  | plateau | R2   |
|------------|-----------|--------|---------|------|
| NGLY1_KO_1 | 48.7      | -0.089 | 0       | 0.98 |
| NGLY1_1    | 49.98     | -0.14  | 0.04    | 1    |
| NGLY1_KO_2 | 49.03     | -0.086 | 0       | 0.99 |
| NGLY1_2    | 48.44     | -0.12  | 0       | 0.97 |

Supplement: Supplementary file 6701 [file 1]

IPI00377050.2|COG5

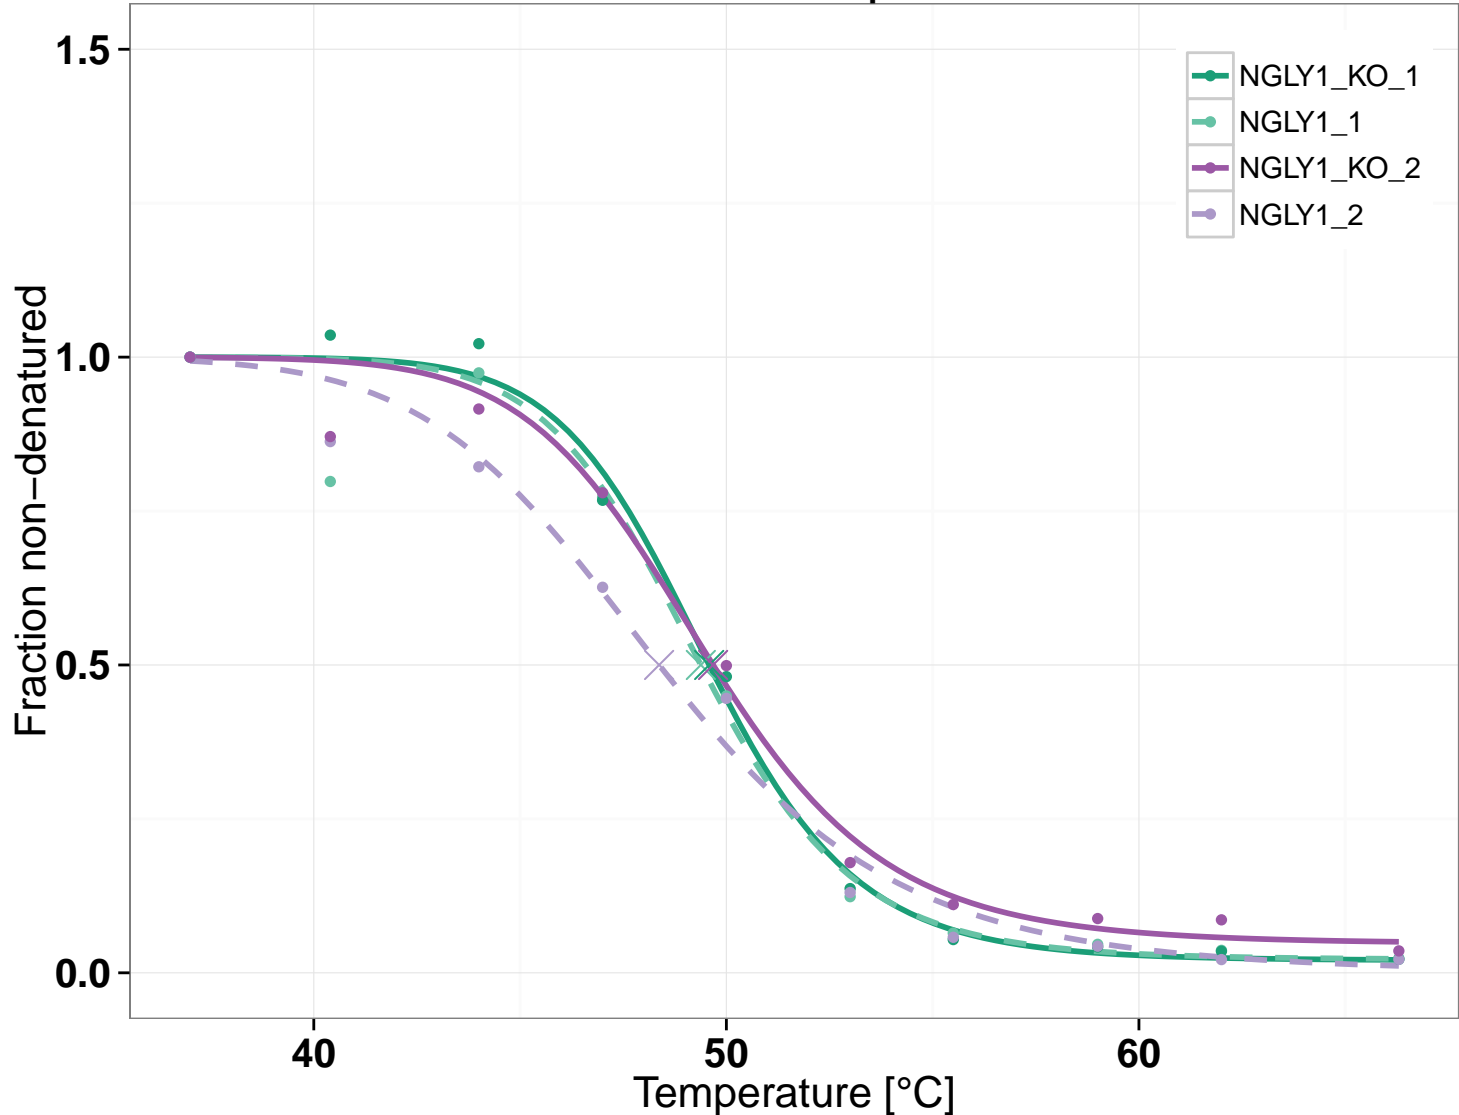

|            | meltPoint | slope  | plateau | R2   |
|------------|-----------|--------|---------|------|
| NGLY1_KO_1 | 49.58     | -0.14  | 0.02    | 1    |
| NGLY1_1    | 49.38     | -0.13  | 0.02    | 0.97 |
| NGLY1_KO_2 | 49.68     | -0.11  | 0.05    | 0.99 |
| NGLY1_2    | 48.37     | -0.087 | 0       | 0.98 |

Supplement: Supplementary file 6702 [file 1]

IPI00003362.2|HSPA5

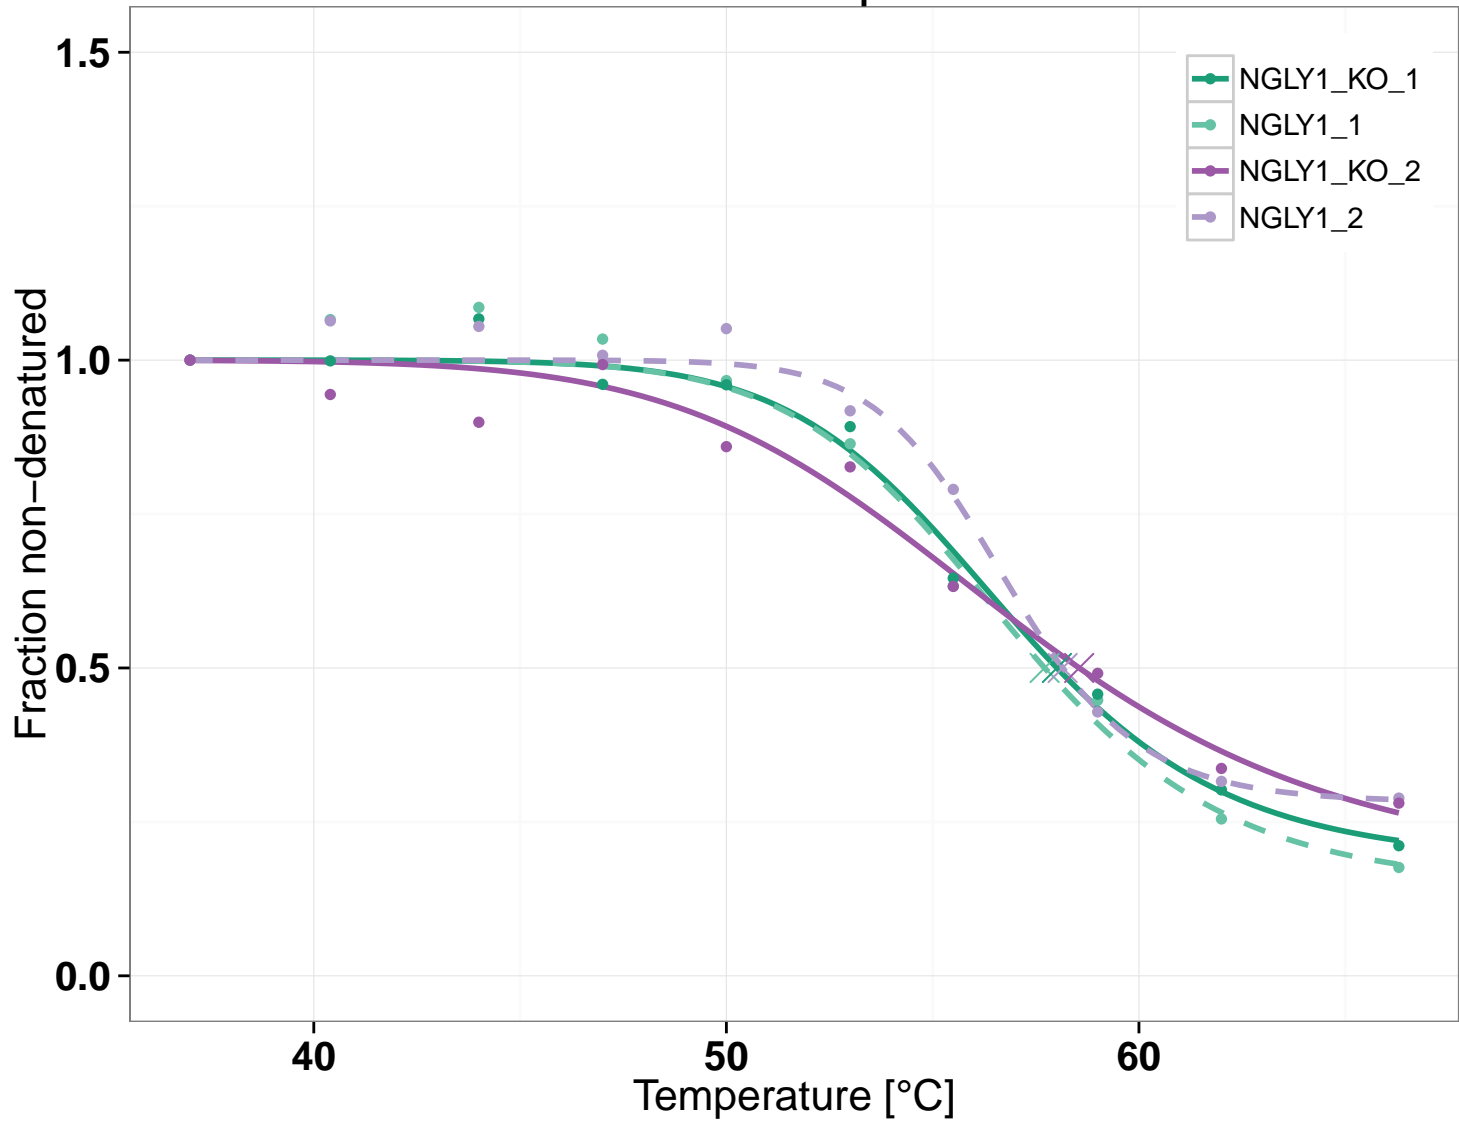

|            | meltPoint | slope  | plateau | R2   |
|------------|-----------|--------|---------|------|
| NGLY1_KO_1 | 58.01     | -0.077 | 0.18    | 0.99 |
| NGLY1_1    | 57.71     | -0.081 | 0.14    | 0.98 |
| NGLY1_KO_2 | 58.55     | -0.052 | 0.16    | 0.97 |
| NGLY1_2    | 58.15     | -0.11  | 0.28    | 0.99 |

Supplement: Supplementary file 6703 [file 1]

IPI00893814.1|EHMT2

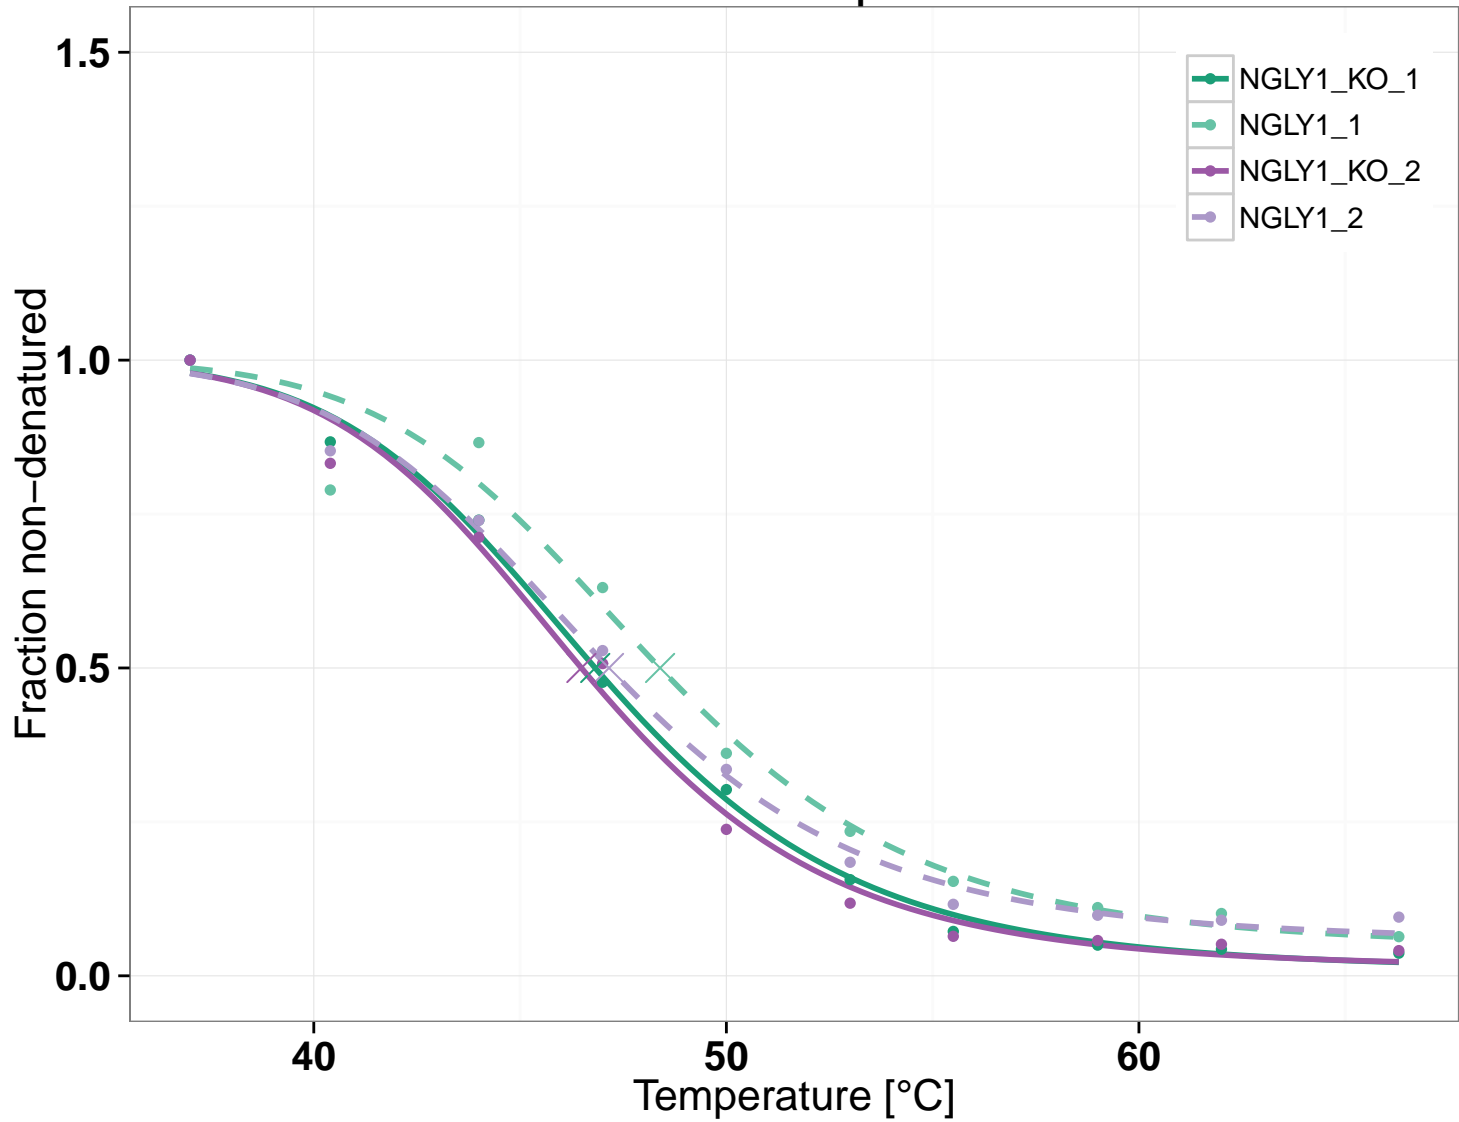

|            | meltPoint | slope  | plateau | R2   |
|------------|-----------|--------|---------|------|
| NGLY1_KO_1 | 46.82     | -0.079 | 0.01    | 1    |
| NGLY1_1    | 48.39     | -0.073 | 0.04    | 0.97 |
| NGLY1_KO_2 | 46.49     | -0.081 | 0.01    | 0.99 |
| NGLY1_2    | 47.16     | -0.073 | 0.05    | 0.99 |

Supplement: Supplementary file 6704 [file 1]

IPI00480028.2|ABI1

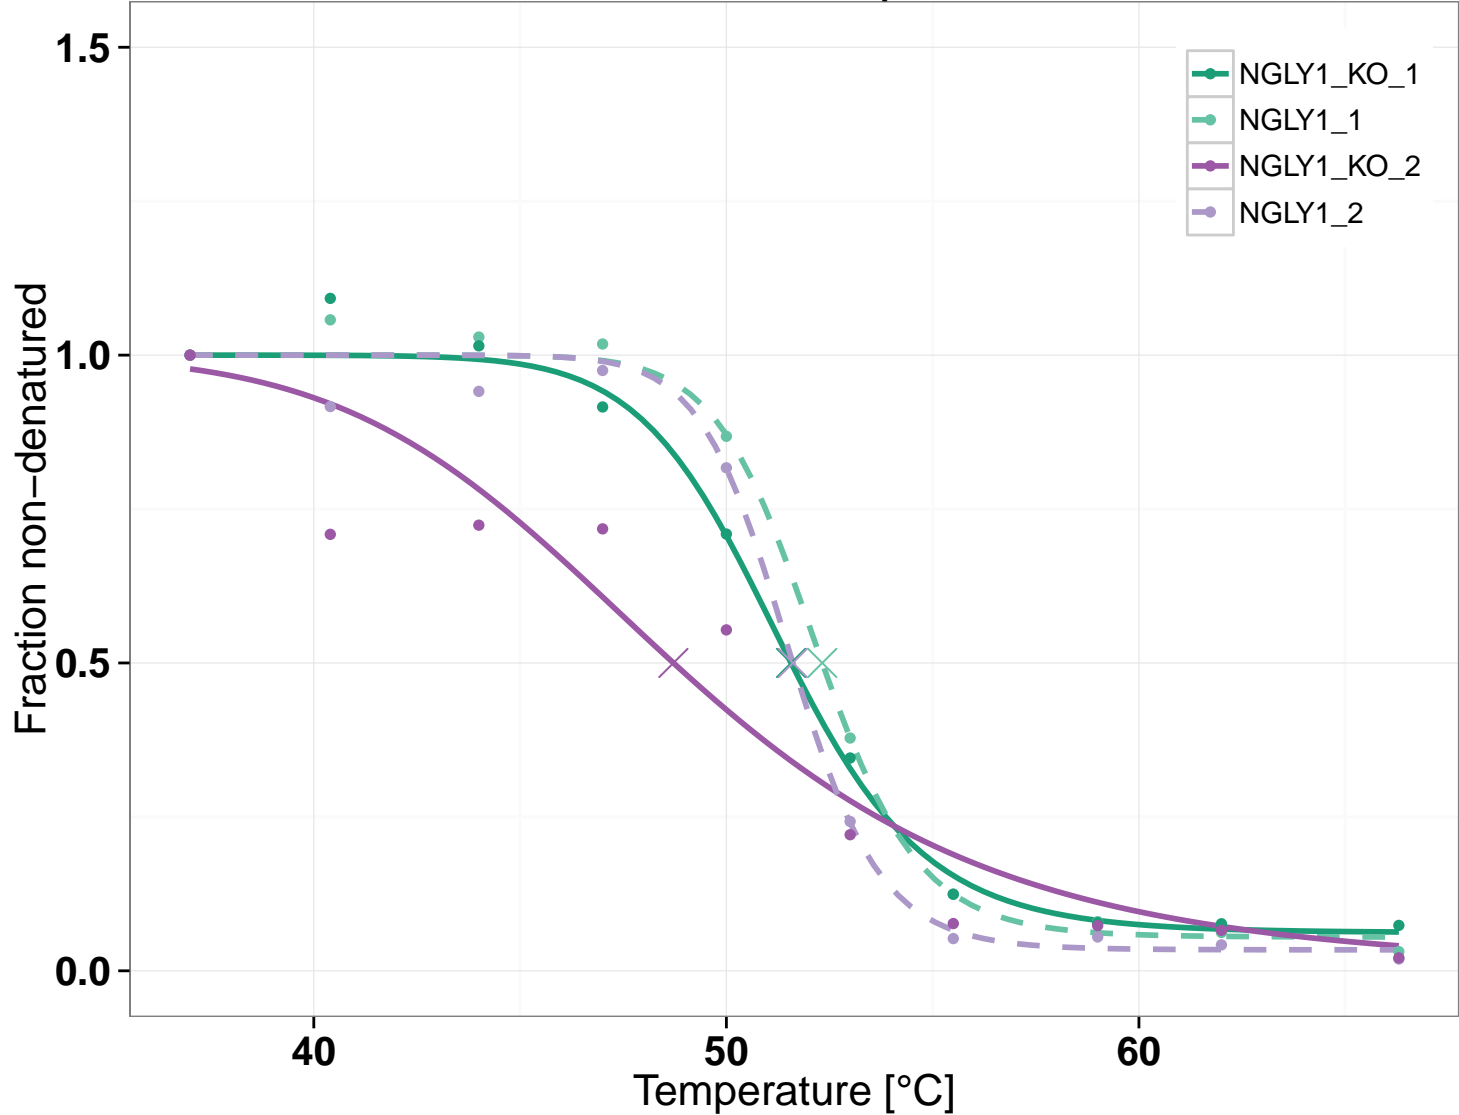

|            | meltPoint | slope  | plateau | R2   |
|------------|-----------|--------|---------|------|
| NGLY1_KO_1 | 51.57     | -0.14  | 0.06    | 0.99 |
| NGLY1_1    | 52.32     | -0.19  | 0.05    | 1    |
| NGLY1_KO_2 | 48.72     | -0.063 | 0       | 0.92 |
| NGLY1_2    | 51.61     | -0.22  | 0.03    | 0.99 |

Supplement: Supplementary file 6705 [file 1]

IPI00027462.1|S100A9

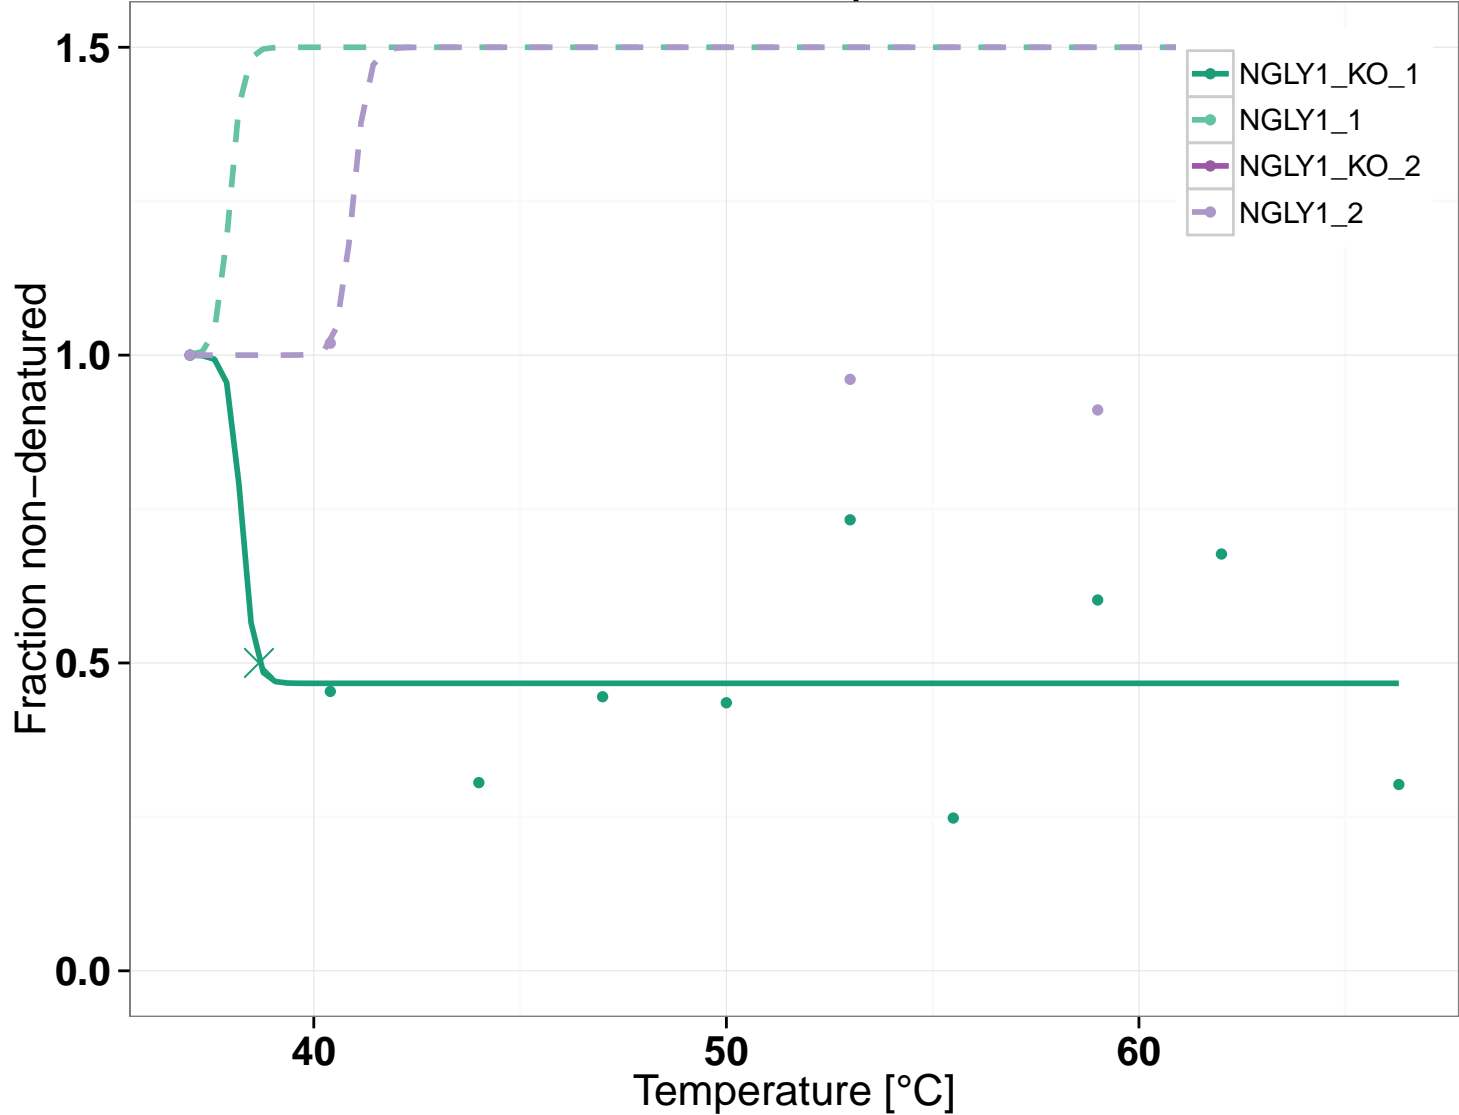

|            | meltPoint | slope | plateau | R2    |
|------------|-----------|-------|---------|-------|
| NGLY1_KO_1 | 38.67     | -0.87 | 0.47    | 0.52  |
| NGLY1_1    | -         | 0.82  | 1.5     | -0.65 |
| NGLY1_KO_2 | -         | -     | -       | -     |
| NGLY1_2    | -         | 0.72  | 1.5     | 0.09  |

Supplement: Supplementary file 6706 [file 1]

IPI00455457.4|Q5TEC6\_HUMAN

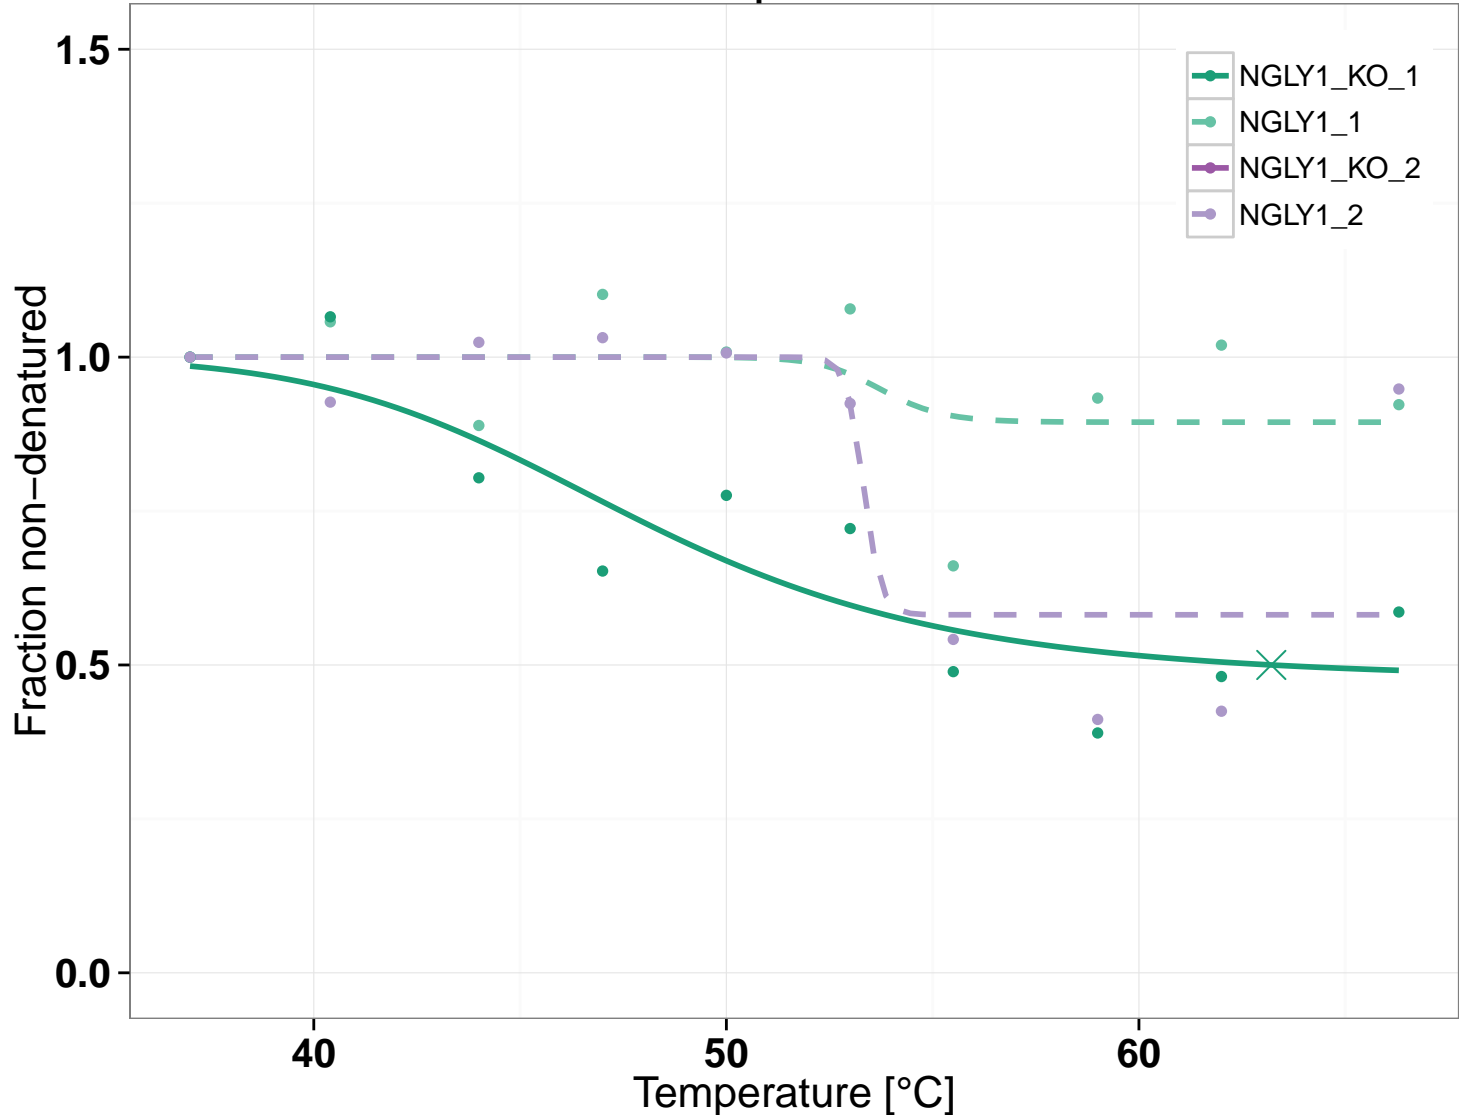

|            | meltPoint | slope  | plateau | R2   |
|------------|-----------|--------|---------|------|
| NGLY1_KO_1 | 63.21     | -0.034 | 0.47    | 0.8  |
| NGLY1_1    | -         | -0.035 | 0.89    | 0.22 |
| NGLY1_KO_2 | -         | -      | -       | -    |
| NGLY1_2    | -         | -0.49  | 0.58    | 0.67 |

Supplement: Supplementary file 6707 [file 1]

# IPI00168953.5|TNIP2

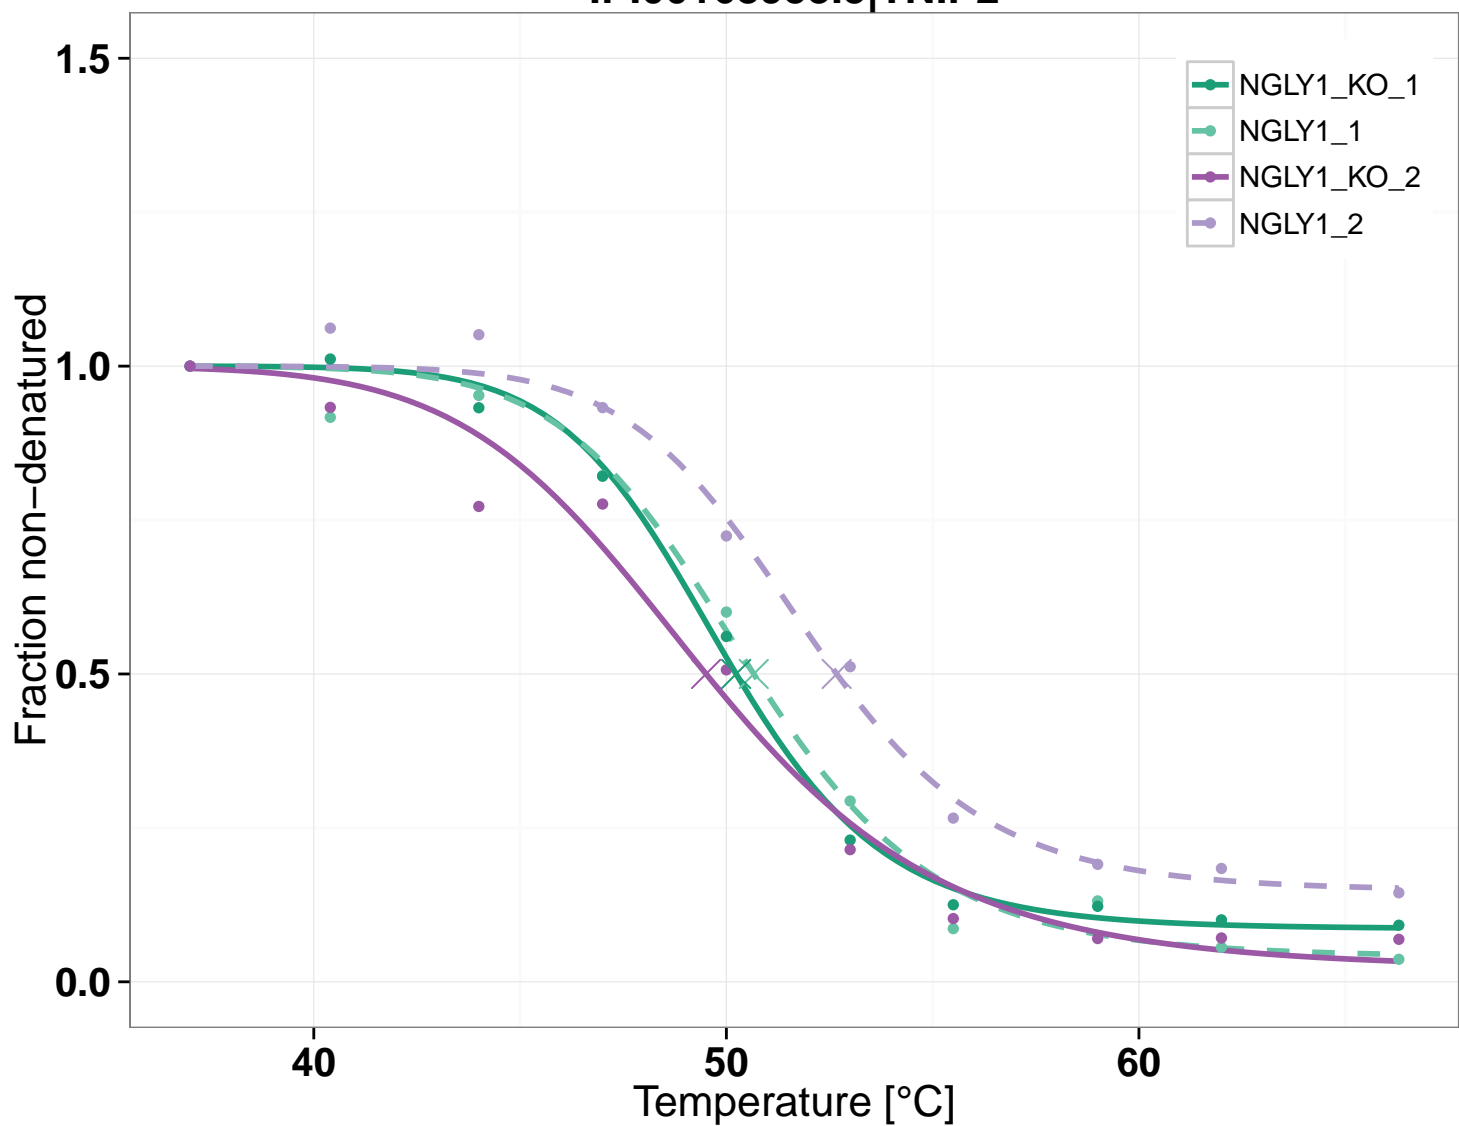

|            | meltPoint | slope  | plateau | R2   |
|------------|-----------|--------|---------|------|
| NGLY1_KO_1 | 50.24     | -0.12  | 0.09    | 1    |
| NGLY1_1    | 50.66     | -0.11  | 0.04    | 0.99 |
| NGLY1_KO_2 | 49.51     | -0.084 | 0.02    | 0.98 |
| NGLY1_2    | 52.67     | -0.098 | 0.15    | 0.99 |

Supplement: Supplementary file 6708 [file 1]

IPI00377261.1|FUBP3

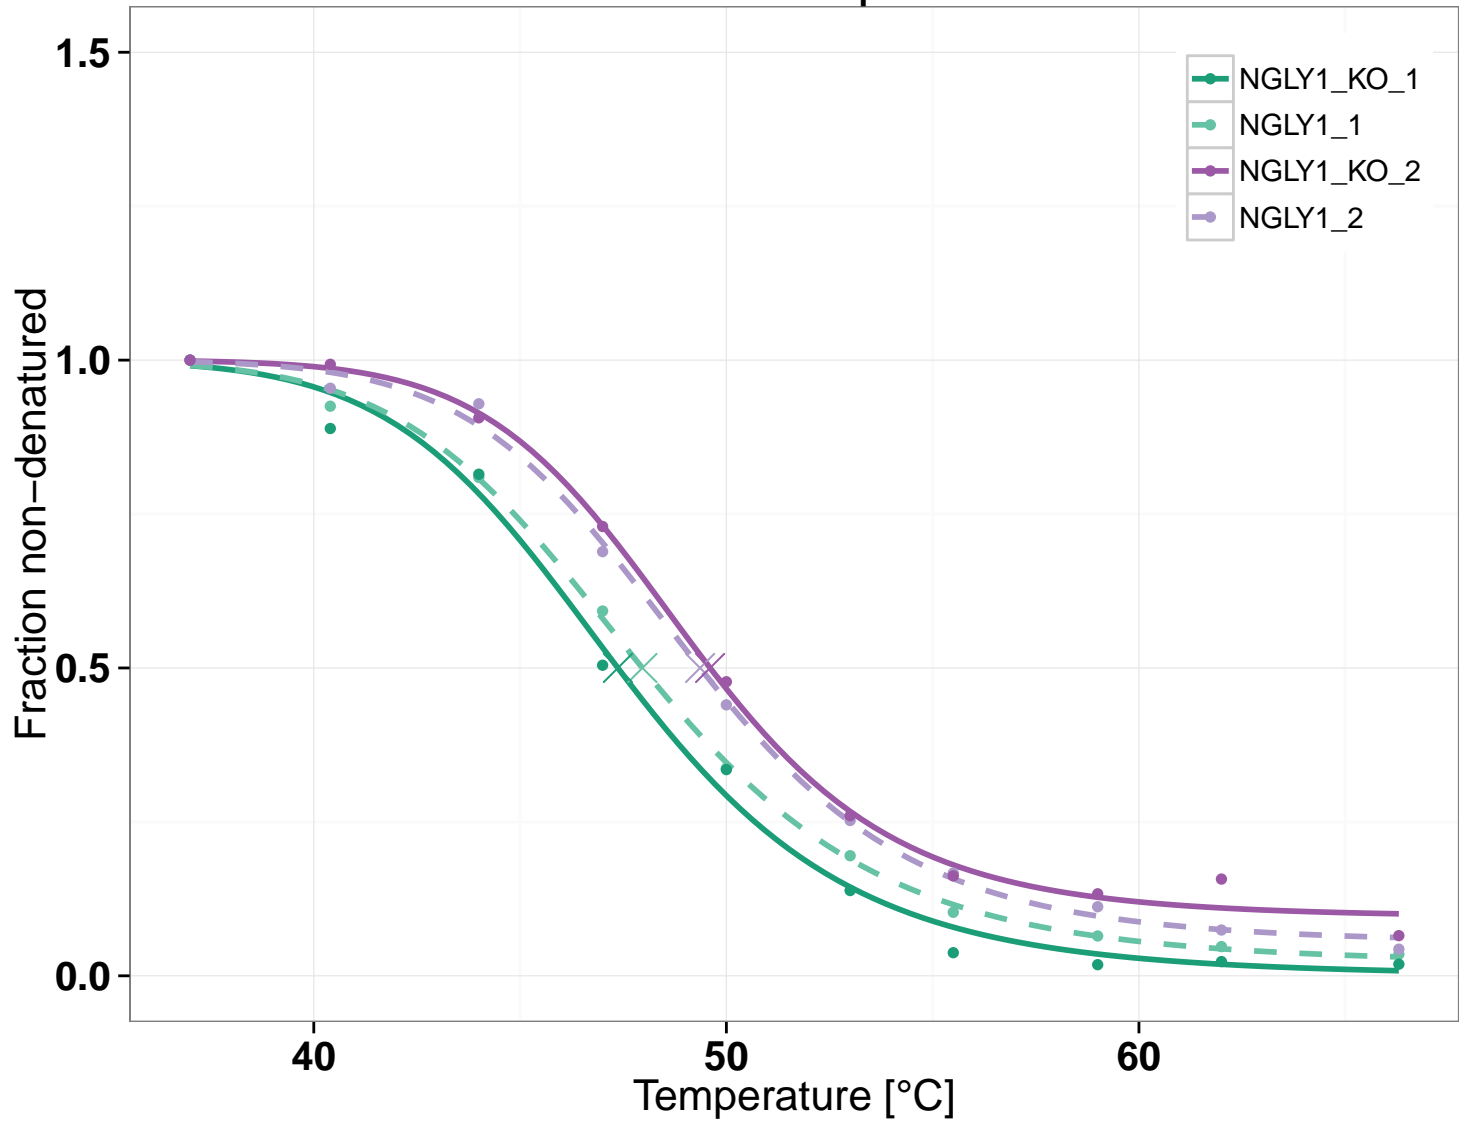

|            | meltPoint | slope  | plateau | R2   |
|------------|-----------|--------|---------|------|
| NGLY1_KO_1 | 47.37     | -0.09  | 0       | 0.99 |
| NGLY1_1    | 47.97     | -0.084 | 0.02    | 1    |
| NGLY1_KO_2 | 49.61     | -0.091 | 0.1     | 1    |
| NGLY1_2    | 49.36     | -0.088 | 0.05    | 1    |

Supplement: Supplementary file 6709 [file 1]

# IPI00334846.4|FTSJD1

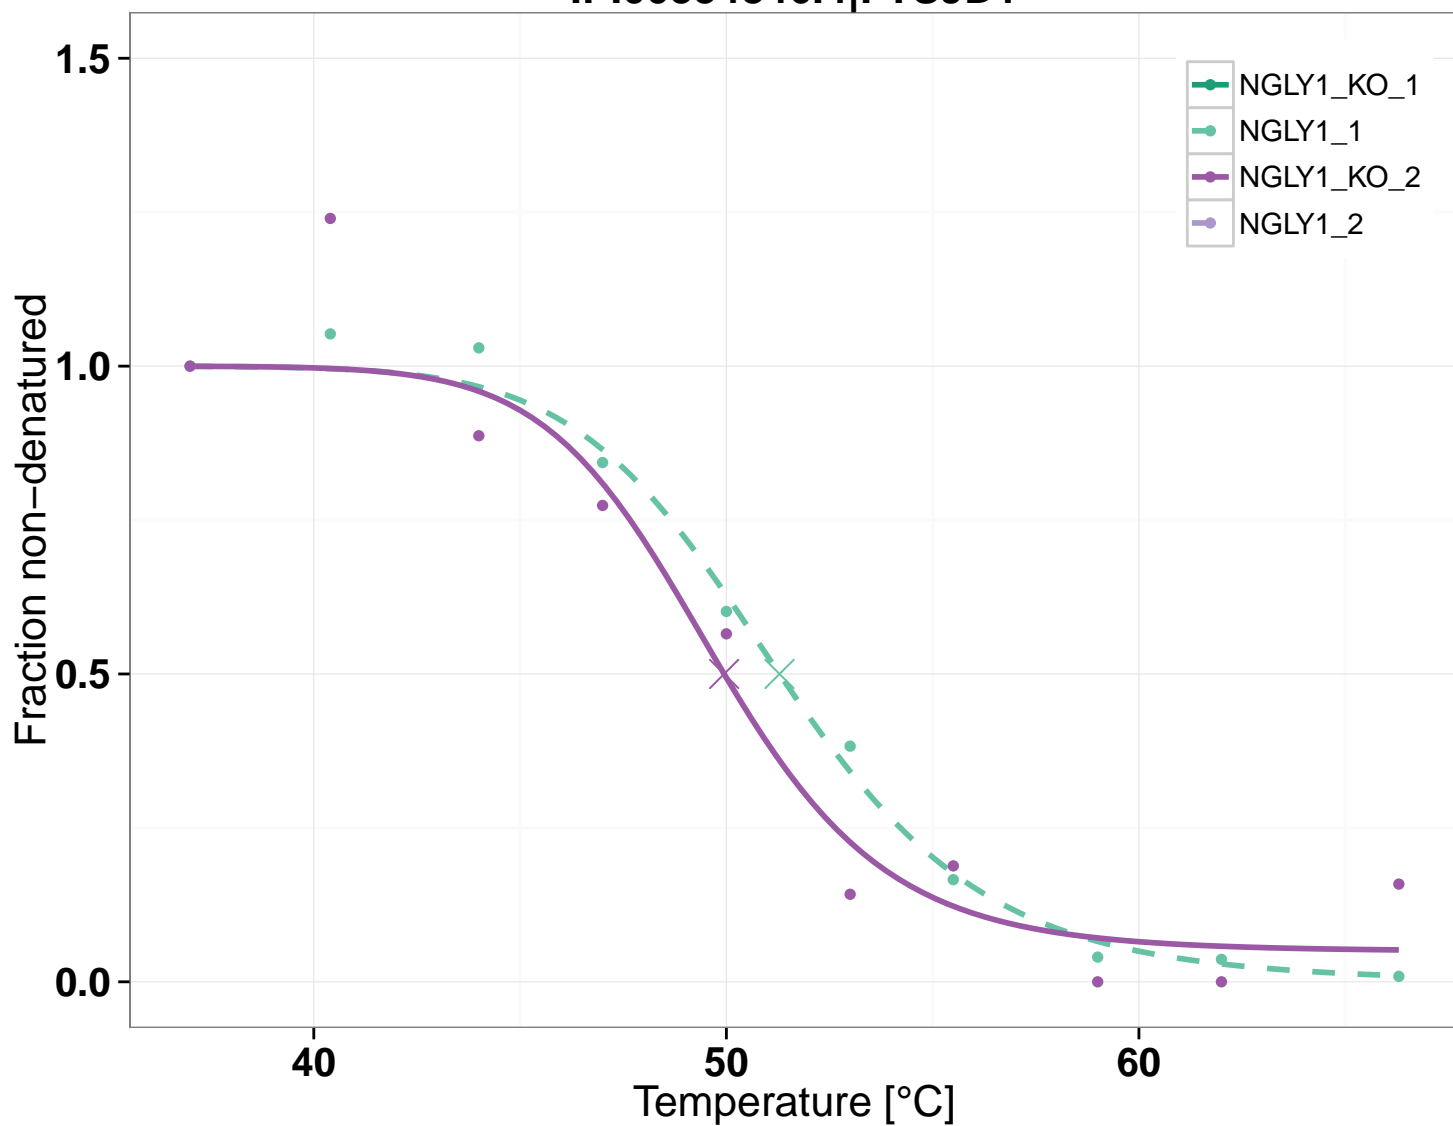

|            | meltPoint | slope | plateau | R2   |
|------------|-----------|-------|---------|------|
| NGLY1_KO_1 | –         | –     | –       | –    |
| NGLY1_1    | 51.29     | –0.1  | 0       | 0.99 |
| NGLY1_KO_2 | 49.95     | –0.11 | 0.05    | 0.95 |
| NGLY1_2    | –         | –     | –       | –    |

Supplement: Supplementary file 6710 [file 1]

IPI00465119.1|RABGAP1L

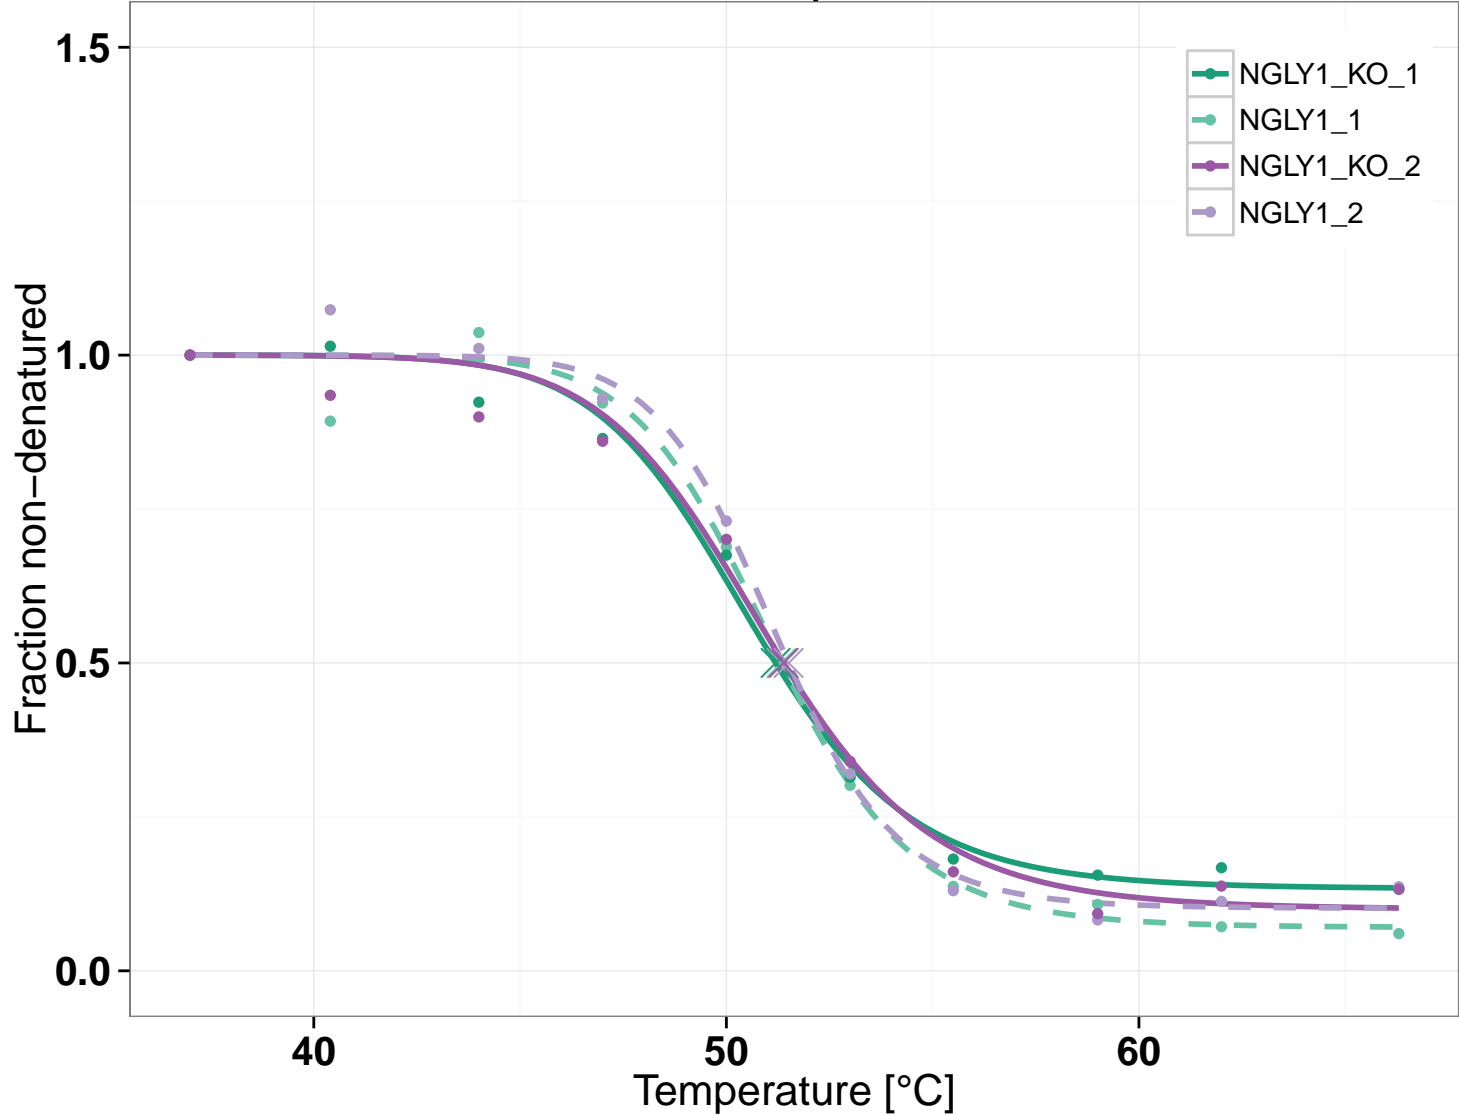

|            | meltPoint | slope | plateau | R2   |
|------------|-----------|-------|---------|------|
| NGLY1_KO_1 | 51.19     | -0.11 | 0.13    | 0.99 |
| NGLY1_1    | 51.34     | -0.14 | 0.07    | 0.99 |
| NGLY1_KO_2 | 51.39     | -0.11 | 0.1     | 0.99 |
| NGLY1_2    | 51.51     | -0.15 | 0.1     | 0.99 |

Supplement: Supplementary file 6711 [file 1]

IPI00007019.1|PPIL1

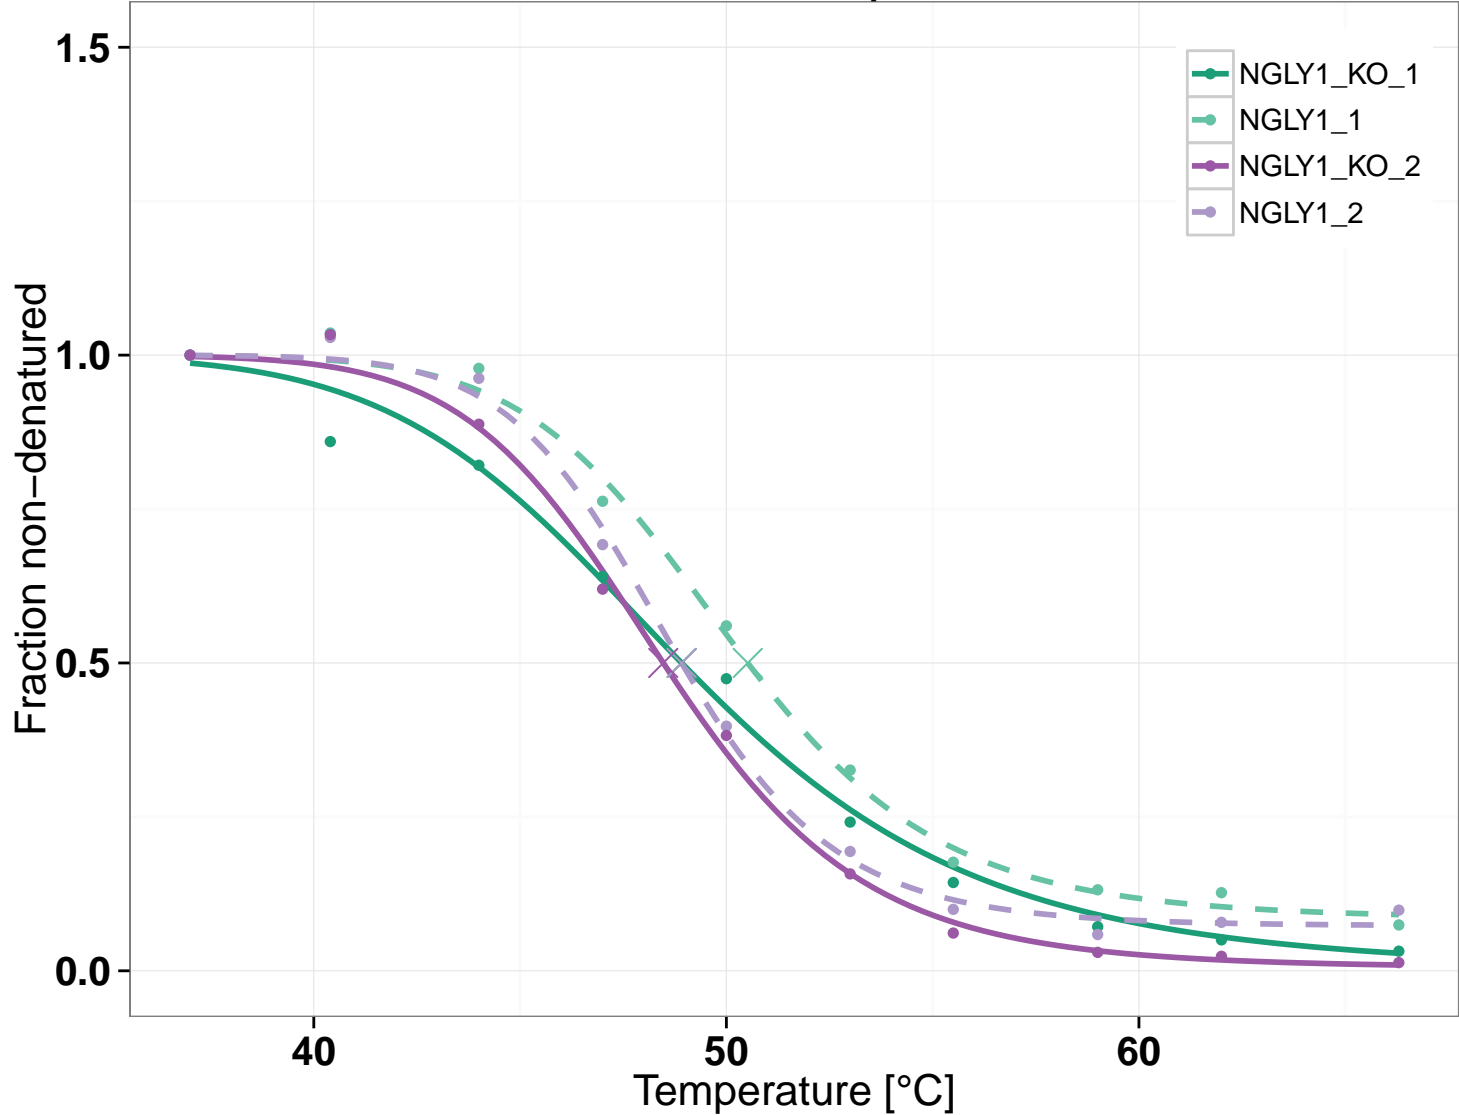

|            | meltPoint | slope  | plateau | R2   |
|------------|-----------|--------|---------|------|
| NGLY1_KO_1 | 48.92     | -0.07  | 0       | 0.99 |
| NGLY1_1    | 50.52     | -0.091 | 0.08    | 1    |
| NGLY1_KO_2 | 48.47     | -0.1   | 0       | 1    |
| NGLY1_2    | 48.92     | -0.12  | 0.07    | 1    |

Supplement: Supplementary file 6712 [file 1]

IPI00178187.3|EHBP1

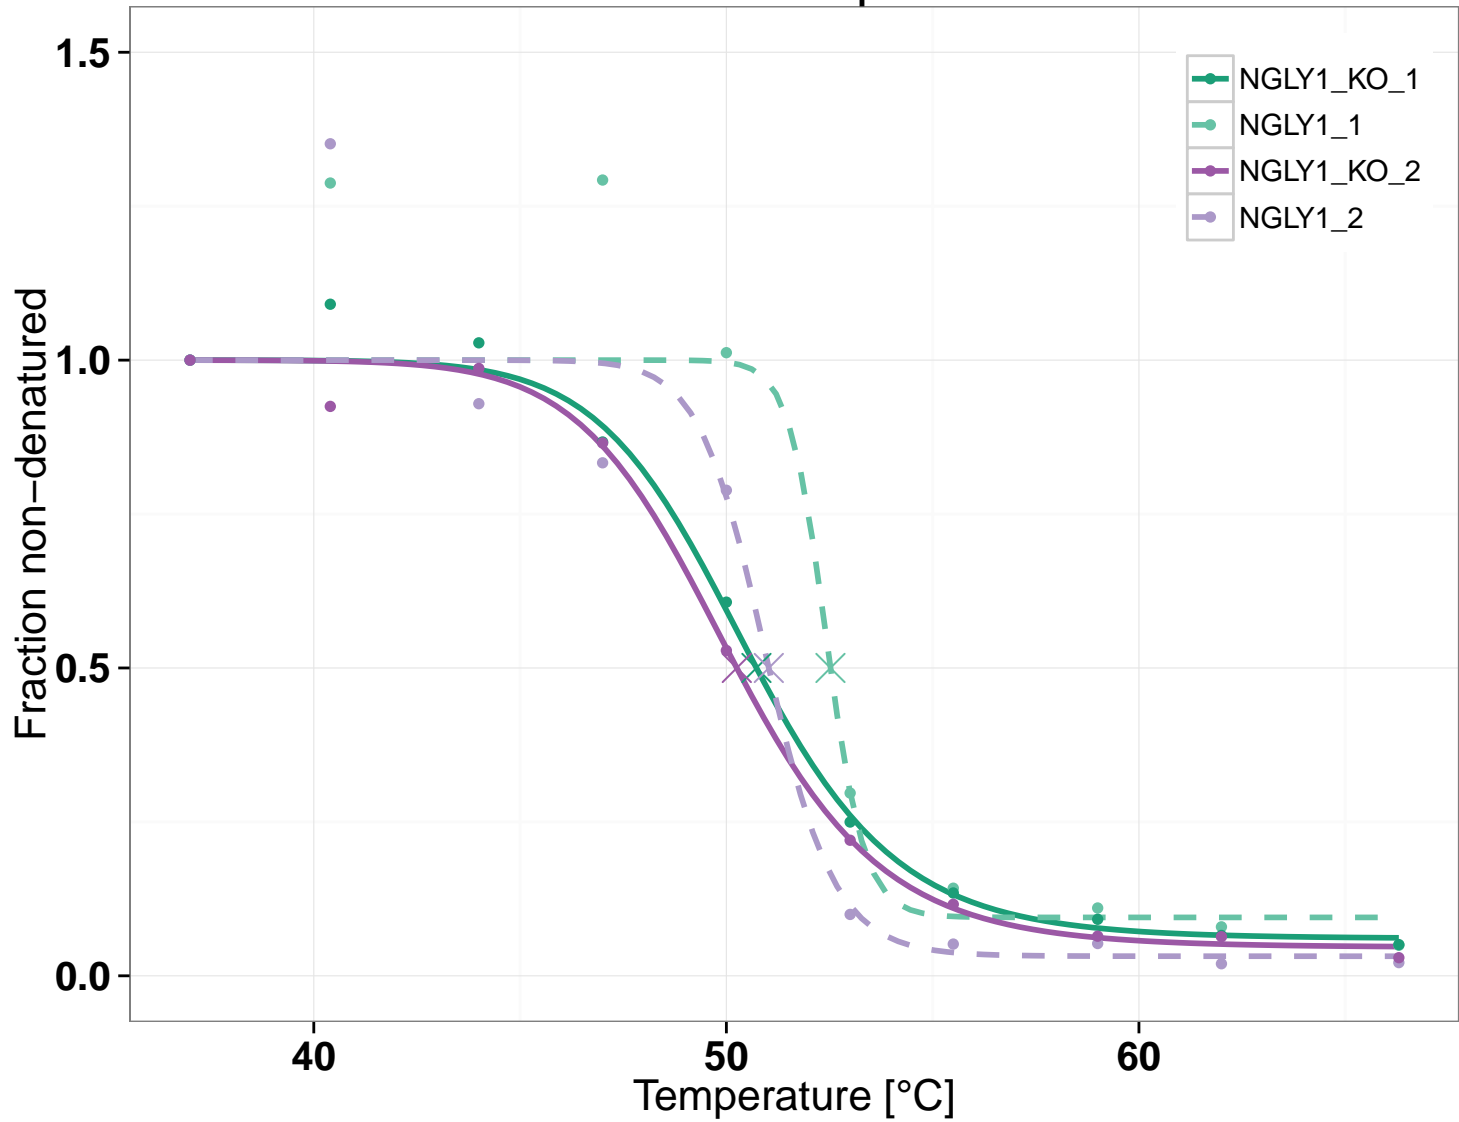

|            | meltPoint | slope | plateau | R2   |
|------------|-----------|-------|---------|------|
| NGLY1_KO_1 | 50.73     | -0.13 | 0.06    | 0.99 |
| NGLY1_1    | 52.52     | -0.5  | 0.09    | 0.86 |
| NGLY1_KO_2 | 50.25     | -0.13 | 0.05    | 1    |
| NGLY1_2    | 51.03     | -0.3  | 0.03    | 0.93 |

Supplement: Supplementary file 6713 [file 1]

# IPI00163084.3|XAB2

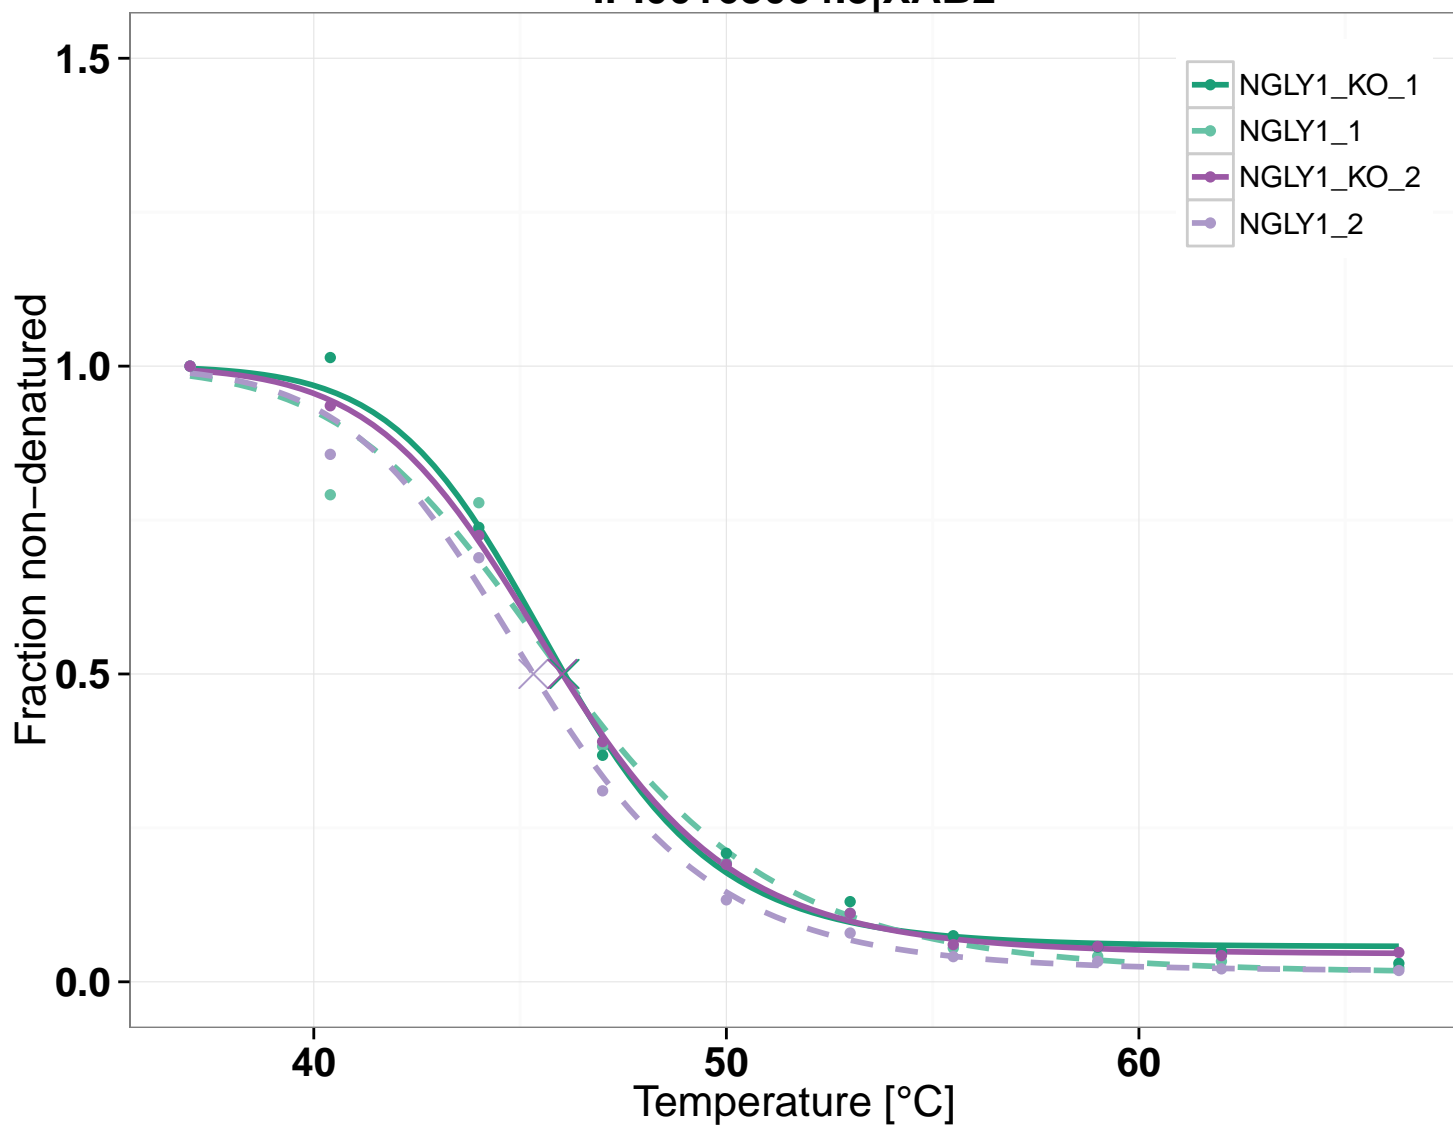

|            | meltPoint | slope  | plateau | R2   |
|------------|-----------|--------|---------|------|
| NGLY1_KO_1 | 46.08     | -0.12  | 0.06    | 1    |
| NGLY1_1    | 46.03     | -0.092 | 0.01    | 0.98 |
| NGLY1_KO_2 | 46.02     | -0.11  | 0.04    | 1    |
| NGLY1_2    | 45.32     | -0.11  | 0.02    | 0.99 |

Supplement: Supplementary file 6714 [file 1]

IPI00289907.7|FYTTD1

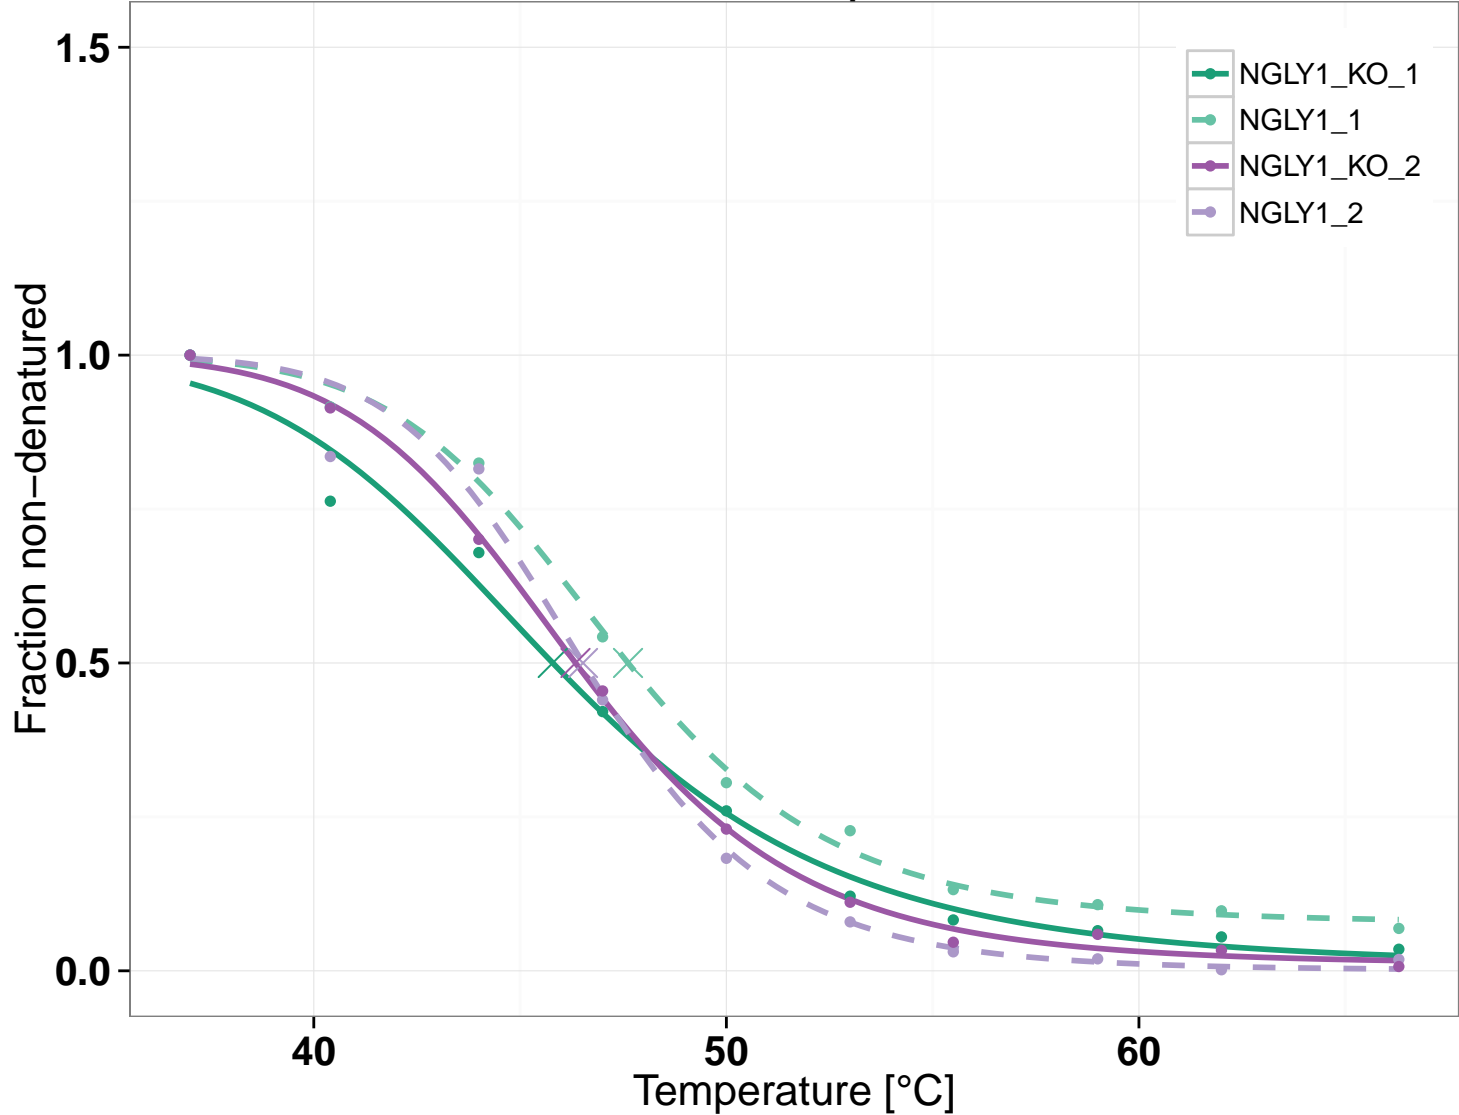

|            | meltPoint | slope  | plateau | R2   |
|------------|-----------|--------|---------|------|
| NGLY1_KO_1 | 45.79     | -0.071 | 0.01    | 0.99 |
| NGLY1_1    | 47.62     | -0.086 | 0.08    | 1    |
| NGLY1_KO_2 | 46.34     | -0.091 | 0.01    | 1    |
| NGLY1_2    | 46.53     | -0.11  | 0       | 0.99 |

Supplement: Supplementary file 6715 [file 1]

IPI00894154.1|NDUFA10

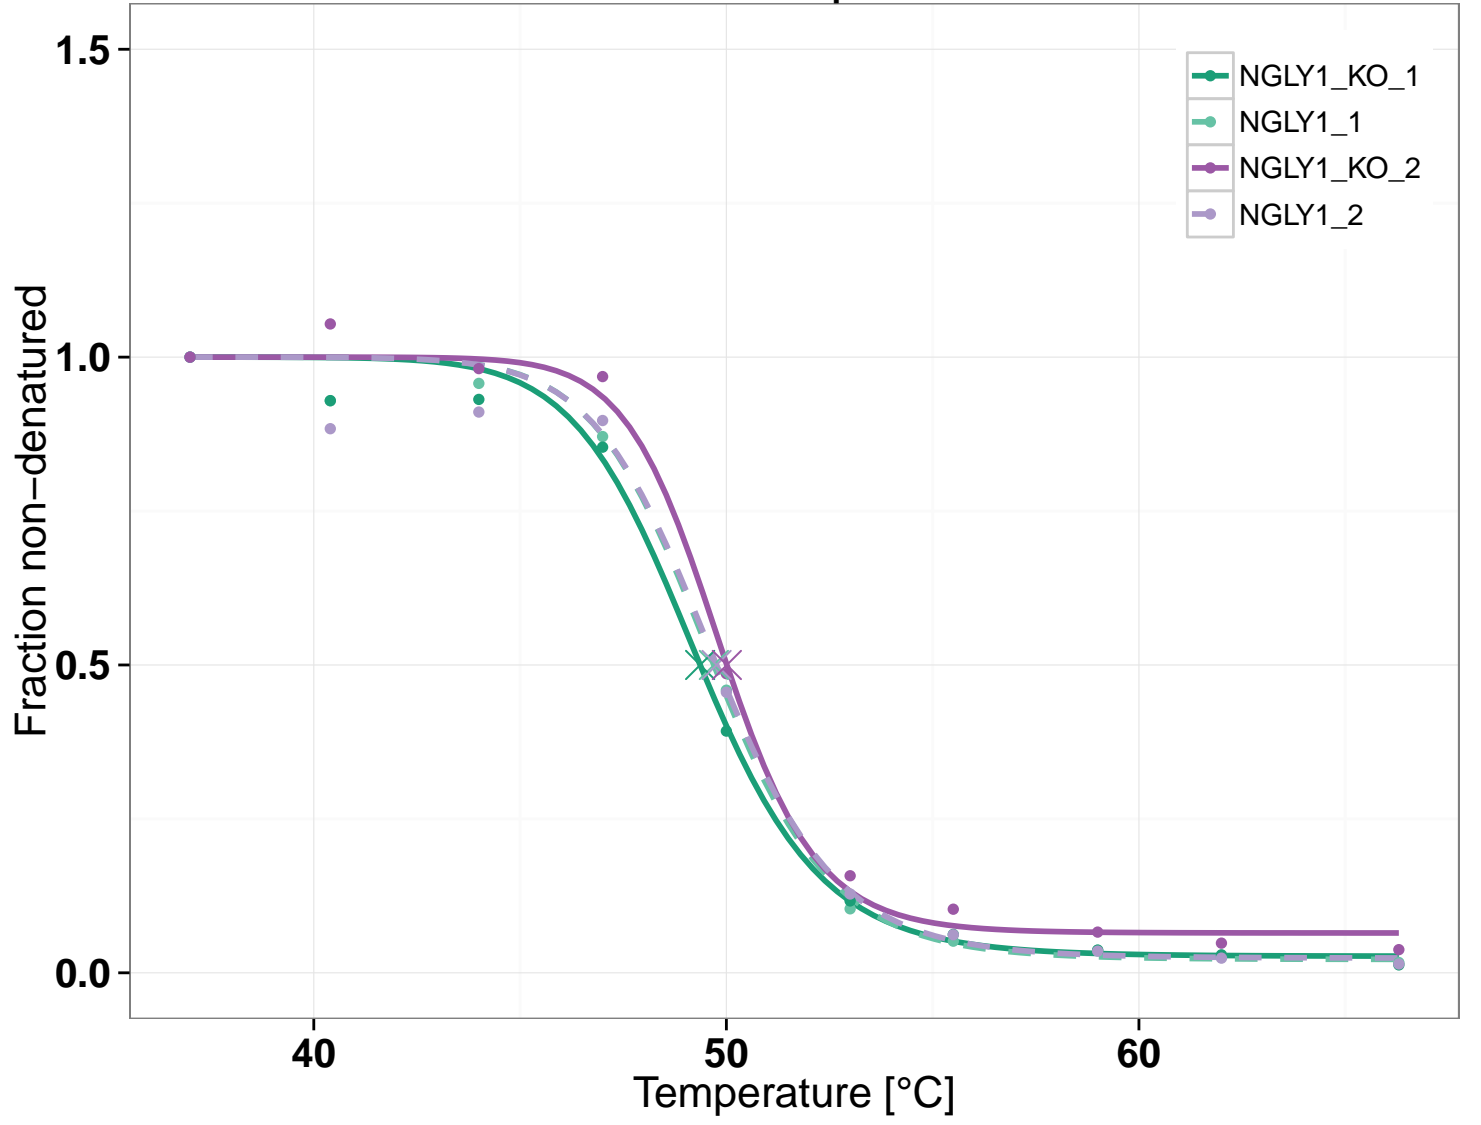

|            | meltPoint | slope | plateau | R2   |
|------------|-----------|-------|---------|------|
| NGLY1_KO_1 | 49.36     | -0.16 | 0.03    | 1    |
| NGLY1_1    | 49.7      | -0.17 | 0.02    | 1    |
| NGLY1_KO_2 | 50.01     | -0.2  | 0.06    | 1    |
| NGLY1_2    | 49.76     | -0.17 | 0.02    | 0.99 |

Supplement: Supplementary file 6716 [file 1]

IPI00044326.3|CHST14

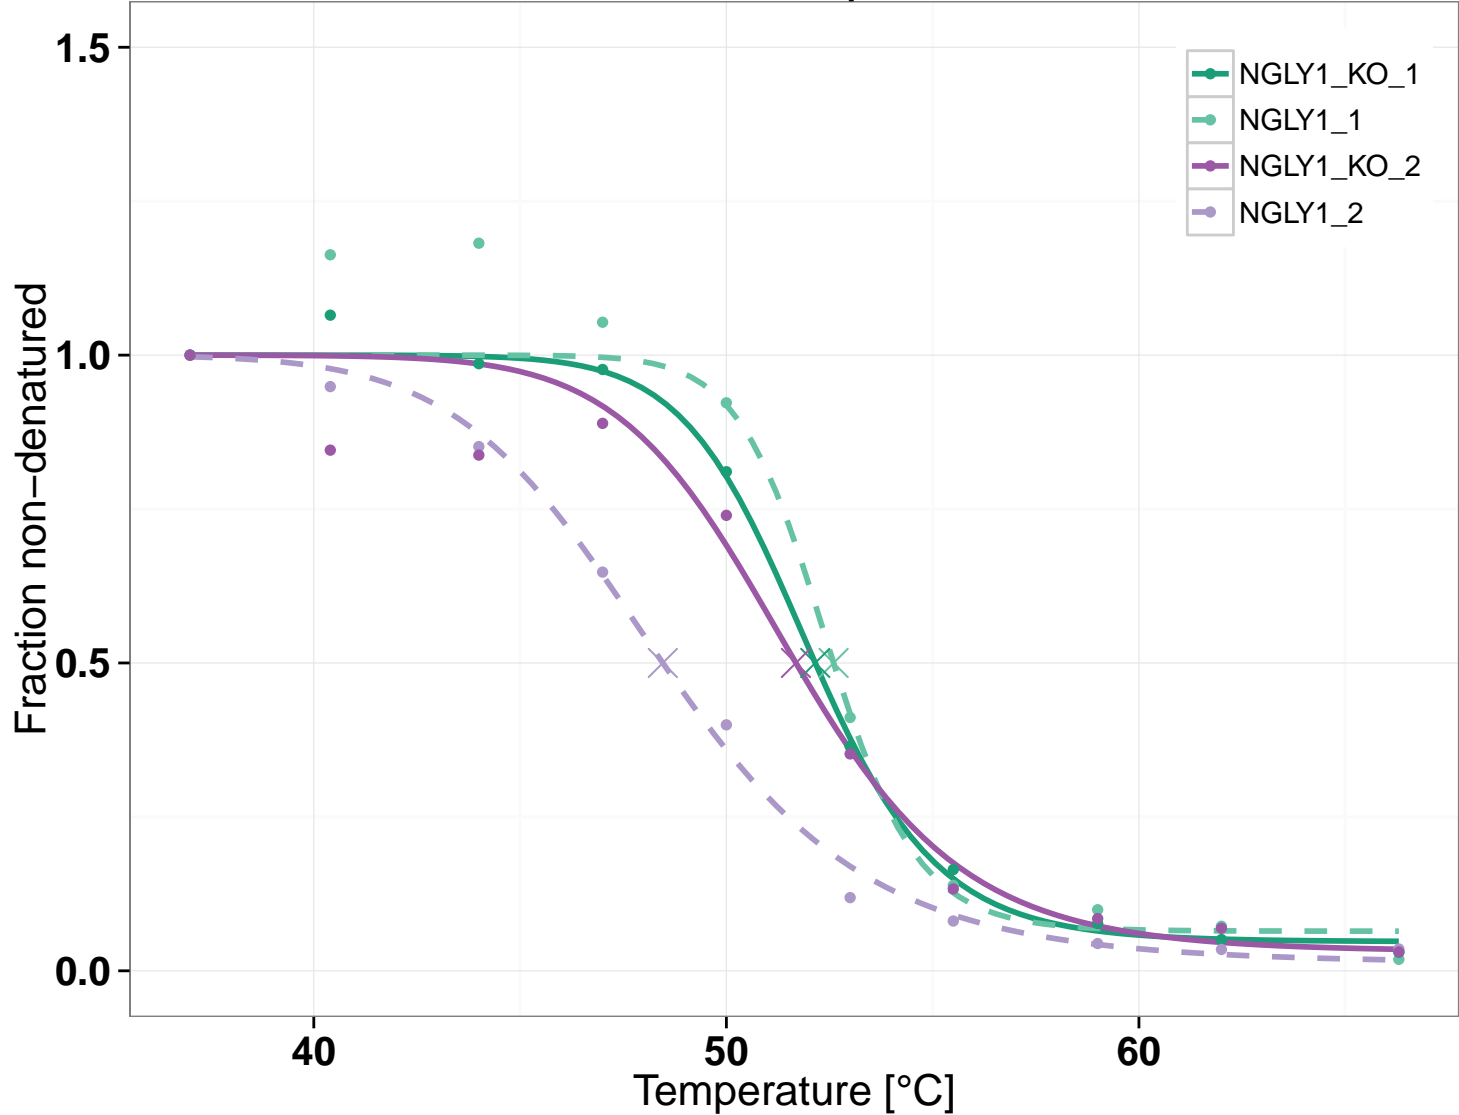

|            | meltPoint | slope  | plateau | R2   |
|------------|-----------|--------|---------|------|
| NGLY1_KO_1 | 52.15     | -0.15  | 0.05    | 1    |
| NGLY1_1    | 52.6      | -0.21  | 0.06    | 0.97 |
| NGLY1_KO_2 | 51.69     | -0.12  | 0.03    | 0.96 |
| NGLY1_2    | 48.46     | -0.099 | 0.01    | 1    |

Supplement: Supplementary file 6717 [file 1]

IPI00007411.1|AKAP11

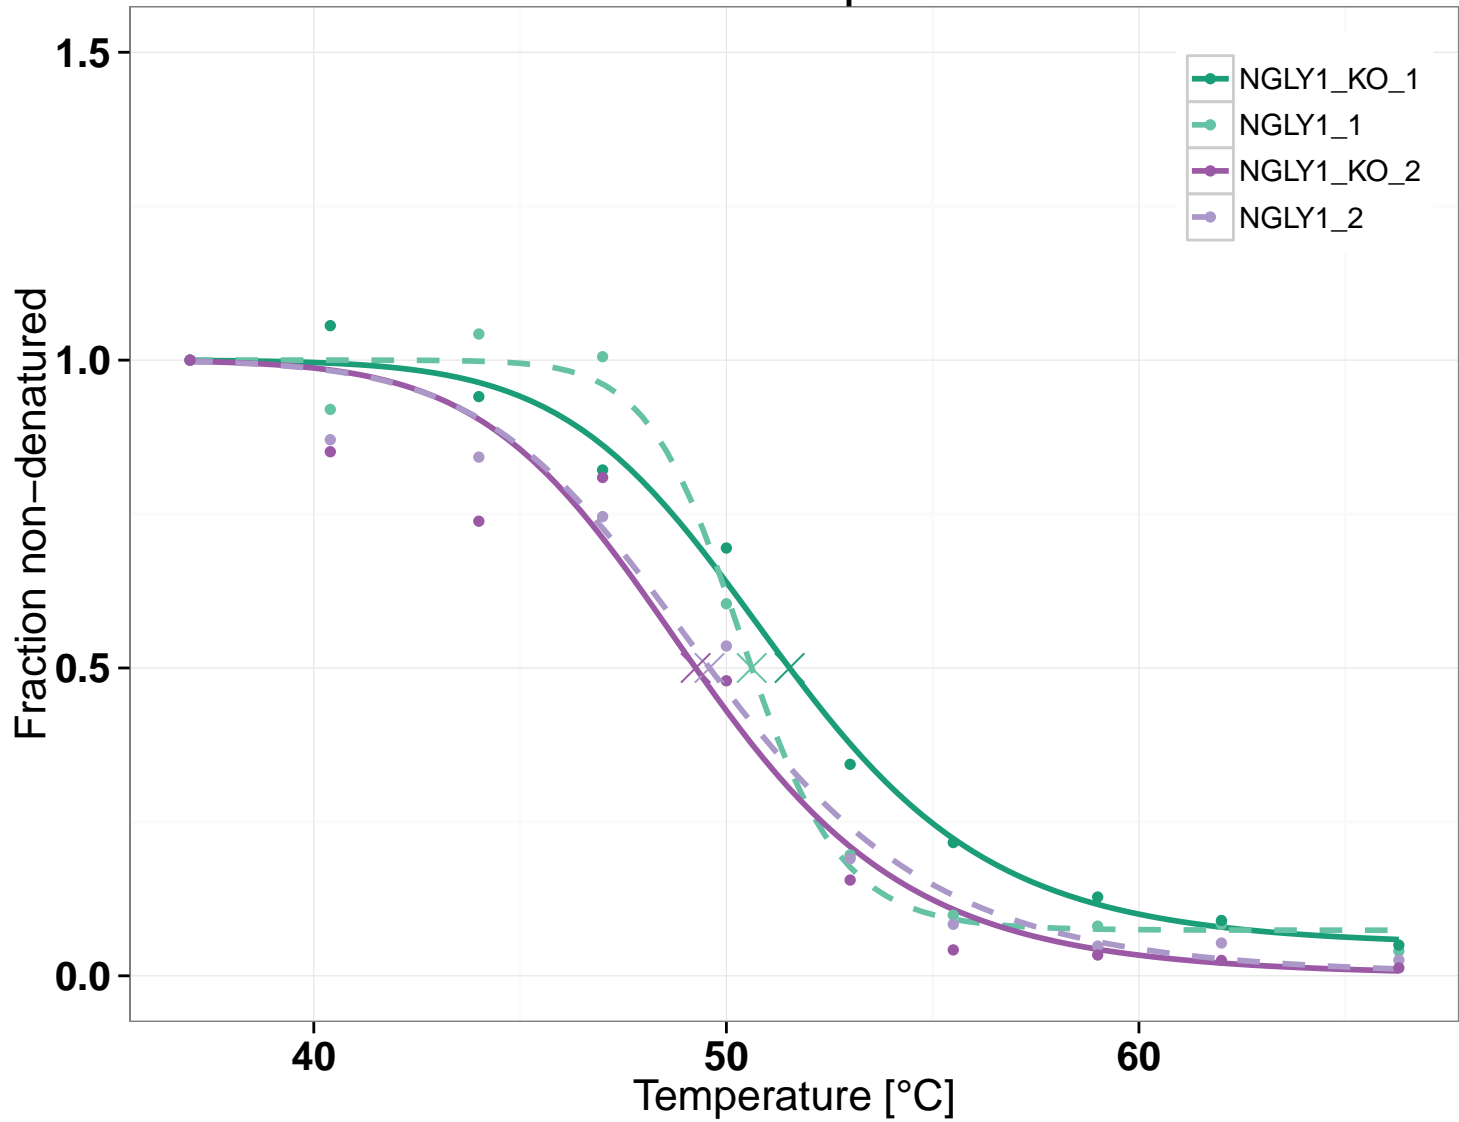

|            | meltPoint | slope  | plateau | R2   |
|------------|-----------|--------|---------|------|
| NGLY1_KO_1 | 51.53     | -0.092 | 0.05    | 0.99 |
| NGLY1_1    | 50.61     | -0.2   | 0.07    | 0.99 |
| NGLY1_KO_2 | 49.26     | -0.096 | 0       | 0.96 |
| NGLY1_2    | 49.59     | -0.091 | 0       | 0.98 |

Supplement: Supplementary file 6718 [file 1]

IPI00026570.2|COX7A2

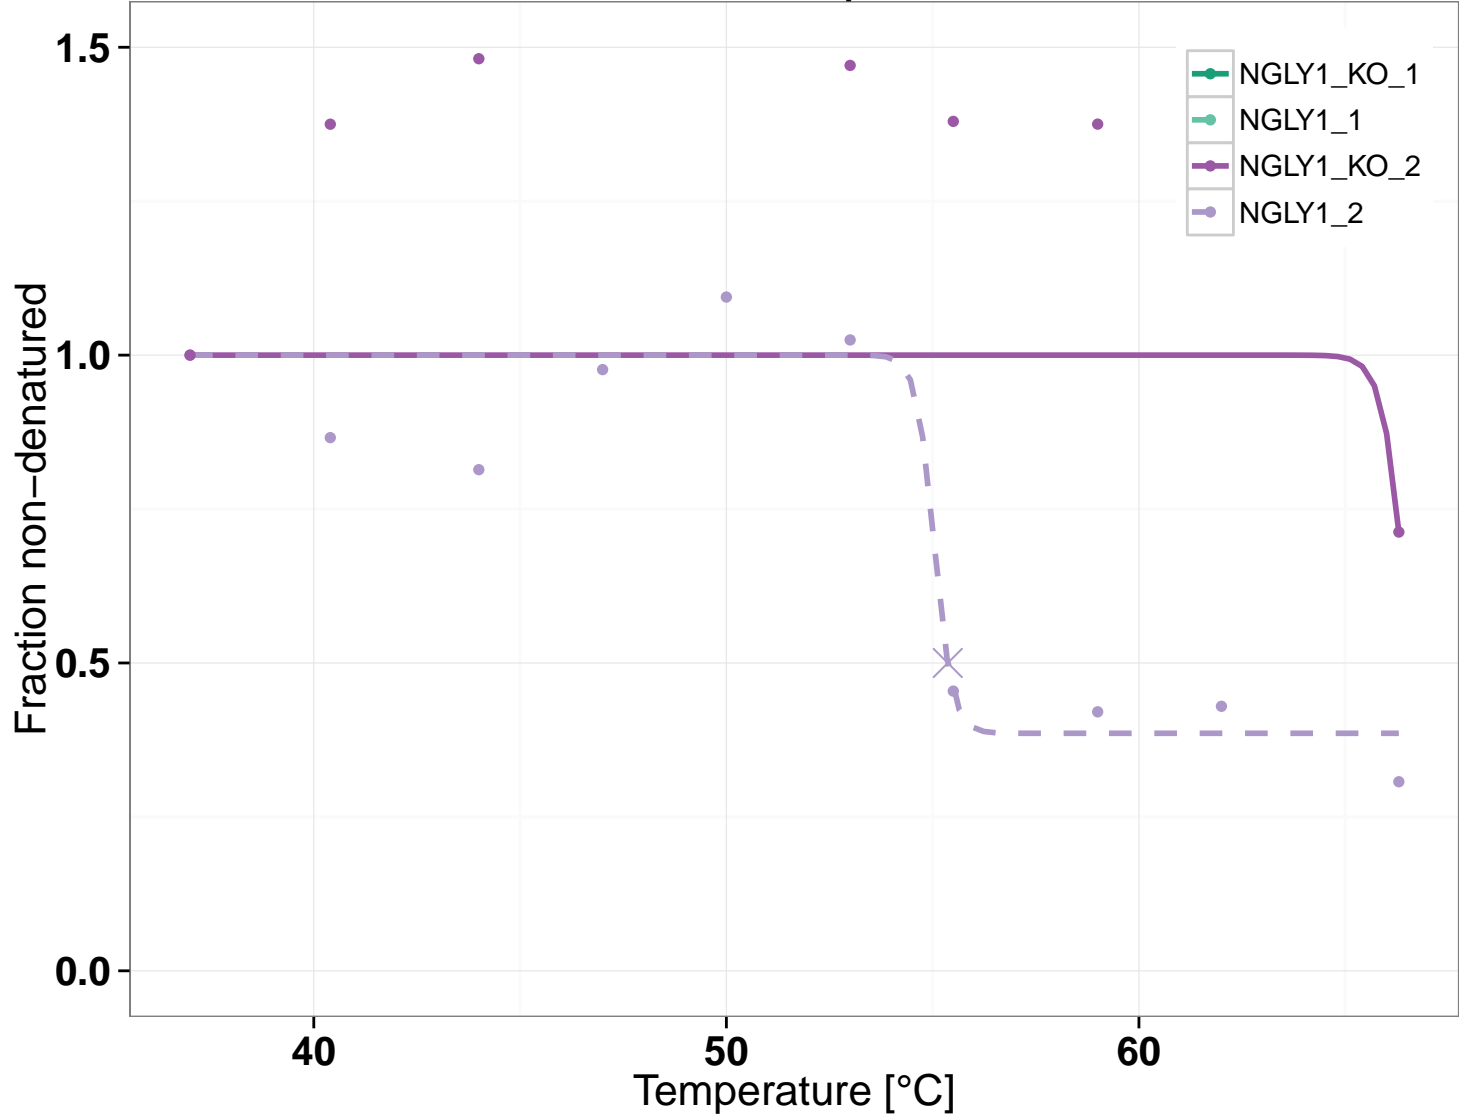

|            | meltPoint | slope | plateau | R2    |
|------------|-----------|-------|---------|-------|
| NGLY1_KO_1 | -         | -     | -       | -     |
| NGLY1_1    | -         | -     | -       | -     |
| NGLY1_KO_2 | -         | -     | 0       | -1.42 |
| NGLY1_2    | 55.37     | -0.7  | 0.39    | 0.91  |

Supplement: Supplementary file 6719 [file 1]

# IPI00903062.1|CYFIP1

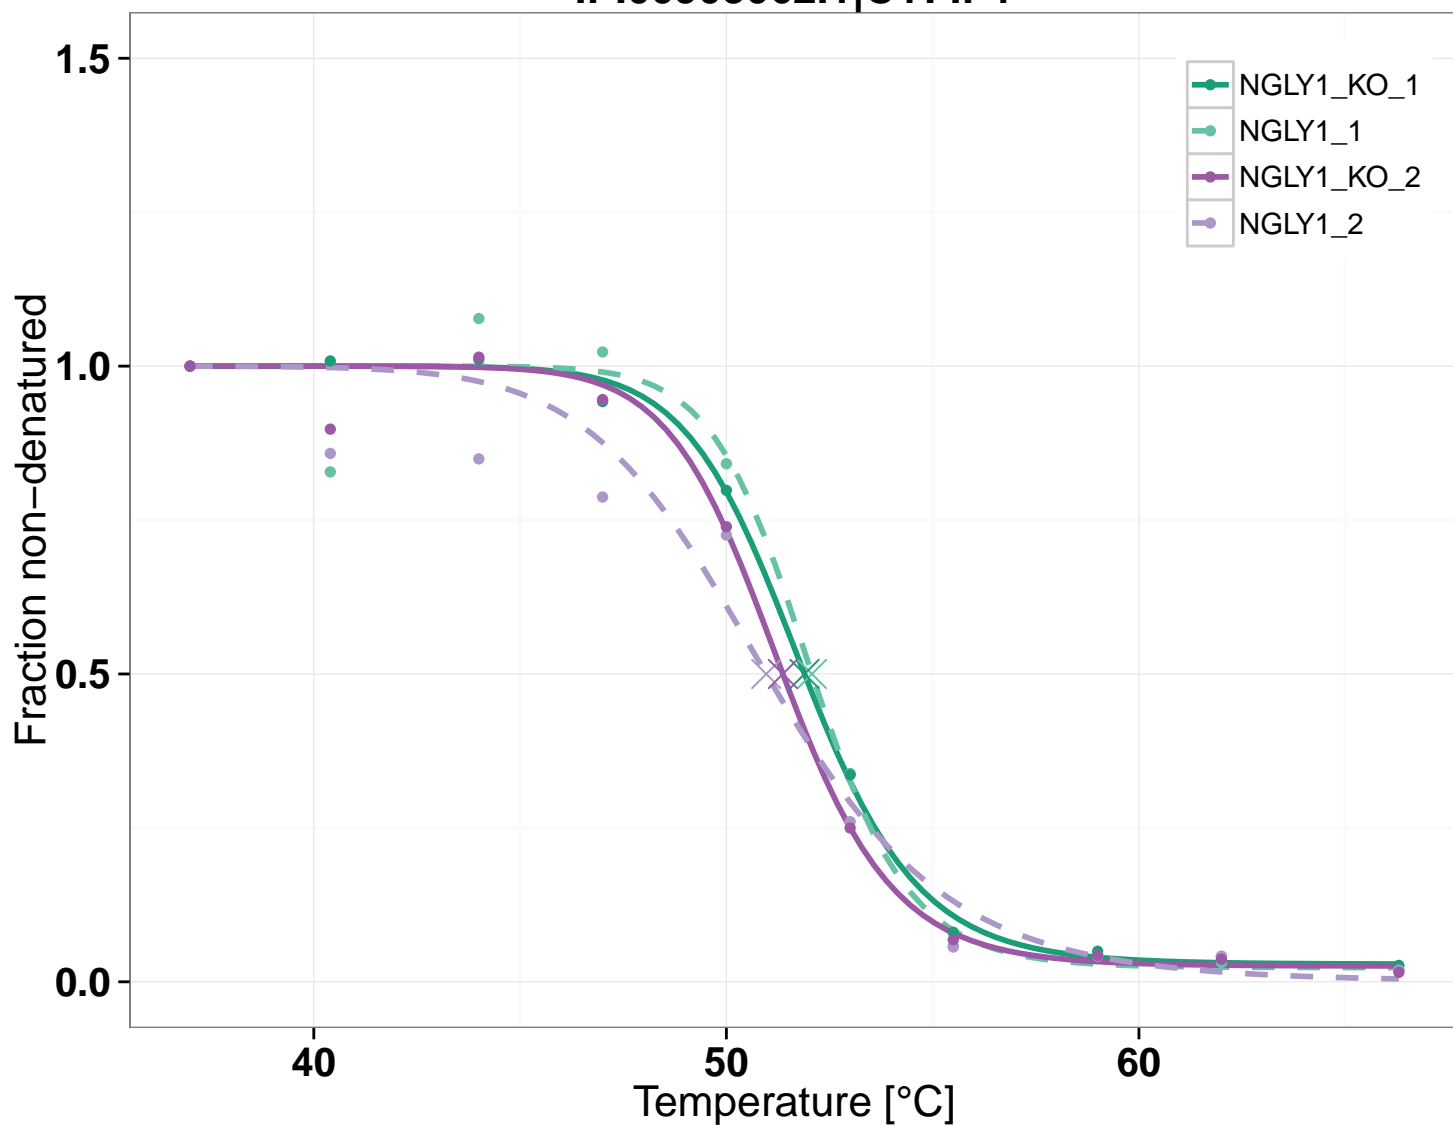

|            | meltPoint | slope | plateau | R2   |
|------------|-----------|-------|---------|------|
| NGLY1_KO_1 | 51.89     | -0.17 | 0.03    | 1    |
| NGLY1_1    | 52.07     | -0.2  | 0.02    | 0.98 |
| NGLY1_KO_2 | 51.37     | -0.18 | 0.03    | 0.99 |
| NGLY1_2    | 50.97     | -0.11 | 0       | 0.96 |

Supplement: Supplementary file 6720 [file 1]

IPI00010404.1|SF3B5

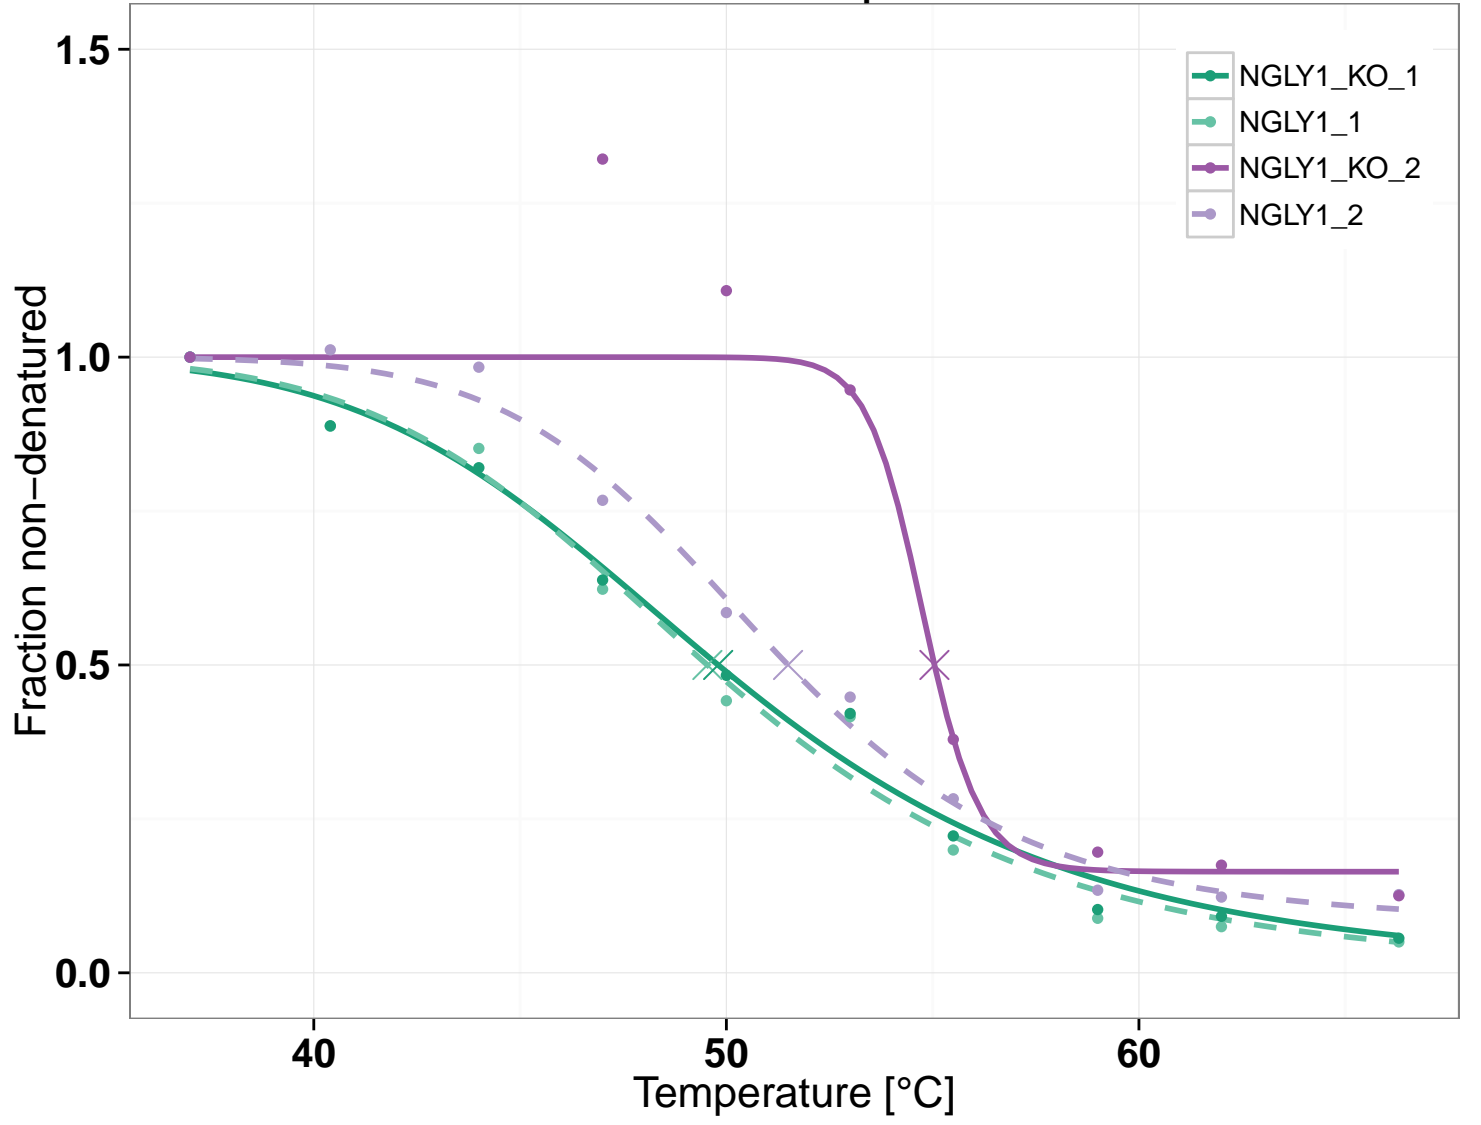

|            | meltPoint | slope  | plateau | R2   |
|------------|-----------|--------|---------|------|
| NGLY1_KO_1 | 49.8      | -0.057 | 0       | 0.99 |
| NGLY1_1    | 49.54     | -0.061 | 0       | 0.98 |
| NGLY1_KO_2 | 55.04     | -0.31  | 0.16    | 0.68 |
| NGLY1_2    | 51.5      | -0.073 | 0.08    | 0.99 |

Supplement: Supplementary file 6721 [file 1]

# IPI00375915.5|MCM10

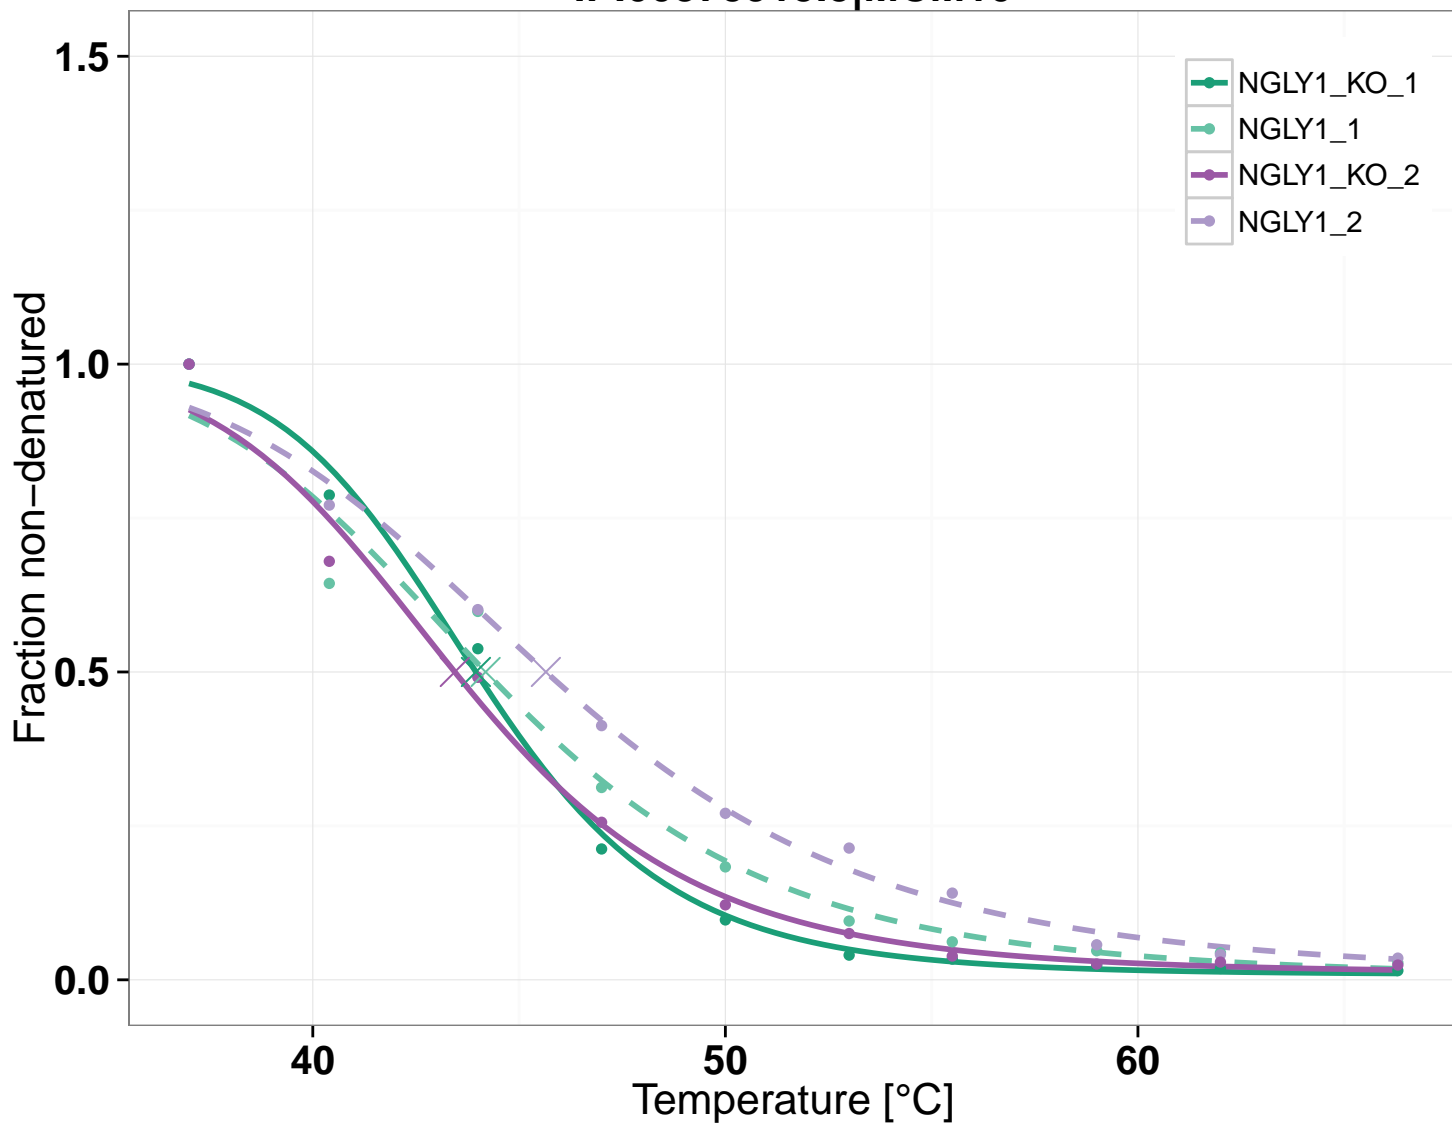

|            | meltPoint | slope  | plateau | R2   |
|------------|-----------|--------|---------|------|
| NGLY1_KO_1 | 43.95     | -0.1   | 0.01    | 1    |
| NGLY1_1    | 44.19     | -0.072 | 0       | 0.97 |
| NGLY1_KO_2 | 43.44     | -0.085 | 0.01    | 0.99 |
| NGLY1_2    | 45.65     | -0.062 | 0       | 0.99 |

Supplement: Supplementary file 6722 [file 1]

# IPI00477494.2|DRAP1

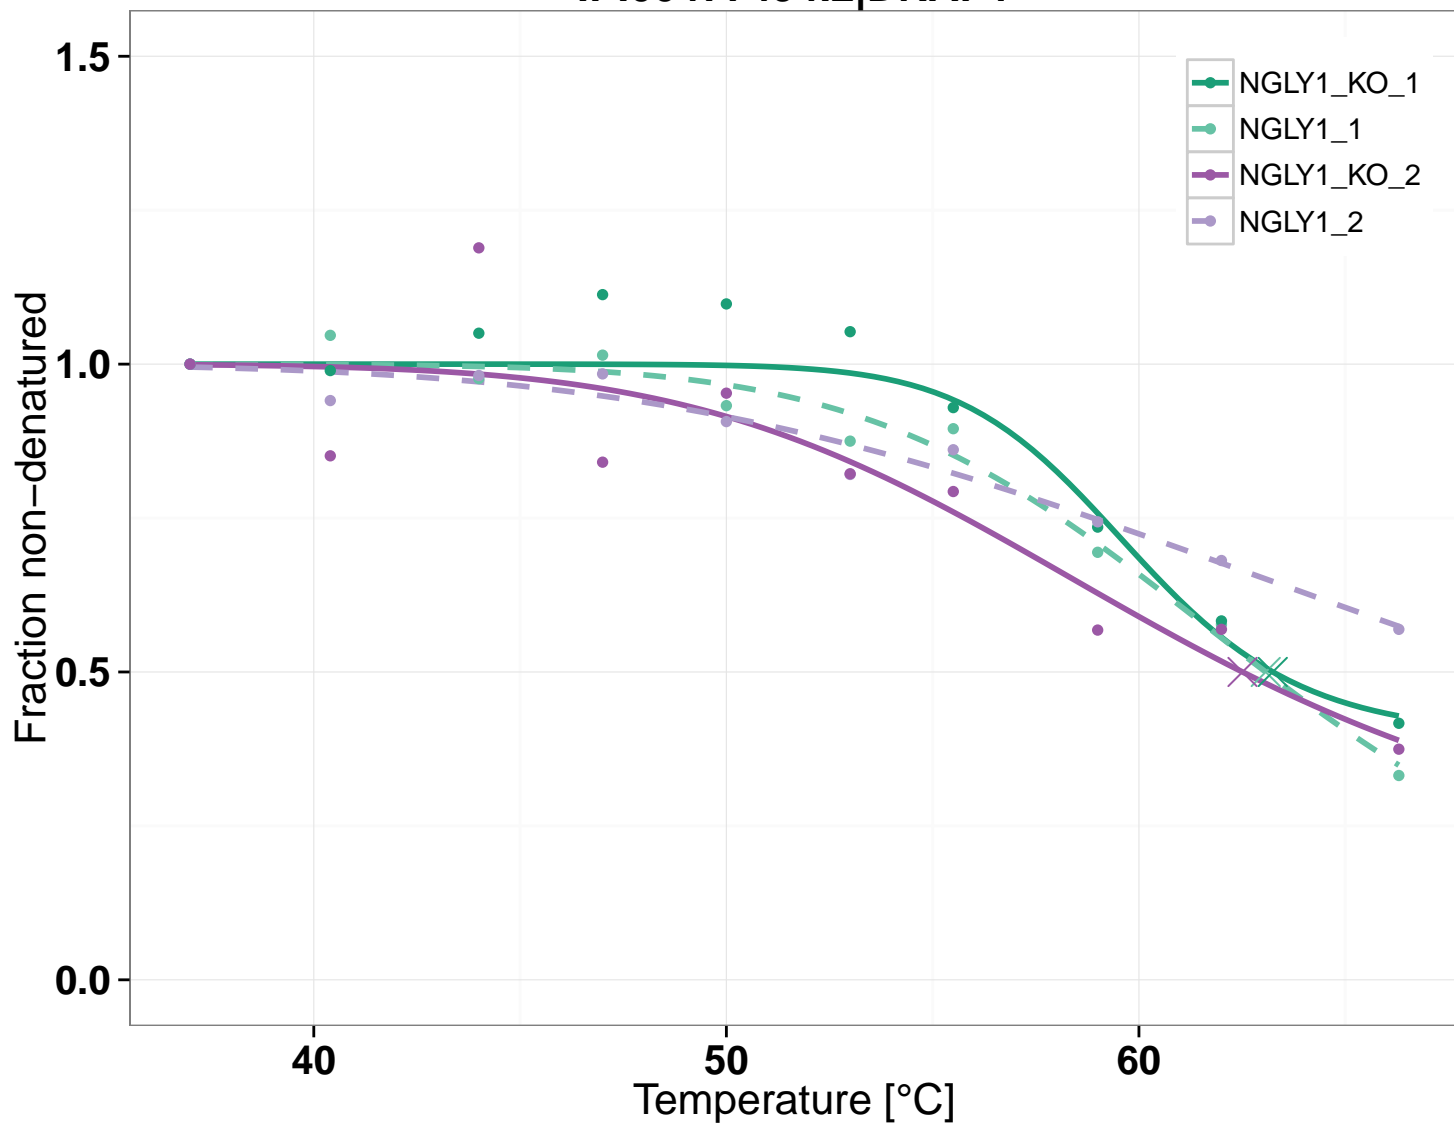

|            | meltPoint | slope  | plateau | R2   |
|------------|-----------|--------|---------|------|
| NGLY1_KO_1 | 63.24     | -0.073 | 0.39    | 0.94 |
| NGLY1_1    | 63.07     | -0.052 | 0       | 0.98 |
| NGLY1_KO_2 | 62.51     | -0.038 | 0.15    | 0.83 |
| NGLY1_2    | -         | -0.024 | 0       | 0.96 |

Supplement: Supplementary file 6723 [file 1]

IPI00216219.3|TJP1

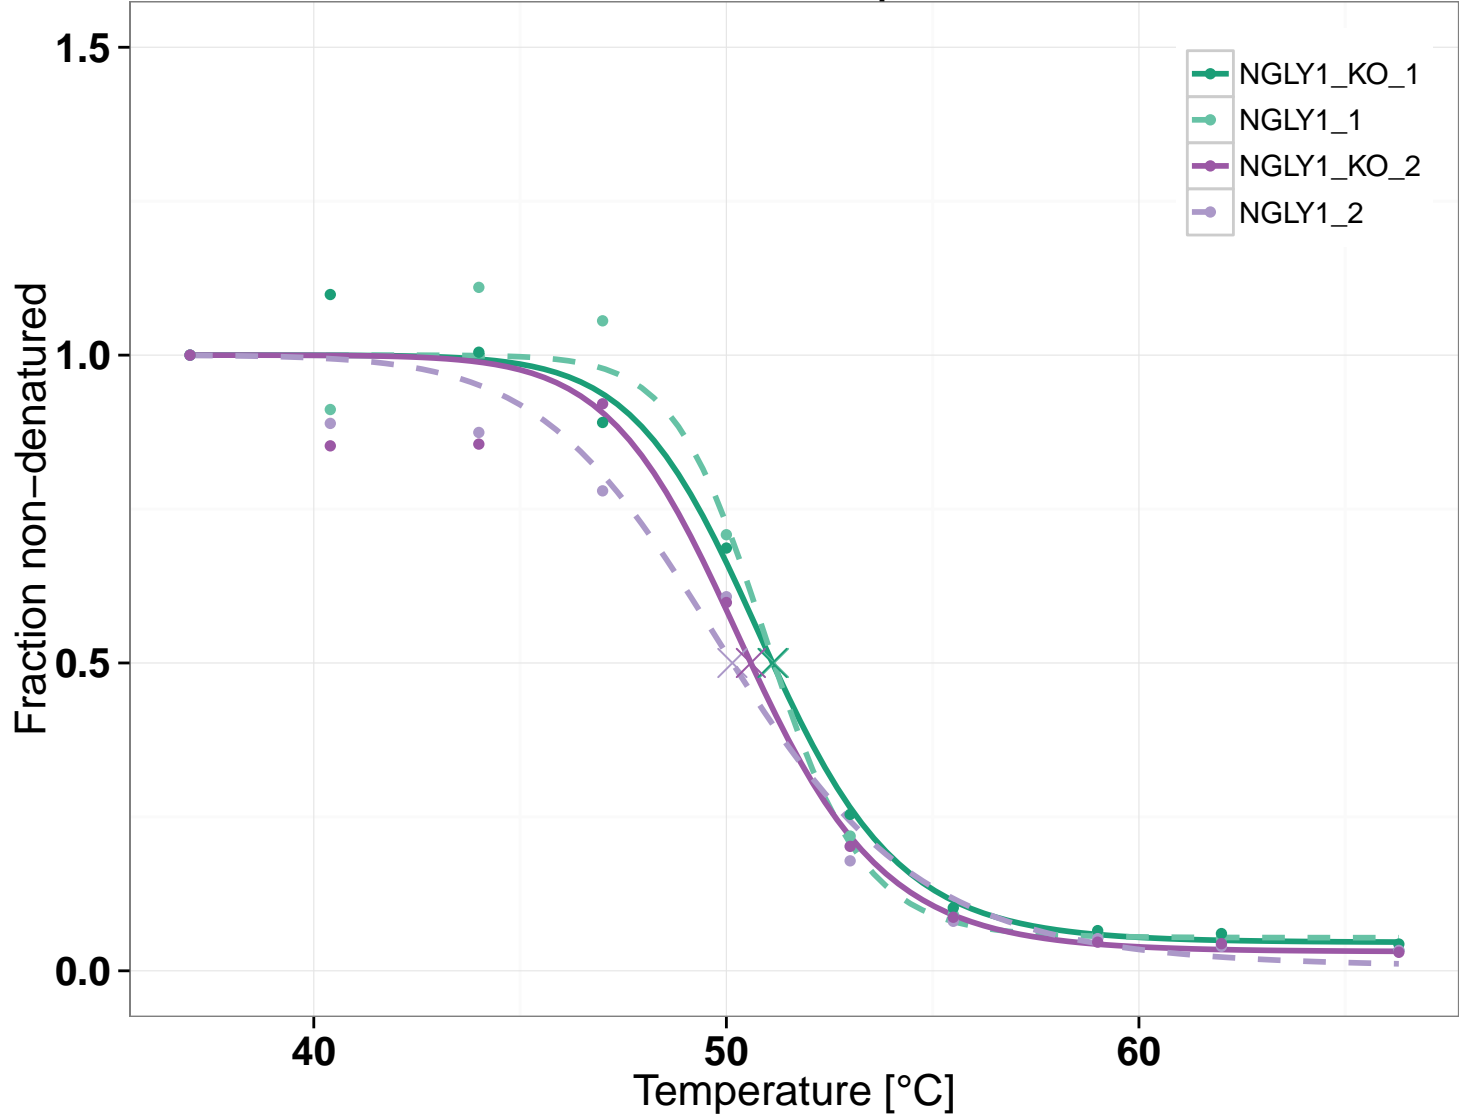

|            | meltPoint | slope | plateau | R2   |
|------------|-----------|-------|---------|------|
| NGLY1_KO_1 | 51.12     | -0.15 | 0.05    | 0.99 |
| NGLY1_1    | 51.15     | -0.2  | 0.05    | 0.99 |
| NGLY1_KO_2 | 50.59     | -0.15 | 0.03    | 0.97 |
| NGLY1_2    | 50.15     | -0.11 | 0.01    | 0.98 |

Supplement: Supplementary file 6724 [file 1]

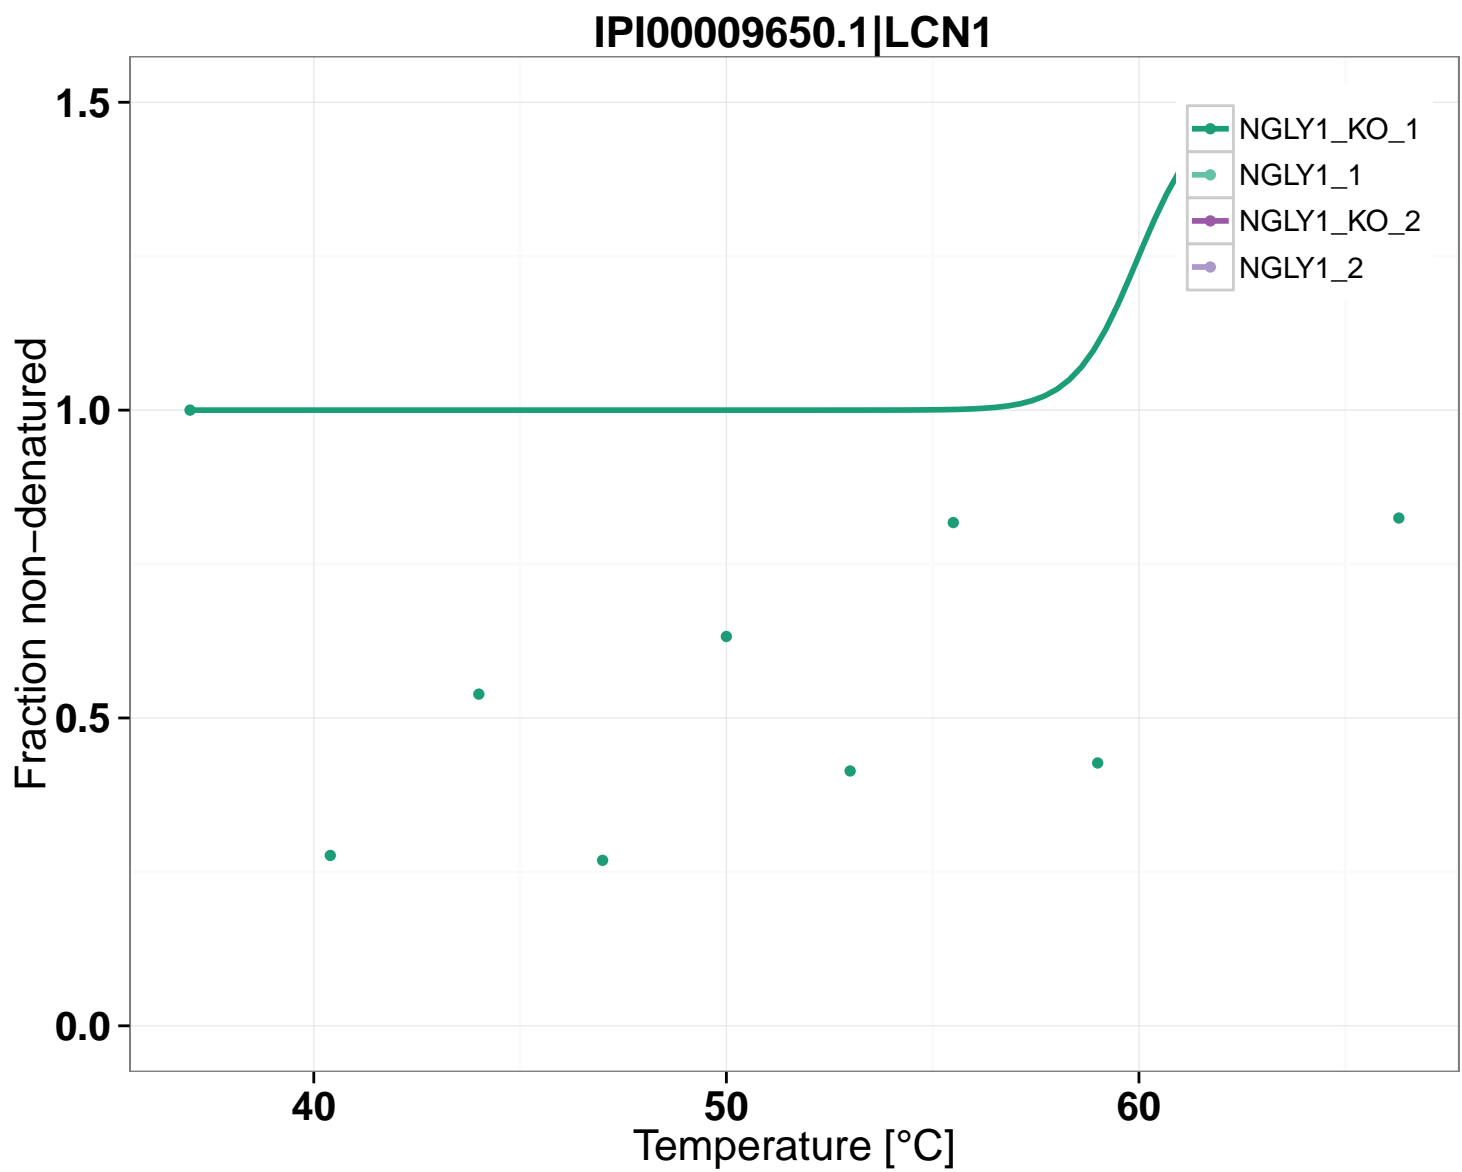

|            | meltPoint | slope | plateau | R2   |
|------------|-----------|-------|---------|------|
| NGLY1_KO_1 | —         | 0.16  | 1.5     | 0.14 |
| NGLY1_1    | —         | —     | —       | —    |
| NGLY1_KO_2 | —         | —     | —       | —    |
| NGLY1_2    | —         | —     | —       | —    |

Supplement: Supplementary file 6725 [file 1]

# IPI00015952.2|EIF4G2

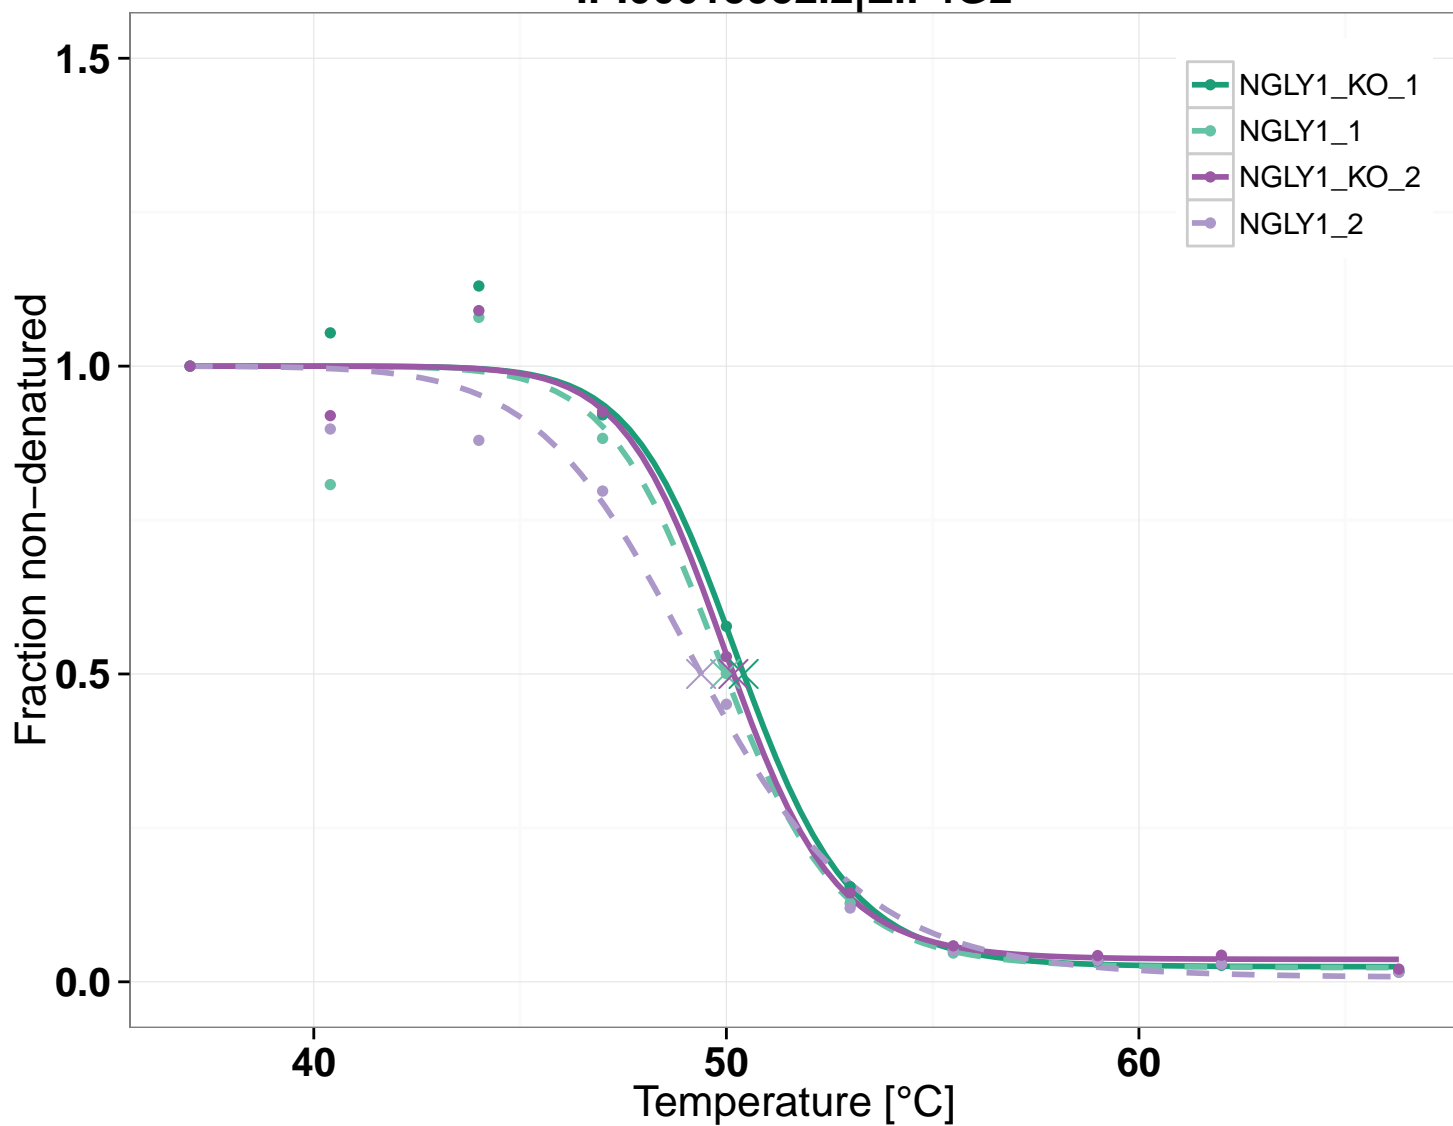

|            | meltPoint | slope | plateau | R2   |
|------------|-----------|-------|---------|------|
| NGLY1_KO_1 | 50.42     | -0.18 | 0.02    | 0.99 |
| NGLY1_1    | 49.97     | -0.17 | 0.02    | 0.98 |
| NGLY1_KO_2 | 50.17     | -0.19 | 0.04    | 0.99 |
| NGLY1_2    | 49.39     | -0.13 | 0.01    | 0.99 |

Supplement: Supplementary file 6726 [file 1]

# IPI00071697.1|NFYC

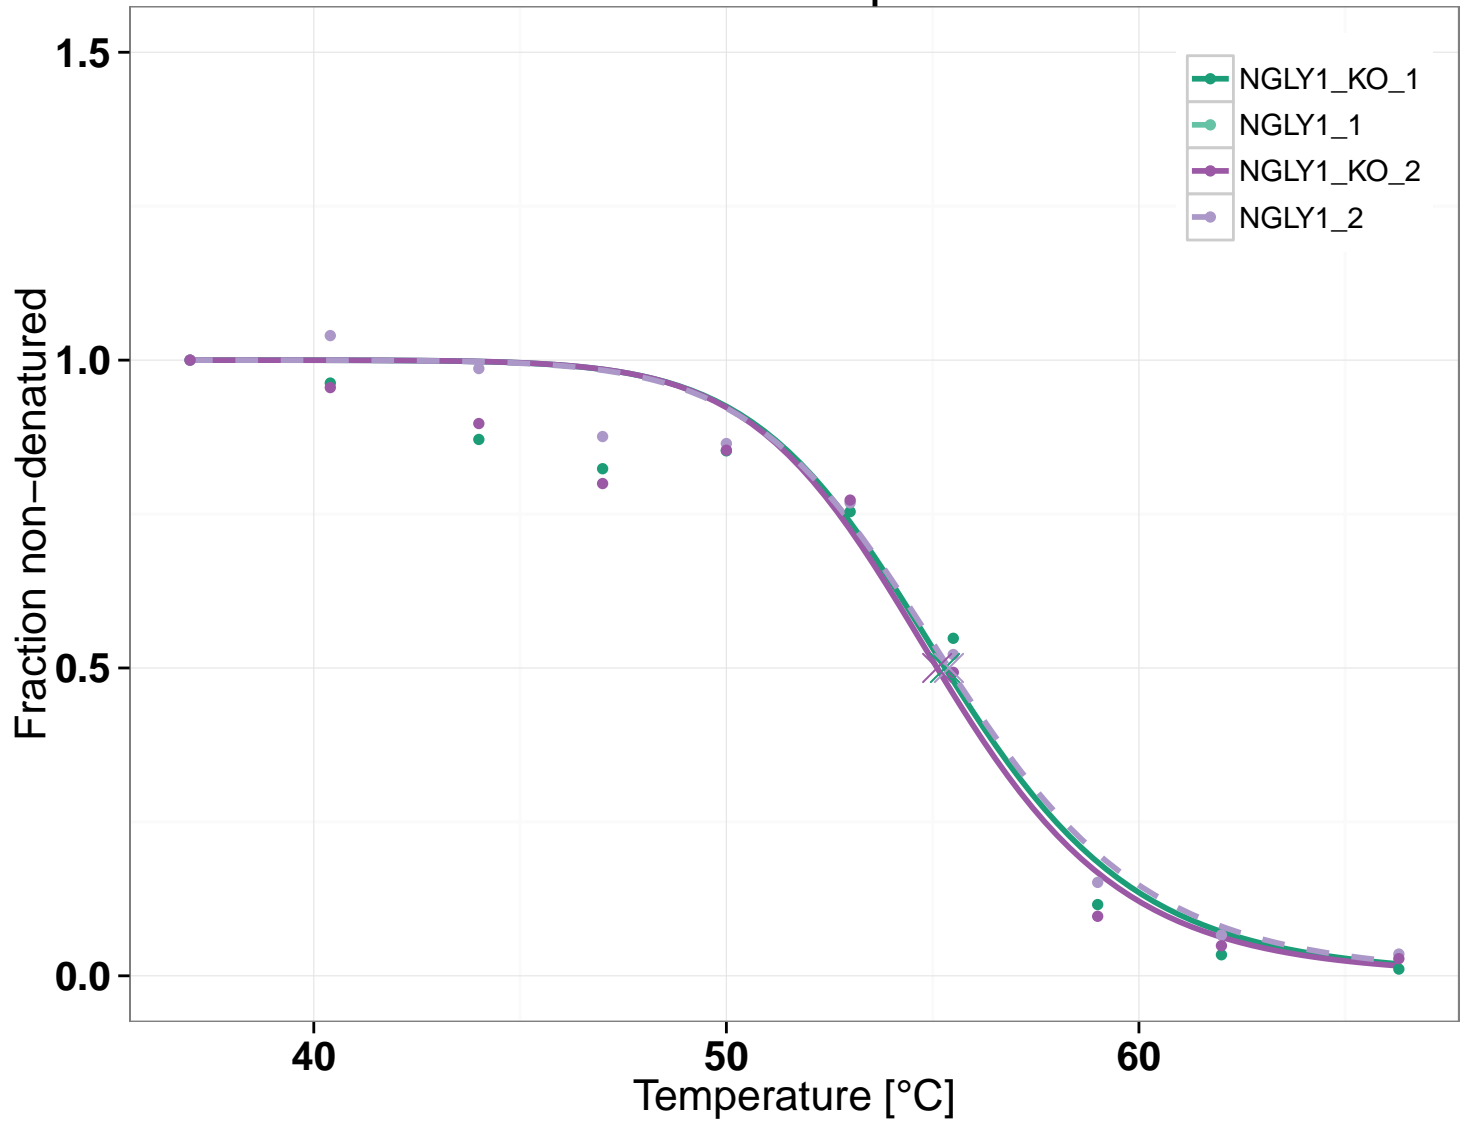

|            | meltPoint | slope | plateau | R2   |
|------------|-----------|-------|---------|------|
| NGLY1_KO_1 | 55.3      | -0.11 | 0       | 0.96 |
| NGLY1_1    | -         | -     | -       | -    |
| NGLY1_KO_2 | 55.11     | -0.11 | 0       | 0.96 |
| NGLY1_2    | 55.4      | -0.1  | 0       | 0.99 |

Supplement: Supplementary file 6727 [file 1]

# IPI00795521.1|GOSR2

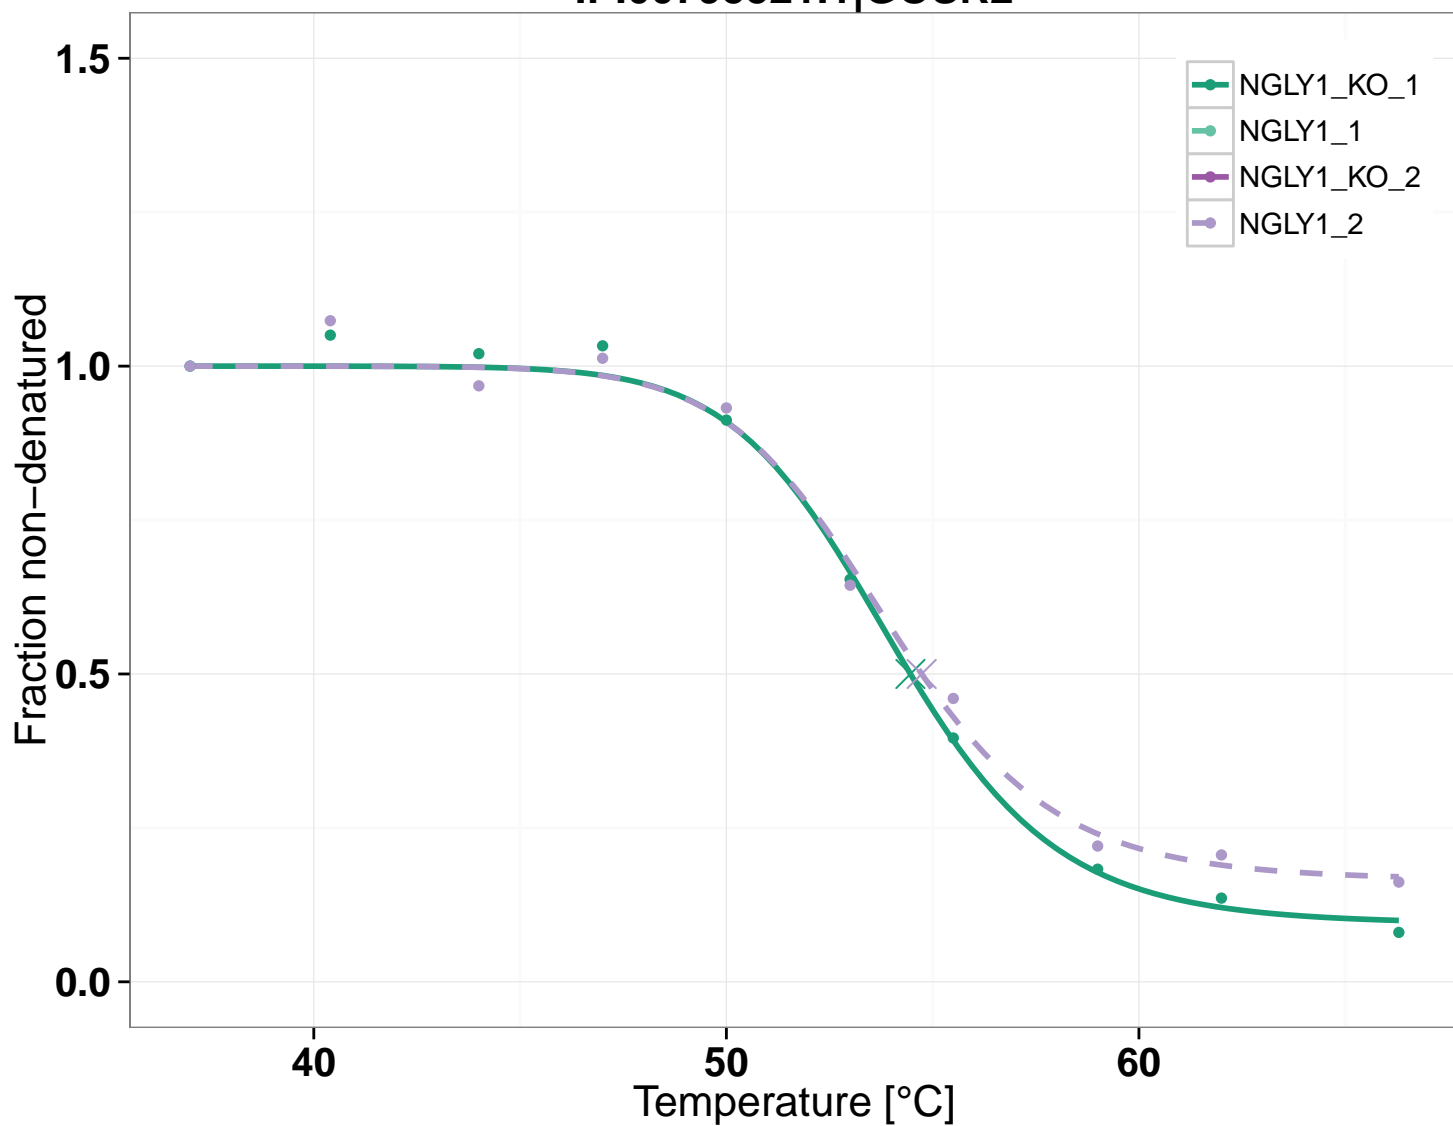

|            | meltPoint | slope | plateau | R2   |
|------------|-----------|-------|---------|------|
| NGLY1_KO_1 | 54.46     | -0.11 | 0.09    | 1    |
| NGLY1_1    | -         | -     | -       | -    |
| NGLY1_KO_2 | -         | -     | -       | -    |
| NGLY1_2    | 54.73     | -0.1  | 0.17    | 0.99 |

Supplement: Supplementary file 6728 [file 1]
