# Supplementary material (part 68 of 85)
Source: publisher figshare collection journal article supplement (https://gsajournals.figshare.com/articles/dataset/_/12014913)

IPI00845470.1|ZNF655

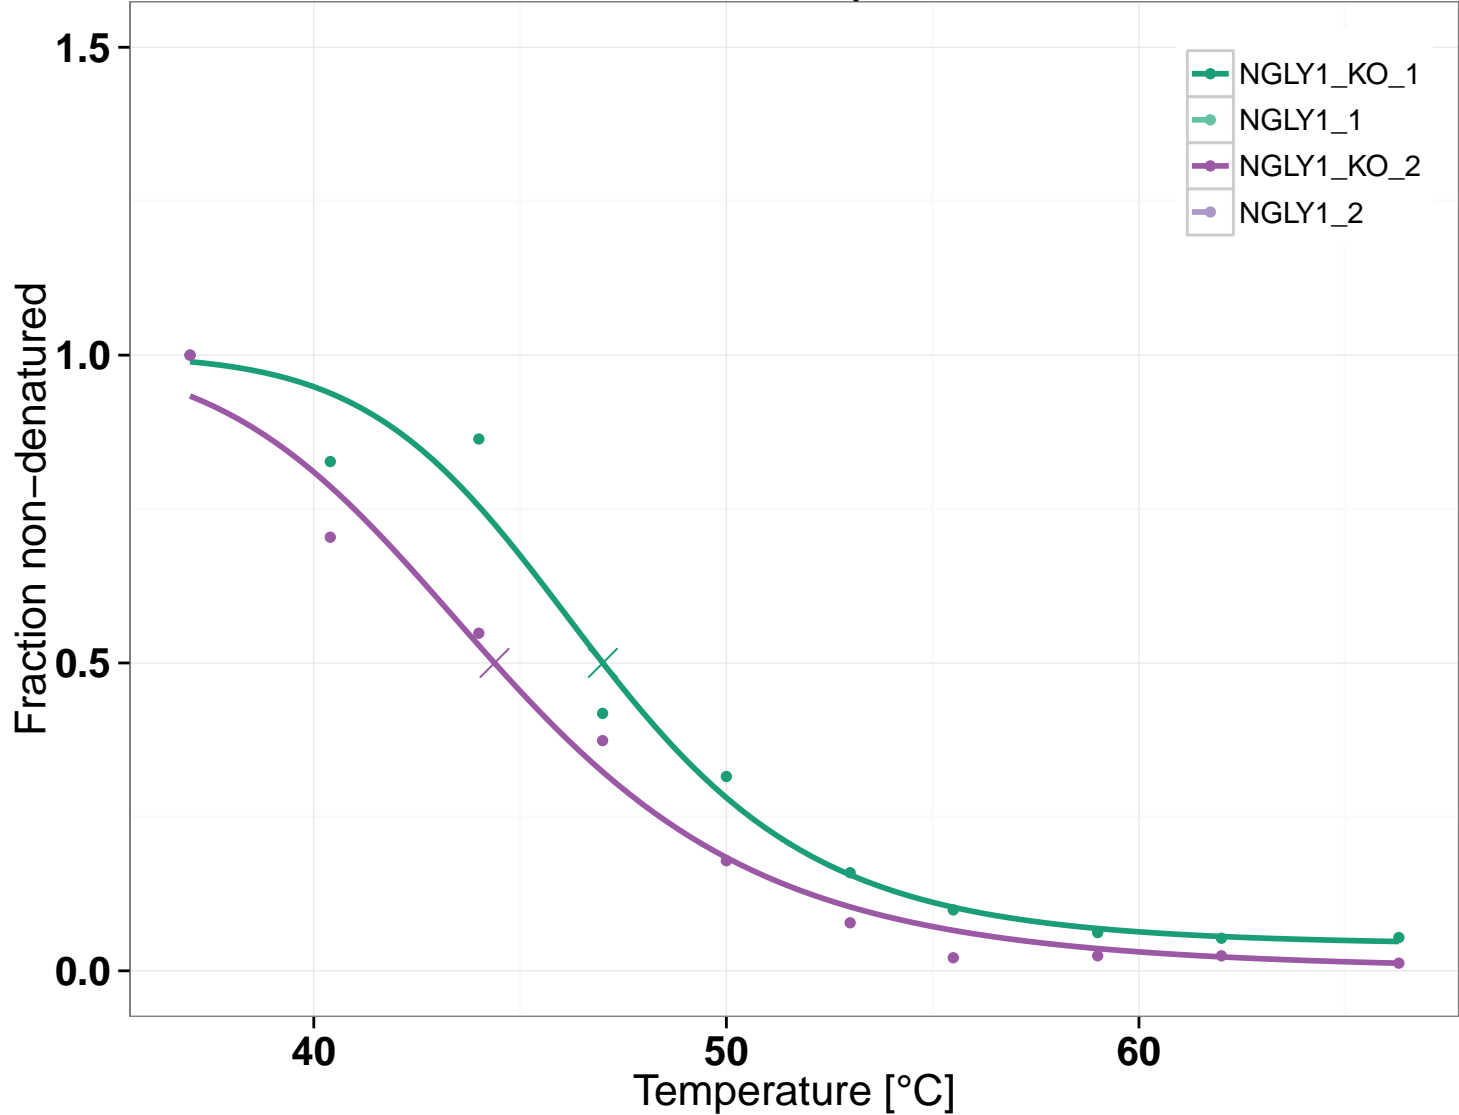

|            | meltPoint | slope  | plateau | R2   |
|------------|-----------|--------|---------|------|
| NGLY1_KO_1 | 47.01     | -0.088 | 0.04    | 0.97 |
| NGLY1_1    | -         | -      | -       | -    |
| NGLY1_KO_2 | 44.38     | -0.076 | 0       | 0.98 |
| NGLY1_2    | -         | -      | -       | -    |

Supplement: Supplementary file 6729 [file 1]

# IPI00216298.6|TXN

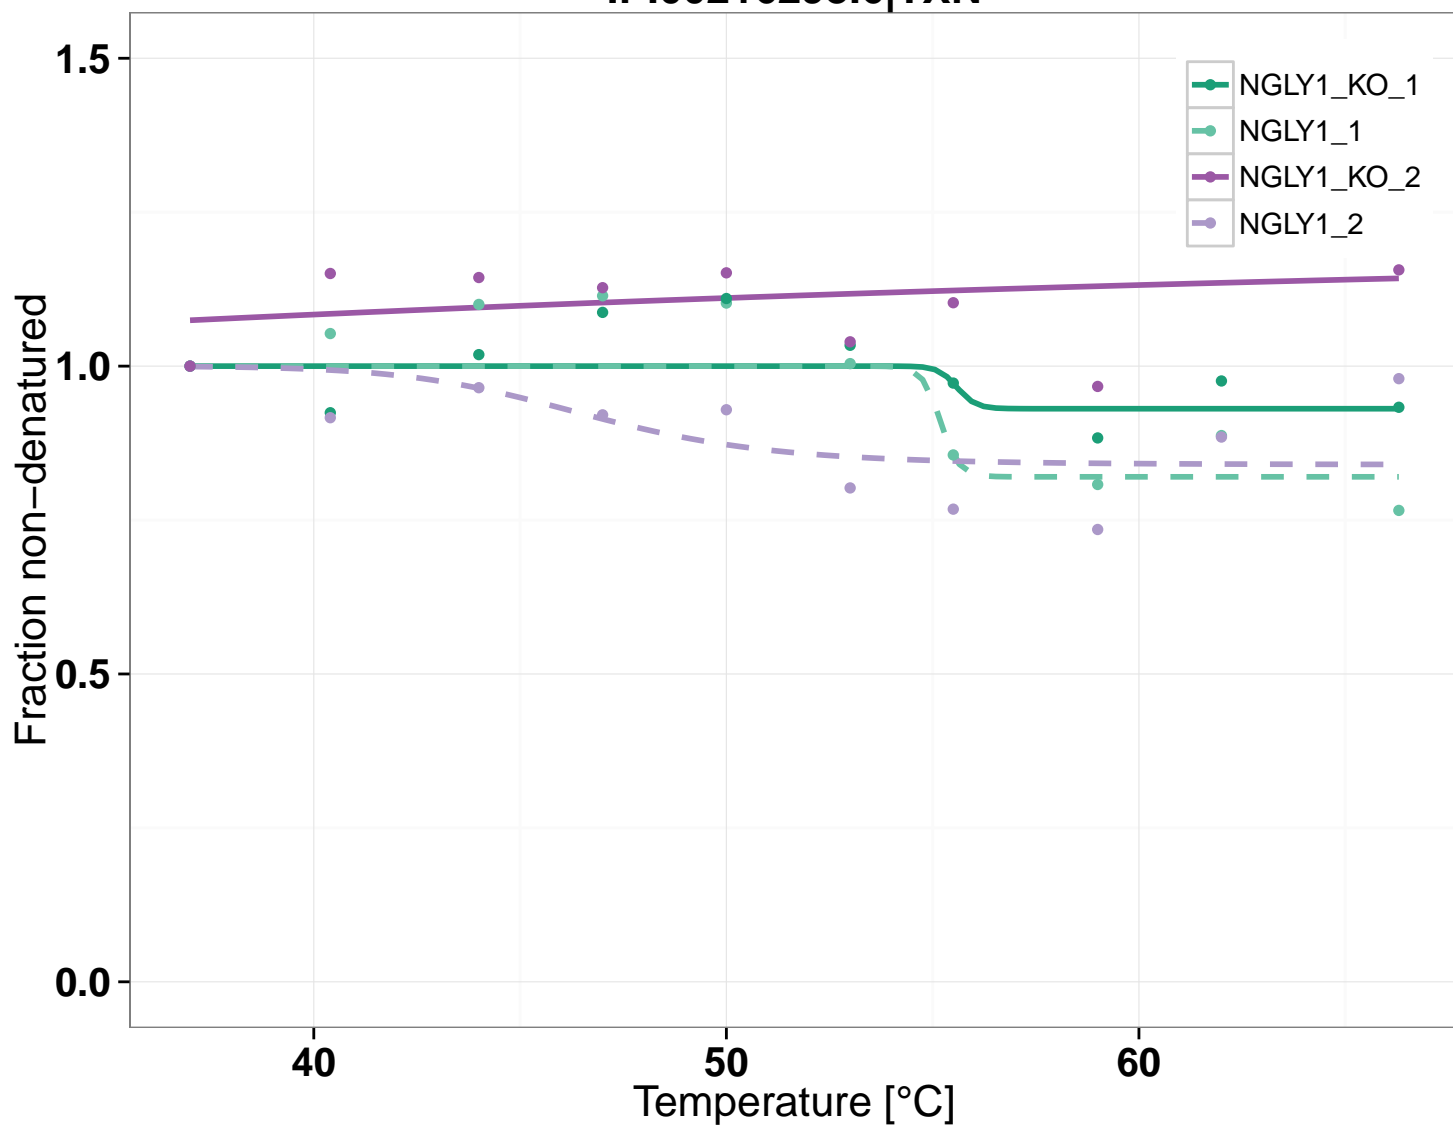

|            | meltPoint | slope  | plateau | R2   |
|------------|-----------|--------|---------|------|
| NGLY1_KO_1 | –         | –0.078 | 0.93    | 0.32 |
| NGLY1_1    | –         | –0.2   | 0.82    | 0.71 |
| NGLY1_KO_2 | –         | –      | 1.5     | 0.06 |
| NGLY1_2    | –         | –0.018 | 0.84    | 0.33 |

Supplement: Supplementary file 6730 [file 1]

IPI00043550.4|FAAH2

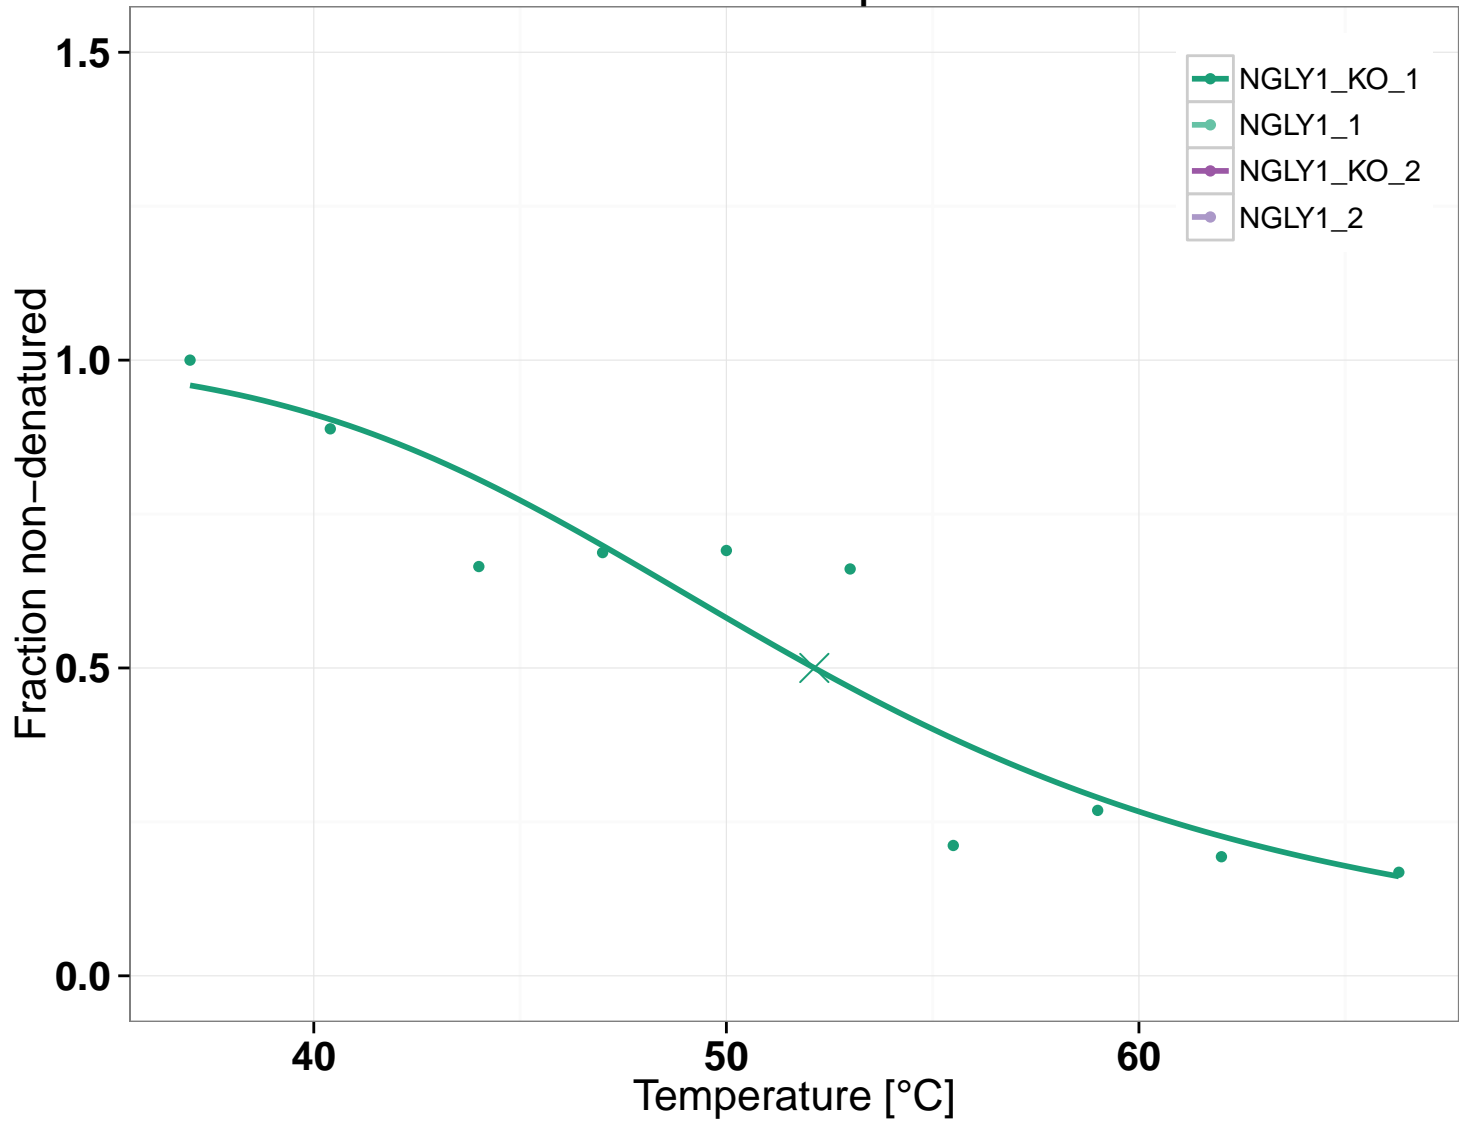

|            | meltPoint | slope  | plateau | R2   |
|------------|-----------|--------|---------|------|
| NGLY1_KO_1 | 52.13     | -0.039 | 0       | 0.88 |
| NGLY1_1    | -         | -      | -       | -    |
| NGLY1_KO_2 | -         | -      | -       | -    |
| NGLY1_2    | -         | -      | -       | -    |

Supplement: Supplementary file 6731 [file 1]

# IPI00301227.2|TTC13

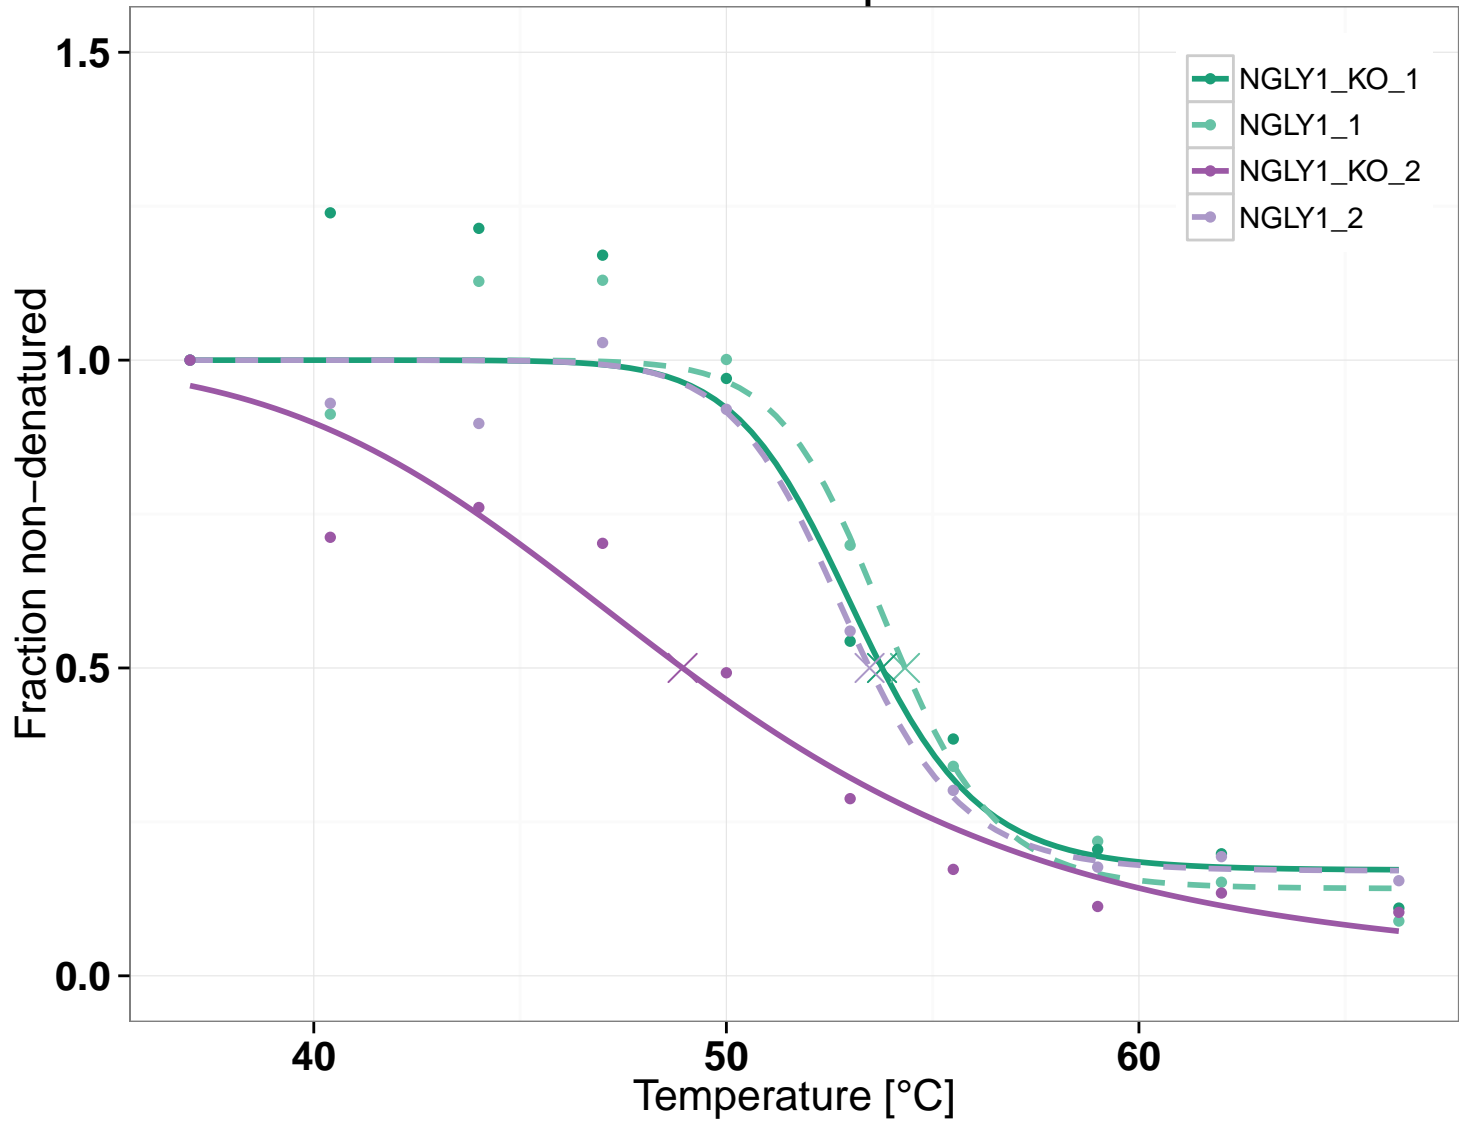

|            | meltPoint | slope  | plateau | R2   |
|------------|-----------|--------|---------|------|
| NGLY1_KO_1 | 53.77     | -0.14  | 0.17    | 0.92 |
| NGLY1_1    | 54.33     | -0.16  | 0.14    | 0.97 |
| NGLY1_KO_2 | 48.94     | -0.052 | 0       | 0.94 |
| NGLY1_2    | 53.47     | -0.15  | 0.17    | 0.99 |

Supplement: Supplementary file 6732 [file 1]

IPI00553175.7|ZGPAT

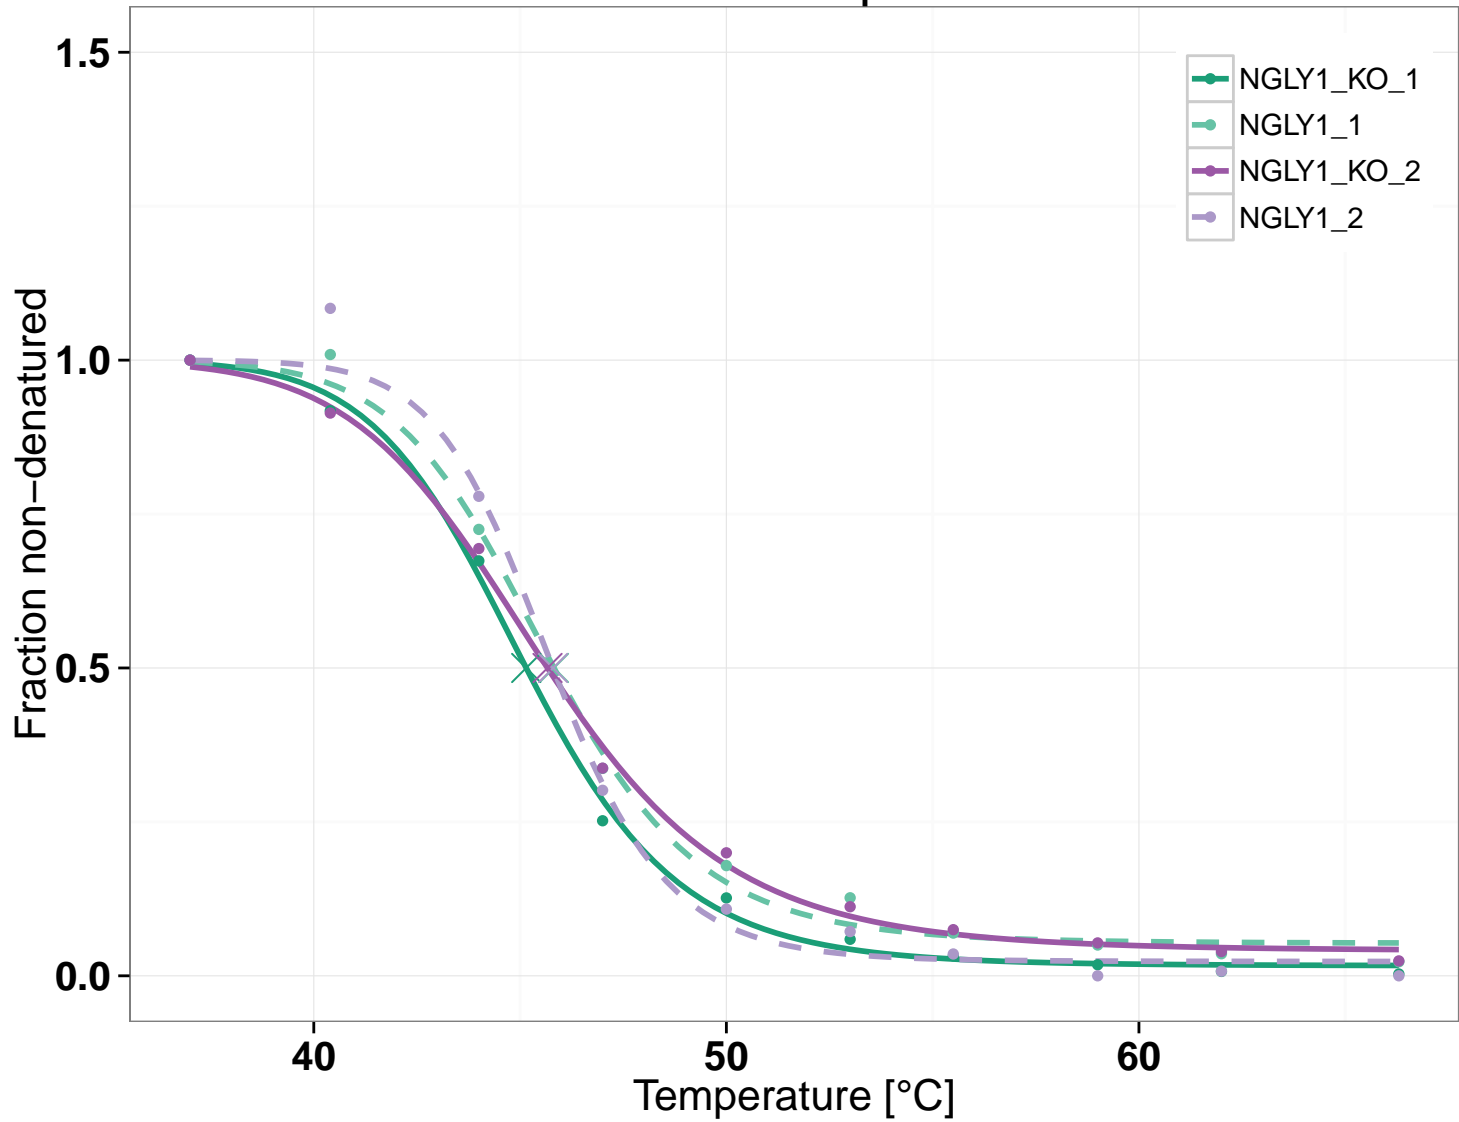

|            | meltPoint | slope | plateau | R2   |
|------------|-----------|-------|---------|------|
| NGLY1_KO_1 | 45.15     | -0.13 | 0.02    | 1    |
| NGLY1_1    | 45.82     | -0.13 | 0.05    | 1    |
| NGLY1_KO_2 | 45.67     | -0.1  | 0.04    | 1    |
| NGLY1_2    | 45.8      | -0.17 | 0.02    | 0.99 |

Supplement: Supplementary file 6733 [file 1]

IPI00010278.6|MRPS30

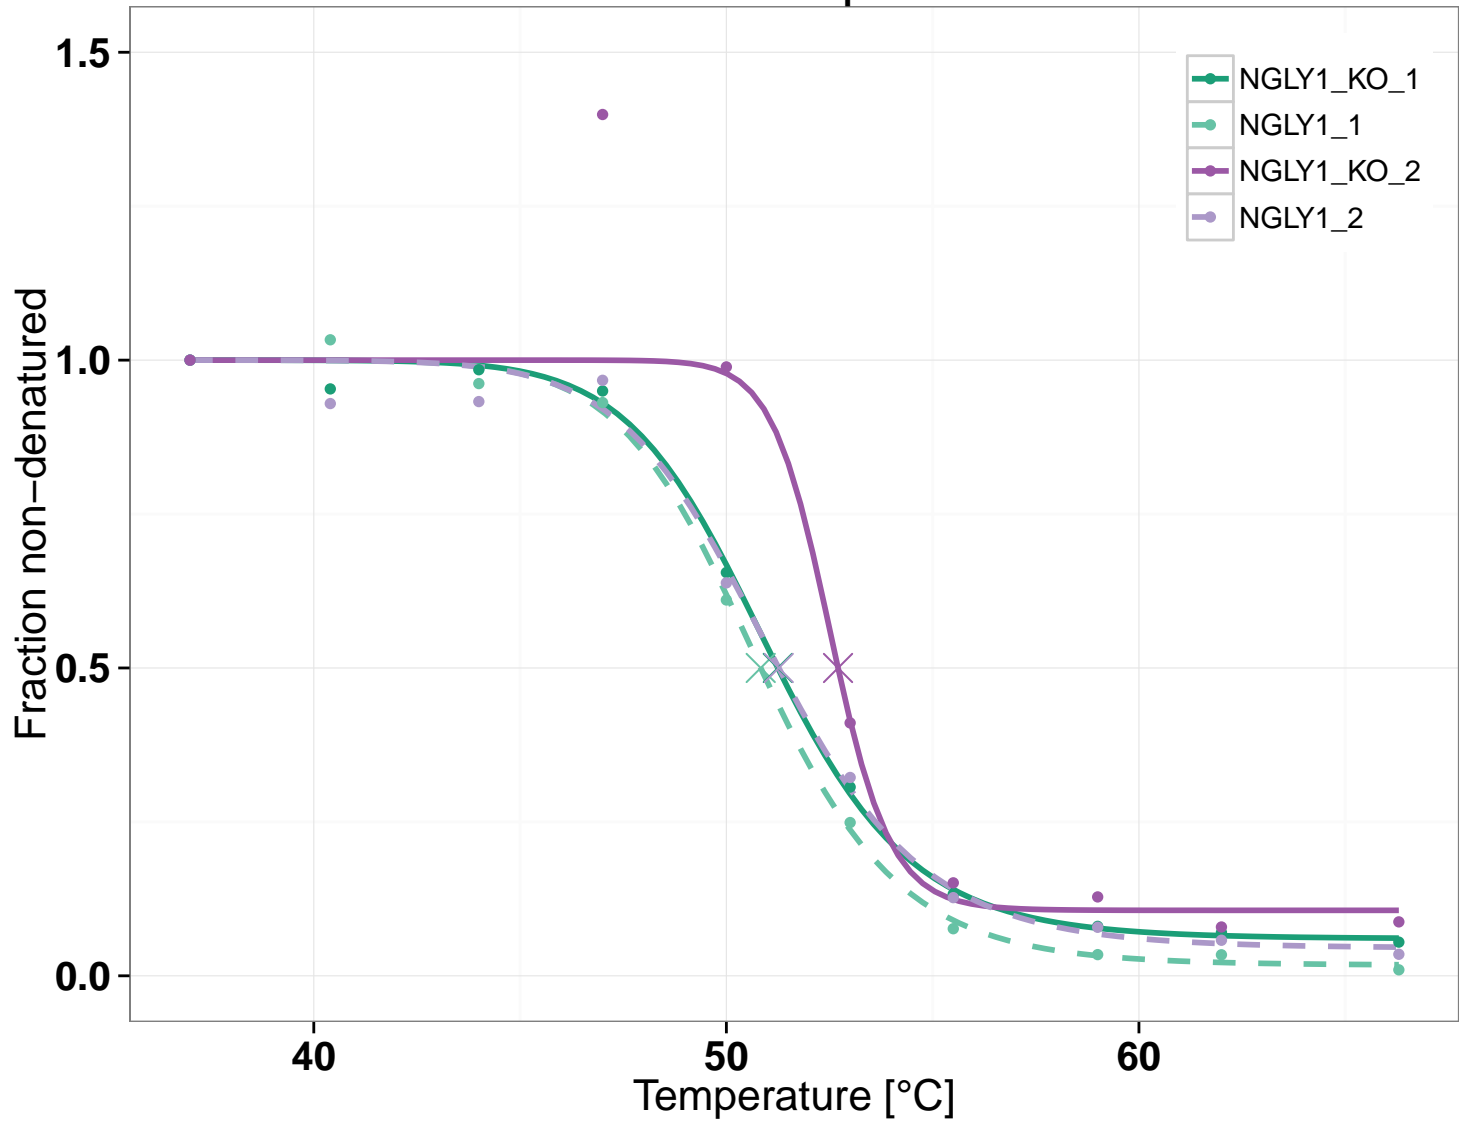

|            | meltPoint | slope | plateau | R2   |
|------------|-----------|-------|---------|------|
| NGLY1_KO_1 | 51.25     | -0.14 | 0.06    | 1    |
| NGLY1_1    | 50.83     | -0.14 | 0.02    | 1    |
| NGLY1_KO_2 | 52.71     | -0.31 | 0.11    | 0.7  |
| NGLY1_2    | 51.27     | -0.13 | 0.04    | 0.99 |

Supplement: Supplementary file 6734 [file 1]

# IPI00746590.2|SLC25A37

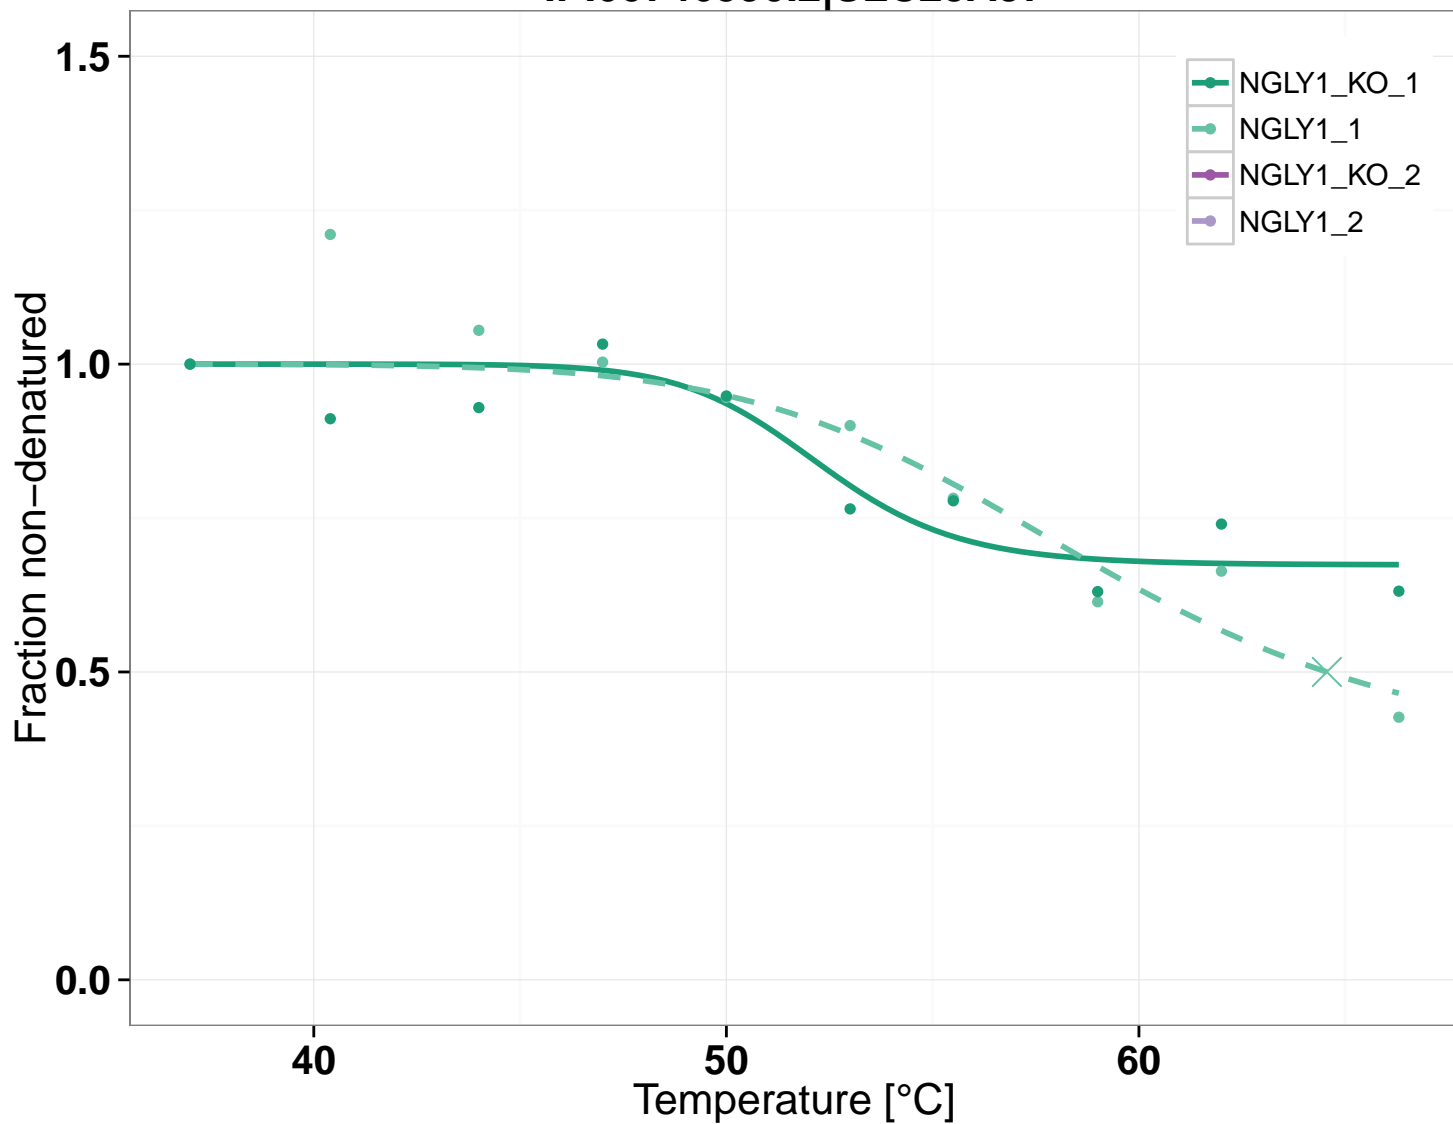

|            | meltPoint | slope  | plateau | R2   |
|------------|-----------|--------|---------|------|
| NGLY1_KO_1 | -         | -0.049 | 0.67    | 0.86 |
| NGLY1_1    | 64.56     | -0.039 | 0.35    | 0.87 |
| NGLY1_KO_2 | -         | -      | -       | -    |
| NGLY1_2    | -         | -      | -       | -    |

Supplement: Supplementary file 6735 [file 1]

IPI00890743.1|PPP6C

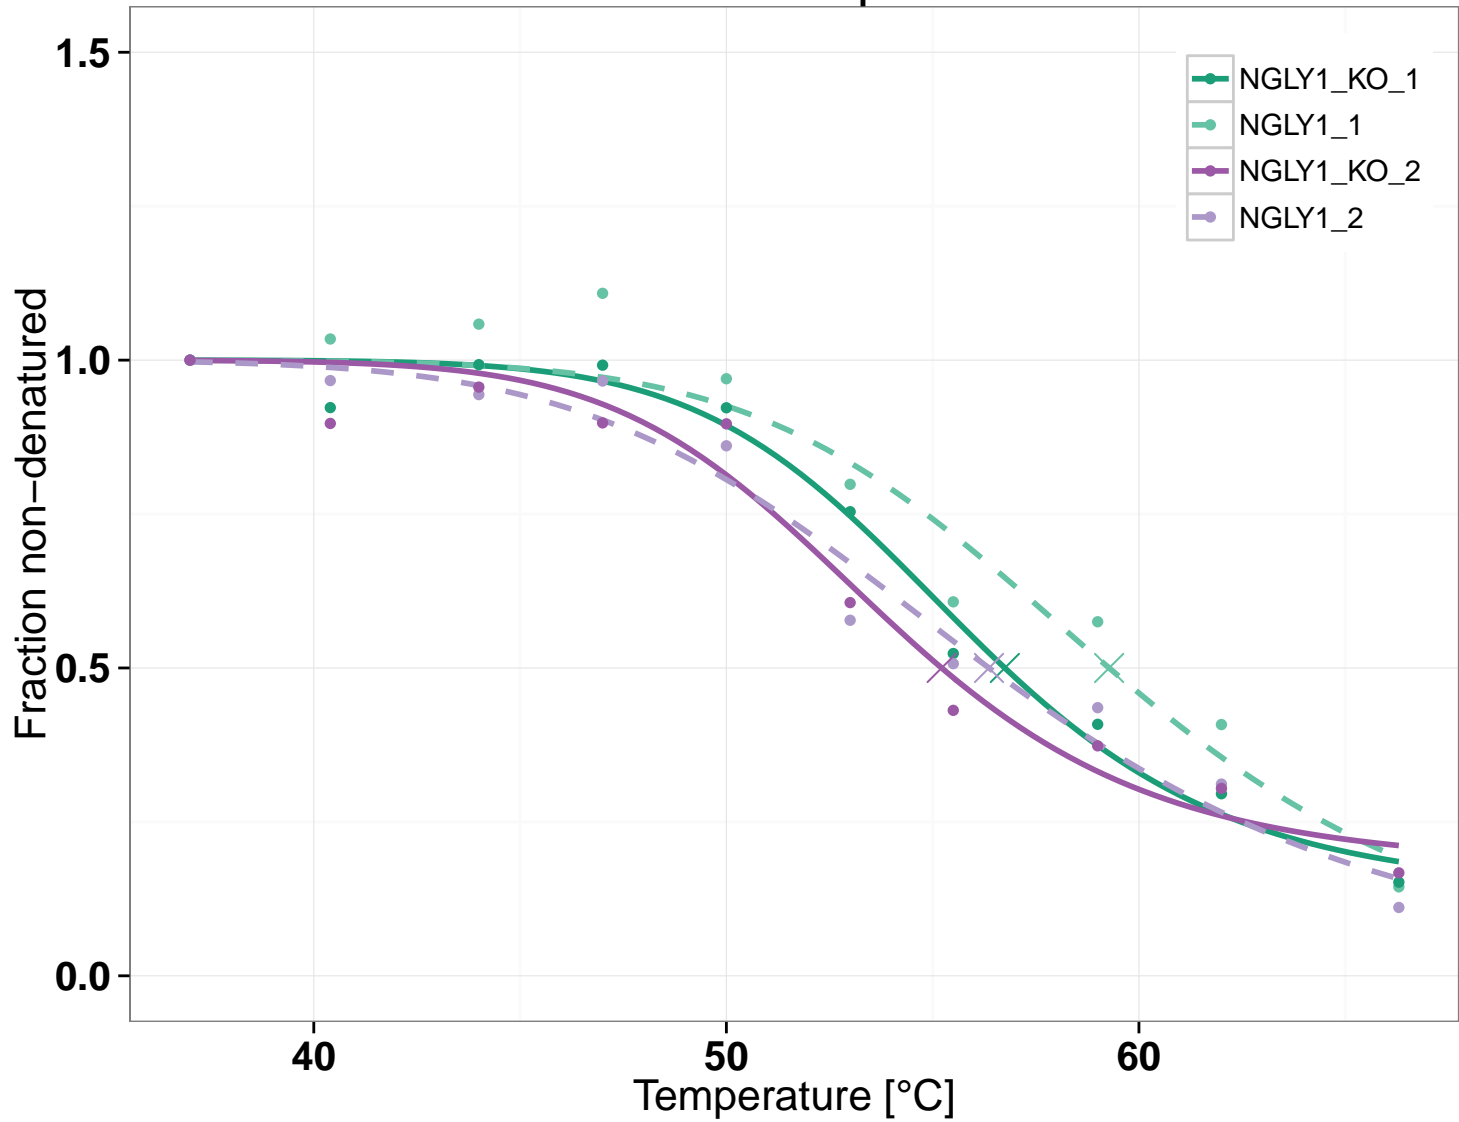

|            | meltPoint | slope  | plateau | R2   |
|------------|-----------|--------|---------|------|
| NGLY1_KO_1 | 56.75     | -0.068 | 0.13    | 0.99 |
| NGLY1_1    | 59.28     | -0.059 | 0       | 0.95 |
| NGLY1_KO_2 | 55.22     | -0.064 | 0.18    | 0.97 |
| NGLY1_2    | 56.37     | -0.051 | 0       | 0.97 |

Supplement: Supplementary file 6736 [file 1]

IPI00292635.1|TRAF2

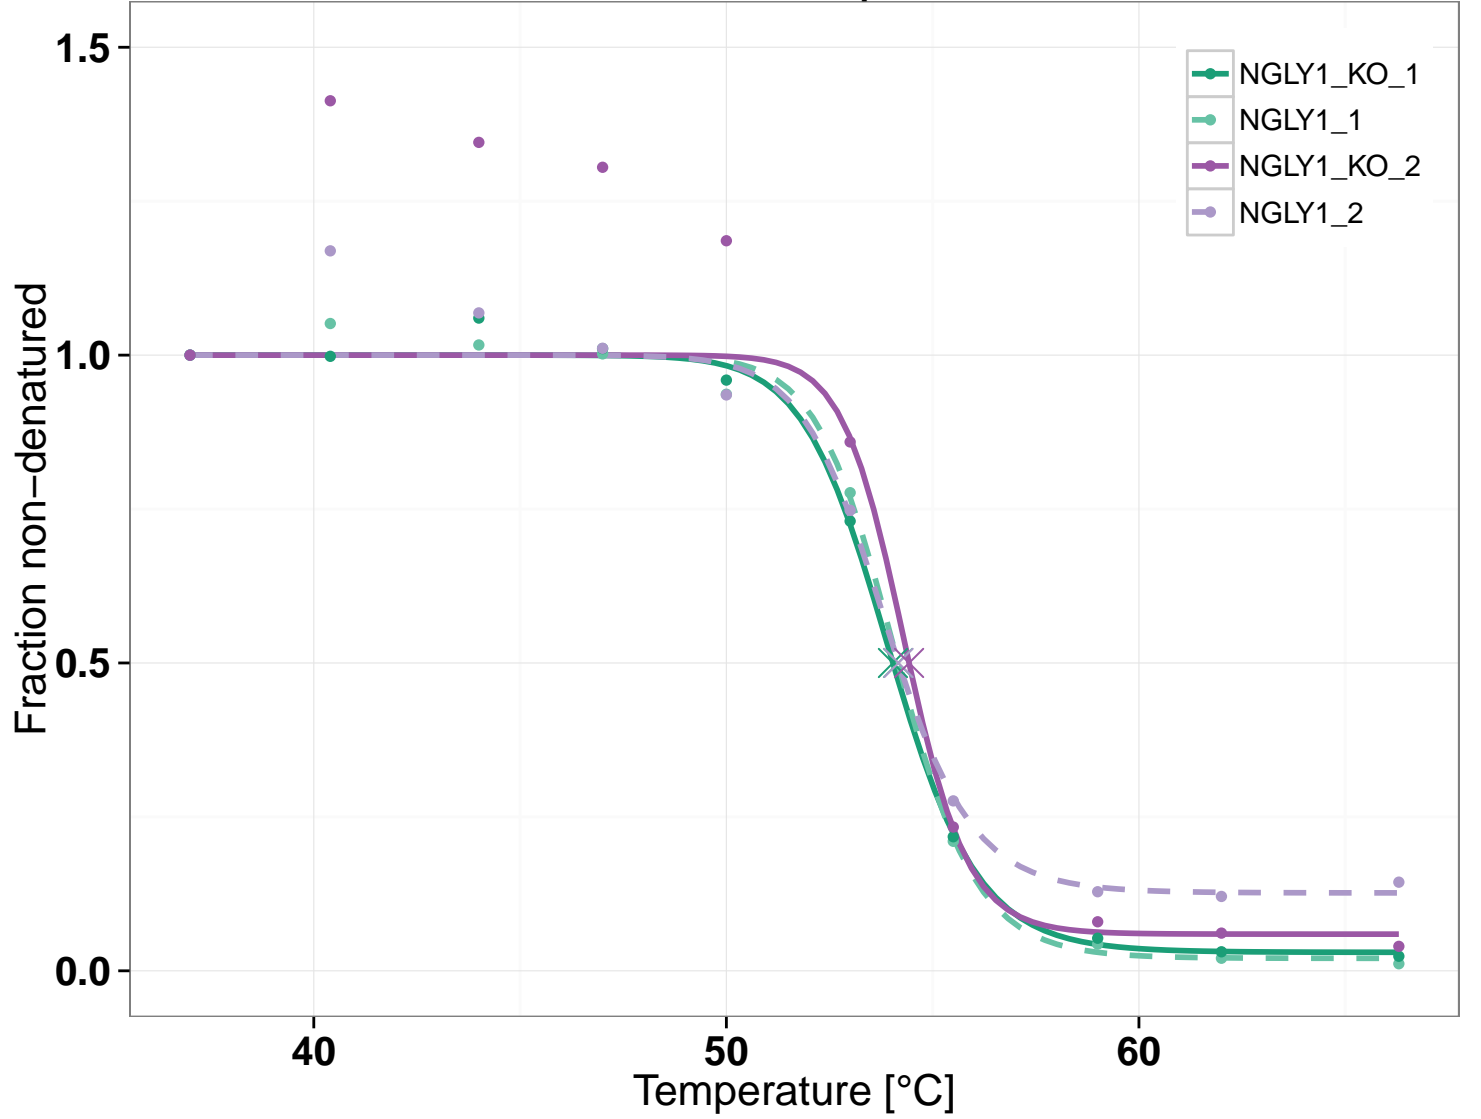

|            | meltPoint | slope | plateau | R2   |
|------------|-----------|-------|---------|------|
| NGLY1_KO_1 | 54.04     | -0.23 | 0.03    | 1    |
| NGLY1_1    | 54.16     | -0.25 | 0.02    | 1    |
| NGLY1_KO_2 | 54.43     | -0.31 | 0.06    | 0.86 |
| NGLY1_2    | 54.17     | -0.21 | 0.13    | 0.98 |

Supplement: Supplementary file 6737 [file 1]

# IPI00061009.4|WDR67

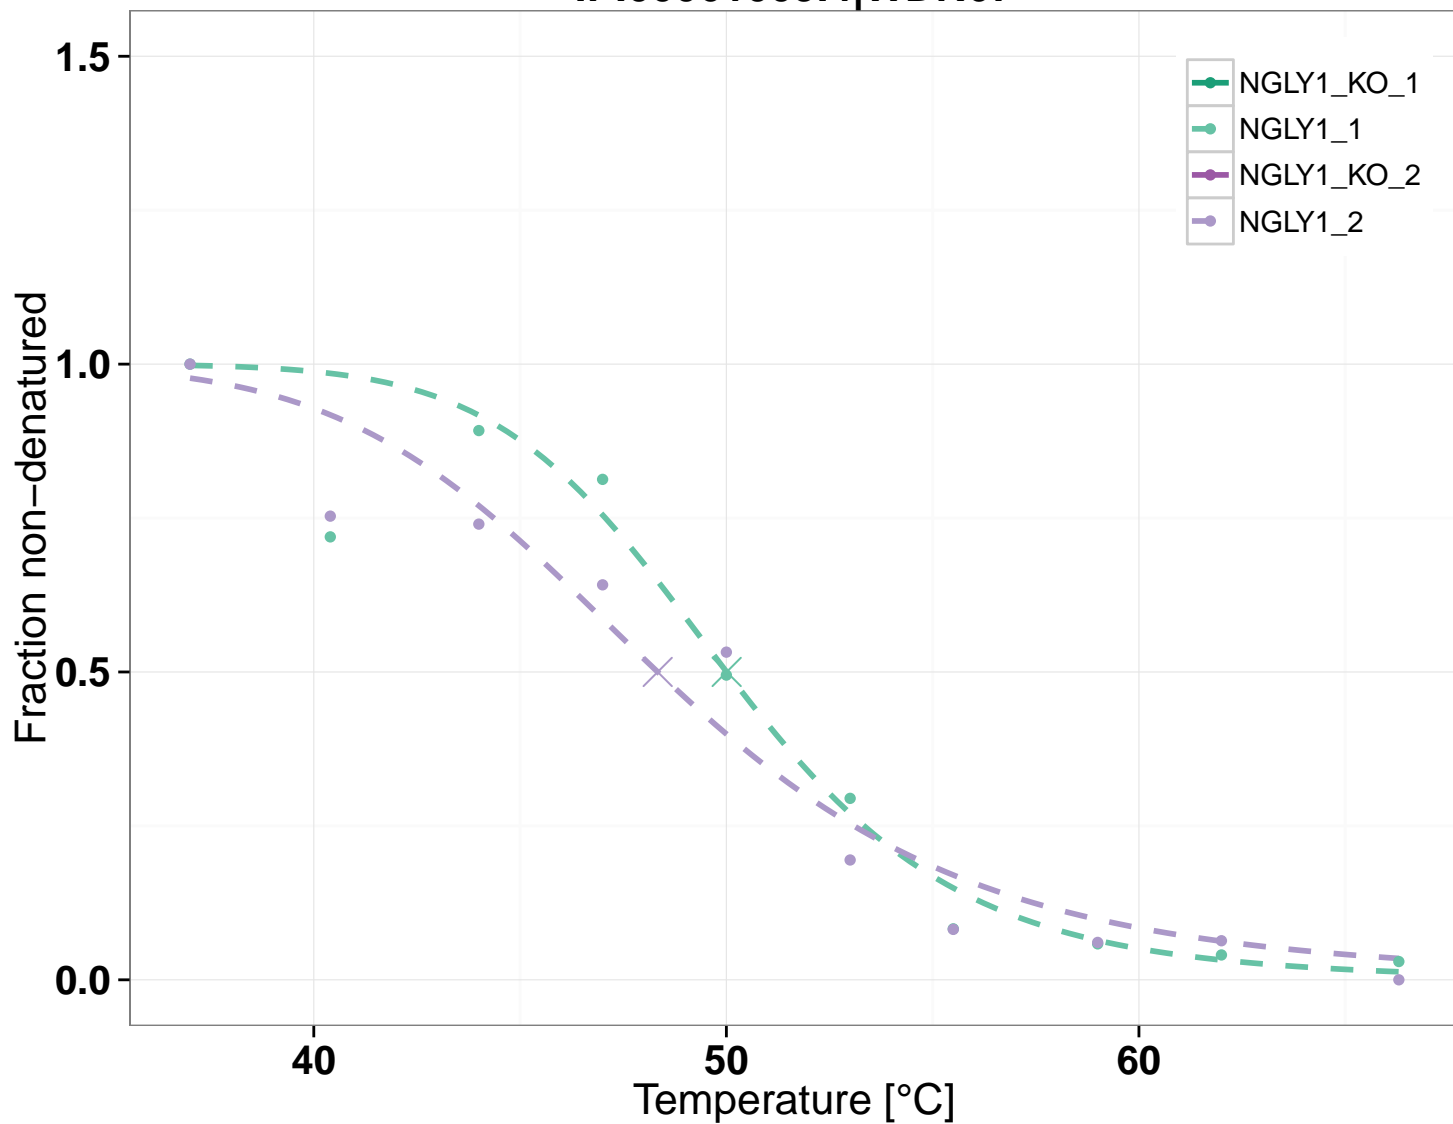

|            | meltPoint | slope  | plateau | R2   |
|------------|-----------|--------|---------|------|
| NGLY1_KO_1 | —         | —      | —       | —    |
| NGLY1_1    | 50.01     | -0.089 | 0       | 0.94 |
| NGLY1_KO_2 | —         | —      | —       | —    |
| NGLY1_2    | 48.34     | -0.065 | 0       | 0.95 |

Supplement: Supplementary file 6738 [file 1]

# IPI00060414.3|CHMP4C

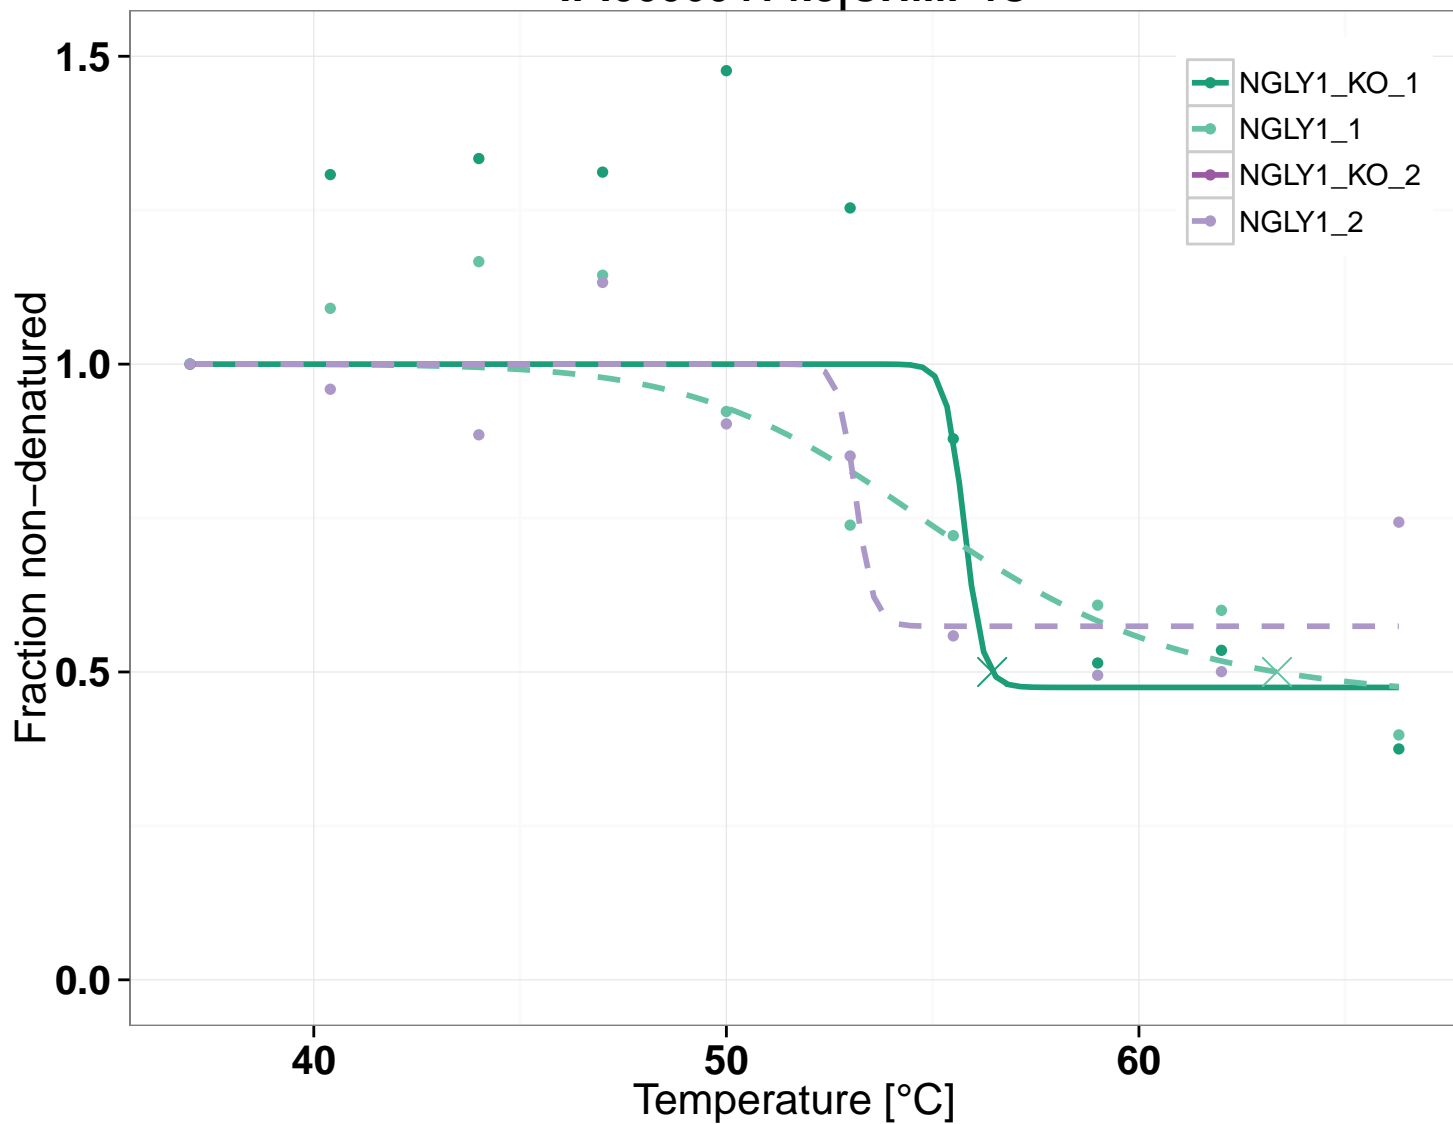

|            | meltPoint | slope  | plateau | R2   |
|------------|-----------|--------|---------|------|
| NGLY1_KO_1 | 56.44     | -0.59  | 0.47    | 0.58 |
| NGLY1_1    | 63.35     | -0.046 | 0.45    | 0.86 |
| NGLY1_KO_2 | -         | -      | -       | -    |
| NGLY1_2    | -         | -0.5   | 0.57    | 0.81 |

Supplement: Supplementary file 6739 [file 1]

IPI00033516.1|TUBGCP3

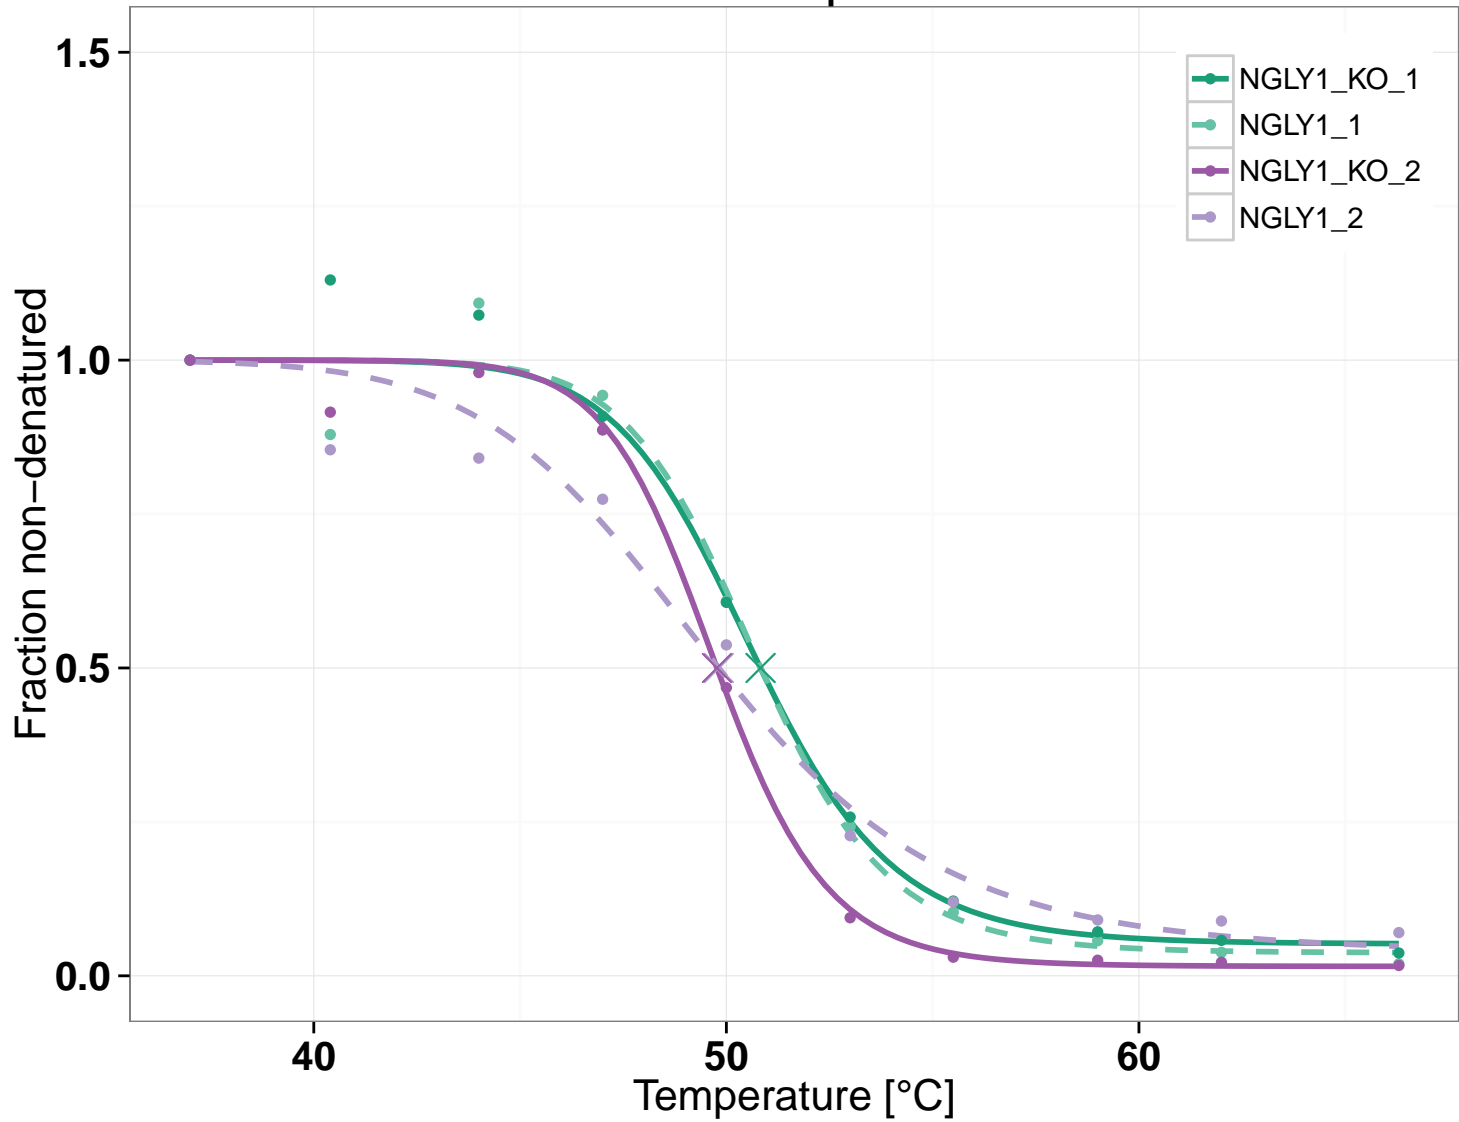

|            | meltPoint | slope  | plateau | R2   |
|------------|-----------|--------|---------|------|
| NGLY1_KO_1 | 50.83     | -0.14  | 0.05    | 0.99 |
| NGLY1_1    | 50.83     | -0.15  | 0.04    | 0.99 |
| NGLY1_KO_2 | 49.77     | -0.18  | 0.02    | 1    |
| NGLY1_2    | 49.82     | -0.086 | 0.04    | 0.98 |

Supplement: Supplementary file 6740 [file 1]

# IPI00449197.1|GMPR2

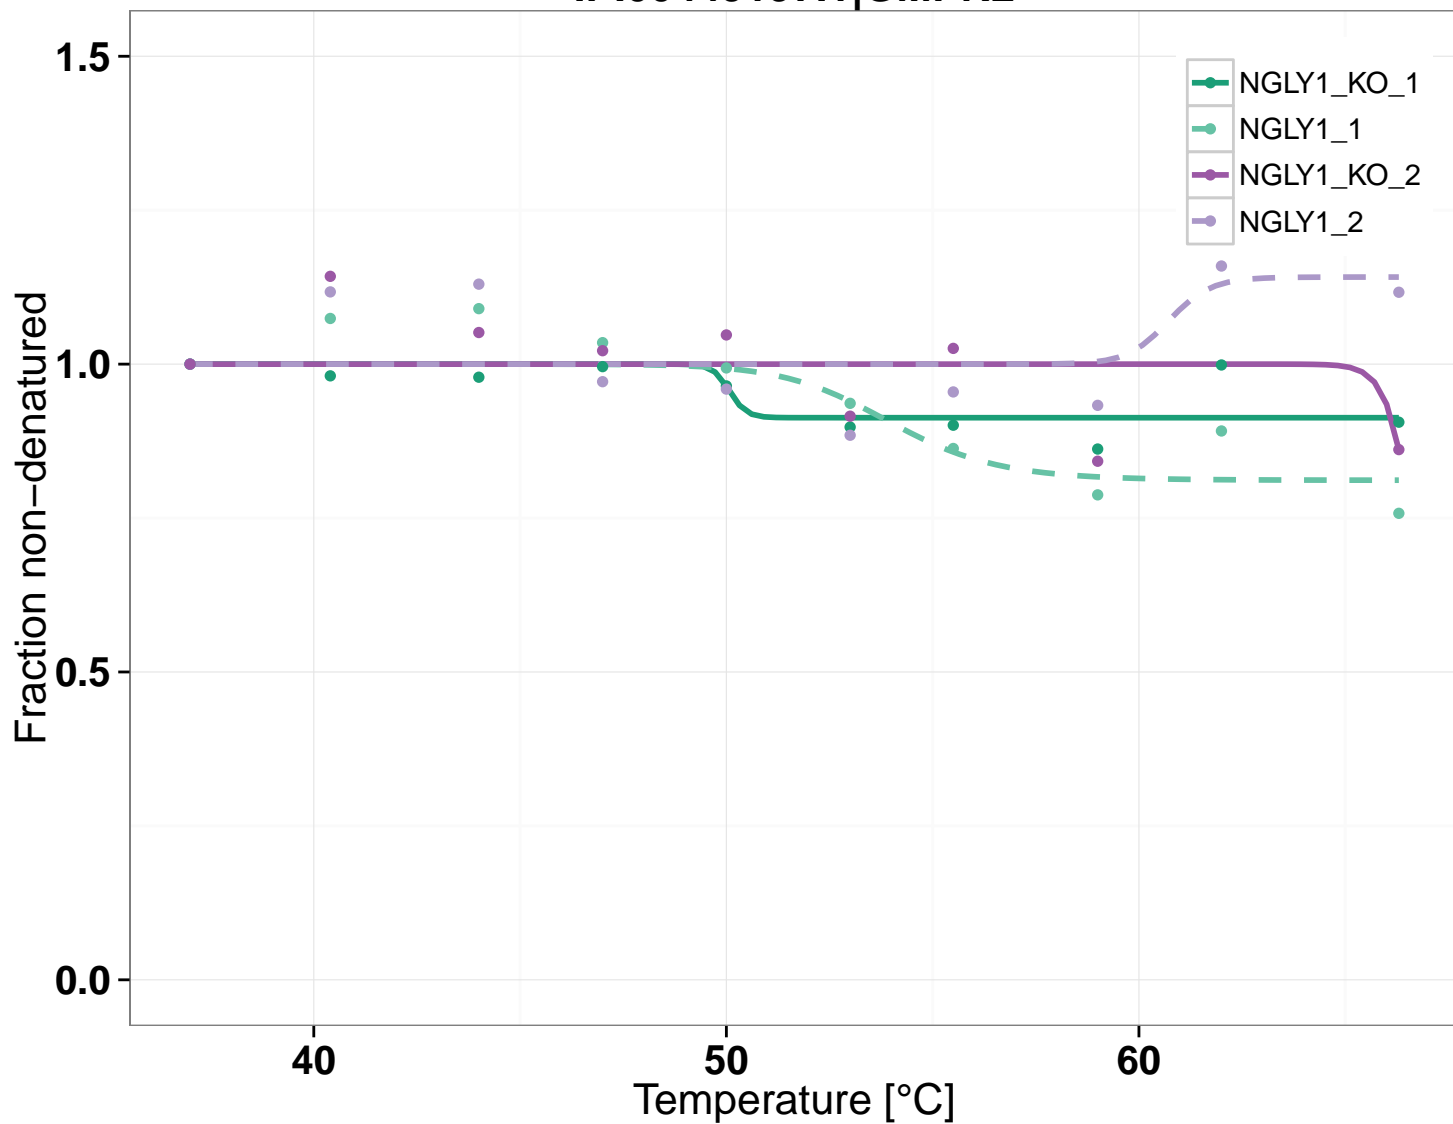

|            | meltPoint | slope  | plateau | R2   |
|------------|-----------|--------|---------|------|
| NGLY1_KO_1 | —         | −0.11  | 0.91    | 0.53 |
| NGLY1_1    | —         | −0.036 | 0.81    | 0.79 |
| NGLY1_KO_2 | —         | —      | 0       | 0.1  |
| NGLY1_2    | —         | 0.07   | 1.14    | 0.37 |

Supplement: Supplementary file 6741 [file 1]

IPI00887826.1|LOC100130005

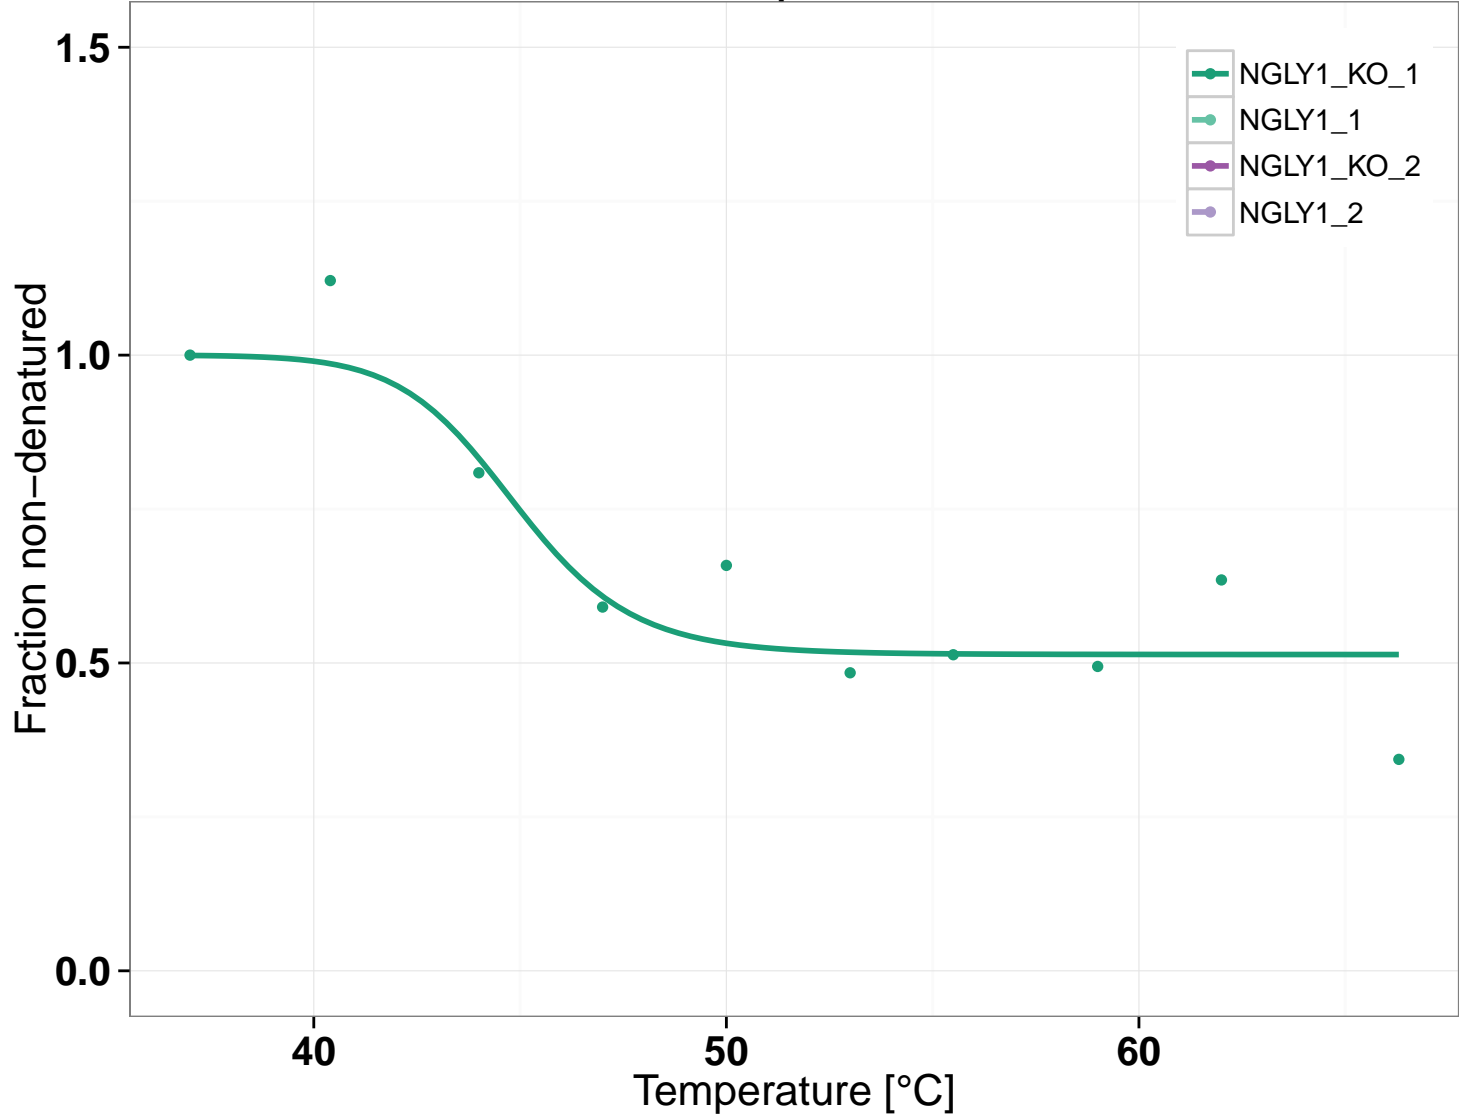

|            | meltPoint | slope  | plateau | R2   |
|------------|-----------|--------|---------|------|
| NGLY1_KO_1 | —         | −0.086 | 0.51    | 0.85 |
| NGLY1_1    | —         | —      | —       | —    |
| NGLY1_KO_2 | —         | —      | —       | —    |
| NGLY1_2    | —         | —      | —       | —    |

Supplement: Supplementary file 6742 [file 1]

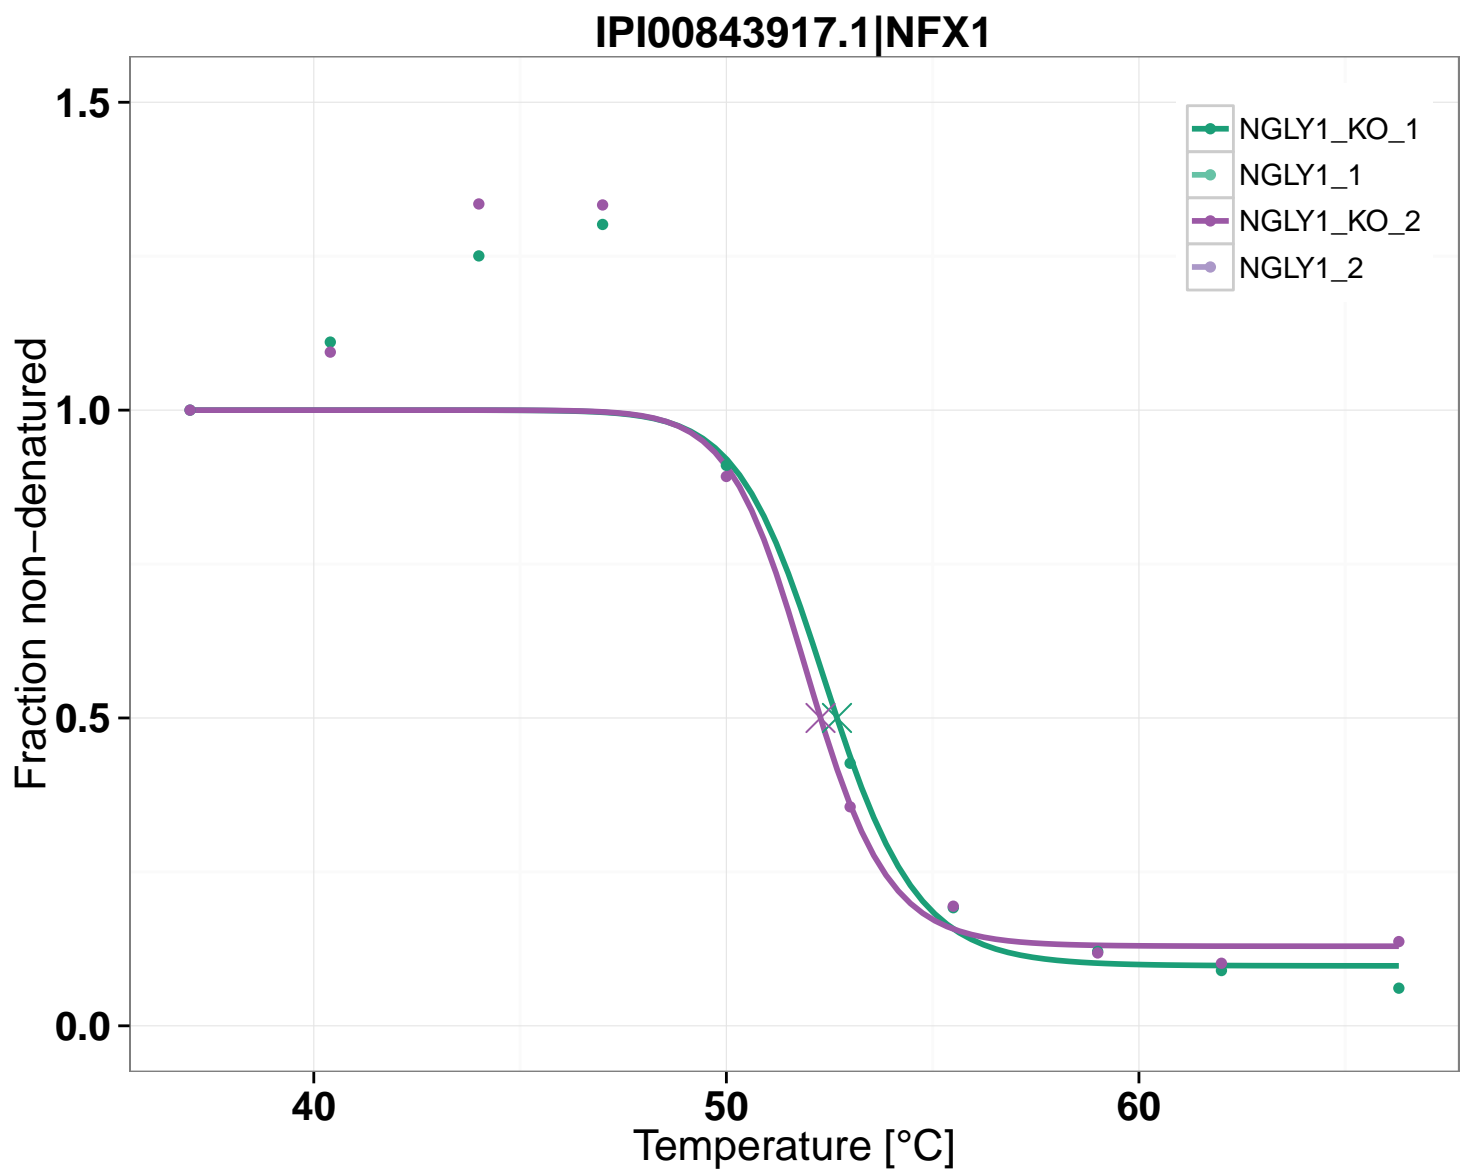

|            | meltPoint | slope | plateau | R2   |
|------------|-----------|-------|---------|------|
| NGLY1_KO_1 | 52.68     | -0.21 | 0.1     | 0.93 |
| NGLY1_1    | -         | -     | -       | -    |
| NGLY1_KO_2 | 52.28     | -0.23 | 0.13    | 0.9  |
| NGLY1_2    | -         | -     | -       | -    |

Supplement: Supplementary file 6743 [file 1]

# IPI00298235.3|POMT1

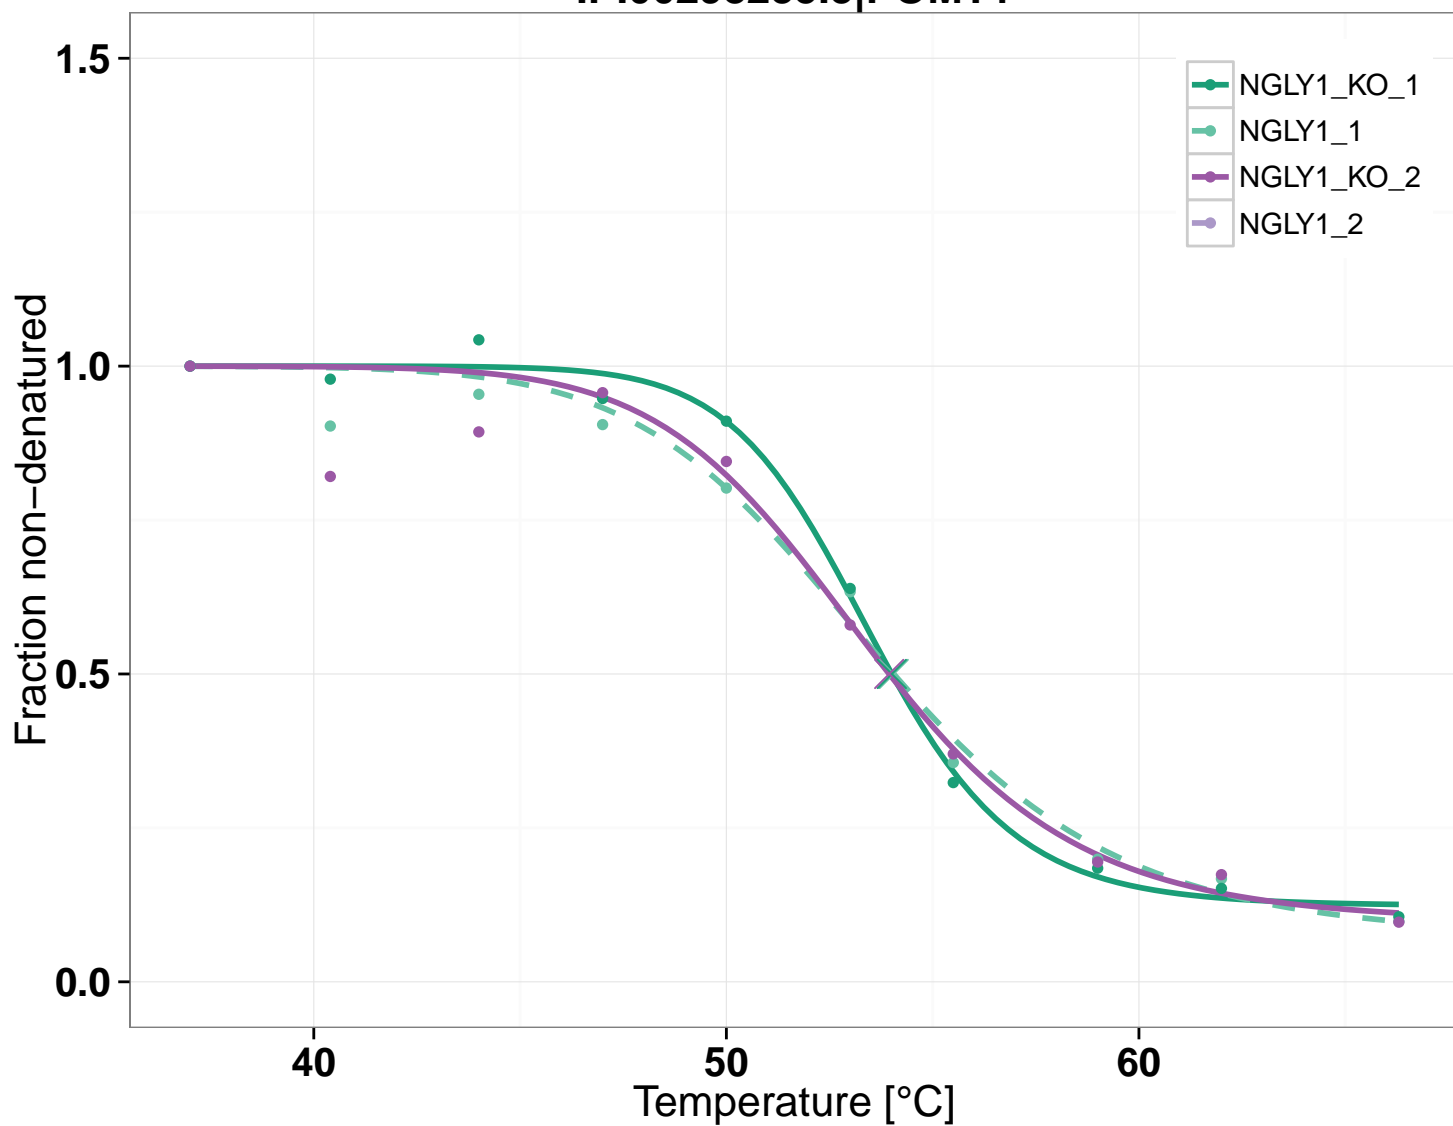

|            | meltPoint | slope  | plateau | R2   |
|------------|-----------|--------|---------|------|
| NGLY1_KO_1 | 54.01     | -0.13  | 0.12    | 1    |
| NGLY1_1    | 54.06     | -0.08  | 0.07    | 0.99 |
| NGLY1_KO_2 | 53.95     | -0.089 | 0.1     | 0.96 |
| NGLY1_2    | -         | -      | -       | -    |

Supplement: Supplementary file 6744 [file 1]

IPI00003848.1|DNAJB4

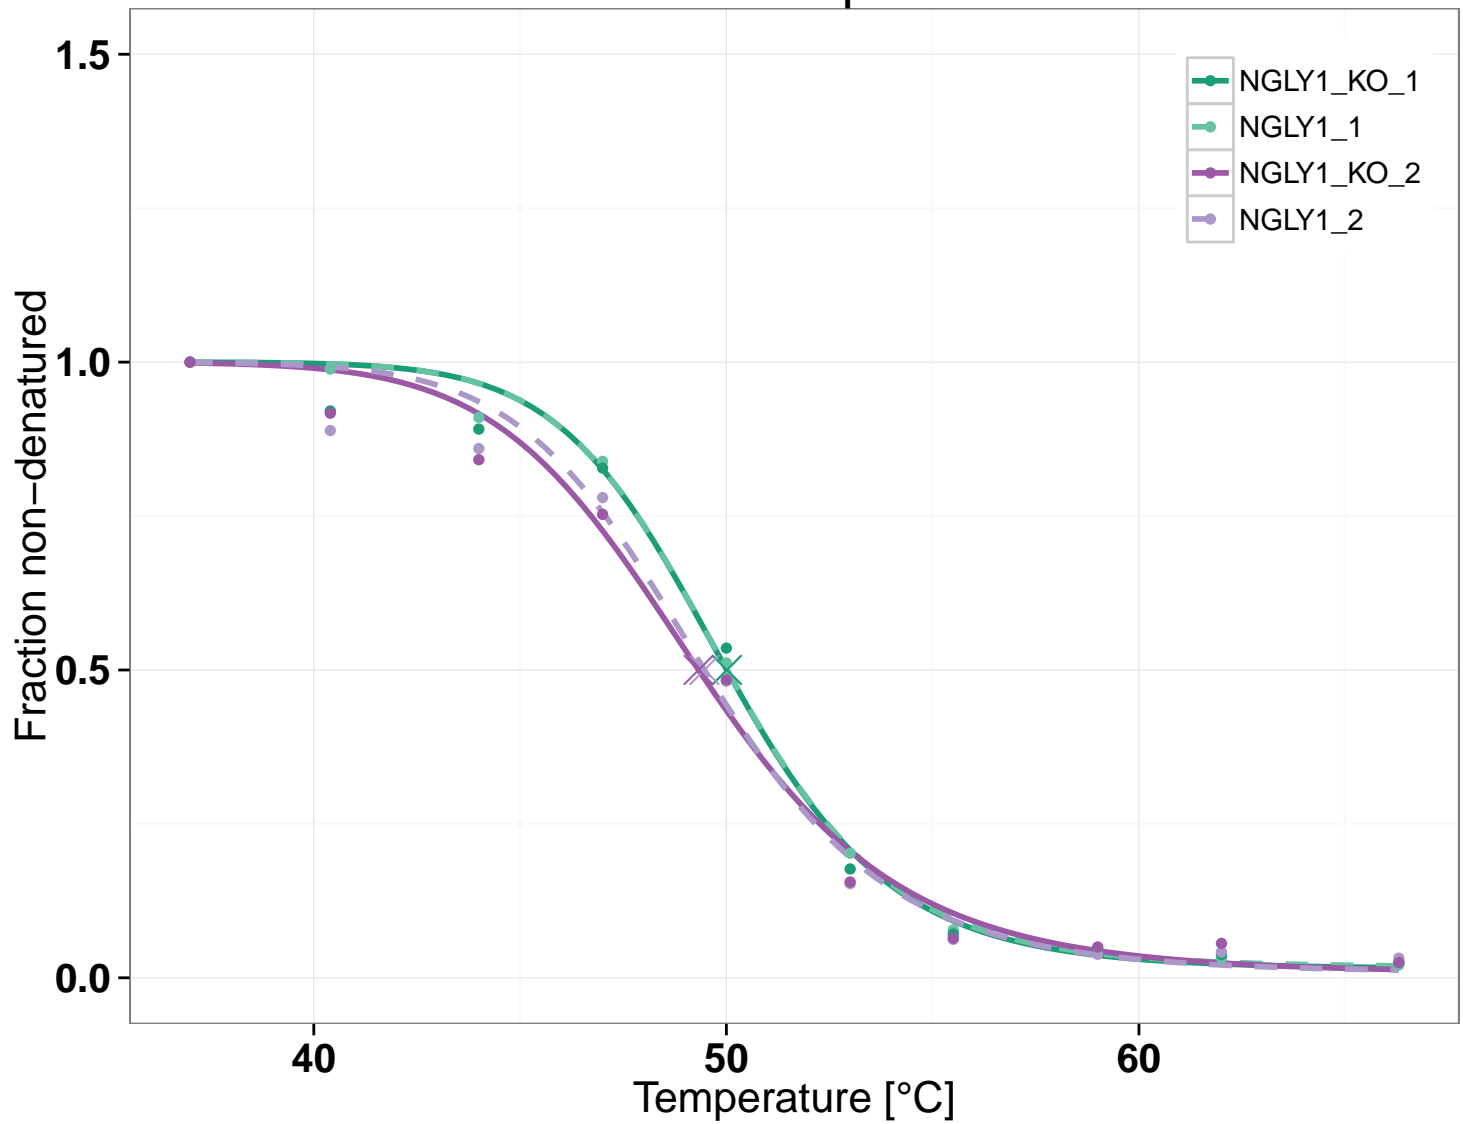

|            | meltPoint | slope | plateau | R2   |
|------------|-----------|-------|---------|------|
| NGLY1_KO_1 | 50.01     | -0.12 | 0.01    | 0.99 |
| NGLY1_1    | 50.02     | -0.12 | 0.02    | 1    |
| NGLY1_KO_2 | 49.33     | -0.1  | 0.01    | 0.99 |
| NGLY1_2    | 49.47     | -0.11 | 0.01    | 0.99 |

Supplement: Supplementary file 6745 [file 1]

# IPI00005774.5|LRP8

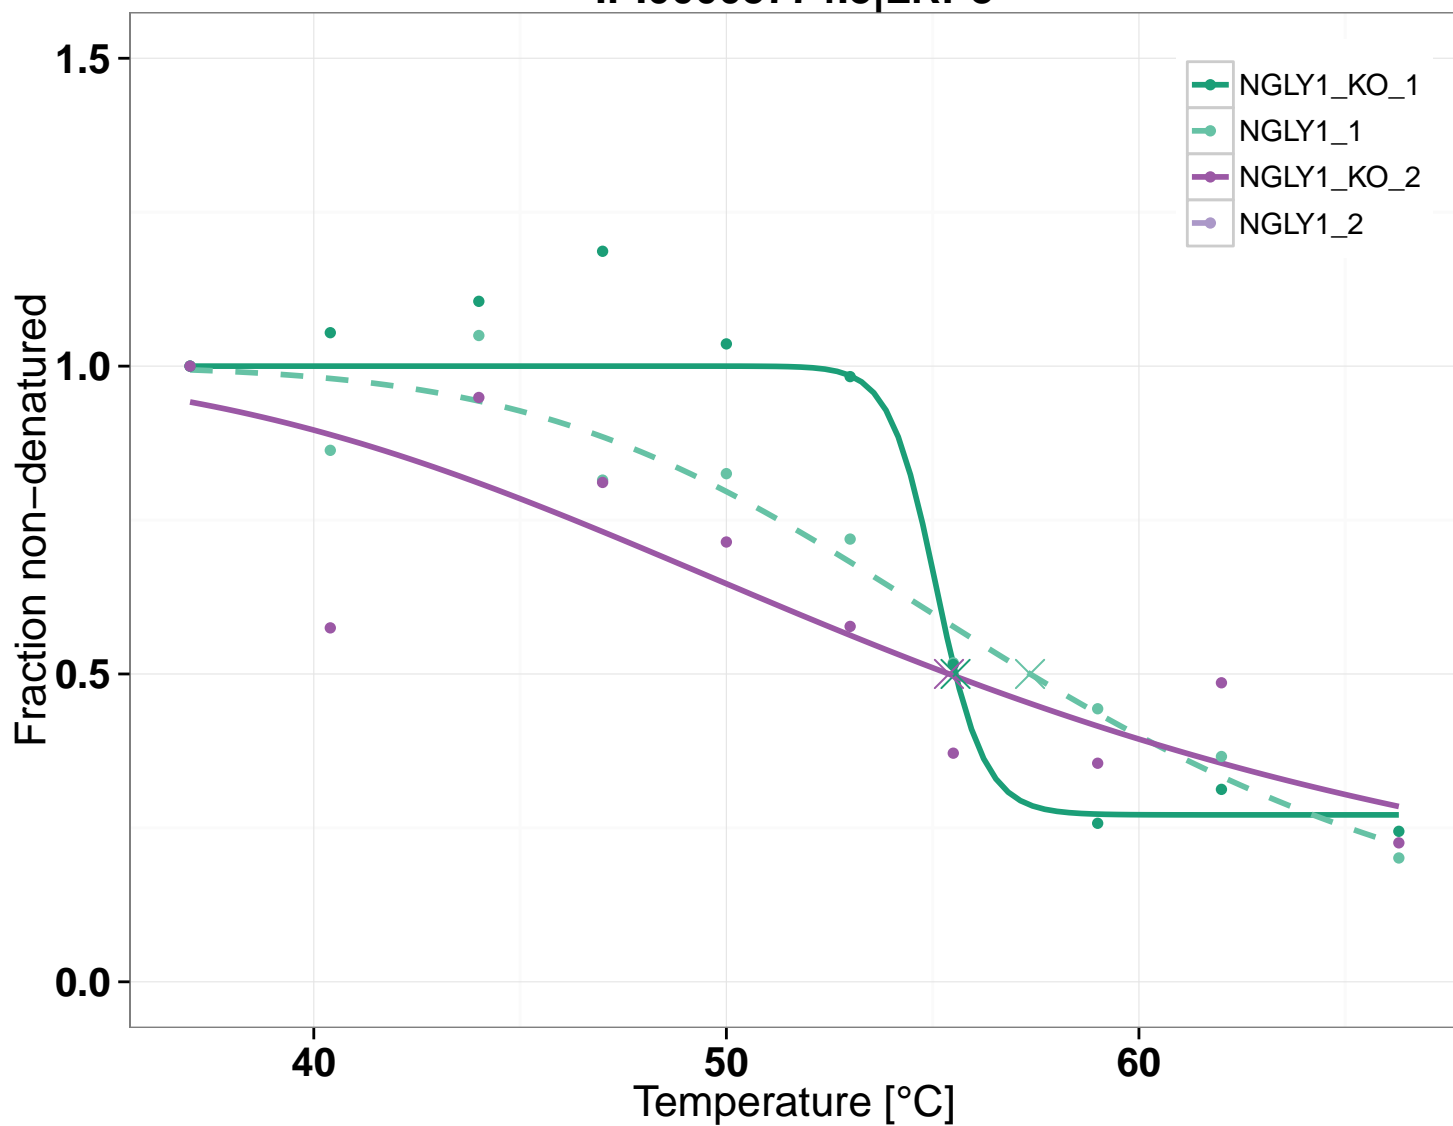

|            | meltPoint | slope  | plateau | R2   |
|------------|-----------|--------|---------|------|
| NGLY1_KO_1 | 55.55     | -0.32  | 0.27    | 0.96 |
| NGLY1_1    | 57.36     | -0.042 | 0       | 0.95 |
| NGLY1_KO_2 | 55.4      | -0.028 | 0       | 0.72 |
| NGLY1_2    | -         | -      | -       | -    |

Supplement: Supplementary file 6746 [file 1]

IPI00815976.1|TMEM120B

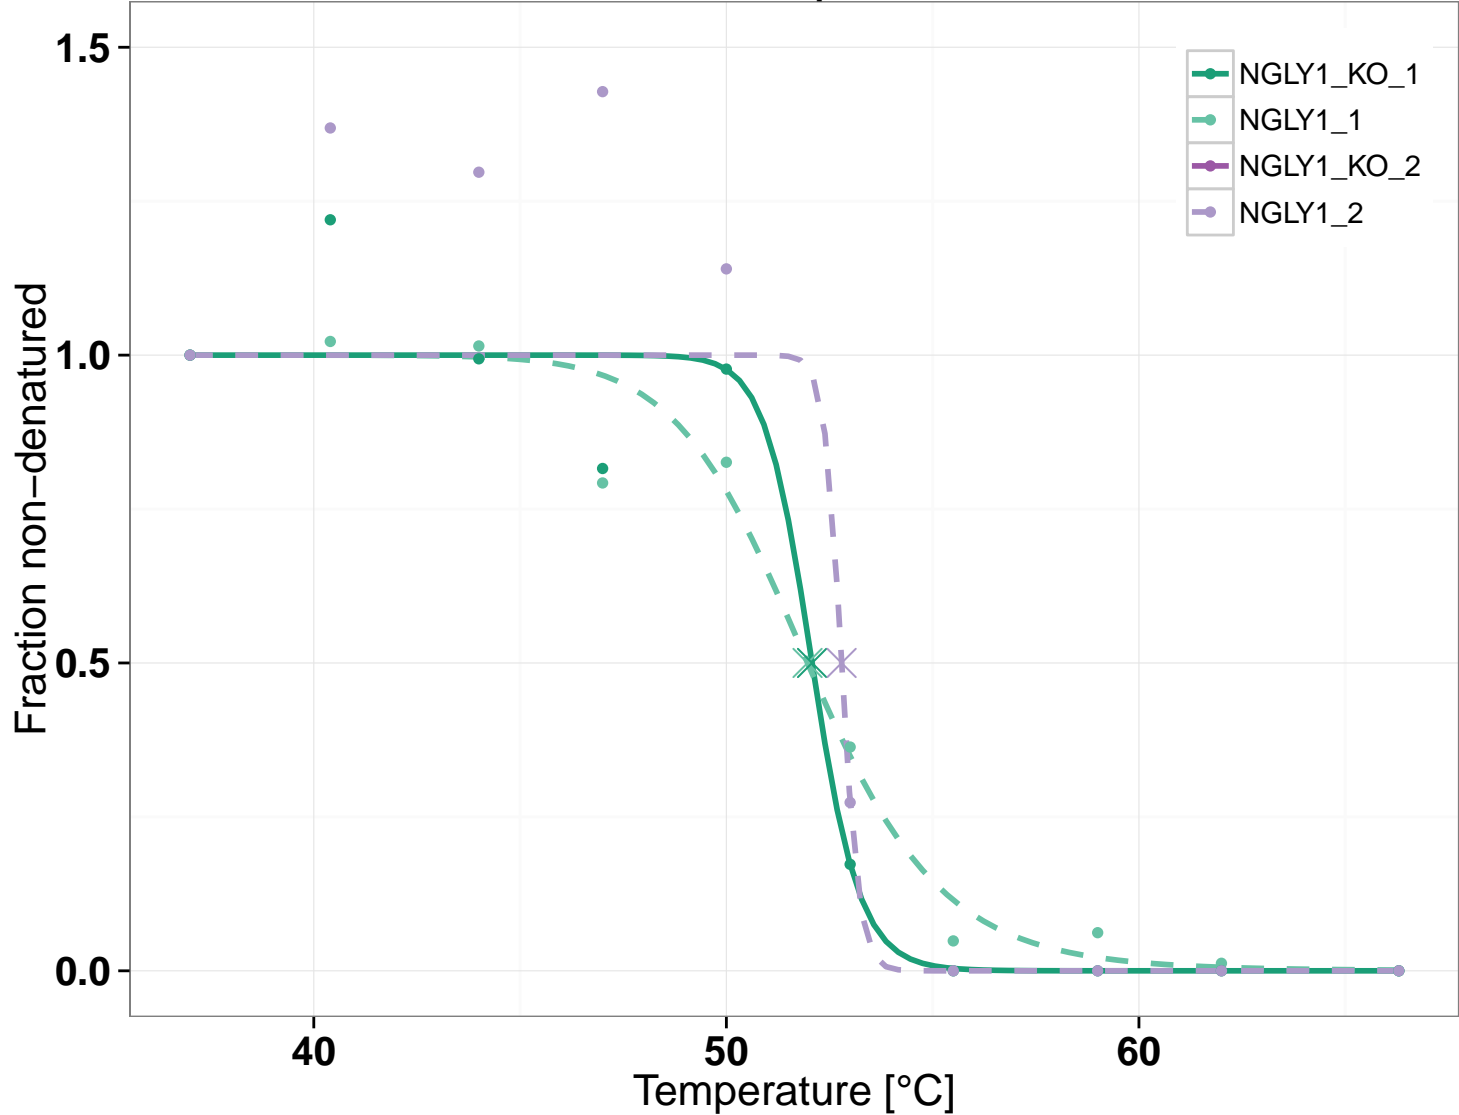

|            | meltPoint | slope | plateau | R2   |
|------------|-----------|-------|---------|------|
| NGLY1_KO_1 | 52.08     | -0.43 | 0       | 0.97 |
| NGLY1_1    | 51.97     | -0.15 | 0       | 0.98 |
| NGLY1_KO_2 | -         | -     | -       | -    |
| NGLY1_2    | 52.79     | -1.2  | 0       | 0.89 |

Supplement: Supplementary file 6747 [file 1]

IPI00552603.2|UBAP2

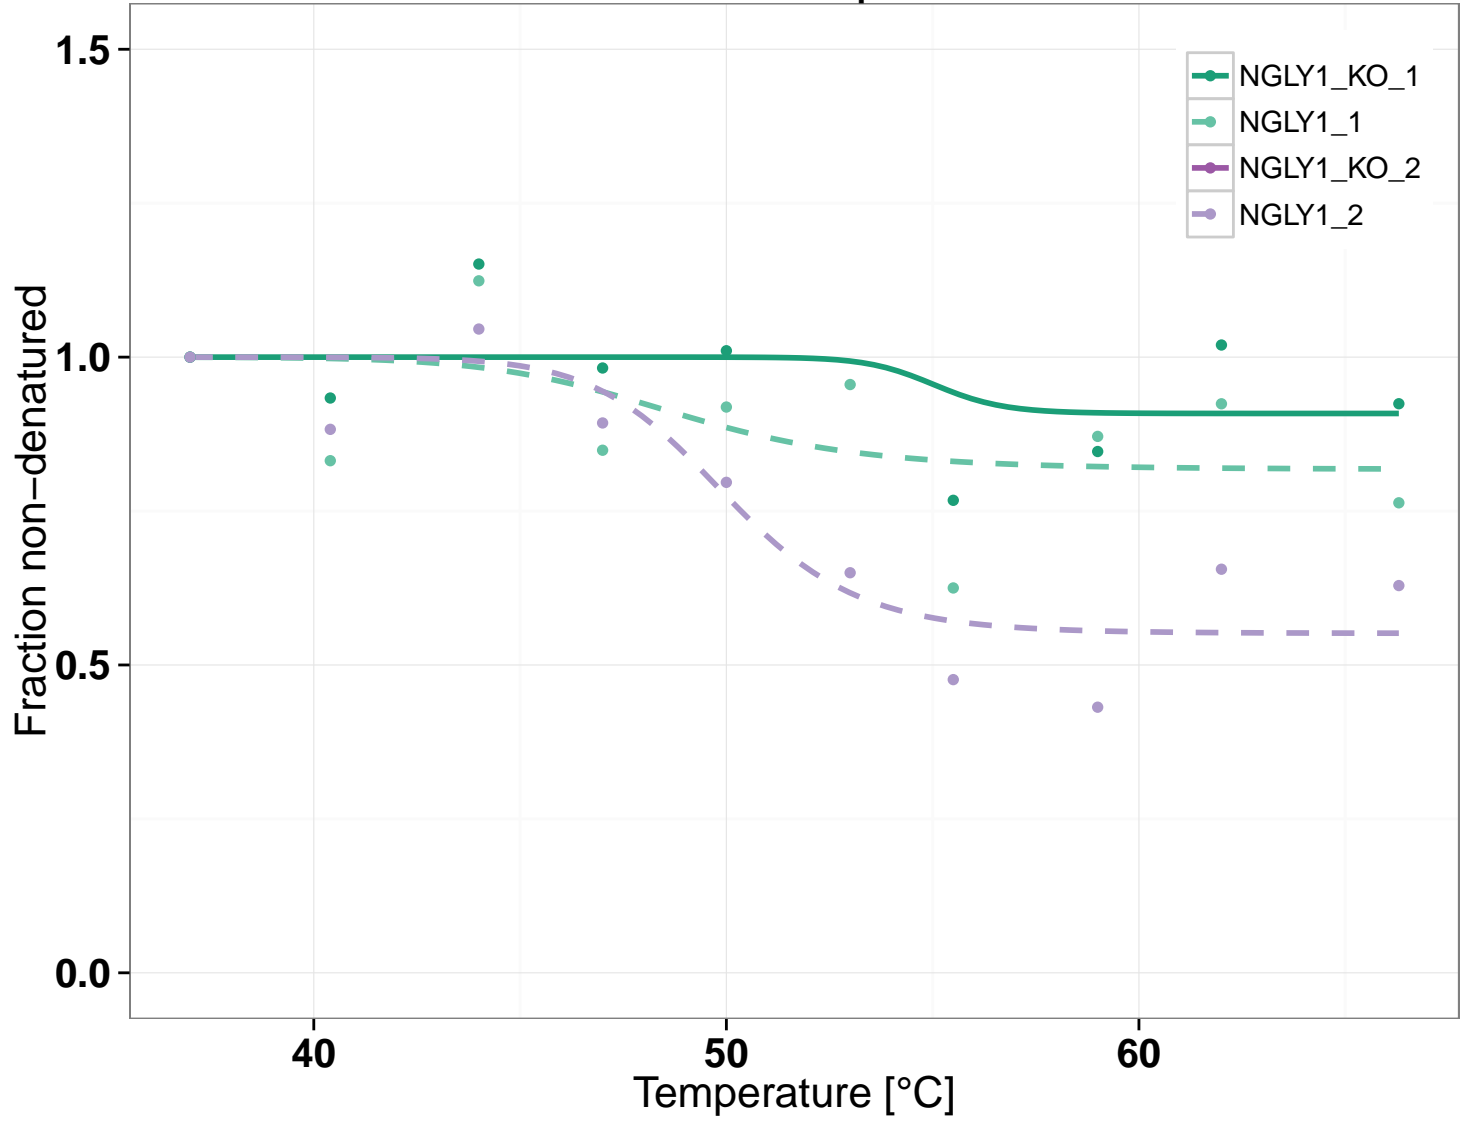

|            | meltPoint | slope  | plateau | R2   |
|------------|-----------|--------|---------|------|
| NGLY1_KO_1 | —         | −0.028 | 0.91    | 0.04 |
| NGLY1_1    | —         | −0.02  | 0.82    | 0.22 |
| NGLY1_KO_2 | —         | —      | —       | —    |
| NGLY1_2    | —         | −0.07  | 0.55    | 0.85 |

Supplement: Supplementary file 6748 [file 1]

# IPI00013068.1|EIF3E

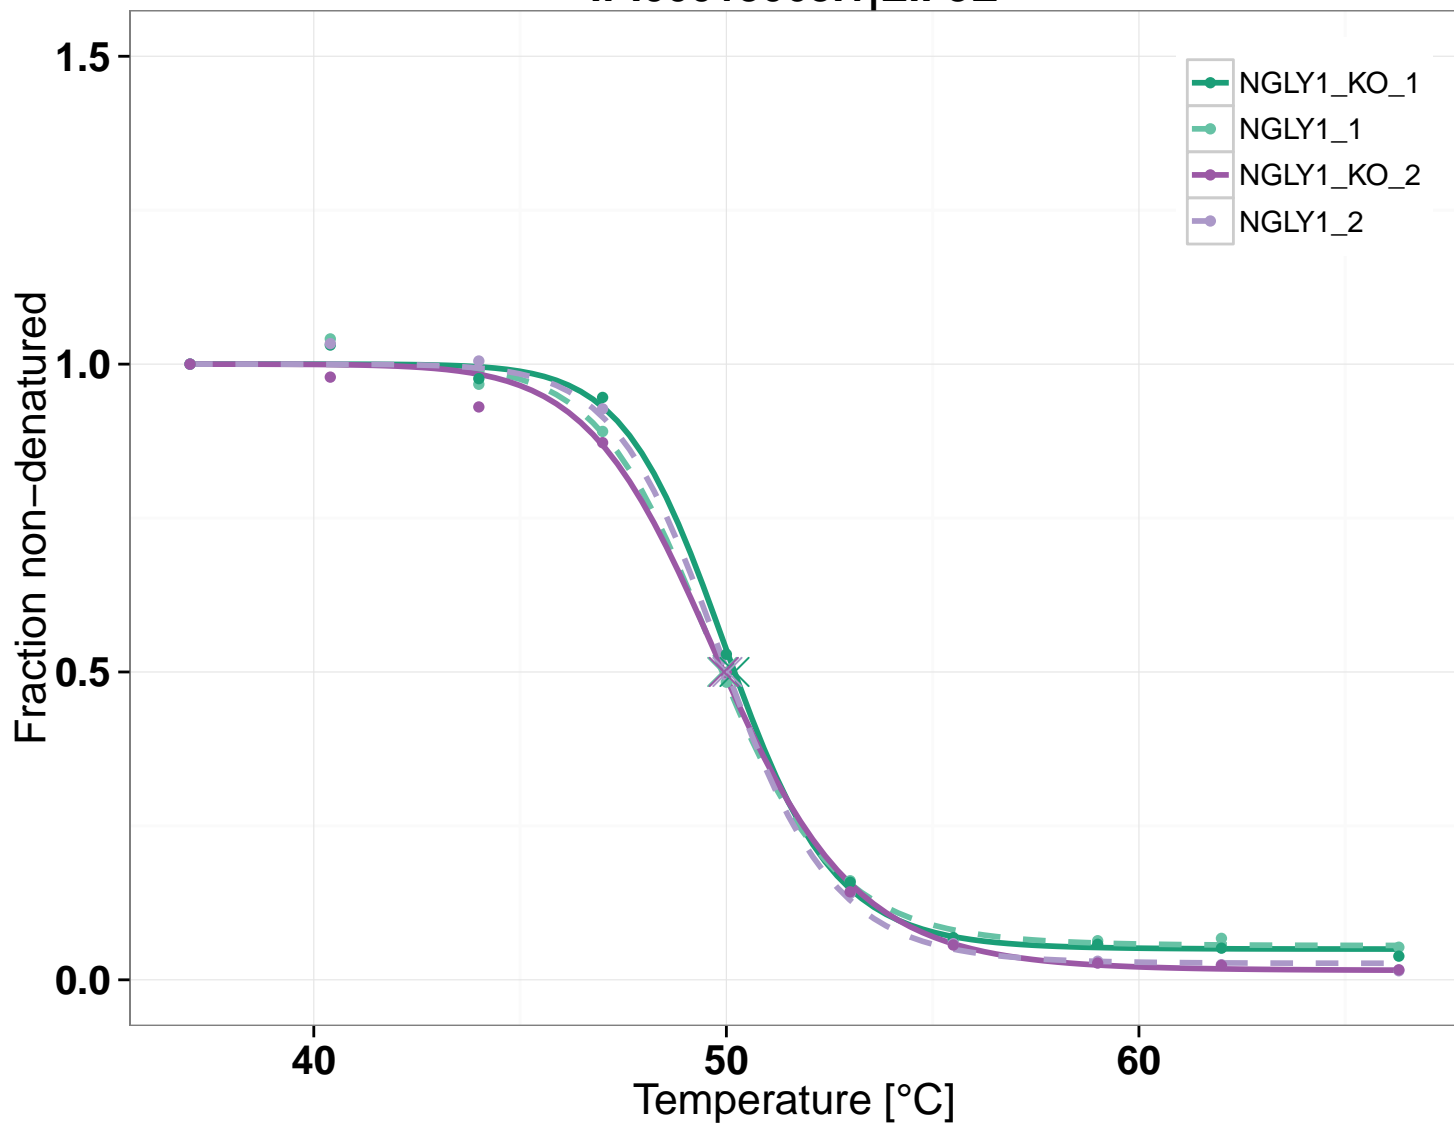

|            | meltPoint | slope | plateau | R2 |
|------------|-----------|-------|---------|----|
| NGLY1_KO_1 | 50.2      | -0.19 | 0.05    | 1  |
| NGLY1_1    | 49.9      | -0.16 | 0.06    | 1  |
| NGLY1_KO_2 | 49.94     | -0.15 | 0.02    | 1  |
| NGLY1_2    | 50.03     | -0.18 | 0.03    | 1  |

Supplement: Supplementary file 6749 [file 1]

# IPI00026230.1|HNRNPH2

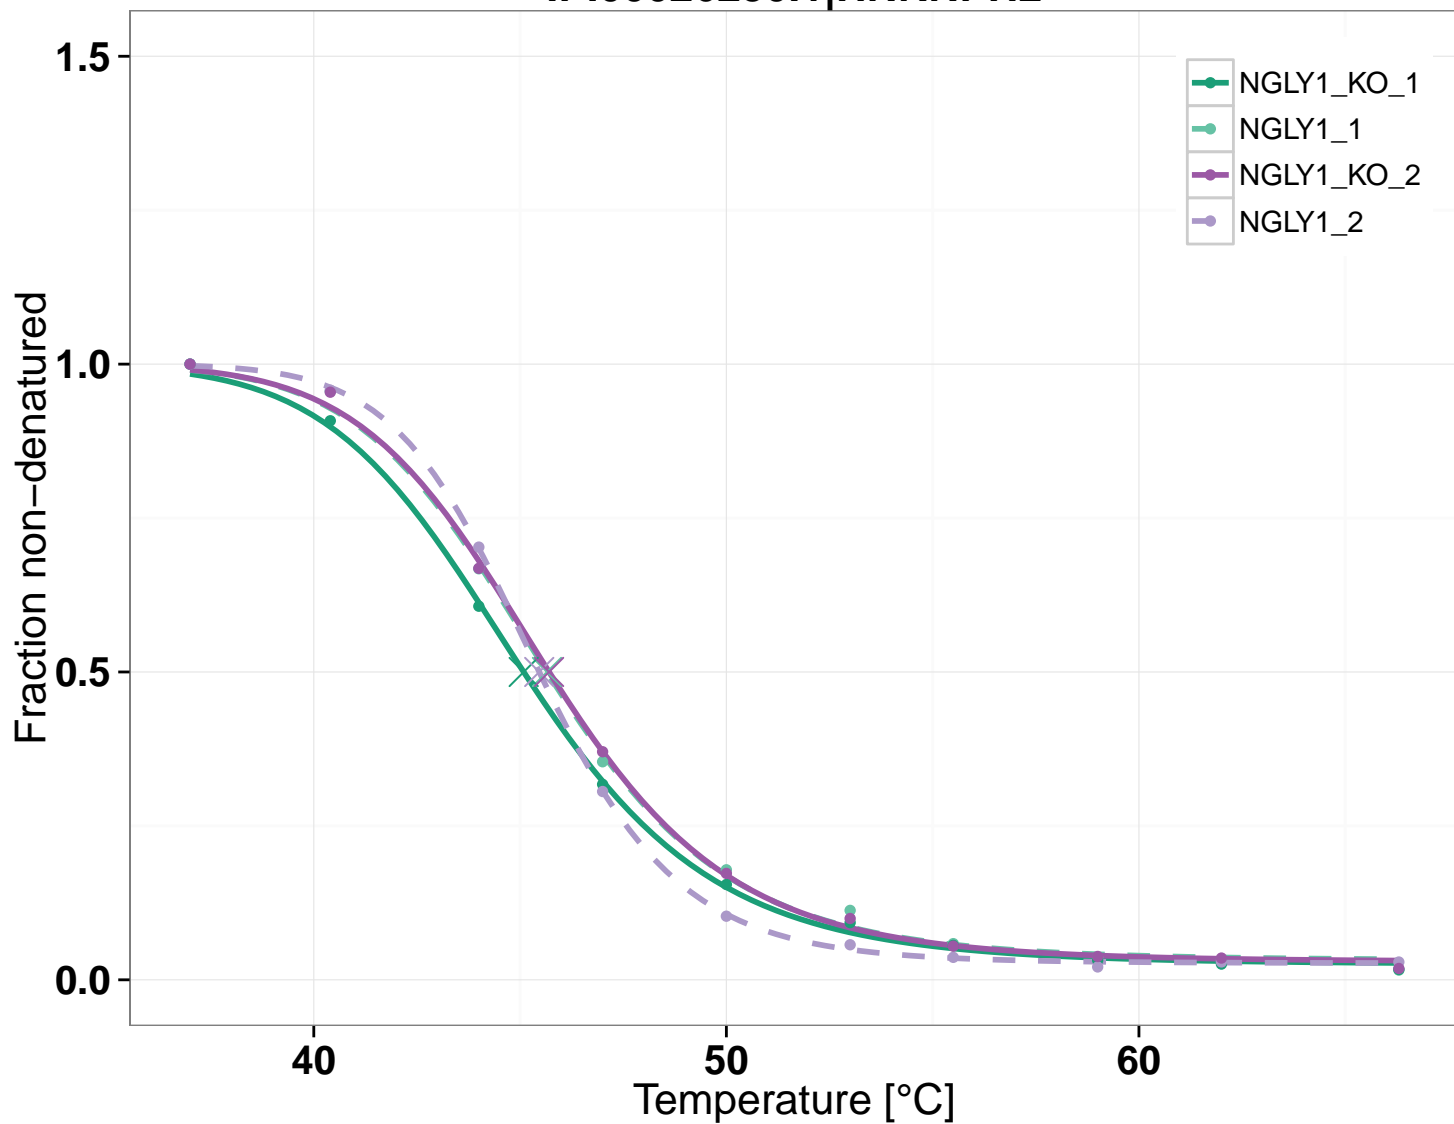

|            | meltPoint | slope | plateau | R2 |
|------------|-----------|-------|---------|----|
| NGLY1_KO_1 | 45.09     | -0.1  | 0.03    | 1  |
| NGLY1_1    | 45.65     | -0.11 | 0.03    | 1  |
| NGLY1_KO_2 | 45.7      | -0.11 | 0.03    | 1  |
| NGLY1_2    | 45.46     | -0.14 | 0.03    | 1  |

Supplement: Supplementary file 6750 [file 1]

# IPI00151119.9|KIFC3

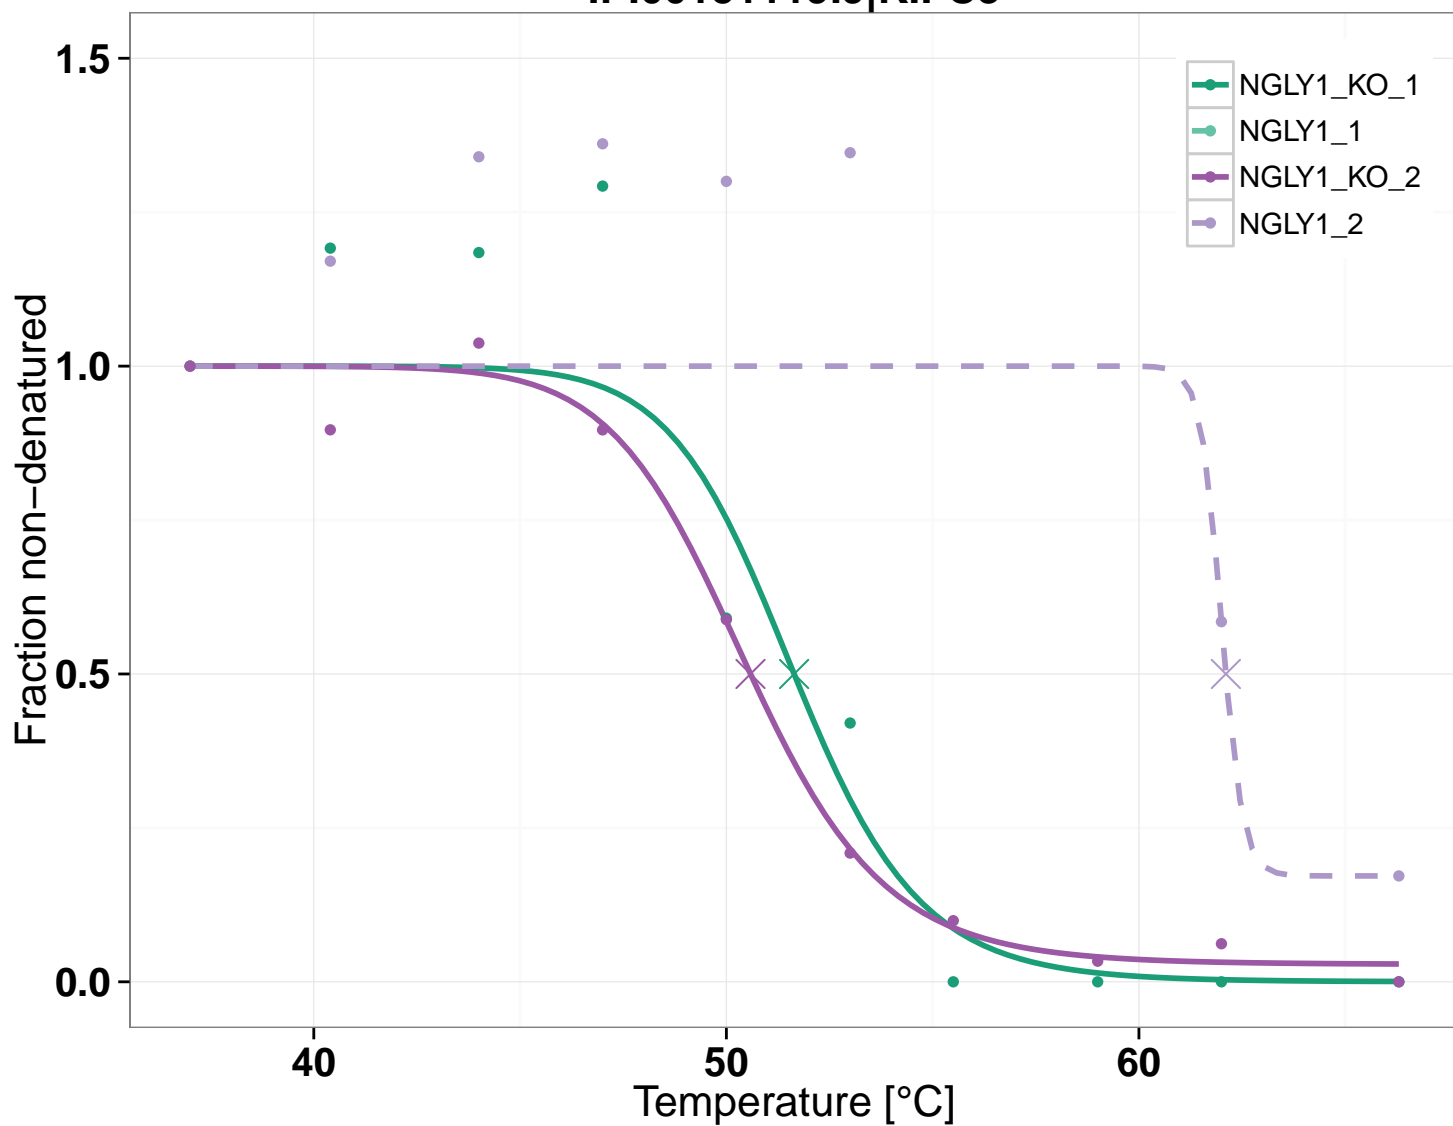

|            | meltPoint | slope | plateau | R2   |
|------------|-----------|-------|---------|------|
| NGLY1_KO_1 | 51.64     | -0.16 | 0       | 0.92 |
| NGLY1_1    | -         | -     | -       | -    |
| NGLY1_KO_2 | 50.59     | -0.15 | 0.03    | 0.99 |
| NGLY1_2    | 62.11     | -0.81 | 0.17    | 0.28 |

Supplement: Supplementary file 6751 [file 1]

IPI00385464.5|FLJ36031

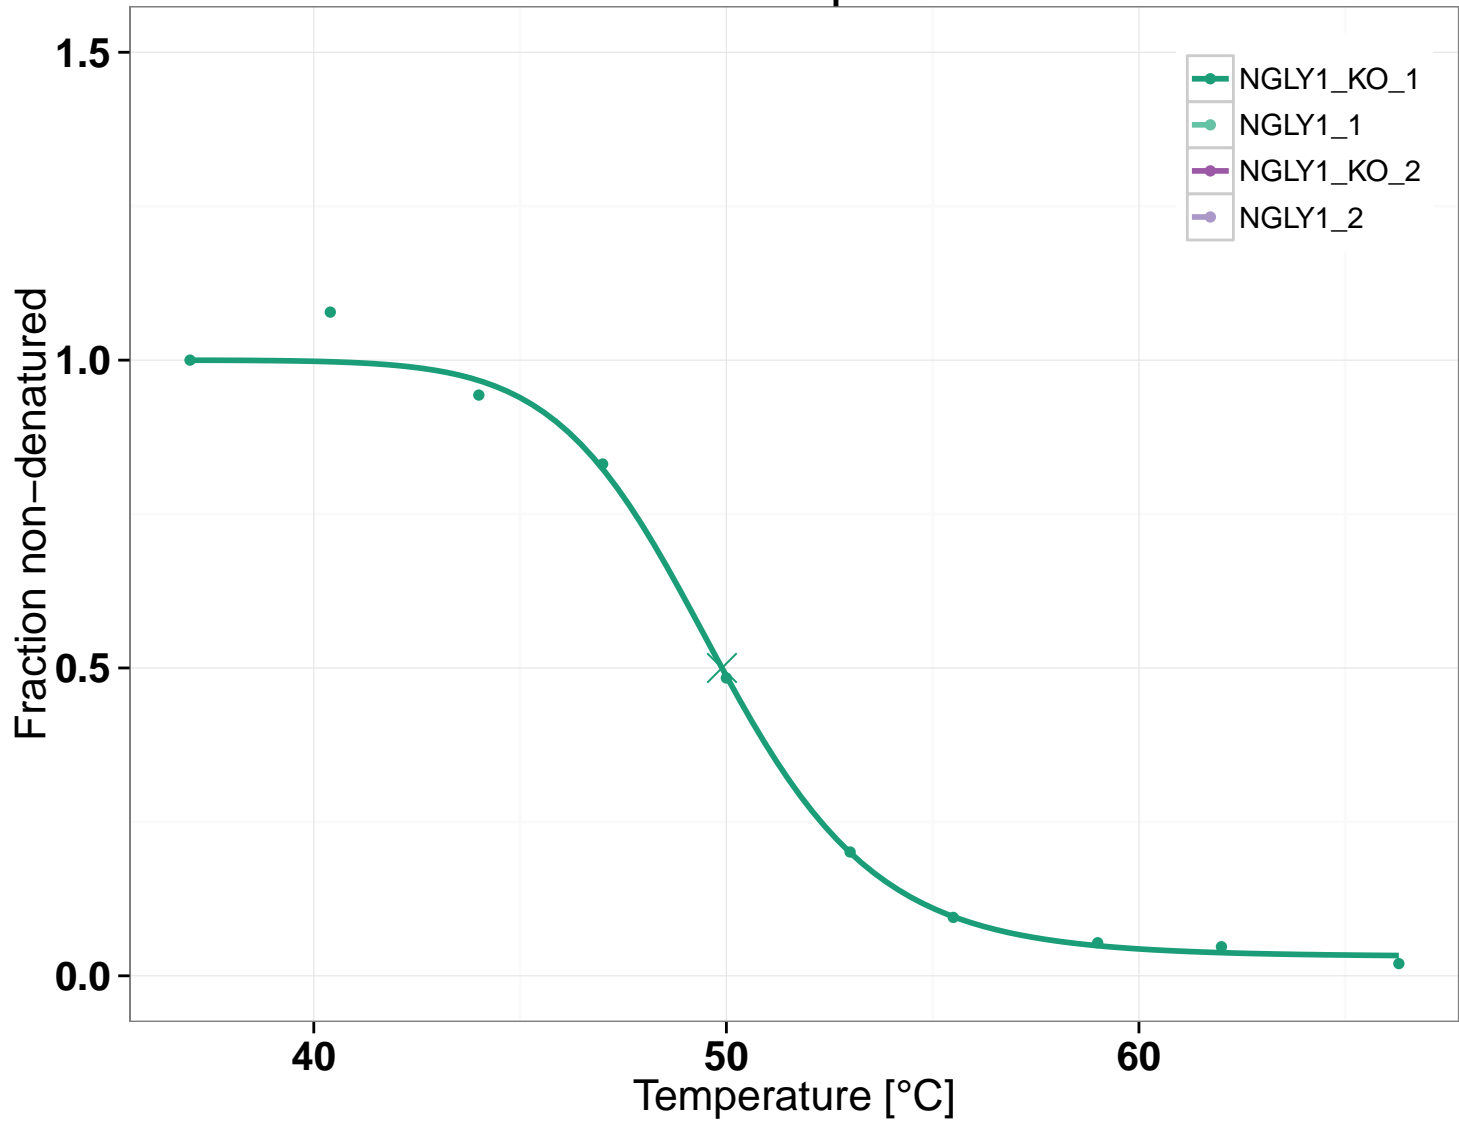

|            | meltPoint | slope | plateau | R2 |
|------------|-----------|-------|---------|----|
| NGLY1_KO_1 | 49.89     | -0.12 | 0.03    | 1  |
| NGLY1_1    | -         | -     | -       | -  |
| NGLY1_KO_2 | -         | -     | -       | -  |
| NGLY1_2    | -         | -     | -       | -  |

Supplement: Supplementary file 6752 [file 1]

IPI00102808.1|DUSP19

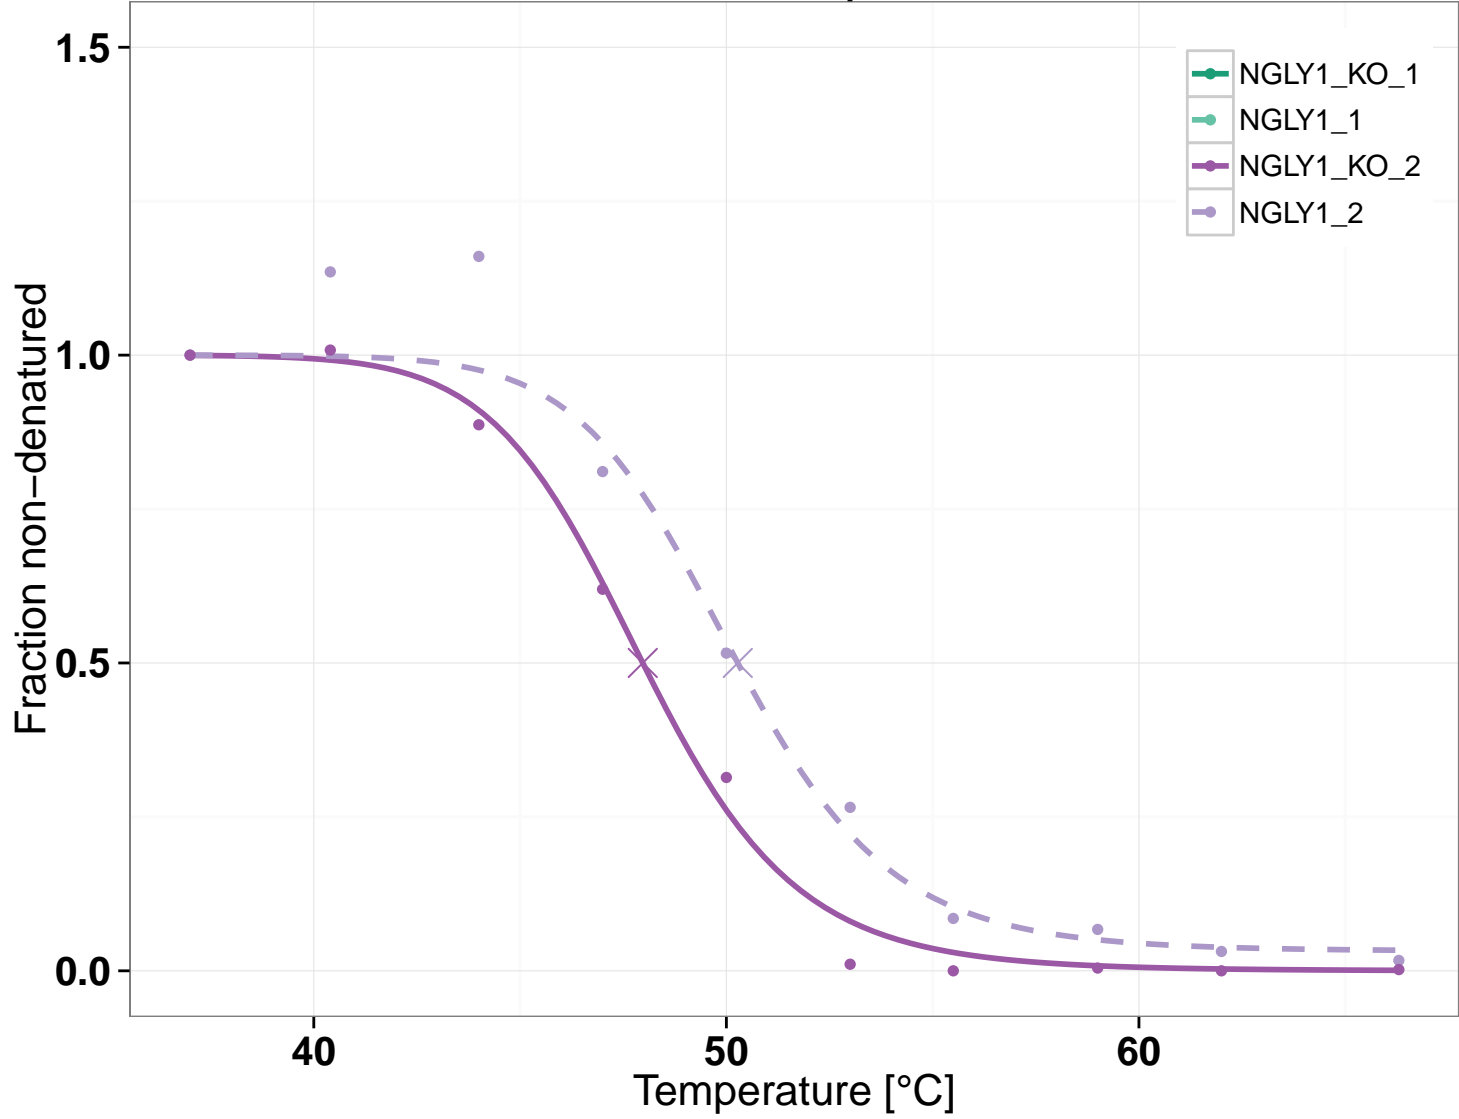

|            | meltPoint | slope | plateau | R2   |
|------------|-----------|-------|---------|------|
| NGLY1_KO_1 | —         | —     | —       | —    |
| NGLY1_1    | —         | —     | —       | —    |
| NGLY1_KO_2 | 47.97     | -0.13 | 0       | 0.99 |
| NGLY1_2    | 50.28     | -0.13 | 0.03    | 0.97 |

Supplement: Supplementary file 6753 [file 1]

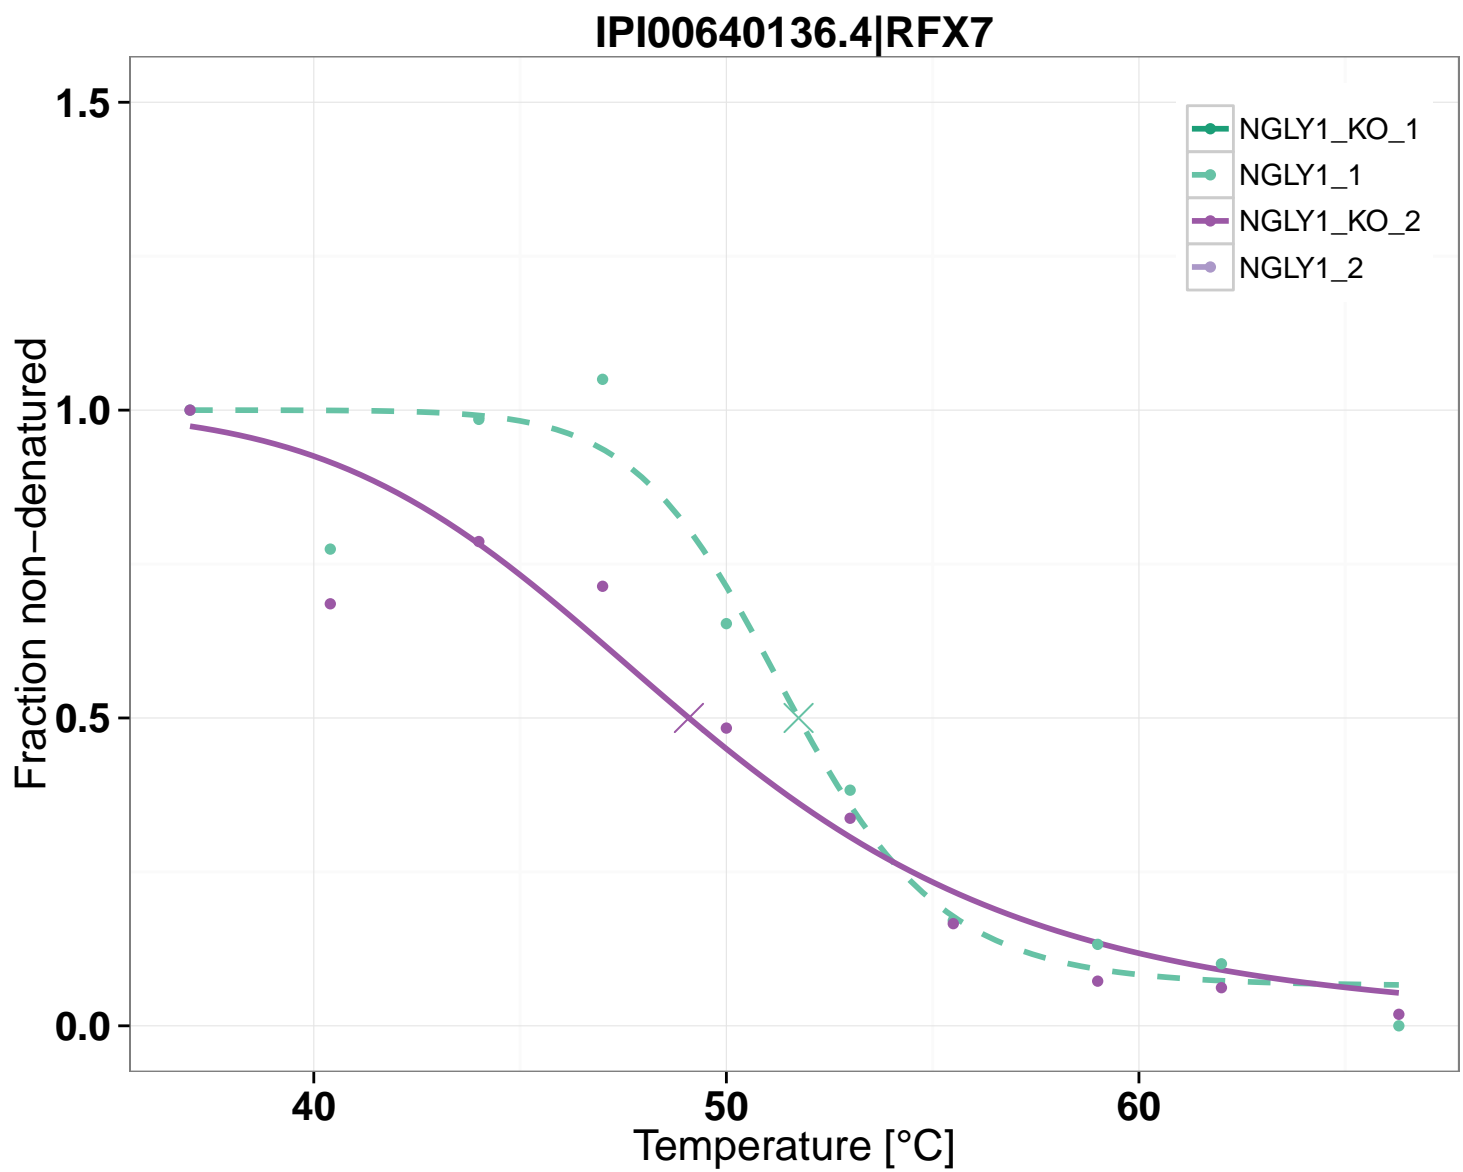

|            | meltPoint | slope  | plateau | R2   |
|------------|-----------|--------|---------|------|
| NGLY1_KO_1 | —         | —      | —       | —    |
| NGLY1_1    | 51.75     | -0.13  | 0.06    | 0.95 |
| NGLY1_KO_2 | 49.09     | -0.058 | 0       | 0.93 |
| NGLY1_2    | —         | —      | —       | —    |

Supplement: Supplementary file 6754 [file 1]

IPI00302647.4|CC2D1A

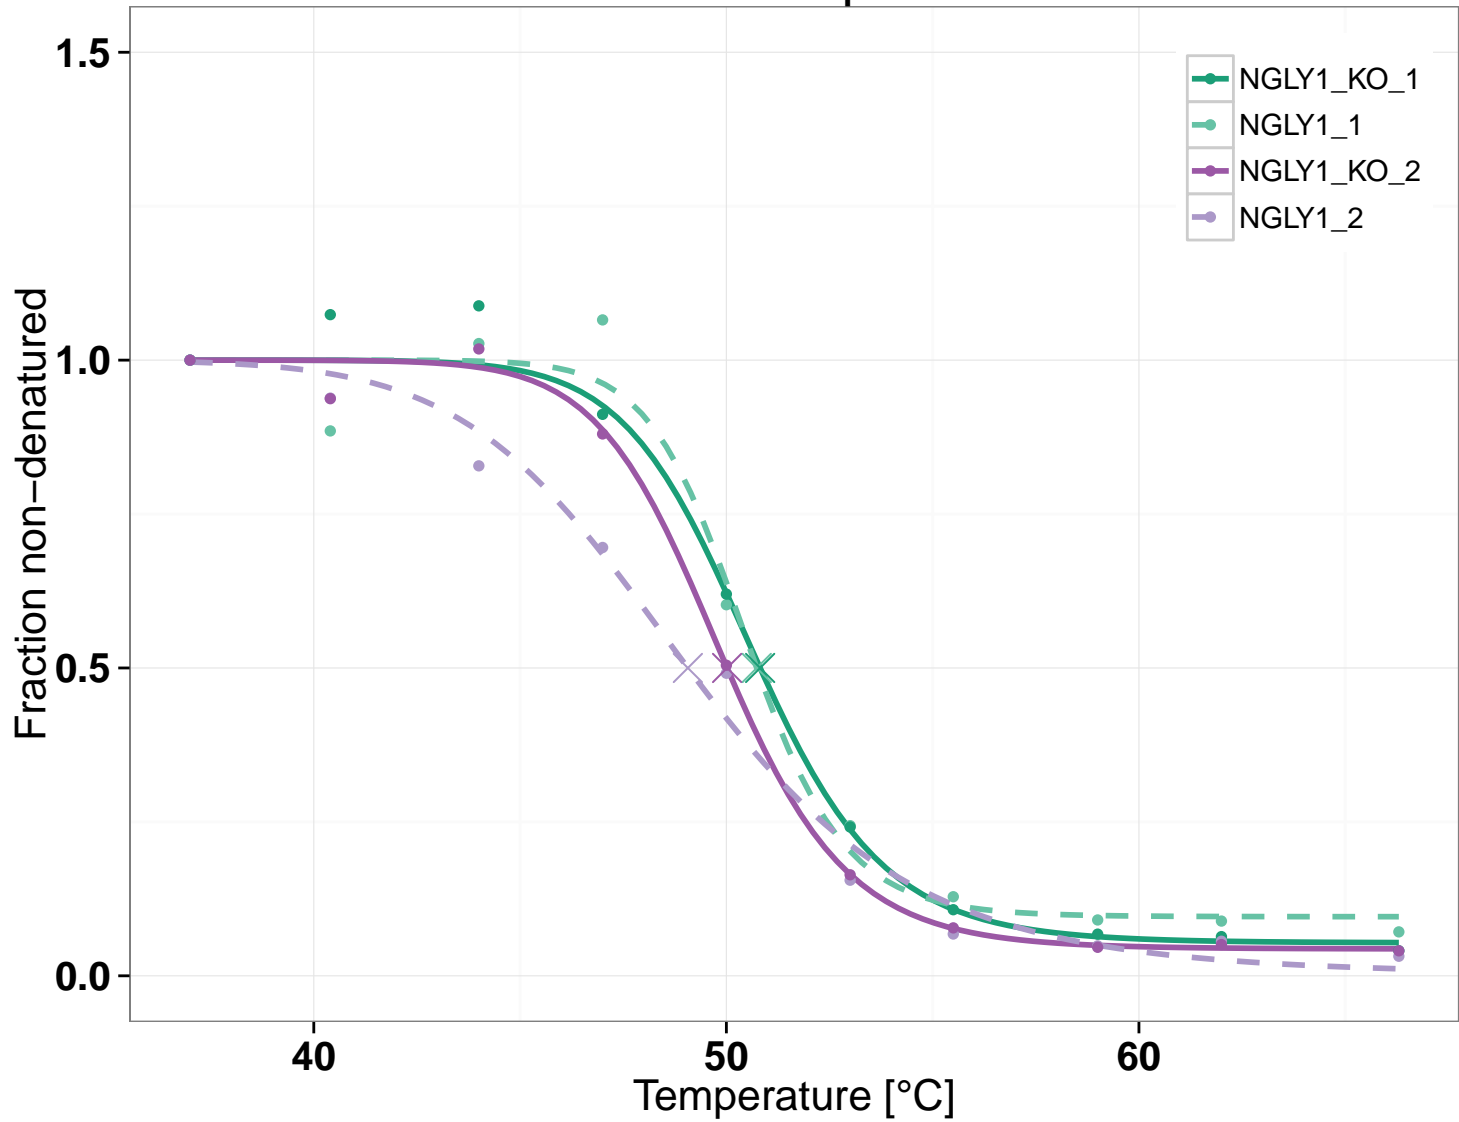

|            | meltPoint | slope  | plateau | R2   |
|------------|-----------|--------|---------|------|
| NGLY1_KO_1 | 50.82     | -0.15  | 0.05    | 0.99 |
| NGLY1_1    | 50.74     | -0.19  | 0.1     | 0.98 |
| NGLY1_KO_2 | 50.02     | -0.16  | 0.04    | 1    |
| NGLY1_2    | 49.07     | -0.091 | 0       | 0.99 |

Supplement: Supplementary file 6755 [file 1]

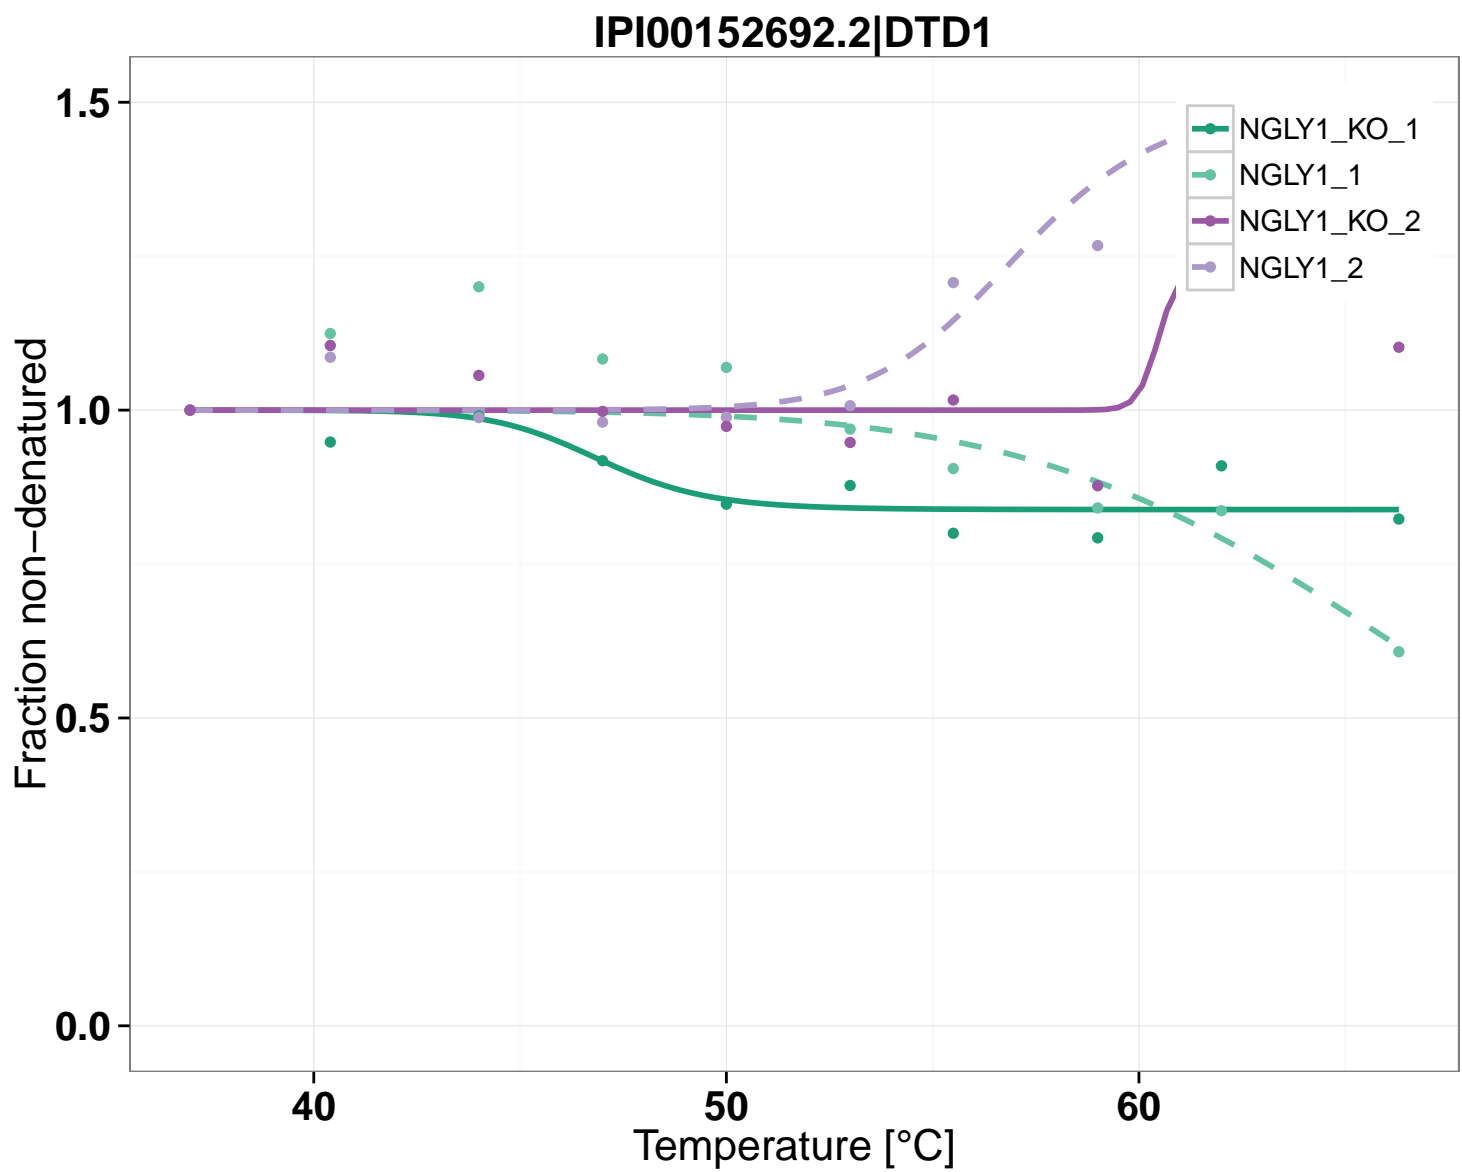

|            | meltPoint | slope  | plateau | R2   |
|------------|-----------|--------|---------|------|
| NGLY1_KO_1 | -         | -0.031 | 0.84    | 0.74 |
| NGLY1_1    | -         | -      | 0.07    | 0.72 |
| NGLY1_KO_2 | -         | 0.23   | 1.23    | 0.57 |
| NGLY1_2    | -         | 0.071  | 1.5     | 0.91 |

Supplement: Supplementary file 6756 [file 1]

IPI00549763.3|C7ORF64

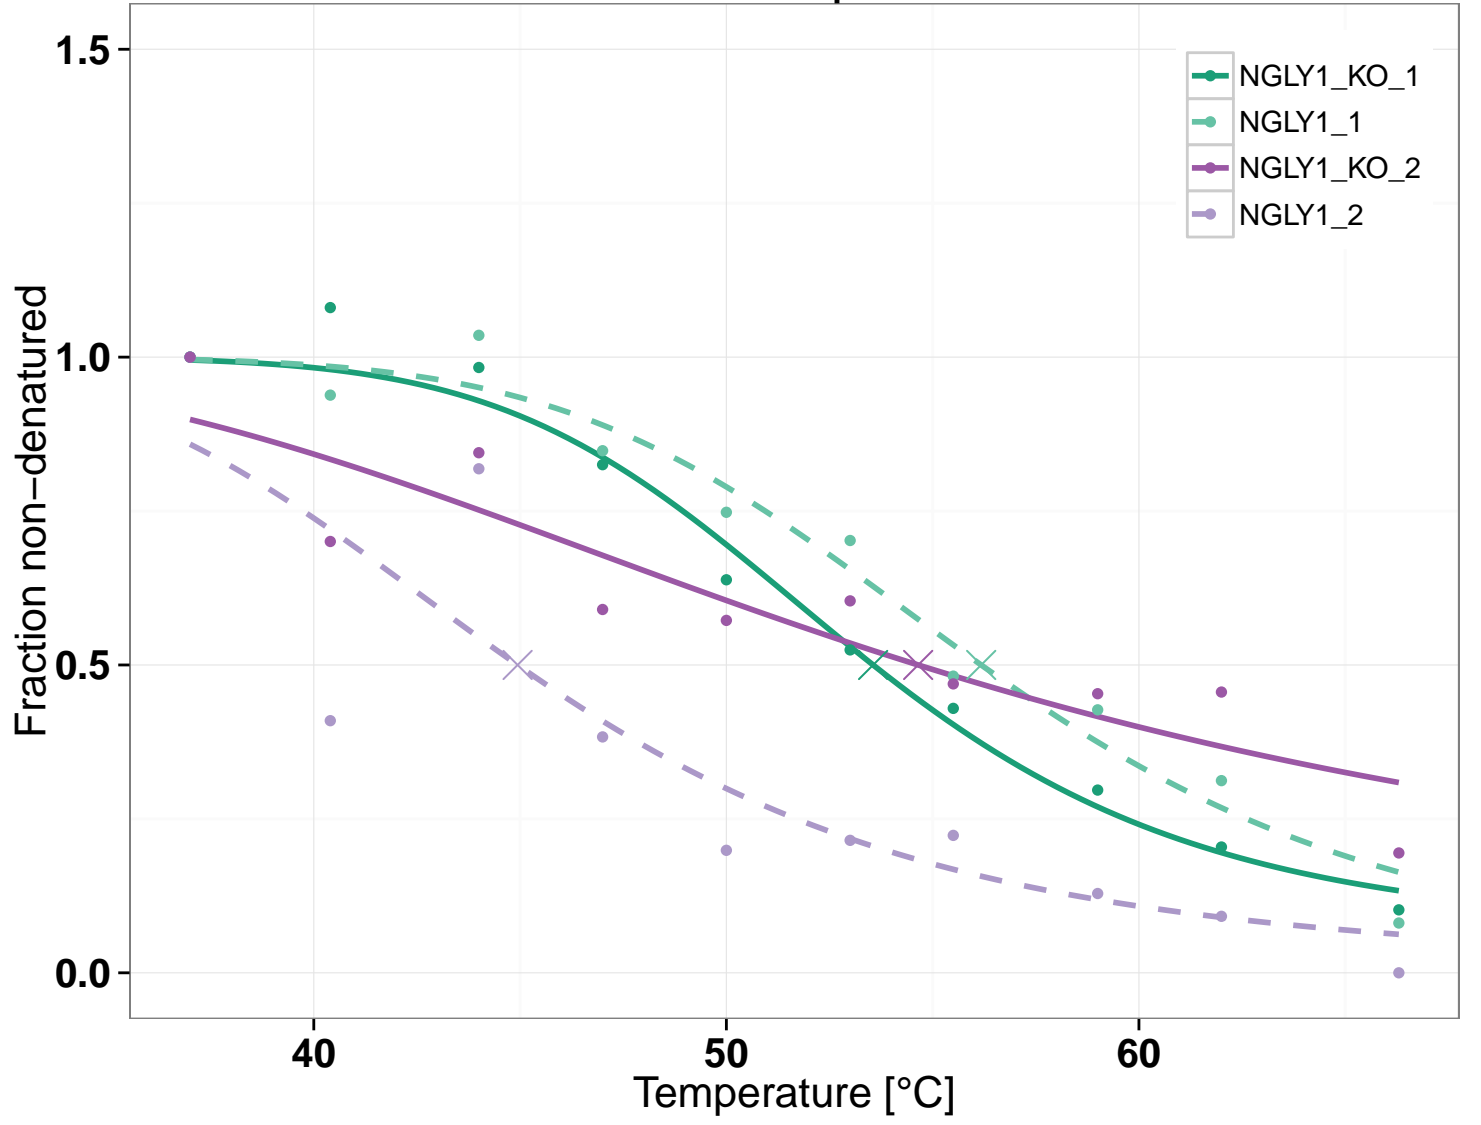

|            | meltPoint | slope  | plateau | R2   |
|------------|-----------|--------|---------|------|
| NGLY1_KO_1 | 53.56     | -0.056 | 0.06    | 0.98 |
| NGLY1_1    | 56.18     | -0.049 | 0       | 0.97 |
| NGLY1_KO_2 | 54.65     | -0.025 | 0       | 0.84 |
| NGLY1_2    | 44.94     | -0.049 | 0       | 0.78 |

Supplement: Supplementary file 6757 [file 1]

IPI00470674.5|CYB5R1

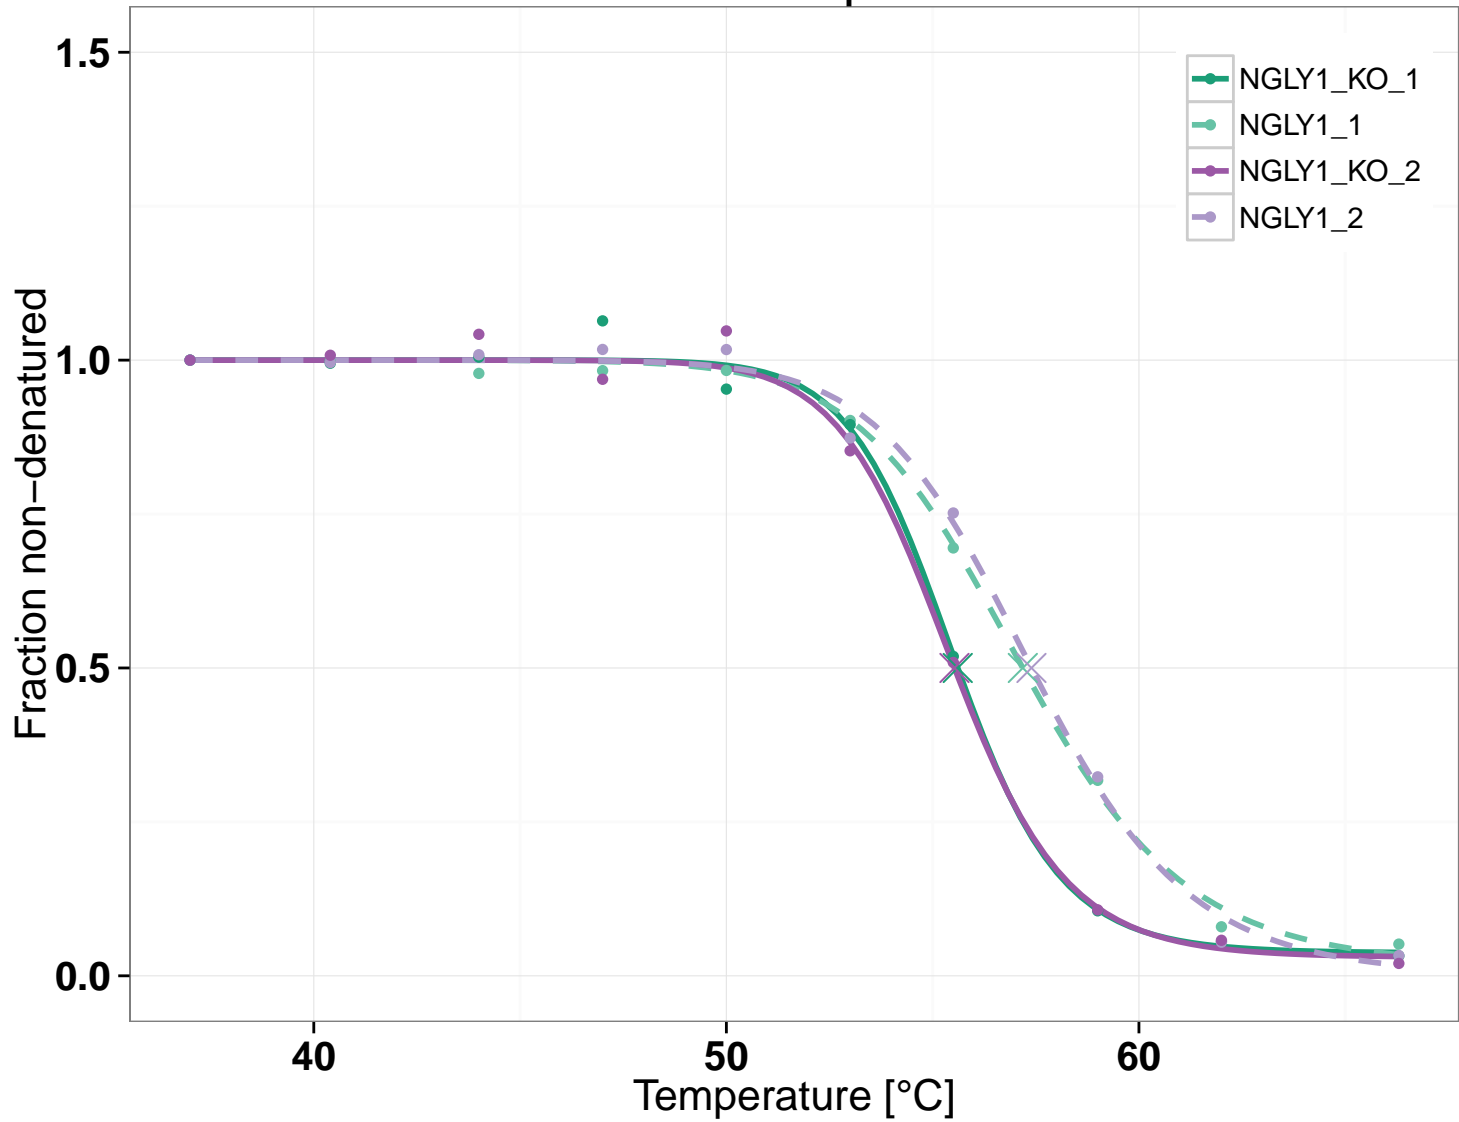

|            | meltPoint | slope | plateau | R2 |
|------------|-----------|-------|---------|----|
| NGLY1_KO_1 | 55.61     | -0.19 | 0.04    | 1  |
| NGLY1_1    | 57.19     | -0.12 | 0.02    | 1  |
| NGLY1_KO_2 | 55.53     | -0.17 | 0.03    | 1  |
| NGLY1_2    | 57.4      | -0.13 | 0       | 1  |

Supplement: Supplementary file 6758 [file 1]

# IPI00465233.1|EIF3L

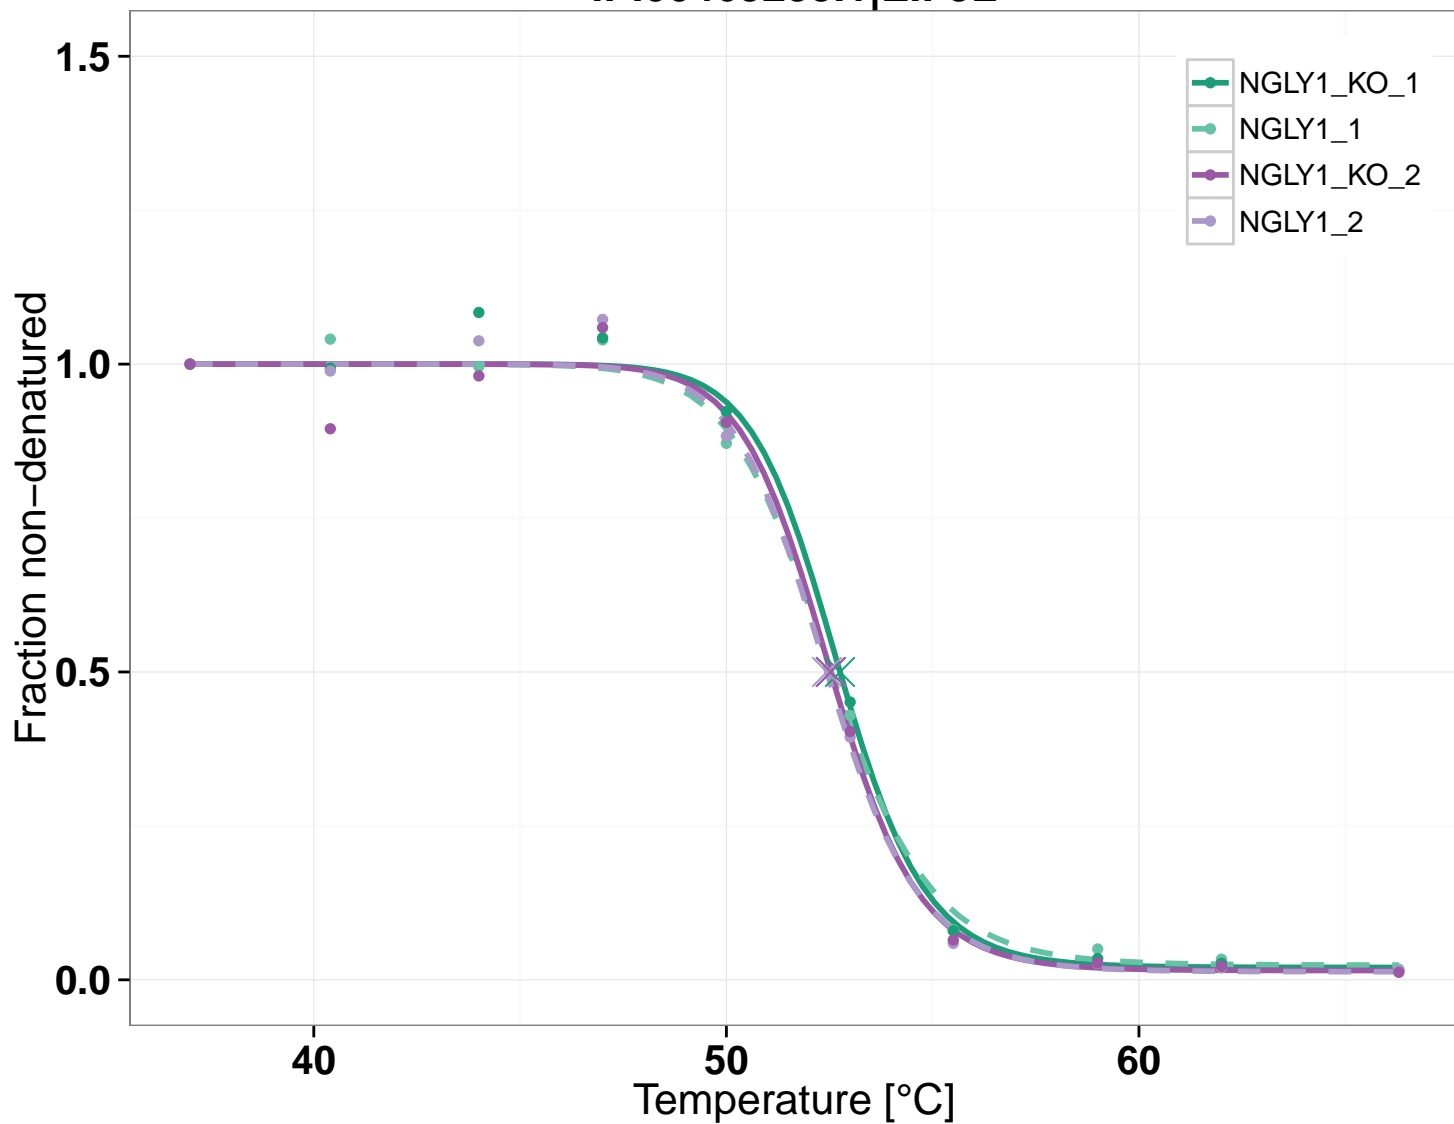

|            | meltPoint | slope | plateau | R2   |
|------------|-----------|-------|---------|------|
| NGLY1_KO_1 | 52.75     | -0.23 | 0.02    | 1    |
| NGLY1_1    | 52.54     | -0.2  | 0.02    | 1    |
| NGLY1_KO_2 | 52.53     | -0.23 | 0.02    | 0.99 |
| NGLY1_2    | 52.44     | -0.22 | 0.01    | 1    |

Supplement: Supplementary file 6759 [file 1]

# IPI00396058.2|NCAPG2

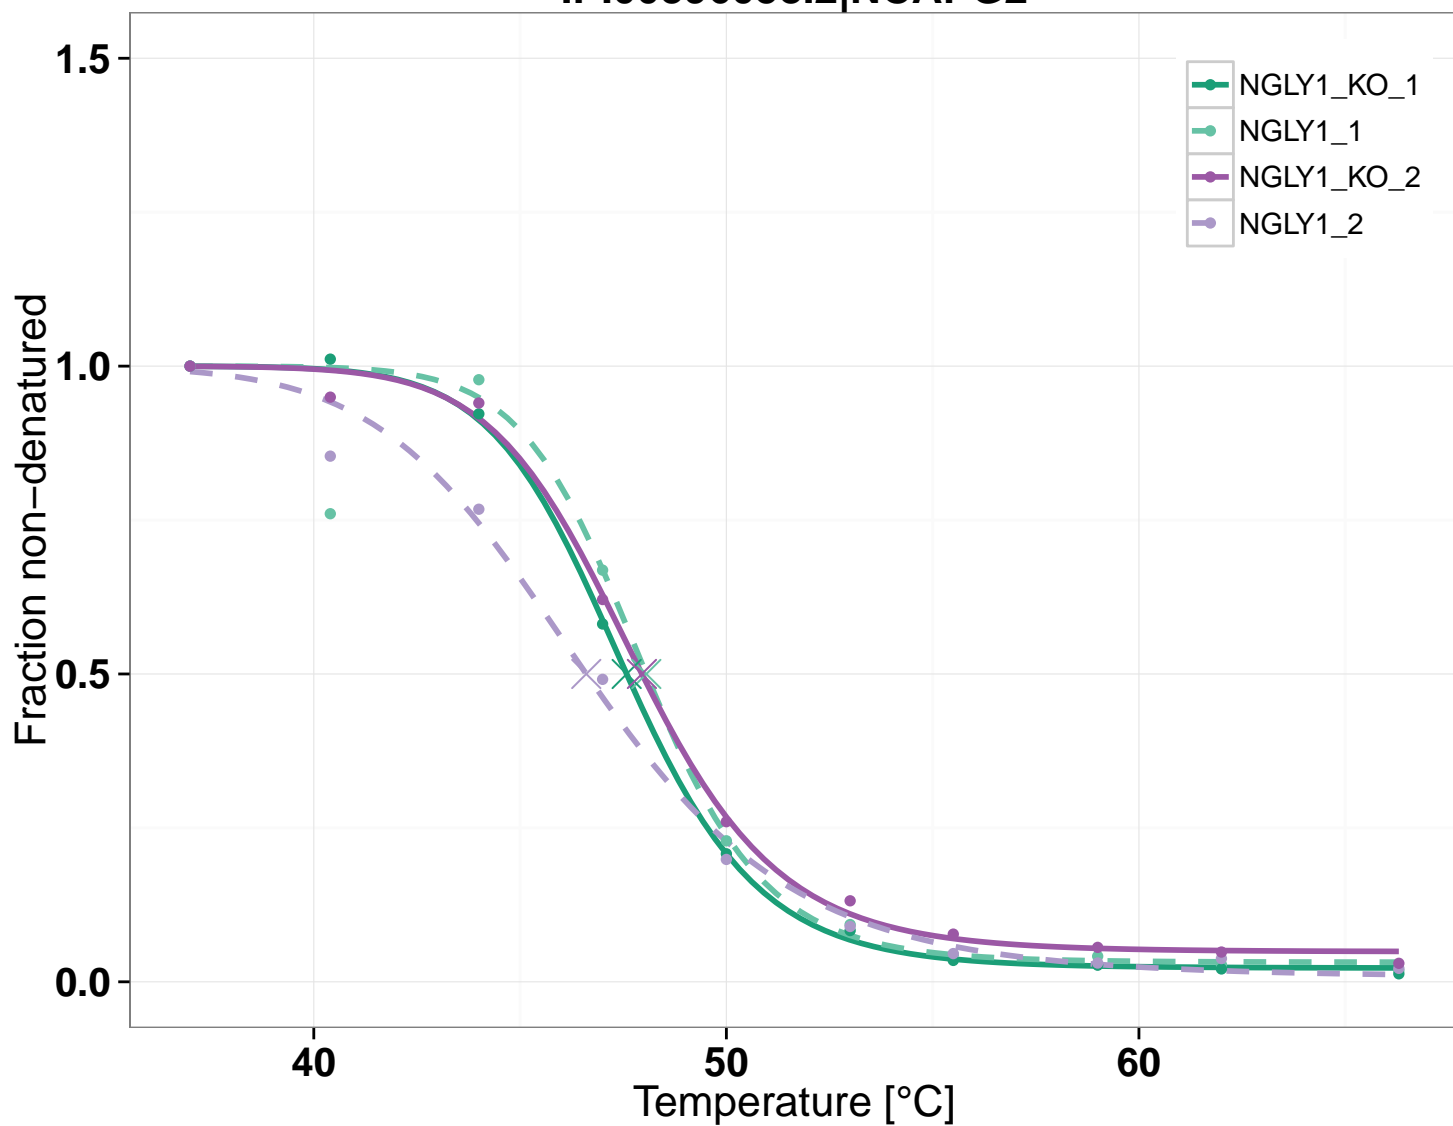

|            | meltPoint | slope  | plateau | R2   |
|------------|-----------|--------|---------|------|
| NGLY1_KO_1 | 47.58     | -0.15  | 0.02    | 1    |
| NGLY1_1    | 48.06     | -0.16  | 0.03    | 0.96 |
| NGLY1_KO_2 | 47.95     | -0.14  | 0.05    | 1    |
| NGLY1_2    | 46.6      | -0.098 | 0.01    | 0.99 |

Supplement: Supplementary file 6760 [file 1]

IPI00291723.3|FAM116A

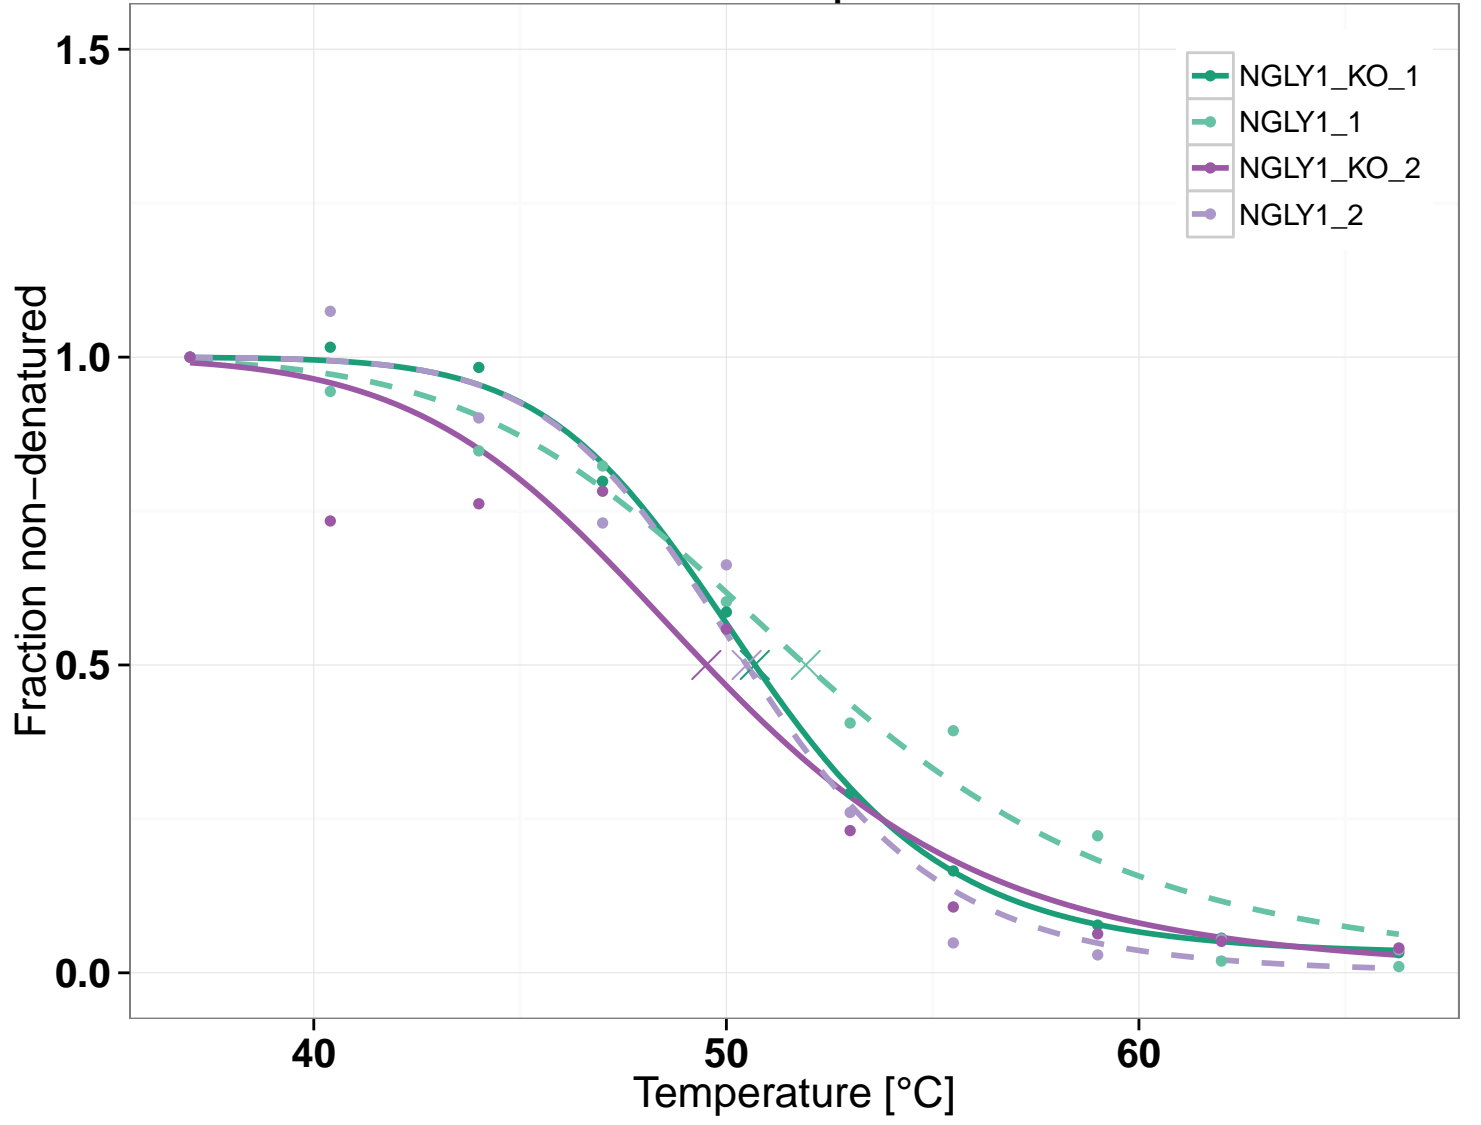

|            | meltPoint | slope  | plateau | R2   |
|------------|-----------|--------|---------|------|
| NGLY1_KO_1 | 50.69     | -0.099 | 0.03    | 1    |
| NGLY1_1    | 51.92     | -0.062 | 0       | 0.98 |
| NGLY1_KO_2 | 49.51     | -0.072 | 0       | 0.93 |
| NGLY1_2    | 50.49     | -0.1   | 0       | 0.98 |

Supplement: Supplementary file 6761 [file 1]

IPI00298447.3|TARBP1

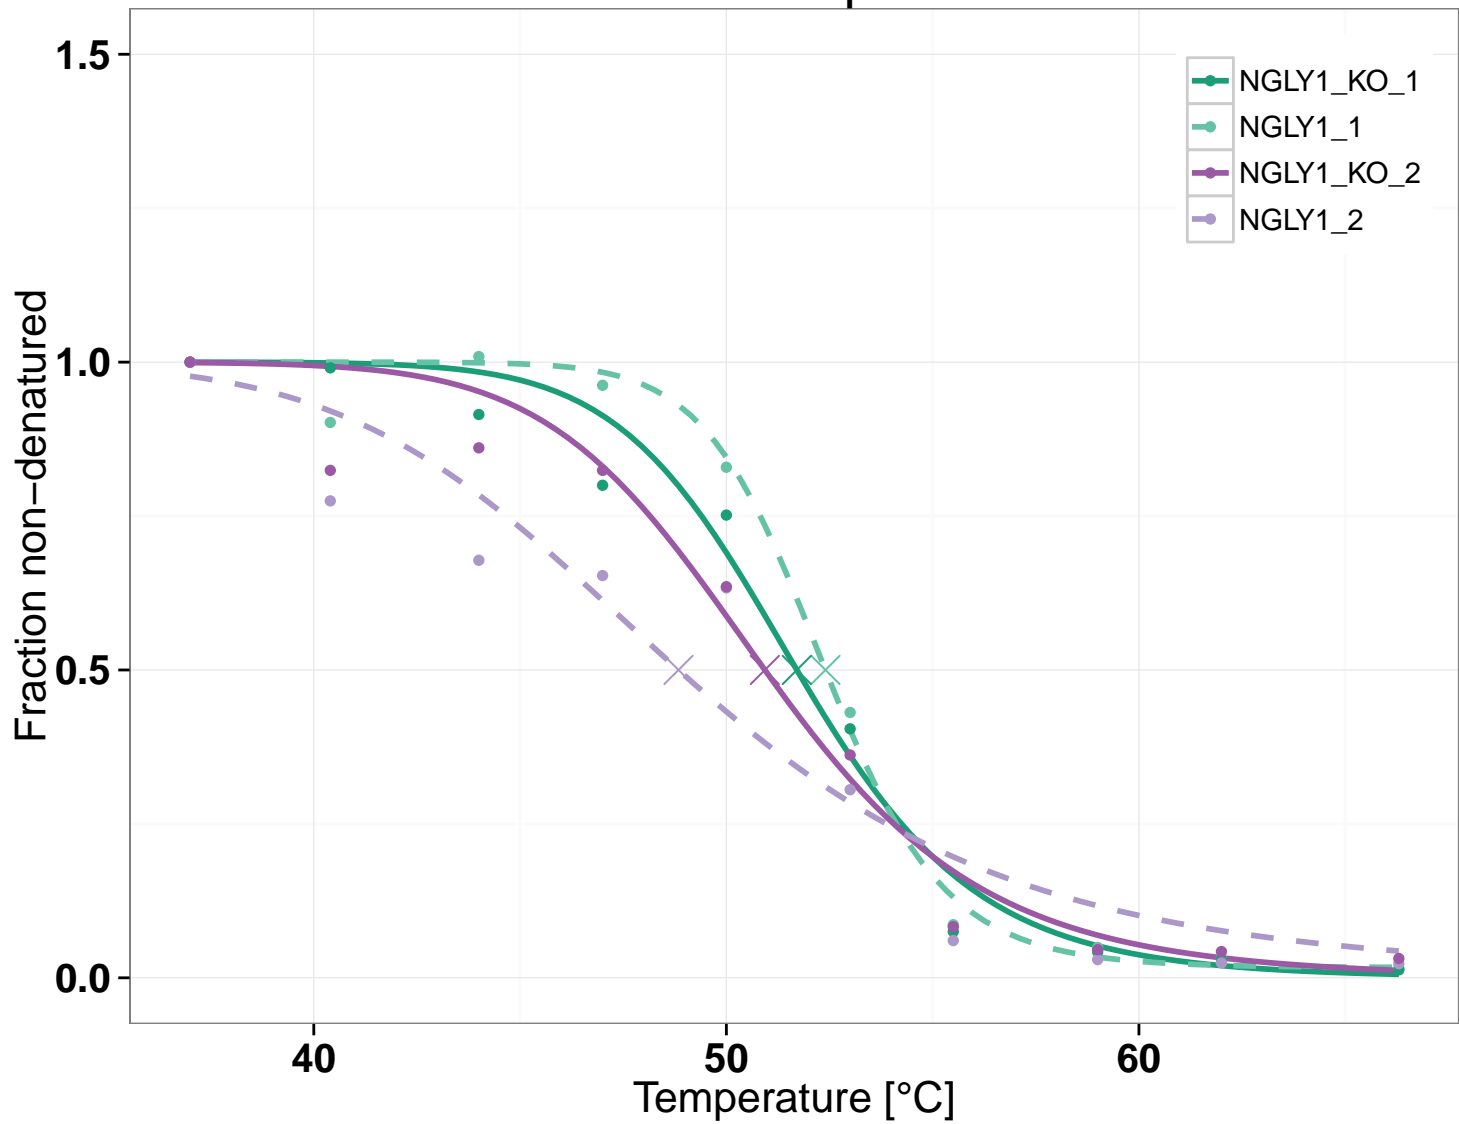

|            | meltPoint | slope  | plateau | R2   |
|------------|-----------|--------|---------|------|
| NGLY1_KO_1 | 51.71     | -0.11  | 0       | 0.98 |
| NGLY1_1    | 52.4      | -0.17  | 0.02    | 0.99 |
| NGLY1_KO_2 | 50.93     | -0.094 | 0       | 0.97 |
| NGLY1_2    | 48.84     | -0.062 | 0       | 0.92 |

Supplement: Supplementary file 6762 [file 1]

IPI00298991.8|KIAA1033

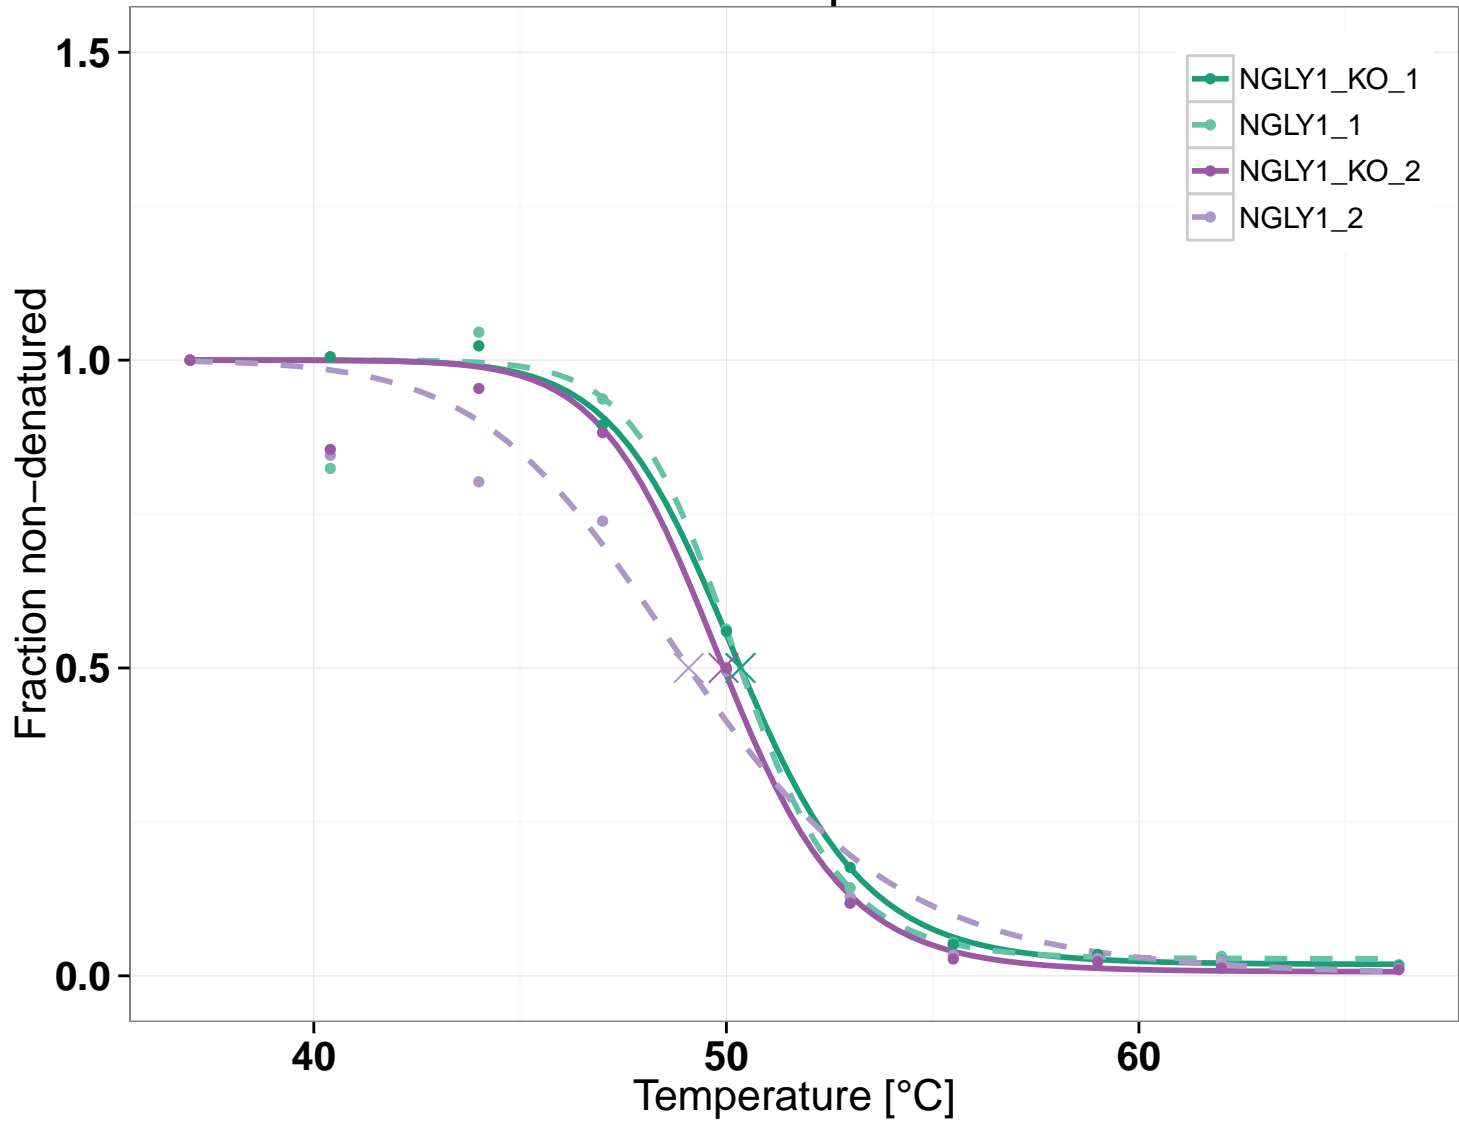

|            | meltPoint | slope  | plateau | R2   |
|------------|-----------|--------|---------|------|
| NGLY1_KO_1 | 50.34     | -0.16  | 0.02    | 1    |
| NGLY1_1    | 50.34     | -0.19  | 0.03    | 0.98 |
| NGLY1_KO_2 | 49.93     | -0.17  | 0.01    | 0.99 |
| NGLY1_2    | 49.09     | -0.098 | 0       | 0.97 |

Supplement: Supplementary file 6763 [file 1]

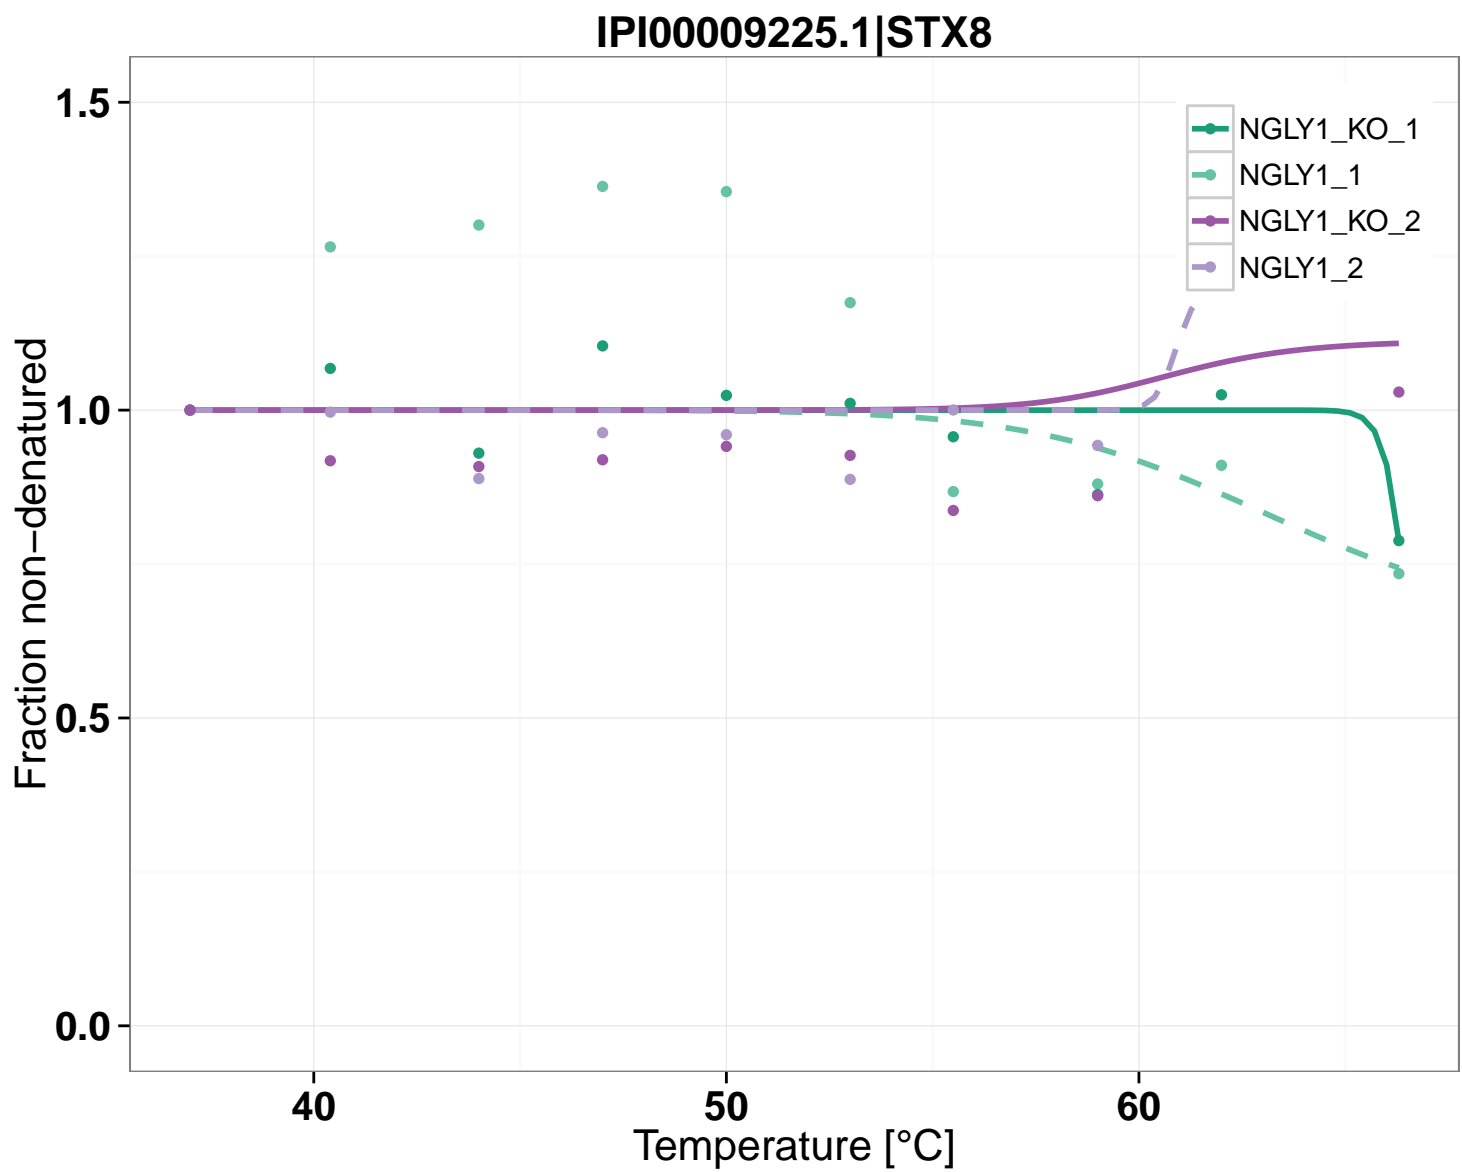

|            | meltPoint | slope | plateau | R2   |
|------------|-----------|-------|---------|------|
| NGLY1_KO_1 | -         | -     | 0       | 0.48 |
| NGLY1_1    | -         | -0.03 | 0.63    | 0.03 |
| NGLY1_KO_2 | -         | 0.018 | 1.11    | 0.03 |
| NGLY1_2    | -         | 0.2   | 1.2     | 0.72 |

Supplement: Supplementary file 6764 [file 1]

IPI00028116.1|KDELR1

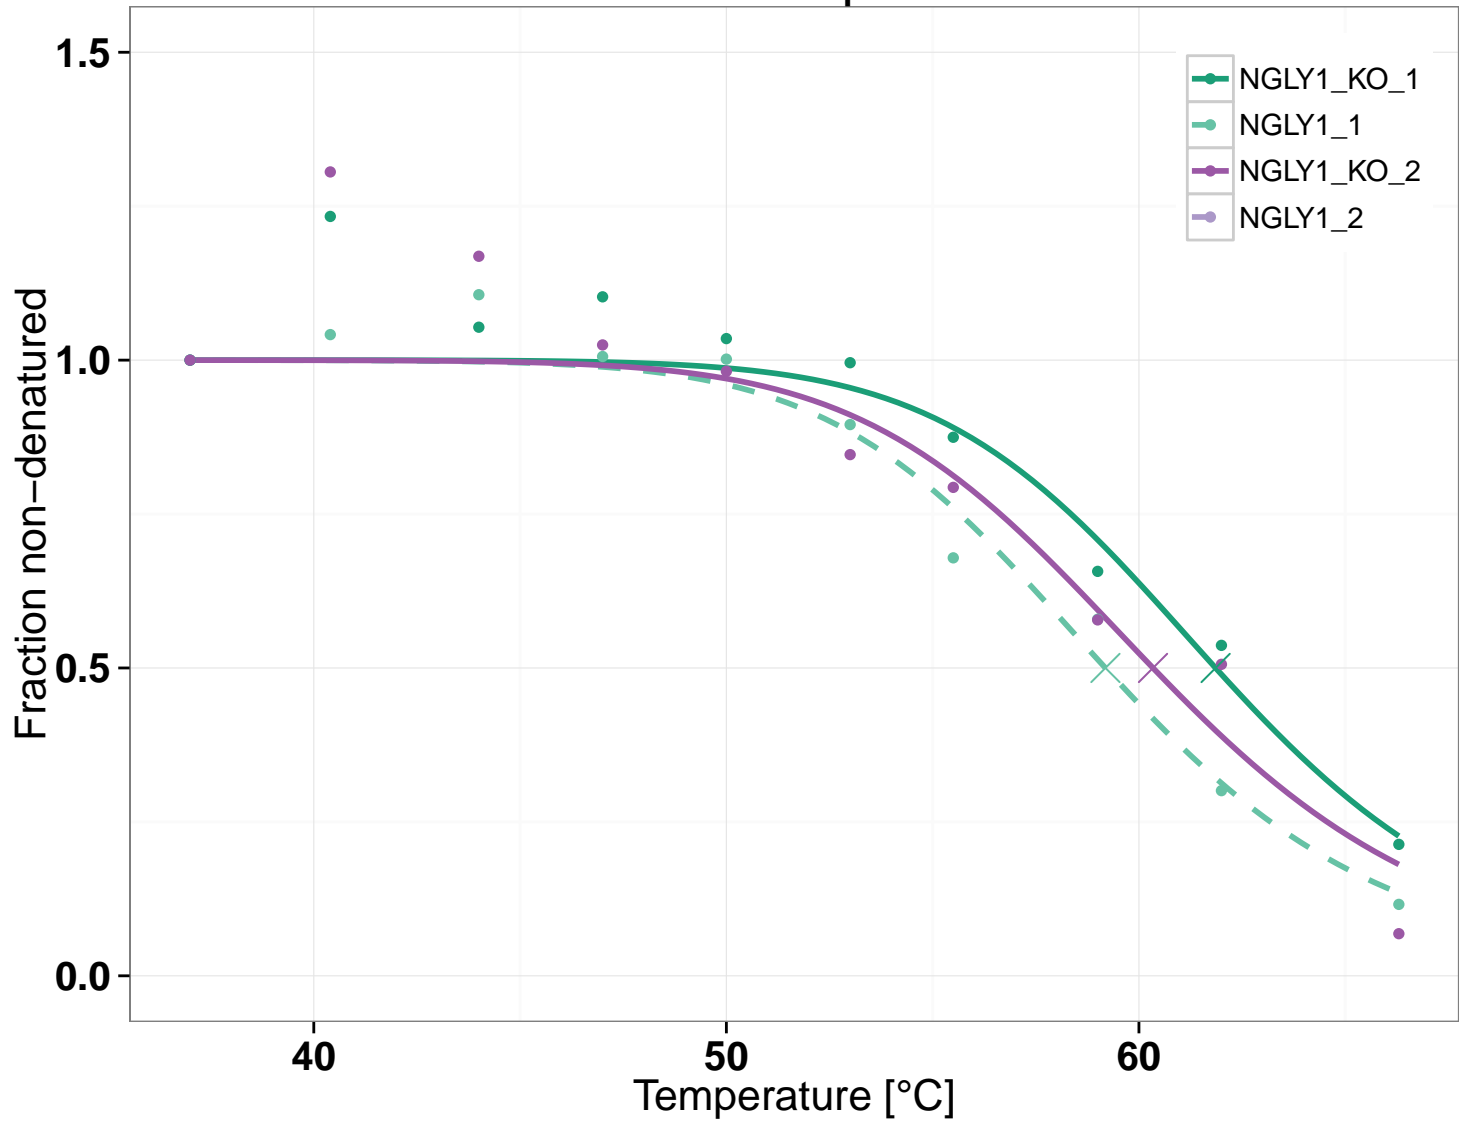

|            | meltPoint | slope  | plateau | R2   |
|------------|-----------|--------|---------|------|
| NGLY1_KO_1 | 61.86     | -0.075 | 0       | 0.91 |
| NGLY1_1    | 59.19     | -0.074 | 0       | 0.97 |
| NGLY1_KO_2 | 60.34     | -0.071 | 0       | 0.87 |
| NGLY1_2    | -         | -      | -       | -    |

Supplement: Supplementary file 6765 [file 1]

# IPI00645192.3|MECP2

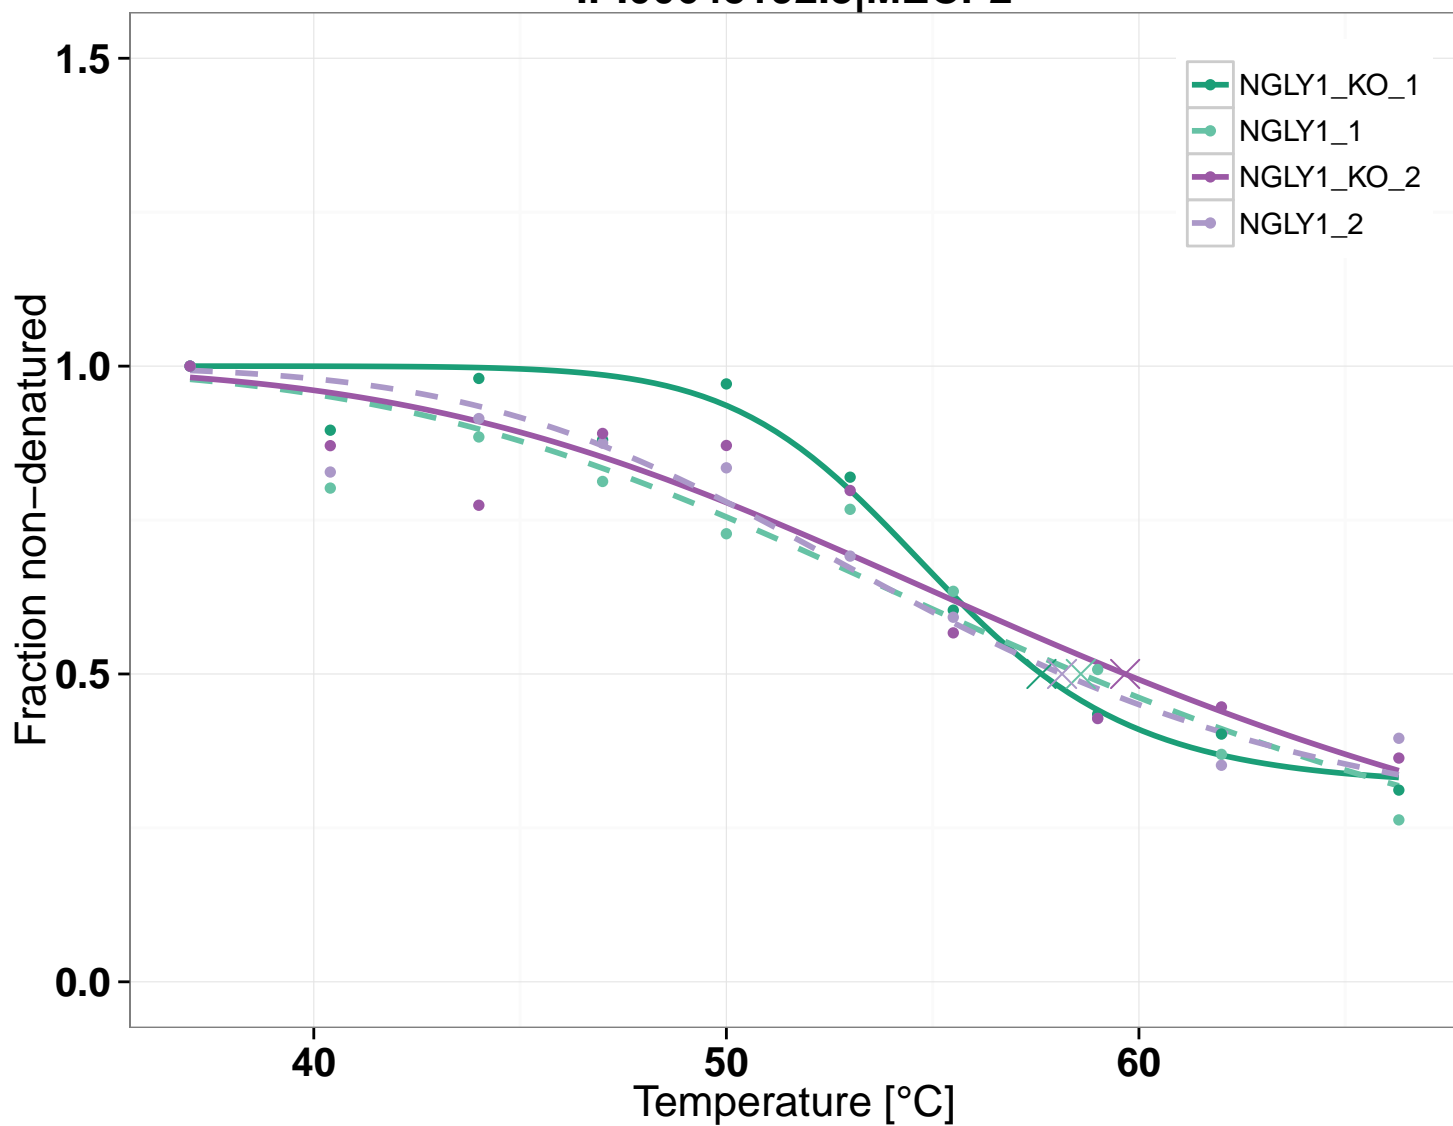

|            | meltPoint | slope  | plateau | R2   |
|------------|-----------|--------|---------|------|
| NGLY1_KO_1 | 57.64     | -0.07  | 0.32    | 0.96 |
| NGLY1_1    | 58.59     | -0.03  | 0       | 0.92 |
| NGLY1_KO_2 | 59.67     | -0.03  | 0       | 0.88 |
| NGLY1_2    | 58.14     | -0.036 | 0.21    | 0.93 |

Supplement: Supplementary file 6766 [file 1]

IPI00017299.4|BMI1

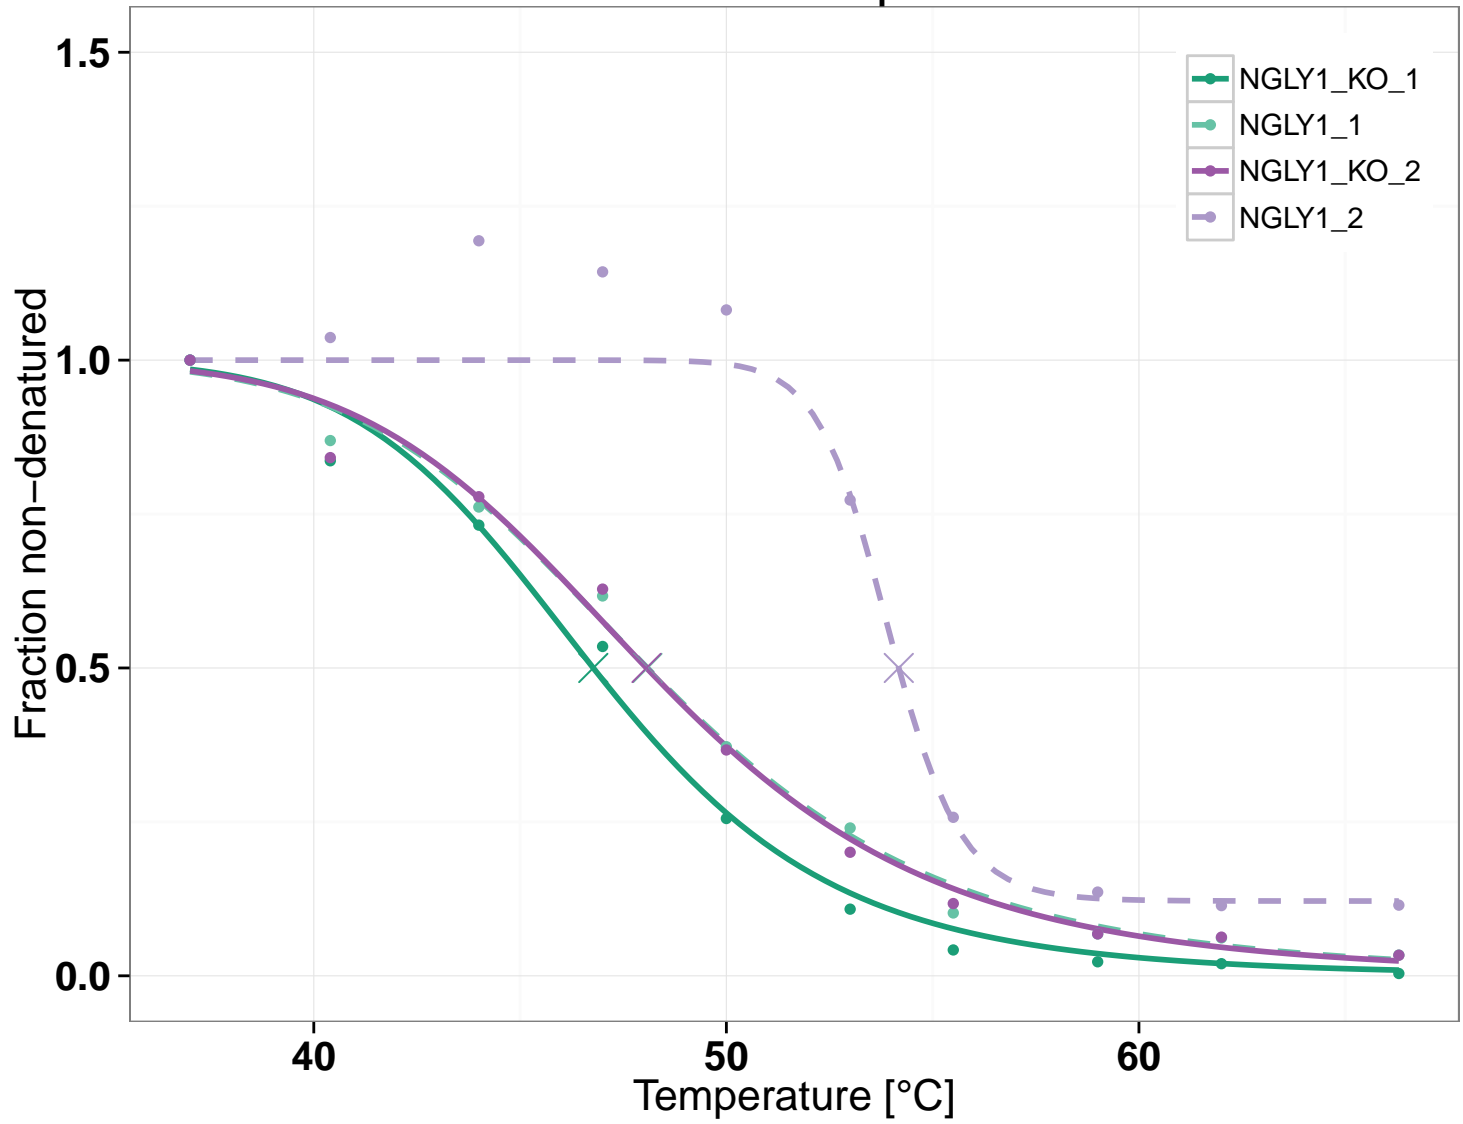

|            | meltPoint | slope  | plateau | R2   |
|------------|-----------|--------|---------|------|
| NGLY1_KO_1 | 46.77     | -0.086 | 0       | 0.99 |
| NGLY1_1    | 48.09     | -0.07  | 0       | 0.99 |
| NGLY1_KO_2 | 48.07     | -0.072 | 0       | 0.99 |
| NGLY1_2    | 54.18     | -0.25  | 0.12    | 0.97 |

Supplement: Supplementary file 6767 [file 1]

# IPI00017767.1|MGST2

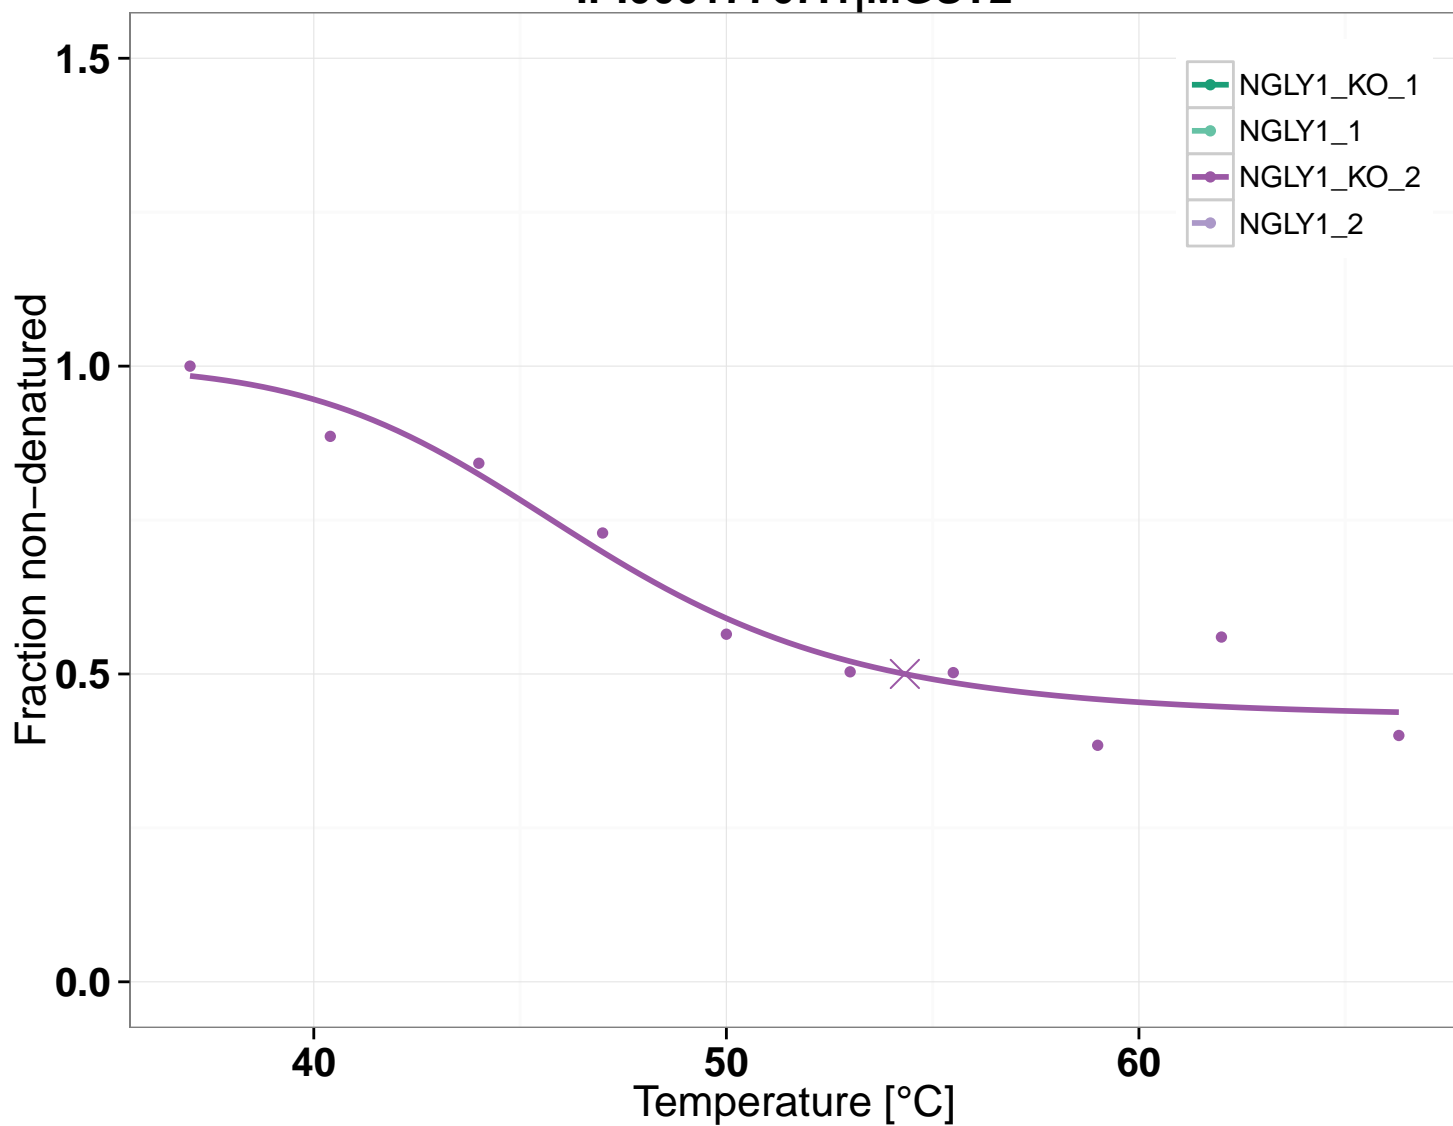

|            | meltPoint | slope  | plateau | R2   |
|------------|-----------|--------|---------|------|
| NGLY1_KO_1 | —         | —      | —       | —    |
| NGLY1_1    | —         | —      | —       | —    |
| NGLY1_KO_2 | 54.33     | -0.043 | 0.43    | 0.94 |
| NGLY1_2    | —         | —      | —       | —    |

Supplement: Supplementary file 6768 [file 1]

# IPI00021808.3|HARS

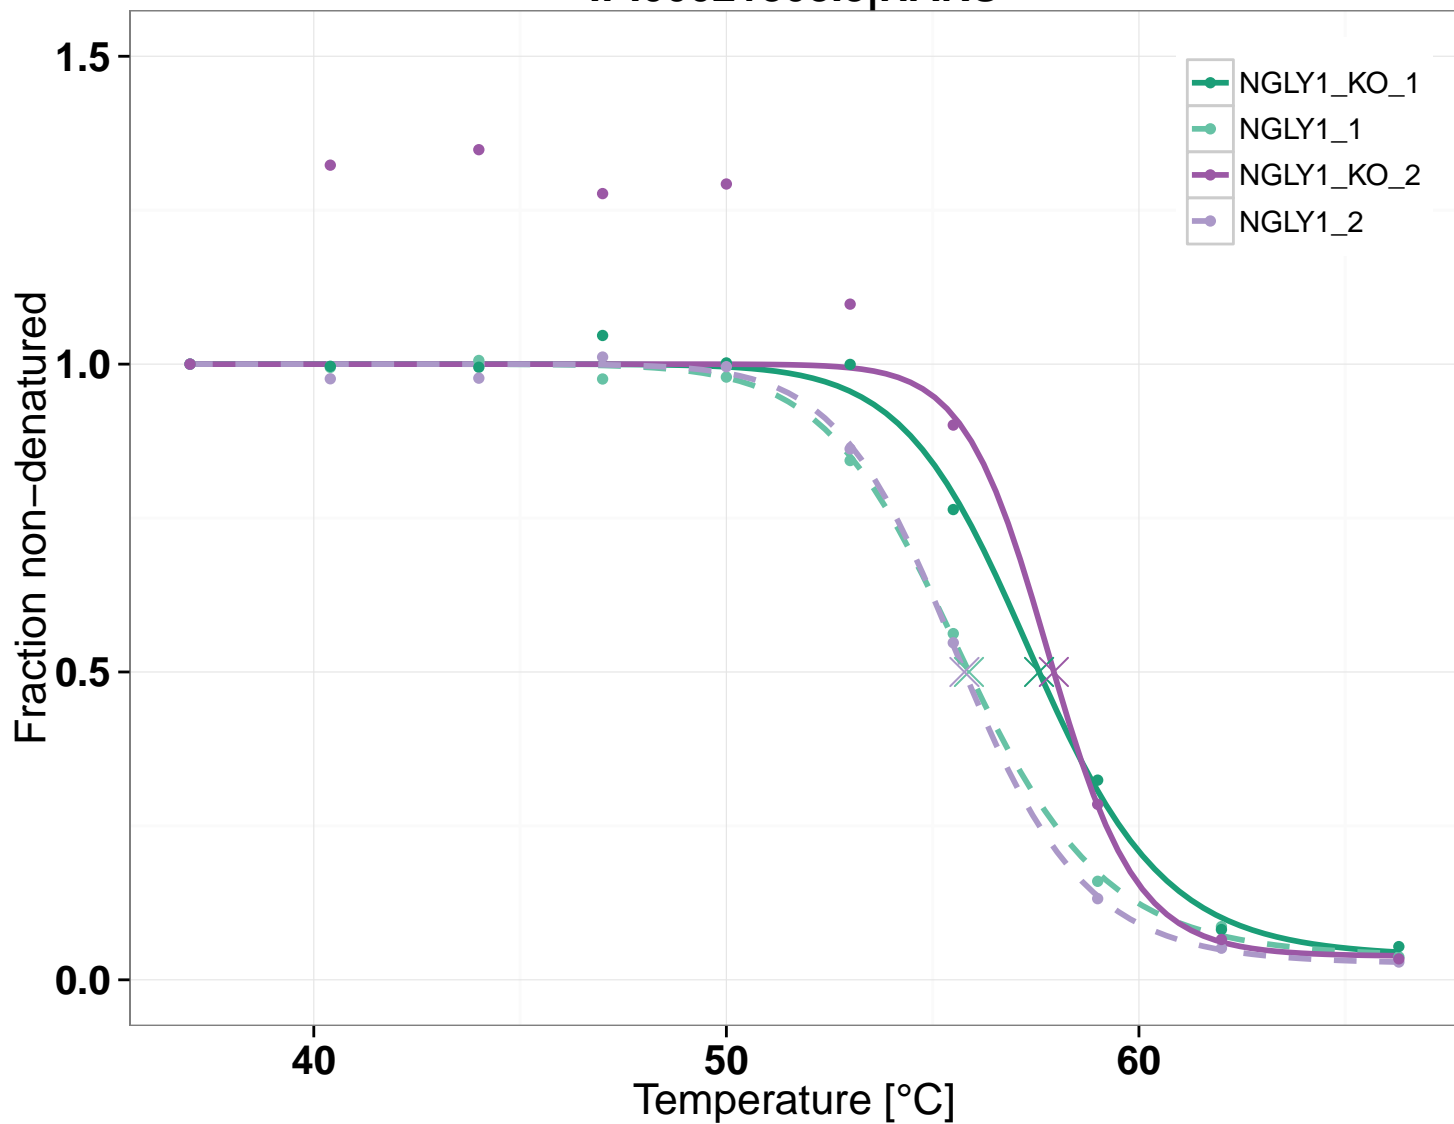

|            | meltPoint | slope | plateau | R2   |
|------------|-----------|-------|---------|------|
| NGLY1_KO_1 | 57.58     | -0.15 | 0.04    | 1    |
| NGLY1_1    | 55.88     | -0.14 | 0.04    | 1    |
| NGLY1_KO_2 | 57.94     | -0.23 | 0.04    | 0.84 |
| NGLY1_2    | 55.77     | -0.16 | 0.03    | 1    |

Supplement: Supplementary file 6769 [file 1]

IPI00304922.1|LSMD1

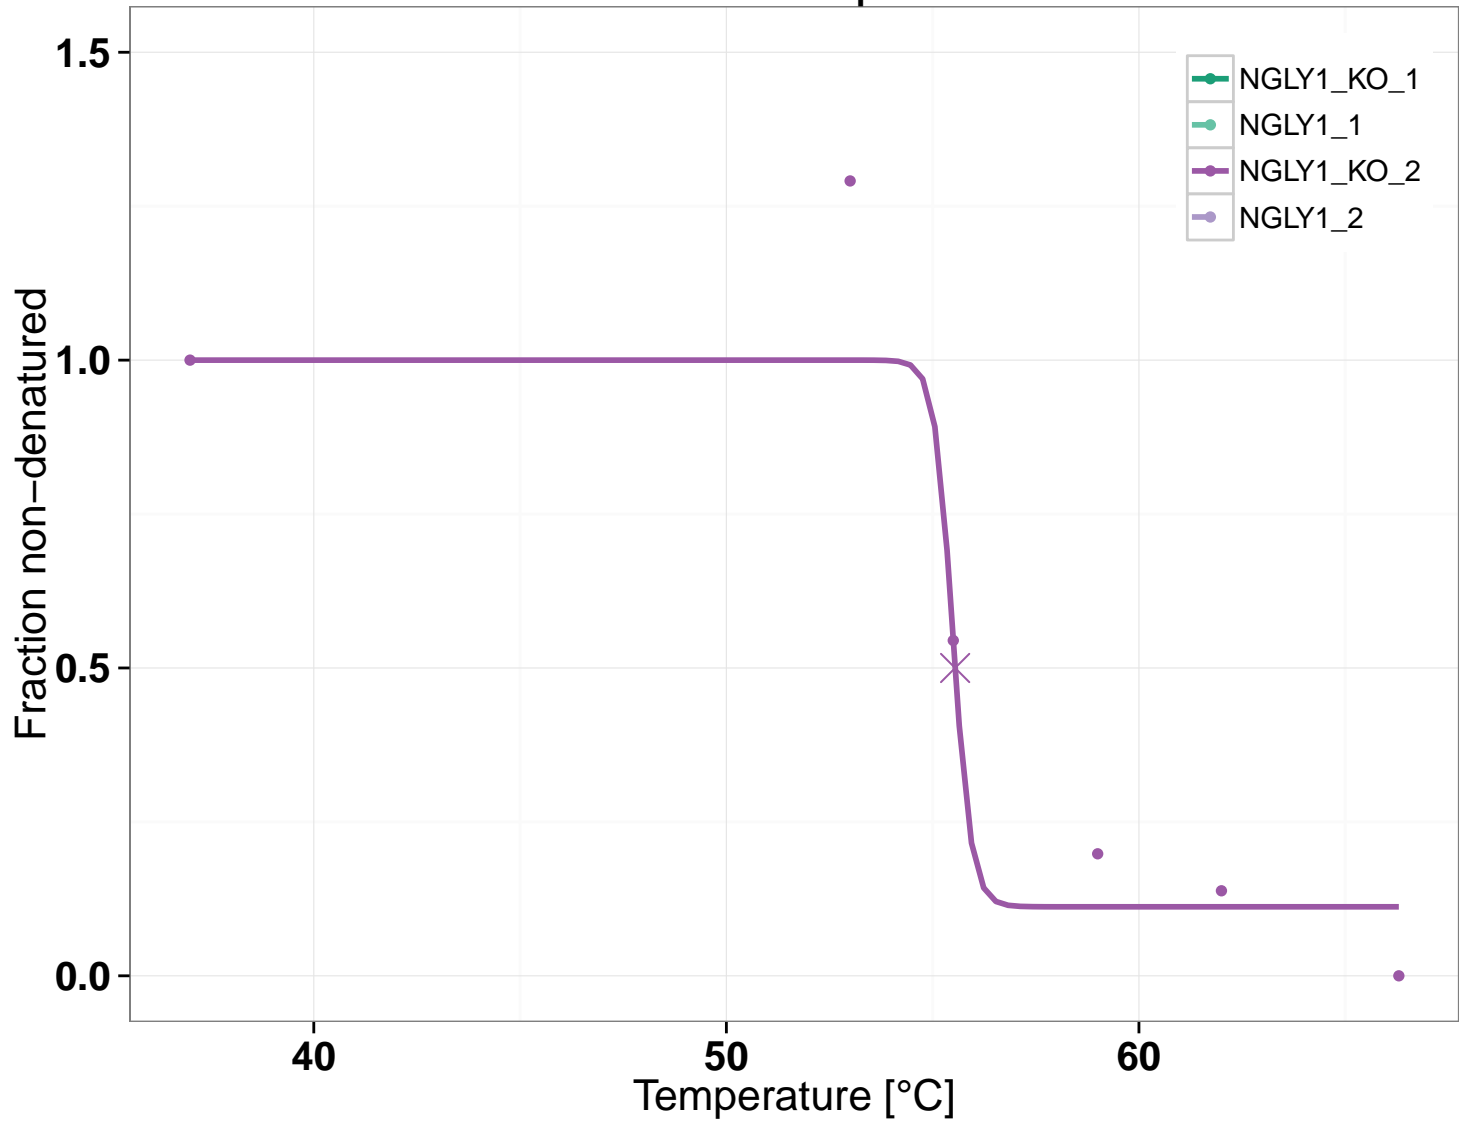

|            | meltPoint | slope | plateau | R2    |
|------------|-----------|-------|---------|-------|
| NGLY1_KO_1 | -         | -     | -       | -     |
| NGLY1_1    | -         | -     | -       | -     |
| NGLY1_KO_2 | 55.55     | -1    | 0.11    | -0.08 |
| NGLY1_2    | -         | -     | -       | -     |

Supplement: Supplementary file 6770 [file 1]

IPI00152998.3|LRRC40

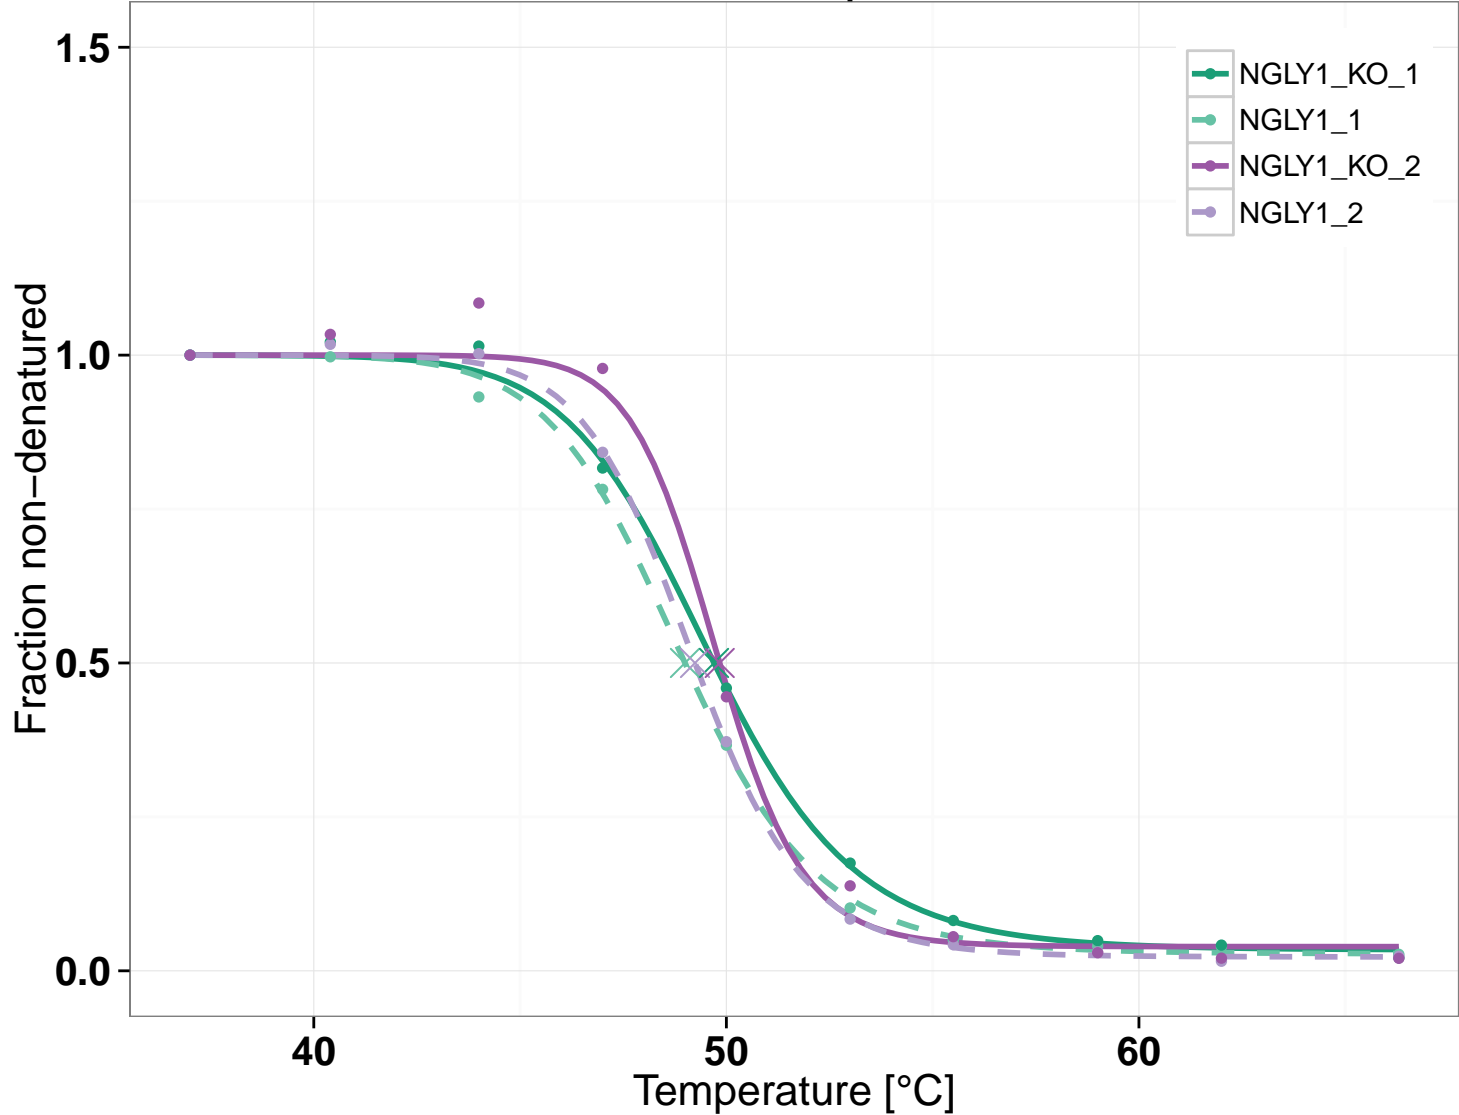

|            | meltPoint | slope | plateau | R2   |
|------------|-----------|-------|---------|------|
| NGLY1_KO_1 | 49.7      | -0.14 | 0.03    | 1    |
| NGLY1_1    | 49        | -0.15 | 0.03    | 1    |
| NGLY1_KO_2 | 49.84     | -0.23 | 0.04    | 0.99 |
| NGLY1_2    | 49.24     | -0.18 | 0.02    | 1    |

Supplement: Supplementary file 6771 [file 1]

IPI00105518.5|MARCH6

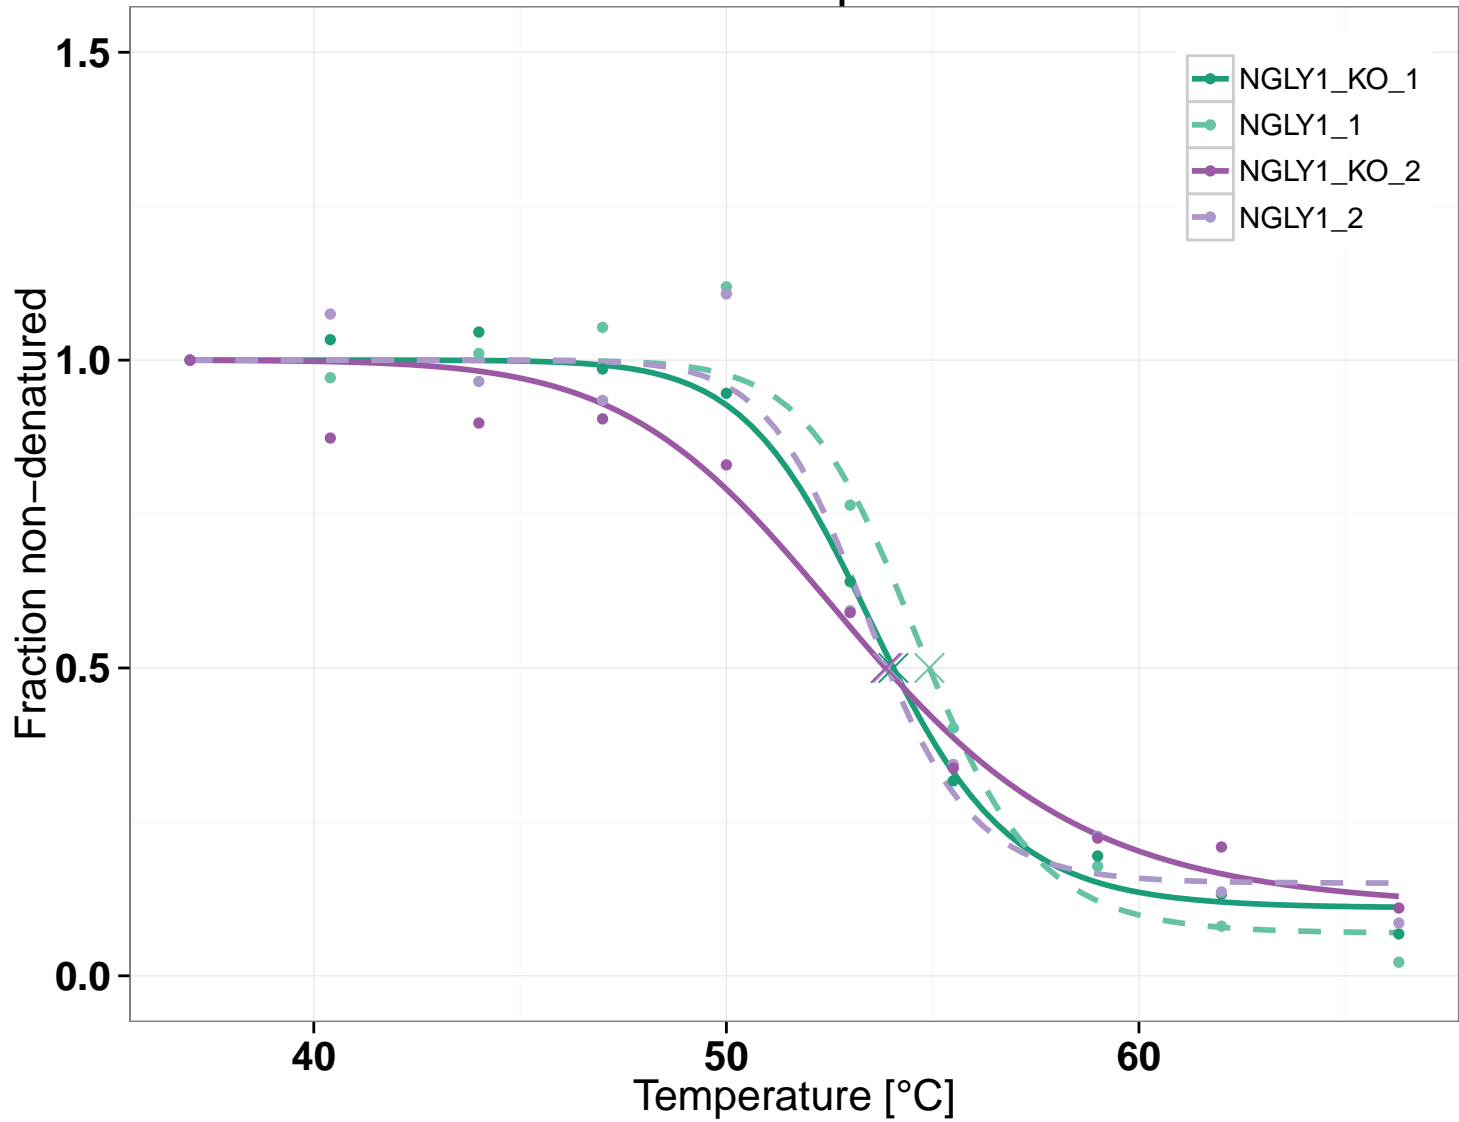

|            | meltPoint | slope  | plateau | R2   |
|------------|-----------|--------|---------|------|
| NGLY1_KO_1 | 54.05     | -0.14  | 0.11    | 0.99 |
| NGLY1_1    | 54.92     | -0.17  | 0.07    | 0.98 |
| NGLY1_KO_2 | 53.86     | -0.079 | 0.11    | 0.97 |
| NGLY1_2    | 53.91     | -0.17  | 0.15    | 0.97 |

Supplement: Supplementary file 6772 [file 1]

IPI00412741.1|SFXN4

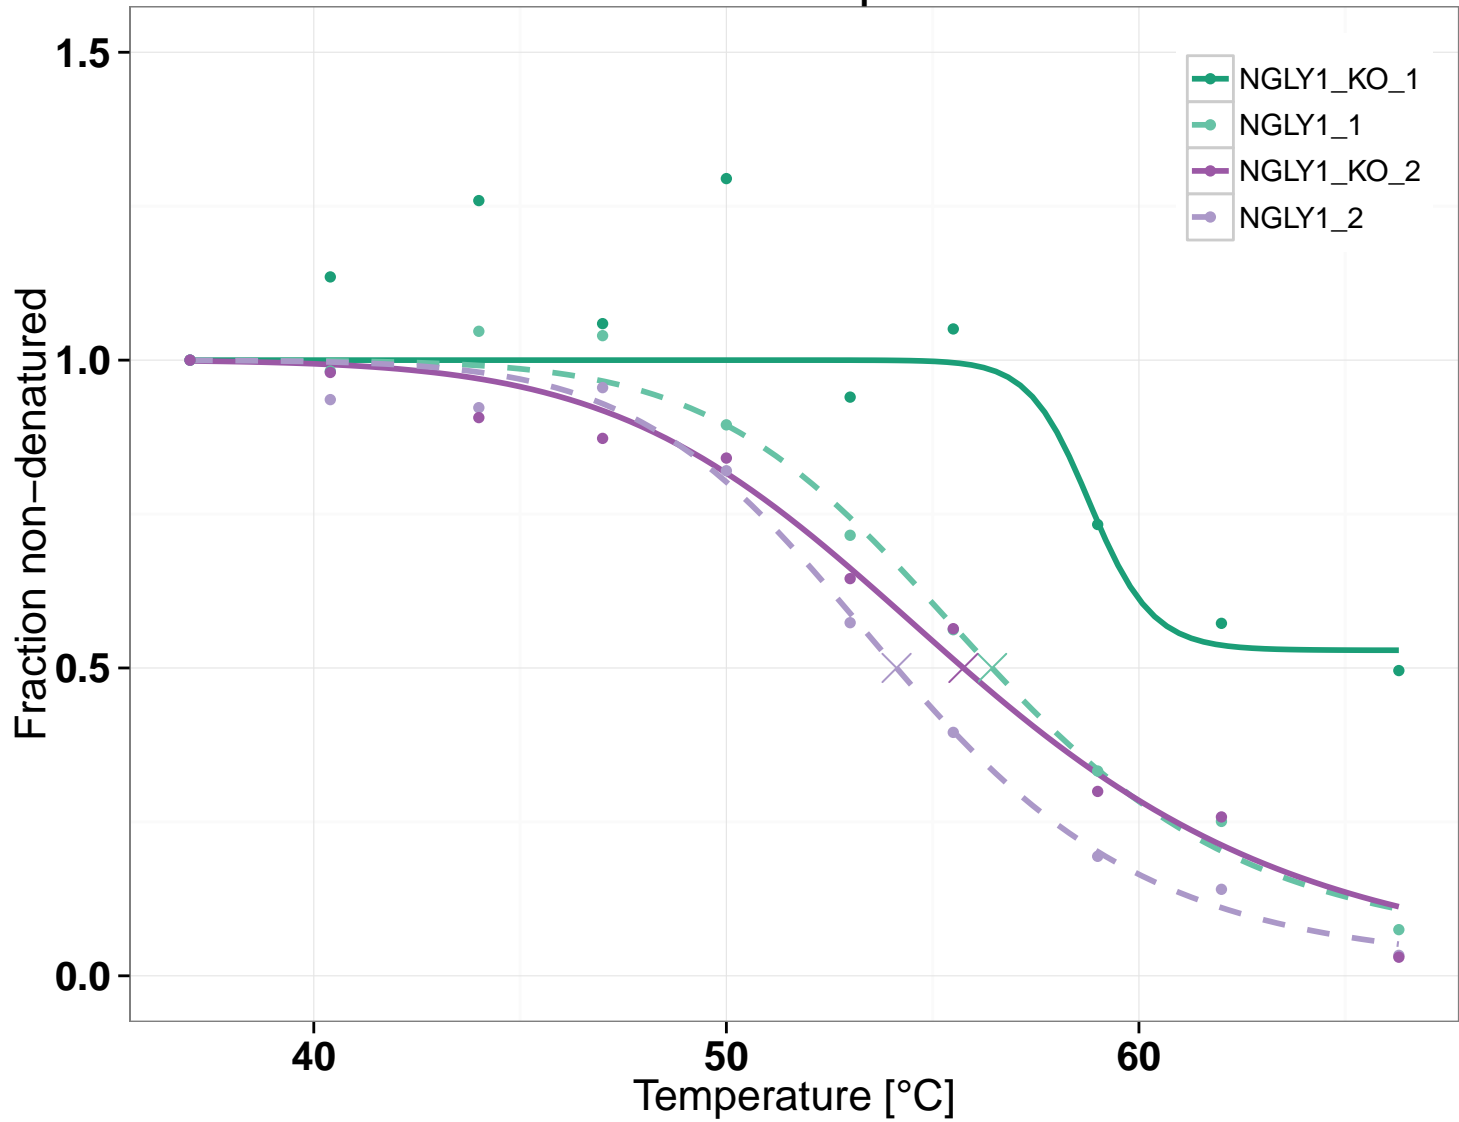

|            | meltPoint | slope  | plateau | R2   |
|------------|-----------|--------|---------|------|
| NGLY1_KO_1 | -         | -0.16  | 0.53    | 0.72 |
| NGLY1_1    | 56.44     | -0.073 | 0.04    | 0.99 |
| NGLY1_KO_2 | 55.75     | -0.06  | 0       | 0.98 |
| NGLY1_2    | 54.13     | -0.079 | 0.01    | 0.99 |

Supplement: Supplementary file 6773 [file 1]

# IPI00183508.3|TWF1

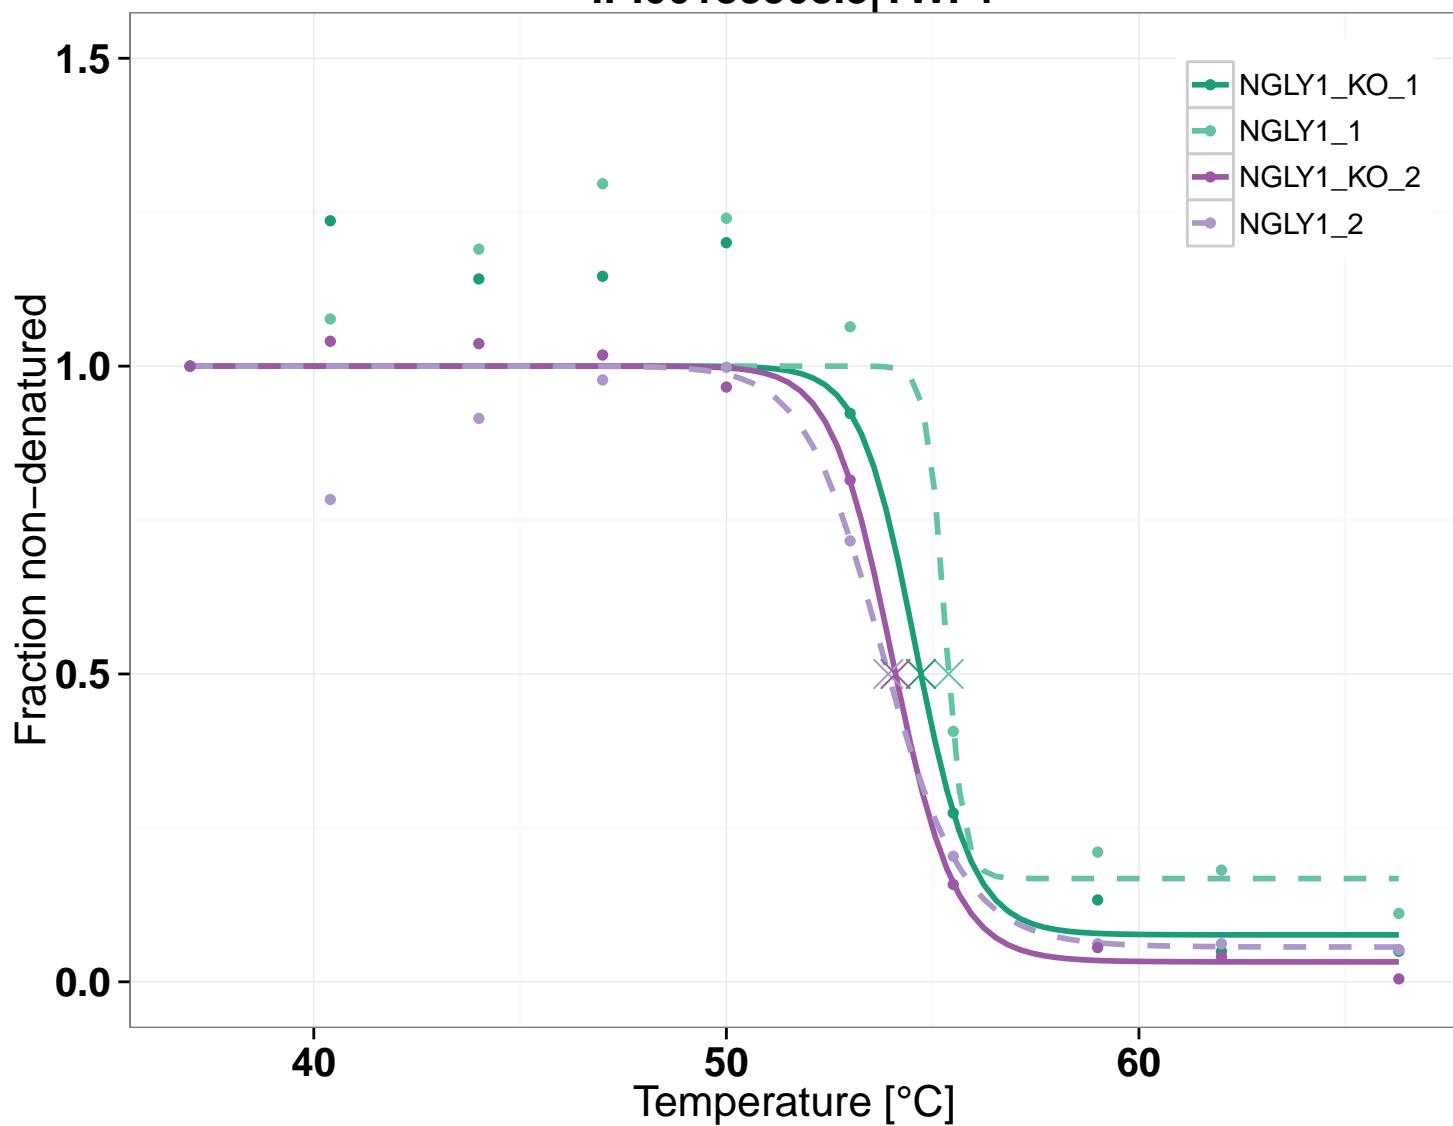

|            | meltPoint | slope | plateau | R2   |
|------------|-----------|-------|---------|------|
| NGLY1_KO_1 | 54.72     | -0.34 | 0.08    | 0.94 |
| NGLY1_1    | 55.39     | -0.94 | 0.17    | 0.91 |
| NGLY1_KO_2 | 54.1      | -0.32 | 0.03    | 1    |
| NGLY1_2    | 53.93     | -0.24 | 0.06    | 0.97 |

Supplement: Supplementary file 6774 [file 1]

IPI00748099.1|C22ORF9

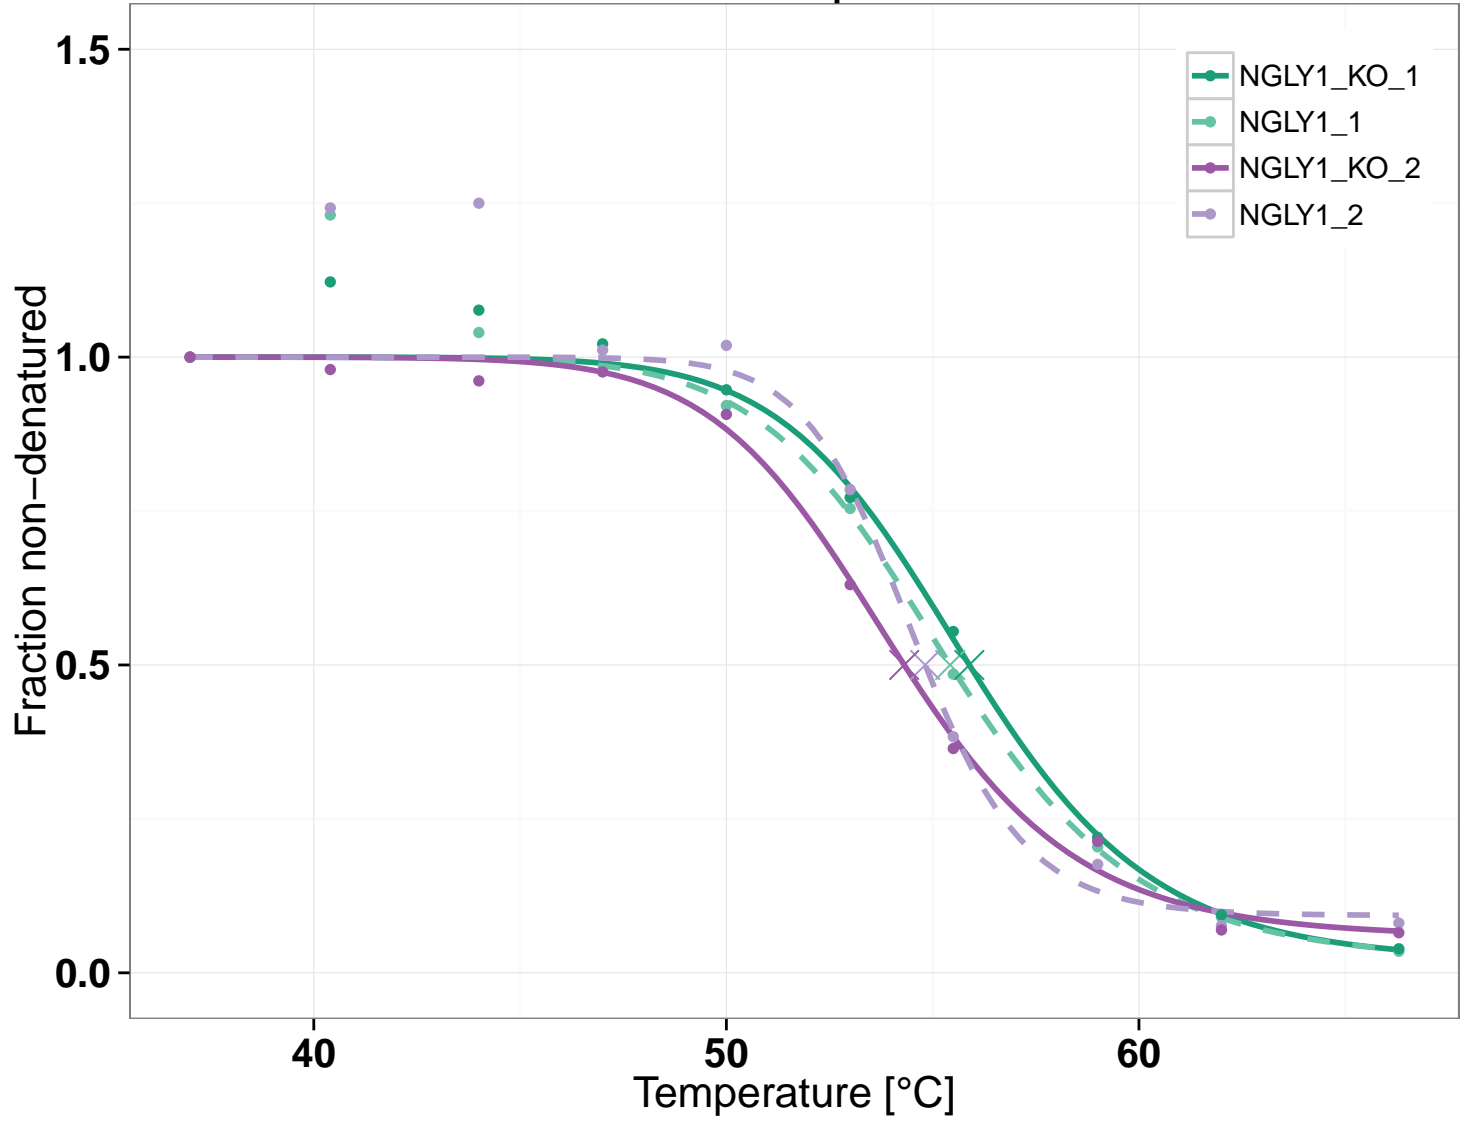

|            | meltPoint | slope | plateau | R2   |
|------------|-----------|-------|---------|------|
| NGLY1_KO_1 | 55.89     | -0.11 | 0.02    | 0.99 |
| NGLY1_1    | 55.42     | -0.11 | 0.02    | 0.97 |
| NGLY1_KO_2 | 54.31     | -0.11 | 0.06    | 1    |
| NGLY1_2    | 54.82     | -0.17 | 0.09    | 0.94 |

Supplement: Supplementary file 6775 [file 1]

IPI00871191.1|GNAS

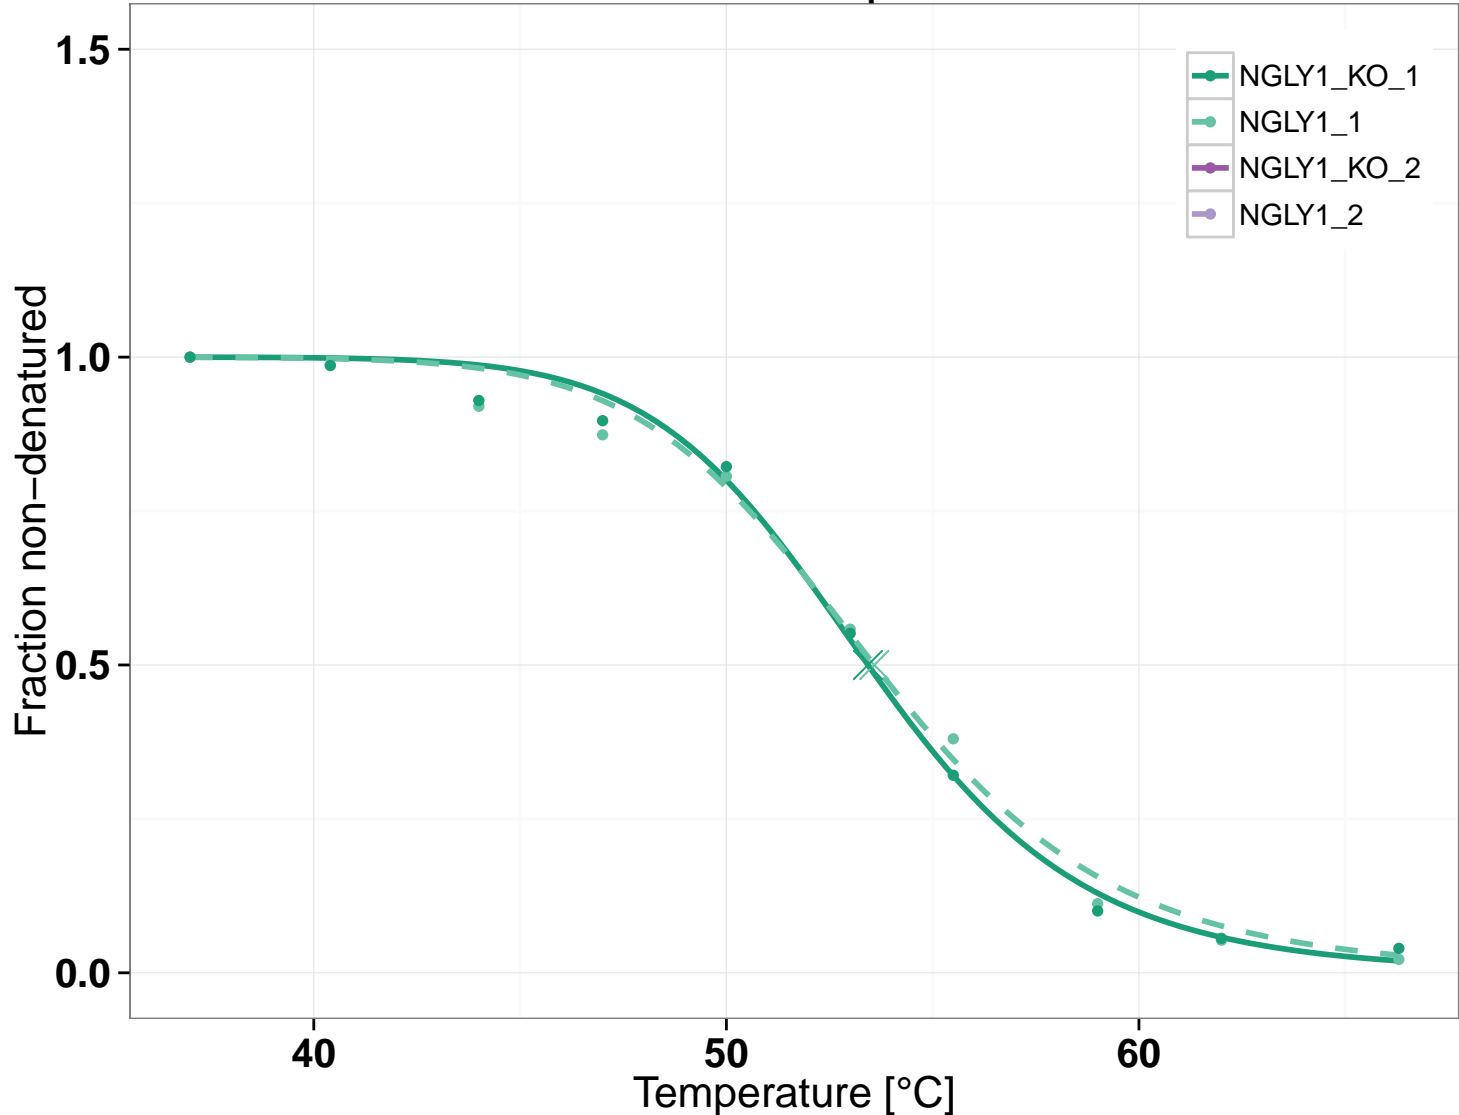

|            | meltPoint | slope  | plateau | R2   |
|------------|-----------|--------|---------|------|
| NGLY1_KO_1 | 53.43     | -0.095 | 0       | 1    |
| NGLY1_1    | 53.59     | -0.087 | 0       | 0.99 |
| NGLY1_KO_2 | -         | -      | -       | -    |
| NGLY1_2    | -         | -      | -       | -    |

Supplement: Supplementary file 6776 [file 1]

# IPI00022649.3|SLC12A2

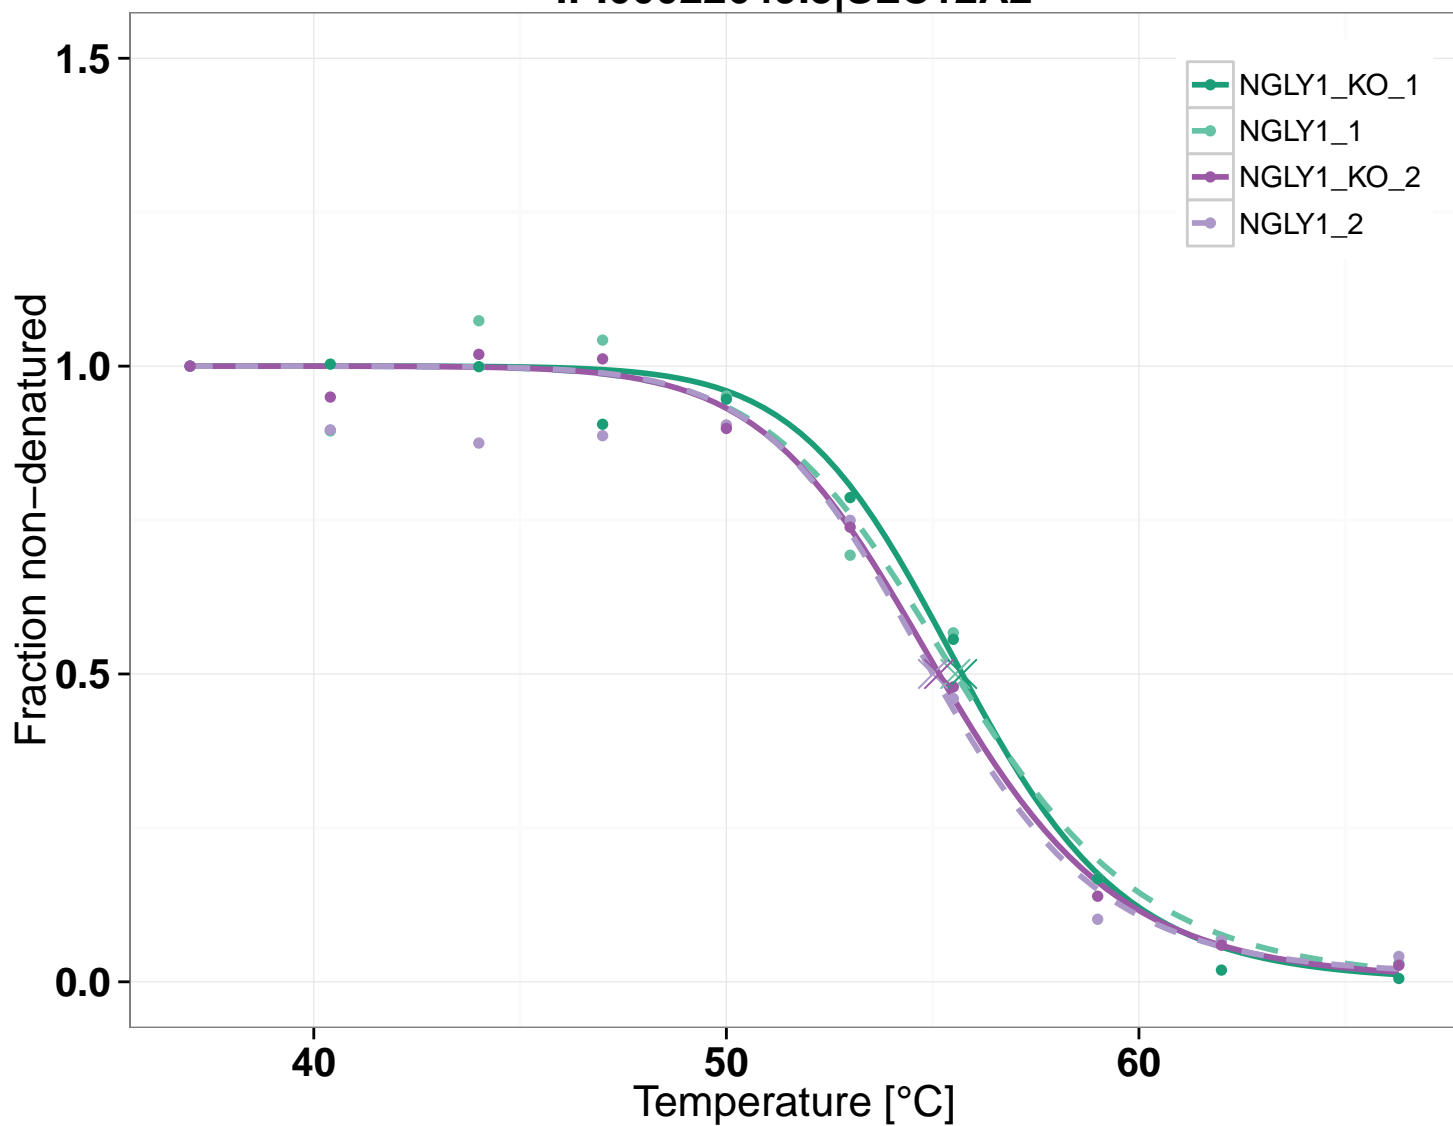

|            | meltPoint | slope | plateau | R2   |
|------------|-----------|-------|---------|------|
| NGLY1_KO_1 | 55.72     | -0.13 | 0       | 0.99 |
| NGLY1_1    | 55.55     | -0.11 | 0       | 0.98 |
| NGLY1_KO_2 | 55.16     | -0.12 | 0       | 1    |
| NGLY1_2    | 55.01     | -0.12 | 0.01    | 0.97 |

Supplement: Supplementary file 6777 [file 1]

IPI00375676.3|FTL

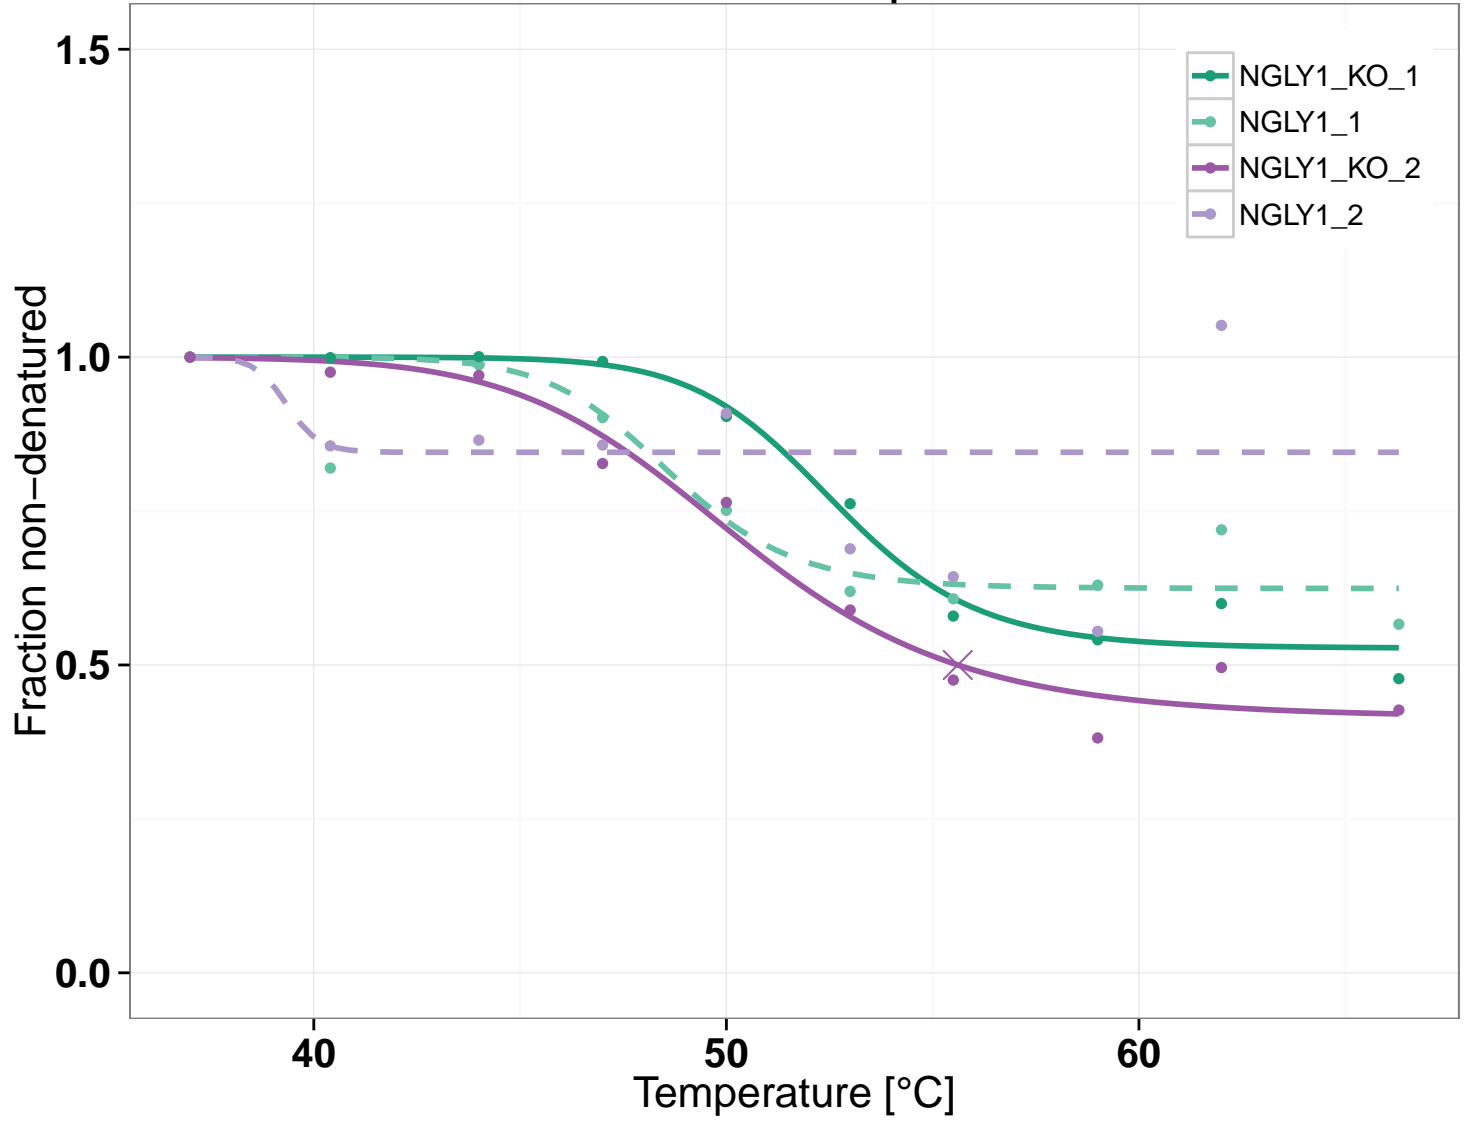

|            | meltPoint | slope  | plateau | R2   |
|------------|-----------|--------|---------|------|
| NGLY1_KO_1 | -         | -0.068 | 0.53    | 0.98 |
| NGLY1_1    | -         | -0.062 | 0.62    | 0.8  |
| NGLY1_KO_2 | 55.61     | -0.054 | 0.41    | 0.97 |
| NGLY1_2    | -         | -0.099 | 0.85    | 0.06 |

Supplement: Supplementary file 6778 [file 1]

IPI00549612.2|ANKRD49

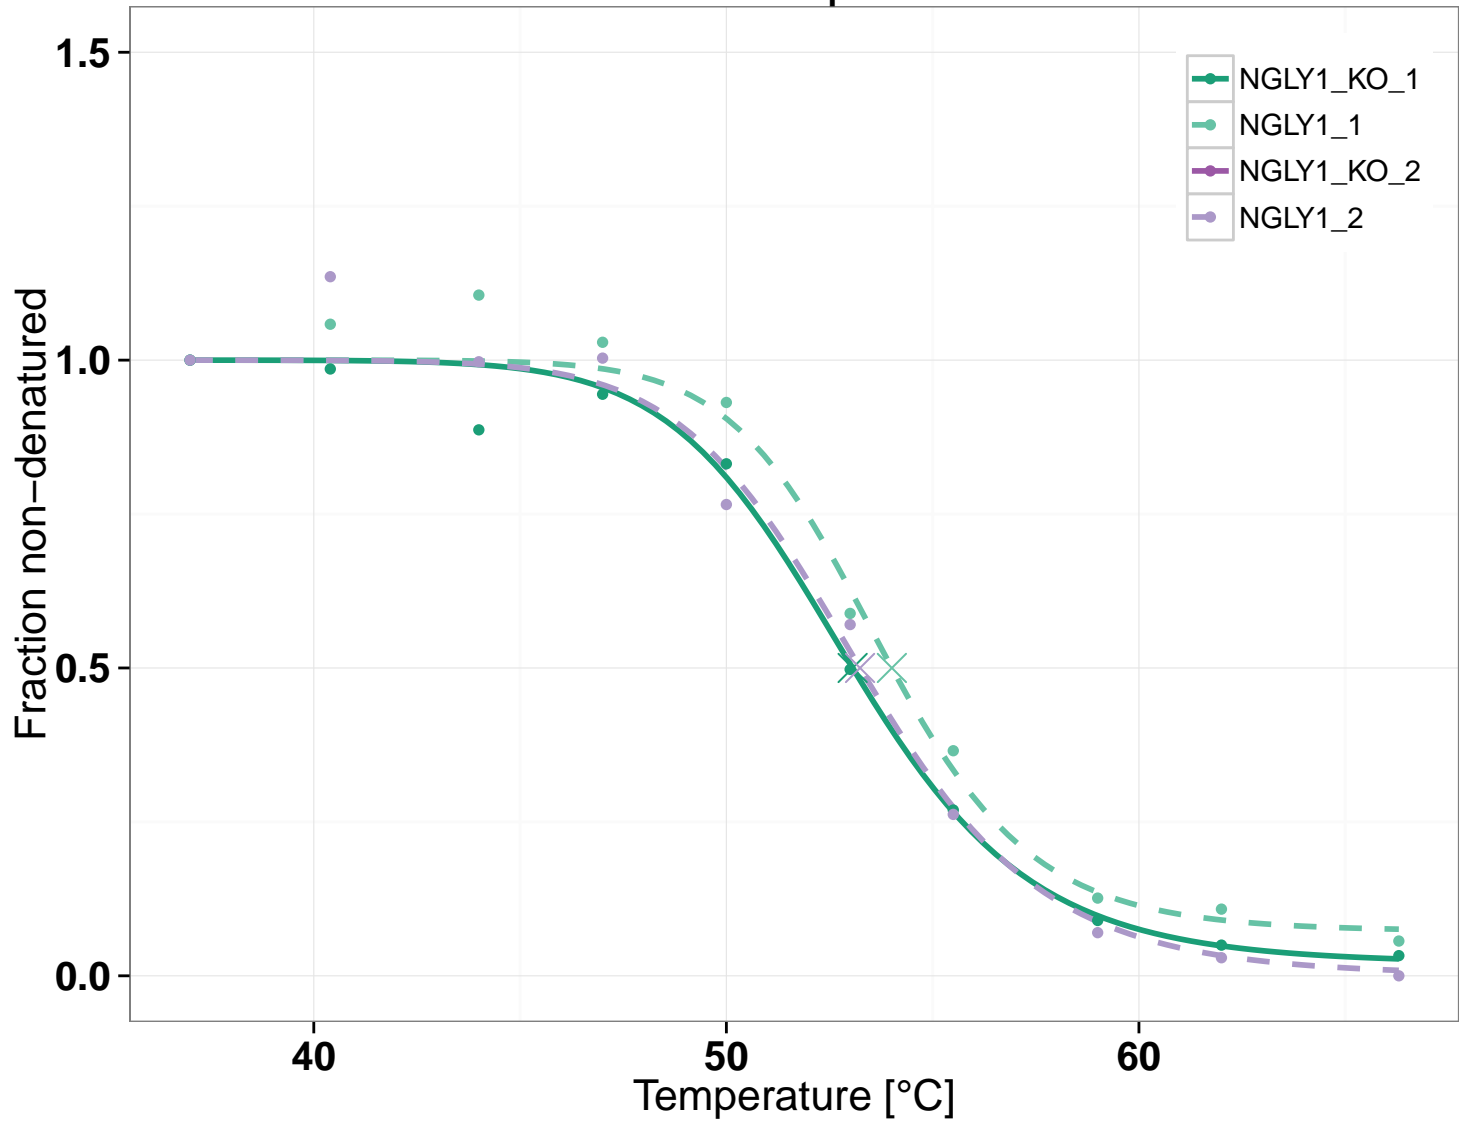

|            | meltPoint | slope | plateau | R2   |
|------------|-----------|-------|---------|------|
| NGLY1_KO_1 | 53.06     | -0.11 | 0.02    | 0.99 |
| NGLY1_1    | 54.01     | -0.13 | 0.07    | 0.99 |
| NGLY1_KO_2 | -         | -     | -       | -    |
| NGLY1_2    | 53.24     | -0.11 | 0       | 0.99 |

Supplement: Supplementary file 6779 [file 1]

IPI00176157.3|C5ORF37

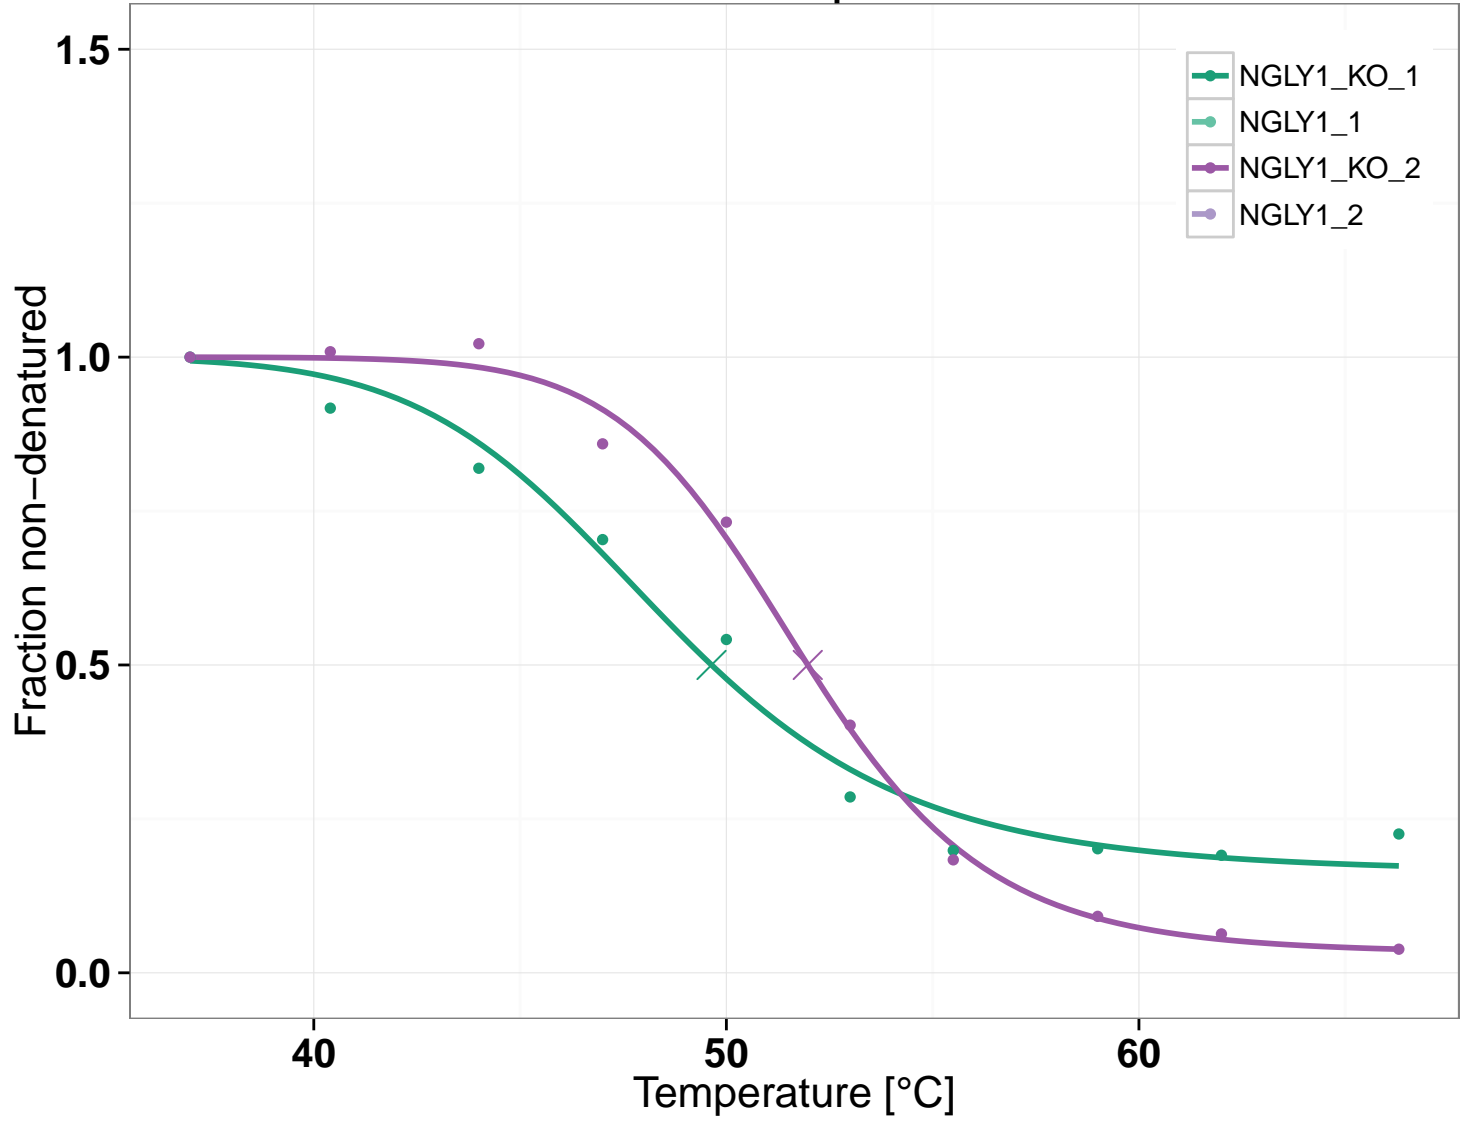

|            | meltPoint | slope | plateau | R2   |
|------------|-----------|-------|---------|------|
| NGLY1_KO_1 | 49.64     | -0.07 | 0.16    | 0.98 |
| NGLY1_1    | -         | -     | -       | -    |
| NGLY1_KO_2 | 51.97     | -0.11 | 0.03    | 1    |
| NGLY1_2    | -         | -     | -       | -    |

Supplement: Supplementary file 6780 [file 1]

IPI00410140.2|AMIGO1

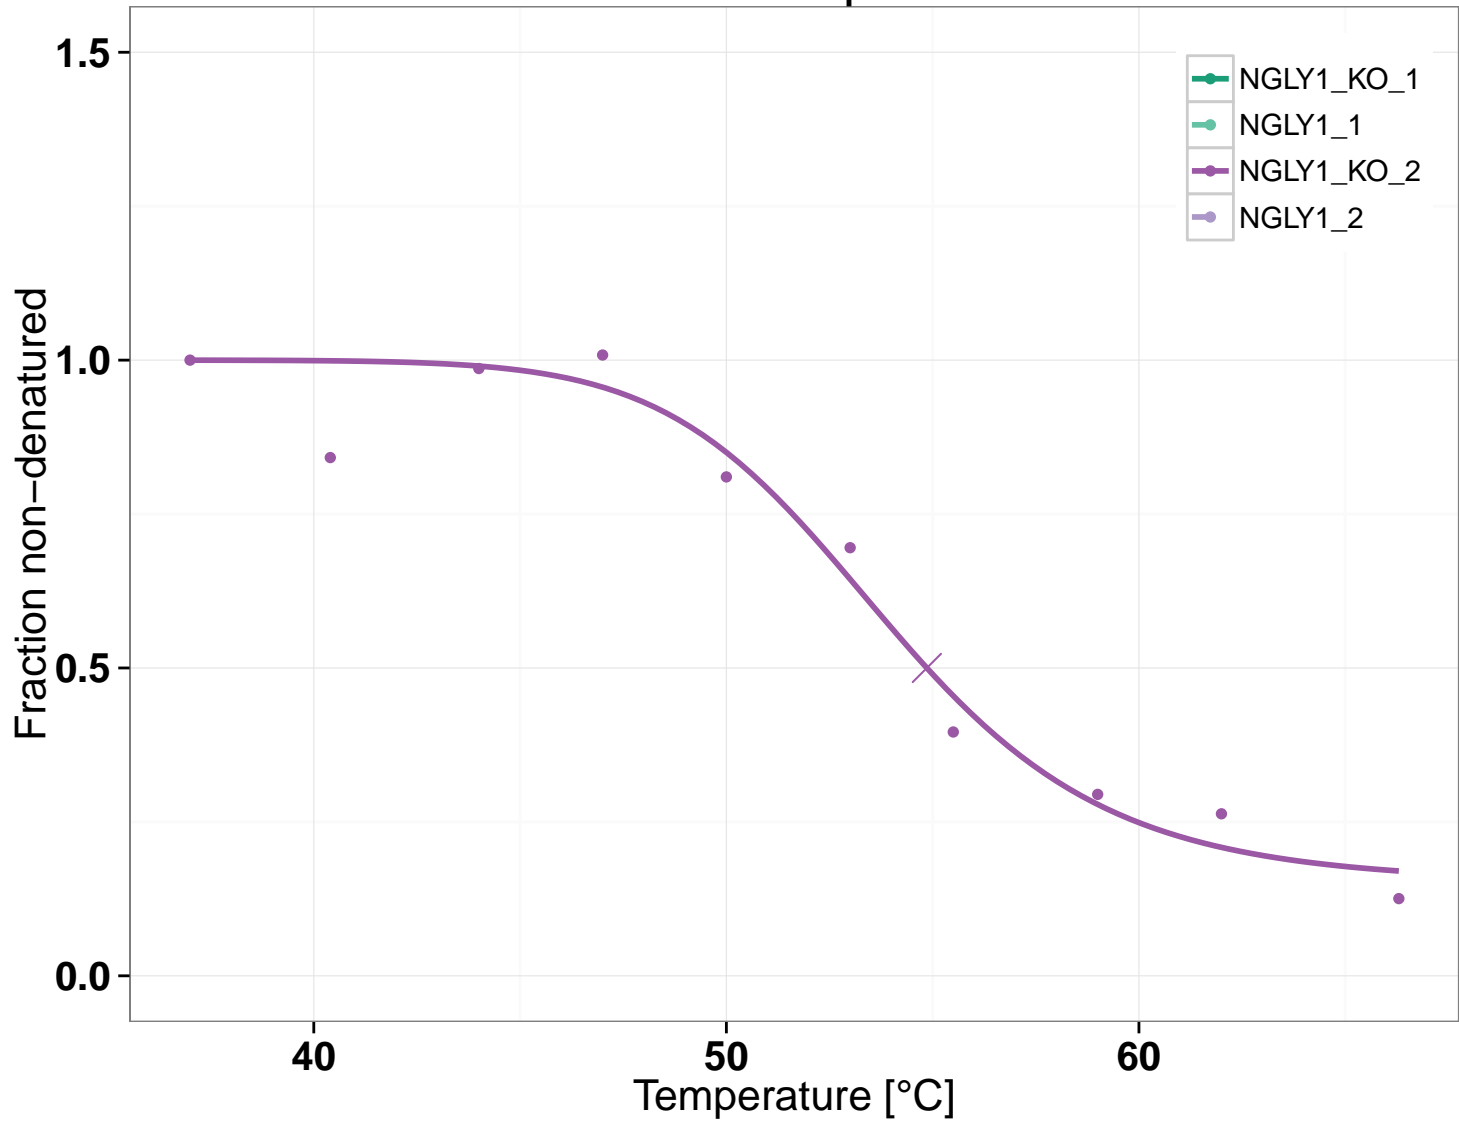

|            | meltPoint | slope  | plateau | R2   |
|------------|-----------|--------|---------|------|
| NGLY1_KO_1 | —         | —      | —       | —    |
| NGLY1_1    | —         | —      | —       | —    |
| NGLY1_KO_2 | 54.86     | -0.079 | 0.15    | 0.96 |
| NGLY1_2    | —         | —      | —       | —    |

Supplement: Supplementary file 6781 [file 1]

# IPI00181617.4|RBM34

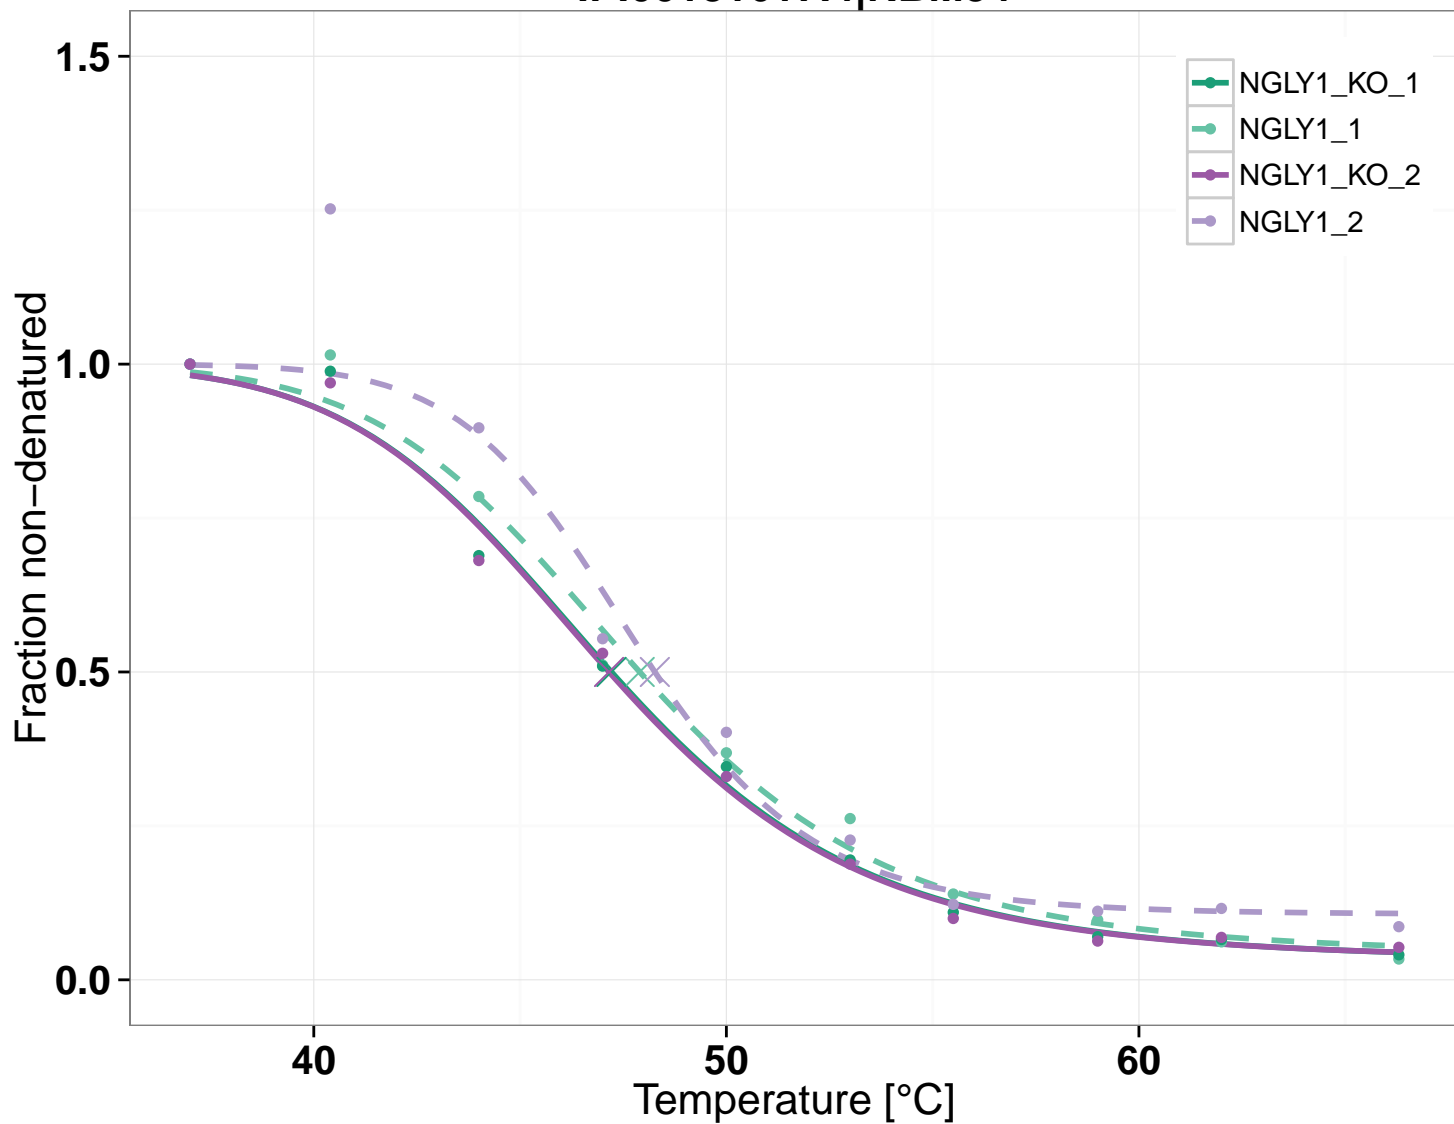

|            | meltPoint | slope  | plateau | R2   |
|------------|-----------|--------|---------|------|
| NGLY1_KO_1 | 47.21     | -0.077 | 0.03    | 0.99 |
| NGLY1_1    | 47.9      | -0.077 | 0.04    | 0.99 |
| NGLY1_KO_2 | 47.16     | -0.077 | 0.03    | 0.99 |
| NGLY1_2    | 48.27     | -0.11  | 0.11    | 0.95 |

Supplement: Supplementary file 6782 [file 1]

IPI00023409.1|UPF3B

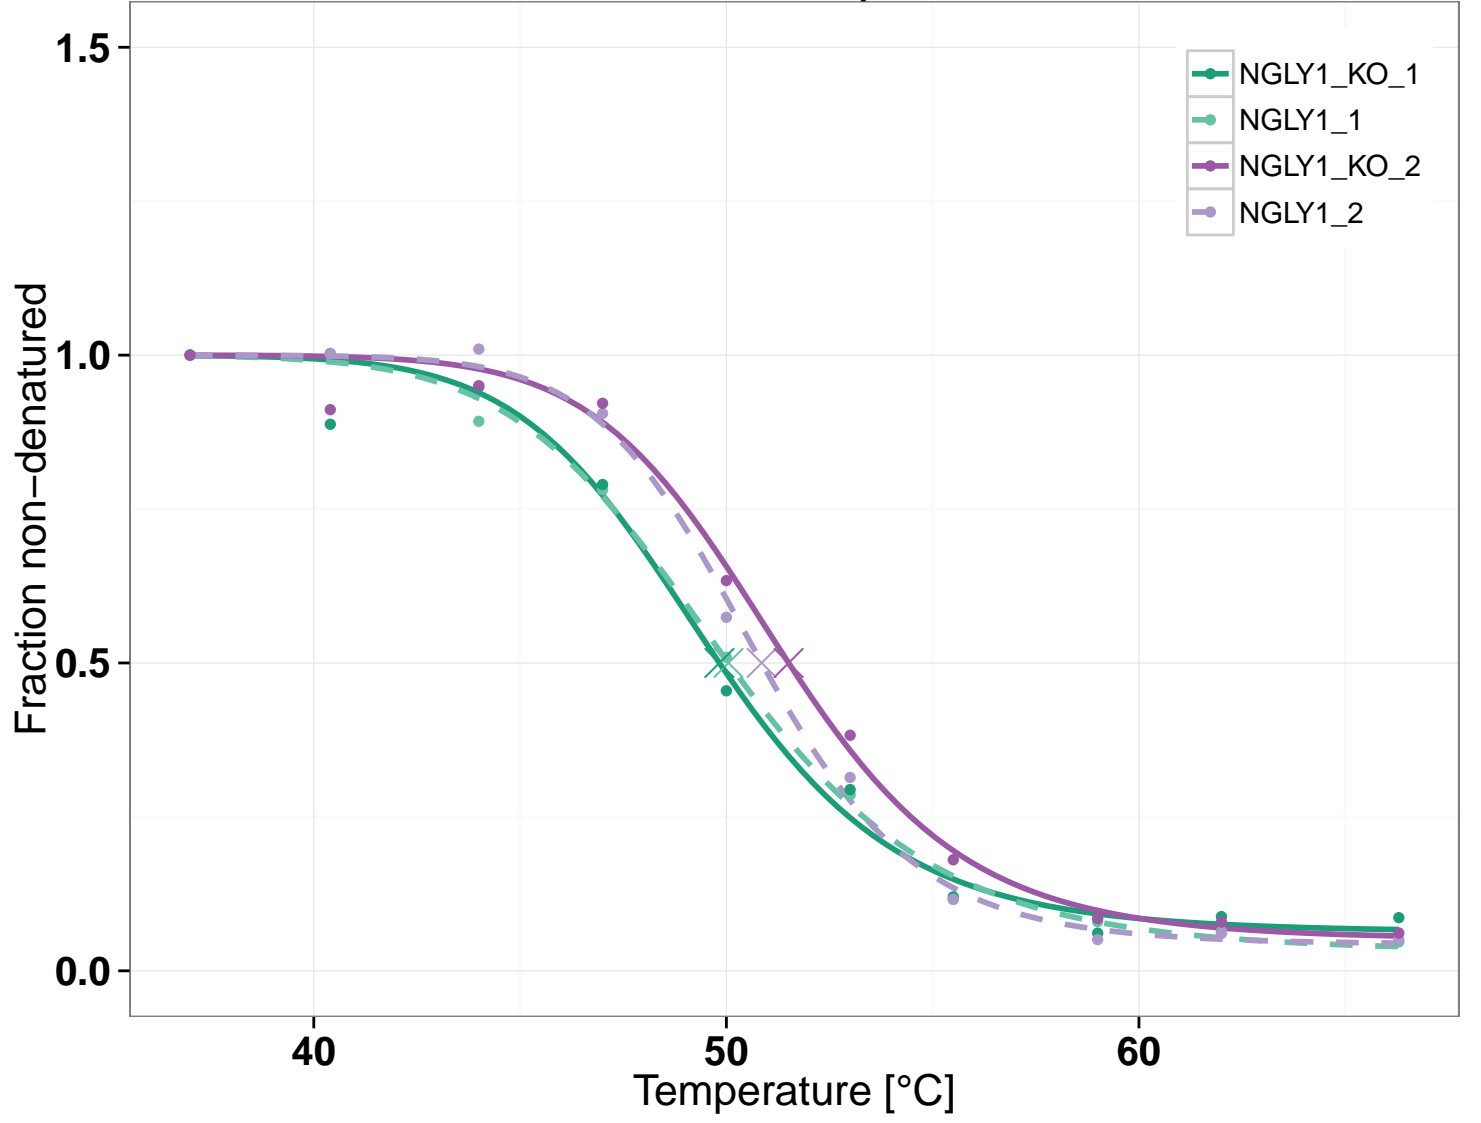

|            | meltPoint | slope  | plateau | R2   |
|------------|-----------|--------|---------|------|
| NGLY1_KO_1 | 49.83     | -0.1   | 0.06    | 0.99 |
| NGLY1_1    | 50.05     | -0.094 | 0.03    | 1    |
| NGLY1_KO_2 | 51.51     | -0.11  | 0.05    | 0.99 |
| NGLY1_2    | 50.86     | -0.12  | 0.04    | 1    |

Supplement: Supplementary file 6783 [file 1]

IPI00032911.3|TBPL1

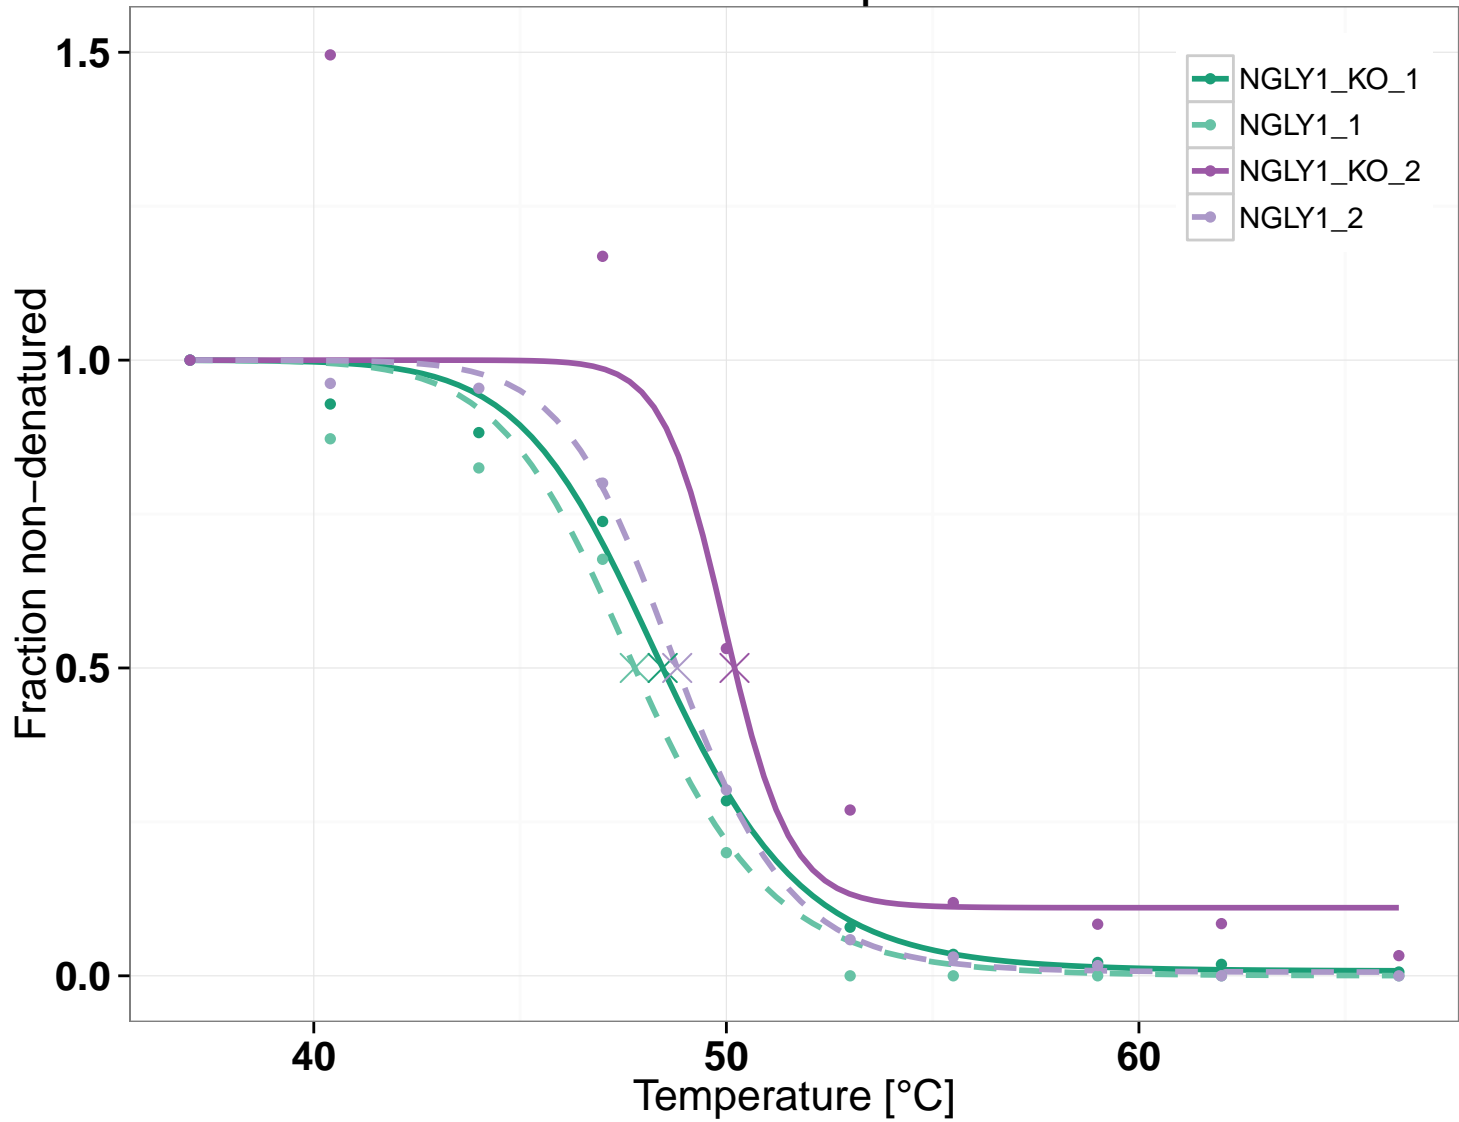

|            | meltPoint | slope | plateau | R2   |
|------------|-----------|-------|---------|------|
| NGLY1_KO_1 | 48.46     | -0.14 | 0.01    | 0.99 |
| NGLY1_1    | 47.78     | -0.15 | 0       | 0.98 |
| NGLY1_KO_2 | 50.2      | -0.29 | 0.11    | 0.83 |
| NGLY1_2    | 48.81     | -0.18 | 0.01    | 1    |

Supplement: Supplementary file 6784 [file 1]

# IPI00386294.2|TOMM6

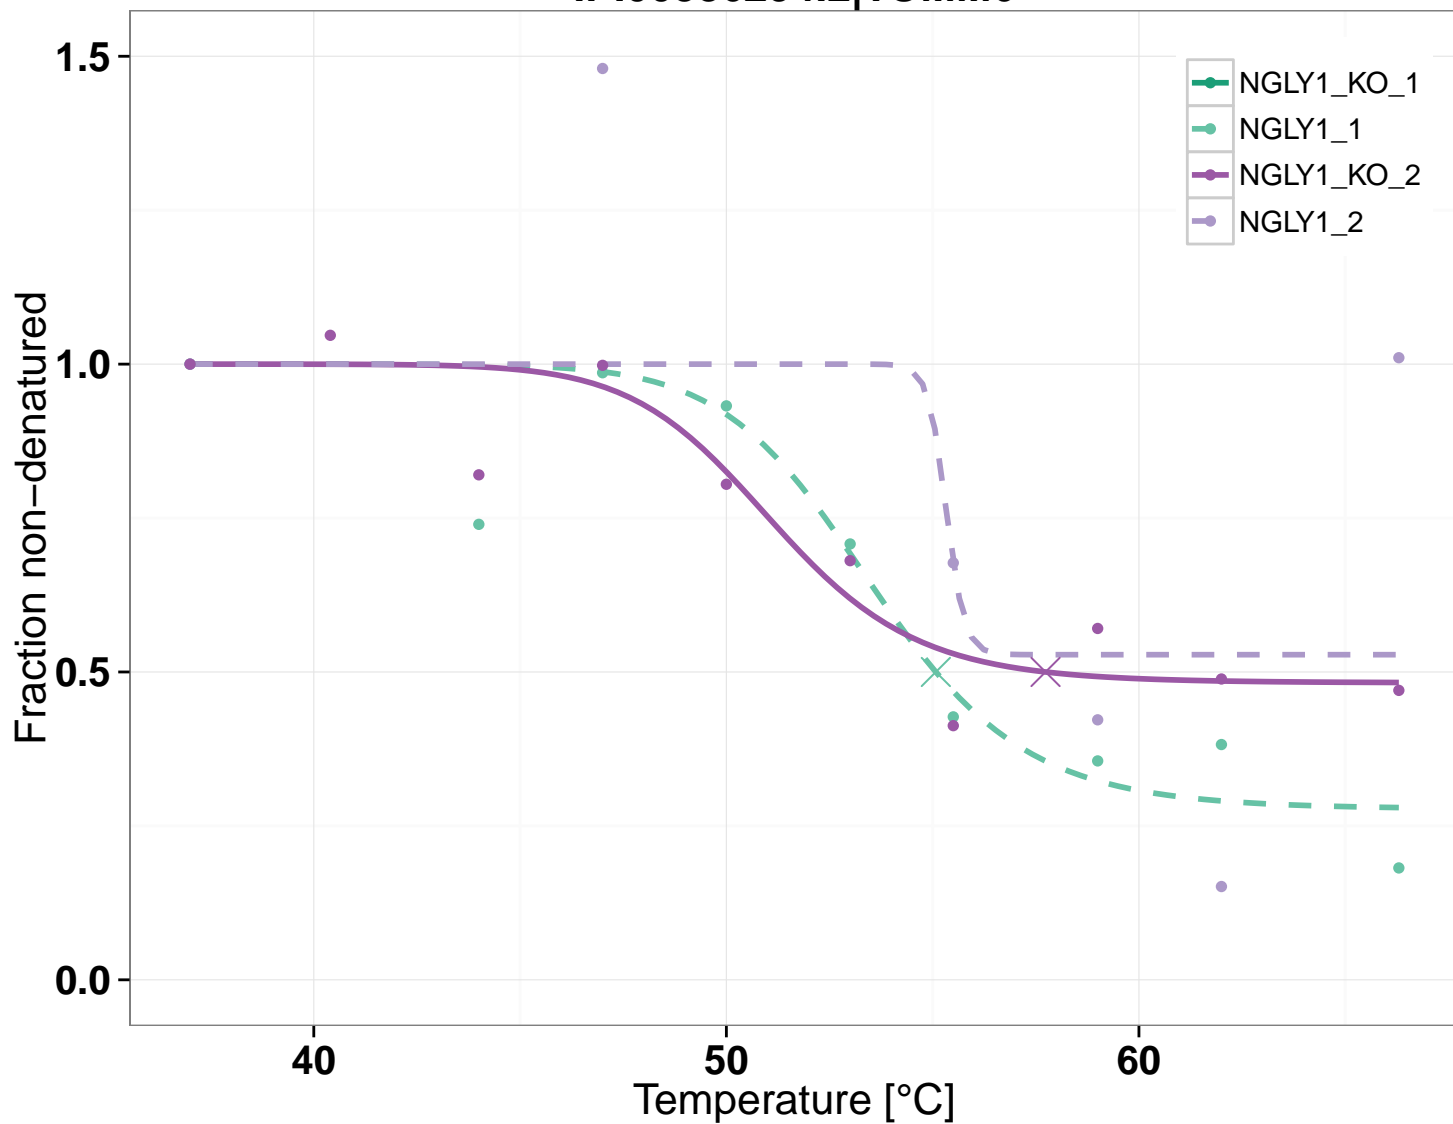

|            | meltPoint | slope  | plateau | R2   |
|------------|-----------|--------|---------|------|
| NGLY1_KO_1 | –         | –      | –       | –    |
| NGLY1_1    | 55.08     | –0.099 | 0.28    | 0.56 |
| NGLY1_KO_2 | 57.74     | –0.074 | 0.48    | 0.89 |
| NGLY1_2    | –         | –0.53  | 0.53    | 0.23 |

Supplement: Supplementary file 6785 [file 1]

IPI00006379.1|NOP5/NOP58

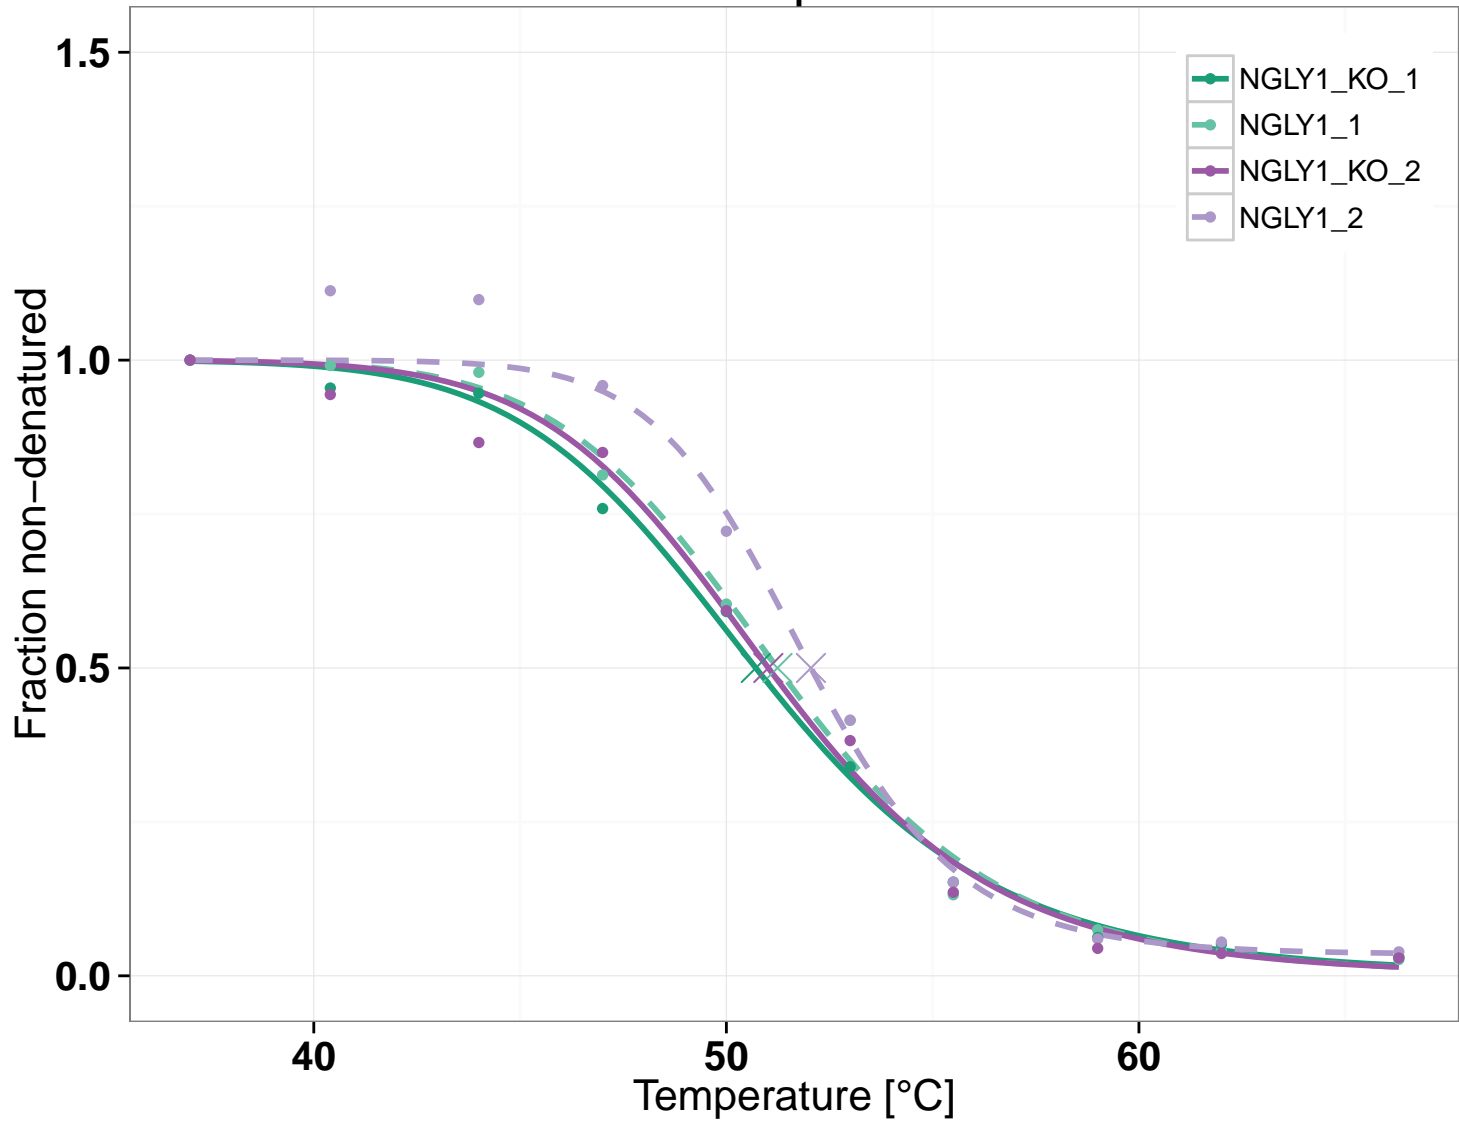

|            | meltPoint | slope  | plateau | R2   |
|------------|-----------|--------|---------|------|
| NGLY1_KO_1 | 50.71     | -0.086 | 0       | 1    |
| NGLY1_1    | 51.24     | -0.092 | 0       | 0.99 |
| NGLY1_KO_2 | 51.02     | -0.091 | 0       | 0.99 |
| NGLY1_2    | 52.05     | -0.13  | 0.03    | 0.99 |

Supplement: Supplementary file 6786 [file 1]

IPI00215911.3|APEX1

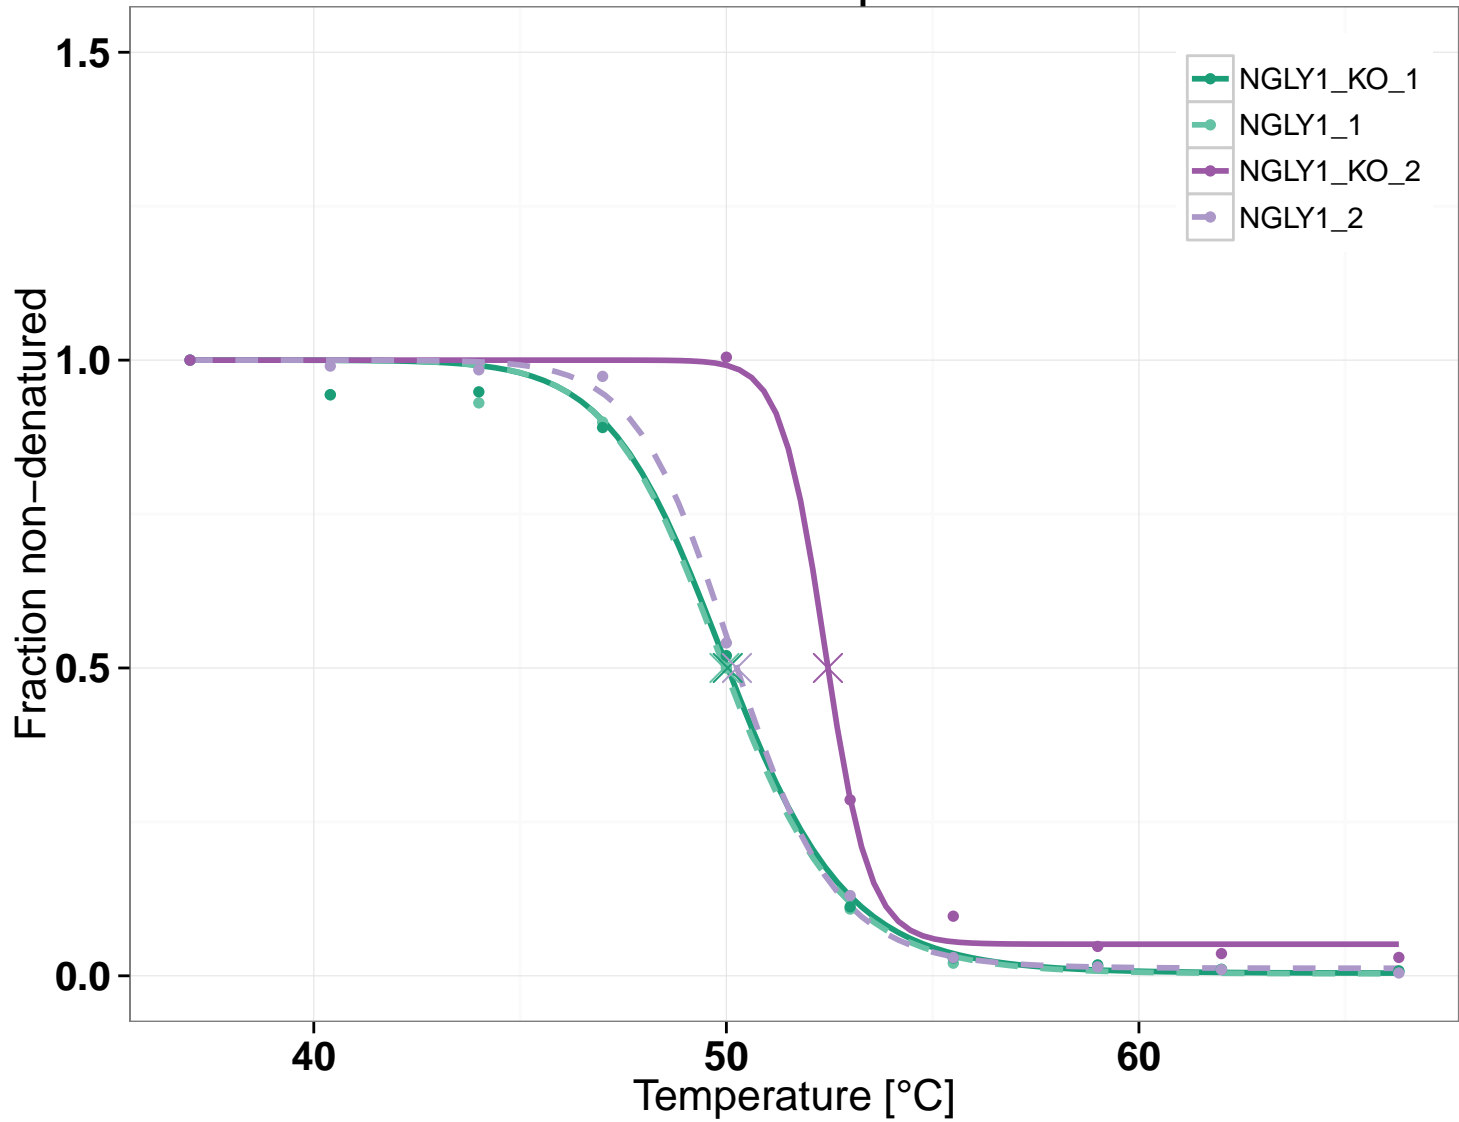

|            | meltPoint | slope | plateau | R2  |
|------------|-----------|-------|---------|-----|
| NGLY1_KO_1 | 50.03     | -0.17 | 0       | 1   |
| NGLY1_1    | 49.95     | -0.18 | 0       | 1   |
| NGLY1_KO_2 | 52.46     | -0.44 | 0.05    | 0.7 |
| NGLY1_2    | 50.26     | -0.2  | 0.01    | 1   |

Supplement: Supplementary file 6787 [file 1]

IPI00793906.1|SUDS3

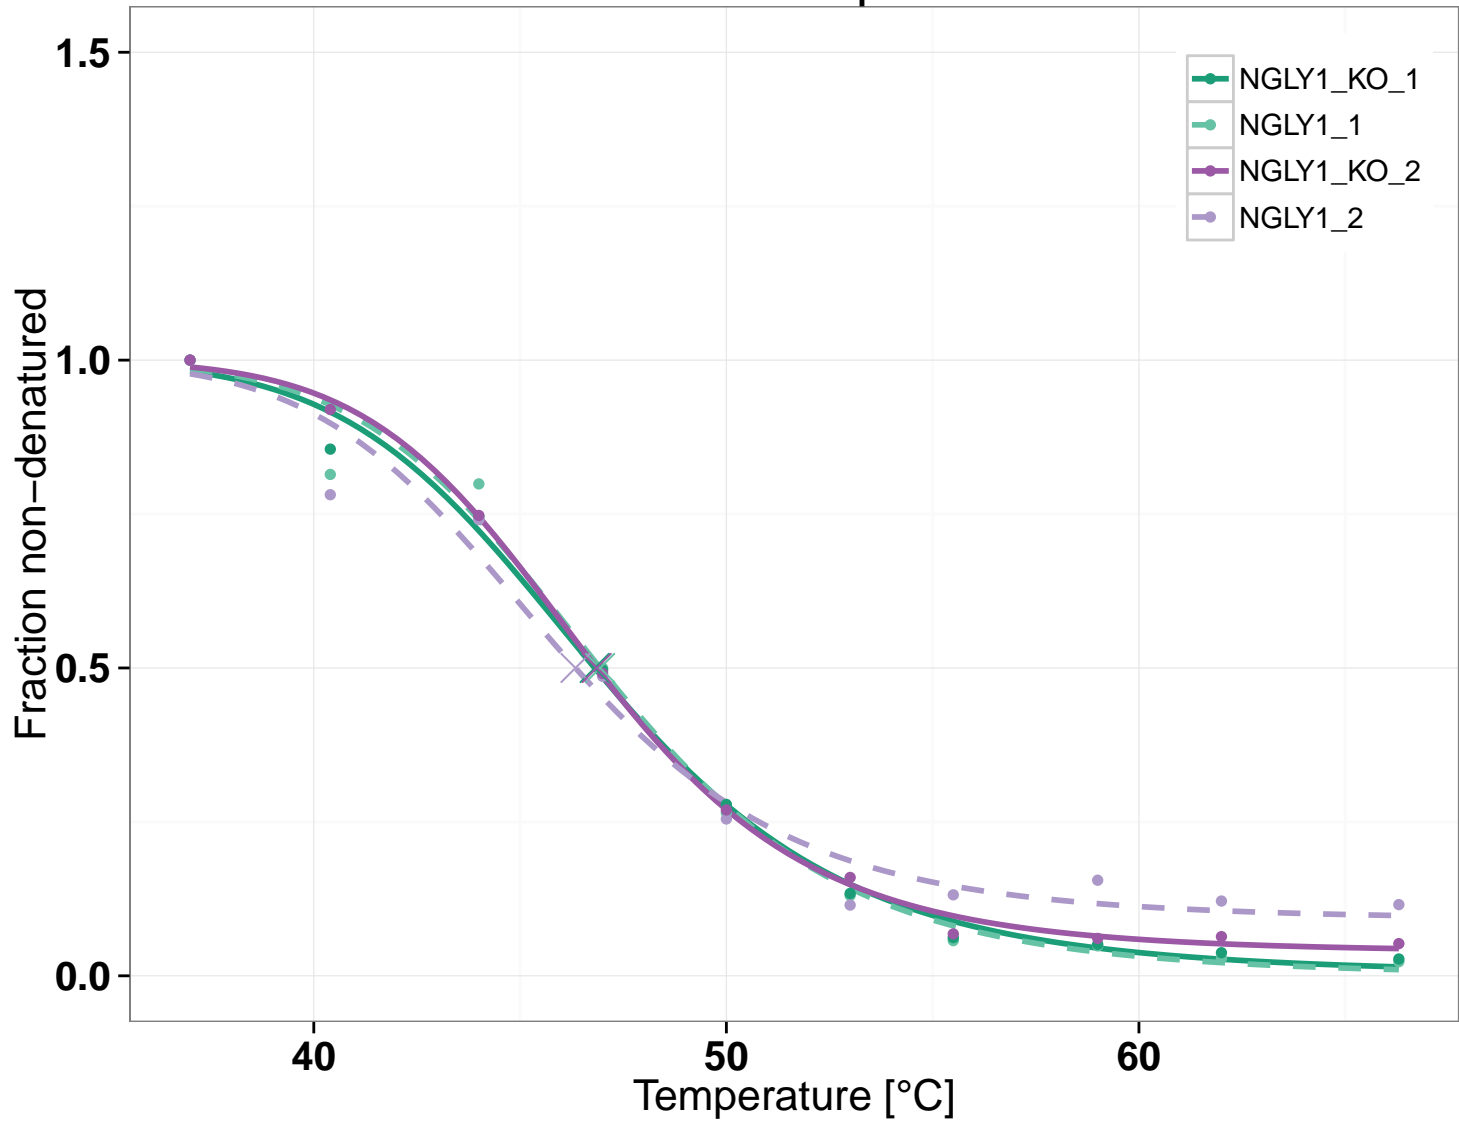

|            | meltPoint | slope  | plateau | R2   |
|------------|-----------|--------|---------|------|
| NGLY1_KO_1 | 46.81     | -0.082 | 0       | 1    |
| NGLY1_1    | 46.94     | -0.085 | 0       | 0.99 |
| NGLY1_KO_2 | 46.86     | -0.089 | 0.04    | 1    |
| NGLY1_2    | 46.34     | -0.079 | 0.09    | 0.97 |

Supplement: Supplementary file 6788 [file 1]

IPI00291401.5|C1ORF52

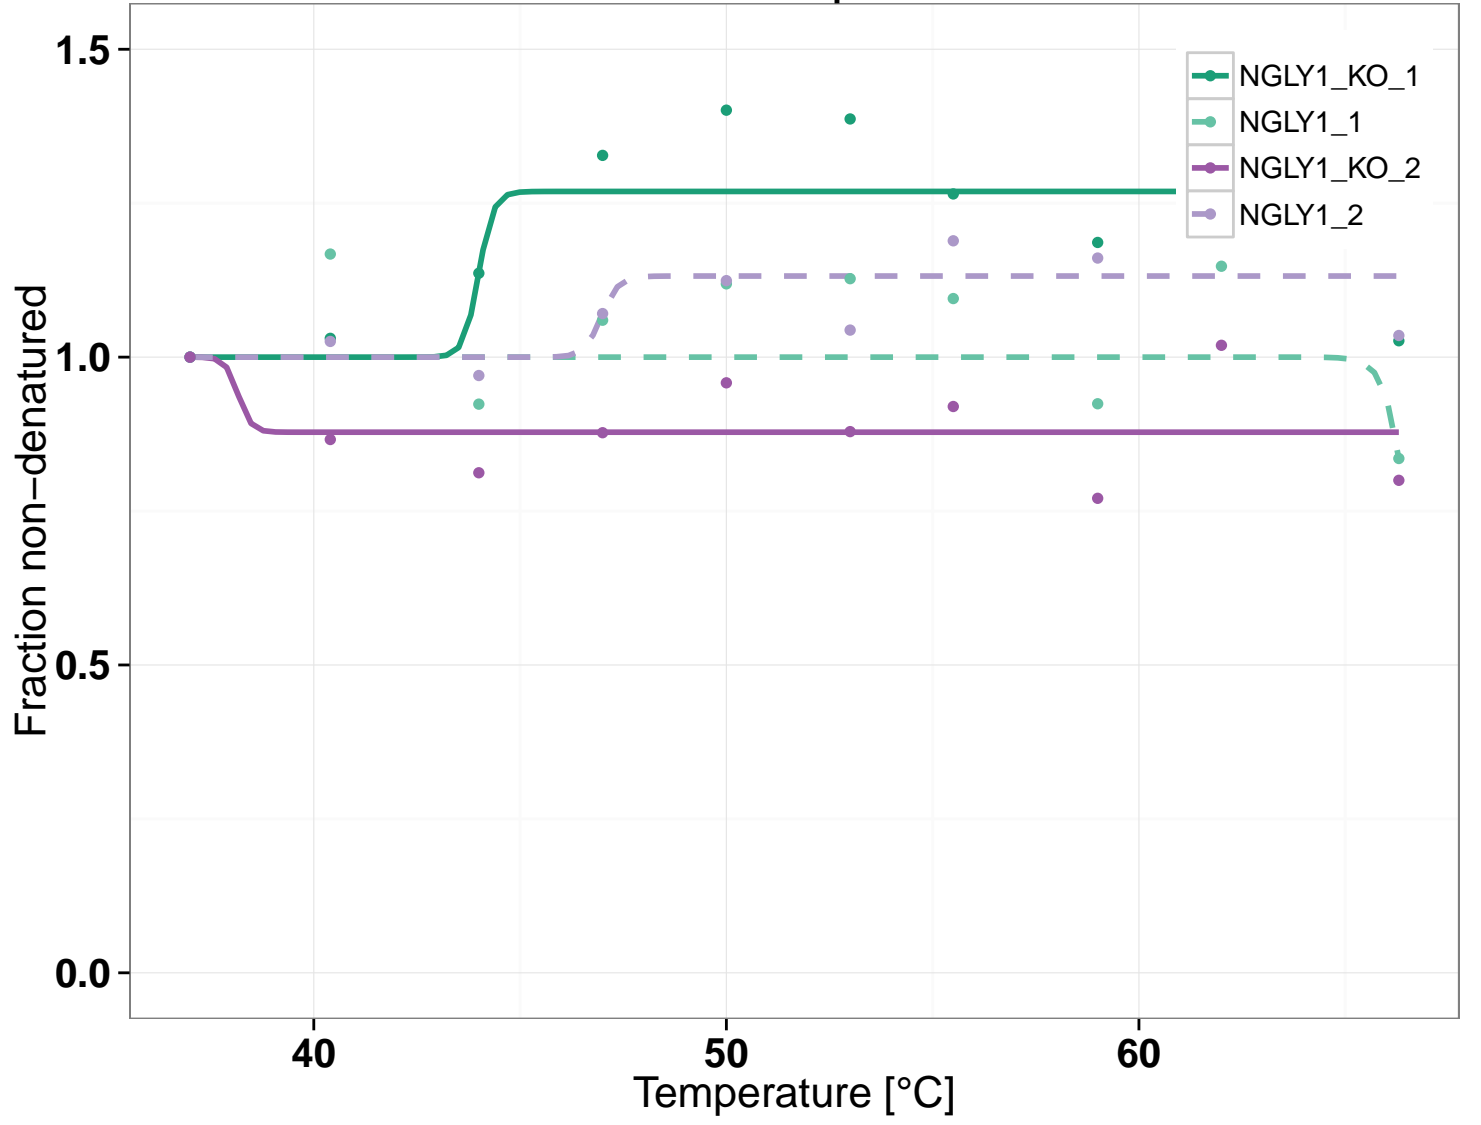

|            | meltPoint | slope | plateau | R2   |
|------------|-----------|-------|---------|------|
| NGLY1_KO_1 | -         | 0.38  | 1.27    | 0.51 |
| NGLY1_1    | -         | -     | 0       | 0.1  |
| NGLY1_KO_2 | -         | -0.2  | 0.88    | 0.21 |
| NGLY1_2    | -         | 0.16  | 1.13    | 0.51 |

Supplement: Supplementary file 6789 [file 1]

IPI00014239.1|LRRC14

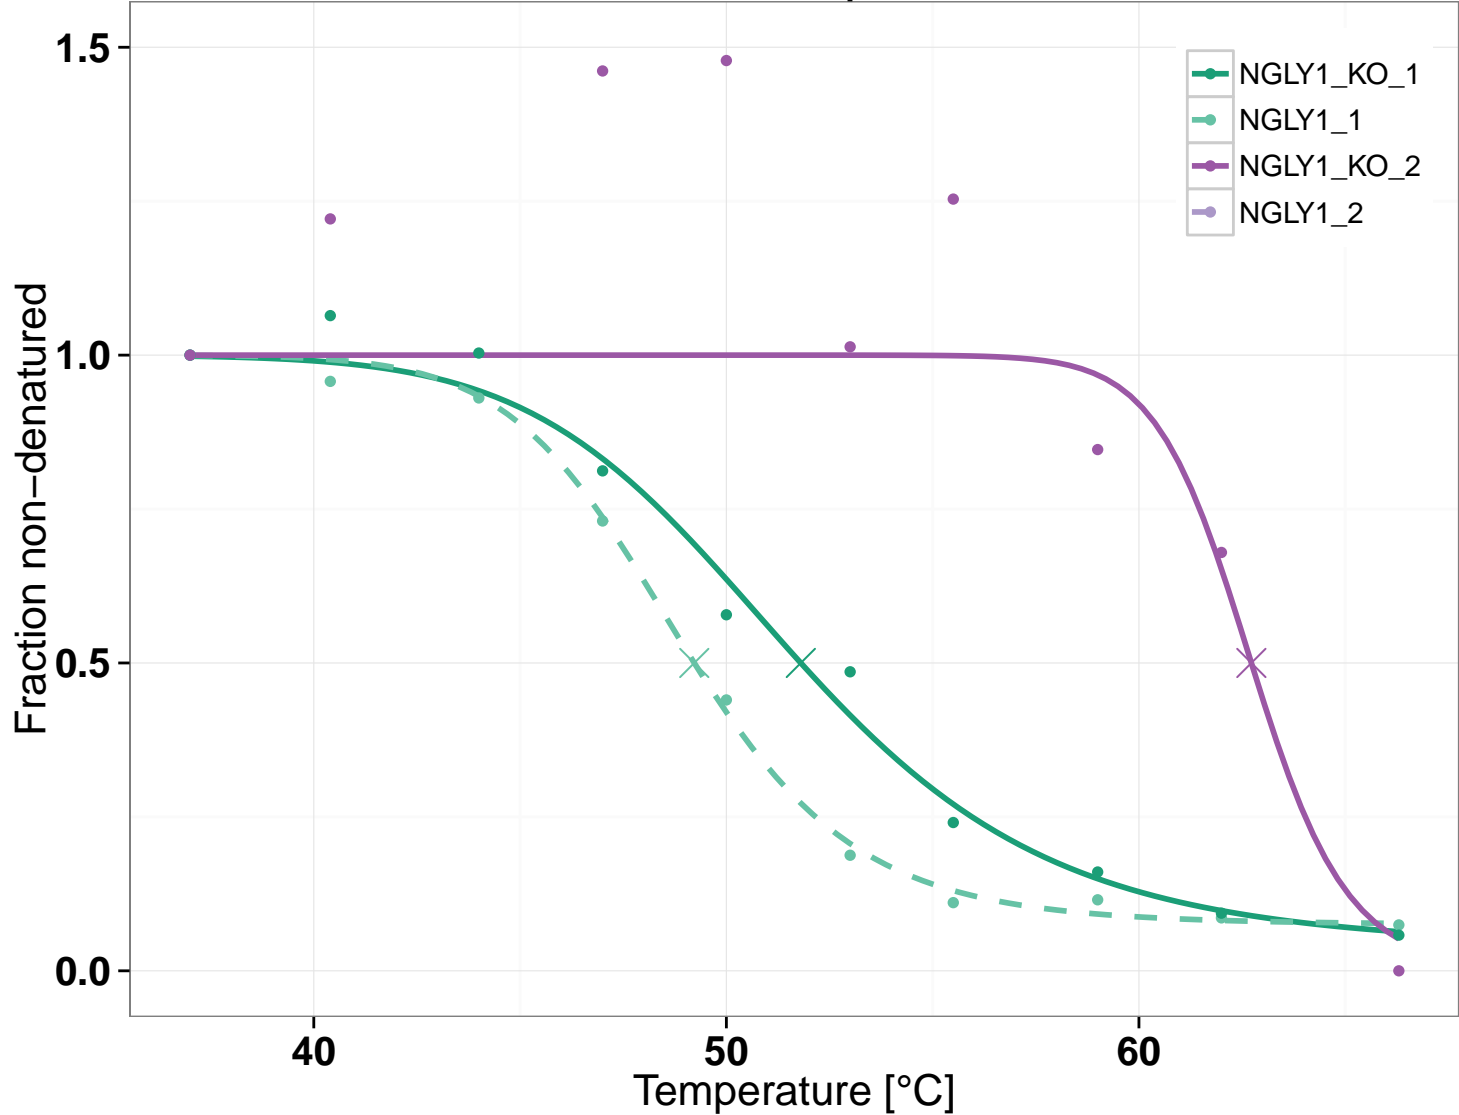

|            | meltPoint | slope  | plateau | R2   |
|------------|-----------|--------|---------|------|
| NGLY1_KO_1 | 51.8      | -0.076 | 0.04    | 0.99 |
| NGLY1_1    | 49.22     | -0.11  | 0.07    | 1    |
| NGLY1_KO_2 | 62.73     | -0.22  | 0       | 0.56 |
| NGLY1_2    | -         | -      | -       | -    |

Supplement: Supplementary file 6790 [file 1]

# IPI00004233.2|MKI67

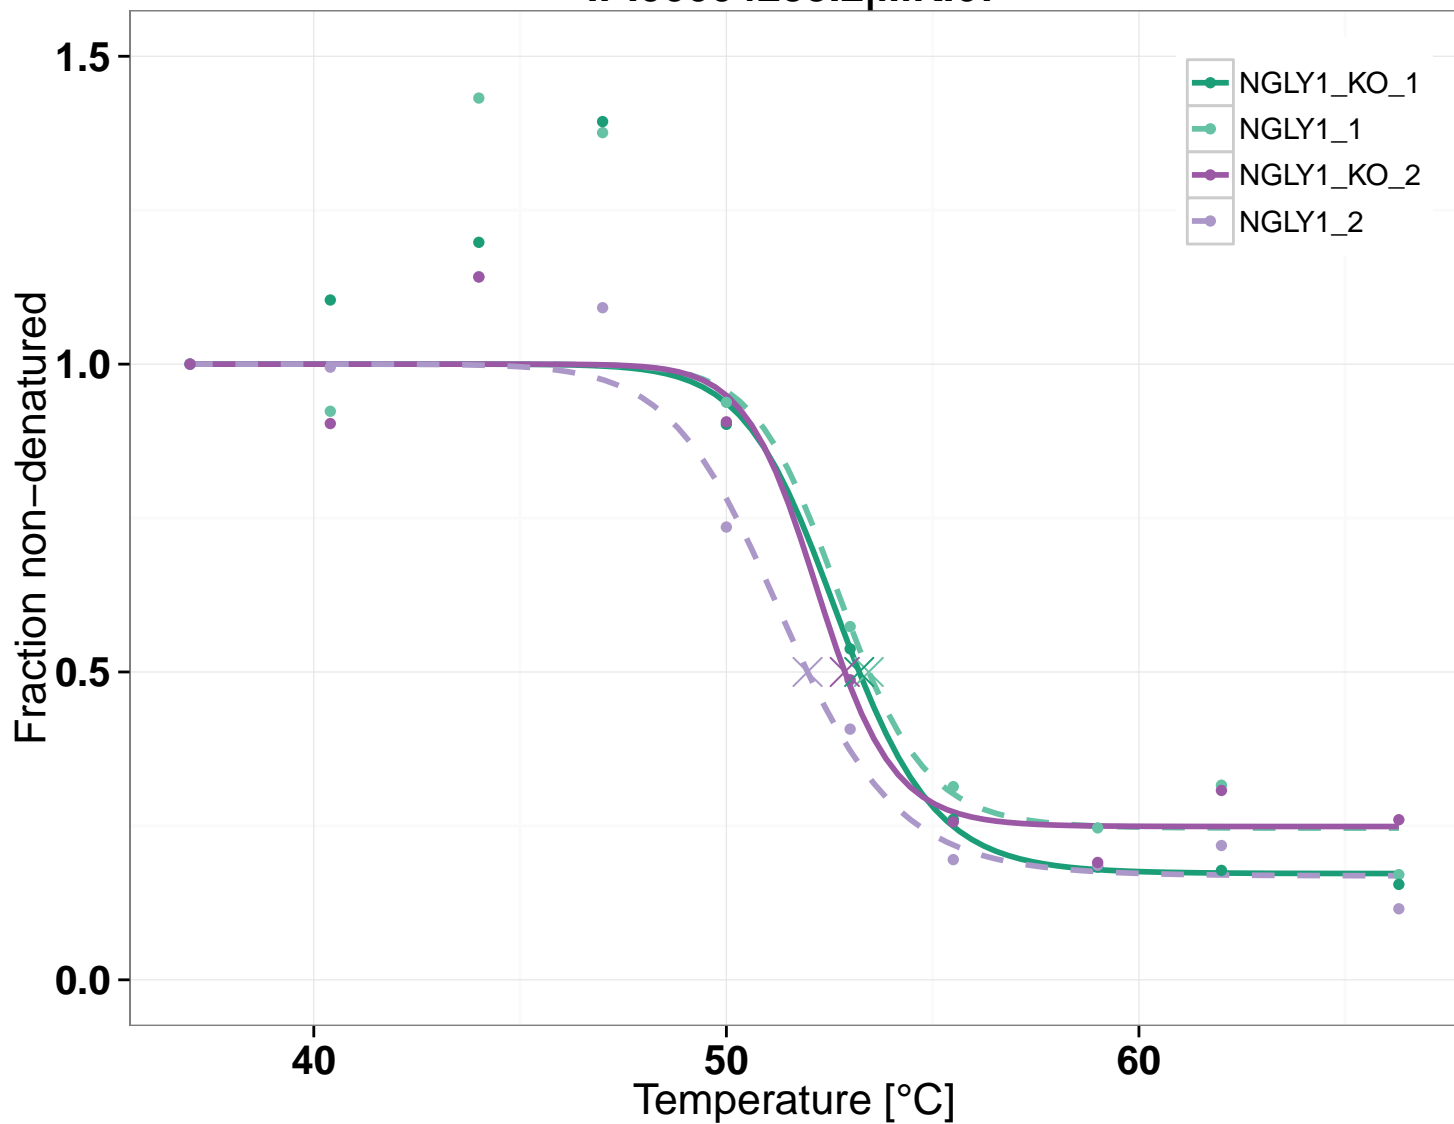

|            | meltPoint | slope | plateau | R2   |
|------------|-----------|-------|---------|------|
| NGLY1_KO_1 | 53.22     | -0.18 | 0.17    | 0.9  |
| NGLY1_1    | 53.45     | -0.18 | 0.25    | 0.83 |
| NGLY1_KO_2 | 52.87     | -0.21 | 0.25    | 0.76 |
| NGLY1_2    | 51.97     | -0.15 | 0.17    | 0.97 |

Supplement: Supplementary file 6791 [file 1]

IPI00073958.1|CNRIP1

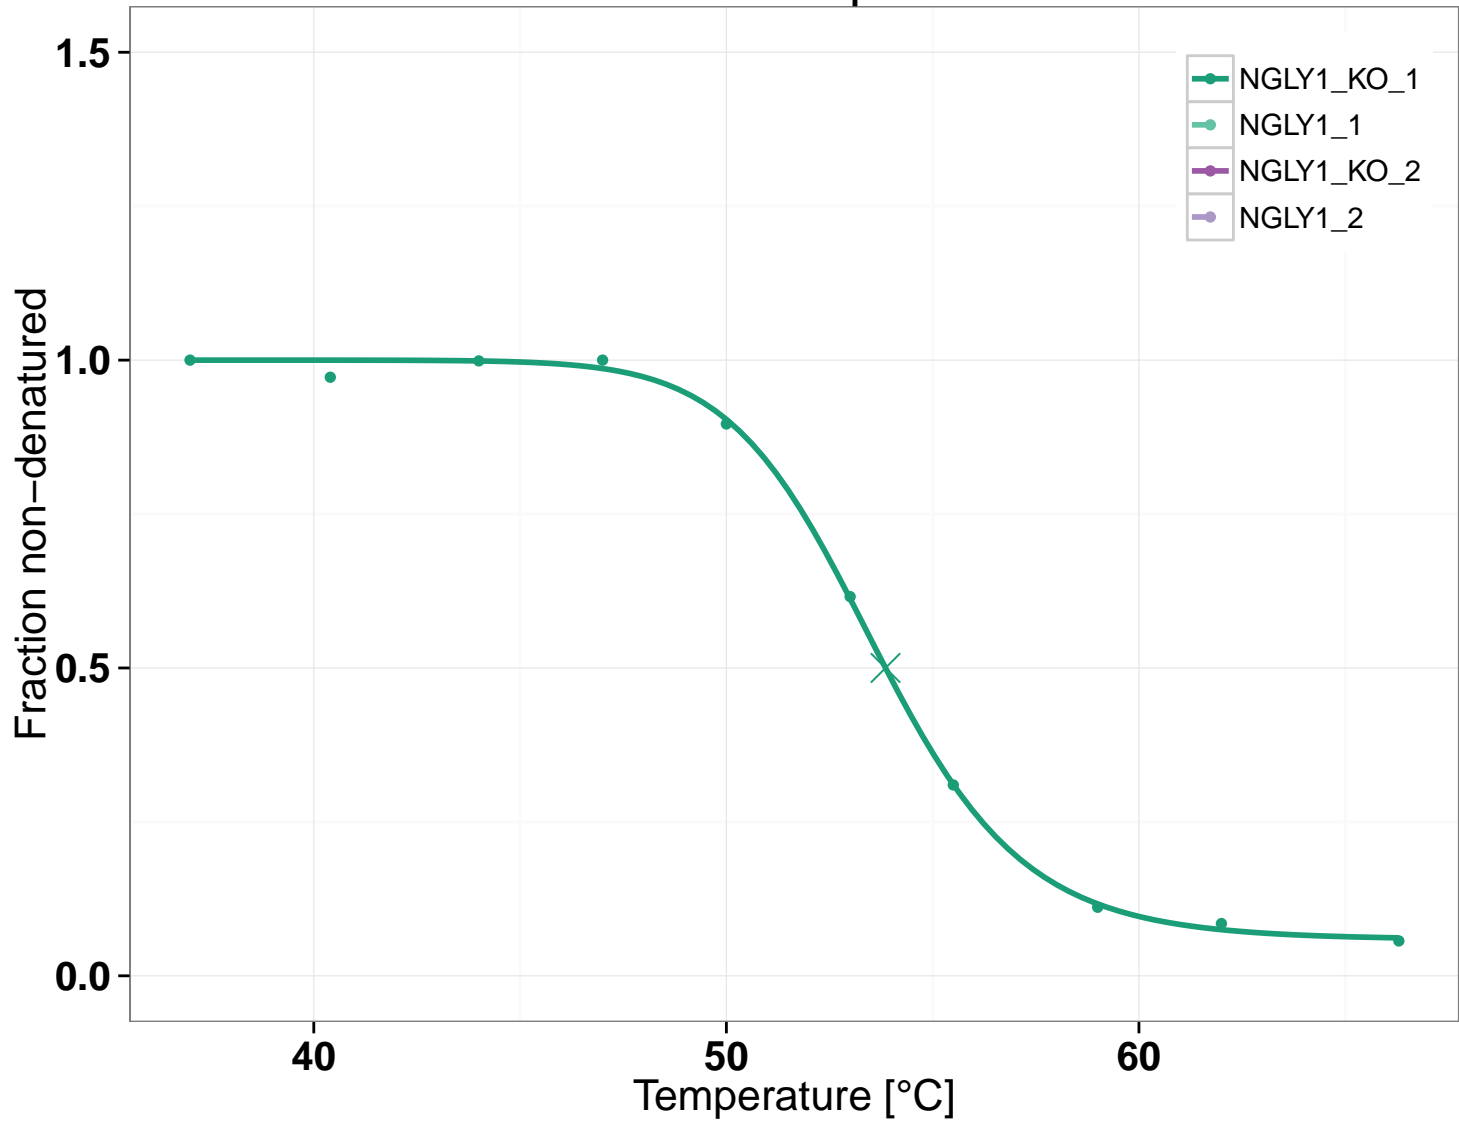

|            | meltPoint | slope | plateau | R2 |
|------------|-----------|-------|---------|----|
| NGLY1_KO_1 | 53.86     | -0.13 | 0.06    | 1  |
| NGLY1_1    | -         | -     | -       | -  |
| NGLY1_KO_2 | -         | -     | -       | -  |
| NGLY1_2    | -         | -     | -       | -  |

Supplement: Supplementary file 6792 [file 1]

# IPI00477825.3|MIER1

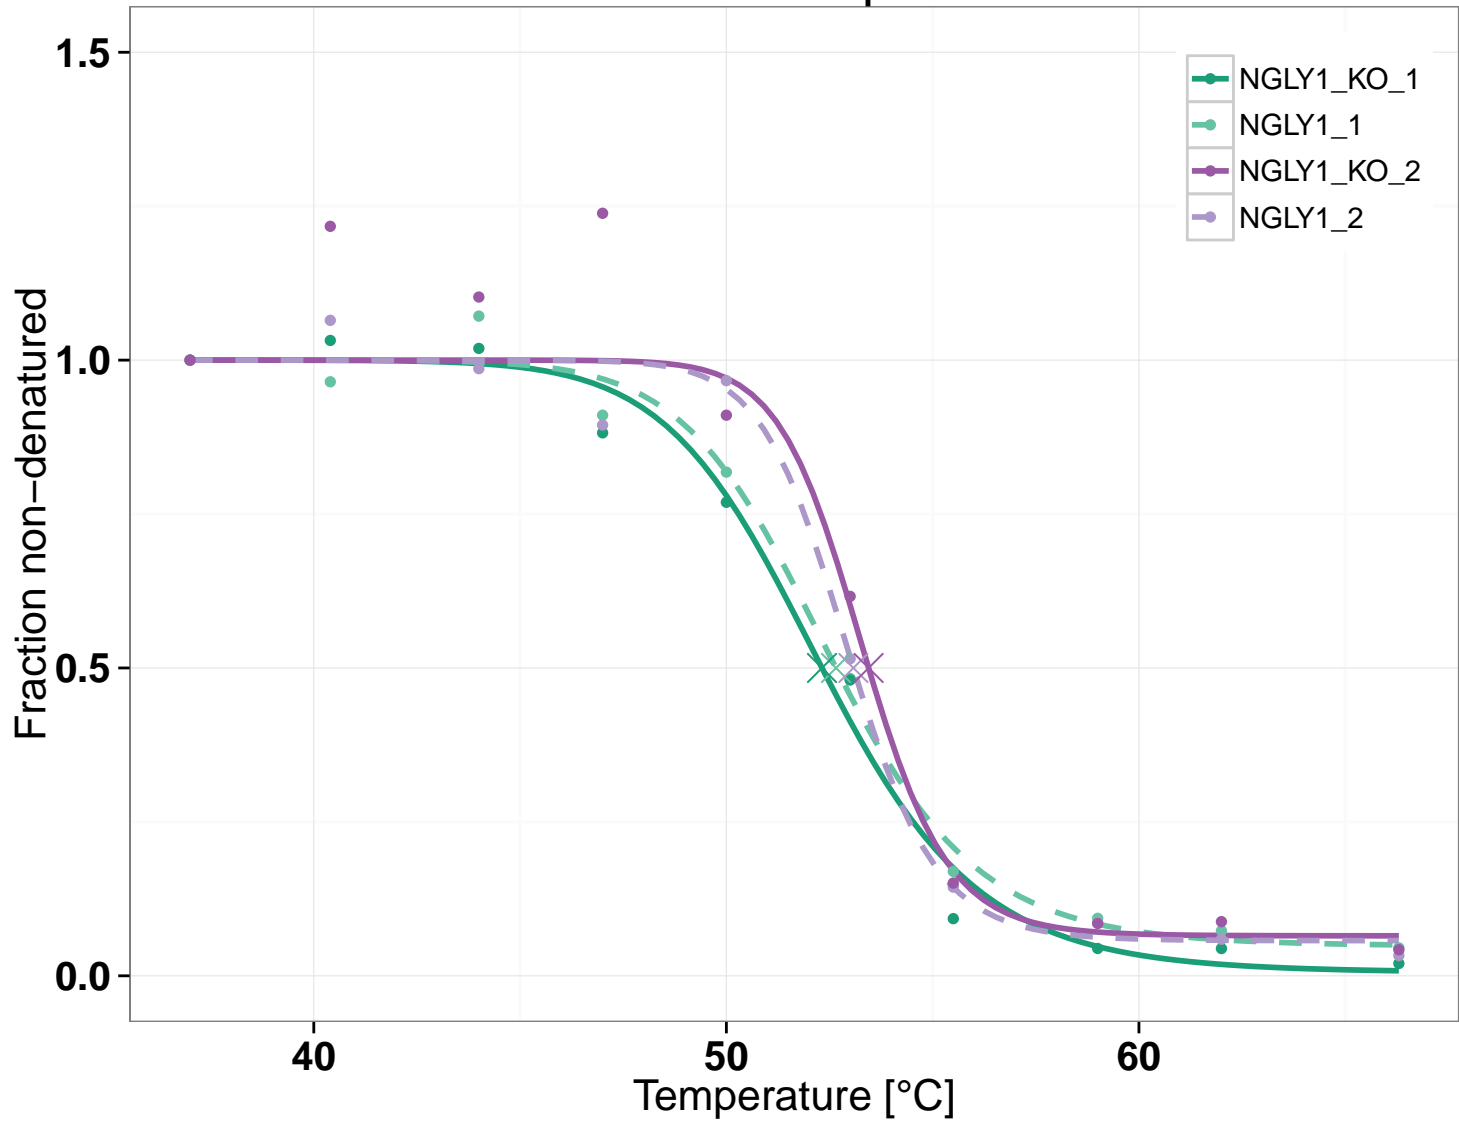

|            | meltPoint | slope | plateau | R2   |
|------------|-----------|-------|---------|------|
| NGLY1_KO_1 | 52.32     | -0.13 | 0.01    | 0.99 |
| NGLY1_1    | 52.66     | -0.13 | 0.05    | 0.99 |
| NGLY1_KO_2 | 53.45     | -0.23 | 0.06    | 0.95 |
| NGLY1_2    | 53.08     | -0.22 | 0.06    | 0.99 |

Supplement: Supplementary file 6793 [file 1]

# IPI00011898.3|EIF2B5

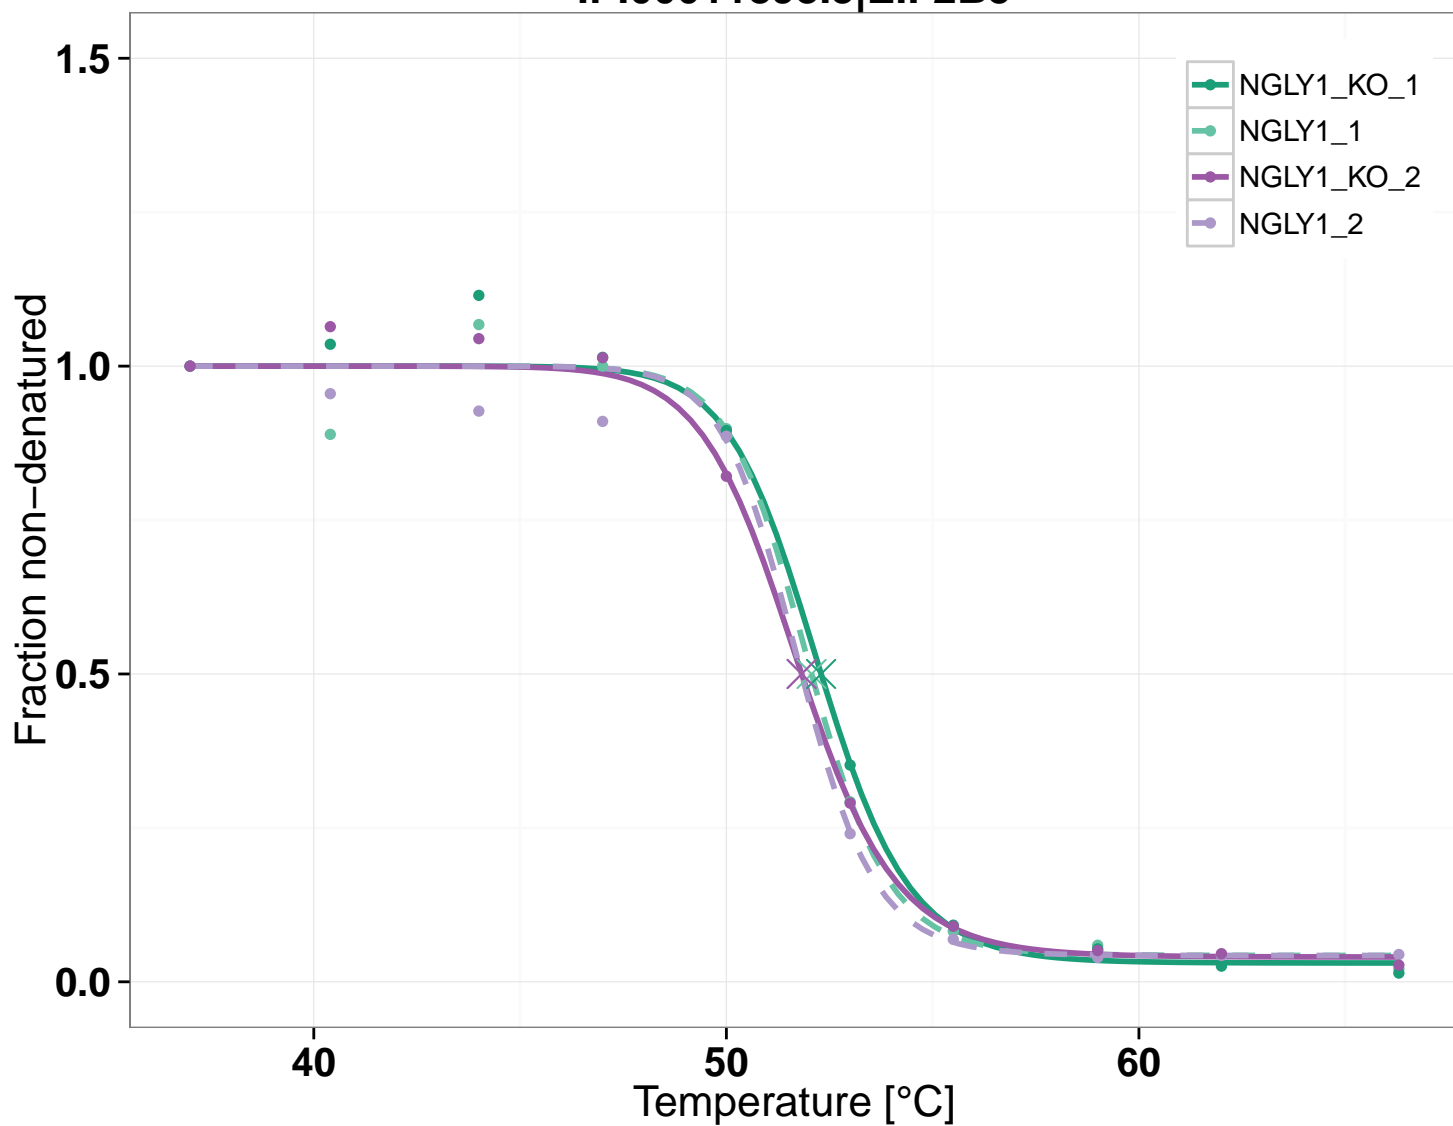

|            | meltPoint | slope | plateau | R2   |
|------------|-----------|-------|---------|------|
| NGLY1_KO_1 | 52.3      | -0.22 | 0.03    | 0.99 |
| NGLY1_1    | 52.07     | -0.25 | 0.04    | 0.99 |
| NGLY1_KO_2 | 51.83     | -0.2  | 0.04    | 1    |
| NGLY1_2    | 51.82     | -0.26 | 0.04    | 0.99 |

Supplement: Supplementary file 6794 [file 1]

IPI00030820.2|MRPL47

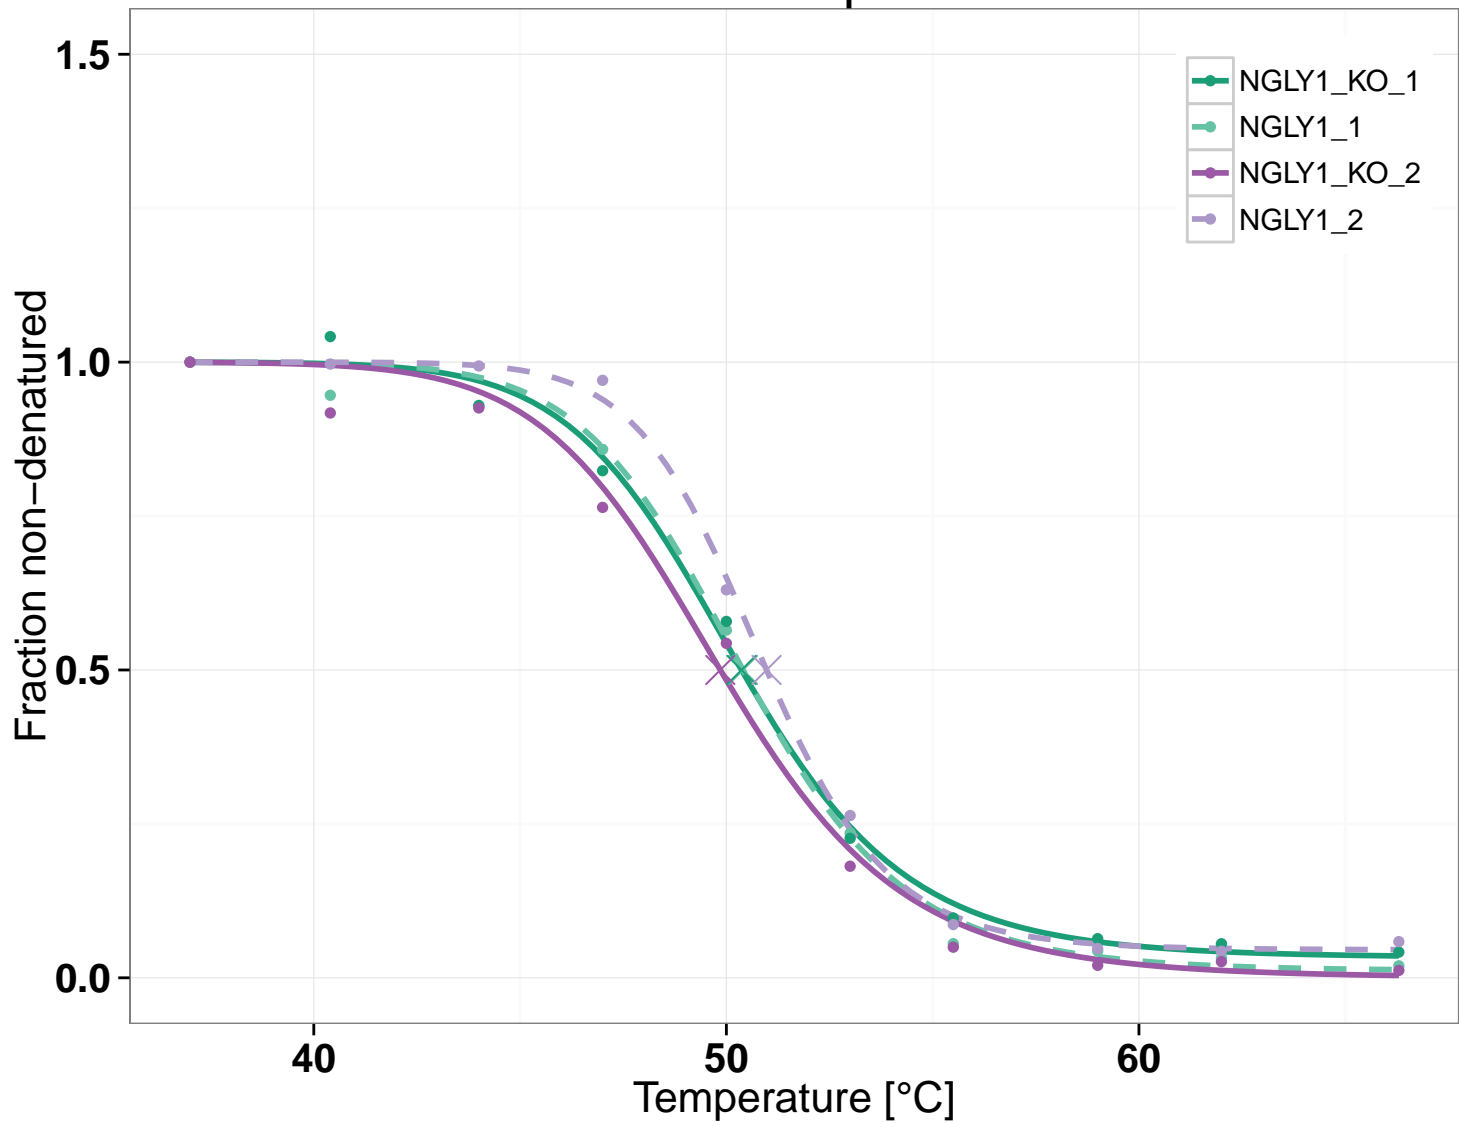

|            | meltPoint | slope | plateau | R2   |
|------------|-----------|-------|---------|------|
| NGLY1_KO_1 | 50.37     | -0.12 | 0.03    | 1    |
| NGLY1_1    | 50.4      | -0.13 | 0.01    | 1    |
| NGLY1_KO_2 | 49.85     | -0.11 | 0       | 0.99 |
| NGLY1_2    | 50.97     | -0.16 | 0.05    | 1    |

Supplement: Supplementary file 6795 [file 1]

# IPI00029756.2|MERTK

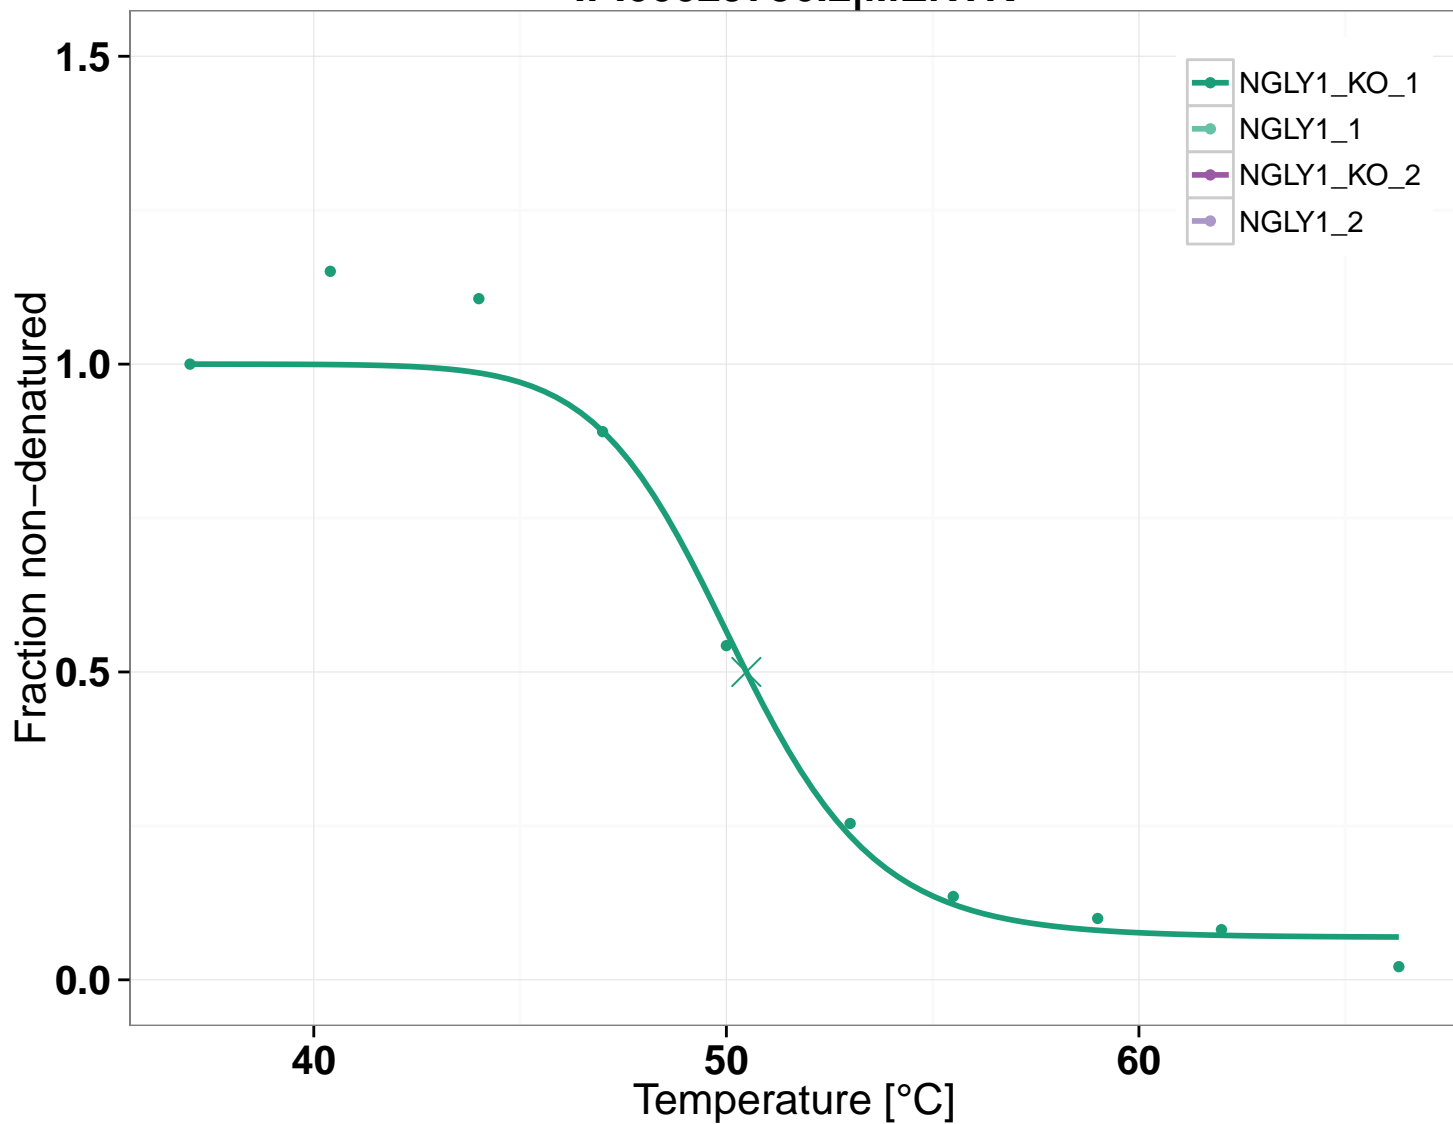

|            | meltPoint | slope | plateau | R2   |
|------------|-----------|-------|---------|------|
| NGLY1_KO_1 | 50.48     | -0.14 | 0.07    | 0.98 |
| NGLY1_1    | -         | -     | -       | -    |
| NGLY1_KO_2 | -         | -     | -       | -    |
| NGLY1_2    | -         | -     | -       | -    |

Supplement: Supplementary file 6796 [file 1]

# IPI00012443.1|FIBP

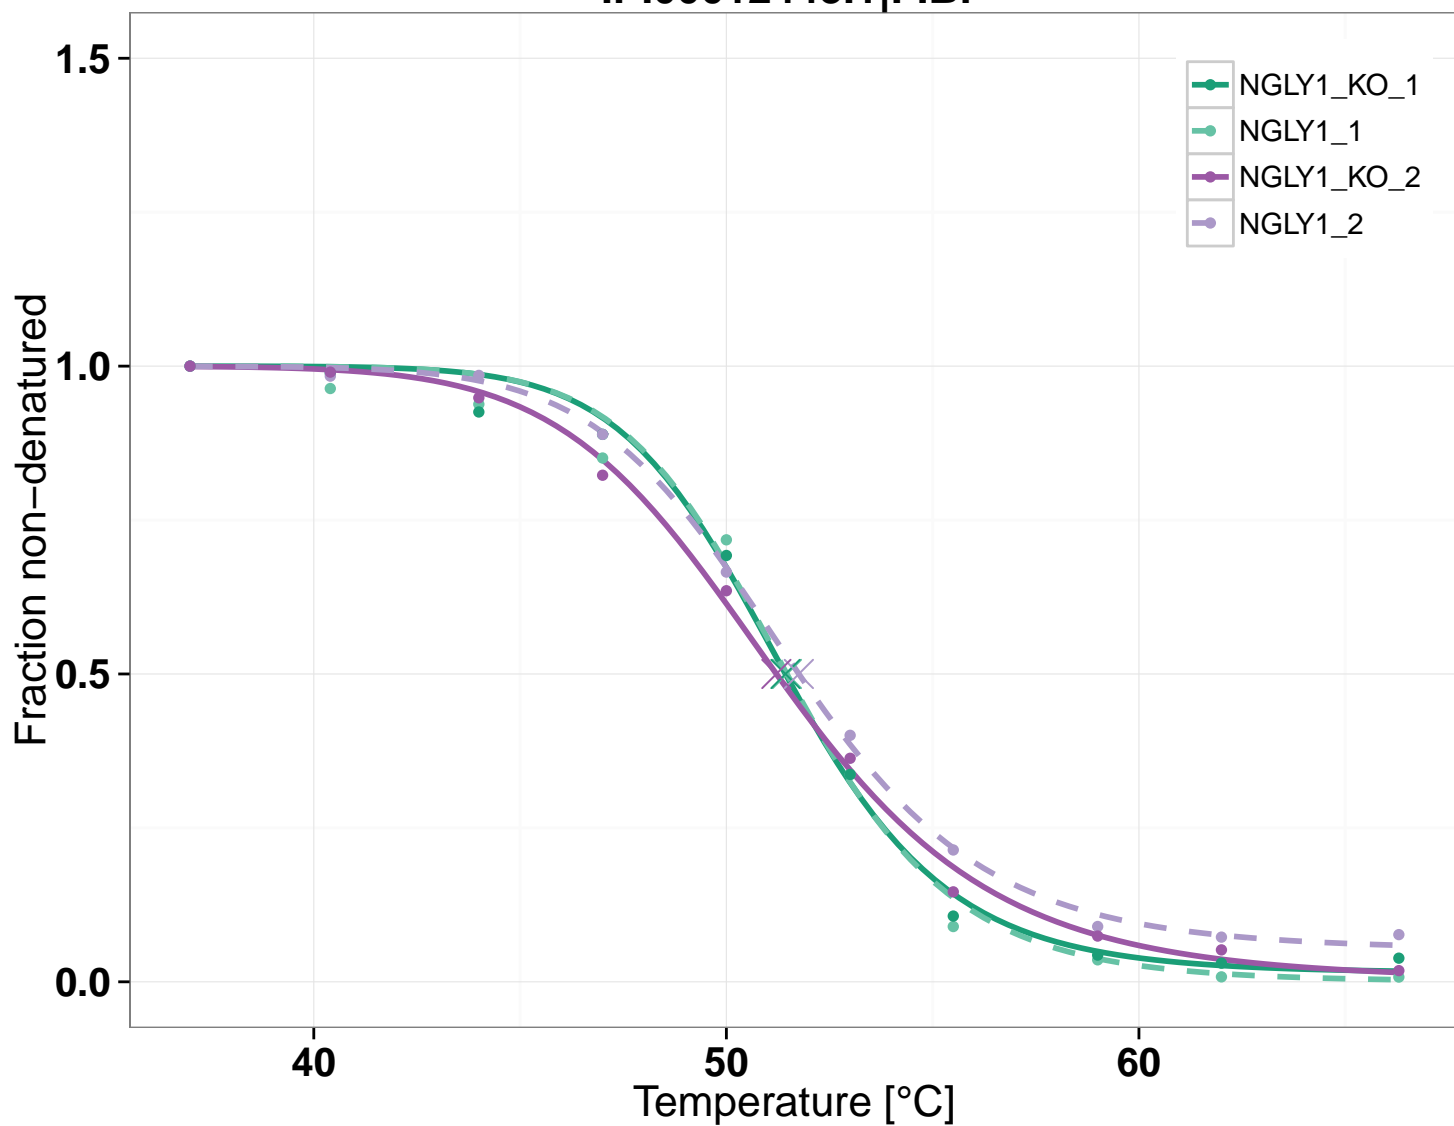

|            | meltPoint | slope  | plateau | R2   |
|------------|-----------|--------|---------|------|
| NGLY1_KO_1 | 51.43     | -0.12  | 0.01    | 1    |
| NGLY1_1    | 51.47     | -0.12  | 0       | 0.99 |
| NGLY1_KO_2 | 51.21     | -0.094 | 0       | 1    |
| NGLY1_2    | 51.76     | -0.1   | 0.05    | 1    |

Supplement: Supplementary file 6797 [file 1]

IPI00292134.6|EPS15

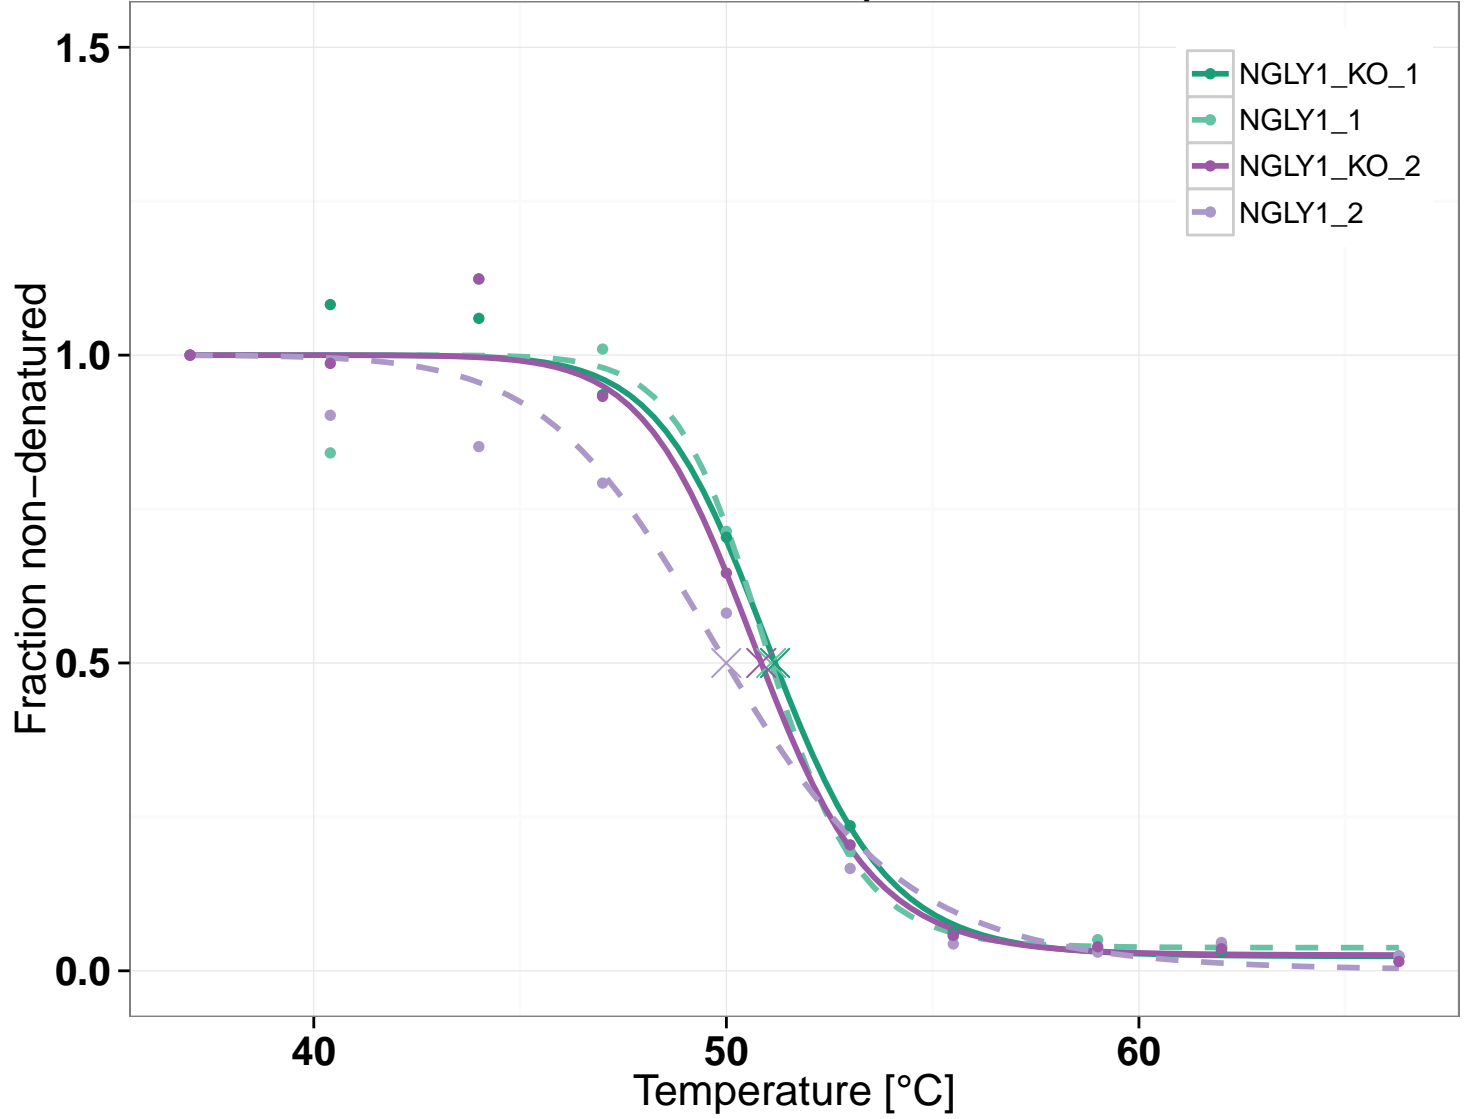

|            | meltPoint | slope | plateau | R2   |
|------------|-----------|-------|---------|------|
| NGLY1_KO_1 | 51.18     | -0.17 | 0.02    | 0.99 |
| NGLY1_1    | 51.08     | -0.21 | 0.04    | 0.98 |
| NGLY1_KO_2 | 50.85     | -0.17 | 0.03    | 0.99 |
| NGLY1_2    | 50        | -0.11 | 0       | 0.98 |

Supplement: Supplementary file 6798 [file 1]

# IPI00023234.3|UBA2

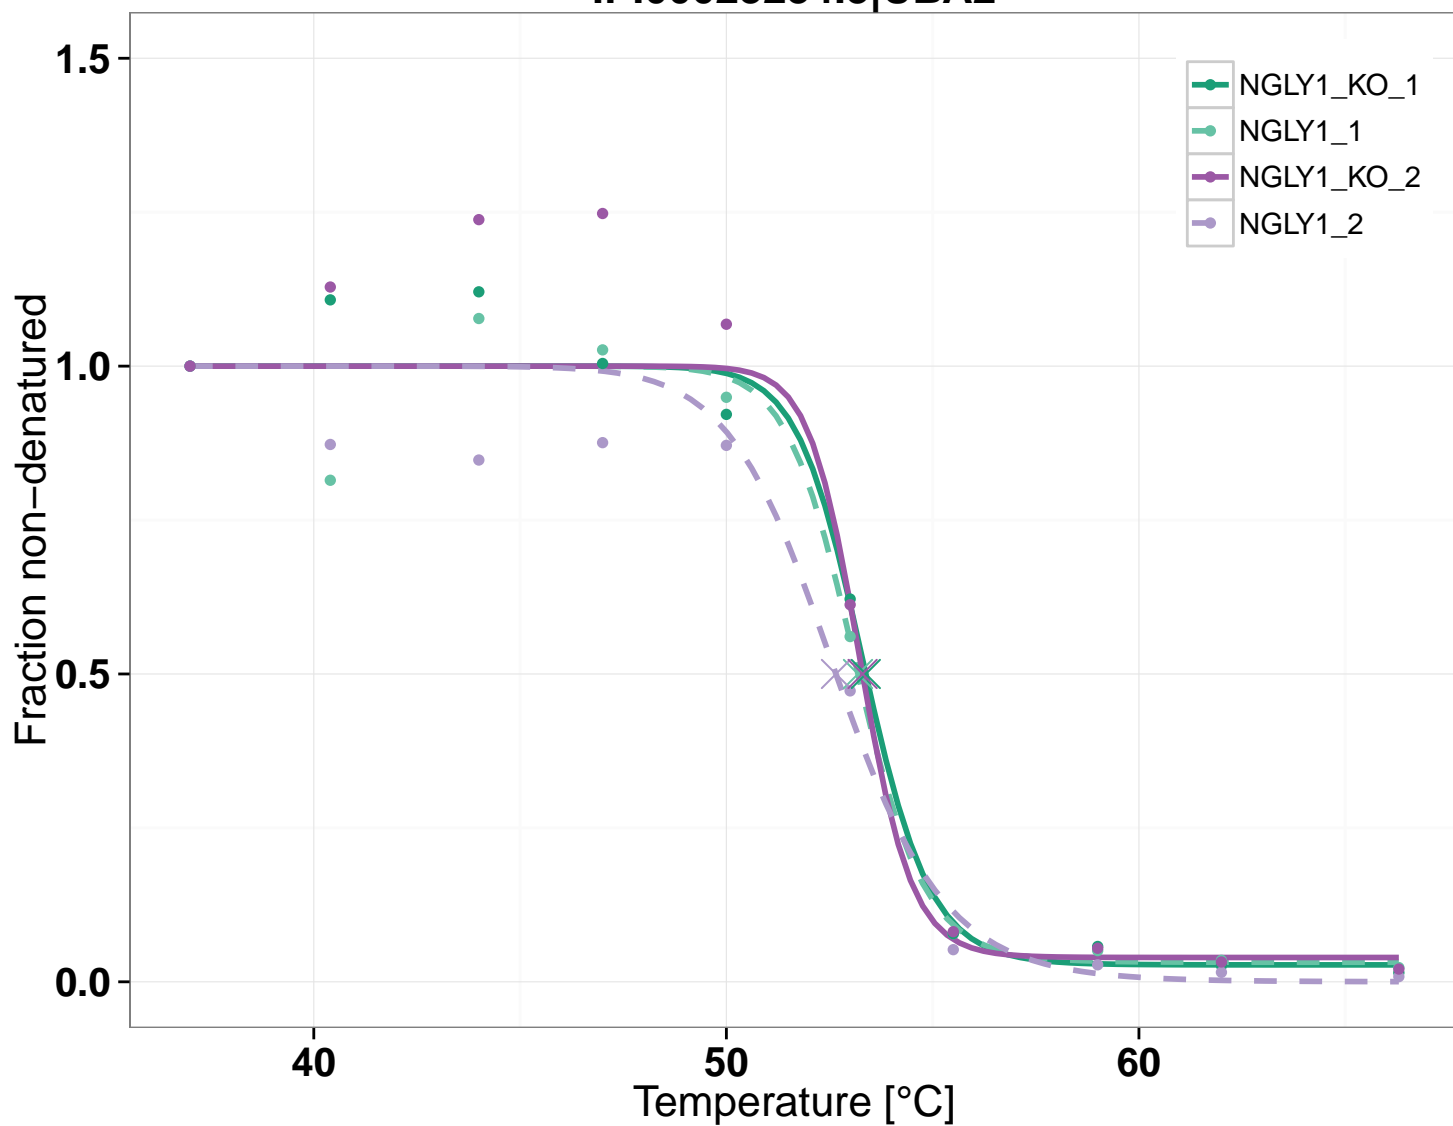

|            | meltPoint | slope | plateau | R2   |
|------------|-----------|-------|---------|------|
| NGLY1_KO_1 | 53.38     | -0.3  | 0.03    | 0.99 |
| NGLY1_1    | 53.19     | -0.29 | 0.03    | 0.98 |
| NGLY1_KO_2 | 53.3      | -0.38 | 0.04    | 0.95 |
| NGLY1_2    | 52.66     | -0.19 | 0       | 0.97 |

Supplement: Supplementary file 6799 [file 1]

IPI00744968.3|C17ORF48

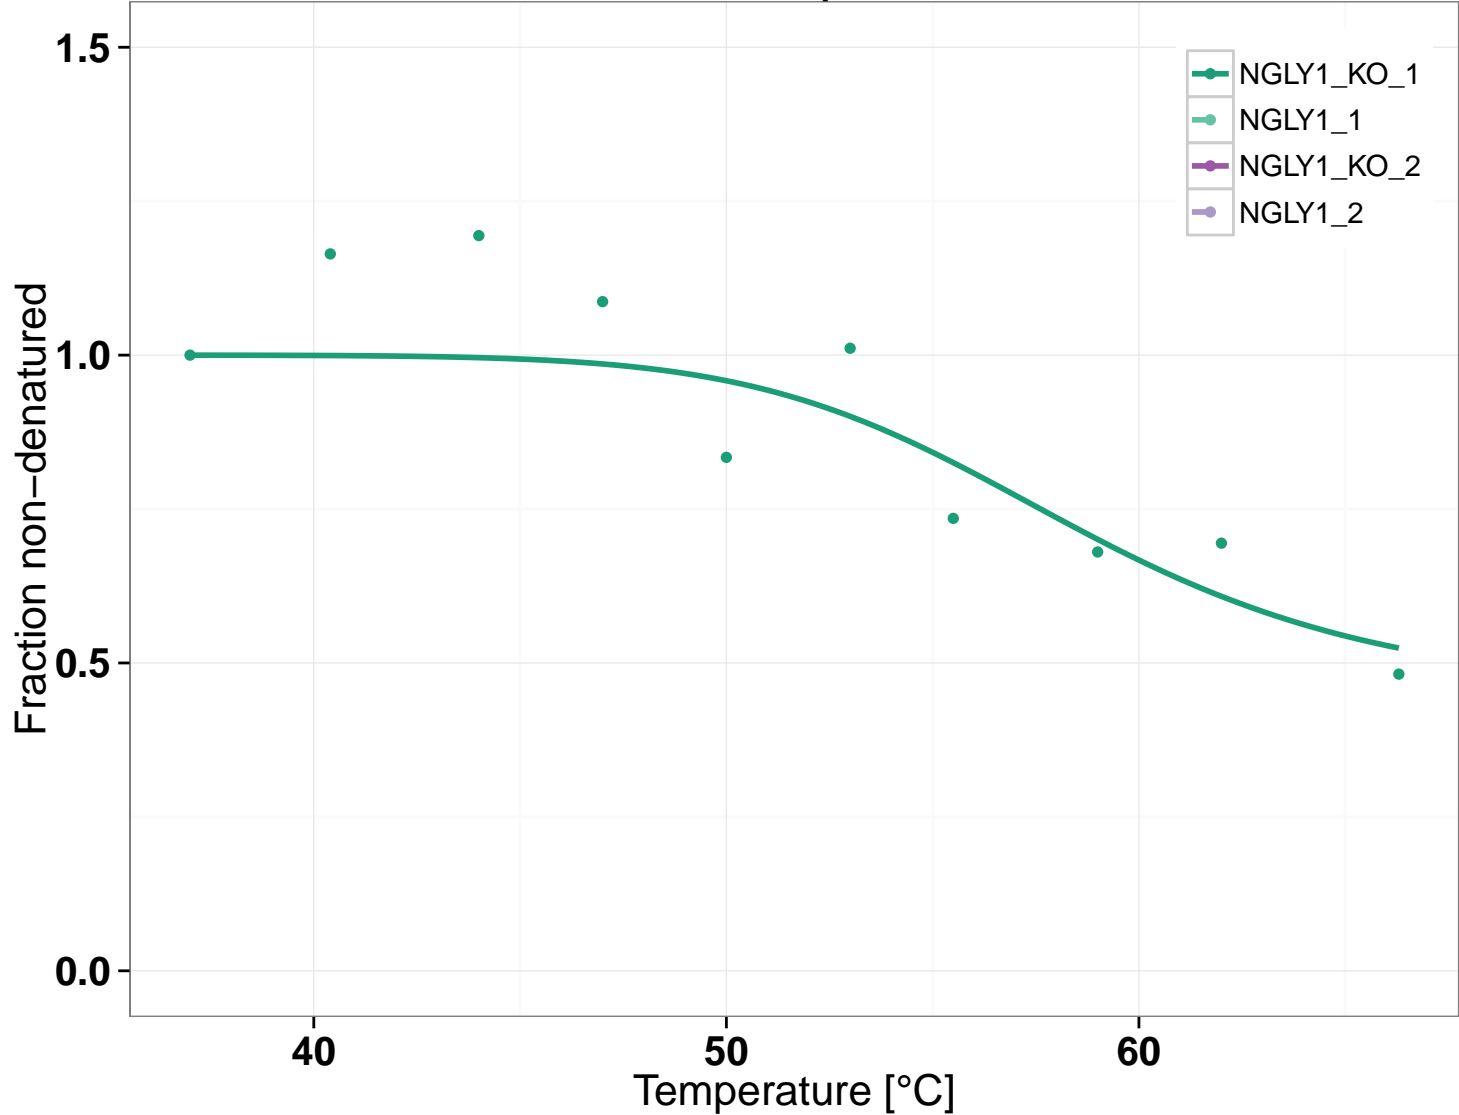

|            | meltPoint | slope  | plateau | R2   |
|------------|-----------|--------|---------|------|
| NGLY1_KO_1 | —         | −0.036 | 0.44    | 0.76 |
| NGLY1_1    | —         | —      | —       | —    |
| NGLY1_KO_2 | —         | —      | —       | —    |
| NGLY1_2    | —         | —      | —       | —    |

Supplement: Supplementary file 6800 [file 1]

IPI00007755.3|RAB21

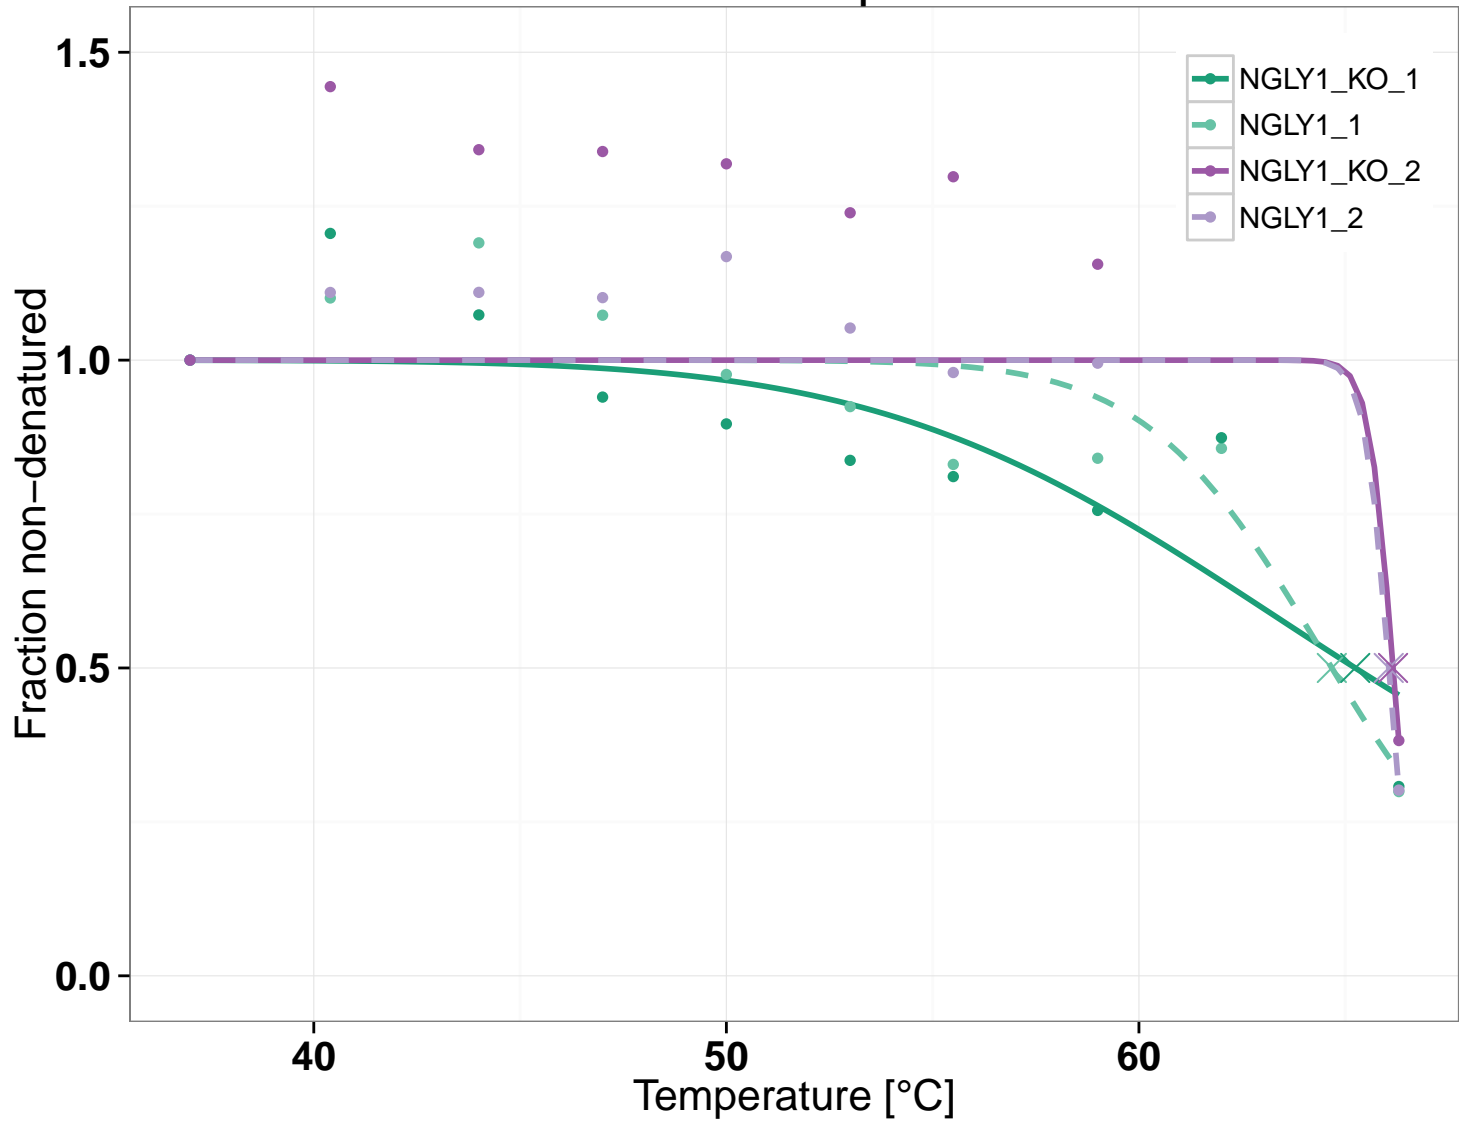

|            | meltPoint | slope  | plateau | R2   |
|------------|-----------|--------|---------|------|
| NGLY1_KO_1 | 65.24     | -0.044 | 0       | 0.72 |
| NGLY1_1    | 64.68     | -0.11  | 0       | 0.81 |
| NGLY1_KO_2 | 66.16     | -0.86  | 0       | -0.1 |
| NGLY1_2    | 66.05     | -0.86  | 0       | 0.82 |

Supplement: Supplementary file 6801 [file 1]

# IPI00016458.2|L2HGDH

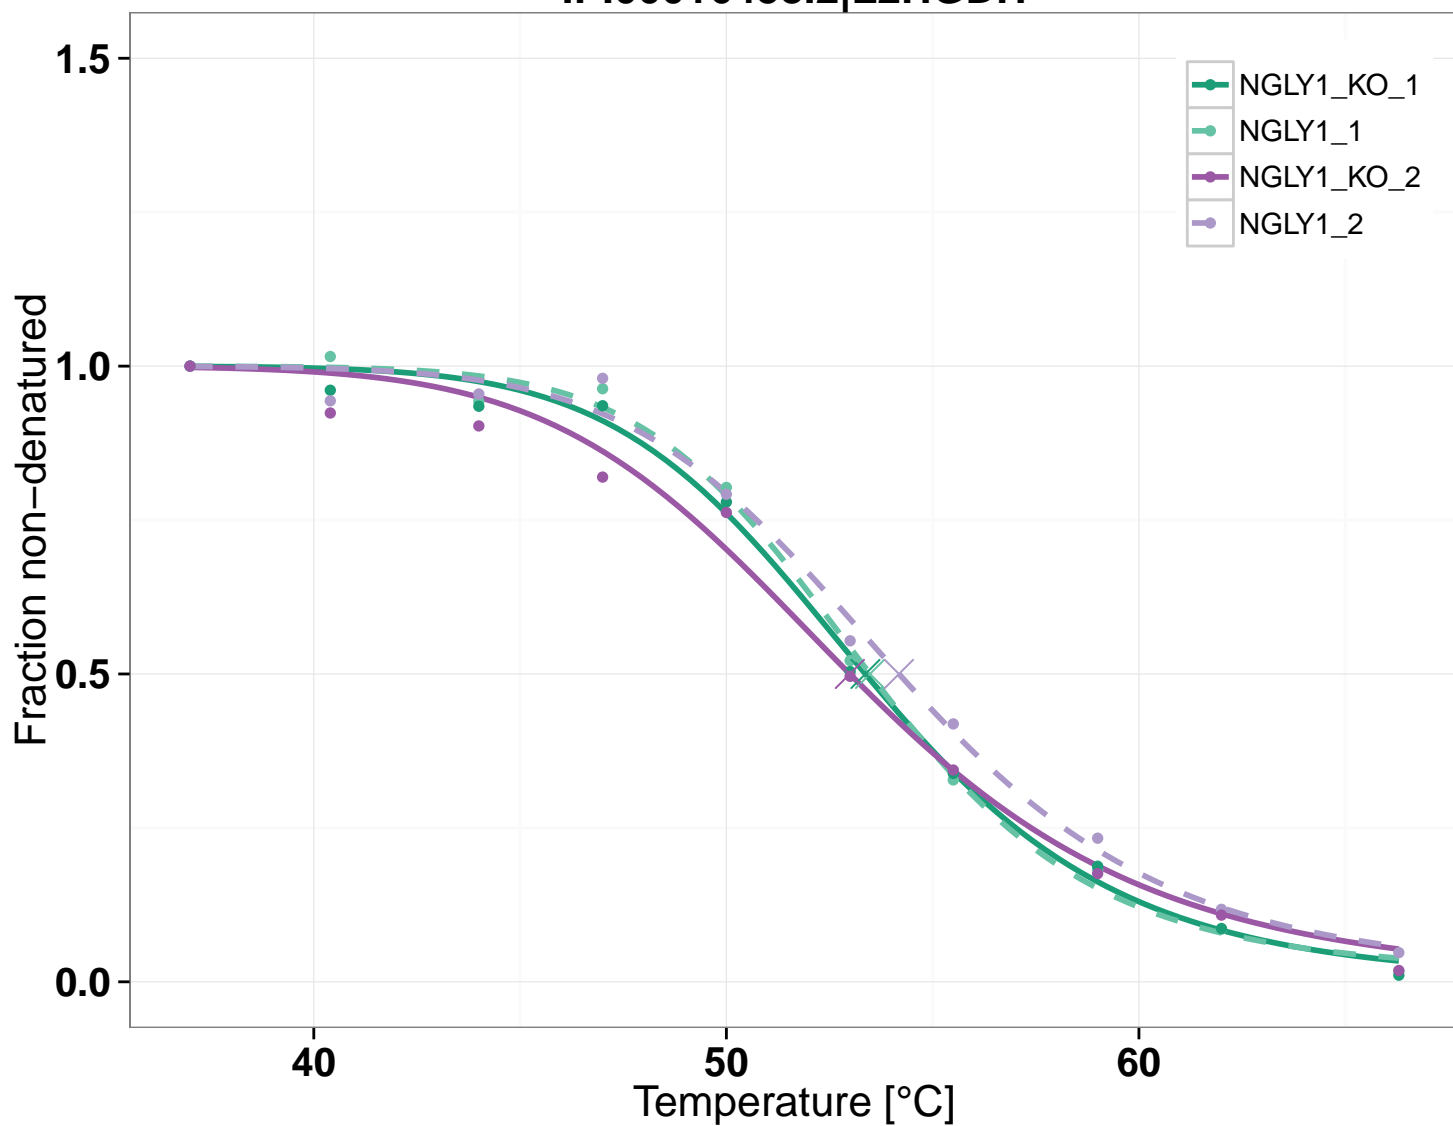

|            | meltPoint | slope  | plateau | R2   |
|------------|-----------|--------|---------|------|
| NGLY1_KO_1 | 53.37     | -0.082 | 0       | 1    |
| NGLY1_1    | 53.48     | -0.09  | 0.02    | 1    |
| NGLY1_KO_2 | 52.99     | -0.069 | 0       | 0.99 |
| NGLY1_2    | 54.18     | -0.076 | 0.01    | 0.99 |

Supplement: Supplementary file 6802 [file 1]

IPI00876842.1|Q15156\_HUMAN

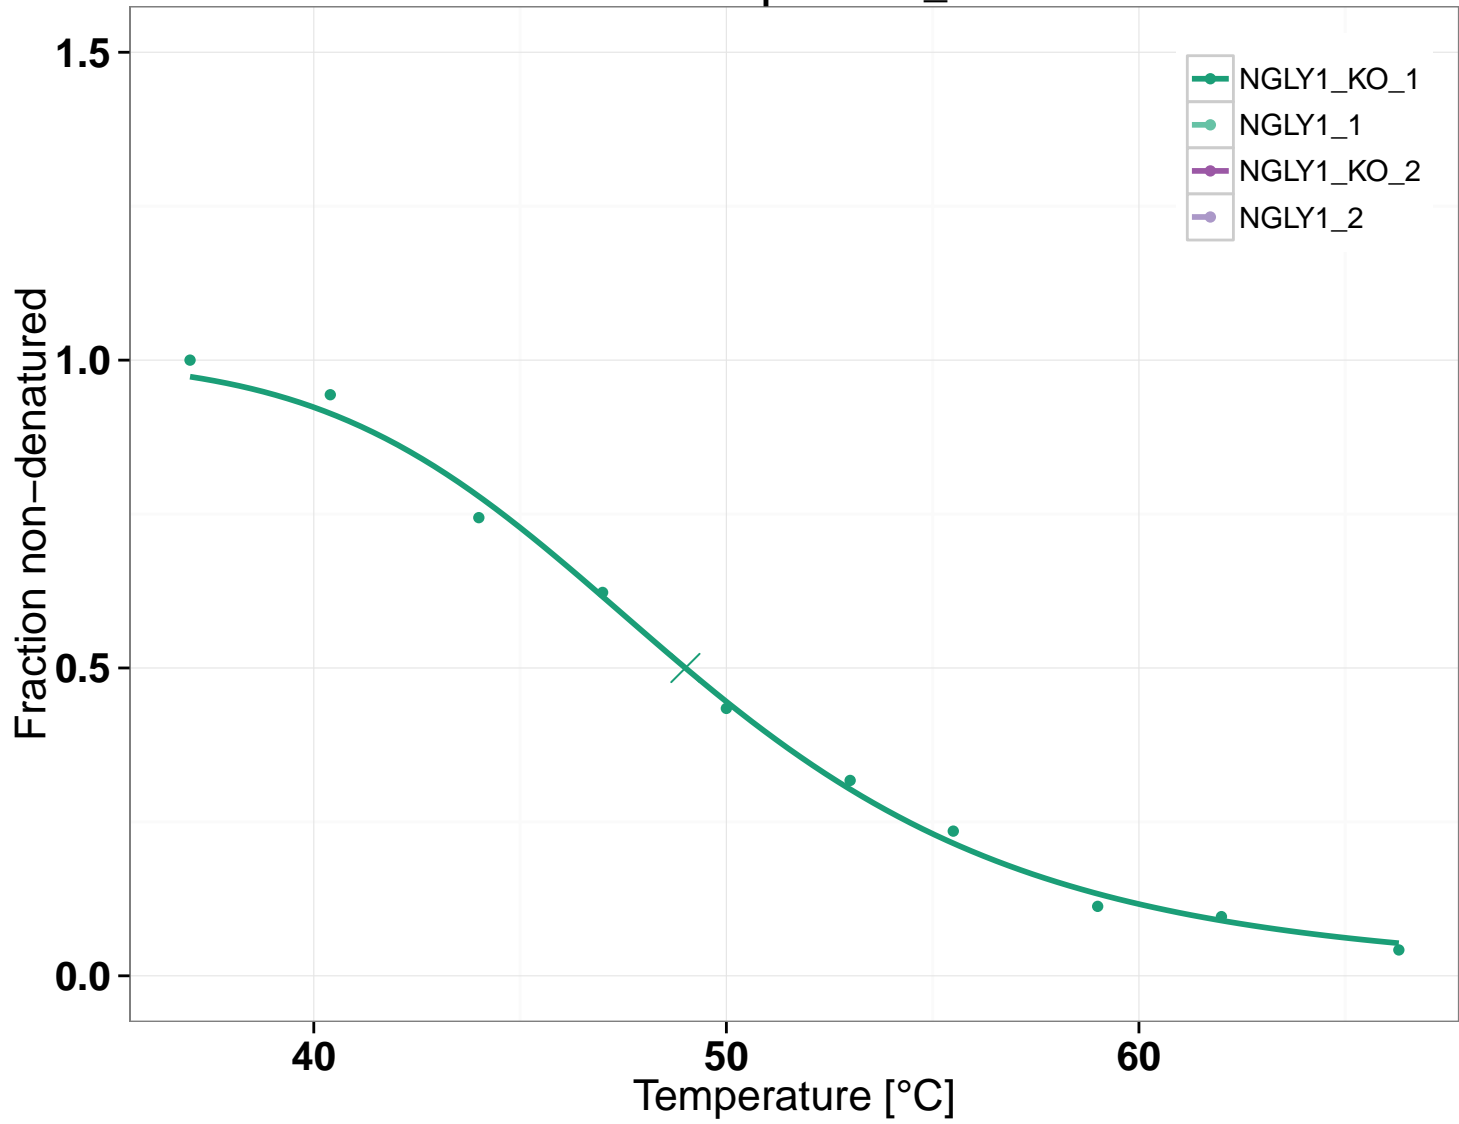

|            | meltPoint | slope  | plateau | R2 |
|------------|-----------|--------|---------|----|
| NGLY1_KO_1 | 49.01     | -0.058 | 0       | 1  |
| NGLY1_1    | -         | -      | -       | -  |
| NGLY1_KO_2 | -         | -      | -       | -  |
| NGLY1_2    | -         | -      | -       | -  |

Supplement: Supplementary file 6803 [file 1]

# IPI00888491.1|LOC100131572

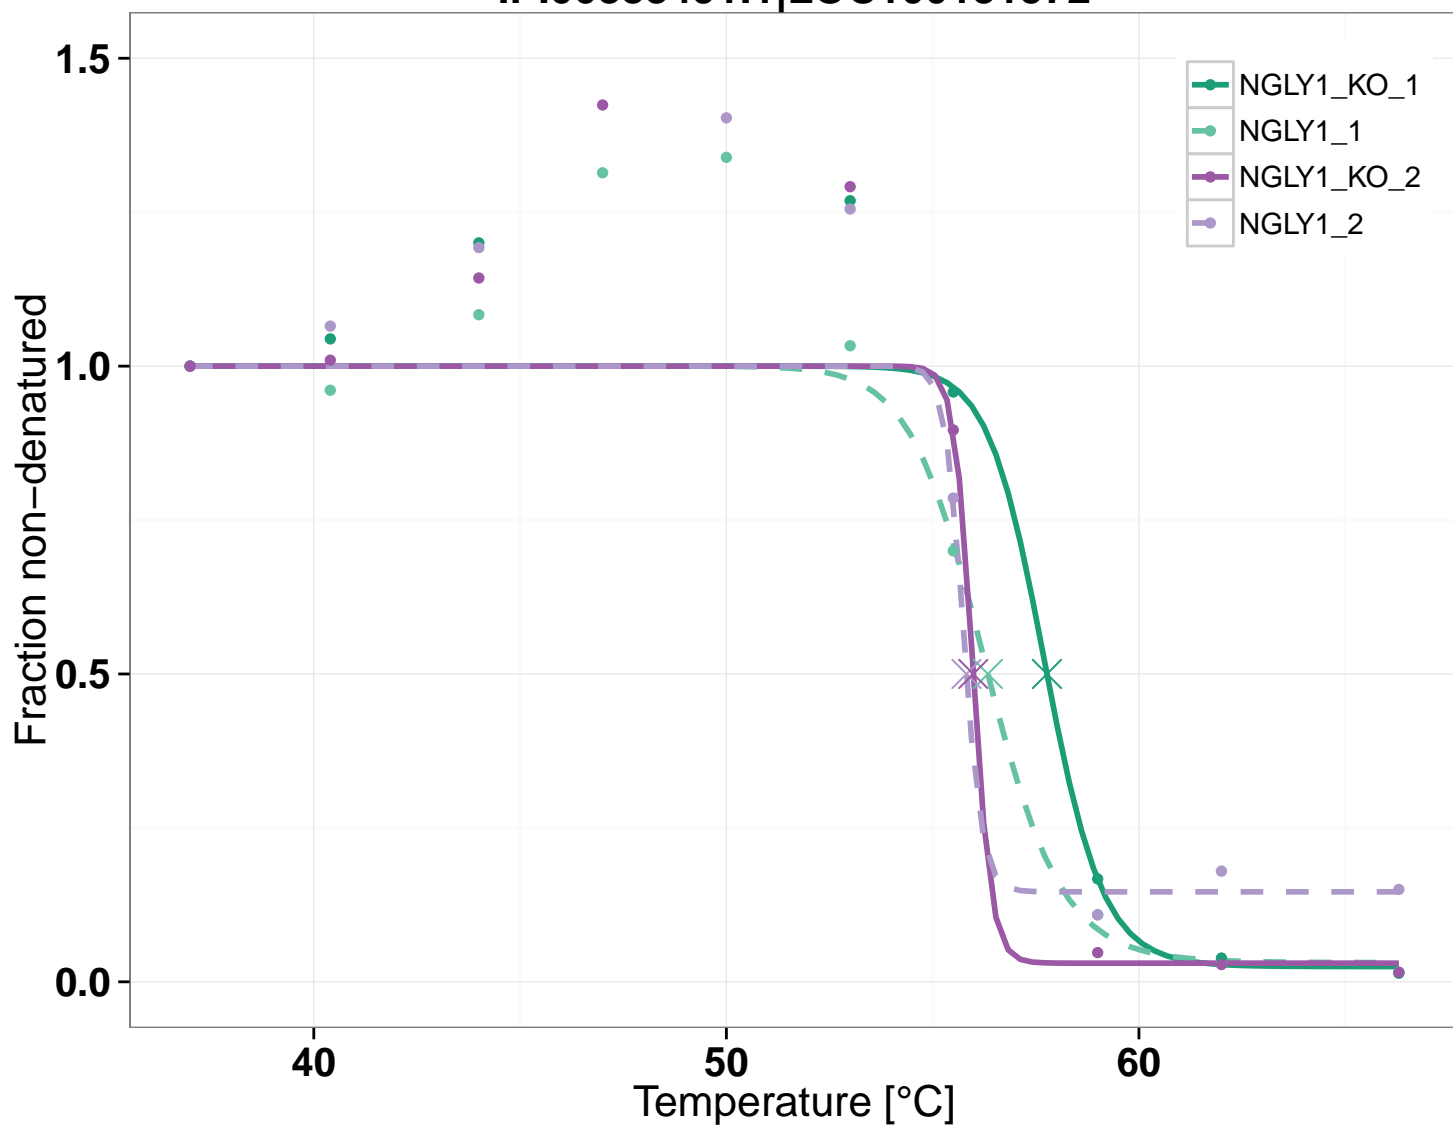

|            | meltPoint | slope | plateau | R2   |
|------------|-----------|-------|---------|------|
| NGLY1_KO_1 | 57.77     | -0.35 | 0.02    | 0.77 |
| NGLY1_1    | 56.34     | -0.26 | 0.03    | 0.91 |
| NGLY1_KO_2 | 55.99     | -1.1  | 0.03    | 0.8  |
| NGLY1_2    | 55.82     | -0.96 | 0.15    | 0.78 |

Supplement: Supplementary file 6804 [file 1]

# IPI00014587.1|CLTA

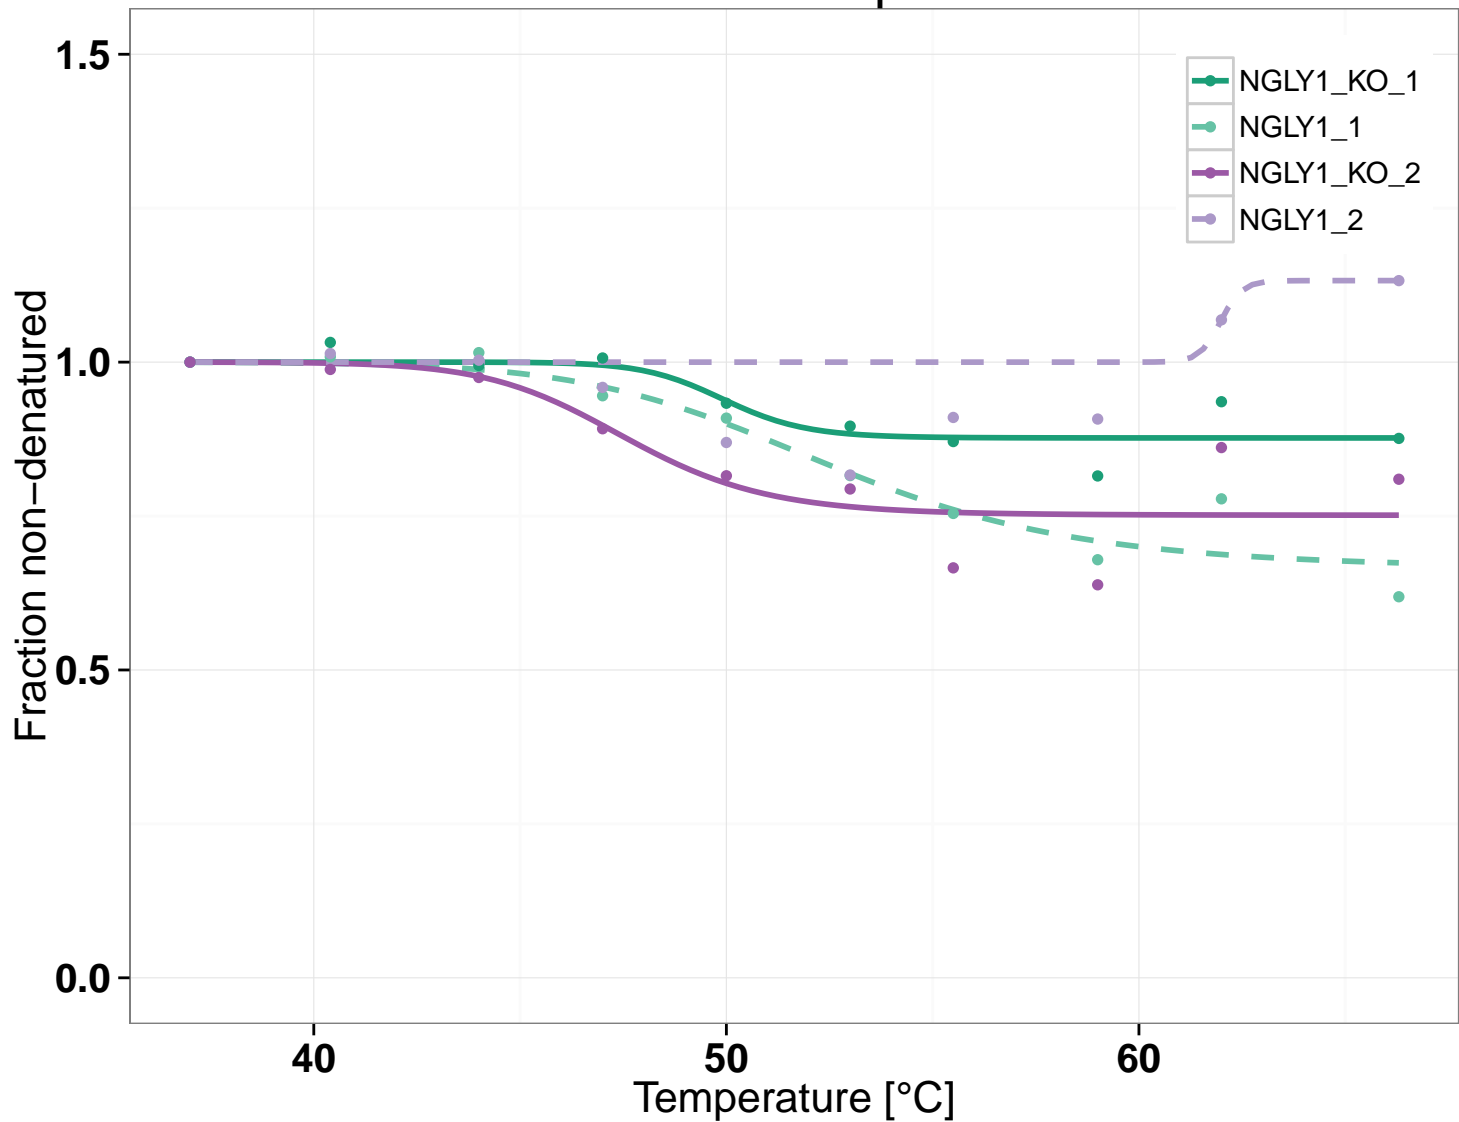

|            | meltPoint | slope  | plateau | R2   |
|------------|-----------|--------|---------|------|
| NGLY1_KO_1 | -         | -0.031 | 0.88    | 0.81 |
| NGLY1_1    | -         | -0.028 | 0.66    | 0.93 |
| NGLY1_KO_2 | -         | -0.036 | 0.75    | 0.74 |
| NGLY1_2    | -         | 0.13   | 1.13    | 0.15 |

Supplement: Supplementary file 6805 [file 1]

# IPI00024235.1|BACH1

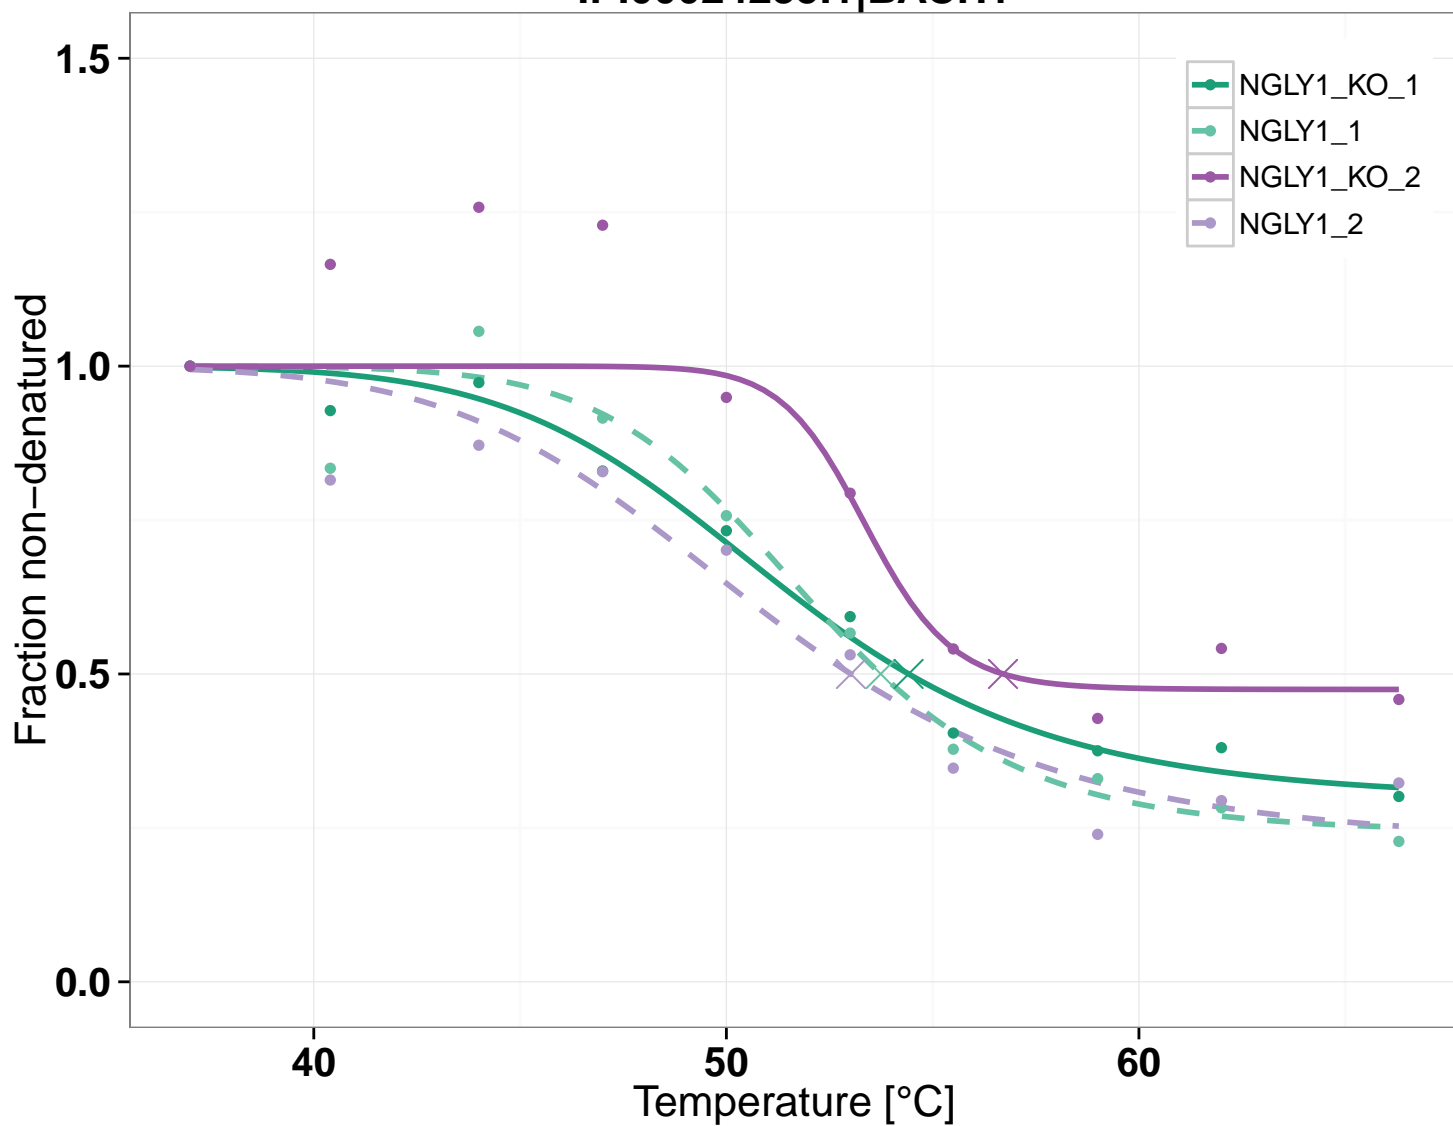

|            | meltPoint | slope  | plateau | R2   |
|------------|-----------|--------|---------|------|
| NGLY1_KO_1 | 54.42     | -0.053 | 0.29    | 0.98 |
| NGLY1_1    | 53.74     | -0.075 | 0.24    | 0.96 |
| NGLY1_KO_2 | 56.71     | -0.13  | 0.47    | 0.84 |
| NGLY1_2    | 53.02     | -0.053 | 0.22    | 0.93 |

Supplement: Supplementary file 6806 [file 1]

# IPI00002255.4|LRBA

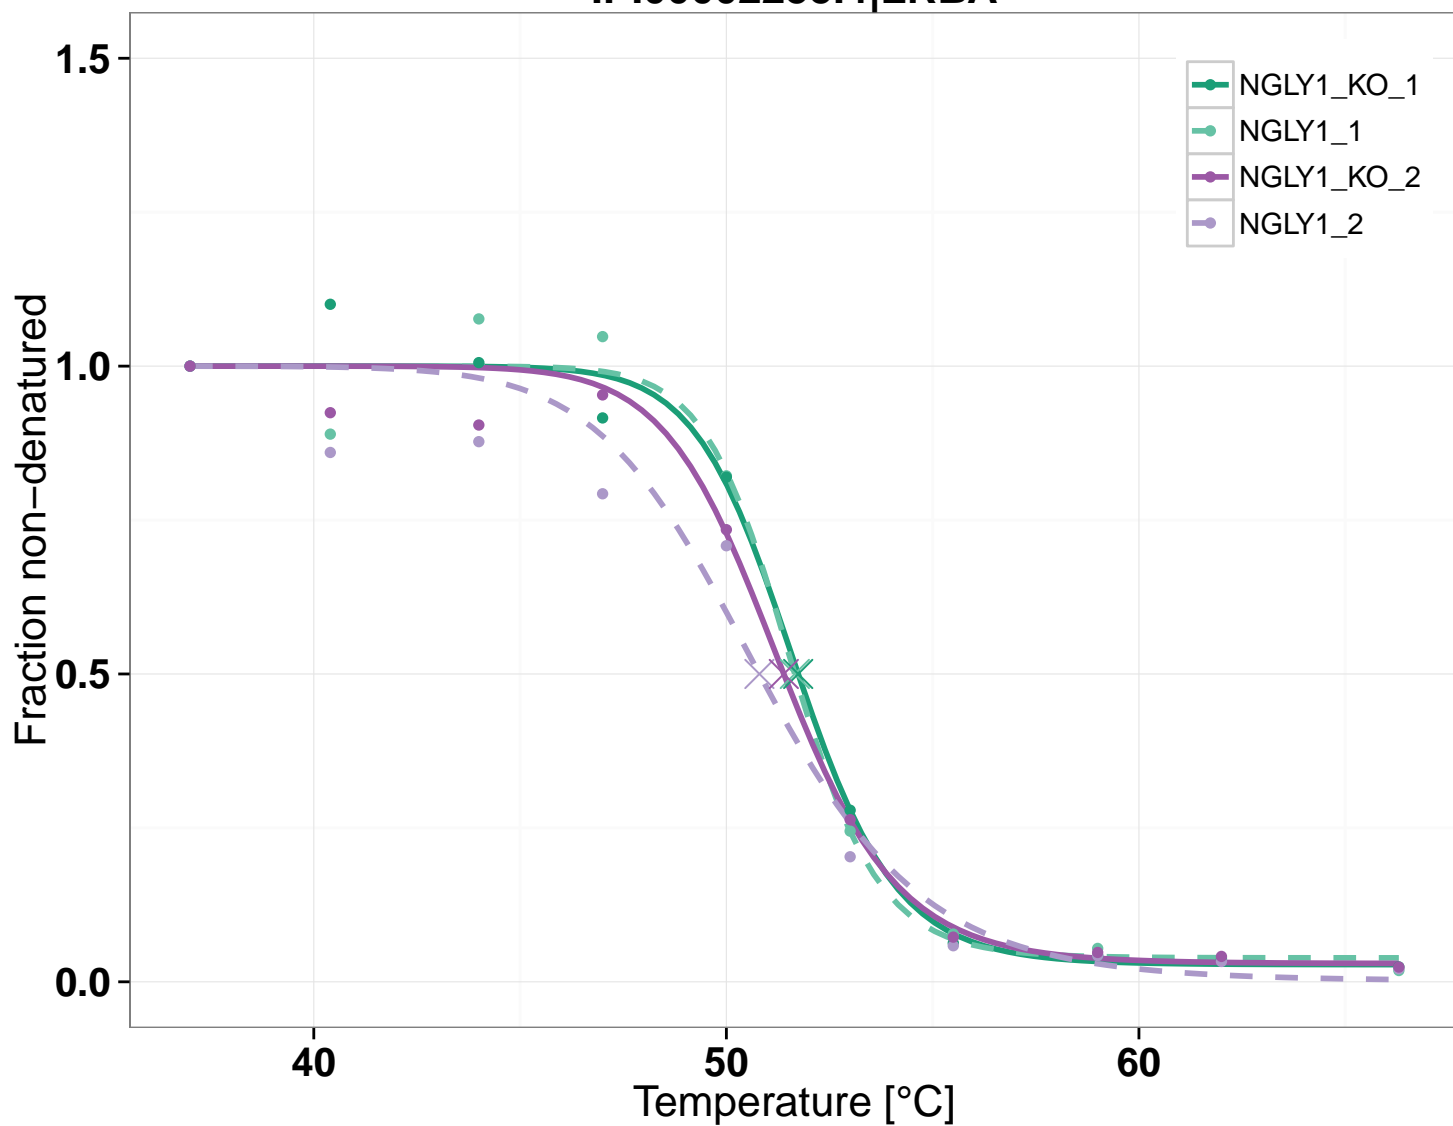

|            | meltPoint | slope | plateau | R2   |
|------------|-----------|-------|---------|------|
| NGLY1_KO_1 | 51.74     | -0.2  | 0.03    | 0.99 |
| NGLY1_1    | 51.66     | -0.23 | 0.04    | 0.99 |
| NGLY1_KO_2 | 51.39     | -0.17 | 0.03    | 0.99 |
| NGLY1_2    | 50.8      | -0.13 | 0       | 0.96 |

Supplement: Supplementary file 6807 [file 1]

IPI00021057.1|SLC12A4

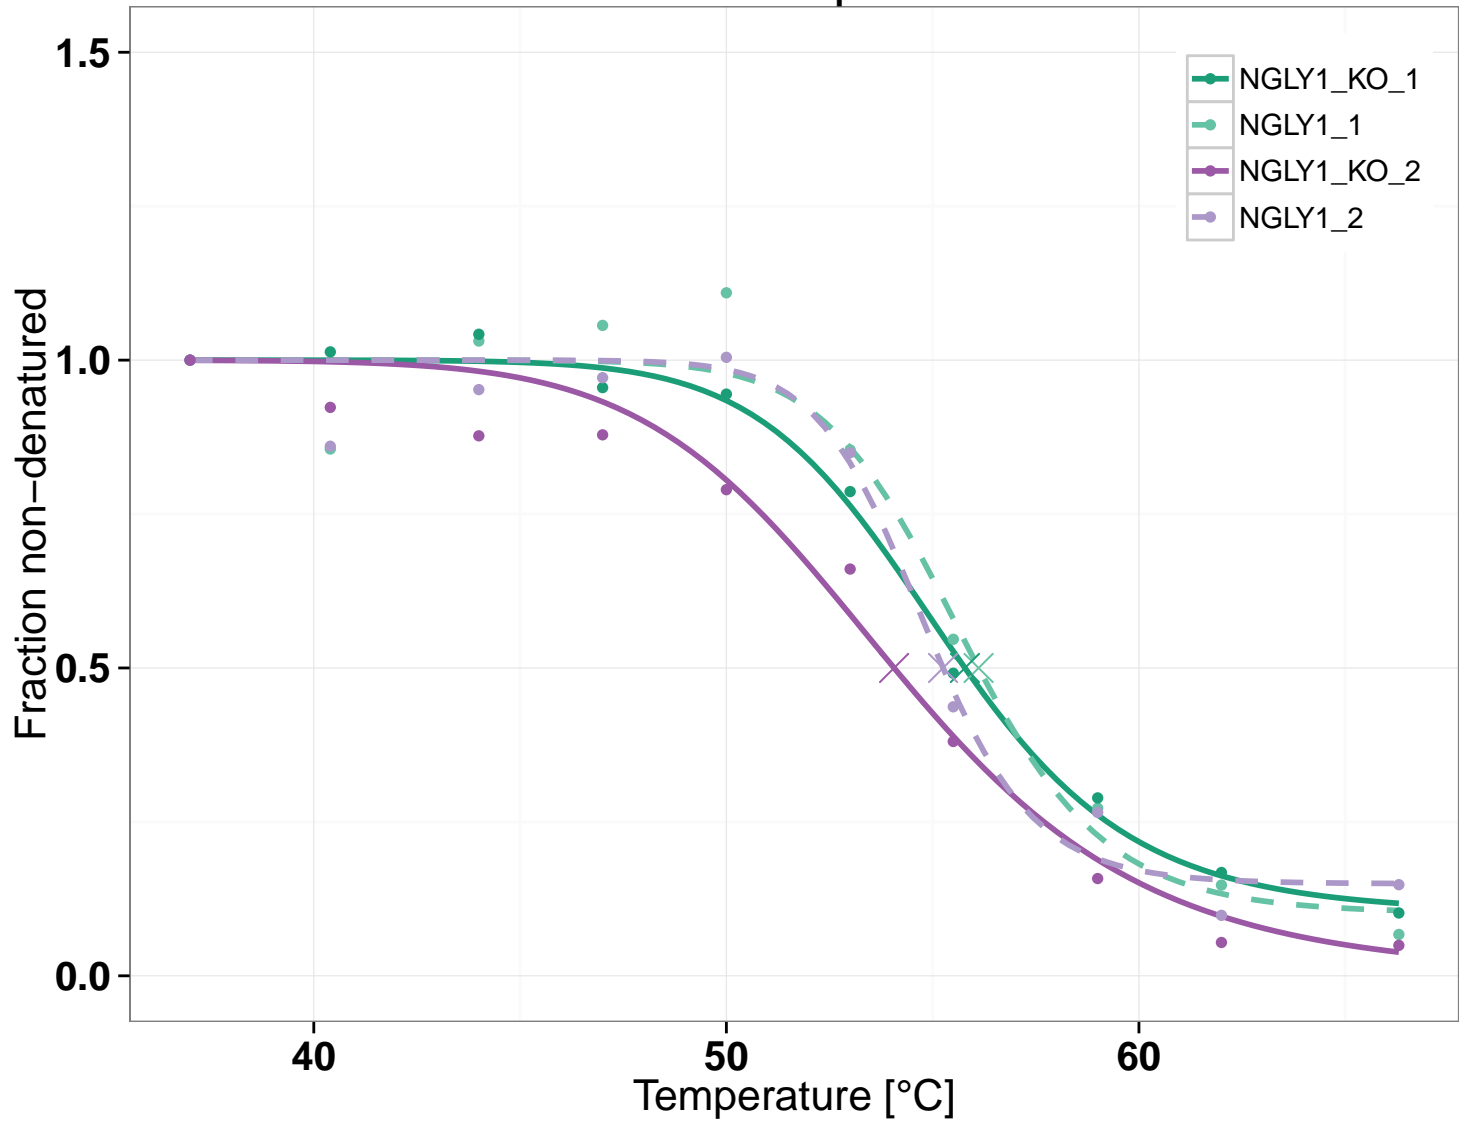

|            | meltPoint | slope  | plateau | R2   |
|------------|-----------|--------|---------|------|
| NGLY1_KO_1 | 55.78     | -0.099 | 0.1     | 1    |
| NGLY1_1    | 56.11     | -0.13  | 0.1     | 0.97 |
| NGLY1_KO_2 | 54.07     | -0.082 | 0       | 0.98 |
| NGLY1_2    | 55.25     | -0.16  | 0.15    | 0.97 |

Supplement: Supplementary file 6808 [file 1]

IPI00008236.6|CYB5R4

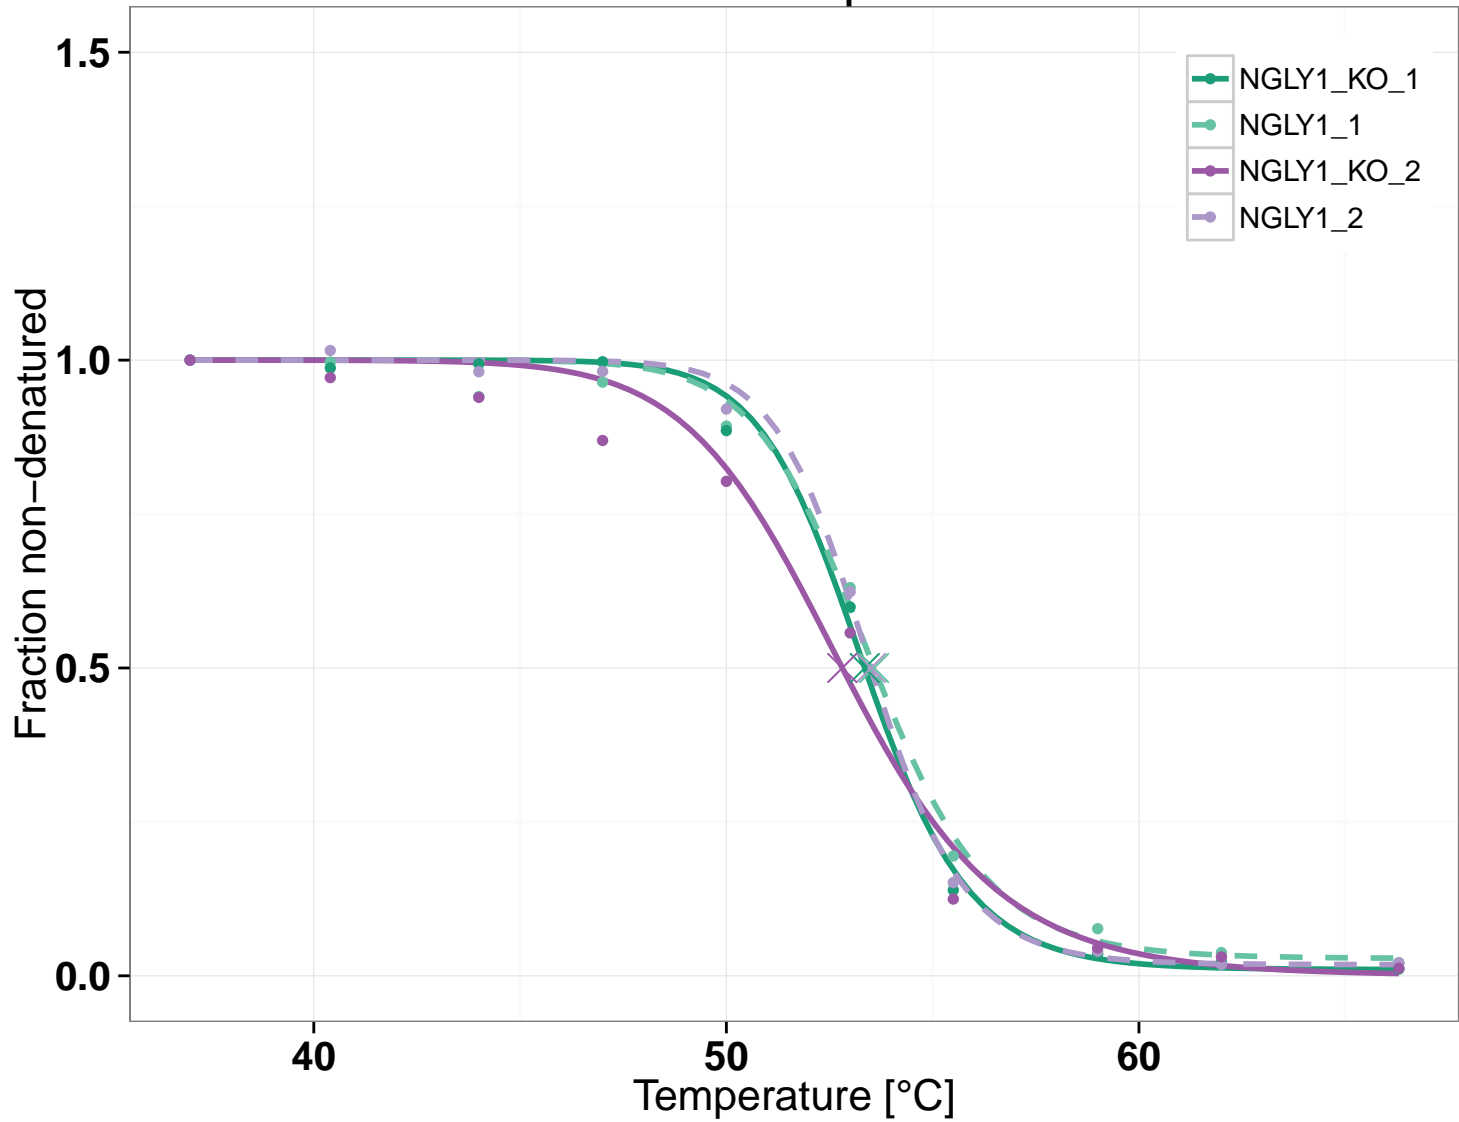

|            | meltPoint | slope | plateau | R2   |
|------------|-----------|-------|---------|------|
| NGLY1_KO_1 | 53.35     | -0.19 | 0.01    | 1    |
| NGLY1_1    | 53.58     | -0.17 | 0.03    | 0.99 |
| NGLY1_KO_2 | 52.81     | -0.13 | 0       | 0.98 |
| NGLY1_2    | 53.51     | -0.21 | 0.02    | 1    |

Supplement: Supplementary file 6809 [file 1]

IPI00168995.5|OR4D9

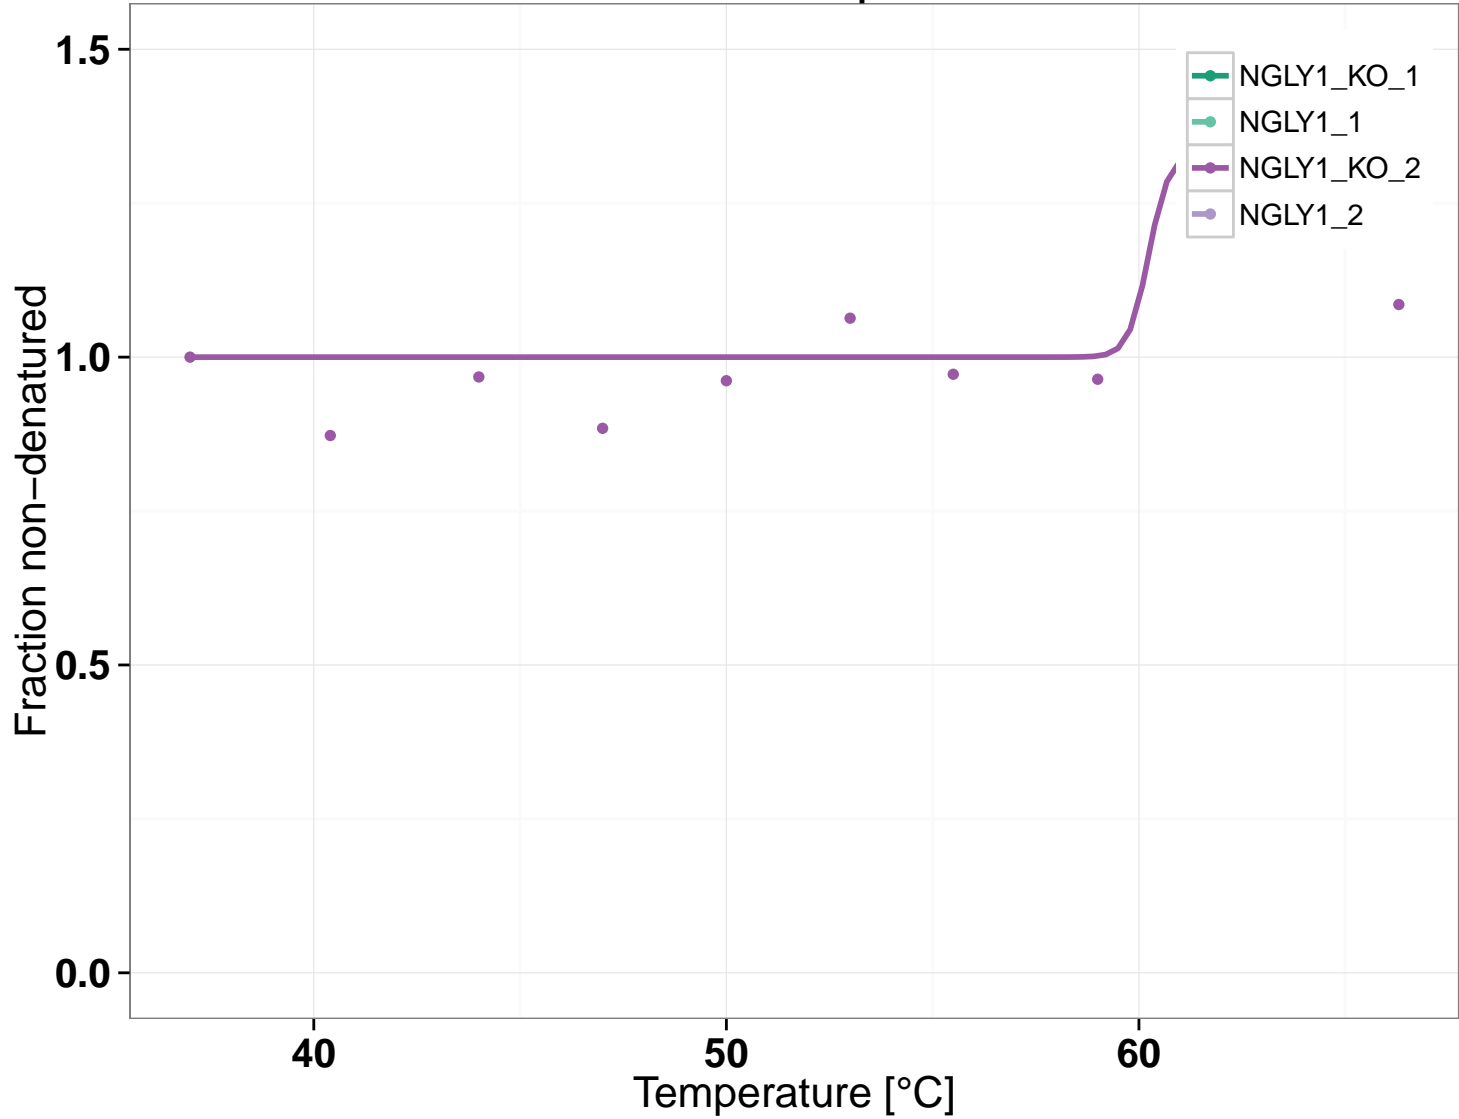

|            | meltPoint | slope | plateau | R2   |
|------------|-----------|-------|---------|------|
| NGLY1_KO_1 | -         | -     | -       | -    |
| NGLY1_1    | -         | -     | -       | -    |
| NGLY1_KO_2 | -         | 0.34  | 1.33    | 0.57 |
| NGLY1_2    | -         | -     | -       | -    |

Supplement: Supplementary file 6810 [file 1]

# IPI00827503.1|KIF20B

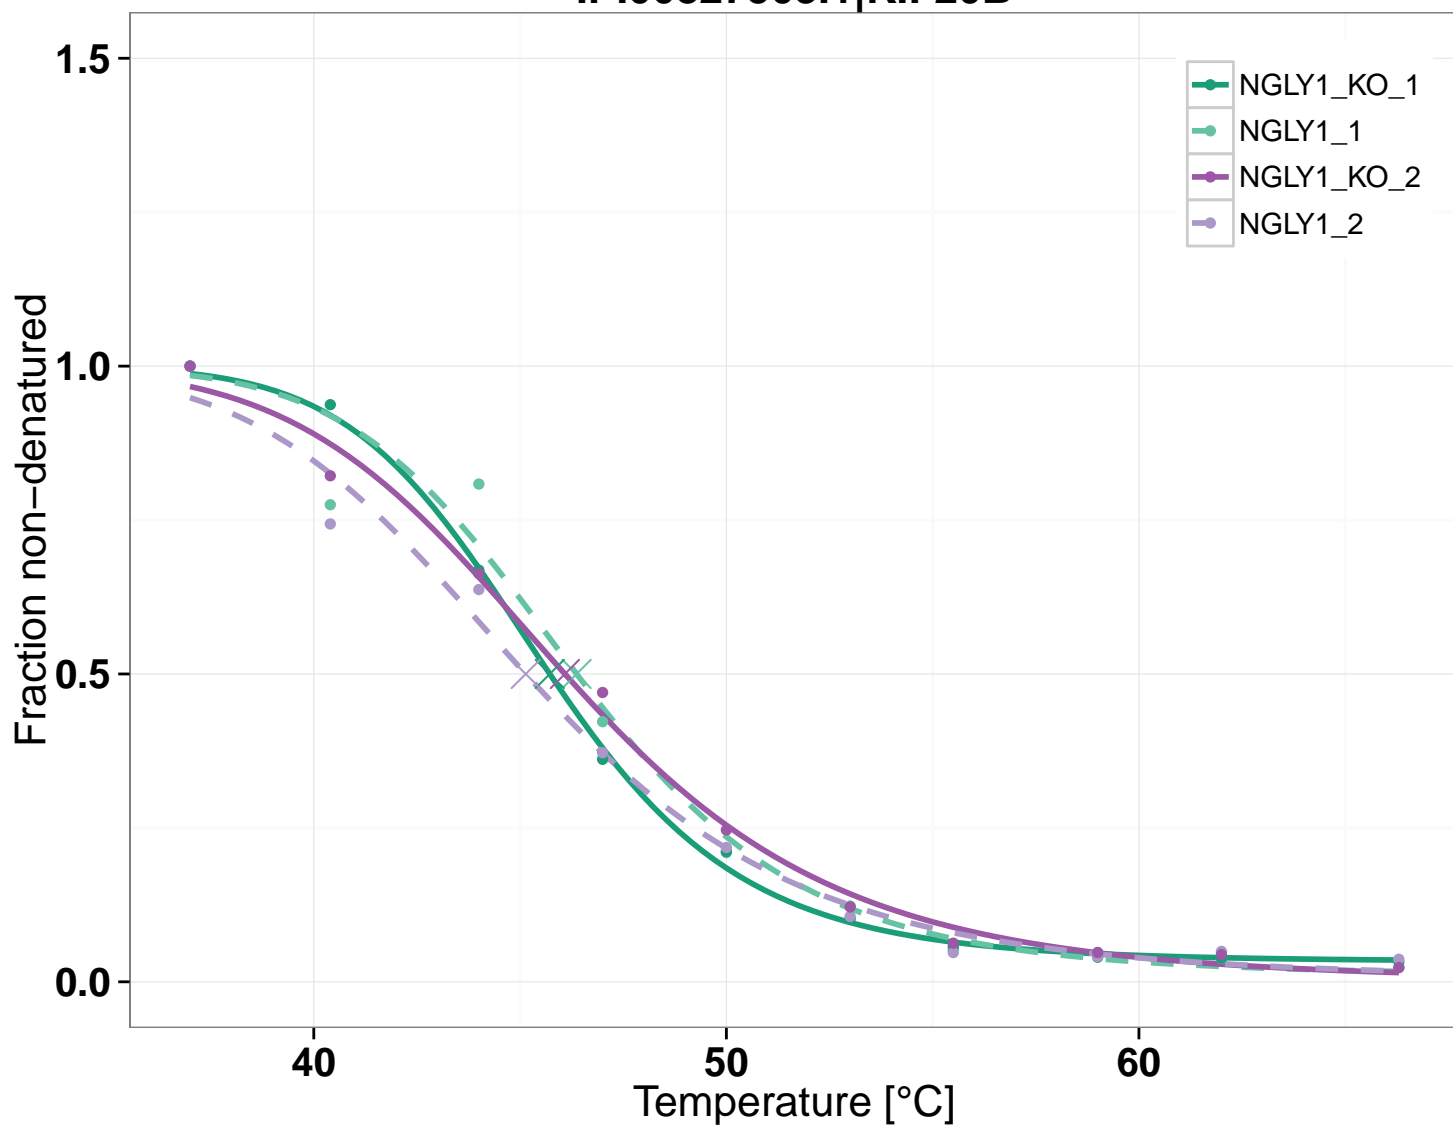

|            | meltPoint | slope  | plateau | R2   |
|------------|-----------|--------|---------|------|
| NGLY1_KO_1 | 45.72     | -0.1   | 0.03    | 1    |
| NGLY1_1    | 46.37     | -0.09  | 0.01    | 0.97 |
| NGLY1_KO_2 | 46.09     | -0.076 | 0       | 0.99 |
| NGLY1_2    | 45.14     | -0.075 | 0       | 0.99 |

Supplement: Supplementary file 6811 [file 1]

# IPI00006197.1|NVL

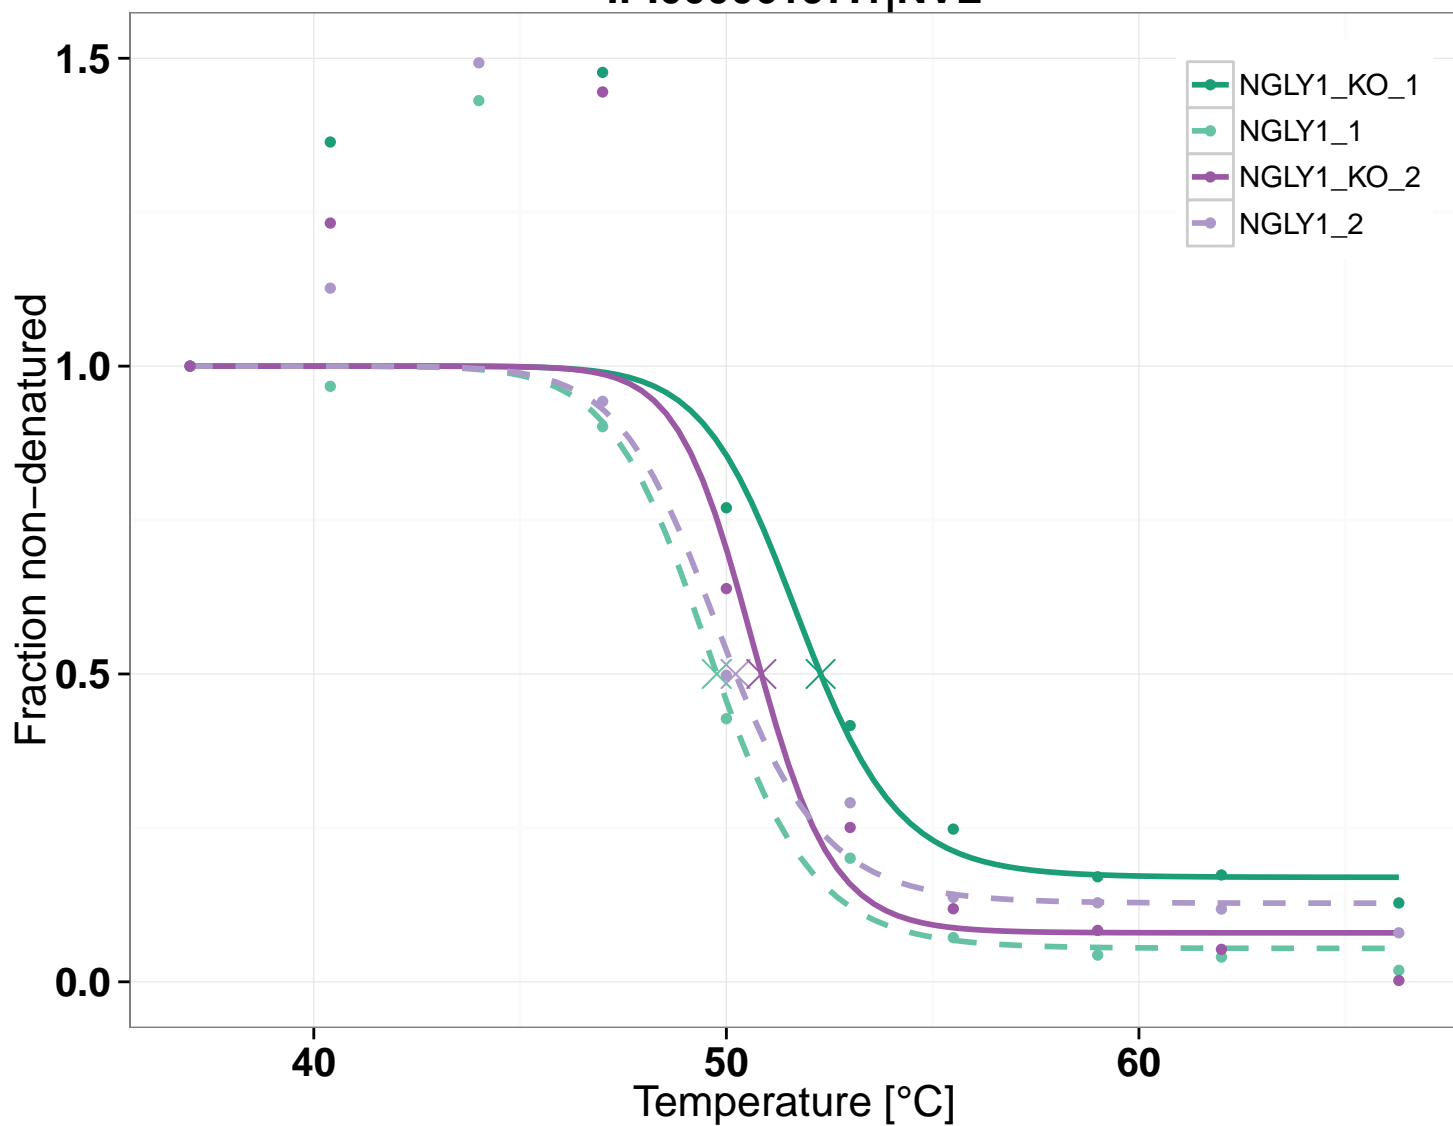

|            | meltPoint | slope | plateau | R2   |
|------------|-----------|-------|---------|------|
| NGLY1_KO_1 | 52.28     | -0.18 | 0.17    | 0.64 |
| NGLY1_1    | 49.77     | -0.19 | 0.05    | 0.92 |
| NGLY1_KO_2 | 50.85     | -0.25 | 0.08    | 0.76 |
| NGLY1_2    | 50.22     | -0.18 | 0.13    | 0.89 |

Supplement: Supplementary file 6812 [file 1]

# IPI00305992.4|WBSCR16

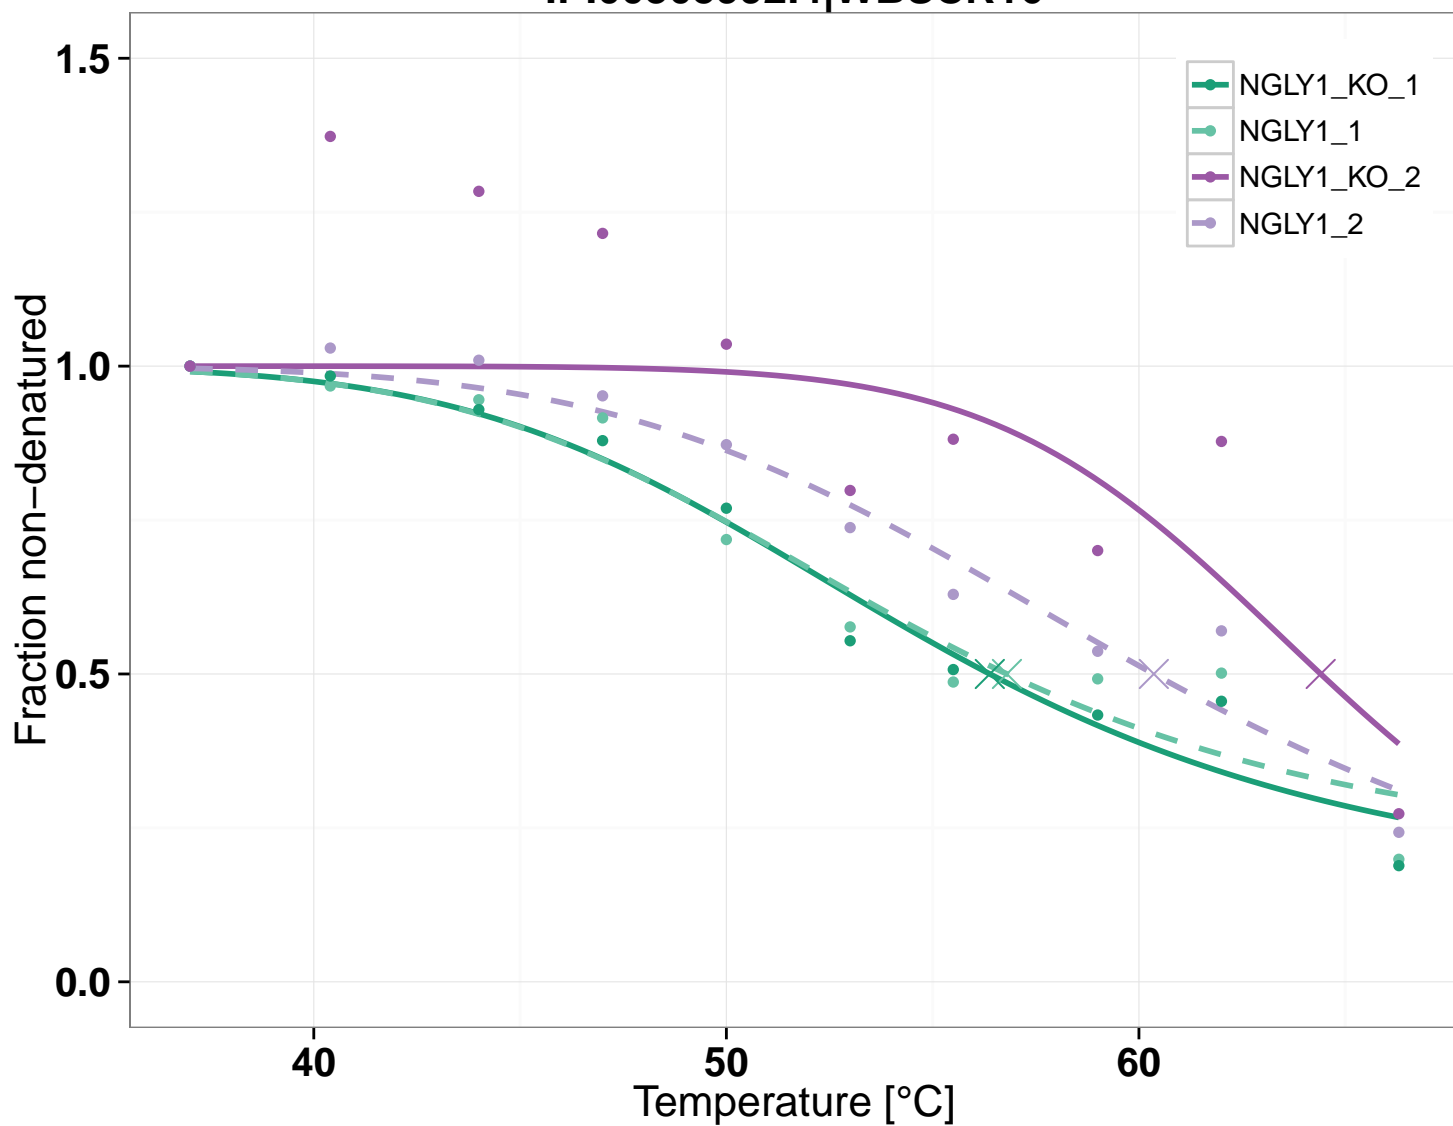

|            | meltPoint | slope  | plateau | R2   |
|------------|-----------|--------|---------|------|
| NGLY1_KO_1 | 56.39     | -0.04  | 0.14    | 0.96 |
| NGLY1_1    | 56.8      | -0.038 | 0.19    | 0.93 |
| NGLY1_KO_2 | 64.41     | -0.064 | 0       | 0.59 |
| NGLY1_2    | 60.36     | -0.039 | 0       | 0.95 |

Supplement: Supplementary file 6813 [file 1]

# IPI00070943.4|PI4KA

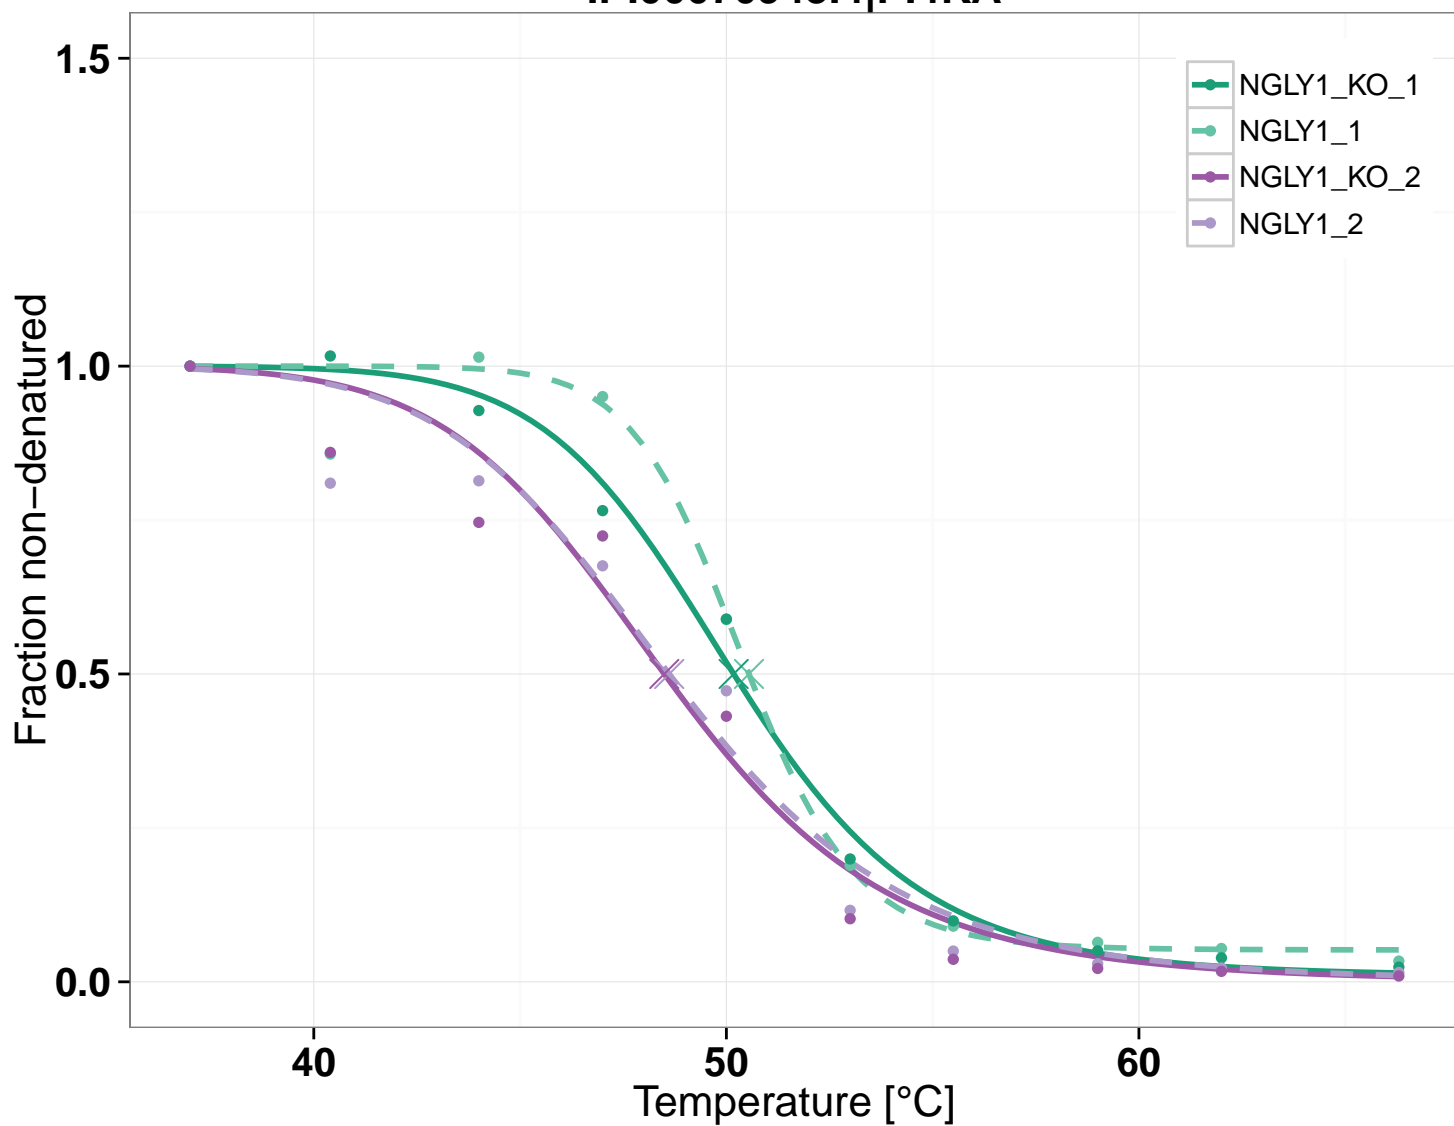

|            | meltPoint | slope  | plateau | R2   |
|------------|-----------|--------|---------|------|
| NGLY1_KO_1 | 50.18     | -0.11  | 0.01    | 0.99 |
| NGLY1_1    | 50.55     | -0.17  | 0.05    | 0.99 |
| NGLY1_KO_2 | 48.5      | -0.093 | 0       | 0.97 |
| NGLY1_2    | 48.62     | -0.089 | 0       | 0.97 |

Supplement: Supplementary file 6814 [file 1]

IPI00873294.1|BLMH

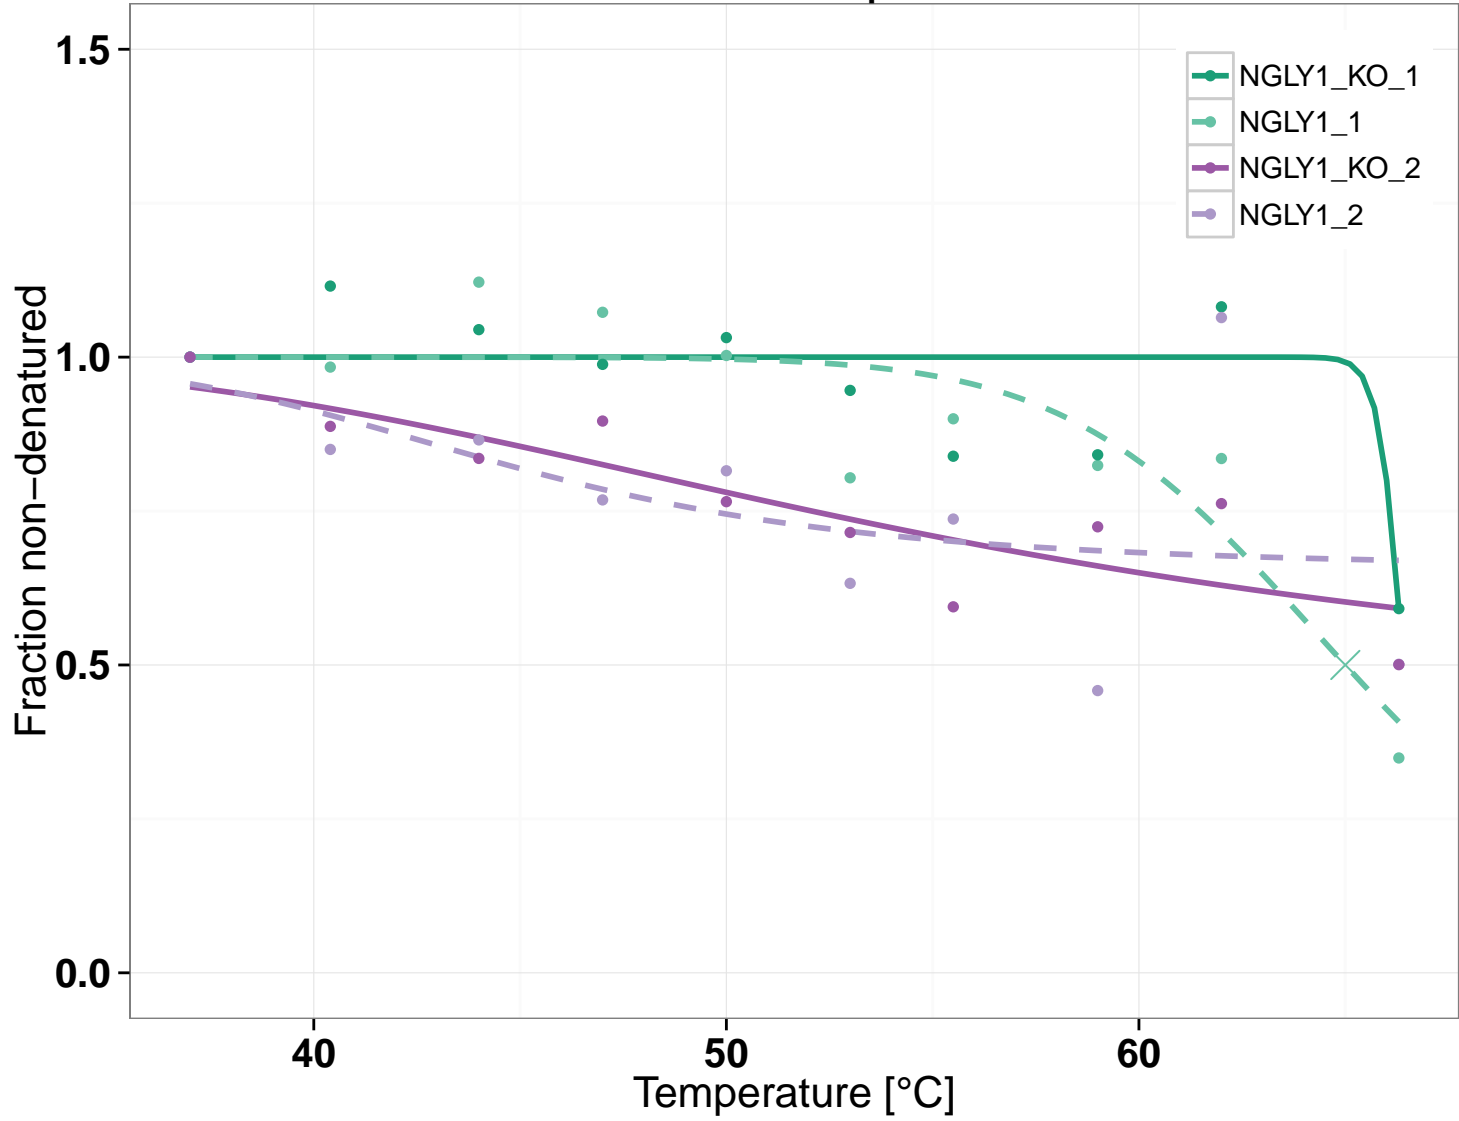

|            | meltPoint | slope  | plateau | R2   |
|------------|-----------|--------|---------|------|
| NGLY1_KO_1 | -         | -      | 0       | 0.64 |
| NGLY1_1    | 65        | -0.074 | 0       | 0.82 |
| NGLY1_KO_2 | -         | -0.015 | 0.41    | 0.73 |
| NGLY1_2    | -         | -0.019 | 0.66    | 0.28 |

Supplement: Supplementary file 6815 [file 1]

IPI00887097.1|KIAA1627

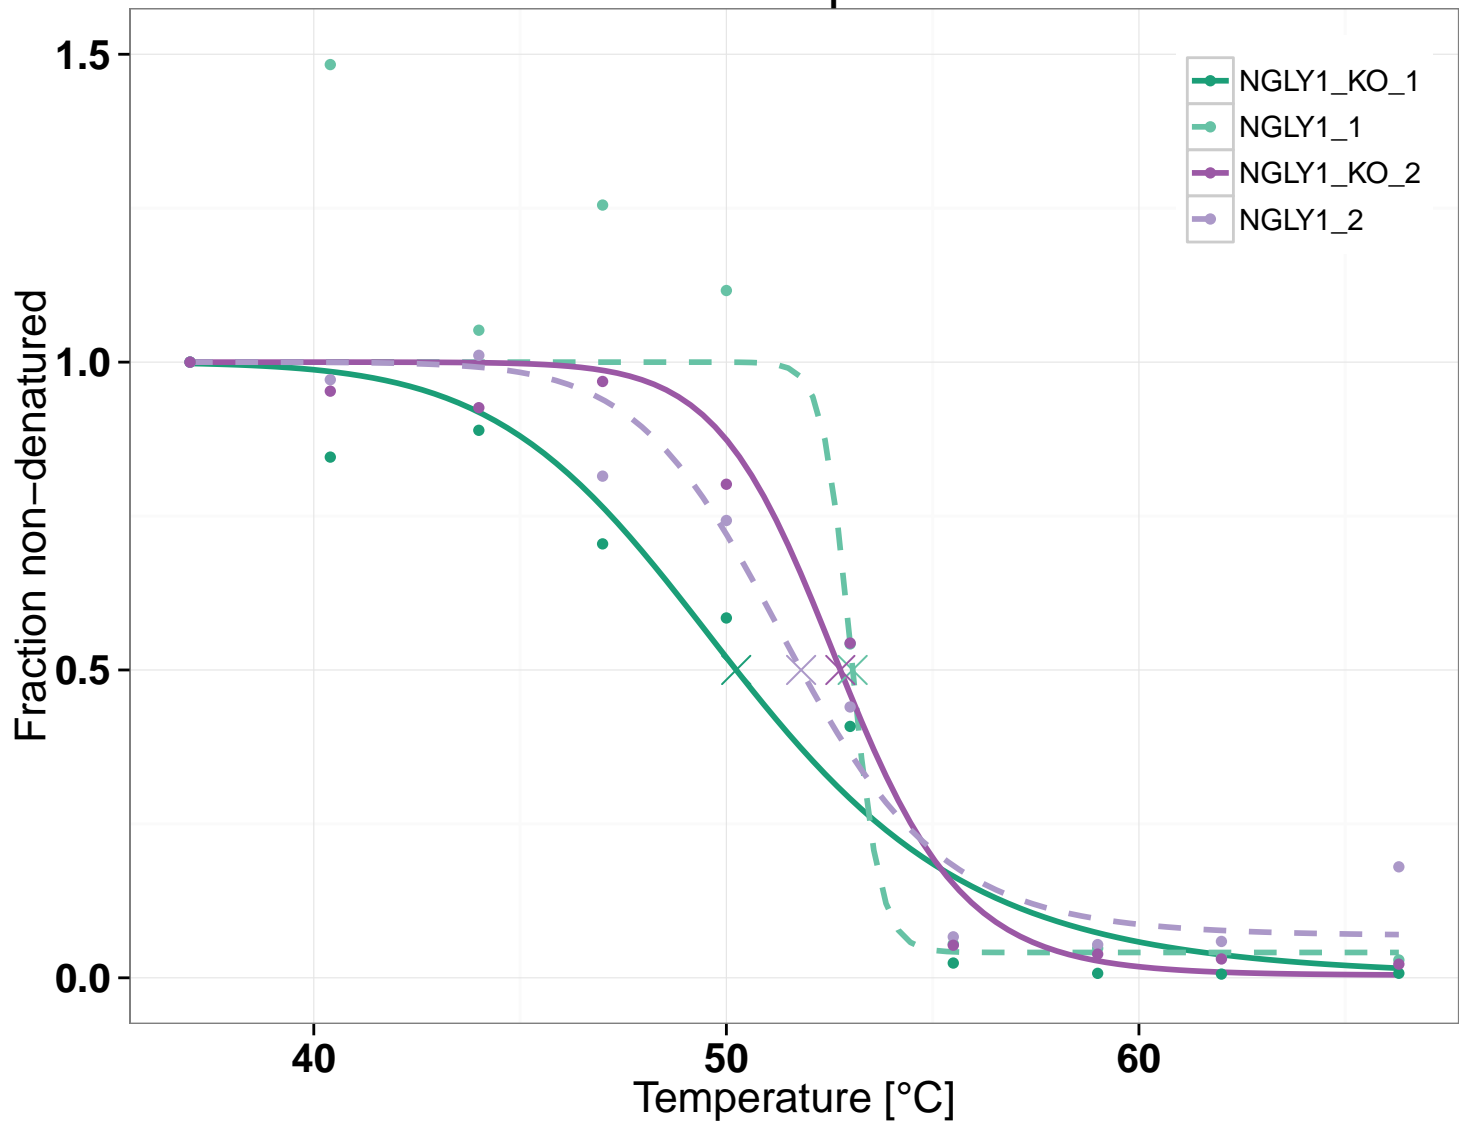

|            | meltPoint | slope  | plateau | R2   |
|------------|-----------|--------|---------|------|
| NGLY1_KO_1 | 50.24     | -0.086 | 0       | 0.96 |
| NGLY1_1    | 53.06     | -0.7   | 0.04    | 0.9  |
| NGLY1_KO_2 | 52.76     | -0.17  | 0       | 0.98 |
| NGLY1_2    | 51.81     | -0.13  | 0.07    | 0.97 |

Supplement: Supplementary file 6816 [file 1]

# IPI00396662.2|NEK6

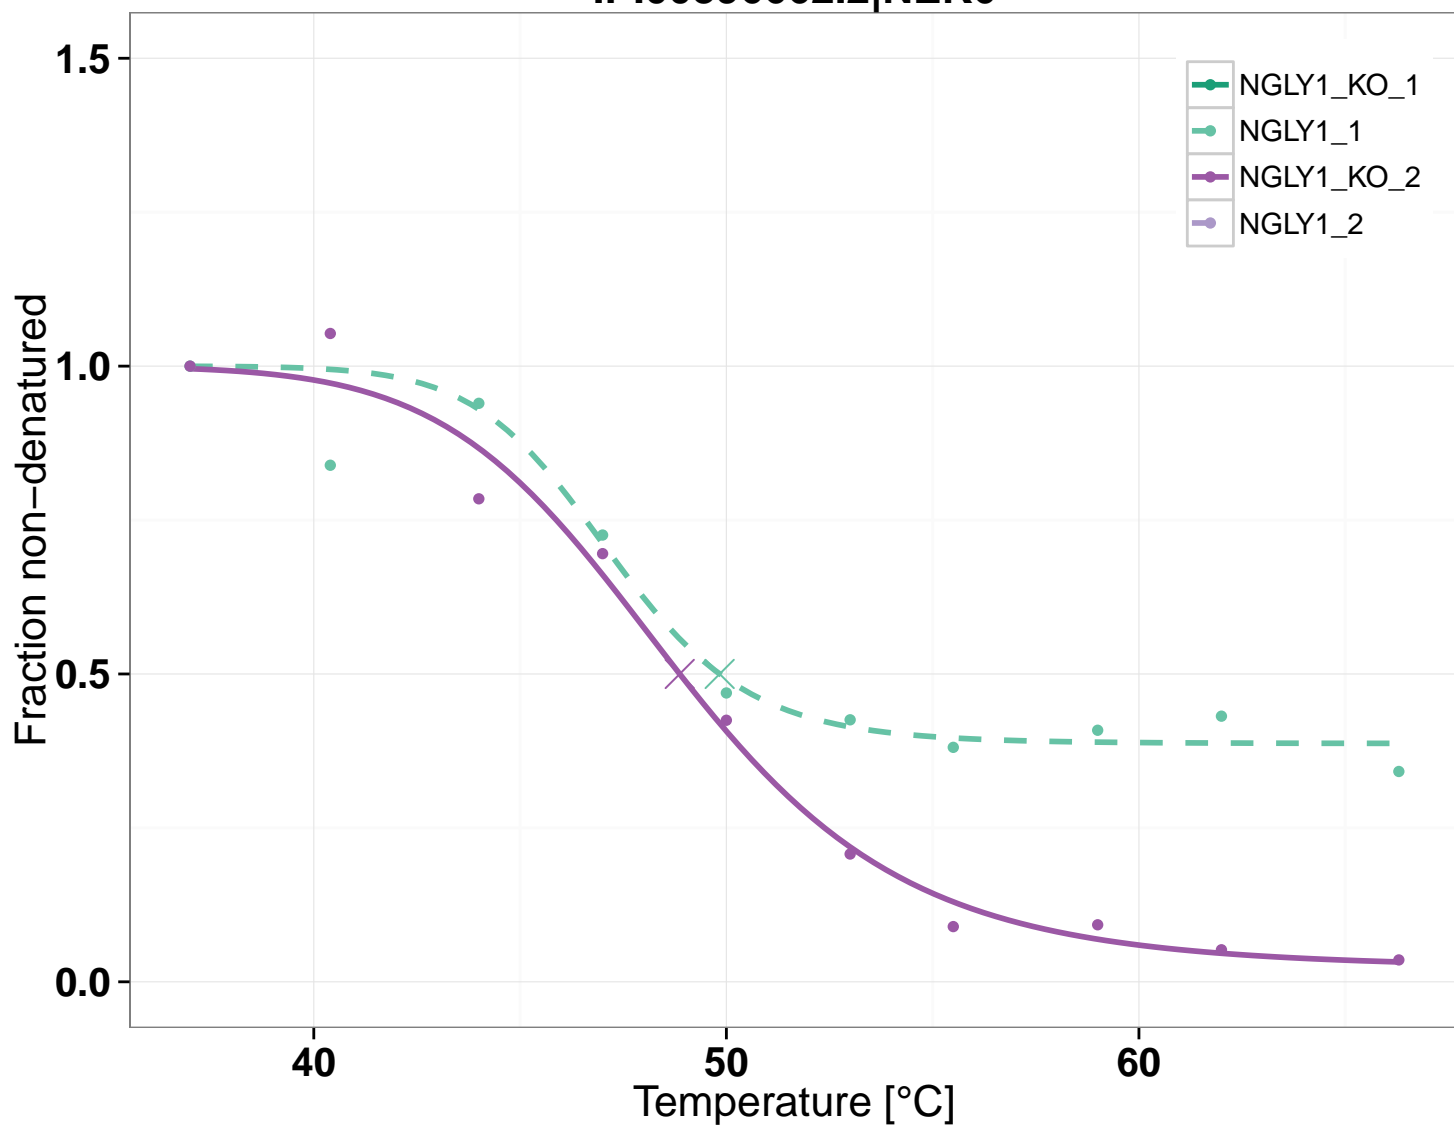

|            | meltPoint | slope  | plateau | R2   |
|------------|-----------|--------|---------|------|
| NGLY1_KO_1 | —         | —      | —       | —    |
| NGLY1_1    | 49.84     | -0.092 | 0.39    | 0.95 |
| NGLY1_KO_2 | 48.87     | -0.087 | 0.02    | 0.99 |
| NGLY1_2    | —         | —      | —       | —    |

Supplement: Supplementary file 6817 [file 1]

# IPI00419579.5|CYP20A1

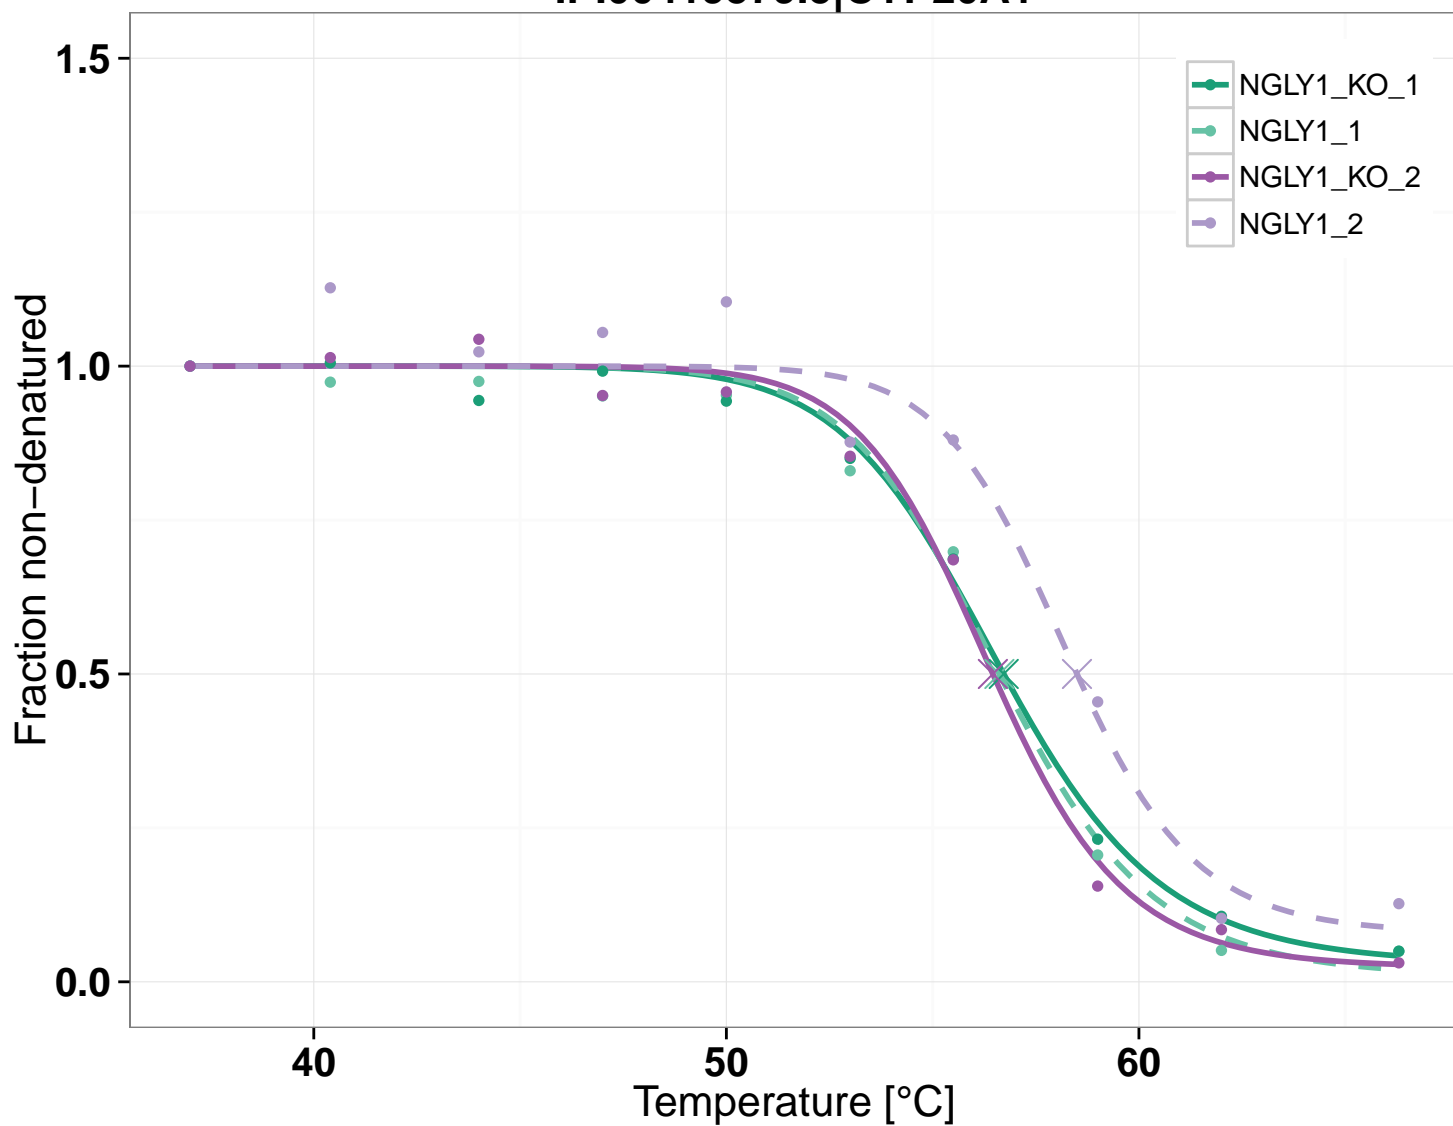

|            | meltPoint | slope | plateau | R2   |
|------------|-----------|-------|---------|------|
| NGLY1_KO_1 | 56.72     | -0.12 | 0.03    | 0.99 |
| NGLY1_1    | 56.62     | -0.13 | 0.01    | 0.99 |
| NGLY1_KO_2 | 56.46     | -0.15 | 0.02    | 0.99 |
| NGLY1_2    | 58.5      | -0.15 | 0.08    | 0.97 |

Supplement: Supplementary file 6818 [file 1]

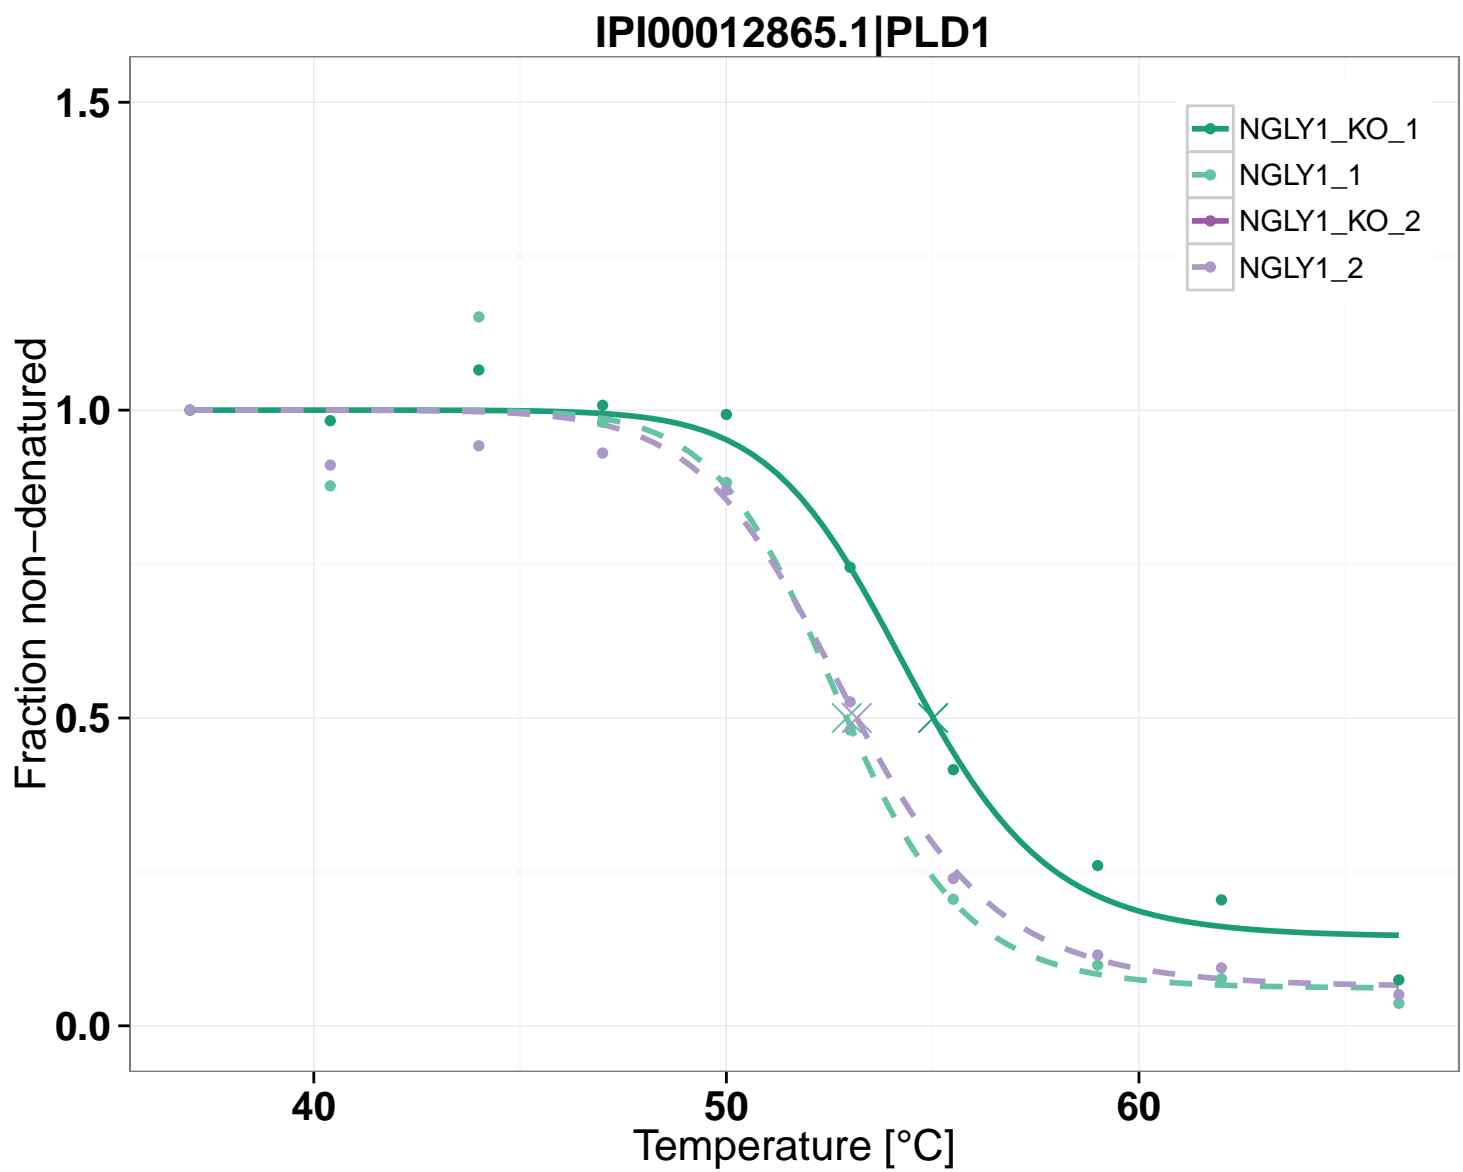

|            | meltPoint | slope | plateau | R2   |
|------------|-----------|-------|---------|------|
| NGLY1_KO_1 | 55.01     | -0.13 | 0.14    | 0.99 |
| NGLY1_1    | 52.92     | -0.15 | 0.06    | 0.98 |
| NGLY1_KO_2 | -         | -     | -       | -    |
| NGLY1_2    | 53.16     | -0.13 | 0.06    | 0.99 |

Supplement: Supplementary file 6819 [file 1]

# IPI00029263.2|FER

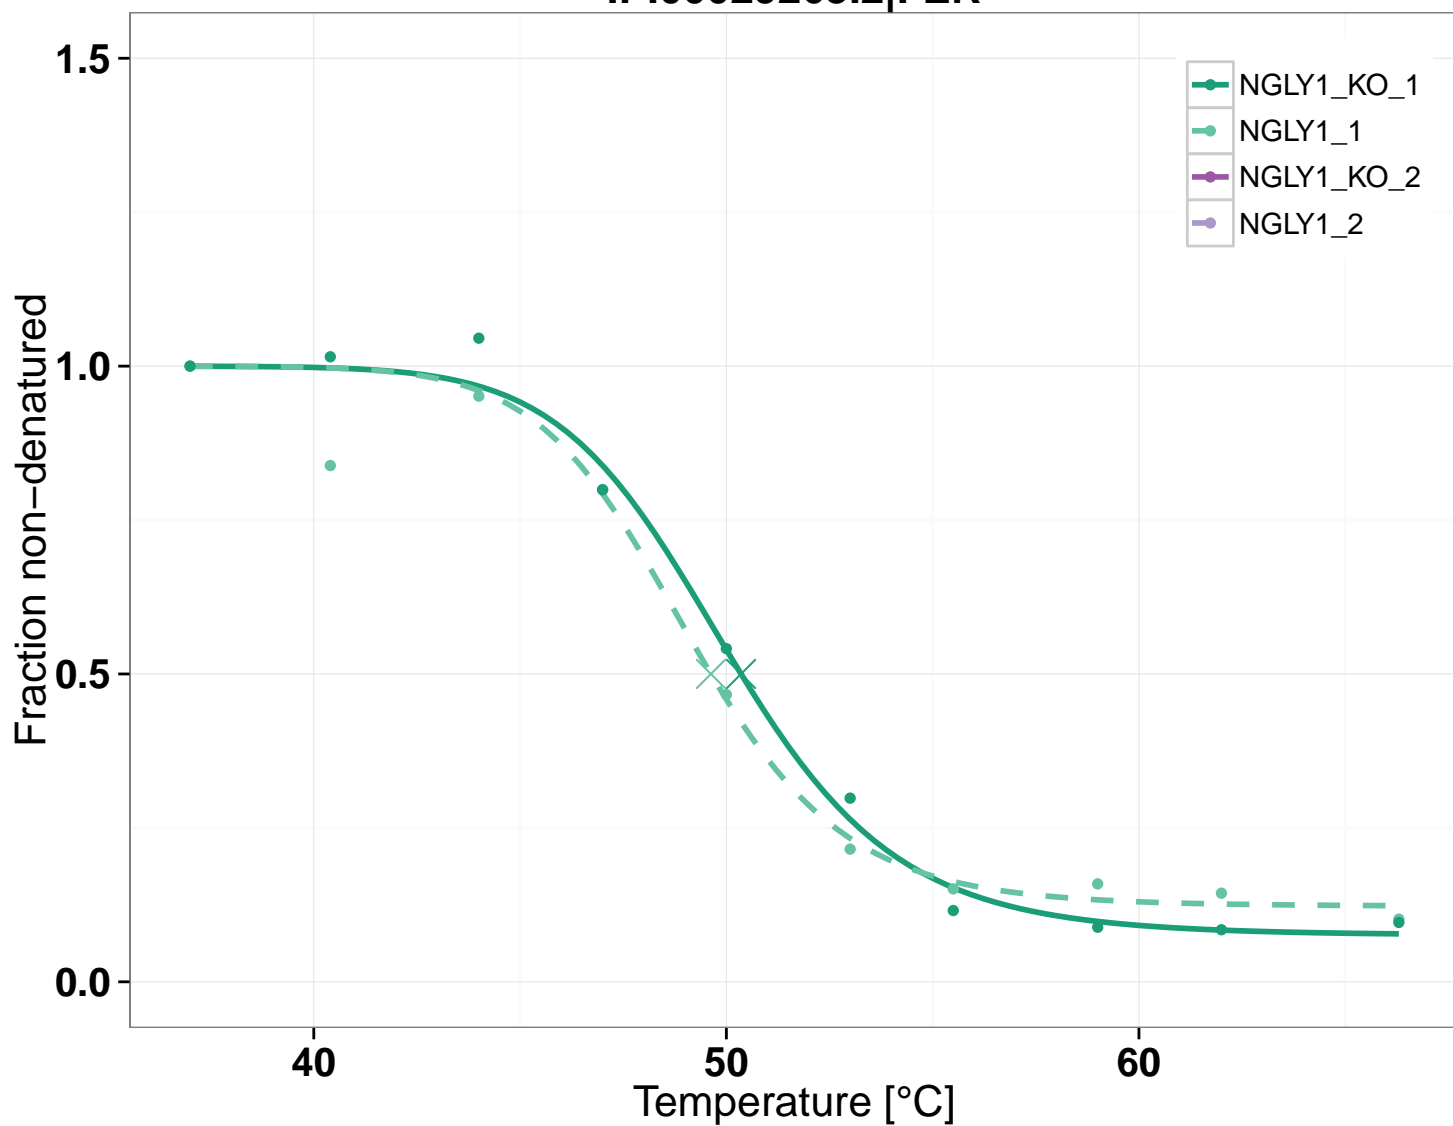

|            | meltPoint | slope | plateau | R2   |
|------------|-----------|-------|---------|------|
| NGLY1_KO_1 | 50.36     | -0.11 | 0.08    | 0.99 |
| NGLY1_1    | 49.63     | -0.12 | 0.12    | 0.98 |
| NGLY1_KO_2 | -         | -     | -       | -    |
| NGLY1_2    | -         | -     | -       | -    |

Supplement: Supplementary file 6820 [file 1]

IPI00909114.1|TNRC6B

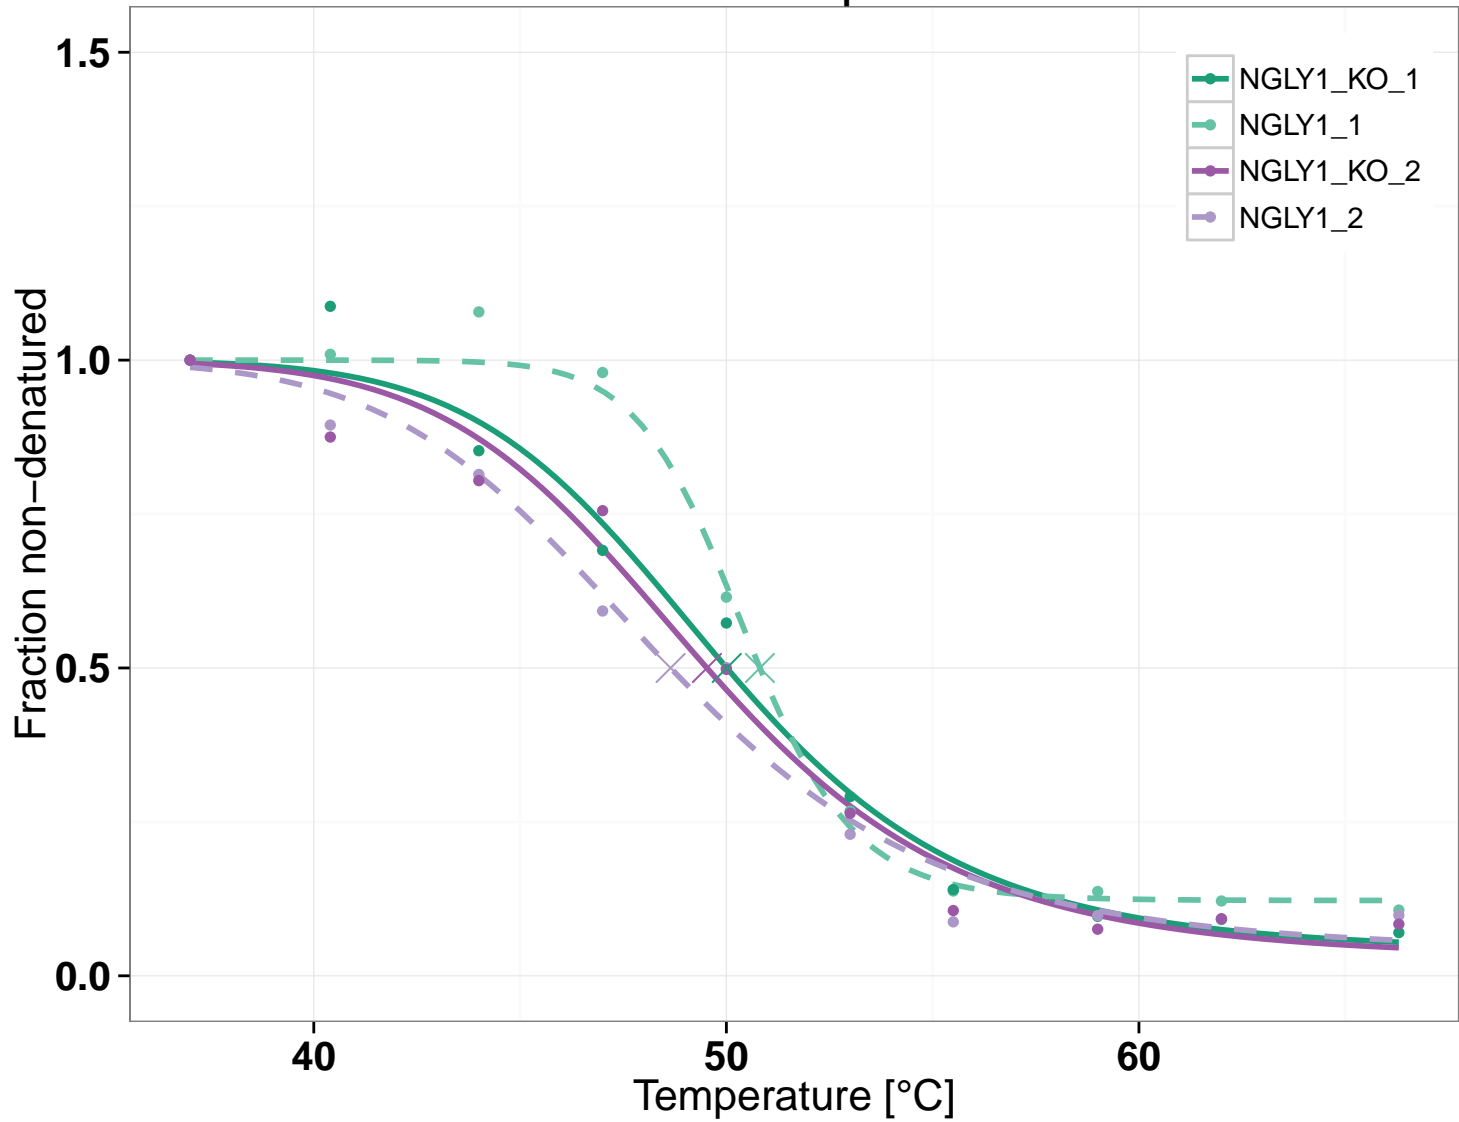

|            | meltPoint | slope  | plateau | R2   |
|------------|-----------|--------|---------|------|
| NGLY1_KO_1 | 50.01     | -0.08  | 0.04    | 0.98 |
| NGLY1_1    | 50.81     | -0.17  | 0.12    | 0.99 |
| NGLY1_KO_2 | 49.53     | -0.078 | 0.03    | 0.98 |
| NGLY1_2    | 48.65     | -0.072 | 0.04    | 0.98 |

Supplement: Supplementary file 6821 [file 1]

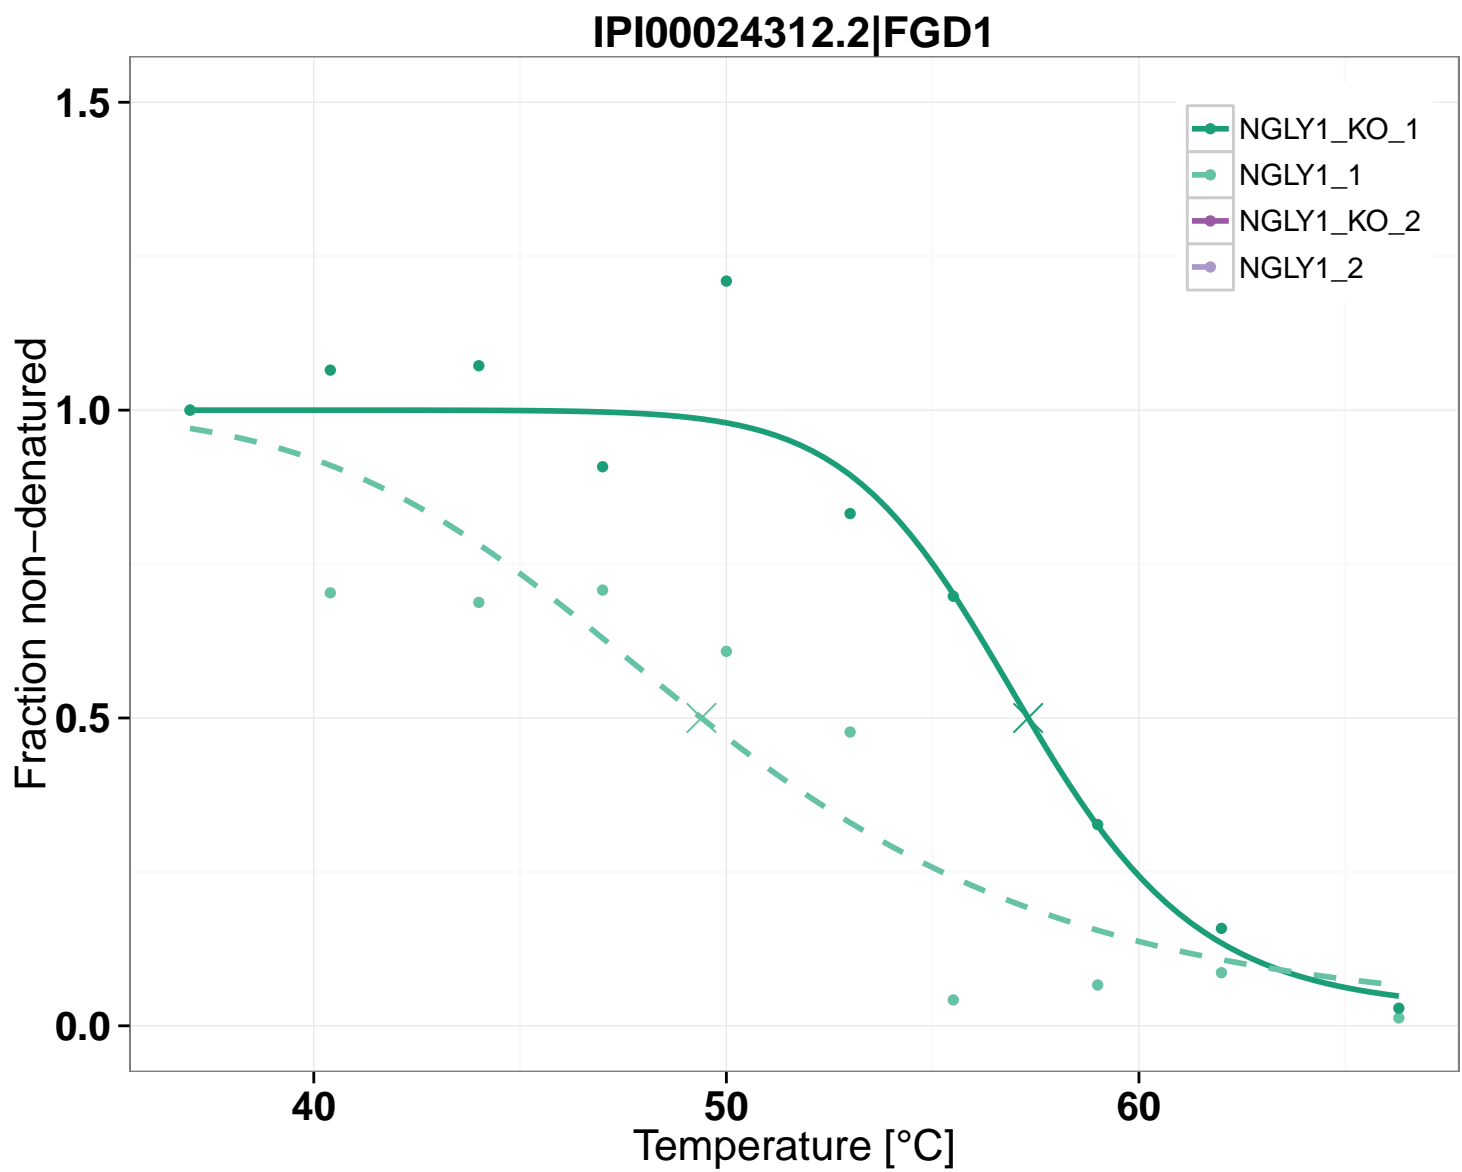

|            | meltPoint | slope  | plateau | R2   |
|------------|-----------|--------|---------|------|
| NGLY1_KO_1 | 57.32     | -0.11  | 0.02    | 0.95 |
| NGLY1_1    | 49.4      | -0.055 | 0       | 0.87 |
| NGLY1_KO_2 | -         | -      | -       | -    |
| NGLY1_2    | -         | -      | -       | -    |

Supplement: Supplementary file 6822 [file 1]

# IPI00002149.1|SAR1B

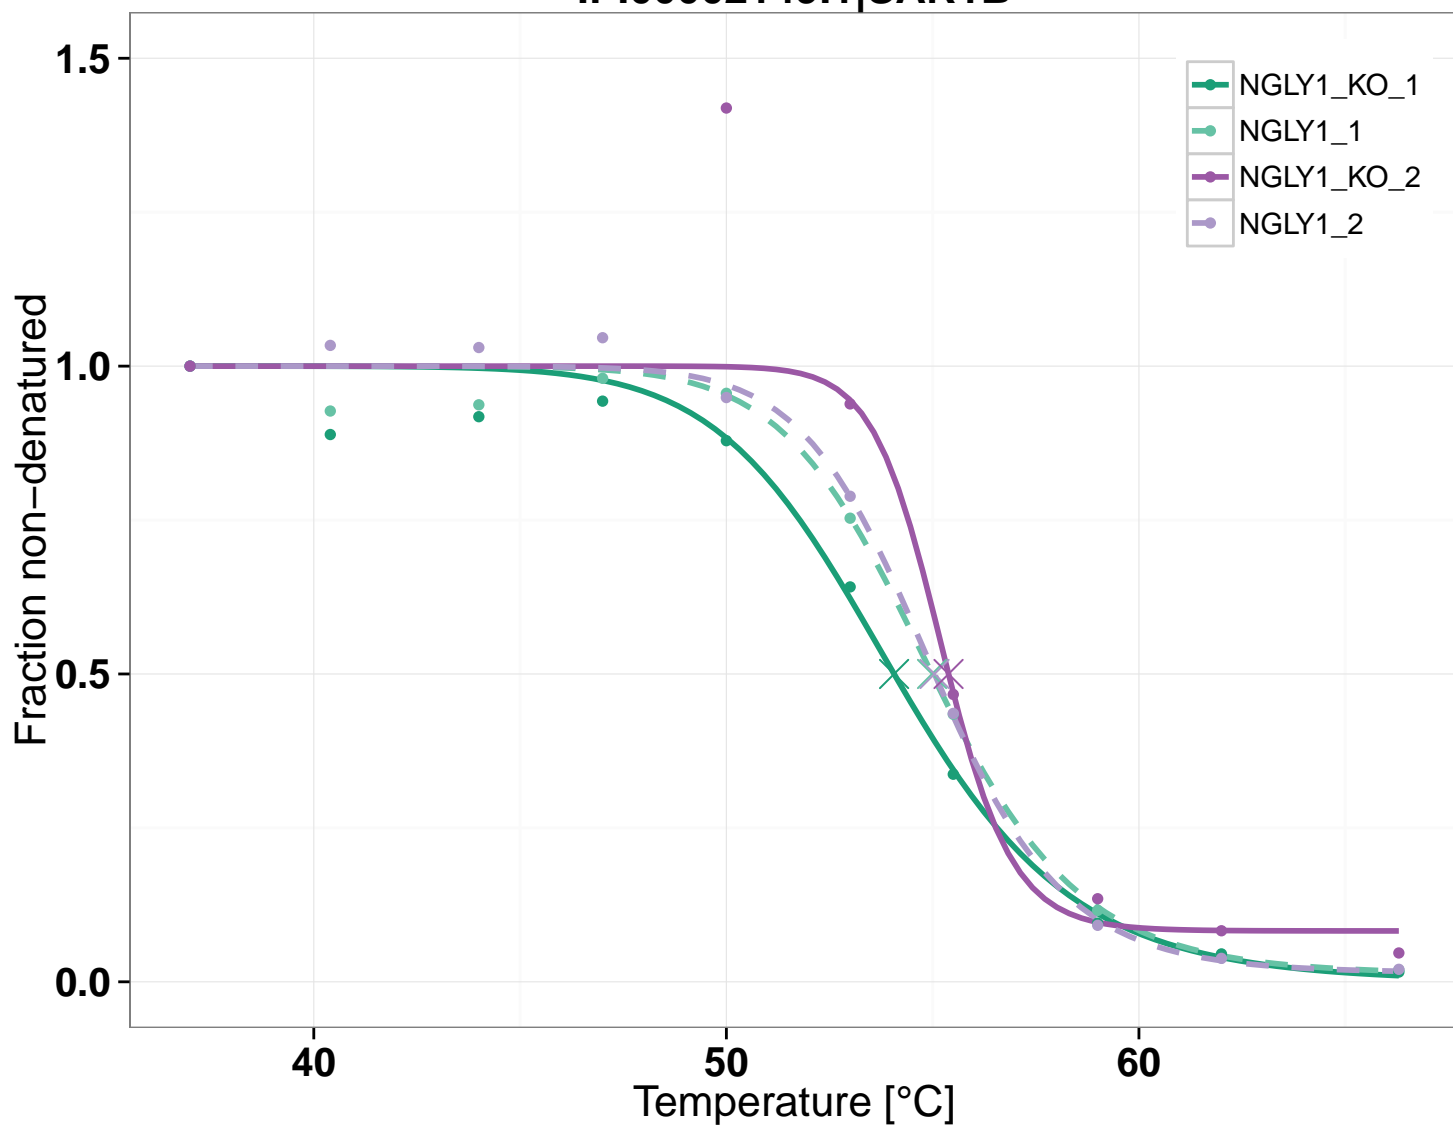

|            | meltPoint | slope | plateau | R2   |
|------------|-----------|-------|---------|------|
| NGLY1_KO_1 | 54.07     | -0.12 | 0       | 0.99 |
| NGLY1_1    | 54.99     | -0.14 | 0.01    | 0.99 |
| NGLY1_KO_2 | 55.38     | -0.27 | 0.08    | 0.71 |
| NGLY1_2    | 55.05     | -0.15 | 0.01    | 1    |

Supplement: Supplementary file 6823 [file 1]

IPI00719285.1|CIT

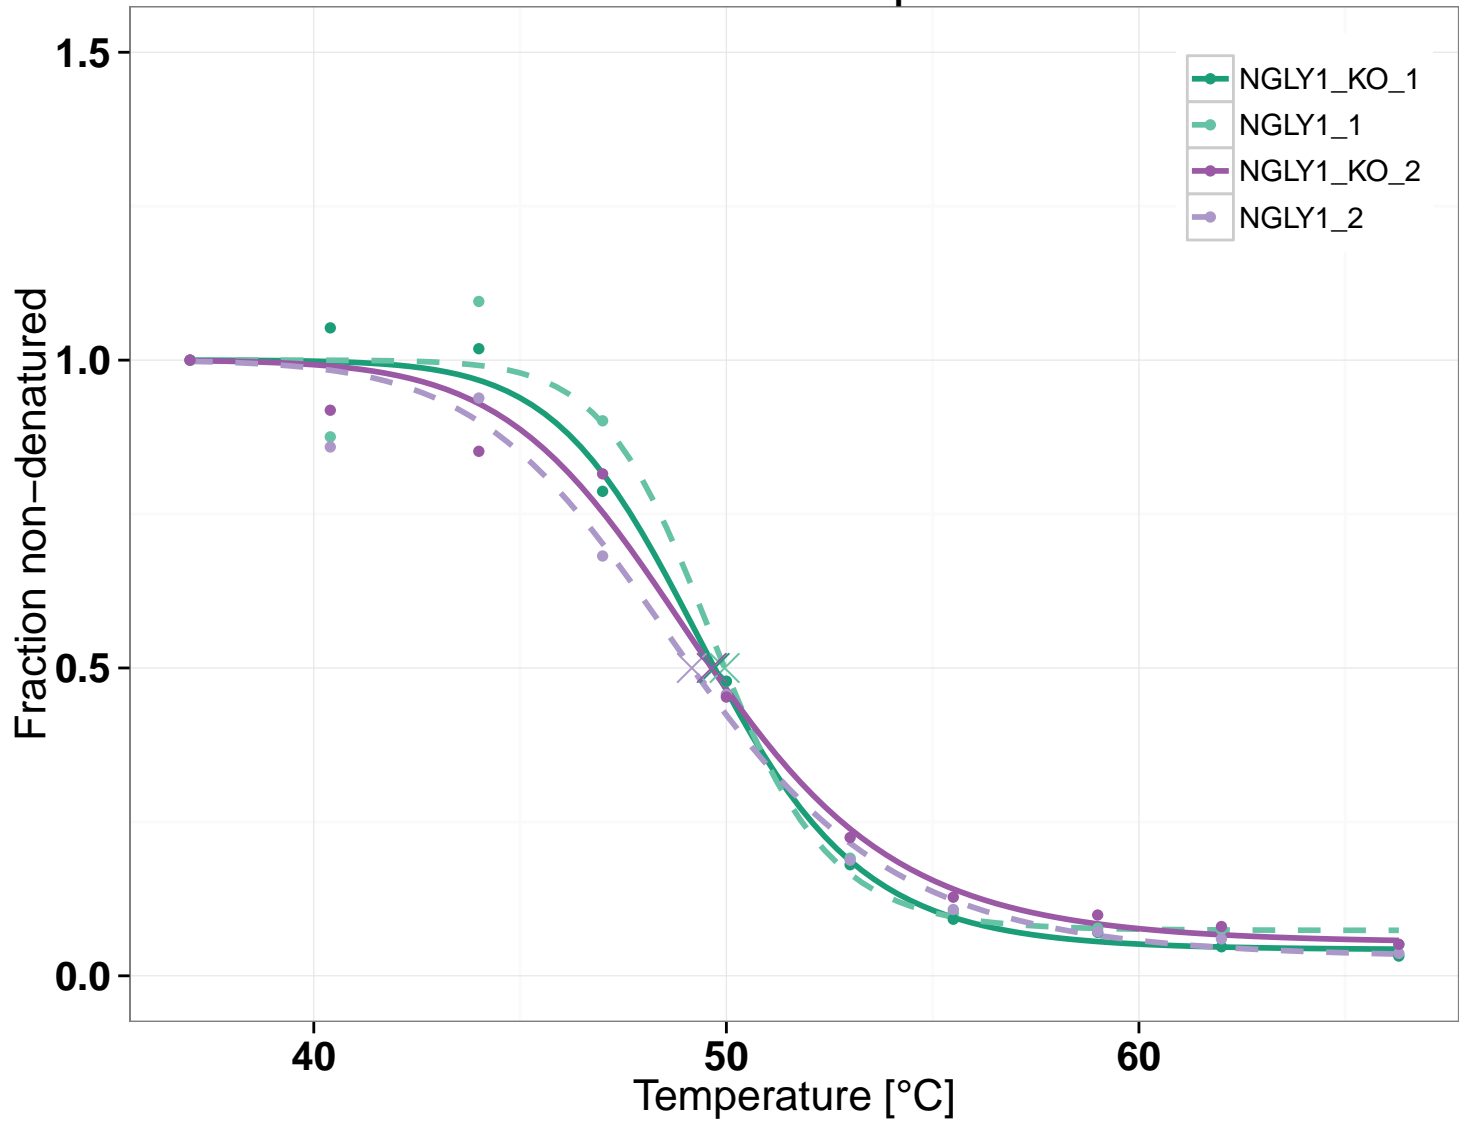

|            | meltPoint | slope  | plateau | R2   |
|------------|-----------|--------|---------|------|
| NGLY1_KO_1 | 49.72     | -0.13  | 0.04    | 1    |
| NGLY1_1    | 49.96     | -0.17  | 0.07    | 0.98 |
| NGLY1_KO_2 | 49.65     | -0.1   | 0.05    | 0.99 |
| NGLY1_2    | 49.16     | -0.096 | 0.03    | 0.99 |

Supplement: Supplementary file 6824 [file 1]

IPI00023598.2|TUBB4

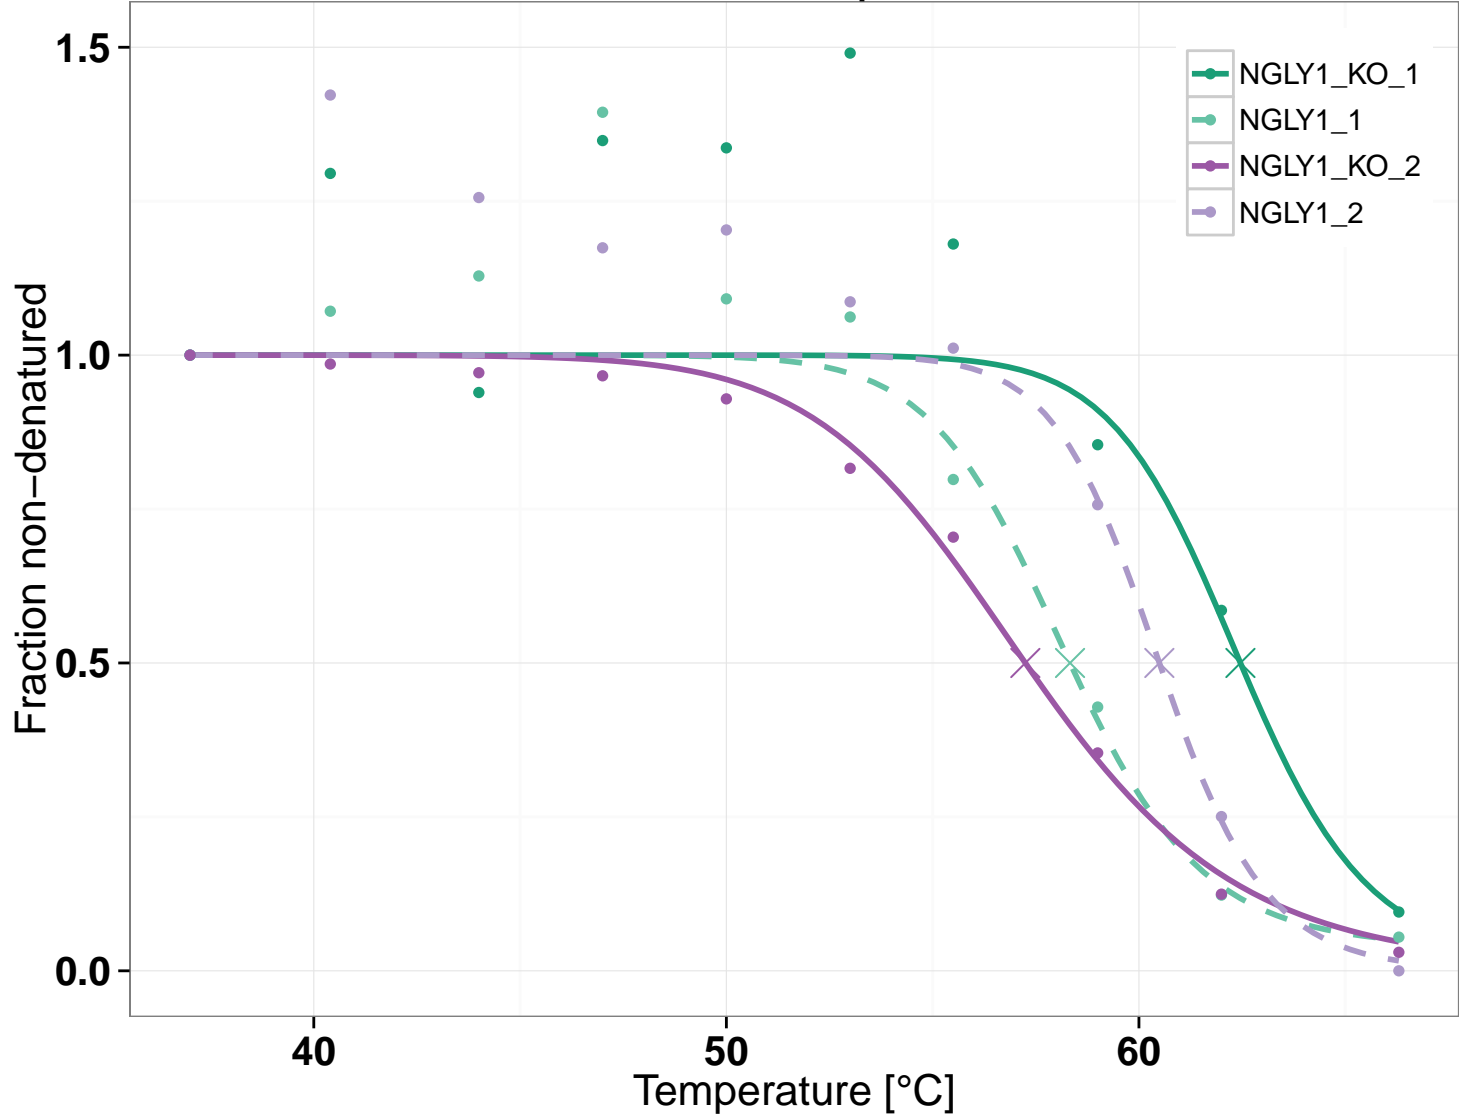

|            | meltPoint | slope  | plateau | R2   |
|------------|-----------|--------|---------|------|
| NGLY1_KO_1 | 62.46     | -0.16  | 0.01    | 0.62 |
| NGLY1_1    | 58.33     | -0.15  | 0.04    | 0.89 |
| NGLY1_KO_2 | 57.25     | -0.097 | 0       | 0.99 |
| NGLY1_2    | 60.49     | -0.19  | 0       | 0.83 |

Supplement: Supplementary file 6825 [file 1]

IPI00020966.1|PIGA

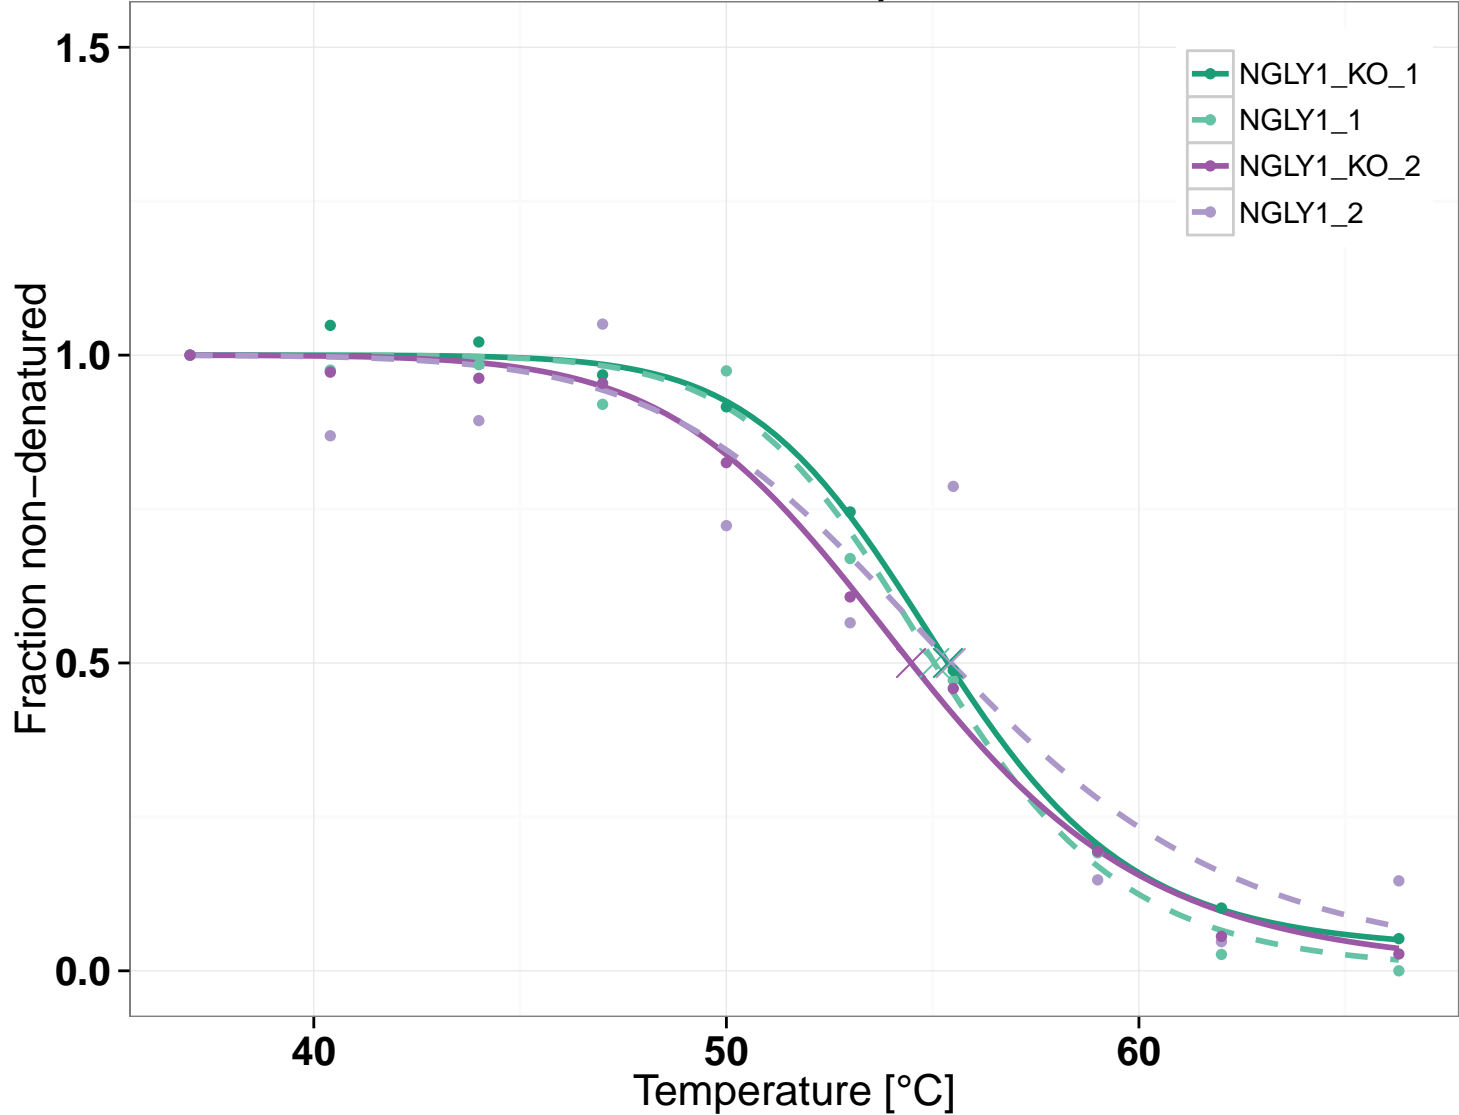

|            | meltPoint | slope  | plateau | R2   |
|------------|-----------|--------|---------|------|
| NGLY1_KO_1 | 55.37     | -0.1   | 0.03    | 1    |
| NGLY1_1    | 55.04     | -0.11  | 0       | 0.99 |
| NGLY1_KO_2 | 54.48     | -0.085 | 0       | 1    |
| NGLY1_2    | 55.44     | -0.072 | 0       | 0.86 |

Supplement: Supplementary file 6826 [file 1]

# IPI00012462.1|EIF2A

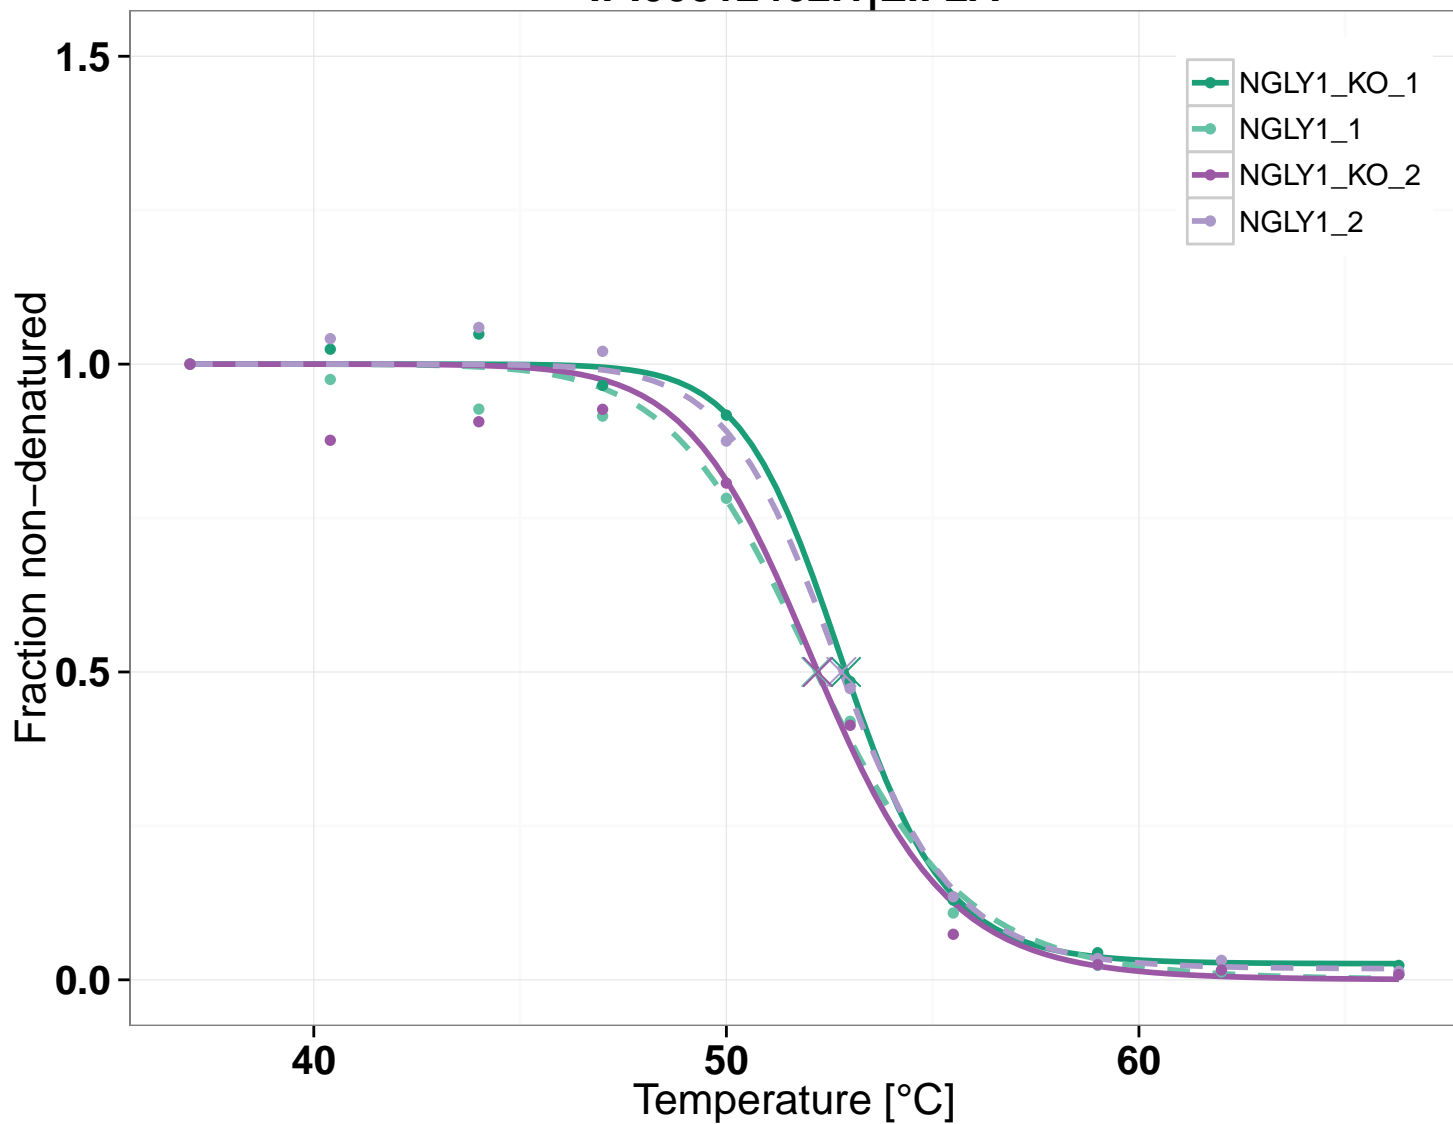

|            | meltPoint | slope | plateau | R2   |
|------------|-----------|-------|---------|------|
| NGLY1_KO_1 | 52.9      | -0.2  | 0.03    | 1    |
| NGLY1_1    | 52.18     | -0.14 | 0       | 0.99 |
| NGLY1_KO_2 | 52.22     | -0.16 | 0       | 0.98 |
| NGLY1_2    | 52.79     | -0.18 | 0.02    | 1    |

Supplement: Supplementary file 6827 [file 1]

IPI00029705.2|TUBGCP2

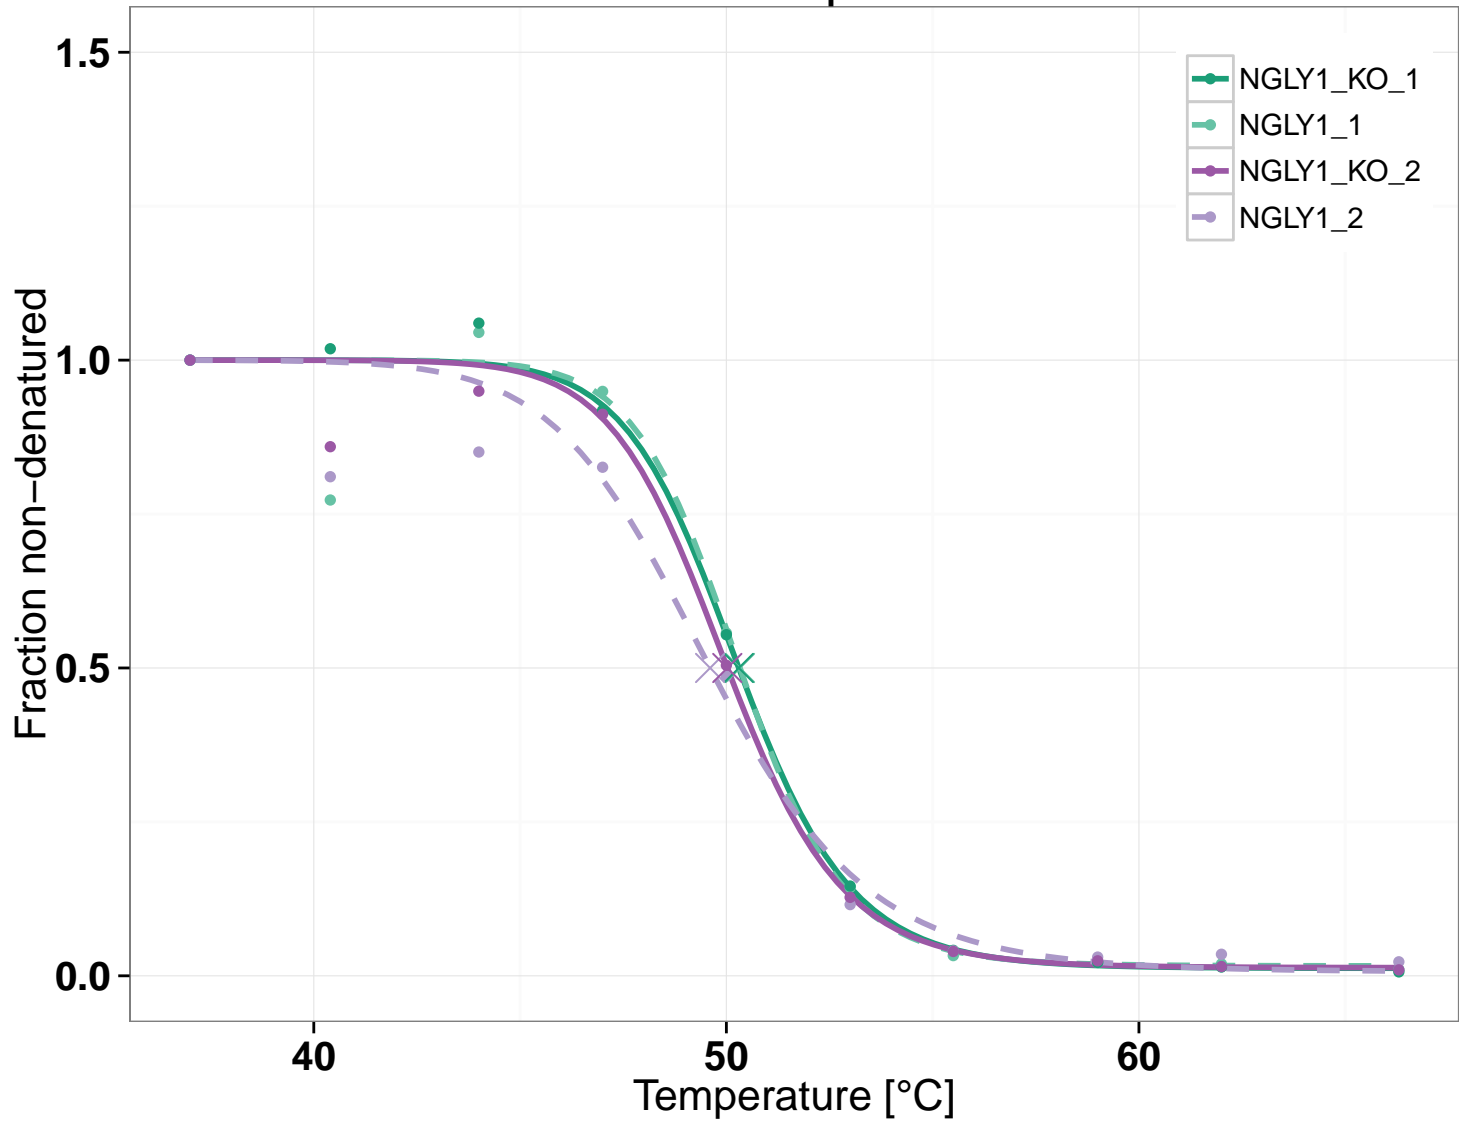

|            | meltPoint | slope | plateau | R2   |
|------------|-----------|-------|---------|------|
| NGLY1_KO_1 | 50.3      | -0.18 | 0.01    | 1    |
| NGLY1_1    | 50.33     | -0.19 | 0.02    | 0.97 |
| NGLY1_KO_2 | 50.02     | -0.17 | 0.01    | 0.99 |
| NGLY1_2    | 49.61     | -0.13 | 0.01    | 0.97 |

Supplement: Supplementary file 6828 [file 1]
