# Supplementary material (part 69 of 85)
Source: publisher figshare collection journal article supplement (https://gsajournals.figshare.com/articles/dataset/_/12014913)

# IPI00016726.3|C14ORF119

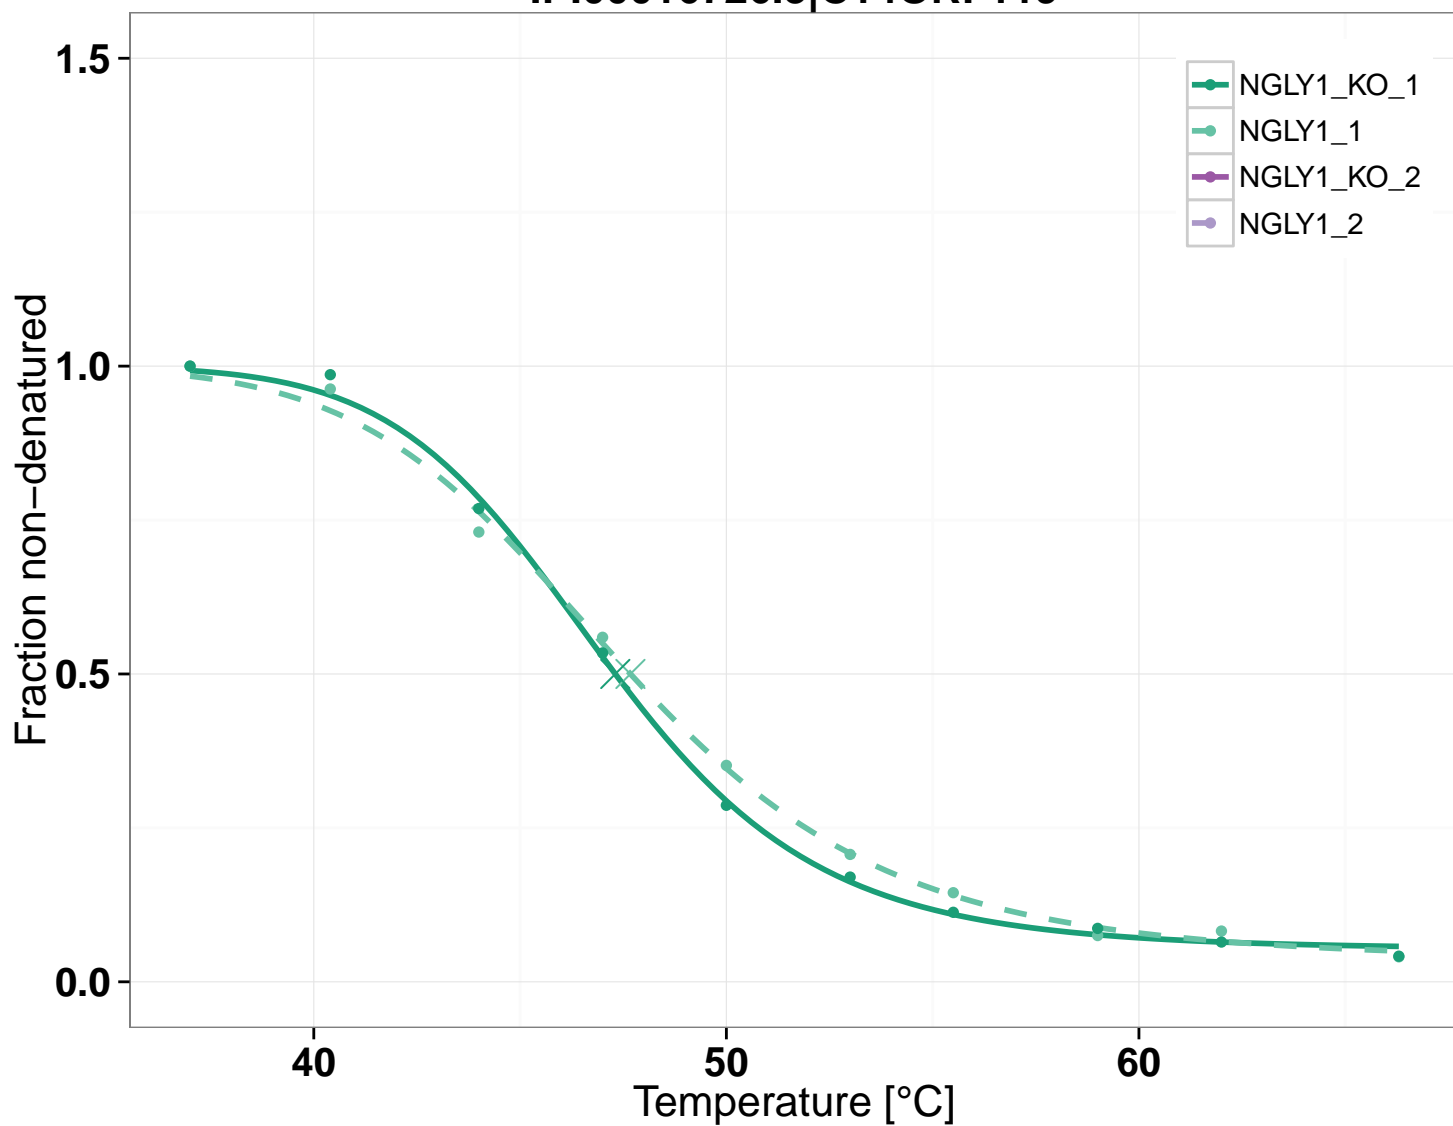

|            | meltPoint | slope  | plateau | R2 |
|------------|-----------|--------|---------|----|
| NGLY1_KO_1 | 47.31     | -0.092 | 0.05    | 1  |
| NGLY1_1    | 47.67     | -0.075 | 0.03    | 1  |
| NGLY1_KO_2 | -         | -      | -       | -  |
| NGLY1_2    | -         | -      | -       | -  |

Supplement: Supplementary file 6829 [file 1]

# IPI00152695.2|WDR82

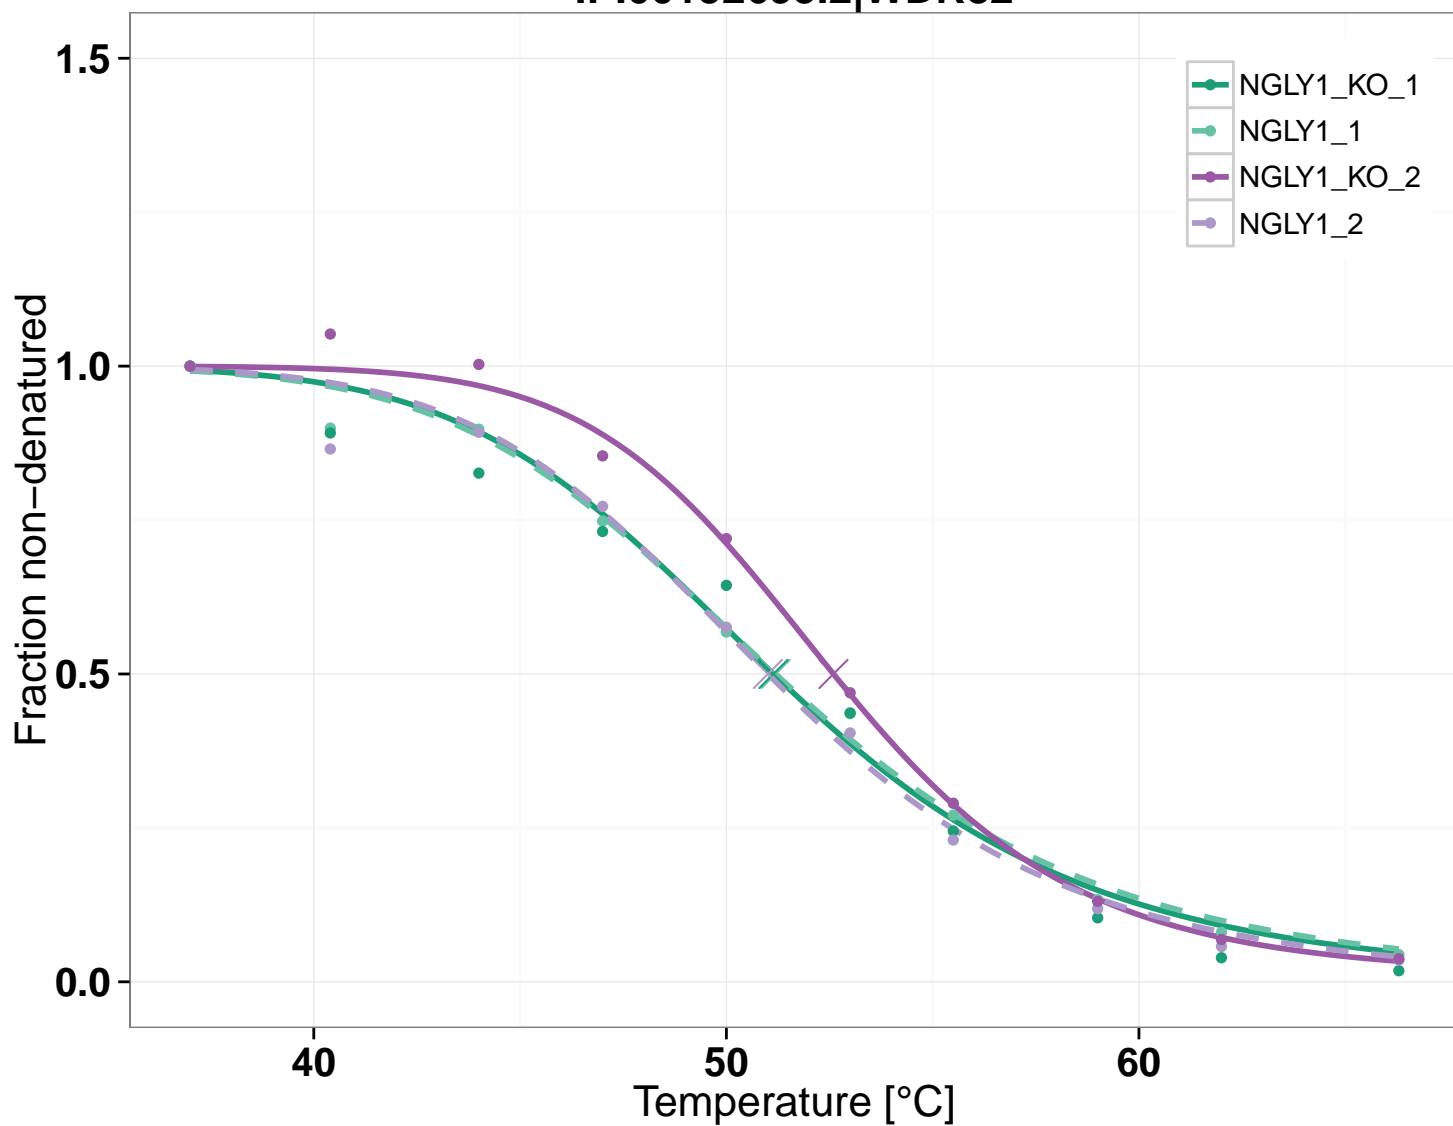

|            | meltPoint | slope  | plateau | R2   |
|------------|-----------|--------|---------|------|
| NGLY1_KO_1 | 51.14     | -0.065 | 0       | 0.98 |
| NGLY1_1    | 51.19     | -0.063 | 0       | 0.99 |
| NGLY1_KO_2 | 52.6      | -0.084 | 0.01    | 1    |
| NGLY1_2    | 51.01     | -0.069 | 0       | 0.99 |

Supplement: Supplementary file 6830 [file 1]

IPI00328879.2|PAQR7

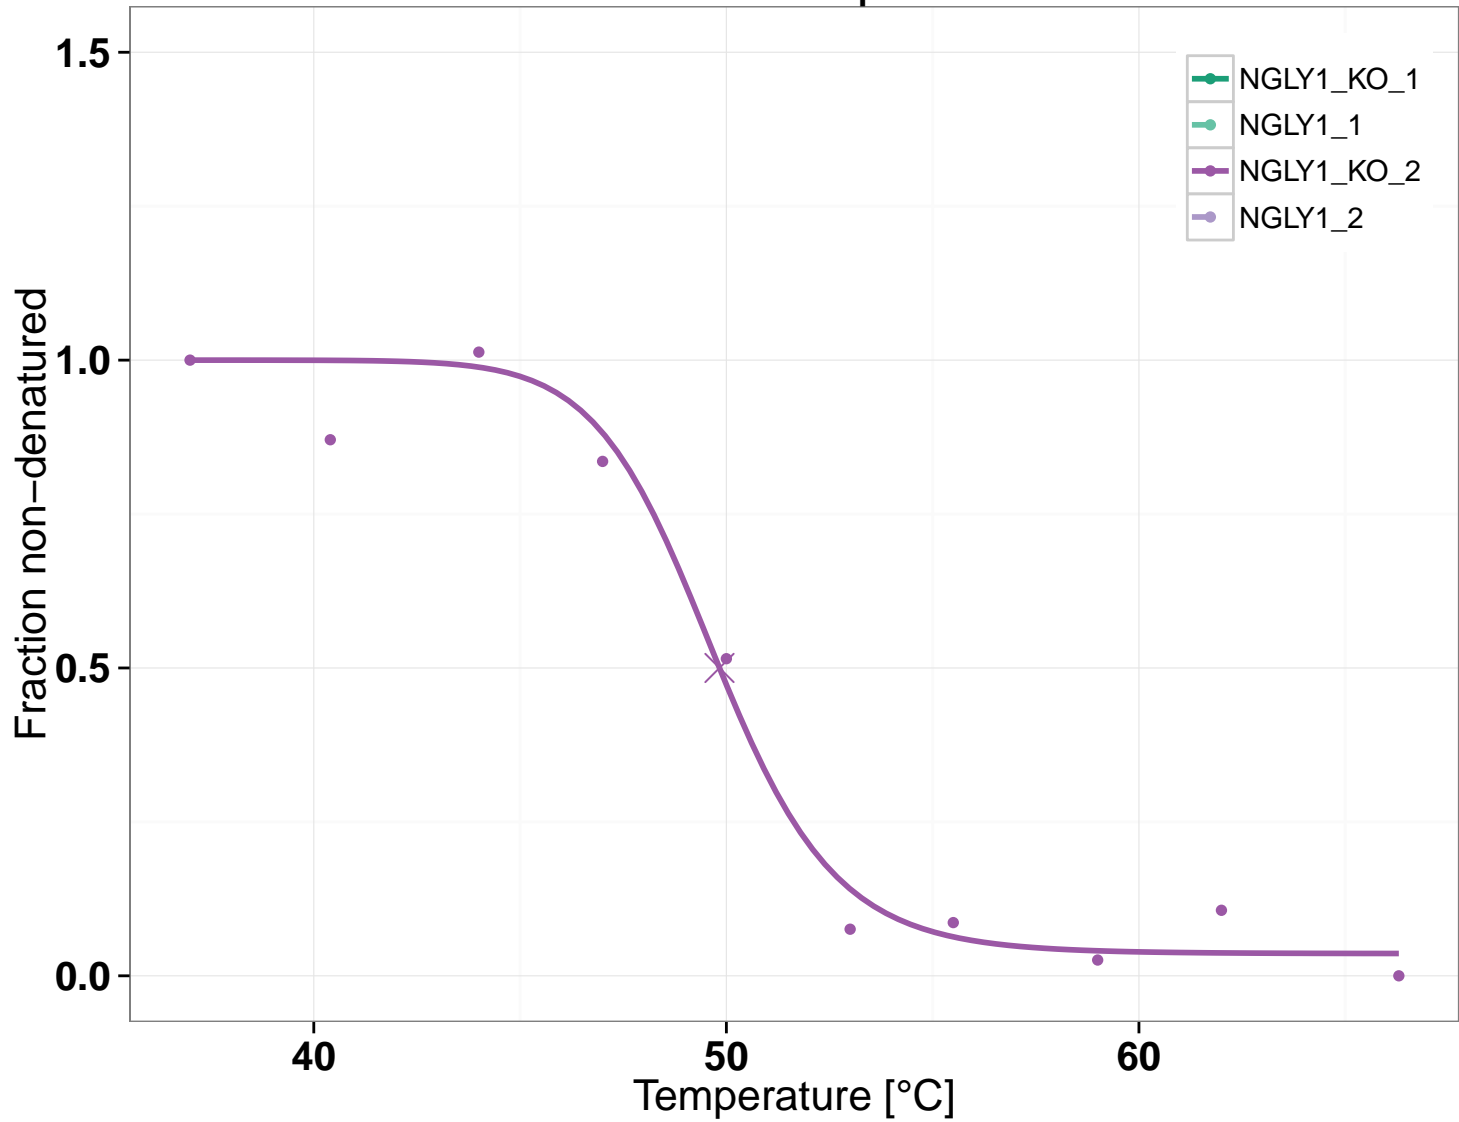

|            | meltPoint | slope | plateau | R2   |
|------------|-----------|-------|---------|------|
| NGLY1_KO_1 | -         | -     | -       | -    |
| NGLY1_1    | -         | -     | -       | -    |
| NGLY1_KO_2 | 49.83     | -0.17 | 0.04    | 0.98 |
| NGLY1_2    | -         | -     | -       | -    |

Supplement: Supplementary file 6831 [file 1]

# IPI00917671.1|WDR81

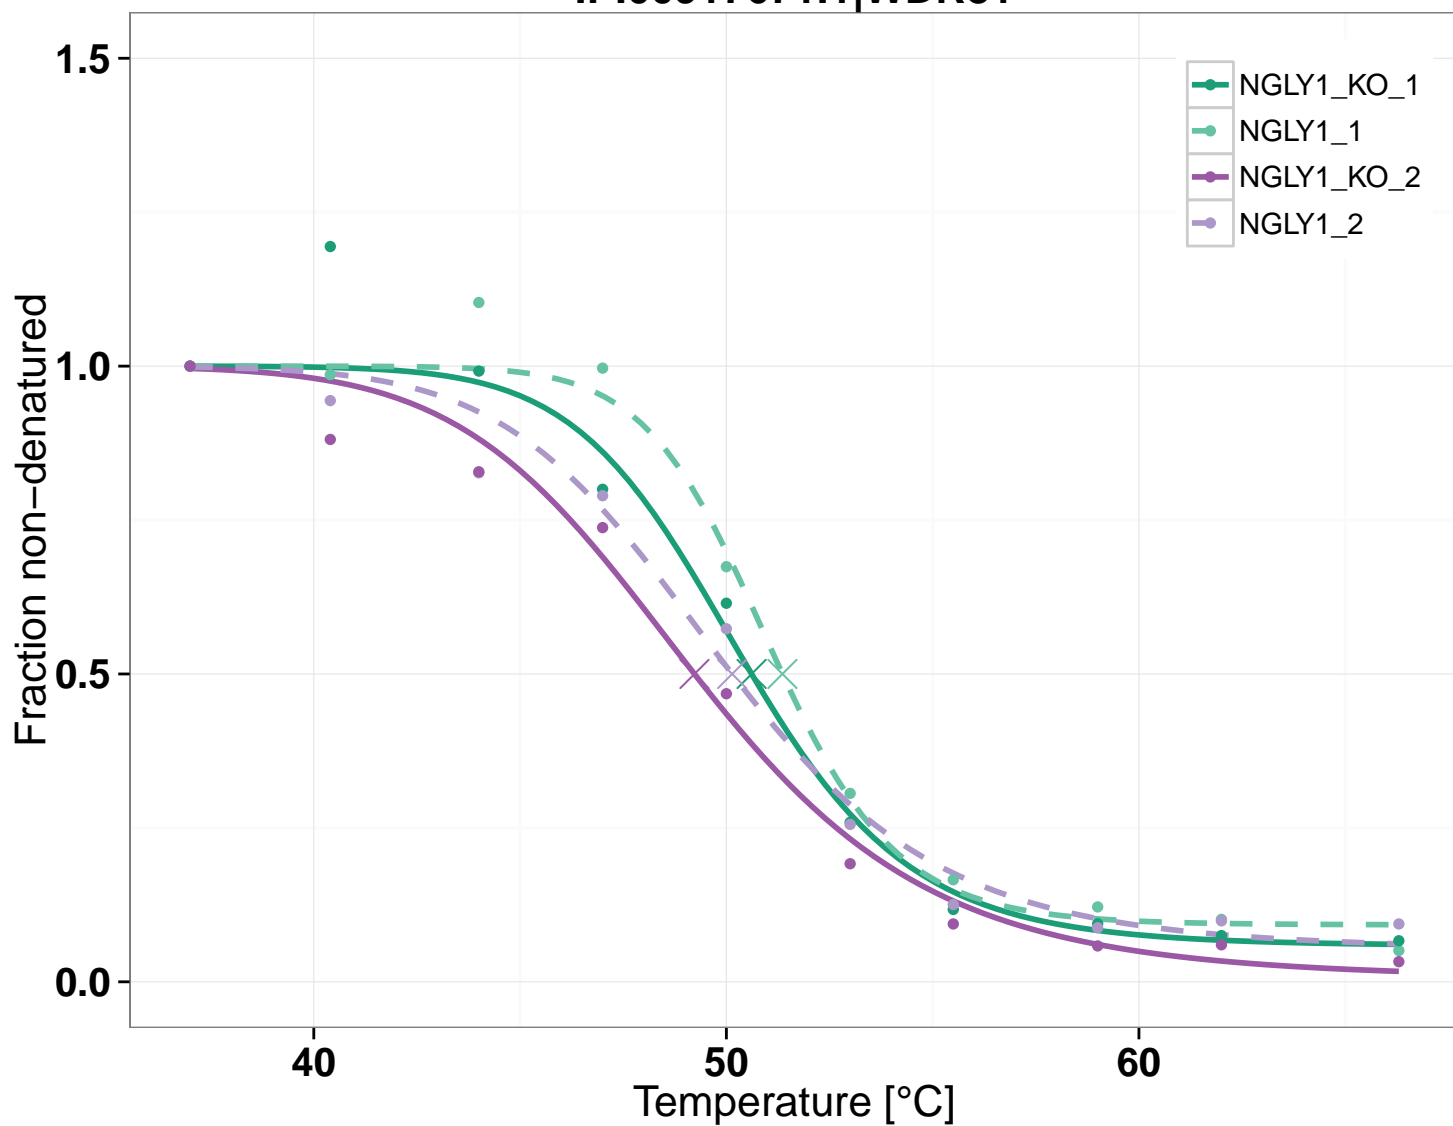

|            | meltPoint | slope  | plateau | R2   |
|------------|-----------|--------|---------|------|
| NGLY1_KO_1 | 50.61     | -0.12  | 0.06    | 0.97 |
| NGLY1_1    | 51.36     | -0.15  | 0.09    | 0.99 |
| NGLY1_KO_2 | 49.23     | -0.087 | 0       | 0.99 |
| NGLY1_2    | 50.14     | -0.089 | 0.05    | 0.98 |

Supplement: Supplementary file 6832 [file 1]

IPI00009851.4|PCDH12

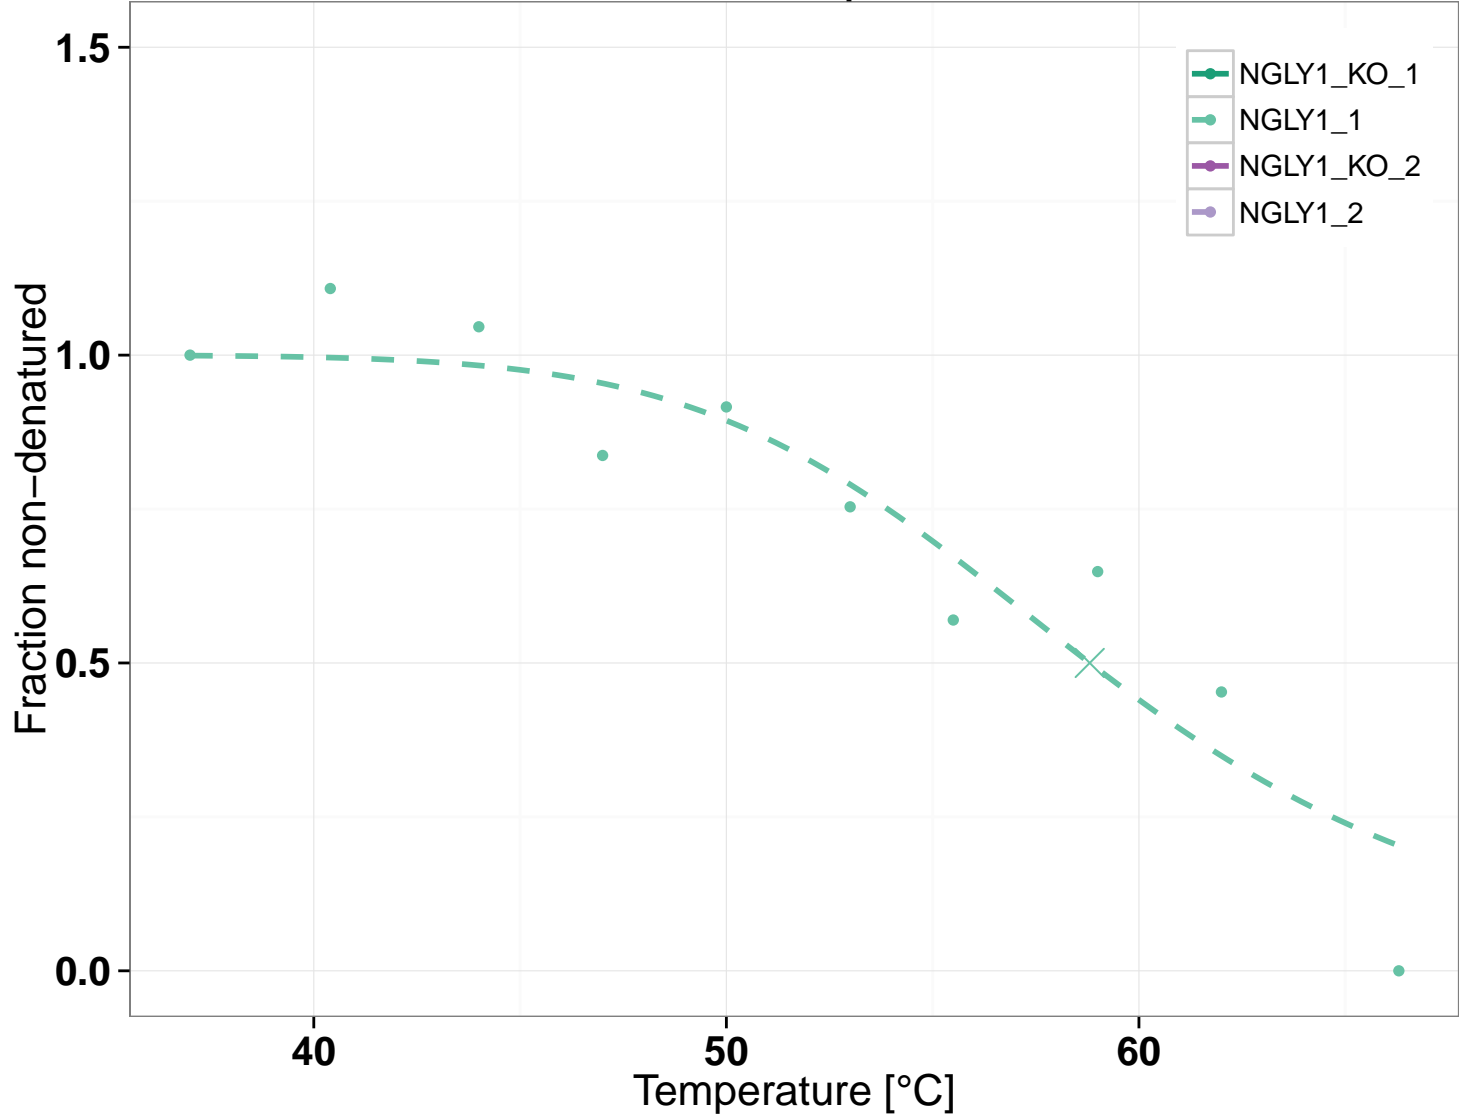

|            | meltPoint | slope  | plateau | R2   |
|------------|-----------|--------|---------|------|
| NGLY1_KO_1 | -         | -      | -       | -    |
| NGLY1_1    | 58.81     | -0.053 | 0       | 0.88 |
| NGLY1_KO_2 | -         | -      | -       | -    |
| NGLY1_2    | -         | -      | -       | -    |

Supplement: Supplementary file 6833 [file 1]

IPI00087498.4|ESCO2

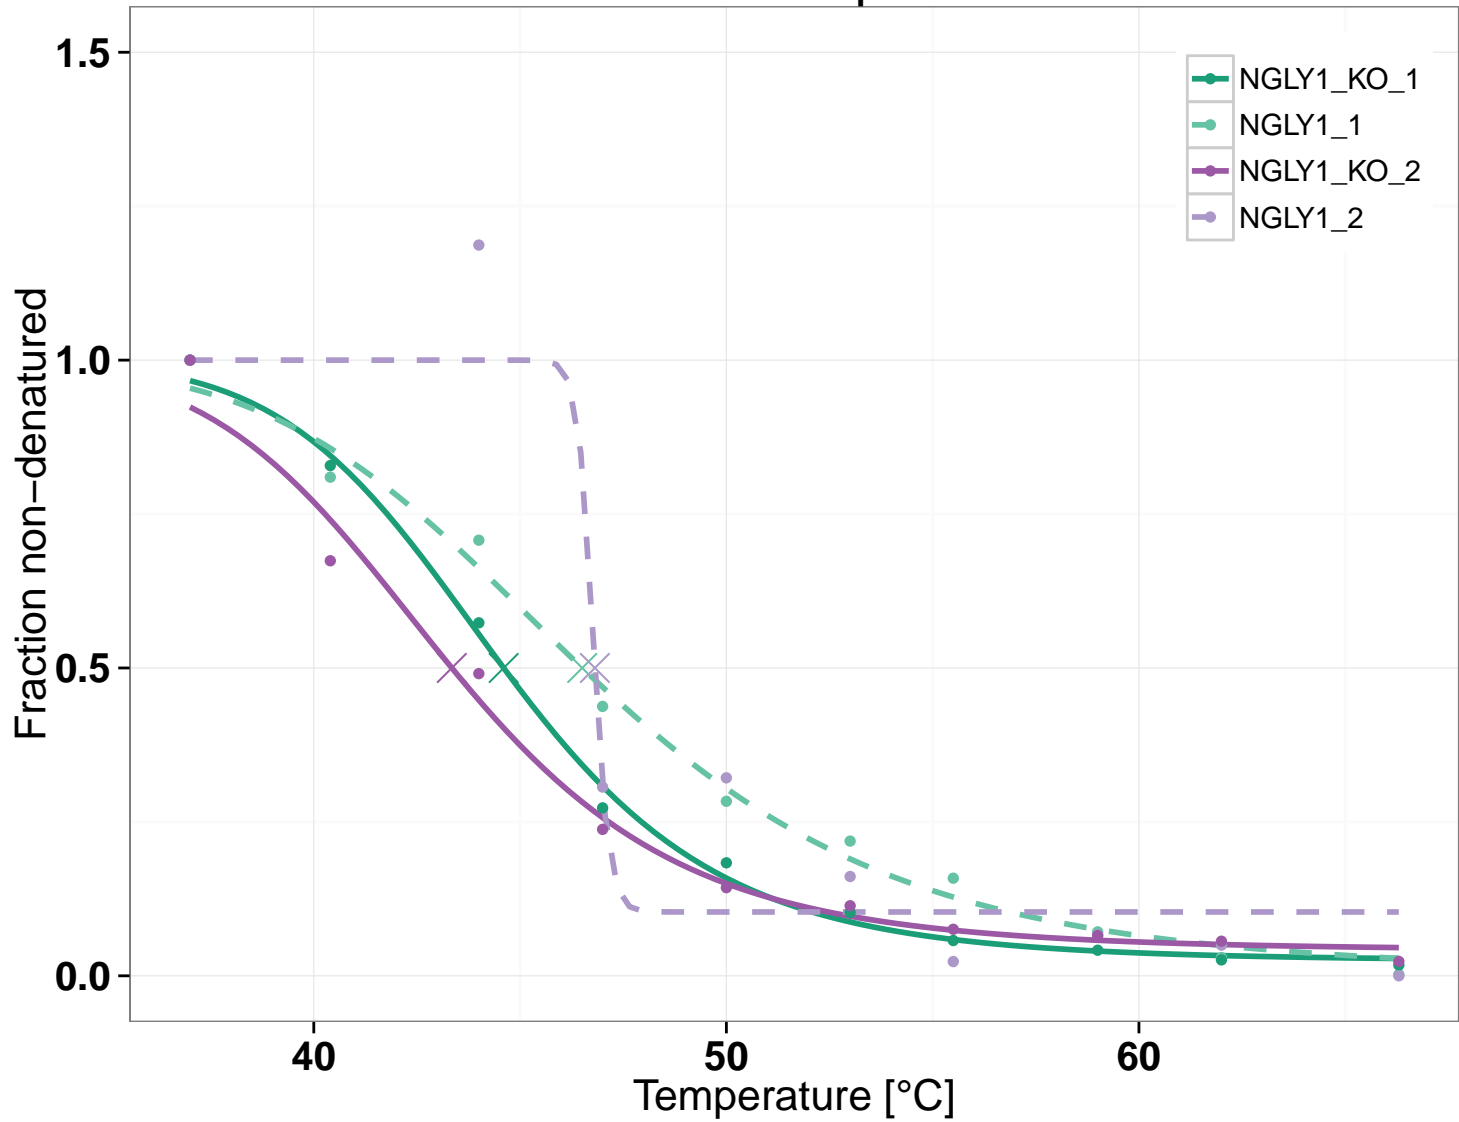

|            | meltPoint | slope  | plateau | R2   |
|------------|-----------|--------|---------|------|
| NGLY1_KO_1 | 44.6      | -0.092 | 0.02    | 1    |
| NGLY1_1    | 46.51     | -0.065 | 0       | 0.99 |
| NGLY1_KO_2 | 43.35     | -0.084 | 0.04    | 0.99 |
| NGLY1_2    | 46.81     | -1.2   | 0.1     | 0.82 |

Supplement: Supplementary file 6834 [file 1]

IPI00021531.6|HYAL2

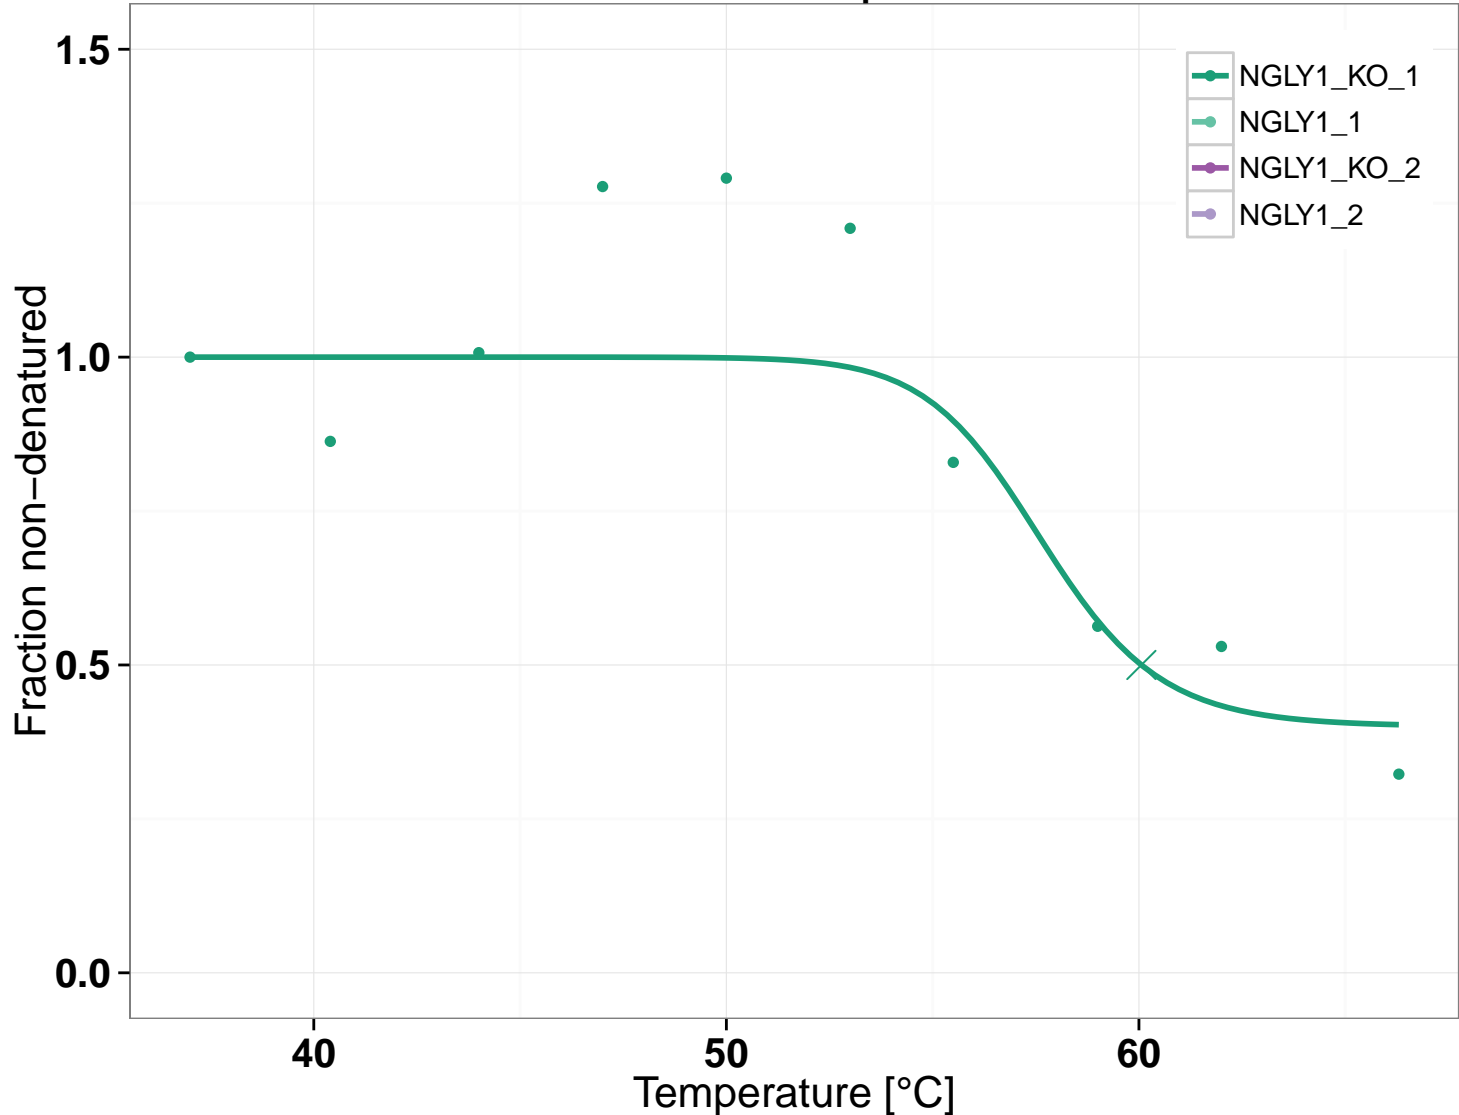

|            | meltPoint | slope | plateau | R2   |
|------------|-----------|-------|---------|------|
| NGLY1_KO_1 | 60.06     | -0.11 | 0.4     | 0.75 |
| NGLY1_1    | -         | -     | -       | -    |
| NGLY1_KO_2 | -         | -     | -       | -    |
| NGLY1_2    | -         | -     | -       | -    |

Supplement: Supplementary file 6835 [file 1]

IPI00008911.1|RNF146

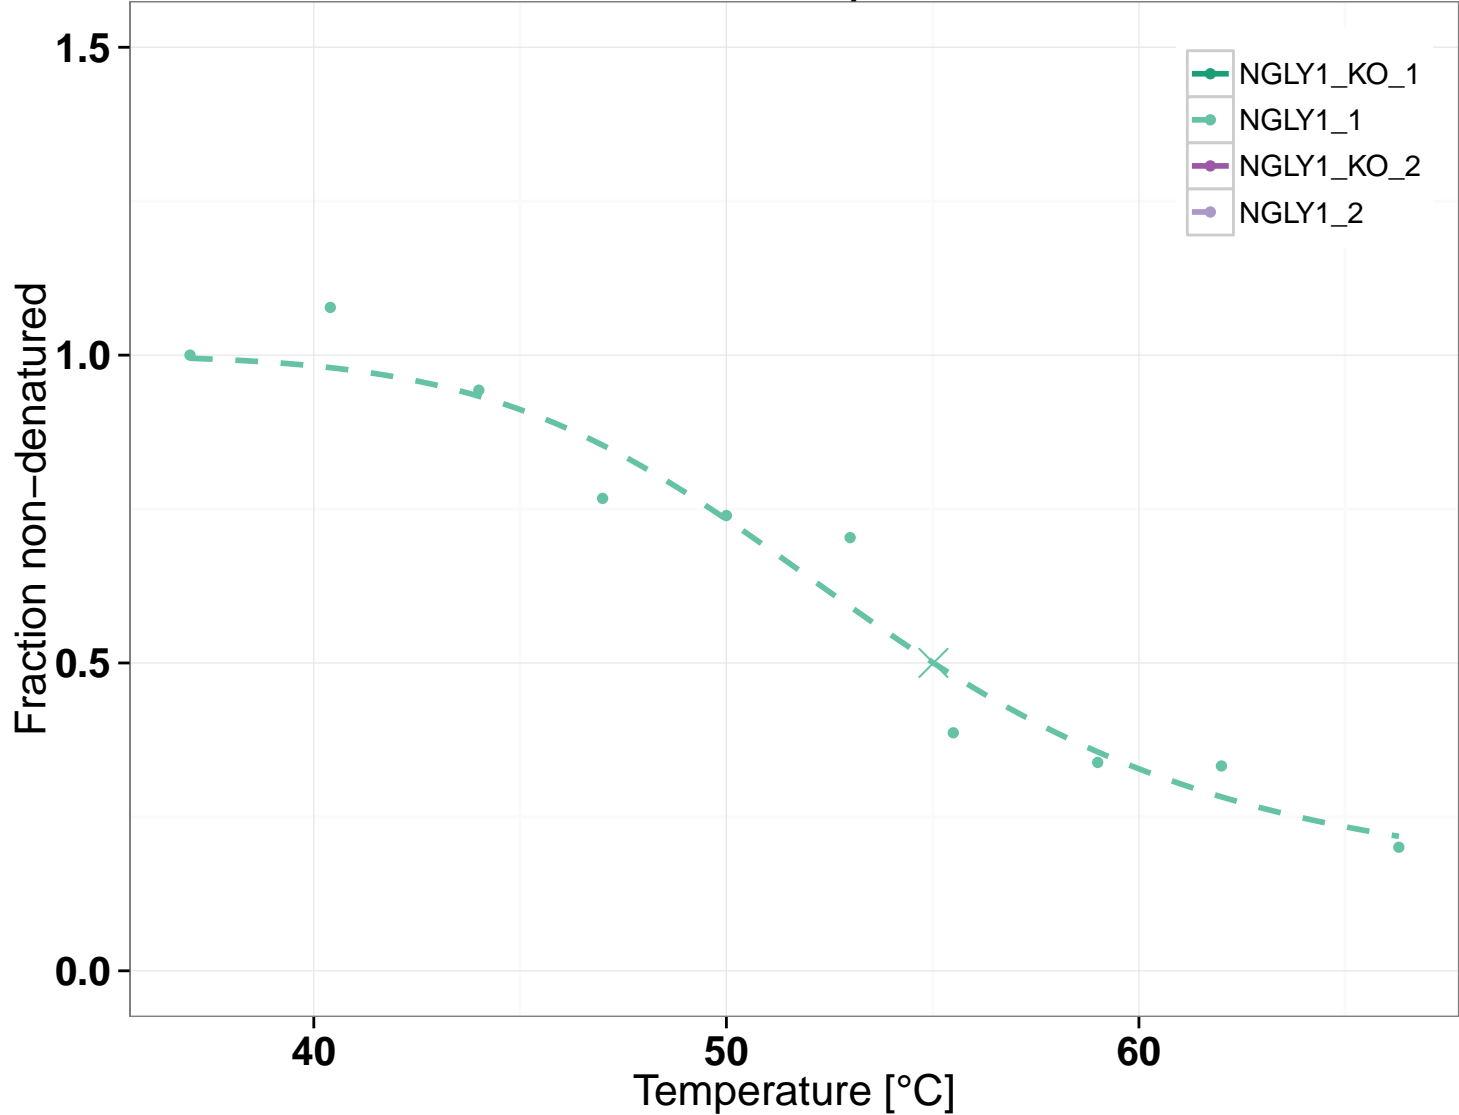

|            | meltPoint | slope  | plateau | R2   |
|------------|-----------|--------|---------|------|
| NGLY1_KO_1 | -         | -      | -       | -    |
| NGLY1_1    | 55.02     | -0.048 | 0.13    | 0.95 |
| NGLY1_KO_2 | -         | -      | -       | -    |
| NGLY1_2    | -         | -      | -       | -    |

Supplement: Supplementary file 6836 [file 1]

IPI00455408.1|GLTPD1

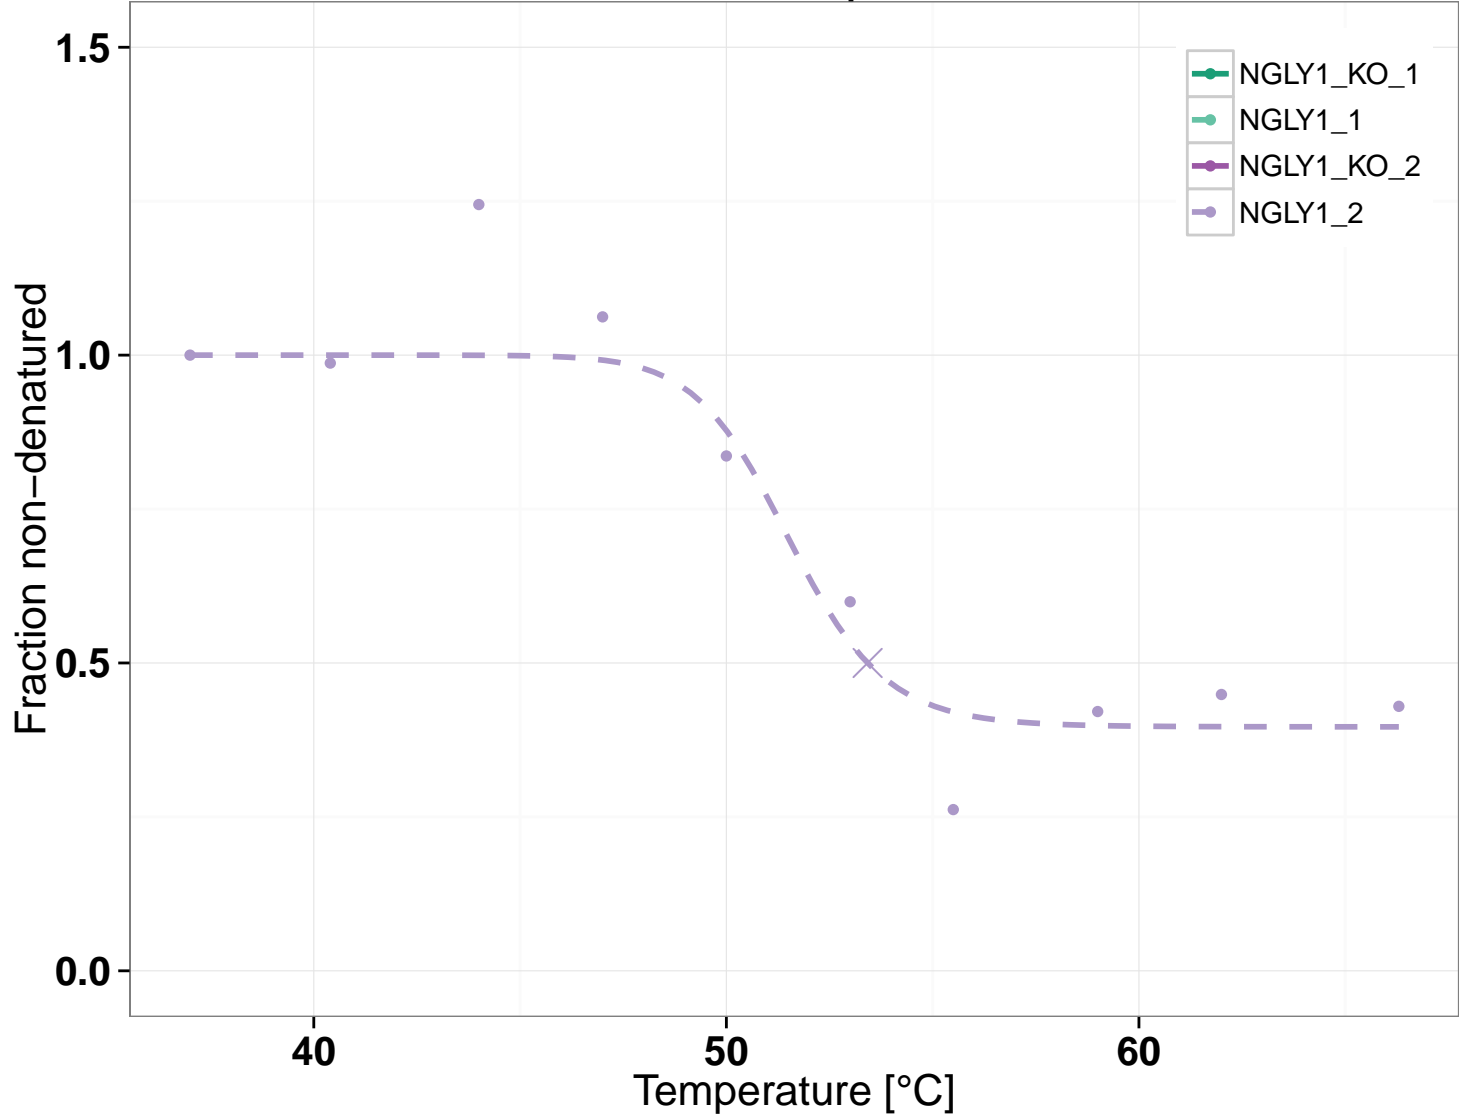

|            | meltPoint | slope | plateau | R2  |
|------------|-----------|-------|---------|-----|
| NGLY1_KO_1 | -         | -     | -       | -   |
| NGLY1_1    | -         | -     | -       | -   |
| NGLY1_KO_2 | -         | -     | -       | -   |
| NGLY1_2    | 53.42     | -0.13 | 0.4     | 0.9 |

Supplement: Supplementary file 6837 [file 1]

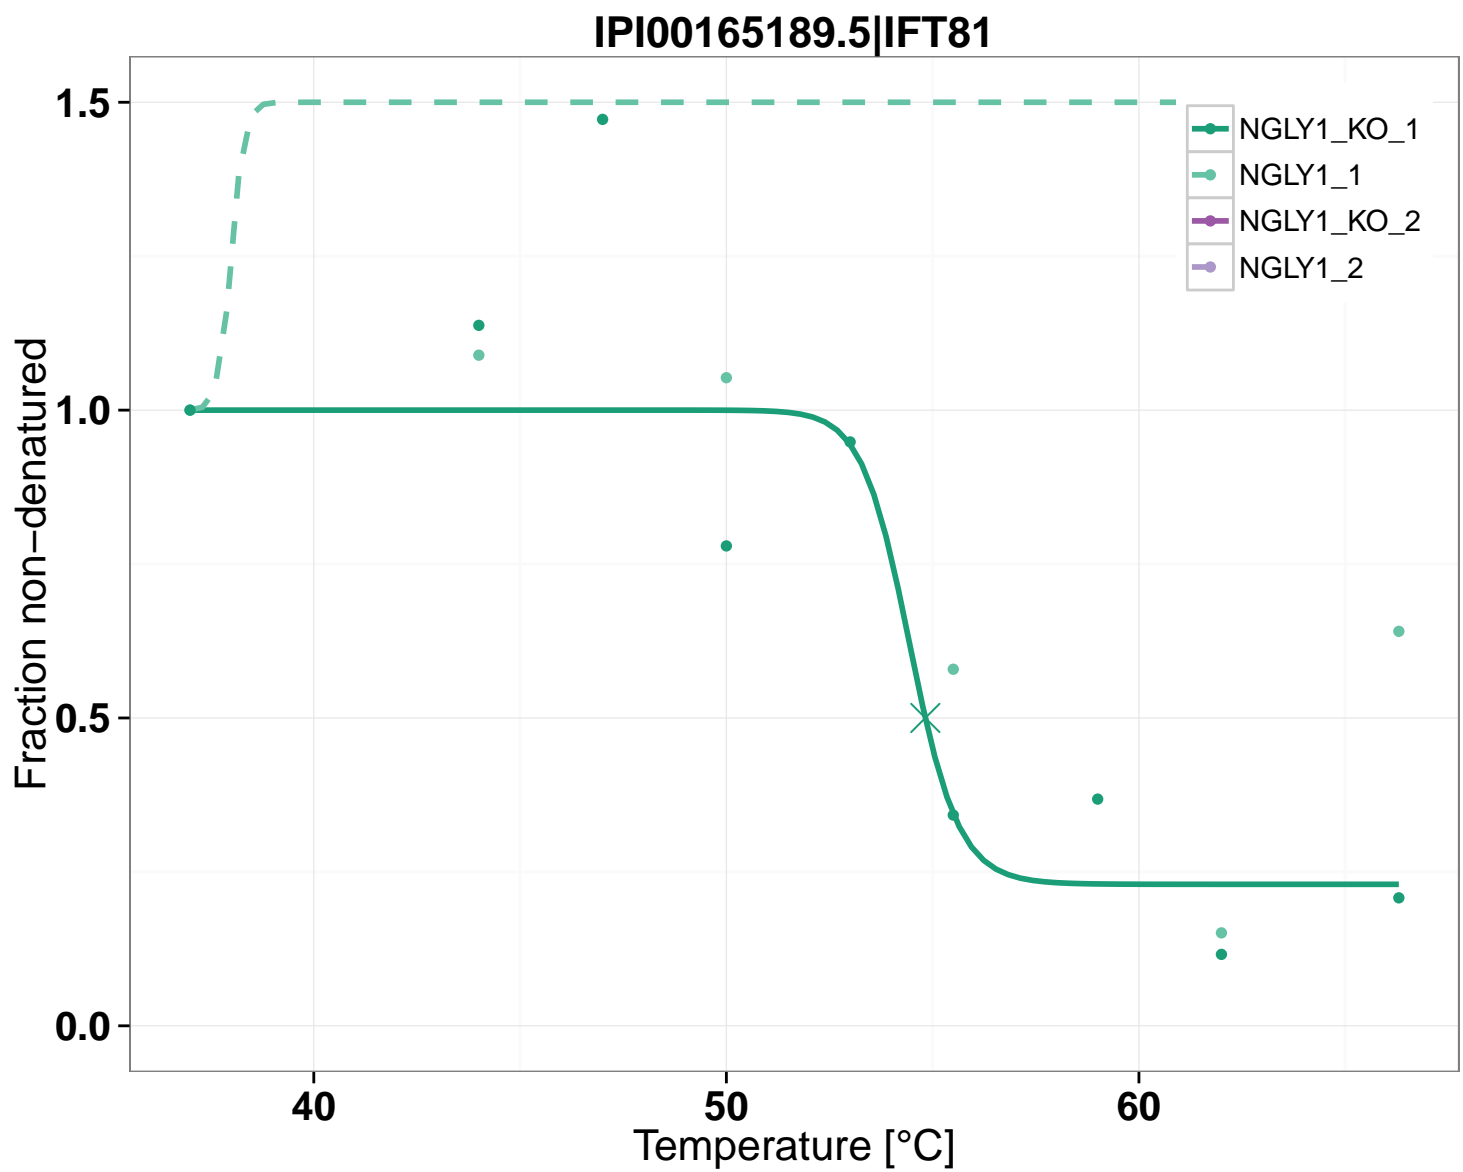

|            | meltPoint | slope | plateau | R2    |
|------------|-----------|-------|---------|-------|
| NGLY1_KO_1 | 54.82     | -0.33 | 0.23    | 0.72  |
| NGLY1_1    | —         | 0.82  | 1.5     | -0.05 |
| NGLY1_KO_2 | —         | —     | —       | —     |
| NGLY1_2    | —         | —     | —       | —     |

Supplement: Supplementary file 6838 [file 1]

IPI00872597.1|ZNF326

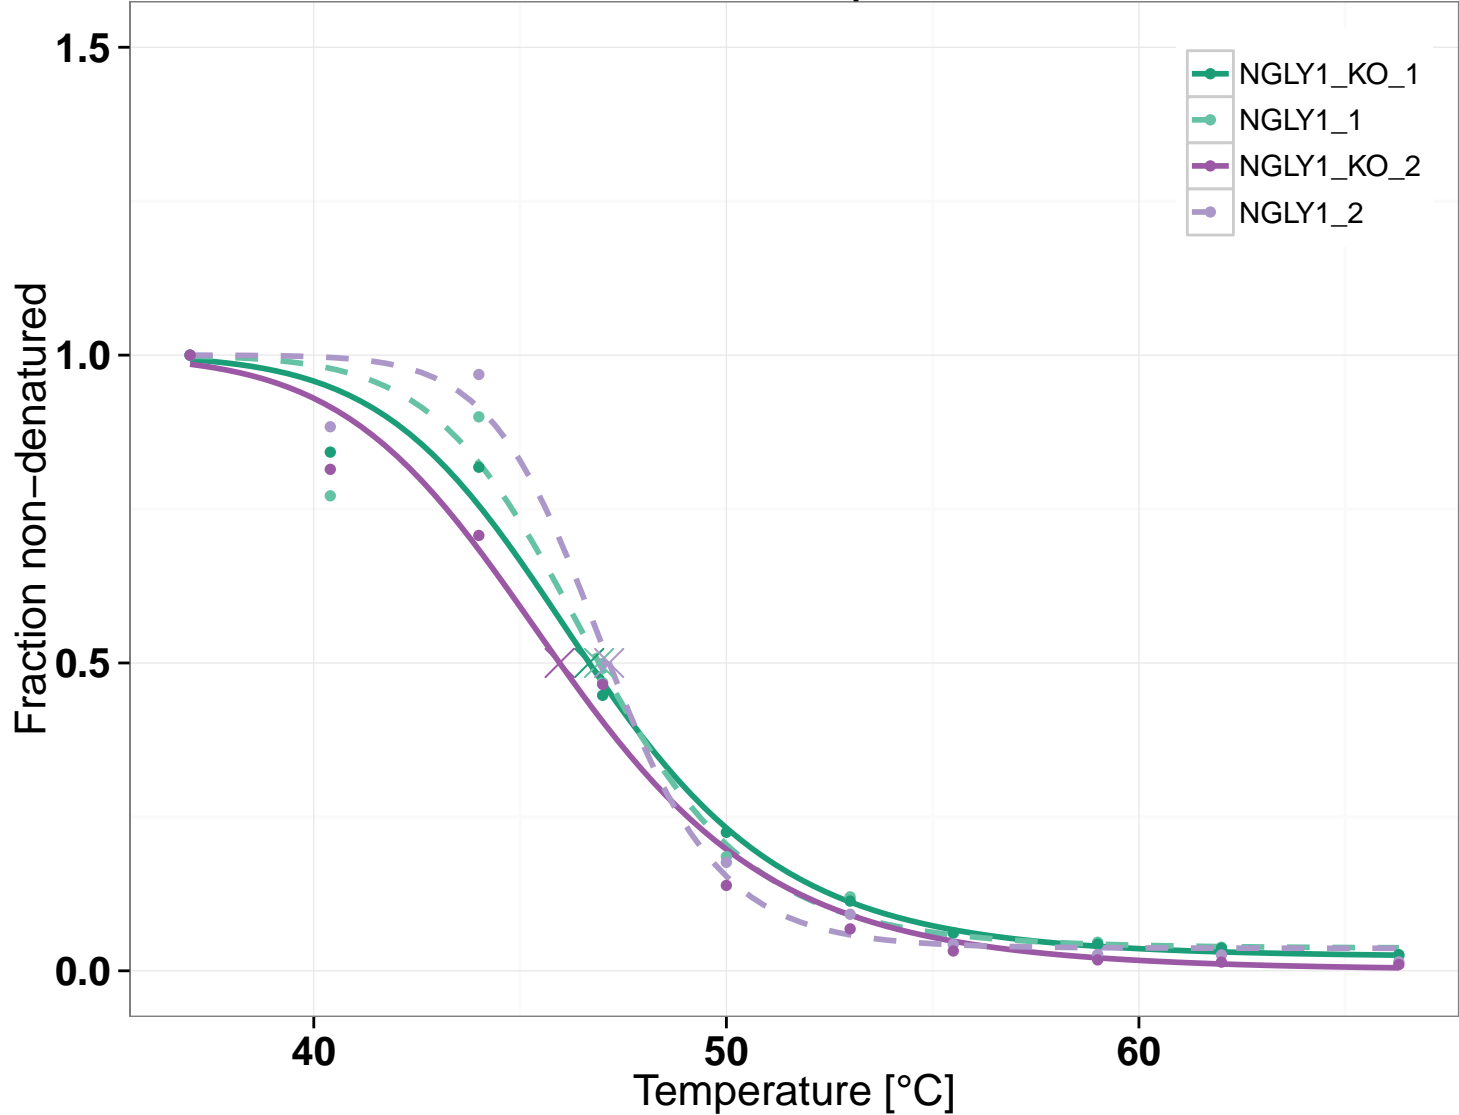

|            | meltPoint | slope  | plateau | R2   |
|------------|-----------|--------|---------|------|
| NGLY1_KO_1 | 46.68     | -0.1   | 0.02    | 0.99 |
| NGLY1_1    | 46.91     | -0.12  | 0.04    | 0.96 |
| NGLY1_KO_2 | 45.96     | -0.096 | 0       | 0.99 |
| NGLY1_2    | 47.16     | -0.17  | 0.04    | 0.99 |

Supplement: Supplementary file 6839 [file 1]

IPI00852741.1|SEC31A

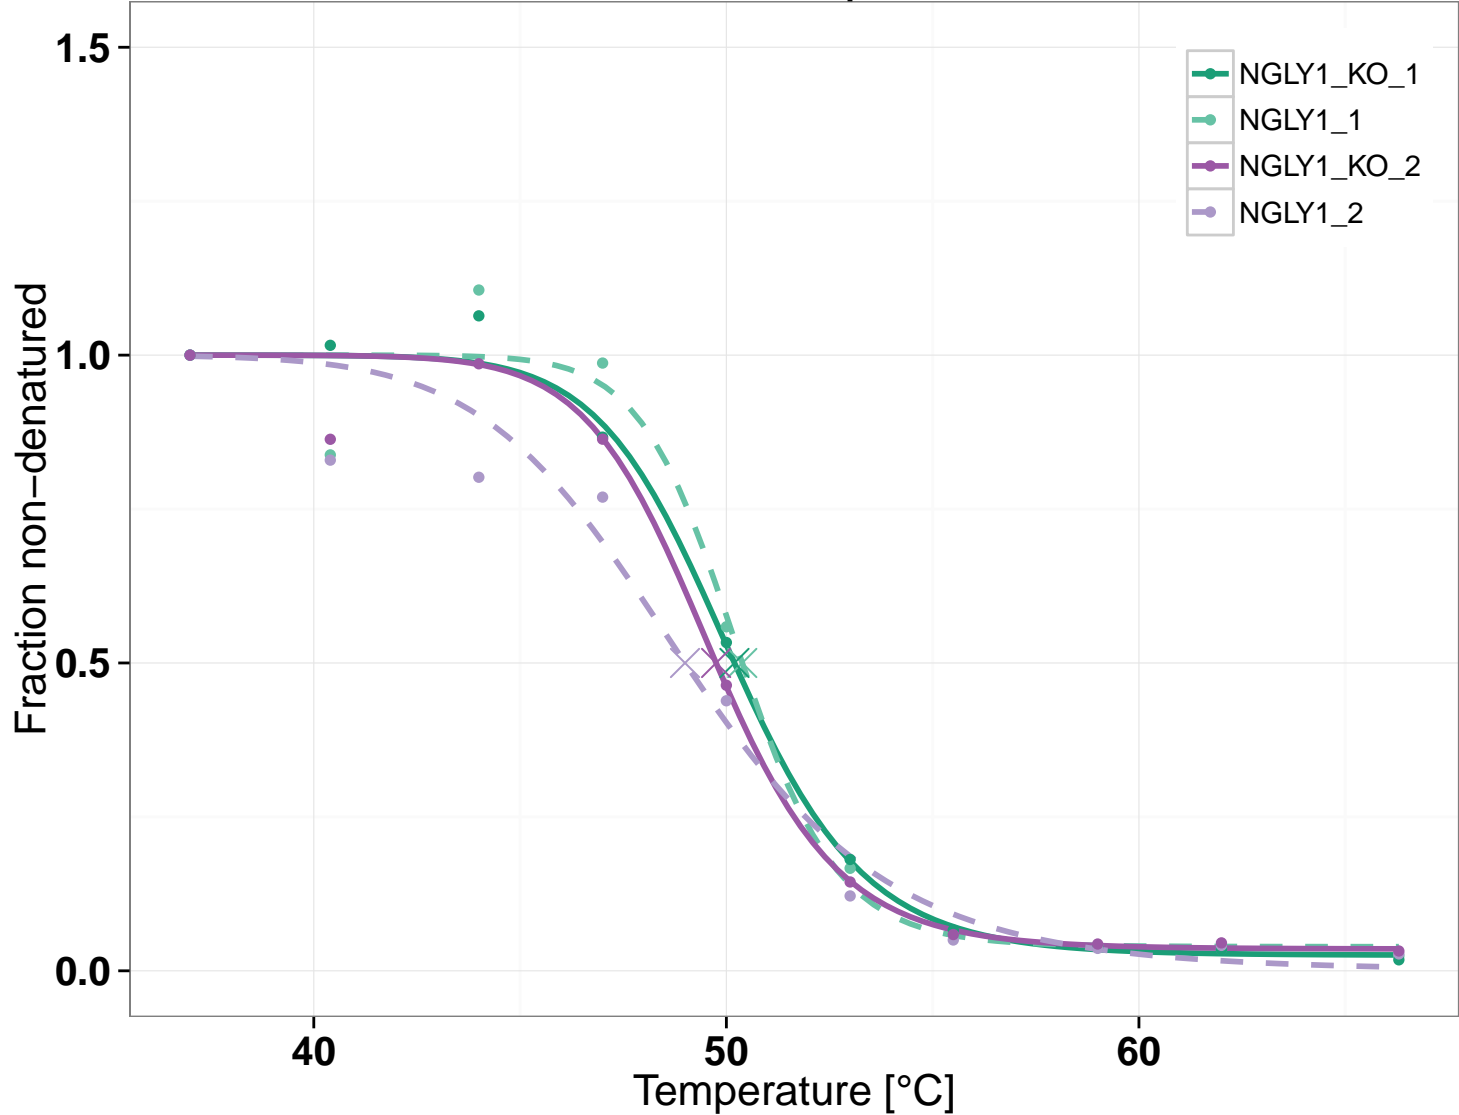

|            | meltPoint | slope | plateau | R2   |
|------------|-----------|-------|---------|------|
| NGLY1_KO_1 | 50.2      | -0.15 | 0.03    | 1    |
| NGLY1_1    | 50.39     | -0.2  | 0.04    | 0.98 |
| NGLY1_KO_2 | 49.75     | -0.16 | 0.04    | 0.99 |
| NGLY1_2    | 49        | -0.1  | 0       | 0.97 |

Supplement: Supplementary file 6840 [file 1]

IPI00291412.1|PPM1F

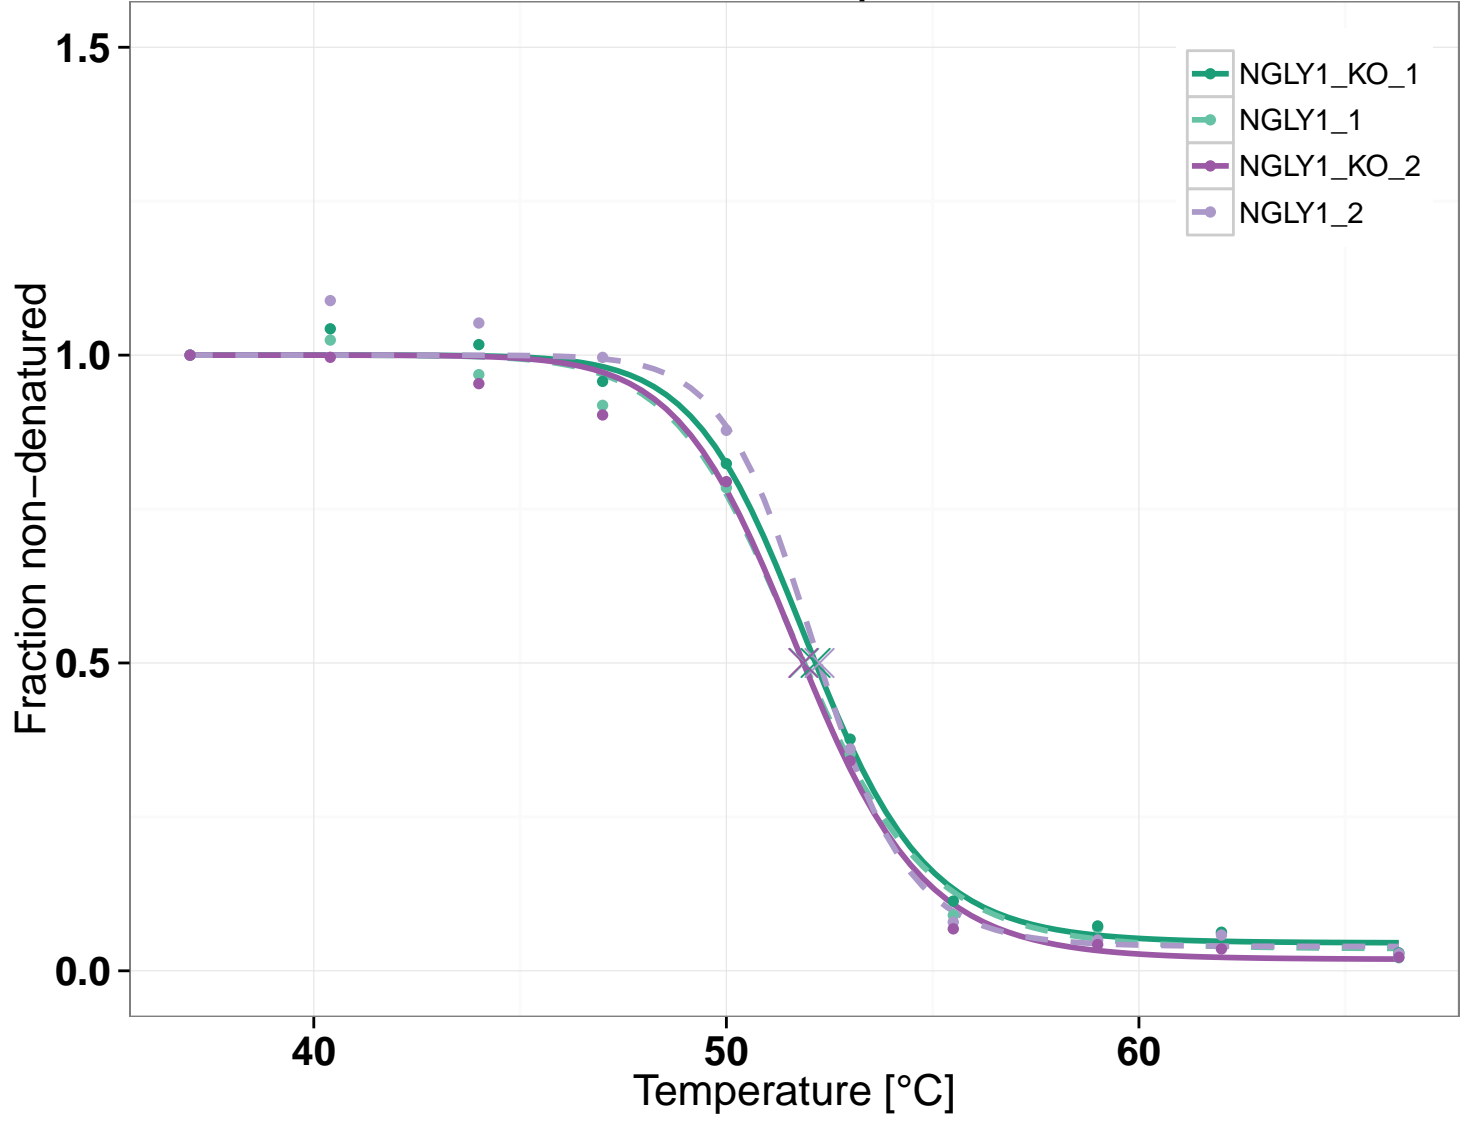

|            | meltPoint | slope | plateau | R2   |
|------------|-----------|-------|---------|------|
| NGLY1_KO_1 | 52.16     | -0.17 | 0.05    | 1    |
| NGLY1_1    | 51.89     | -0.16 | 0.04    | 1    |
| NGLY1_KO_2 | 51.87     | -0.16 | 0.02    | 1    |
| NGLY1_2    | 52.26     | -0.21 | 0.04    | 0.99 |

Supplement: Supplementary file 6841 [file 1]

IPI00008616.3|SLC12A7

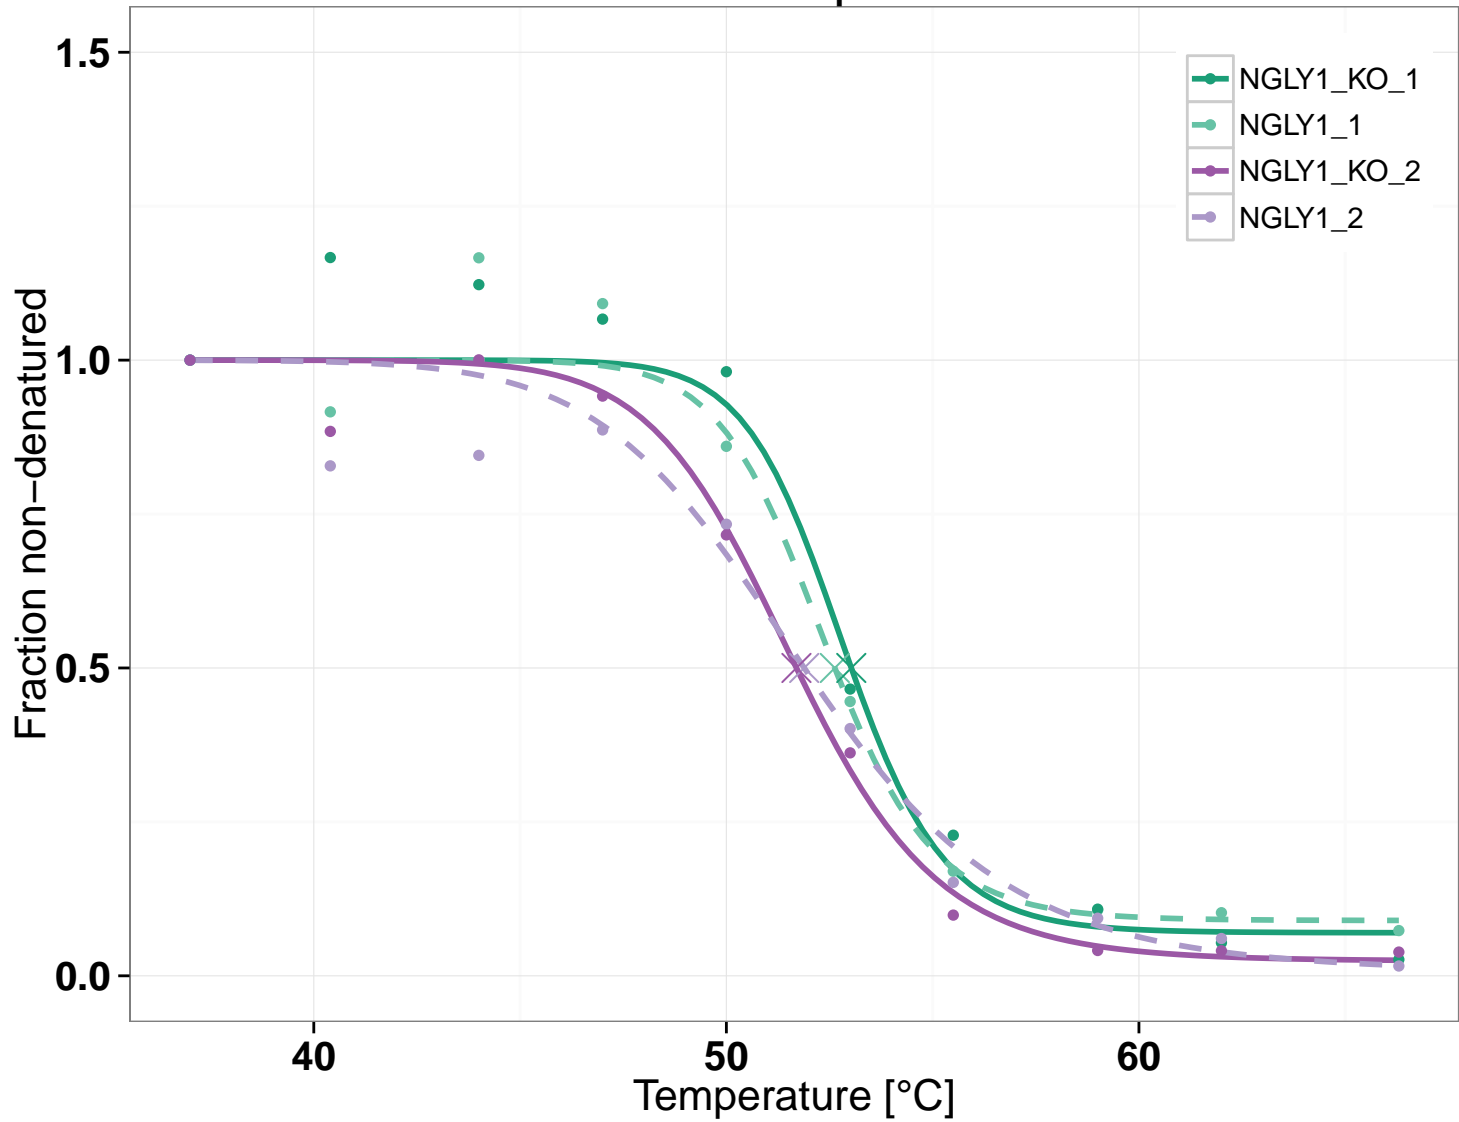

|            | meltPoint | slope | plateau | R2   |
|------------|-----------|-------|---------|------|
| NGLY1_KO_1 | 53.03     | -0.19 | 0.07    | 0.97 |
| NGLY1_1    | 52.63     | -0.18 | 0.09    | 0.98 |
| NGLY1_KO_2 | 51.7      | -0.14 | 0.02    | 0.99 |
| NGLY1_2    | 51.89     | -0.1  | 0.01    | 0.96 |

Supplement: Supplementary file 6842 [file 1]

# IPI00872103.1|ASL

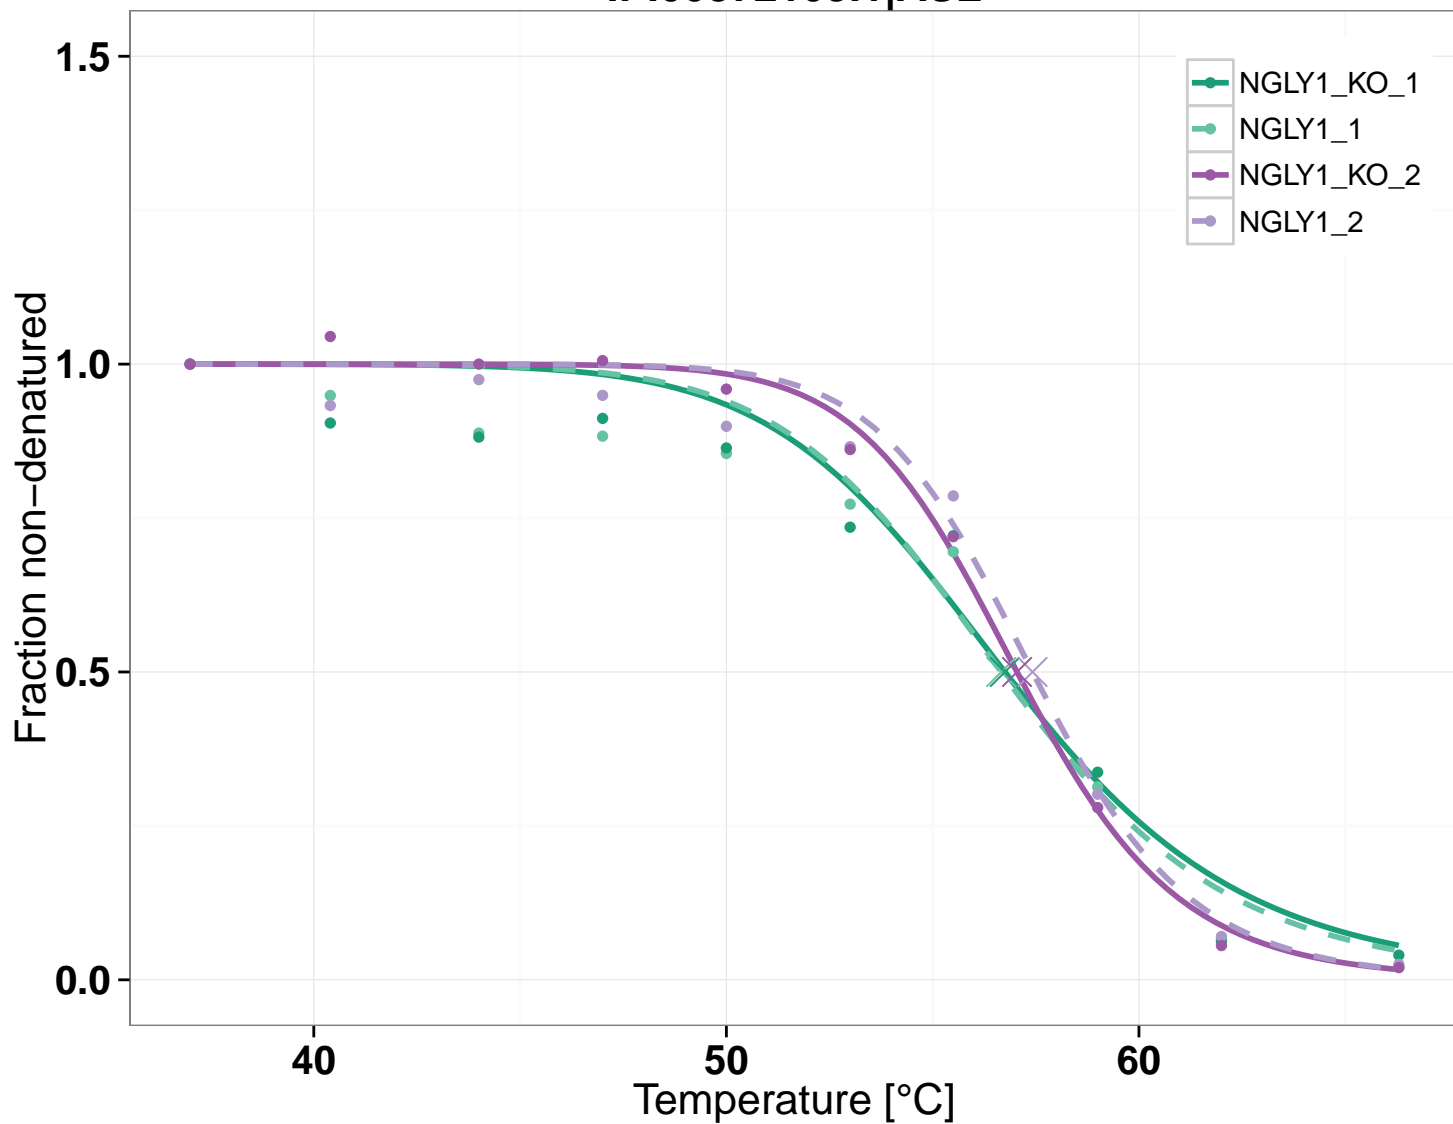

|            | meltPoint | slope  | plateau | R2   |
|------------|-----------|--------|---------|------|
| NGLY1_KO_1 | 56.75     | -0.087 | 0       | 0.95 |
| NGLY1_1    | 56.66     | -0.092 | 0       | 0.96 |
| NGLY1_KO_2 | 57.05     | -0.13  | 0       | 1    |
| NGLY1_2    | 57.42     | -0.13  | 0       | 0.98 |

Supplement: Supplementary file 6843 [file 1]

IPI00030781.1|STAT1

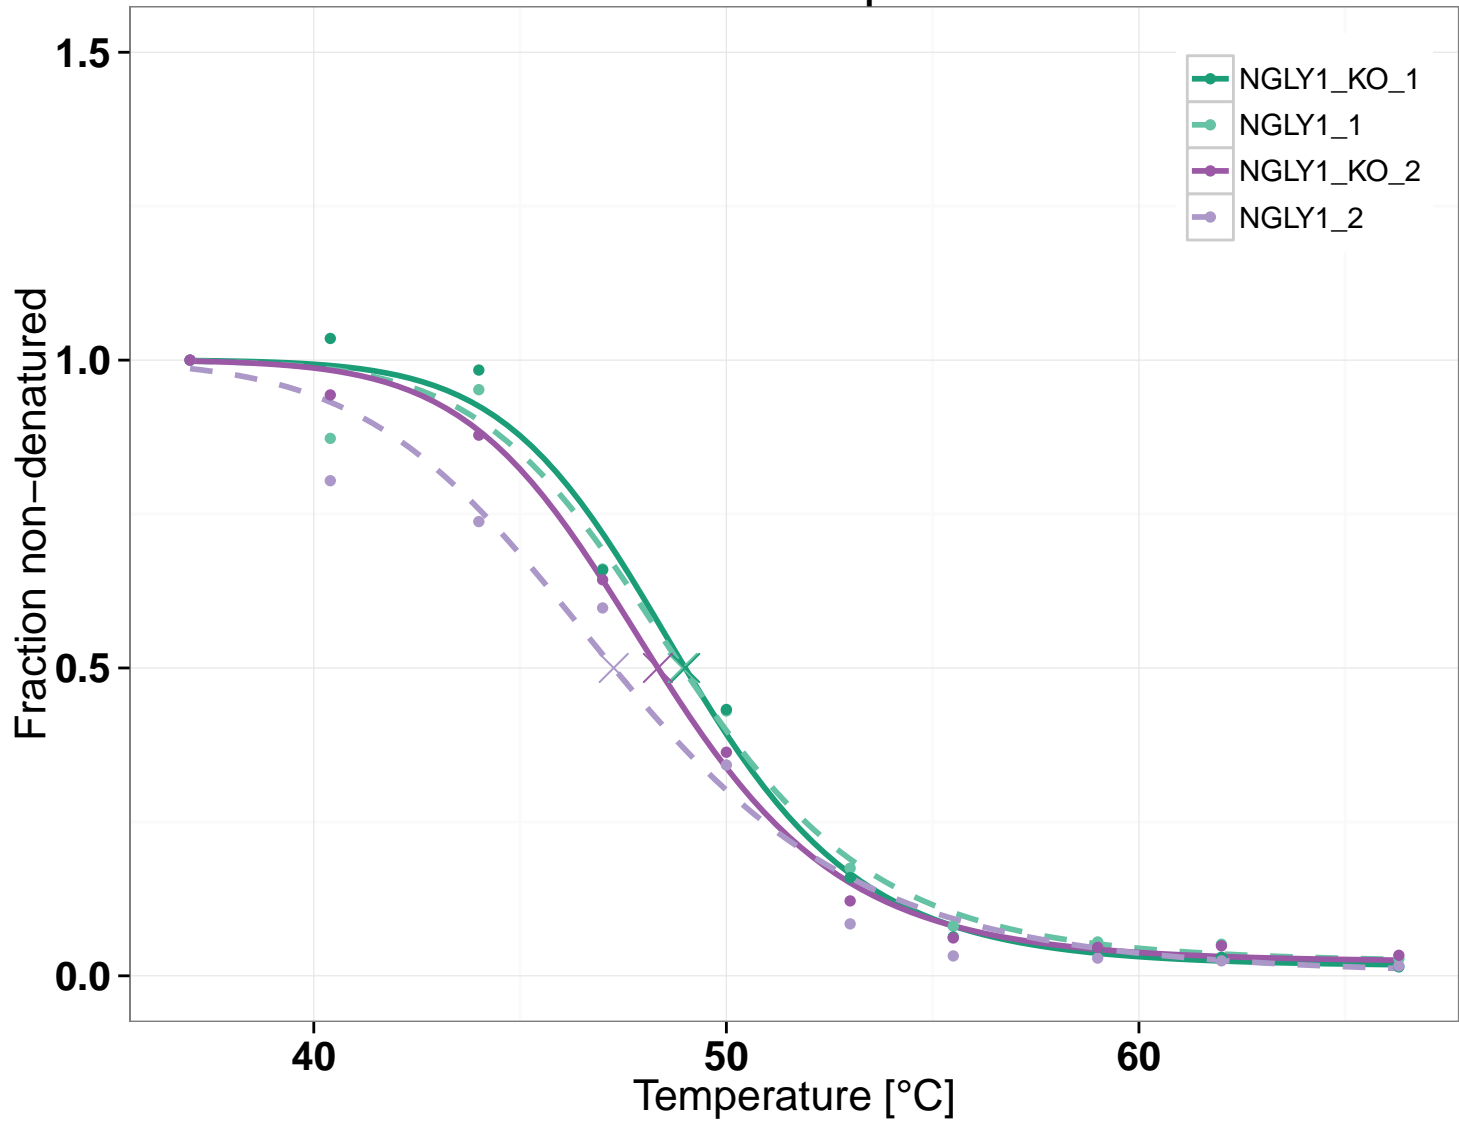

|            | meltPoint | slope  | plateau | R2   |
|------------|-----------|--------|---------|------|
| NGLY1_KO_1 | 49        | -0.11  | 0.02    | 0.99 |
| NGLY1_1    | 48.94     | -0.1   | 0.02    | 0.99 |
| NGLY1_KO_2 | 48.34     | -0.11  | 0.02    | 1    |
| NGLY1_2    | 47.27     | -0.083 | 0       | 0.97 |

Supplement: Supplementary file 6844 [file 1]

# IPI00260090.3|ELMO2

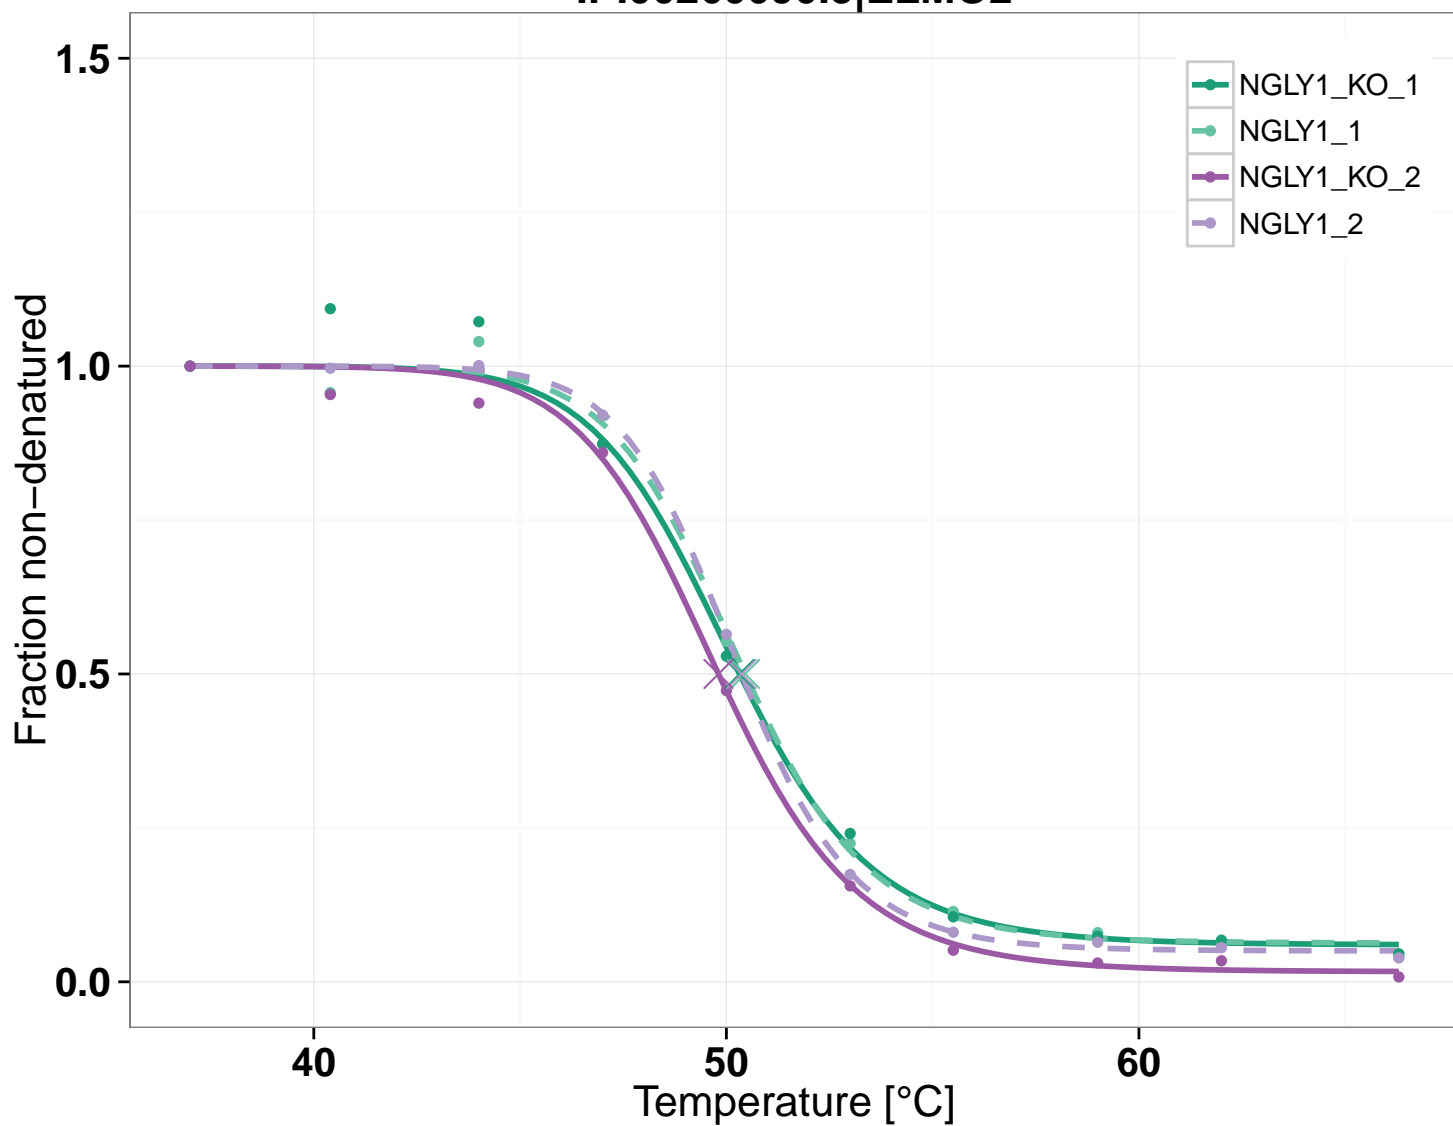

|            | meltPoint | slope | plateau | R2   |
|------------|-----------|-------|---------|------|
| NGLY1_KO_1 | 50.32     | -0.14 | 0.06    | 0.99 |
| NGLY1_1    | 50.46     | -0.15 | 0.06    | 1    |
| NGLY1_KO_2 | 49.81     | -0.15 | 0.02    | 1    |
| NGLY1_2    | 50.37     | -0.17 | 0.05    | 1    |

Supplement: Supplementary file 6845 [file 1]

# IPI00045908.2|IMMP2L

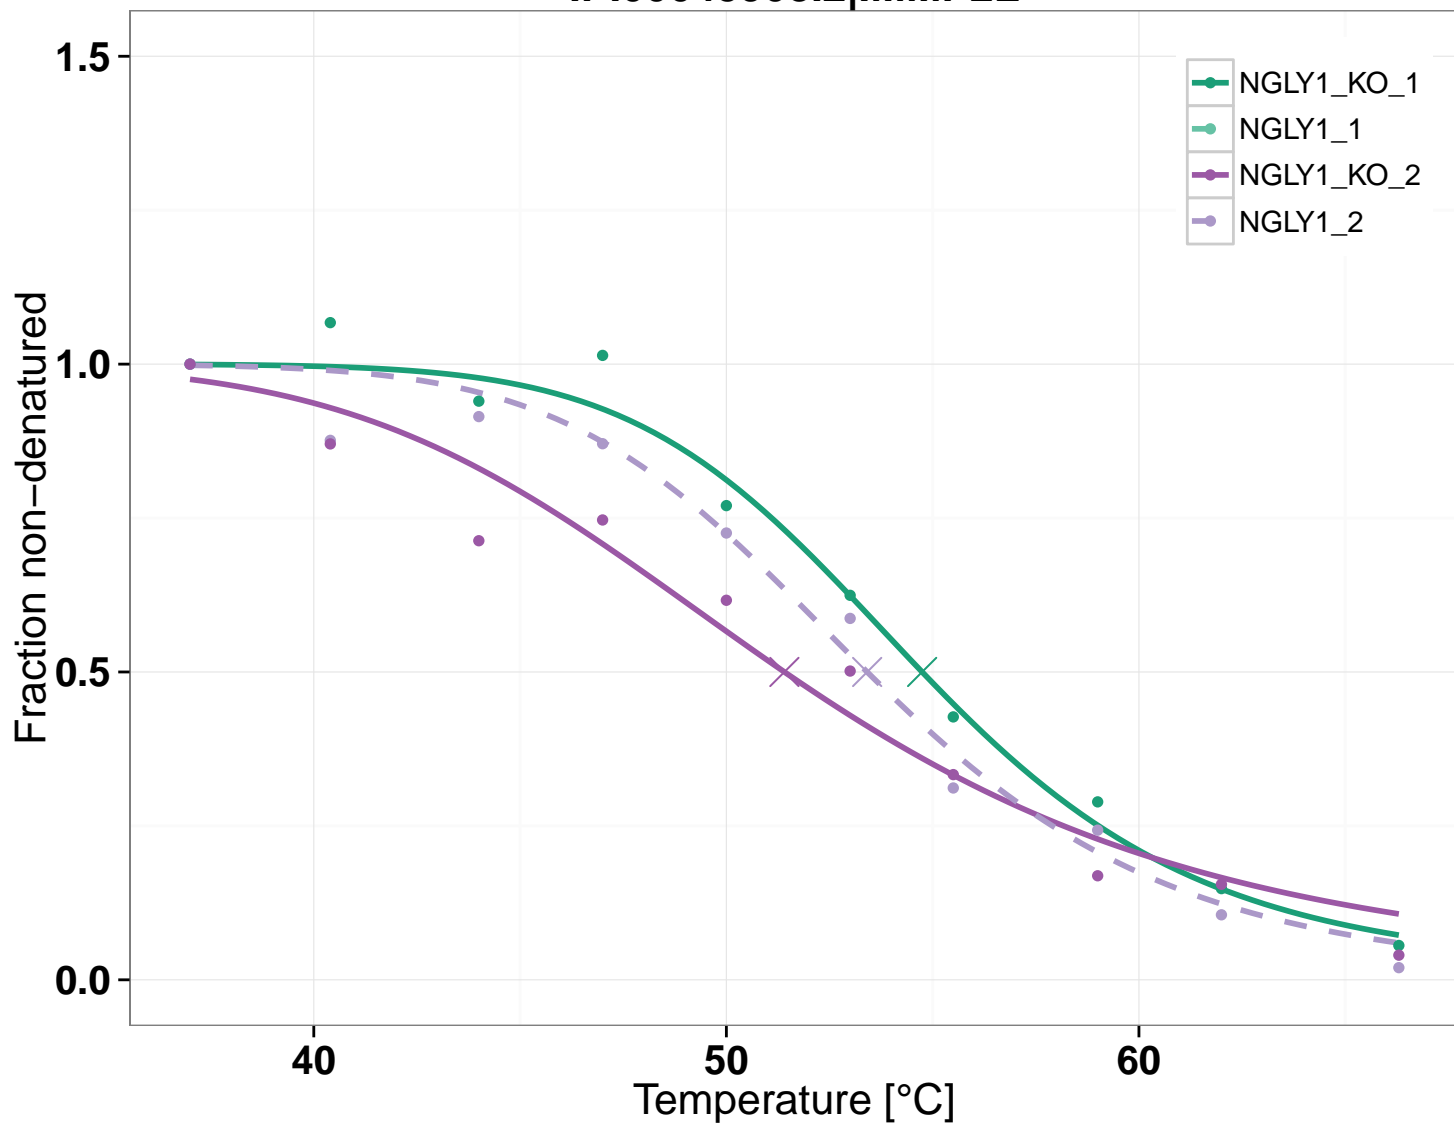

|            | meltPoint | slope  | plateau | R2   |
|------------|-----------|--------|---------|------|
| NGLY1_KO_1 | 54.75     | -0.071 | 0.01    | 0.99 |
| NGLY1_1    | -         | -      | -       | -    |
| NGLY1_KO_2 | 51.41     | -0.048 | 0       | 0.96 |
| NGLY1_2    | 53.41     | -0.068 | 0       | 0.98 |

Supplement: Supplementary file 6846 [file 1]

# IPI00030919.3|MAPKSP1

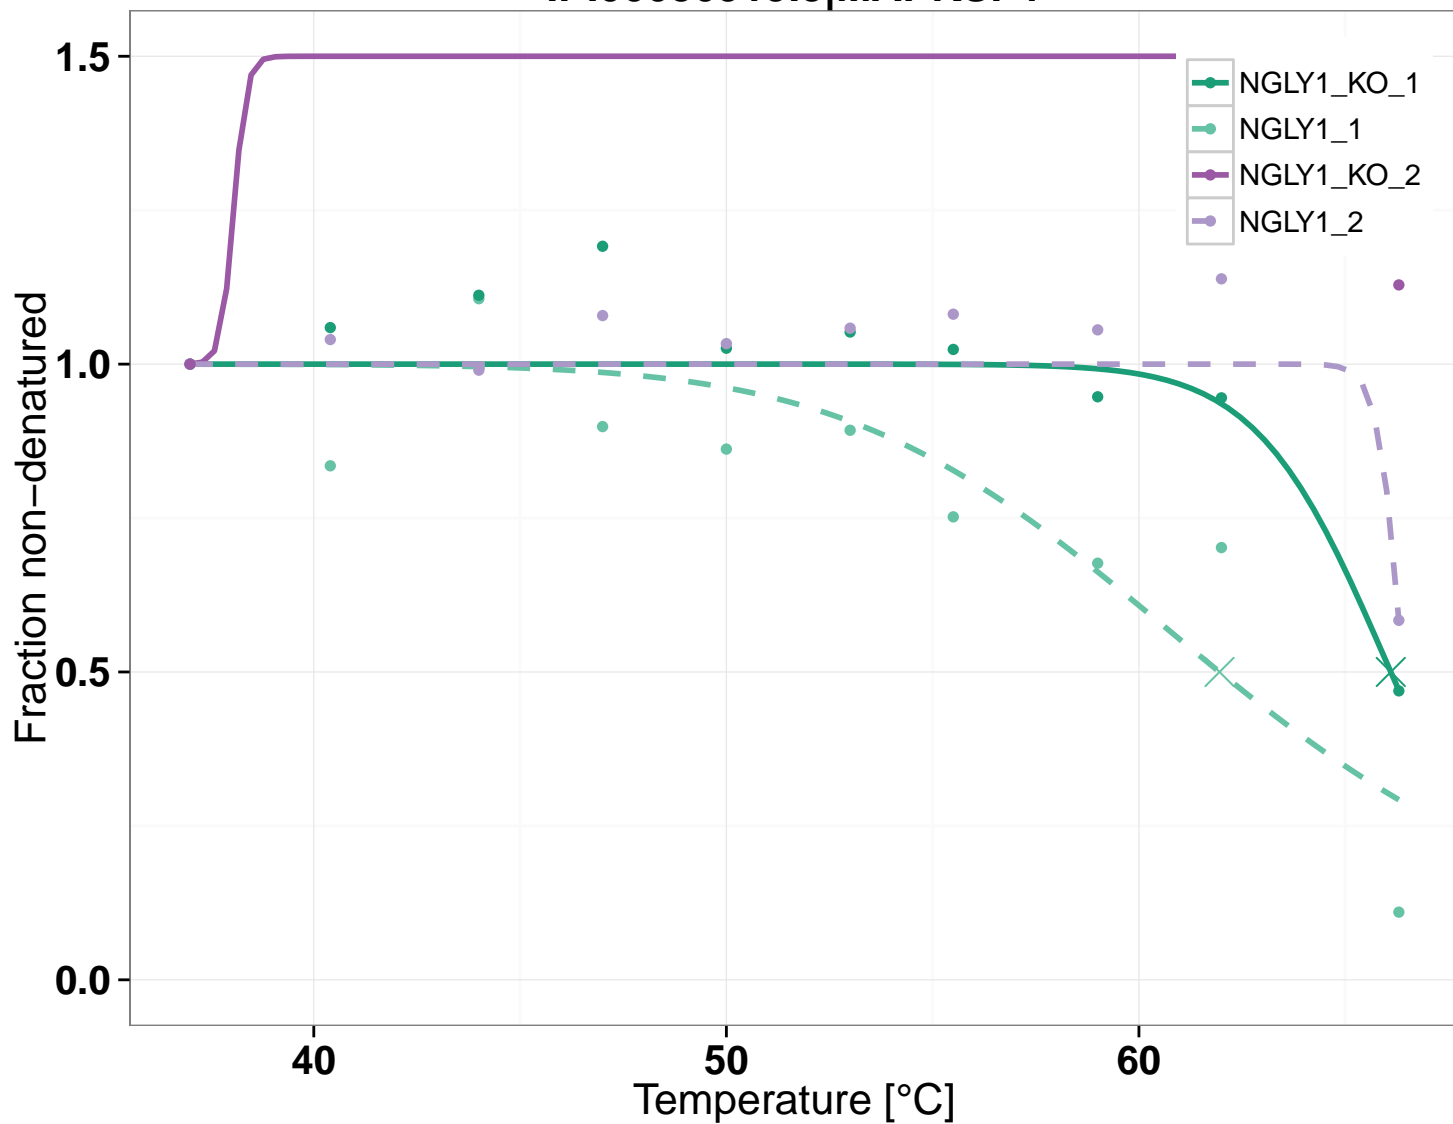

|            | meltPoint | slope  | plateau | R2    |
|------------|-----------|--------|---------|-------|
| NGLY1_KO_1 | 66.1      | -0.15  | 0       | 0.83  |
| NGLY1_1    | 61.95     | -0.056 | 0       | 0.79  |
| NGLY1_KO_2 | -         | 0.82   | 1.5     | -0.81 |
| NGLY1_2    | -         | -      | 0       | 0.81  |

Supplement: Supplementary file 6847 [file 1]

IPI00872398.1|TNPO3

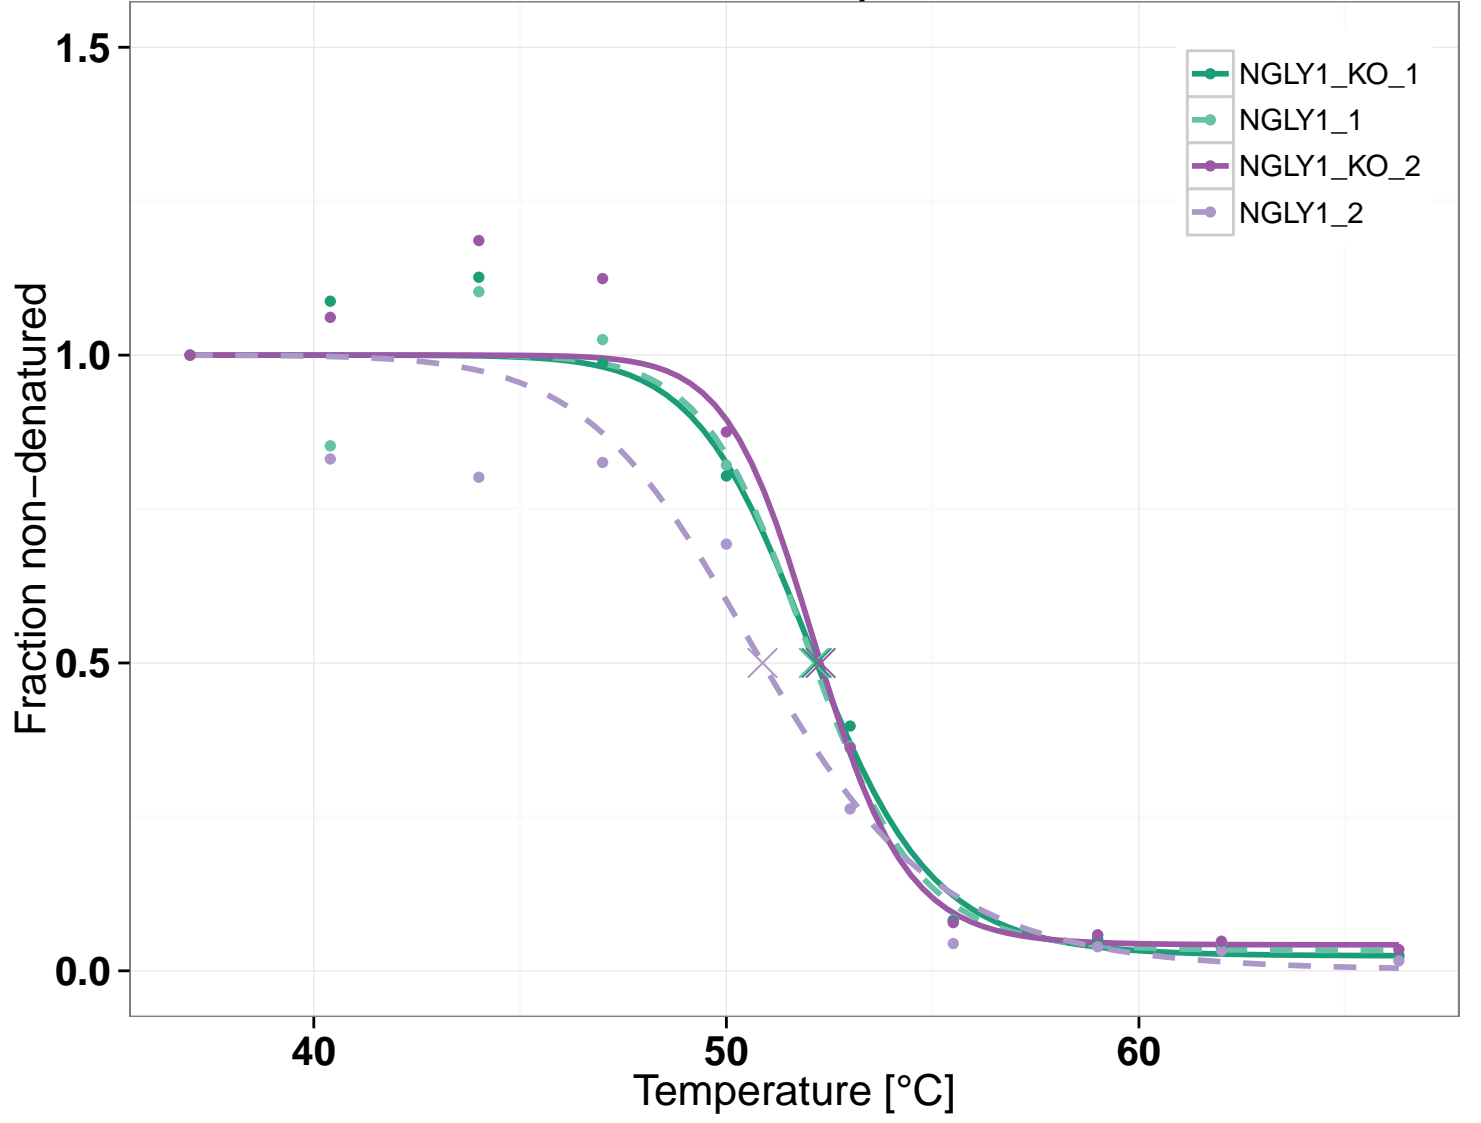

|            | meltPoint | slope | plateau | R2   |
|------------|-----------|-------|---------|------|
| NGLY1_KO_1 | 52.19     | -0.17 | 0.02    | 0.99 |
| NGLY1_1    | 52.12     | -0.18 | 0.03    | 0.98 |
| NGLY1_KO_2 | 52.29     | -0.22 | 0.04    | 0.98 |
| NGLY1_2    | 50.88     | -0.12 | 0       | 0.95 |

Supplement: Supplementary file 6848 [file 1]

IPI00477535.6|ERCC5

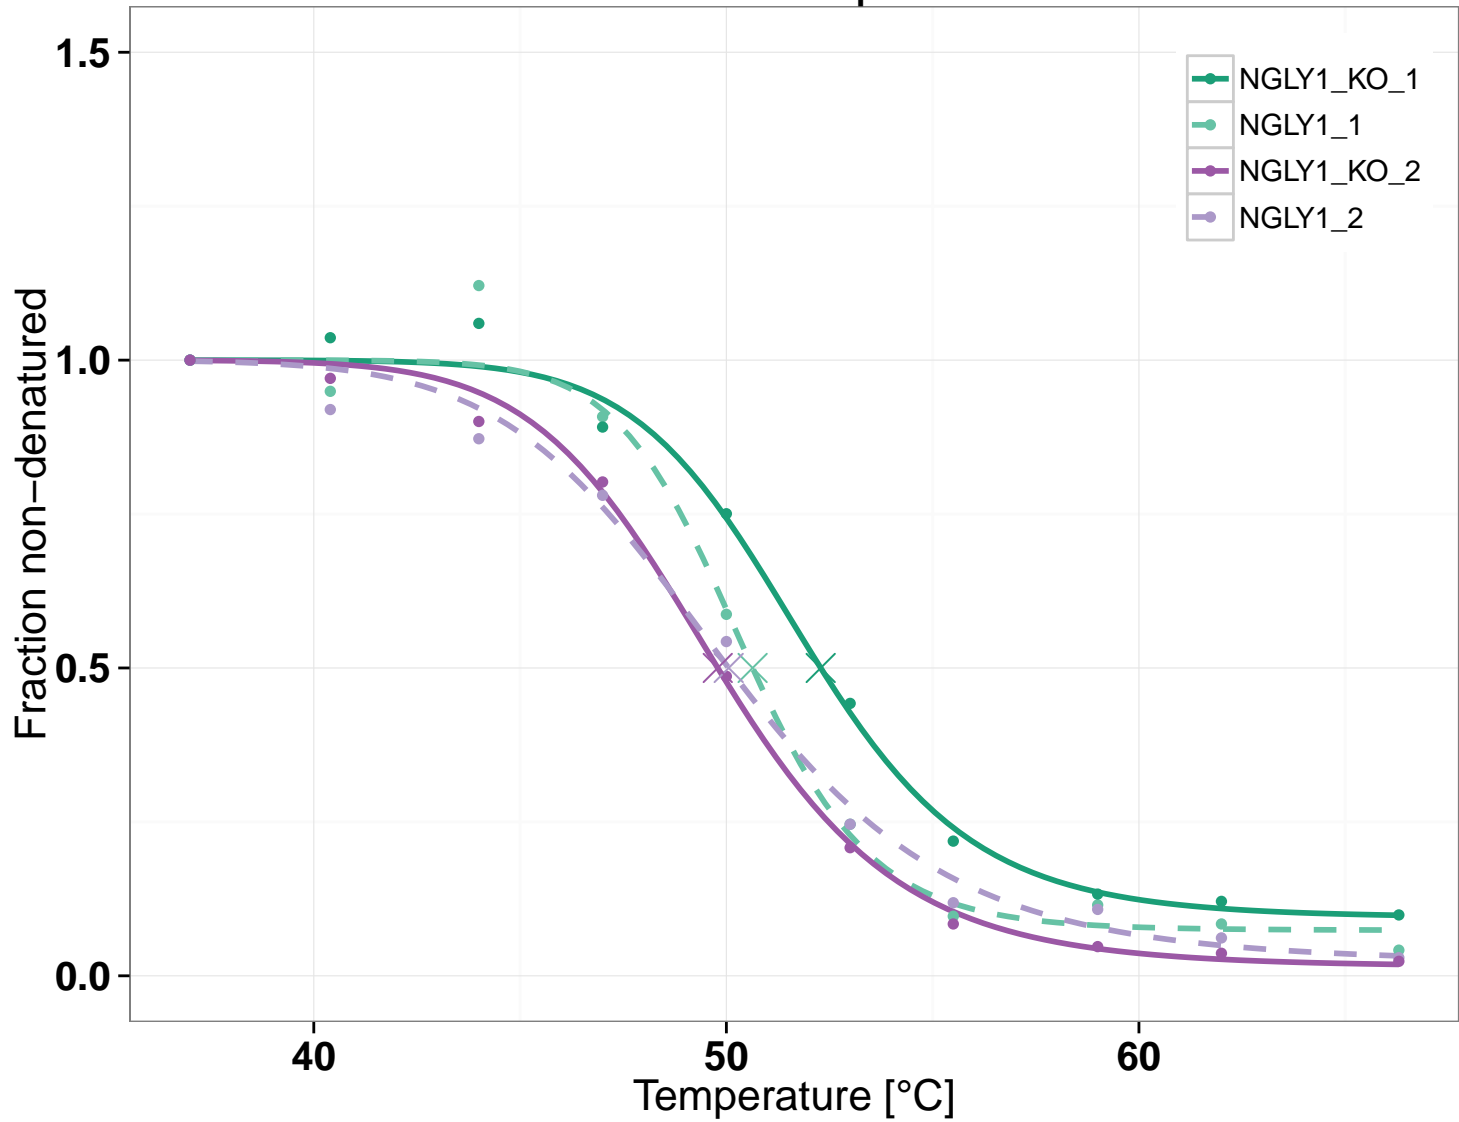

|            | meltPoint | slope | plateau | R2   |
|------------|-----------|-------|---------|------|
| NGLY1_KO_1 | 52.29     | -0.11 | 0.09    | 0.99 |
| NGLY1_1    | 50.64     | -0.15 | 0.07    | 0.99 |
| NGLY1_KO_2 | 49.79     | -0.11 | 0.01    | 1    |
| NGLY1_2    | 50.06     | -0.09 | 0.02    | 0.99 |

Supplement: Supplementary file 6849 [file 1]

# IPI00411886.4|NOC2L

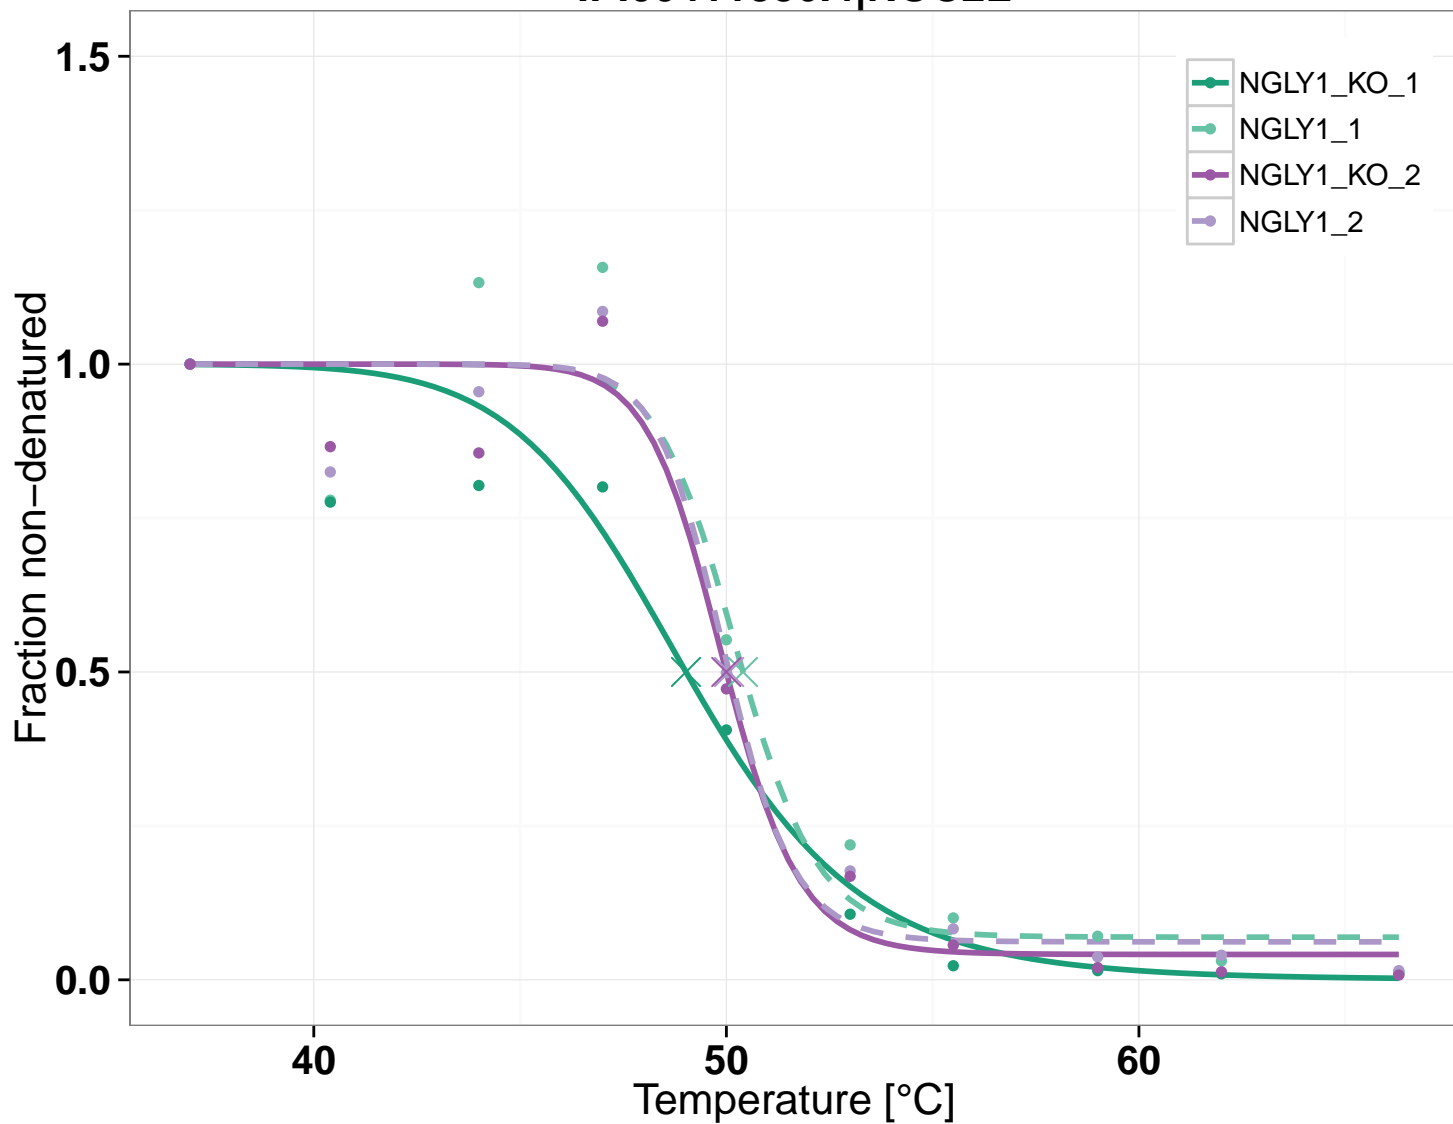

|            | meltPoint | slope | plateau | R2   |
|------------|-----------|-------|---------|------|
| NGLY1_KO_1 | 49.02     | -0.12 | 0       | 0.95 |
| NGLY1_1    | 50.4      | -0.24 | 0.07    | 0.94 |
| NGLY1_KO_2 | 50        | -0.26 | 0.04    | 0.97 |
| NGLY1_2    | 50.07     | -0.28 | 0.06    | 0.97 |

Supplement: Supplementary file 6850 [file 1]

IPI00410118.1|QKI

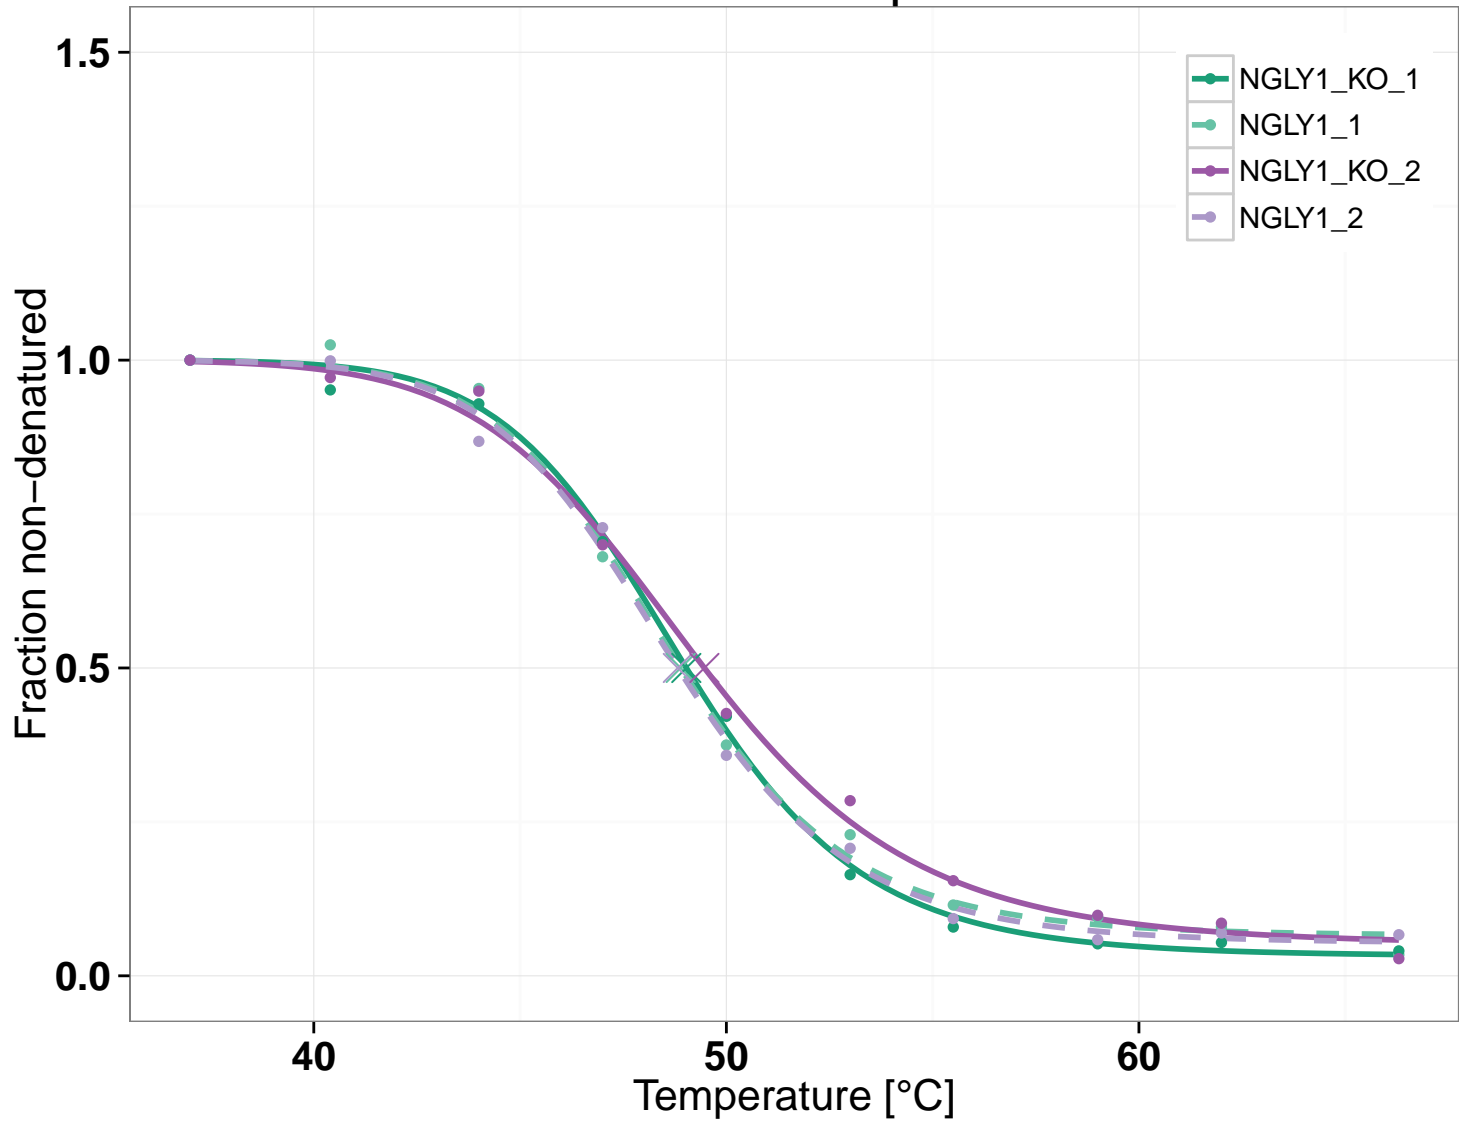

|            | meltPoint | slope | plateau | R2 |
|------------|-----------|-------|---------|----|
| NGLY1_KO_1 | 49.03     | -0.11 | 0.03    | 1  |
| NGLY1_1    | 48.89     | -0.11 | 0.06    | 1  |
| NGLY1_KO_2 | 49.47     | -0.09 | 0.05    | 1  |
| NGLY1_2    | 48.82     | -0.11 | 0.05    | 1  |

Supplement: Supplementary file 6851 [file 1]

# IPI00154833.7|GFOD2

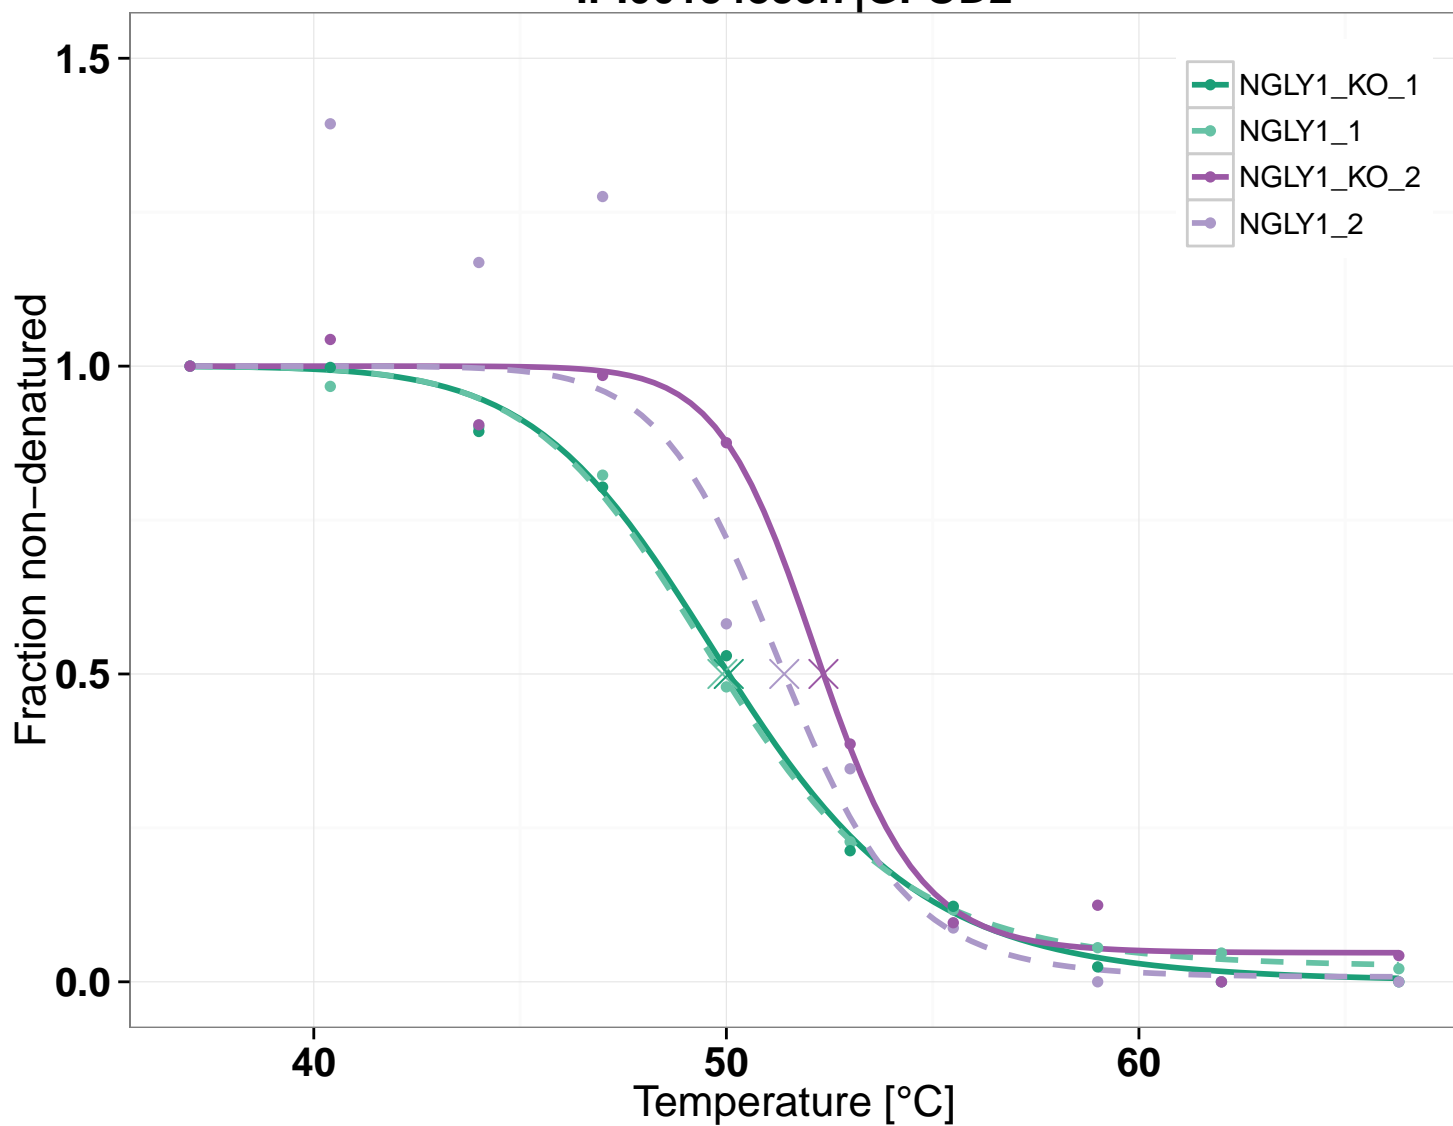

|            | meltPoint | slope | plateau | R2   |
|------------|-----------|-------|---------|------|
| NGLY1_KO_1 | 50.06     | -0.11 | 0       | 1    |
| NGLY1_1    | 49.9      | -0.11 | 0.02    | 1    |
| NGLY1_KO_2 | 52.35     | -0.2  | 0.05    | 0.99 |
| NGLY1_2    | 51.4      | -0.16 | 0.01    | 0.9  |

Supplement: Supplementary file 6852 [file 1]

# IPI00218850.5|SCAMP2

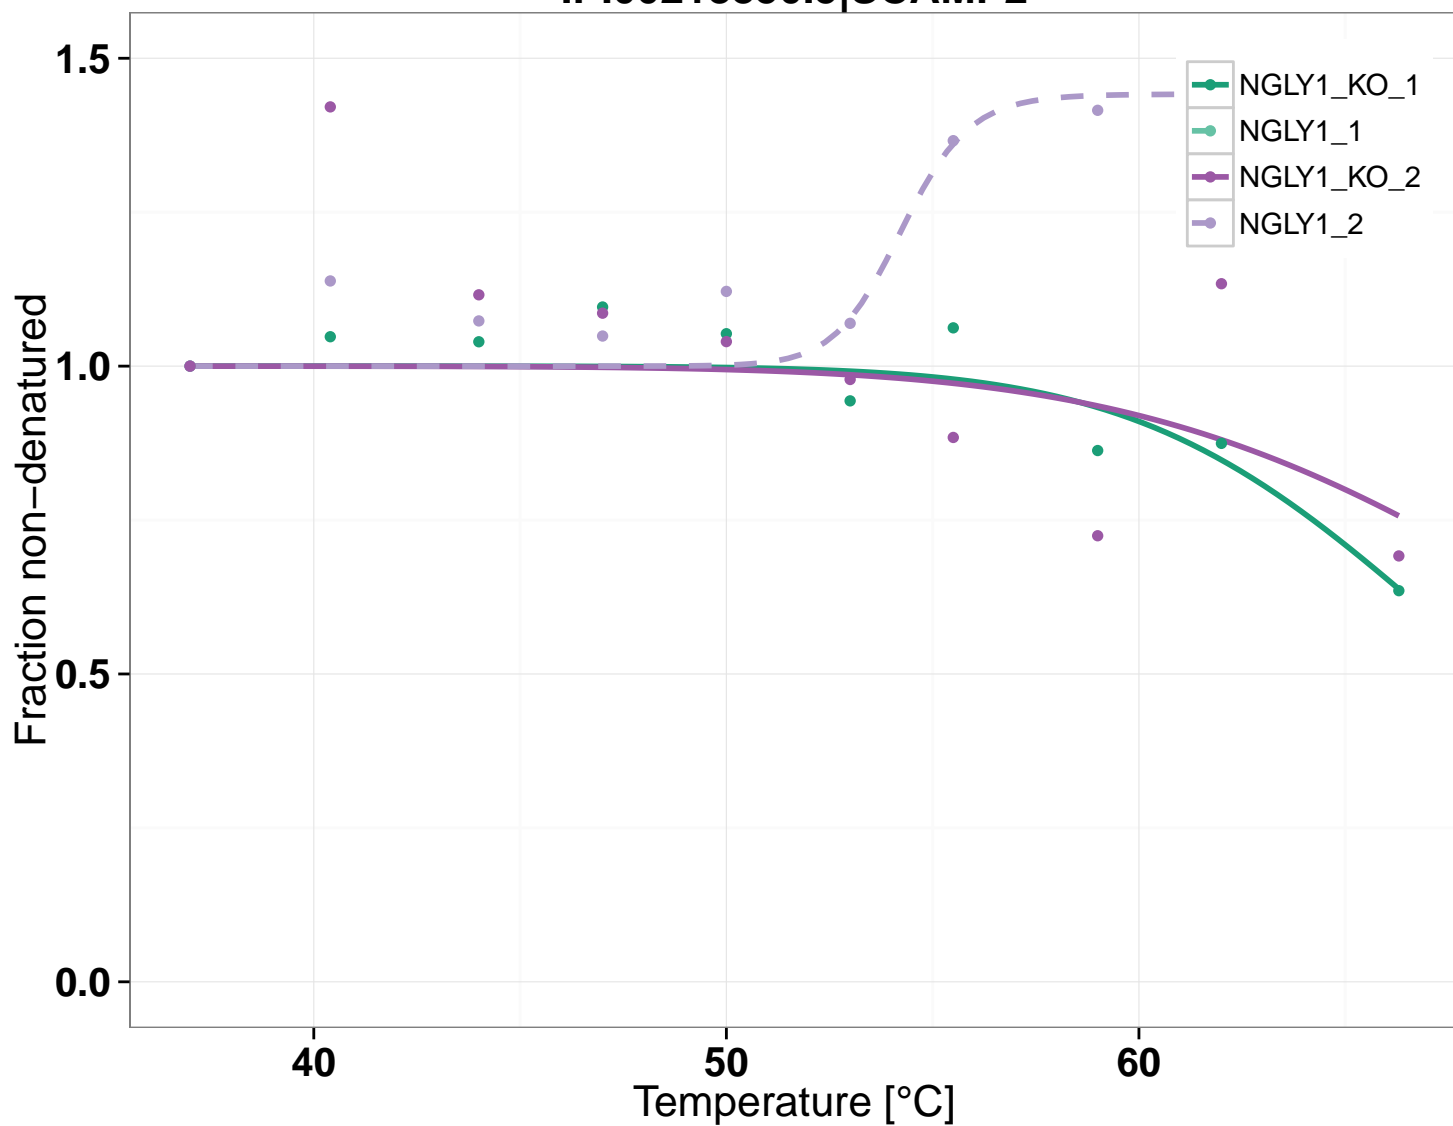

|            | meltPoint | slope | plateau | R2   |
|------------|-----------|-------|---------|------|
| NGLY1_KO_1 | –         | –     | 0.07    | 0.82 |
| NGLY1_1    | –         | –     | –       | –    |
| NGLY1_KO_2 | –         | –     | 0       | 0.2  |
| NGLY1_2    | –         | 0.13  | 1.44    | 0.81 |

Supplement: Supplementary file 6853 [file 1]

IPI00793456.1|LRFN1

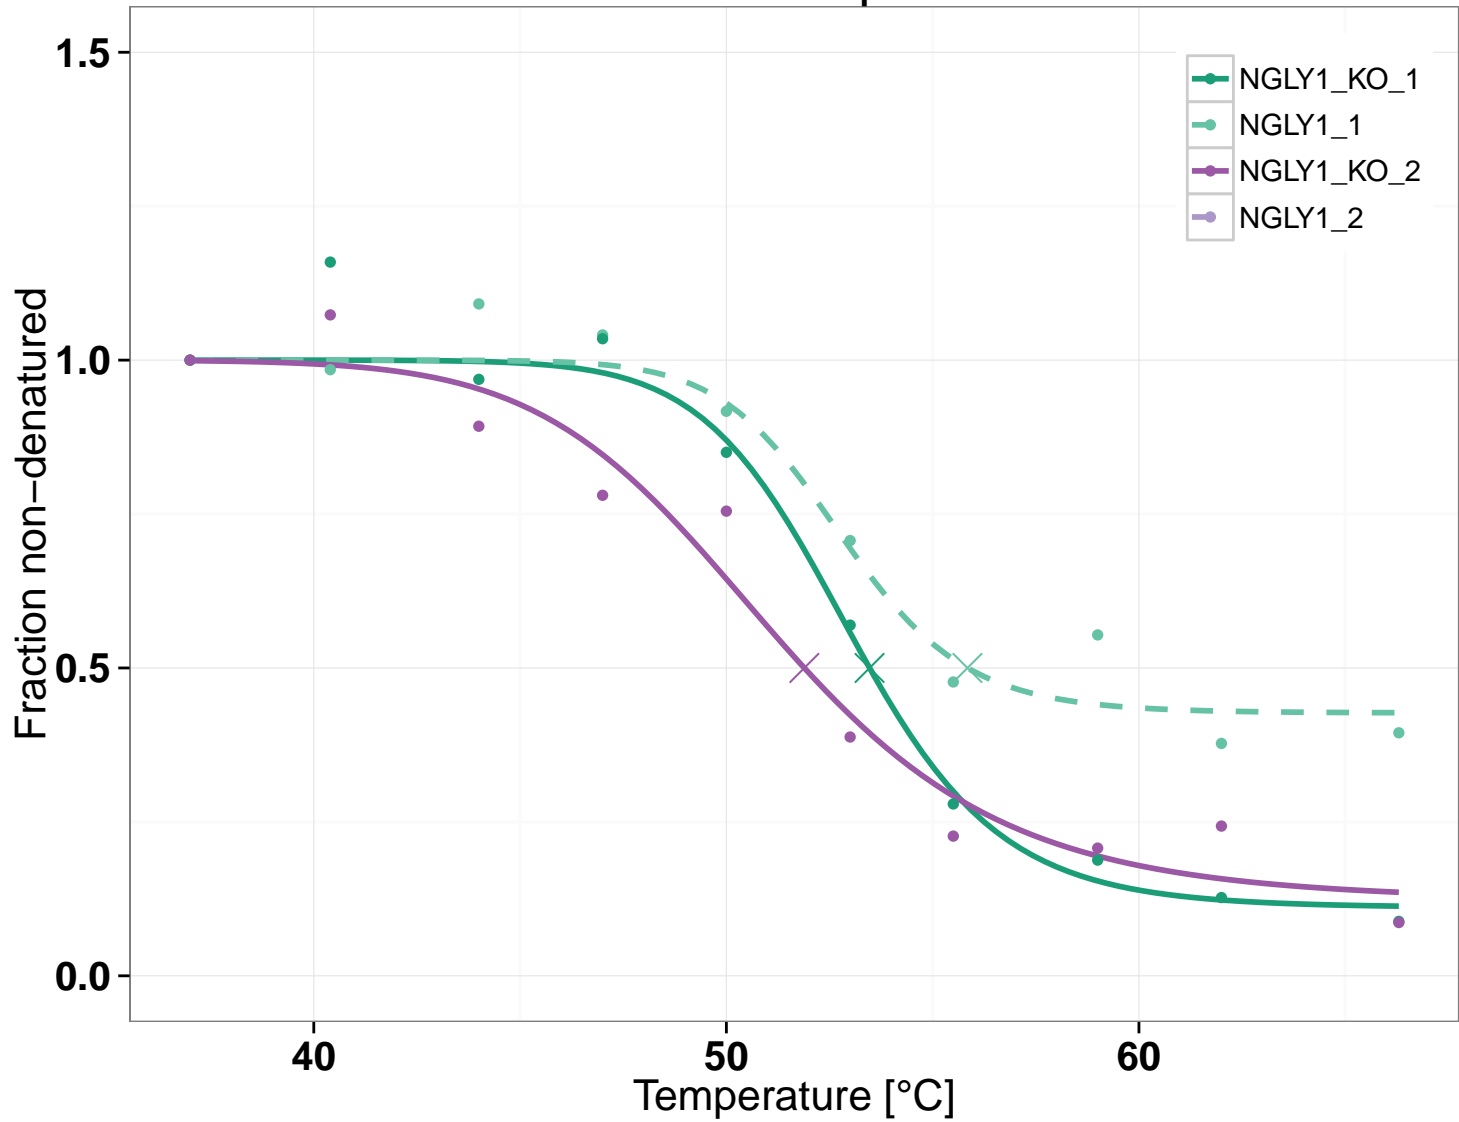

|            | meltPoint | slope  | plateau | R2   |
|------------|-----------|--------|---------|------|
| NGLY1_KO_1 | 53.47     | -0.12  | 0.11    | 0.98 |
| NGLY1_1    | 55.84     | -0.096 | 0.43    | 0.96 |
| NGLY1_KO_2 | 51.89     | -0.078 | 0.12    | 0.97 |
| NGLY1_2    | -         | -      | -       | -    |

Supplement: Supplementary file 6854 [file 1]

# IPI00160418.4|TMEM22

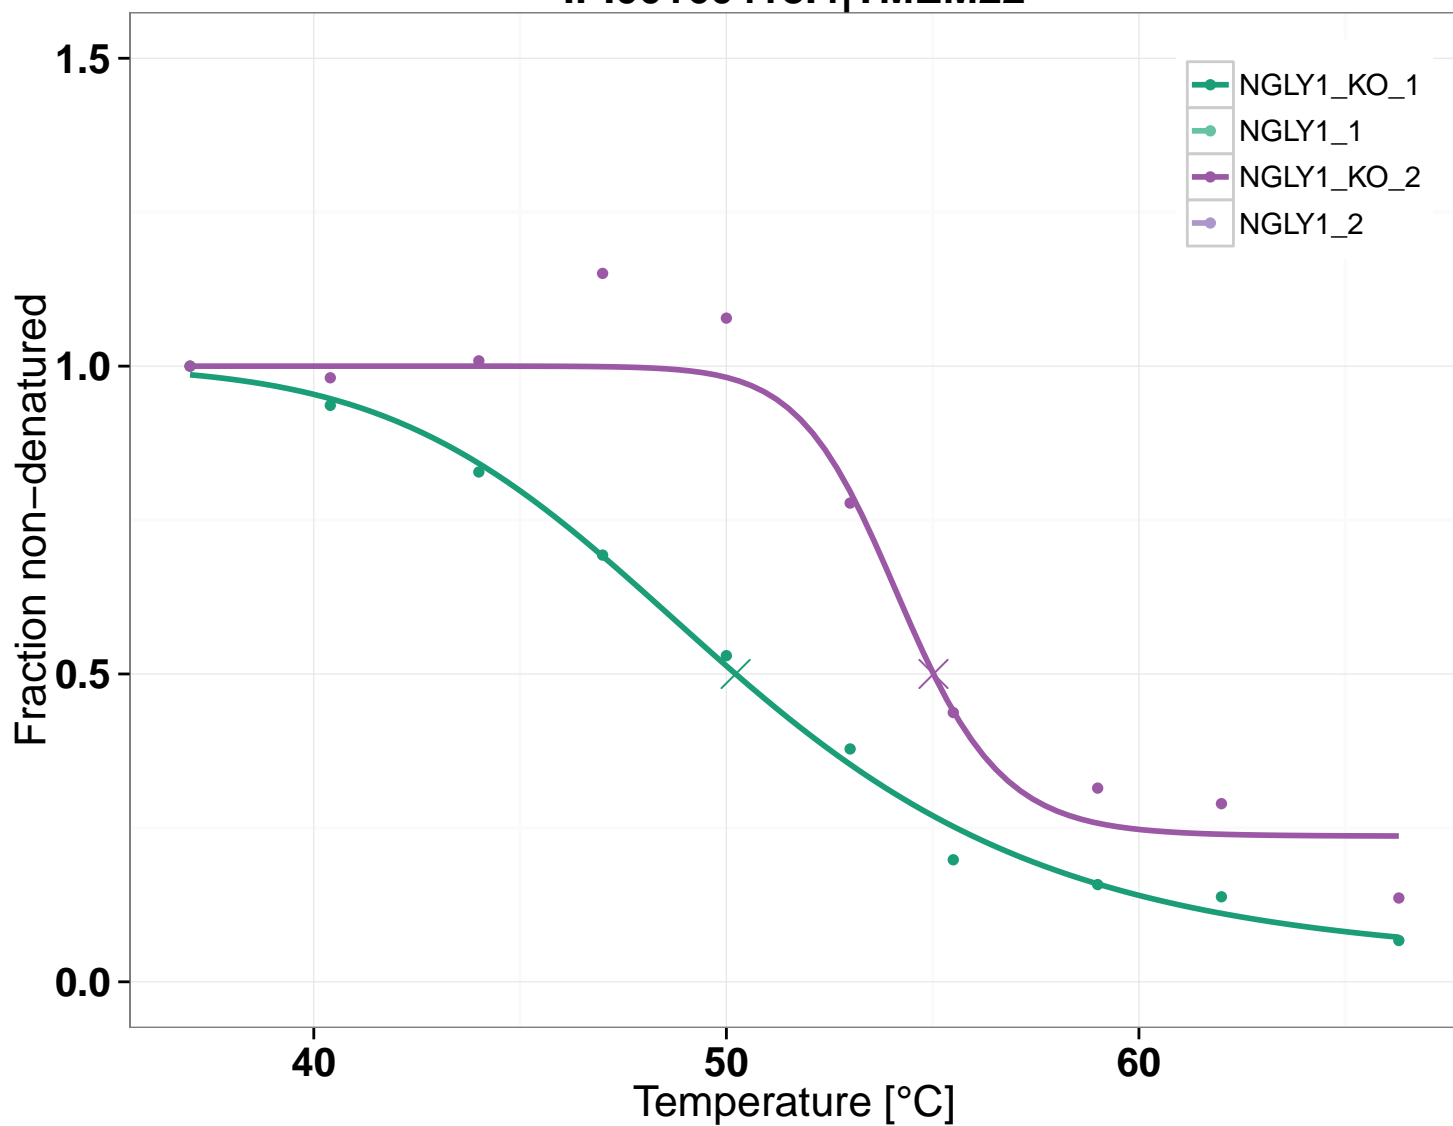

|            | meltPoint | slope | plateau | R2   |
|------------|-----------|-------|---------|------|
| NGLY1_KO_1 | 50.22     | -0.06 | 0.02    | 1    |
| NGLY1_1    | -         | -     | -       | -    |
| NGLY1_KO_2 | 55.02     | -0.16 | 0.24    | 0.96 |
| NGLY1_2    | -         | -     | -       | -    |

Supplement: Supplementary file 6855 [file 1]

IPI00217965.1|HDAC3

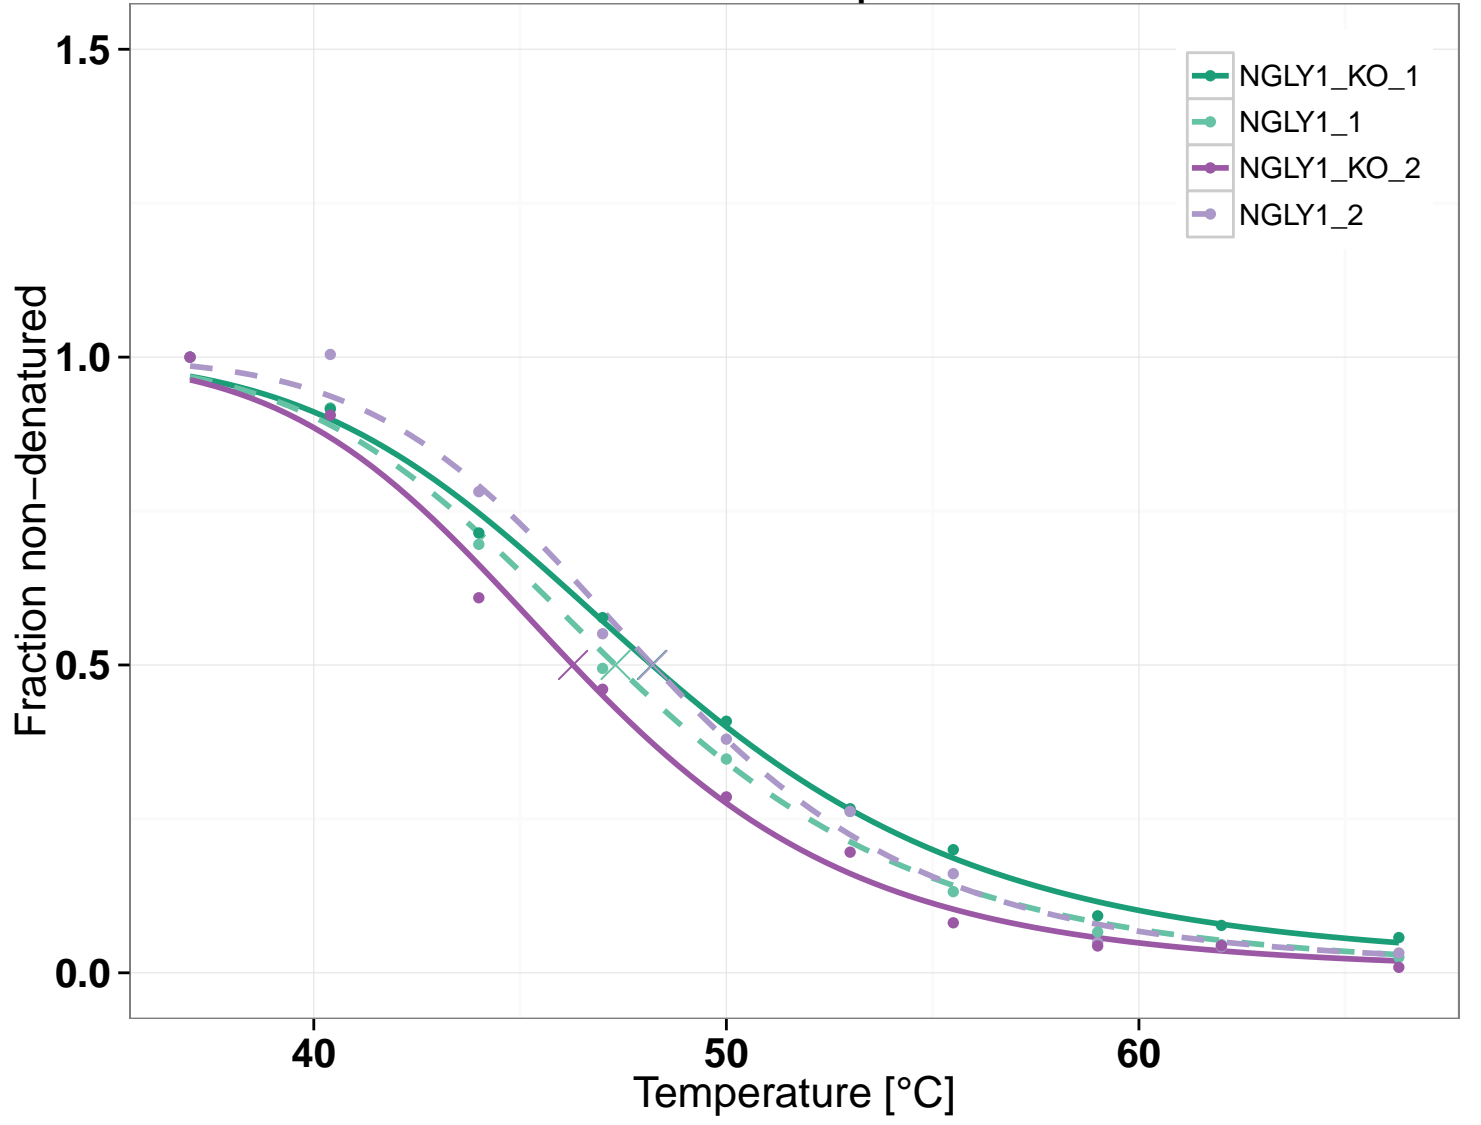

|            | meltPoint | slope  | plateau | R2   |
|------------|-----------|--------|---------|------|
| NGLY1_KO_1 | 48.2      | -0.061 | 0.01    | 1    |
| NGLY1_1    | 47.31     | -0.066 | 0       | 1    |
| NGLY1_KO_2 | 46.28     | -0.072 | 0       | 0.99 |
| NGLY1_2    | 48.21     | -0.073 | 0.01    | 0.99 |

Supplement: Supplementary file 6856 [file 1]

IPI00385455.3|TEAD3

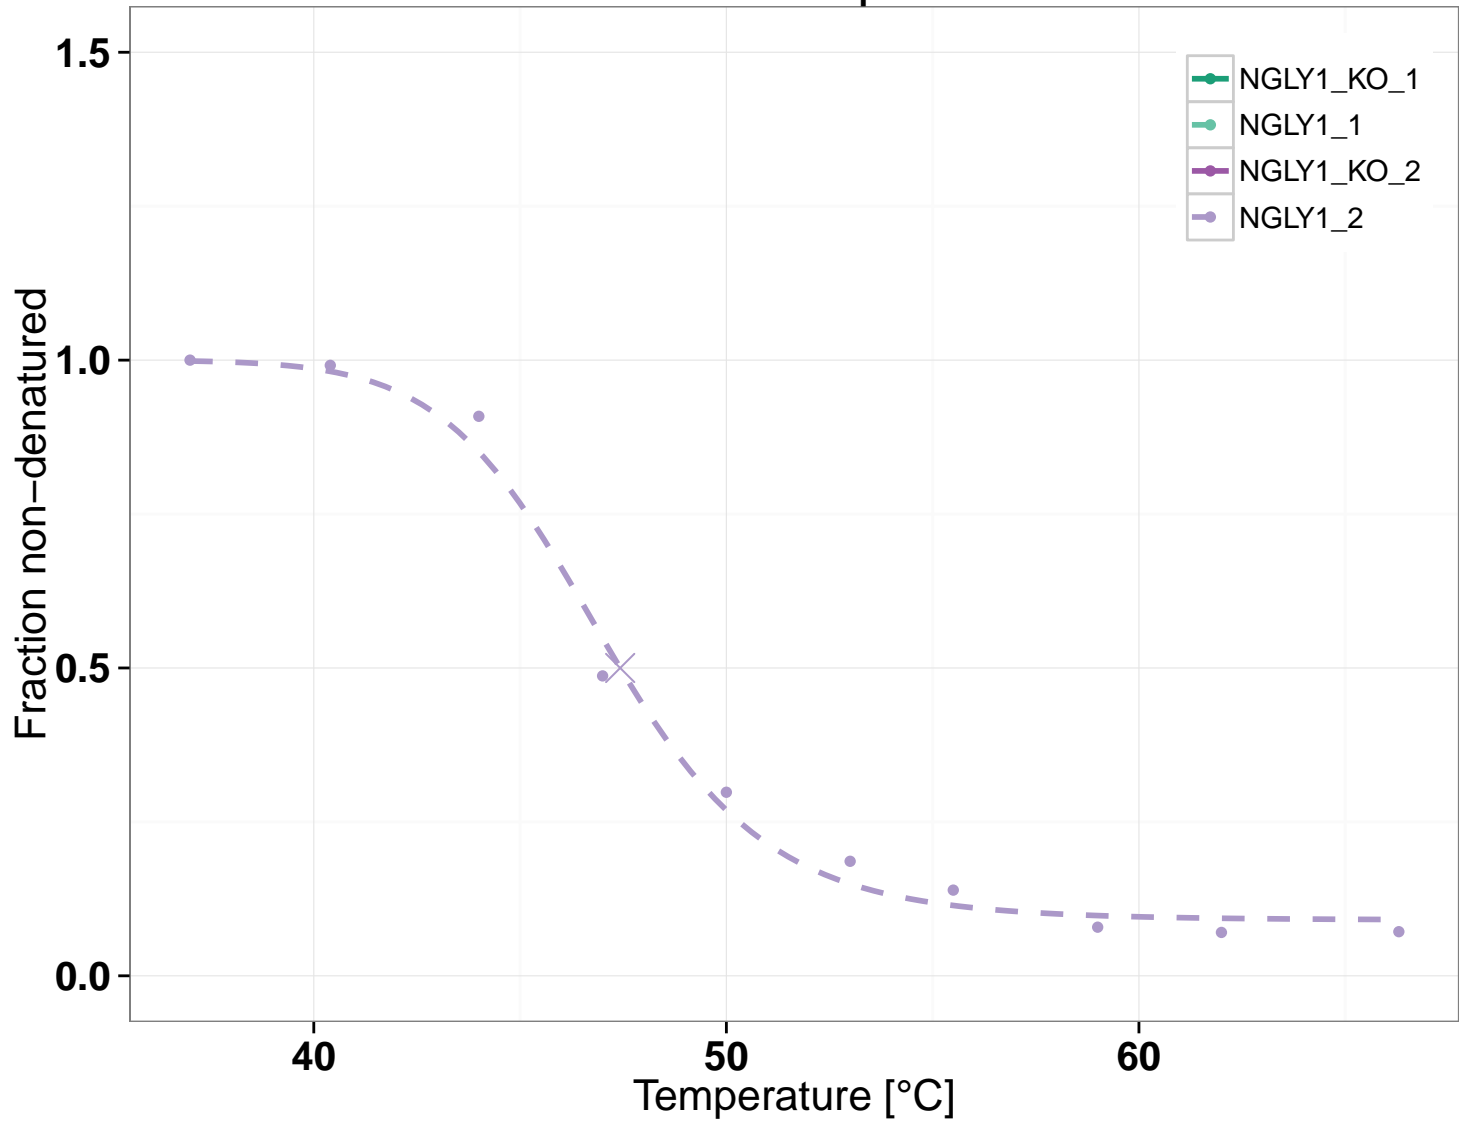

|            | meltPoint | slope | plateau | R2   |
|------------|-----------|-------|---------|------|
| NGLY1_KO_1 | -         | -     | -       | -    |
| NGLY1_1    | -         | -     | -       | -    |
| NGLY1_KO_2 | -         | -     | -       | -    |
| NGLY1_2    | 47.43     | -0.12 | 0.09    | 0.99 |

Supplement: Supplementary file 6857 [file 1]

# IPI00876858.1|PHC2

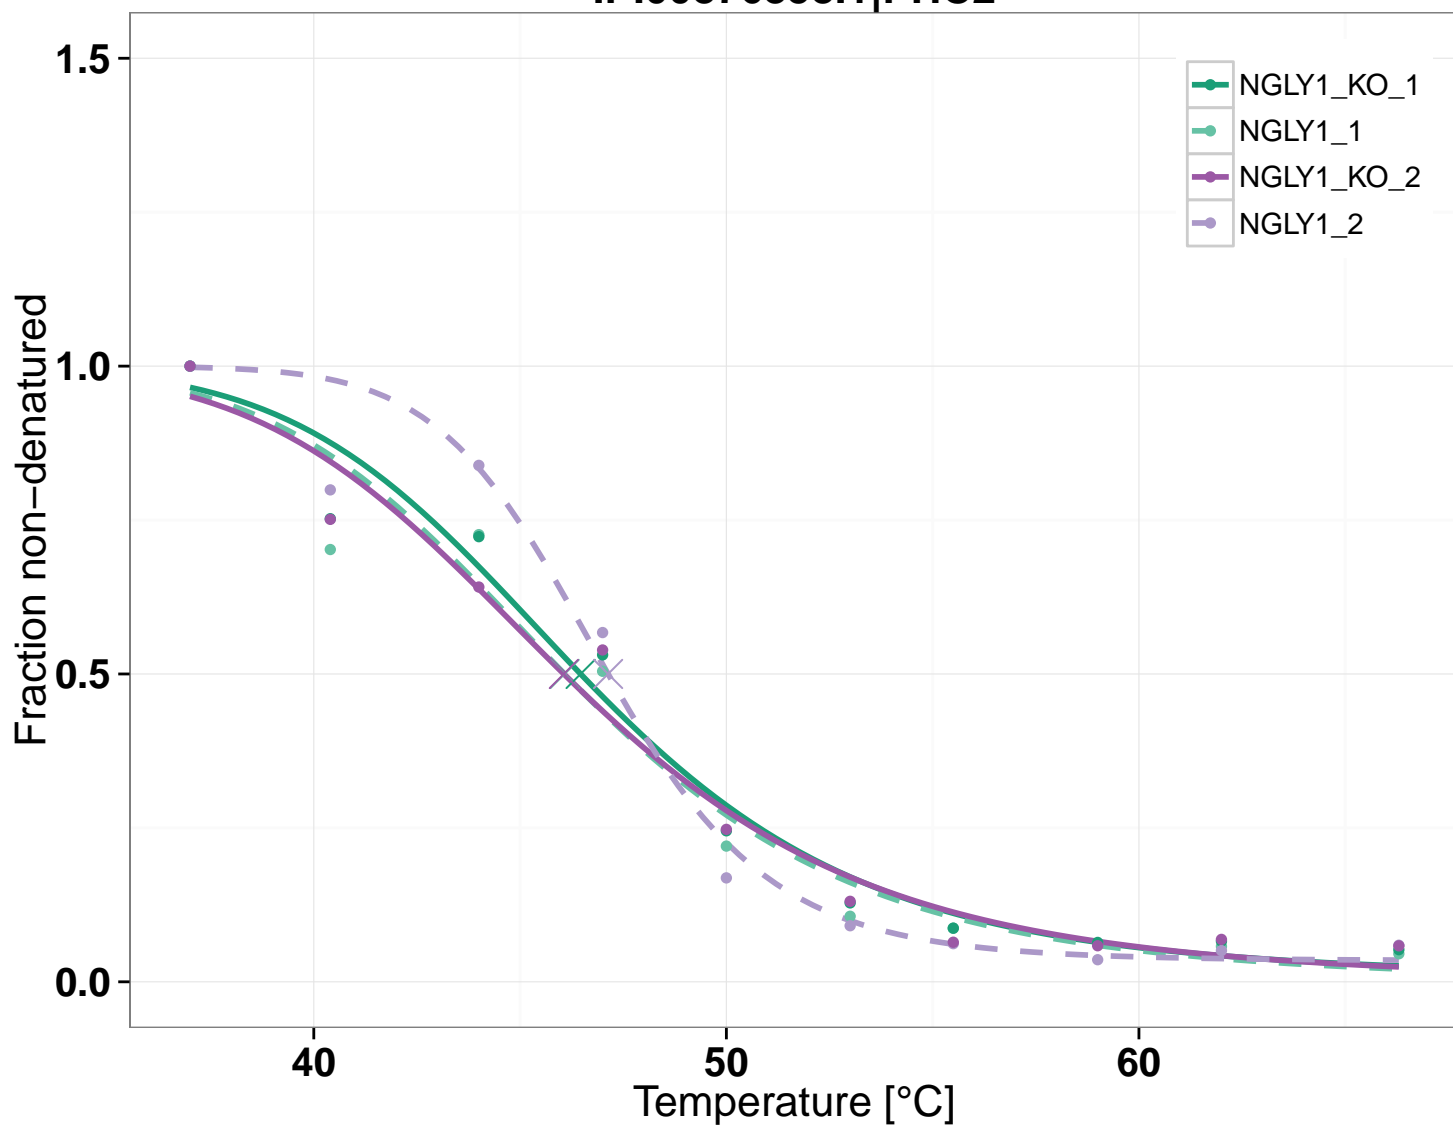

|            | meltPoint | slope  | plateau | R2   |
|------------|-----------|--------|---------|------|
| NGLY1_KO_1 | 46.47     | -0.072 | 0.01    | 0.97 |
| NGLY1_1    | 46.08     | -0.07  | 0       | 0.96 |
| NGLY1_KO_2 | 46.06     | -0.067 | 0       | 0.97 |
| NGLY1_2    | 47.13     | -0.12  | 0.03    | 0.97 |

Supplement: Supplementary file 6858 [file 1]

IPI00719120.2|MRPL28

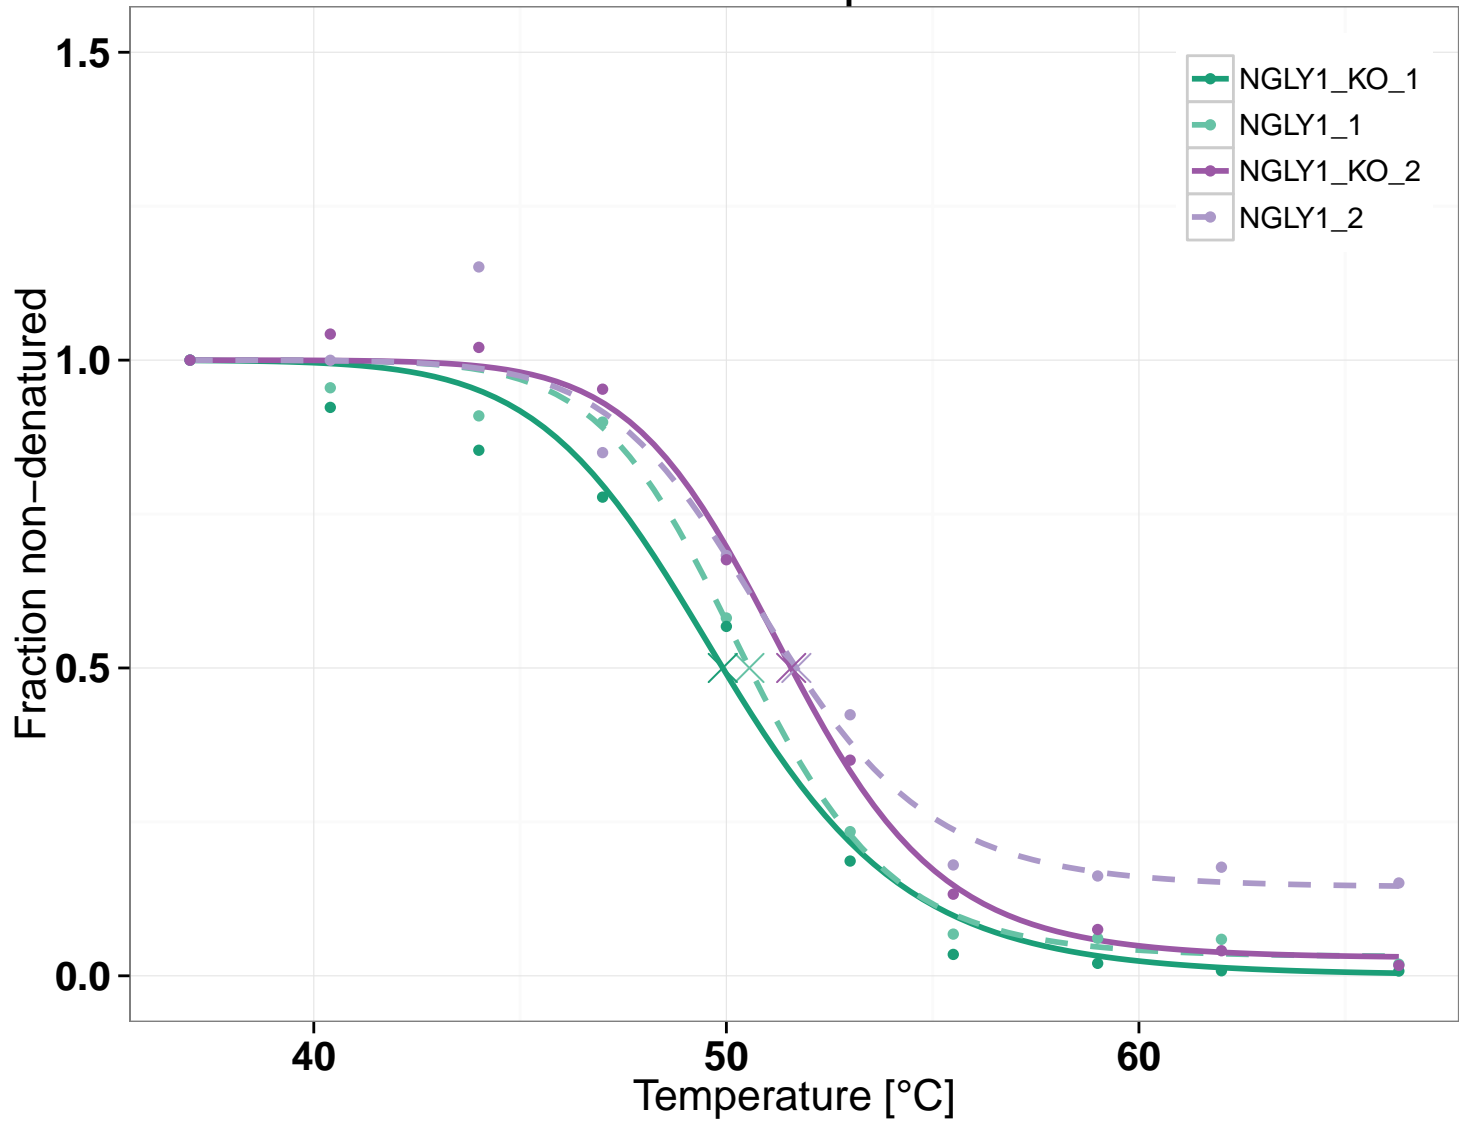

|            | meltPoint | slope | plateau | R2   |
|------------|-----------|-------|---------|------|
| NGLY1_KO_1 | 49.91     | -0.11 | 0       | 0.98 |
| NGLY1_1    | 50.56     | -0.14 | 0.03    | 0.99 |
| NGLY1_KO_2 | 51.57     | -0.13 | 0.03    | 1    |
| NGLY1_2    | 51.7      | -0.11 | 0.14    | 0.97 |

Supplement: Supplementary file 6859 [file 1]

IPI00433169.2|ARHGEF1

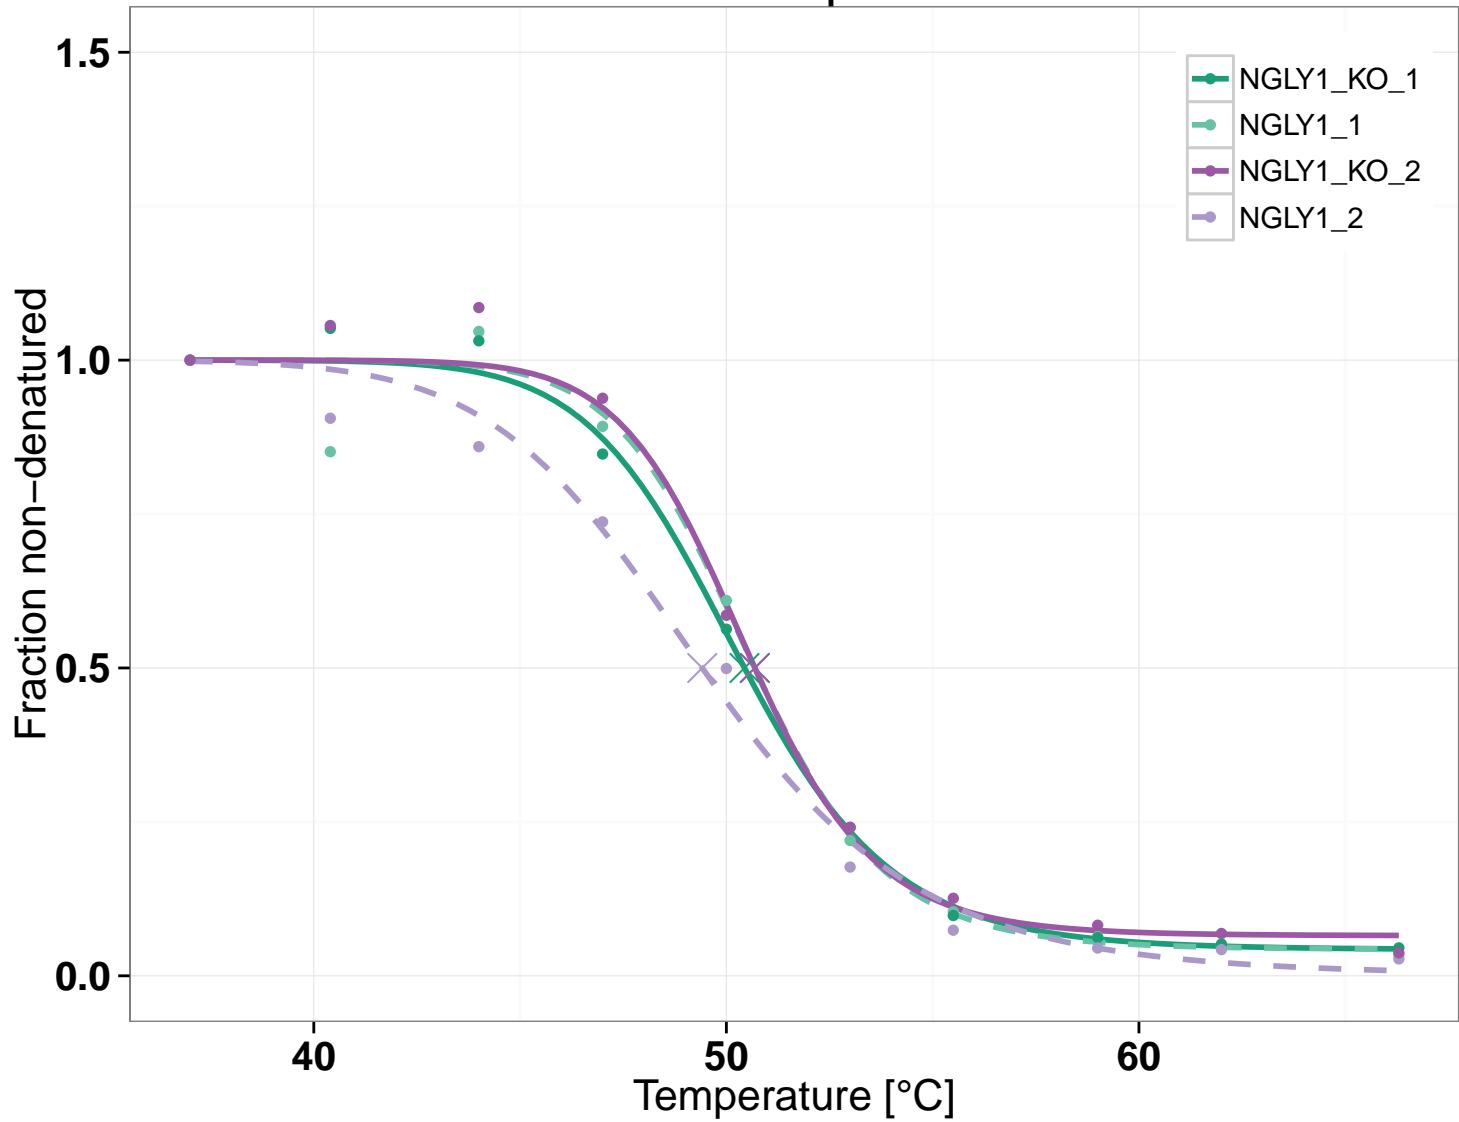

|            | meltPoint | slope  | plateau | R2   |
|------------|-----------|--------|---------|------|
| NGLY1_KO_1 | 50.44     | -0.13  | 0.04    | 1    |
| NGLY1_1    | 50.69     | -0.15  | 0.04    | 0.98 |
| NGLY1_KO_2 | 50.69     | -0.15  | 0.07    | 0.99 |
| NGLY1_2    | 49.42     | -0.096 | 0       | 0.99 |

Supplement: Supplementary file 6860 [file 1]

IPI00305589.3|PFKFB2

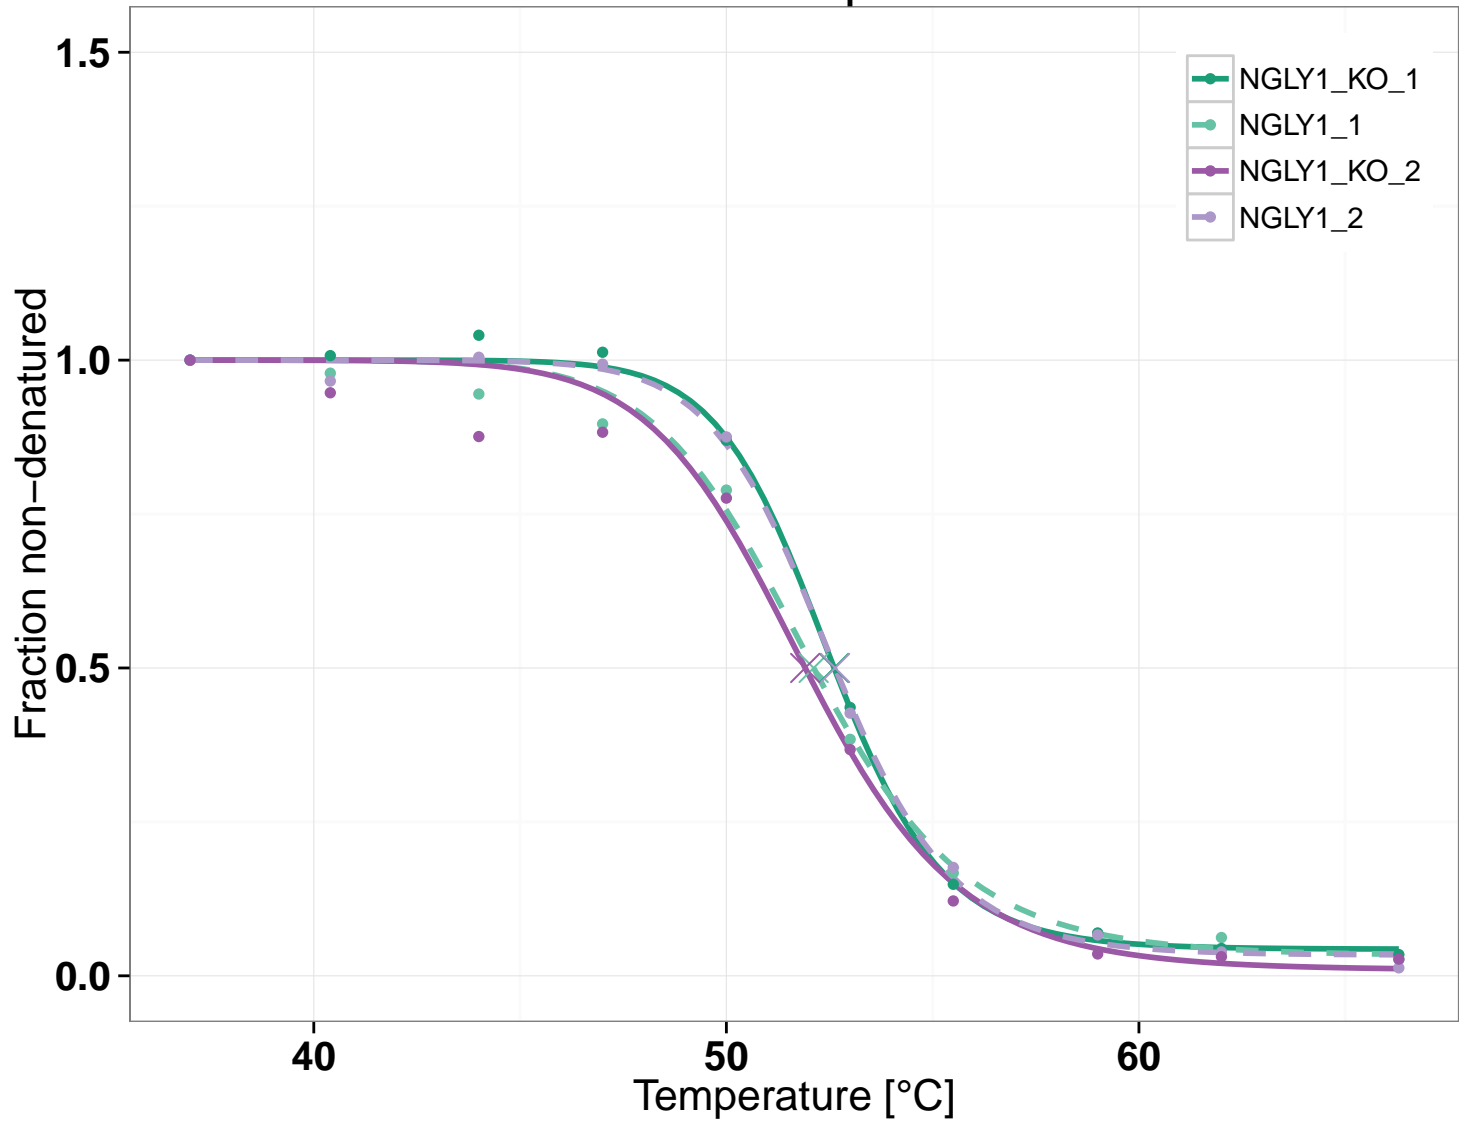

|            | meltPoint | slope | plateau | R2   |
|------------|-----------|-------|---------|------|
| NGLY1_KO_1 | 52.61     | -0.17 | 0.04    | 1    |
| NGLY1_1    | 52.12     | -0.13 | 0.03    | 1    |
| NGLY1_KO_2 | 51.91     | -0.13 | 0.01    | 0.99 |
| NGLY1_2    | 52.64     | -0.16 | 0.03    | 1    |

Supplement: Supplementary file 6861 [file 1]

# IPI00855846.1|C6ORF115

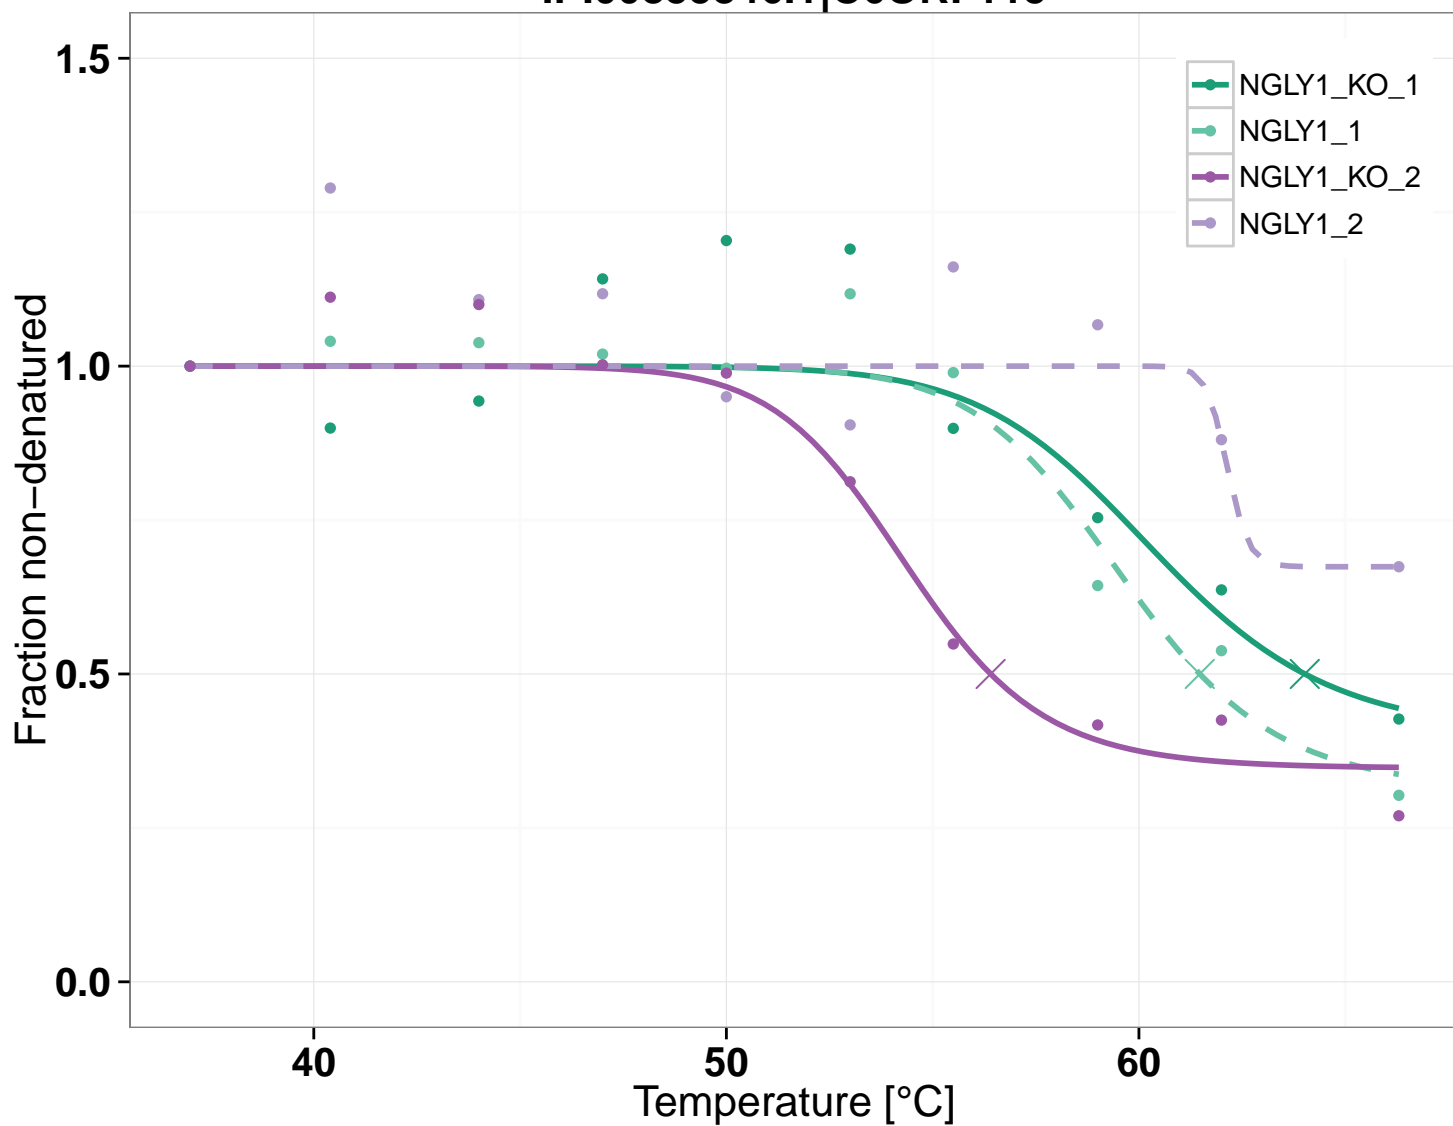

|            | meltPoint | slope  | plateau | R2   |
|------------|-----------|--------|---------|------|
| NGLY1_KO_1 | 64.02     | -0.07  | 0.4     | 0.78 |
| NGLY1_1    | 61.47     | -0.094 | 0.31    | 0.95 |
| NGLY1_KO_2 | 56.41     | -0.1   | 0.35    | 0.96 |
| NGLY1_2    | –         | -0.32  | 0.67    | 0.44 |

Supplement: Supplementary file 6862 [file 1]

# IPI00216067.1|GK

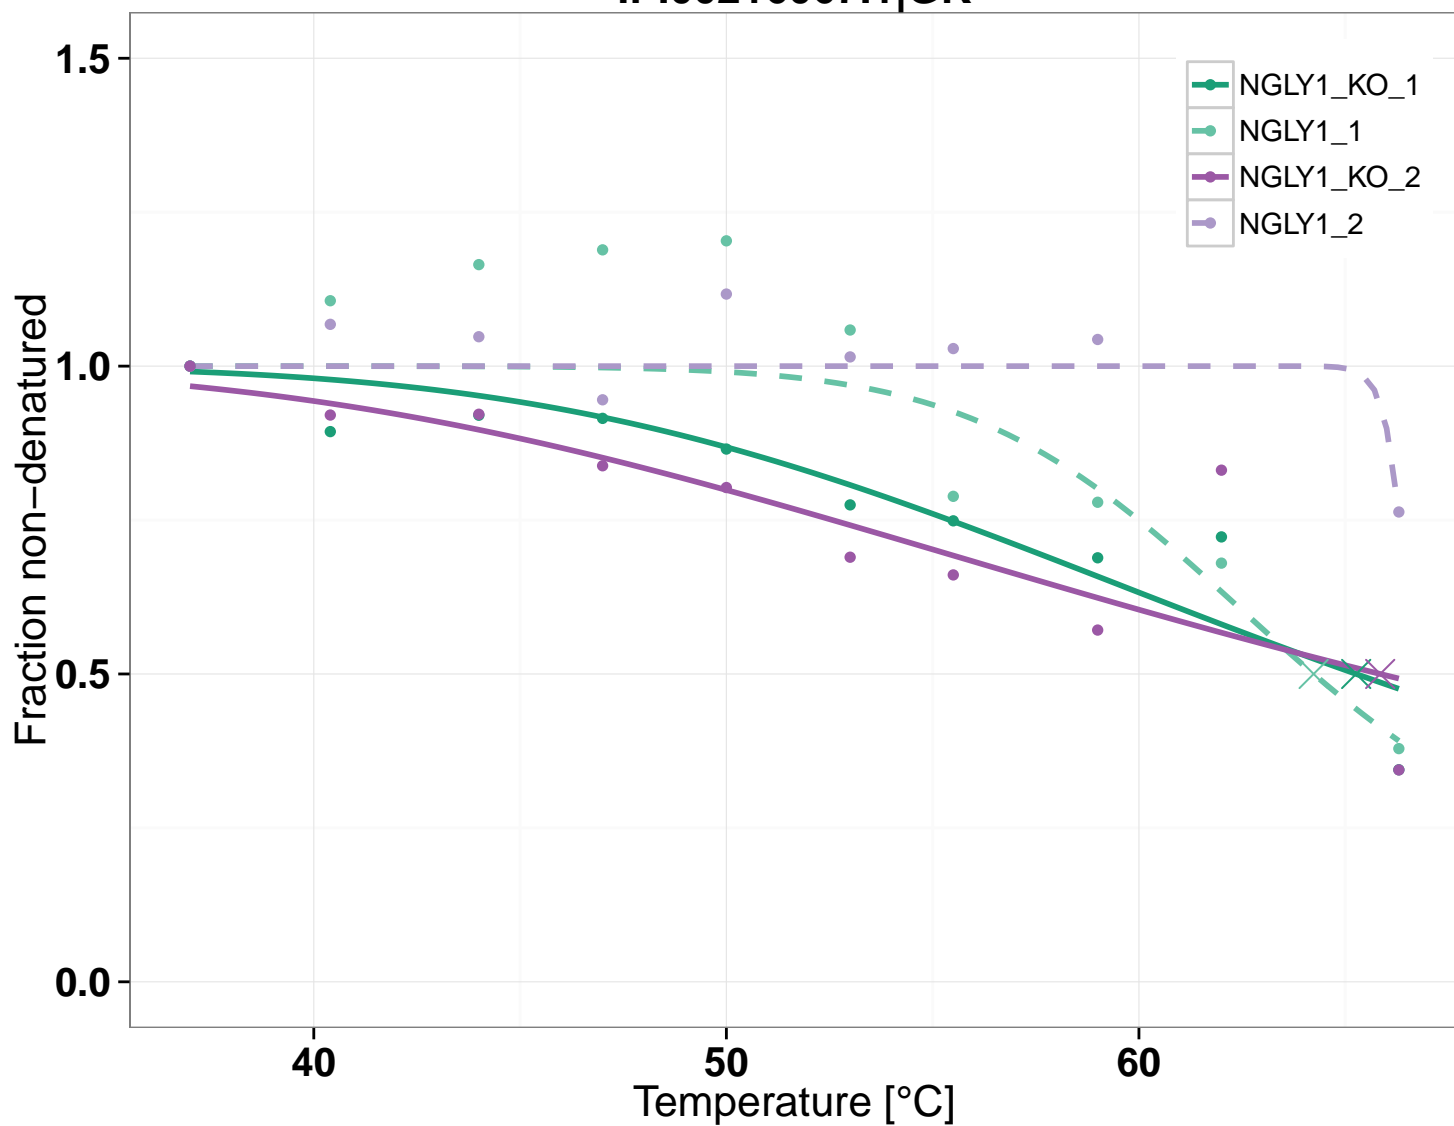

|            | meltPoint | slope  | plateau | R2   |
|------------|-----------|--------|---------|------|
| NGLY1_KO_1 | 65.27     | -0.026 | 0       | 0.85 |
| NGLY1_1    | 64.23     | -0.061 | 0.11    | 0.77 |
| NGLY1_KO_2 | 65.85     | -0.02  | 0       | 0.71 |
| NGLY1_2    | –         | –      | 0       | 0.43 |

Supplement: Supplementary file 6863 [file 1]

# IPI00235412.6|DNM1L

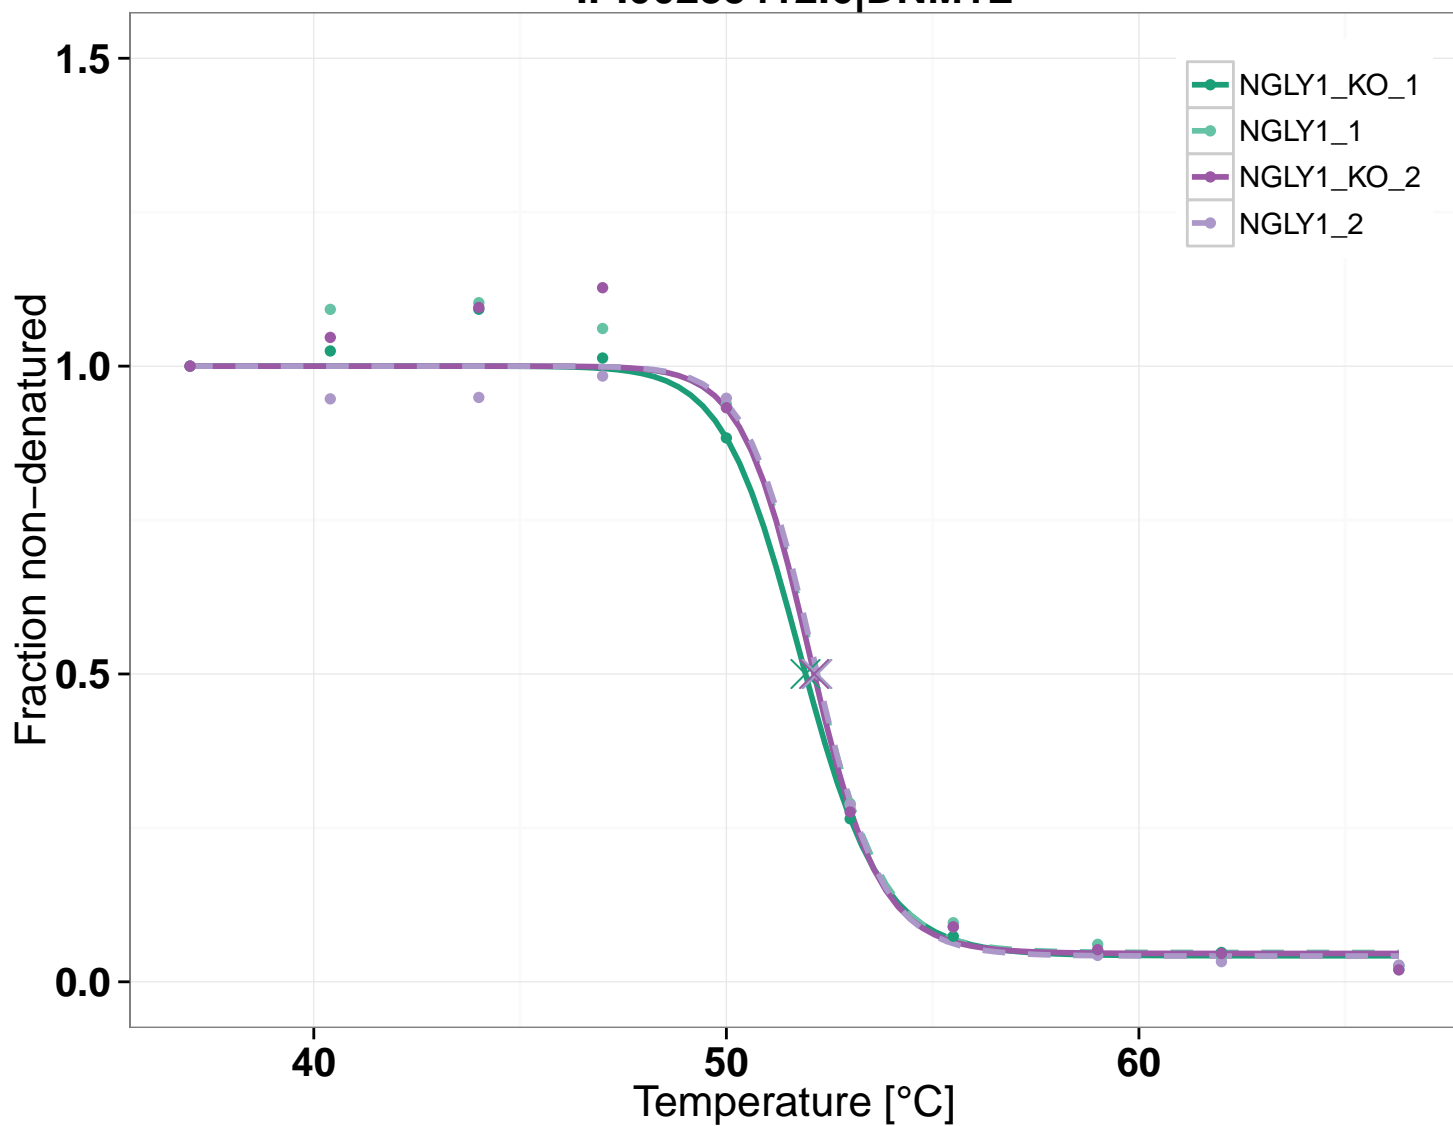

|            | meltPoint | slope | plateau | R2   |
|------------|-----------|-------|---------|------|
| NGLY1_KO_1 | 51.92     | -0.25 | 0.04    | 1    |
| NGLY1_1    | 52.18     | -0.28 | 0.05    | 0.99 |
| NGLY1_KO_2 | 52.13     | -0.29 | 0.05    | 0.99 |
| NGLY1_2    | 52.21     | -0.29 | 0.04    | 1    |

Supplement: Supplementary file 6864 [file 1]

# IPI00844050.1|UQCC

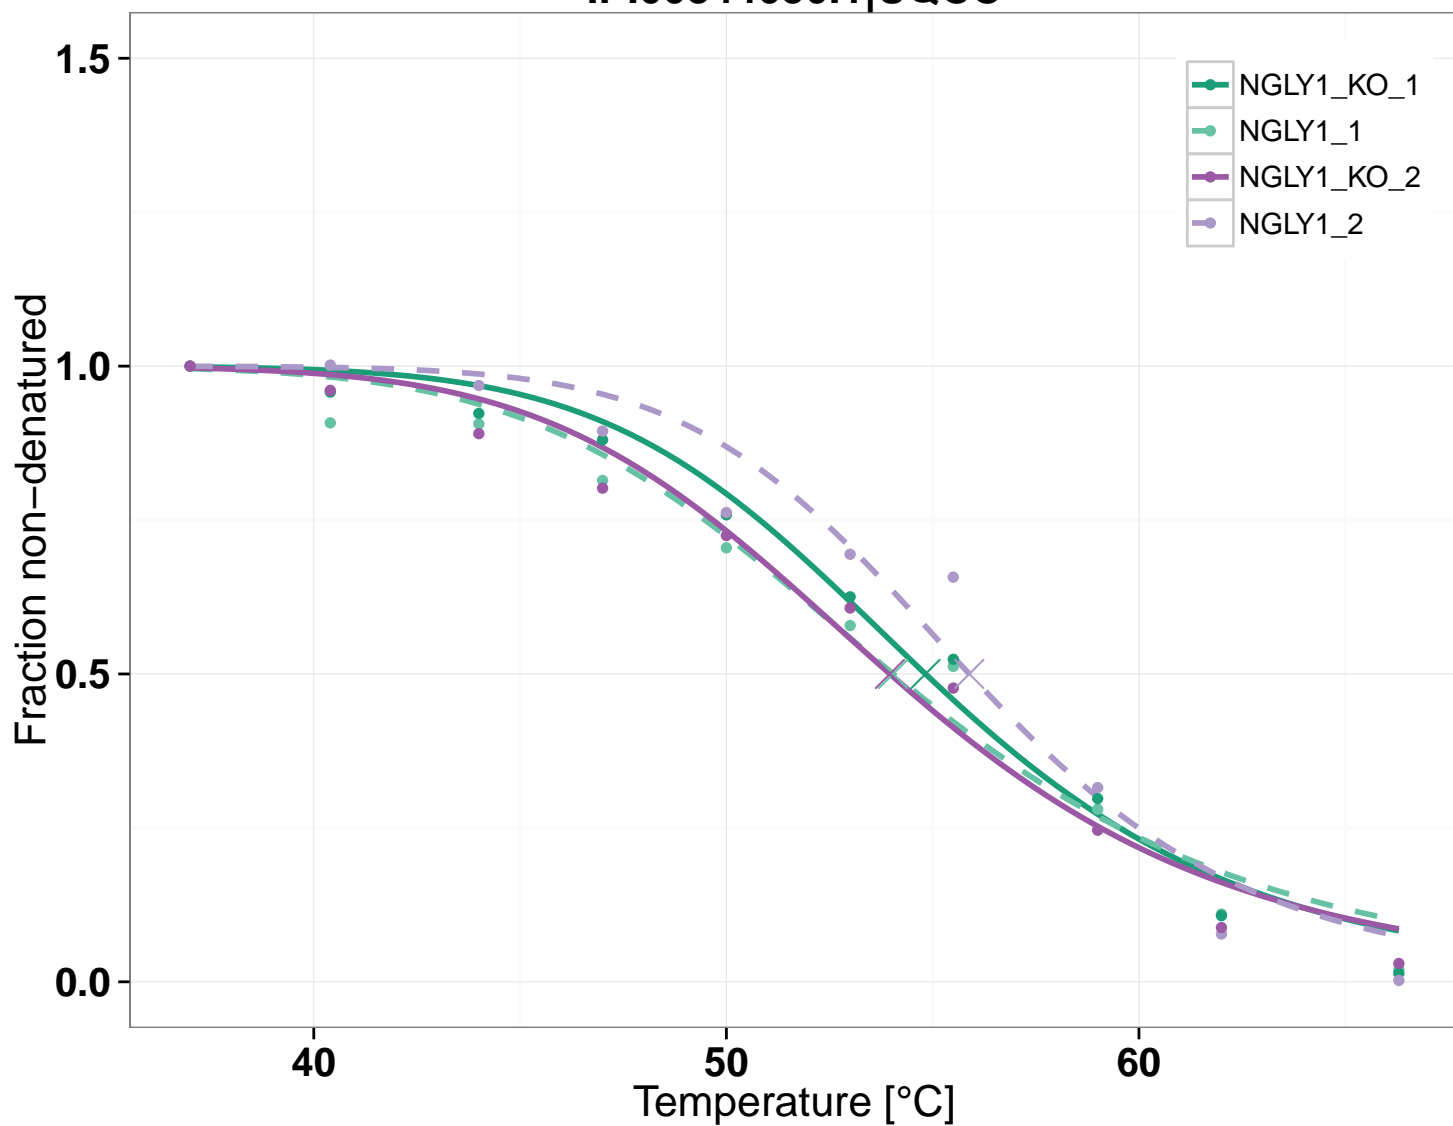

|            | meltPoint | slope  | plateau | R2   |
|------------|-----------|--------|---------|------|
| NGLY1_KO_1 | 54.83     | -0.065 | 0       | 0.98 |
| NGLY1_1    | 54.04     | -0.057 | 0       | 0.97 |
| NGLY1_KO_2 | 53.96     | -0.06  | 0       | 0.98 |
| NGLY1_2    | 55.89     | -0.073 | 0       | 0.96 |

Supplement: Supplementary file 6865 [file 1]

# IPI00020008.1|NEDD8

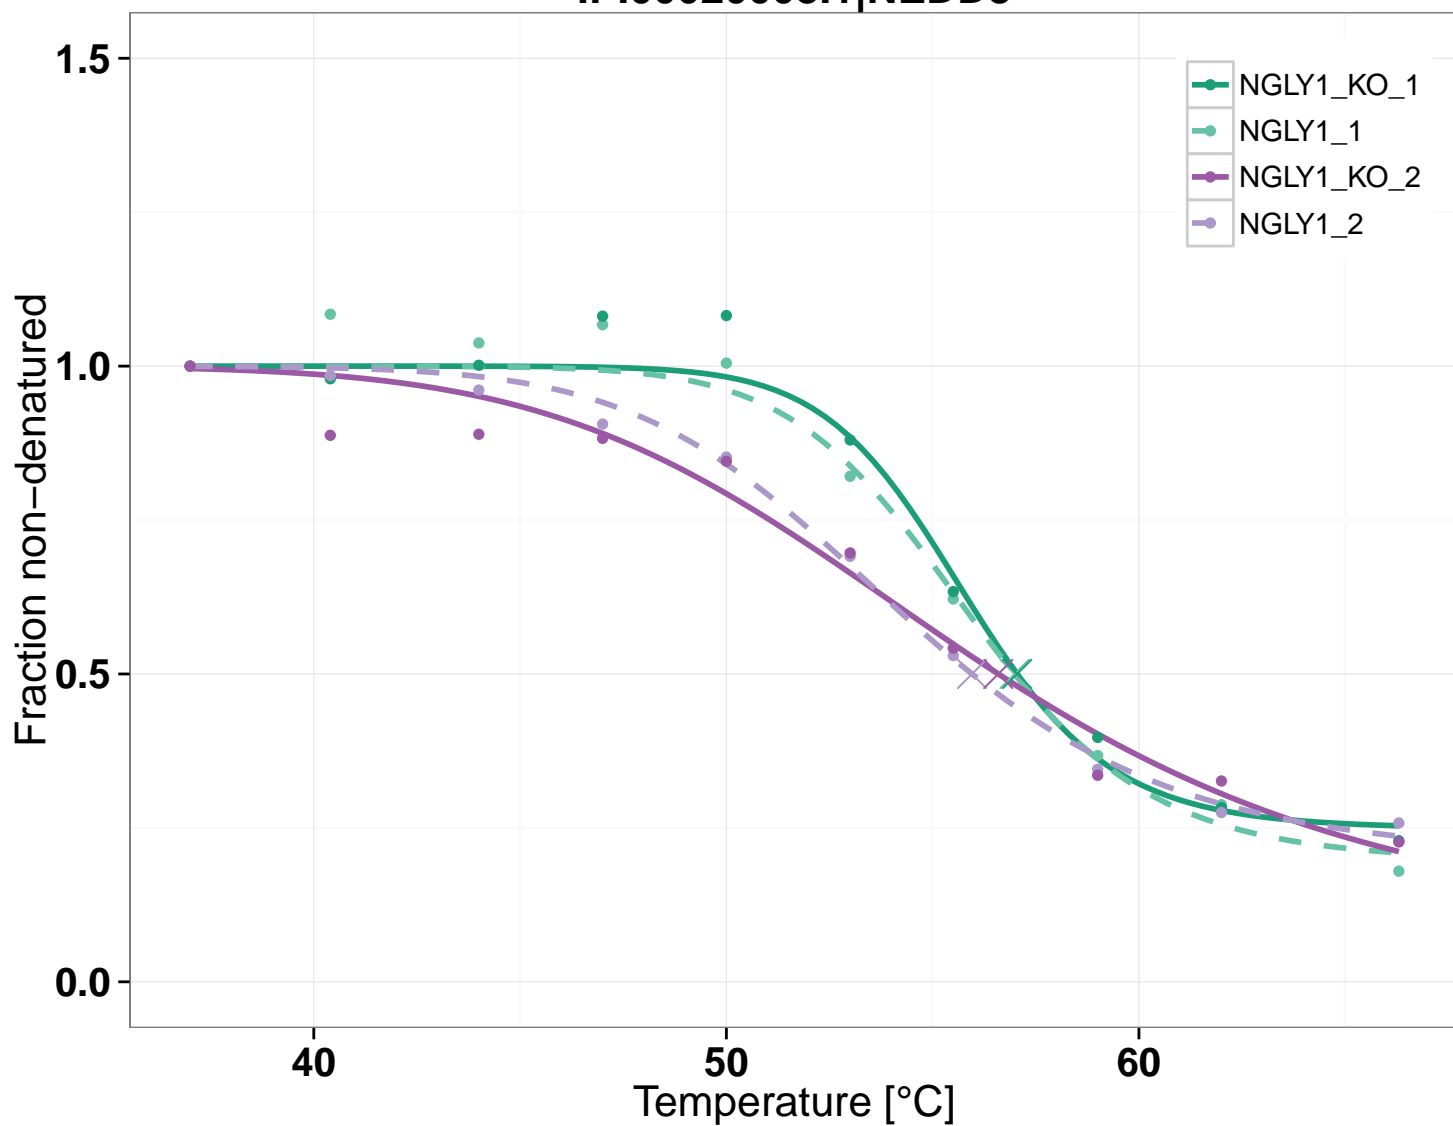

|            | meltPoint | slope  | plateau | R2   |
|------------|-----------|--------|---------|------|
| NGLY1_KO_1 | 57.05     | -0.11  | 0.25    | 0.98 |
| NGLY1_1    | 56.99     | -0.092 | 0.19    | 0.98 |
| NGLY1_KO_2 | 56.59     | -0.046 | 0.07    | 0.97 |
| NGLY1_2    | 55.95     | -0.062 | 0.2     | 1    |

Supplement: Supplementary file 6866 [file 1]

IPI00013180.2|BUD31

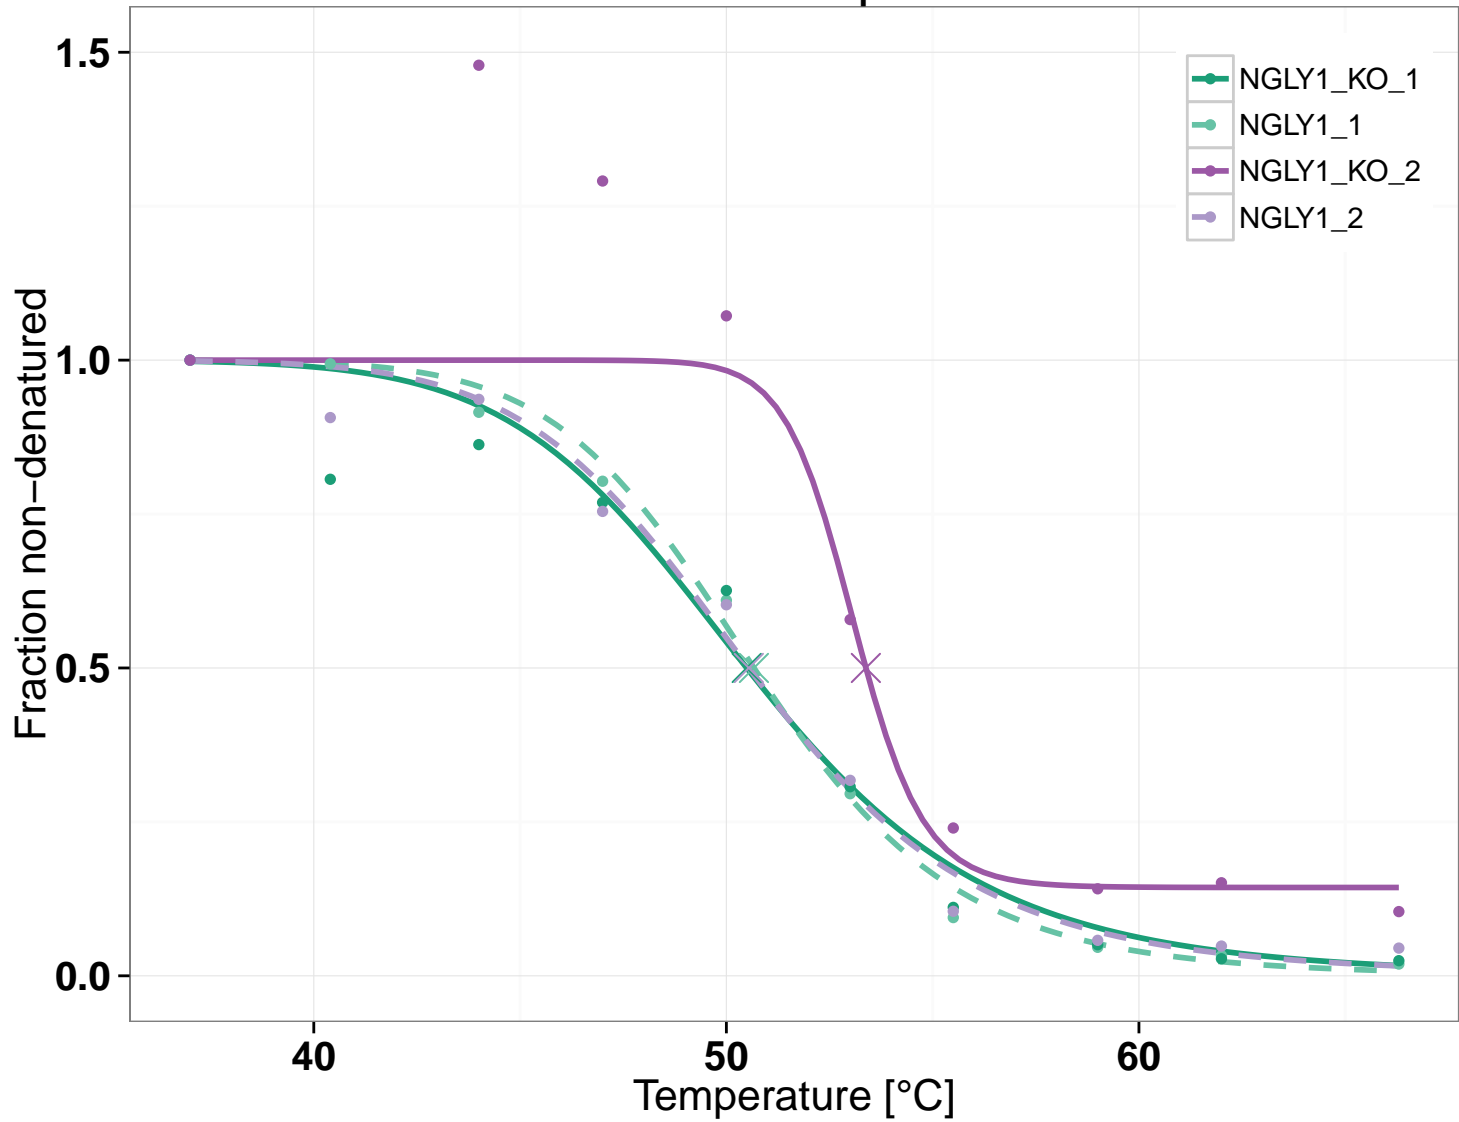

|            | meltPoint | slope  | plateau | R2   |
|------------|-----------|--------|---------|------|
| NGLY1_KO_1 | 50.49     | -0.086 | 0       | 0.96 |
| NGLY1_1    | 50.67     | -0.1   | 0       | 1    |
| NGLY1_KO_2 | 53.38     | -0.25  | 0.14    | 0.8  |
| NGLY1_2    | 50.54     | -0.09  | 0       | 0.99 |

Supplement: Supplementary file 6867 [file 1]

IPI00384280.5|PCYOX1

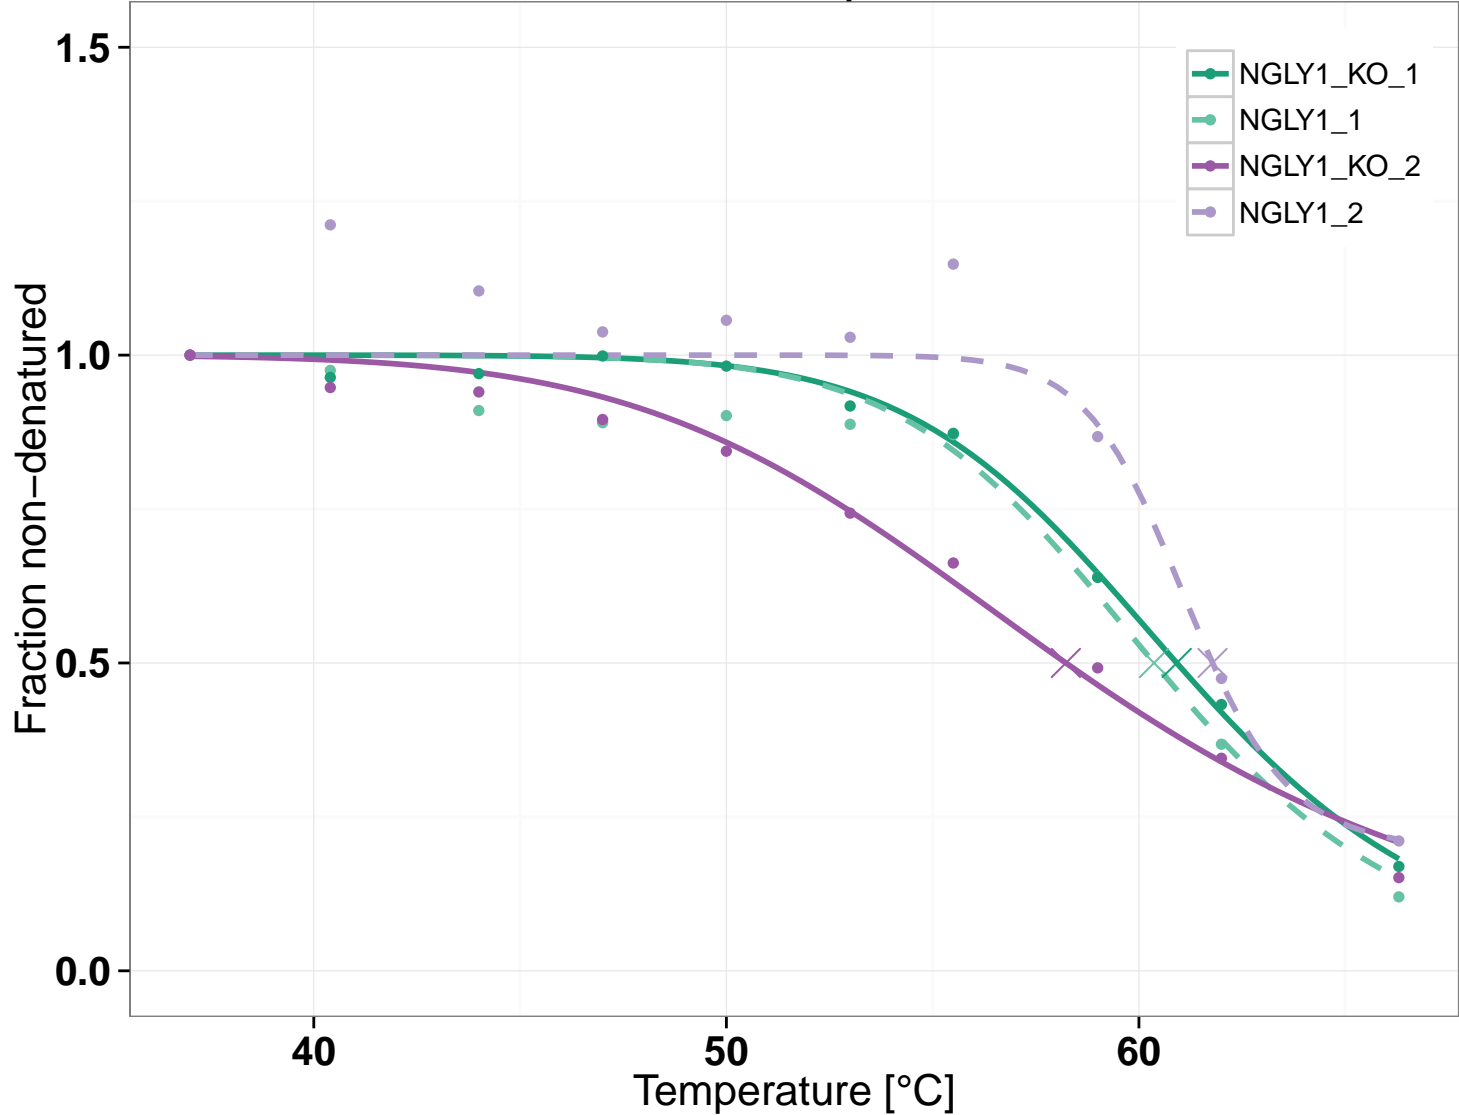

|            | meltPoint | slope  | plateau | R2   |
|------------|-----------|--------|---------|------|
| NGLY1_KO_1 | 60.92     | -0.077 | 0       | 1    |
| NGLY1_1    | 60.37     | -0.081 | 0       | 0.96 |
| NGLY1_KO_2 | 58.23     | -0.049 | 0       | 0.99 |
| NGLY1_2    | 61.78     | -0.16  | 0.2     | 0.91 |

Supplement: Supplementary file 6868 [file 1]

IPI00009505.1|SNTB2

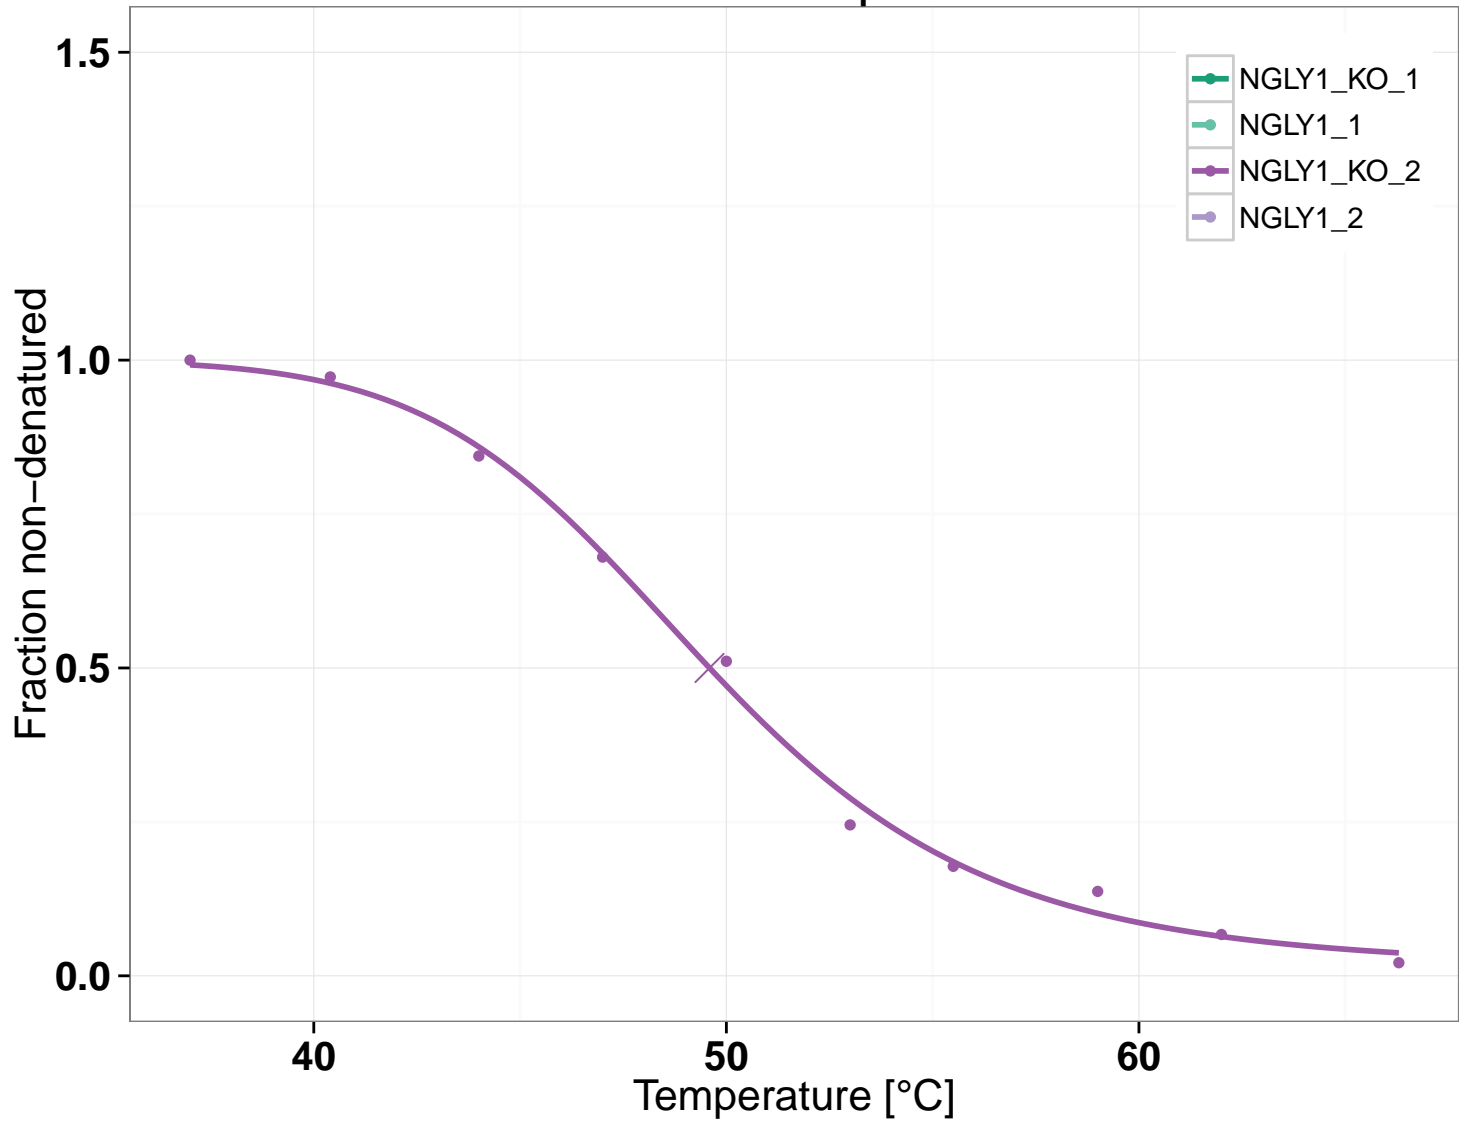

|            | meltPoint | slope  | plateau | R2 |
|------------|-----------|--------|---------|----|
| NGLY1_KO_1 | -         | -      | -       | -  |
| NGLY1_1    | -         | -      | -       | -  |
| NGLY1_KO_2 | 49.59     | -0.073 | 0.01    | 1  |
| NGLY1_2    | -         | -      | -       | -  |

Supplement: Supplementary file 6869 [file 1]

# IPI00641181.5|MARCKSL1

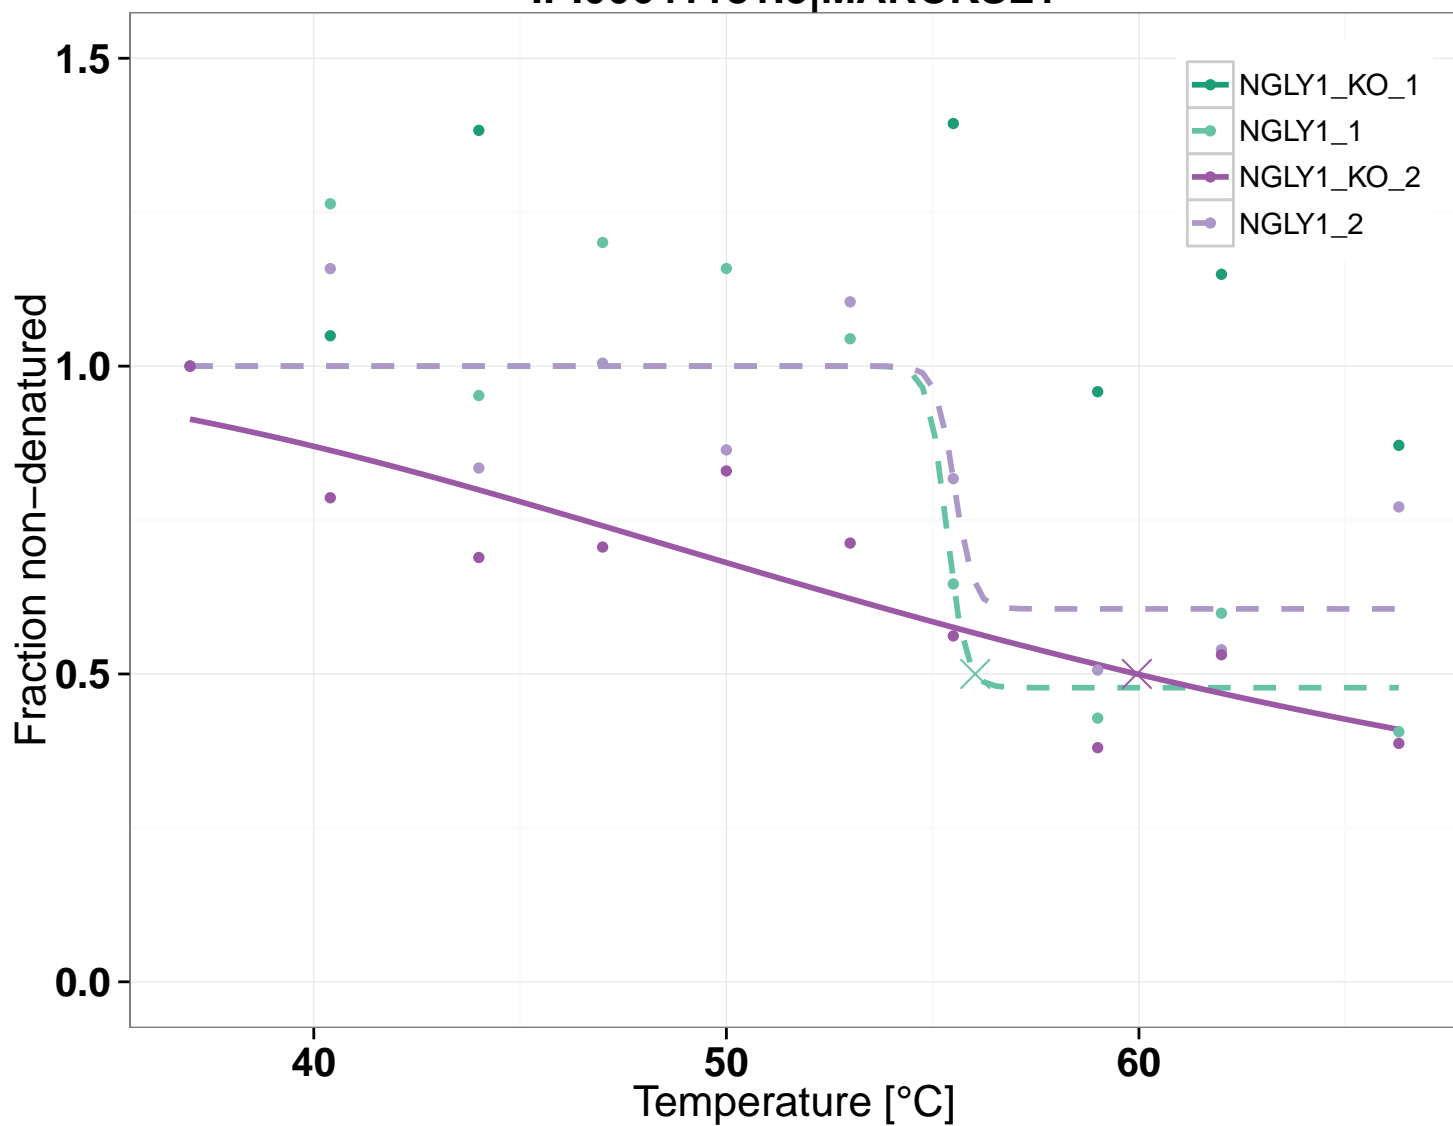

|            | meltPoint | slope | plateau | R2   |
|------------|-----------|-------|---------|------|
| NGLY1_KO_1 | –         | –     | –       | –    |
| NGLY1_1    | 56.03     | –0.59 | 0.48    | 0.83 |
| NGLY1_KO_2 | 59.95     | –0.02 | 0       | 0.77 |
| NGLY1_2    | –         | –0.44 | 0.61    | 0.71 |

Supplement: Supplementary file 6870 [file 1]

IPI00291367.4|RASGRP4

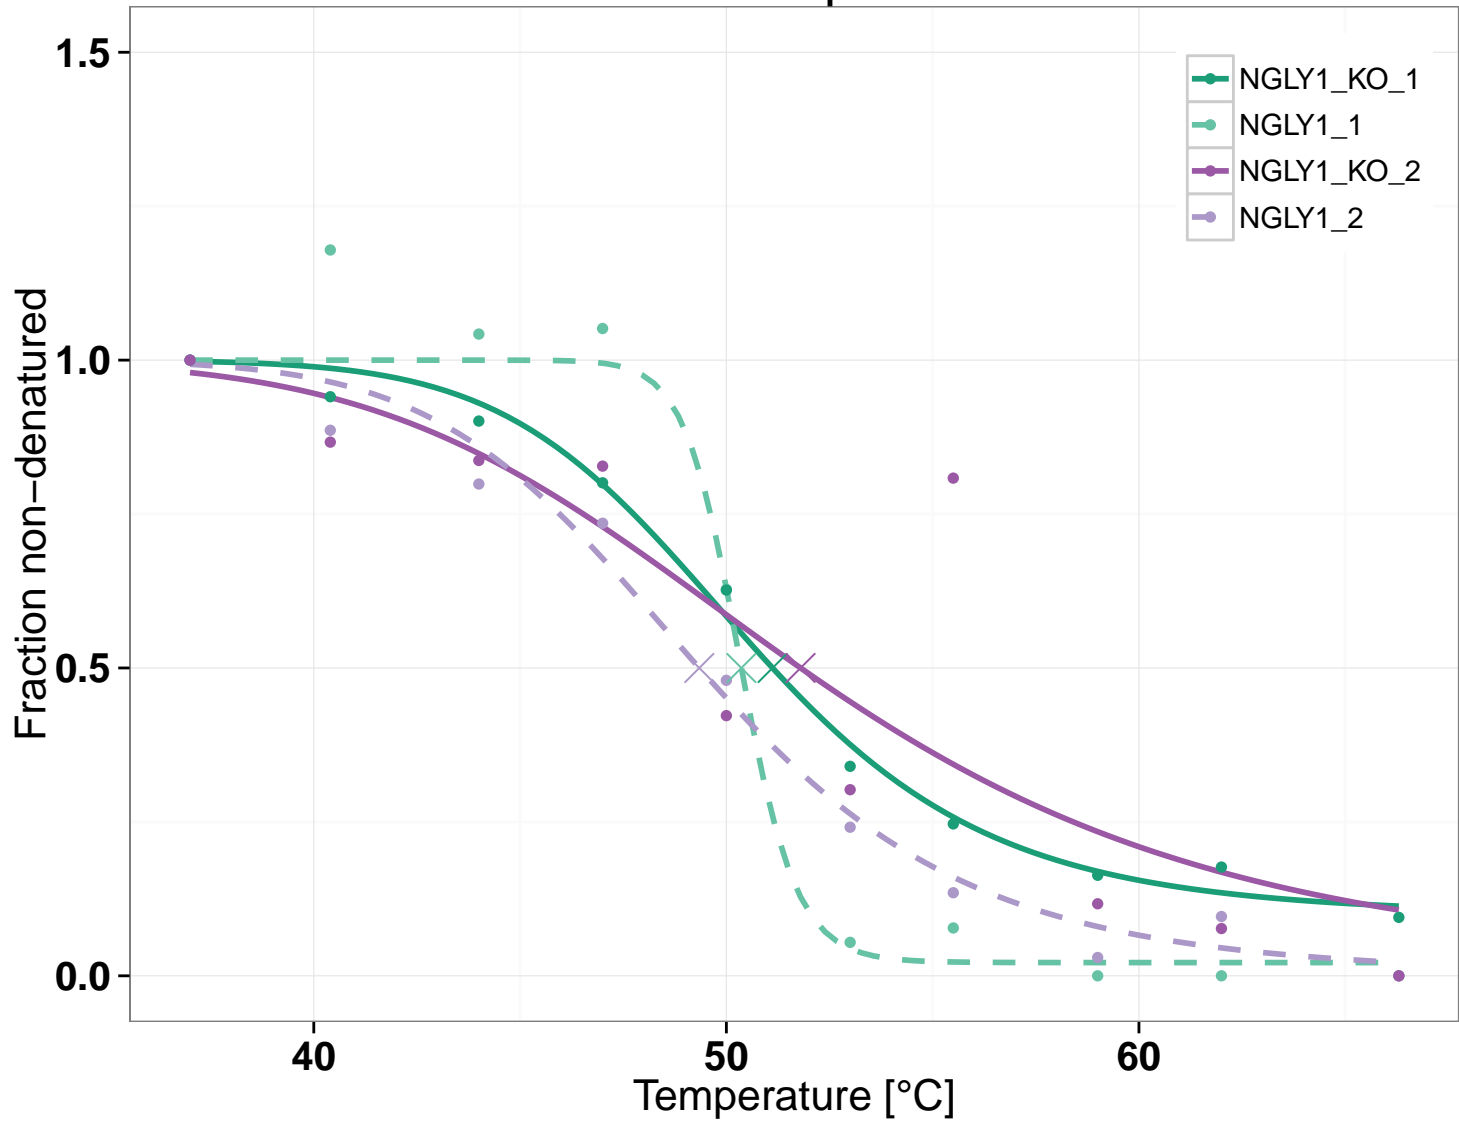

|            | meltPoint | slope  | plateau | R2   |
|------------|-----------|--------|---------|------|
| NGLY1_KO_1 | 51.12     | -0.077 | 0.1     | 0.99 |
| NGLY1_1    | 50.36     | -0.36  | 0.02    | 0.98 |
| NGLY1_KO_2 | 51.8      | -0.049 | 0       | 0.76 |
| NGLY1_2    | 49.34     | -0.077 | 0       | 0.98 |

Supplement: Supplementary file 6871 [file 1]

# IPI00027445.1|HARS2

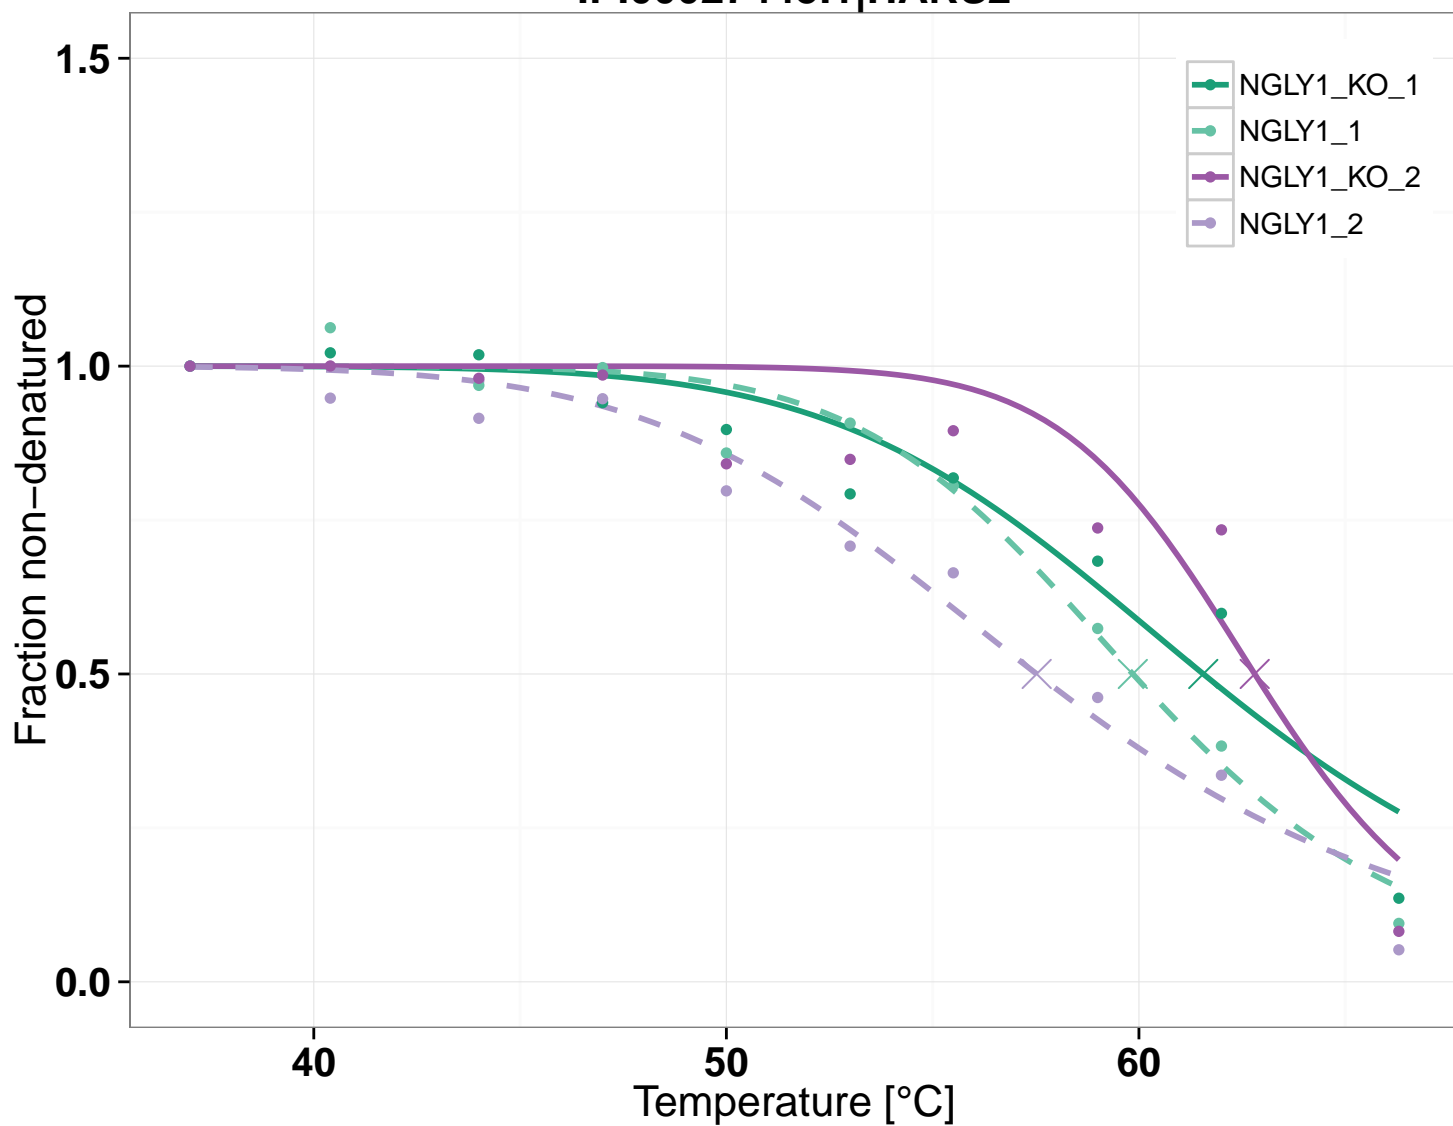

|            | meltPoint | slope  | plateau | R2   |
|------------|-----------|--------|---------|------|
| NGLY1_KO_1 | 61.56     | -0.056 | 0       | 0.92 |
| NGLY1_1    | 59.85     | -0.074 | 0       | 0.98 |
| NGLY1_KO_2 | 62.81     | -0.11  | 0       | 0.85 |
| NGLY1_2    | 57.52     | -0.053 | 0       | 0.97 |

Supplement: Supplementary file 6872 [file 1]

IPI00291946.8|USP10

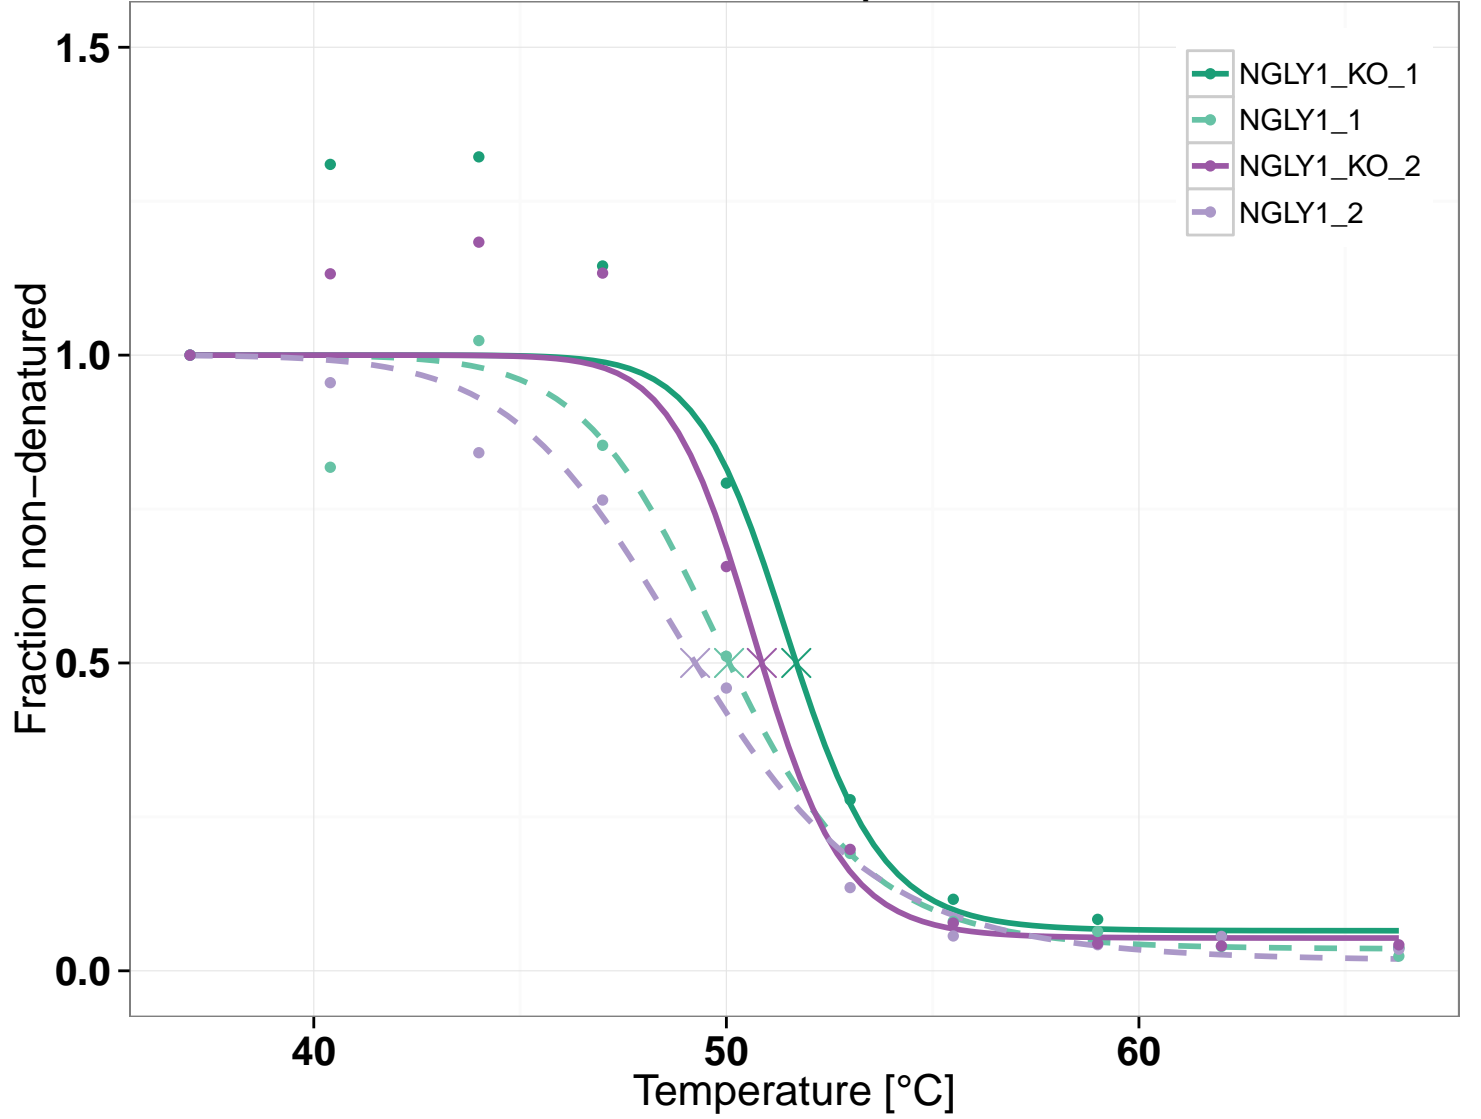

|            | meltPoint | slope | plateau | R2   |
|------------|-----------|-------|---------|------|
| NGLY1_KO_1 | 51.69     | -0.21 | 0.07    | 0.92 |
| NGLY1_1    | 50.07     | -0.14 | 0.04    | 0.98 |
| NGLY1_KO_2 | 50.86     | -0.22 | 0.05    | 0.97 |
| NGLY1_2    | 49.24     | -0.11 | 0.02    | 0.99 |

Supplement: Supplementary file 6873 [file 1]

IPI00065064.1|UBXN10

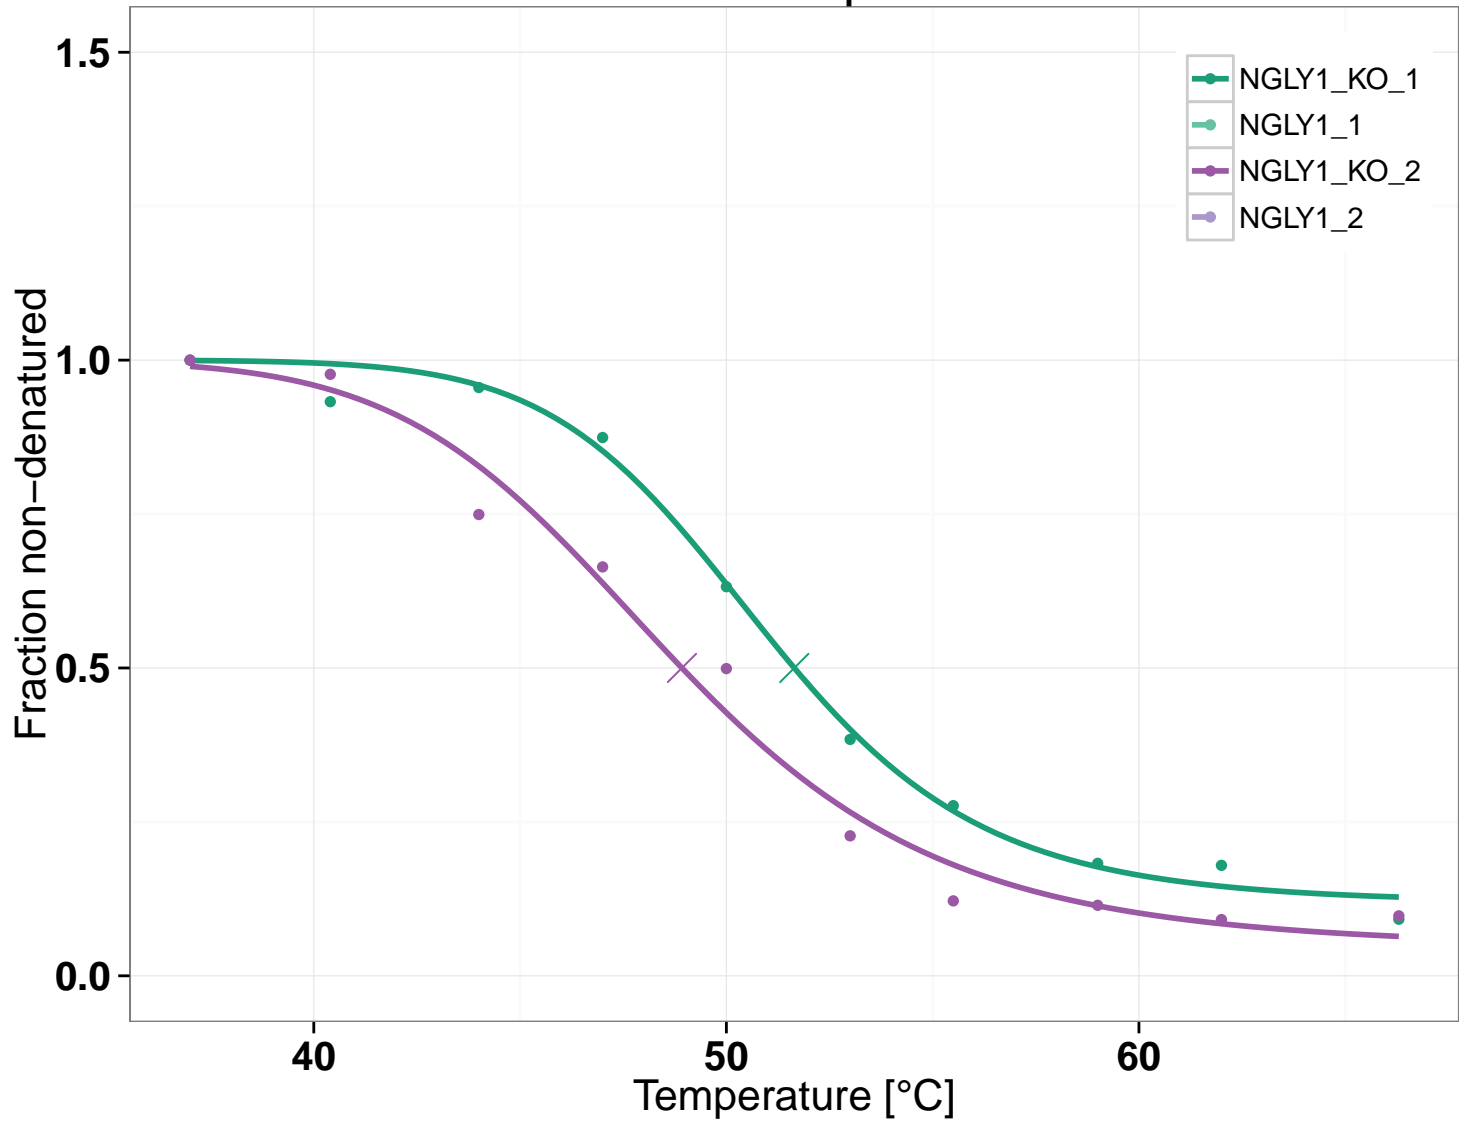

|            | meltPoint | slope  | plateau | R2   |
|------------|-----------|--------|---------|------|
| NGLY1_KO_1 | 51.65     | -0.084 | 0.12    | 0.99 |
| NGLY1_1    | -         | -      | -       | -    |
| NGLY1_KO_2 | 48.92     | -0.072 | 0.04    | 0.98 |
| NGLY1_2    | -         | -      | -       | -    |

Supplement: Supplementary file 6874 [file 1]

# IPI00008557.5|IGF2BP1

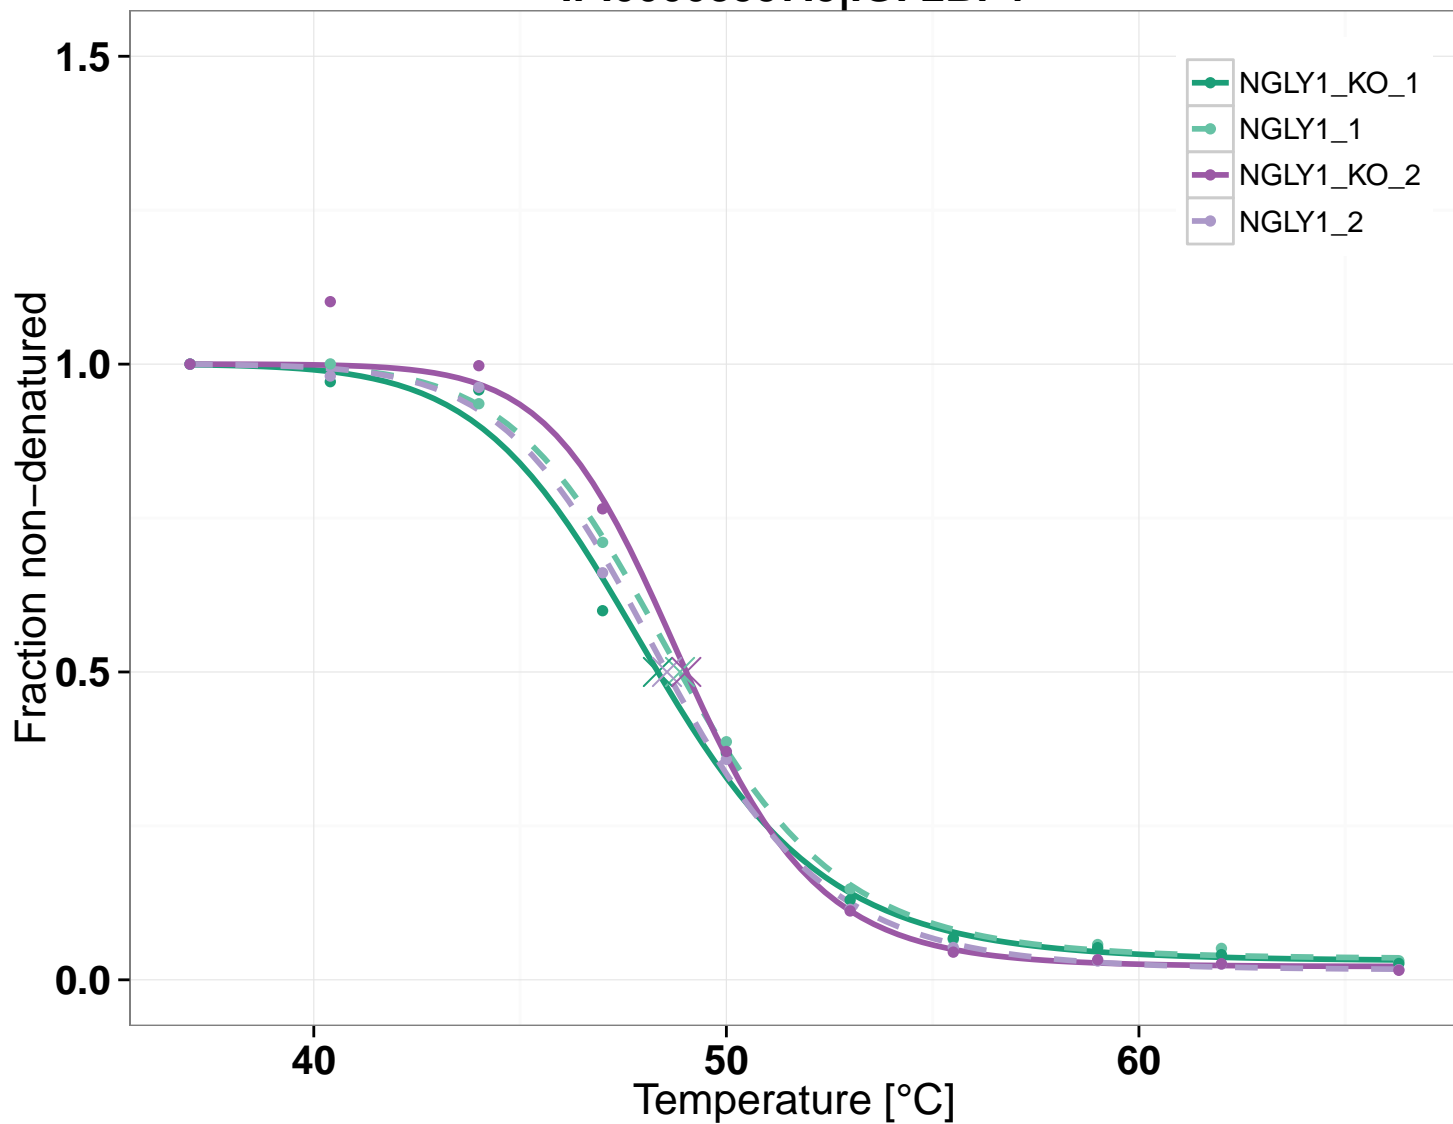

|            | meltPoint | slope | plateau | R2   |
|------------|-----------|-------|---------|------|
| NGLY1_KO_1 | 48.34     | -0.11 | 0.03    | 0.99 |
| NGLY1_1    | 48.88     | -0.12 | 0.03    | 1    |
| NGLY1_KO_2 | 49.03     | -0.15 | 0.02    | 0.99 |
| NGLY1_2    | 48.56     | -0.13 | 0.02    | 1    |

Supplement: Supplementary file 6875 [file 1]

# IPI00014053.3|TOMM40

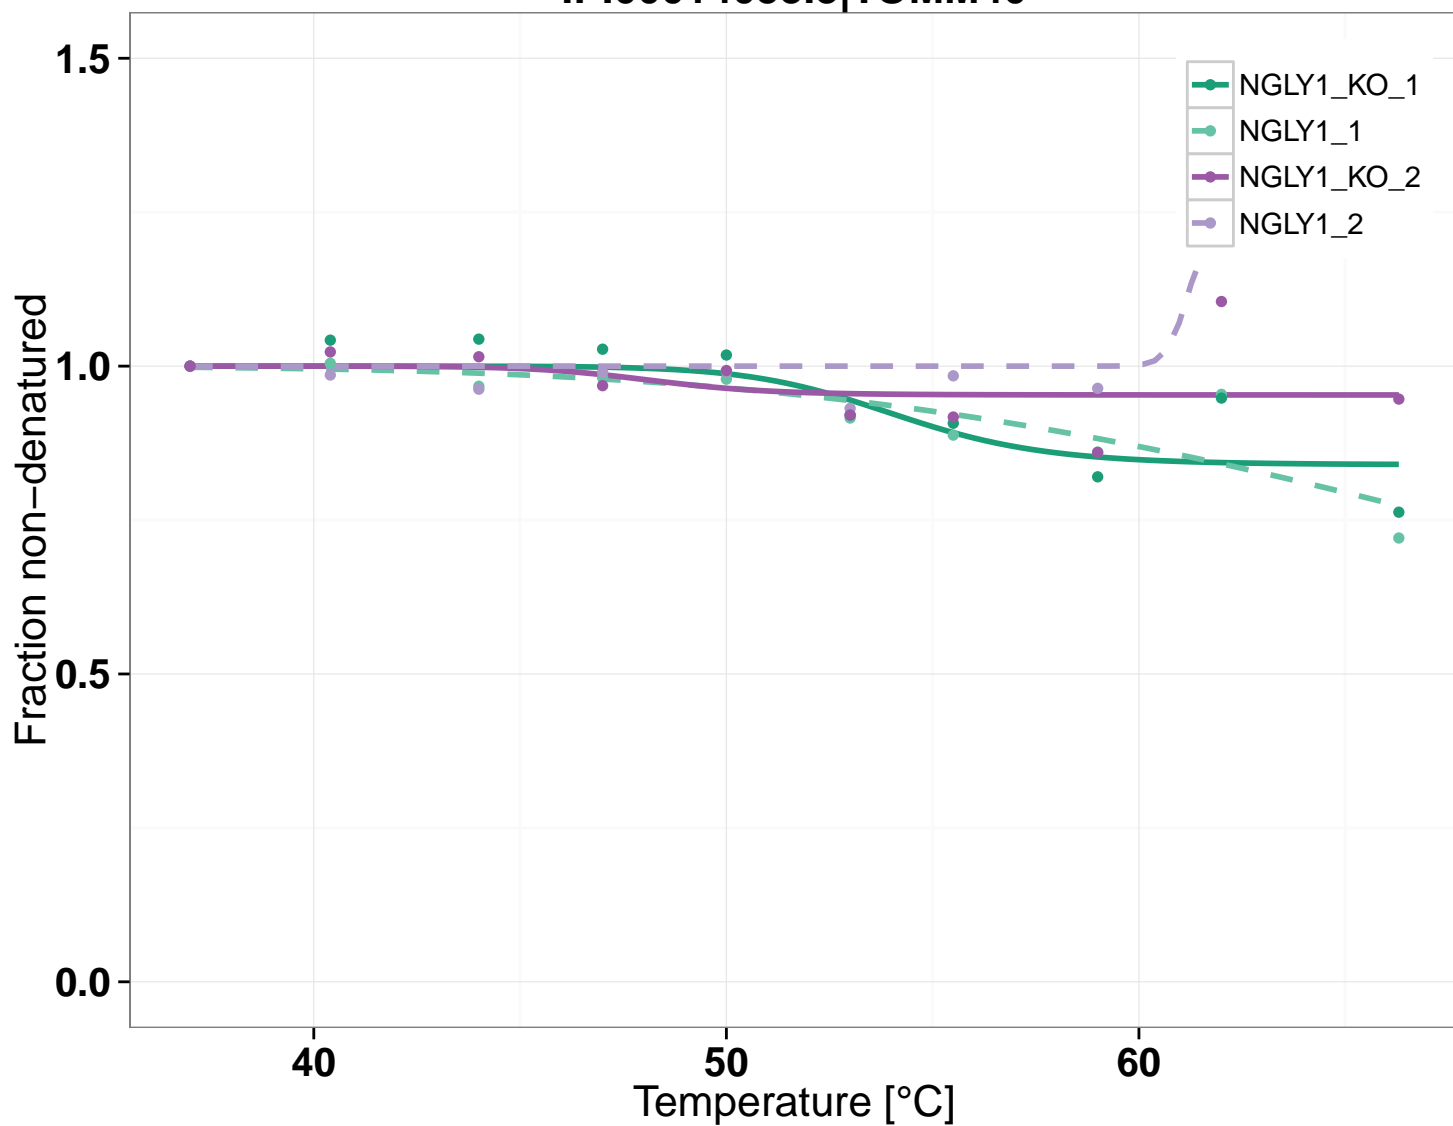

|            | meltPoint | slope   | plateau | R2   |
|------------|-----------|---------|---------|------|
| NGLY1_KO_1 | –         | –0.022  | 0.84    | 0.71 |
| NGLY1_1    | –         | –       | 0       | 0.73 |
| NGLY1_KO_2 | –         | –0.0082 | 0.95    | 0.14 |
| NGLY1_2    | –         | 0.23    | 1.23    | 0.92 |

Supplement: Supplementary file 6876 [file 1]

IPI00218349.2|POFUT2

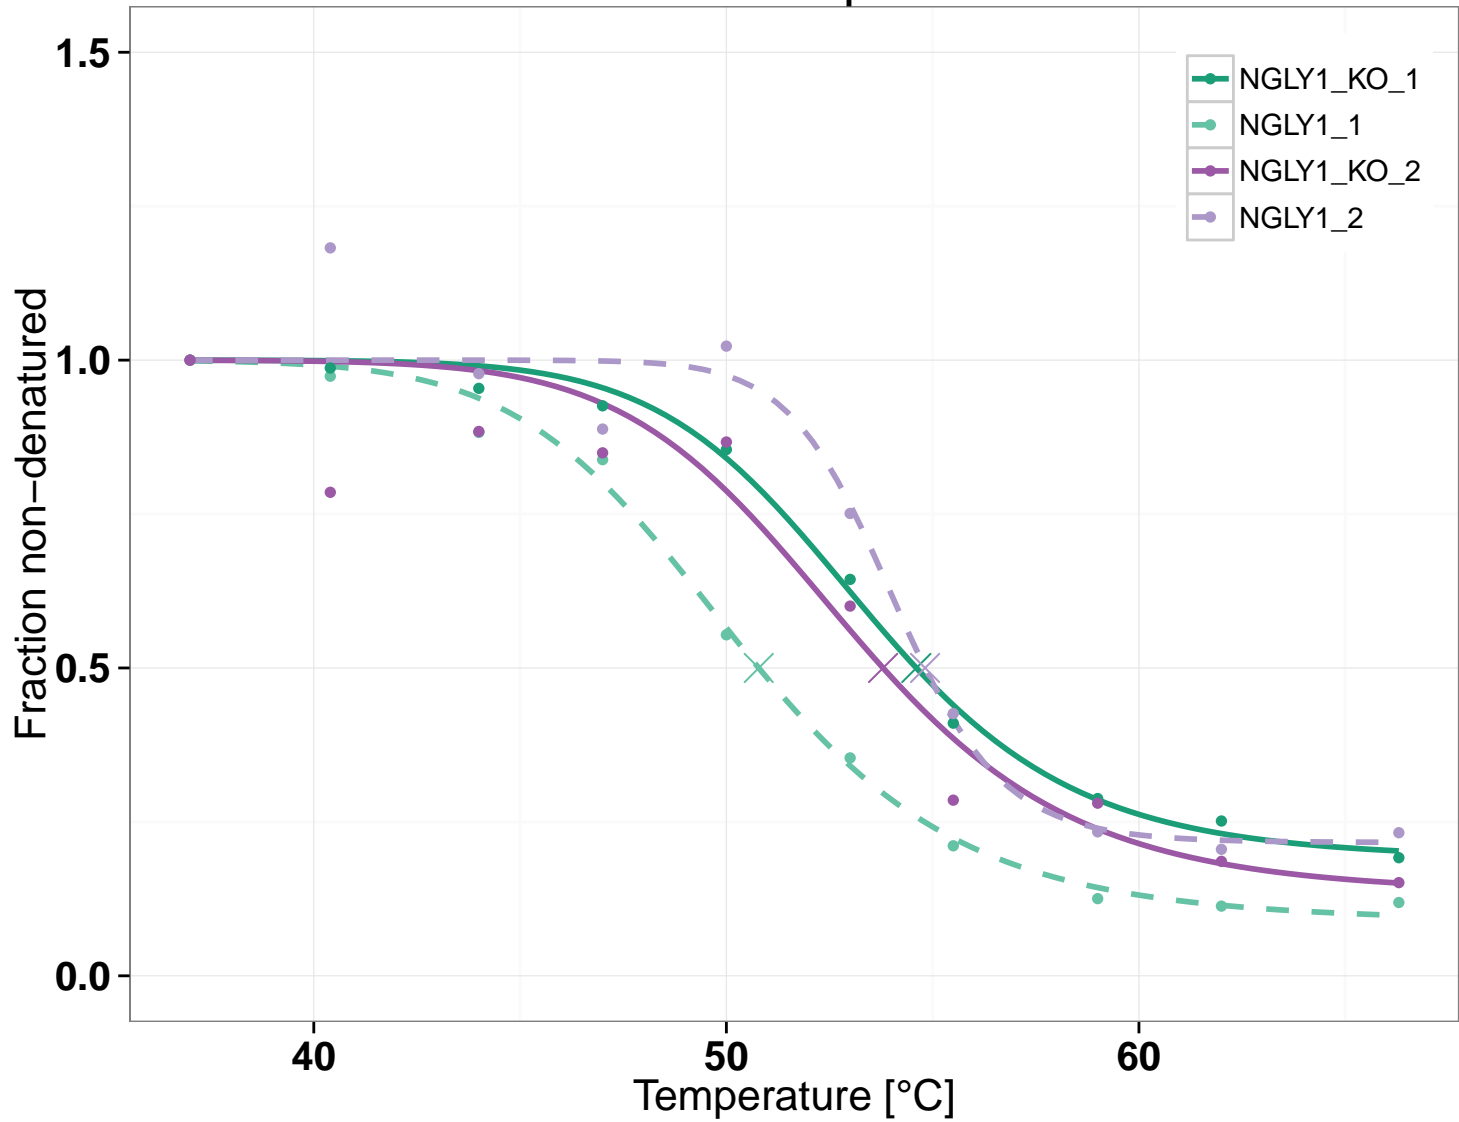

|            | meltPoint | slope  | plateau | R2   |
|------------|-----------|--------|---------|------|
| NGLY1_KO_1 | 54.61     | -0.08  | 0.19    | 1    |
| NGLY1_1    | 50.79     | -0.085 | 0.09    | 1    |
| NGLY1_KO_2 | 53.8      | -0.08  | 0.13    | 0.92 |
| NGLY1_2    | 54.82     | -0.15  | 0.22    | 0.96 |

Supplement: Supplementary file 6877 [file 1]

IPI00017763.6|NAP1L4

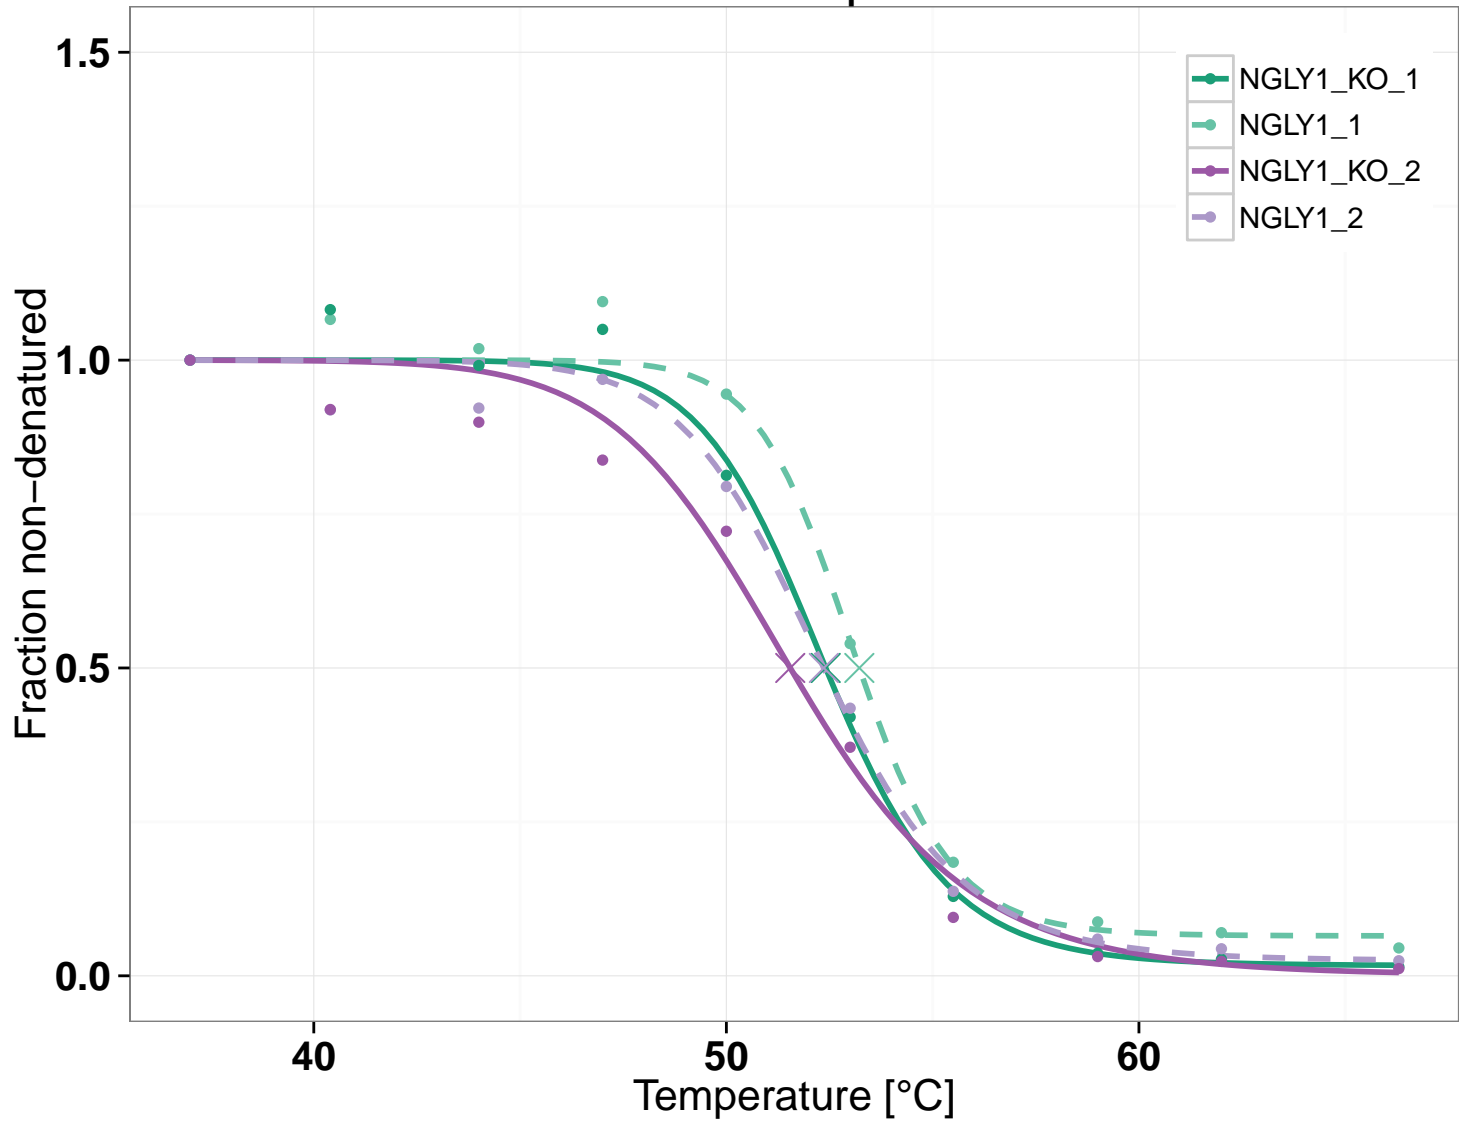

|            | meltPoint | slope | plateau | R2   |
|------------|-----------|-------|---------|------|
| NGLY1_KO_1 | 52.41     | -0.16 | 0.02    | 0.99 |
| NGLY1_1    | 53.22     | -0.2  | 0.06    | 0.99 |
| NGLY1_KO_2 | 51.55     | -0.11 | 0       | 0.98 |
| NGLY1_2    | 52.36     | -0.14 | 0.02    | 0.99 |

Supplement: Supplementary file 6878 [file 1]

IPI00873422.1|TRIM5

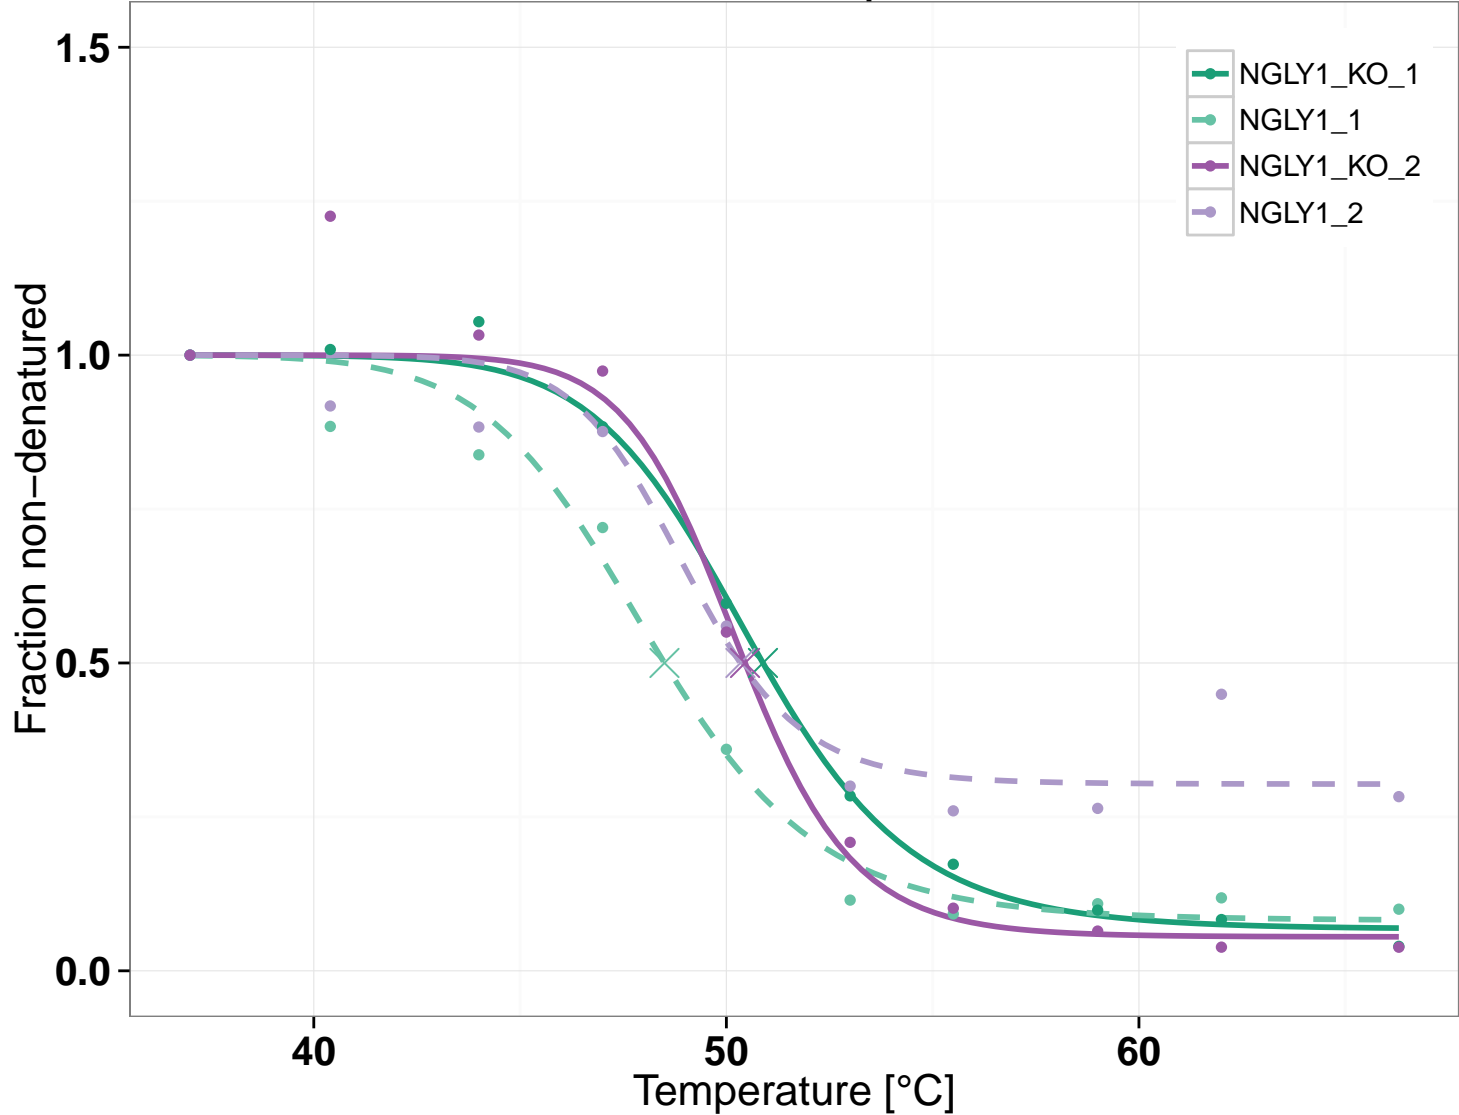

|            | meltPoint | slope | plateau | R2   |
|------------|-----------|-------|---------|------|
| NGLY1_KO_1 | 50.89     | -0.12 | 0.07    | 1    |
| NGLY1_1    | 48.5      | -0.11 | 0.08    | 0.98 |
| NGLY1_KO_2 | 50.45     | -0.17 | 0.06    | 0.97 |
| NGLY1_2    | 50.34     | -0.13 | 0.3     | 0.95 |

Supplement: Supplementary file 6879 [file 1]

IPI00374563.3|AGRN

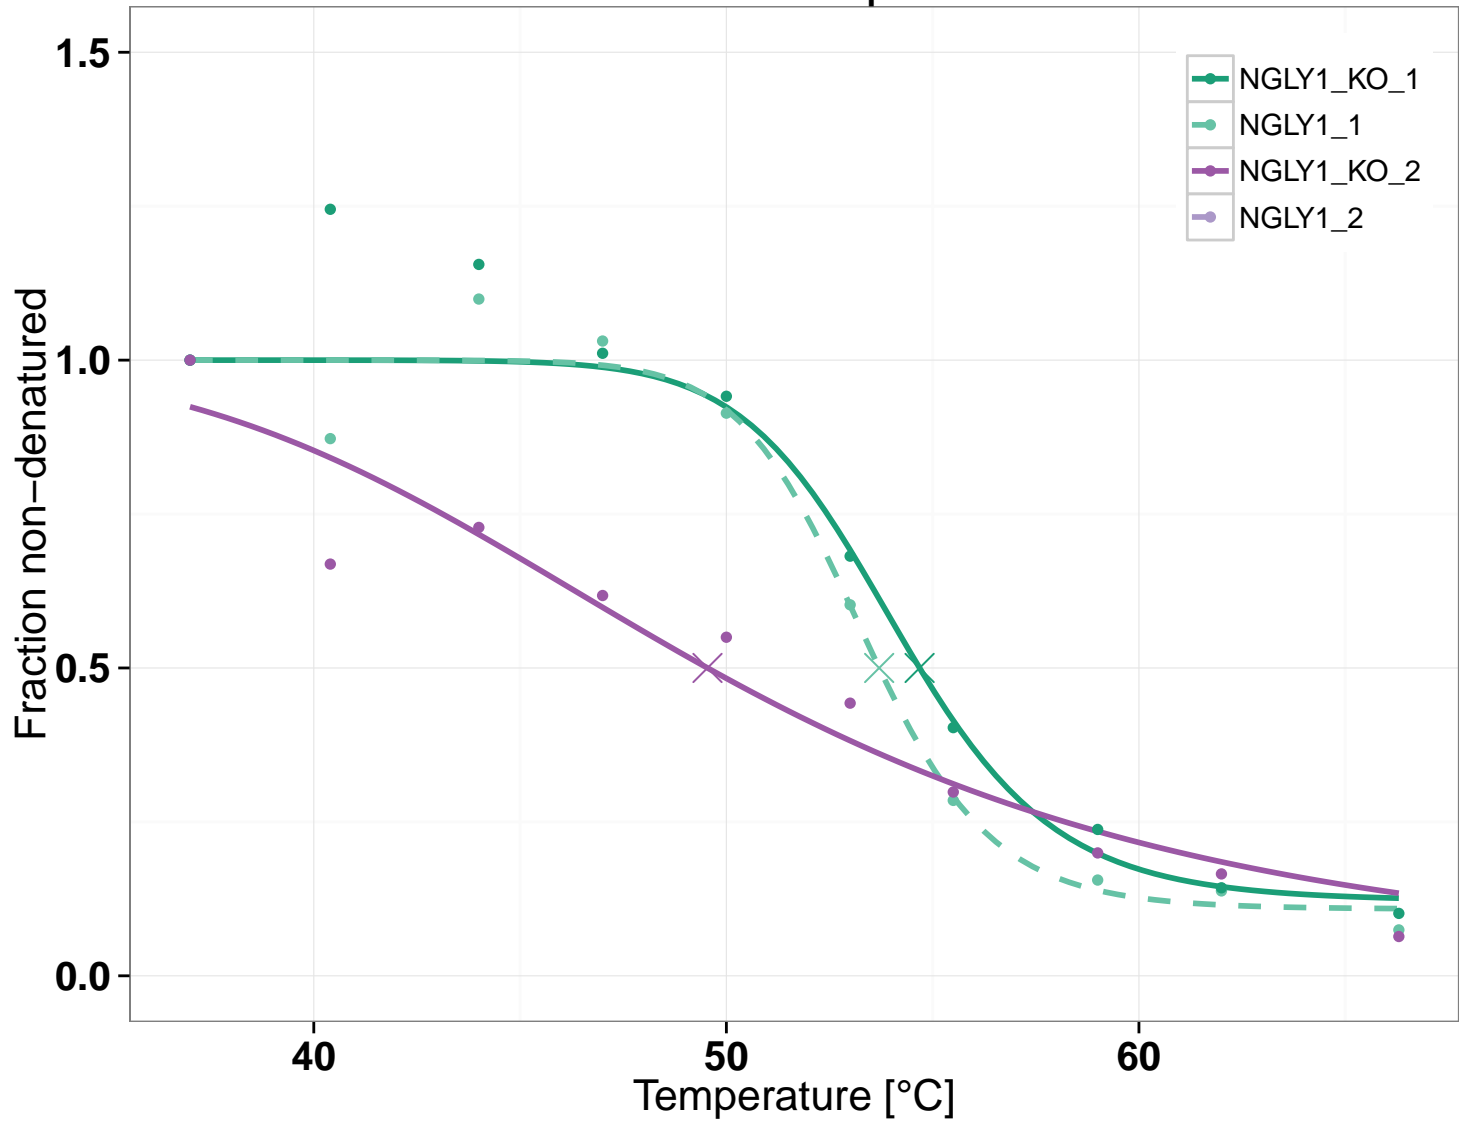

|            | meltPoint | slope | plateau | R2   |
|------------|-----------|-------|---------|------|
| NGLY1_KO_1 | 54.68     | -0.12 | 0.12    | 0.95 |
| NGLY1_1    | 53.7      | -0.15 | 0.11    | 0.98 |
| NGLY1_KO_2 | 49.54     | -0.04 | 0       | 0.93 |
| NGLY1_2    | -         | -     | -       | -    |

Supplement: Supplementary file 6880 [file 1]

IPI00299512.4|NF1

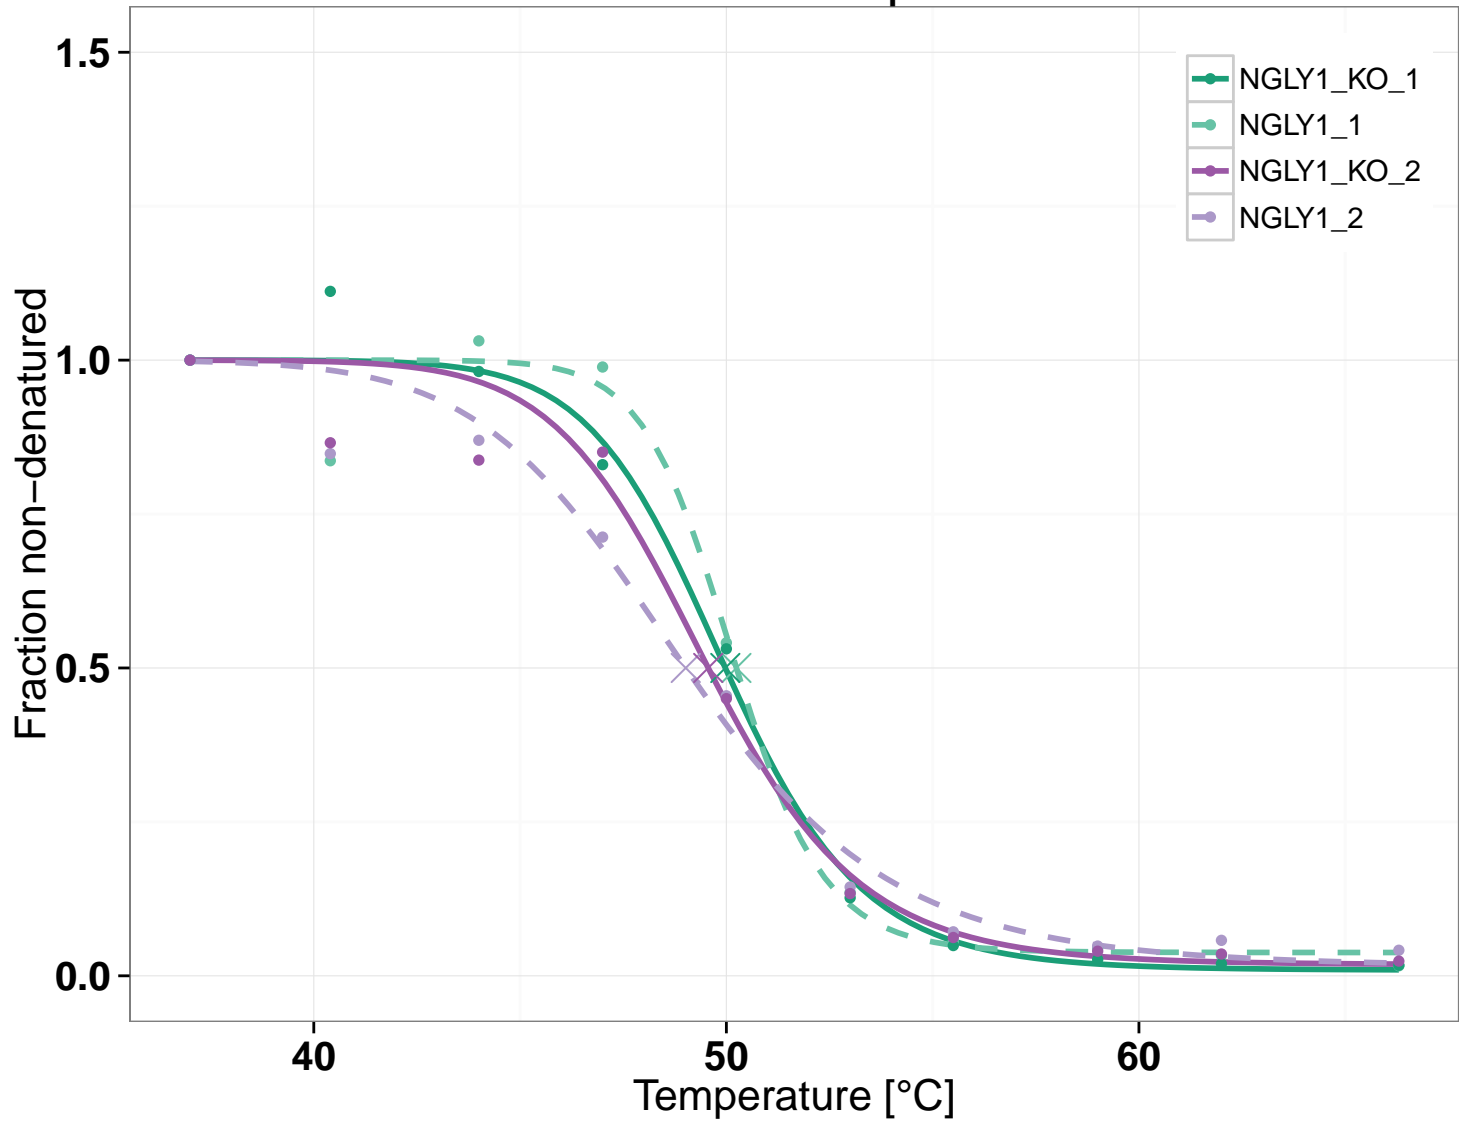

|            | meltPoint | slope  | plateau | R2   |
|------------|-----------|--------|---------|------|
| NGLY1_KO_1 | 49.97     | -0.15  | 0.01    | 0.99 |
| NGLY1_1    | 50.24     | -0.22  | 0.04    | 0.98 |
| NGLY1_KO_2 | 49.56     | -0.13  | 0.02    | 0.98 |
| NGLY1_2    | 49.02     | -0.098 | 0.01    | 0.98 |

Supplement: Supplementary file 6881 [file 1]

IPI00549189.4|THOP1

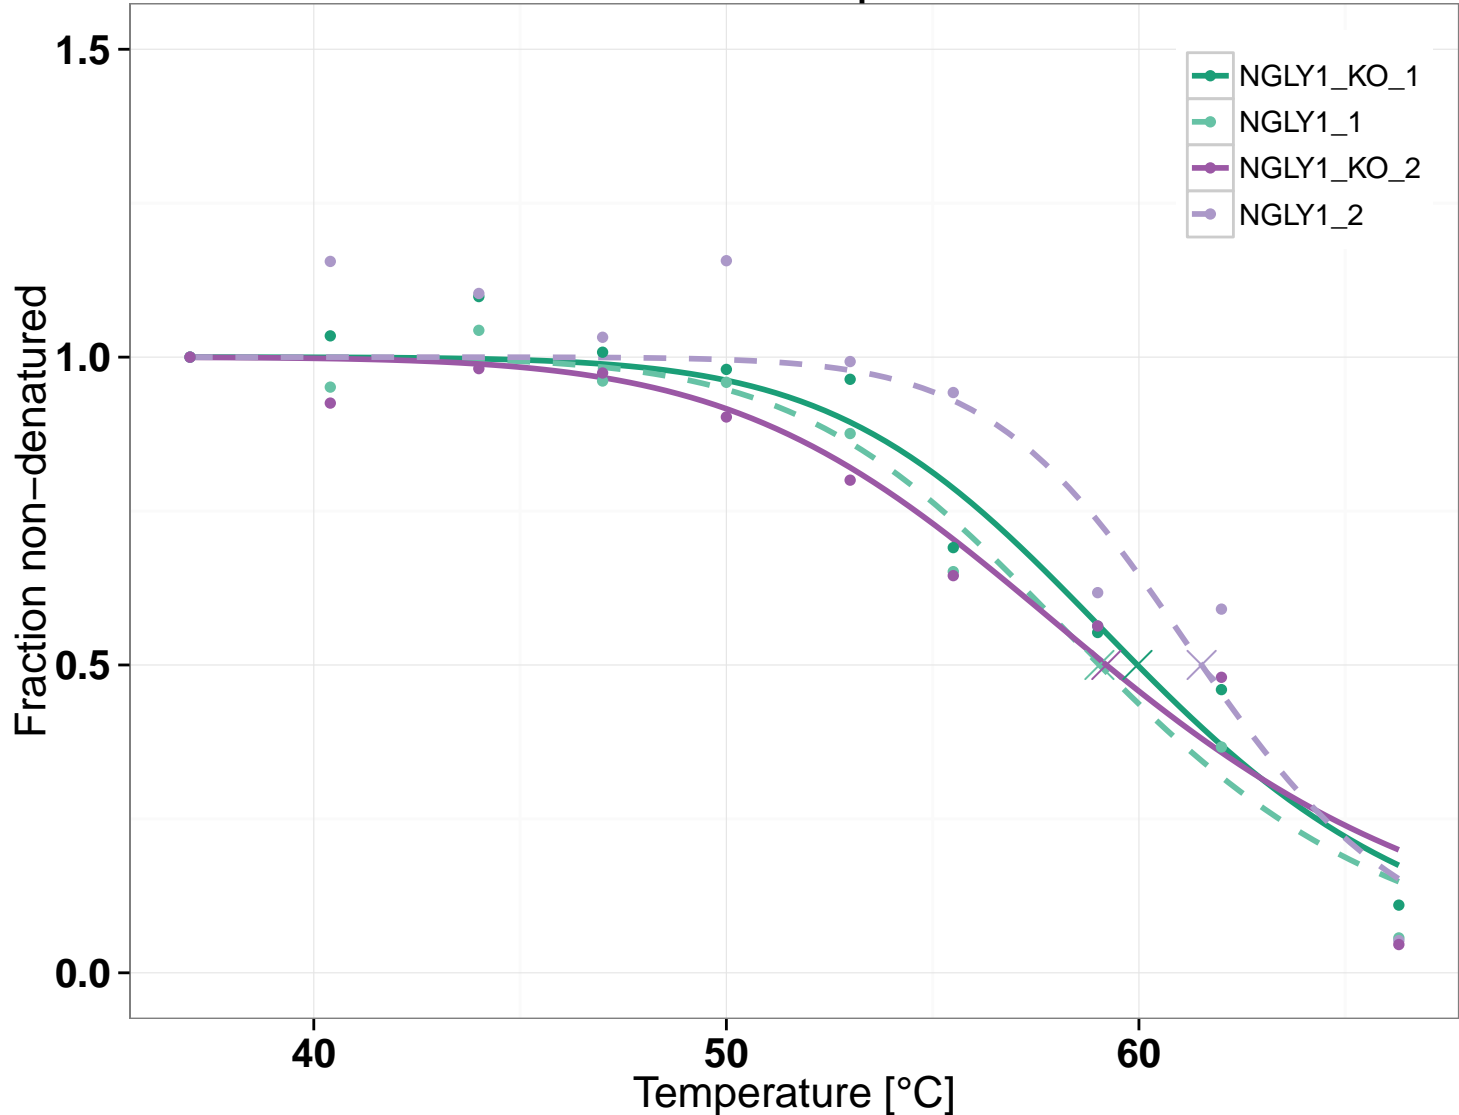

|            | meltPoint | slope  | plateau | R2   |
|------------|-----------|--------|---------|------|
| NGLY1_KO_1 | 59.96     | -0.069 | 0       | 0.96 |
| NGLY1_1    | 59.04     | -0.069 | 0       | 0.97 |
| NGLY1_KO_2 | 59.21     | -0.056 | 0       | 0.94 |
| NGLY1_2    | 61.52     | -0.097 | 0       | 0.9  |

Supplement: Supplementary file 6882 [file 1]

# IPI00304670.7|PSD4

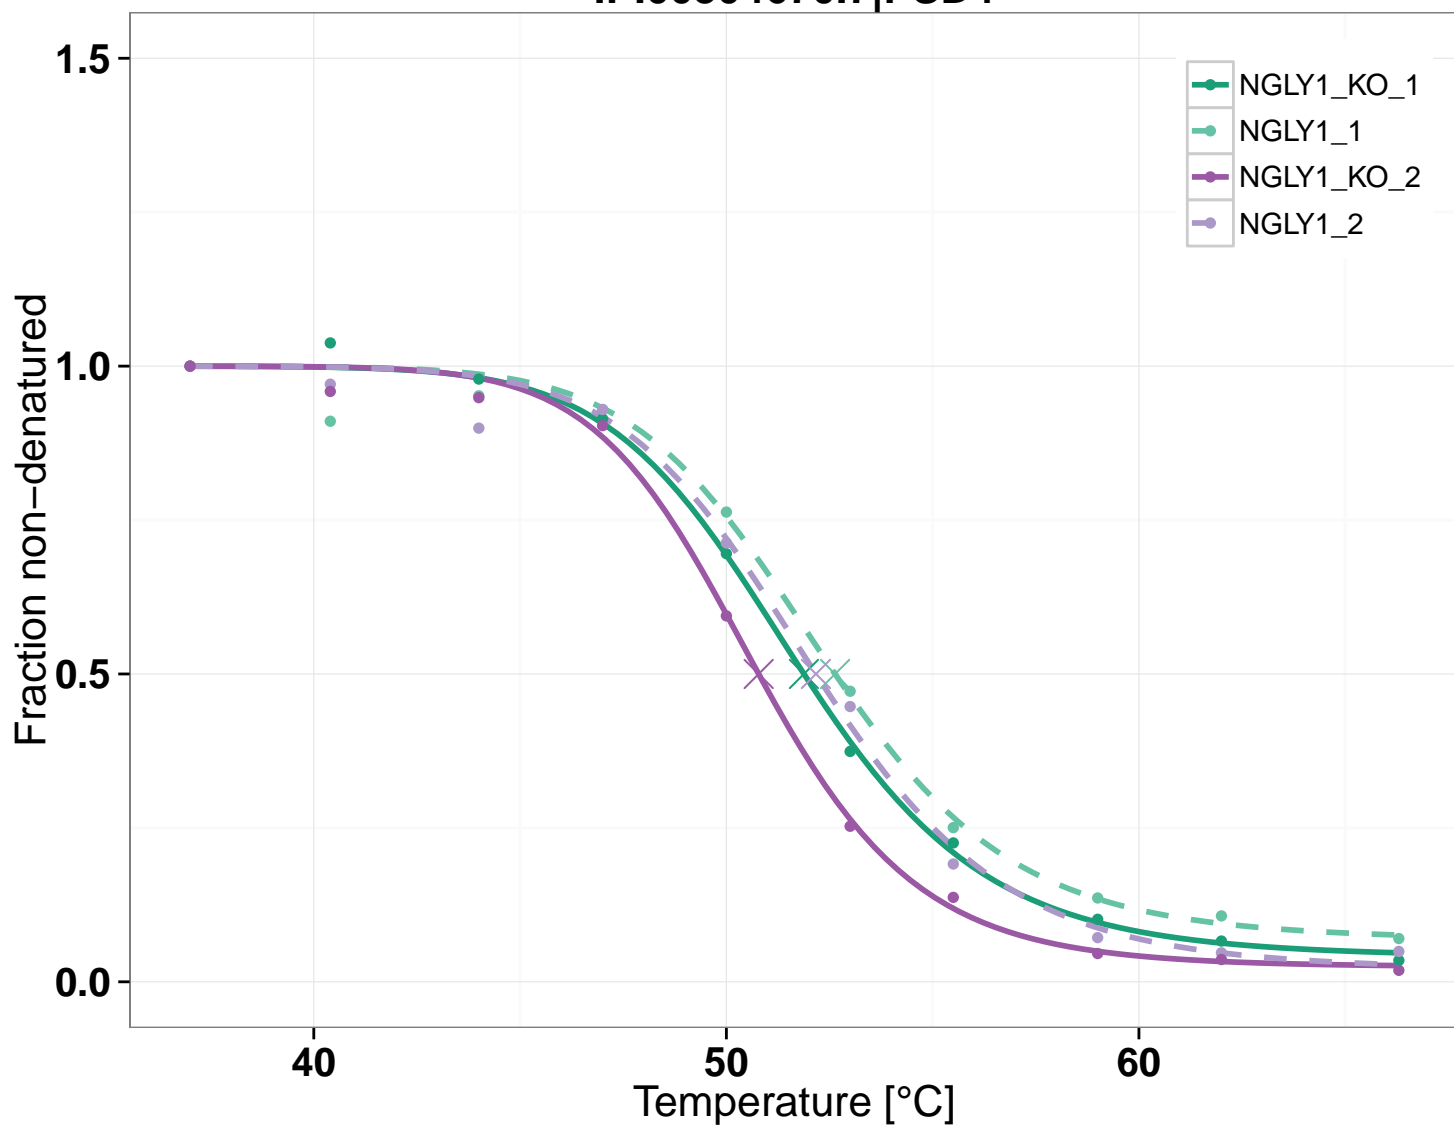

|            | meltPoint | slope | plateau | R2   |
|------------|-----------|-------|---------|------|
| NGLY1_KO_1 | 51.88     | -0.1  | 0.04    | 1    |
| NGLY1_1    | 52.64     | -0.1  | 0.07    | 0.99 |
| NGLY1_KO_2 | 50.78     | -0.12 | 0.02    | 1    |
| NGLY1_2    | 52.17     | -0.1  | 0.02    | 0.99 |

Supplement: Supplementary file 6883 [file 1]

IPI00014624.2|AP3S1

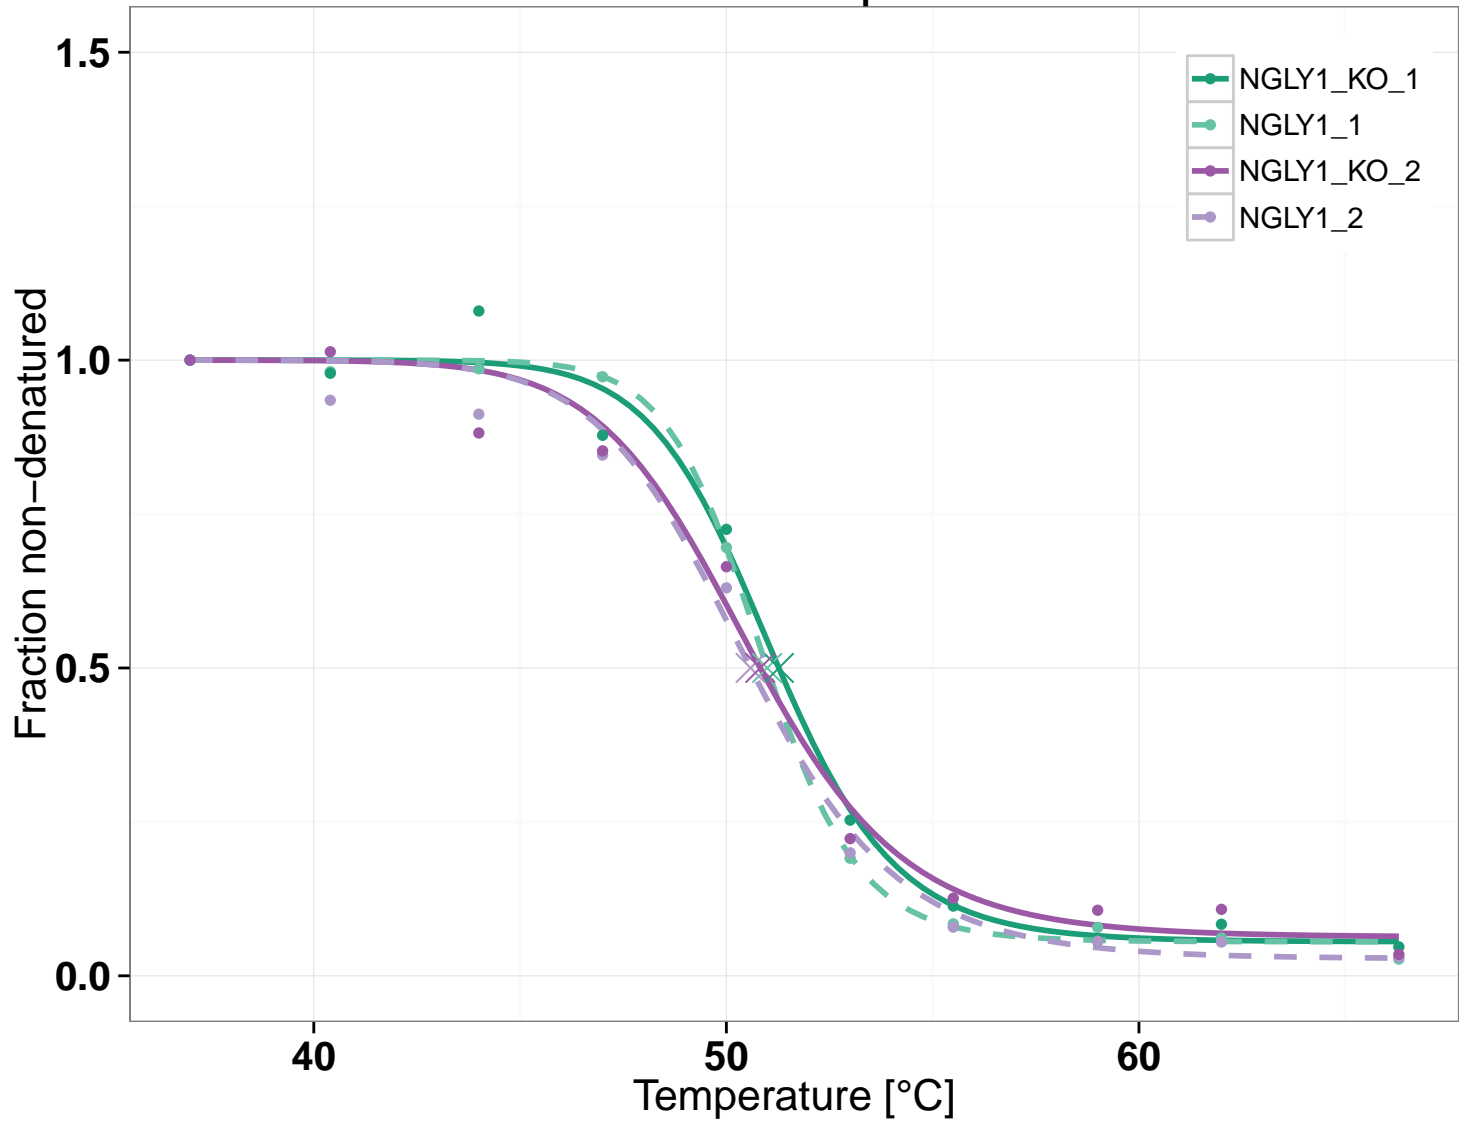

|            | meltPoint | slope | plateau | R2   |
|------------|-----------|-------|---------|------|
| NGLY1_KO_1 | 51.27     | -0.16 | 0.06    | 0.99 |
| NGLY1_1    | 50.99     | -0.2  | 0.06    | 1    |
| NGLY1_KO_2 | 50.82     | -0.13 | 0.06    | 0.99 |
| NGLY1_2    | 50.59     | -0.13 | 0.03    | 0.99 |

Supplement: Supplementary file 6884 [file 1]

IPI00413784.5|SEPN1

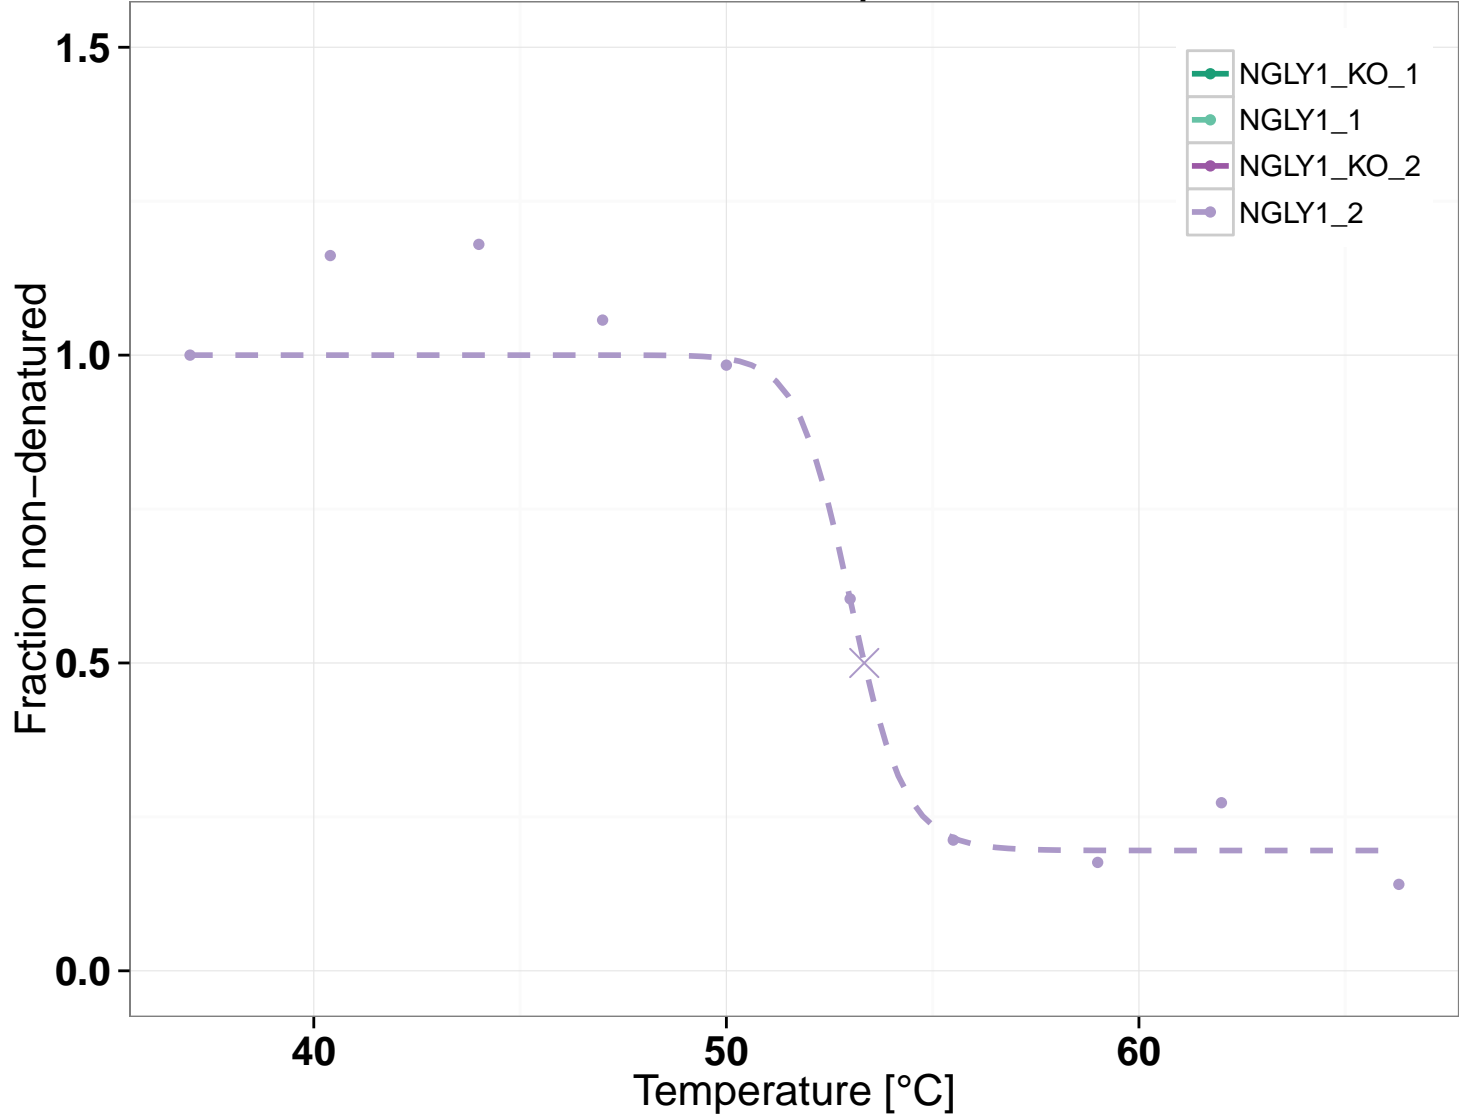

|            | meltPoint | slope | plateau | R2   |
|------------|-----------|-------|---------|------|
| NGLY1_KO_1 | -         | -     | -       | -    |
| NGLY1_1    | -         | -     | -       | -    |
| NGLY1_KO_2 | -         | -     | -       | -    |
| NGLY1_2    | 53.34     | -0.31 | 0.2     | 0.96 |

Supplement: Supplementary file 6885 [file 1]

IPI00439946.2|C11ORF61

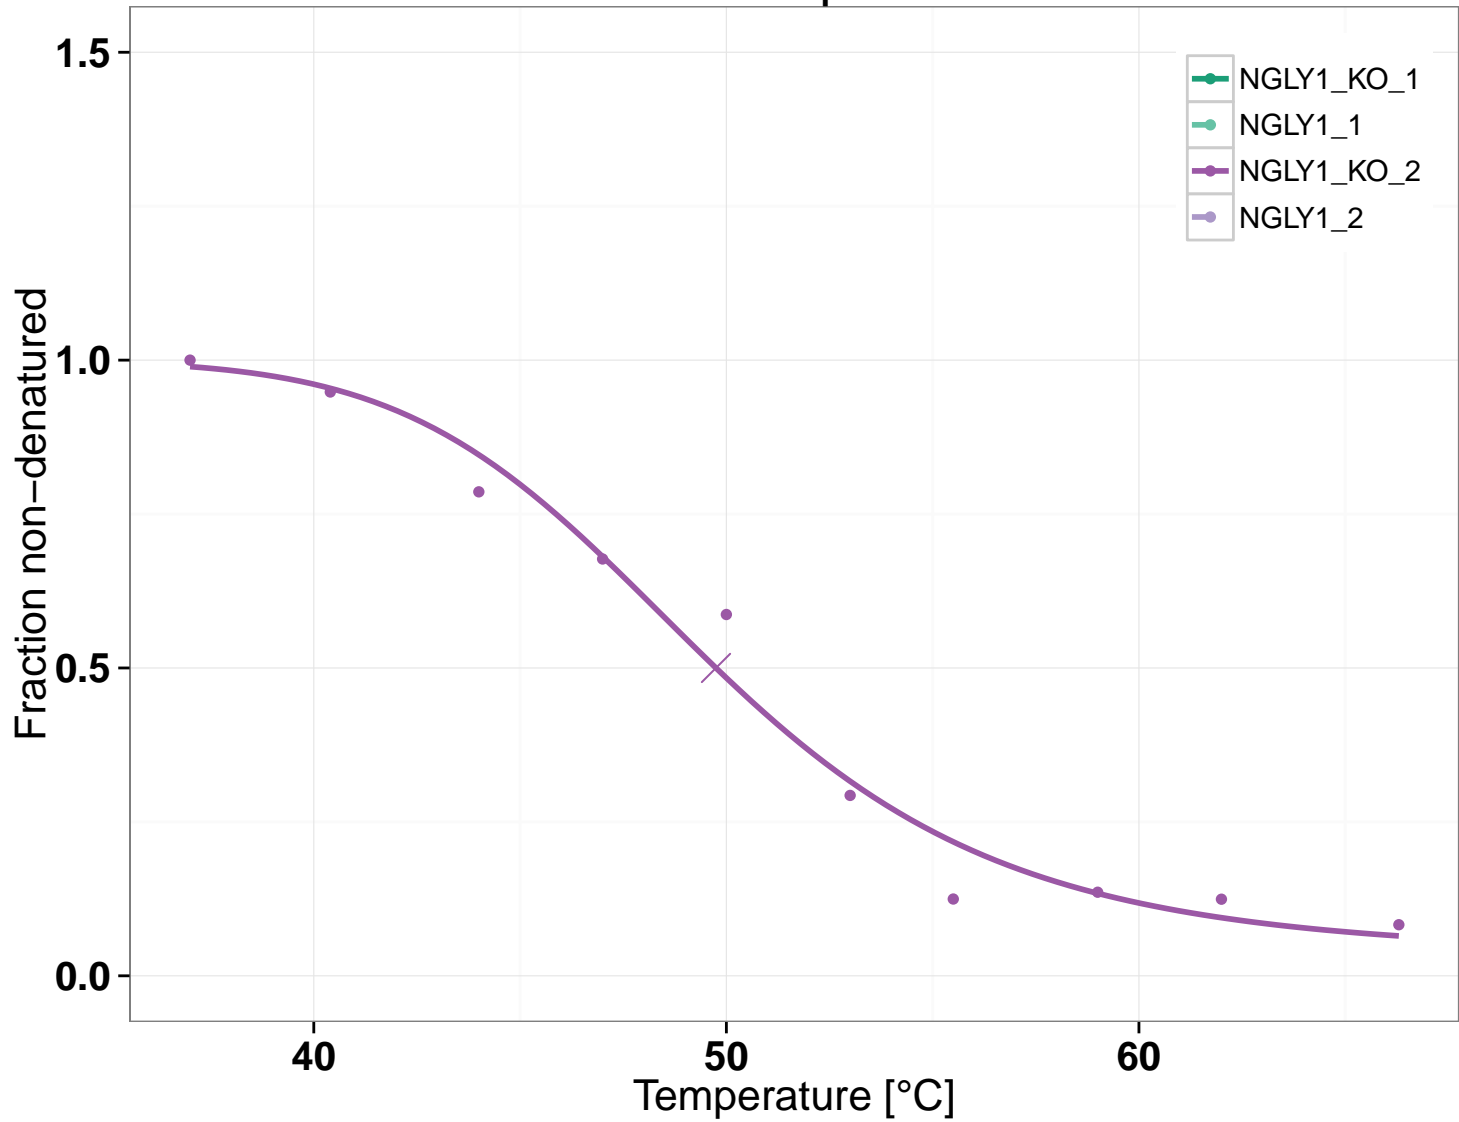

|            | meltPoint | slope  | plateau | R2   |
|------------|-----------|--------|---------|------|
| NGLY1_KO_1 | —         | —      | —       | —    |
| NGLY1_1    | —         | —      | —       | —    |
| NGLY1_KO_2 | 49.75     | -0.067 | 0.03    | 0.98 |
| NGLY1_2    | —         | —      | —       | —    |

Supplement: Supplementary file 6887 [file 1]

IPI00549276.1|ZNF669

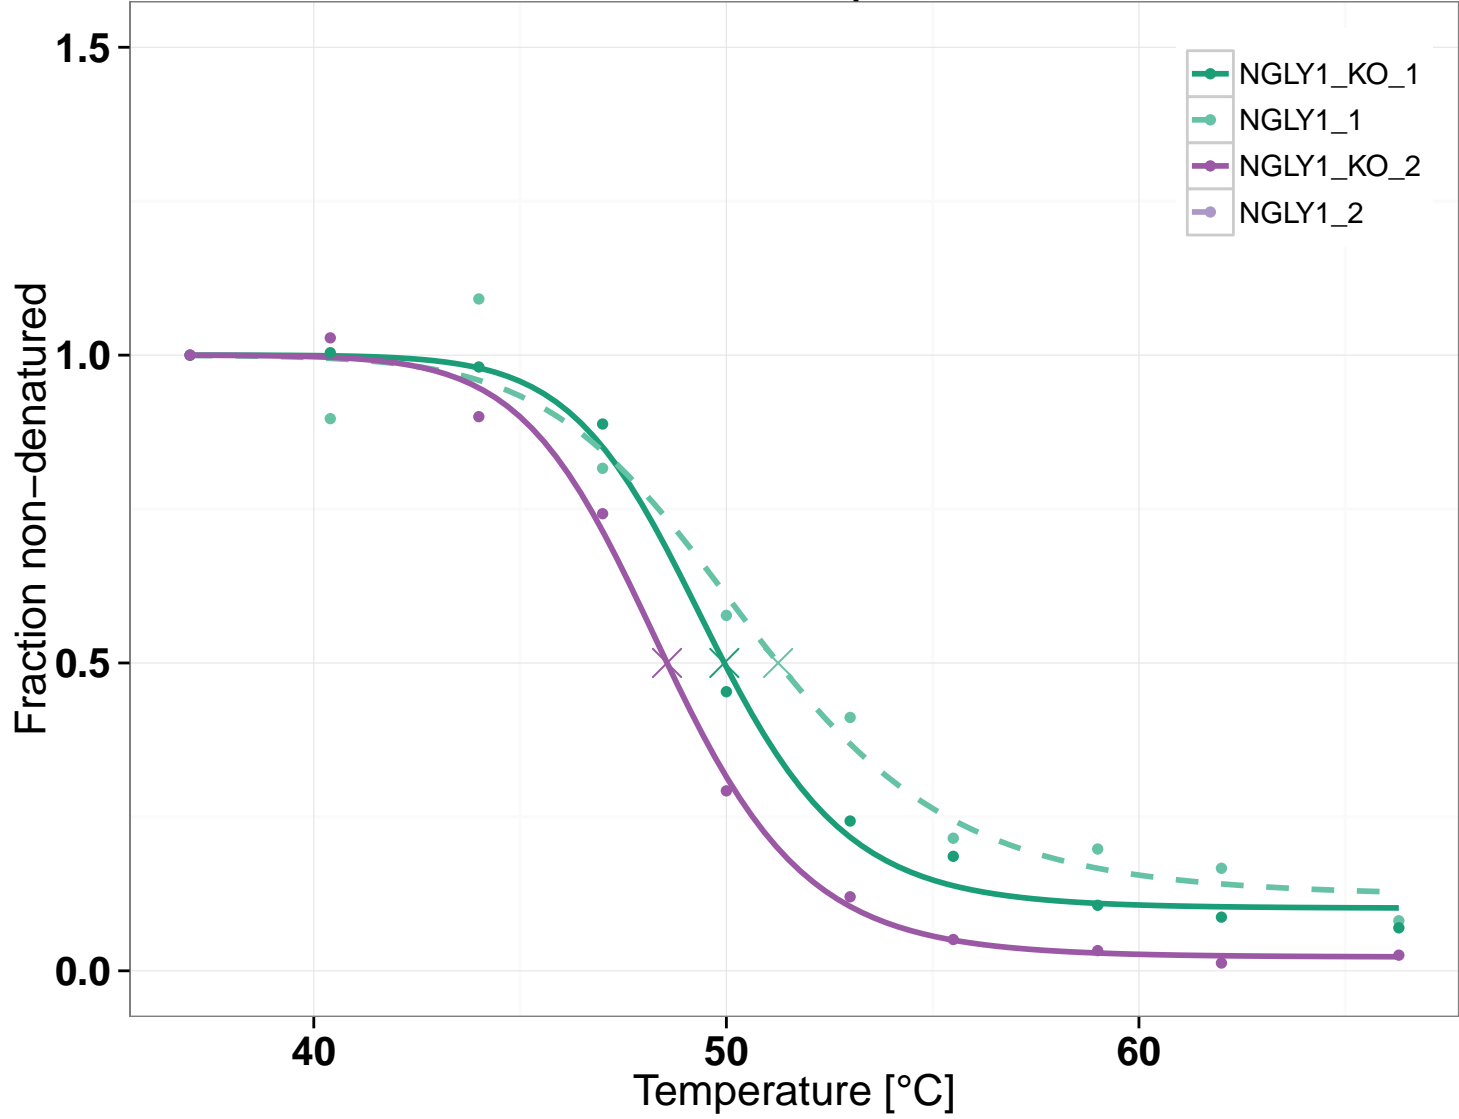

|            | meltPoint | slope  | plateau | R2   |
|------------|-----------|--------|---------|------|
| NGLY1_KO_1 | 49.95     | -0.13  | 0.1     | 1    |
| NGLY1_1    | 51.26     | -0.089 | 0.12    | 0.97 |
| NGLY1_KO_2 | 48.56     | -0.14  | 0.02    | 1    |
| NGLY1_2    | -         | -      | -       | -    |

Supplement: Supplementary file 6888 [file 1]

IPI00604598.1|JMJD6

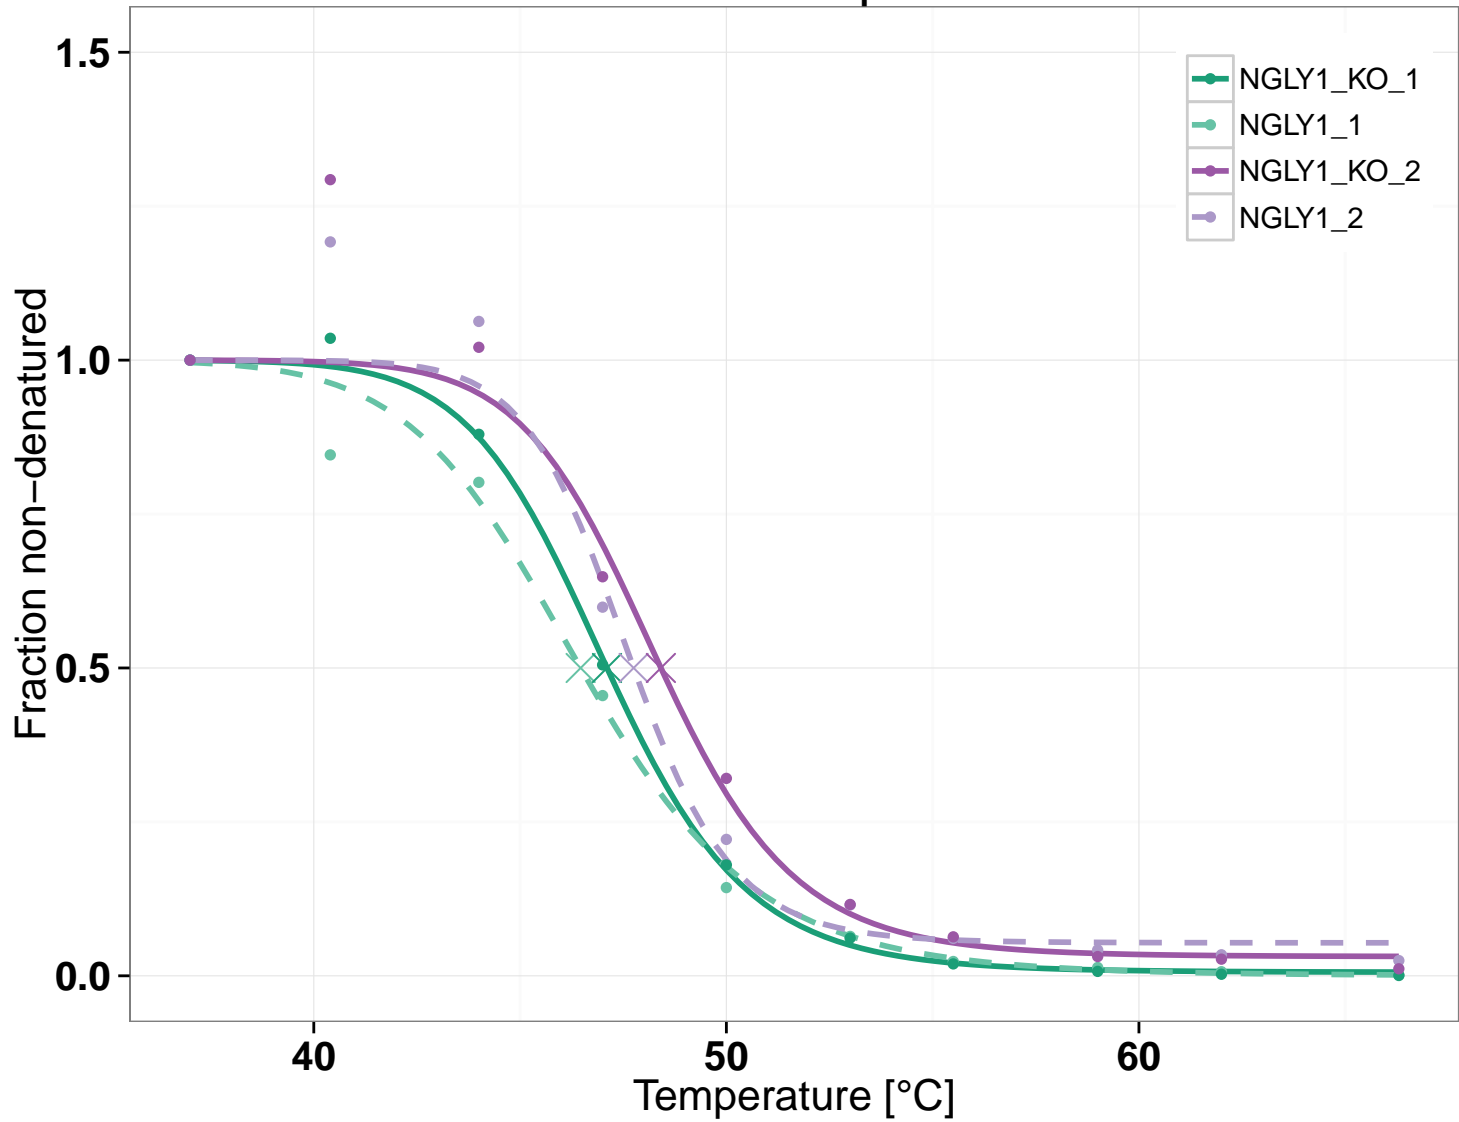

|            | meltPoint | slope | plateau | R2   |
|------------|-----------|-------|---------|------|
| NGLY1_KO_1 | 47.11     | -0.15 | 0.01    | 1    |
| NGLY1_1    | 46.47     | -0.12 | 0       | 0.99 |
| NGLY1_KO_2 | 48.41     | -0.15 | 0.03    | 0.96 |
| NGLY1_2    | 47.75     | -0.19 | 0.05    | 0.97 |

Supplement: Supplementary file 6889 [file 1]

# IPI00012497.2|ADRBK1

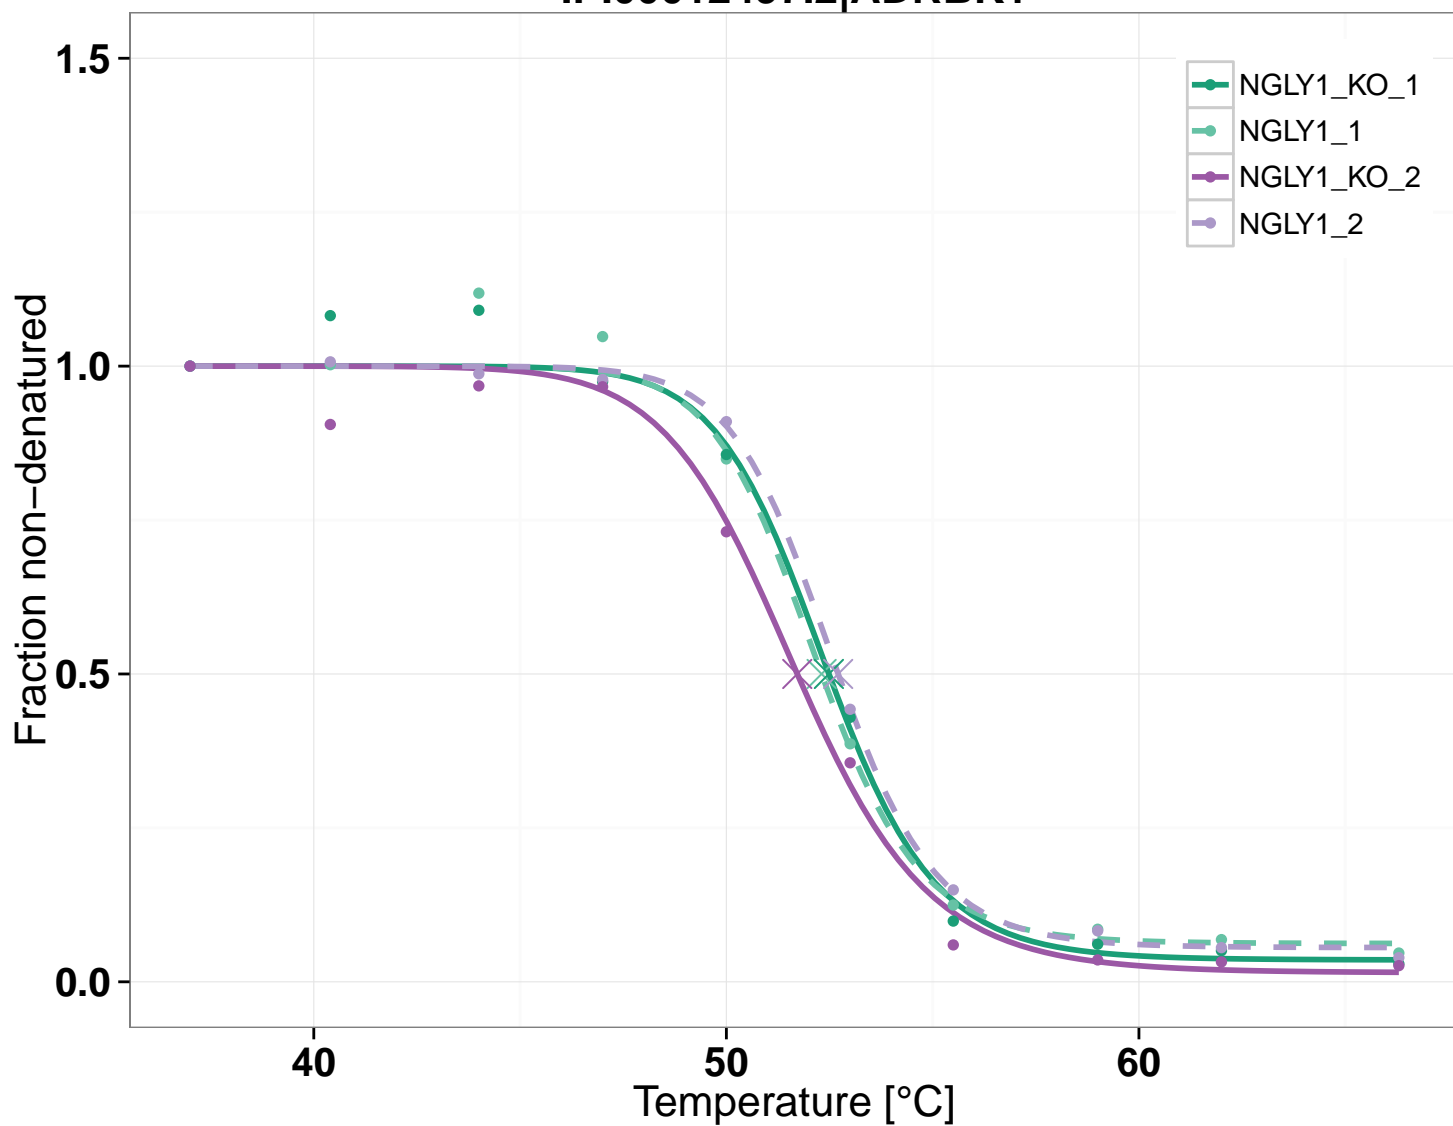

|            | meltPoint | slope | plateau | R2   |
|------------|-----------|-------|---------|------|
| NGLY1_KO_1 | 52.49     | -0.18 | 0.04    | 0.99 |
| NGLY1_1    | 52.31     | -0.19 | 0.06    | 0.99 |
| NGLY1_KO_2 | 51.72     | -0.15 | 0.01    | 0.99 |
| NGLY1_2    | 52.71     | -0.19 | 0.06    | 1    |

Supplement: Supplementary file 6890 [file 1]

IPI00001091.4|AFG3L2

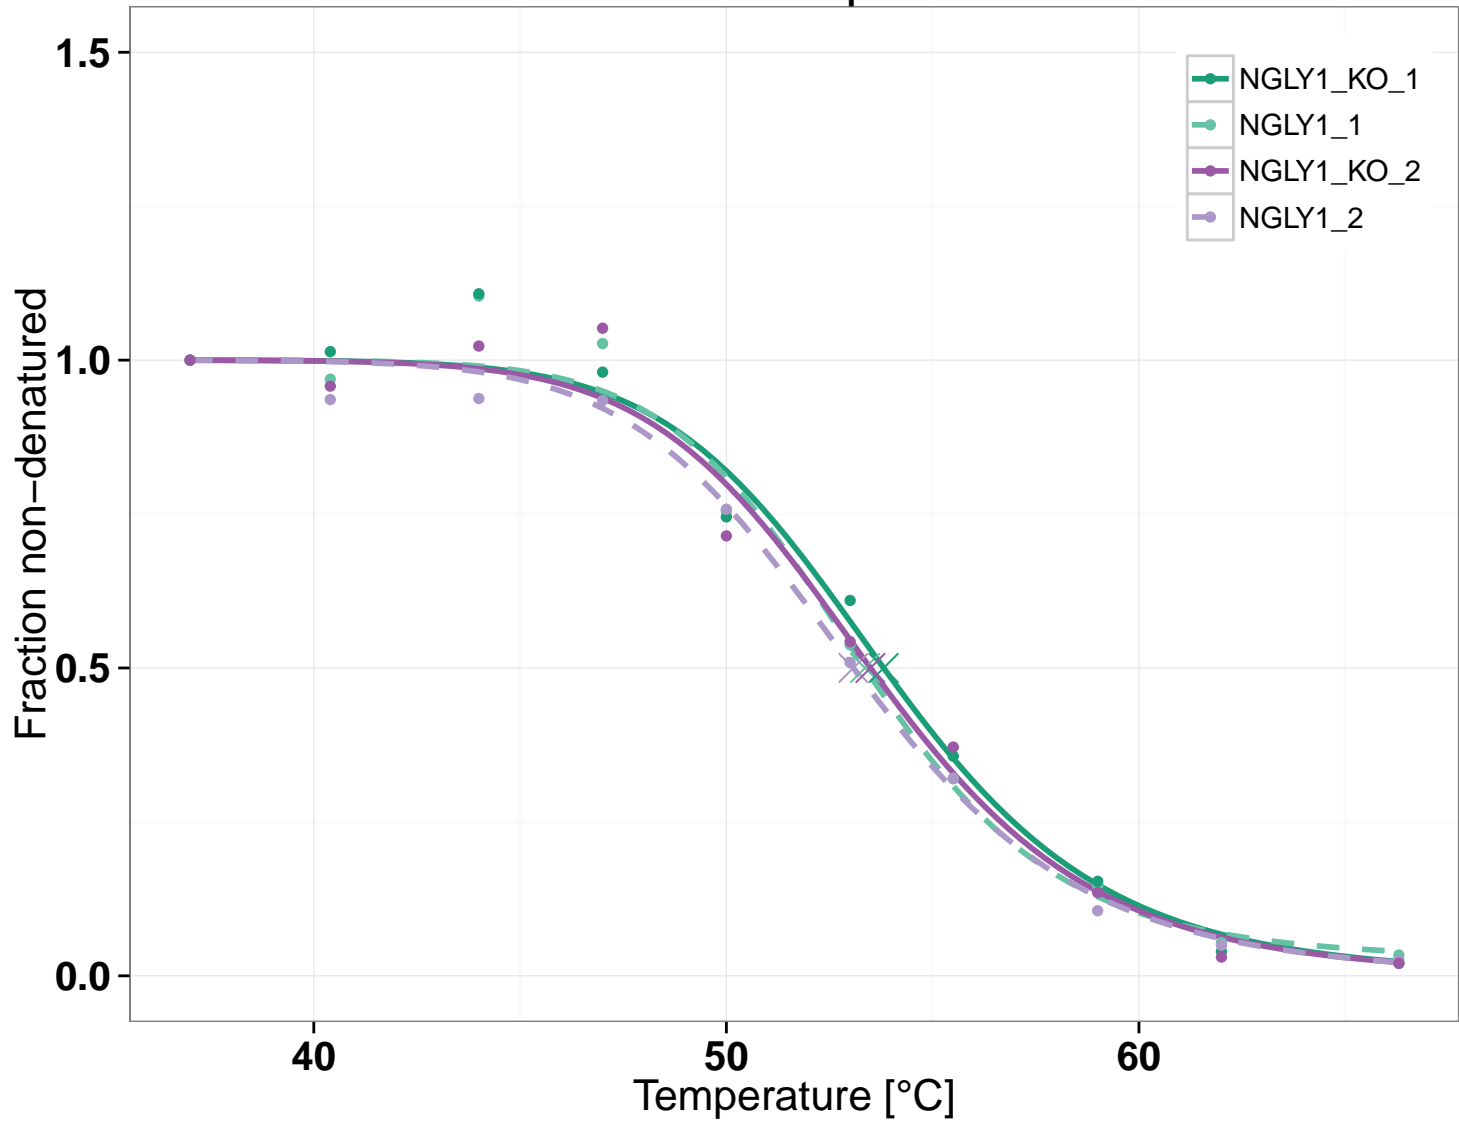

|            | meltPoint | slope  | plateau | R2   |
|------------|-----------|--------|---------|------|
| NGLY1_KO_1 | 53.81     | -0.093 | 0       | 0.99 |
| NGLY1_1    | 53.36     | -0.1   | 0.03    | 0.99 |
| NGLY1_KO_2 | 53.49     | -0.093 | 0       | 0.98 |
| NGLY1_2    | 53.08     | -0.091 | 0       | 1    |

Supplement: Supplementary file 6891 [file 1]

IPI00007127.3|DPEP2

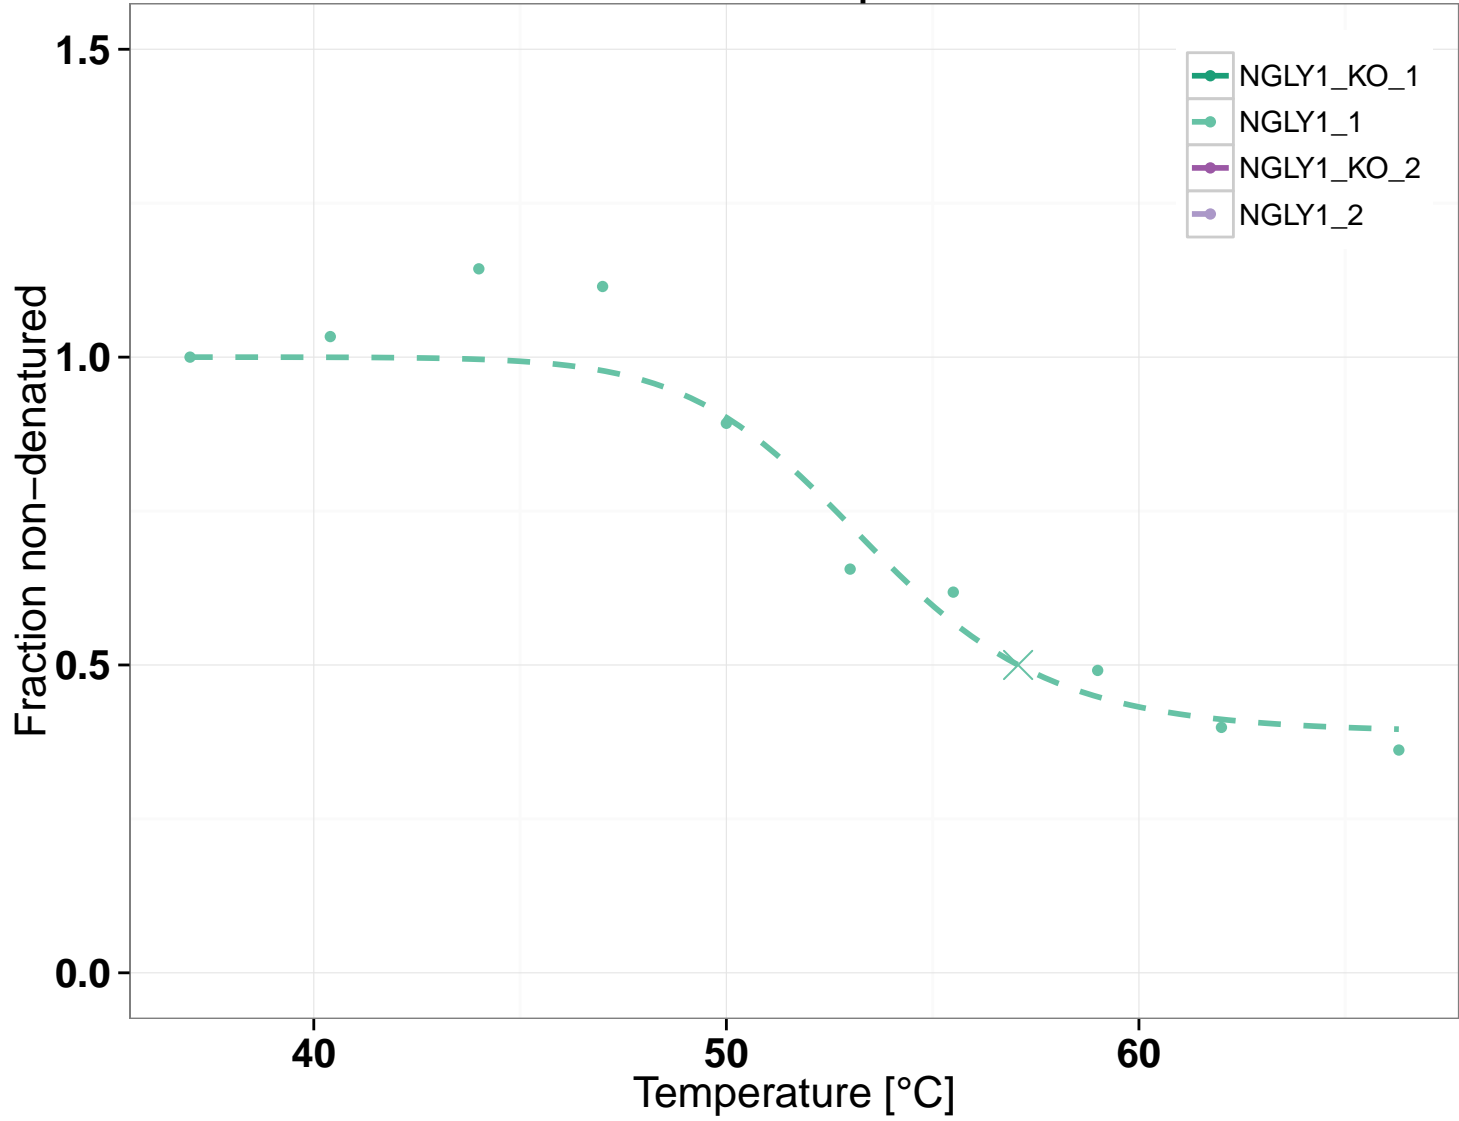

|            | meltPoint | slope  | plateau | R2   |
|------------|-----------|--------|---------|------|
| NGLY1_KO_1 | -         | -      | -       | -    |
| NGLY1_1    | 57.07     | -0.069 | 0.39    | 0.94 |
| NGLY1_KO_2 | -         | -      | -       | -    |
| NGLY1_2    | -         | -      | -       | -    |

Supplement: Supplementary file 6892 [file 1]

# IPI00219778.3|SLMO2

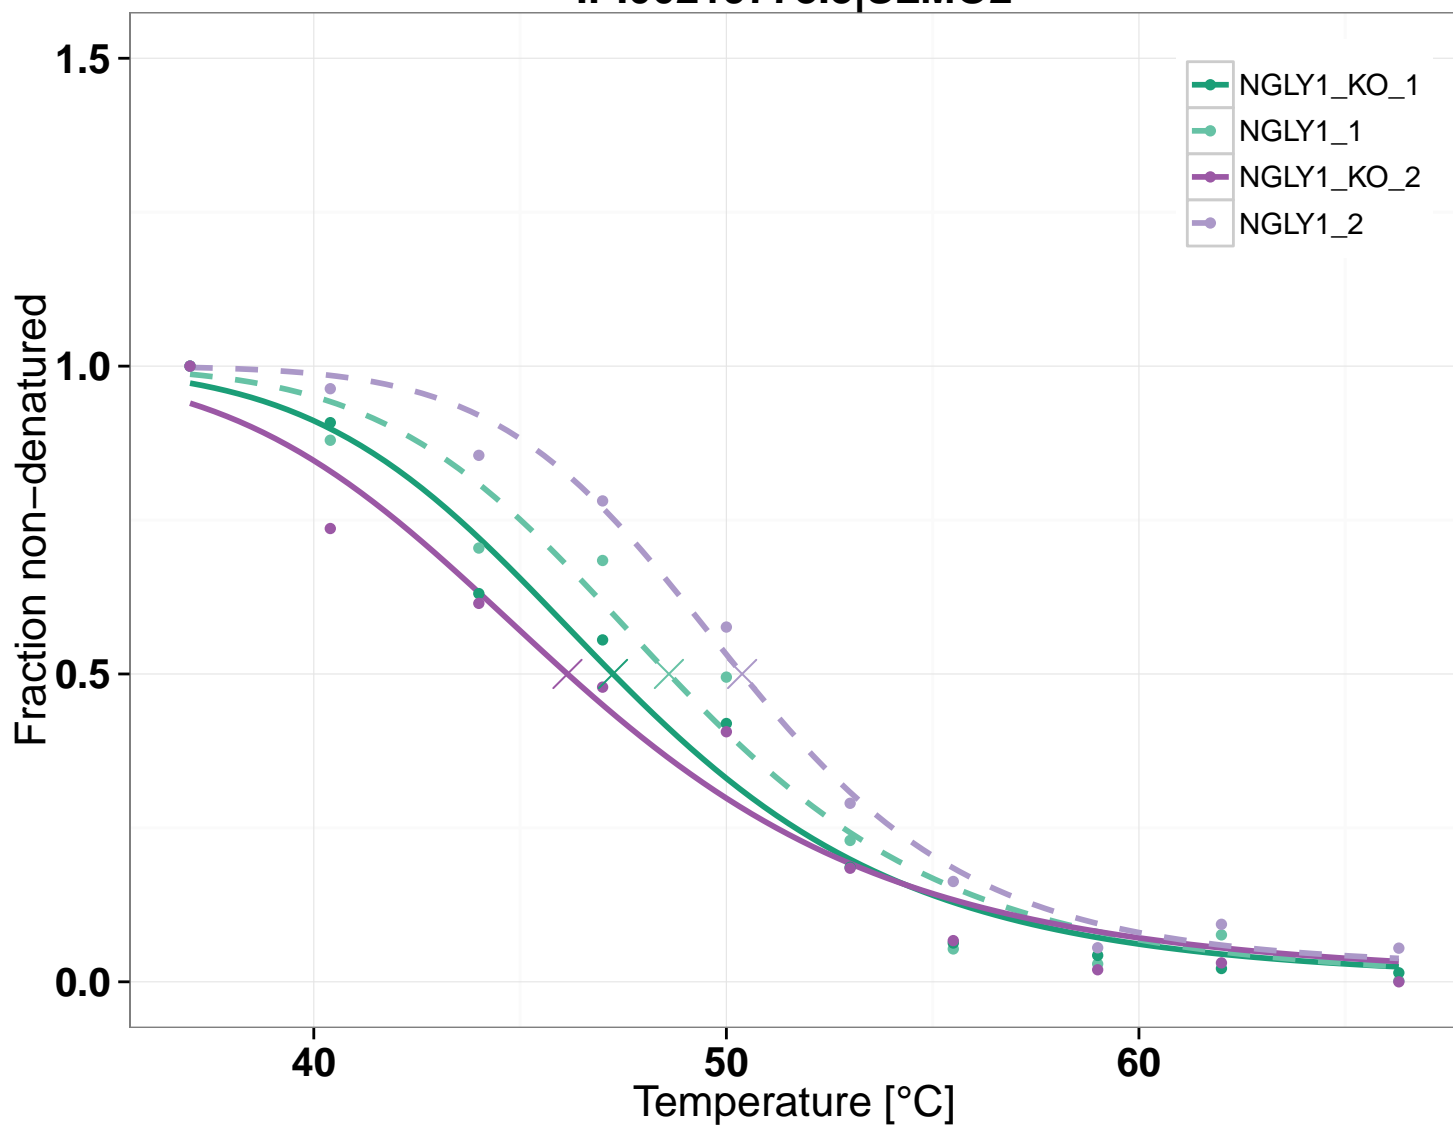

|            | meltPoint | slope  | plateau | R2   |
|------------|-----------|--------|---------|------|
| NGLY1_KO_1 | 47.25     | -0.07  | 0       | 0.98 |
| NGLY1_1    | 48.61     | -0.072 | 0       | 0.97 |
| NGLY1_KO_2 | 46.15     | -0.062 | 0       | 0.97 |
| NGLY1_2    | 50.38     | -0.084 | 0.02    | 0.99 |

Supplement: Supplementary file 6893 [file 1]

IPI00791750.1|DCTN6

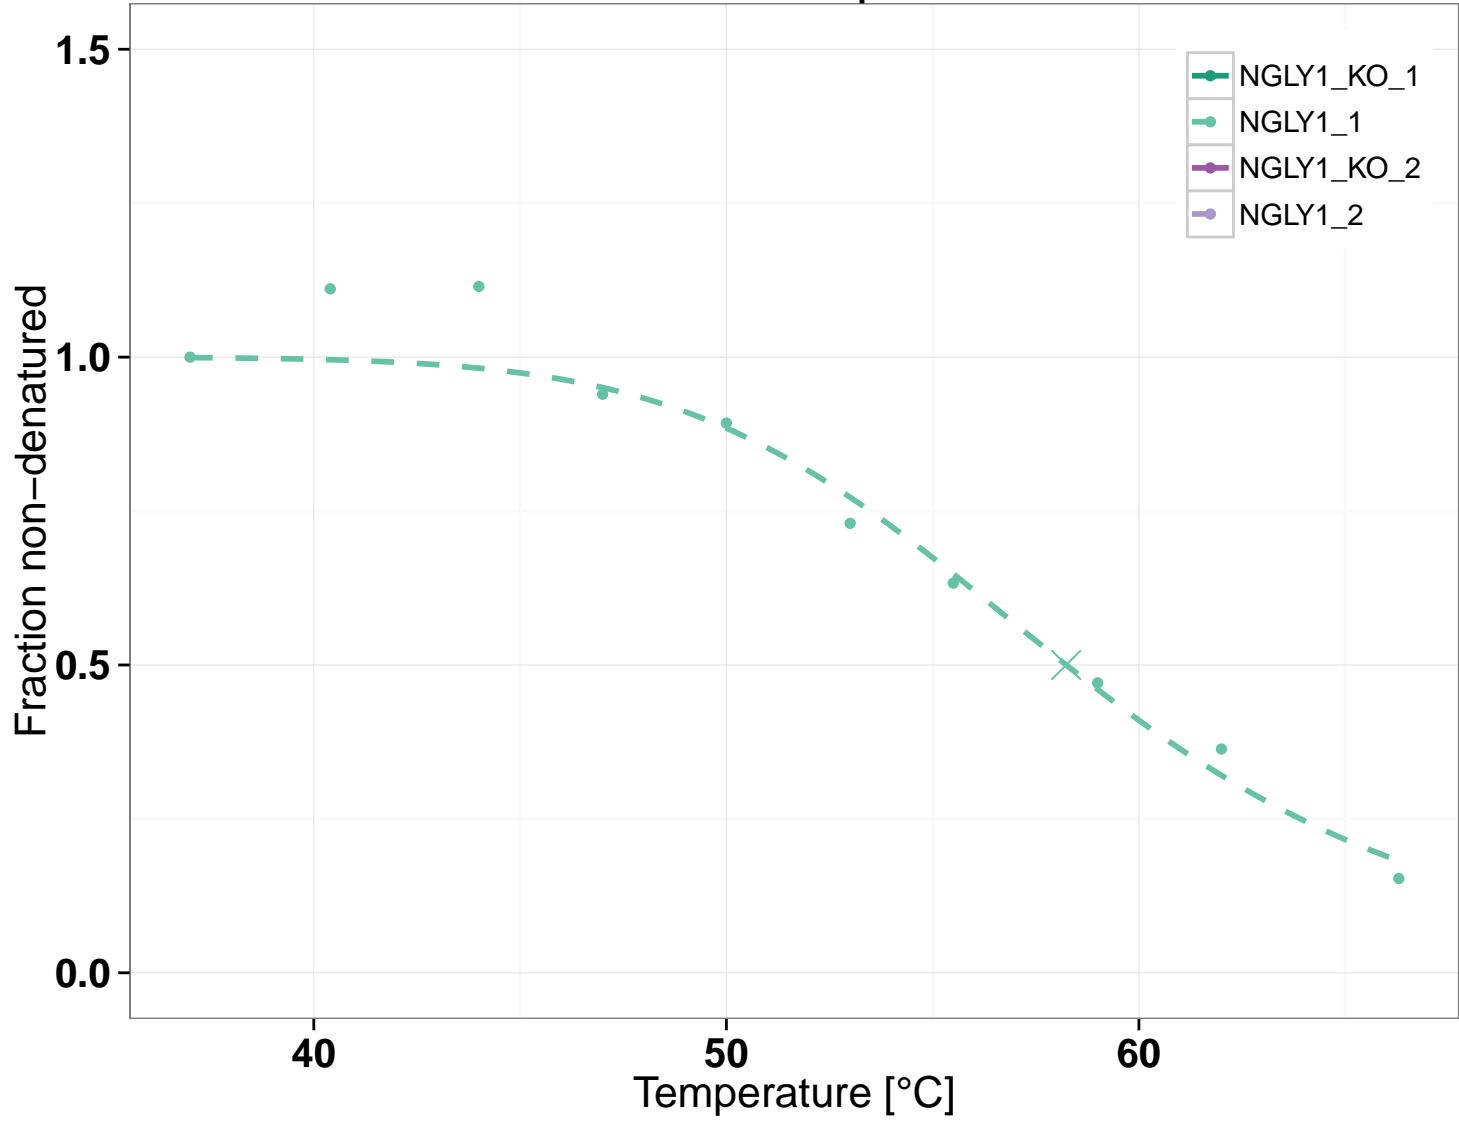

|            | meltPoint | slope  | plateau | R2   |
|------------|-----------|--------|---------|------|
| NGLY1_KO_1 | -         | -      | -       | -    |
| NGLY1_1    | 58.24     | -0.054 | 0       | 0.96 |
| NGLY1_KO_2 | -         | -      | -       | -    |
| NGLY1_2    | -         | -      | -       | -    |

Supplement: Supplementary file 6894 [file 1]

IPI00382868.3|CCDC28B

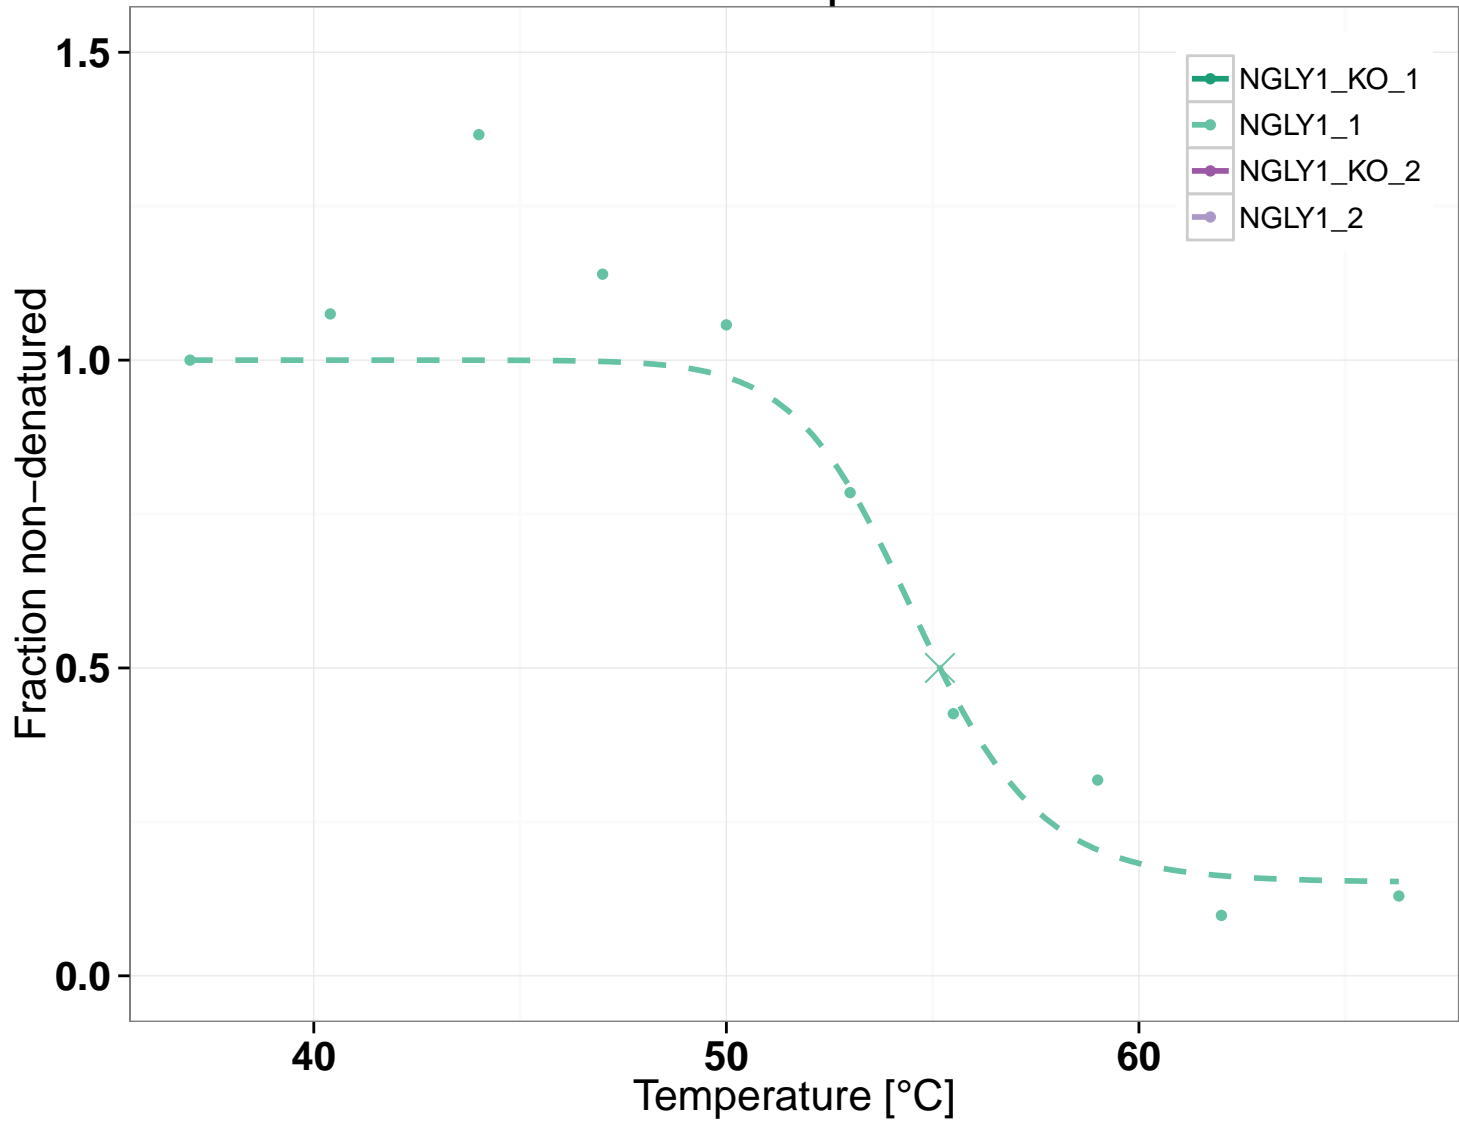

|            | meltPoint | slope | plateau | R2  |
|------------|-----------|-------|---------|-----|
| NGLY1_KO_1 | -         | -     | -       | -   |
| NGLY1_1    | 55.18     | -0.14 | 0.15    | 0.9 |
| NGLY1_KO_2 | -         | -     | -       | -   |
| NGLY1_2    | -         | -     | -       | -   |

Supplement: Supplementary file 6895 [file 1]

# IPI00002478.1|ECE1

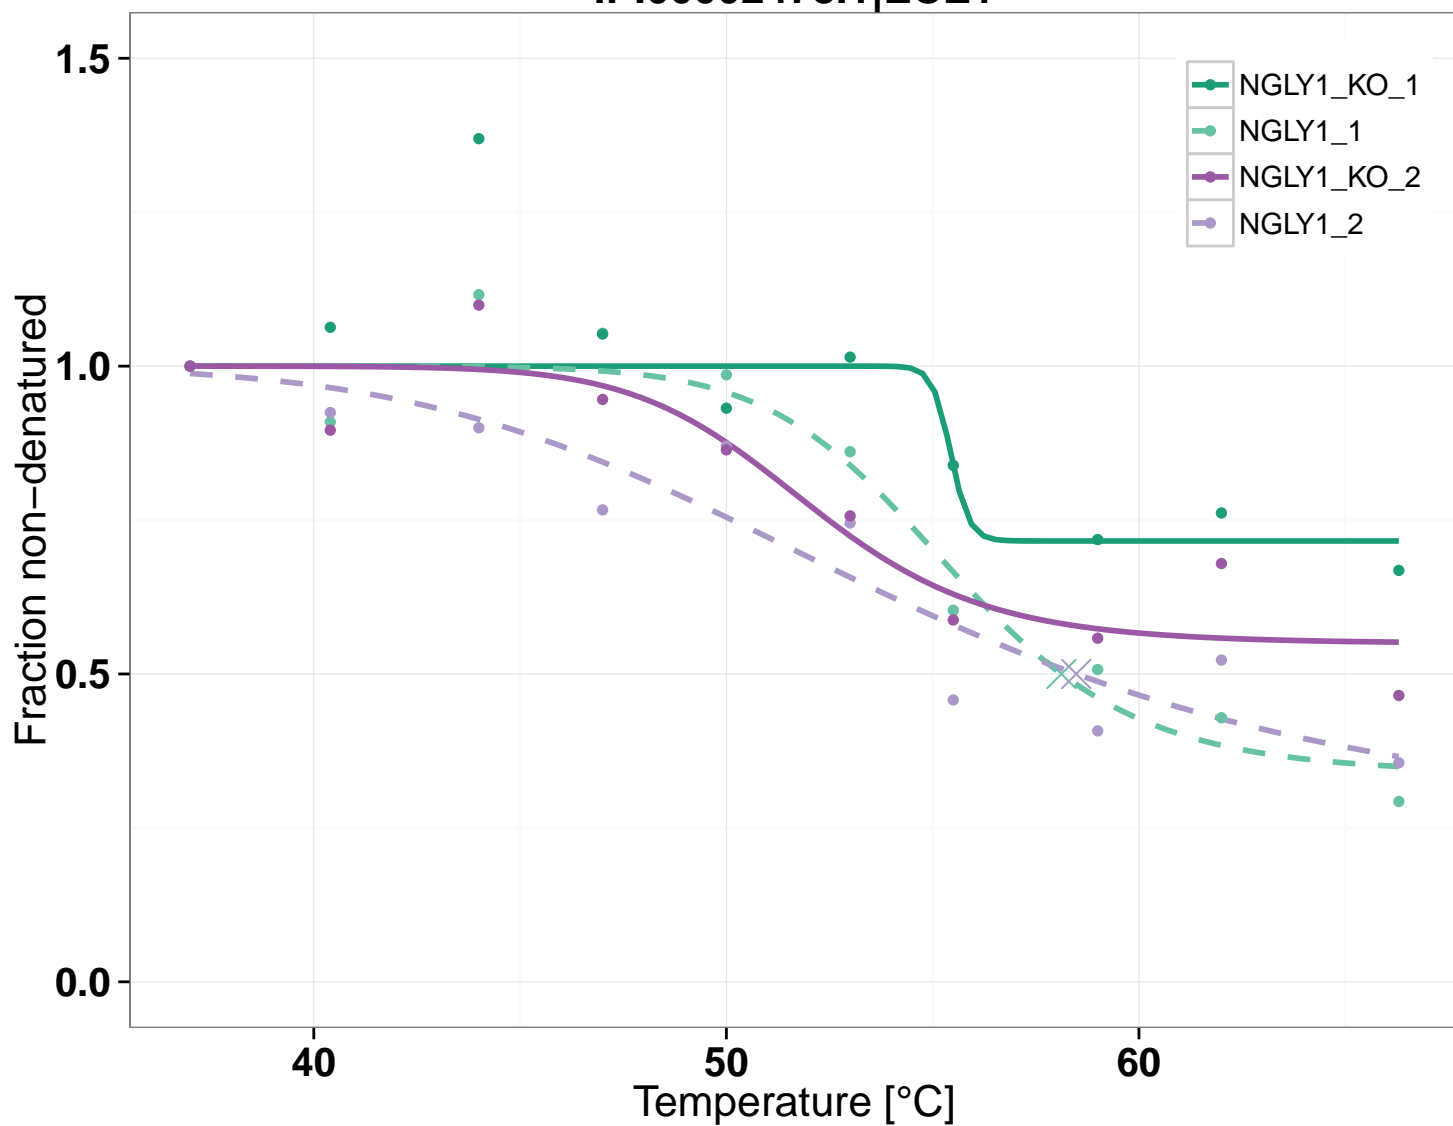

|            | meltPoint | slope  | plateau | R2   |
|------------|-----------|--------|---------|------|
| NGLY1_KO_1 | –         | –0.32  | 0.72    | 0.61 |
| NGLY1_1    | 58.12     | –0.074 | 0.34    | 0.95 |
| NGLY1_KO_2 | –         | –0.053 | 0.55    | 0.88 |
| NGLY1_2    | 58.48     | –0.033 | 0.24    | 0.88 |

Supplement: Supplementary file 6896 [file 1]

IPI00303253.6|C10ORF32

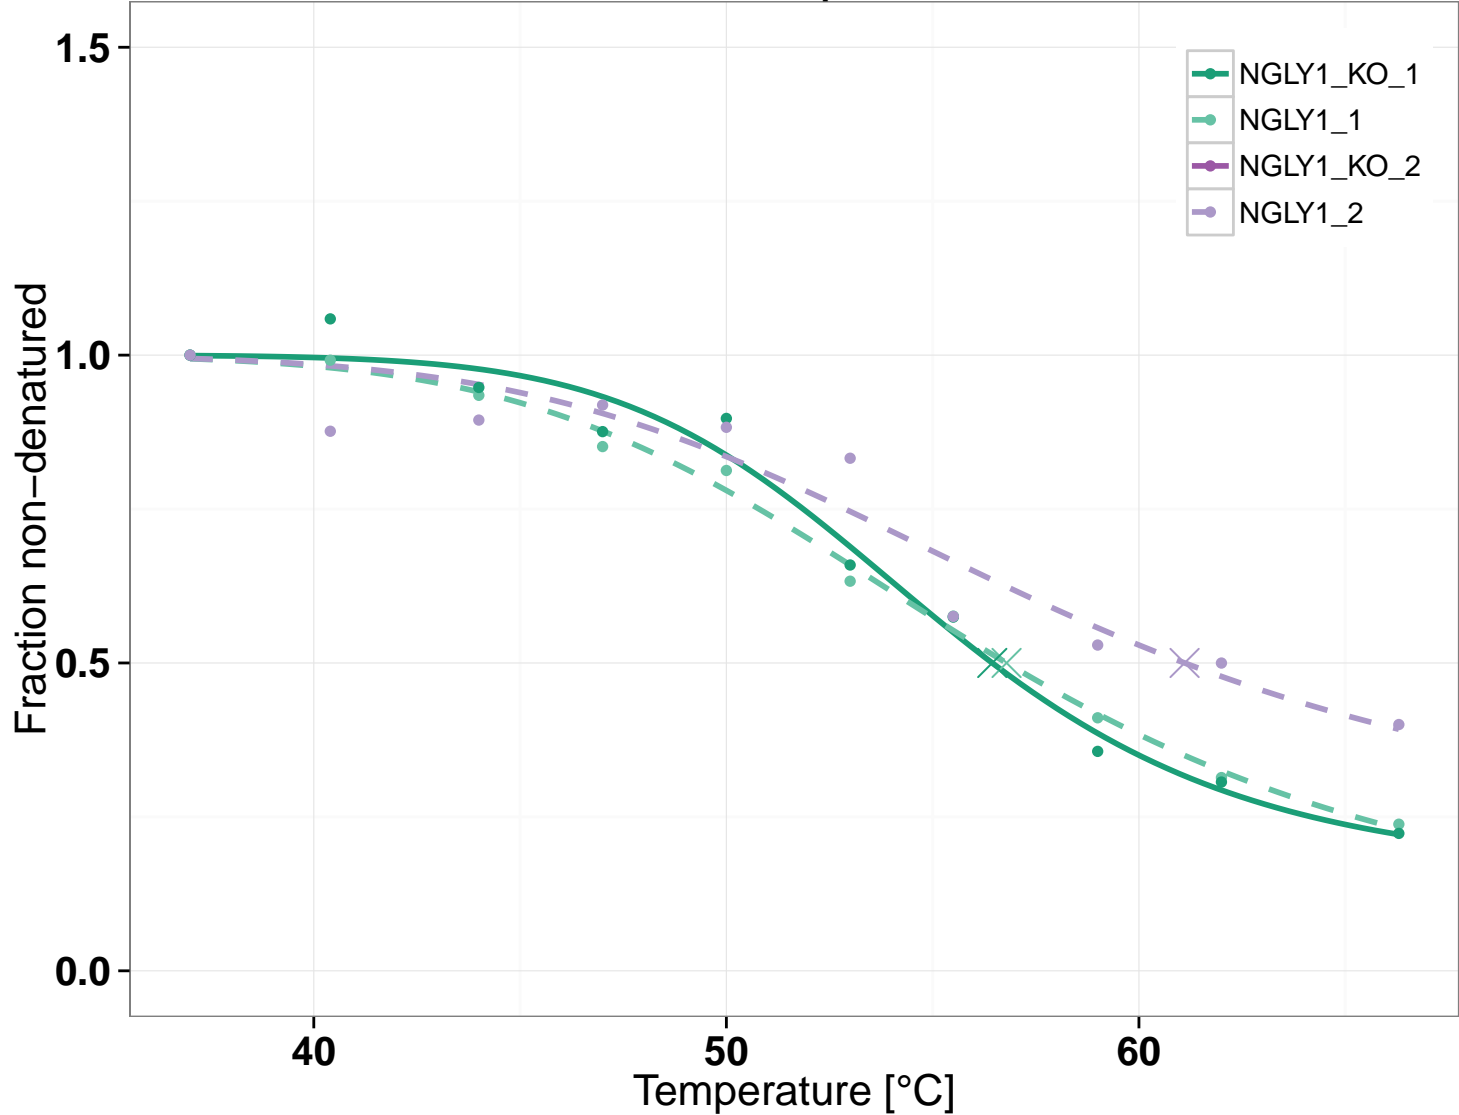

|            | meltPoint | slope  | plateau | R2   |
|------------|-----------|--------|---------|------|
| NGLY1_KO_1 | 56.44     | -0.056 | 0.15    | 0.98 |
| NGLY1_1    | 56.79     | -0.043 | 0.06    | 1    |
| NGLY1_KO_2 | -         | -      | -       | -    |
| NGLY1_2    | 61.11     | -0.032 | 0.21    | 0.92 |

Supplement: Supplementary file 6897 [file 1]

IPI00303832.6|RTF1

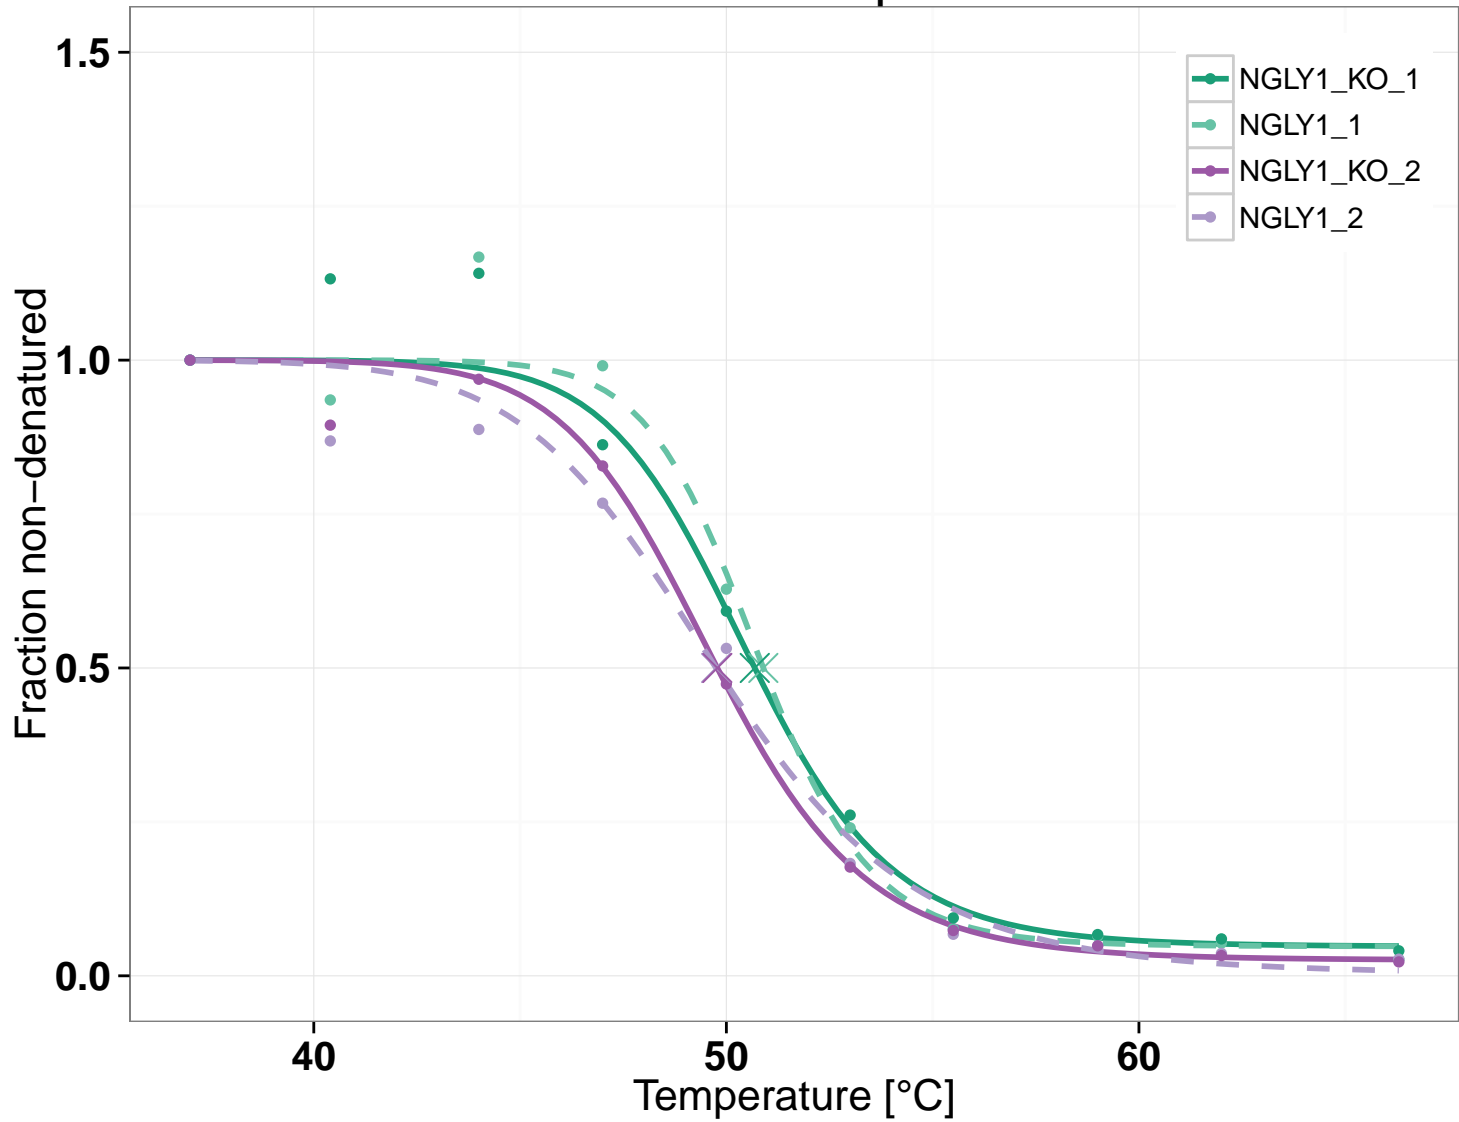

|            | meltPoint | slope | plateau | R2   |
|------------|-----------|-------|---------|------|
| NGLY1_KO_1 | 50.69     | -0.14 | 0.05    | 0.98 |
| NGLY1_1    | 50.9      | -0.17 | 0.05    | 0.98 |
| NGLY1_KO_2 | 49.78     | -0.13 | 0.03    | 0.99 |
| NGLY1_2    | 49.75     | -0.1  | 0       | 0.98 |

Supplement: Supplementary file 6898 [file 1]

IPI00178314.1|STXBP6

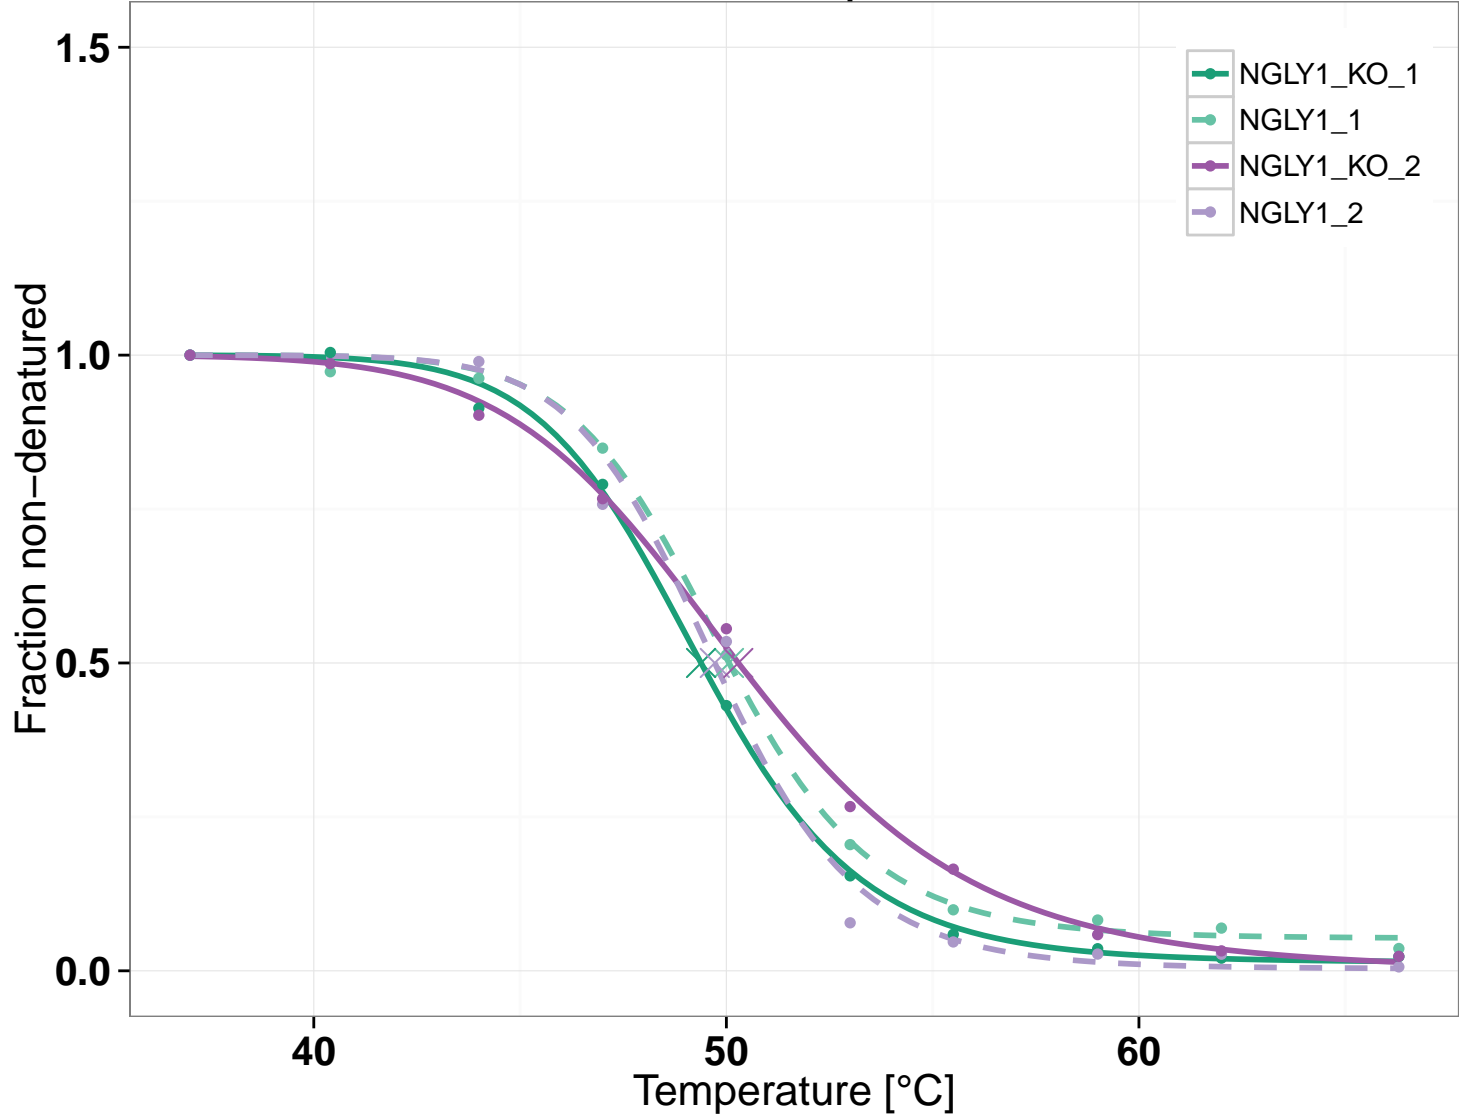

|            | meltPoint | slope  | plateau | R2   |
|------------|-----------|--------|---------|------|
| NGLY1_KO_1 | 49.39     | -0.13  | 0.01    | 1    |
| NGLY1_1    | 50.06     | -0.13  | 0.05    | 1    |
| NGLY1_KO_2 | 50.29     | -0.089 | 0       | 1    |
| NGLY1_2    | 49.72     | -0.14  | 0       | 0.88 |

Supplement: Supplementary file 6899 [file 1]

# IPI00011284.1|COMT

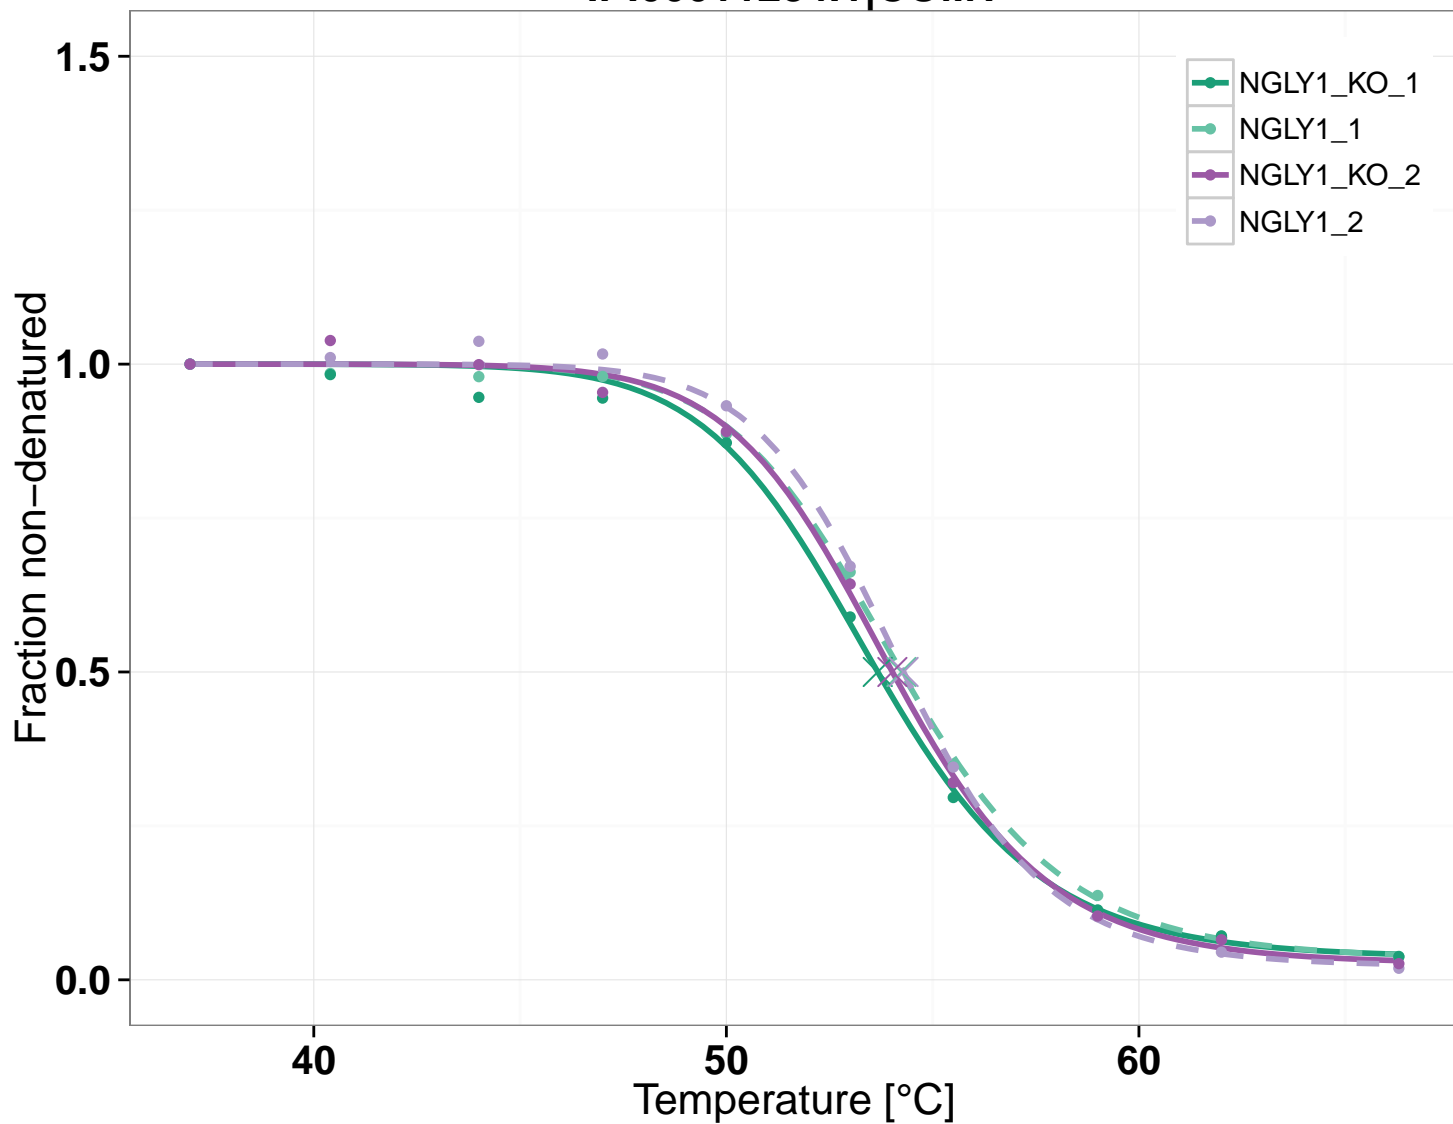

|            | meltPoint | slope | plateau | R2 |
|------------|-----------|-------|---------|----|
| NGLY1_KO_1 | 53.67     | -0.12 | 0.04    | 1  |
| NGLY1_1    | 54.24     | -0.12 | 0.03    | 1  |
| NGLY1_KO_2 | 54.02     | -0.12 | 0.03    | 1  |
| NGLY1_2    | 54.3      | -0.14 | 0.02    | 1  |

Supplement: Supplementary file 6900 [file 1]

IPI00073713.3|MSI2

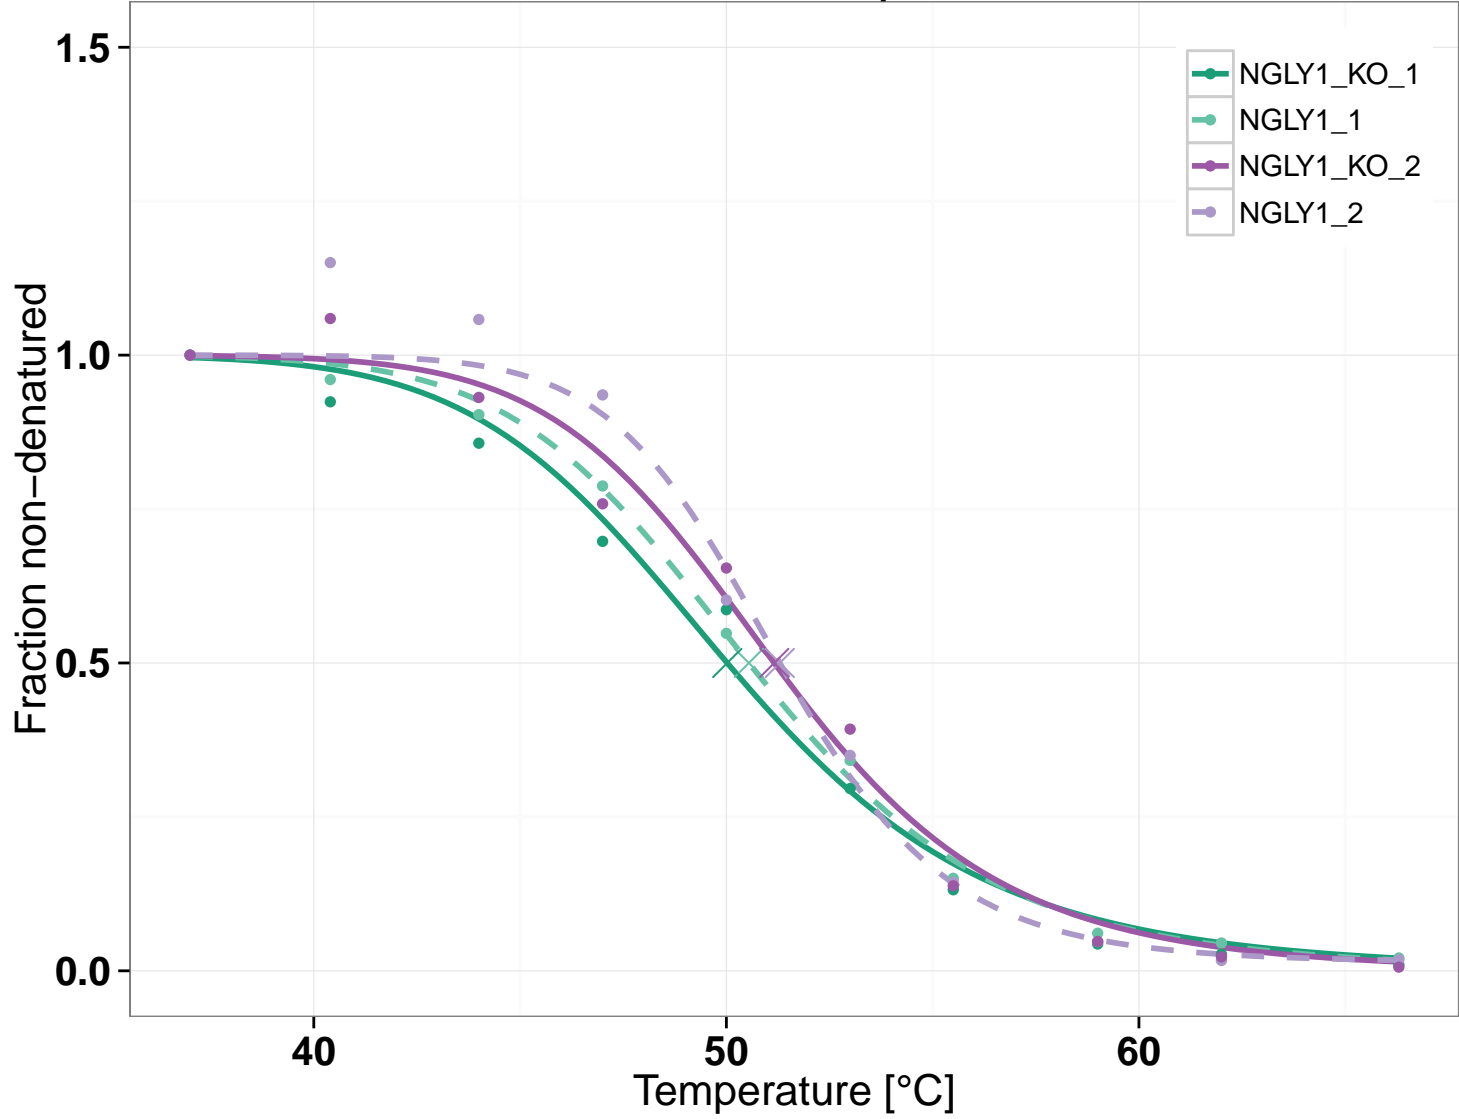

|            | meltPoint | slope  | plateau | R2   |
|------------|-----------|--------|---------|------|
| NGLY1_KO_1 | 50.02     | -0.08  | 0       | 0.99 |
| NGLY1_1    | 50.55     | -0.085 | 0       | 1    |
| NGLY1_KO_2 | 51.16     | -0.091 | 0       | 0.99 |
| NGLY1_2    | 51.29     | -0.12  | 0.01    | 0.98 |

Supplement: Supplementary file 6901 [file 1]

IPI00894163.1|MYO19

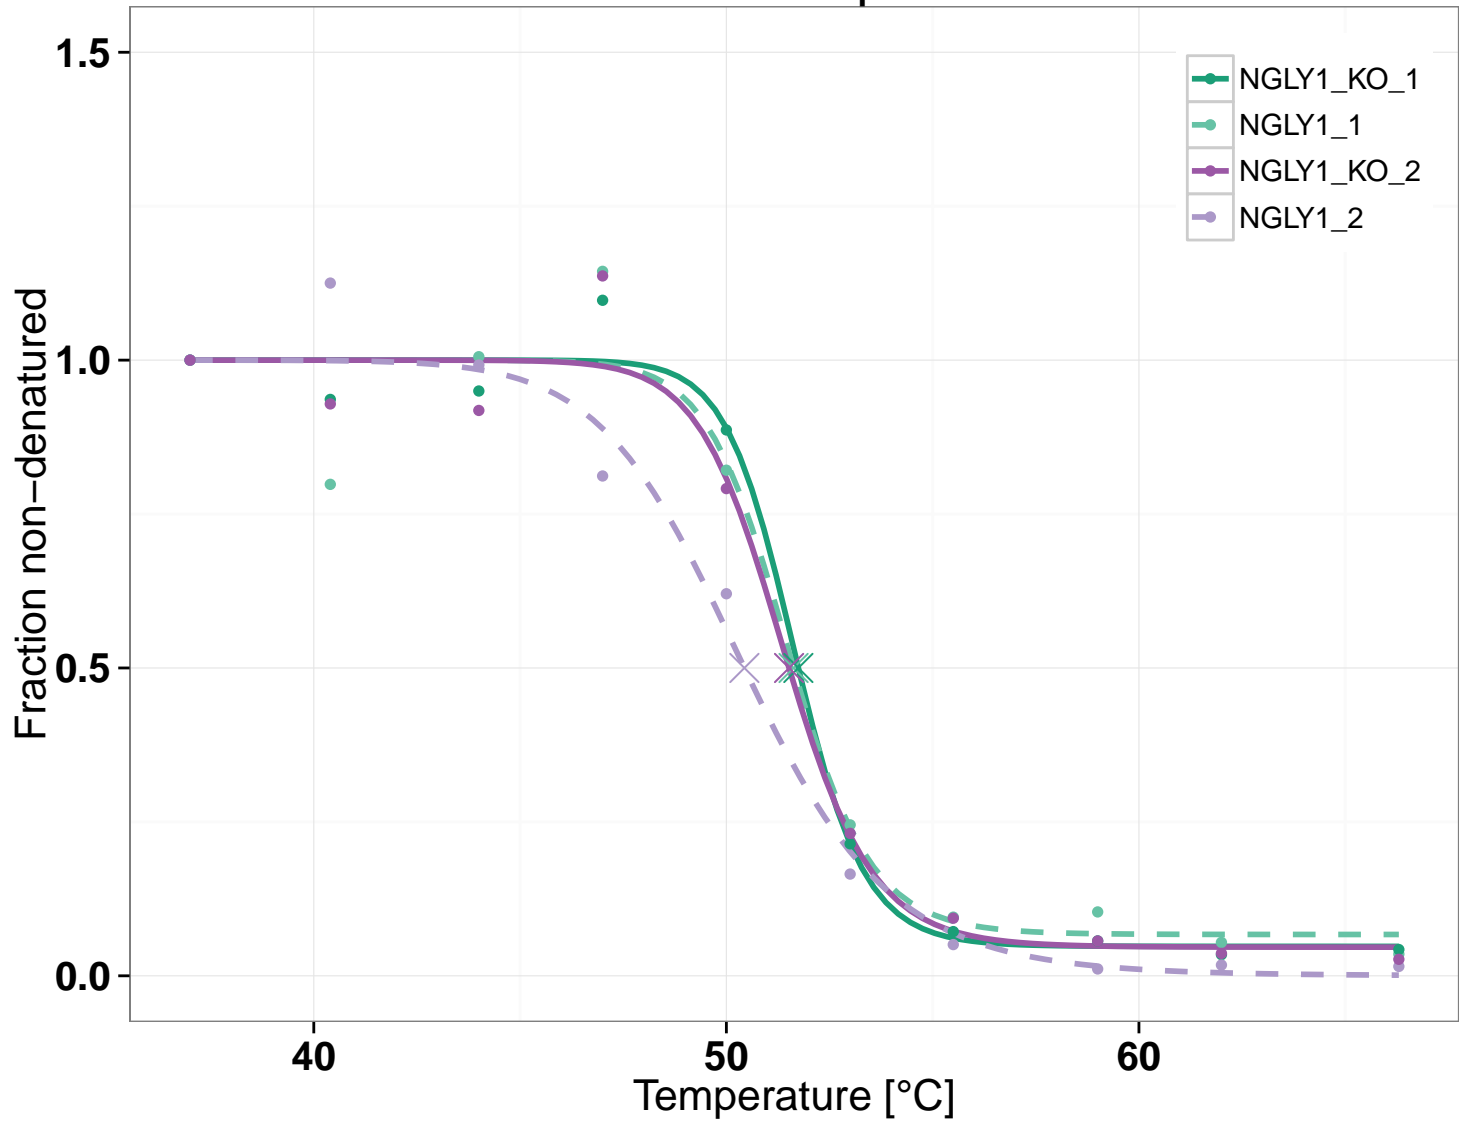

|            | meltPoint | slope | plateau | R2   |
|------------|-----------|-------|---------|------|
| NGLY1_KO_1 | 51.75     | -0.28 | 0.05    | 0.99 |
| NGLY1_1    | 51.63     | -0.24 | 0.07    | 0.97 |
| NGLY1_KO_2 | 51.52     | -0.23 | 0.05    | 0.98 |
| NGLY1_2    | 50.44     | -0.14 | 0       | 0.99 |

Supplement: Supplementary file 6902 [file 1]

IPI00025160.2|VAC14

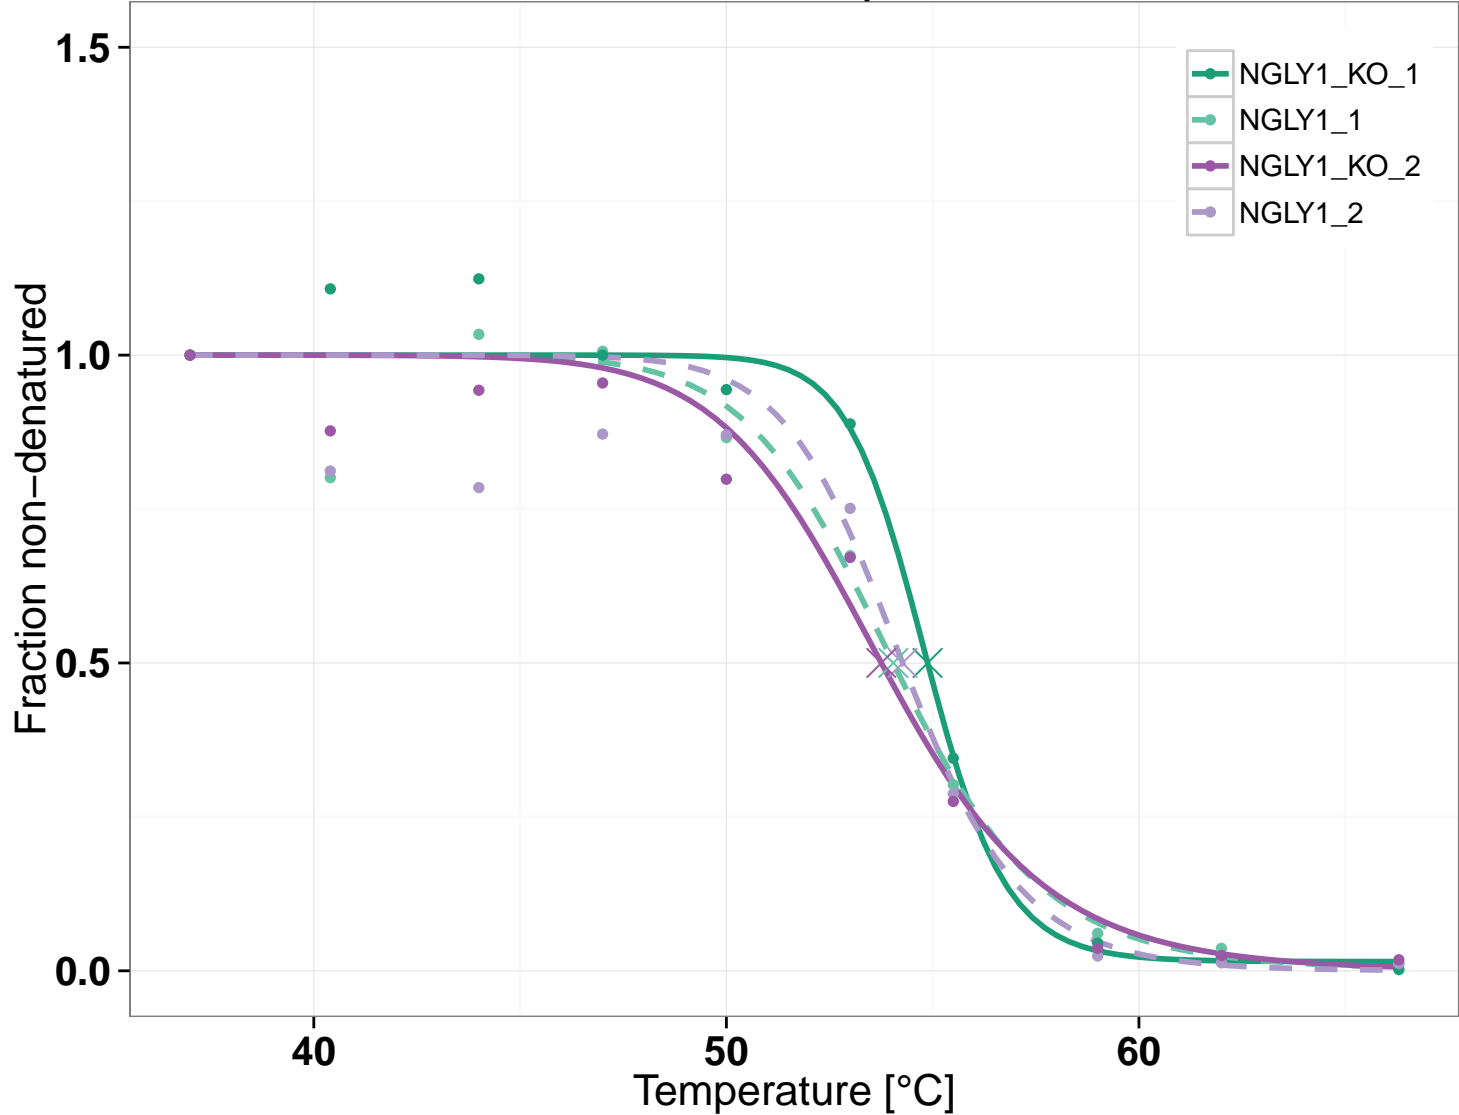

|            | meltPoint | slope | plateau | R2   |
|------------|-----------|-------|---------|------|
| NGLY1_KO_1 | 54.88     | -0.26 | 0.01    | 0.99 |
| NGLY1_1    | 54.05     | -0.14 | 0       | 0.97 |
| NGLY1_KO_2 | 53.76     | -0.13 | 0       | 0.98 |
| NGLY1_2    | 54.27     | -0.17 | 0       | 0.93 |

Supplement: Supplementary file 6903 [file 1]

# IPI00025846.2|DSC2

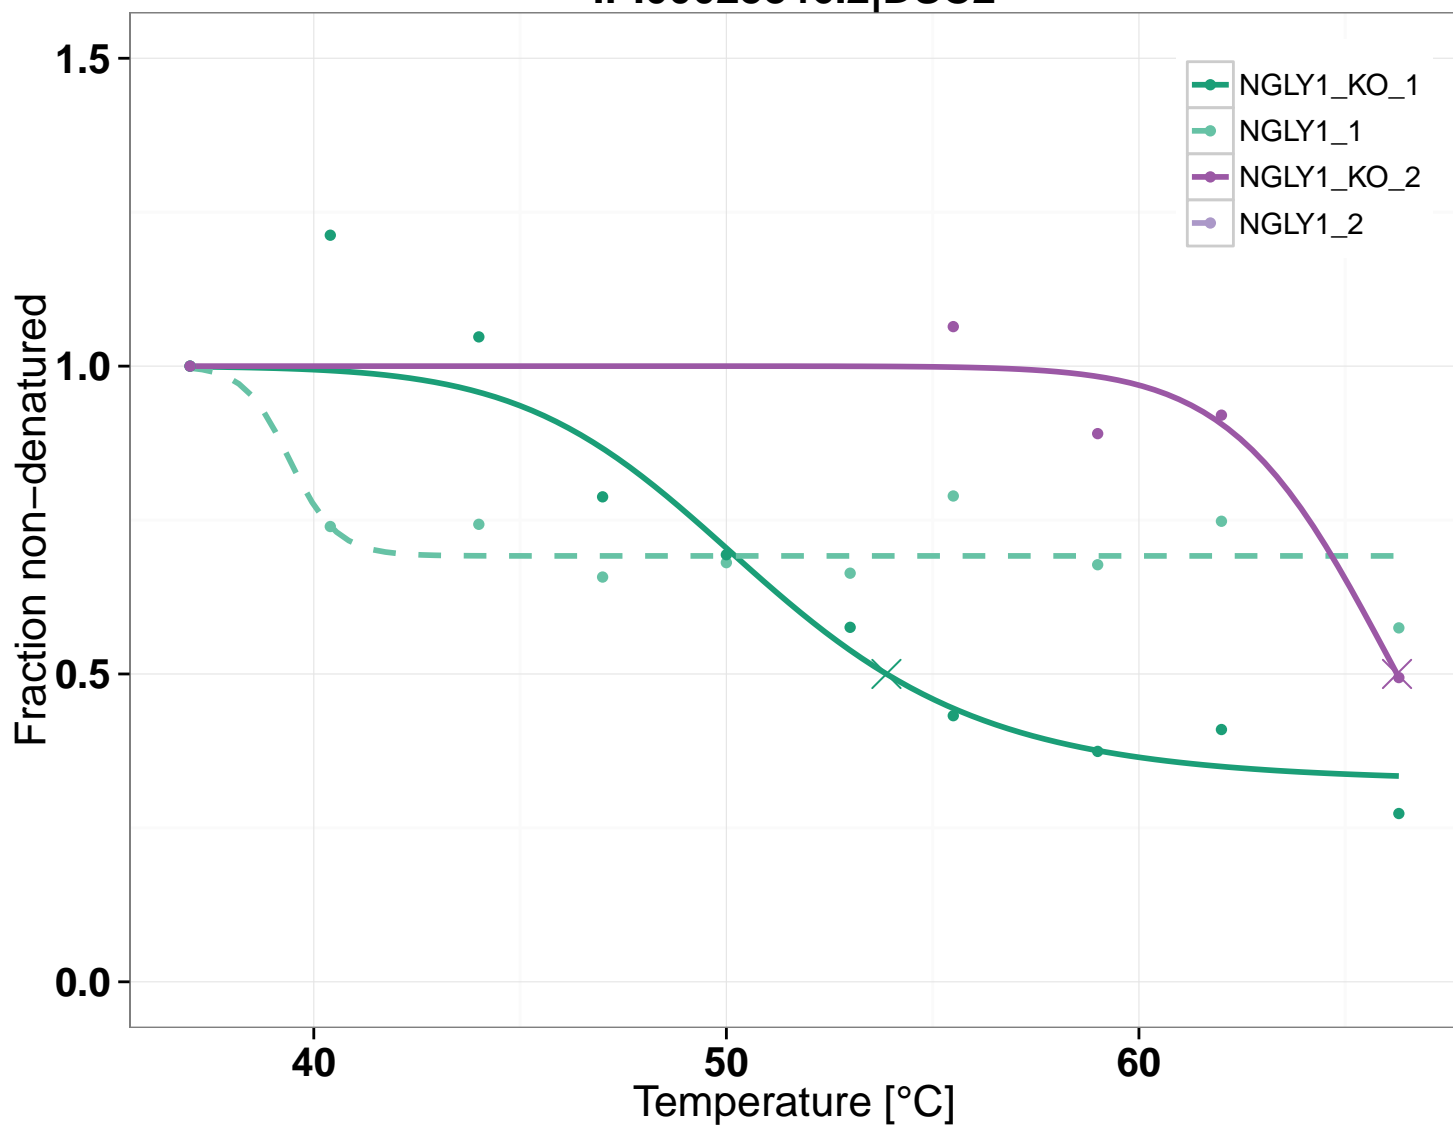

|            | meltPoint | slope | plateau | R2    |
|------------|-----------|-------|---------|-------|
| NGLY1_KO_1 | 53.88     | -0.06 | 0.32    | 0.92  |
| NGLY1_1    | -         | -0.14 | 0.69    | 0.73  |
| NGLY1_KO_2 | 66.26     | -0.13 | 0       | -0.33 |
| NGLY1_2    | -         | -     | -       | -     |

Supplement: Supplementary file 6904 [file 1]

IPI00103467.4|ALDH1B1

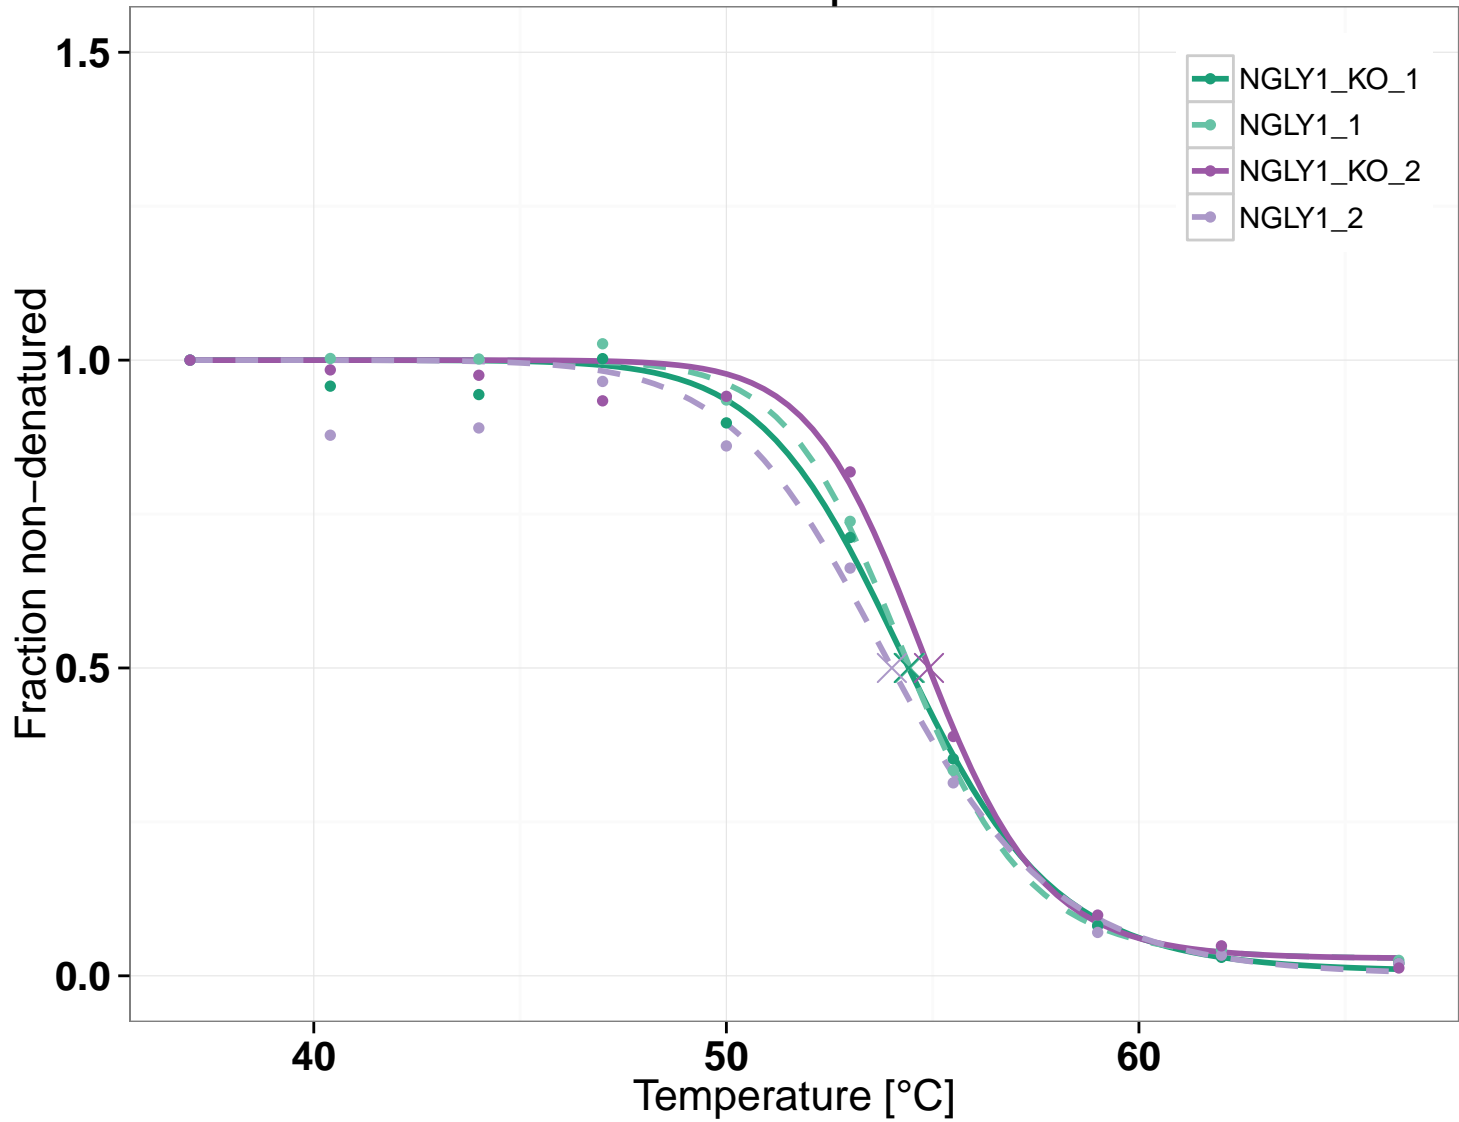

|            | meltPoint | slope | plateau | R2   |
|------------|-----------|-------|---------|------|
| NGLY1_KO_1 | 54.42     | -0.14 | 0.01    | 1    |
| NGLY1_1    | 54.45     | -0.16 | 0.03    | 1    |
| NGLY1_KO_2 | 54.91     | -0.17 | 0.03    | 1    |
| NGLY1_2    | 54.01     | -0.13 | 0       | 0.98 |

Supplement: Supplementary file 6905 [file 1]

# IPI00102856.3|SMAP2

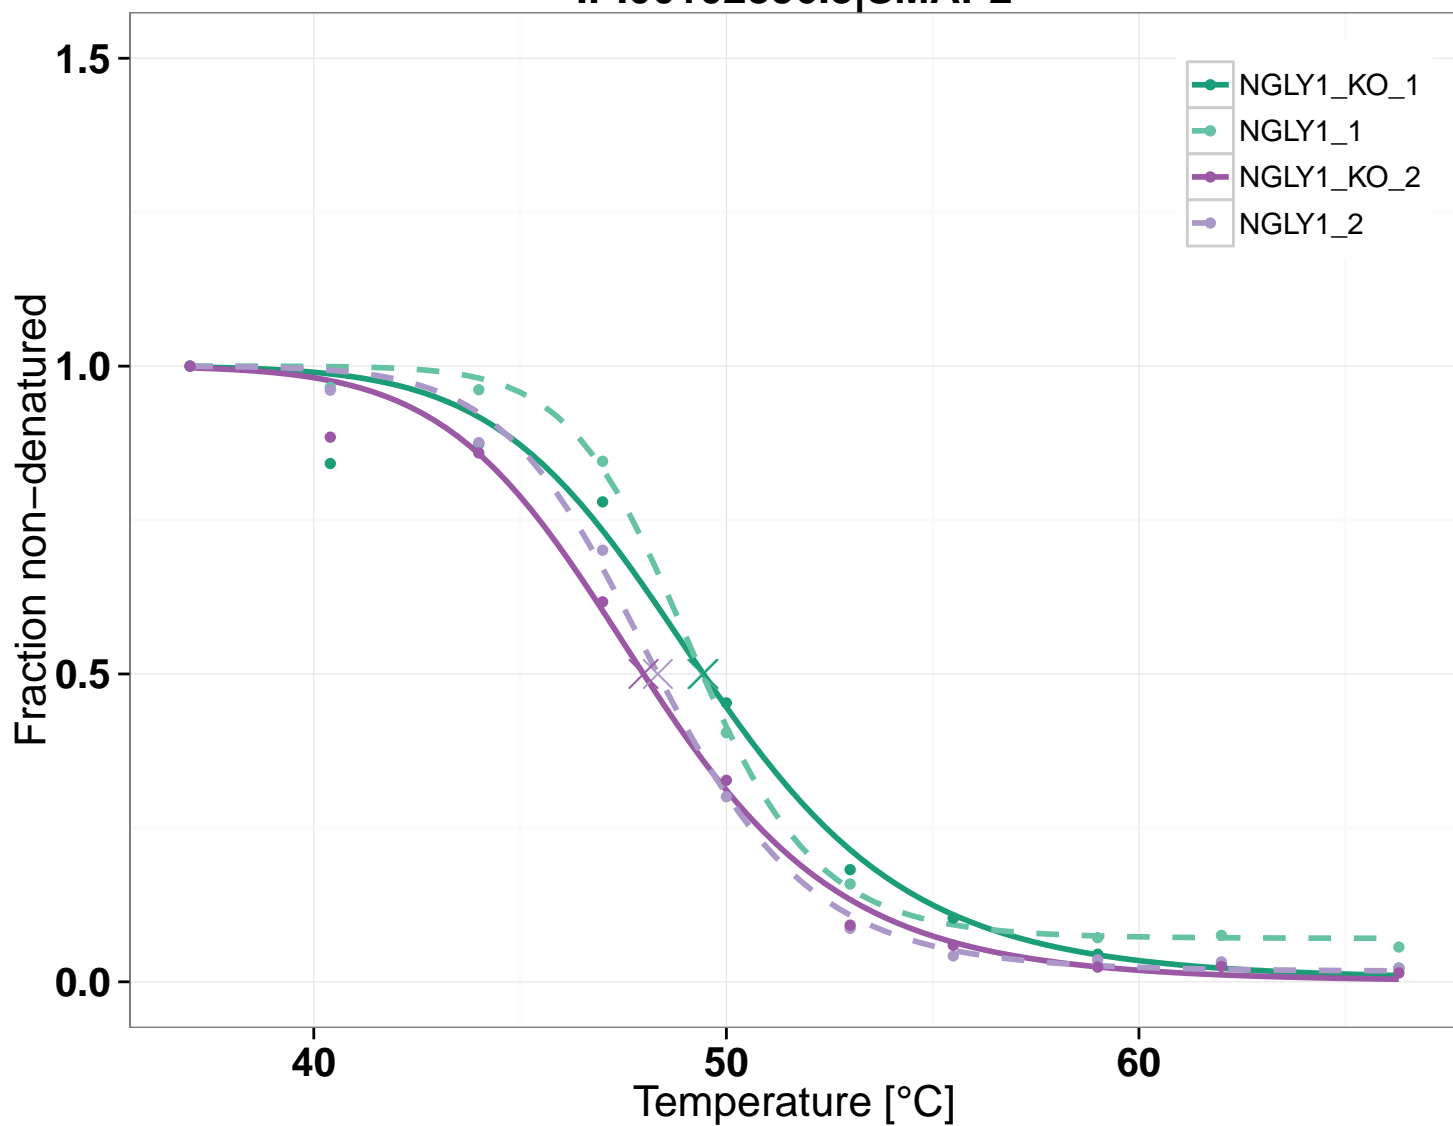

|            | meltPoint | slope  | plateau | R2   |
|------------|-----------|--------|---------|------|
| NGLY1_KO_1 | 49.44     | -0.099 | 0       | 0.98 |
| NGLY1_1    | 49.41     | -0.15  | 0.07    | 1    |
| NGLY1_KO_2 | 47.99     | -0.1   | 0       | 0.99 |
| NGLY1_2    | 48.34     | -0.13  | 0.02    | 1    |

Supplement: Supplementary file 6906 [file 1]

IPI00873581.1|TPD52L1

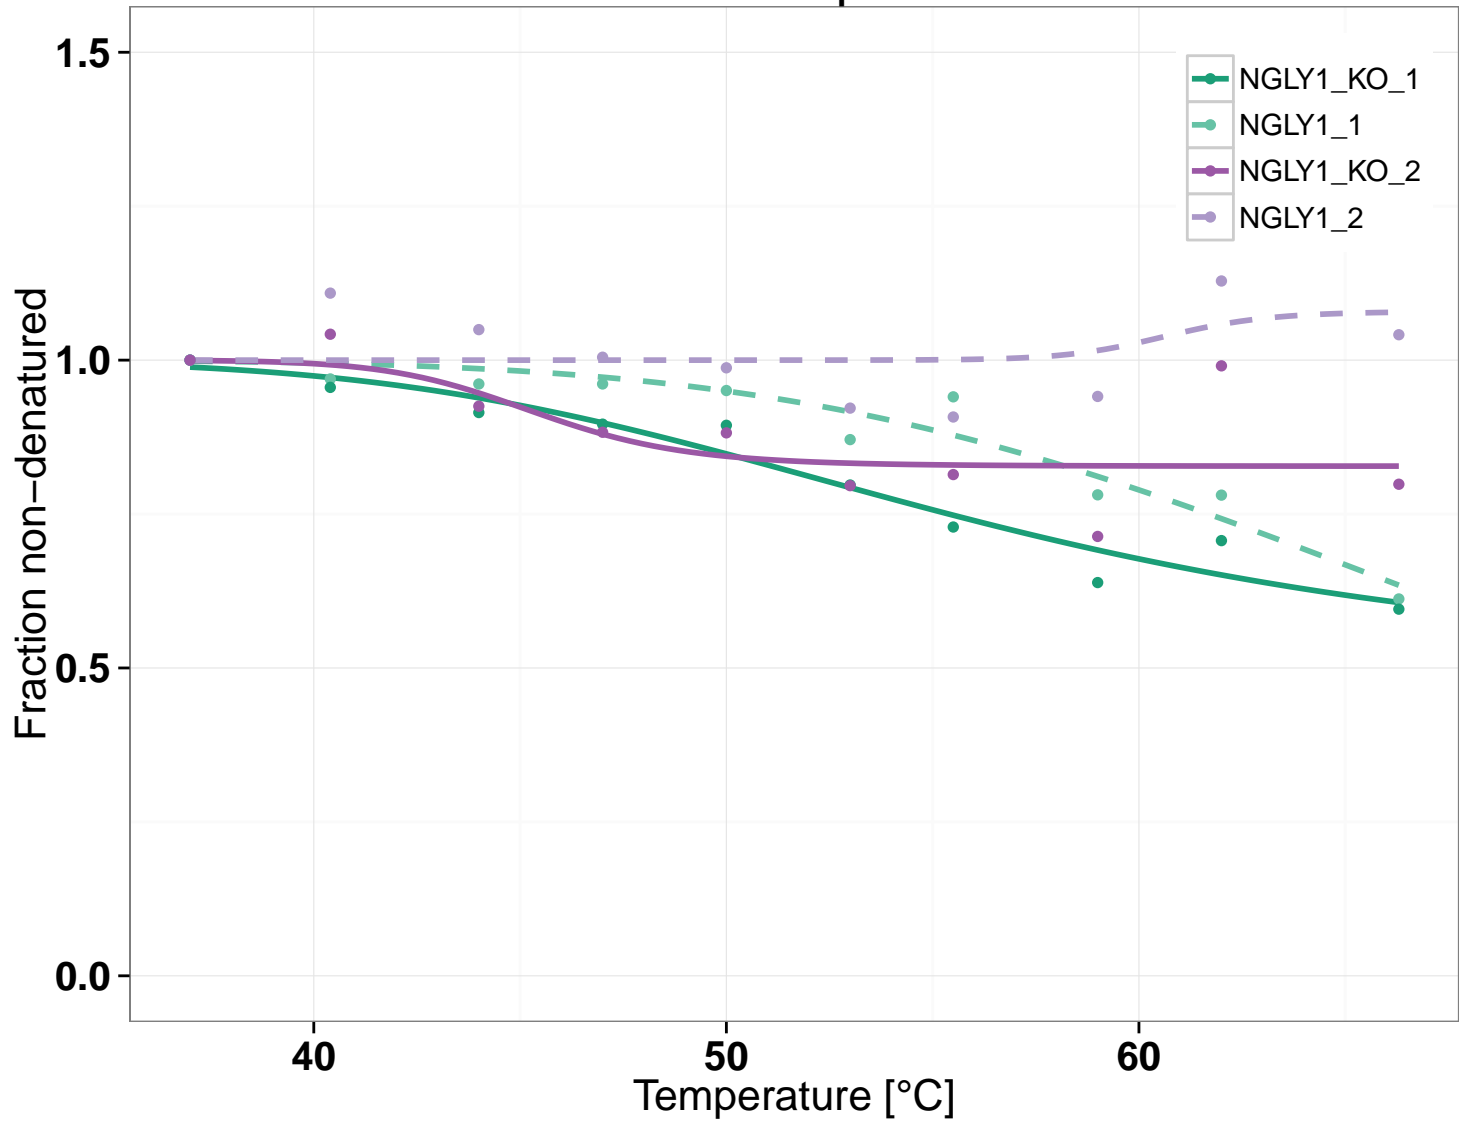

|            | meltPoint | slope  | plateau | R2   |
|------------|-----------|--------|---------|------|
| NGLY1_KO_1 | —         | -0.018 | 0.49    | 0.95 |
| NGLY1_1    | —         | -0.026 | 0       | 0.93 |
| NGLY1_KO_2 | —         | -0.024 | 0.83    | 0.54 |
| NGLY1_2    | —         | 0.016  | 1.08    | 0.18 |

Supplement: Supplementary file 6907 [file 1]

IPI00152853.3|KIAA1949

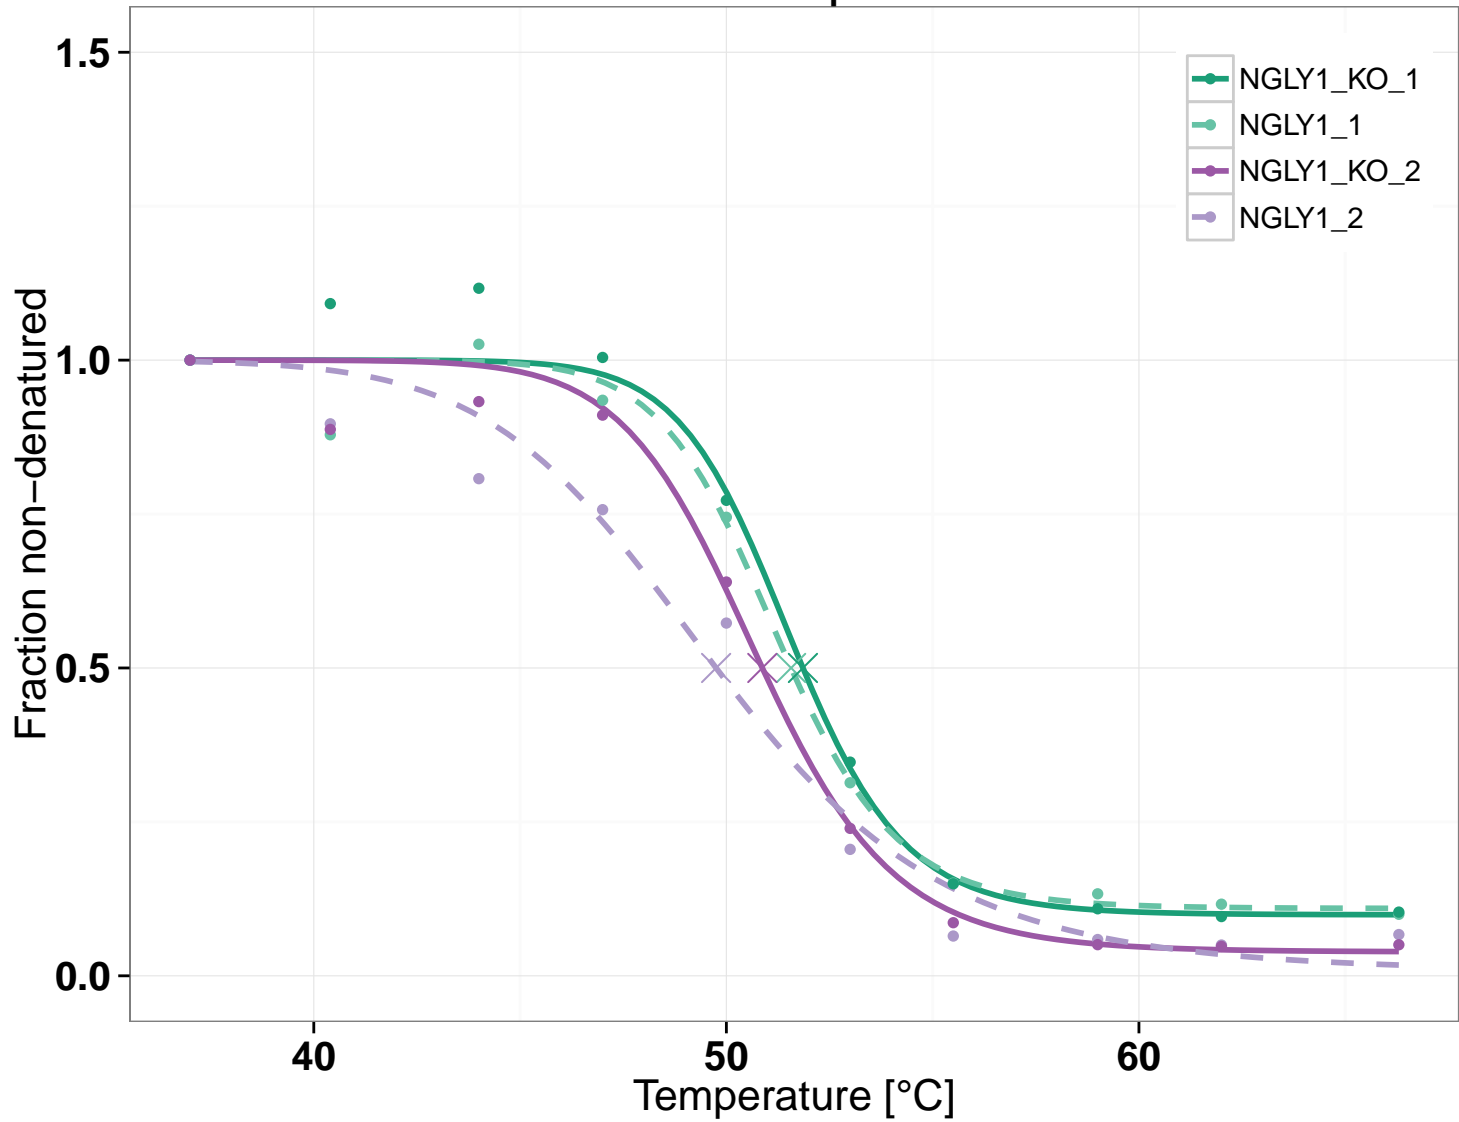

|            | meltPoint | slope | plateau | R2   |
|------------|-----------|-------|---------|------|
| NGLY1_KO_1 | 51.86     | -0.16 | 0.1     | 0.99 |
| NGLY1_1    | 51.57     | -0.16 | 0.11    | 0.99 |
| NGLY1_KO_2 | 50.87     | -0.15 | 0.04    | 0.99 |
| NGLY1_2    | 49.75     | -0.09 | 0.01    | 0.97 |

Supplement: Supplementary file 6908 [file 1]

# IPI00029631.1|ERH

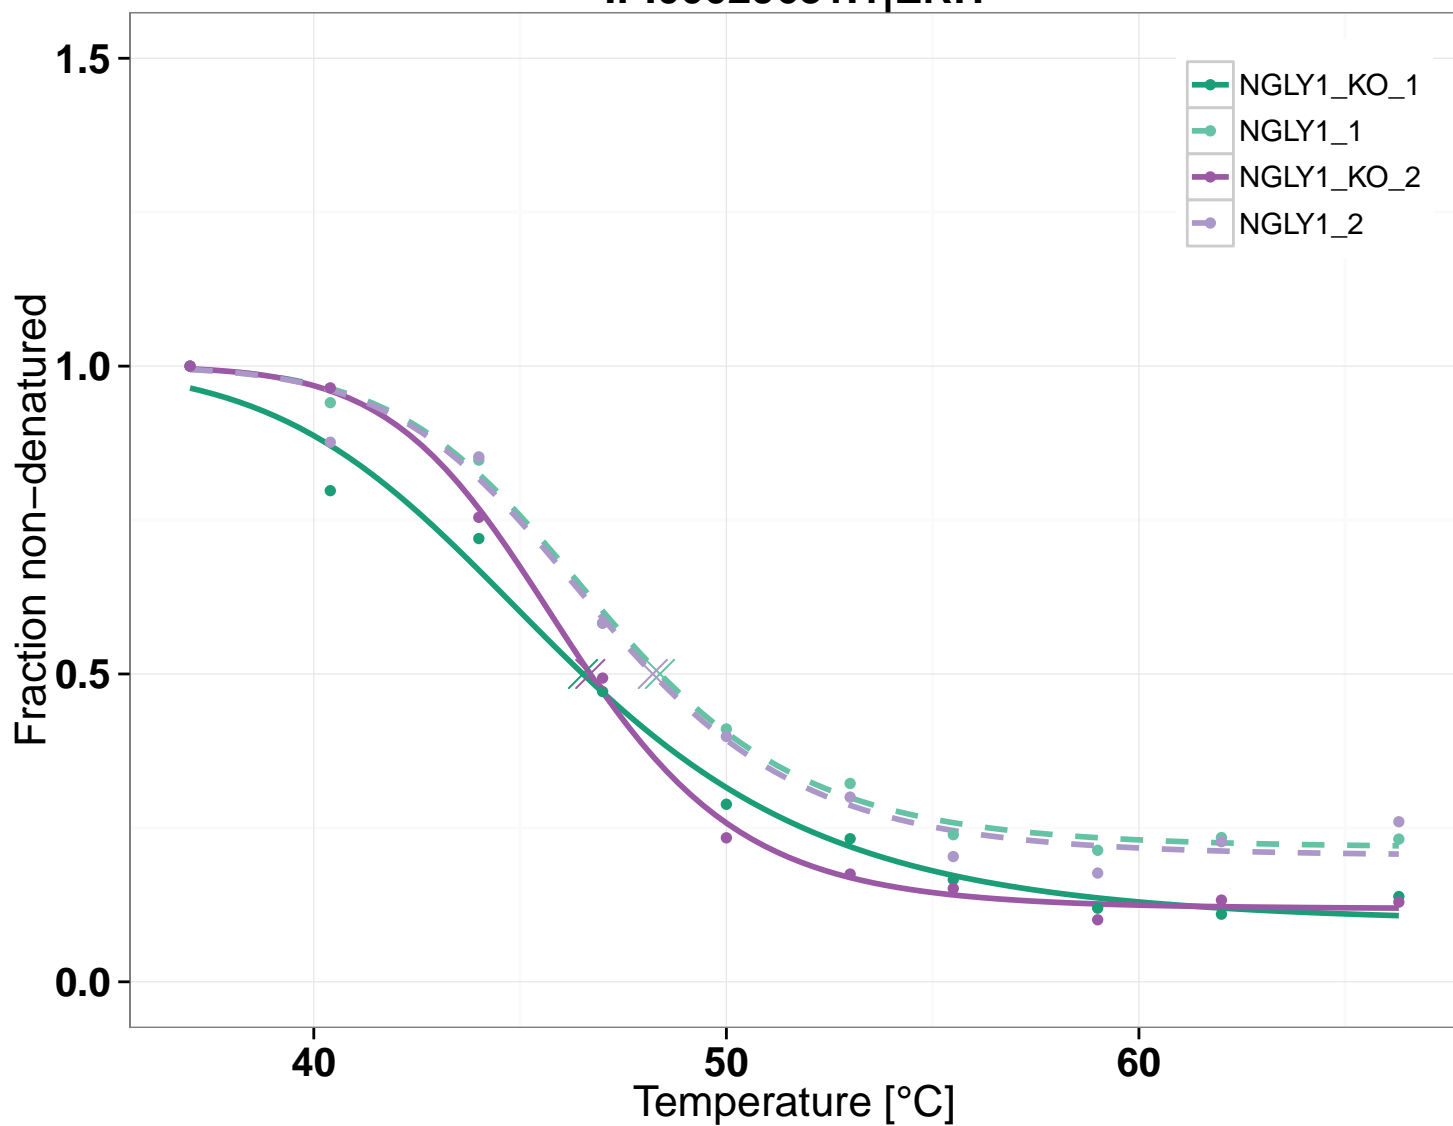

|            | meltPoint | slope  | plateau | R2   |
|------------|-----------|--------|---------|------|
| NGLY1_KO_1 | 46.52     | -0.068 | 0.09    | 0.99 |
| NGLY1_1    | 48.39     | -0.079 | 0.22    | 1    |
| NGLY1_KO_2 | 46.7      | -0.1   | 0.12    | 1    |
| NGLY1_2    | 48.22     | -0.08  | 0.2     | 0.98 |

Supplement: Supplementary file 6909 [file 1]

IPI00008034.1|RAB23

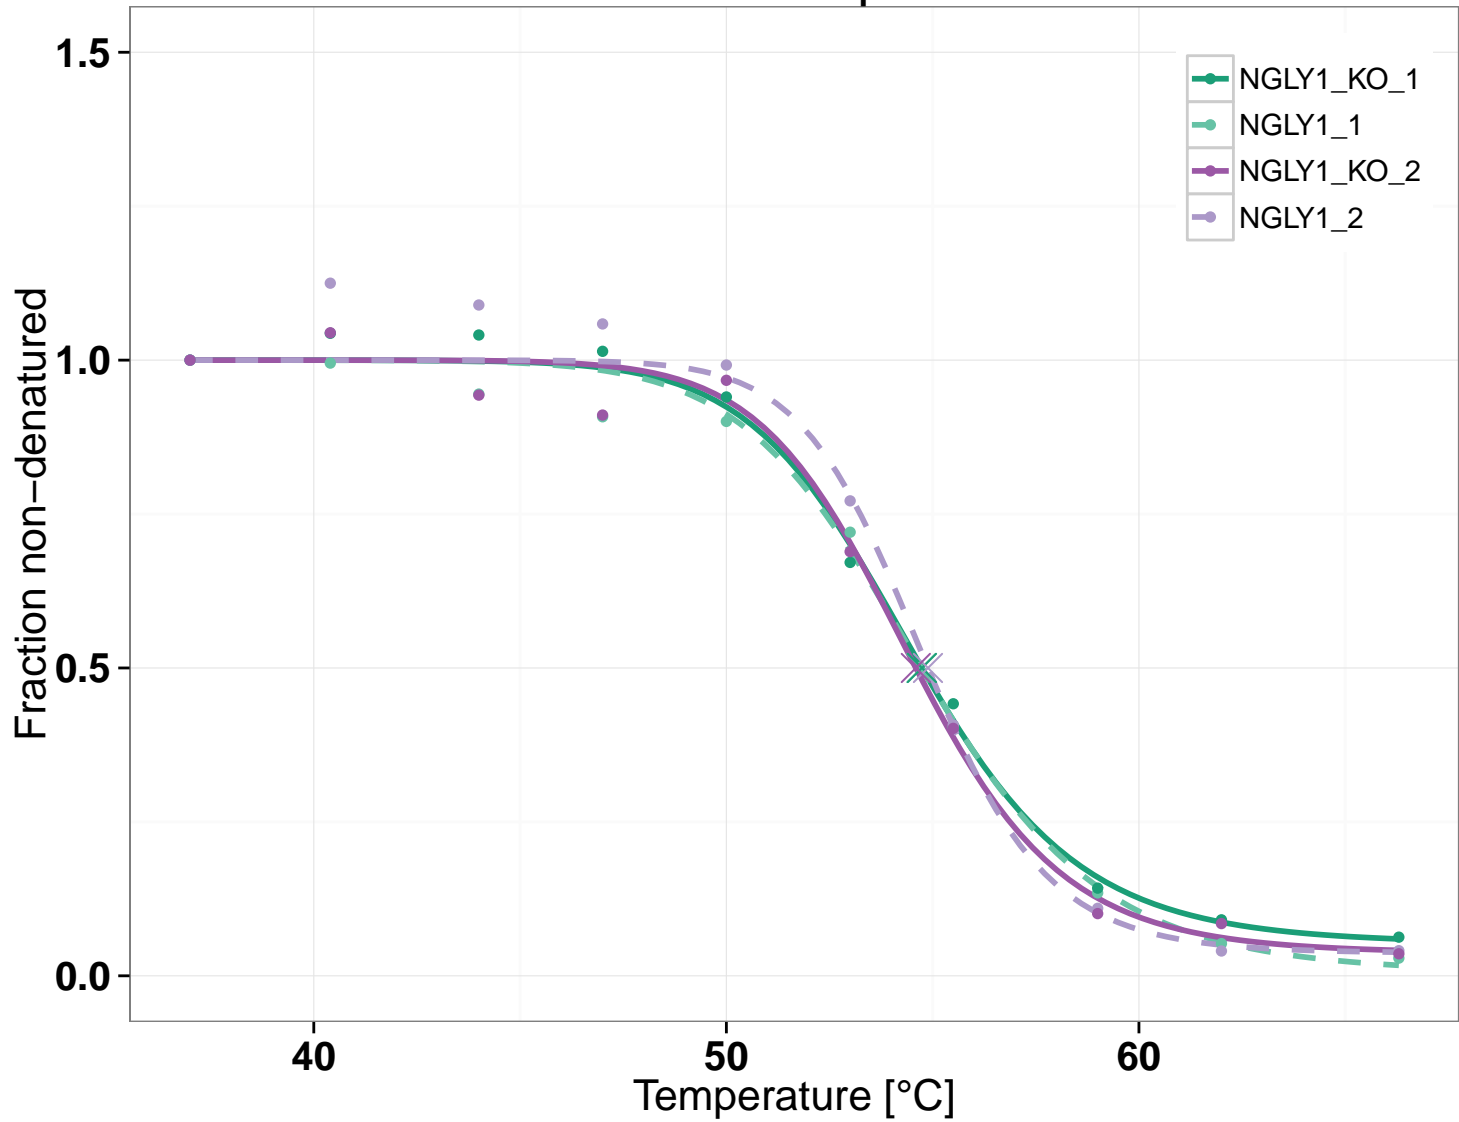

|            | meltPoint | slope | plateau | R2   |
|------------|-----------|-------|---------|------|
| NGLY1_KO_1 | 54.74     | -0.12 | 0.05    | 1    |
| NGLY1_1    | 54.73     | -0.11 | 0       | 0.99 |
| NGLY1_KO_2 | 54.59     | -0.13 | 0.04    | 0.99 |
| NGLY1_2    | 54.89     | -0.16 | 0.04    | 0.99 |

Supplement: Supplementary file 6910 [file 1]

# IPI00465087.2|BAP1

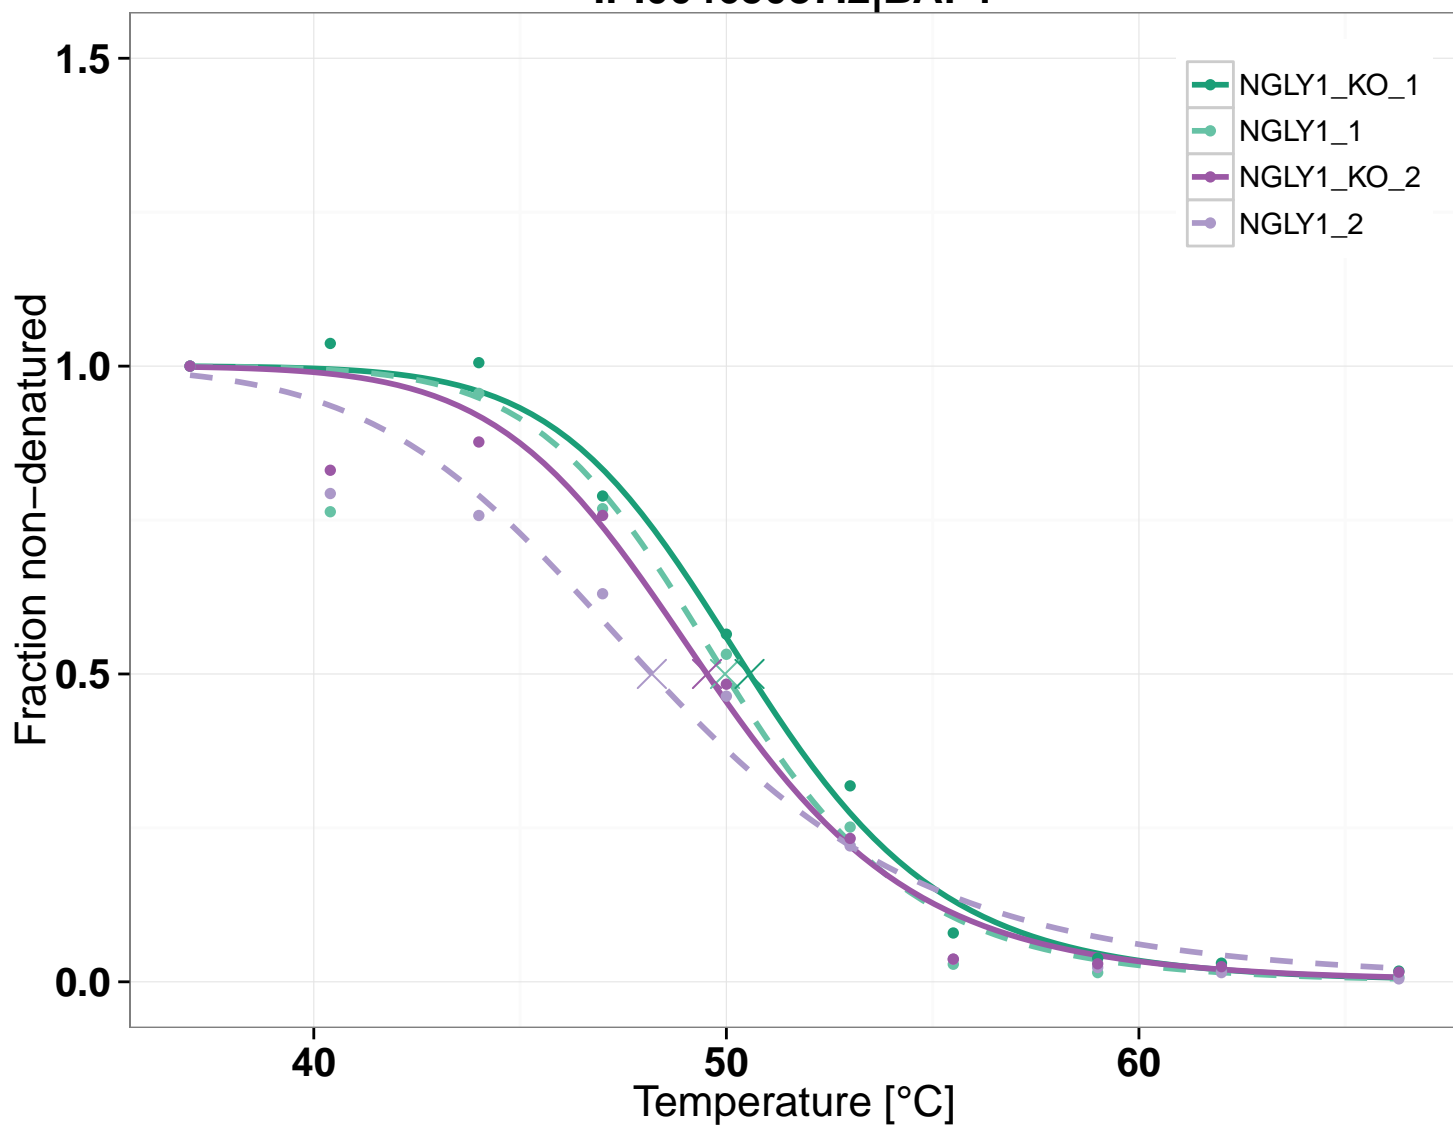

|            | meltPoint | slope  | plateau | R2   |
|------------|-----------|--------|---------|------|
| NGLY1_KO_1 | 50.56     | -0.11  | 0       | 0.99 |
| NGLY1_1    | 49.97     | -0.11  | 0       | 0.96 |
| NGLY1_KO_2 | 49.53     | -0.099 | 0       | 0.98 |
| NGLY1_2    | 48.19     | -0.074 | 0       | 0.97 |

Supplement: Supplementary file 6911 [file 1]

IPI00009070.1|HBS1L

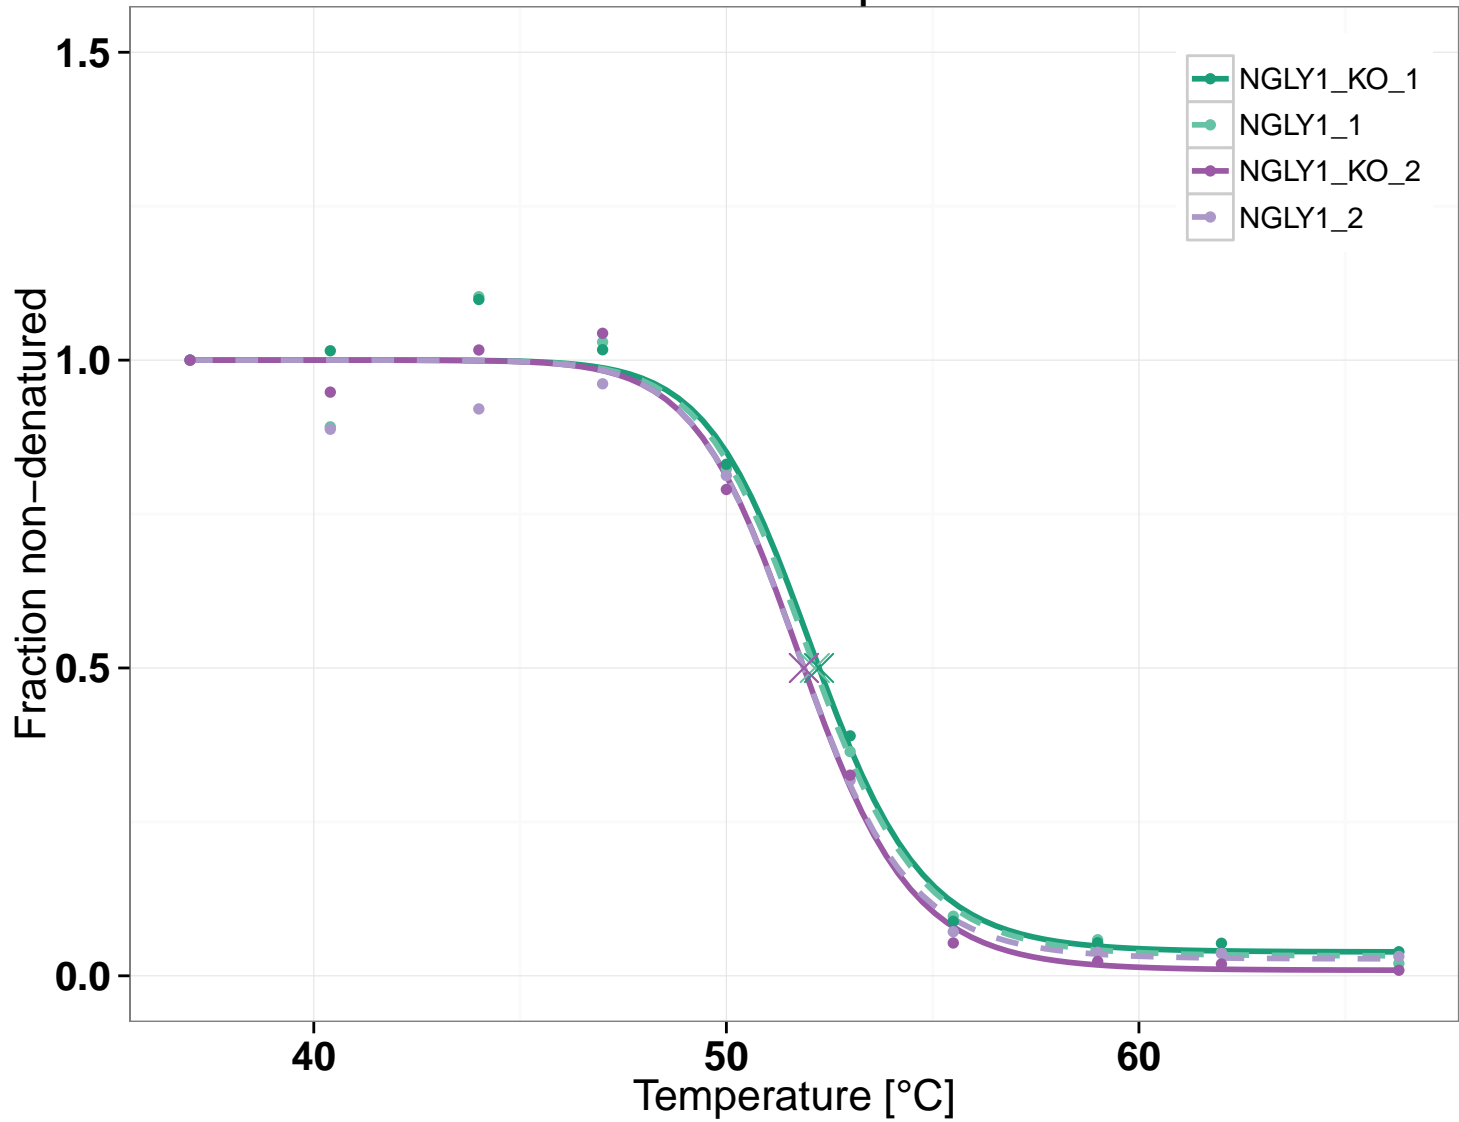

|            | meltPoint | slope | plateau | R2   |
|------------|-----------|-------|---------|------|
| NGLY1_KO_1 | 52.25     | -0.18 | 0.04    | 0.99 |
| NGLY1_1    | 52.14     | -0.18 | 0.03    | 0.99 |
| NGLY1_KO_2 | 51.88     | -0.19 | 0.01    | 1    |
| NGLY1_2    | 51.88     | -0.19 | 0.03    | 0.99 |

Supplement: Supplementary file 6912 [file 1]

IPI00031077.1|CCNE1

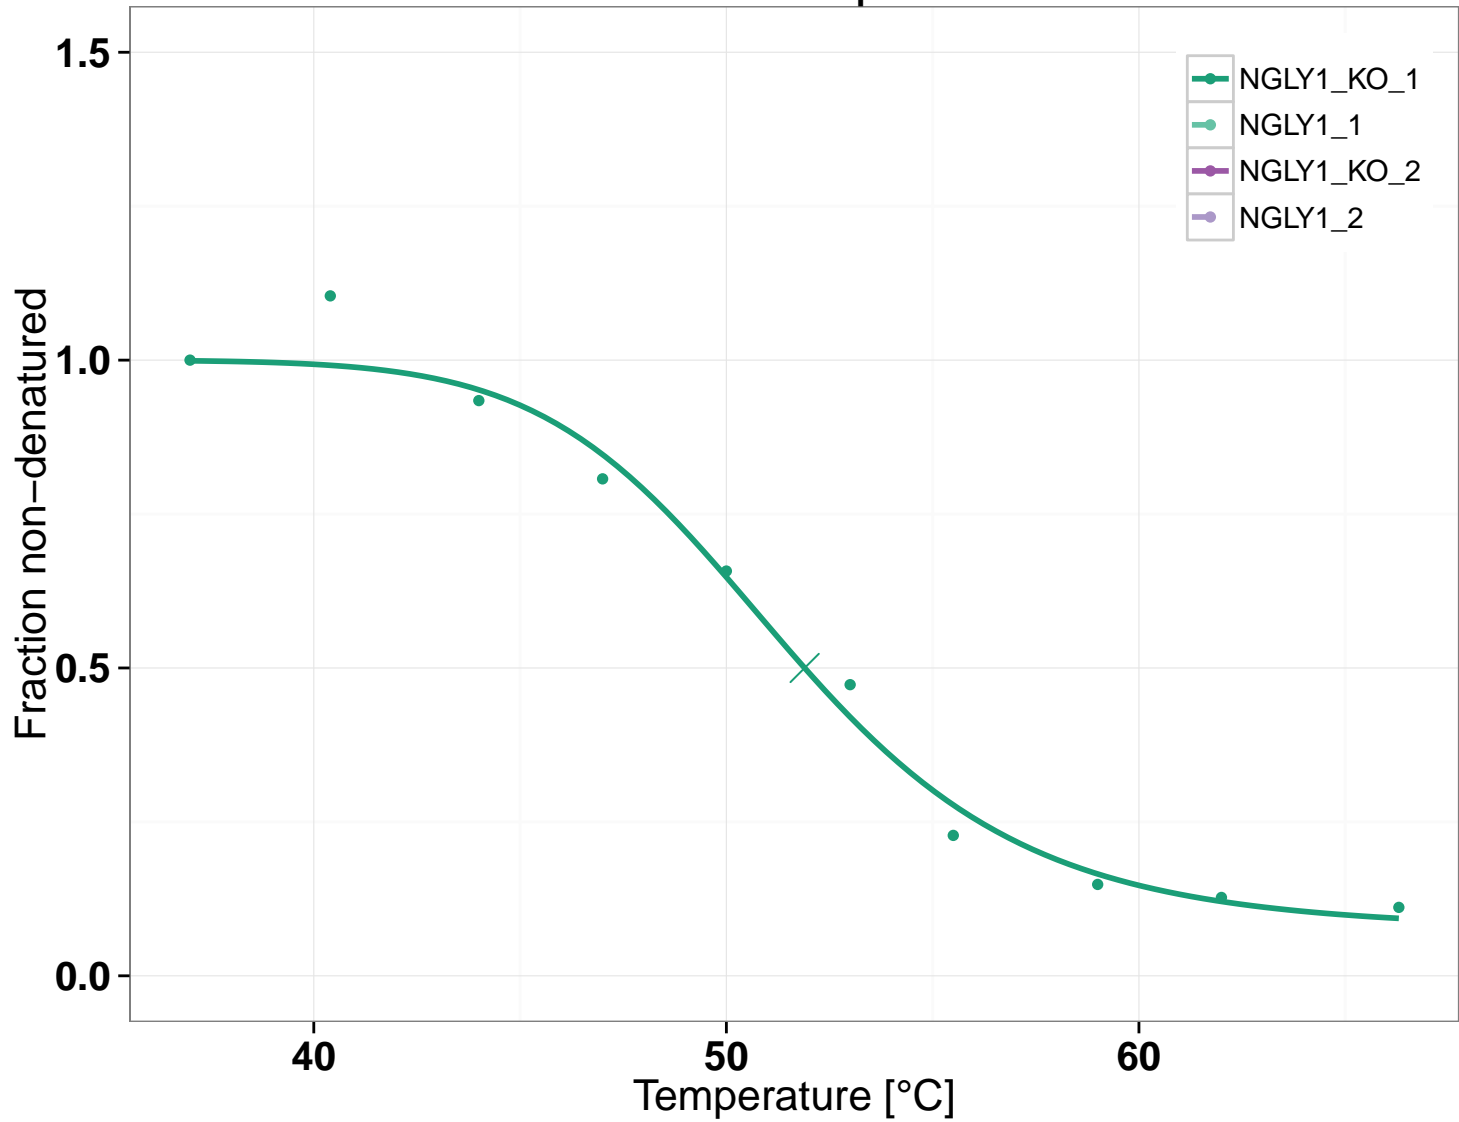

|            | meltPoint | slope  | plateau | R2   |
|------------|-----------|--------|---------|------|
| NGLY1_KO_1 | 51.9      | -0.079 | 0.07    | 0.99 |
| NGLY1_1    | -         | -      | -       | -    |
| NGLY1_KO_2 | -         | -      | -       | -    |
| NGLY1_2    | -         | -      | -       | -    |

Supplement: Supplementary file 6913 [file 1]

IPI00003627.1|ACTL6A

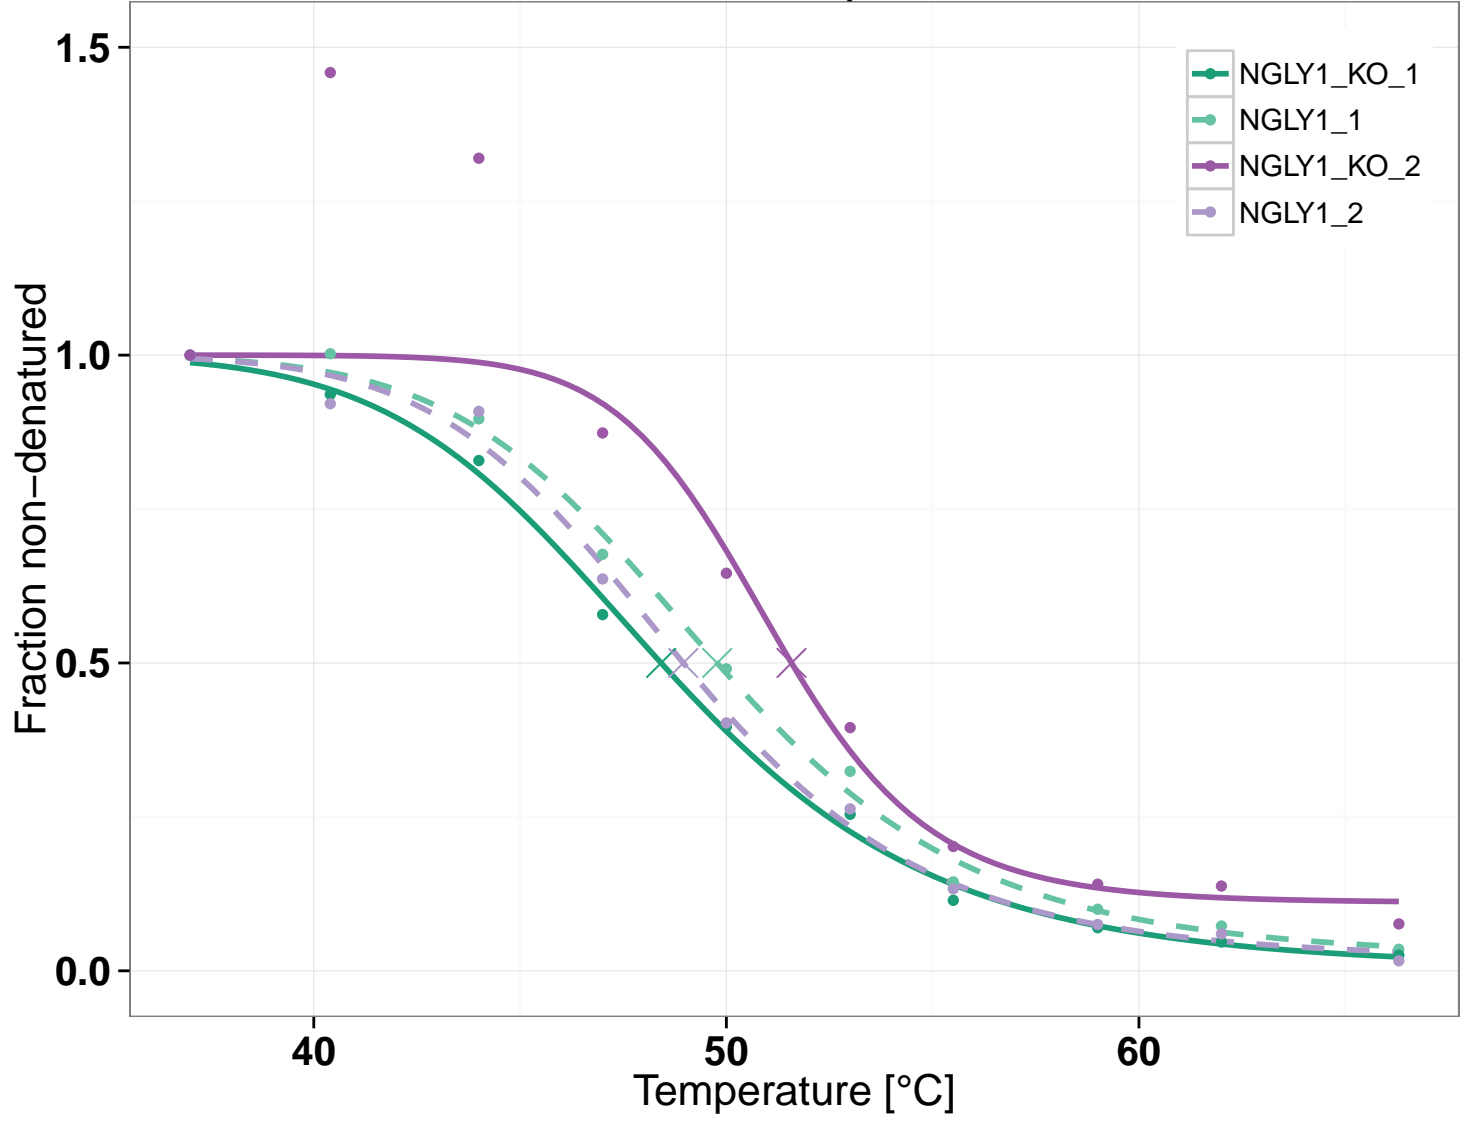

|            | meltPoint | slope  | plateau | R2   |
|------------|-----------|--------|---------|------|
| NGLY1_KO_1 | 48.42     | -0.075 | 0       | 1    |
| NGLY1_1    | 49.78     | -0.077 | 0.02    | 1    |
| NGLY1_KO_2 | 51.58     | -0.12  | 0.11    | 0.86 |
| NGLY1_2    | 48.96     | -0.082 | 0.02    | 1    |

Supplement: Supplementary file 6914 [file 1]

IPI00556528.1|PPP2R5E

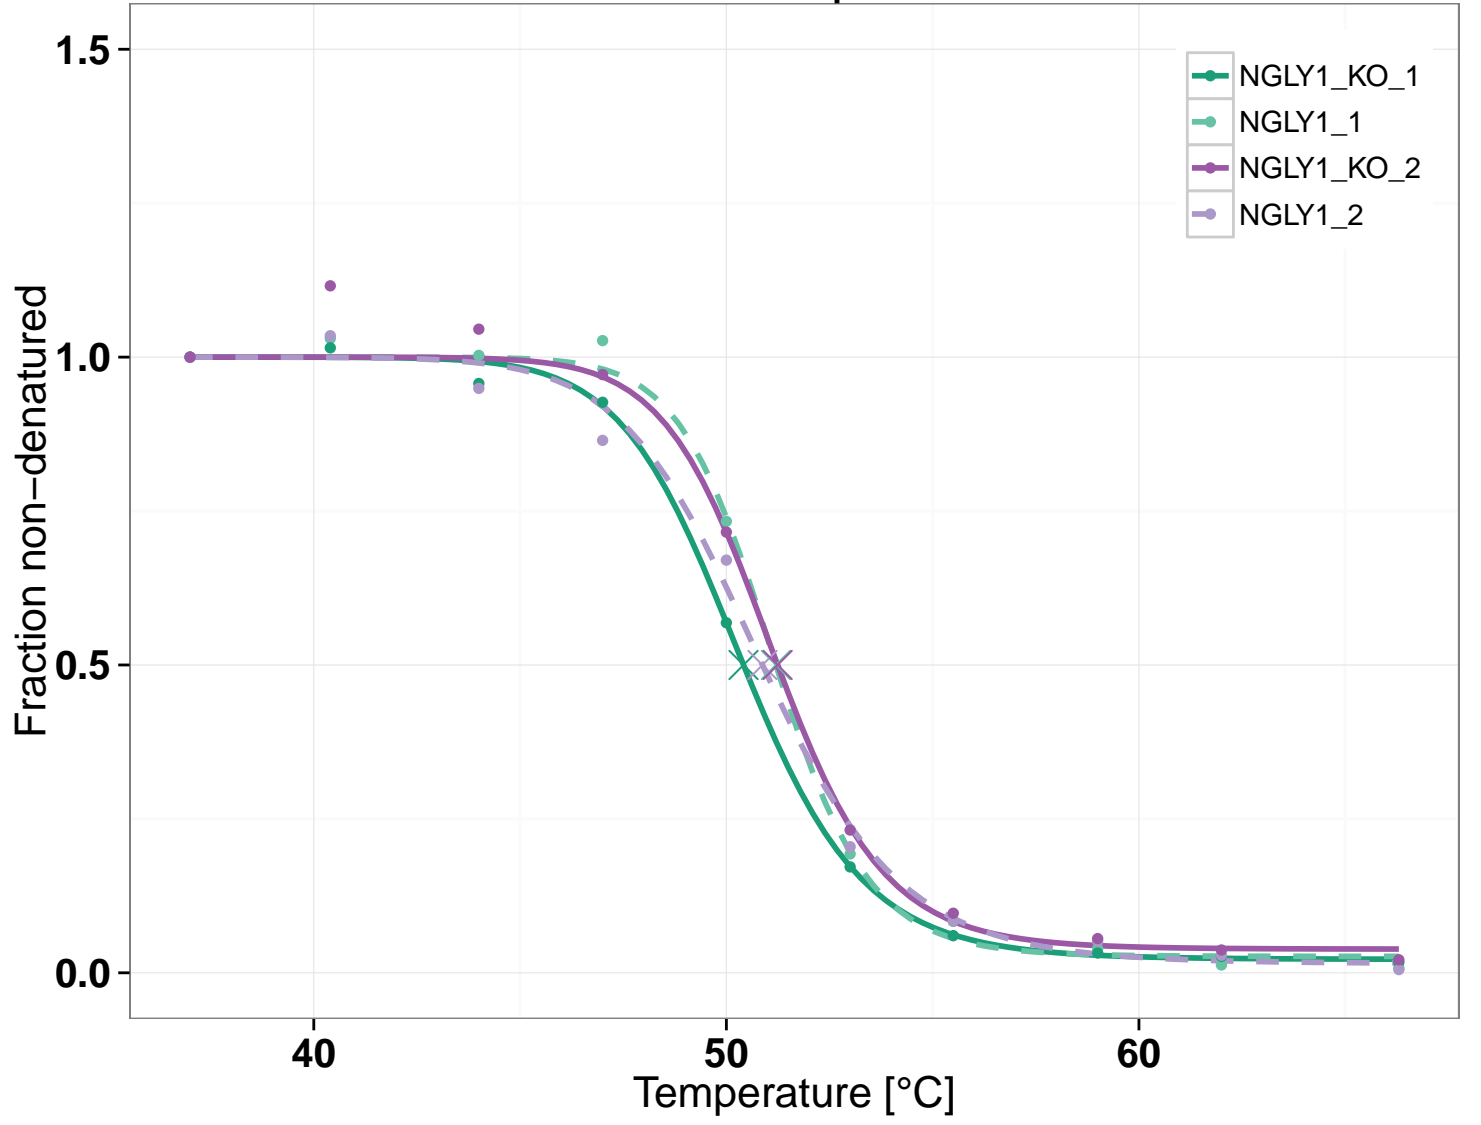

|            | meltPoint | slope | plateau | R2   |
|------------|-----------|-------|---------|------|
| NGLY1_KO_1 | 50.42     | -0.17 | 0.02    | 1    |
| NGLY1_1    | 51.2      | -0.21 | 0.03    | 1    |
| NGLY1_KO_2 | 51.24     | -0.18 | 0.04    | 0.99 |
| NGLY1_2    | 50.88     | -0.15 | 0.02    | 0.99 |

Supplement: Supplementary file 6916 [file 1]

# IPI00013895.1|S100A11

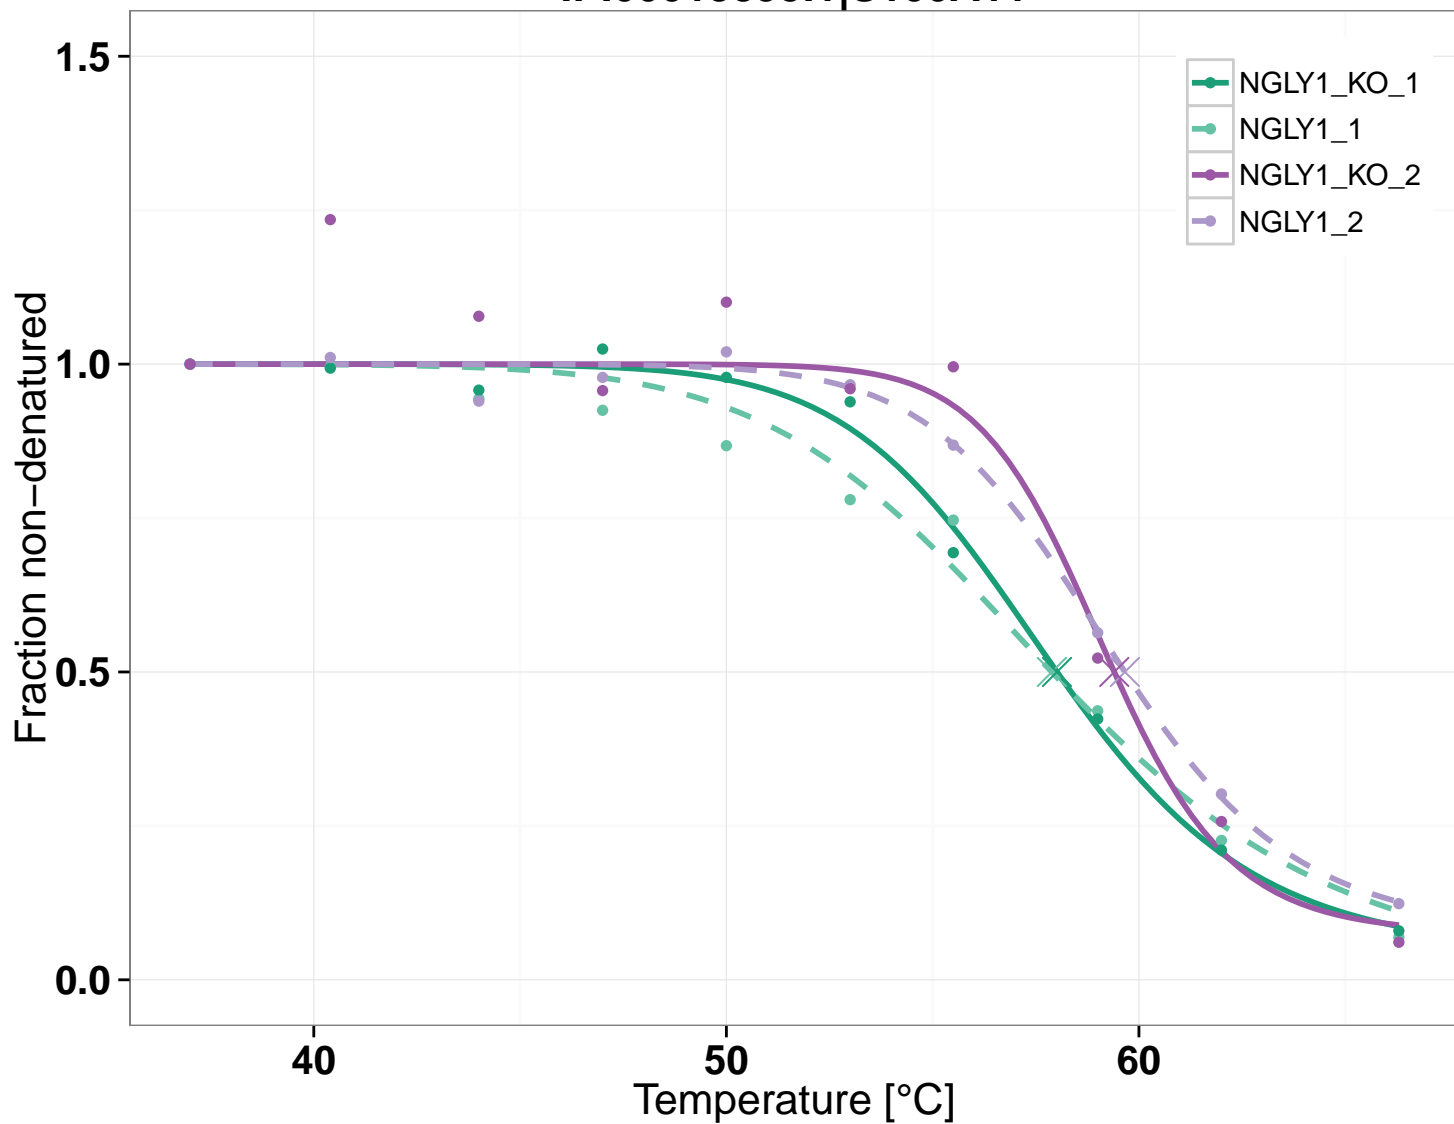

|            | meltPoint | slope  | plateau | R2   |
|------------|-----------|--------|---------|------|
| NGLY1_KO_1 | 58.01     | -0.097 | 0.04    | 0.99 |
| NGLY1_1    | 57.89     | -0.072 | 0       | 0.98 |
| NGLY1_KO_2 | 59.4      | -0.15  | 0.07    | 0.94 |
| NGLY1_2    | 59.66     | -0.1   | 0.07    | 0.99 |

Supplement: Supplementary file 6917 [file 1]

IPI00456145.1|SLC6A19

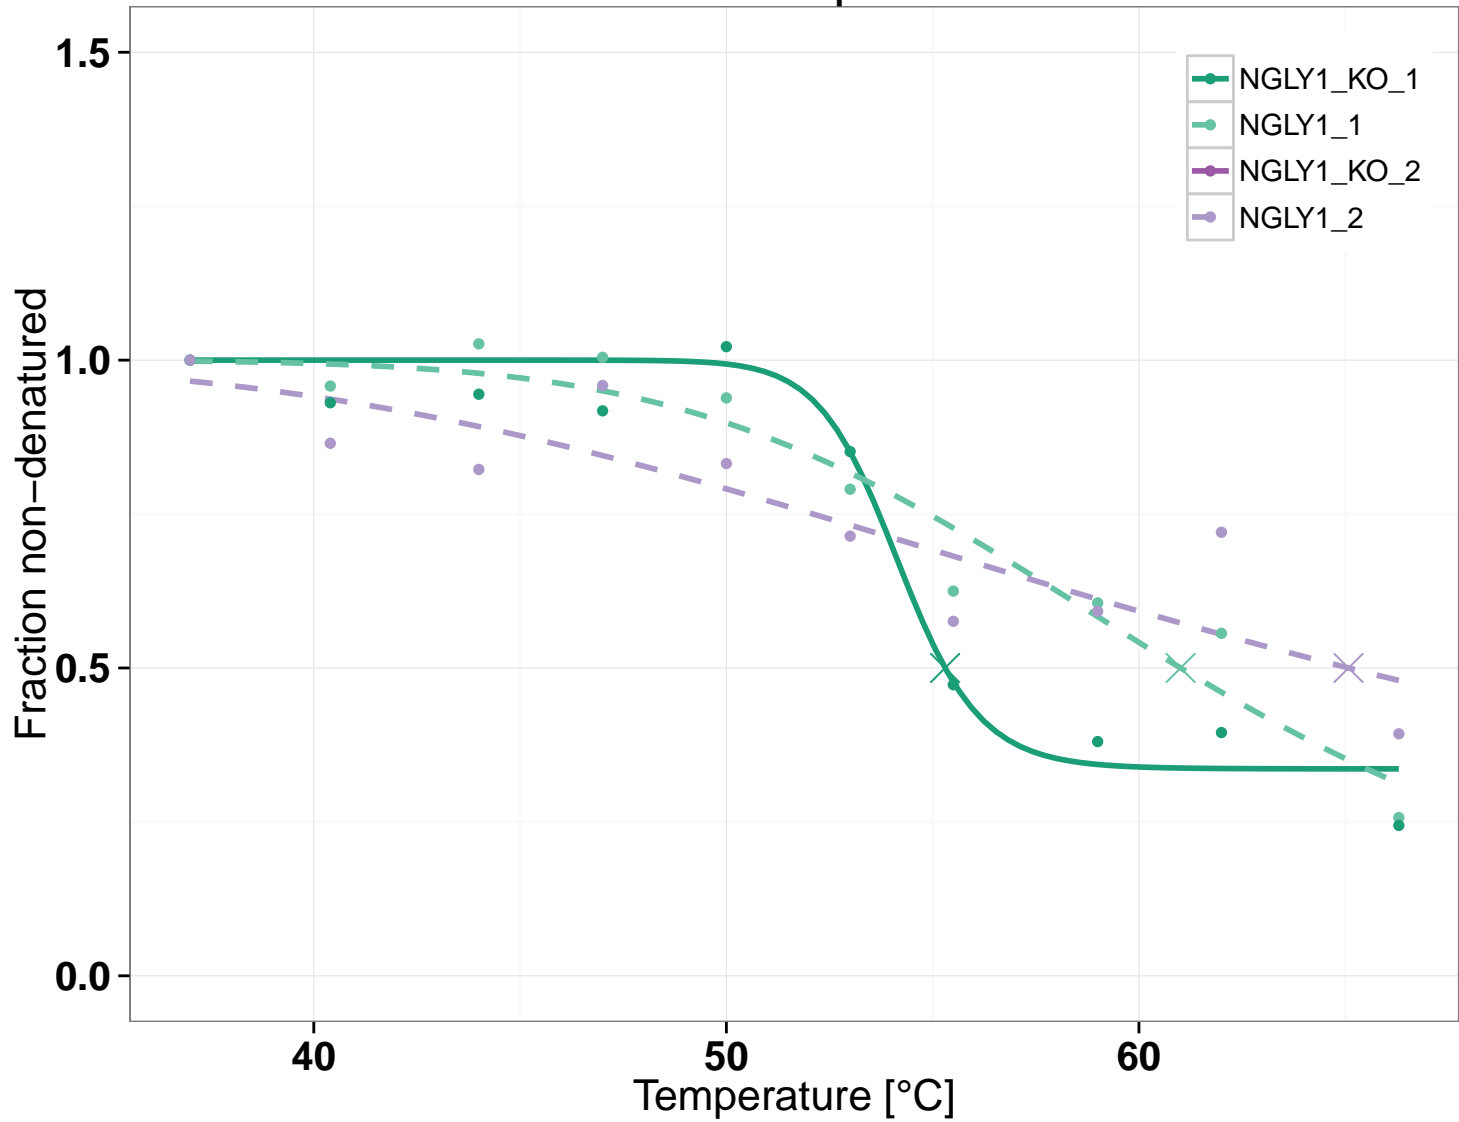

|            | meltPoint | slope  | plateau | R2   |
|------------|-----------|--------|---------|------|
| NGLY1_KO_1 | 55.3      | -0.17  | 0.34    | 0.97 |
| NGLY1_1    | 61.01     | -0.042 | 0       | 0.95 |
| NGLY1_KO_2 | -         | -      | -       | -    |
| NGLY1_2    | 65.08     | -0.02  | 0       | 0.77 |

Supplement: Supplementary file 6918 [file 1]

IPI00019993.1|MYBL2

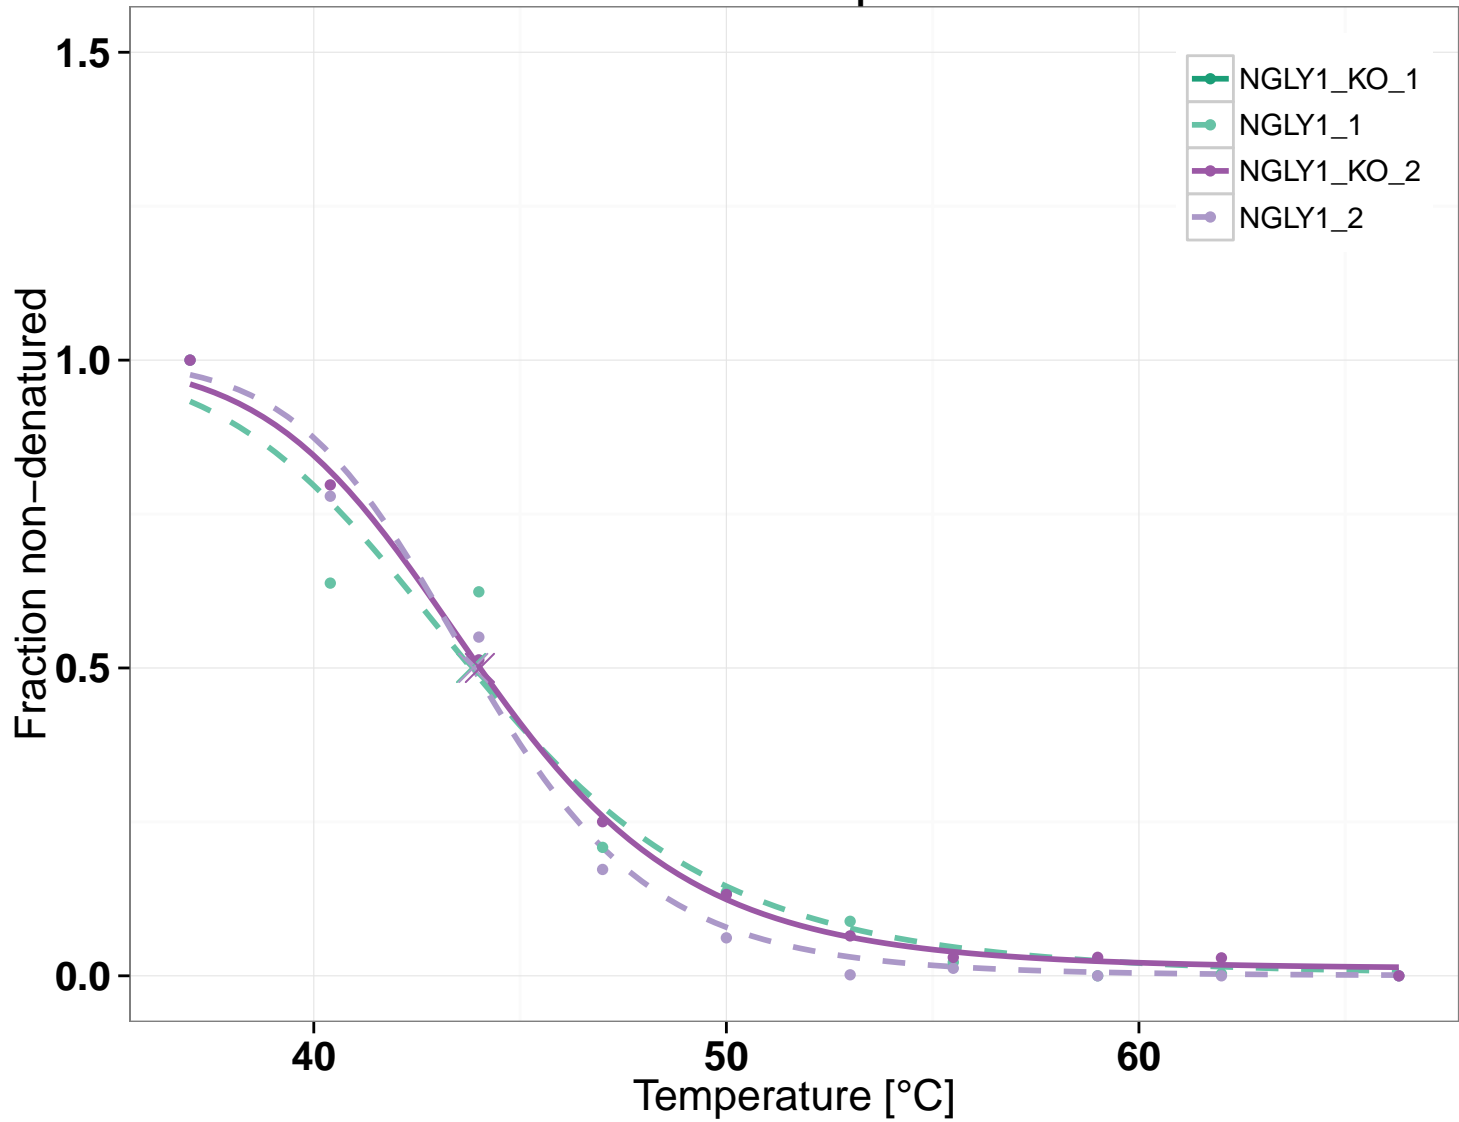

|            | meltPoint | slope  | plateau | R2   |
|------------|-----------|--------|---------|------|
| NGLY1_KO_1 | -         | -      | -       | -    |
| NGLY1_1    | 43.81     | -0.083 | 0       | 0.96 |
| NGLY1_KO_2 | 44.03     | -0.097 | 0.01    | 1    |
| NGLY1_2    | 43.86     | -0.12  | 0       | 0.99 |

Supplement: Supplementary file 6919 [file 1]

IPI00006571.2|TDRD3

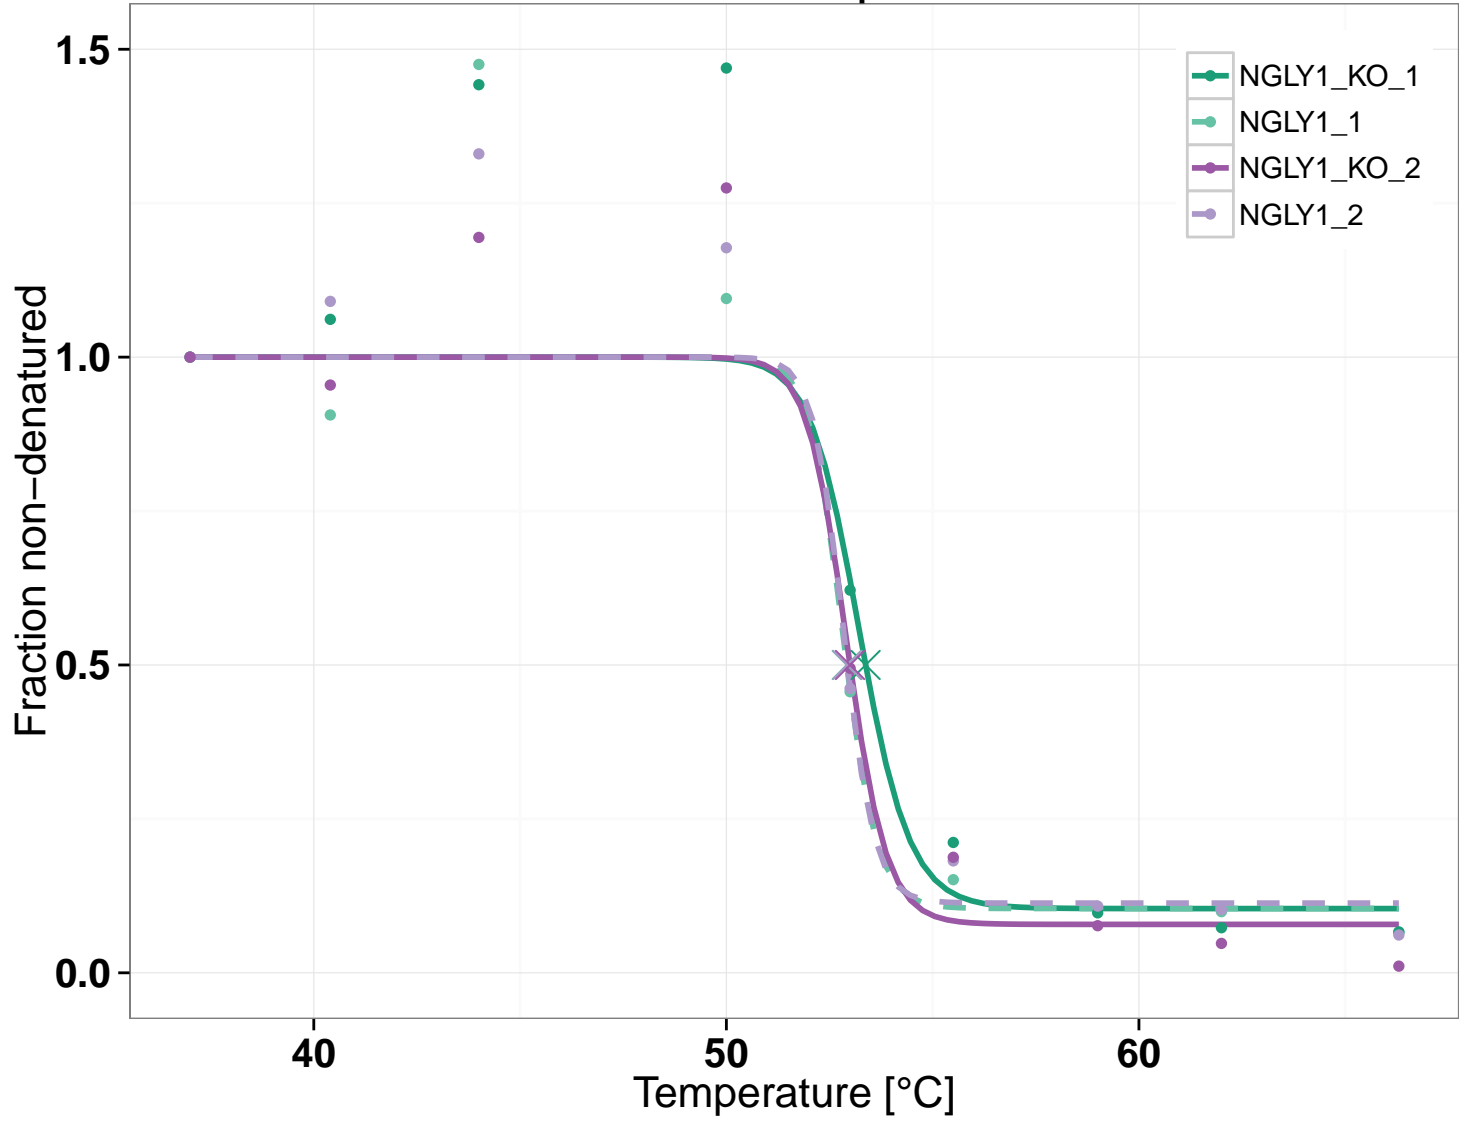

|            | meltPoint | slope | plateau | R2   |
|------------|-----------|-------|---------|------|
| NGLY1_KO_1 | 53.38     | -0.37 | 0.1     | 0.66 |
| NGLY1_1    | 52.92     | -0.54 | 0.1     | 0.81 |
| NGLY1_KO_2 | 53        | -0.48 | 0.08    | 0.74 |
| NGLY1_2    | 52.93     | -0.6  | 0.11    | 0.85 |

Supplement: Supplementary file 6920 [file 1]

IPI00304664.4|KIAA1704

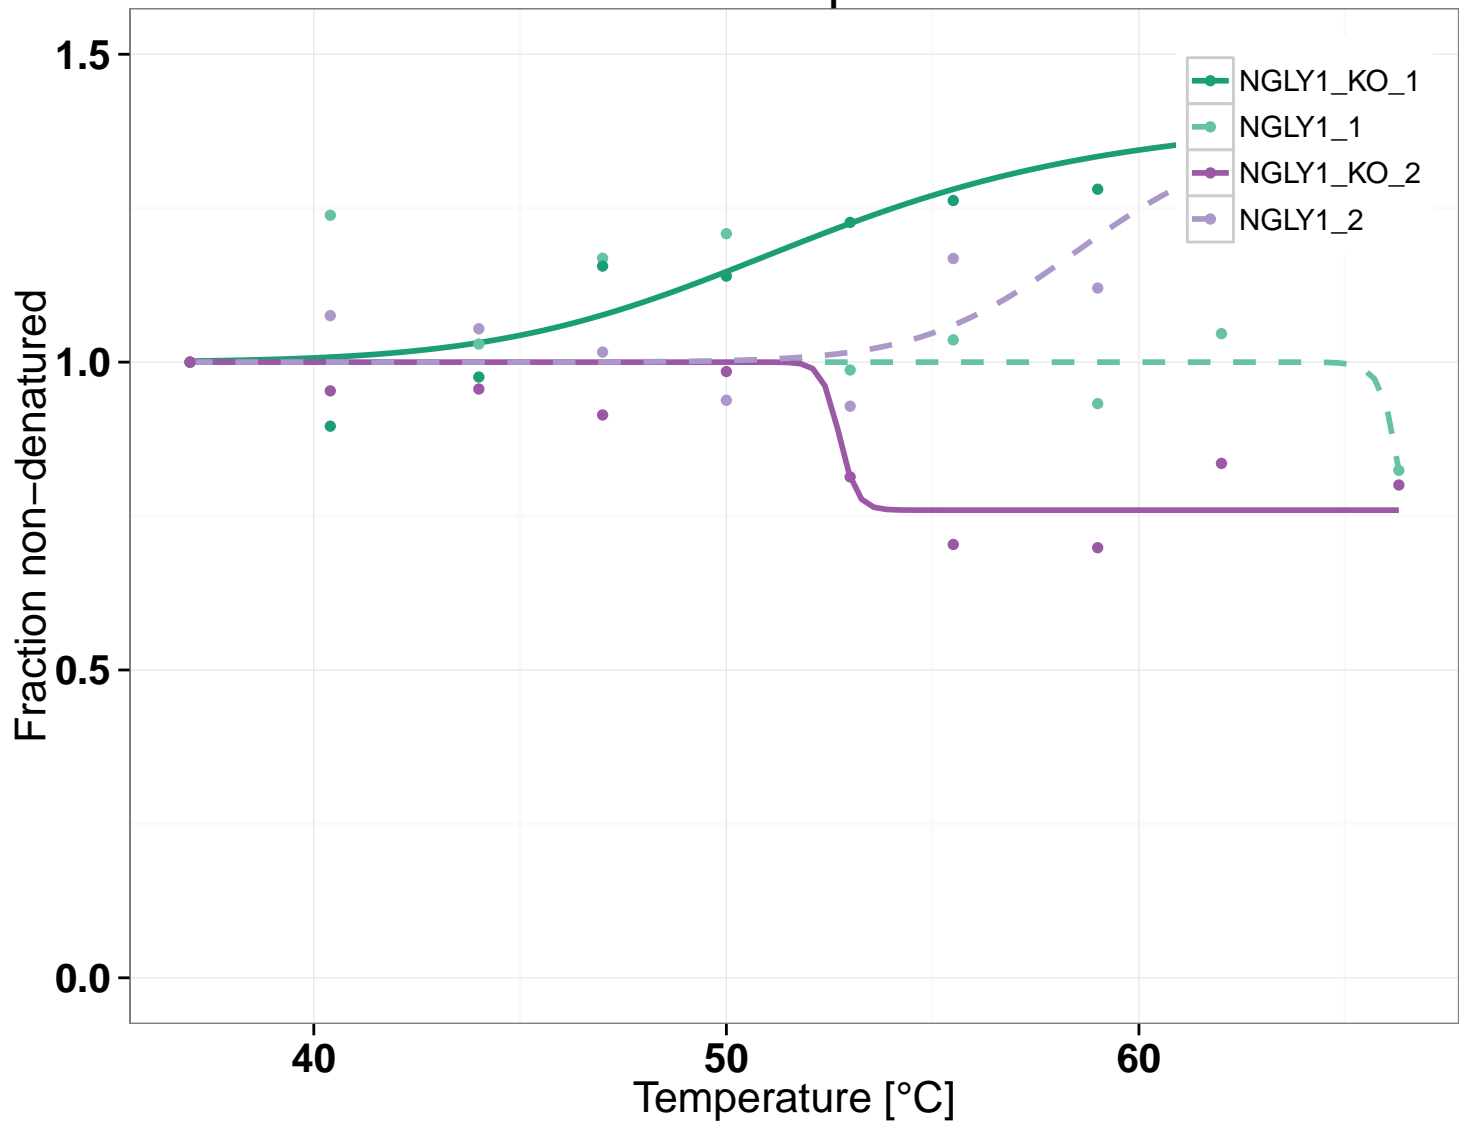

|            | meltPoint | slope | plateau | R2   |
|------------|-----------|-------|---------|------|
| NGLY1_KO_1 | -         | 0.027 | 1.4     | 0.88 |
| NGLY1_1    | -         | -     | 0       | 0.06 |
| NGLY1_KO_2 | -         | -0.28 | 0.76    | 0.77 |
| NGLY1_2    | -         | 0.047 | 1.38    | 0.79 |

Supplement: Supplementary file 6921 [file 1]

# IPI00295772.5|CYP51A1

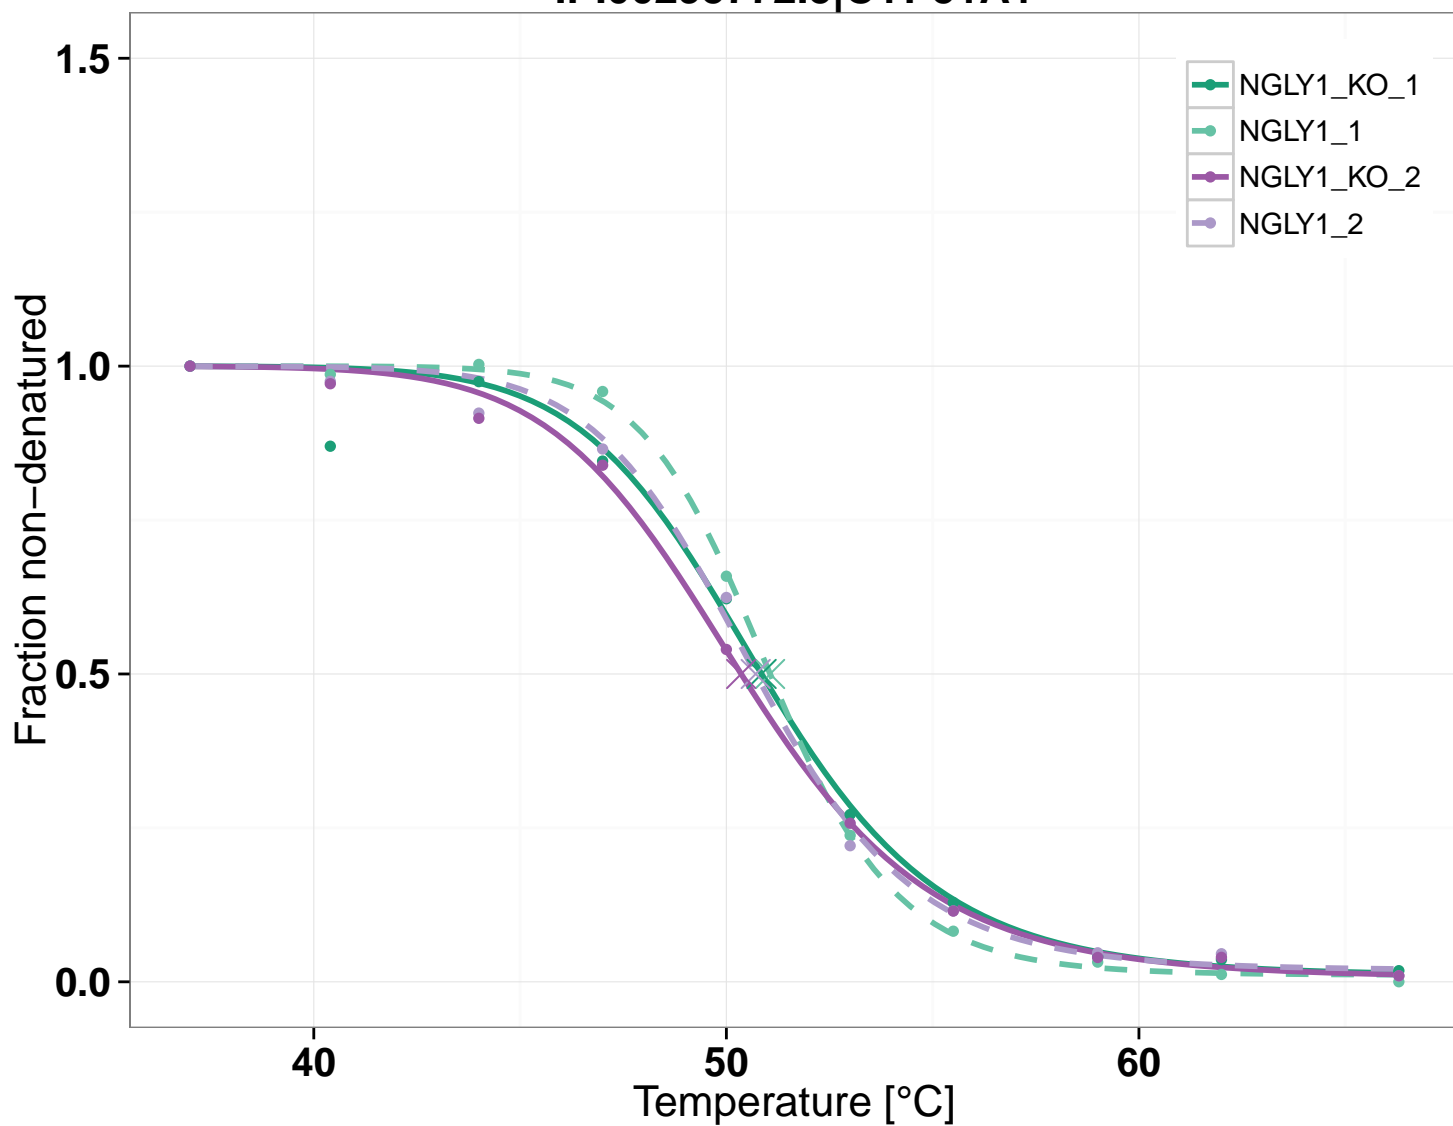

|            | meltPoint | slope | plateau | R2   |
|------------|-----------|-------|---------|------|
| NGLY1_KO_1 | 50.85     | -0.11 | 0.01    | 0.99 |
| NGLY1_1    | 51.06     | -0.16 | 0.01    | 1    |
| NGLY1_KO_2 | 50.36     | -0.11 | 0.01    | 1    |
| NGLY1_2    | 50.71     | -0.13 | 0.02    | 1    |

Supplement: Supplementary file 6922 [file 1]

IPI00647771.1|FBXO44

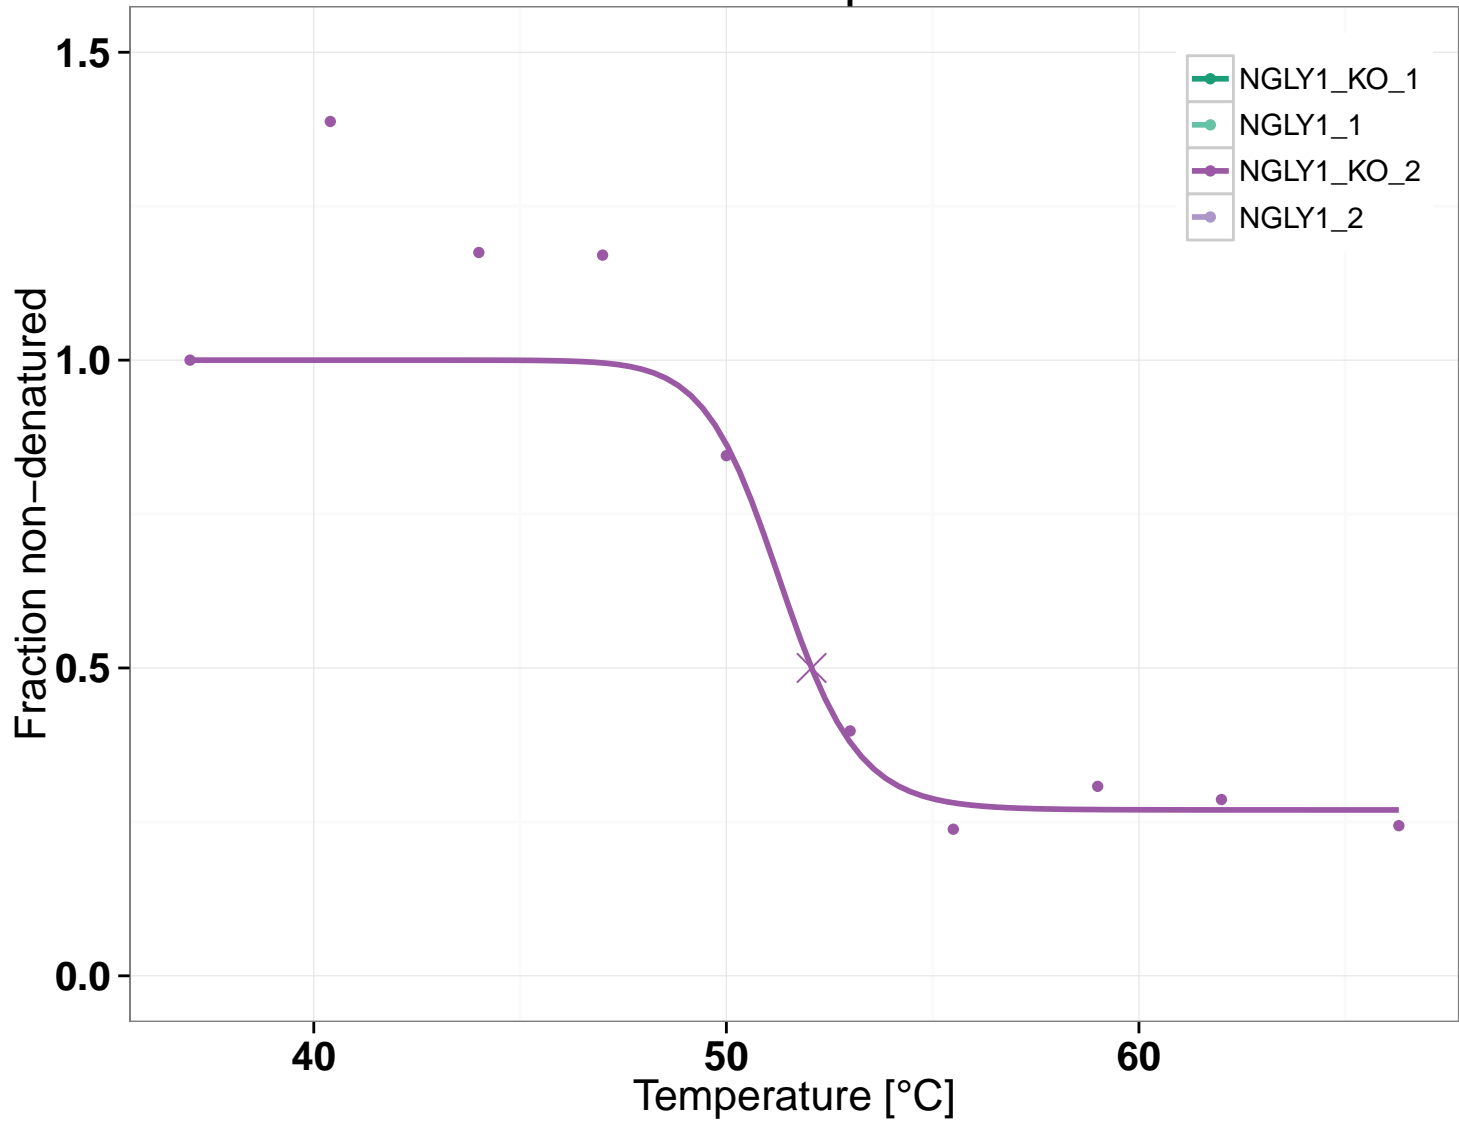

|            | meltPoint | slope | plateau | R2   |
|------------|-----------|-------|---------|------|
| NGLY1_KO_1 | —         | —     | —       | —    |
| NGLY1_1    | —         | —     | —       | —    |
| NGLY1_KO_2 | 52.07     | -0.2  | 0.27    | 0.88 |
| NGLY1_2    | —         | —     | —       | —    |

Supplement: Supplementary file 6923 [file 1]

# IPI00020984.2|CANX

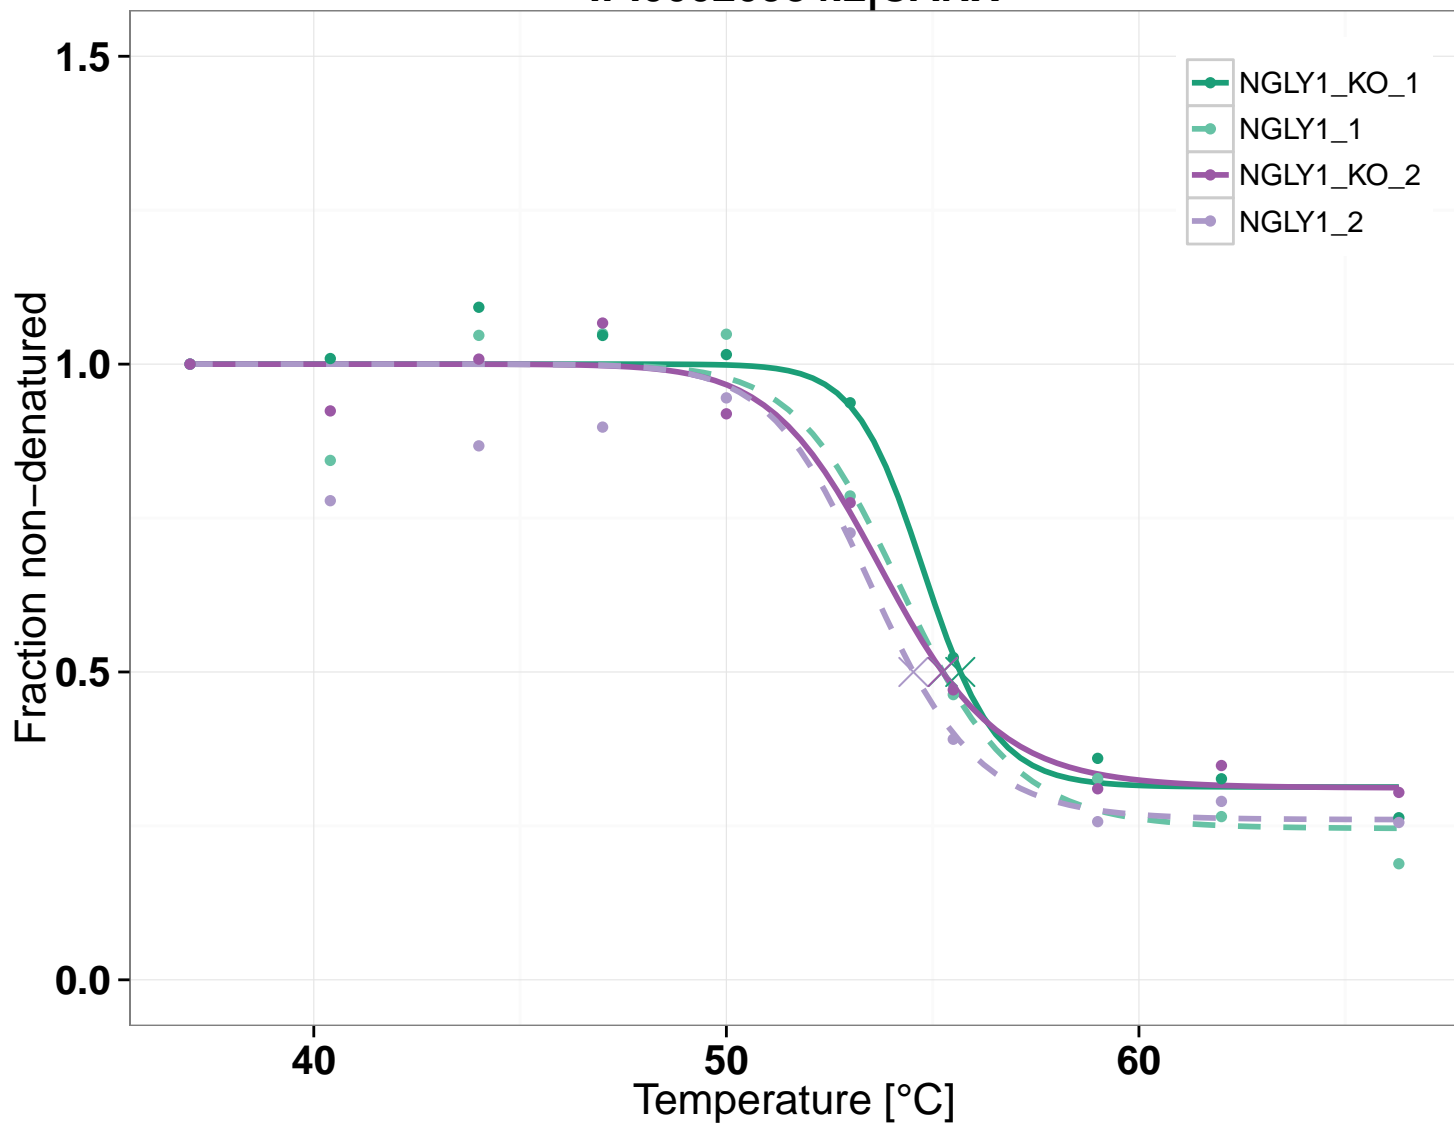

|            | meltPoint | slope | plateau | R2   |
|------------|-----------|-------|---------|------|
| NGLY1_KO_1 | 55.67     | -0.2  | 0.31    | 0.99 |
| NGLY1_1    | 55.25     | -0.14 | 0.25    | 0.96 |
| NGLY1_KO_2 | 55.24     | -0.12 | 0.31    | 0.98 |
| NGLY1_2    | 54.53     | -0.15 | 0.26    | 0.91 |

Supplement: Supplementary file 6924 [file 1]

IPI00307760.7|ZC3H8

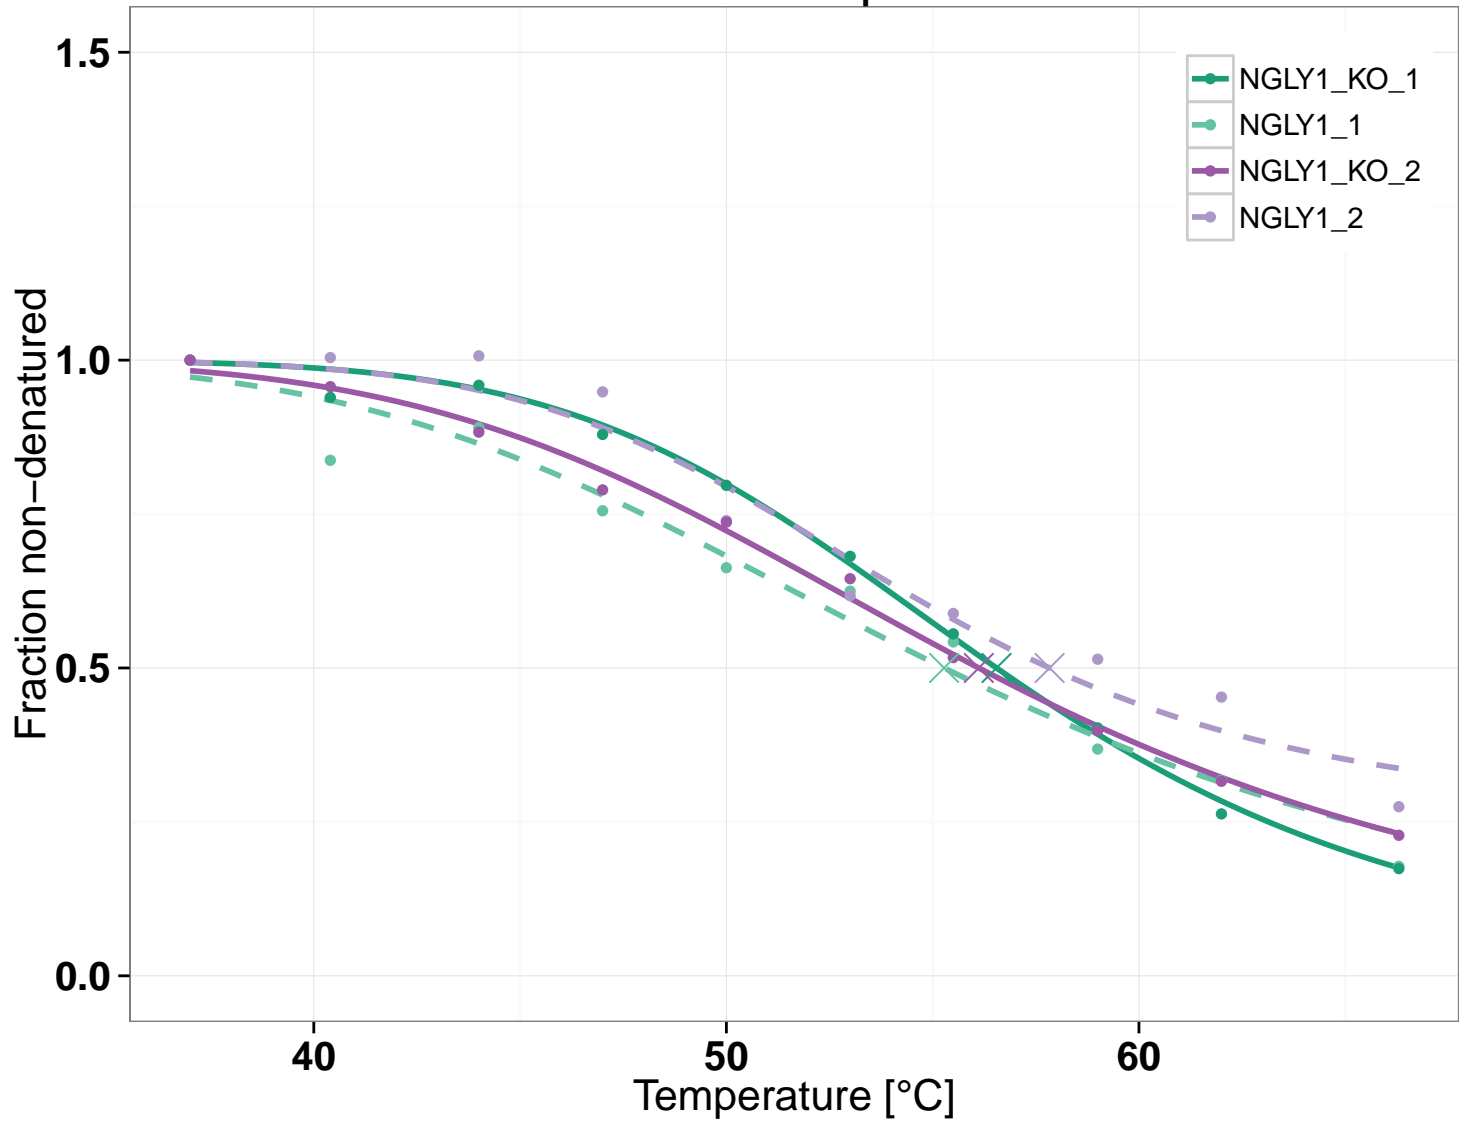

|            | meltPoint | slope  | plateau | R2   |
|------------|-----------|--------|---------|------|
| NGLY1_KO_1 | 56.55     | -0.048 | 0       | 1    |
| NGLY1_1    | 55.28     | -0.035 | 0       | 0.97 |
| NGLY1_KO_2 | 56.12     | -0.037 | 0       | 1    |
| NGLY1_2    | 57.83     | -0.04  | 0.25    | 0.96 |

Supplement: Supplementary file 6925 [file 1]

# IPI00006579.1|COX4I1

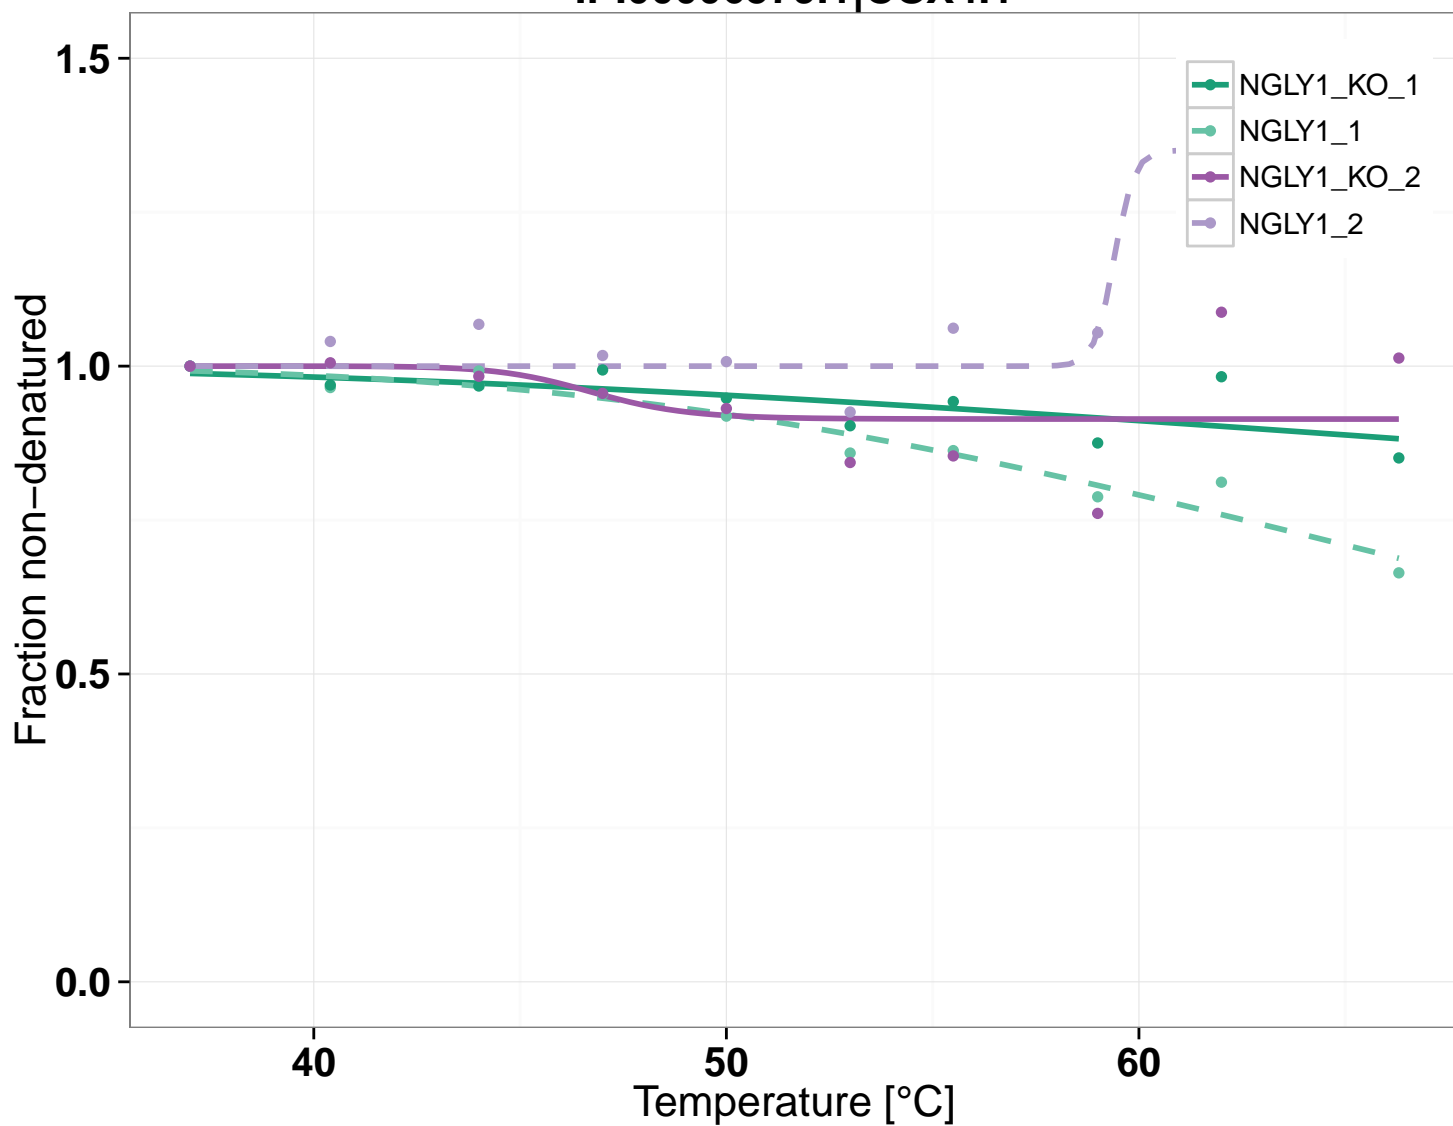

|            | meltPoint | slope  | plateau | R2   |
|------------|-----------|--------|---------|------|
| NGLY1_KO_1 | -         | -      | 0       | 0.49 |
| NGLY1_1    | -         | -0.017 | 0       | 0.94 |
| NGLY1_KO_2 | -         | -0.019 | 0.91    | 0.16 |
| NGLY1_2    | -         | 0.37   | 1.35    | 0.91 |

Supplement: Supplementary file 6926 [file 1]

# IPI00029680.2|TROAP

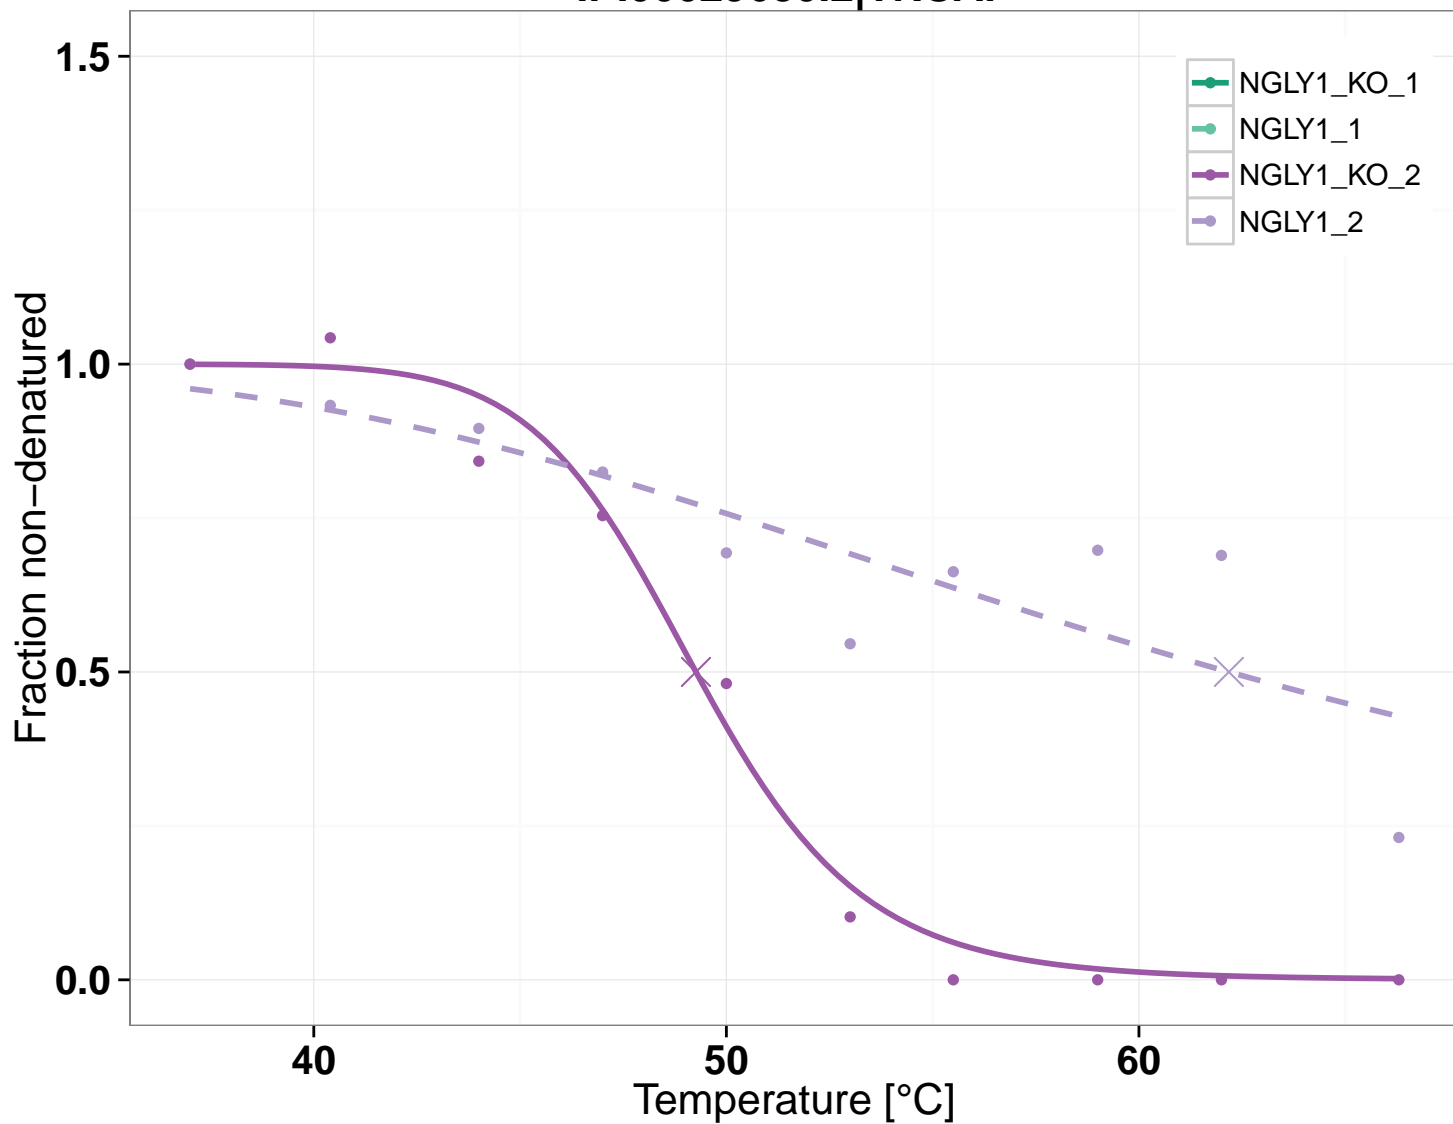

|            | meltPoint | slope  | plateau | R2   |
|------------|-----------|--------|---------|------|
| NGLY1_KO_1 | —         | —      | —       | —    |
| NGLY1_1    | —         | —      | —       | —    |
| NGLY1_KO_2 | 49.26     | -0.12  | 0       | 0.99 |
| NGLY1_2    | 62.18     | -0.022 | 0       | 0.73 |

Supplement: Supplementary file 6927 [file 1]

# IPI00009286.4|MLL

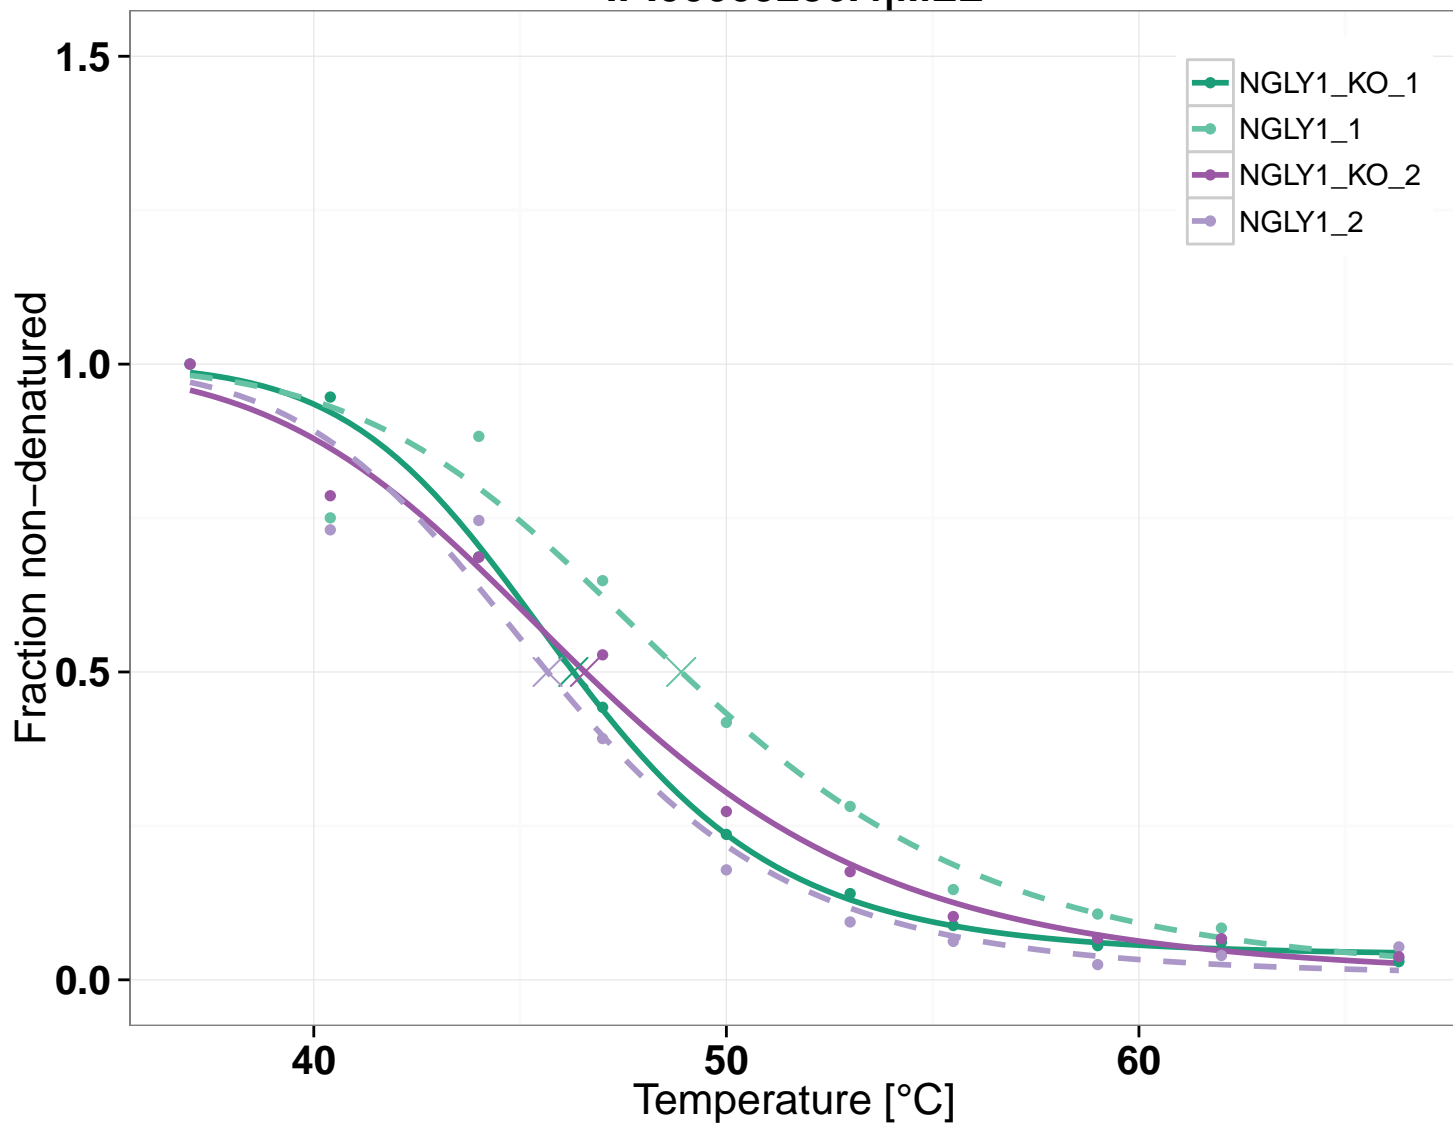

|            | meltPoint | slope  | plateau | R2   |
|------------|-----------|--------|---------|------|
| NGLY1_KO_1 | 46.29     | -0.091 | 0.04    | 1    |
| NGLY1_1    | 48.91     | -0.065 | 0       | 0.96 |
| NGLY1_KO_2 | 46.57     | -0.067 | 0       | 0.99 |
| NGLY1_2    | 45.67     | -0.083 | 0.01    | 0.97 |

Supplement: Supplementary file 6928 [file 1]

IPI00004353.1|GTF2A2

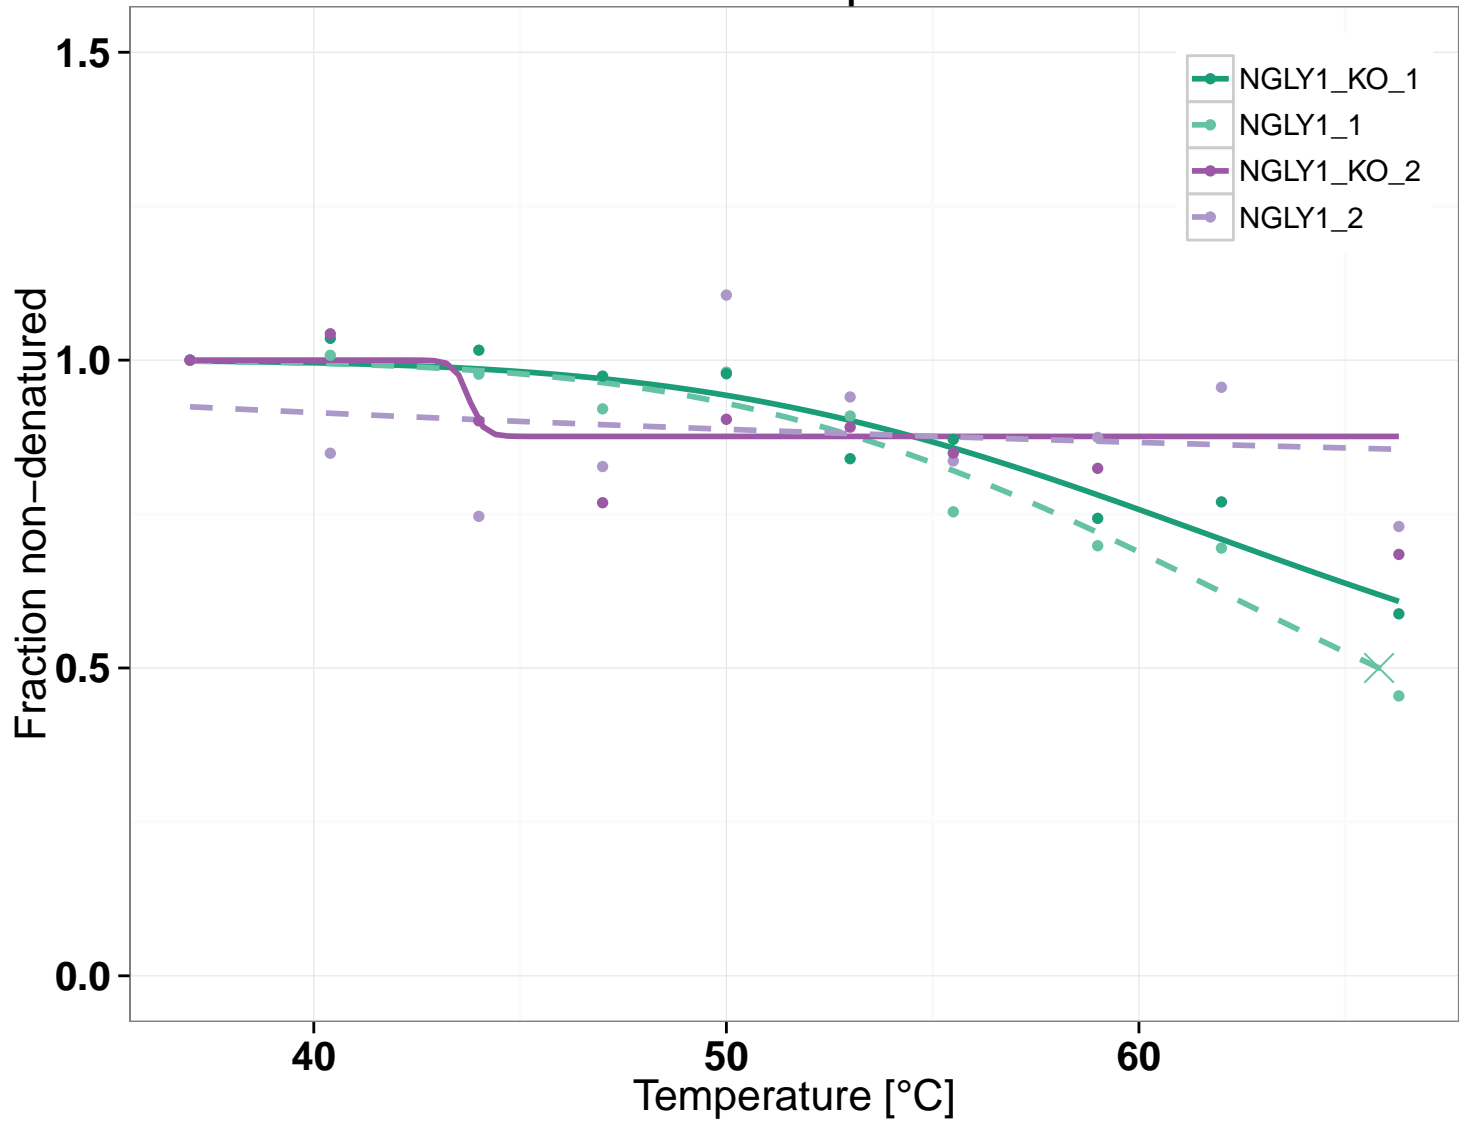

|            | meltPoint | slope  | plateau | R2   |
|------------|-----------|--------|---------|------|
| NGLY1_KO_1 | –         | –0.024 | 0.26    | 0.93 |
| NGLY1_1    | 65.82     | –0.033 | 0       | 0.95 |
| NGLY1_KO_2 | –         | –0.18  | 0.88    | 0.16 |
| NGLY1_2    | –         | –      | 0.45    | 0.03 |

Supplement: Supplementary file 6929 [file 1]

IPI00031618.3|DDI2

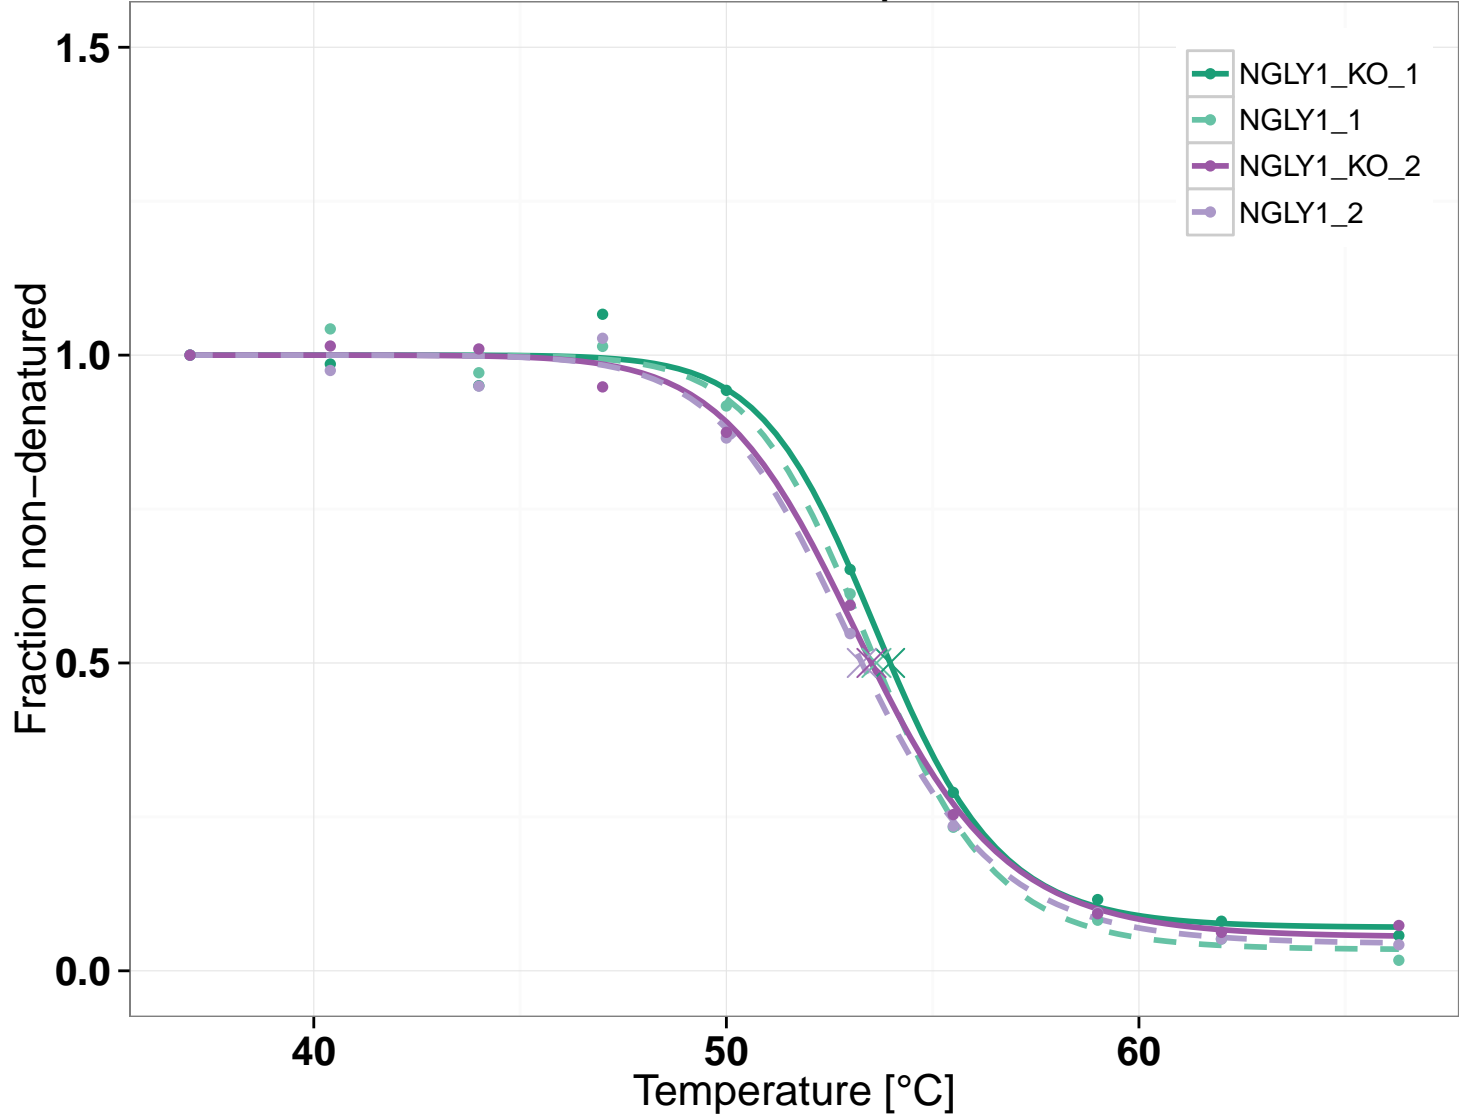

|            | meltPoint | slope | plateau | R2 |
|------------|-----------|-------|---------|----|
| NGLY1_KO_1 | 53.97     | -0.16 | 0.07    | 1  |
| NGLY1_1    | 53.64     | -0.16 | 0.03    | 1  |
| NGLY1_KO_2 | 53.52     | -0.14 | 0.05    | 1  |
| NGLY1_2    | 53.28     | -0.14 | 0.04    | 1  |

Supplement: Supplementary file 6930 [file 1]
