# Supplementary material (part 70 of 85)
Source: publisher figshare collection journal article supplement (https://gsajournals.figshare.com/articles/dataset/_/12014913)

# IPI00893833.1|ABCB5

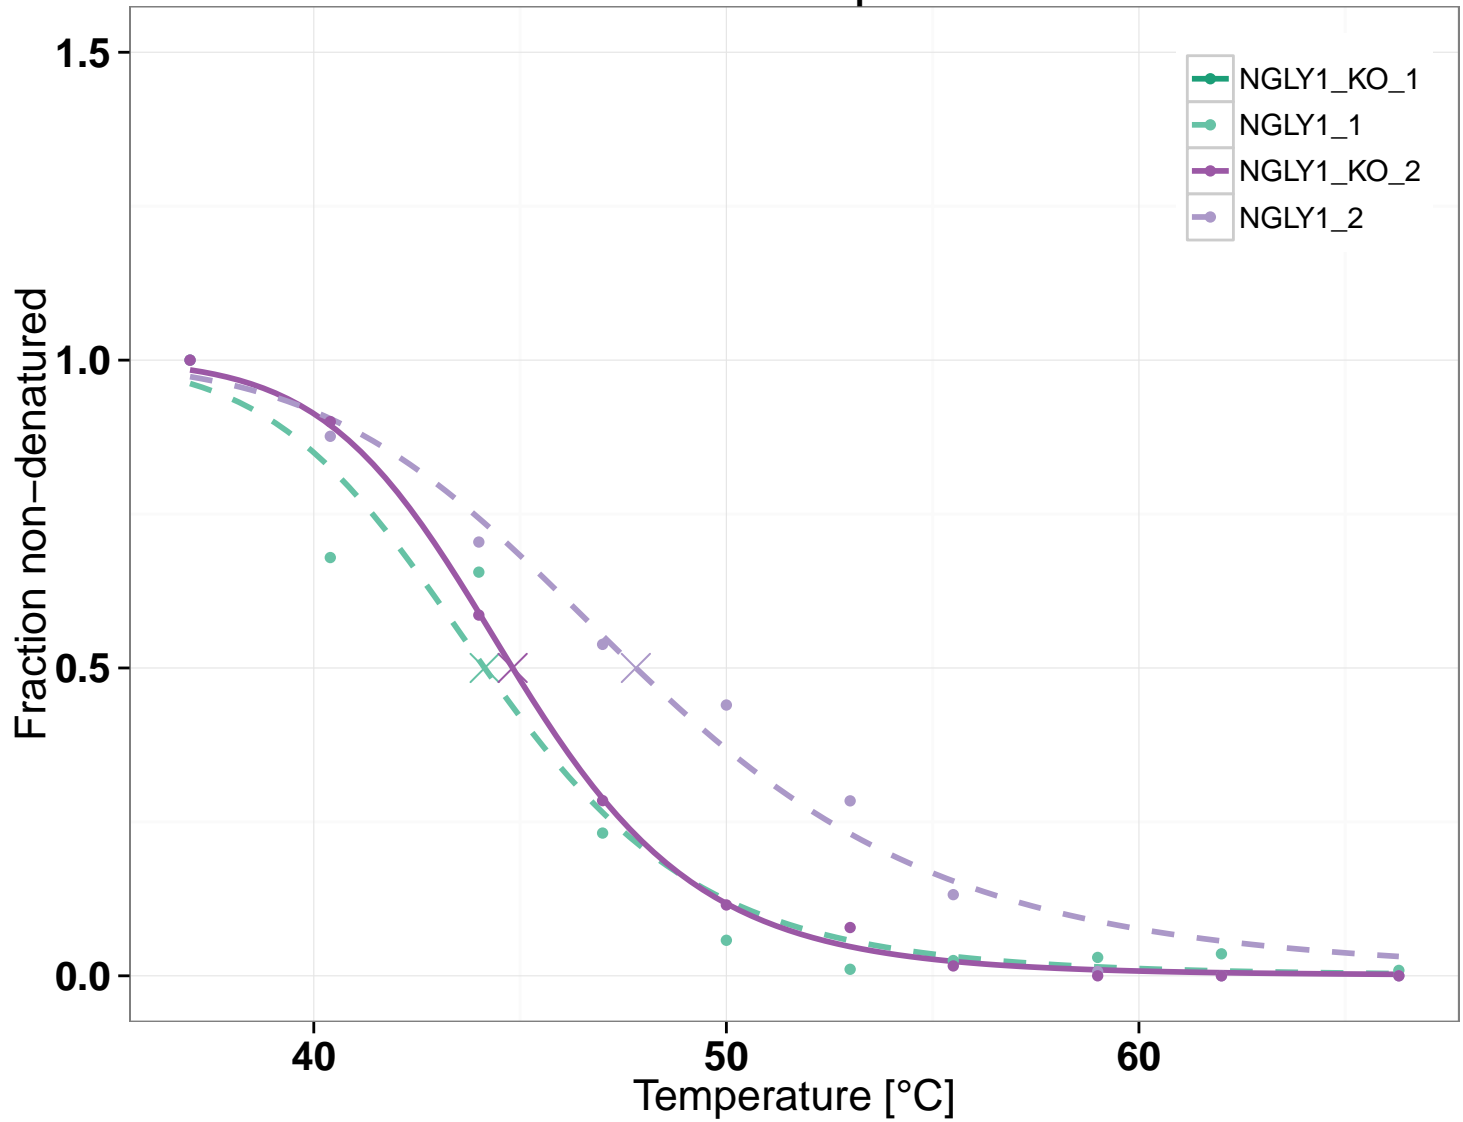

|            | meltPoint | slope  | plateau | R2   |
|------------|-----------|--------|---------|------|
| NGLY1_KO_1 | —         | —      | —       | —    |
| NGLY1_1    | 44.14     | -0.096 | 0       | 0.96 |
| NGLY1_KO_2 | 44.82     | -0.11  | 0       | 1    |
| NGLY1_2    | 47.81     | -0.066 | 0       | 0.98 |

Supplement: Supplementary file 6931 [file 1]

IPI00871686.1|CLASP2

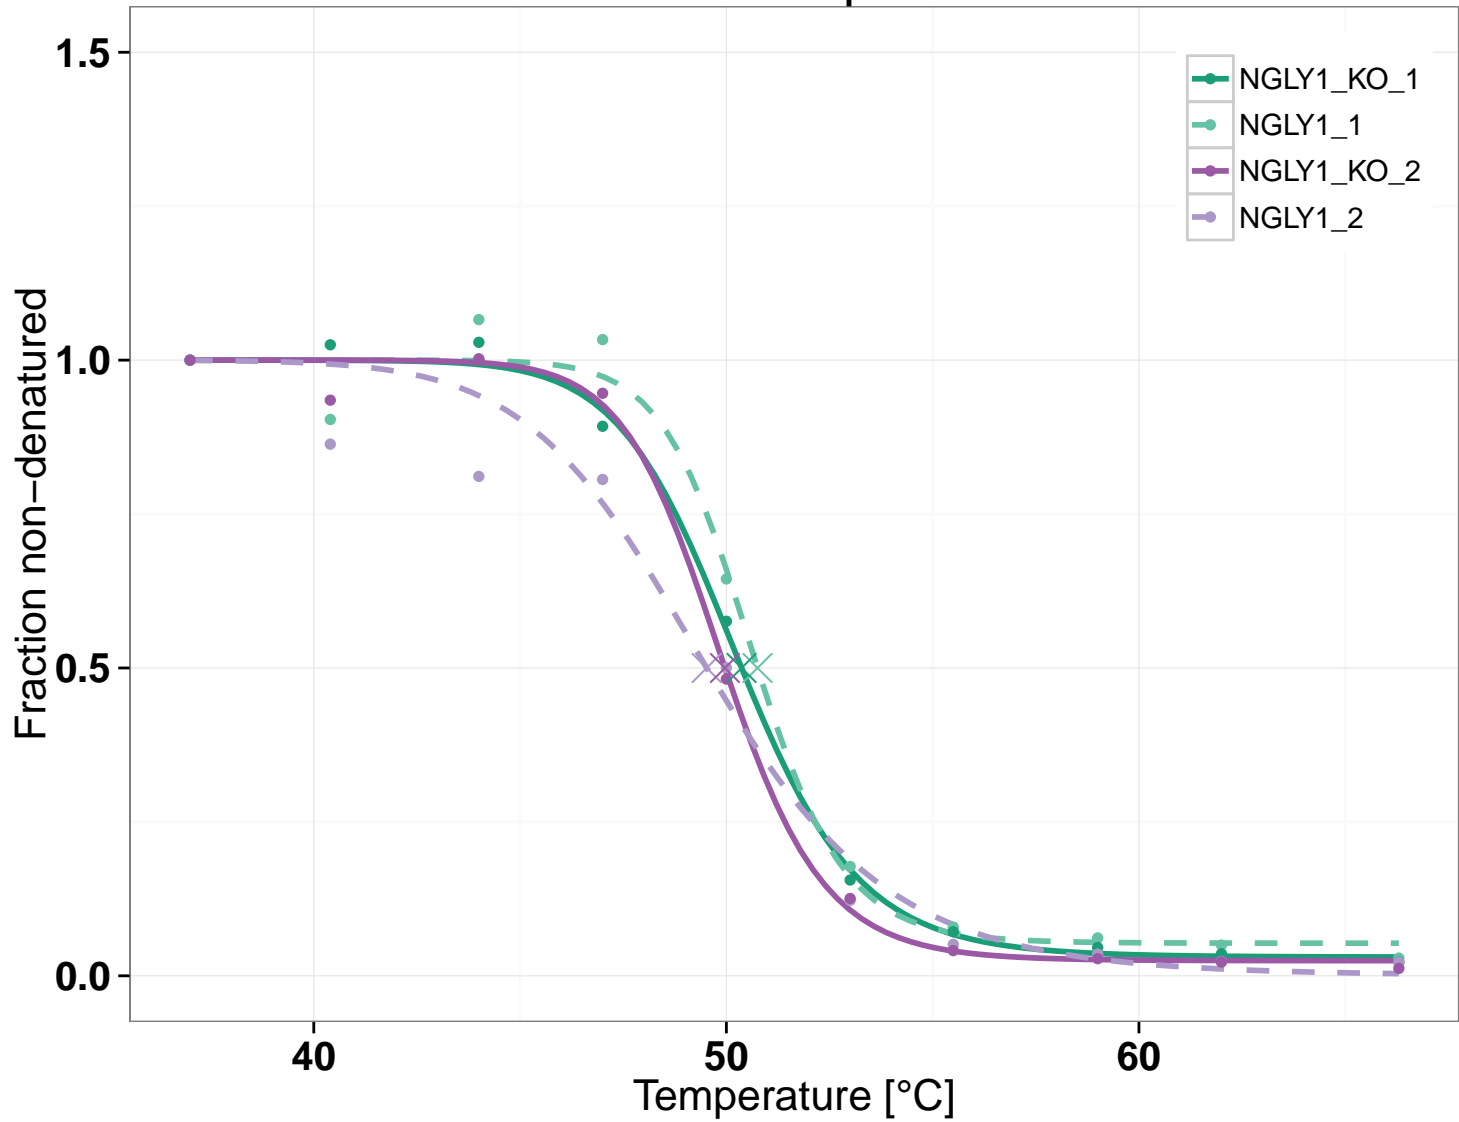

|            | meltPoint | slope | plateau | R2   |
|------------|-----------|-------|---------|------|
| NGLY1_KO_1 | 50.37     | -0.17 | 0.03    | 1    |
| NGLY1_1    | 50.76     | -0.22 | 0.05    | 0.99 |
| NGLY1_KO_2 | 49.97     | -0.2  | 0.02    | 1    |
| NGLY1_2    | 49.52     | -0.11 | 0       | 0.97 |

Supplement: Supplementary file 6932 [file 1]

# IPI00385987.6|DAGLB

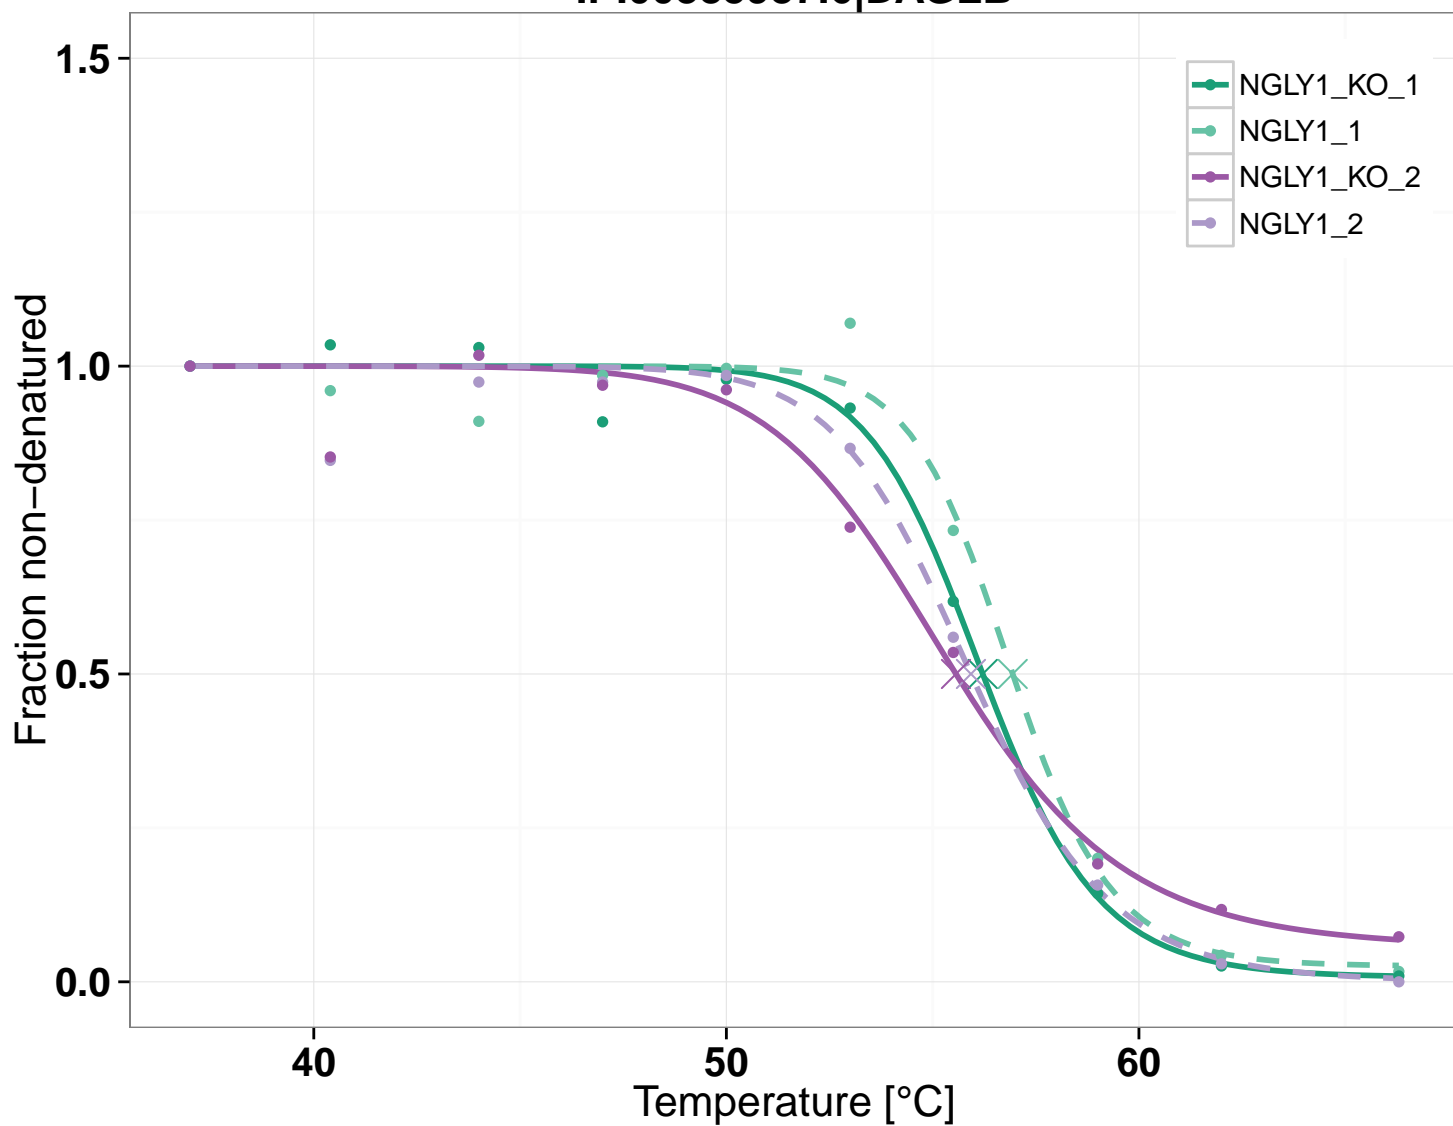

|            | meltPoint | slope | plateau | R2   |
|------------|-----------|-------|---------|------|
| NGLY1_KO_1 | 56.21     | -0.18 | 0.01    | 0.99 |
| NGLY1_1    | 56.94     | -0.2  | 0.03    | 0.99 |
| NGLY1_KO_2 | 55.57     | -0.11 | 0.05    | 0.98 |
| NGLY1_2    | 55.93     | -0.15 | 0       | 0.98 |

Supplement: Supplementary file 6933 [file 1]

# IPI00005607.2|DBC1

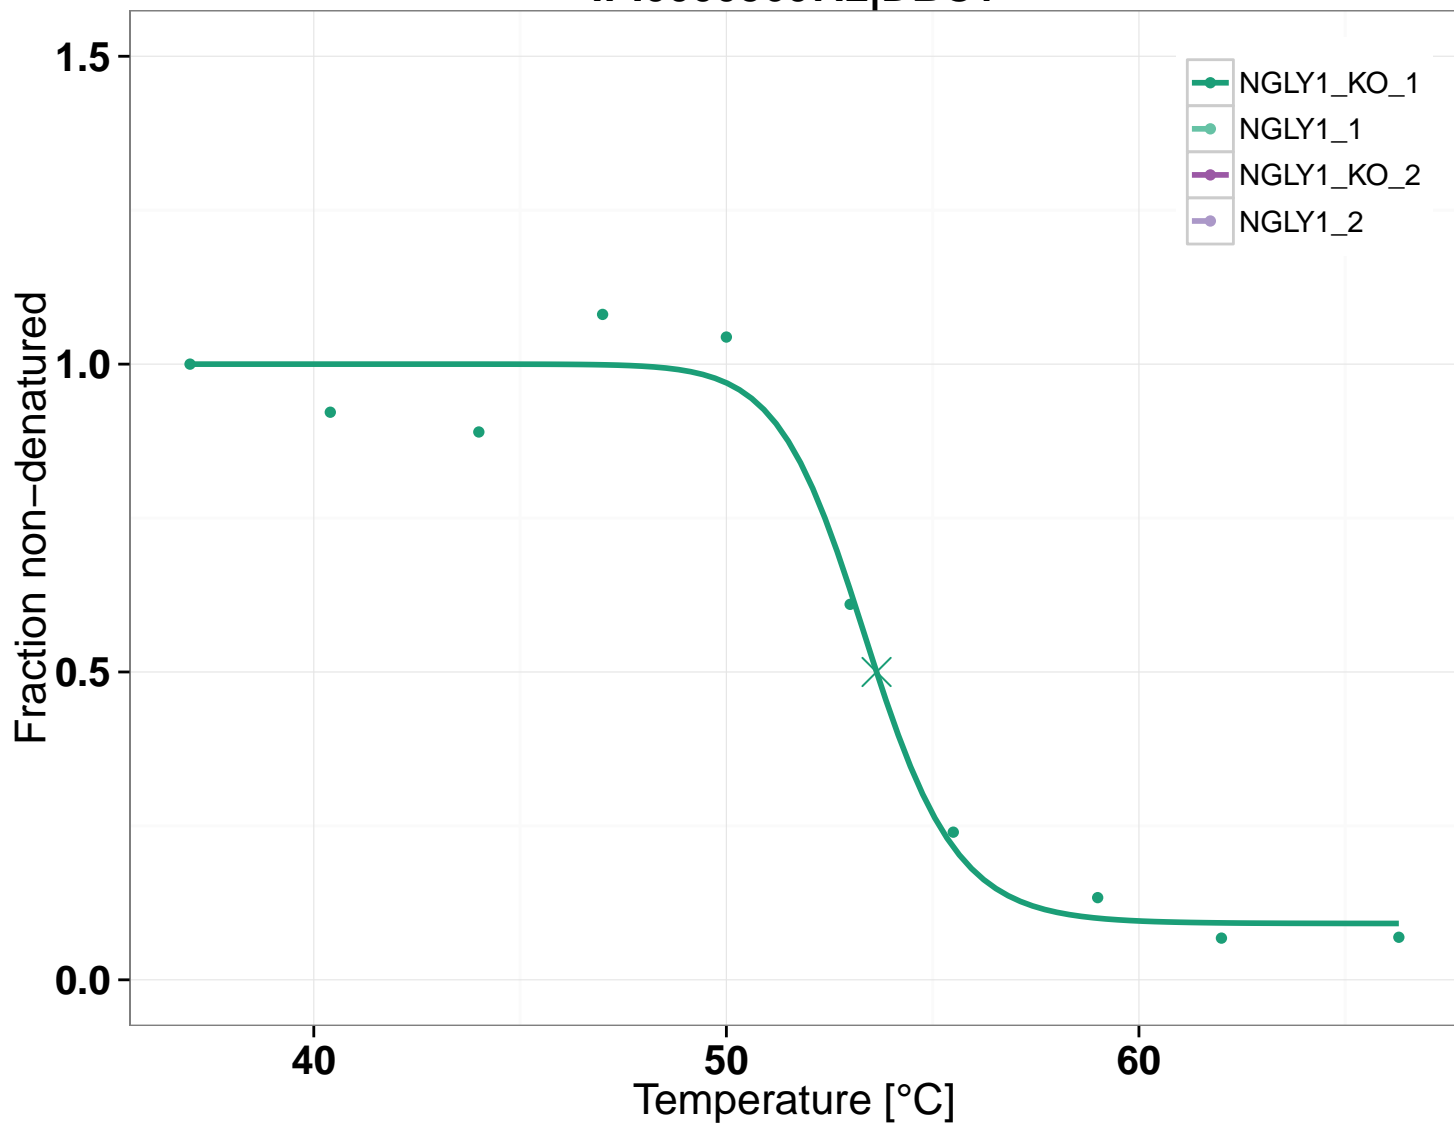

|            | meltPoint | slope | plateau | R2   |
|------------|-----------|-------|---------|------|
| NGLY1_KO_1 | 53.64     | -0.21 | 0.09    | 0.98 |
| NGLY1_1    | -         | -     | -       | -    |
| NGLY1_KO_2 | -         | -     | -       | -    |
| NGLY1_2    | -         | -     | -       | -    |

Supplement: Supplementary file 6934 [file 1]

IPI00783302.1|PTCD3

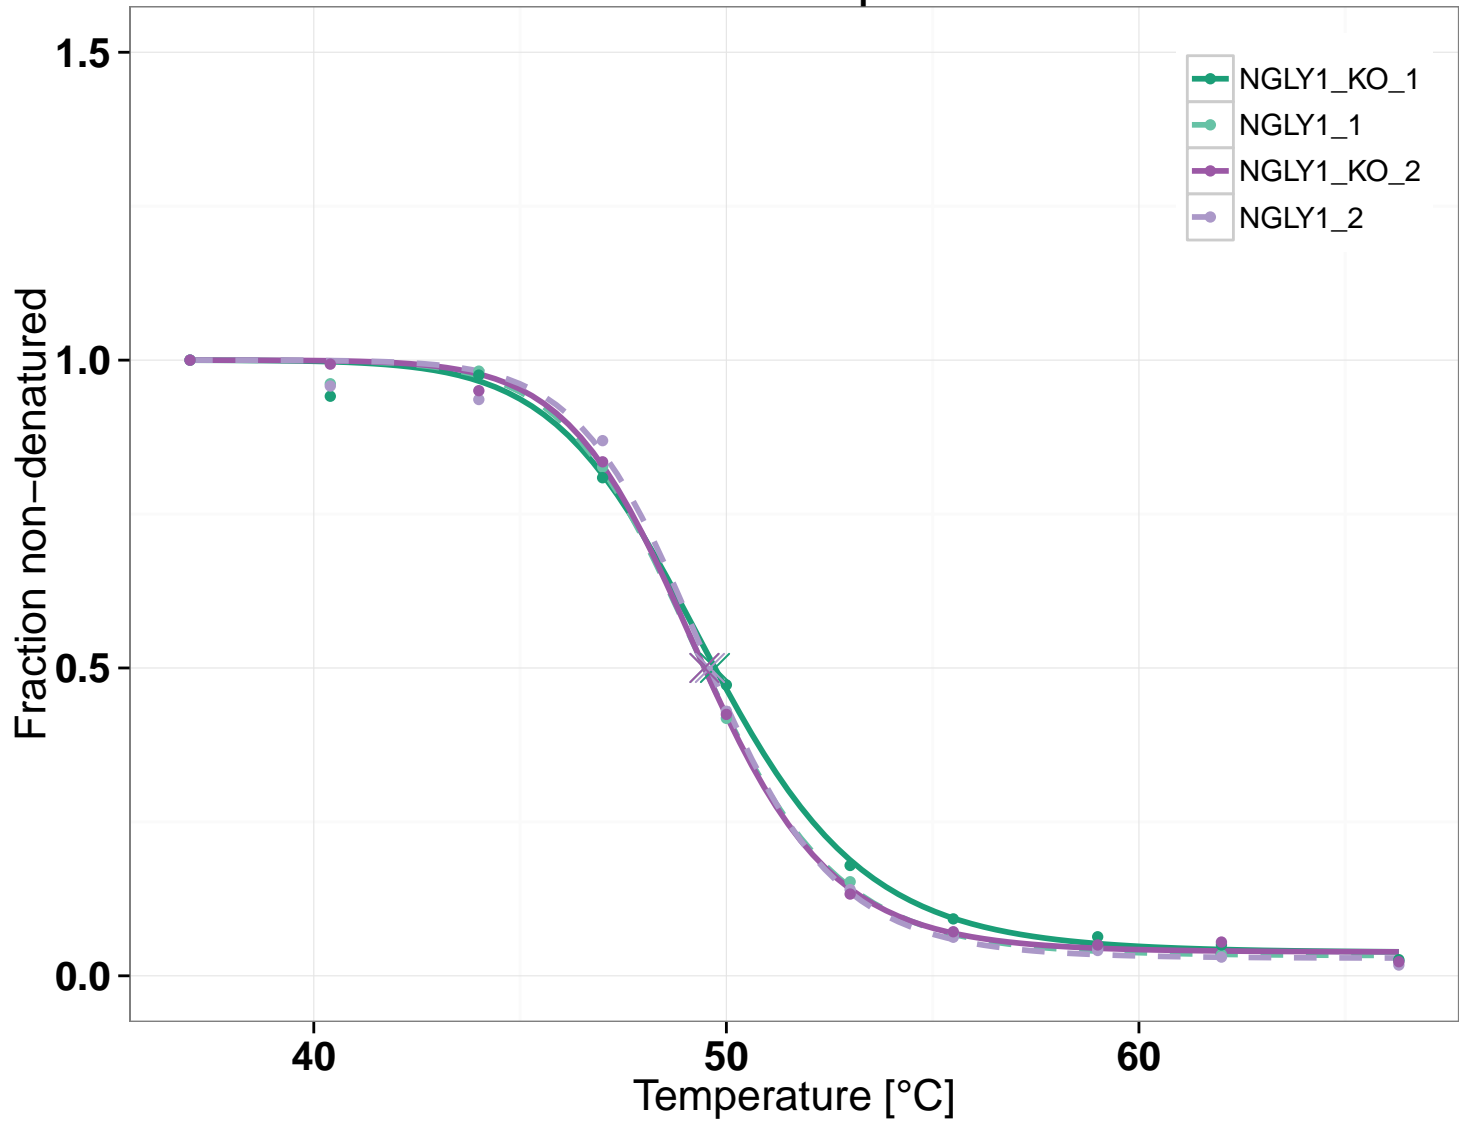

|            | meltPoint | slope | plateau | R2 |
|------------|-----------|-------|---------|----|
| NGLY1_KO_1 | 49.72     | -0.13 | 0.04    | 1  |
| NGLY1_1    | 49.47     | -0.15 | 0.03    | 1  |
| NGLY1_KO_2 | 49.47     | -0.15 | 0.04    | 1  |
| NGLY1_2    | 49.6      | -0.16 | 0.03    | 1  |

Supplement: Supplementary file 6935 [file 1]

# IPI00783305.1|BUB1

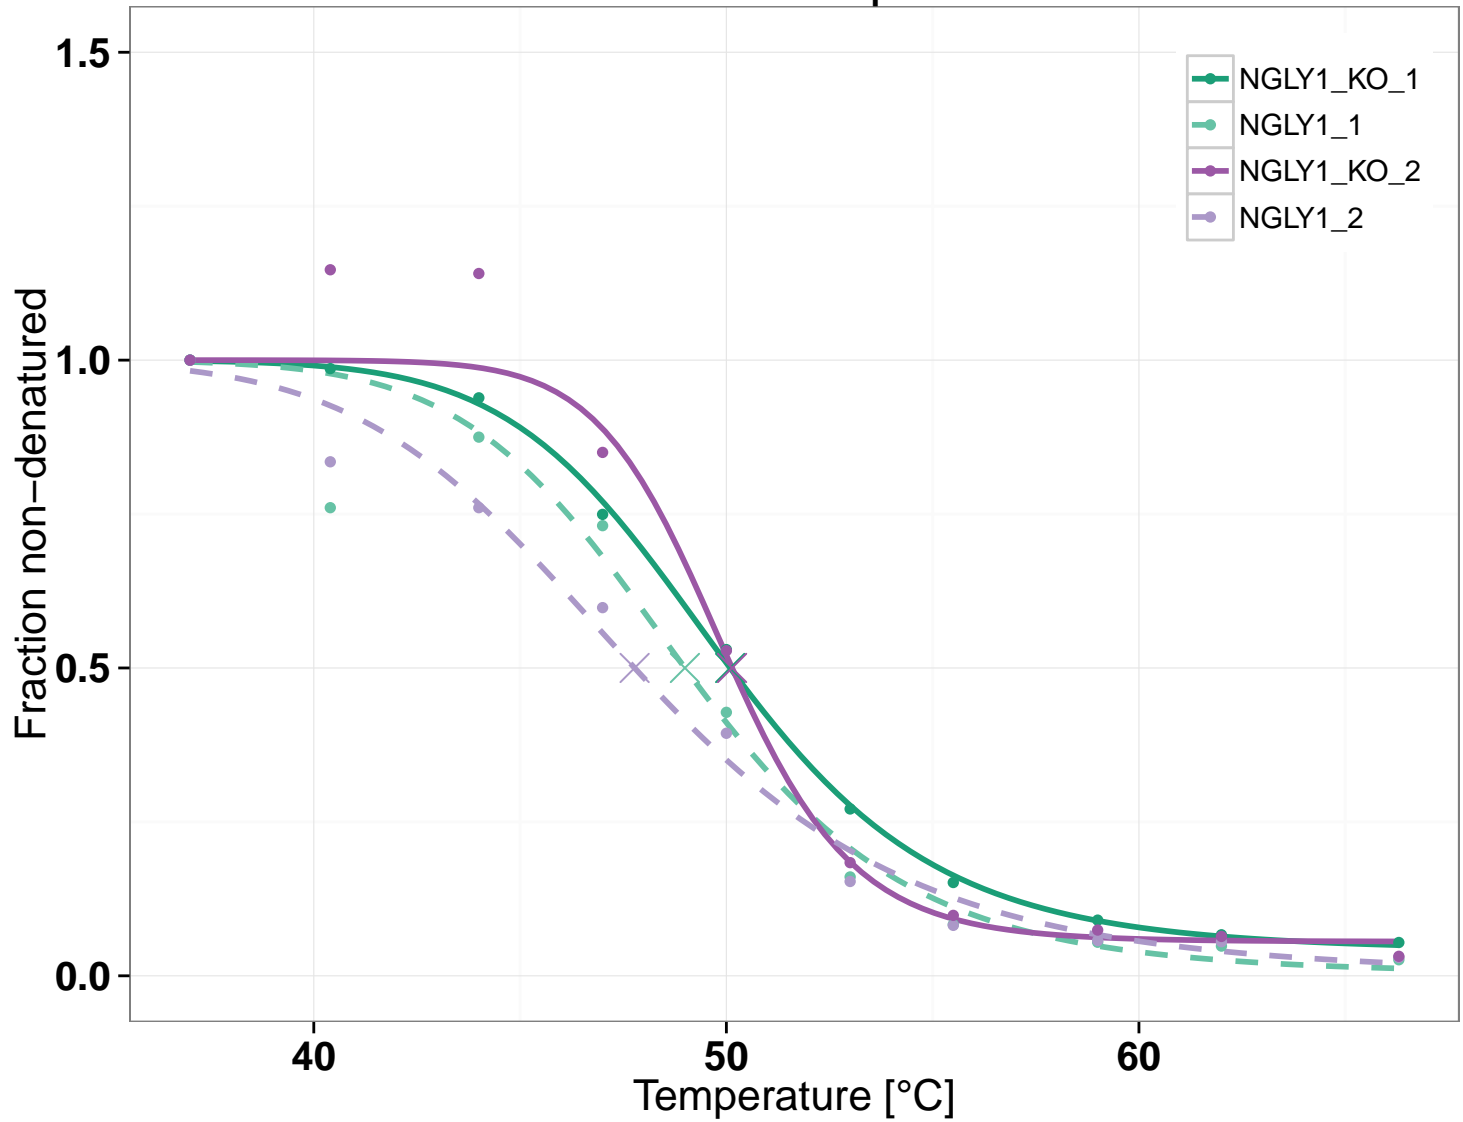

|            | meltPoint | slope  | plateau | R2   |
|------------|-----------|--------|---------|------|
| NGLY1_KO_1 | 50.09     | -0.092 | 0.04    | 1    |
| NGLY1_1    | 48.99     | -0.092 | 0       | 0.96 |
| NGLY1_KO_2 | 50.14     | -0.15  | 0.06    | 0.98 |
| NGLY1_2    | 47.78     | -0.074 | 0       | 0.99 |

Supplement: Supplementary file 6936 [file 1]

IPI00759776.1|ACTN1

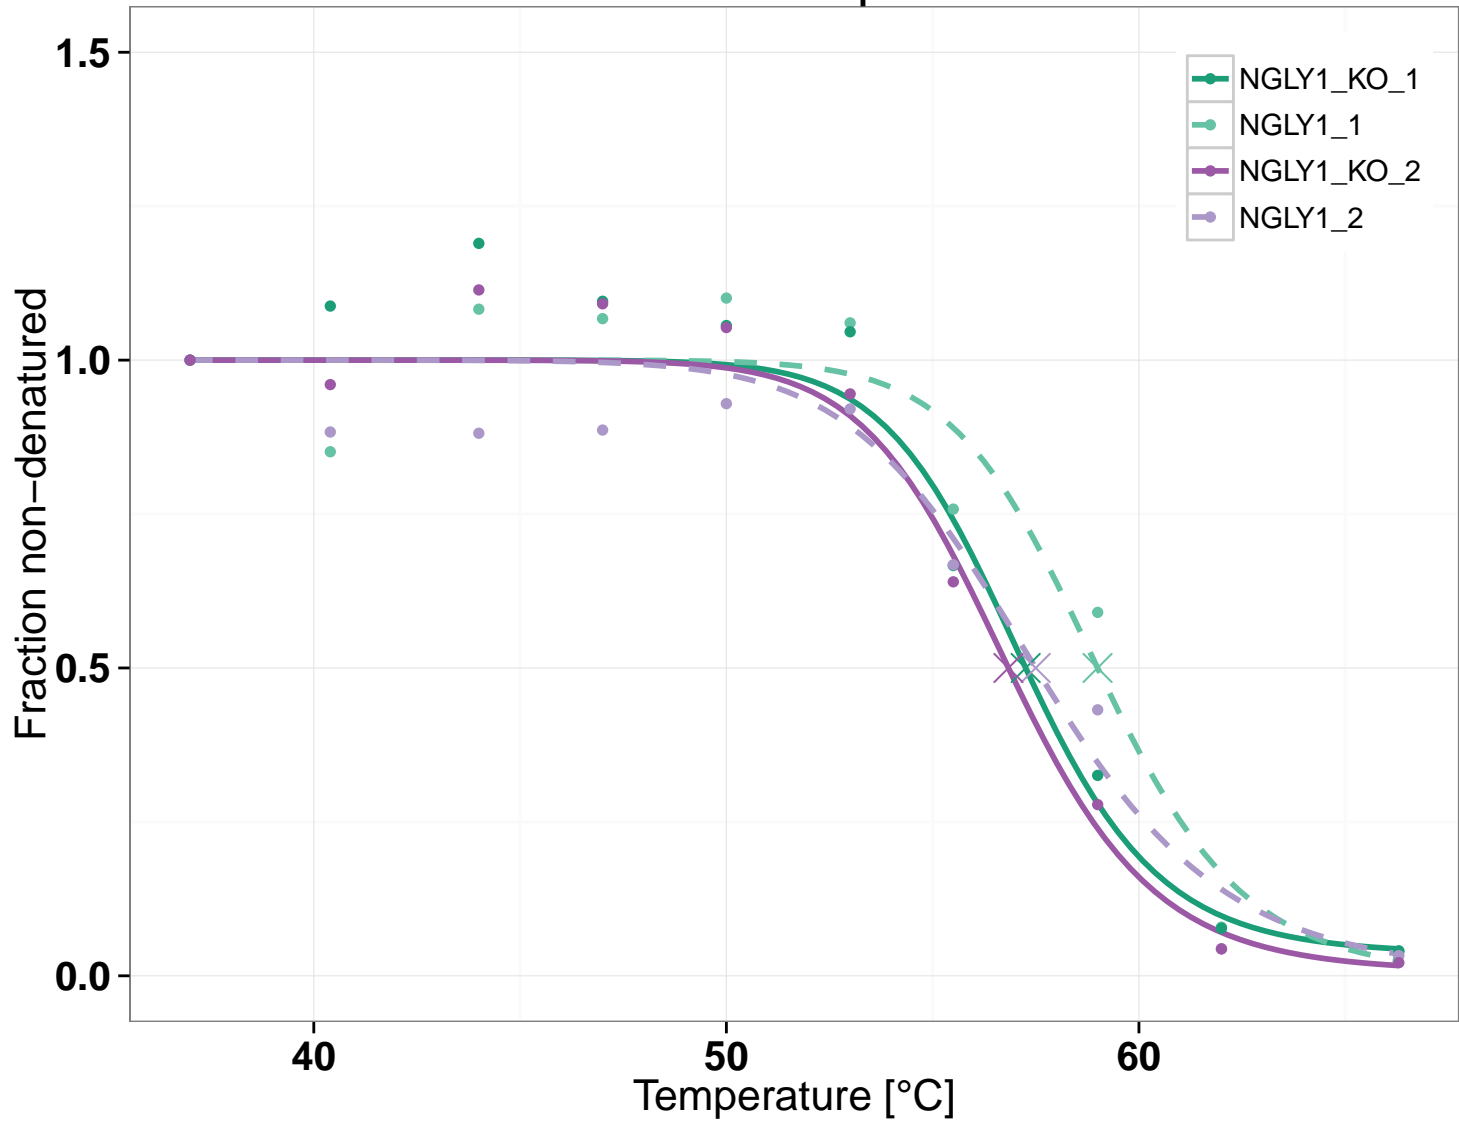

|            | meltPoint | slope | plateau | R2   |
|------------|-----------|-------|---------|------|
| NGLY1_KO_1 | 57.25     | -0.14 | 0.04    | 0.96 |
| NGLY1_1    | 59        | -0.14 | 0       | 0.94 |
| NGLY1_KO_2 | 56.84     | -0.14 | 0.01    | 0.98 |
| NGLY1_2    | 57.5      | -0.11 | 0       | 0.95 |

Supplement: Supplementary file 6937 [file 1]

# IPI00306661.3|KCMF1

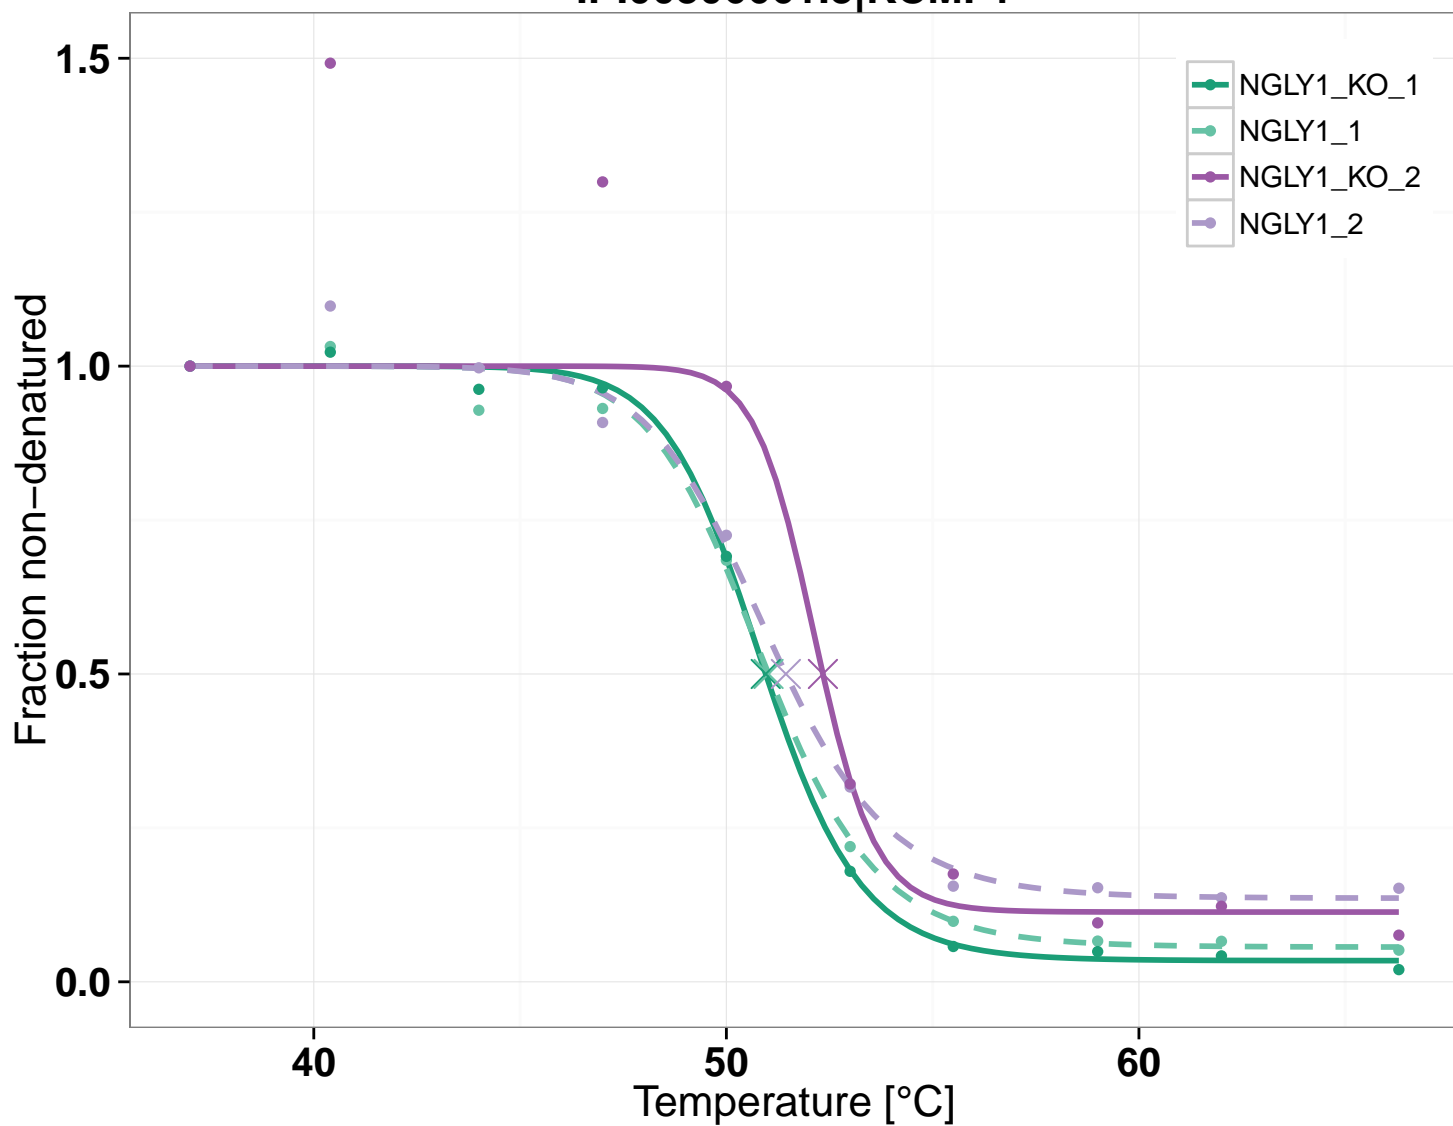

|            | meltPoint | slope | plateau | R2   |
|------------|-----------|-------|---------|------|
| NGLY1_KO_1 | 50.95     | -0.2  | 0.03    | 1    |
| NGLY1_1    | 51.02     | -0.17 | 0.06    | 1    |
| NGLY1_KO_2 | 52.34     | -0.31 | 0.11    | 0.82 |
| NGLY1_2    | 51.44     | -0.15 | 0.14    | 0.99 |

Supplement: Supplementary file 6938 [file 1]

# IPI00245135.1|RNASEH2B

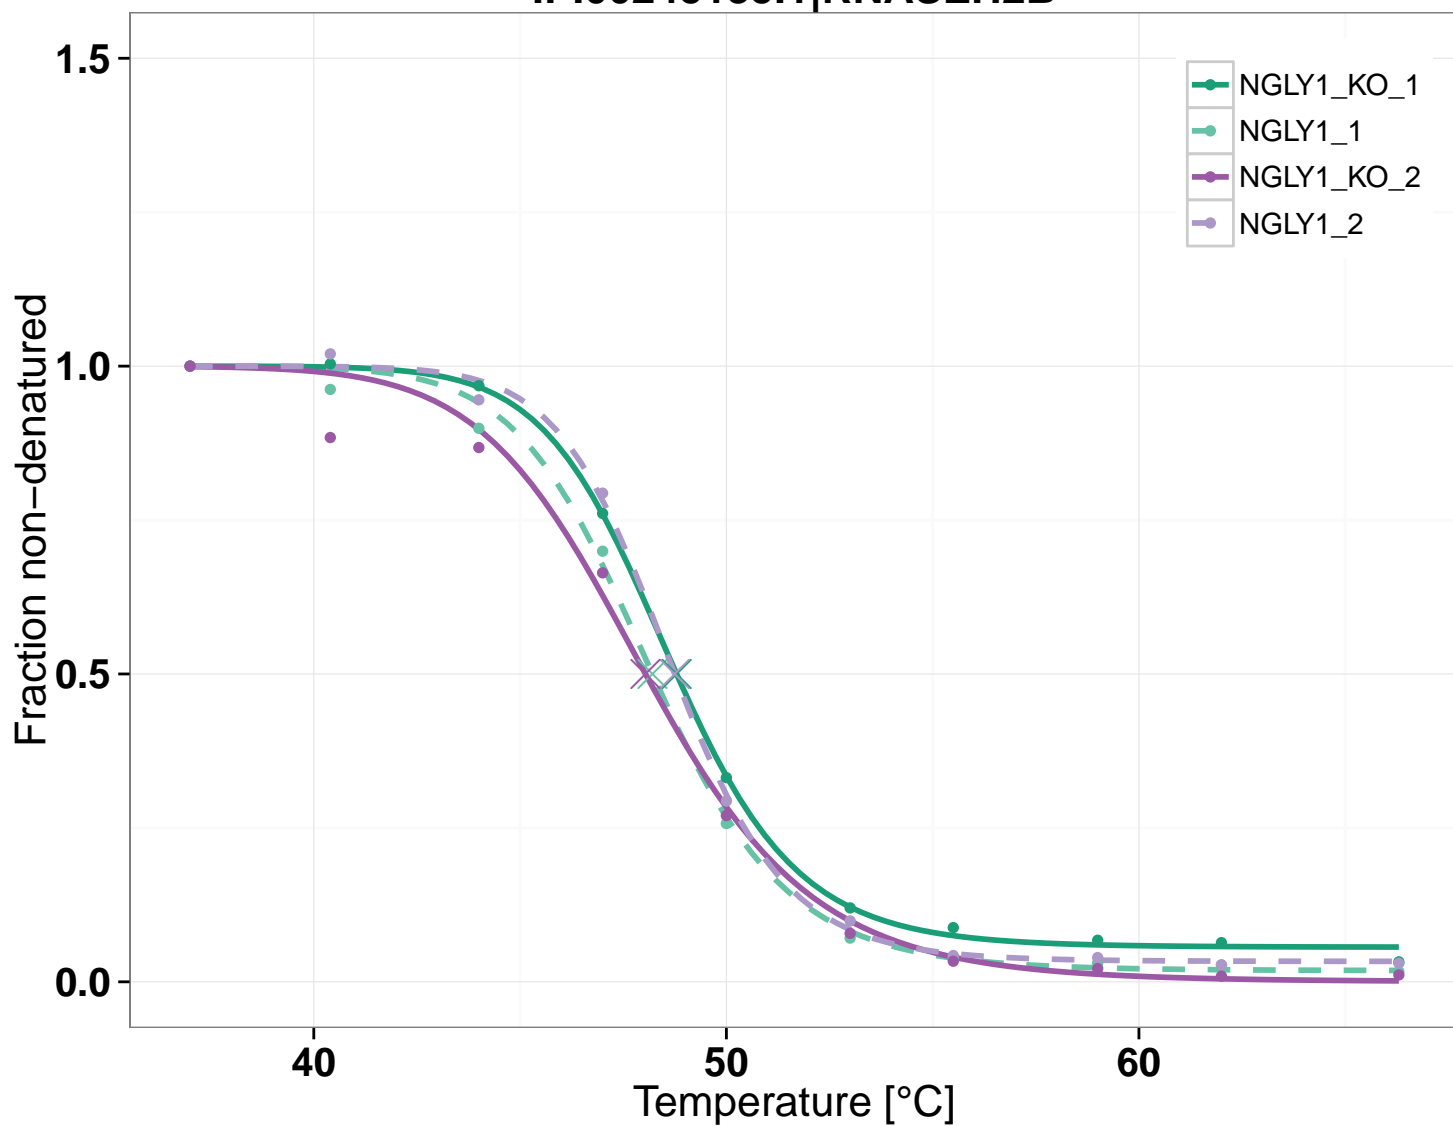

|            | meltPoint | slope | plateau | R2   |
|------------|-----------|-------|---------|------|
| NGLY1_KO_1 | 48.79     | -0.15 | 0.06    | 1    |
| NGLY1_1    | 48.21     | -0.15 | 0.02    | 1    |
| NGLY1_KO_2 | 48.04     | -0.12 | 0       | 0.99 |
| NGLY1_2    | 48.75     | -0.17 | 0.03    | 1    |

Supplement: Supplementary file 6939 [file 1]

IPI00442304.1|Q6ZNE2\_HUMAN

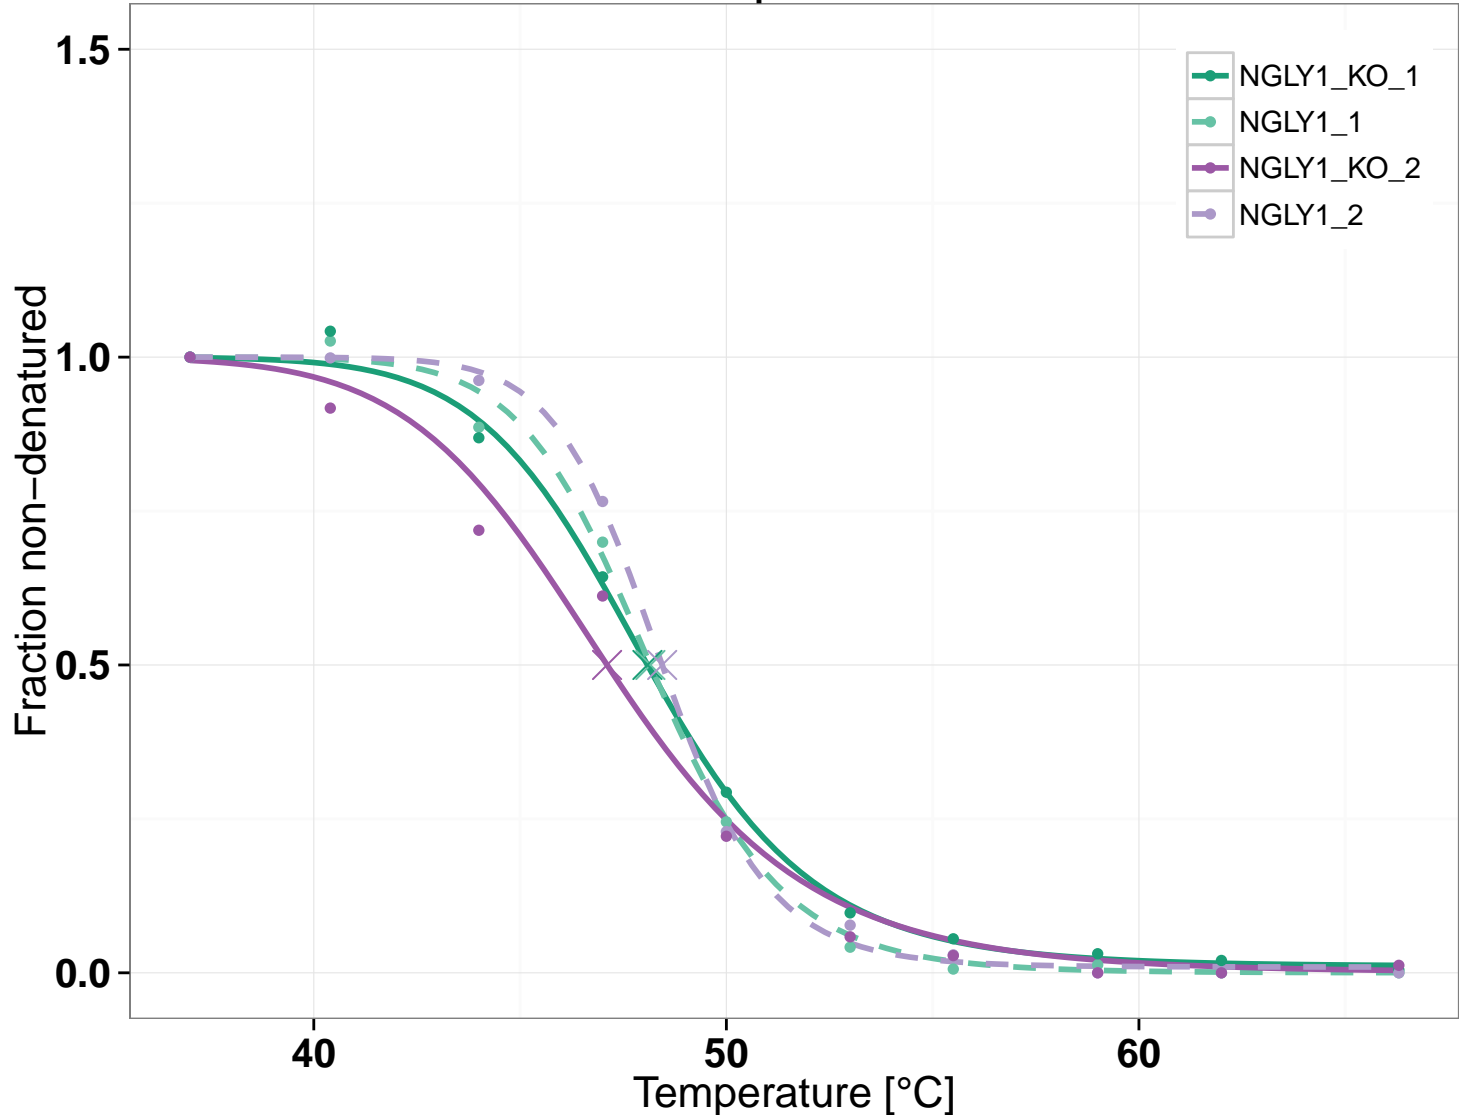

|            | meltPoint | slope | plateau | R2   |
|------------|-----------|-------|---------|------|
| NGLY1_KO_1 | 48.09     | -0.12 | 0.01    | 1    |
| NGLY1_1    | 48.16     | -0.16 | 0       | 1    |
| NGLY1_KO_2 | 47.11     | -0.1  | 0       | 0.99 |
| NGLY1_2    | 48.44     | -0.19 | 0.01    | 1    |

Supplement: Supplementary file 6940 [file 1]

# IPI00178899.1|SKP2

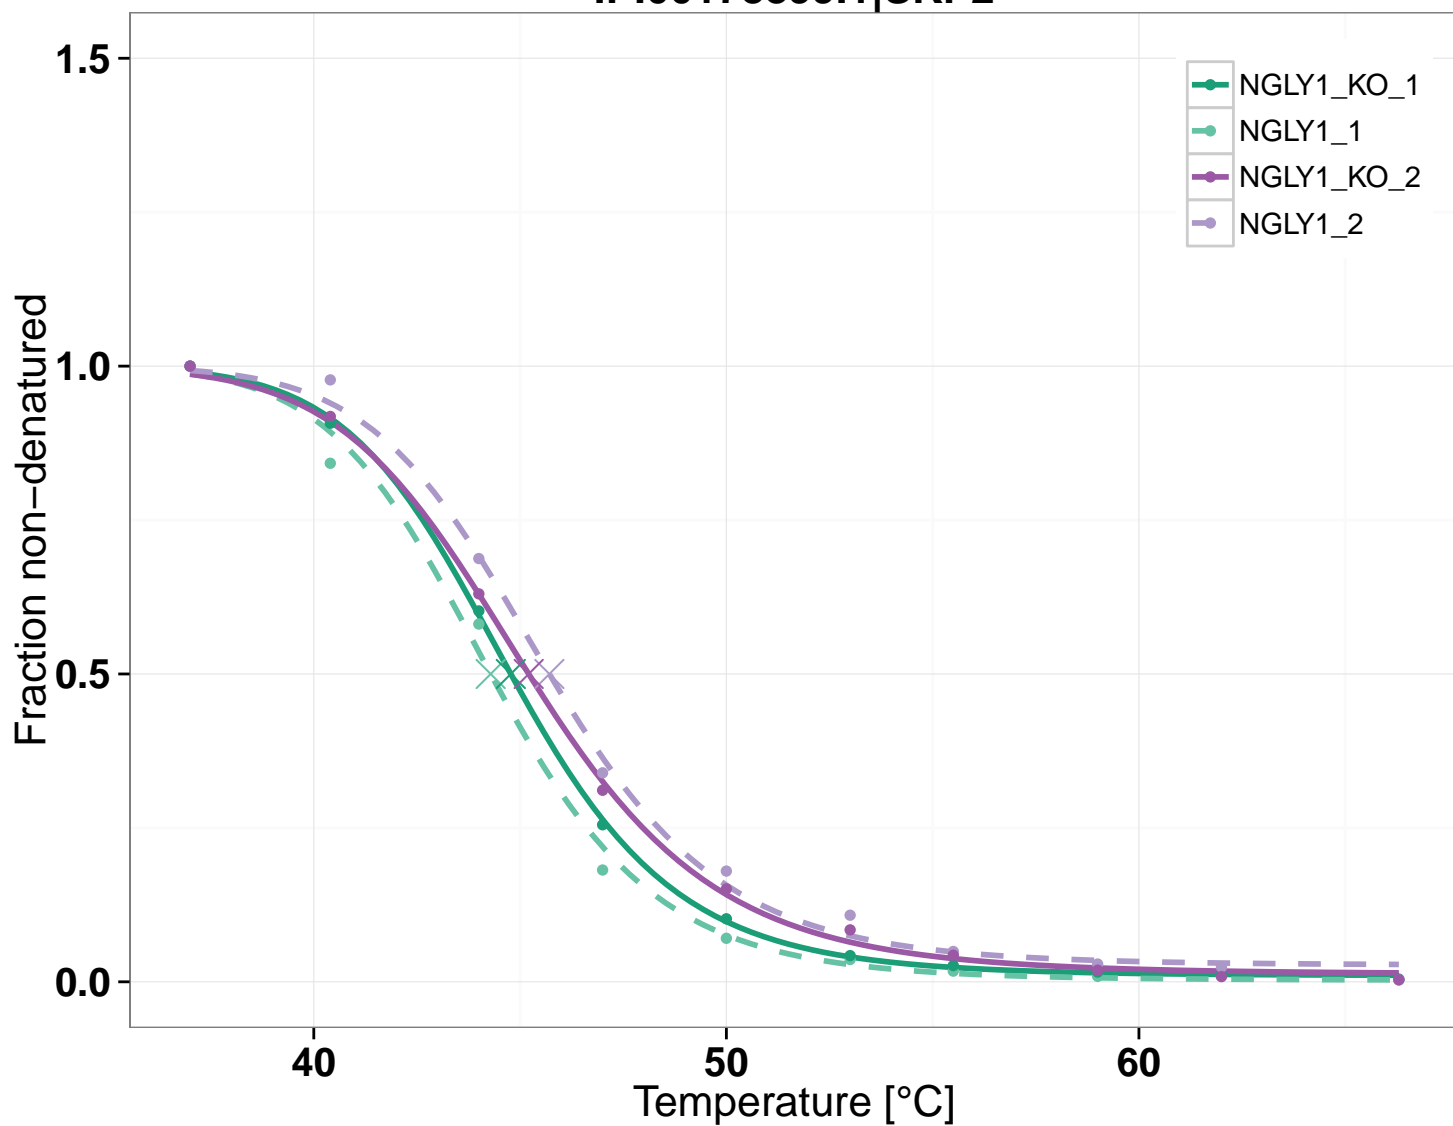

|            | meltPoint | slope | plateau | R2 |
|------------|-----------|-------|---------|----|
| NGLY1_KO_1 | 44.78     | -0.12 | 0.01    | 1  |
| NGLY1_1    | 44.29     | -0.13 | 0       | 1  |
| NGLY1_KO_2 | 45.21     | -0.11 | 0.01    | 1  |
| NGLY1_2    | 45.71     | -0.11 | 0.03    | 1  |

Supplement: Supplementary file 6941 [file 1]

IPI00760670.1|TMEM20

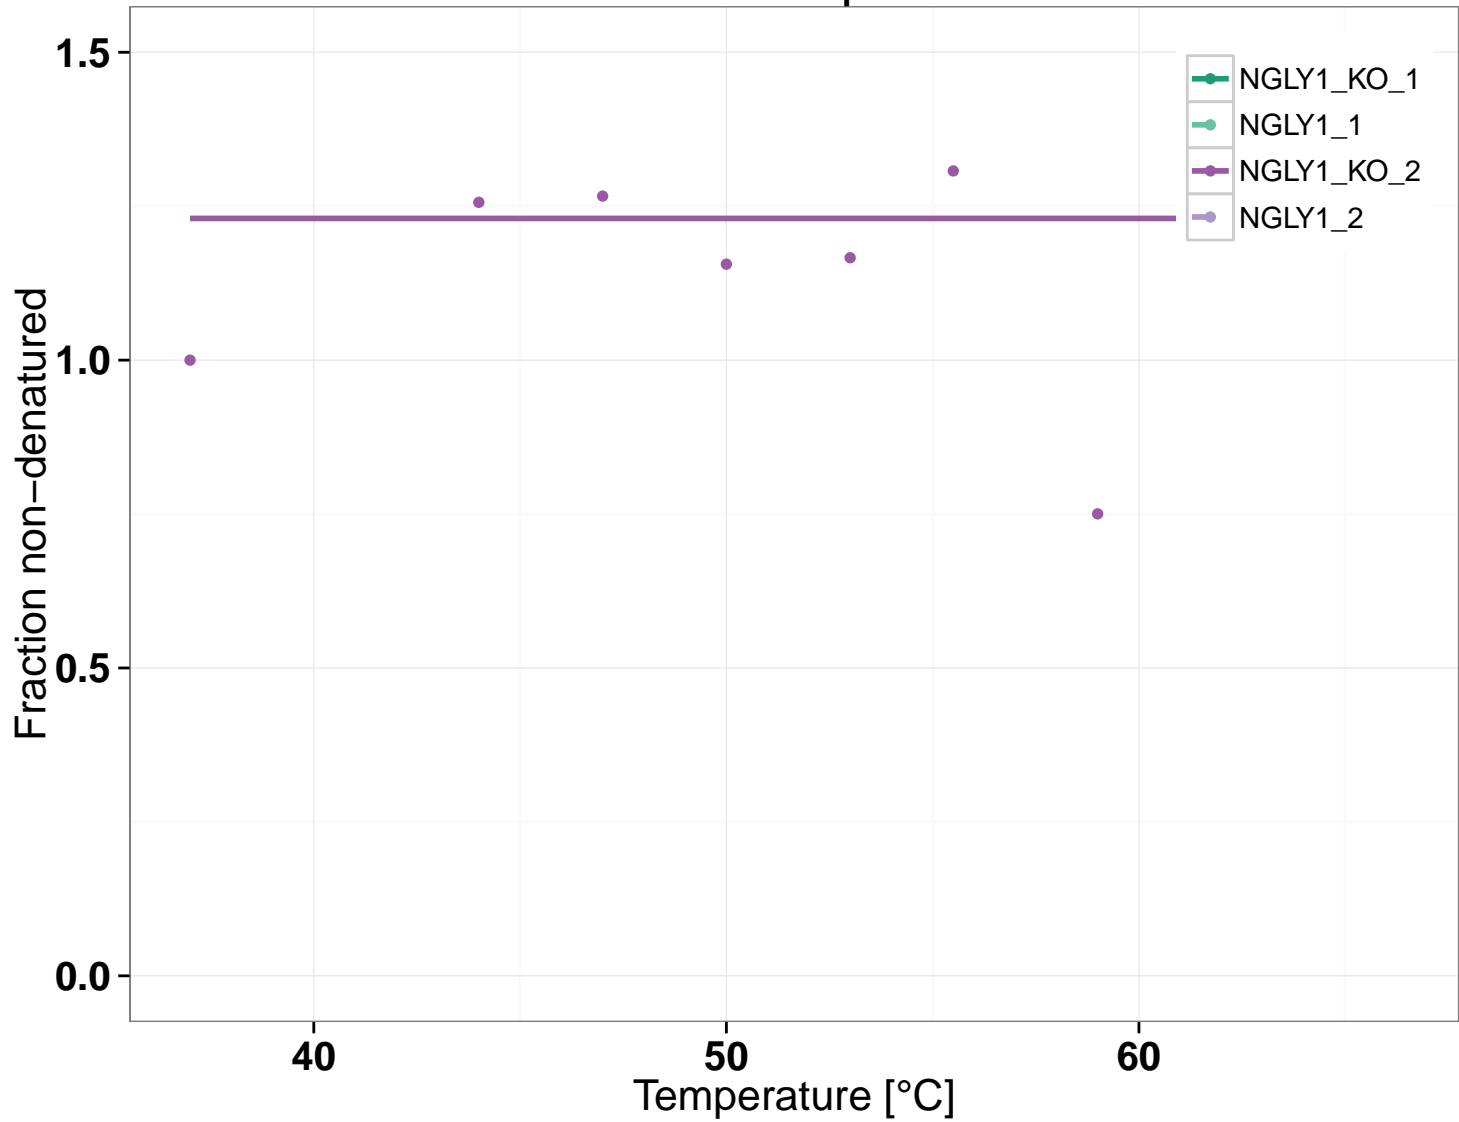

|            | meltPoint | slope | plateau | R2 |
|------------|-----------|-------|---------|----|
| NGLY1_KO_1 | -         | -     | -       | -  |
| NGLY1_1    | -         | -     | -       | -  |
| NGLY1_KO_2 | -         | -     | 1.46    | 0  |
| NGLY1_2    | -         | -     | -       | -  |

Supplement: Supplementary file 6942 [file 1]

IPI00855946.1|SNX30

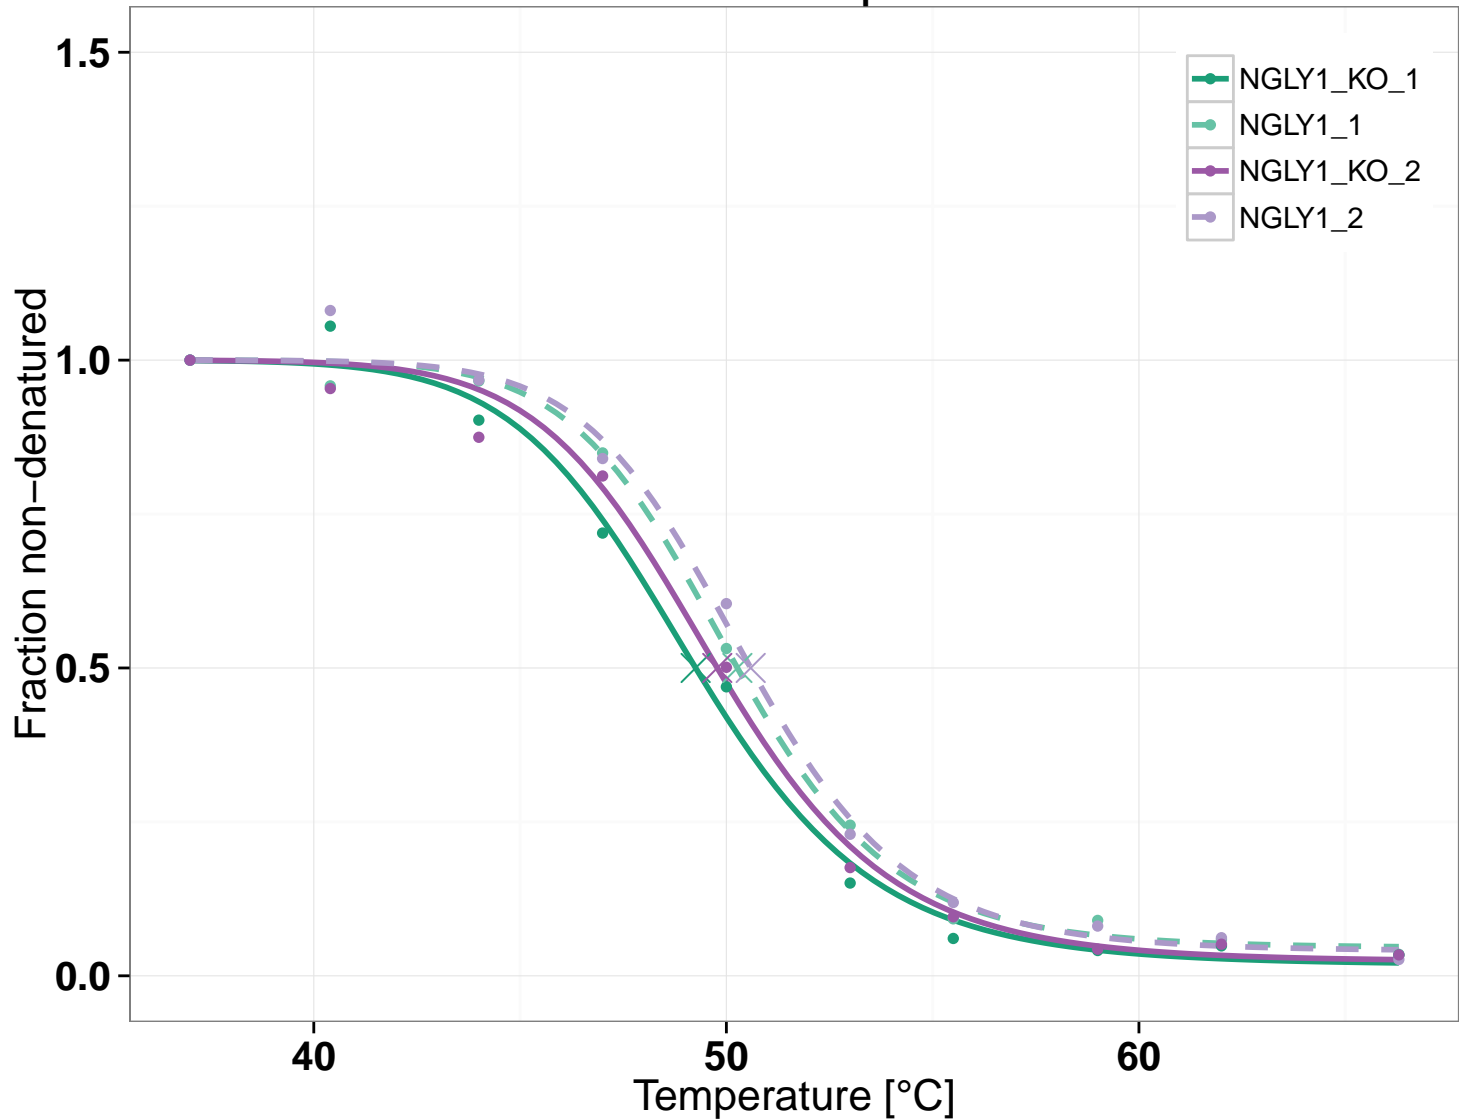

|            | meltPoint | slope | plateau | R2   |
|------------|-----------|-------|---------|------|
| NGLY1_KO_1 | 49.26     | -0.11 | 0.02    | 0.99 |
| NGLY1_1    | 50.27     | -0.12 | 0.05    | 1    |
| NGLY1_KO_2 | 49.78     | -0.11 | 0.02    | 0.99 |
| NGLY1_2    | 50.59     | -0.12 | 0.04    | 0.99 |

Supplement: Supplementary file 6943 [file 1]

IPI00006803.1|CHST10

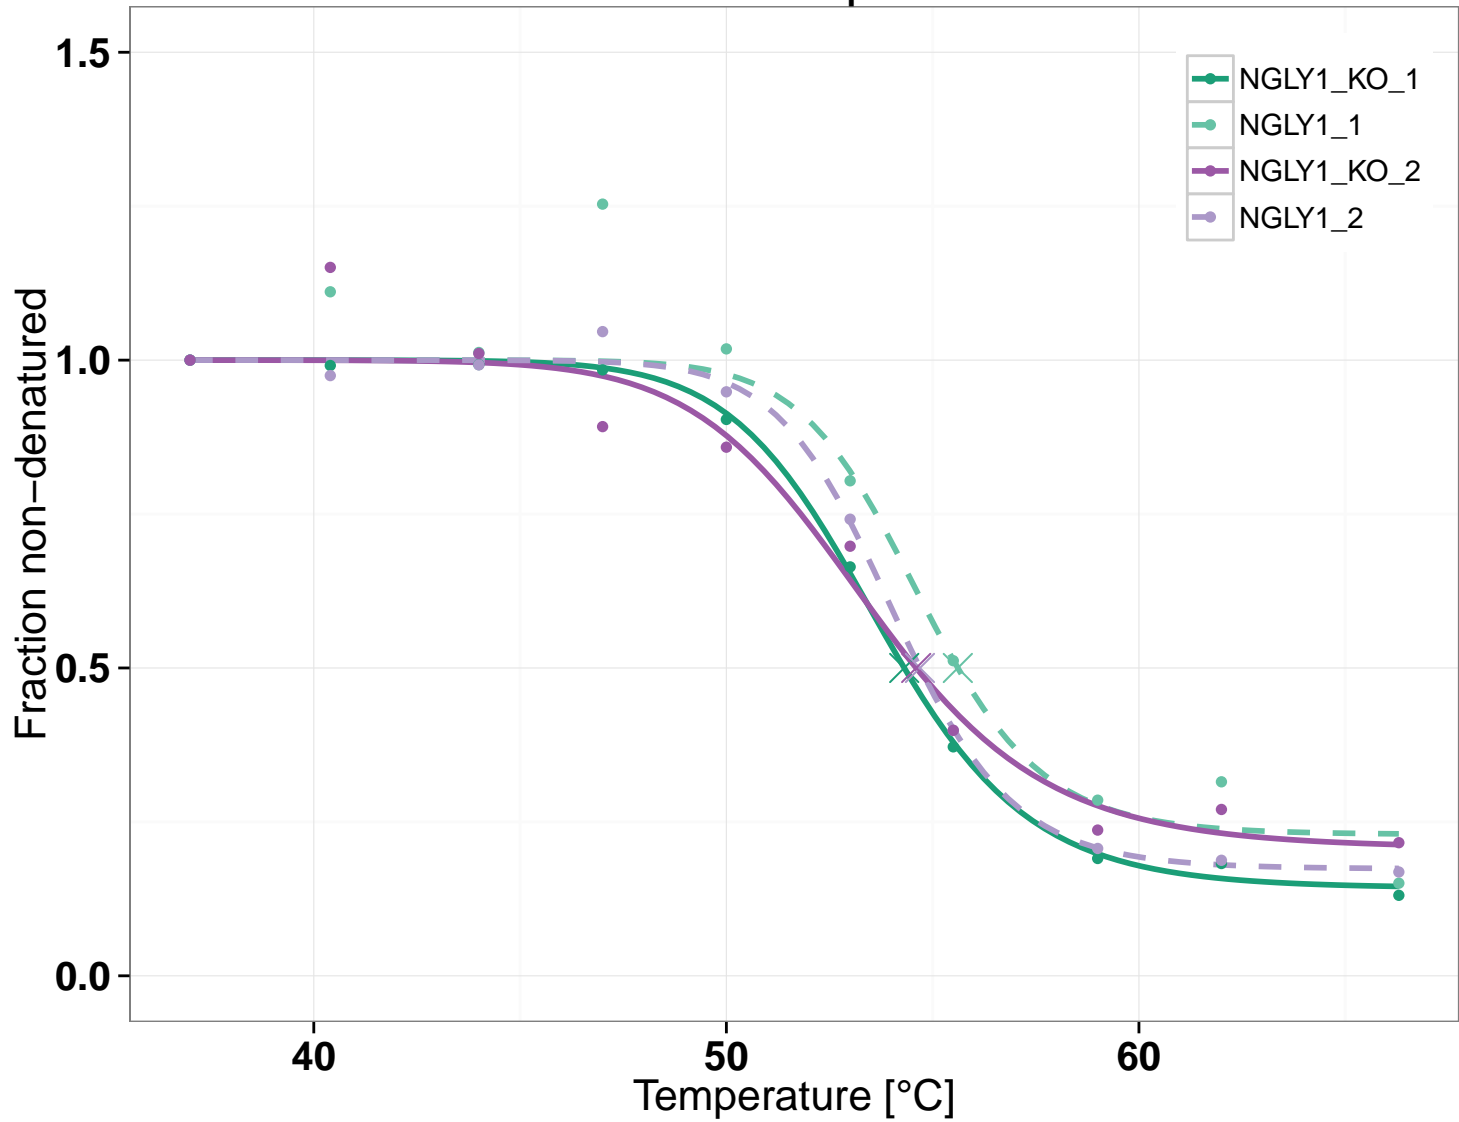

|            | meltPoint | slope  | plateau | R2   |
|------------|-----------|--------|---------|------|
| NGLY1_KO_1 | 54.31     | -0.12  | 0.14    | 1    |
| NGLY1_1    | 55.61     | -0.13  | 0.23    | 0.93 |
| NGLY1_KO_2 | 54.6      | -0.093 | 0.21    | 0.97 |
| NGLY1_2    | 54.69     | -0.14  | 0.17    | 1    |

Supplement: Supplementary file 6944 [file 1]

IPI00165309.5|GTF2H5

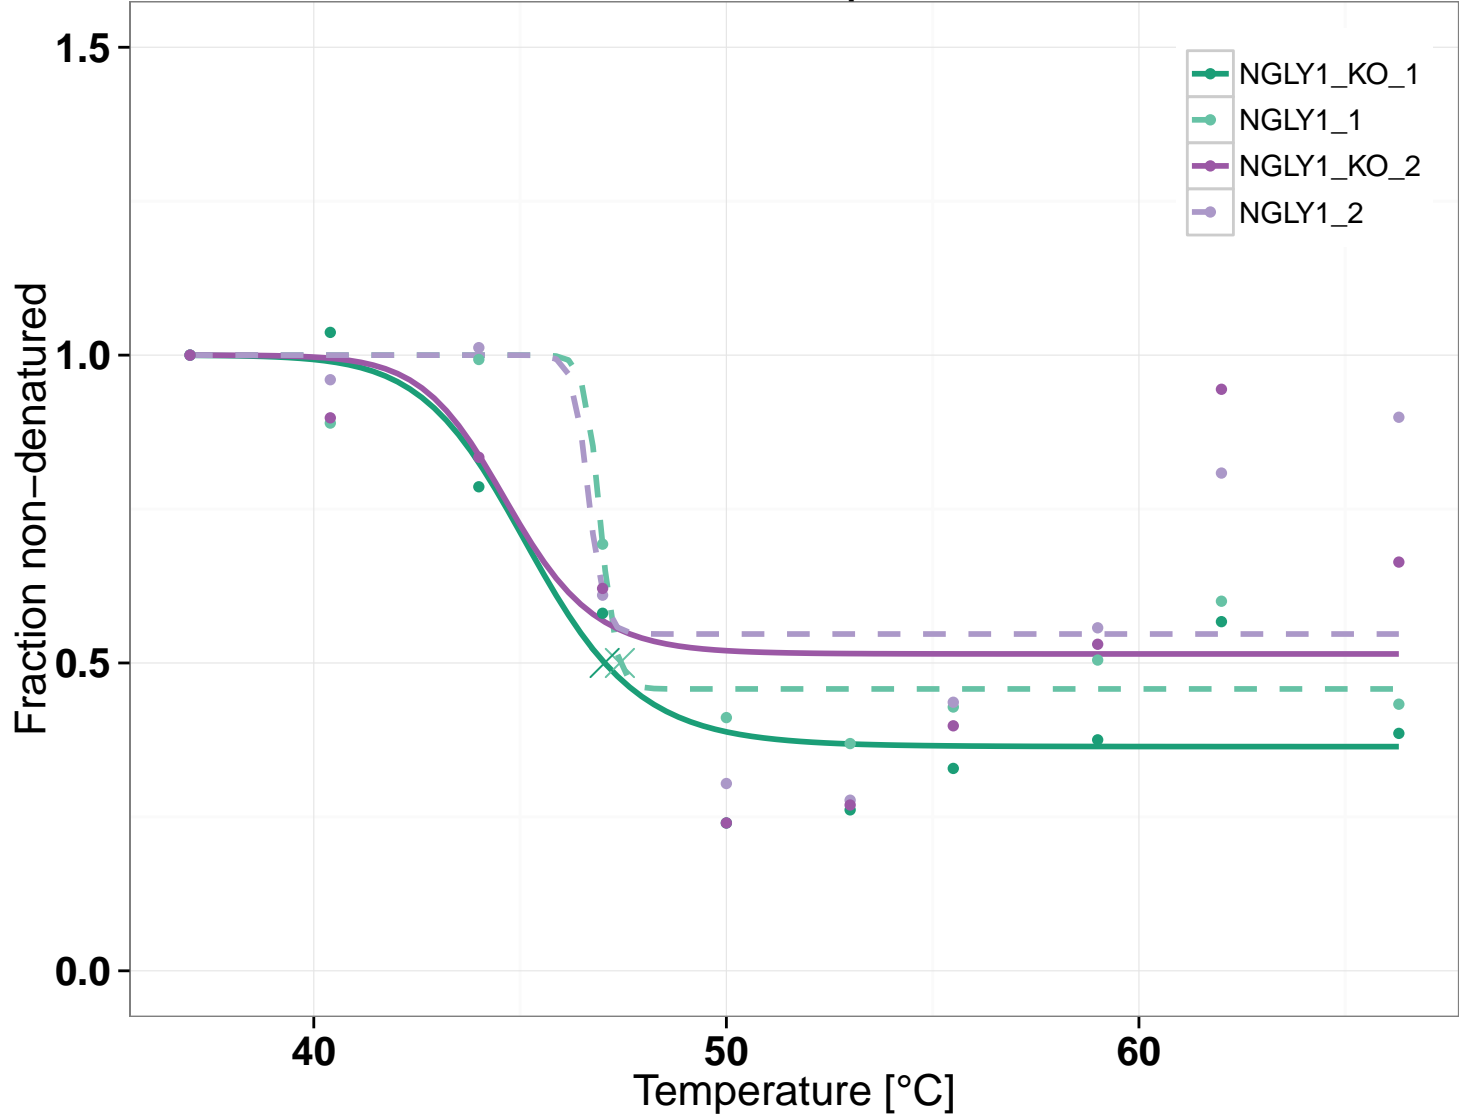

|            | meltPoint | slope | plateau | R2   |
|------------|-----------|-------|---------|------|
| NGLY1_KO_1 | 47.05     | -0.12 | 0.36    | 0.89 |
| NGLY1_1    | 47.42     | -0.72 | 0.46    | 0.92 |
| NGLY1_KO_2 | -         | -0.12 | 0.51    | 0.47 |
| NGLY1_2    | -         | -0.61 | 0.55    | 0.54 |

Supplement: Supplementary file 6945 [file 1]

IPI00816474.1|FAM127A

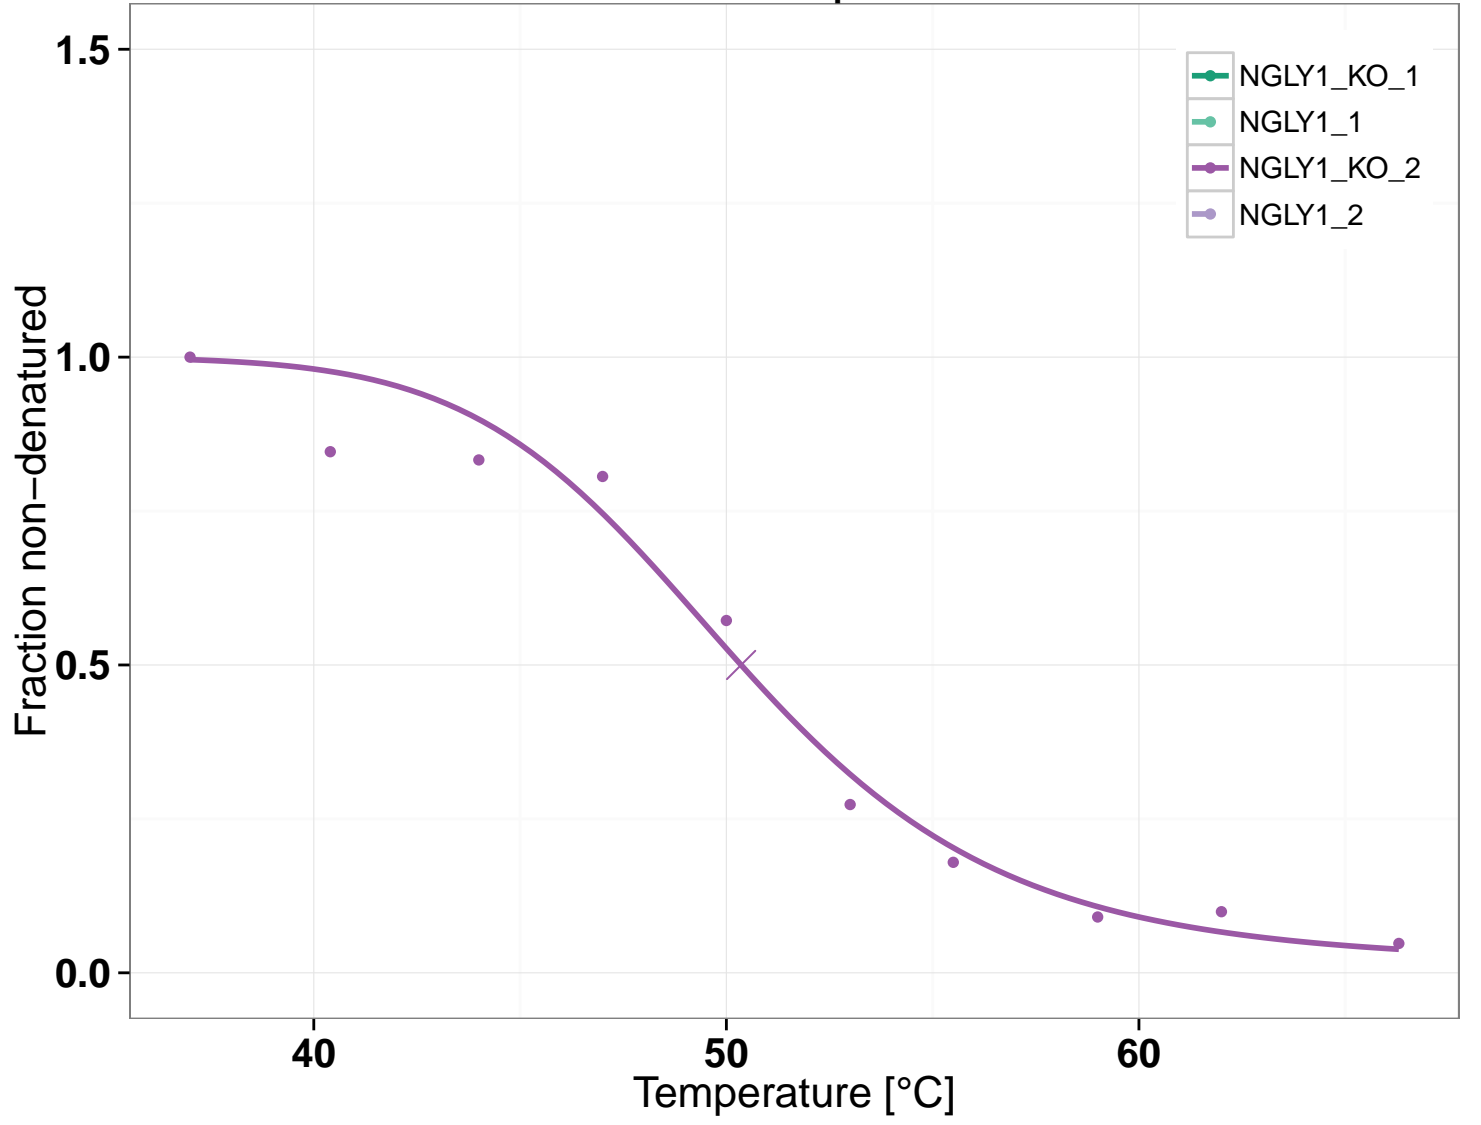

|            | meltPoint | slope  | plateau | R2   |
|------------|-----------|--------|---------|------|
| NGLY1_KO_1 | -         | -      | -       | -    |
| NGLY1_1    | -         | -      | -       | -    |
| NGLY1_KO_2 | 50.36     | -0.076 | 0.01    | 0.98 |
| NGLY1_2    | -         | -      | -       | -    |

Supplement: Supplementary file 6946 [file 1]

IPI00878627.1|KCTD7

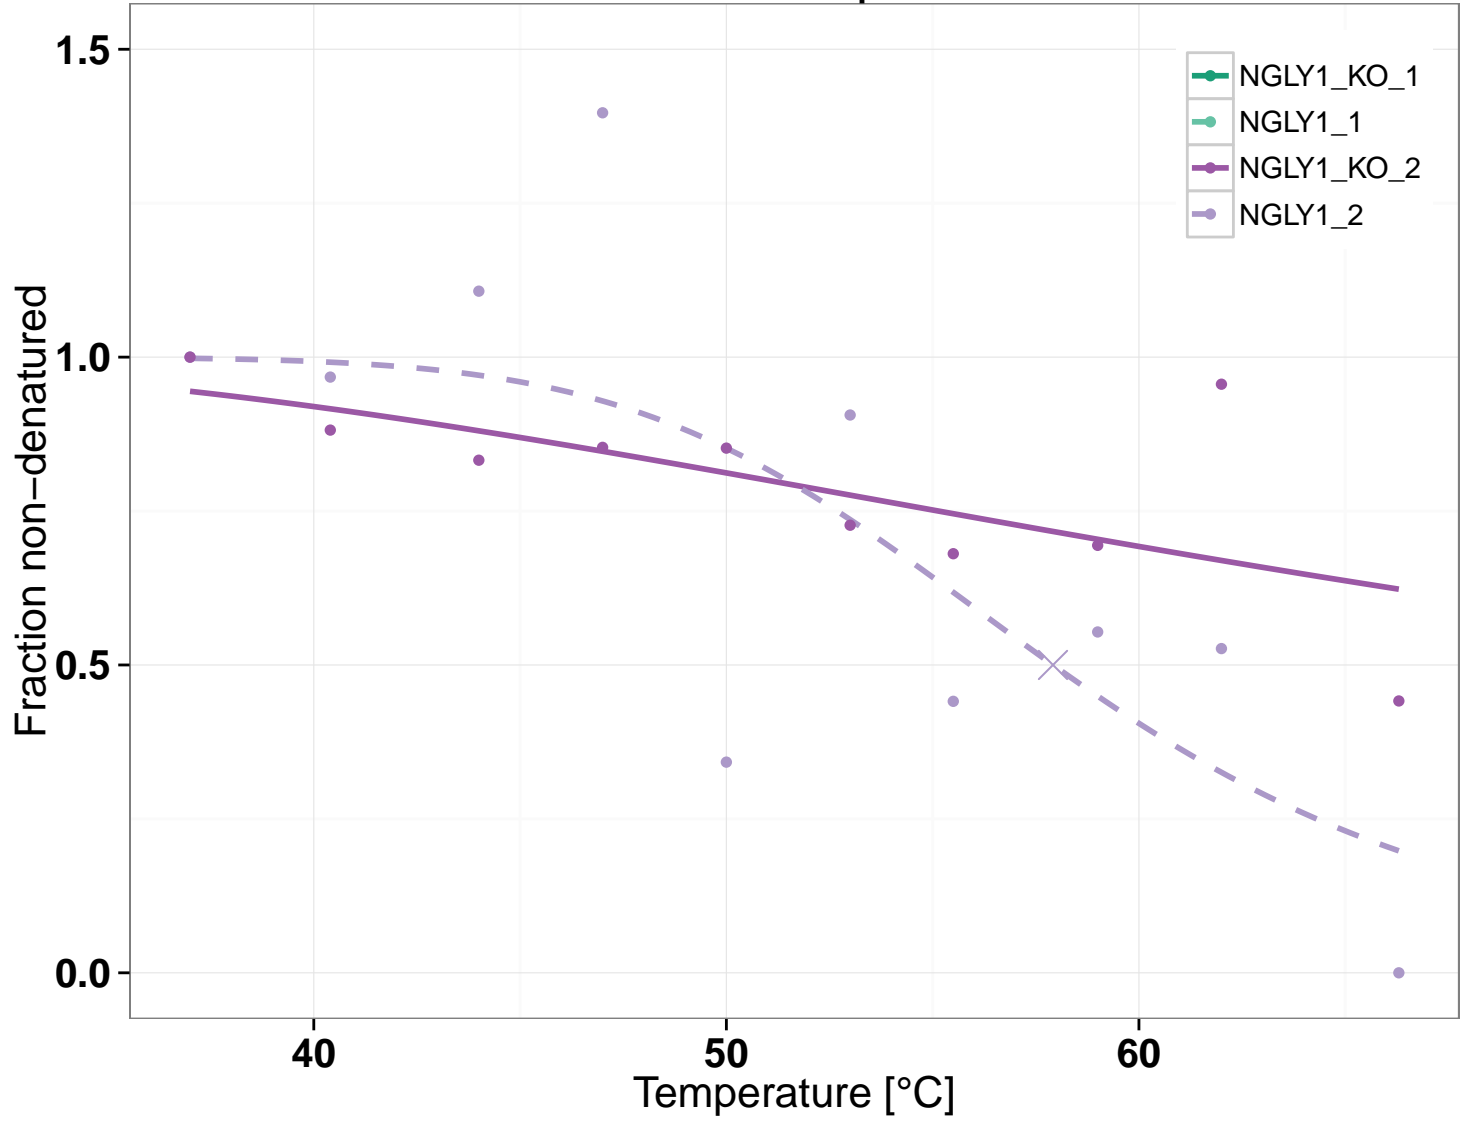

|            | meltPoint | slope  | plateau | R2   |
|------------|-----------|--------|---------|------|
| NGLY1_KO_1 | -         | -      | -       | -    |
| NGLY1_1    | -         | -      | -       | -    |
| NGLY1_KO_2 | -         | -0.012 | 0       | 0.45 |
| NGLY1_2    | 57.92     | -0.049 | 0       | 0.59 |

Supplement: Supplementary file 6947 [file 1]

IPI00031005.3|SGK196

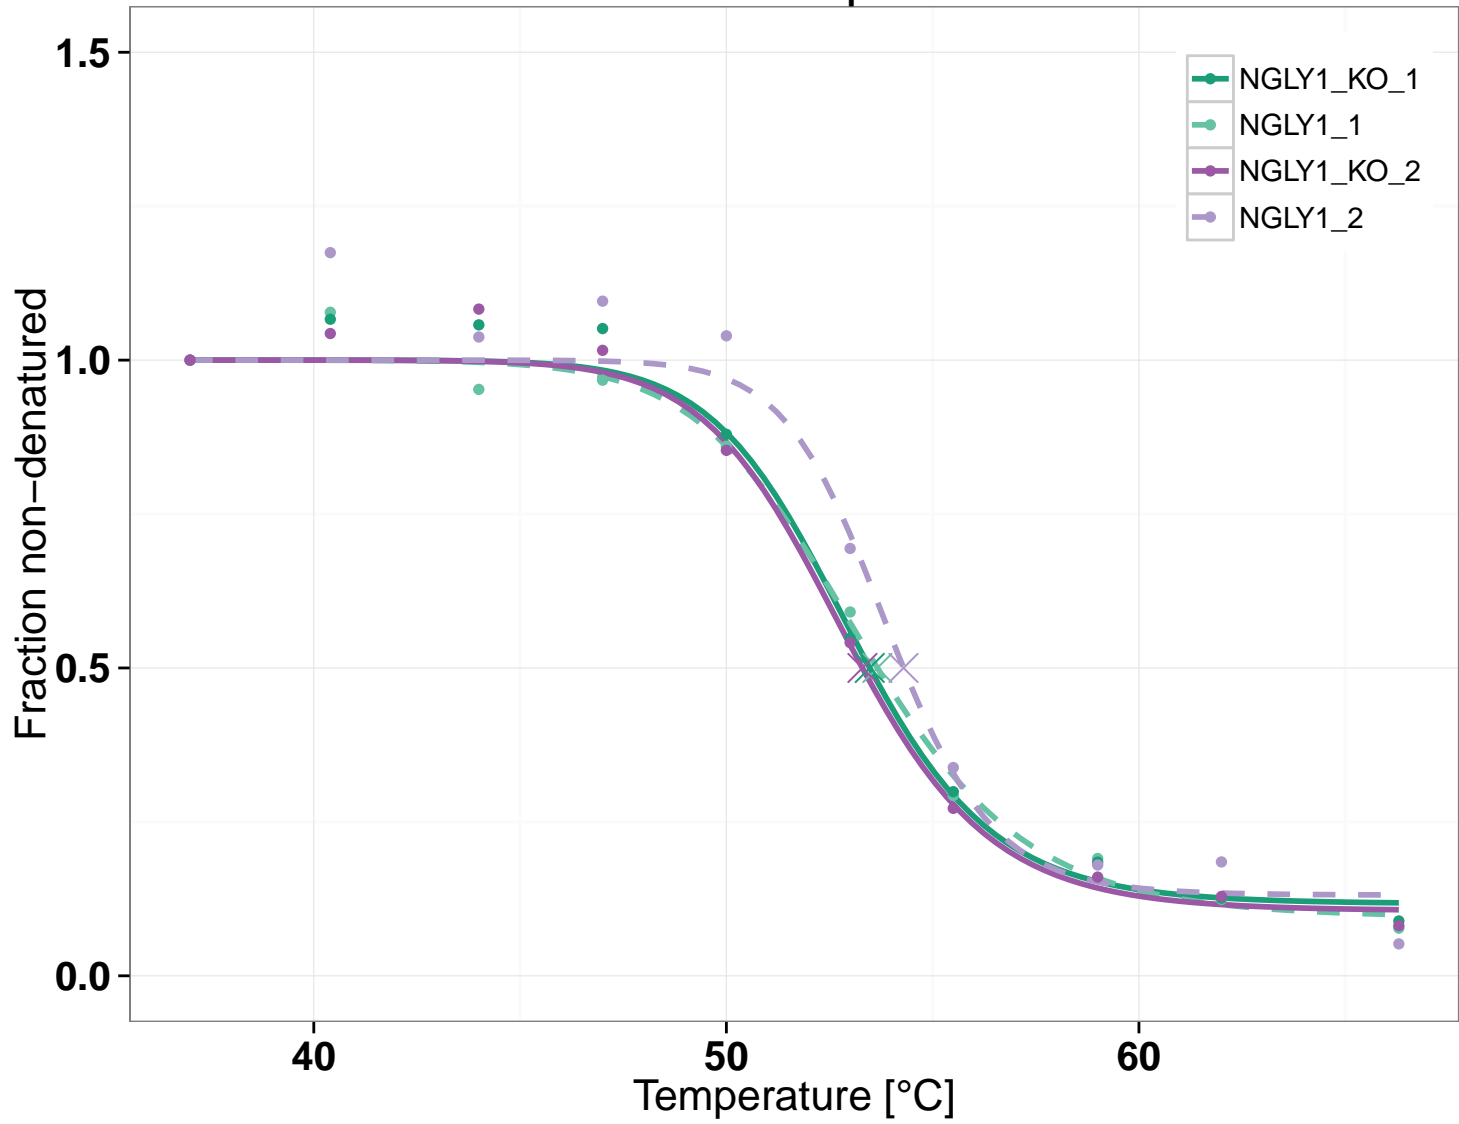

|            | meltPoint | slope | plateau | R2   |
|------------|-----------|-------|---------|------|
| NGLY1_KO_1 | 53.48     | -0.13 | 0.12    | 0.99 |
| NGLY1_1    | 53.66     | -0.11 | 0.09    | 0.99 |
| NGLY1_KO_2 | 53.3      | -0.13 | 0.11    | 0.99 |
| NGLY1_2    | 54.29     | -0.17 | 0.13    | 0.97 |

Supplement: Supplementary file 6948 [file 1]

IPI00162088.1|TRAF4

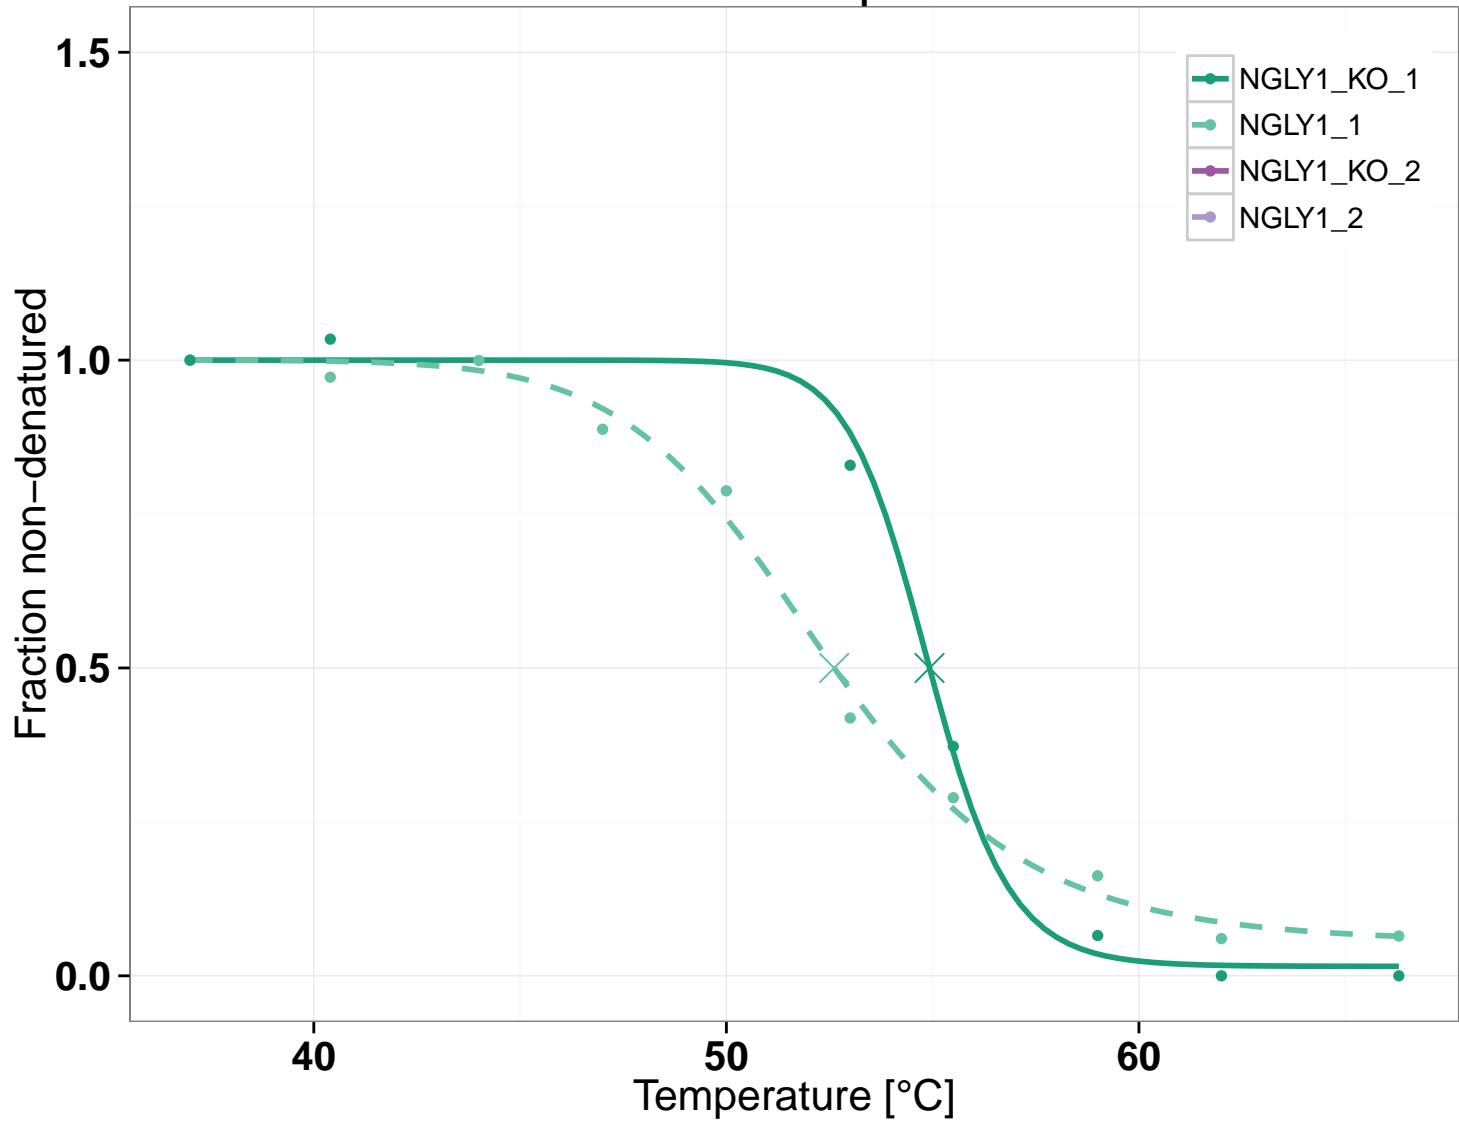

|            | meltPoint | slope  | plateau | R2   |
|------------|-----------|--------|---------|------|
| NGLY1_KO_1 | 54.92     | -0.25  | 0.02    | 0.67 |
| NGLY1_1    | 52.61     | -0.097 | 0.05    | 0.99 |
| NGLY1_KO_2 | -         | -      | -       | -    |
| NGLY1_2    | -         | -      | -       | -    |

Supplement: Supplementary file 6949 [file 1]

IPI00002344.1|SRD5A3

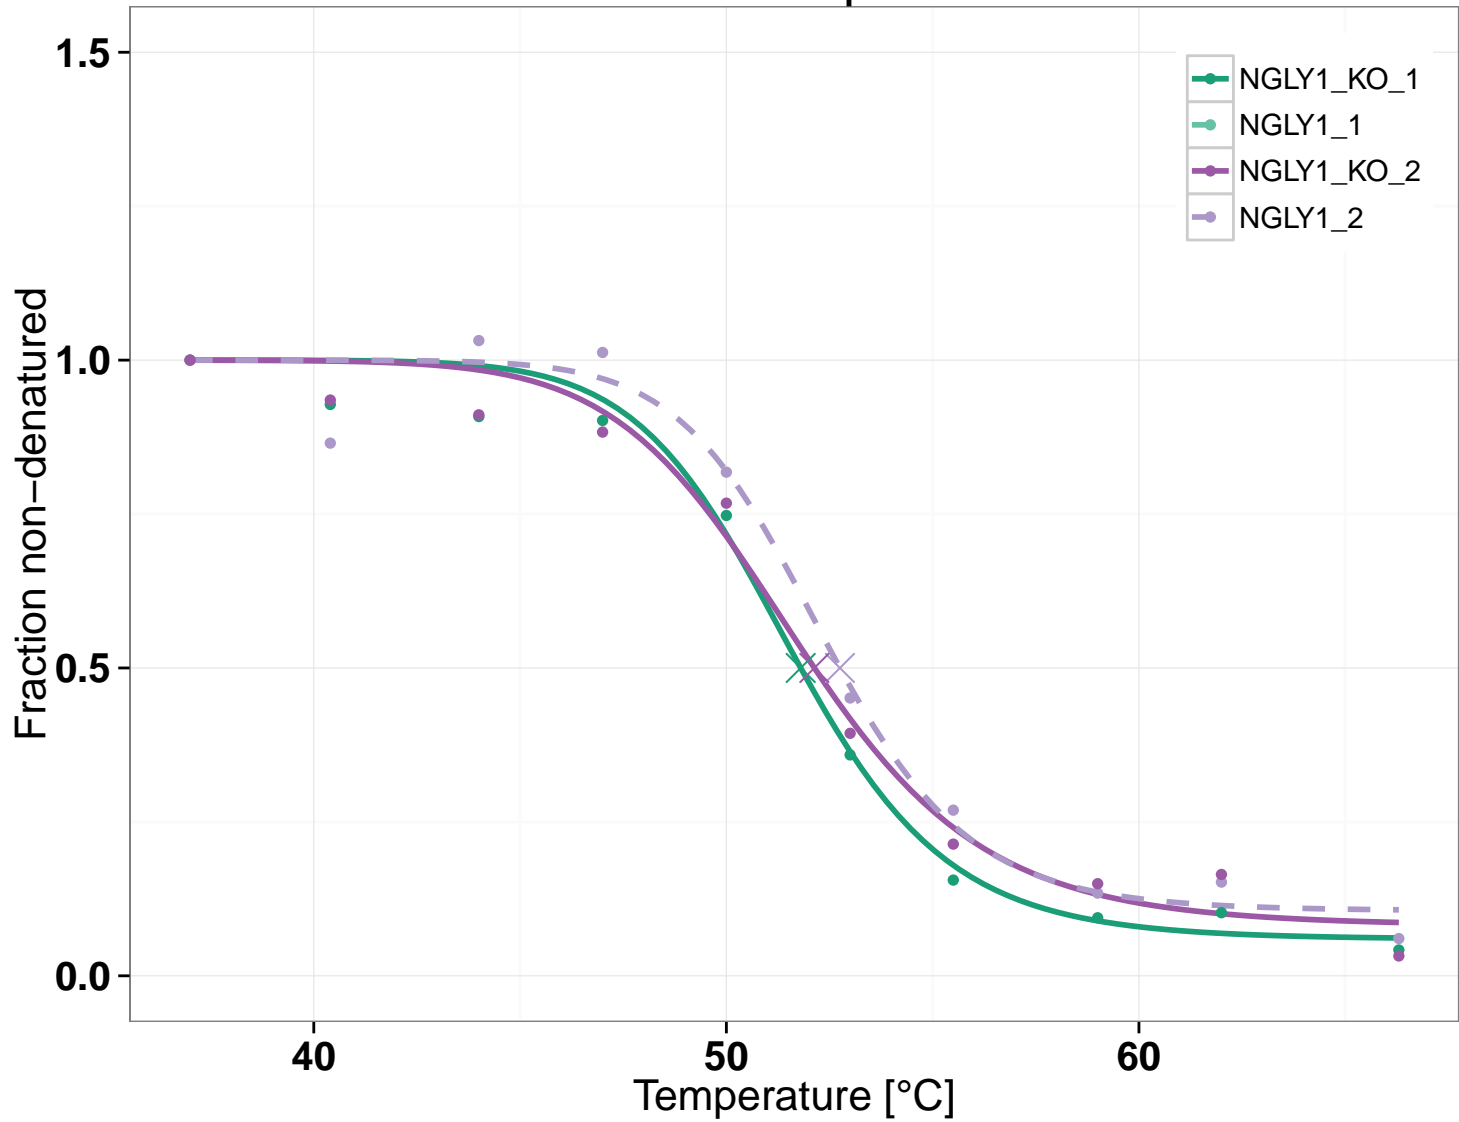

|            | meltPoint | slope | plateau | R2   |
|------------|-----------|-------|---------|------|
| NGLY1_KO_1 | 51.8      | -0.12 | 0.06    | 0.99 |
| NGLY1_1    | -         | -     | -       | -    |
| NGLY1_KO_2 | 52.13     | -0.1  | 0.08    | 0.98 |
| NGLY1_2    | 52.75     | -0.13 | 0.11    | 0.98 |

Supplement: Supplementary file 6950 [file 1]

IPI00026317.3|ZBTB7A

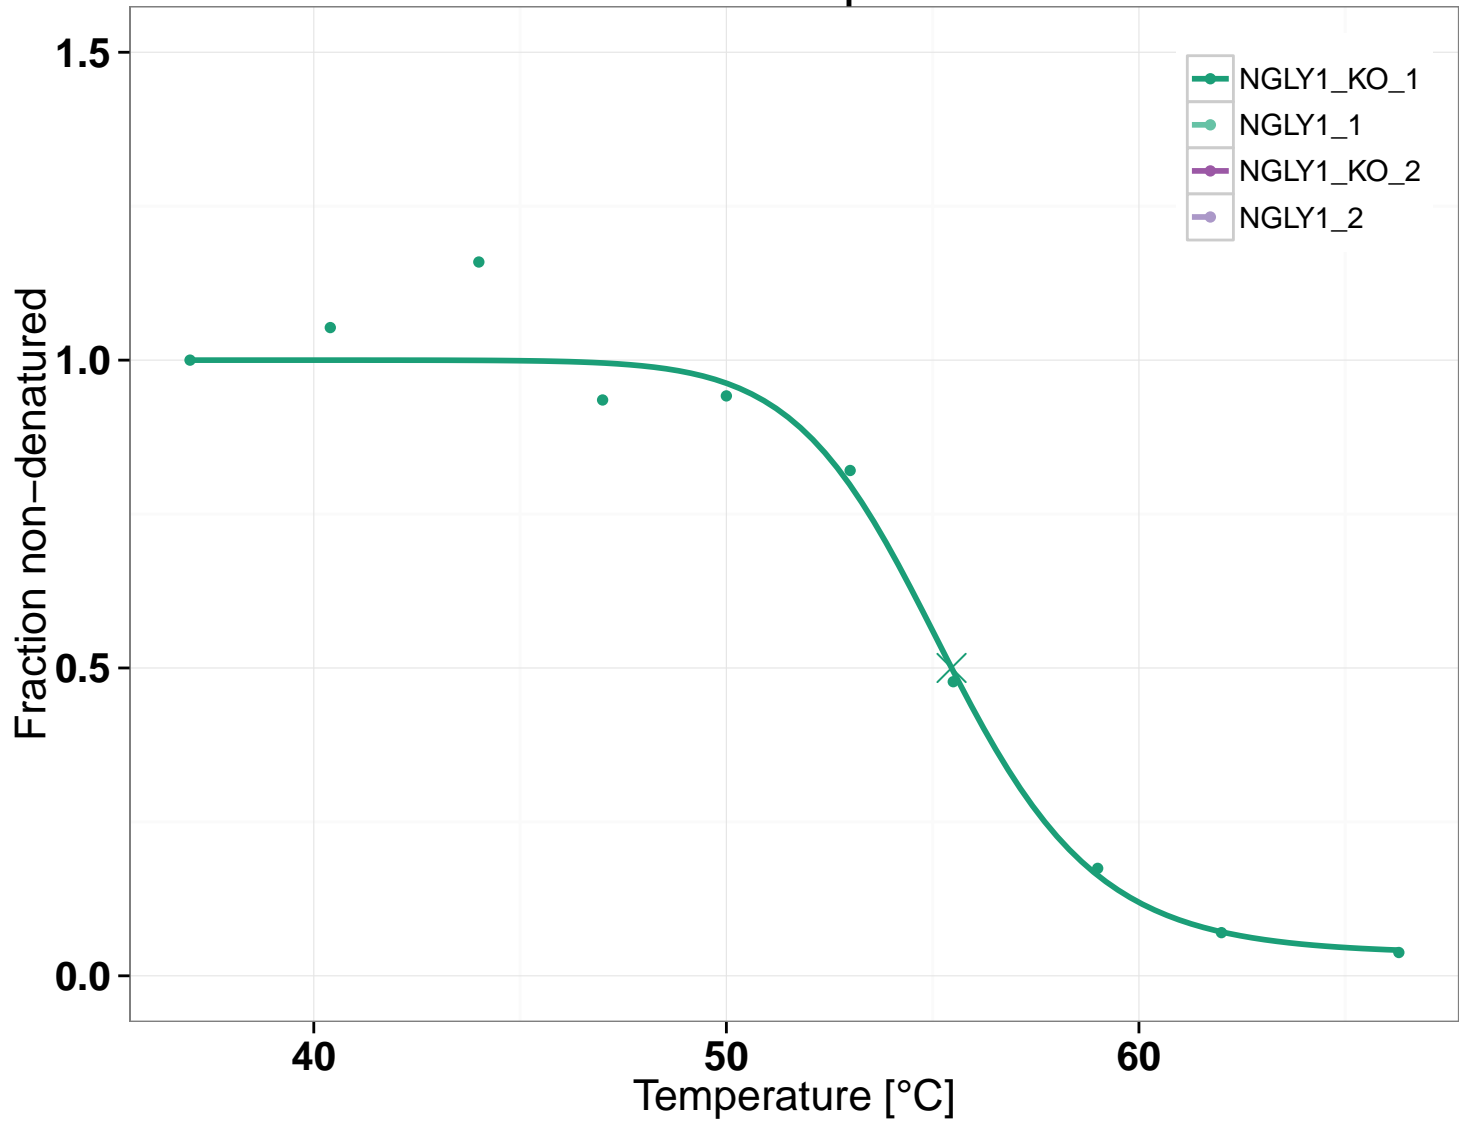

|            | meltPoint | slope | plateau | R2   |
|------------|-----------|-------|---------|------|
| NGLY1_KO_1 | 55.46     | -0.13 | 0.04    | 0.98 |
| NGLY1_1    | -         | -     | -       | -    |
| NGLY1_KO_2 | -         | -     | -       | -    |
| NGLY1_2    | -         | -     | -       | -    |

Supplement: Supplementary file 6951 [file 1]

# IPI00294312.5|SIDT2

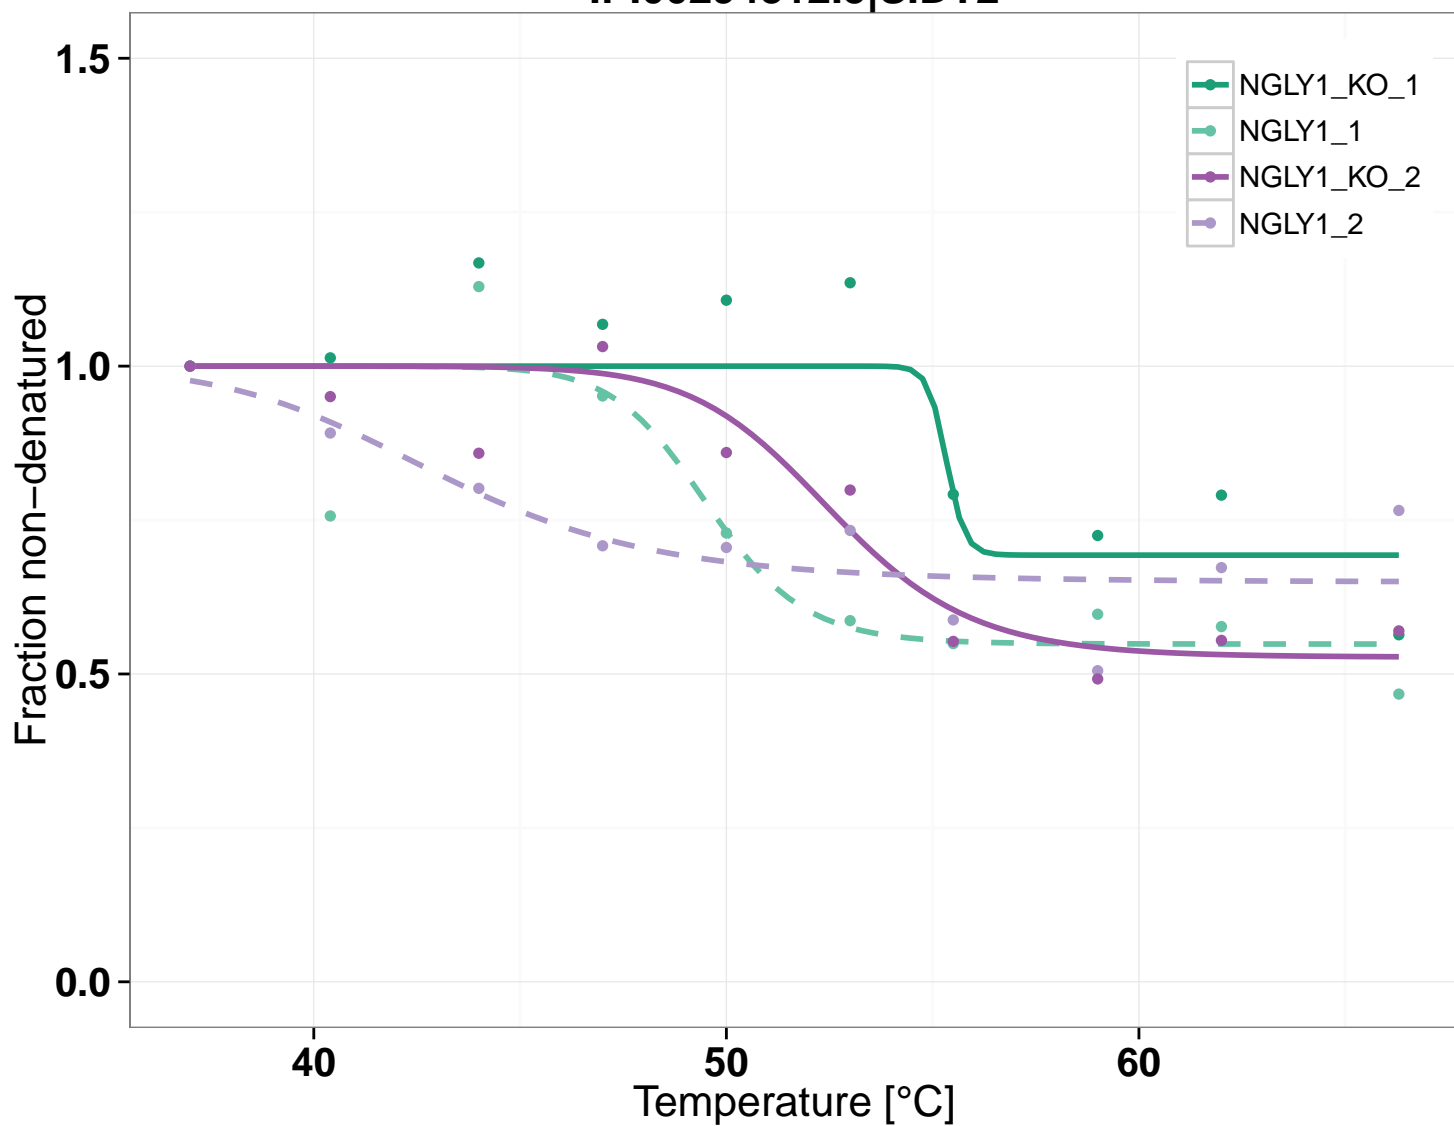

|            | meltPoint | slope  | plateau | R2   |
|------------|-----------|--------|---------|------|
| NGLY1_KO_1 | —         | −0.35  | 0.69    | 0.76 |
| NGLY1_1    | —         | −0.097 | 0.55    | 0.81 |
| NGLY1_KO_2 | —         | −0.07  | 0.53    | 0.9  |
| NGLY1_2    | —         | −0.034 | 0.65    | 0.74 |

Supplement: Supplementary file 6952 [file 1]

IPI00184871.3|C6ORF130

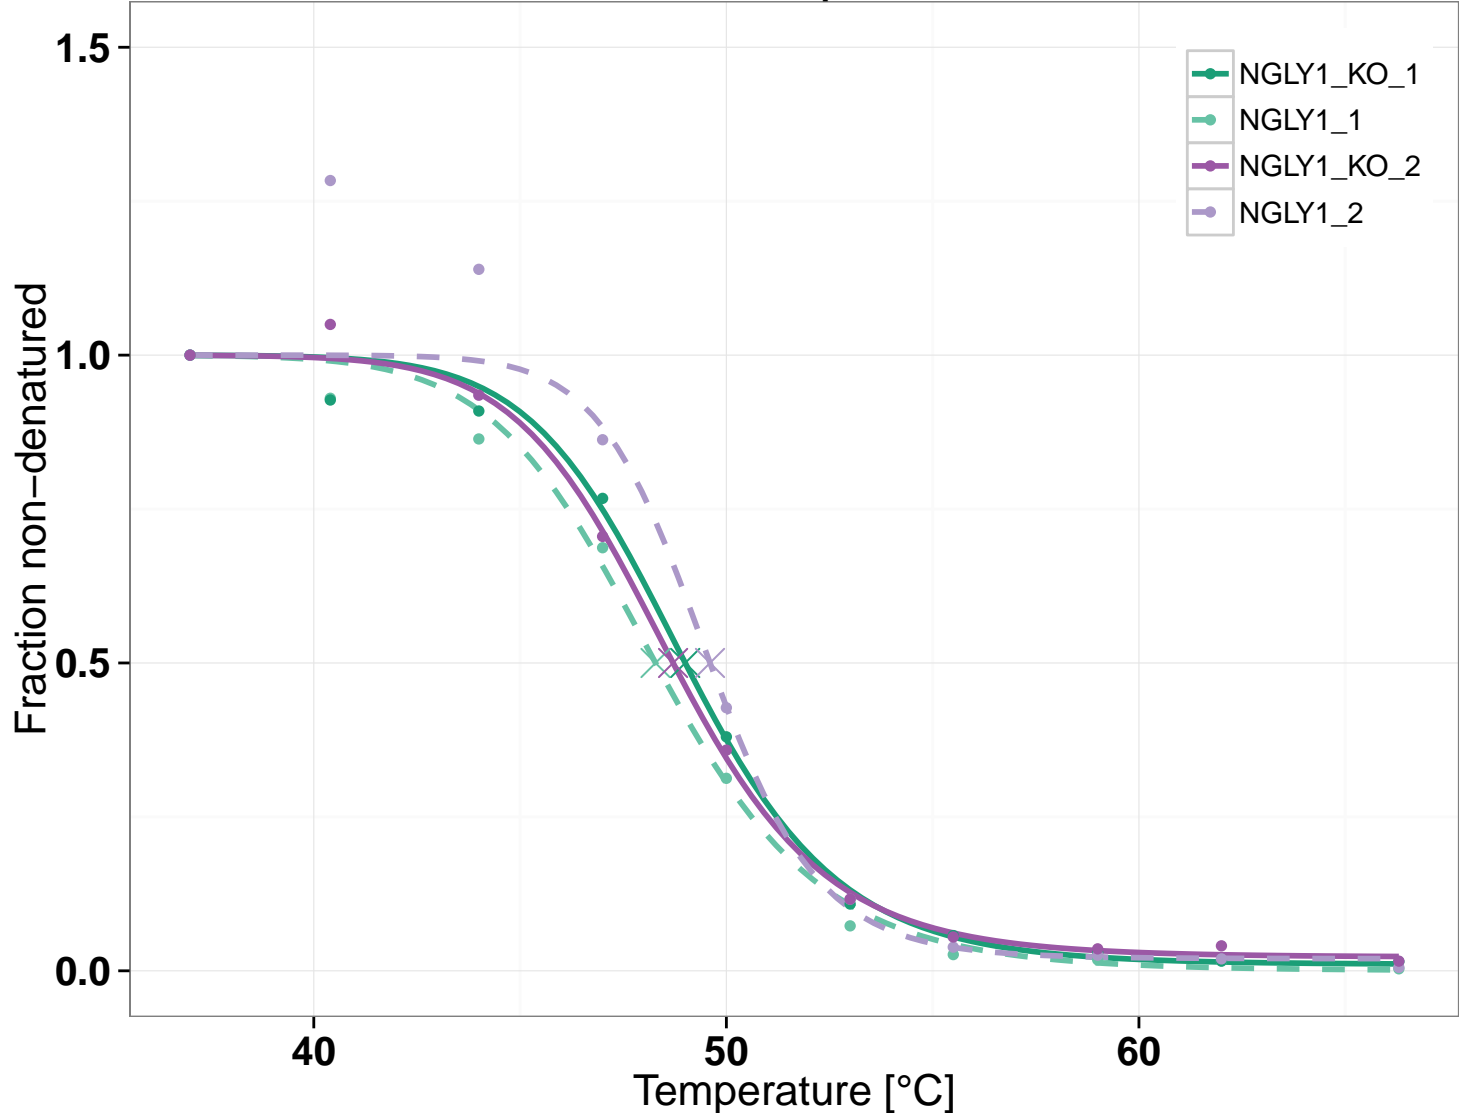

|            | meltPoint | slope | plateau | R2   |
|------------|-----------|-------|---------|------|
| NGLY1_KO_1 | 49        | -0.13 | 0.01    | 1    |
| NGLY1_1    | 48.28     | -0.12 | 0       | 0.99 |
| NGLY1_KO_2 | 48.71     | -0.13 | 0.02    | 1    |
| NGLY1_2    | 49.6      | -0.18 | 0.02    | 0.96 |

Supplement: Supplementary file 6953 [file 1]

IPI00641026.3|CXXC1

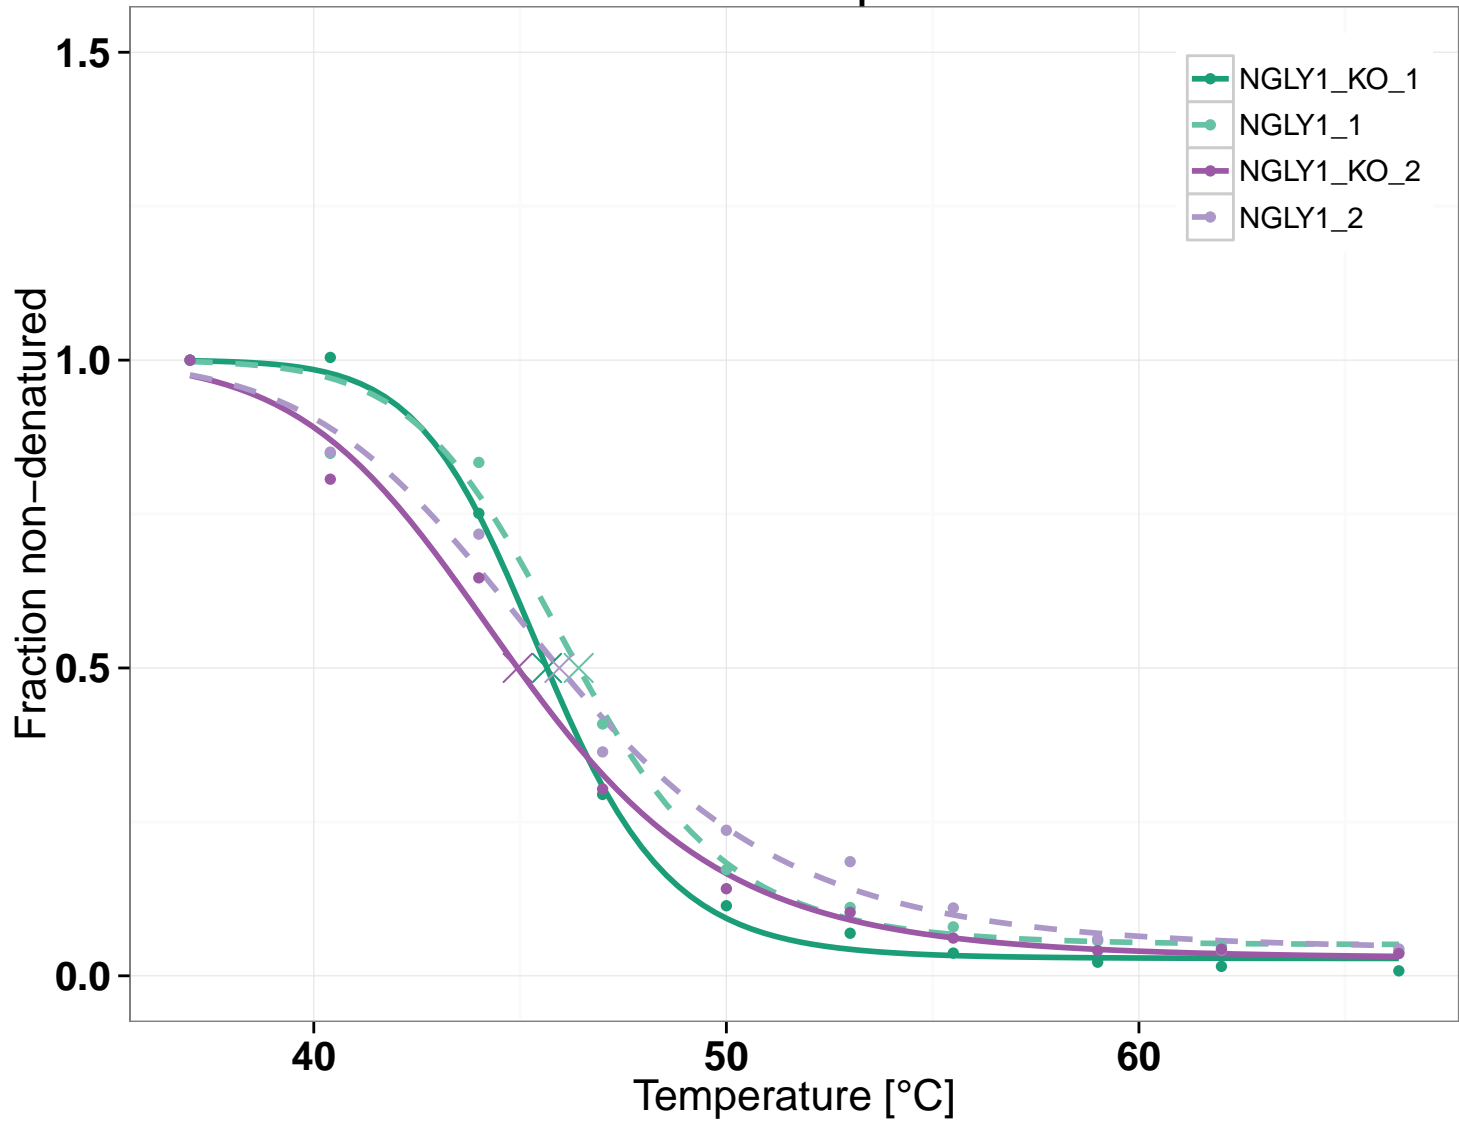

|            | meltPoint | slope  | plateau | R2   |
|------------|-----------|--------|---------|------|
| NGLY1_KO_1 | 45.65     | -0.16  | 0.03    | 1    |
| NGLY1_1    | 46.42     | -0.12  | 0.05    | 0.99 |
| NGLY1_KO_2 | 44.94     | -0.095 | 0.03    | 0.99 |
| NGLY1_2    | 45.95     | -0.083 | 0.04    | 0.99 |

Supplement: Supplementary file 6954 [file 1]

IPI00902991.1|CSTF2

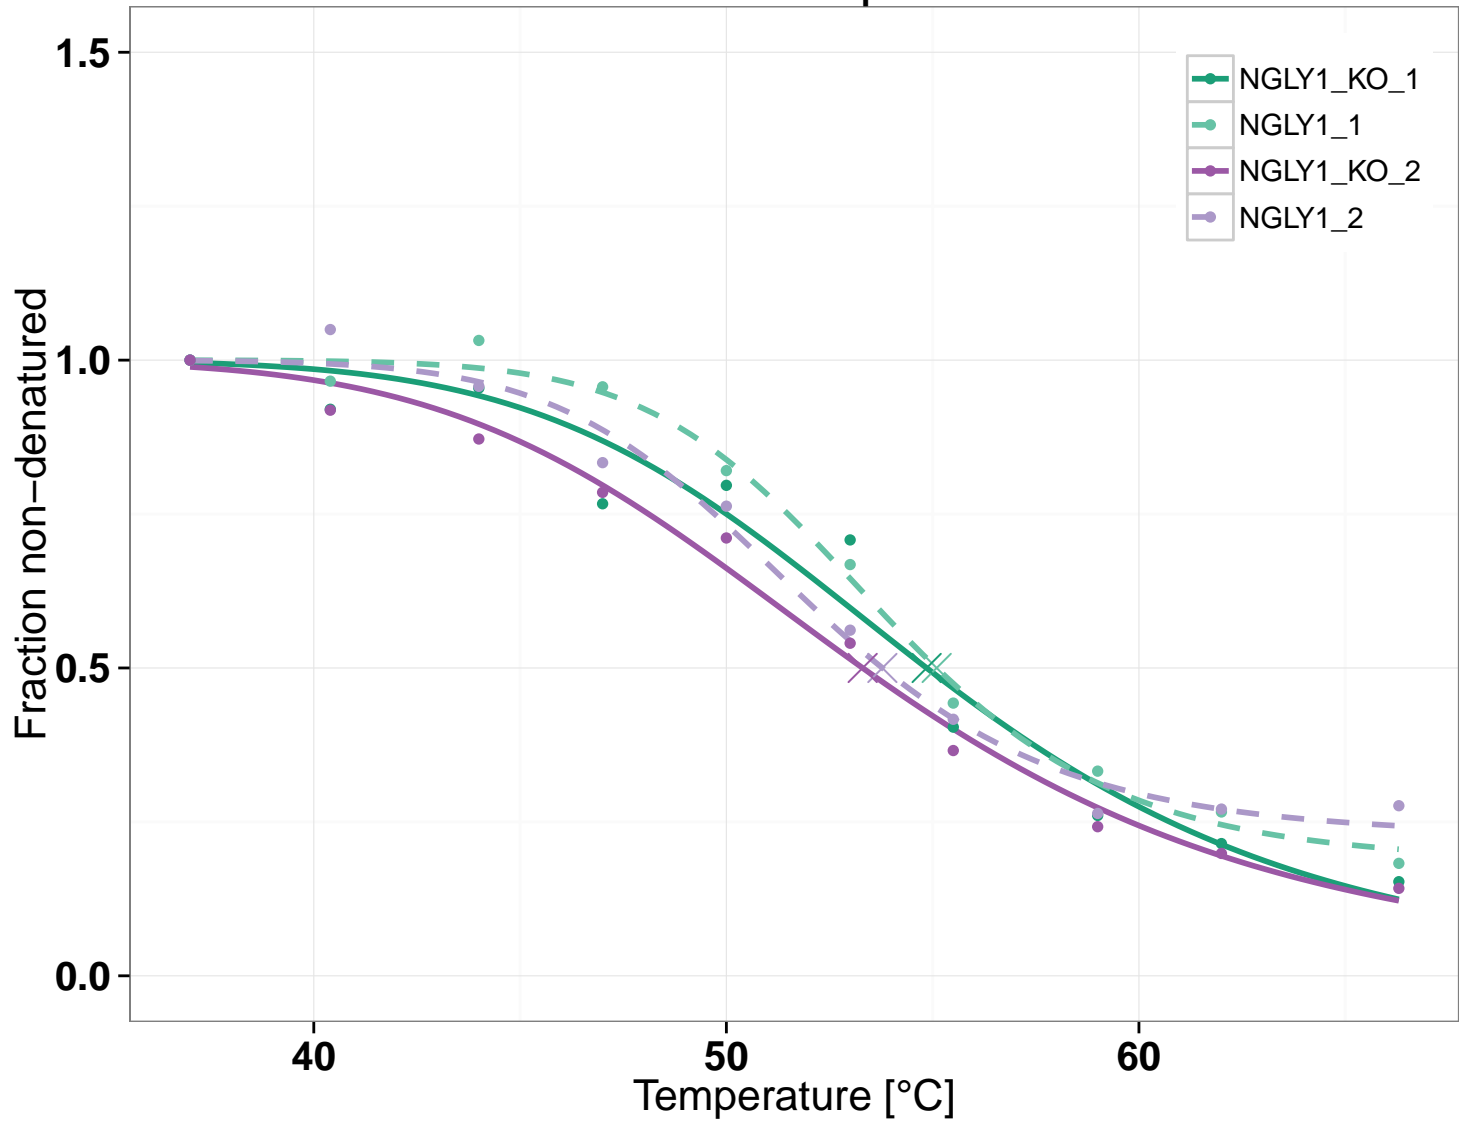

|            | meltPoint | slope  | plateau | R2   |
|------------|-----------|--------|---------|------|
| NGLY1_KO_1 | 54.85     | -0.053 | 0       | 0.96 |
| NGLY1_1    | 55.1      | -0.072 | 0.18    | 0.99 |
| NGLY1_KO_2 | 53.3      | -0.05  | 0       | 0.99 |
| NGLY1_2    | 53.78     | -0.064 | 0.22    | 0.99 |

Supplement: Supplementary file 6955 [file 1]

IPI00005179.1|POLR1C

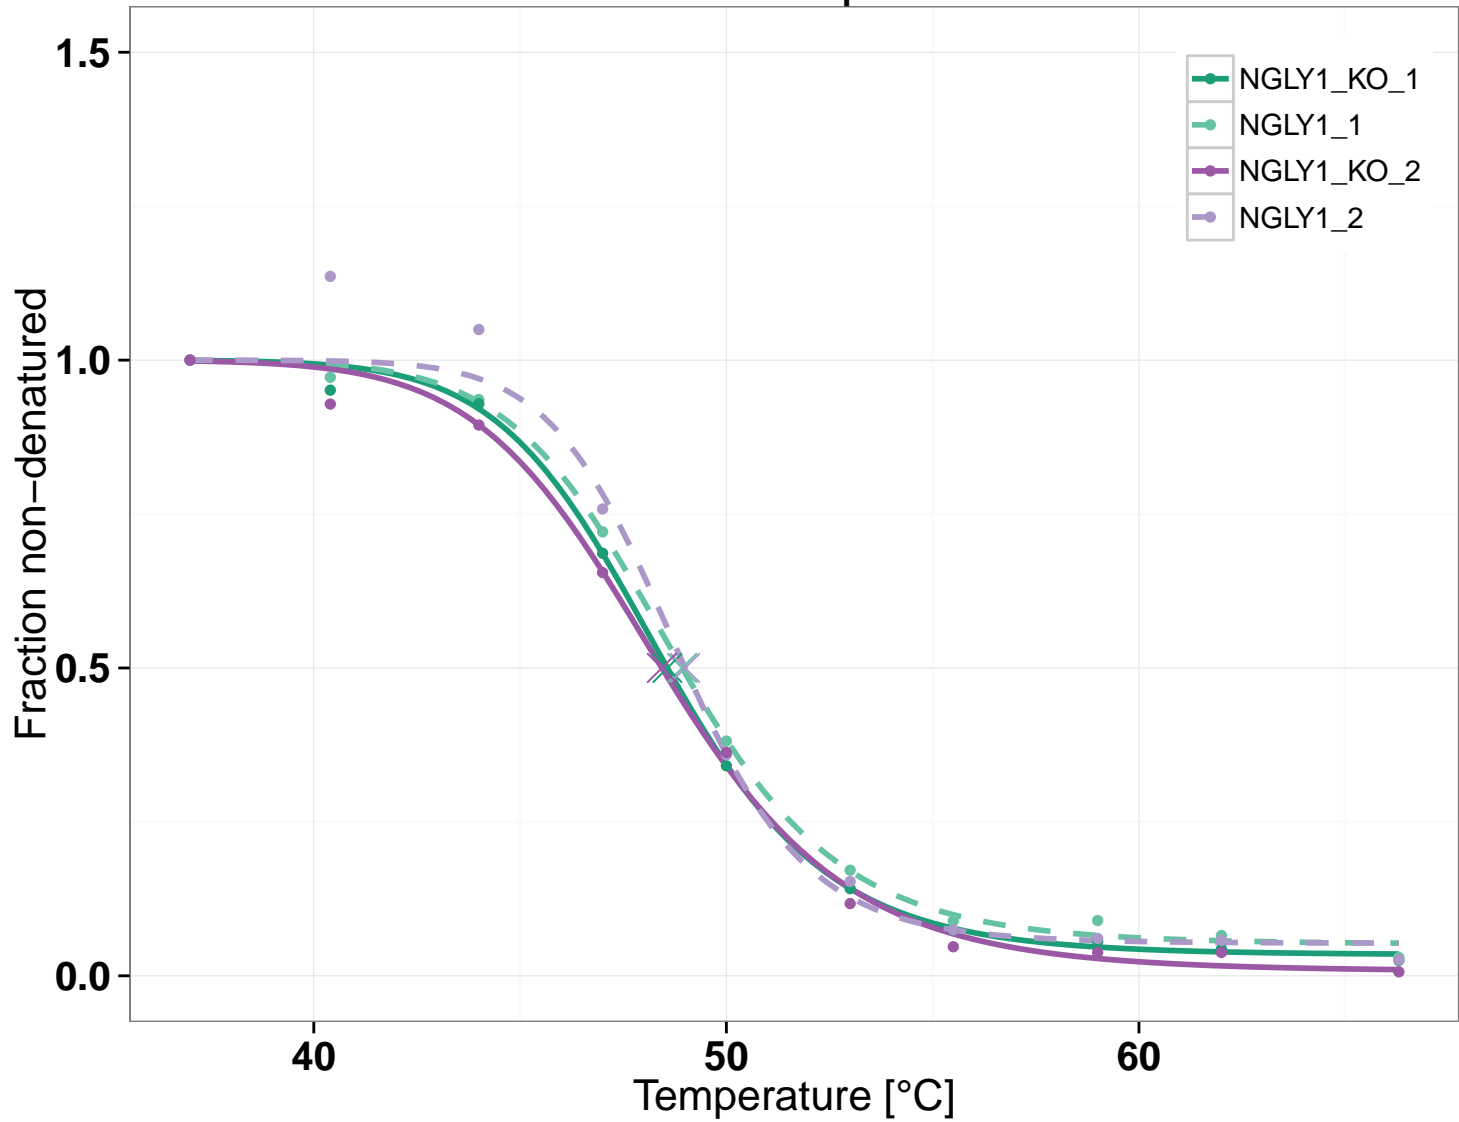

|            | meltPoint | slope | plateau | R2   |
|------------|-----------|-------|---------|------|
| NGLY1_KO_1 | 48.57     | -0.12 | 0.03    | 1    |
| NGLY1_1    | 48.93     | -0.12 | 0.05    | 1    |
| NGLY1_KO_2 | 48.44     | -0.11 | 0.01    | 1    |
| NGLY1_2    | 49        | -0.15 | 0.05    | 0.99 |

Supplement: Supplementary file 6956 [file 1]

# IPI00014311.4|CUL2

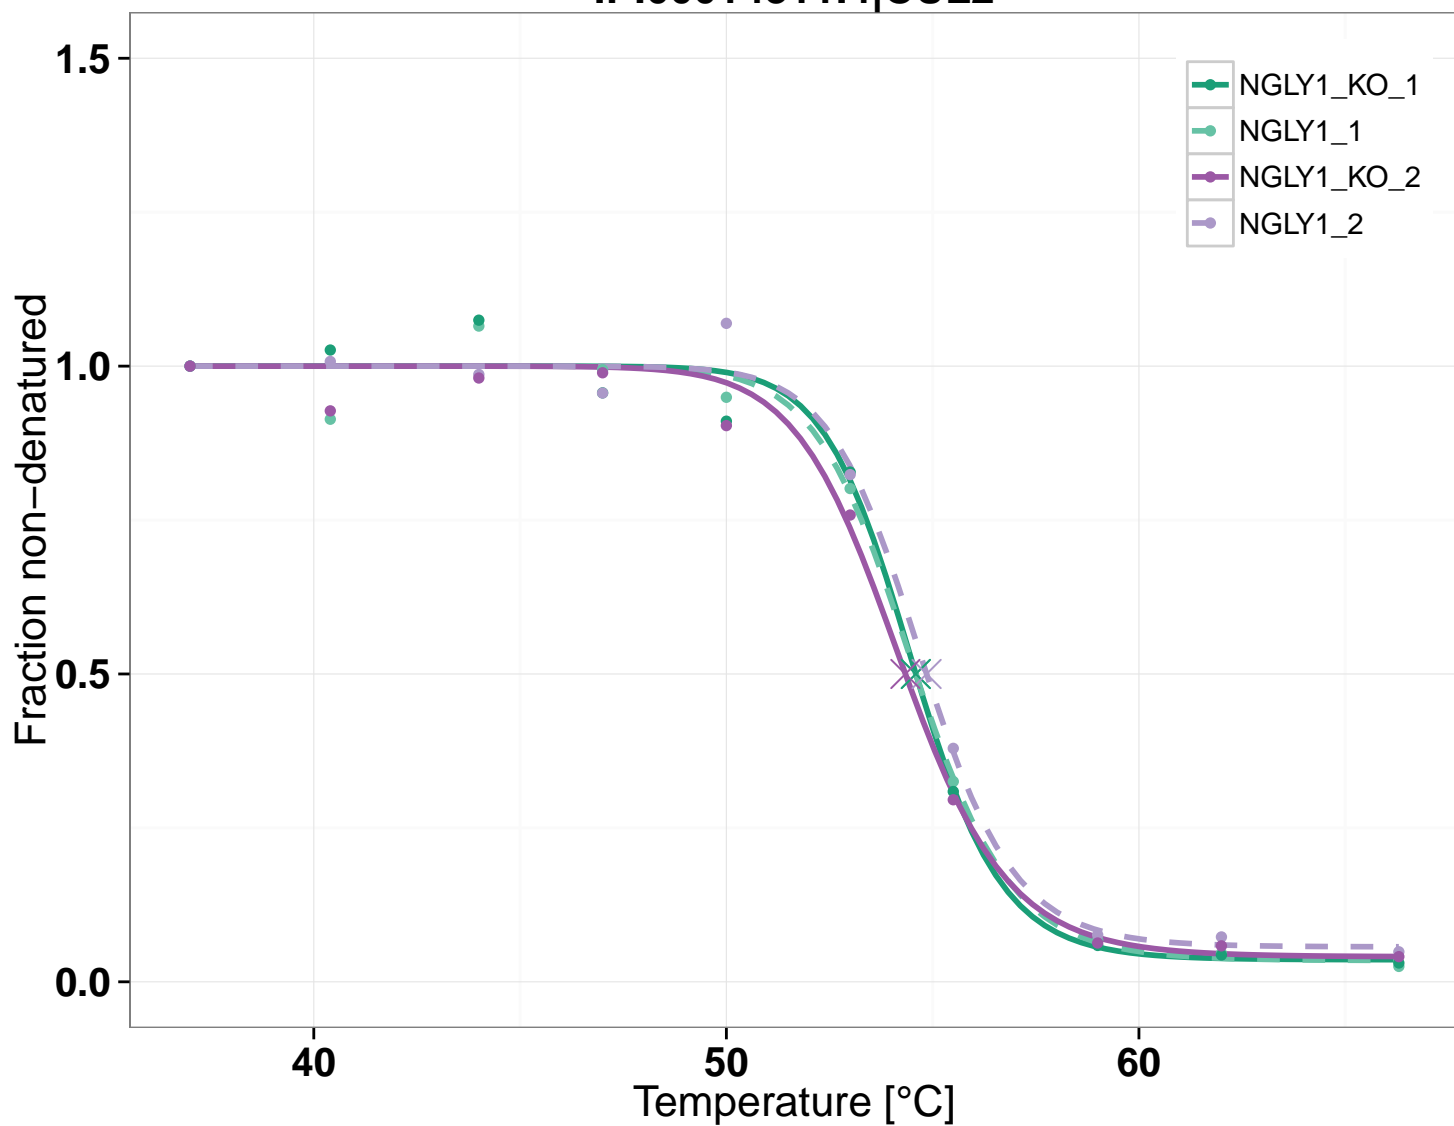

|            | meltPoint | slope | plateau | R2   |
|------------|-----------|-------|---------|------|
| NGLY1_KO_1 | 54.59     | -0.22 | 0.04    | 0.99 |
| NGLY1_1    | 54.59     | -0.2  | 0.03    | 0.99 |
| NGLY1_KO_2 | 54.34     | -0.19 | 0.04    | 0.99 |
| NGLY1_2    | 54.85     | -0.21 | 0.06    | 0.99 |

Supplement: Supplementary file 6957 [file 1]

# IPI00297045.5|MKLN1

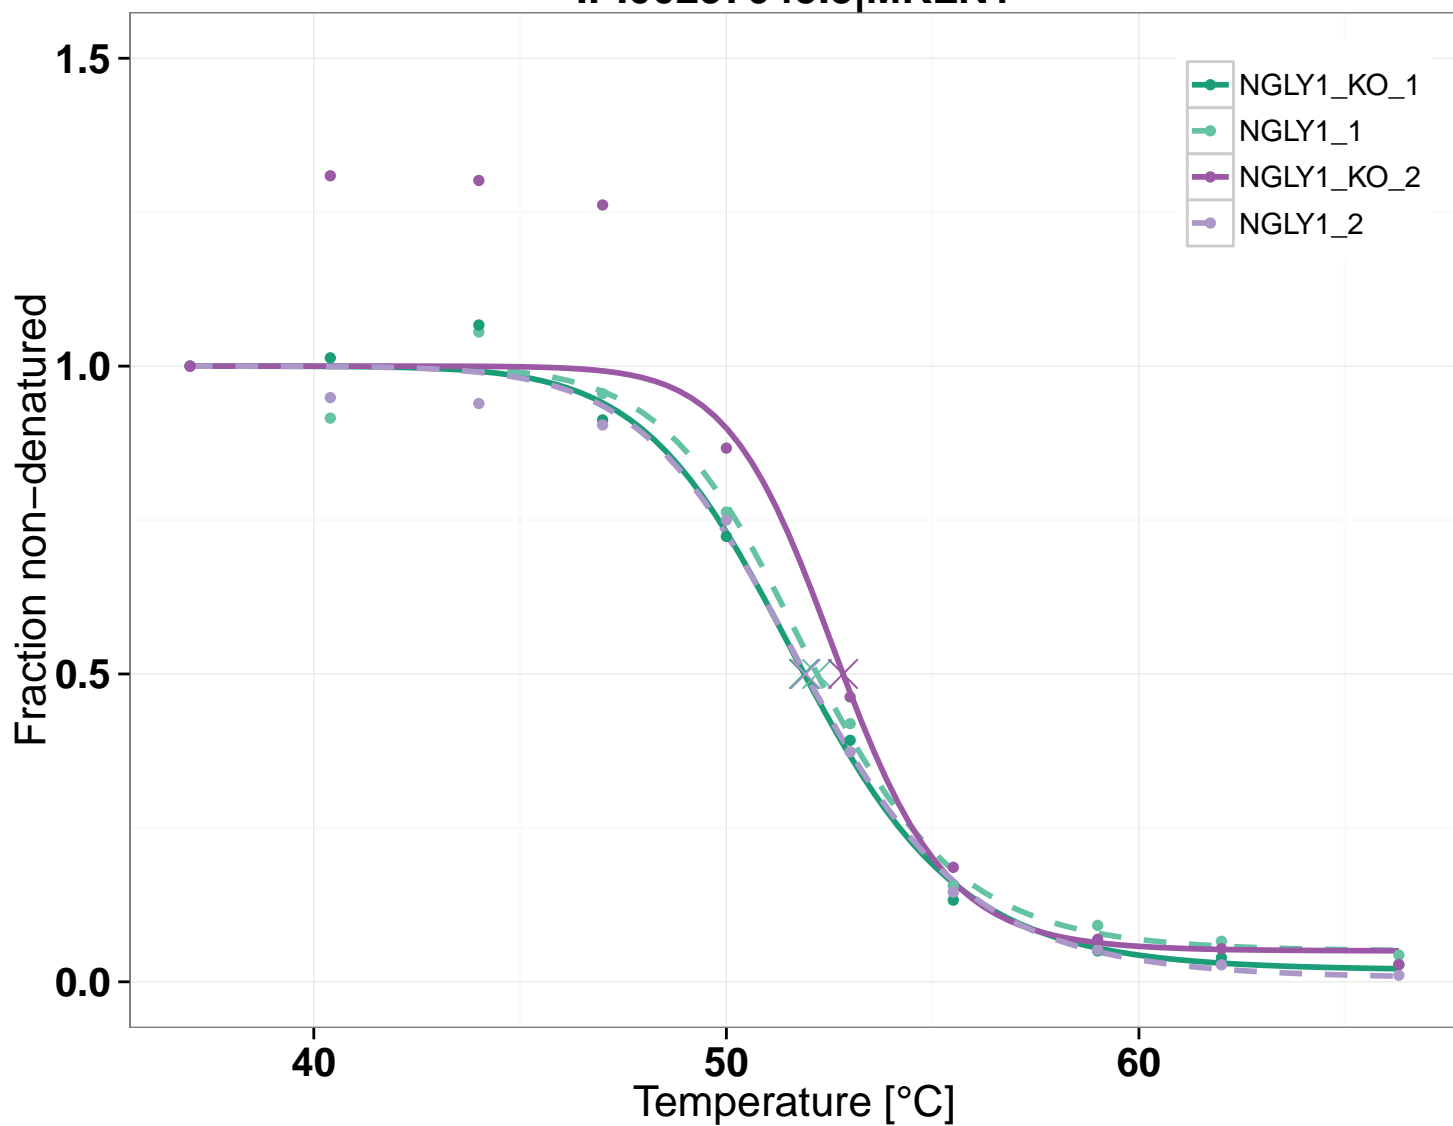

|            | meltPoint | slope | plateau | R2   |
|------------|-----------|-------|---------|------|
| NGLY1_KO_1 | 51.89     | -0.13 | 0.02    | 1    |
| NGLY1_1    | 52.2      | -0.13 | 0.05    | 0.99 |
| NGLY1_KO_2 | 52.83     | -0.18 | 0.05    | 0.9  |
| NGLY1_2    | 51.92     | -0.12 | 0.01    | 1    |

Supplement: Supplementary file 6958 [file 1]

IPI00307017.2|LNPEP

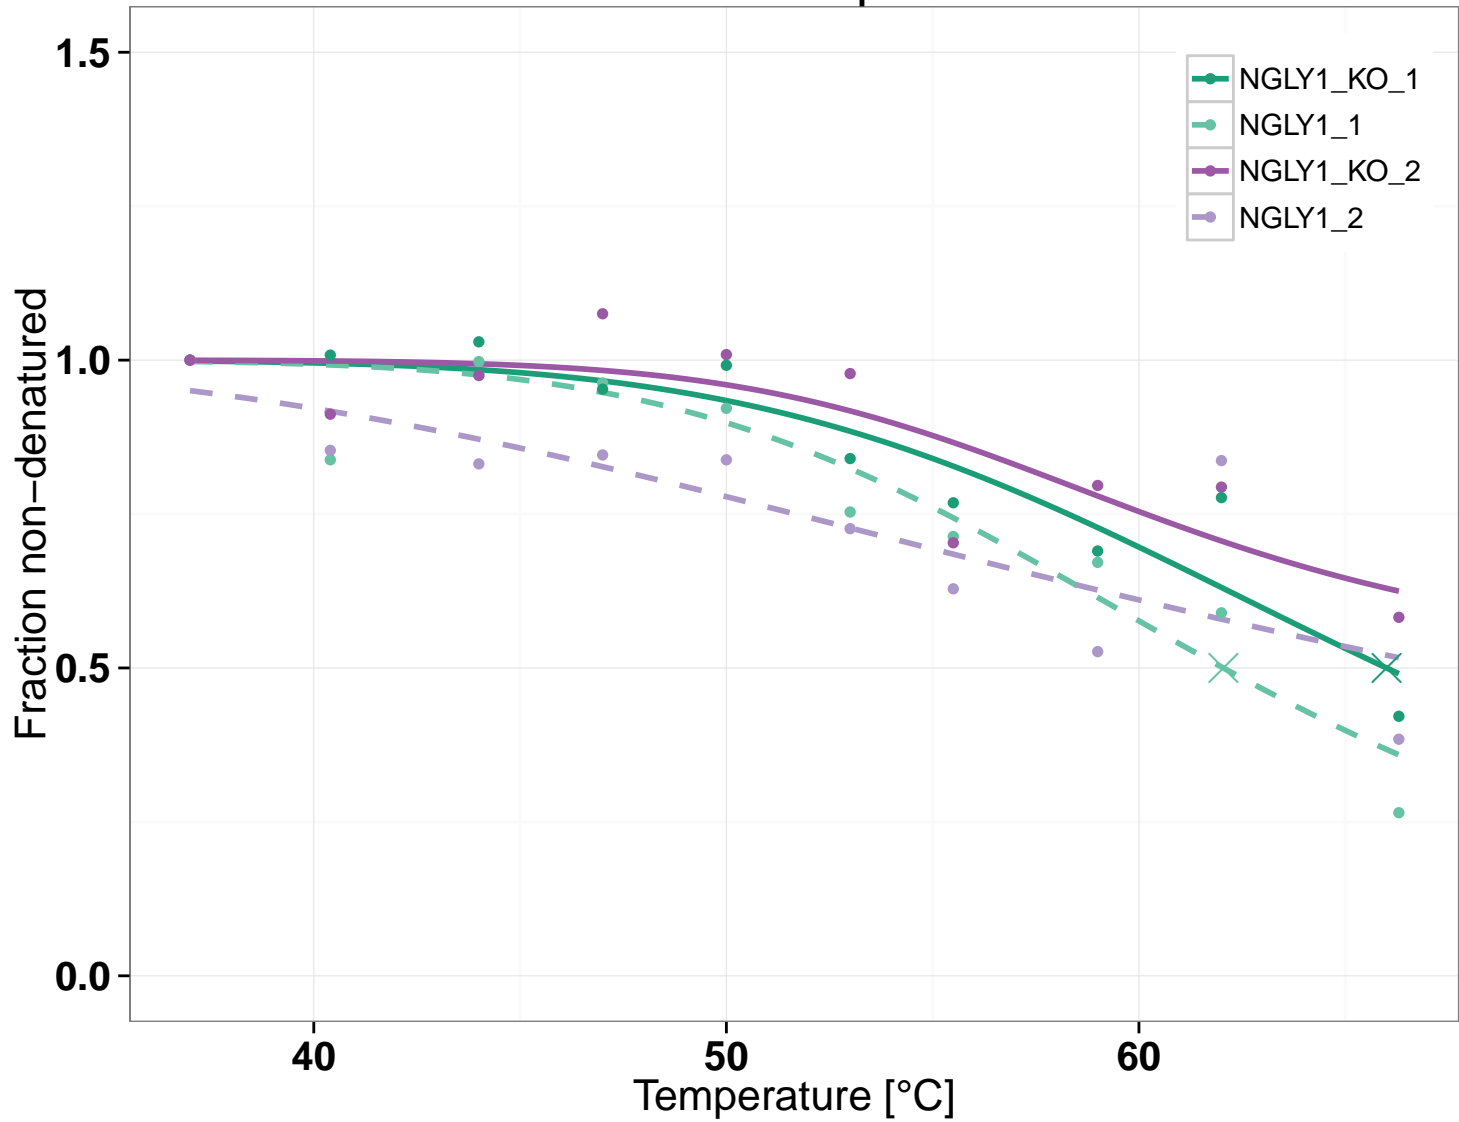

|            | meltPoint | slope  | plateau | R2   |
|------------|-----------|--------|---------|------|
| NGLY1_KO_1 | 66        | -0.033 | 0       | 0.88 |
| NGLY1_1    | 62.05     | -0.038 | 0       | 0.89 |
| NGLY1_KO_2 | -         | -0.026 | 0.5     | 0.74 |
| NGLY1_2    | -         | -0.017 | 0       | 0.64 |

Supplement: Supplementary file 6959 [file 1]

IPI00010467.4|TP53INP2

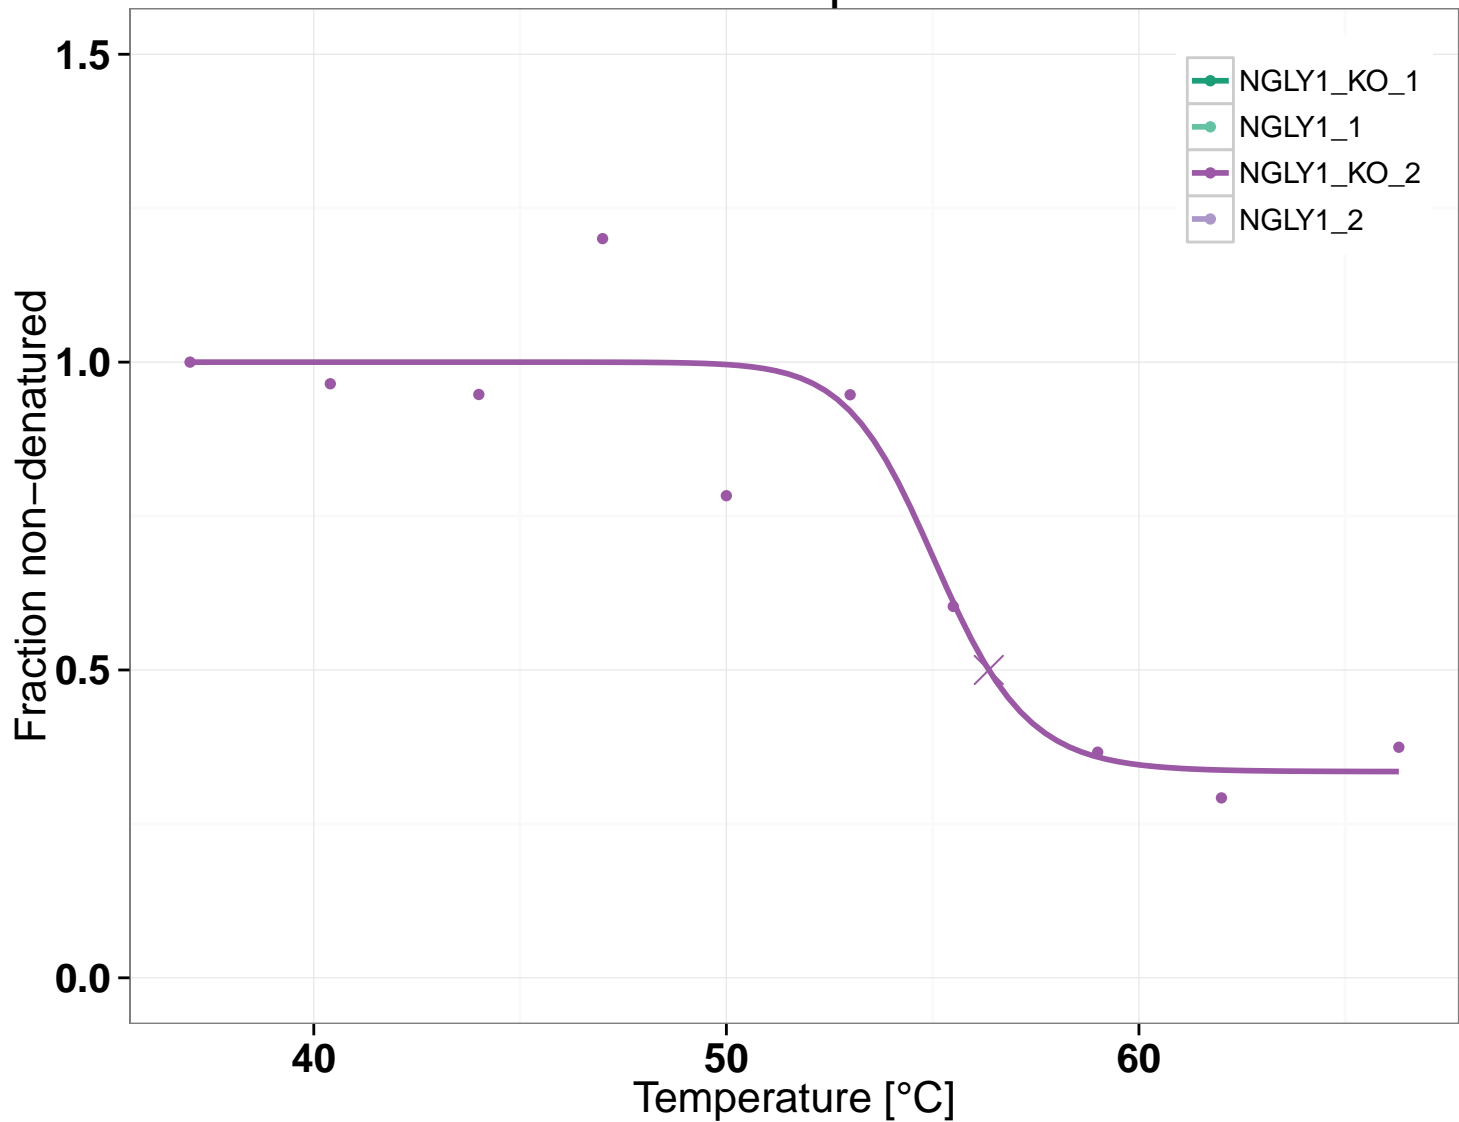

|            | meltPoint | slope | plateau | R2  |
|------------|-----------|-------|---------|-----|
| NGLY1_KO_1 | —         | —     | —       | —   |
| NGLY1_1    | —         | —     | —       | —   |
| NGLY1_KO_2 | 56.36     | -0.15 | 0.33    | 0.9 |
| NGLY1_2    | —         | —     | —       | —   |

Supplement: Supplementary file 6960 [file 1]

IPI00642162.1|PPP1R3E

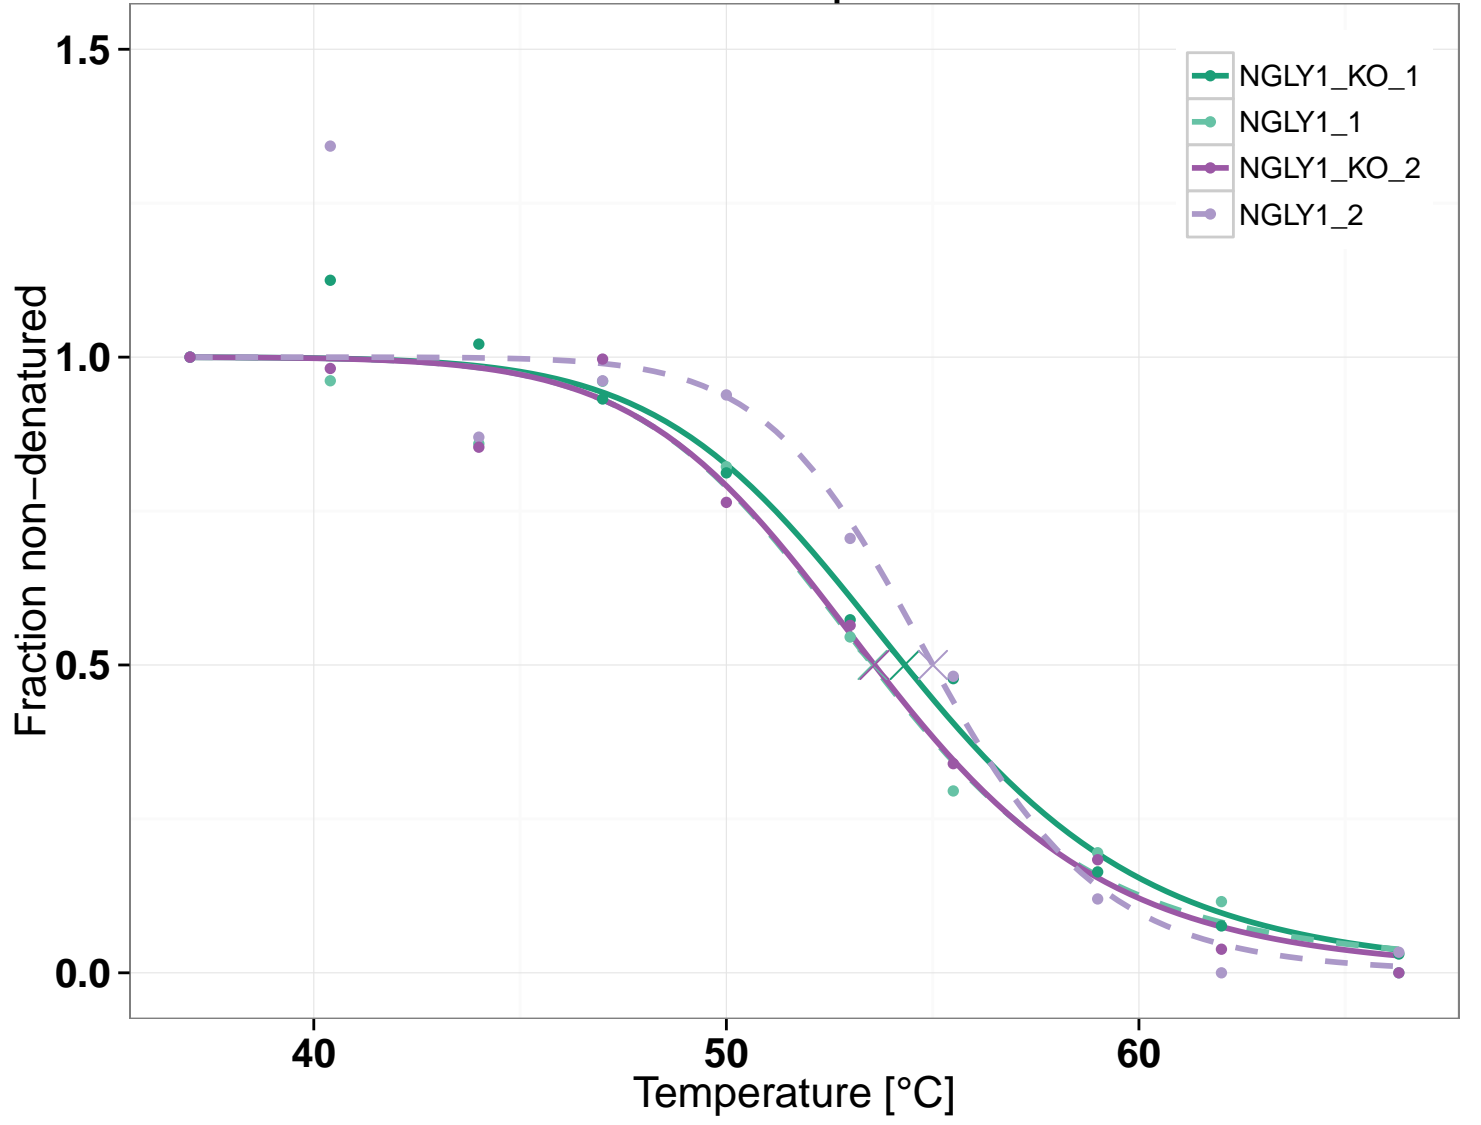

|            | meltPoint | slope  | plateau | R2   |
|------------|-----------|--------|---------|------|
| NGLY1_KO_1 | 54.32     | -0.084 | 0       | 0.98 |
| NGLY1_1    | 53.54     | -0.088 | 0.01    | 0.98 |
| NGLY1_KO_2 | 53.59     | -0.088 | 0       | 0.98 |
| NGLY1_2    | 55.01     | -0.12  | 0       | 0.93 |

Supplement: Supplementary file 6961 [file 1]

IPI00003438.2|DNAJC8

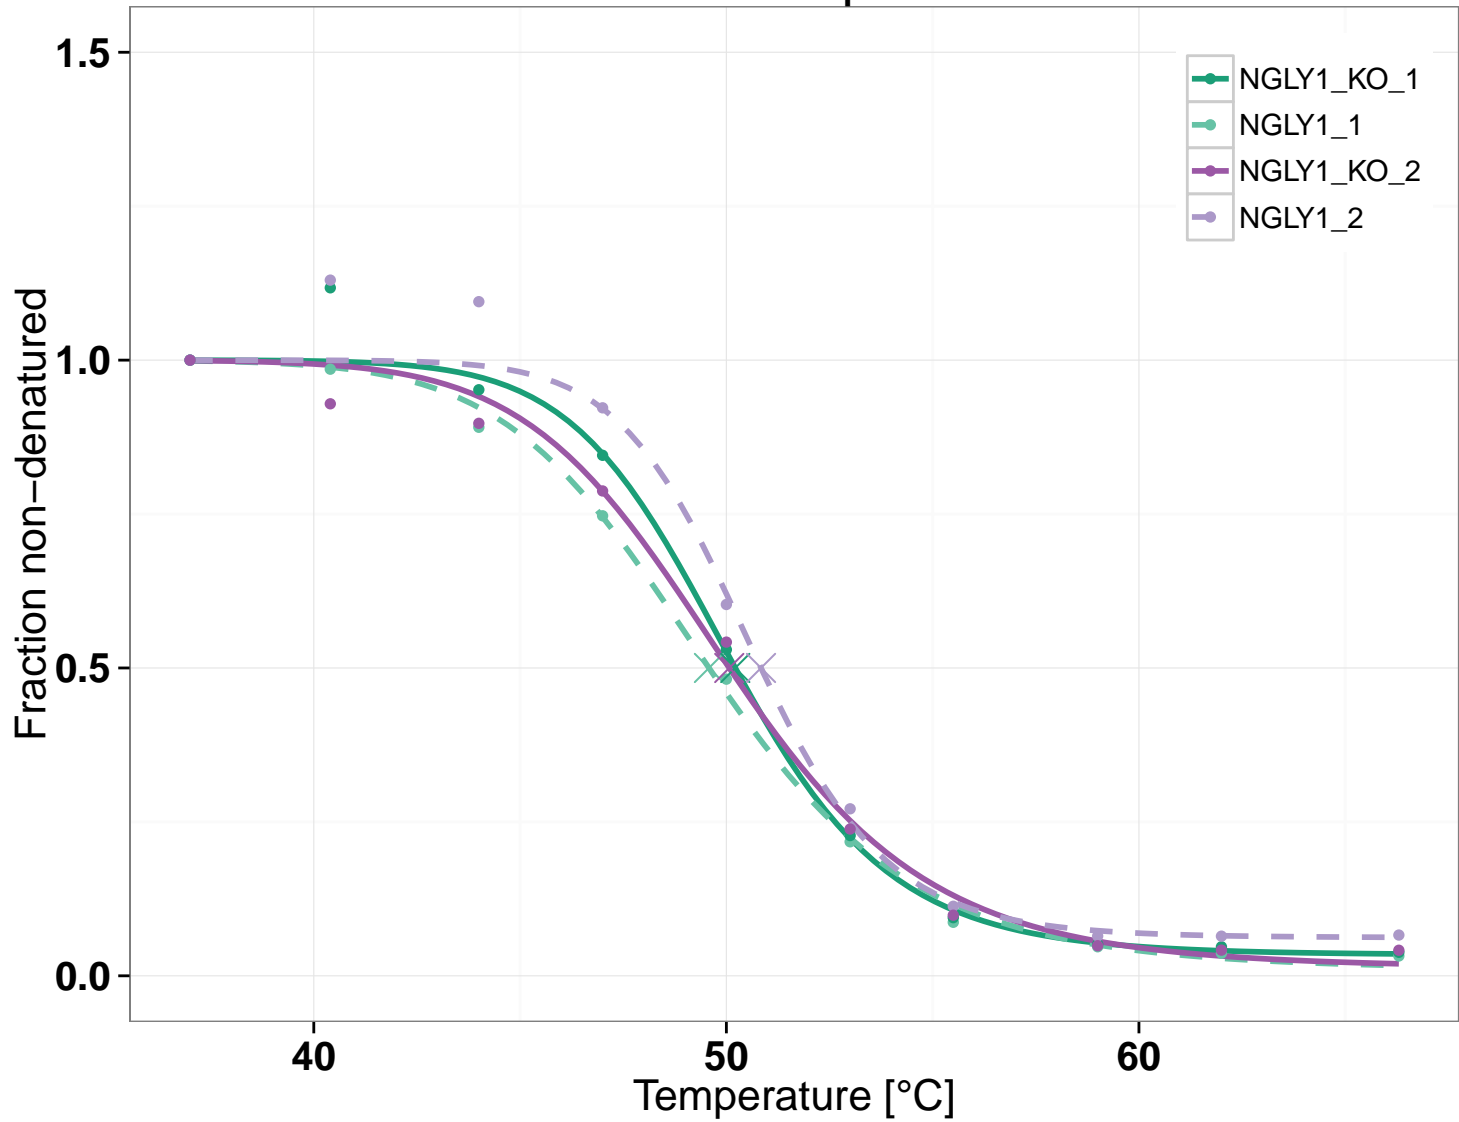

|            | meltPoint | slope  | plateau | R2   |
|------------|-----------|--------|---------|------|
| NGLY1_KO_1 | 50.22     | -0.12  | 0.03    | 0.99 |
| NGLY1_1    | 49.58     | -0.099 | 0.01    | 1    |
| NGLY1_KO_2 | 50.07     | -0.1   | 0.01    | 0.99 |
| NGLY1_2    | 50.84     | -0.14  | 0.06    | 0.99 |

Supplement: Supplementary file 6962 [file 1]

# IPI00032799.3|RRP7A

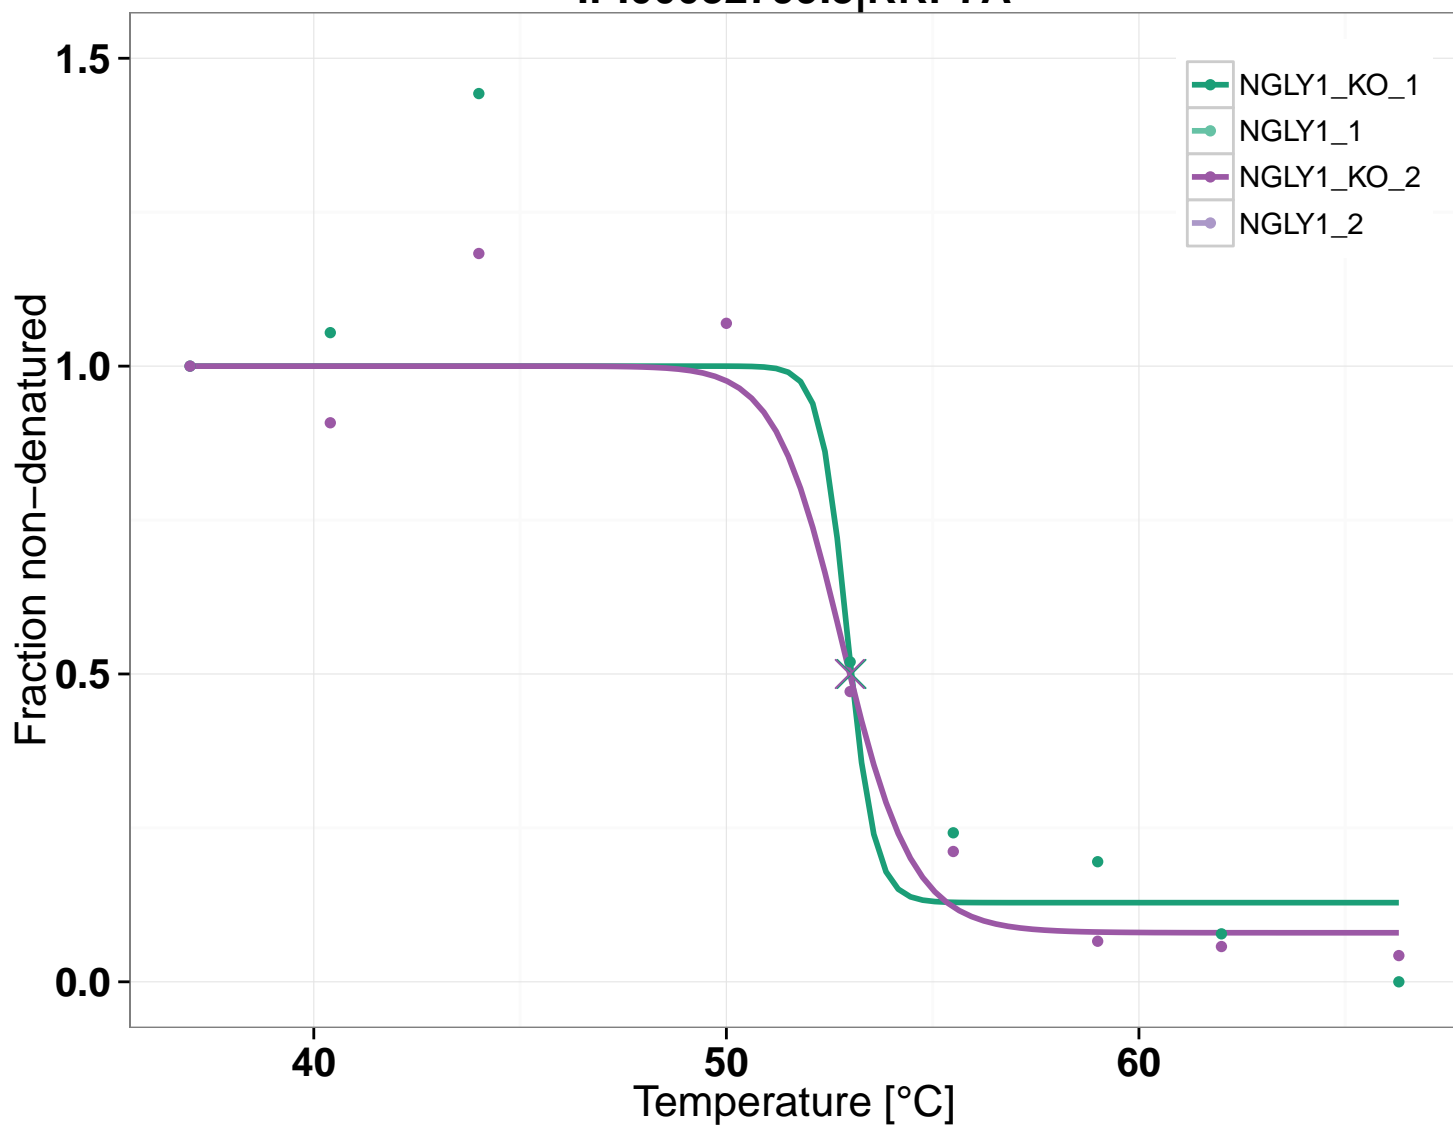

|            | meltPoint | slope | plateau | R2   |
|------------|-----------|-------|---------|------|
| NGLY1_KO_1 | 53.03     | -0.66 | 0.13    | 0.43 |
| NGLY1_1    | -         | -     | -       | -    |
| NGLY1_KO_2 | 52.99     | -0.28 | 0.08    | 0.82 |
| NGLY1_2    | -         | -     | -       | -    |

Supplement: Supplementary file 6963 [file 1]

IPI00019690.5|GRAMD4

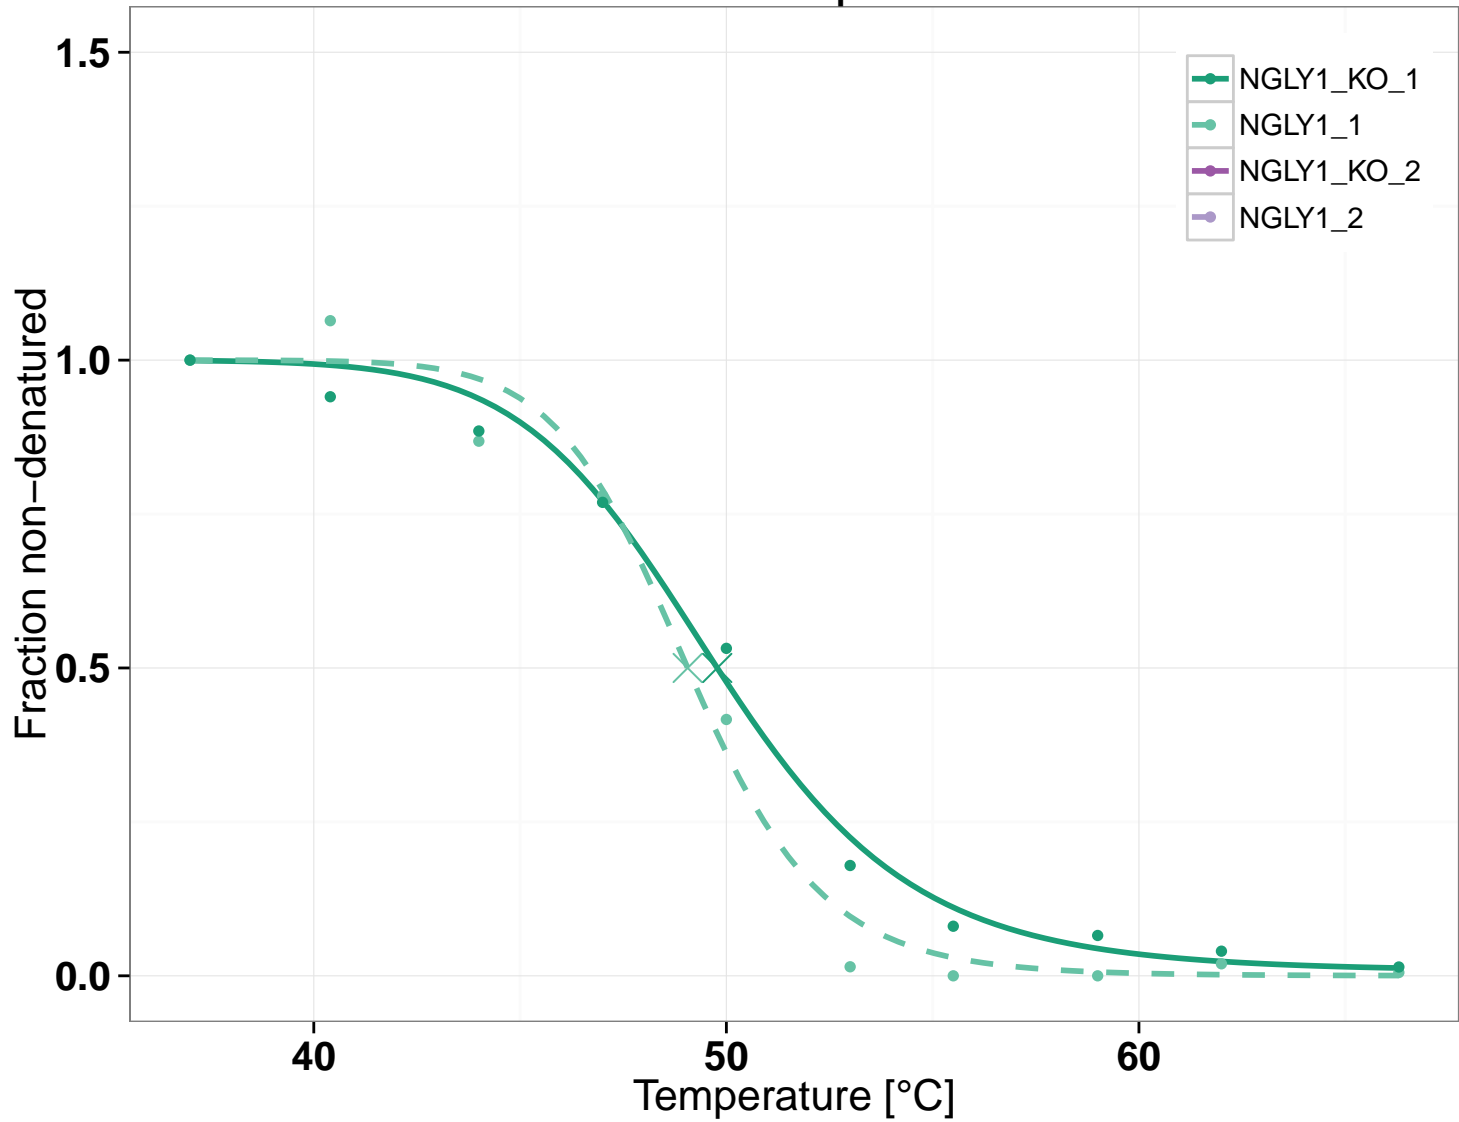

|            | meltPoint | slope | plateau | R2   |
|------------|-----------|-------|---------|------|
| NGLY1_KO_1 | 49.78     | -0.1  | 0.01    | 0.99 |
| NGLY1_1    | 49.06     | -0.15 | 0       | 0.99 |
| NGLY1_KO_2 | -         | -     | -       | -    |
| NGLY1_2    | -         | -     | -       | -    |

Supplement: Supplementary file 6964 [file 1]

# IPI00017373.1|RPA3

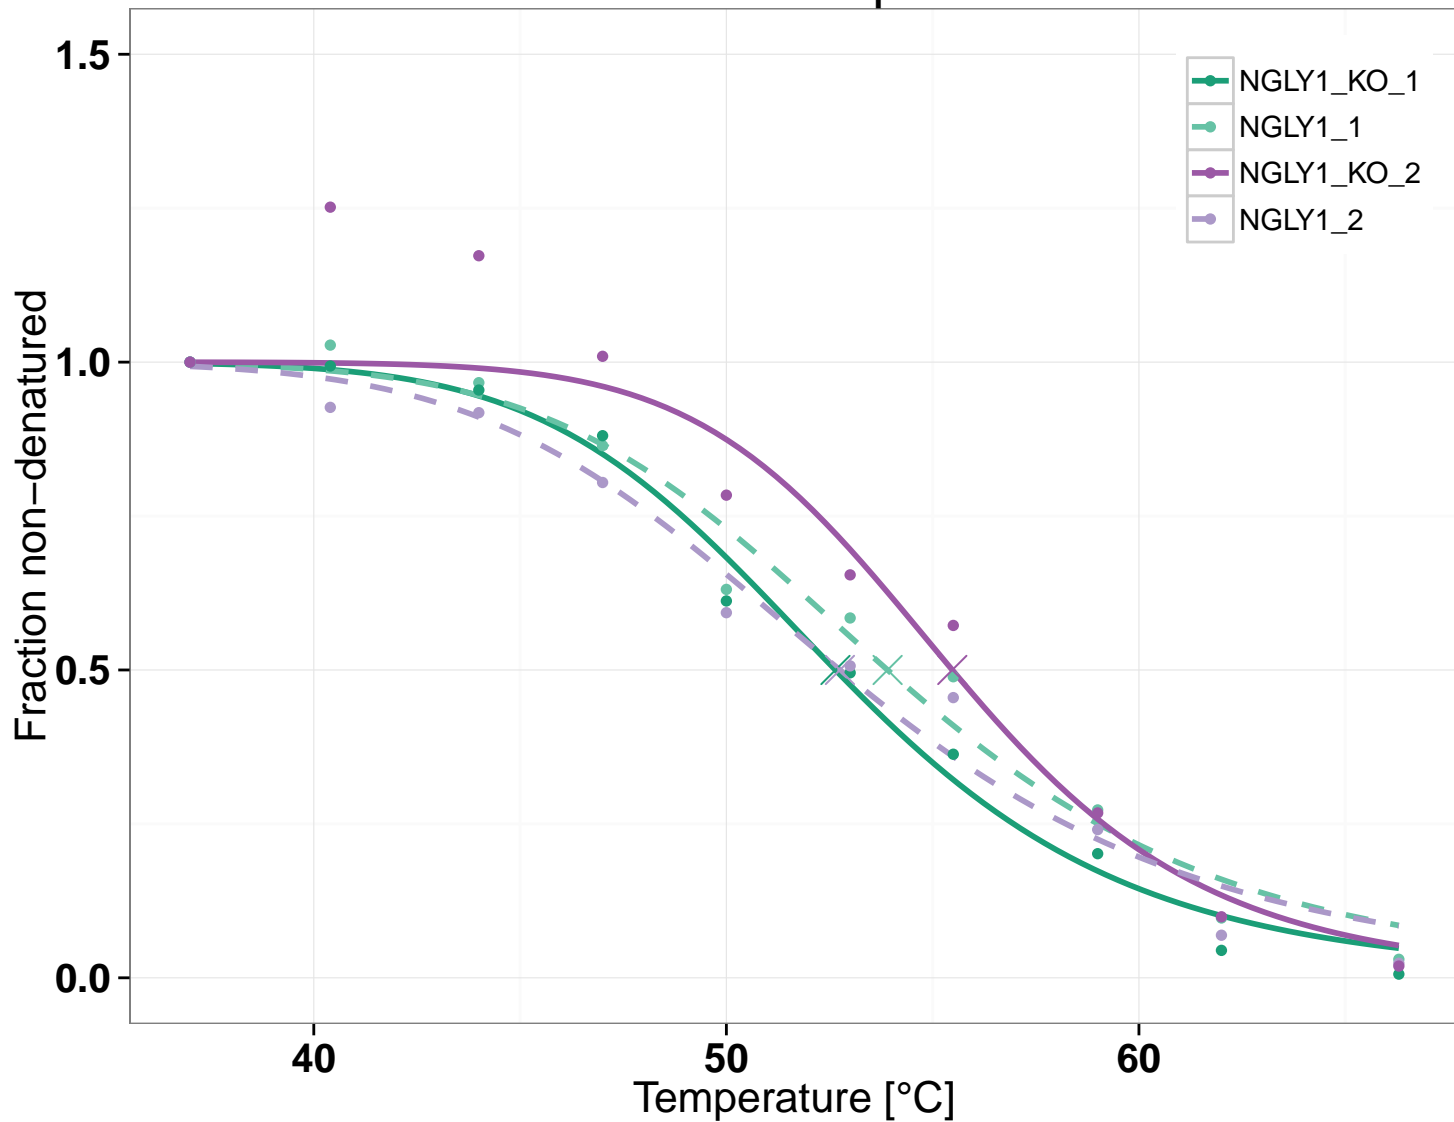

|            | meltPoint | slope  | plateau | R2   |
|------------|-----------|--------|---------|------|
| NGLY1_KO_1 | 52.64     | -0.07  | 0       | 0.99 |
| NGLY1_1    | 53.91     | -0.06  | 0       | 0.98 |
| NGLY1_KO_2 | 55.48     | -0.081 | 0       | 0.93 |
| NGLY1_2    | 52.75     | -0.057 | 0       | 0.98 |

Supplement: Supplementary file 6965 [file 1]

IPI00220487.4|ATP5H

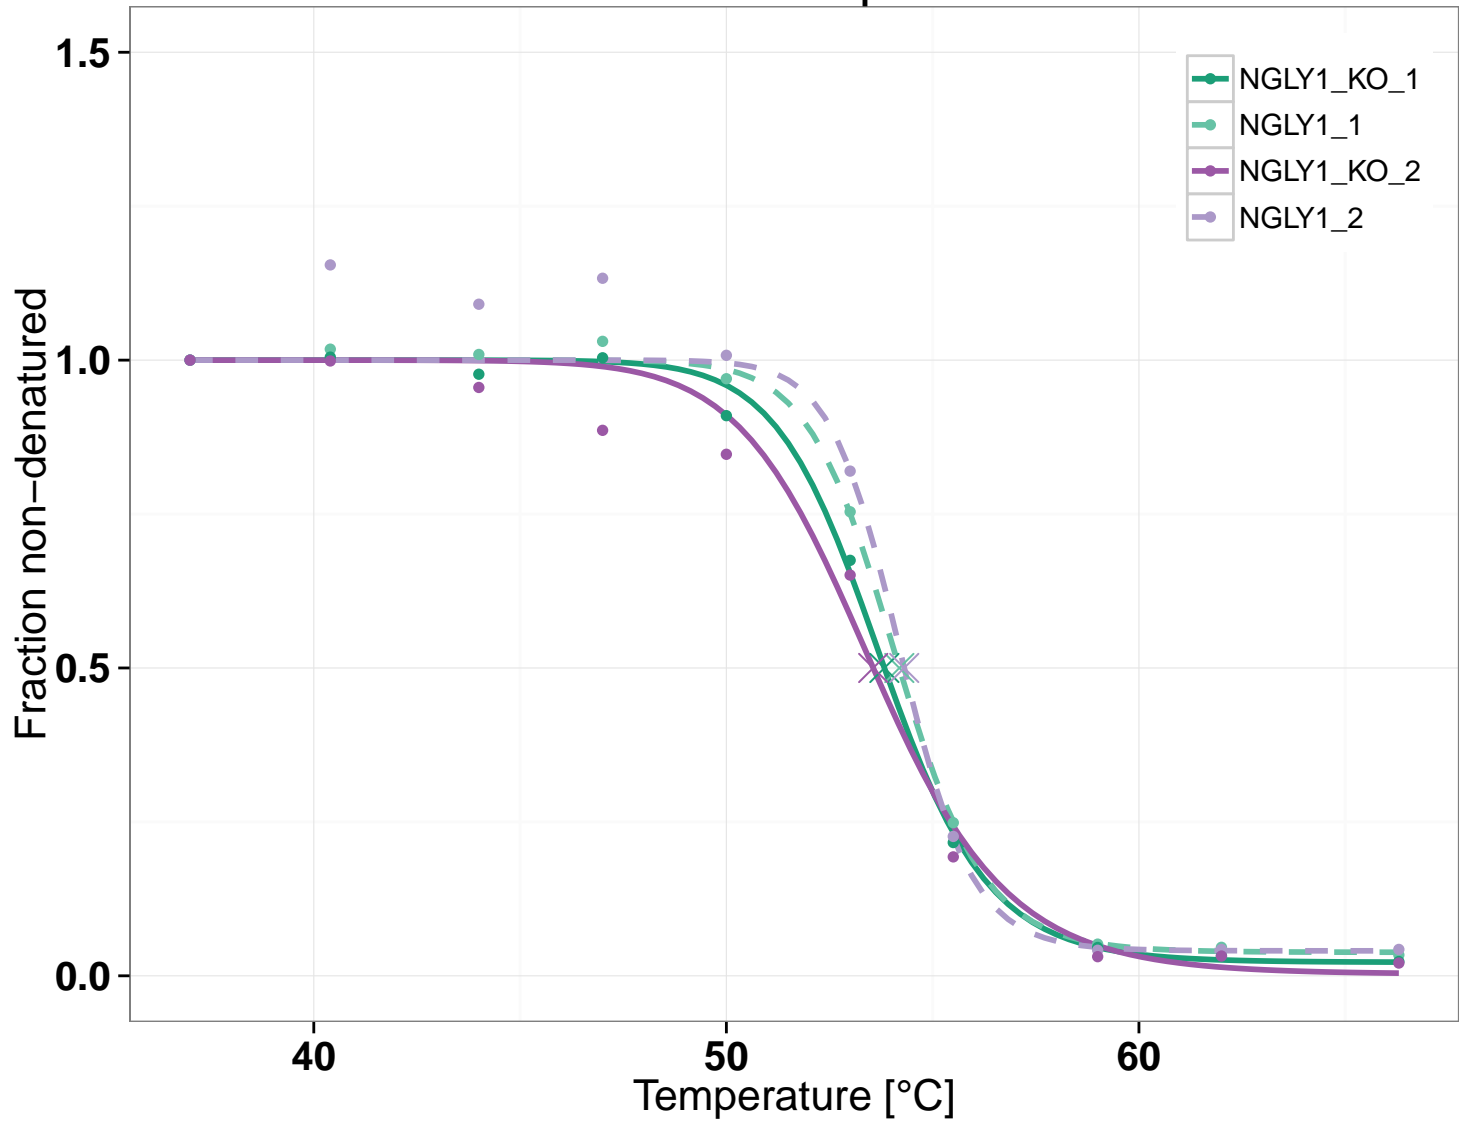

|            | meltPoint | slope | plateau | R2   |
|------------|-----------|-------|---------|------|
| NGLY1_KO_1 | 53.83     | -0.19 | 0.02    | 1    |
| NGLY1_1    | 54.19     | -0.22 | 0.04    | 1    |
| NGLY1_KO_2 | 53.56     | -0.15 | 0       | 0.99 |
| NGLY1_2    | 54.31     | -0.28 | 0.04    | 0.98 |

Supplement: Supplementary file 6966 [file 1]

IPI00216461.4|ACYP2

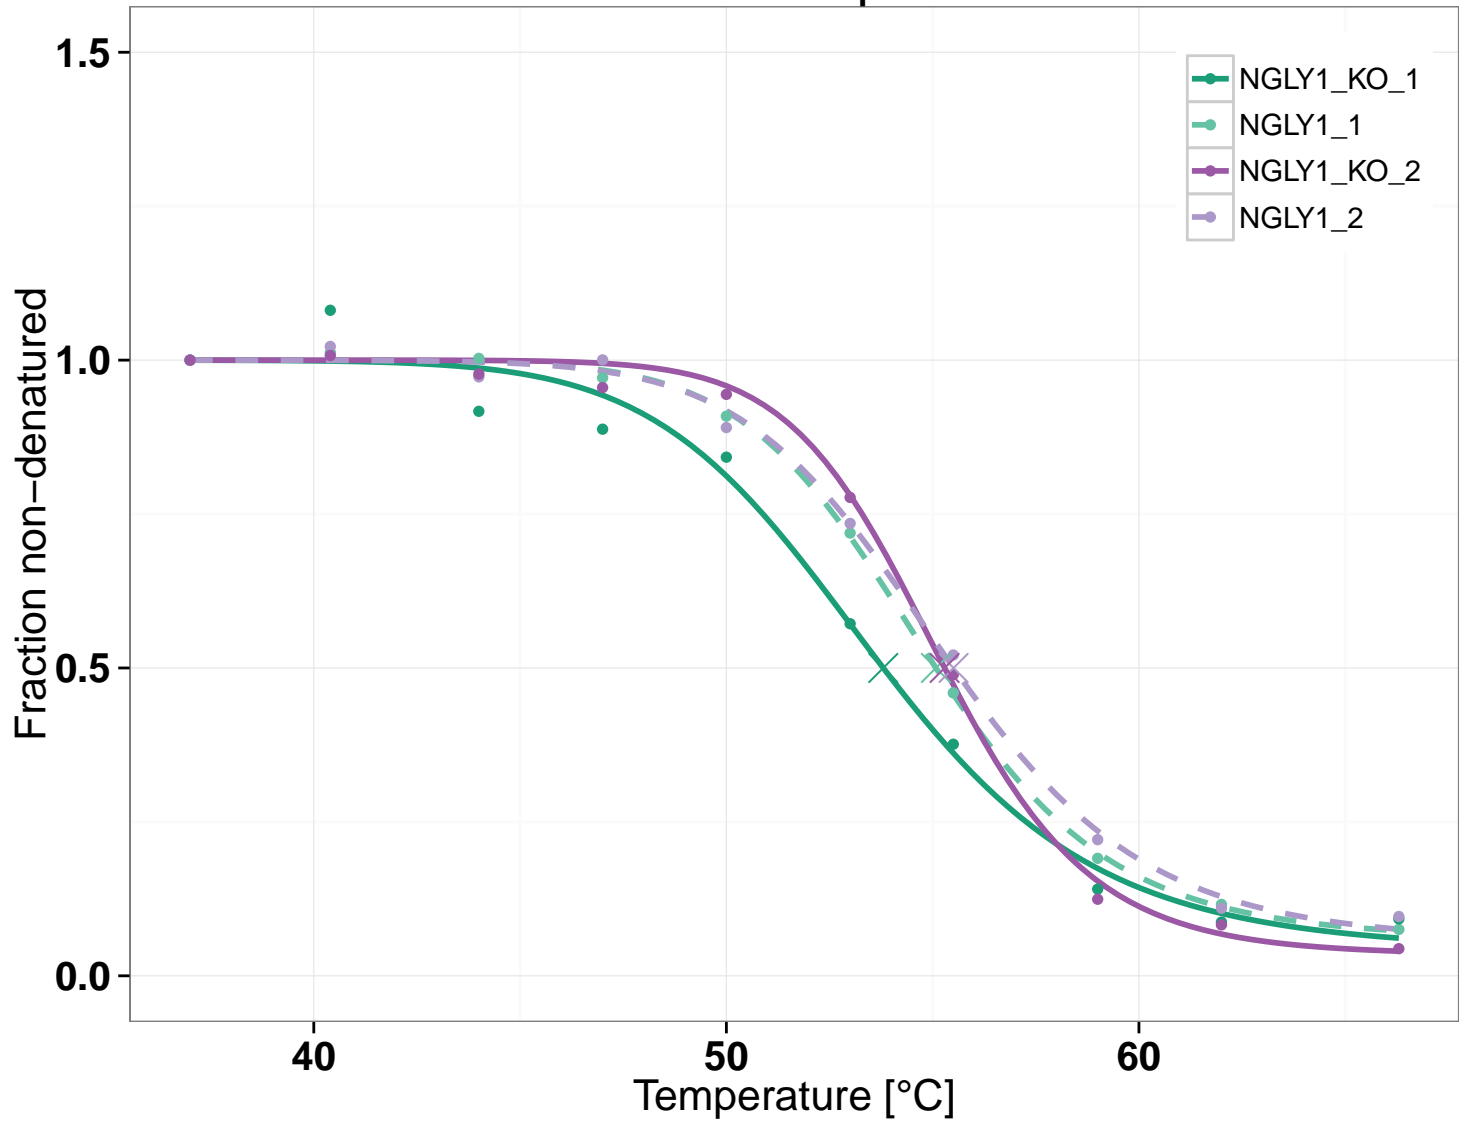

|            | meltPoint | slope  | plateau | R2   |
|------------|-----------|--------|---------|------|
| NGLY1_KO_1 | 53.8      | -0.089 | 0.04    | 0.99 |
| NGLY1_1    | 55.08     | -0.11  | 0.06    | 1    |
| NGLY1_KO_2 | 55.29     | -0.13  | 0.03    | 1    |
| NGLY1_2    | 55.51     | -0.097 | 0.05    | 1    |

Supplement: Supplementary file 6967 [file 1]

# IPI00029558.1|NDUFC2

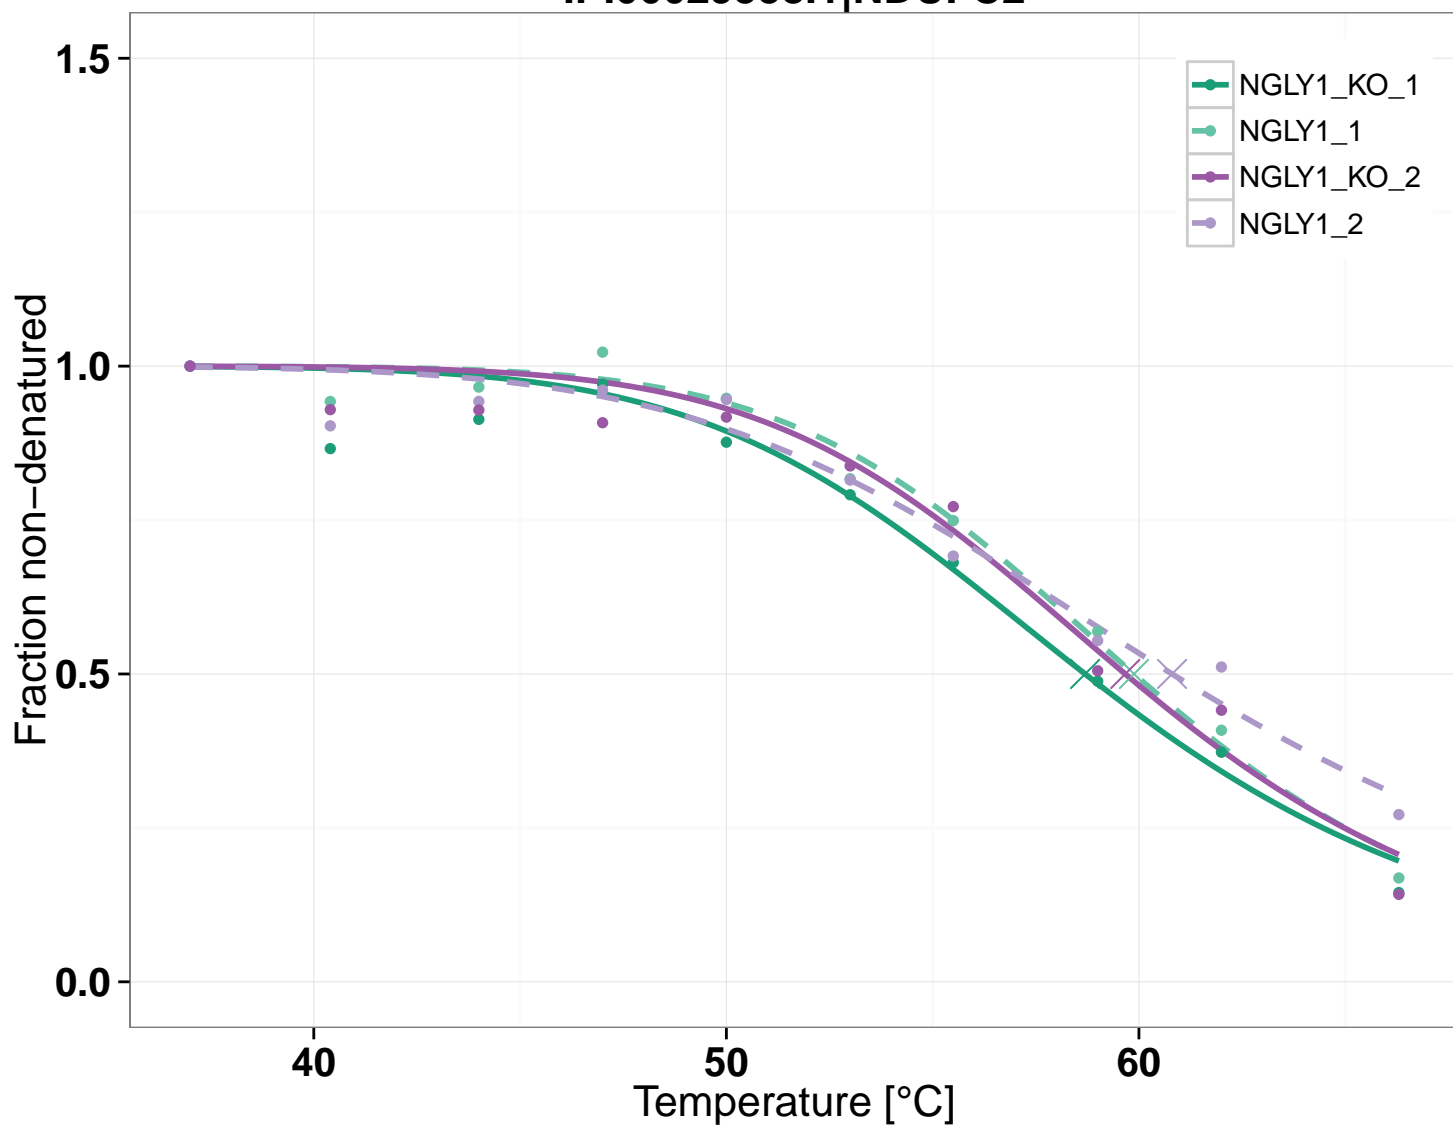

|            | meltPoint | slope  | plateau | R2   |
|------------|-----------|--------|---------|------|
| NGLY1_KO_1 | 58.7      | -0.054 | 0       | 0.96 |
| NGLY1_1    | 59.88     | -0.059 | 0       | 0.99 |
| NGLY1_KO_2 | 59.67     | -0.058 | 0       | 0.97 |
| NGLY1_2    | 60.8      | -0.043 | 0       | 0.97 |

Supplement: Supplementary file 6968 [file 1]

IPI00181881.11|NIBP

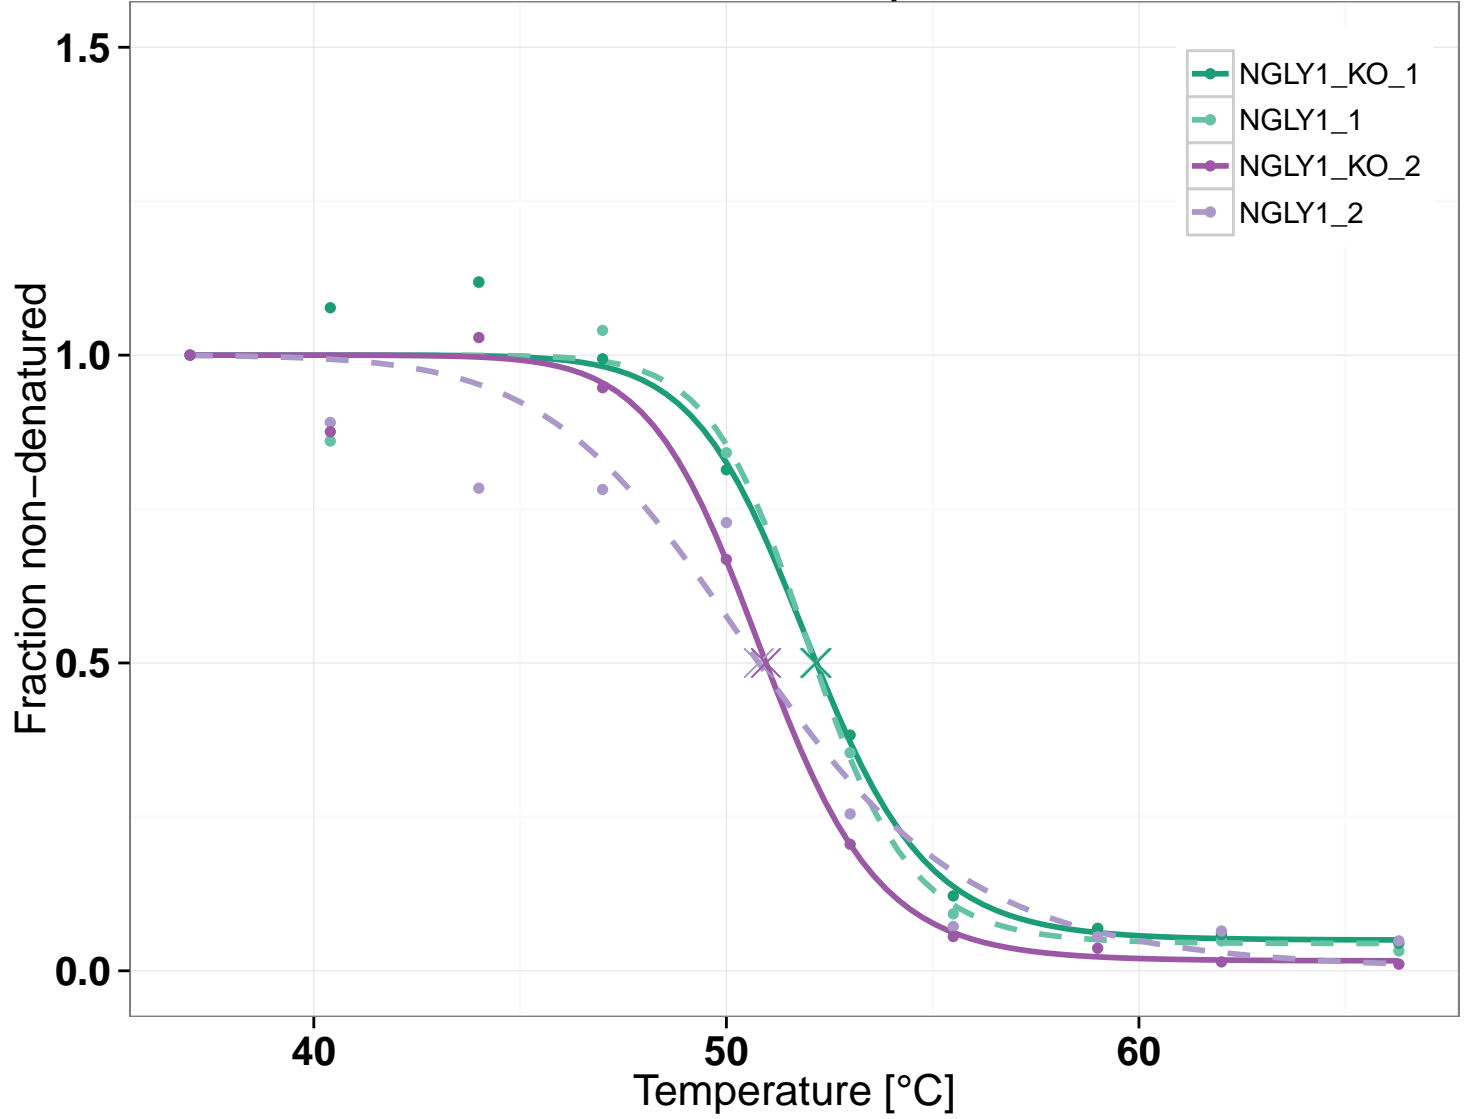

|            | meltPoint | slope  | plateau | R2   |
|------------|-----------|--------|---------|------|
| NGLY1_KO_1 | 52.18     | -0.17  | 0.05    | 0.99 |
| NGLY1_1    | 52.14     | -0.2   | 0.04    | 0.98 |
| NGLY1_KO_2 | 50.96     | -0.18  | 0.02    | 0.99 |
| NGLY1_2    | 50.79     | -0.097 | 0       | 0.95 |

Supplement: Supplementary file 6969 [file 1]

# IPI00872944.1|NUCKS1

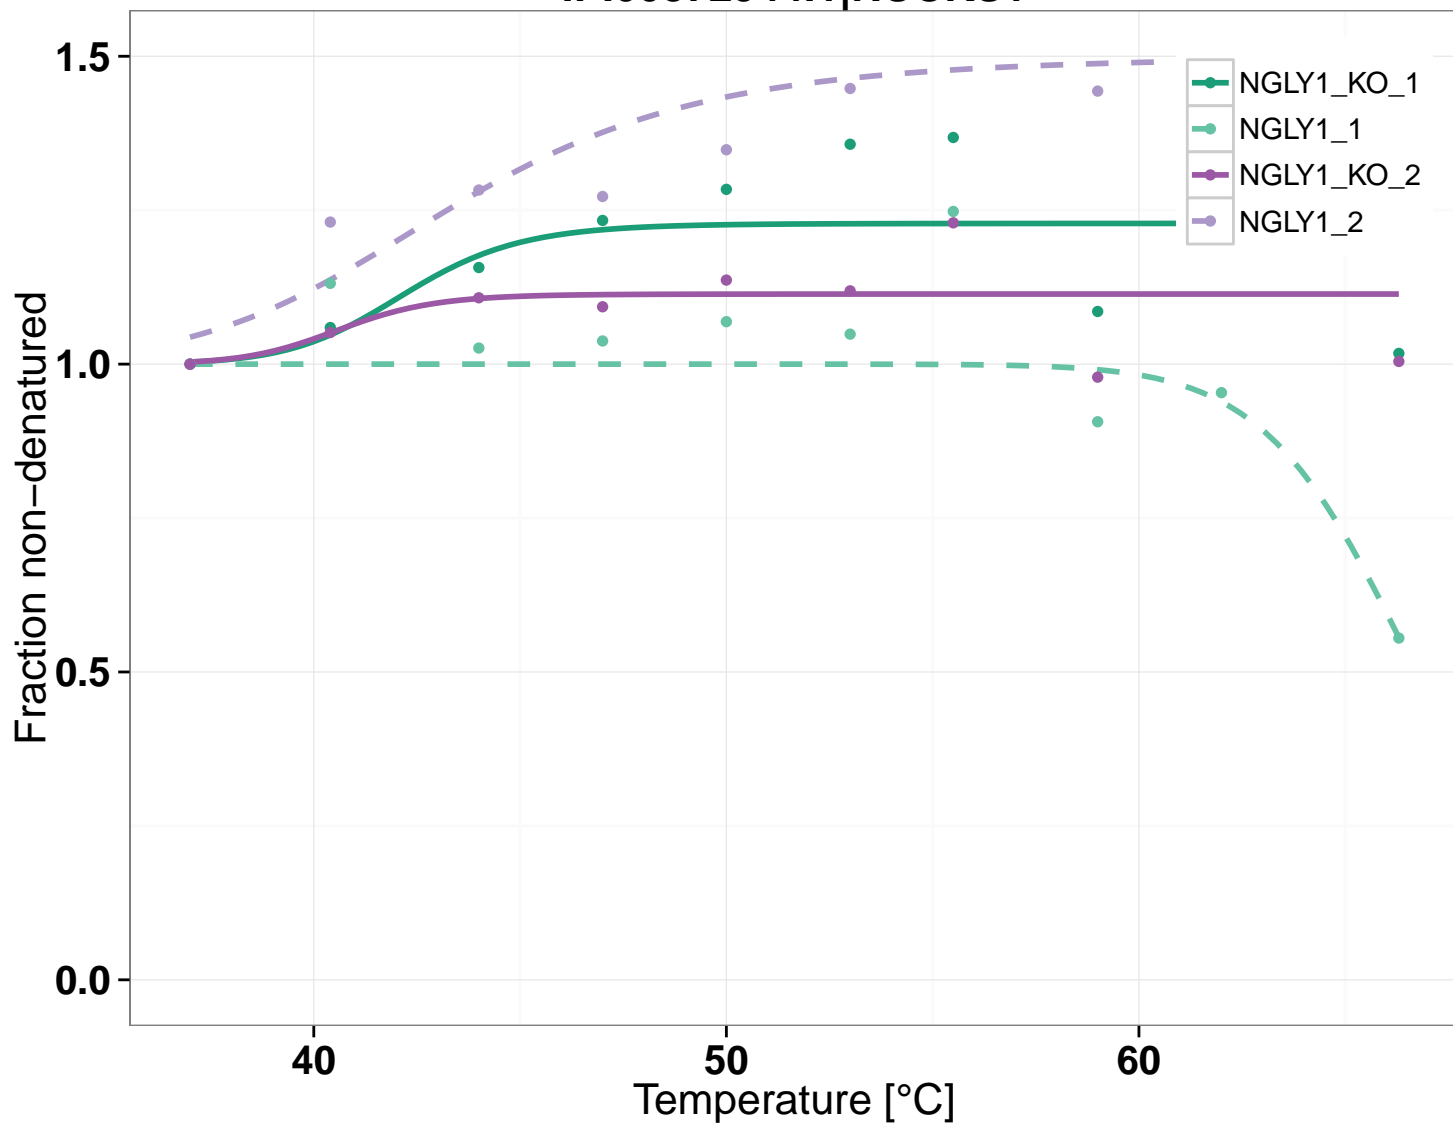

|            | meltPoint | slope | plateau | R2   |
|------------|-----------|-------|---------|------|
| NGLY1_KO_1 | –         | 0.041 | 1.23    | 0.37 |
| NGLY1_1    | –         | –     | 0       | 0.68 |
| NGLY1_KO_2 | –         | 0.025 | 1.11    | 0.19 |
| NGLY1_2    | –         | 0.041 | 1.5     | 0.59 |

Supplement: Supplementary file 6970 [file 1]

IPI00871938.1|PTGFRN

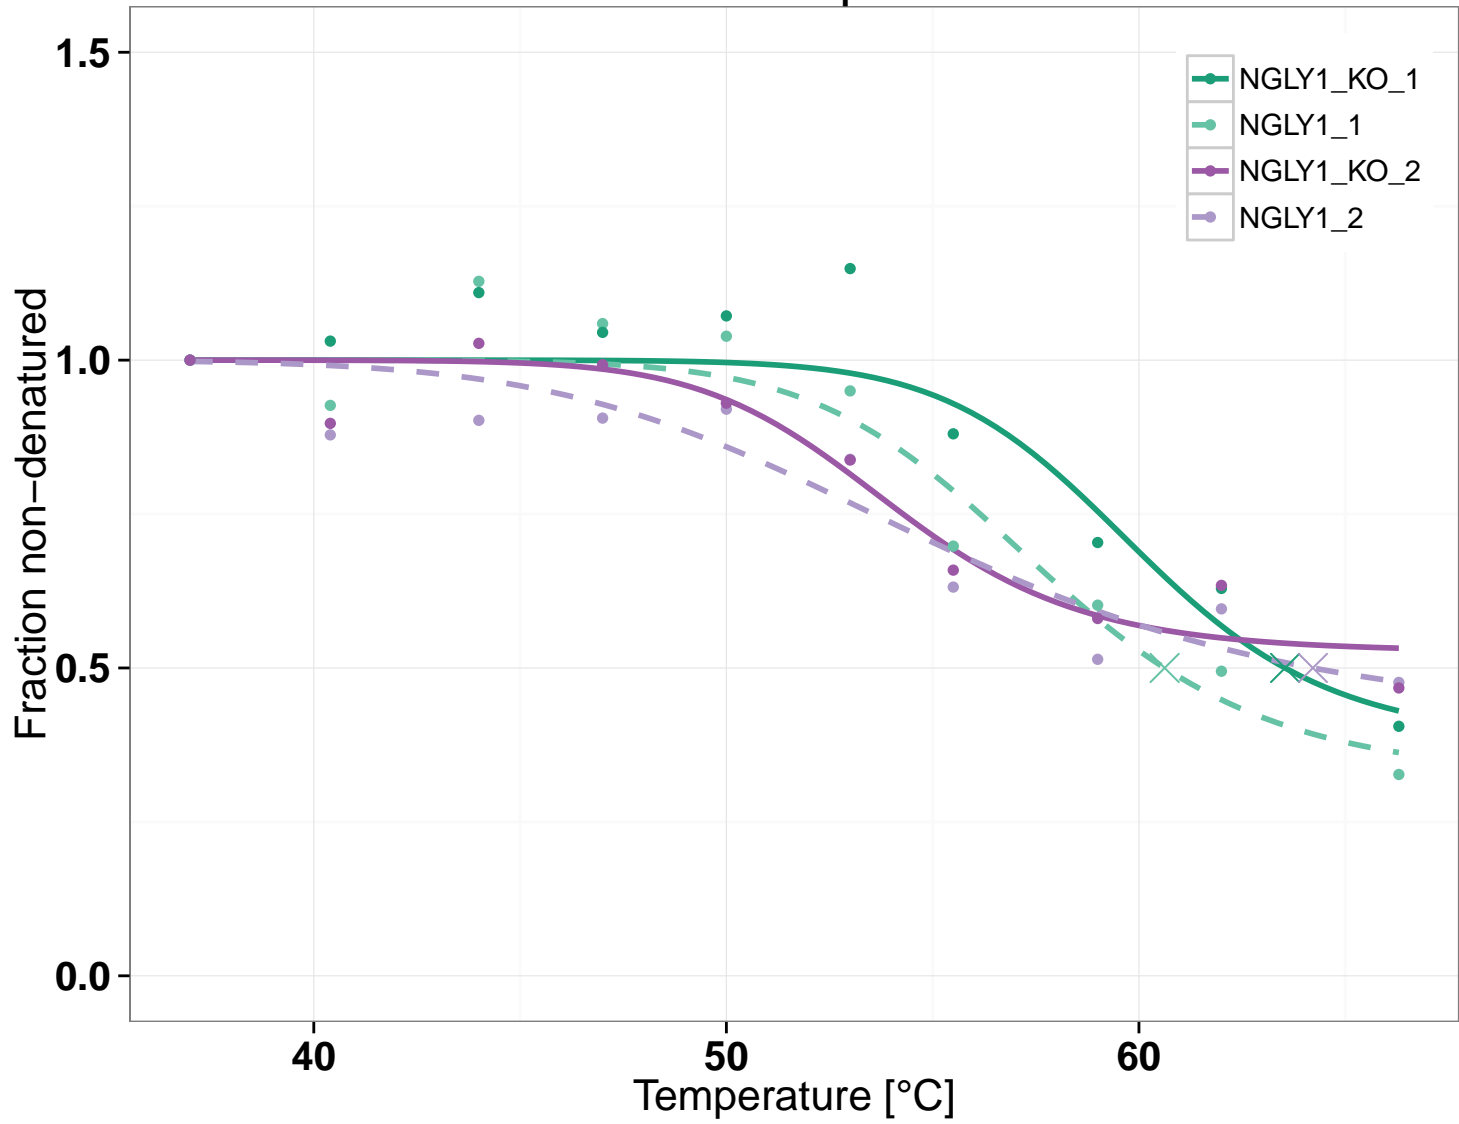

|            | meltPoint | slope  | plateau | R2   |
|------------|-----------|--------|---------|------|
| NGLY1_KO_1 | 63.54     | -0.066 | 0.38    | 0.89 |
| NGLY1_1    | 60.62     | -0.062 | 0.32    | 0.93 |
| NGLY1_KO_2 | -         | -0.051 | 0.53    | 0.93 |
| NGLY1_2    | 64.22     | -0.032 | 0.4     | 0.88 |

Supplement: Supplementary file 6971 [file 1]

IPI00027014.1|DCTN3

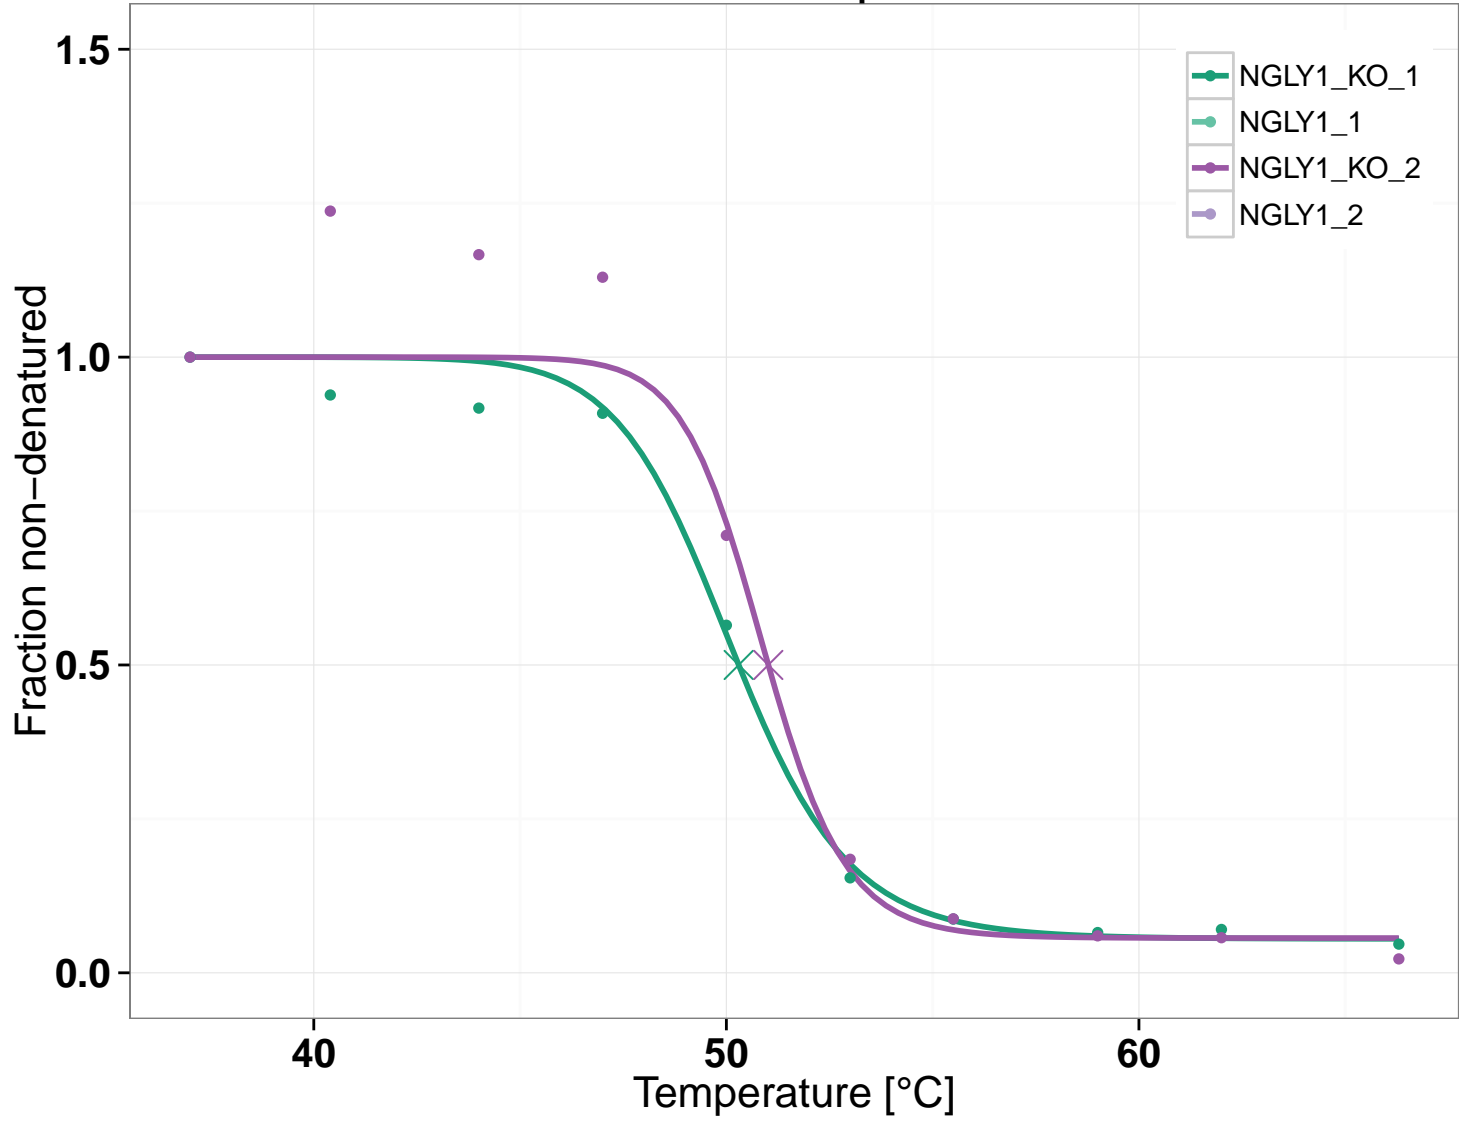

|            | meltPoint | slope | plateau | R2   |
|------------|-----------|-------|---------|------|
| NGLY1_KO_1 | 50.3      | -0.17 | 0.06    | 0.99 |
| NGLY1_1    | -         | -     | -       | -    |
| NGLY1_KO_2 | 51.02     | -0.24 | 0.06    | 0.96 |
| NGLY1_2    | -         | -     | -       | -    |

Supplement: Supplementary file 6972 [file 1]

IPI00221285.5|ANKRD50

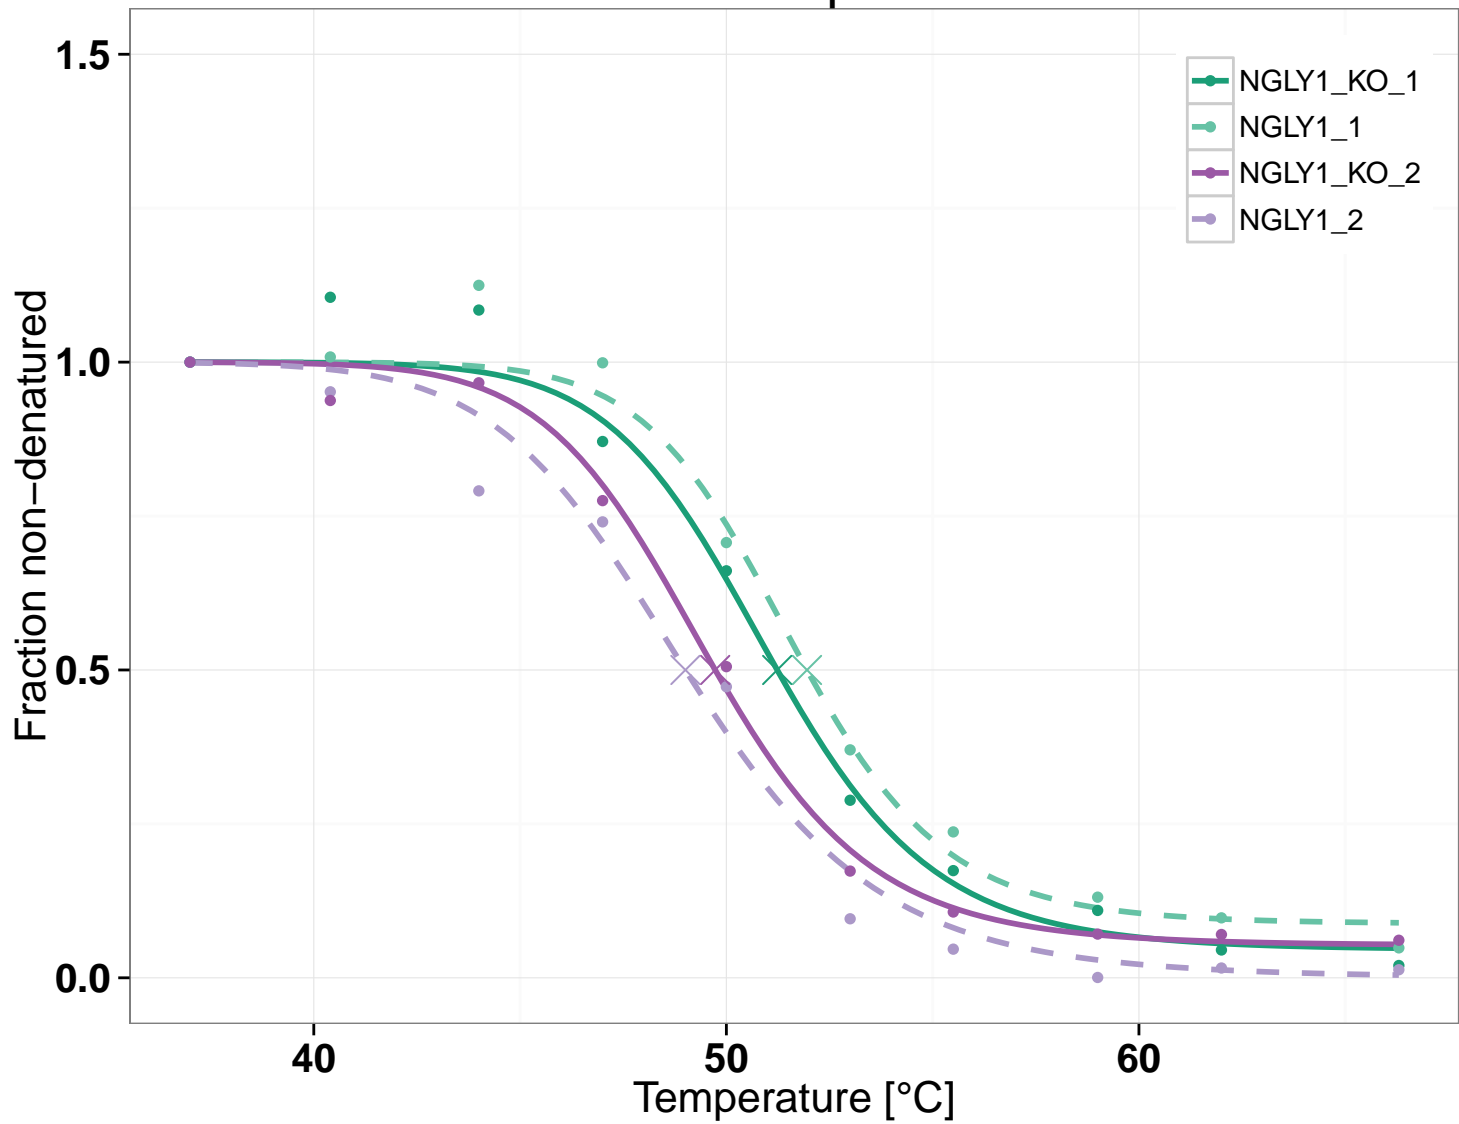

|            | meltPoint | slope | plateau | R2   |
|------------|-----------|-------|---------|------|
| NGLY1_KO_1 | 51.23     | -0.12 | 0.05    | 0.99 |
| NGLY1_1    | 51.95     | -0.13 | 0.09    | 0.99 |
| NGLY1_KO_2 | 49.73     | -0.12 | 0.05    | 1    |
| NGLY1_2    | 49.01     | -0.11 | 0       | 0.98 |

Supplement: Supplementary file 6973 [file 1]

IPI00101600.5|CWF19L1

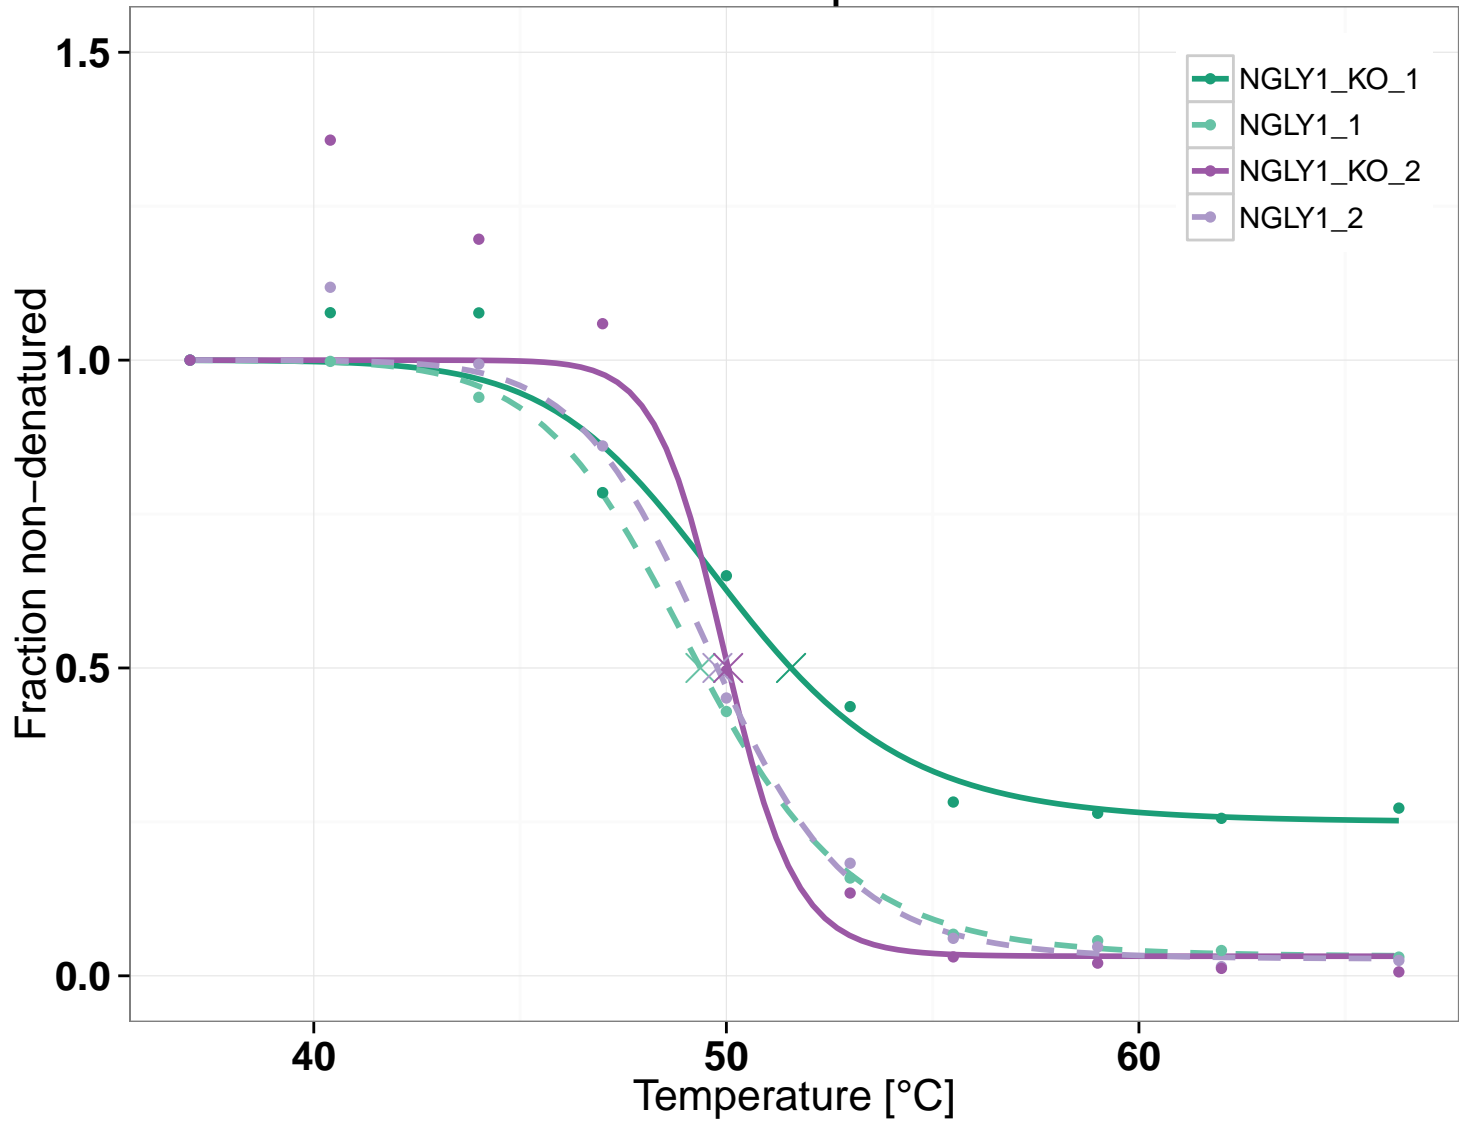

|            | meltPoint | slope  | plateau | R2   |
|------------|-----------|--------|---------|------|
| NGLY1_KO_1 | 51.57     | -0.087 | 0.25    | 0.98 |
| NGLY1_1    | 49.37     | -0.13  | 0.03    | 1    |
| NGLY1_KO_2 | 50.04     | -0.28  | 0.03    | 0.94 |
| NGLY1_2    | 49.78     | -0.15  | 0.03    | 0.99 |

Supplement: Supplementary file 6974 [file 1]

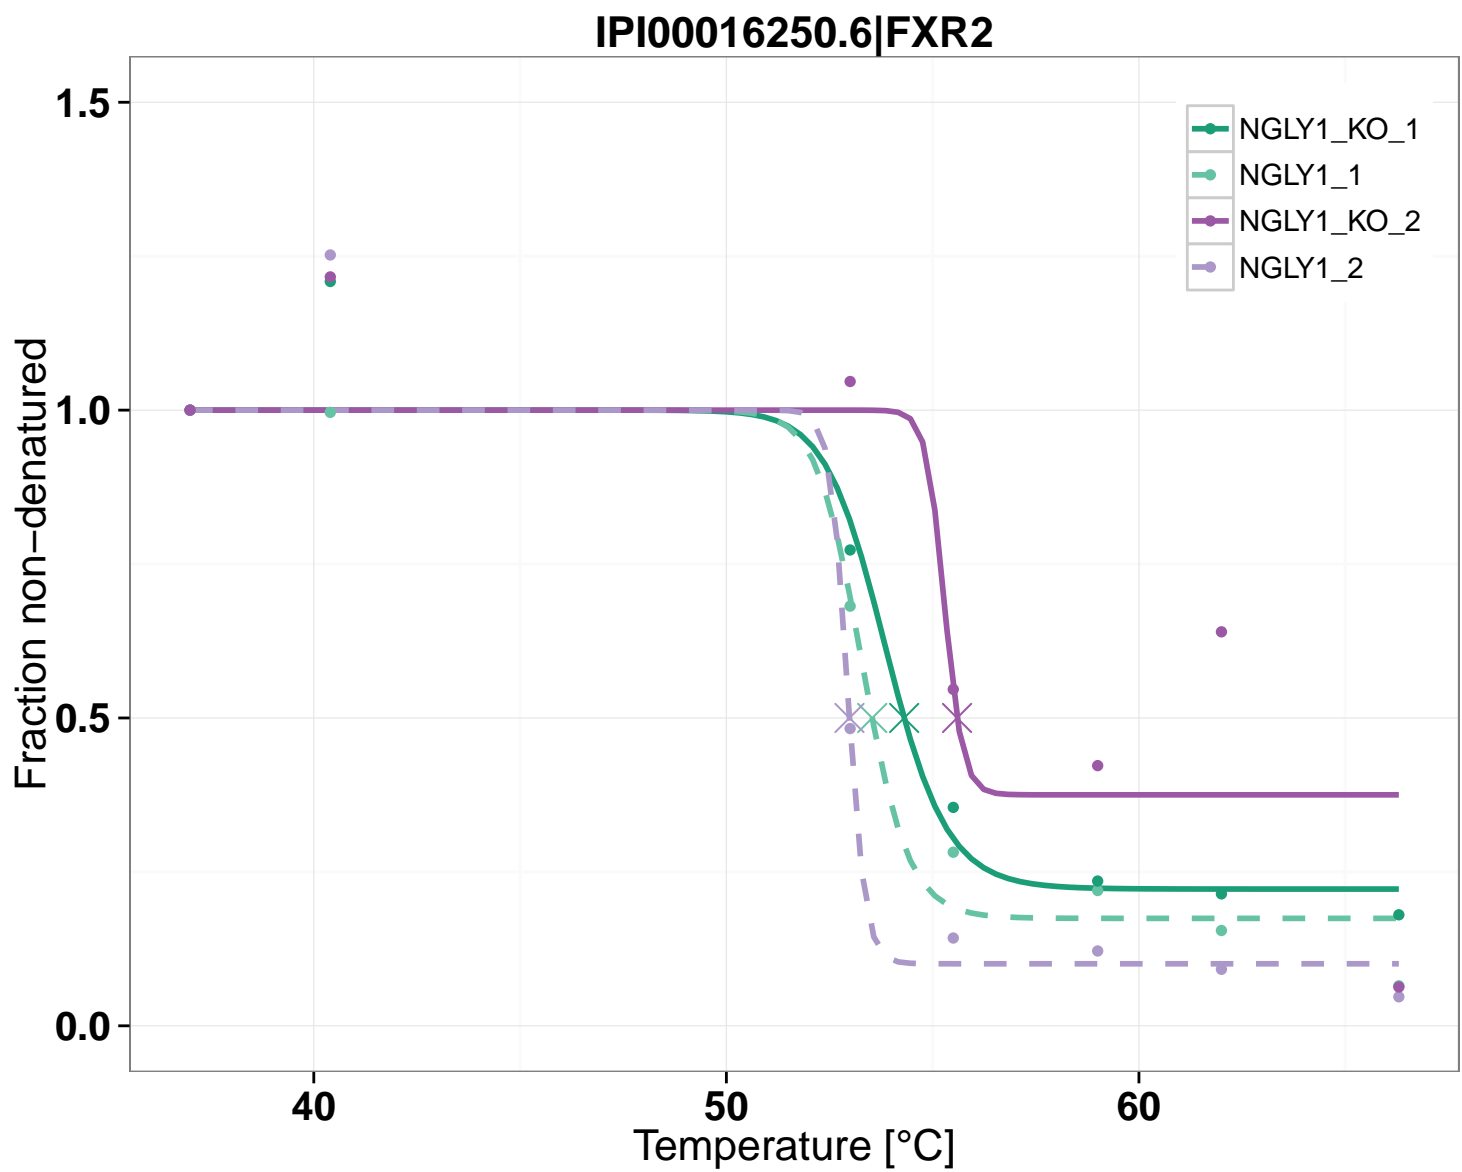

|            | meltPoint | slope | plateau | R2    |
|------------|-----------|-------|---------|-------|
| NGLY1_KO_1 | 54.31     | -0.26 | 0.22    | 0.32  |
| NGLY1_1    | 53.54     | -0.37 | 0.17    | 0.4   |
| NGLY1_KO_2 | 55.59     | -0.71 | 0.38    | -0.05 |
| NGLY1_2    | 52.98     | -1.1  | 0.1     | 0.41  |

Supplement: Supplementary file 6975 [file 1]

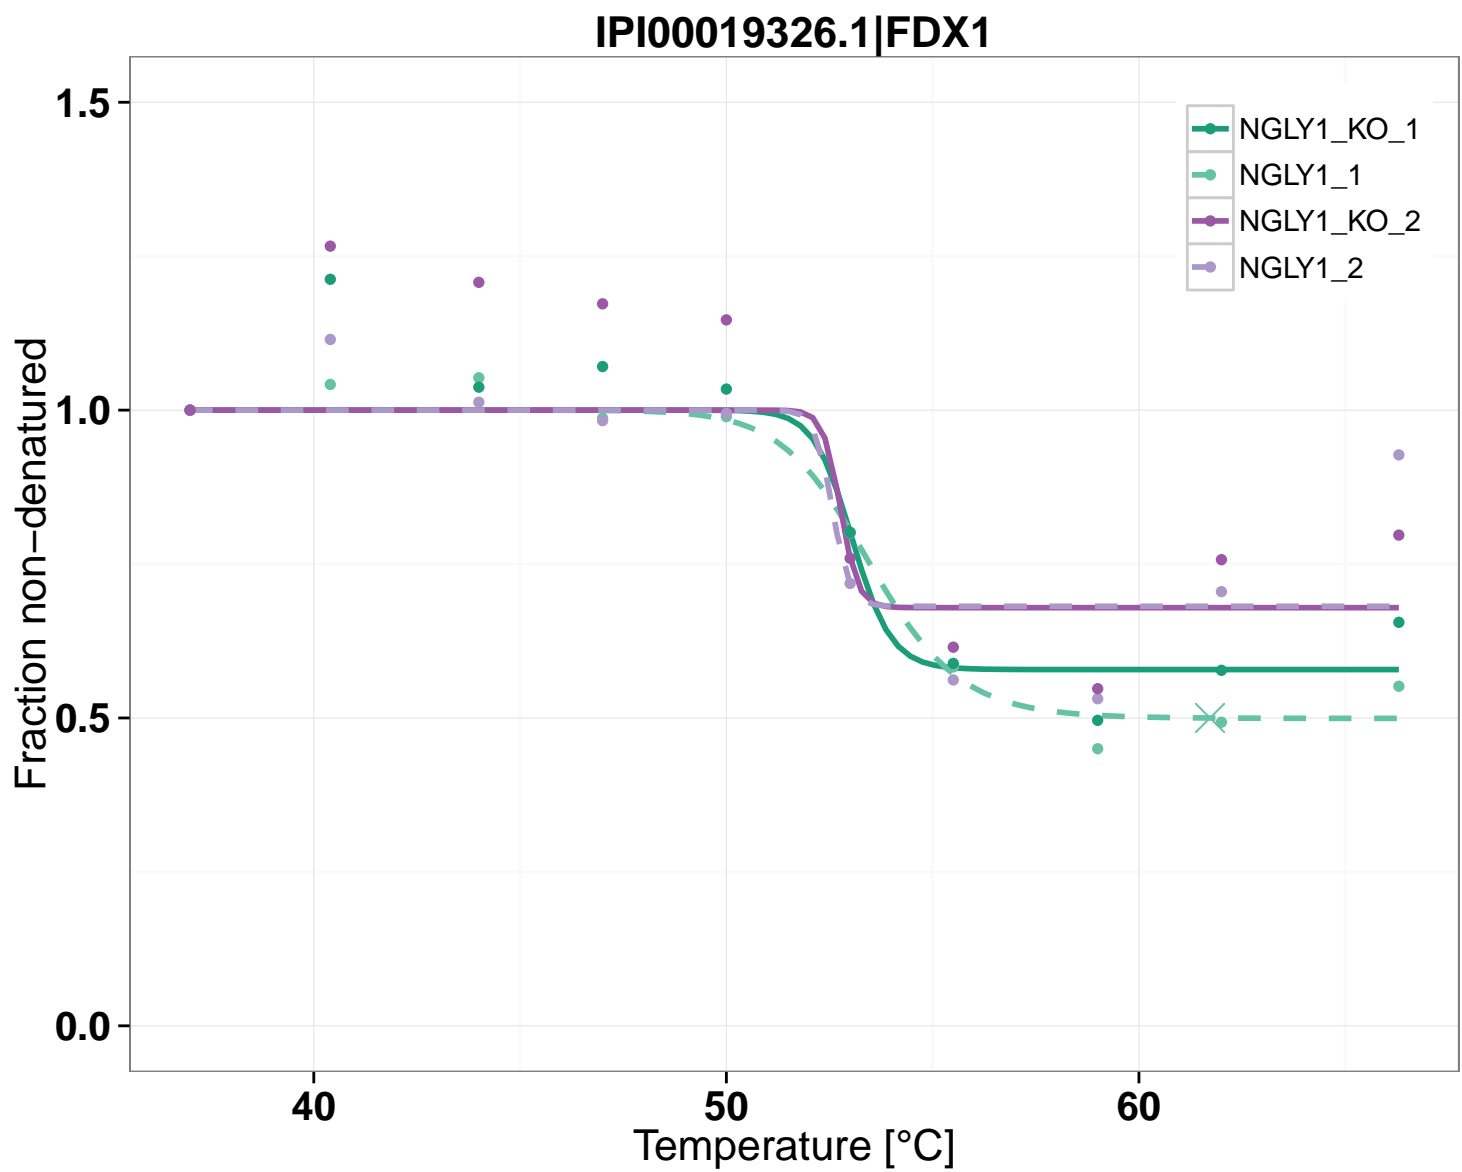

|            | meltPoint | slope | plateau | R2   |
|------------|-----------|-------|---------|------|
| NGLY1_KO_1 | –         | –0.22 | 0.58    | 0.89 |
| NGLY1_1    | 61.72     | –0.12 | 0.5     | 0.98 |
| NGLY1_KO_2 | –         | –0.38 | 0.68    | 0.67 |
| NGLY1_2    | –         | –0.38 | 0.68    | 0.71 |

Supplement: Supplementary file 6976 [file 1]

IPI00301139.5|MED17

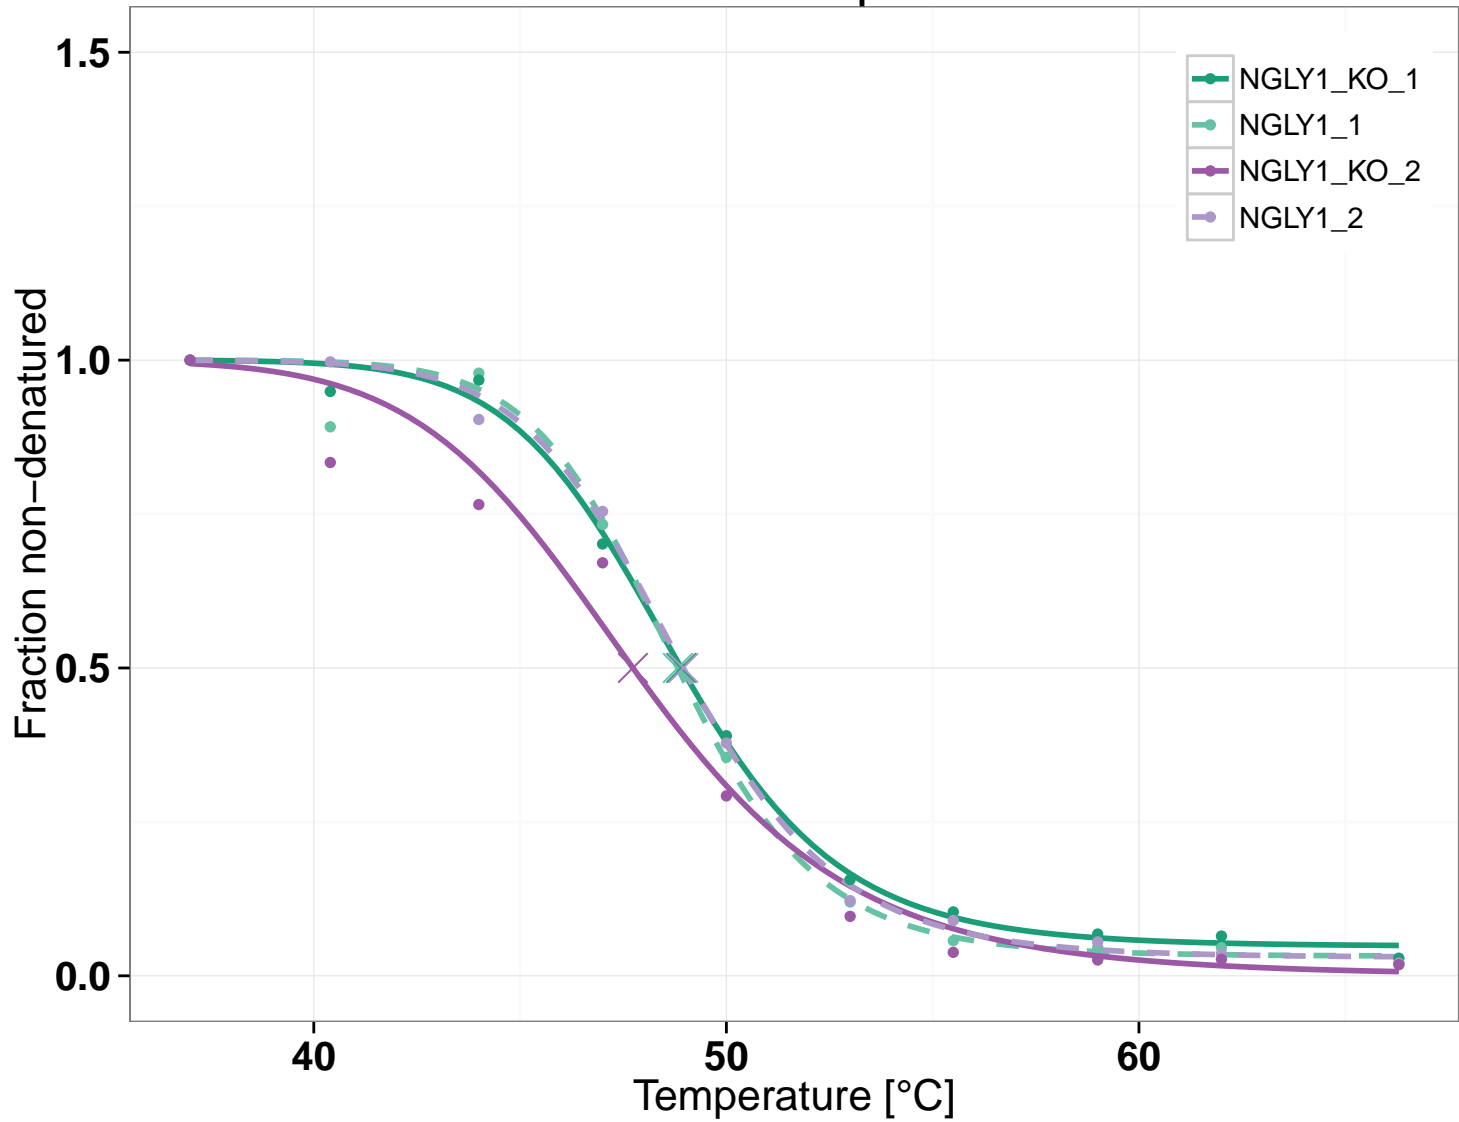

|            | meltPoint | slope  | plateau | R2   |
|------------|-----------|--------|---------|------|
| NGLY1_KO_1 | 48.91     | -0.12  | 0.05    | 1    |
| NGLY1_1    | 48.82     | -0.14  | 0.03    | 0.99 |
| NGLY1_KO_2 | 47.73     | -0.094 | 0       | 0.98 |
| NGLY1_2    | 48.95     | -0.13  | 0.03    | 1    |

Supplement: Supplementary file 6977 [file 1]

IPI00301879.3|GEMIN8

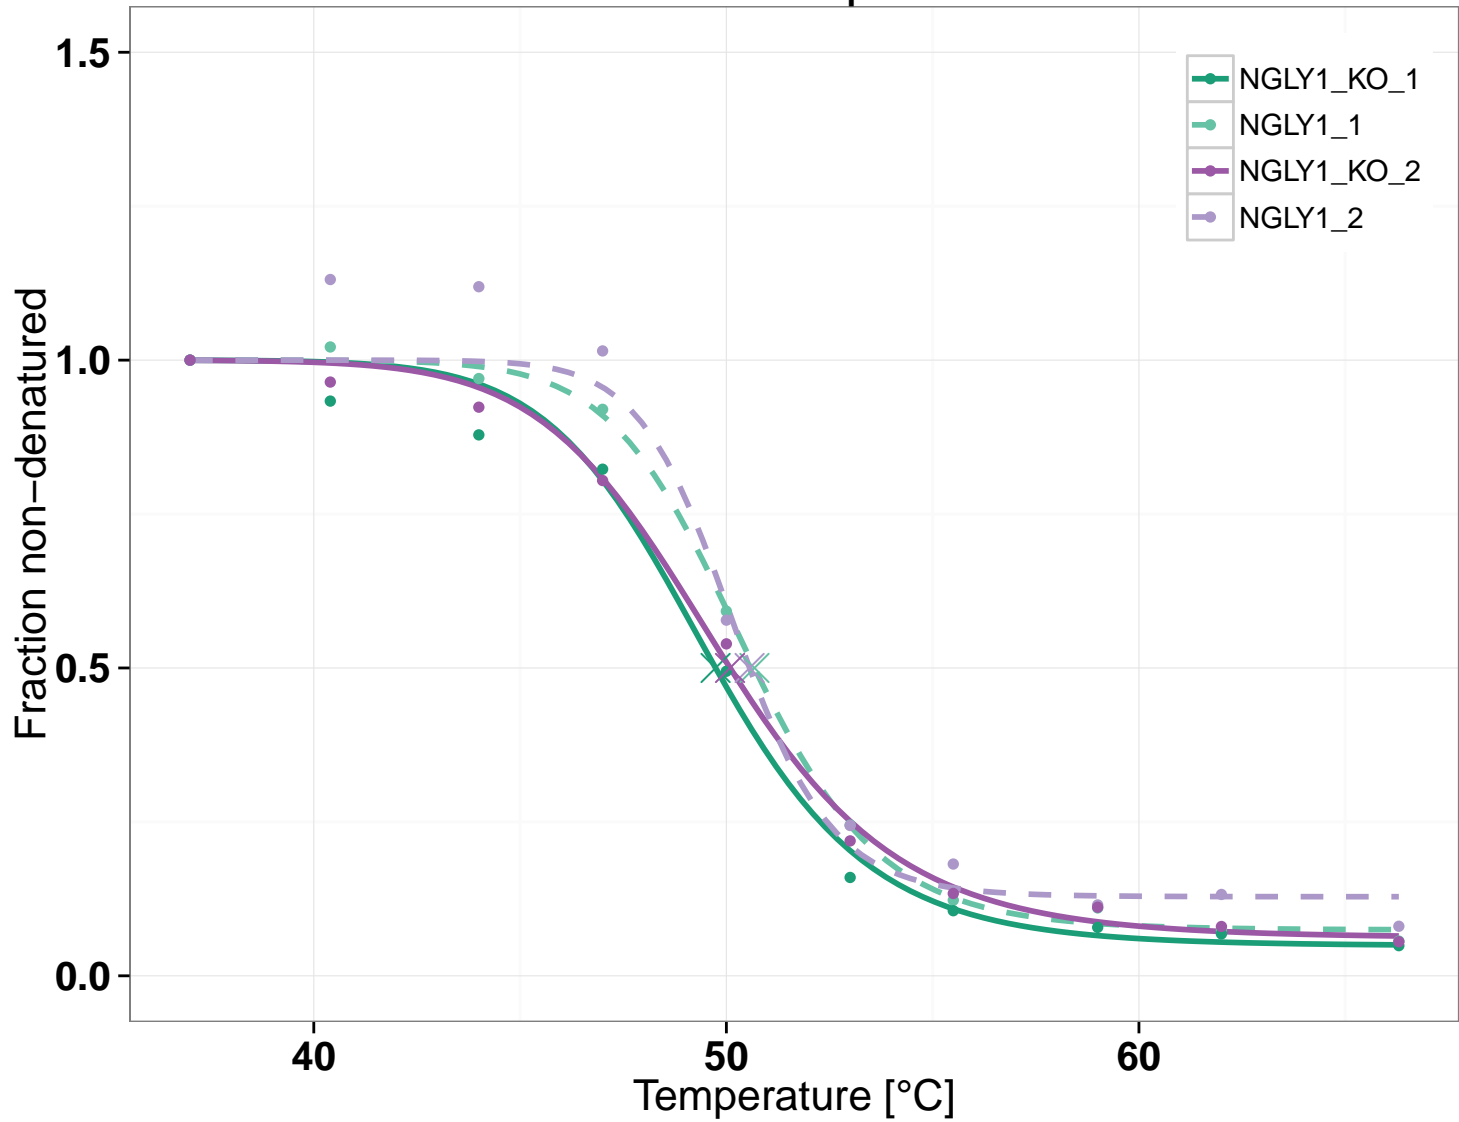

|            | meltPoint | slope | plateau | R2   |
|------------|-----------|-------|---------|------|
| NGLY1_KO_1 | 49.74     | -0.12 | 0.05    | 0.99 |
| NGLY1_1    | 50.68     | -0.14 | 0.07    | 1    |
| NGLY1_KO_2 | 50.09     | -0.11 | 0.06    | 1    |
| NGLY1_2    | 50.56     | -0.19 | 0.13    | 0.98 |

Supplement: Supplementary file 6978 [file 1]

IPI00328309.1|DCP1B

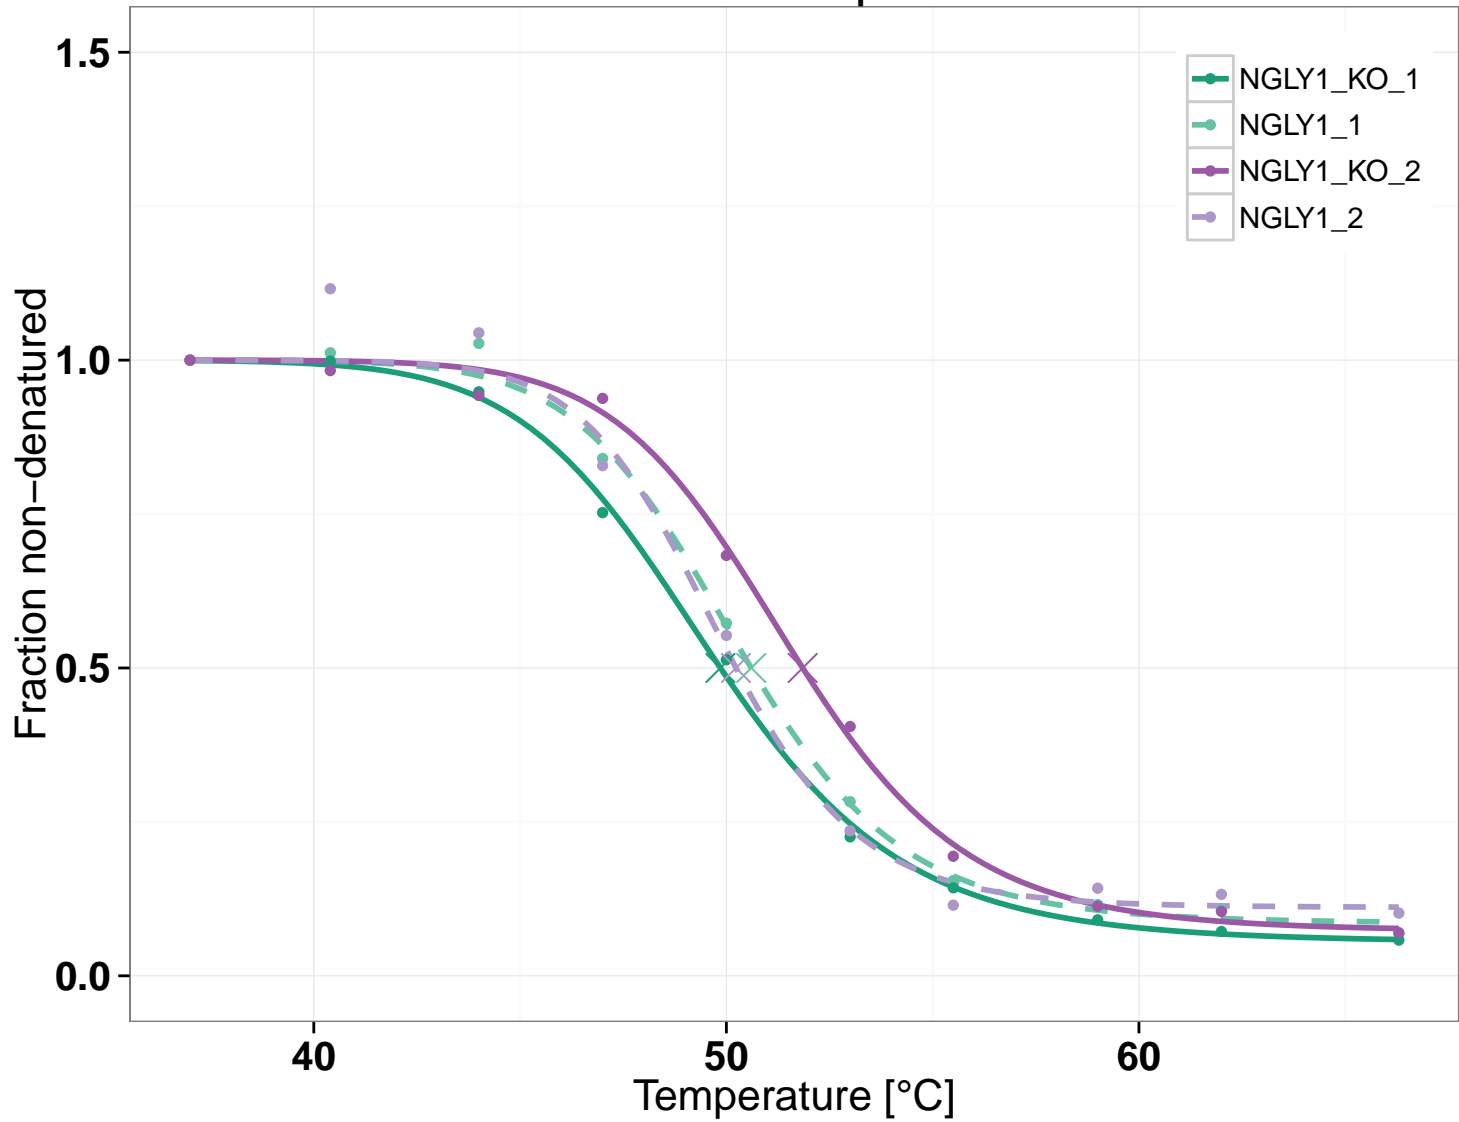

|            | meltPoint | slope | plateau | R2   |
|------------|-----------|-------|---------|------|
| NGLY1_KO_1 | 49.86     | -0.1  | 0.05    | 1    |
| NGLY1_1    | 50.6      | -0.12 | 0.09    | 1    |
| NGLY1_KO_2 | 51.85     | -0.11 | 0.07    | 1    |
| NGLY1_2    | 50.23     | -0.13 | 0.11    | 0.99 |

Supplement: Supplementary file 6979 [file 1]

# IPI00552440.1|POLK

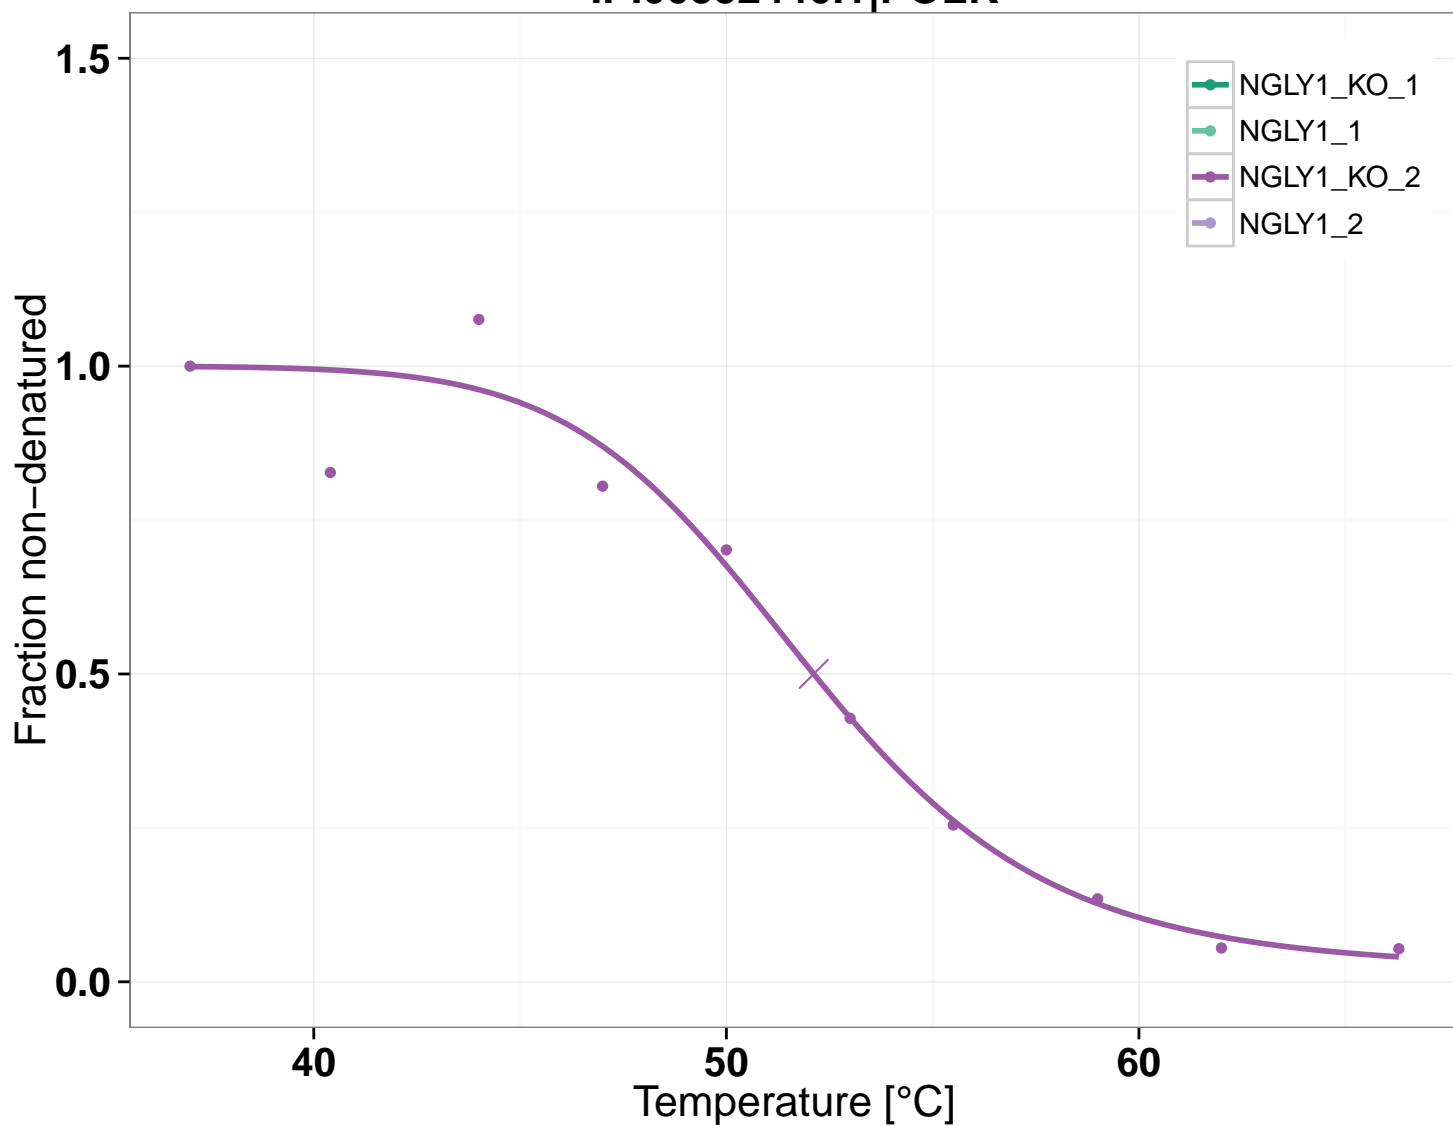

|            | meltPoint | slope  | plateau | R2   |
|------------|-----------|--------|---------|------|
| NGLY1_KO_1 | —         | —      | —       | —    |
| NGLY1_1    | —         | —      | —       | —    |
| NGLY1_KO_2 | 52.12     | -0.084 | 0.02    | 0.97 |
| NGLY1_2    | —         | —      | —       | —    |

Supplement: Supplementary file 6980 [file 1]

IPI00025974.3|CHMP4B

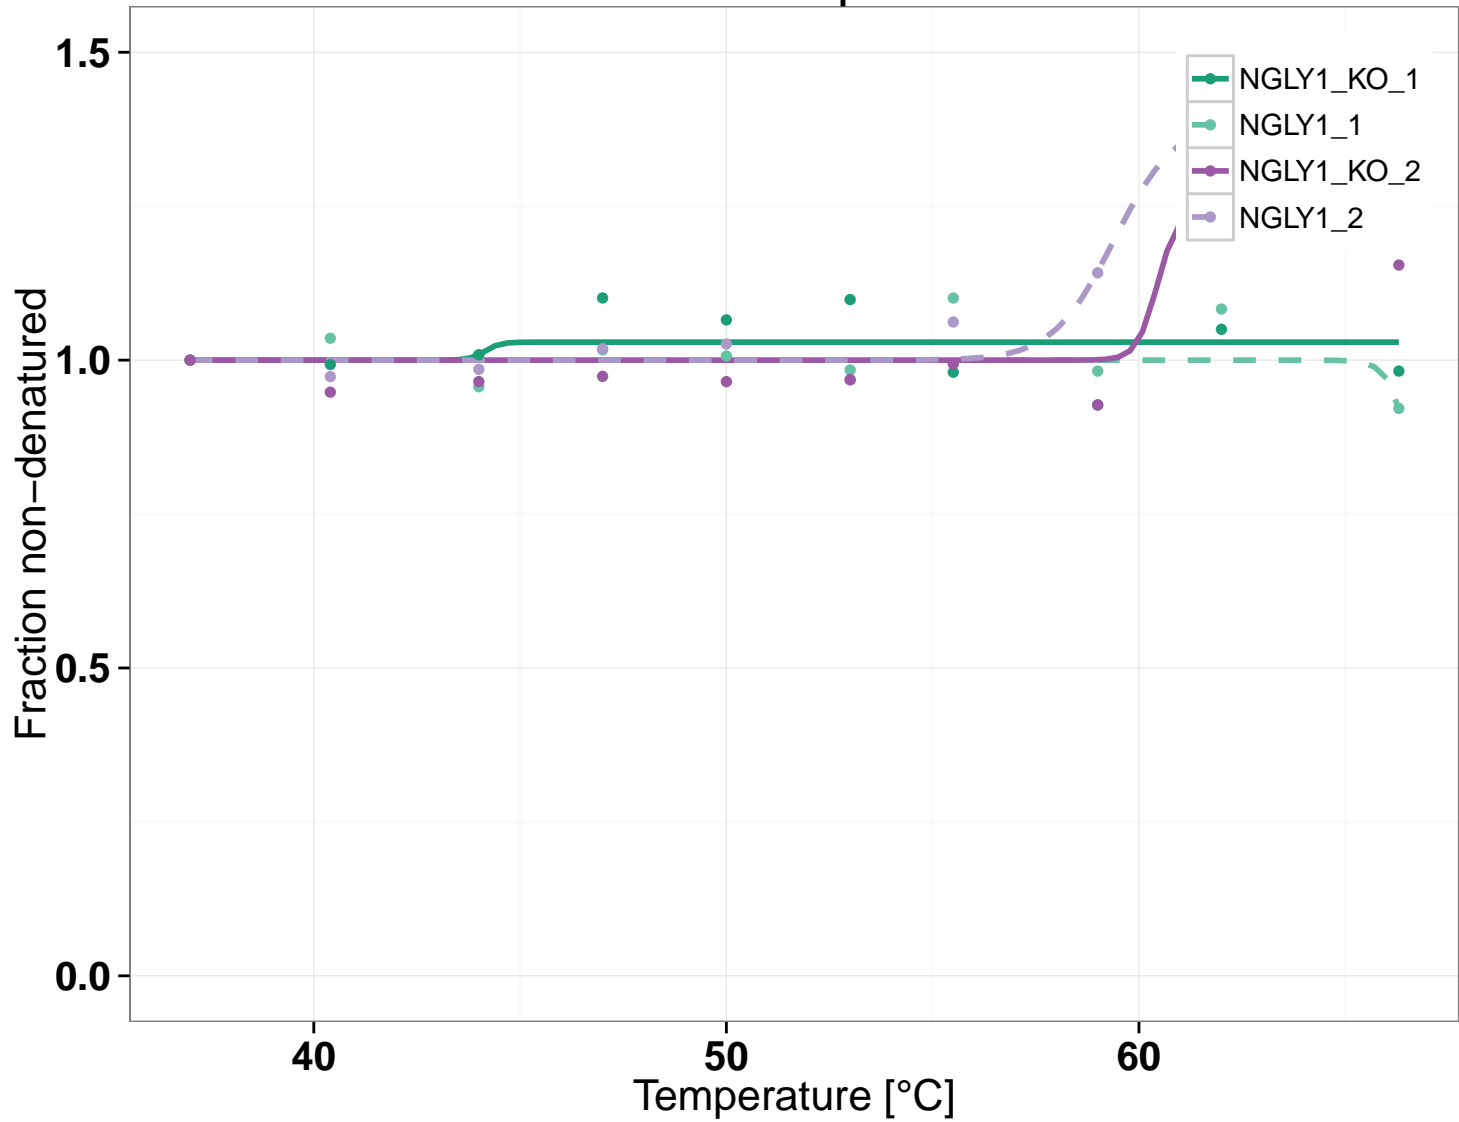

|            | meltPoint | slope | plateau | R2   |
|------------|-----------|-------|---------|------|
| NGLY1_KO_1 | -         | 0.041 | 1.03    | 0.06 |
| NGLY1_1    | -         | -     | 0       | 0.2  |
| NGLY1_KO_2 | -         | 0.25  | 1.24    | 0.8  |
| NGLY1_2    | -         | 0.13  | 1.4     | 0.97 |

Supplement: Supplementary file 6981 [file 1]

# IPI00412229.2|BOLA3

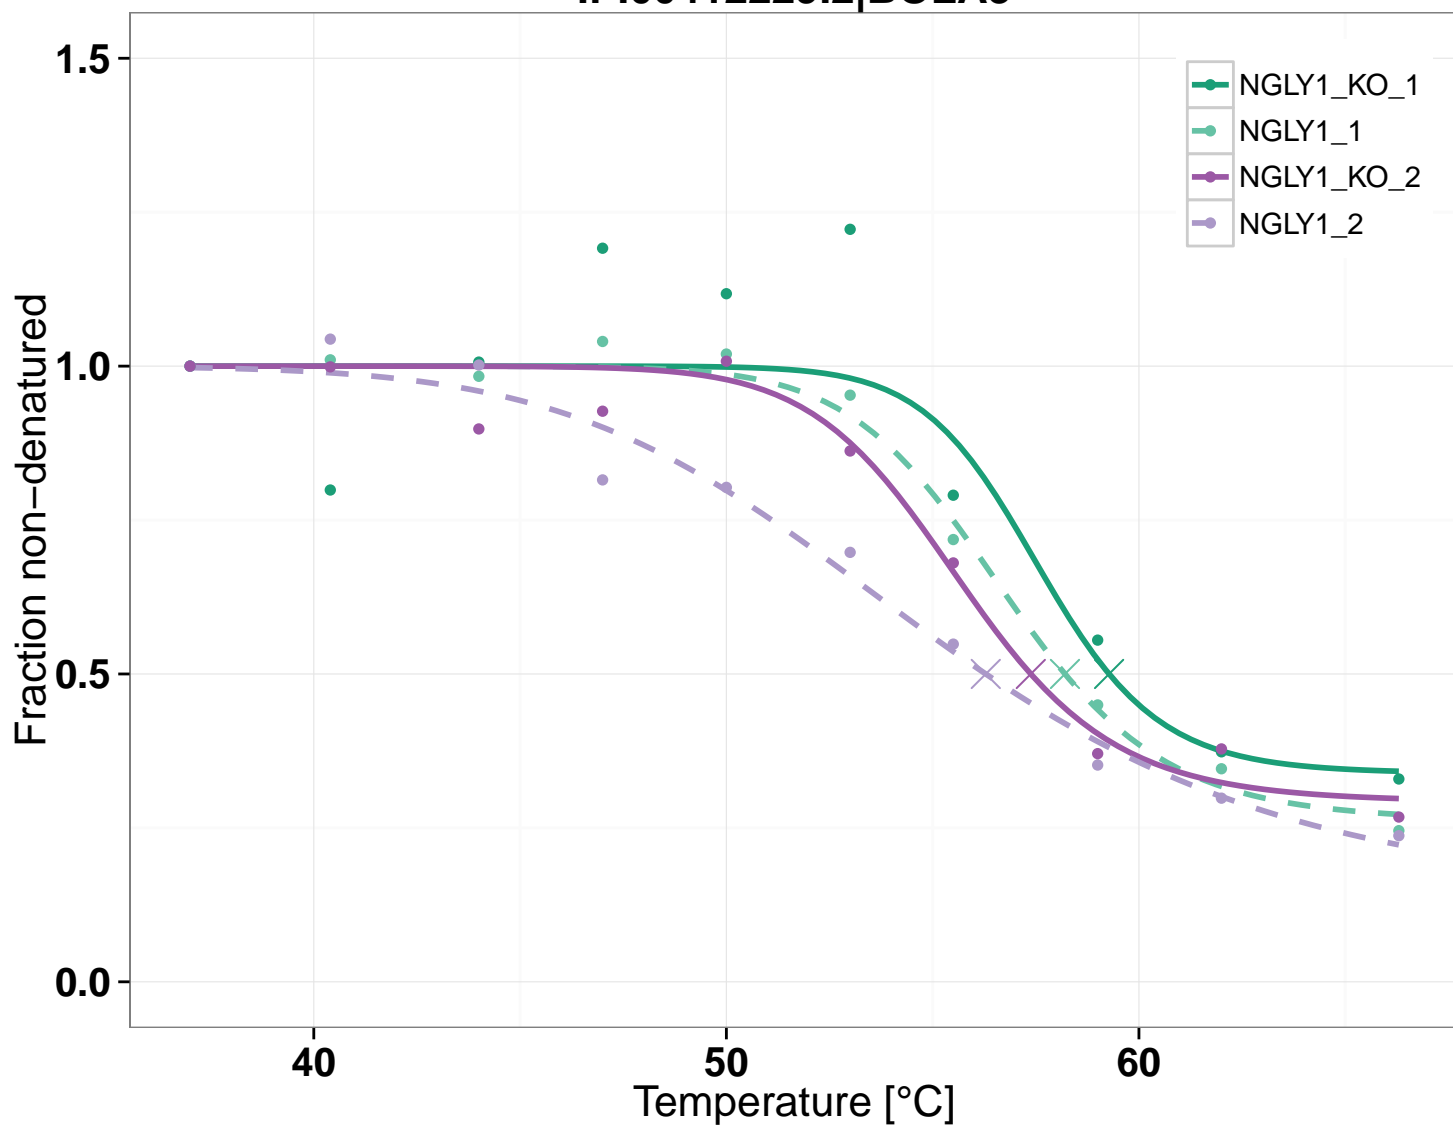

|            | meltPoint | slope  | plateau | R2   |
|------------|-----------|--------|---------|------|
| NGLY1_KO_1 | 59.28     | -0.12  | 0.34    | 0.83 |
| NGLY1_1    | 58.21     | -0.097 | 0.26    | 0.99 |
| NGLY1_KO_2 | 57.38     | -0.096 | 0.29    | 0.97 |
| NGLY1_2    | 56.29     | -0.05  | 0.13    | 0.98 |

Supplement: Supplementary file 6982 [file 1]

IPI00890795.1|LOC440957

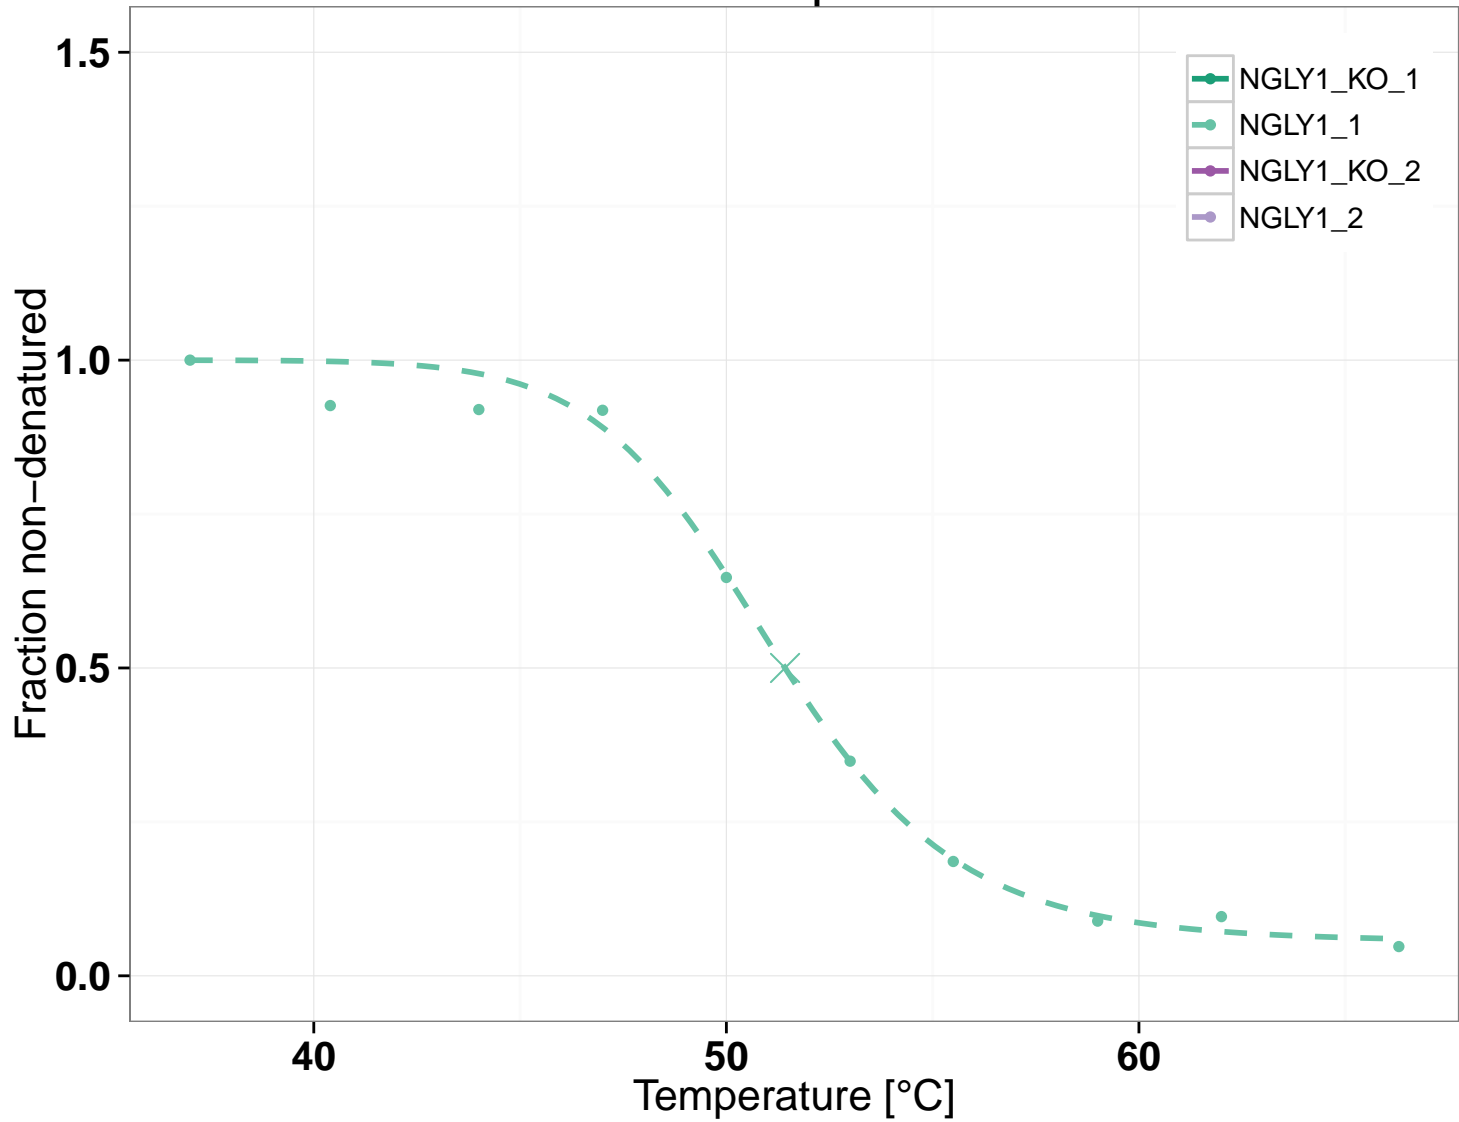

|            | meltPoint | slope | plateau | R2   |
|------------|-----------|-------|---------|------|
| NGLY1_KO_1 | -         | -     | -       | -    |
| NGLY1_1    | 51.42     | -0.11 | 0.06    | 0.99 |
| NGLY1_KO_2 | -         | -     | -       | -    |
| NGLY1_2    | -         | -     | -       | -    |

Supplement: Supplementary file 6983 [file 1]

# IPI00030362.1|PLP2

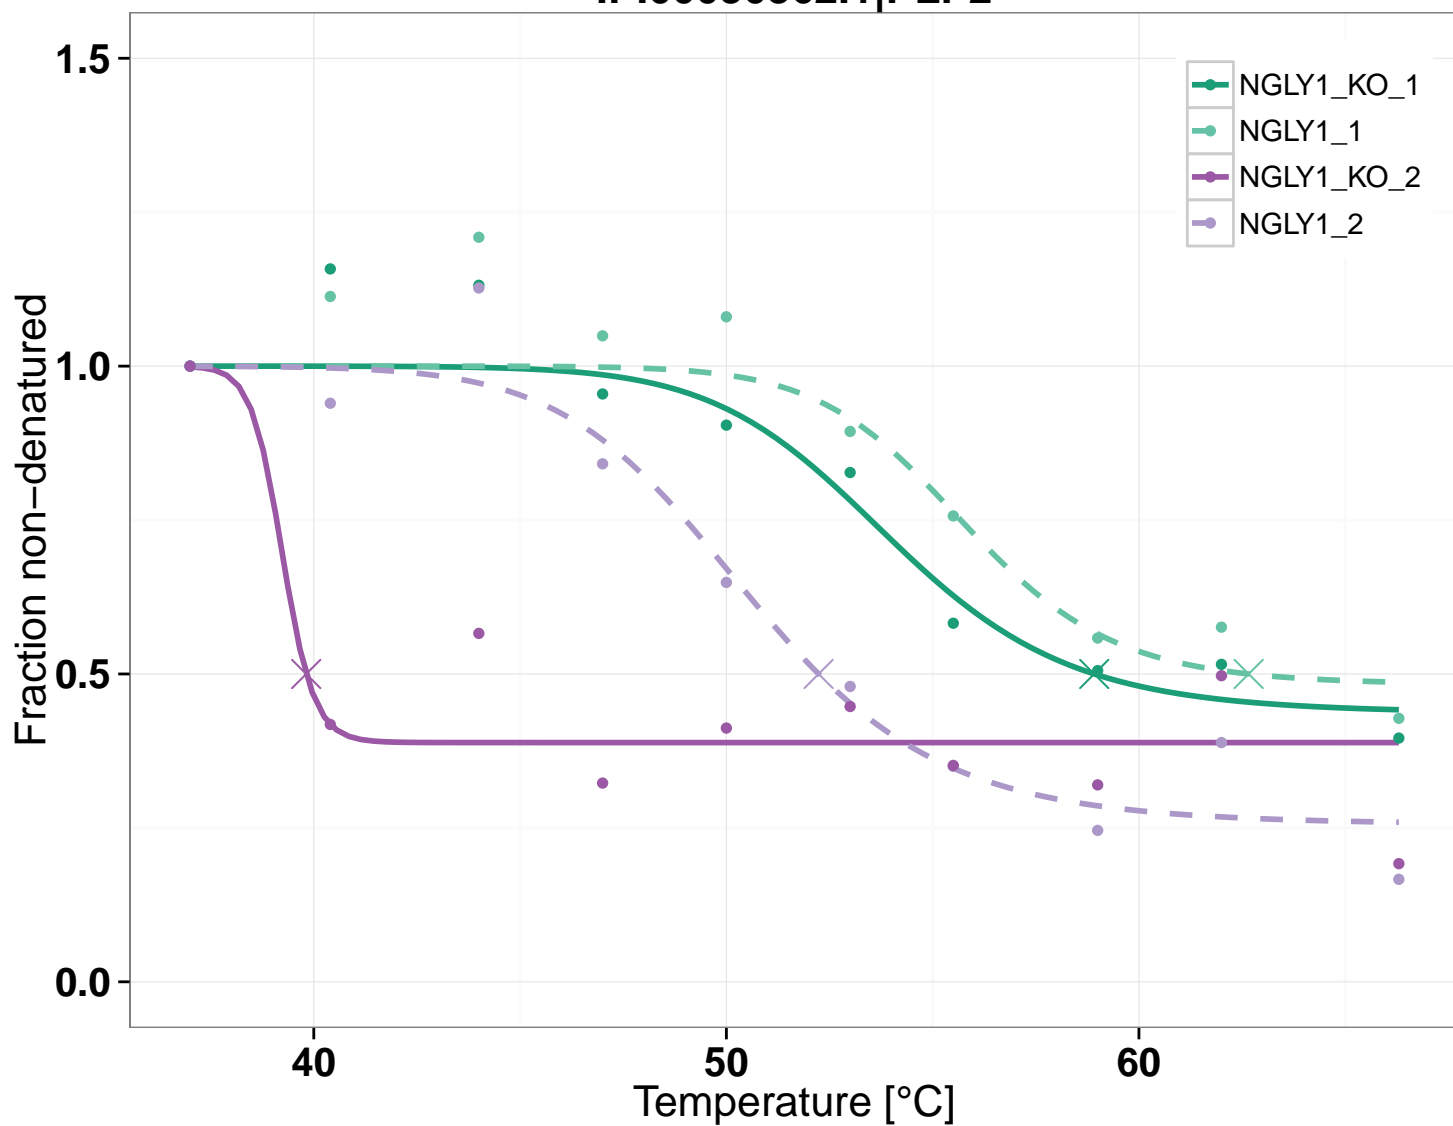

|            | meltPoint | slope  | plateau | R2   |
|------------|-----------|--------|---------|------|
| NGLY1_KO_1 | 58.92     | -0.065 | 0.44    | 0.92 |
| NGLY1_1    | 62.66     | -0.071 | 0.48    | 0.88 |
| NGLY1_KO_2 | 39.82     | -0.4   | 0.39    | 0.78 |
| NGLY1_2    | 52.24     | -0.082 | 0.26    | 0.95 |

Supplement: Supplementary file 6984 [file 1]

IPI00024990.6|ALDH6A1

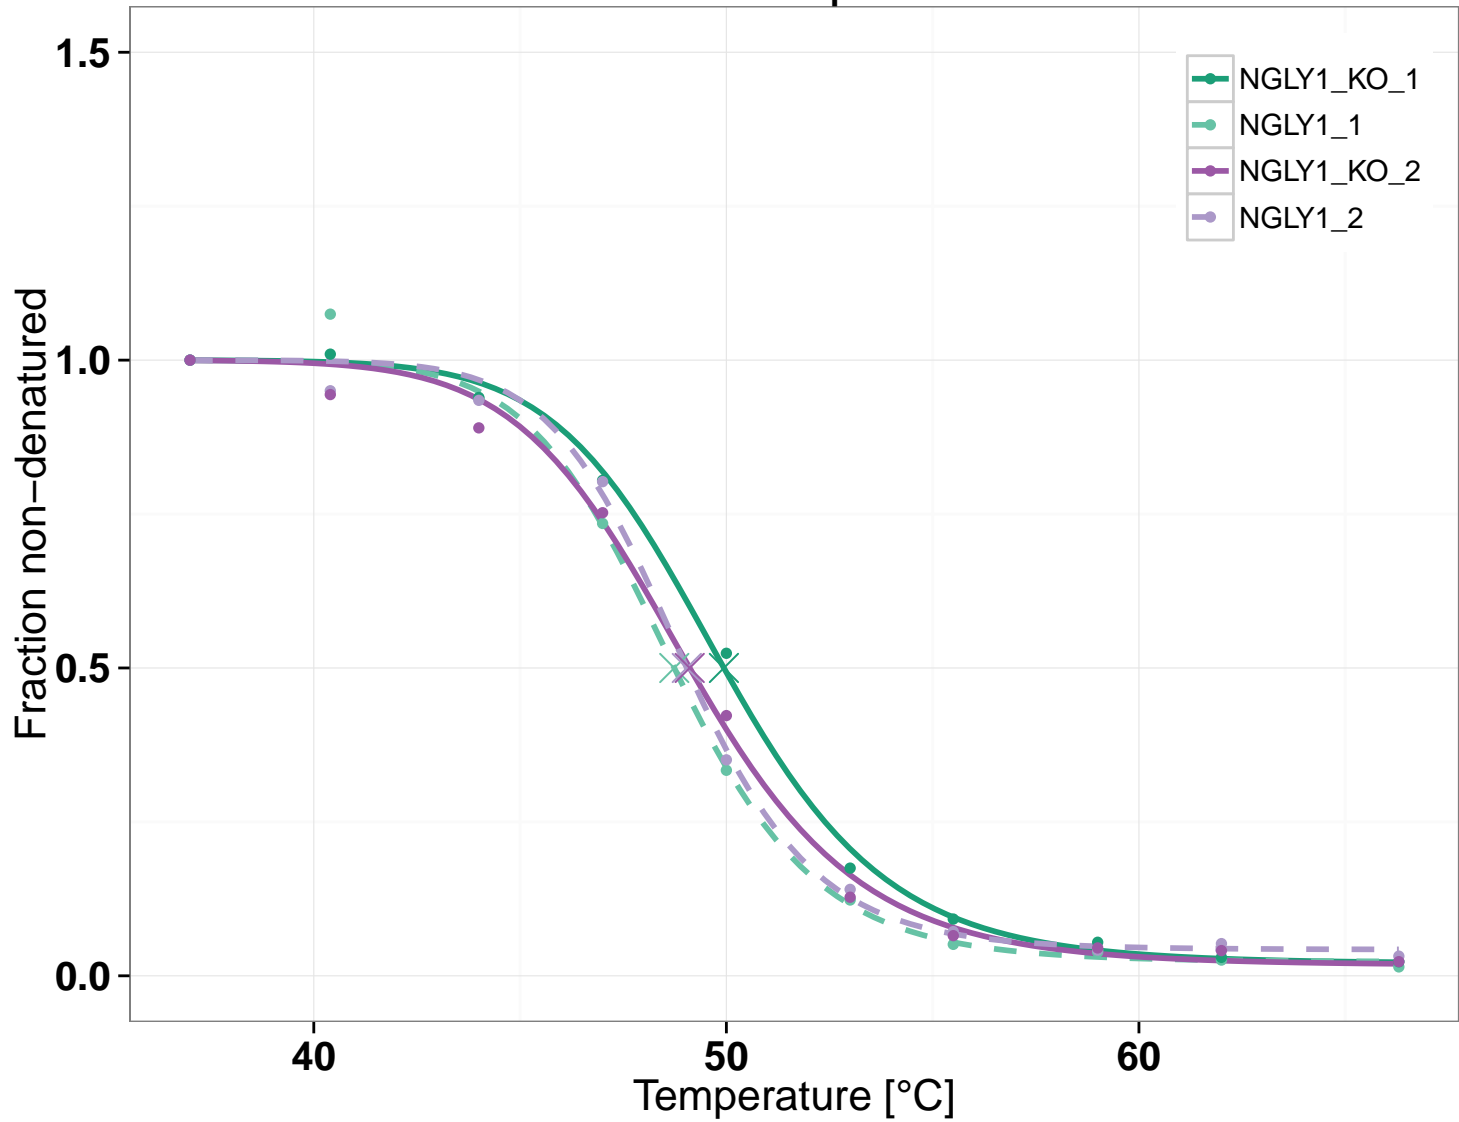

|            | meltPoint | slope | plateau | R2 |
|------------|-----------|-------|---------|----|
| NGLY1_KO_1 | 49.94     | -0.12 | 0.02    | 1  |
| NGLY1_1    | 48.74     | -0.14 | 0.02    | 1  |
| NGLY1_KO_2 | 49.11     | -0.12 | 0.02    | 1  |
| NGLY1_2    | 49.04     | -0.15 | 0.04    | 1  |

Supplement: Supplementary file 6985 [file 1]

# IPI00178888.1|ZNHIT3

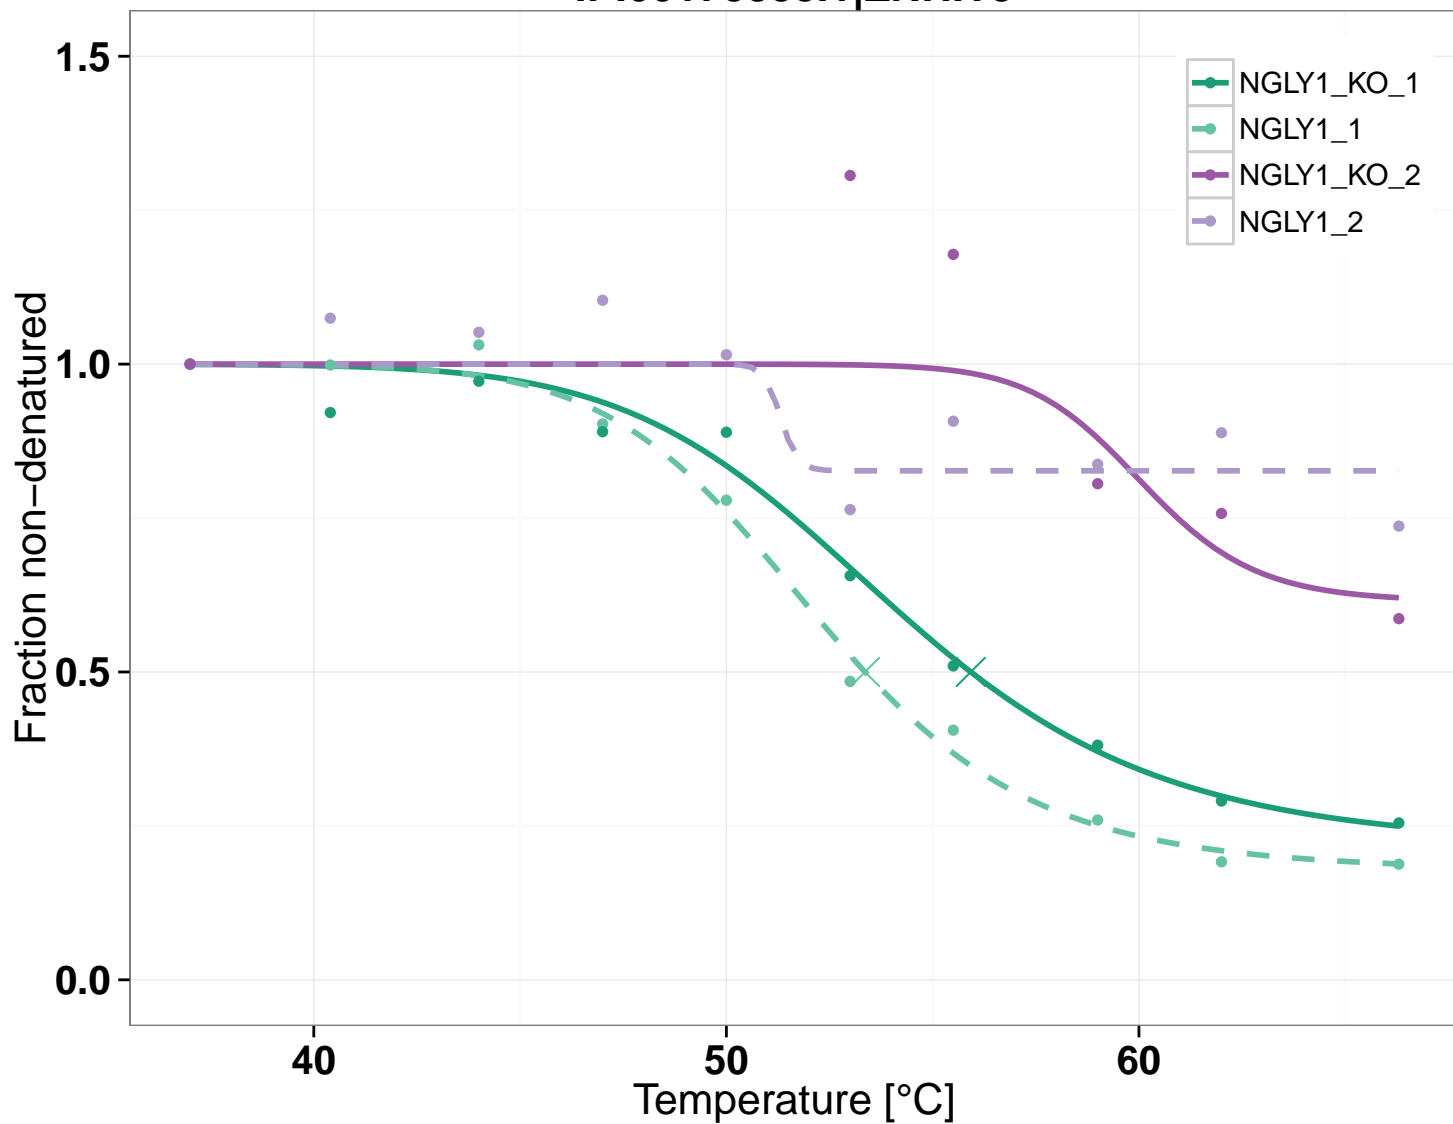

|            | meltPoint | slope  | plateau | R2    |
|------------|-----------|--------|---------|-------|
| NGLY1_KO_1 | 55.92     | -0.061 | 0.21    | 0.99  |
| NGLY1_1    | 53.36     | -0.08  | 0.18    | 0.99  |
| NGLY1_KO_2 | -         | -0.07  | 0.61    | -0.31 |
| NGLY1_2    | -         | -0.21  | 0.83    | 0.73  |

Supplement: Supplementary file 6986 [file 1]

# IPI00012451.3|GNB4

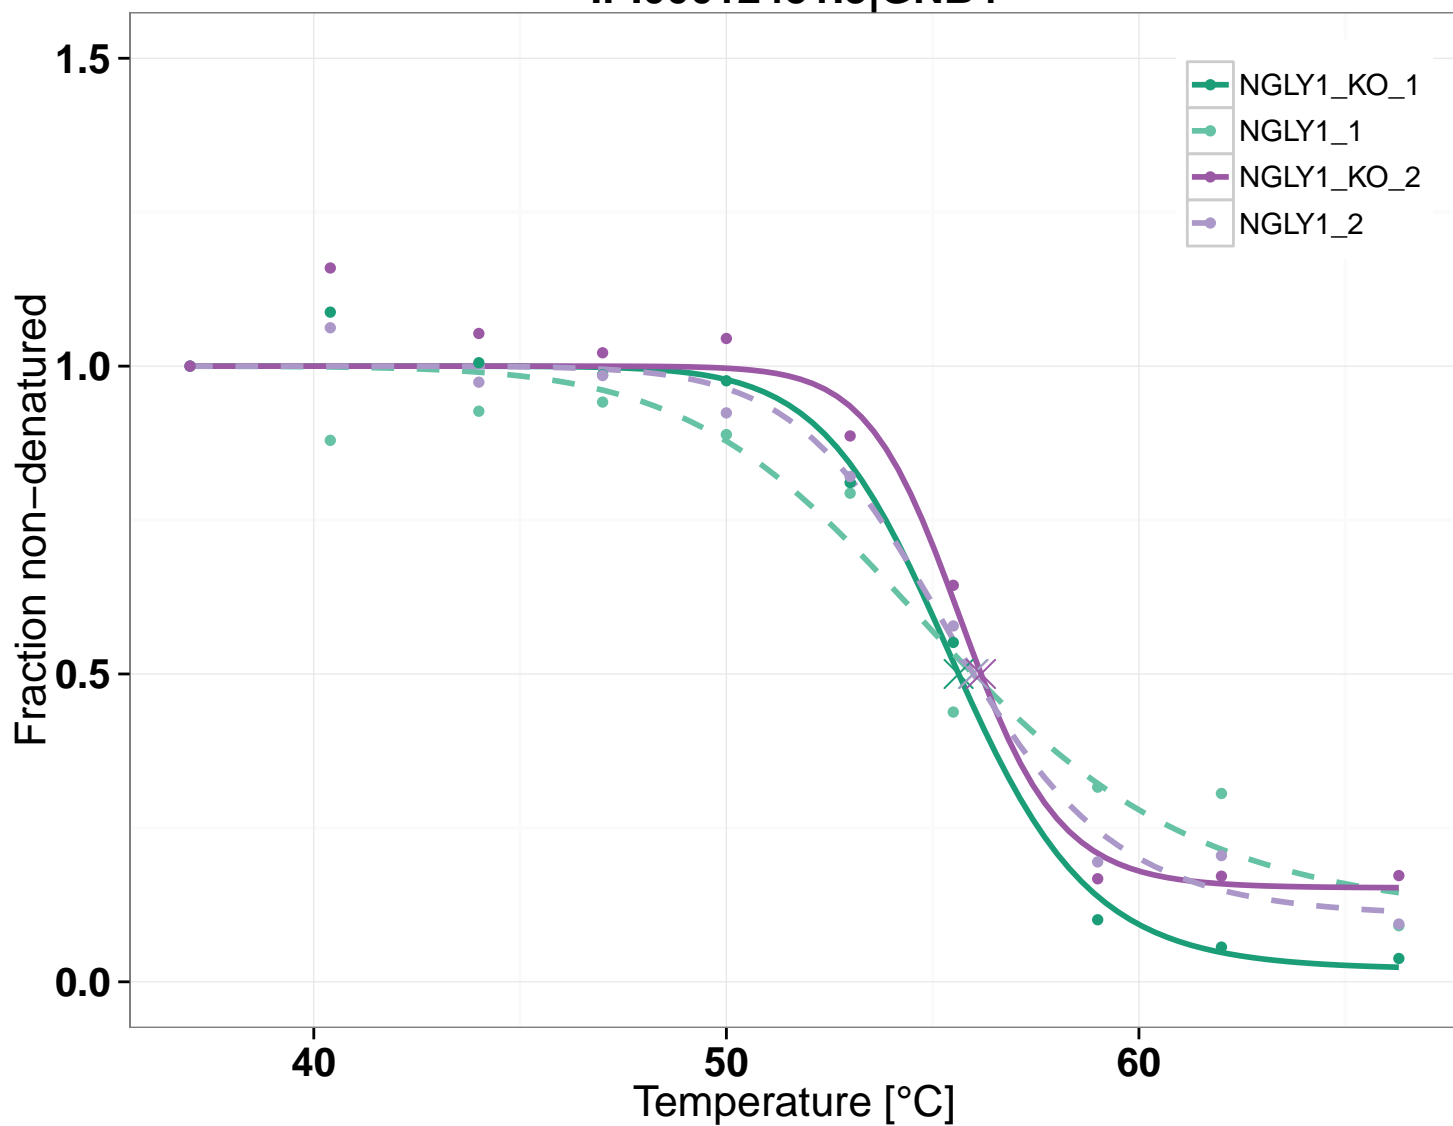

|            | meltPoint | slope  | plateau | R2   |
|------------|-----------|--------|---------|------|
| NGLY1_KO_1 | 55.63     | -0.15  | 0.02    | 0.99 |
| NGLY1_1    | 55.98     | -0.073 | 0.1     | 0.95 |
| NGLY1_KO_2 | 56.17     | -0.18  | 0.15    | 0.98 |
| NGLY1_2    | 55.99     | -0.12  | 0.11    | 0.99 |

Supplement: Supplementary file 6987 [file 1]

IPI00790292.1|MRPL45

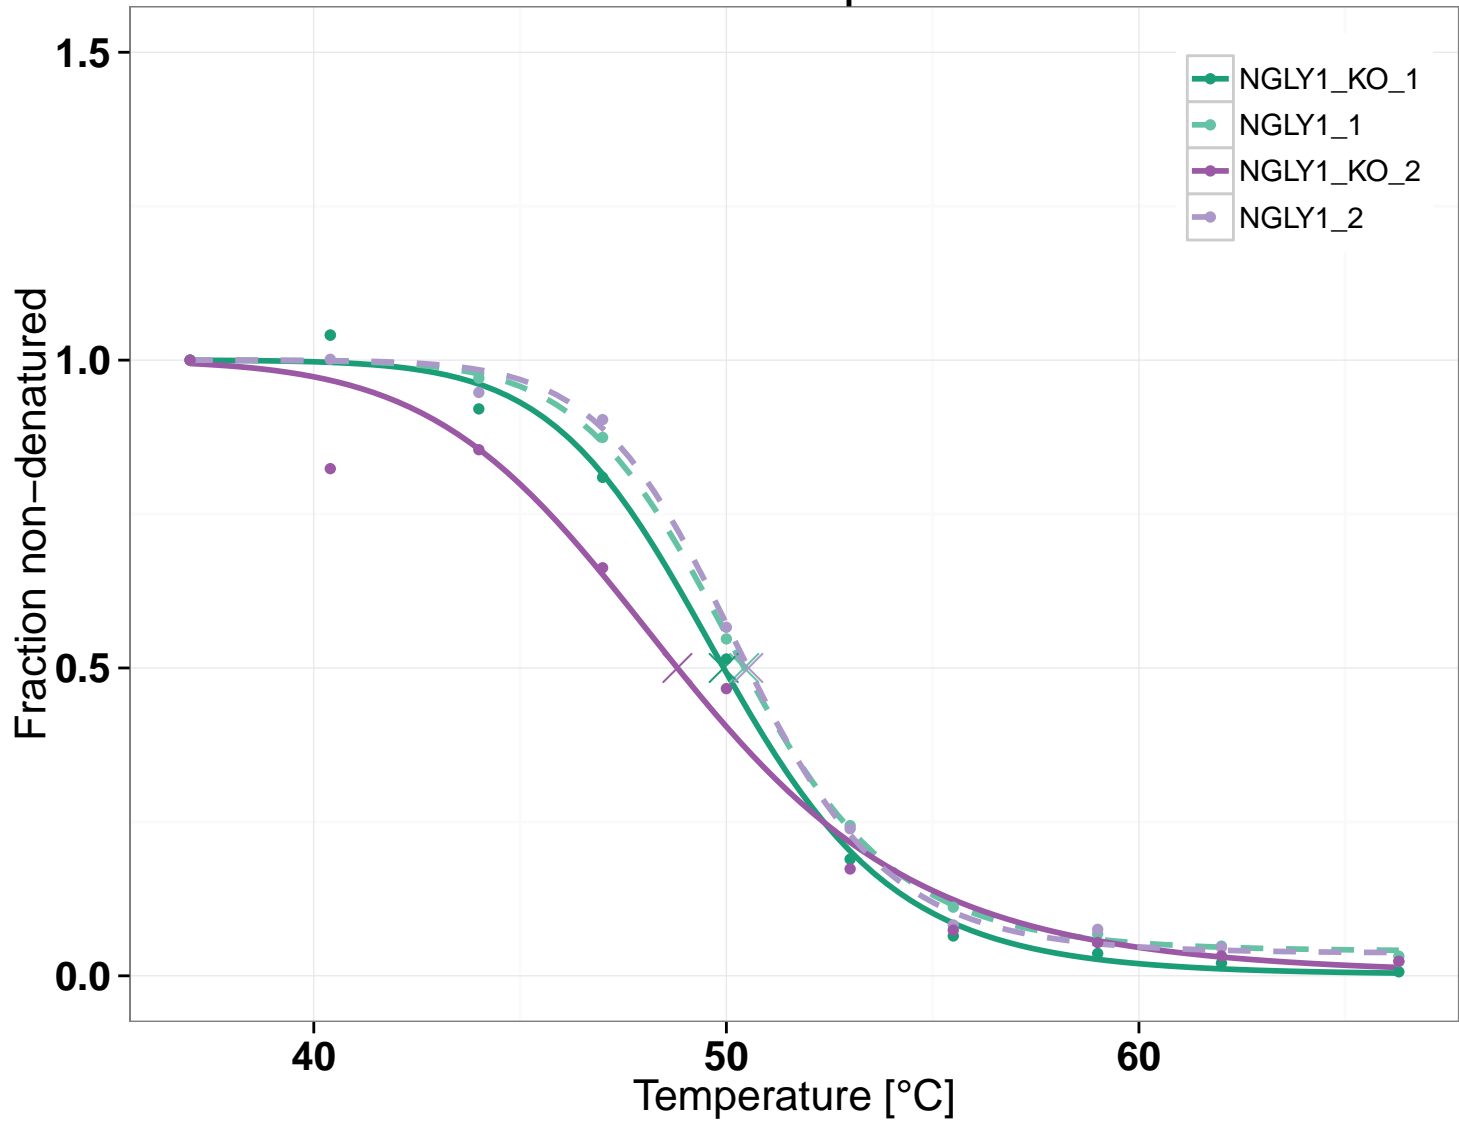

|            | meltPoint | slope  | plateau | R2   |
|------------|-----------|--------|---------|------|
| NGLY1_KO_1 | 49.94     | -0.12  | 0       | 1    |
| NGLY1_1    | 50.43     | -0.13  | 0.04    | 1    |
| NGLY1_KO_2 | 48.81     | -0.085 | 0       | 0.98 |
| NGLY1_2    | 50.53     | -0.14  | 0.04    | 1    |

Supplement: Supplementary file 6988 [file 1]

# IPI00306229.3|XRCC2

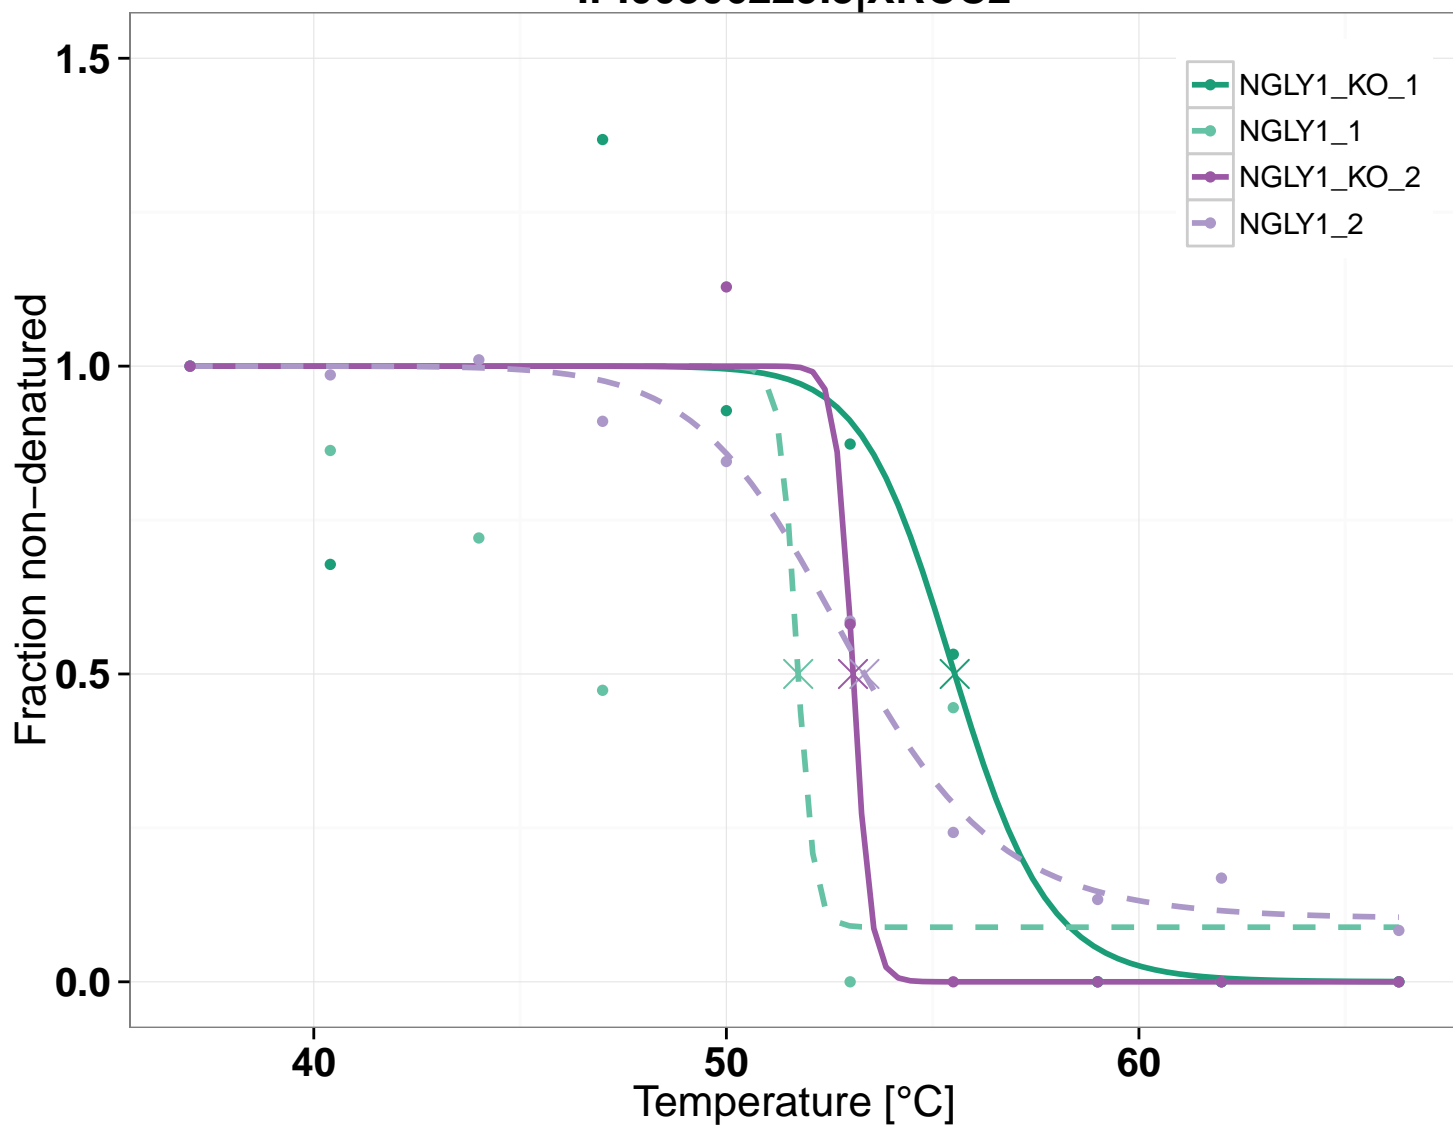

|            | meltPoint | slope | plateau | R2   |
|------------|-----------|-------|---------|------|
| NGLY1_KO_1 | 55.53     | -0.22 | 0       | 0.61 |
| NGLY1_1    | 51.74     | -1.1  | 0.09    | 0.6  |
| NGLY1_KO_2 | 53.07     | -1.2  | 0       | 0.45 |
| NGLY1_2    | 53.35     | -0.12 | 0.1     | 0.99 |

Supplement: Supplementary file 6989 [file 1]

IPI00152578.2|PANK1

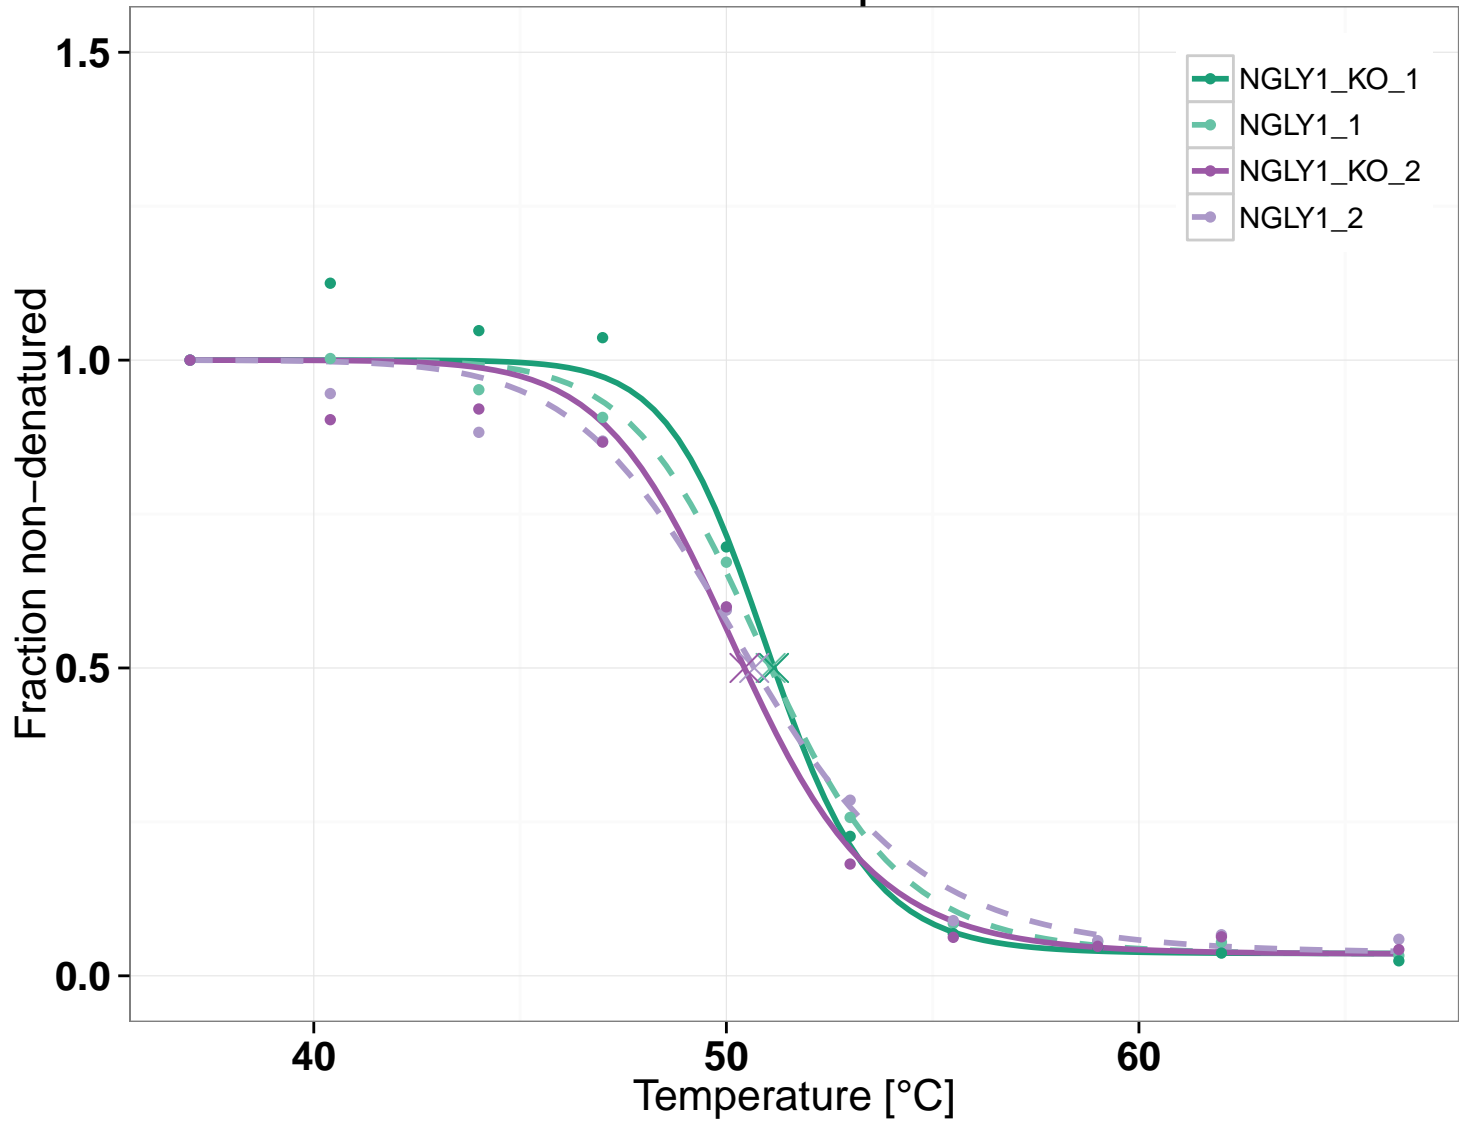

|            | meltPoint | slope | plateau | R2   |
|------------|-----------|-------|---------|------|
| NGLY1_KO_1 | 51.15     | -0.19 | 0.04    | 0.99 |
| NGLY1_1    | 51.07     | -0.15 | 0.04    | 1    |
| NGLY1_KO_2 | 50.44     | -0.15 | 0.04    | 0.99 |
| NGLY1_2    | 50.68     | -0.11 | 0.04    | 0.99 |

Supplement: Supplementary file 6990 [file 1]

# IPI00375824.1|DPH5

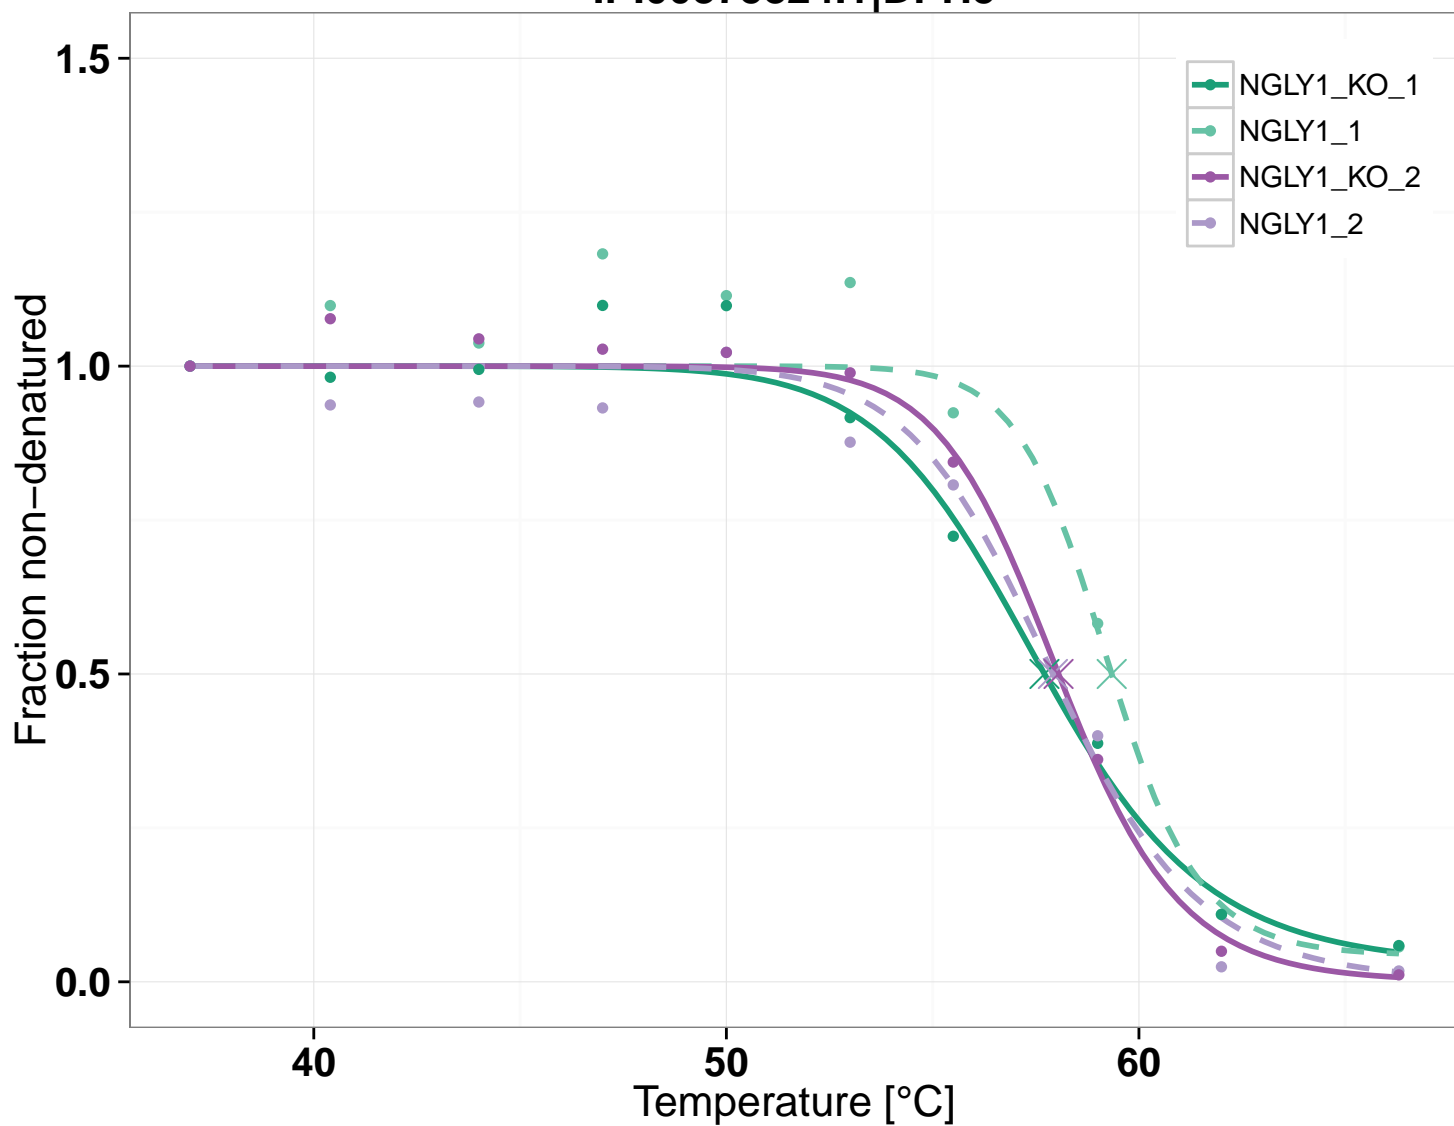

|            | meltPoint | slope | plateau | R2   |
|------------|-----------|-------|---------|------|
| NGLY1_KO_1 | 57.71     | -0.12 | 0.03    | 0.98 |
| NGLY1_1    | 59.34     | -0.22 | 0.04    | 0.95 |
| NGLY1_KO_2 | 58.05     | -0.17 | 0       | 0.99 |
| NGLY1_2    | 57.91     | -0.14 | 0       | 0.98 |

Supplement: Supplementary file 6991 [file 1]

IPI00640902.1|ZBTB8OS

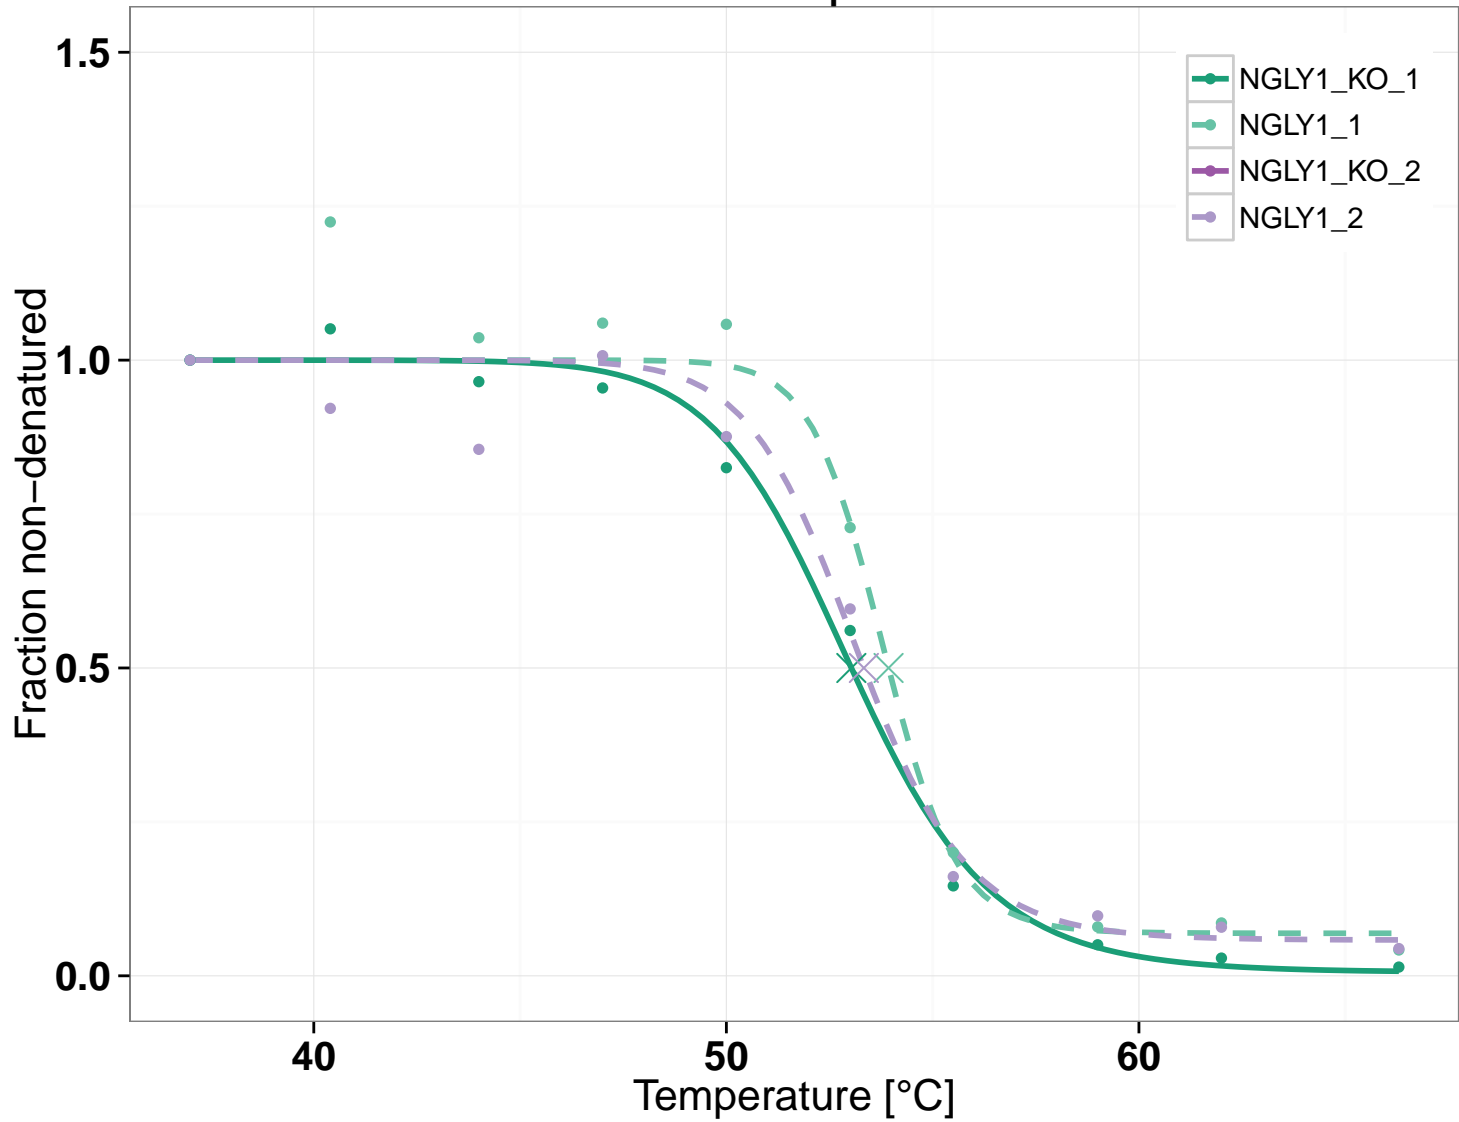

|            | meltPoint | slope | plateau | R2   |
|------------|-----------|-------|---------|------|
| NGLY1_KO_1 | 53.03     | -0.15 | 0.01    | 0.99 |
| NGLY1_1    | 53.93     | -0.26 | 0.07    | 0.97 |
| NGLY1_KO_2 | -         | -     | -       | -    |
| NGLY1_2    | 53.33     | -0.18 | 0.06    | 0.98 |

Supplement: Supplementary file 6992 [file 1]

# IPI00030399.2|BNIP2

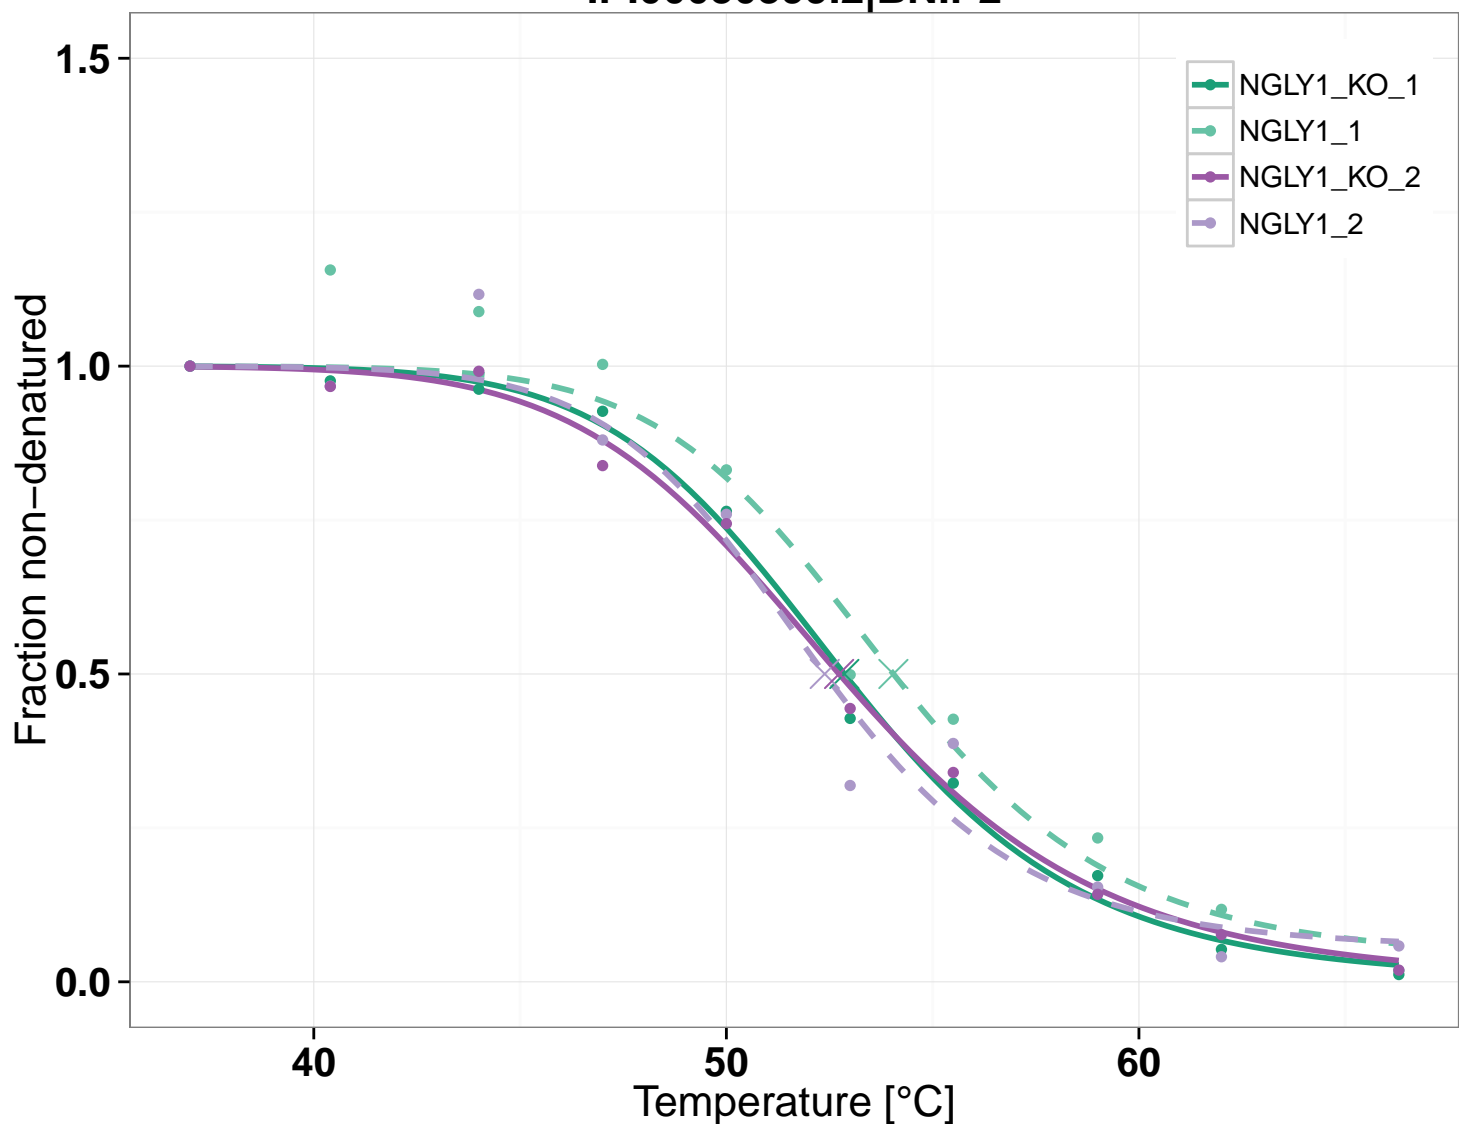

|            | meltPoint | slope  | plateau | R2   |
|------------|-----------|--------|---------|------|
| NGLY1_KO_1 | 52.86     | -0.086 | 0       | 0.99 |
| NGLY1_1    | 54.05     | -0.086 | 0.04    | 0.97 |
| NGLY1_KO_2 | 52.73     | -0.078 | 0       | 0.99 |
| NGLY1_2    | 52.38     | -0.093 | 0.05    | 0.96 |

Supplement: Supplementary file 6993 [file 1]

IPI00176692.7|32 KDA PROTEIN.

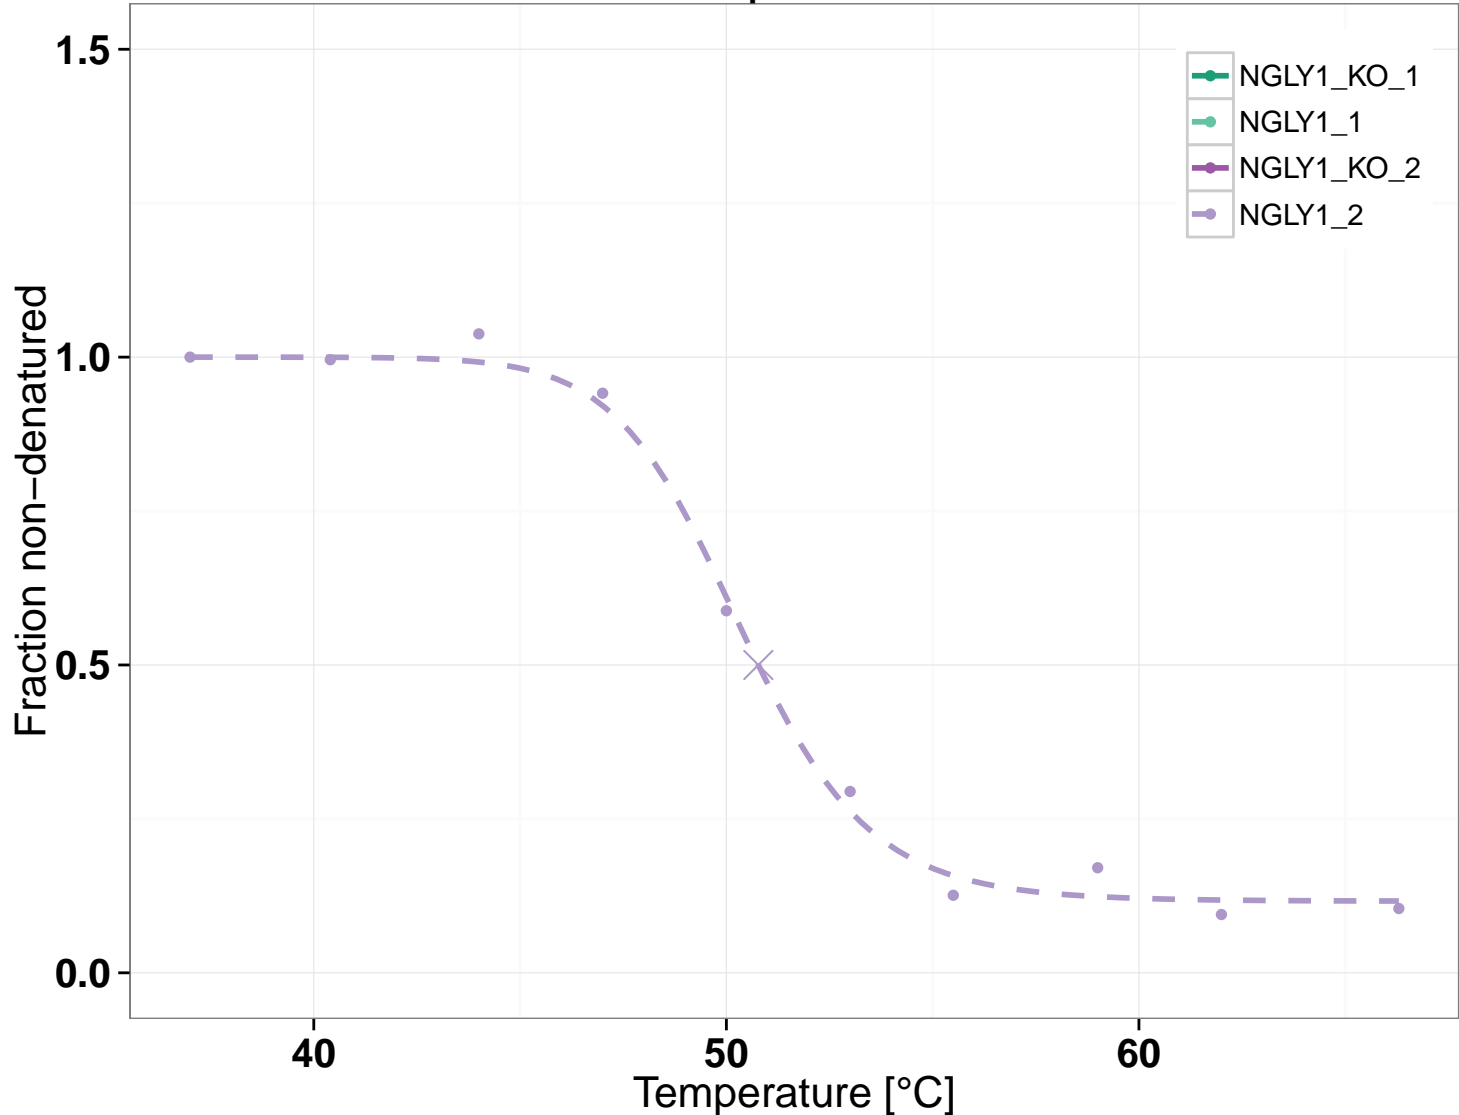

|            | meltPoint | slope | plateau | R2 |
|------------|-----------|-------|---------|----|
| NGLY1_KO_1 | -         | -     | -       | -  |
| NGLY1_1    | -         | -     | -       | -  |
| NGLY1_KO_2 | -         | -     | -       | -  |
| NGLY1_2    | 50.77     | -0.14 | 0.12    | 1  |

Supplement: Supplementary file 6994 [file 1]

IPI00879636.1|HYPOTHETICAL SHORT PROTEIN.

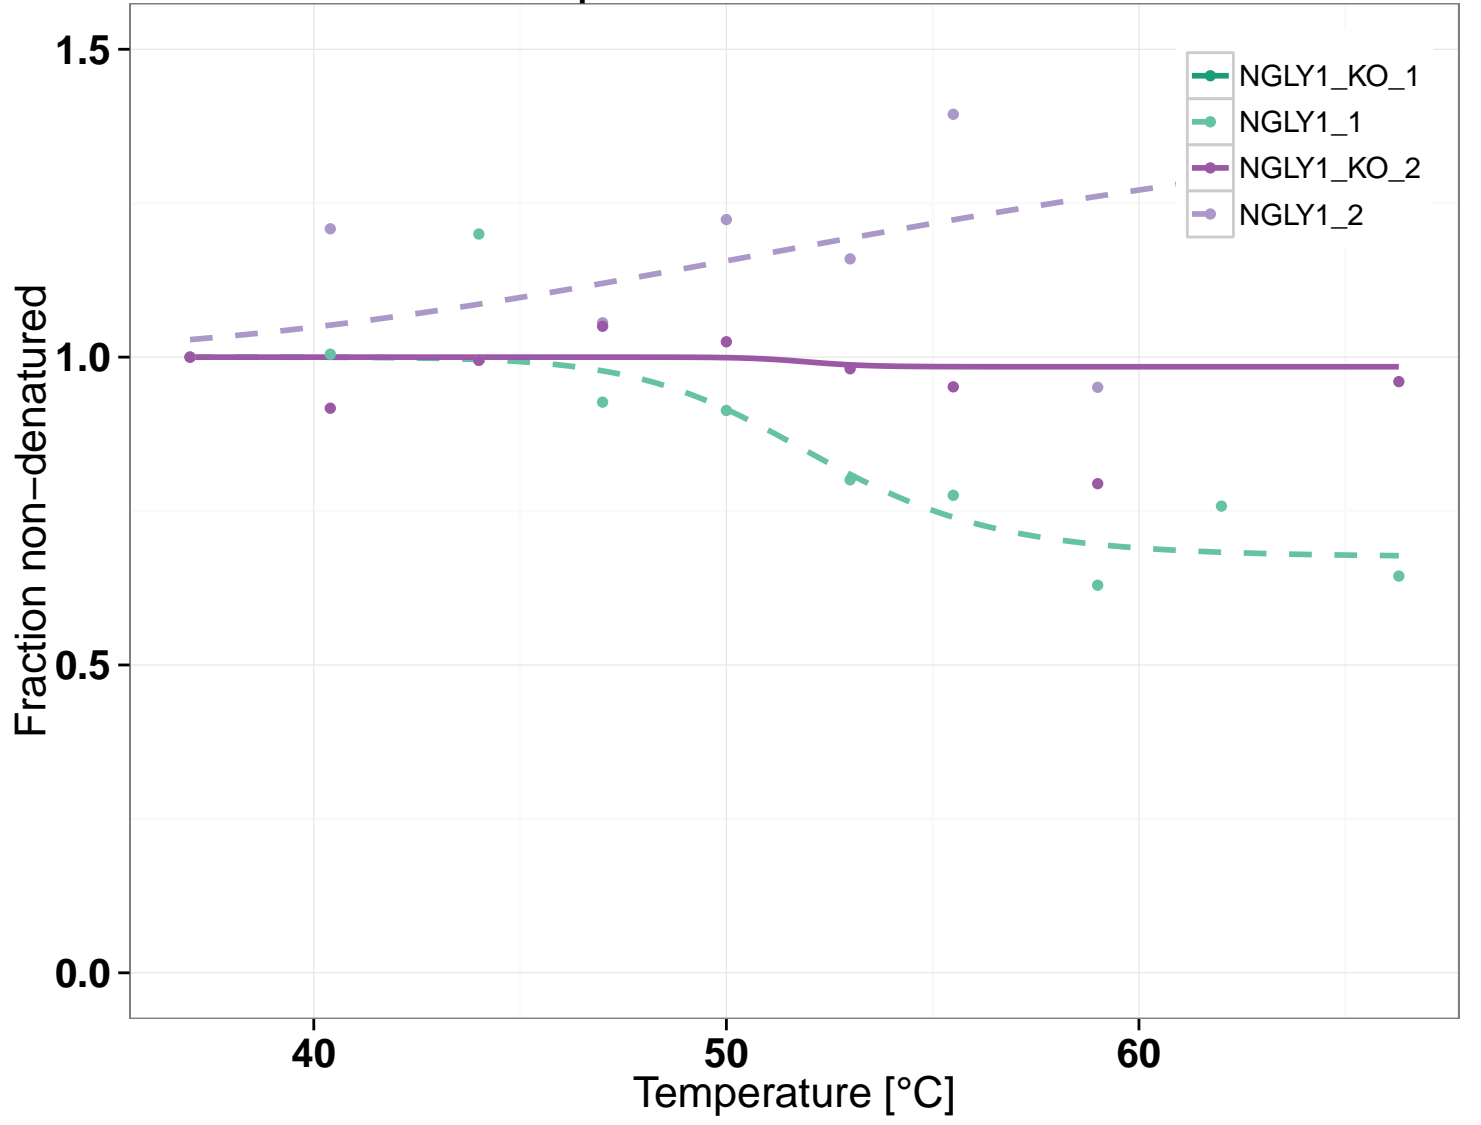

|            | meltPoint | slope   | plateau | R2   |
|------------|-----------|---------|---------|------|
| NGLY1_KO_1 | -         | -       | -       | -    |
| NGLY1_1    | -         | -0.037  | 0.68    | 0.8  |
| NGLY1_KO_2 | -         | -0.0054 | 0.98    | 0    |
| NGLY1_2    | -         | 0.012   | 1.5     | 0.33 |

Supplement: Supplementary file 6995 [file 1]

IPI00004758.5|LDLRAP1

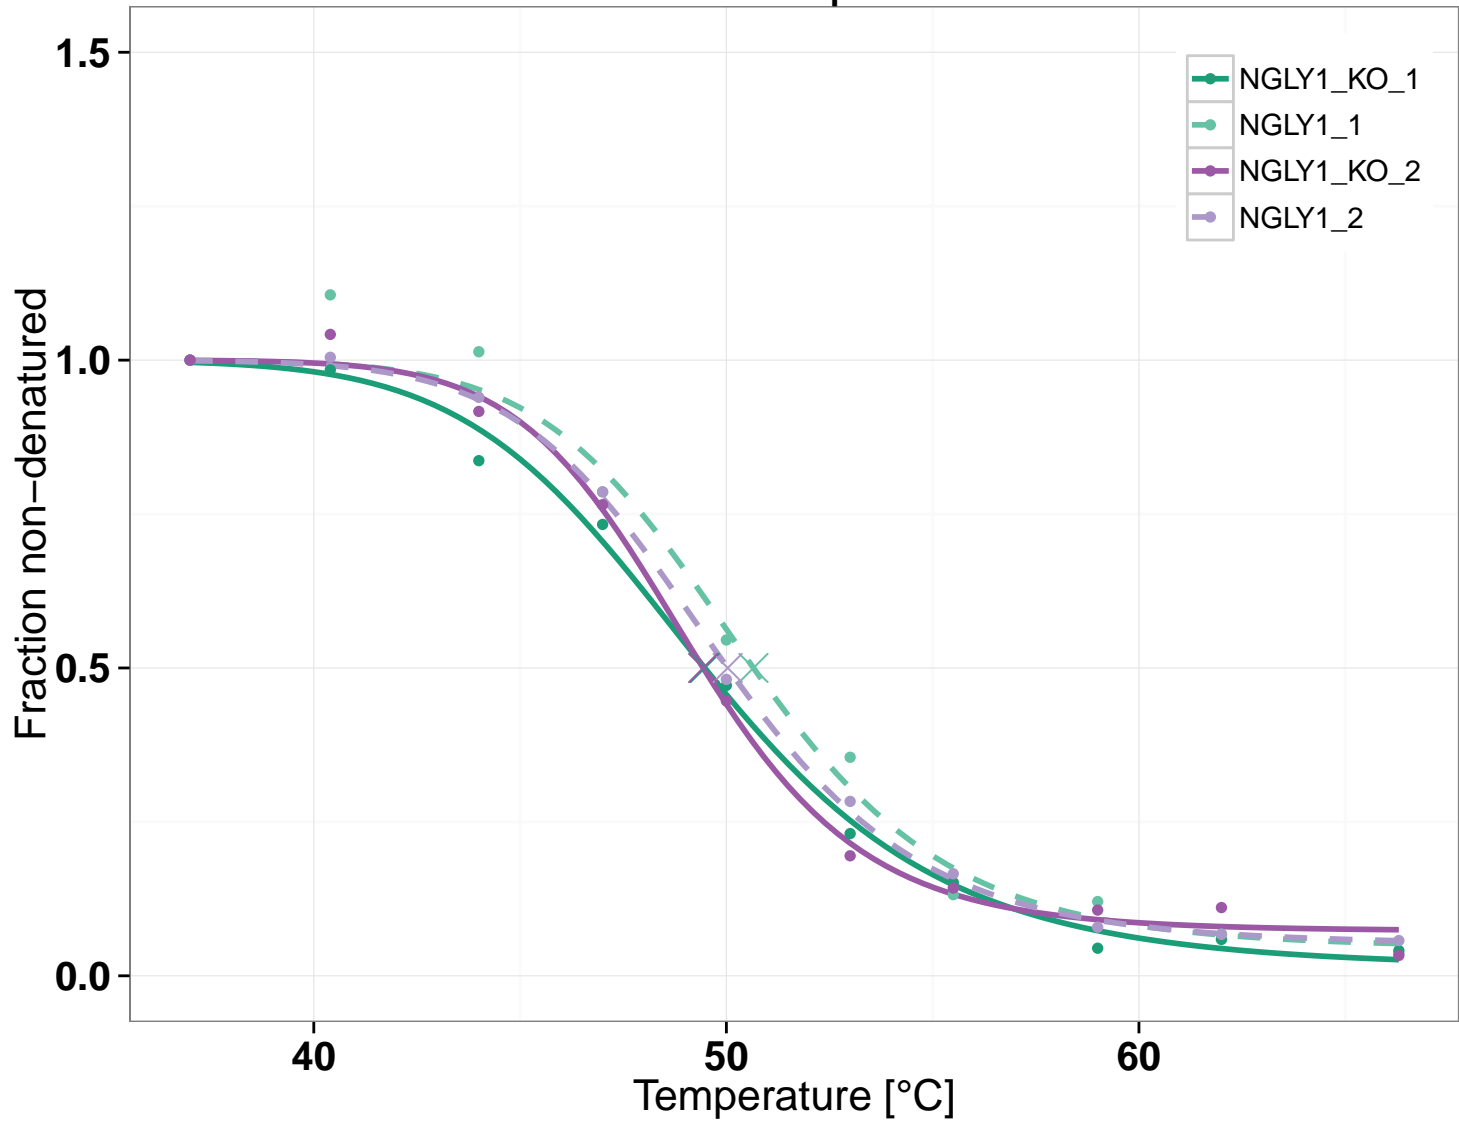

|            | meltPoint | slope  | plateau | R2   |
|------------|-----------|--------|---------|------|
| NGLY1_KO_1 | 49.48     | -0.085 | 0.01    | 1    |
| NGLY1_1    | 50.66     | -0.096 | 0.04    | 0.99 |
| NGLY1_KO_2 | 49.44     | -0.11  | 0.07    | 1    |
| NGLY1_2    | 50.03     | -0.096 | 0.05    | 1    |

Supplement: Supplementary file 6996 [file 1]

IPI00171494.6|DYNC2H1

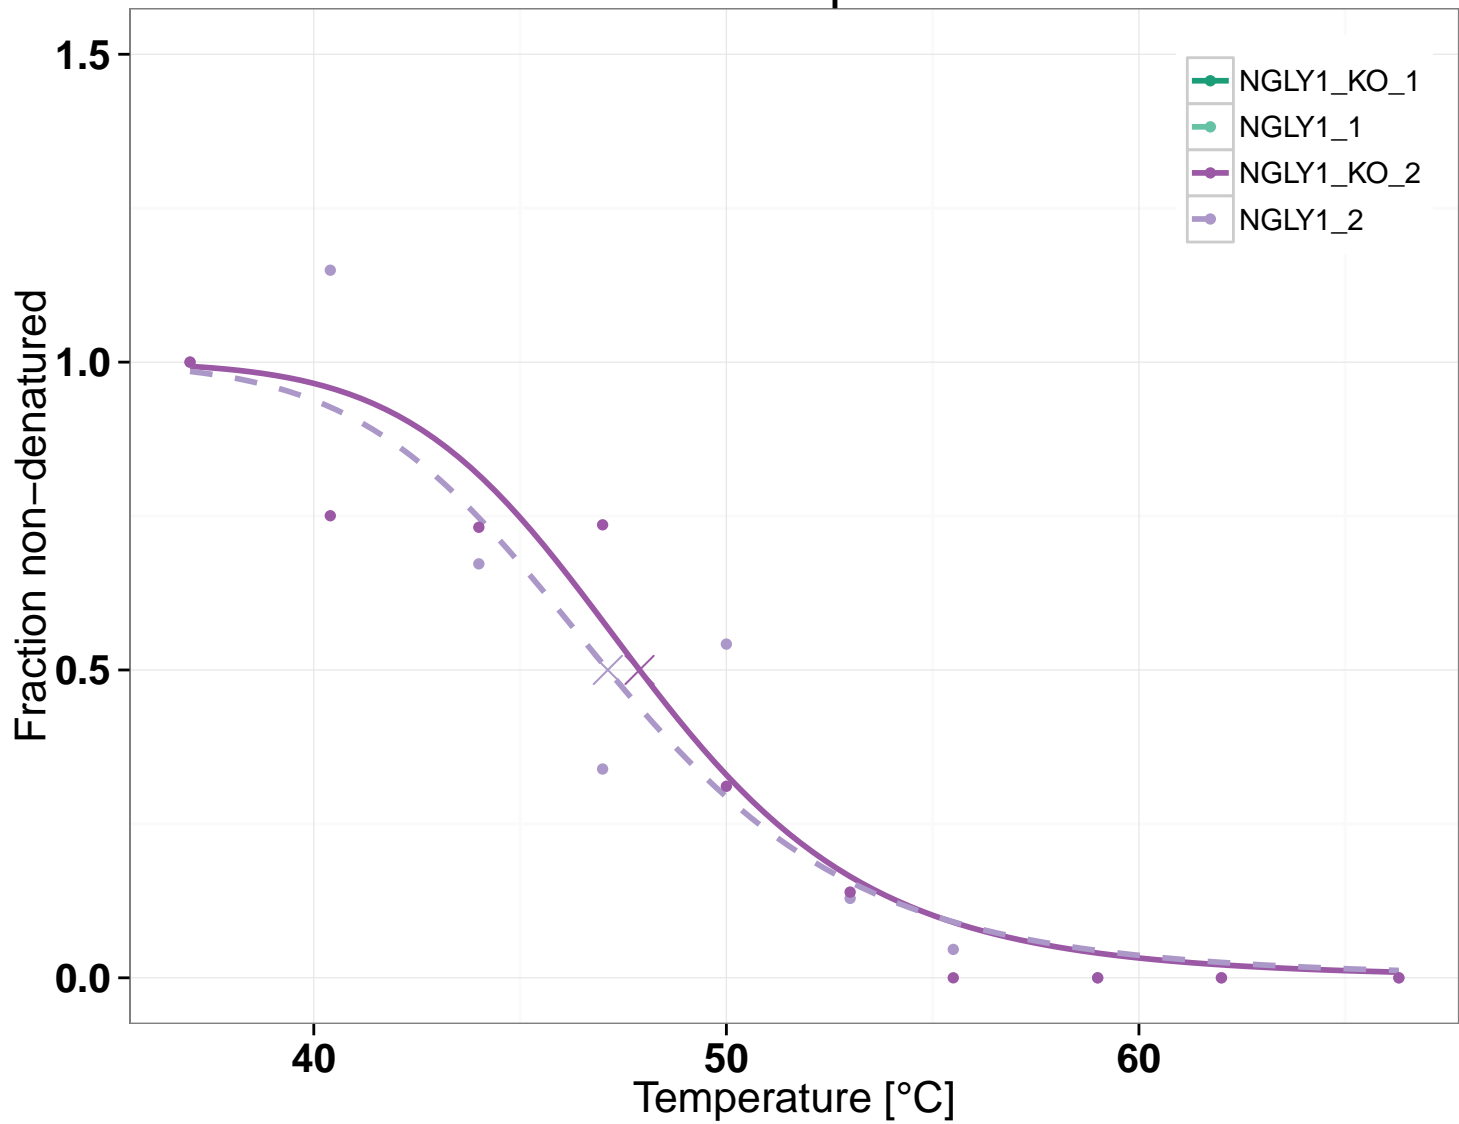

|            | meltPoint | slope  | plateau | R2   |
|------------|-----------|--------|---------|------|
| NGLY1_KO_1 | —         | —      | —       | —    |
| NGLY1_1    | —         | —      | —       | —    |
| NGLY1_KO_2 | 47.9      | -0.089 | 0       | 0.94 |
| NGLY1_2    | 47.13     | -0.082 | 0       | 0.91 |

Supplement: Supplementary file 6997 [file 1]

IPI00016418.3|LPCAT2

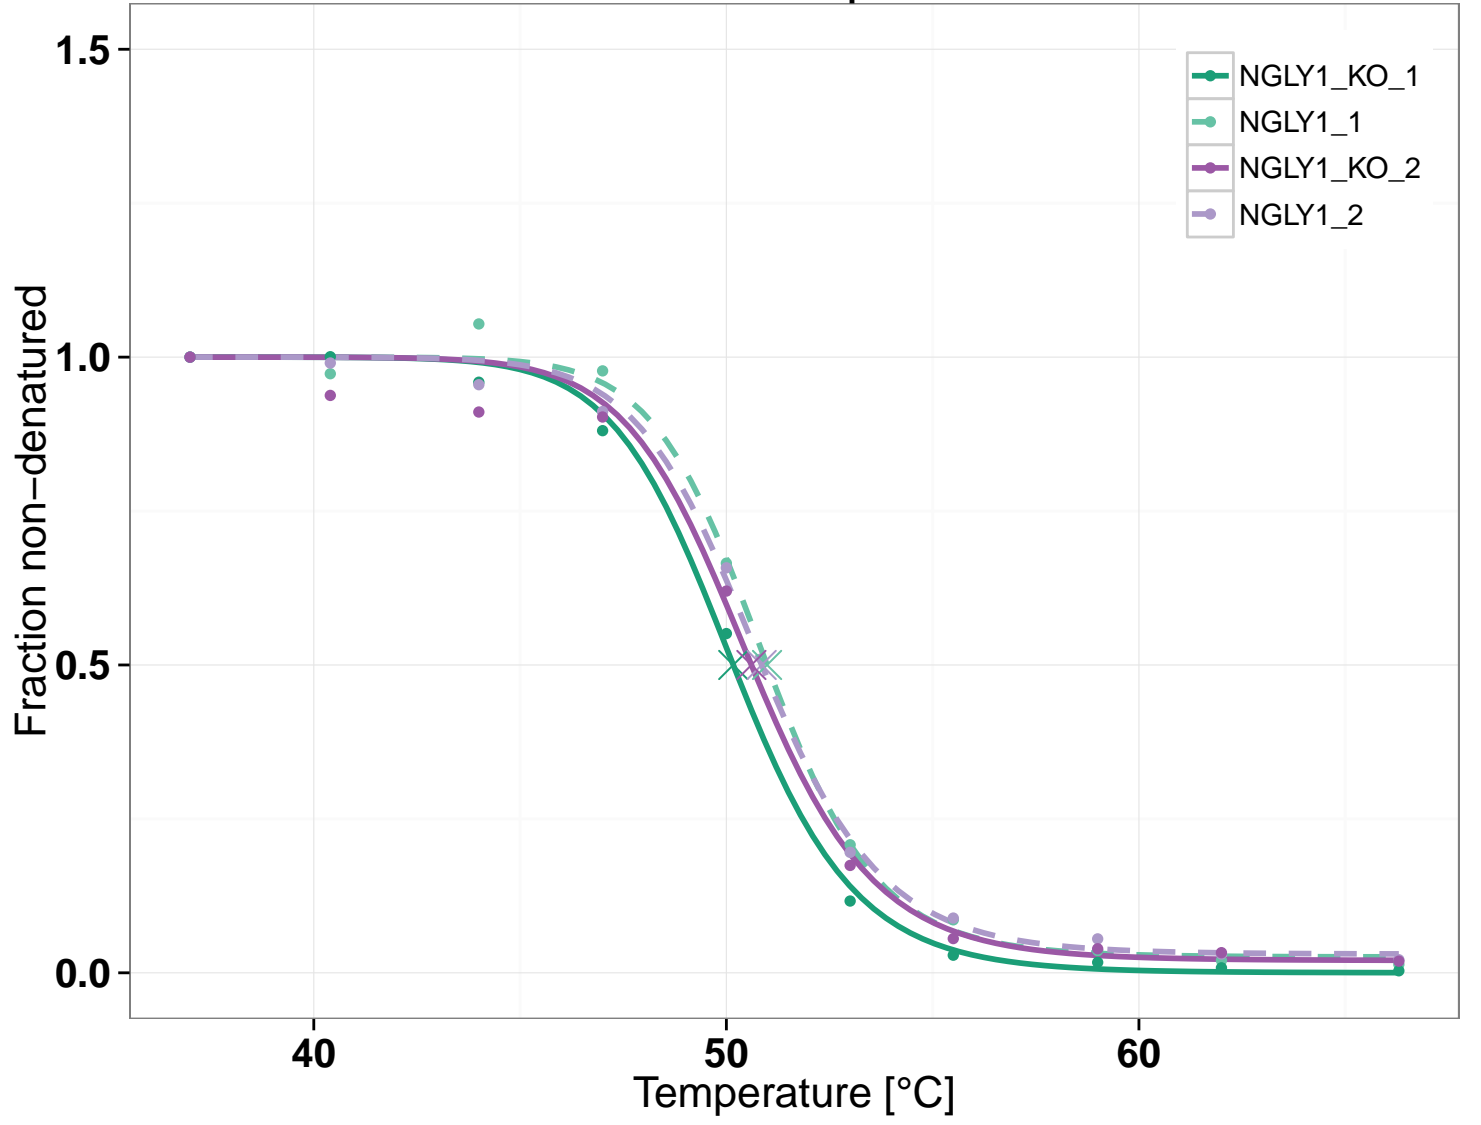

|            | meltPoint | slope | plateau | R2   |
|------------|-----------|-------|---------|------|
| NGLY1_KO_1 | 50.17     | -0.17 | 0       | 1    |
| NGLY1_1    | 50.99     | -0.18 | 0.03    | 1    |
| NGLY1_KO_2 | 50.61     | -0.16 | 0.02    | 0.99 |
| NGLY1_2    | 50.86     | -0.16 | 0.03    | 1    |

Supplement: Supplementary file 6998 [file 1]

# IPI00021805.1|MGST1

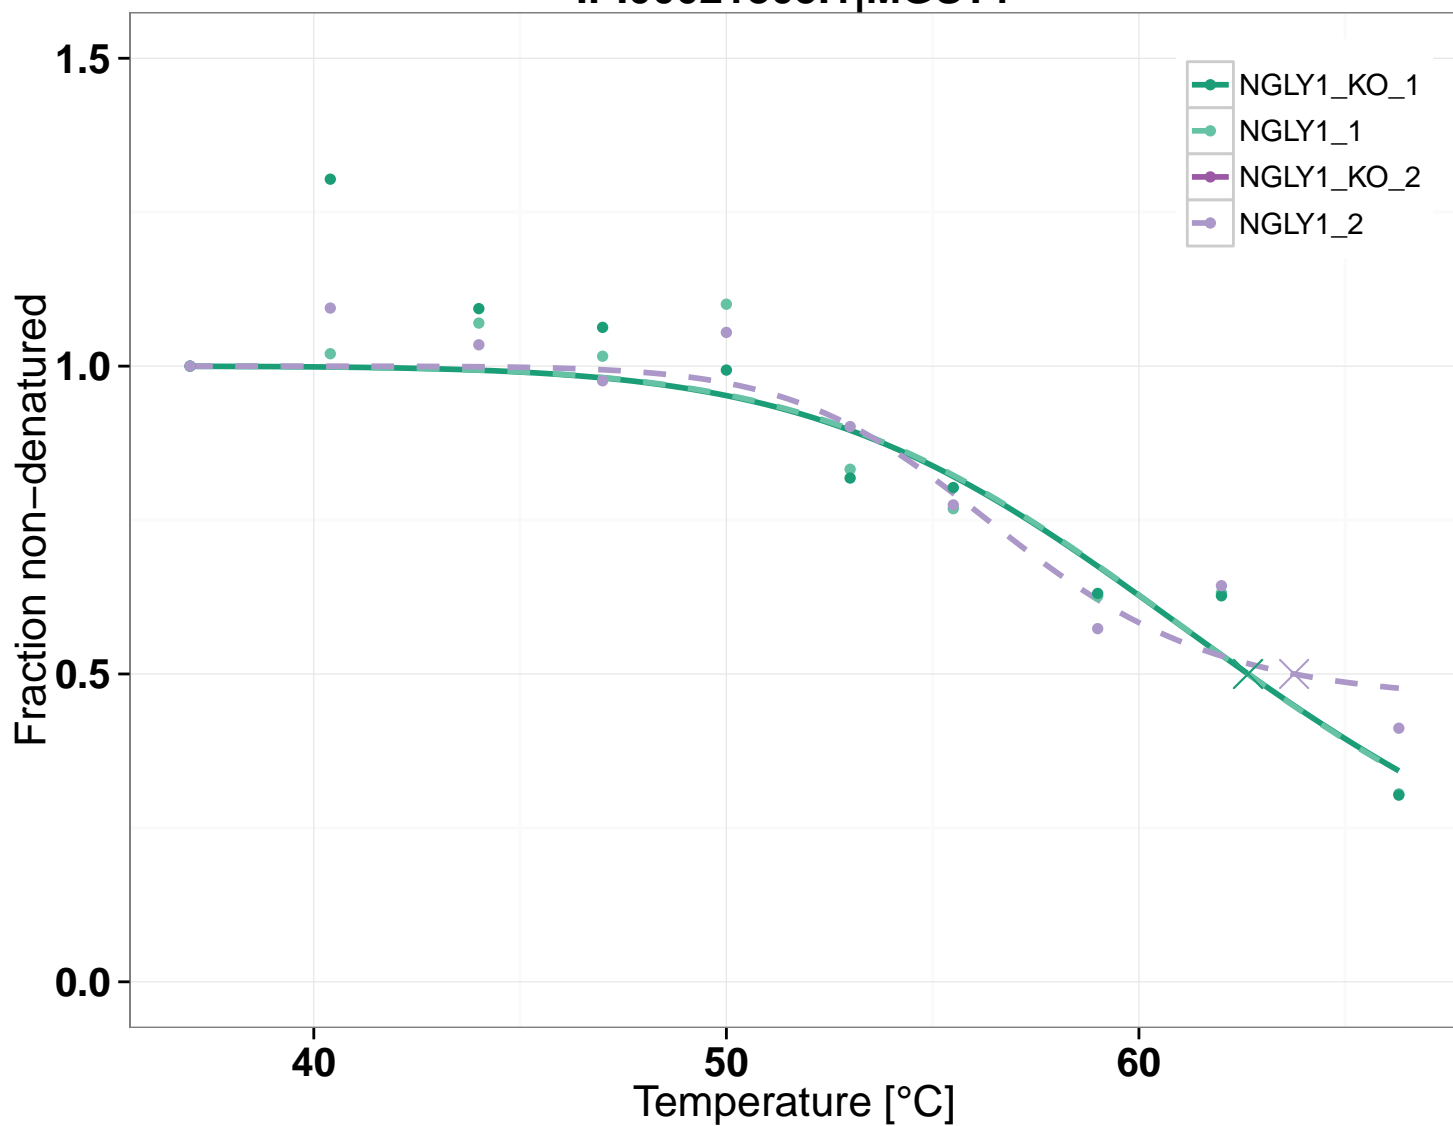

|            | meltPoint | slope  | plateau | R2   |
|------------|-----------|--------|---------|------|
| NGLY1_KO_1 | 62.65     | -0.049 | 0       | 0.83 |
| NGLY1_1    | 62.64     | -0.049 | 0       | 0.91 |
| NGLY1_KO_2 | -         | -      | -       | -    |
| NGLY1_2    | 63.76     | -0.053 | 0.45    | 0.92 |

Supplement: Supplementary file 6999 [file 1]

IPI00029021.6|KIAA0146

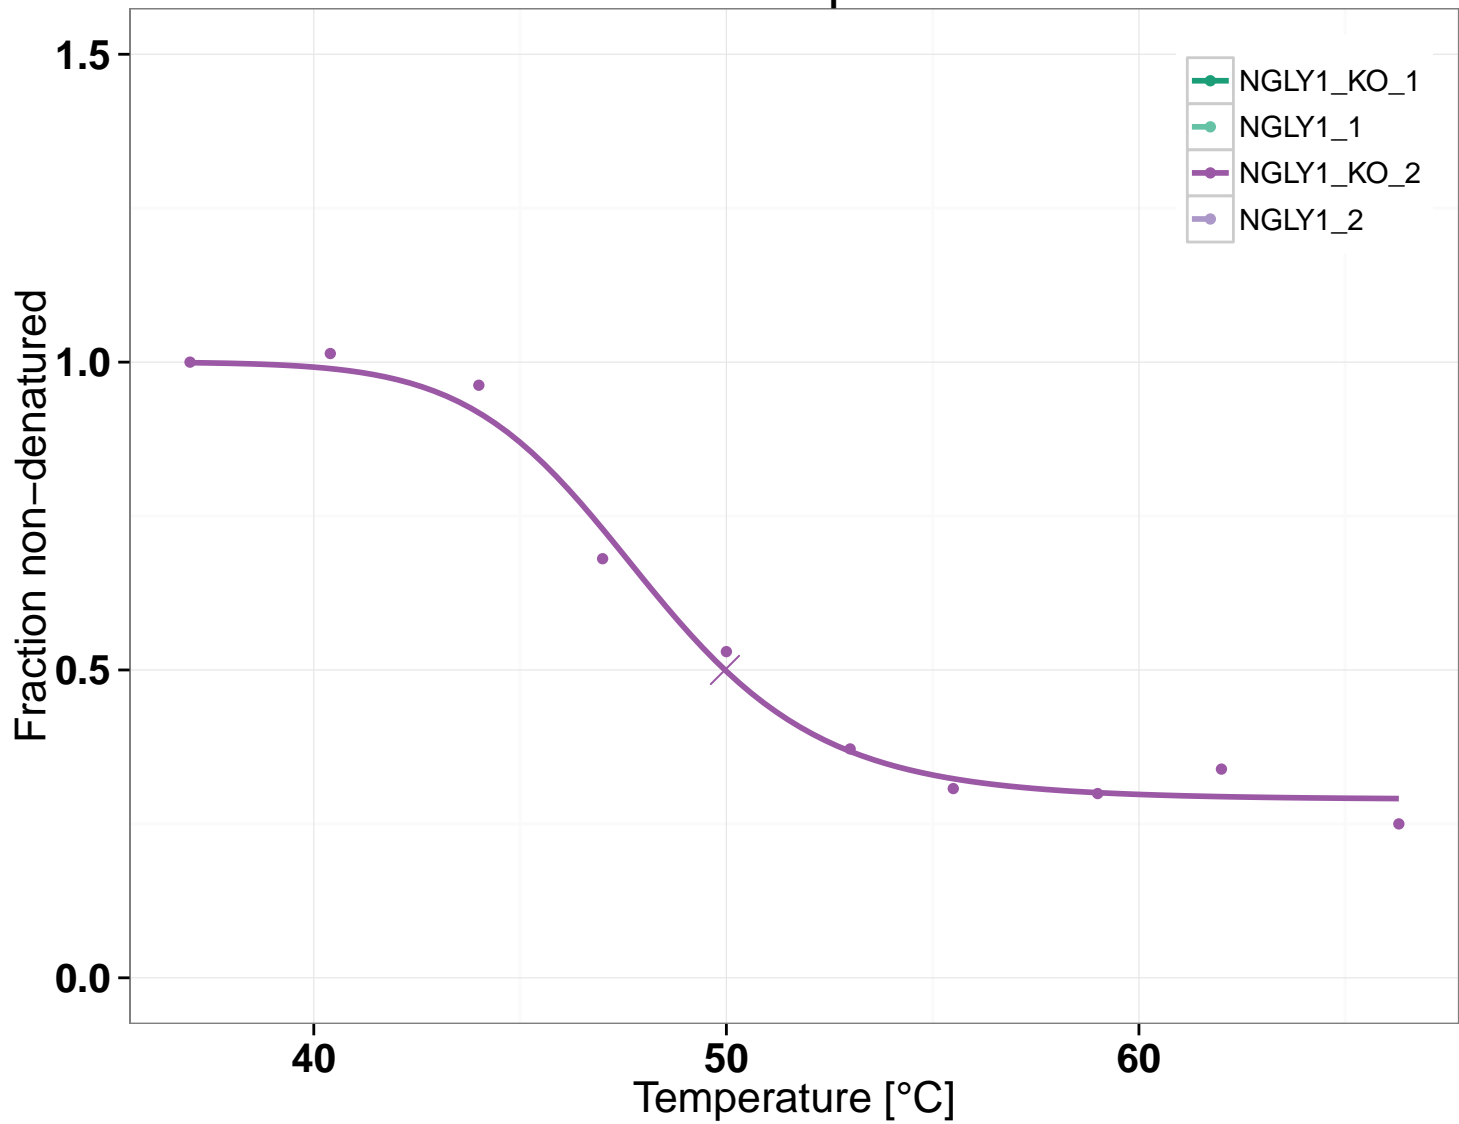

|            | meltPoint | slope  | plateau | R2   |
|------------|-----------|--------|---------|------|
| NGLY1_KO_1 | —         | —      | —       | —    |
| NGLY1_1    | —         | —      | —       | —    |
| NGLY1_KO_2 | 49.97     | -0.083 | 0.29    | 0.99 |
| NGLY1_2    | —         | —      | —       | —    |

Supplement: Supplementary file 7000 [file 1]

IPI00014367.4|NSMCE4A

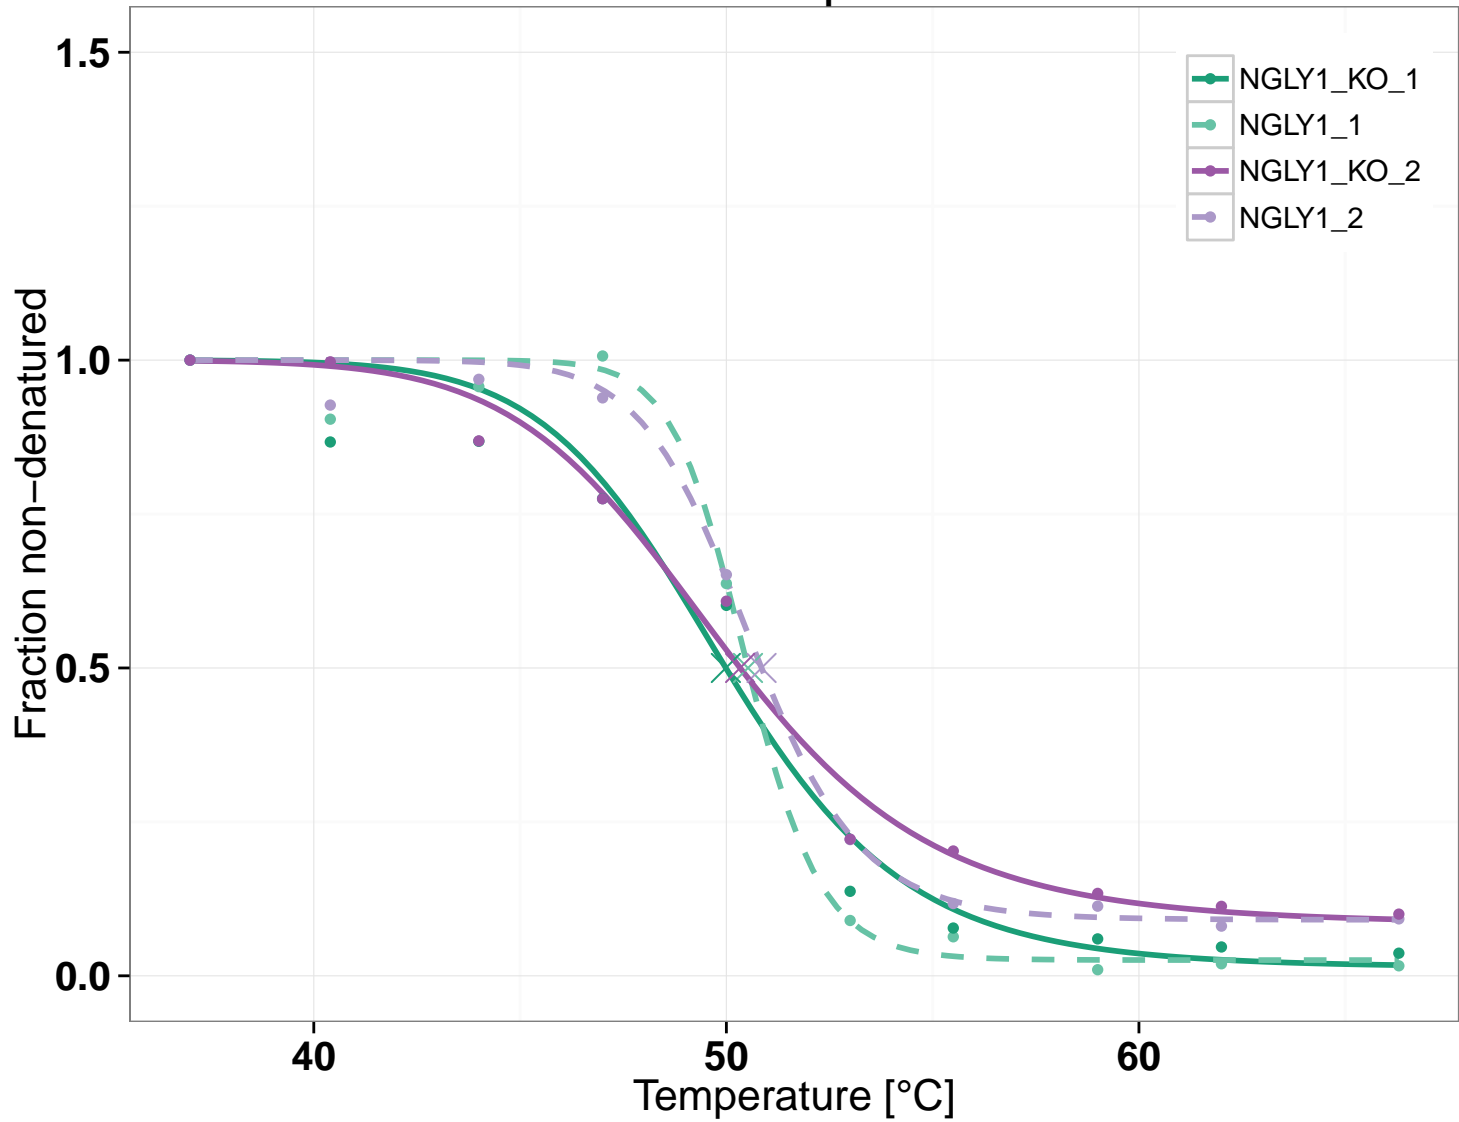

|            | meltPoint | slope | plateau | R2   |
|------------|-----------|-------|---------|------|
| NGLY1_KO_1 | 49.99     | -0.11 | 0.01    | 0.97 |
| NGLY1_1    | 50.52     | -0.27 | 0.03    | 0.99 |
| NGLY1_KO_2 | 50.33     | -0.09 | 0.08    | 0.99 |
| NGLY1_2    | 50.85     | -0.17 | 0.09    | 1    |

Supplement: Supplementary file 7001 [file 1]

# IPI00008599.3|EBP

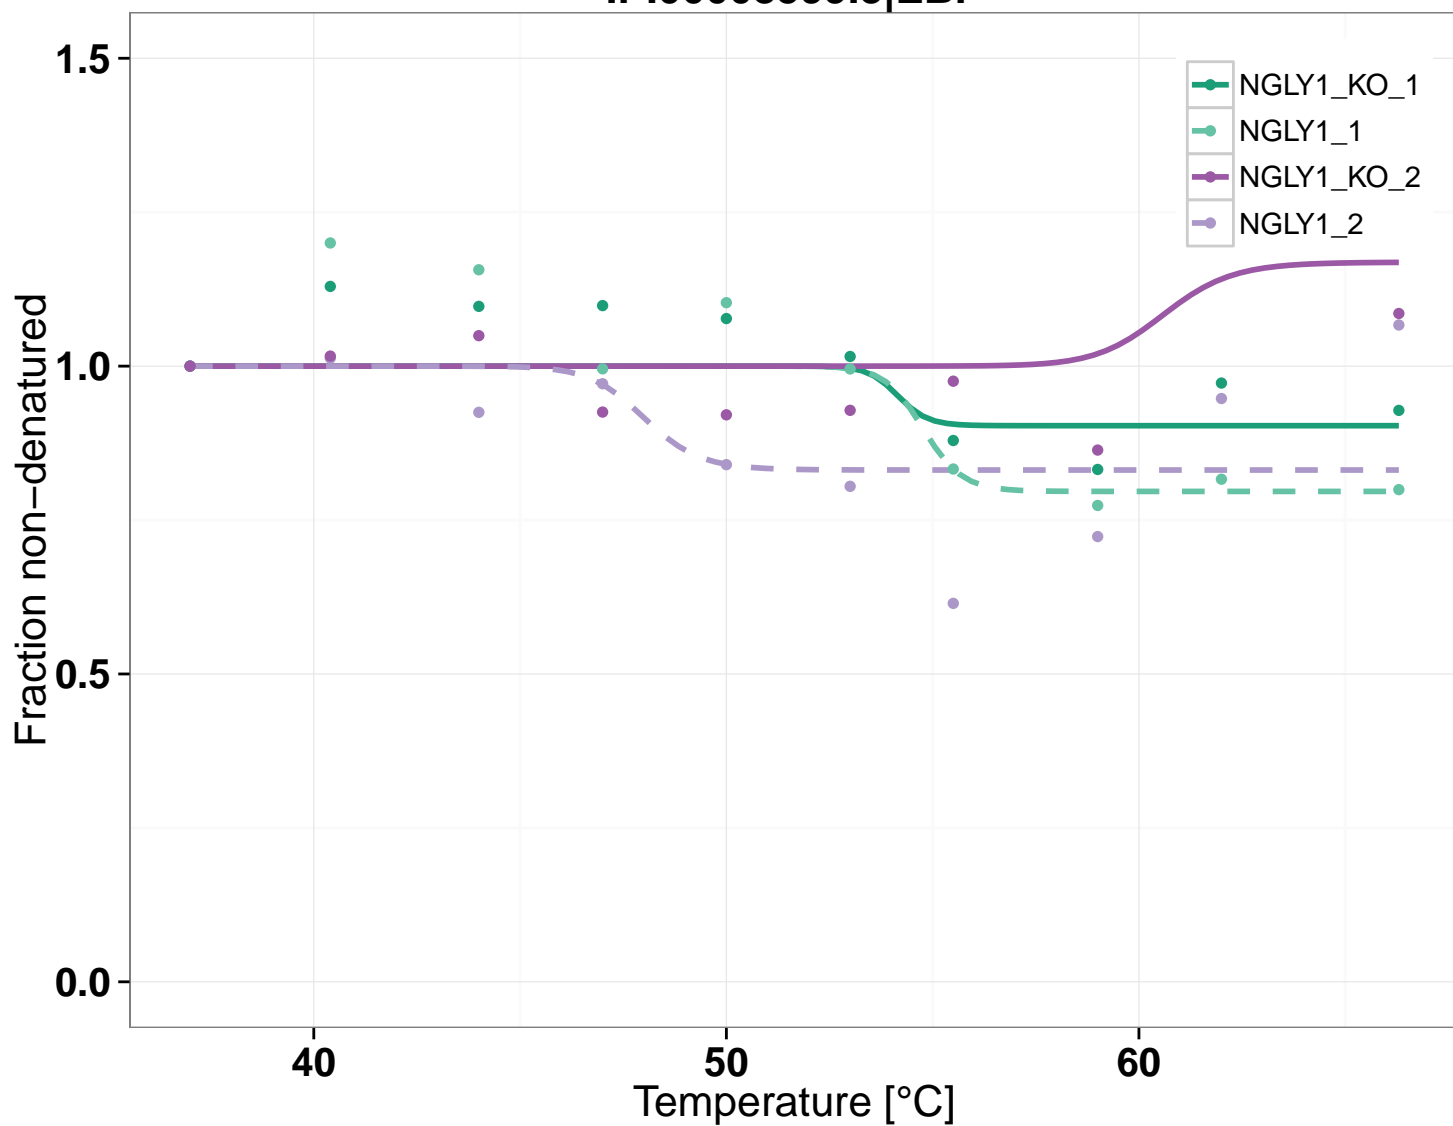

|            | meltPoint | slope  | plateau | R2   |
|------------|-----------|--------|---------|------|
| NGLY1_KO_1 | –         | –0.067 | 0.9     | 0.41 |
| NGLY1_1    | –         | –0.11  | 0.8     | 0.65 |
| NGLY1_KO_2 | –         | 0.051  | 1.17    | 0.42 |
| NGLY1_2    | –         | –0.063 | 0.83    | 0.27 |

Supplement: Supplementary file 7002 [file 1]

IPI00306017.3|C15ORF44

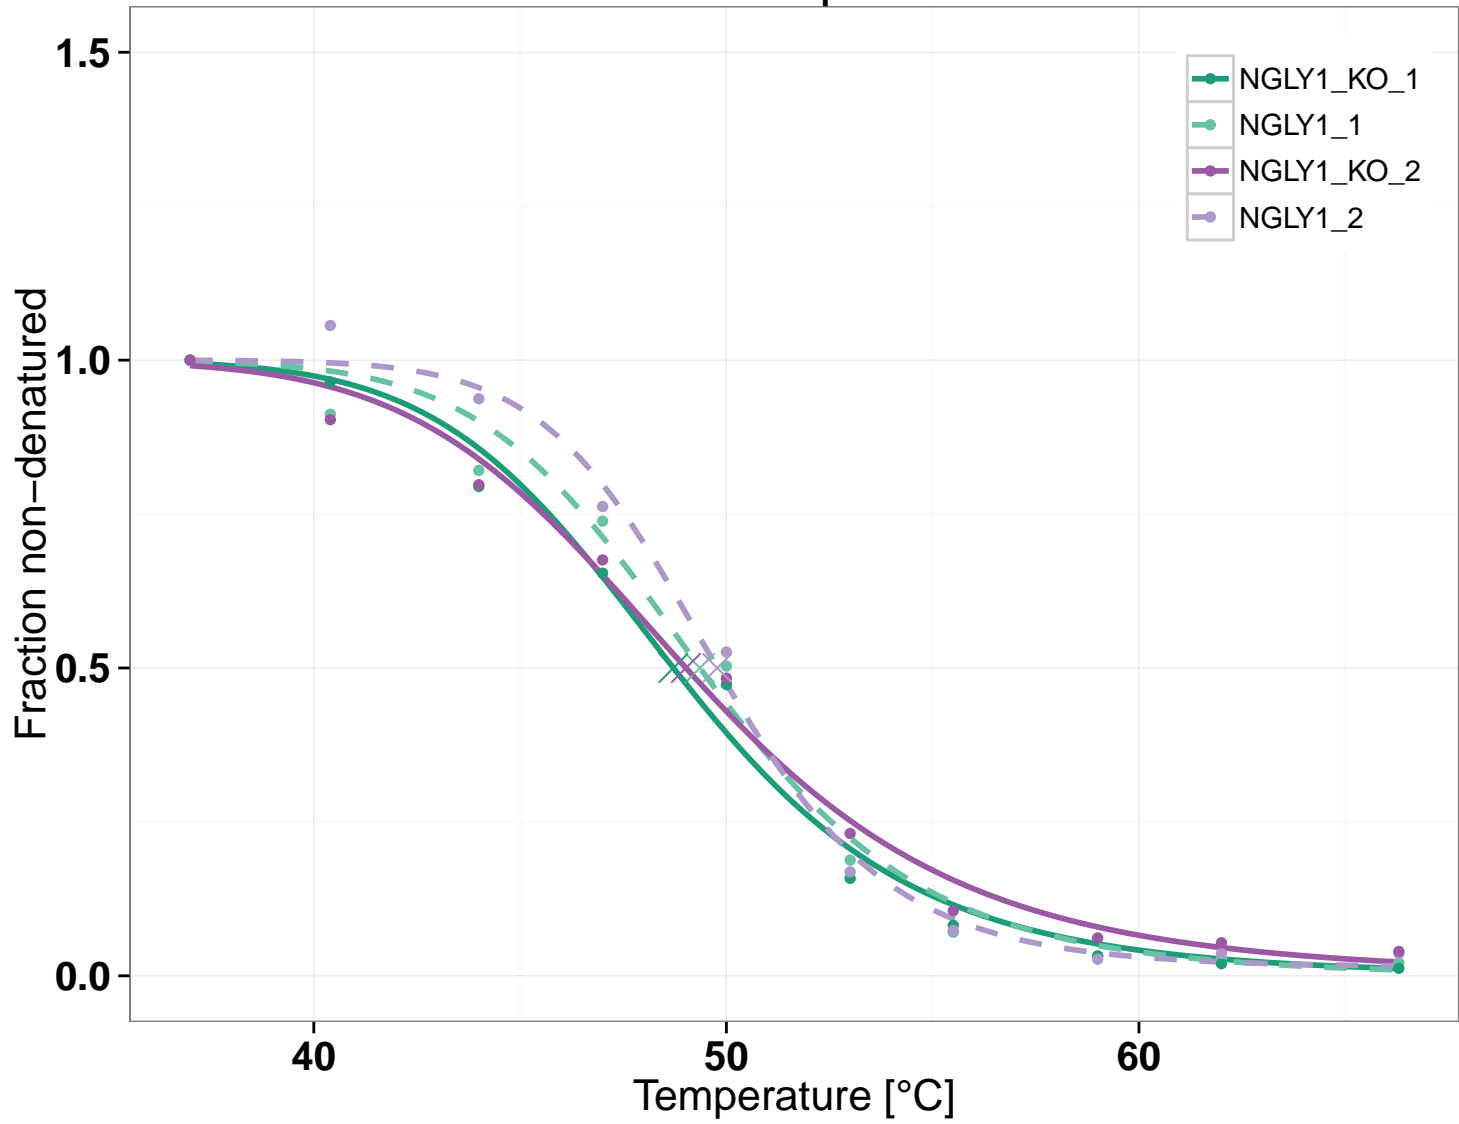

|            | meltPoint | slope  | plateau | R2   |
|------------|-----------|--------|---------|------|
| NGLY1_KO_1 | 48.72     | -0.087 | 0       | 0.99 |
| NGLY1_1    | 49.36     | -0.093 | 0       | 0.99 |
| NGLY1_KO_2 | 49.02     | -0.075 | 0       | 0.99 |
| NGLY1_2    | 49.78     | -0.12  | 0.01    | 0.99 |

Supplement: Supplementary file 7003 [file 1]

# IPI00872610.1|CHCHD2

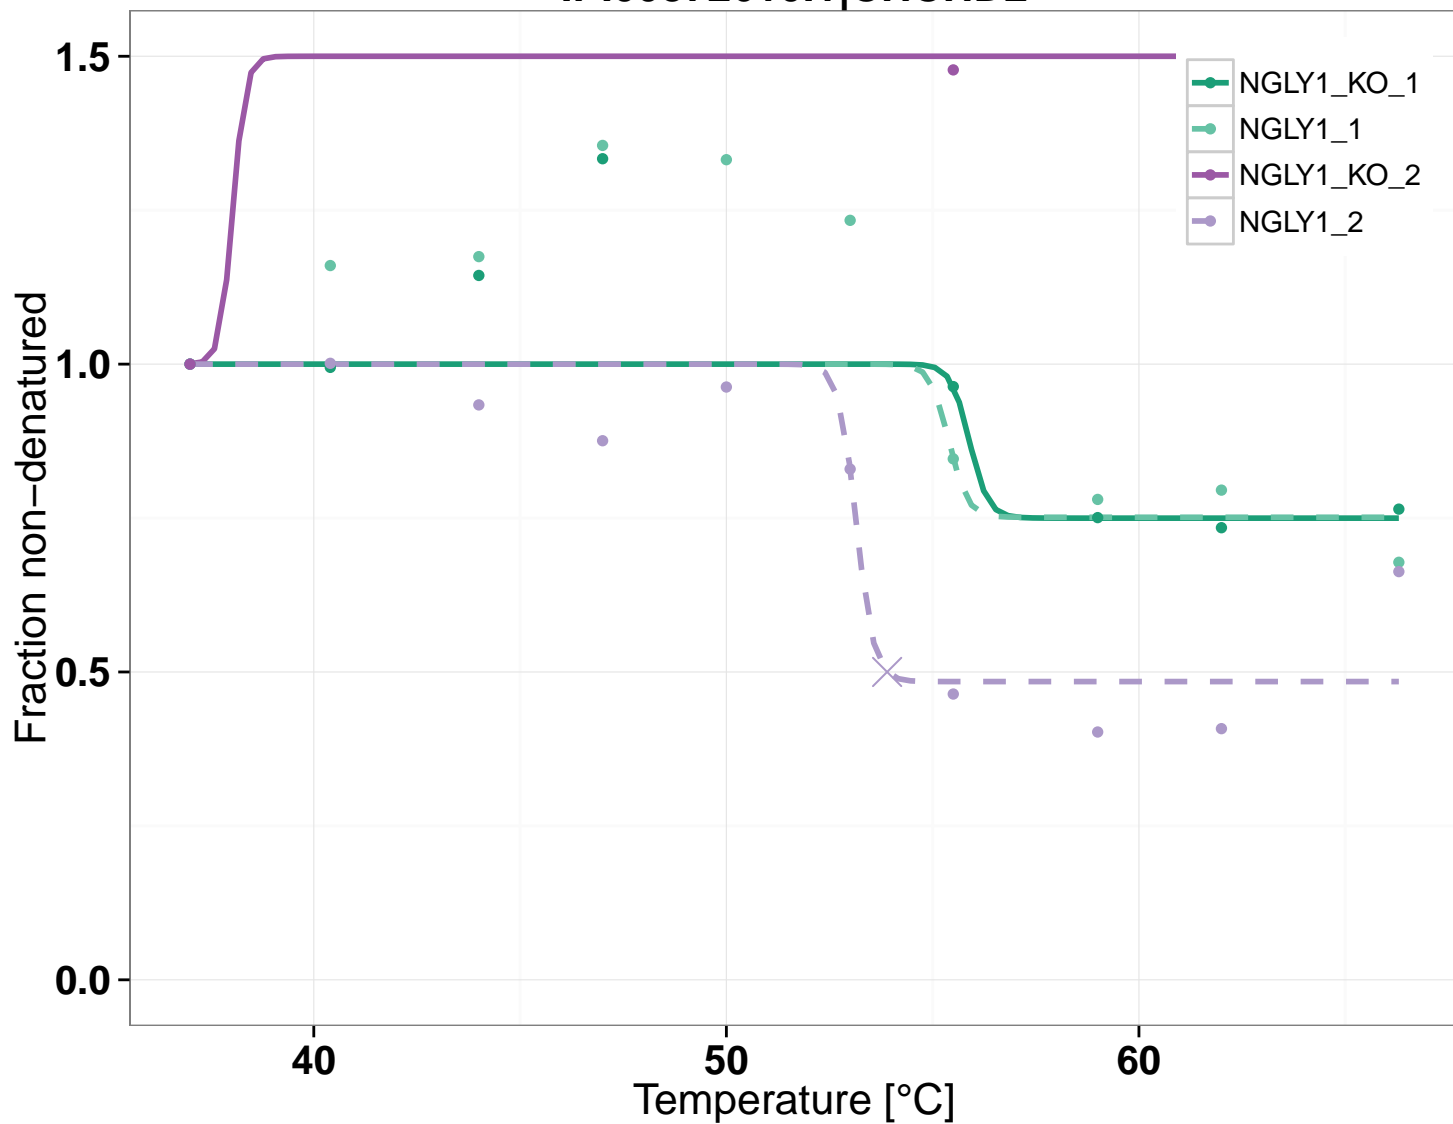

|            | meltPoint | slope | plateau | R2    |
|------------|-----------|-------|---------|-------|
| NGLY1_KO_1 | –         | –0.28 | 0.75    | 0.04  |
| NGLY1_1    | –         | –0.28 | 0.75    | 0.36  |
| NGLY1_KO_2 | –         | 0.82  | 1.5     | –0.52 |
| NGLY1_2    | 53.9      | –0.61 | 0.48    | 0.88  |

Supplement: Supplementary file 7004 [file 1]

IPI00376119.1|PRKACB

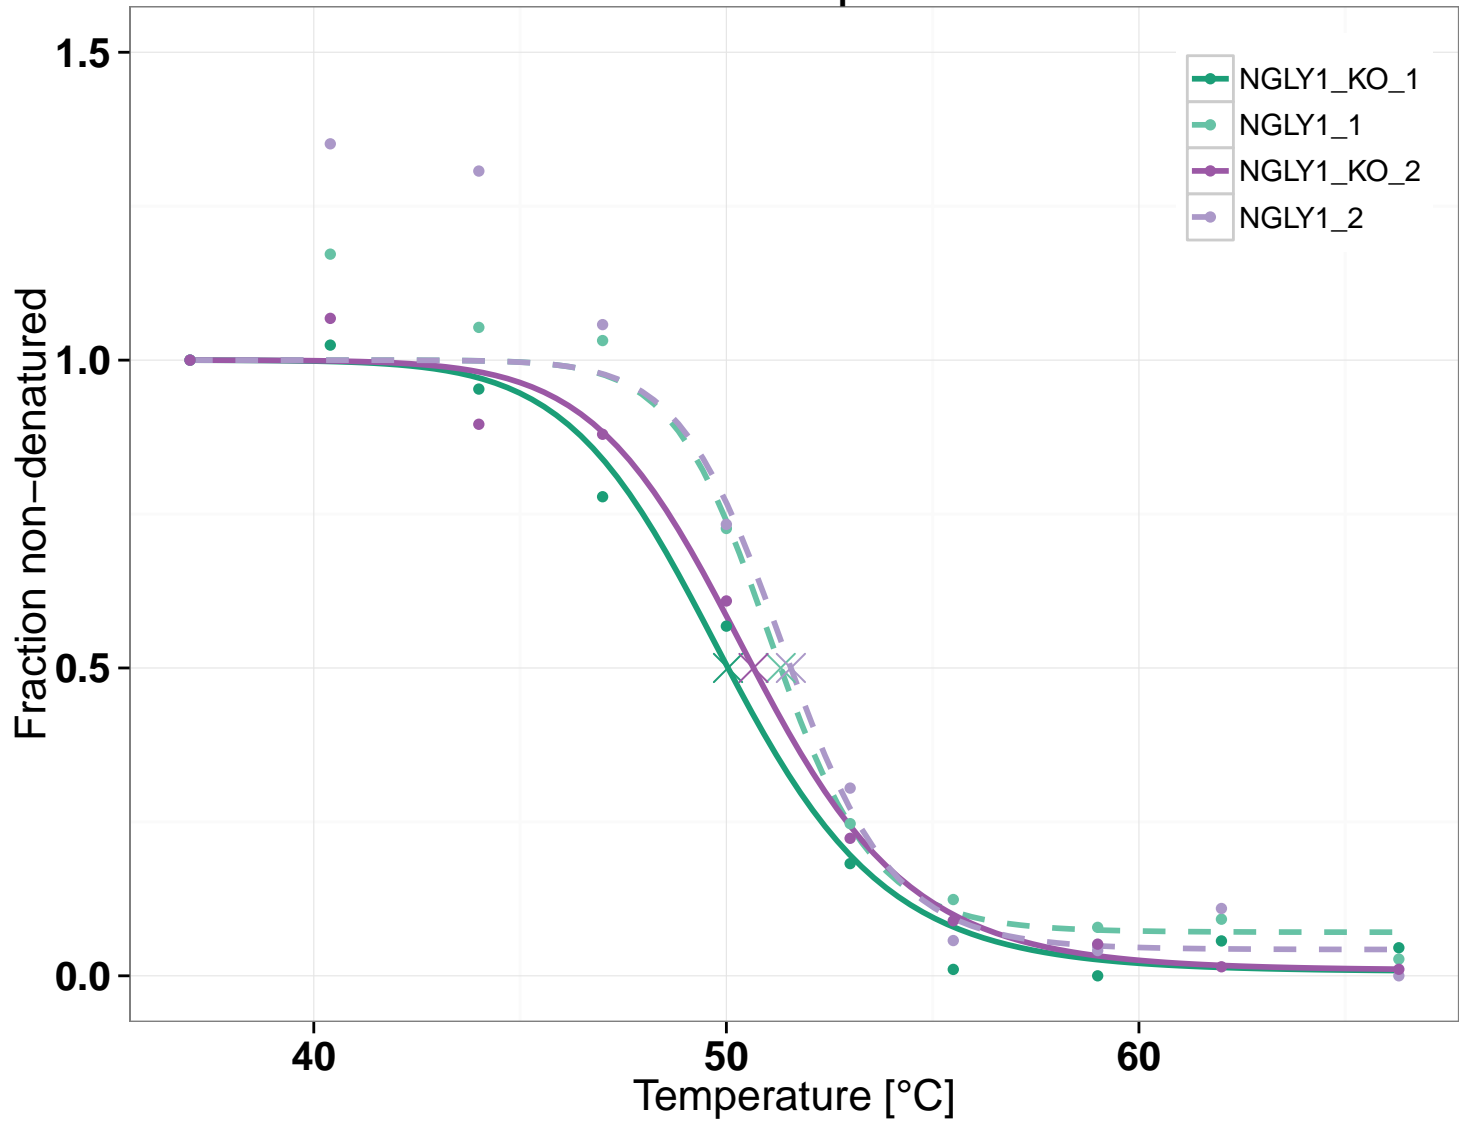

|            | meltPoint | slope | plateau | R2   |
|------------|-----------|-------|---------|------|
| NGLY1_KO_1 | 50.04     | -0.13 | 0.01    | 0.99 |
| NGLY1_1    | 51.32     | -0.19 | 0.07    | 0.98 |
| NGLY1_KO_2 | 50.66     | -0.13 | 0.01    | 0.99 |
| NGLY1_2    | 51.56     | -0.18 | 0.04    | 0.91 |

Supplement: Supplementary file 7005 [file 1]

# IPI00302673.3|ATPAF1

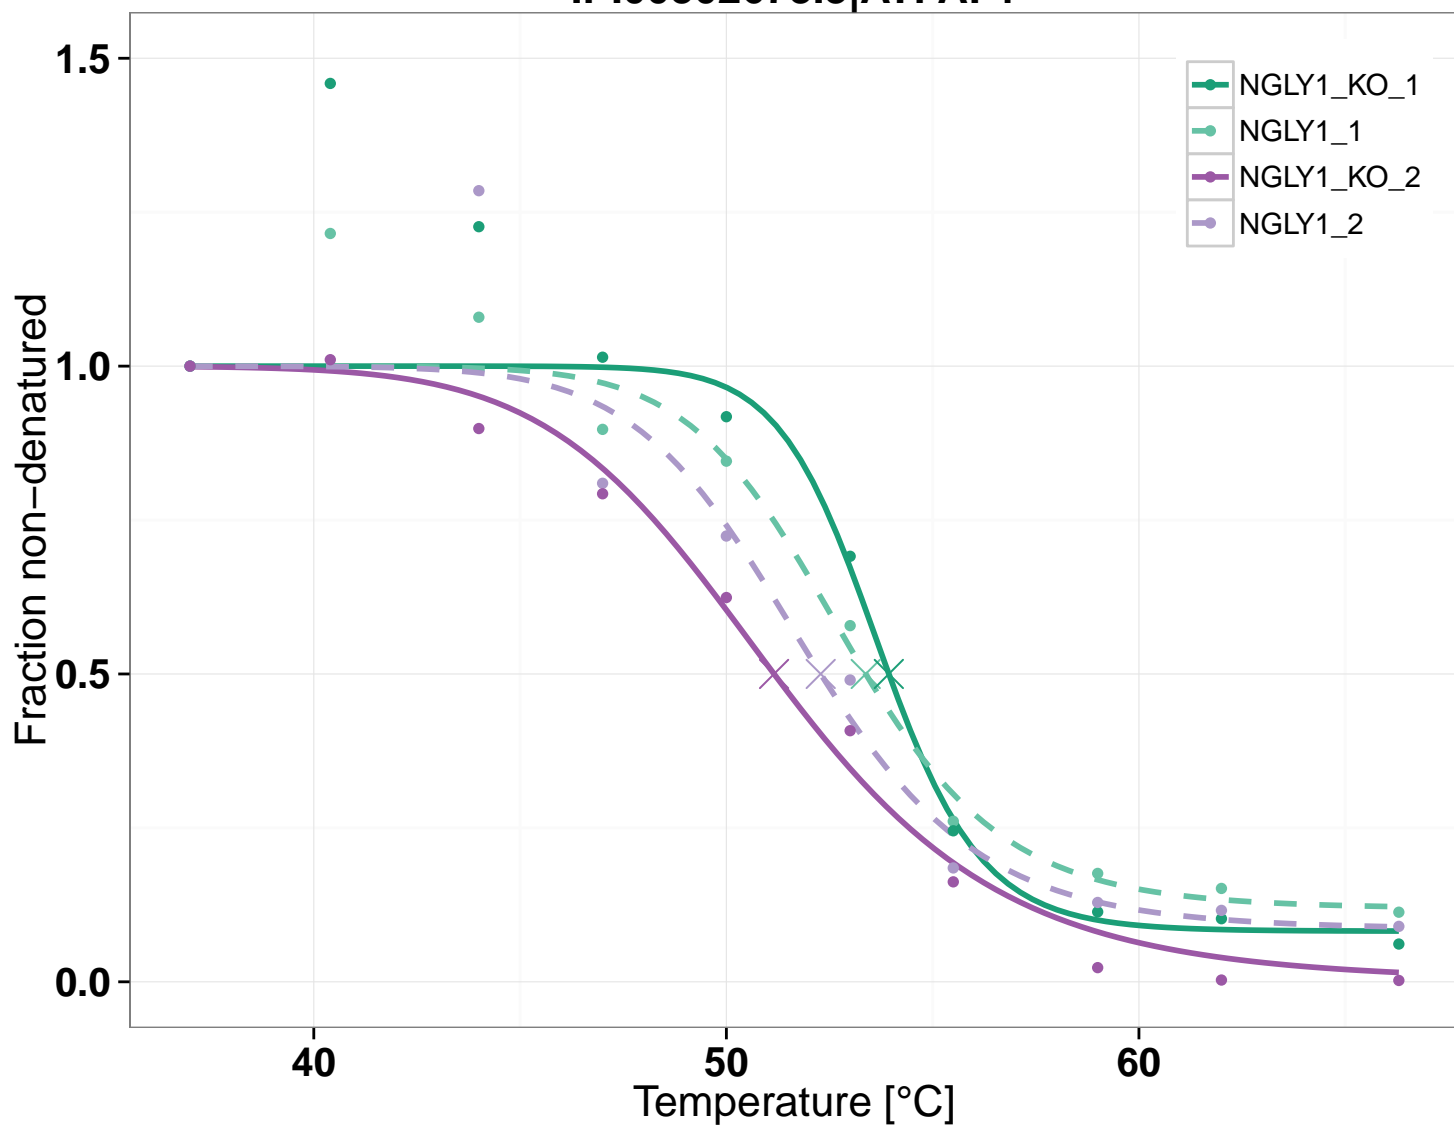

|            | meltPoint | slope | plateau | R2   |
|------------|-----------|-------|---------|------|
| NGLY1_KO_1 | 53.94     | -0.19 | 0.08    | 0.89 |
| NGLY1_1    | 53.38     | -0.12 | 0.12    | 0.96 |
| NGLY1_KO_2 | 51.16     | -0.09 | 0       | 0.99 |
| NGLY1_2    | 52.29     | -0.11 | 0.08    | 0.71 |

Supplement: Supplementary file 7006 [file 1]

IPI00168438.3|LOC100130633

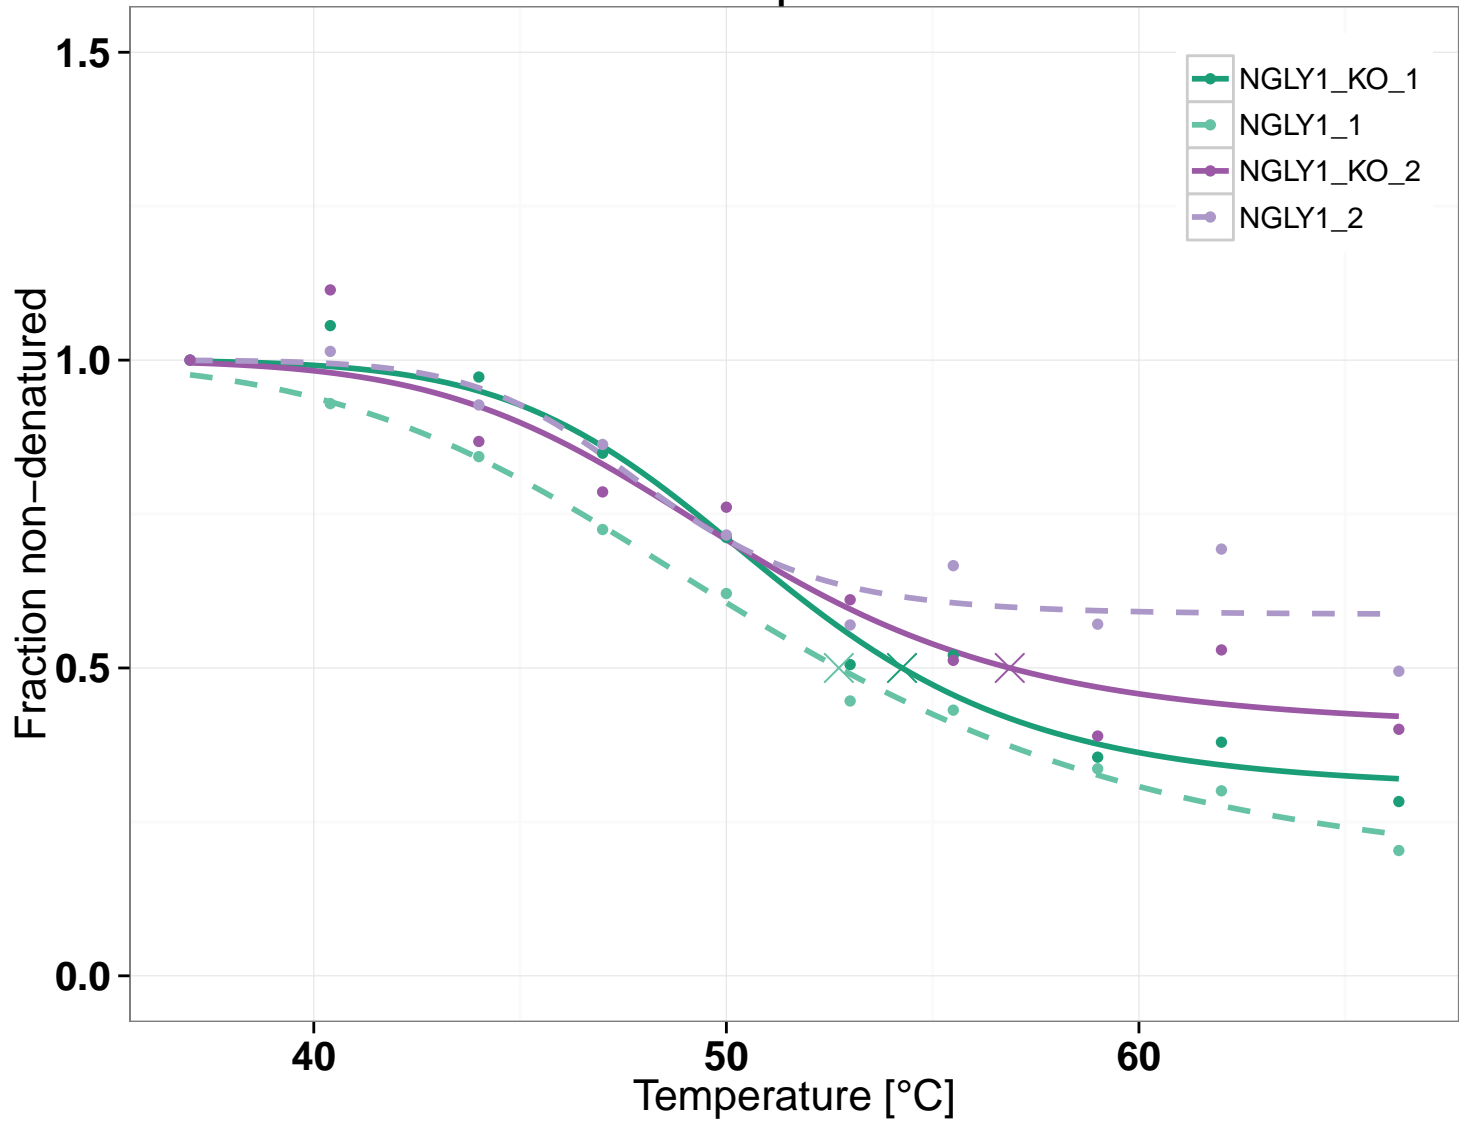

|            | meltPoint | slope  | plateau | R2   |
|------------|-----------|--------|---------|------|
| NGLY1_KO_1 | 54.26     | -0.055 | 0.3     | 0.98 |
| NGLY1_1    | 52.73     | -0.042 | 0.15    | 0.99 |
| NGLY1_KO_2 | 56.87     | -0.042 | 0.4     | 0.93 |
| NGLY1_2    | -         | -0.049 | 0.59    | 0.91 |

Supplement: Supplementary file 7007 [file 1]

# IPI00024467.2|UGCGL2

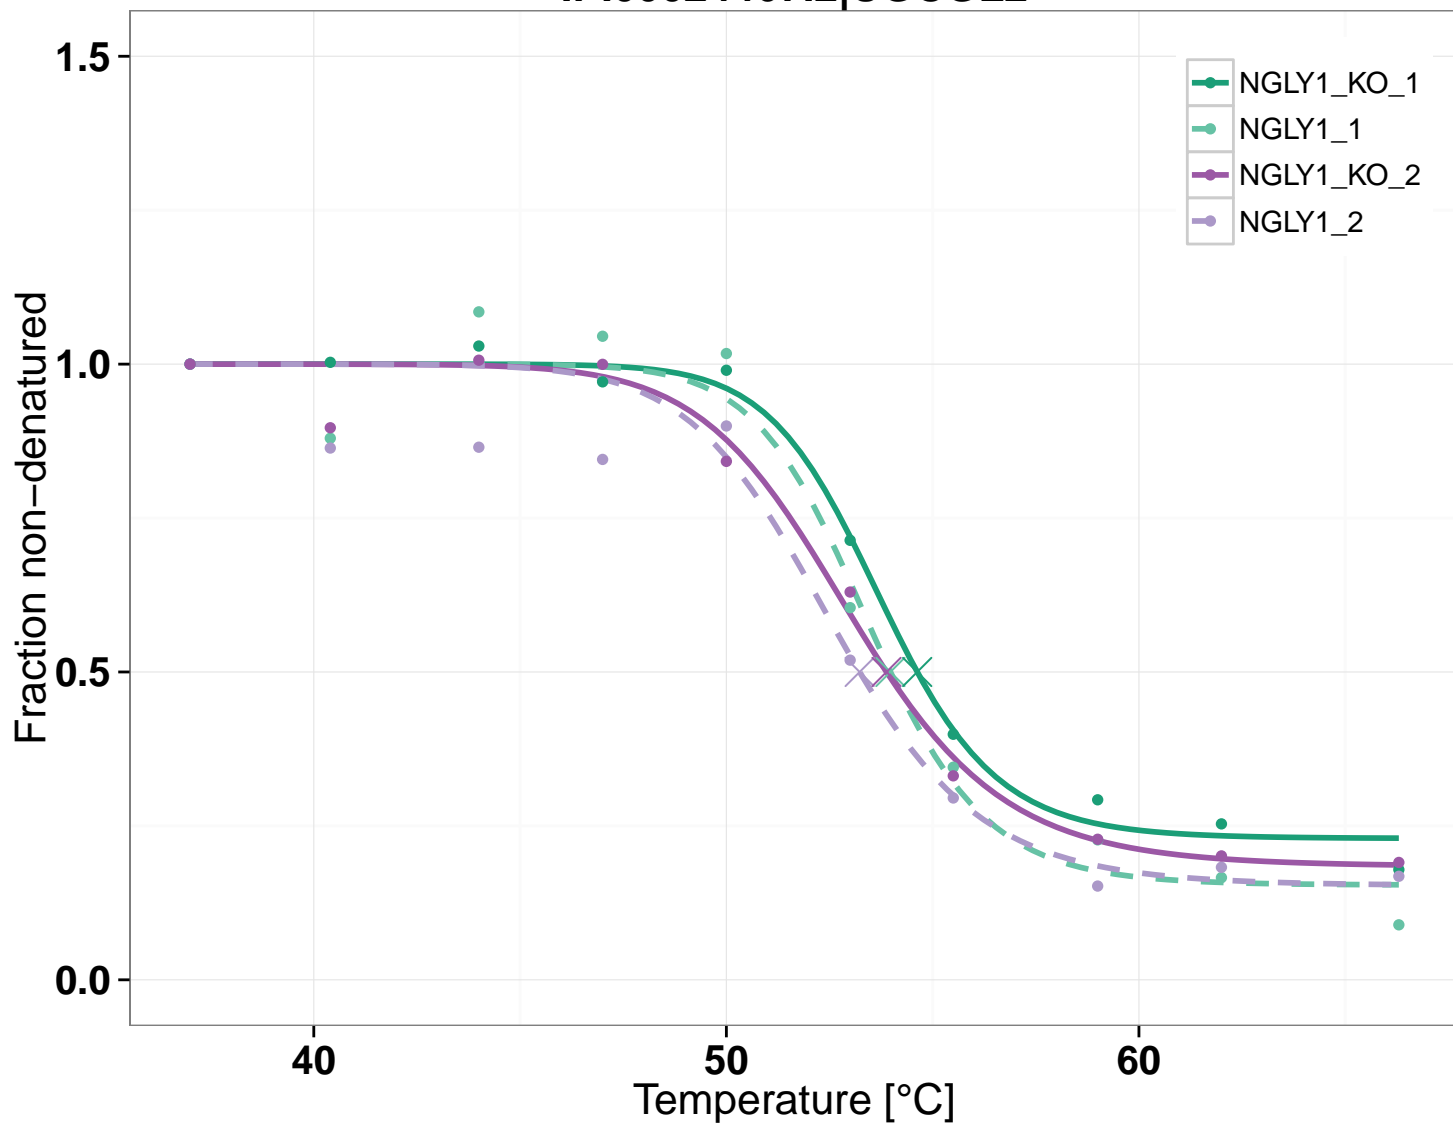

|            | meltPoint | slope | plateau | R2   |
|------------|-----------|-------|---------|------|
| NGLY1_KO_1 | 54.63     | -0.14 | 0.23    | 0.99 |
| NGLY1_1    | 53.98     | -0.15 | 0.15    | 0.97 |
| NGLY1_KO_2 | 53.88     | -0.11 | 0.18    | 0.99 |
| NGLY1_2    | 53.23     | -0.12 | 0.15    | 0.95 |

Supplement: Supplementary file 7008 [file 1]

# IPI00009982.1|TDRKH

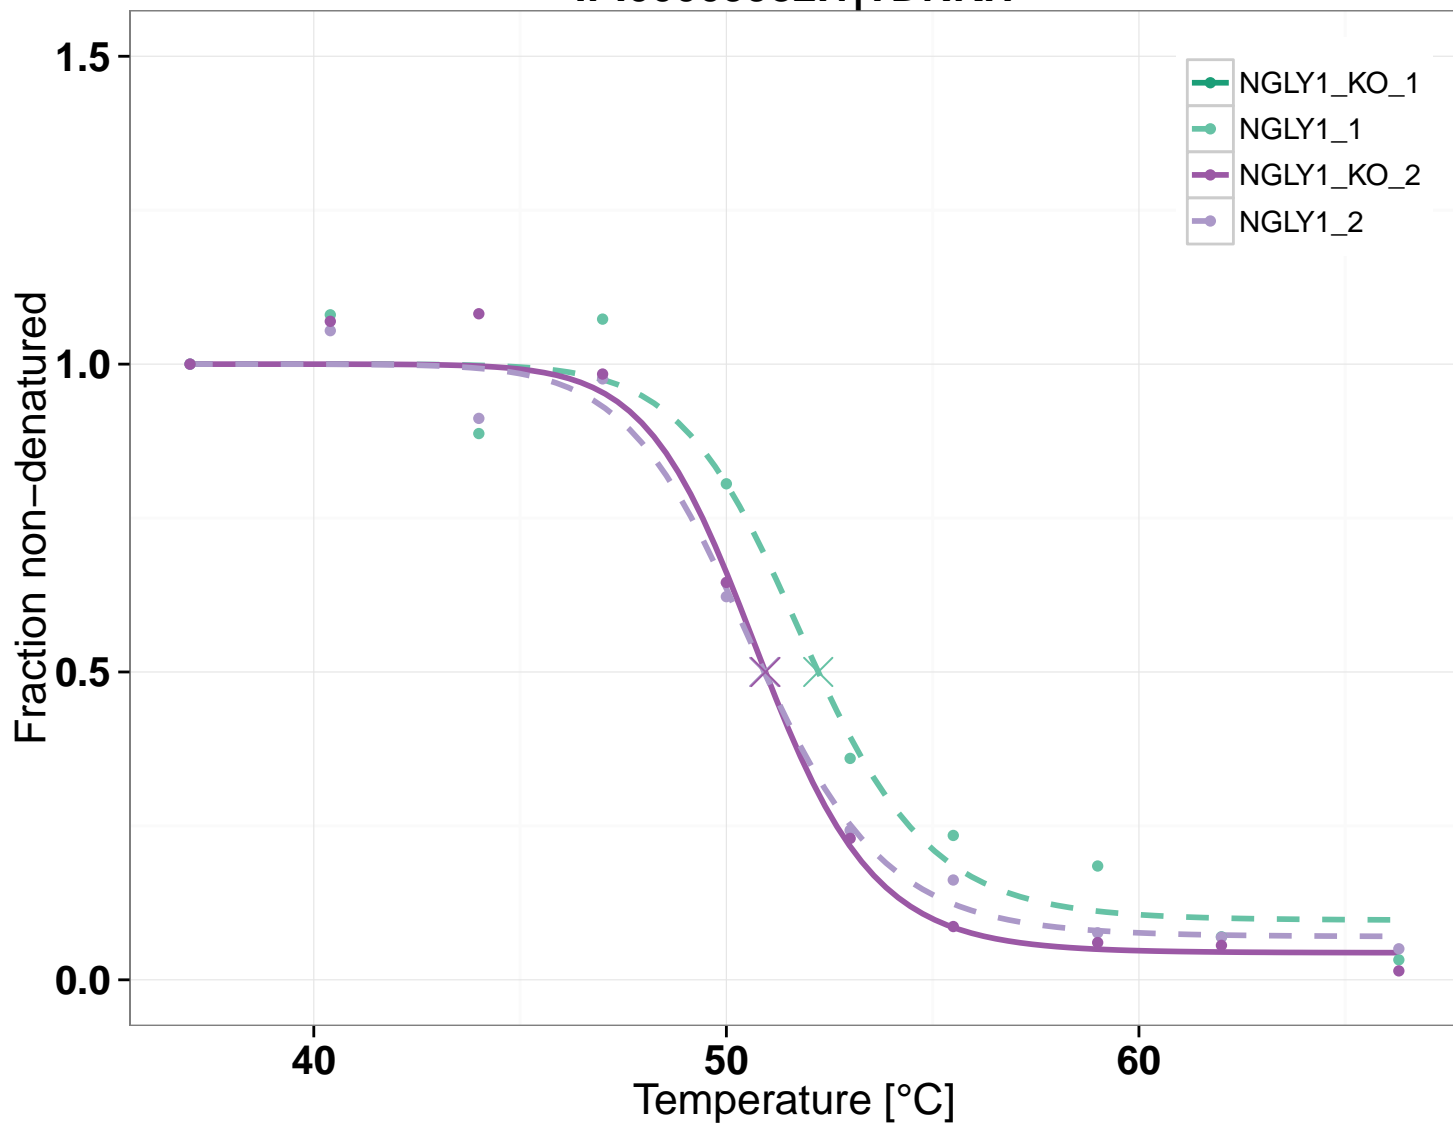

|            | meltPoint | slope | plateau | R2   |
|------------|-----------|-------|---------|------|
| NGLY1_KO_1 | —         | —     | —       | —    |
| NGLY1_1    | 52.23     | -0.15 | 0.1     | 0.98 |
| NGLY1_KO_2 | 50.95     | -0.17 | 0.04    | 0.99 |
| NGLY1_2    | 50.92     | -0.15 | 0.07    | 0.99 |

Supplement: Supplementary file 7009 [file 1]

IPI00329679.3|ZWILCH

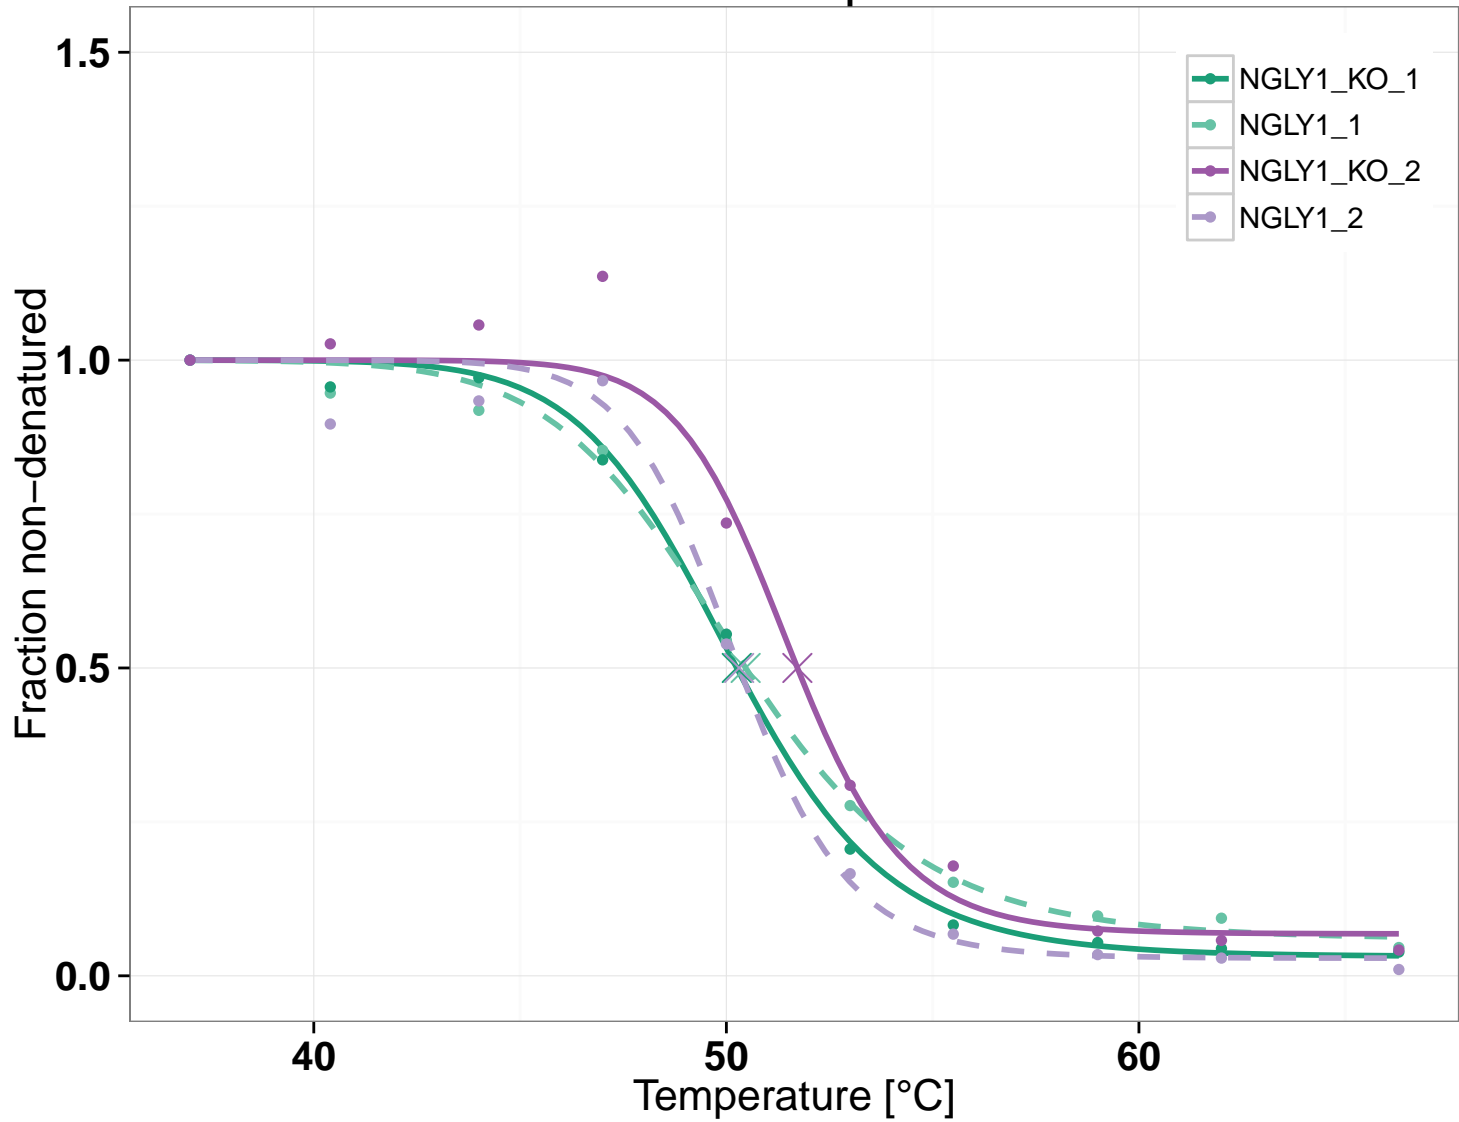

|            | meltPoint | slope | plateau | R2   |
|------------|-----------|-------|---------|------|
| NGLY1_KO_1 | 50.25     | -0.13 | 0.03    | 1    |
| NGLY1_1    | 50.47     | -0.1  | 0.06    | 1    |
| NGLY1_KO_2 | 51.72     | -0.17 | 0.07    | 0.98 |
| NGLY1_2    | 50.31     | -0.18 | 0.03    | 0.99 |

Supplement: Supplementary file 7010 [file 1]

IPI00872533.1|CD2AP

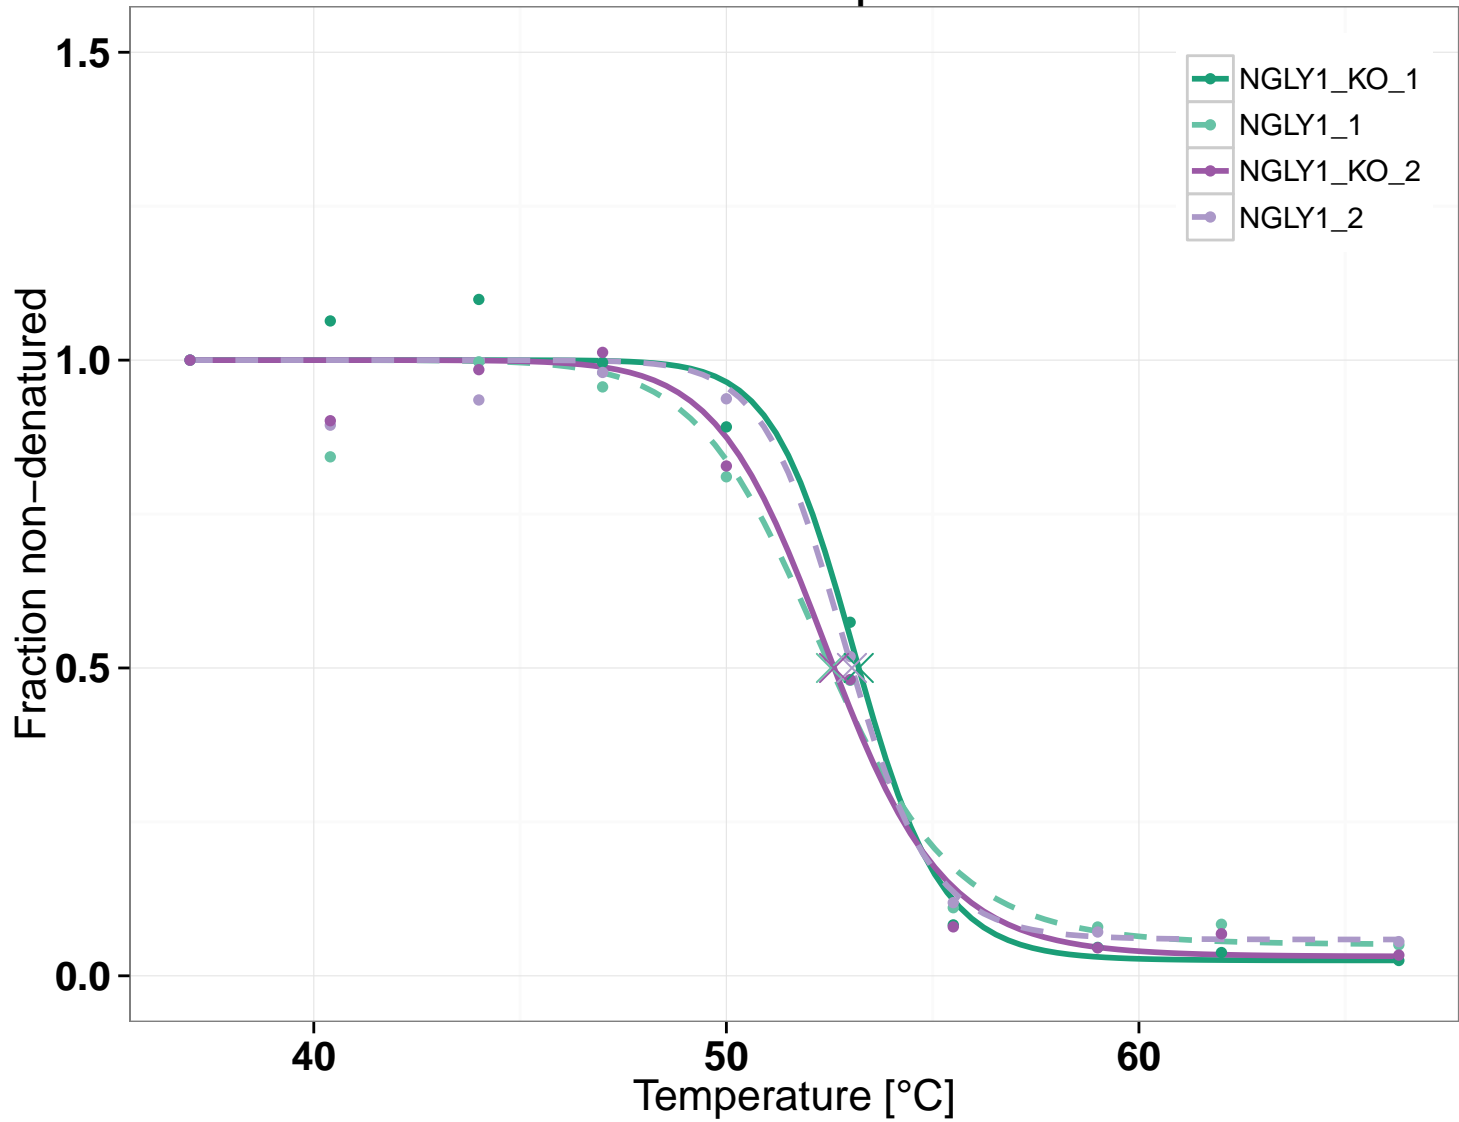

|            | meltPoint | slope | plateau | R2   |
|------------|-----------|-------|---------|------|
| NGLY1_KO_1 | 53.21     | -0.24 | 0.02    | 0.99 |
| NGLY1_1    | 52.54     | -0.15 | 0.05    | 0.98 |
| NGLY1_KO_2 | 52.61     | -0.17 | 0.03    | 0.99 |
| NGLY1_2    | 53.04     | -0.23 | 0.06    | 0.99 |

Supplement: Supplementary file 7011 [file 1]

IPI00025491.1|EIF4A1

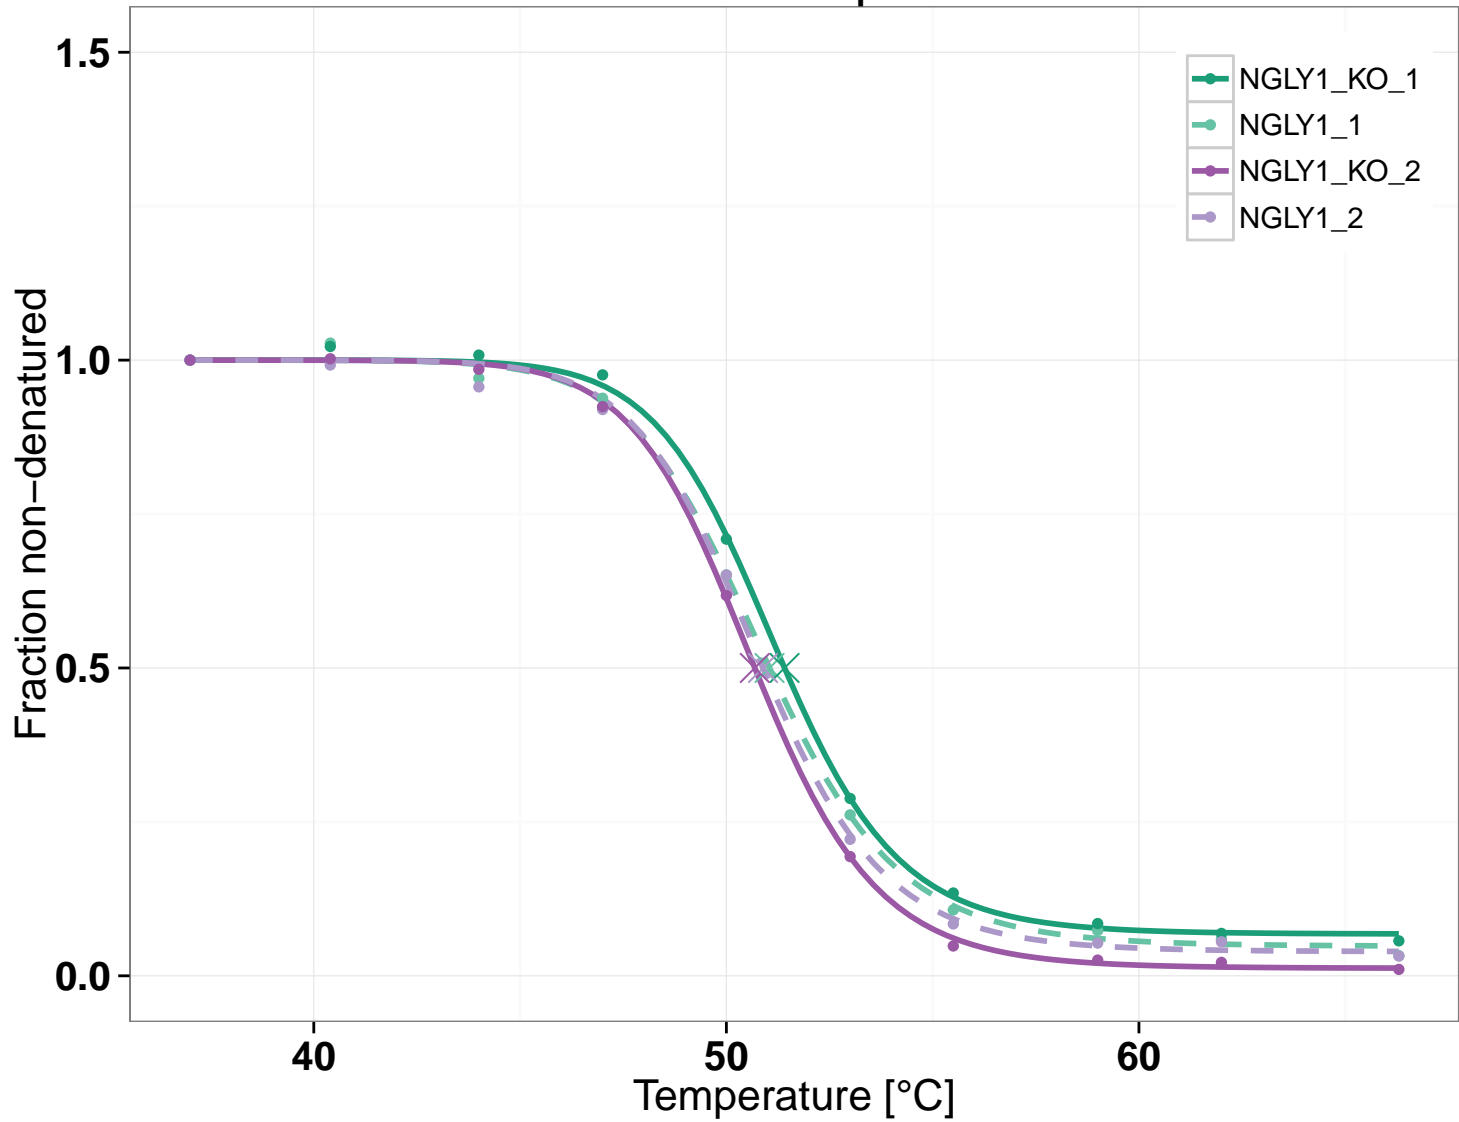

|            | meltPoint | slope | plateau | R2 |
|------------|-----------|-------|---------|----|
| NGLY1_KO_1 | 51.41     | -0.16 | 0.07    | 1  |
| NGLY1_1    | 51.05     | -0.15 | 0.05    | 1  |
| NGLY1_KO_2 | 50.69     | -0.17 | 0.01    | 1  |
| NGLY1_2    | 50.89     | -0.16 | 0.04    | 1  |

Supplement: Supplementary file 7012 [file 1]

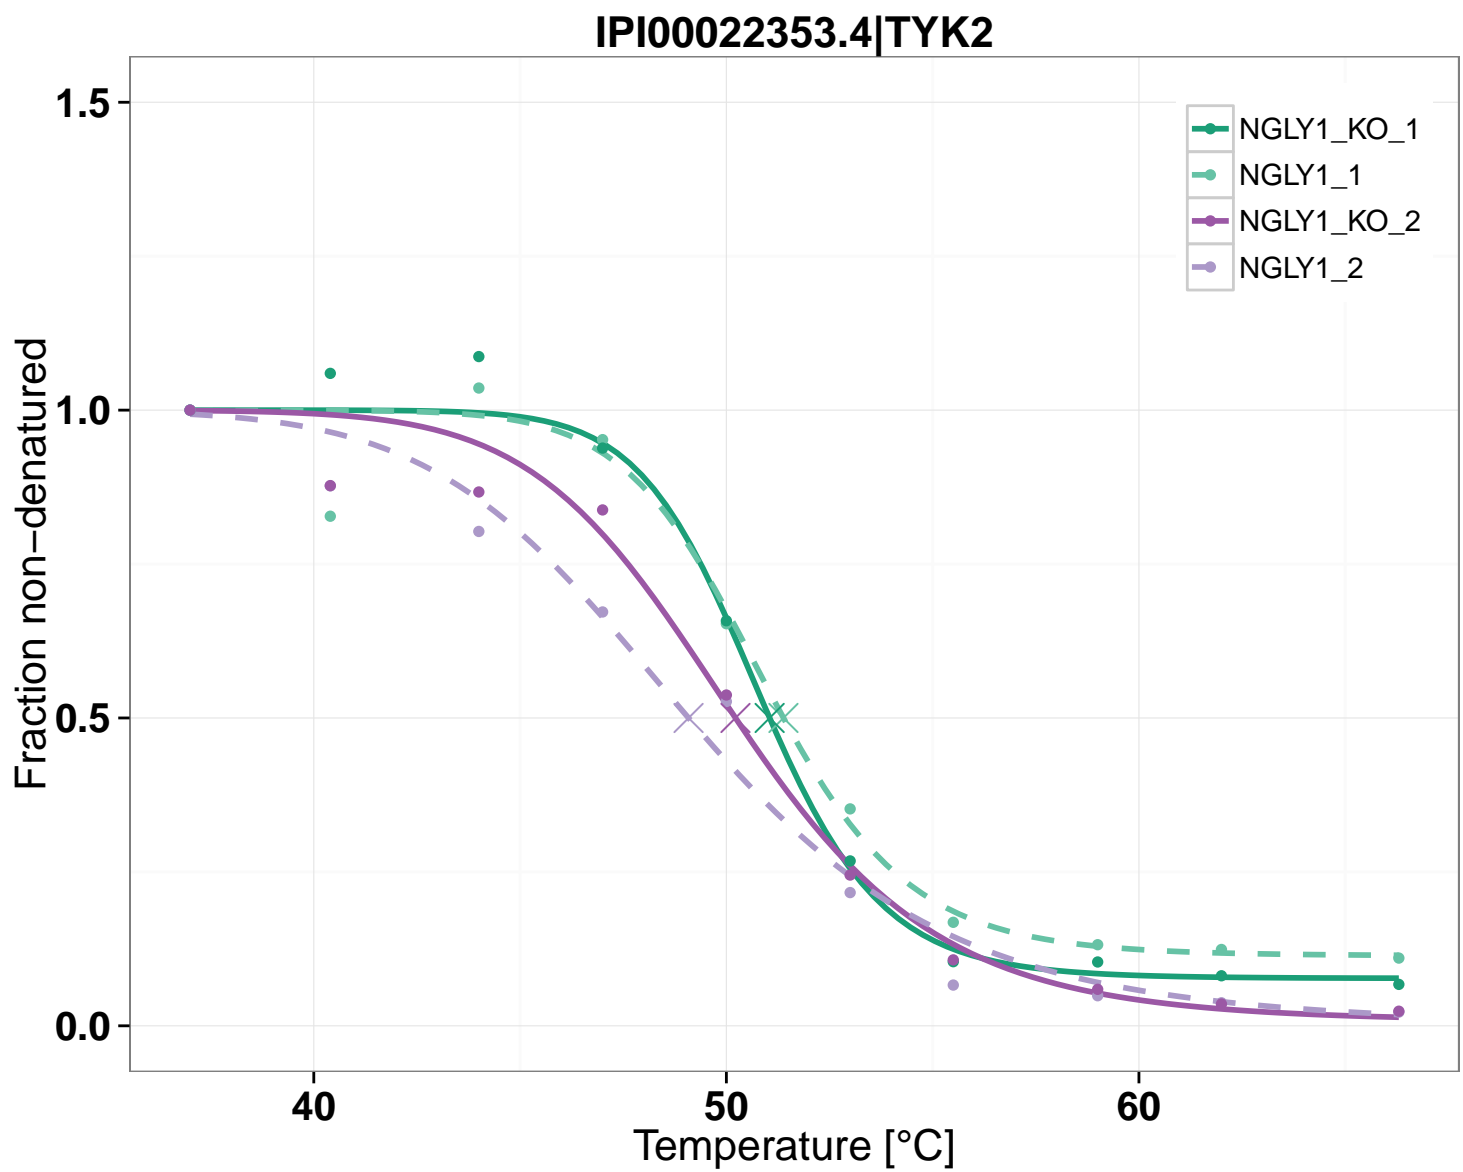

|            | meltPoint | slope | plateau | R2   |
|------------|-----------|-------|---------|------|
| NGLY1_KO_1 | 51.05     | -0.16 | 0.08    | 0.99 |
| NGLY1_1    | 51.38     | -0.13 | 0.11    | 0.98 |
| NGLY1_KO_2 | 50.22     | -0.1  | 0.01    | 0.99 |
| NGLY1_2    | 49.08     | -0.08 | 0       | 0.98 |

Supplement: Supplementary file 7013 [file 1]

IPI00031627.3|POLR2A

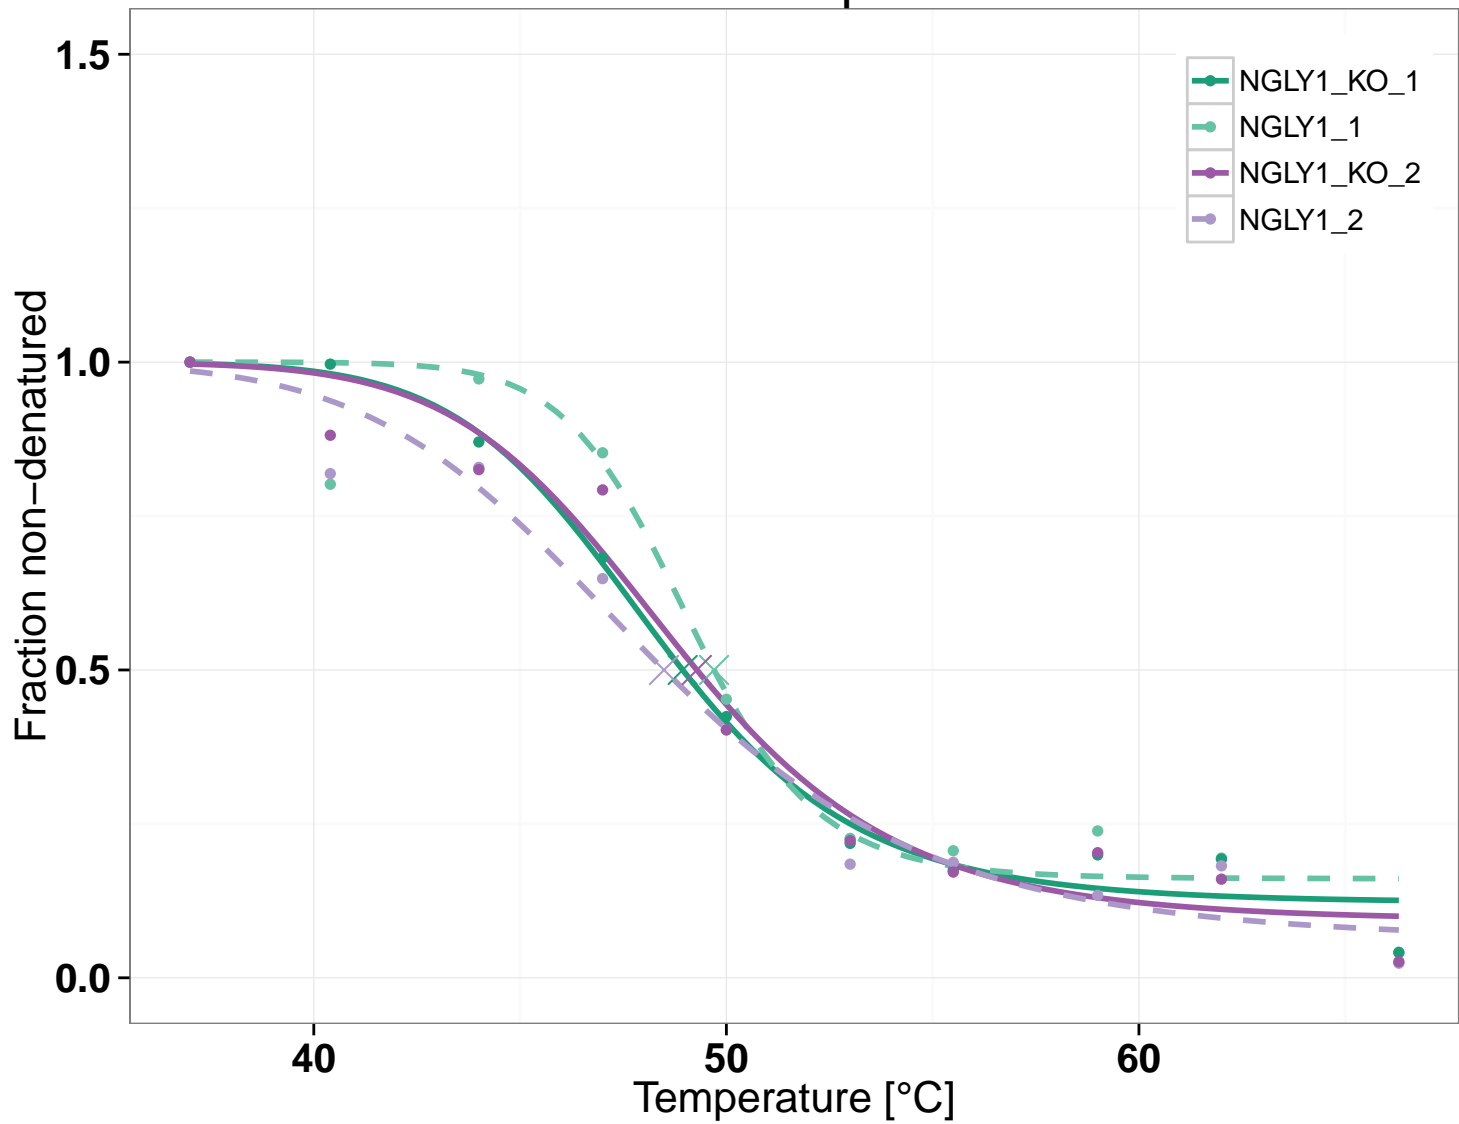

|            | meltPoint | slope  | plateau | R2   |
|------------|-----------|--------|---------|------|
| NGLY1_KO_1 | 48.94     | -0.091 | 0.12    | 0.99 |
| NGLY1_1    | 49.7      | -0.14  | 0.16    | 0.95 |
| NGLY1_KO_2 | 49.28     | -0.085 | 0.09    | 0.97 |
| NGLY1_2    | 48.49     | -0.07  | 0.06    | 0.97 |

Supplement: Supplementary file 7014 [file 1]

IPI00302658.6|C14ORF94

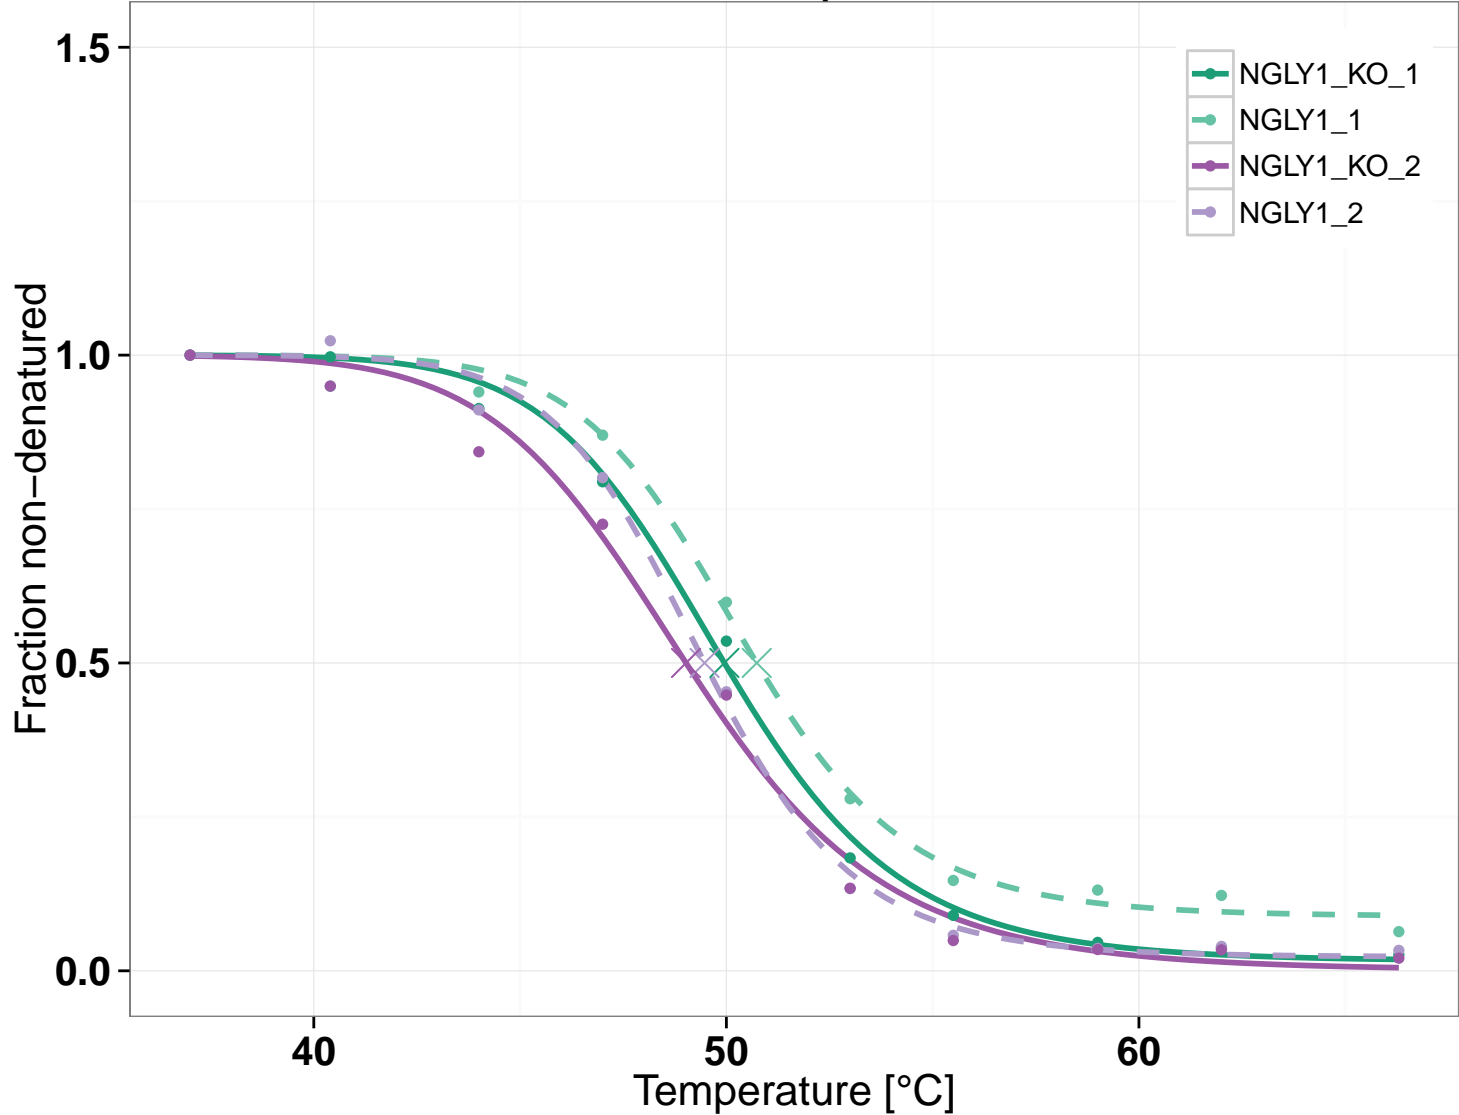

|            | meltPoint | slope | plateau | R2   |
|------------|-----------|-------|---------|------|
| NGLY1_KO_1 | 49.95     | -0.11 | 0.02    | 1    |
| NGLY1_1    | 50.74     | -0.12 | 0.09    | 1    |
| NGLY1_KO_2 | 49.02     | -0.1  | 0       | 0.99 |
| NGLY1_2    | 49.47     | -0.13 | 0.02    | 1    |

Supplement: Supplementary file 7015 [file 1]

IPI00337371.4|HACE1

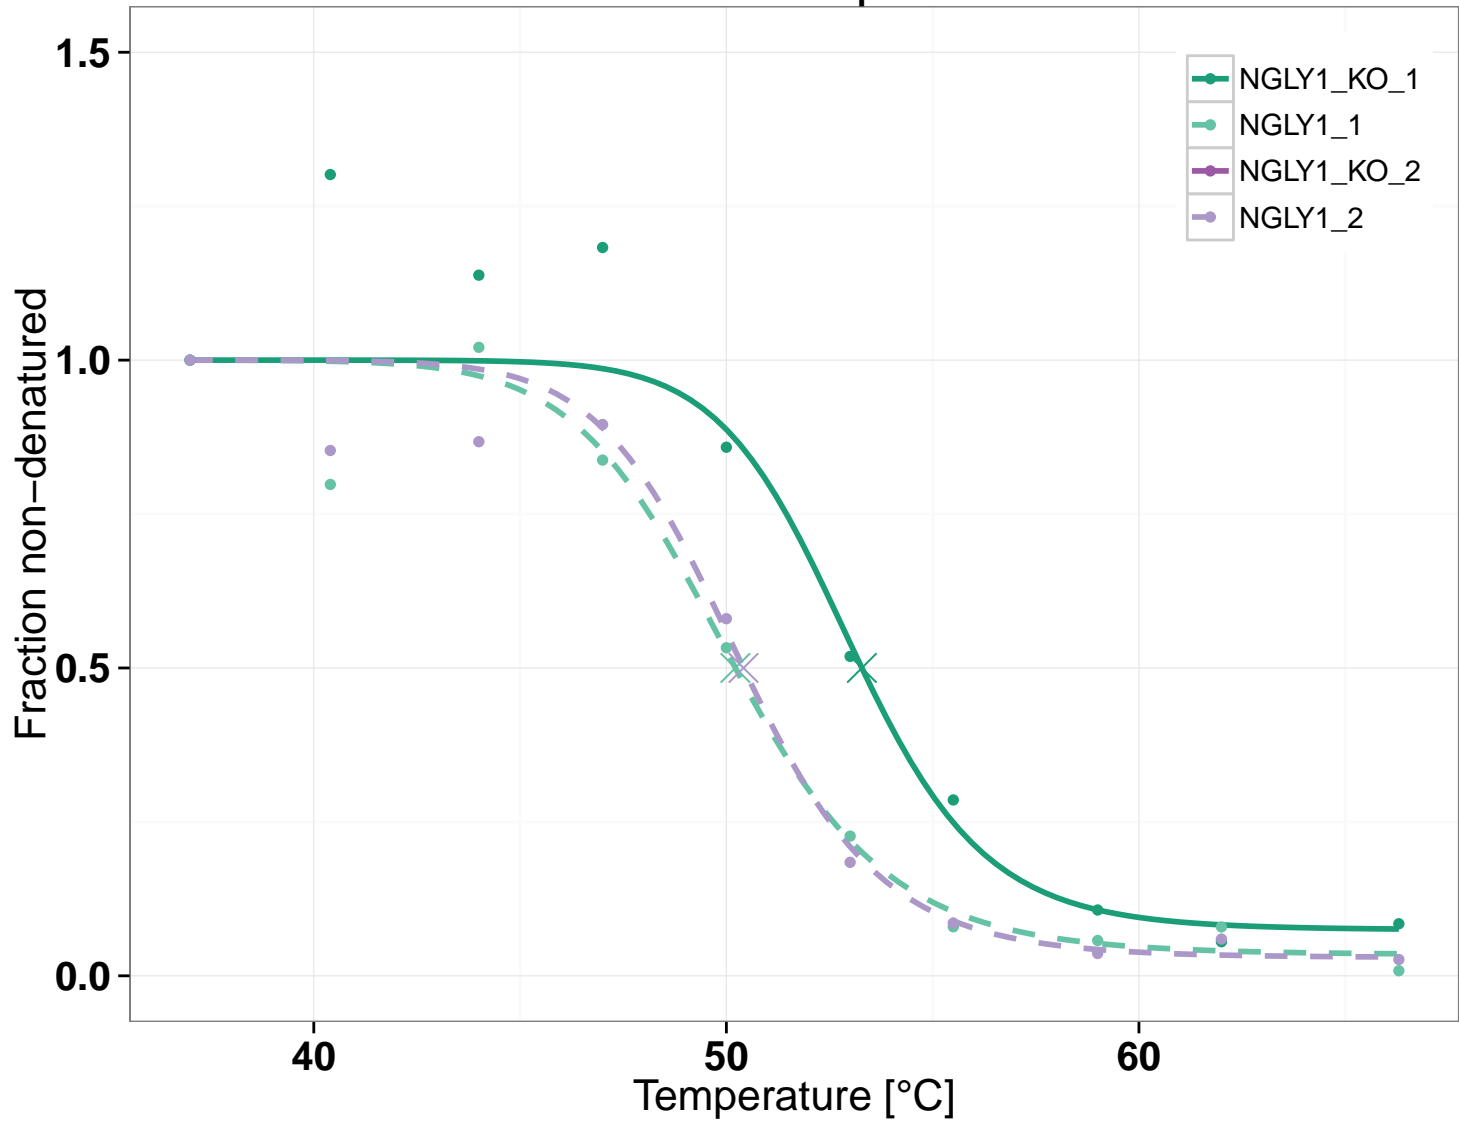

|            | meltPoint | slope | plateau | R2   |
|------------|-----------|-------|---------|------|
| NGLY1_KO_1 | 53.28     | -0.14 | 0.07    | 0.93 |
| NGLY1_1    | 50.22     | -0.13 | 0.03    | 0.97 |
| NGLY1_KO_2 | -         | -     | -       | -    |
| NGLY1_2    | 50.42     | -0.14 | 0.03    | 0.98 |

Supplement: Supplementary file 7016 [file 1]

IPI00006937.2|UBE2J1

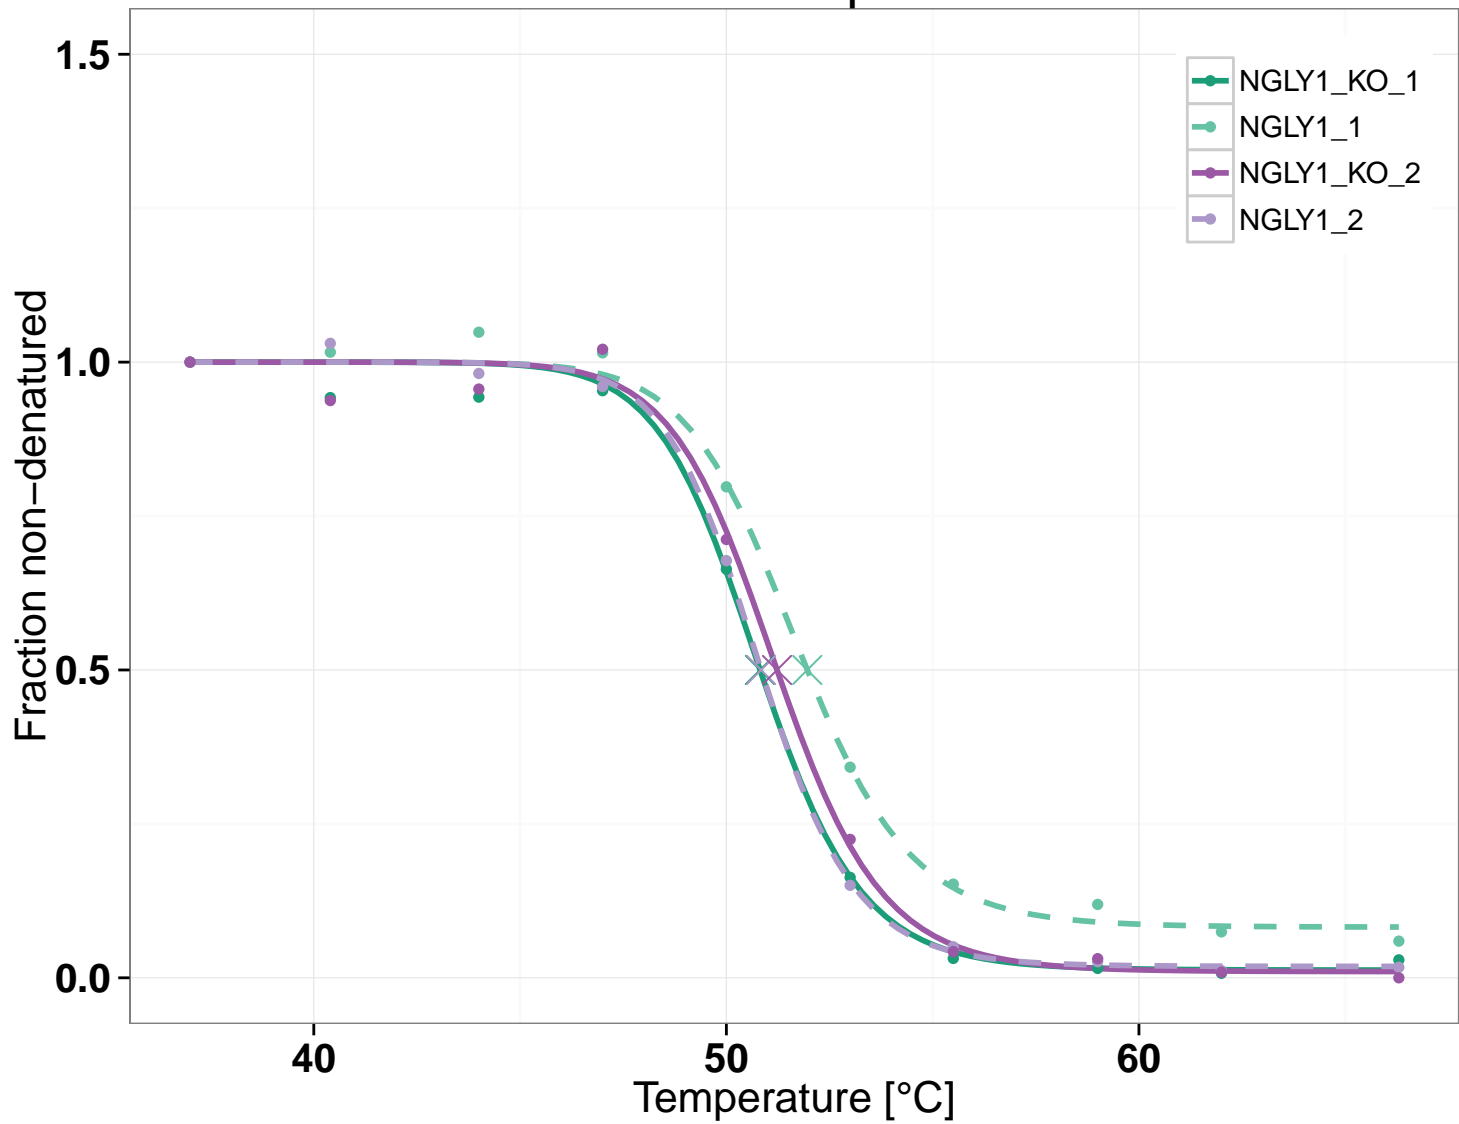

|            | meltPoint | slope | plateau | R2 |
|------------|-----------|-------|---------|----|
| NGLY1_KO_1 | 50.82     | -0.2  | 0.01    | 1  |
| NGLY1_1    | 51.96     | -0.17 | 0.08    | 1  |
| NGLY1_KO_2 | 51.23     | -0.19 | 0.01    | 1  |
| NGLY1_2    | 50.84     | -0.21 | 0.02    | 1  |

Supplement: Supplementary file 7017 [file 1]

# IPI00008586.2|CSPG5

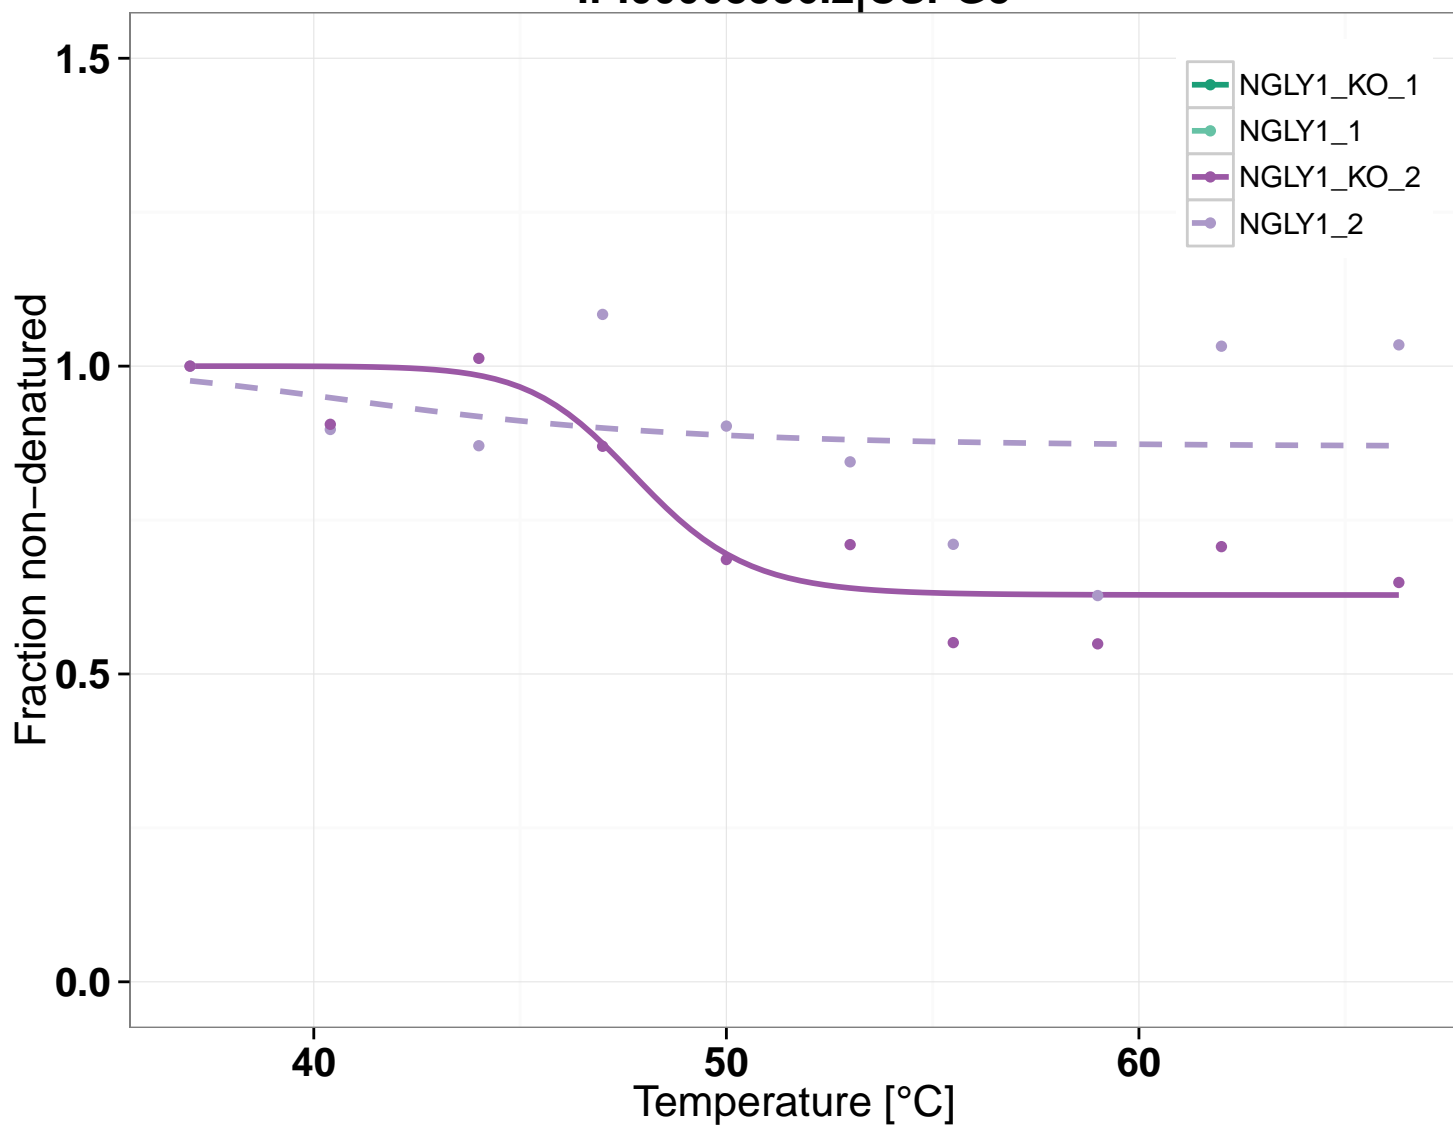

|            | meltPoint | slope  | plateau | R2   |
|------------|-----------|--------|---------|------|
| NGLY1_KO_1 | —         | —      | —       | —    |
| NGLY1_1    | —         | —      | —       | —    |
| NGLY1_KO_2 | —         | -0.07  | 0.63    | 0.87 |
| NGLY1_2    | —         | -0.009 | 0.87    | 0.06 |

Supplement: Supplementary file 7018 [file 1]

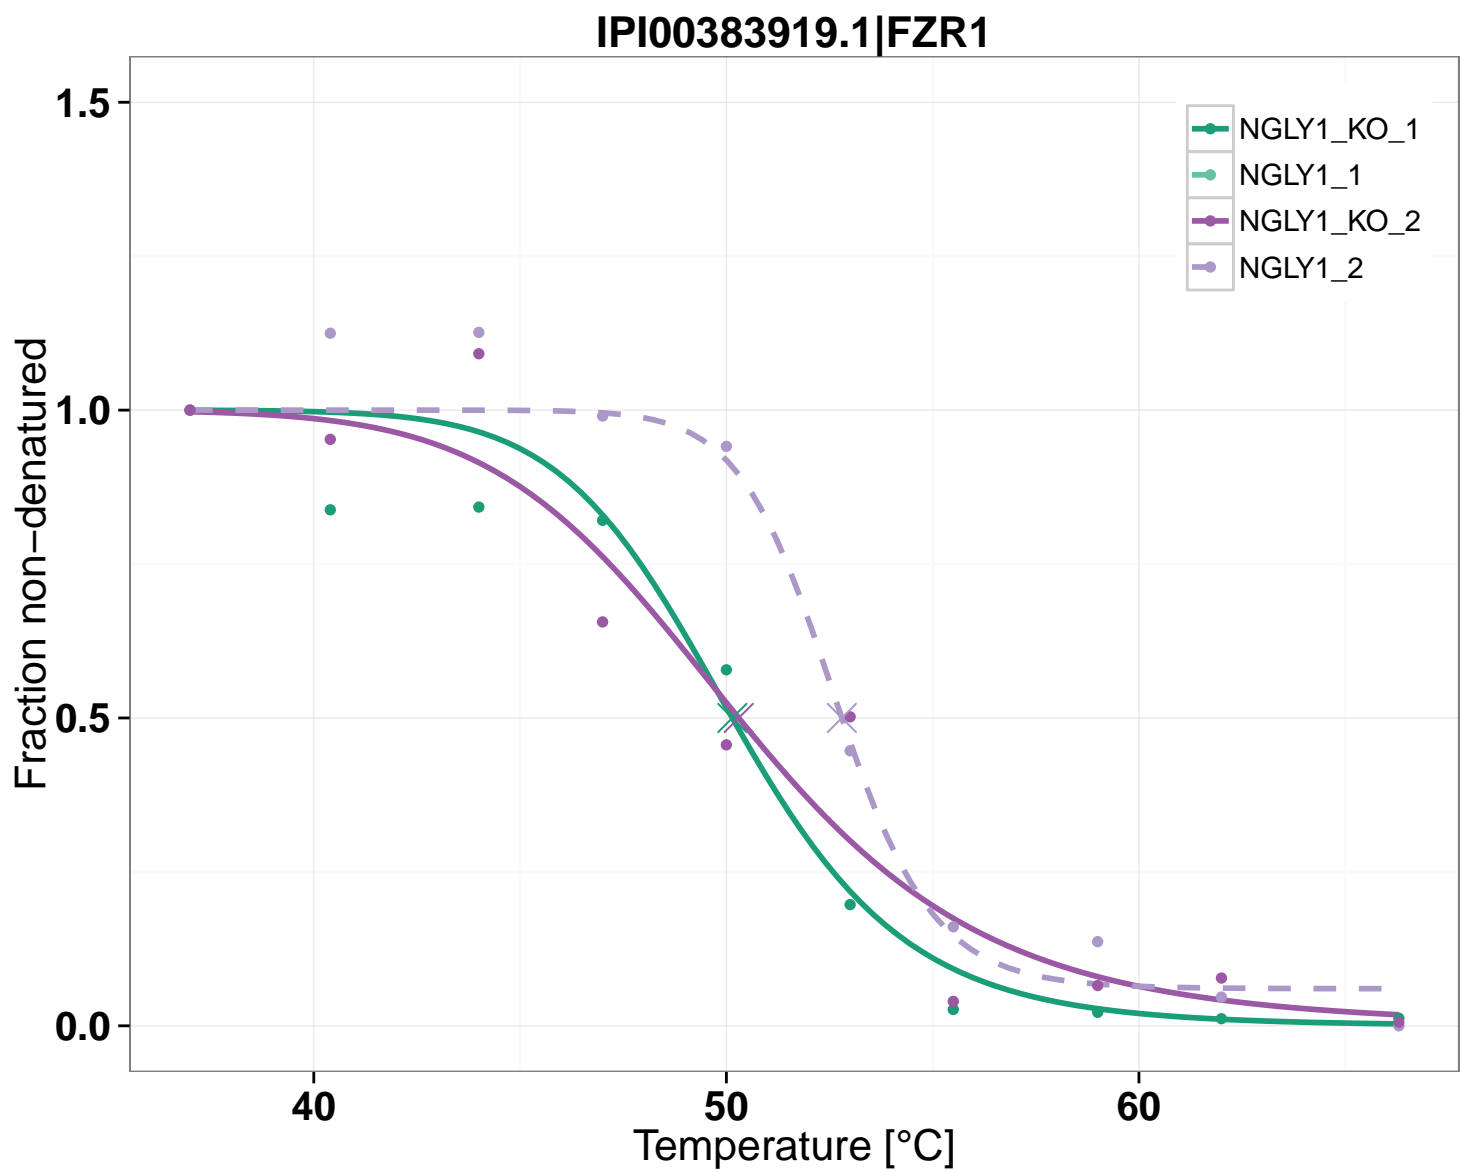

|            | meltPoint | slope  | plateau | R2   |
|------------|-----------|--------|---------|------|
| NGLY1_KO_1 | 50.15     | -0.12  | 0       | 0.97 |
| NGLY1_1    | -         | -      | -       | -    |
| NGLY1_KO_2 | 50.3      | -0.084 | 0       | 0.93 |
| NGLY1_2    | 52.8      | -0.2   | 0.06    | 0.98 |

Supplement: Supplementary file 7019 [file 1]

IPI00006657.1|FAM20B

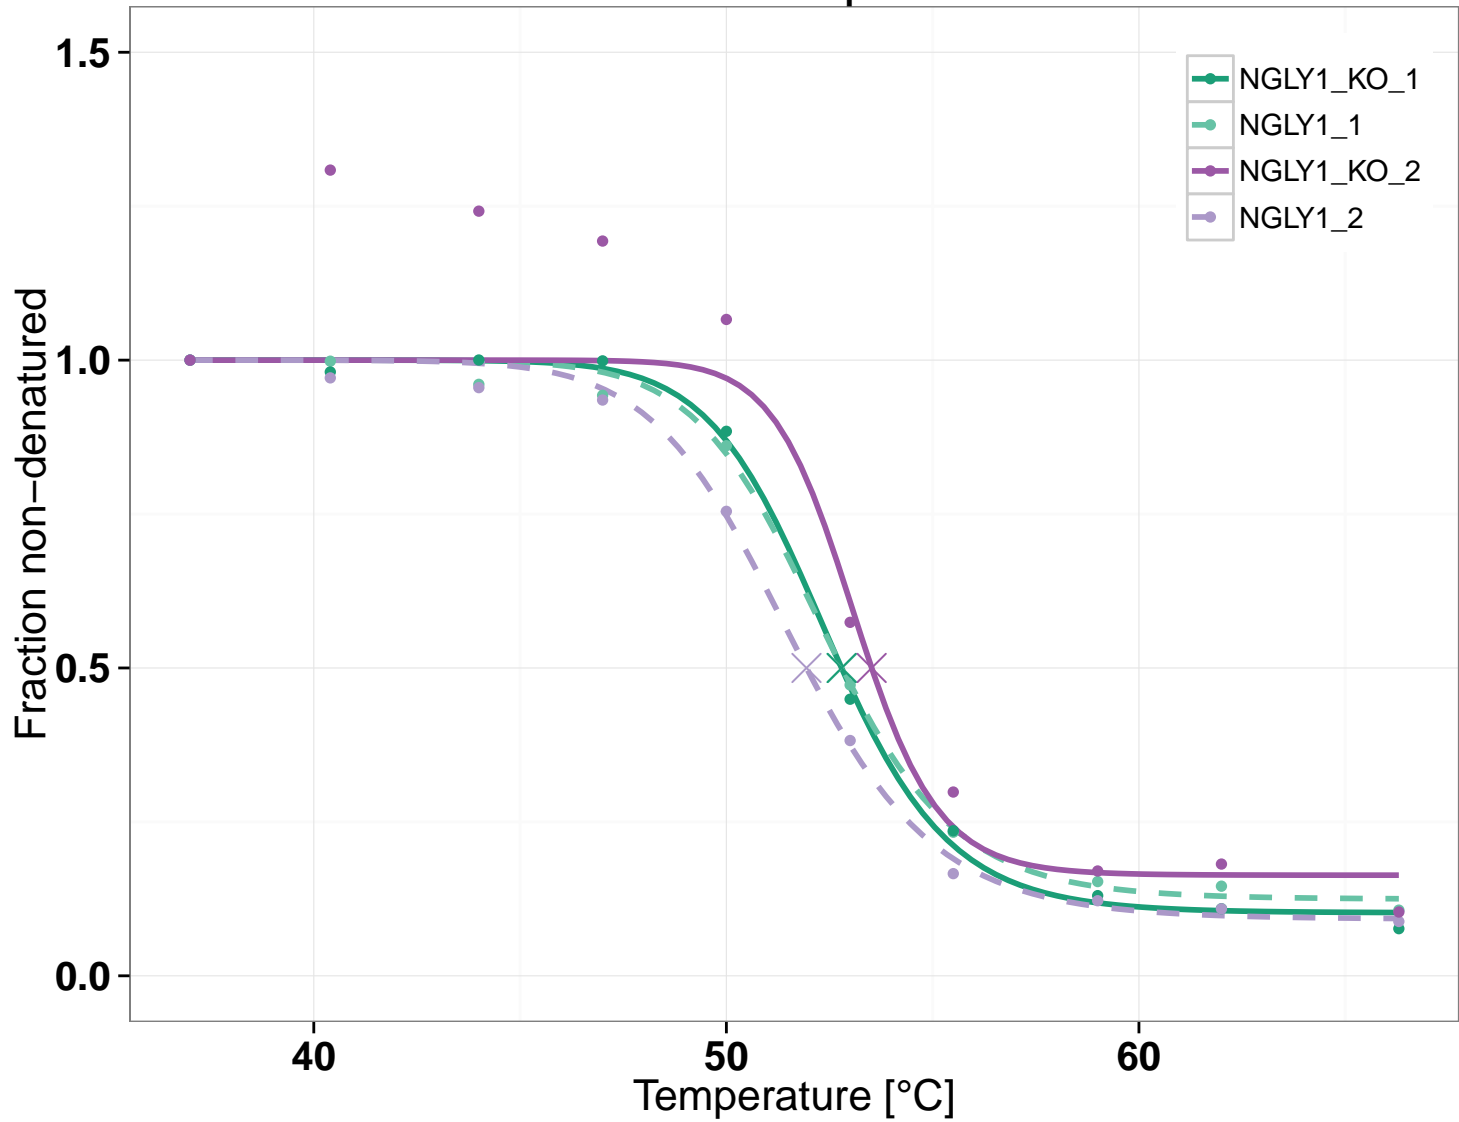

|            | meltPoint | slope | plateau | R2   |
|------------|-----------|-------|---------|------|
| NGLY1_KO_1 | 52.79     | -0.15 | 0.1     | 1    |
| NGLY1_1    | 52.81     | -0.14 | 0.12    | 1    |
| NGLY1_KO_2 | 53.52     | -0.21 | 0.16    | 0.91 |
| NGLY1_2    | 51.94     | -0.13 | 0.09    | 1    |

Supplement: Supplementary file 7020 [file 1]

IPI00006476.1|ENTPD7

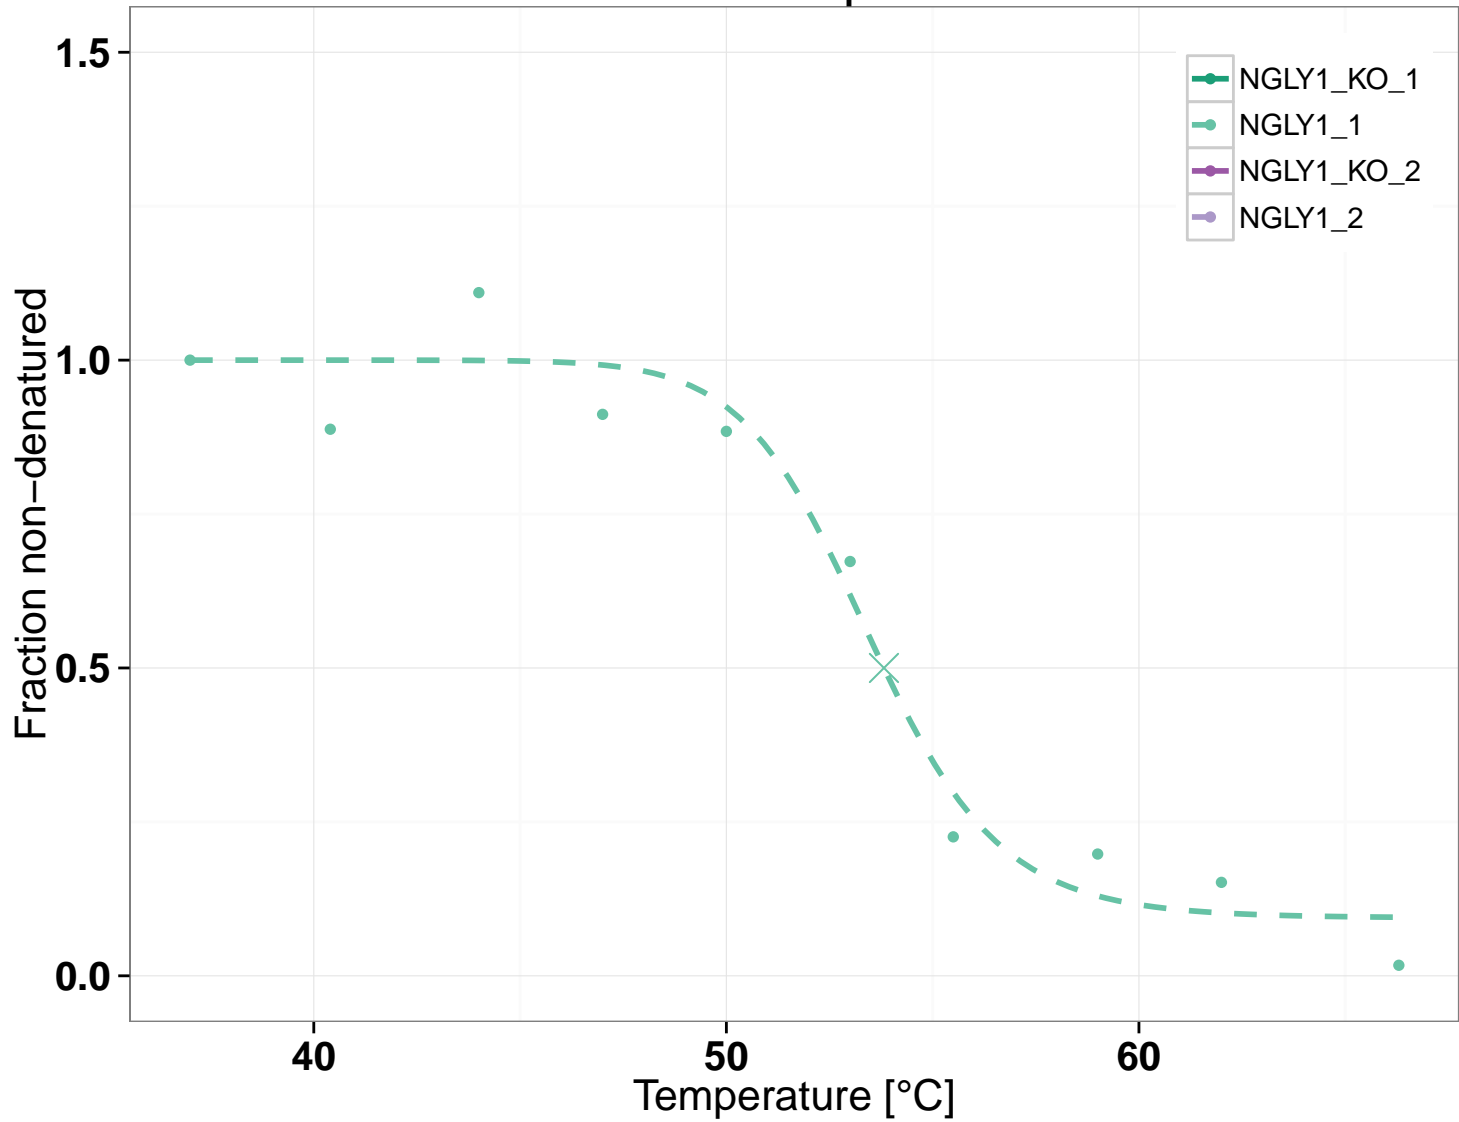

|            | meltPoint | slope | plateau | R2   |
|------------|-----------|-------|---------|------|
| NGLY1_KO_1 | -         | -     | -       | -    |
| NGLY1_1    | 53.82     | -0.15 | 0.09    | 0.96 |
| NGLY1_KO_2 | -         | -     | -       | -    |
| NGLY1_2    | -         | -     | -       | -    |

Supplement: Supplementary file 7021 [file 1]

# IPI00168878.1|TOR1AIP2

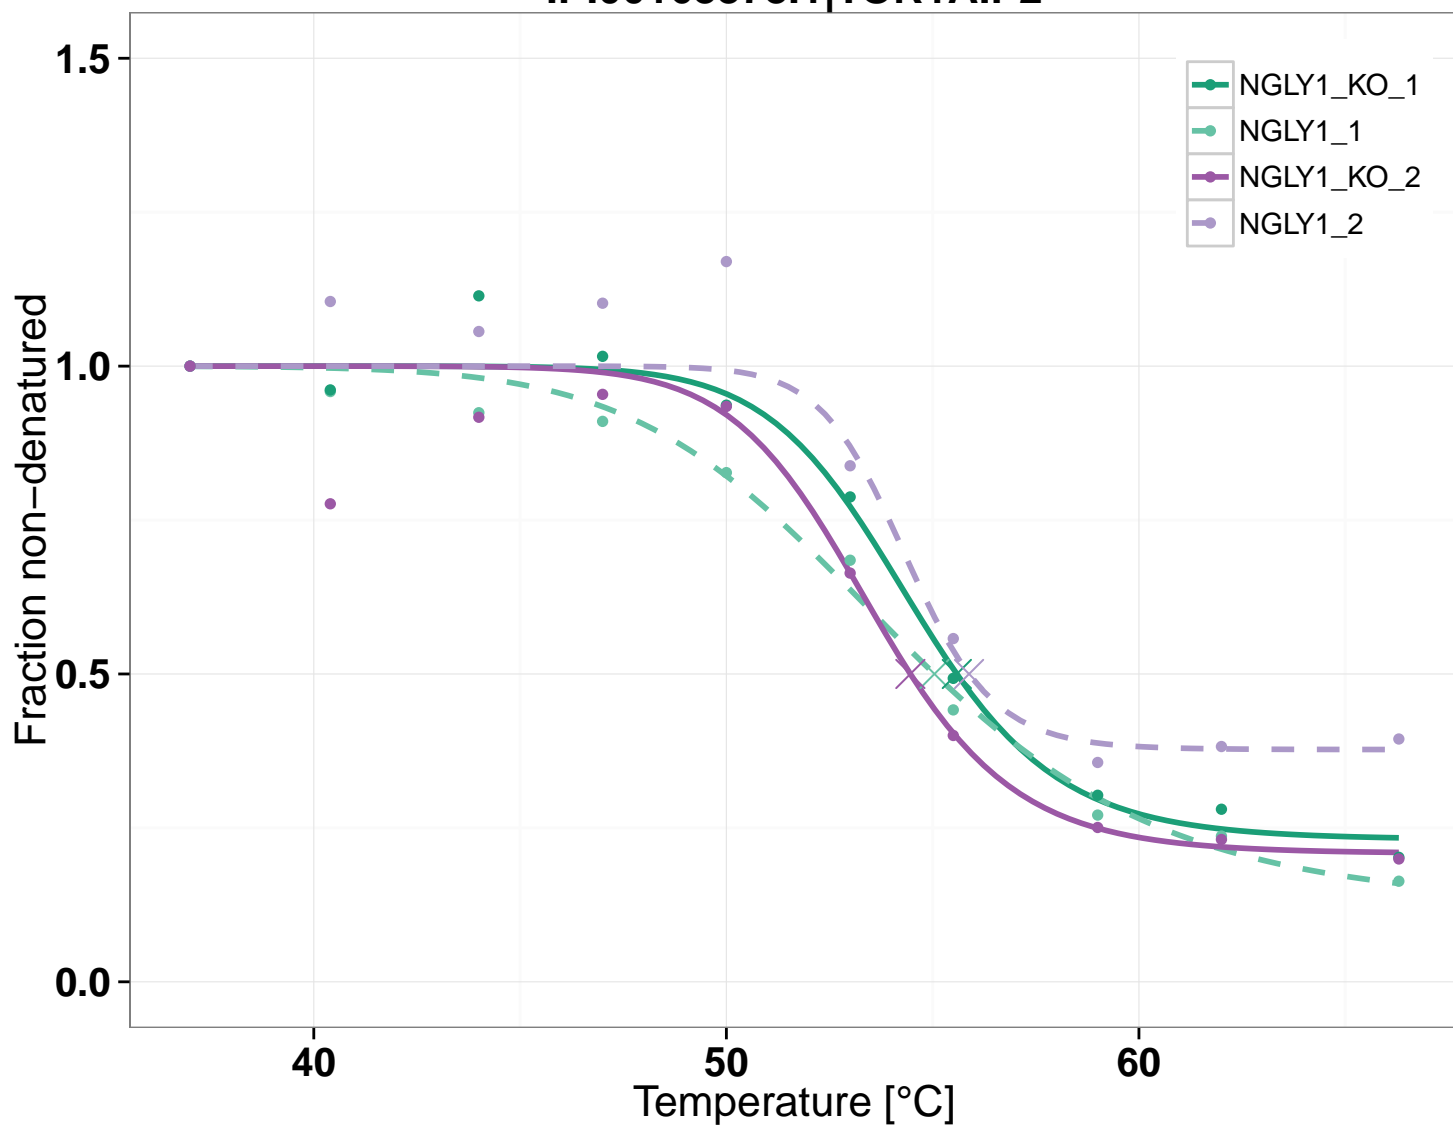

|            | meltPoint | slope  | plateau | R2   |
|------------|-----------|--------|---------|------|
| NGLY1_KO_1 | 55.59     | -0.11  | 0.23    | 0.98 |
| NGLY1_1    | 55.04     | -0.068 | 0.12    | 0.99 |
| NGLY1_KO_2 | 54.46     | -0.12  | 0.21    | 0.94 |
| NGLY1_2    | 55.88     | -0.15  | 0.38    | 0.94 |

Supplement: Supplementary file 7022 [file 1]

# IPI00329648.3|POMT2

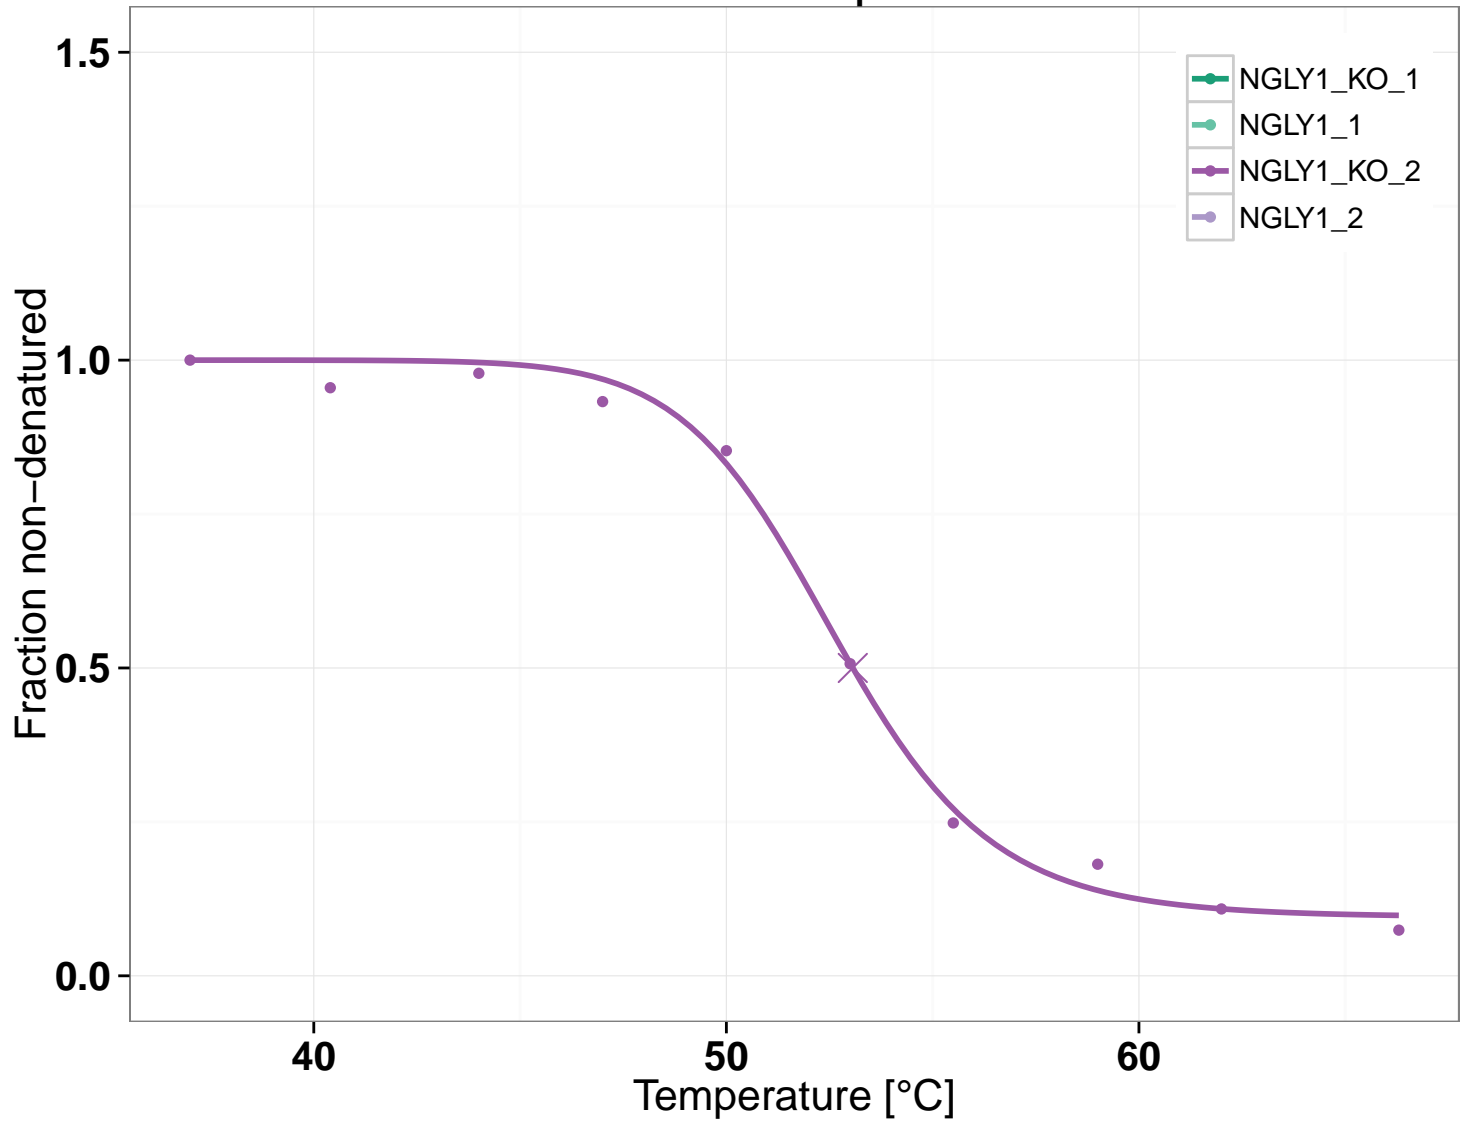

|            | meltPoint | slope | plateau | R2 |
|------------|-----------|-------|---------|----|
| NGLY1_KO_1 | —         | —     | —       | —  |
| NGLY1_1    | —         | —     | —       | —  |
| NGLY1_KO_2 | 53.06     | -0.12 | 0.1     | 1  |
| NGLY1_2    | —         | —     | —       | —  |

Supplement: Supplementary file 7023 [file 1]

# IPI00030356.4|MCL1

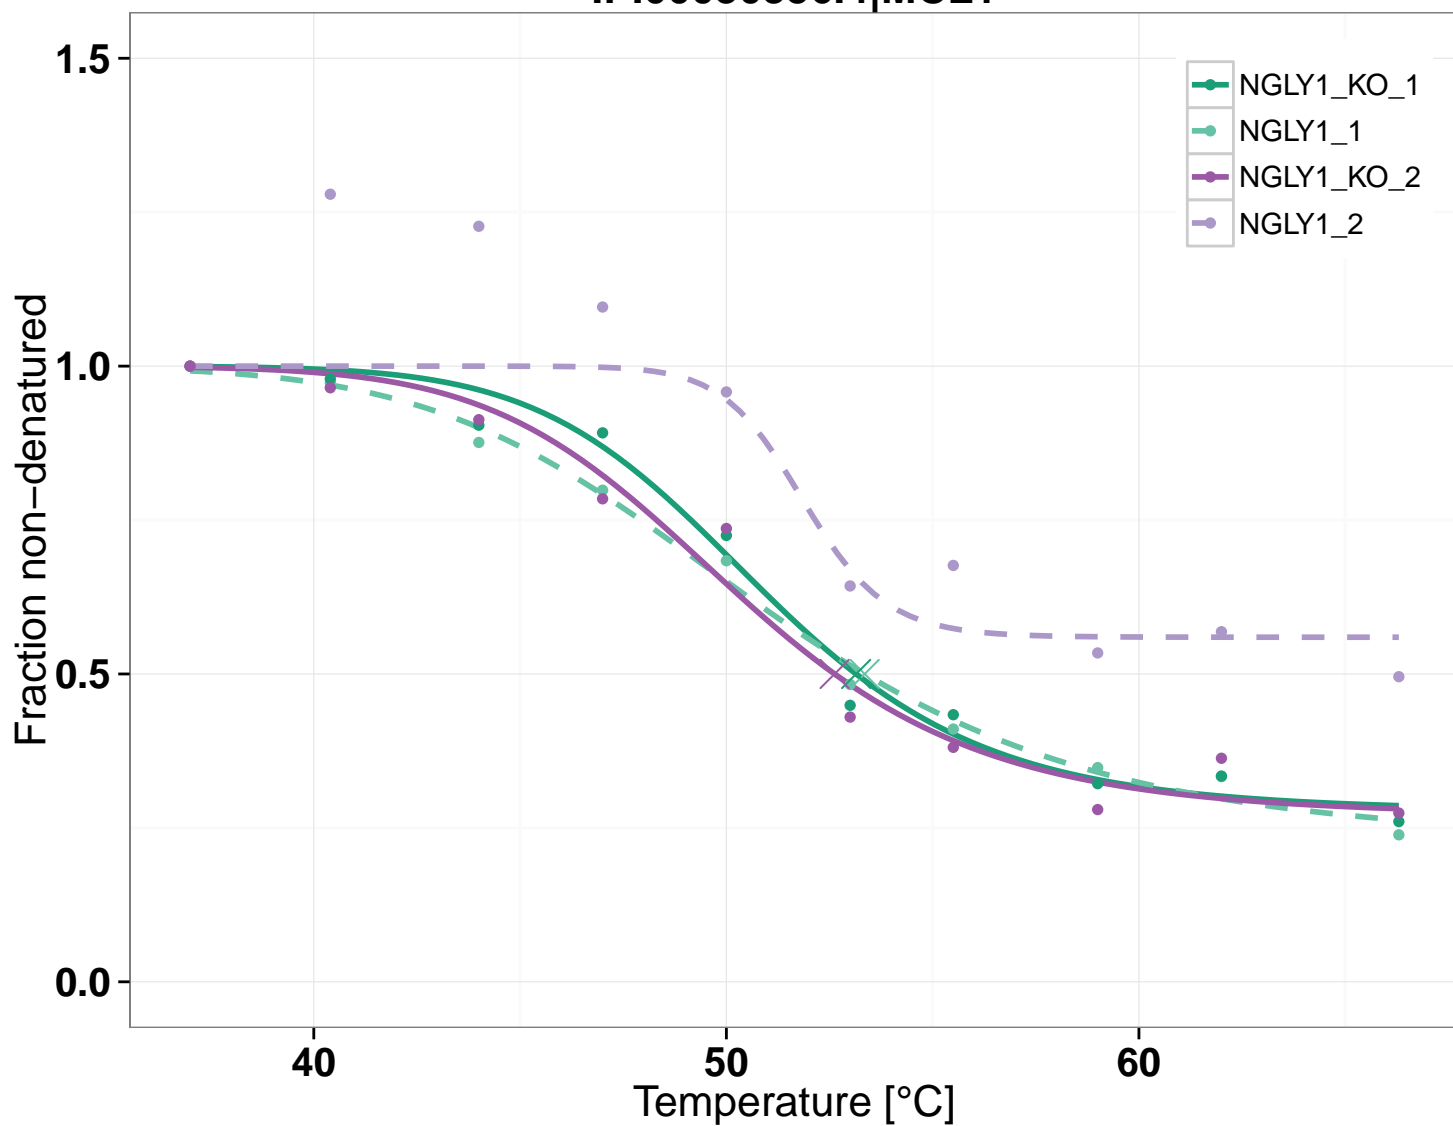

|            | meltPoint | slope  | plateau | R2   |
|------------|-----------|--------|---------|------|
| NGLY1_KO_1 | 53.15     | -0.067 | 0.28    | 0.99 |
| NGLY1_1    | 53.35     | -0.049 | 0.22    | 0.99 |
| NGLY1_KO_2 | 52.62     | -0.062 | 0.27    | 0.97 |
| NGLY1_2    | –         | -0.11  | 0.56    | 0.81 |

Supplement: Supplementary file 7024 [file 1]

# IPI00060419.3|TIFA

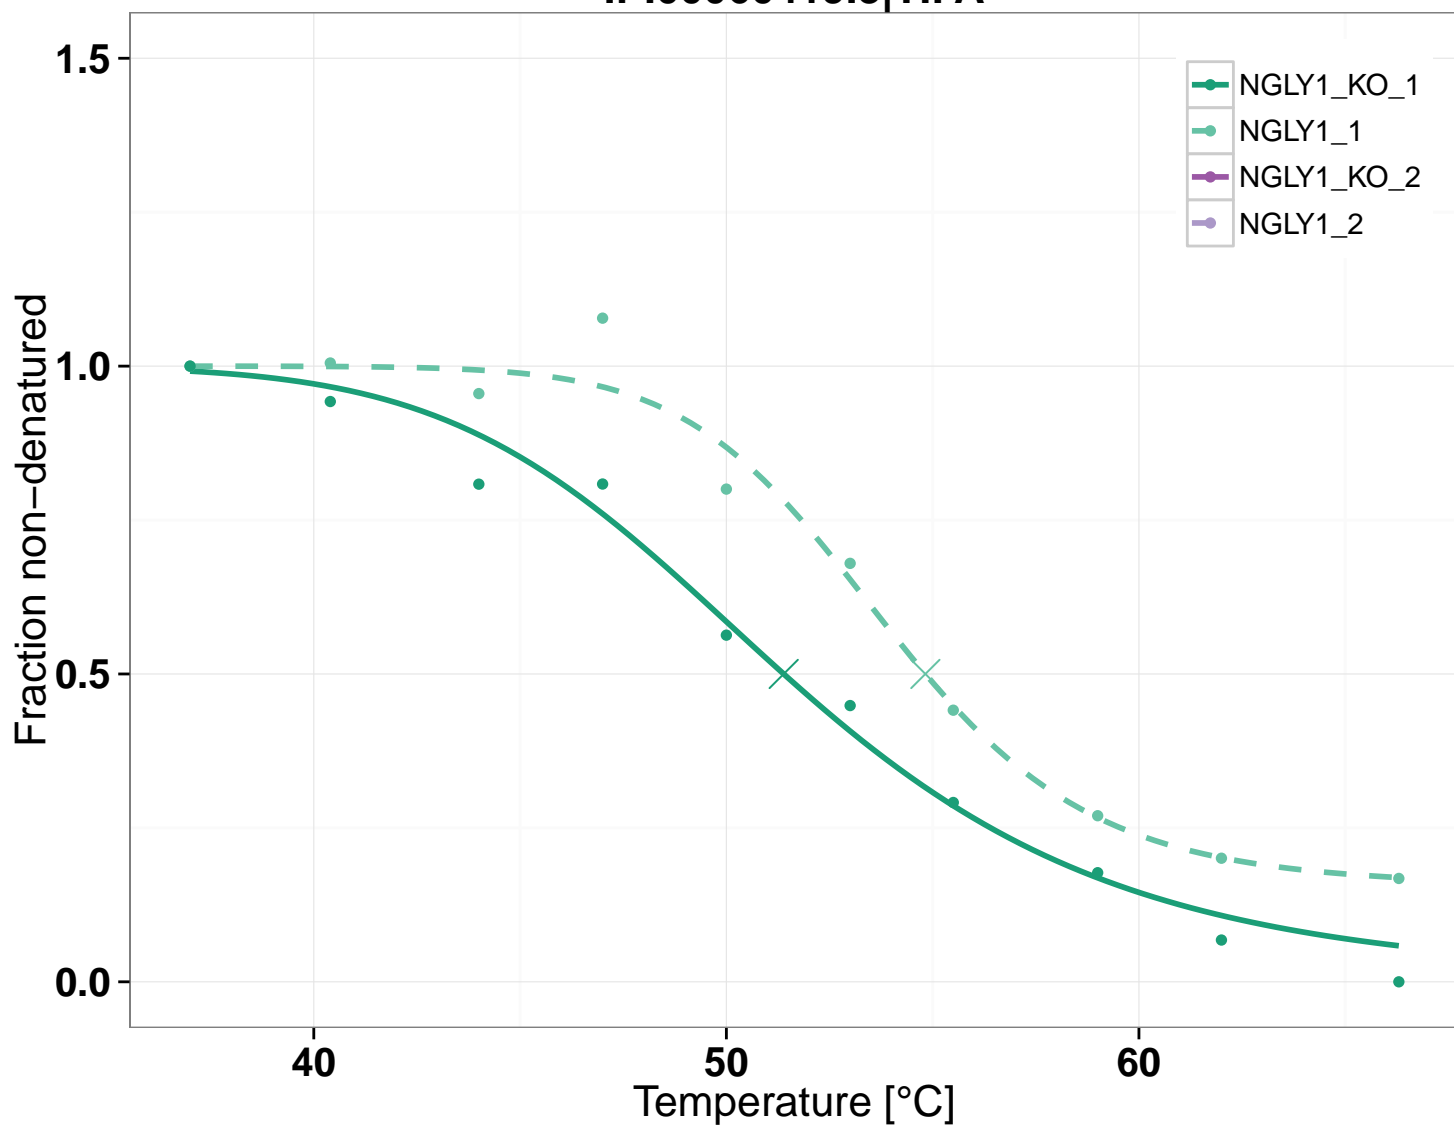

|            | meltPoint | slope  | plateau | R2   |
|------------|-----------|--------|---------|------|
| NGLY1_KO_1 | 51.39     | -0.062 | 0       | 0.99 |
| NGLY1_1    | 54.82     | -0.086 | 0.16    | 0.98 |
| NGLY1_KO_2 | -         | -      | -       | -    |
| NGLY1_2    | -         | -      | -       | -    |

Supplement: Supplementary file 7025 [file 1]

IPI00031554.1|DDX50

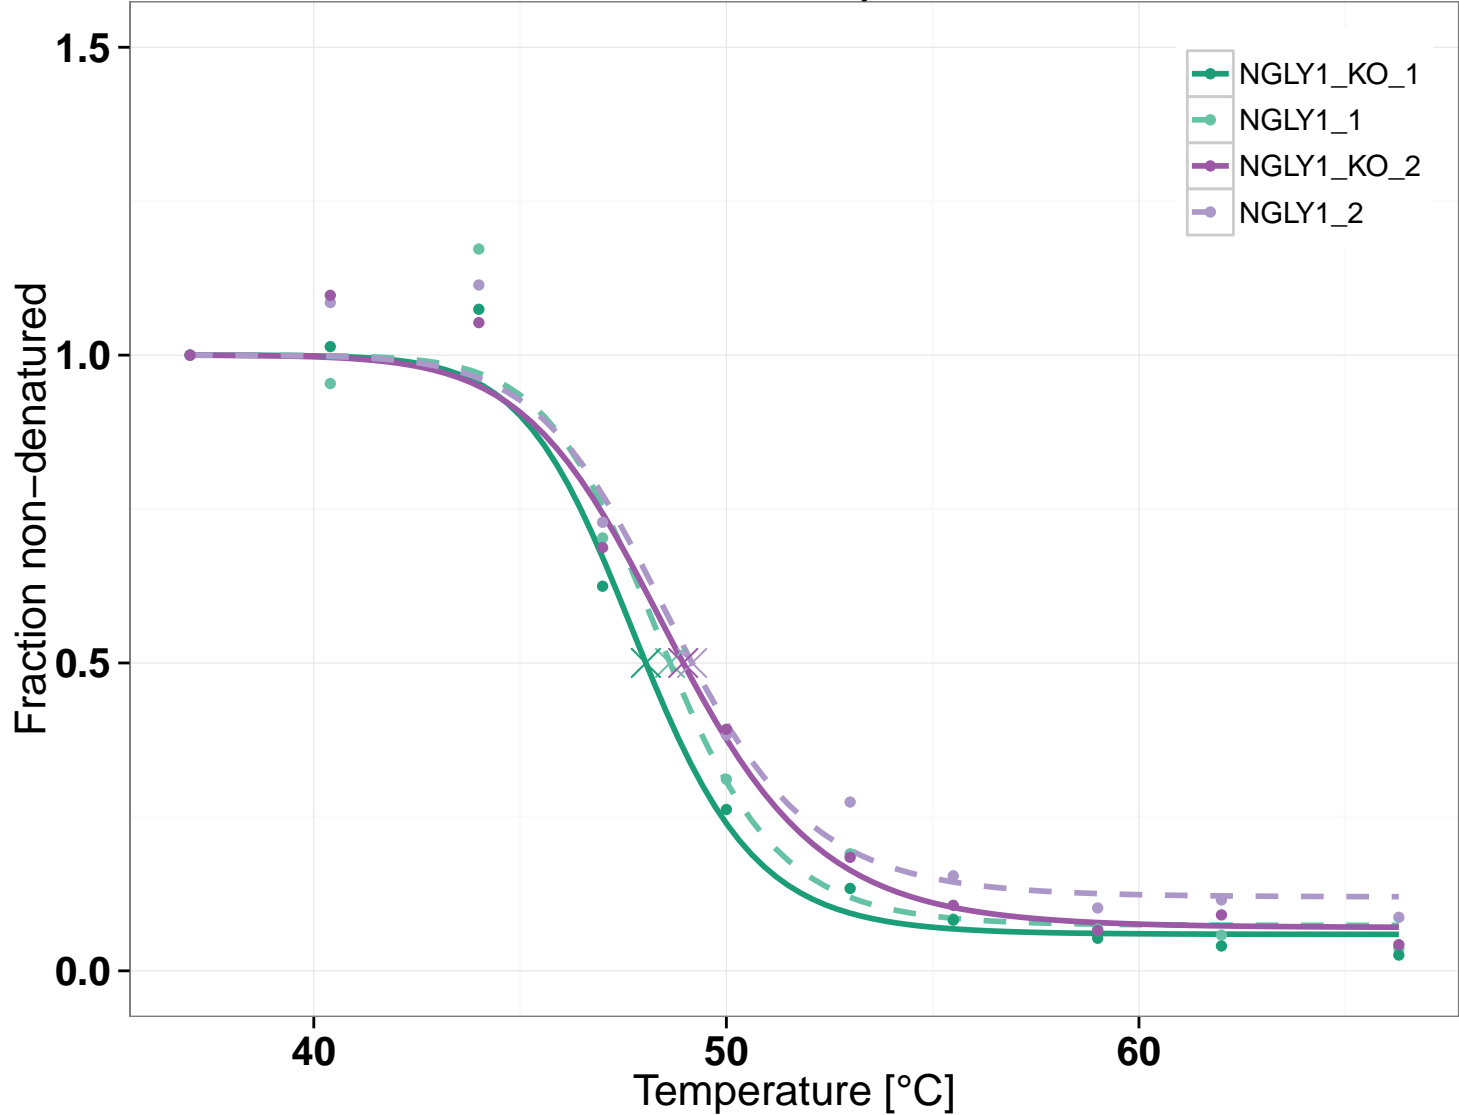

|            | meltPoint | slope | plateau | R2   |
|------------|-----------|-------|---------|------|
| NGLY1_KO_1 | 48.05     | -0.17 | 0.06    | 0.99 |
| NGLY1_1    | 48.63     | -0.16 | 0.07    | 0.97 |
| NGLY1_KO_2 | 48.95     | -0.13 | 0.07    | 0.99 |
| NGLY1_2    | 49.17     | -0.13 | 0.12    | 0.98 |

Supplement: Supplementary file 7026 [file 1]

# IPI00465110.1|PPIL5

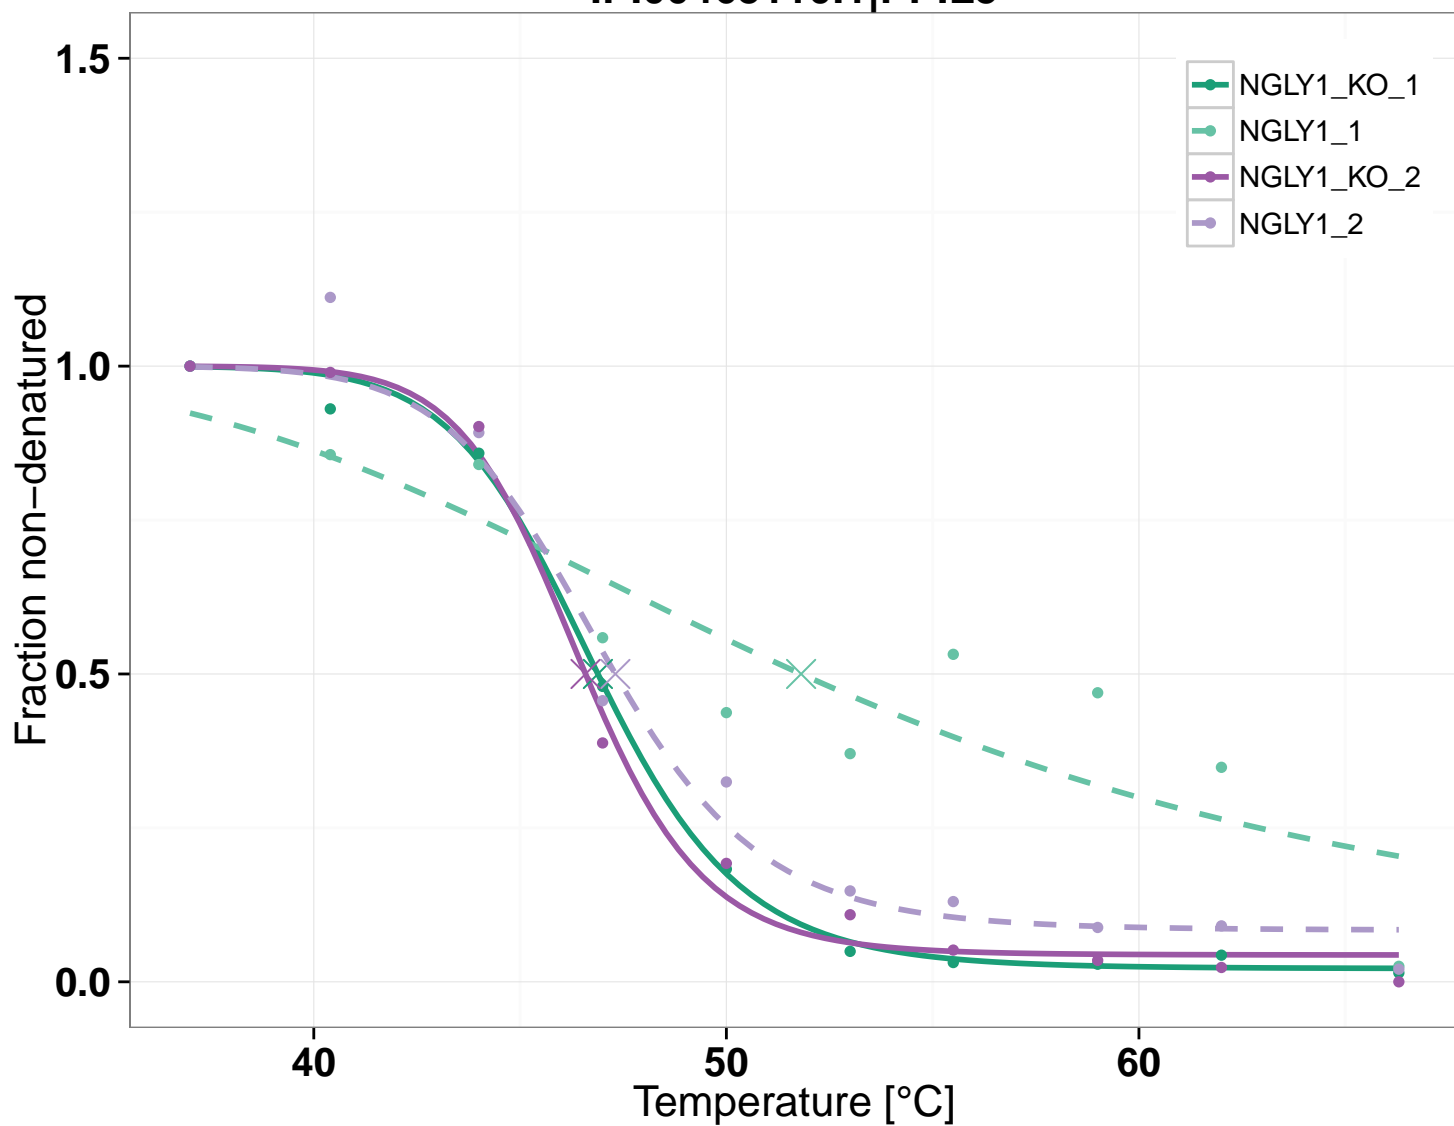

|            | meltPoint | slope  | plateau | R2   |
|------------|-----------|--------|---------|------|
| NGLY1_KO_1 | 46.89     | -0.14  | 0.02    | 1    |
| NGLY1_1    | 51.81     | -0.033 | 0       | 0.83 |
| NGLY1_KO_2 | 46.59     | -0.16  | 0.04    | 0.99 |
| NGLY1_2    | 47.31     | -0.12  | 0.08    | 0.98 |

Supplement: Supplementary file 7027 [file 1]

IPI00787359.1|LOC727877

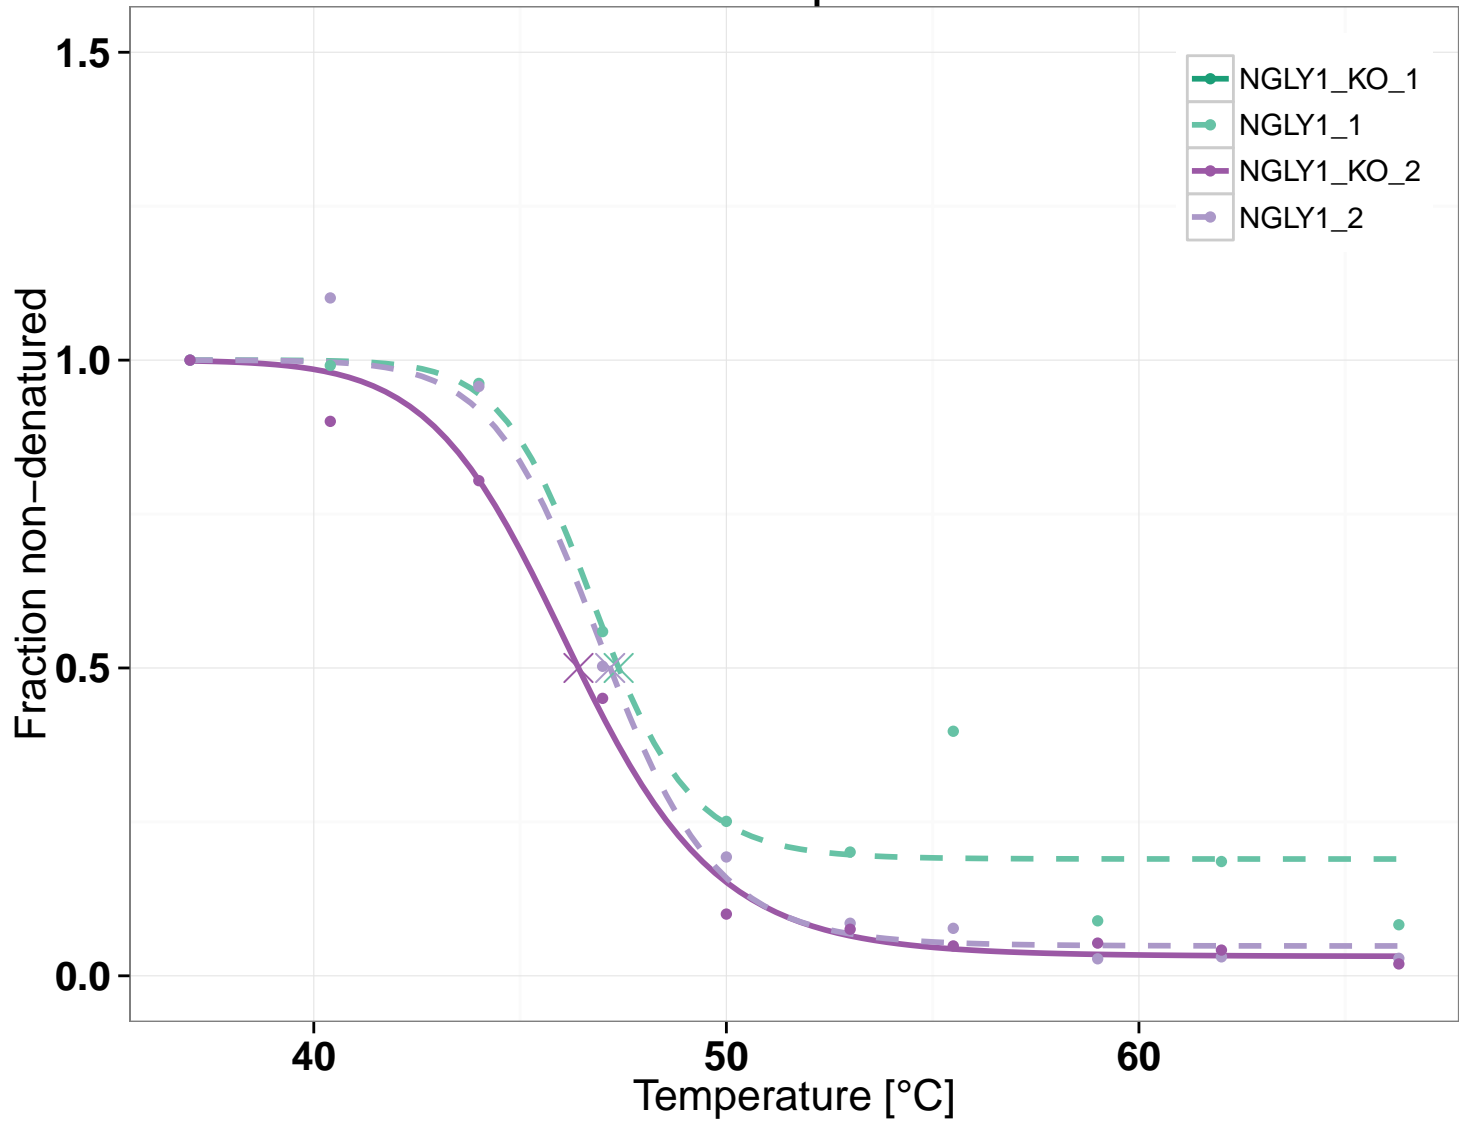

|            | meltPoint | slope | plateau | R2   |
|------------|-----------|-------|---------|------|
| NGLY1_KO_1 | -         | -     | -       | -    |
| NGLY1_1    | 47.39     | -0.18 | 0.19    | 0.95 |
| NGLY1_KO_2 | 46.42     | -0.14 | 0.03    | 0.99 |
| NGLY1_2    | 47.18     | -0.17 | 0.05    | 0.99 |

Supplement: Supplementary file 7028 [file 1]

IPI00477349.4|MIB2

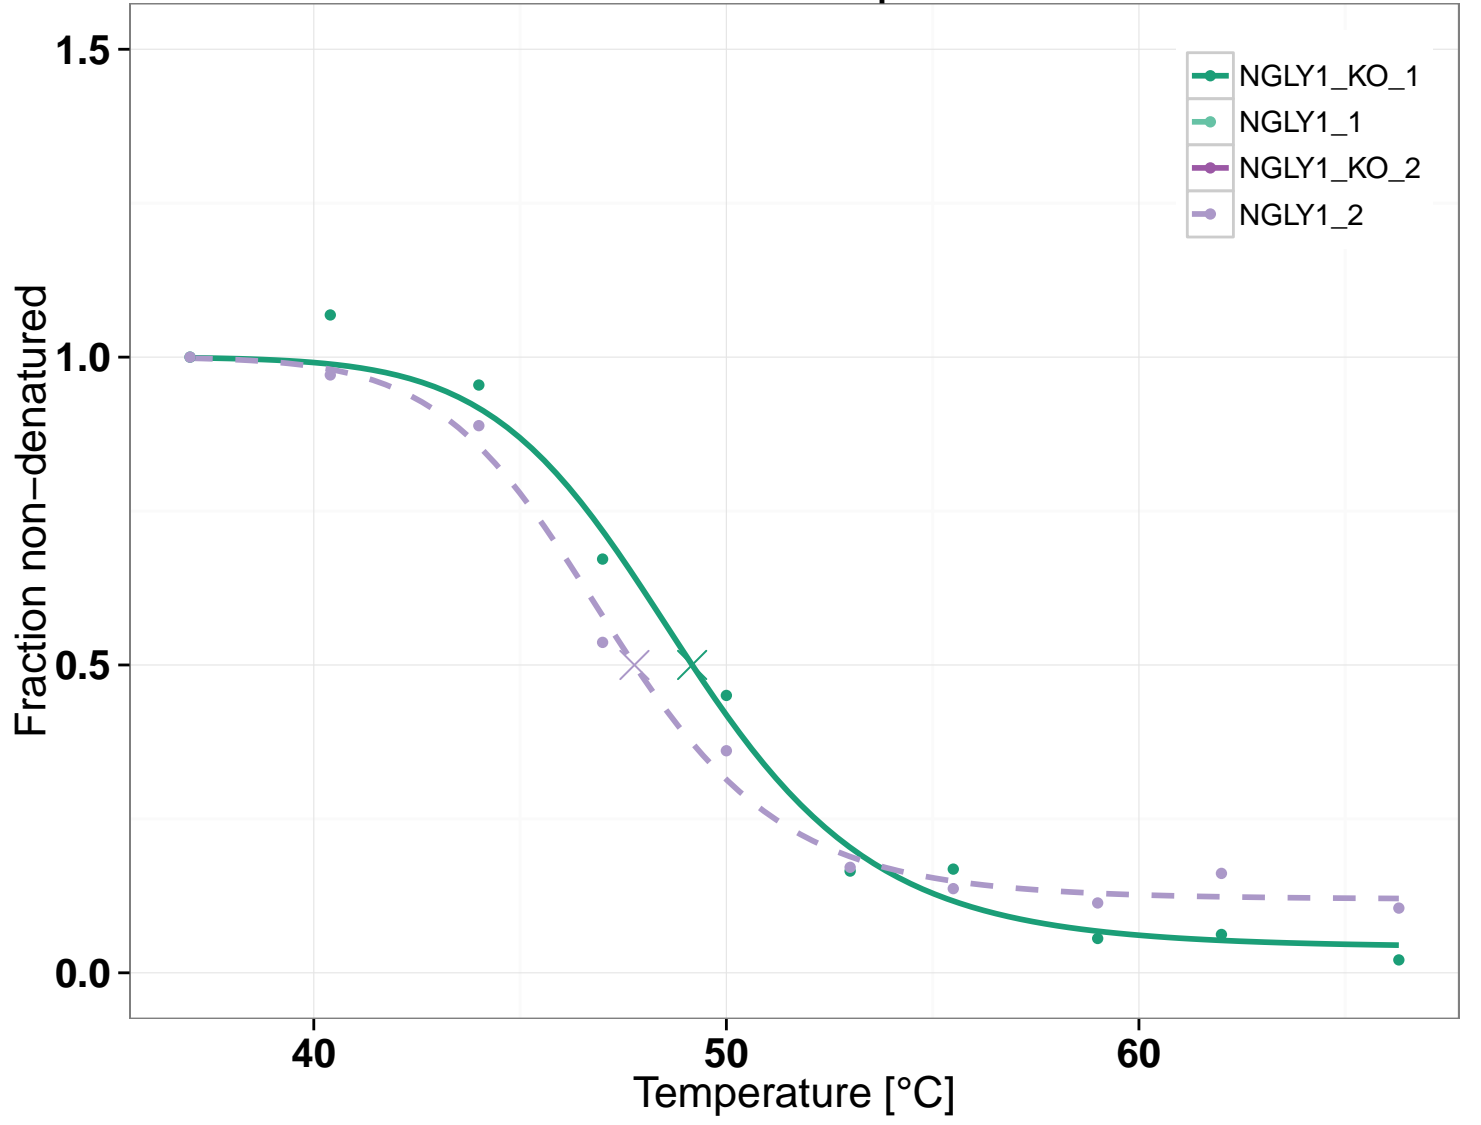

|            | meltPoint | slope | plateau | R2   |
|------------|-----------|-------|---------|------|
| NGLY1_KO_1 | 49.17     | -0.1  | 0.04    | 0.99 |
| NGLY1_1    | -         | -     | -       | -    |
| NGLY1_KO_2 | -         | -     | -       | -    |
| NGLY1_2    | 47.77     | -0.11 | 0.12    | 0.99 |

Supplement: Supplementary file 7029 [file 1]

IPI00001824.1|SOX21

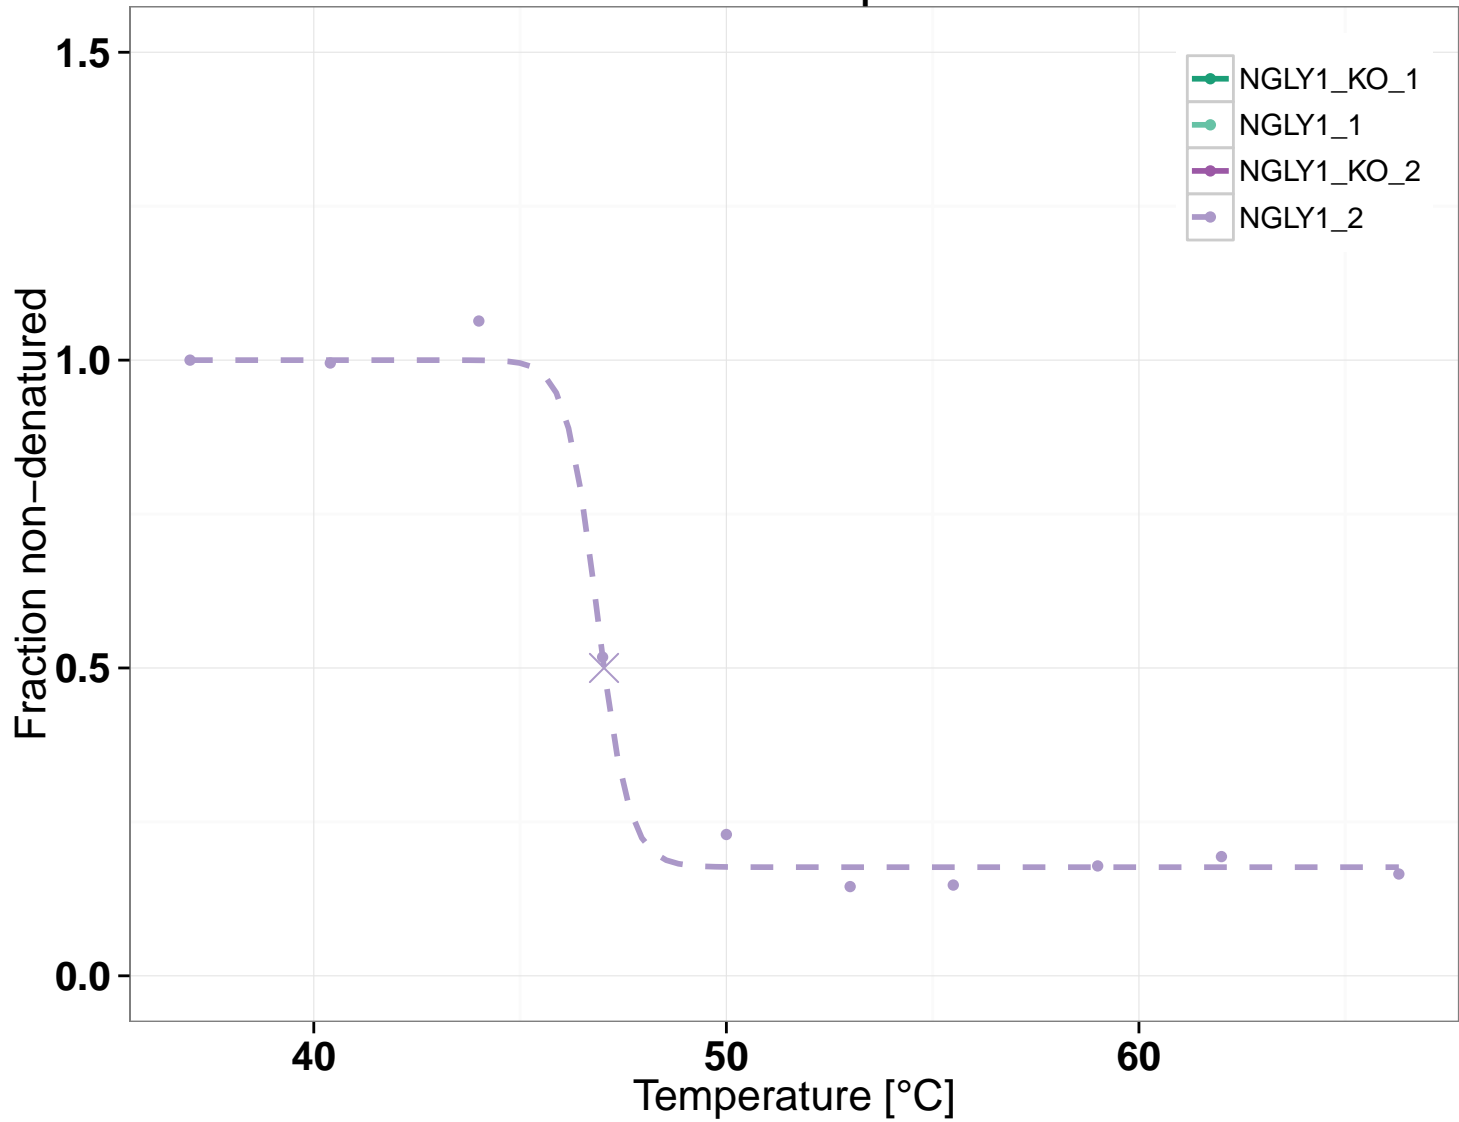

|            | meltPoint | slope | plateau | R2   |
|------------|-----------|-------|---------|------|
| NGLY1_KO_1 | -         | -     | -       | -    |
| NGLY1_1    | -         | -     | -       | -    |
| NGLY1_KO_2 | -         | -     | -       | -    |
| NGLY1_2    | 47.03     | -0.54 | 0.18    | 0.99 |

Supplement: Supplementary file 7030 [file 1]
