# Supplementary material (part 71 of 85)
Source: publisher figshare collection journal article supplement (https://gsajournals.figshare.com/articles/dataset/_/12014913)

IPI00215637.5|DDX3X

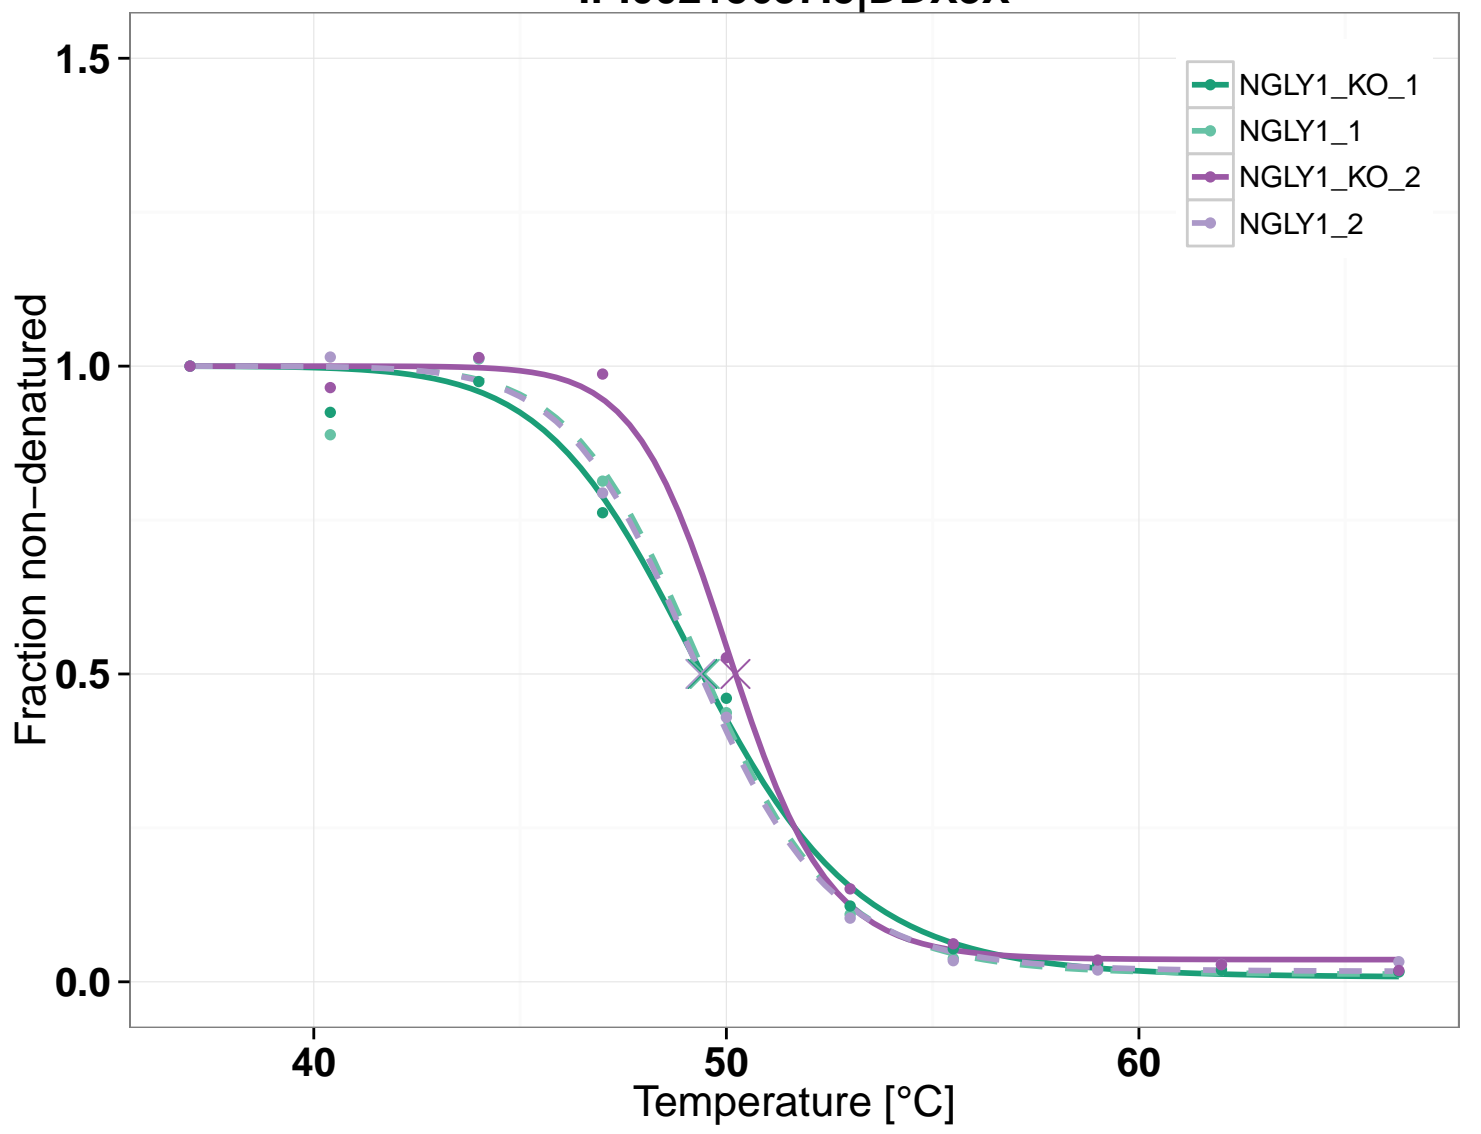

|            | meltPoint | slope | plateau | R2   |
|------------|-----------|-------|---------|------|
| NGLY1_KO_1 | 49.42     | -0.13 | 0.01    | 1    |
| NGLY1_1    | 49.48     | -0.15 | 0.01    | 0.99 |
| NGLY1_KO_2 | 50.22     | -0.2  | 0.04    | 1    |
| NGLY1_2    | 49.37     | -0.15 | 0.02    | 1    |

Supplement: Supplementary file 7031 [file 1]

IPI00216007.1|COL4A5

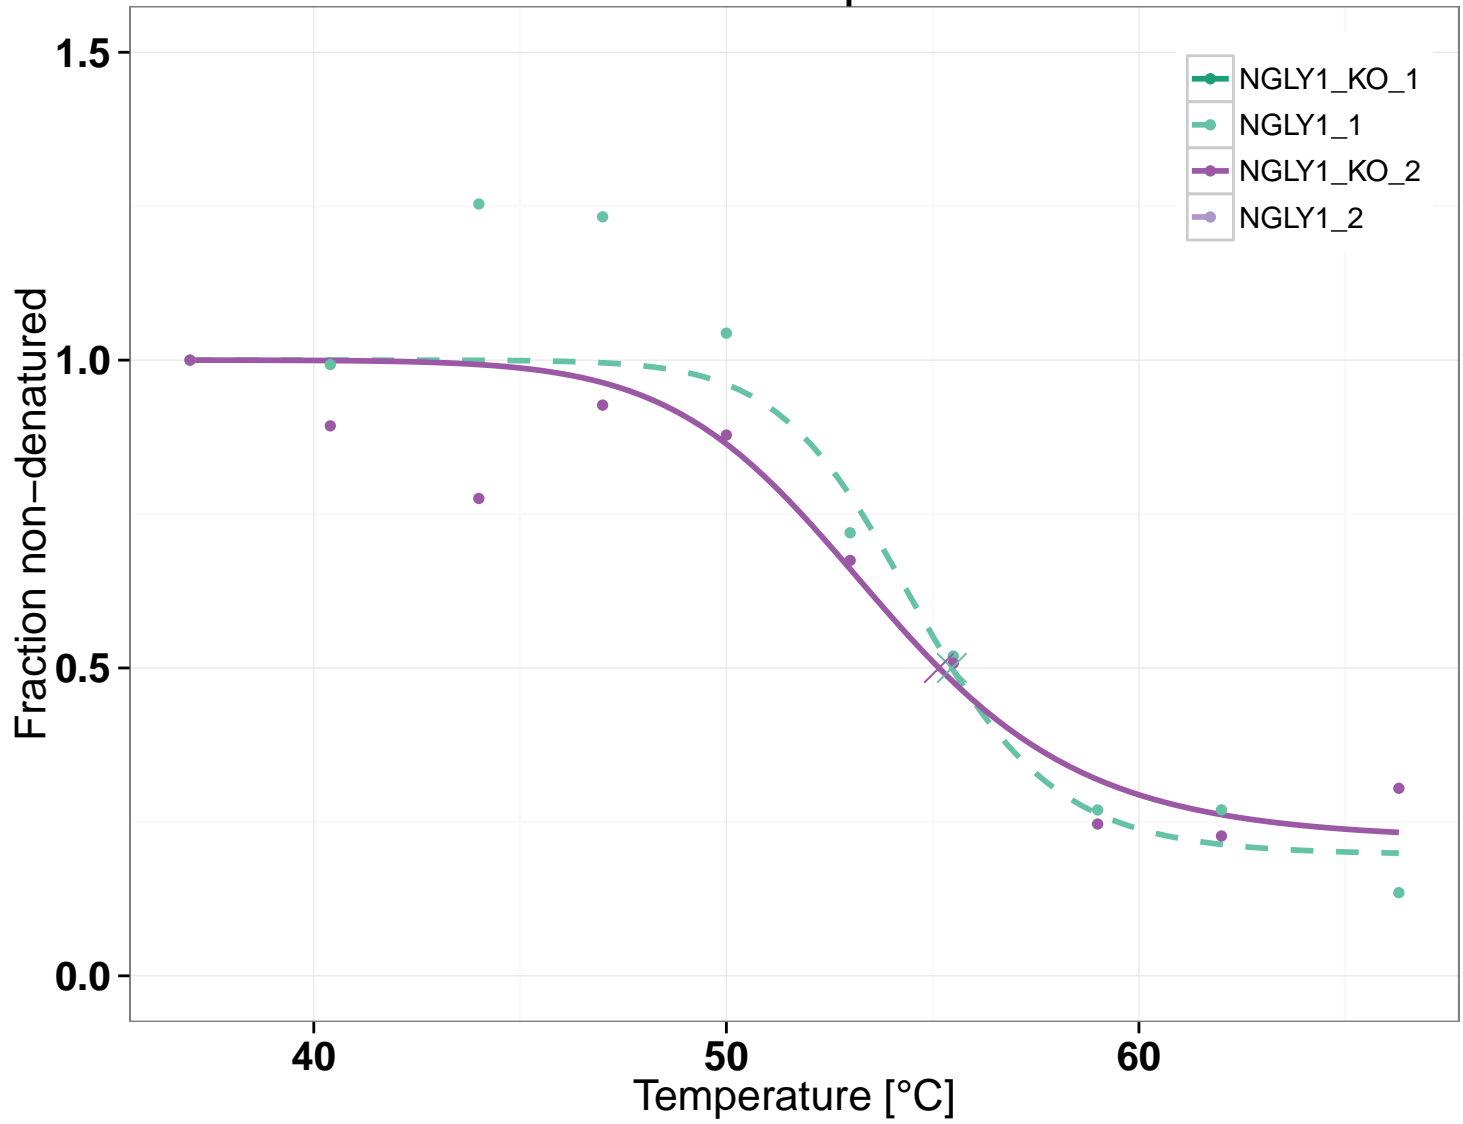

|            | meltPoint | slope  | plateau | R2   |
|------------|-----------|--------|---------|------|
| NGLY1_KO_1 | —         | —      | —       | —    |
| NGLY1_1    | 55.46     | -0.12  | 0.2     | 0.91 |
| NGLY1_KO_2 | 55.15     | -0.078 | 0.22    | 0.91 |
| NGLY1_2    | —         | —      | —       | —    |

Supplement: Supplementary file 7032 [file 1]

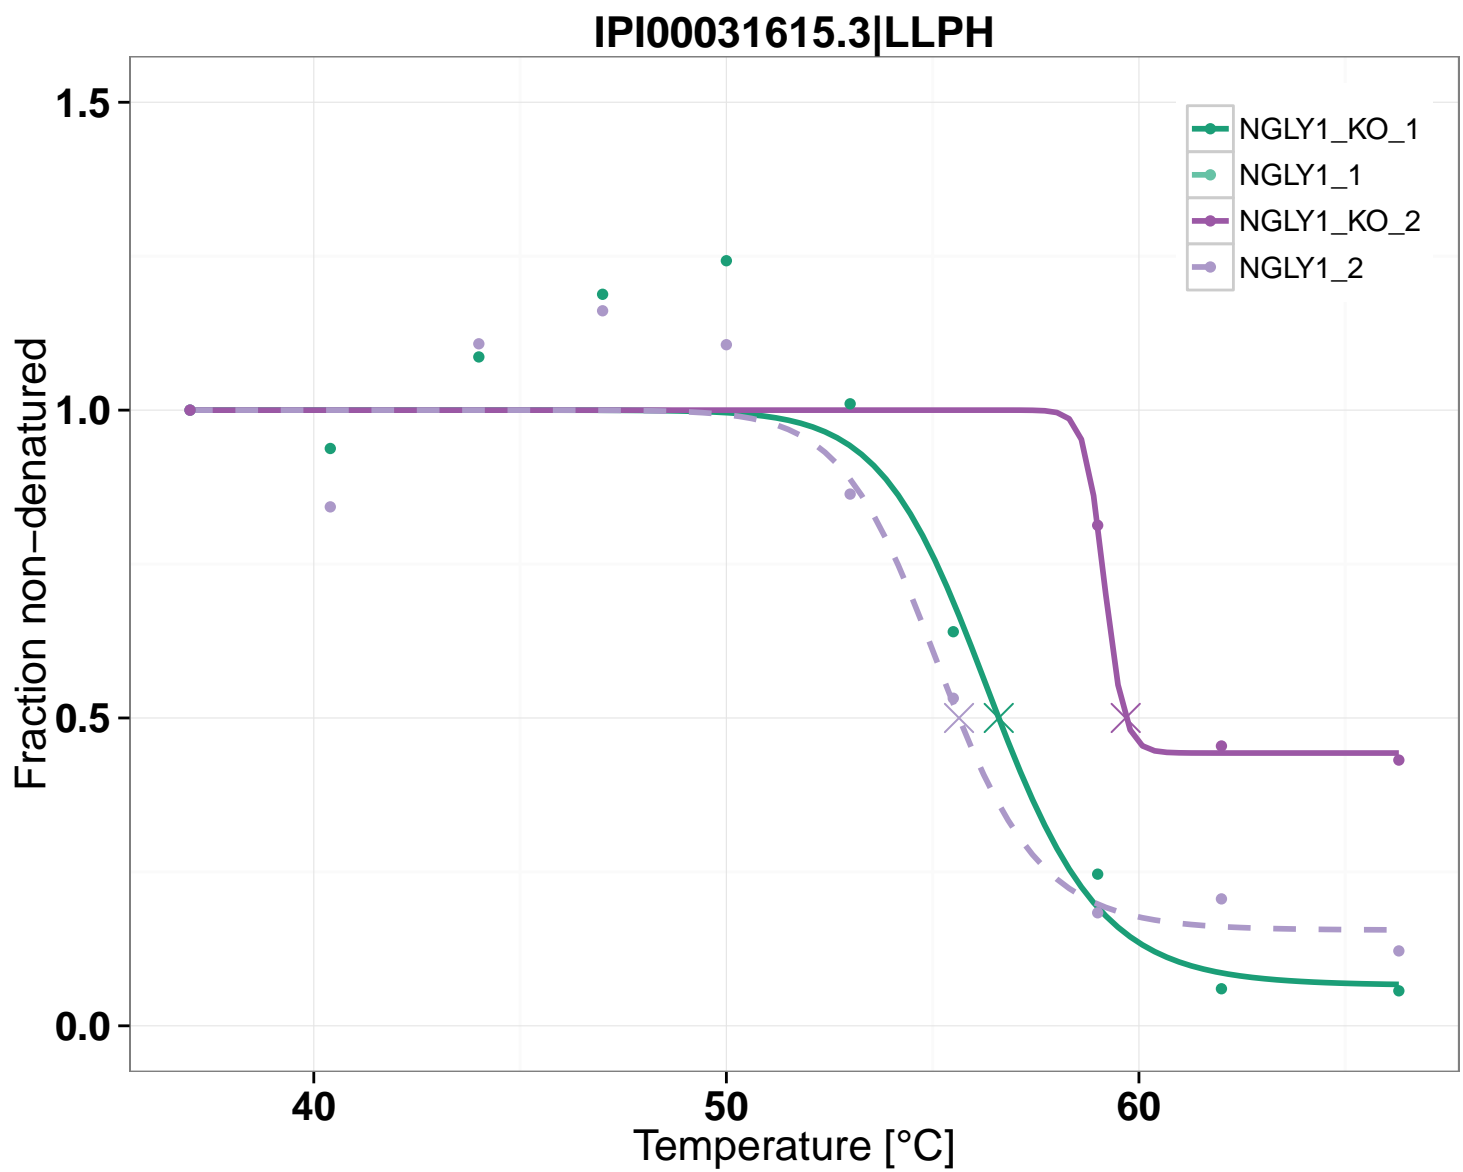

|            | meltPoint | slope | plateau | R2    |
|------------|-----------|-------|---------|-------|
| NGLY1_KO_1 | 56.6      | -0.18 | 0.07    | 0.94  |
| NGLY1_1    | -         | -     | -       | -     |
| NGLY1_KO_2 | 59.68     | -0.59 | 0.44    | -0.83 |
| NGLY1_2    | 55.64     | -0.17 | 0.16    | 0.95  |

Supplement: Supplementary file 7033 [file 1]

# IPI00385631.6|ZZEF1

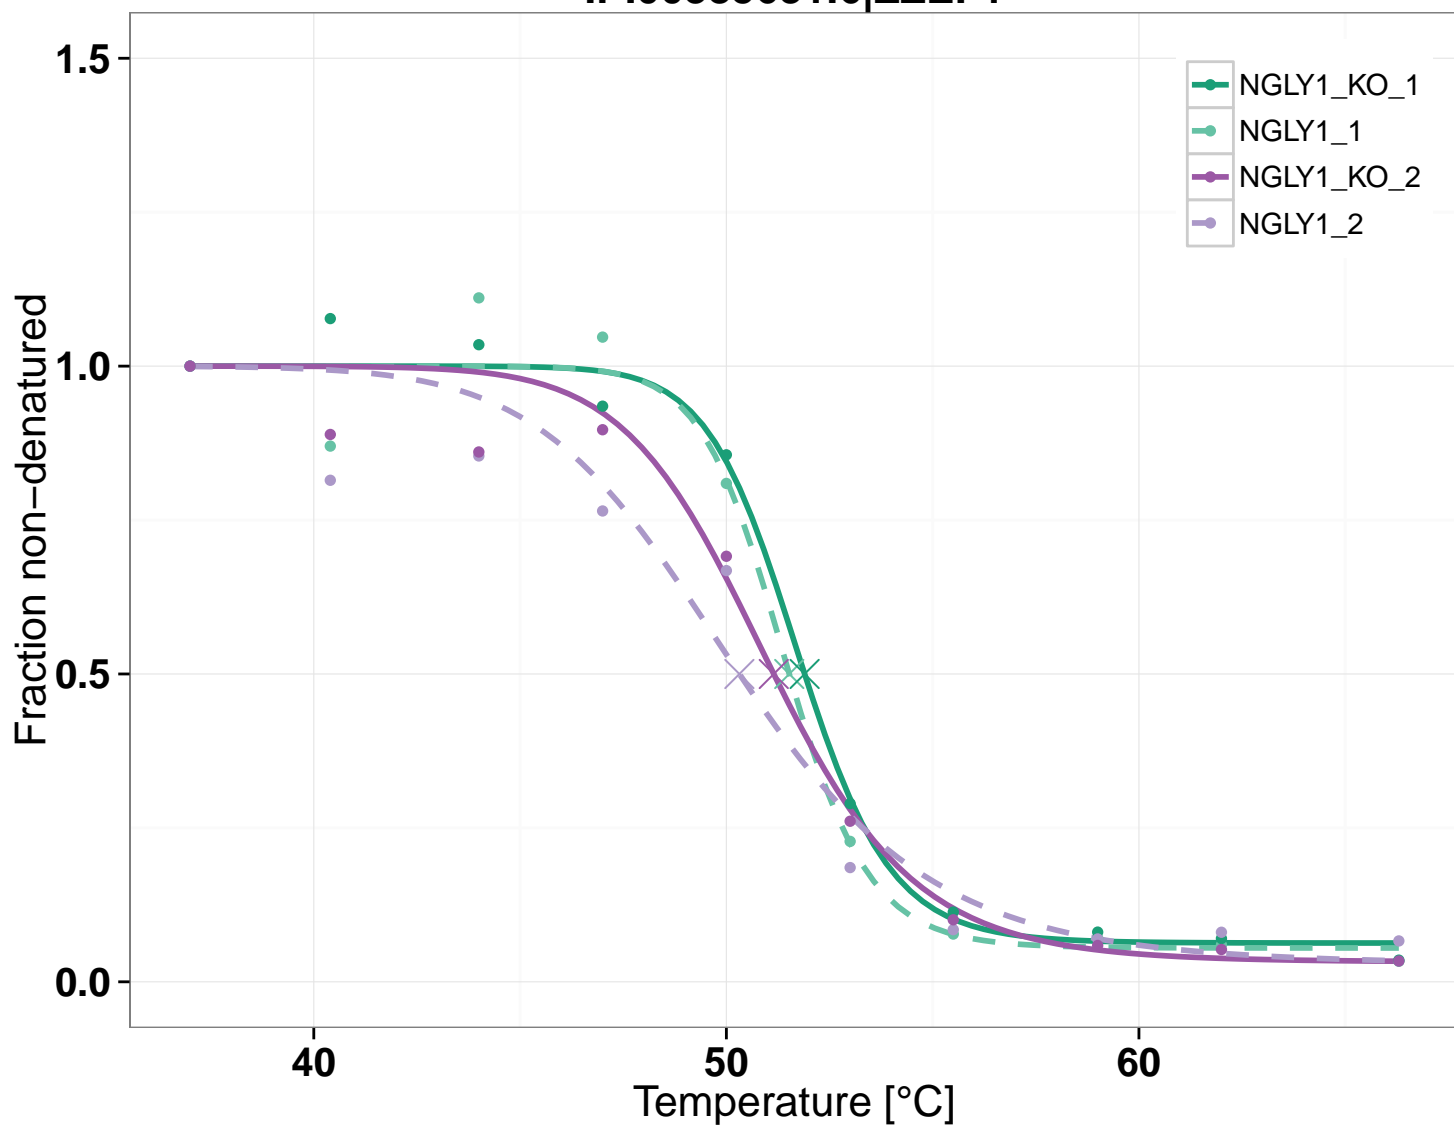

|            | meltPoint | slope | plateau | R2   |
|------------|-----------|-------|---------|------|
| NGLY1_KO_1 | 51.9      | -0.21 | 0.06    | 0.99 |
| NGLY1_1    | 51.52     | -0.23 | 0.05    | 0.98 |
| NGLY1_KO_2 | 51.15     | -0.14 | 0.03    | 0.98 |
| NGLY1_2    | 50.32     | -0.1  | 0.03    | 0.95 |

Supplement: Supplementary file 7034 [file 1]

IPI00005547.3|SLC40A1

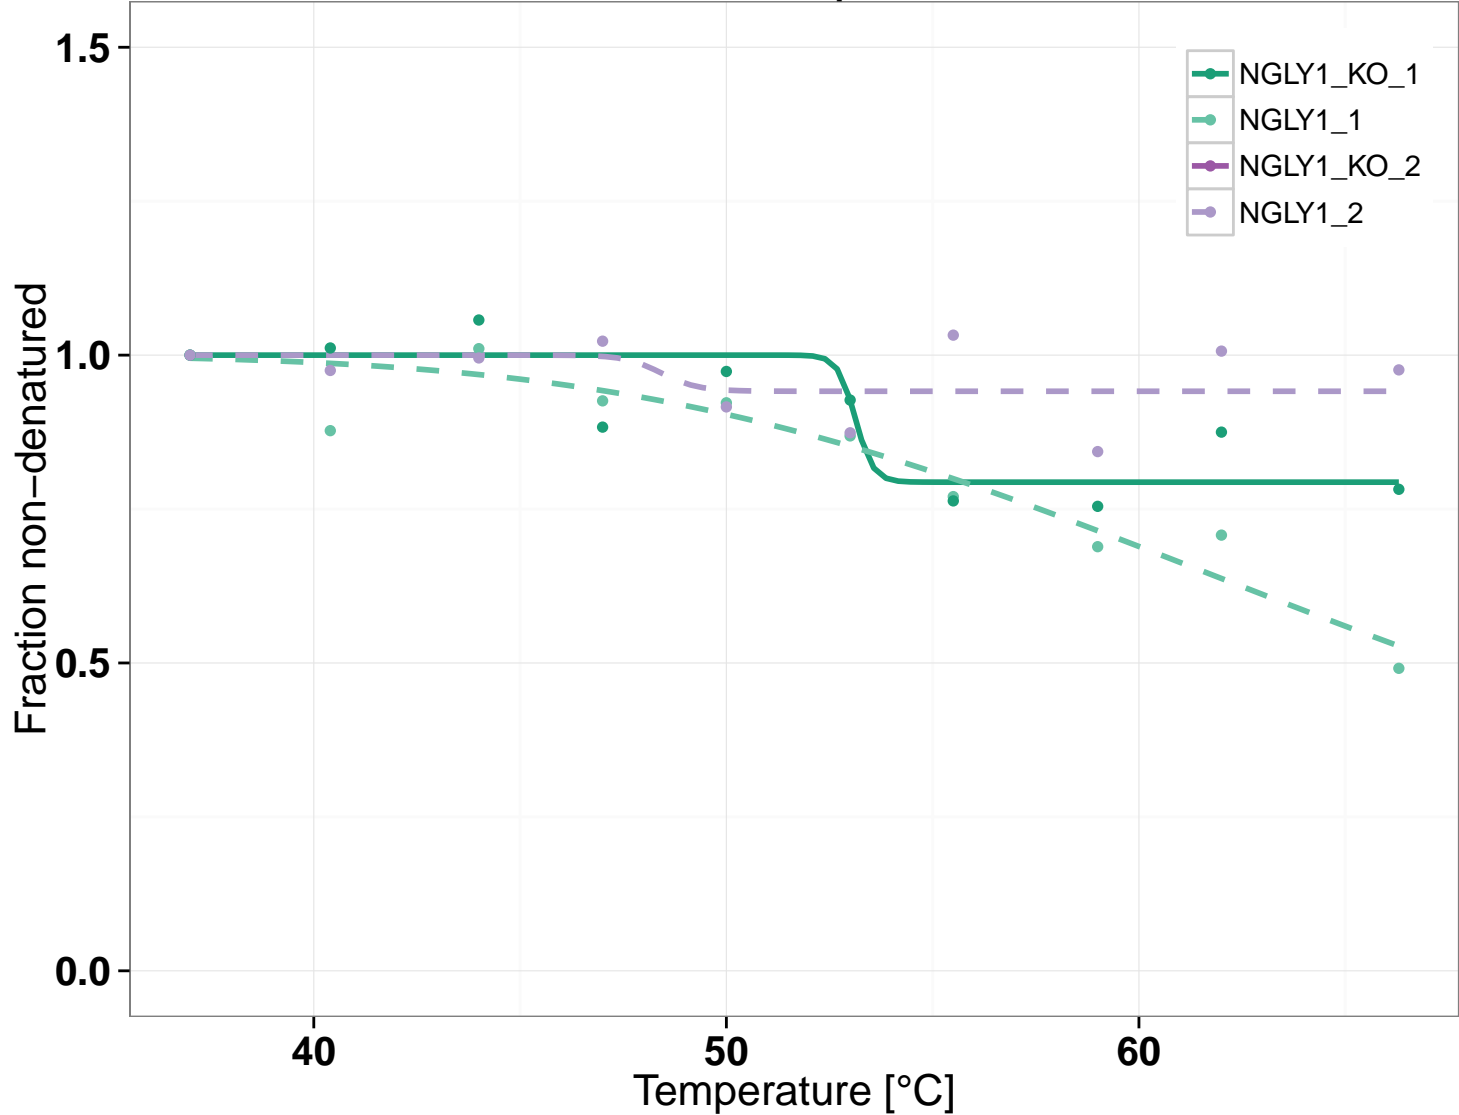

|            | meltPoint | slope  | plateau | R2   |
|------------|-----------|--------|---------|------|
| NGLY1_KO_1 | -         | -0.24  | 0.79    | 0.75 |
| NGLY1_1    | -         | -0.026 | 0       | 0.9  |
| NGLY1_KO_2 | -         | -      | -       | -    |
| NGLY1_2    | -         | -0.033 | 0.94    | 0.2  |

Supplement: Supplementary file 7035 [file 1]

# IPI00306159.7|MECR

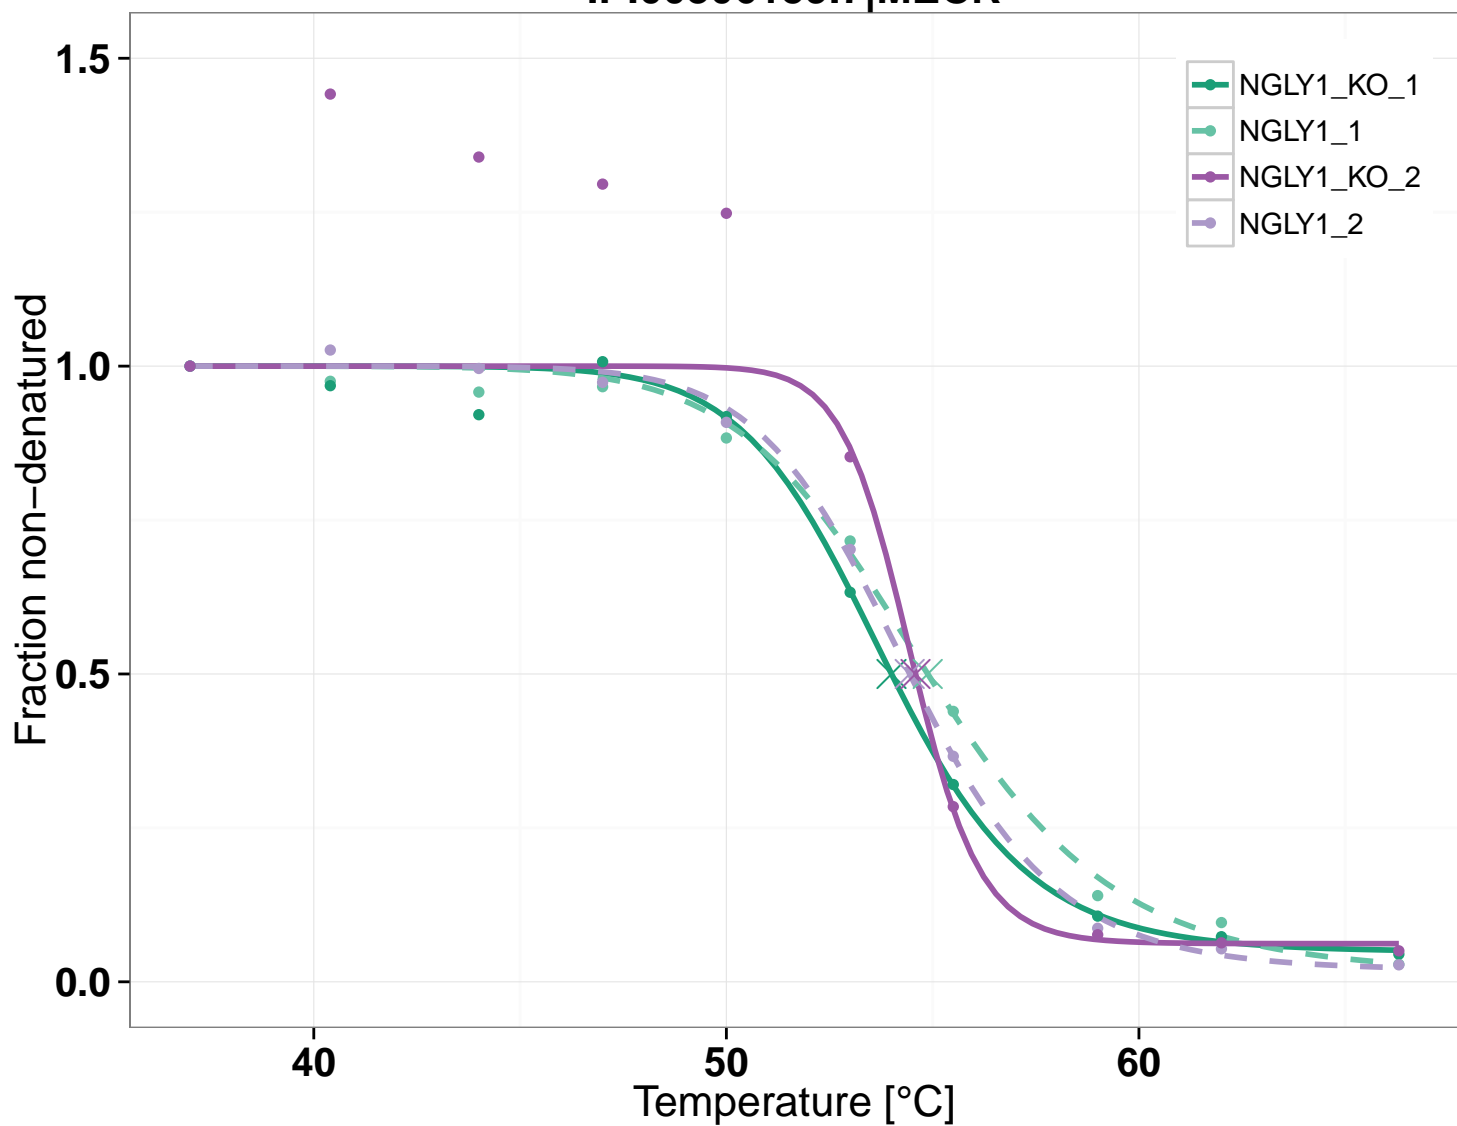

|            | meltPoint | slope | plateau | R2   |
|------------|-----------|-------|---------|------|
| NGLY1_KO_1 | 54        | -0.14 | 0.05    | 1    |
| NGLY1_1    | 54.88     | -0.11 | 0.01    | 1    |
| NGLY1_KO_2 | 54.58     | -0.28 | 0.06    | 0.85 |
| NGLY1_2    | 54.44     | -0.13 | 0.02    | 1    |

Supplement: Supplementary file 7036 [file 1]

# IPI00026689.4|CDC2

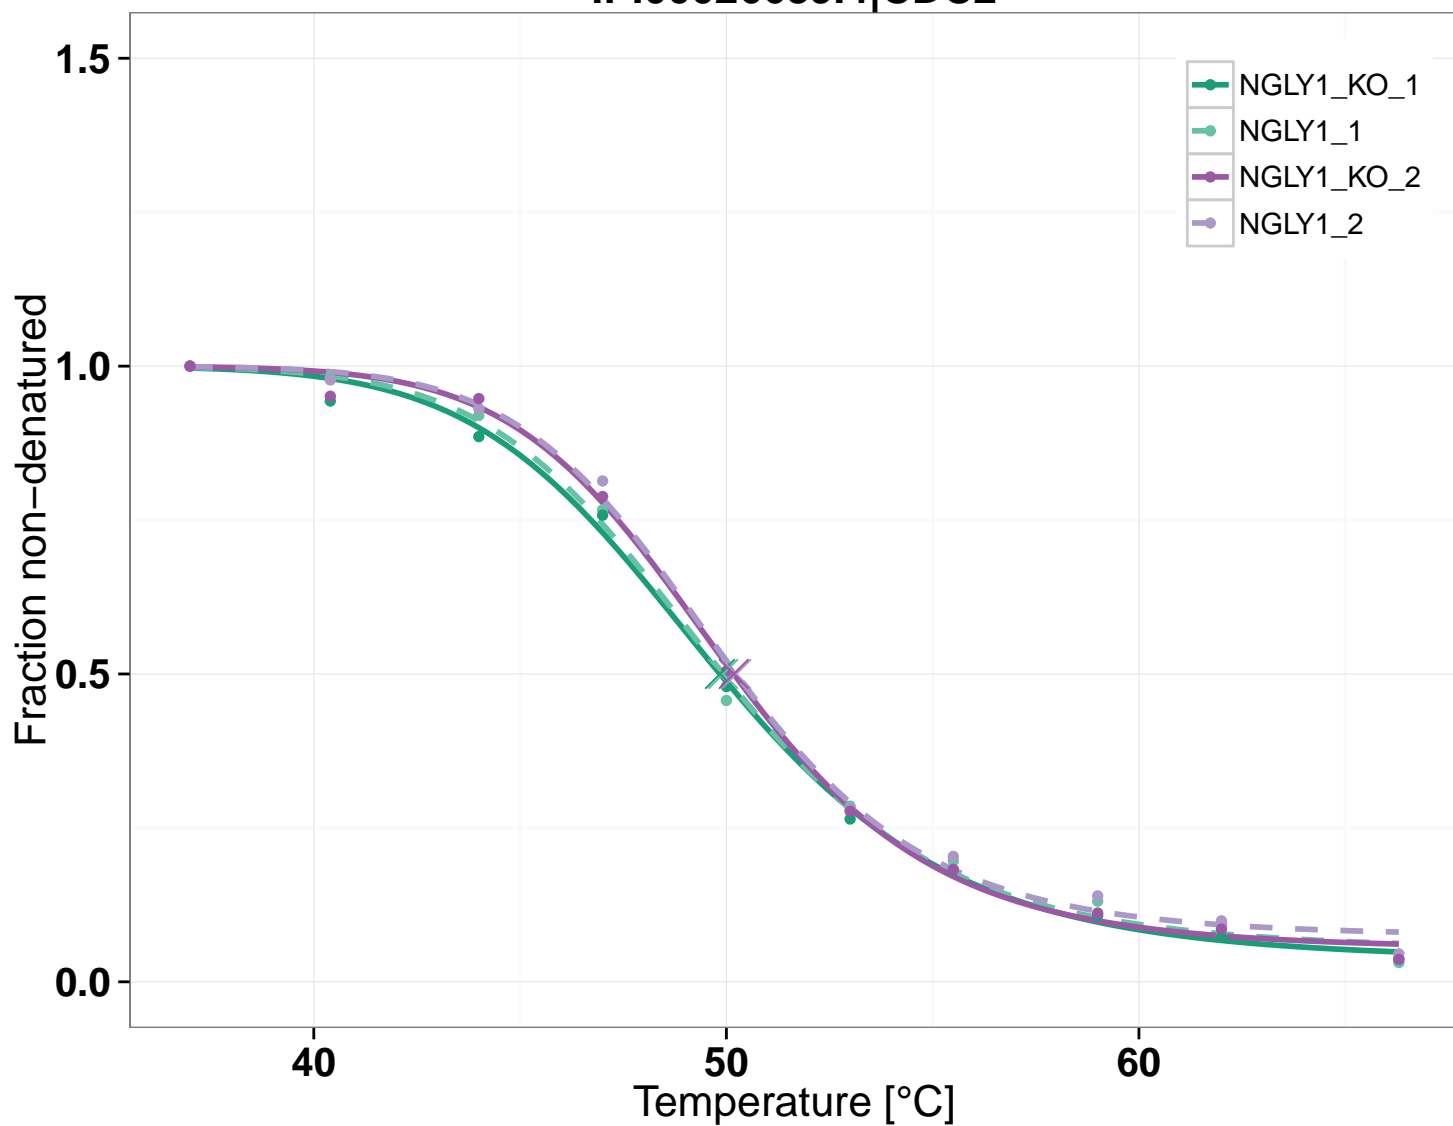

|            | meltPoint | slope  | plateau | R2 |
|------------|-----------|--------|---------|----|
| NGLY1_KO_1 | 49.85     | -0.083 | 0.03    | 1  |
| NGLY1_1    | 49.92     | -0.086 | 0.05    | 1  |
| NGLY1_KO_2 | 50.18     | -0.093 | 0.05    | 1  |
| NGLY1_2    | 50.24     | -0.093 | 0.07    | 1  |

Supplement: Supplementary file 7037 [file 1]

IPI00018057.3|MYO9A

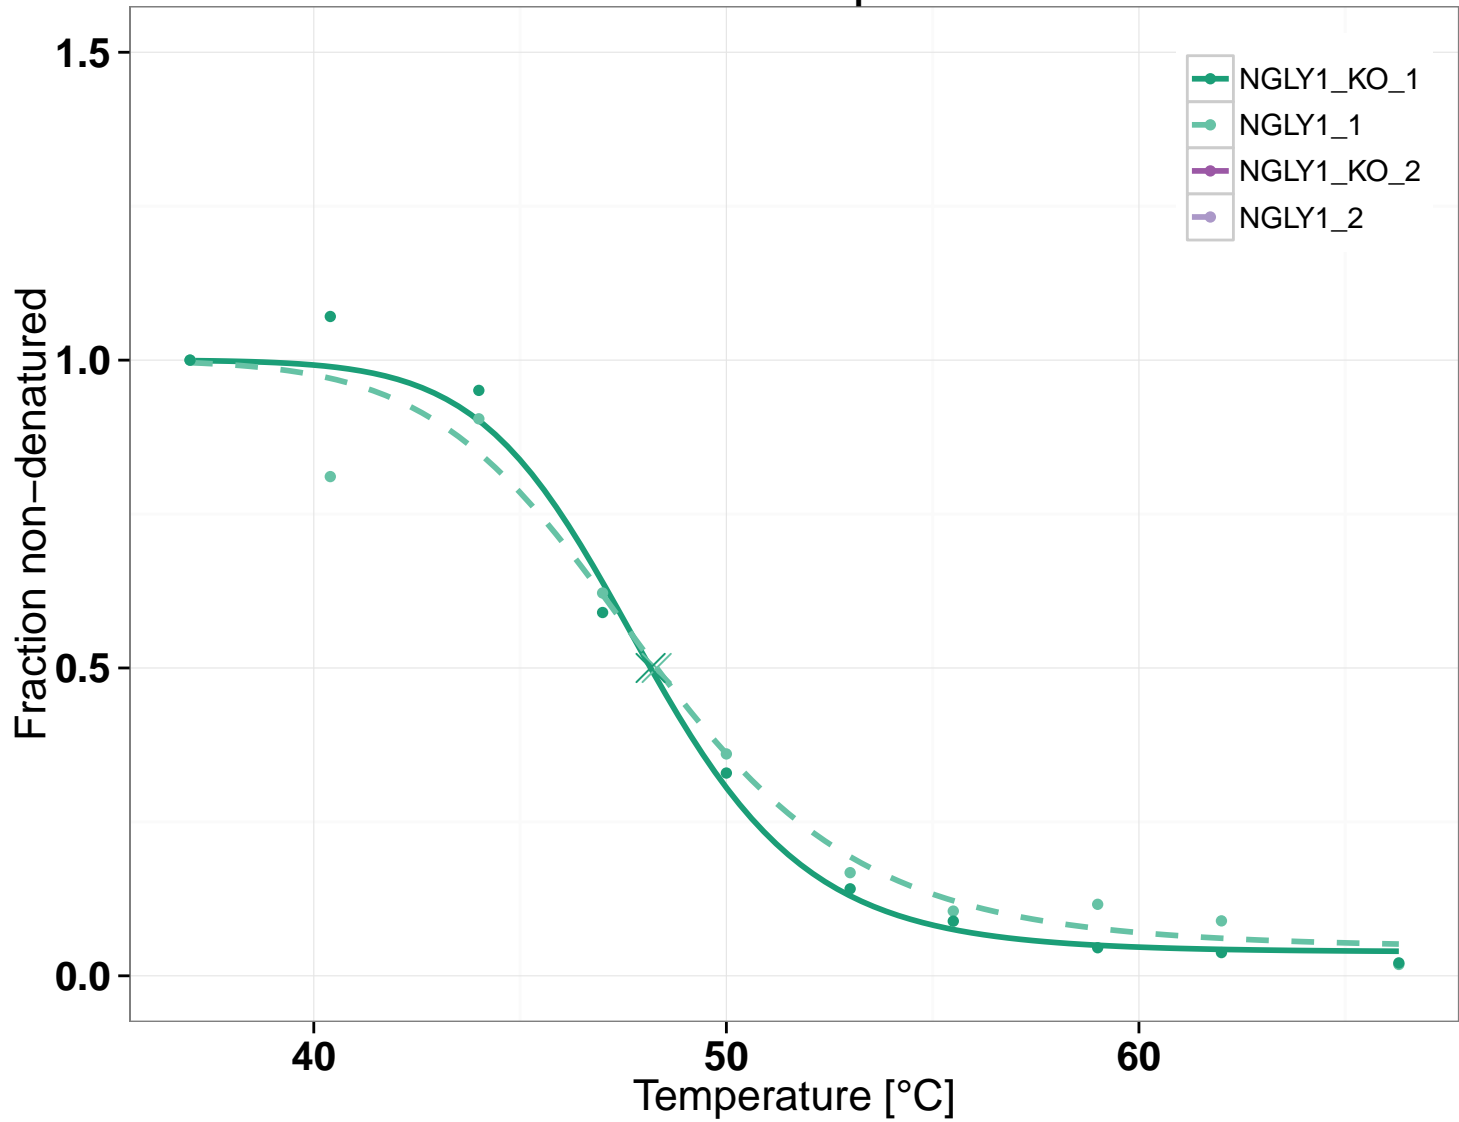

|            | meltPoint | slope  | plateau | R2   |
|------------|-----------|--------|---------|------|
| NGLY1_KO_1 | 48.16     | -0.12  | 0.04    | 0.99 |
| NGLY1_1    | 48.31     | -0.091 | 0.05    | 0.97 |
| NGLY1_KO_2 | -         | -      | -       | -    |
| NGLY1_2    | -         | -      | -       | -    |

Supplement: Supplementary file 7038 [file 1]

# IPI00549882.1|GABPB2

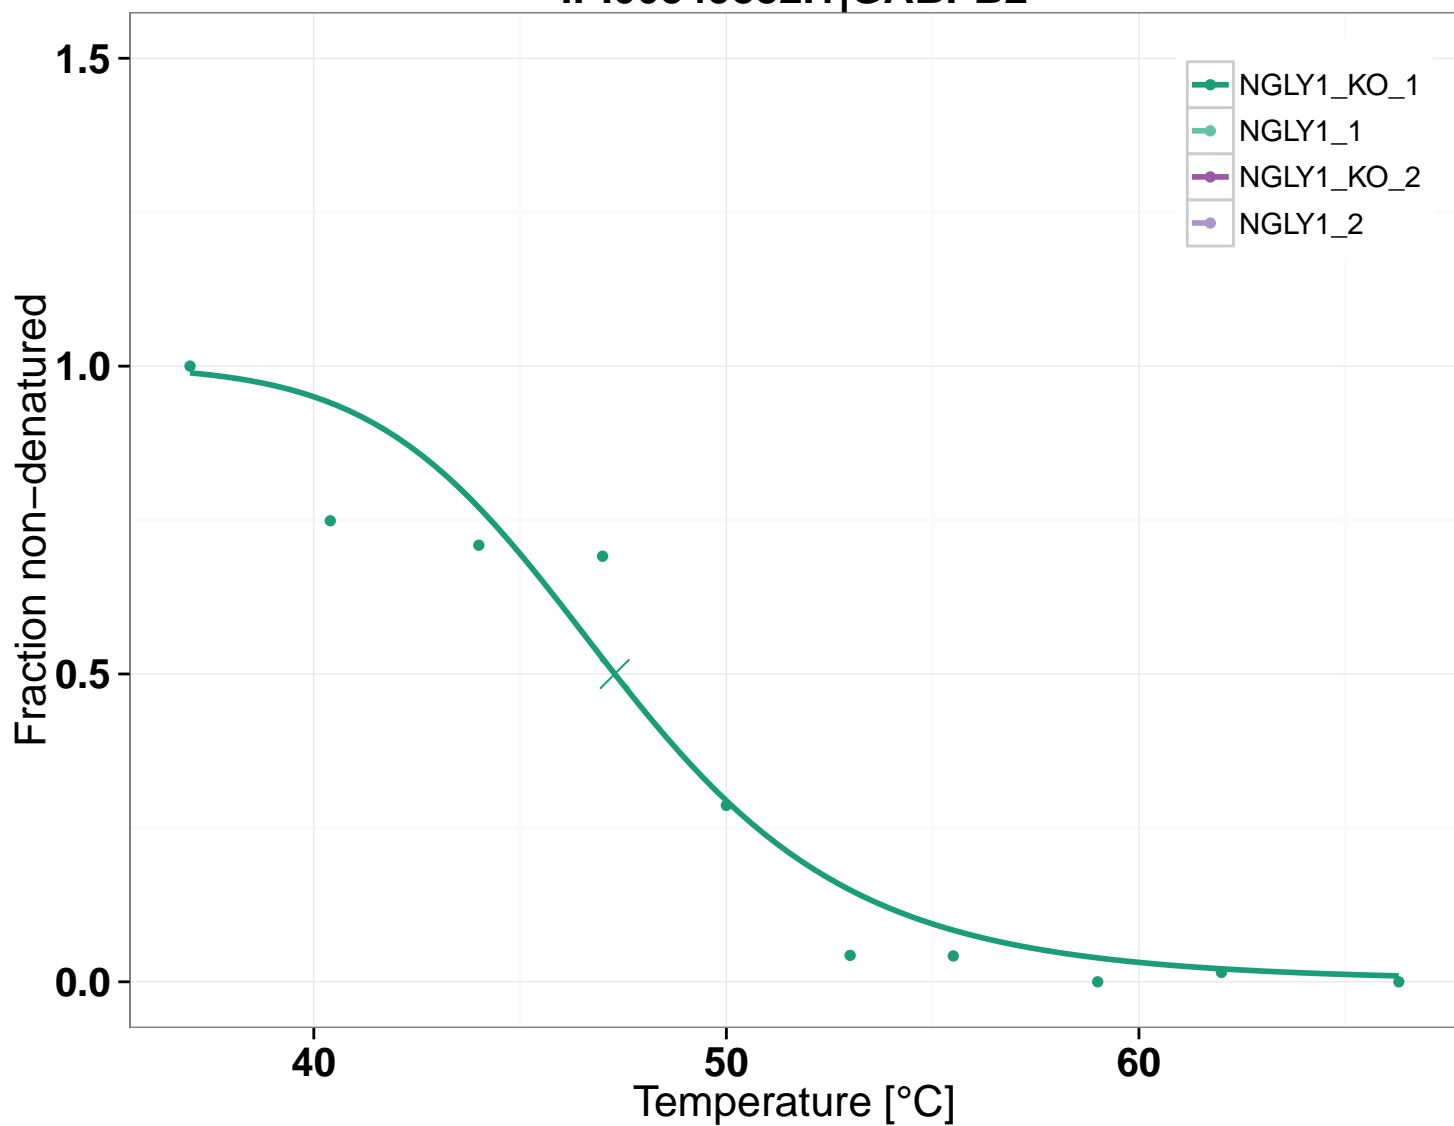

|            | meltPoint | slope  | plateau | R2   |
|------------|-----------|--------|---------|------|
| NGLY1_KO_1 | 47.29     | -0.087 | 0       | 0.94 |
| NGLY1_1    | -         | -      | -       | -    |
| NGLY1_KO_2 | -         | -      | -       | -    |
| NGLY1_2    | -         | -      | -       | -    |

Supplement: Supplementary file 7039 [file 1]

# IPI00411763.2|KIF1B

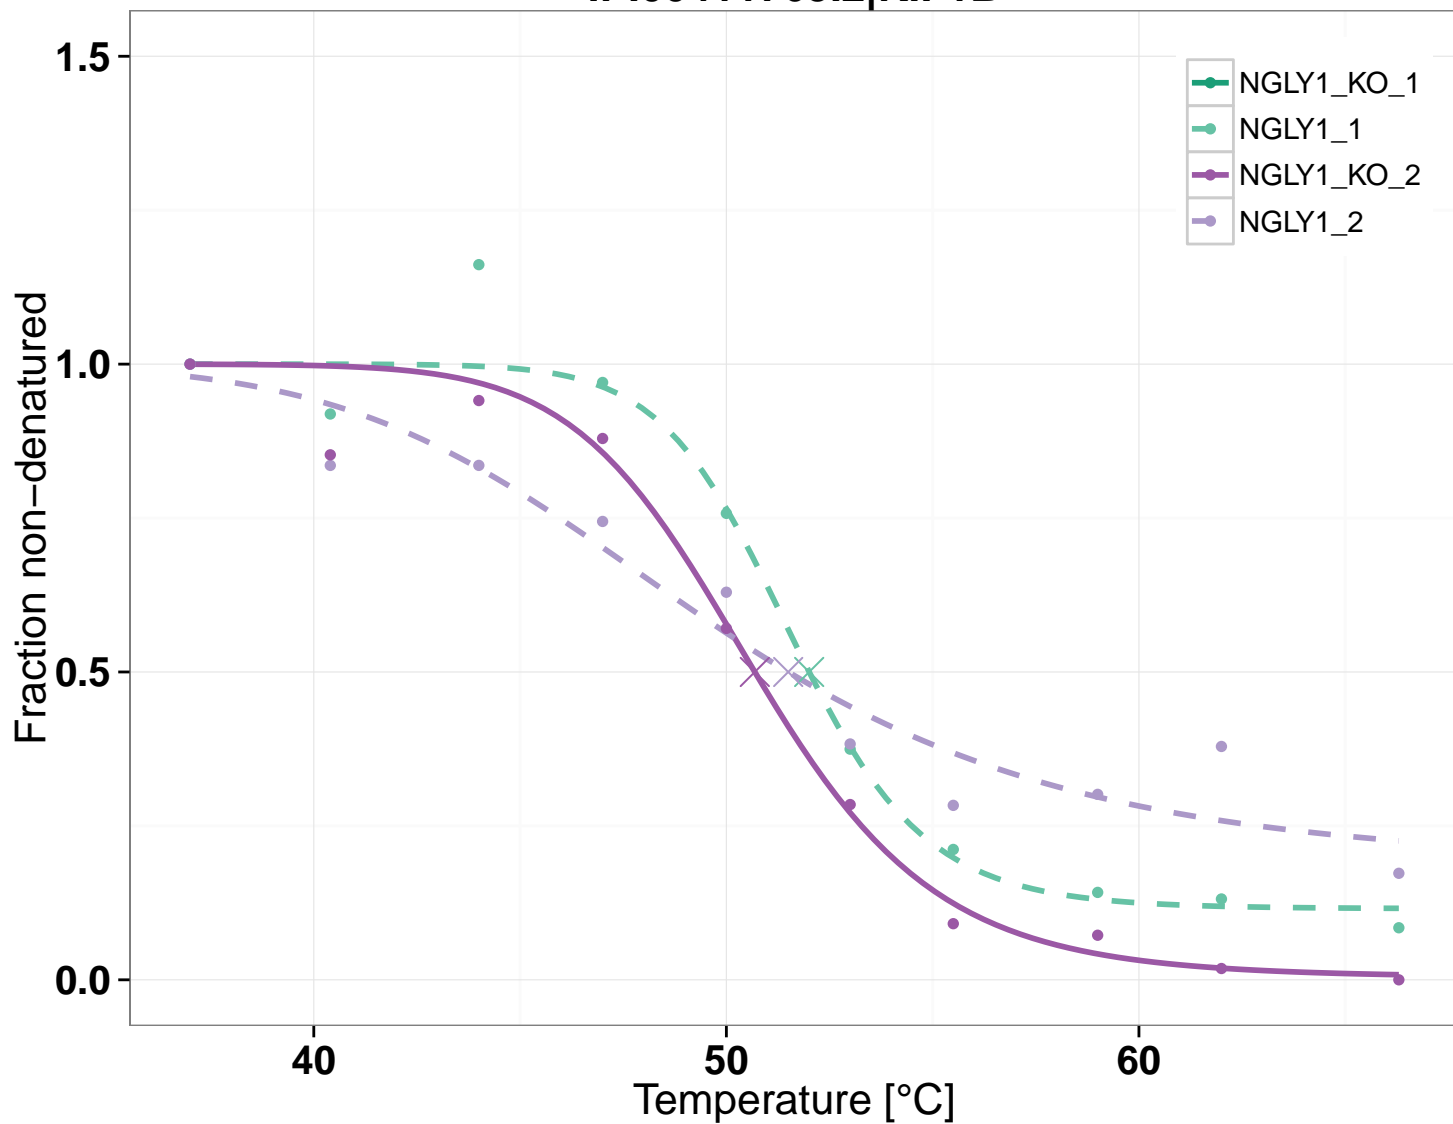

|            | meltPoint | slope  | plateau | R2   |
|------------|-----------|--------|---------|------|
| NGLY1_KO_1 | -         | -      | -       | -    |
| NGLY1_1    | 52.01     | -0.14  | 0.12    | 0.98 |
| NGLY1_KO_2 | 50.69     | -0.11  | 0       | 0.98 |
| NGLY1_2    | 51.5      | -0.047 | 0.18    | 0.94 |

Supplement: Supplementary file 7040 [file 1]

IPI00182839.5|EXOC3L2

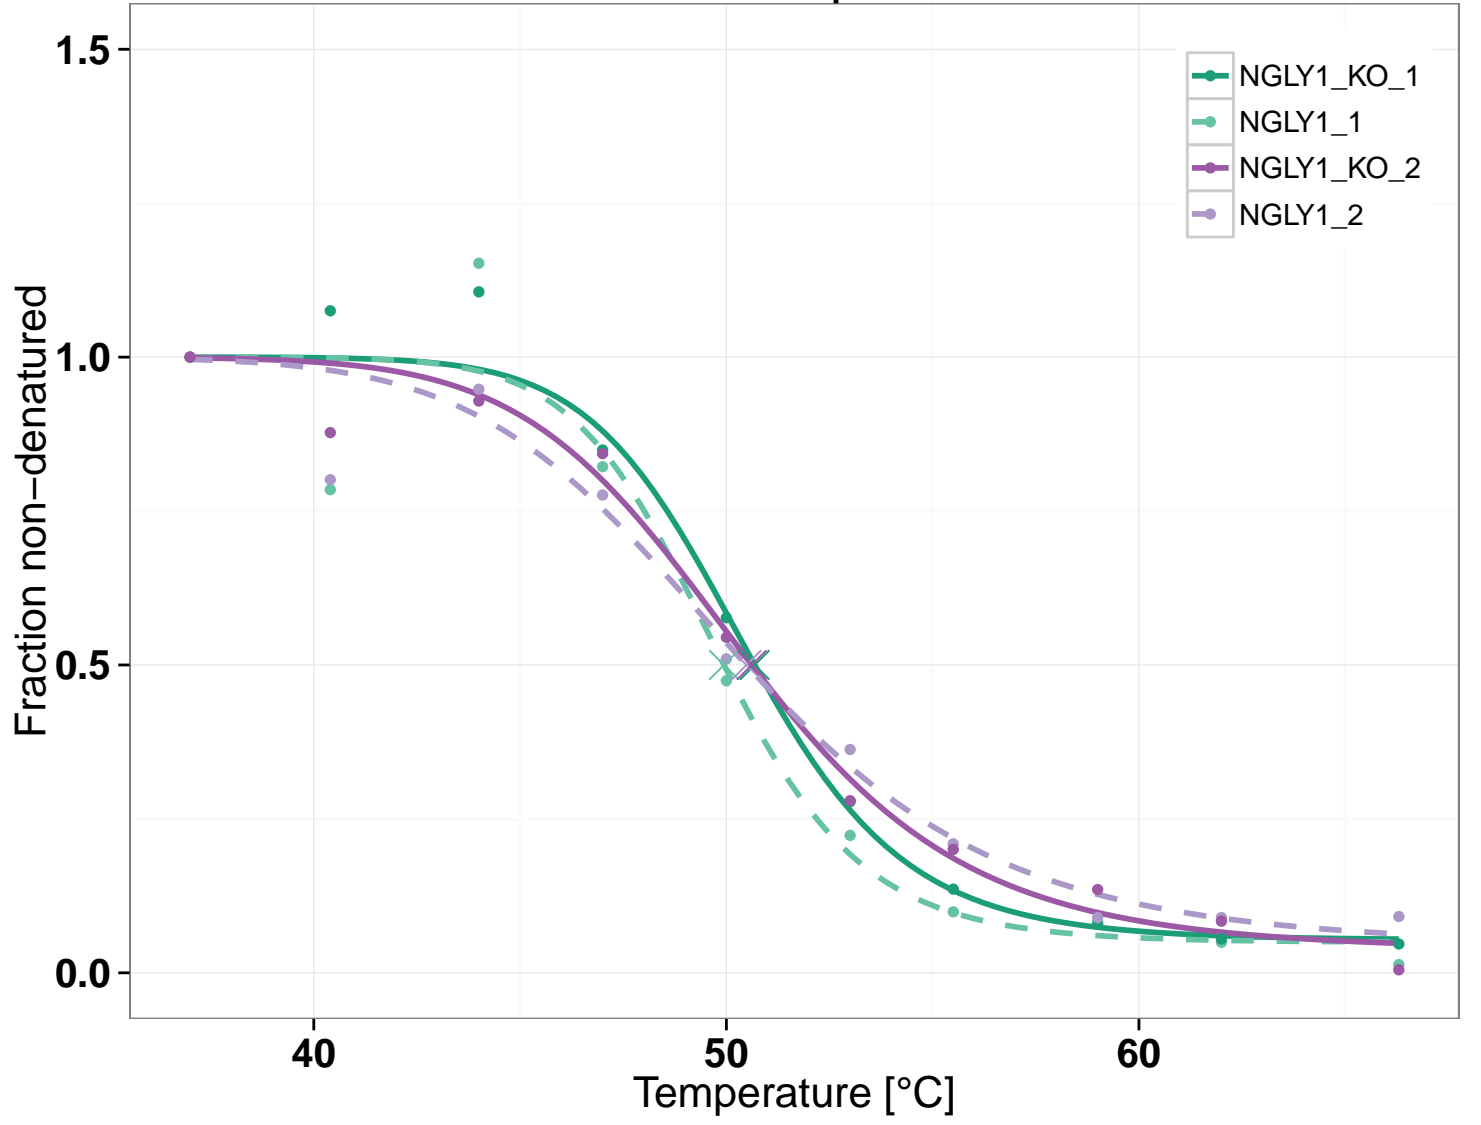

|            | meltPoint | slope  | plateau | R2   |
|------------|-----------|--------|---------|------|
| NGLY1_KO_1 | 50.69     | -0.12  | 0.05    | 0.99 |
| NGLY1_1    | 49.94     | -0.14  | 0.05    | 0.95 |
| NGLY1_KO_2 | 50.62     | -0.089 | 0.04    | 0.99 |
| NGLY1_2    | 50.49     | -0.075 | 0.04    | 0.97 |

Supplement: Supplementary file 7041 [file 1]

# IPI00020515.3|USE1

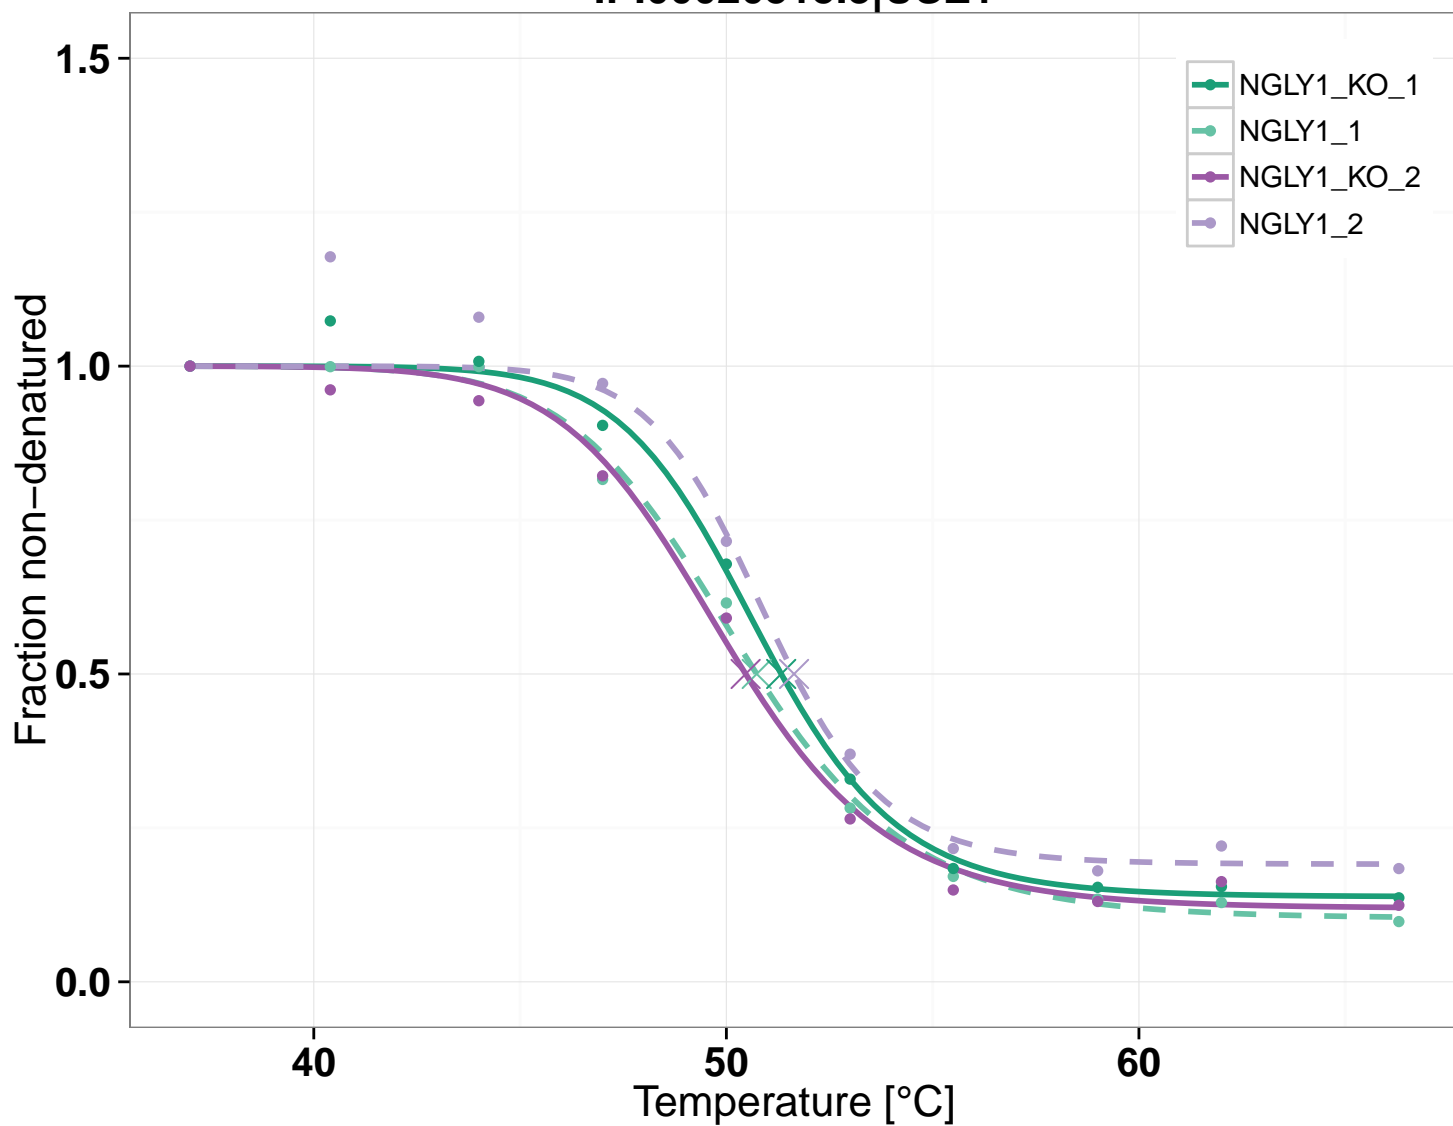

|            | meltPoint | slope | plateau | R2   |
|------------|-----------|-------|---------|------|
| NGLY1_KO_1 | 51.33     | -0.13 | 0.14    | 1    |
| NGLY1_1    | 50.74     | -0.11 | 0.1     | 1    |
| NGLY1_KO_2 | 50.47     | -0.11 | 0.12    | 0.99 |
| NGLY1_2    | 51.64     | -0.14 | 0.19    | 0.97 |

Supplement: Supplementary file 7042 [file 1]

IPI00910694.1|NSUN5

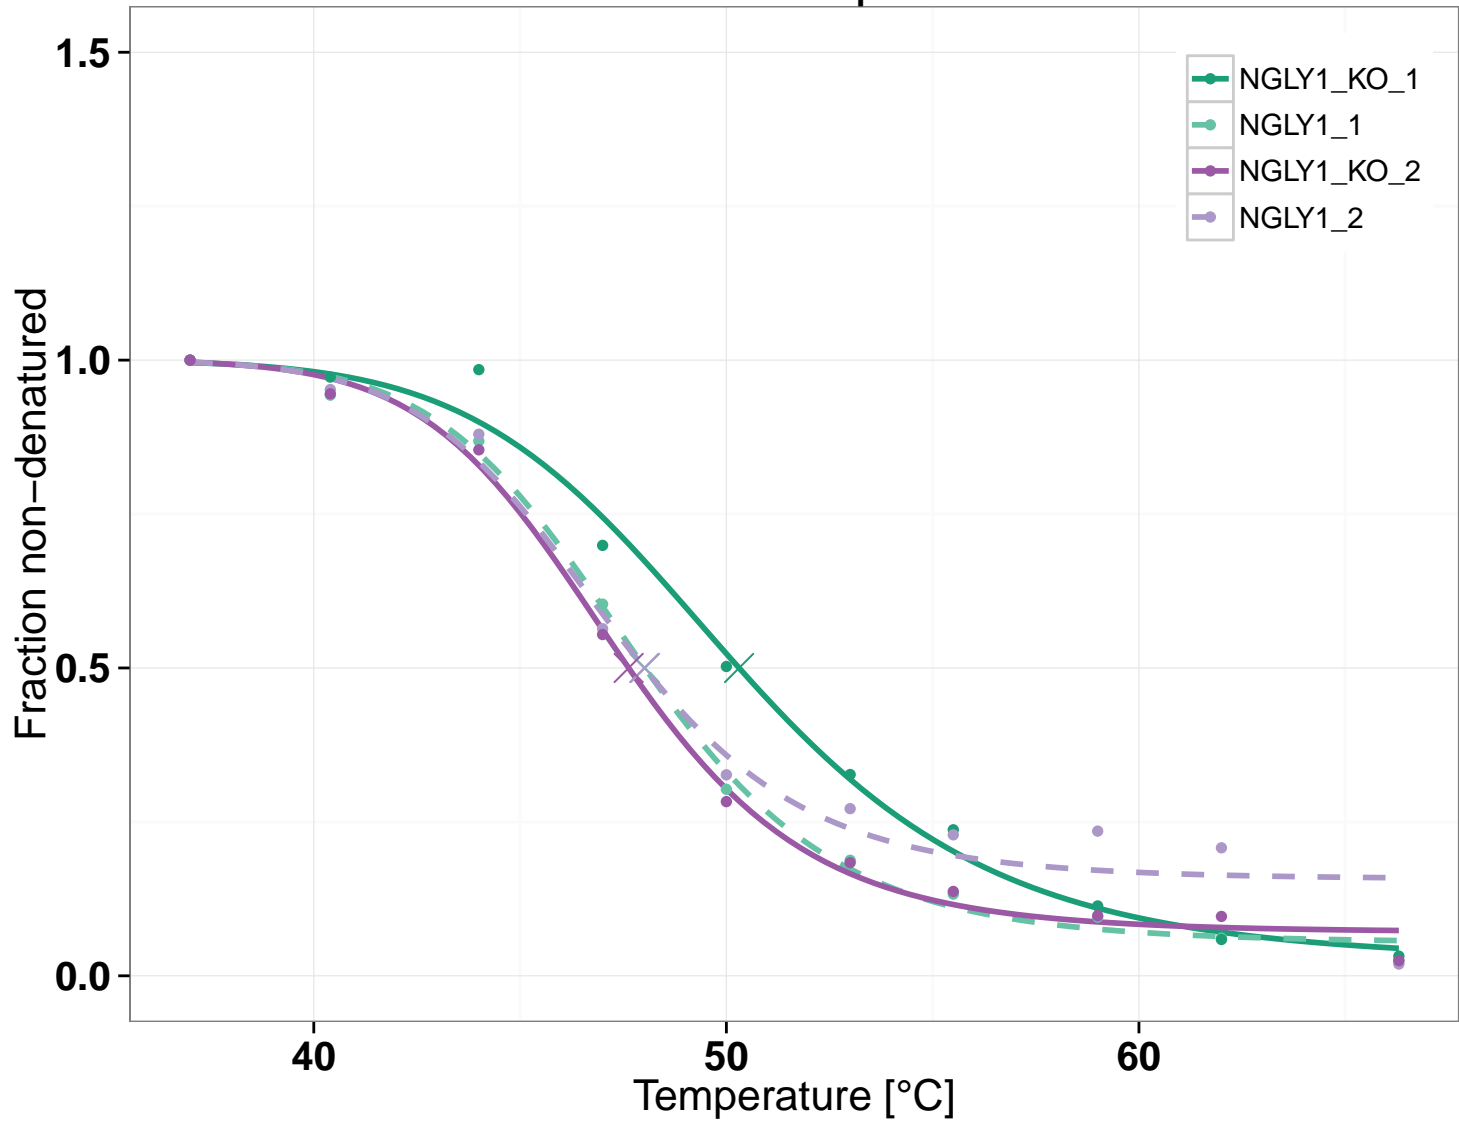

|            | meltPoint | slope  | plateau | R2   |
|------------|-----------|--------|---------|------|
| NGLY1_KO_1 | 50.31     | -0.077 | 0.02    | 0.99 |
| NGLY1_1    | 48.03     | -0.097 | 0.05    | 1    |
| NGLY1_KO_2 | 47.63     | -0.1   | 0.07    | 1    |
| NGLY1_2    | 48.01     | -0.09  | 0.16    | 0.97 |

Supplement: Supplementary file 7043 [file 1]

IPI00024151.3|TRUB2

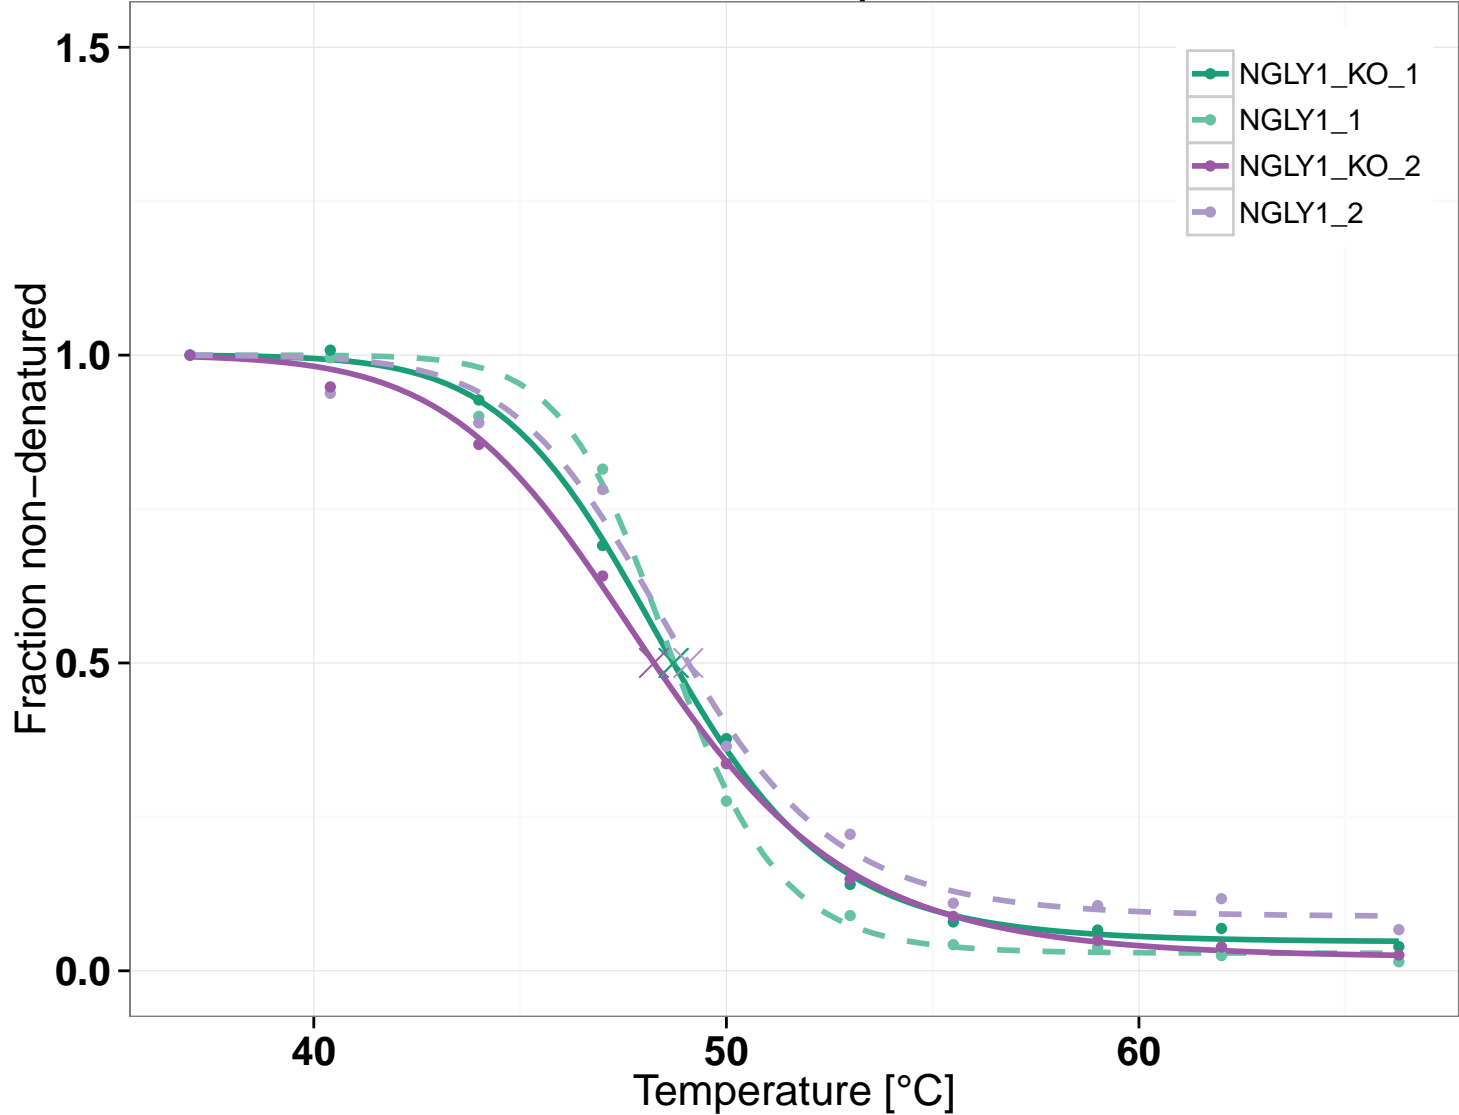

|            | meltPoint | slope | plateau | R2   |
|------------|-----------|-------|---------|------|
| NGLY1_KO_1 | 48.72     | -0.12 | 0.05    | 1    |
| NGLY1_1    | 48.73     | -0.18 | 0.03    | 1    |
| NGLY1_KO_2 | 48.24     | -0.1  | 0.02    | 1    |
| NGLY1_2    | 49.08     | -0.12 | 0.09    | 0.99 |

Supplement: Supplementary file 7044 [file 1]

IPI00176581.5|FANCM

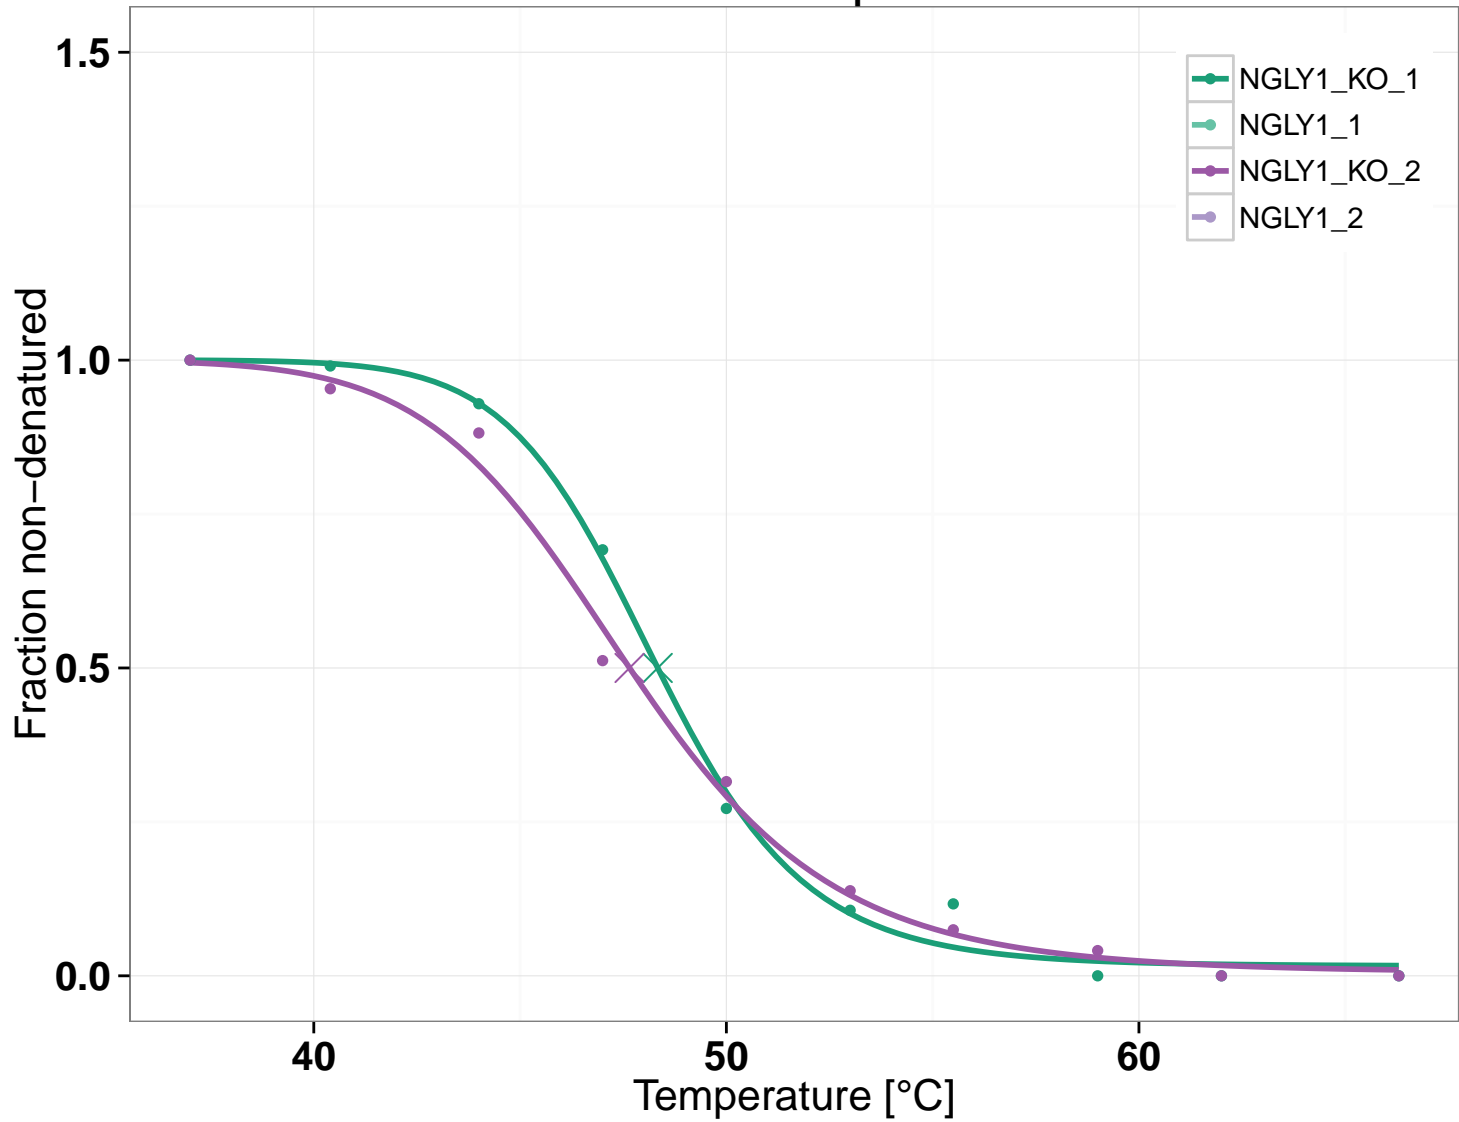

|            | meltPoint | slope | plateau | R2 |
|------------|-----------|-------|---------|----|
| NGLY1_KO_1 | 48.34     | -0.14 | 0.02    | 1  |
| NGLY1_1    | -         | -     | -       | -  |
| NGLY1_KO_2 | 47.65     | -0.1  | 0.01    | 1  |
| NGLY1_2    | -         | -     | -       | -  |

Supplement: Supplementary file 7045 [file 1]

IPI00383627.1|PTTG1

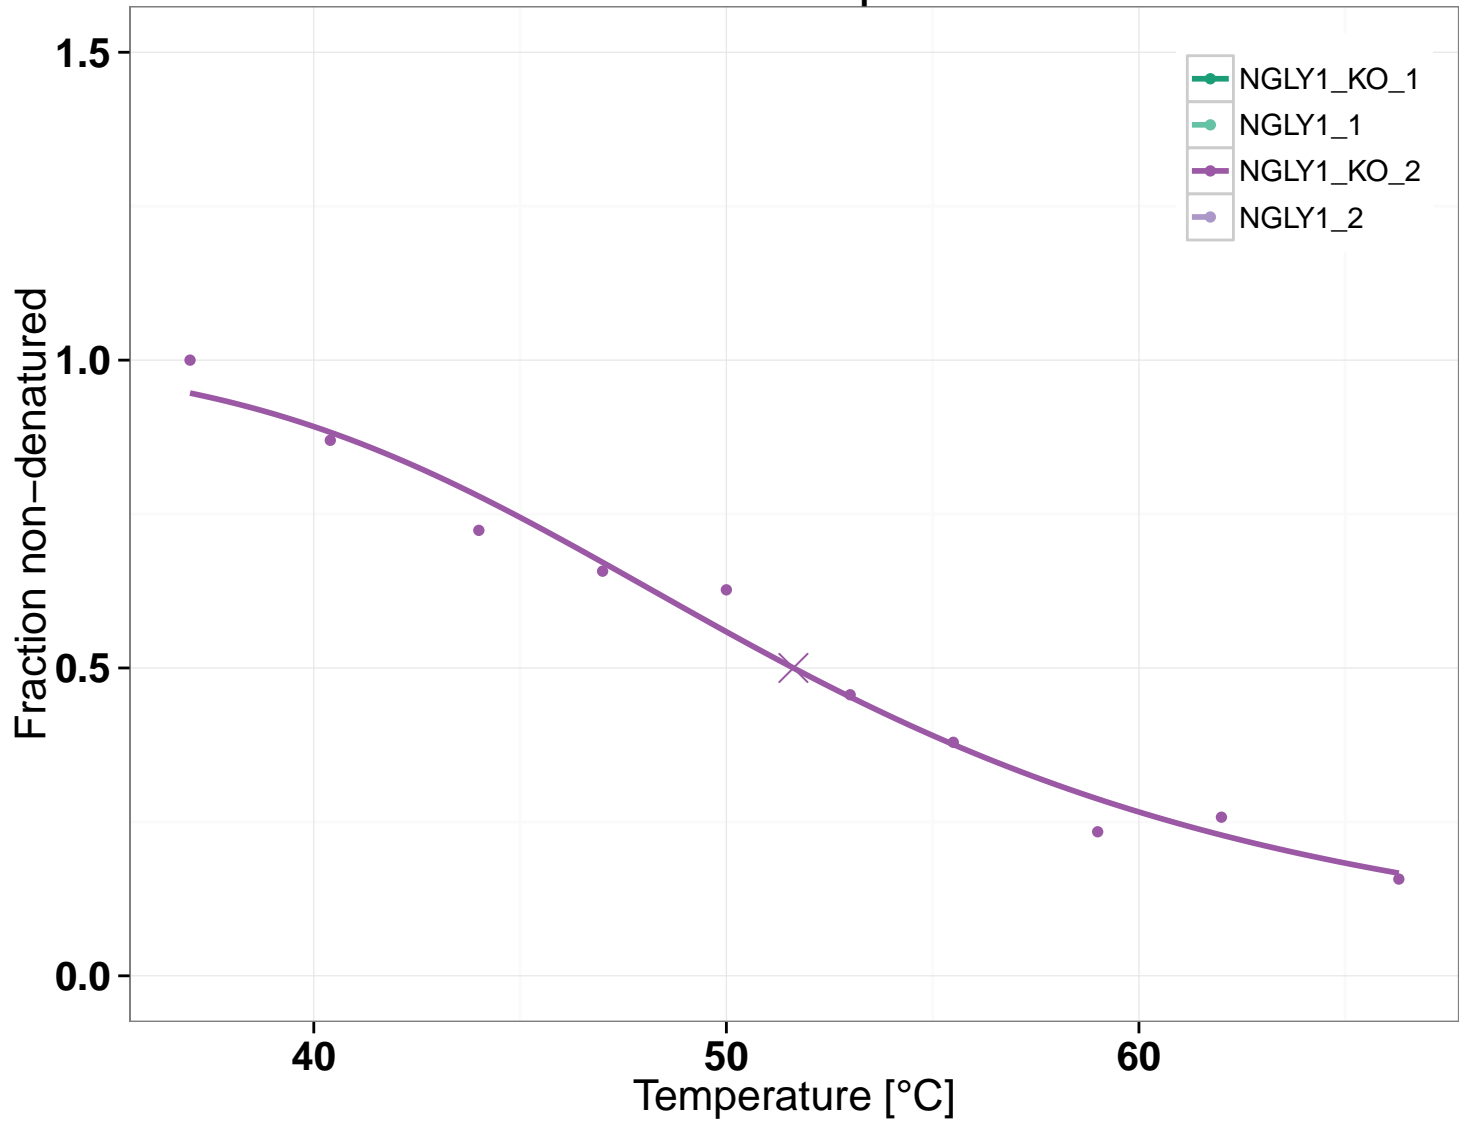

|            | meltPoint | slope  | plateau | R2   |
|------------|-----------|--------|---------|------|
| NGLY1_KO_1 | —         | —      | —       | —    |
| NGLY1_1    | —         | —      | —       | —    |
| NGLY1_KO_2 | 51.62     | −0.038 | 0       | 0.98 |
| NGLY1_2    | —         | —      | —       | —    |

Supplement: Supplementary file 7046 [file 1]

IPI00383849.5|PLCG1

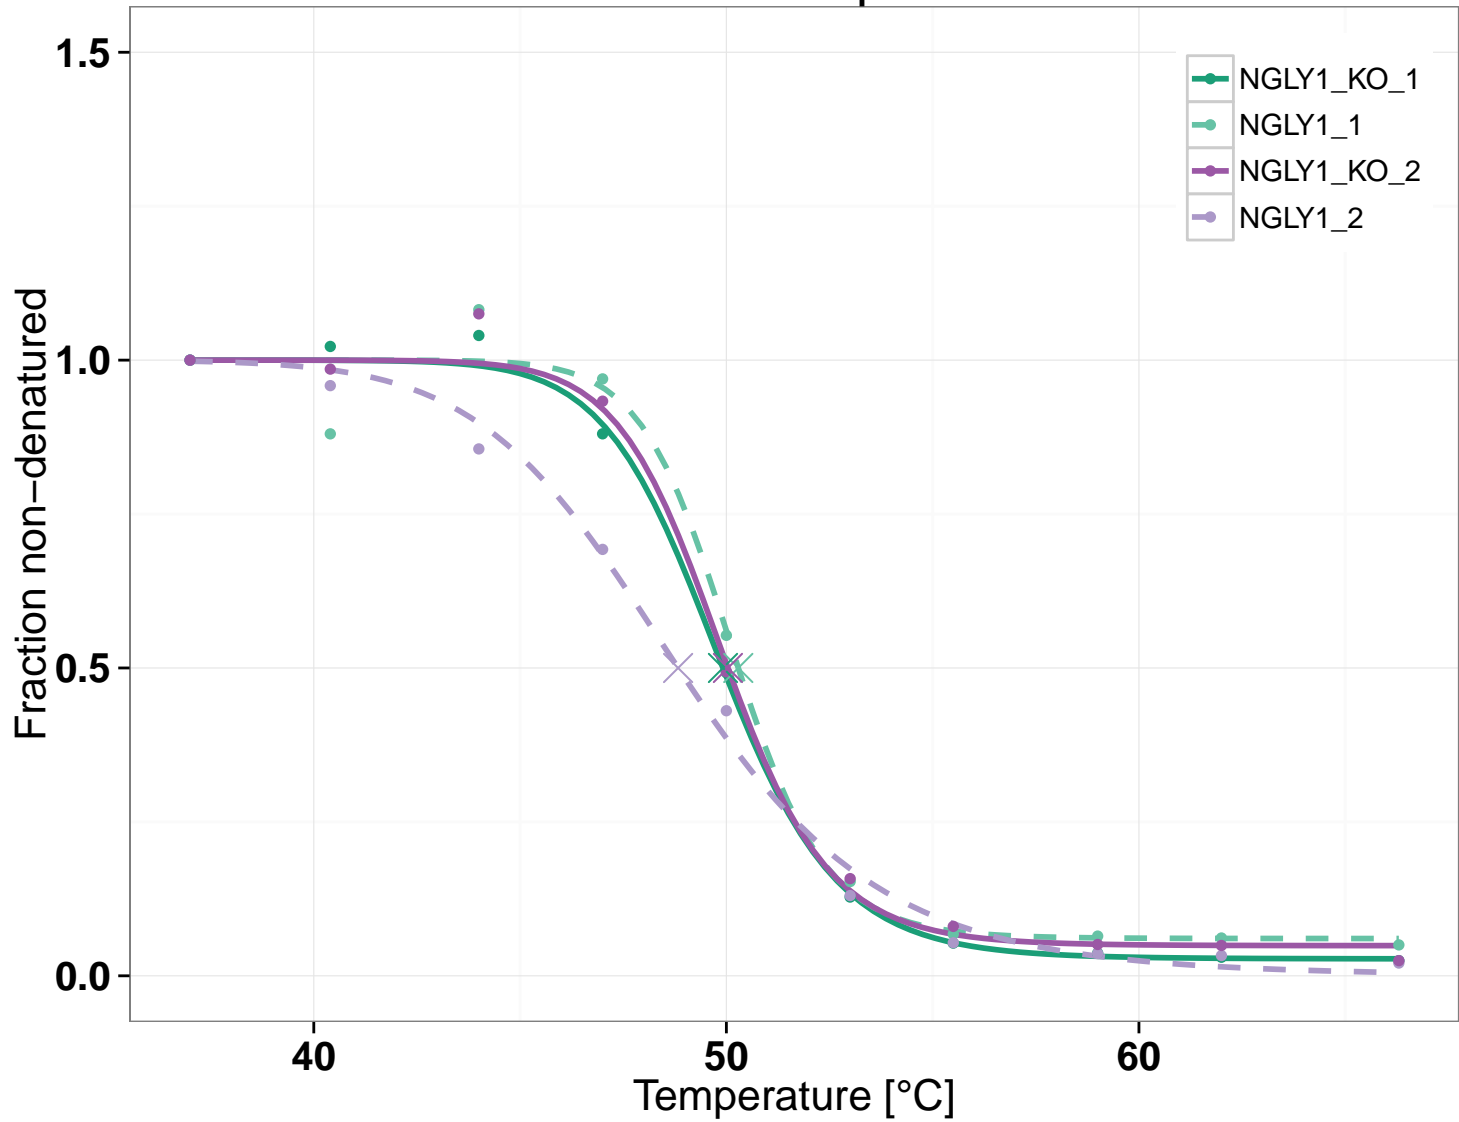

|            | meltPoint | slope | plateau | R2   |
|------------|-----------|-------|---------|------|
| NGLY1_KO_1 | 49.92     | -0.17 | 0.03    | 1    |
| NGLY1_1    | 50.29     | -0.21 | 0.06    | 0.99 |
| NGLY1_KO_2 | 50.04     | -0.19 | 0.05    | 1    |
| NGLY1_2    | 48.83     | -0.1  | 0       | 0.99 |

Supplement: Supplementary file 7047 [file 1]

IPI00001813.5|PHRF1

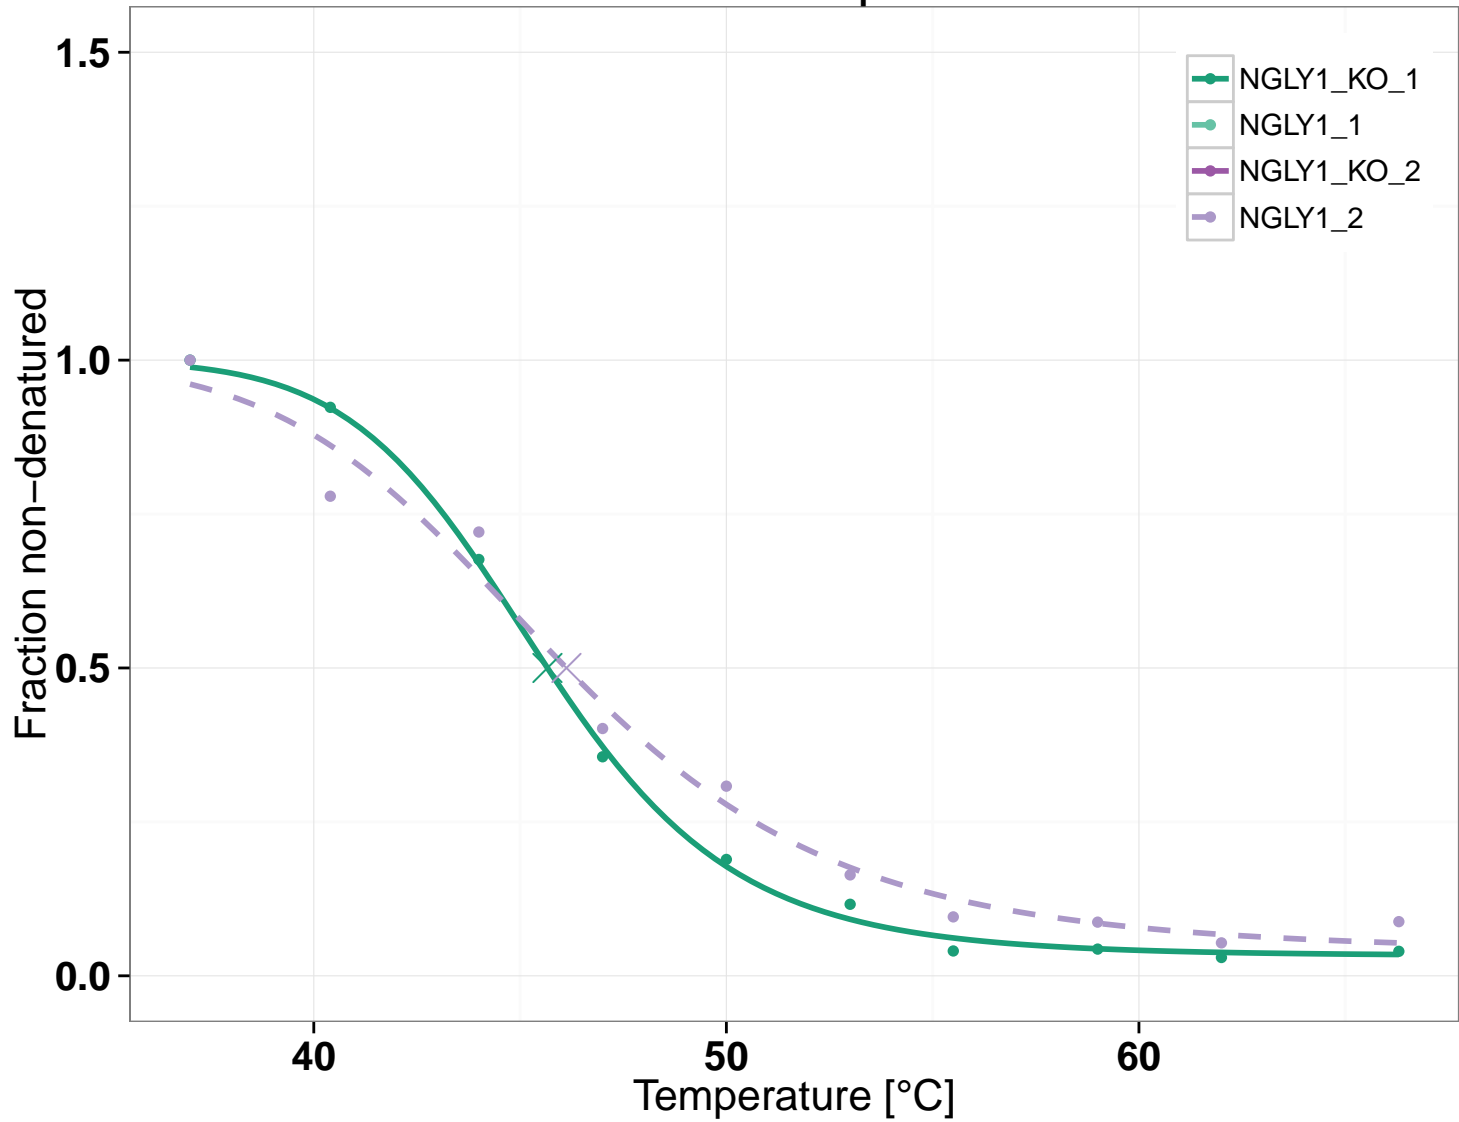

|            | meltPoint | slope  | plateau | R2   |
|------------|-----------|--------|---------|------|
| NGLY1_KO_1 | 45.66     | -0.1   | 0.03    | 1    |
| NGLY1_1    | -         | -      | -       | -    |
| NGLY1_KO_2 | -         | -      | -       | -    |
| NGLY1_2    | 46.12     | -0.071 | 0.04    | 0.98 |

Supplement: Supplementary file 7048 [file 1]

# IPI00018522.4|PRMT1

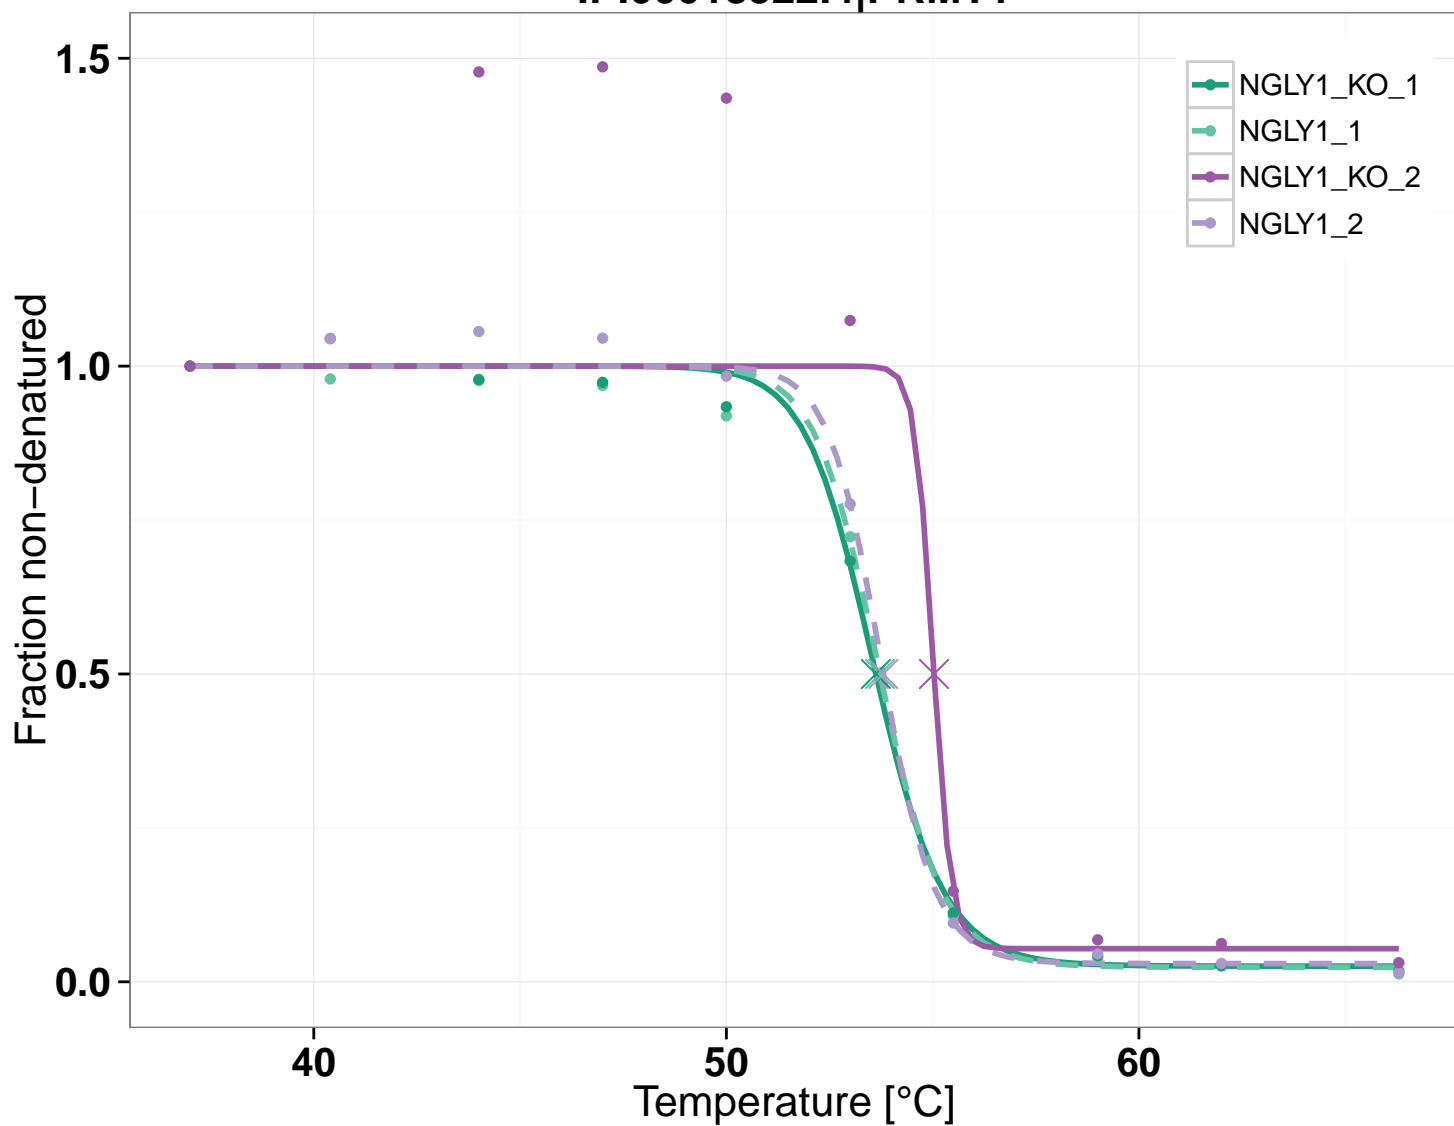

|            | meltPoint | slope | plateau | R2   |
|------------|-----------|-------|---------|------|
| NGLY1_KO_1 | 53.62     | -0.29 | 0.03    | 1    |
| NGLY1_1    | 53.72     | -0.32 | 0.02    | 1    |
| NGLY1_KO_2 | 55.03     | -1.1  | 0.05    | 0.76 |
| NGLY1_2    | 53.8      | -0.38 | 0.03    | 1    |

Supplement: Supplementary file 7049 [file 1]

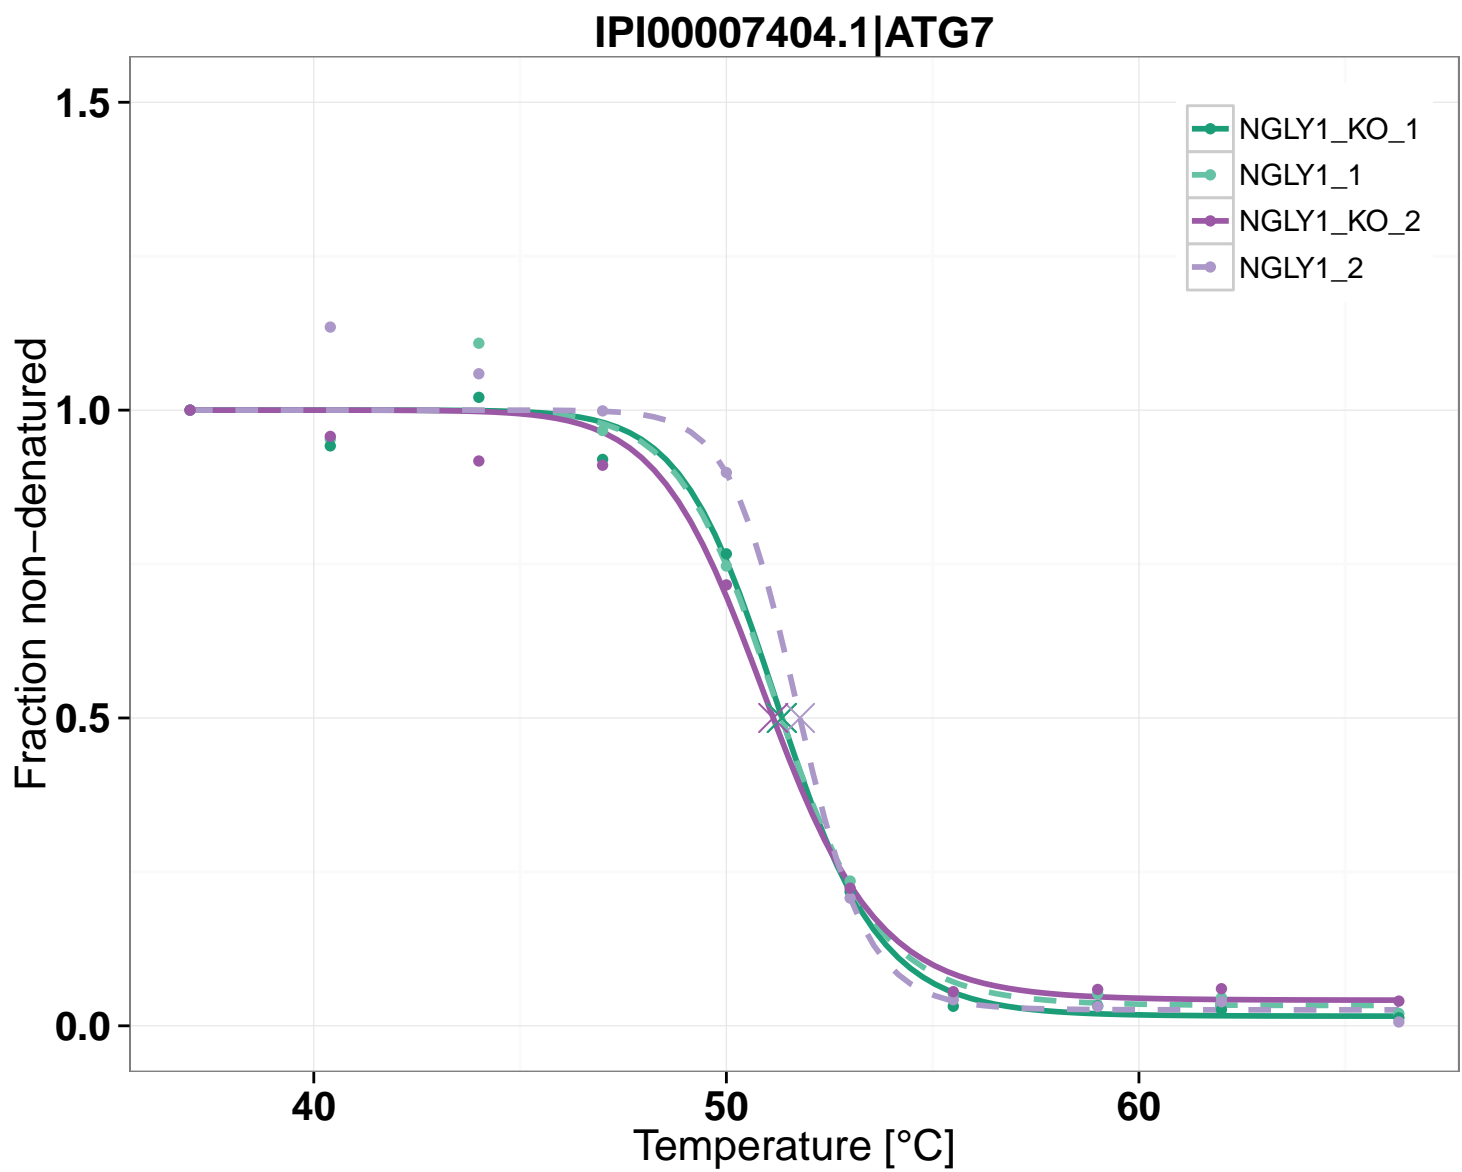

|            | meltPoint | slope | plateau | R2   |
|------------|-----------|-------|---------|------|
| NGLY1_KO_1 | 51.35     | -0.2  | 0.02    | 1    |
| NGLY1_1    | 51.34     | -0.2  | 0.03    | 0.99 |
| NGLY1_KO_2 | 51.14     | -0.18 | 0.04    | 0.99 |
| NGLY1_2    | 51.78     | -0.29 | 0.03    | 0.99 |

Supplement: Supplementary file 7050 [file 1]

IPI00104341.4|EPHX2

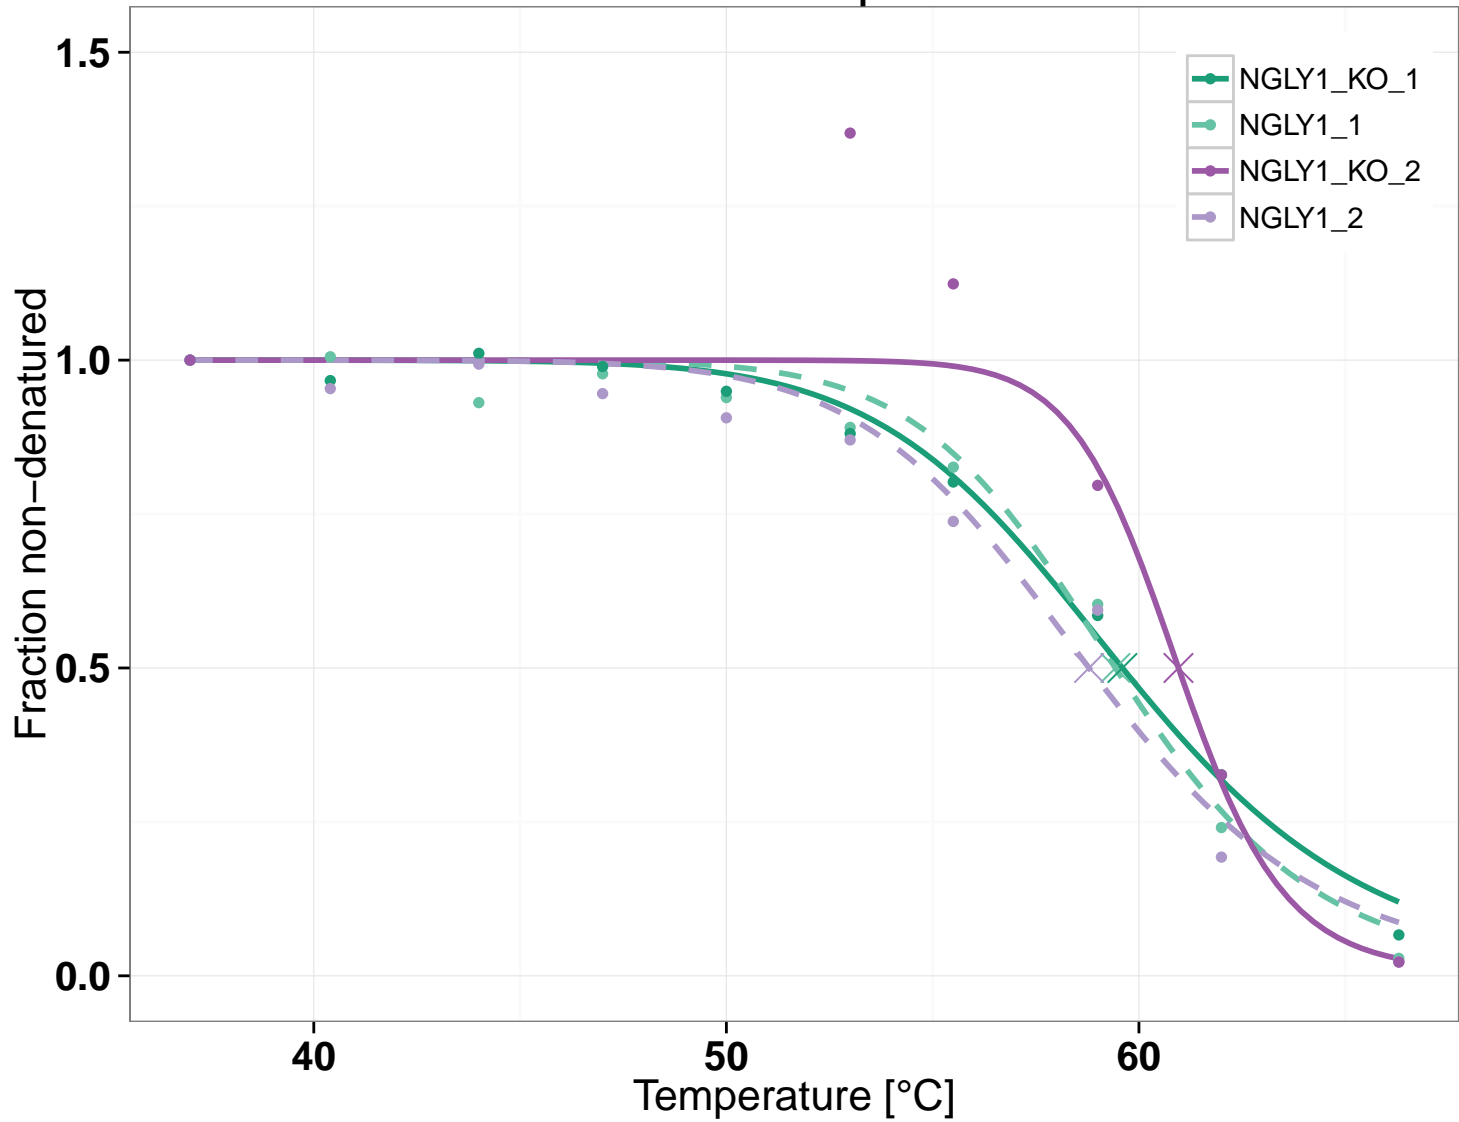

|            | meltPoint | slope  | plateau | R2   |
|------------|-----------|--------|---------|------|
| NGLY1_KO_1 | 59.6      | -0.084 | 0       | 0.99 |
| NGLY1_1    | 59.43     | -0.1   | 0       | 0.98 |
| NGLY1_KO_2 | 60.96     | -0.19  | 0.01    | 0.45 |
| NGLY1_2    | 58.79     | -0.089 | 0       | 0.97 |

Supplement: Supplementary file 7051 [file 1]

IPI00374008.3|MCOLN2

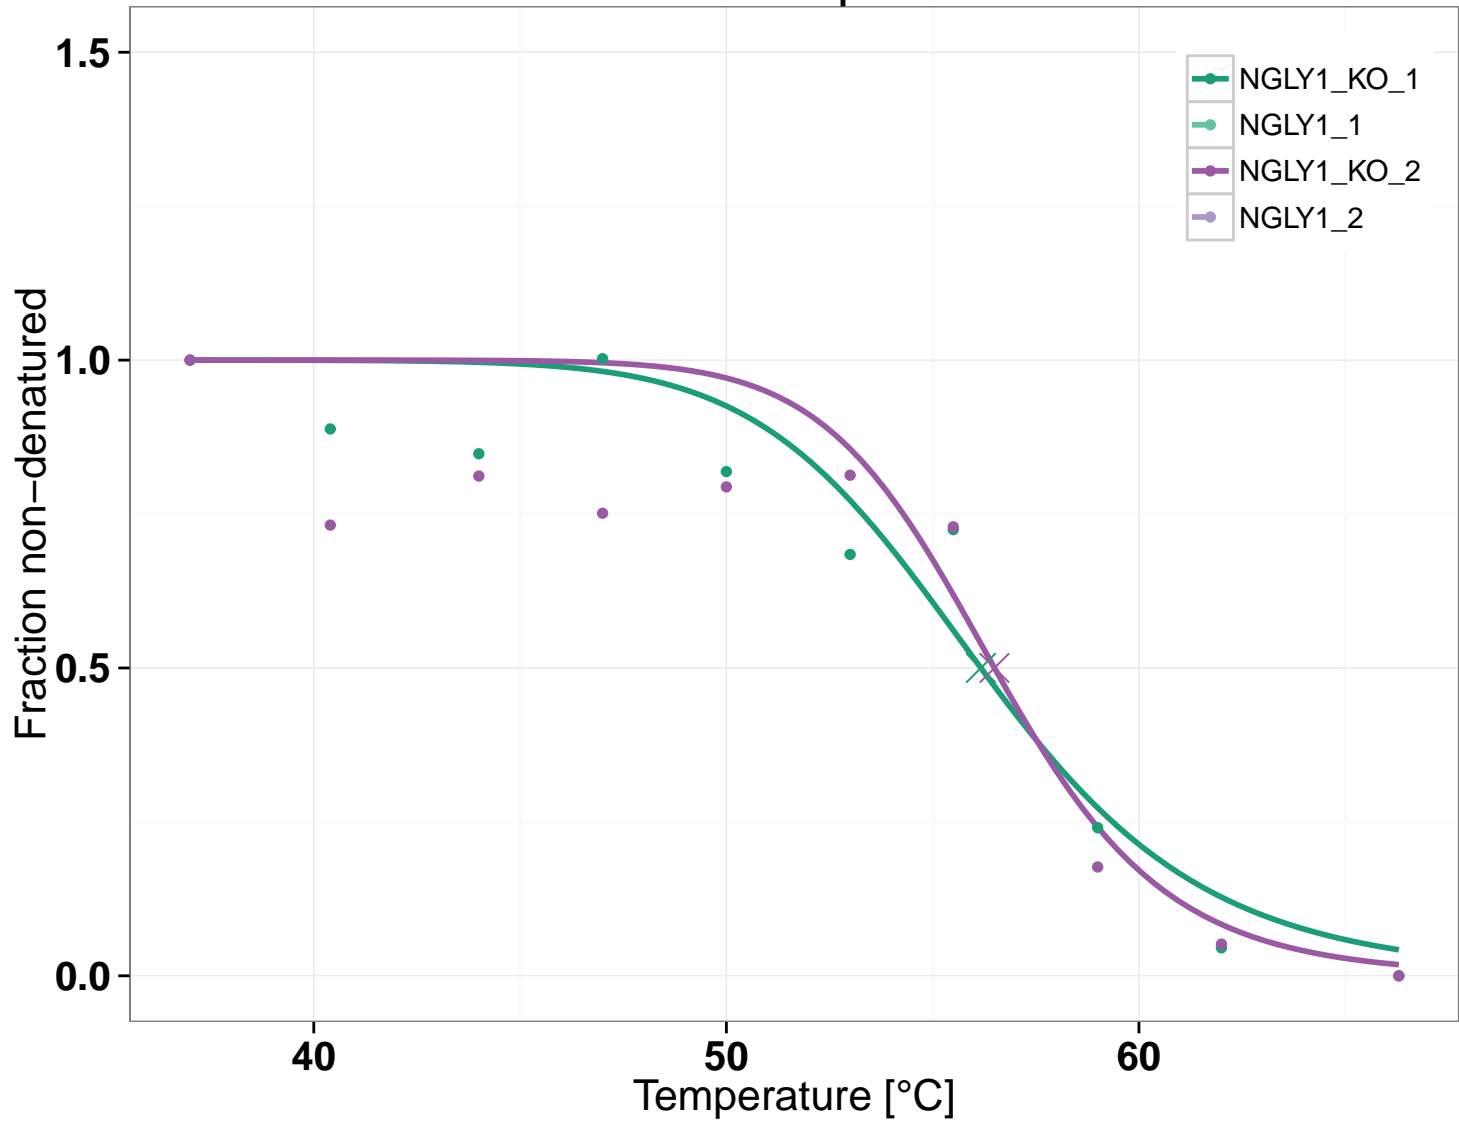

|            | meltPoint | slope  | plateau | R2   |
|------------|-----------|--------|---------|------|
| NGLY1_KO_1 | 56.17     | -0.092 | 0       | 0.93 |
| NGLY1_1    | -         | -      | -       | -    |
| NGLY1_KO_2 | 56.5      | -0.12  | 0       | 0.82 |
| NGLY1_2    | -         | -      | -       | -    |

Supplement: Supplementary file 7052 [file 1]

# IPI00027035.2|GPN1

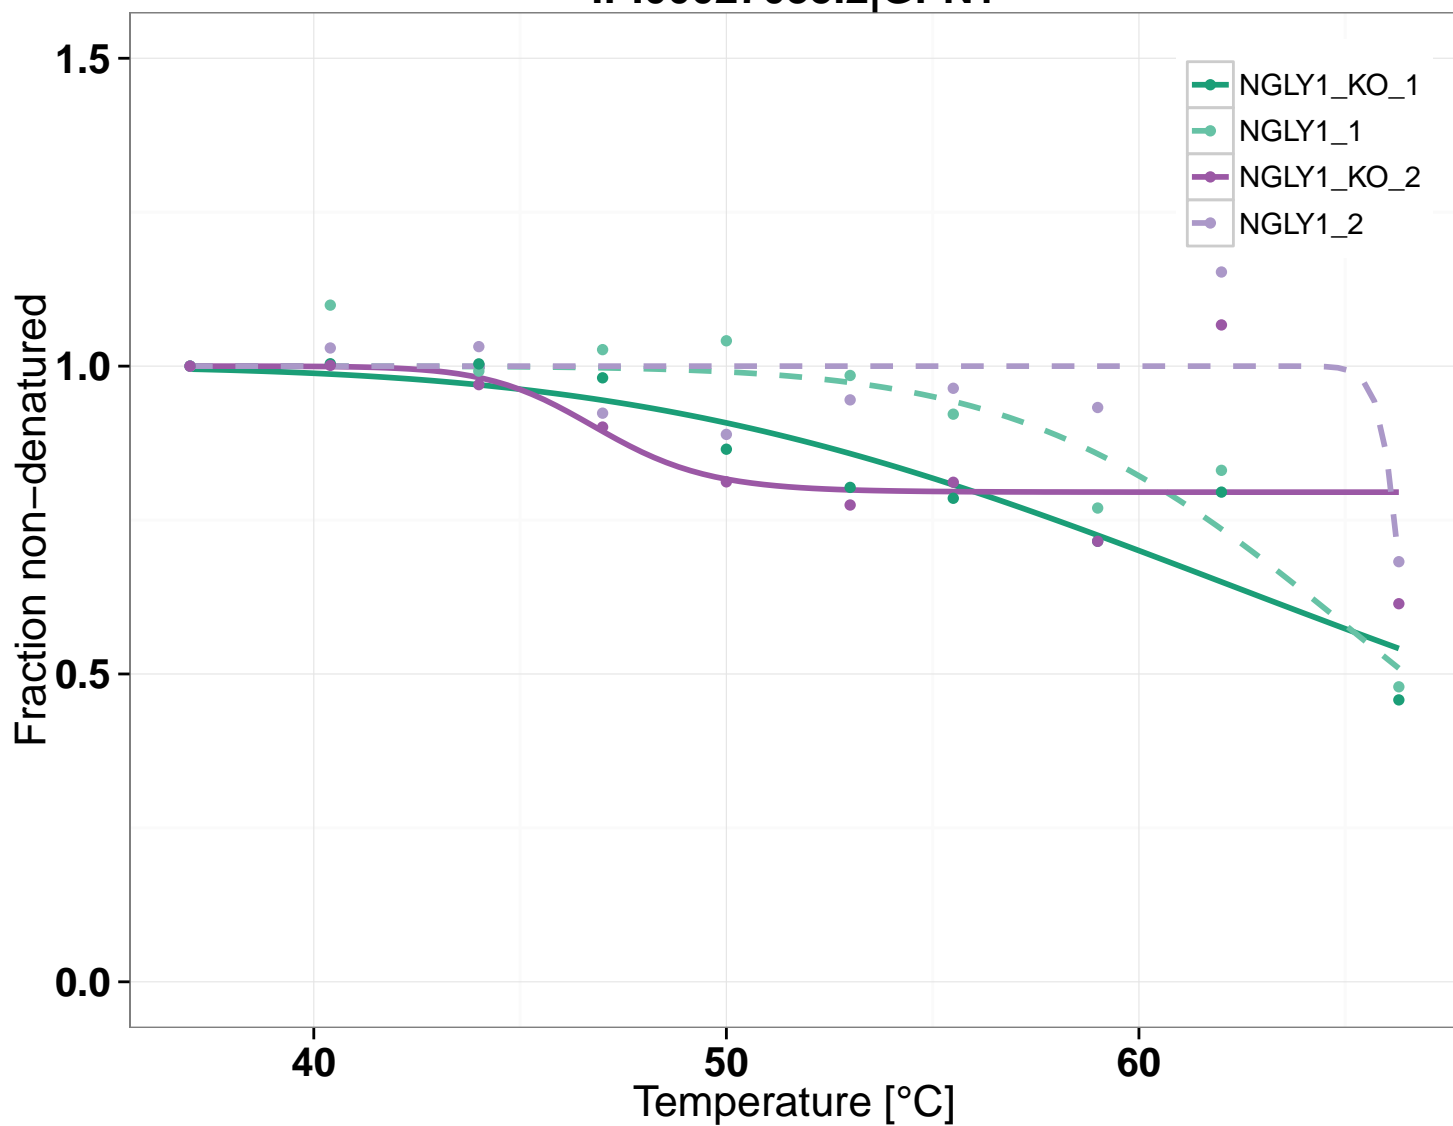

|            | meltPoint | slope  | plateau | R2   |
|------------|-----------|--------|---------|------|
| NGLY1_KO_1 | –         | –0.026 | 0       | 0.86 |
| NGLY1_1    | –         | –0.054 | 0       | 0.89 |
| NGLY1_KO_2 | –         | –0.038 | 0.8     | 0.4  |
| NGLY1_2    | –         | –      | 0       | 0.61 |

Supplement: Supplementary file 7053 [file 1]

# IPI00216164.3|EHHADH

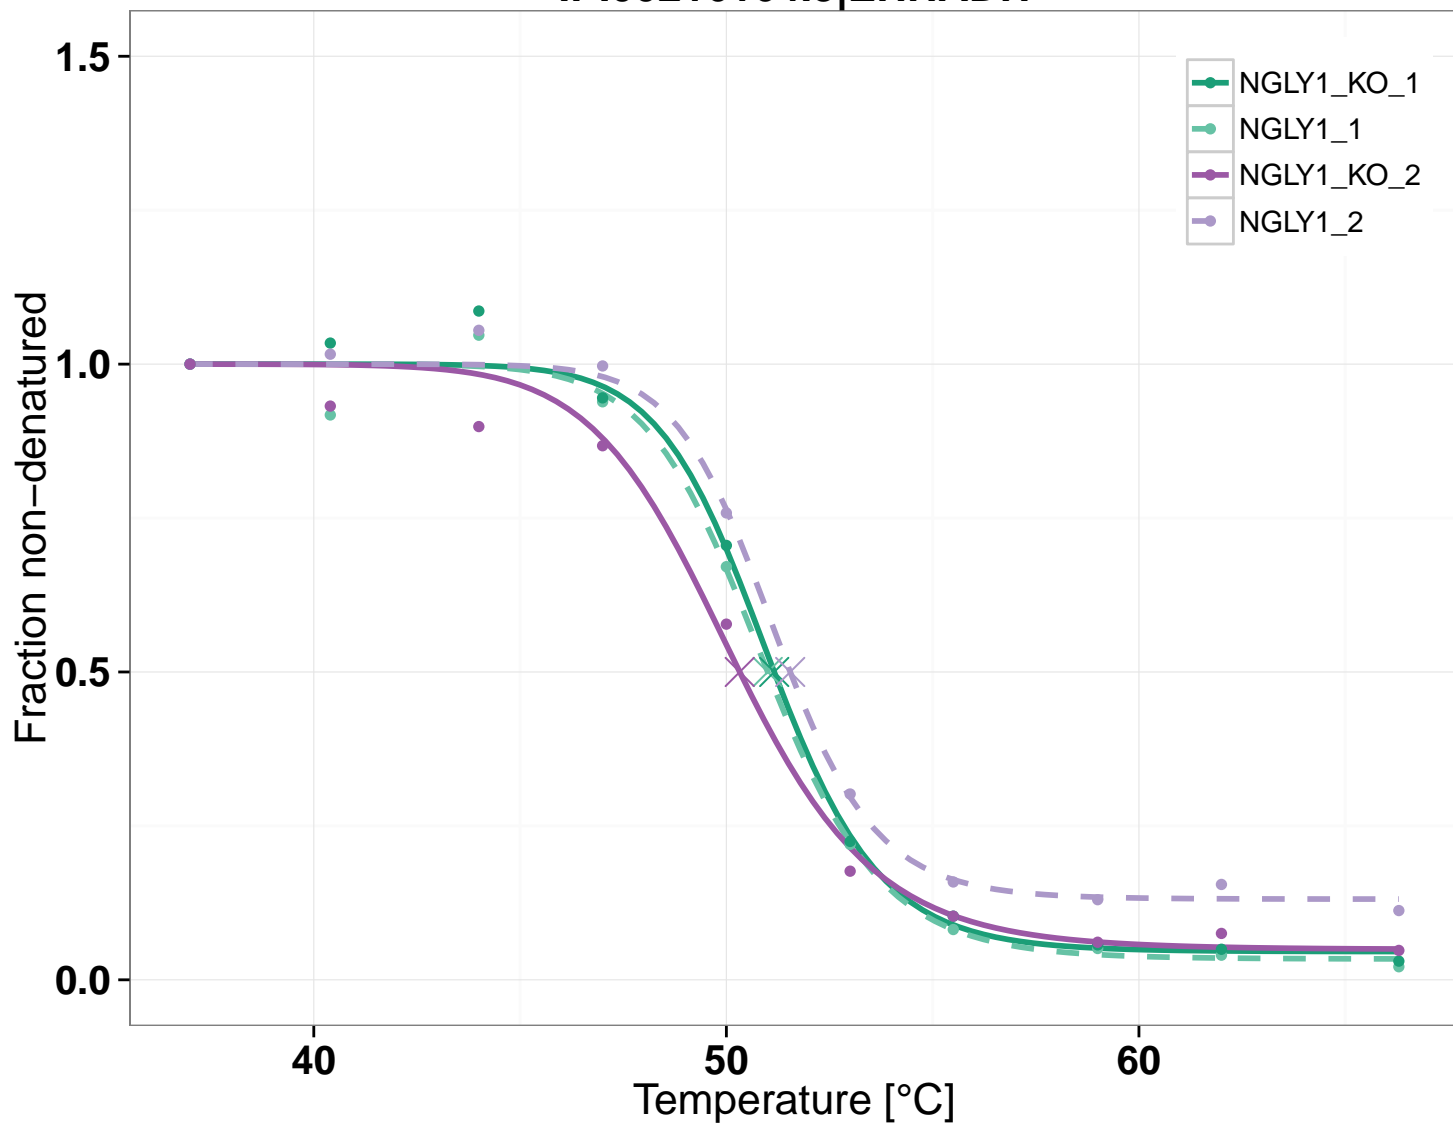

|            | meltPoint | slope | plateau | R2   |
|------------|-----------|-------|---------|------|
| NGLY1_KO_1 | 51.16     | -0.18 | 0.05    | 0.99 |
| NGLY1_1    | 51        | -0.17 | 0.03    | 0.99 |
| NGLY1_KO_2 | 50.32     | -0.14 | 0.05    | 0.99 |
| NGLY1_2    | 51.55     | -0.18 | 0.13    | 1    |

Supplement: Supplementary file 7054 [file 1]

IPI00012977.1|BTN3A3

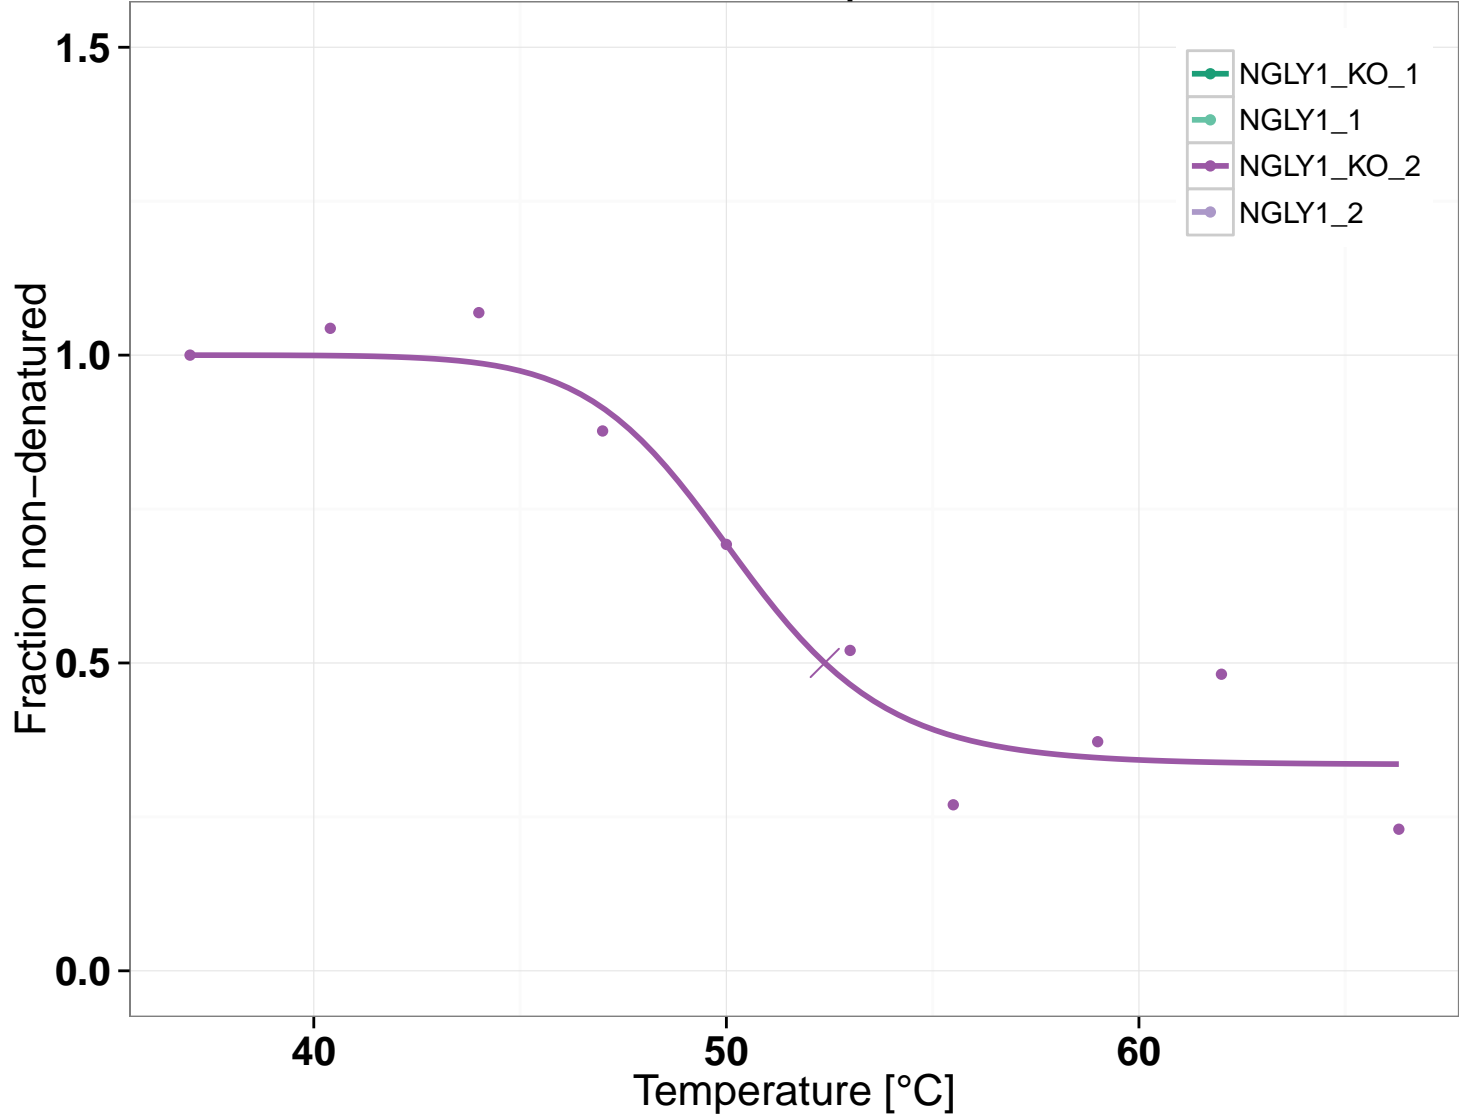

|            | meltPoint | slope  | plateau | R2   |
|------------|-----------|--------|---------|------|
| NGLY1_KO_1 | -         | -      | -       | -    |
| NGLY1_1    | -         | -      | -       | -    |
| NGLY1_KO_2 | 52.38     | -0.091 | 0.33    | 0.94 |
| NGLY1_2    | -         | -      | -       | -    |

Supplement: Supplementary file 7055 [file 1]

IPI00217391.6|LMTK2

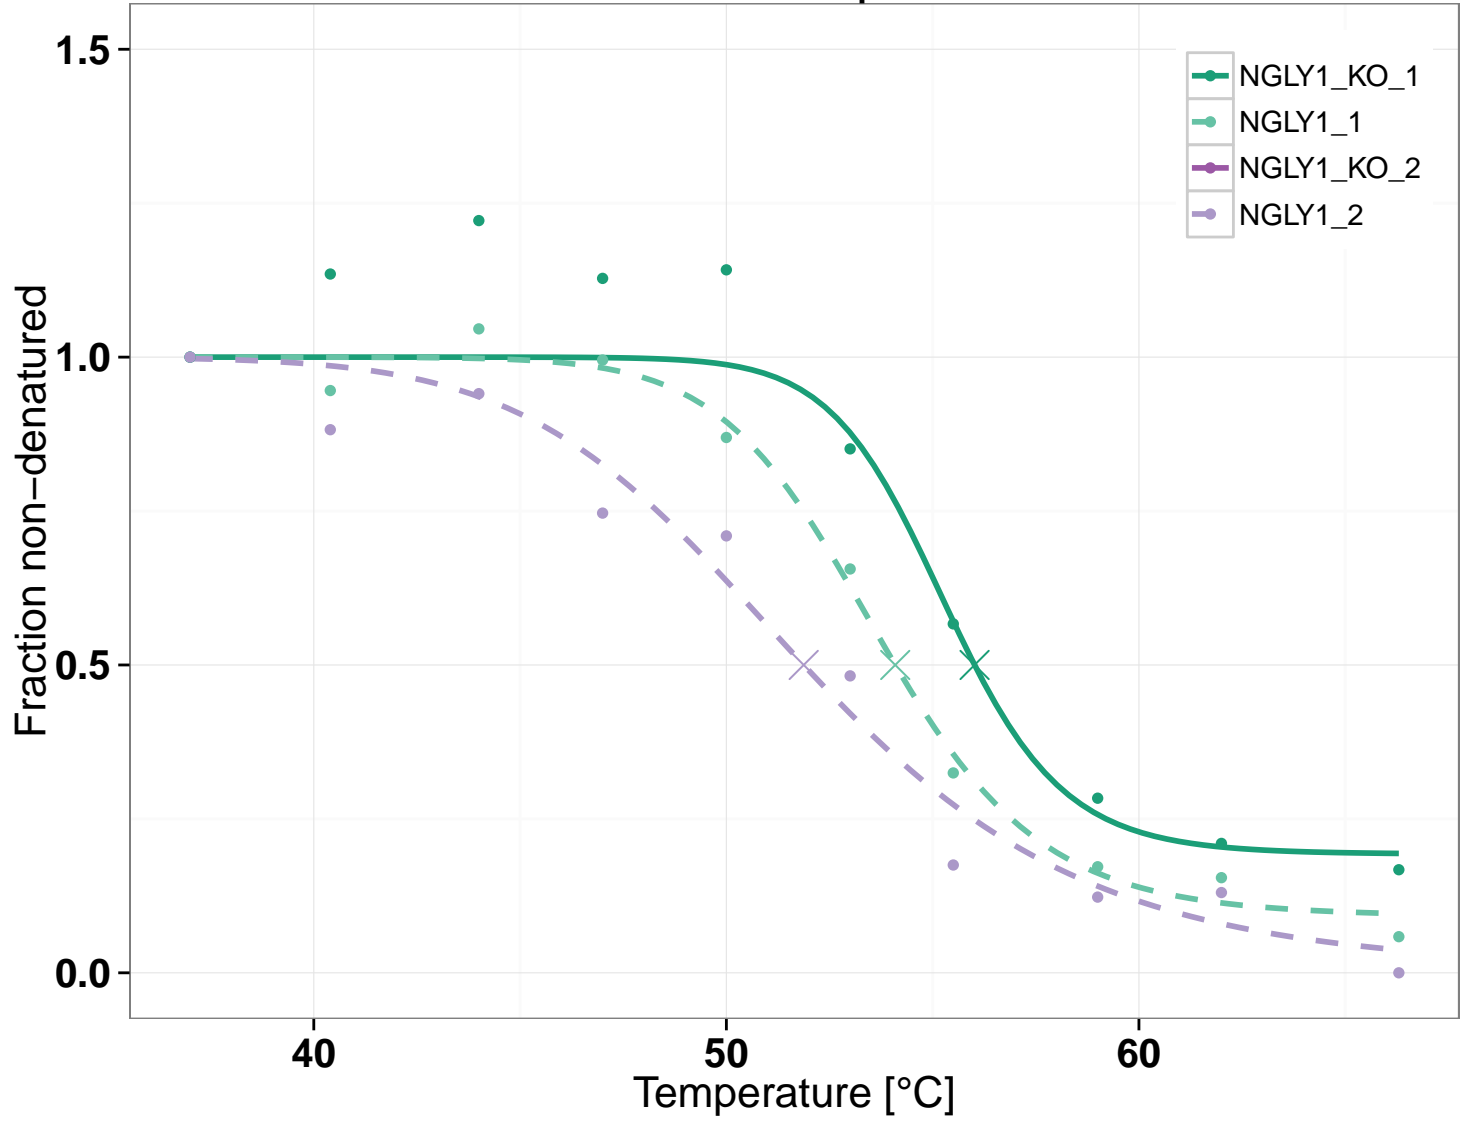

|            | meltPoint | slope  | plateau | R2   |
|------------|-----------|--------|---------|------|
| NGLY1_KO_1 | 56.02     | -0.14  | 0.19    | 0.93 |
| NGLY1_1    | 54.09     | -0.12  | 0.09    | 0.99 |
| NGLY1_KO_2 | -         | -      | -       | -    |
| NGLY1_2    | 51.87     | -0.073 | 0       | 0.97 |

Supplement: Supplementary file 7056 [file 1]

# IPI00477856.3|NMT2

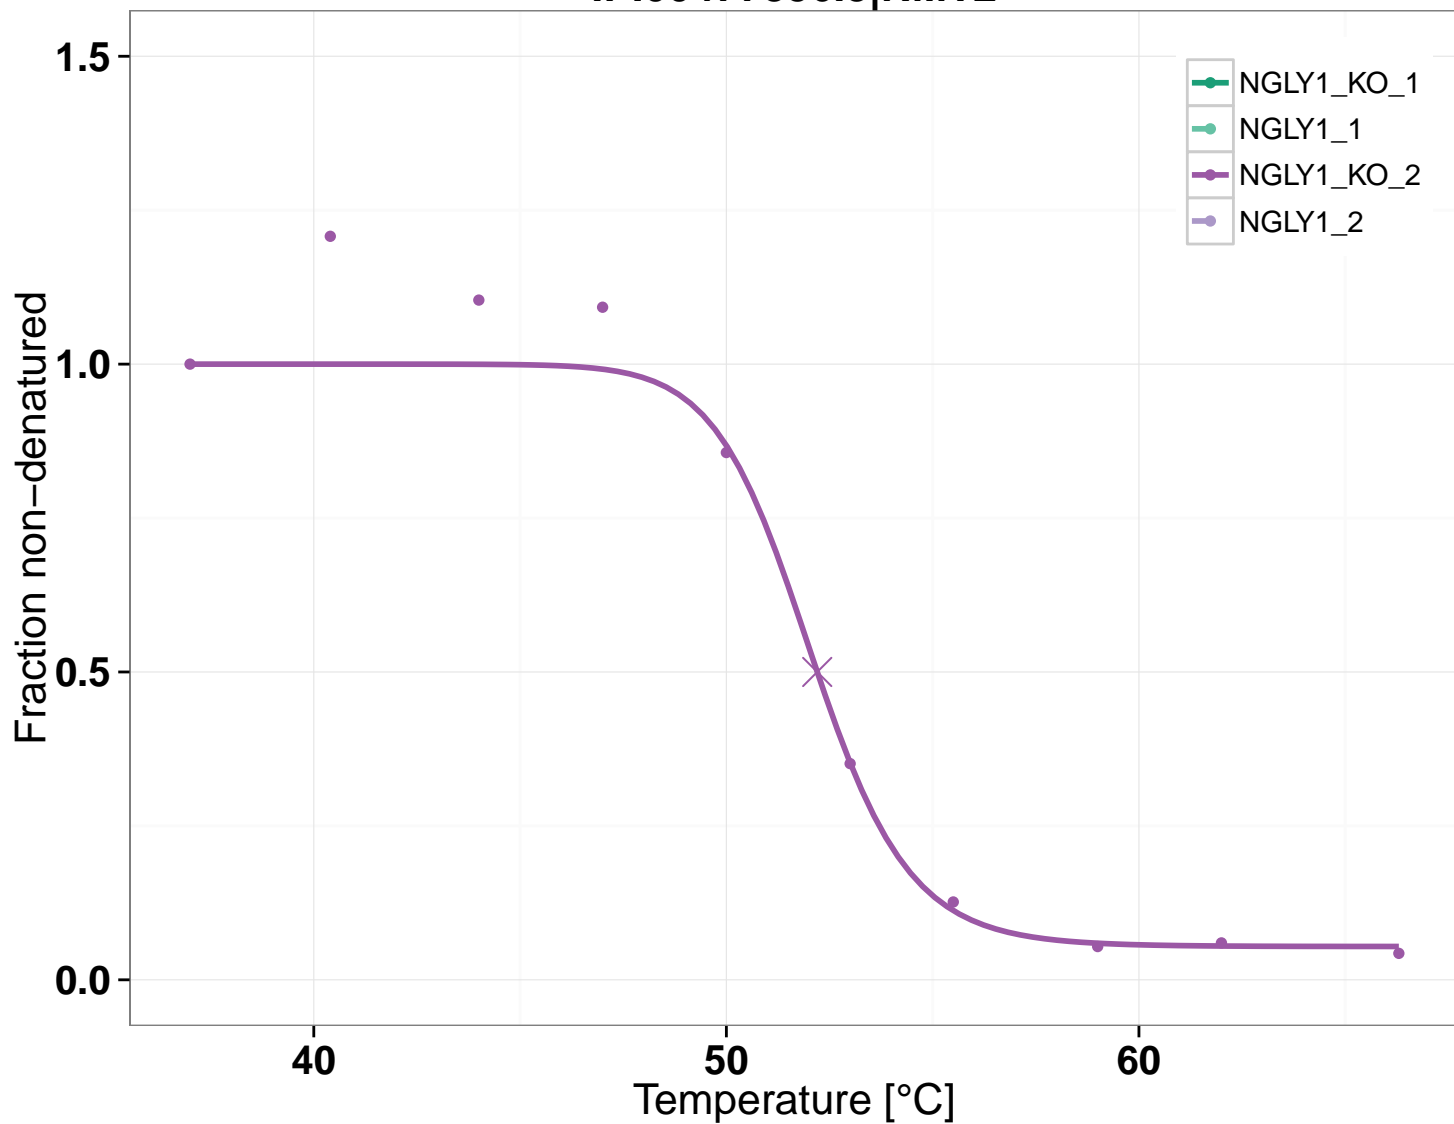

|            | meltPoint | slope | plateau | R2   |
|------------|-----------|-------|---------|------|
| NGLY1_KO_1 | —         | —     | —       | —    |
| NGLY1_1    | —         | —     | —       | —    |
| NGLY1_KO_2 | 52.2      | -0.2  | 0.05    | 0.97 |
| NGLY1_2    | —         | —     | —       | —    |

Supplement: Supplementary file 7057 [file 1]

IPI00022019.1|SAP30

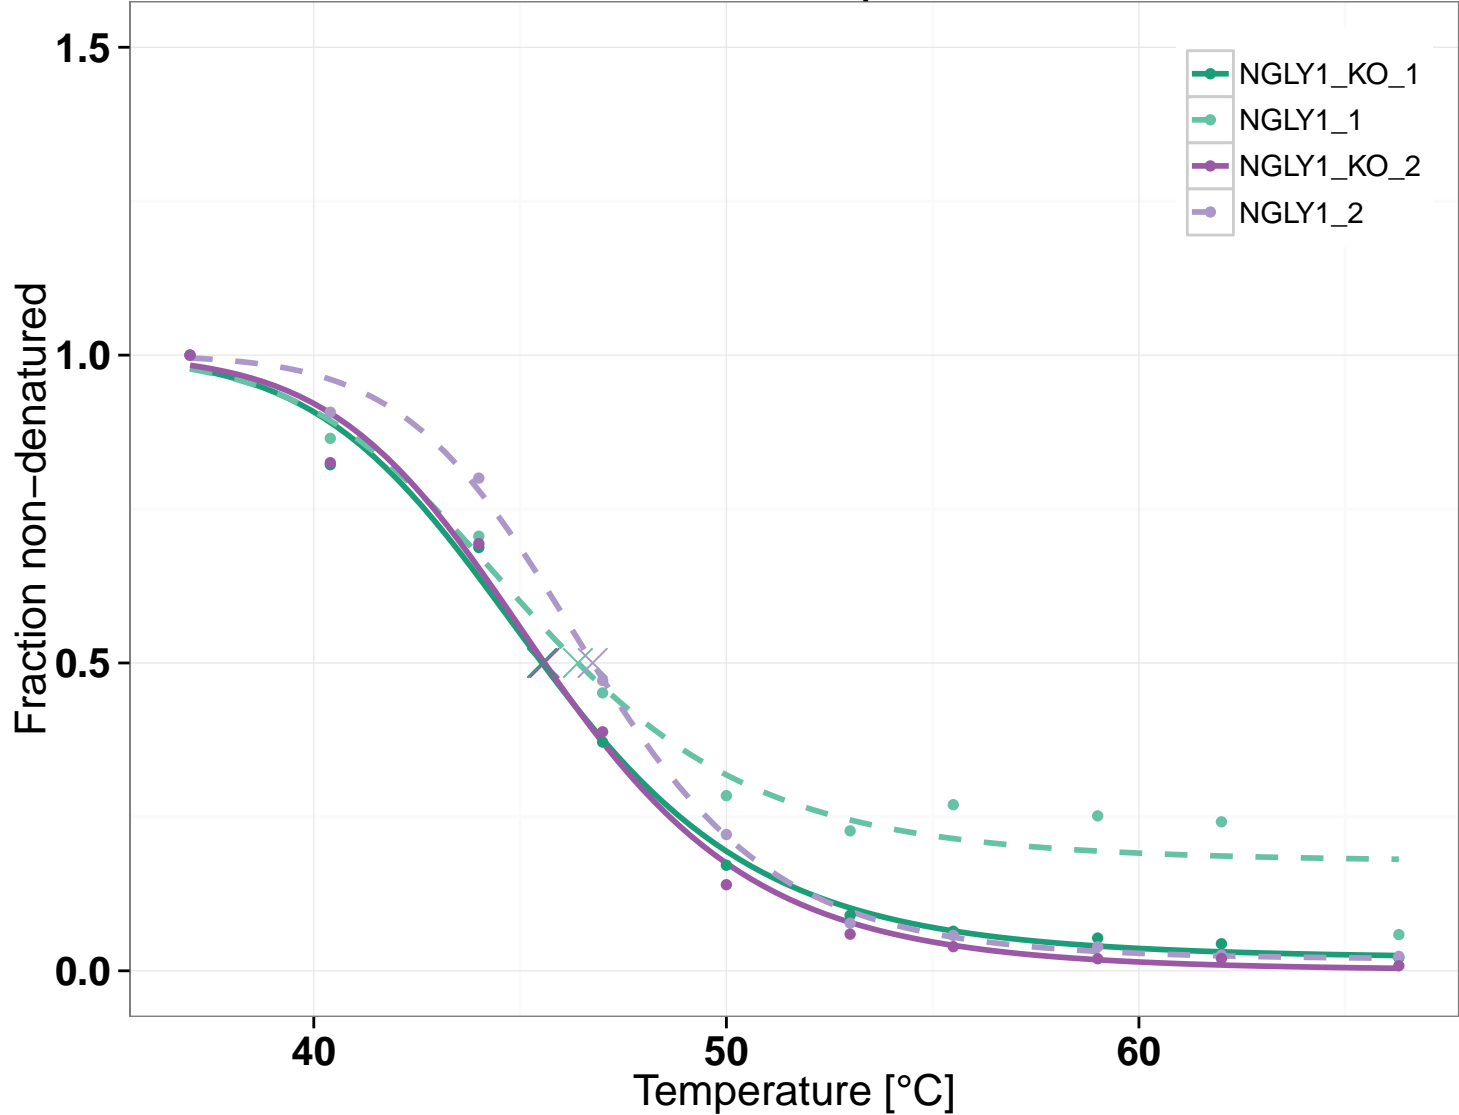

|            | meltPoint | slope  | plateau | R2   |
|------------|-----------|--------|---------|------|
| NGLY1_KO_1 | 45.53     | -0.091 | 0.02    | 0.99 |
| NGLY1_1    | 46.4      | -0.075 | 0.18    | 0.97 |
| NGLY1_KO_2 | 45.59     | -0.098 | 0       | 0.99 |
| NGLY1_2    | 46.76     | -0.11  | 0.02    | 1    |

Supplement: Supplementary file 7058 [file 1]

IPI00021408.1|NUDT4

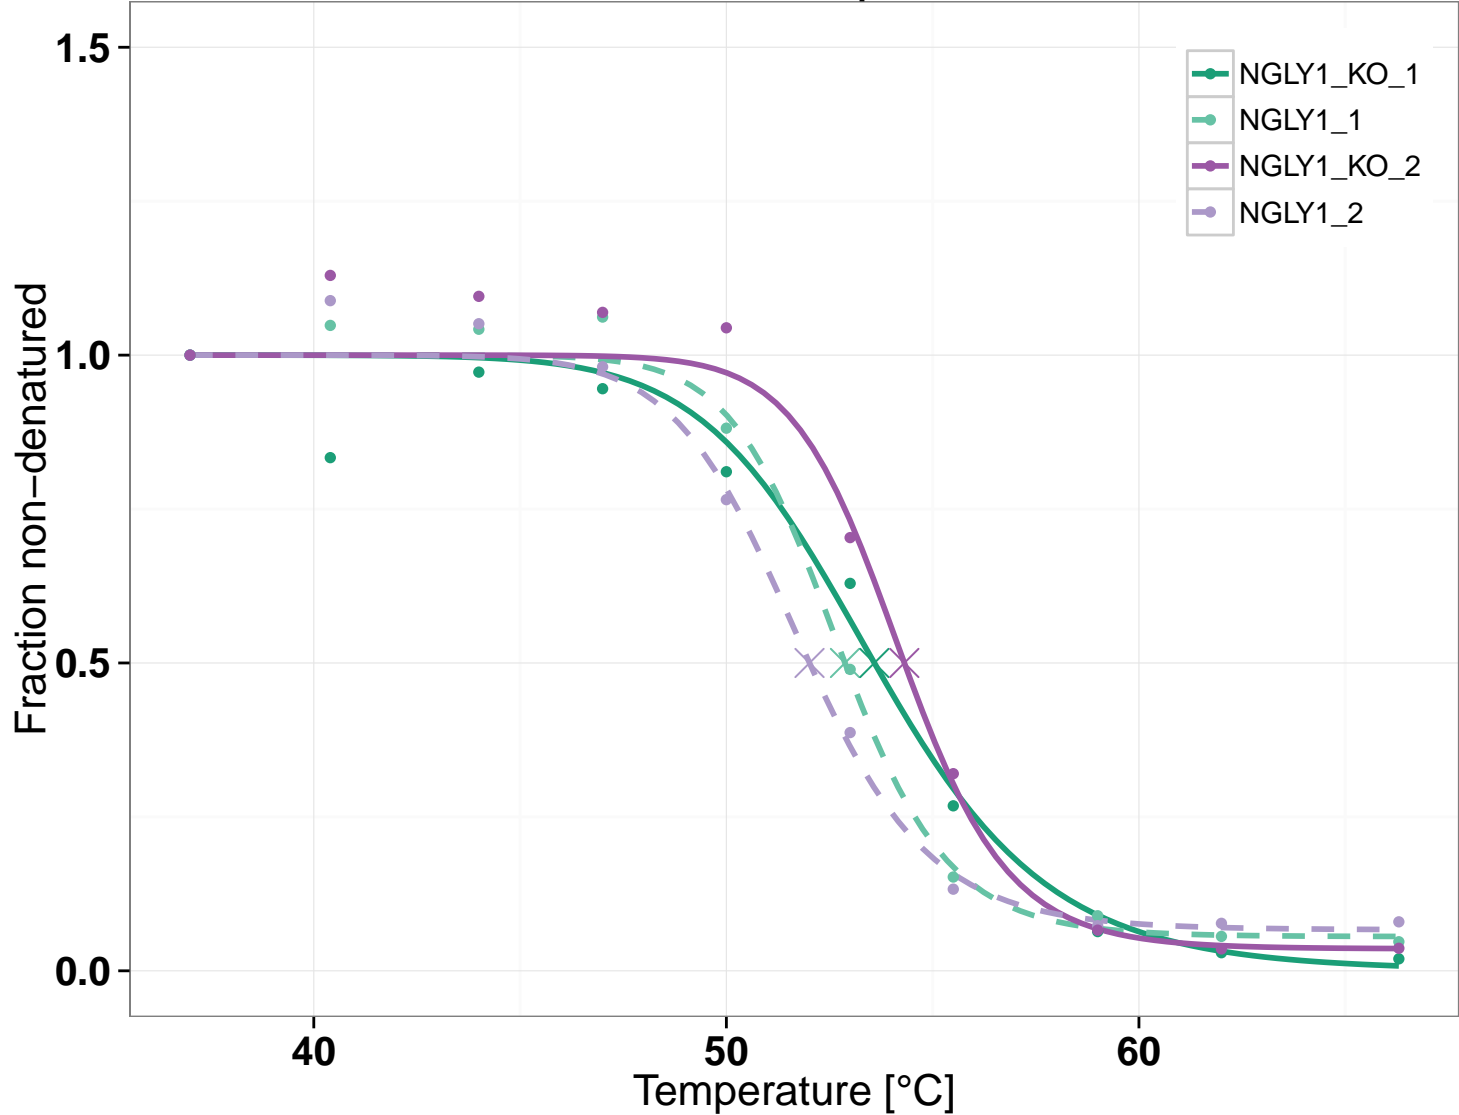

|            | meltPoint | slope | plateau | R2   |
|------------|-----------|-------|---------|------|
| NGLY1_KO_1 | 53.59     | -0.12 | 0       | 0.98 |
| NGLY1_1    | 52.87     | -0.18 | 0.06    | 0.99 |
| NGLY1_KO_2 | 54.31     | -0.18 | 0.04    | 0.98 |
| NGLY1_2    | 52.02     | -0.15 | 0.07    | 0.99 |

Supplement: Supplementary file 7059 [file 1]

IPI00784614.1|SEPT9

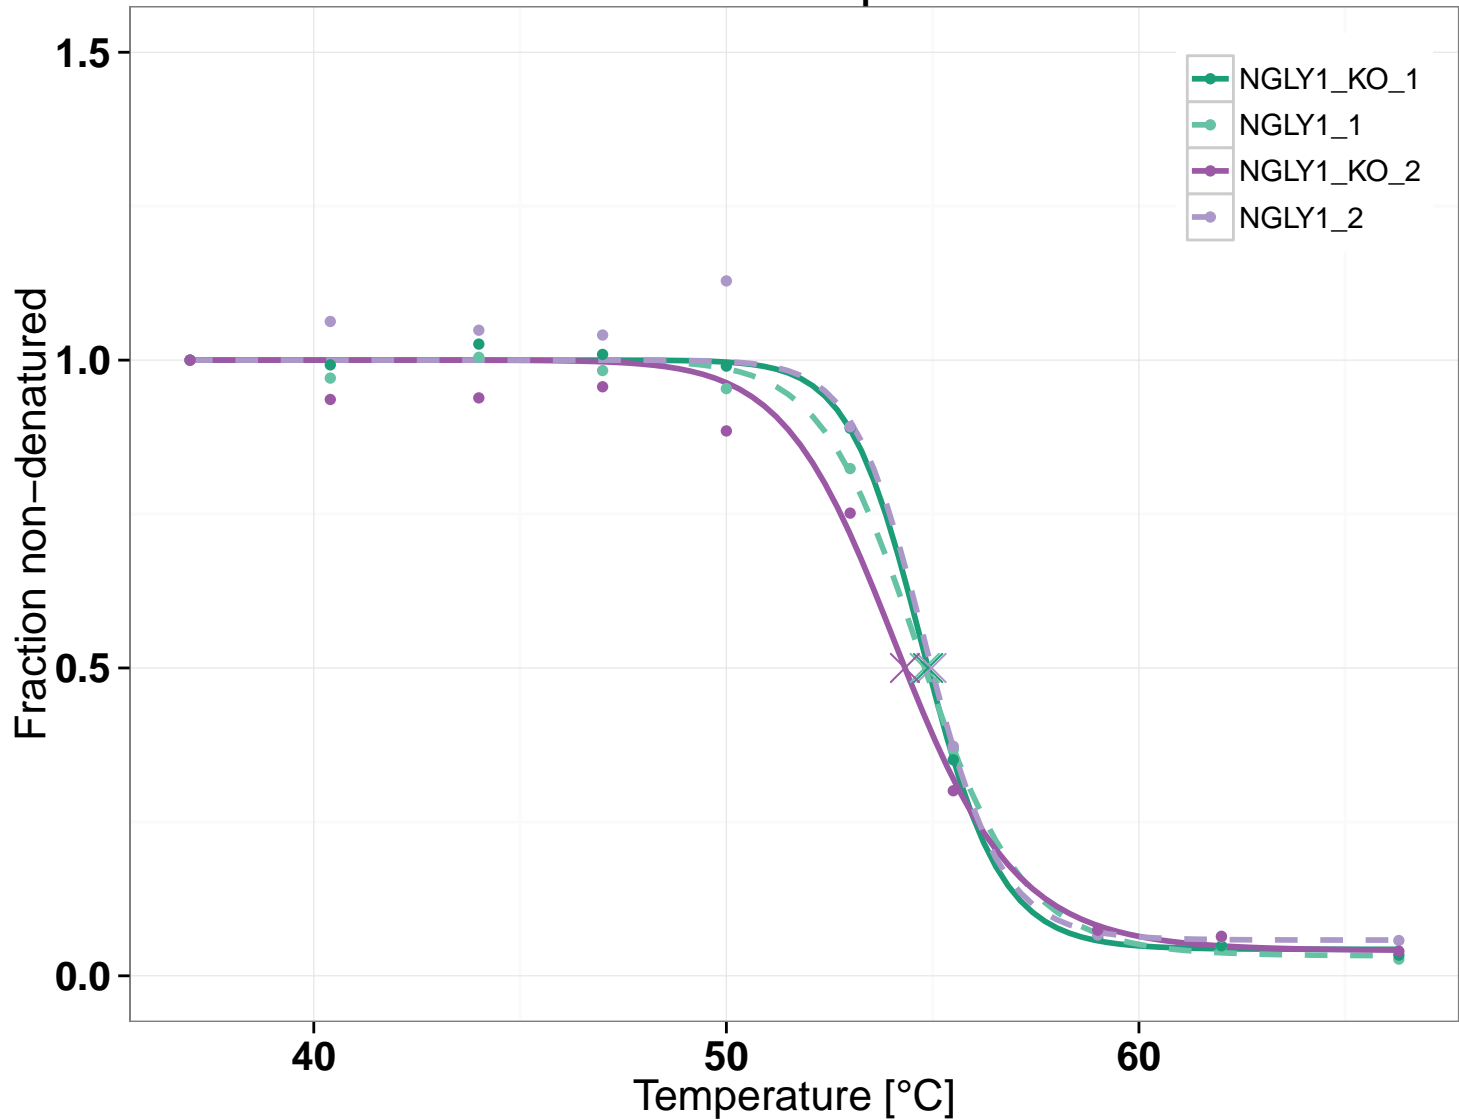

|            | meltPoint | slope | plateau | R2   |
|------------|-----------|-------|---------|------|
| NGLY1_KO_1 | 54.89     | -0.26 | 0.04    | 1    |
| NGLY1_1    | 54.81     | -0.2  | 0.03    | 1    |
| NGLY1_KO_2 | 54.33     | -0.17 | 0.04    | 0.99 |
| NGLY1_2    | 54.97     | -0.26 | 0.06    | 0.99 |

Supplement: Supplementary file 7060 [file 1]

IPI00030782.1|STAT6

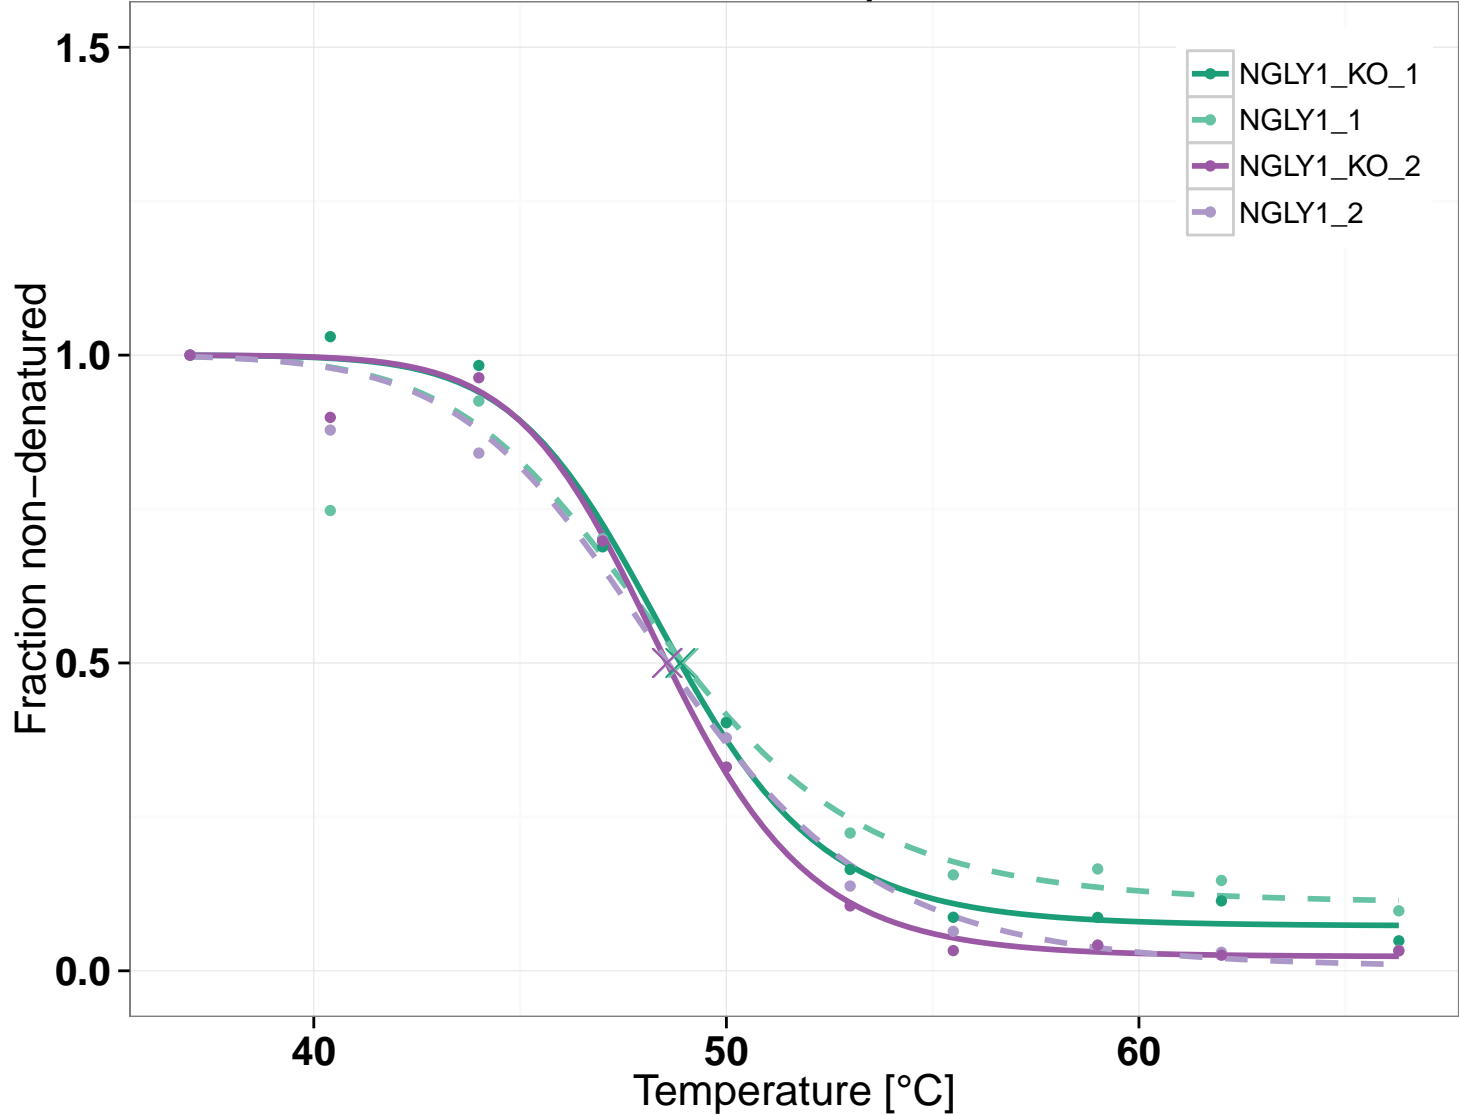

|            | meltPoint | slope  | plateau | R2   |
|------------|-----------|--------|---------|------|
| NGLY1_KO_1 | 48.88     | -0.12  | 0.07    | 1    |
| NGLY1_1    | 48.96     | -0.09  | 0.11    | 0.95 |
| NGLY1_KO_2 | 48.56     | -0.14  | 0.02    | 0.99 |
| NGLY1_2    | 48.58     | -0.099 | 0       | 0.99 |

Supplement: Supplementary file 7061 [file 1]

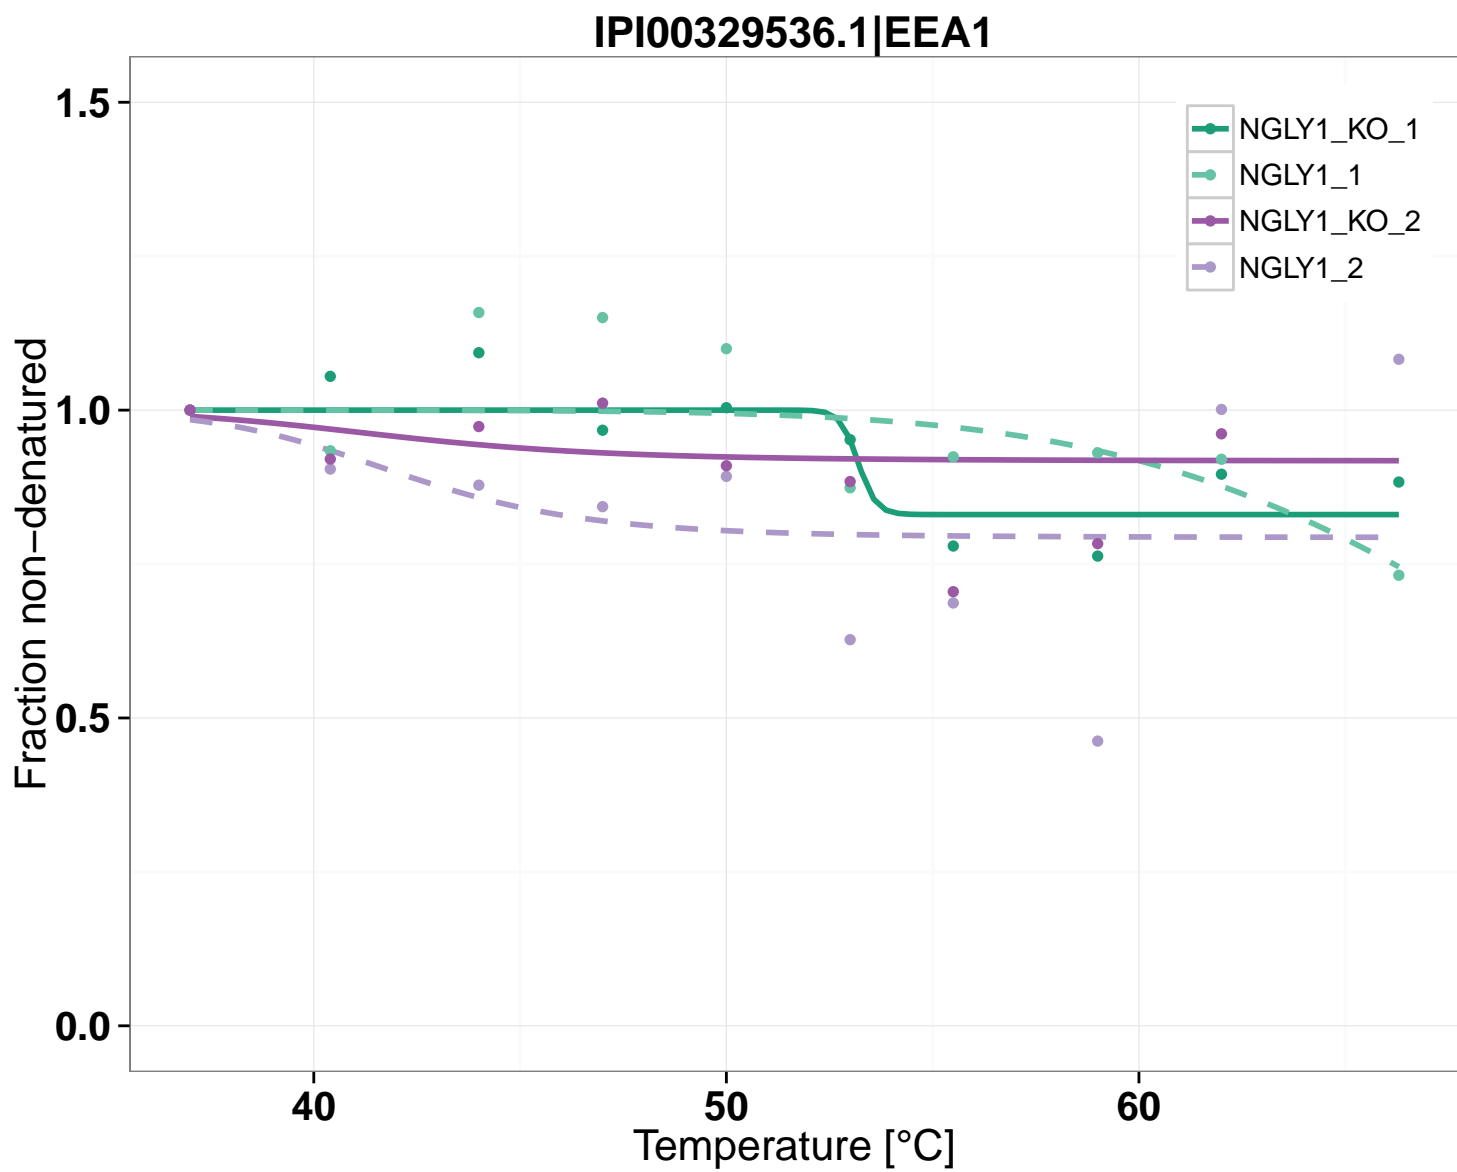

|            | meltPoint | slope   | plateau | R2   |
|------------|-----------|---------|---------|------|
| NGLY1_KO_1 | —         | −0.2    | 0.83    | 0.75 |
| NGLY1_1    | —         | —       | 0       | 0.49 |
| NGLY1_KO_2 | —         | −0.0076 | 0.92    | 0.03 |
| NGLY1_2    | —         | −0.023  | 0.79    | 0.13 |

Supplement: Supplementary file 7062 [file 1]

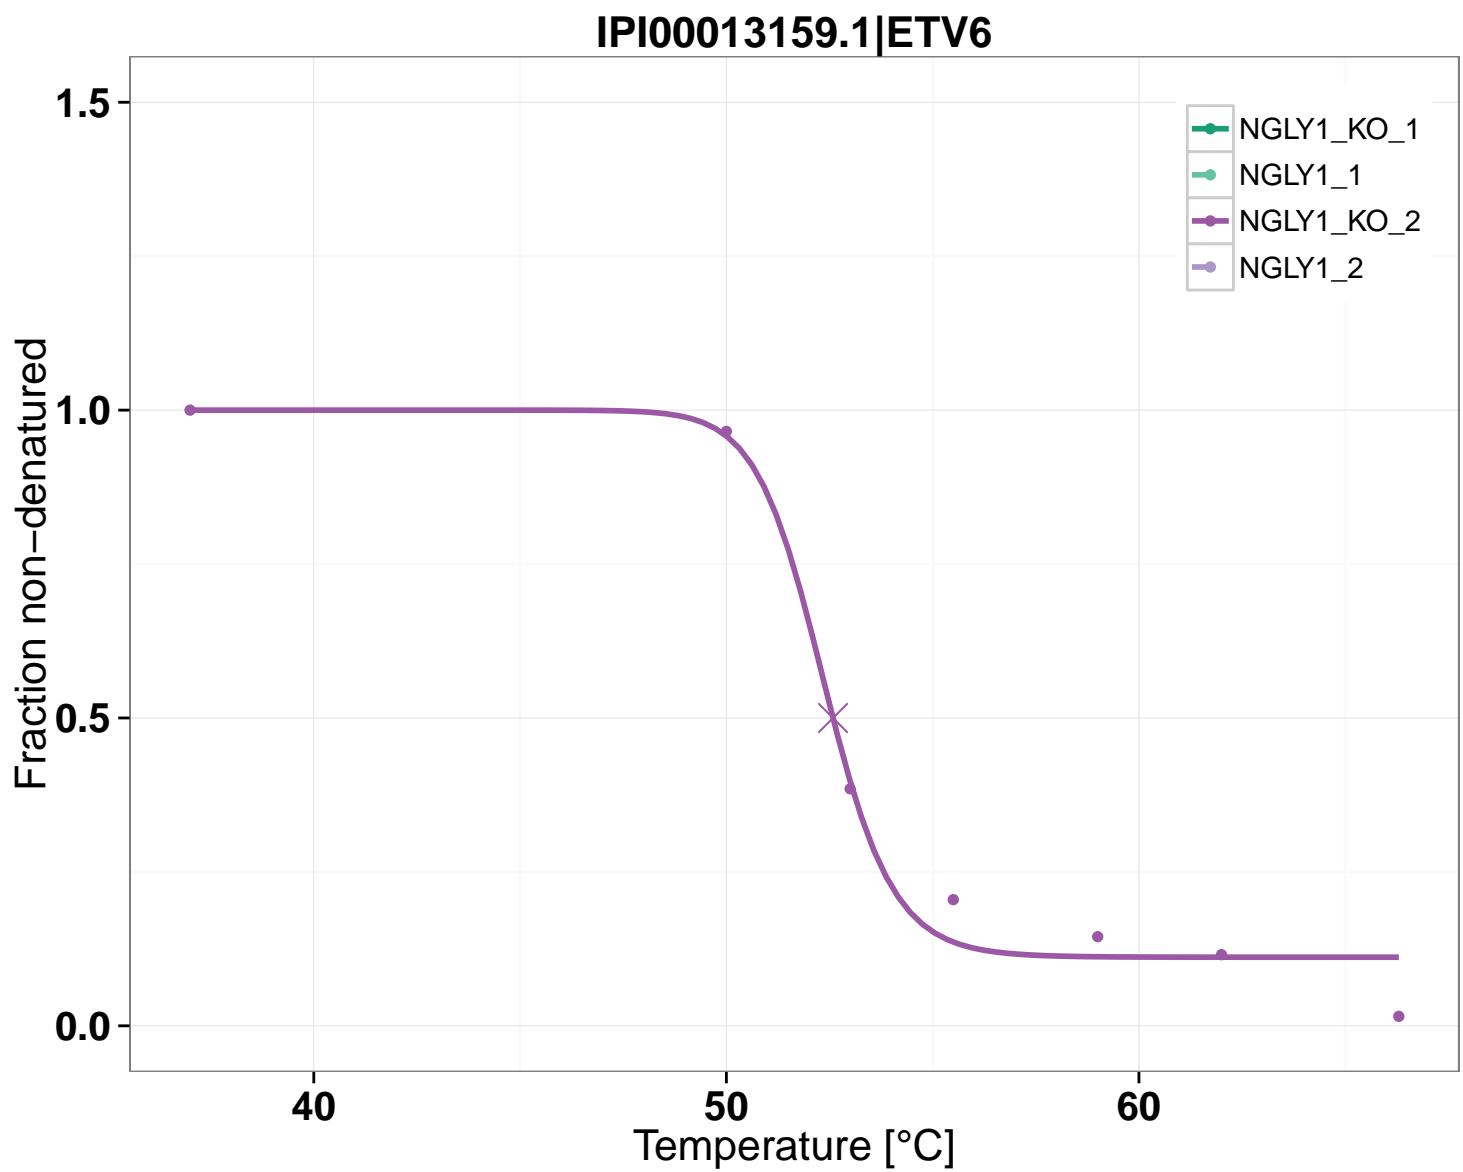

|            | meltPoint | slope | plateau | R2  |
|------------|-----------|-------|---------|-----|
| NGLY1_KO_1 | —         | —     | —       | —   |
| NGLY1_1    | —         | —     | —       | —   |
| NGLY1_KO_2 | 52.59     | -0.27 | 0.11    | 0.6 |
| NGLY1_2    | —         | —     | —       | —   |

Supplement: Supplementary file 7063 [file 1]

# IPI00021595.2|GLCCI1

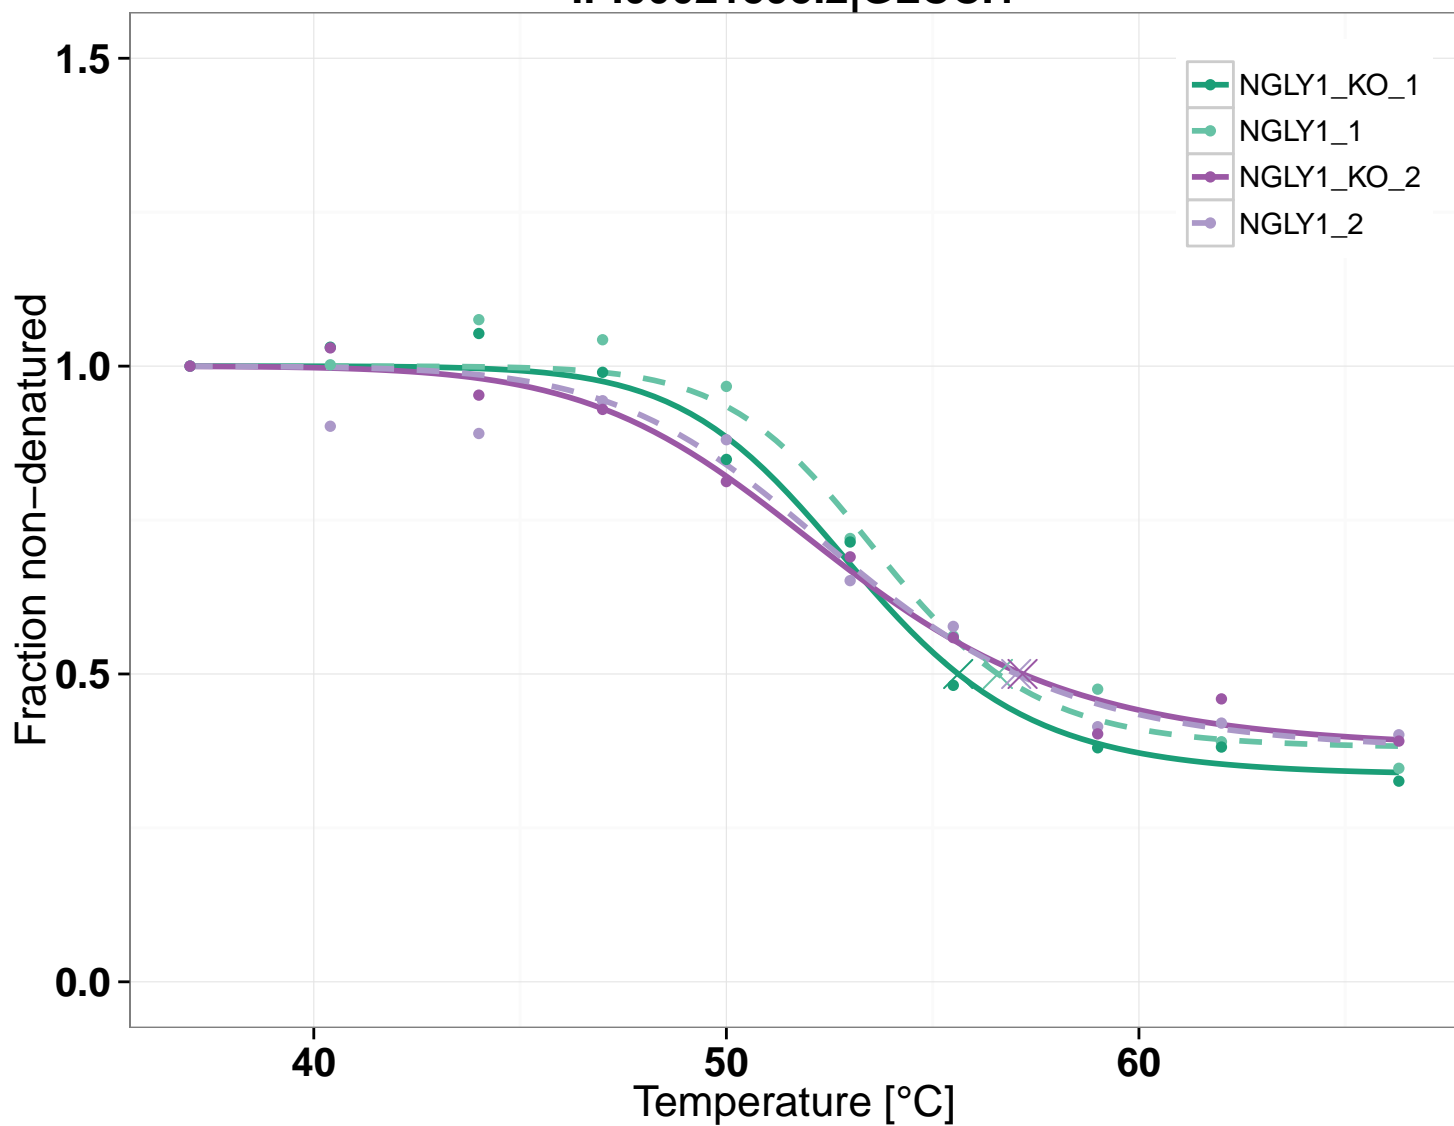

|            | meltPoint | slope  | plateau | R2   |
|------------|-----------|--------|---------|------|
| NGLY1_KO_1 | 55.62     | -0.078 | 0.34    | 0.99 |
| NGLY1_1    | 56.58     | -0.083 | 0.38    | 0.98 |
| NGLY1_KO_2 | 57.18     | -0.052 | 0.38    | 0.99 |
| NGLY1_2    | 57.03     | -0.056 | 0.37    | 0.96 |

Supplement: Supplementary file 7064 [file 1]

IPI00795769.1|DNAJC14

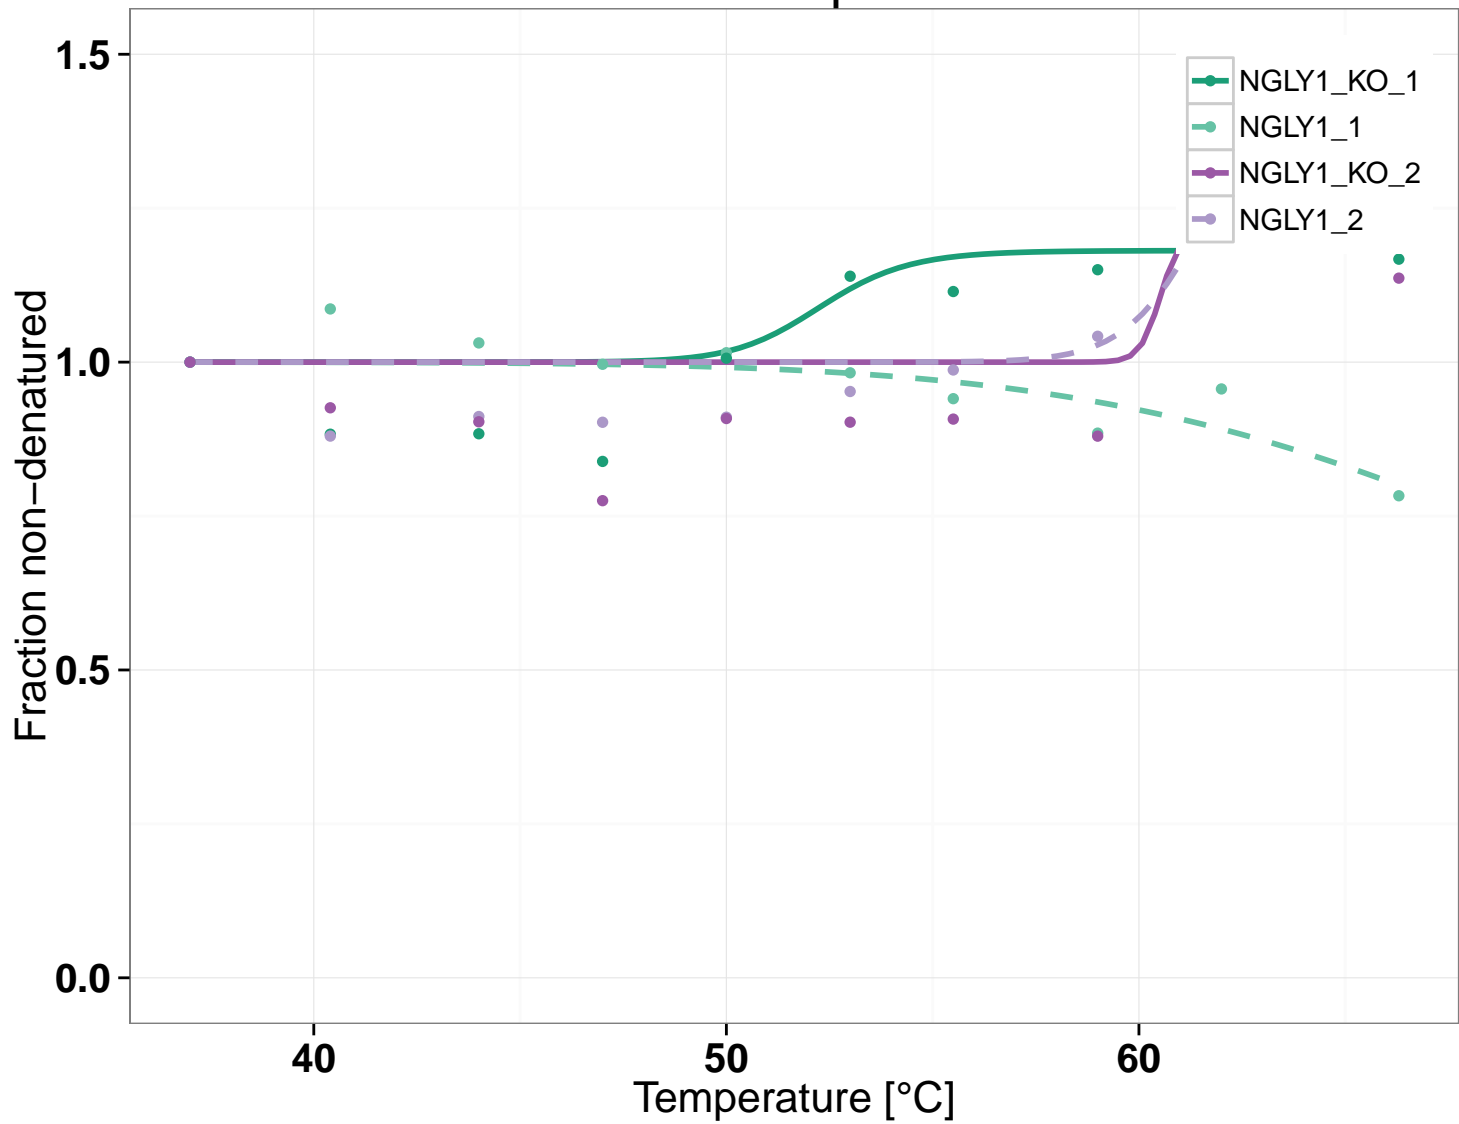

|            | meltPoint | slope | plateau | R2   |
|------------|-----------|-------|---------|------|
| NGLY1_KO_1 | –         | 0.043 | 1.18    | 0.65 |
| NGLY1_1    | –         | –     | 0       | 0.74 |
| NGLY1_KO_2 | –         | 0.22  | 1.21    | 0.39 |
| NGLY1_2    | –         | 0.12  | 1.5     | 0.89 |

Supplement: Supplementary file 7065 [file 1]

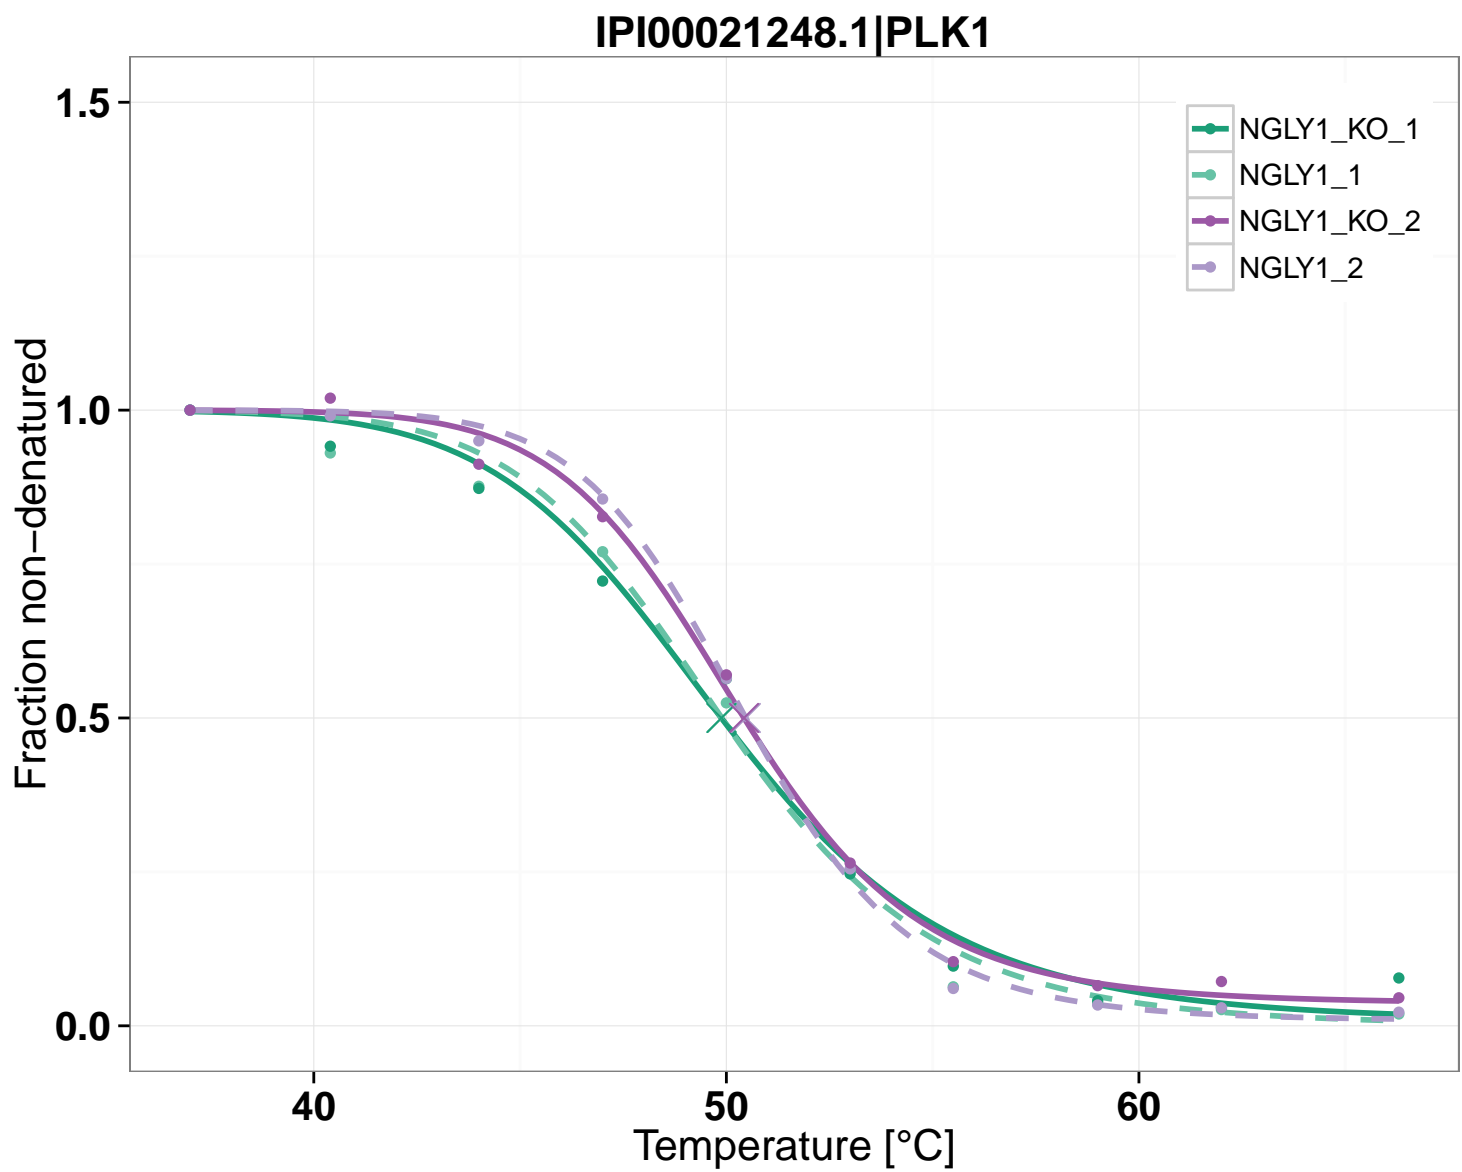

|            | meltPoint | slope  | plateau | R2   |
|------------|-----------|--------|---------|------|
| NGLY1_KO_1 | 49.88     | -0.089 | 0.01    | 0.99 |
| NGLY1_1    | 49.89     | -0.098 | 0       | 0.99 |
| NGLY1_KO_2 | 50.43     | -0.11  | 0.04    | 1    |
| NGLY1_2    | 50.47     | -0.12  | 0.01    | 1    |

Supplement: Supplementary file 7066 [file 1]

IPI00031195.5|VANGL1

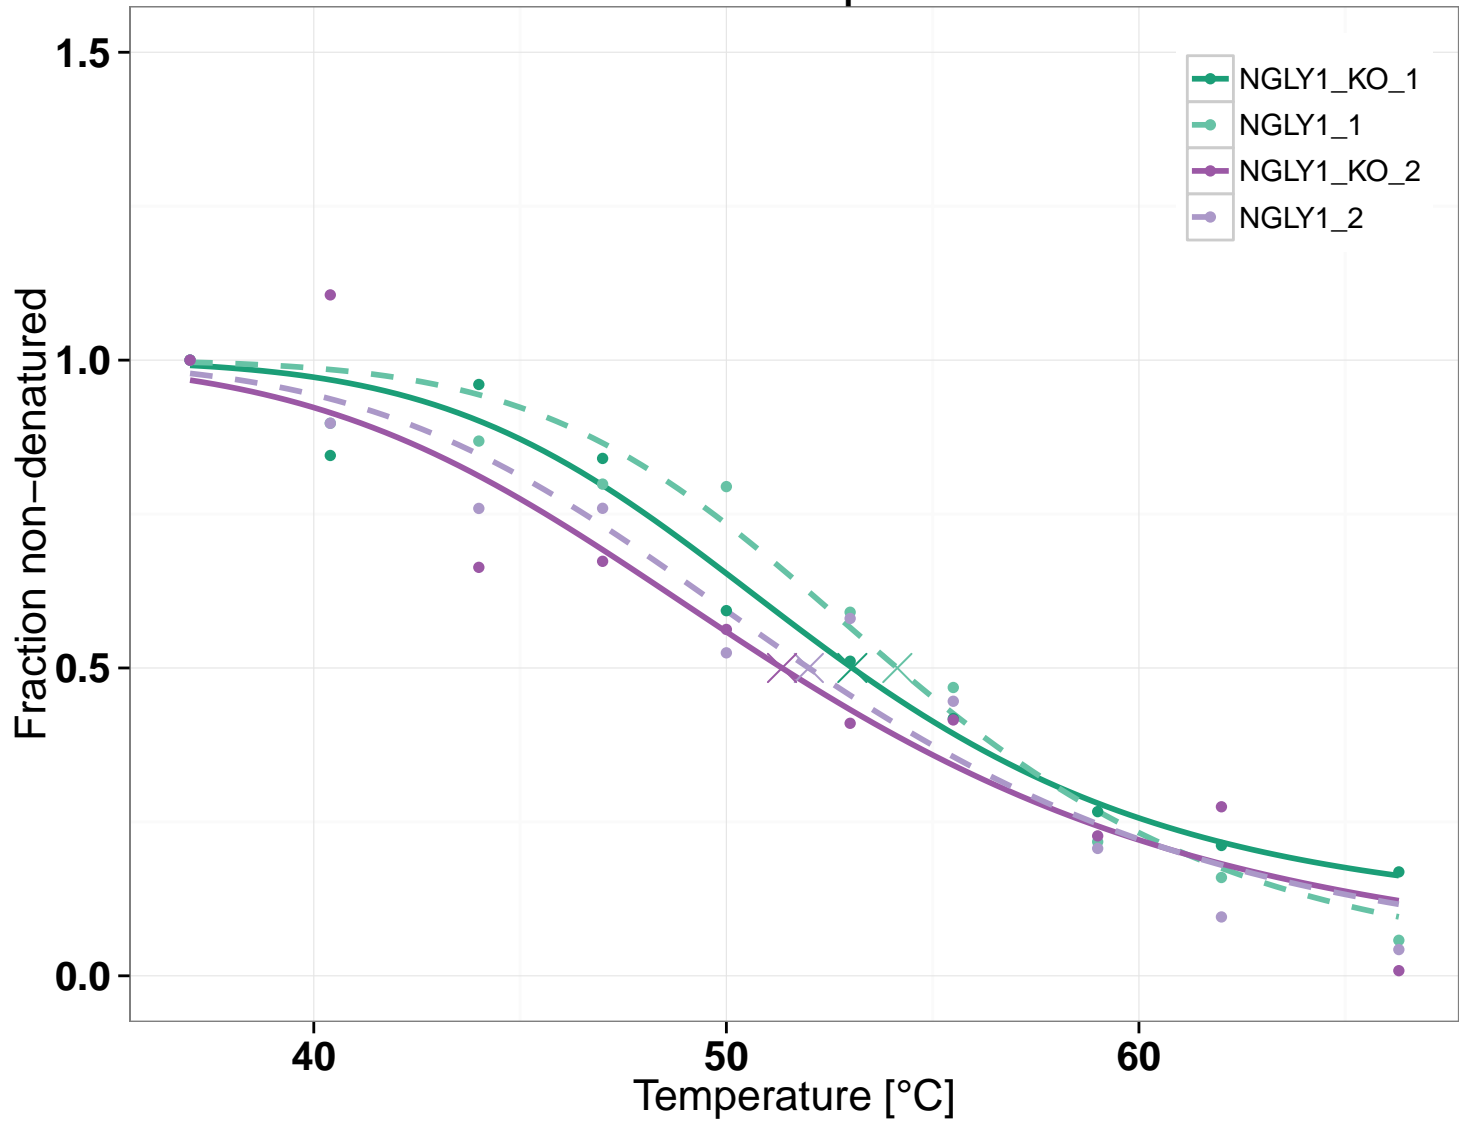

|            | meltPoint | slope  | plateau | R2   |
|------------|-----------|--------|---------|------|
| NGLY1_KO_1 | 53.05     | -0.051 | 0.09    | 0.97 |
| NGLY1_1    | 54.14     | -0.058 | 0       | 0.97 |
| NGLY1_KO_2 | 51.35     | -0.045 | 0       | 0.92 |
| NGLY1_2    | 52        | -0.047 | 0       | 0.95 |

Supplement: Supplementary file 7067 [file 1]

# IPI00759799.1|MPDU1

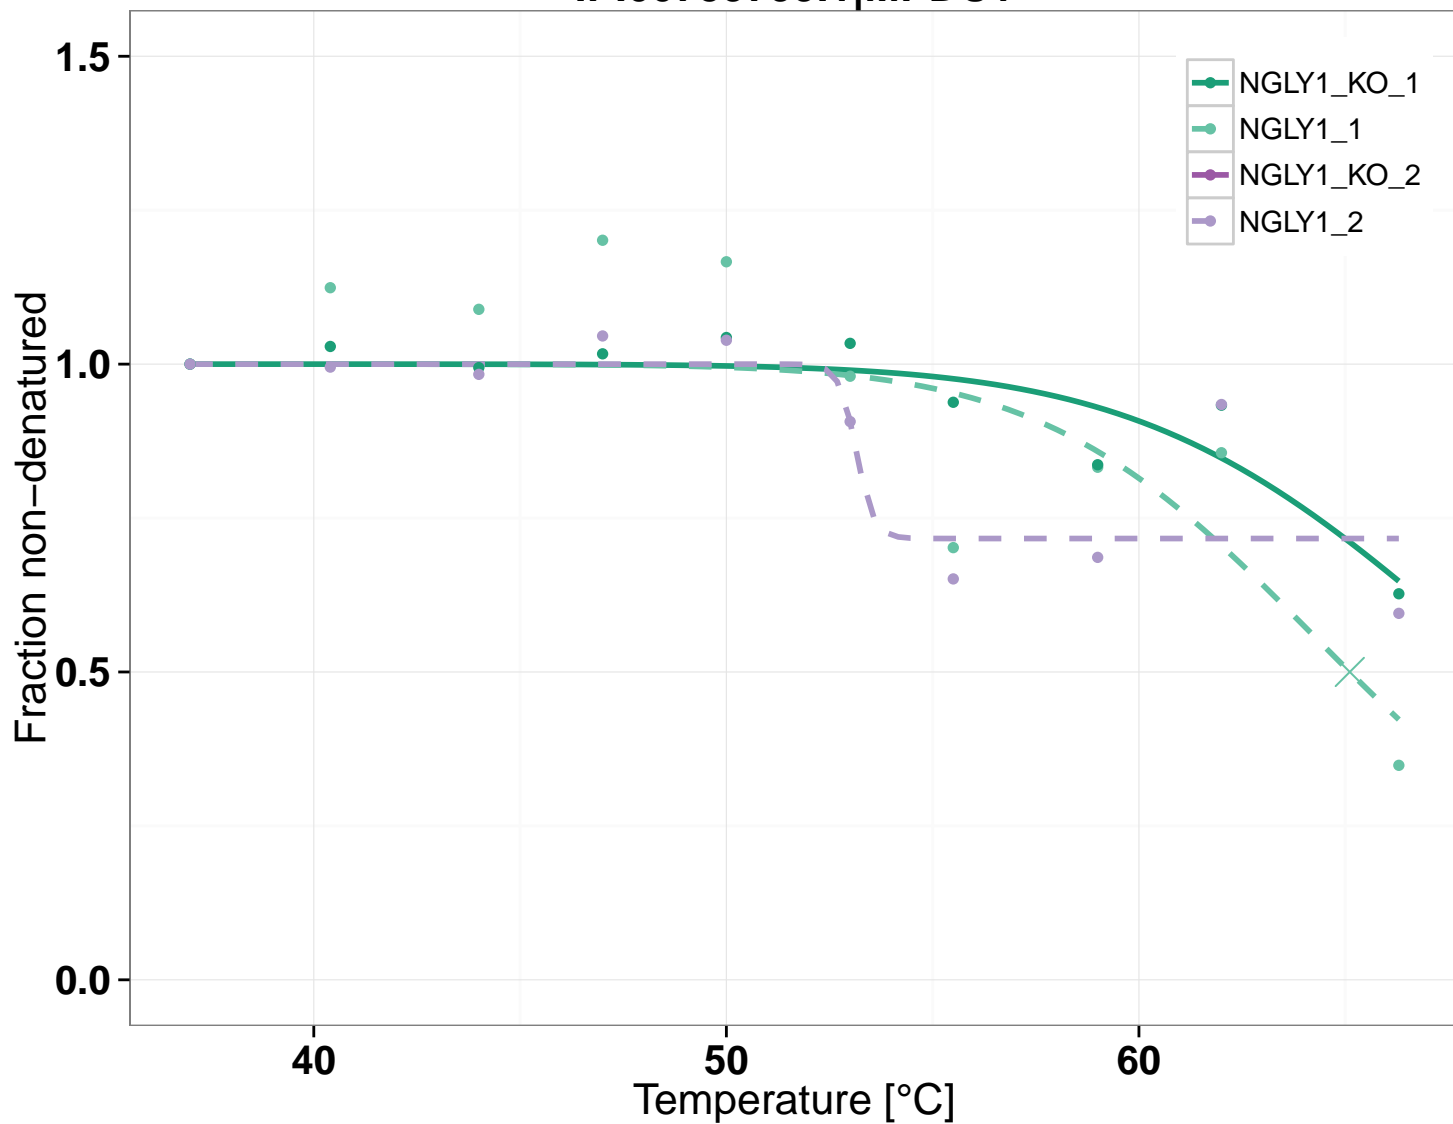

|            | meltPoint | slope  | plateau | R2   |
|------------|-----------|--------|---------|------|
| NGLY1_KO_1 | -         | -      | 0       | 0.84 |
| NGLY1_1    | 65.11     | -0.068 | 0       | 0.69 |
| NGLY1_KO_2 | -         | -      | -       | -    |
| NGLY1_2    | -         | -0.33  | 0.72    | 0.73 |

Supplement: Supplementary file 7068 [file 1]

IPI00910701.1|AARS

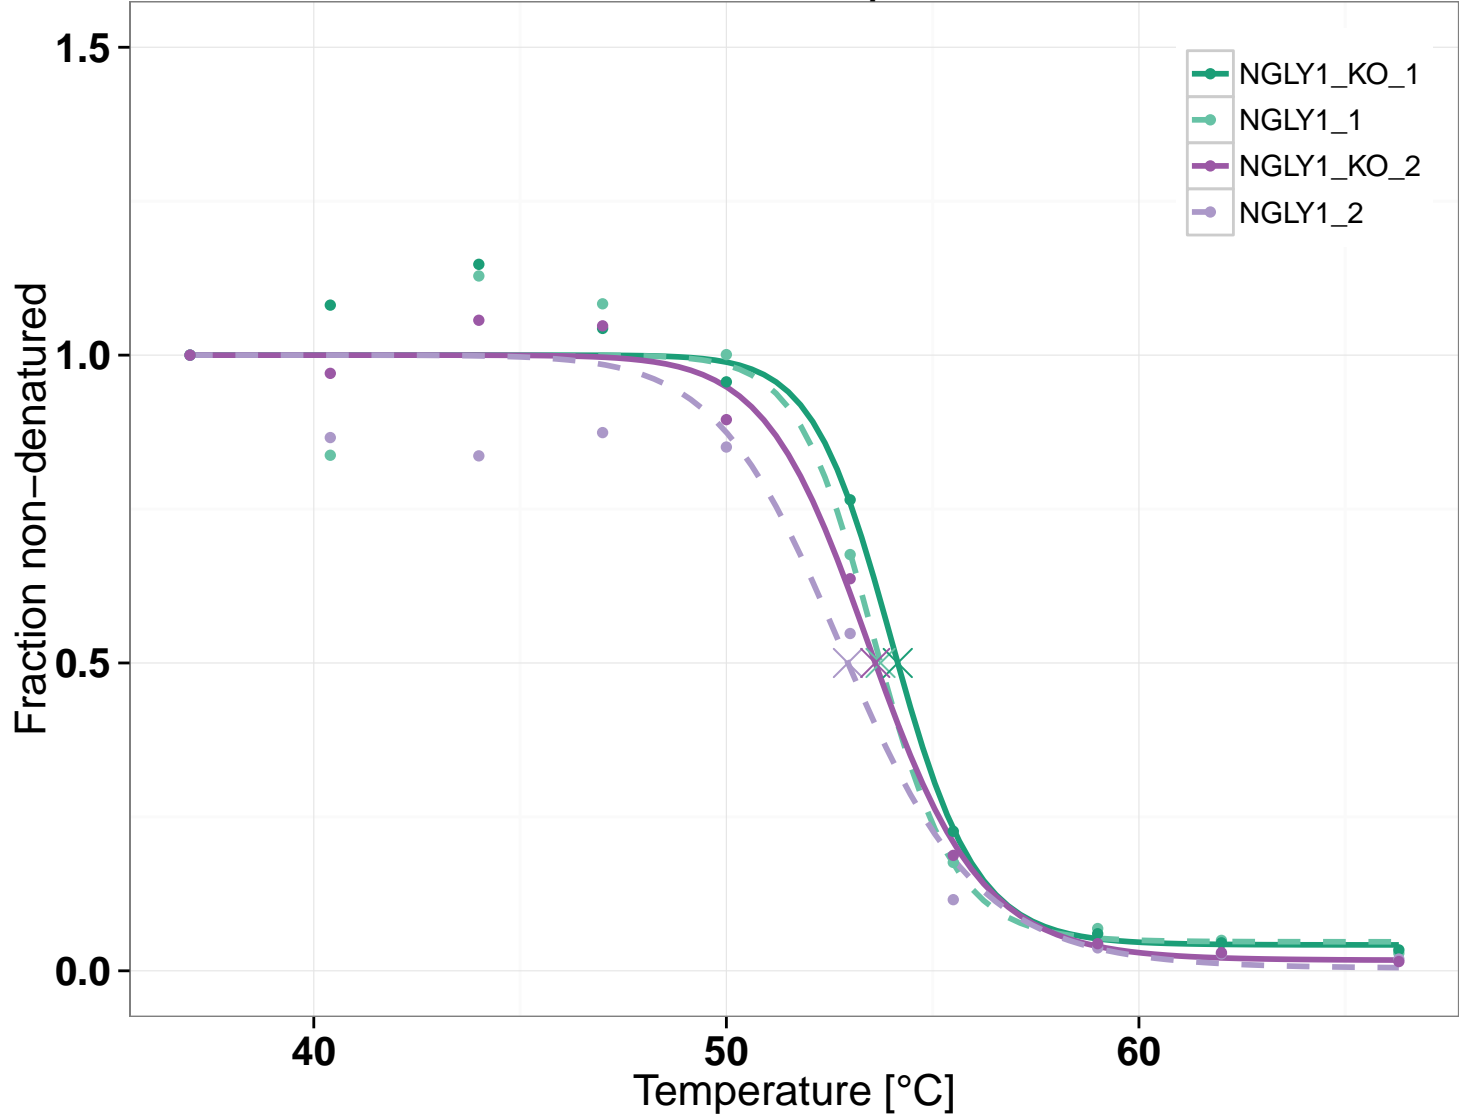

|            | meltPoint | slope | plateau | R2   |
|------------|-----------|-------|---------|------|
| NGLY1_KO_1 | 54.15     | -0.24 | 0.04    | 0.98 |
| NGLY1_1    | 53.74     | -0.25 | 0.05    | 0.97 |
| NGLY1_KO_2 | 53.61     | -0.19 | 0.02    | 0.99 |
| NGLY1_2    | 52.95     | -0.16 | 0       | 0.96 |

Supplement: Supplementary file 7069 [file 1]

IPI00396485.3|EEF1A1

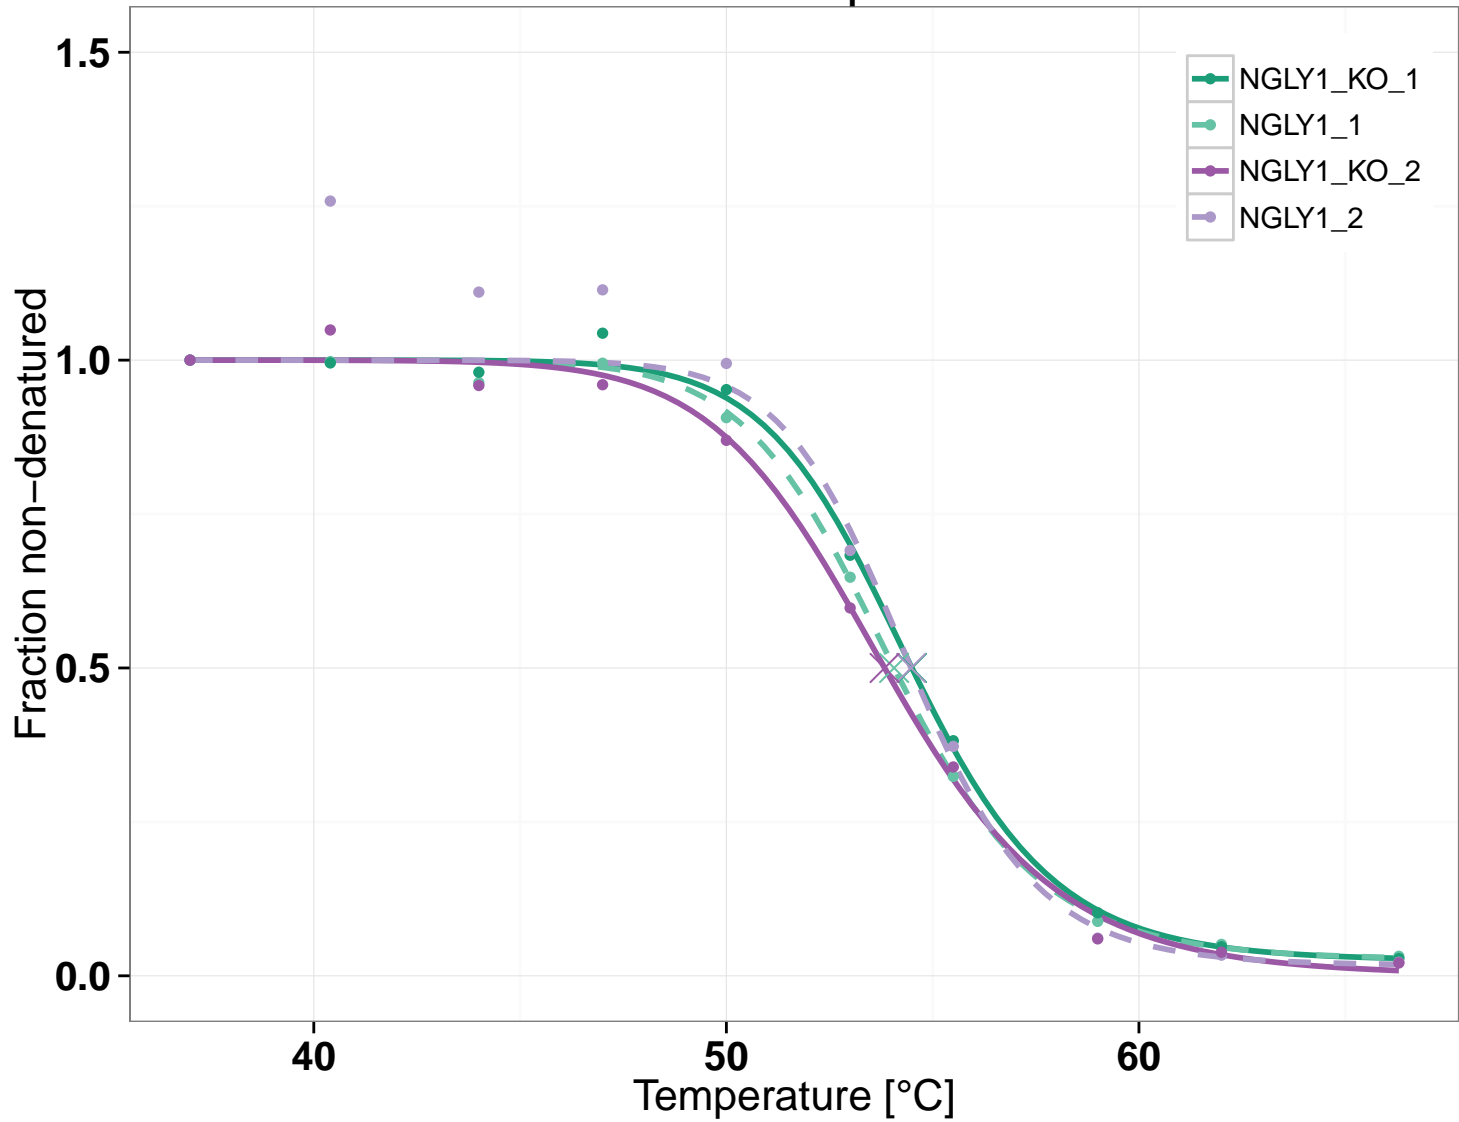

|            | meltPoint | slope | plateau | R2   |
|------------|-----------|-------|---------|------|
| NGLY1_KO_1 | 54.5      | -0.14 | 0.02    | 1    |
| NGLY1_1    | 54.07     | -0.13 | 0.03    | 1    |
| NGLY1_KO_2 | 53.84     | -0.12 | 0       | 1    |
| NGLY1_2    | 54.48     | -0.16 | 0.02    | 0.96 |

Supplement: Supplementary file 7070 [file 1]

IPI00328905.5|IQGAP3

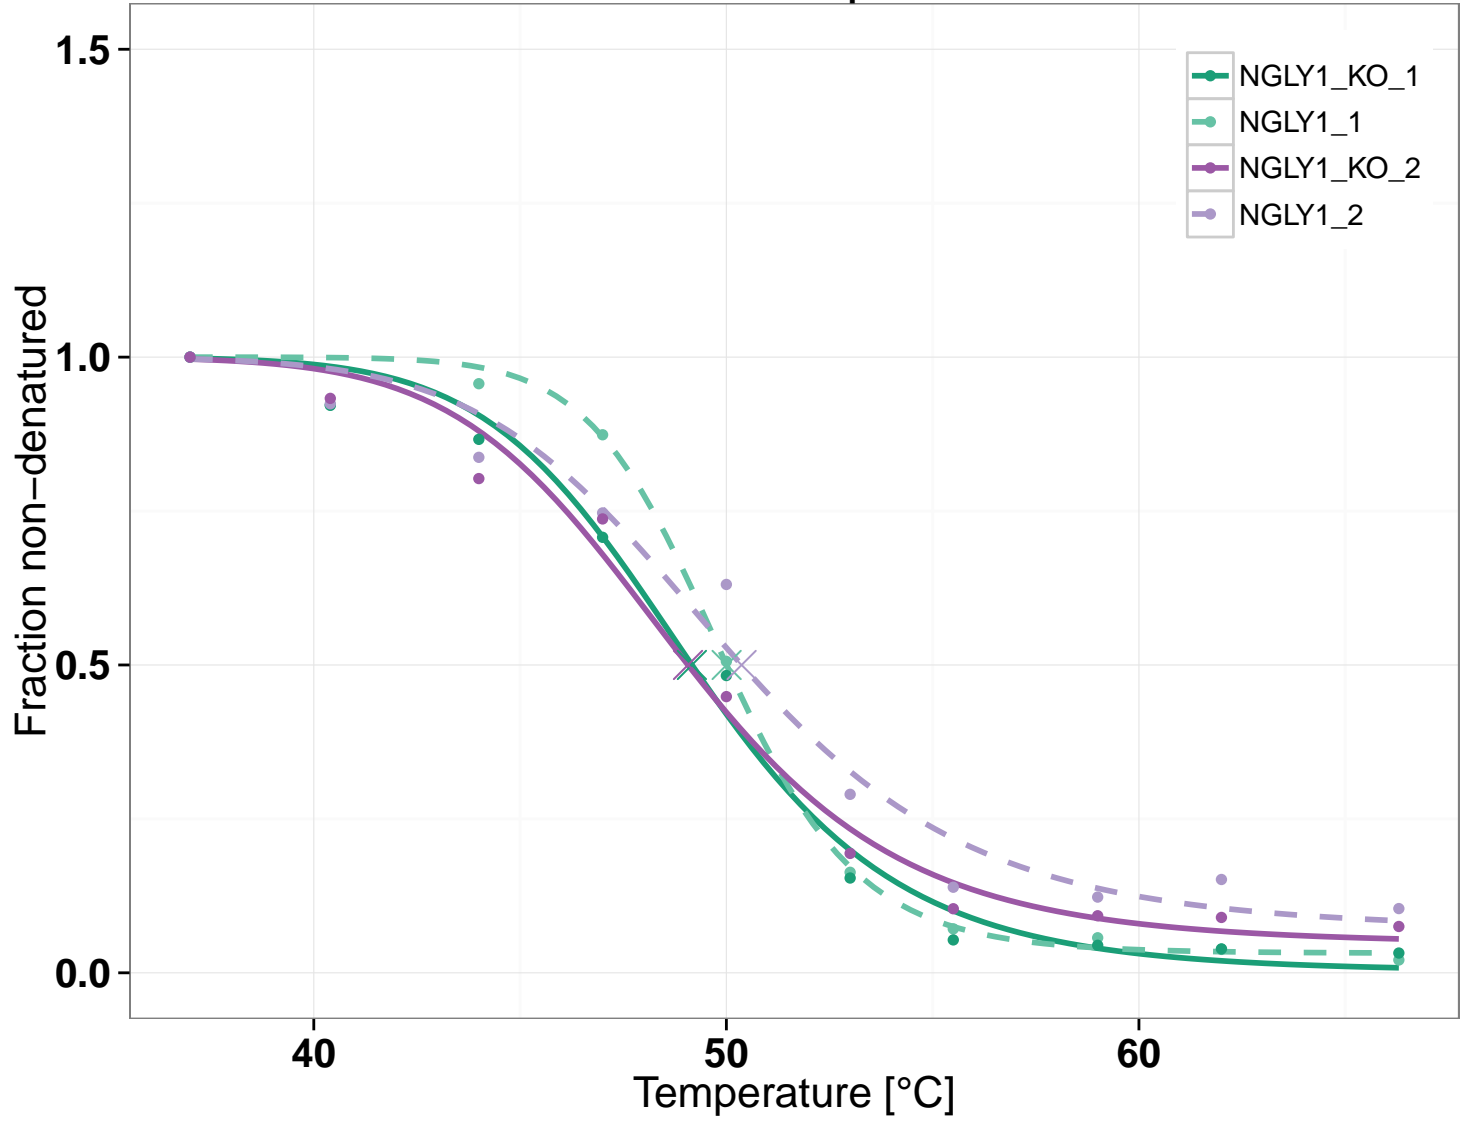

|            | meltPoint | slope  | plateau | R2   |
|------------|-----------|--------|---------|------|
| NGLY1_KO_1 | 49.16     | -0.099 | 0       | 0.99 |
| NGLY1_1    | 50.01     | -0.15  | 0.03    | 1    |
| NGLY1_KO_2 | 49.07     | -0.088 | 0.05    | 0.99 |
| NGLY1_2    | 50.37     | -0.078 | 0.07    | 0.98 |

Supplement: Supplementary file 7071 [file 1]

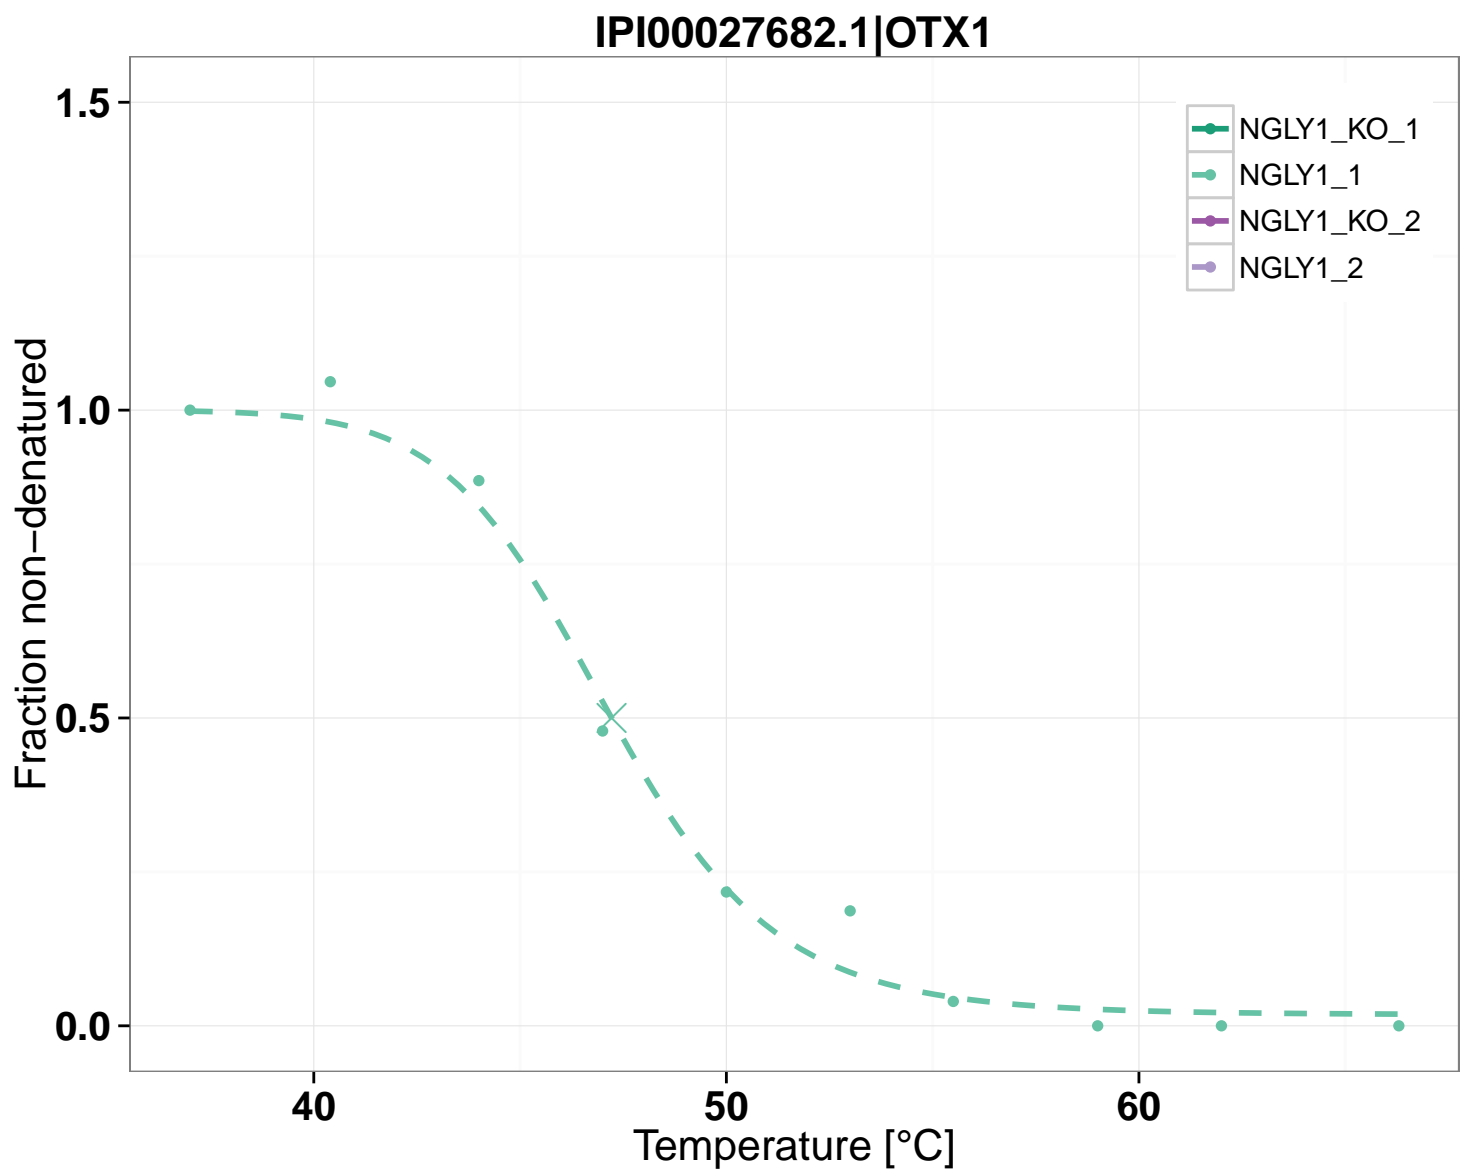

|            | meltPoint | slope | plateau | R2   |
|------------|-----------|-------|---------|------|
| NGLY1_KO_1 | —         | —     | —       | —    |
| NGLY1_1    | 47.22     | -0.12 | 0.02    | 0.99 |
| NGLY1_KO_2 | —         | —     | —       | —    |
| NGLY1_2    | —         | —     | —       | —    |

Supplement: Supplementary file 7072 [file 1]

IPI00012028.2|STX17

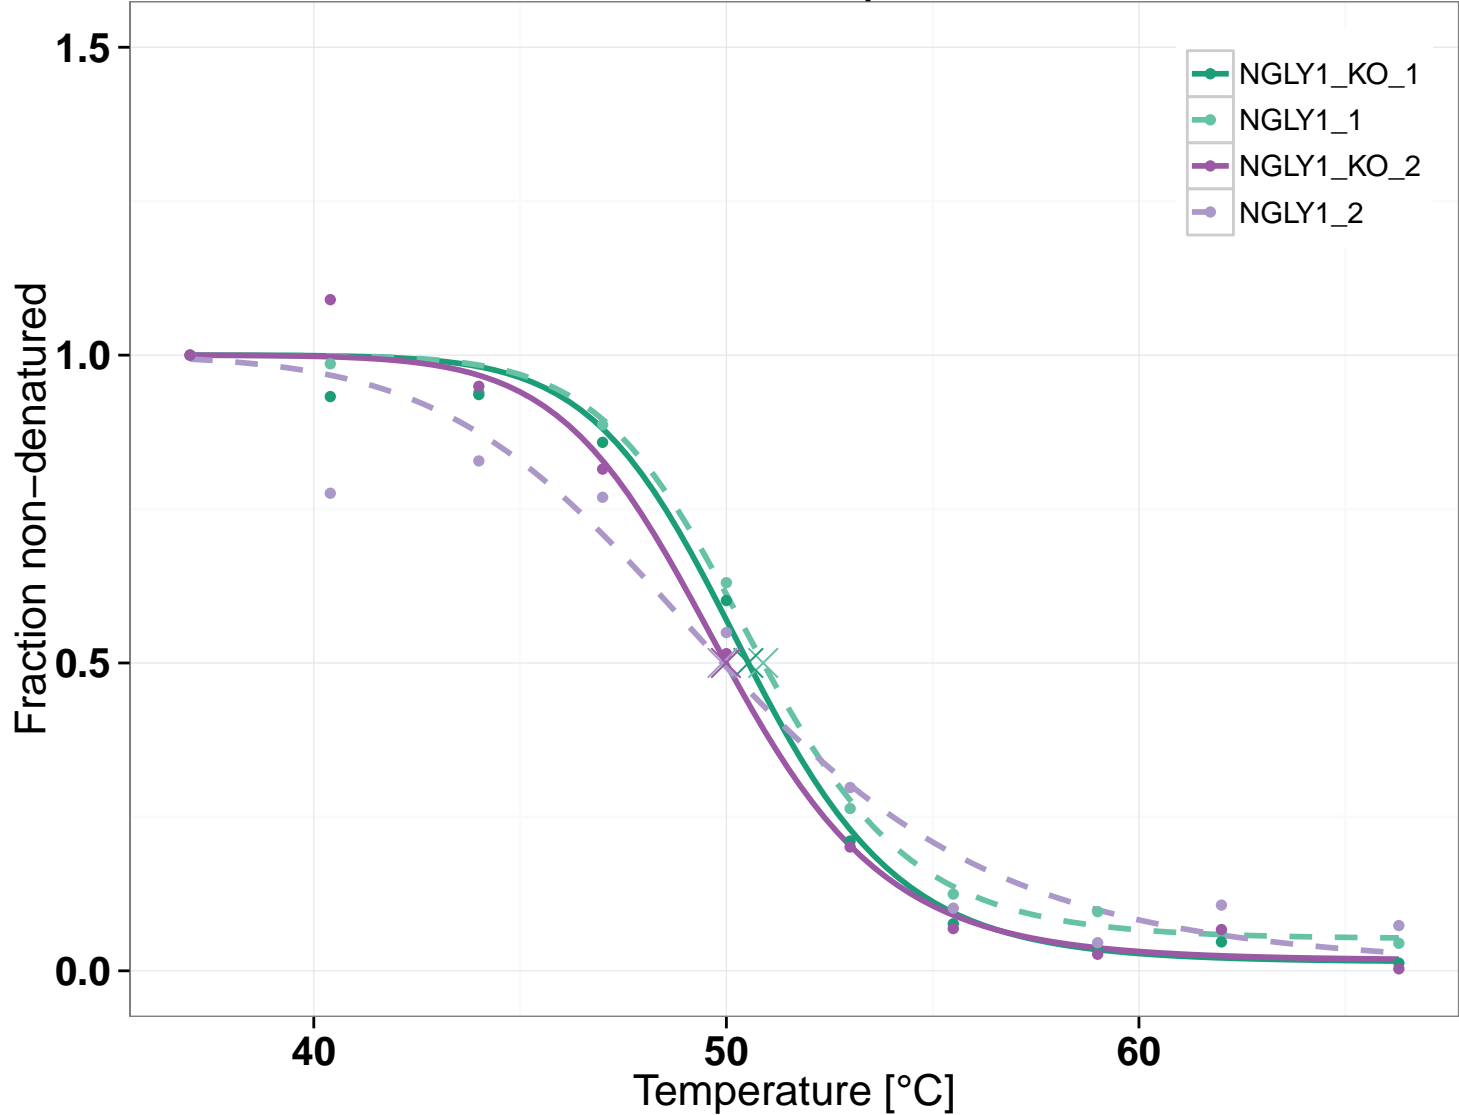

|            | meltPoint | slope  | plateau | R2   |
|------------|-----------|--------|---------|------|
| NGLY1_KO_1 | 50.53     | -0.13  | 0.01    | 0.99 |
| NGLY1_1    | 50.89     | -0.13  | 0.05    | 1    |
| NGLY1_KO_2 | 49.99     | -0.12  | 0.02    | 0.99 |
| NGLY1_2    | 49.91     | -0.074 | 0       | 0.95 |

Supplement: Supplementary file 7073 [file 1]

# IPI00884928.1|CAMSAP1

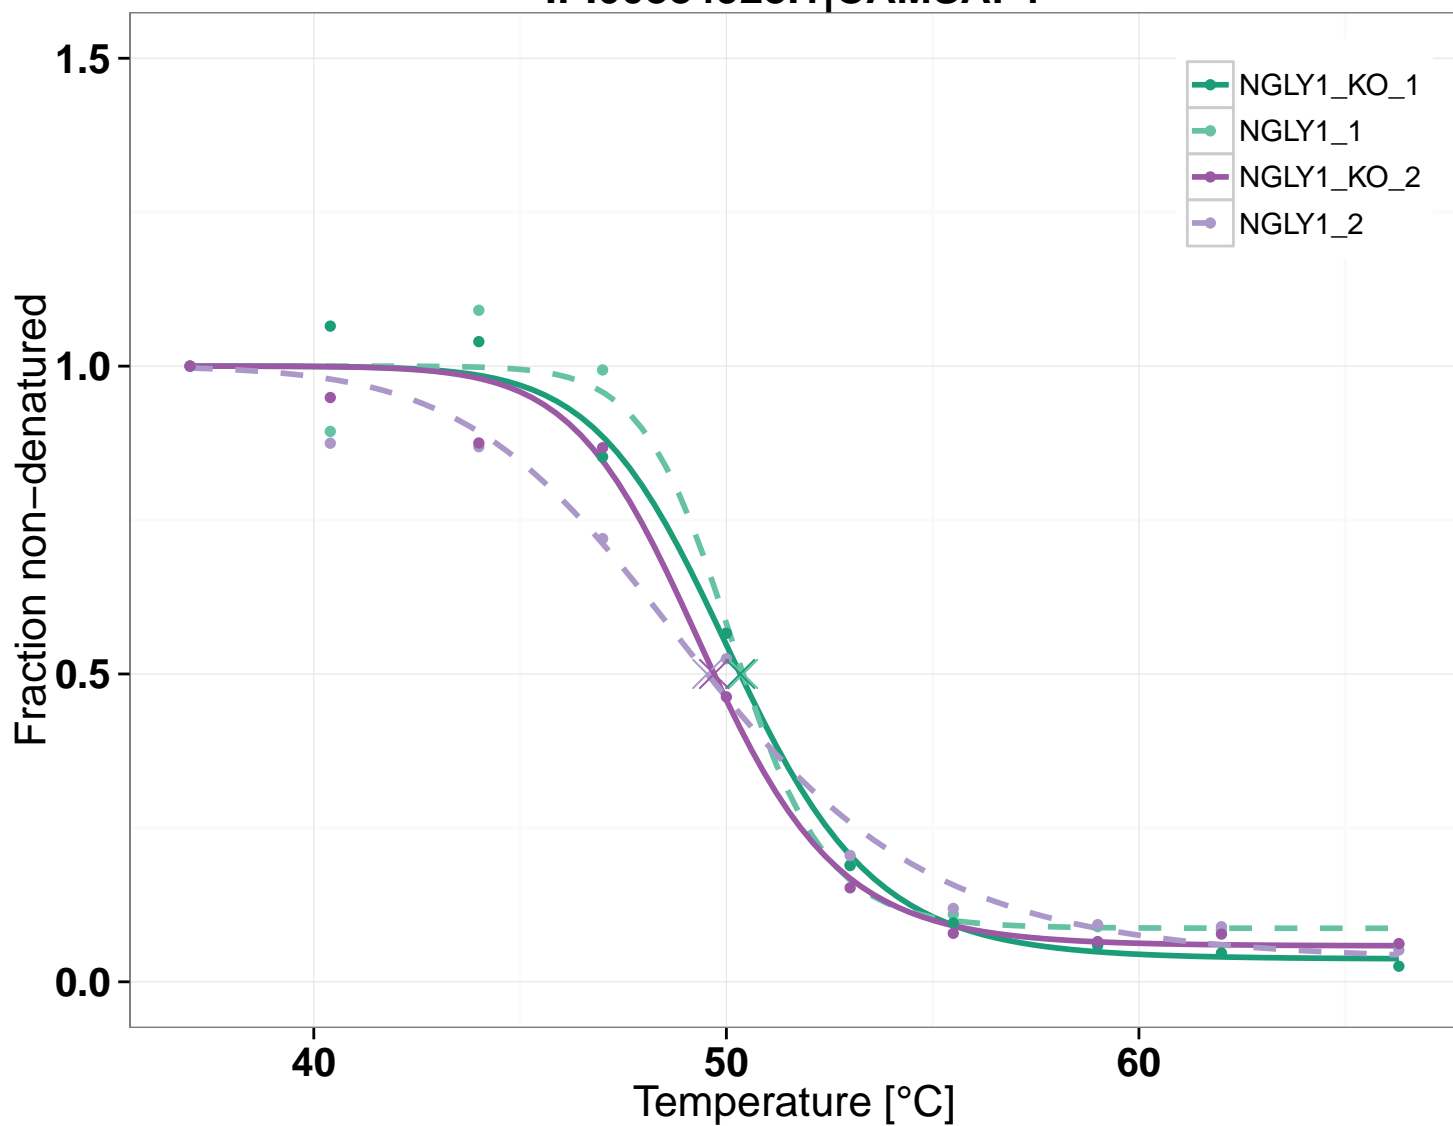

|            | meltPoint | slope  | plateau | R2   |
|------------|-----------|--------|---------|------|
| NGLY1_KO_1 | 50.34     | -0.14  | 0.04    | 1    |
| NGLY1_1    | 50.41     | -0.2   | 0.09    | 0.99 |
| NGLY1_KO_2 | 49.7      | -0.15  | 0.06    | 0.99 |
| NGLY1_2    | 49.54     | -0.085 | 0.03    | 0.98 |

Supplement: Supplementary file 7074 [file 1]

IPI00641579.1|CIRBP

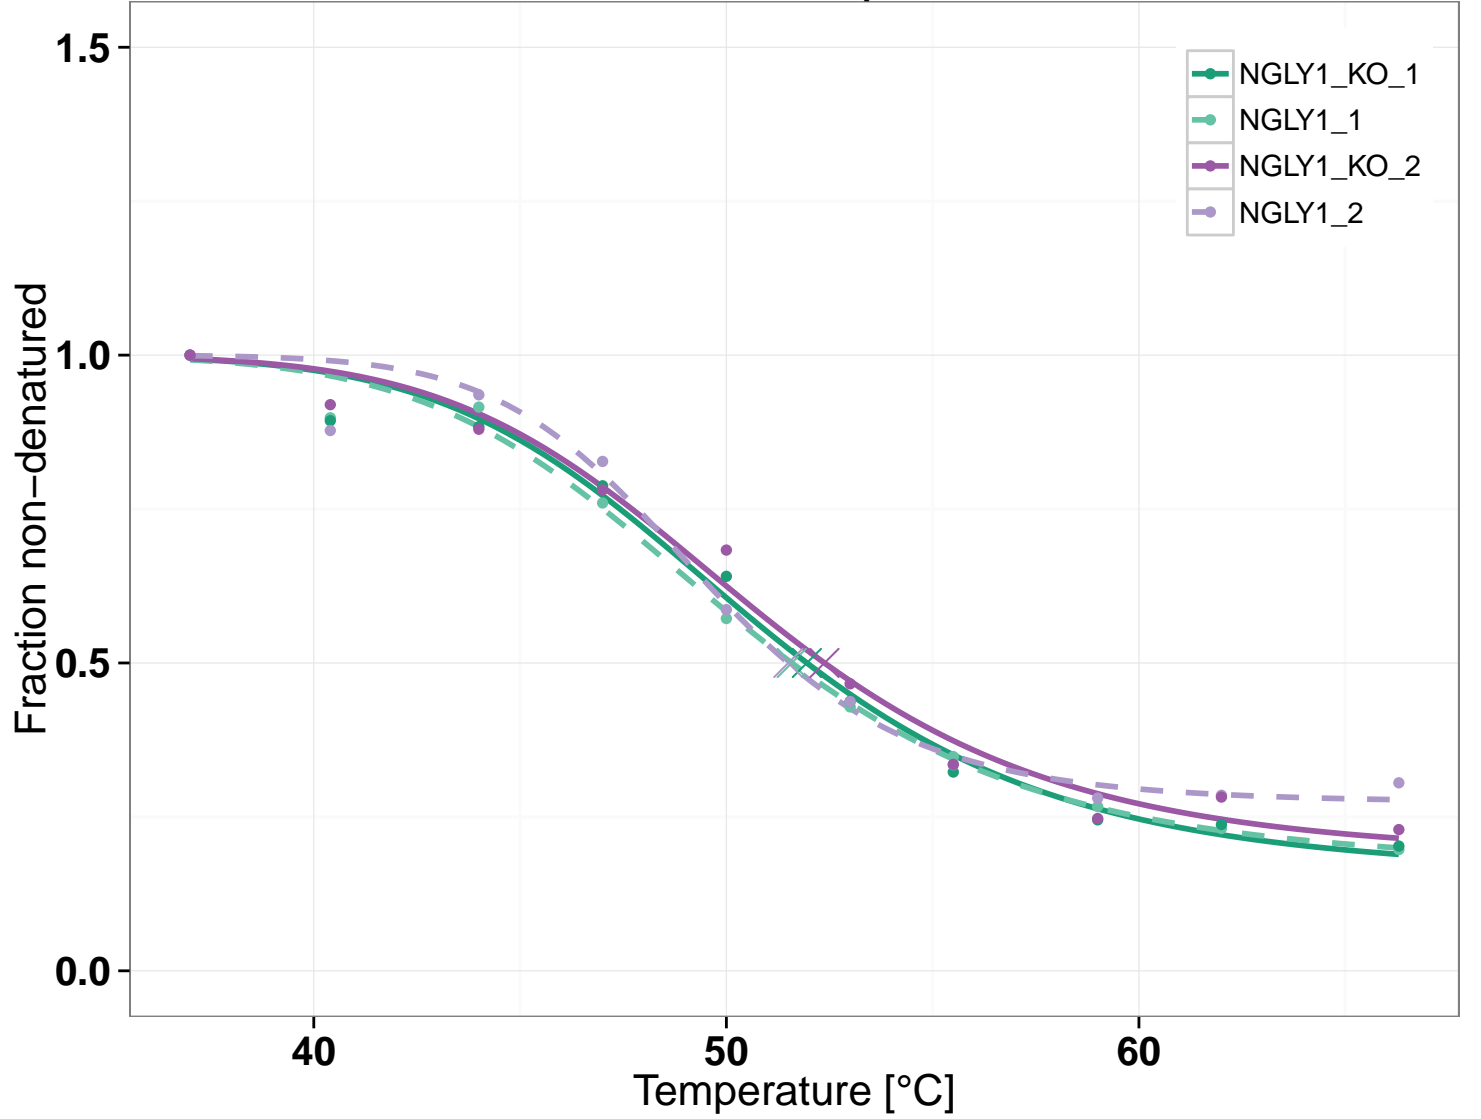

|            | meltPoint | slope  | plateau | R2   |
|------------|-----------|--------|---------|------|
| NGLY1_KO_1 | 51.95     | -0.057 | 0.16    | 0.99 |
| NGLY1_1    | 51.58     | -0.057 | 0.17    | 0.99 |
| NGLY1_KO_2 | 52.38     | -0.056 | 0.18    | 0.99 |
| NGLY1_2    | 51.5      | -0.073 | 0.27    | 0.98 |

Supplement: Supplementary file 7075 [file 1]

# IPI00784224.1|ZFR

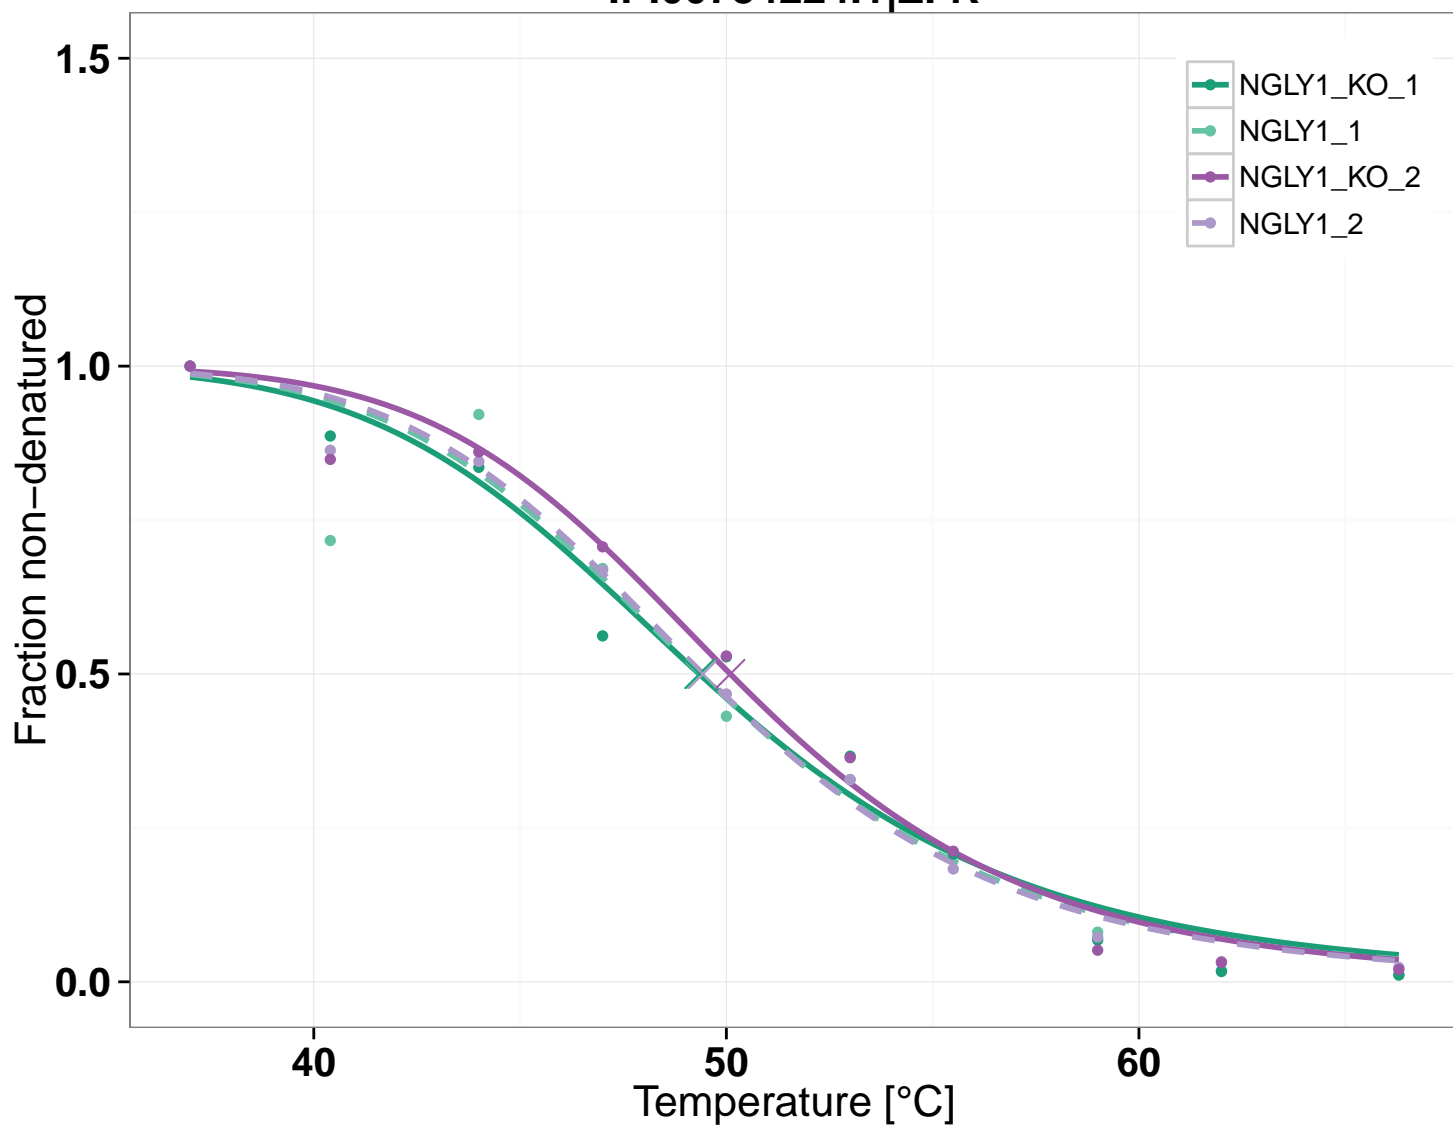

|            | meltPoint | slope  | plateau | R2   |
|------------|-----------|--------|---------|------|
| NGLY1_KO_1 | 49.35     | -0.063 | 0       | 0.98 |
| NGLY1_1    | 49.38     | -0.066 | 0       | 0.95 |
| NGLY1_KO_2 | 50.1      | -0.069 | 0       | 0.98 |
| NGLY1_2    | 49.44     | -0.068 | 0       | 0.99 |

Supplement: Supplementary file 7076 [file 1]

IPI00641210.1|LOC652968

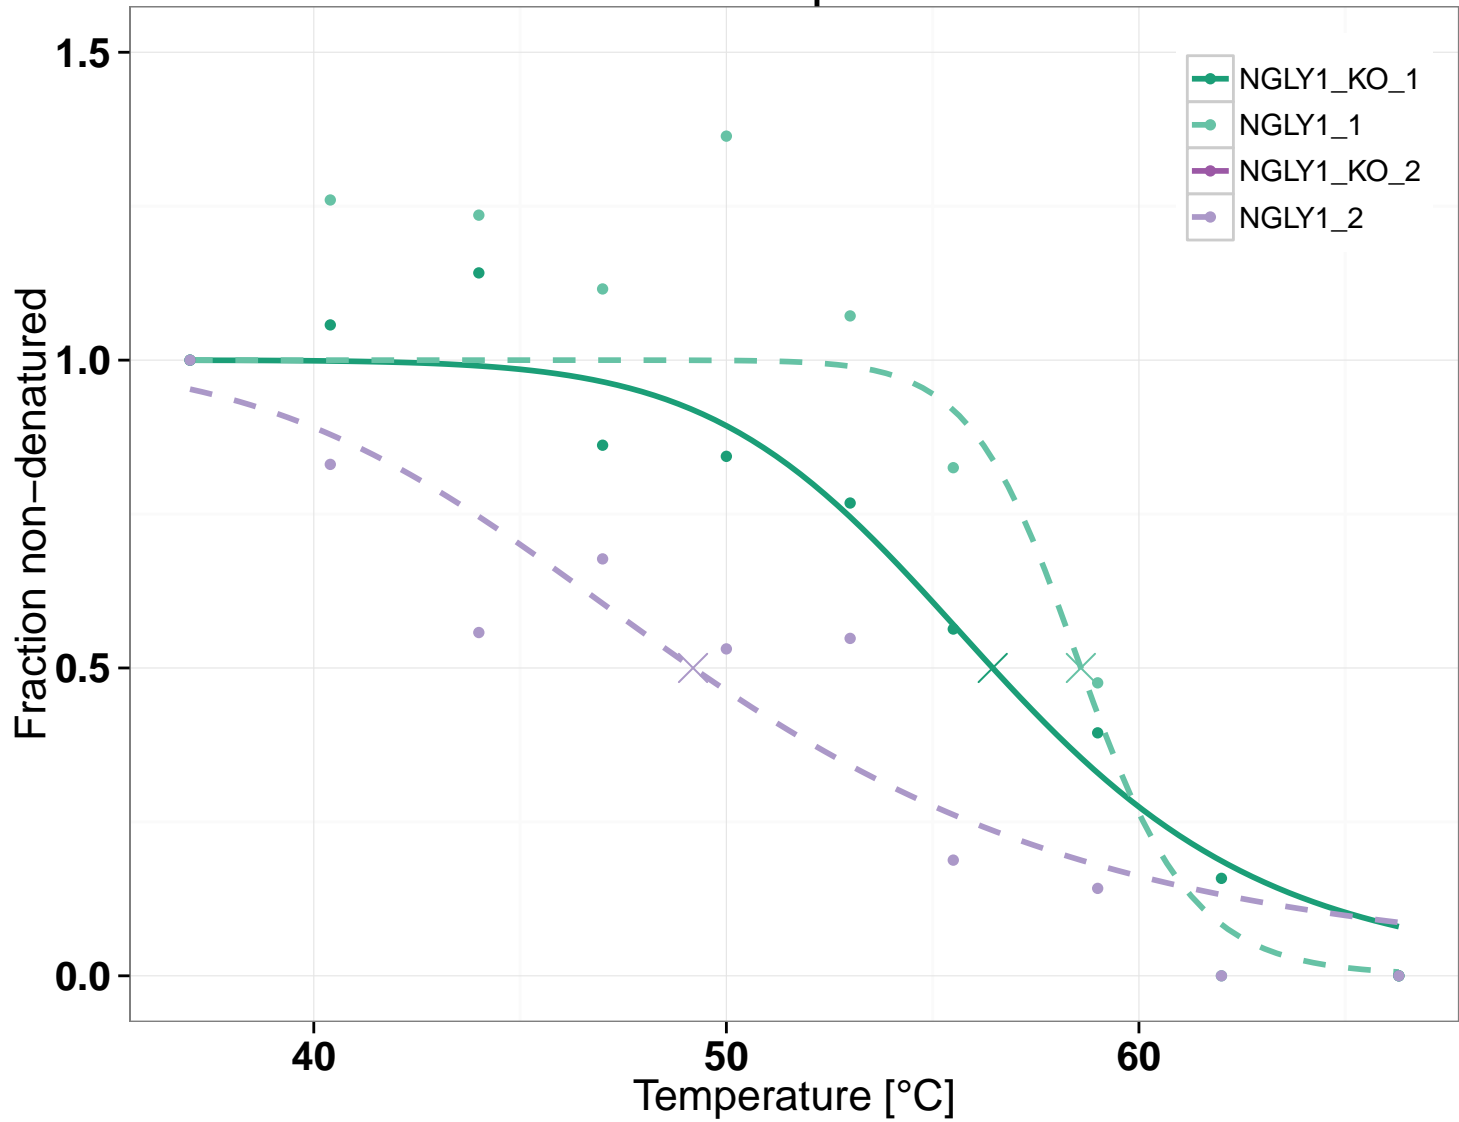

|            | meltPoint | slope  | plateau | R2   |
|------------|-----------|--------|---------|------|
| NGLY1_KO_1 | 56.46     | -0.074 | 0       | 0.96 |
| NGLY1_1    | 58.59     | -0.19  | 0       | 0.87 |
| NGLY1_KO_2 | -         | -      | -       | -    |
| NGLY1_2    | 49.19     | -0.049 | 0       | 0.89 |

Supplement: Supplementary file 7077 [file 1]

IPI00719680.1|AP3D1

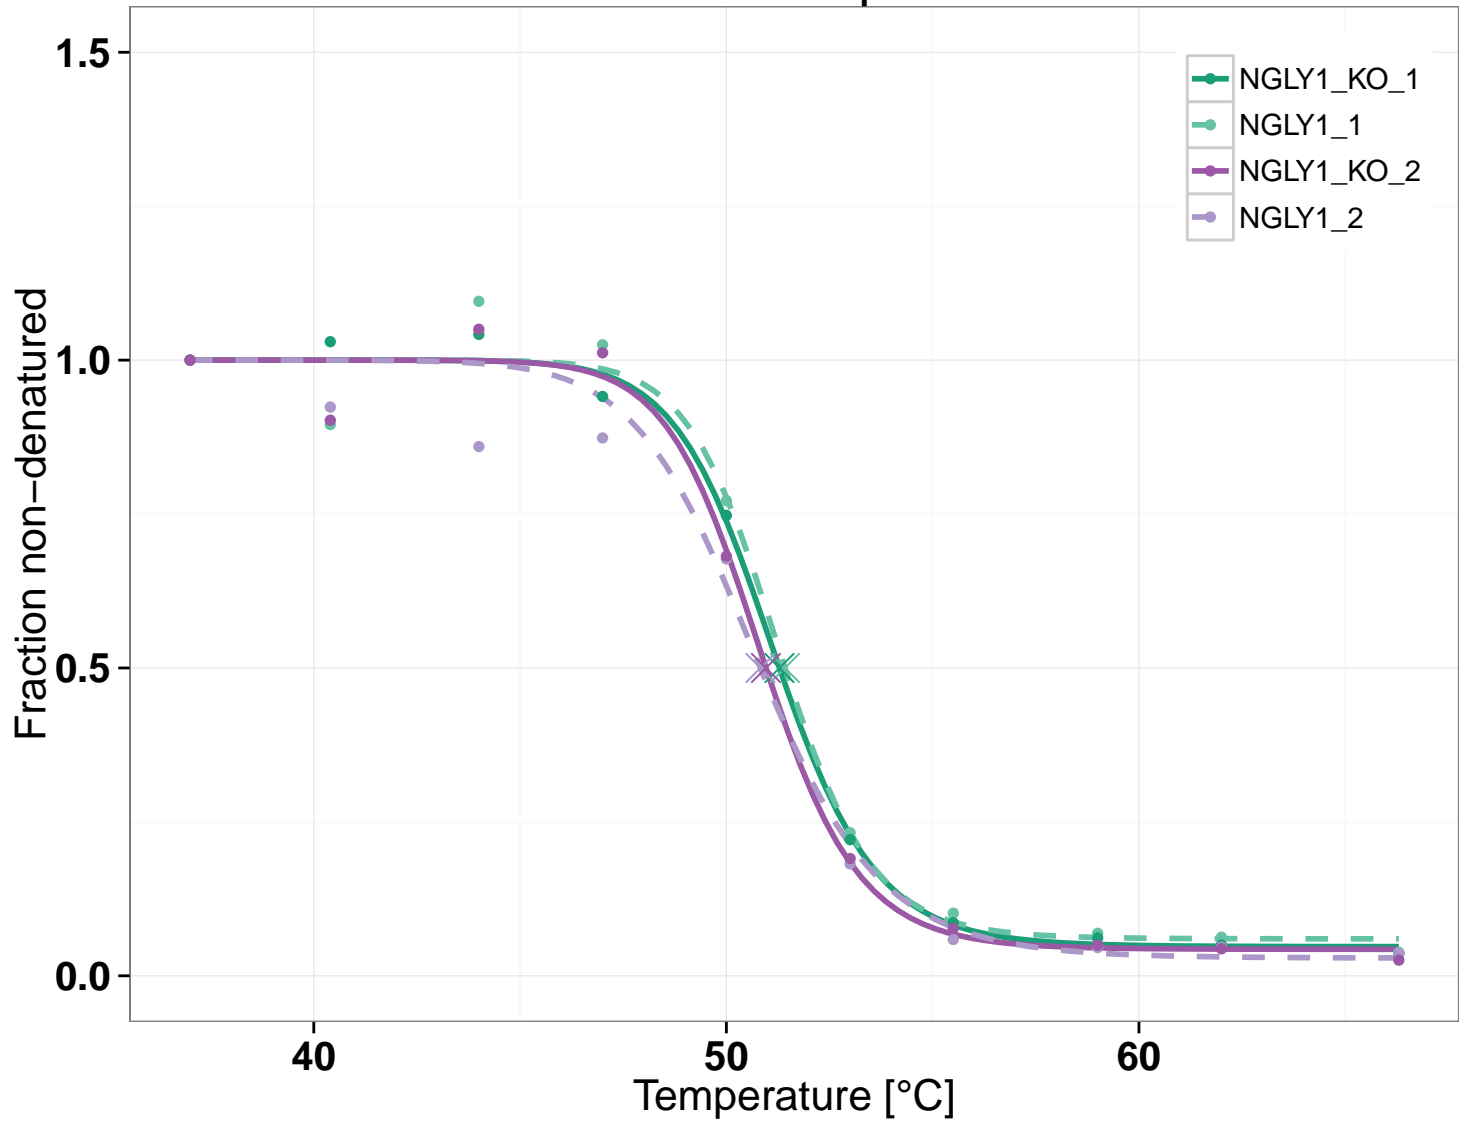

|            | meltPoint | slope | plateau | R2   |
|------------|-----------|-------|---------|------|
| NGLY1_KO_1 | 51.29     | -0.19 | 0.05    | 1    |
| NGLY1_1    | 51.42     | -0.21 | 0.06    | 0.99 |
| NGLY1_KO_2 | 50.96     | -0.2  | 0.04    | 0.99 |
| NGLY1_2    | 50.83     | -0.16 | 0.03    | 0.98 |

Supplement: Supplementary file 7078 [file 1]

# IPI00641109.1|ZMYM3

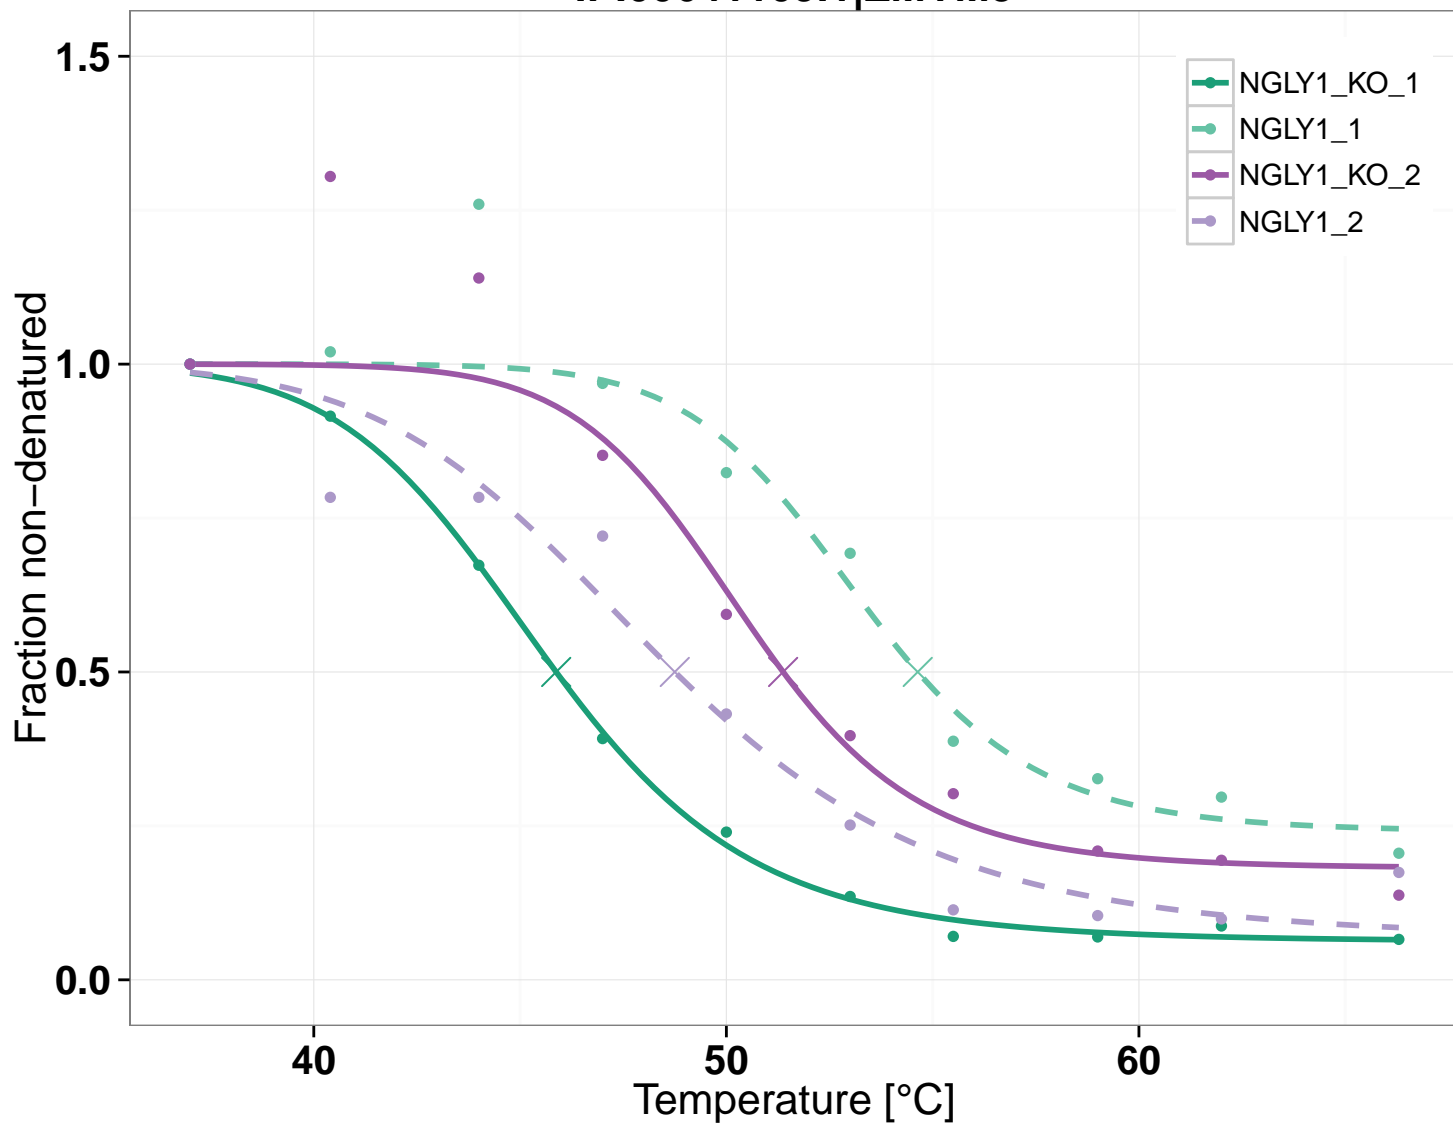

|            | meltPoint | slope  | plateau | R2   |
|------------|-----------|--------|---------|------|
| NGLY1_KO_1 | 45.87     | -0.094 | 0.06    | 1    |
| NGLY1_1    | 54.64     | -0.09  | 0.24    | 0.93 |
| NGLY1_KO_2 | 51.38     | -0.099 | 0.18    | 0.92 |
| NGLY1_2    | 48.75     | -0.069 | 0.06    | 0.95 |

Supplement: Supplementary file 7079 [file 1]

IPI00185769.2|RECQL5

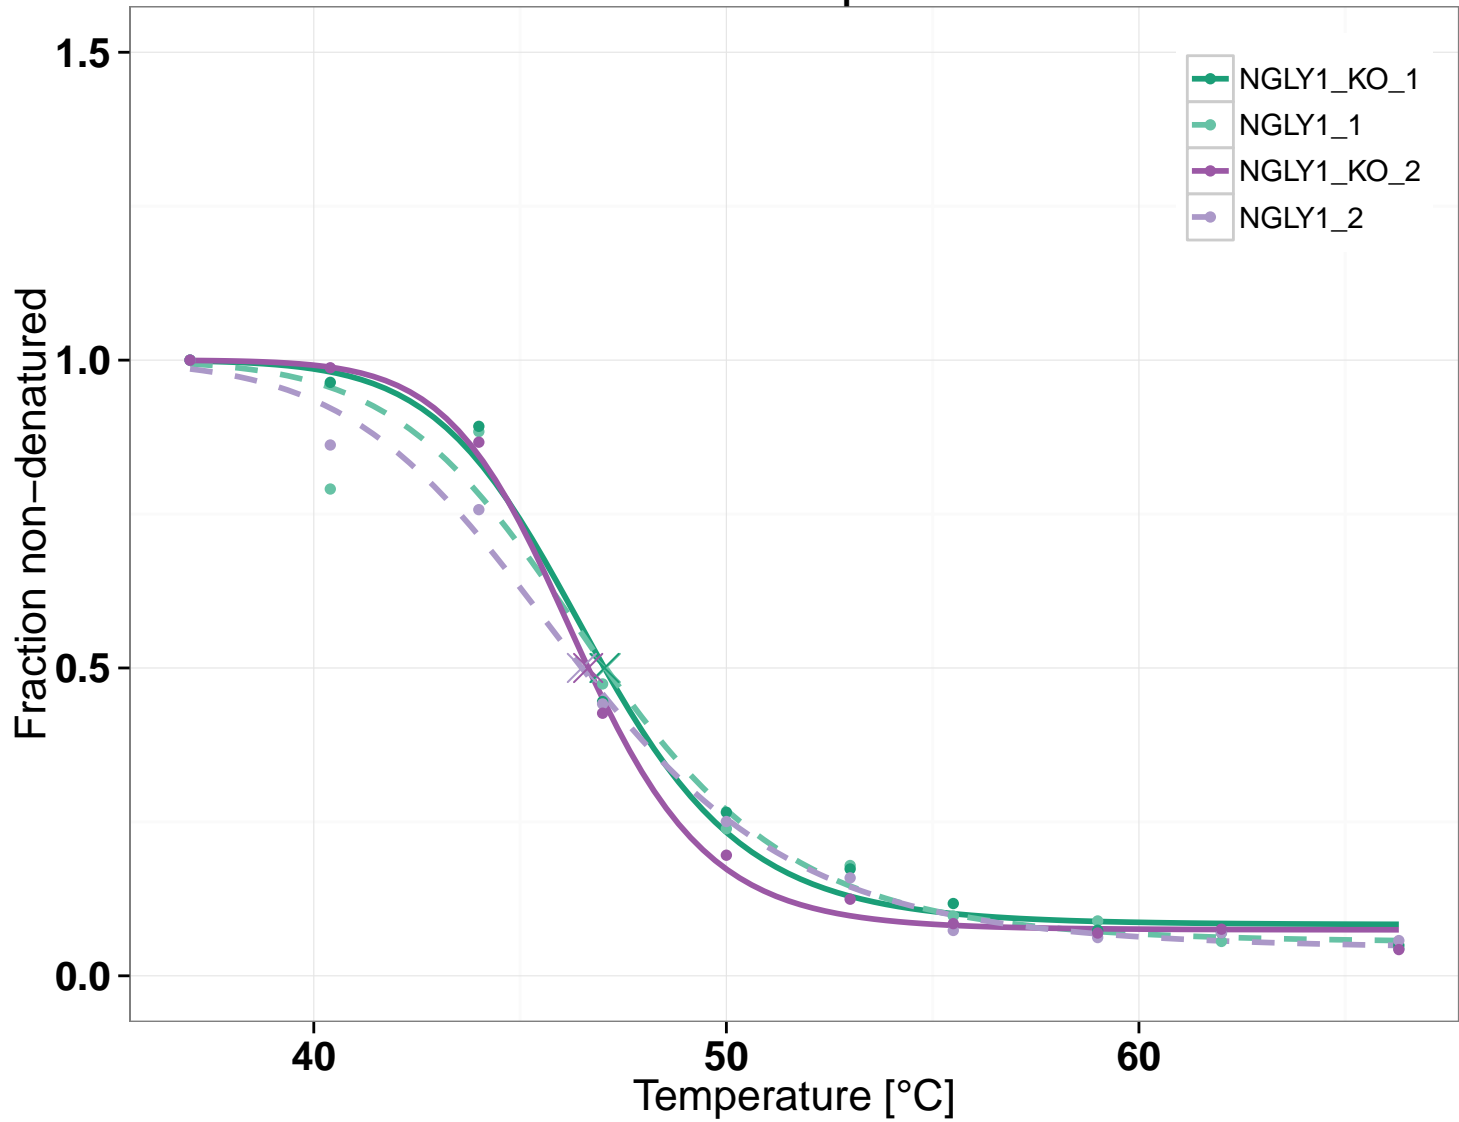

|            | meltPoint | slope  | plateau | R2   |
|------------|-----------|--------|---------|------|
| NGLY1_KO_1 | 47.05     | -0.12  | 0.08    | 0.99 |
| NGLY1_1    | 47.08     | -0.097 | 0.05    | 0.97 |
| NGLY1_KO_2 | 46.65     | -0.15  | 0.07    | 1    |
| NGLY1_2    | 46.5      | -0.088 | 0.04    | 0.99 |

Supplement: Supplementary file 7080 [file 1]

IPI00003907.1|PCDHGA12

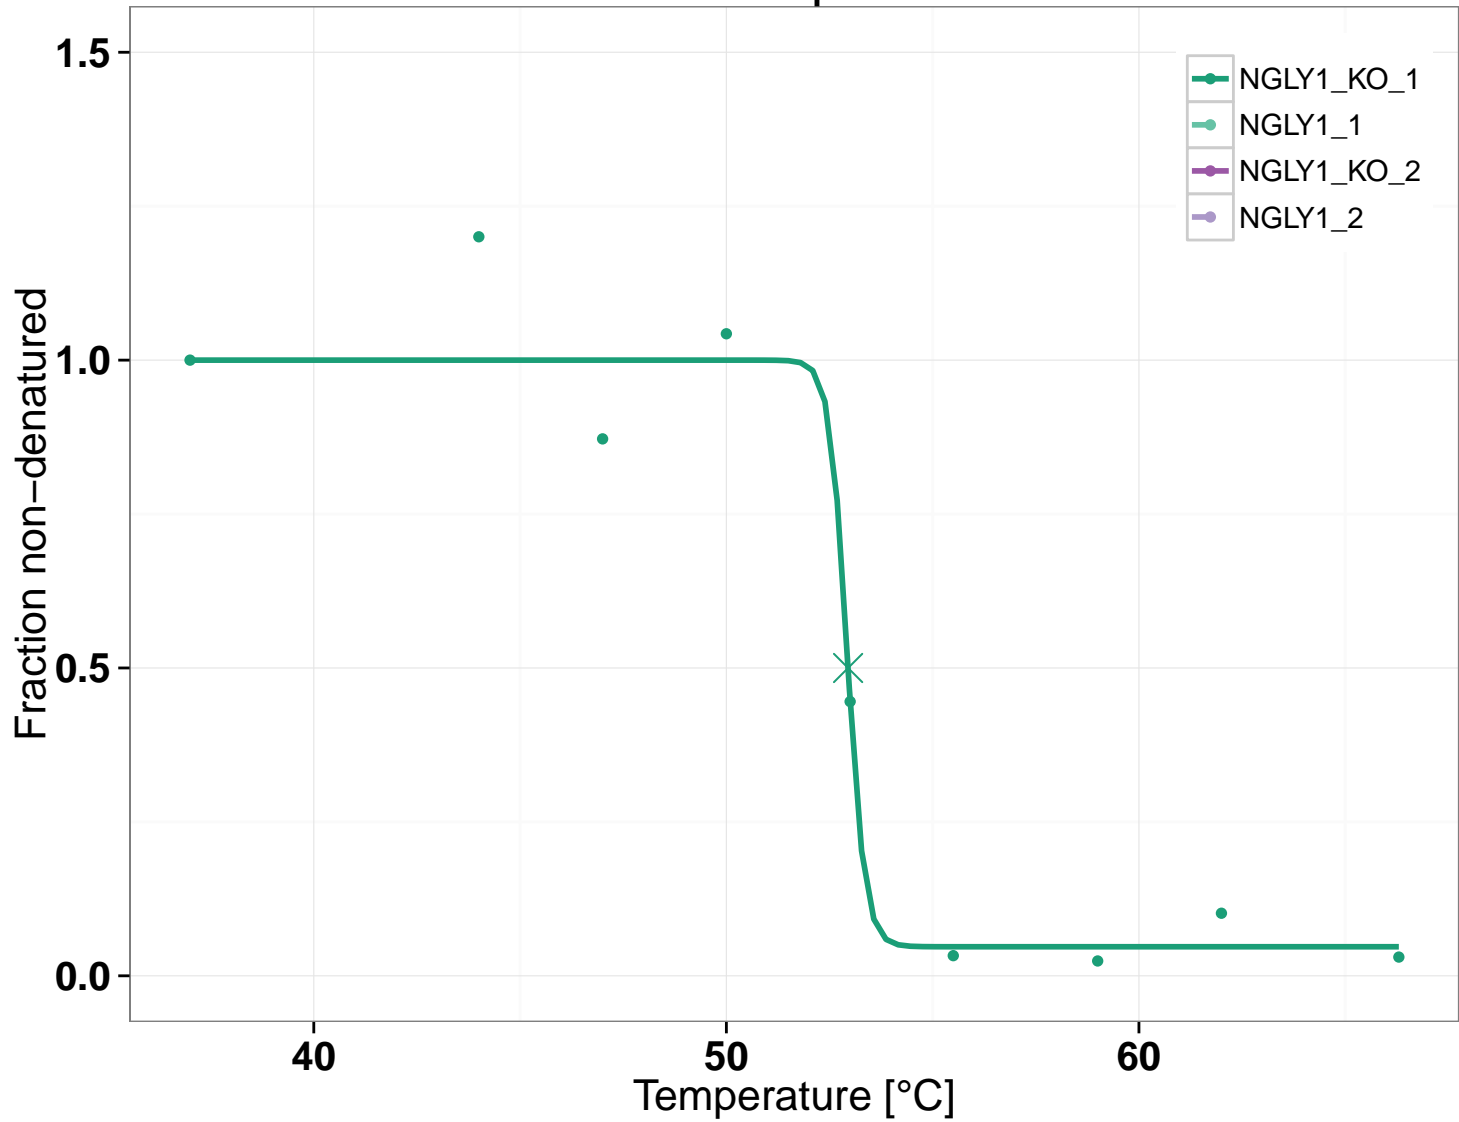

|            | meltPoint | slope | plateau | R2   |
|------------|-----------|-------|---------|------|
| NGLY1_KO_1 | 52.95     | -1.1  | 0.05    | 0.77 |
| NGLY1_1    | -         | -     | -       | -    |
| NGLY1_KO_2 | -         | -     | -       | -    |
| NGLY1_2    | -         | -     | -       | -    |

Supplement: Supplementary file 7082 [file 1]

IPI00006052.3|PFDN2

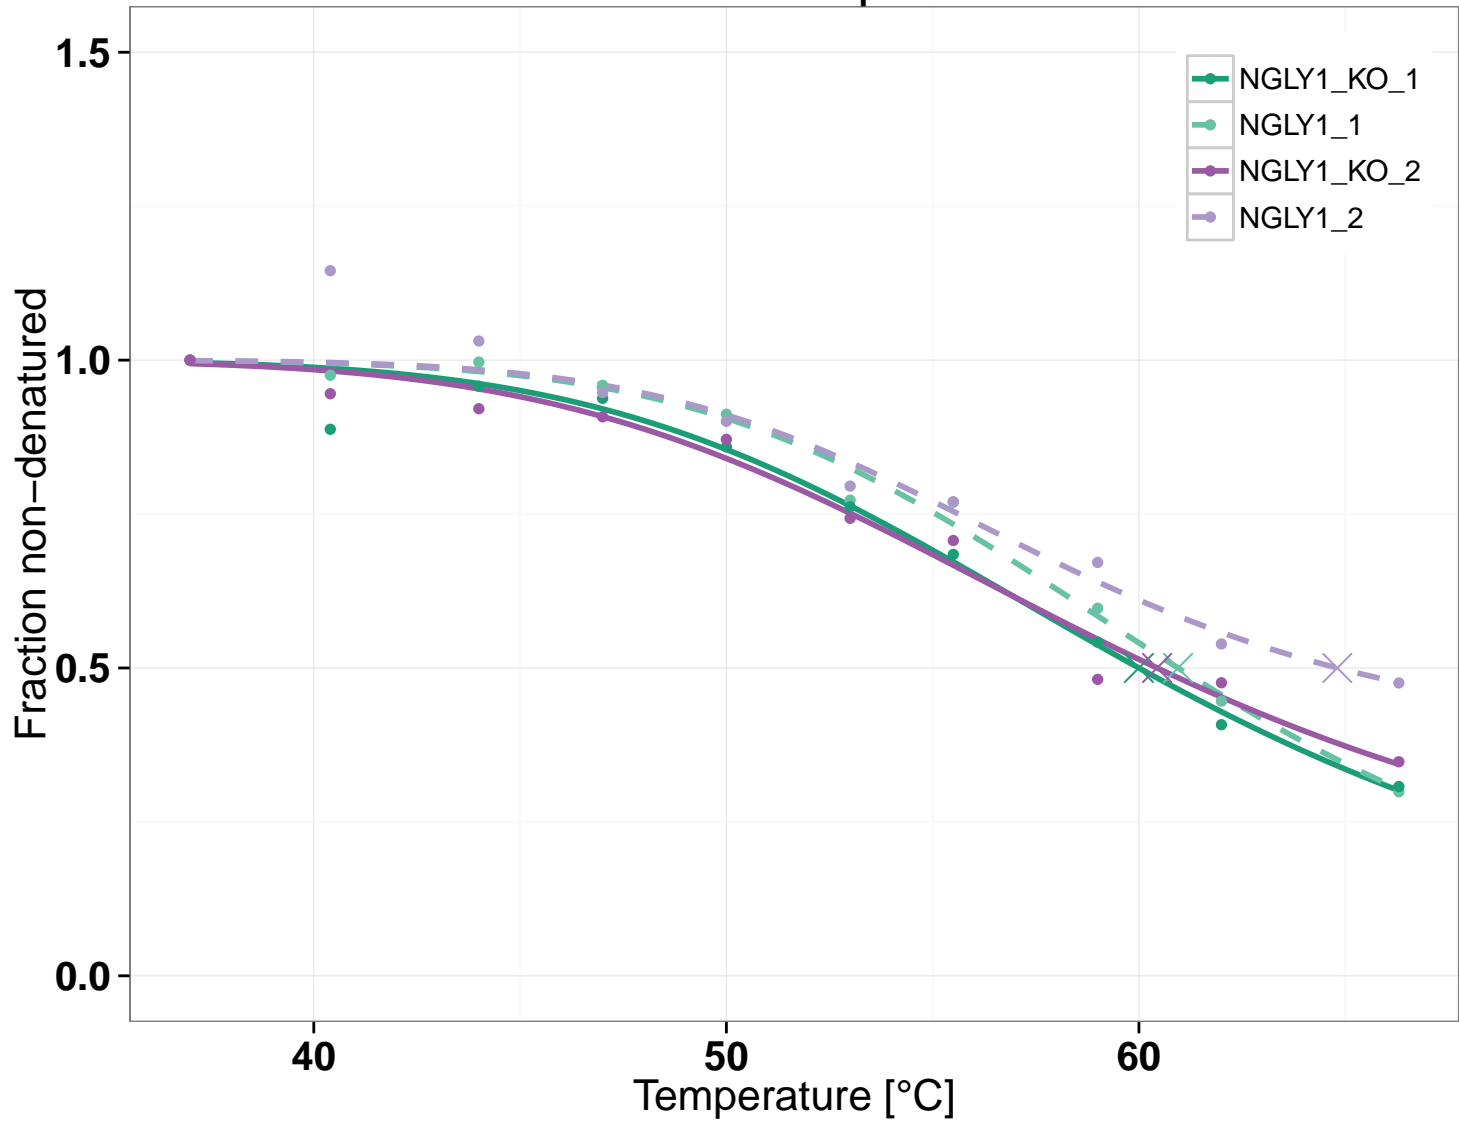

|            | meltPoint | slope  | plateau | R2   |
|------------|-----------|--------|---------|------|
| NGLY1_KO_1 | 60        | -0.039 | 0       | 0.98 |
| NGLY1_1    | 60.95     | -0.044 | 0       | 0.99 |
| NGLY1_KO_2 | 60.44     | -0.035 | 0.08    | 0.98 |
| NGLY1_2    | 64.81     | -0.034 | 0.36    | 0.93 |

Supplement: Supplementary file 7083 [file 1]

IPI00737801.3|ZNF841

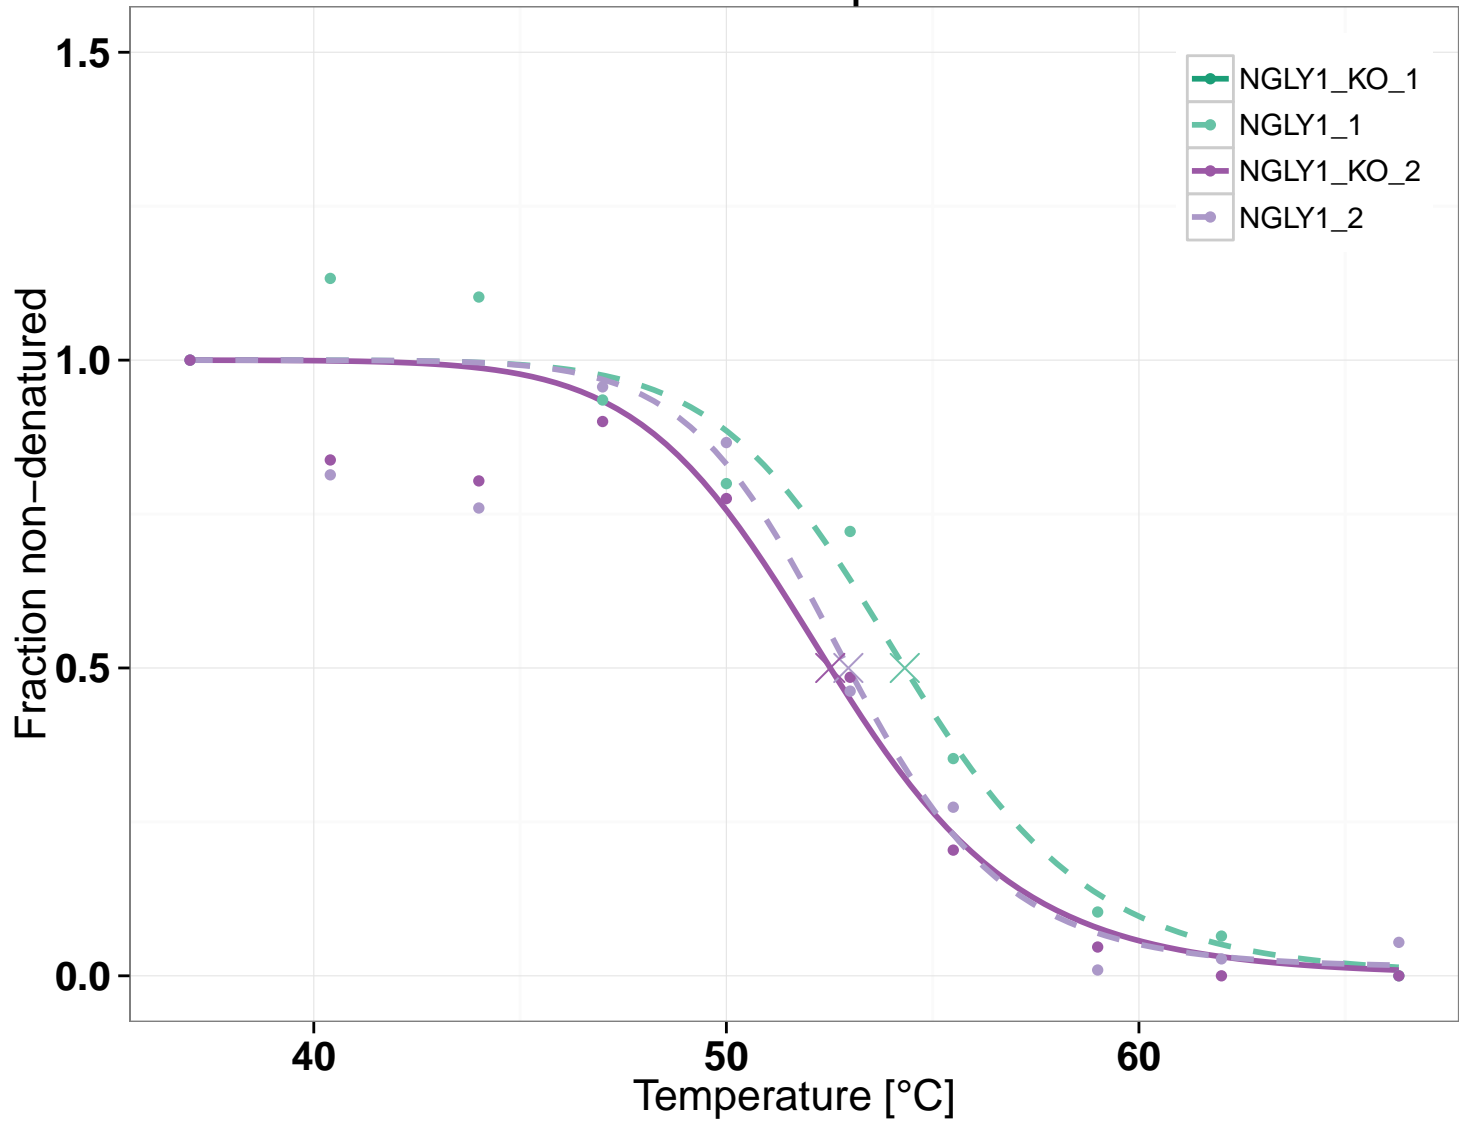

|            | meltPoint | slope | plateau | R2   |
|------------|-----------|-------|---------|------|
| NGLY1_KO_1 | –         | –     | –       | –    |
| NGLY1_1    | 54.32     | –0.11 | 0       | 0.97 |
| NGLY1_KO_2 | 52.52     | –0.11 | 0       | 0.96 |
| NGLY1_2    | 52.96     | –0.13 | 0.01    | 0.93 |

Supplement: Supplementary file 7084 [file 1]

# IPI00003394.1|SMN1

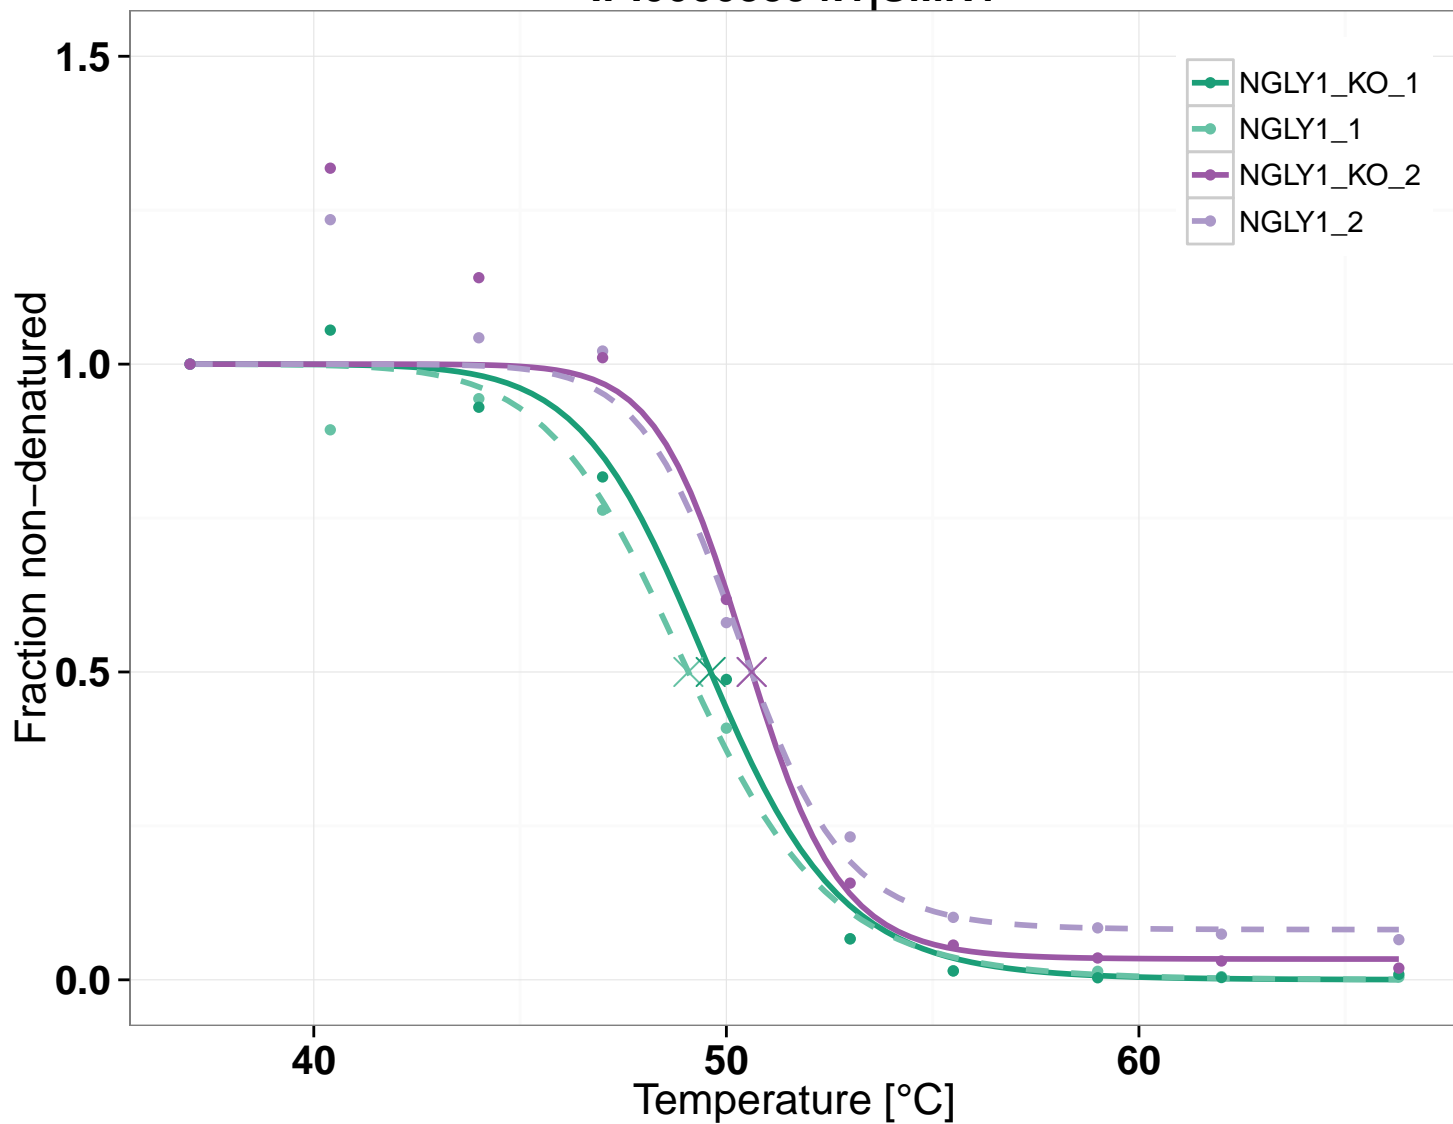

|            | meltPoint | slope | plateau | R2   |
|------------|-----------|-------|---------|------|
| NGLY1_KO_1 | 49.62     | -0.16 | 0       | 0.99 |
| NGLY1_1    | 49.08     | -0.14 | 0       | 0.99 |
| NGLY1_KO_2 | 50.62     | -0.22 | 0.03    | 0.95 |
| NGLY1_2    | 50.61     | -0.18 | 0.08    | 0.97 |

Supplement: Supplementary file 7085 [file 1]

IPI00148063.1|HEBP1

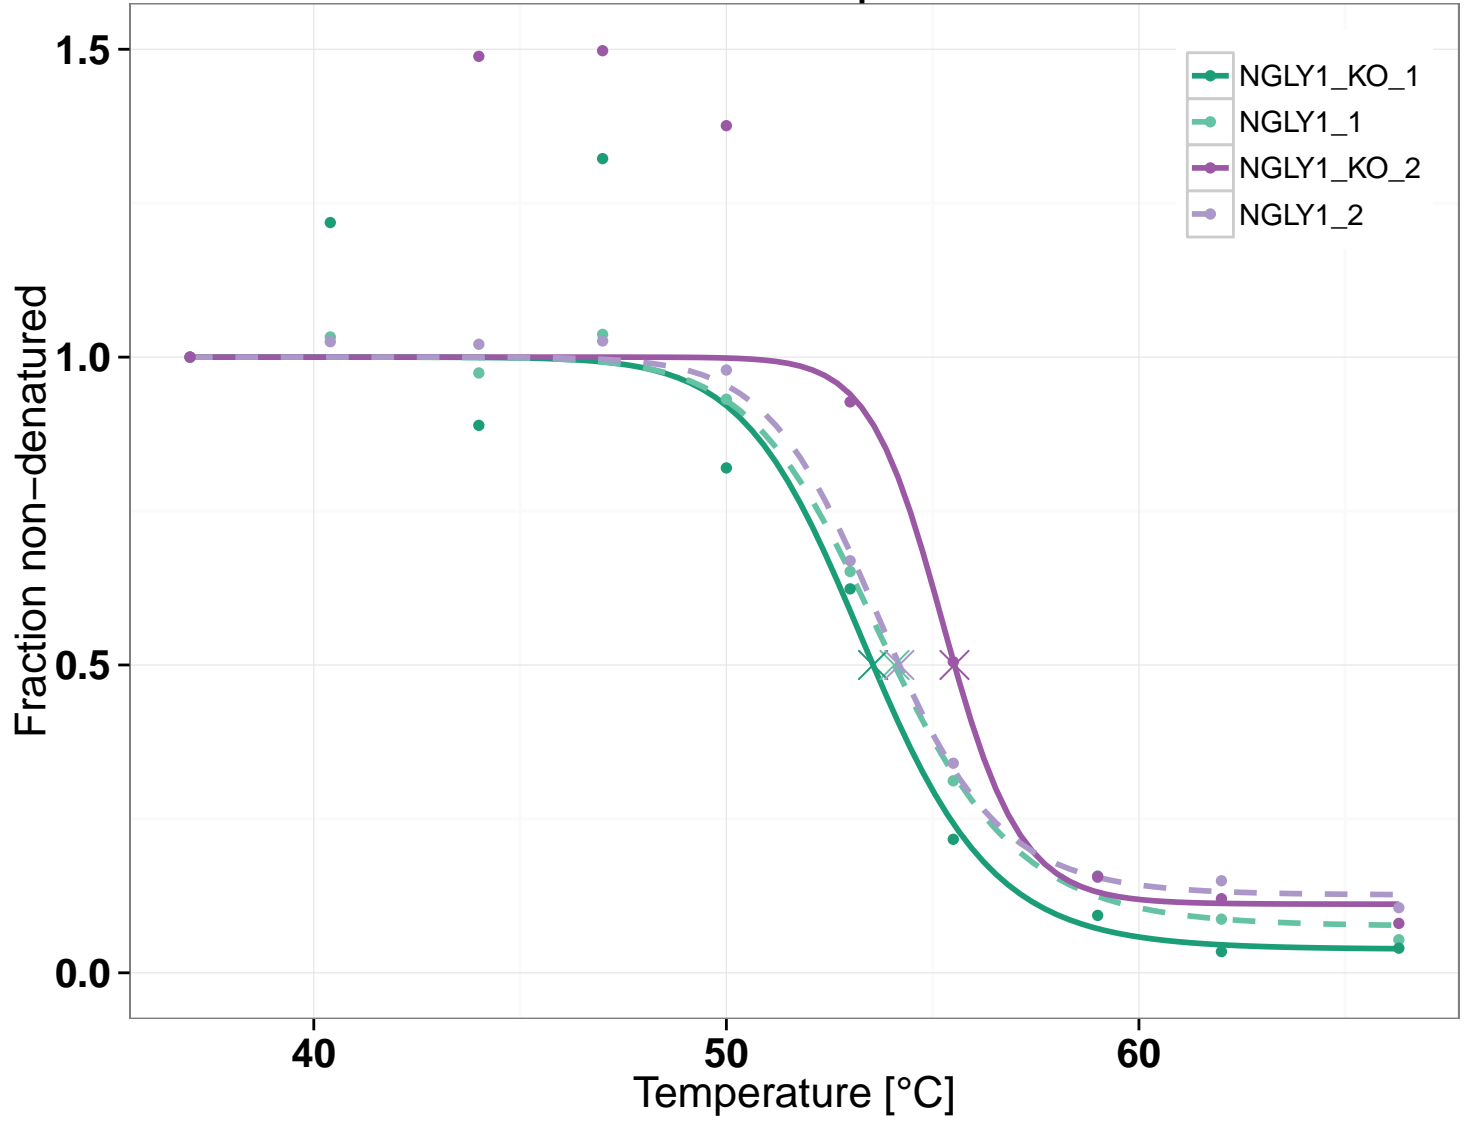

|            | meltPoint | slope | plateau | R2   |
|------------|-----------|-------|---------|------|
| NGLY1_KO_1 | 53.56     | -0.16 | 0.04    | 0.92 |
| NGLY1_1    | 54.08     | -0.14 | 0.08    | 1    |
| NGLY1_KO_2 | 55.53     | -0.24 | 0.11    | 0.71 |
| NGLY1_2    | 54.19     | -0.16 | 0.13    | 1    |

Supplement: Supplementary file 7086 [file 1]

# IPI00470594.1|C1ORF144

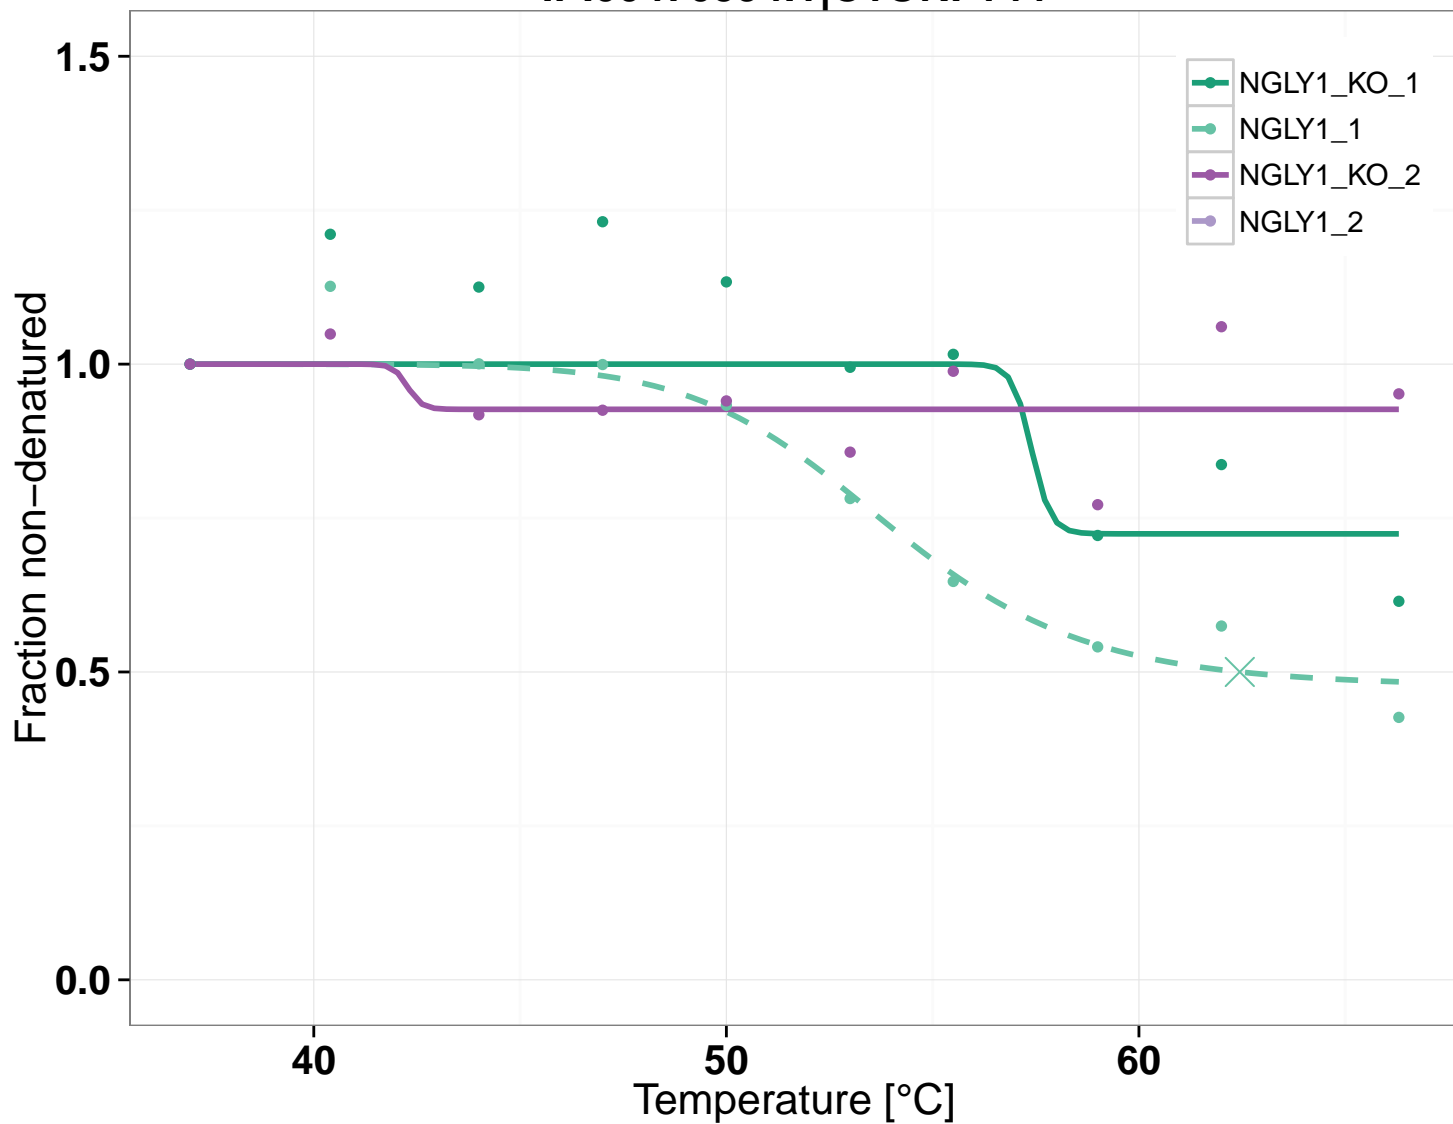

|            | meltPoint | slope  | plateau | R2   |
|------------|-----------|--------|---------|------|
| NGLY1_KO_1 | -         | -0.3   | 0.72    | 0.59 |
| NGLY1_1    | 62.44     | -0.055 | 0.48    | 0.95 |
| NGLY1_KO_2 | -         | -0.11  | 0.93    | 0.21 |
| NGLY1_2    | -         | -      | -       | -    |

Supplement: Supplementary file 7087 [file 1]

# IPI00007215.3|ASB3

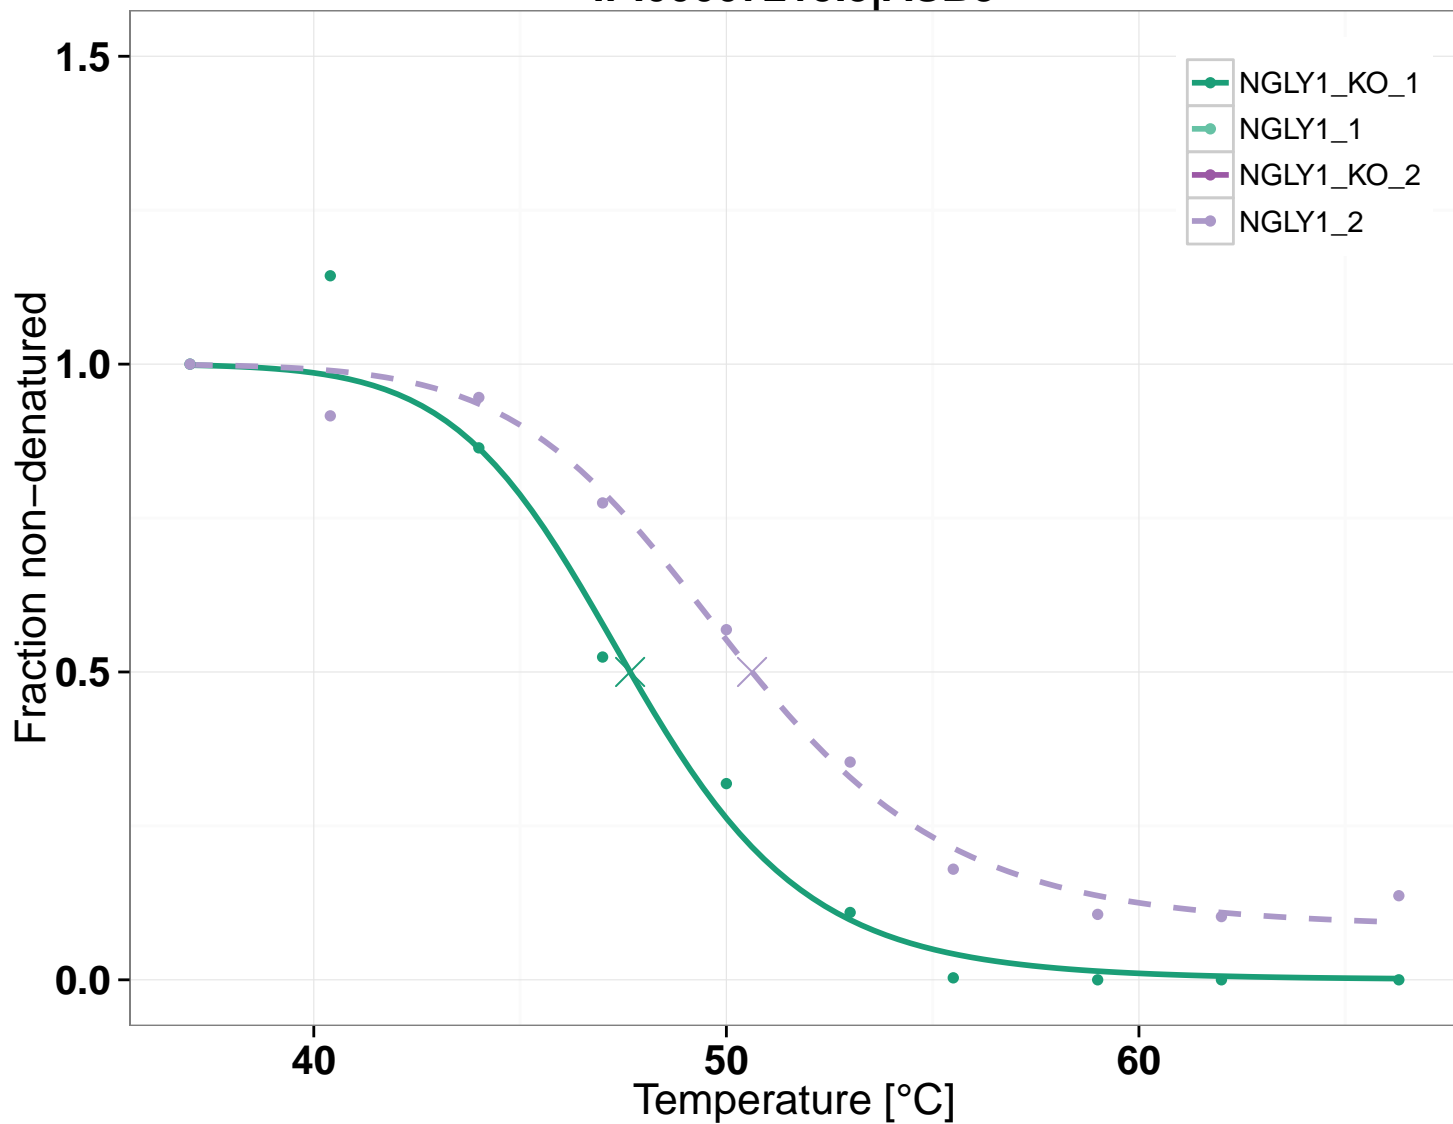

|            | meltPoint | slope  | plateau | R2   |
|------------|-----------|--------|---------|------|
| NGLY1_KO_1 | 47.67     | -0.12  | 0       | 0.98 |
| NGLY1_1    | -         | -      | -       | -    |
| NGLY1_KO_2 | -         | -      | -       | -    |
| NGLY1_2    | 50.62     | -0.086 | 0.08    | 0.99 |

Supplement: Supplementary file 7088 [file 1]

# IPI00027887.4|PDRG1

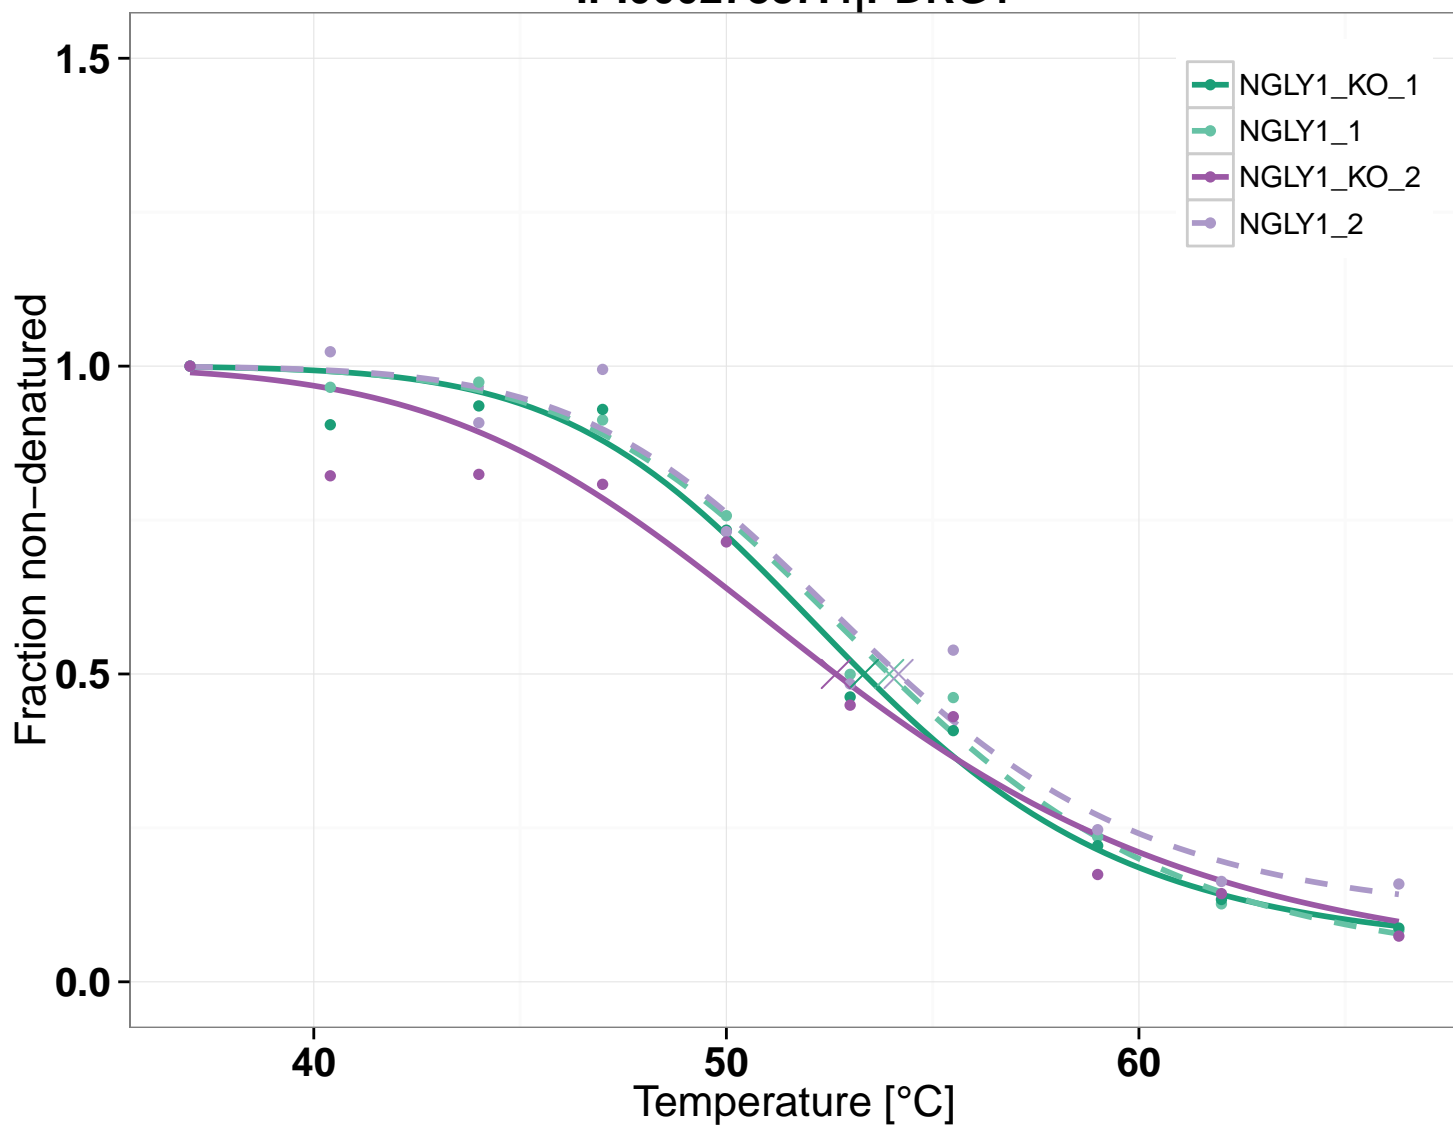

|            | meltPoint | slope  | plateau | R2   |
|------------|-----------|--------|---------|------|
| NGLY1_KO_1 | 53.33     | -0.069 | 0.05    | 0.99 |
| NGLY1_1    | 53.95     | -0.066 | 0.01    | 0.99 |
| NGLY1_KO_2 | 52.65     | -0.053 | 0       | 0.96 |
| NGLY1_2    | 54.17     | -0.065 | 0.1     | 0.97 |

Supplement: Supplementary file 7089 [file 1]

IPI00293921.3|TOPBP1

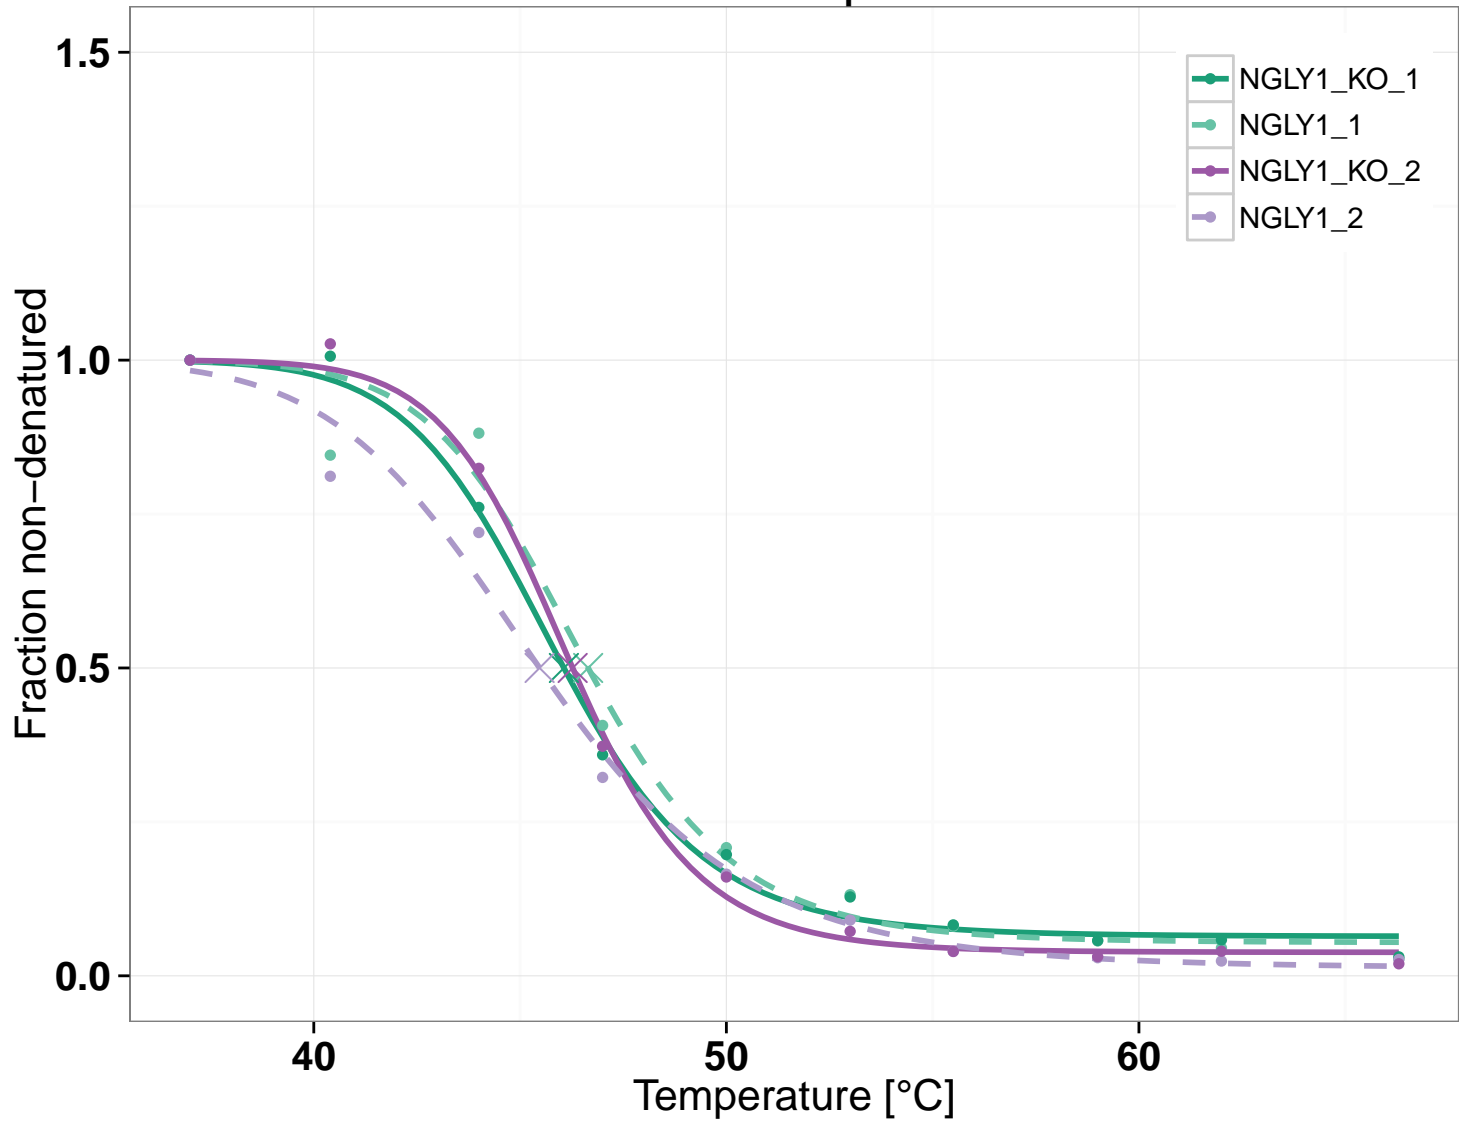

|            | meltPoint | slope  | plateau | R2   |
|------------|-----------|--------|---------|------|
| NGLY1_KO_1 | 46.06     | -0.13  | 0.06    | 1    |
| NGLY1_1    | 46.65     | -0.13  | 0.05    | 0.98 |
| NGLY1_KO_2 | 46.27     | -0.15  | 0.04    | 1    |
| NGLY1_2    | 45.47     | -0.098 | 0.01    | 0.99 |

Supplement: Supplementary file 7090 [file 1]

IPI00740545.1|LOC653269

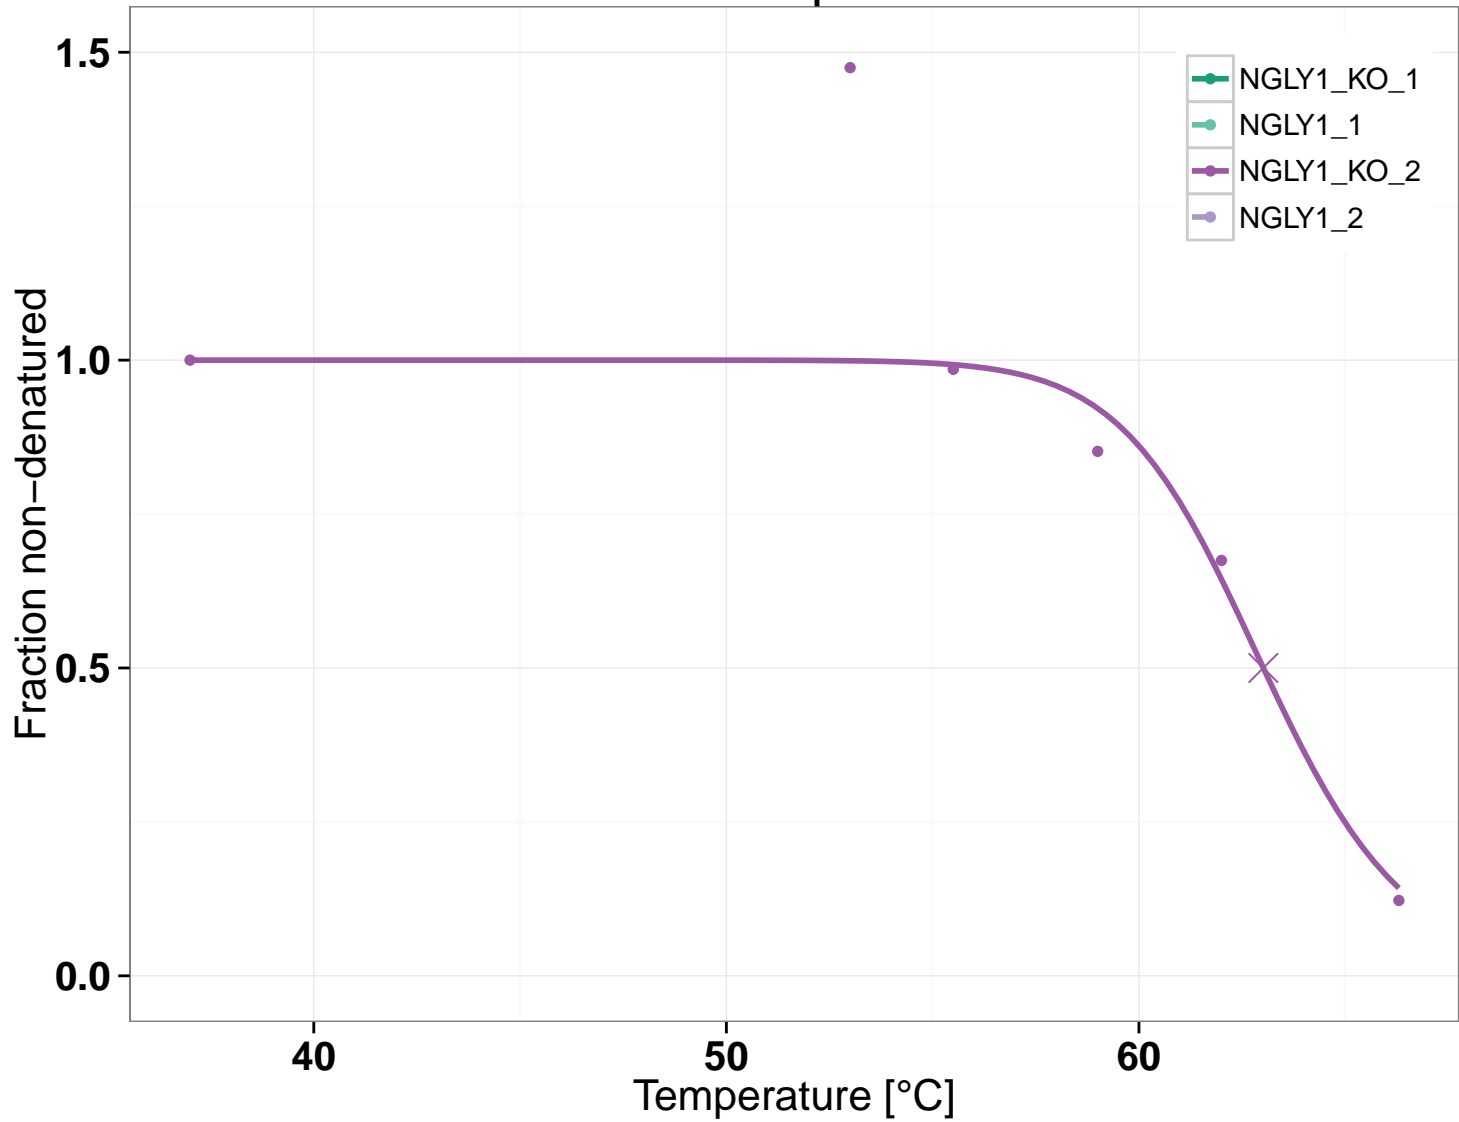

|            | meltPoint | slope | plateau | R2    |
|------------|-----------|-------|---------|-------|
| NGLY1_KO_1 | -         | -     | -       | -     |
| NGLY1_1    | -         | -     | -       | -     |
| NGLY1_KO_2 | 63.02     | -0.14 | 0       | -0.16 |
| NGLY1_2    | -         | -     | -       | -     |

Supplement: Supplementary file 7091 [file 1]

# IPI00168565.2|CNNM3

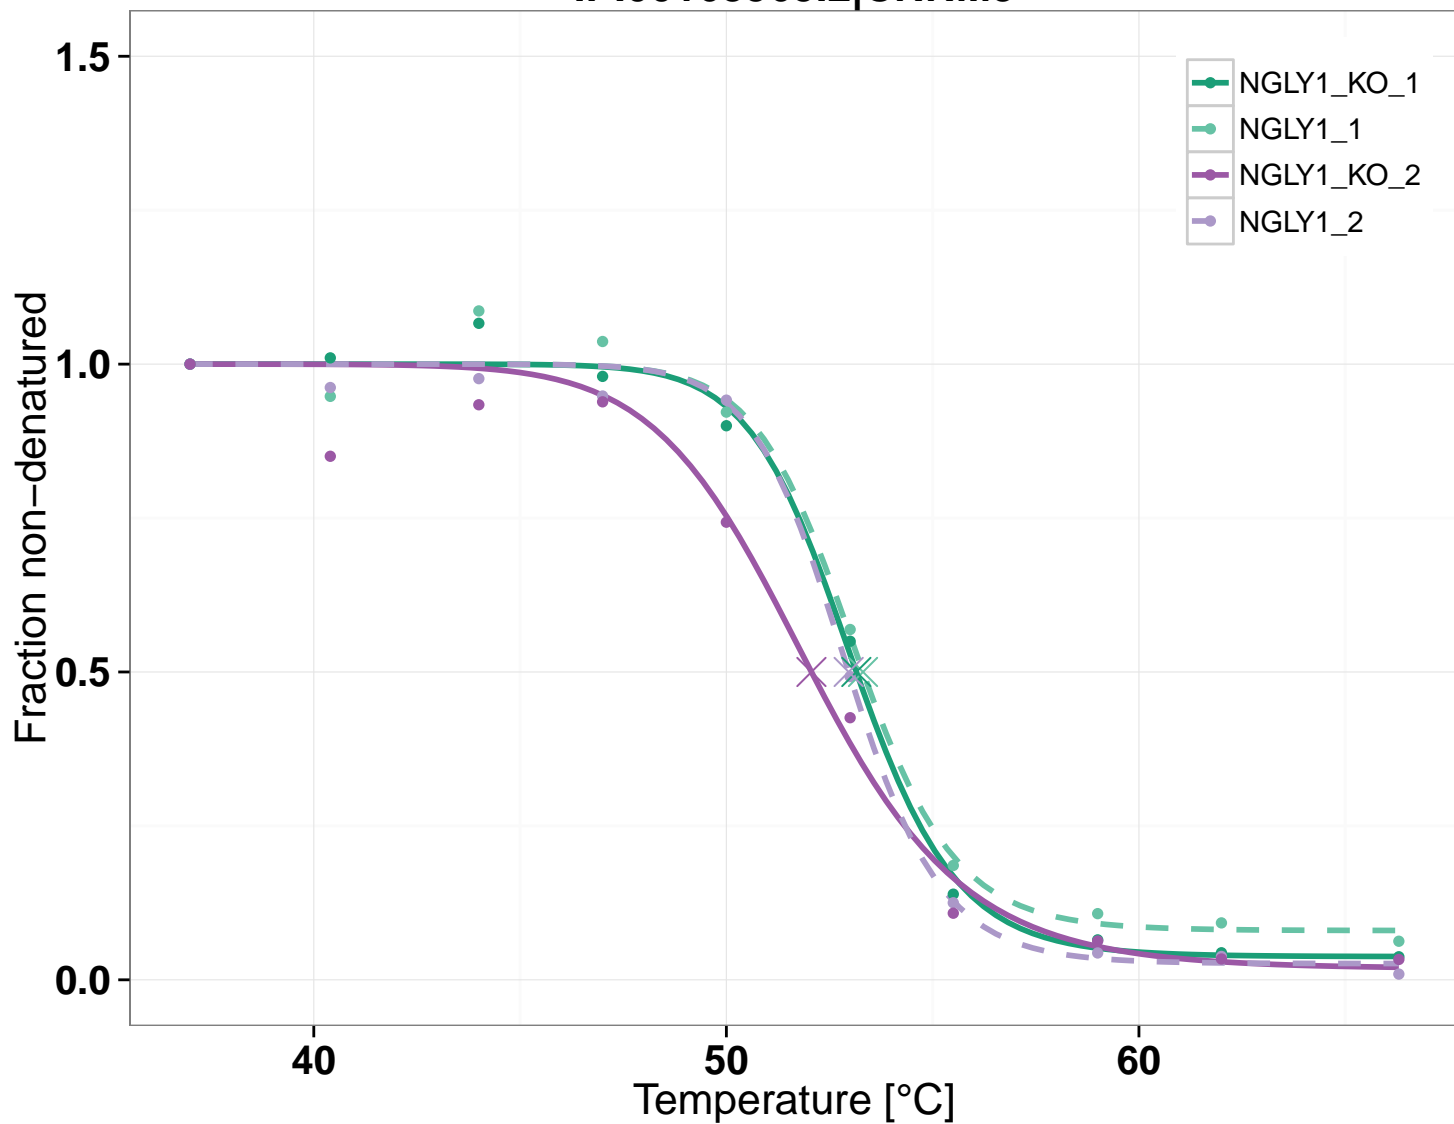

|            | meltPoint | slope | plateau | R2   |
|------------|-----------|-------|---------|------|
| NGLY1_KO_1 | 53.15     | -0.19 | 0.04    | 1    |
| NGLY1_1    | 53.31     | -0.19 | 0.08    | 0.99 |
| NGLY1_KO_2 | 52.06     | -0.13 | 0.02    | 0.98 |
| NGLY1_2    | 52.96     | -0.21 | 0.03    | 1    |

Supplement: Supplementary file 7092 [file 1]

IPI00007346.1|PPIH

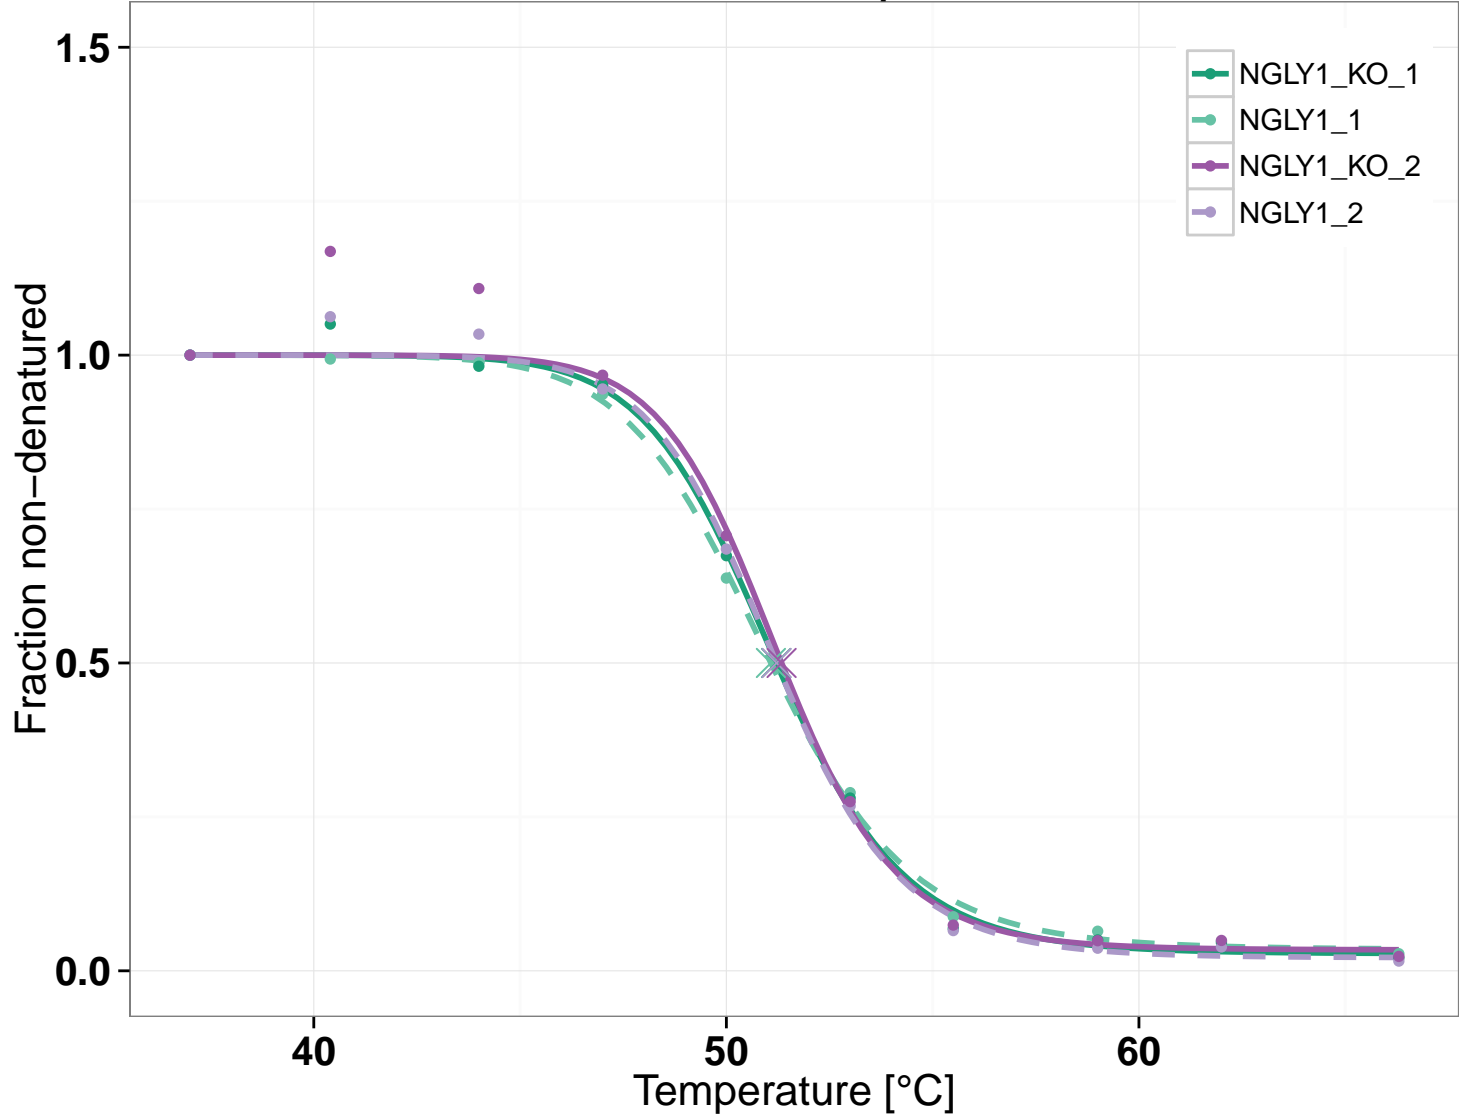

|            | meltPoint | slope | plateau | R2   |
|------------|-----------|-------|---------|------|
| NGLY1_KO_1 | 51.21     | -0.15 | 0.03    | 1    |
| NGLY1_1    | 51.08     | -0.14 | 0.03    | 1    |
| NGLY1_KO_2 | 51.34     | -0.17 | 0.03    | 0.98 |
| NGLY1_2    | 51.22     | -0.16 | 0.02    | 1    |

Supplement: Supplementary file 7093 [file 1]

IPI00031718.1|ENTPD4

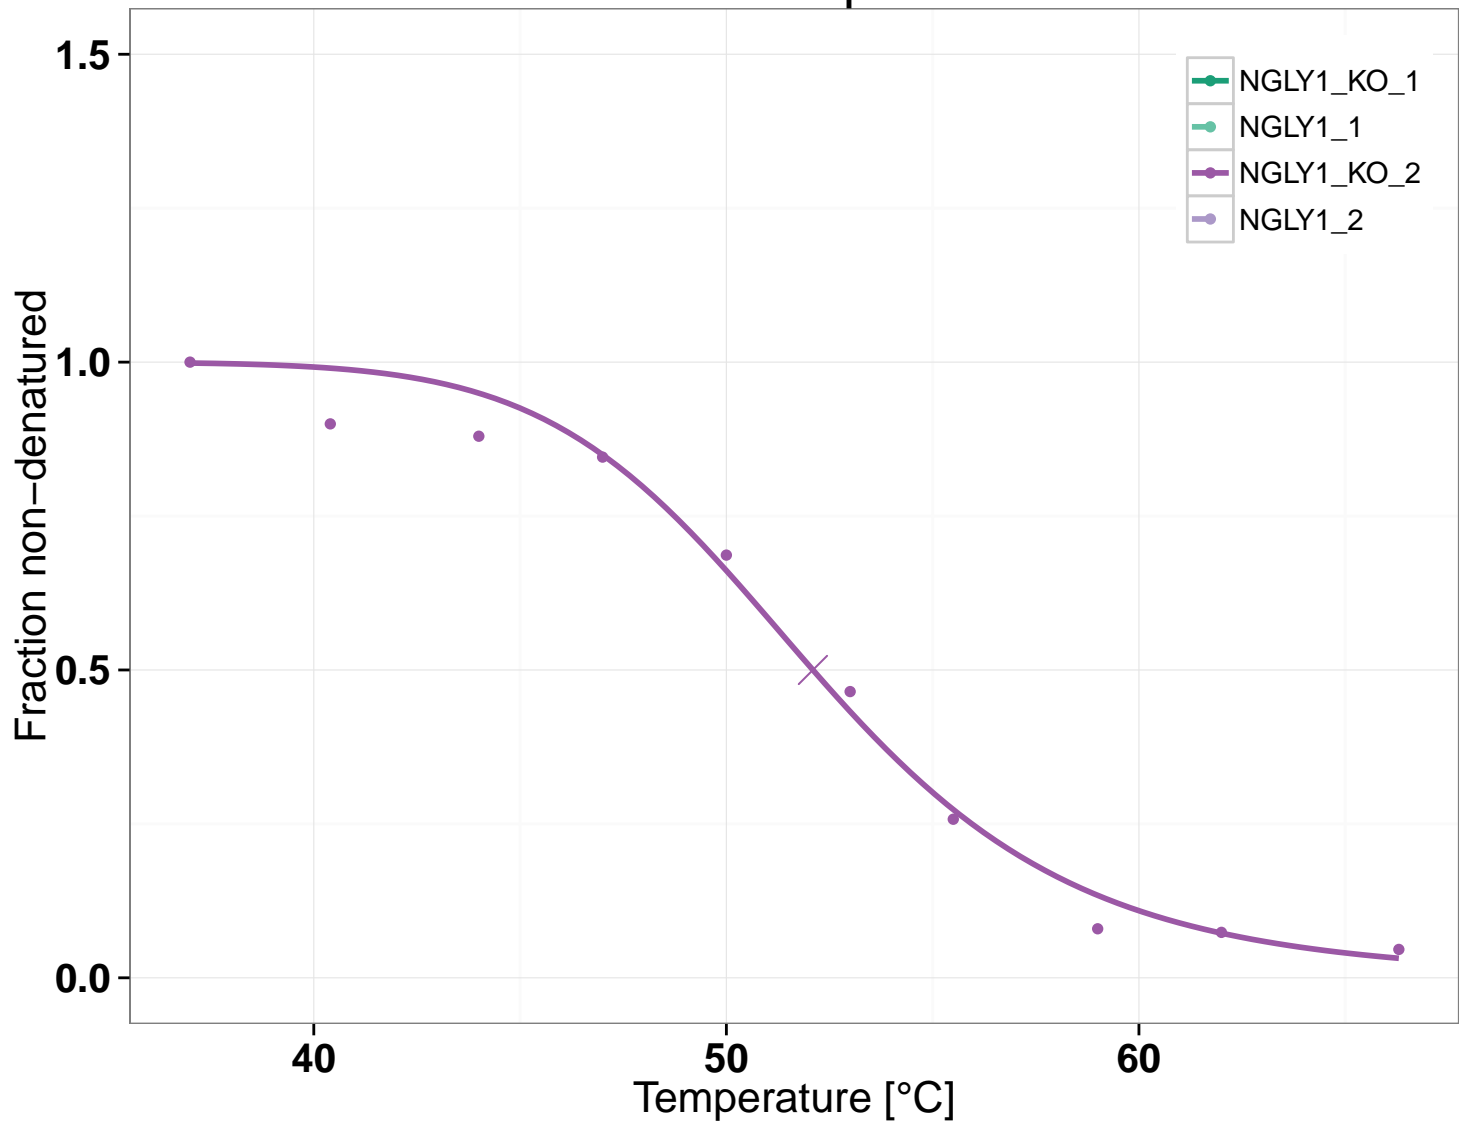

|            | meltPoint | slope  | plateau | R2   |
|------------|-----------|--------|---------|------|
| NGLY1_KO_1 | —         | —      | —       | —    |
| NGLY1_1    | —         | —      | —       | —    |
| NGLY1_KO_2 | 52.1      | -0.078 | 0       | 0.99 |
| NGLY1_2    | —         | —      | —       | —    |

Supplement: Supplementary file 7094 [file 1]

# IPI00027730.4|STAR

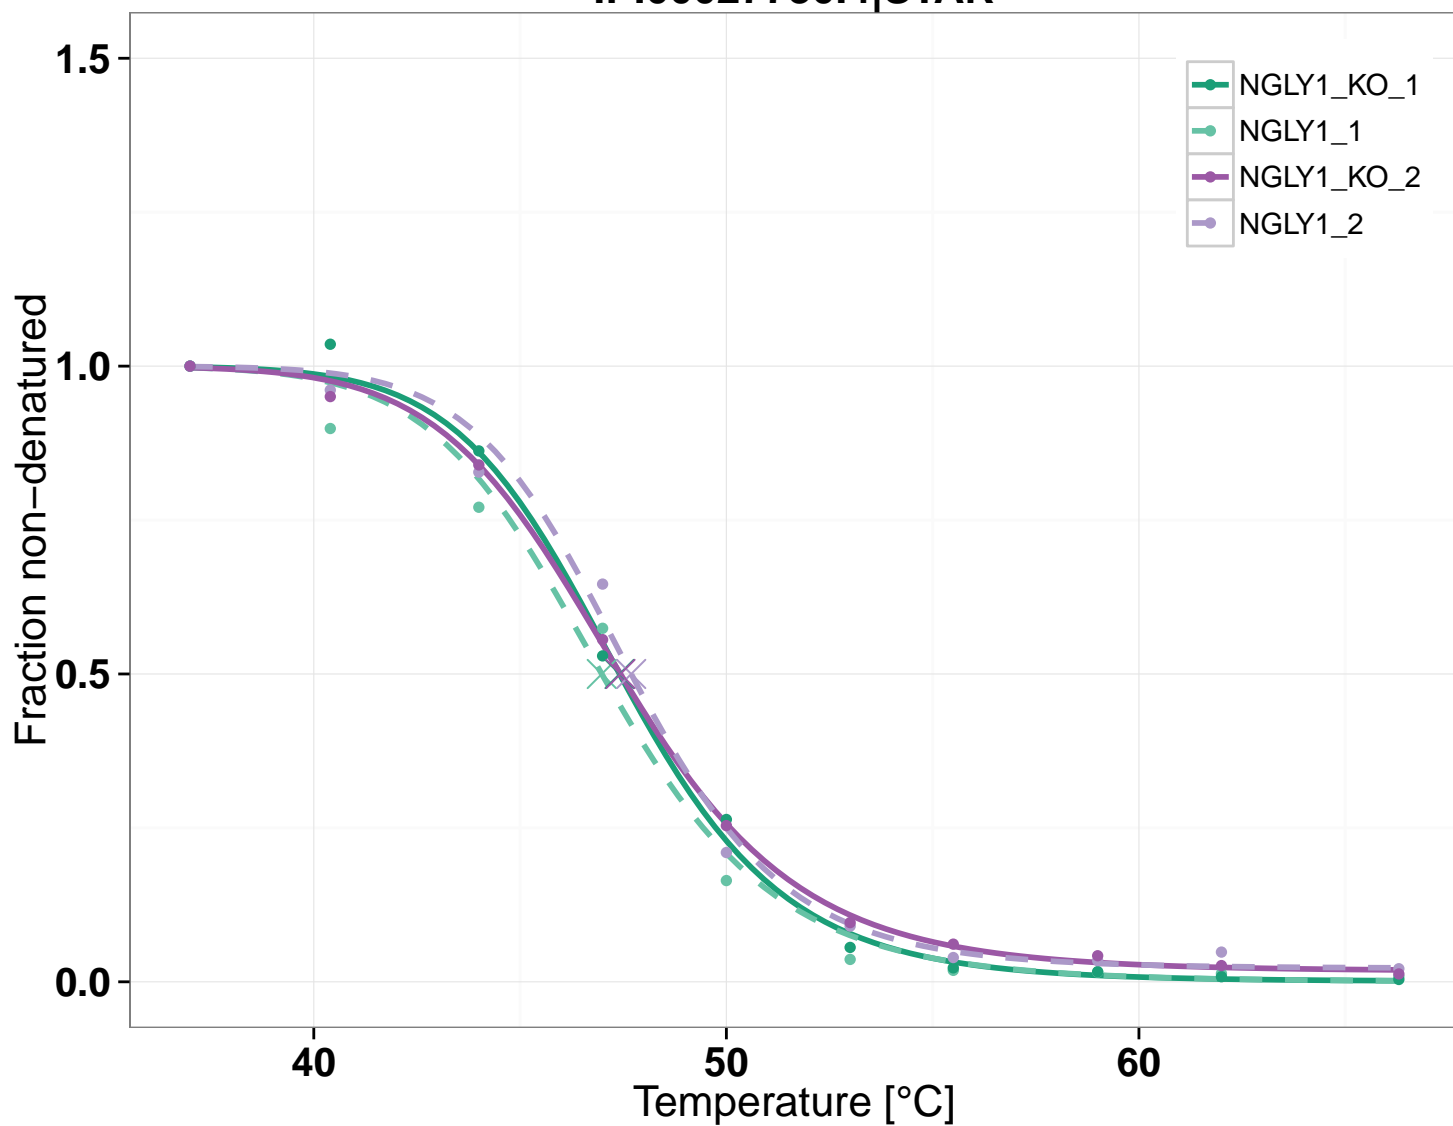

|            | meltPoint | slope | plateau | R2   |
|------------|-----------|-------|---------|------|
| NGLY1_KO_1 | 47.41     | -0.12 | 0       | 1    |
| NGLY1_1    | 46.98     | -0.12 | 0       | 0.99 |
| NGLY1_KO_2 | 47.43     | -0.11 | 0.02    | 1    |
| NGLY1_2    | 47.69     | -0.13 | 0.02    | 0.99 |

Supplement: Supplementary file 7095 [file 1]

IPI00744698.3|LOC731049

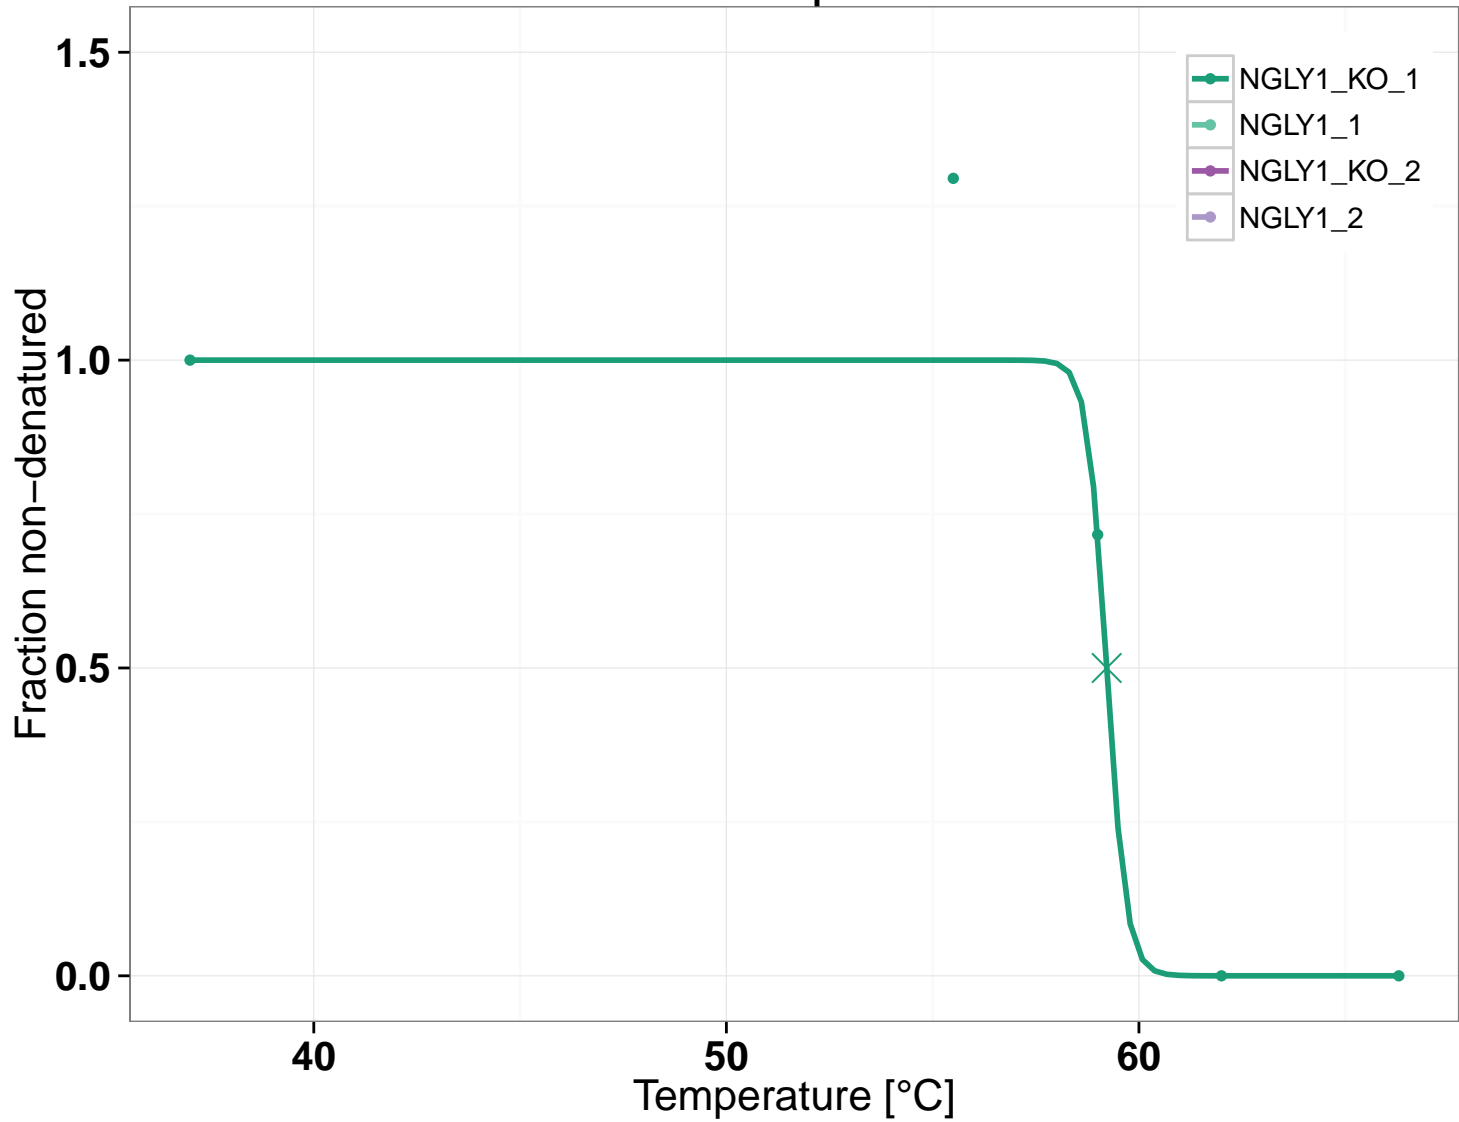

|            | meltPoint | slope | plateau | R2   |
|------------|-----------|-------|---------|------|
| NGLY1_KO_1 | 59.22     | -1.1  | 0       | 0.31 |
| NGLY1_1    | -         | -     | -       | -    |
| NGLY1_KO_2 | -         | -     | -       | -    |
| NGLY1_2    | -         | -     | -       | -    |

Supplement: Supplementary file 7096 [file 1]

IPI00258168.8|RBM9

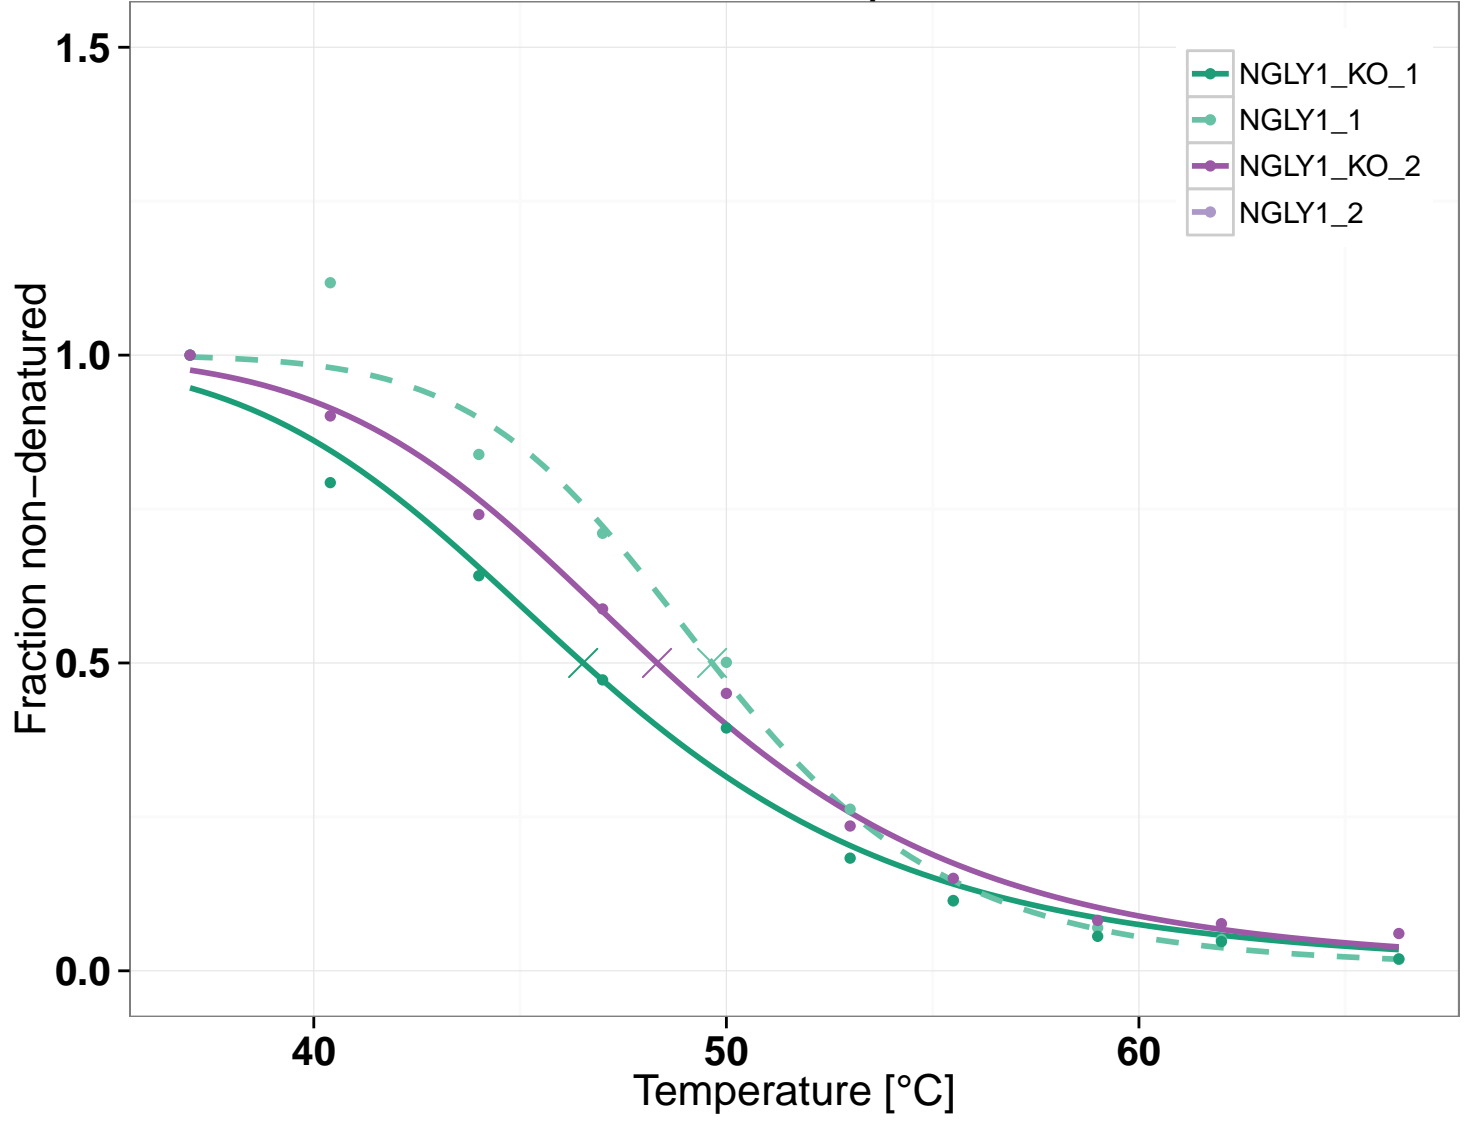

|            | meltPoint | slope  | plateau | R2   |
|------------|-----------|--------|---------|------|
| NGLY1_KO_1 | 46.53     | -0.062 | 0       | 0.99 |
| NGLY1_1    | 49.65     | -0.086 | 0.01    | 0.98 |
| NGLY1_KO_2 | 48.32     | -0.064 | 0       | 0.99 |
| NGLY1_2    | -         | -      | -       | -    |

Supplement: Supplementary file 7097 [file 1]

IPI00871573.1|MRPL23

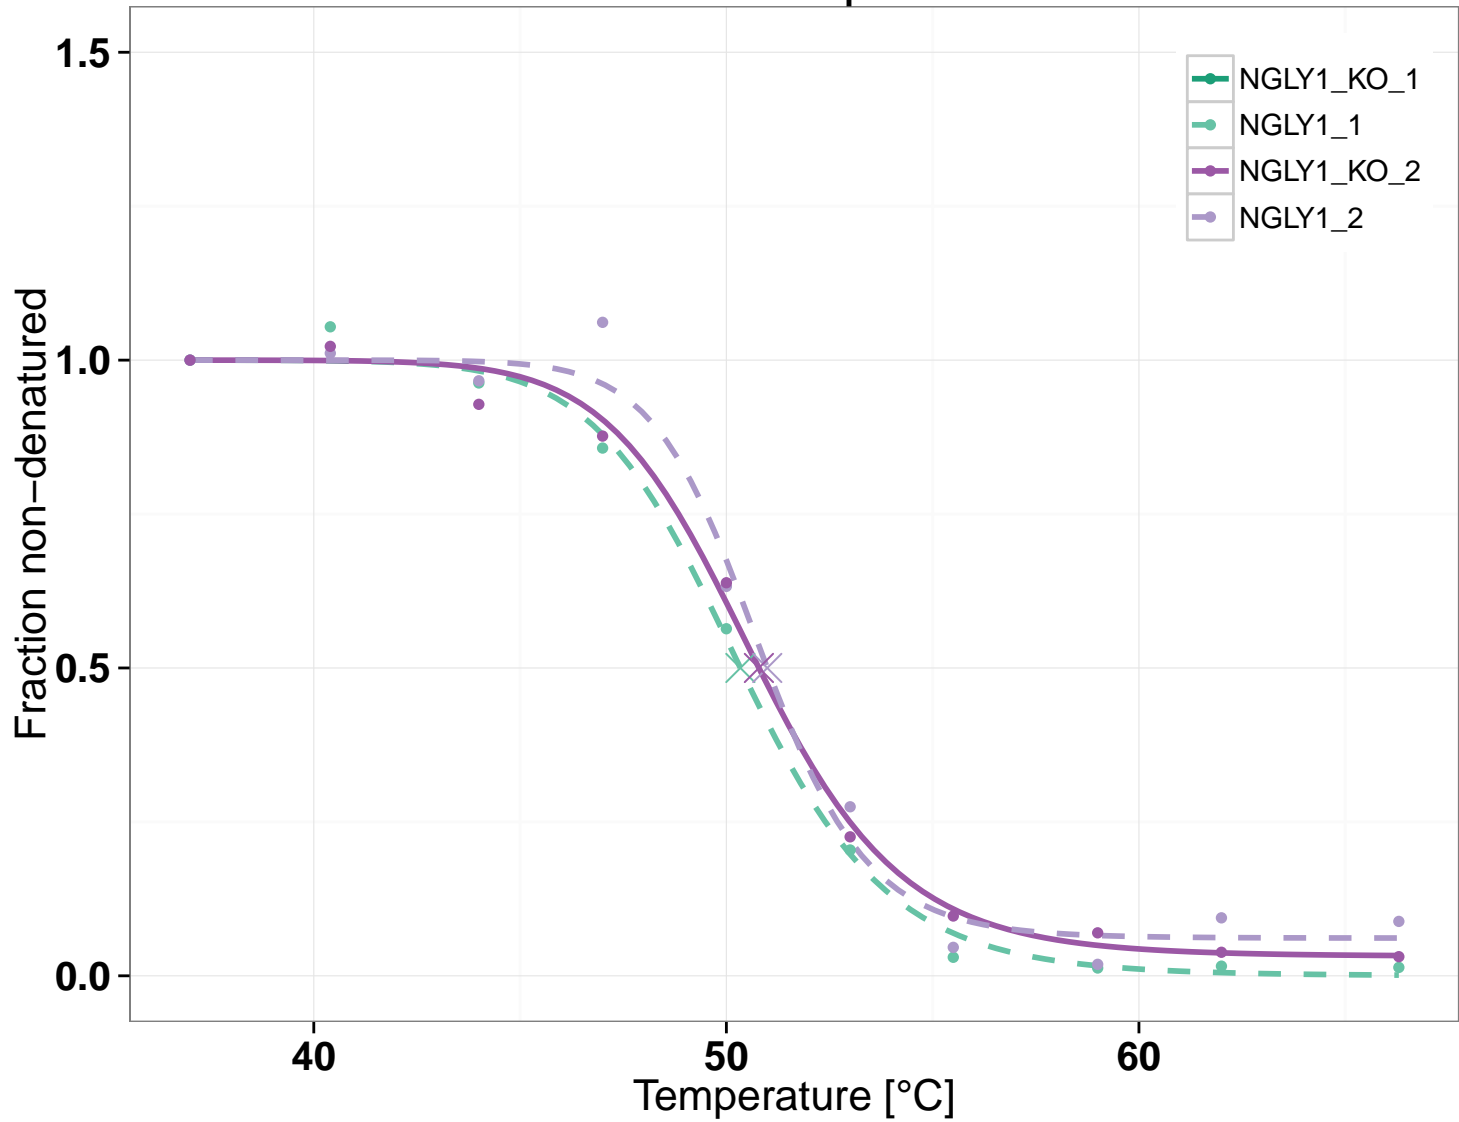

|            | meltPoint | slope | plateau | R2   |
|------------|-----------|-------|---------|------|
| NGLY1_KO_1 | —         | —     | —       | —    |
| NGLY1_1    | 50.34     | -0.14 | 0       | 1    |
| NGLY1_KO_2 | 50.79     | -0.14 | 0.03    | 1    |
| NGLY1_2    | 50.99     | -0.18 | 0.06    | 0.99 |

Supplement: Supplementary file 7098 [file 1]

# IPI00304999.4|ROR2

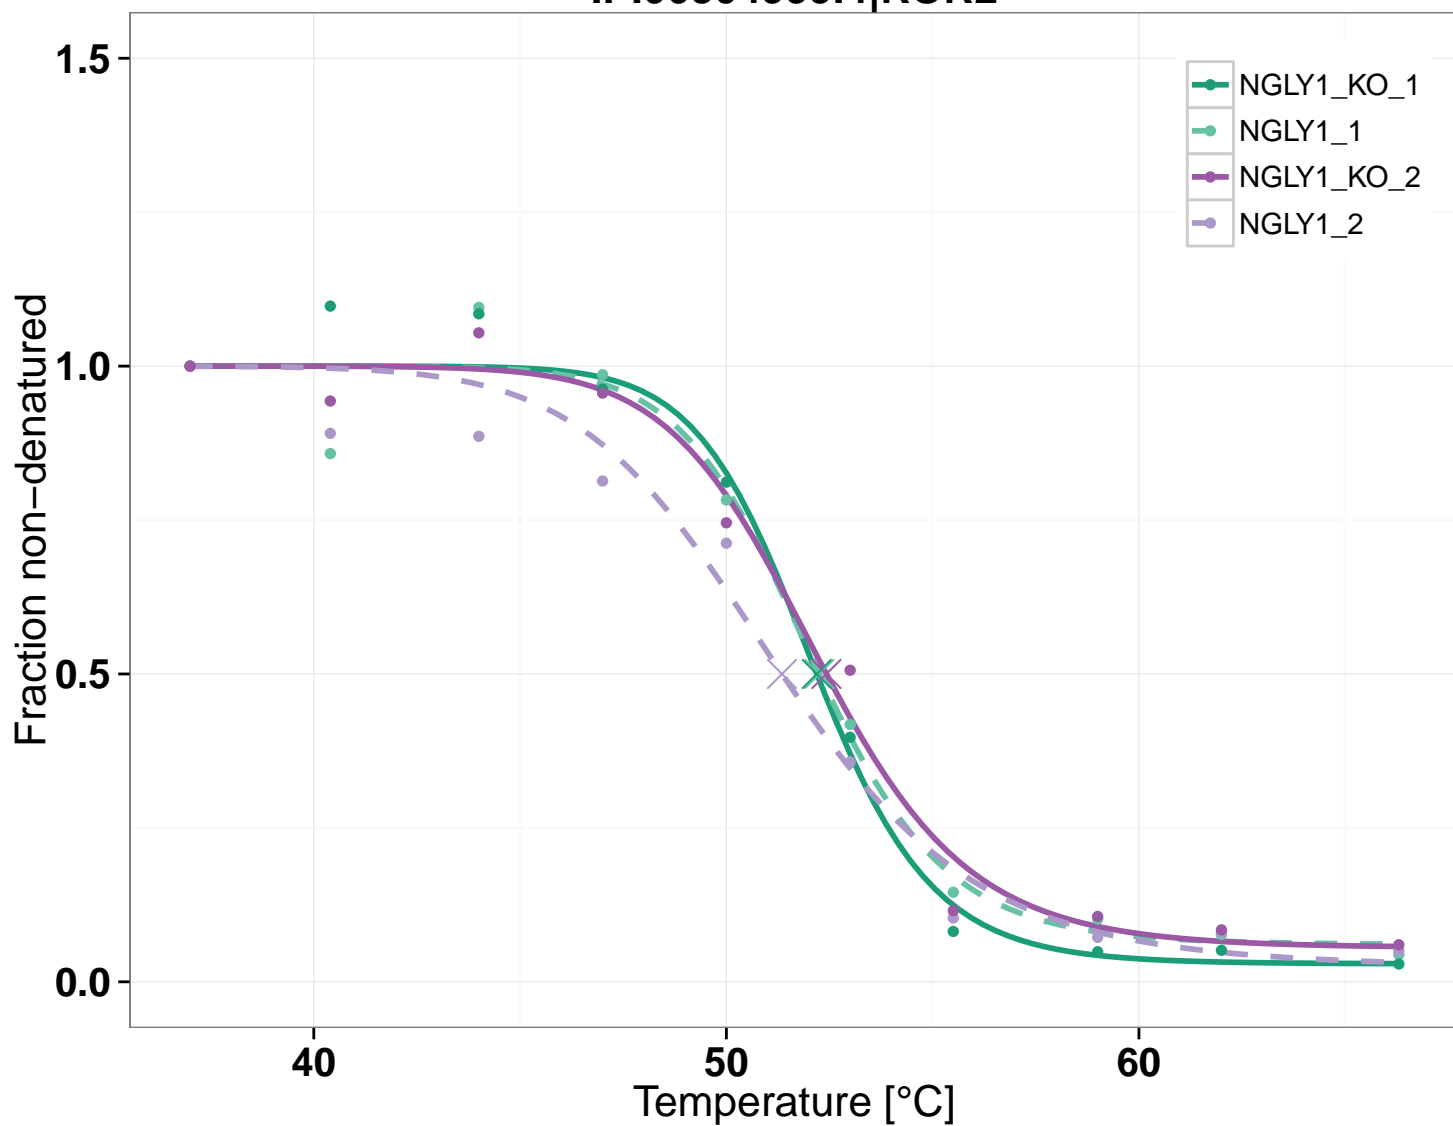

|            | meltPoint | slope | plateau | R2   |
|------------|-----------|-------|---------|------|
| NGLY1_KO_1 | 52.19     | -0.17 | 0.03    | 0.99 |
| NGLY1_1    | 52.25     | -0.15 | 0.06    | 0.98 |
| NGLY1_KO_2 | 52.43     | -0.13 | 0.06    | 0.99 |
| NGLY1_2    | 51.35     | -0.1  | 0.02    | 0.97 |

Supplement: Supplementary file 7099 [file 1]

# IPI00016457.5|CRAT

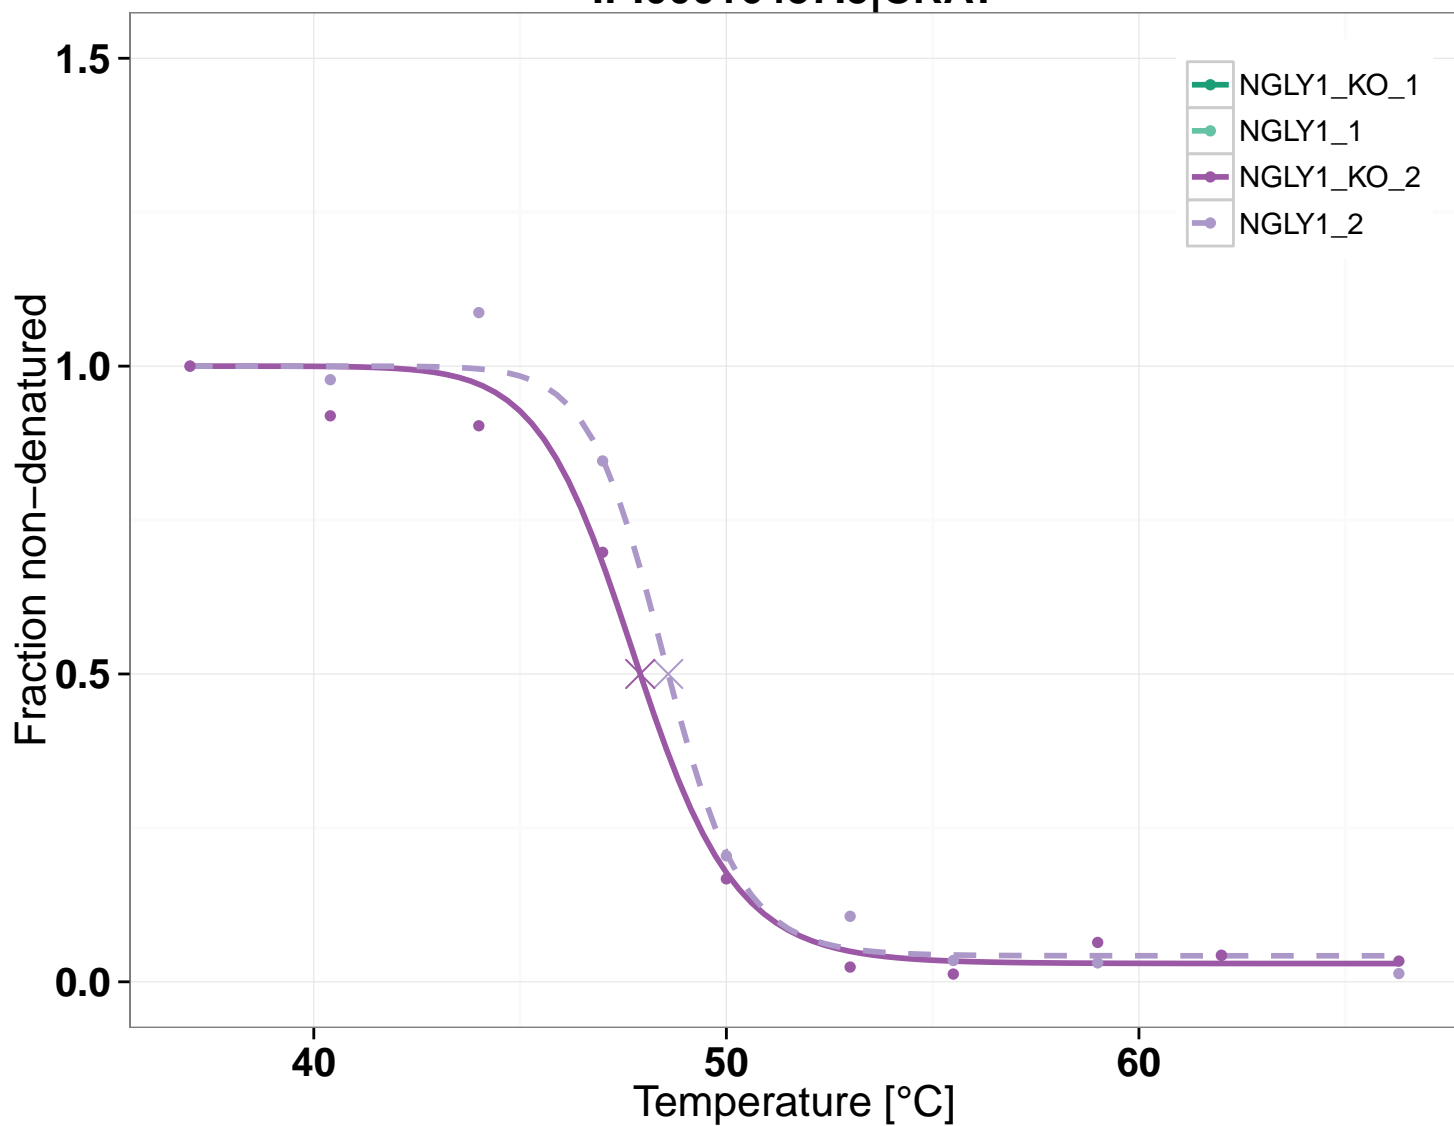

|            | meltPoint | slope | plateau | R2   |
|------------|-----------|-------|---------|------|
| NGLY1_KO_1 | —         | —     | —       | —    |
| NGLY1_1    | —         | —     | —       | —    |
| NGLY1_KO_2 | 47.91     | -0.2  | 0.03    | 0.99 |
| NGLY1_2    | 48.59     | -0.26 | 0.04    | 0.99 |

Supplement: Supplementary file 7100 [file 1]

IPI00328200.3|QRICH1

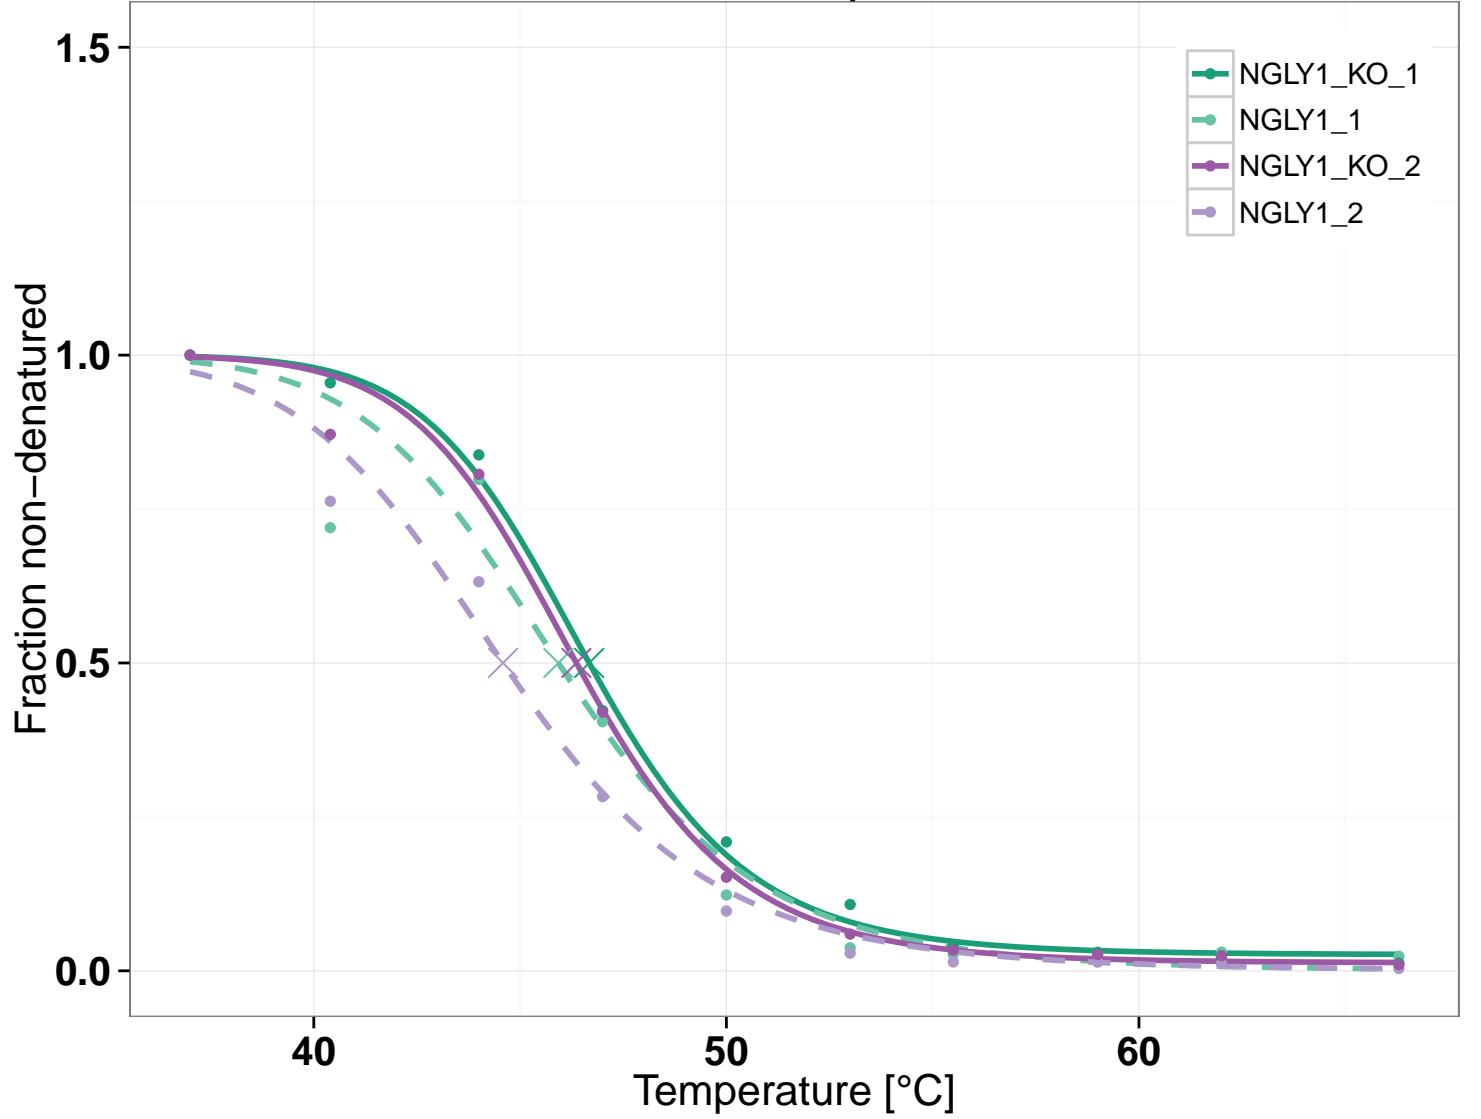

|            | meltPoint | slope  | plateau | R2   |
|------------|-----------|--------|---------|------|
| NGLY1_KO_1 | 46.67     | -0.12  | 0.03    | 1    |
| NGLY1_1    | 45.93     | -0.1   | 0       | 0.95 |
| NGLY1_KO_2 | 46.36     | -0.12  | 0.01    | 0.99 |
| NGLY1_2    | 44.59     | -0.099 | 0       | 0.99 |

Supplement: Supplementary file 7101 [file 1]

# IPI00301554.5|MFSD5

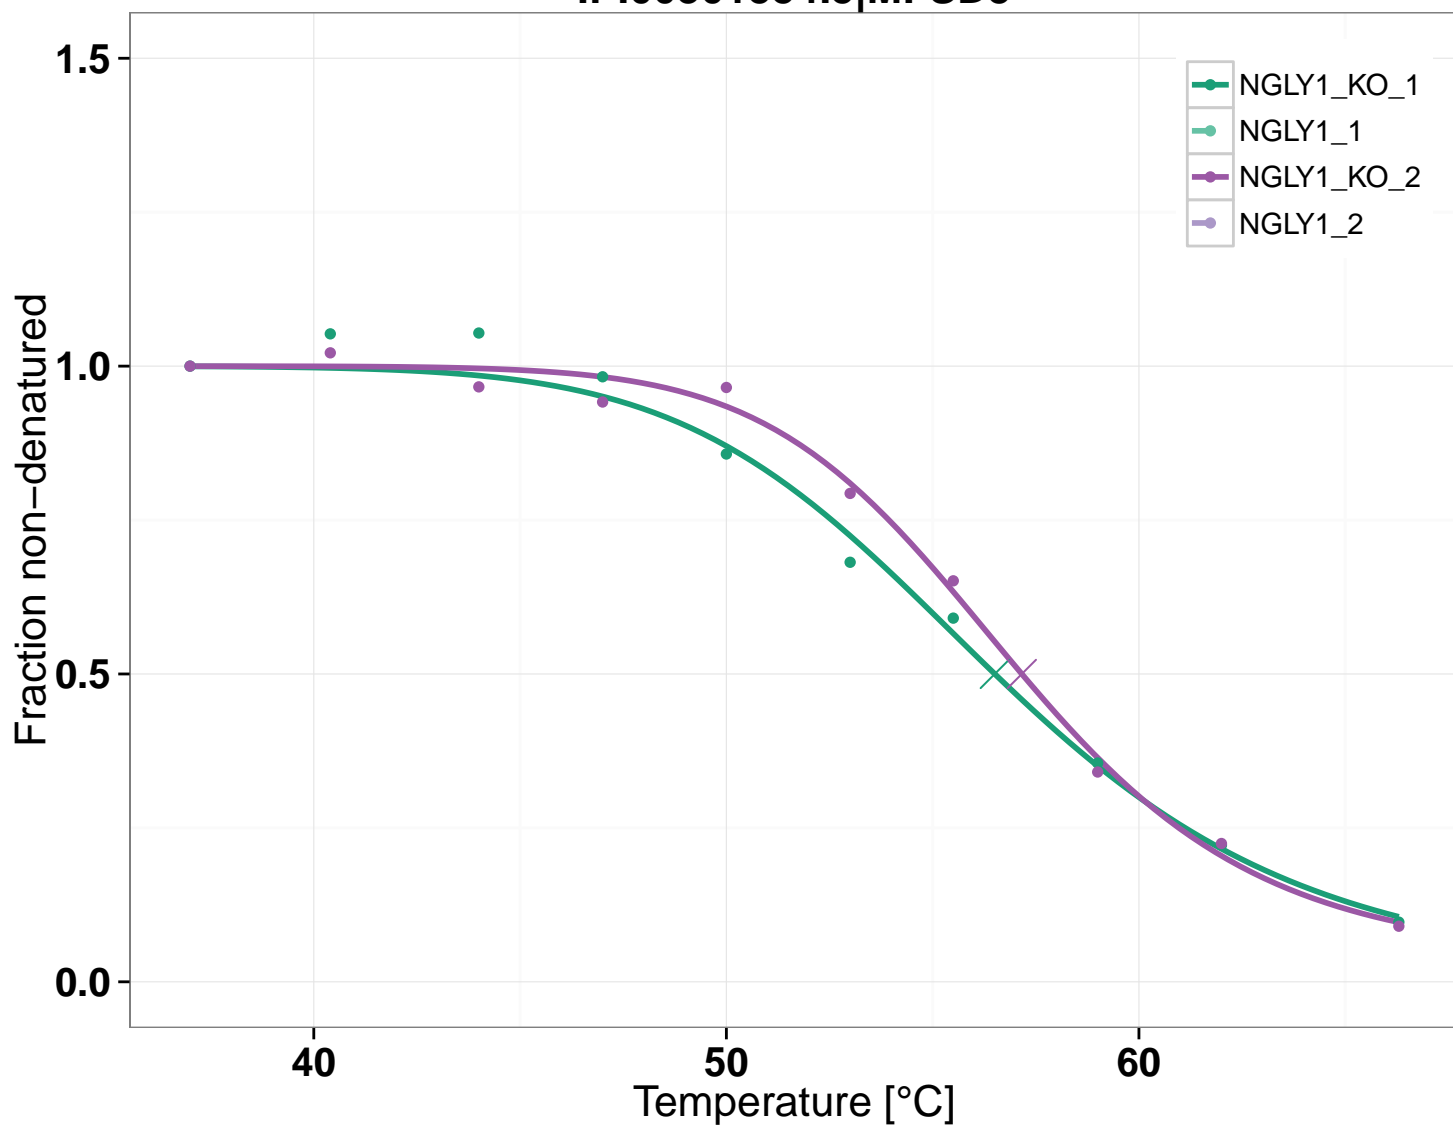

|            | meltPoint | slope  | plateau | R2   |
|------------|-----------|--------|---------|------|
| NGLY1_KO_1 | 56.51     | -0.066 | 0       | 0.99 |
| NGLY1_1    | -         | -      | -       | -    |
| NGLY1_KO_2 | 57.16     | -0.081 | 0.03    | 1    |
| NGLY1_2    | -         | -      | -       | -    |

Supplement: Supplementary file 7102 [file 1]

# IPI00465028.7|TPI1

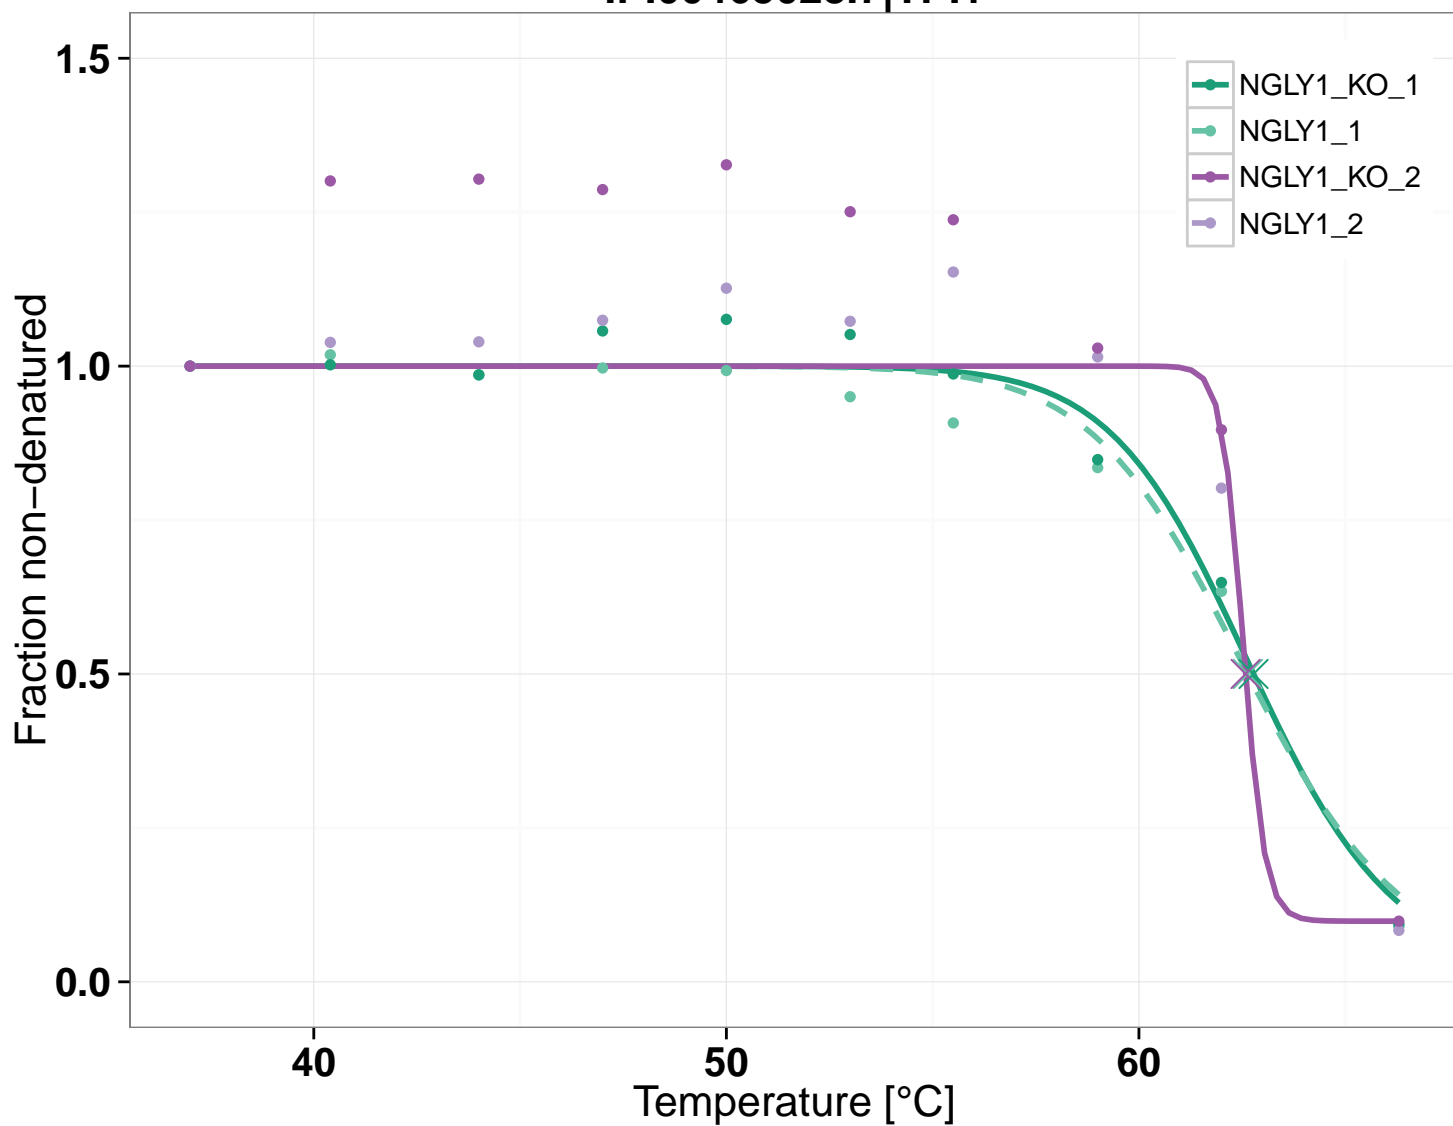

|            | meltPoint | slope | plateau | R2   |
|------------|-----------|-------|---------|------|
| NGLY1_KO_1 | 62.78     | -0.14 | 0       | 0.98 |
| NGLY1_1    | 62.64     | -0.13 | 0       | 0.98 |
| NGLY1_KO_2 | 62.59     | -0.86 | 0.1     | 0.61 |
| NGLY1_2    | -         | -     | -       | -    |

Supplement: Supplementary file 7103 [file 1]

IPI00219132.2|PTPN18

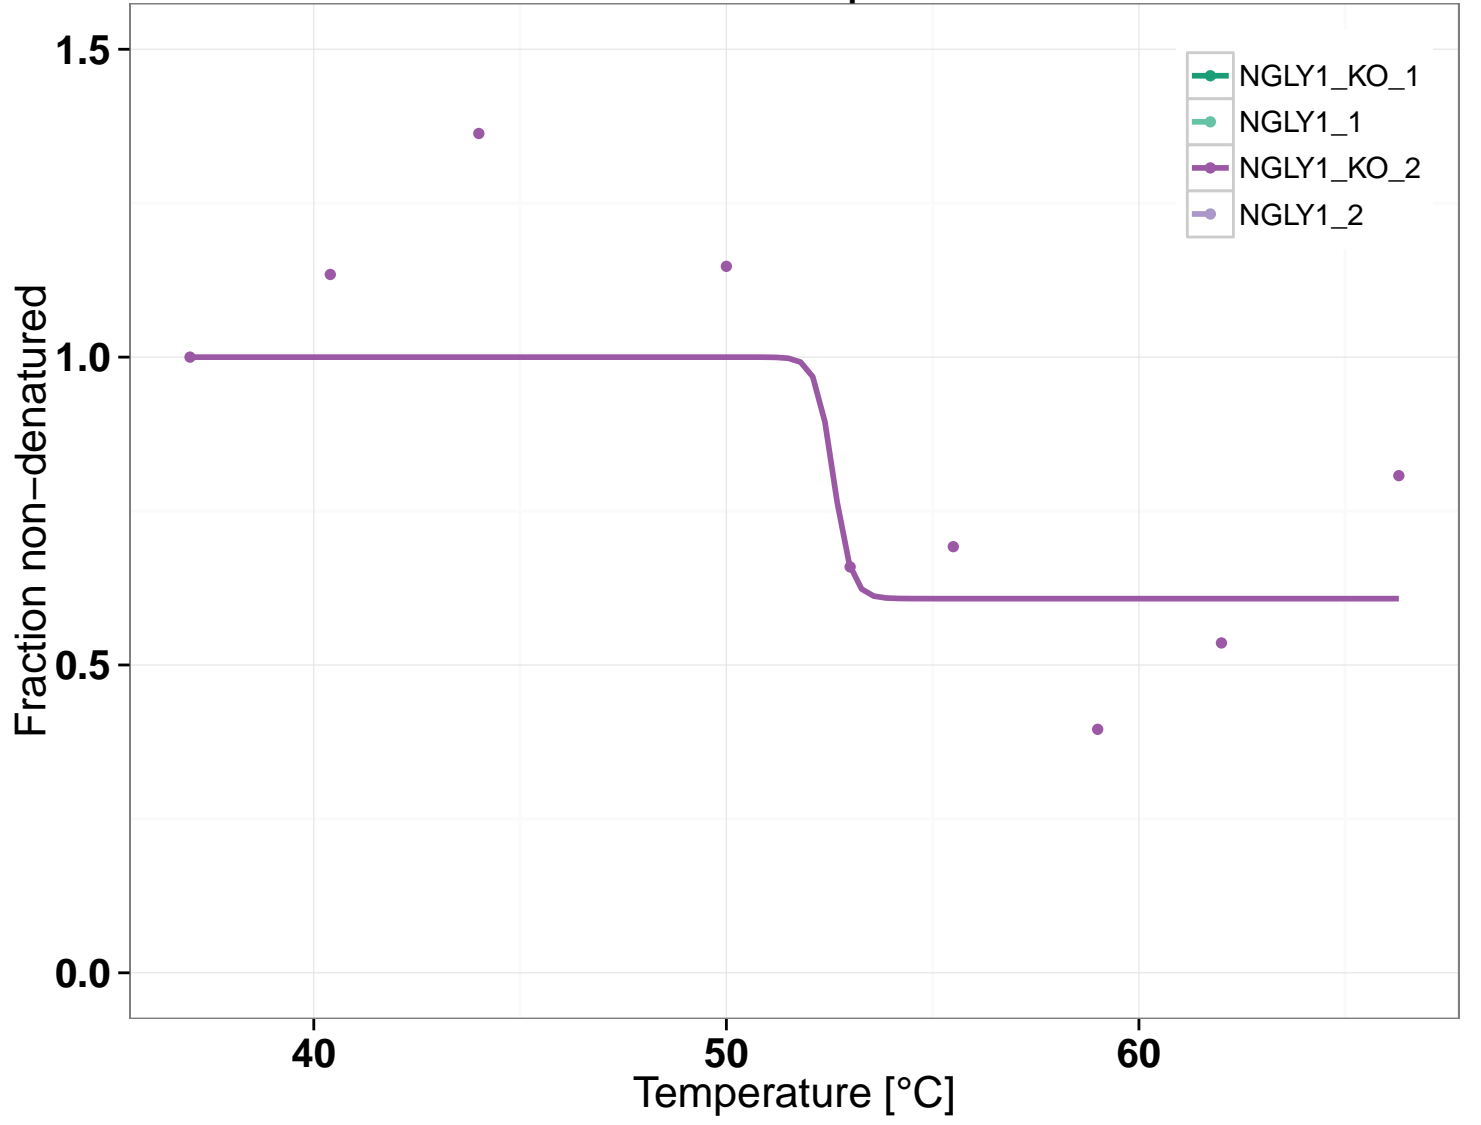

|            | meltPoint | slope | plateau | R2   |
|------------|-----------|-------|---------|------|
| NGLY1_KO_1 | -         | -     | -       | -    |
| NGLY1_1    | -         | -     | -       | -    |
| NGLY1_KO_2 | -         | -0.47 | 0.61    | 0.55 |
| NGLY1_2    | -         | -     | -       | -    |

Supplement: Supplementary file 7104 [file 1]

IPI00795646.1|STRA13

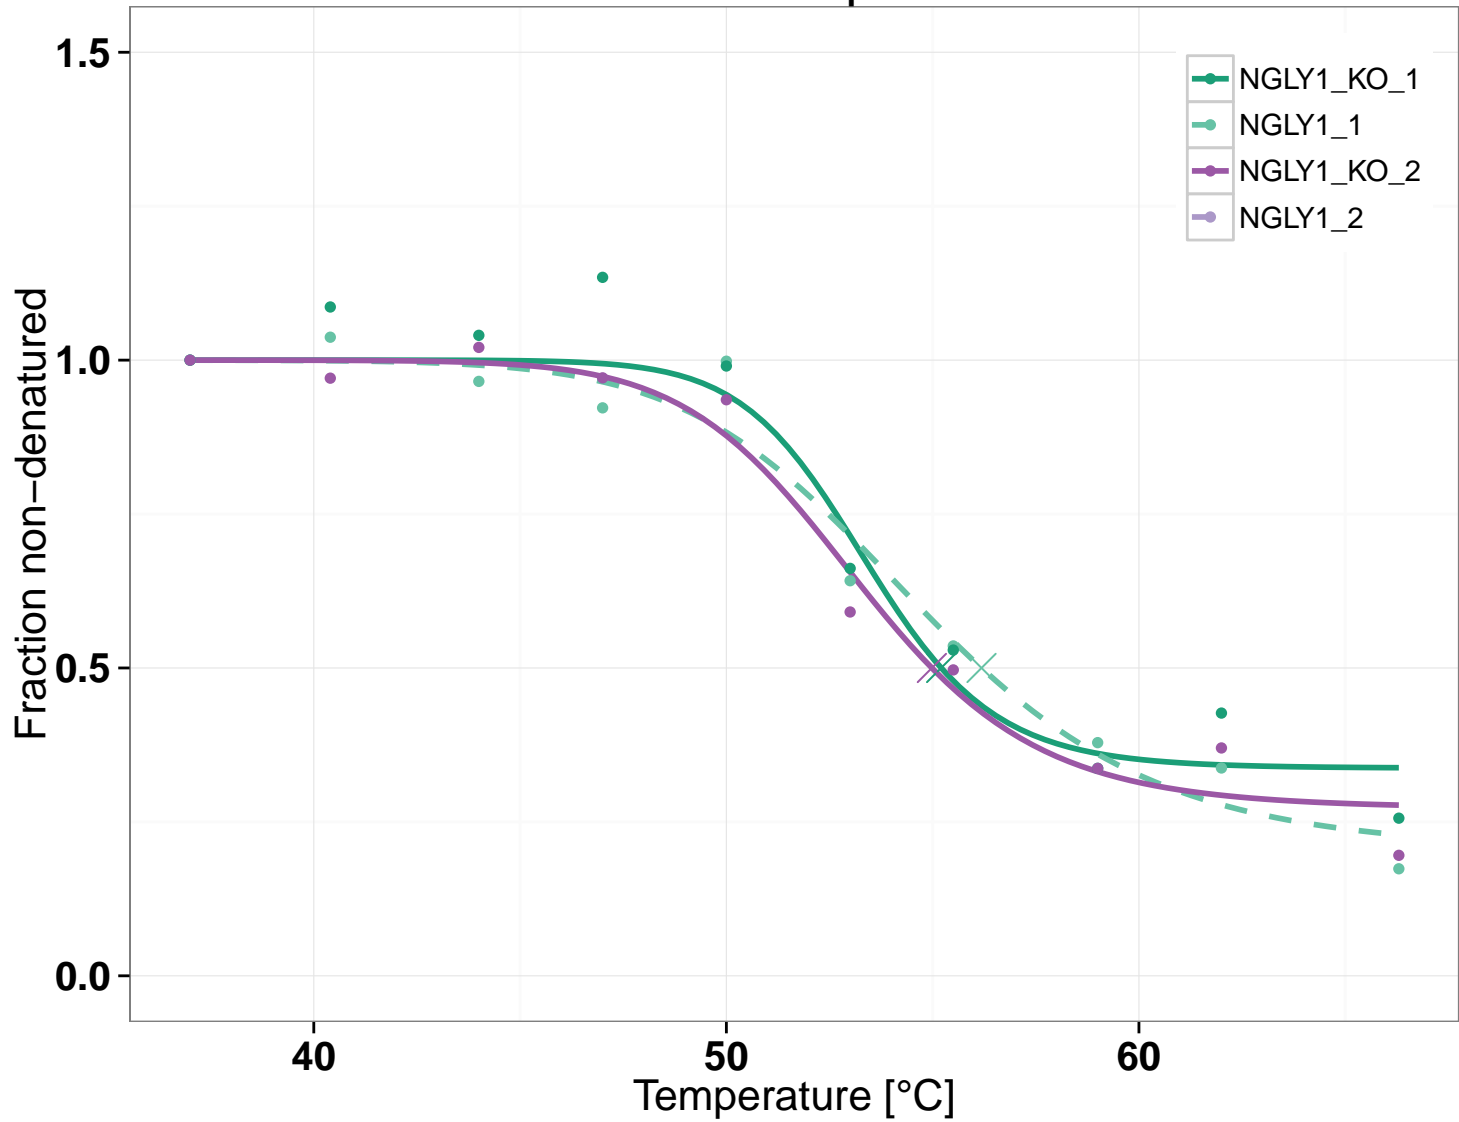

|            | meltPoint | slope  | plateau | R2   |
|------------|-----------|--------|---------|------|
| NGLY1_KO_1 | 55.21     | -0.11  | 0.34    | 0.95 |
| NGLY1_1    | 56.18     | -0.07  | 0.2     | 0.97 |
| NGLY1_KO_2 | 54.98     | -0.085 | 0.27    | 0.98 |
| NGLY1_2    | -         | -      | -       | -    |

Supplement: Supplementary file 7105 [file 1]

# IPI00294344.2|FES

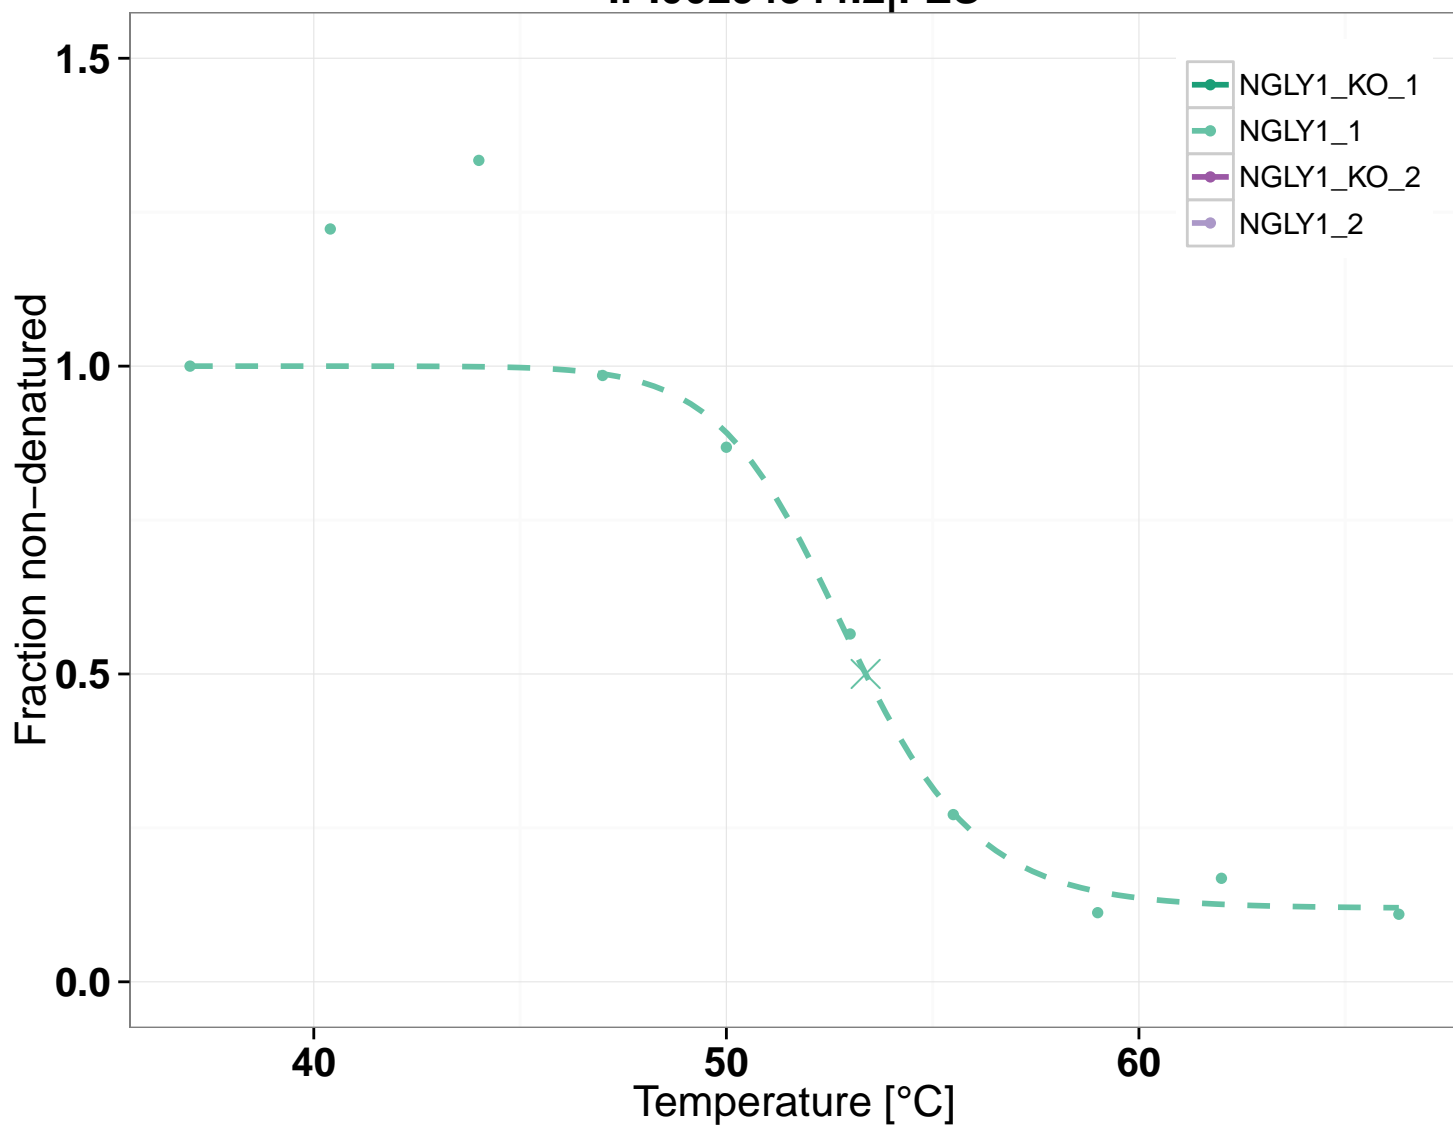

|            | meltPoint | slope | plateau | R2   |
|------------|-----------|-------|---------|------|
| NGLY1_KO_1 | —         | —     | —       | —    |
| NGLY1_1    | 53.38     | -0.14 | 0.12    | 0.92 |
| NGLY1_KO_2 | —         | —     | —       | —    |
| NGLY1_2    | —         | —     | —       | —    |

Supplement: Supplementary file 7106 [file 1]

IPI00029095.1|TFDP1

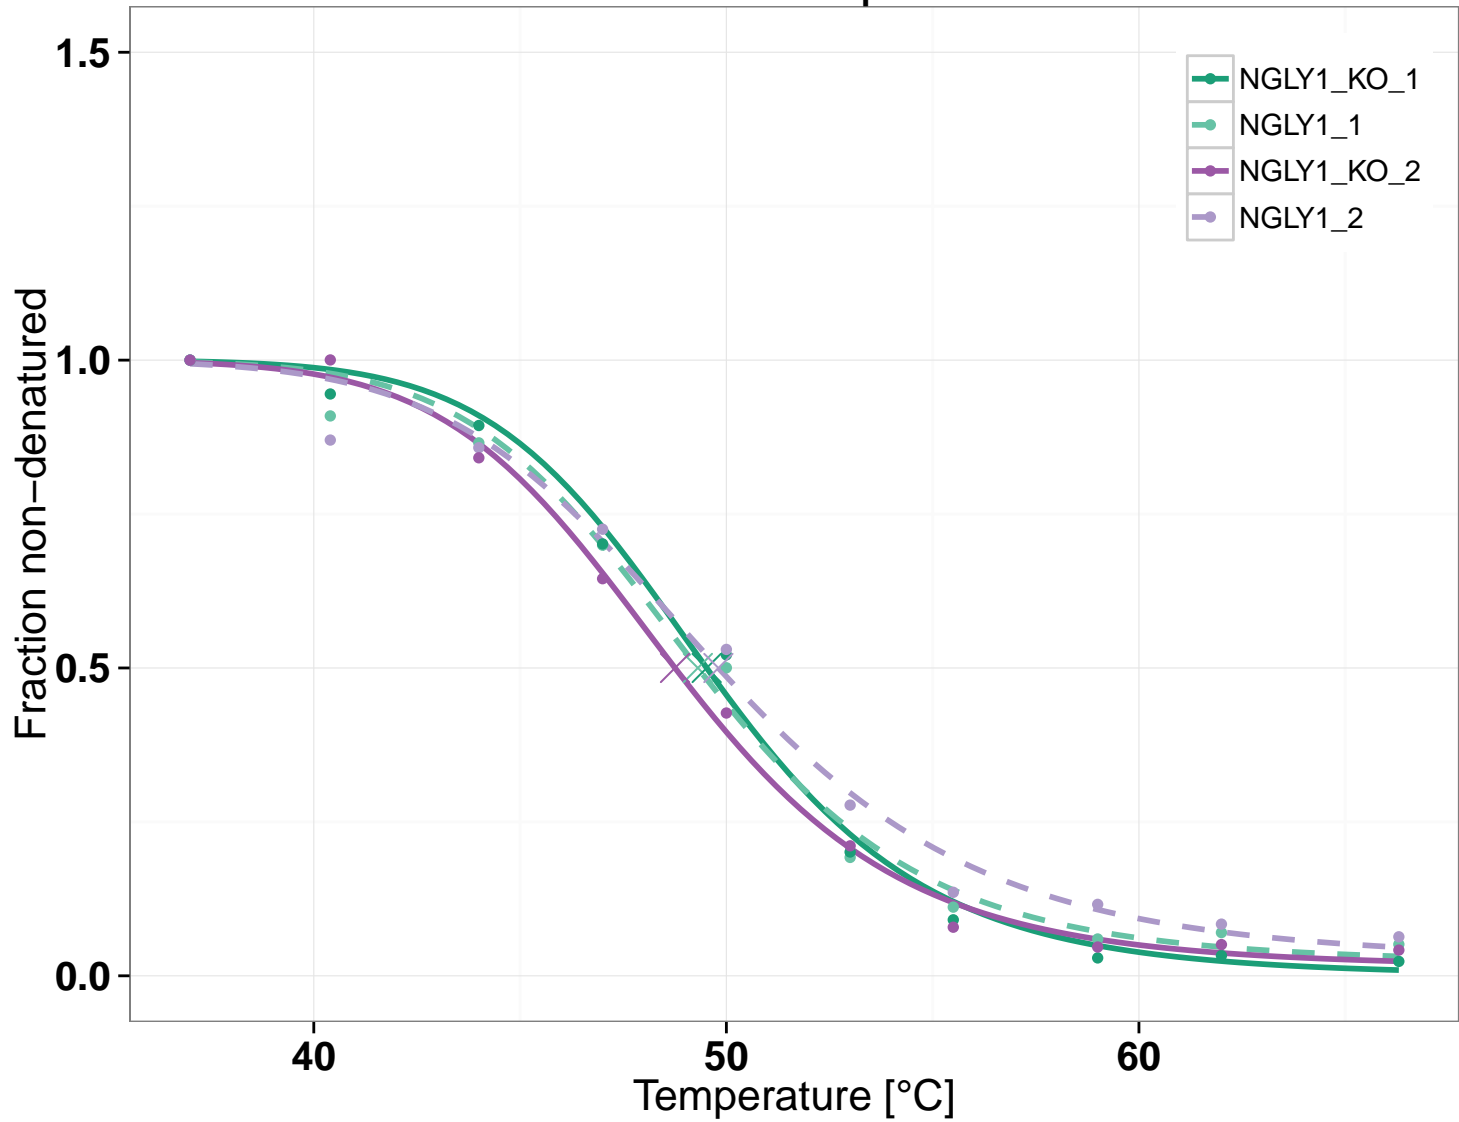

|            | meltPoint | slope  | plateau | R2   |
|------------|-----------|--------|---------|------|
| NGLY1_KO_1 | 49.52     | -0.094 | 0       | 0.99 |
| NGLY1_1    | 49.31     | -0.088 | 0.02    | 0.99 |
| NGLY1_KO_2 | 48.76     | -0.089 | 0.01    | 1    |
| NGLY1_2    | 49.81     | -0.075 | 0.02    | 0.99 |

Supplement: Supplementary file 7107 [file 1]

# IPI00427501.1|GHDC

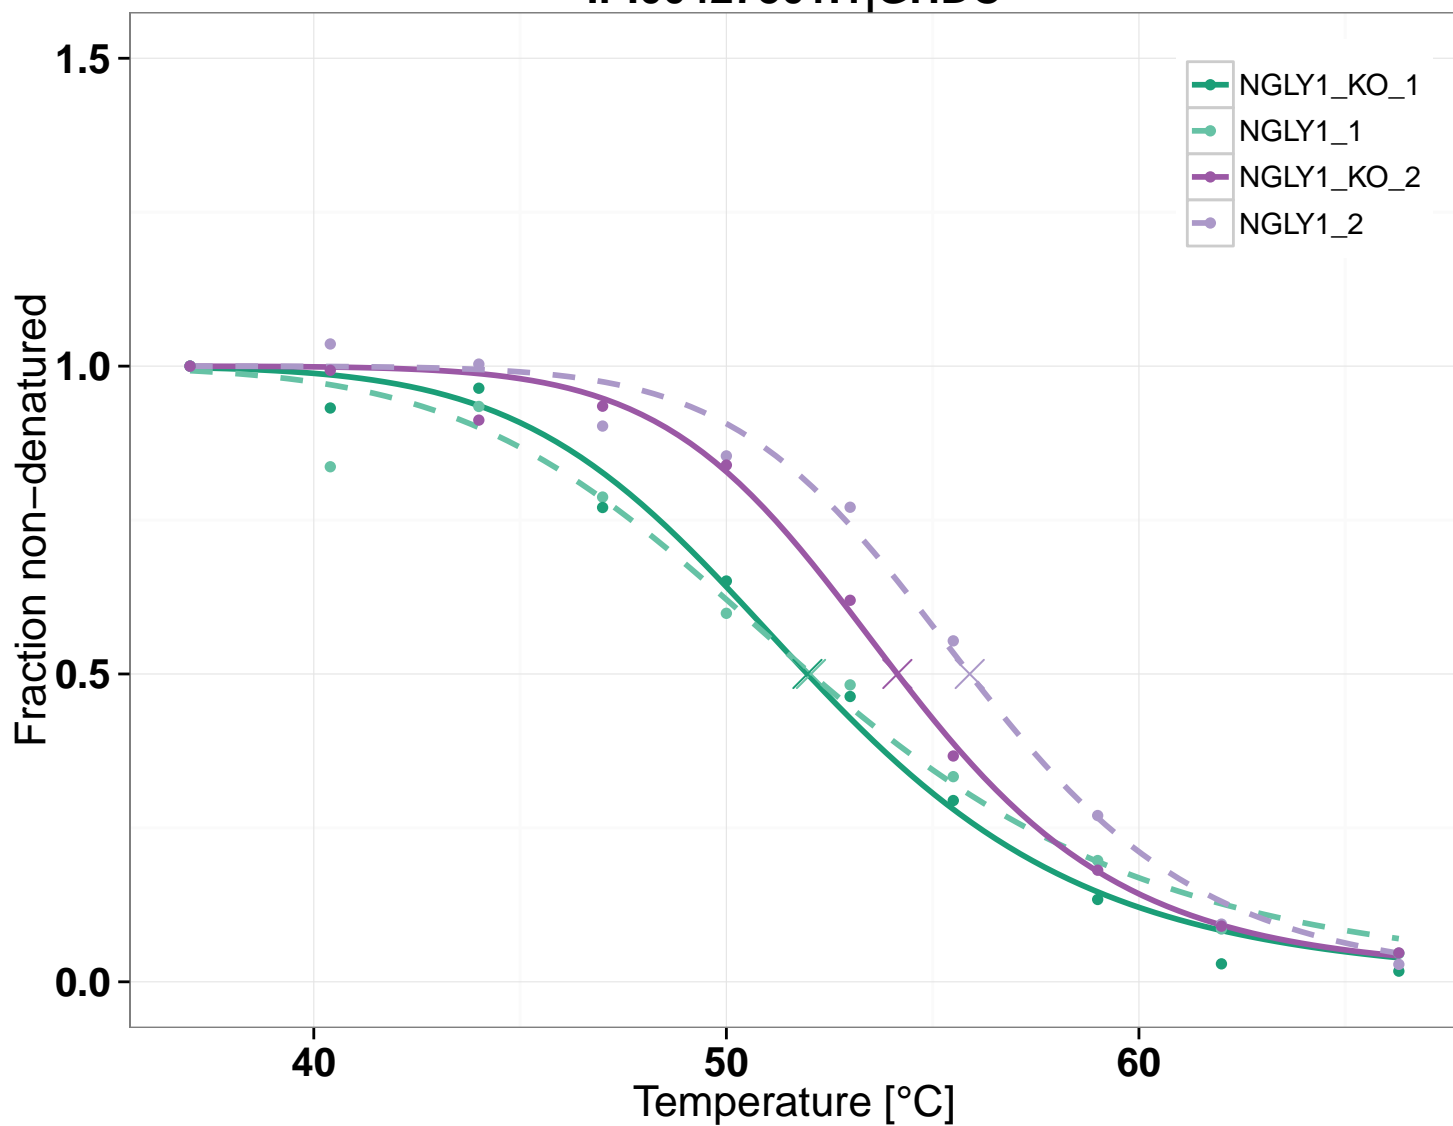

|            | meltPoint | slope  | plateau | R2   |
|------------|-----------|--------|---------|------|
| NGLY1_KO_1 | 51.97     | -0.073 | 0       | 0.99 |
| NGLY1_1    | 52.05     | -0.059 | 0       | 0.98 |
| NGLY1_KO_2 | 54.15     | -0.088 | 0.01    | 1    |
| NGLY1_2    | 55.9      | -0.087 | 0       | 0.99 |

Supplement: Supplementary file 7108 [file 1]

# IPI00294943.1|ARIH1

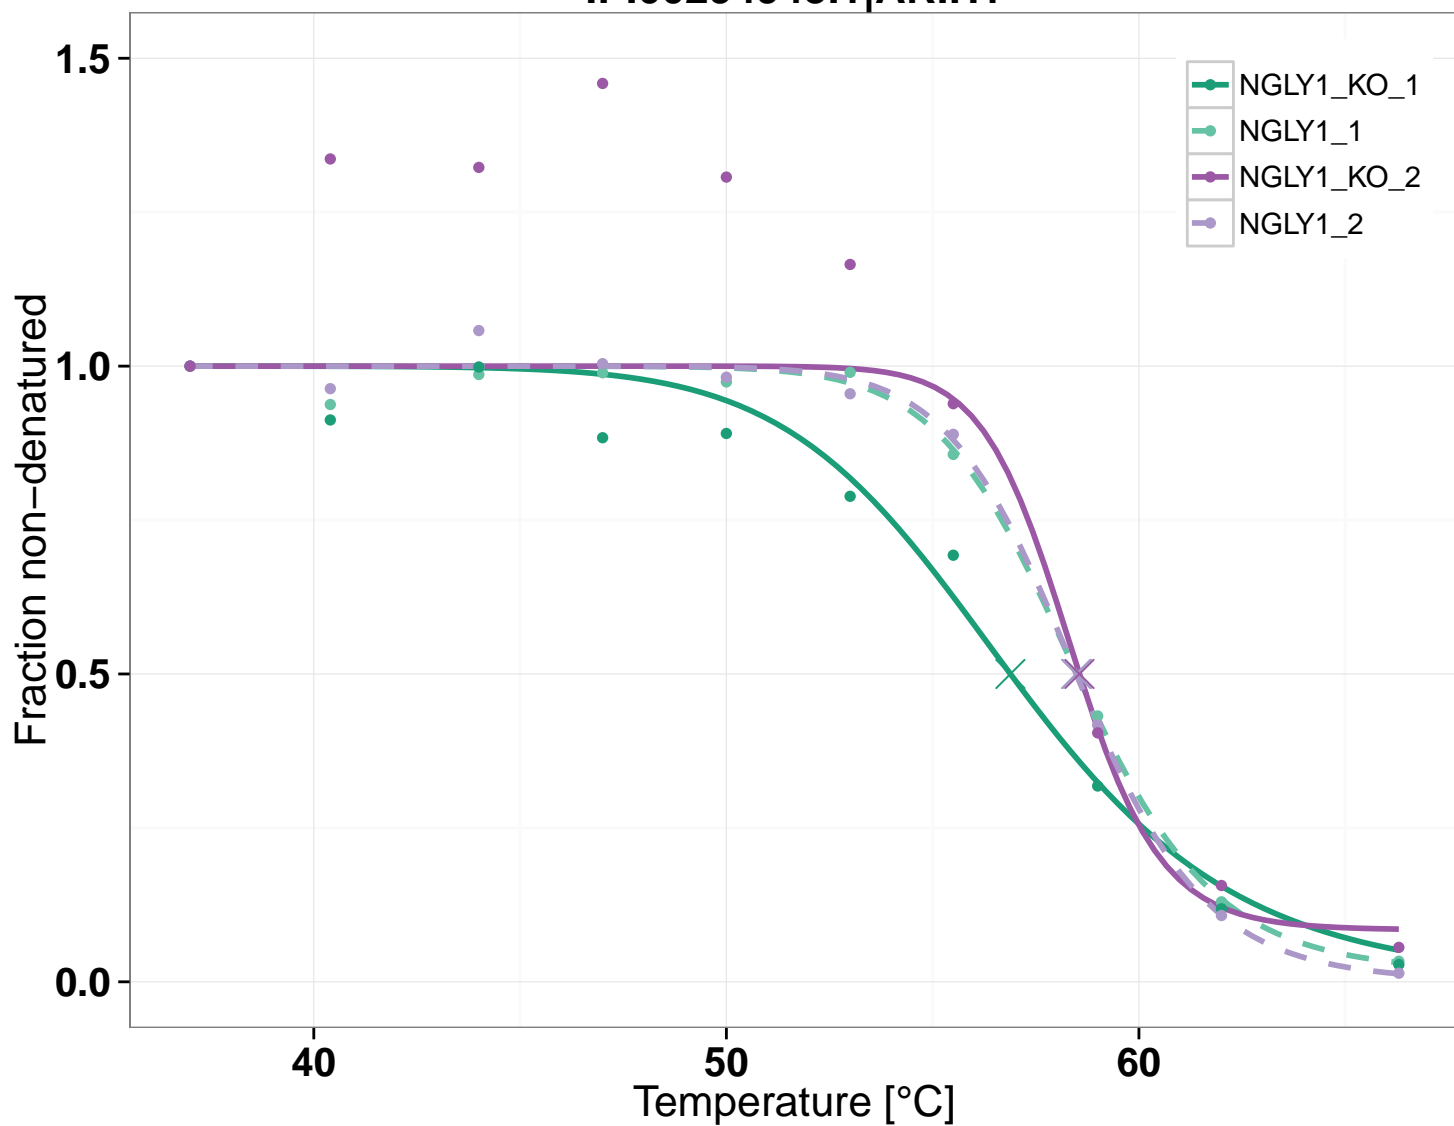

|            | meltPoint | slope  | plateau | R2   |
|------------|-----------|--------|---------|------|
| NGLY1_KO_1 | 56.88     | -0.091 | 0       | 0.98 |
| NGLY1_1    | 58.5      | -0.15  | 0.02    | 1    |
| NGLY1_KO_2 | 58.56     | -0.21  | 0.08    | 0.77 |
| NGLY1_2    | 58.48     | -0.16  | 0       | 1    |

Supplement: Supplementary file 7109 [file 1]

IPI00010088.1|HDAC4

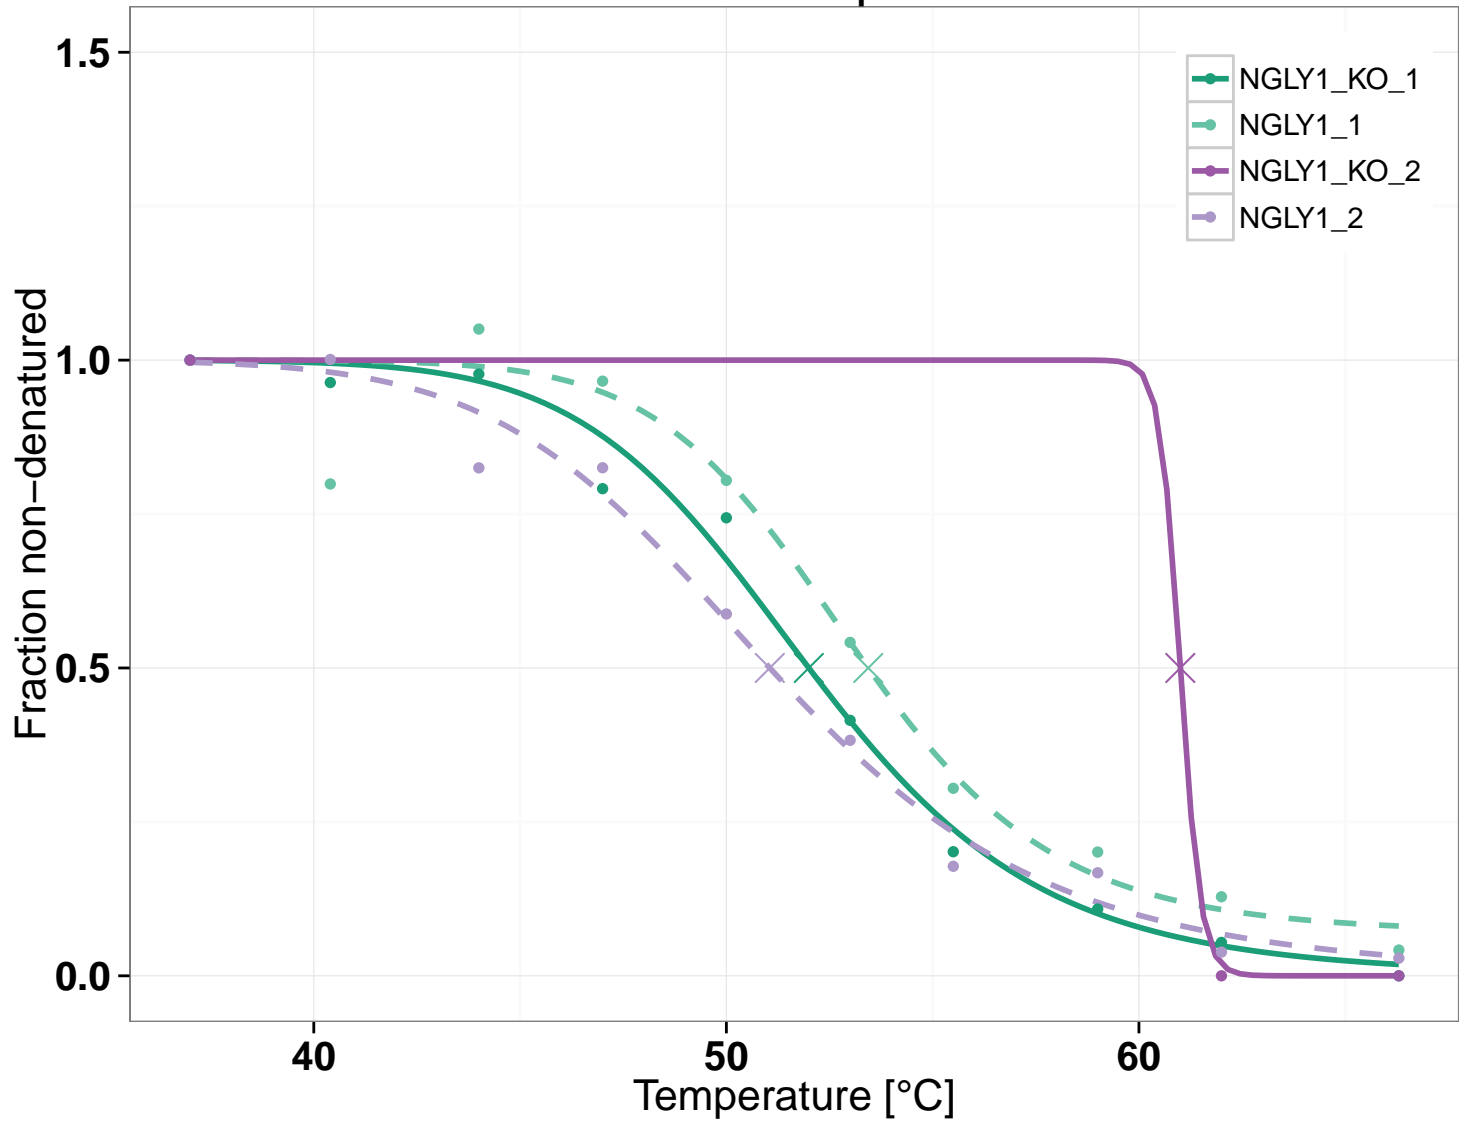

|            | meltPoint | slope  | plateau | R2    |
|------------|-----------|--------|---------|-------|
| NGLY1_KO_1 | 52        | -0.09  | 0       | 0.99  |
| NGLY1_1    | 53.44     | -0.097 | 0.07    | 0.96  |
| NGLY1_KO_2 | 61        | -1     | 0       | -0.63 |
| NGLY1_2    | 51.05     | -0.074 | 0       | 0.99  |

Supplement: Supplementary file 7110 [file 1]

IPI00412539.3|CCDC104

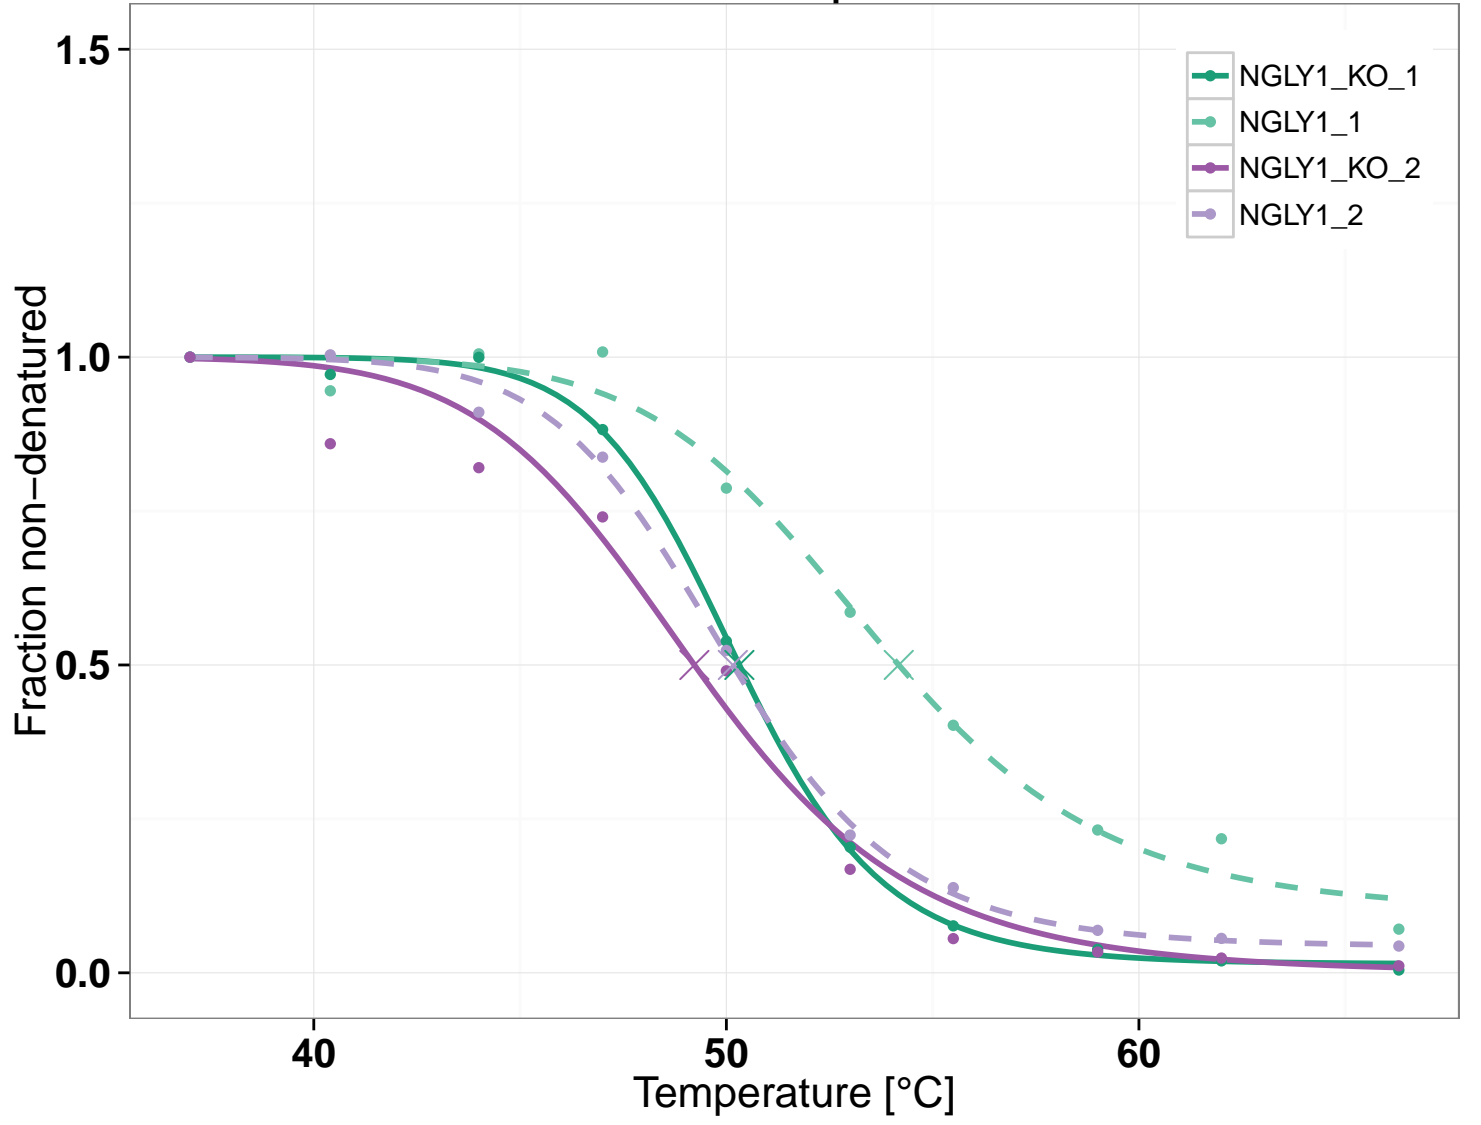

|            | meltPoint | slope  | plateau | R2   |
|------------|-----------|--------|---------|------|
| NGLY1_KO_1 | 50.32     | -0.14  | 0.01    | 1    |
| NGLY1_1    | 54.18     | -0.081 | 0.1     | 0.99 |
| NGLY1_KO_2 | 49.22     | -0.095 | 0       | 0.98 |
| NGLY1_2    | 50.16     | -0.11  | 0.04    | 1    |

Supplement: Supplementary file 7111 [file 1]

# IPI00647635.3|GIGYF2

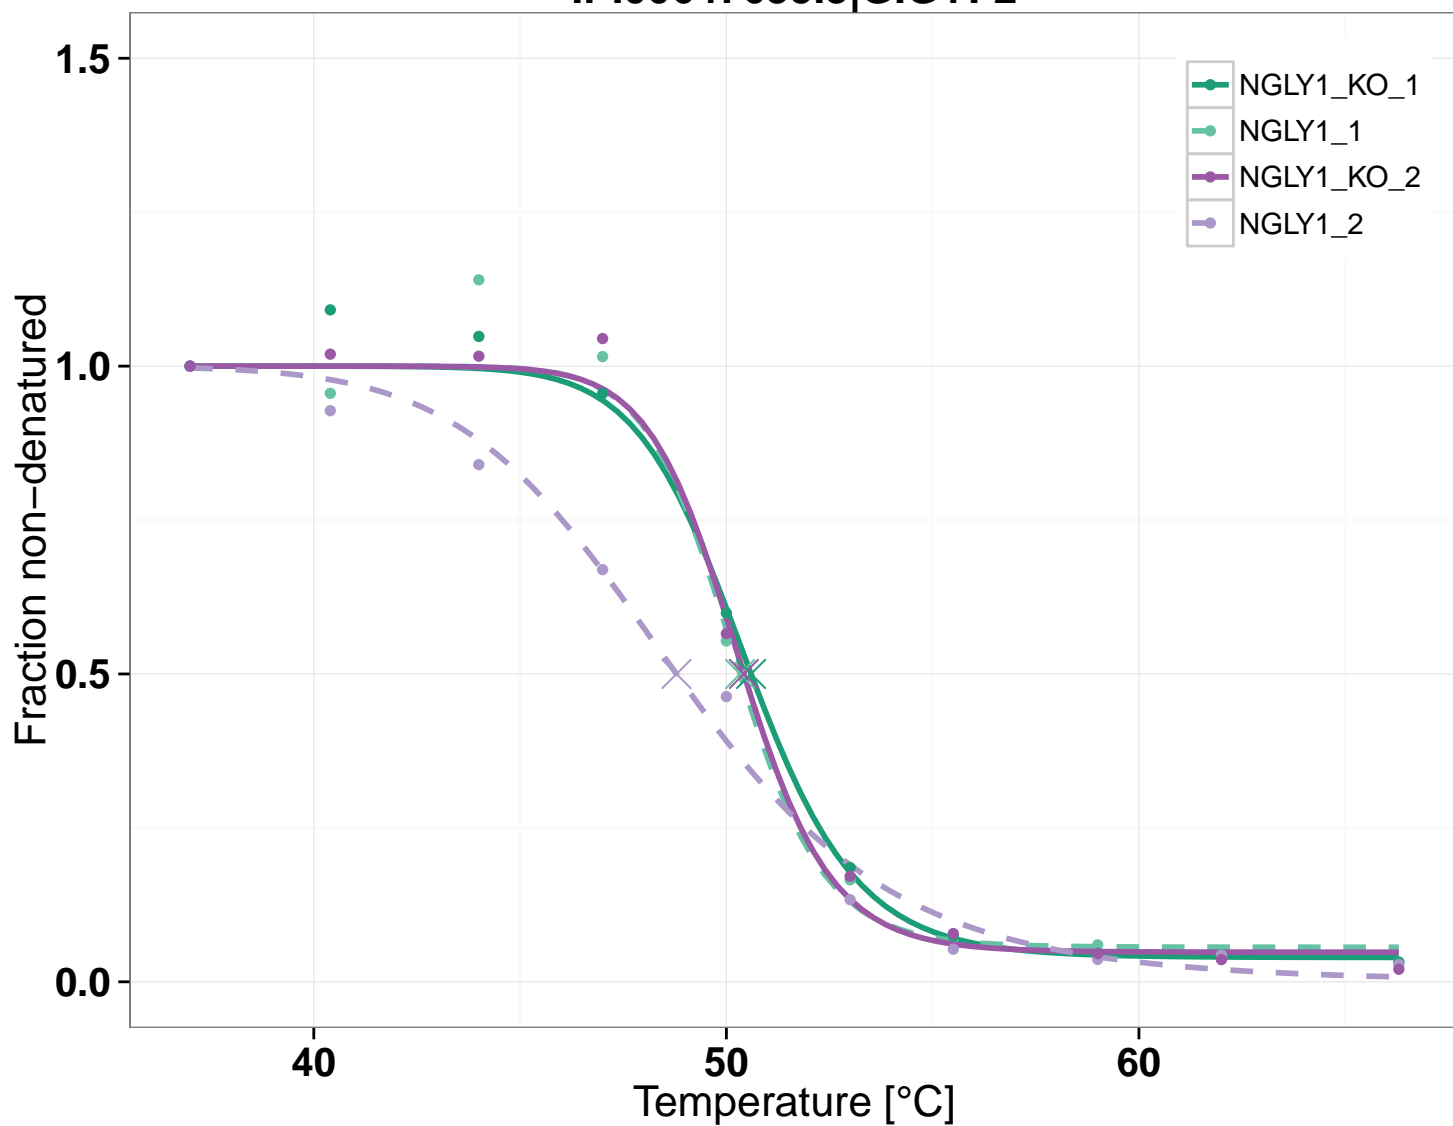

|            | meltPoint | slope  | plateau | R2   |
|------------|-----------|--------|---------|------|
| NGLY1_KO_1 | 50.6      | -0.18  | 0.04    | 0.99 |
| NGLY1_1    | 50.33     | -0.22  | 0.06    | 0.99 |
| NGLY1_KO_2 | 50.42     | -0.22  | 0.05    | 0.99 |
| NGLY1_2    | 48.79     | -0.095 | 0       | 0.99 |

Supplement: Supplementary file 7112 [file 1]

IPI00478993.4|C10ORF79

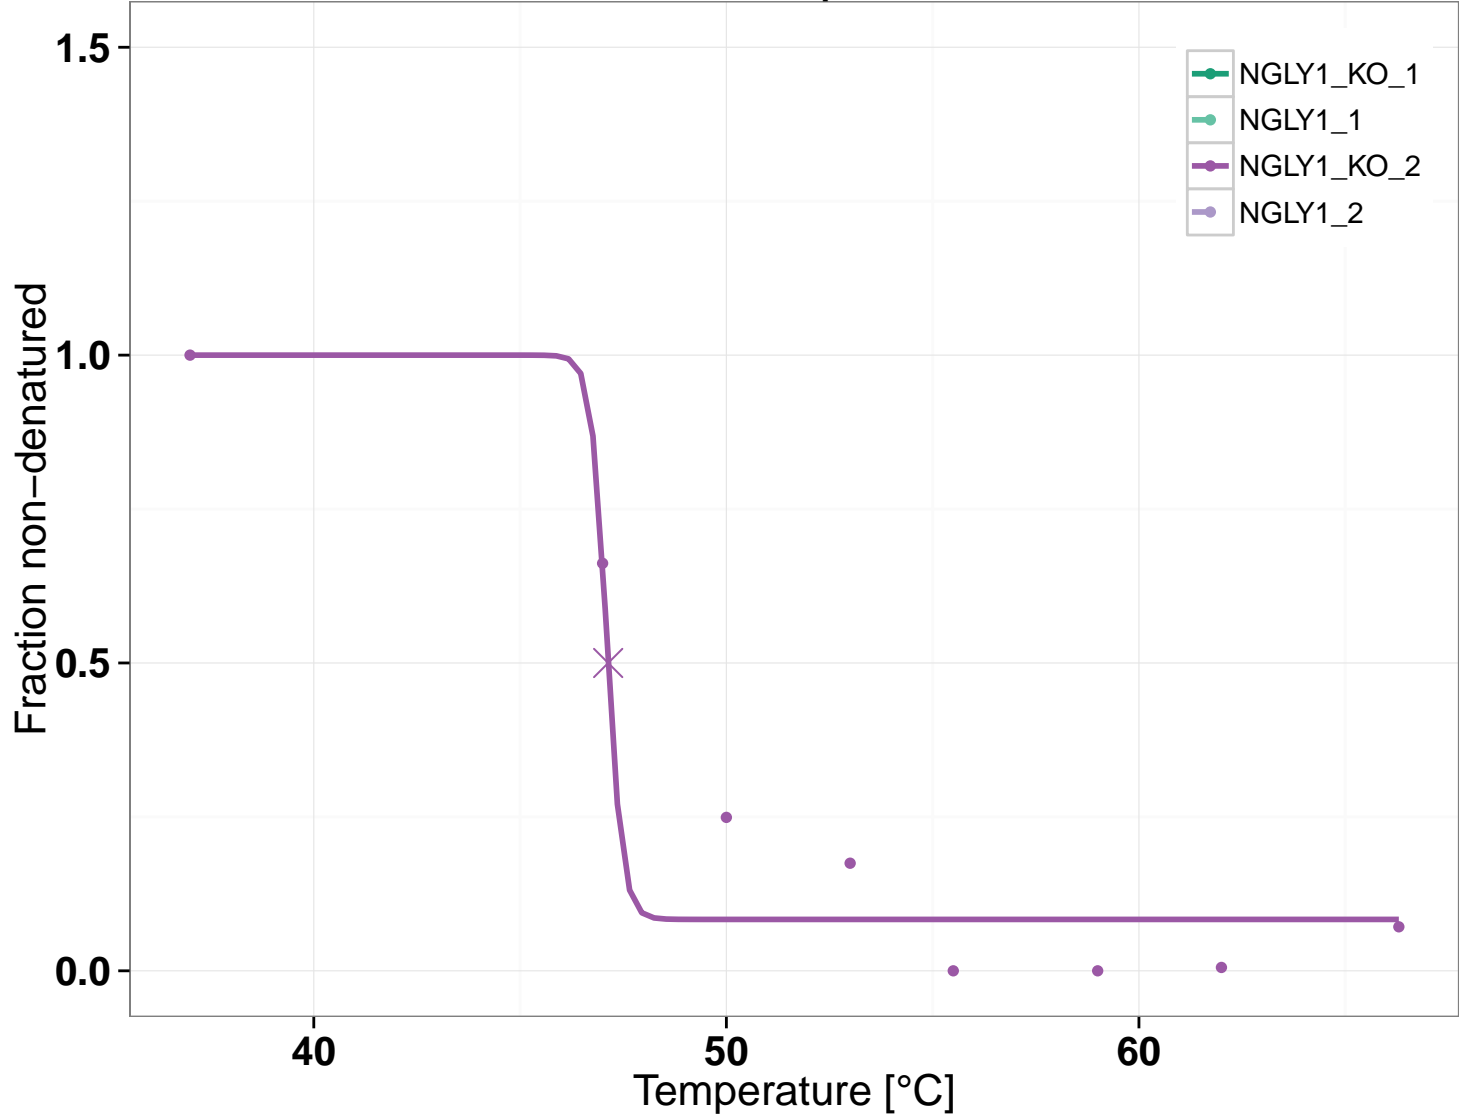

|            | meltPoint | slope | plateau | R2    |
|------------|-----------|-------|---------|-------|
| NGLY1_KO_1 | -         | -     | -       | -     |
| NGLY1_1    | -         | -     | -       | -     |
| NGLY1_KO_2 | 47.14     | -1.2  | 0.08    | -0.09 |
| NGLY1_2    | -         | -     | -       | -     |

Supplement: Supplementary file 7113 [file 1]

IPI00909959.1|SLC35A2

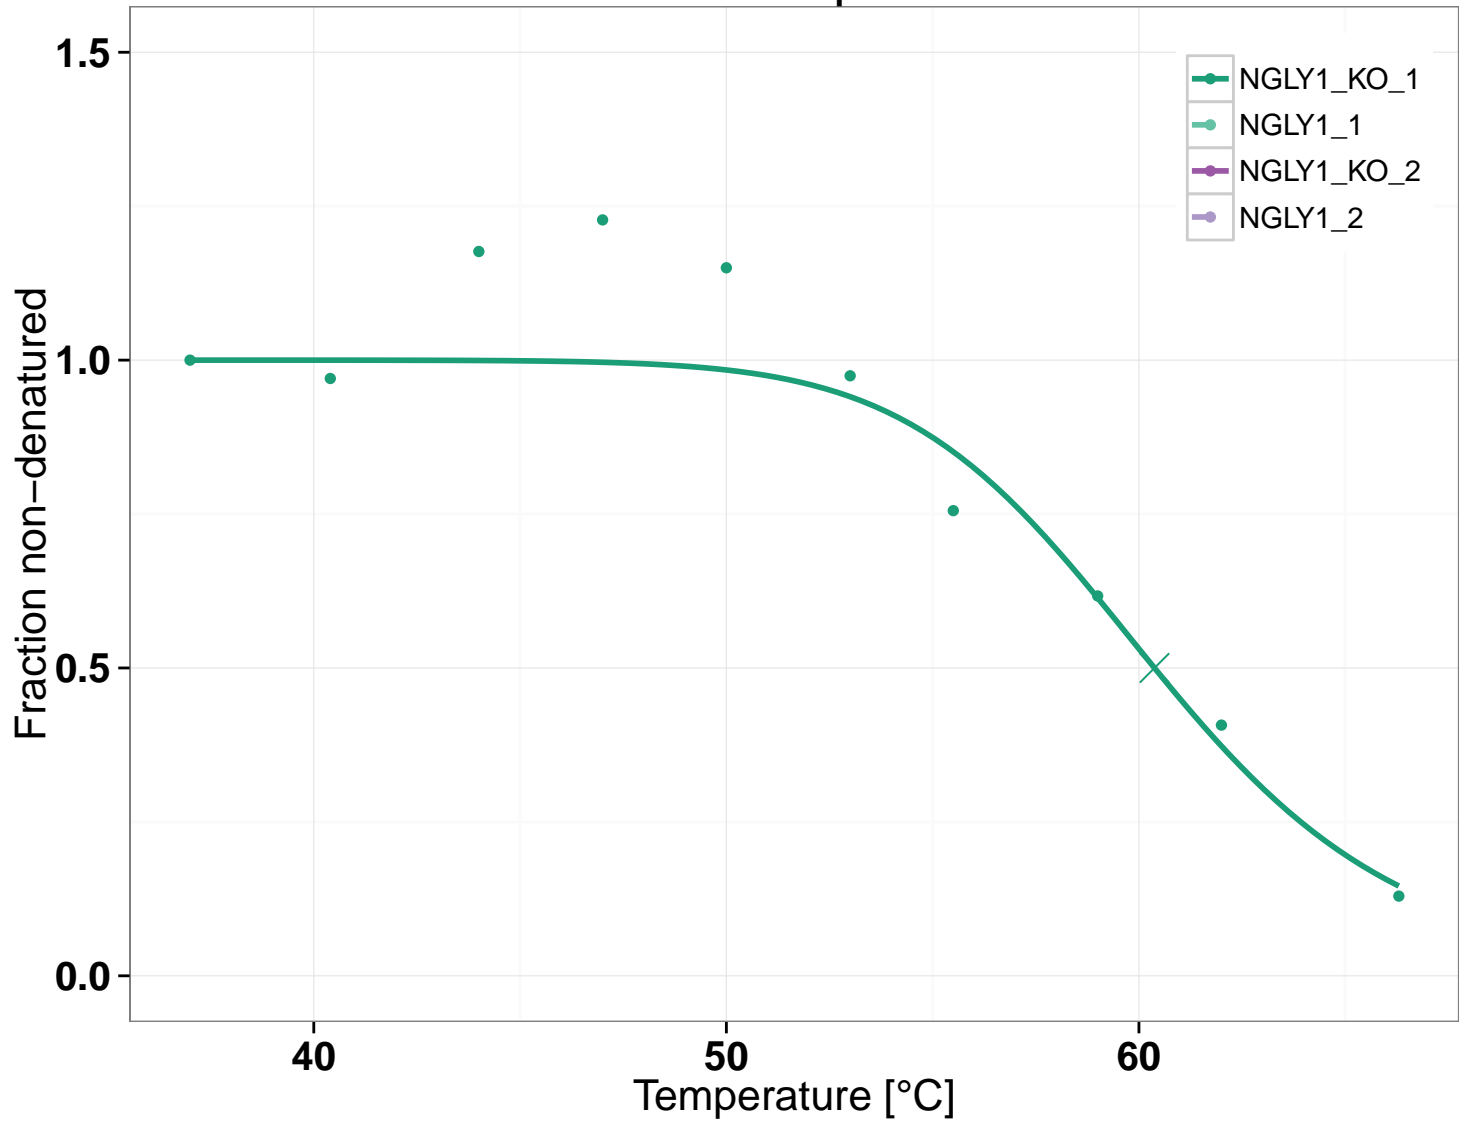

|            | meltPoint | slope  | plateau | R2   |
|------------|-----------|--------|---------|------|
| NGLY1_KO_1 | 60.38     | -0.083 | 0       | 0.89 |
| NGLY1_1    | -         | -      | -       | -    |
| NGLY1_KO_2 | -         | -      | -       | -    |
| NGLY1_2    | -         | -      | -       | -    |

Supplement: Supplementary file 7114 [file 1]

# IPI00395939.3|PITPNB

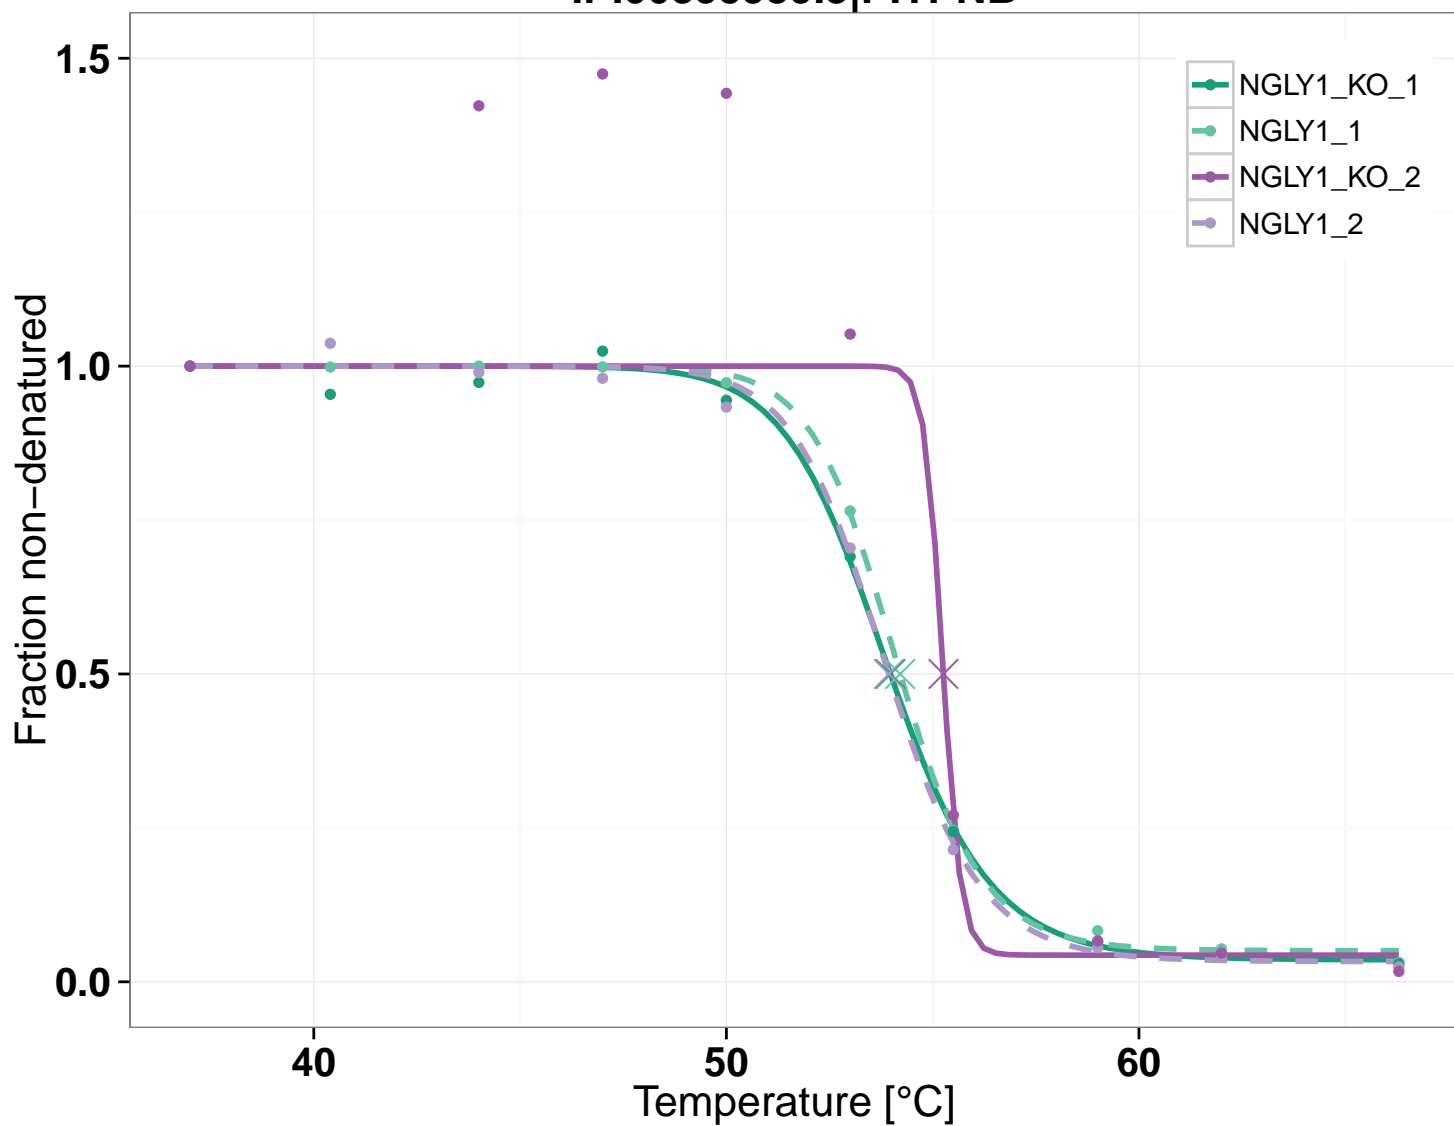

|            | meltPoint | slope | plateau | R2   |
|------------|-----------|-------|---------|------|
| NGLY1_KO_1 | 53.98     | -0.19 | 0.04    | 1    |
| NGLY1_1    | 54.21     | -0.23 | 0.05    | 1    |
| NGLY1_KO_2 | 55.26     | -1.1  | 0.04    | 0.78 |
| NGLY1_2    | 53.94     | -0.21 | 0.03    | 1    |

Supplement: Supplementary file 7115 [file 1]

IPI00792422.1|FAM21B

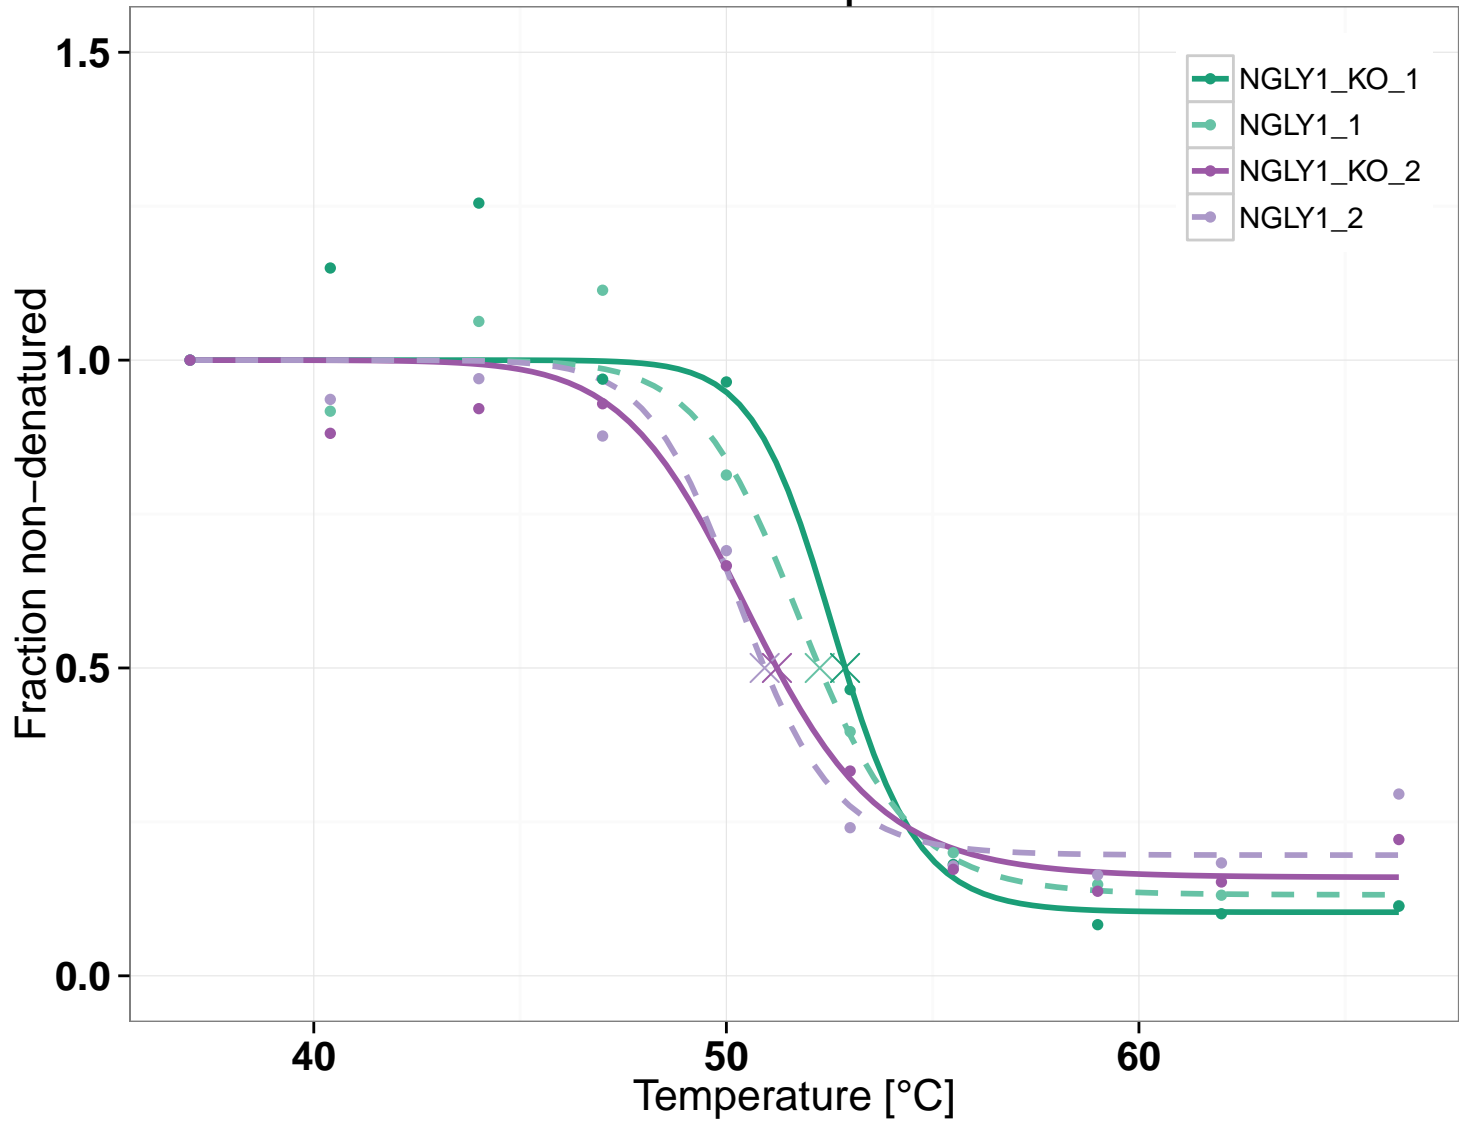

|            | meltPoint | slope | plateau | R2   |
|------------|-----------|-------|---------|------|
| NGLY1_KO_1 | 52.88     | -0.22 | 0.1     | 0.96 |
| NGLY1_1    | 52.26     | -0.17 | 0.13    | 0.98 |
| NGLY1_KO_2 | 51.23     | -0.13 | 0.16    | 0.98 |
| NGLY1_2    | 50.93     | -0.18 | 0.2     | 0.98 |

Supplement: Supplementary file 7116 [file 1]

IPI00217081.1|FUND C1

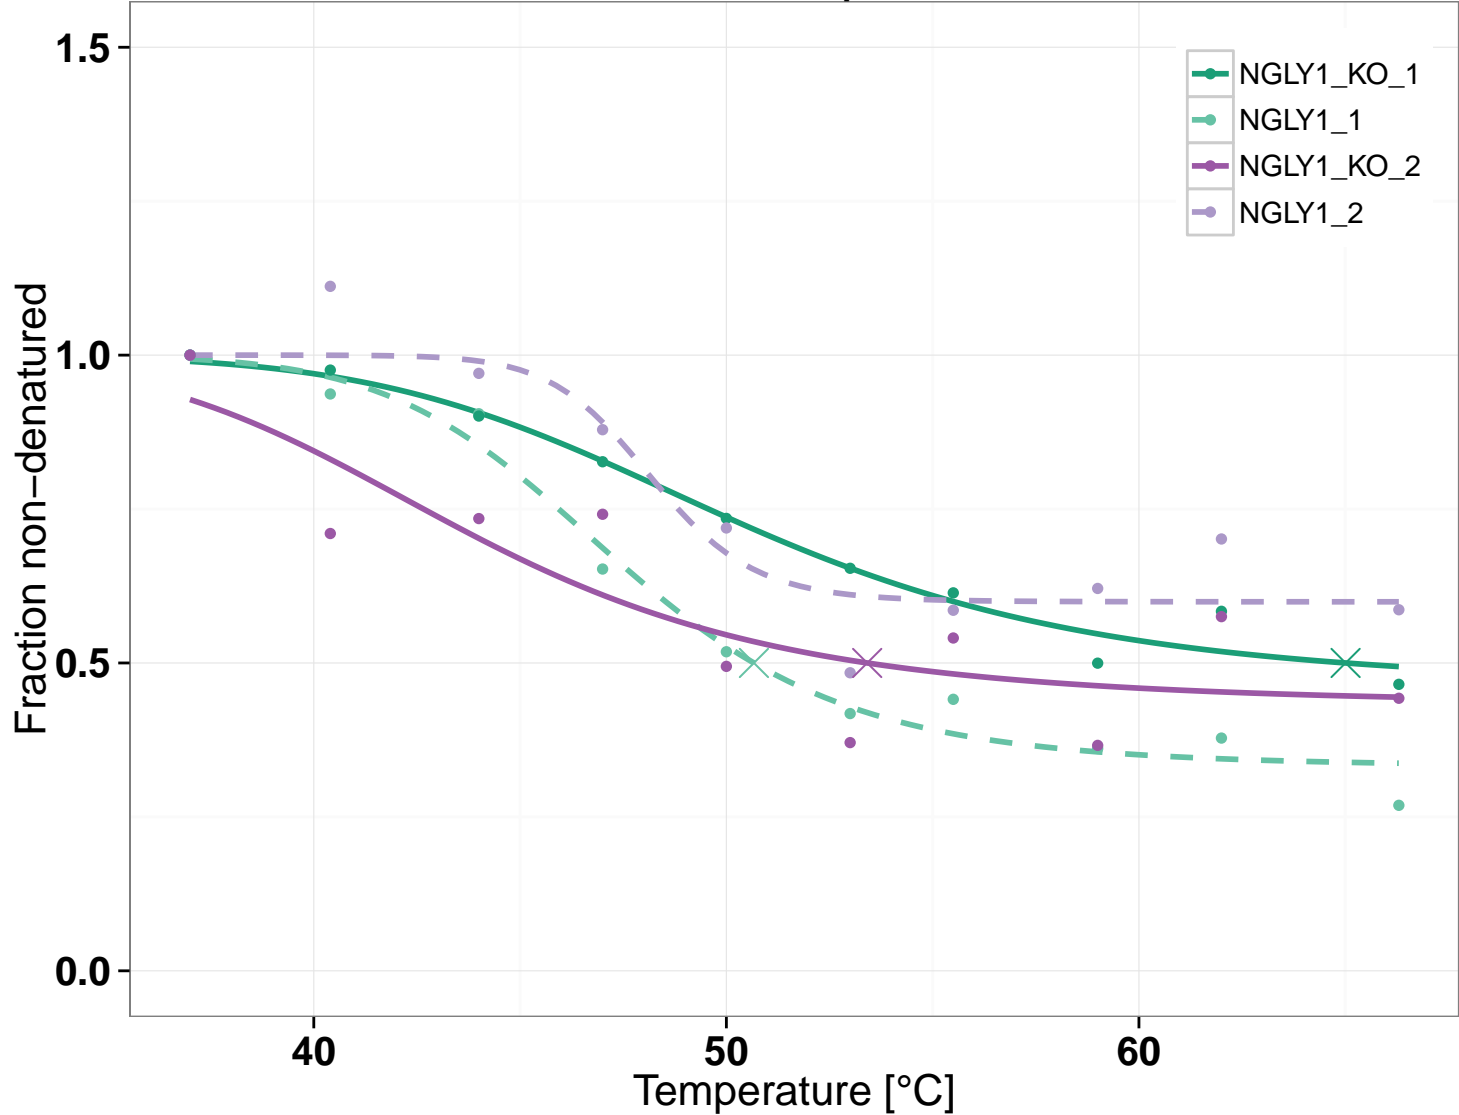

|            | meltPoint | slope  | plateau | R2   |
|------------|-----------|--------|---------|------|
| NGLY1_KO_1 | 65.01     | -0.031 | 0.46    | 0.98 |
| NGLY1_1    | 50.67     | -0.06  | 0.33    | 0.98 |
| NGLY1_KO_2 | 53.41     | -0.036 | 0.43    | 0.76 |
| NGLY1_2    | -         | -0.081 | 0.6     | 0.89 |

Supplement: Supplementary file 7117 [file 1]

# IPI00844578.1|DHX9

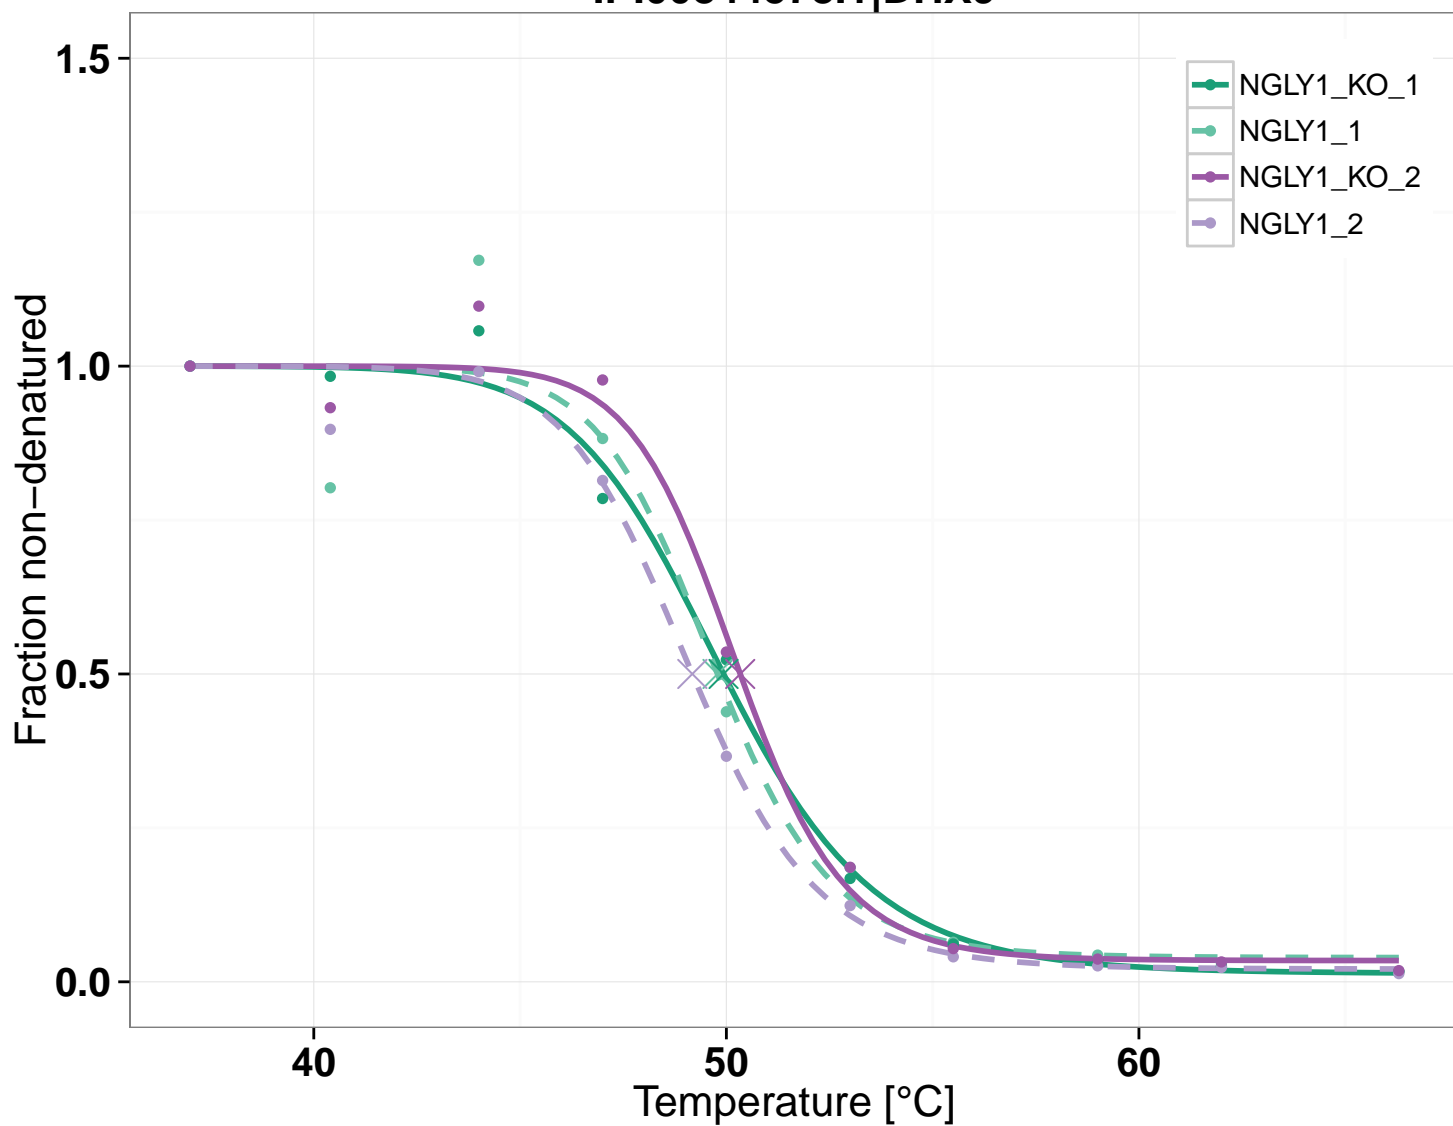

|            | meltPoint | slope | plateau | R2   |
|------------|-----------|-------|---------|------|
| NGLY1_KO_1 | 49.93     | -0.13 | 0.01    | 0.99 |
| NGLY1_1    | 49.79     | -0.17 | 0.04    | 0.96 |
| NGLY1_KO_2 | 50.34     | -0.19 | 0.03    | 0.99 |
| NGLY1_2    | 49.17     | -0.16 | 0.02    | 0.99 |

Supplement: Supplementary file 7118 [file 1]

# IPI00011118.2|RRM2

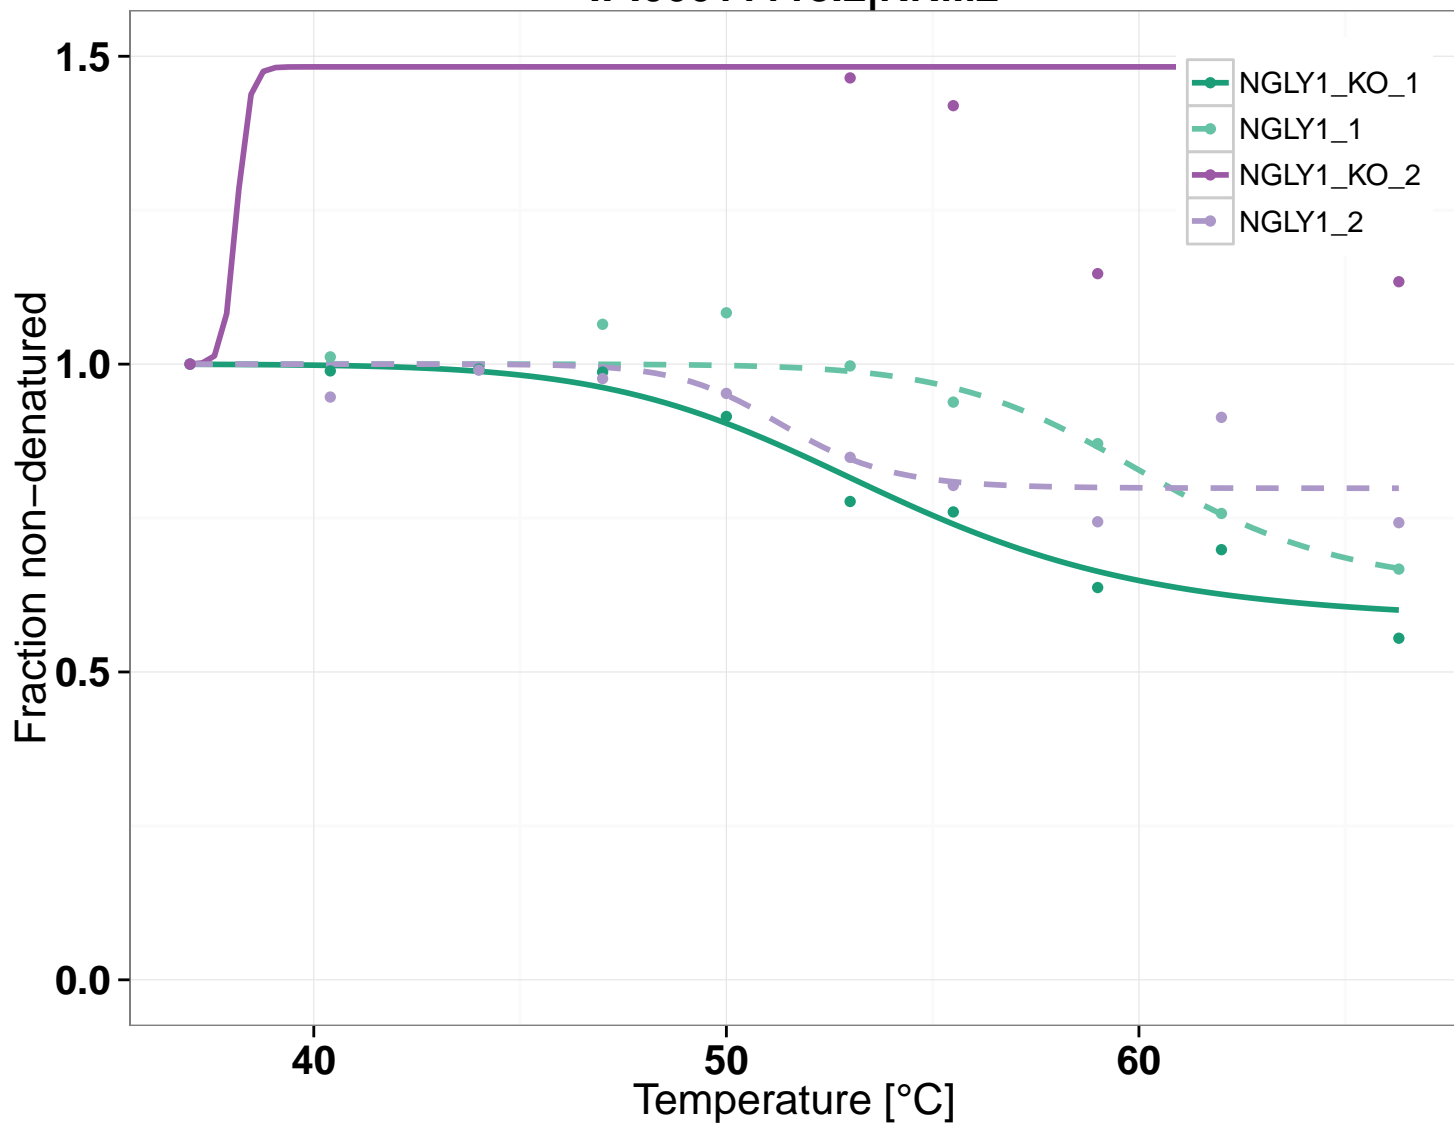

|            | meltPoint | slope  | plateau | R2   |
|------------|-----------|--------|---------|------|
| NGLY1_KO_1 | —         | −0.032 | 0.58    | 0.96 |
| NGLY1_1    | —         | −0.038 | 0.63    | 0.92 |
| NGLY1_KO_2 | —         | 0.79   | 1.48    | 0.37 |
| NGLY1_2    | —         | −0.039 | 0.8     | 0.75 |

Supplement: Supplementary file 7119 [file 1]

# IPI00019988.1|SGSH

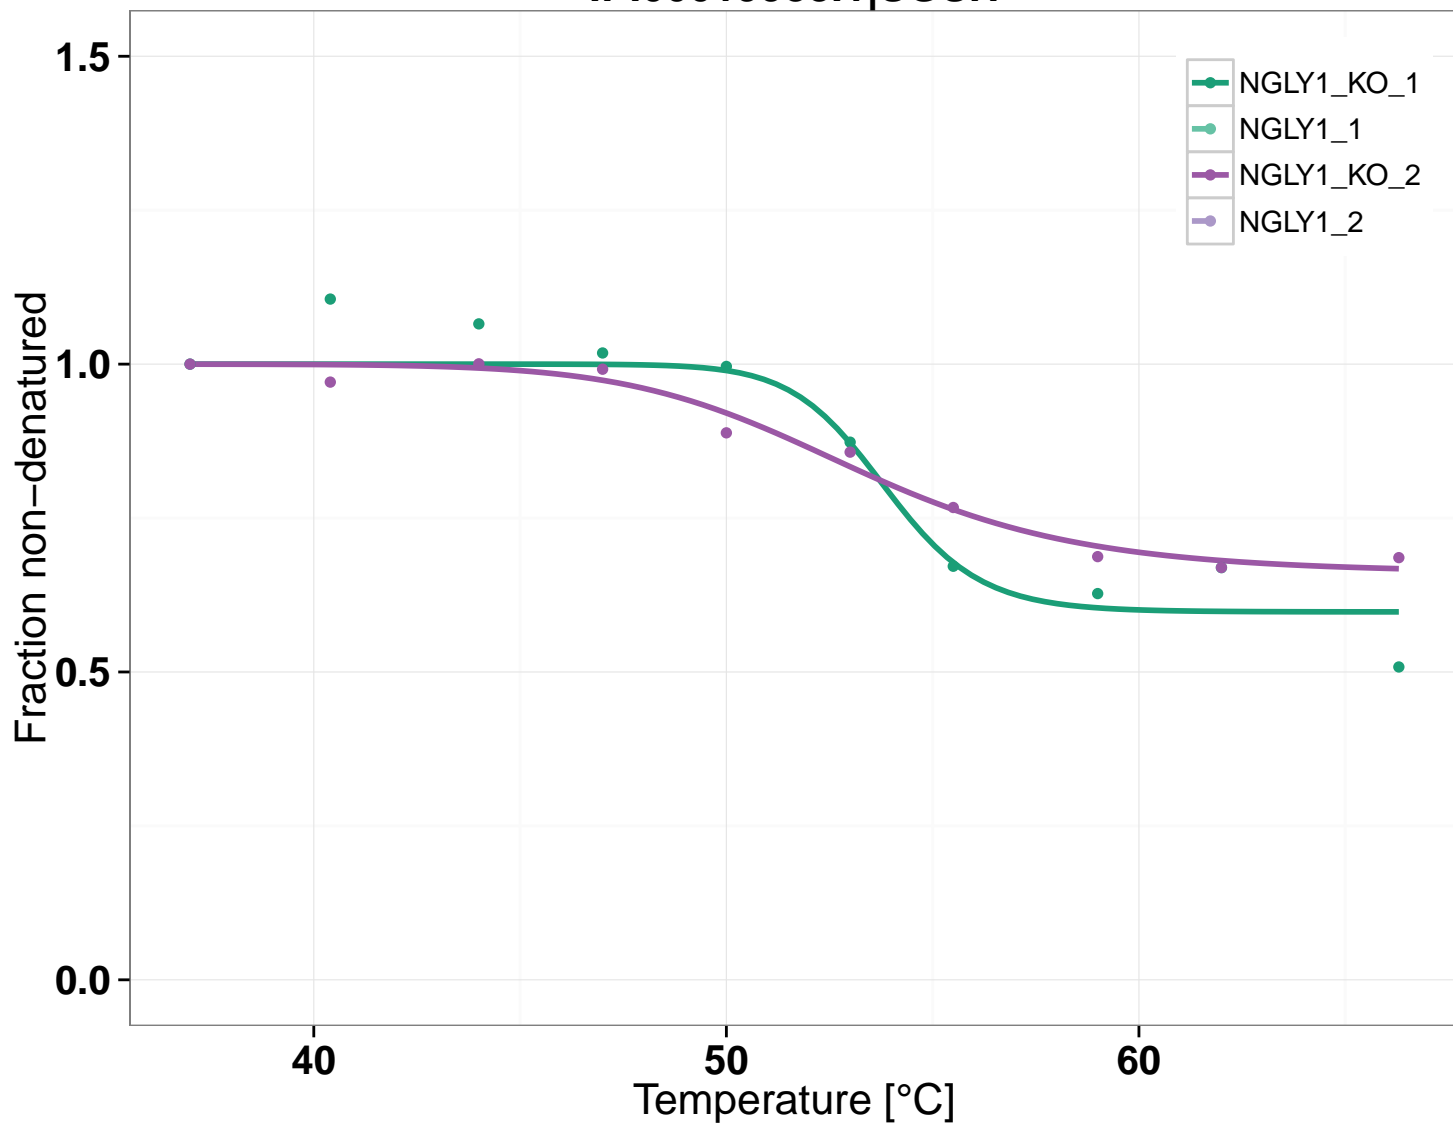

|            | meltPoint | slope  | plateau | R2   |
|------------|-----------|--------|---------|------|
| NGLY1_KO_1 | —         | -0.088 | 0.6     | 0.93 |
| NGLY1_1    | —         | —      | —       | —    |
| NGLY1_KO_2 | —         | -0.031 | 0.66    | 0.98 |
| NGLY1_2    | —         | —      | —       | —    |

Supplement: Supplementary file 7120 [file 1]

# IPI00107745.3|CROP

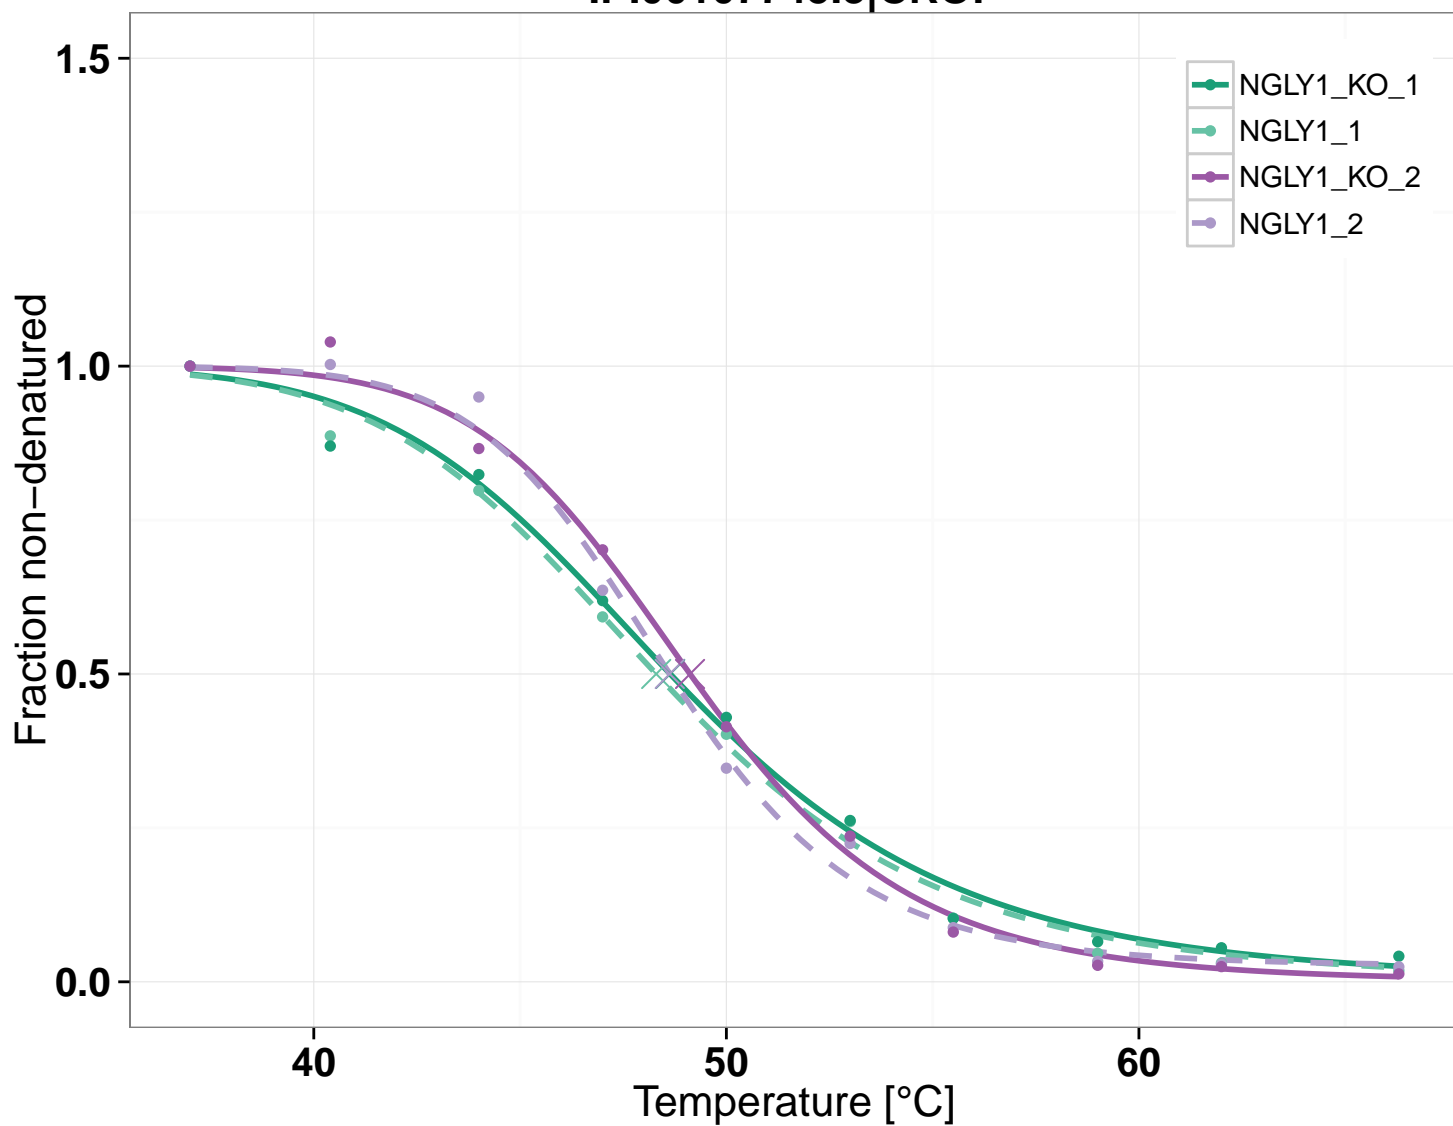

|            | meltPoint | slope  | plateau | R2   |
|------------|-----------|--------|---------|------|
| NGLY1_KO_1 | 48.64     | -0.072 | 0       | 0.99 |
| NGLY1_1    | 48.3      | -0.073 | 0       | 0.99 |
| NGLY1_KO_2 | 49.12     | -0.095 | 0       | 1    |
| NGLY1_2    | 48.63     | -0.11  | 0.03    | 0.99 |

Supplement: Supplementary file 7121 [file 1]

# IPI00010130.3|GLUL

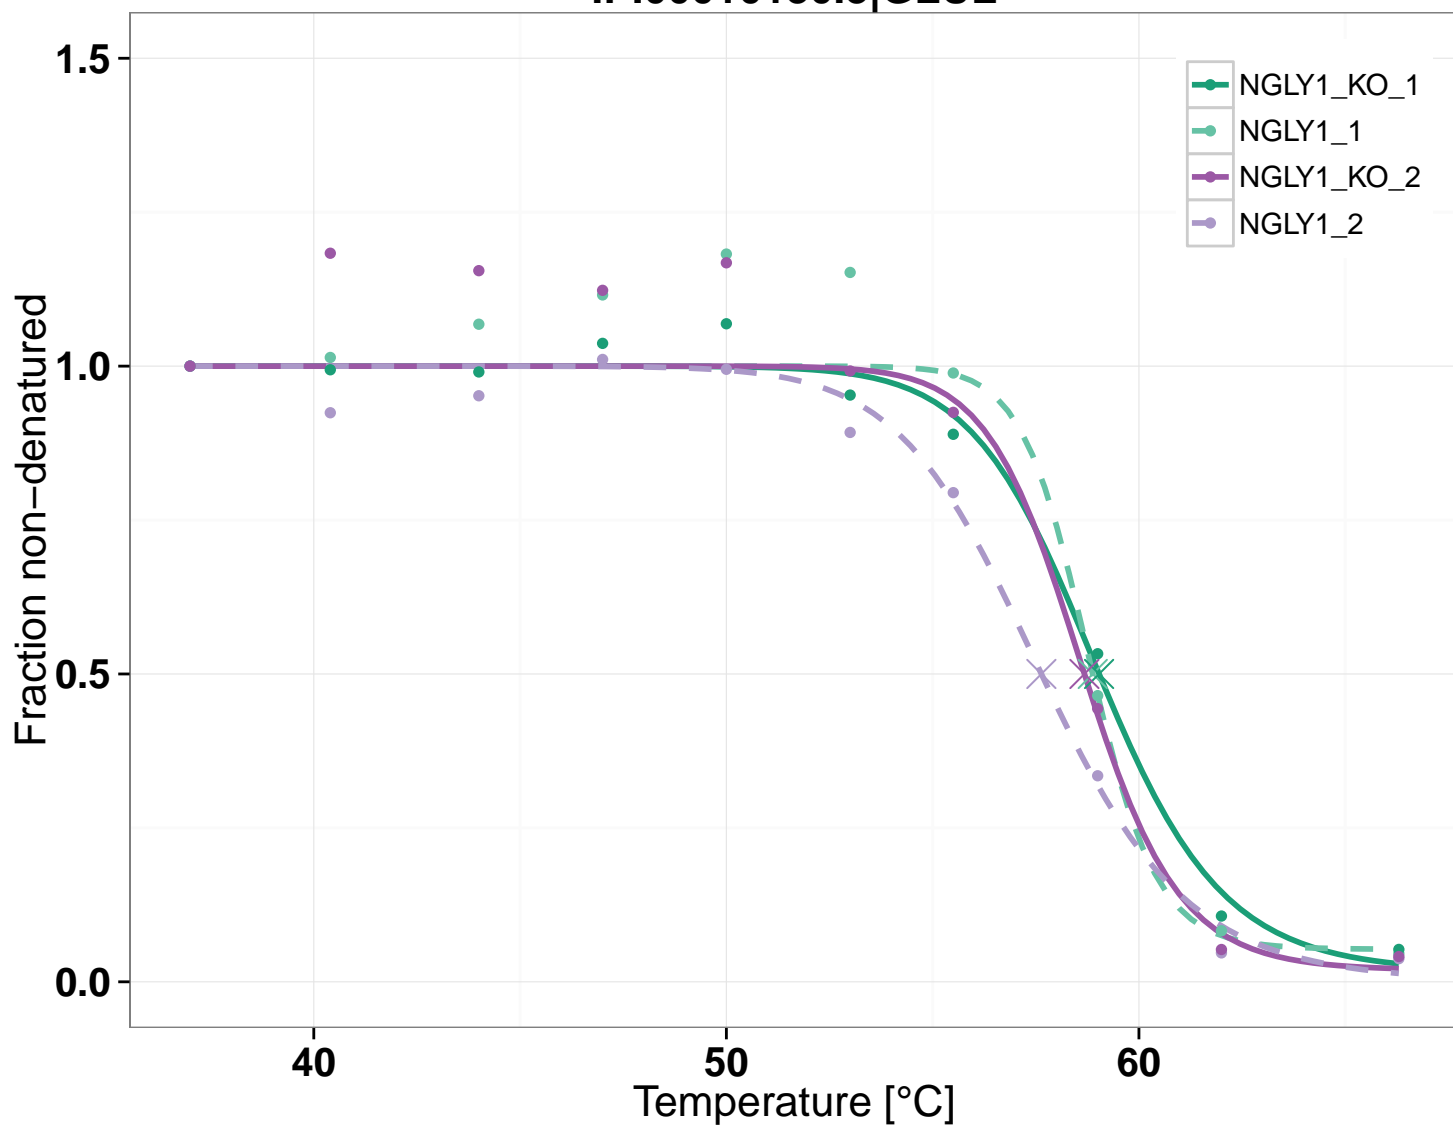

|            | meltPoint | slope | plateau | R2   |
|------------|-----------|-------|---------|------|
| NGLY1_KO_1 | 59.03     | -0.16 | 0.02    | 0.99 |
| NGLY1_1    | 58.88     | -0.29 | 0.05    | 0.96 |
| NGLY1_KO_2 | 58.68     | -0.21 | 0.02    | 0.94 |
| NGLY1_2    | 57.64     | -0.14 | 0       | 0.99 |

Supplement: Supplementary file 7122 [file 1]

IPI00007110.4|OSGEPL1

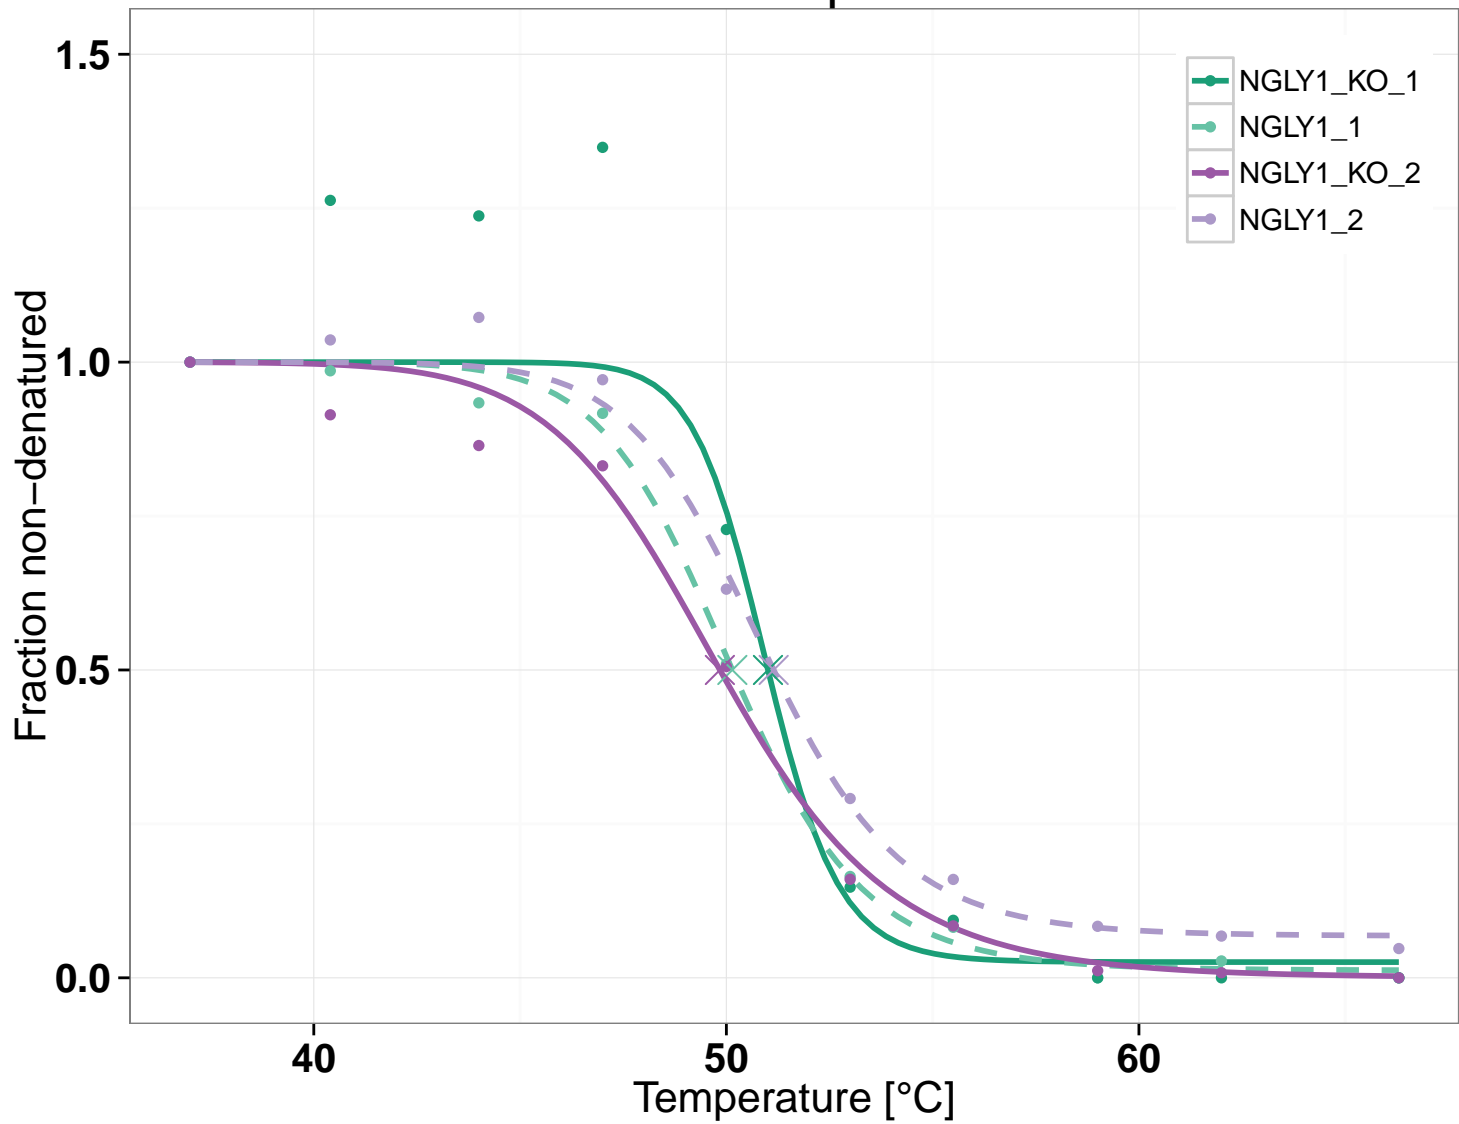

|            | meltPoint | slope | plateau | R2   |
|------------|-----------|-------|---------|------|
| NGLY1_KO_1 | 51.01     | -0.28 | 0.03    | 0.92 |
| NGLY1_1    | 50.14     | -0.15 | 0.01    | 1    |
| NGLY1_KO_2 | 49.84     | -0.12 | 0       | 0.99 |
| NGLY1_2    | 51.15     | -0.14 | 0.07    | 0.99 |

Supplement: Supplementary file 7123 [file 1]

IPI00478450.1|NDUFB11

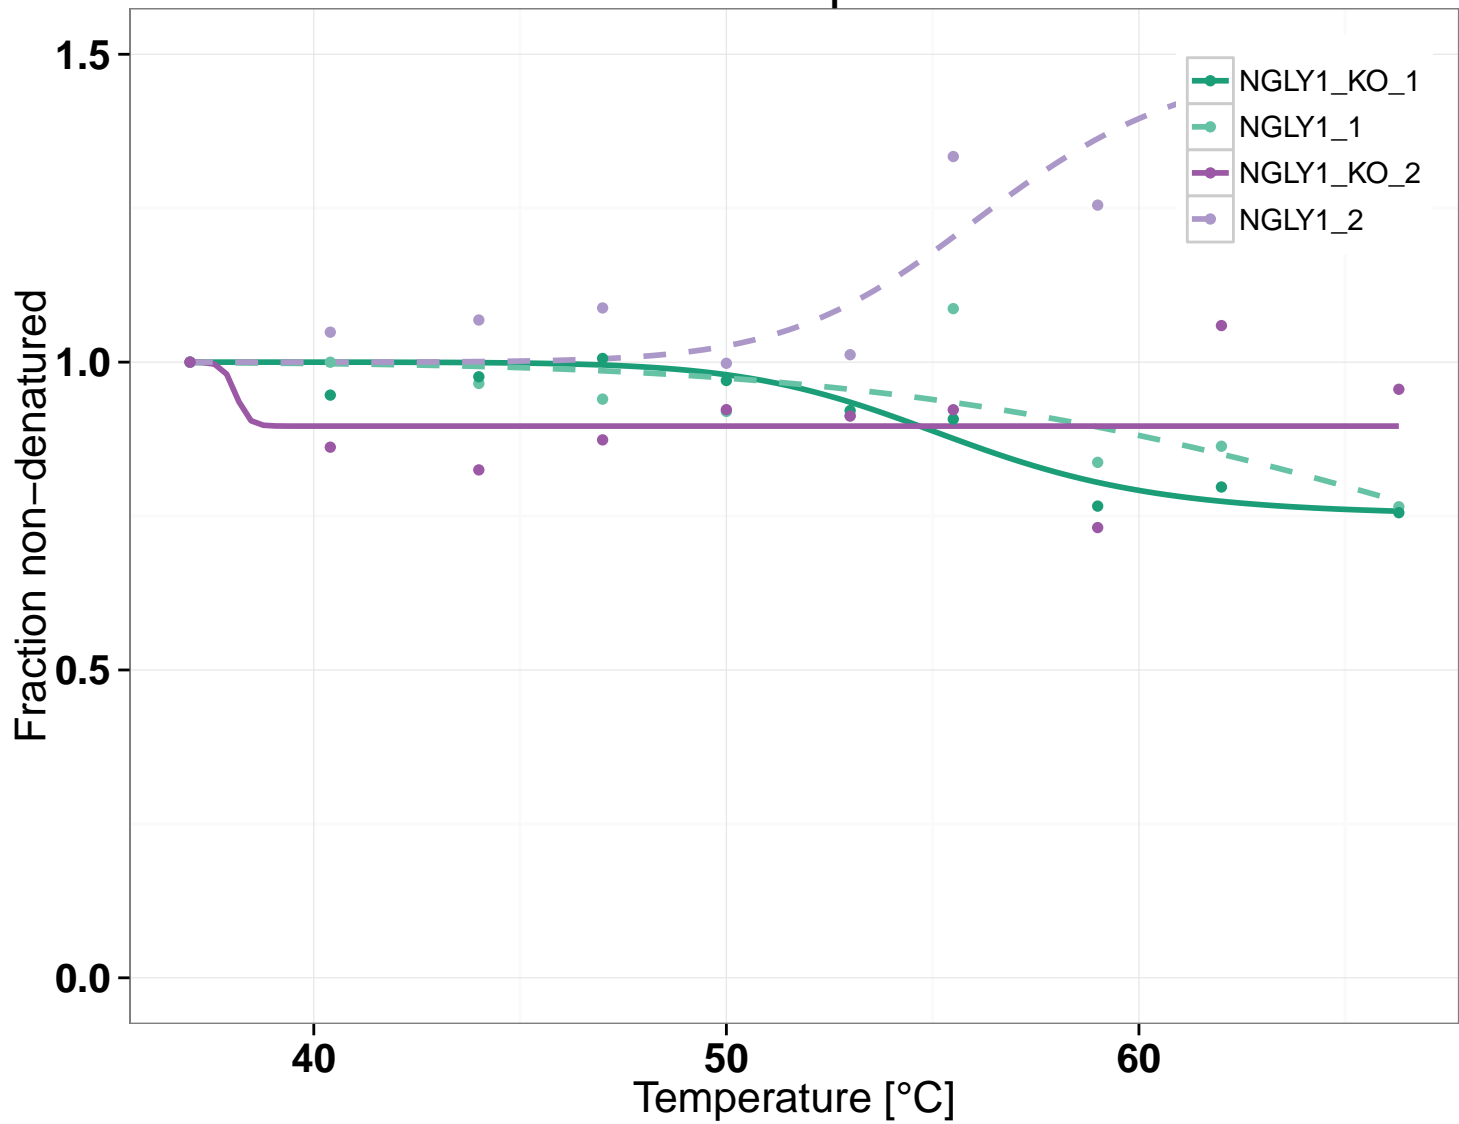

|            | meltPoint | slope  | plateau | R2   |
|------------|-----------|--------|---------|------|
| NGLY1_KO_1 | -         | -0.025 | 0.75    | 0.92 |
| NGLY1_1    | -         | -      | 0       | 0.55 |
| NGLY1_KO_2 | -         | -0.17  | 0.9     | 0.13 |
| NGLY1_2    | -         | 0.05   | 1.5     | 0.8  |

Supplement: Supplementary file 7124 [file 1]

# IPI00007812.1|ATP6V1B2

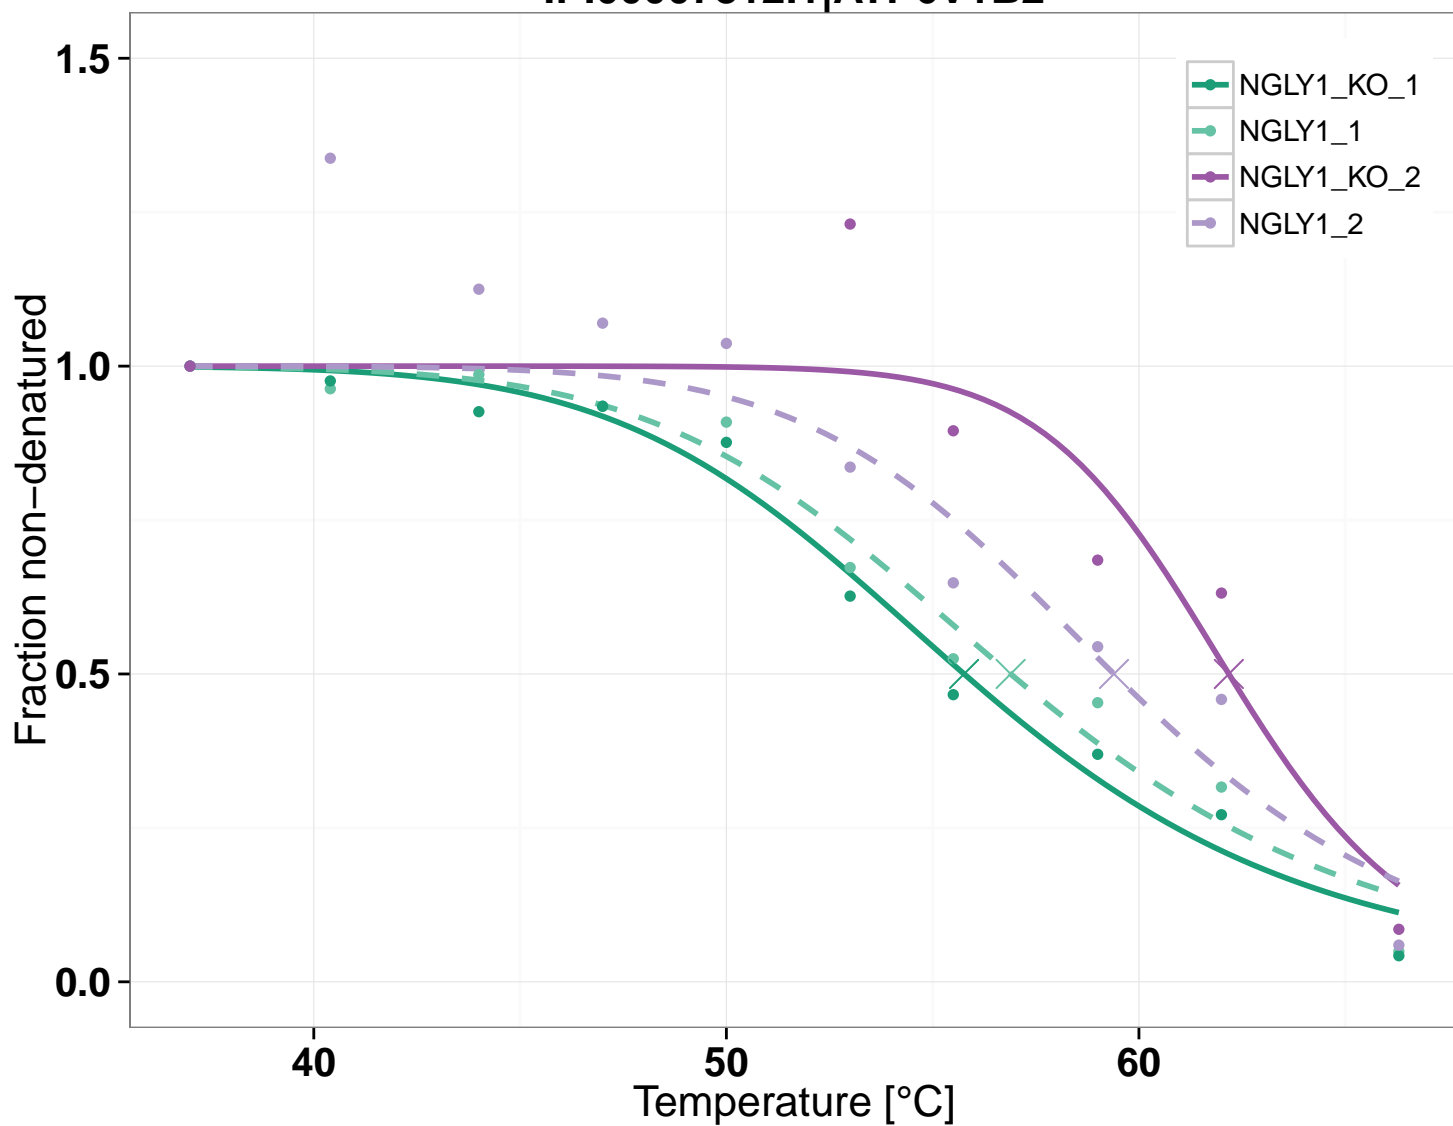

|            | meltPoint | slope  | plateau | R2   |
|------------|-----------|--------|---------|------|
| NGLY1_KO_1 | 55.76     | -0.06  | 0       | 0.98 |
| NGLY1_1    | 56.89     | -0.058 | 0       | 0.97 |
| NGLY1_KO_2 | 62.18     | -0.11  | 0       | 0.21 |
| NGLY1_2    | 59.39     | -0.067 | 0       | 0.86 |

Supplement: Supplementary file 7125 [file 1]

# IPI00297635.5|ACSM3

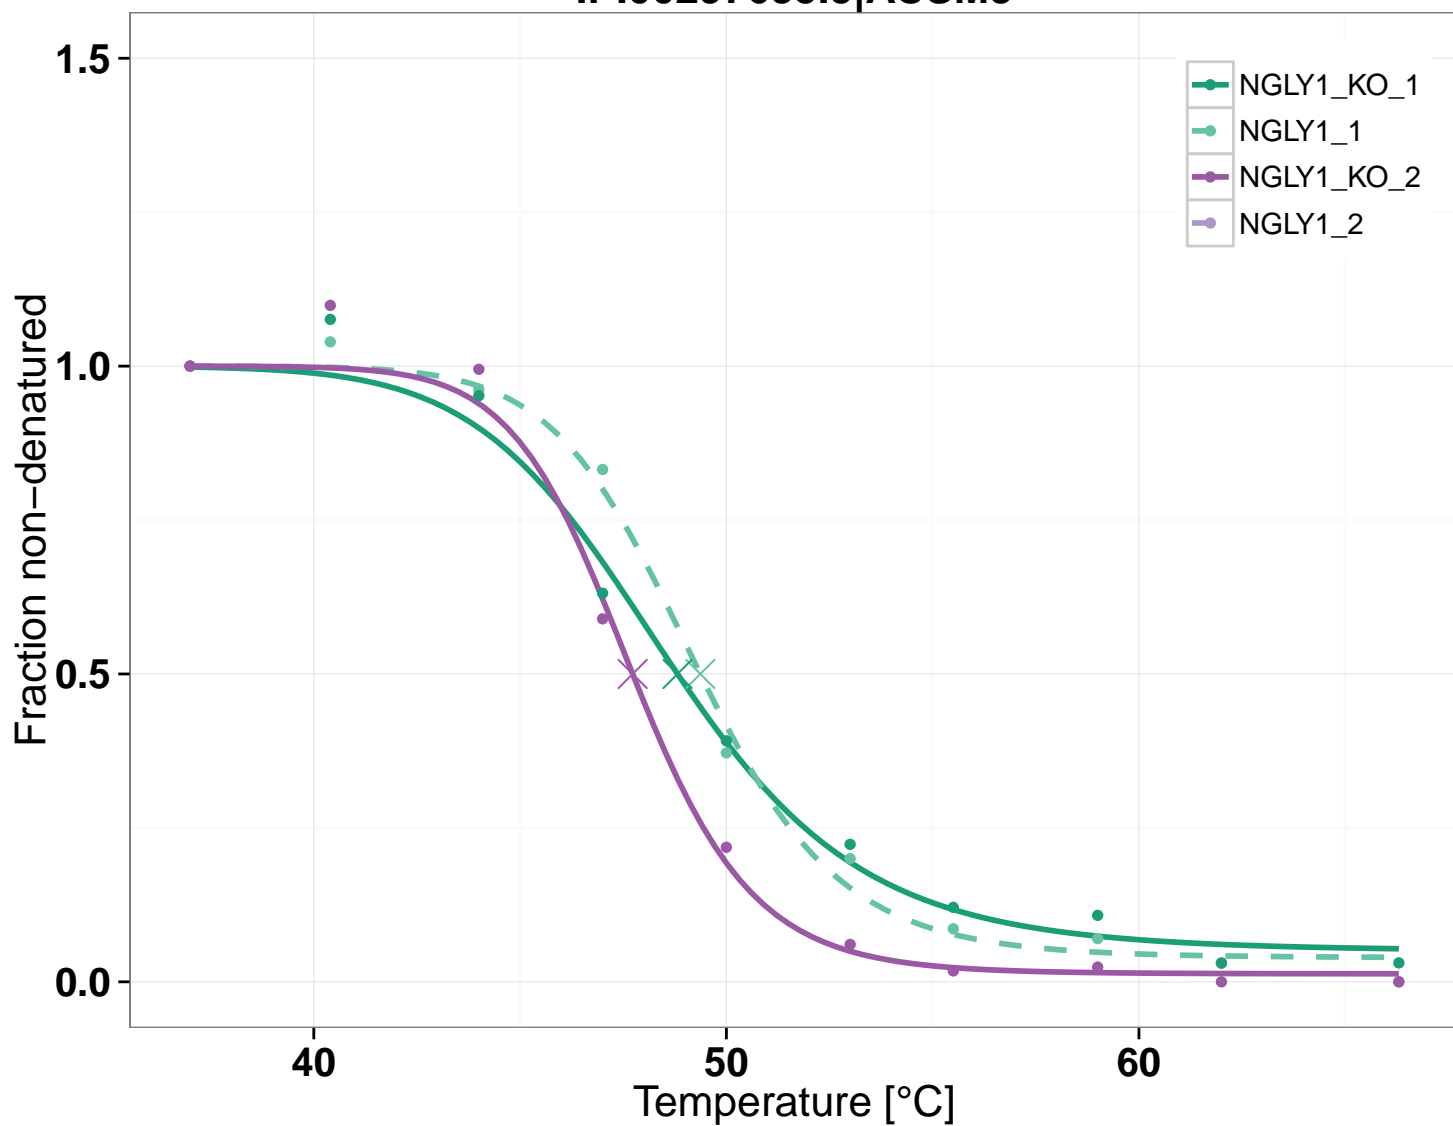

|            | meltPoint | slope | plateau | R2   |
|------------|-----------|-------|---------|------|
| NGLY1_KO_1 | 48.82     | -0.1  | 0.05    | 0.99 |
| NGLY1_1    | 49.37     | -0.14 | 0.04    | 0.99 |
| NGLY1_KO_2 | 47.73     | -0.17 | 0.01    | 0.99 |
| NGLY1_2    | -         | -     | -       | -    |

Supplement: Supplementary file 7126 [file 1]

IPI00644864.1|ZNF324

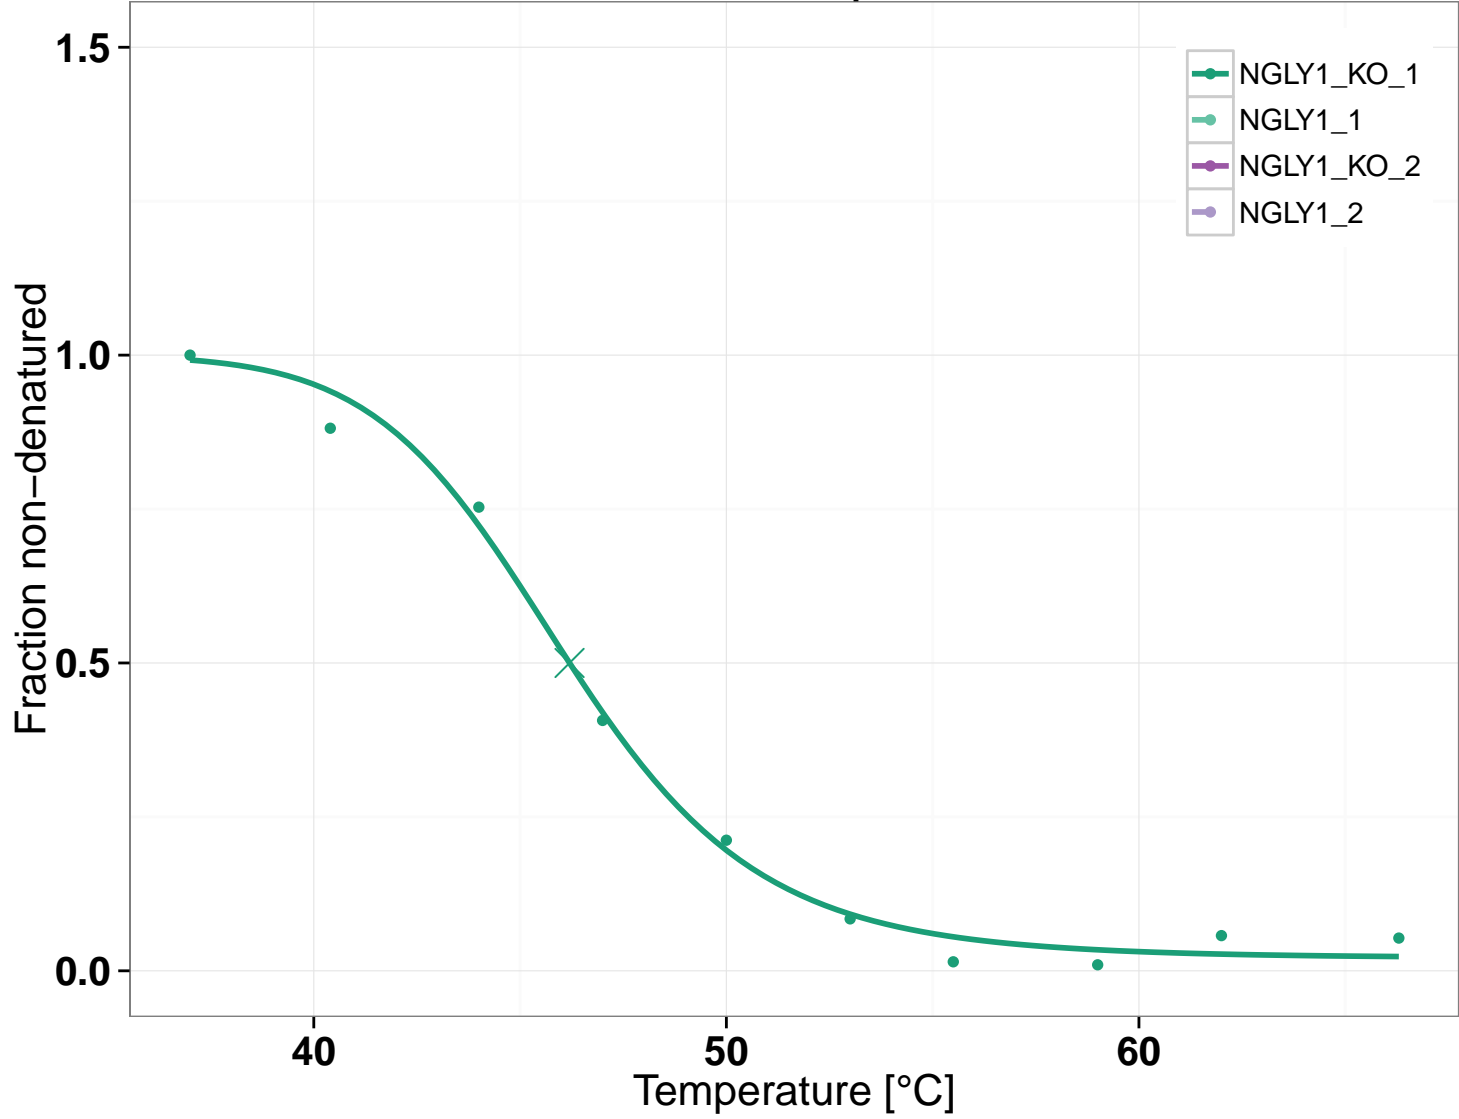

|            | meltPoint | slope | plateau | R2   |
|------------|-----------|-------|---------|------|
| NGLY1_KO_1 | 46.2      | -0.1  | 0.02    | 0.99 |
| NGLY1_1    | -         | -     | -       | -    |
| NGLY1_KO_2 | -         | -     | -       | -    |
| NGLY1_2    | -         | -     | -       | -    |

Supplement: Supplementary file 7127 [file 1]

# IPI00024620.6|ENY2

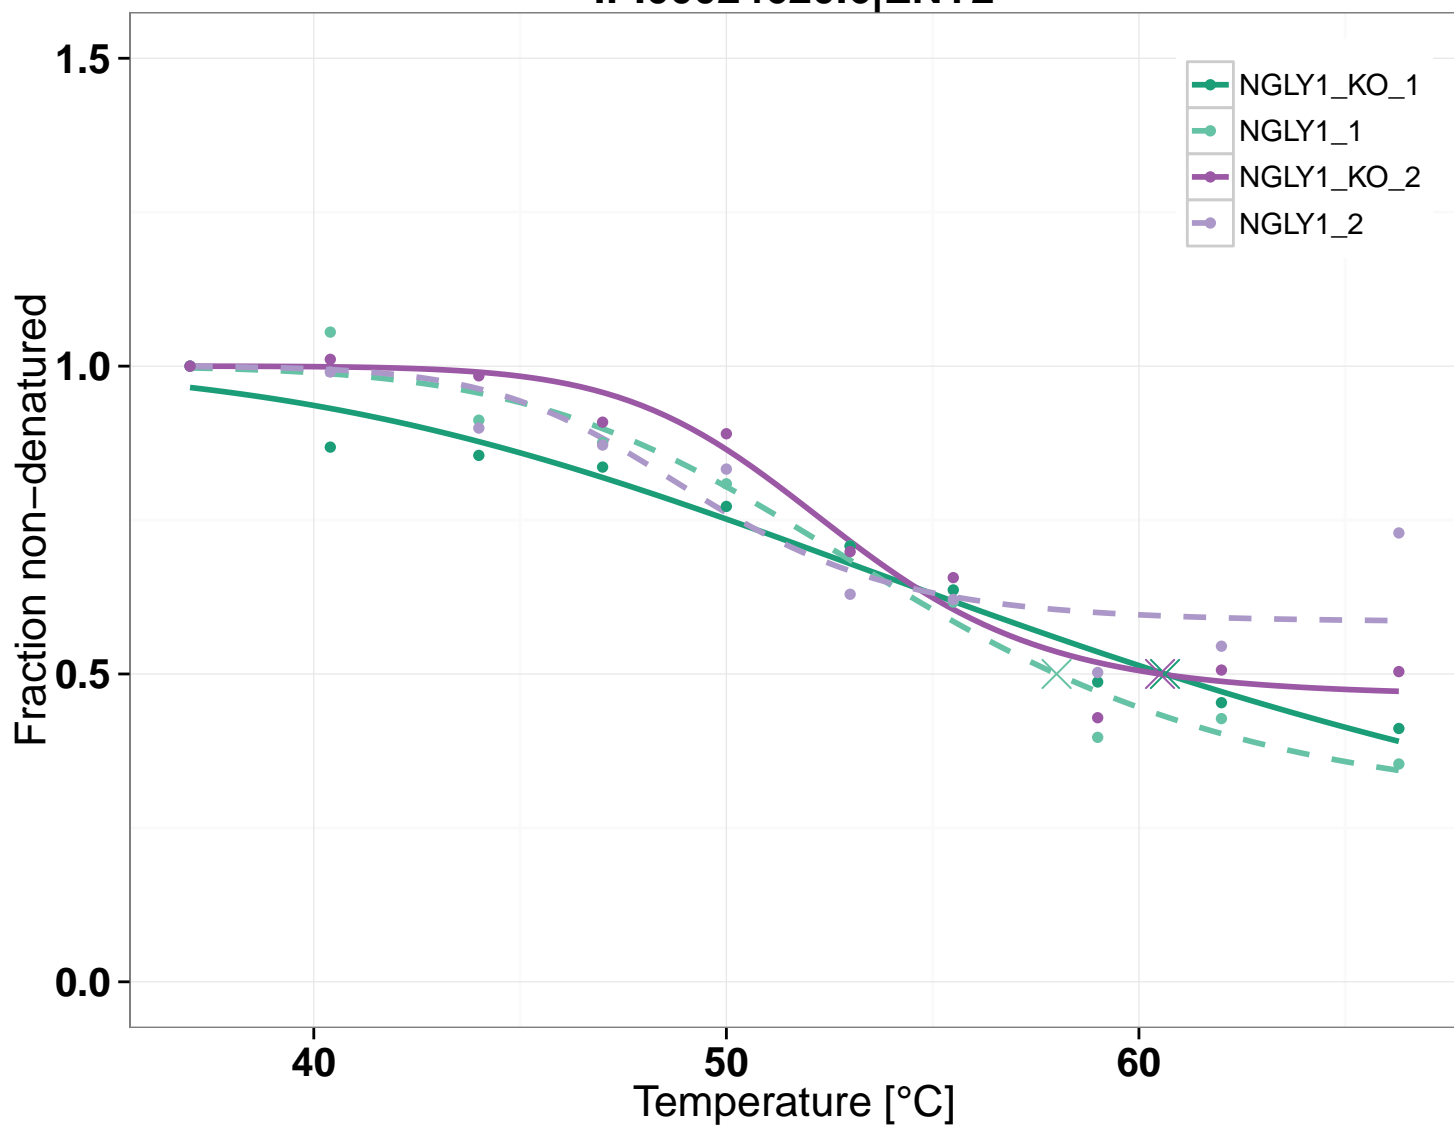

|            | meltPoint | slope  | plateau | R2   |
|------------|-----------|--------|---------|------|
| NGLY1_KO_1 | 60.63     | -0.025 | 0       | 0.97 |
| NGLY1_1    | 58        | -0.041 | 0.27    | 0.98 |
| NGLY1_KO_2 | 60.51     | -0.052 | 0.46    | 0.97 |
| NGLY1_2    | -         | -0.042 | 0.58    | 0.86 |

Supplement: Supplementary file 7128 [file 1]

IPI00028513.2|ADCY3

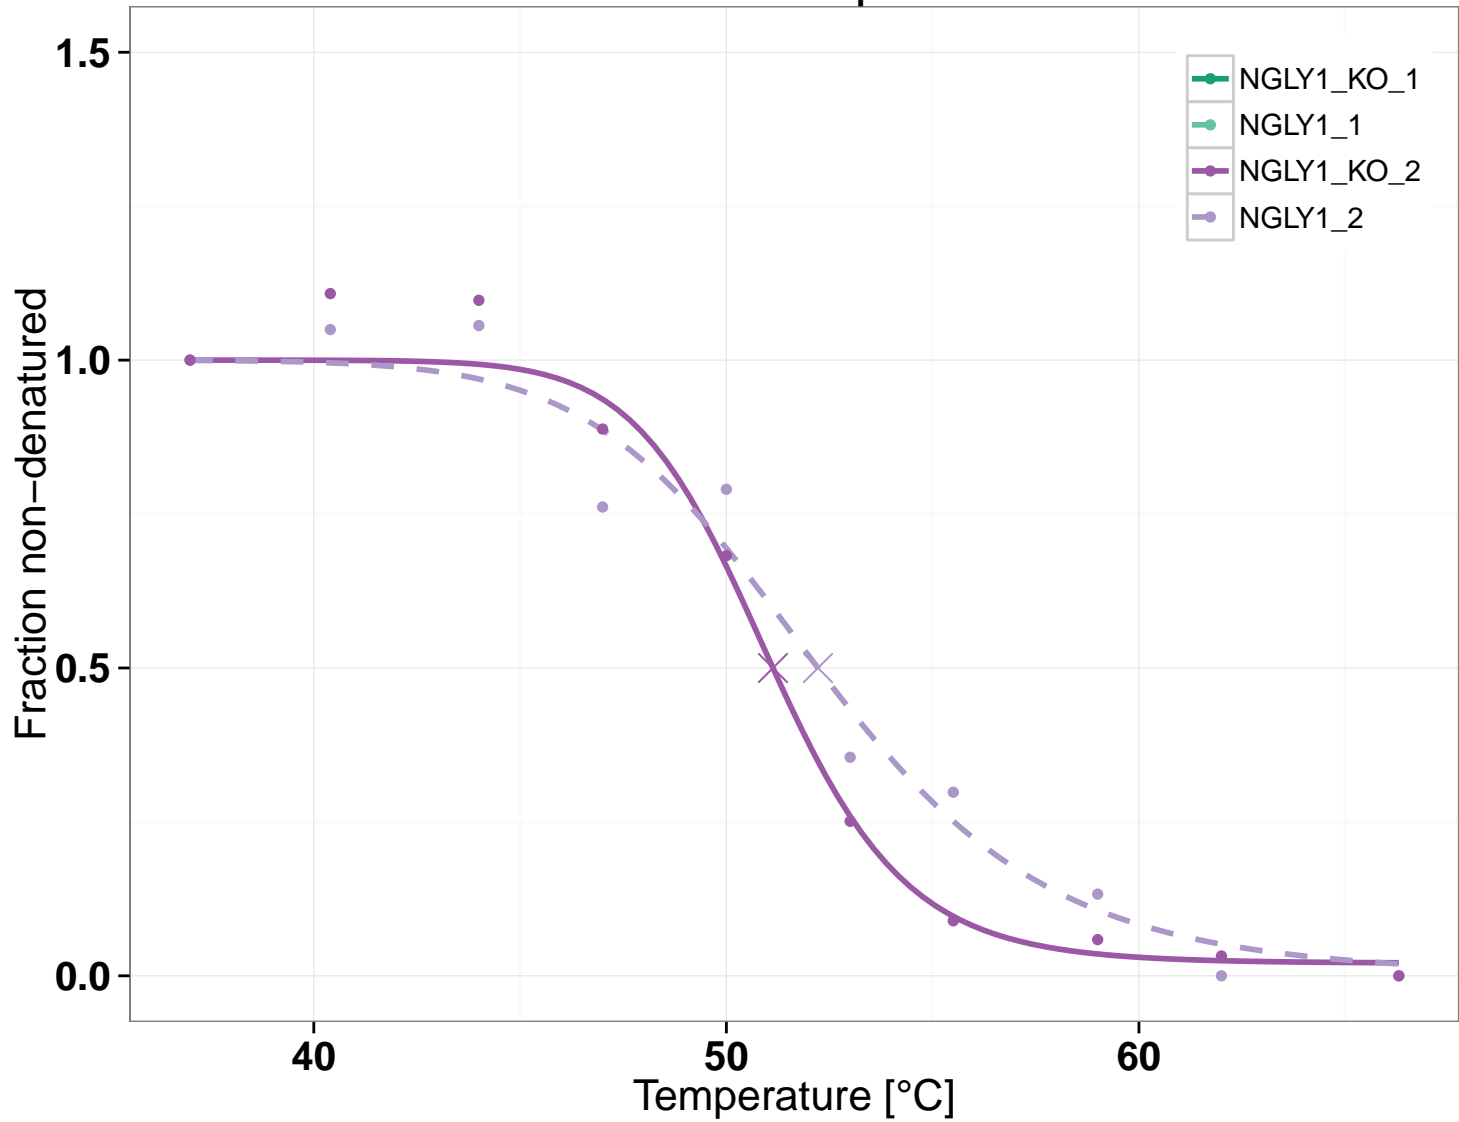

|            | meltPoint | slope | plateau | R2   |
|------------|-----------|-------|---------|------|
| NGLY1_KO_1 | —         | —     | —       | —    |
| NGLY1_1    | —         | —     | —       | —    |
| NGLY1_KO_2 | 51.13     | -0.15 | 0.02    | 0.99 |
| NGLY1_2    | 52.22     | -0.09 | 0       | 0.97 |

Supplement: Supplementary file 7129 [file 1]

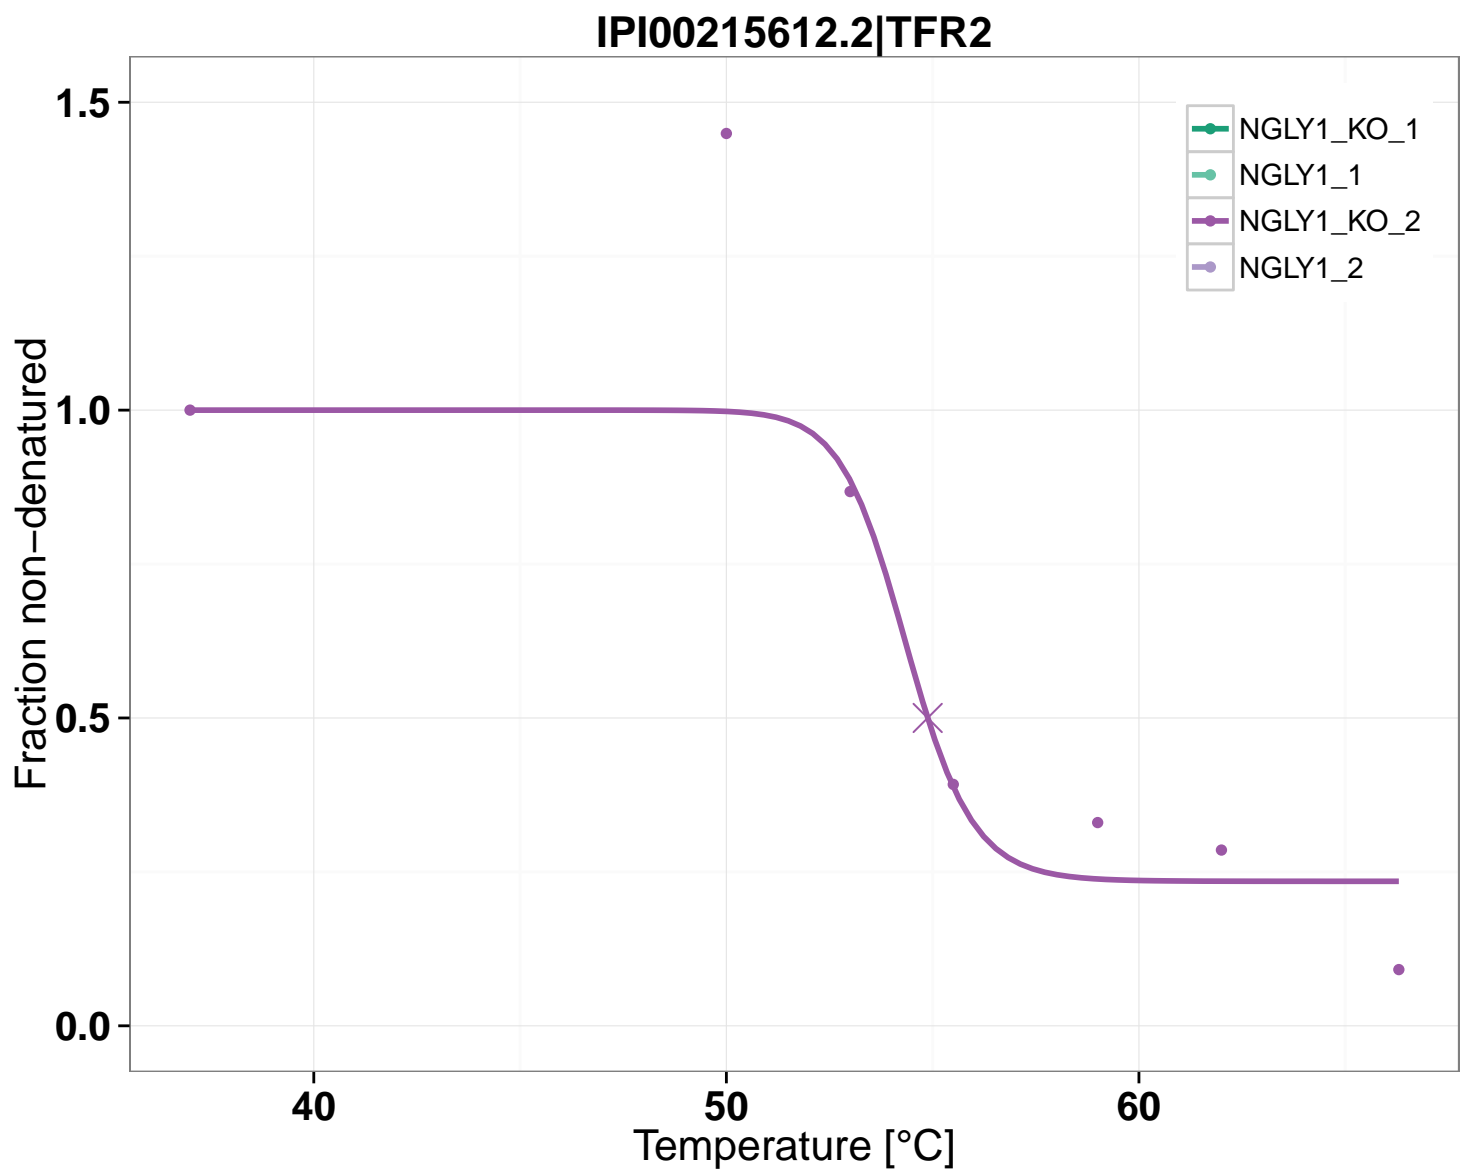

|            | meltPoint | slope | plateau | R2   |
|------------|-----------|-------|---------|------|
| NGLY1_KO_1 | —         | —     | —       | —    |
| NGLY1_1    | —         | —     | —       | —    |
| NGLY1_KO_2 | 54.88     | -0.24 | 0.23    | 0.45 |
| NGLY1_2    | —         | —     | —       | —    |

Supplement: Supplementary file 7130 [file 1]

IPI00402008.4|SAPS1

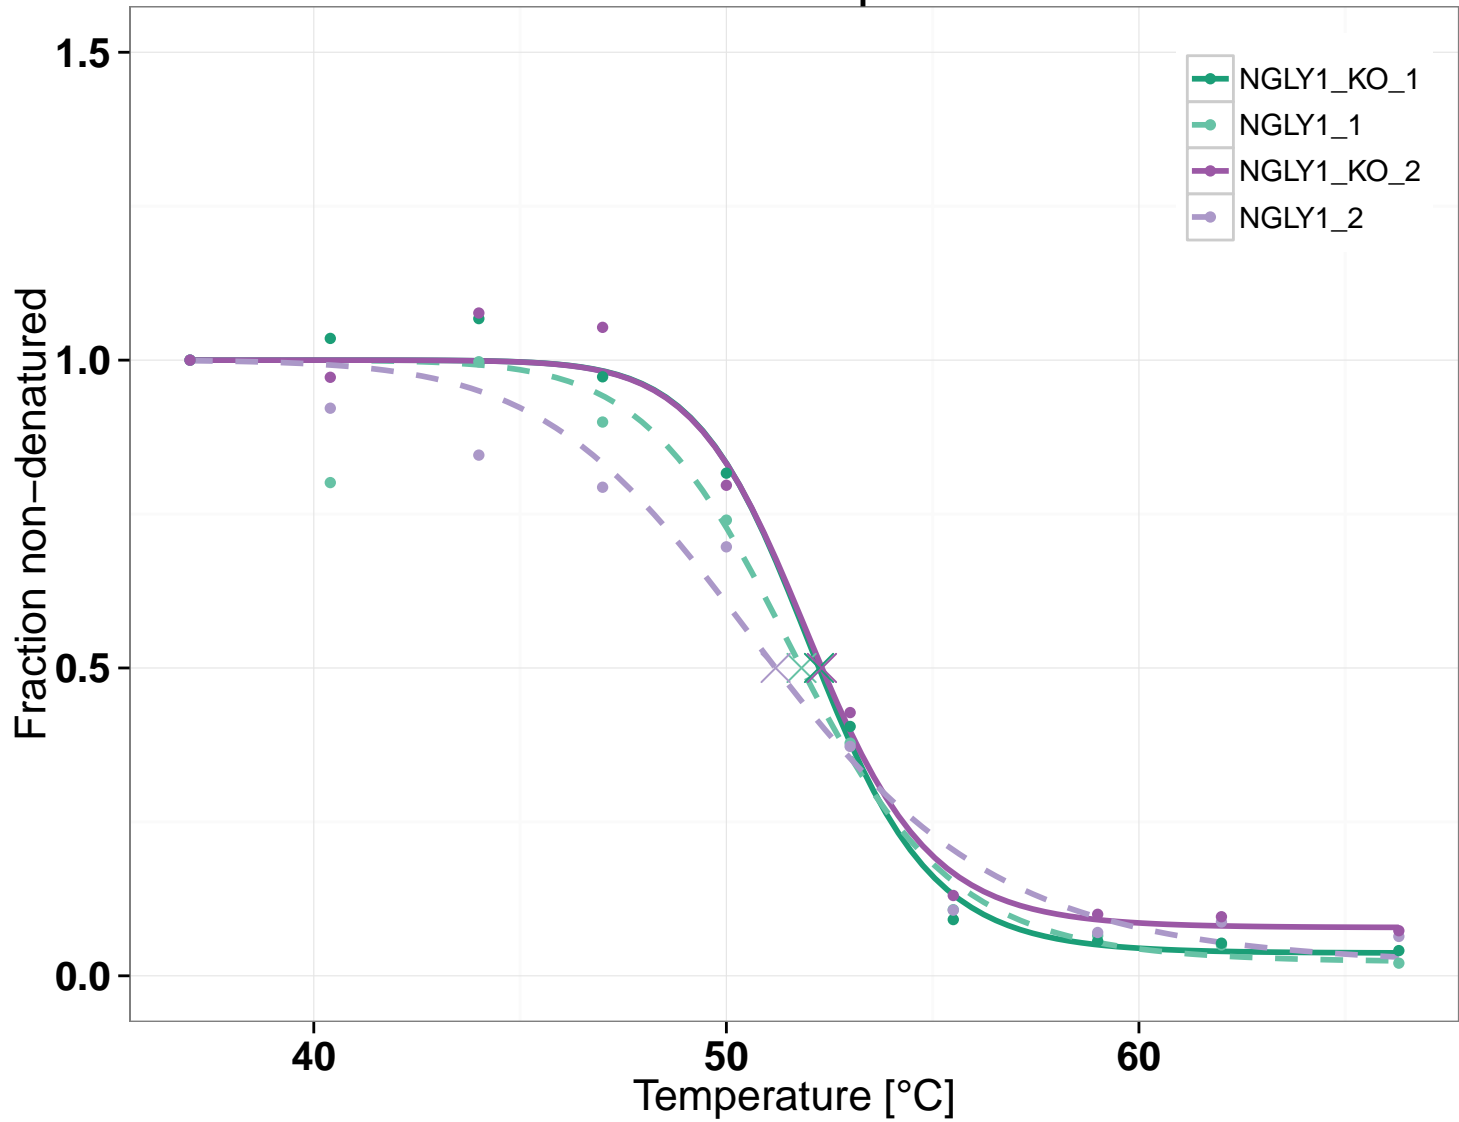

|            | meltPoint | slope  | plateau | R2   |
|------------|-----------|--------|---------|------|
| NGLY1_KO_1 | 52.25     | -0.17  | 0.04    | 1    |
| NGLY1_1    | 51.82     | -0.13  | 0.02    | 0.97 |
| NGLY1_KO_2 | 52.32     | -0.16  | 0.08    | 0.99 |
| NGLY1_2    | 51.19     | -0.088 | 0.02    | 0.97 |

Supplement: Supplementary file 7131 [file 1]
