# Supplementary material (part 72 of 85)
Source: publisher figshare collection journal article supplement (https://gsajournals.figshare.com/articles/dataset/_/12014913)

IPI00063130.2|TMEM205

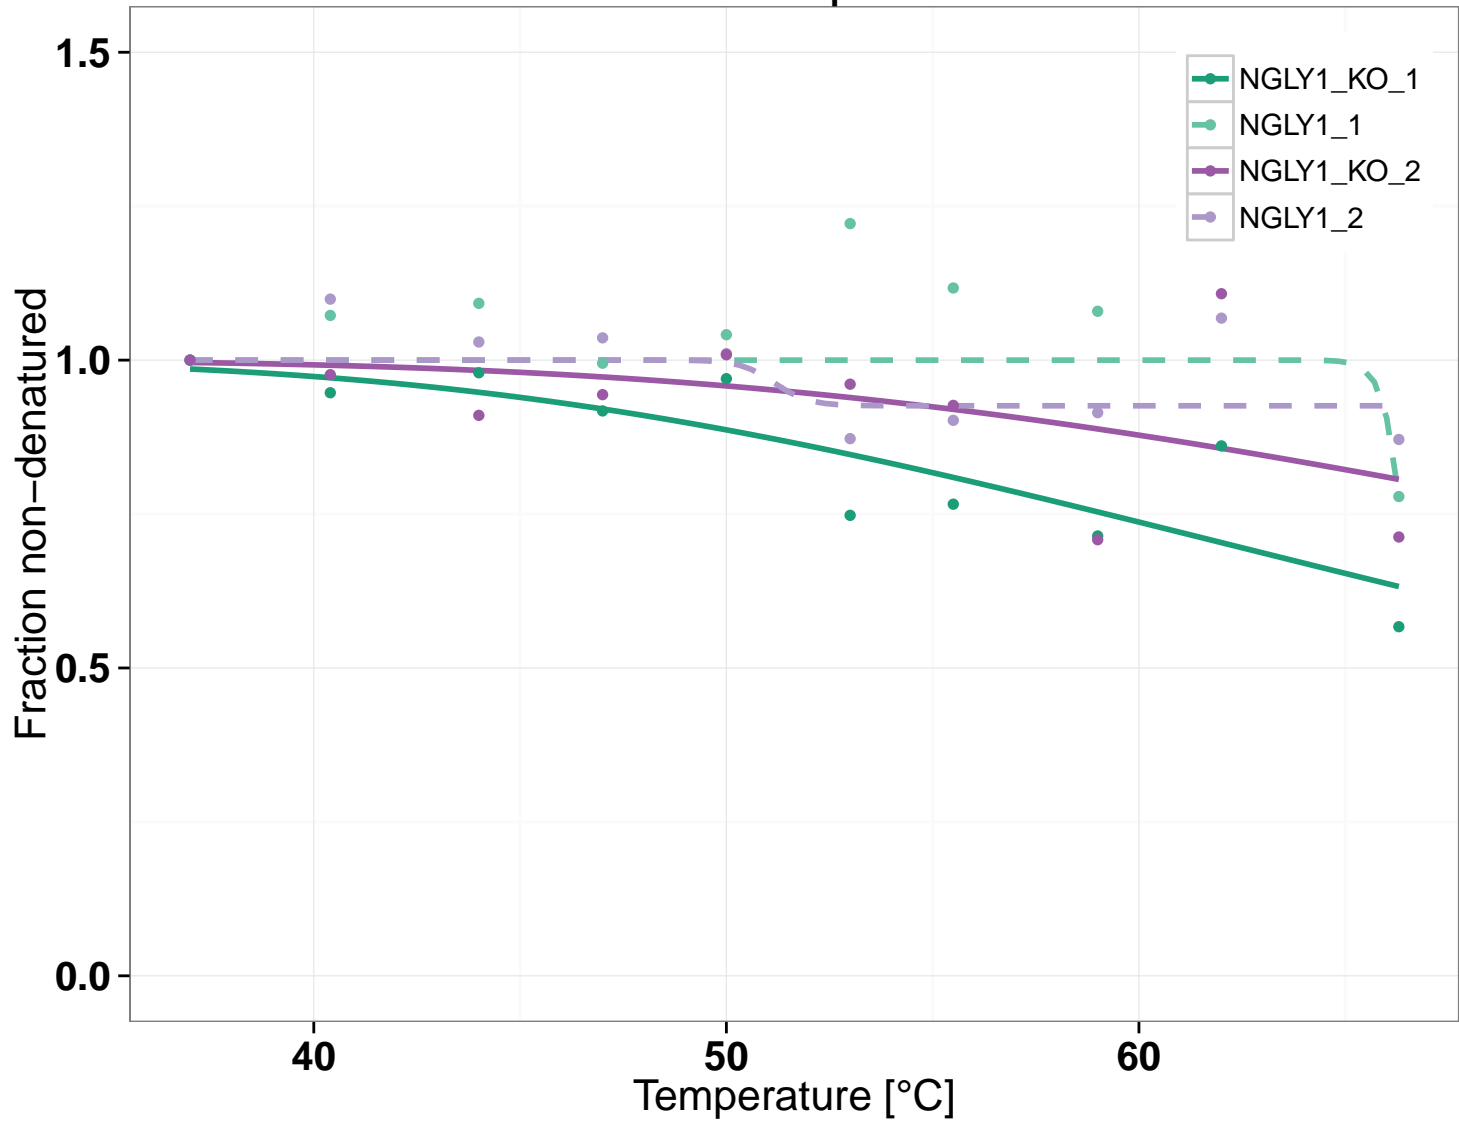

|            | meltPoint | slope  | plateau | R2   |
|------------|-----------|--------|---------|------|
| NGLY1_KO_1 | -         | -0.017 | 0       | 0.72 |
| NGLY1_1    | -         | -      | 0       | 0.09 |
| NGLY1_KO_2 | -         | -      | 0       | 0.2  |
| NGLY1_2    | -         | -0.045 | 0.93    | 0.38 |

Supplement: Supplementary file 7132 [file 1]

# IPI00874144.1|MRPS6

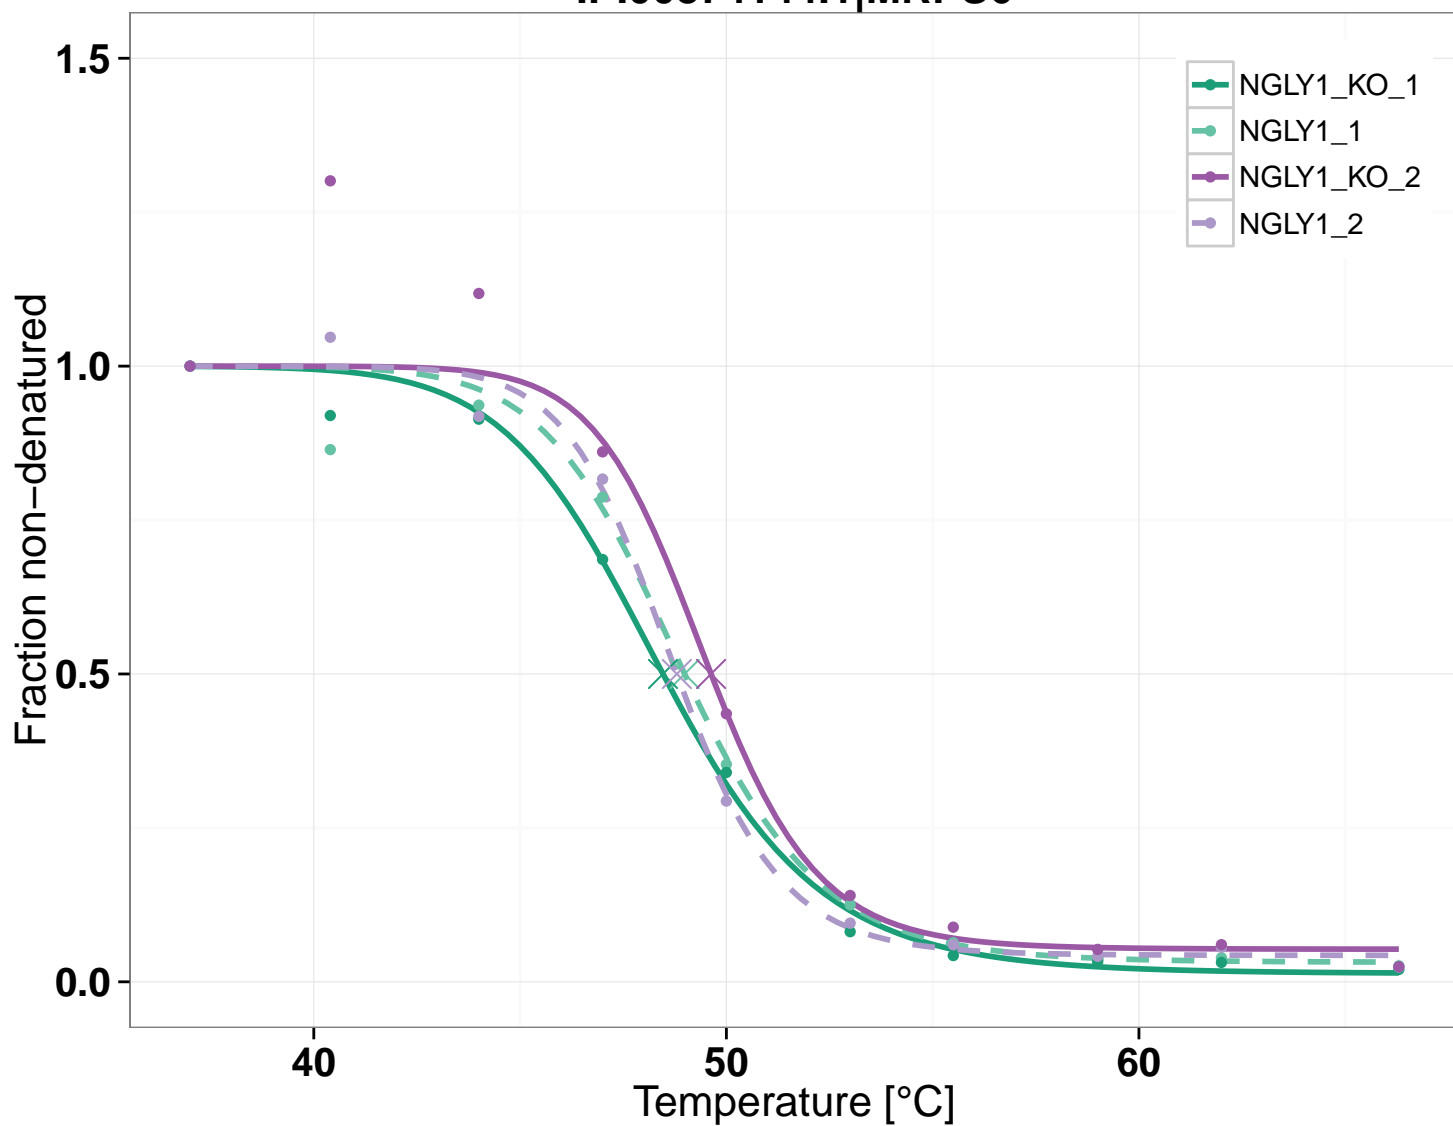

|            | meltPoint | slope | plateau | R2   |
|------------|-----------|-------|---------|------|
| NGLY1_KO_1 | 48.46     | -0.13 | 0.01    | 1    |
| NGLY1_1    | 48.99     | -0.14 | 0.03    | 0.99 |
| NGLY1_KO_2 | 49.63     | -0.17 | 0.05    | 0.95 |
| NGLY1_2    | 48.8      | -0.18 | 0.04    | 1    |

Supplement: Supplementary file 7133 [file 1]

IPI00292771.4|NUMA1

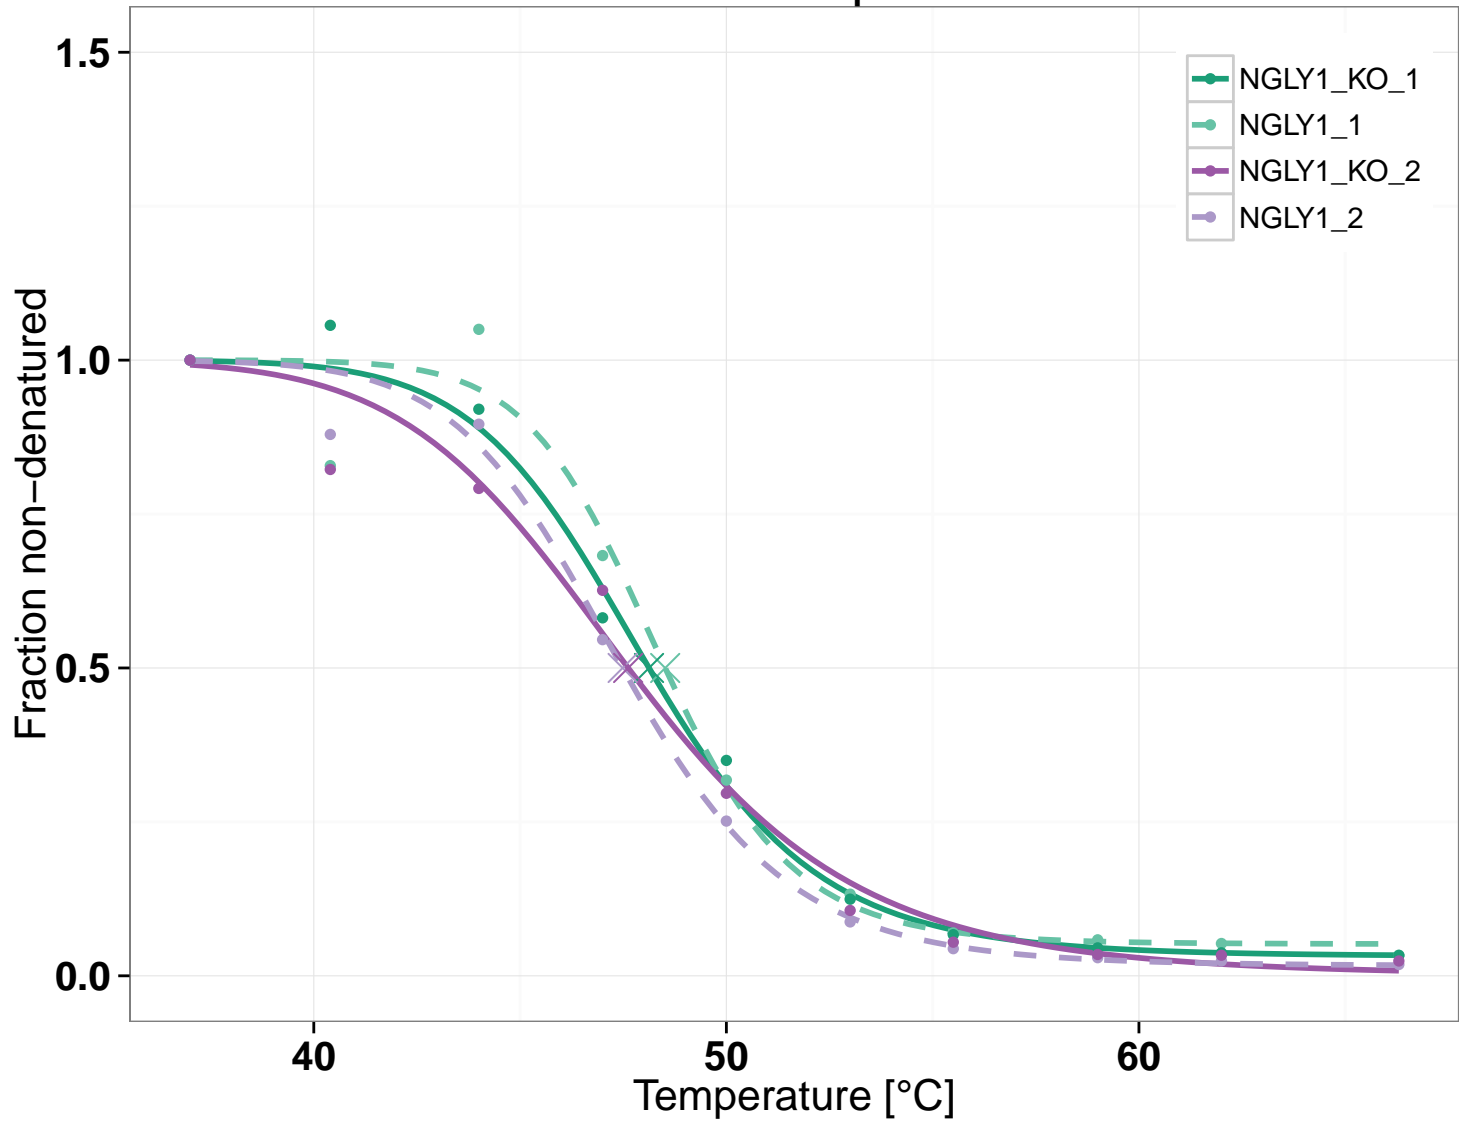

|            | meltPoint | slope | plateau | R2   |
|------------|-----------|-------|---------|------|
| NGLY1_KO_1 | 48.13     | -0.12 | 0.03    | 0.99 |
| NGLY1_1    | 48.52     | -0.15 | 0.05    | 0.98 |
| NGLY1_KO_2 | 47.62     | -0.09 | 0       | 0.98 |
| NGLY1_2    | 47.49     | -0.12 | 0.02    | 0.99 |

Supplement: Supplementary file 7134 [file 1]

IPI00885015.1|FANCL

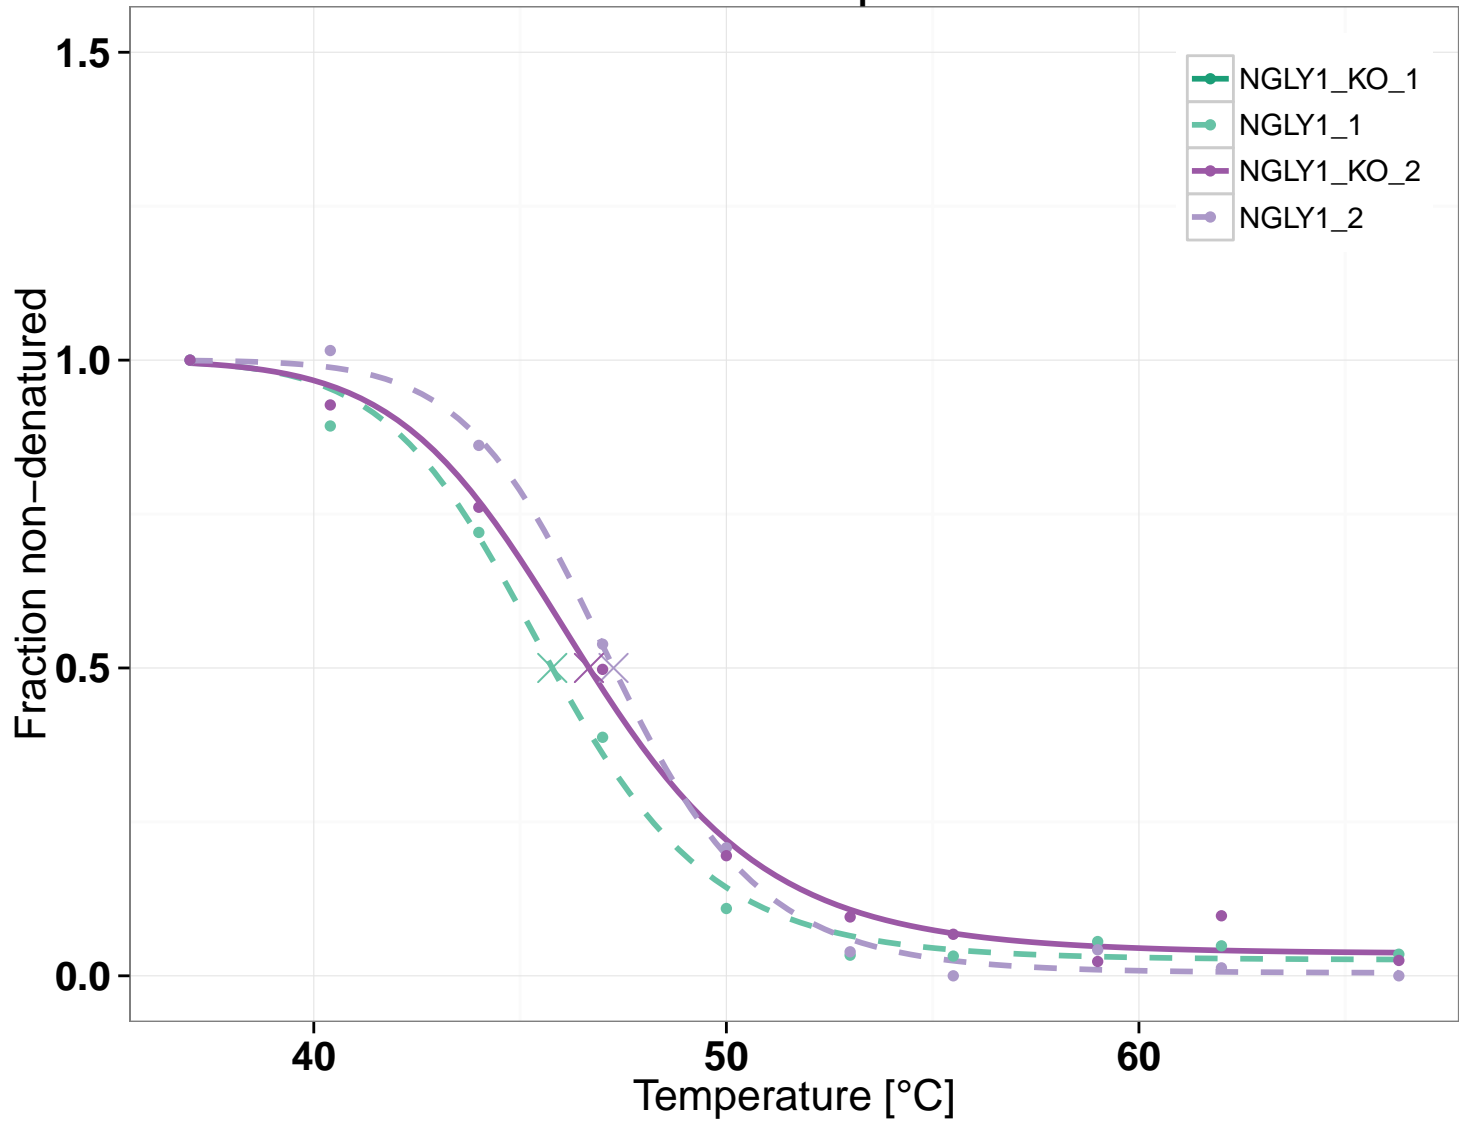

|            | meltPoint | slope | plateau | R2   |
|------------|-----------|-------|---------|------|
| NGLY1_KO_1 | –         | –     | –       | –    |
| NGLY1_1    | 45.78     | –0.12 | 0.03    | 0.99 |
| NGLY1_KO_2 | 46.67     | –0.11 | 0.04    | 1    |
| NGLY1_2    | 47.27     | –0.14 | 0       | 1    |

Supplement: Supplementary file 7135 [file 1]

# IPI00019407.1|NSDHL

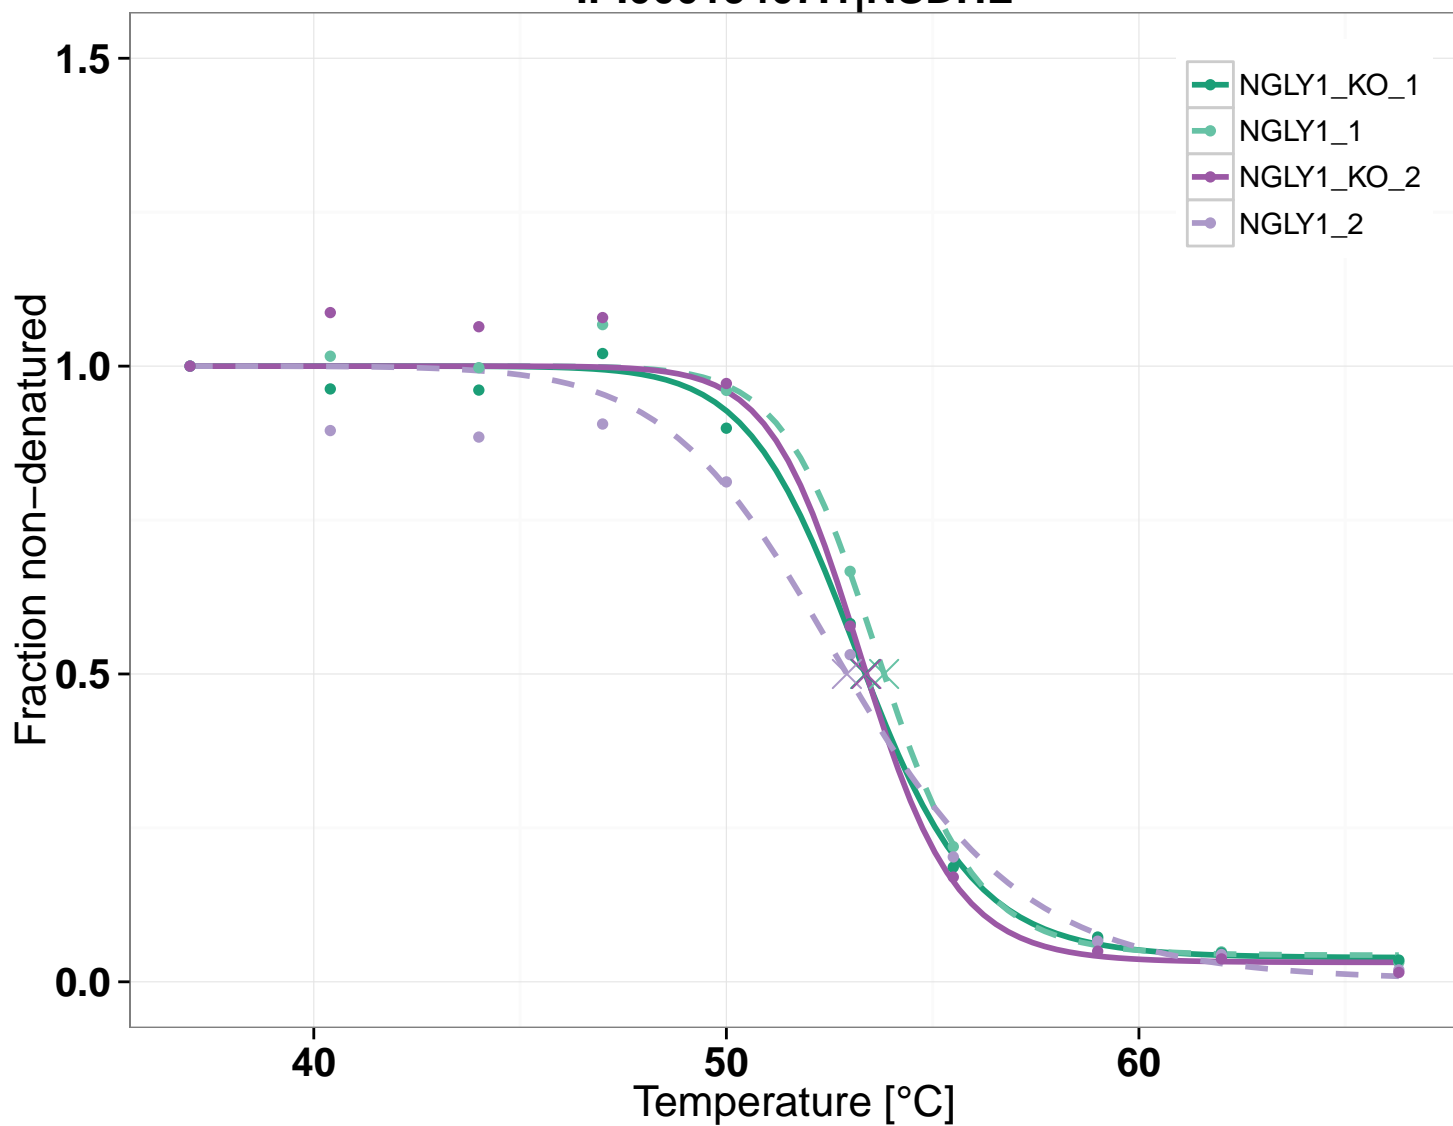

|            | meltPoint | slope | plateau | R2   |
|------------|-----------|-------|---------|------|
| NGLY1_KO_1 | 53.37     | -0.17 | 0.04    | 1    |
| NGLY1_1    | 53.82     | -0.2  | 0.04    | 1    |
| NGLY1_KO_2 | 53.39     | -0.21 | 0.03    | 0.99 |
| NGLY1_2    | 52.92     | -0.11 | 0       | 0.98 |

Supplement: Supplementary file 7136 [file 1]

# IPI00295400.1|WARS

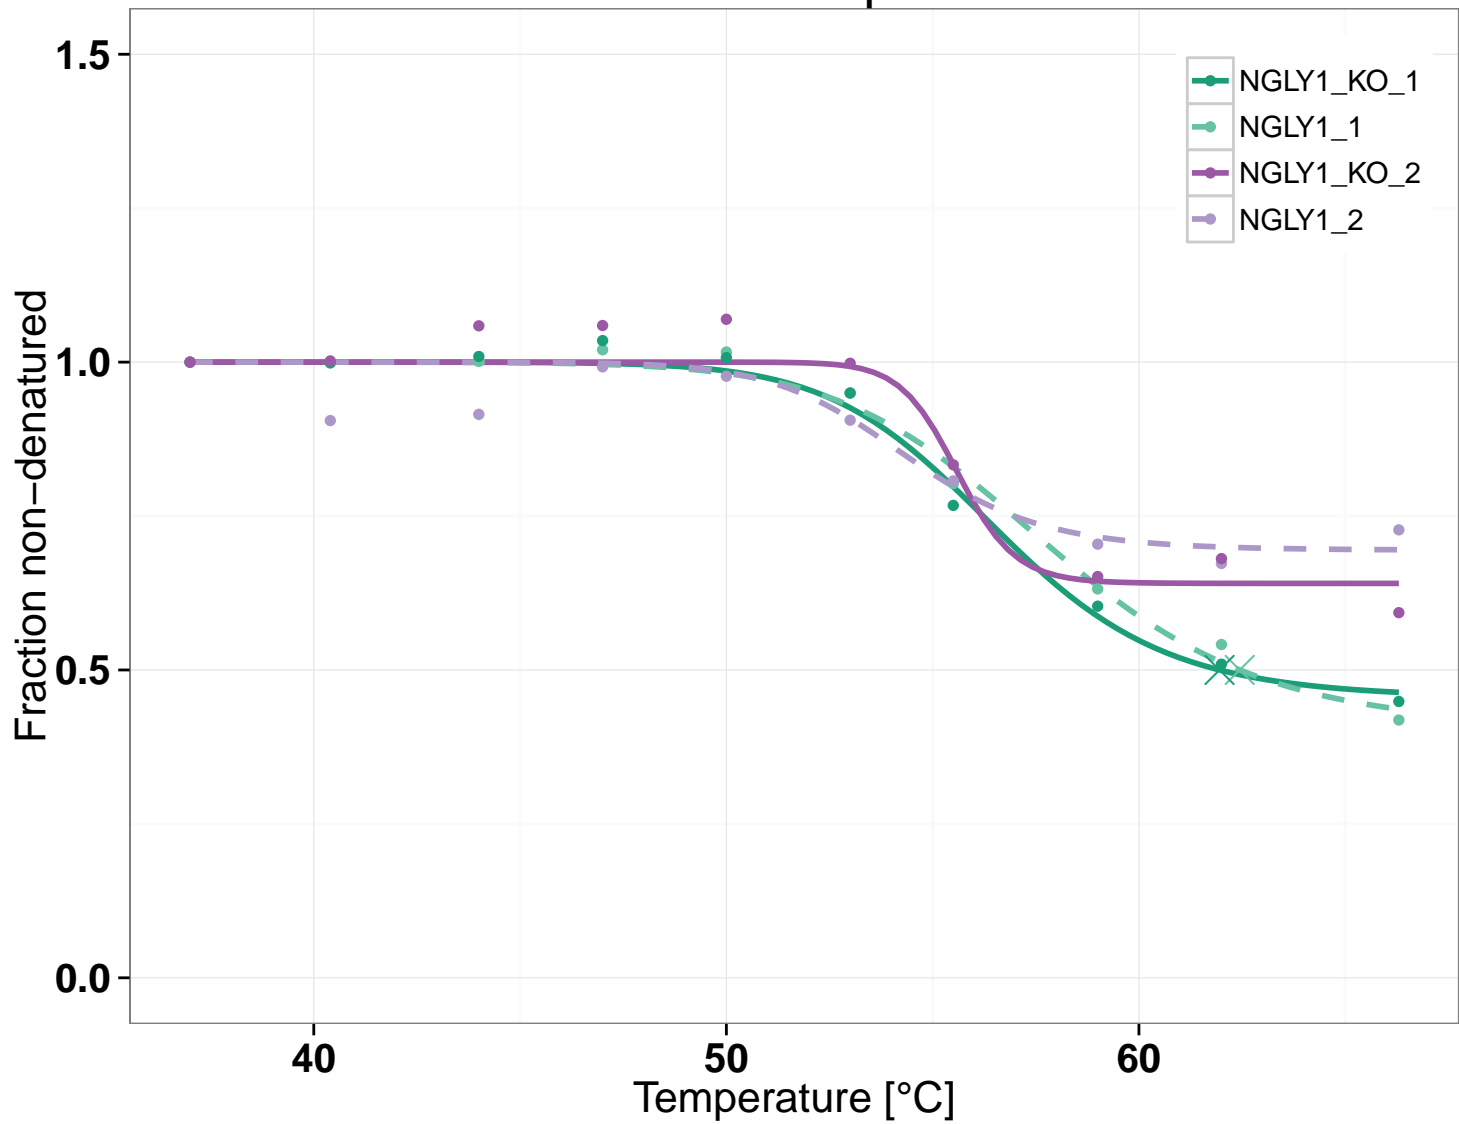

|            | meltPoint | slope  | plateau | R2   |
|------------|-----------|--------|---------|------|
| NGLY1_KO_1 | 61.95     | -0.067 | 0.45    | 0.99 |
| NGLY1_1    | 62.44     | -0.058 | 0.4     | 0.99 |
| NGLY1_KO_2 | -         | -0.13  | 0.64    | 0.95 |
| NGLY1_2    | -         | -0.046 | 0.69    | 0.87 |

Supplement: Supplementary file 7137 [file 1]

# IPI00002251.1|PDP2

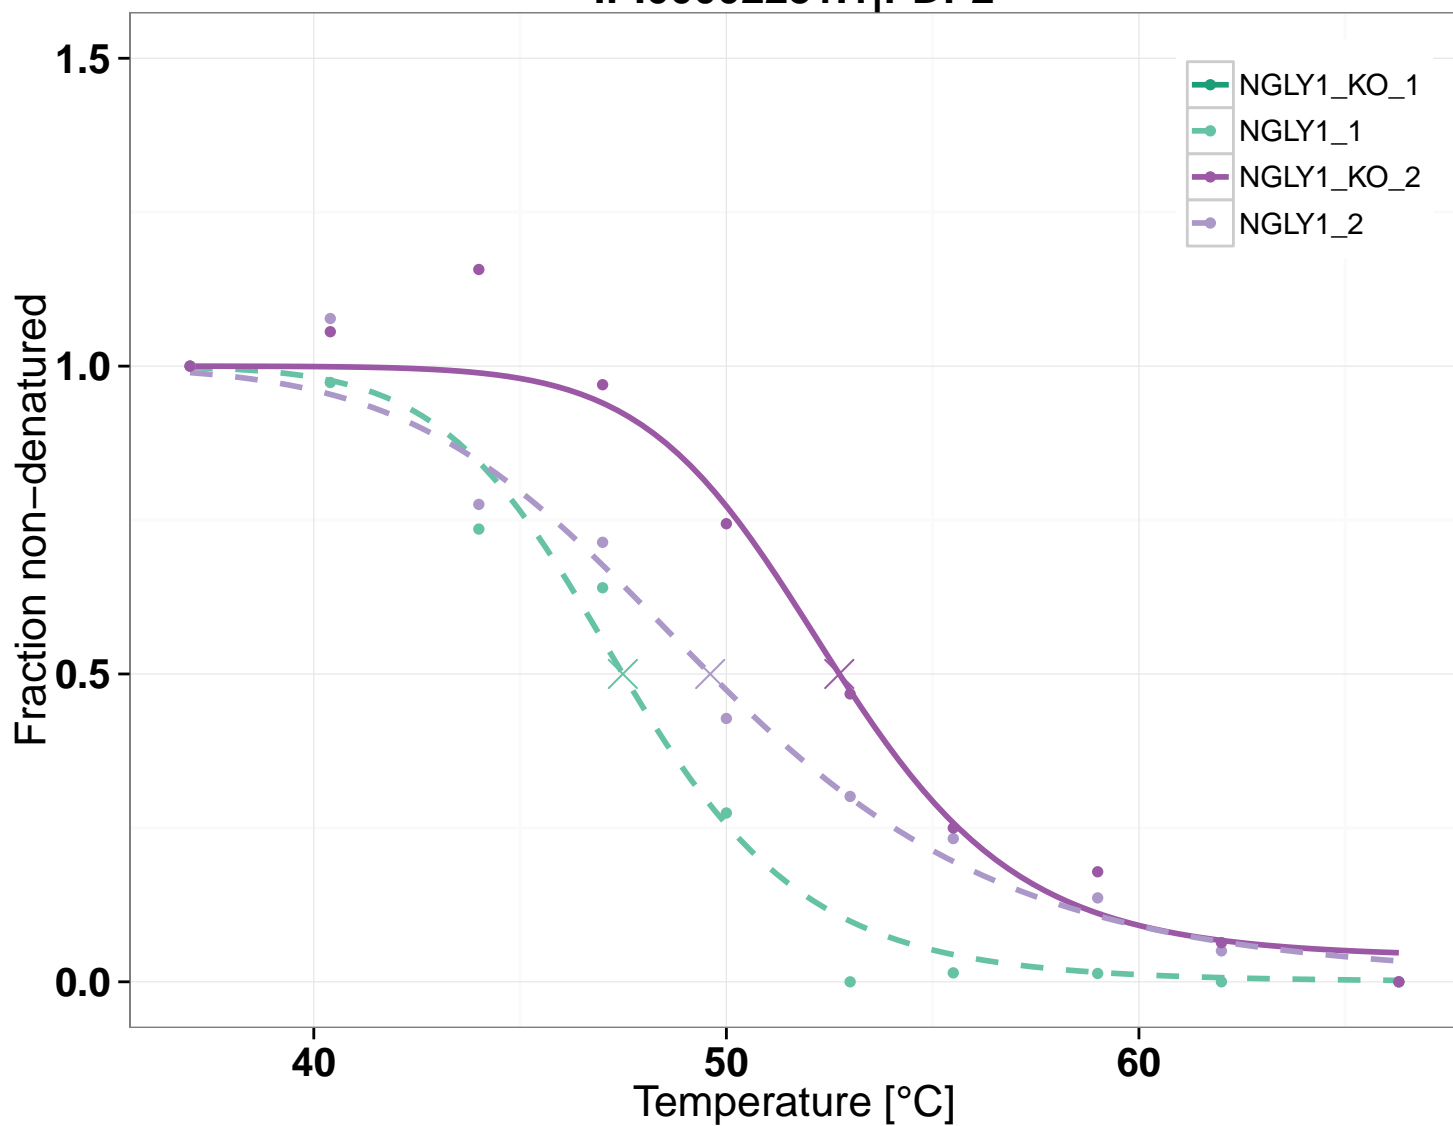

|            | meltPoint | slope  | plateau | R2   |
|------------|-----------|--------|---------|------|
| NGLY1_KO_1 | —         | —      | —       | —    |
| NGLY1_1    | 47.49     | -0.11  | 0       | 0.98 |
| NGLY1_KO_2 | 52.74     | -0.11  | 0.04    | 0.98 |
| NGLY1_2    | 49.61     | -0.069 | 0       | 0.98 |

Supplement: Supplementary file 7138 [file 1]

IPI00335449.3|PPP2R1B

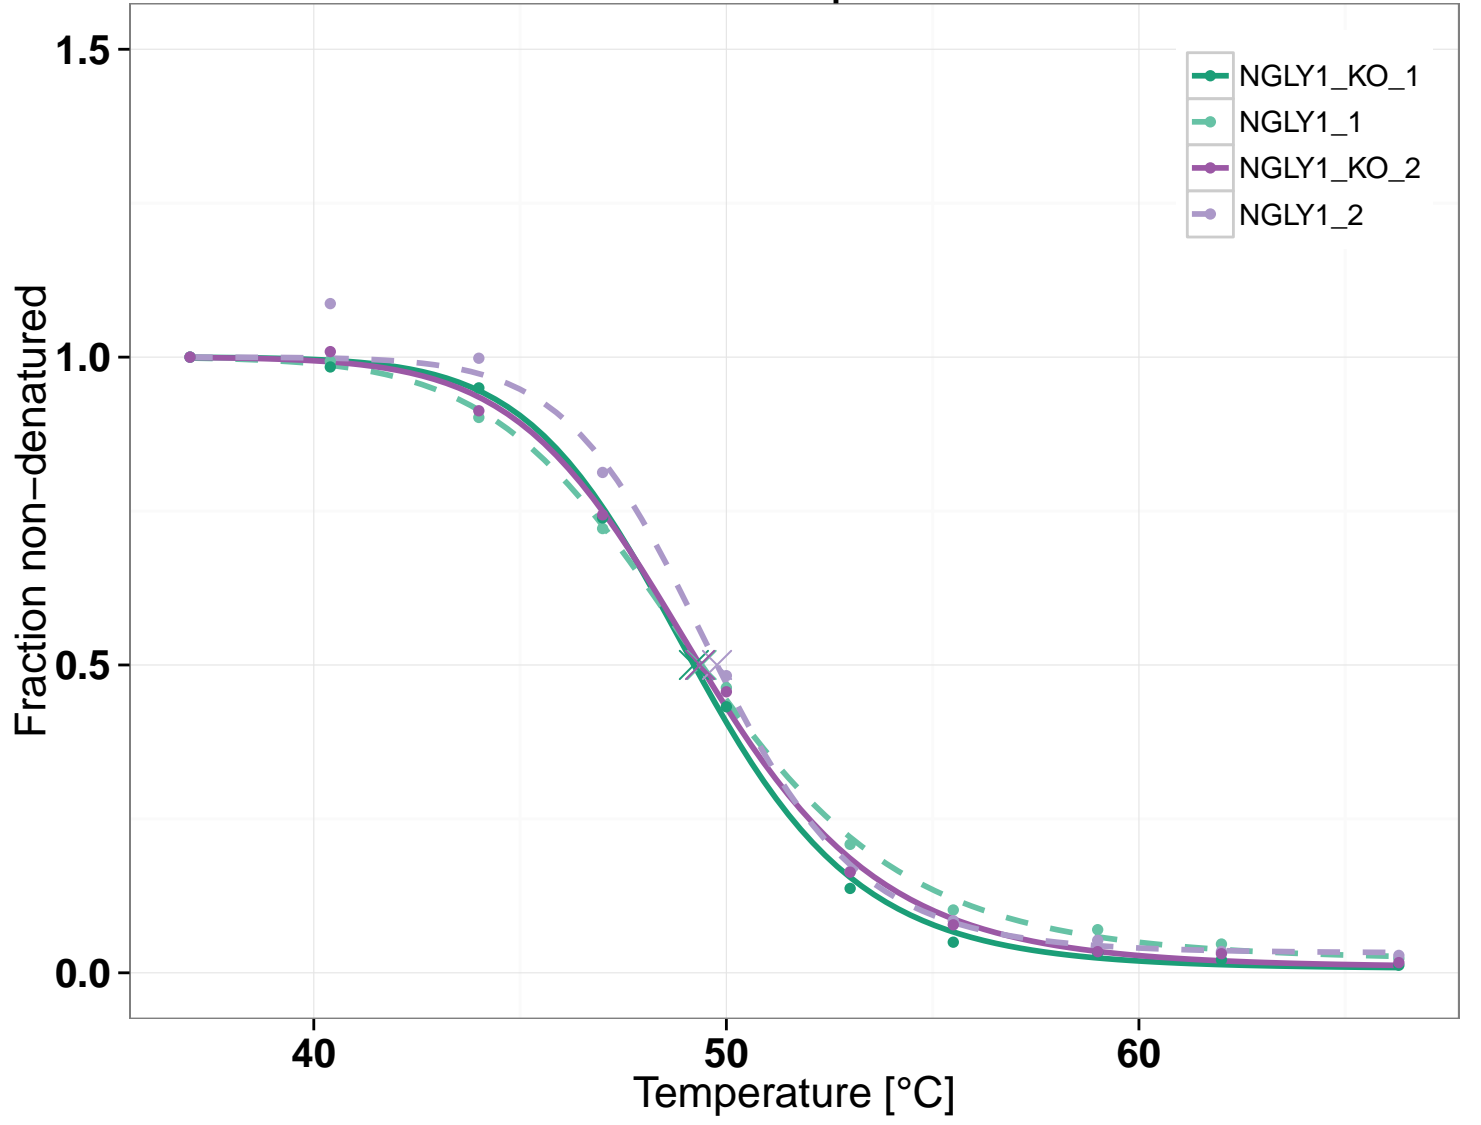

|            | meltPoint | slope  | plateau | R2 |
|------------|-----------|--------|---------|----|
| NGLY1_KO_1 | 49.21     | -0.12  | 0.01    | 1  |
| NGLY1_1    | 49.4      | -0.098 | 0.02    | 1  |
| NGLY1_KO_2 | 49.36     | -0.11  | 0.01    | 1  |
| NGLY1_2    | 49.77     | -0.14  | 0.03    | 1  |

Supplement: Supplementary file 7139 [file 1]

# IPI00329488.4|ABL2

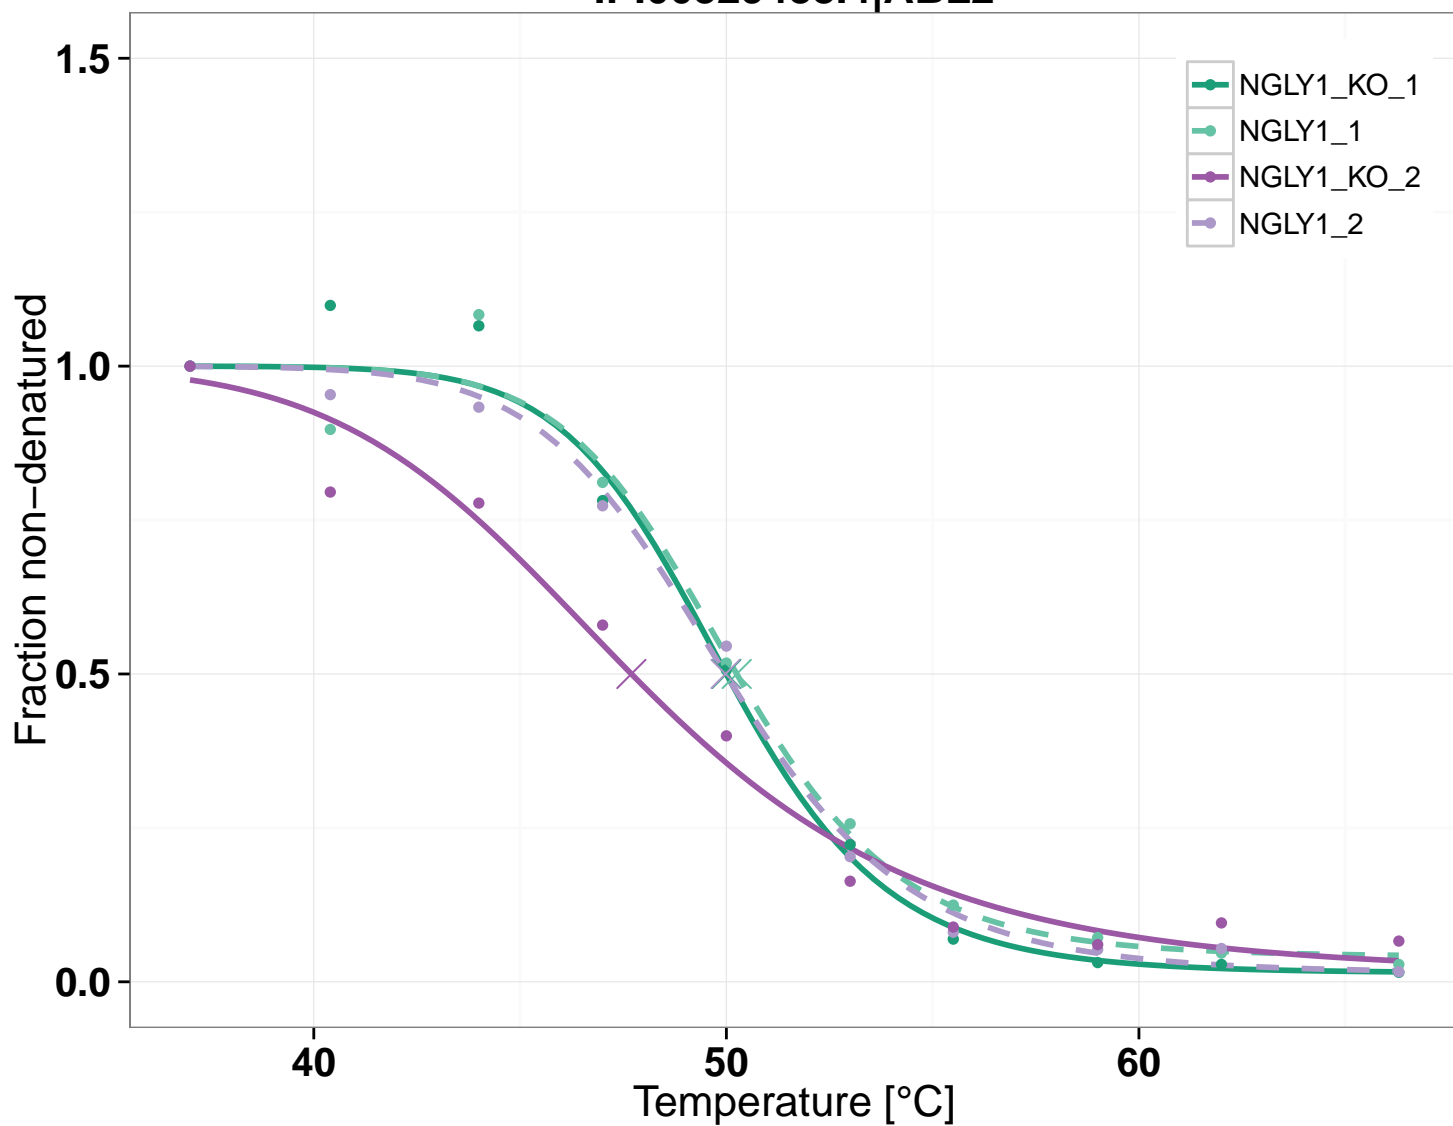

|            | meltPoint | slope | plateau | R2   |
|------------|-----------|-------|---------|------|
| NGLY1_KO_1 | 50        | -0.12 | 0.01    | 0.99 |
| NGLY1_1    | 50.25     | -0.12 | 0.04    | 0.98 |
| NGLY1_KO_2 | 47.7      | -0.07 | 0.01    | 0.98 |
| NGLY1_2    | 49.98     | -0.11 | 0.01    | 1    |

Supplement: Supplementary file 7140 [file 1]

IPI00384458.2|INTU

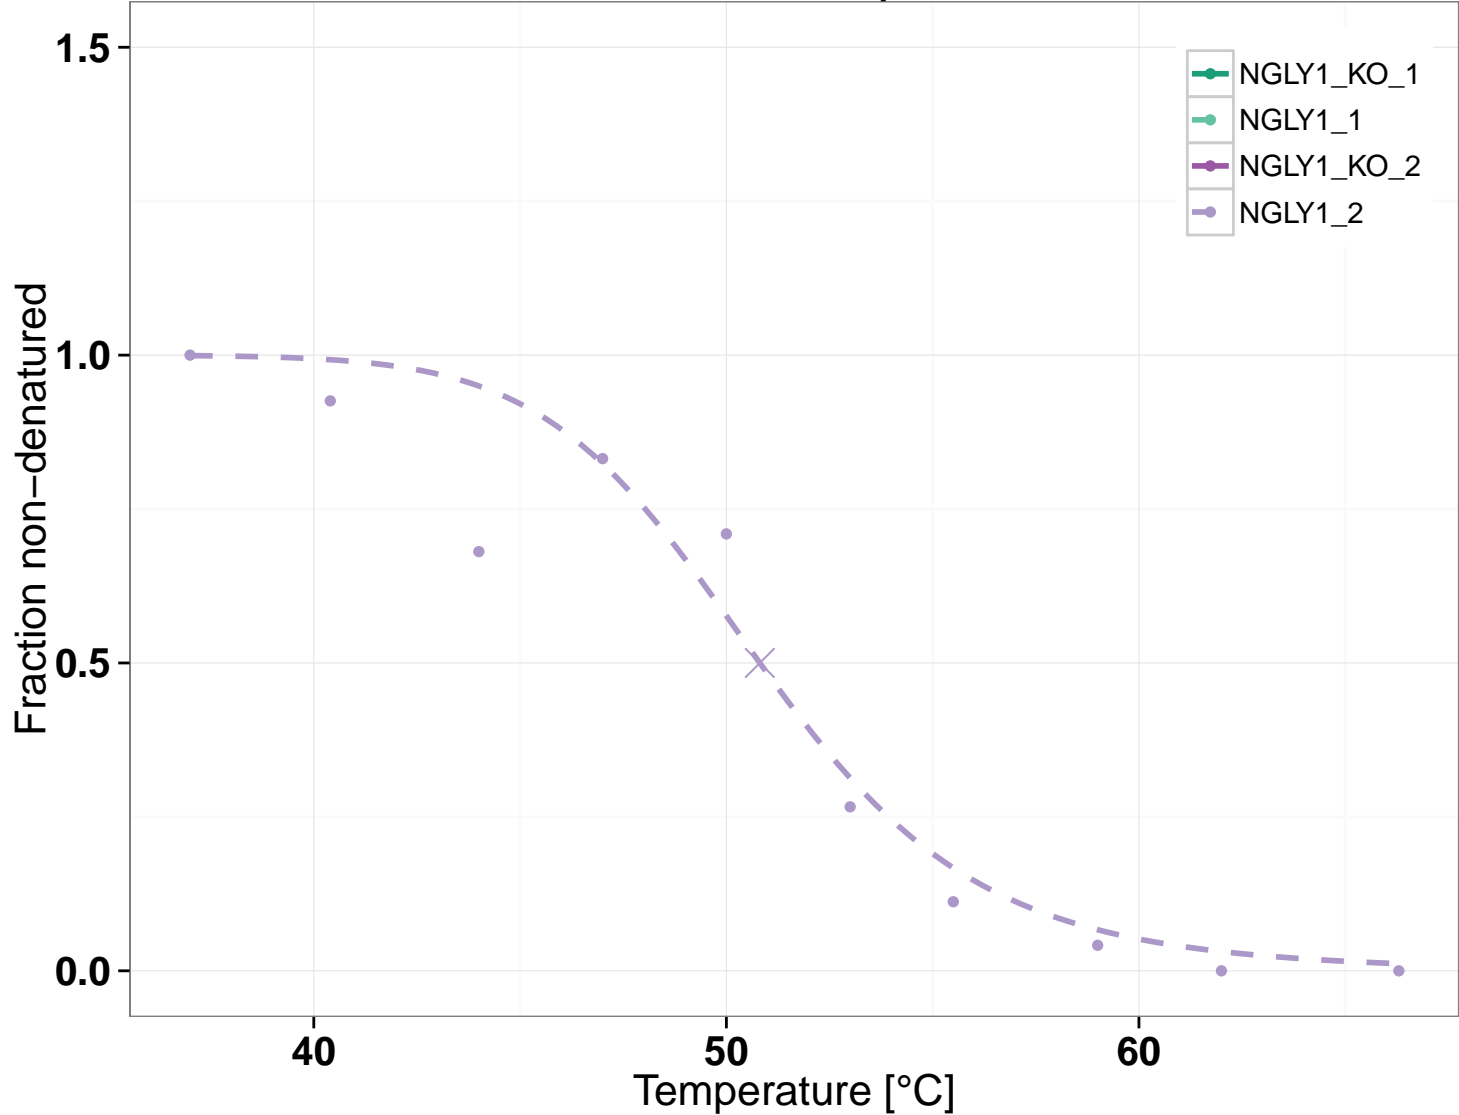

|            | meltPoint | slope  | plateau | R2   |
|------------|-----------|--------|---------|------|
| NGLY1_KO_1 | -         | -      | -       | -    |
| NGLY1_1    | -         | -      | -       | -    |
| NGLY1_KO_2 | -         | -      | -       | -    |
| NGLY1_2    | 50.81     | -0.095 | 0       | 0.93 |

Supplement: Supplementary file 7141 [file 1]

IPI00604494.2|CCDC92

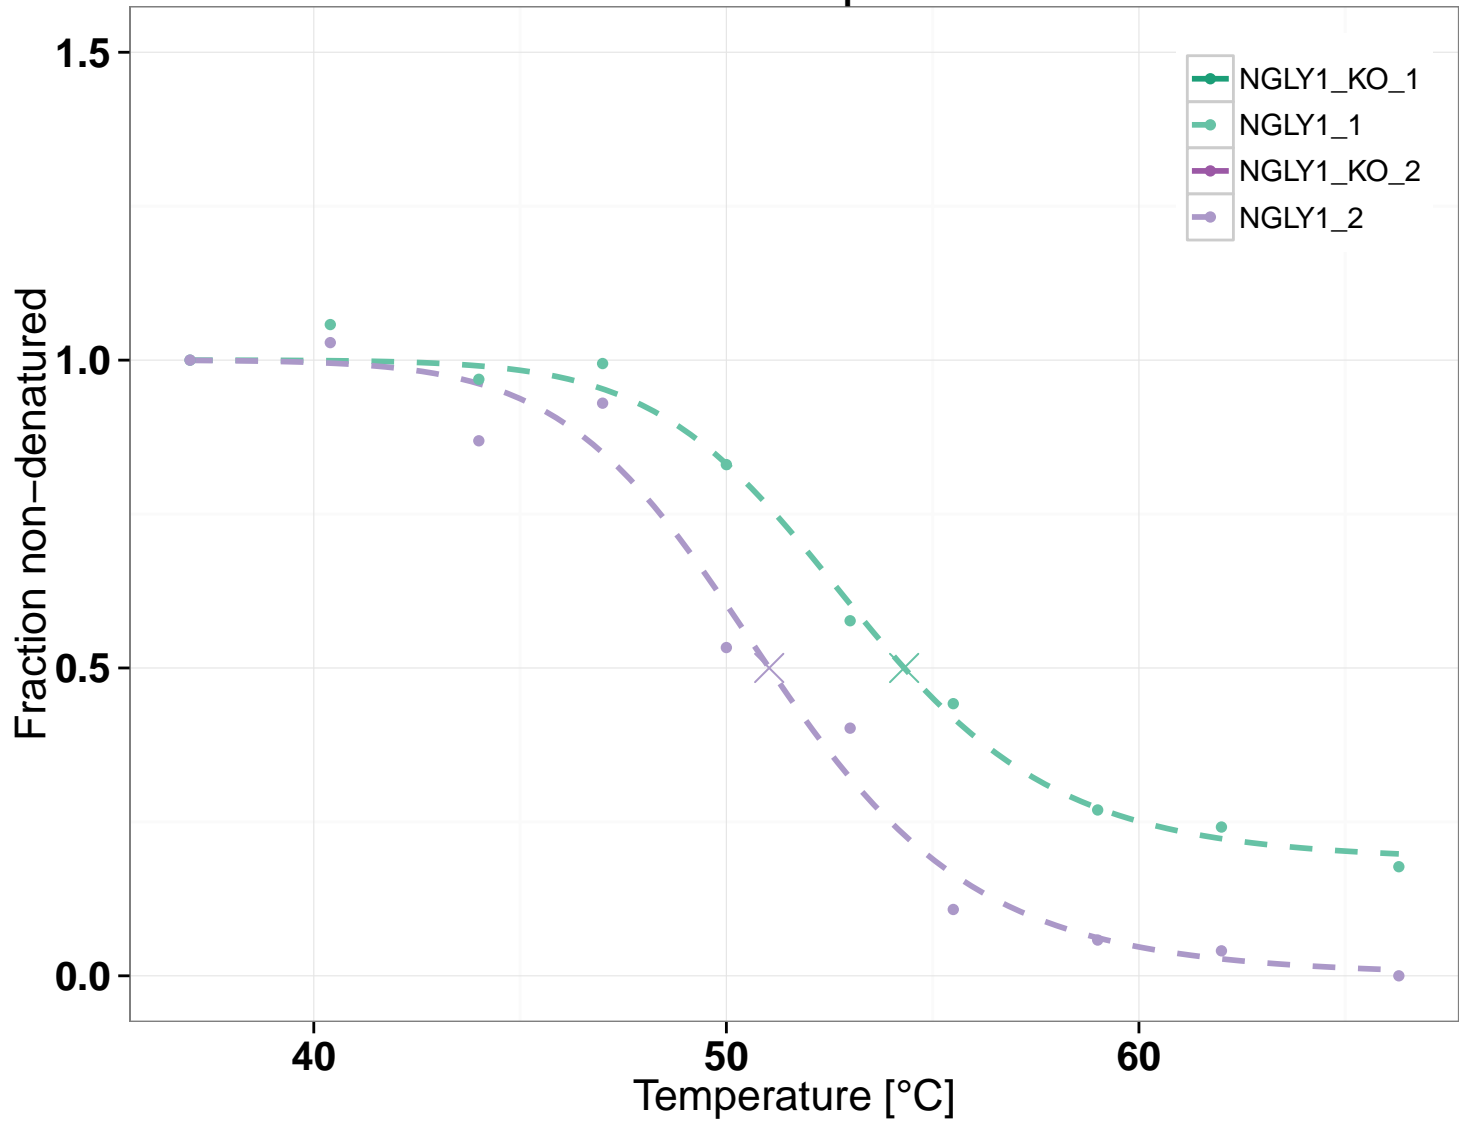

|            | meltPoint | slope  | plateau | R2   |
|------------|-----------|--------|---------|------|
| NGLY1_KO_1 | -         | -      | -       | -    |
| NGLY1_1    | 54.31     | -0.083 | 0.19    | 0.99 |
| NGLY1_KO_2 | -         | -      | -       | -    |
| NGLY1_2    | 51.04     | -0.1   | 0       | 0.98 |

Supplement: Supplementary file 7142 [file 1]

IPI00297455.5|AKAP8L

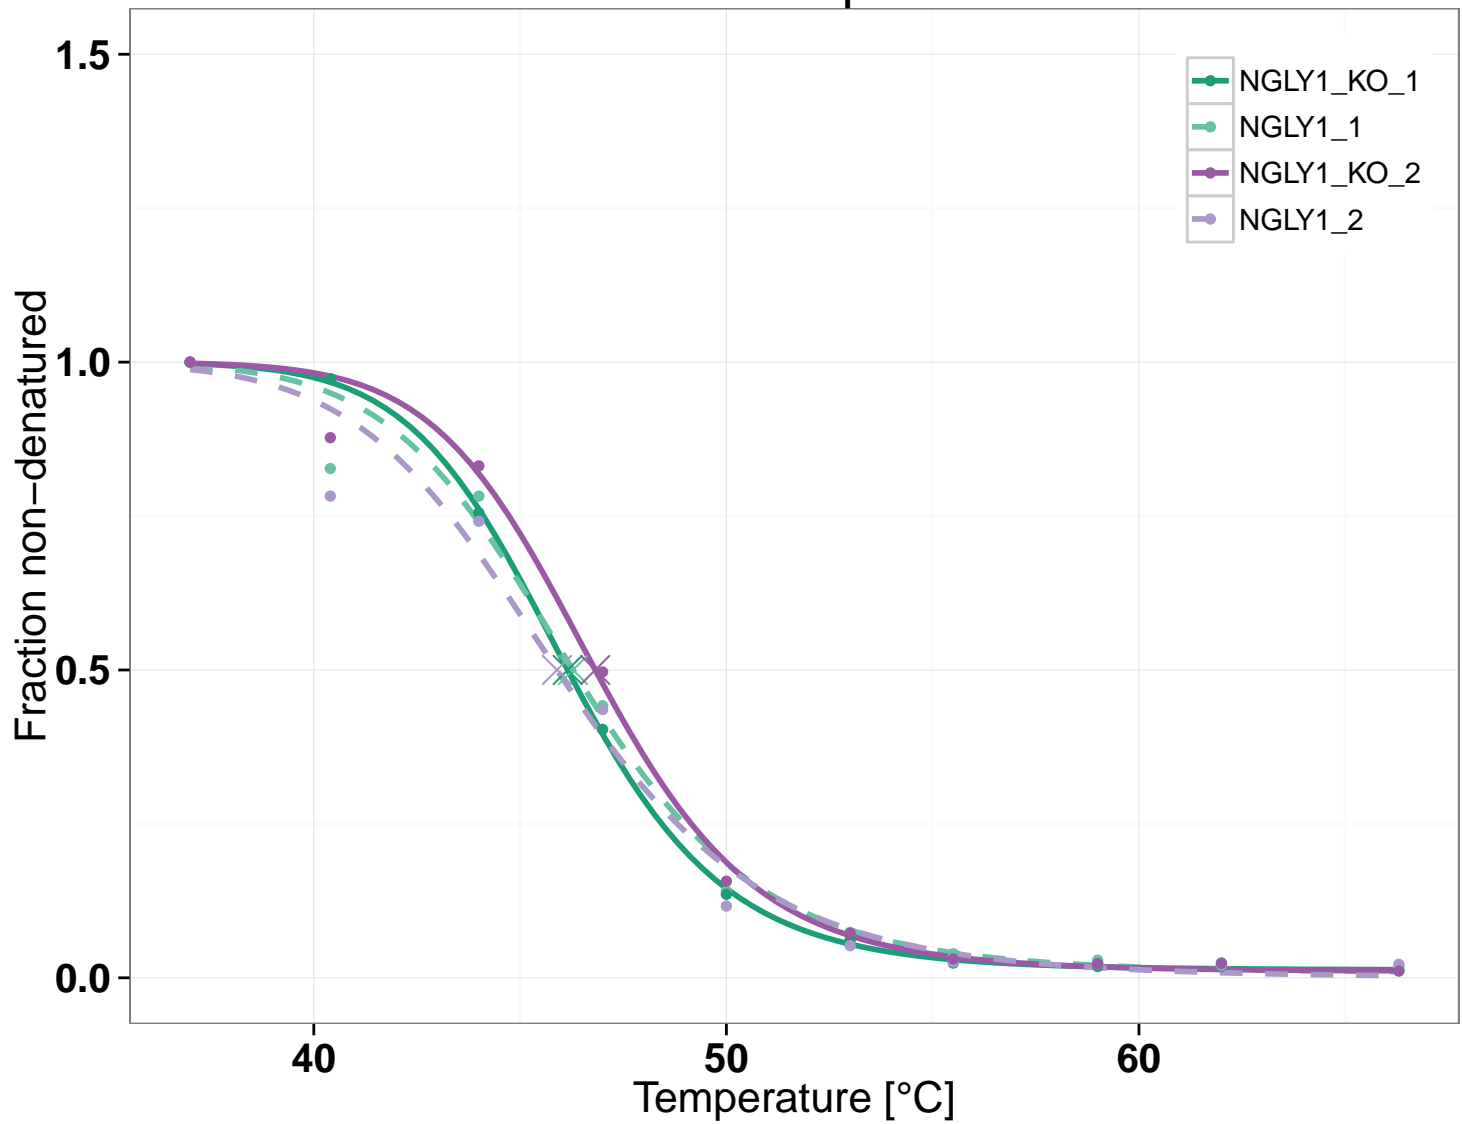

|            | meltPoint | slope | plateau | R2   |
|------------|-----------|-------|---------|------|
| NGLY1_KO_1 | 46.15     | -0.13 | 0.01    | 1    |
| NGLY1_1    | 46.28     | -0.11 | 0.01    | 0.99 |
| NGLY1_KO_2 | 46.82     | -0.13 | 0.01    | 0.99 |
| NGLY1_2    | 45.89     | -0.1  | 0       | 0.98 |

Supplement: Supplementary file 7143 [file 1]

IPI00020418.1|RRAS

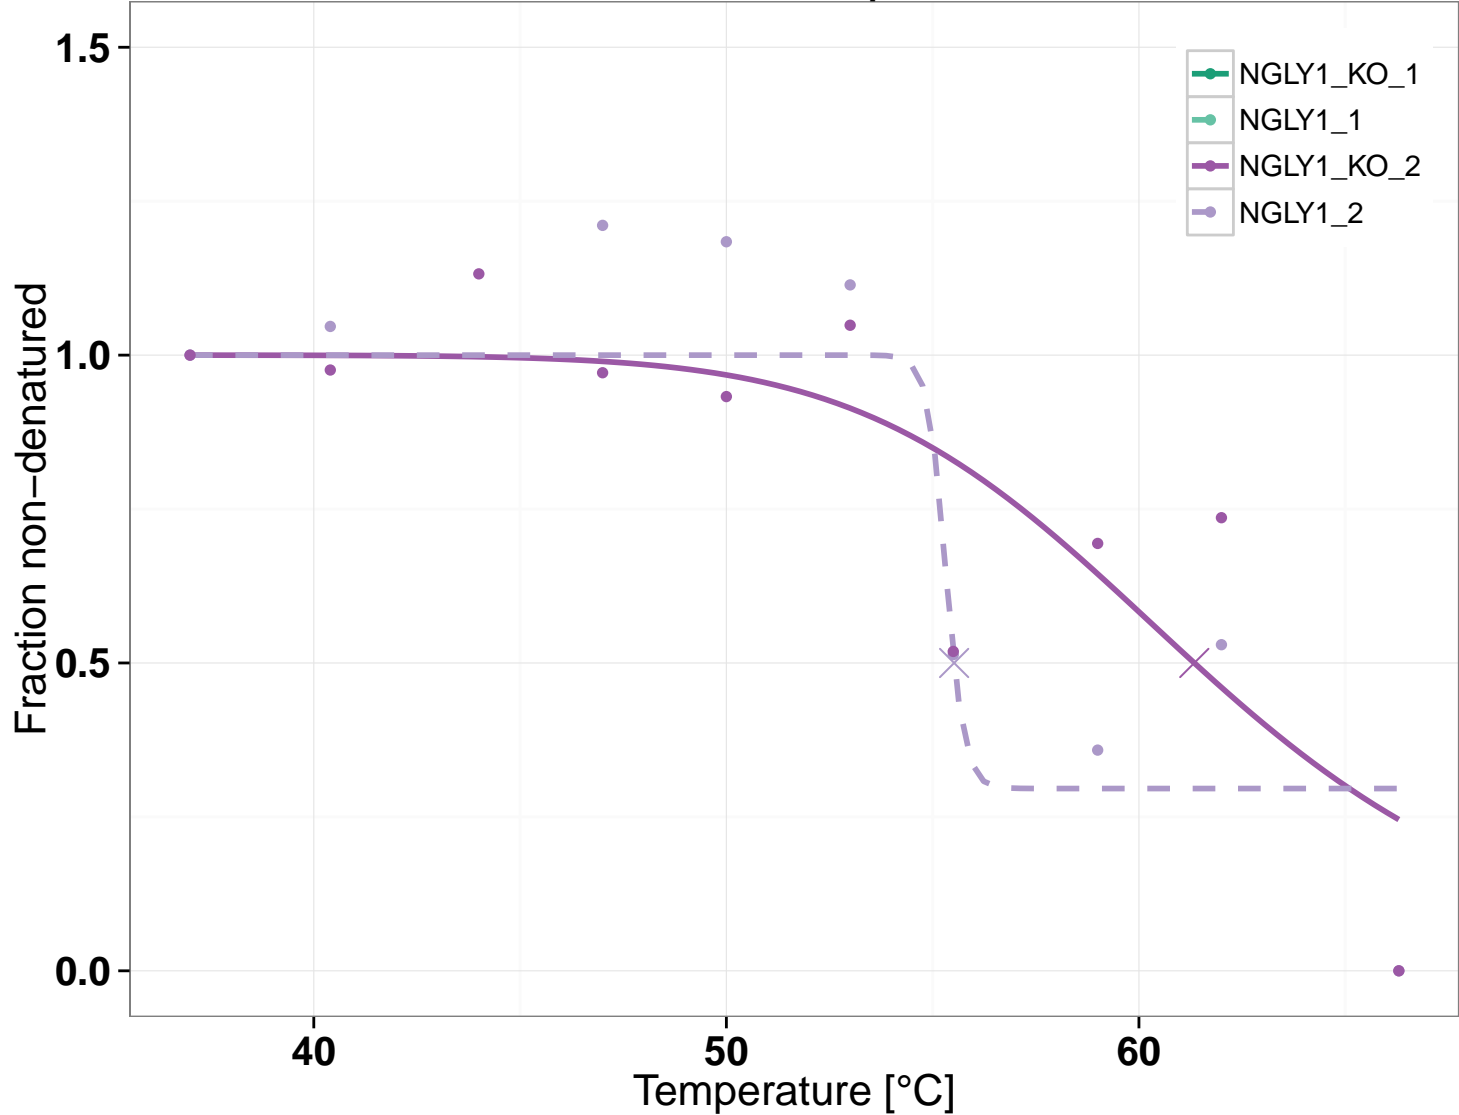

|            | meltPoint | slope  | plateau | R2   |
|------------|-----------|--------|---------|------|
| NGLY1_KO_1 | -         | -      | -       | -    |
| NGLY1_1    | -         | -      | -       | -    |
| NGLY1_KO_2 | 61.34     | -0.062 | 0       | 0.73 |
| NGLY1_2    | 55.52     | -0.8   | 0.3     | 0.74 |

Supplement: Supplementary file 7144 [file 1]

IPI00010873.1|WRB

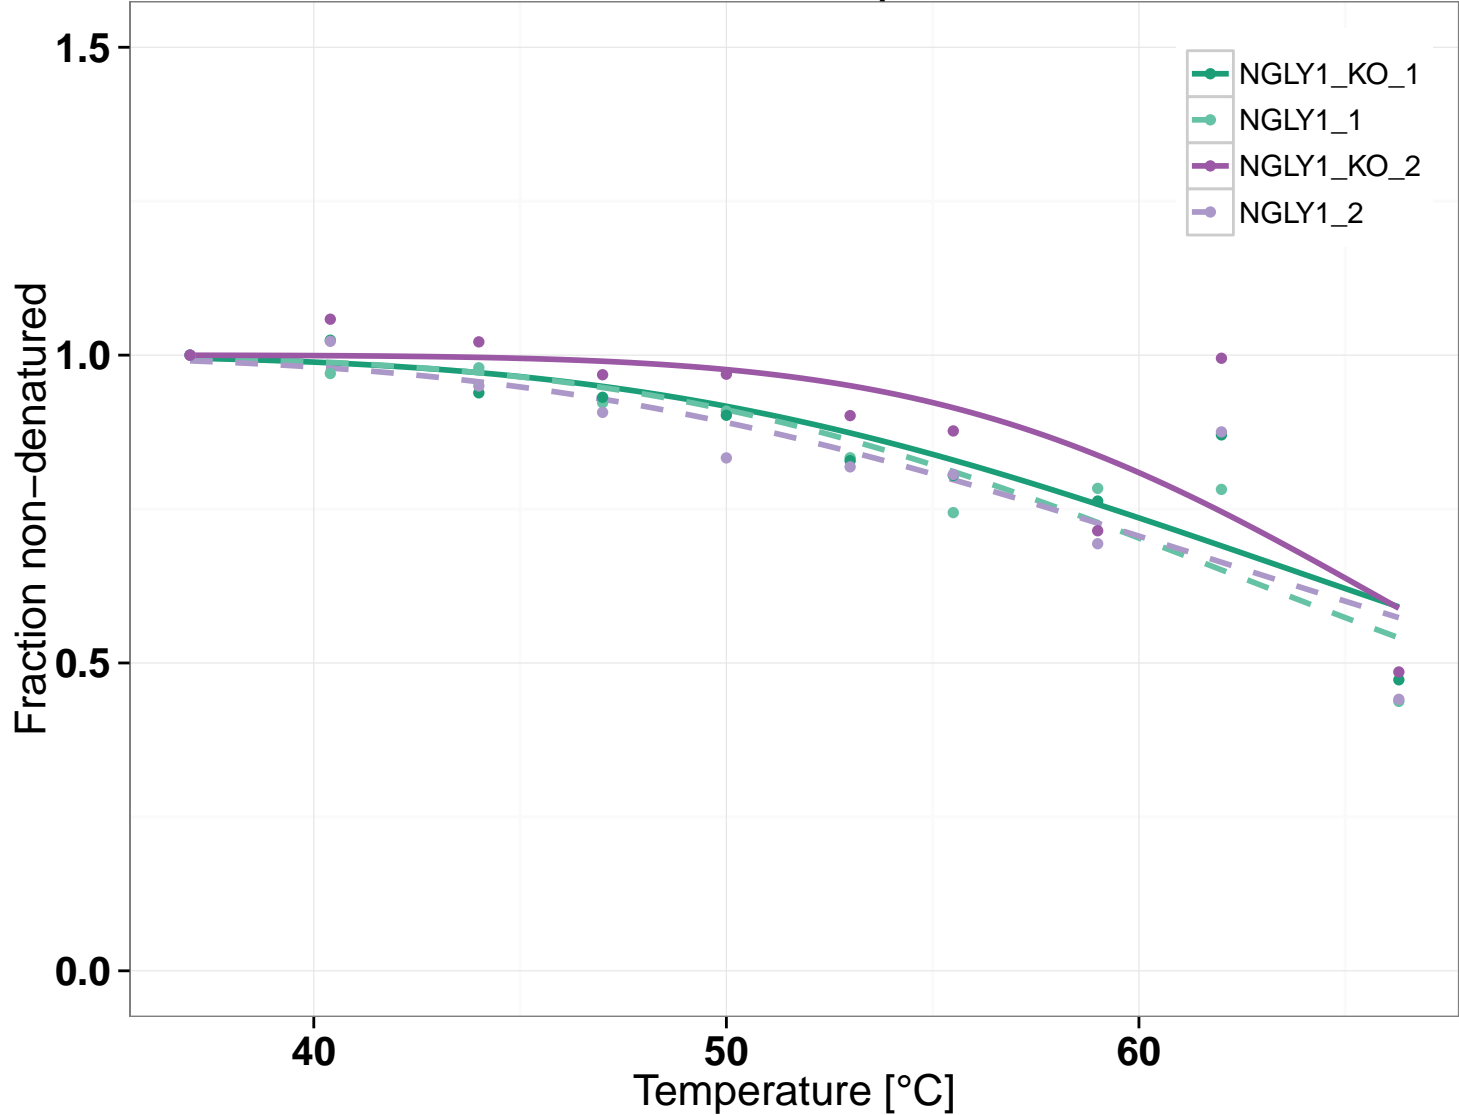

|            | meltPoint | slope  | plateau | R2   |
|------------|-----------|--------|---------|------|
| NGLY1_KO_1 | –         | –0.023 | 0       | 0.77 |
| NGLY1_1    | –         | –0.026 | 0       | 0.85 |
| NGLY1_KO_2 | –         | –0.038 | 0       | 0.65 |
| NGLY1_2    | –         | –0.021 | 0       | 0.73 |

Supplement: Supplementary file 7145 [file 1]

IPI00016448.3|TSAP1\_HUMAN

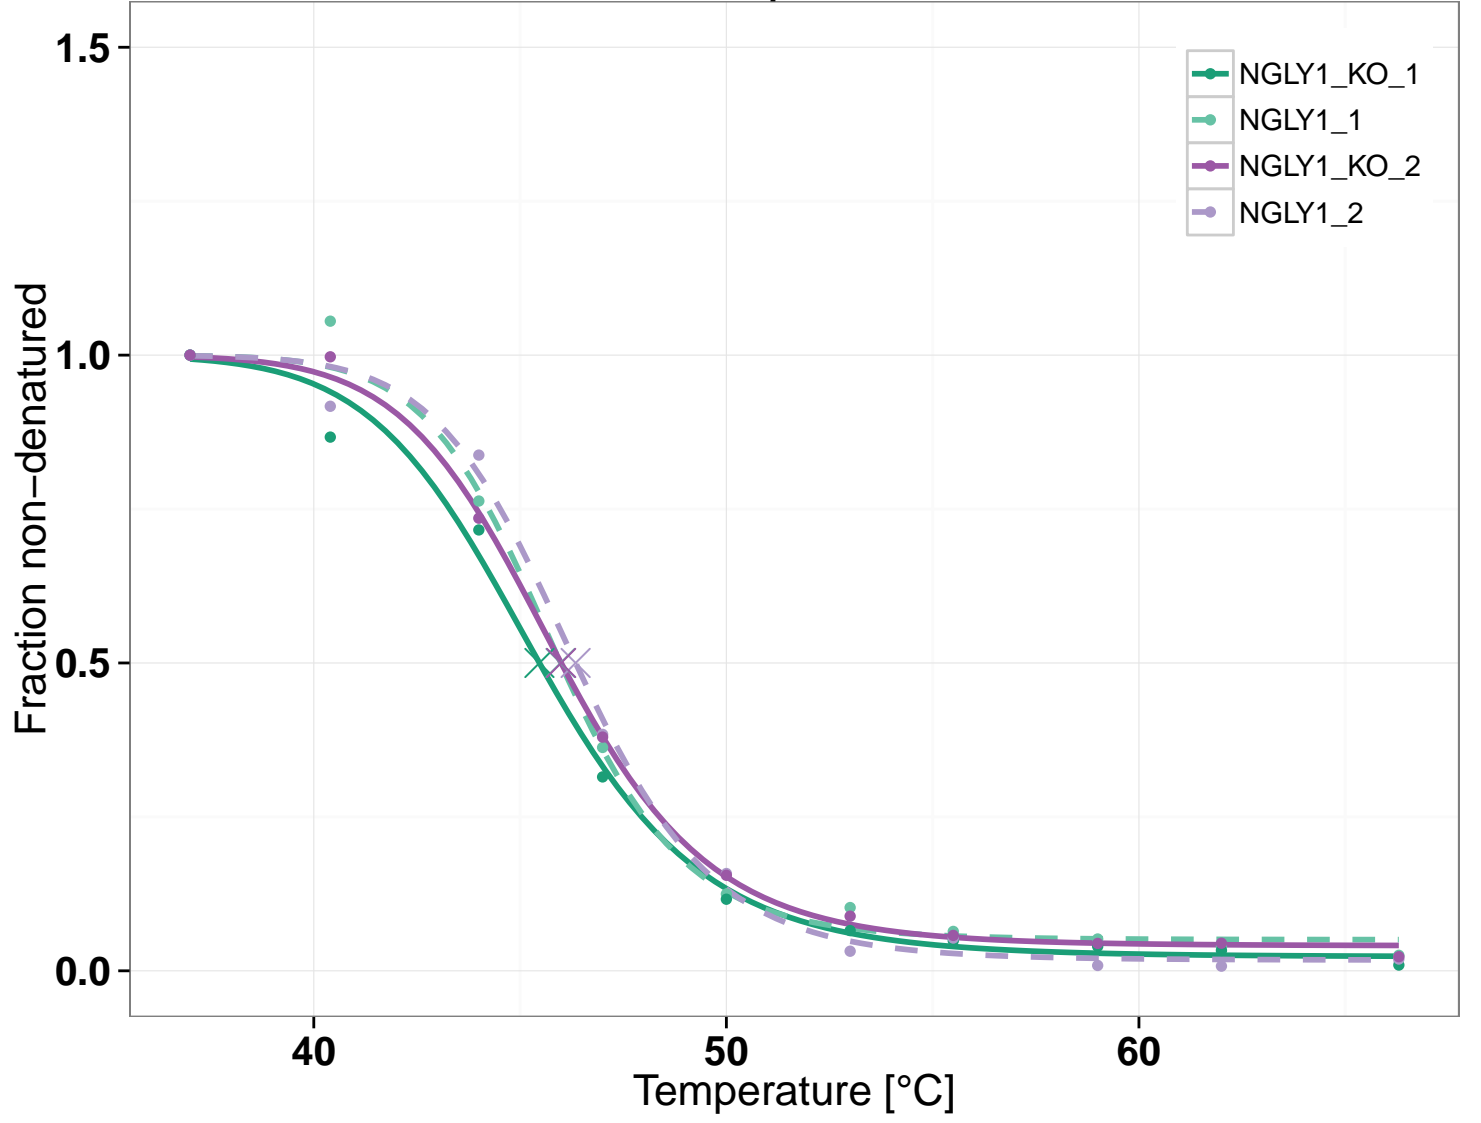

|            | meltPoint | slope | plateau | R2   |
|------------|-----------|-------|---------|------|
| NGLY1_KO_1 | 45.47     | -0.12 | 0.02    | 0.99 |
| NGLY1_1    | 45.98     | -0.15 | 0.05    | 1    |
| NGLY1_KO_2 | 46        | -0.13 | 0.04    | 1    |
| NGLY1_2    | 46.35     | -0.14 | 0.02    | 1    |

Supplement: Supplementary file 7146 [file 1]

# IPI00029091.1|NDK8\_HUMAN

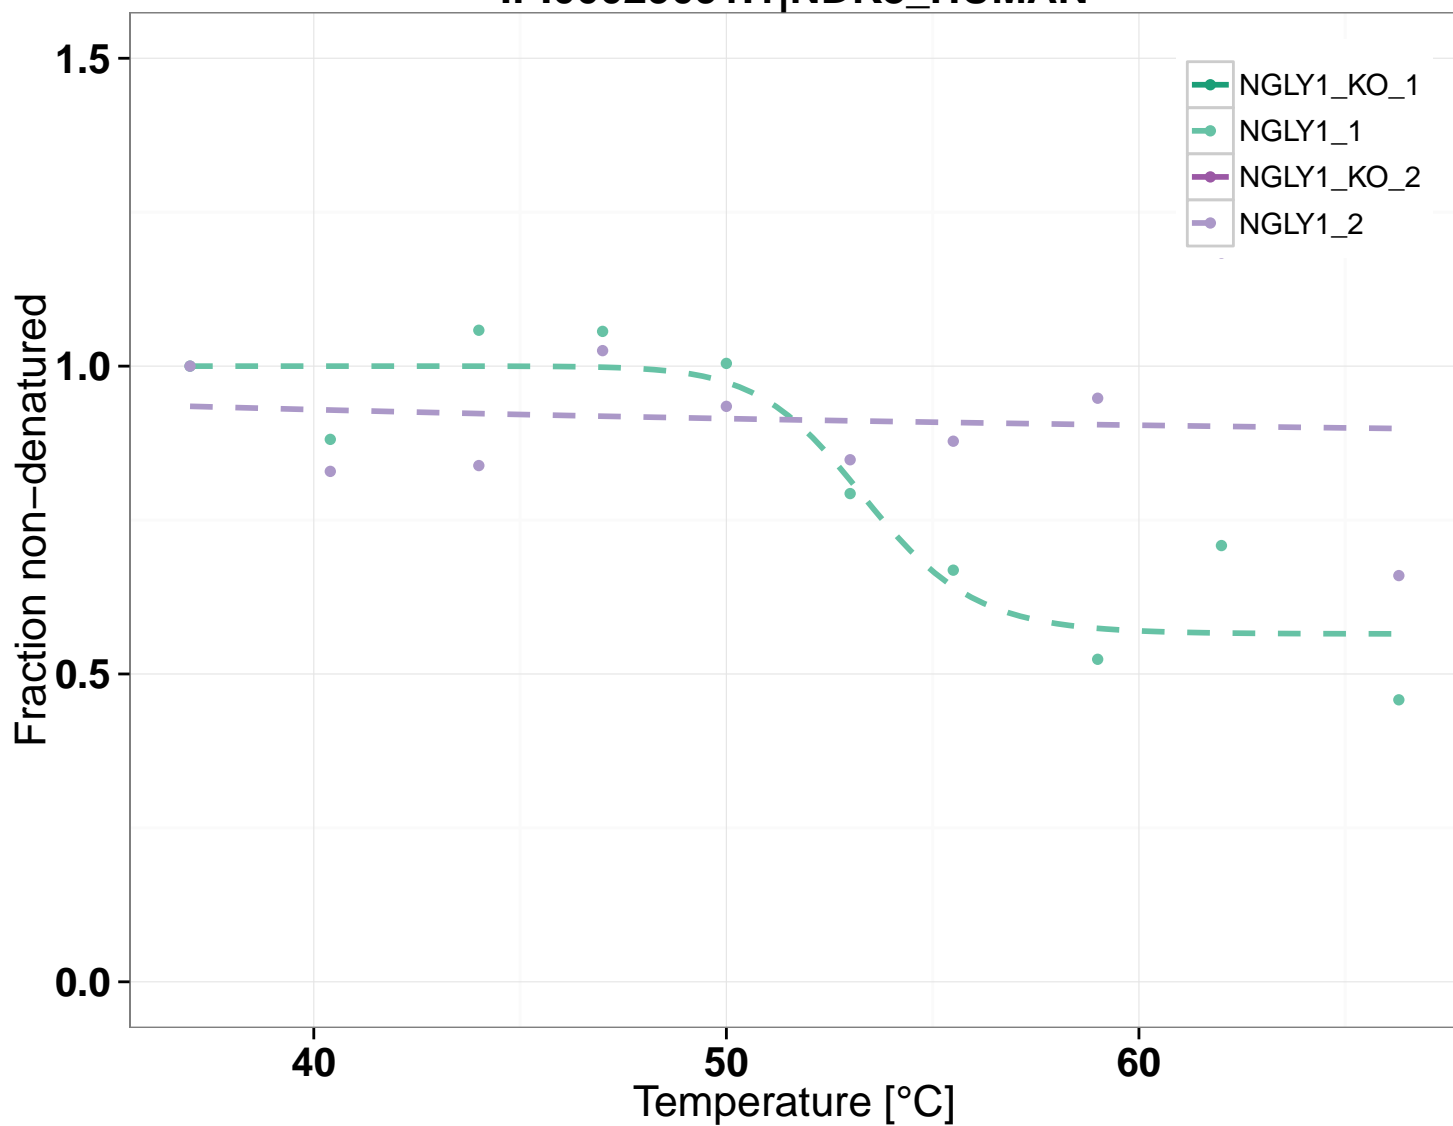

|            | meltPoint | slope  | plateau | R2   |
|------------|-----------|--------|---------|------|
| NGLY1_KO_1 | —         | —      | —       | —    |
| NGLY1_1    | —         | -0.083 | 0.56    | 0.87 |
| NGLY1_KO_2 | —         | —      | —       | —    |
| NGLY1_2    | —         | —      | 0.68    | 0.01 |

Supplement: Supplementary file 7147 [file 1]

IPI00793375.1|XPNPEP1

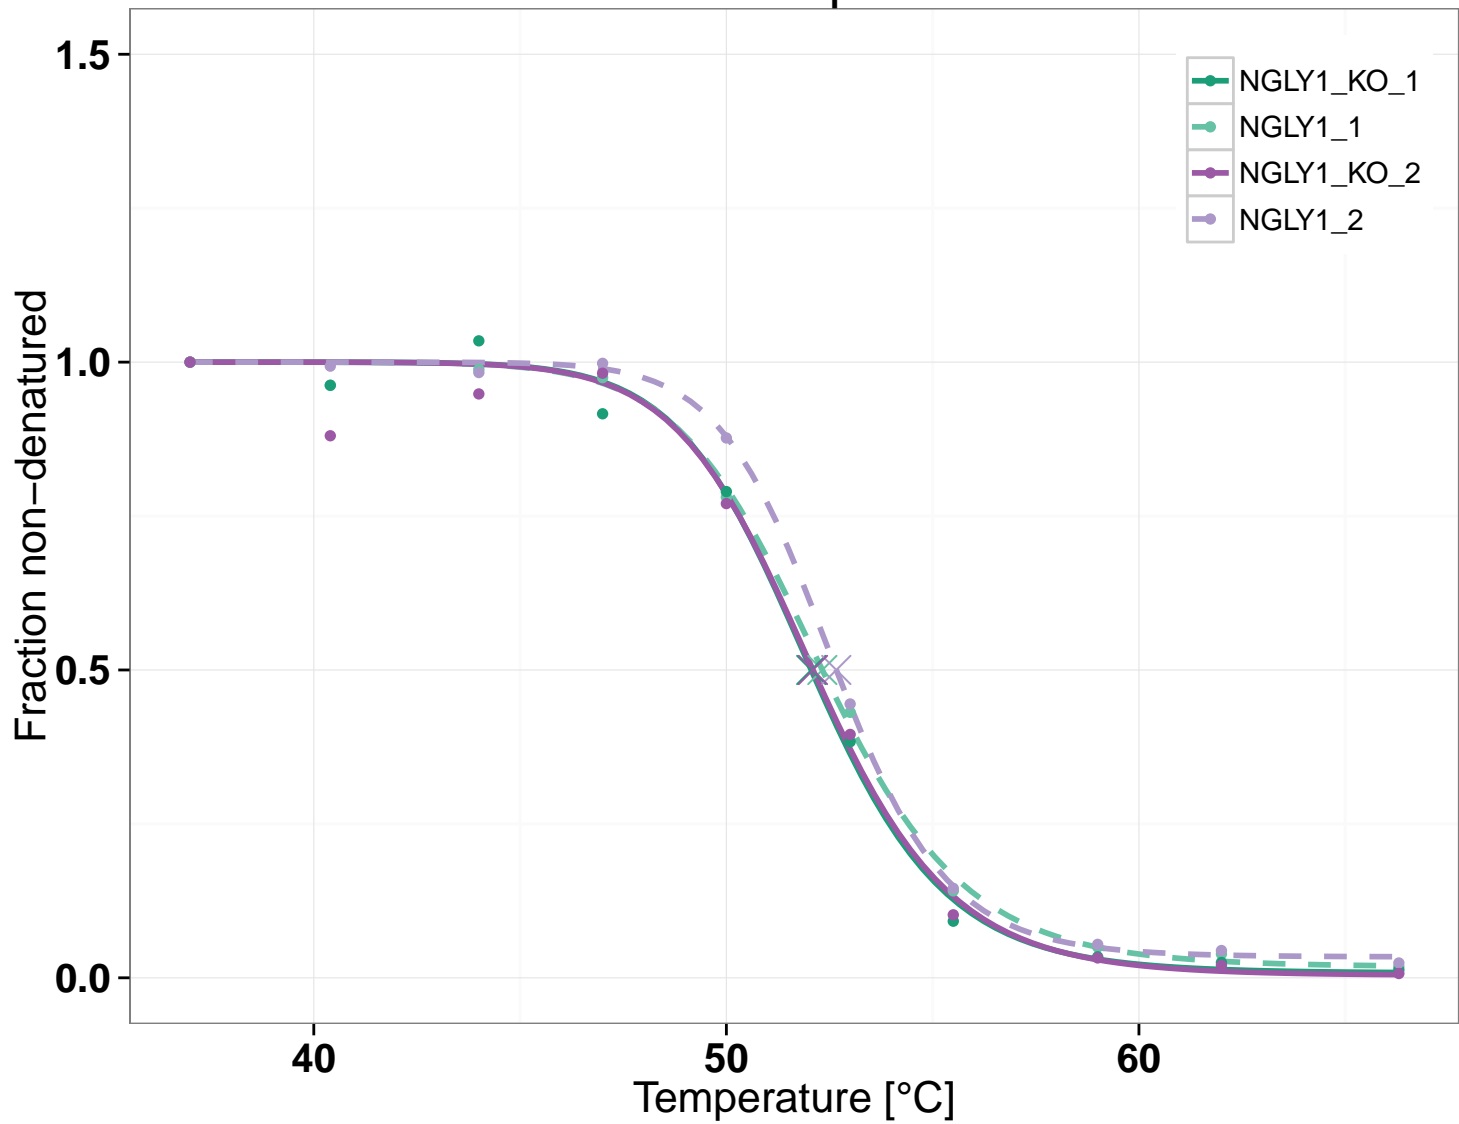

|            | meltPoint | slope | plateau | R2   |
|------------|-----------|-------|---------|------|
| NGLY1_KO_1 | 52.06     | -0.15 | 0.01    | 1    |
| NGLY1_1    | 52.33     | -0.14 | 0.02    | 1    |
| NGLY1_KO_2 | 52.1      | -0.15 | 0       | 0.99 |
| NGLY1_2    | 52.67     | -0.17 | 0.03    | 1    |

Supplement: Supplementary file 7148 [file 1]

IPI00791151.1|NKIRAS2

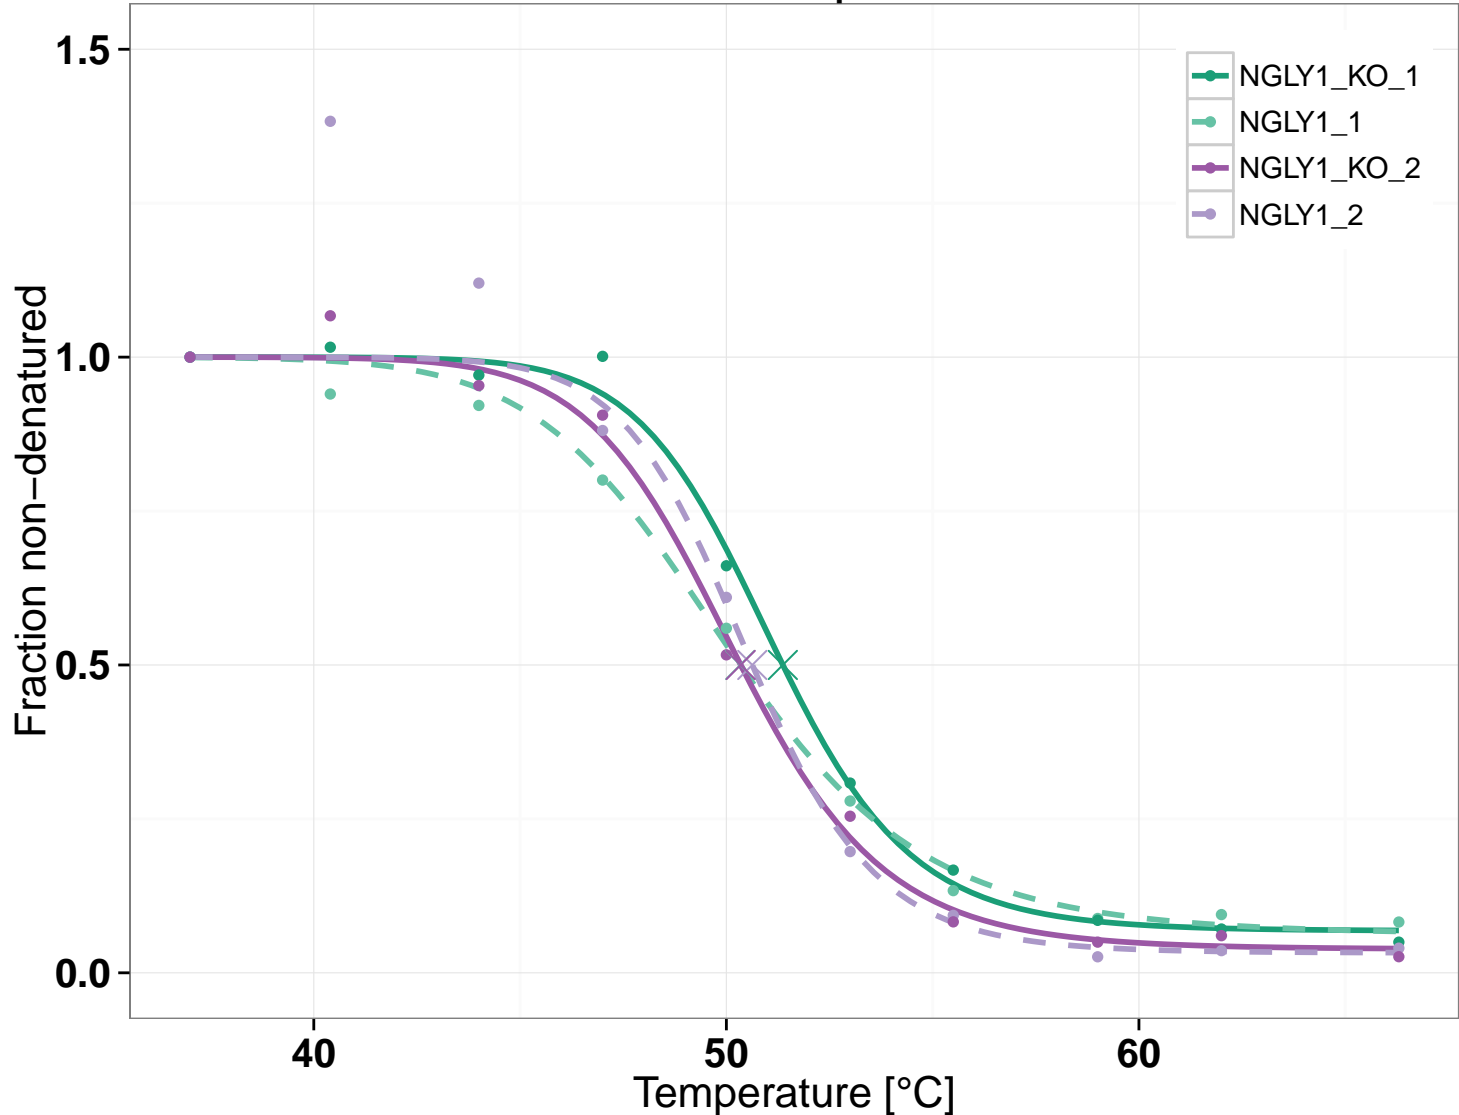

|            | meltPoint | slope  | plateau | R2   |
|------------|-----------|--------|---------|------|
| NGLY1_KO_1 | 51.37     | -0.14  | 0.07    | 1    |
| NGLY1_1    | 50.34     | -0.099 | 0.06    | 1    |
| NGLY1_KO_2 | 50.35     | -0.13  | 0.04    | 0.99 |
| NGLY1_2    | 50.63     | -0.16  | 0.03    | 0.93 |

Supplement: Supplementary file 7149 [file 1]

IPI00032879.1|TAF9

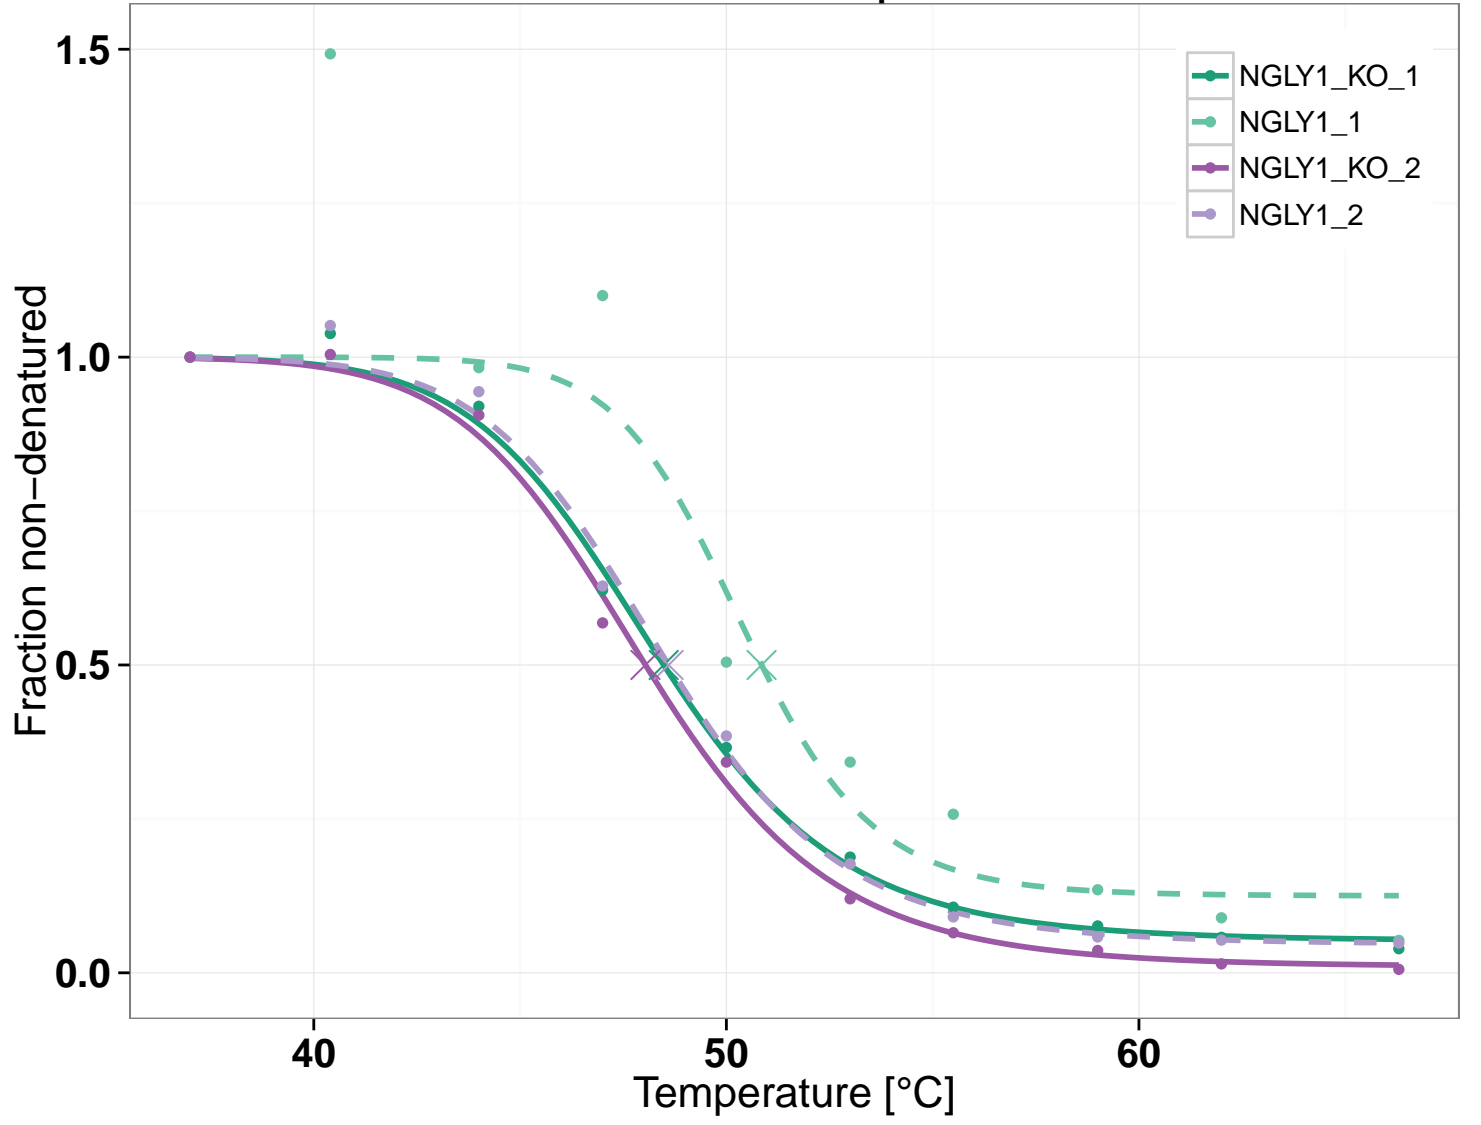

|            | meltPoint | slope | plateau | R2   |
|------------|-----------|-------|---------|------|
| NGLY1_KO_1 | 48.48     | -0.11 | 0.05    | 1    |
| NGLY1_1    | 50.85     | -0.14 | 0.12    | 0.87 |
| NGLY1_KO_2 | 48.04     | -0.11 | 0.01    | 1    |
| NGLY1_2    | 48.6      | -0.11 | 0.05    | 0.99 |

Supplement: Supplementary file 7150 [file 1]

# IPI00900312.1|RAF1

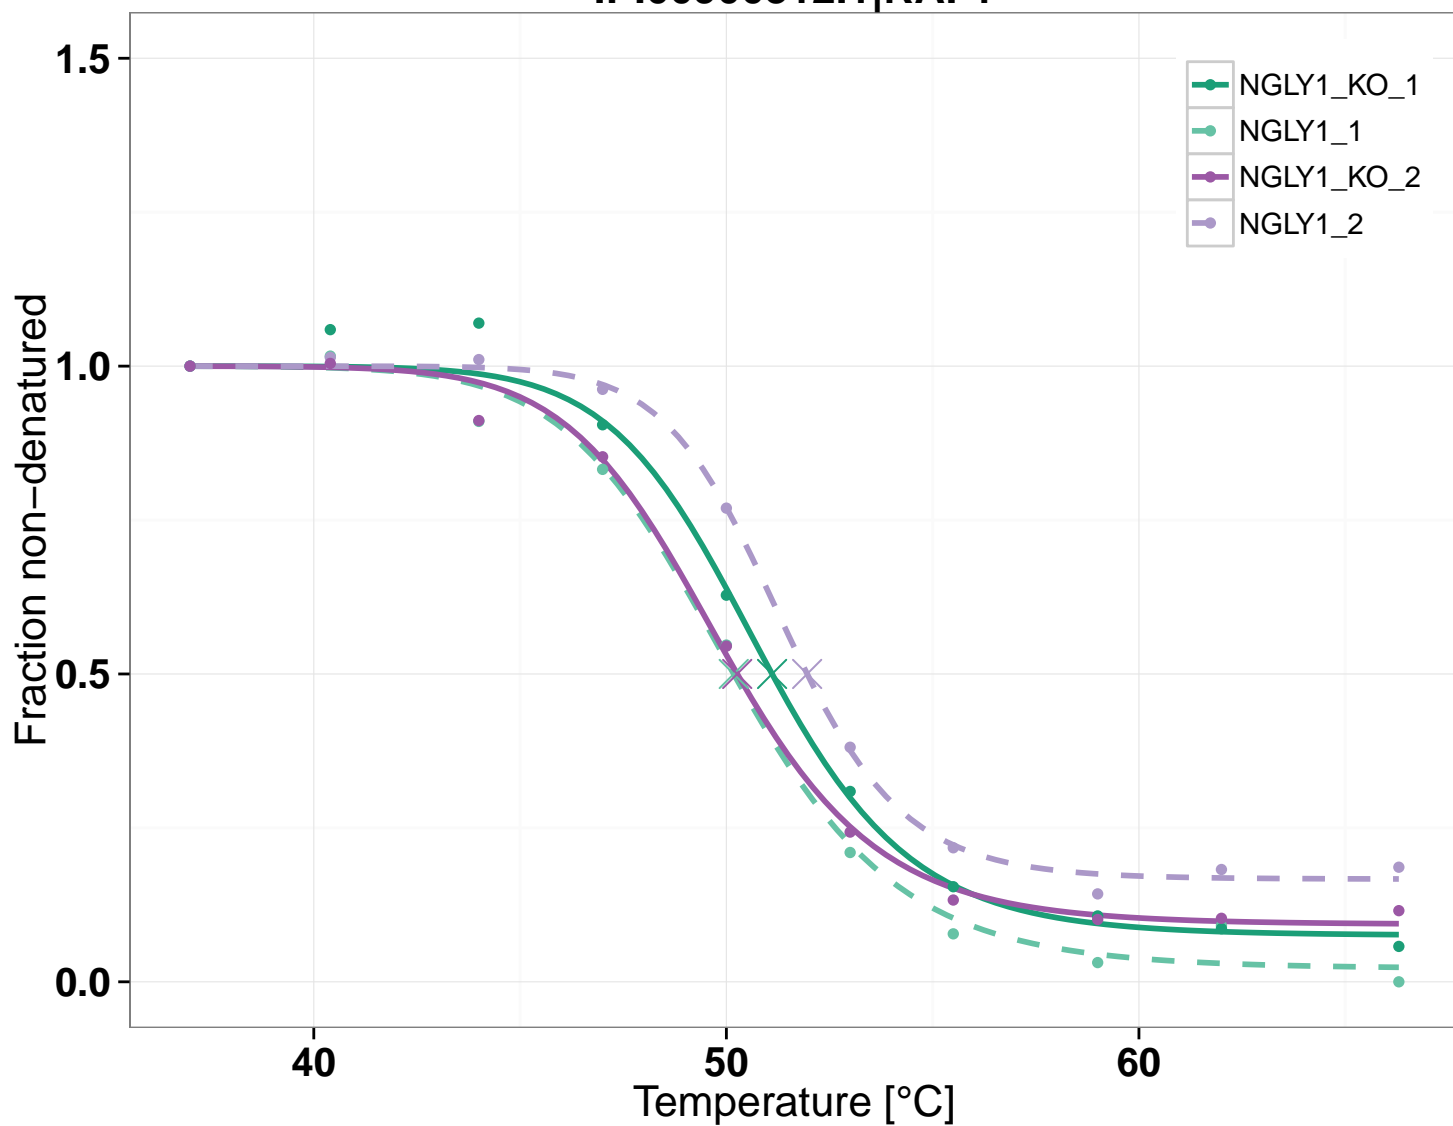

|            | meltPoint | slope | plateau | R2   |
|------------|-----------|-------|---------|------|
| NGLY1_KO_1 | 51.11     | -0.13 | 0.08    | 0.99 |
| NGLY1_1    | 50.18     | -0.12 | 0.02    | 0.99 |
| NGLY1_KO_2 | 50.26     | -0.12 | 0.09    | 1    |
| NGLY1_2    | 51.96     | -0.14 | 0.17    | 1    |

Supplement: Supplementary file 7151 [file 1]

IPI00011115.1|KLF16

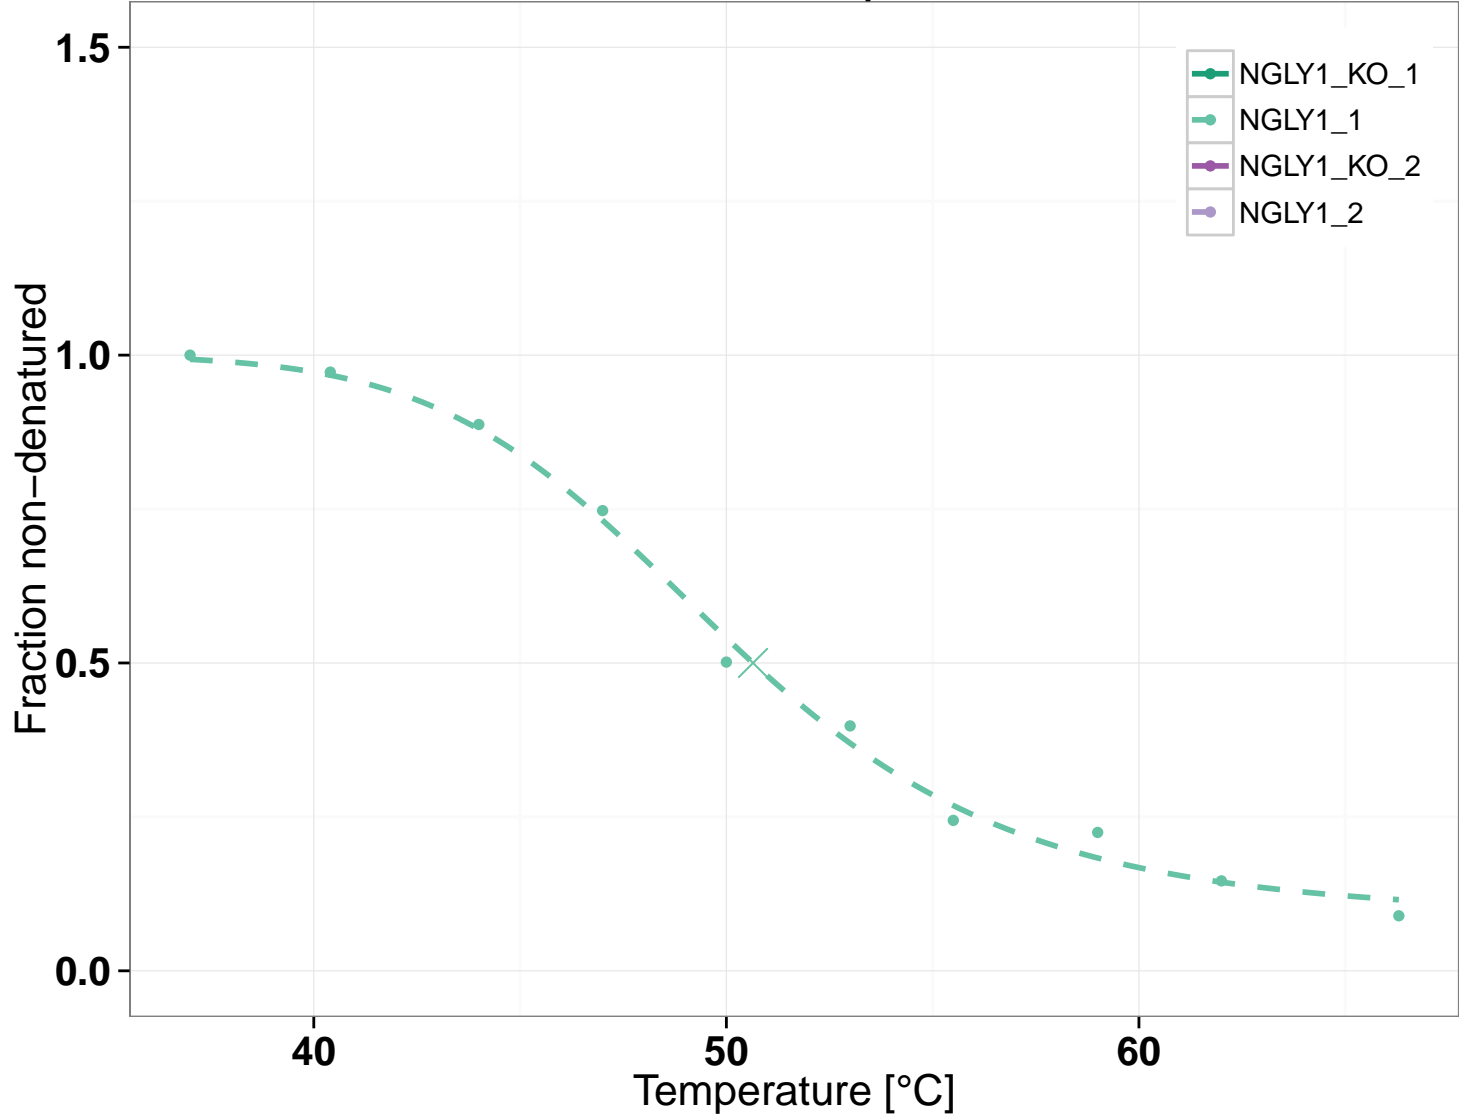

|            | meltPoint | slope  | plateau | R2   |
|------------|-----------|--------|---------|------|
| NGLY1_KO_1 | -         | -      | -       | -    |
| NGLY1_1    | 50.65     | -0.065 | 0.09    | 0.99 |
| NGLY1_KO_2 | -         | -      | -       | -    |
| NGLY1_2    | -         | -      | -       | -    |

Supplement: Supplementary file 7152 [file 1]

IPI00011937.1|PRDX4

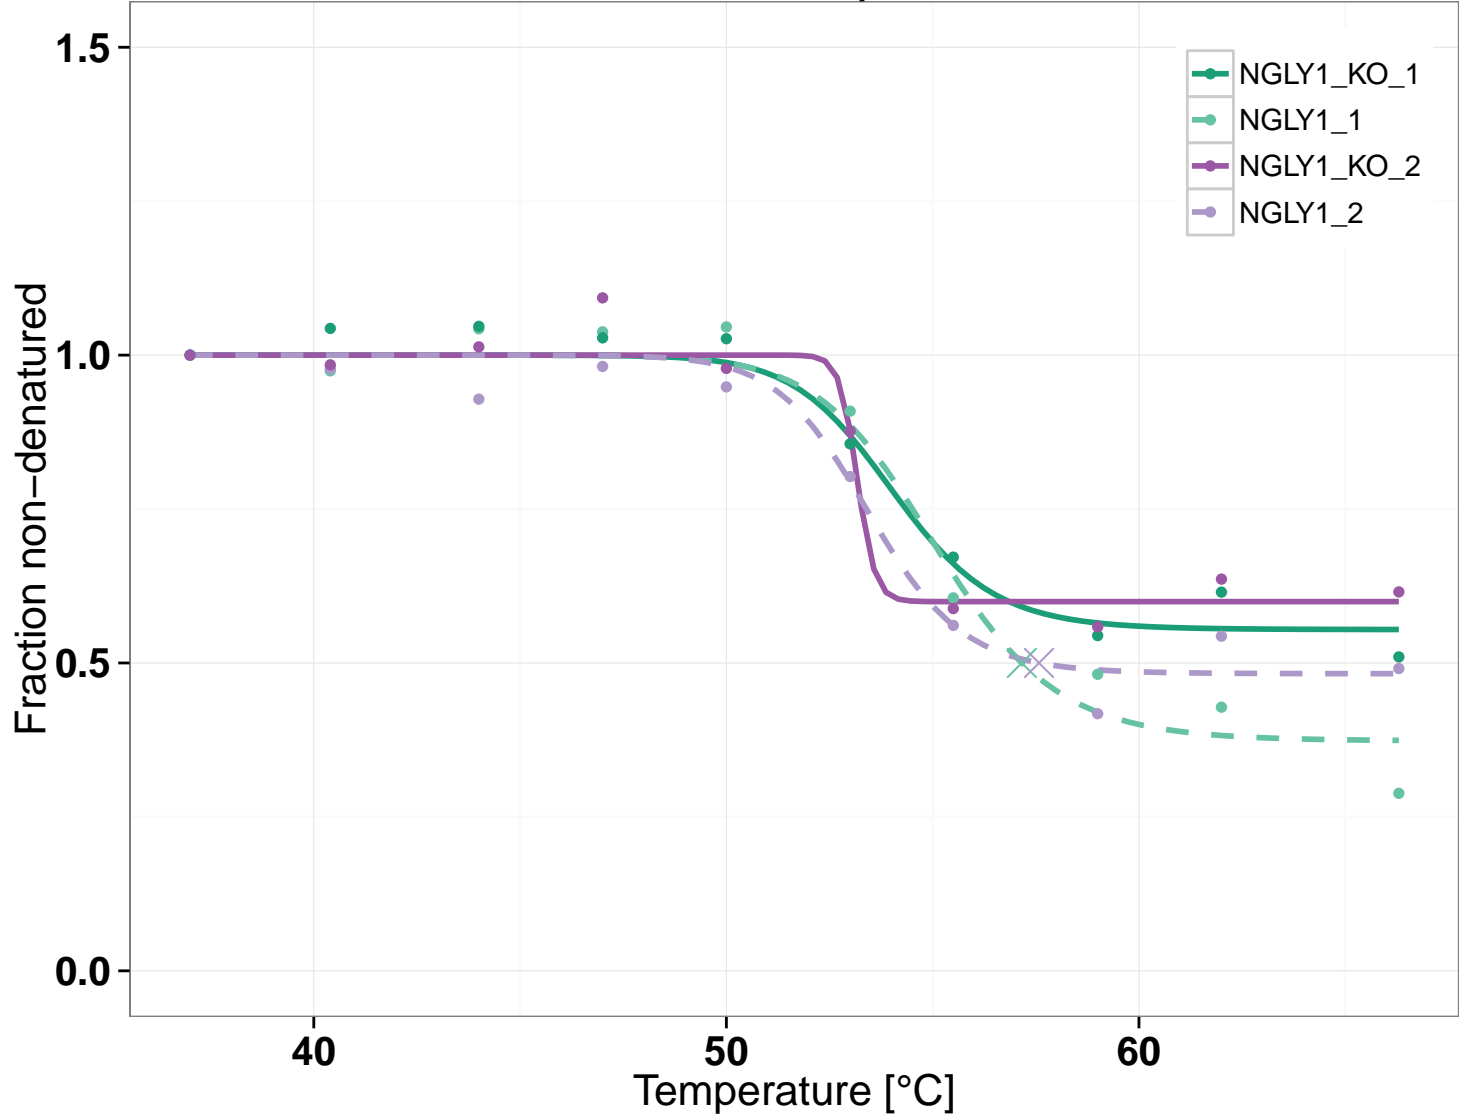

|            | meltPoint | slope  | plateau | R2   |
|------------|-----------|--------|---------|------|
| NGLY1_KO_1 | -         | -0.091 | 0.55    | 0.97 |
| NGLY1_1    | 57.16     | -0.11  | 0.37    | 0.97 |
| NGLY1_KO_2 | -         | -0.47  | 0.6     | 0.97 |
| NGLY1_2    | 57.58     | -0.11  | 0.48    | 0.97 |

Supplement: Supplementary file 7153 [file 1]

# IPI00018398.4|PSMC3

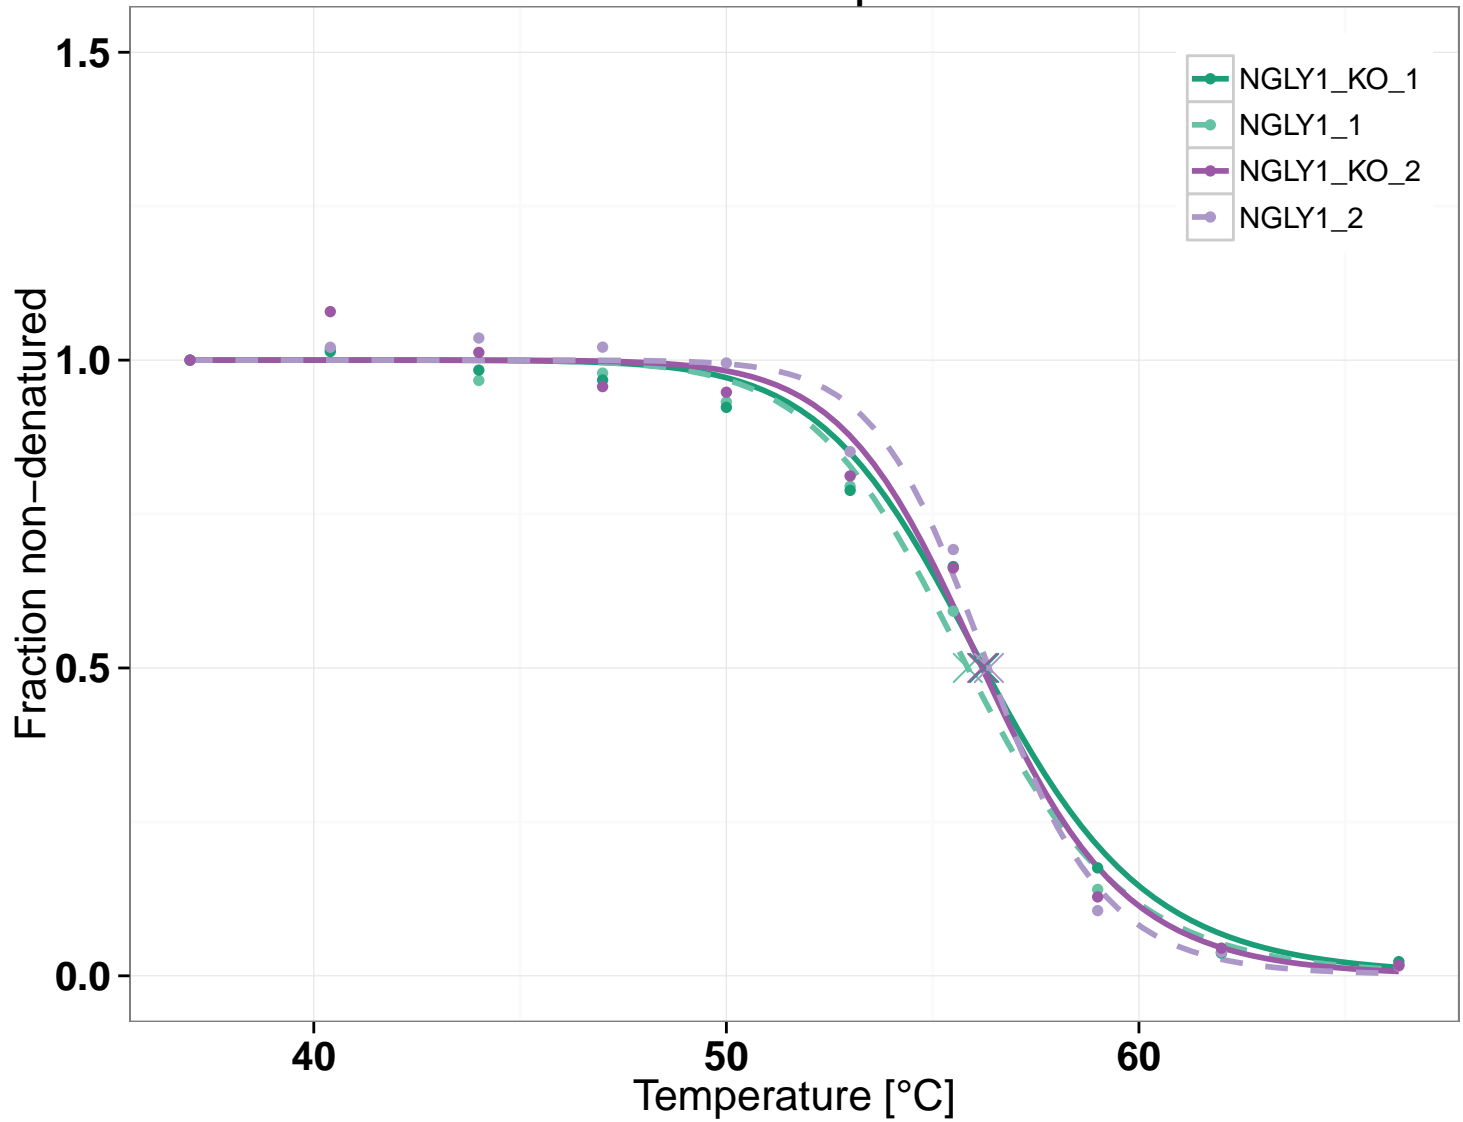

|            | meltPoint | slope | plateau | R2   |
|------------|-----------|-------|---------|------|
| NGLY1_KO_1 | 56.25     | -0.13 | 0       | 0.99 |
| NGLY1_1    | 55.85     | -0.13 | 0       | 1    |
| NGLY1_KO_2 | 56.2      | -0.15 | 0       | 0.99 |
| NGLY1_2    | 56.36     | -0.18 | 0       | 0.99 |

Supplement: Supplementary file 7154 [file 1]

IPI00910991.1|LAPTM5

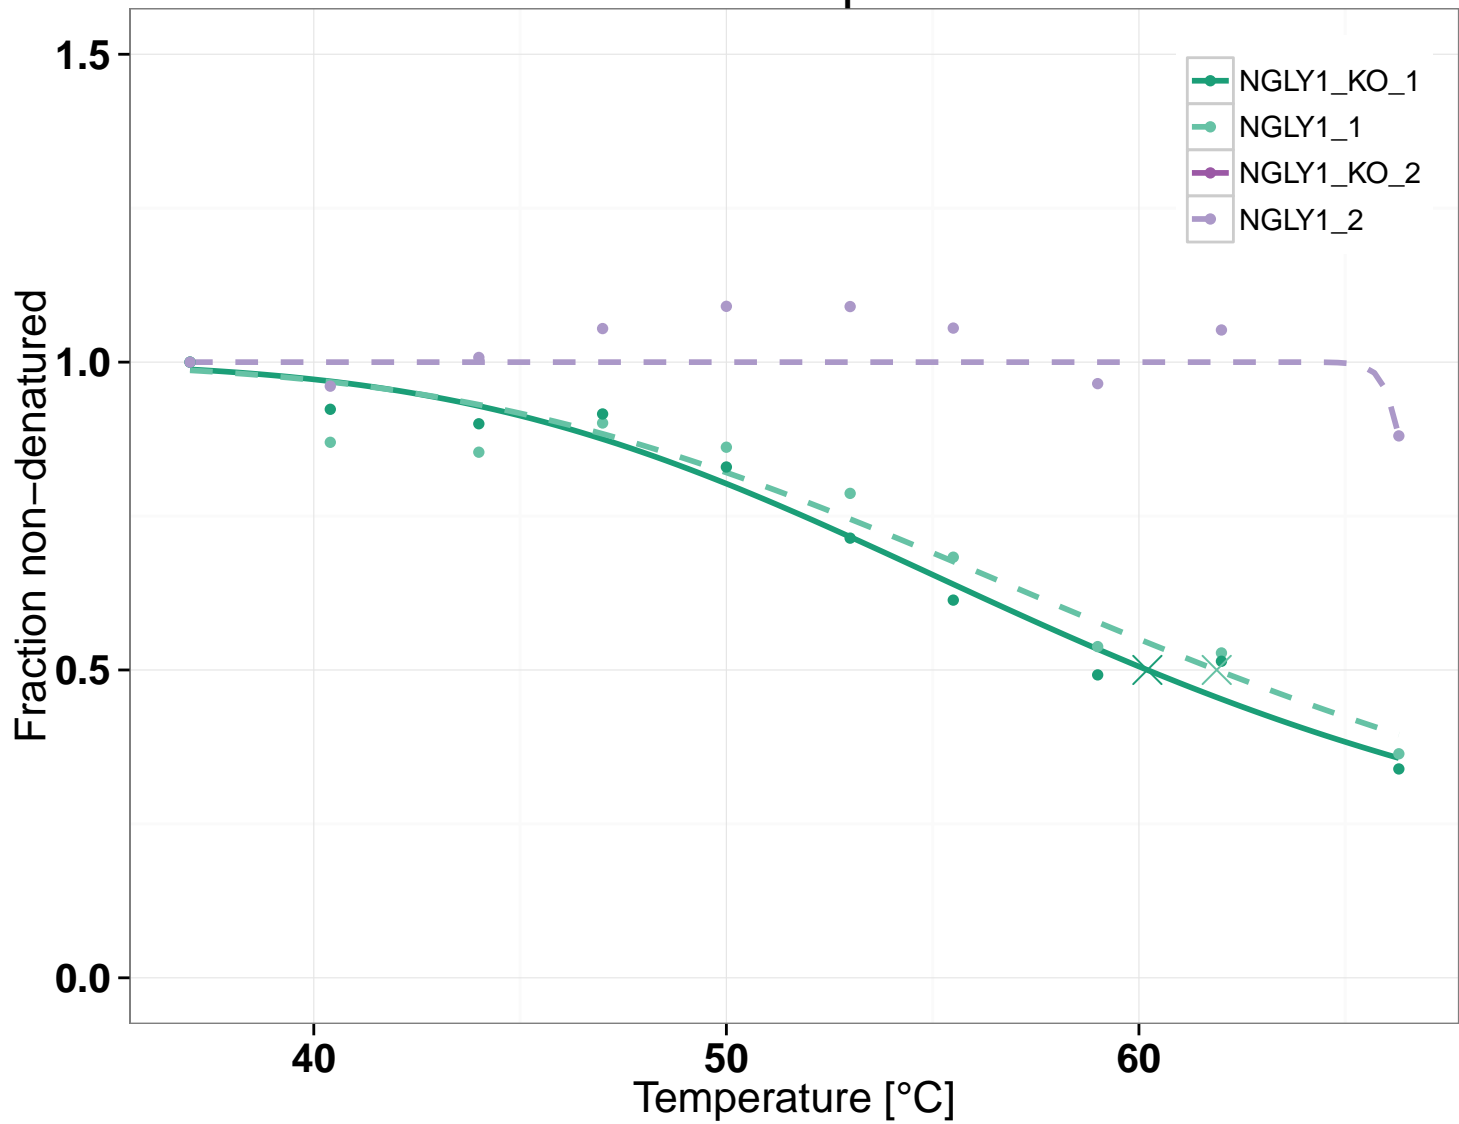

|            | meltPoint | slope  | plateau | R2   |
|------------|-----------|--------|---------|------|
| NGLY1_KO_1 | 60.2      | -0.031 | 0.07    | 0.97 |
| NGLY1_1    | 61.89     | -0.028 | 0       | 0.94 |
| NGLY1_KO_2 | -         | -      | -       | -    |
| NGLY1_2    | -         | -      | 0       | 0.3  |

Supplement: Supplementary file 7155 [file 1]

IPI00657688.1|MIER3

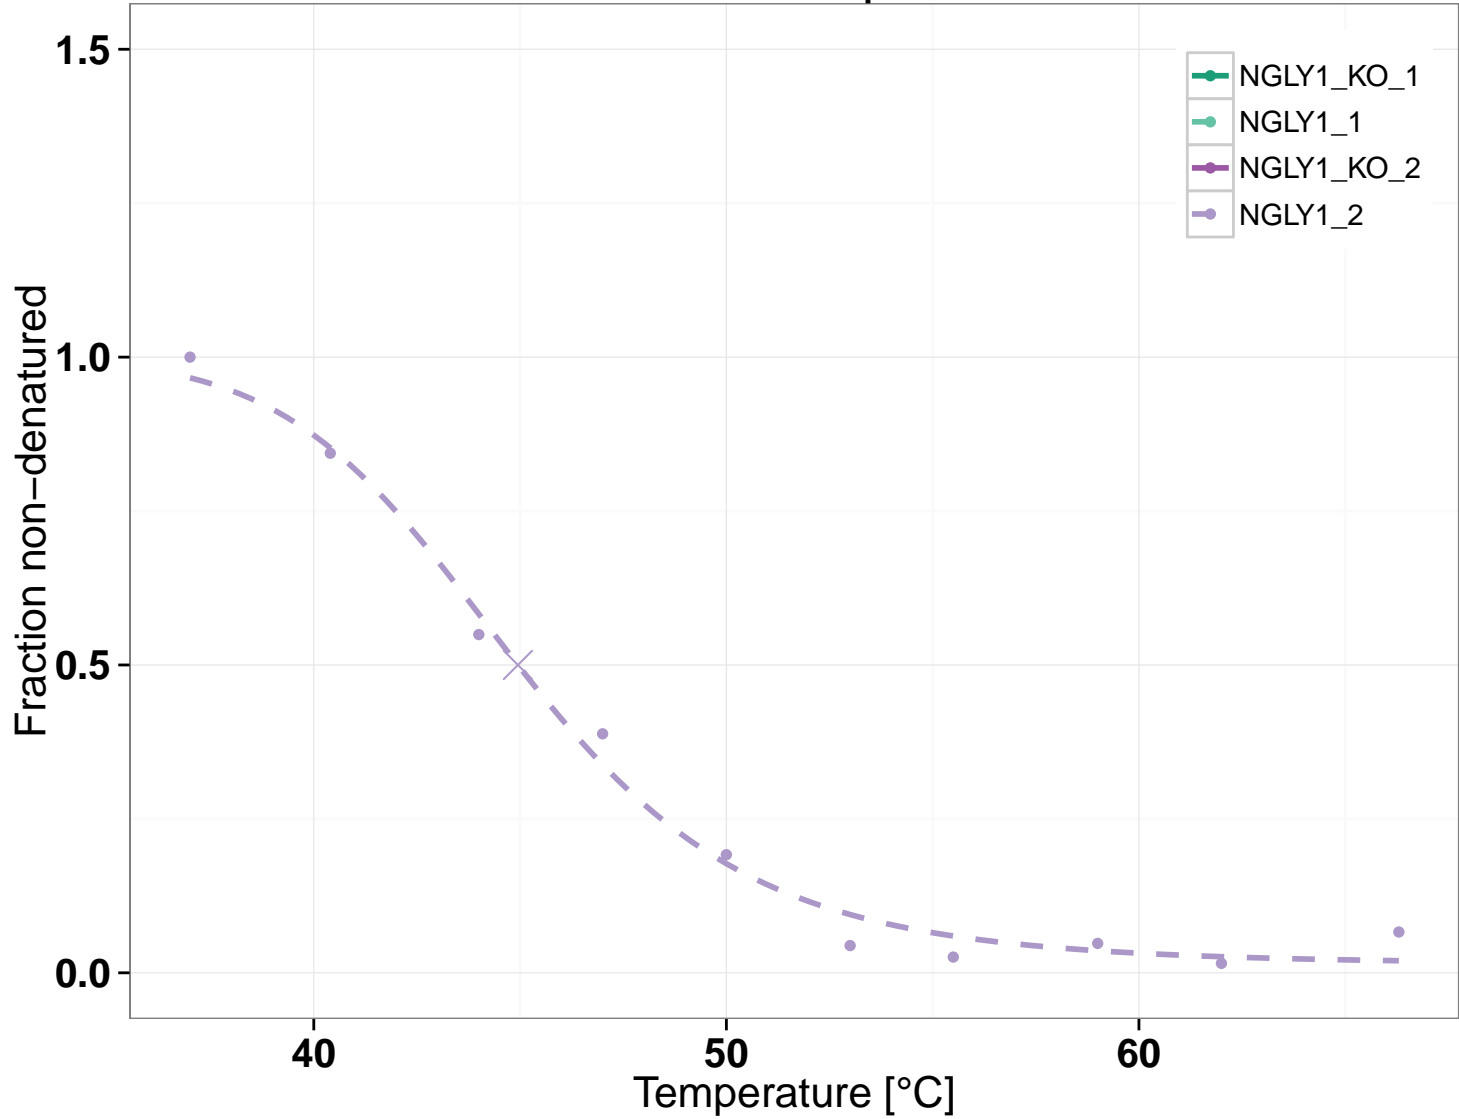

|            | meltPoint | slope  | plateau | R2   |
|------------|-----------|--------|---------|------|
| NGLY1_KO_1 | -         | -      | -       | -    |
| NGLY1_1    | -         | -      | -       | -    |
| NGLY1_KO_2 | -         | -      | -       | -    |
| NGLY1_2    | 44.95     | -0.088 | 0.01    | 0.99 |

Supplement: Supplementary file 7156 [file 1]

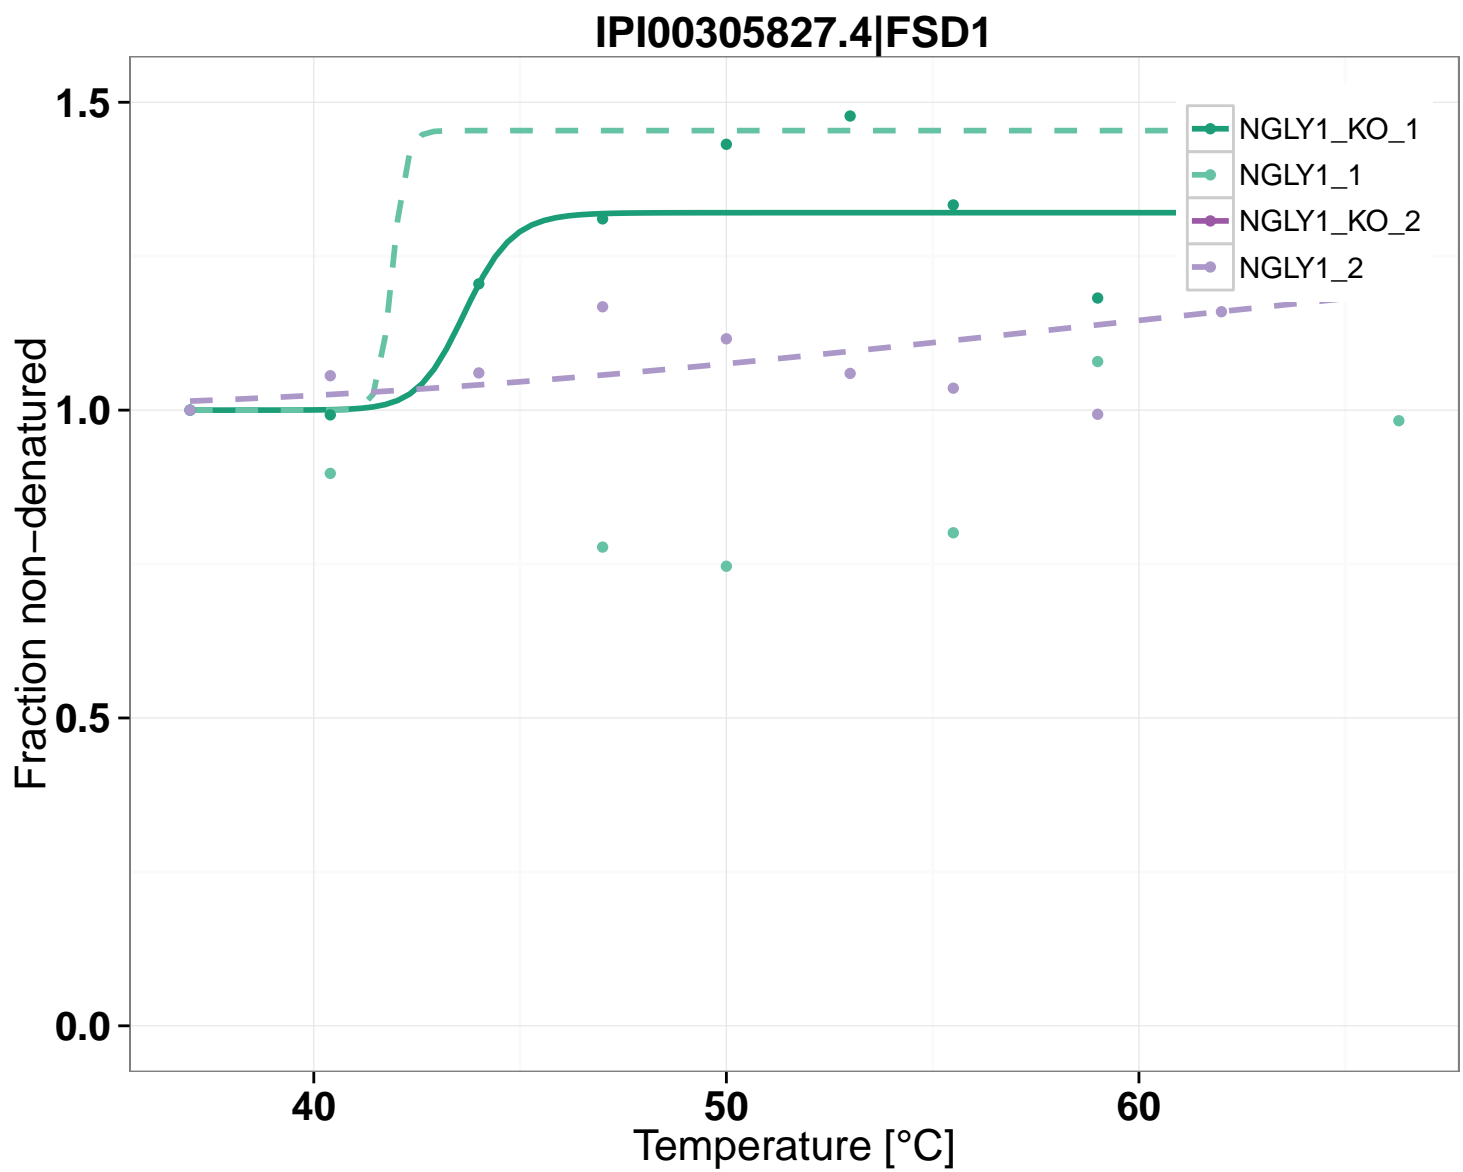

|            | meltPoint | slope  | plateau | R2   |
|------------|-----------|--------|---------|------|
| NGLY1_KO_1 | —         | 0.14   | 1.32    | 0.71 |
| NGLY1_1    | —         | 0.68   | 1.45    | 0.06 |
| NGLY1_KO_2 | —         | —      | —       | —    |
| NGLY1_2    | —         | 0.0073 | 1.5     | 0.3  |

Supplement: Supplementary file 7157 [file 1]

IPI00434623.1|MBD2

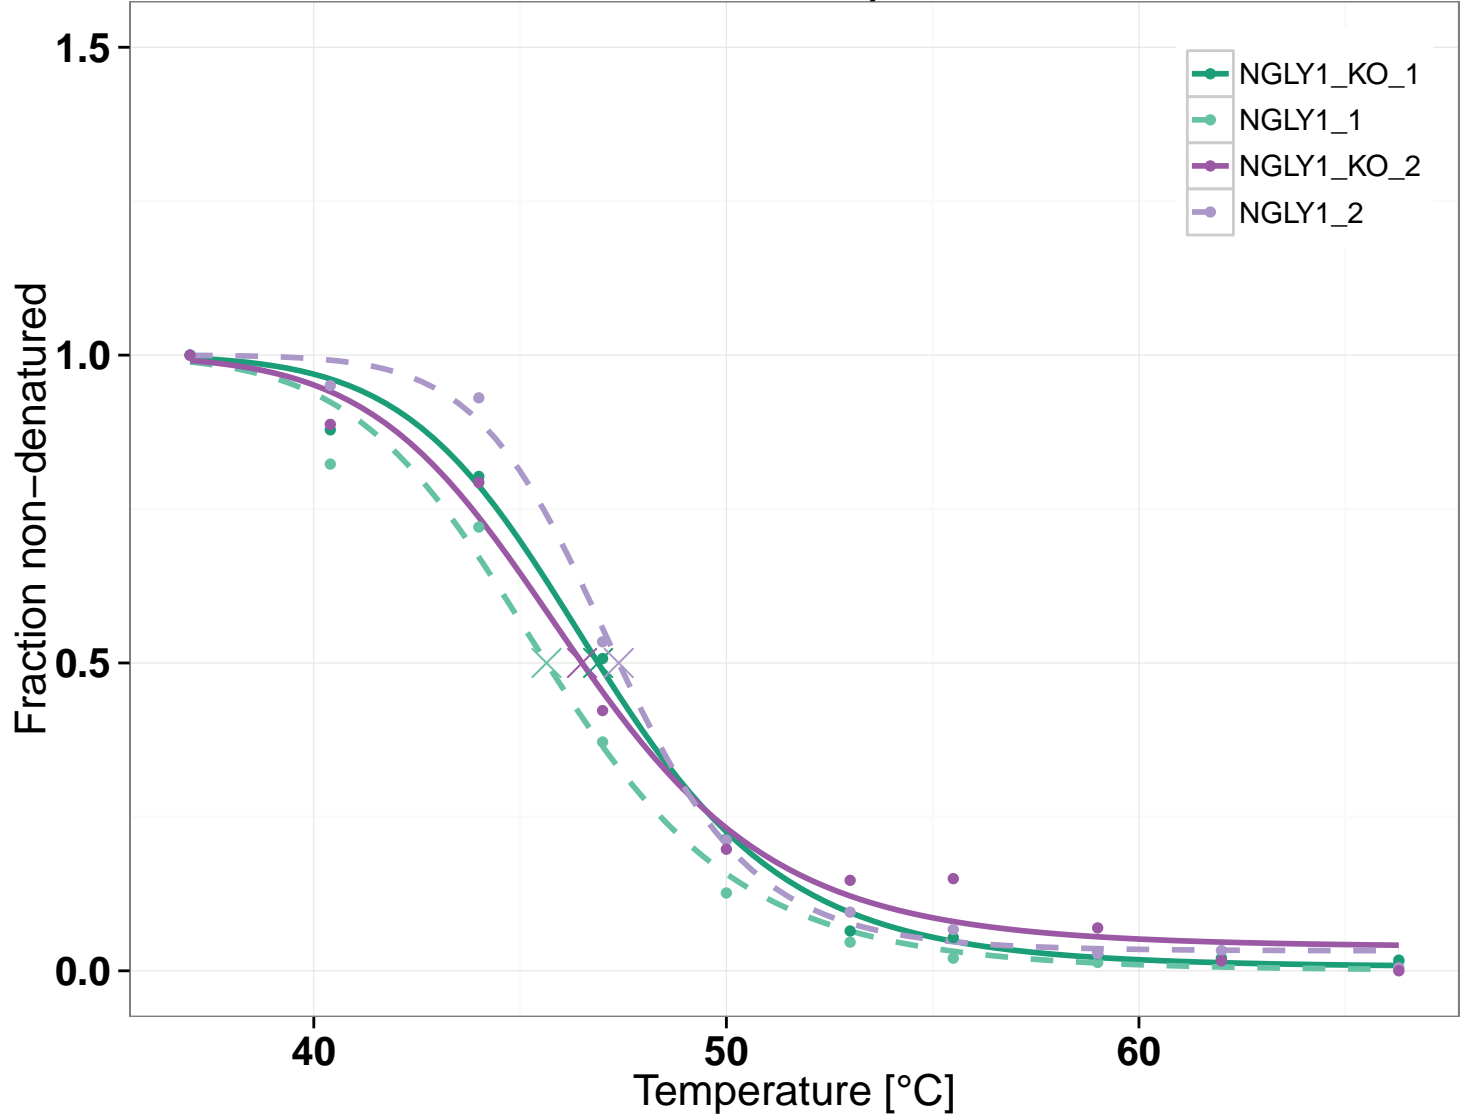

|            | meltPoint | slope  | plateau | R2   |
|------------|-----------|--------|---------|------|
| NGLY1_KO_1 | 46.89     | -0.11  | 0.01    | 0.99 |
| NGLY1_1    | 45.64     | -0.11  | 0       | 0.99 |
| NGLY1_KO_2 | 46.5      | -0.098 | 0.04    | 0.99 |
| NGLY1_2    | 47.39     | -0.14  | 0.03    | 1    |

Supplement: Supplementary file 7158 [file 1]

IPI00217957.4|AHCTF1

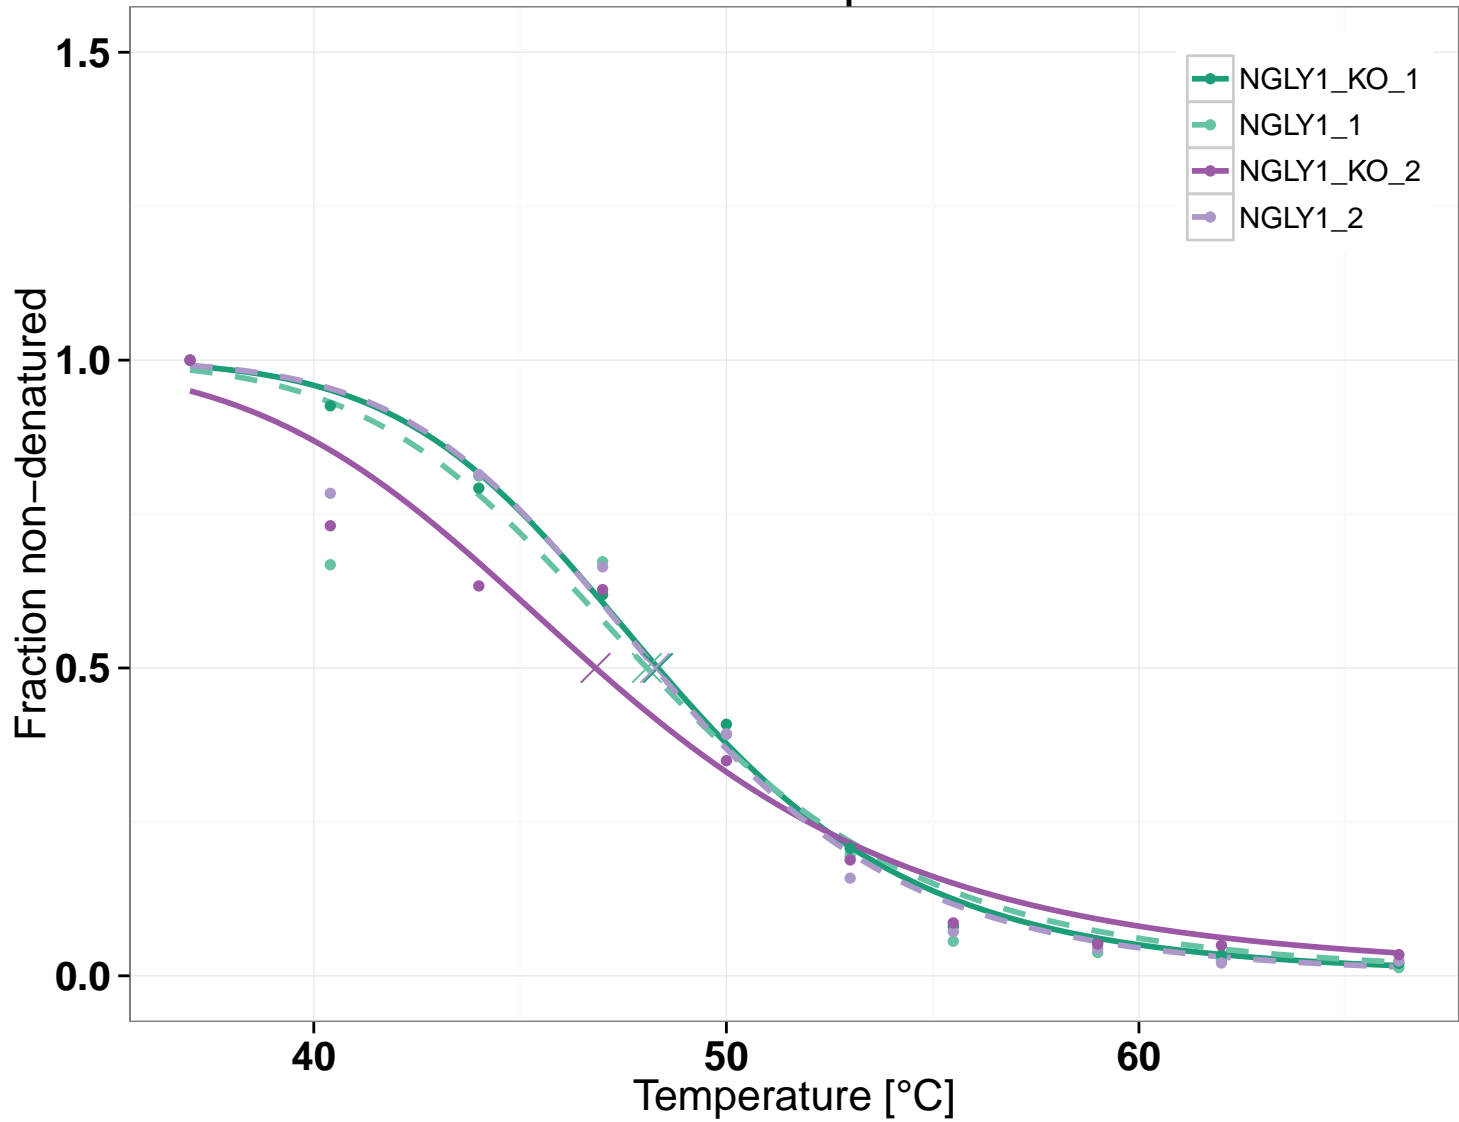

|            | meltPoint | slope  | plateau | R2   |
|------------|-----------|--------|---------|------|
| NGLY1_KO_1 | 48.34     | -0.08  | 0       | 1    |
| NGLY1_1    | 48.07     | -0.073 | 0       | 0.93 |
| NGLY1_KO_2 | 46.83     | -0.061 | 0       | 0.96 |
| NGLY1_2    | 48.28     | -0.082 | 0       | 0.97 |

Supplement: Supplementary file 7159 [file 1]

IPI00642186.1|IFT140

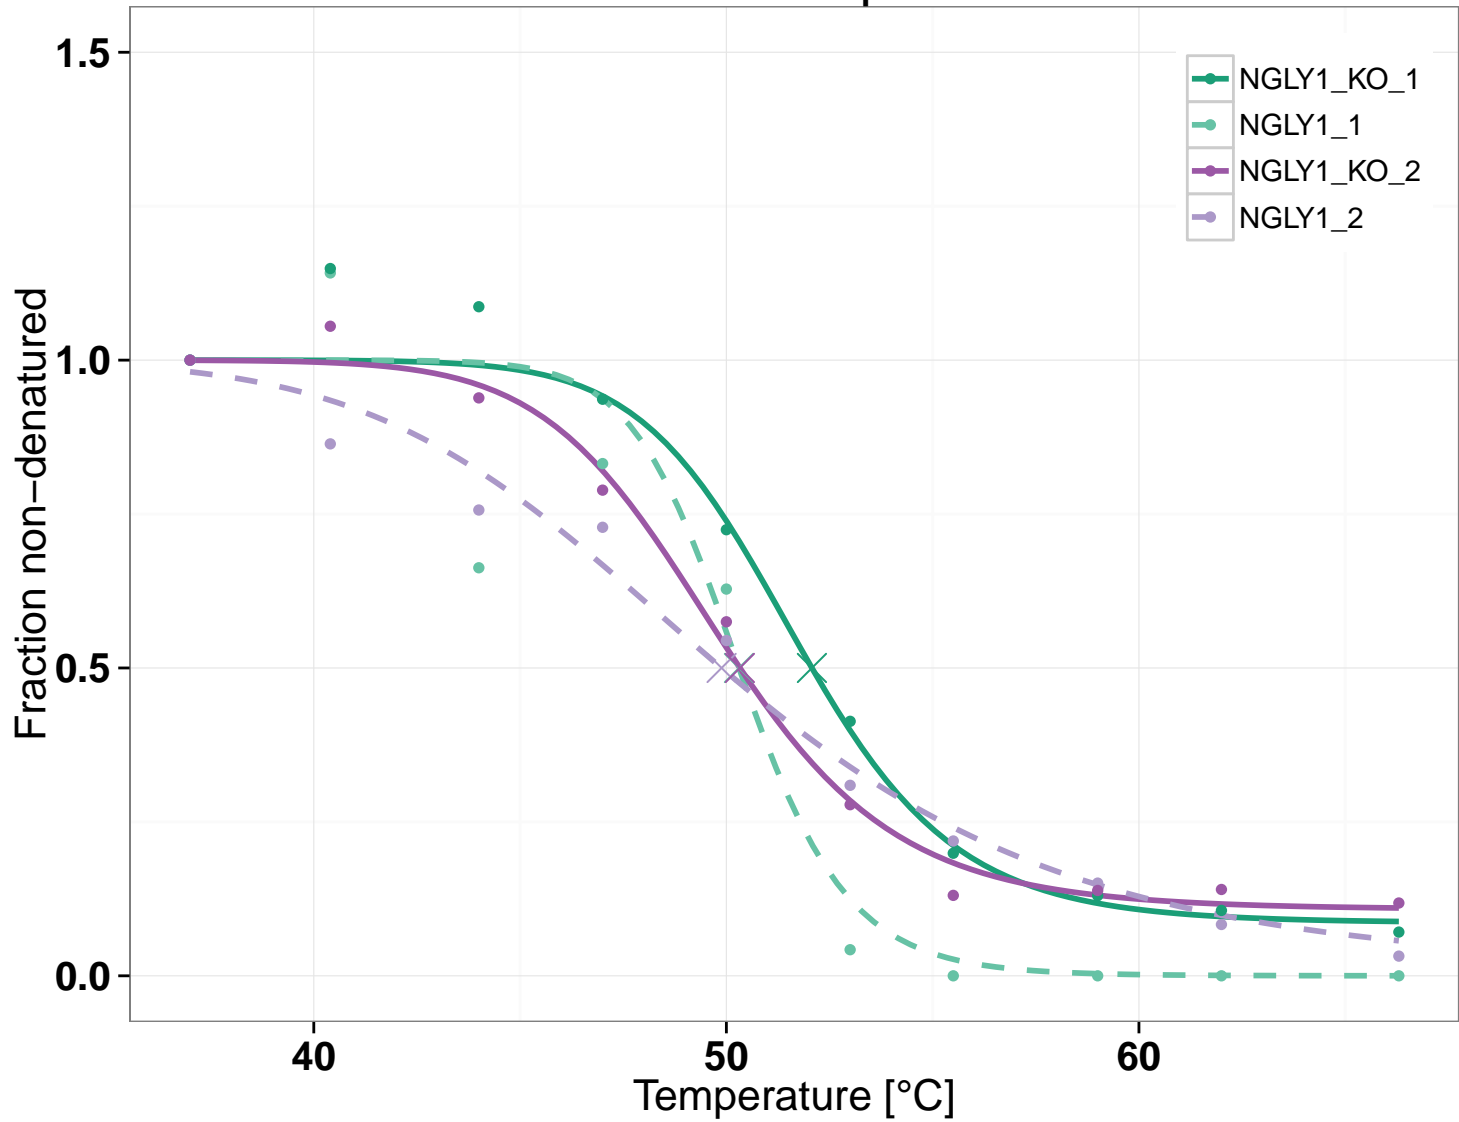

|            | meltPoint | slope  | plateau | R2   |
|------------|-----------|--------|---------|------|
| NGLY1_KO_1 | 52.07     | -0.12  | 0.09    | 0.98 |
| NGLY1_1    | 50.31     | -0.19  | 0       | 0.92 |
| NGLY1_KO_2 | 50.33     | -0.1   | 0.11    | 0.99 |
| NGLY1_2    | 49.88     | -0.059 | 0       | 0.98 |

Supplement: Supplementary file 7160 [file 1]

IPI00385169.1|ARHGEF3

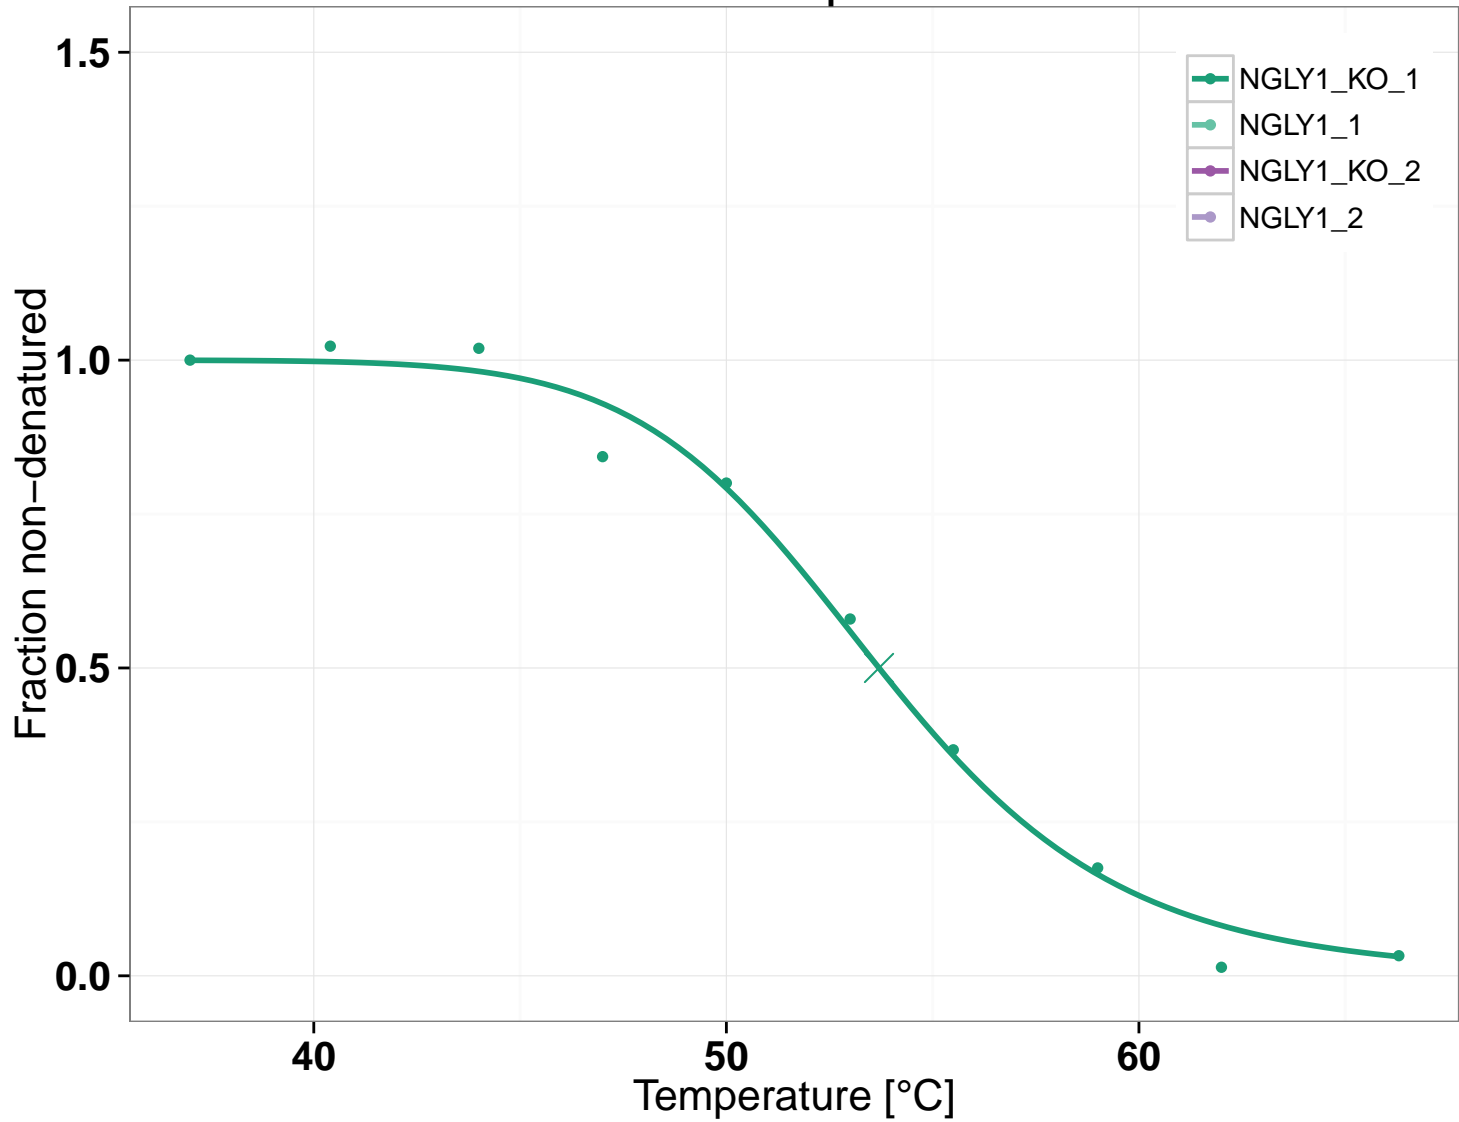

|            | meltPoint | slope  | plateau | R2   |
|------------|-----------|--------|---------|------|
| NGLY1_KO_1 | 53.7      | -0.085 | 0       | 0.99 |
| NGLY1_1    | -         | -      | -       | -    |
| NGLY1_KO_2 | -         | -      | -       | -    |
| NGLY1_2    | -         | -      | -       | -    |

Supplement: Supplementary file 7161 [file 1]

IPI00889612.2|KIAA0922

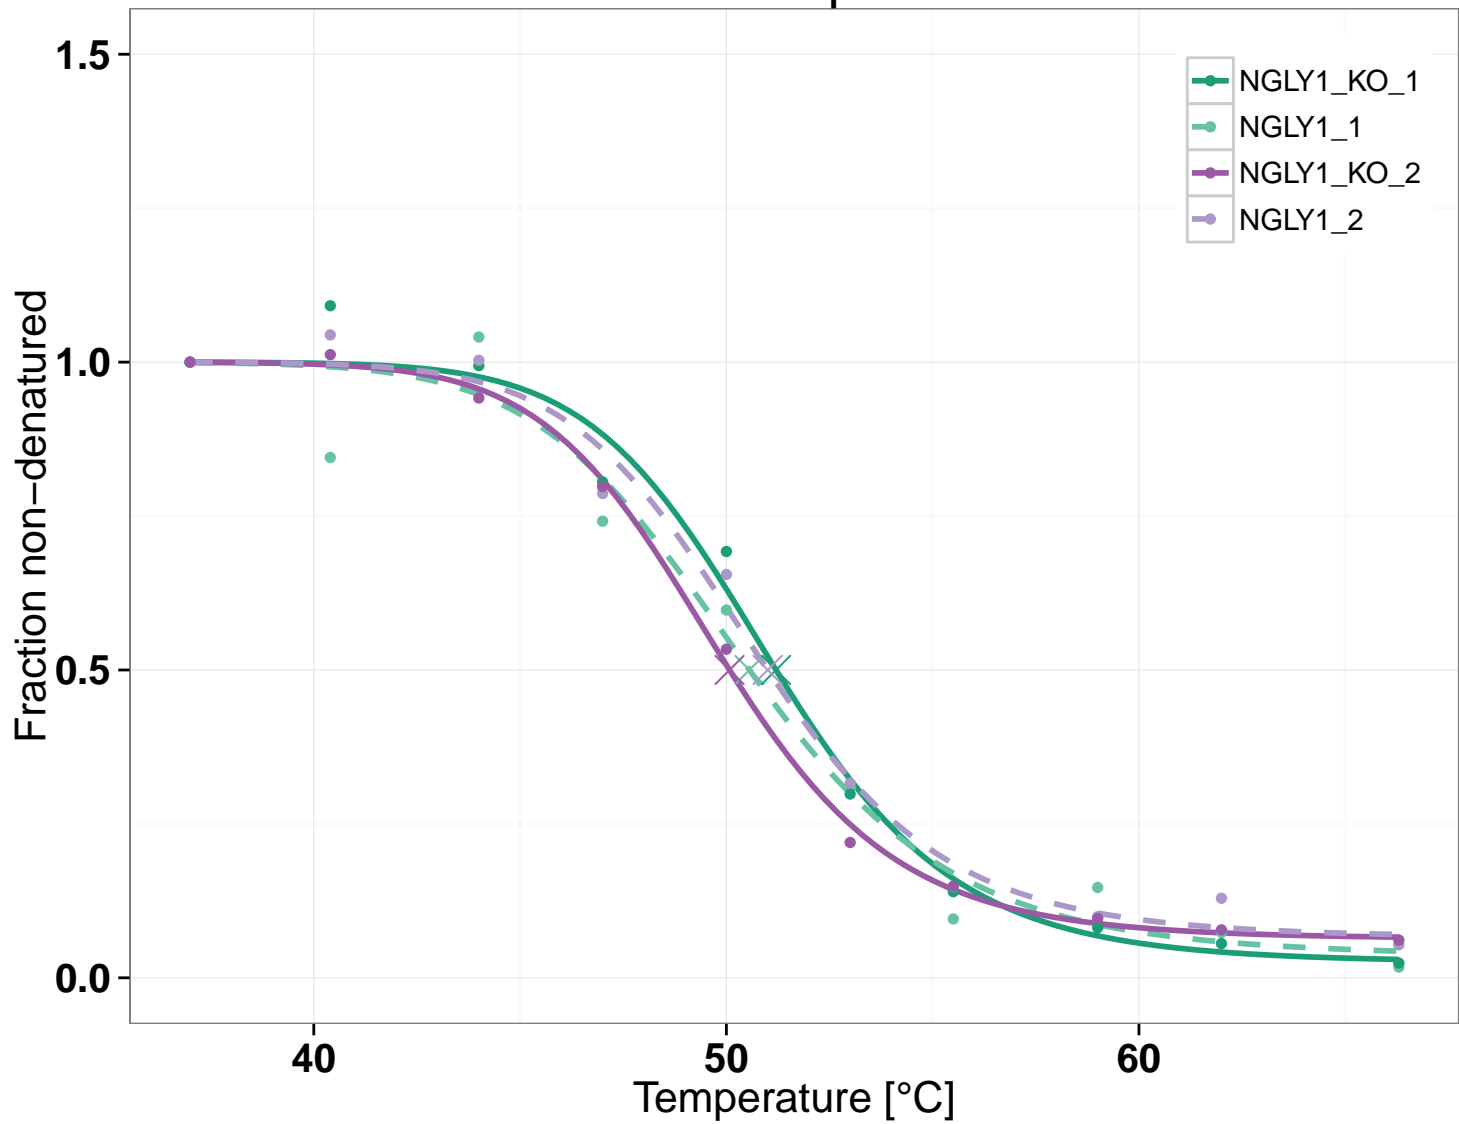

|            | meltPoint | slope  | plateau | R2   |
|------------|-----------|--------|---------|------|
| NGLY1_KO_1 | 51.2      | -0.11  | 0.02    | 0.99 |
| NGLY1_1    | 50.56     | -0.095 | 0.03    | 0.97 |
| NGLY1_KO_2 | 50.08     | -0.11  | 0.06    | 1    |
| NGLY1_2    | 51        | -0.1   | 0.07    | 0.99 |

Supplement: Supplementary file 7162 [file 1]

IPI00719714.3|LYSMD3

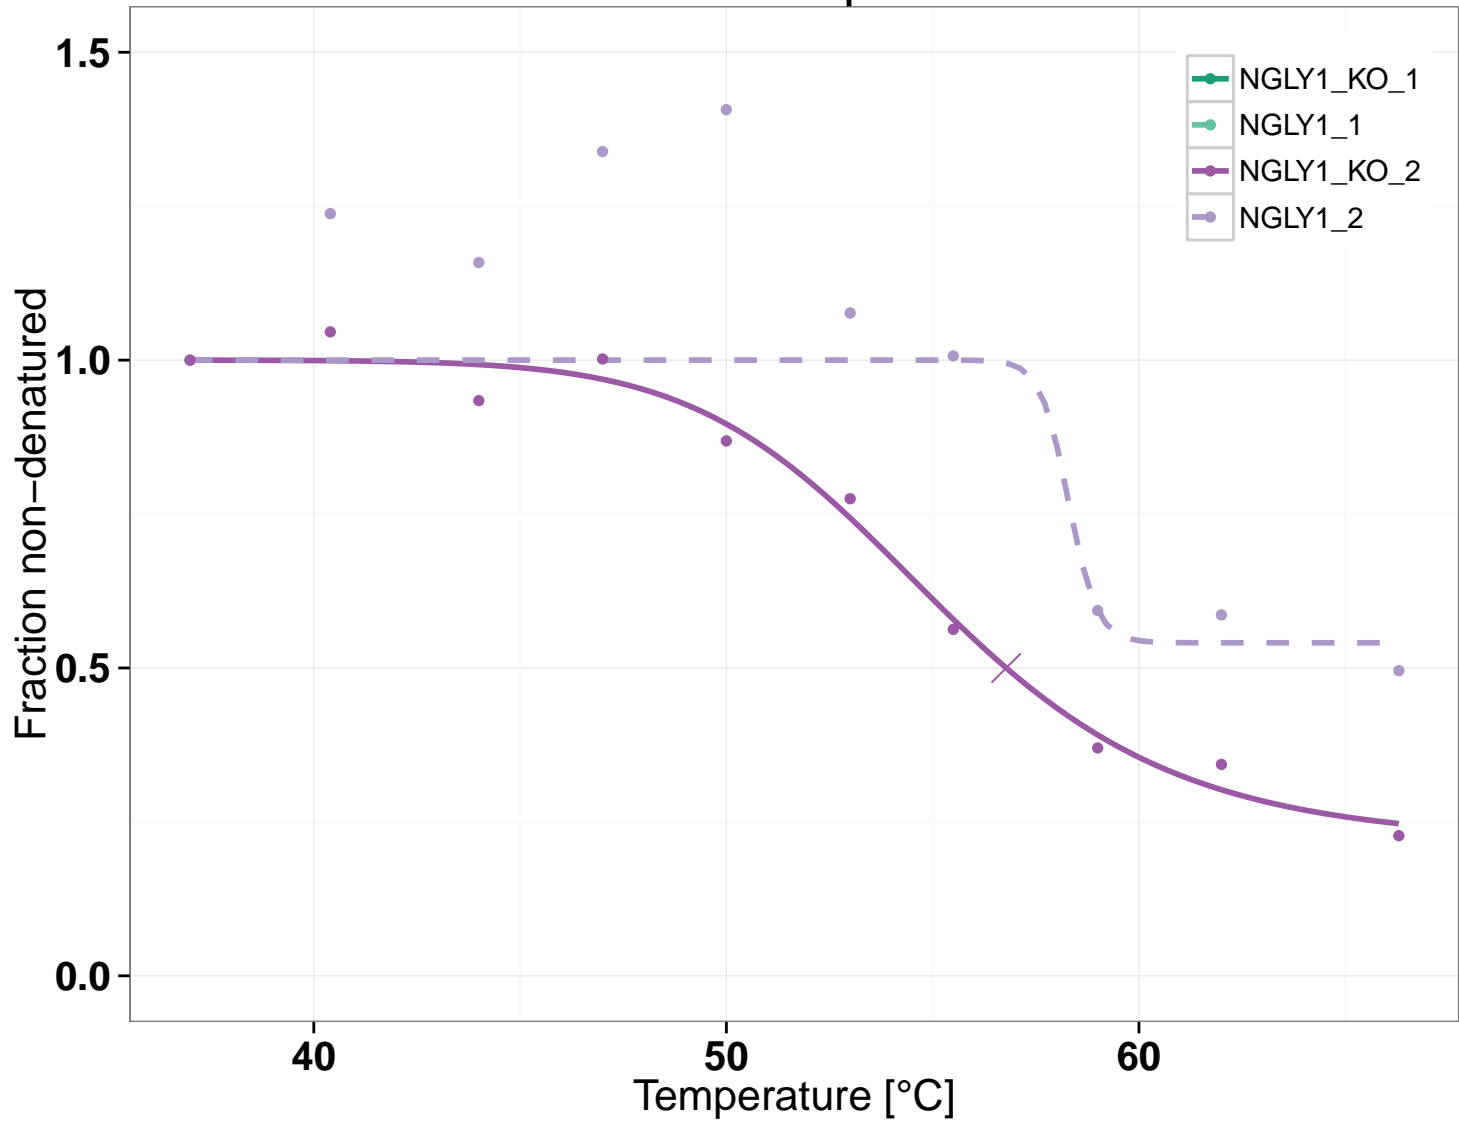

|            | meltPoint | slope  | plateau | R2   |
|------------|-----------|--------|---------|------|
| NGLY1_KO_1 | -         | -      | -       | -    |
| NGLY1_1    | -         | -      | -       | -    |
| NGLY1_KO_2 | 56.78     | -0.067 | 0.21    | 0.99 |
| NGLY1_2    | -         | -0.34  | 0.54    | 0.61 |

Supplement: Supplementary file 7163 [file 1]

# IPI00456981.2|C13ORF37

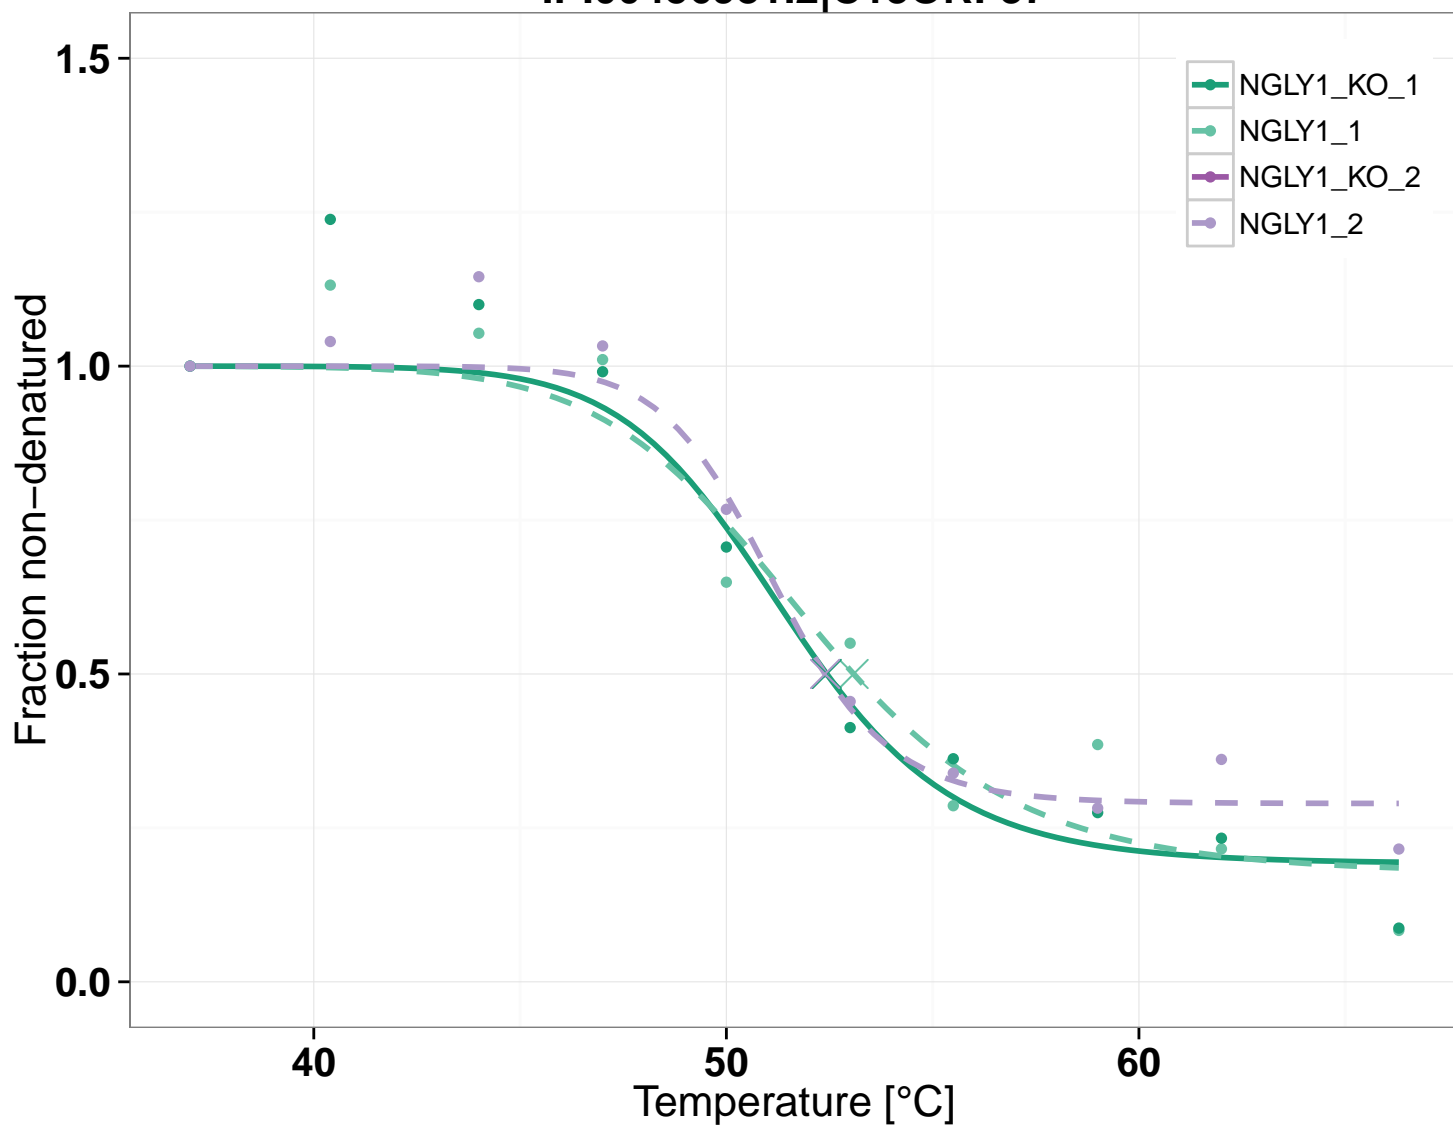

|            | meltPoint | slope  | plateau | R2   |
|------------|-----------|--------|---------|------|
| NGLY1_KO_1 | 52.43     | -0.1   | 0.19    | 0.94 |
| NGLY1_1    | 53.08     | -0.082 | 0.18    | 0.94 |
| NGLY1_KO_2 | -         | -      | -       | -    |
| NGLY1_2    | 52.39     | -0.13  | 0.29    | 0.97 |

Supplement: Supplementary file 7164 [file 1]

IPI00643152.2|HSPA1L

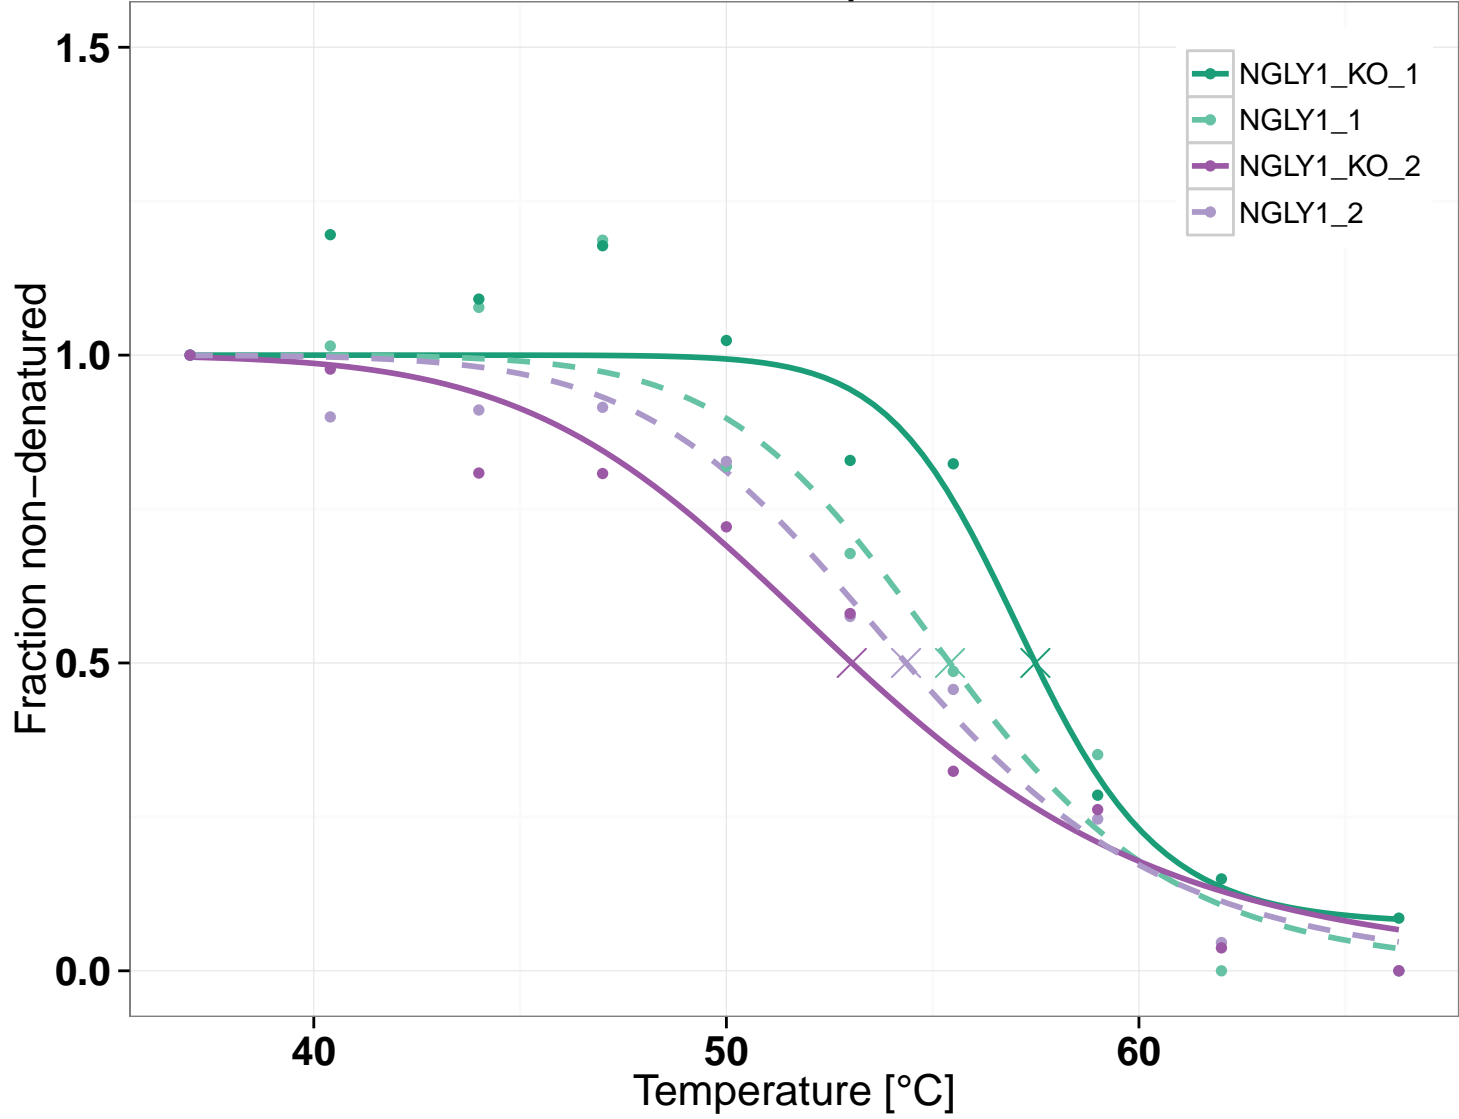

|            | meltPoint | slope  | plateau | R2   |
|------------|-----------|--------|---------|------|
| NGLY1_KO_1 | 57.49     | -0.14  | 0.08    | 0.94 |
| NGLY1_1    | 55.42     | -0.091 | 0       | 0.95 |
| NGLY1_KO_2 | 53.04     | -0.064 | 0       | 0.97 |
| NGLY1_2    | 54.36     | -0.078 | 0       | 0.98 |

Supplement: Supplementary file 7165 [file 1]

# IPI00004839.1|CRKL

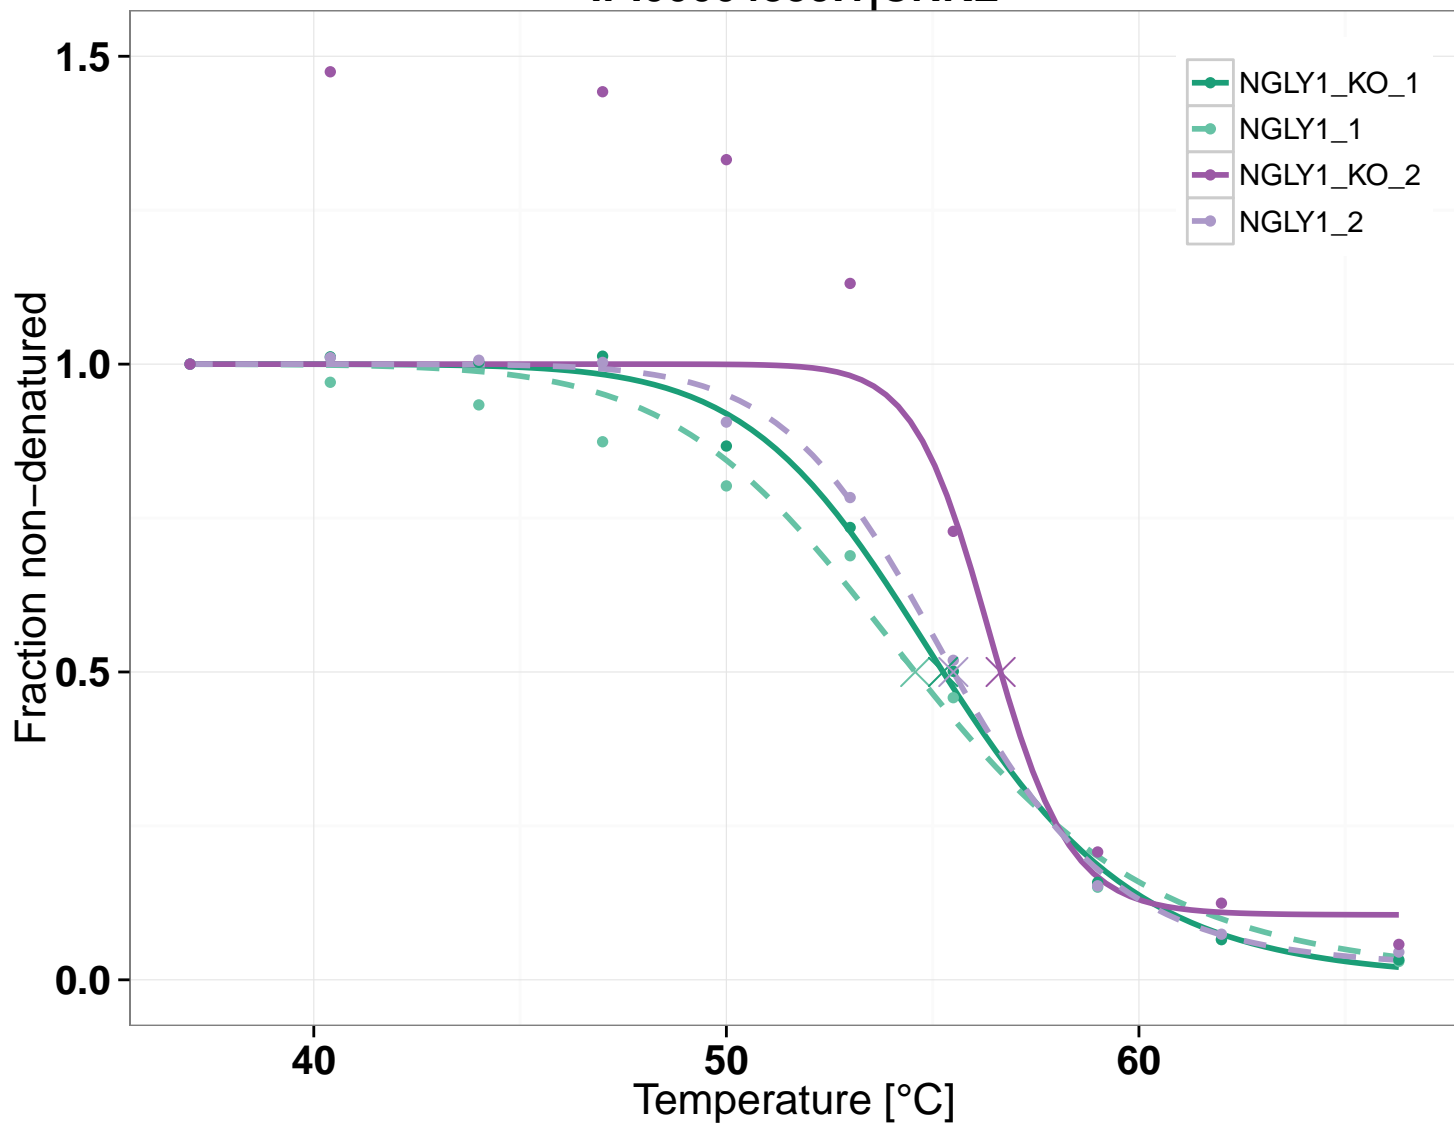

|            | meltPoint | slope  | plateau | R2   |
|------------|-----------|--------|---------|------|
| NGLY1_KO_1 | 55.25     | -0.11  | 0       | 1    |
| NGLY1_1    | 54.58     | -0.085 | 0       | 0.99 |
| NGLY1_KO_2 | 56.65     | -0.24  | 0.11    | 0.73 |
| NGLY1_2    | 55.5      | -0.12  | 0.02    | 1    |

Supplement: Supplementary file 7166 [file 1]

IPI00413436.2|COX19

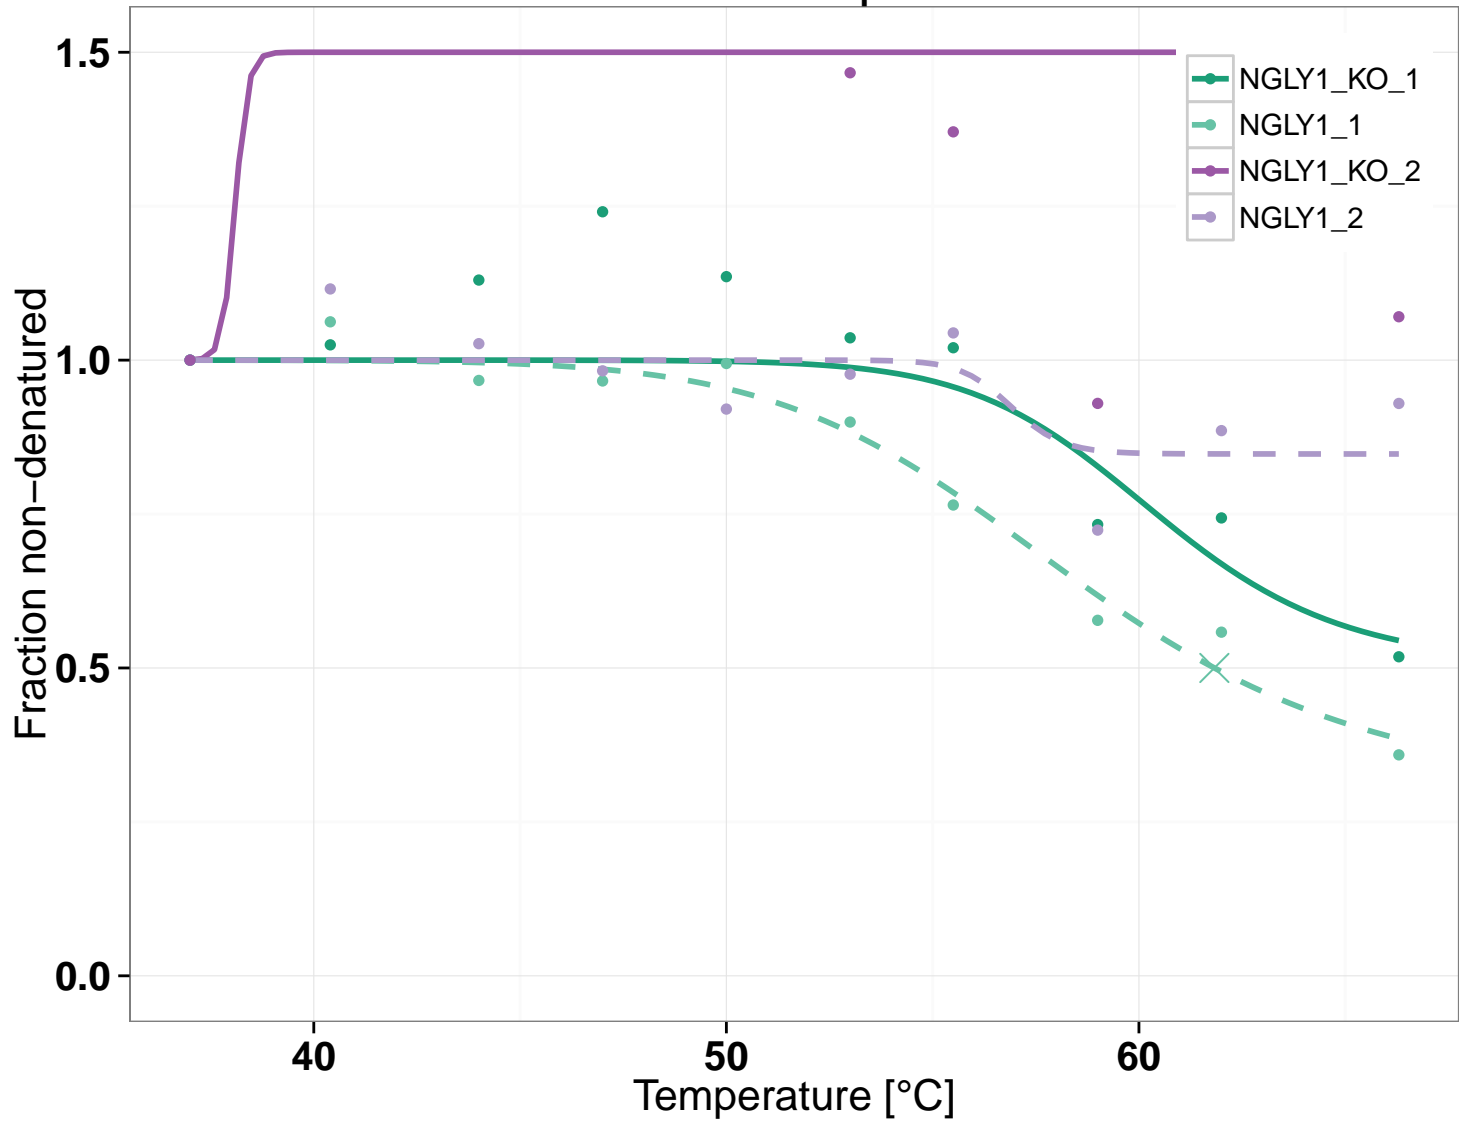

|            | meltPoint | slope  | plateau | R2   |
|------------|-----------|--------|---------|------|
| NGLY1_KO_1 | -         | -0.055 | 0.5     | 0.74 |
| NGLY1_1    | 61.83     | -0.049 | 0.29    | 0.97 |
| NGLY1_KO_2 | -         | 0.82   | 1.5     | 0.18 |
| NGLY1_2    | -         | -0.062 | 0.85    | 0.52 |

Supplement: Supplementary file 7167 [file 1]

# IPI00031479.1|PDIA5

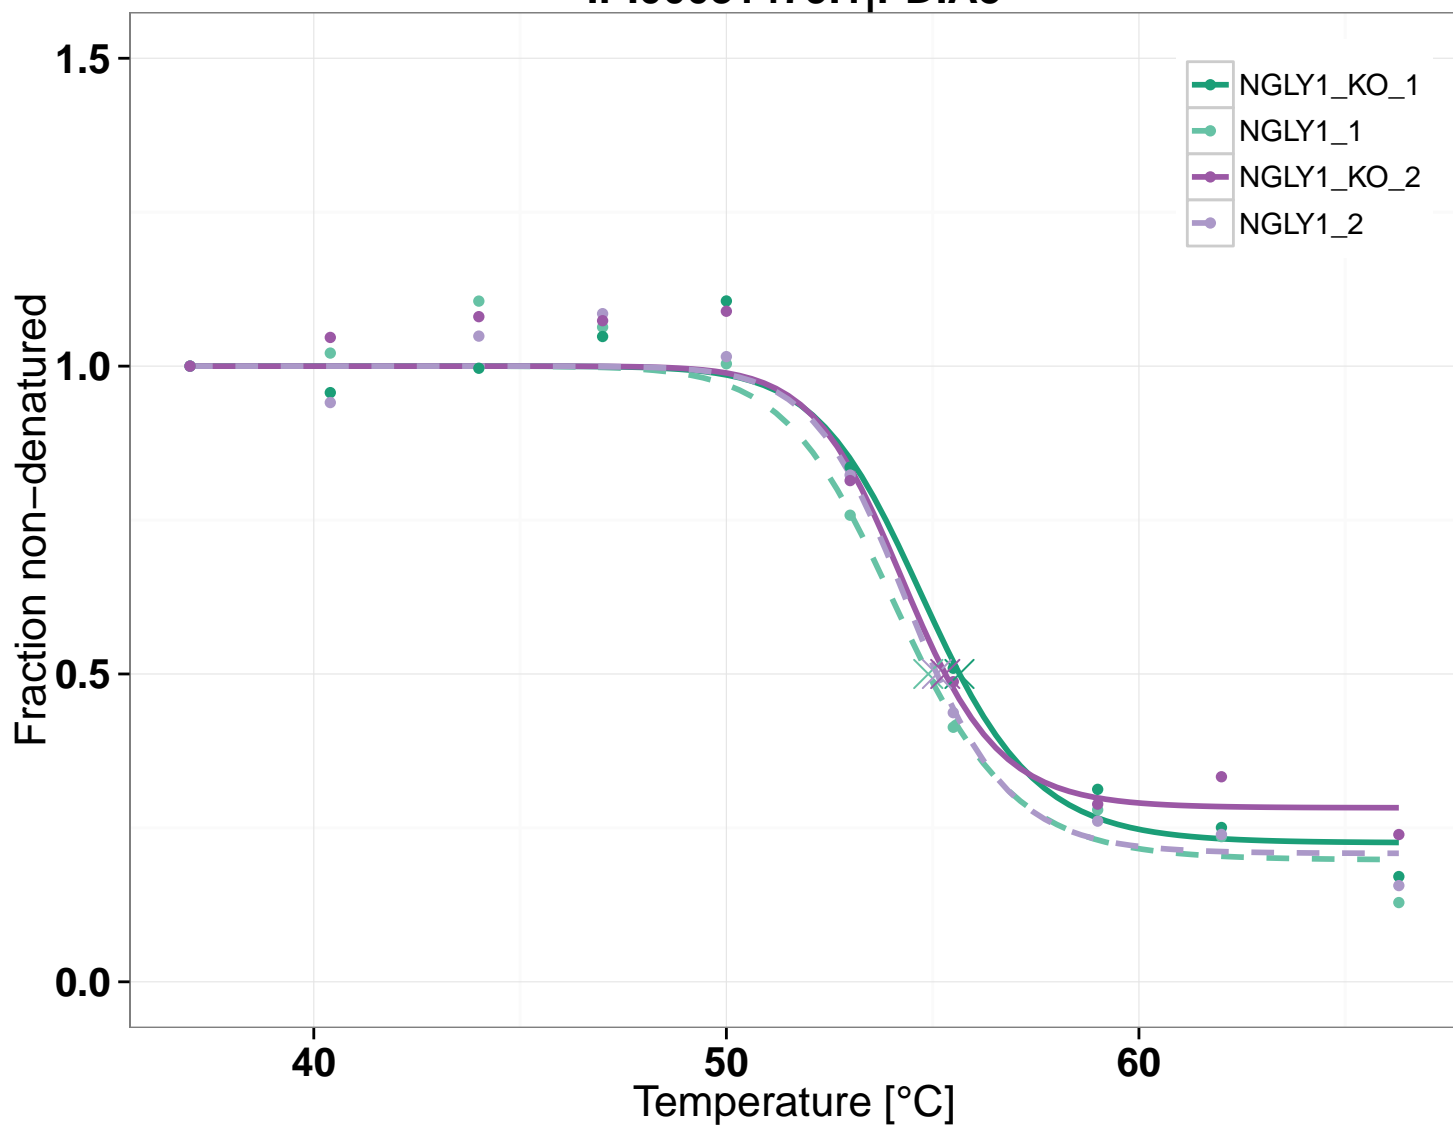

|            | meltPoint | slope | plateau | R2   |
|------------|-----------|-------|---------|------|
| NGLY1_KO_1 | 55.65     | -0.15 | 0.23    | 0.98 |
| NGLY1_1    | 54.89     | -0.14 | 0.2     | 0.98 |
| NGLY1_KO_2 | 55.31     | -0.16 | 0.28    | 0.98 |
| NGLY1_2    | 55.1      | -0.17 | 0.21    | 0.99 |

Supplement: Supplementary file 7168 [file 1]

IPI00170934.3|STK11IP

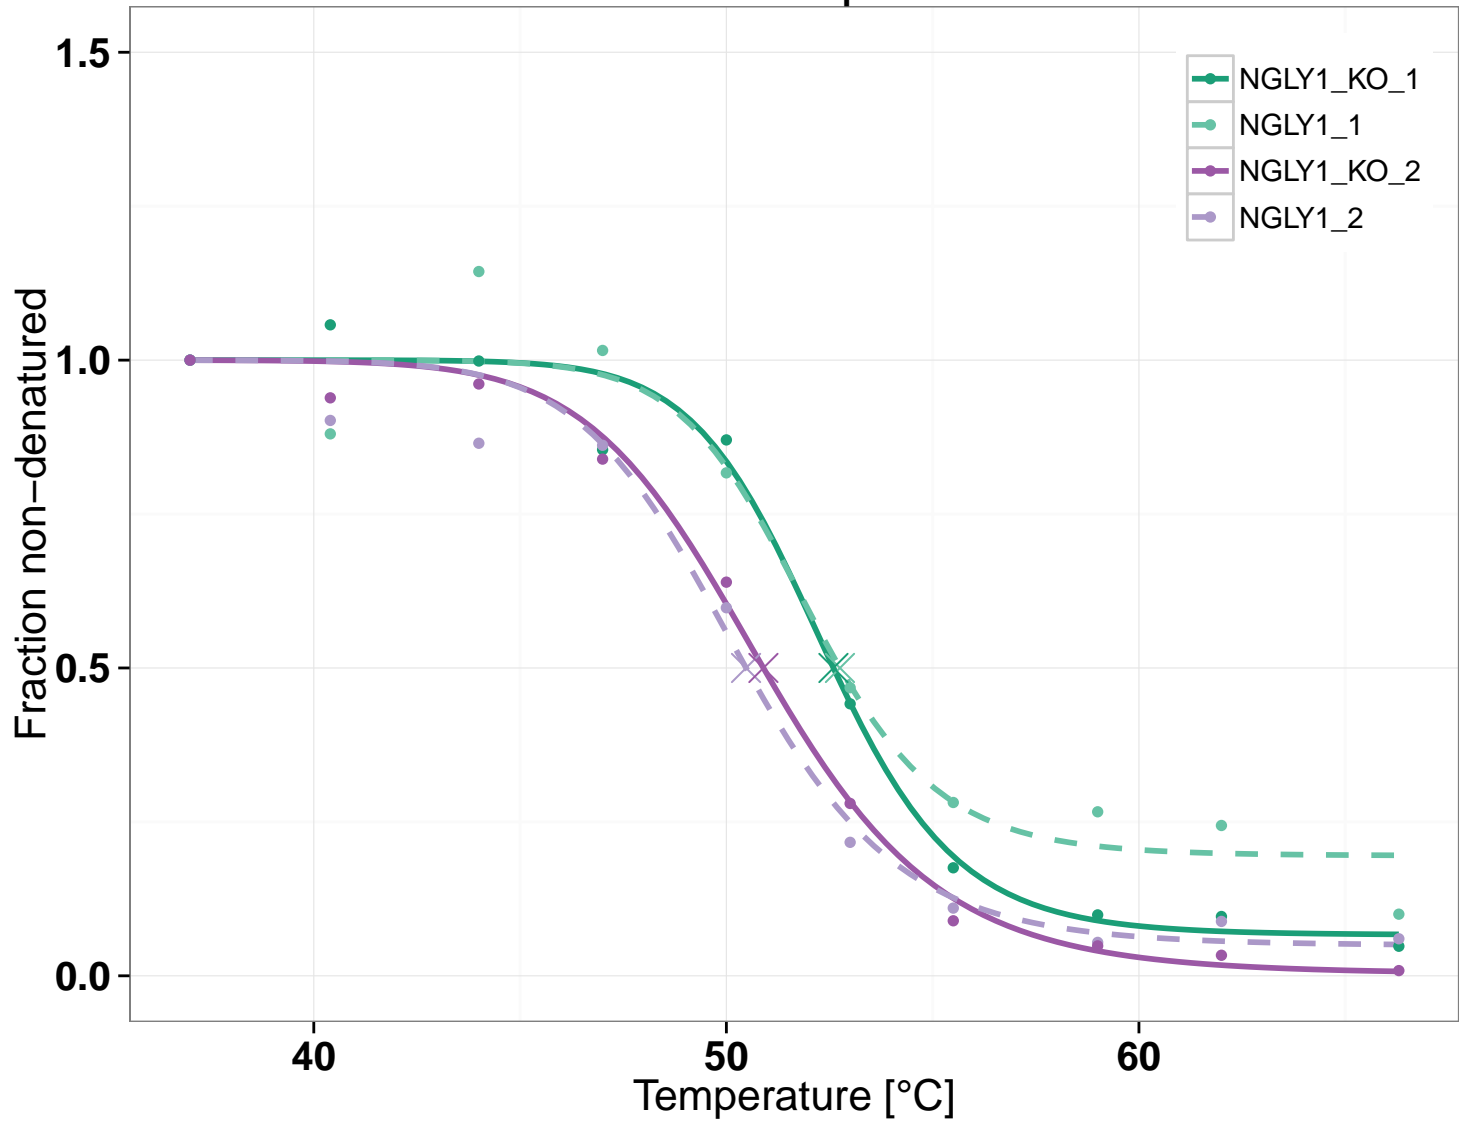

|            | meltPoint | slope | plateau | R2   |
|------------|-----------|-------|---------|------|
| NGLY1_KO_1 | 52.6      | -0.15 | 0.07    | 0.99 |
| NGLY1_1    | 52.75     | -0.13 | 0.2     | 0.96 |
| NGLY1_KO_2 | 50.9      | -0.12 | 0       | 1    |
| NGLY1_2    | 50.48     | -0.12 | 0.05    | 0.98 |

Supplement: Supplementary file 7169 [file 1]

IPI00059912.1|C18ORF24

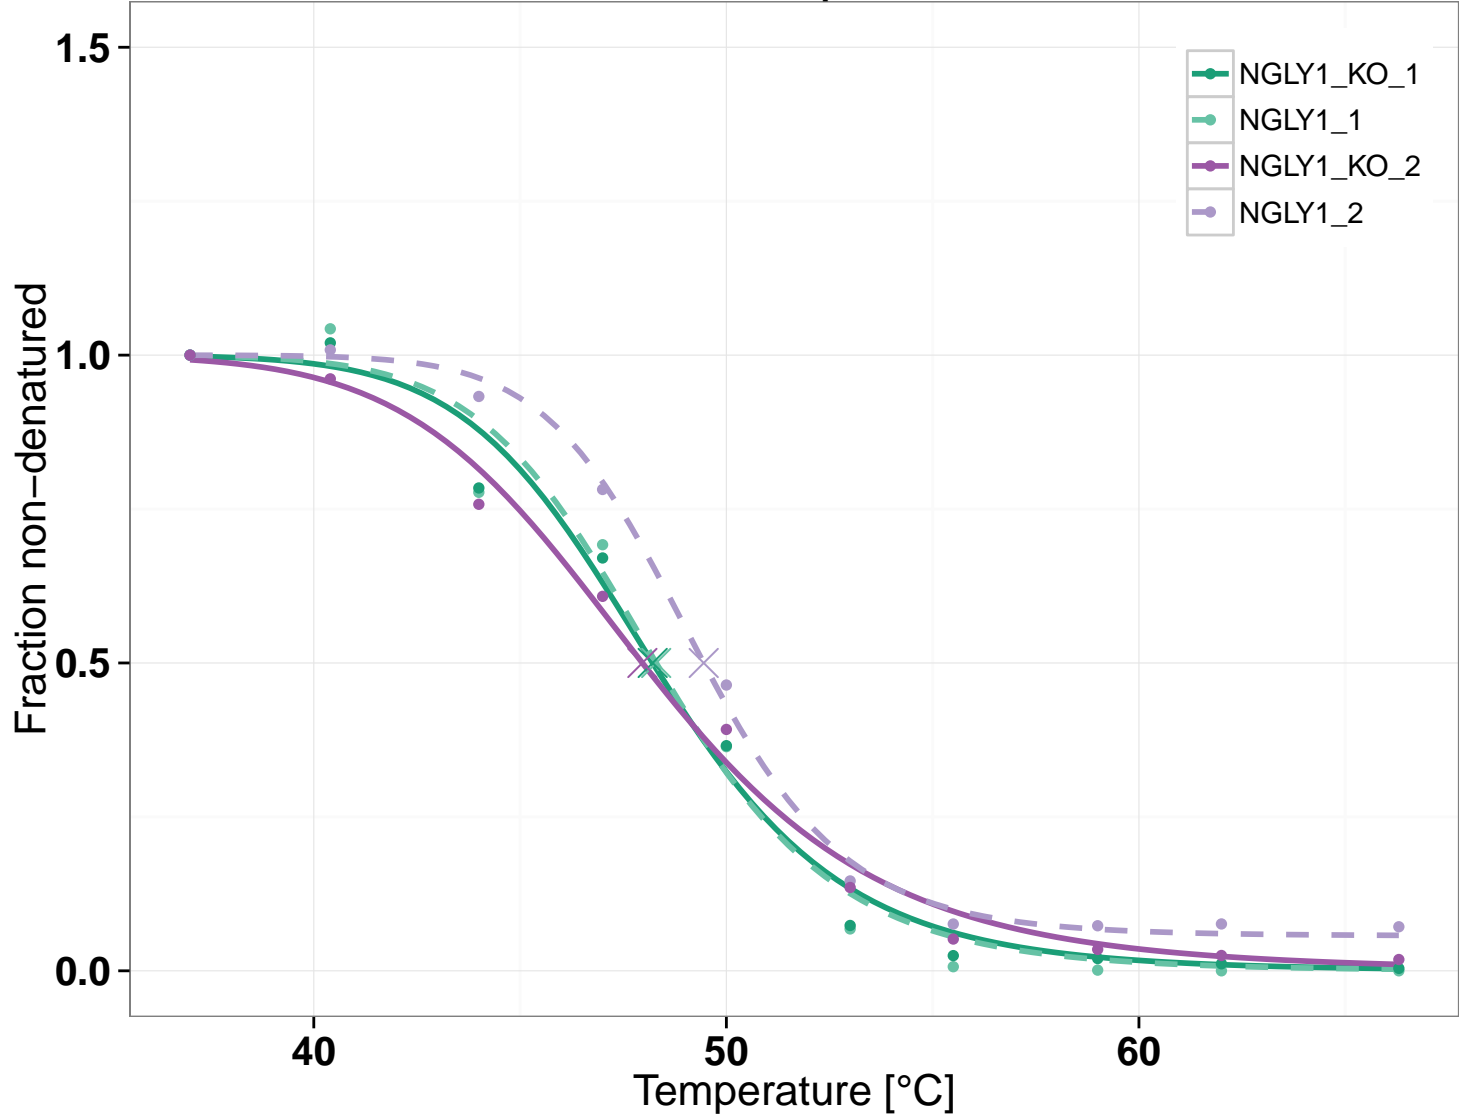

|            | meltPoint | slope  | plateau | R2   |
|------------|-----------|--------|---------|------|
| NGLY1_KO_1 | 48.21     | -0.11  | 0       | 0.99 |
| NGLY1_1    | 48.3      | -0.11  | 0       | 0.98 |
| NGLY1_KO_2 | 47.96     | -0.087 | 0       | 0.99 |
| NGLY1_2    | 49.45     | -0.13  | 0.06    | 1    |

Supplement: Supplementary file 7170 [file 1]

IPI00221206.1|TLE3

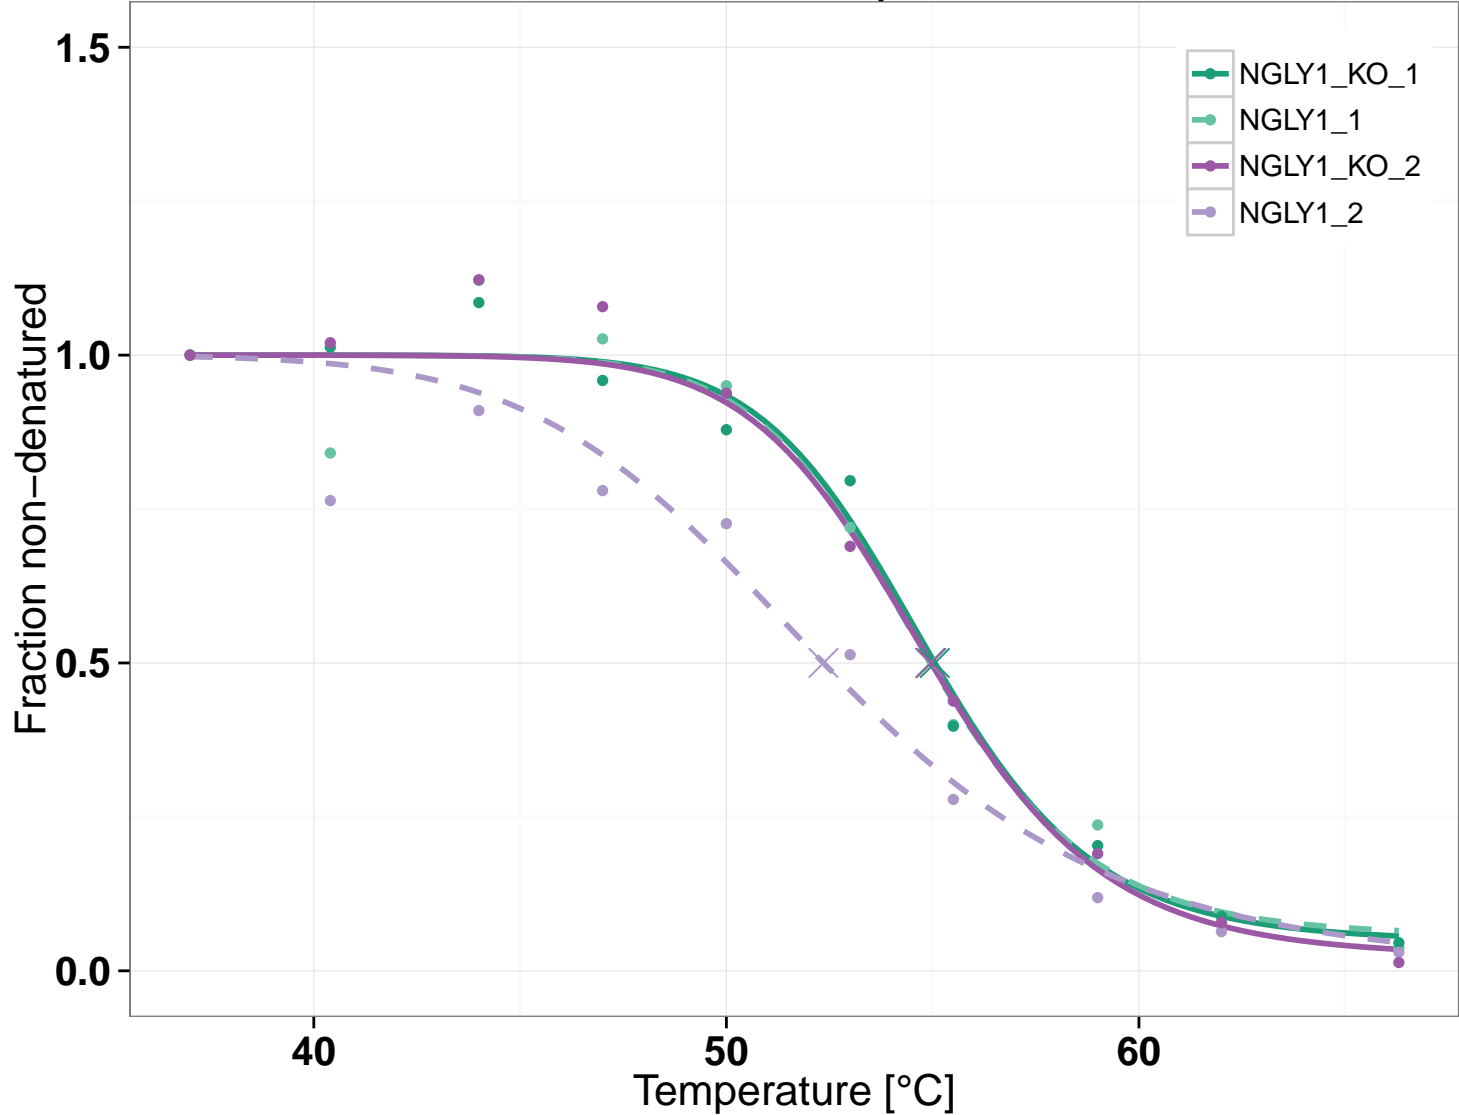

|            | meltPoint | slope | plateau | R2   |
|------------|-----------|-------|---------|------|
| NGLY1_KO_1 | 55.05     | -0.12 | 0.05    | 0.99 |
| NGLY1_1    | 54.94     | -0.12 | 0.06    | 0.97 |
| NGLY1_KO_2 | 54.96     | -0.11 | 0.02    | 0.98 |
| NGLY1_2    | 52.35     | -0.07 | 0       | 0.95 |

Supplement: Supplementary file 7171 [file 1]

IPI00453475.3|IFITM2

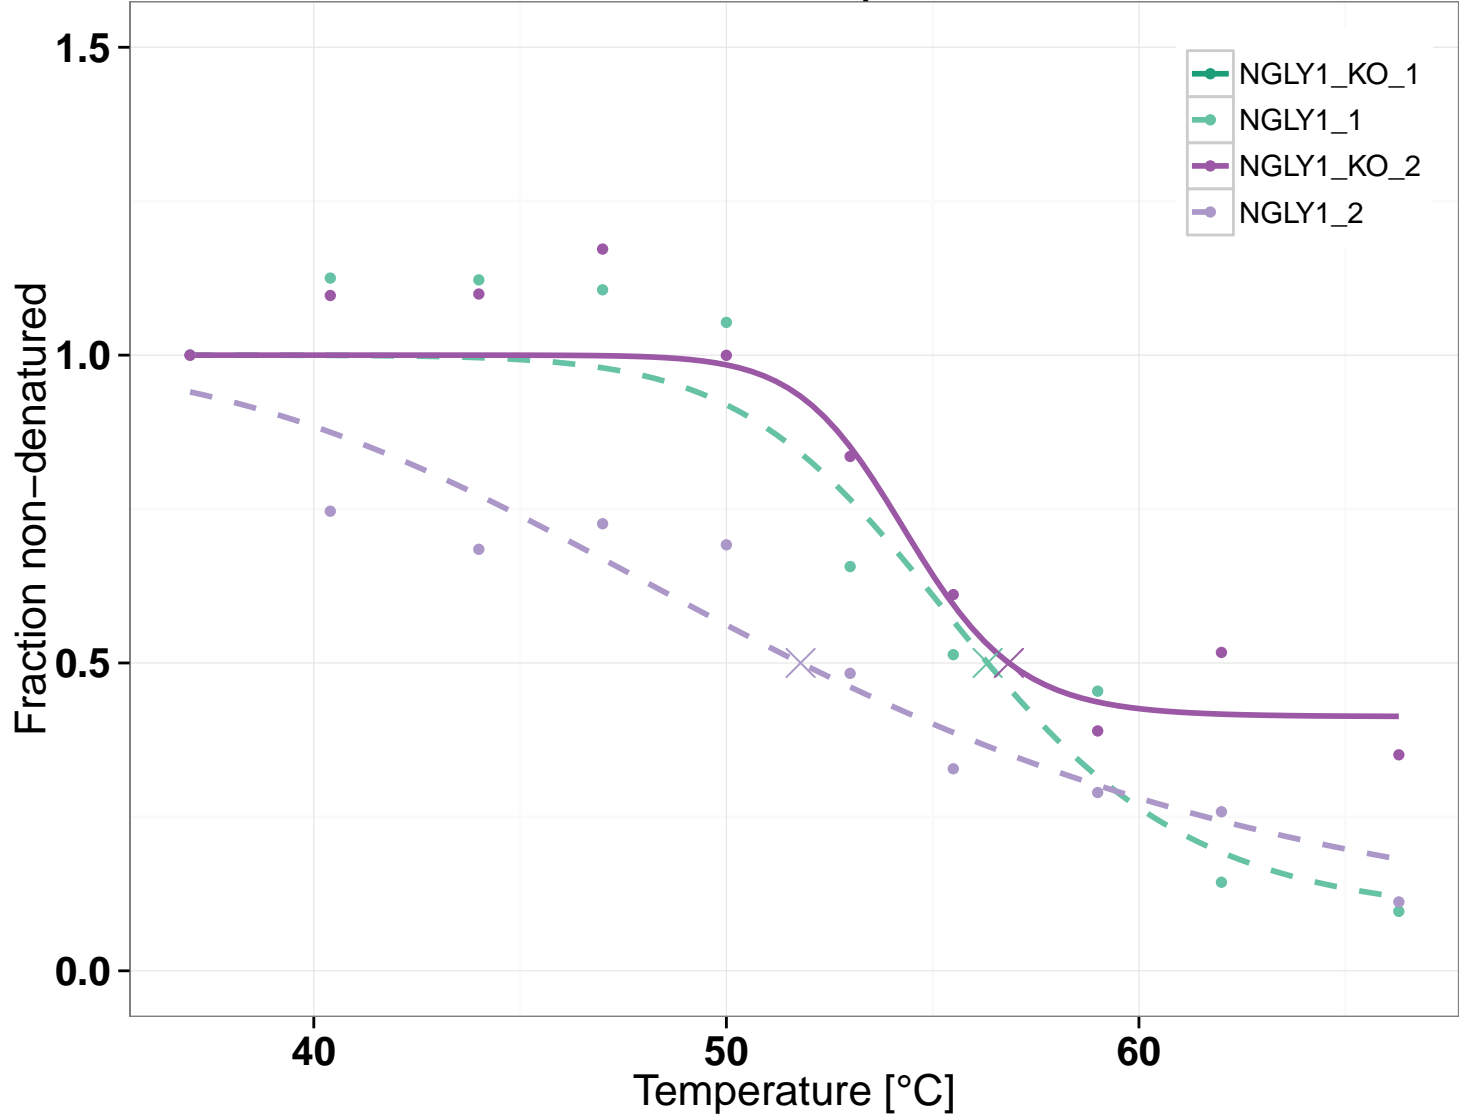

|            | meltPoint | slope  | plateau | R2   |
|------------|-----------|--------|---------|------|
| NGLY1_KO_1 | —         | —      | —       | —    |
| NGLY1_1    | 56.33     | -0.083 | 0.08    | 0.93 |
| NGLY1_KO_2 | 56.85     | -0.11  | 0.41    | 0.93 |
| NGLY1_2    | 51.8      | -0.036 | 0       | 0.92 |

Supplement: Supplementary file 7172 [file 1]

IPI00413451.1|SERPINB6

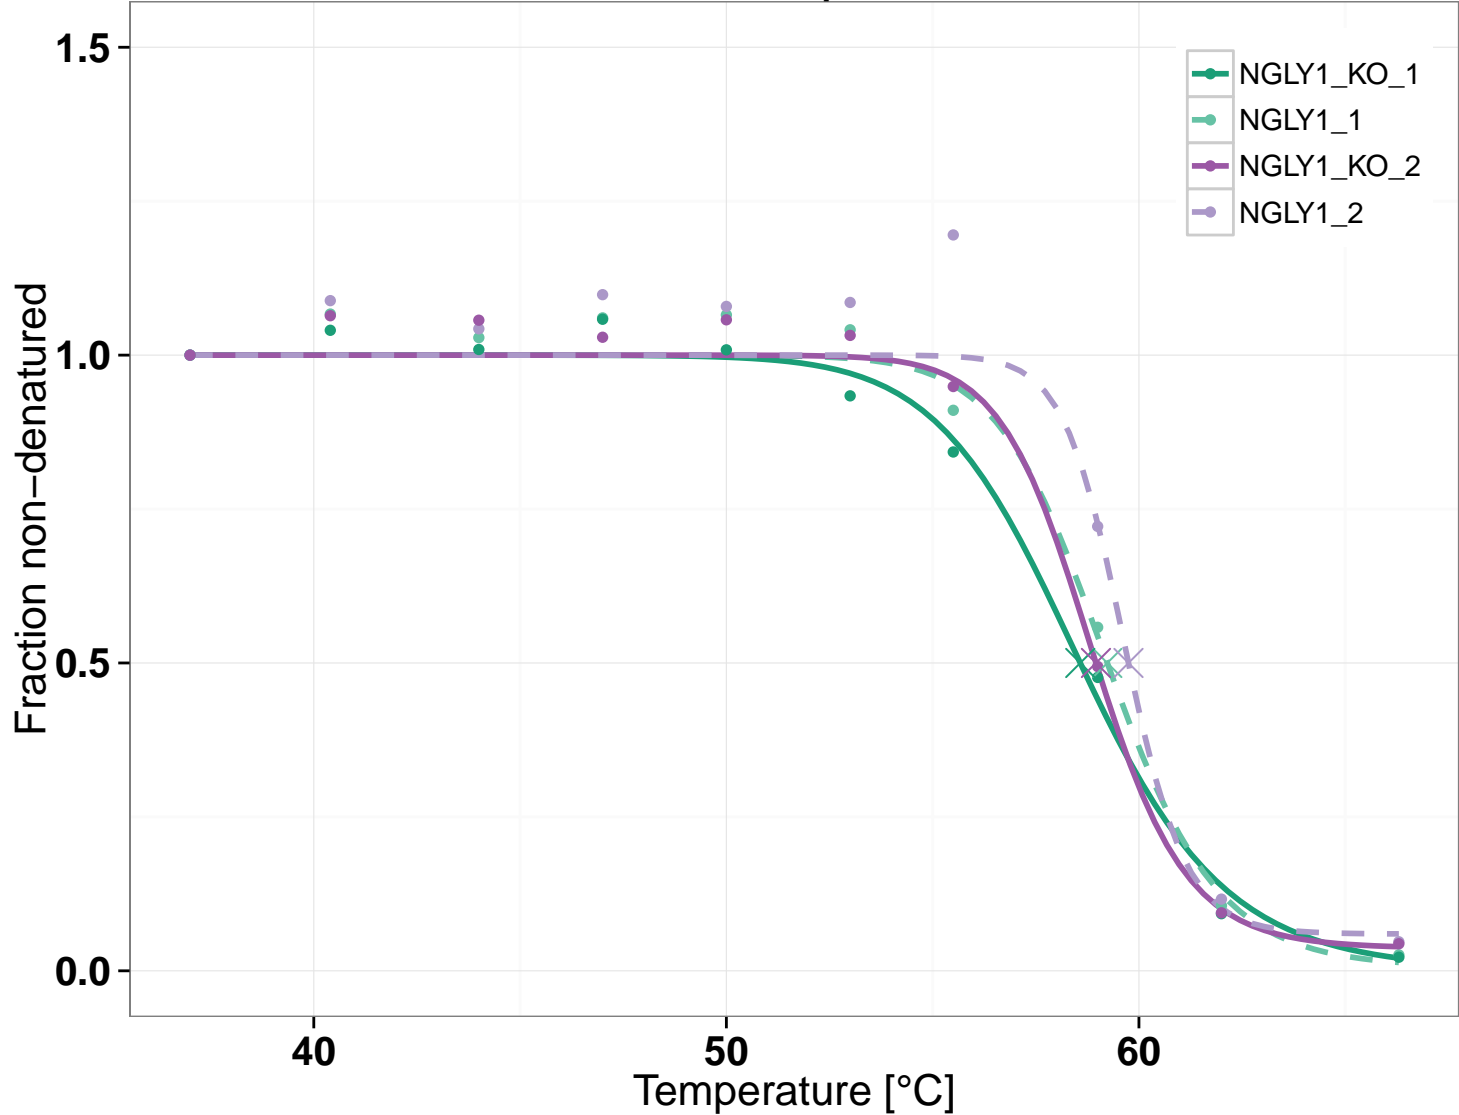

|            | meltPoint | slope | plateau | R2   |
|------------|-----------|-------|---------|------|
| NGLY1_KO_1 | 58.58     | -0.14 | 0       | 0.99 |
| NGLY1_1    | 59.23     | -0.19 | 0       | 0.99 |
| NGLY1_KO_2 | 58.96     | -0.21 | 0.04    | 0.99 |
| NGLY1_2    | 59.75     | -0.32 | 0.06    | 0.95 |

Supplement: Supplementary file 7173 [file 1]

# IPI00514468.1|MACF1

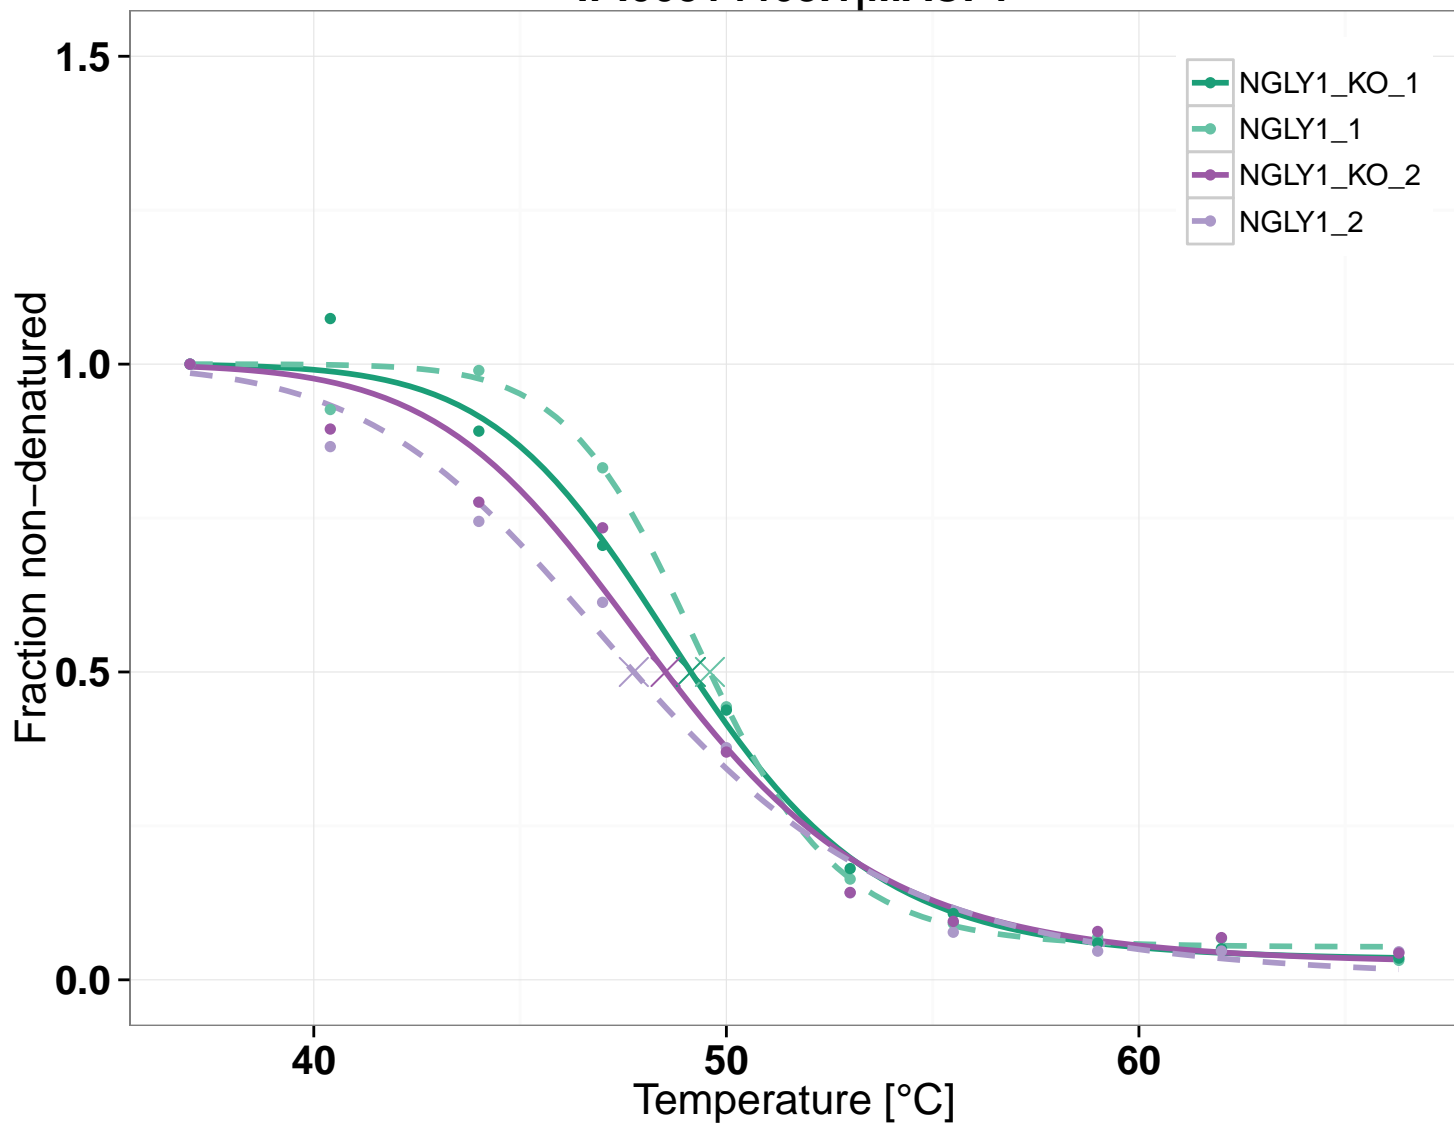

|            | meltPoint | slope  | plateau | R2   |
|------------|-----------|--------|---------|------|
| NGLY1_KO_1 | 49.14     | -0.1   | 0.03    | 0.99 |
| NGLY1_1    | 49.6      | -0.14  | 0.05    | 1    |
| NGLY1_KO_2 | 48.53     | -0.09  | 0.02    | 0.98 |
| NGLY1_2    | 47.76     | -0.077 | 0       | 0.99 |

Supplement: Supplementary file 7174 [file 1]

# IPI00300223.2|SMCR7L

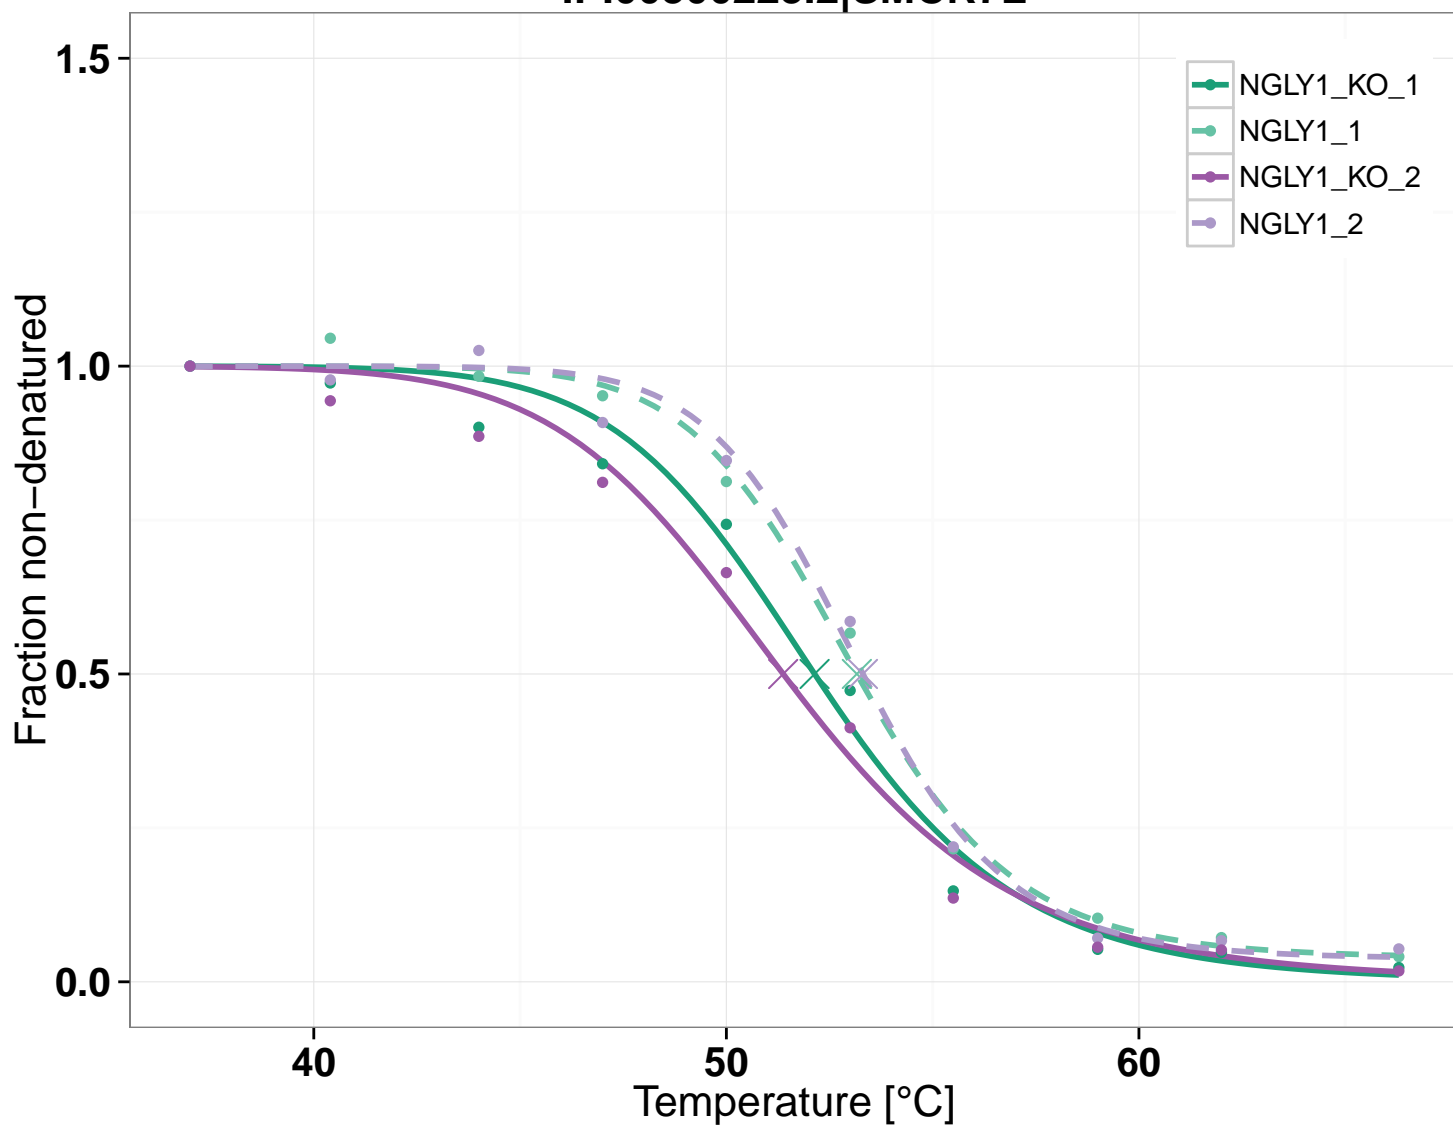

|            | meltPoint | slope | plateau | R2   |
|------------|-----------|-------|---------|------|
| NGLY1_KO_1 | 52.14     | -0.1  | 0       | 0.99 |
| NGLY1_1    | 53.16     | -0.12 | 0.04    | 1    |
| NGLY1_KO_2 | 51.38     | -0.09 | 0       | 0.99 |
| NGLY1_2    | 53.31     | -0.13 | 0.04    | 0.99 |

Supplement: Supplementary file 7175 [file 1]

IPI00743663.3|TRAF6

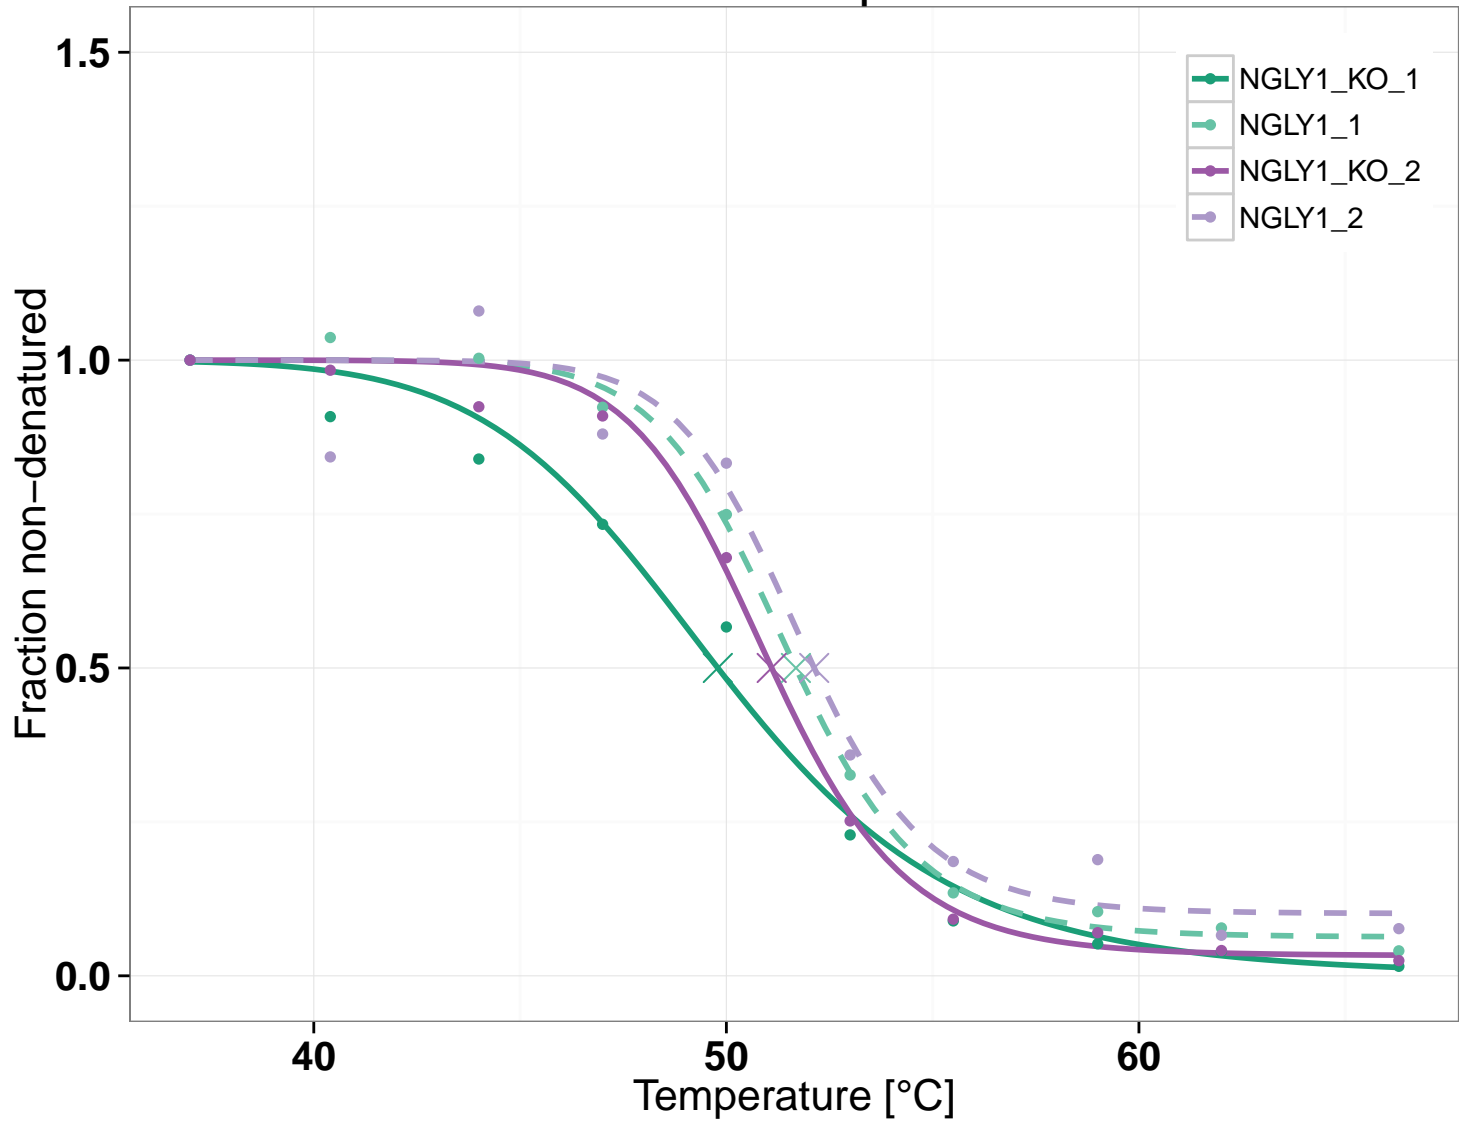

|            | meltPoint | slope  | plateau | R2   |
|------------|-----------|--------|---------|------|
| NGLY1_KO_1 | 49.79     | -0.088 | 0       | 0.99 |
| NGLY1_1    | 51.69     | -0.14  | 0.06    | 1    |
| NGLY1_KO_2 | 51.1      | -0.15  | 0.03    | 1    |
| NGLY1_2    | 52.13     | -0.15  | 0.1     | 0.97 |

Supplement: Supplementary file 7176 [file 1]

# IPI00873762.1|TAF15

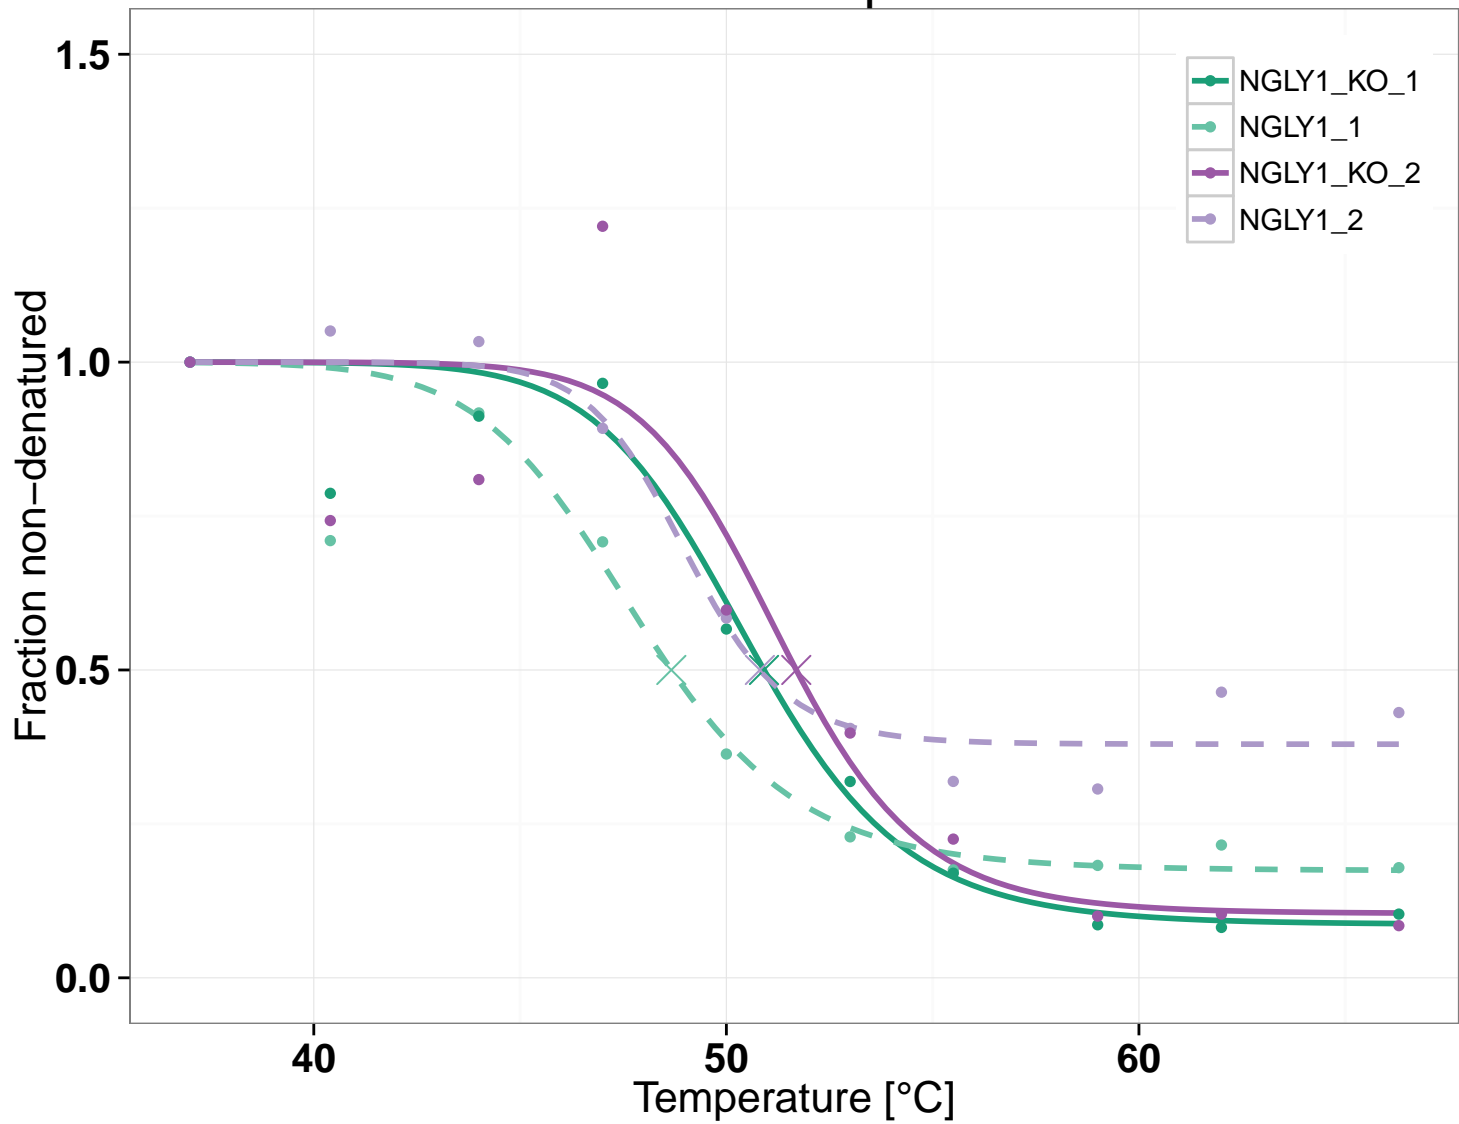

|            | meltPoint | slope | plateau | R2   |
|------------|-----------|-------|---------|------|
| NGLY1_KO_1 | 50.91     | -0.12 | 0.09    | 0.96 |
| NGLY1_1    | 48.67     | -0.11 | 0.17    | 0.92 |
| NGLY1_KO_2 | 51.69     | -0.13 | 0.1     | 0.87 |
| NGLY1_2    | 50.81     | -0.13 | 0.38    | 0.97 |

Supplement: Supplementary file 7177 [file 1]

IPI00418468.1|ANKRD16

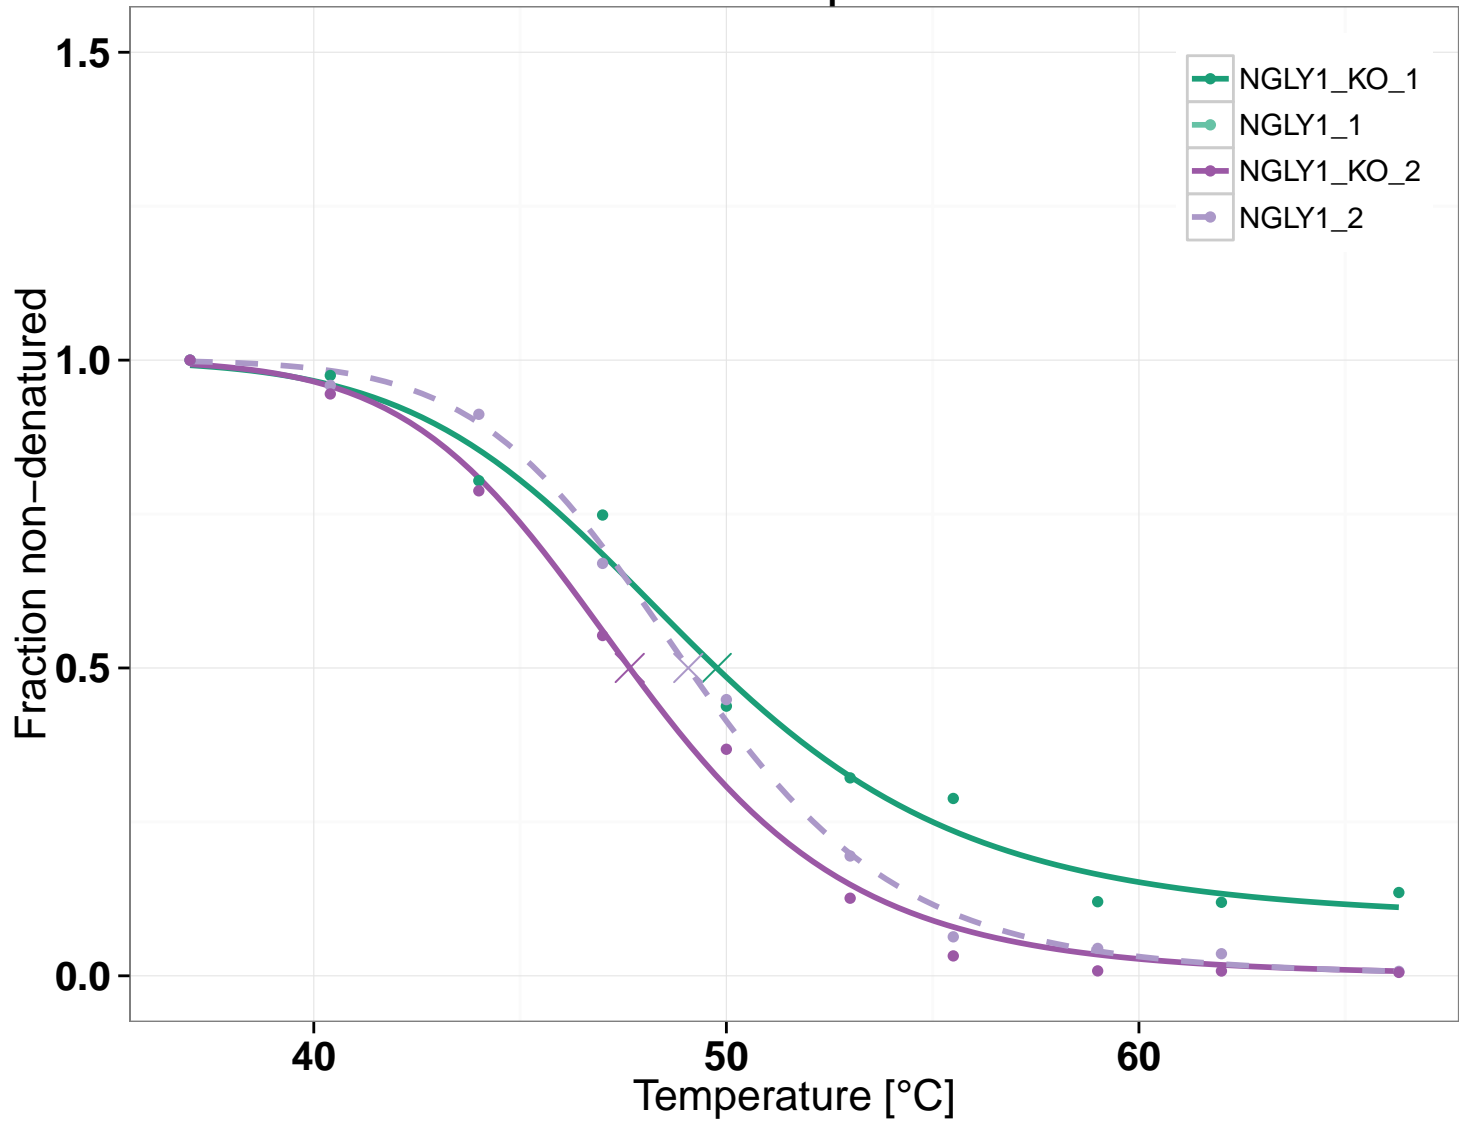

|            | meltPoint | slope  | plateau | R2   |
|------------|-----------|--------|---------|------|
| NGLY1_KO_1 | 49.77     | -0.068 | 0.09    | 0.99 |
| NGLY1_1    | -         | -      | -       | -    |
| NGLY1_KO_2 | 47.66     | -0.092 | 0       | 0.99 |
| NGLY1_2    | 49.08     | -0.097 | 0       | 1    |

Supplement: Supplementary file 7178 [file 1]

# IPI00301303.4|SLC25A36

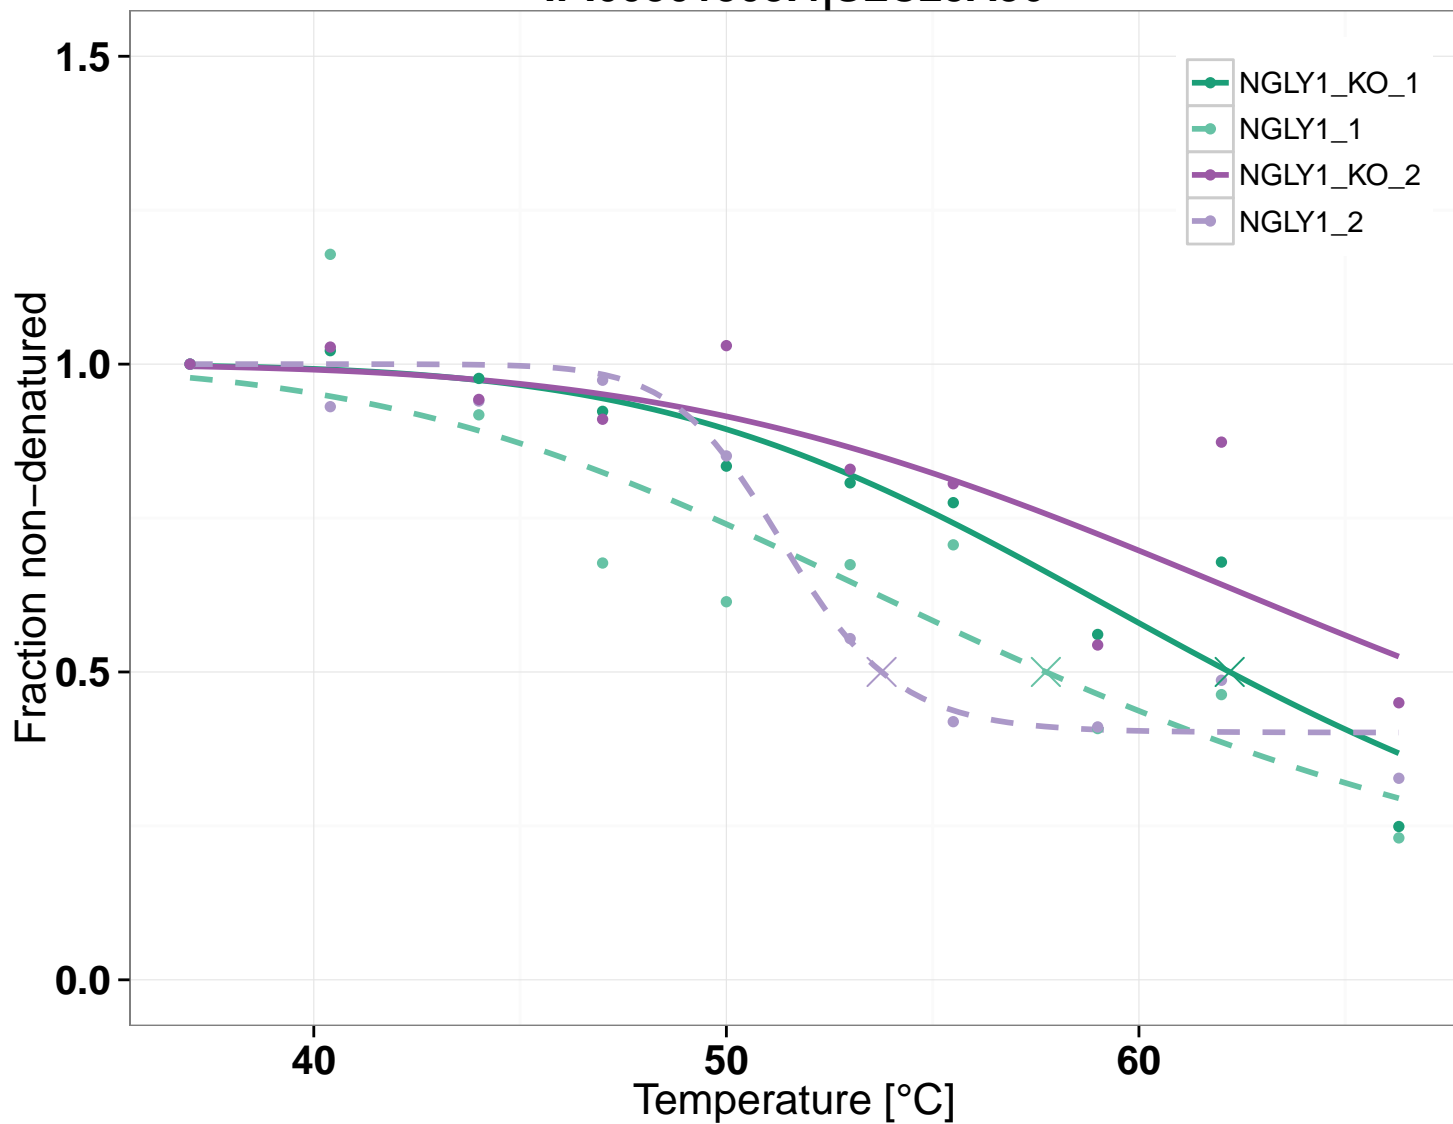

|            | meltPoint | slope  | plateau | R2   |
|------------|-----------|--------|---------|------|
| NGLY1_KO_1 | 62.2      | -0.037 | 0       | 0.9  |
| NGLY1_1    | 57.74     | -0.032 | 0       | 0.83 |
| NGLY1_KO_2 | -         | -0.028 | 0       | 0.69 |
| NGLY1_2    | 53.76     | -0.11  | 0.4     | 0.97 |

Supplement: Supplementary file 7179 [file 1]

IPI00018034.1|SURF1

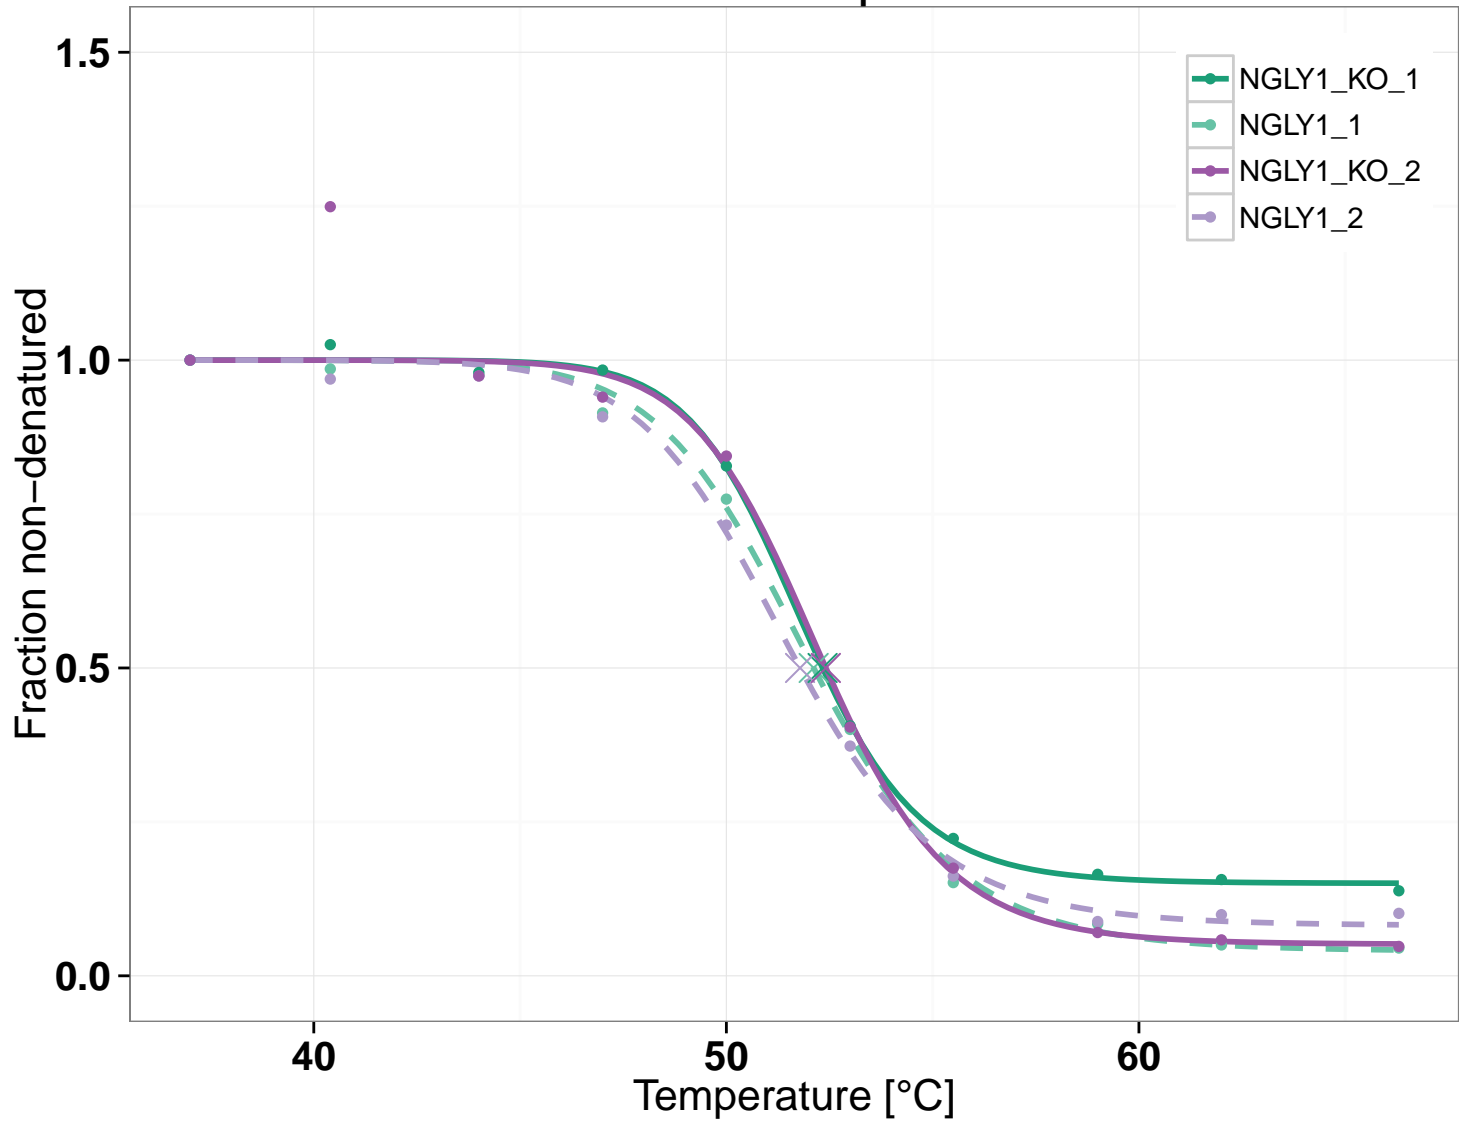

|            | meltPoint | slope | plateau | R2   |
|------------|-----------|-------|---------|------|
| NGLY1_KO_1 | 52.33     | -0.15 | 0.15    | 1    |
| NGLY1_1    | 52.12     | -0.13 | 0.04    | 1    |
| NGLY1_KO_2 | 52.41     | -0.15 | 0.05    | 0.97 |
| NGLY1_2    | 51.79     | -0.13 | 0.08    | 1    |

Supplement: Supplementary file 7180 [file 1]

IPI00011770.1|NDUFA4

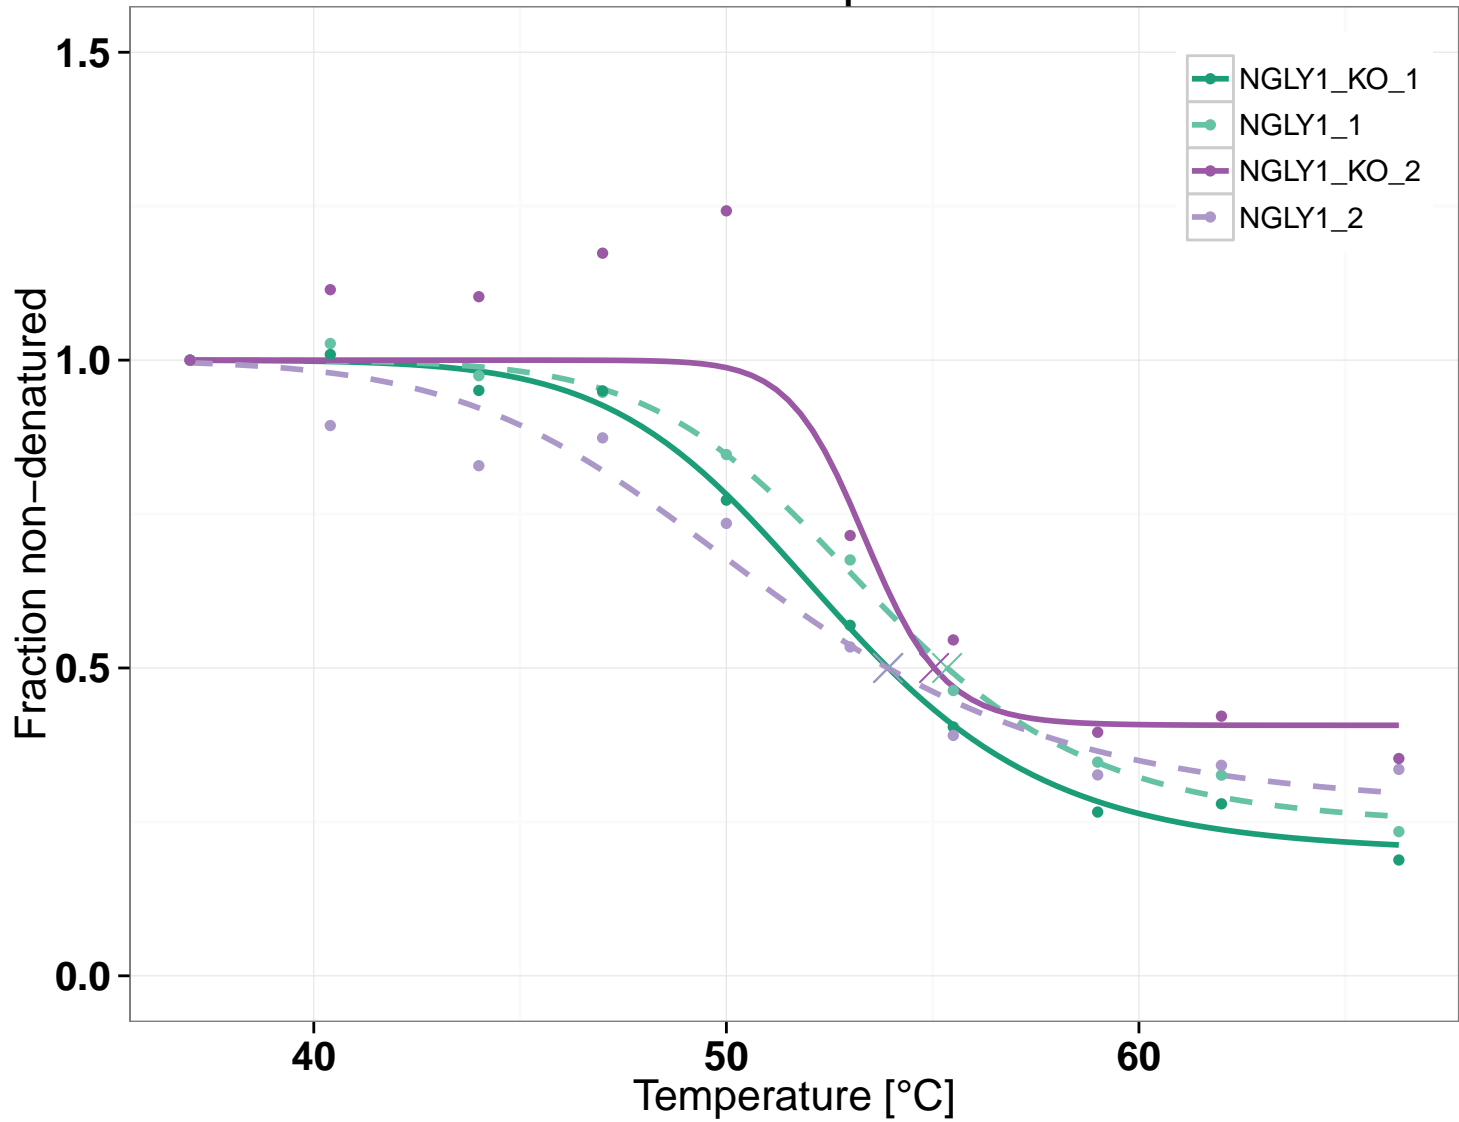

|            | meltPoint | slope  | plateau | R2   |
|------------|-----------|--------|---------|------|
| NGLY1_KO_1 | 53.92     | -0.075 | 0.2     | 1    |
| NGLY1_1    | 55.35     | -0.07  | 0.24    | 1    |
| NGLY1_KO_2 | 55.04     | -0.16  | 0.41    | 0.89 |
| NGLY1_2    | 53.92     | -0.05  | 0.27    | 0.96 |

Supplement: Supplementary file 7181 [file 1]

# IPI00005780.3|OGT

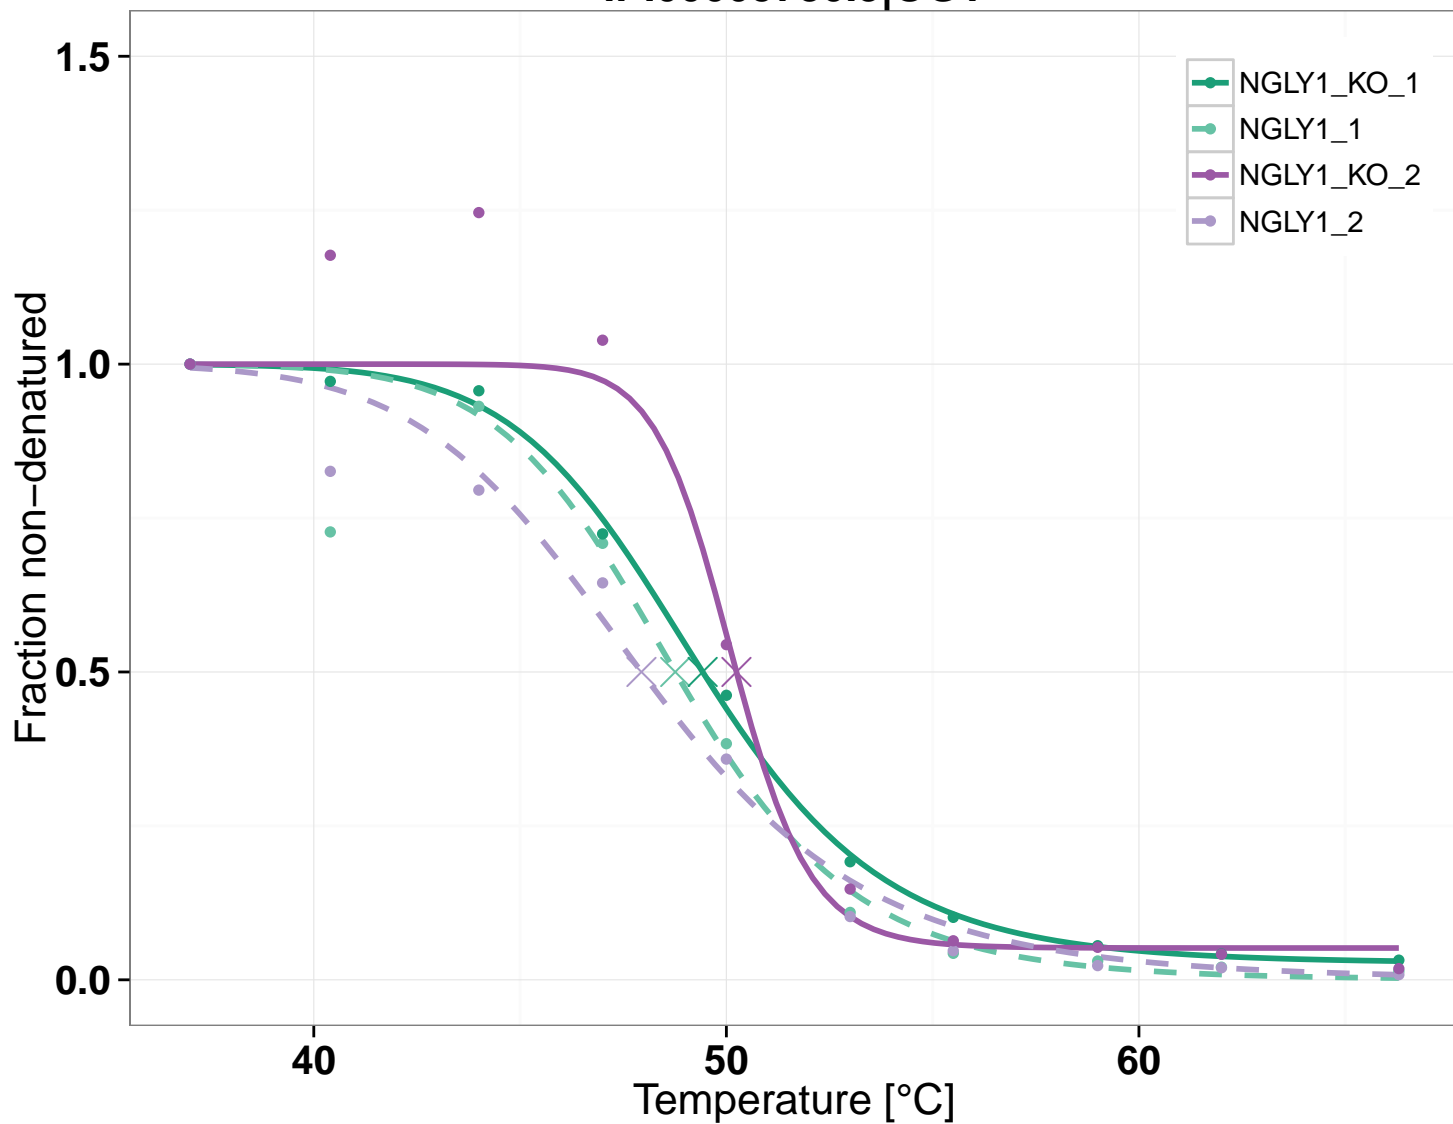

|            | meltPoint | slope  | plateau | R2   |
|------------|-----------|--------|---------|------|
| NGLY1_KO_1 | 49.43     | -0.11  | 0.03    | 1    |
| NGLY1_1    | 48.76     | -0.11  | 0       | 0.95 |
| NGLY1_KO_2 | 50.24     | -0.25  | 0.05    | 0.96 |
| NGLY1_2    | 47.94     | -0.091 | 0       | 0.98 |

Supplement: Supplementary file 7182 [file 1]

# IPI00290085.2|CDH2

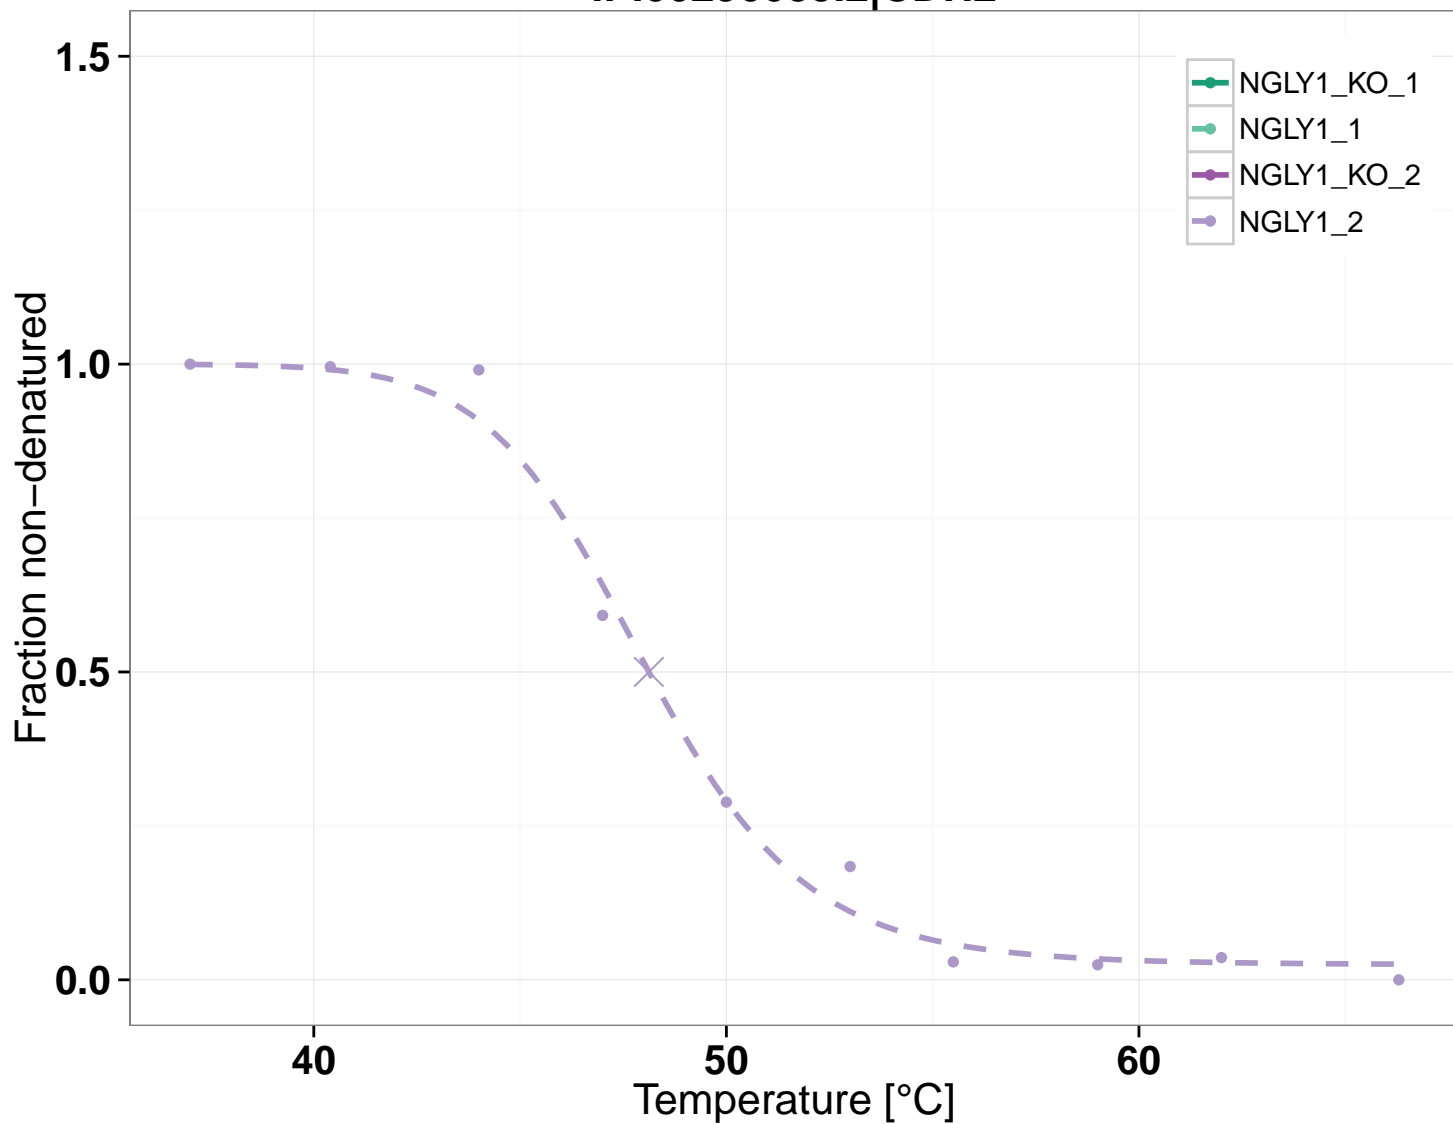

|            | meltPoint | slope | plateau | R2   |
|------------|-----------|-------|---------|------|
| NGLY1_KO_1 | —         | —     | —       | —    |
| NGLY1_1    | —         | —     | —       | —    |
| NGLY1_KO_2 | —         | —     | —       | —    |
| NGLY1_2    | 48.12     | -0.13 | 0.02    | 0.99 |

Supplement: Supplementary file 7183 [file 1]

IPI00879193.3|TTC28

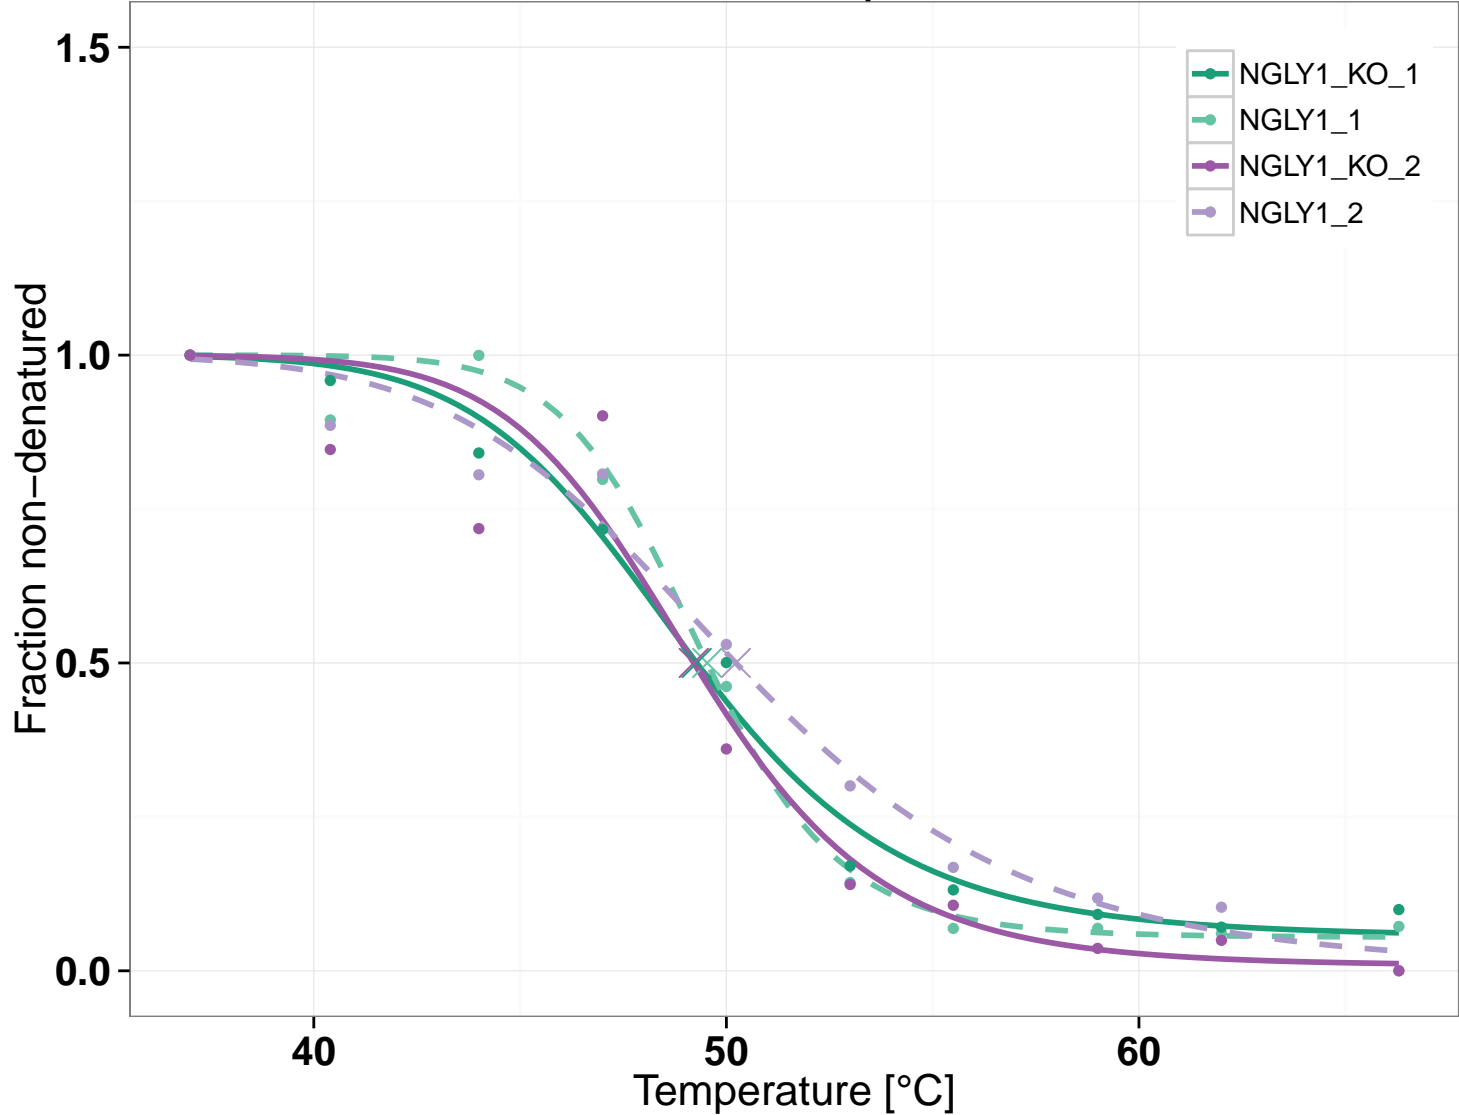

|            | meltPoint | slope  | plateau | R2   |
|------------|-----------|--------|---------|------|
| NGLY1_KO_1 | 49.28     | -0.092 | 0.05    | 0.99 |
| NGLY1_1    | 49.54     | -0.14  | 0.05    | 0.99 |
| NGLY1_KO_2 | 49.21     | -0.11  | 0.01    | 0.93 |
| NGLY1_2    | 50.23     | -0.071 | 0       | 0.98 |

Supplement: Supplementary file 7184 [file 1]

IPI00005966.6|NDUFA12

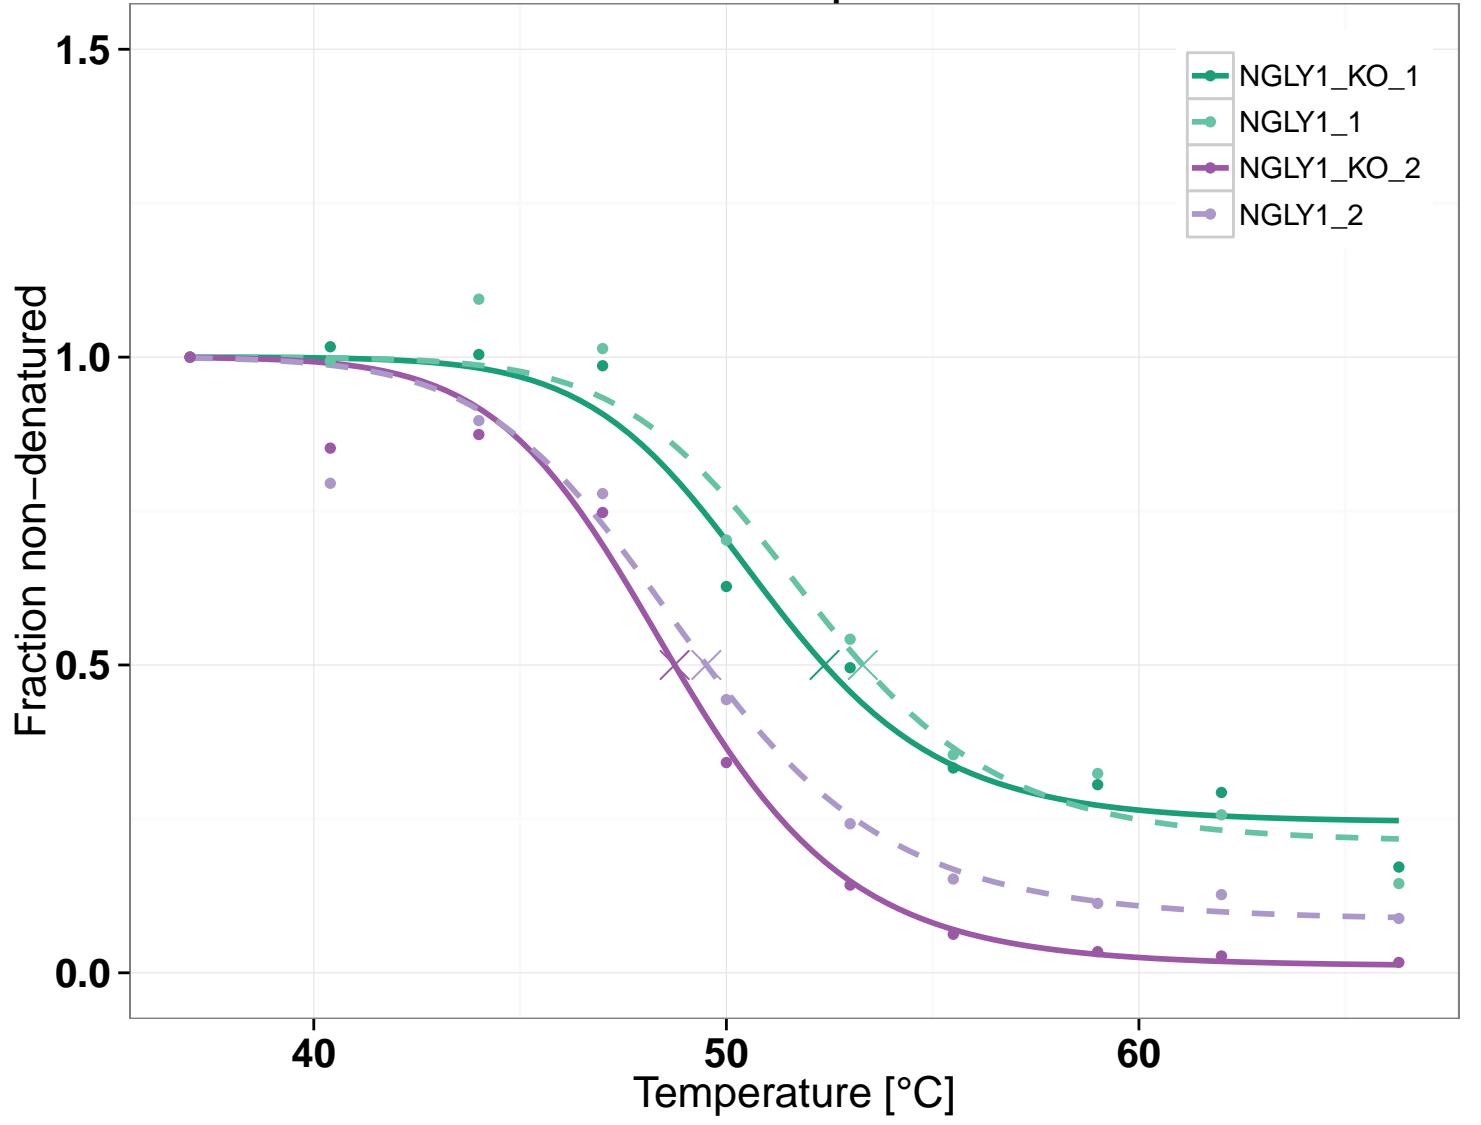

|            | meltPoint | slope  | plateau | R2   |
|------------|-----------|--------|---------|------|
| NGLY1_KO_1 | 52.38     | -0.089 | 0.24    | 0.98 |
| NGLY1_1    | 53.31     | -0.086 | 0.21    | 0.97 |
| NGLY1_KO_2 | 48.75     | -0.11  | 0.01    | 0.98 |
| NGLY1_2    | 49.51     | -0.093 | 0.08    | 0.97 |

Supplement: Supplementary file 7185 [file 1]

IPI00328846.3|FAM83A

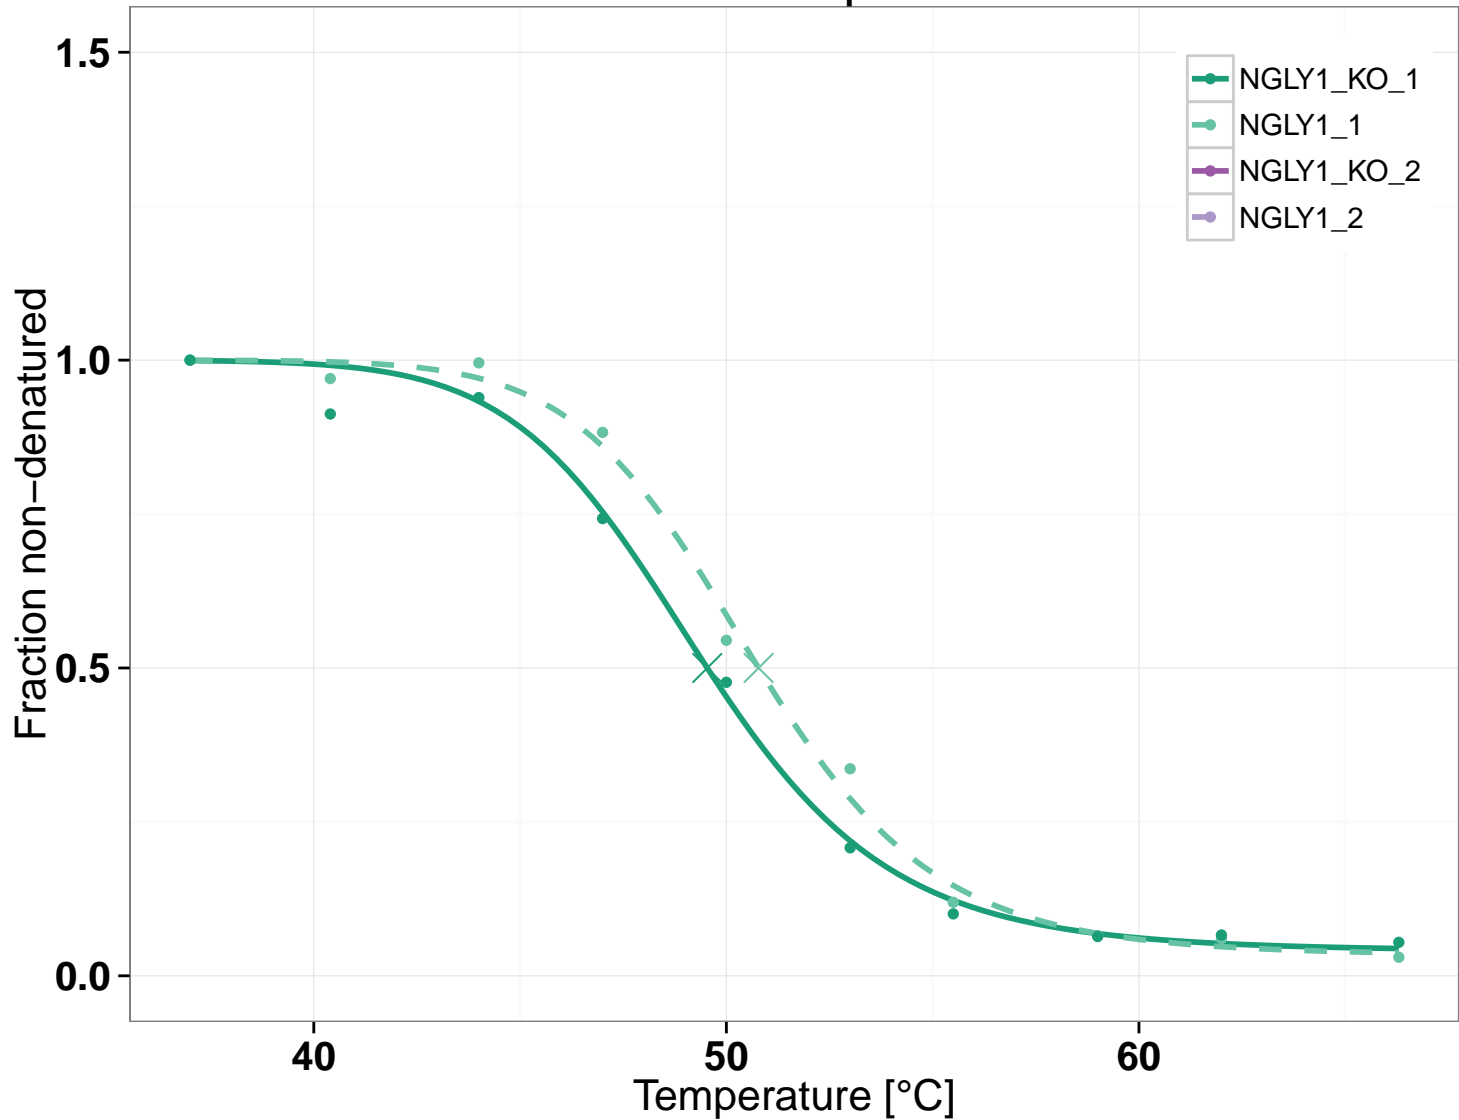

|            | meltPoint | slope | plateau | R2   |
|------------|-----------|-------|---------|------|
| NGLY1_KO_1 | 49.54     | -0.1  | 0.04    | 0.99 |
| NGLY1_1    | 50.78     | -0.11 | 0.03    | 1    |
| NGLY1_KO_2 | -         | -     | -       | -    |
| NGLY1_2    | -         | -     | -       | -    |

Supplement: Supplementary file 7186 [file 1]

# IPI00025714.1|RIPK4

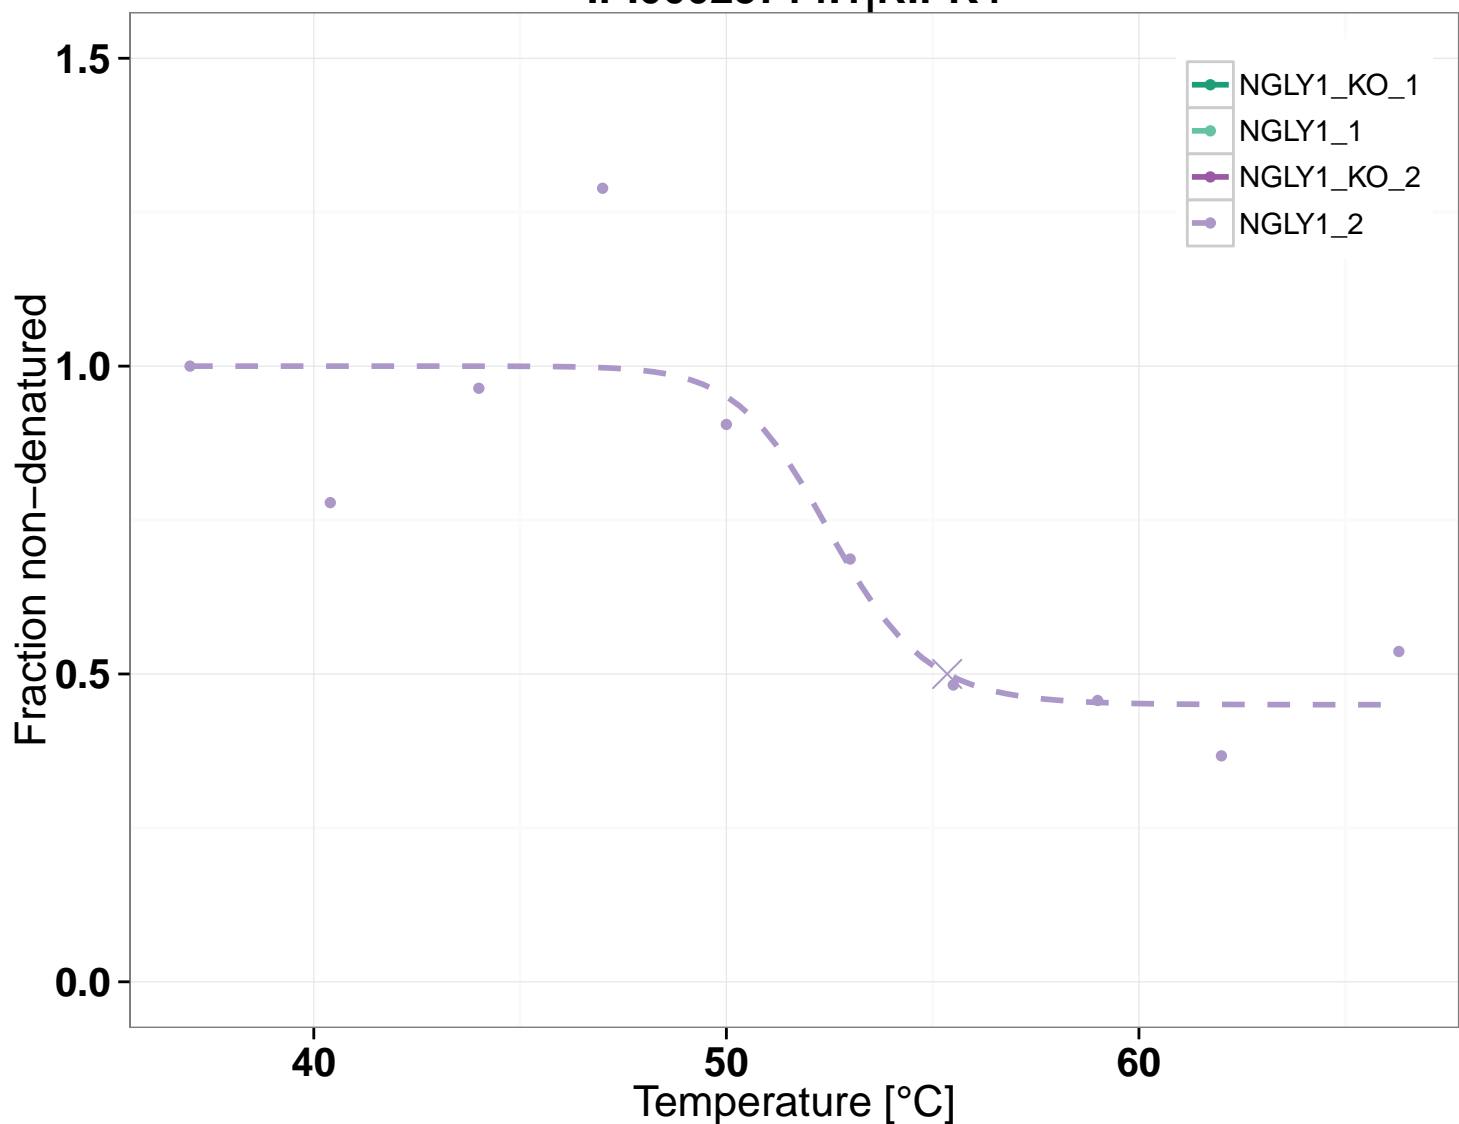

|            | meltPoint | slope | plateau | R2  |
|------------|-----------|-------|---------|-----|
| NGLY1_KO_1 | —         | —     | —       | —   |
| NGLY1_1    | —         | —     | —       | —   |
| NGLY1_KO_2 | —         | —     | —       | —   |
| NGLY1_2    | 55.35     | -0.12 | 0.45    | 0.8 |

Supplement: Supplementary file 7187 [file 1]

# IPI00005218.1|MOCS2

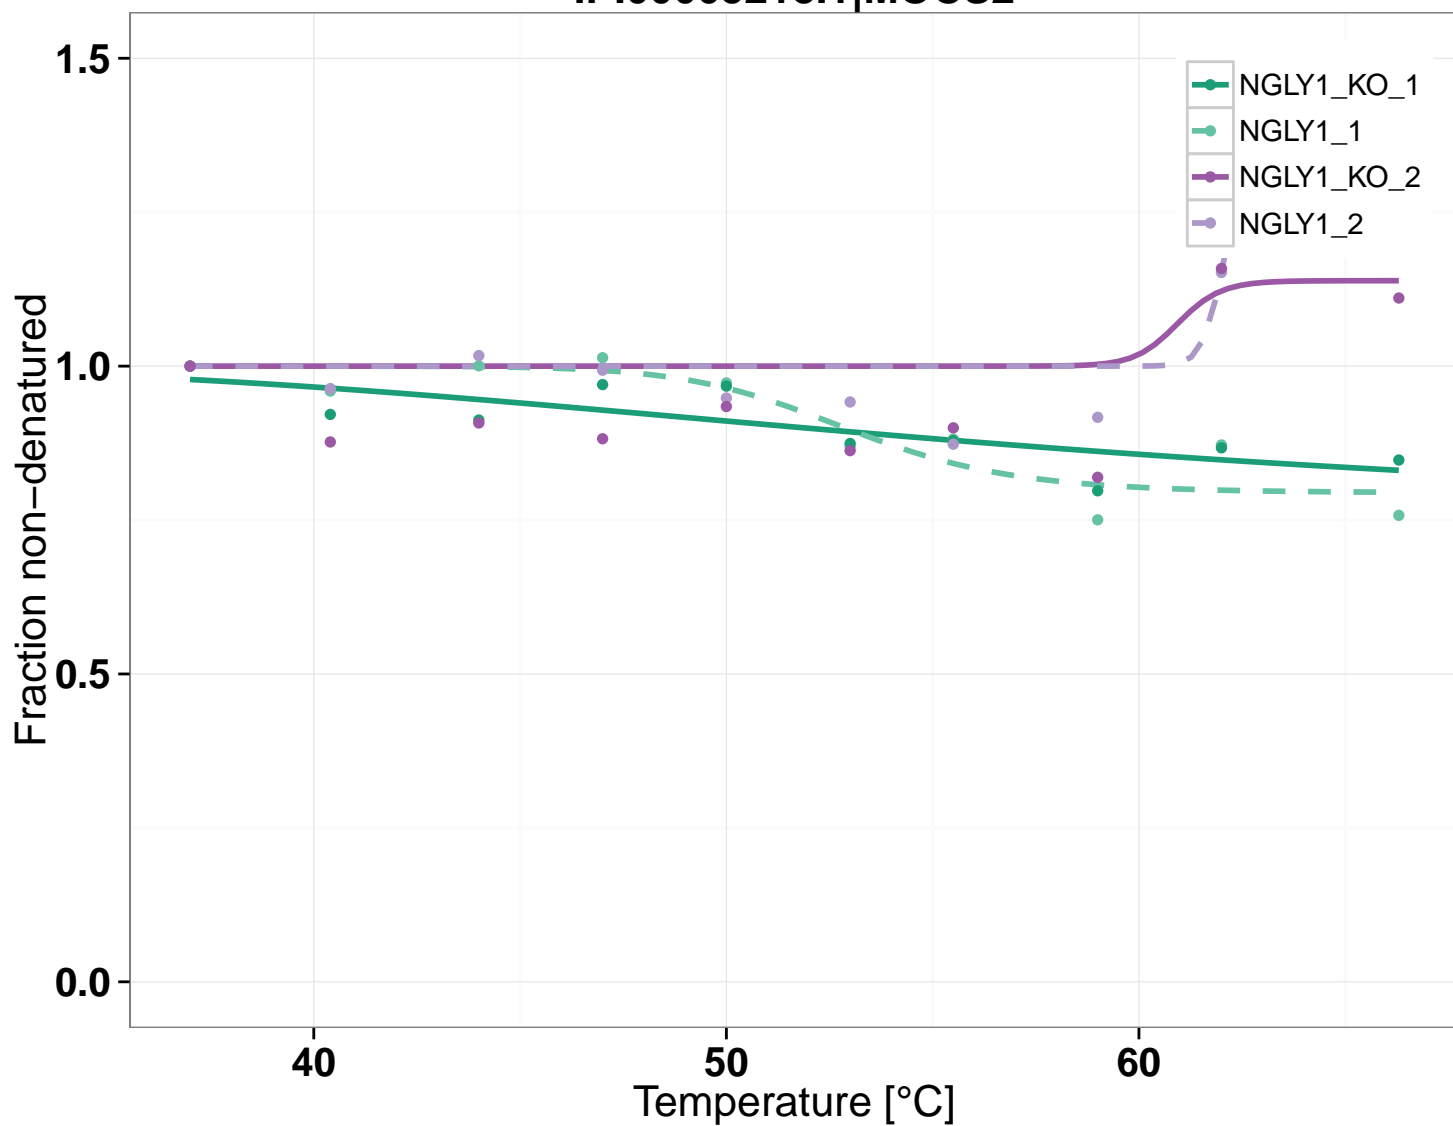

|            | meltPoint | slope   | plateau | R2   |
|------------|-----------|---------|---------|------|
| NGLY1_KO_1 | –         | –0.0059 | 0.73    | 0.62 |
| NGLY1_1    | –         | –0.026  | 0.79    | 0.83 |
| NGLY1_KO_2 | –         | 0.067   | 1.14    | 0.04 |
| NGLY1_2    | –         | 0.33    | 1.34    | 0.81 |

Supplement: Supplementary file 7188 [file 1]

# IPI00796333.1|ALDOA

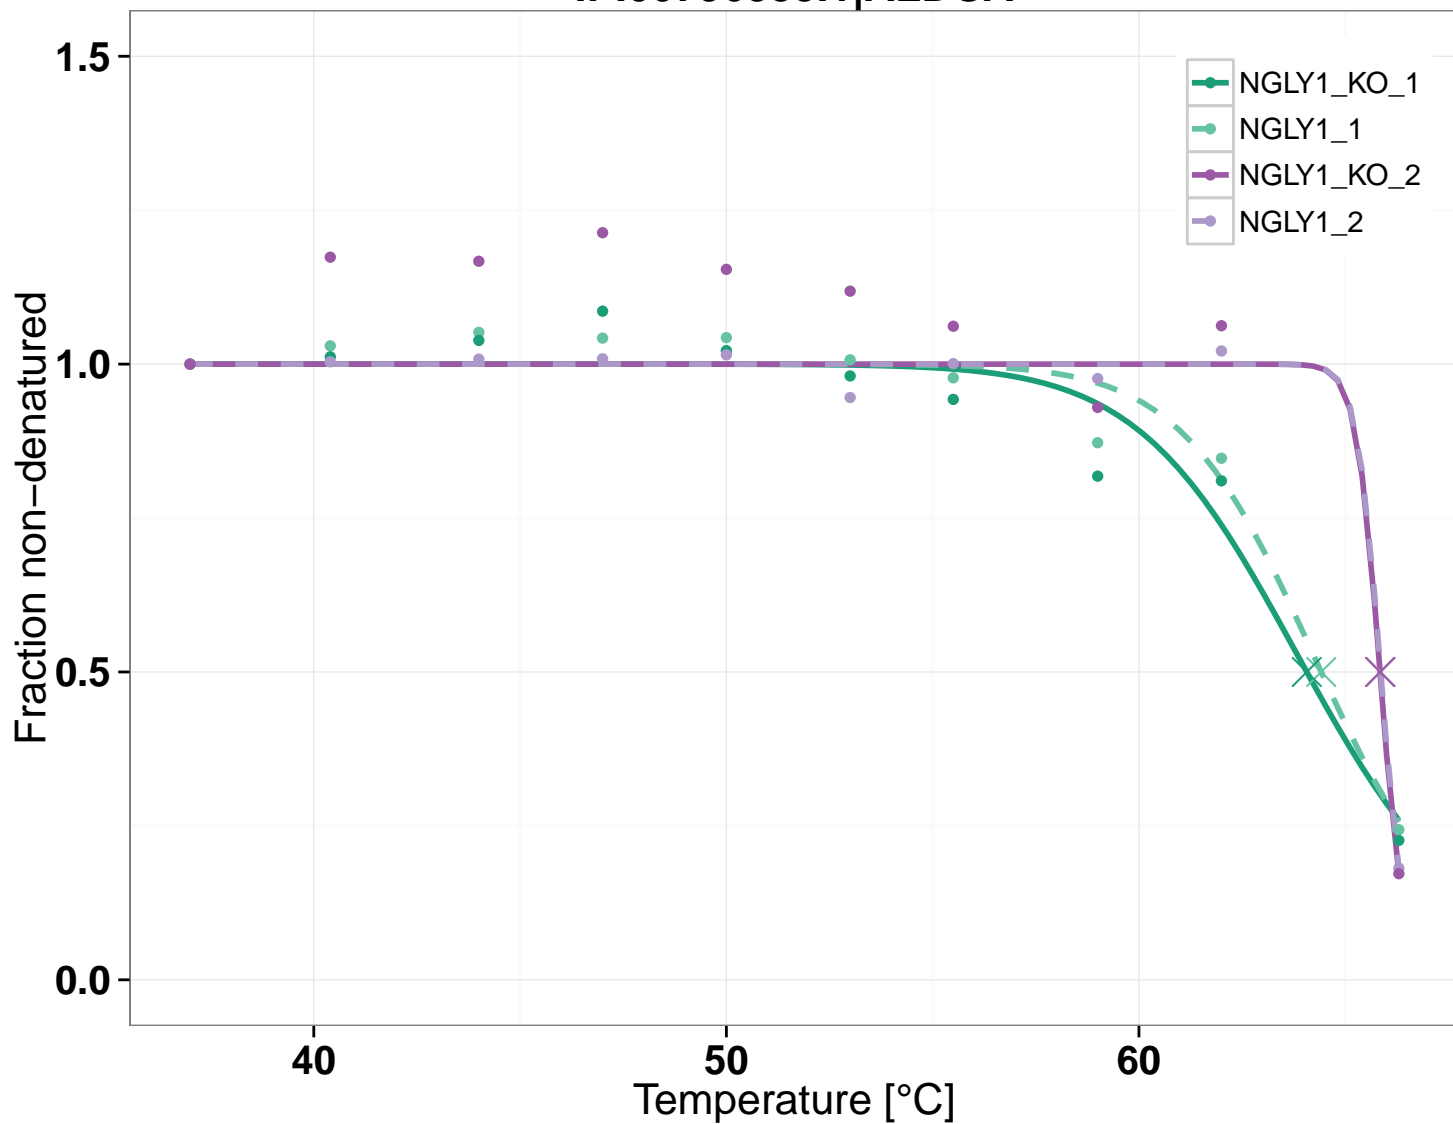

|            | meltPoint | slope | plateau | R2   |
|------------|-----------|-------|---------|------|
| NGLY1_KO_1 | 64.07     | -0.12 | 0       | 0.94 |
| NGLY1_1    | 64.42     | -0.15 | 0       | 0.97 |
| NGLY1_KO_2 | 65.84     | -0.87 | 0       | 0.82 |
| NGLY1_2    | 65.86     | -0.86 | 0       | 0.99 |

Supplement: Supplementary file 7189 [file 1]

IPI00044714.7|ZNF285A

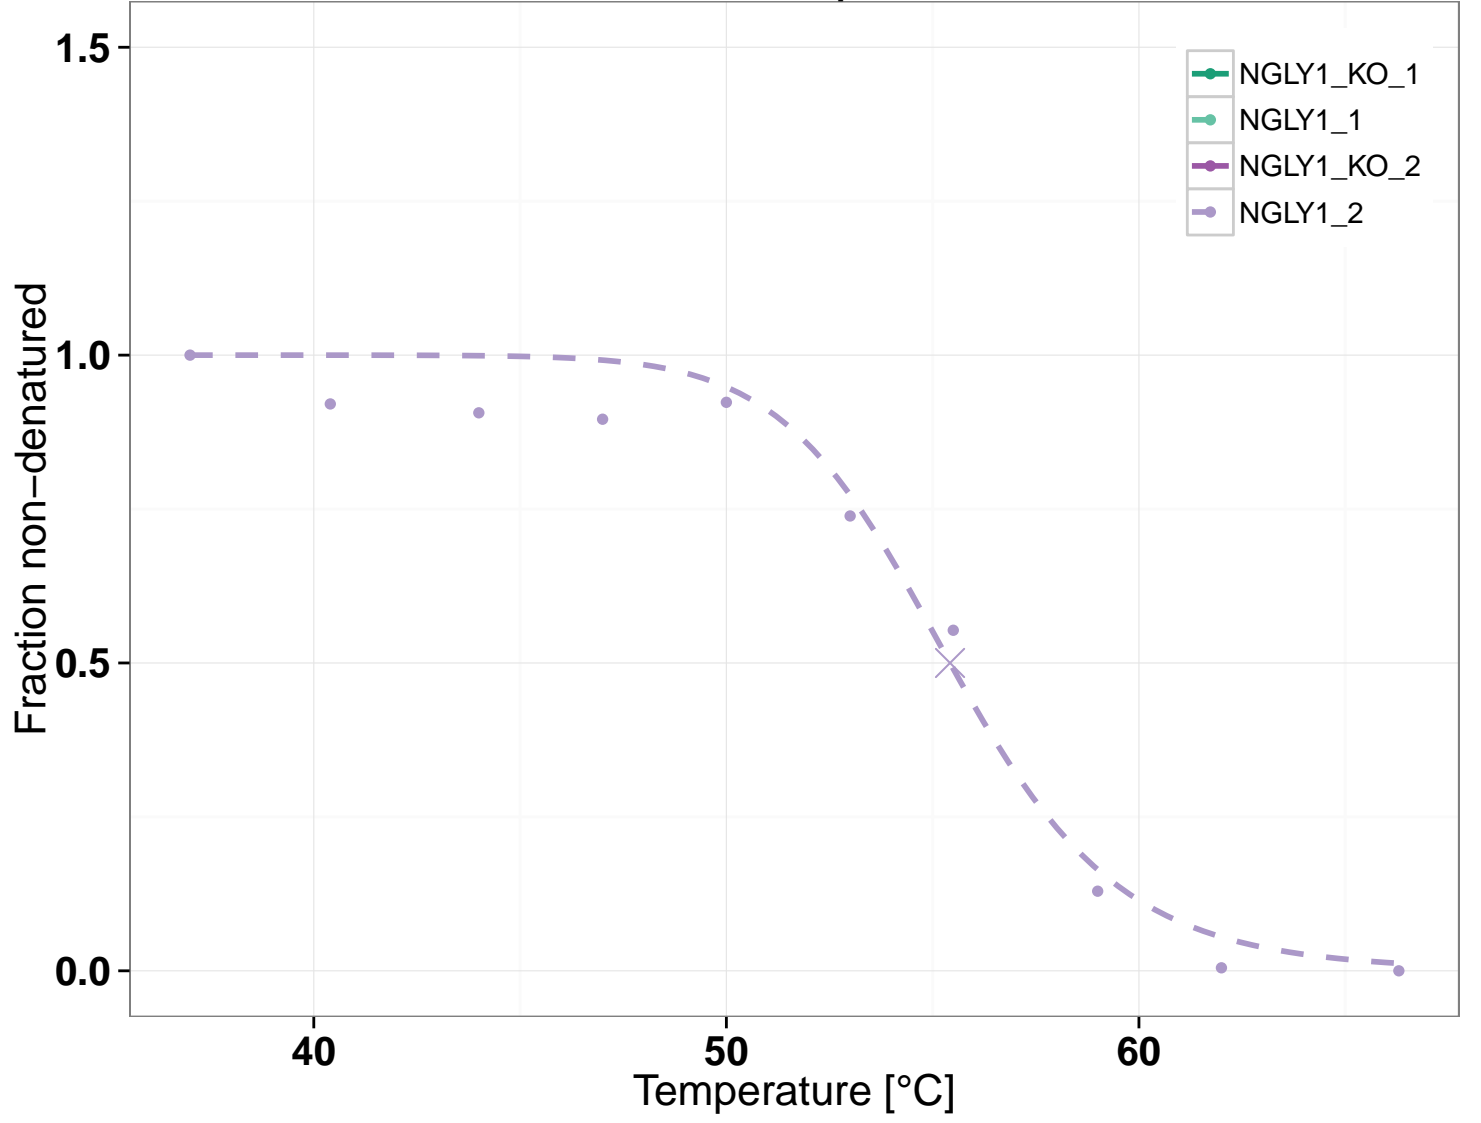

|            | meltPoint | slope | plateau | R2   |
|------------|-----------|-------|---------|------|
| NGLY1_KO_1 | -         | -     | -       | -    |
| NGLY1_1    | -         | -     | -       | -    |
| NGLY1_KO_2 | -         | -     | -       | -    |
| NGLY1_2    | 55.42     | -0.12 | 0       | 0.98 |

Supplement: Supplementary file 7190 [file 1]

IPI00377085.1|ARHGEF11

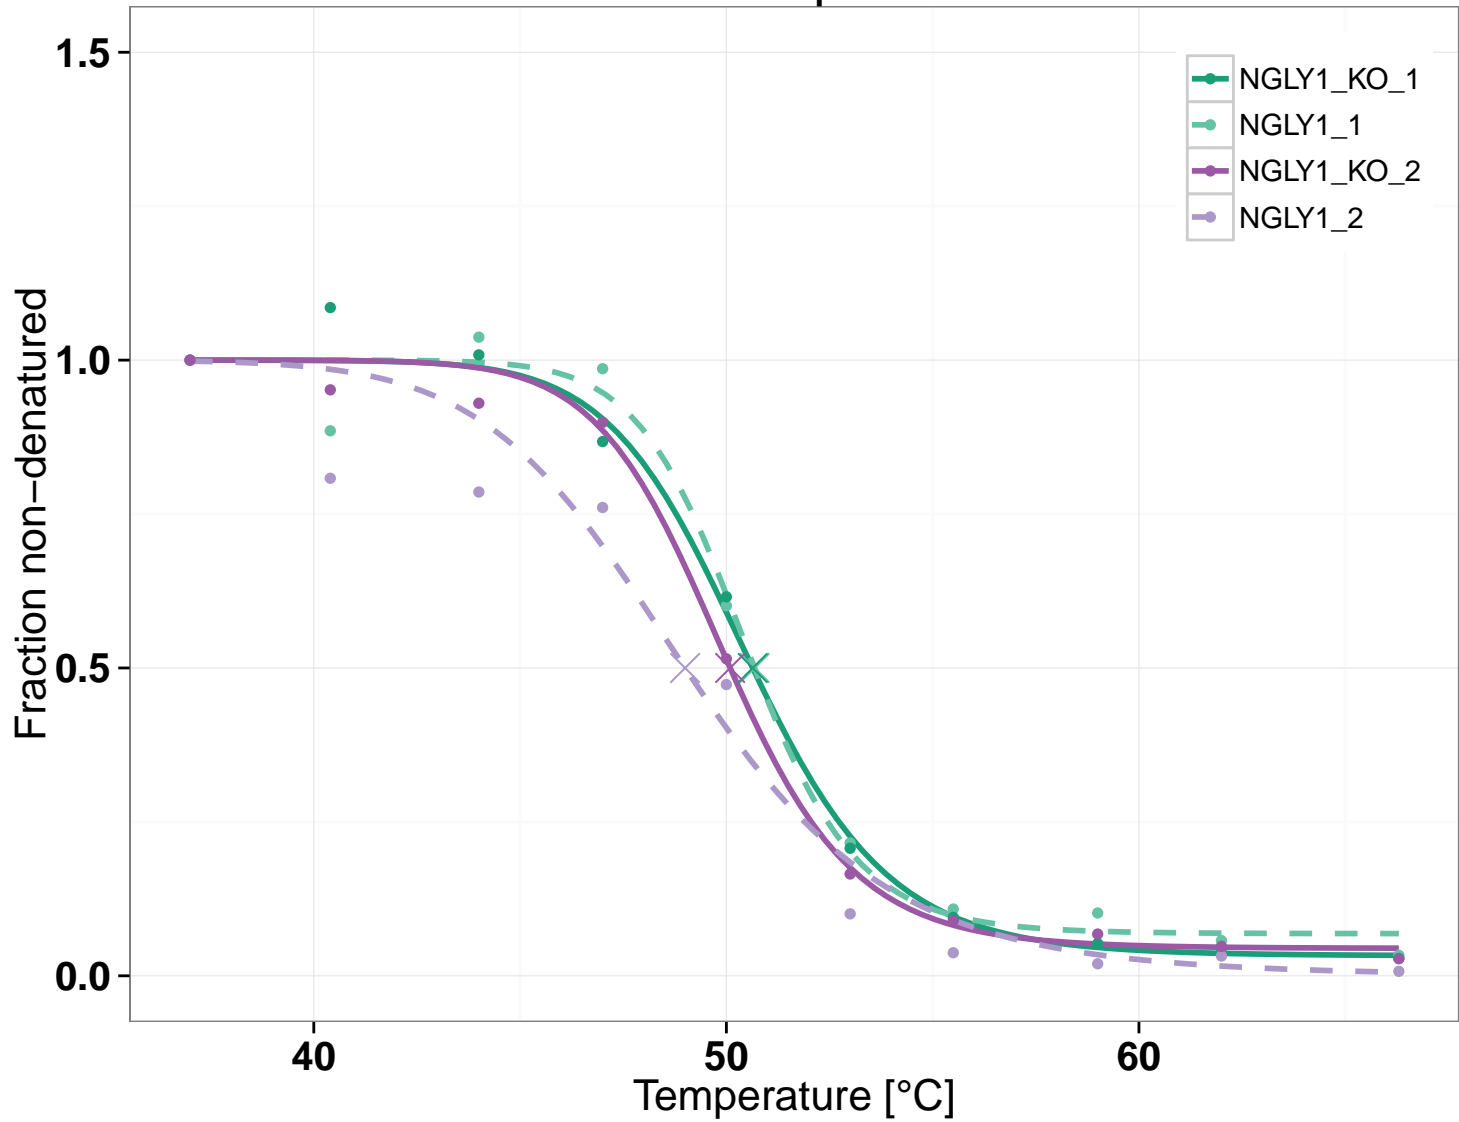

|            | meltPoint | slope | plateau | R2   |
|------------|-----------|-------|---------|------|
| NGLY1_KO_1 | 50.64     | -0.14 | 0.03    | 0.99 |
| NGLY1_1    | 50.68     | -0.18 | 0.07    | 0.99 |
| NGLY1_KO_2 | 50.09     | -0.15 | 0.04    | 1    |
| NGLY1_2    | 49        | -0.1  | 0       | 0.96 |

Supplement: Supplementary file 7191 [file 1]

IPI00871168.1|TBC1D22B

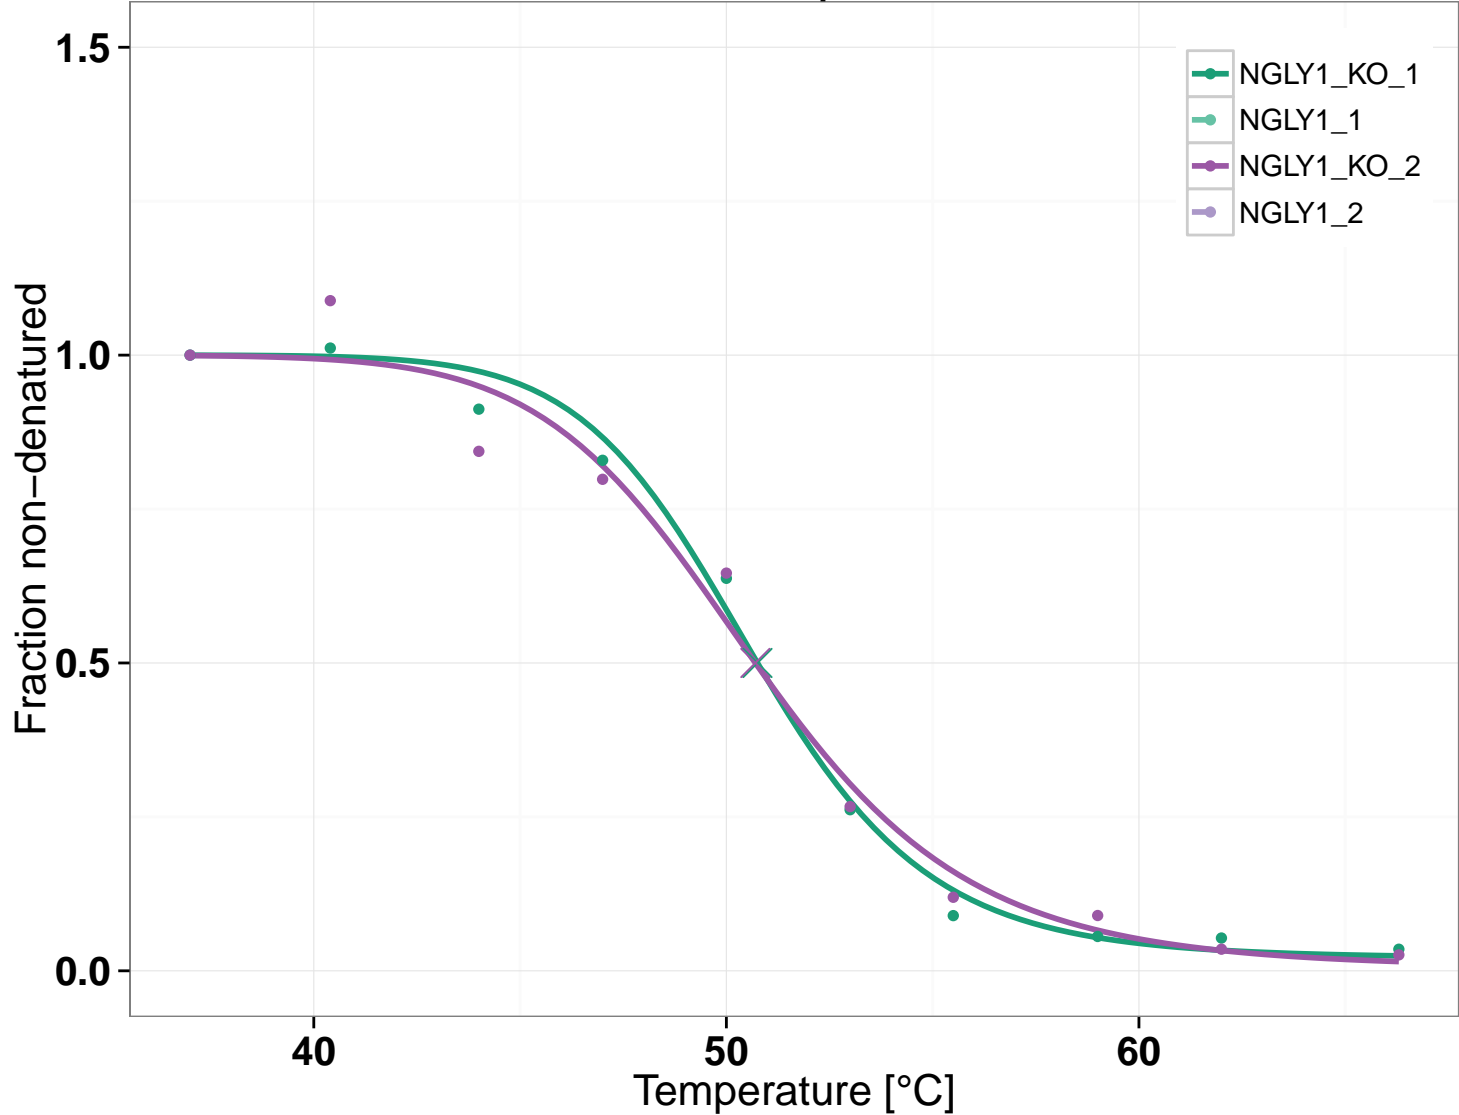

|            | meltPoint | slope  | plateau | R2   |
|------------|-----------|--------|---------|------|
| NGLY1_KO_1 | 50.75     | -0.12  | 0.02    | 0.99 |
| NGLY1_1    | -         | -      | -       | -    |
| NGLY1_KO_2 | 50.7      | -0.096 | 0       | 0.98 |
| NGLY1_2    | -         | -      | -       | -    |

Supplement: Supplementary file 7192 [file 1]

IPI00011857.1|CHAF1B

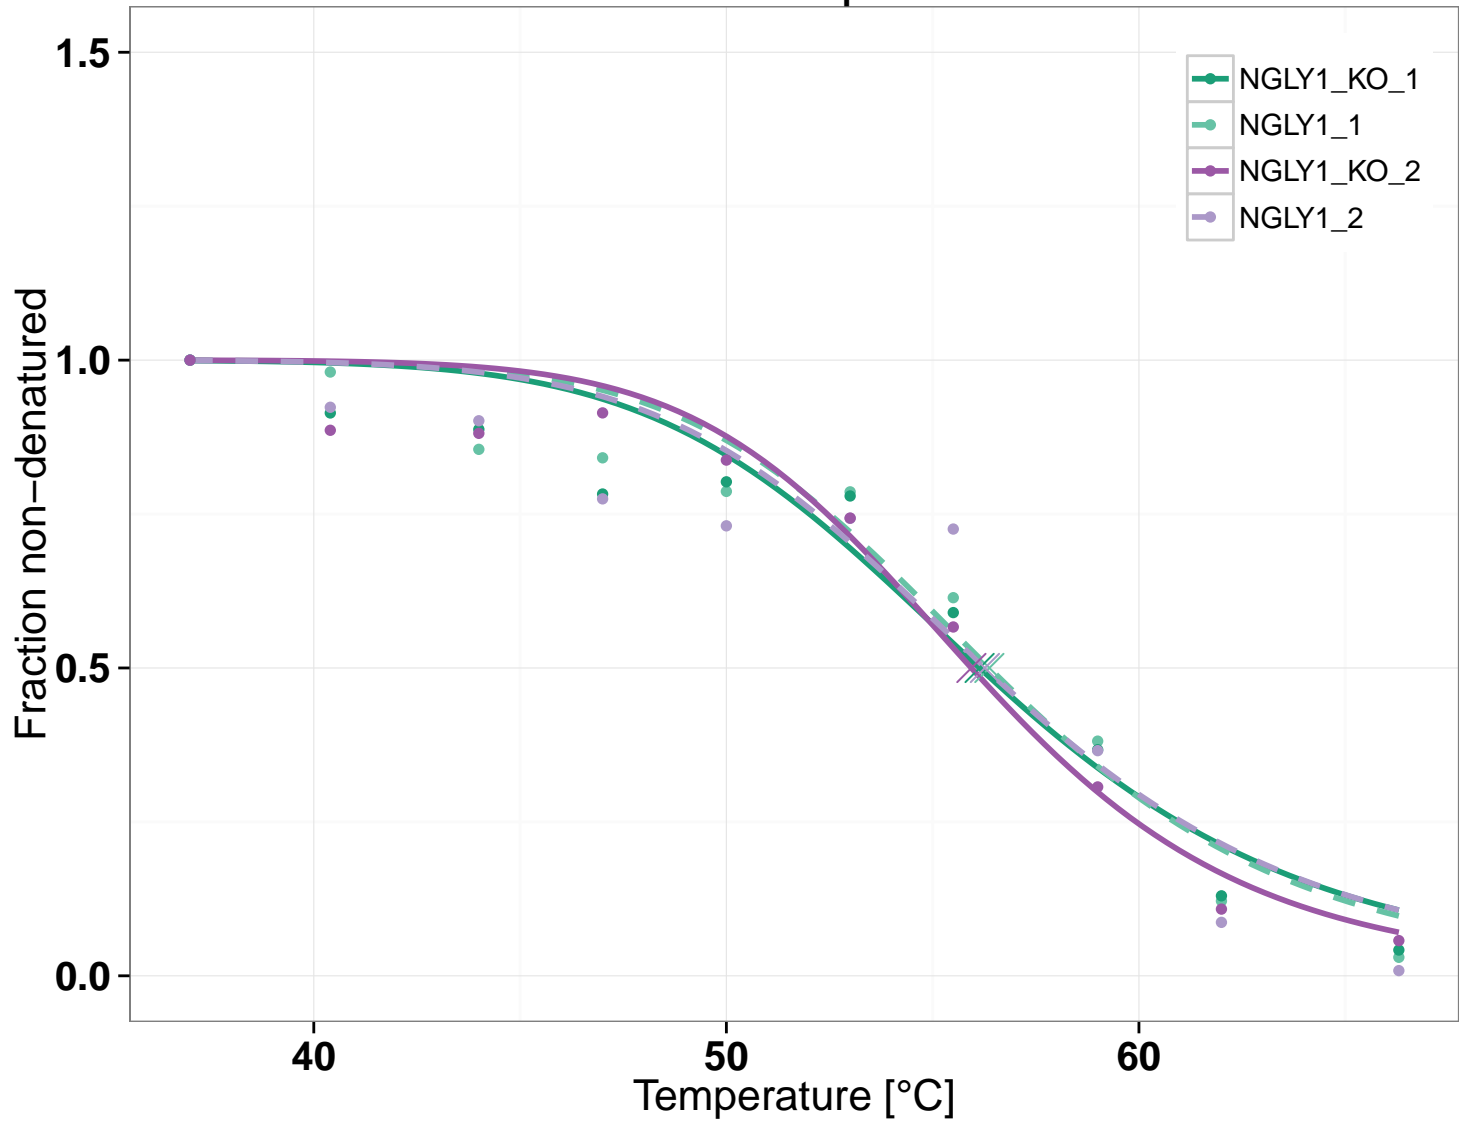

|            | meltPoint | slope  | plateau | R2   |
|------------|-----------|--------|---------|------|
| NGLY1_KO_1 | 56.14     | -0.063 | 0       | 0.94 |
| NGLY1_1    | 56.37     | -0.067 | 0       | 0.95 |
| NGLY1_KO_2 | 55.94     | -0.075 | 0       | 0.97 |
| NGLY1_2    | 56.27     | -0.064 | 0       | 0.9  |

Supplement: Supplementary file 7193 [file 1]

IPI00216155.1|SESN1

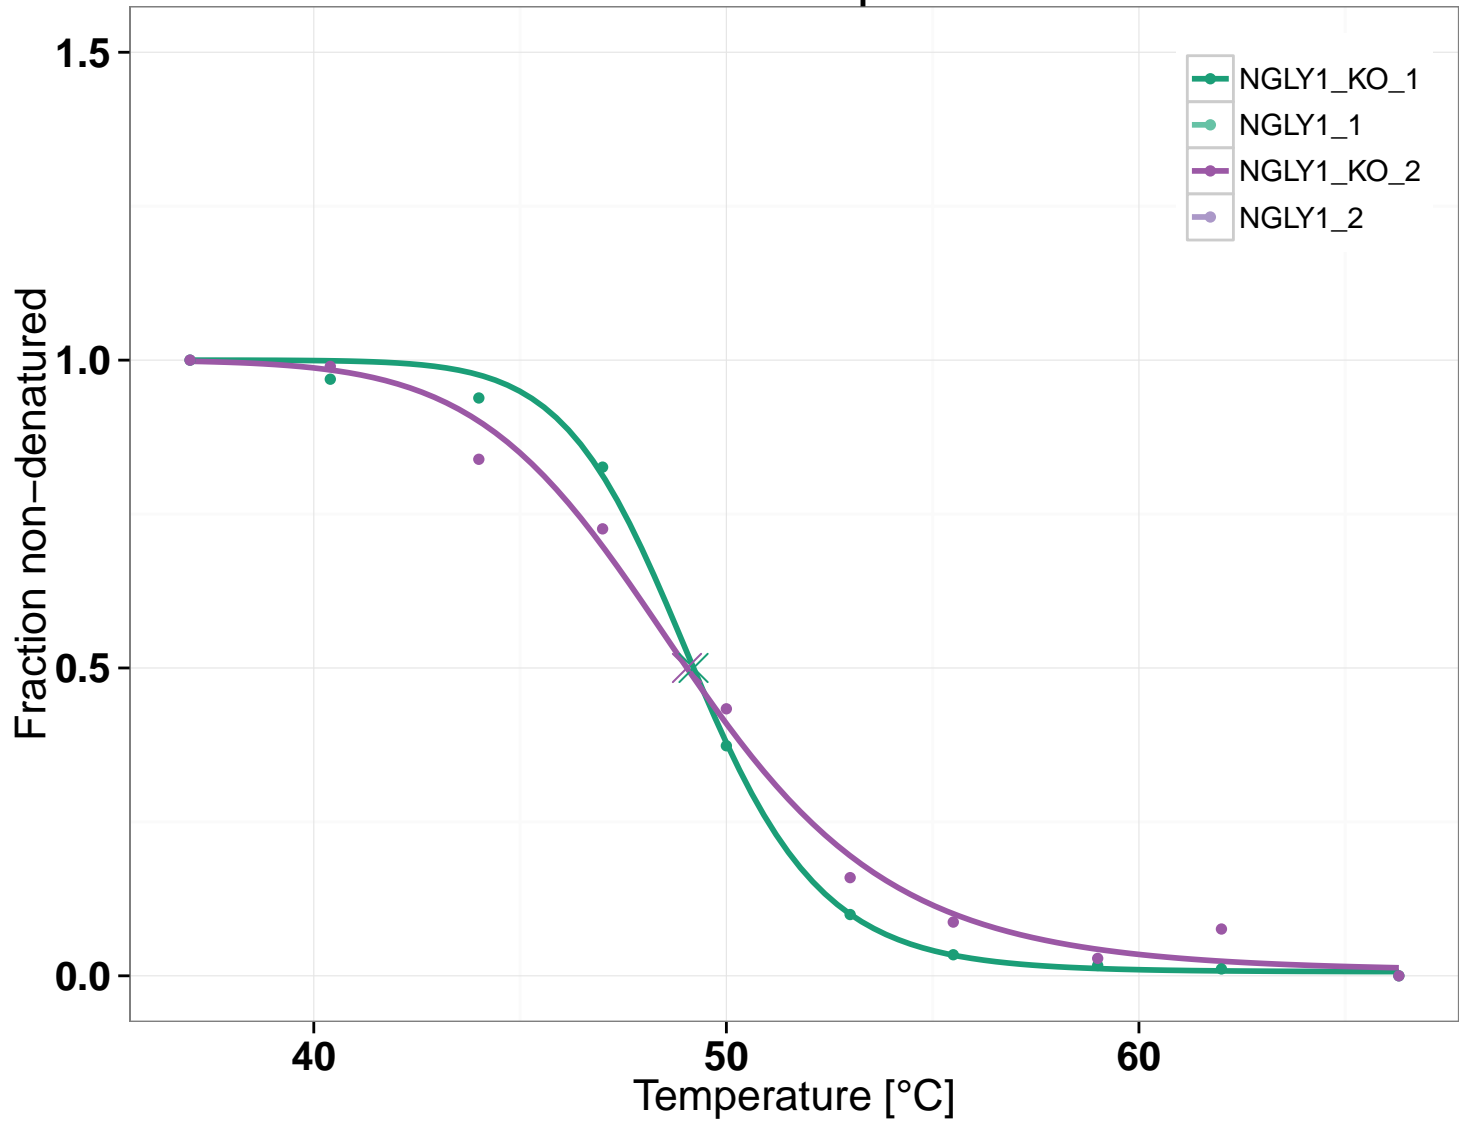

|            | meltPoint | slope  | plateau | R2   |
|------------|-----------|--------|---------|------|
| NGLY1_KO_1 | 49.2      | -0.16  | 0.01    | 1    |
| NGLY1_1    | -         | -      | -       | -    |
| NGLY1_KO_2 | 49.05     | -0.099 | 0.01    | 0.99 |
| NGLY1_2    | -         | -      | -       | -    |

Supplement: Supplementary file 7194 [file 1]

# IPI00916847.1|OLA1

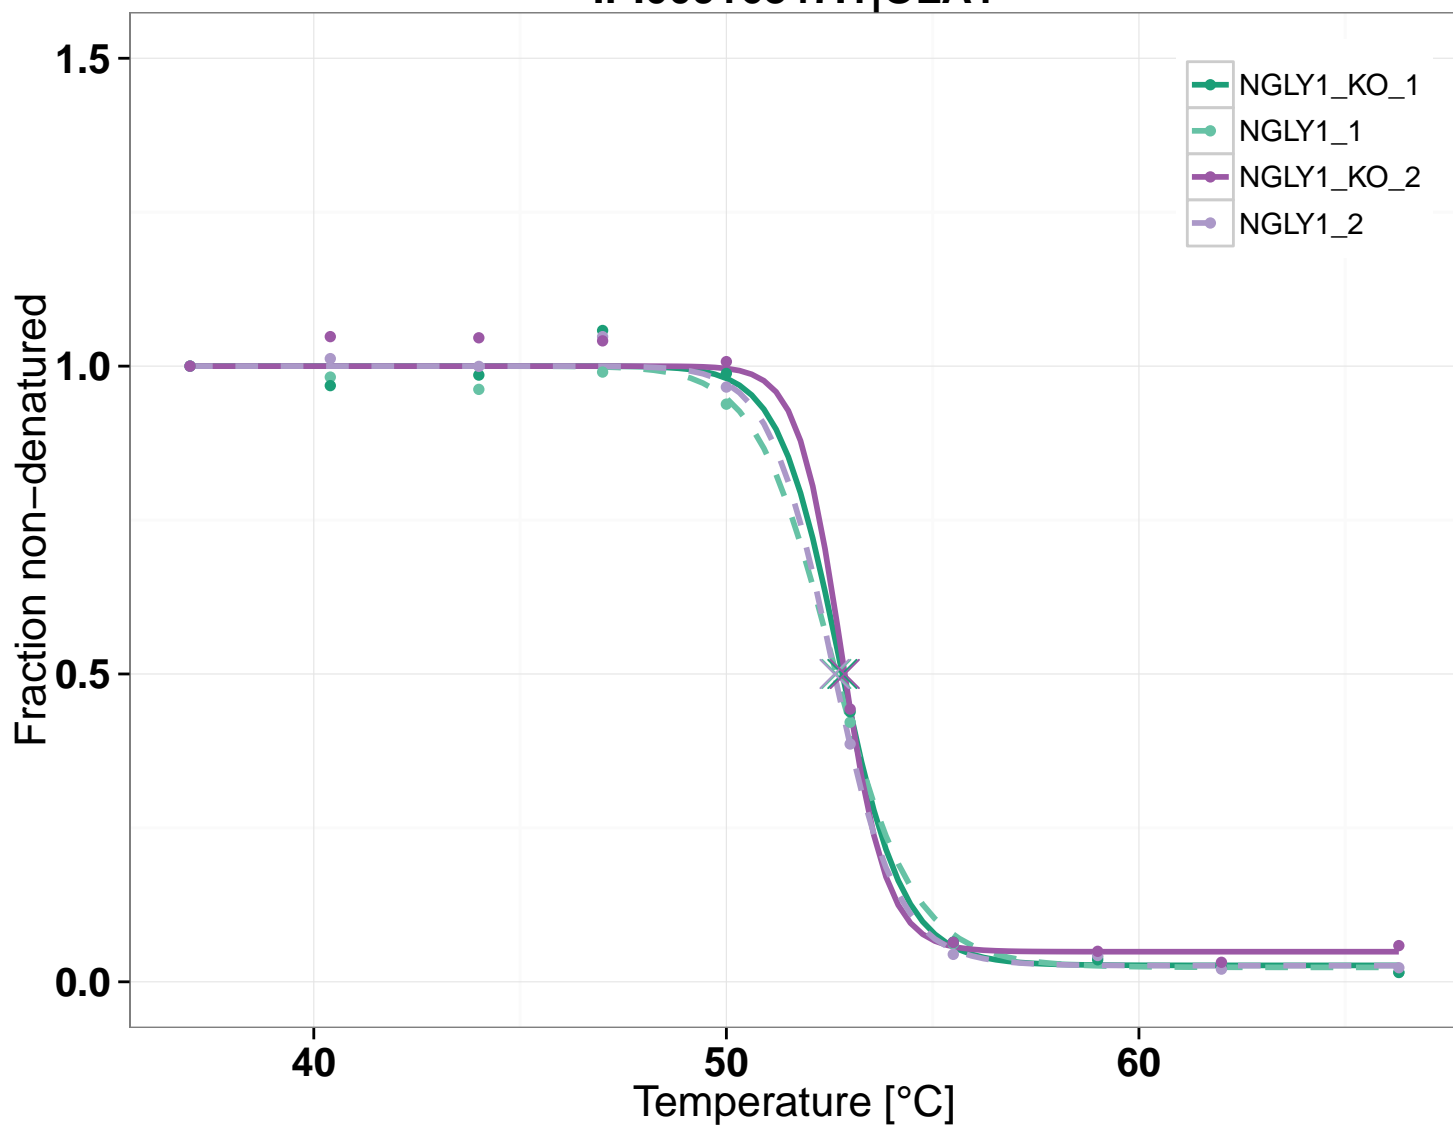

|            | meltPoint | slope | plateau | R2 |
|------------|-----------|-------|---------|----|
| NGLY1_KO_1 | 52.81     | -0.32 | 0.03    | 1  |
| NGLY1_1    | 52.66     | -0.26 | 0.02    | 1  |
| NGLY1_KO_2 | 52.87     | -0.44 | 0.05    | 1  |
| NGLY1_2    | 52.62     | -0.32 | 0.03    | 1  |

Supplement: Supplementary file 7195 [file 1]

# IPI00307092.2|KARS

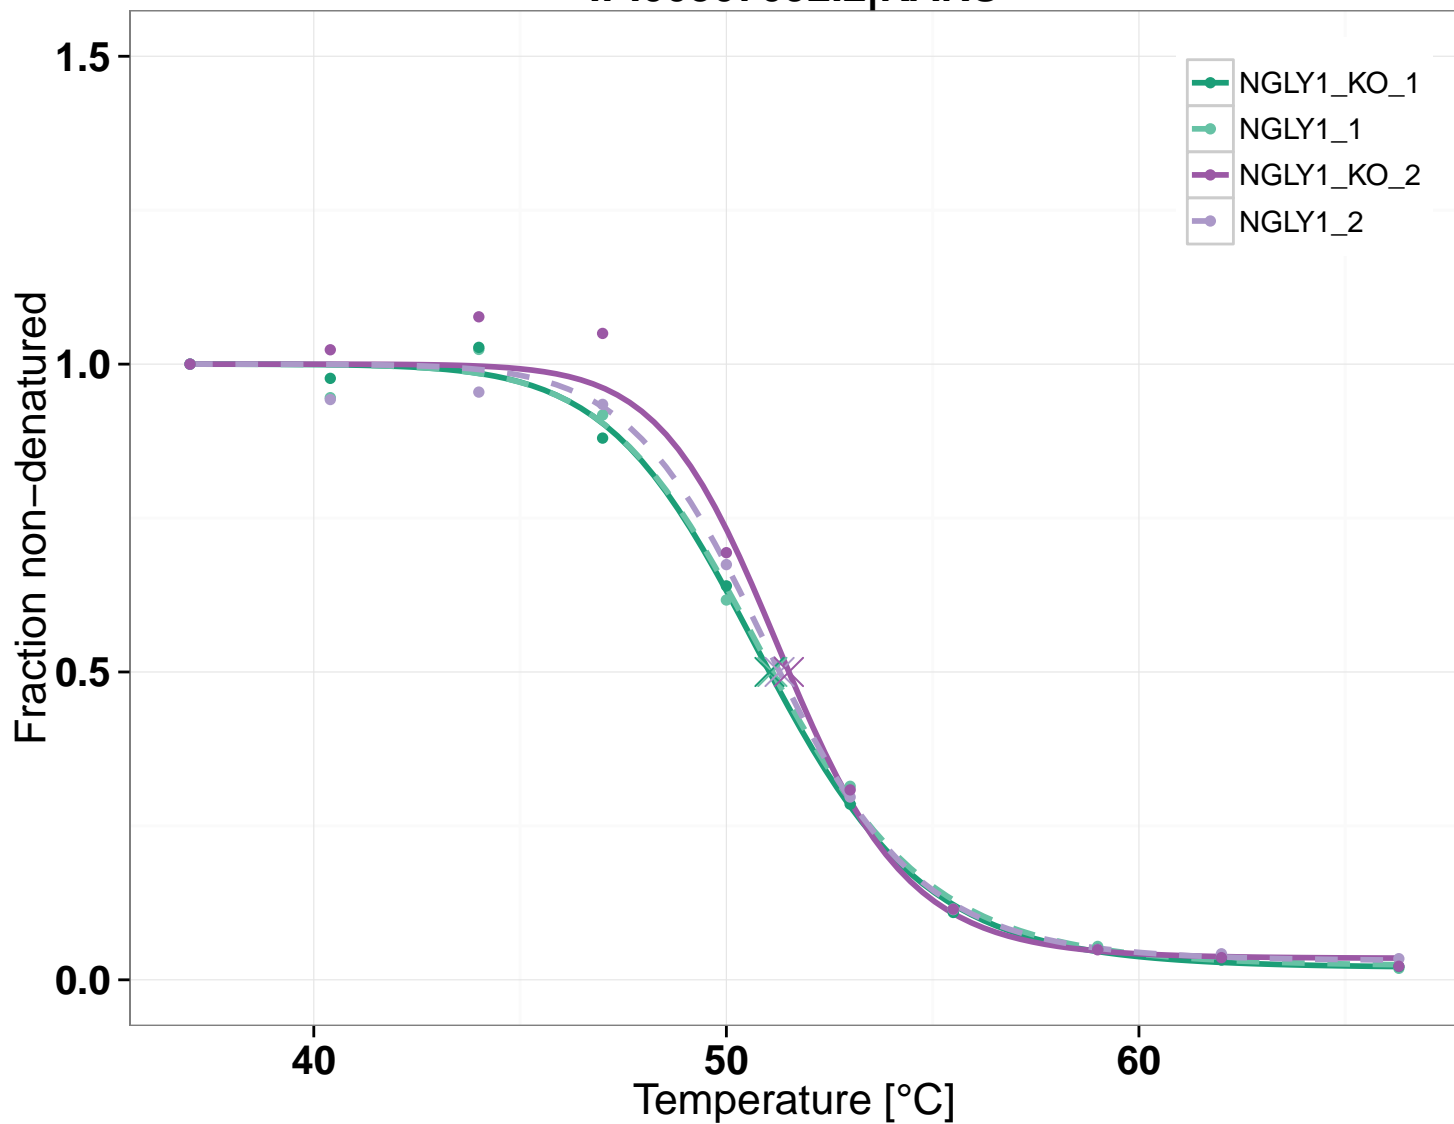

|            | meltPoint | slope | plateau | R2   |
|------------|-----------|-------|---------|------|
| NGLY1_KO_1 | 51.05     | -0.13 | 0.02    | 1    |
| NGLY1_1    | 51.11     | -0.13 | 0.02    | 1    |
| NGLY1_KO_2 | 51.52     | -0.16 | 0.03    | 0.99 |
| NGLY1_2    | 51.29     | -0.14 | 0.03    | 1    |

Supplement: Supplementary file 7196 [file 1]

IPI00328082.3|TARSL2

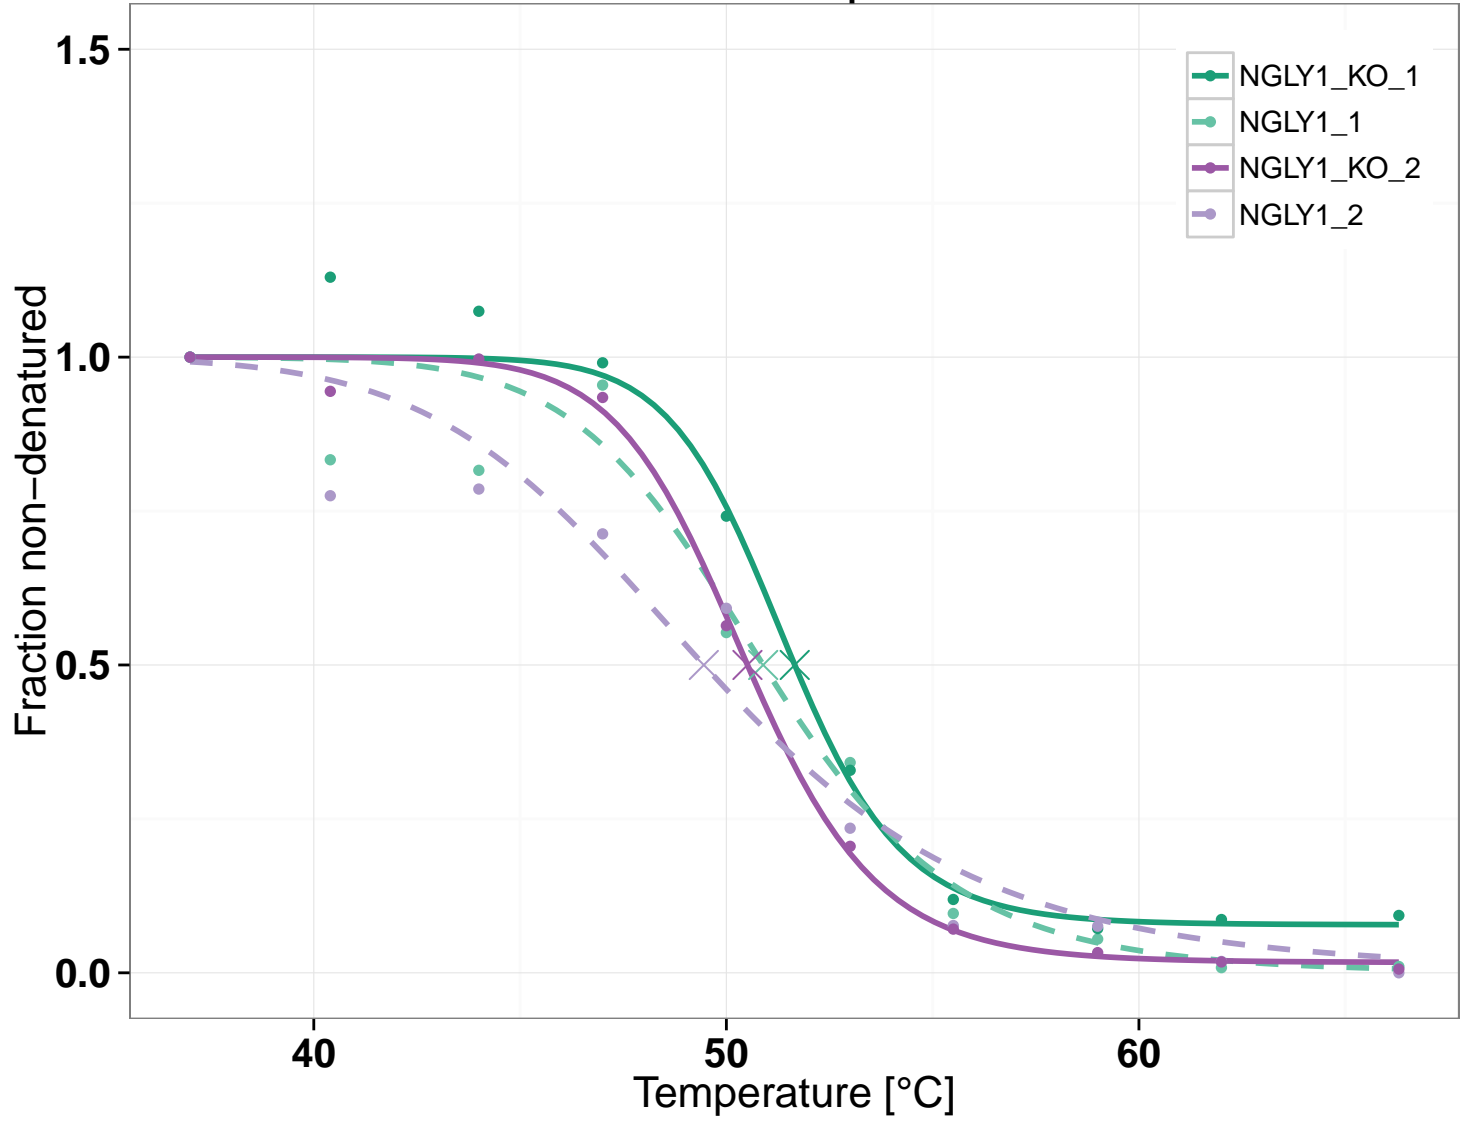

|            | meltPoint | slope  | plateau | R2   |
|------------|-----------|--------|---------|------|
| NGLY1_KO_1 | 51.66     | -0.16  | 0.08    | 0.99 |
| NGLY1_1    | 50.89     | -0.11  | 0       | 0.96 |
| NGLY1_KO_2 | 50.51     | -0.15  | 0.02    | 1    |
| NGLY1_2    | 49.45     | -0.075 | 0       | 0.95 |

Supplement: Supplementary file 7197 [file 1]

# IPI00029665.8|MMAB

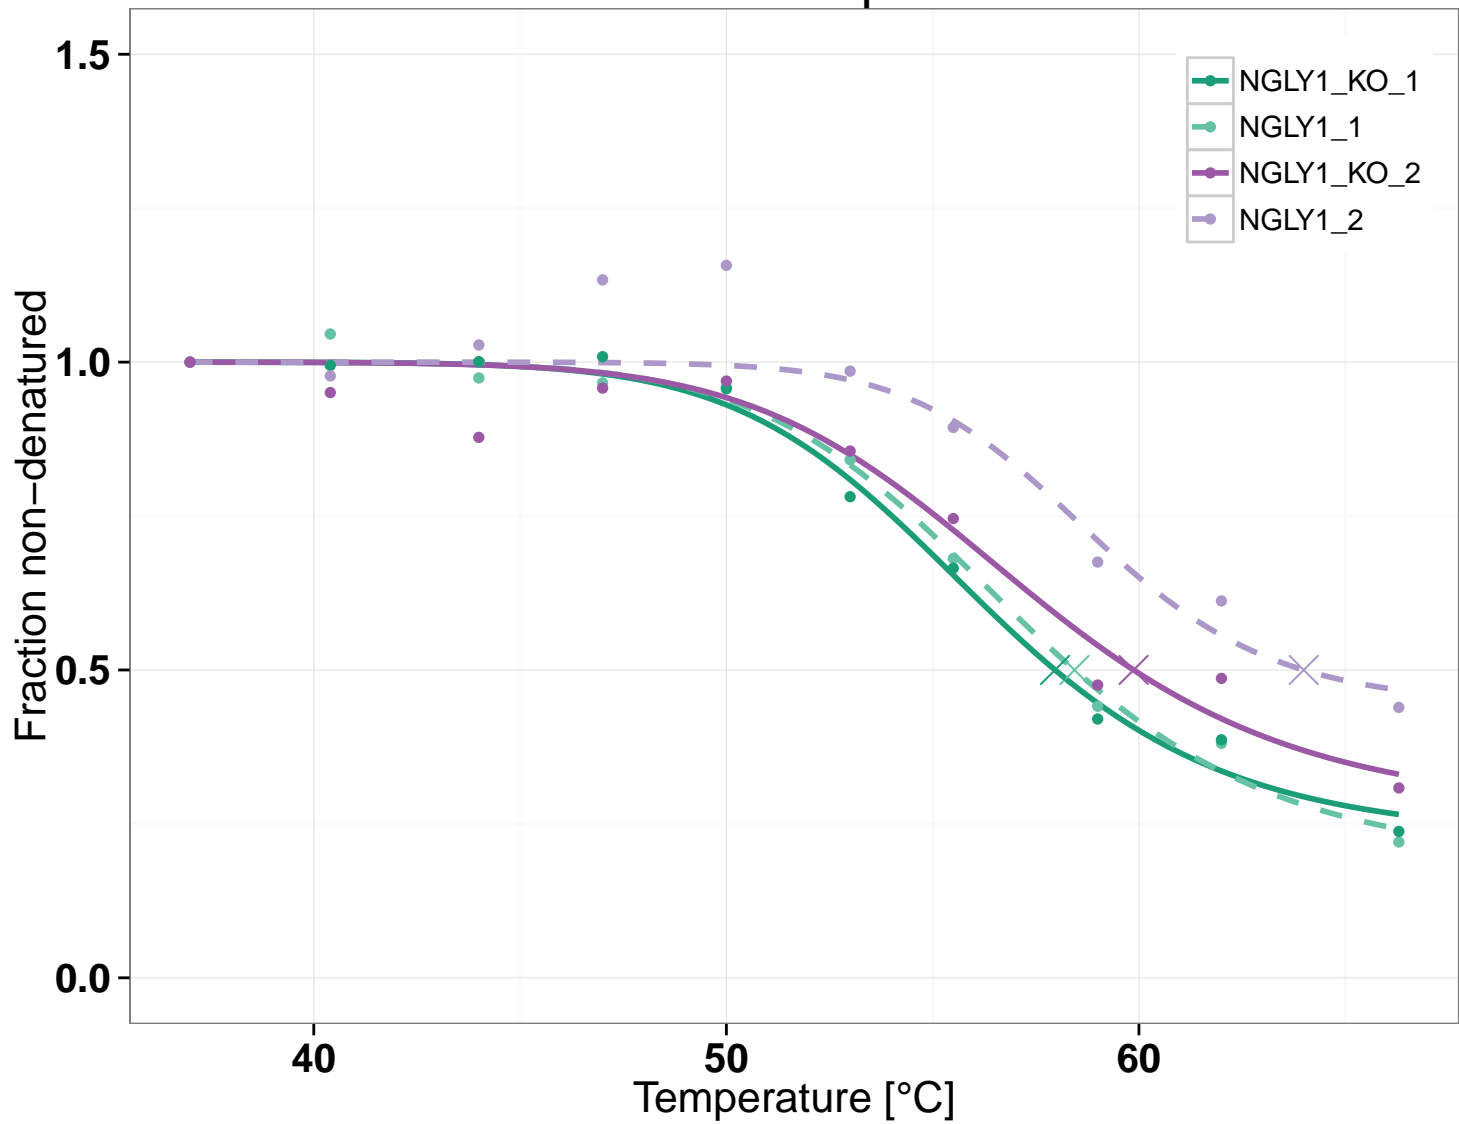

|            | meltPoint | slope  | plateau | R2   |
|------------|-----------|--------|---------|------|
| NGLY1_KO_1 | 57.97     | -0.066 | 0.22    | 0.99 |
| NGLY1_1    | 58.44     | -0.066 | 0.18    | 0.99 |
| NGLY1_KO_2 | 59.87     | -0.056 | 0.27    | 0.95 |
| NGLY1_2    | 63.99     | -0.063 | 0.44    | 0.9  |

Supplement: Supplementary file 7198 [file 1]

# IPI00791117.1|TK1

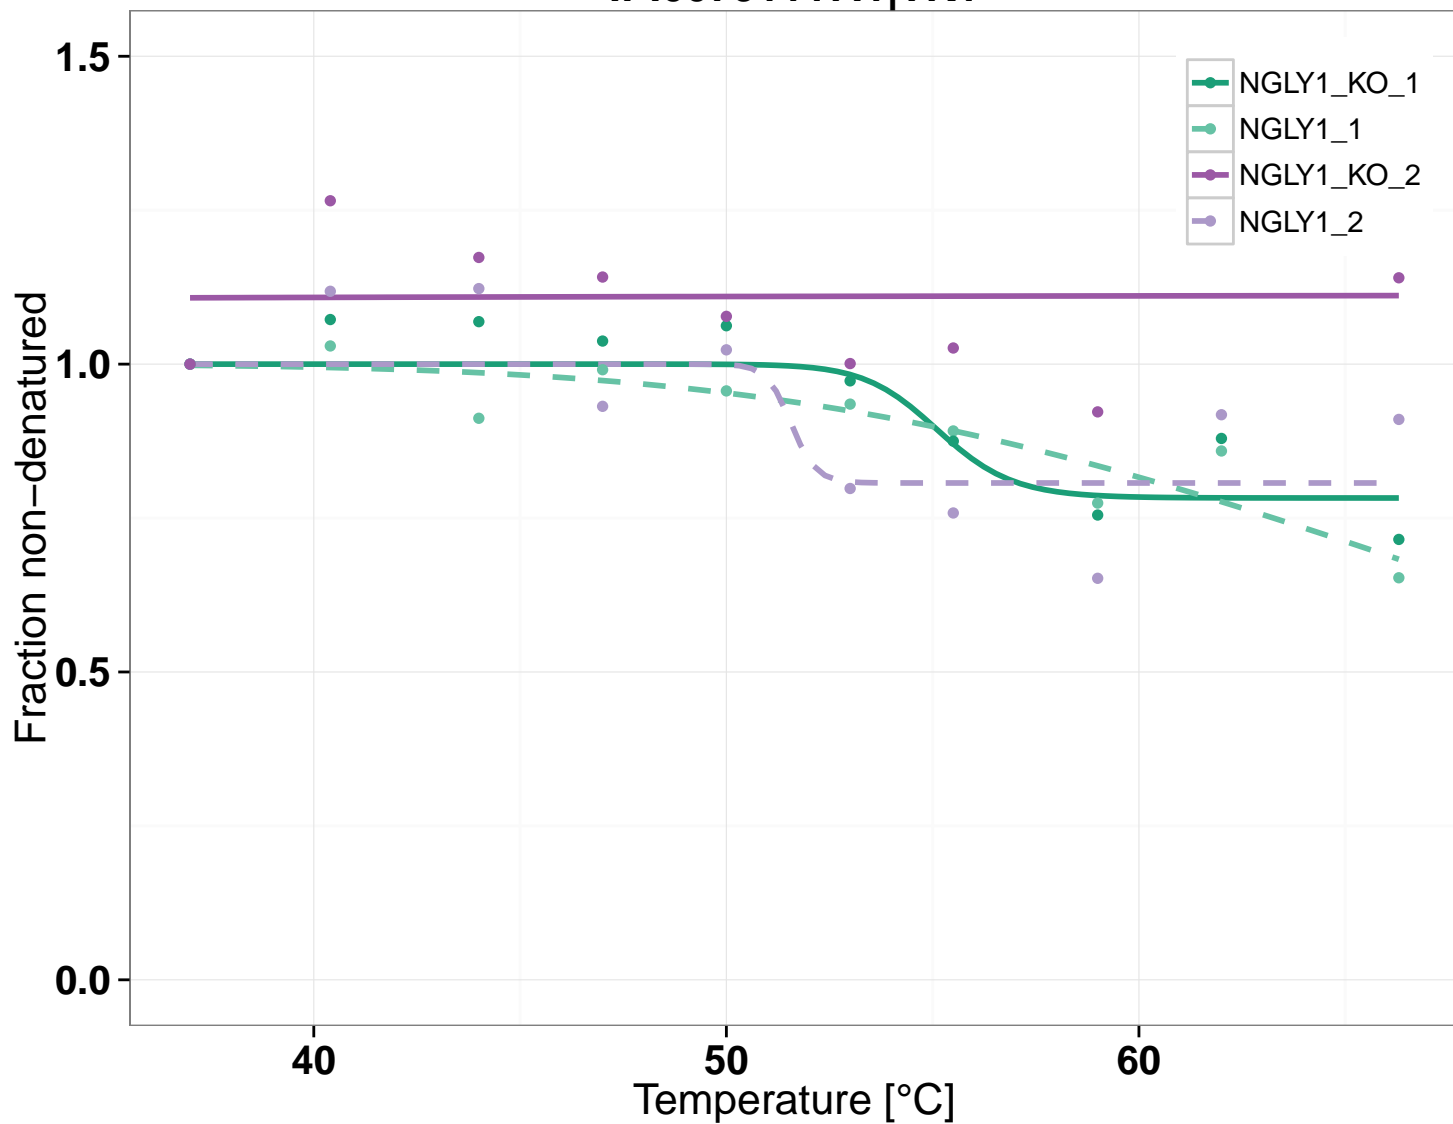

|            | meltPoint | slope | plateau | R2   |
|------------|-----------|-------|---------|------|
| NGLY1_KO_1 | —         | −0.06 | 0.78    | 0.81 |
| NGLY1_1    | —         | —     | 0       | 0.84 |
| NGLY1_KO_2 | —         | —     | 1.23    | 0    |
| NGLY1_2    | —         | −0.16 | 0.81    | 0.6  |

Supplement: Supplementary file 7199 [file 1]

# IPI00470416.2|MTPAP

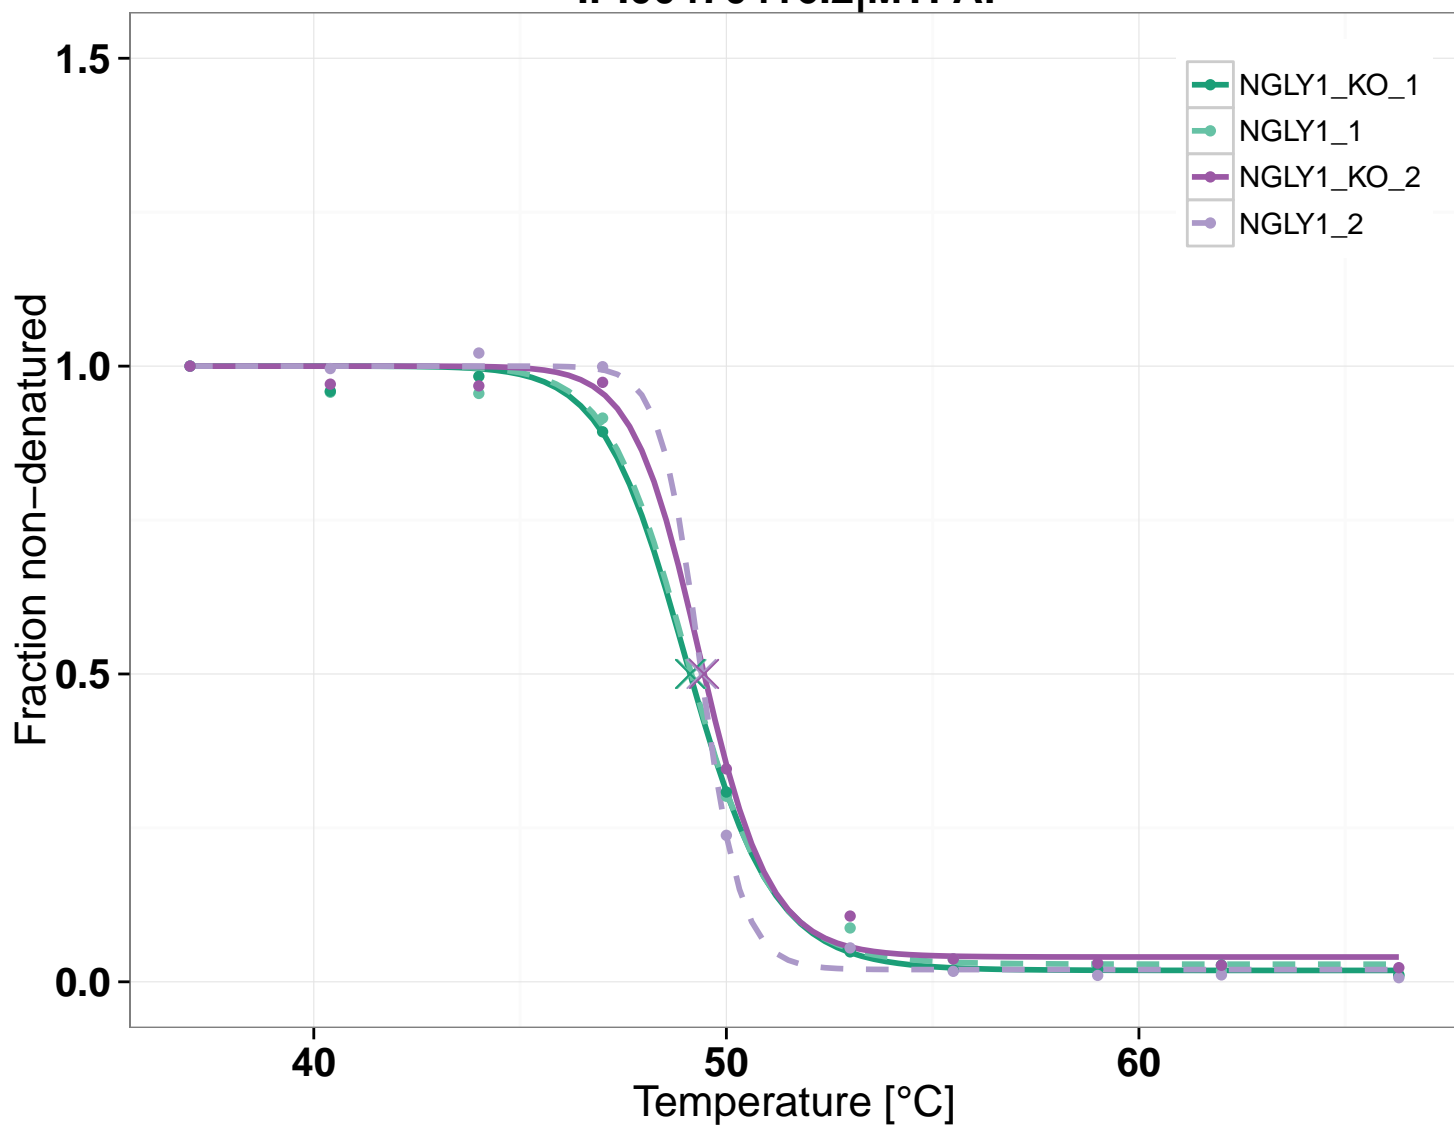

|            | meltPoint | slope | plateau | R2 |
|------------|-----------|-------|---------|----|
| NGLY1_KO_1 | 49.12     | -0.24 | 0.02    | 1  |
| NGLY1_1    | 49.15     | -0.25 | 0.03    | 1  |
| NGLY1_KO_2 | 49.46     | -0.29 | 0.04    | 1  |
| NGLY1_2    | 49.4      | -0.5  | 0.02    | 1  |

Supplement: Supplementary file 7200 [file 1]

# IPI00797612.1|WDR6

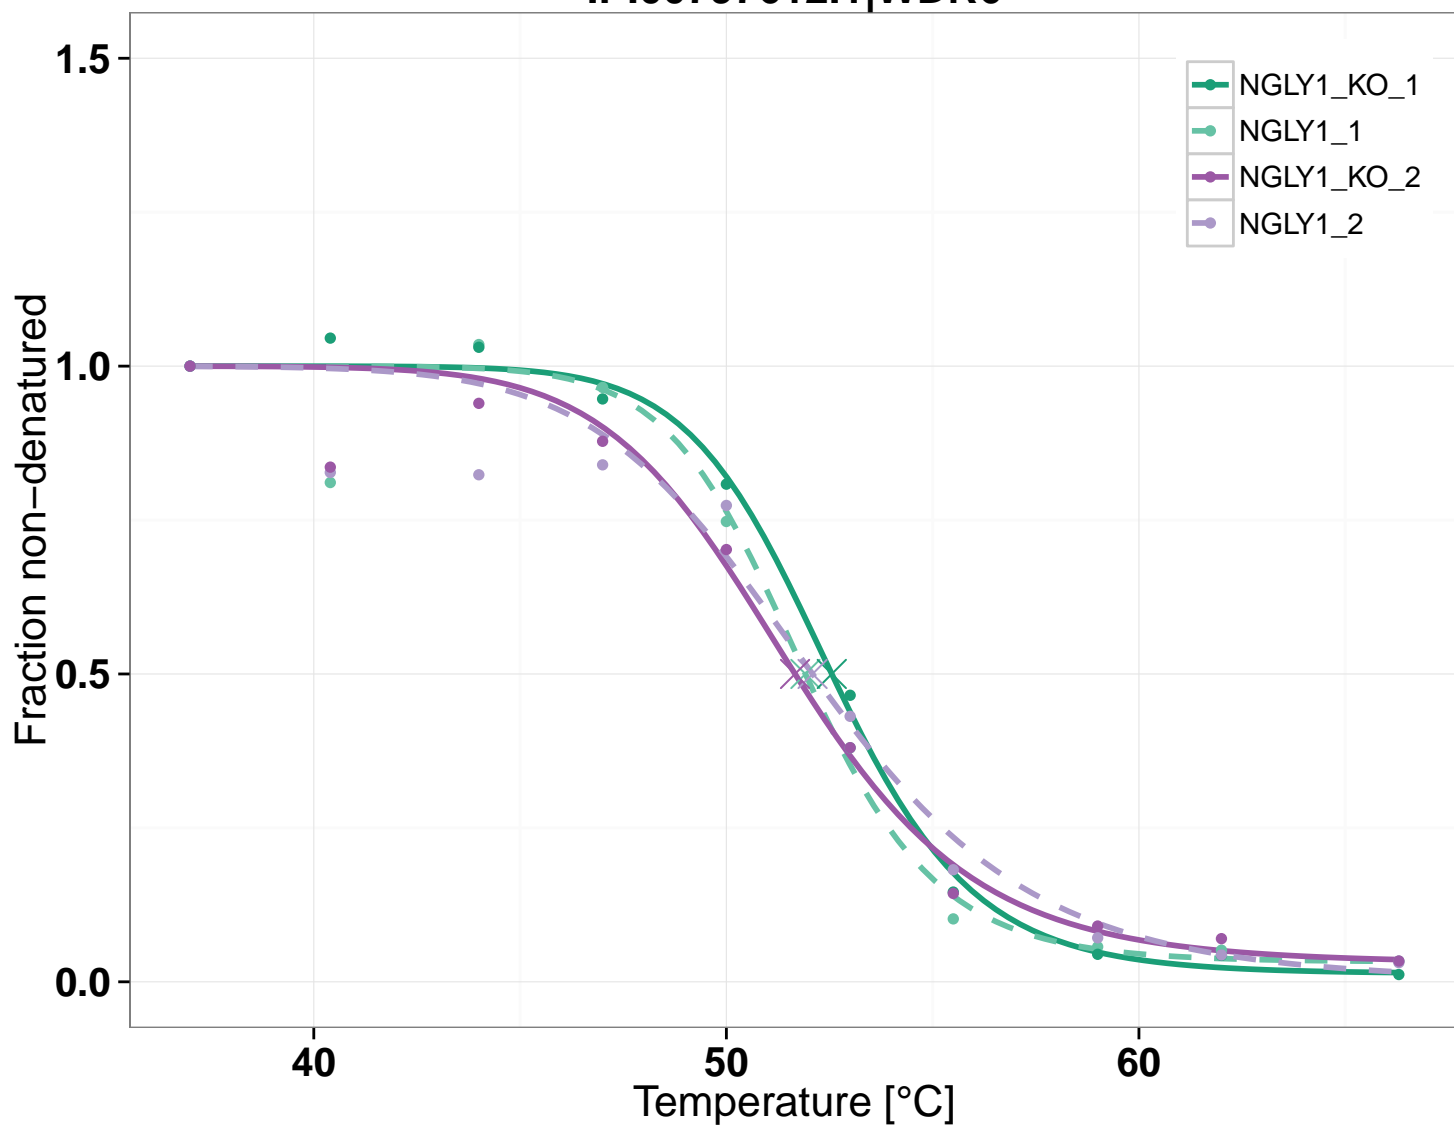

|            | meltPoint | slope  | plateau | R2   |
|------------|-----------|--------|---------|------|
| NGLY1_KO_1 | 52.56     | -0.14  | 0.01    | 1    |
| NGLY1_1    | 51.92     | -0.15  | 0.03    | 0.98 |
| NGLY1_KO_2 | 51.66     | -0.11  | 0.03    | 0.98 |
| NGLY1_2    | 52.09     | -0.093 | 0       | 0.95 |

Supplement: Supplementary file 7201 [file 1]

# IPI00168910.7|LINS1

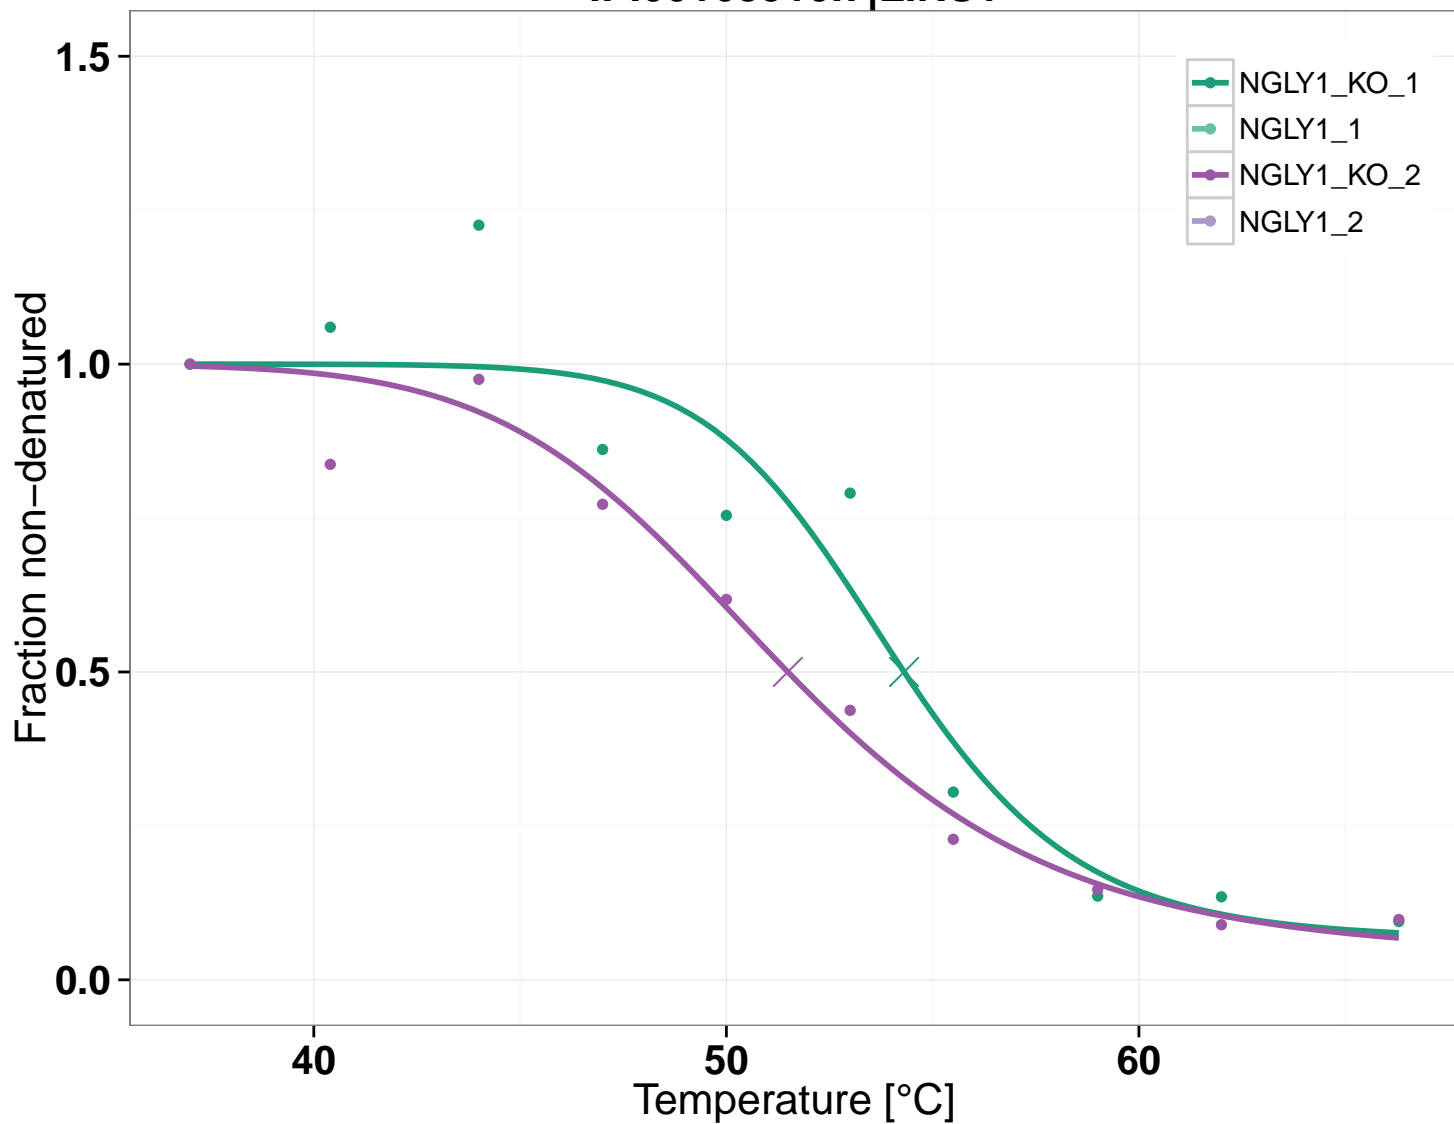

|            | meltPoint | slope  | plateau | R2   |
|------------|-----------|--------|---------|------|
| NGLY1_KO_1 | 54.31     | -0.1   | 0.07    | 0.93 |
| NGLY1_1    | -         | -      | -       | -    |
| NGLY1_KO_2 | 51.49     | -0.071 | 0.04    | 0.98 |
| NGLY1_2    | -         | -      | -       | -    |

Supplement: Supplementary file 7202 [file 1]

IPI00061267.2|RSPRY1

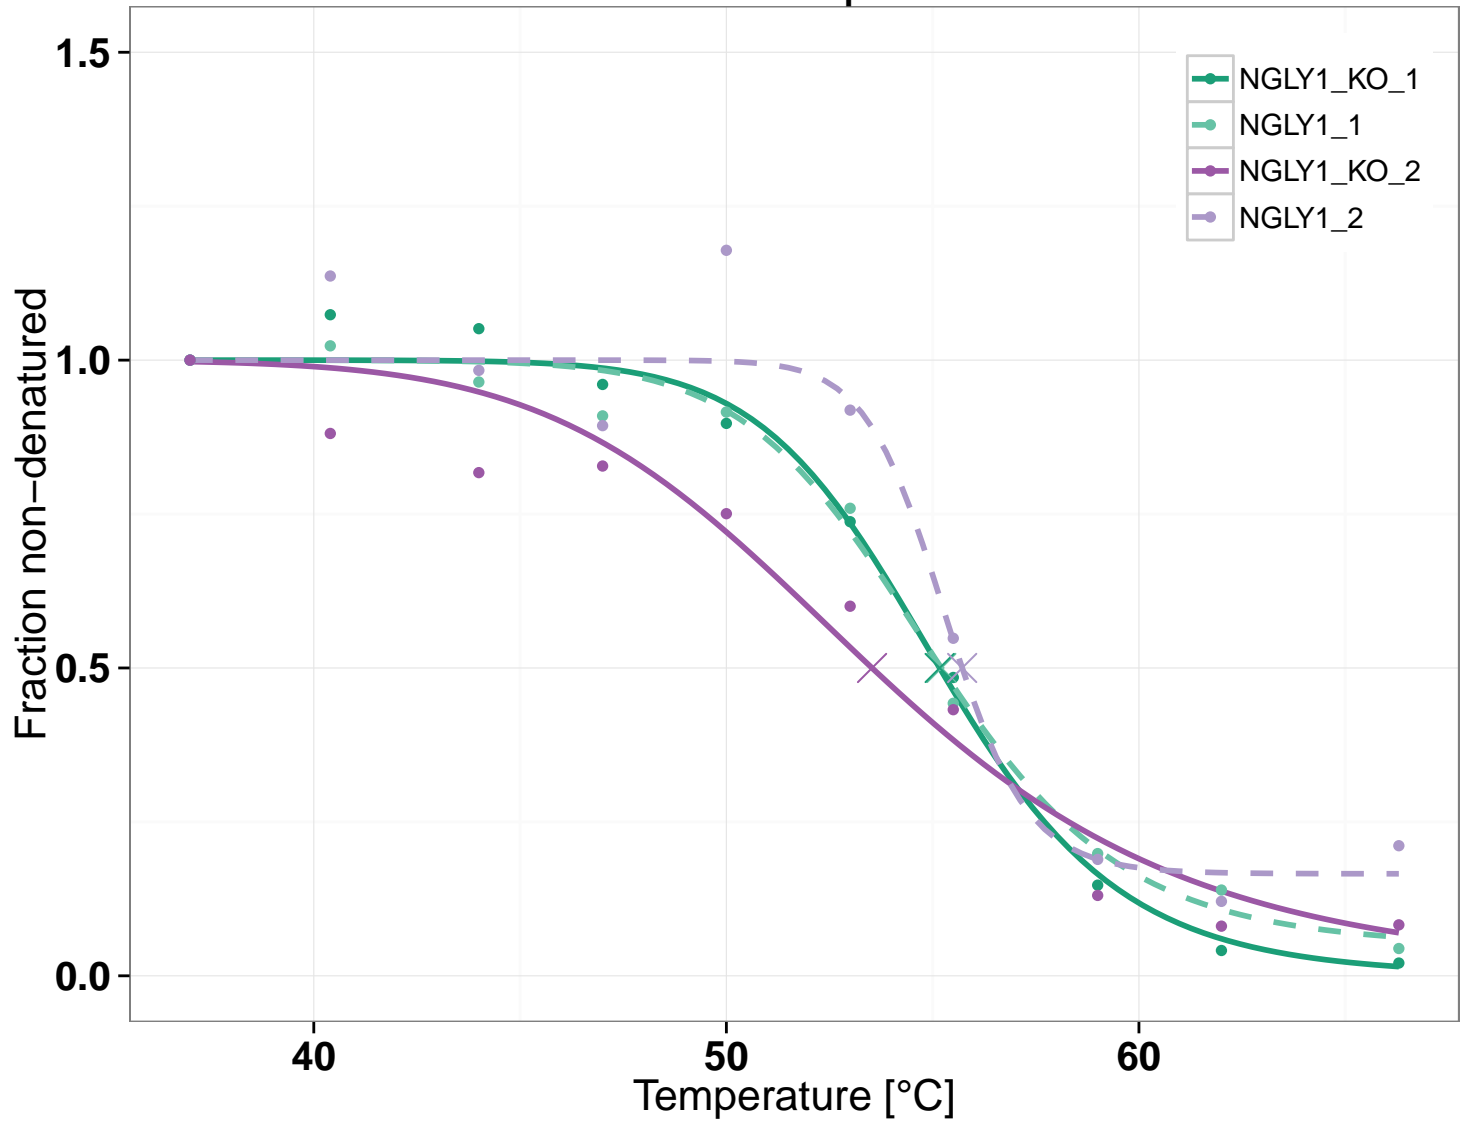

|            | meltPoint | slope  | plateau | R2   |
|------------|-----------|--------|---------|------|
| NGLY1_KO_1 | 55.17     | -0.11  | 0       | 0.99 |
| NGLY1_1    | 55.21     | -0.1   | 0.05    | 0.99 |
| NGLY1_KO_2 | 53.53     | -0.064 | 0       | 0.96 |
| NGLY1_2    | 55.72     | -0.21  | 0.17    | 0.96 |

Supplement: Supplementary file 7203 [file 1]

IPI00843983.1|IL13RA1

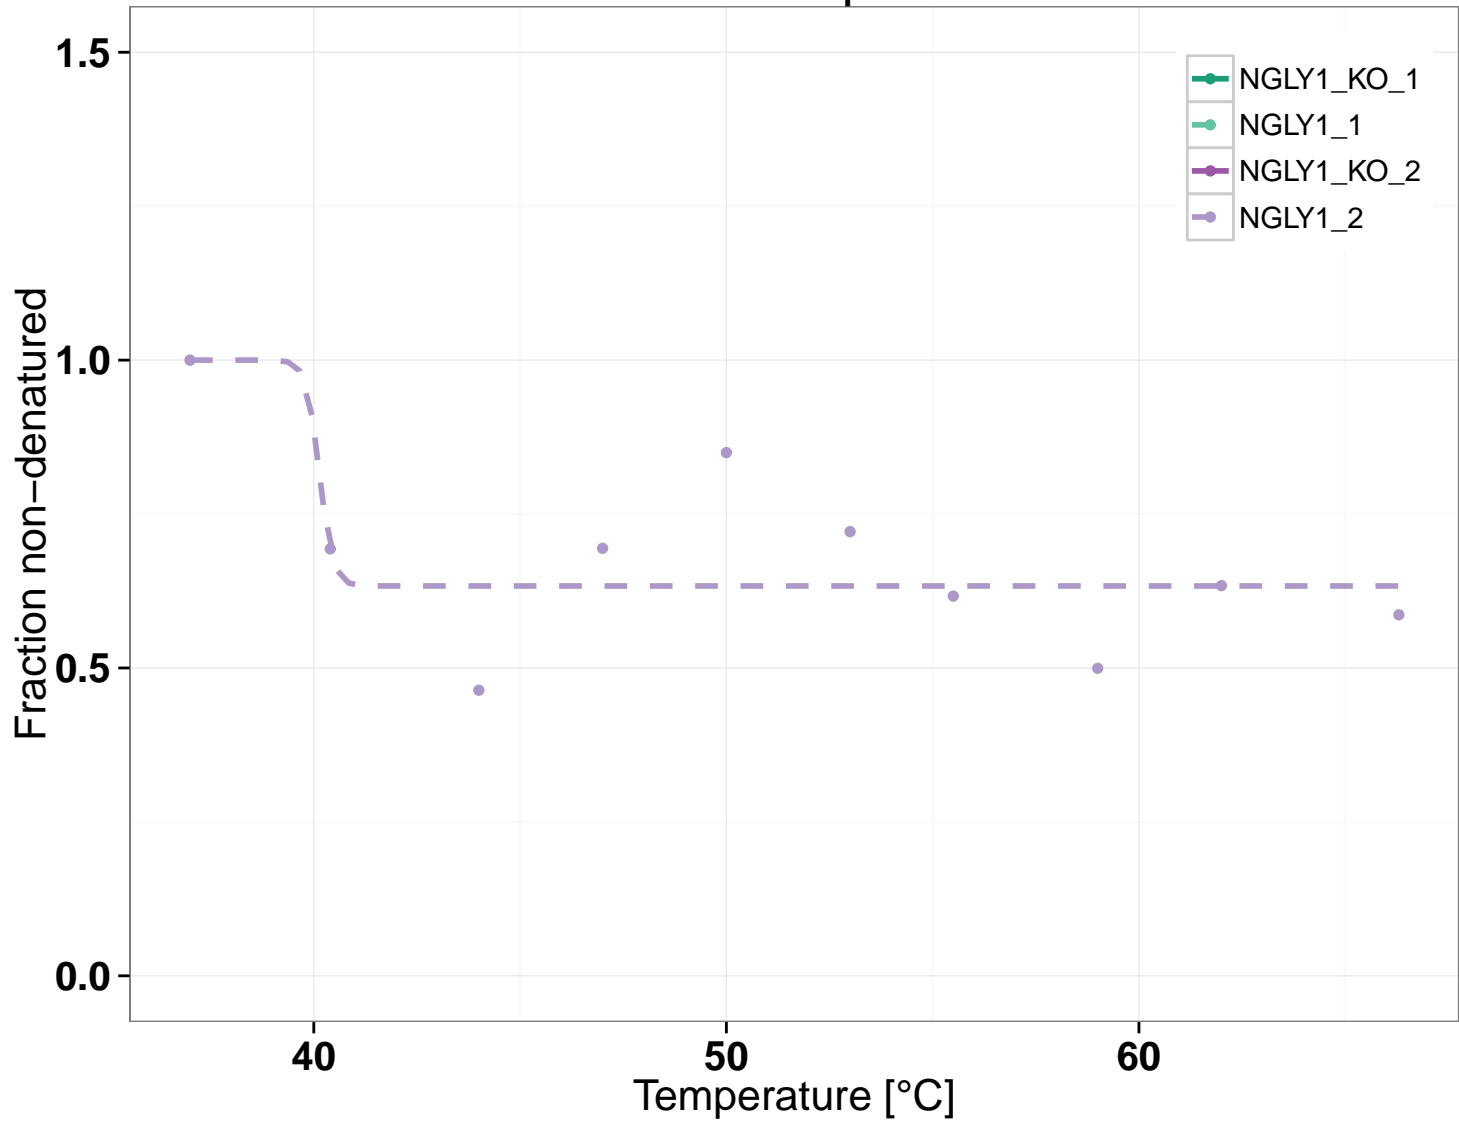

|            | meltPoint | slope | plateau | R2   |
|------------|-----------|-------|---------|------|
| NGLY1_KO_1 | —         | —     | —       | —    |
| NGLY1_1    | —         | —     | —       | —    |
| NGLY1_KO_2 | —         | —     | —       | —    |
| NGLY1_2    | —         | -0.57 | 0.63    | 0.53 |

Supplement: Supplementary file 7204 [file 1]

# IPI00386747.2|CDAN1

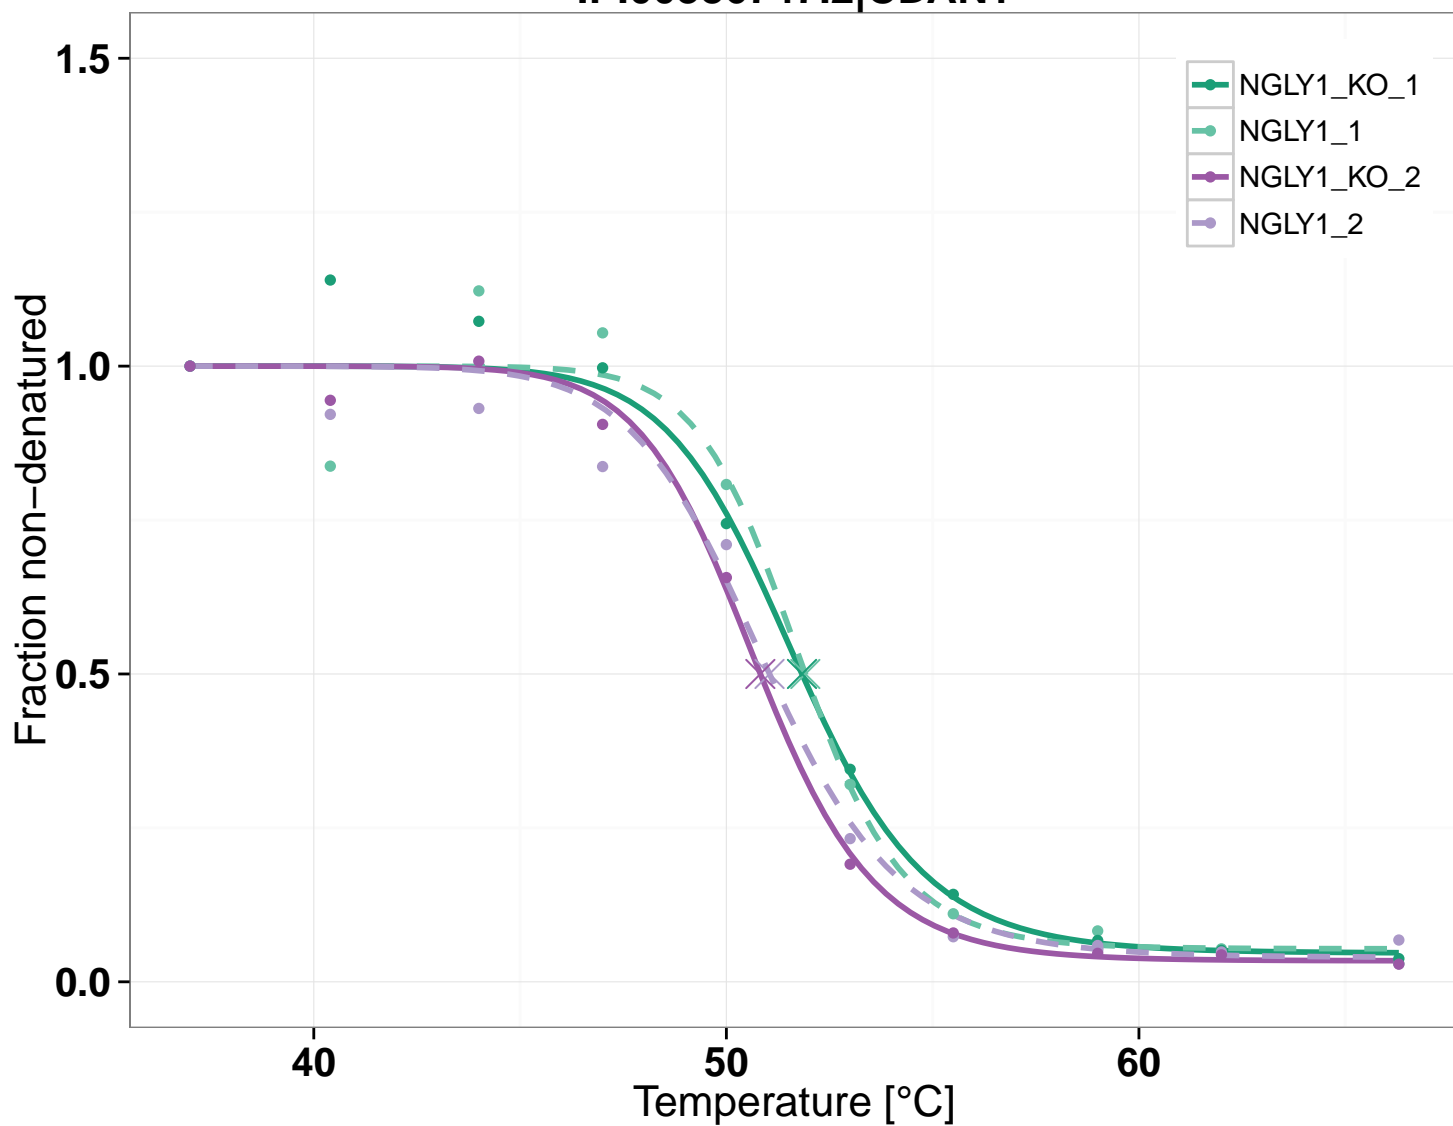

|            | meltPoint | slope | plateau | R2   |
|------------|-----------|-------|---------|------|
| NGLY1_KO_1 | 51.83     | -0.15 | 0.05    | 0.99 |
| NGLY1_1    | 51.91     | -0.19 | 0.05    | 0.98 |
| NGLY1_KO_2 | 50.82     | -0.17 | 0.03    | 1    |
| NGLY1_2    | 51.05     | -0.15 | 0.04    | 0.98 |

Supplement: Supplementary file 7205 [file 1]

# IPI00165138.1|GCC1

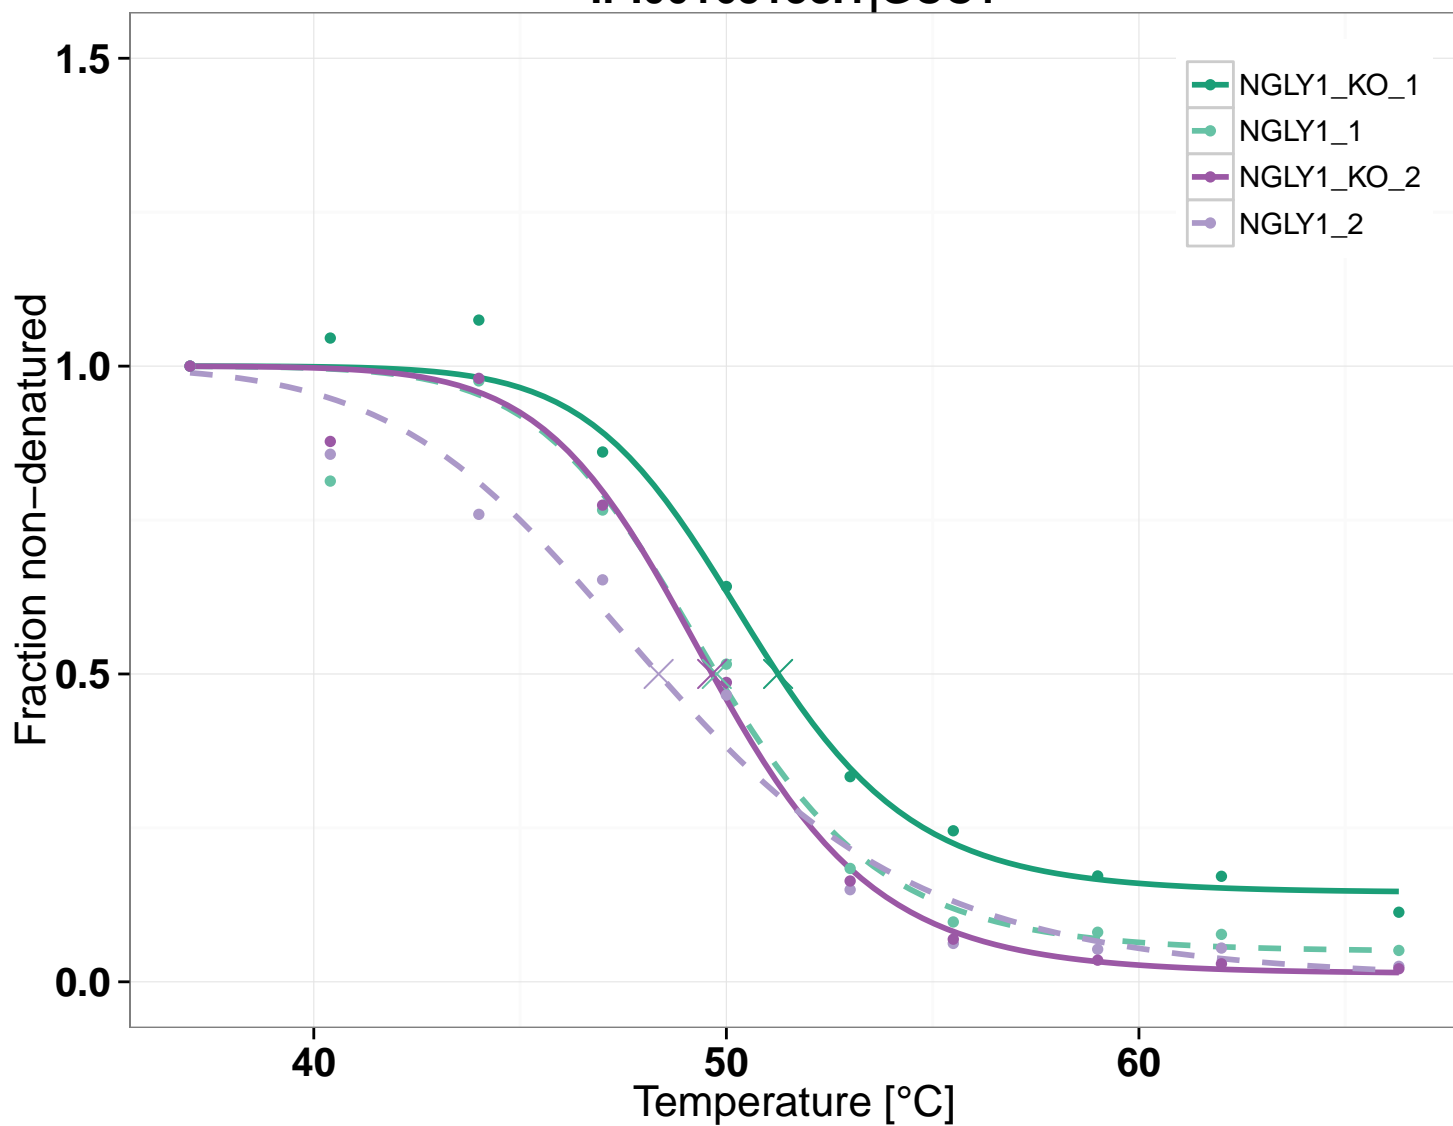

|            | meltPoint | slope  | plateau | R2   |
|------------|-----------|--------|---------|------|
| NGLY1_KO_1 | 51.25     | -0.11  | 0.14    | 0.99 |
| NGLY1_1    | 49.77     | -0.11  | 0.05    | 0.97 |
| NGLY1_KO_2 | 49.66     | -0.12  | 0.01    | 0.99 |
| NGLY1_2    | 48.36     | -0.077 | 0       | 0.98 |

Supplement: Supplementary file 7206 [file 1]

# IPI00170429.3|OGFOD1

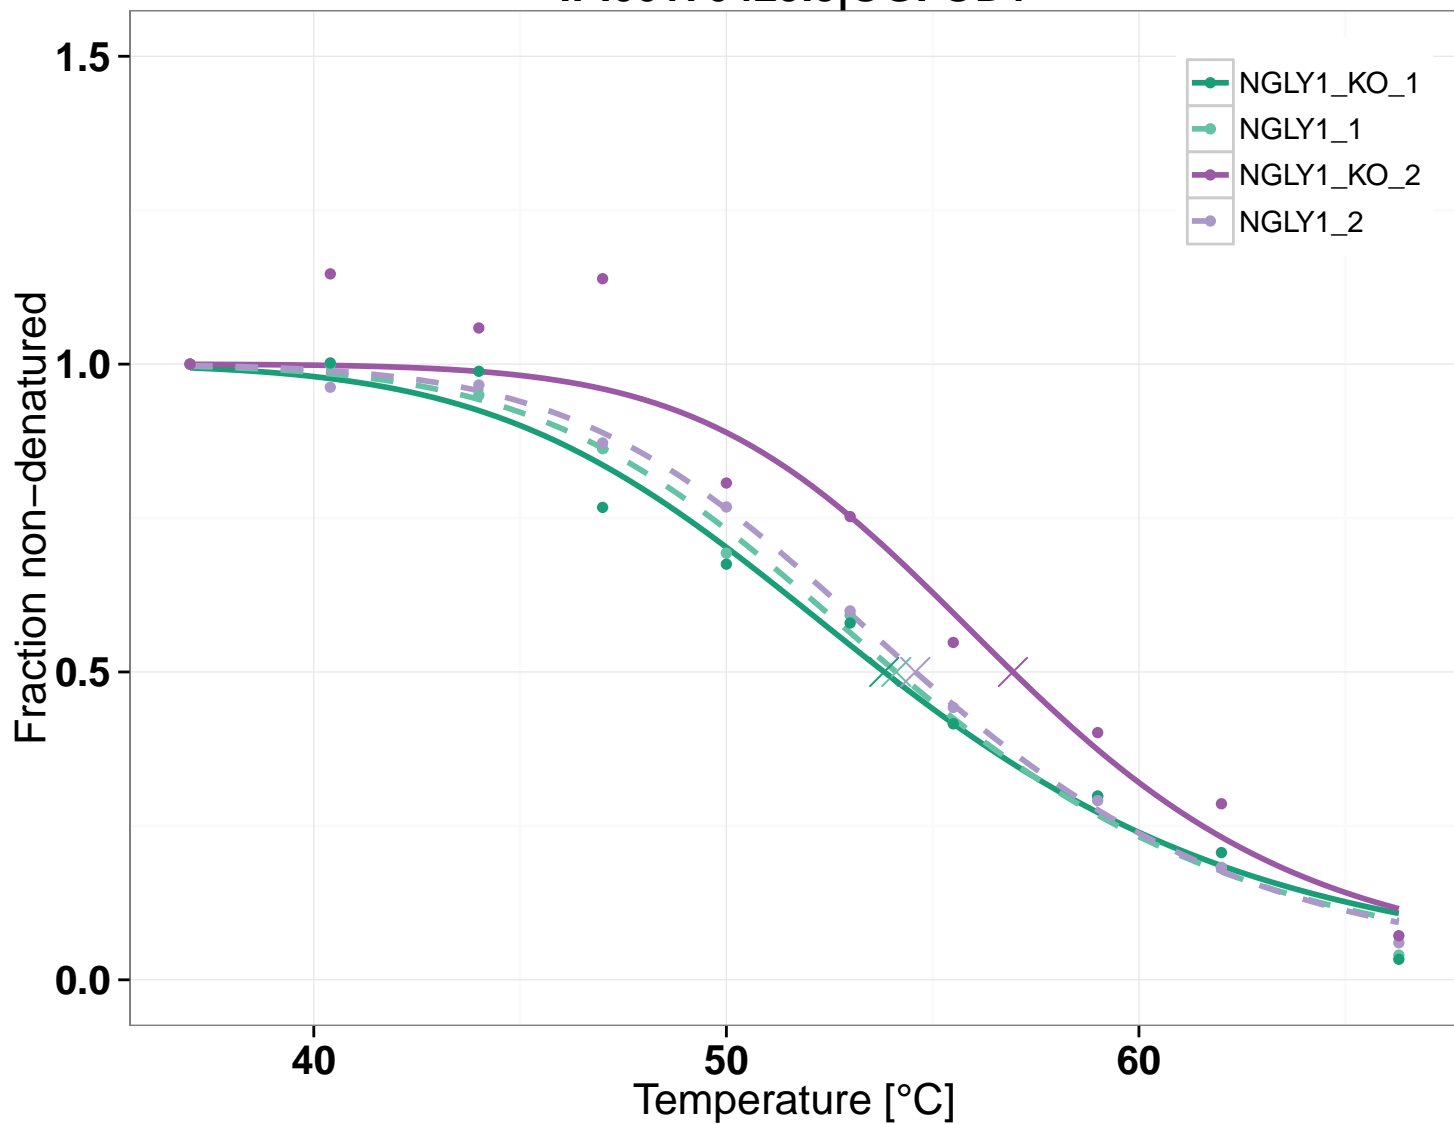

|            | meltPoint | slope  | plateau | R2   |
|------------|-----------|--------|---------|------|
| NGLY1_KO_1 | 53.83     | -0.054 | 0       | 0.98 |
| NGLY1_1    | 54.12     | -0.058 | 0       | 0.99 |
| NGLY1_KO_2 | 56.95     | -0.067 | 0.01    | 0.94 |
| NGLY1_2    | 54.58     | -0.06  | 0       | 1    |

Supplement: Supplementary file 7207 [file 1]

# IPI00871941.1|NBR1

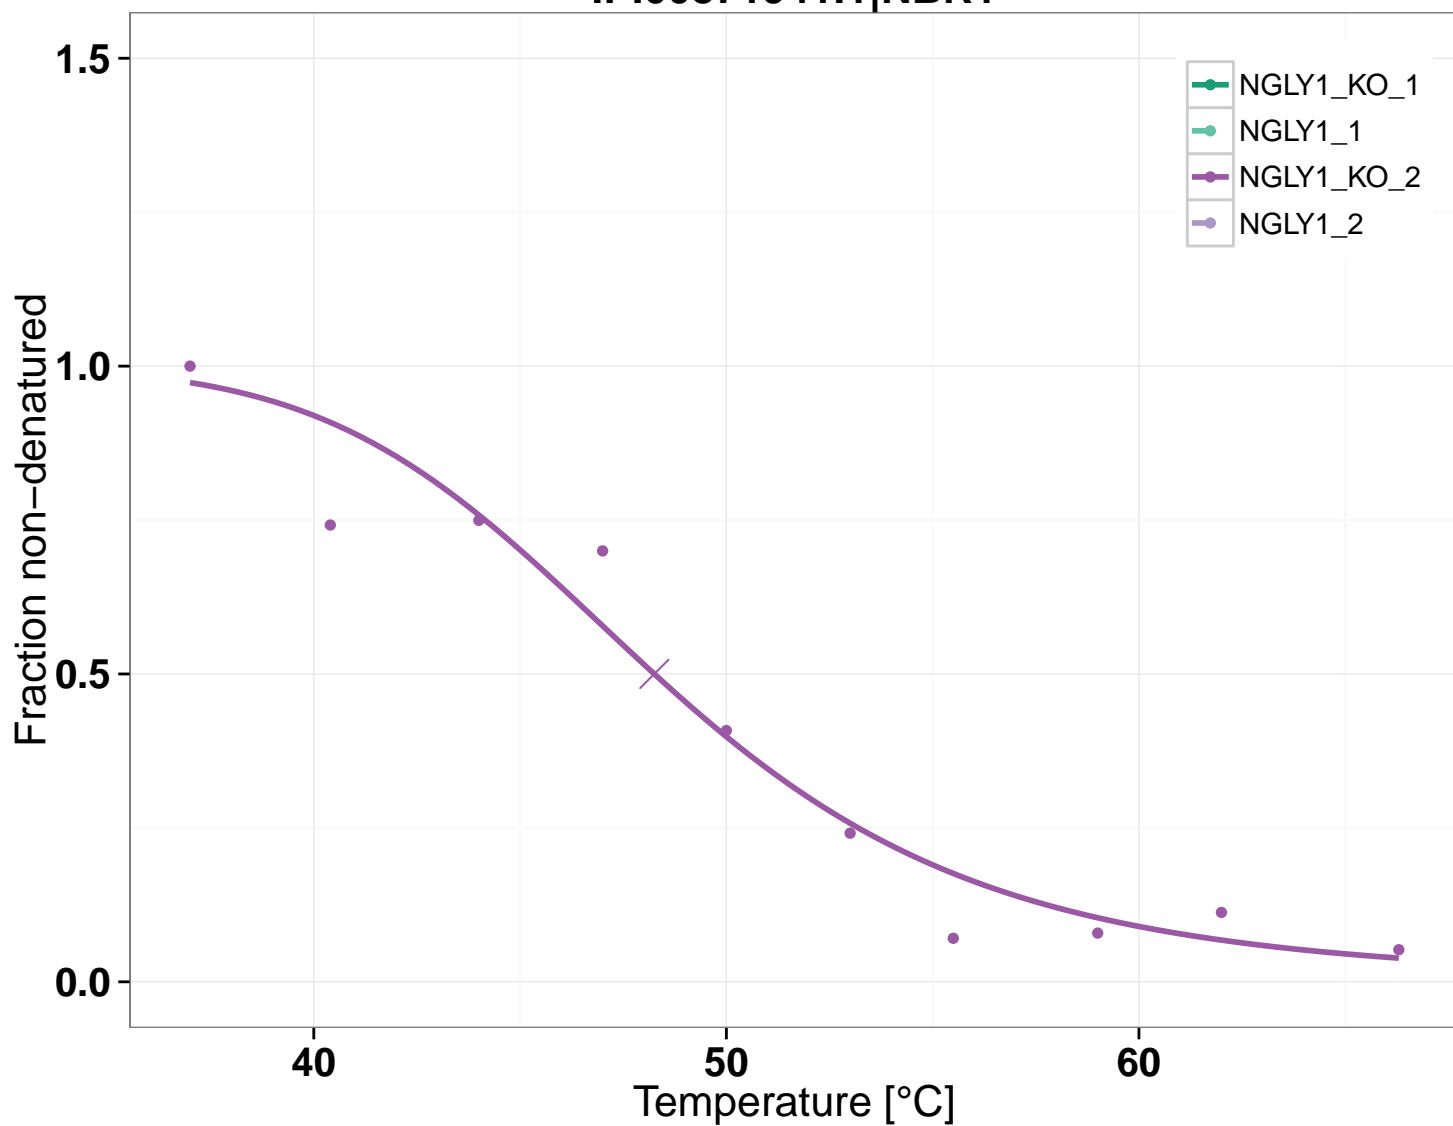

|            | meltPoint | slope  | plateau | R2   |
|------------|-----------|--------|---------|------|
| NGLY1_KO_1 | —         | —      | —       | —    |
| NGLY1_1    | —         | —      | —       | —    |
| NGLY1_KO_2 | 48.25     | -0.063 | 0       | 0.95 |
| NGLY1_2    | —         | —      | —       | —    |

Supplement: Supplementary file 7208 [file 1]

# IPI00396563.2|UBXN1

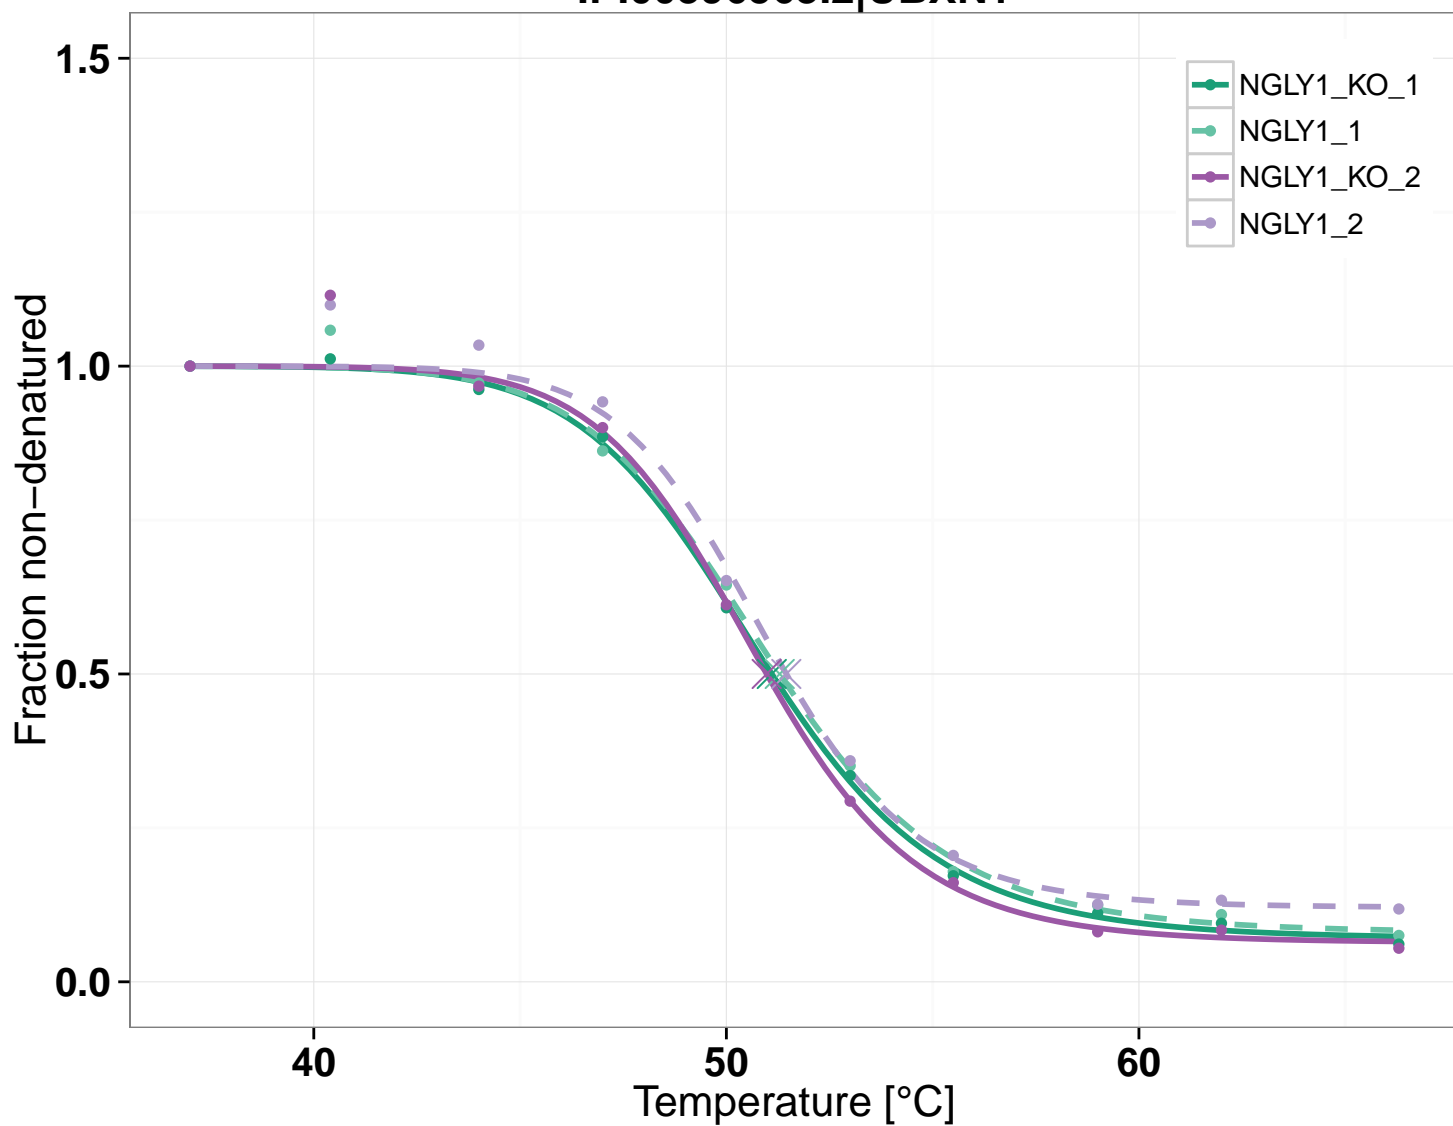

|            | meltPoint | slope | plateau | R2   |
|------------|-----------|-------|---------|------|
| NGLY1_KO_1 | 51.1      | -0.11 | 0.07    | 1    |
| NGLY1_1    | 51.29     | -0.1  | 0.08    | 1    |
| NGLY1_KO_2 | 50.98     | -0.12 | 0.06    | 0.99 |
| NGLY1_2    | 51.45     | -0.12 | 0.12    | 0.99 |

Supplement: Supplementary file 7209 [file 1]

# IPI00783637.4|DNAH2

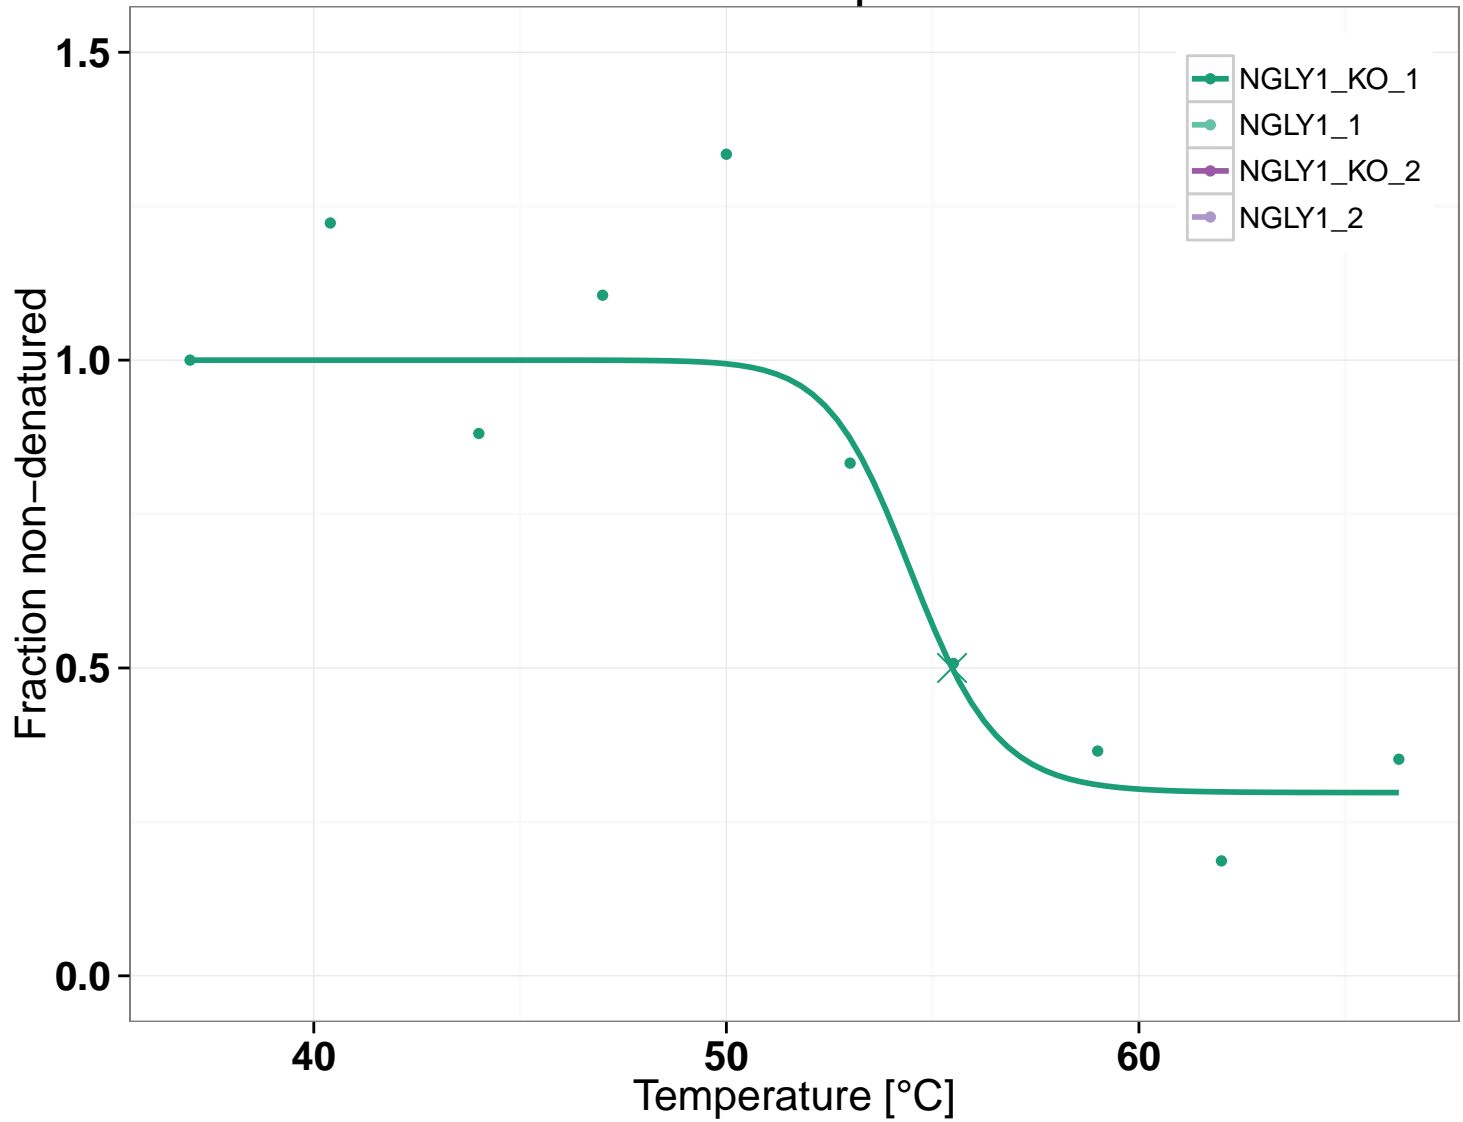

|            | meltPoint | slope | plateau | R2   |
|------------|-----------|-------|---------|------|
| NGLY1_KO_1 | 55.47     | -0.17 | 0.3     | 0.85 |
| NGLY1_1    | -         | -     | -       | -    |
| NGLY1_KO_2 | -         | -     | -       | -    |
| NGLY1_2    | -         | -     | -       | -    |

Supplement: Supplementary file 7210 [file 1]

# IPI00300073.8|ZNF589

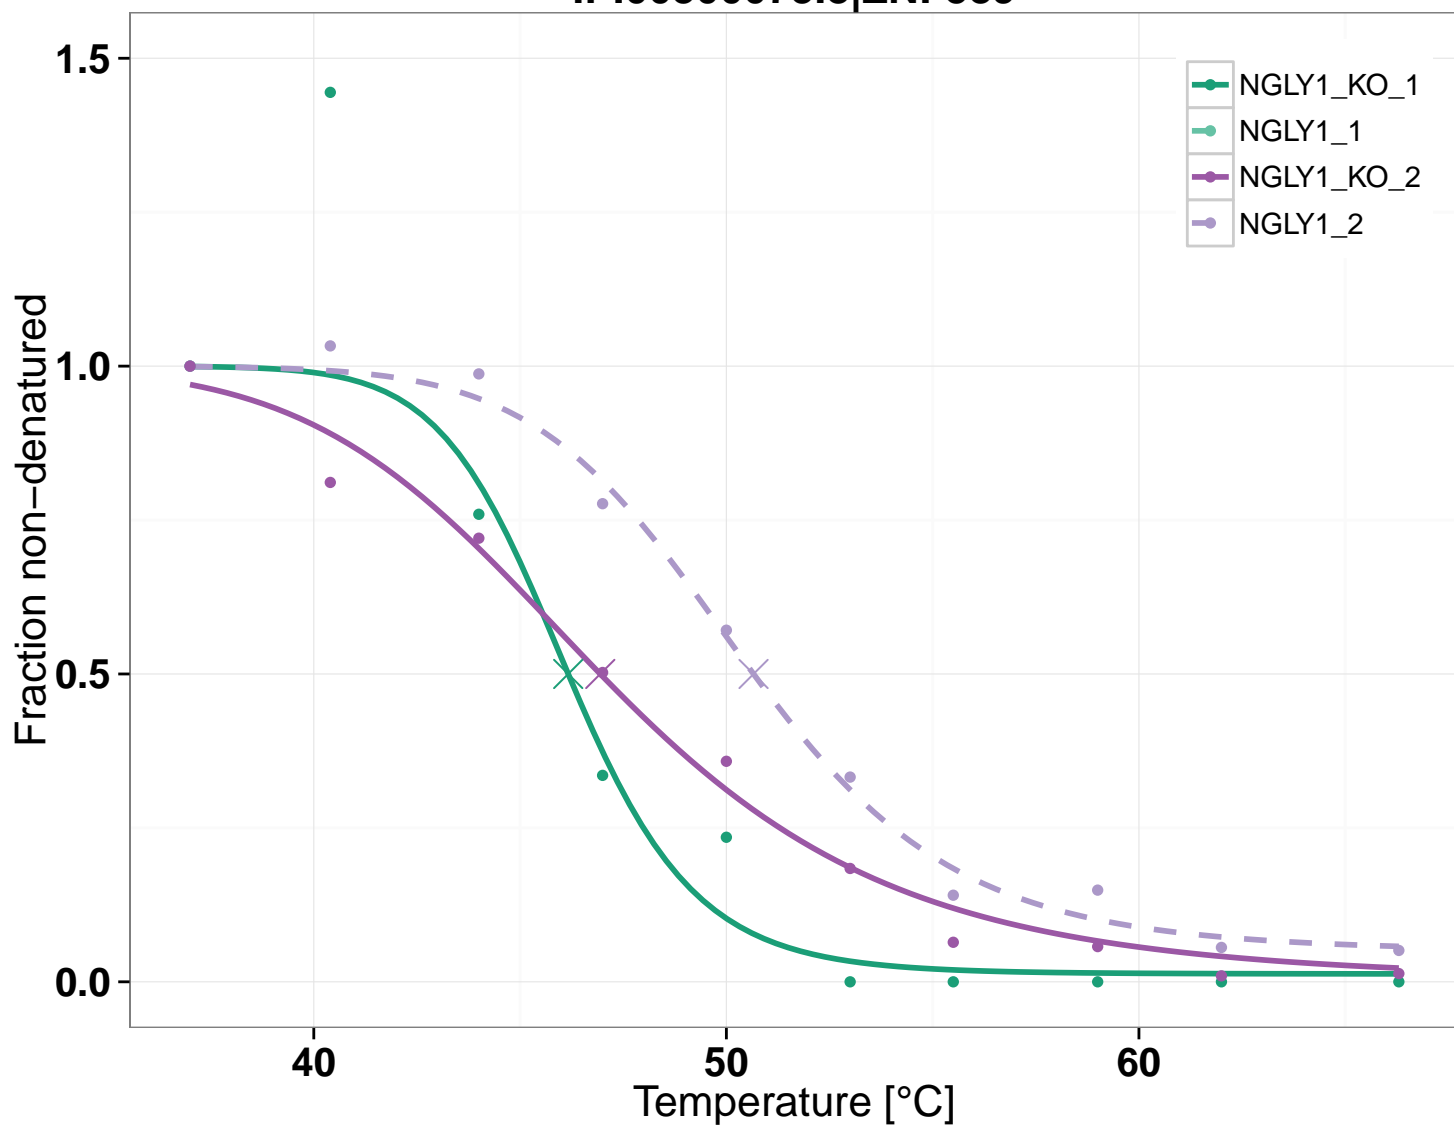

|            | meltPoint | slope  | plateau | R2   |
|------------|-----------|--------|---------|------|
| NGLY1_KO_1 | 46.17     | -0.16  | 0.01    | 0.9  |
| NGLY1_1    | -         | -      | -       | -    |
| NGLY1_KO_2 | 46.94     | -0.071 | 0       | 0.99 |
| NGLY1_2    | 50.66     | -0.093 | 0.05    | 0.99 |

Supplement: Supplementary file 7211 [file 1]

# IPI00013455.8|CLIP1

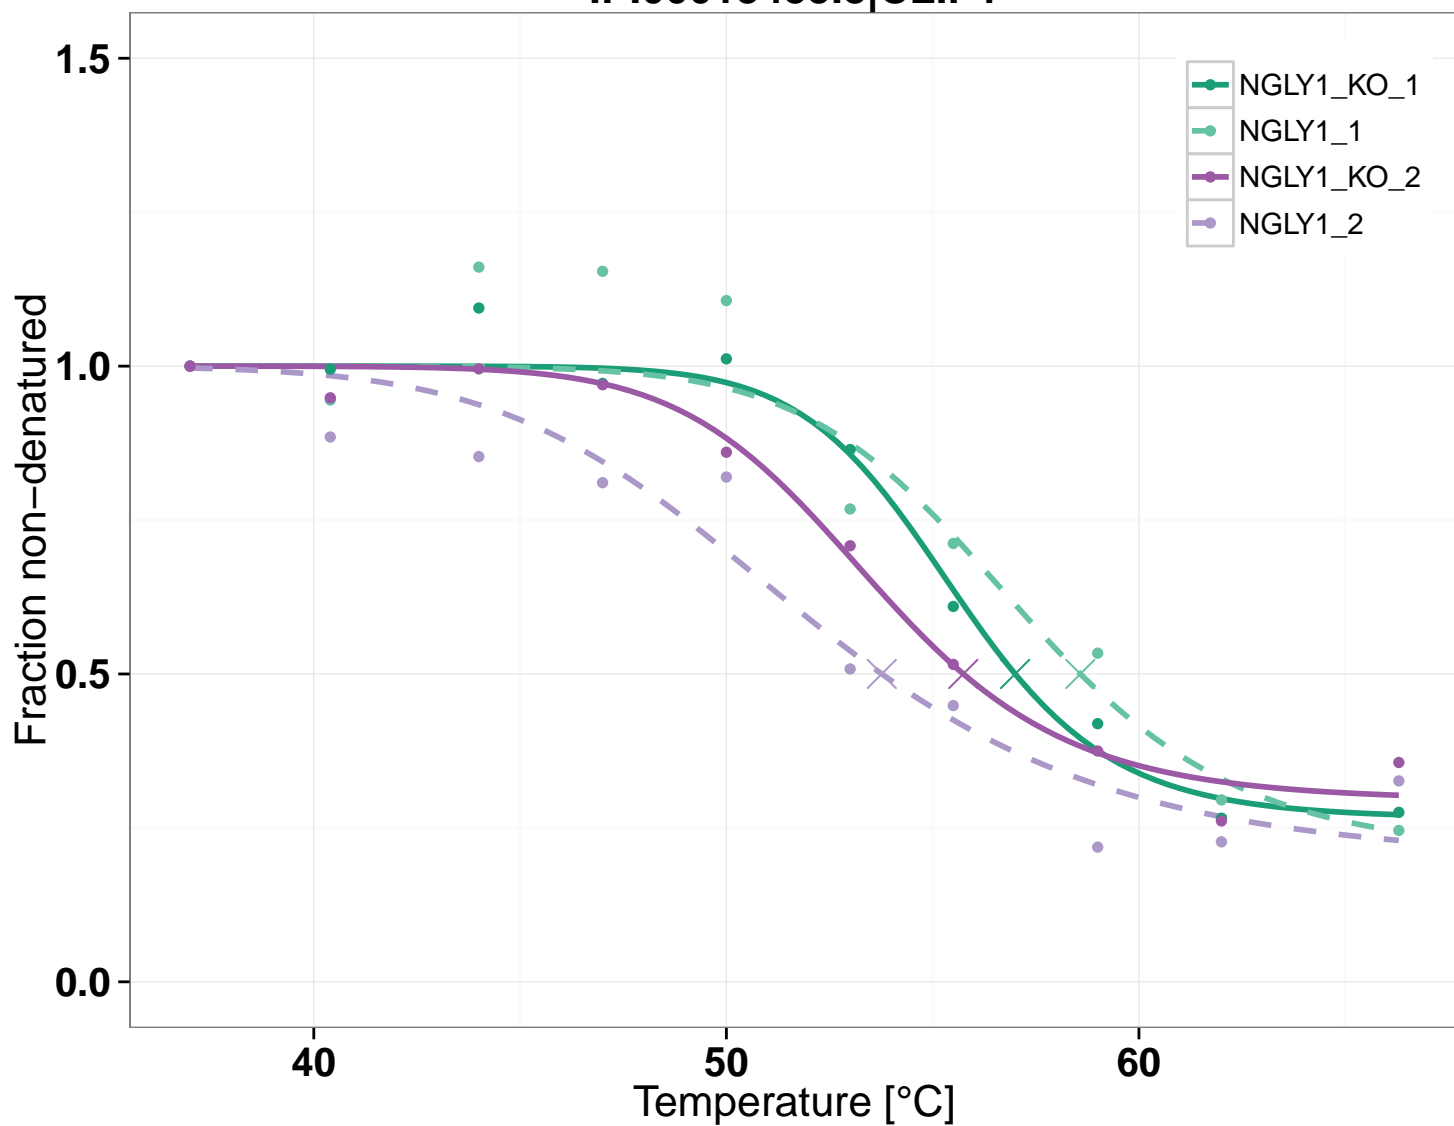

|            | meltPoint | slope  | plateau | R2   |
|------------|-----------|--------|---------|------|
| NGLY1_KO_1 | 57        | -0.098 | 0.27    | 0.98 |
| NGLY1_1    | 58.58     | -0.075 | 0.21    | 0.91 |
| NGLY1_KO_2 | 55.74     | -0.075 | 0.29    | 0.99 |
| NGLY1_2    | 53.77     | -0.055 | 0.19    | 0.93 |

Supplement: Supplementary file 7212 [file 1]

IPI00030654.1|CPSF6

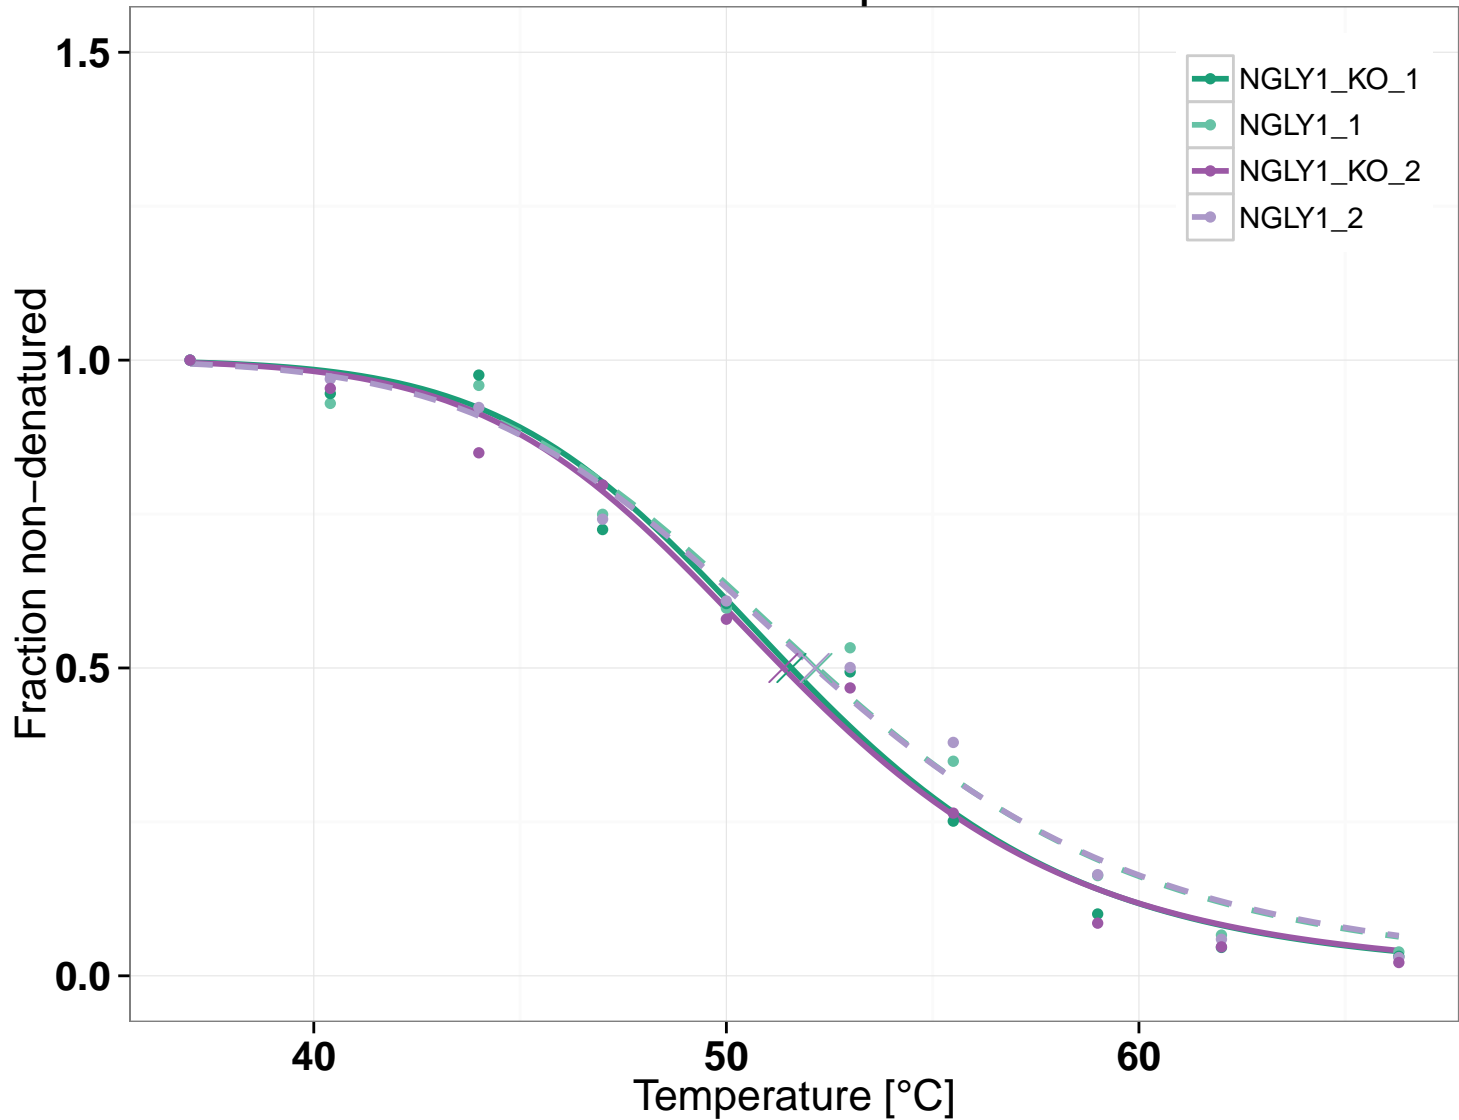

|            | meltPoint | slope  | plateau | R2   |
|------------|-----------|--------|---------|------|
| NGLY1_KO_1 | 51.58     | -0.071 | 0       | 0.98 |
| NGLY1_1    | 52.21     | -0.062 | 0       | 0.98 |
| NGLY1_KO_2 | 51.38     | -0.07  | 0       | 0.99 |
| NGLY1_2    | 52.14     | -0.061 | 0       | 0.99 |

Supplement: Supplementary file 7213 [file 1]

# IPI00001466.2|EML4

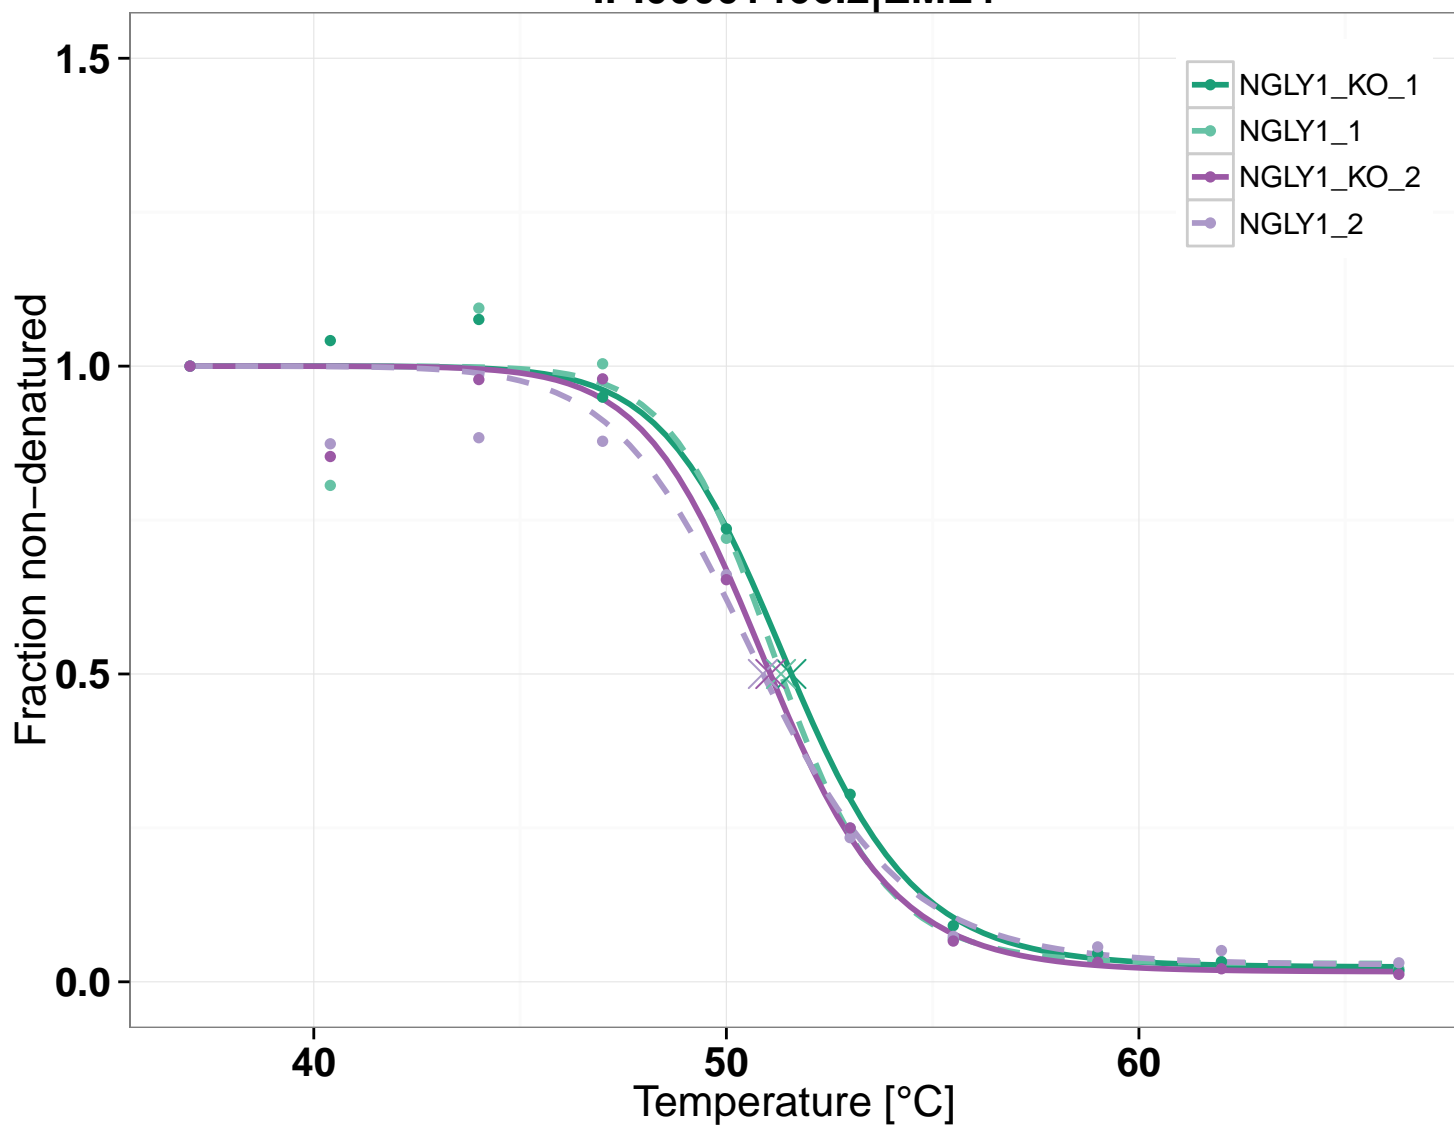

|            | meltPoint | slope | plateau | R2   |
|------------|-----------|-------|---------|------|
| NGLY1_KO_1 | 51.58     | -0.16 | 0.02    | 1    |
| NGLY1_1    | 51.32     | -0.18 | 0.03    | 0.97 |
| NGLY1_KO_2 | 51.07     | -0.16 | 0.02    | 0.99 |
| NGLY1_2    | 50.88     | -0.14 | 0.03    | 0.98 |

Supplement: Supplementary file 7214 [file 1]

IPI00217157.5|DDX59

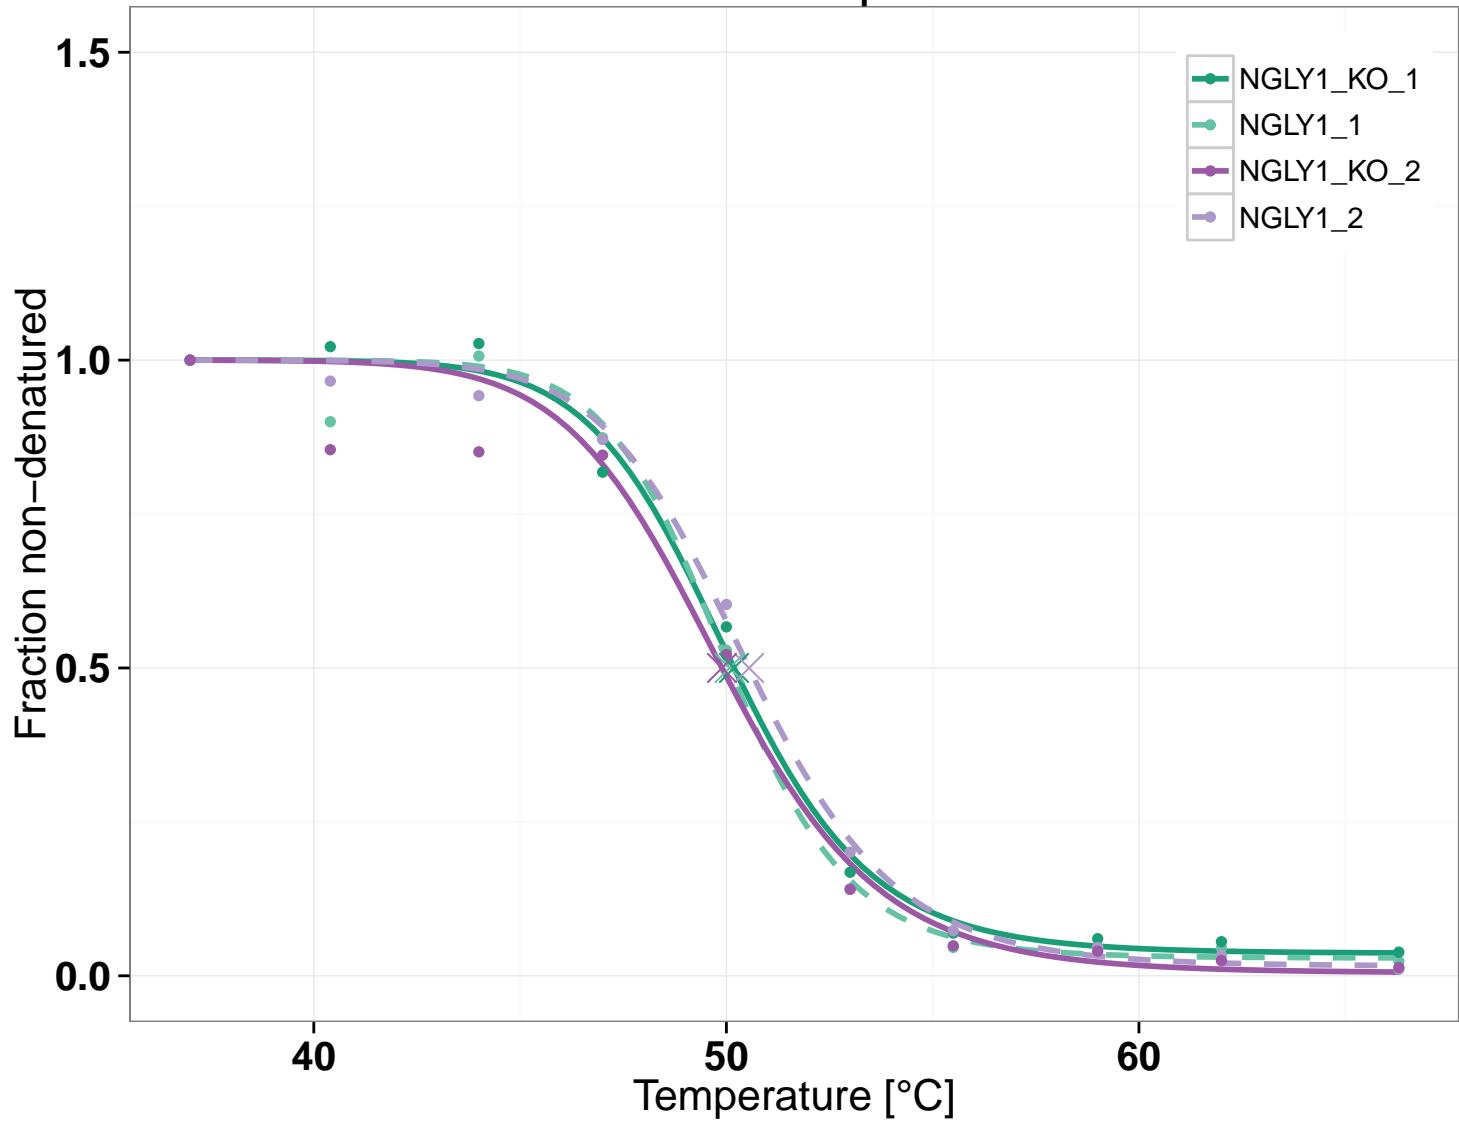

|            | meltPoint | slope | plateau | R2   |
|------------|-----------|-------|---------|------|
| NGLY1_KO_1 | 50.19     | -0.14 | 0.04    | 1    |
| NGLY1_1    | 50.08     | -0.16 | 0.03    | 0.99 |
| NGLY1_KO_2 | 49.89     | -0.13 | 0       | 0.98 |
| NGLY1_2    | 50.55     | -0.14 | 0.02    | 1    |

Supplement: Supplementary file 7215 [file 1]

IPI00215999.1|CDC2L1

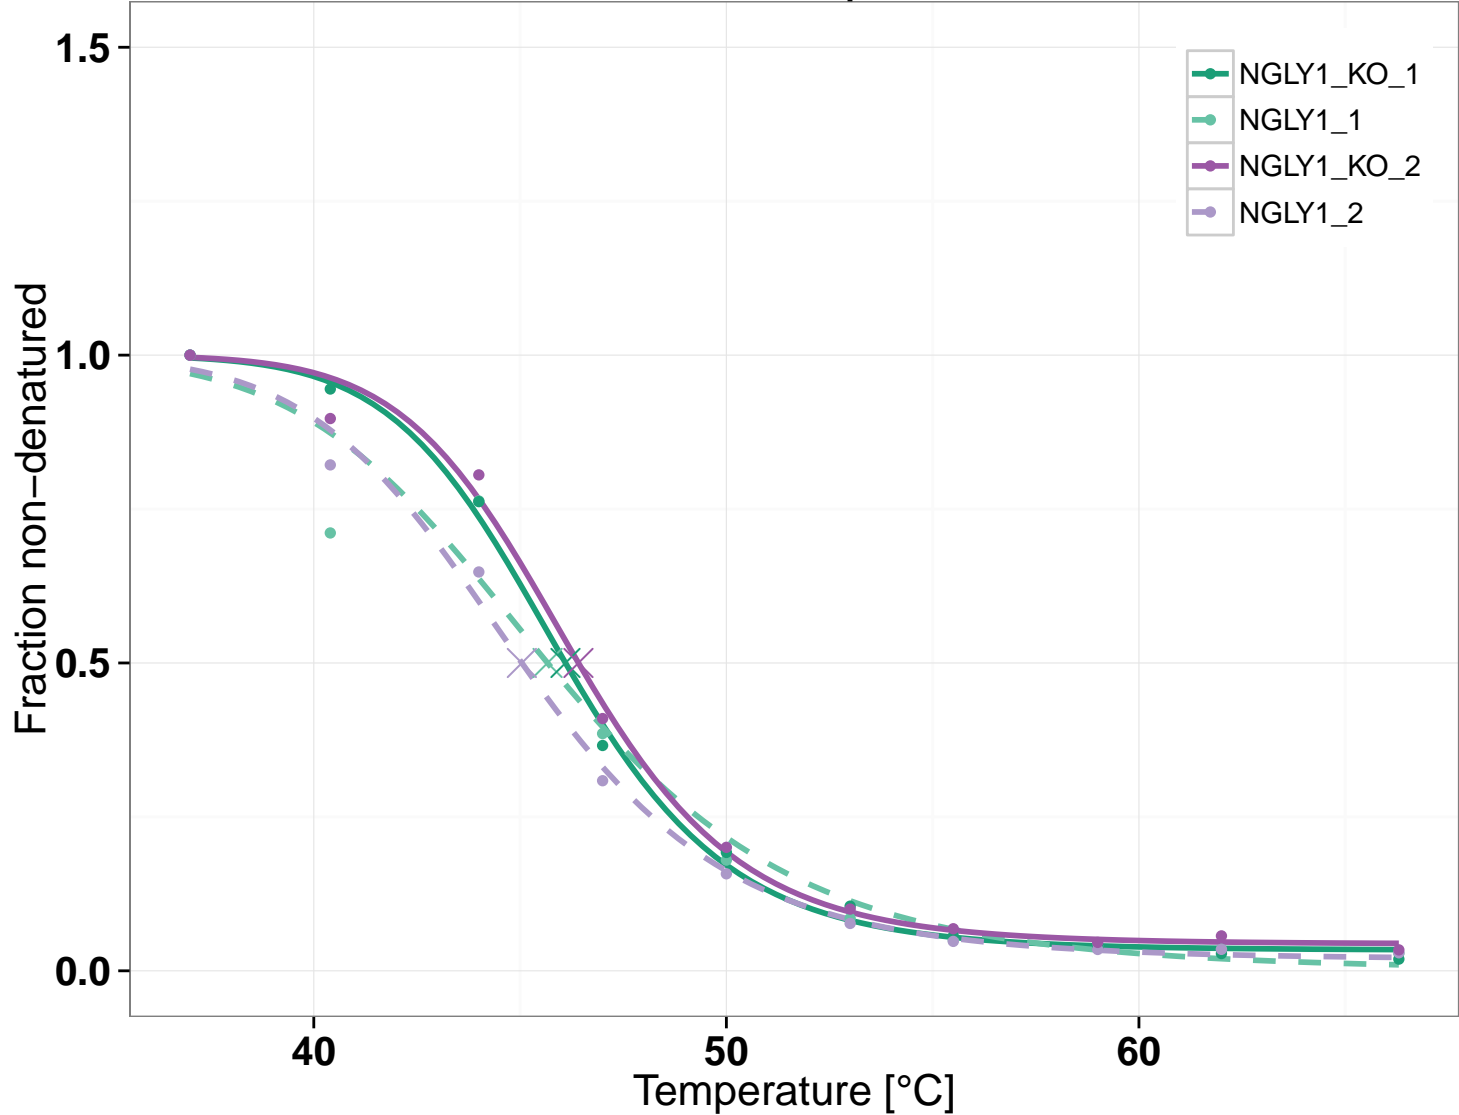

|            | meltPoint | slope  | plateau | R2   |
|------------|-----------|--------|---------|------|
| NGLY1_KO_1 | 46.1      | -0.12  | 0.03    | 1    |
| NGLY1_1    | 45.67     | -0.083 | 0       | 0.96 |
| NGLY1_KO_2 | 46.41     | -0.12  | 0.04    | 0.99 |
| NGLY1_2    | 45.04     | -0.096 | 0.02    | 0.99 |

Supplement: Supplementary file 7216 [file 1]

IPI00873208.2|ASXL2

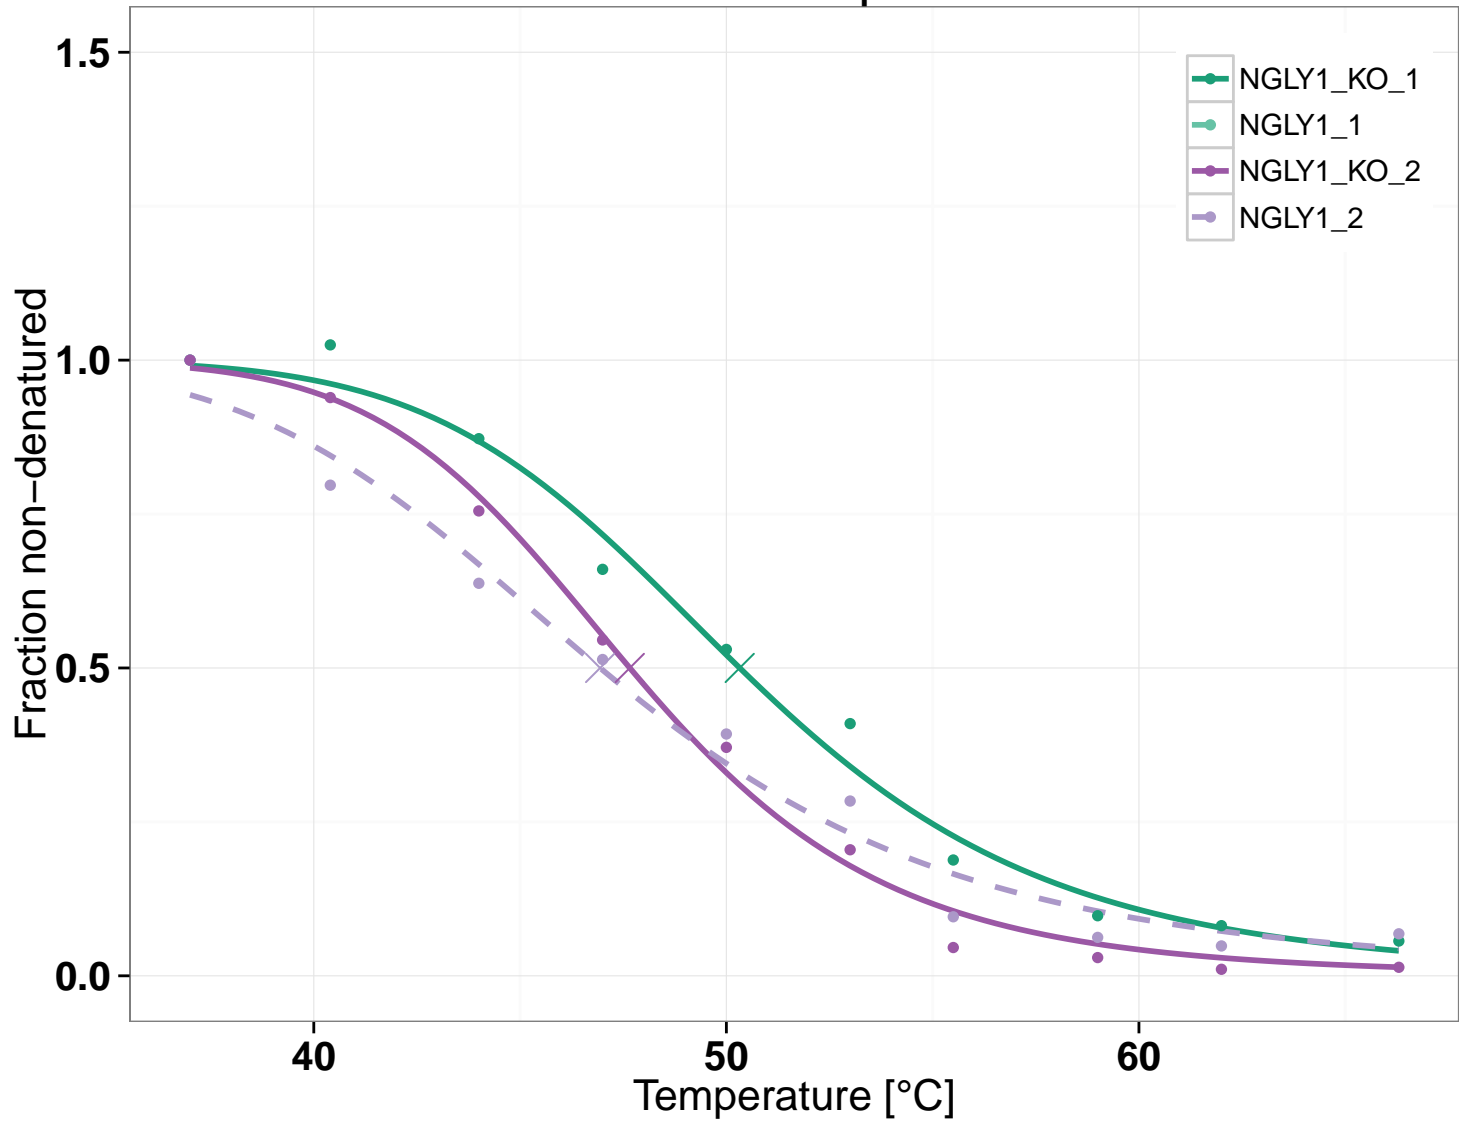

|            | meltPoint | slope  | plateau | R2   |
|------------|-----------|--------|---------|------|
| NGLY1_KO_1 | 50.32     | -0.067 | 0       | 0.99 |
| NGLY1_1    | -         | -      | -       | -    |
| NGLY1_KO_2 | 47.66     | -0.081 | 0       | 0.99 |
| NGLY1_2    | 46.94     | -0.058 | 0       | 0.98 |

Supplement: Supplementary file 7217 [file 1]

IPI00291215.6|PARP14

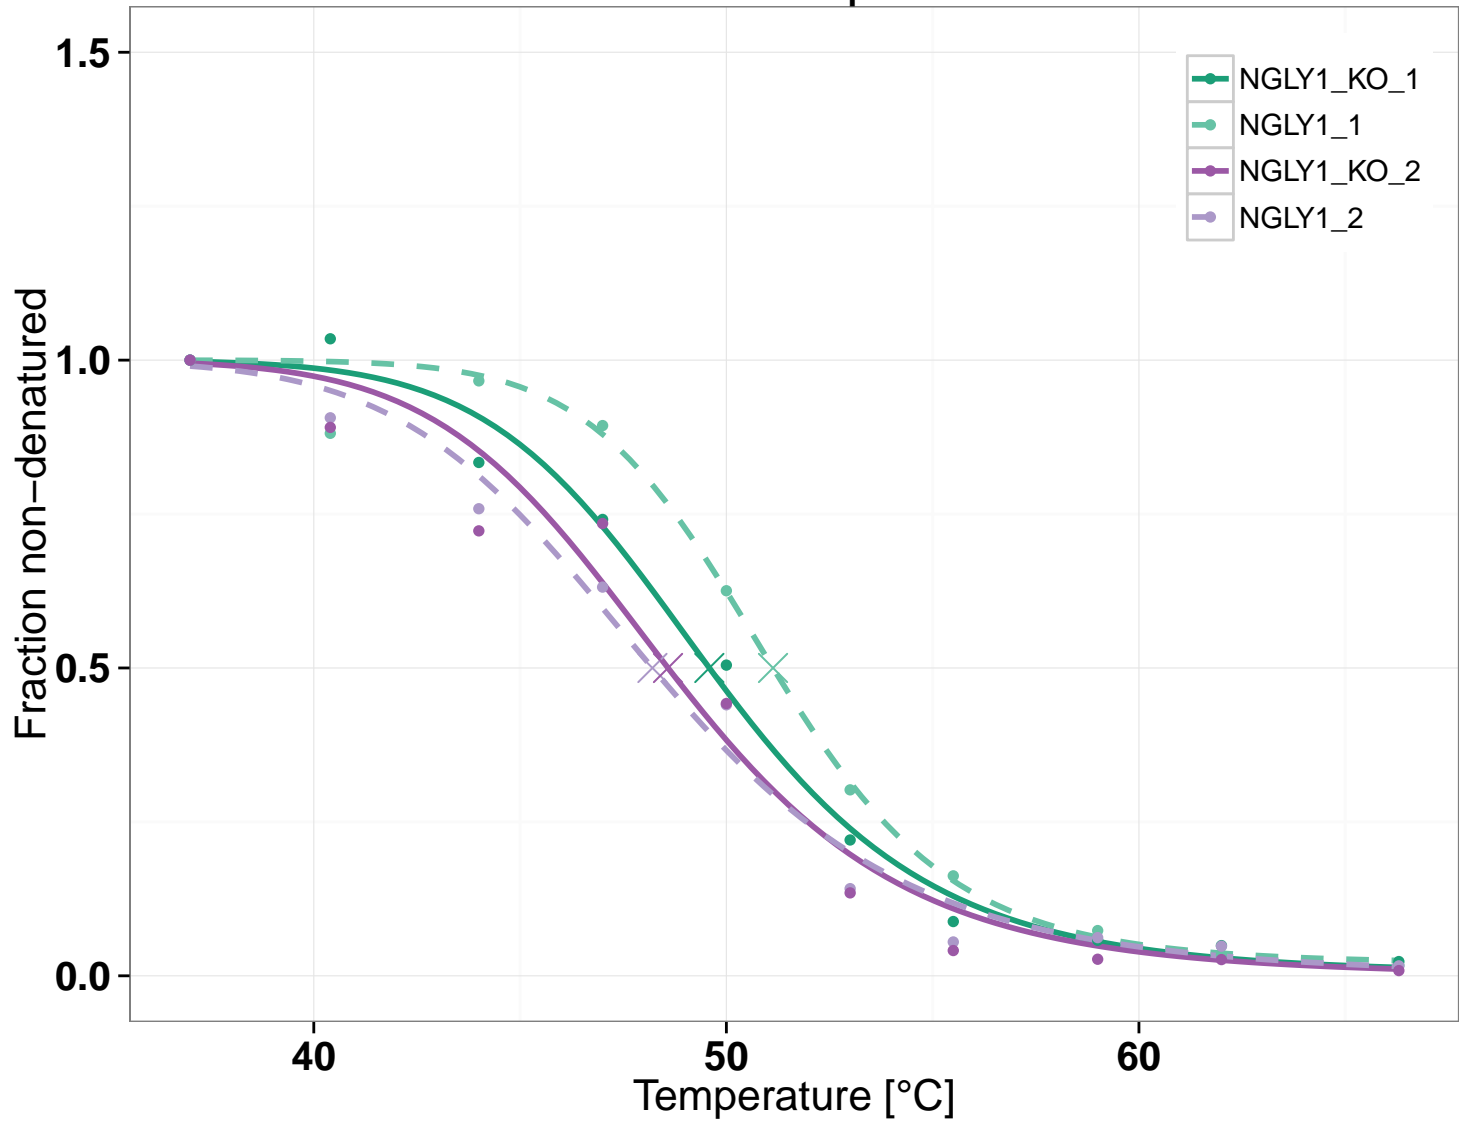

|            | meltPoint | slope  | plateau | R2   |
|------------|-----------|--------|---------|------|
| NGLY1_KO_1 | 49.59     | -0.092 | 0       | 0.99 |
| NGLY1_1    | 51.13     | -0.11  | 0.02    | 0.99 |
| NGLY1_KO_2 | 48.59     | -0.088 | 0       | 0.97 |
| NGLY1_2    | 48.21     | -0.081 | 0       | 0.99 |

Supplement: Supplementary file 7218 [file 1]

IPI00890798.1|C9ORF75

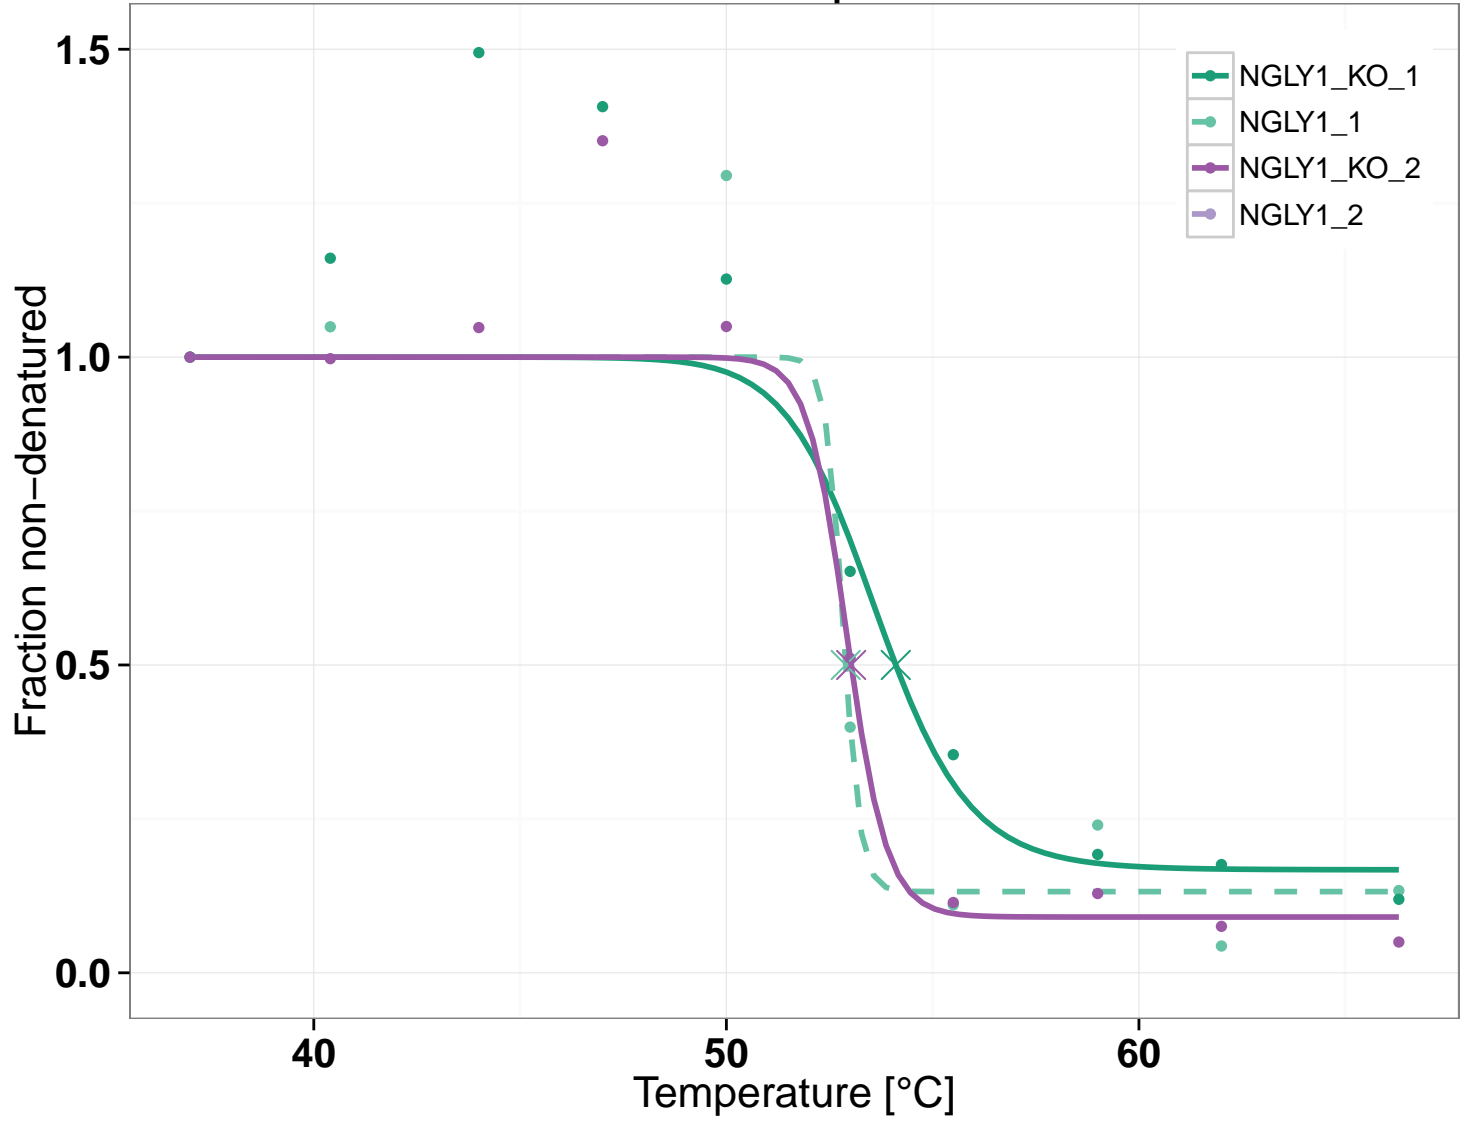

|            | meltPoint | slope | plateau | R2   |
|------------|-----------|-------|---------|------|
| NGLY1_KO_1 | 54.11     | -0.19 | 0.17    | 0.82 |
| NGLY1_1    | 52.89     | -1    | 0.13    | 0.63 |
| NGLY1_KO_2 | 53.02     | -0.47 | 0.09    | 0.94 |
| NGLY1_2    | -         | -     | -       | -    |

Supplement: Supplementary file 7219 [file 1]

# IPI00335581.5|UBR3

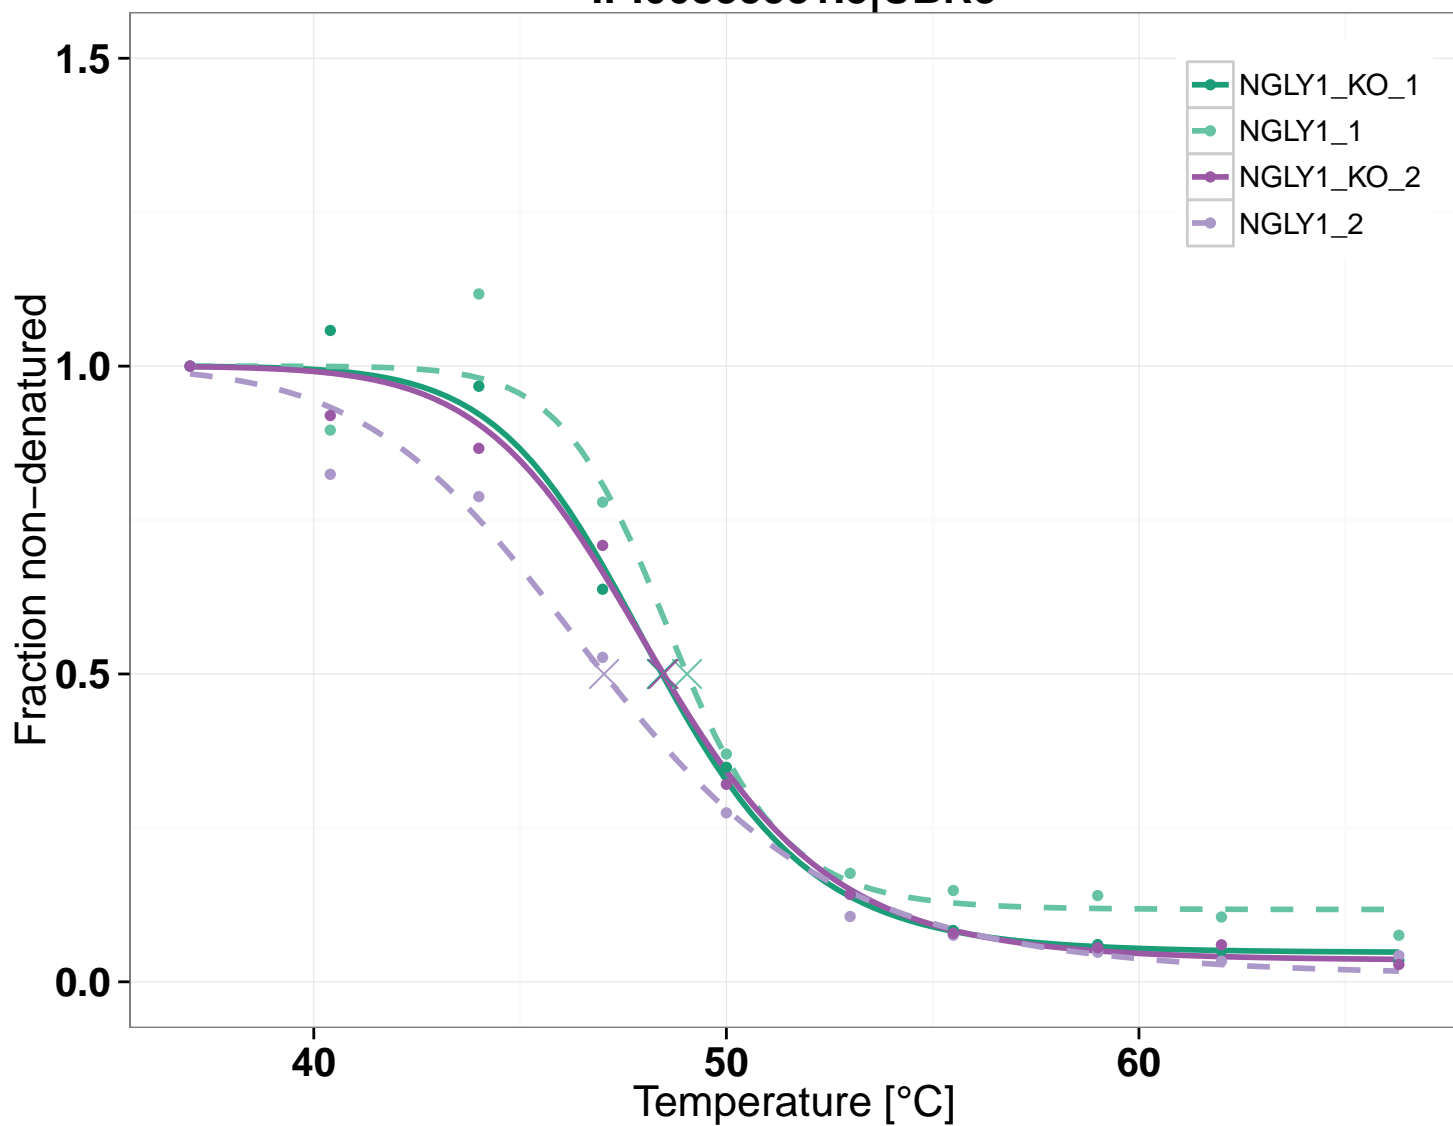

|            | meltPoint | slope  | plateau | R2   |
|------------|-----------|--------|---------|------|
| NGLY1_KO_1 | 48.44     | -0.12  | 0.05    | 1    |
| NGLY1_1    | 49.05     | -0.16  | 0.12    | 0.98 |
| NGLY1_KO_2 | 48.47     | -0.11  | 0.03    | 0.99 |
| NGLY1_2    | 47.04     | -0.086 | 0.01    | 0.99 |

Supplement: Supplementary file 7220 [file 1]

# IPI00747147.3|C14ORF104

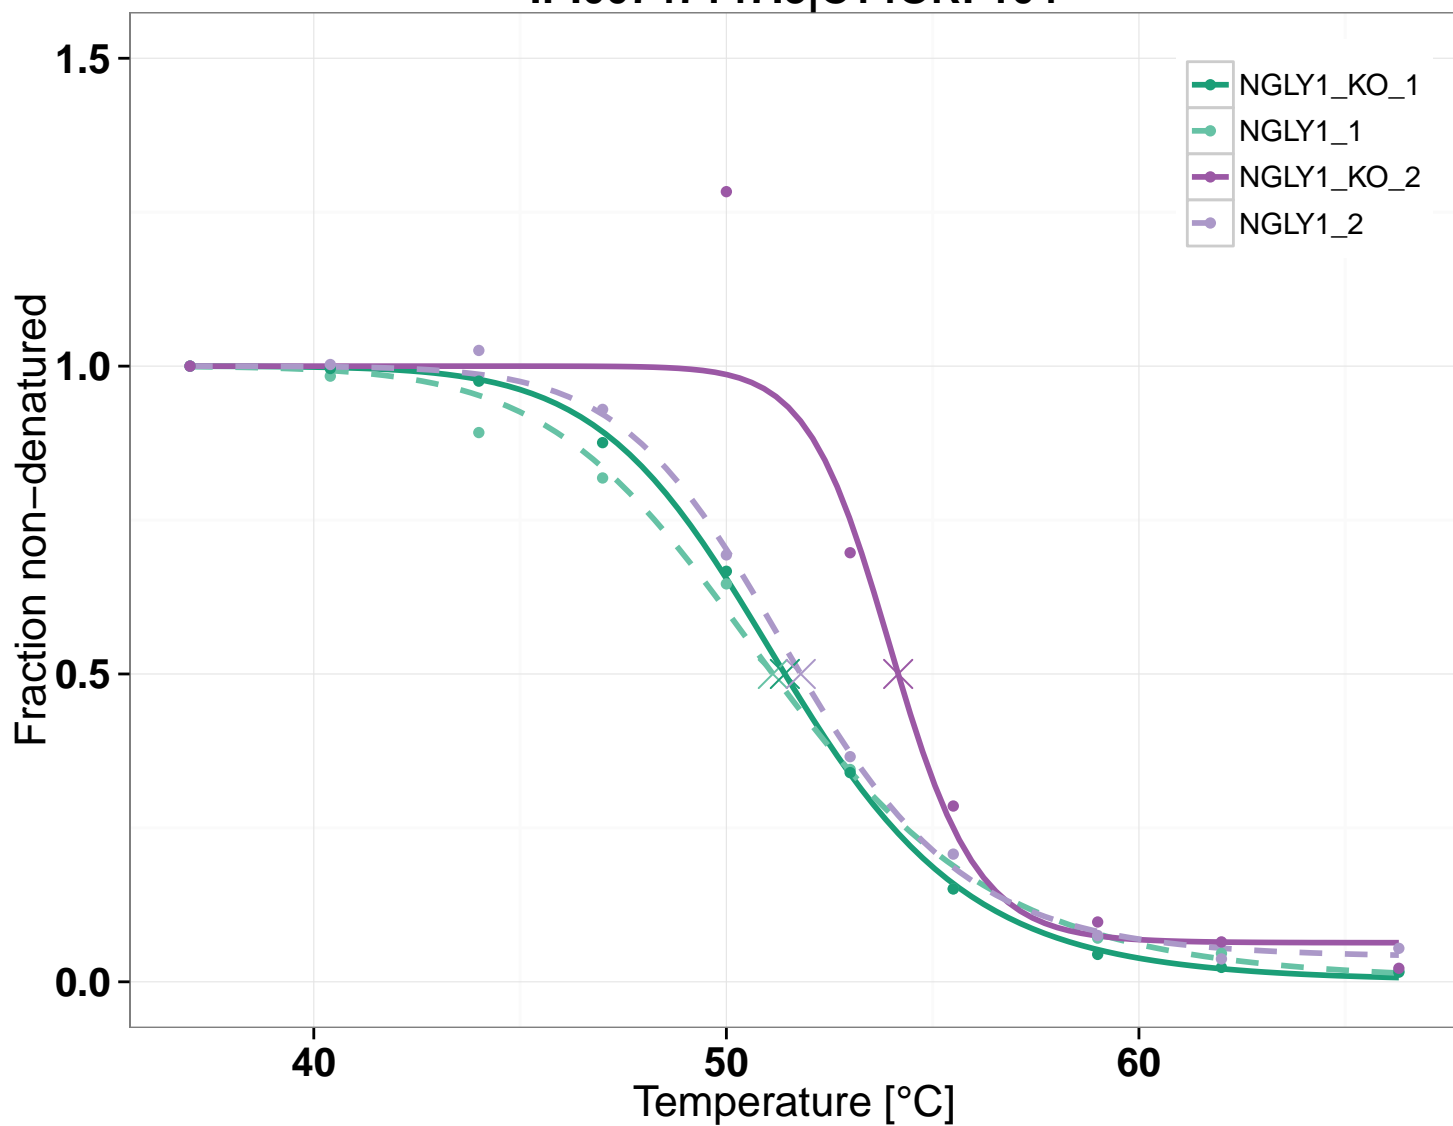

|            | meltPoint | slope  | plateau | R2   |
|------------|-----------|--------|---------|------|
| NGLY1_KO_1 | 51.42     | -0.11  | 0       | 1    |
| NGLY1_1    | 51.13     | -0.092 | 0       | 1    |
| NGLY1_KO_2 | 54.16     | -0.23  | 0.06    | 0.67 |
| NGLY1_2    | 51.8      | -0.12  | 0.04    | 1    |

Supplement: Supplementary file 7221 [file 1]

IPI00435947.2|WIPF2

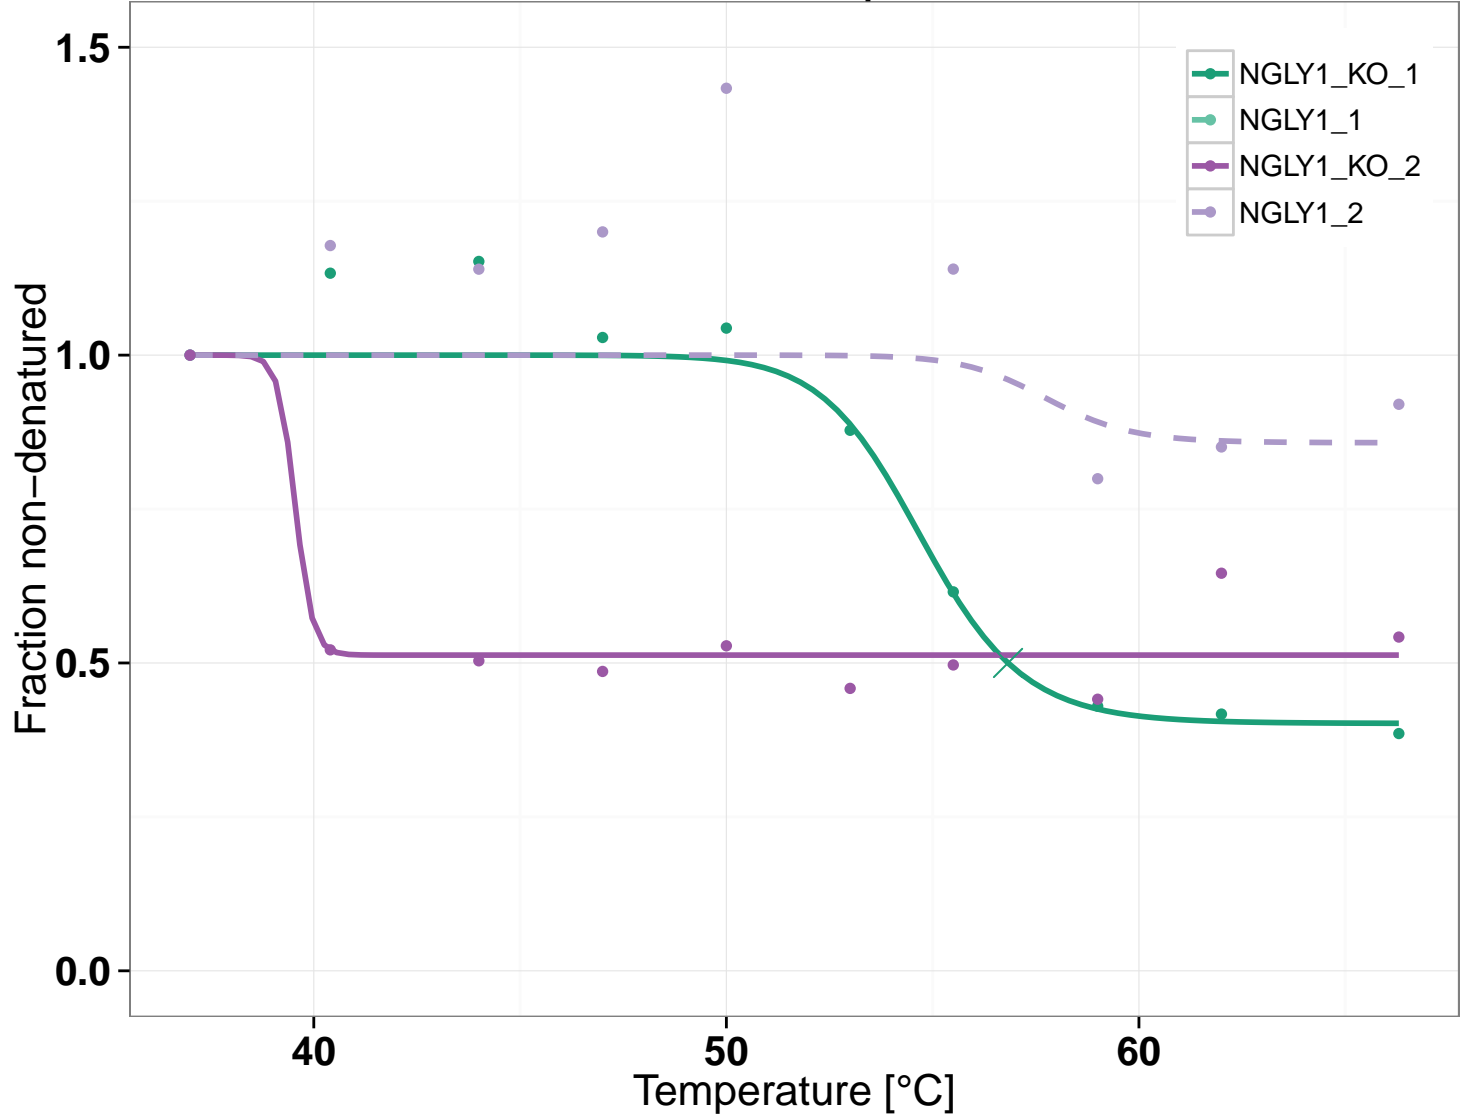

|            | meltPoint | slope  | plateau | R2    |
|------------|-----------|--------|---------|-------|
| NGLY1_KO_1 | 56.83     | -0.12  | 0.4     | 0.95  |
| NGLY1_1    | -         | -      | -       | -     |
| NGLY1_KO_2 | -         | -0.59  | 0.51    | 0.88  |
| NGLY1_2    | -         | -0.035 | 0.86    | -0.18 |

Supplement: Supplementary file 7222 [file 1]

# IPI00908804.1|ABCD3

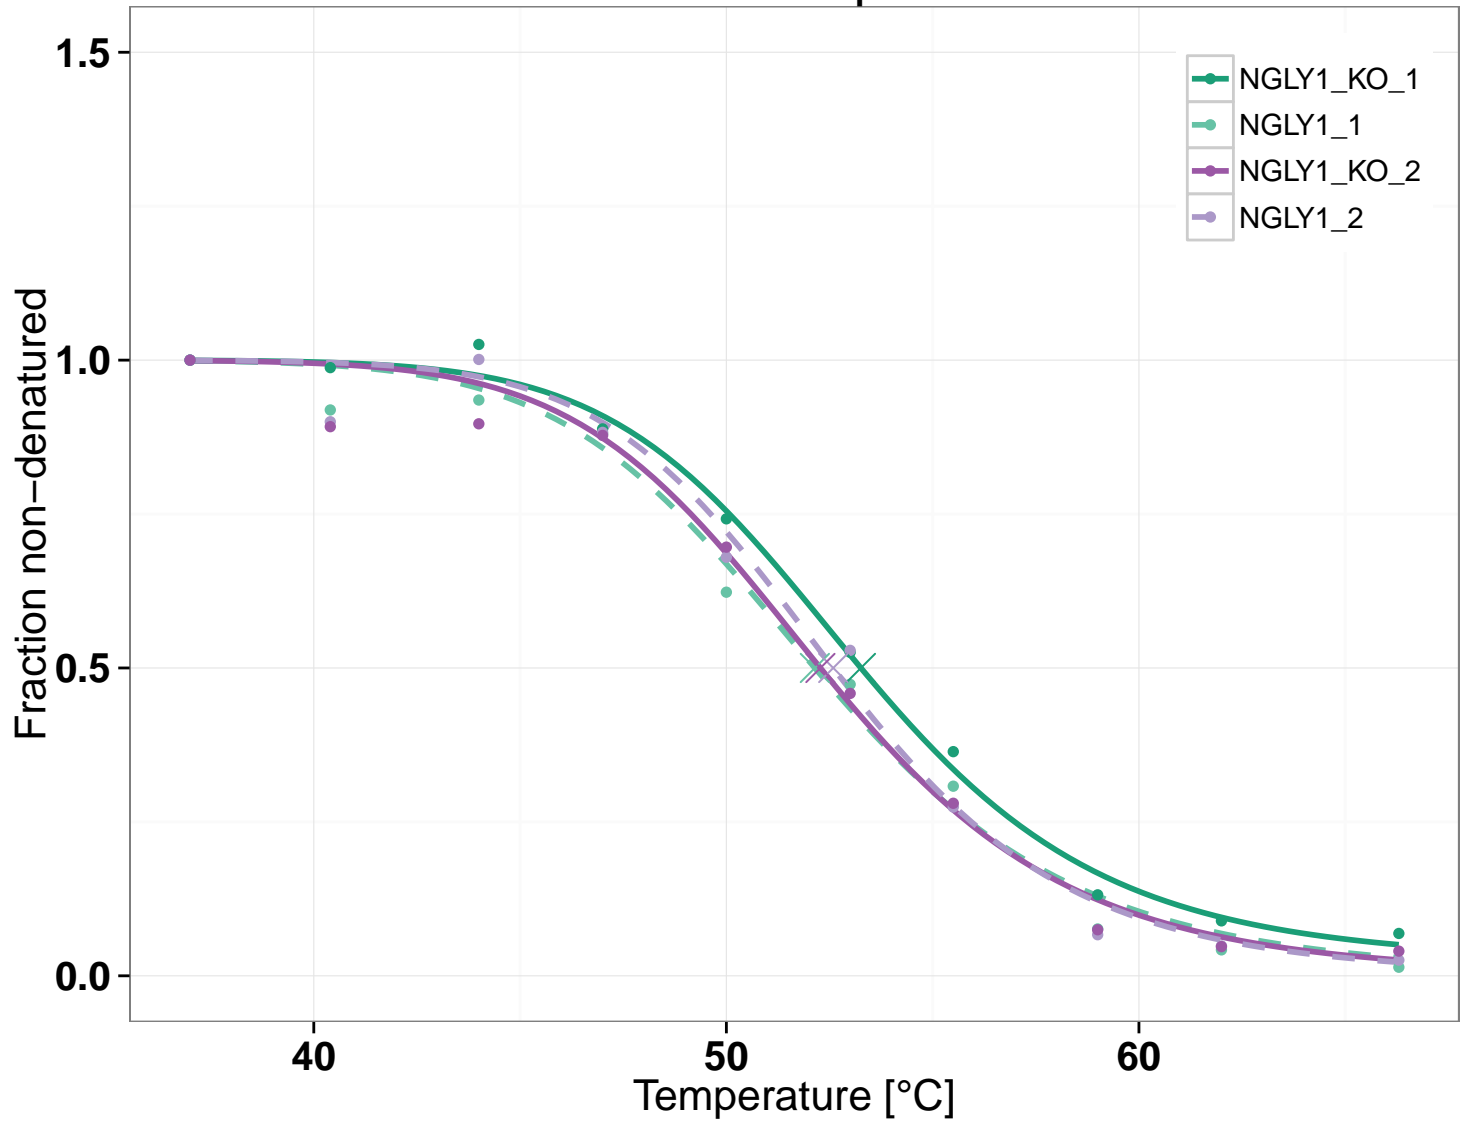

|            | meltPoint | slope  | plateau | R2   |
|------------|-----------|--------|---------|------|
| NGLY1_KO_1 | 53.26     | -0.082 | 0.02    | 1    |
| NGLY1_1    | 52.14     | -0.08  | 0       | 0.99 |
| NGLY1_KO_2 | 52.28     | -0.083 | 0       | 0.99 |
| NGLY1_2    | 52.59     | -0.088 | 0       | 0.99 |

Supplement: Supplementary file 7223 [file 1]

IPI00918021.1|UBE2E3

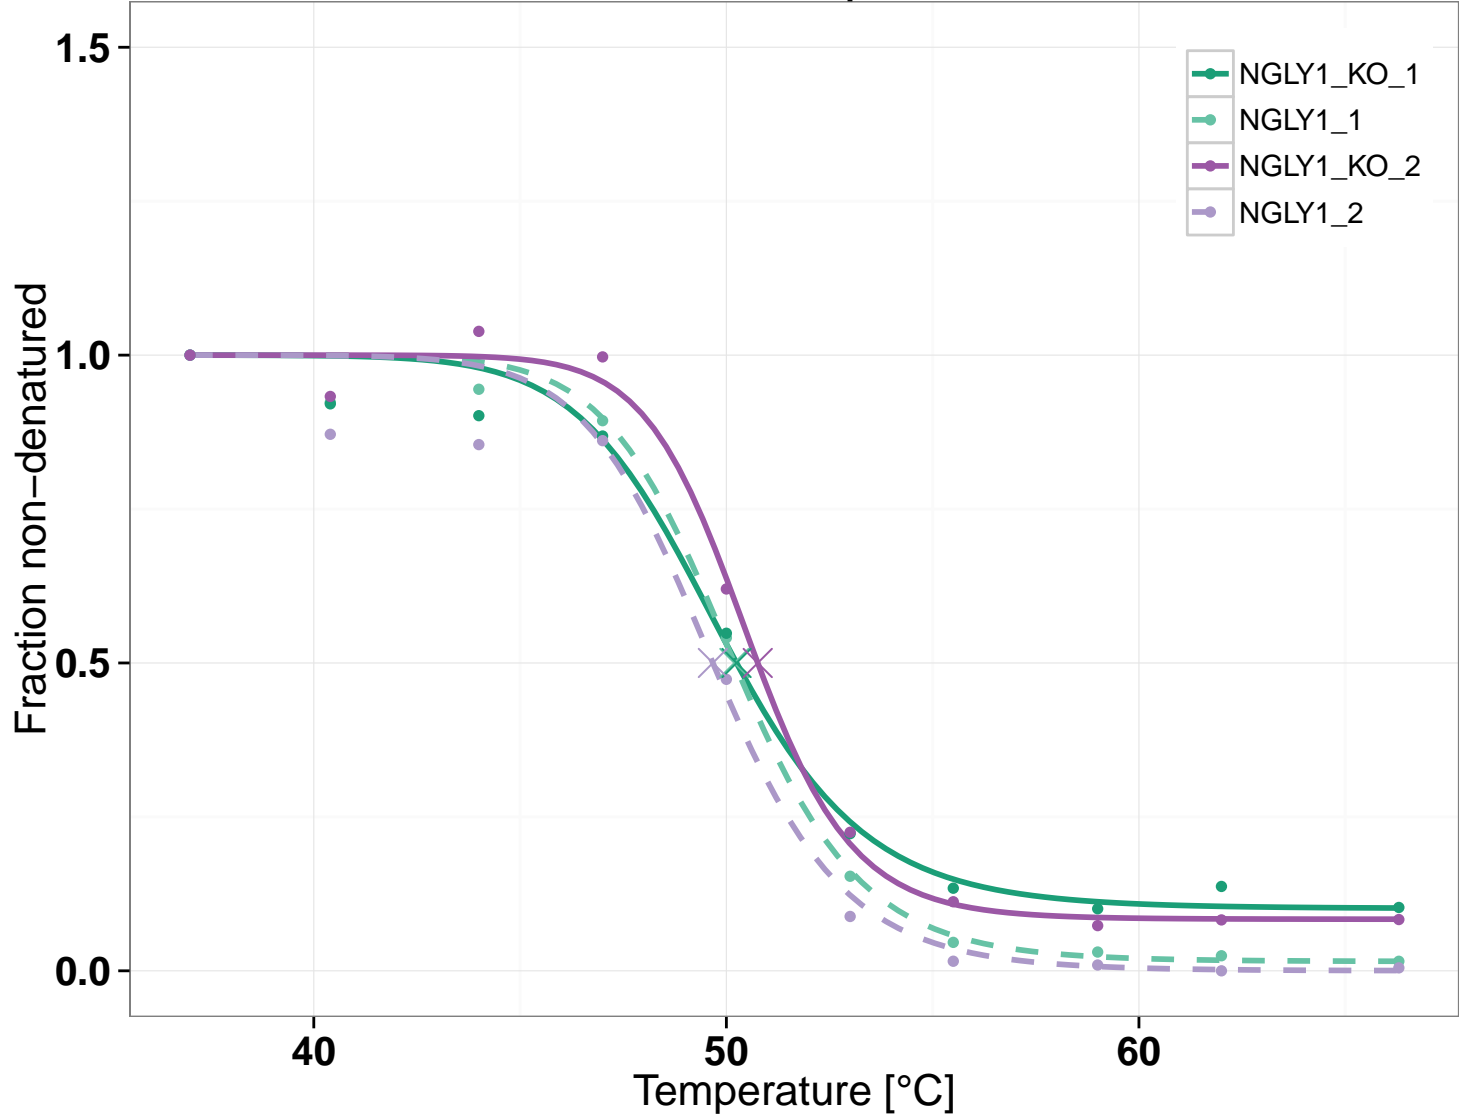

|            | meltPoint | slope | plateau | R2   |
|------------|-----------|-------|---------|------|
| NGLY1_KO_1 | 50.25     | -0.13 | 0.1     | 0.99 |
| NGLY1_1    | 50.2      | -0.16 | 0.02    | 1    |
| NGLY1_KO_2 | 50.76     | -0.18 | 0.08    | 1    |
| NGLY1_2    | 49.67     | -0.16 | 0       | 0.98 |

Supplement: Supplementary file 7224 [file 1]

# IPI00216898.2|CRY2

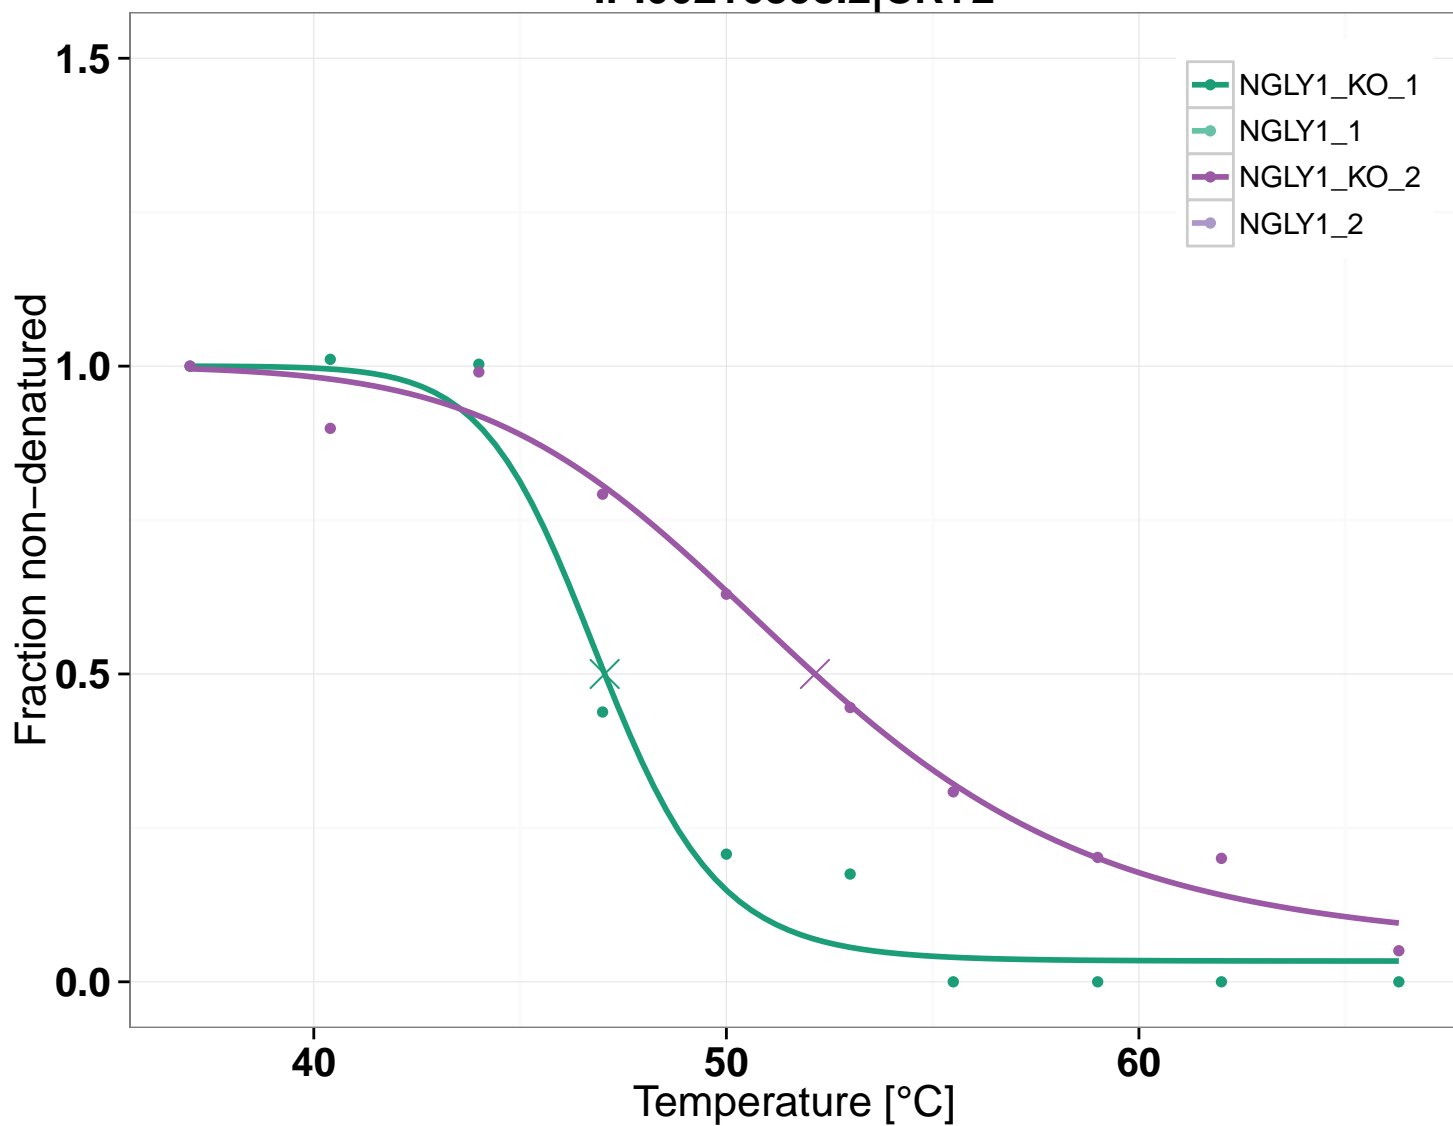

|            | meltPoint | slope  | plateau | R2   |
|------------|-----------|--------|---------|------|
| NGLY1_KO_1 | 47.05     | -0.17  | 0.03    | 0.98 |
| NGLY1_1    | -         | -      | -       | -    |
| NGLY1_KO_2 | 52.15     | -0.063 | 0.05    | 0.98 |
| NGLY1_2    | -         | -      | -       | -    |

Supplement: Supplementary file 7225 [file 1]

# IPI00288964.3|ANO8

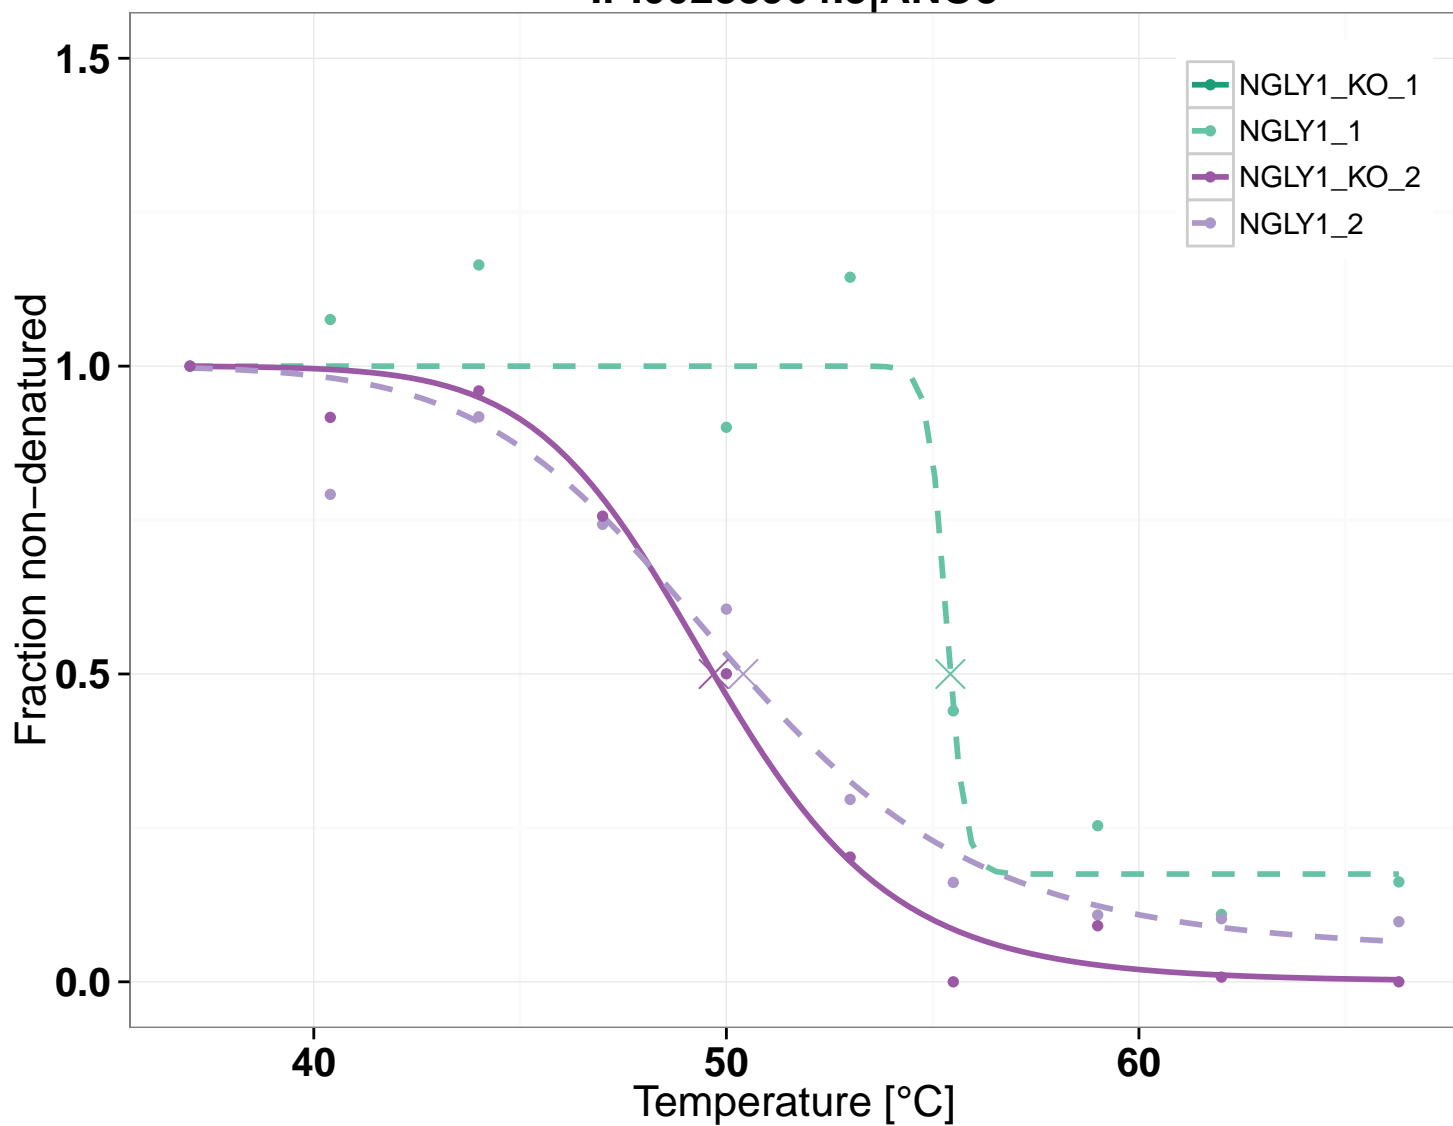

|            | meltPoint | slope  | plateau | R2   |
|------------|-----------|--------|---------|------|
| NGLY1_KO_1 | –         | –      | –       | –    |
| NGLY1_1    | 55.43     | –0.93  | 0.18    | 0.39 |
| NGLY1_KO_2 | 49.69     | –0.11  | 0       | 0.99 |
| NGLY1_2    | 50.41     | –0.078 | 0.05    | 0.96 |

Supplement: Supplementary file 7226 [file 1]

IPI00009707.5|RMND5A

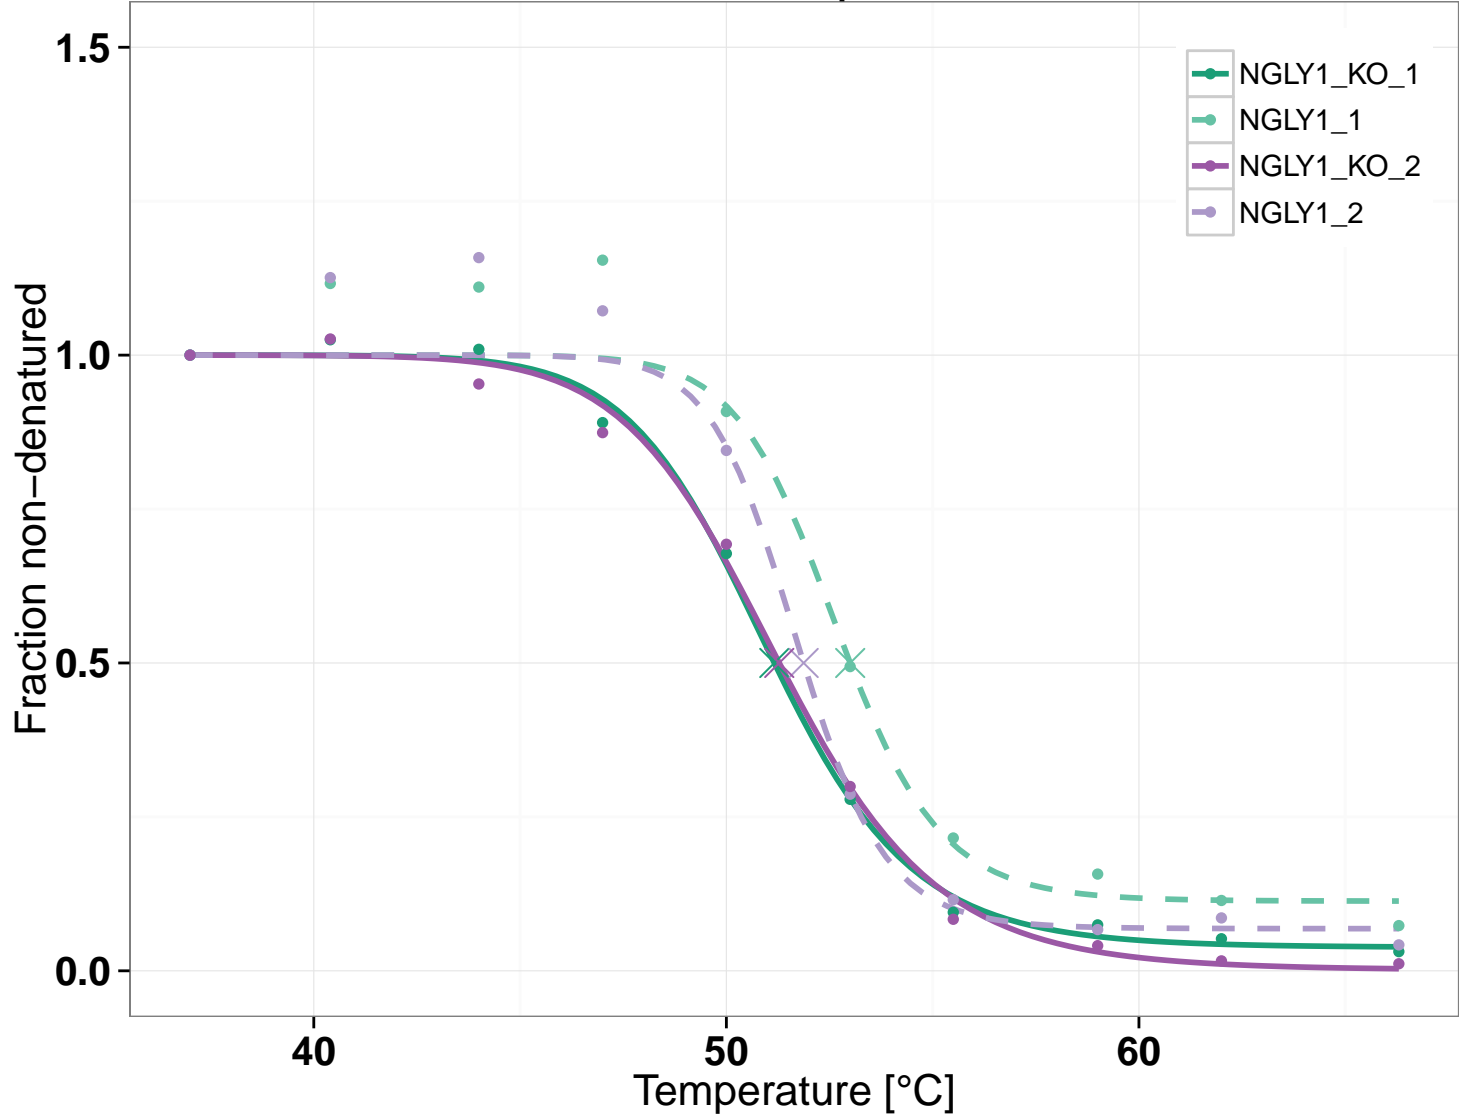

|            | meltPoint | slope | plateau | R2   |
|------------|-----------|-------|---------|------|
| NGLY1_KO_1 | 51.16     | -0.14 | 0.04    | 1    |
| NGLY1_1    | 53        | -0.18 | 0.11    | 0.97 |
| NGLY1_KO_2 | 51.28     | -0.13 | 0       | 1    |
| NGLY1_2    | 51.87     | -0.22 | 0.07    | 0.98 |

Supplement: Supplementary file 7227 [file 1]

IPI00031695.2|ELOVL6

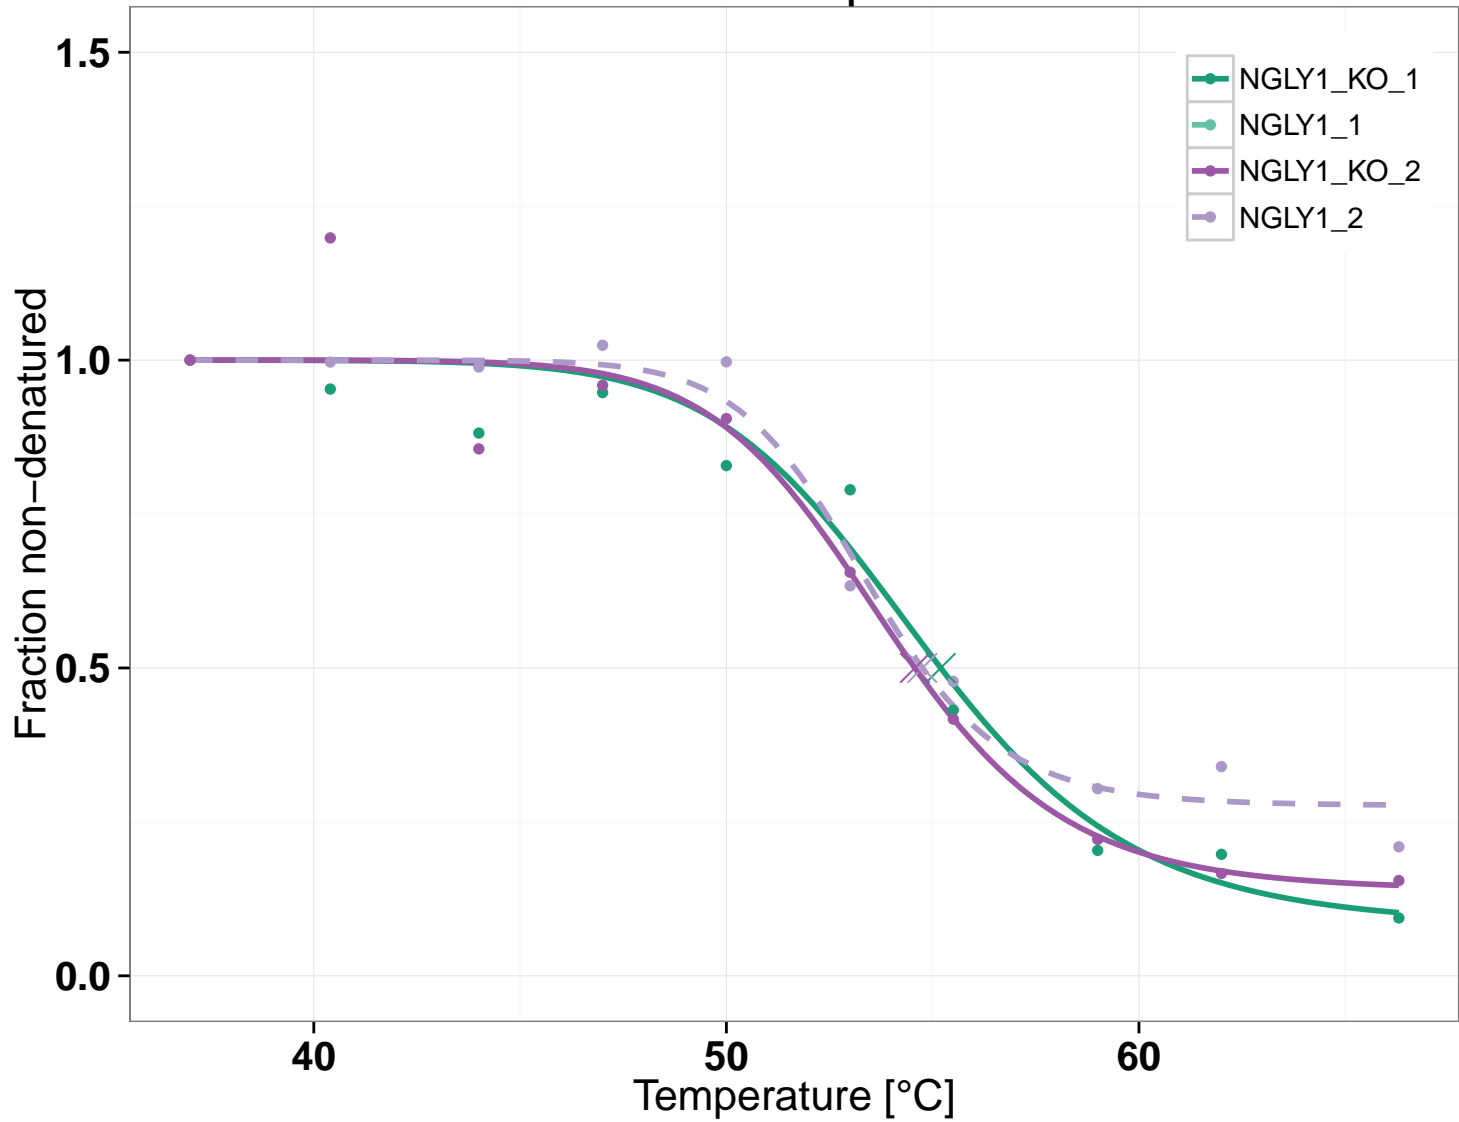

|            | meltPoint | slope | plateau | R2   |
|------------|-----------|-------|---------|------|
| NGLY1_KO_1 | 55.2      | -0.09 | 0.08    | 0.97 |
| NGLY1_1    | -         | -     | -       | -    |
| NGLY1_KO_2 | 54.57     | -0.1  | 0.14    | 0.96 |
| NGLY1_2    | 54.75     | -0.11 | 0.28    | 0.98 |

Supplement: Supplementary file 7228 [file 1]

IPI00376439.1|VPS13B

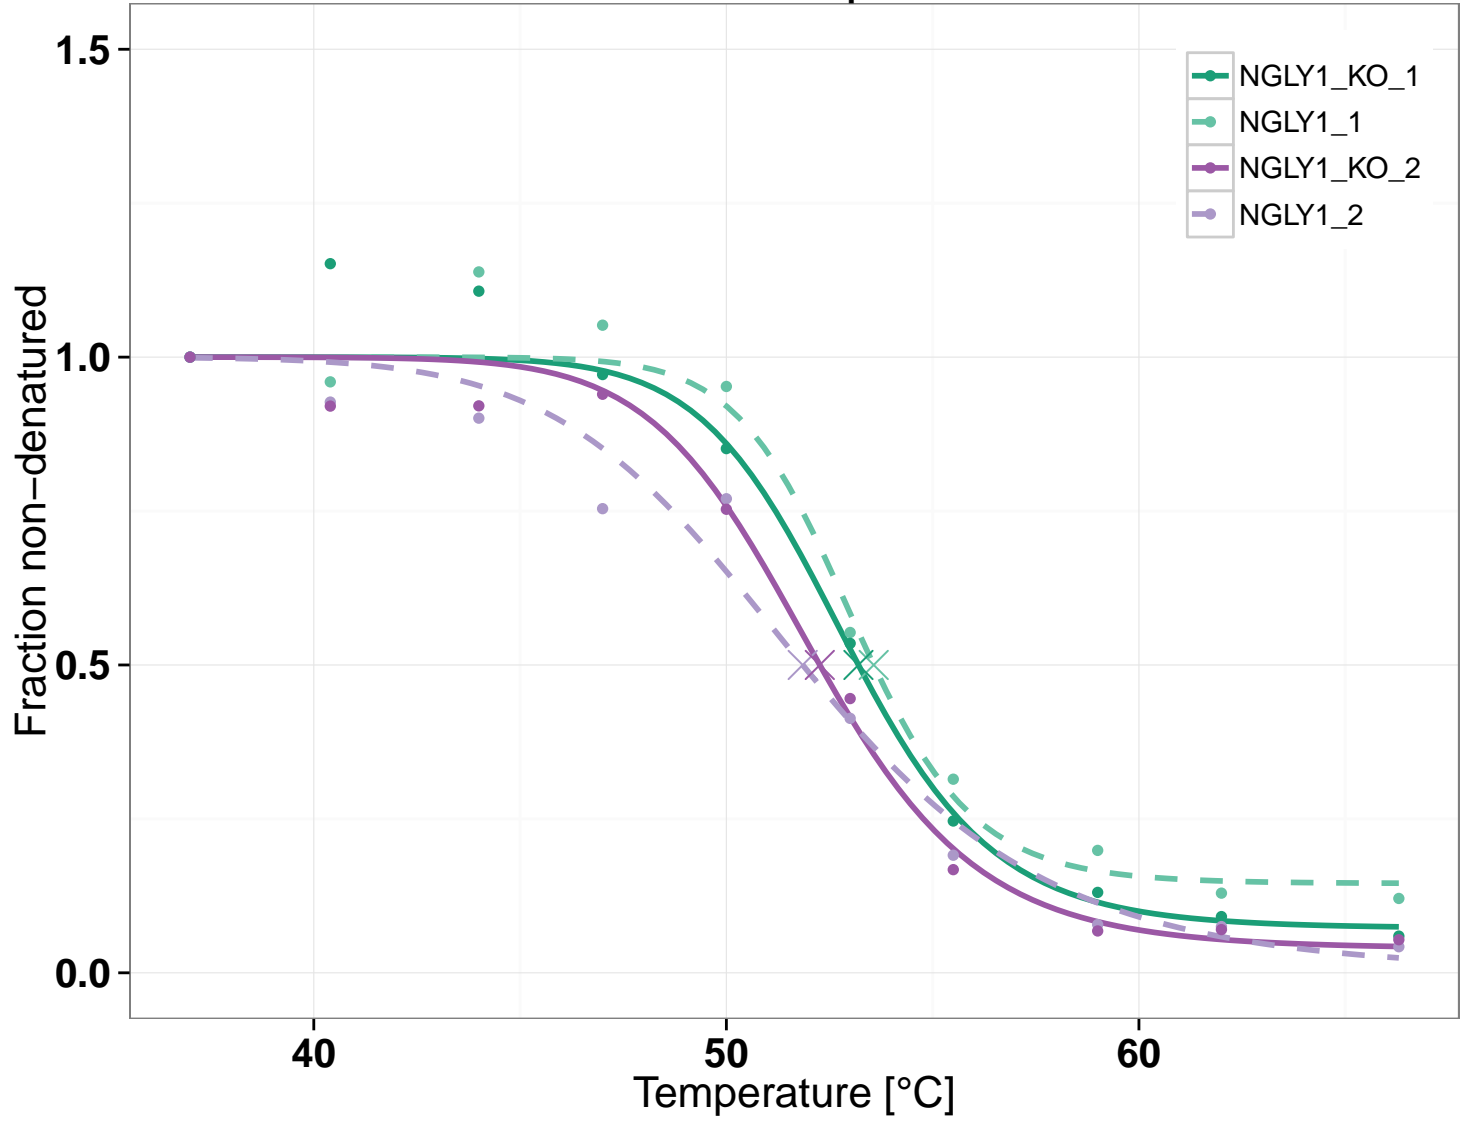

|            | meltPoint | slope  | plateau | R2   |
|------------|-----------|--------|---------|------|
| NGLY1_KO_1 | 53.2      | -0.13  | 0.07    | 0.98 |
| NGLY1_1    | 53.57     | -0.15  | 0.15    | 0.98 |
| NGLY1_KO_2 | 52.26     | -0.12  | 0.04    | 0.99 |
| NGLY1_2    | 51.85     | -0.083 | 0       | 0.97 |

Supplement: Supplementary file 7229 [file 1]

IPI00761105.2|TADA2B

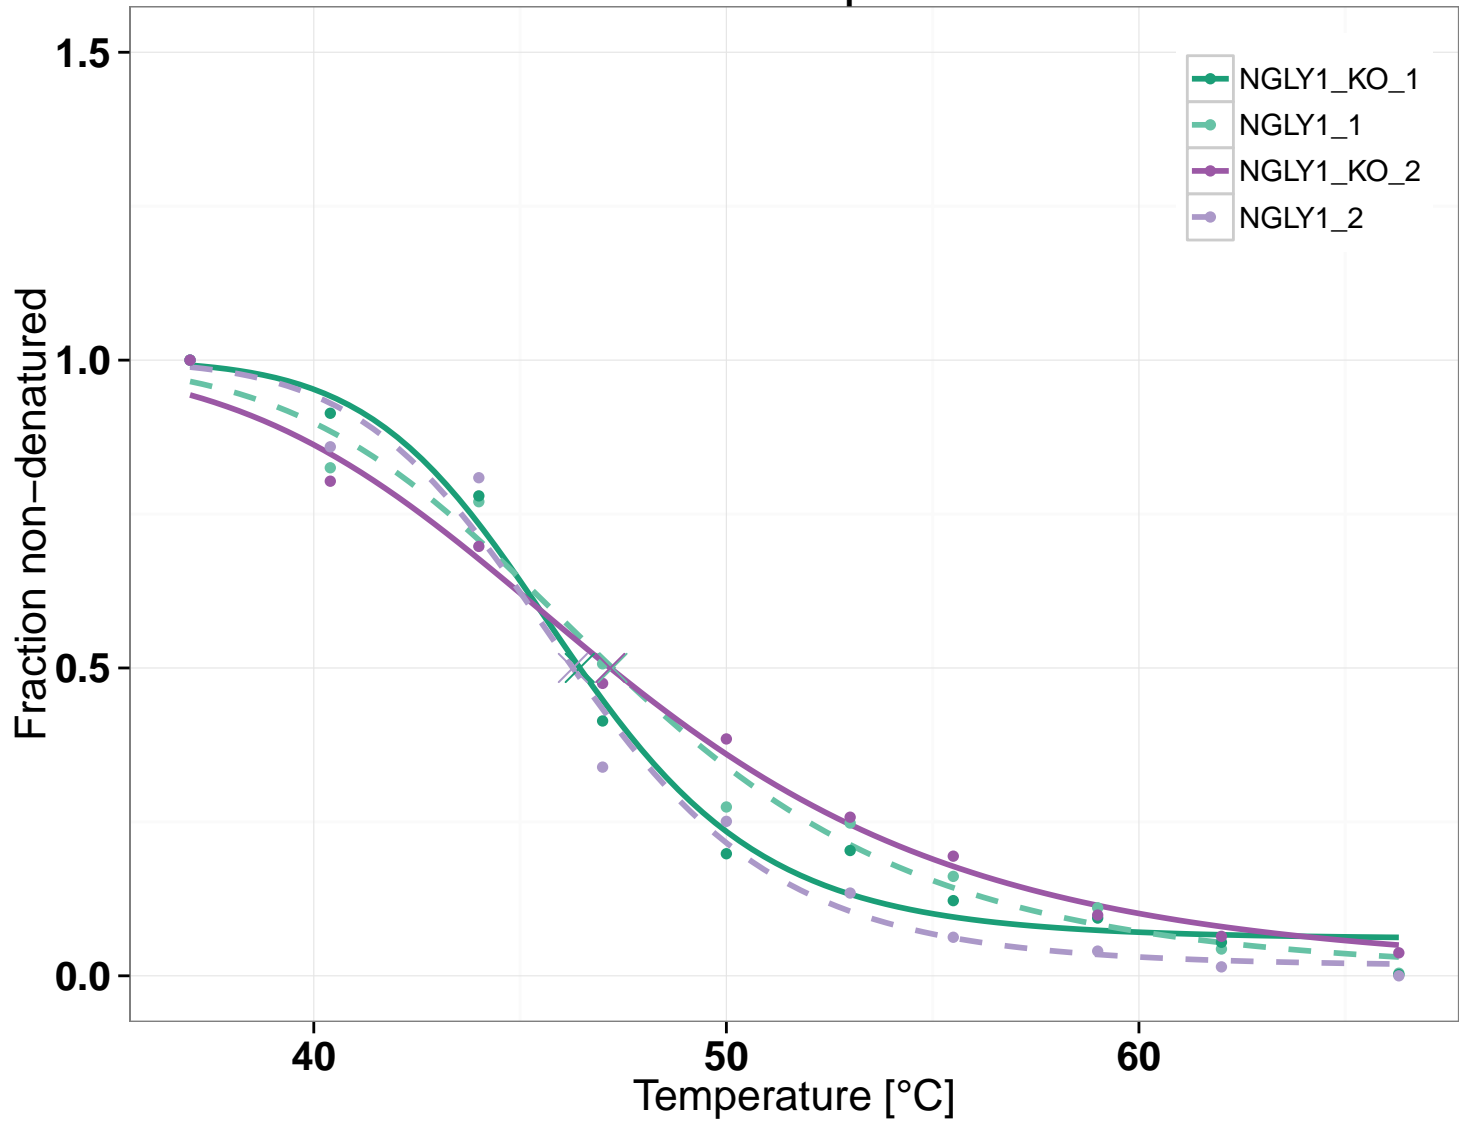

|            | meltPoint | slope  | plateau | R2   |
|------------|-----------|--------|---------|------|
| NGLY1_KO_1 | 46.45     | -0.099 | 0.06    | 0.99 |
| NGLY1_1    | 47.24     | -0.065 | 0       | 0.99 |
| NGLY1_KO_2 | 47.18     | -0.056 | 0       | 0.99 |
| NGLY1_2    | 46.28     | -0.097 | 0.01    | 0.98 |

Supplement: Supplementary file 7230 [file 1]

# IPI00301583.3|ZNF691

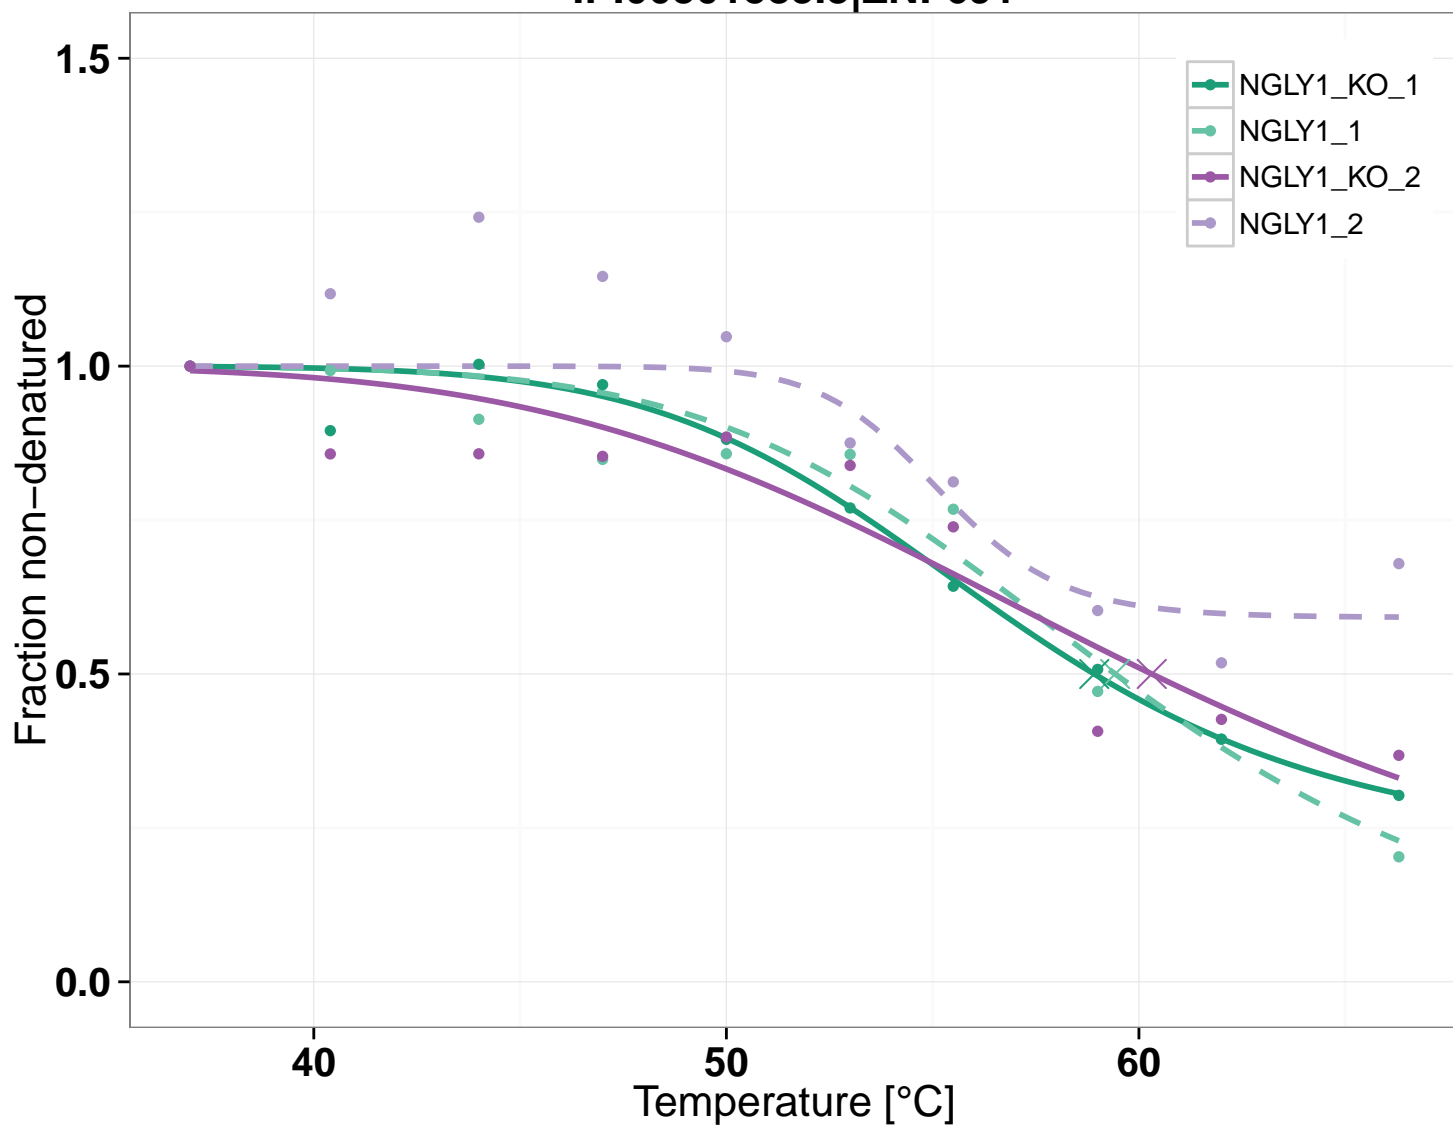

|            | meltPoint | slope  | plateau | R2   |
|------------|-----------|--------|---------|------|
| NGLY1_KO_1 | 58.92     | -0.048 | 0.21    | 0.98 |
| NGLY1_1    | 59.42     | -0.051 | 0       | 0.96 |
| NGLY1_KO_2 | 60.31     | -0.034 | 0       | 0.87 |
| NGLY1_2    | –         | -0.07  | 0.59    | 0.79 |

Supplement: Supplementary file 7231 [file 1]
