# Supplementary material (part 73 of 85)
Source: publisher figshare collection journal article supplement (https://gsajournals.figshare.com/articles/dataset/_/12014913)

IPI00903255.1|OSTF1

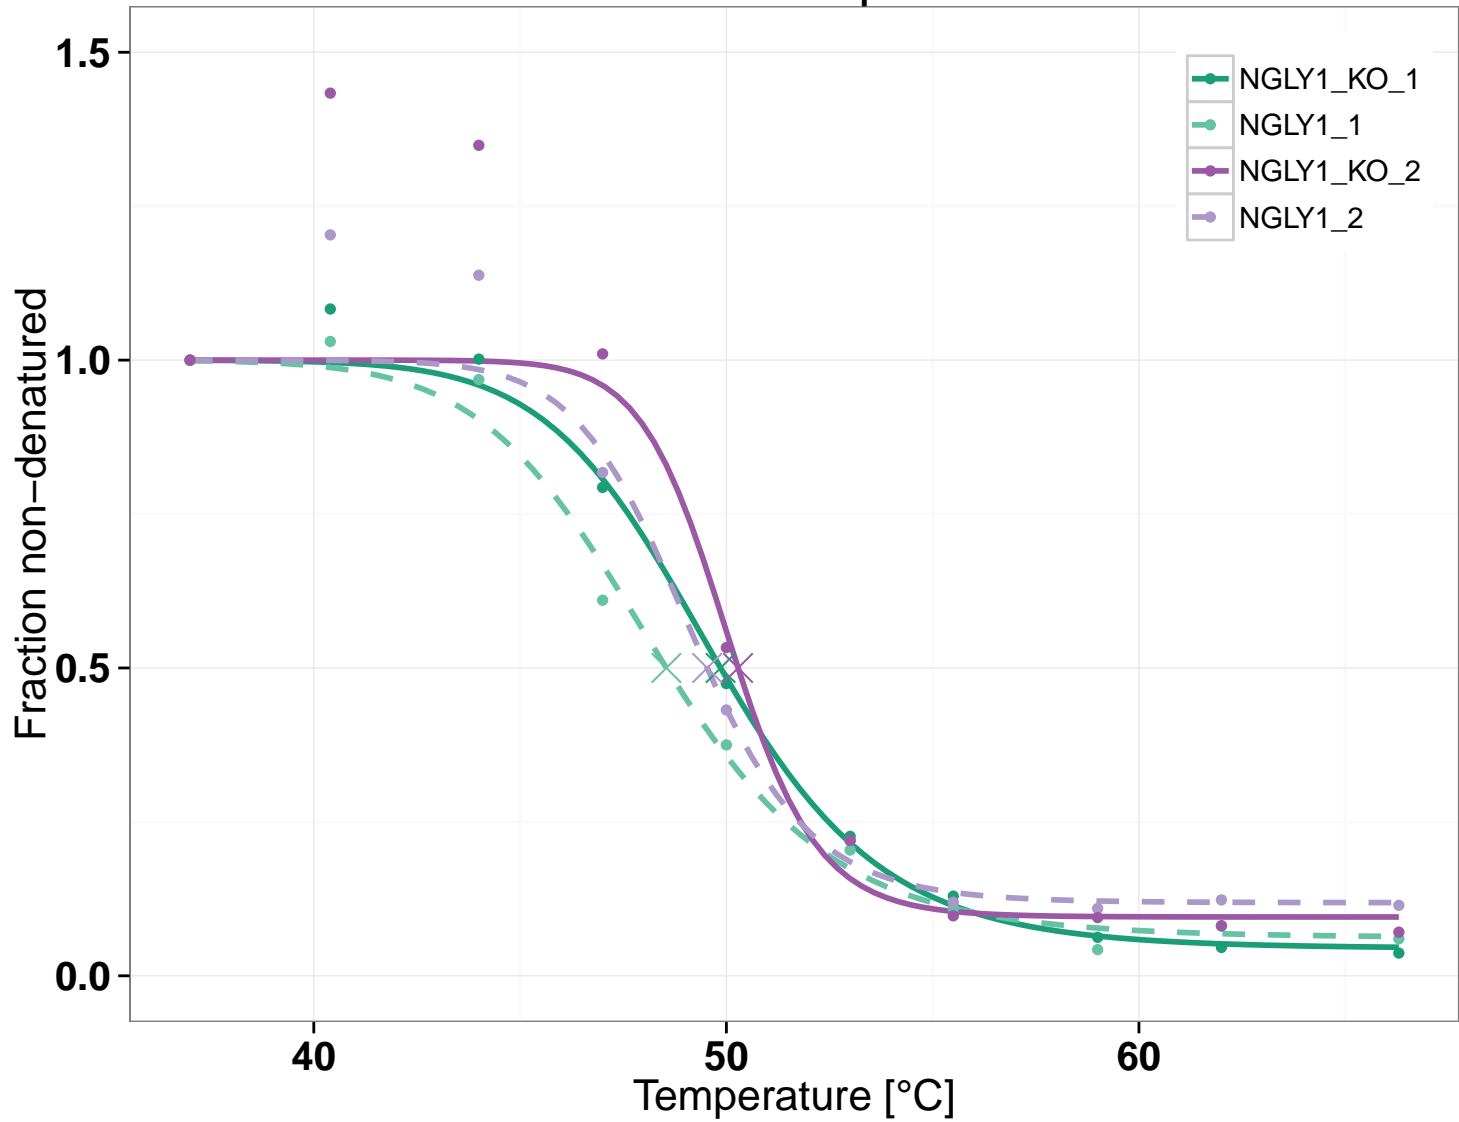

|            | meltPoint | slope | plateau | R2   |
|------------|-----------|-------|---------|------|
| NGLY1_KO_1 | 49.86     | -0.12 | 0.04    | 0.99 |
| NGLY1_1    | 48.55     | -0.11 | 0.06    | 0.99 |
| NGLY1_KO_2 | 50.28     | -0.21 | 0.1     | 0.89 |
| NGLY1_2    | 49.54     | -0.16 | 0.12    | 0.96 |

Supplement: Supplementary file 7232 [file 1]

IPI00009797.3|TM7SF3

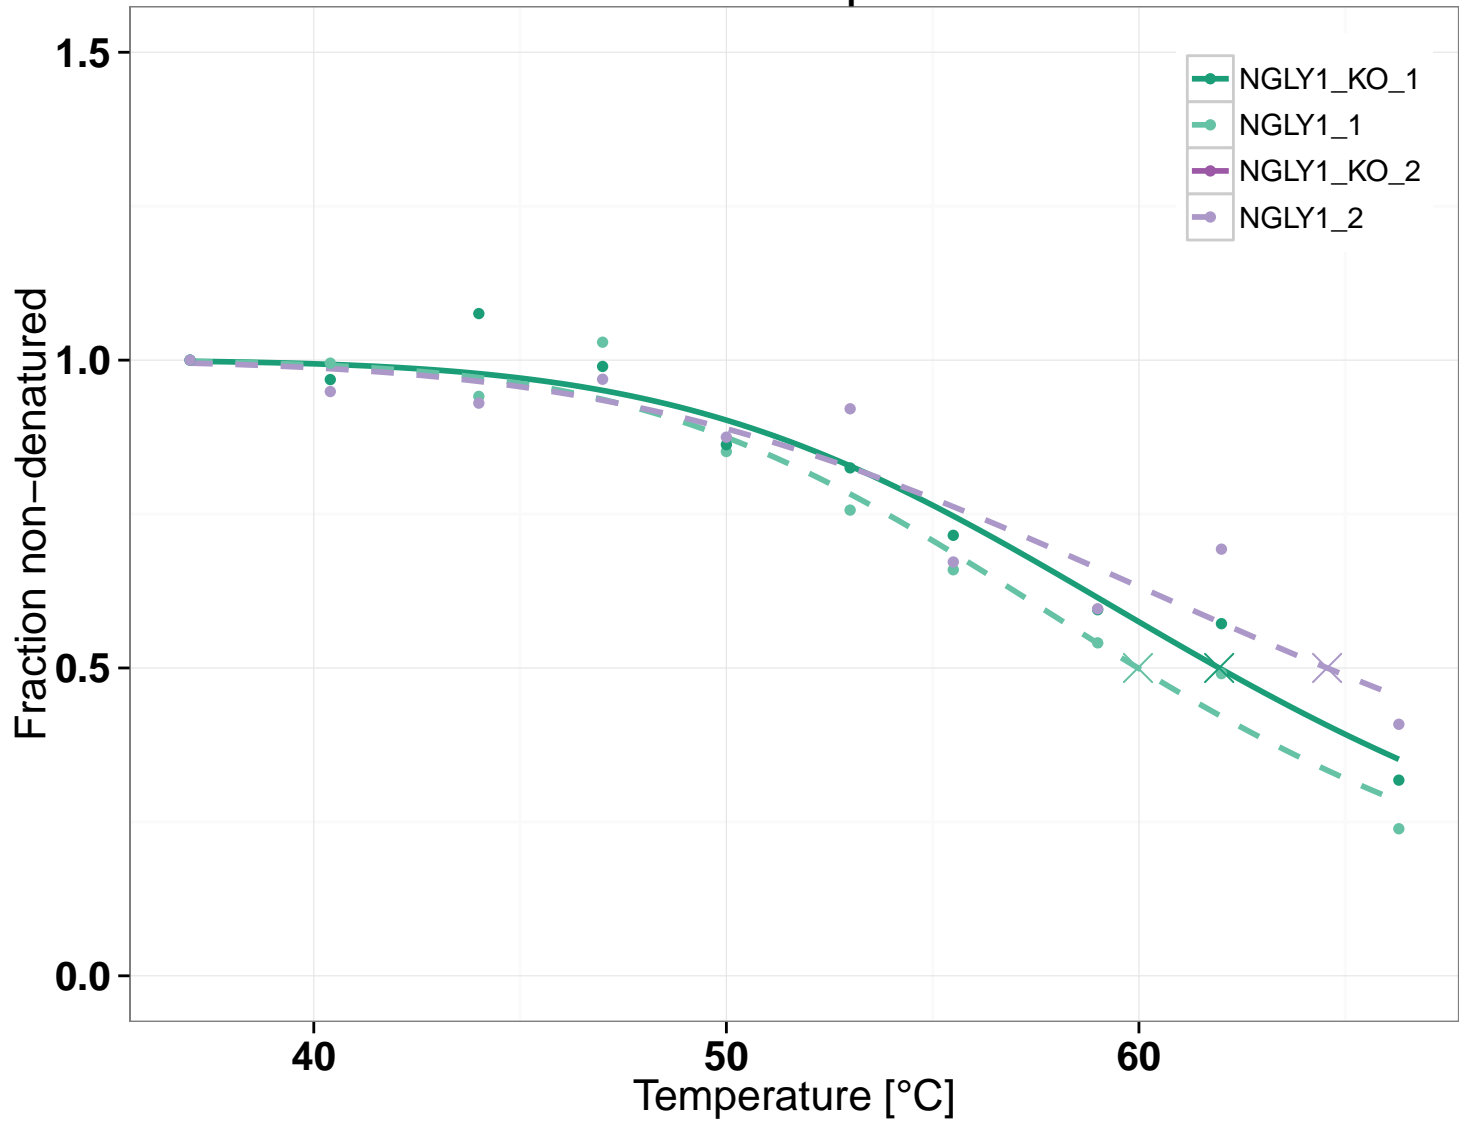

|            | meltPoint | slope  | plateau | R2   |
|------------|-----------|--------|---------|------|
| NGLY1_KO_1 | 61.94     | -0.039 | 0       | 0.96 |
| NGLY1_1    | 59.98     | -0.042 | 0       | 0.97 |
| NGLY1_KO_2 | -         | -      | -       | -    |
| NGLY1_2    | 64.56     | -0.03  | 0       | 0.88 |

Supplement: Supplementary file 7233 [file 1]

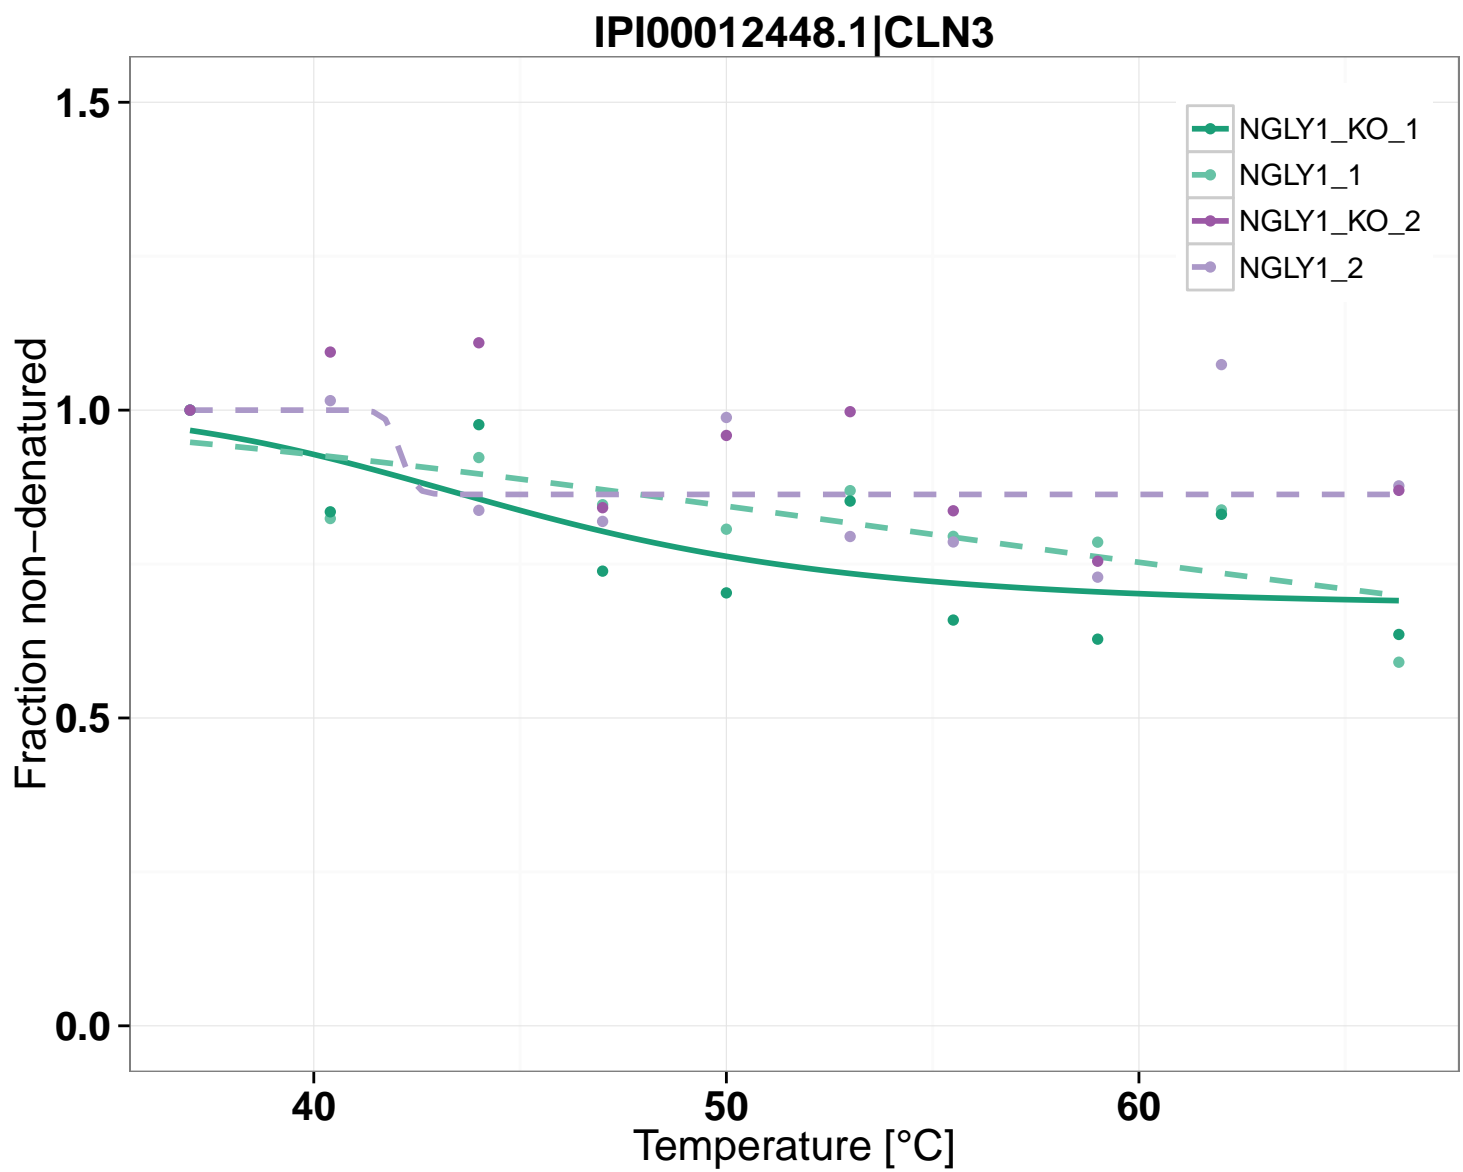

|            | meltPoint | slope   | plateau | R2   |
|------------|-----------|---------|---------|------|
| NGLY1_KO_1 | —         | -0.019  | 0.68    | 0.54 |
| NGLY1_1    | —         | -0.0092 | 0       | 0.59 |
| NGLY1_KO_2 | —         | —       | —       | —    |
| NGLY1_2    | —         | -0.2    | 0.86    | 0.27 |

Supplement: Supplementary file 7234 [file 1]

IPI00026497.4|PARP2

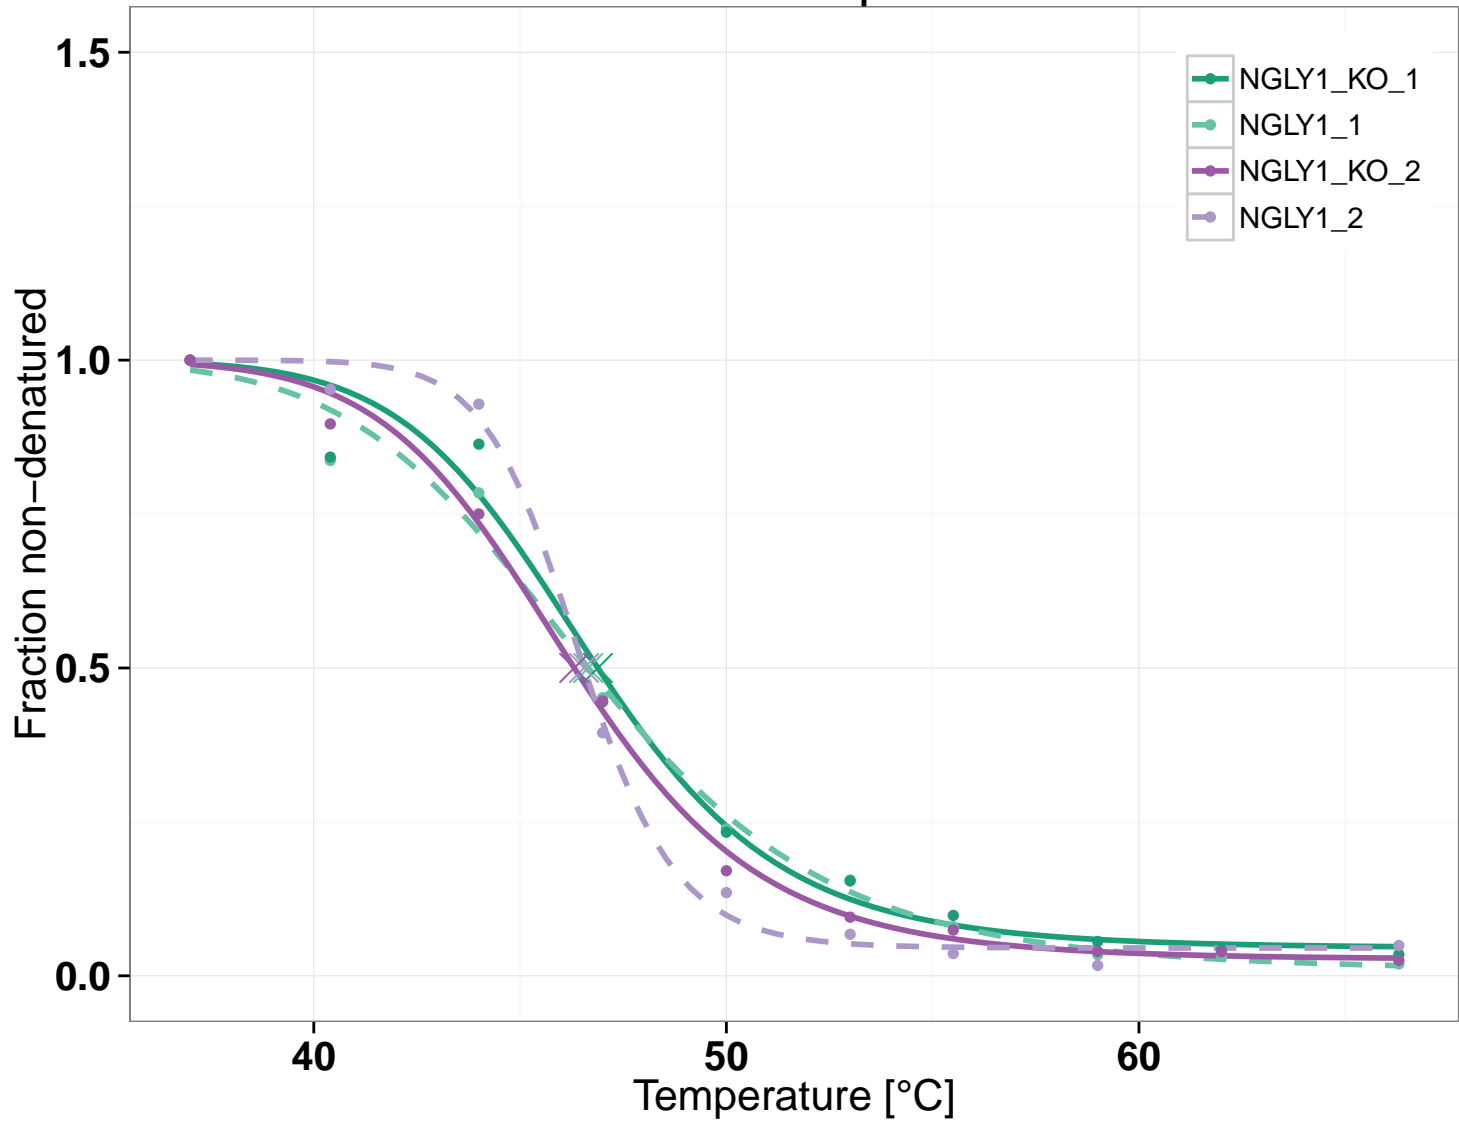

|            | meltPoint | slope  | plateau | R2   |
|------------|-----------|--------|---------|------|
| NGLY1_KO_1 | 46.88     | -0.1   | 0.04    | 0.98 |
| NGLY1_1    | 46.65     | -0.085 | 0.01    | 0.99 |
| NGLY1_KO_2 | 46.31     | -0.11  | 0.03    | 1    |
| NGLY1_2    | 46.55     | -0.2   | 0.05    | 1    |

Supplement: Supplementary file 7235 [file 1]

IPI00254162.2|PTBP2

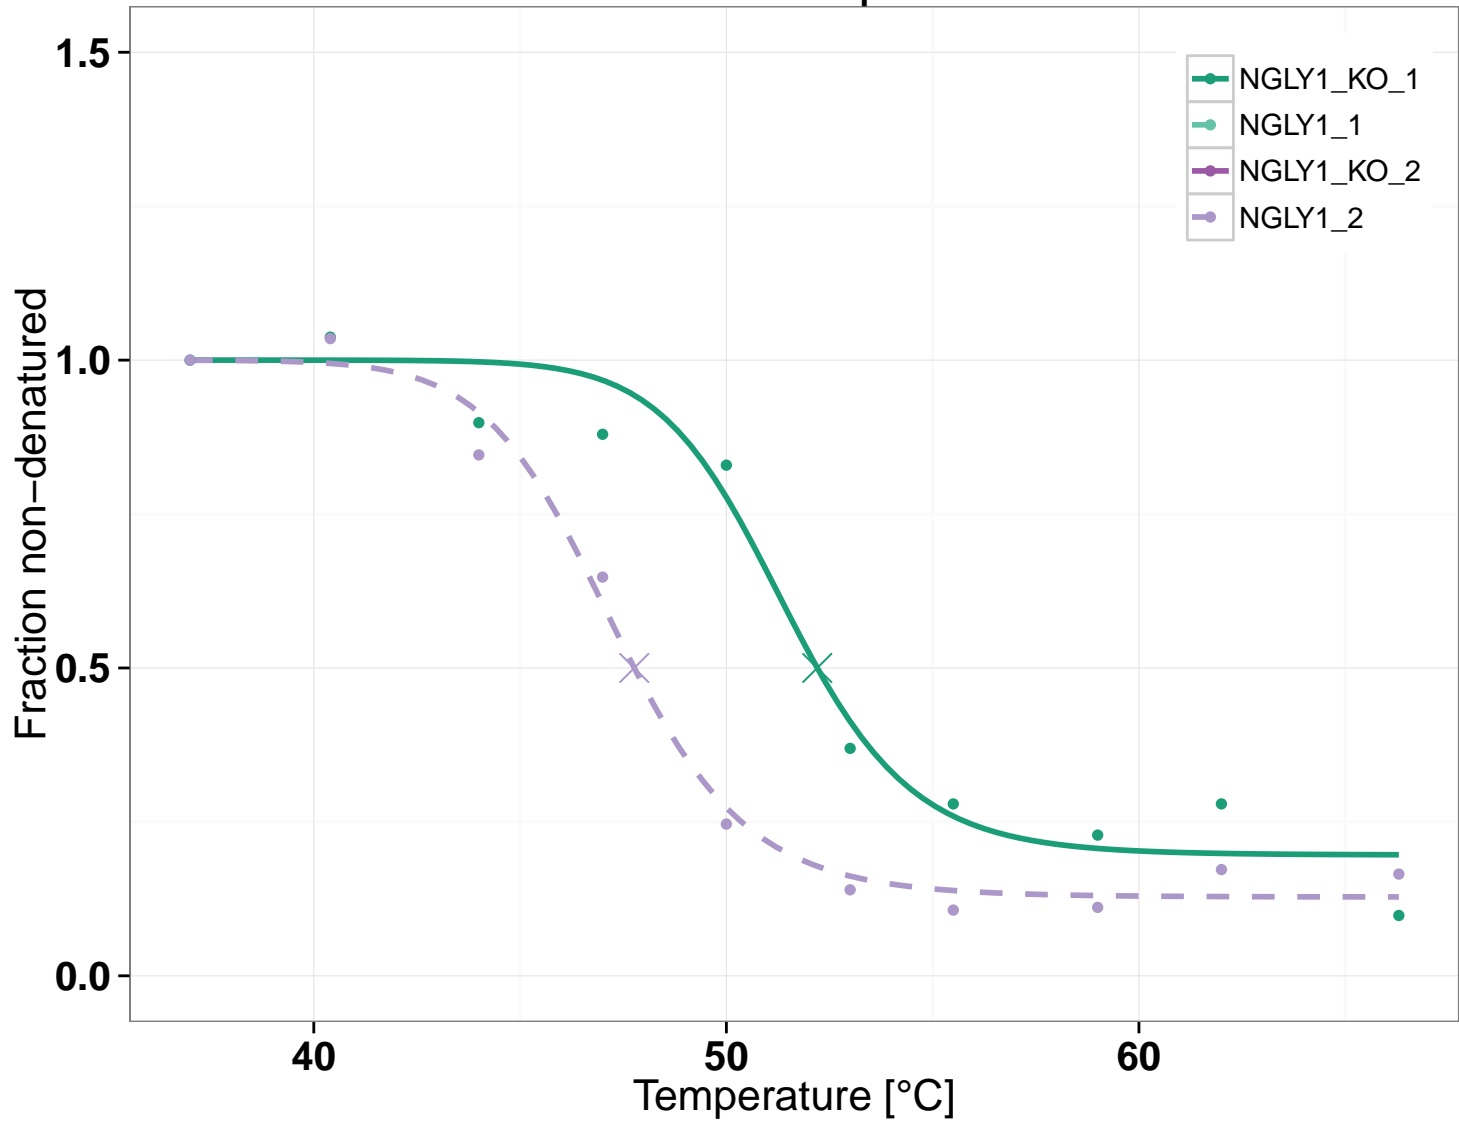

|            | meltPoint | slope | plateau | R2   |
|------------|-----------|-------|---------|------|
| NGLY1_KO_1 | 52.2      | -0.13 | 0.2     | 0.97 |
| NGLY1_1    | -         | -     | -       | -    |
| NGLY1_KO_2 | -         | -     | -       | -    |
| NGLY1_2    | 47.77     | -0.14 | 0.13    | 0.99 |

Supplement: Supplementary file 7236 [file 1]

IPI00748877.3|CEP120

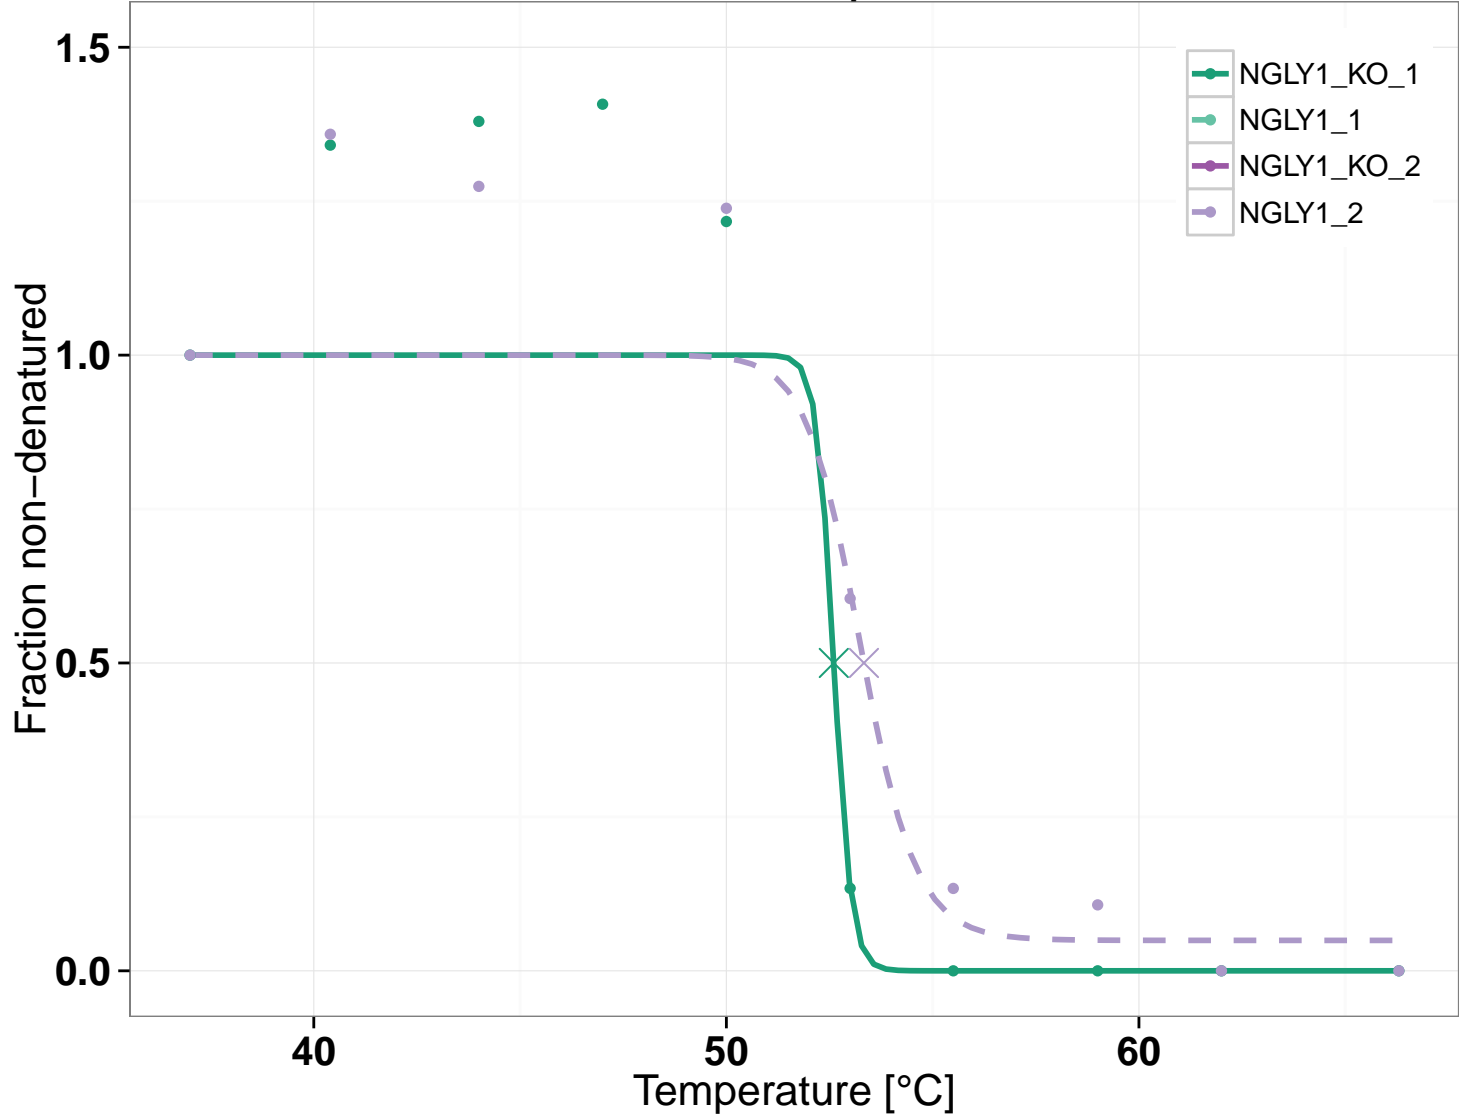

|            | meltPoint | slope | plateau | R2   |
|------------|-----------|-------|---------|------|
| NGLY1_KO_1 | 52.6      | -1.2  | 0       | 0.88 |
| NGLY1_1    | -         | -     | -       | -    |
| NGLY1_KO_2 | -         | -     | -       | -    |
| NGLY1_2    | 53.33     | -0.36 | 0.05    | 0.81 |

Supplement: Supplementary file 7237 [file 1]

# IPI00028392.3|C1ORF116

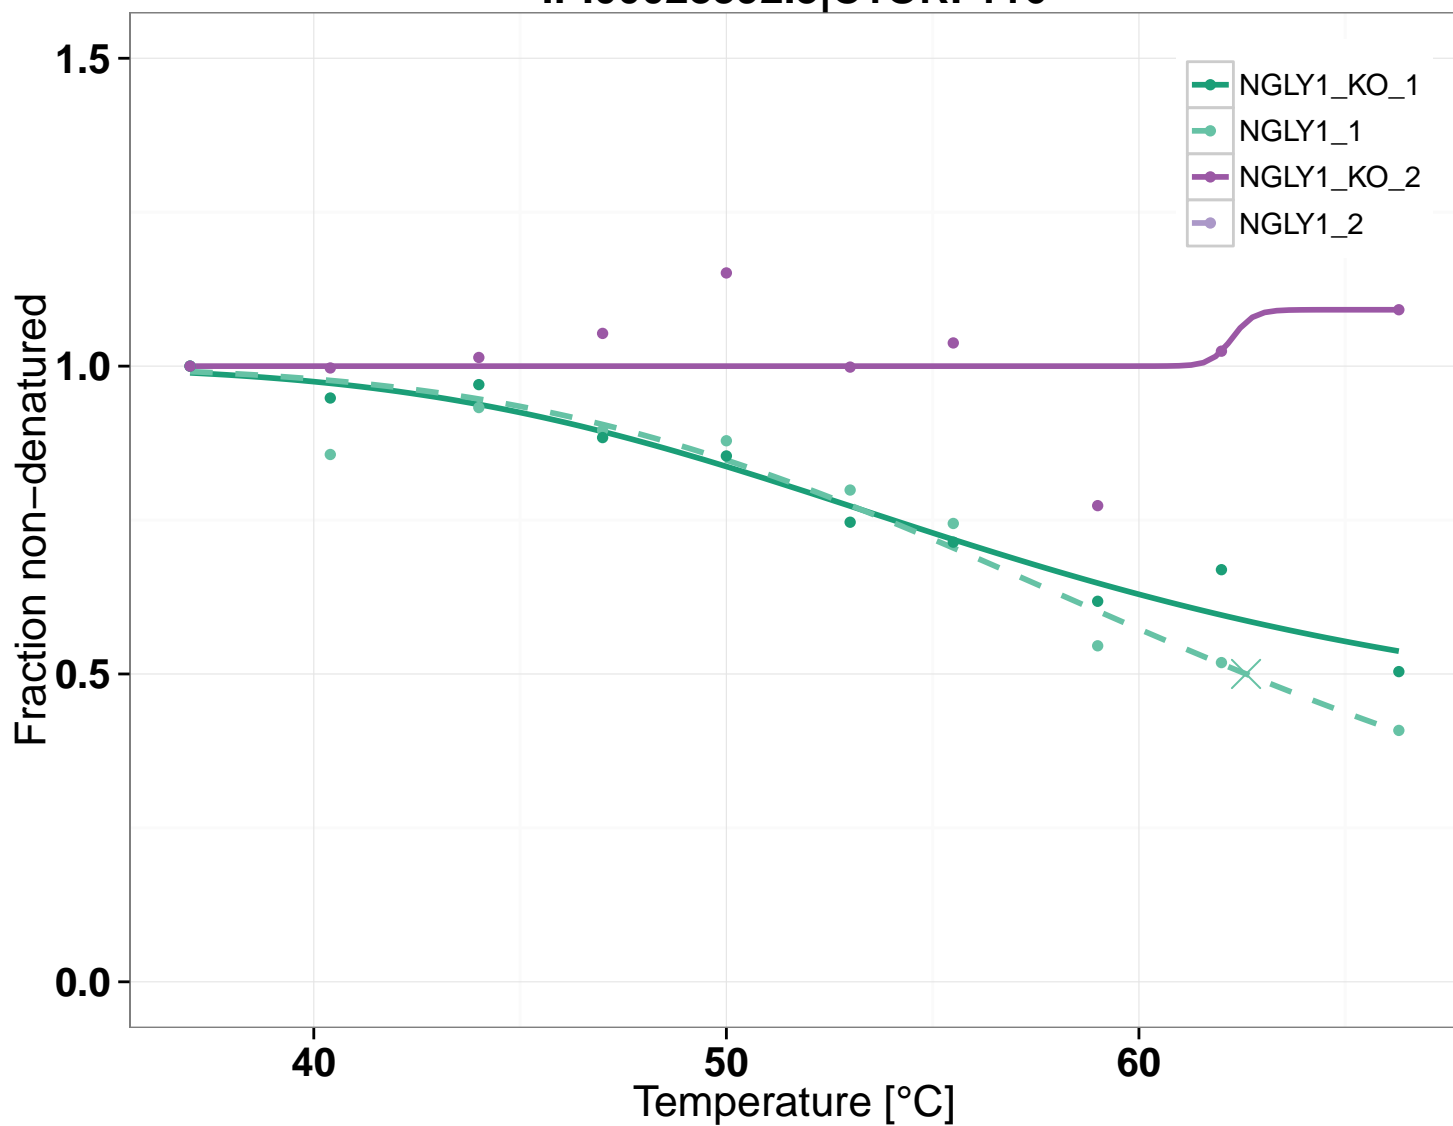

|            | meltPoint | slope  | plateau | R2   |
|------------|-----------|--------|---------|------|
| NGLY1_KO_1 | –         | –0.022 | 0.38    | 0.96 |
| NGLY1_1    | 62.6      | –0.029 | 0       | 0.94 |
| NGLY1_KO_2 | –         | 0.089  | 1.09    | 0.08 |
| NGLY1_2    | –         | –      | –       | –    |

Supplement: Supplementary file 7238 [file 1]

IPI00024129.1|PPIC

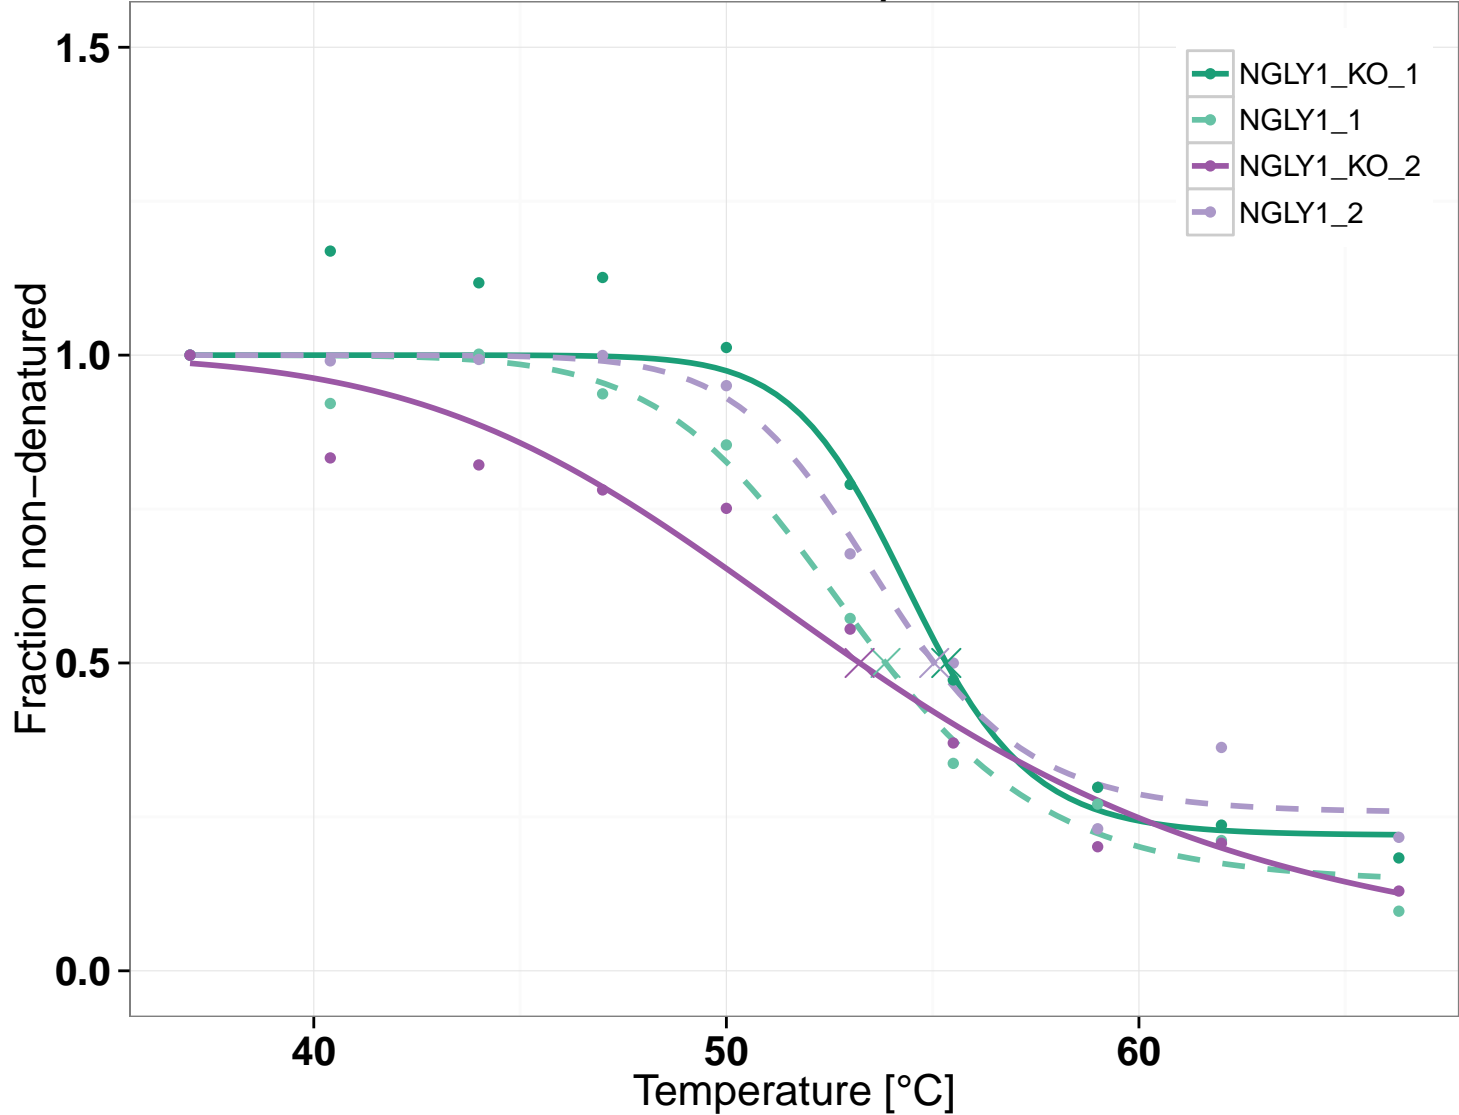

|            | meltPoint | slope  | plateau | R2   |
|------------|-----------|--------|---------|------|
| NGLY1_KO_1 | 55.33     | -0.14  | 0.22    | 0.96 |
| NGLY1_1    | 53.86     | -0.091 | 0.14    | 0.99 |
| NGLY1_KO_2 | 53.23     | -0.048 | 0       | 0.96 |
| NGLY1_2    | 55.04     | -0.11  | 0.26    | 0.98 |

Supplement: Supplementary file 7239 [file 1]

IPI00028262.1|ITPRIP

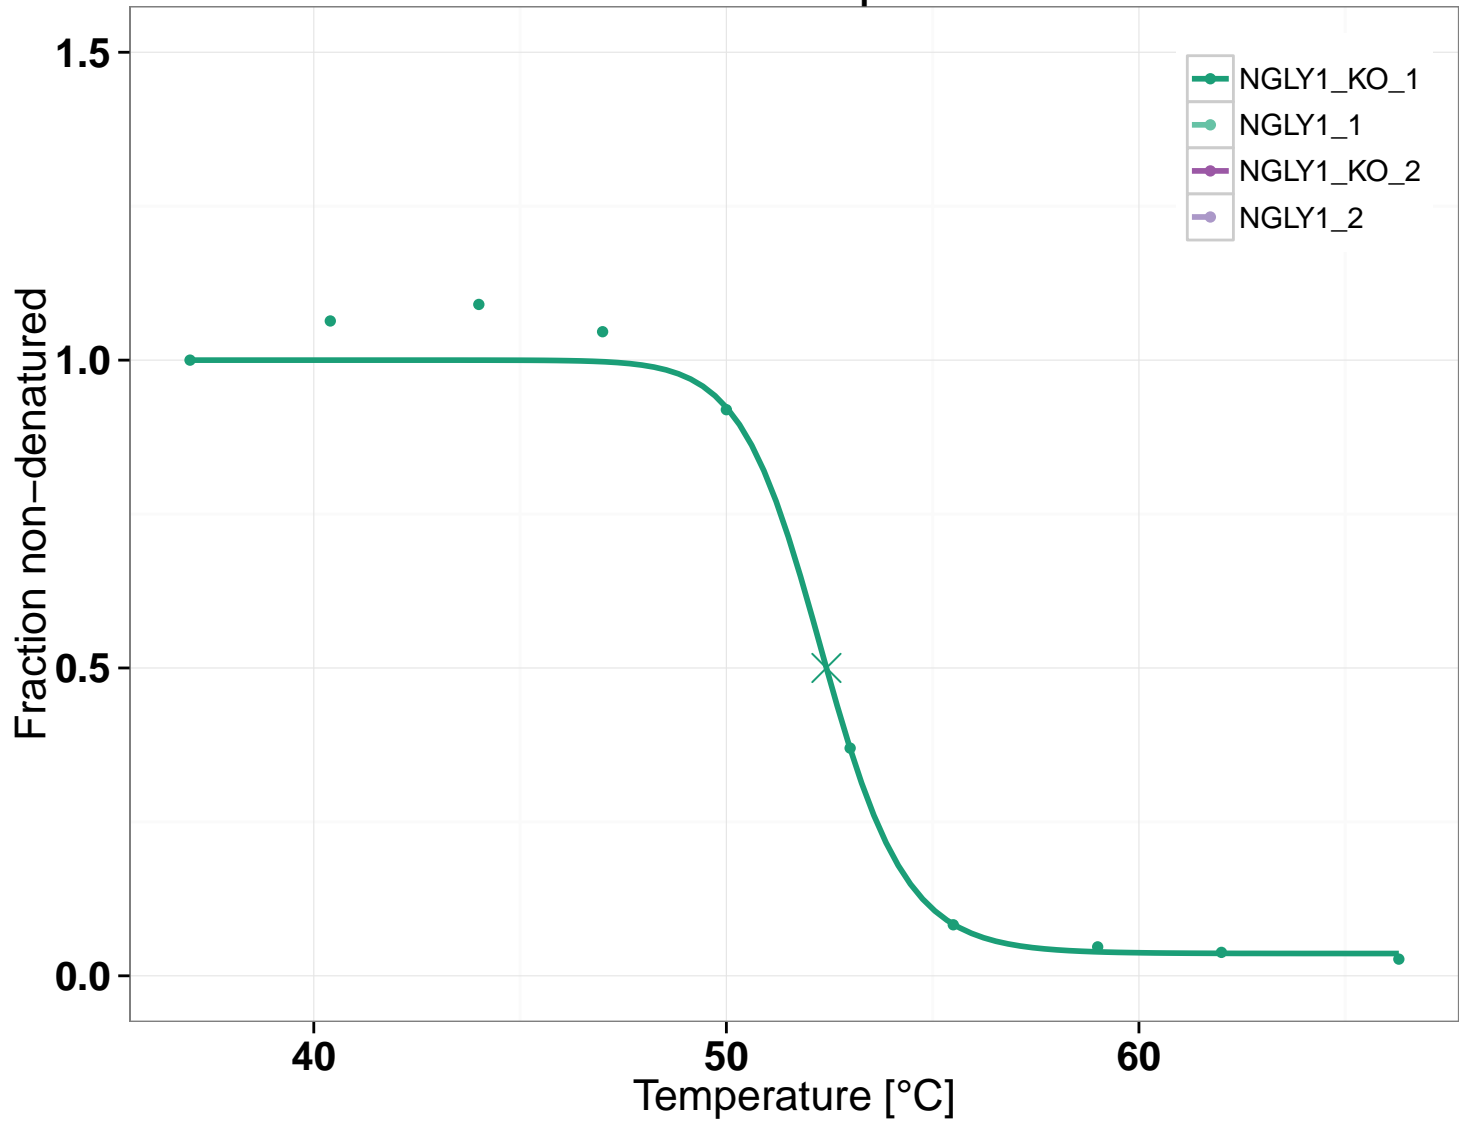

|            | meltPoint | slope | plateau | R2   |
|------------|-----------|-------|---------|------|
| NGLY1_KO_1 | 52.43     | -0.24 | 0.04    | 0.99 |
| NGLY1_1    | -         | -     | -       | -    |
| NGLY1_KO_2 | -         | -     | -       | -    |
| NGLY1_2    | -         | -     | -       | -    |

Supplement: Supplementary file 7240 [file 1]

IPI00384349.2|FAM78A

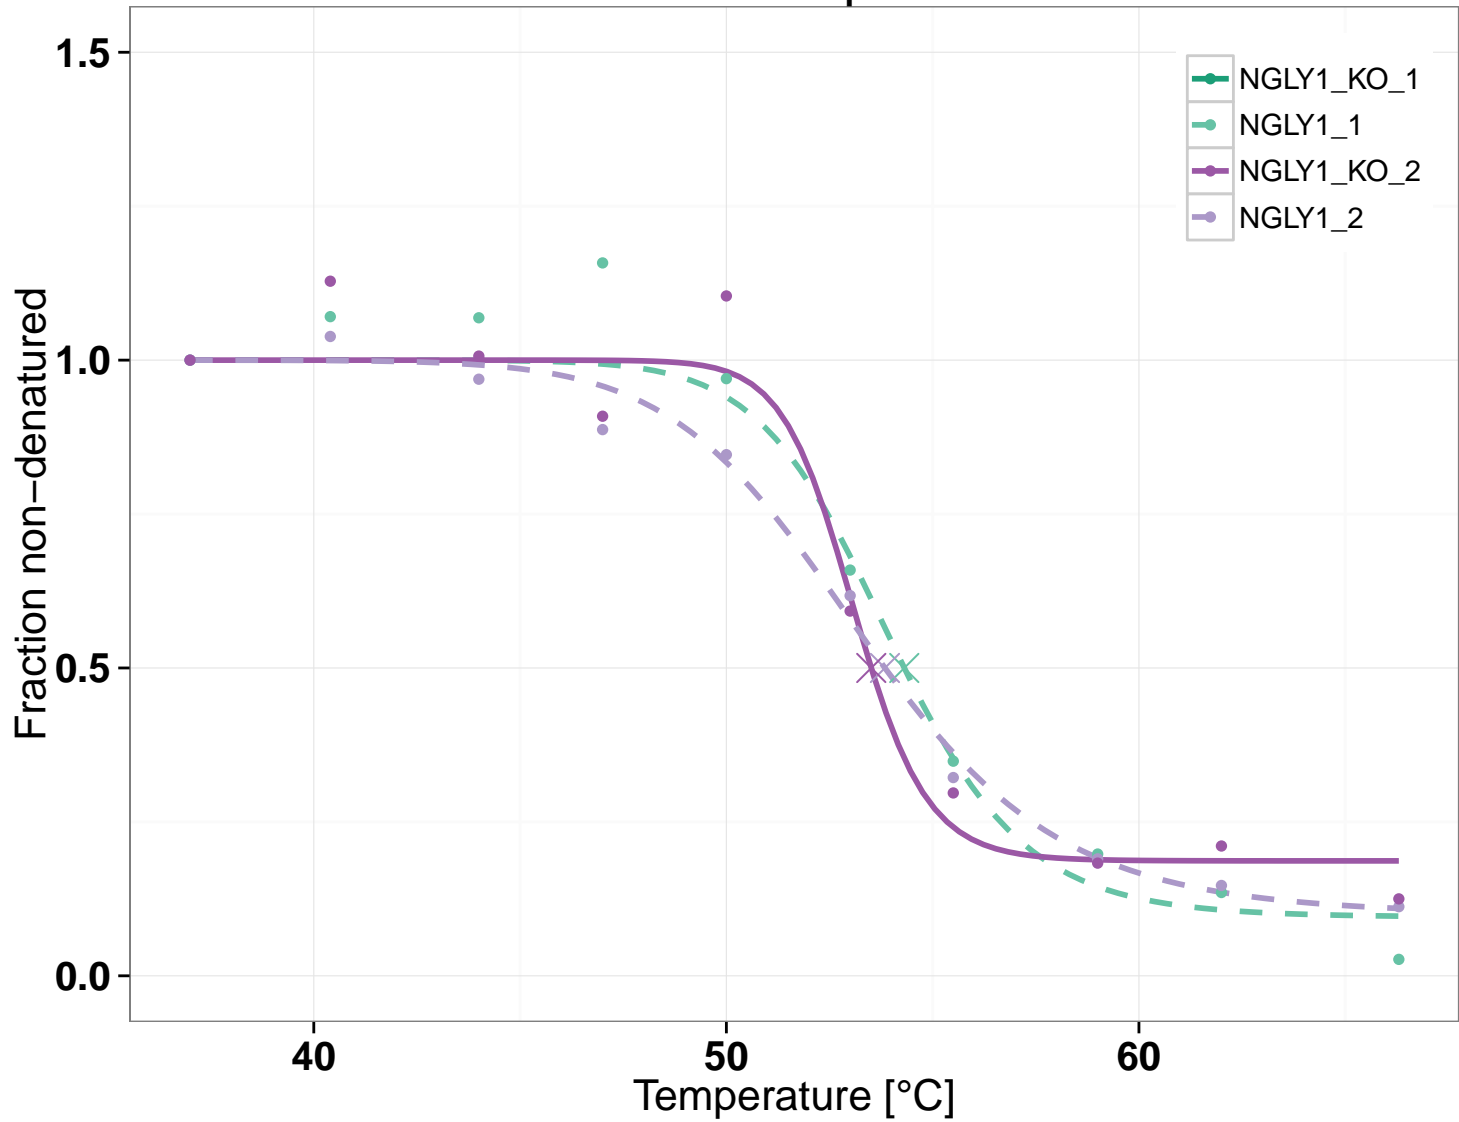

|            | meltPoint | slope  | plateau | R2   |
|------------|-----------|--------|---------|------|
| NGLY1_KO_1 | —         | —      | —       | —    |
| NGLY1_1    | 54.31     | -0.14  | 0.1     | 0.97 |
| NGLY1_KO_2 | 53.51     | -0.23  | 0.19    | 0.97 |
| NGLY1_2    | 53.84     | -0.096 | 0.1     | 0.99 |

Supplement: Supplementary file 7241 [file 1]

IPI00472864.2|RPL18A

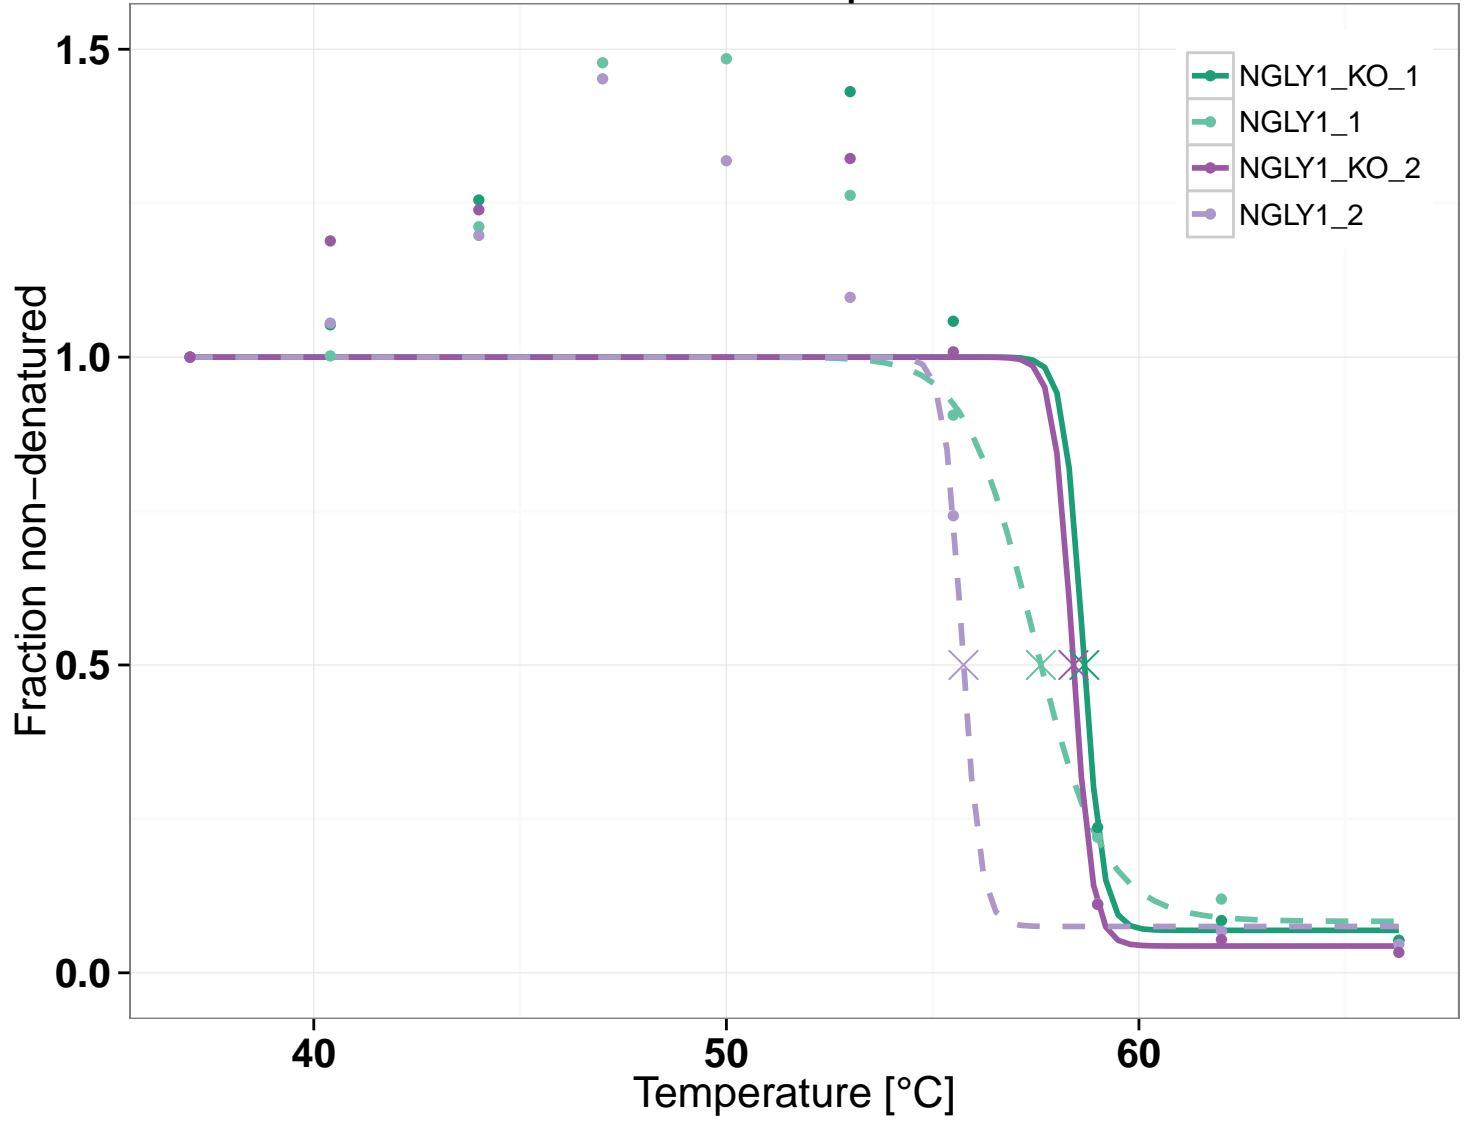

|            | meltPoint | slope | plateau | R2   |
|------------|-----------|-------|---------|------|
| NGLY1_KO_1 | 58.68     | -0.99 | 0.07    | 0.67 |
| NGLY1_1    | 57.62     | -0.27 | 0.08    | 0.79 |
| NGLY1_KO_2 | 58.41     | -1    | 0.04    | 0.71 |
| NGLY1_2    | 55.75     | -1    | 0.08    | 0.86 |

Supplement: Supplementary file 7242 [file 1]

IPI00296957.5|TTC12

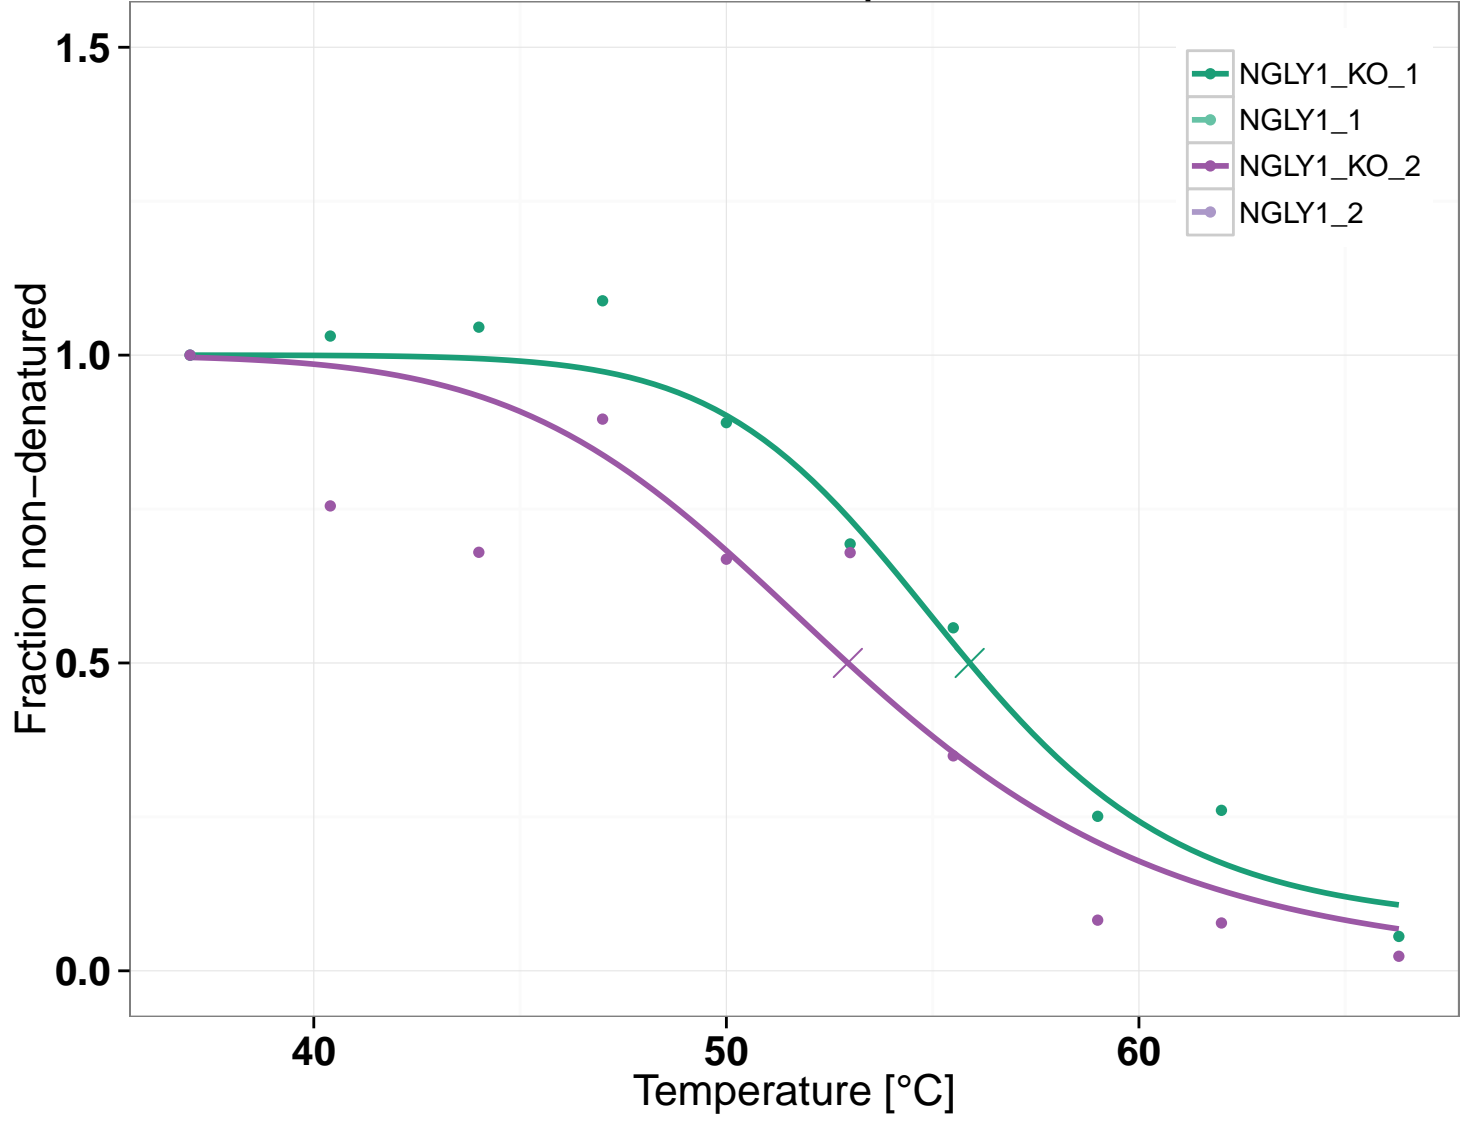

|            | meltPoint | slope  | plateau | R2   |
|------------|-----------|--------|---------|------|
| NGLY1_KO_1 | 55.9      | -0.083 | 0.07    | 0.98 |
| NGLY1_1    | -         | -      | -       | -    |
| NGLY1_KO_2 | 52.94     | -0.063 | 0       | 0.85 |
| NGLY1_2    | -         | -      | -       | -    |

Supplement: Supplementary file 7243 [file 1]

# IPI00006525.3|SIX4

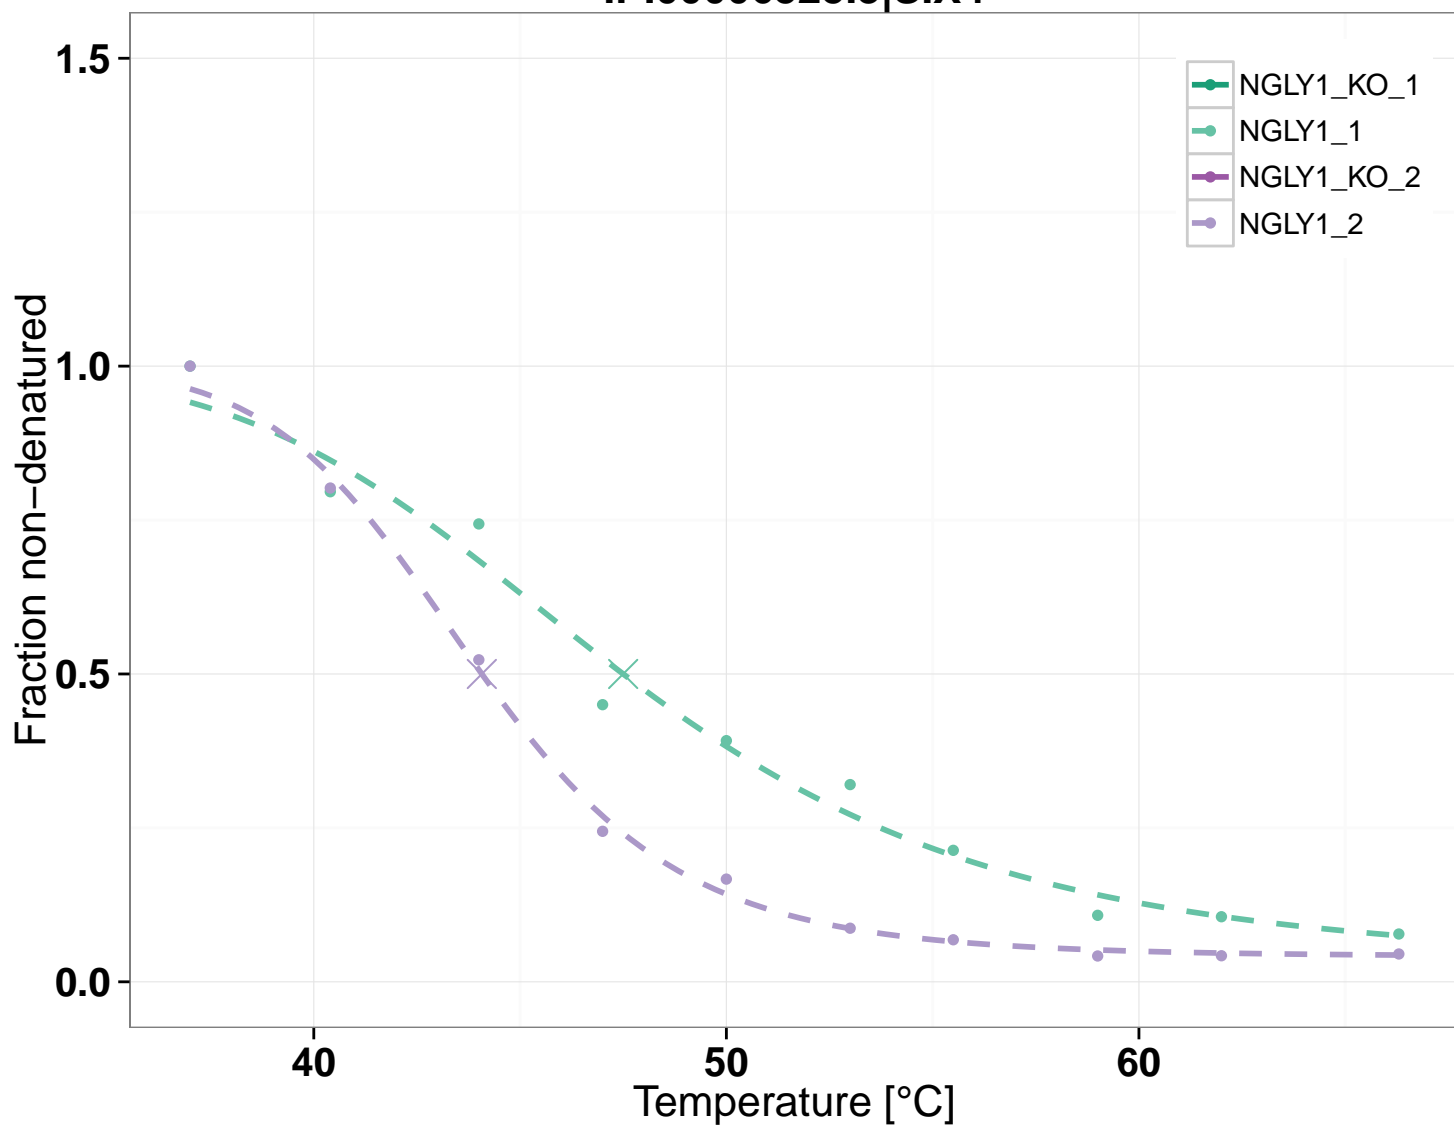

|            | meltPoint | slope  | plateau | R2   |
|------------|-----------|--------|---------|------|
| NGLY1_KO_1 | -         | -      | -       | -    |
| NGLY1_1    | 47.5      | -0.053 | 0.02    | 0.98 |
| NGLY1_KO_2 | -         | -      | -       | -    |
| NGLY1_2    | 44.07     | -0.096 | 0.04    | 1    |

Supplement: Supplementary file 7244 [file 1]

IPI00556645.3|FOXK1

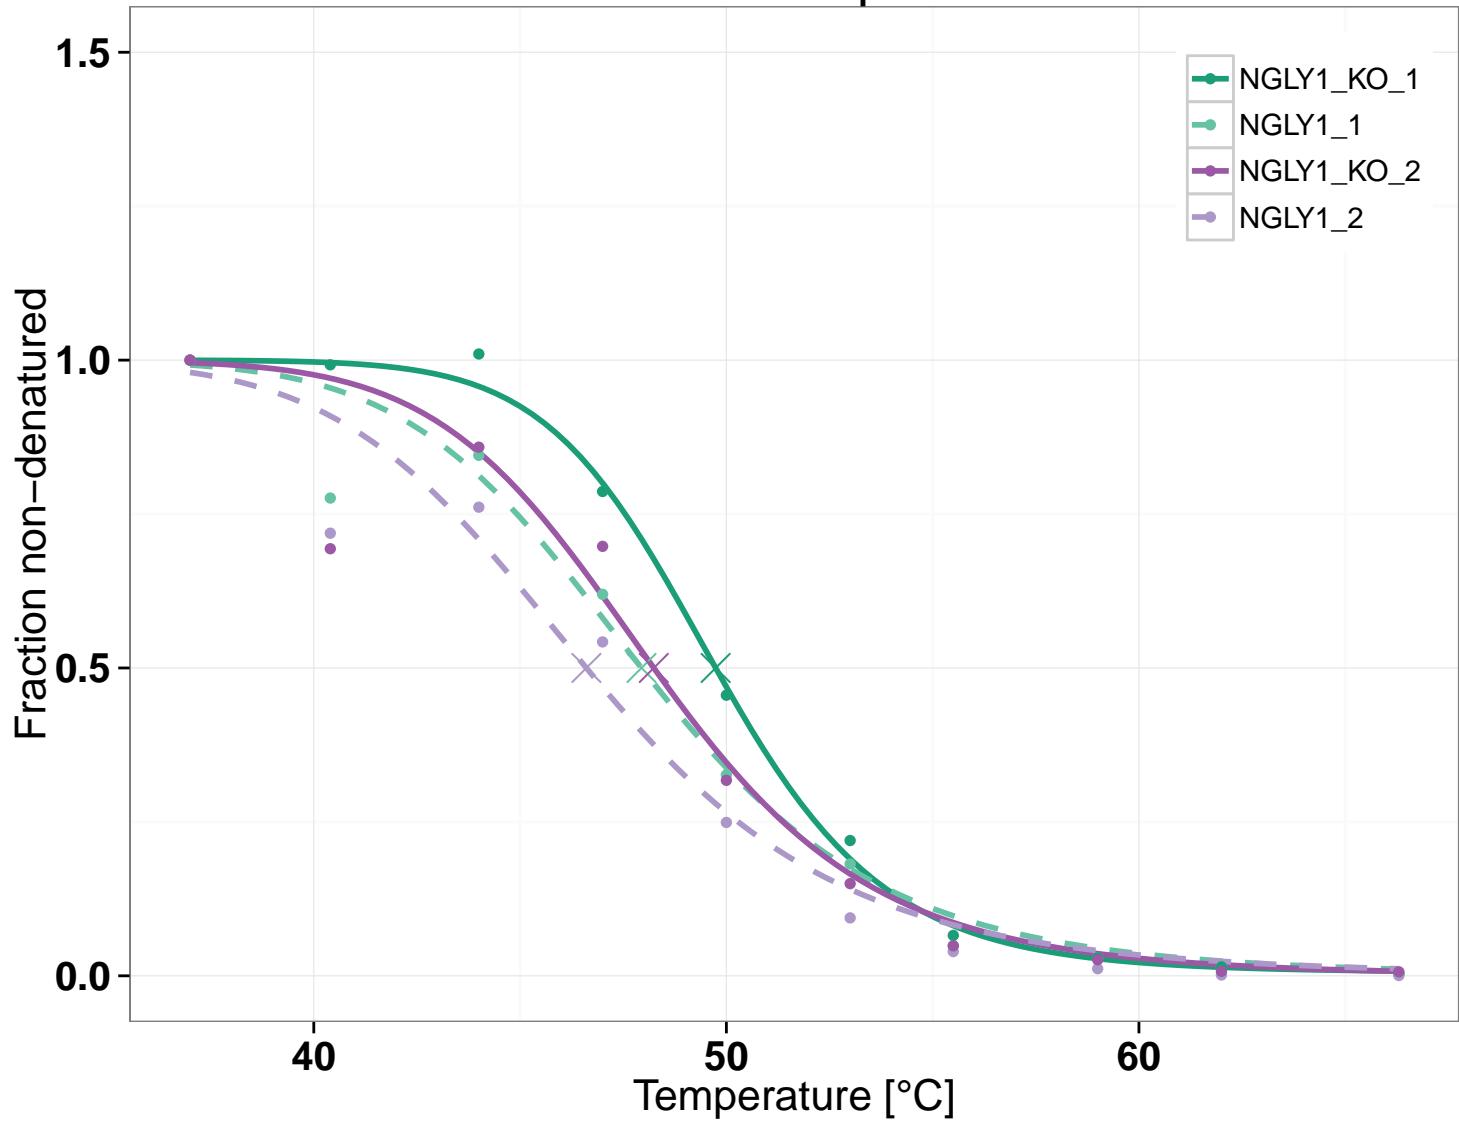

|            | meltPoint | slope  | plateau | R2   |
|------------|-----------|--------|---------|------|
| NGLY1_KO_1 | 49.74     | -0.12  | 0.01    | 1    |
| NGLY1_1    | 47.94     | -0.087 | 0       | 0.97 |
| NGLY1_KO_2 | 48.24     | -0.095 | 0       | 0.94 |
| NGLY1_2    | 46.61     | -0.082 | 0       | 0.96 |

Supplement: Supplementary file 7245 [file 1]

IPI00100460.2|DARS2

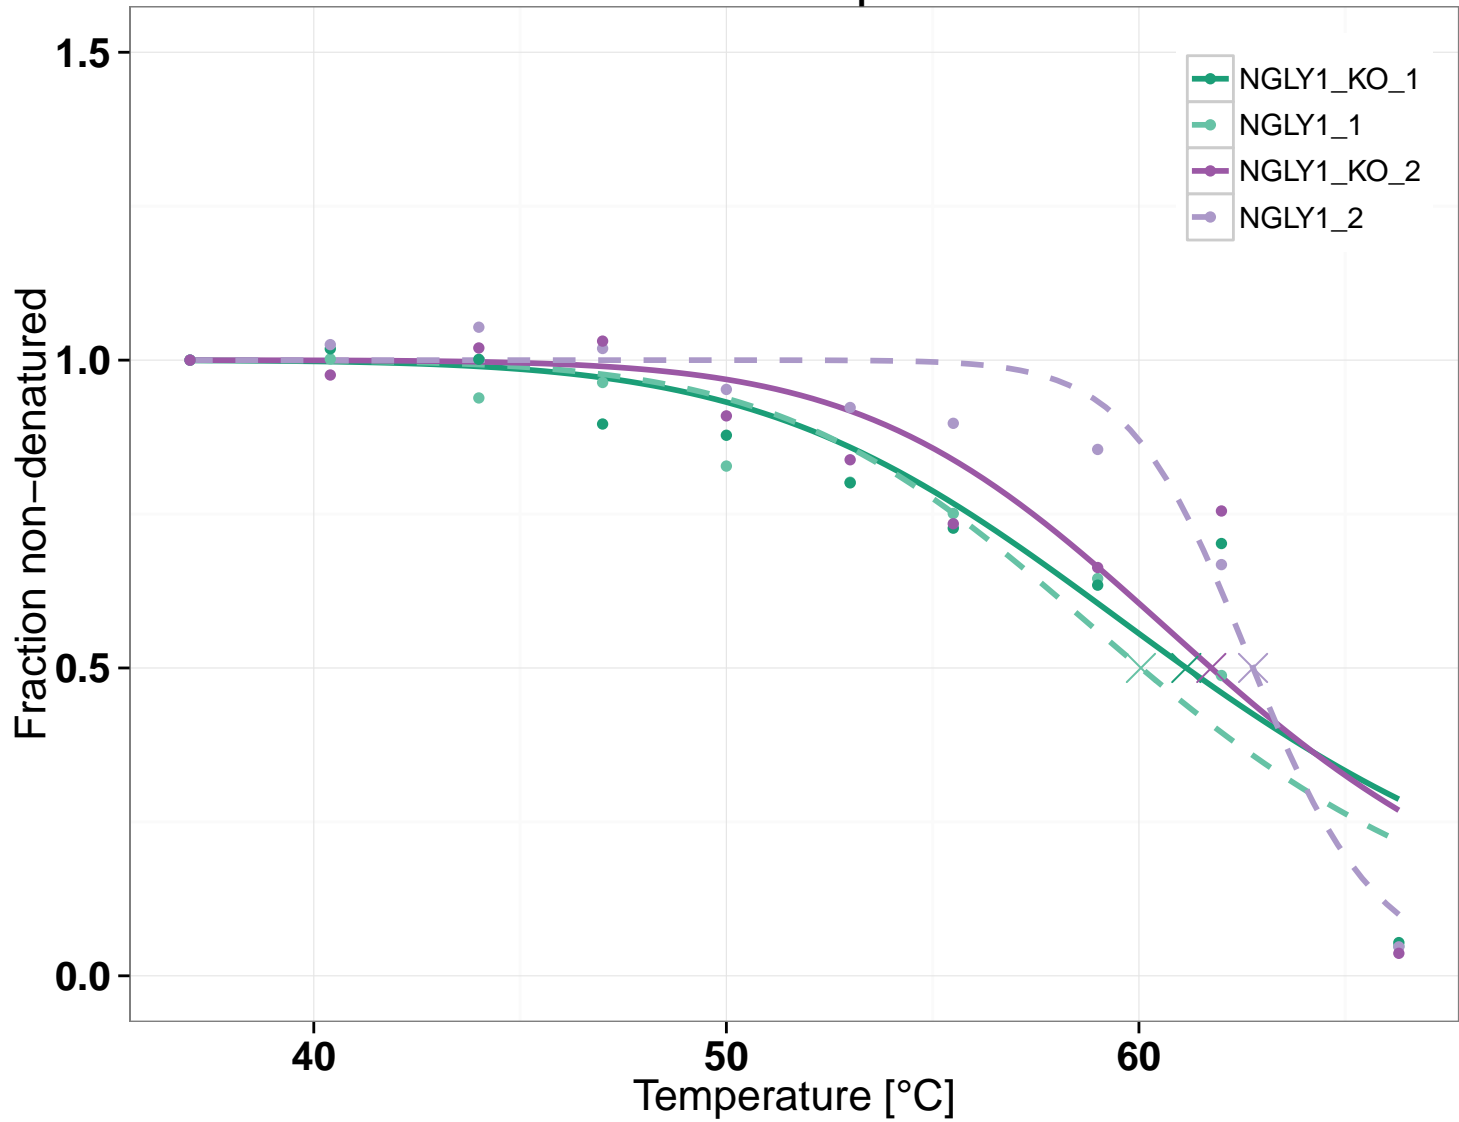

|            | meltPoint | slope  | plateau | R2   |
|------------|-----------|--------|---------|------|
| NGLY1_KO_1 | 61.15     | -0.049 | 0       | 0.83 |
| NGLY1_1    | 60.05     | -0.057 | 0       | 0.92 |
| NGLY1_KO_2 | 61.75     | -0.06  | 0       | 0.81 |
| NGLY1_2    | 62.77     | -0.16  | 0       | 0.96 |

Supplement: Supplementary file 7246 [file 1]

# IPI00012831.2|HBXIP

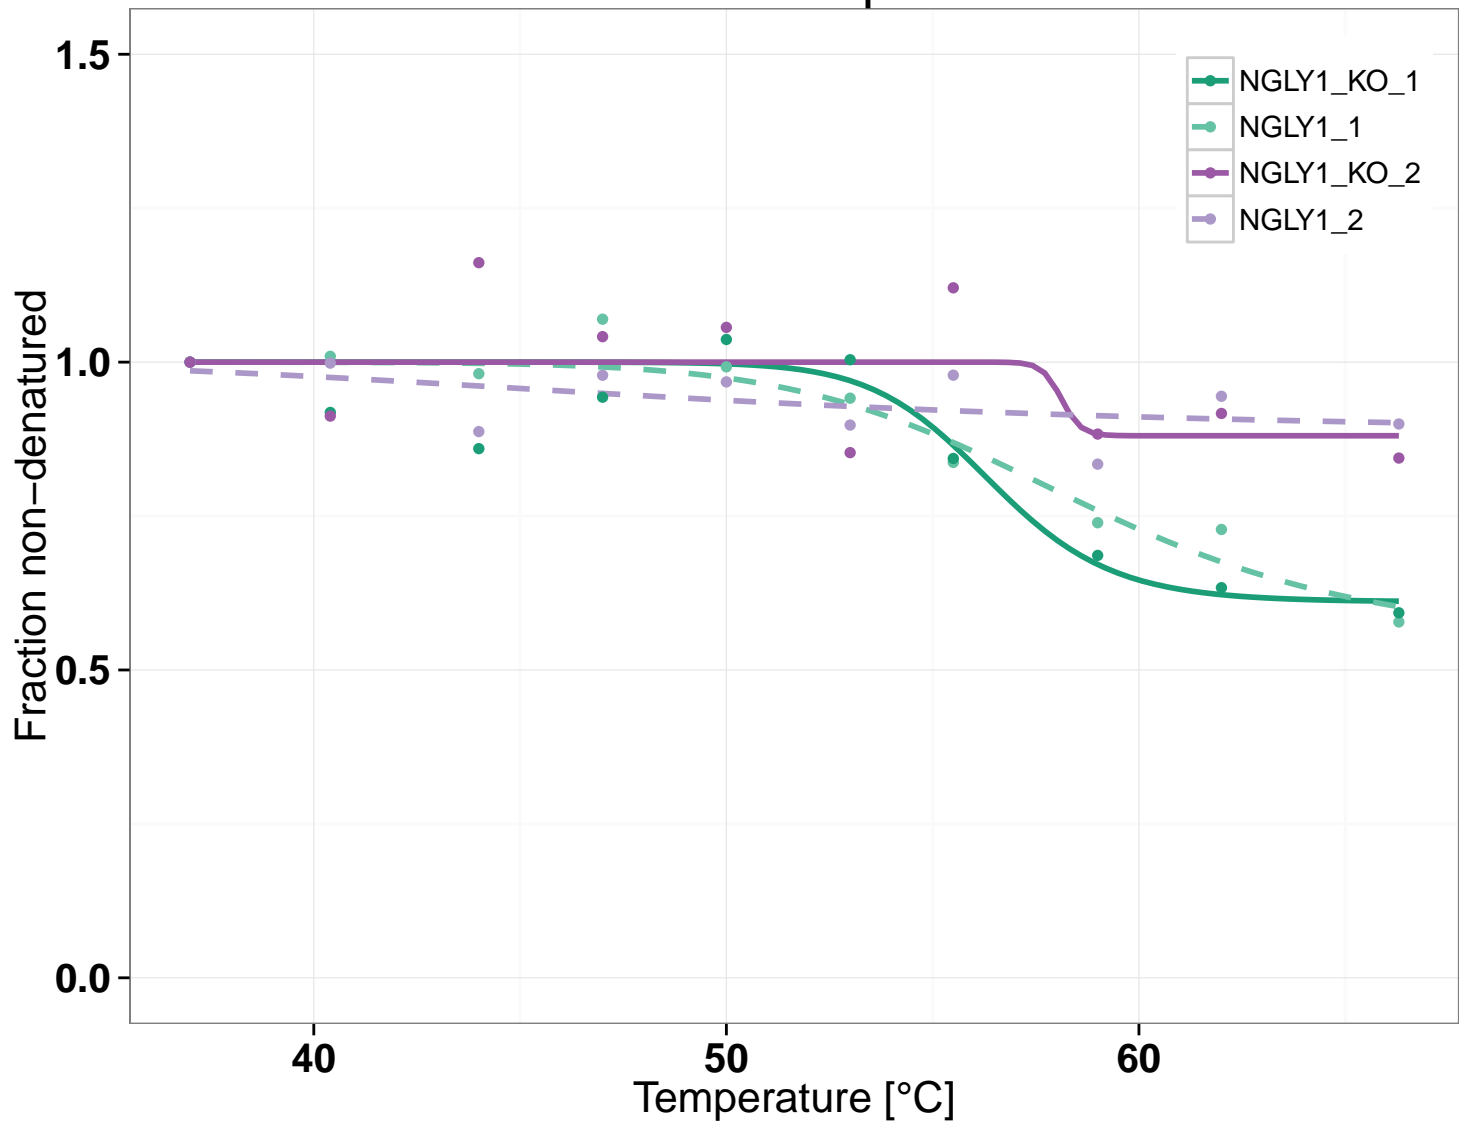

|            | meltPoint | slope  | plateau | R2   |
|------------|-----------|--------|---------|------|
| NGLY1_KO_1 | —         | −0.067 | 0.61    | 0.86 |
| NGLY1_1    | —         | −0.032 | 0.54    | 0.95 |
| NGLY1_KO_2 | —         | −0.13  | 0.88    | 0.33 |
| NGLY1_2    | —         | −0.004 | 0.88    | 0.3  |

Supplement: Supplementary file 7247 [file 1]

# IPI00171438.2|MUTED

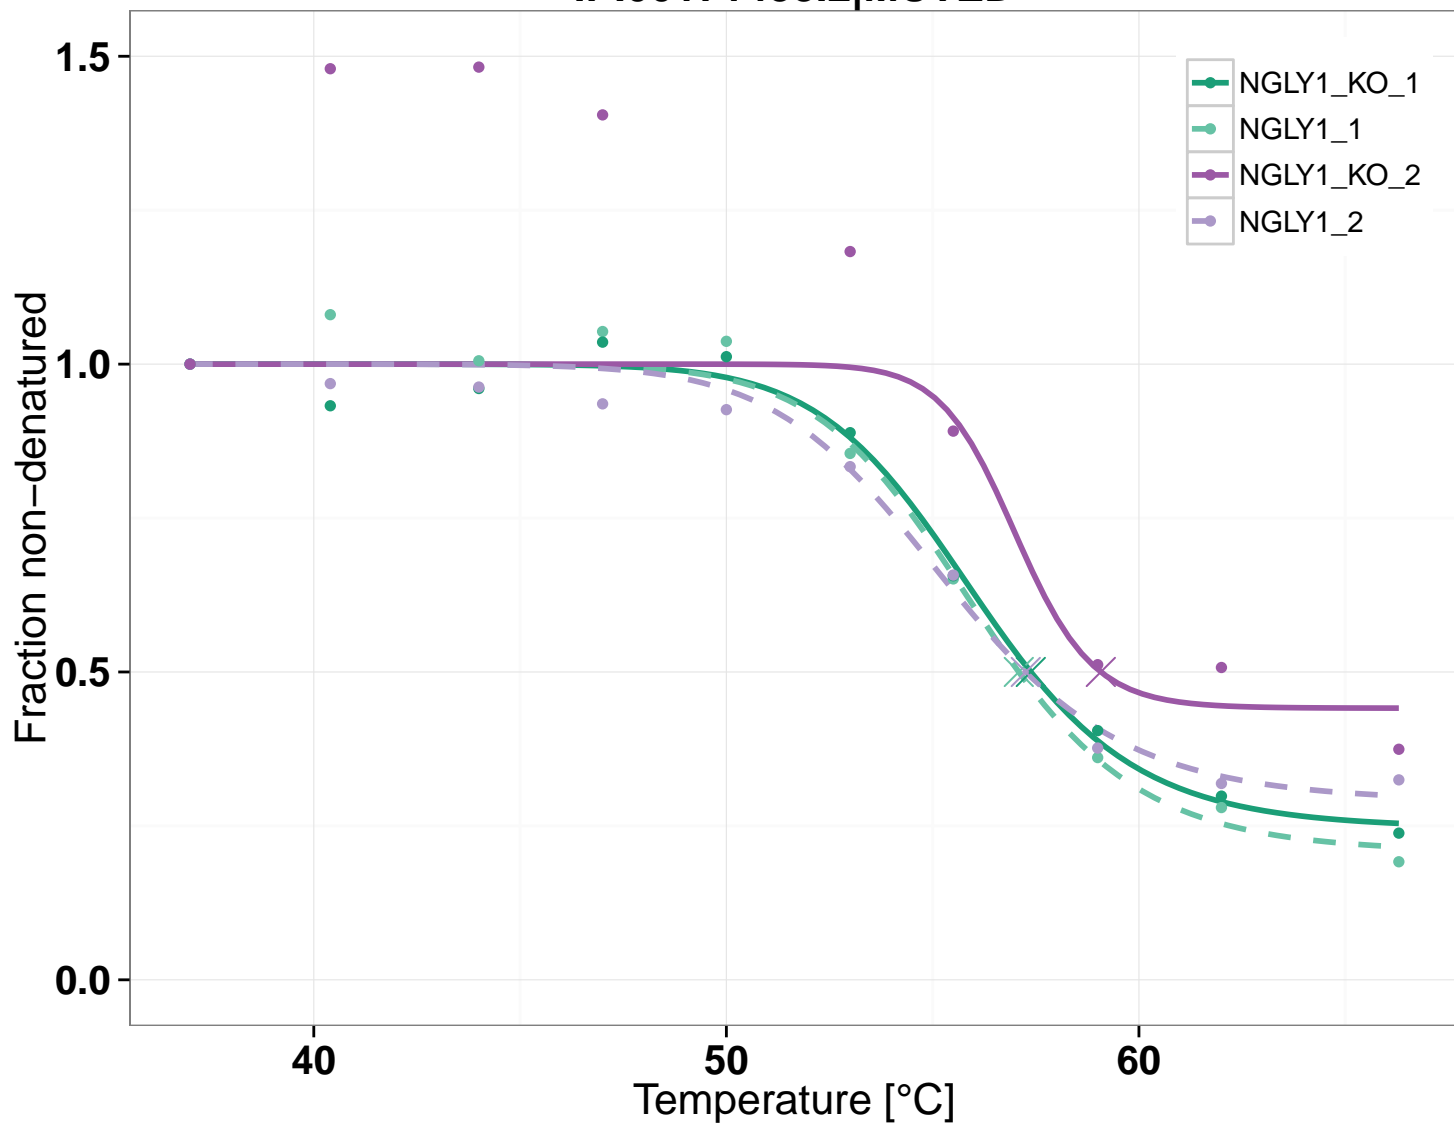

|            | meltPoint | slope  | plateau | R2   |
|------------|-----------|--------|---------|------|
| NGLY1_KO_1 | 57.38     | -0.098 | 0.25    | 0.99 |
| NGLY1_1    | 57.09     | -0.1   | 0.21    | 0.99 |
| NGLY1_KO_2 | 59.08     | -0.15  | 0.44    | 0.48 |
| NGLY1_2    | 57.26     | -0.084 | 0.29    | 0.99 |

Supplement: Supplementary file 7248 [file 1]

IPI00867552.1|MED25

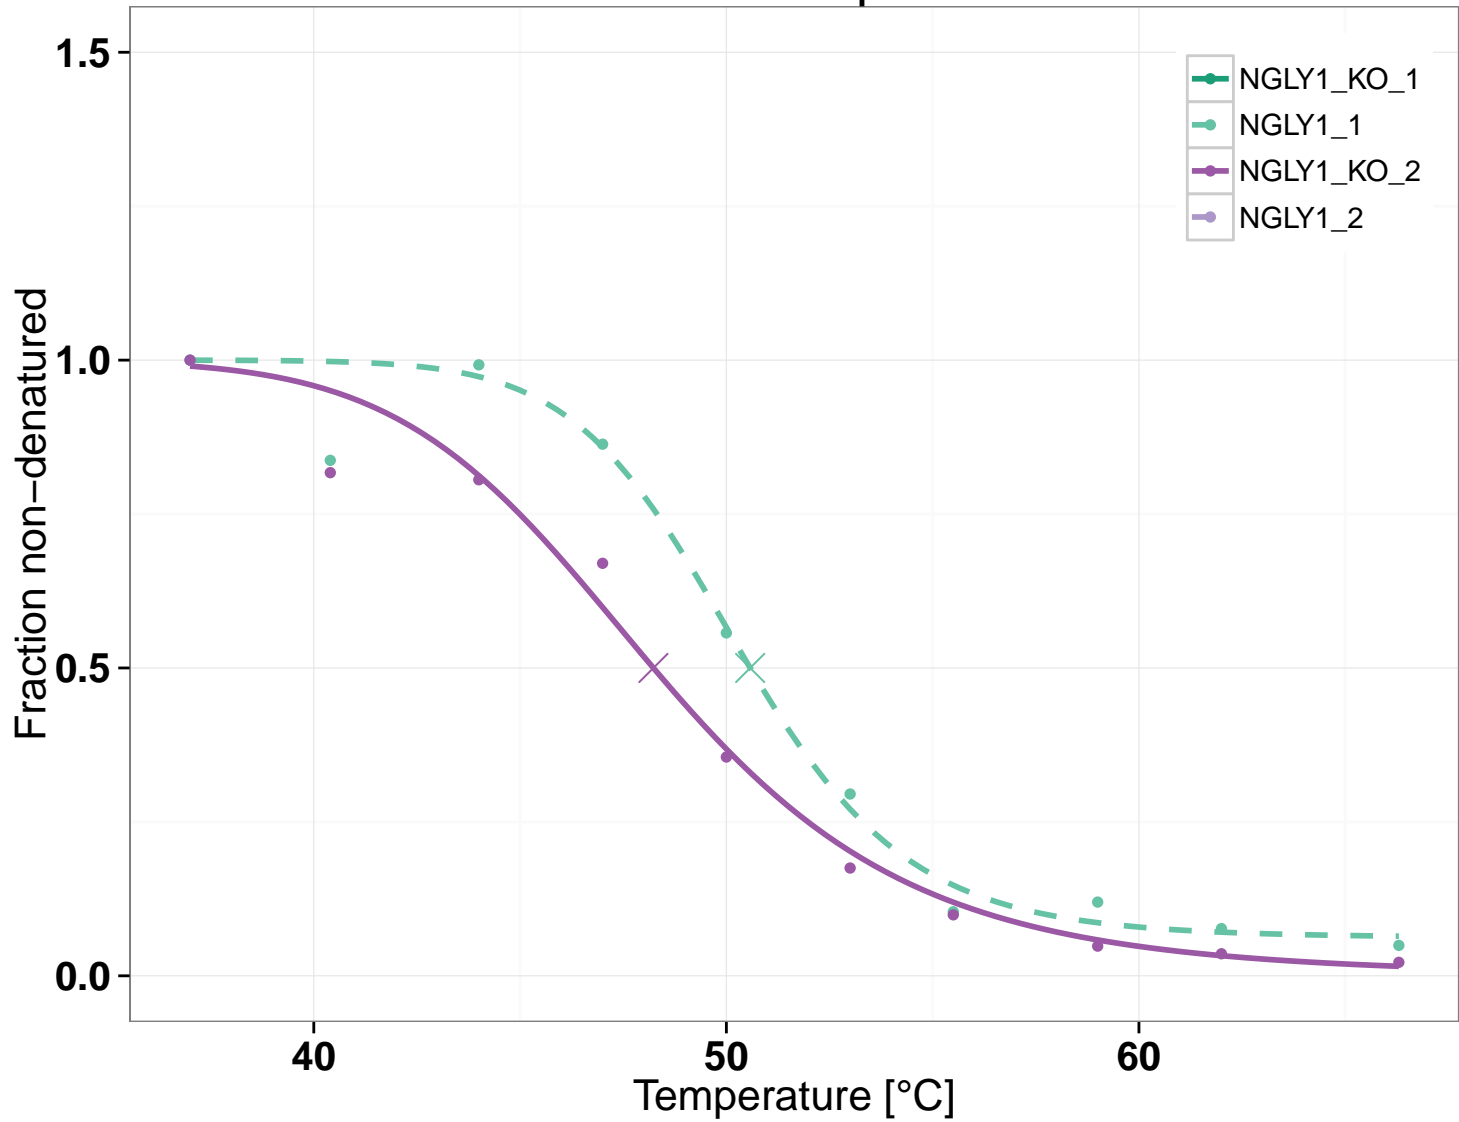

|            | meltPoint | slope | plateau | R2   |
|------------|-----------|-------|---------|------|
| NGLY1_KO_1 | -         | -     | -       | -    |
| NGLY1_1    | 50.58     | -0.12 | 0.06    | 0.98 |
| NGLY1_KO_2 | 48.23     | -0.08 | 0       | 0.98 |
| NGLY1_2    | -         | -     | -       | -    |

Supplement: Supplementary file 7249 [file 1]

# IPI00375803.3|GON4L

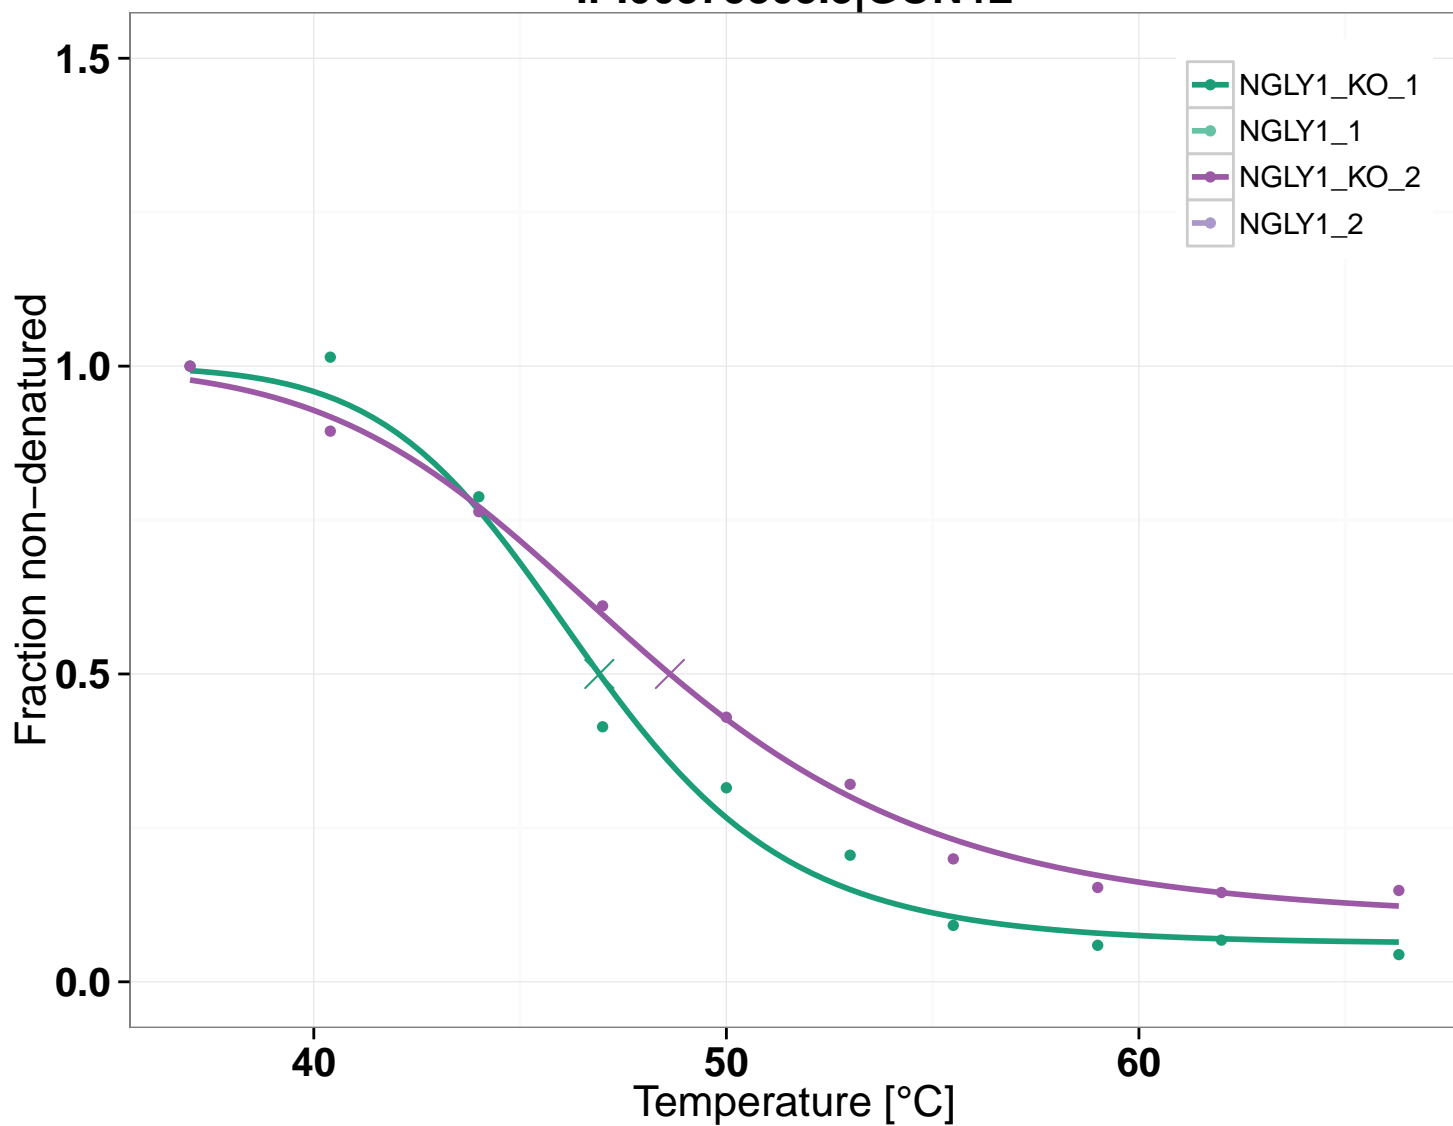

|            | meltPoint | slope  | plateau | R2   |
|------------|-----------|--------|---------|------|
| NGLY1_KO_1 | 46.92     | -0.095 | 0.06    | 0.99 |
| NGLY1_1    | -         | -      | -       | -    |
| NGLY1_KO_2 | 48.63     | -0.061 | 0.1     | 1    |
| NGLY1_2    | -         | -      | -       | -    |

Supplement: Supplementary file 7250 [file 1]

IPI00009949.2|PSMF1

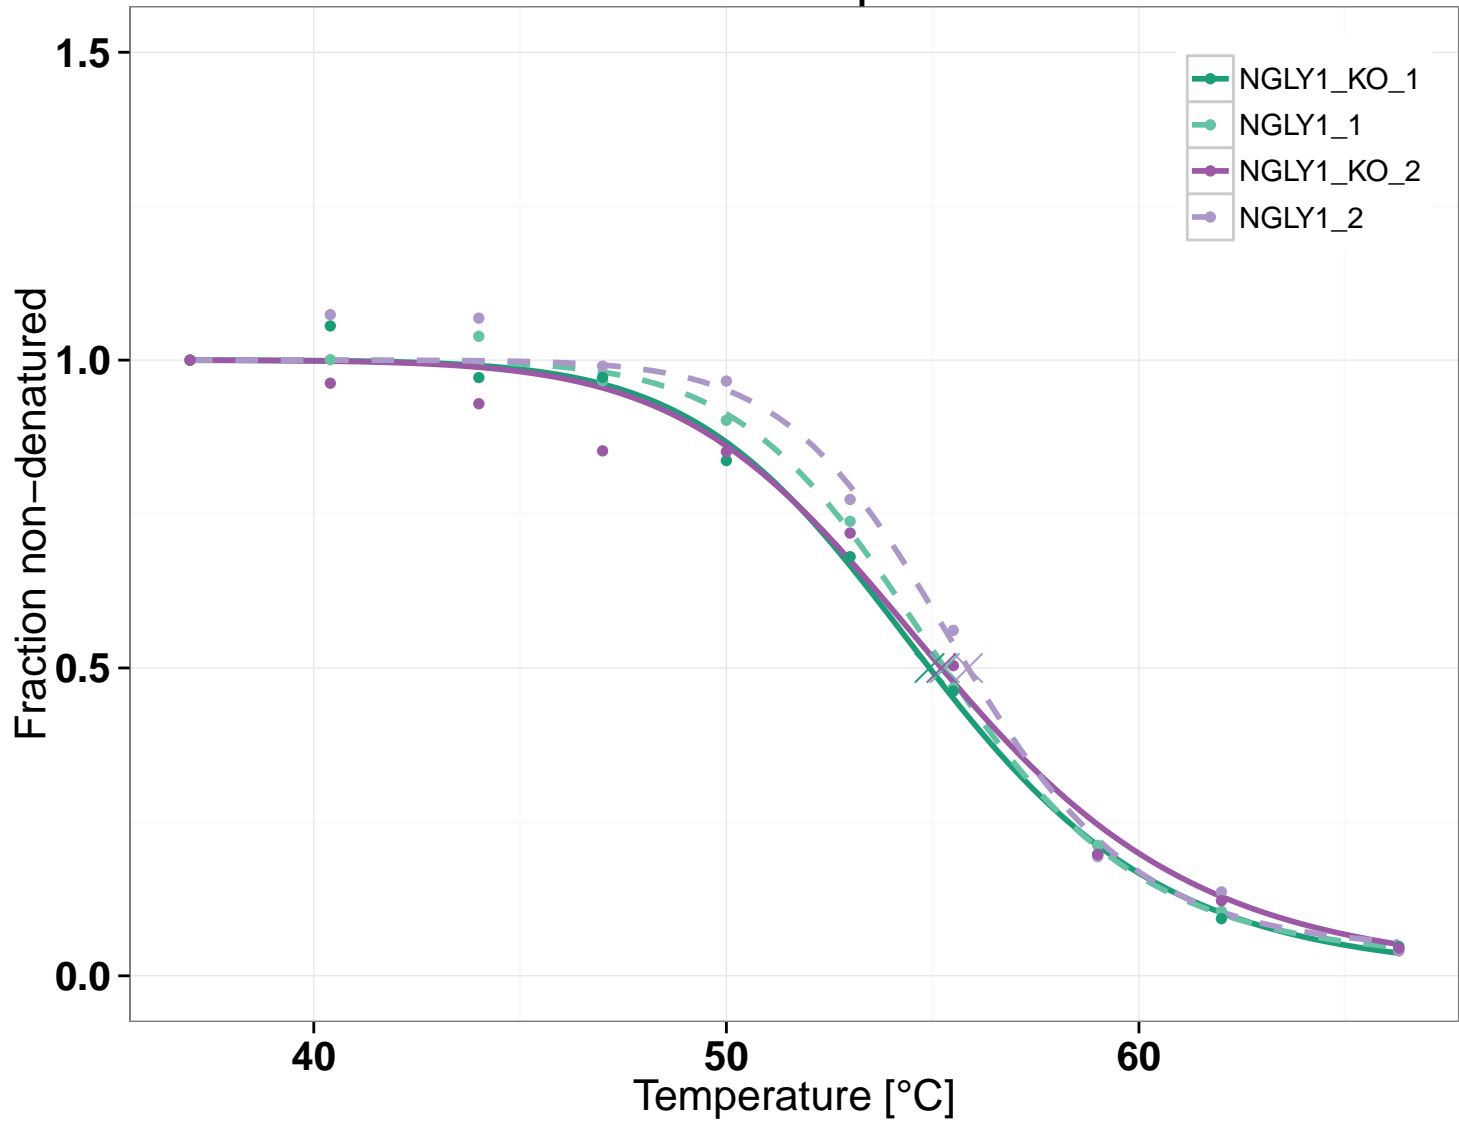

|            | meltPoint | slope  | plateau | R2   |
|------------|-----------|--------|---------|------|
| NGLY1_KO_1 | 54.92     | -0.088 | 0       | 1    |
| NGLY1_1    | 55.29     | -0.1   | 0.02    | 1    |
| NGLY1_KO_2 | 55.21     | -0.08  | 0       | 0.98 |
| NGLY1_2    | 55.86     | -0.11  | 0.04    | 0.99 |

Supplement: Supplementary file 7251 [file 1]

IPI00552744.1|C1ORF124

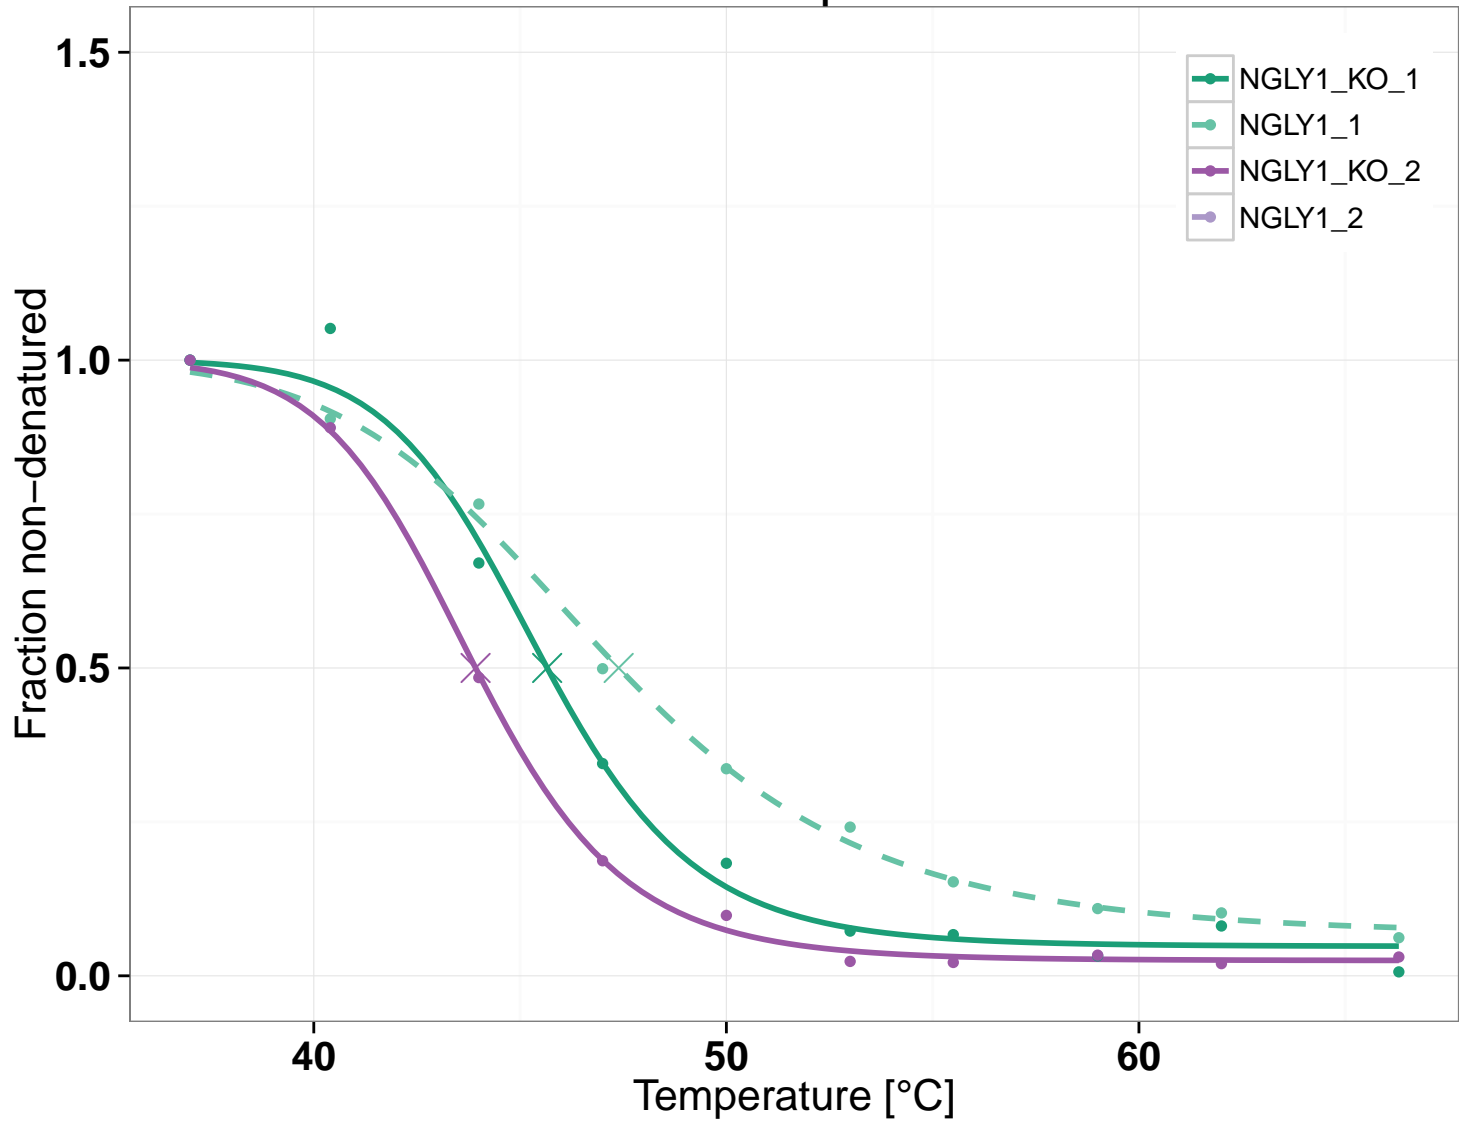

|            | meltPoint | slope  | plateau | R2   |
|------------|-----------|--------|---------|------|
| NGLY1_KO_1 | 45.66     | -0.13  | 0.05    | 0.99 |
| NGLY1_1    | 47.39     | -0.073 | 0.06    | 1    |
| NGLY1_KO_2 | 43.92     | -0.13  | 0.02    | 1    |
| NGLY1_2    | -         | -      | -       | -    |

Supplement: Supplementary file 7252 [file 1]

# IPI00893918.1|VARs

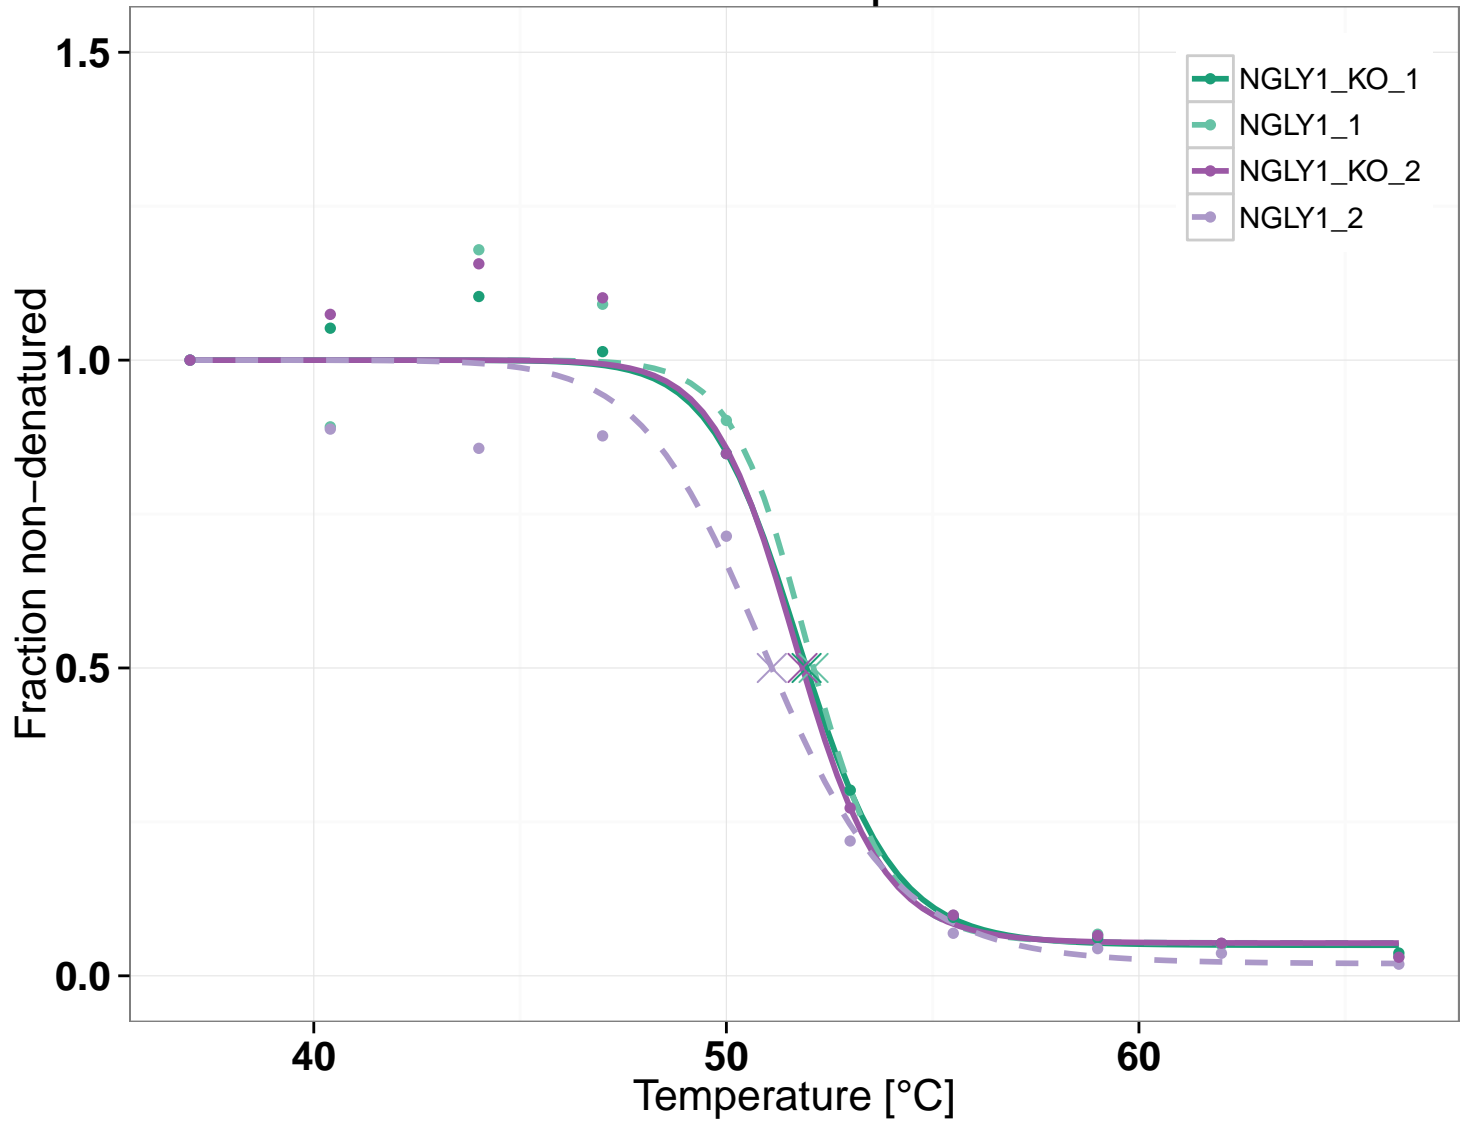

|            | meltPoint | slope | plateau | R2   |
|------------|-----------|-------|---------|------|
| NGLY1_KO_1 | 51.94     | -0.21 | 0.05    | 0.99 |
| NGLY1_1    | 52.11     | -0.25 | 0.05    | 0.98 |
| NGLY1_KO_2 | 51.85     | -0.23 | 0.05    | 0.98 |
| NGLY1_2    | 51.1      | -0.16 | 0.02    | 0.98 |

Supplement: Supplementary file 7253 [file 1]

IPI00006025.1|SART3

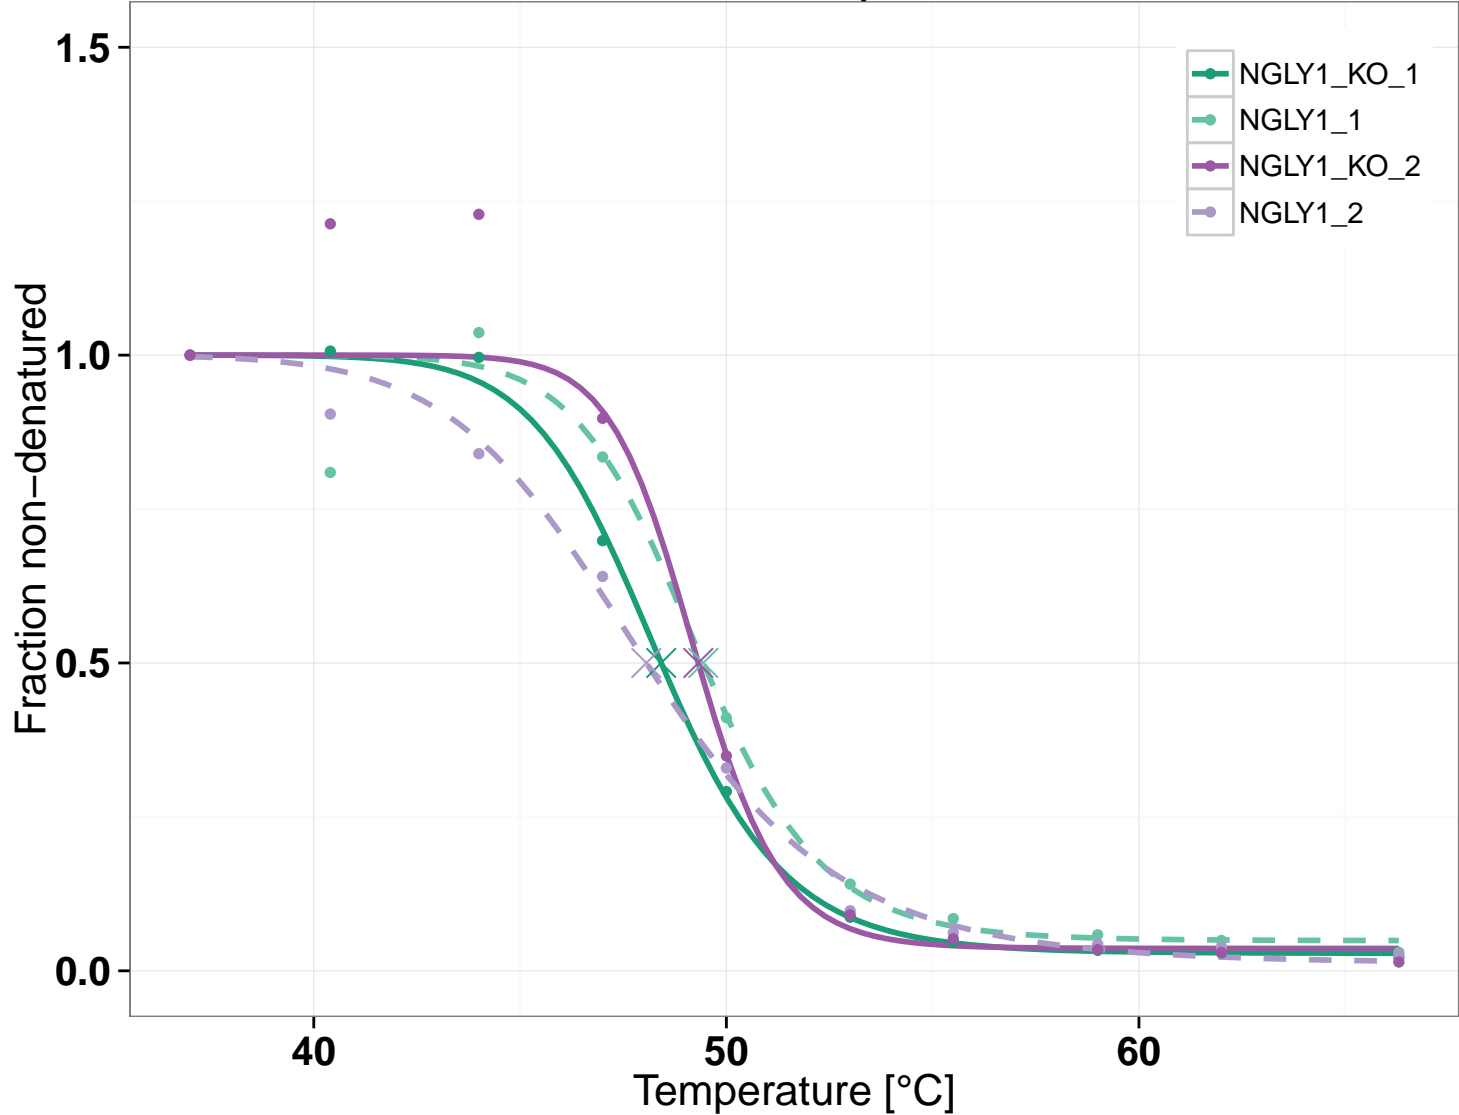

|            | meltPoint | slope | plateau | R2   |
|------------|-----------|-------|---------|------|
| NGLY1_KO_1 | 48.42     | -0.16 | 0.03    | 1    |
| NGLY1_1    | 49.44     | -0.16 | 0.05    | 0.98 |
| NGLY1_KO_2 | 49.32     | -0.23 | 0.04    | 0.96 |
| NGLY1_2    | 48.06     | -0.1  | 0.01    | 0.99 |

Supplement: Supplementary file 7254 [file 1]

IPI00549564.6|ACSS2

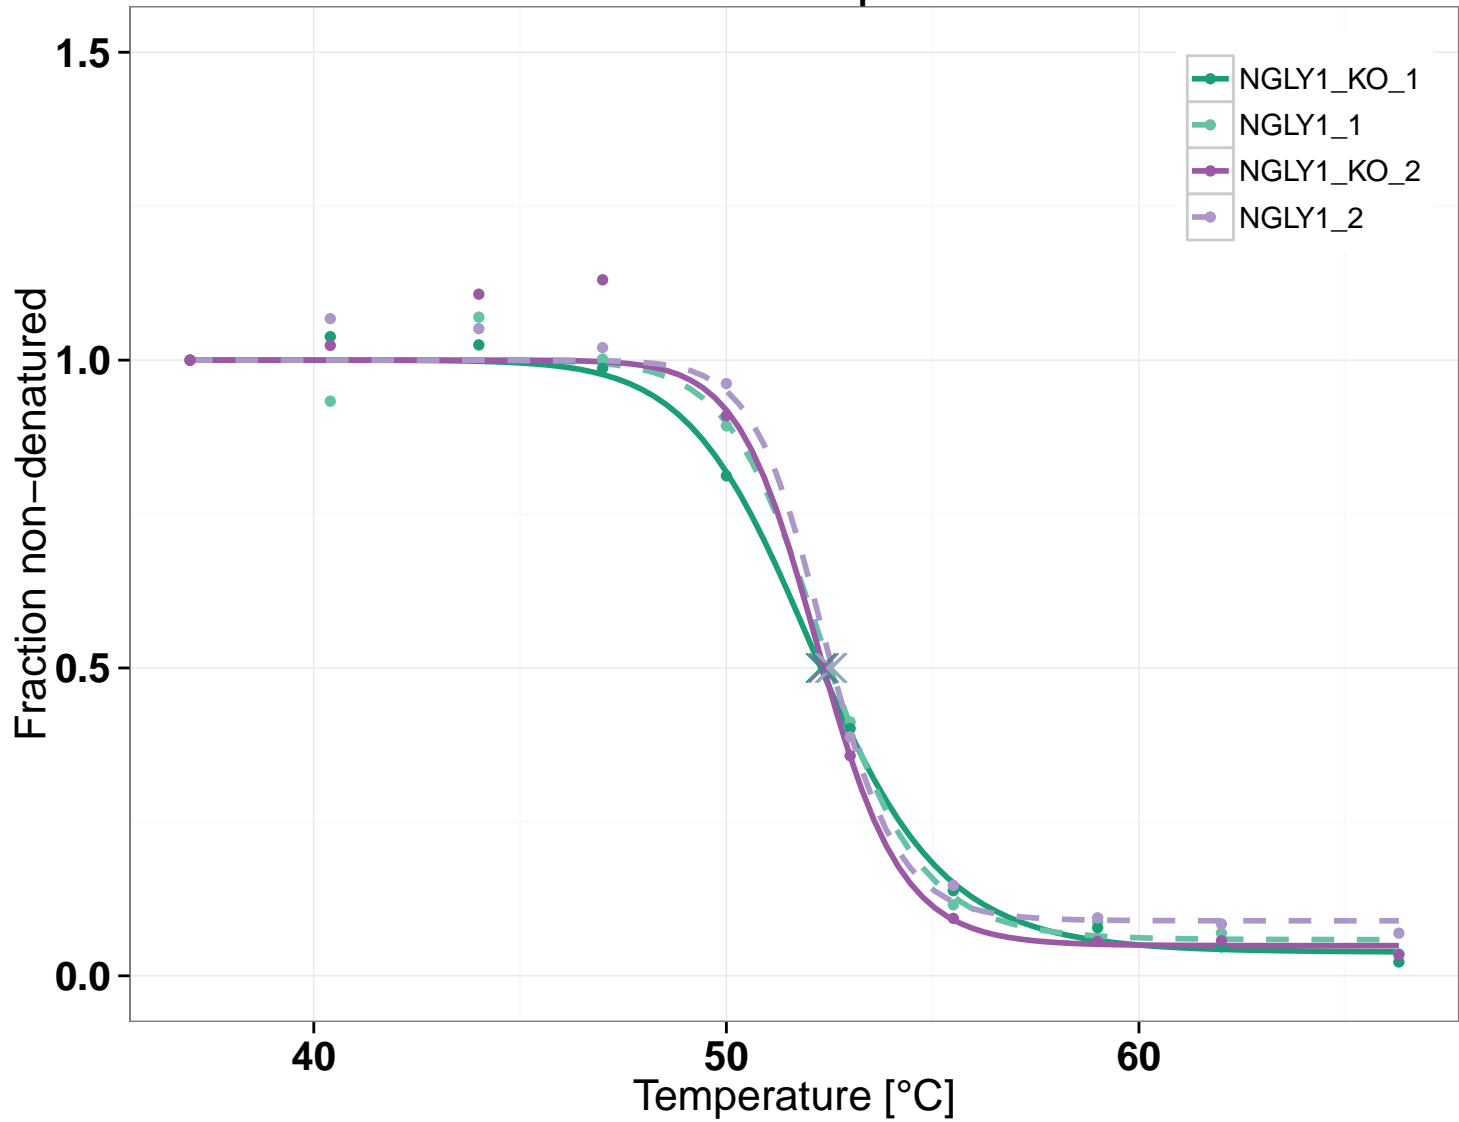

|            | meltPoint | slope | plateau | R2   |
|------------|-----------|-------|---------|------|
| NGLY1_KO_1 | 52.29     | -0.16 | 0.04    | 1    |
| NGLY1_1    | 52.52     | -0.2  | 0.06    | 0.99 |
| NGLY1_KO_2 | 52.36     | -0.24 | 0.05    | 0.99 |
| NGLY1_2    | 52.57     | -0.26 | 0.09    | 1    |

Supplement: Supplementary file 7255 [file 1]

IPI00103869.1|CTTNBP2

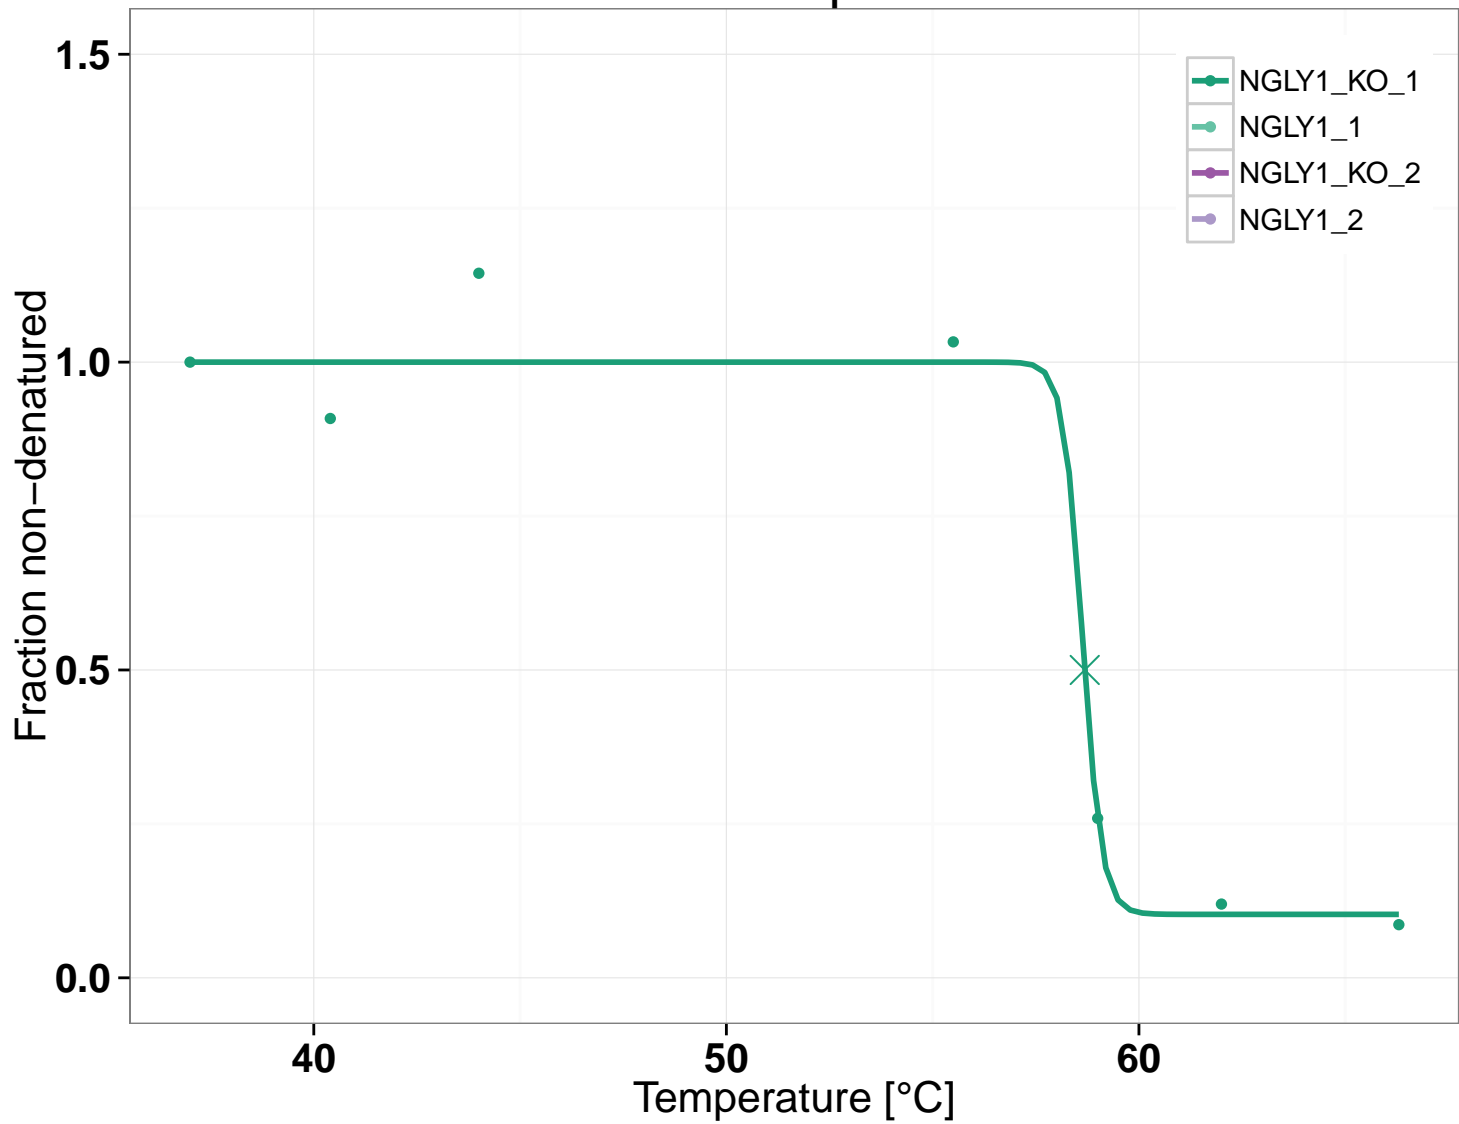

|            | meltPoint | slope | plateau | R2   |
|------------|-----------|-------|---------|------|
| NGLY1_KO_1 | 58.69     | -0.96 | 0.1     | 0.53 |
| NGLY1_1    | -         | -     | -       | -    |
| NGLY1_KO_2 | -         | -     | -       | -    |
| NGLY1_2    | -         | -     | -       | -    |

Supplement: Supplementary file 7256 [file 1]

# IPI00015801.3|CMTM6

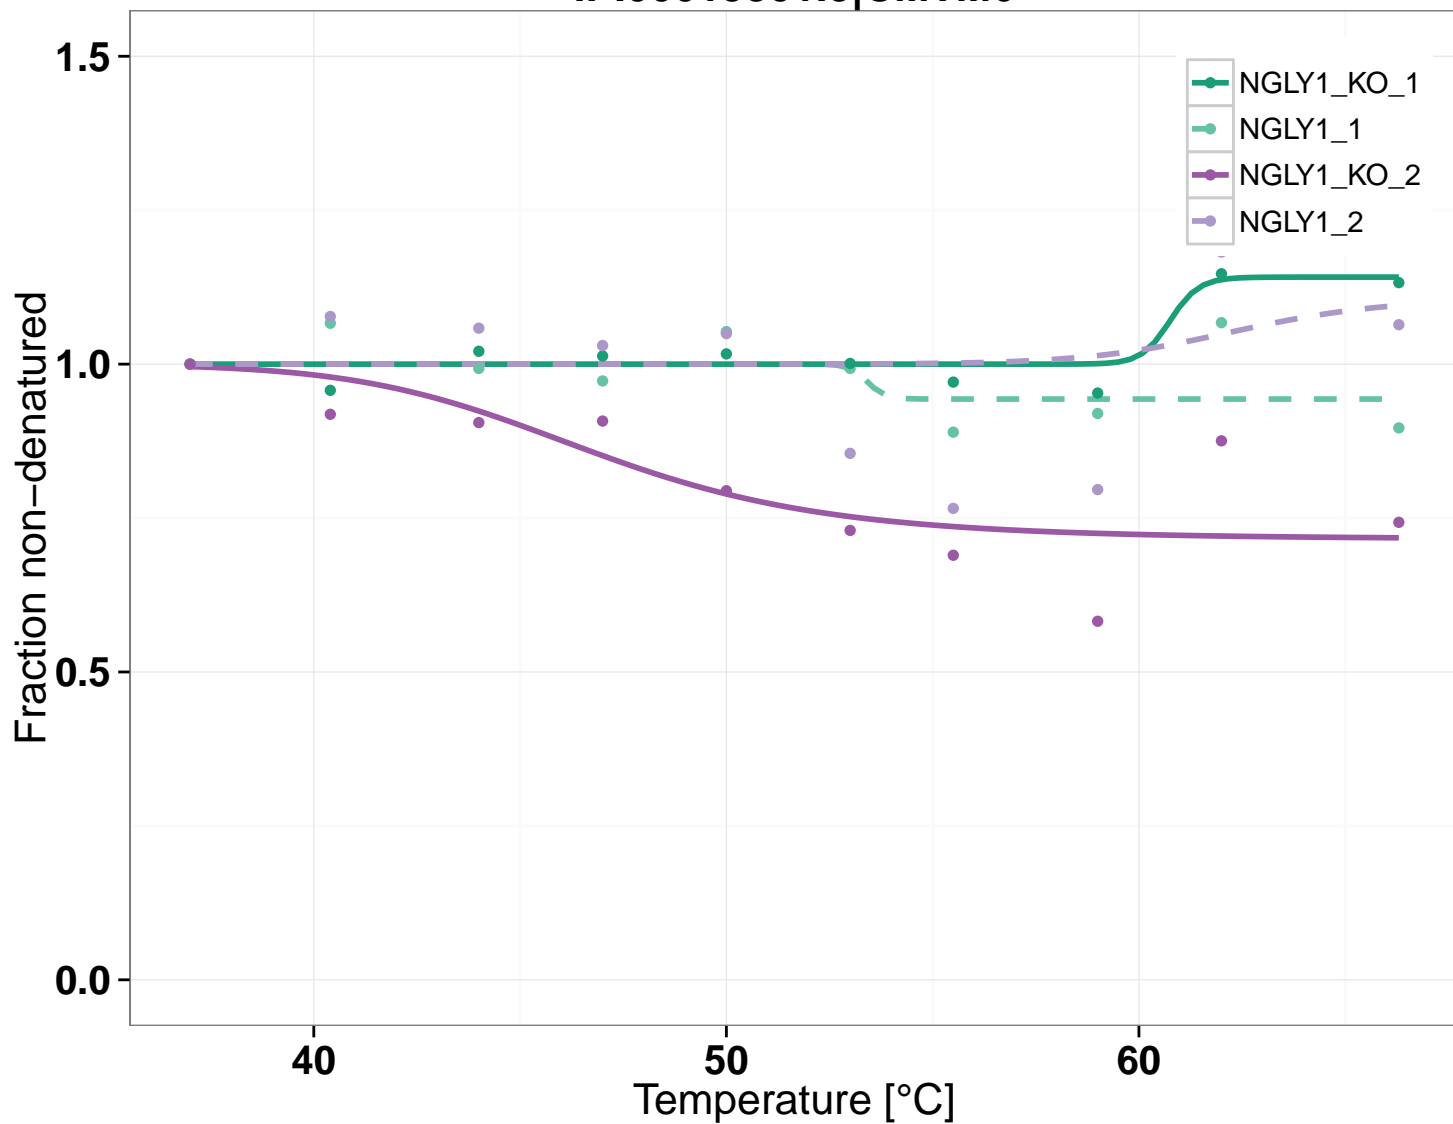

|            | meltPoint | slope  | plateau | R2   |
|------------|-----------|--------|---------|------|
| NGLY1_KO_1 | —         | 0.1    | 1.14    | 0.85 |
| NGLY1_1    | —         | -0.066 | 0.94    | 0.27 |
| NGLY1_KO_2 | —         | -0.025 | 0.72    | 0.63 |
| NGLY1_2    | —         | 0.015  | 1.11    | 0.06 |

Supplement: Supplementary file 7257 [file 1]

IPI00073179.1|VPS33A

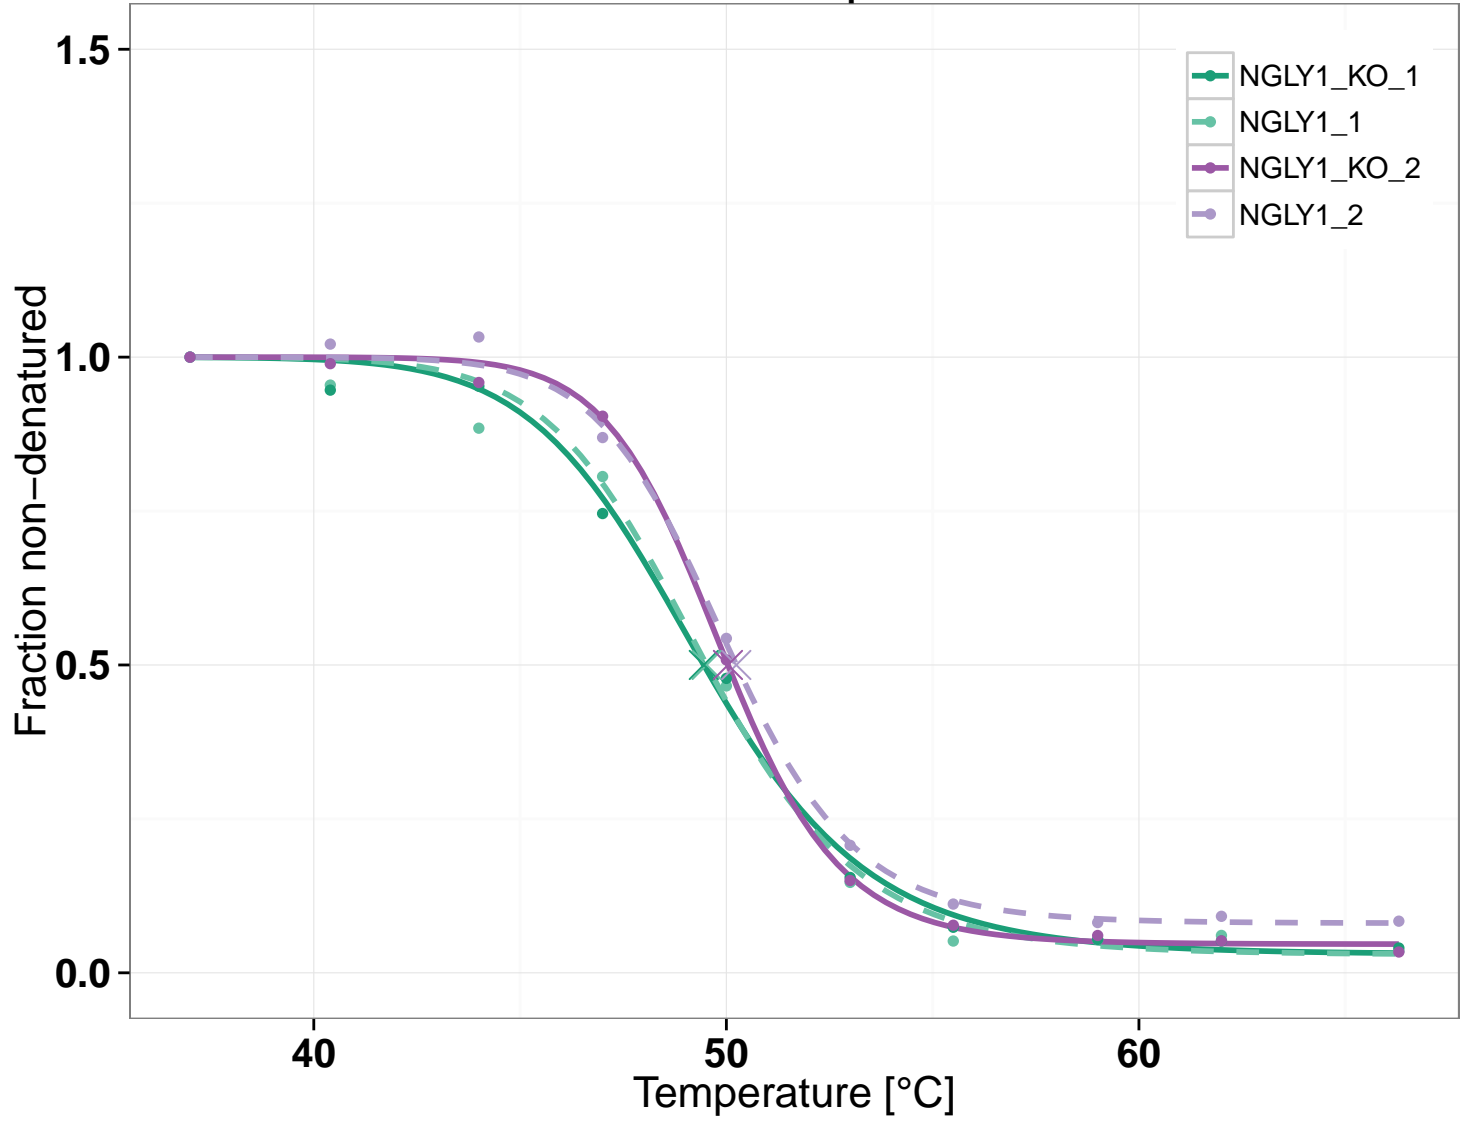

|            | meltPoint | slope | plateau | R2   |
|------------|-----------|-------|---------|------|
| NGLY1_KO_1 | 49.45     | -0.12 | 0.03    | 1    |
| NGLY1_1    | 49.52     | -0.13 | 0.03    | 0.99 |
| NGLY1_KO_2 | 50.04     | -0.17 | 0.05    | 1    |
| NGLY1_2    | 50.24     | -0.15 | 0.08    | 1    |

Supplement: Supplementary file 7258 [file 1]

IPI00735288.1|NHEJ1

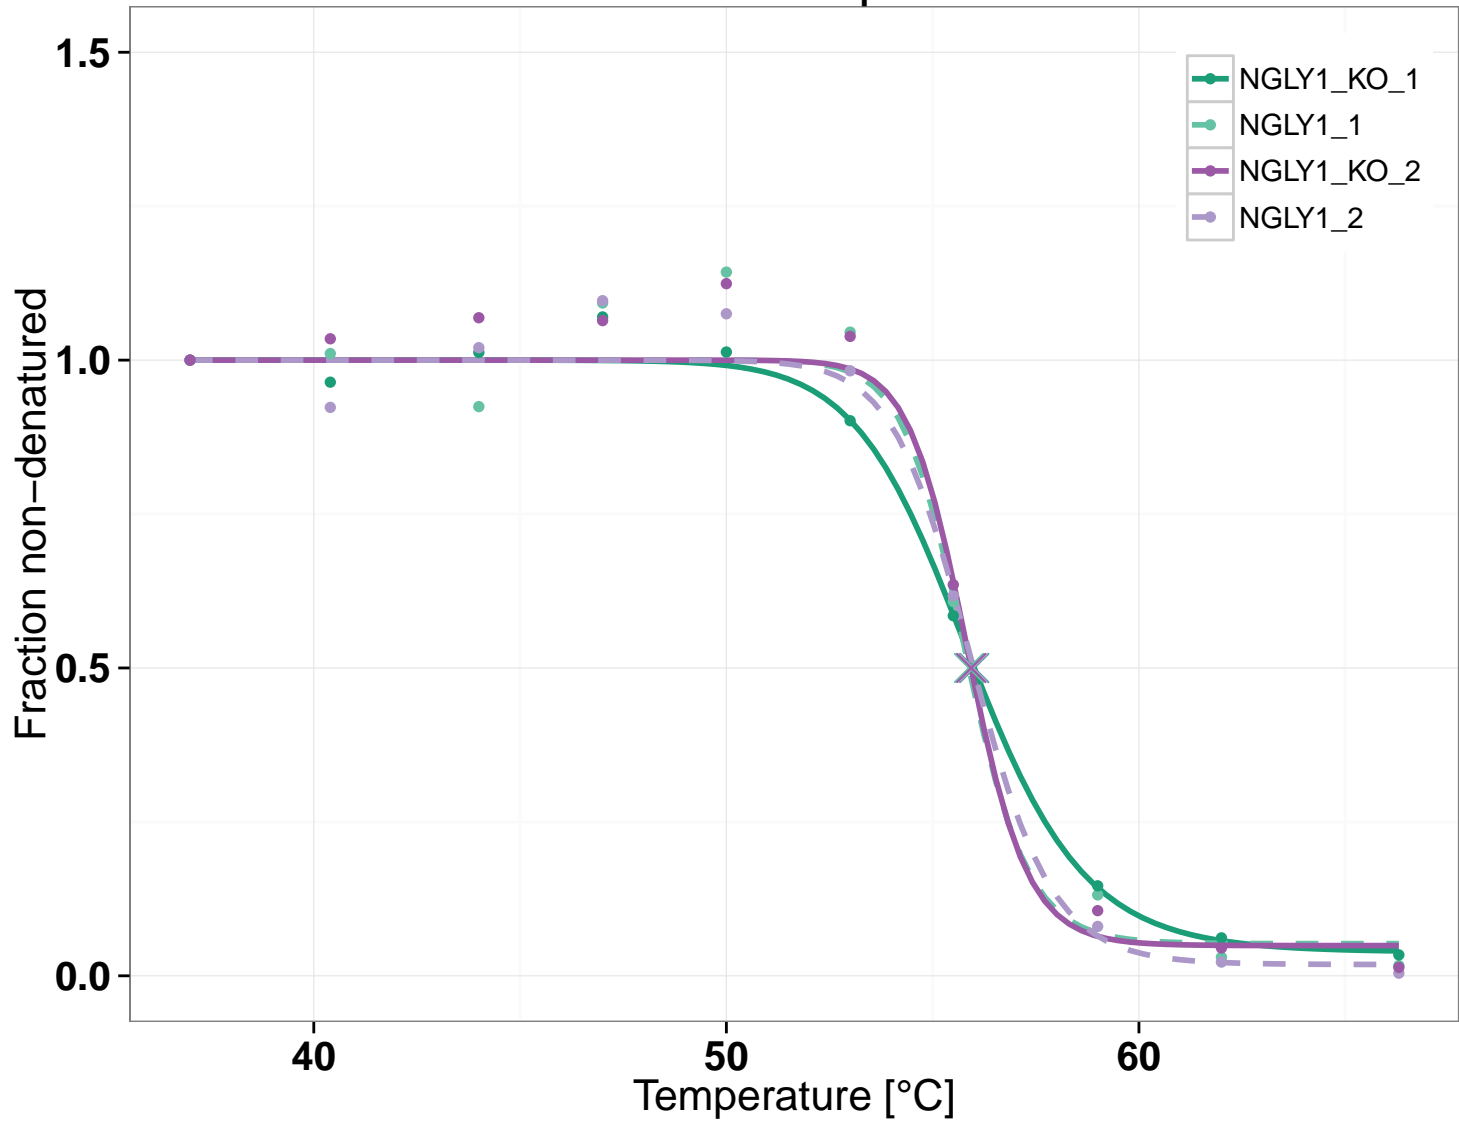

|            | meltPoint | slope | plateau | R2   |
|------------|-----------|-------|---------|------|
| NGLY1_KO_1 | 56.01     | -0.17 | 0.04    | 1    |
| NGLY1_1    | 55.88     | -0.31 | 0.05    | 0.98 |
| NGLY1_KO_2 | 55.93     | -0.33 | 0.05    | 0.98 |
| NGLY1_2    | 55.99     | -0.26 | 0.02    | 0.99 |

Supplement: Supplementary file 7259 [file 1]

# IPI00165477.6|ELP3

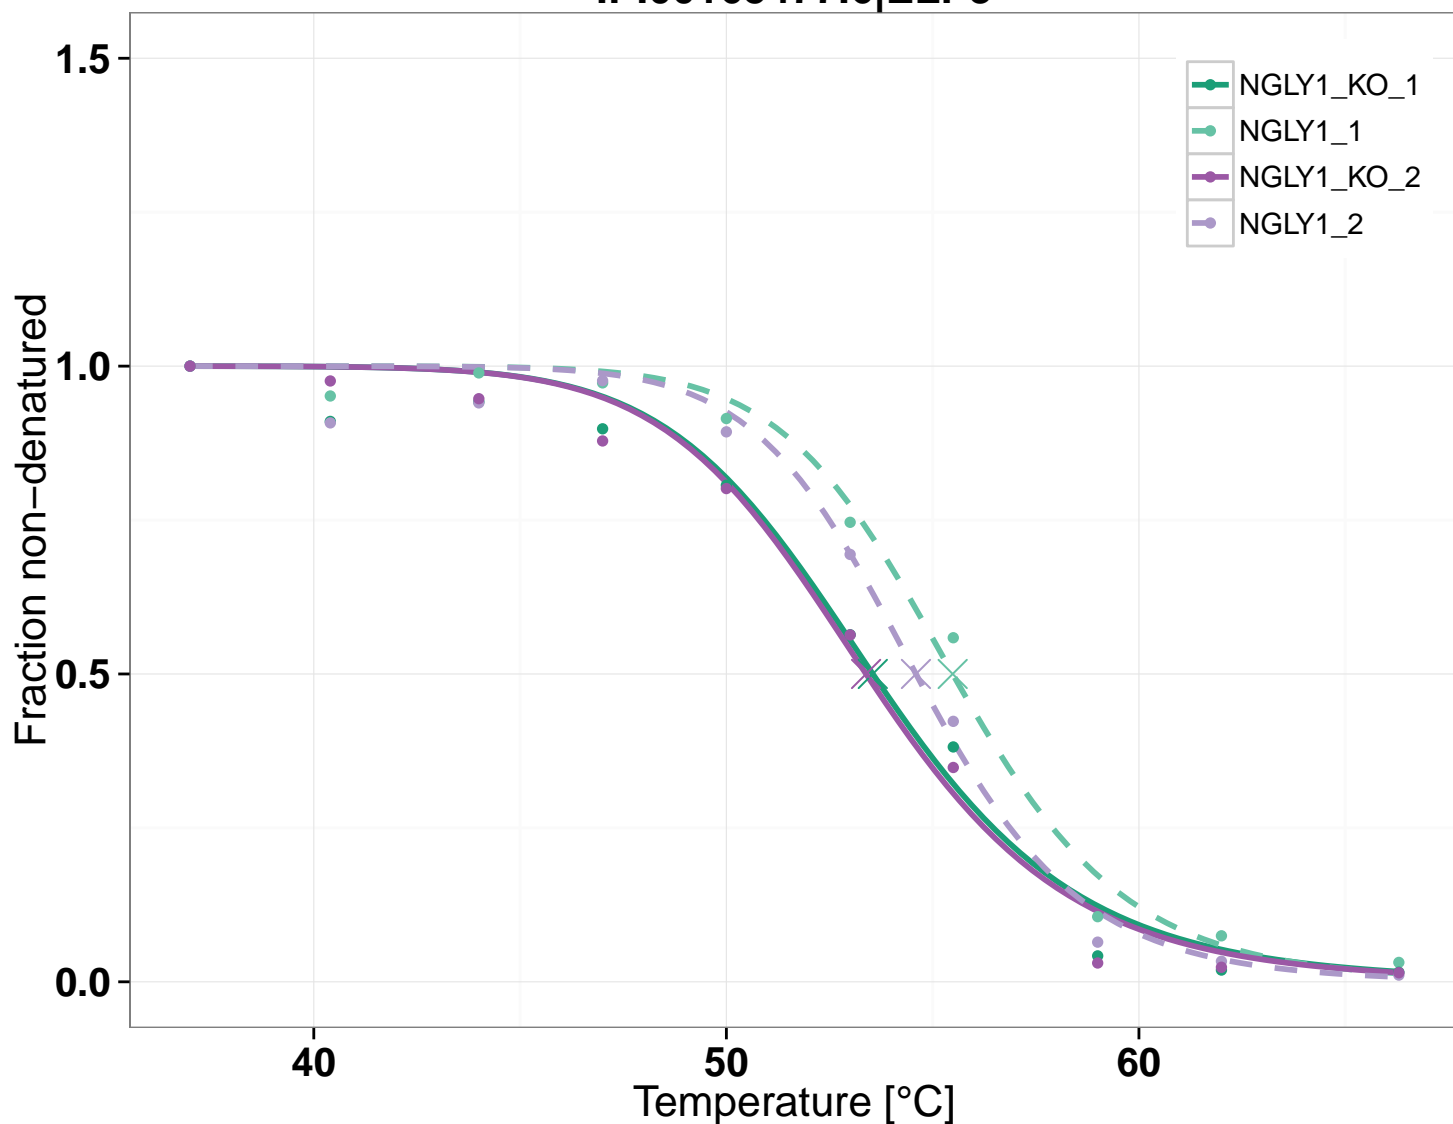

|            | meltPoint | slope | plateau | R2   |
|------------|-----------|-------|---------|------|
| NGLY1_KO_1 | 53.55     | -0.1  | 0       | 0.98 |
| NGLY1_1    | 55.49     | -0.12 | 0       | 0.99 |
| NGLY1_KO_2 | 53.39     | -0.1  | 0       | 0.99 |
| NGLY1_2    | 54.6      | -0.13 | 0       | 0.99 |

Supplement: Supplementary file 7260 [file 1]

# IPI00412987.10|GMFB

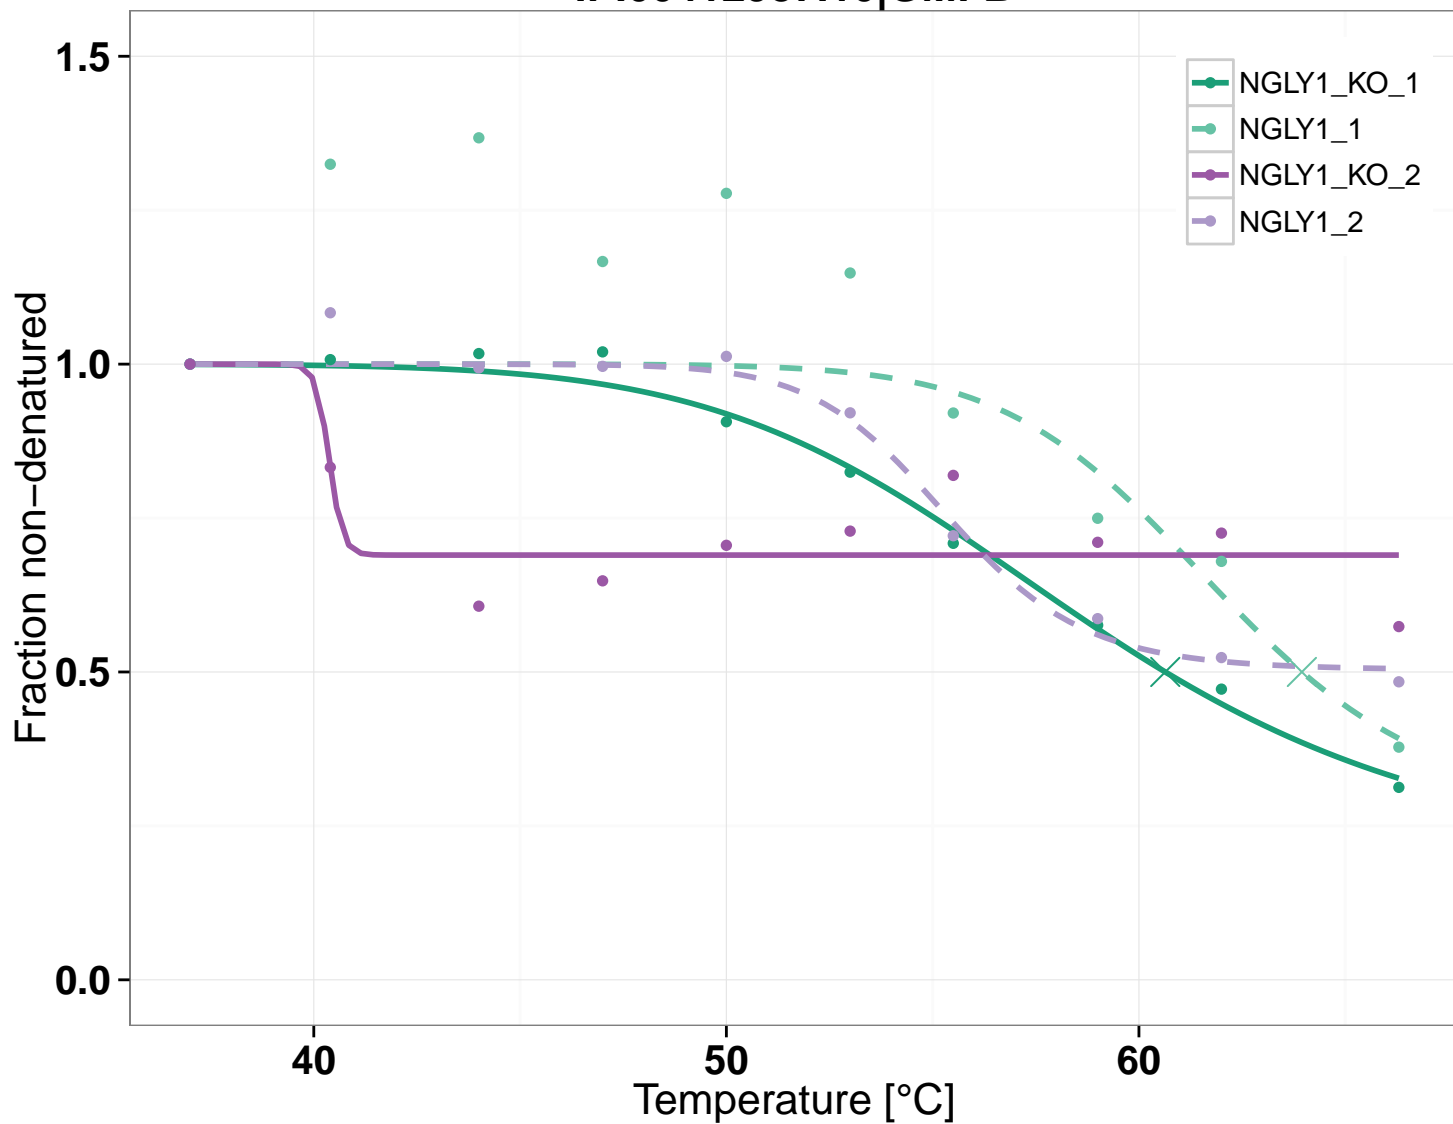

|            | meltPoint | slope  | plateau | R2   |
|------------|-----------|--------|---------|------|
| NGLY1_KO_1 | 60.64     | -0.046 | 0.18    | 0.99 |
| NGLY1_1    | 63.95     | -0.07  | 0.26    | 0.59 |
| NGLY1_KO_2 | -         | -0.48  | 0.69    | 0.69 |
| NGLY1_2    | -         | -0.075 | 0.5     | 0.98 |

Supplement: Supplementary file 7261 [file 1]

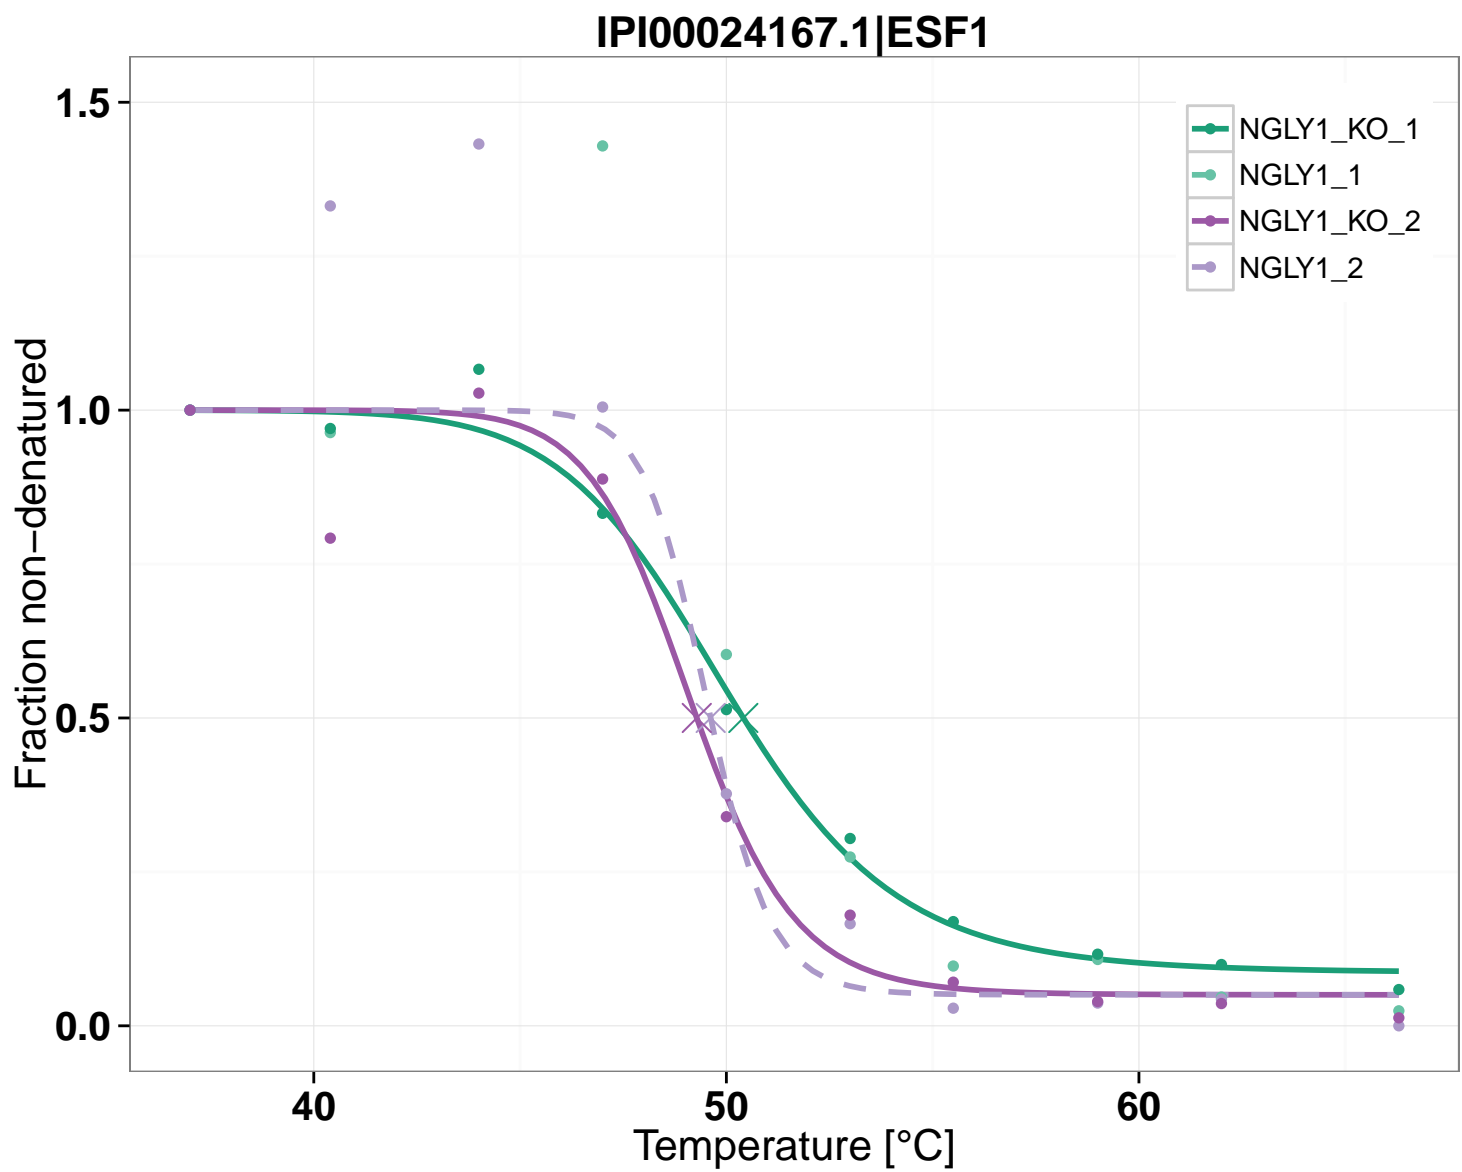

|            | meltPoint | slope | plateau | R2   |
|------------|-----------|-------|---------|------|
| NGLY1_KO_1 | 50.41     | -0.11 | 0.09    | 0.99 |
| NGLY1_1    | —         | —     | —       | —    |
| NGLY1_KO_2 | 49.28     | -0.19 | 0.05    | 0.97 |
| NGLY1_2    | 49.62     | -0.31 | 0.05    | 0.9  |

Supplement: Supplementary file 7262 [file 1]

IPI00873875.1|SH3KBP1

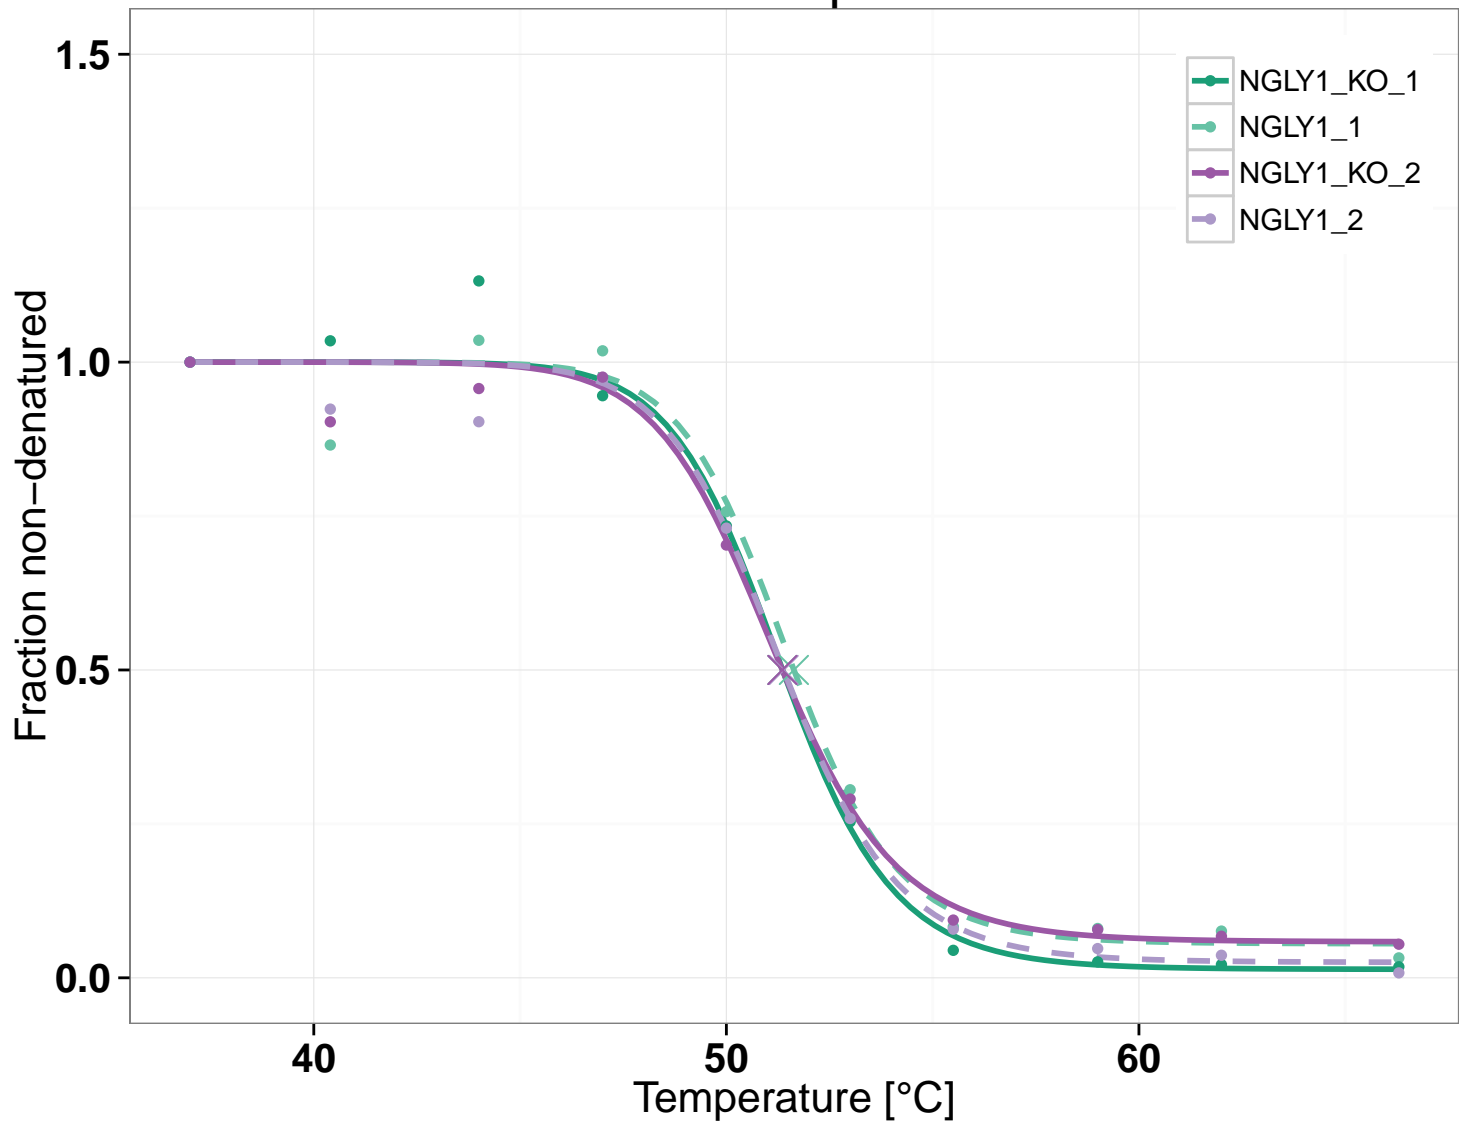

|            | meltPoint | slope | plateau | R2   |
|------------|-----------|-------|---------|------|
| NGLY1_KO_1 | 51.36     | -0.18 | 0.01    | 0.99 |
| NGLY1_1    | 51.64     | -0.18 | 0.06    | 0.99 |
| NGLY1_KO_2 | 51.36     | -0.16 | 0.06    | 0.99 |
| NGLY1_2    | 51.39     | -0.17 | 0.03    | 0.99 |

Supplement: Supplementary file 7263 [file 1]

IPI00418213.1|RABGEF1

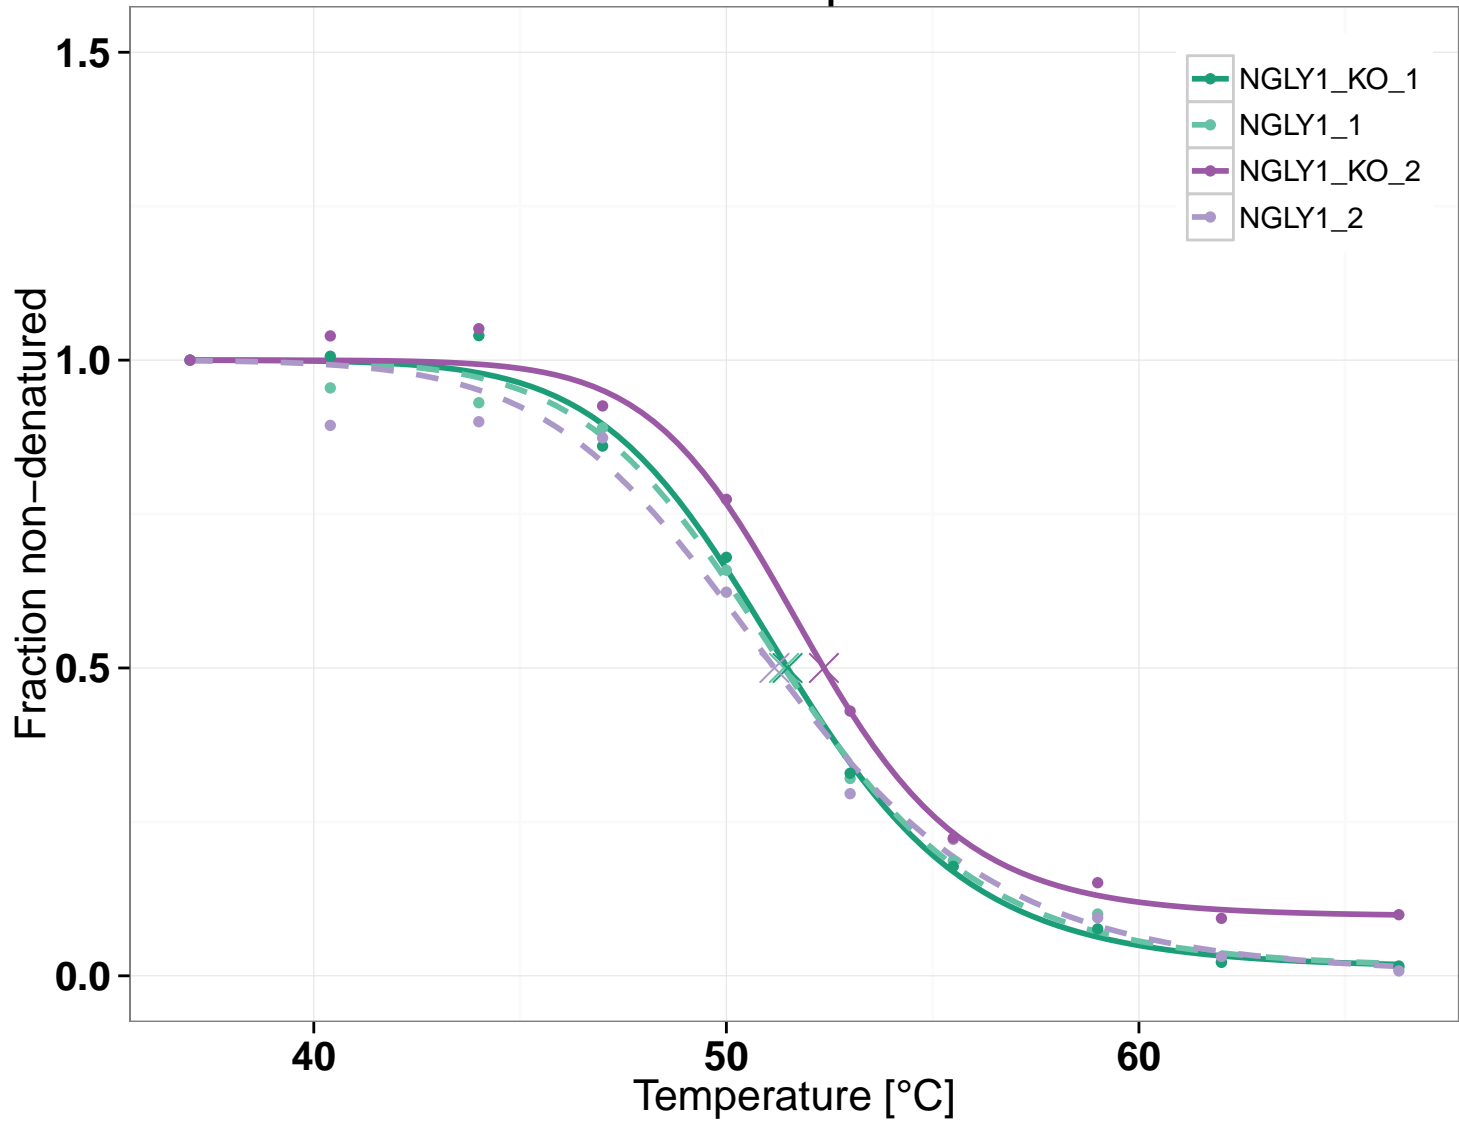

|            | meltPoint | slope | plateau | R2   |
|------------|-----------|-------|---------|------|
| NGLY1_KO_1 | 51.48     | -0.11 | 0.01    | 1    |
| NGLY1_1    | 51.4      | -0.1  | 0.01    | 1    |
| NGLY1_KO_2 | 52.36     | -0.12 | 0.1     | 1    |
| NGLY1_2    | 51.16     | -0.09 | 0       | 0.99 |

Supplement: Supplementary file 7264 [file 1]

# IPI00384992.7|MYL4

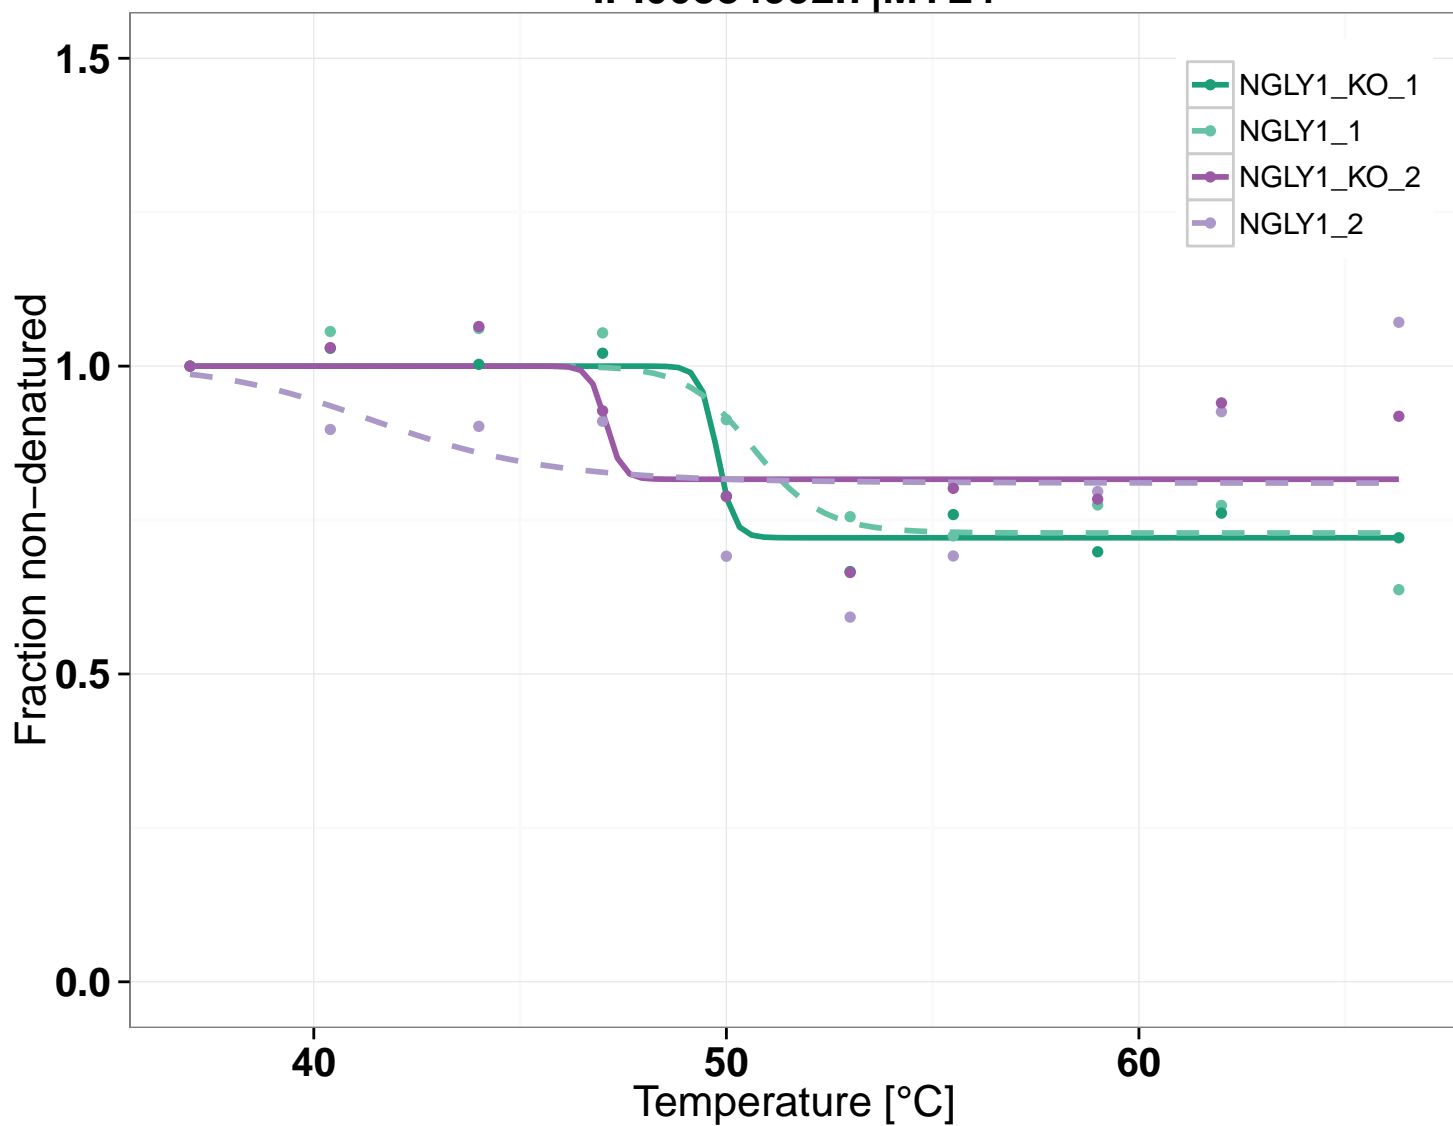

|            | meltPoint | slope  | plateau | R2   |
|------------|-----------|--------|---------|------|
| NGLY1_KO_1 | —         | -0.35  | 0.72    | 0.96 |
| NGLY1_1    | —         | -0.082 | 0.73    | 0.9  |
| NGLY1_KO_2 | —         | -0.24  | 0.82    | 0.62 |
| NGLY1_2    | —         | -0.023 | 0.81    | 0.17 |

Supplement: Supplementary file 7265 [file 1]

IPI00023340.2|MYST3

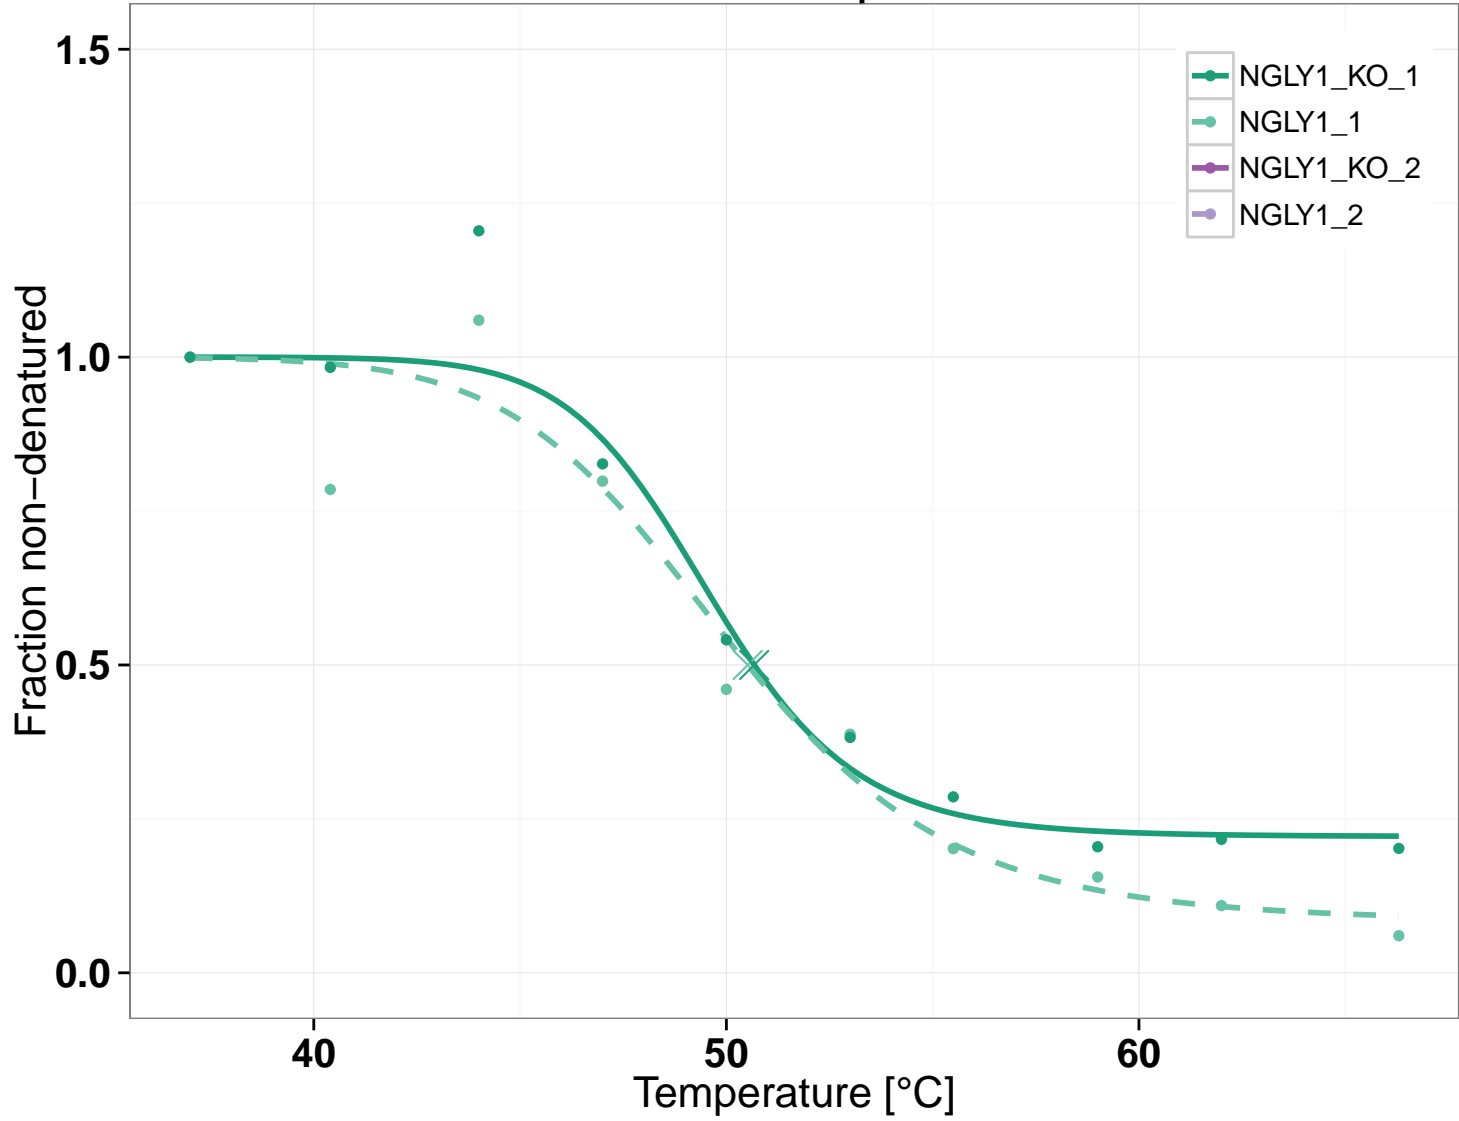

|            | meltPoint | slope  | plateau | R2   |
|------------|-----------|--------|---------|------|
| NGLY1_KO_1 | 50.67     | -0.11  | 0.22    | 0.96 |
| NGLY1_1    | 50.52     | -0.086 | 0.08    | 0.95 |
| NGLY1_KO_2 | -         | -      | -       | -    |
| NGLY1_2    | -         | -      | -       | -    |

Supplement: Supplementary file 7266 [file 1]

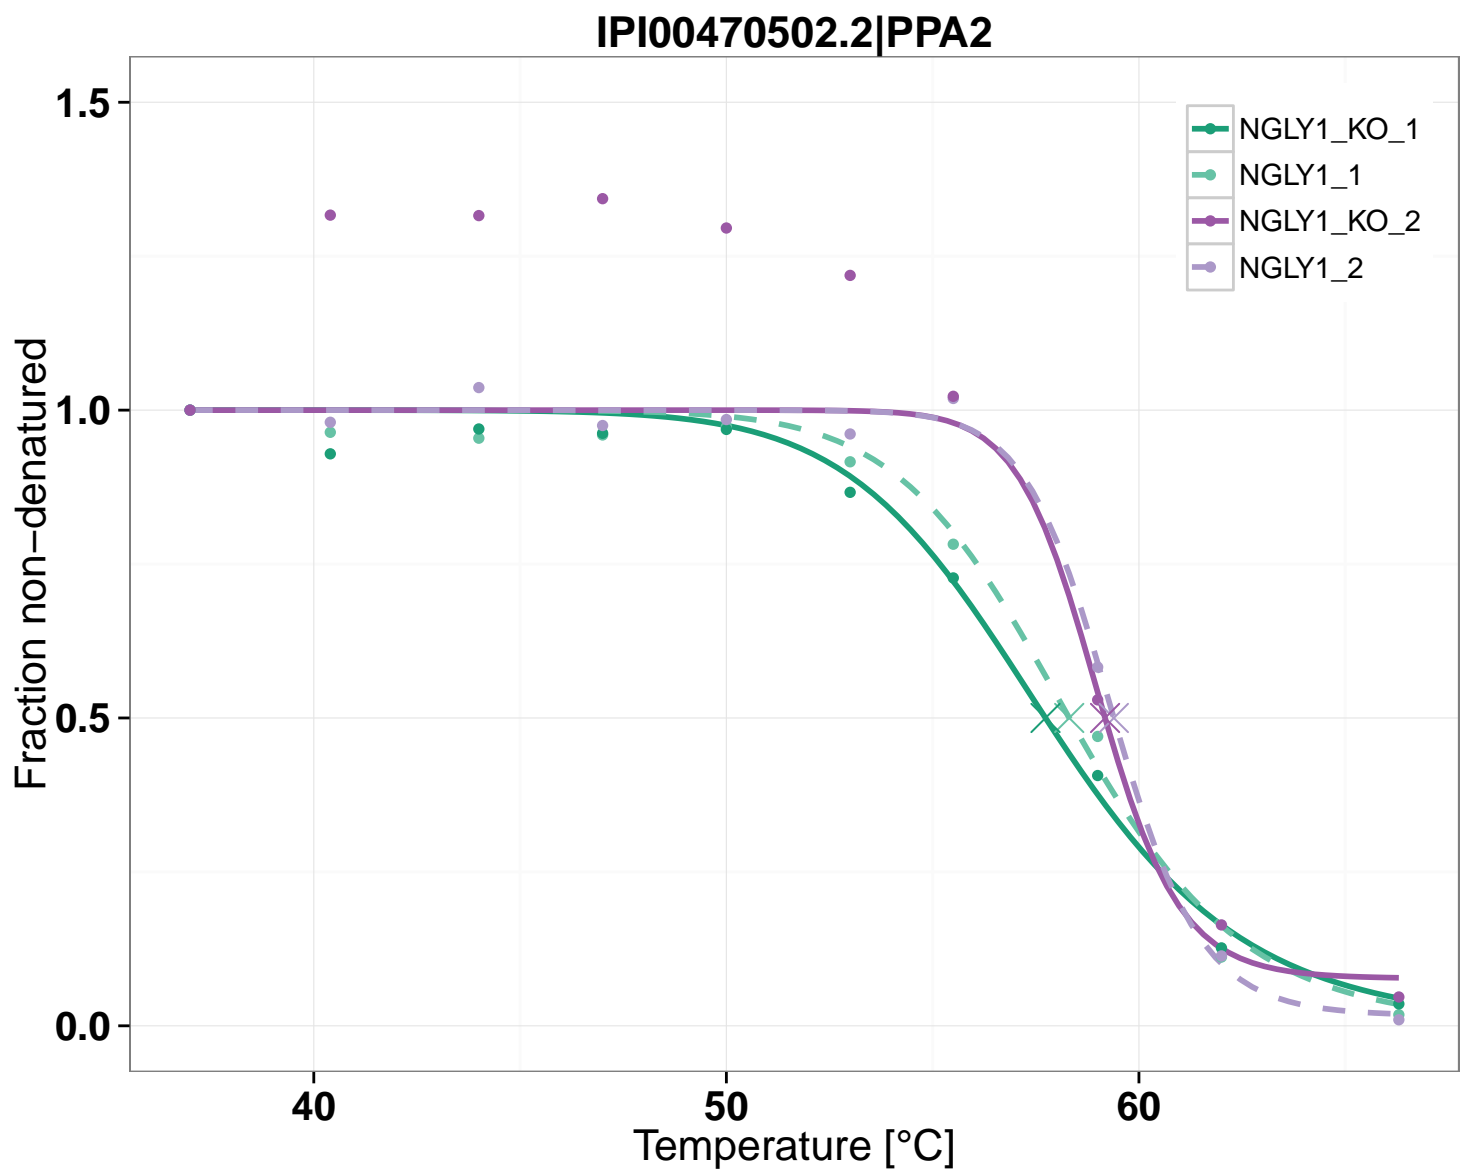

|            | meltPoint | slope | plateau | R2   |
|------------|-----------|-------|---------|------|
| NGLY1_KO_1 | 57.74     | -0.1  | 0       | 0.99 |
| NGLY1_1    | 58.31     | -0.12 | 0       | 0.99 |
| NGLY1_KO_2 | 59.18     | -0.23 | 0.08    | 0.79 |
| NGLY1_2    | 59.39     | -0.23 | 0.02    | 1    |

Supplement: Supplementary file 7267 [file 1]

IPI00029337.4|SLC39A3

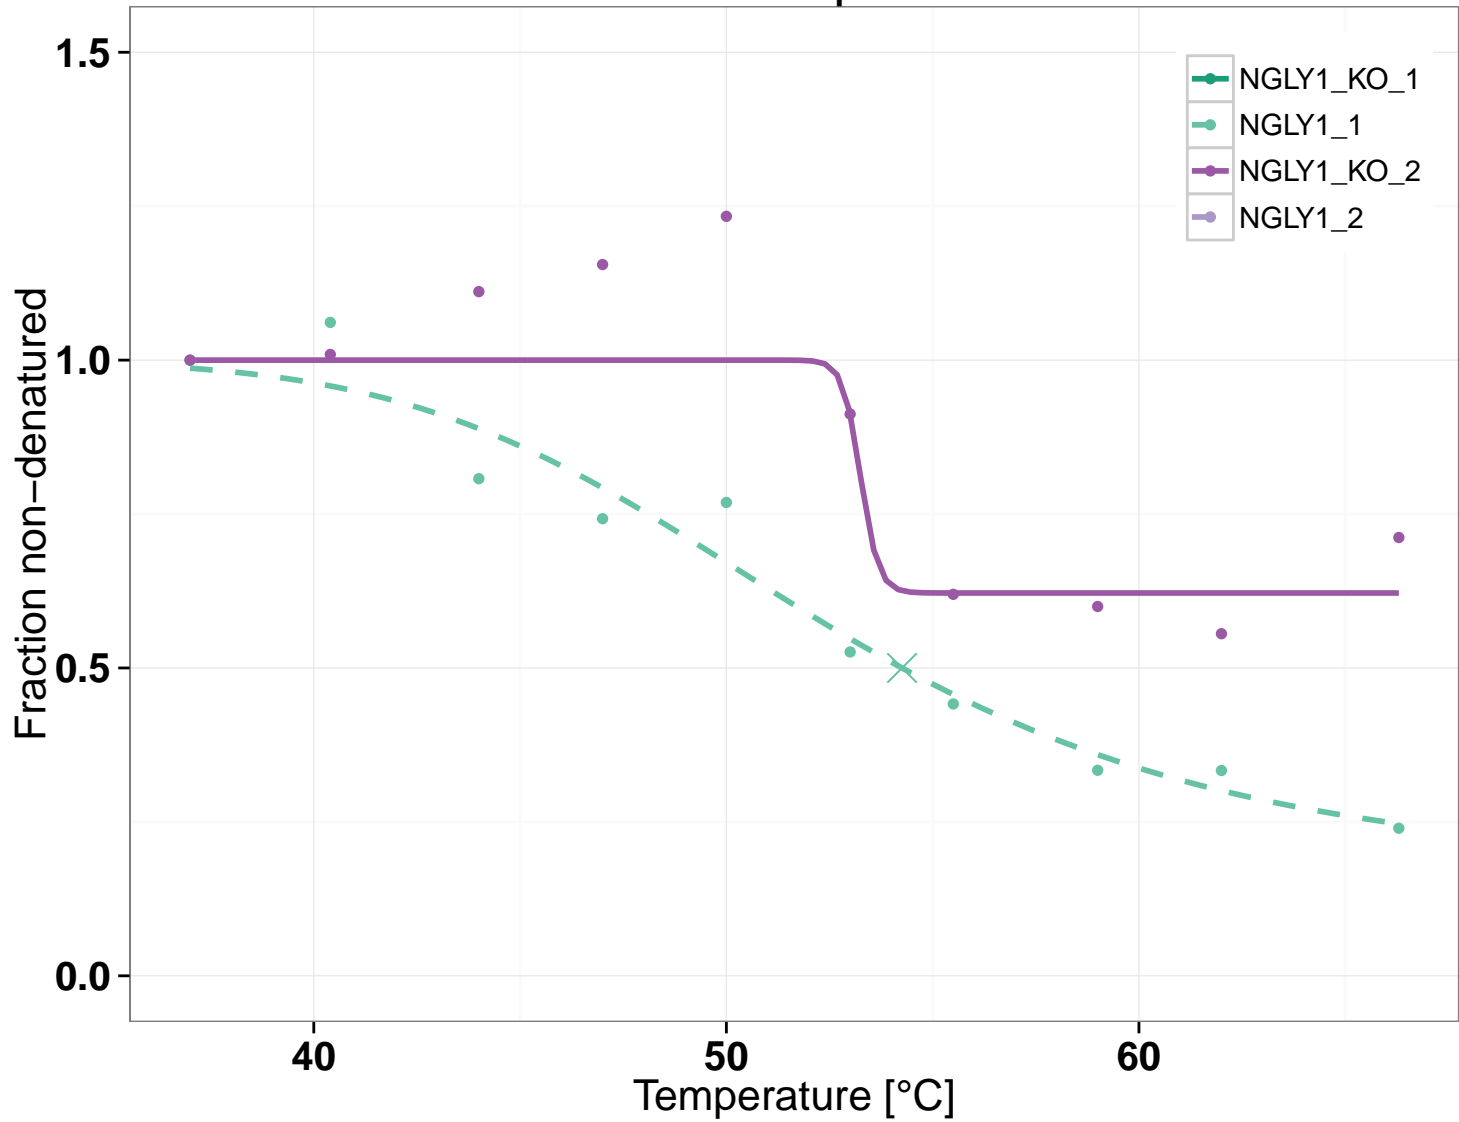

|            | meltPoint | slope  | plateau | R2   |
|------------|-----------|--------|---------|------|
| NGLY1_KO_1 | -         | -      | -       | -    |
| NGLY1_1    | 54.26     | -0.042 | 0.16    | 0.96 |
| NGLY1_KO_2 | -         | -0.44  | 0.62    | 0.82 |
| NGLY1_2    | -         | -      | -       | -    |

Supplement: Supplementary file 7268 [file 1]

# IPI00007983.2|PDLIM2

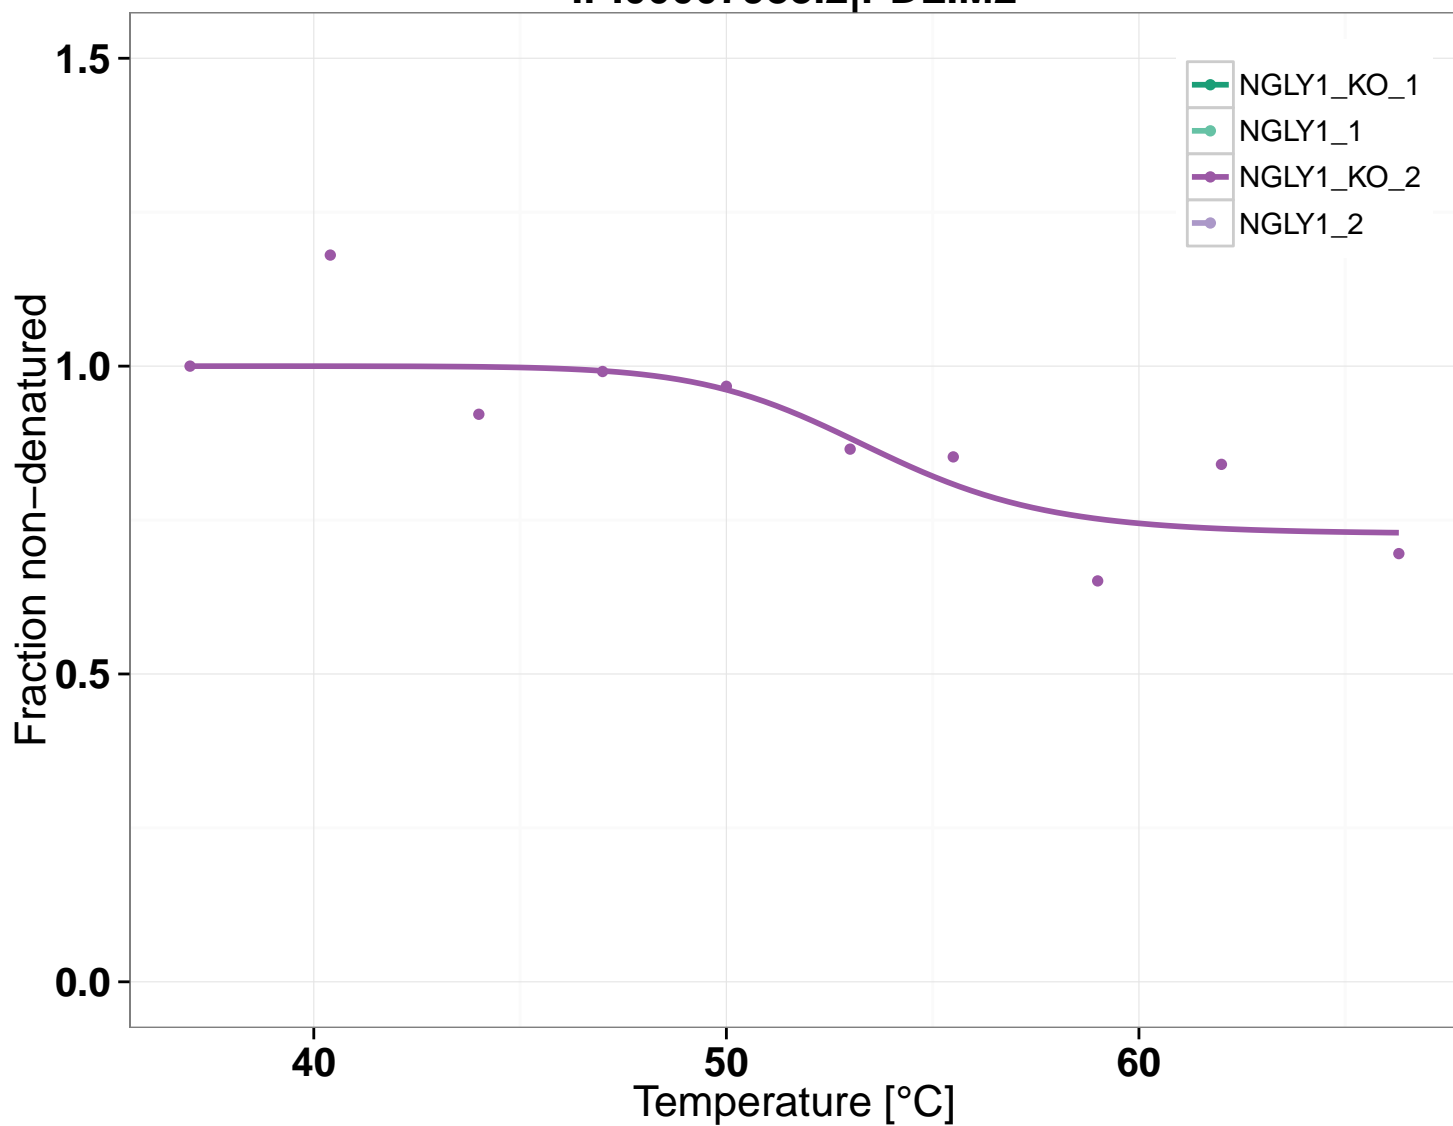

|            | meltPoint | slope  | plateau | R2  |
|------------|-----------|--------|---------|-----|
| NGLY1_KO_1 | —         | —      | —       | —   |
| NGLY1_1    | —         | —      | —       | —   |
| NGLY1_KO_2 | —         | -0.032 | 0.73    | 0.7 |
| NGLY1_2    | —         | —      | —       | —   |

Supplement: Supplementary file 7269 [file 1]

# IPI00015864.1|RNASEL

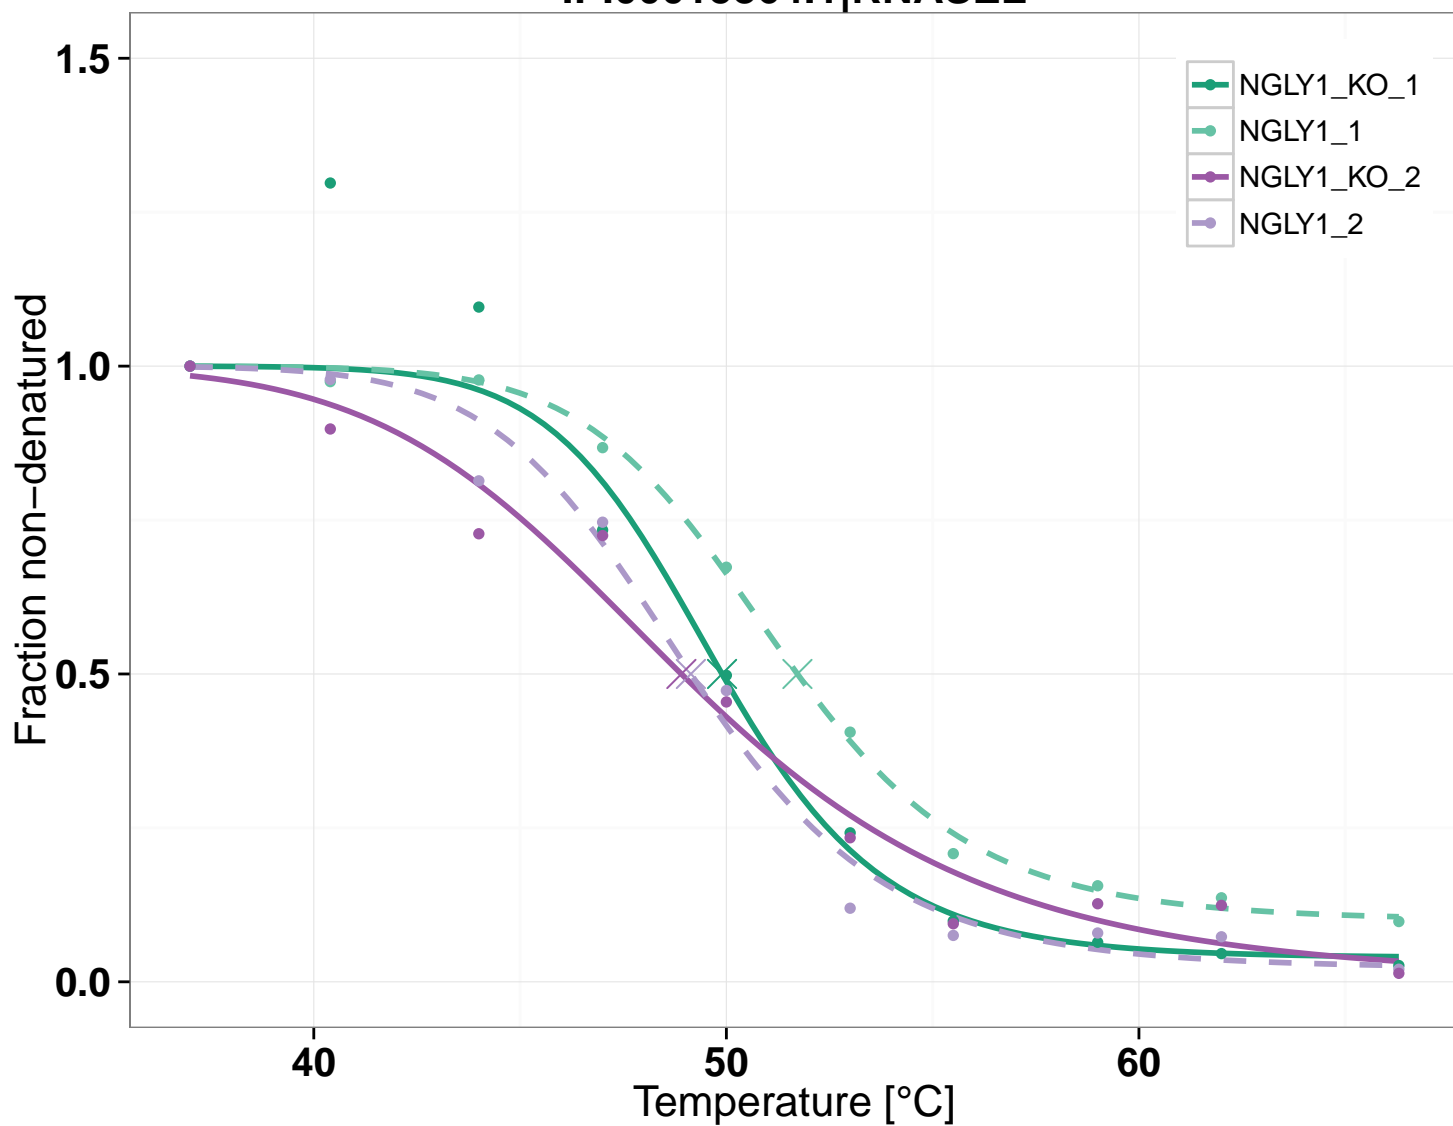

|            | meltPoint | slope  | plateau | R2   |
|------------|-----------|--------|---------|------|
| NGLY1_KO_1 | 49.89     | -0.12  | 0.04    | 0.95 |
| NGLY1_1    | 51.72     | -0.096 | 0.1     | 1    |
| NGLY1_KO_2 | 48.91     | -0.067 | 0       | 0.97 |
| NGLY1_2    | 49.14     | -0.1   | 0.02    | 0.98 |

Supplement: Supplementary file 7270 [file 1]

IPI00855705.1|PPHLN1

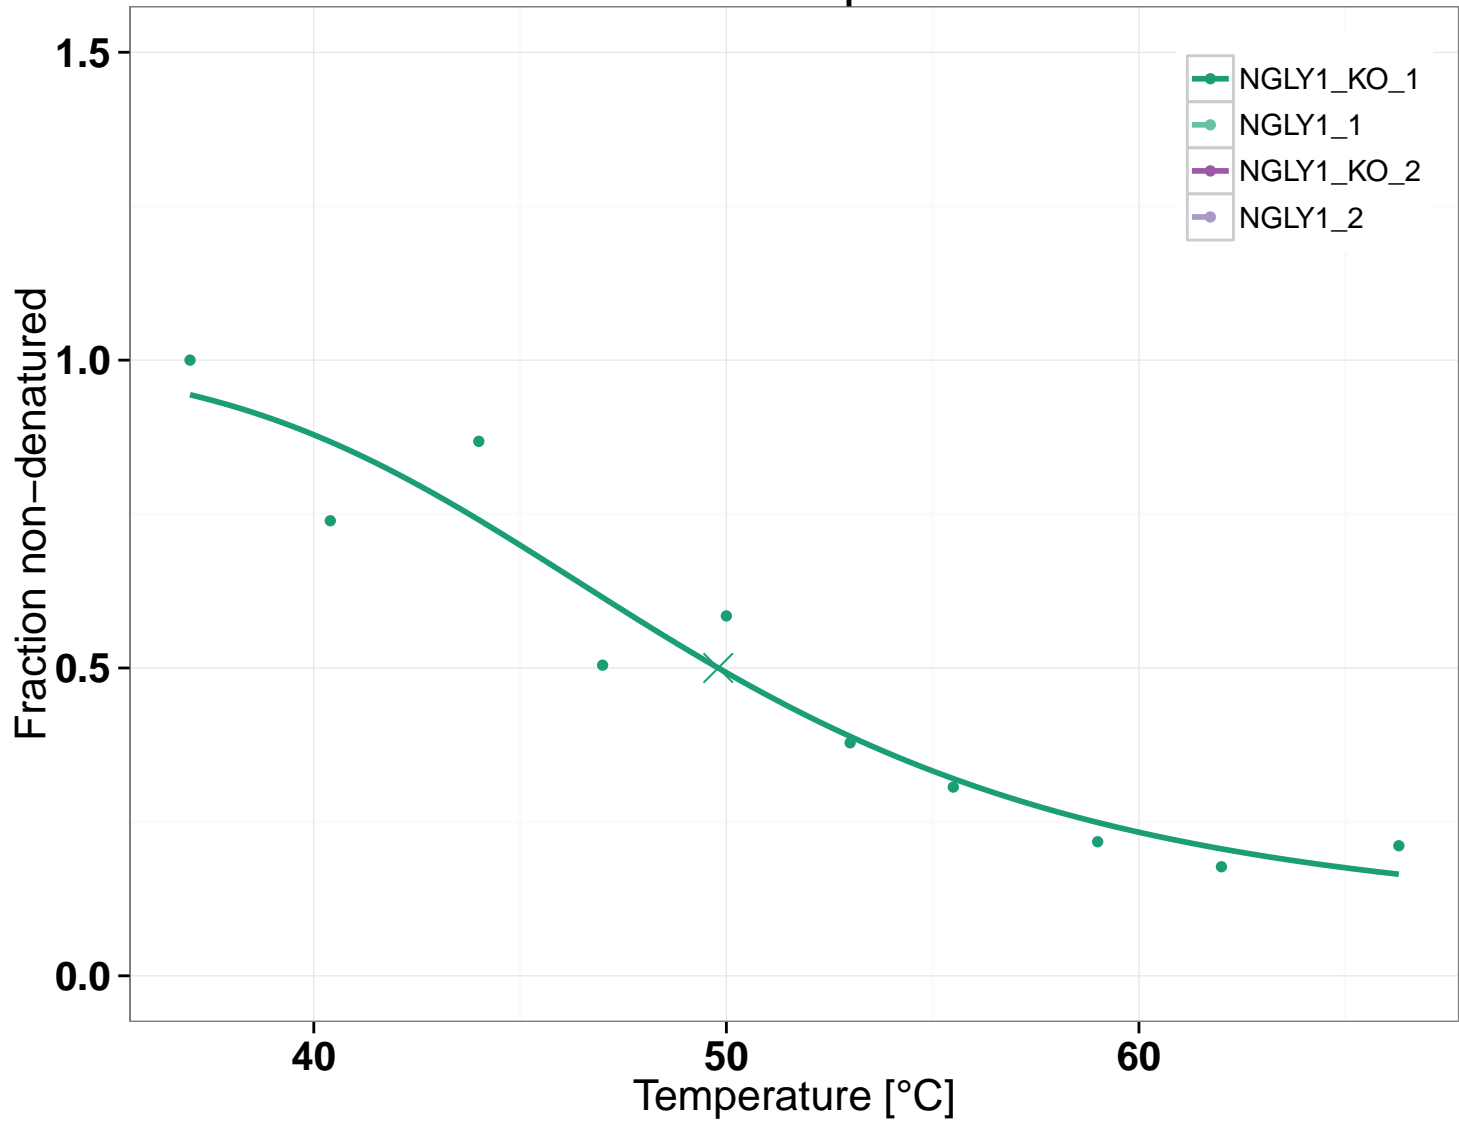

|            | meltPoint | slope  | plateau | R2   |
|------------|-----------|--------|---------|------|
| NGLY1_KO_1 | 49.8      | -0.043 | 0.08    | 0.92 |
| NGLY1_1    | -         | -      | -       | -    |
| NGLY1_KO_2 | -         | -      | -       | -    |
| NGLY1_2    | -         | -      | -       | -    |

Supplement: Supplementary file 7271 [file 1]

# IPI00009730.1|MIG12

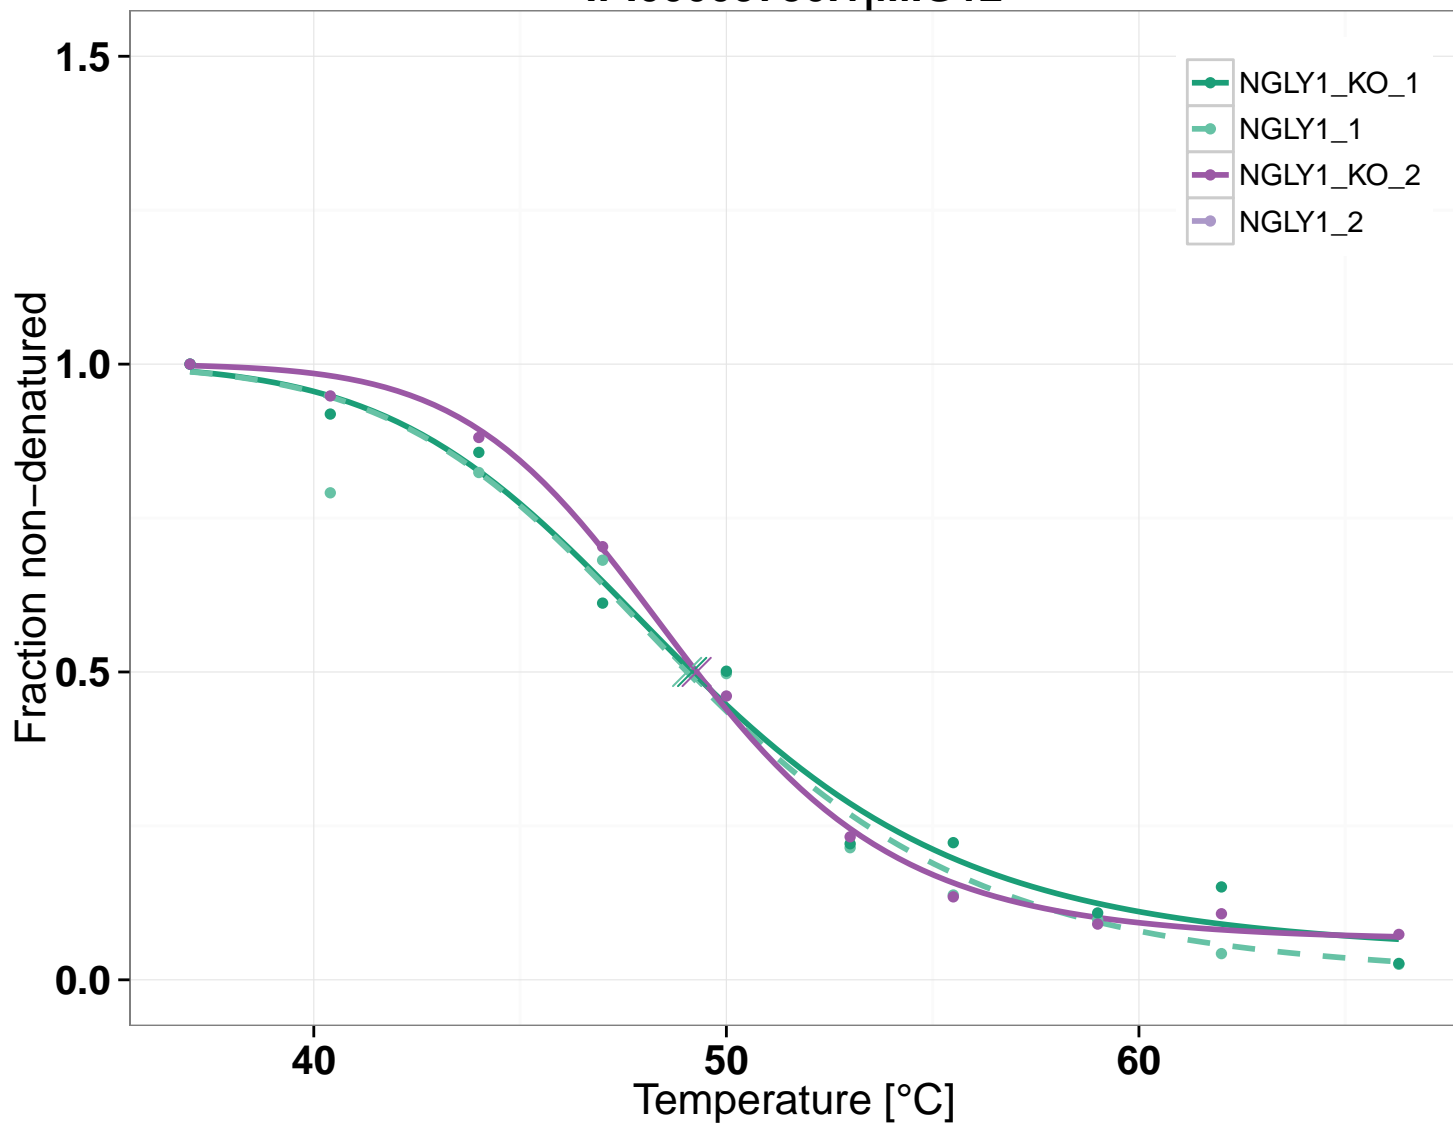

|            | meltPoint | slope  | plateau | R2   |
|------------|-----------|--------|---------|------|
| NGLY1_KO_1 | 49.17     | -0.068 | 0.04    | 0.99 |
| NGLY1_1    | 49.05     | -0.07  | 0       | 0.97 |
| NGLY1_KO_2 | 49.28     | -0.089 | 0.06    | 1    |
| NGLY1_2    | -         | -      | -       | -    |

Supplement: Supplementary file 7272 [file 1]

# IPI00009315.6|ACBD3

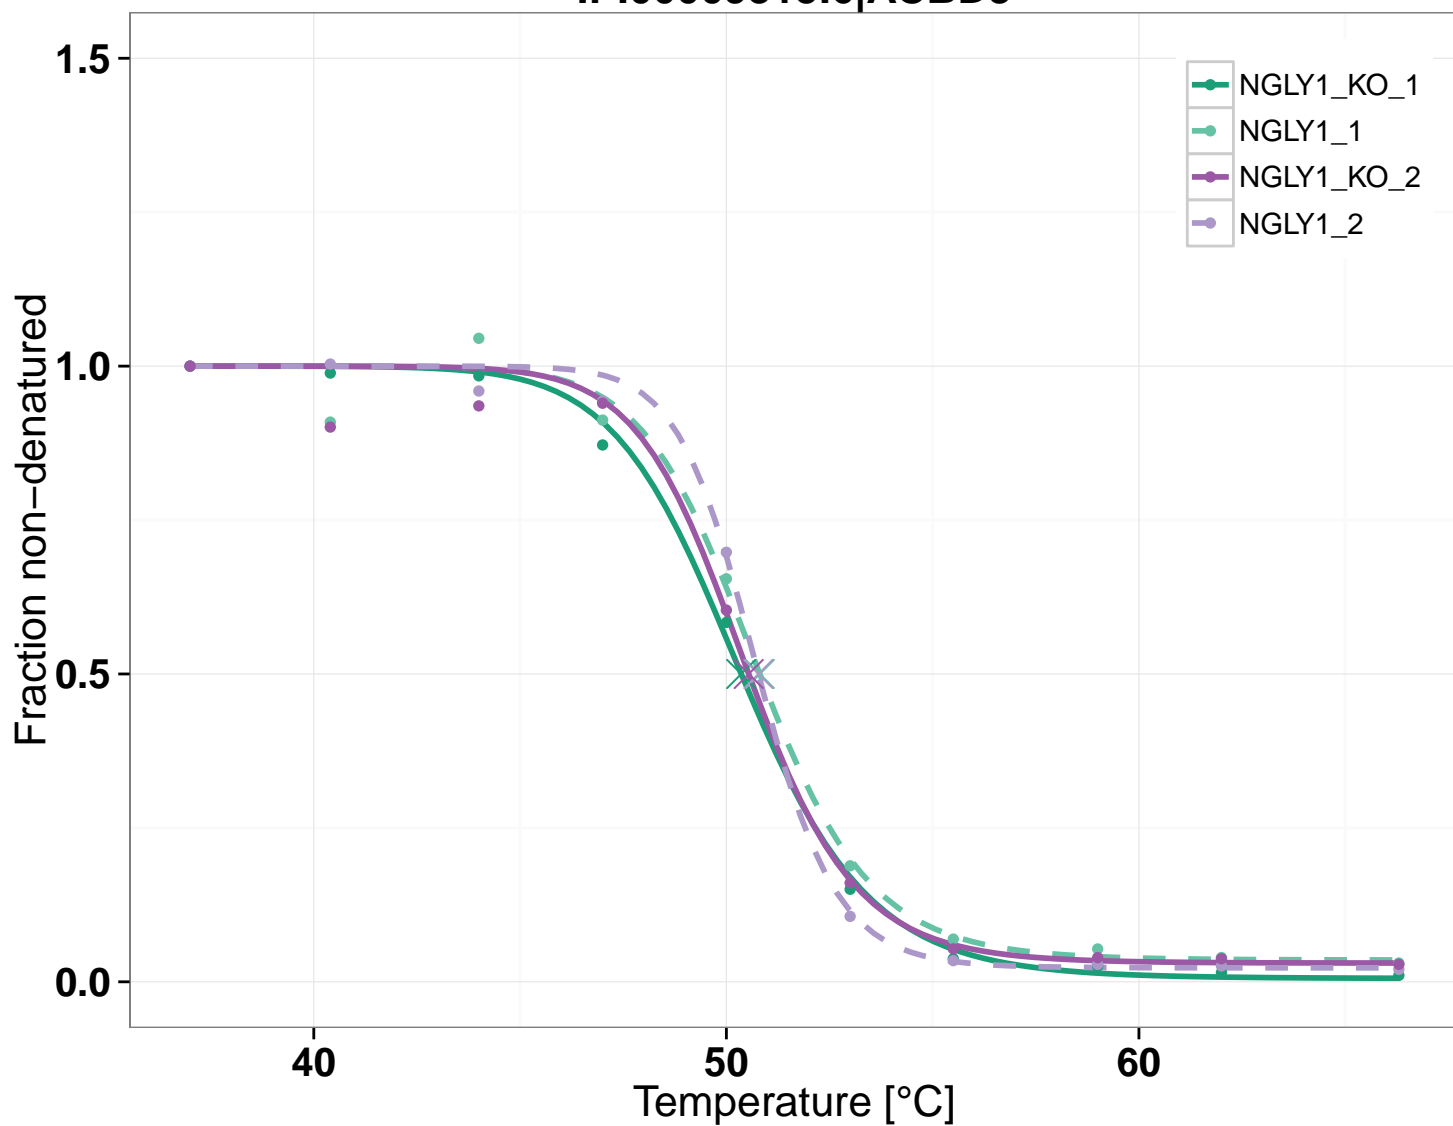

|            | meltPoint | slope | plateau | R2   |
|------------|-----------|-------|---------|------|
| NGLY1_KO_1 | 50.36     | -0.16 | 0.01    | 1    |
| NGLY1_1    | 50.81     | -0.17 | 0.04    | 0.99 |
| NGLY1_KO_2 | 50.54     | -0.18 | 0.03    | 0.99 |
| NGLY1_2    | 50.78     | -0.25 | 0.02    | 1    |

Supplement: Supplementary file 7273 [file 1]

IPI00063404.8|CPSF3L

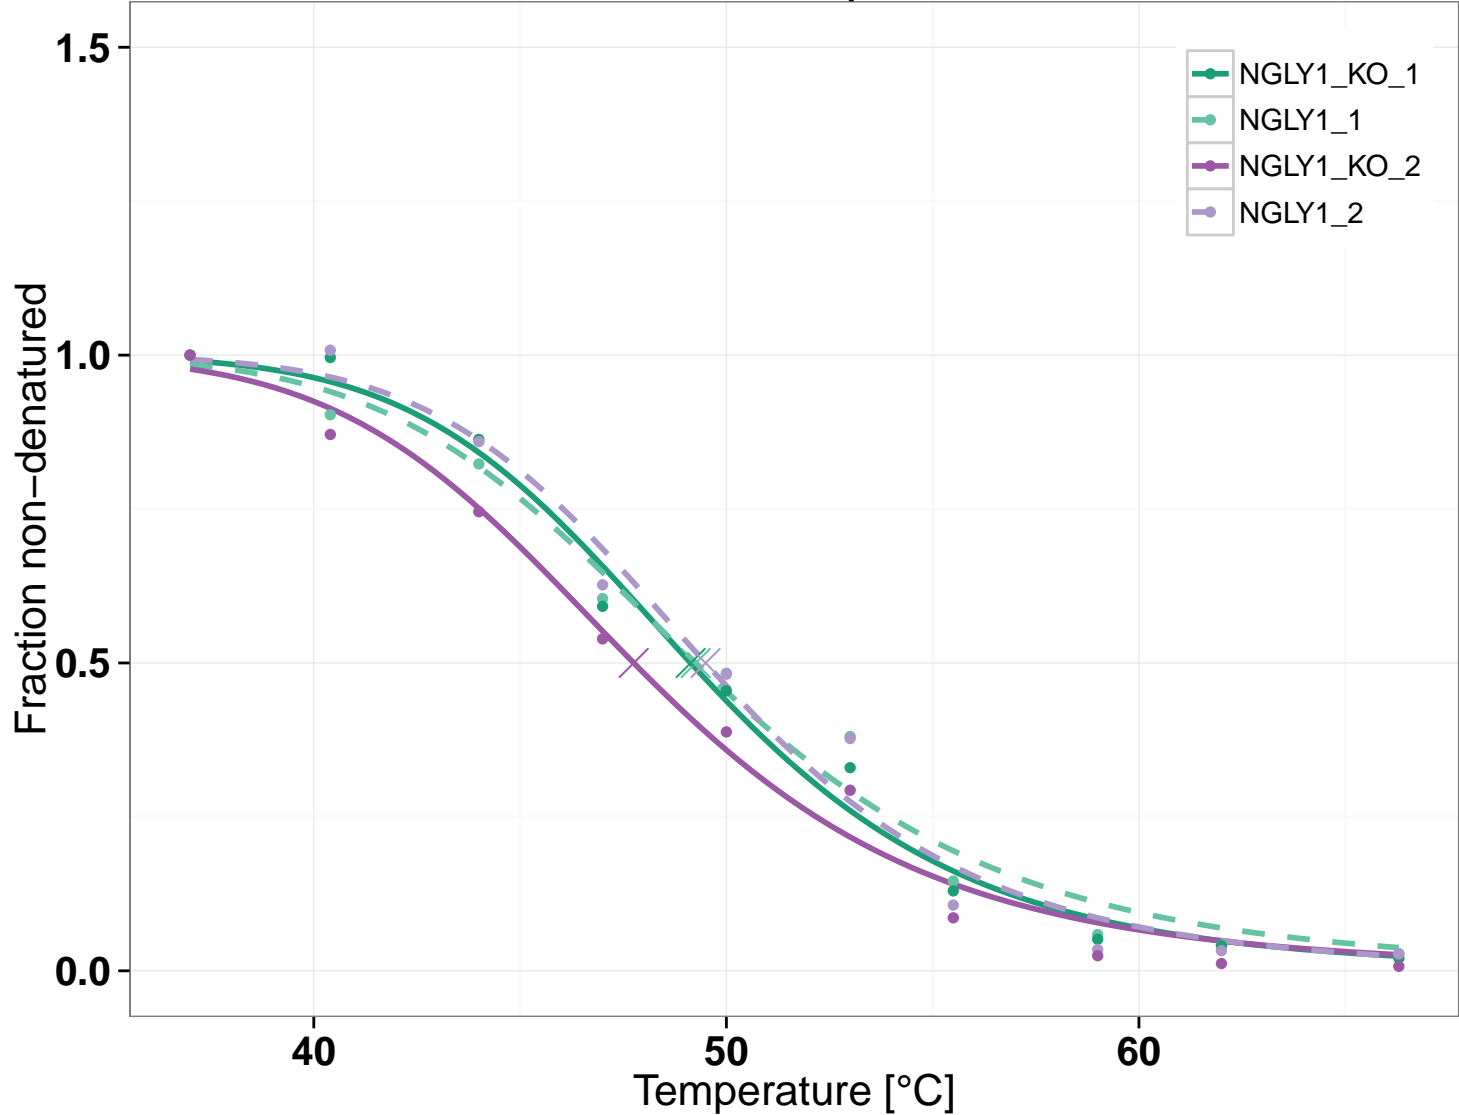

|            | meltPoint | slope  | plateau | R2   |
|------------|-----------|--------|---------|------|
| NGLY1_KO_1 | 49.14     | -0.074 | 0       | 0.99 |
| NGLY1_1    | 49.26     | -0.066 | 0       | 0.99 |
| NGLY1_KO_2 | 47.75     | -0.069 | 0       | 0.99 |
| NGLY1_2    | 49.5      | -0.075 | 0       | 0.98 |

Supplement: Supplementary file 7274 [file 1]

# IPI00168849.3|TRIP10

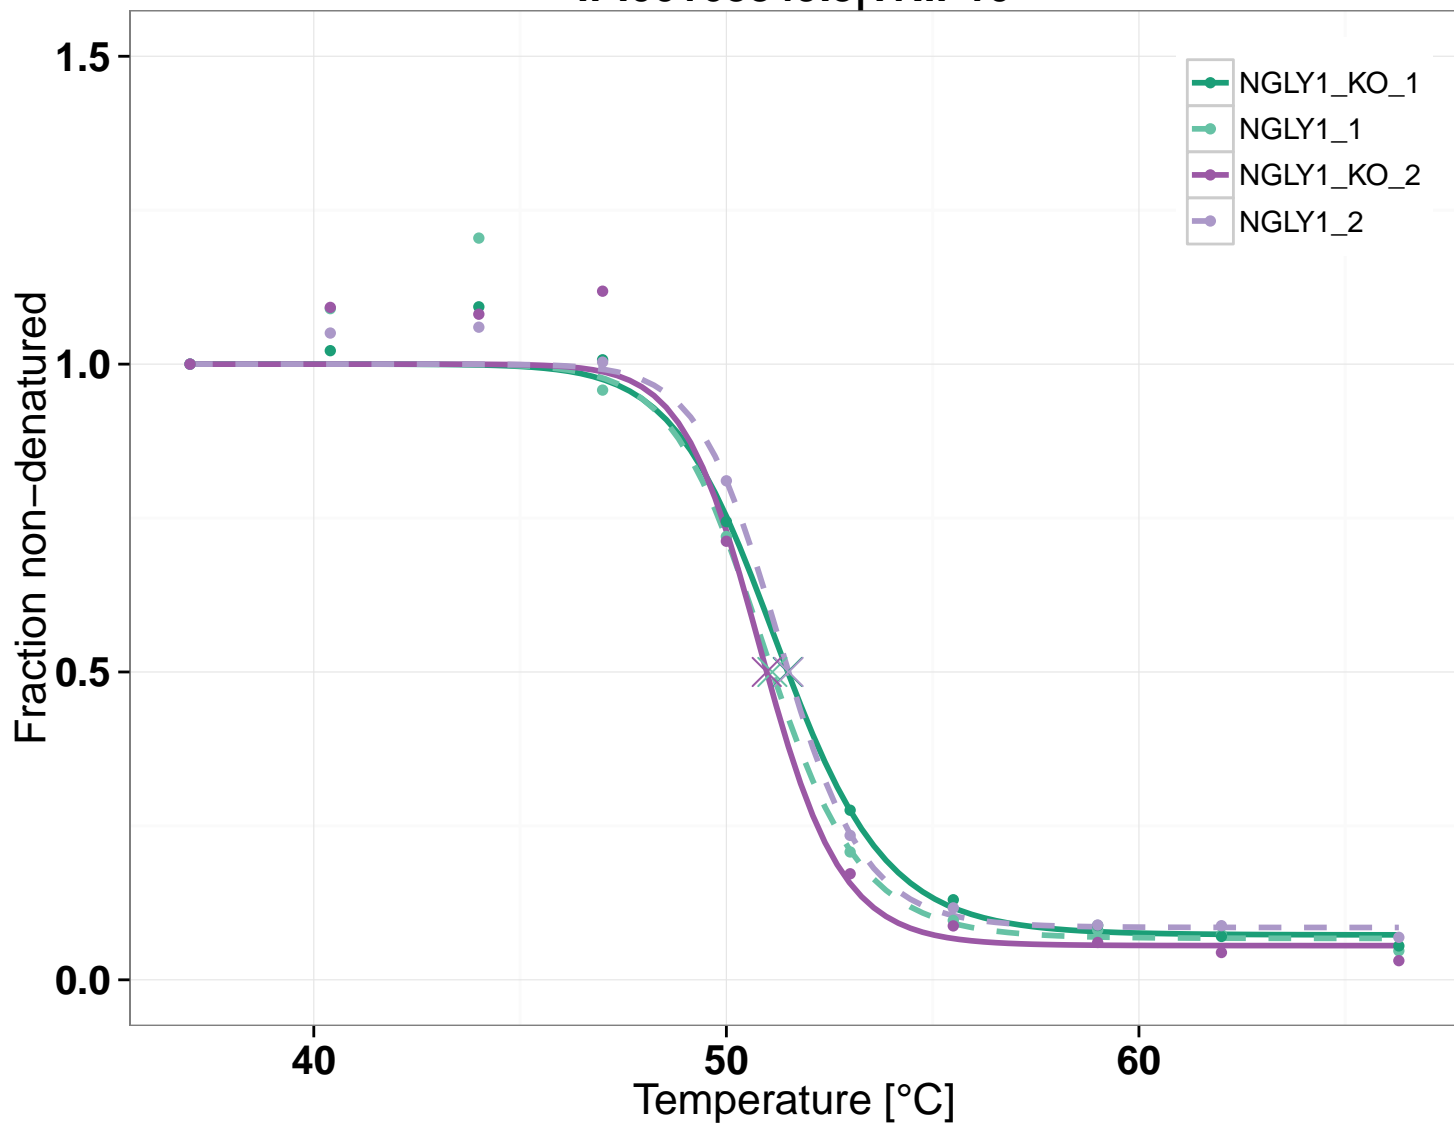

|            | meltPoint | slope | plateau | R2   |
|------------|-----------|-------|---------|------|
| NGLY1_KO_1 | 51.49     | -0.18 | 0.07    | 0.99 |
| NGLY1_1    | 51.11     | -0.2  | 0.07    | 0.98 |
| NGLY1_KO_2 | 50.98     | -0.24 | 0.06    | 0.98 |
| NGLY1_2    | 51.51     | -0.23 | 0.08    | 1    |

Supplement: Supplementary file 7275 [file 1]

IPI00910072.1|B4DEP8\_HUMAN

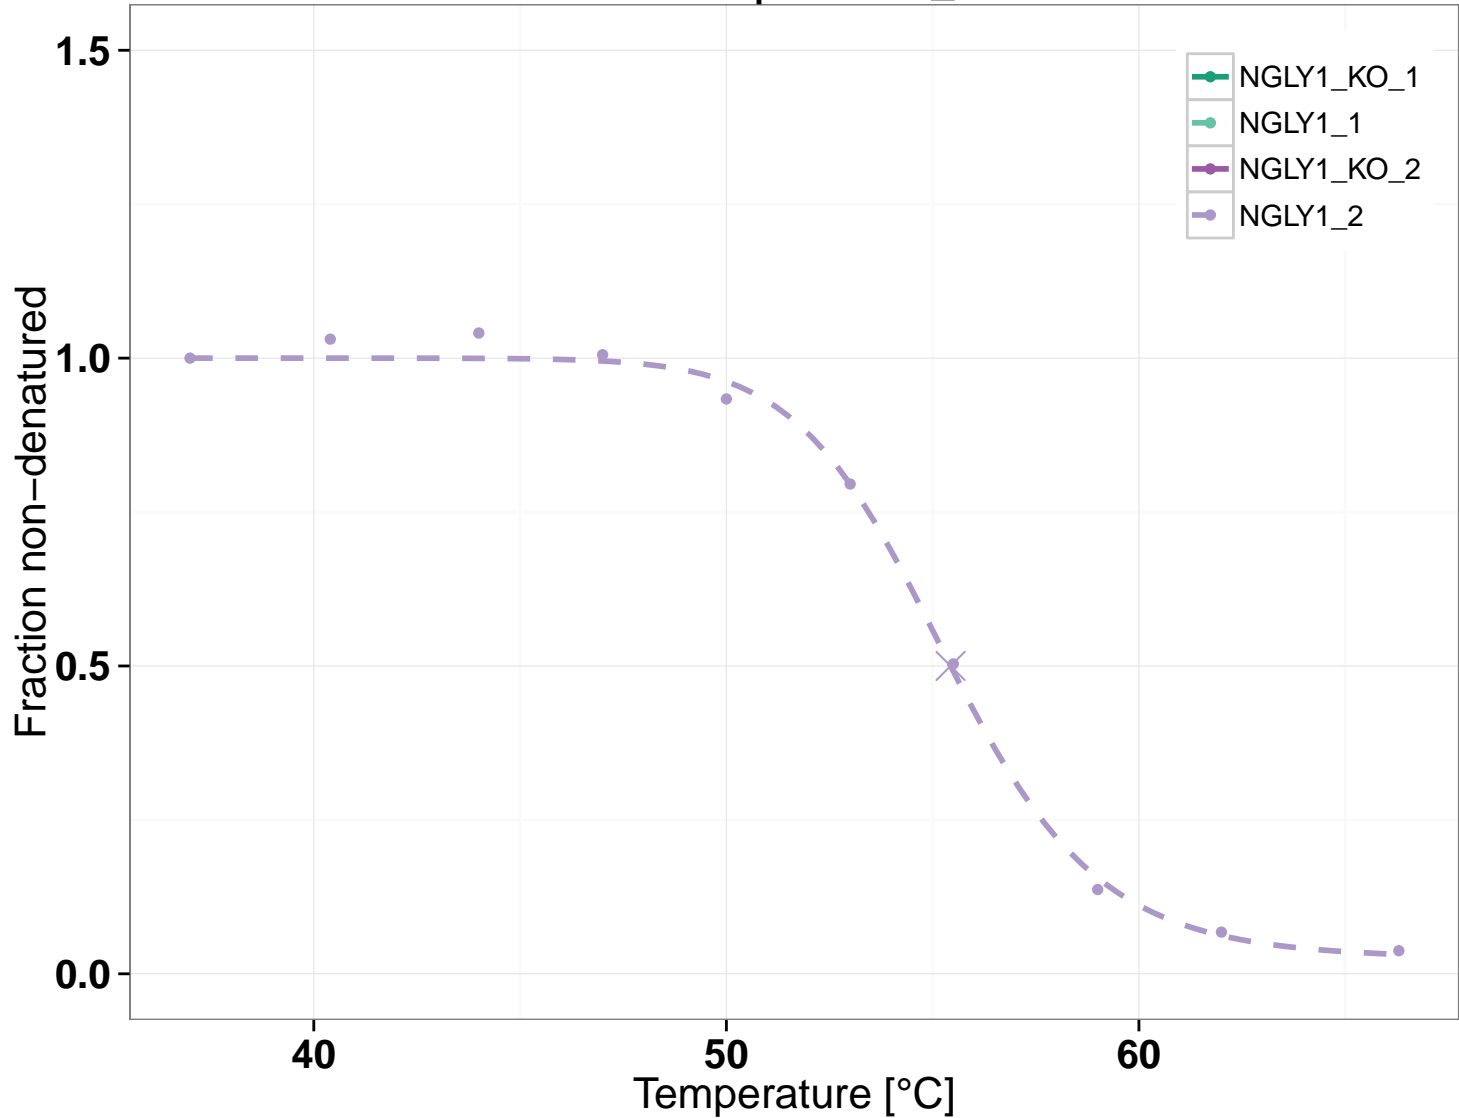

|            | meltPoint | slope | plateau | R2 |
|------------|-----------|-------|---------|----|
| NGLY1_KO_1 | -         | -     | -       | -  |
| NGLY1_1    | -         | -     | -       | -  |
| NGLY1_KO_2 | -         | -     | -       | -  |
| NGLY1_2    | 55.44     | -0.13 | 0.02    | 1  |

Supplement: Supplementary file 7276 [file 1]

IPI00166879.4|FAM69B

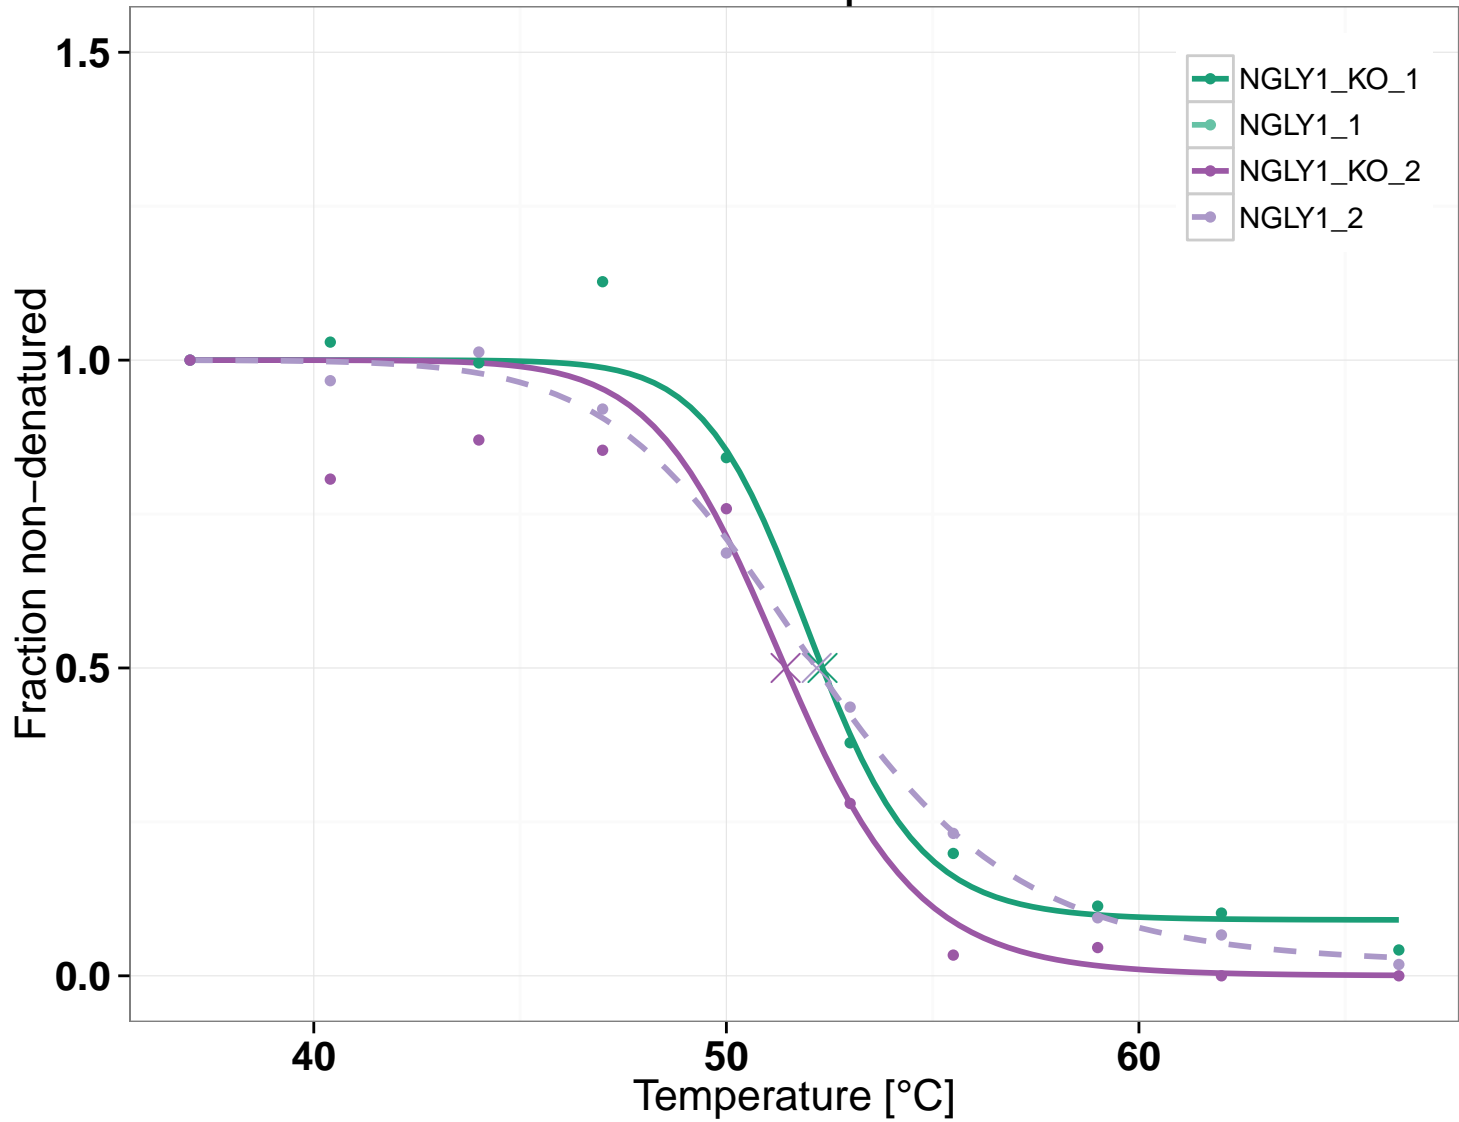

|            | meltPoint | slope  | plateau | R2   |
|------------|-----------|--------|---------|------|
| NGLY1_KO_1 | 52.33     | -0.17  | 0.09    | 0.99 |
| NGLY1_1    | -         | -      | -       | -    |
| NGLY1_KO_2 | 51.44     | -0.16  | 0       | 0.96 |
| NGLY1_2    | 52.19     | -0.099 | 0.02    | 1    |

Supplement: Supplementary file 7277 [file 1]

IPI00102182.1|ZFYVE21

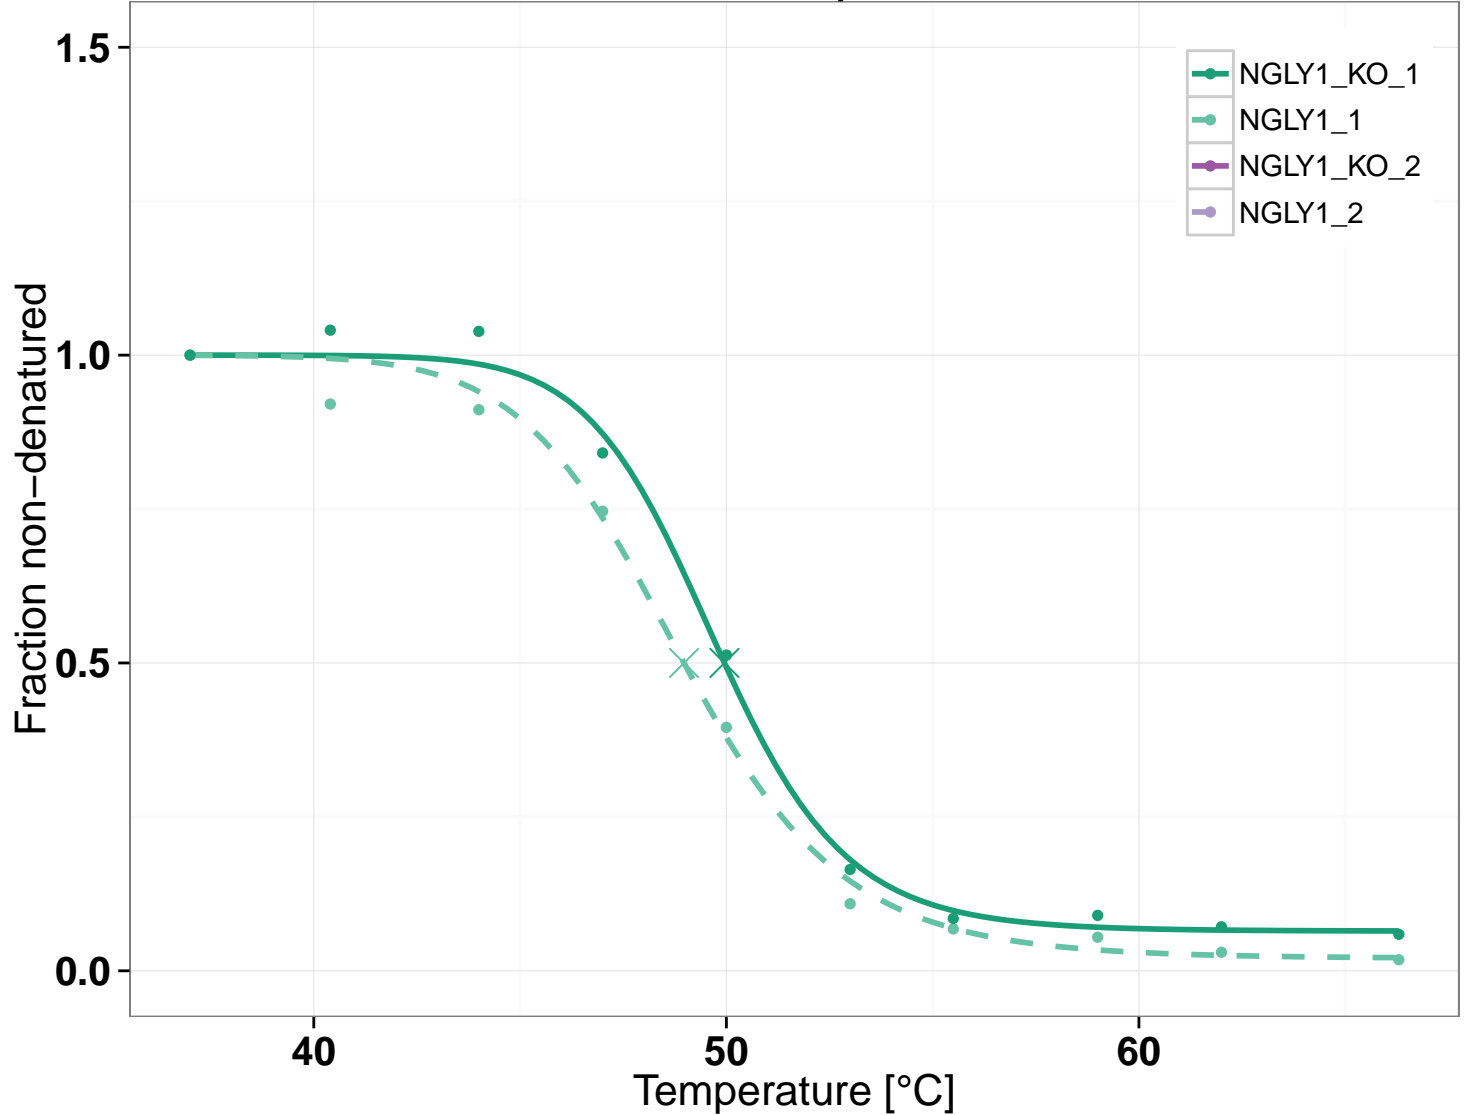

|            | meltPoint | slope | plateau | R2   |
|------------|-----------|-------|---------|------|
| NGLY1_KO_1 | 49.95     | -0.15 | 0.06    | 1    |
| NGLY1_1    | 48.97     | -0.12 | 0.02    | 0.99 |
| NGLY1_KO_2 | -         | -     | -       | -    |
| NGLY1_2    | -         | -     | -       | -    |

Supplement: Supplementary file 7278 [file 1]

# IPI00291702.2|LIMK1

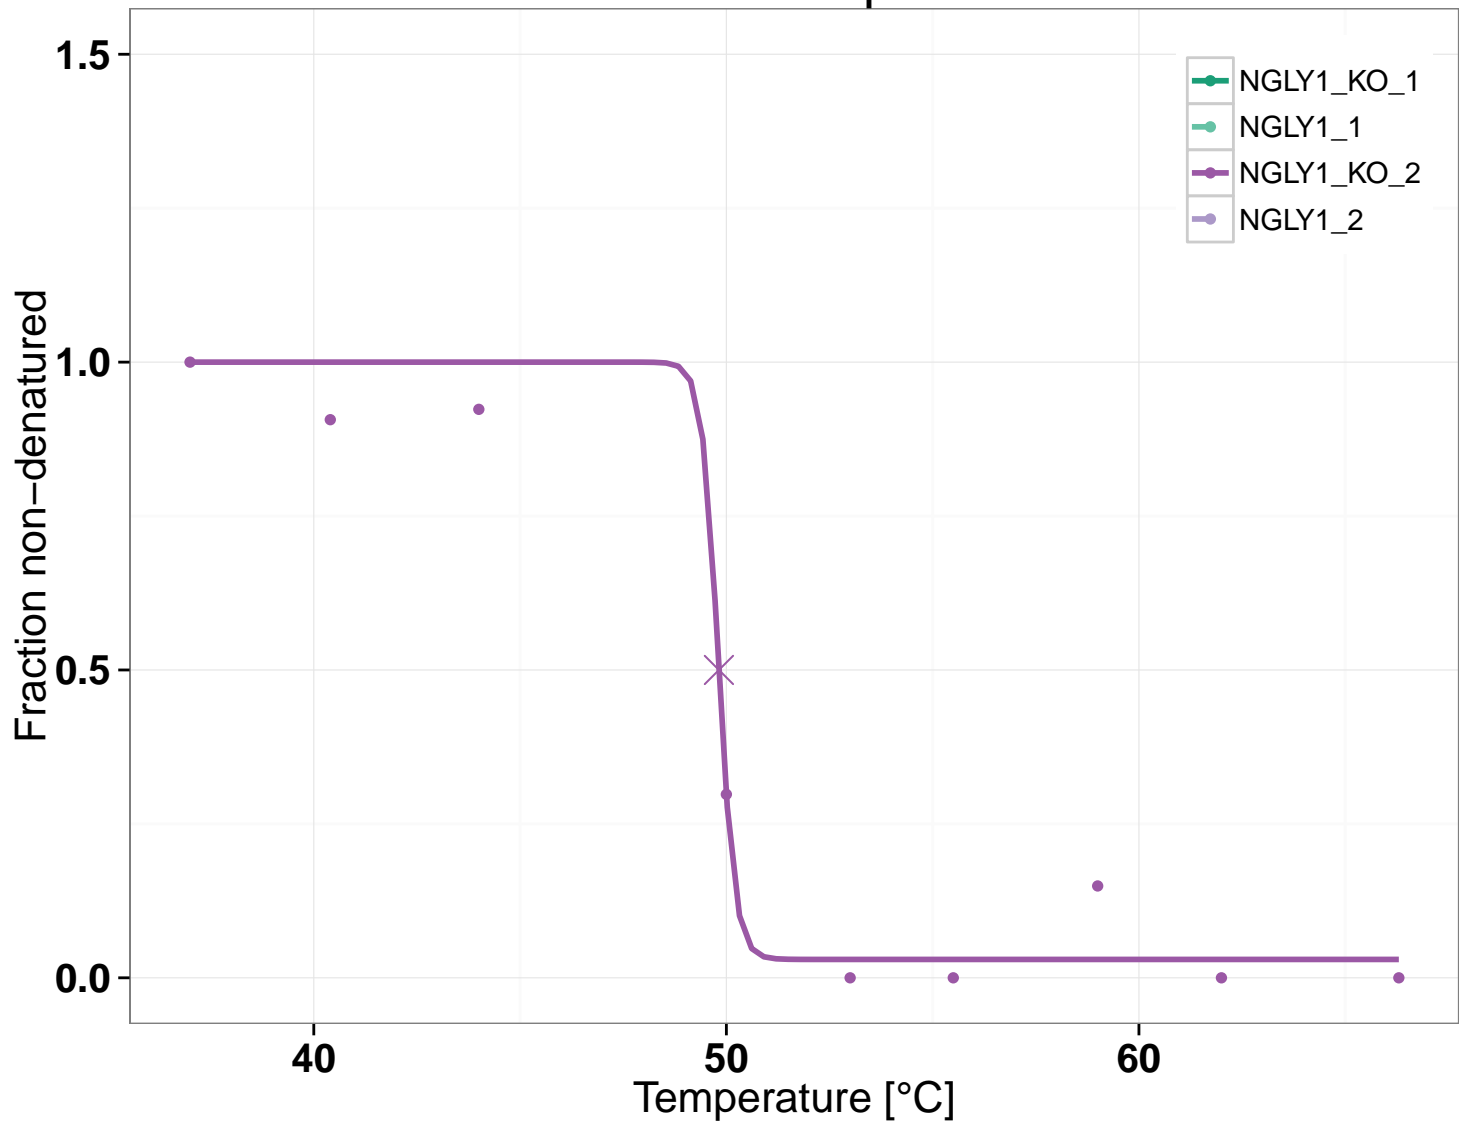

|            | meltPoint | slope | plateau | R2   |
|------------|-----------|-------|---------|------|
| NGLY1_KO_1 | -         | -     | -       | -    |
| NGLY1_1    | -         | -     | -       | -    |
| NGLY1_KO_2 | 49.82     | -1.2  | 0.03    | 0.87 |
| NGLY1_2    | -         | -     | -       | -    |

Supplement: Supplementary file 7279 [file 1]

IPI00022264.1|ZBTB43

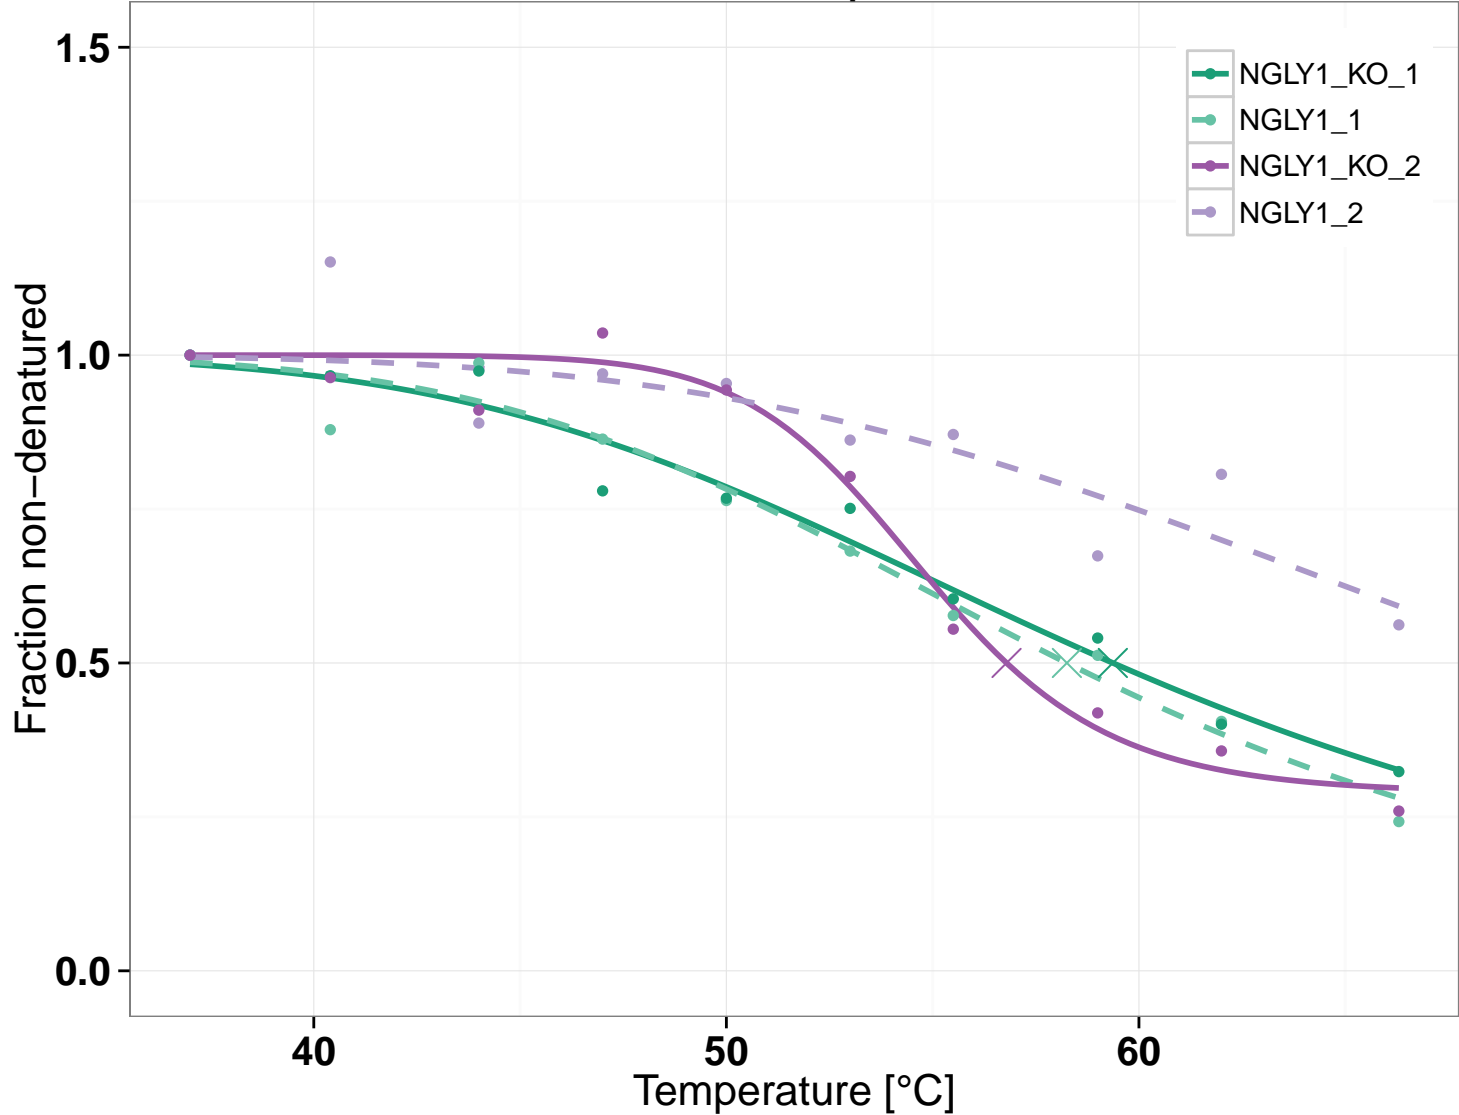

|            | meltPoint | slope  | plateau | R2   |
|------------|-----------|--------|---------|------|
| NGLY1_KO_1 | 59.37     | -0.032 | 0       | 0.97 |
| NGLY1_1    | 58.25     | -0.035 | 0       | 0.97 |
| NGLY1_KO_2 | 56.79     | -0.081 | 0.29    | 0.98 |
| NGLY1_2    | -         | -0.025 | 0       | 0.77 |

Supplement: Supplementary file 7280 [file 1]

IPI00783568.1|LRCH1

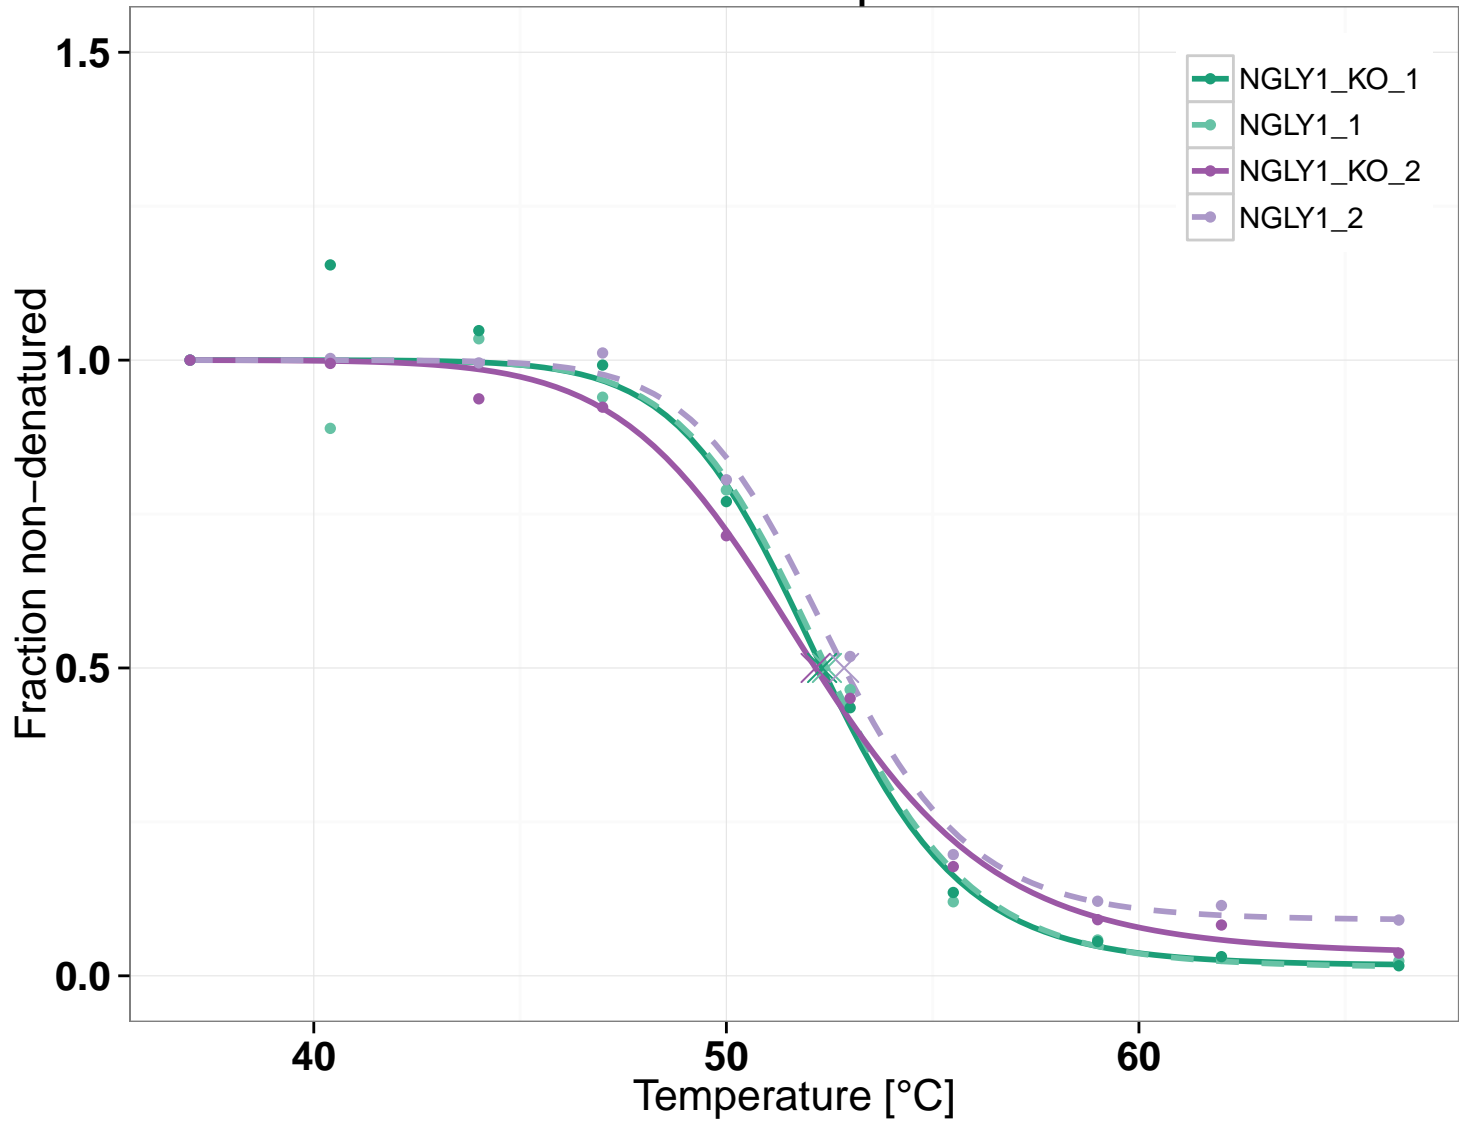

|            | meltPoint | slope | plateau | R2   |
|------------|-----------|-------|---------|------|
| NGLY1_KO_1 | 52.32     | -0.14 | 0.02    | 0.99 |
| NGLY1_1    | 52.44     | -0.14 | 0.01    | 0.99 |
| NGLY1_KO_2 | 52.16     | -0.11 | 0.03    | 1    |
| NGLY1_2    | 52.85     | -0.13 | 0.09    | 1    |

Supplement: Supplementary file 7281 [file 1]

# IPI00025244.1|ZNF259

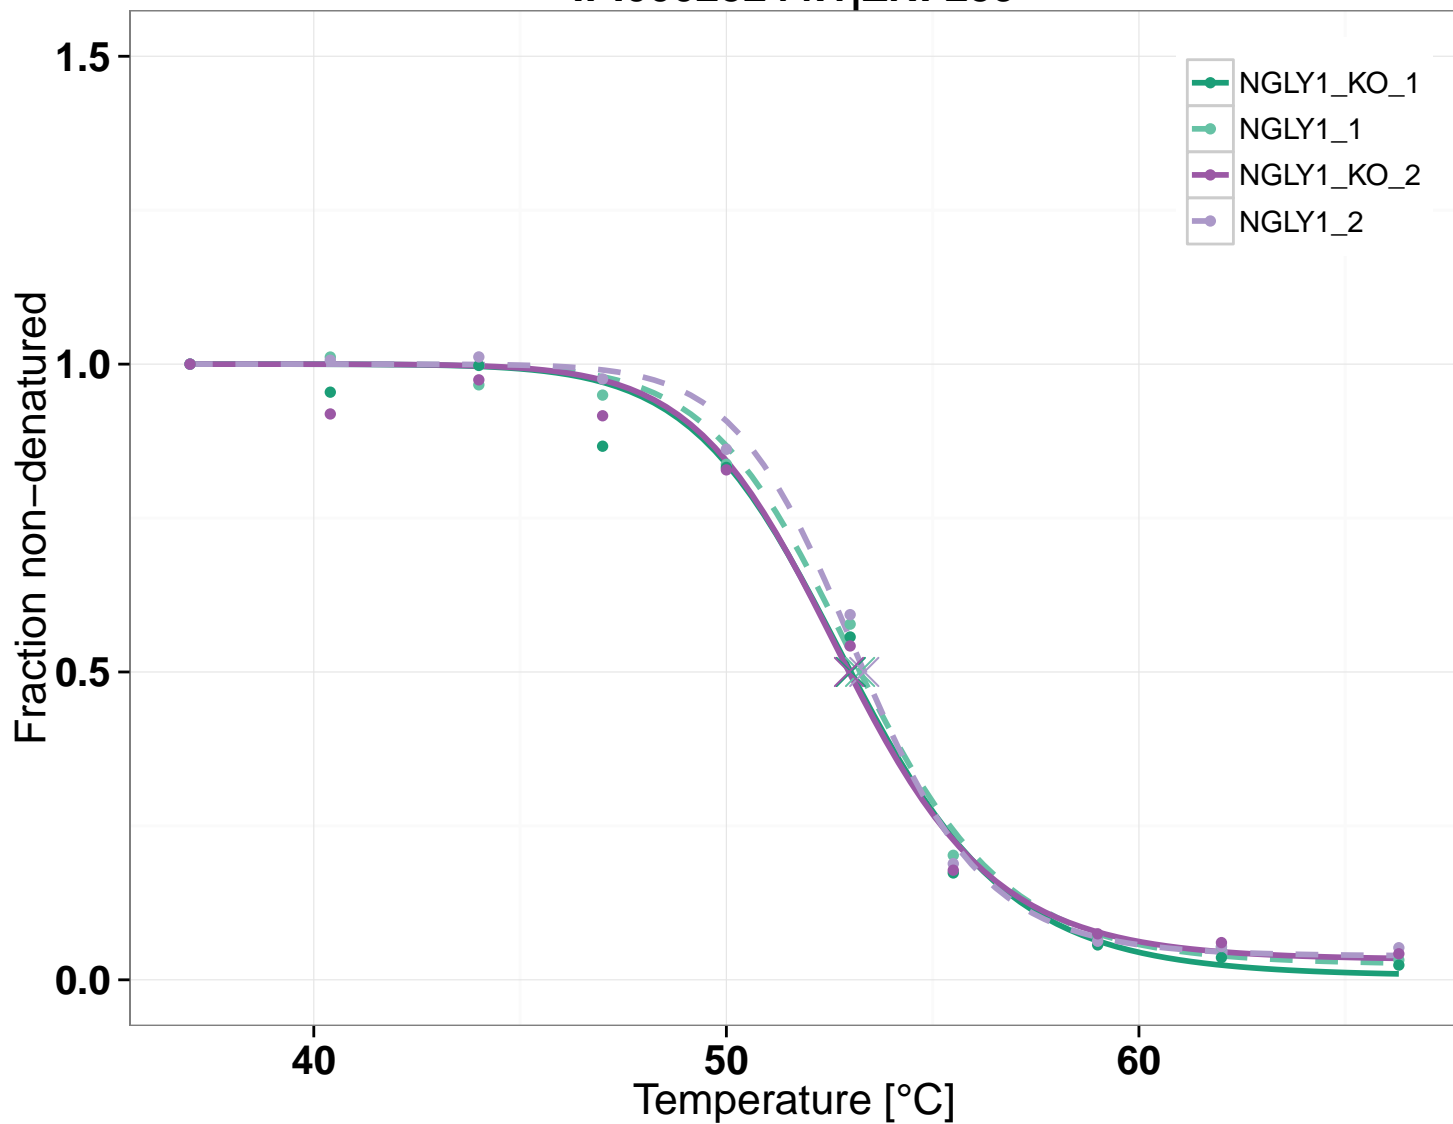

|            | meltPoint | slope | plateau | R2   |
|------------|-----------|-------|---------|------|
| NGLY1_KO_1 | 53.02     | -0.13 | 0.01    | 0.99 |
| NGLY1_1    | 53.24     | -0.14 | 0.02    | 1    |
| NGLY1_KO_2 | 52.97     | -0.13 | 0.03    | 0.99 |
| NGLY1_2    | 53.34     | -0.16 | 0.04    | 1    |

Supplement: Supplementary file 7282 [file 1]

IPI00642238.4|HP1BP3

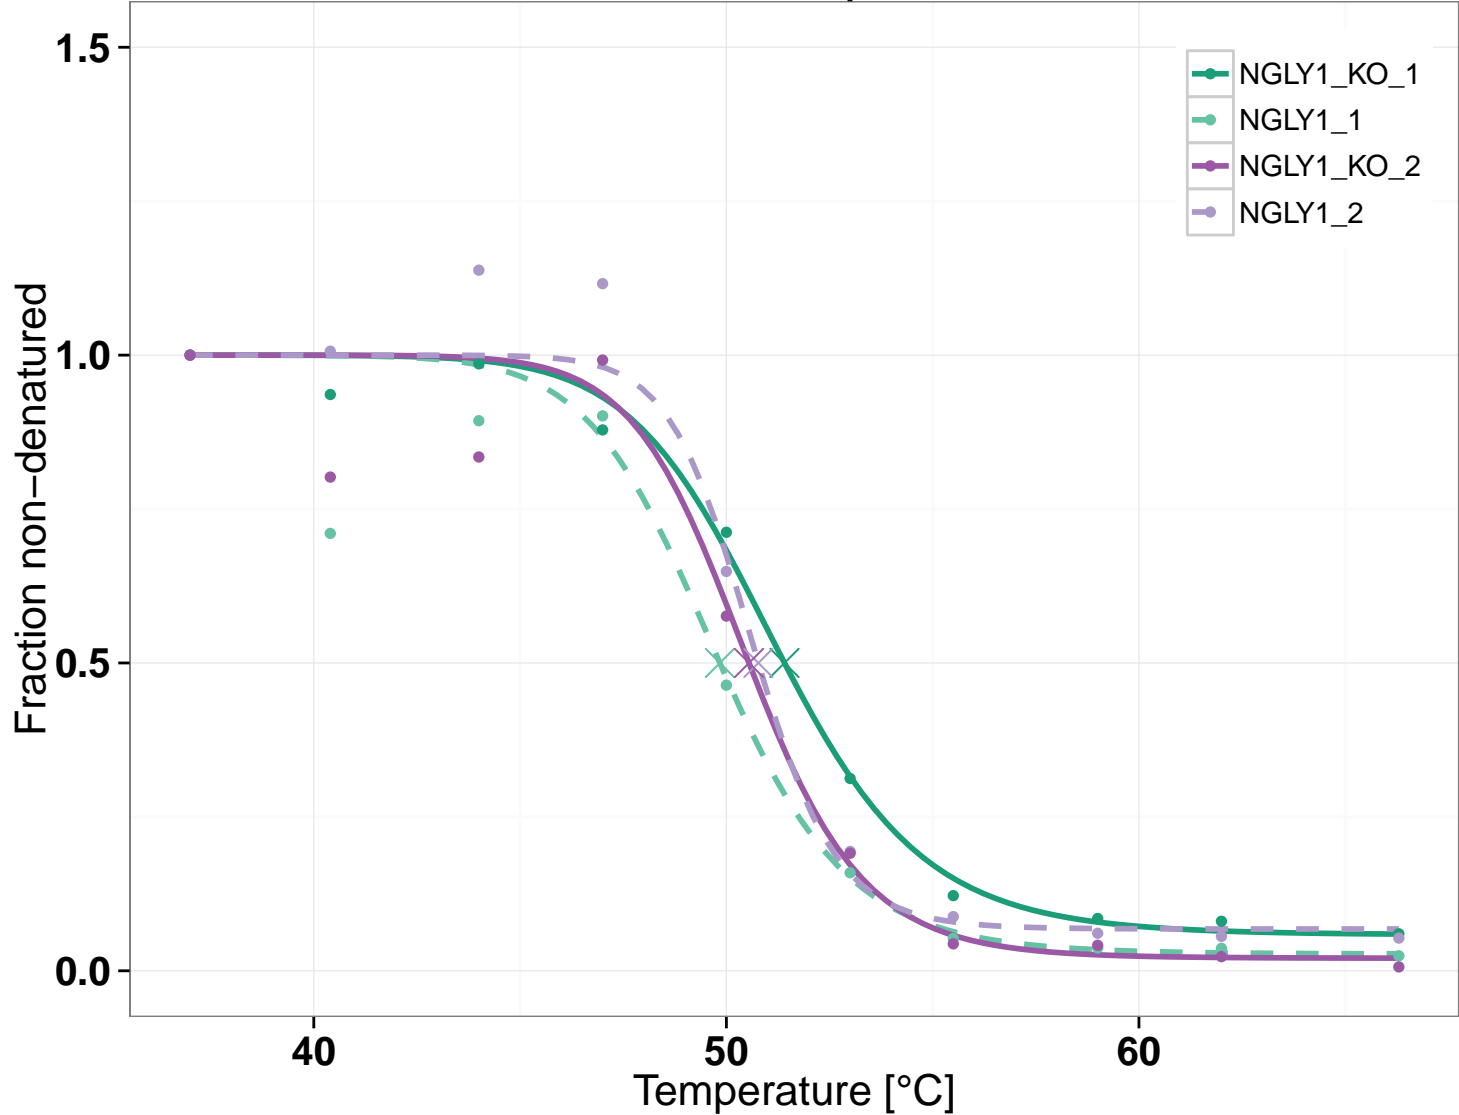

|            | meltPoint | slope | plateau | R2   |
|------------|-----------|-------|---------|------|
| NGLY1_KO_1 | 51.41     | -0.13 | 0.06    | 0.99 |
| NGLY1_1    | 49.84     | -0.15 | 0.03    | 0.94 |
| NGLY1_KO_2 | 50.55     | -0.17 | 0.02    | 0.96 |
| NGLY1_2    | 50.78     | -0.23 | 0.07    | 0.98 |

Supplement: Supplementary file 7283 [file 1]

IPI00465045.2|DIP2B

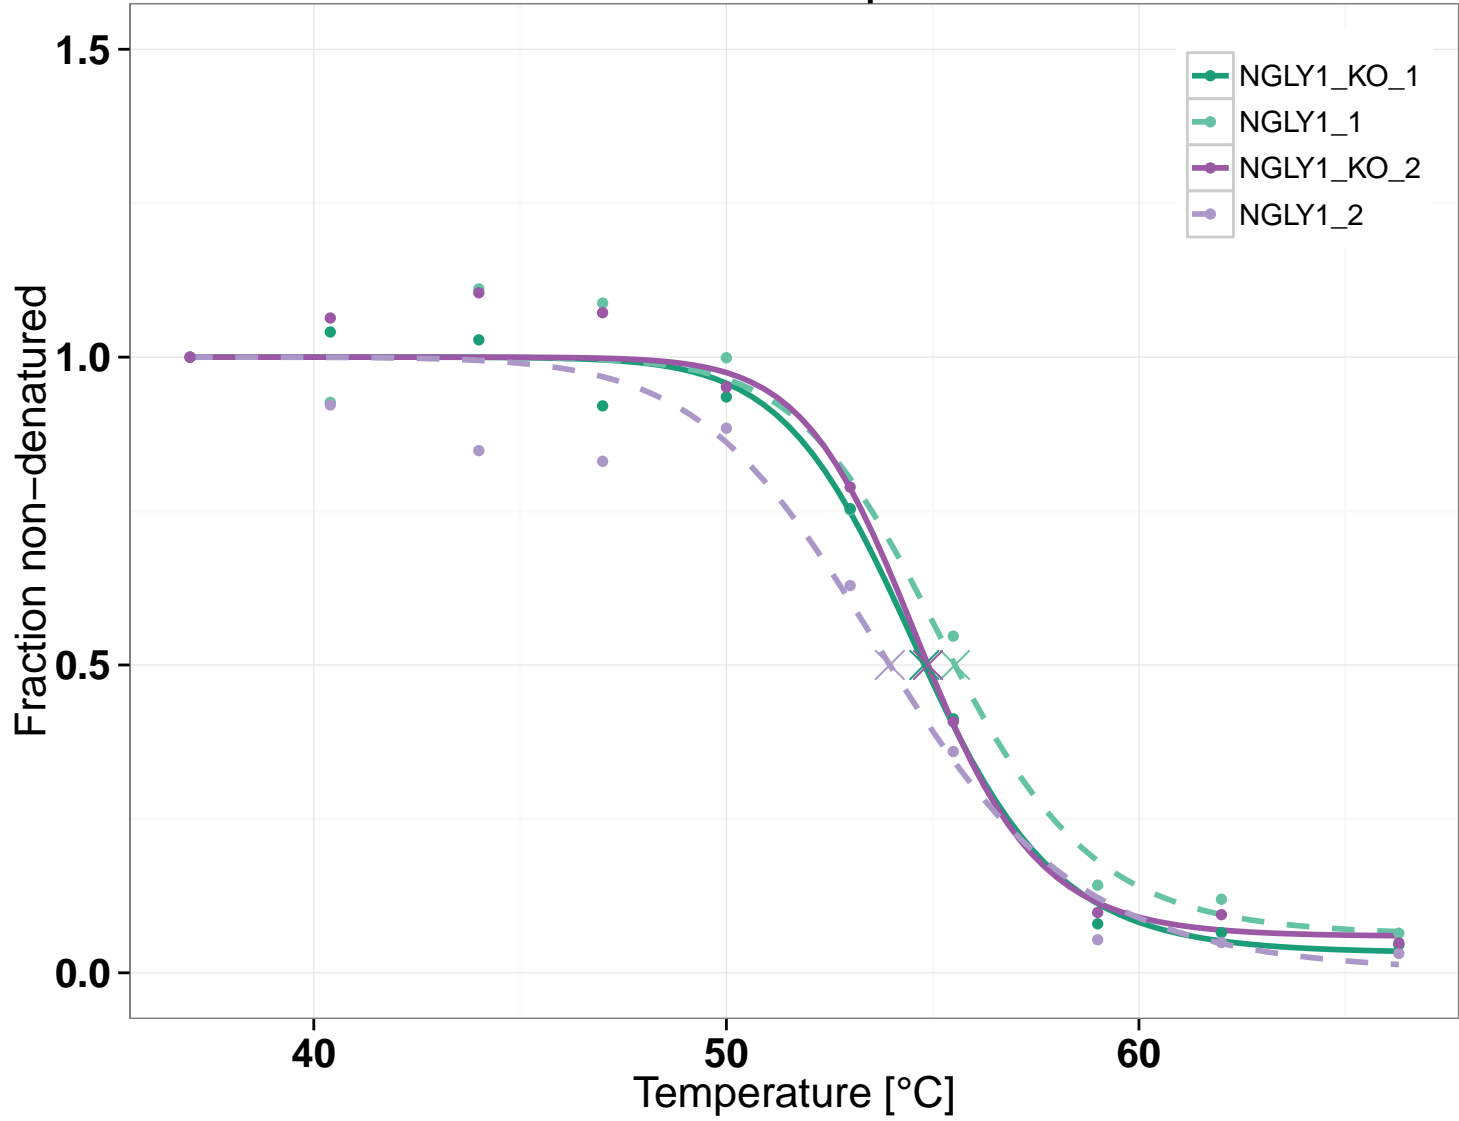

|            | meltPoint | slope | plateau | R2   |
|------------|-----------|-------|---------|------|
| NGLY1_KO_1 | 54.8      | -0.15 | 0.03    | 0.99 |
| NGLY1_1    | 55.54     | -0.13 | 0.06    | 0.98 |
| NGLY1_KO_2 | 54.89     | -0.16 | 0.06    | 0.99 |
| NGLY1_2    | 53.96     | -0.11 | 0       | 0.96 |

Supplement: Supplementary file 7284 [file 1]

IPI00783761.2|ELOVL7

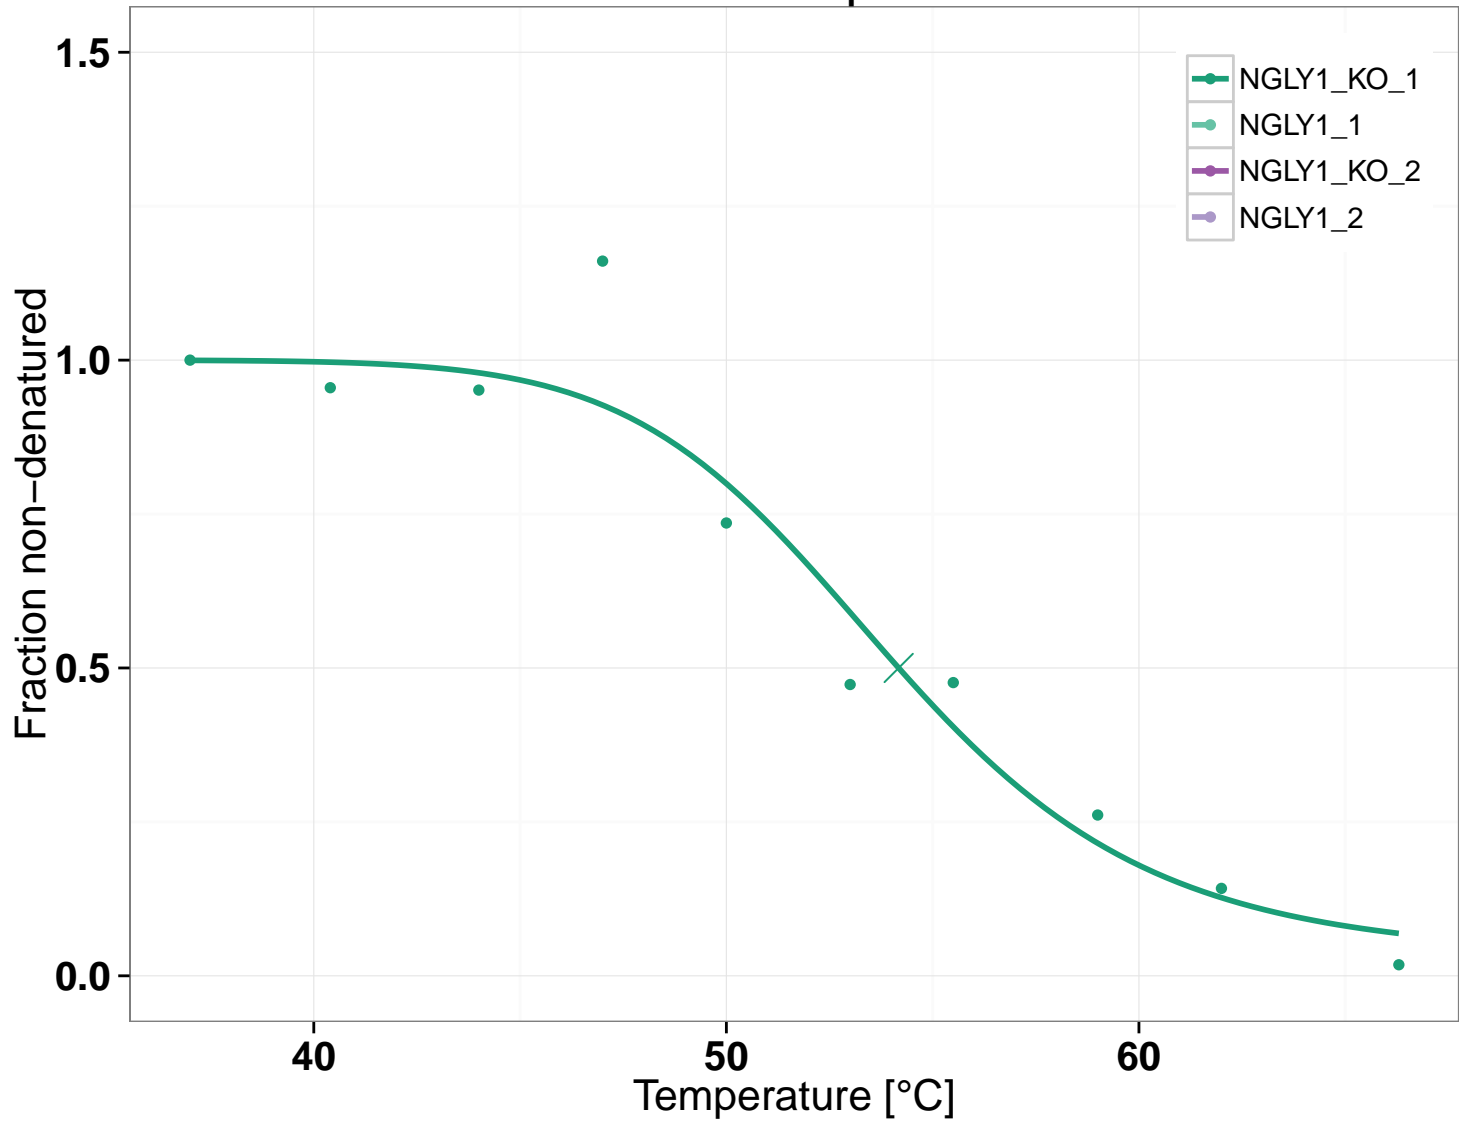

|            | meltPoint | slope  | plateau | R2   |
|------------|-----------|--------|---------|------|
| NGLY1_KO_1 | 54.18     | -0.077 | 0.03    | 0.94 |
| NGLY1_1    | -         | -      | -       | -    |
| NGLY1_KO_2 | -         | -      | -       | -    |
| NGLY1_2    | -         | -      | -       | -    |

Supplement: Supplementary file 7285 [file 1]

# IPI00219538.3|POLB

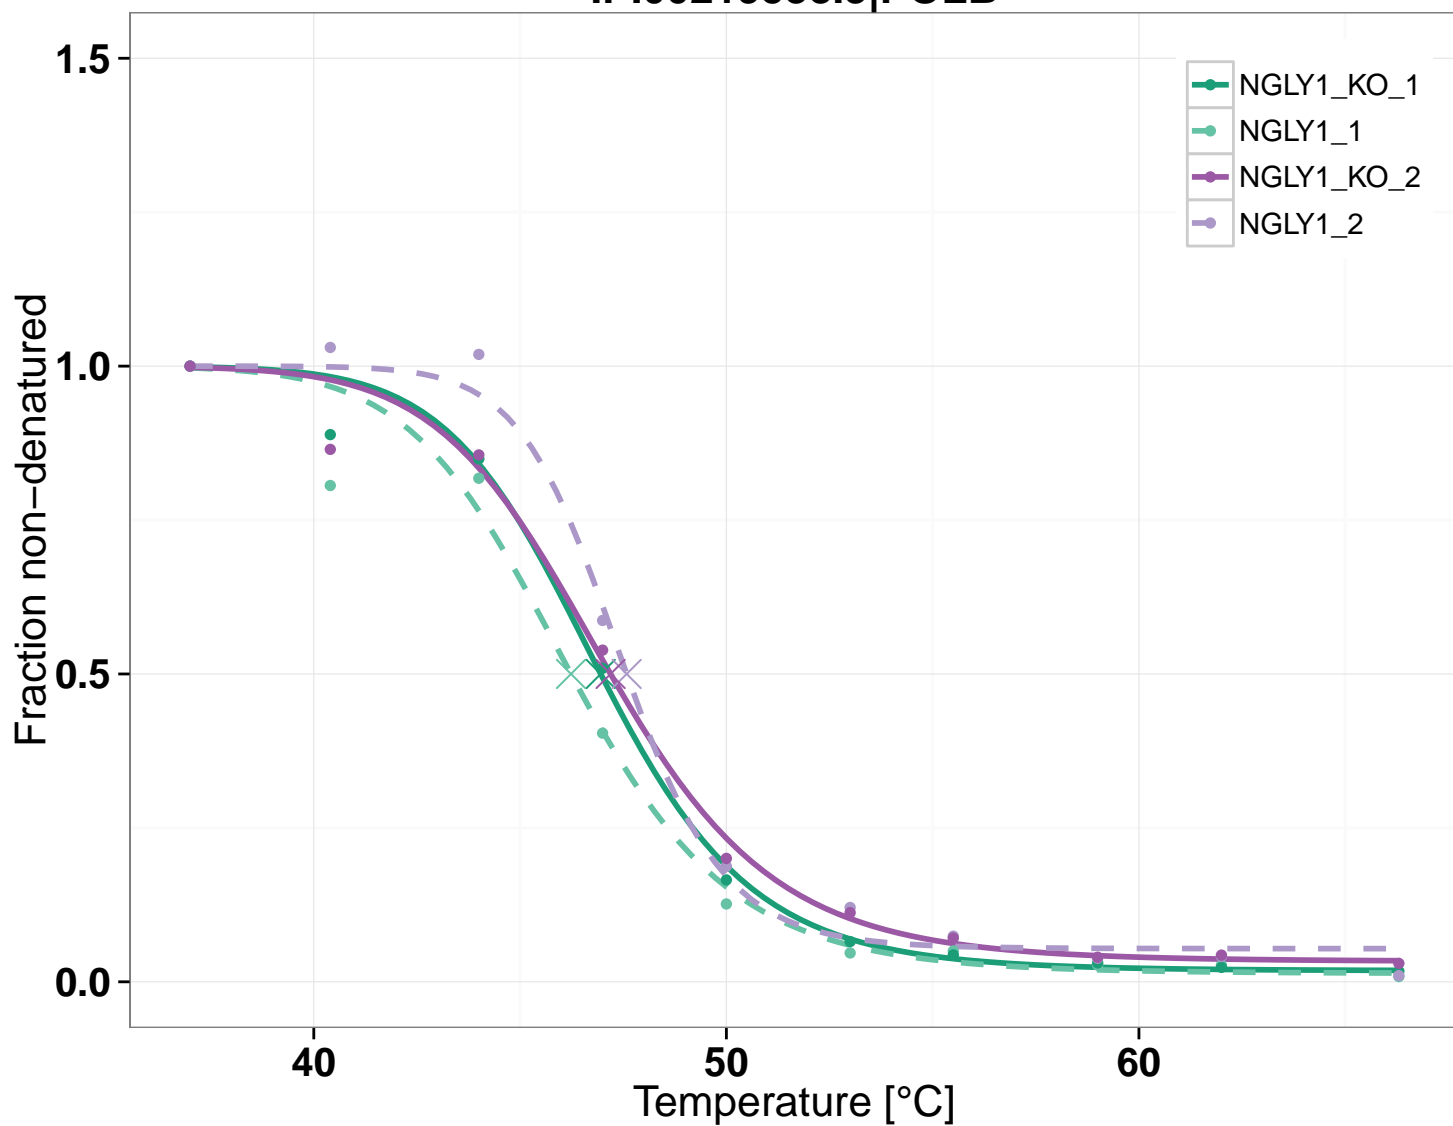

|            | meltPoint | slope | plateau | R2   |
|------------|-----------|-------|---------|------|
| NGLY1_KO_1 | 46.95     | -0.13 | 0.02    | 0.99 |
| NGLY1_1    | 46.23     | -0.13 | 0.01    | 0.98 |
| NGLY1_KO_2 | 47.19     | -0.12 | 0.03    | 0.99 |
| NGLY1_2    | 47.58     | -0.19 | 0.05    | 0.99 |

Supplement: Supplementary file 7286 [file 1]

# IPI00645248.1|C20ORF112

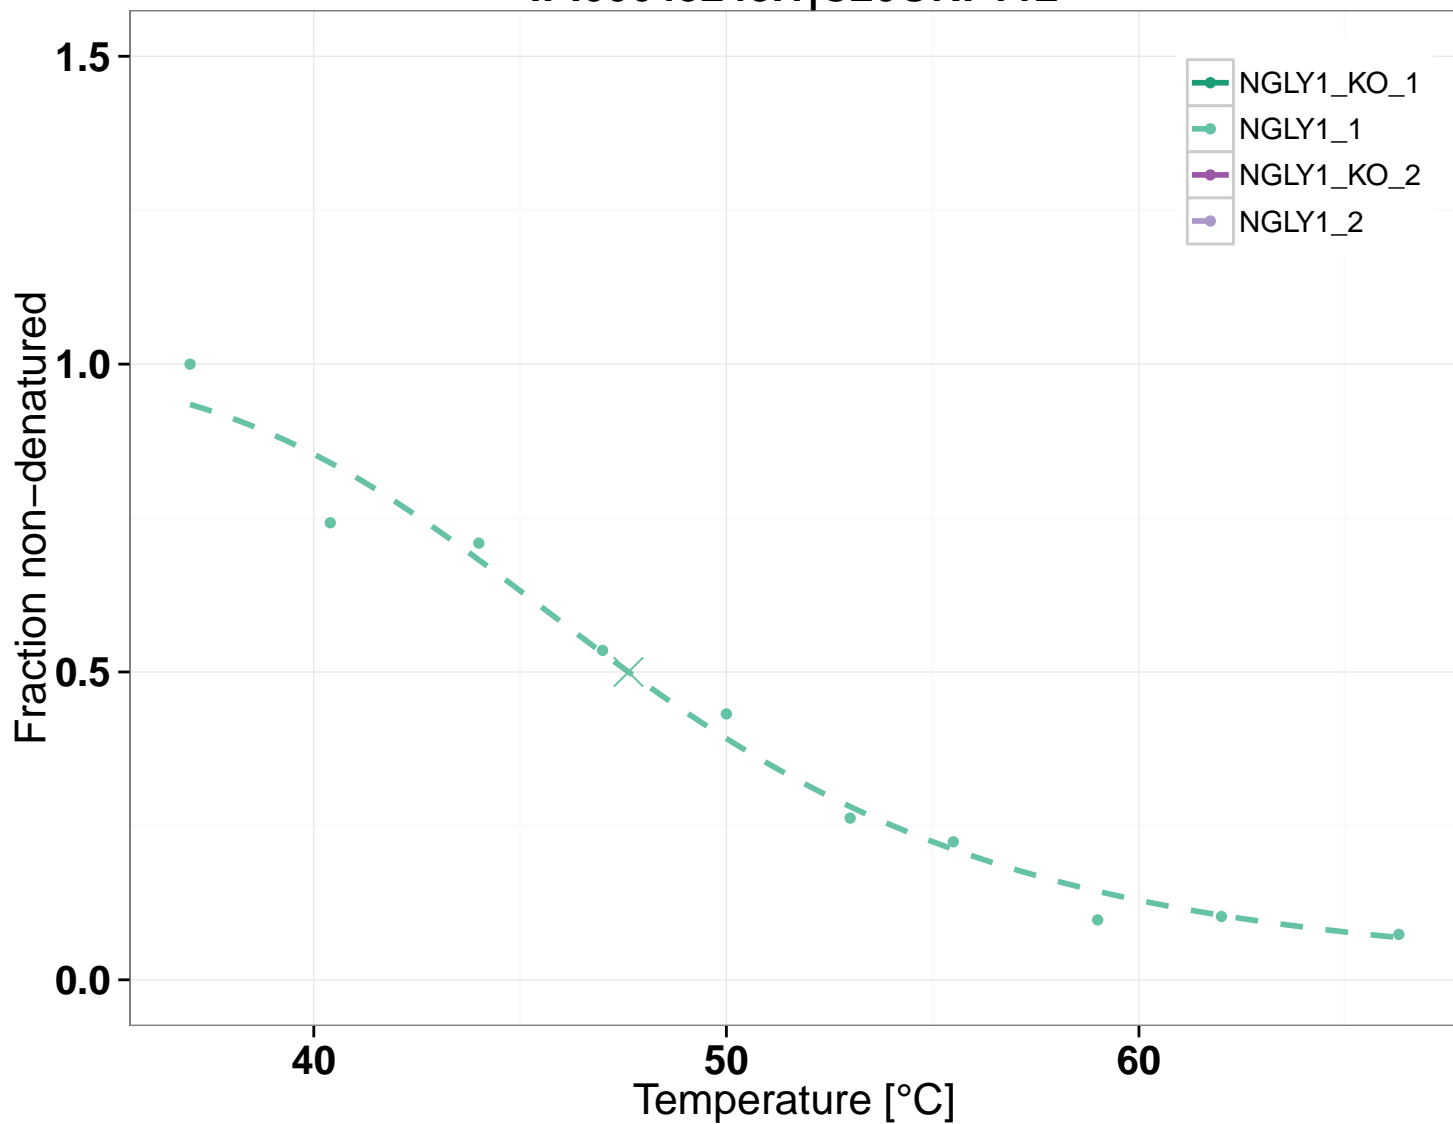

|            | meltPoint | slope  | plateau | R2   |
|------------|-----------|--------|---------|------|
| NGLY1_KO_1 | —         | —      | —       | —    |
| NGLY1_1    | 47.63     | -0.051 | 0       | 0.98 |
| NGLY1_KO_2 | —         | —      | —       | —    |
| NGLY1_2    | —         | —      | —       | —    |

Supplement: Supplementary file 7287 [file 1]

IPI00795553.2|ARMC8

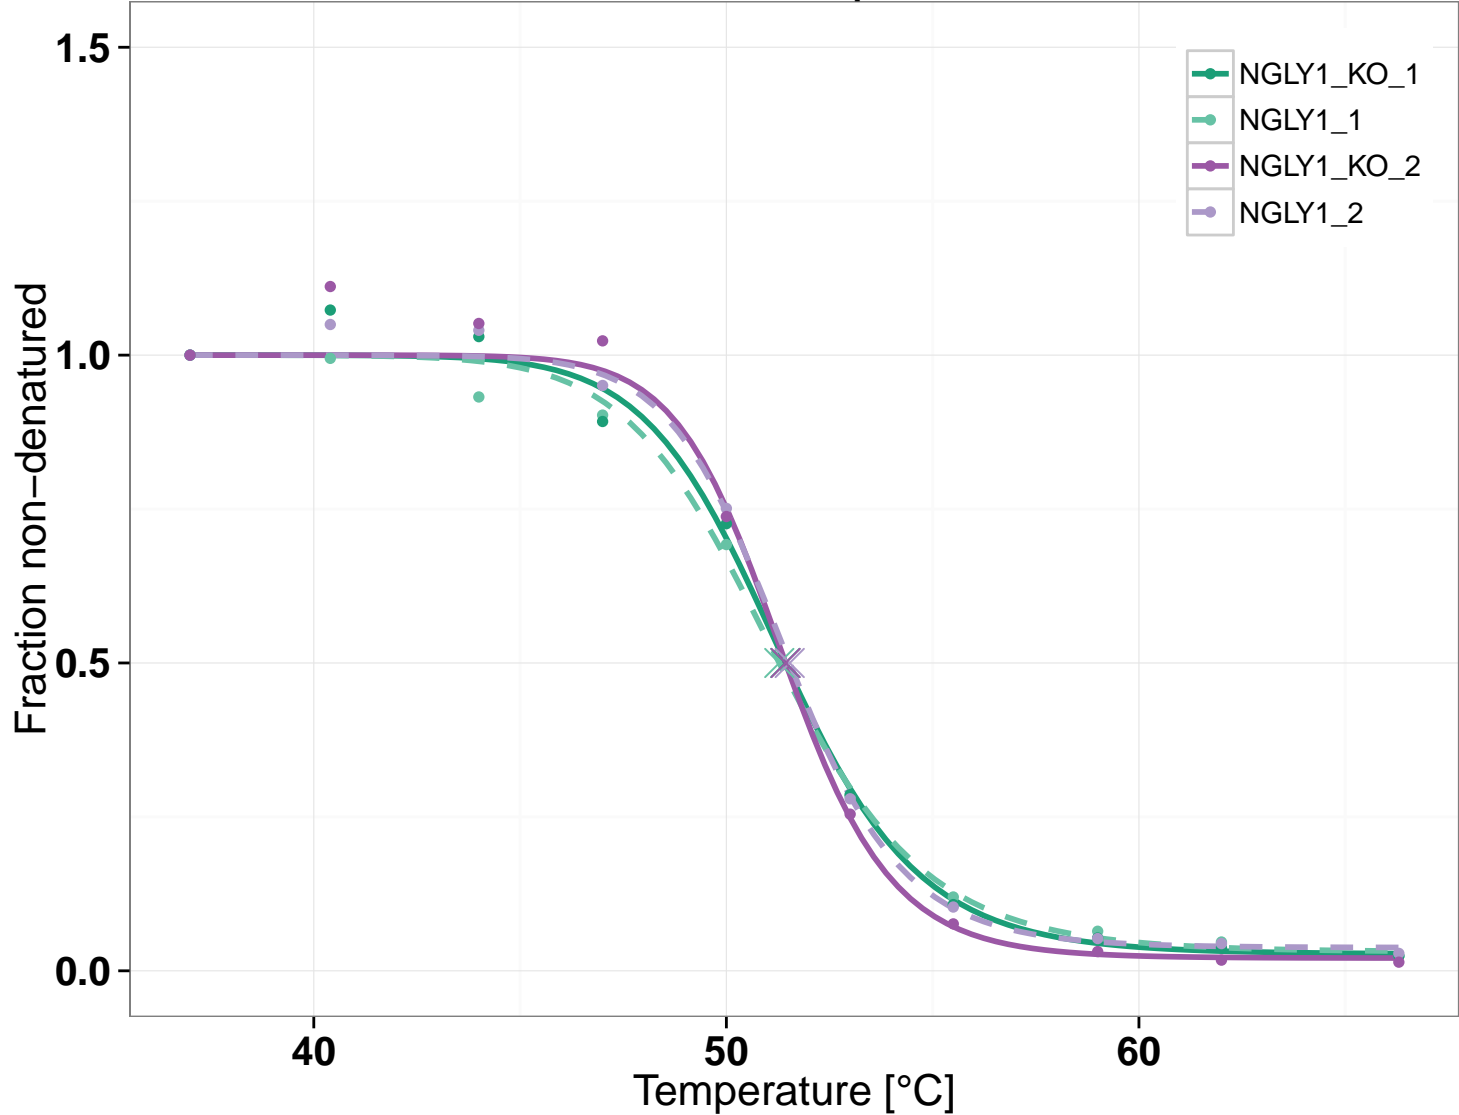

|            | meltPoint | slope | plateau | R2   |
|------------|-----------|-------|---------|------|
| NGLY1_KO_1 | 51.43     | -0.15 | 0.03    | 0.99 |
| NGLY1_1    | 51.28     | -0.13 | 0.03    | 1    |
| NGLY1_KO_2 | 51.44     | -0.19 | 0.02    | 0.99 |
| NGLY1_2    | 51.54     | -0.17 | 0.04    | 1    |

Supplement: Supplementary file 7288 [file 1]

IPI00025346.3|PEX14

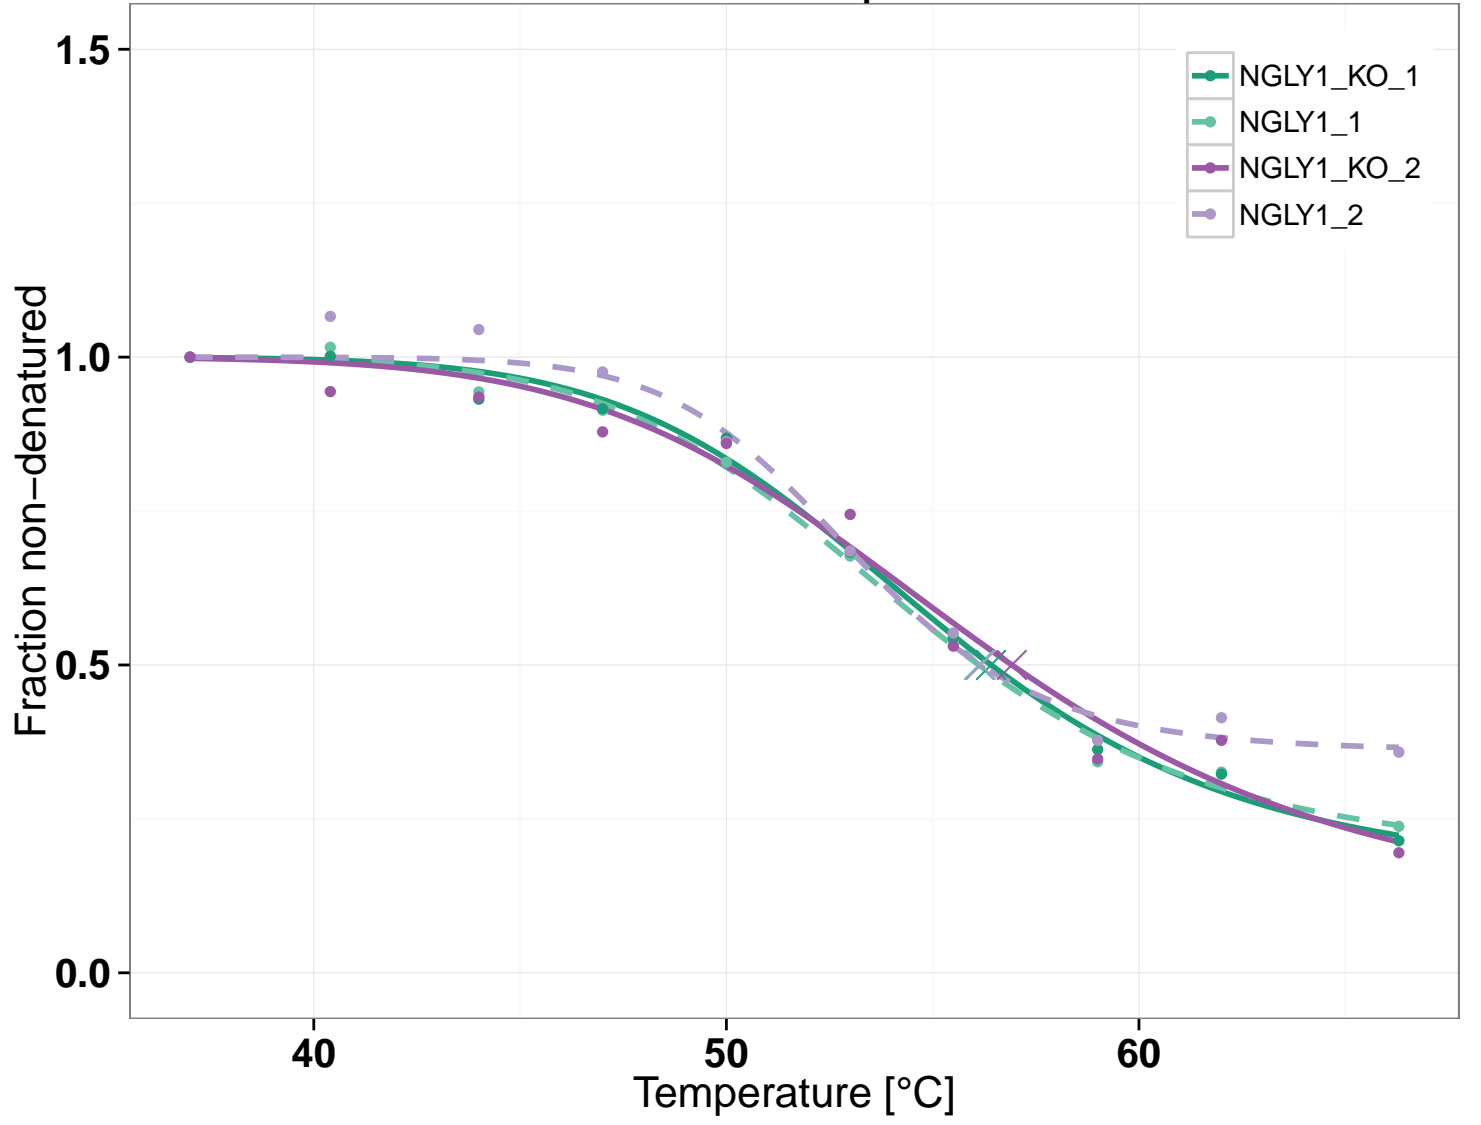

|            | meltPoint | slope  | plateau | R2   |
|------------|-----------|--------|---------|------|
| NGLY1_KO_1 | 56.42     | -0.056 | 0.16    | 0.99 |
| NGLY1_1    | 56.12     | -0.056 | 0.18    | 1    |
| NGLY1_KO_2 | 56.92     | -0.05  | 0.09    | 0.98 |
| NGLY1_2    | 56.17     | -0.071 | 0.36    | 0.99 |

Supplement: Supplementary file 7289 [file 1]

IPI00157734.2|EXOC3

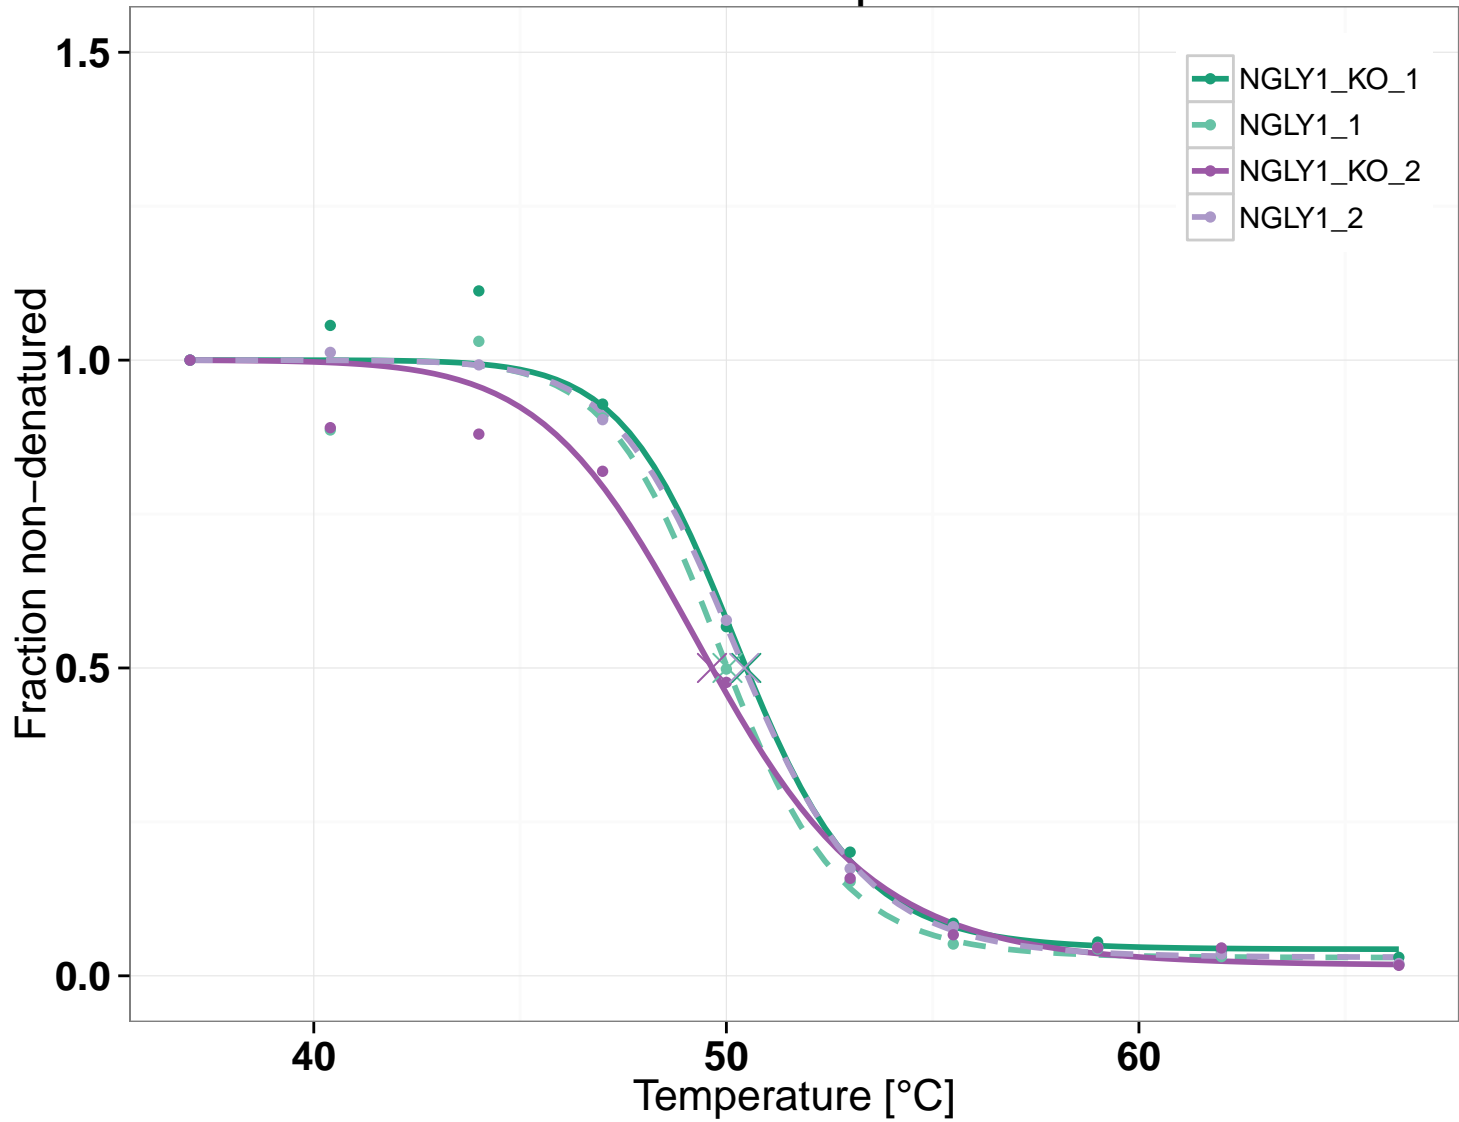

|            | meltPoint | slope | plateau | R2   |
|------------|-----------|-------|---------|------|
| NGLY1_KO_1 | 50.48     | -0.17 | 0.04    | 0.99 |
| NGLY1_1    | 50.03     | -0.17 | 0.03    | 0.99 |
| NGLY1_KO_2 | 49.65     | -0.12 | 0.02    | 0.99 |
| NGLY1_2    | 50.43     | -0.16 | 0.03    | 1    |

Supplement: Supplementary file 7290 [file 1]

# IPI00016372.1|RAB9A

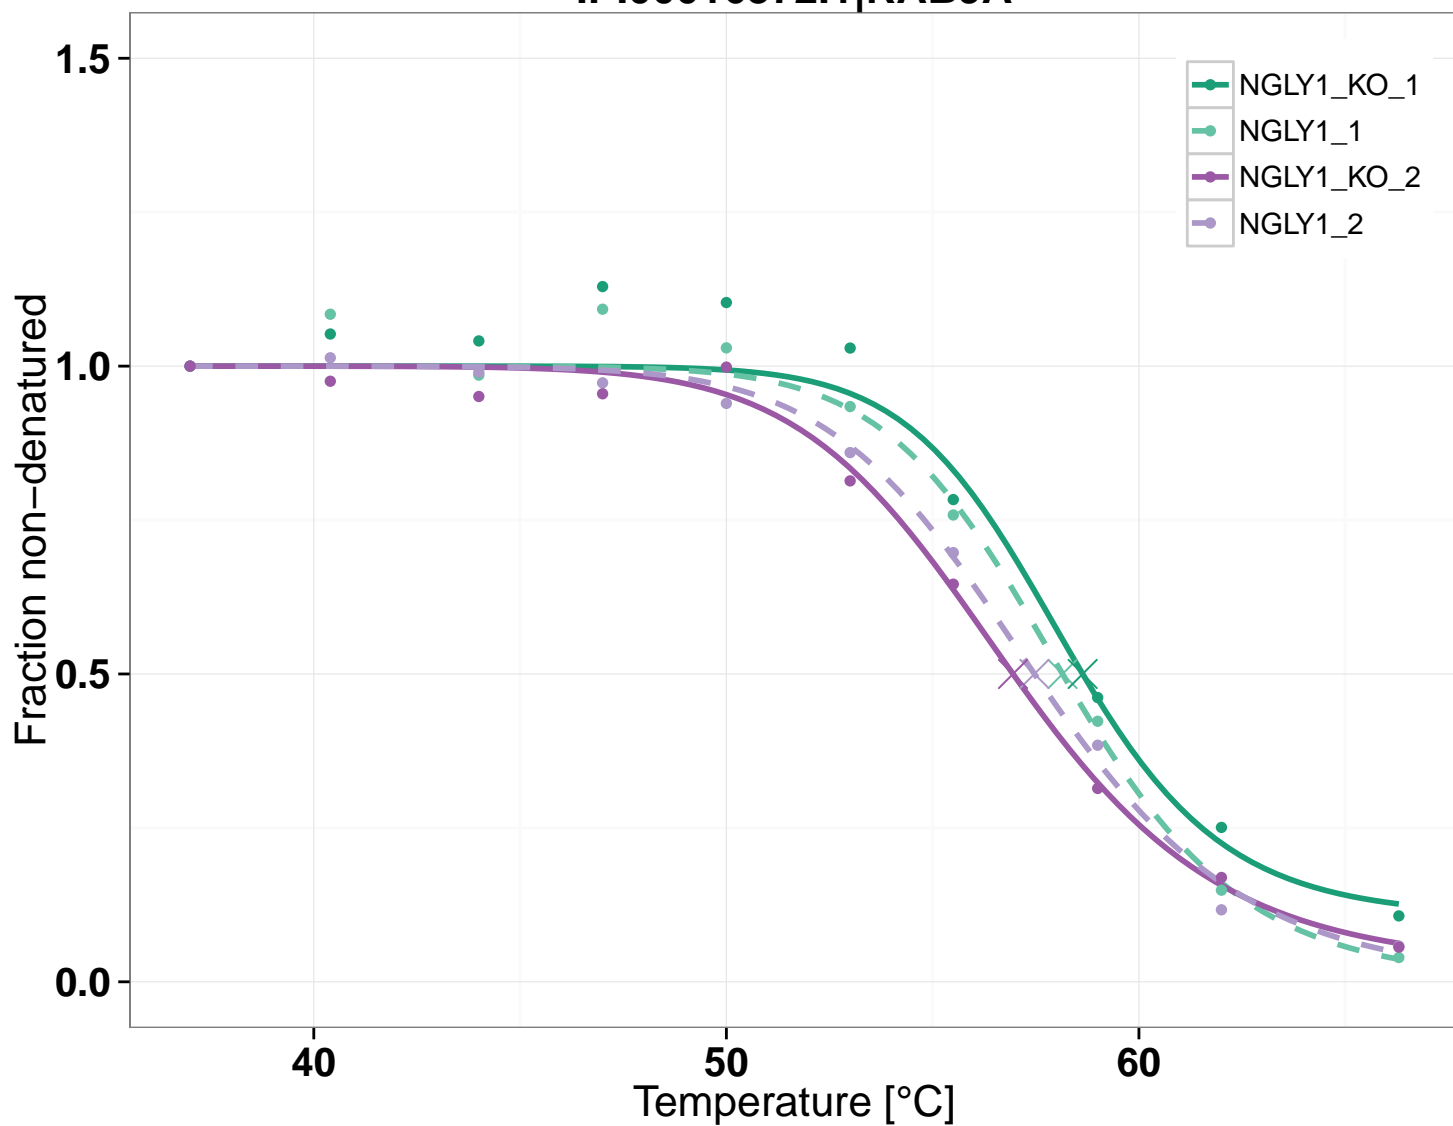

|            | meltPoint | slope  | plateau | R2   |
|------------|-----------|--------|---------|------|
| NGLY1_KO_1 | 58.64     | -0.12  | 0.1     | 0.97 |
| NGLY1_1    | 58.15     | -0.11  | 0       | 0.99 |
| NGLY1_KO_2 | 56.95     | -0.095 | 0.02    | 0.99 |
| NGLY1_2    | 57.47     | -0.099 | 0       | 1    |

Supplement: Supplementary file 7291 [file 1]

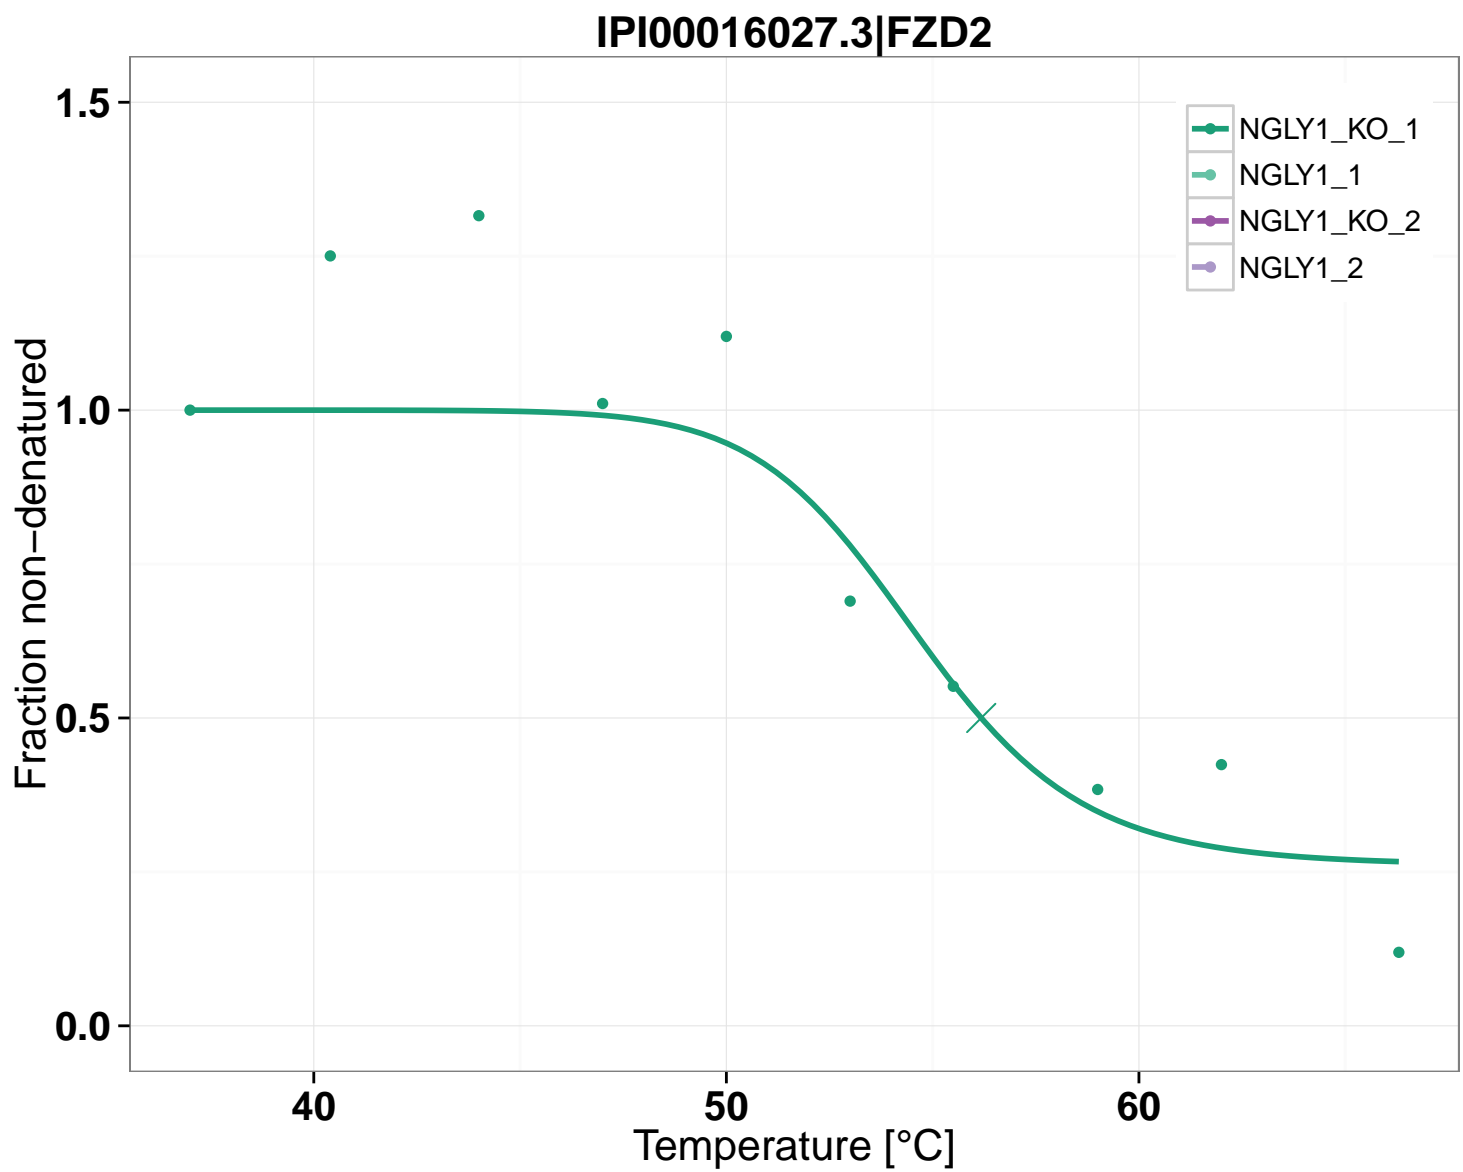

|            | meltPoint | slope  | plateau | R2   |
|------------|-----------|--------|---------|------|
| NGLY1_KO_1 | 56.18     | -0.093 | 0.26    | 0.84 |
| NGLY1_1    | -         | -      | -       | -    |
| NGLY1_KO_2 | -         | -      | -       | -    |
| NGLY1_2    | -         | -      | -       | -    |

Supplement: Supplementary file 7292 [file 1]

IPI00021841.1|APOA1

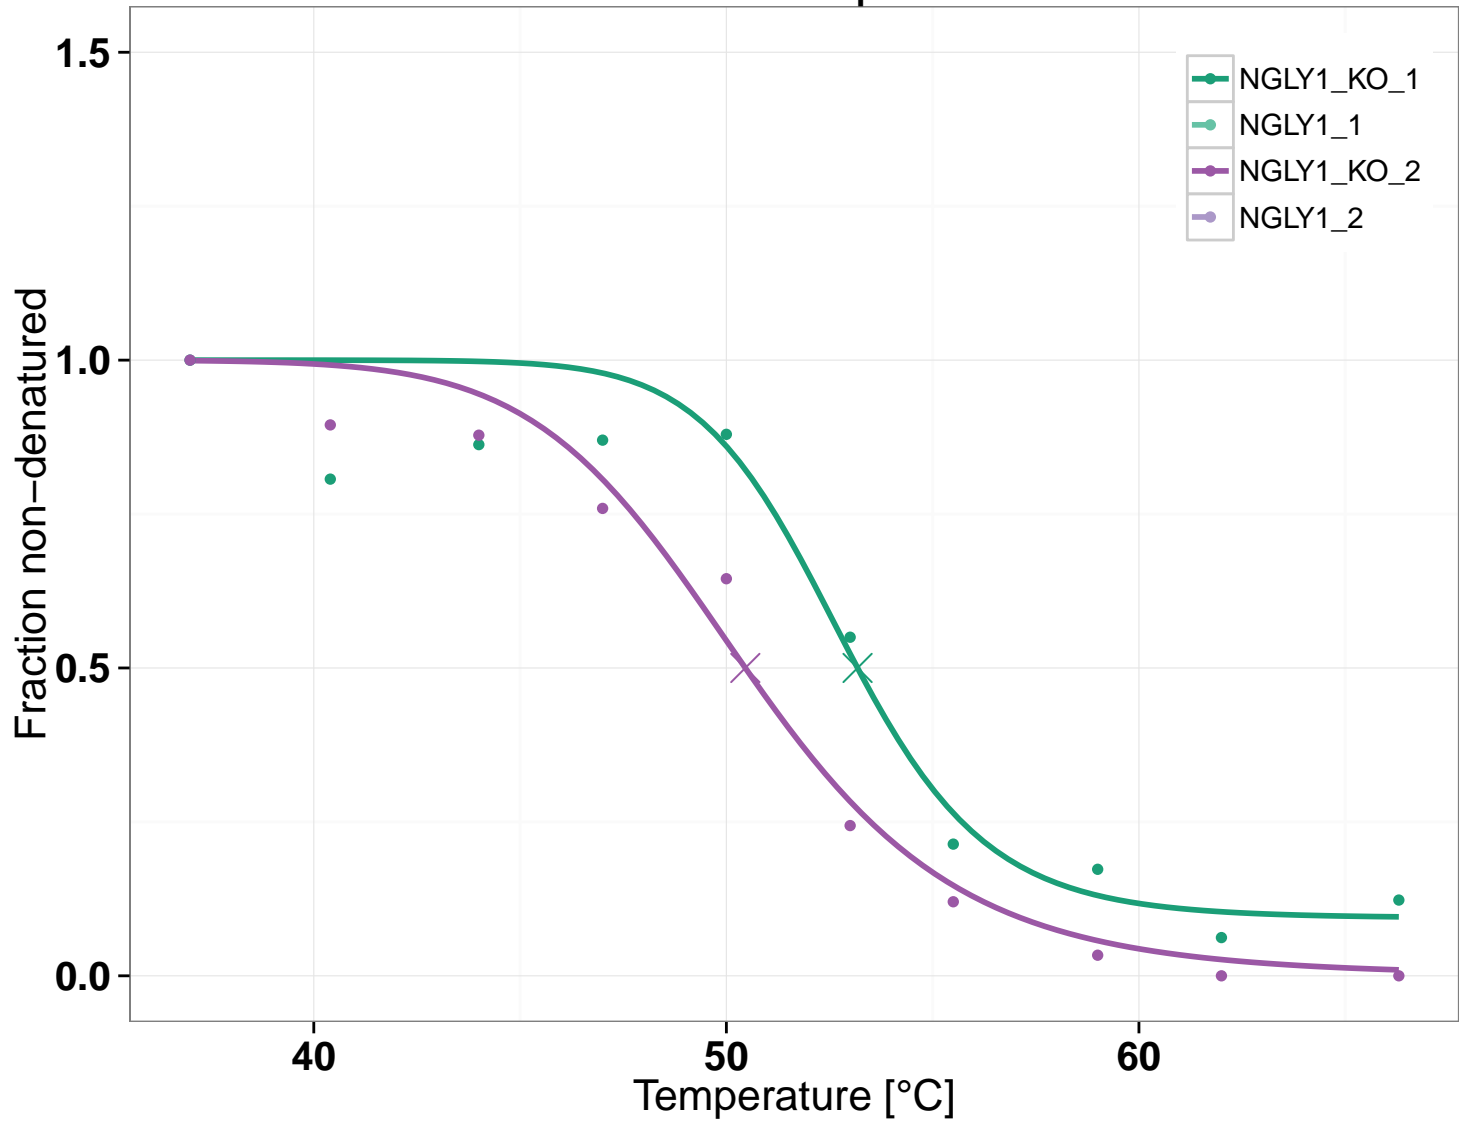

|            | meltPoint | slope  | plateau | R2   |
|------------|-----------|--------|---------|------|
| NGLY1_KO_1 | 53.18     | -0.13  | 0.09    | 0.94 |
| NGLY1_1    | -         | -      | -       | -    |
| NGLY1_KO_2 | 50.46     | -0.097 | 0       | 0.98 |
| NGLY1_2    | -         | -      | -       | -    |

Supplement: Supplementary file 7293 [file 1]

IPI00657757.1|ZKSCAN1

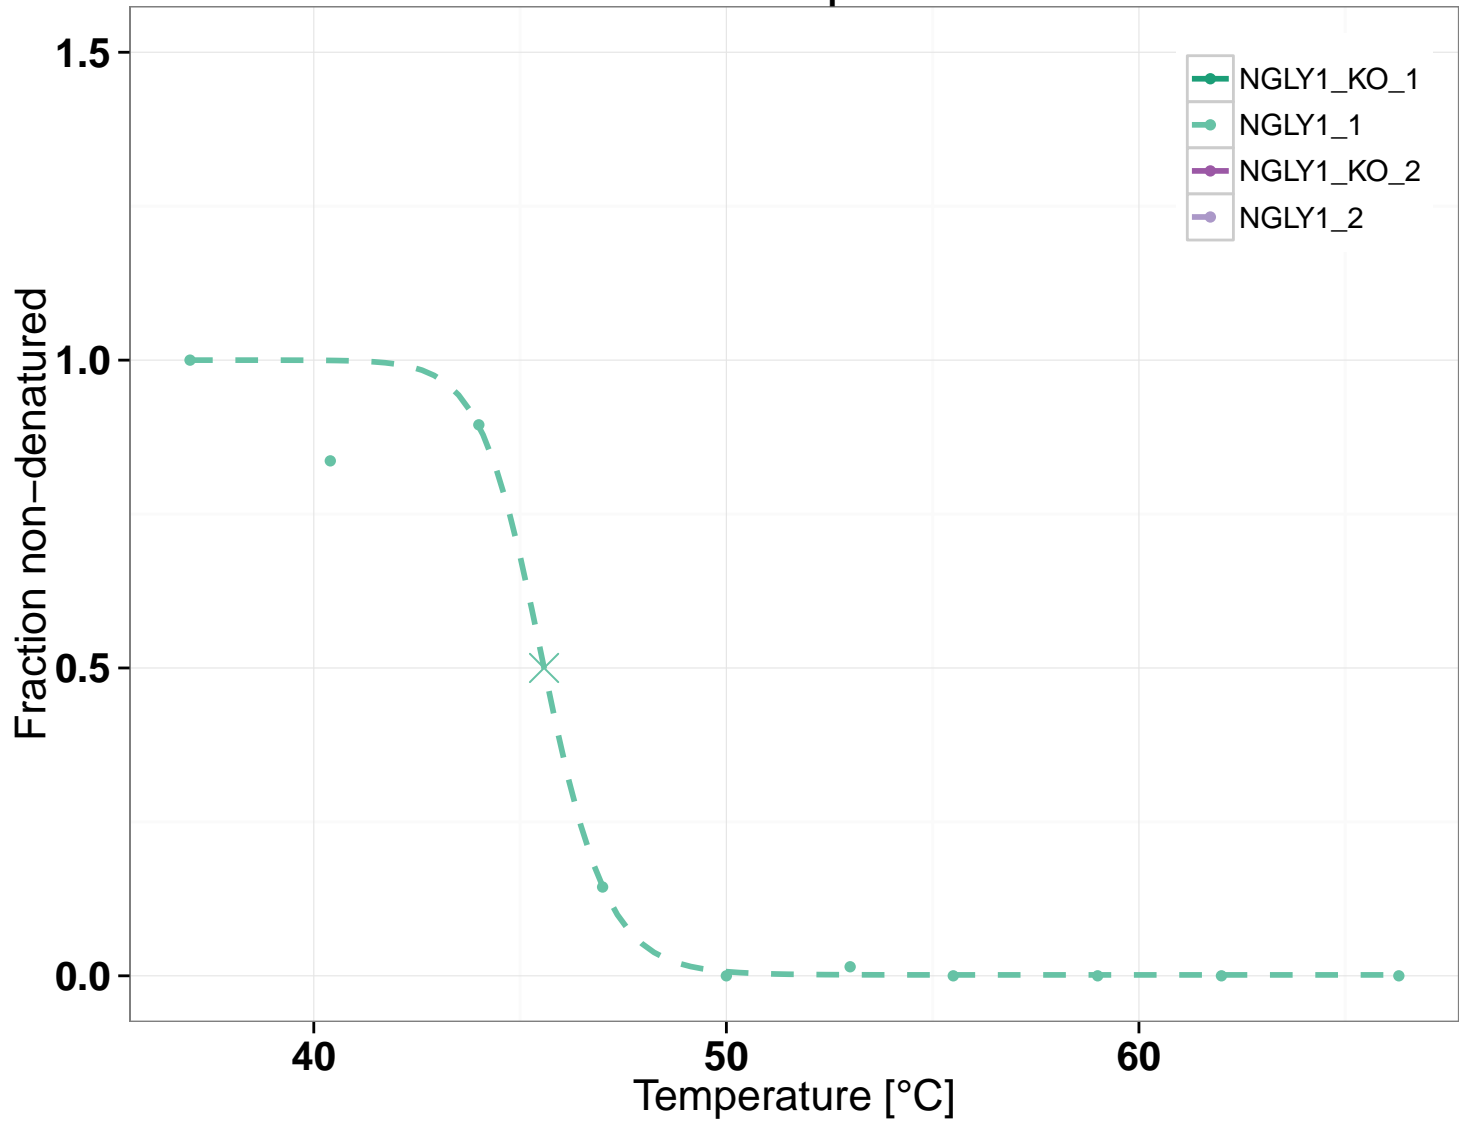

|            | meltPoint | slope | plateau | R2   |
|------------|-----------|-------|---------|------|
| NGLY1_KO_1 | -         | -     | -       | -    |
| NGLY1_1    | 45.58     | -0.32 | 0       | 0.98 |
| NGLY1_KO_2 | -         | -     | -       | -    |
| NGLY1_2    | -         | -     | -       | -    |

Supplement: Supplementary file 7294 [file 1]

IPI00107282.5|PHF10

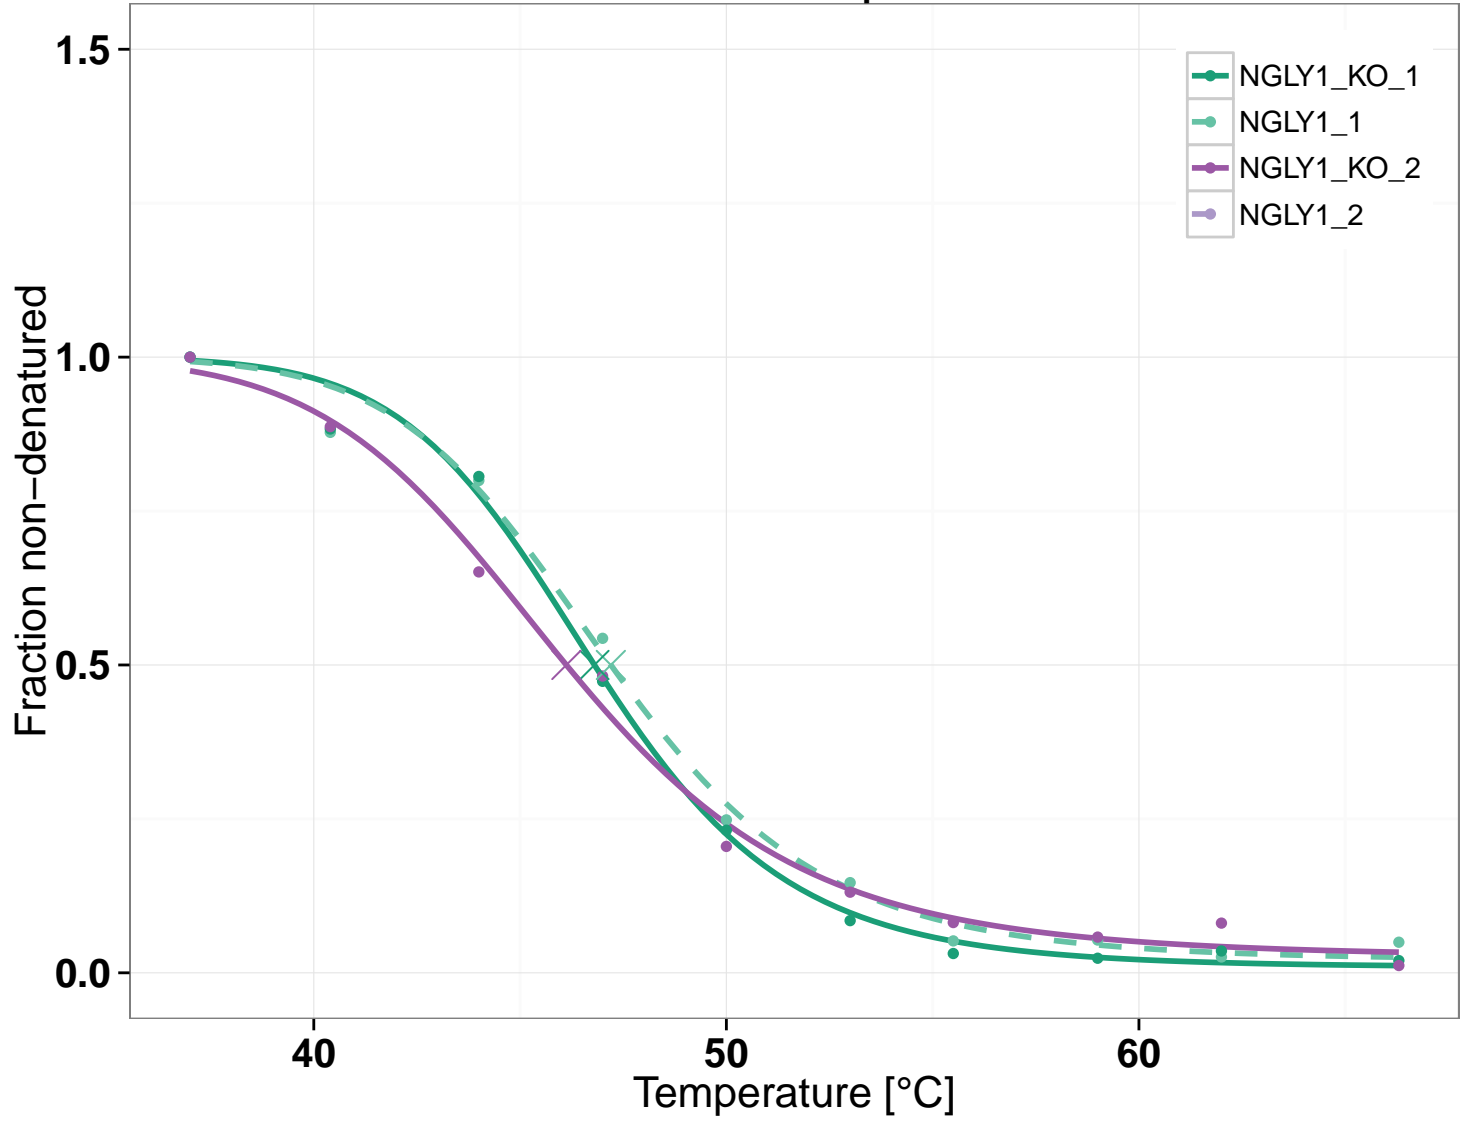

|            | meltPoint | slope  | plateau | R2   |
|------------|-----------|--------|---------|------|
| NGLY1_KO_1 | 46.8      | -0.11  | 0.01    | 0.99 |
| NGLY1_1    | 47.2      | -0.095 | 0.02    | 0.99 |
| NGLY1_KO_2 | 46.12     | -0.084 | 0.03    | 0.99 |
| NGLY1_2    | -         | -      | -       | -    |

Supplement: Supplementary file 7295 [file 1]

IPI00646917.1|NUDT21

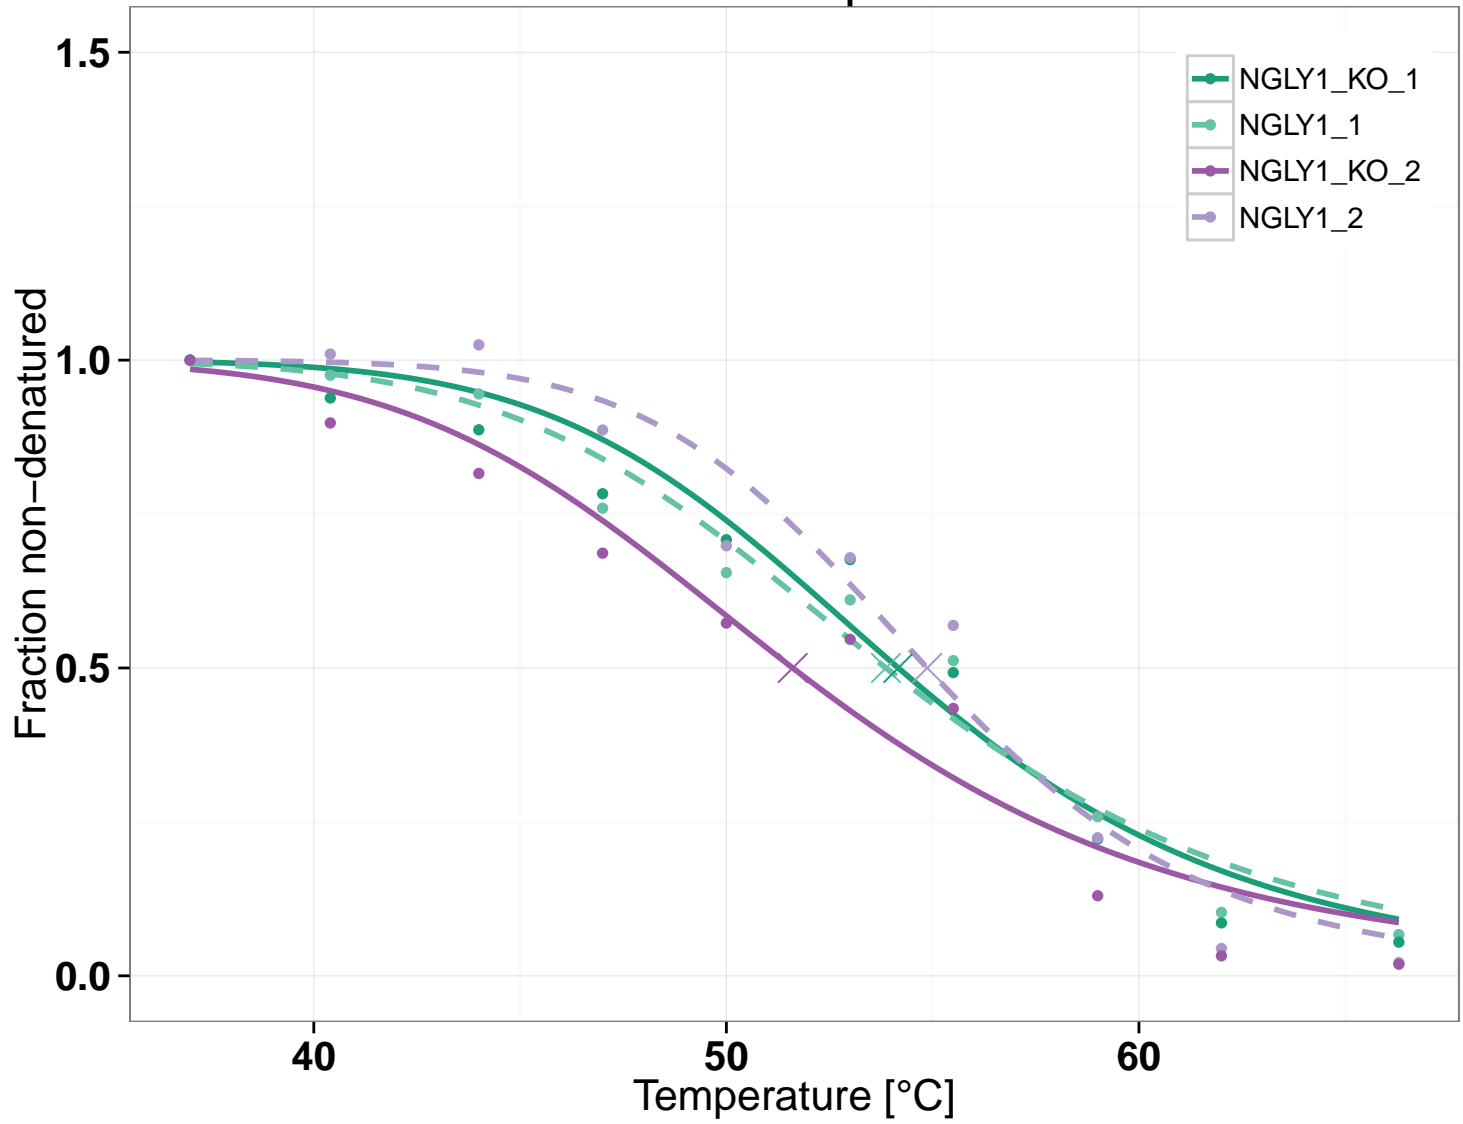

|            | meltPoint | slope  | plateau | R2   |
|------------|-----------|--------|---------|------|
| NGLY1_KO_1 | 54.17     | -0.059 | 0       | 0.96 |
| NGLY1_1    | 53.87     | -0.054 | 0       | 0.97 |
| NGLY1_KO_2 | 51.61     | -0.053 | 0       | 0.95 |
| NGLY1_2    | 54.87     | -0.073 | 0       | 0.97 |

Supplement: Supplementary file 7296 [file 1]

IPI00792109.1|CCDC43

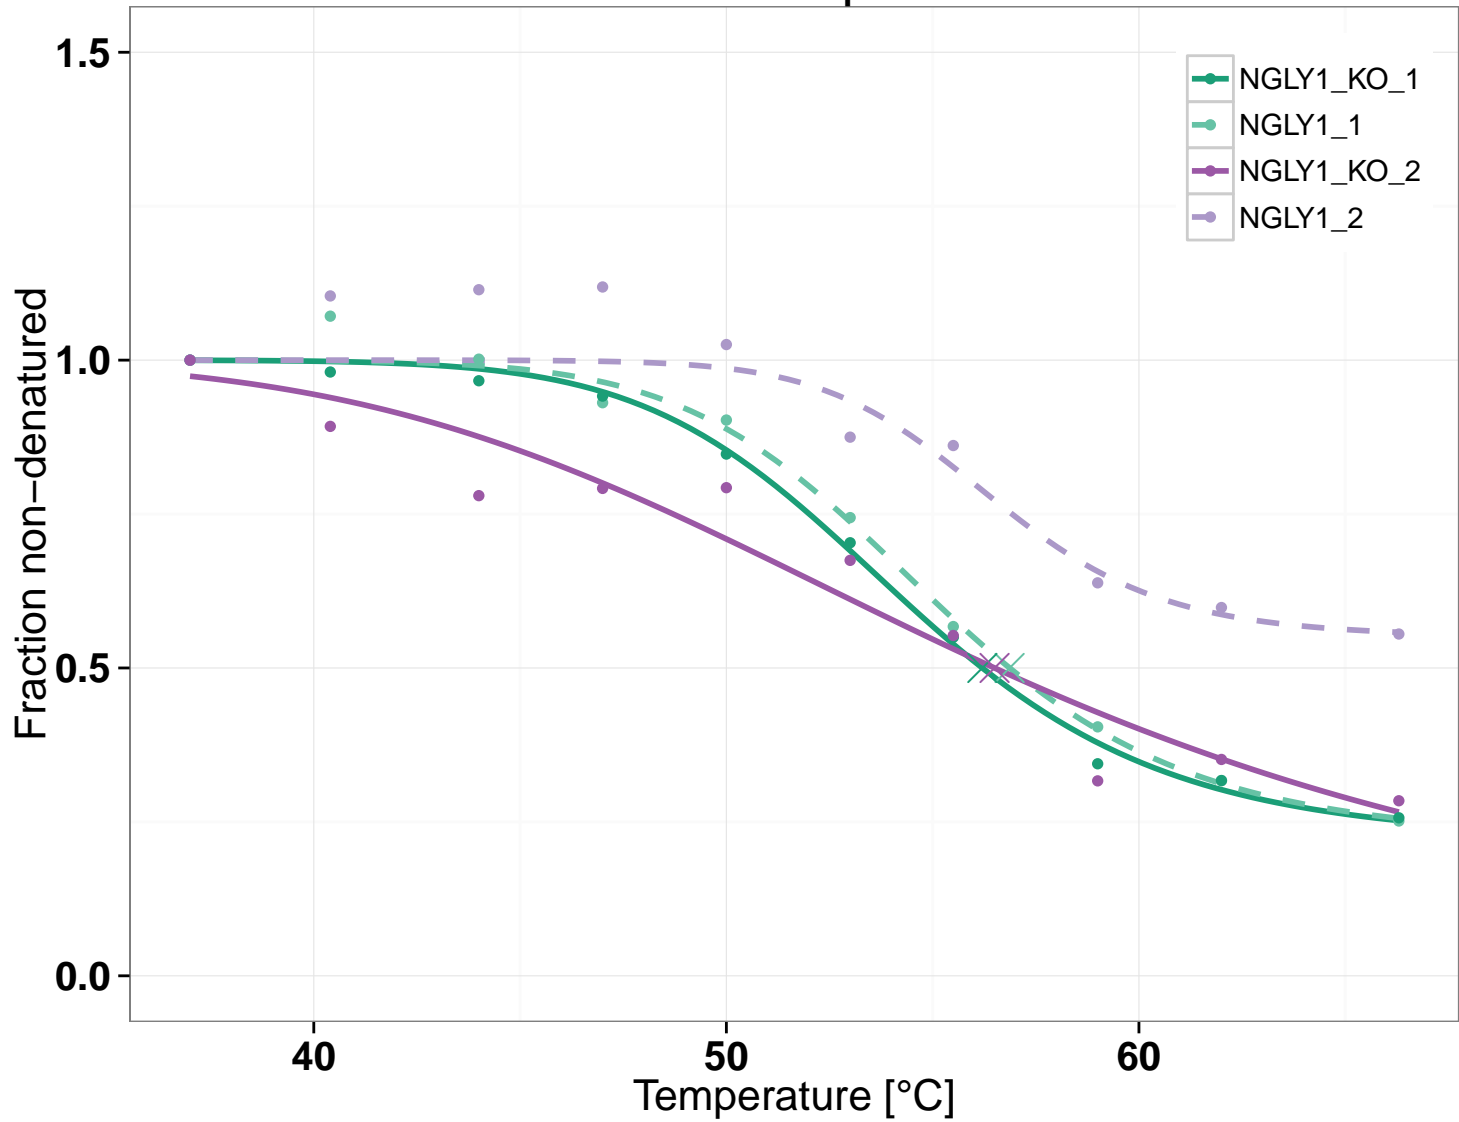

|            | meltPoint | slope  | plateau | R2   |
|------------|-----------|--------|---------|------|
| NGLY1_KO_1 | 56.21     | -0.062 | 0.22    | 1    |
| NGLY1_1    | 56.87     | -0.064 | 0.22    | 0.99 |
| NGLY1_KO_2 | 56.5      | -0.033 | 0       | 0.94 |
| NGLY1_2    | -         | -0.054 | 0.55    | 0.9  |

Supplement: Supplementary file 7297 [file 1]

# IPI00396391.8|CPZ

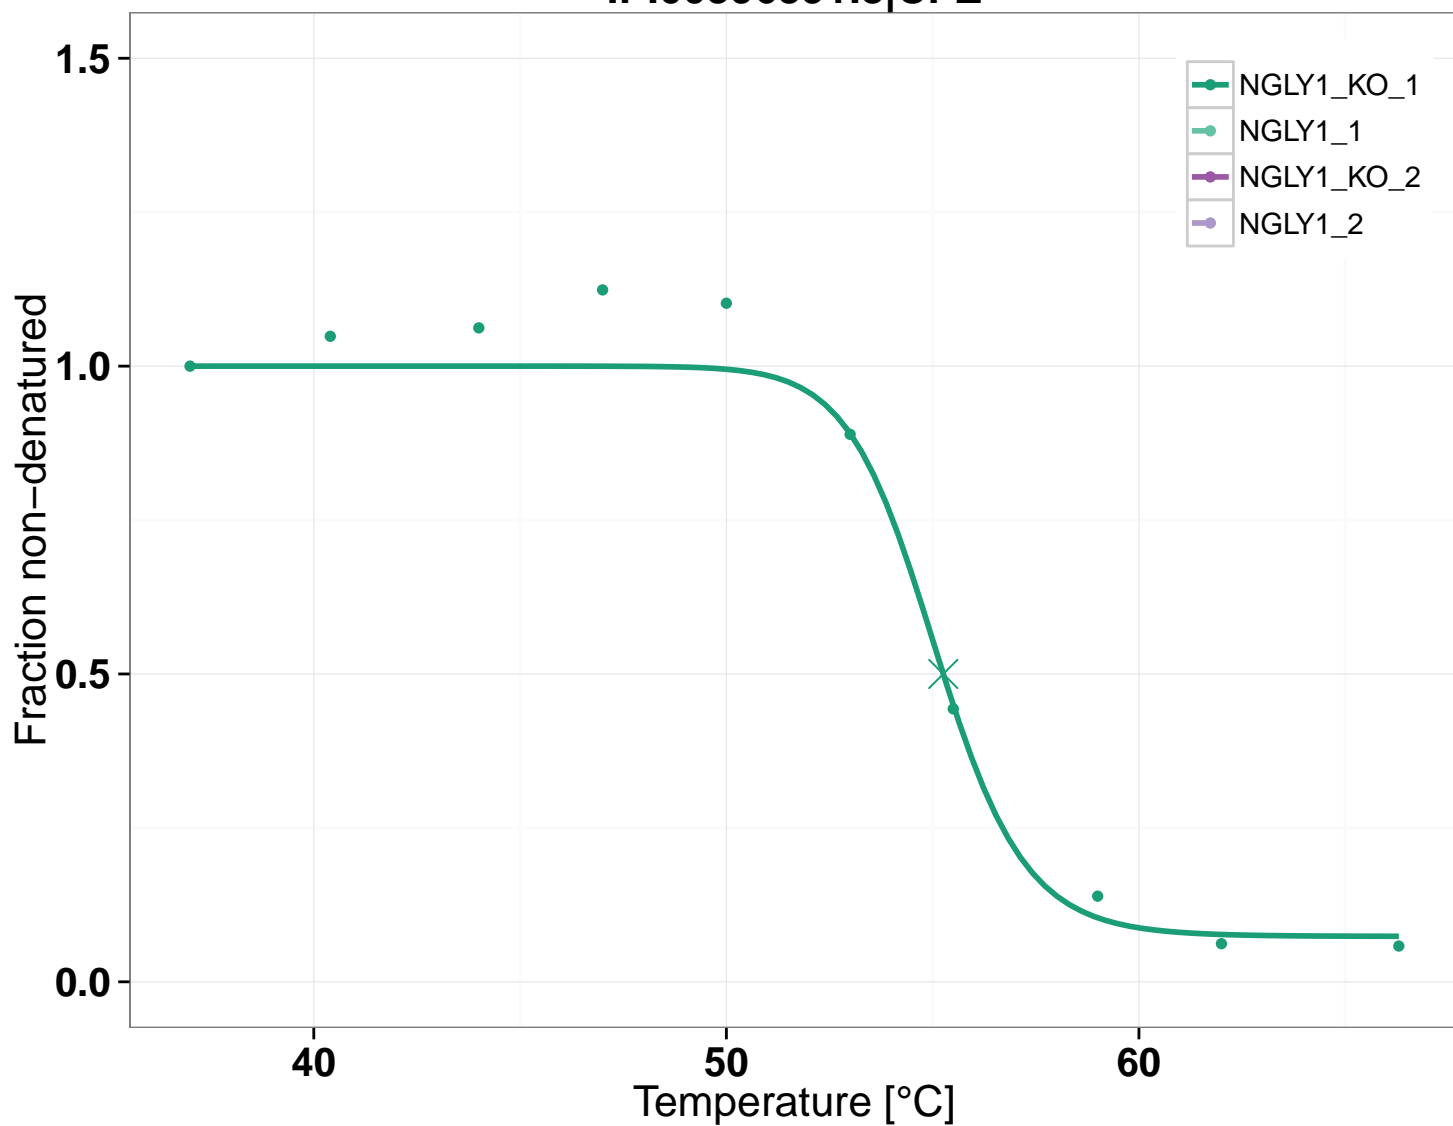

|            | meltPoint | slope | plateau | R2   |
|------------|-----------|-------|---------|------|
| NGLY1_KO_1 | 55.26     | -0.22 | 0.07    | 0.98 |
| NGLY1_1    | -         | -     | -       | -    |
| NGLY1_KO_2 | -         | -     | -       | -    |
| NGLY1_2    | -         | -     | -       | -    |

Supplement: Supplementary file 7298 [file 1]

IPI00883786.1|SIMILAR TO NUCLEOLAR PROTEIN 5A.

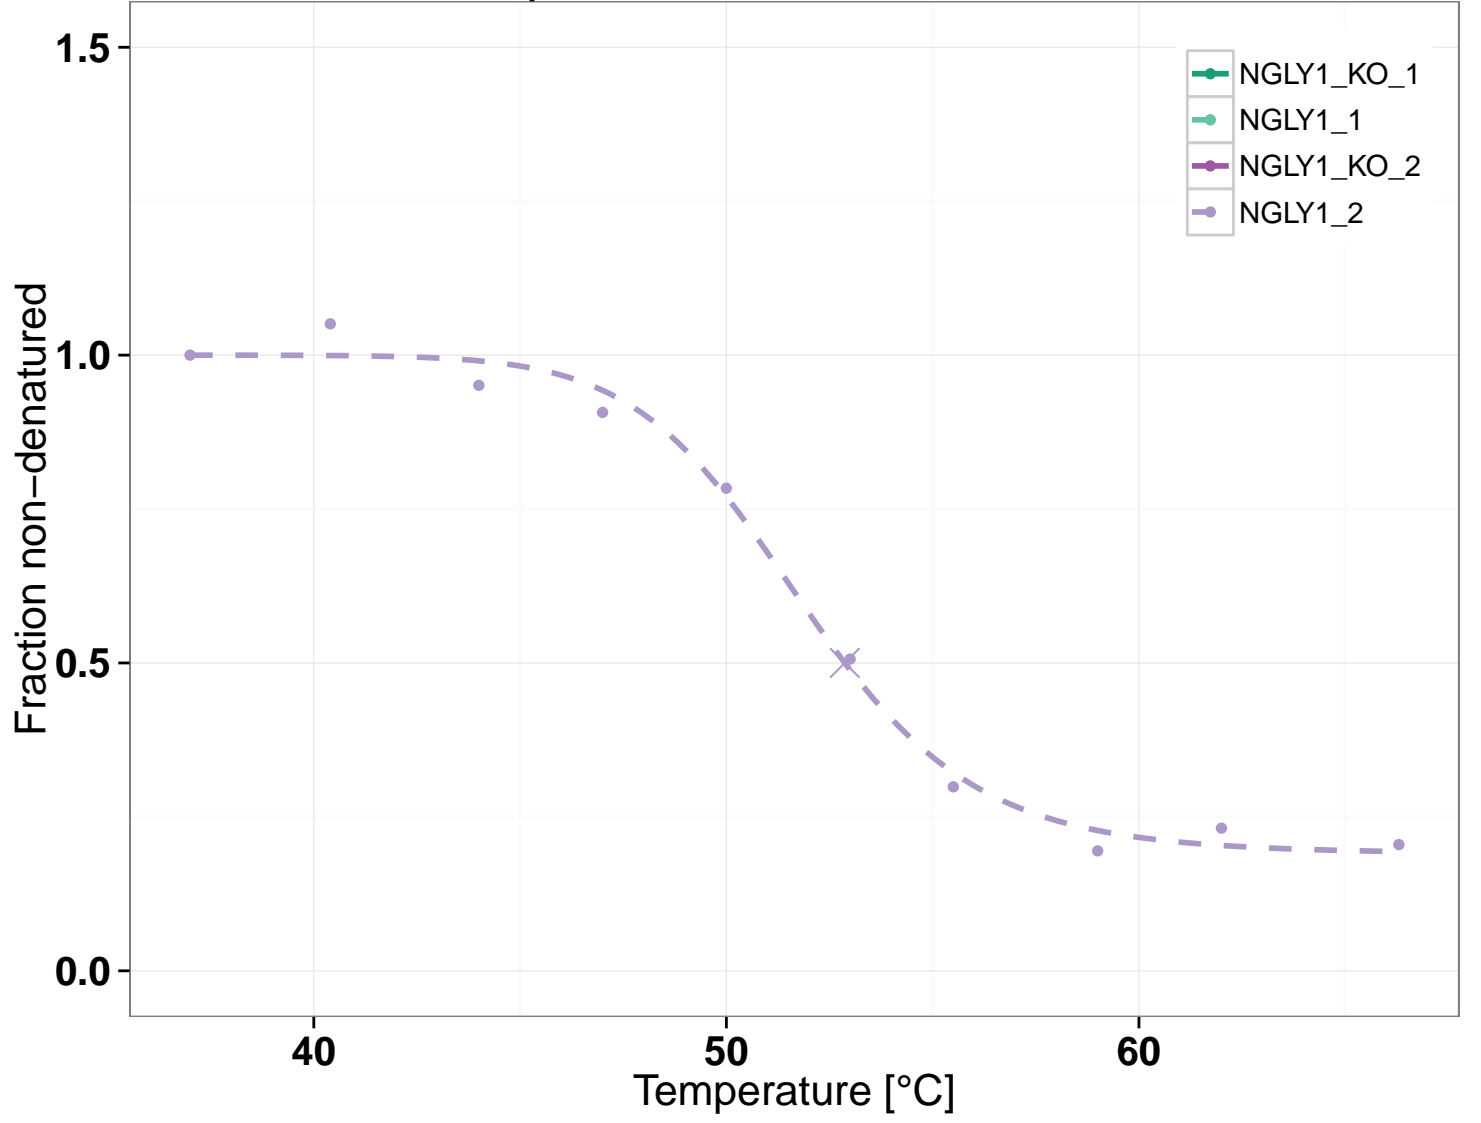

|            | meltPoint | slope  | plateau | R2   |
|------------|-----------|--------|---------|------|
| NGLY1_KO_1 | -         | -      | -       | -    |
| NGLY1_1    | -         | -      | -       | -    |
| NGLY1_KO_2 | -         | -      | -       | -    |
| NGLY1_2    | 52.87     | -0.098 | 0.19    | 0.99 |

Supplement: Supplementary file 7299 [file 1]

# IPI00410264.2|WDR32

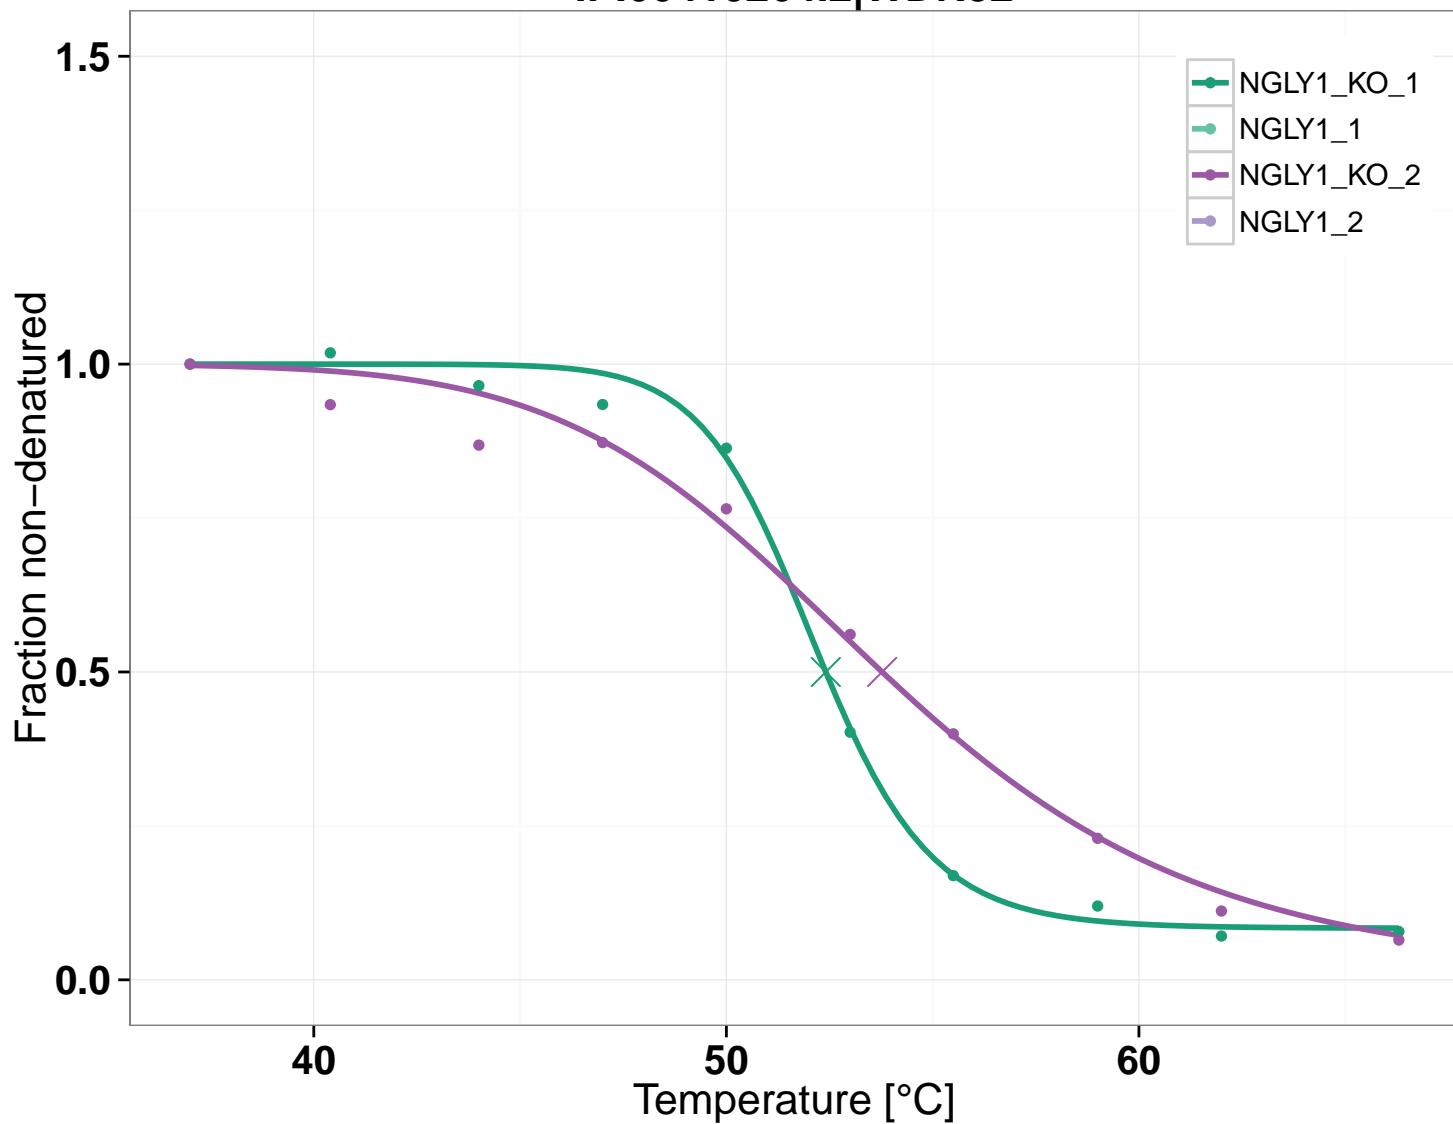

|            | meltPoint | slope  | plateau | R2   |
|------------|-----------|--------|---------|------|
| NGLY1_KO_1 | 52.41     | -0.16  | 0.08    | 1    |
| NGLY1_1    | -         | -      | -       | -    |
| NGLY1_KO_2 | 53.78     | -0.064 | 0       | 0.99 |
| NGLY1_2    | -         | -      | -       | -    |

Supplement: Supplementary file 7300 [file 1]

IPI00297208.6|FAM184B

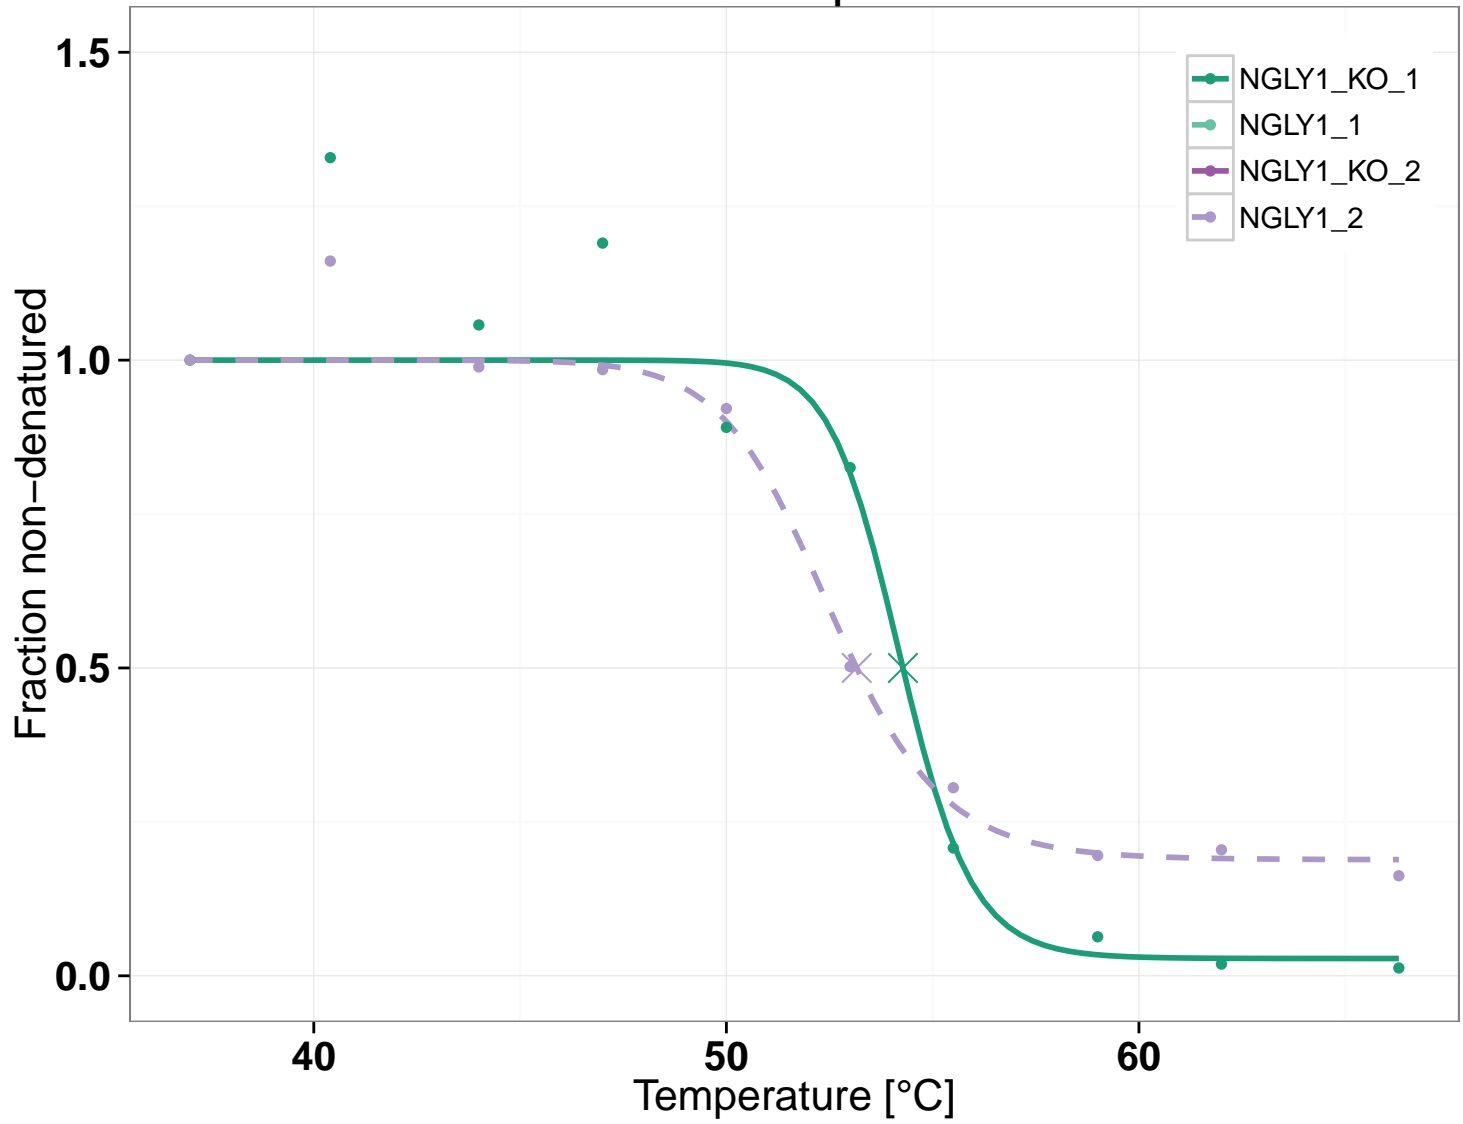

|            | meltPoint | slope | plateau | R2   |
|------------|-----------|-------|---------|------|
| NGLY1_KO_1 | 54.28     | -0.28 | 0.03    | 0.94 |
| NGLY1_1    | -         | -     | -       | -    |
| NGLY1_KO_2 | -         | -     | -       | -    |
| NGLY1_2    | 53.16     | -0.15 | 0.19    | 0.98 |

Supplement: Supplementary file 7301 [file 1]

IPI00297702.4|RNFT1

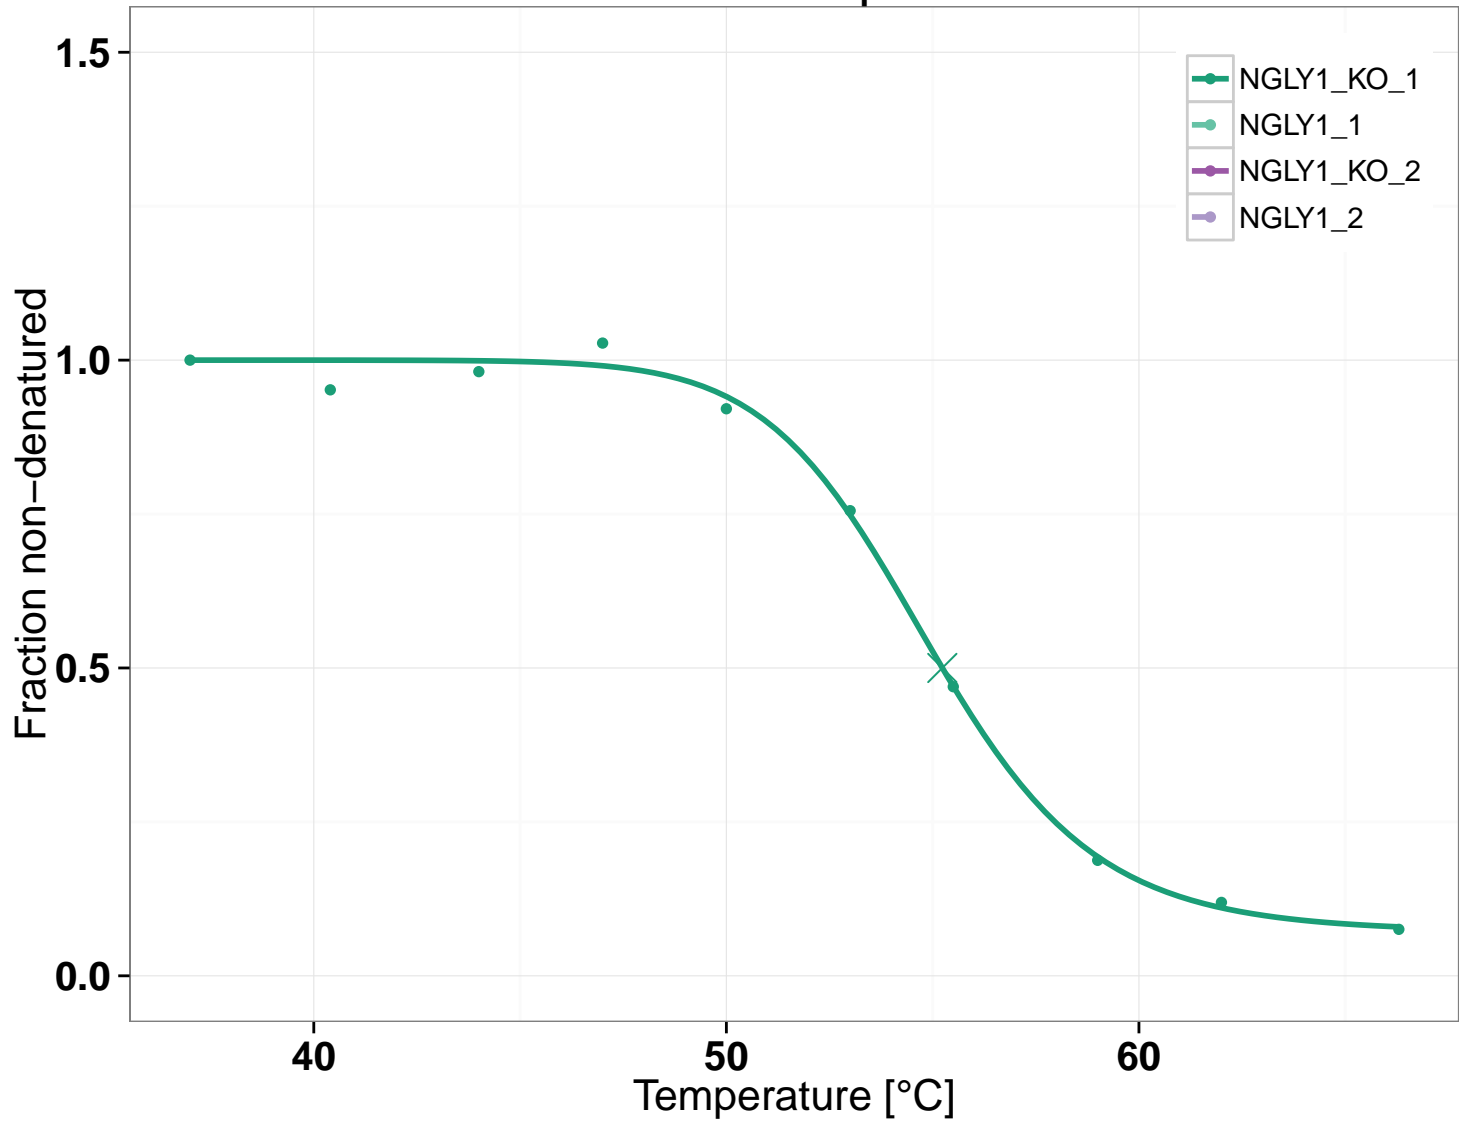

|            | meltPoint | slope | plateau | R2 |
|------------|-----------|-------|---------|----|
| NGLY1_KO_1 | 55.23     | -0.12 | 0.07    | 1  |
| NGLY1_1    | -         | -     | -       | -  |
| NGLY1_KO_2 | -         | -     | -       | -  |
| NGLY1_2    | -         | -     | -       | -  |

Supplement: Supplementary file 7302 [file 1]

# IPI00299166.2|TANK

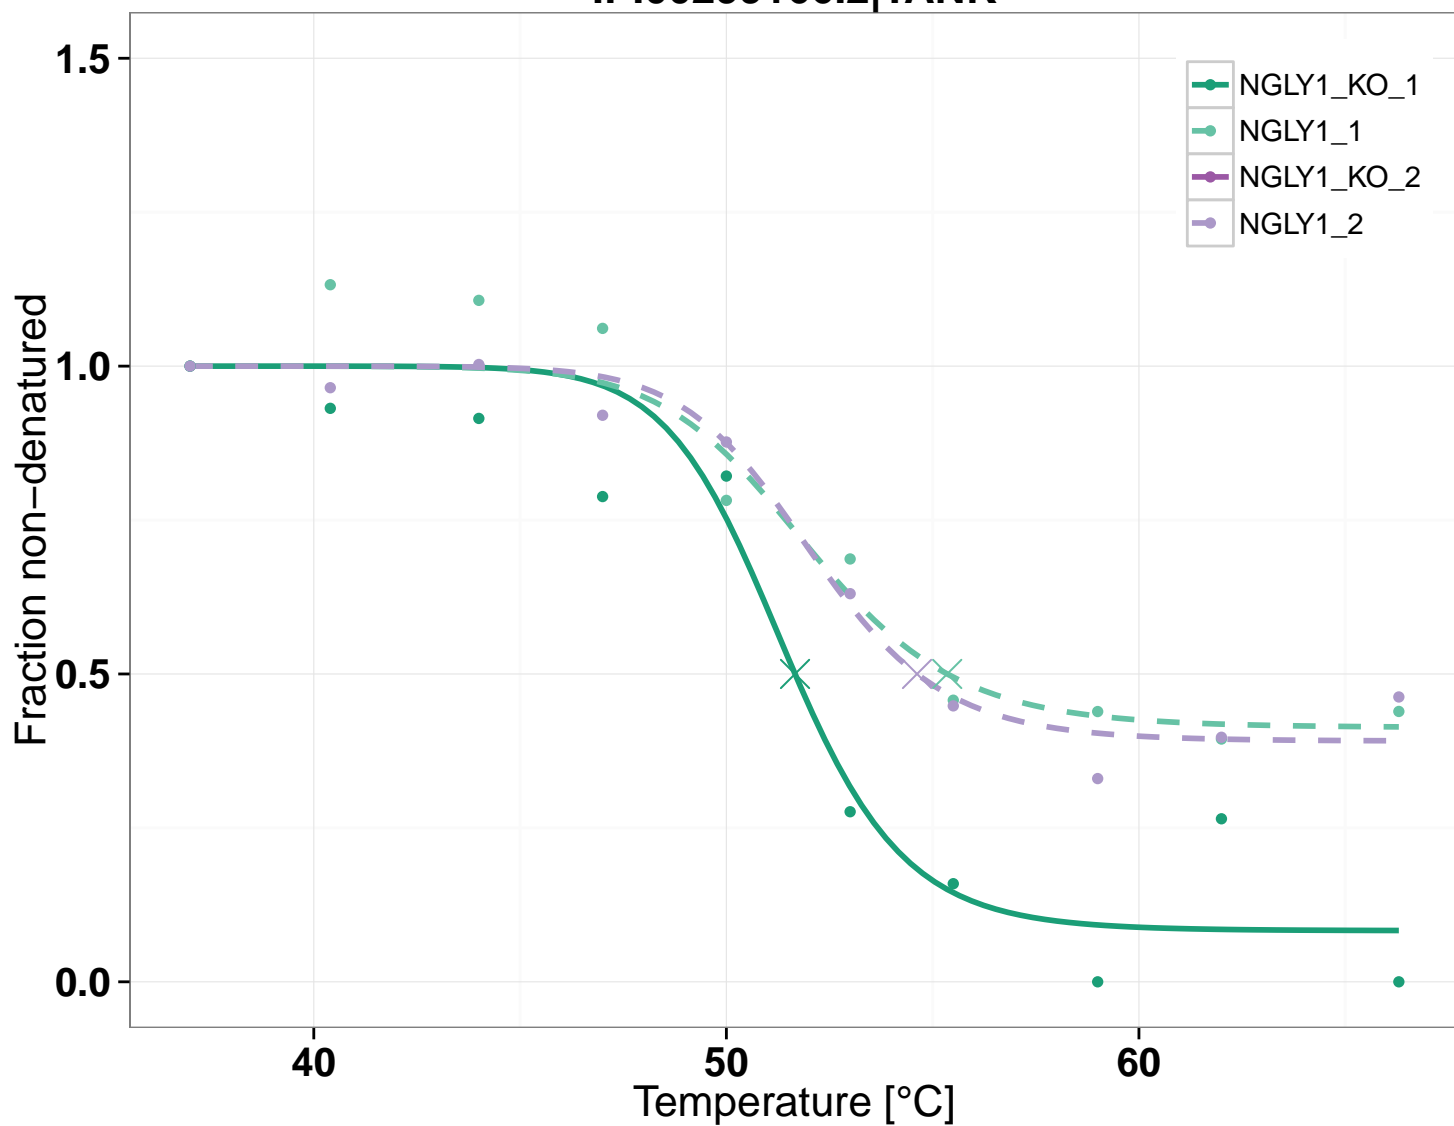

|            | meltPoint | slope  | plateau | R2   |
|------------|-----------|--------|---------|------|
| NGLY1_KO_1 | 51.66     | -0.16  | 0.08    | 0.94 |
| NGLY1_1    | 55.35     | -0.081 | 0.41    | 0.94 |
| NGLY1_KO_2 | -         | -      | -       | -    |
| NGLY1_2    | 54.62     | -0.096 | 0.39    | 0.98 |

Supplement: Supplementary file 7304 [file 1]

IPI00395878.2|TNRC6A

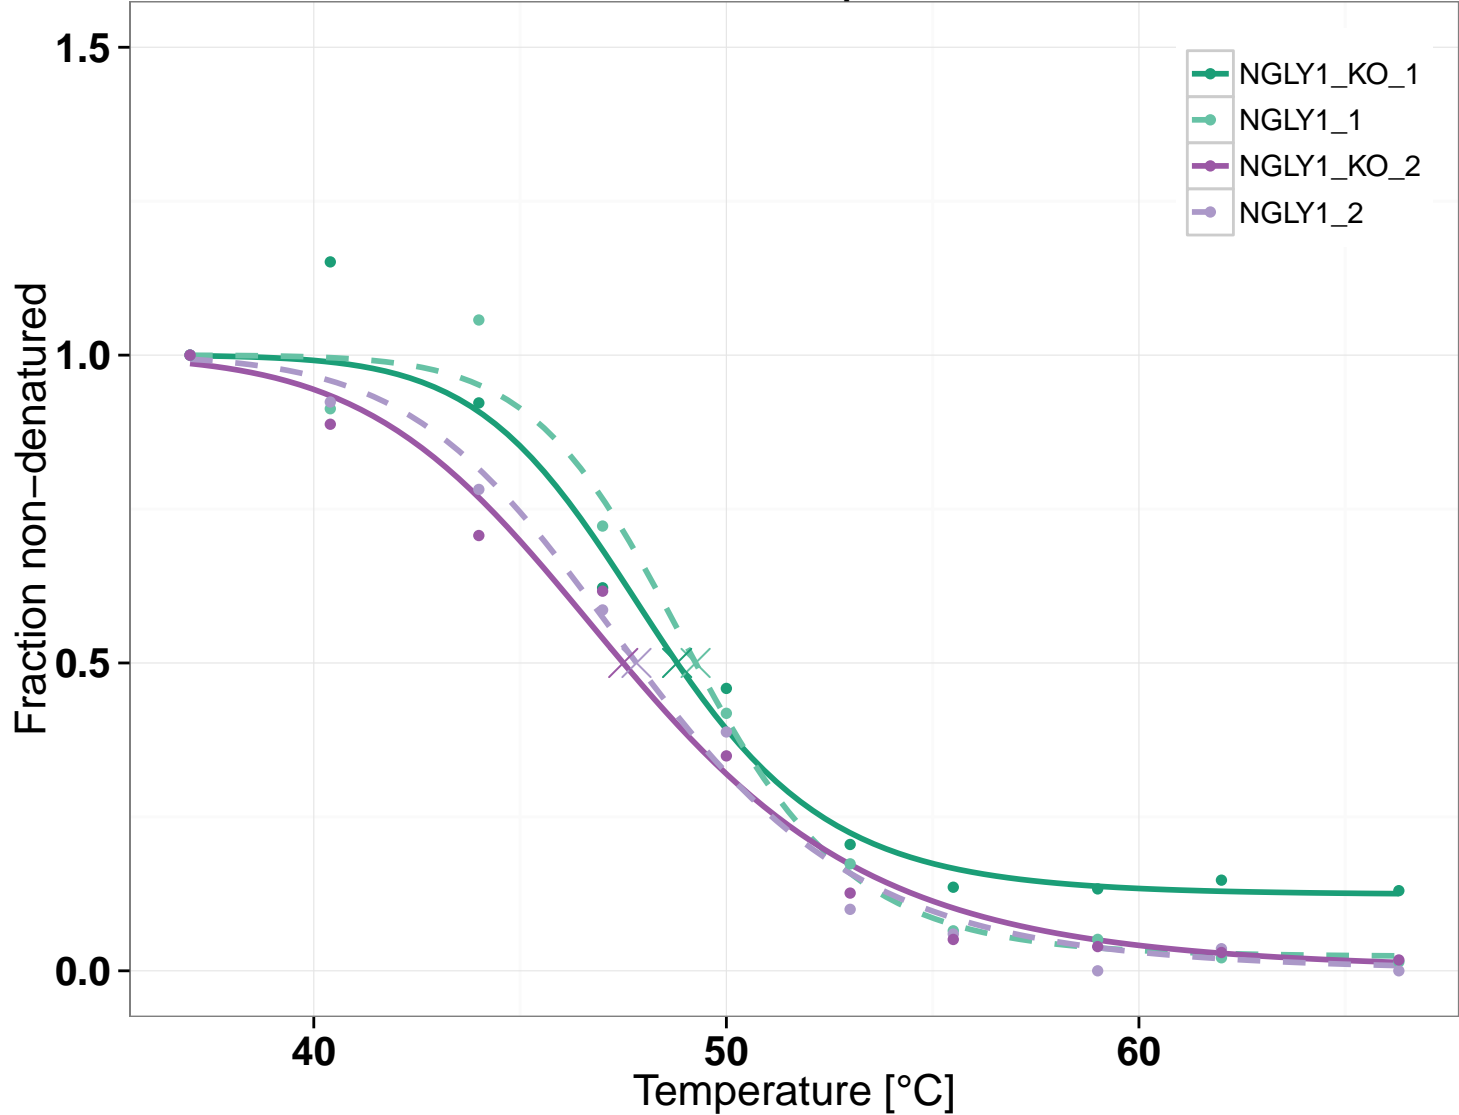

|            | meltPoint | slope  | plateau | R2   |
|------------|-----------|--------|---------|------|
| NGLY1_KO_1 | 48.81     | -0.1   | 0.12    | 0.98 |
| NGLY1_1    | 49.25     | -0.13  | 0.02    | 0.99 |
| NGLY1_KO_2 | 47.5      | -0.081 | 0       | 0.99 |
| NGLY1_2    | 47.82     | -0.091 | 0       | 0.99 |

Supplement: Supplementary file 7305 [file 1]

# IPI00742677.2|ABCB6

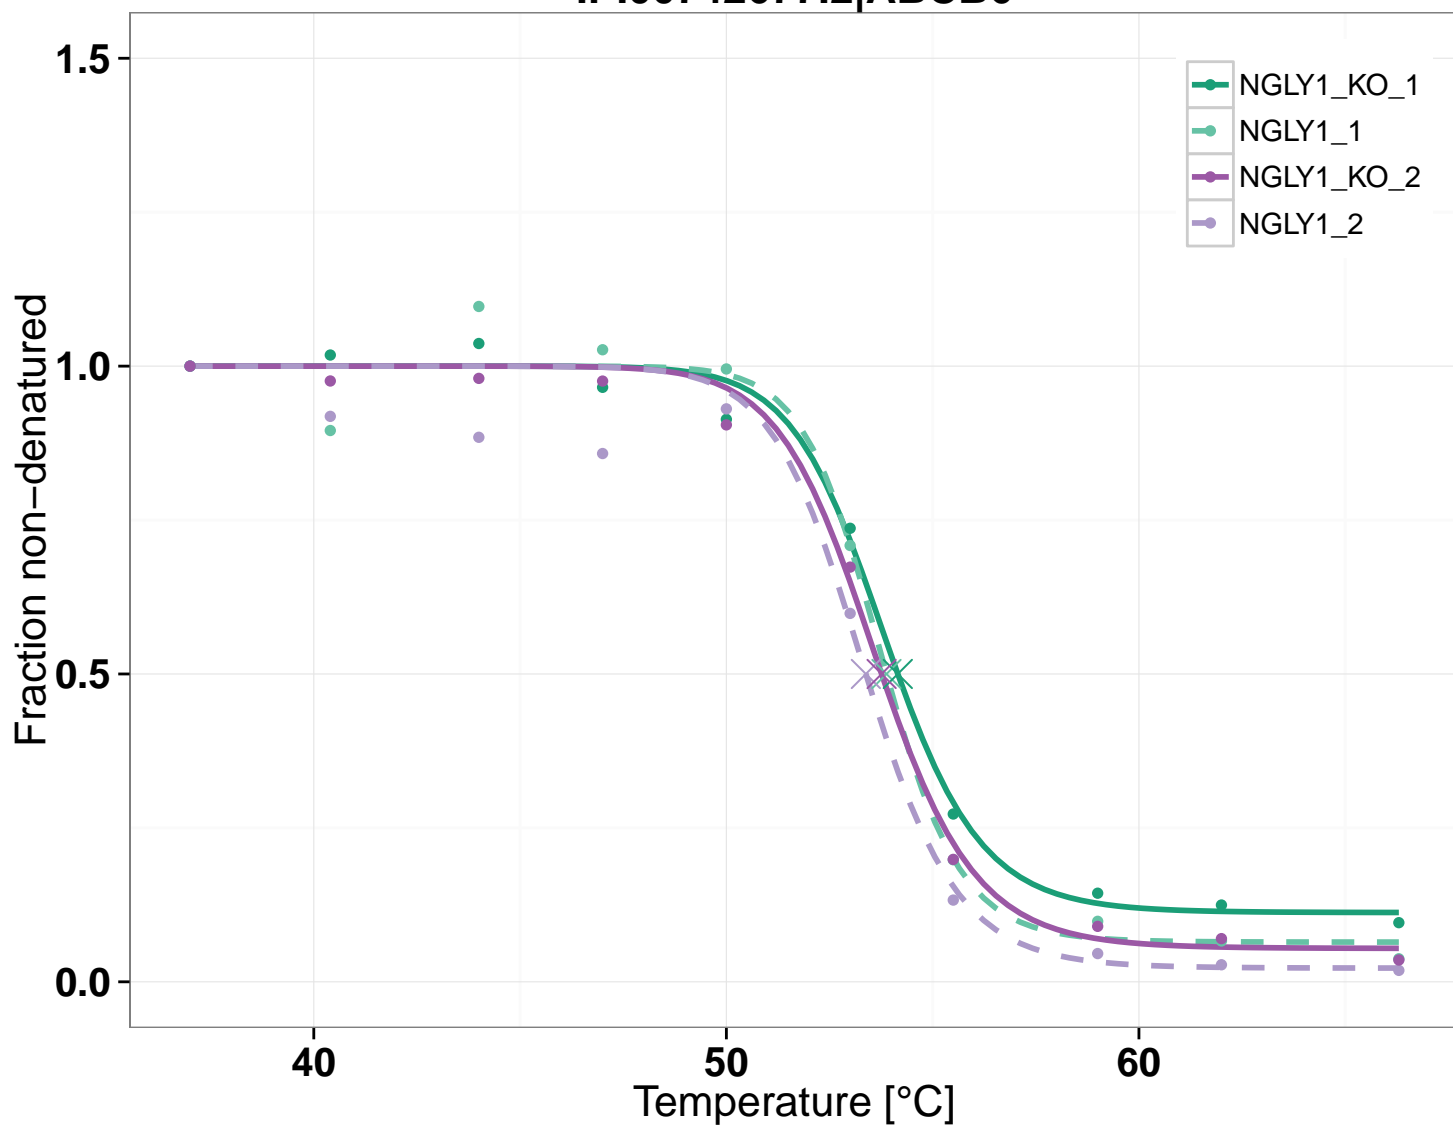

|            | meltPoint | slope | plateau | R2   |
|------------|-----------|-------|---------|------|
| NGLY1_KO_1 | 54.16     | -0.19 | 0.11    | 0.99 |
| NGLY1_1    | 53.88     | -0.25 | 0.06    | 0.99 |
| NGLY1_KO_2 | 53.76     | -0.2  | 0.05    | 1    |
| NGLY1_2    | 53.38     | -0.22 | 0.02    | 0.98 |

Supplement: Supplementary file 7306 [file 1]

# IPI00008771.1|HHEX

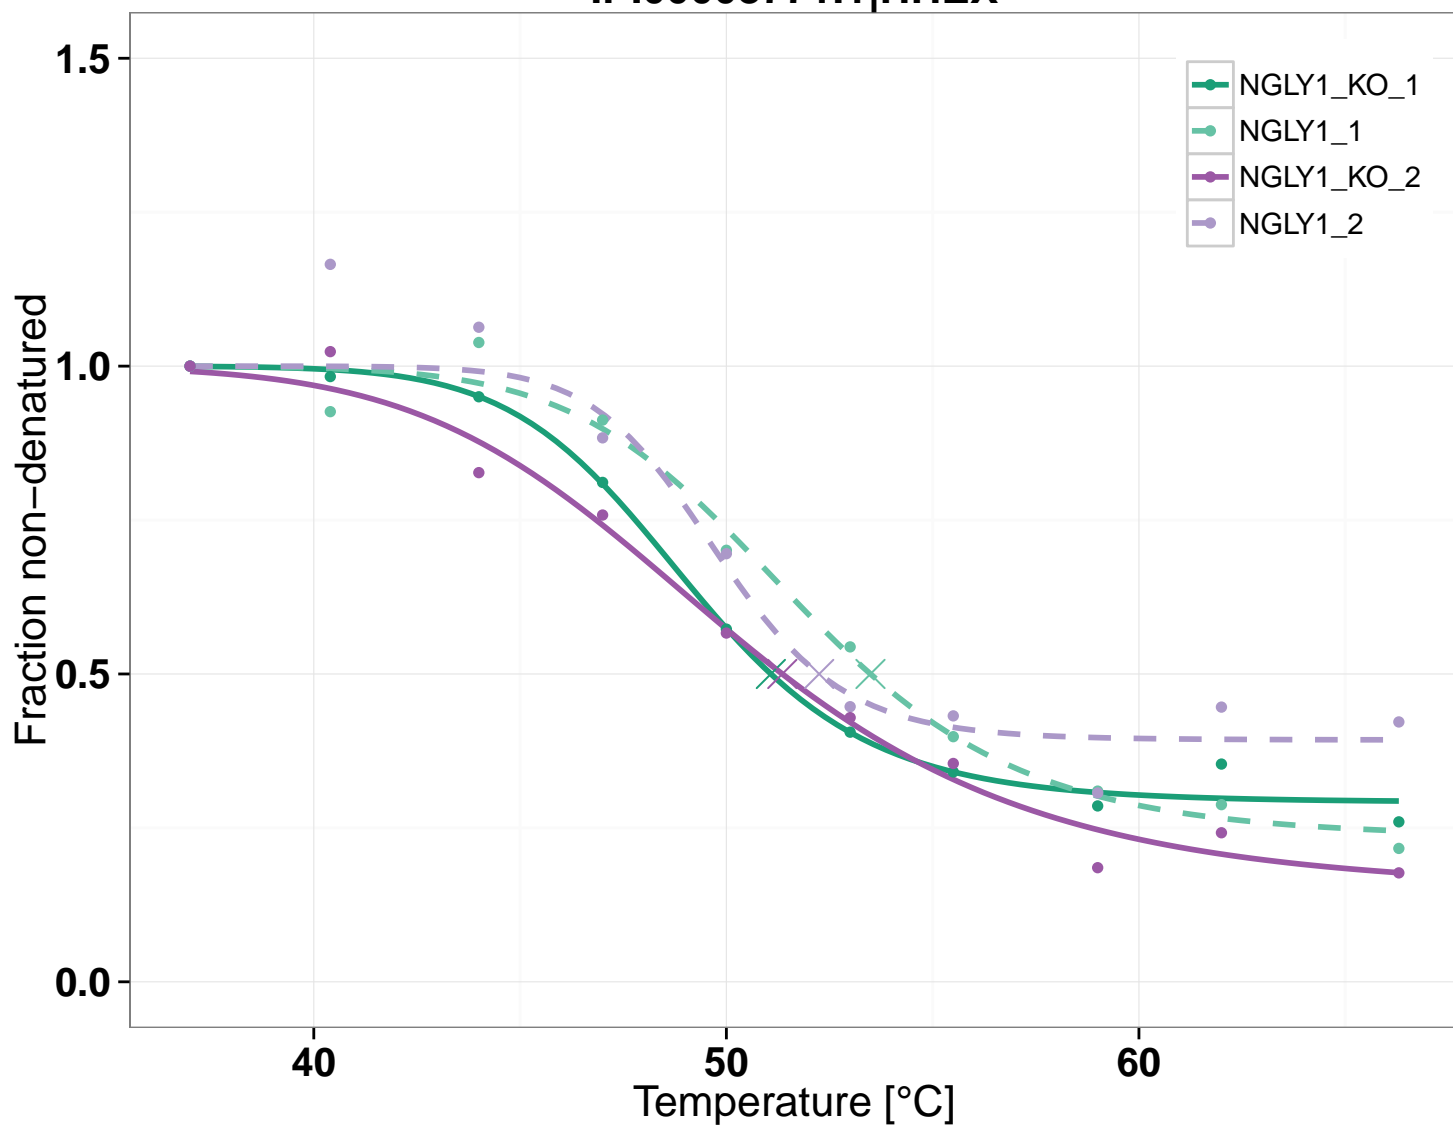

|            | meltPoint | slope  | plateau | R2   |
|------------|-----------|--------|---------|------|
| NGLY1_KO_1 | 51.08     | -0.082 | 0.29    | 0.99 |
| NGLY1_1    | 53.49     | -0.07  | 0.23    | 0.99 |
| NGLY1_KO_2 | 51.36     | -0.057 | 0.14    | 0.99 |
| NGLY1_2    | 52.25     | -0.1   | 0.39    | 0.95 |

Supplement: Supplementary file 7307 [file 1]

# IPI00654865.2|DIP2A

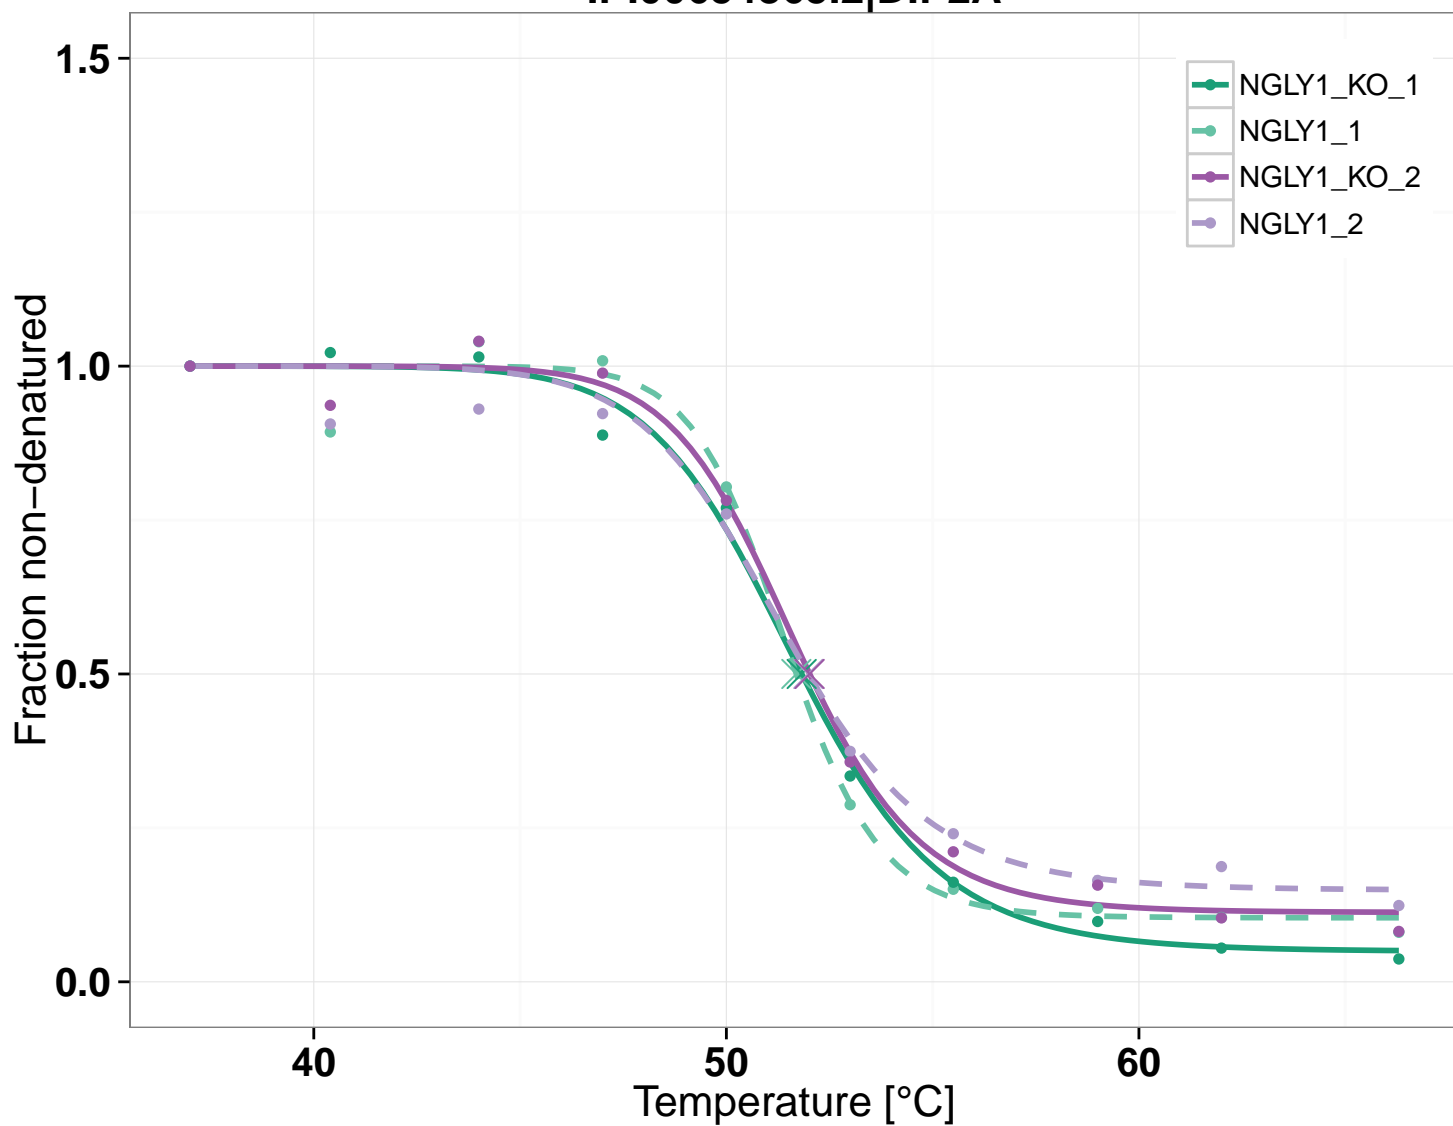

|            | meltPoint | slope | plateau | R2   |
|------------|-----------|-------|---------|------|
| NGLY1_KO_1 | 51.83     | -0.13 | 0.05    | 1    |
| NGLY1_1    | 51.7      | -0.2  | 0.1     | 0.99 |
| NGLY1_KO_2 | 52.02     | -0.15 | 0.11    | 0.99 |
| NGLY1_2    | 51.99     | -0.12 | 0.15    | 0.99 |

Supplement: Supplementary file 7308 [file 1]

IPI00011217.3|NDUFS4

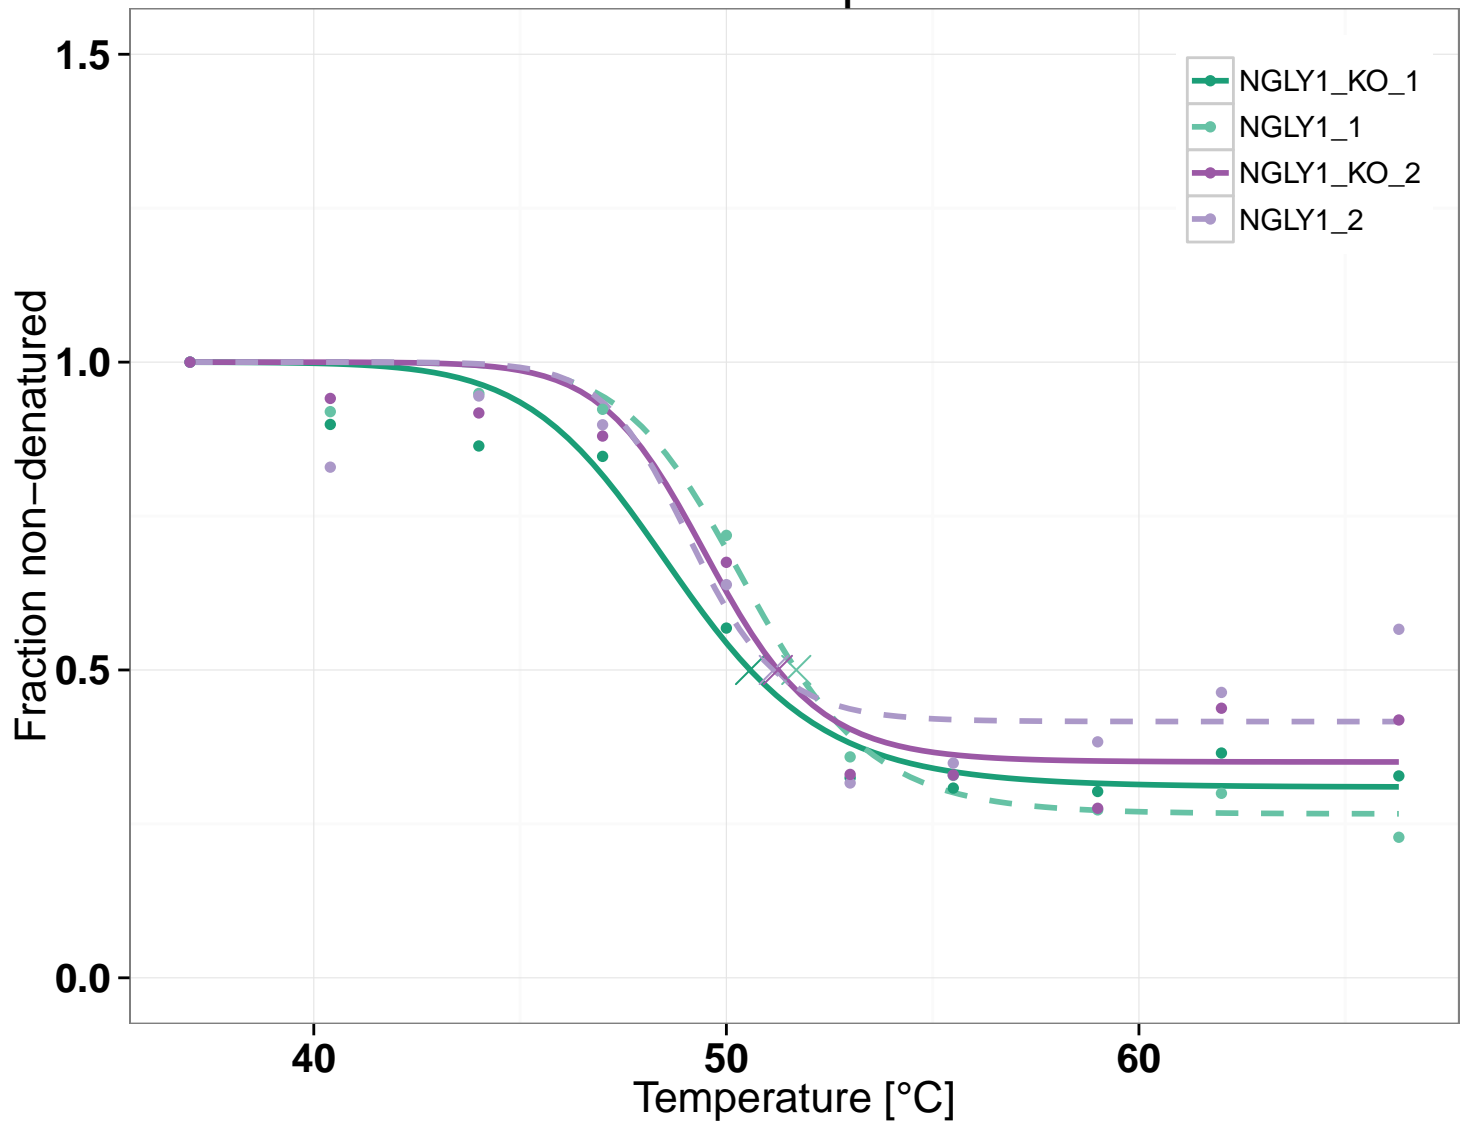

|            | meltPoint | slope  | plateau | R2   |
|------------|-----------|--------|---------|------|
| NGLY1_KO_1 | 50.57     | -0.096 | 0.31    | 0.96 |
| NGLY1_1    | 51.69     | -0.12  | 0.27    | 0.99 |
| NGLY1_KO_2 | 51.25     | -0.12  | 0.35    | 0.95 |
| NGLY1_2    | 51.15     | -0.14  | 0.42    | 0.87 |

Supplement: Supplementary file 7309 [file 1]

IPI00014301.3|OXA1L

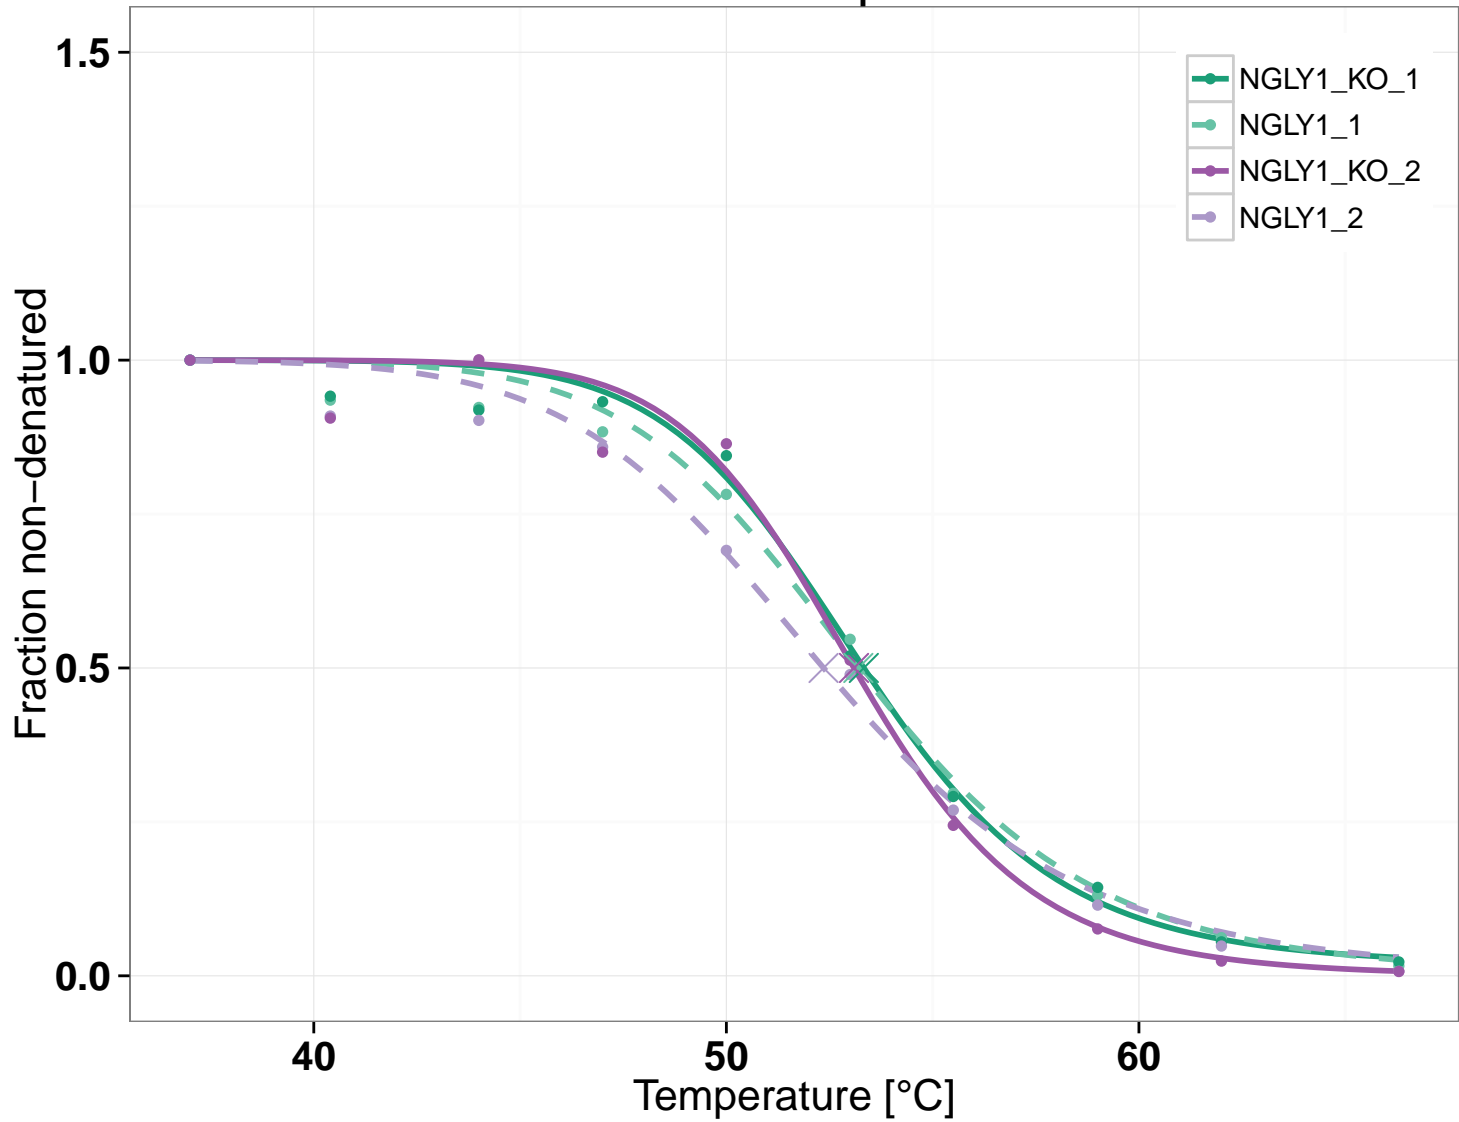

|            | meltPoint | slope  | plateau | R2   |
|------------|-----------|--------|---------|------|
| NGLY1_KO_1 | 53.33     | -0.1   | 0.02    | 0.99 |
| NGLY1_1    | 53.2      | -0.088 | 0       | 0.99 |
| NGLY1_KO_2 | 53.09     | -0.12  | 0       | 0.99 |
| NGLY1_2    | 52.36     | -0.08  | 0       | 0.99 |

Supplement: Supplementary file 7310 [file 1]

IPI00299977.1|PHPT1

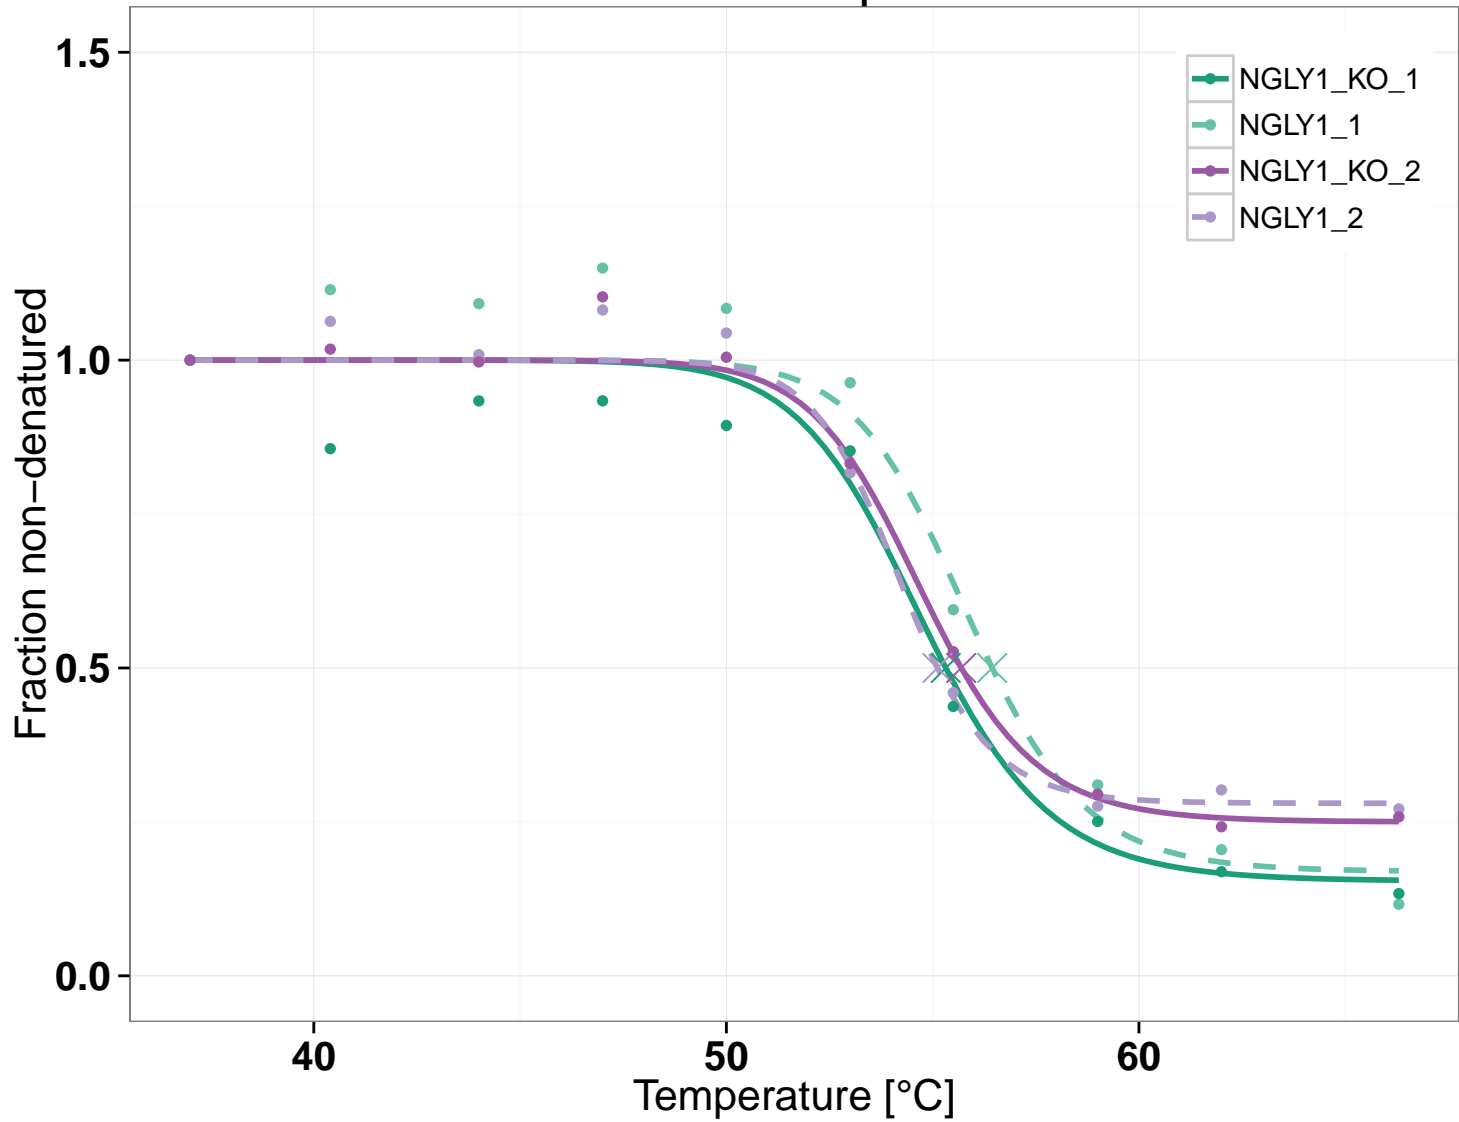

|            | meltPoint | slope | plateau | R2   |
|------------|-----------|-------|---------|------|
| NGLY1_KO_1 | 55.32     | -0.14 | 0.15    | 0.96 |
| NGLY1_1    | 56.44     | -0.15 | 0.17    | 0.96 |
| NGLY1_KO_2 | 55.69     | -0.14 | 0.25    | 0.99 |
| NGLY1_2    | 55.12     | -0.17 | 0.28    | 0.99 |

Supplement: Supplementary file 7311 [file 1]

IPI00011209.8|KCTD10

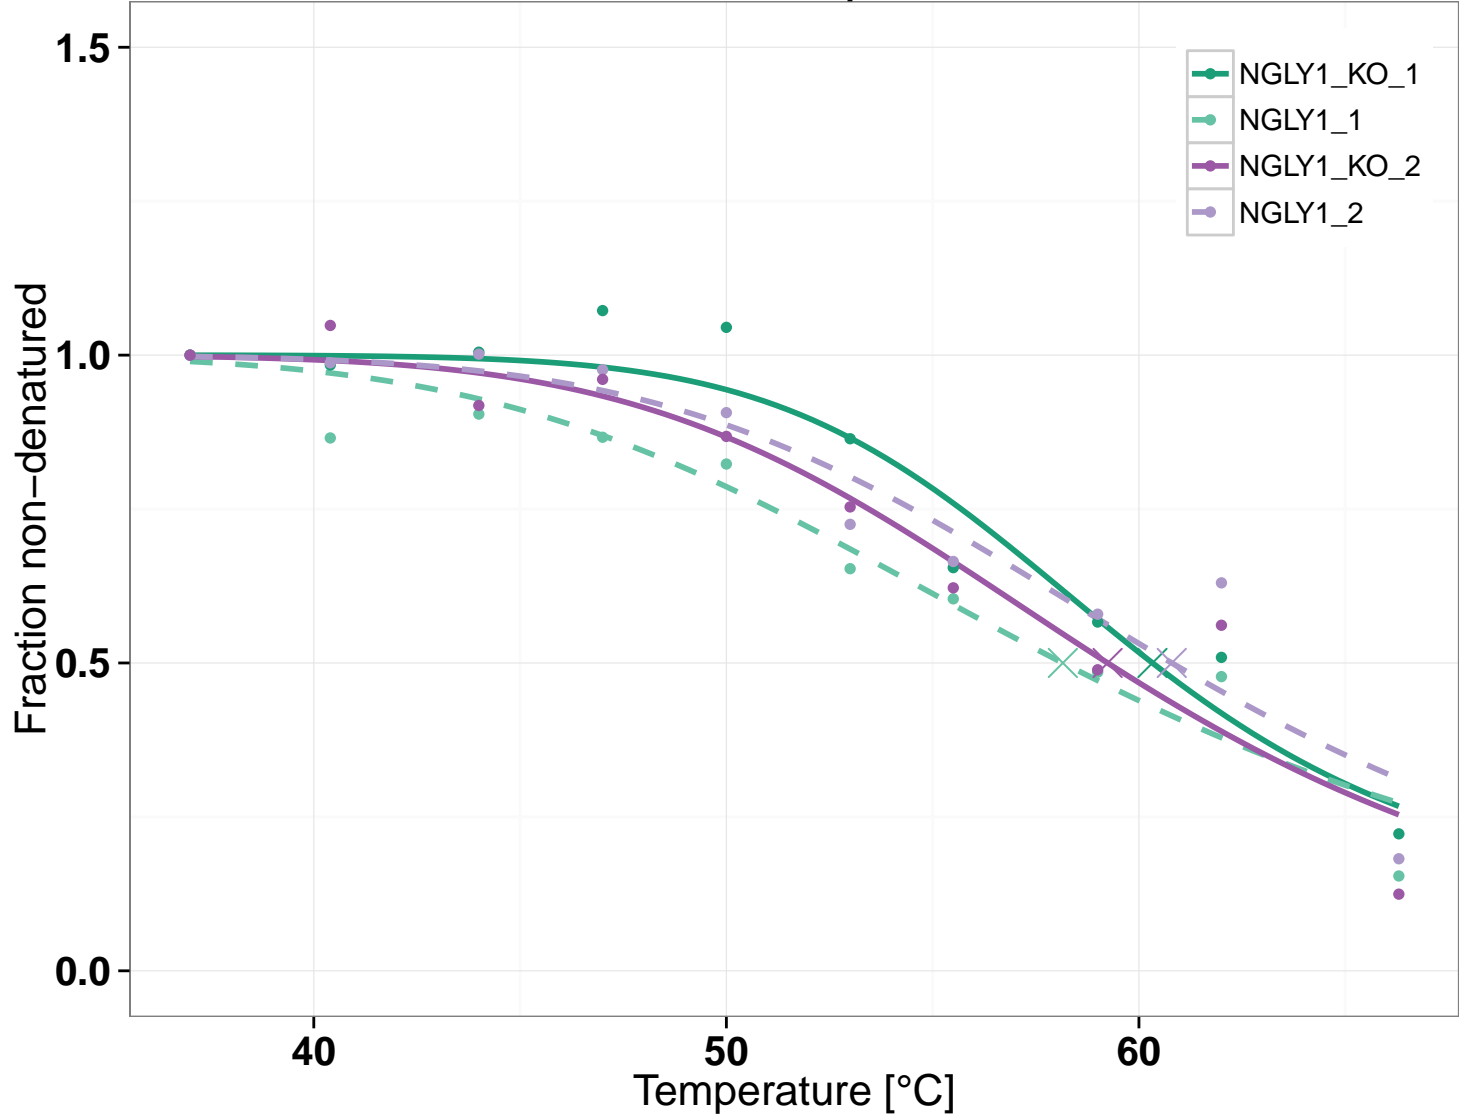

|            | meltPoint | slope  | plateau | R2   |
|------------|-----------|--------|---------|------|
| NGLY1_KO_1 | 60.33     | -0.056 | 0.11    | 0.95 |
| NGLY1_1    | 58.16     | -0.036 | 0       | 0.94 |
| NGLY1_KO_2 | 59.24     | -0.044 | 0       | 0.93 |
| NGLY1_2    | 60.8      | -0.041 | 0       | 0.91 |

Supplement: Supplementary file 7312 [file 1]

# IPI00030207.1|GMDS

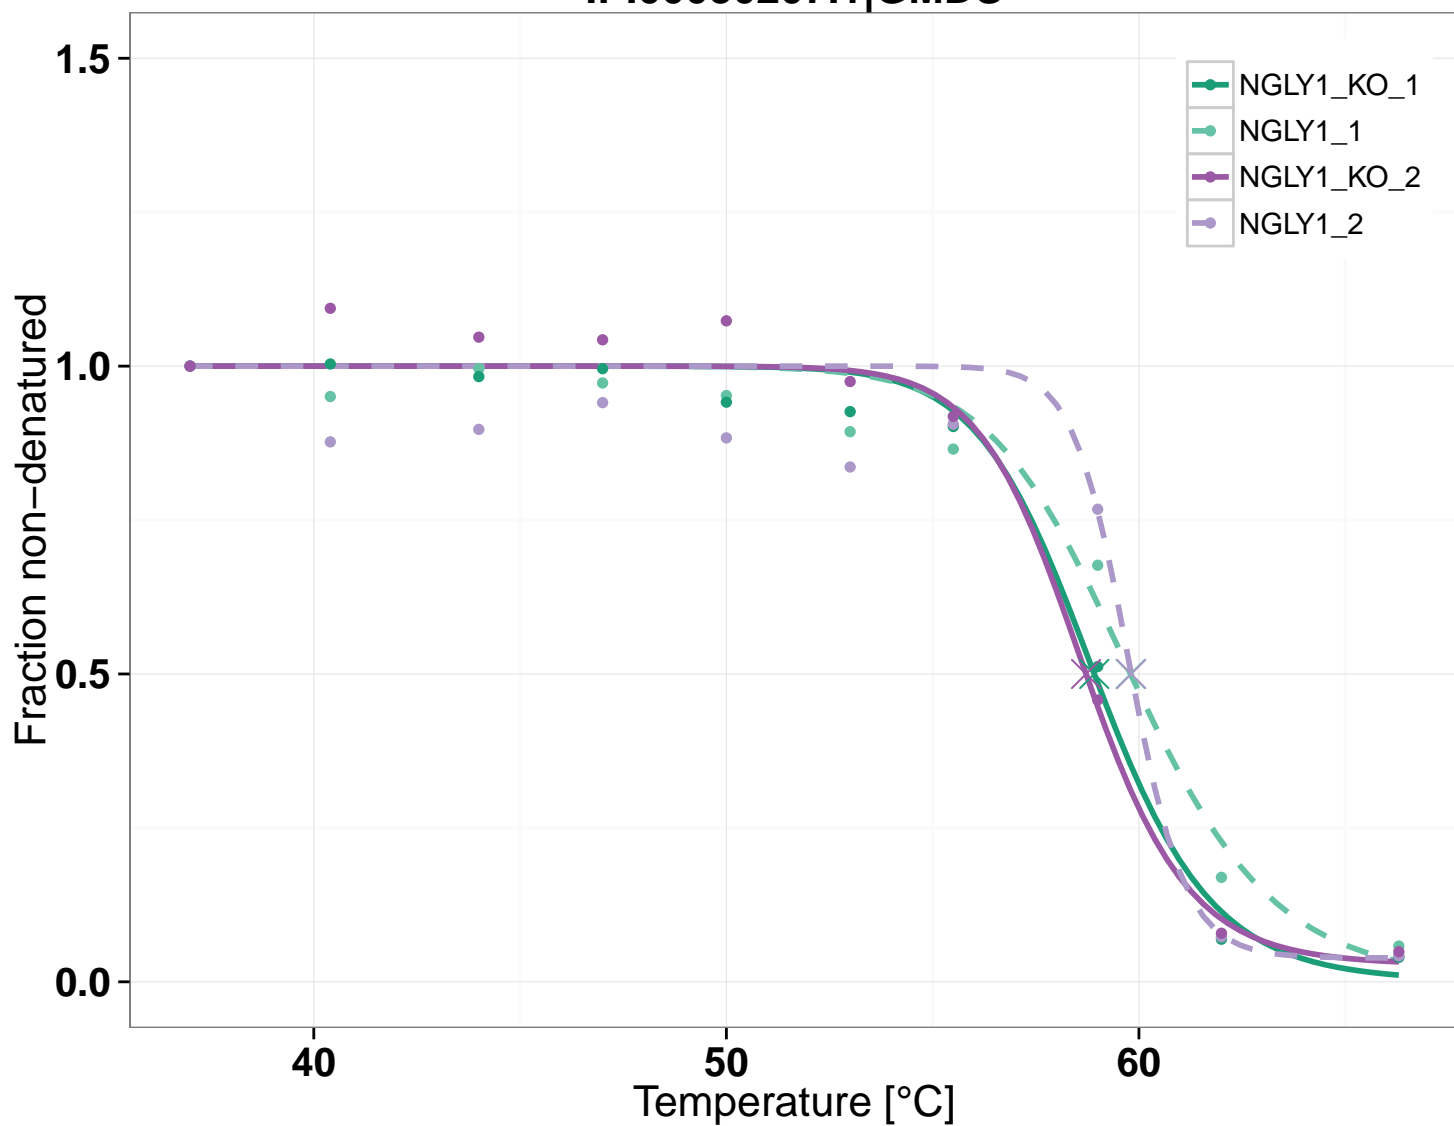

|            | meltPoint | slope | plateau | R2   |
|------------|-----------|-------|---------|------|
| NGLY1_KO_1 | 58.92     | -0.18 | 0       | 0.99 |
| NGLY1_1    | 59.8      | -0.14 | 0       | 0.98 |
| NGLY1_KO_2 | 58.72     | -0.19 | 0.03    | 0.99 |
| NGLY1_2    | 59.81     | -0.35 | 0.04    | 0.93 |

Supplement: Supplementary file 7313 [file 1]

# IPI00410404.3|CMPK2

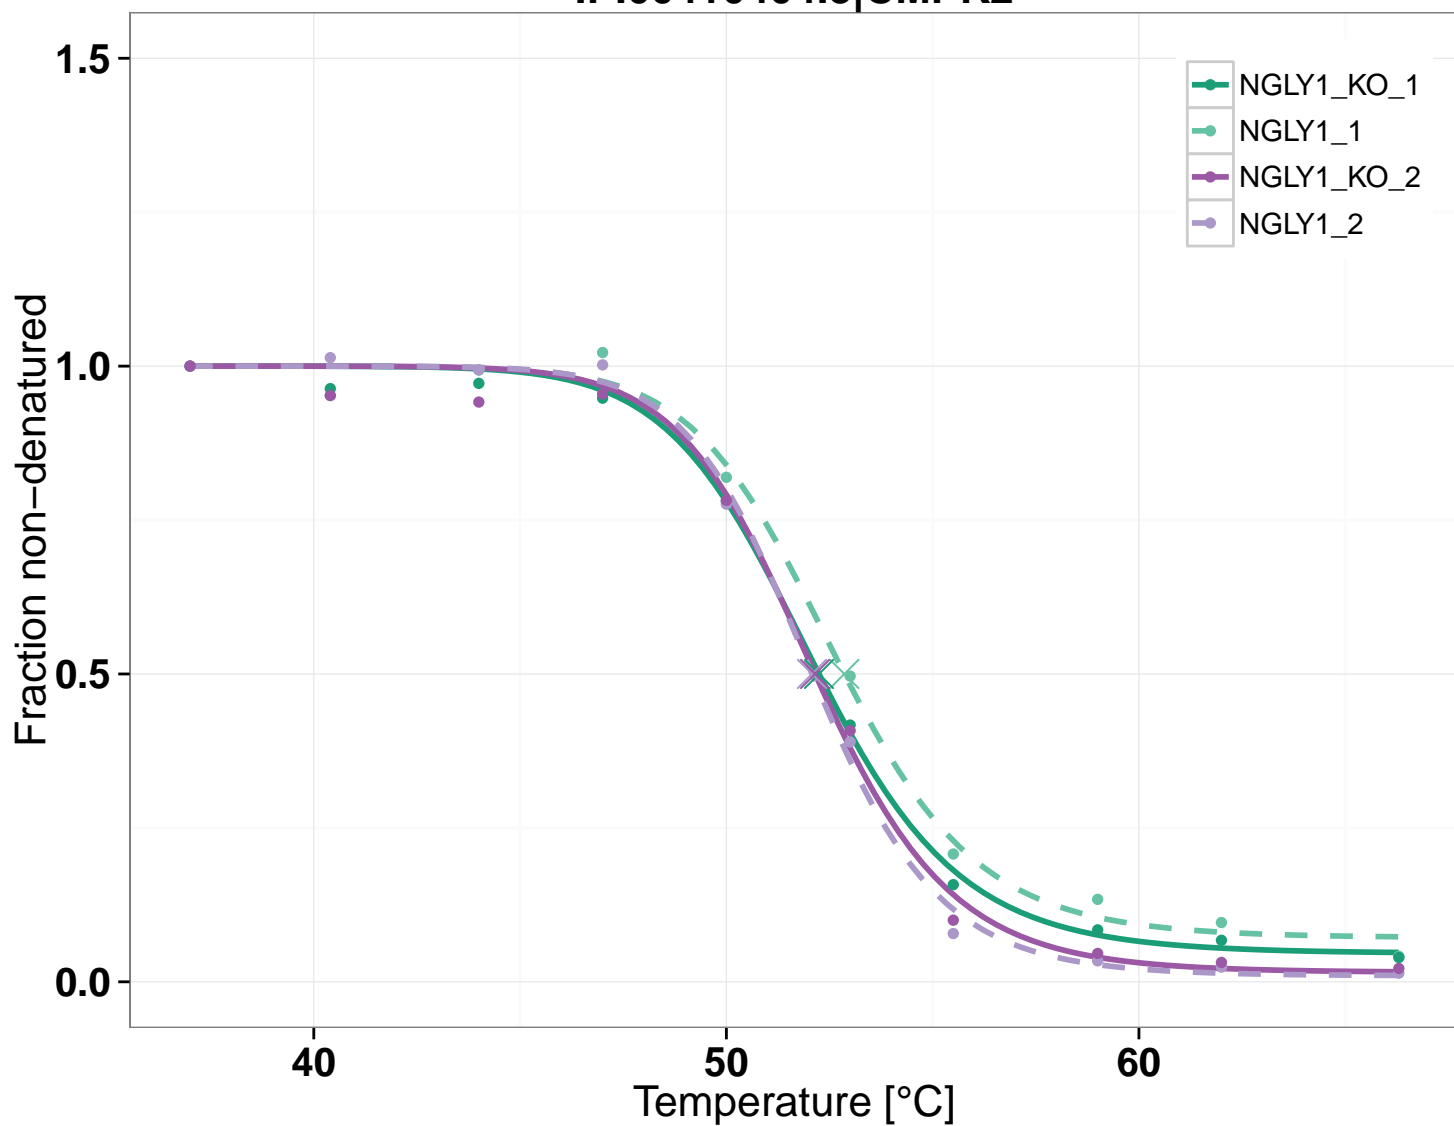

|            | meltPoint | slope | plateau | R2 |
|------------|-----------|-------|---------|----|
| NGLY1_KO_1 | 52.24     | -0.13 | 0.05    | 1  |
| NGLY1_1    | 52.86     | -0.13 | 0.07    | 1  |
| NGLY1_KO_2 | 52.15     | -0.15 | 0.02    | 1  |
| NGLY1_2    | 52.08     | -0.16 | 0.01    | 1  |

Supplement: Supplementary file 7314 [file 1]

IPI00161119.3|NFKBIB

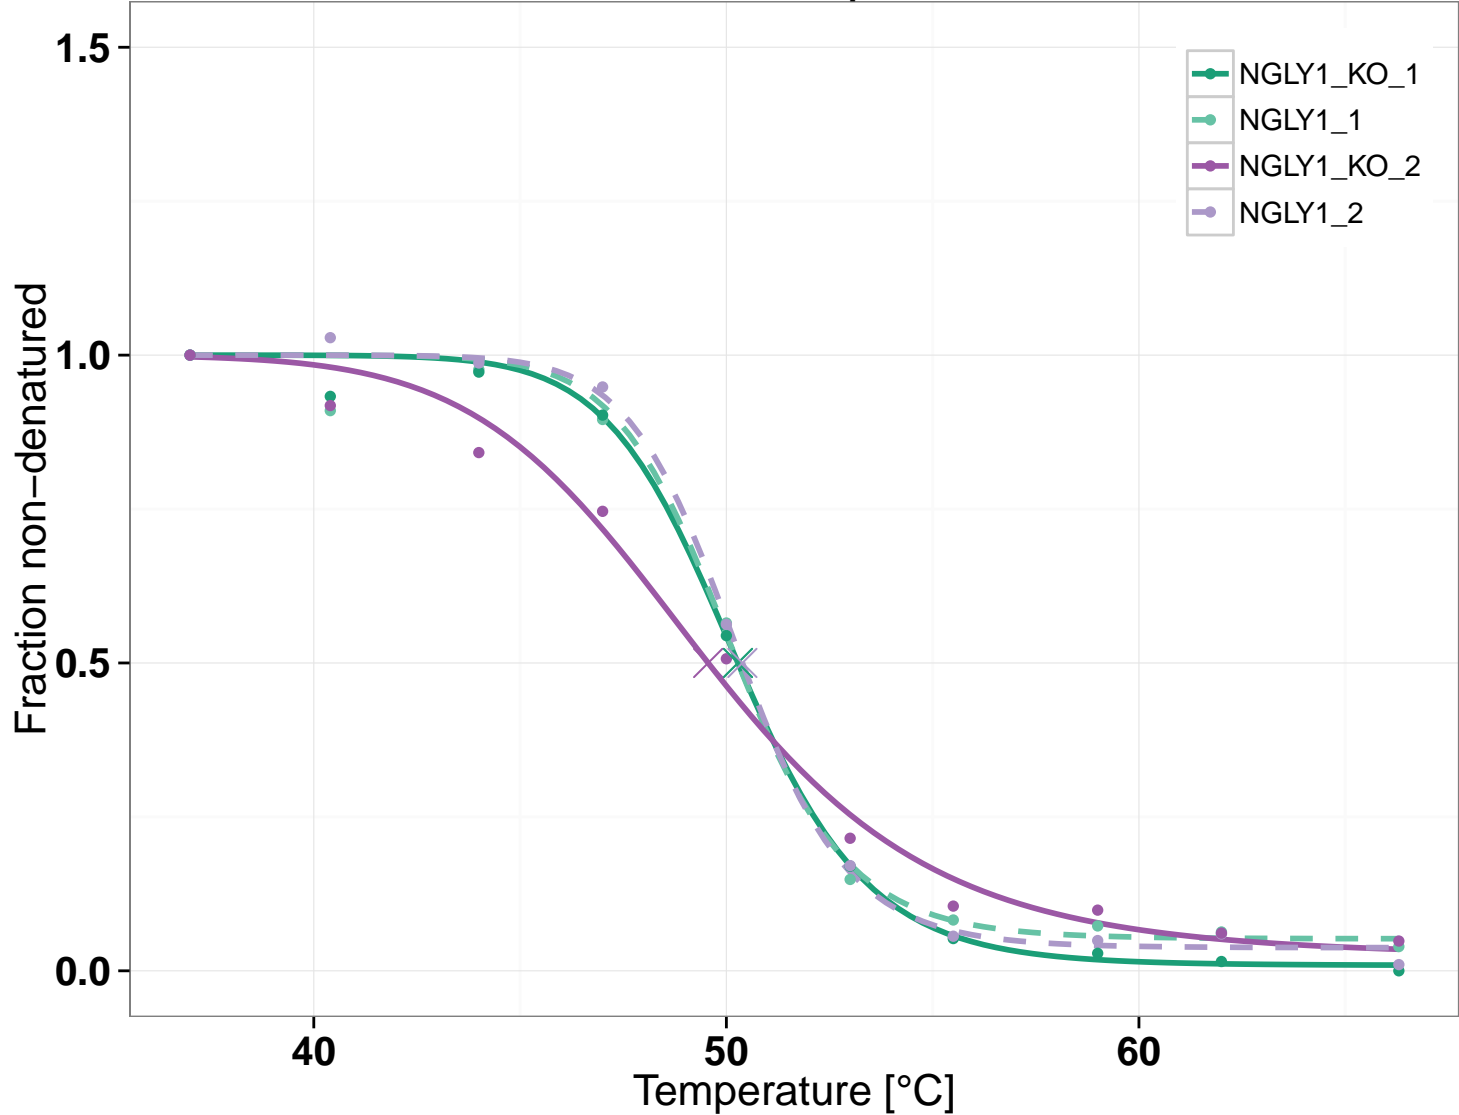

|            | meltPoint | slope  | plateau | R2   |
|------------|-----------|--------|---------|------|
| NGLY1_KO_1 | 50.28     | -0.16  | 0.01    | 1    |
| NGLY1_1    | 50.28     | -0.17  | 0.05    | 0.99 |
| NGLY1_KO_2 | 49.56     | -0.087 | 0.02    | 0.99 |
| NGLY1_2    | 50.39     | -0.18  | 0.04    | 1    |

Supplement: Supplementary file 7315 [file 1]

IPI00215719.6|RPL18

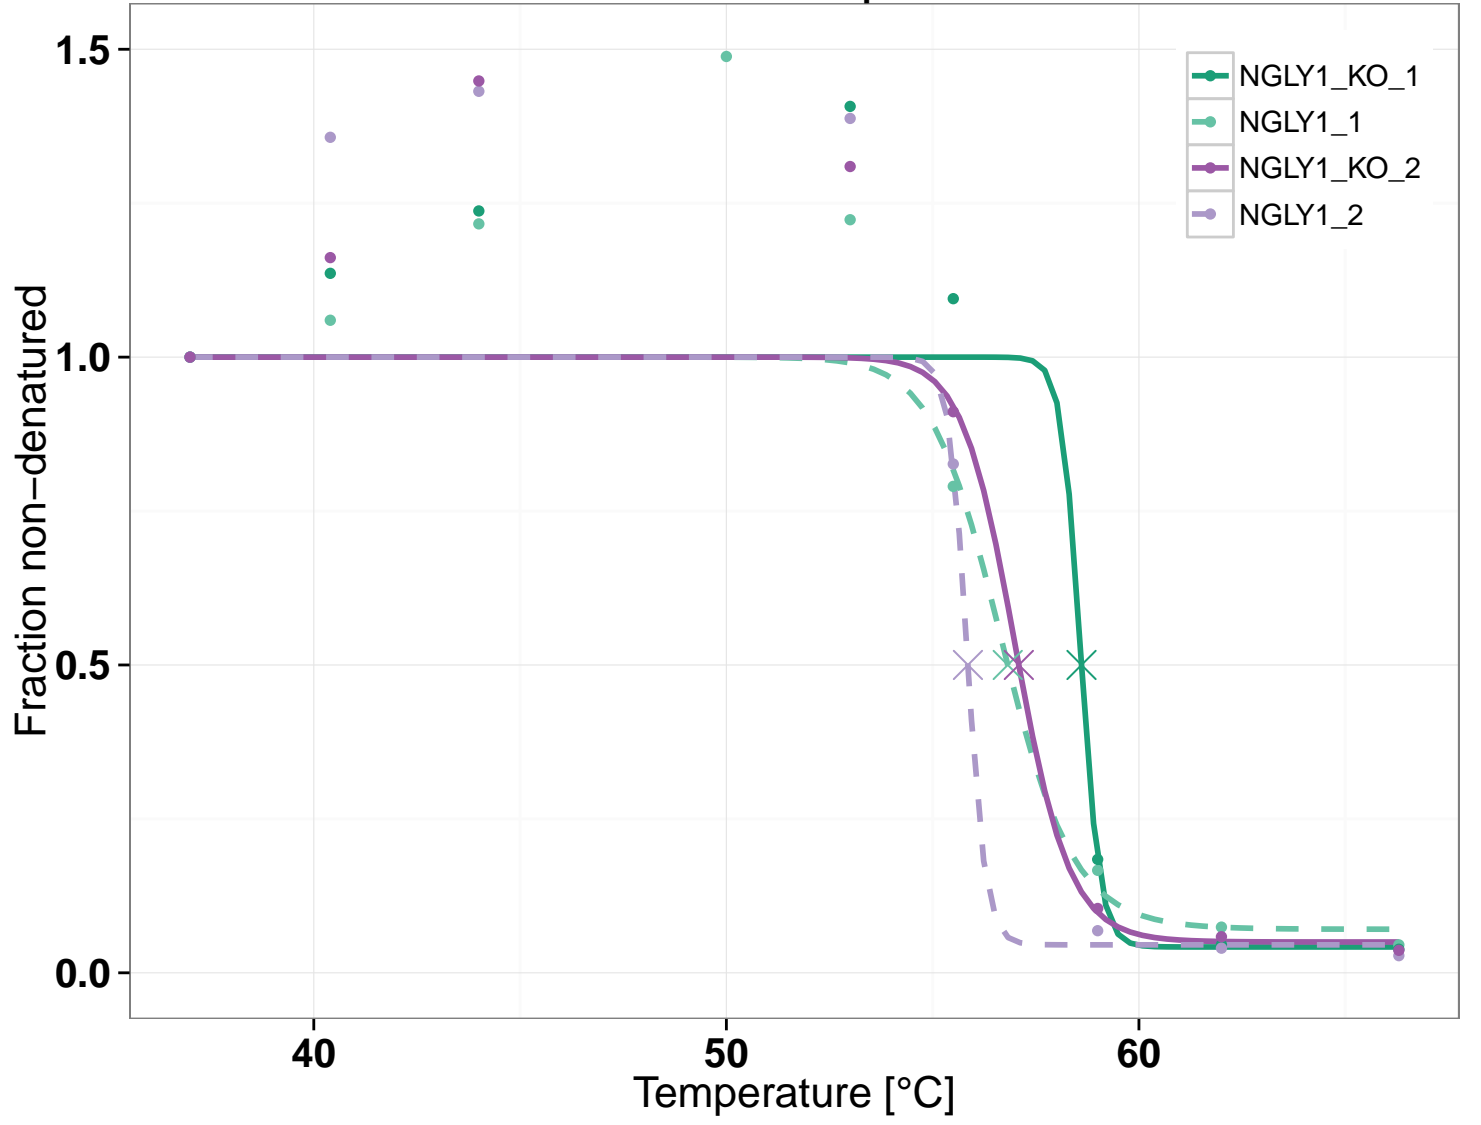

|            | meltPoint | slope | plateau | R2   |
|------------|-----------|-------|---------|------|
| NGLY1_KO_1 | 58.61     | -1    | 0.04    | 0.67 |
| NGLY1_1    | 56.82     | -0.27 | 0.07    | 0.79 |
| NGLY1_KO_2 | 57.09     | -0.36 | 0.05    | 0.68 |
| NGLY1_2    | 55.86     | -1.1  | 0.05    | 0.64 |

Supplement: Supplementary file 7316 [file 1]

# IPI00300504.5|UPF2

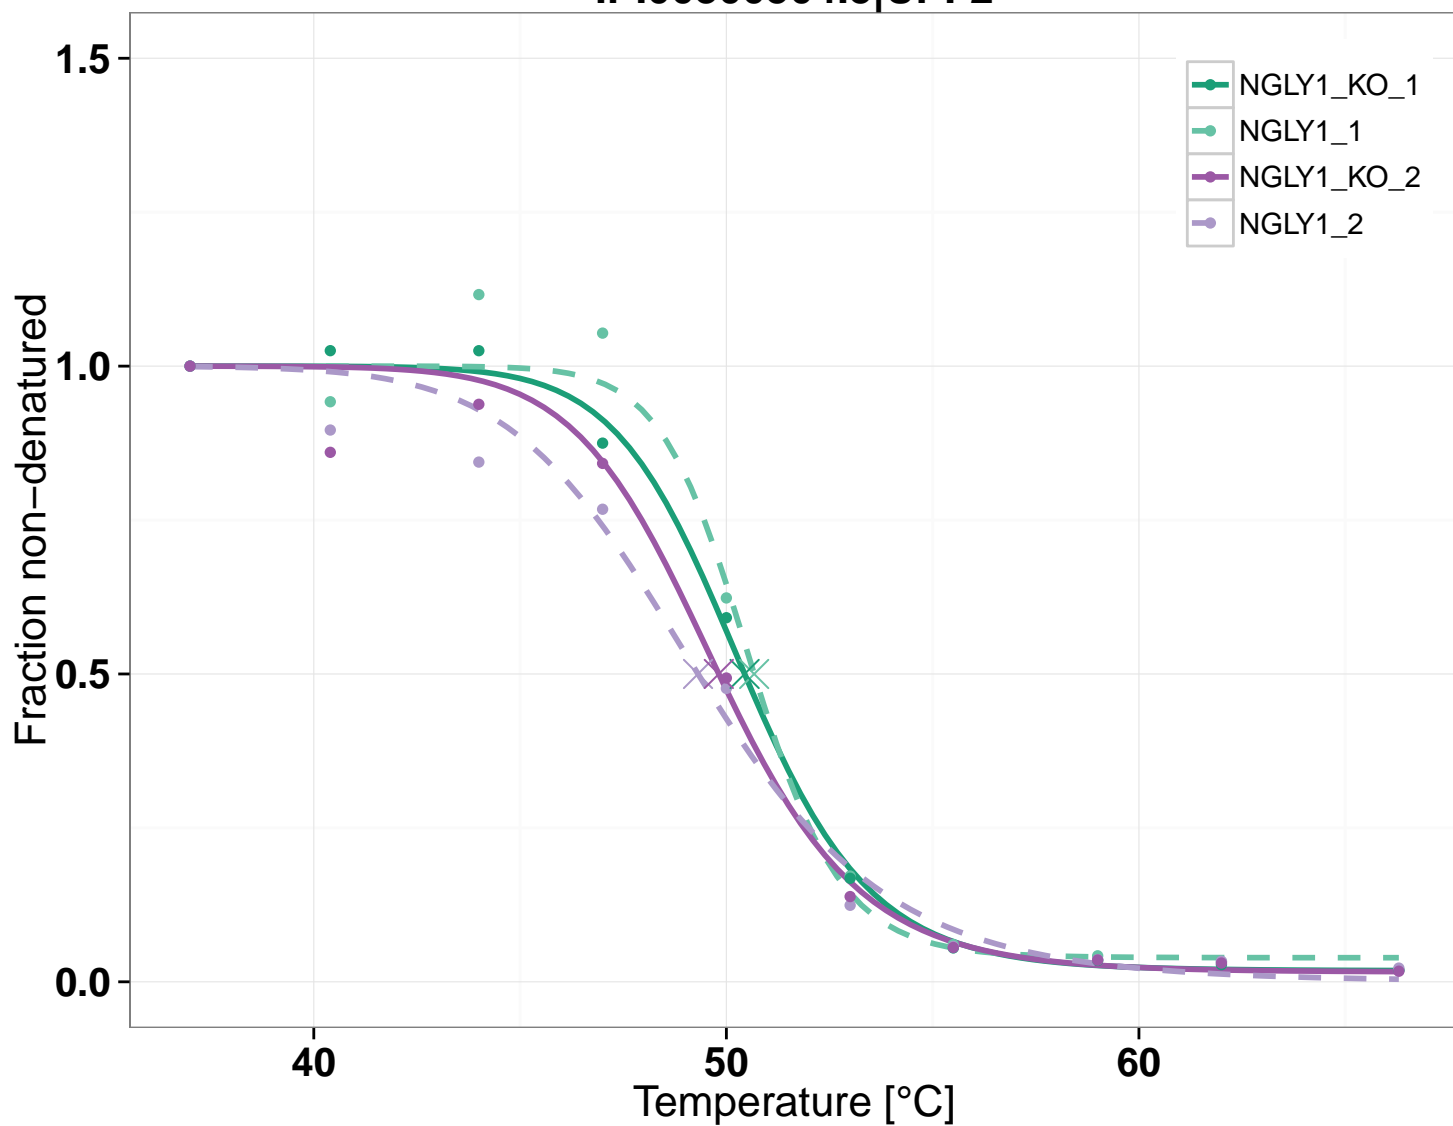

|            | meltPoint | slope | plateau | R2   |
|------------|-----------|-------|---------|------|
| NGLY1_KO_1 | 50.44     | -0.16 | 0.02    | 1    |
| NGLY1_1    | 50.67     | -0.22 | 0.04    | 0.99 |
| NGLY1_KO_2 | 49.82     | -0.14 | 0.02    | 0.99 |
| NGLY1_2    | 49.31     | -0.11 | 0       | 0.98 |

Supplement: Supplementary file 7317 [file 1]

IPI00871585.1|BID

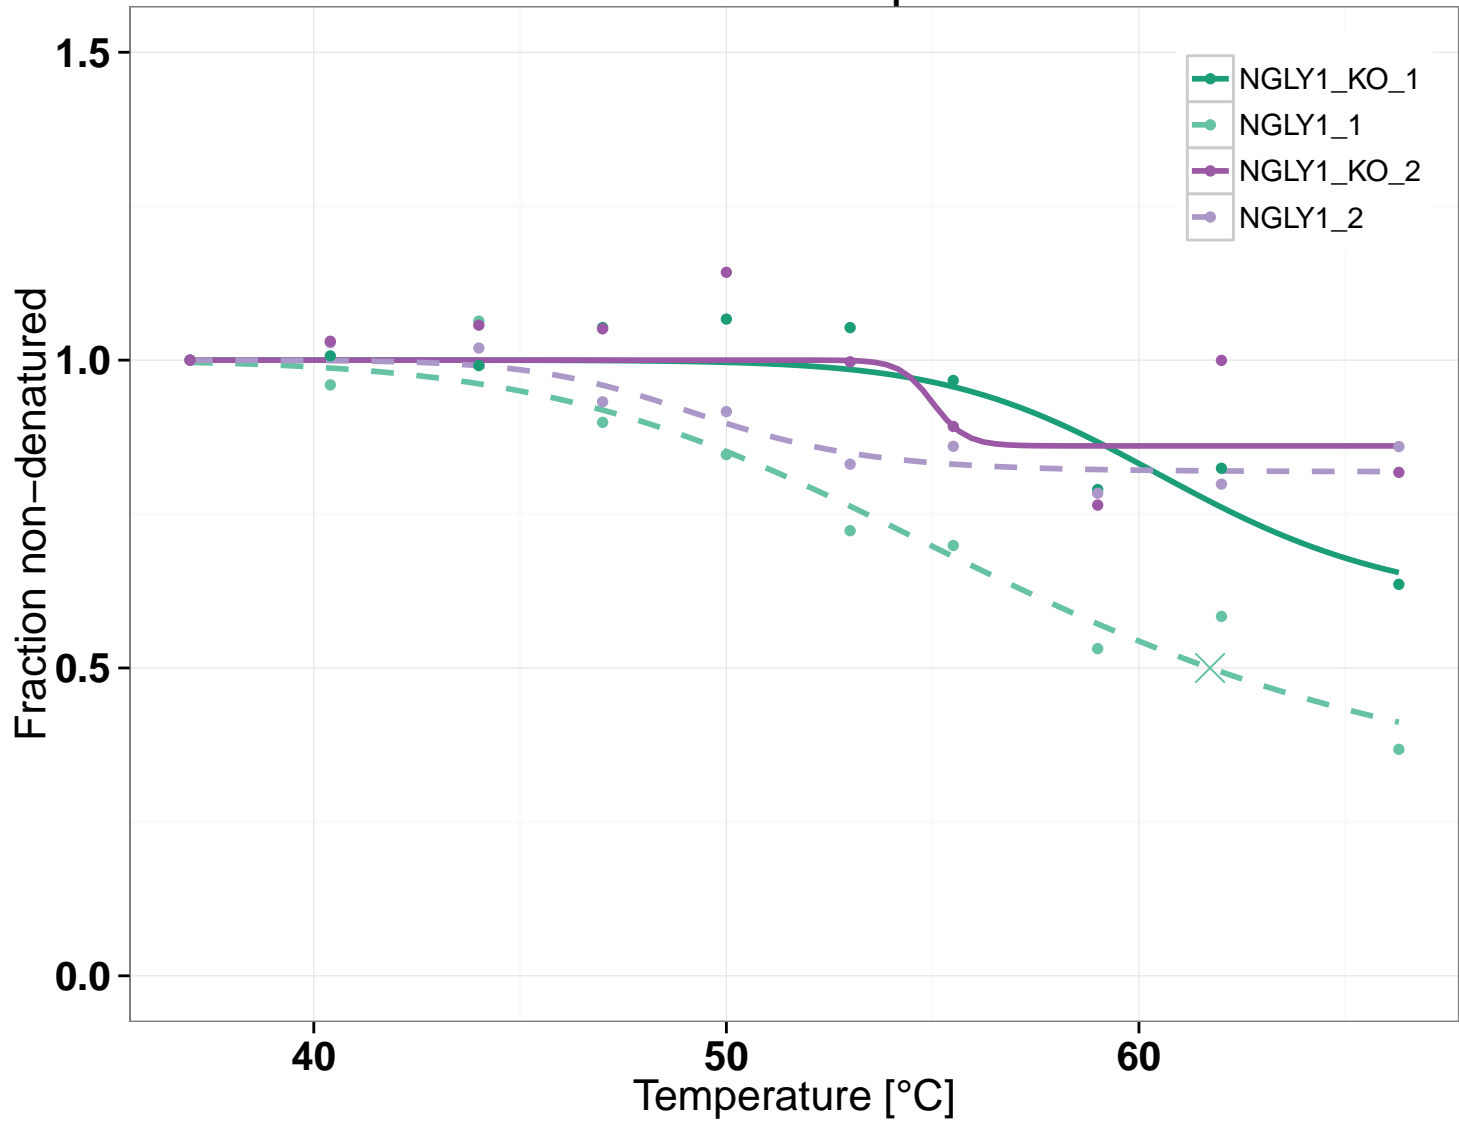

|            | meltPoint | slope  | plateau | R2   |
|------------|-----------|--------|---------|------|
| NGLY1_KO_1 | -         | -0.036 | 0.59    | 0.87 |
| NGLY1_1    | 61.72     | -0.033 | 0.26    | 0.95 |
| NGLY1_KO_2 | -         | -0.088 | 0.86    | 0.53 |
| NGLY1_2    | -         | -0.022 | 0.82    | 0.9  |

Supplement: Supplementary file 7318 [file 1]

# IPI00016179.1|S100A13

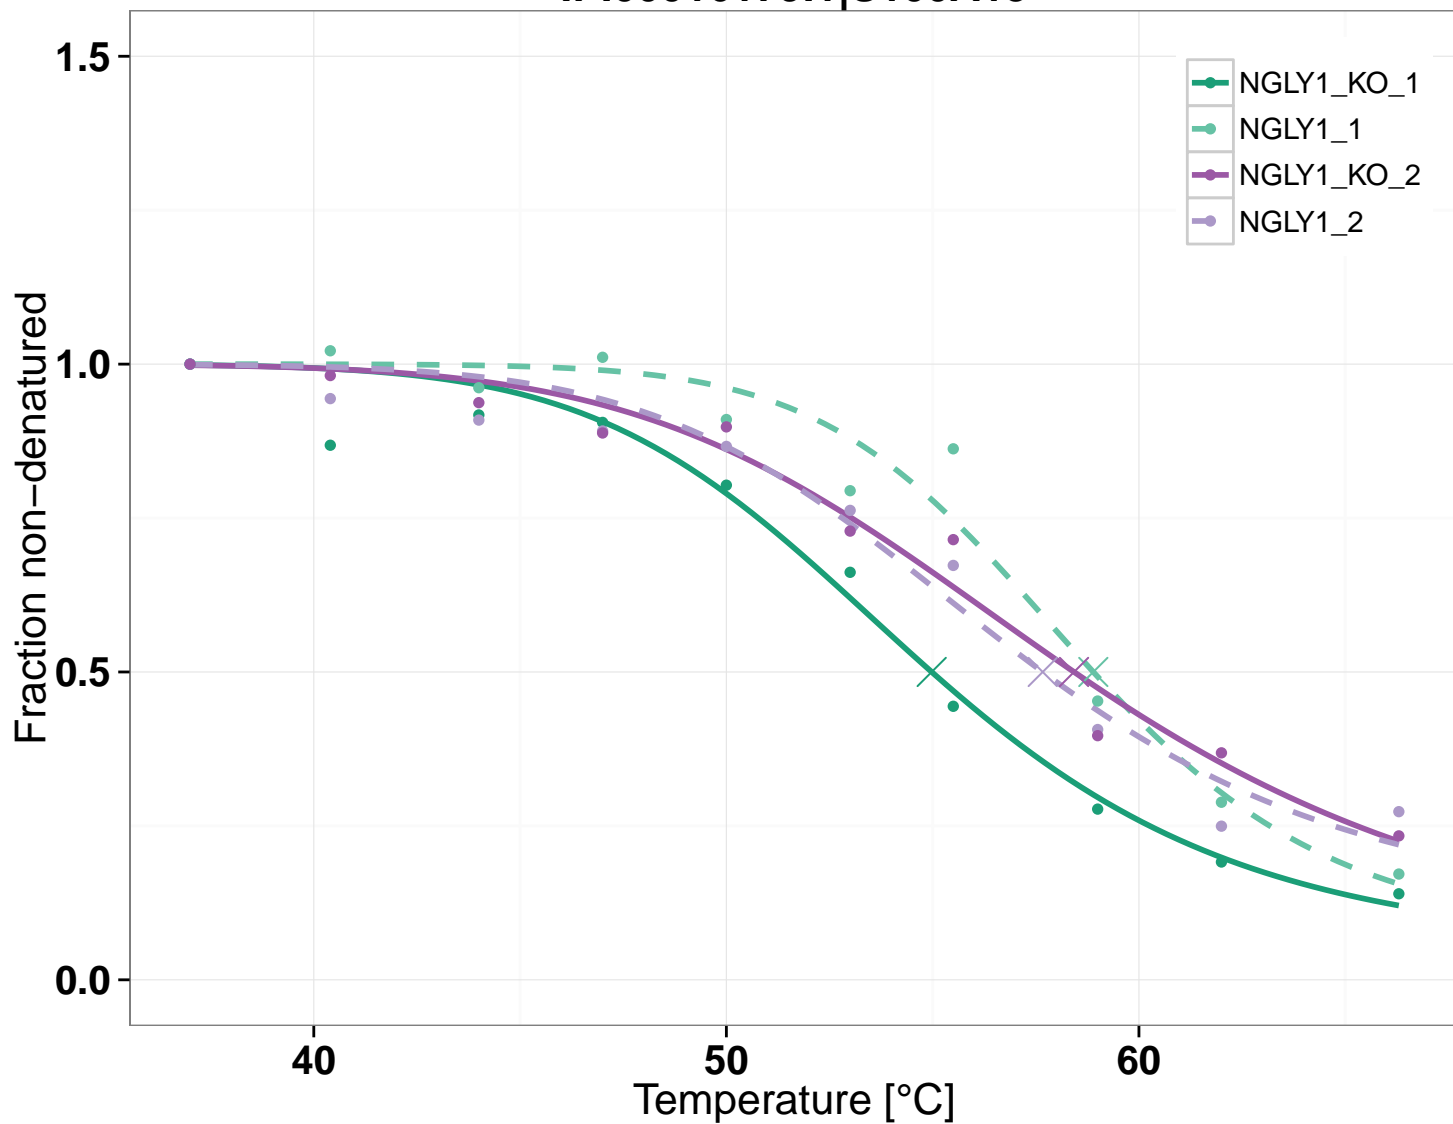

|            | meltPoint | slope  | plateau | R2   |
|------------|-----------|--------|---------|------|
| NGLY1_KO_1 | 54.98     | -0.061 | 0.04    | 0.98 |
| NGLY1_1    | 58.89     | -0.075 | 0.06    | 0.97 |
| NGLY1_KO_2 | 58.43     | -0.048 | 0.02    | 0.98 |
| NGLY1_2    | 57.67     | -0.053 | 0.1     | 0.97 |

Supplement: Supplementary file 7319 [file 1]

IPI00024279.4|HEATR1

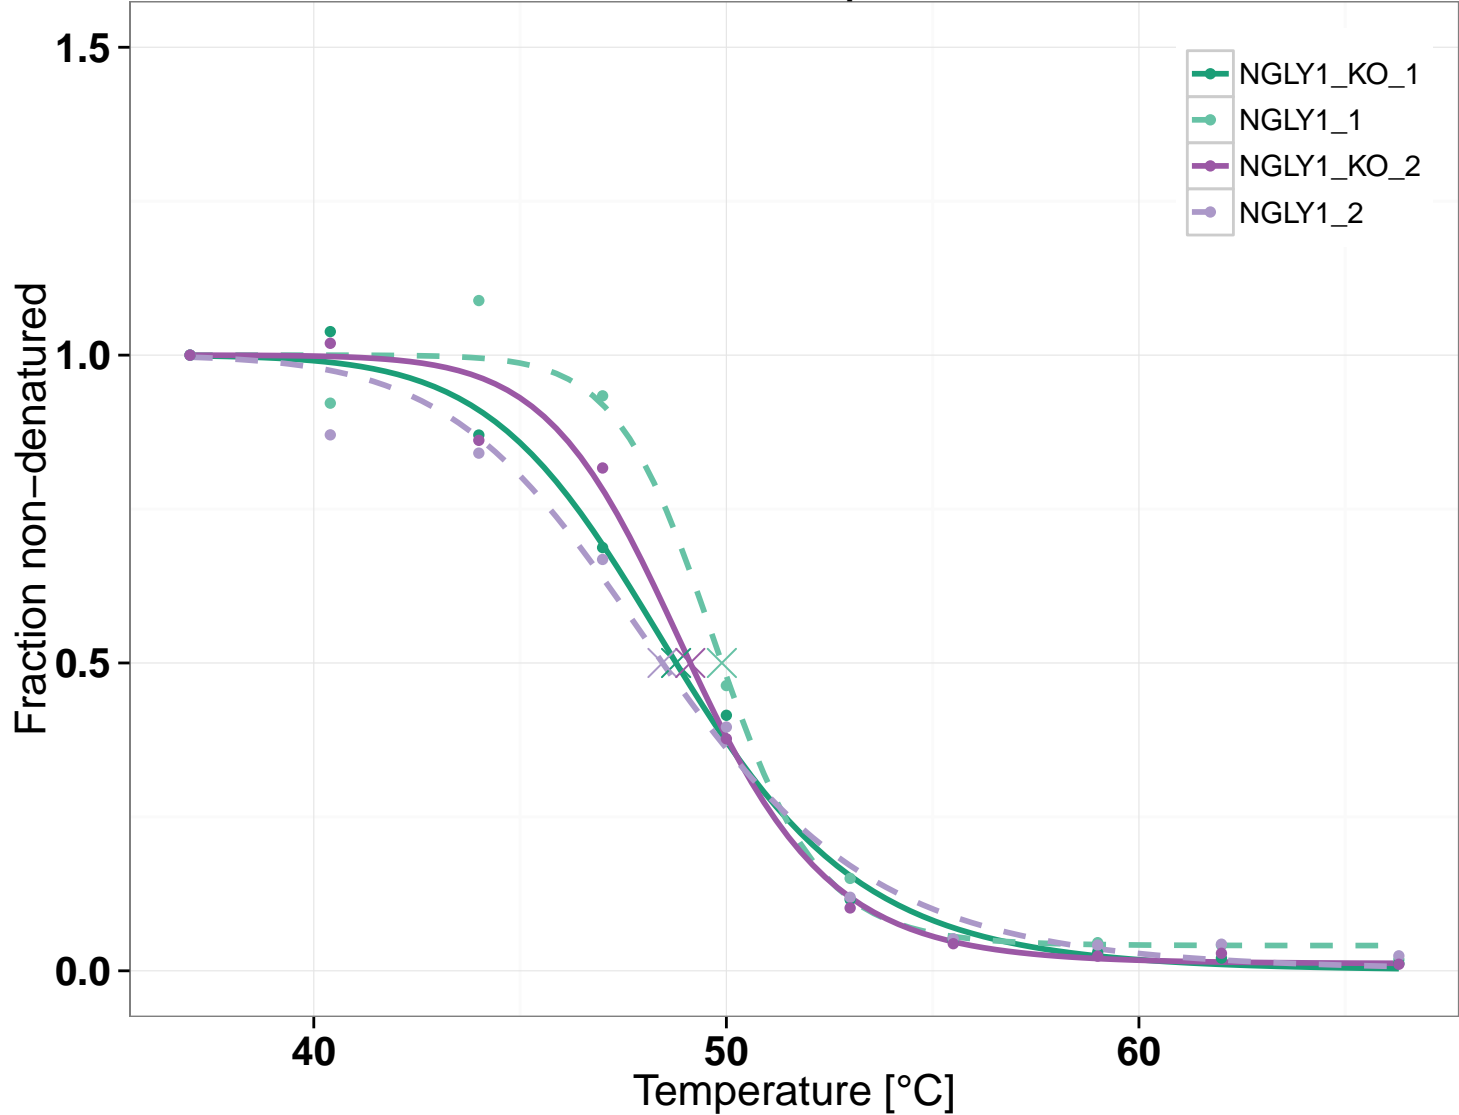

|            | meltPoint | slope  | plateau | R2   |
|------------|-----------|--------|---------|------|
| NGLY1_KO_1 | 48.78     | -0.11  | 0       | 1    |
| NGLY1_1    | 49.89     | -0.19  | 0.04    | 0.99 |
| NGLY1_KO_2 | 49.13     | -0.14  | 0.01    | 0.99 |
| NGLY1_2    | 48.45     | -0.096 | 0       | 0.99 |

Supplement: Supplementary file 7320 [file 1]

# IPI00792057.1|NGRN

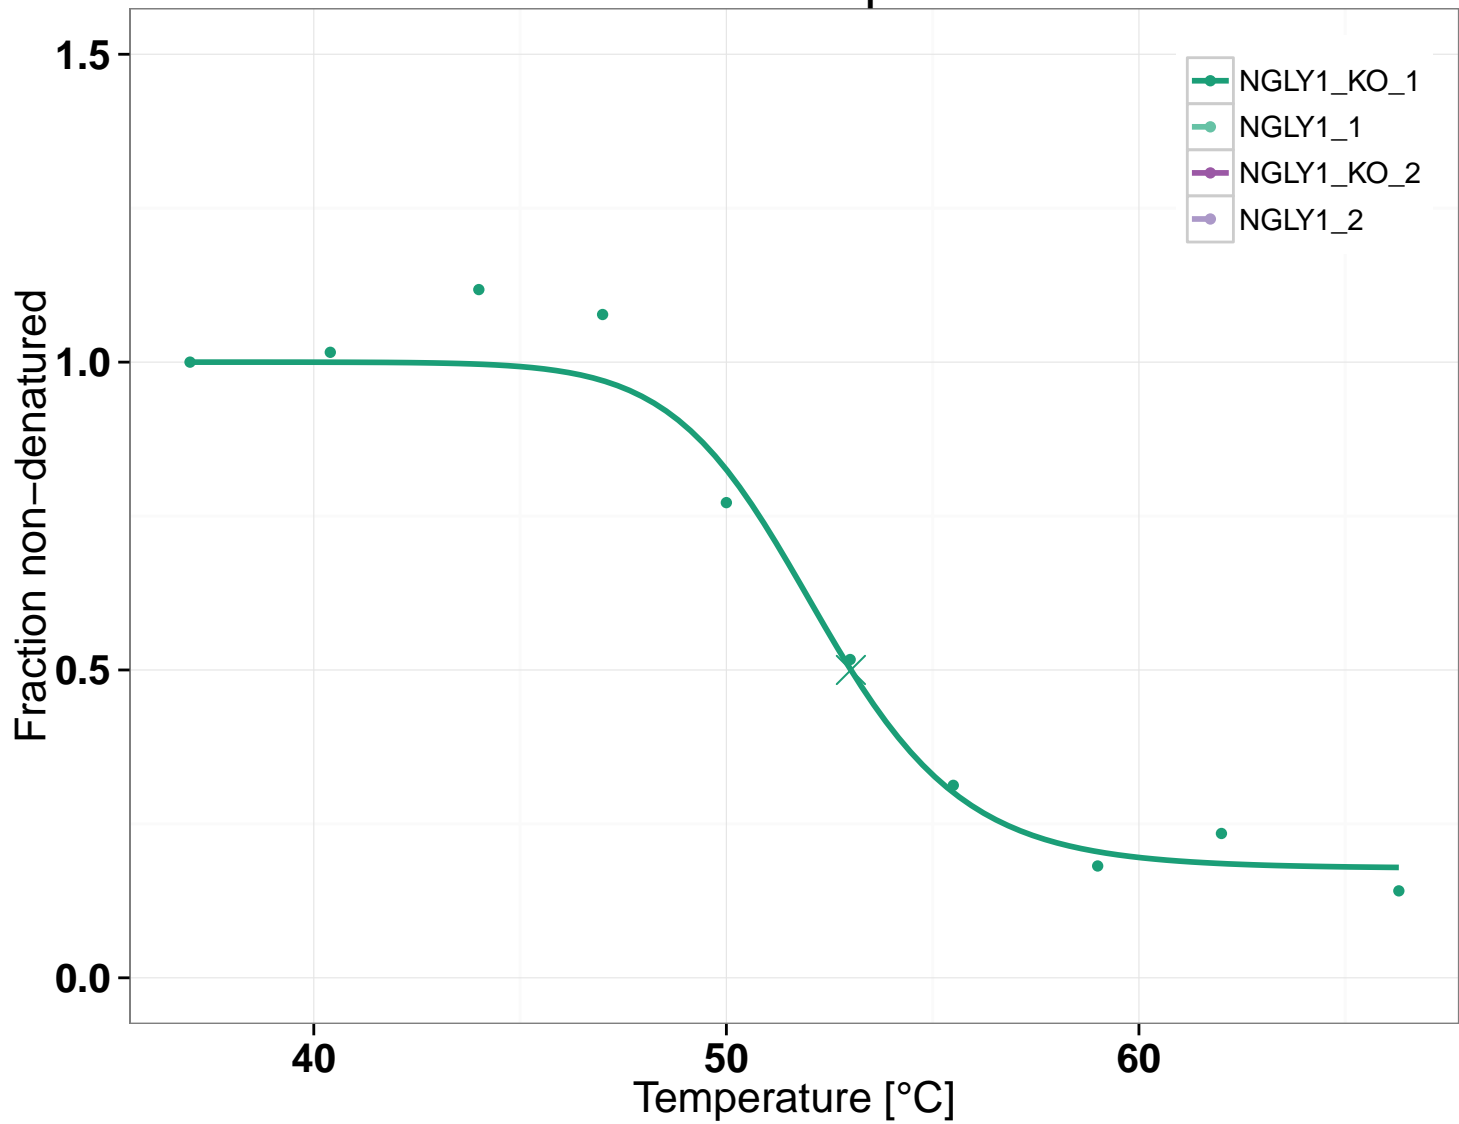

|            | meltPoint | slope | plateau | R2   |
|------------|-----------|-------|---------|------|
| NGLY1_KO_1 | 53.02     | -0.12 | 0.18    | 0.98 |
| NGLY1_1    | -         | -     | -       | -    |
| NGLY1_KO_2 | -         | -     | -       | -    |
| NGLY1_2    | -         | -     | -       | -    |

Supplement: Supplementary file 7321 [file 1]

IPI00000728.3|USP15

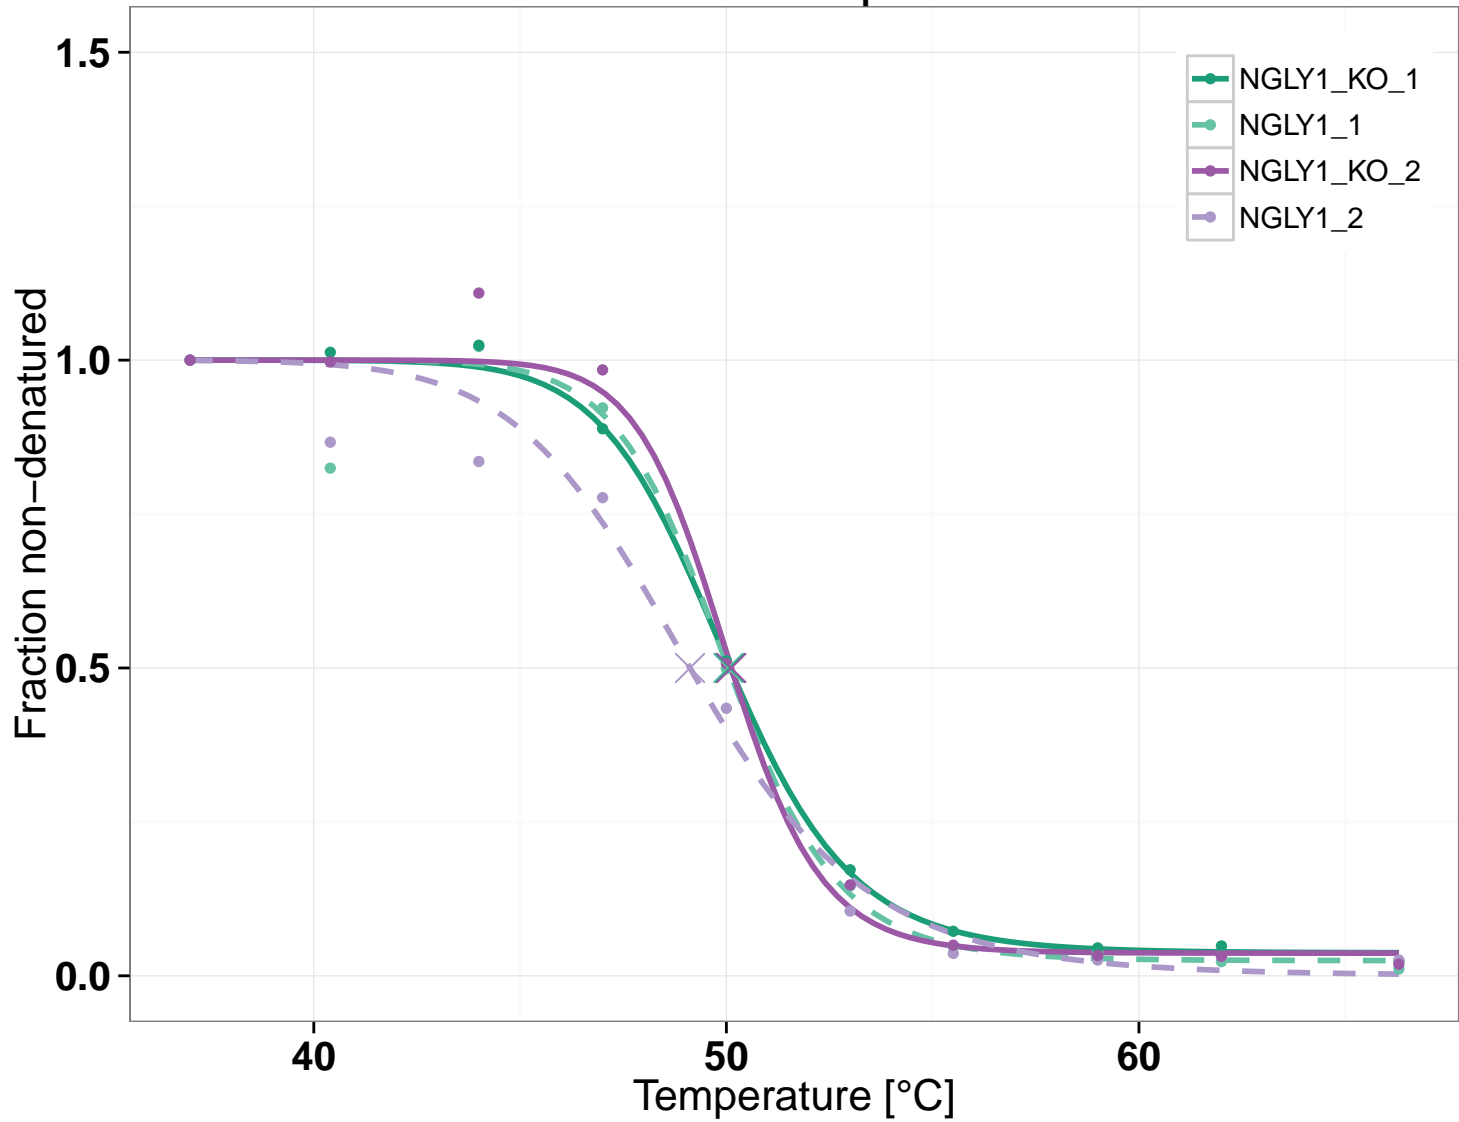

|            | meltPoint | slope | plateau | R2   |
|------------|-----------|-------|---------|------|
| NGLY1_KO_1 | 50.09     | -0.16 | 0.04    | 1    |
| NGLY1_1    | 50.05     | -0.18 | 0.02    | 0.98 |
| NGLY1_KO_2 | 50.12     | -0.21 | 0.04    | 0.99 |
| NGLY1_2    | 49.12     | -0.12 | 0       | 0.98 |

Supplement: Supplementary file 7322 [file 1]

# IPI00011229.1|CTSD

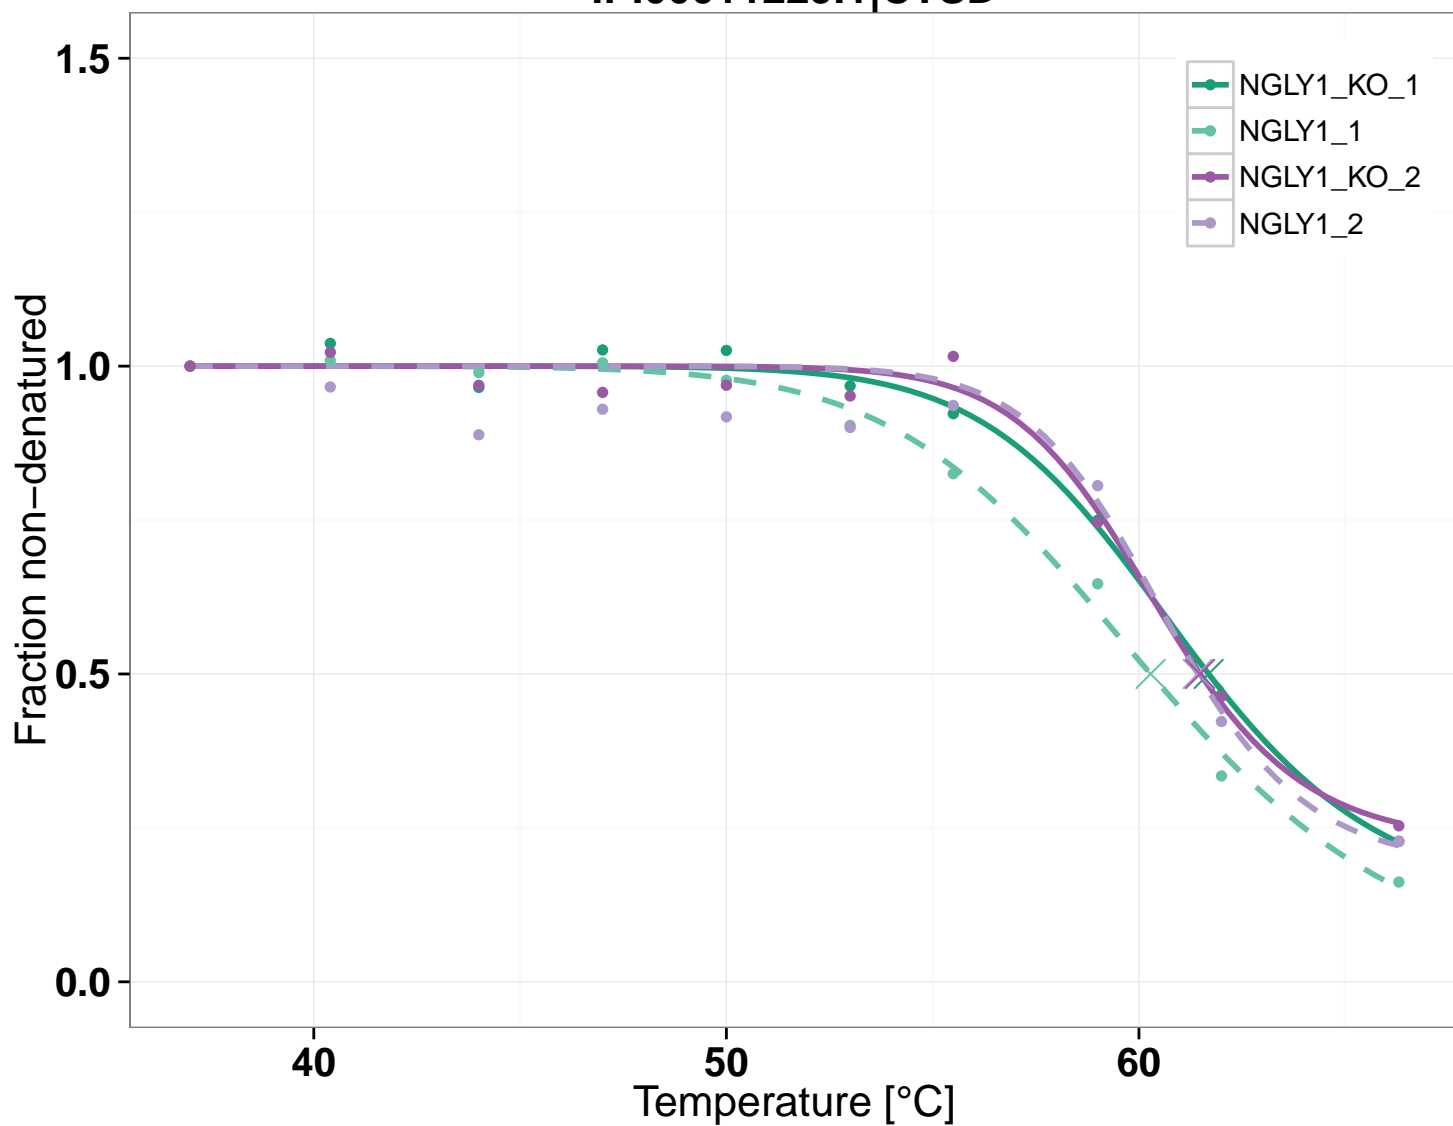

|            | meltPoint | slope  | plateau | R2   |
|------------|-----------|--------|---------|------|
| NGLY1_KO_1 | 61.69     | -0.091 | 0.12    | 0.99 |
| NGLY1_1    | 60.28     | -0.079 | 0       | 0.99 |
| NGLY1_KO_2 | 61.48     | -0.11  | 0.22    | 0.99 |
| NGLY1_2    | 61.43     | -0.12  | 0.18    | 0.94 |

Supplement: Supplementary file 7323 [file 1]

IPI00184180.3|PCYOX1L

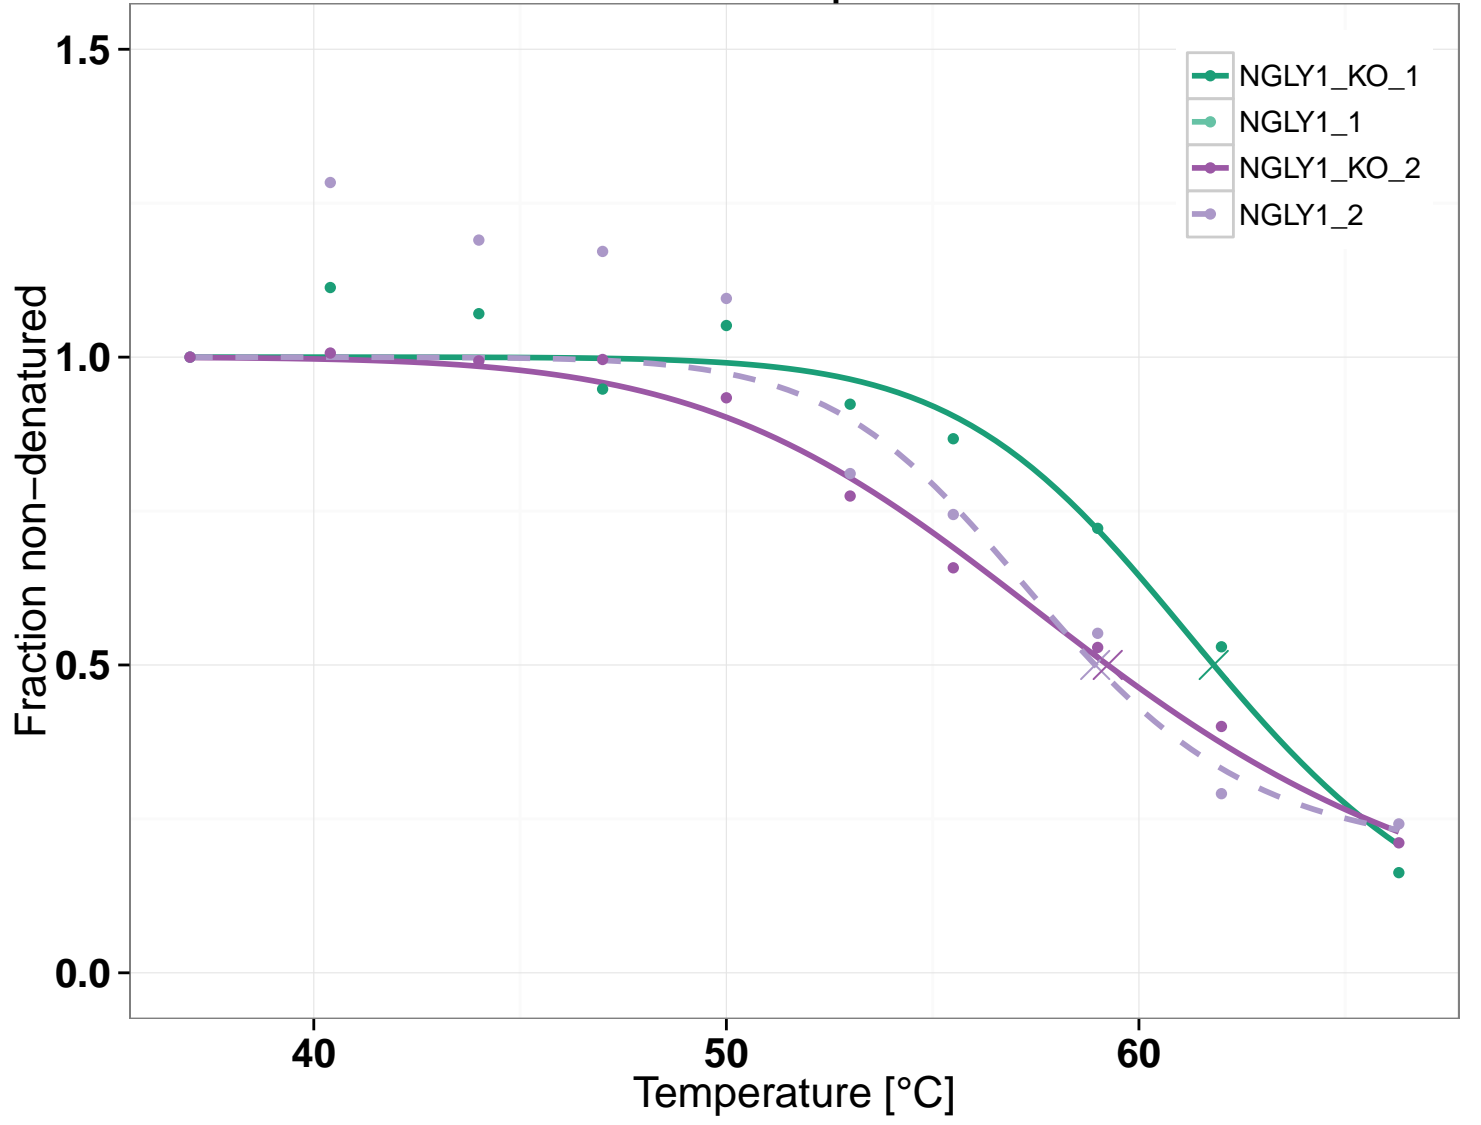

|            | meltPoint | slope  | plateau | R2   |
|------------|-----------|--------|---------|------|
| NGLY1_KO_1 | 61.81     | -0.081 | 0       | 0.96 |
| NGLY1_1    | -         | -      | -       | -    |
| NGLY1_KO_2 | 59.24     | -0.052 | 0.03    | 0.99 |
| NGLY1_2    | 58.94     | -0.078 | 0.19    | 0.86 |

Supplement: Supplementary file 7324 [file 1]

IPI00009880.1|TMEM9B

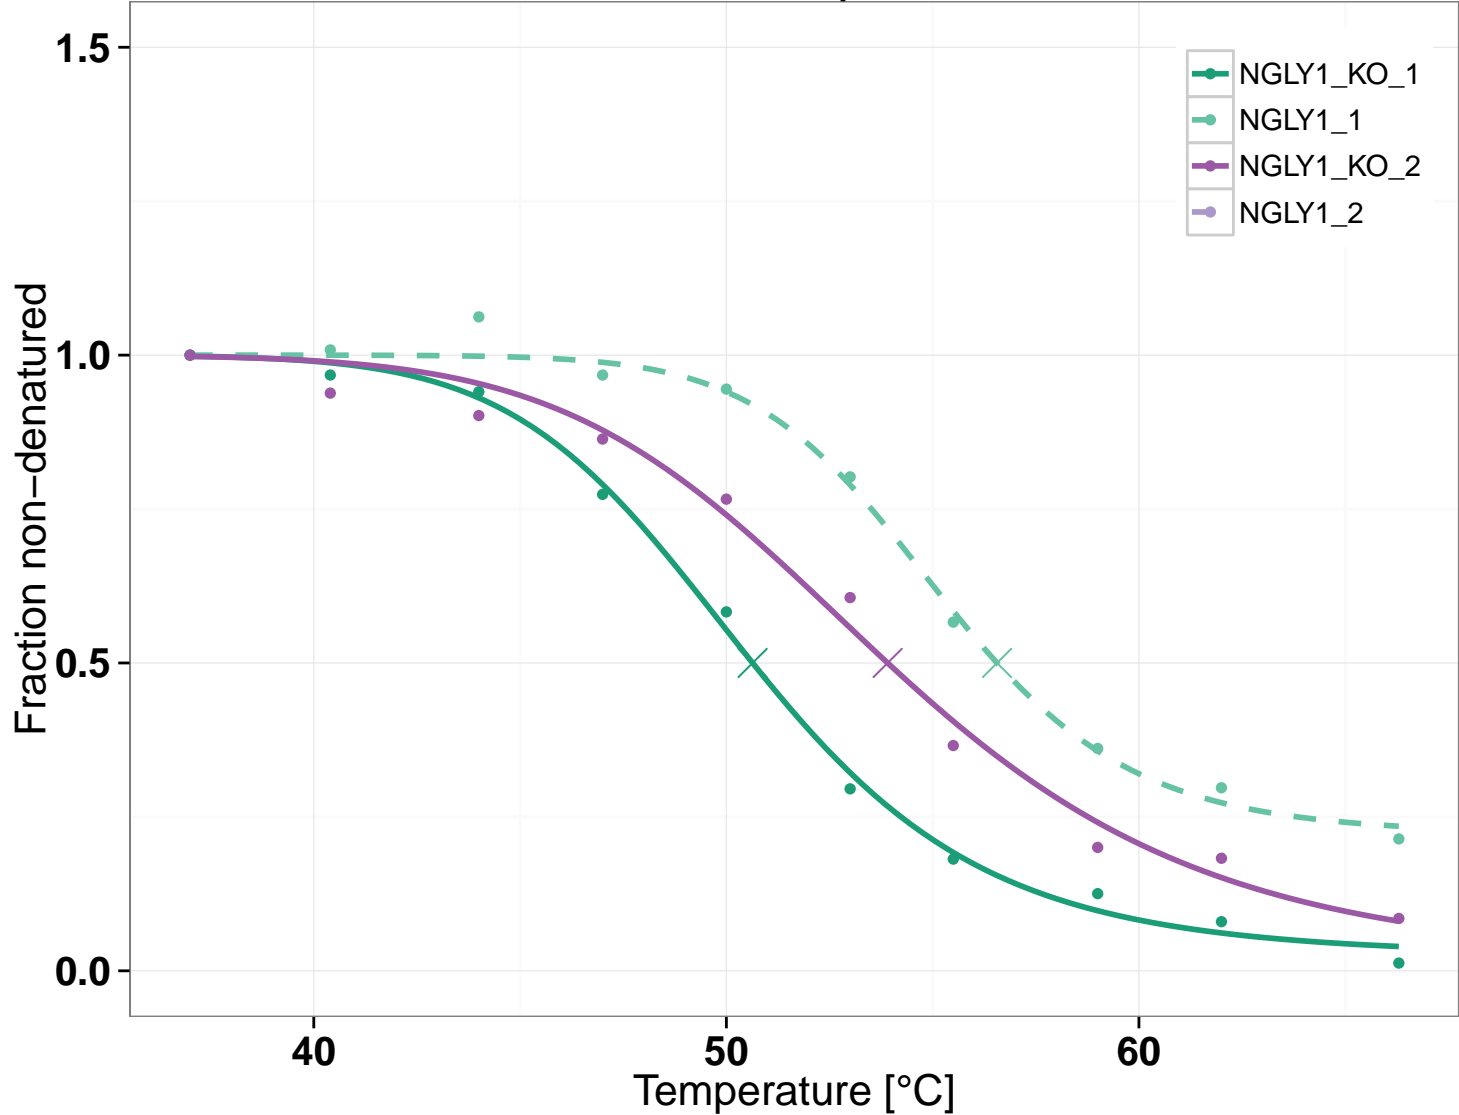

|            | meltPoint | slope  | plateau | R2   |
|------------|-----------|--------|---------|------|
| NGLY1_KO_1 | 50.64     | -0.085 | 0.02    | 1    |
| NGLY1_1    | 56.56     | -0.085 | 0.22    | 0.99 |
| NGLY1_KO_2 | 53.91     | -0.064 | 0.01    | 0.99 |
| NGLY1_2    | -         | -      | -       | -    |

Supplement: Supplementary file 7325 [file 1]

# IPI00164838.4|25 KDA PROTEIN.

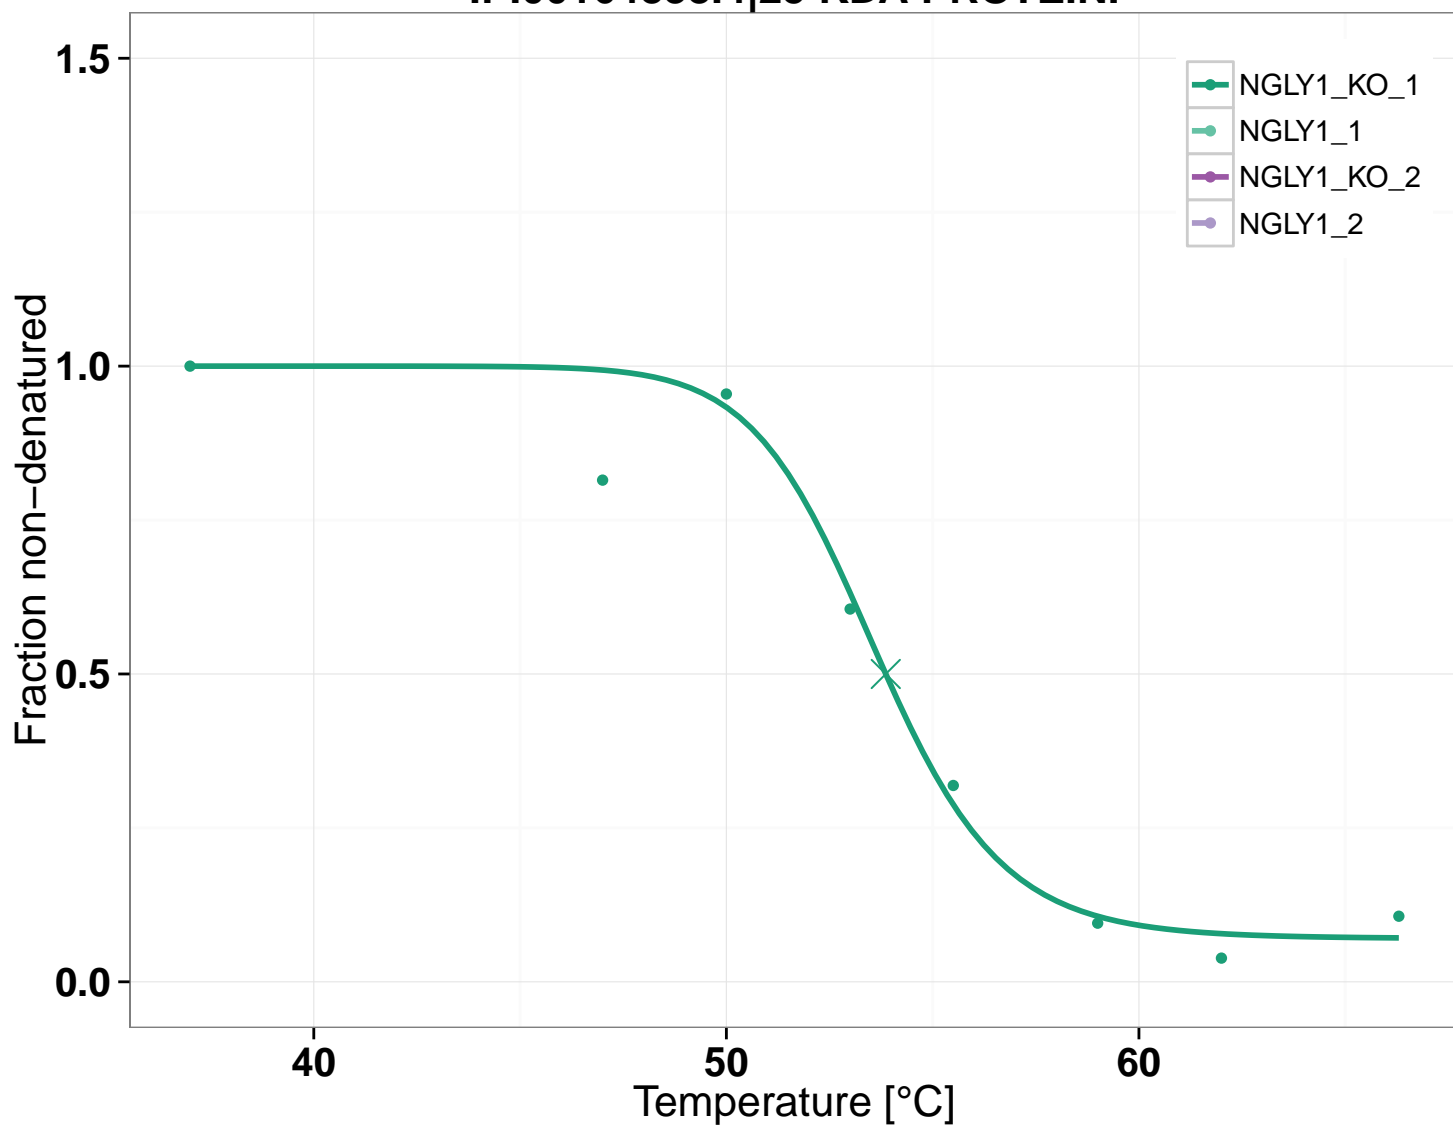

|            | meltPoint | slope | plateau | R2   |
|------------|-----------|-------|---------|------|
| NGLY1_KO_1 | 53.86     | -0.15 | 0.07    | 0.07 |
| NGLY1_1    | -         | -     | -       | -    |
| NGLY1_KO_2 | -         | -     | -       | -    |
| NGLY1_2    | -         | -     | -       | -    |

Supplement: Supplementary file 7326 [file 1]

IPI00012369.1|MAD2L1

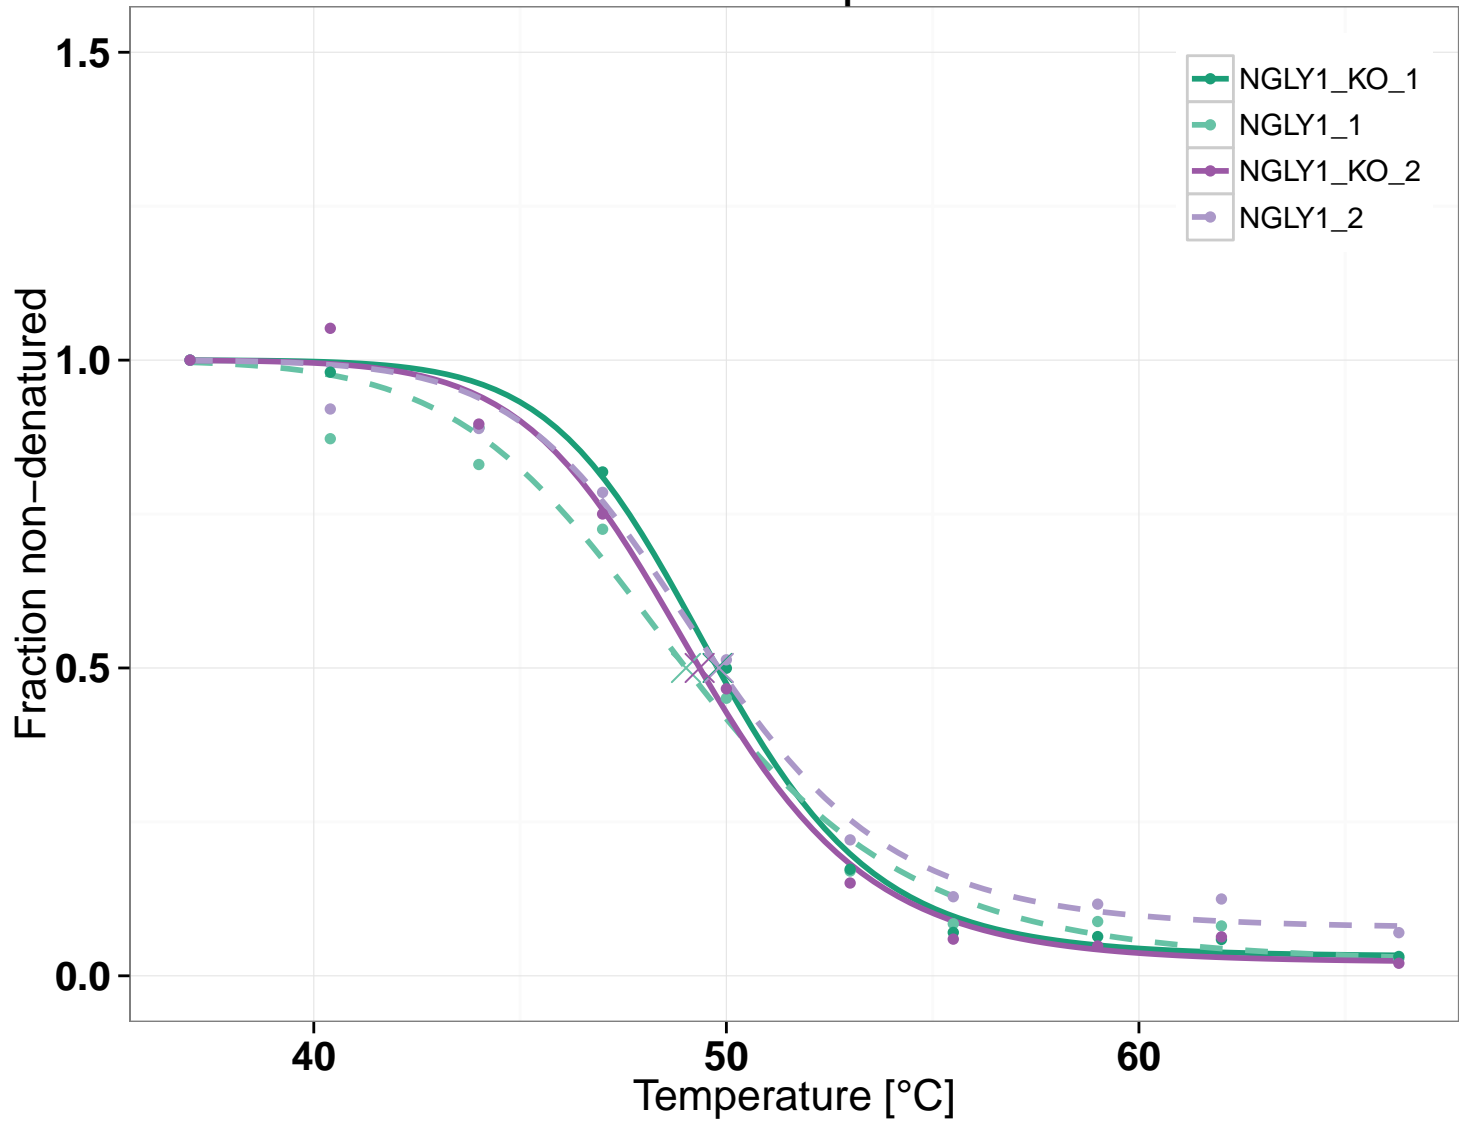

|            | meltPoint | slope  | plateau | R2   |
|------------|-----------|--------|---------|------|
| NGLY1_KO_1 | 49.79     | -0.12  | 0.03    | 0.99 |
| NGLY1_1    | 49.02     | -0.089 | 0.02    | 0.98 |
| NGLY1_KO_2 | 49.35     | -0.12  | 0.02    | 0.99 |
| NGLY1_2    | 49.82     | -0.1   | 0.08    | 0.99 |

Supplement: Supplementary file 7327 [file 1]

IPI00001640.1|N6AMT1

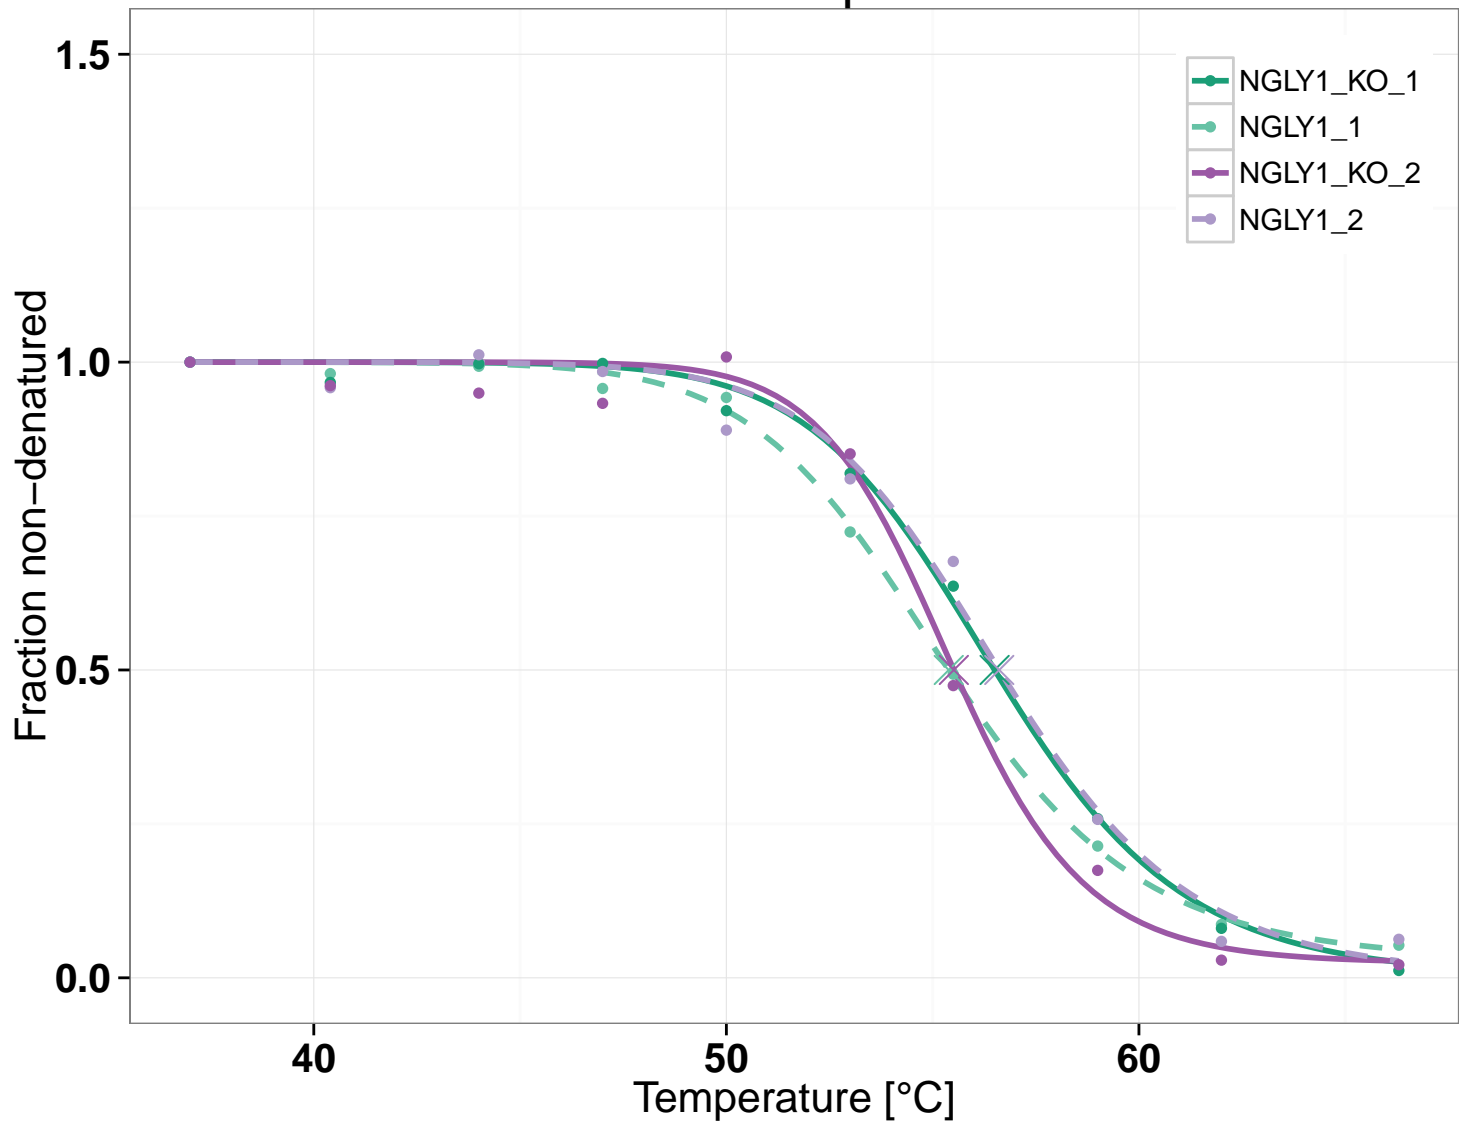

|            | meltPoint | slope | plateau | R2   |
|------------|-----------|-------|---------|------|
| NGLY1_KO_1 | 56.5      | -0.11 | 0       | 1    |
| NGLY1_1    | 55.39     | -0.1  | 0.03    | 1    |
| NGLY1_KO_2 | 55.51     | -0.15 | 0.02    | 0.99 |
| NGLY1_2    | 56.61     | -0.11 | 0       | 0.99 |

Supplement: Supplementary file 7328 [file 1]

# IPI00013971.1|FCGR2C

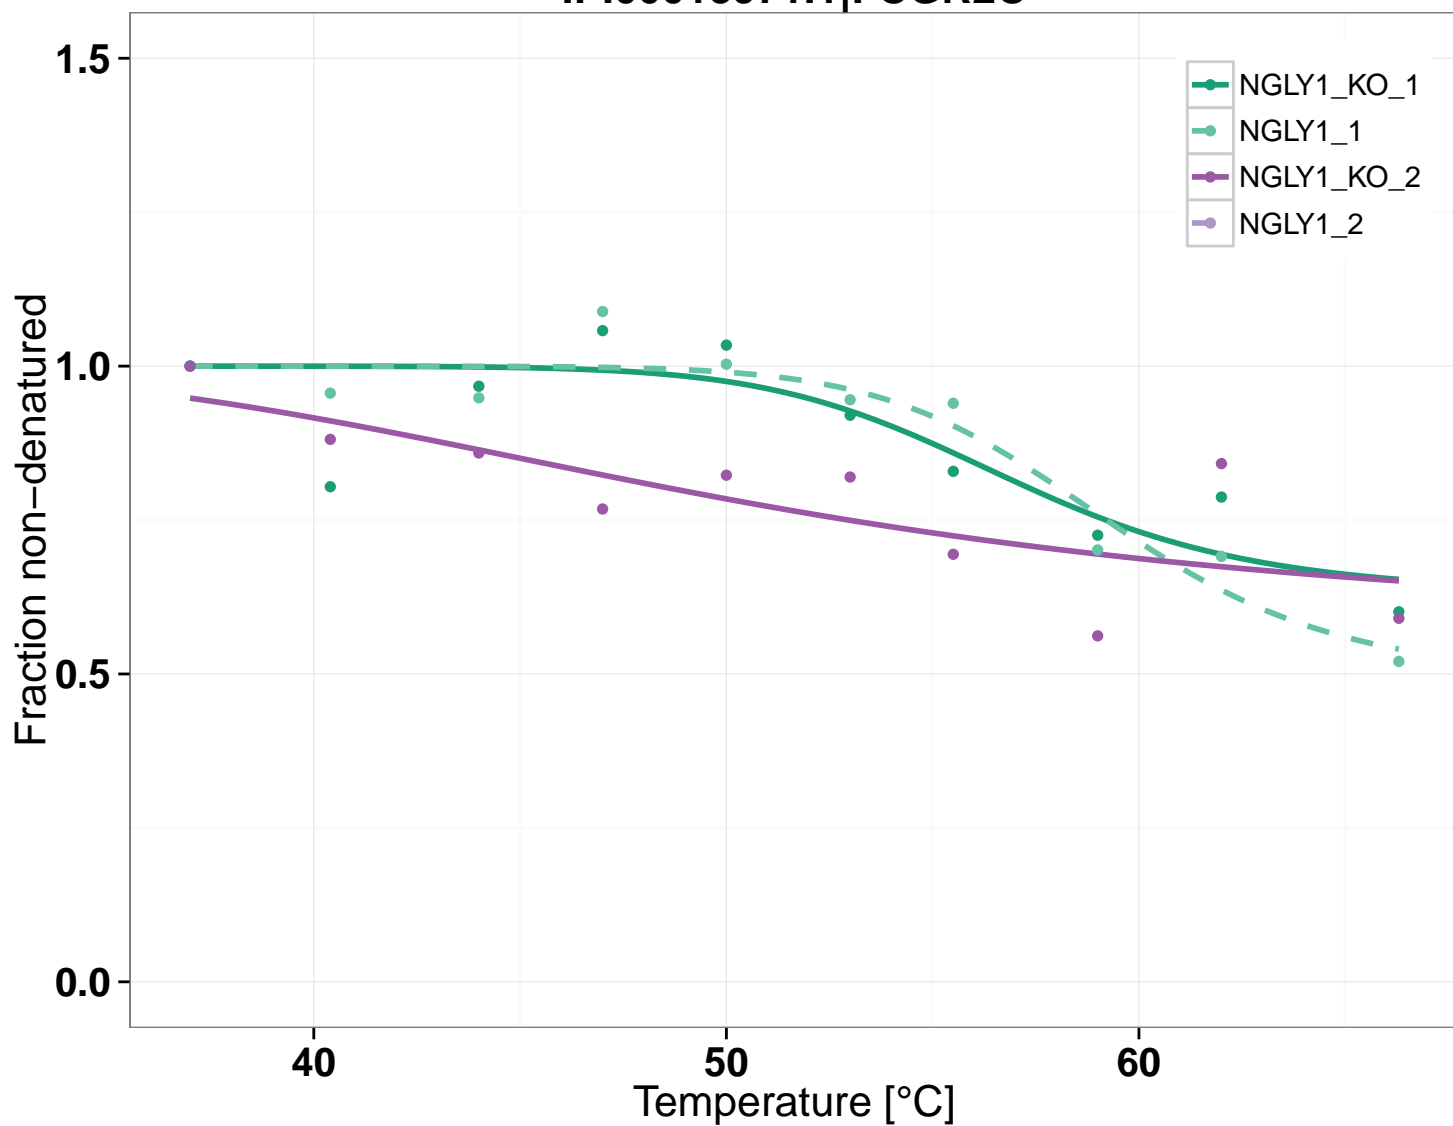

|            | meltPoint | slope  | plateau | R2   |
|------------|-----------|--------|---------|------|
| NGLY1_KO_1 | —         | −0.031 | 0.63    | 0.69 |
| NGLY1_1    | —         | −0.046 | 0.49    | 0.93 |
| NGLY1_KO_2 | —         | −0.014 | 0.56    | 0.61 |
| NGLY1_2    | —         | —      | —       | —    |

Supplement: Supplementary file 7329 [file 1]

IPI00916930.1|STK17B

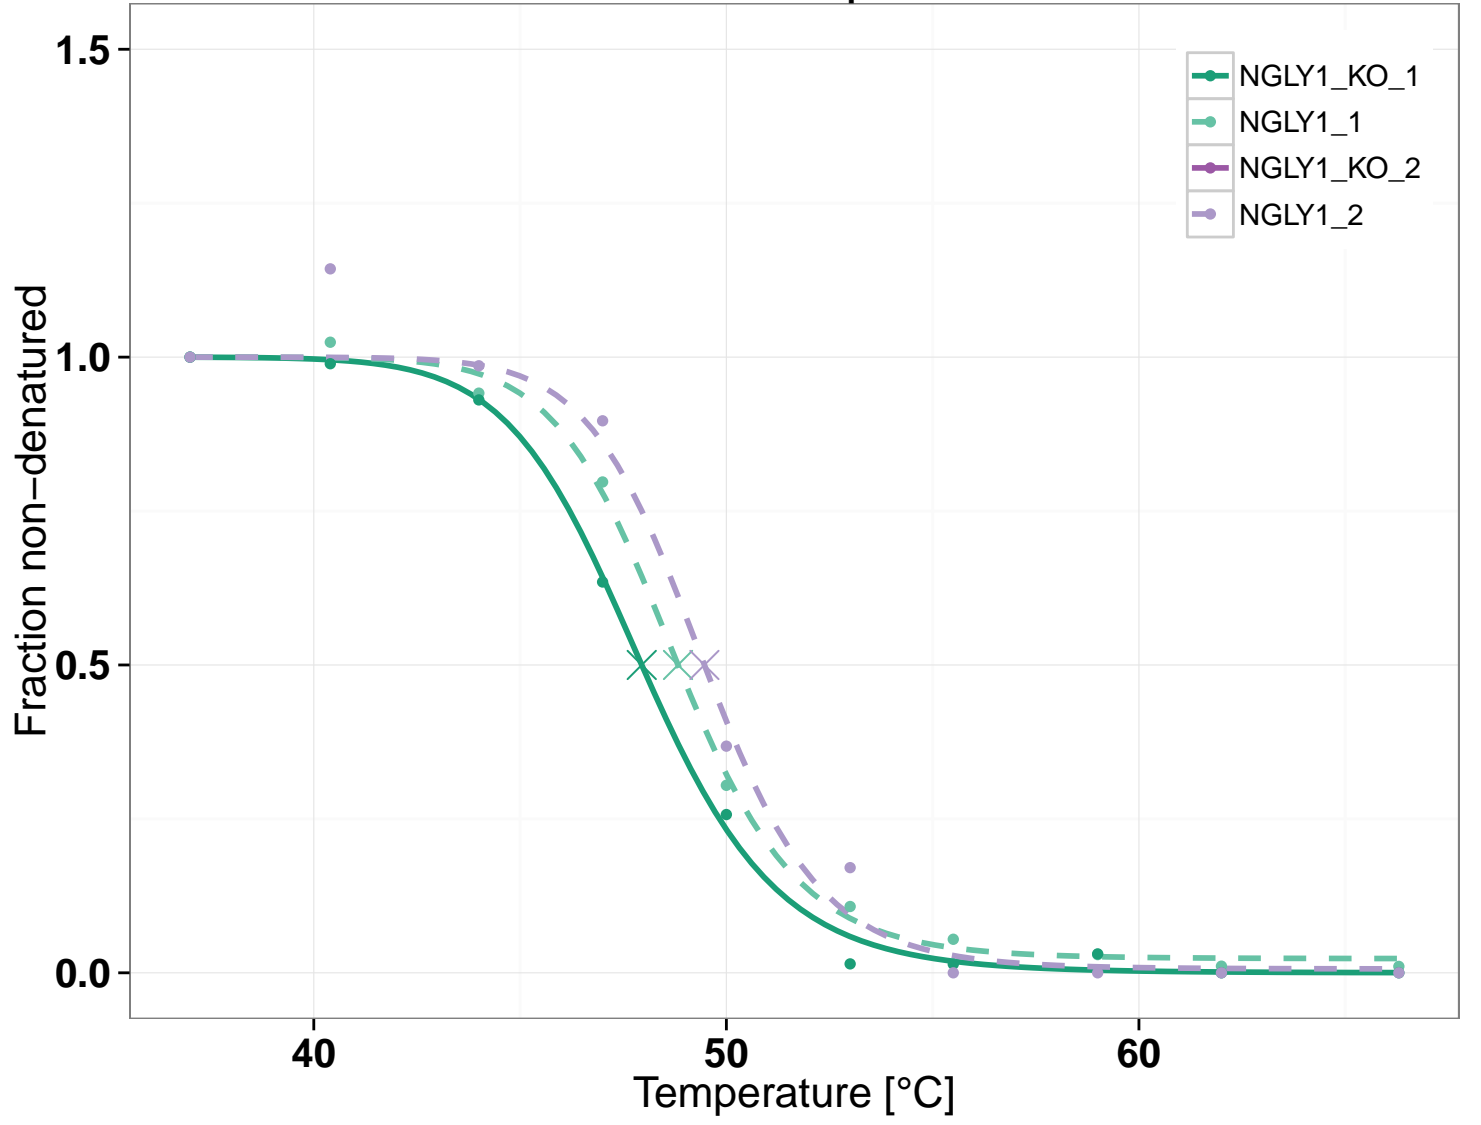

|            | meltPoint | slope | plateau | R2   |
|------------|-----------|-------|---------|------|
| NGLY1_KO_1 | 47.95     | -0.15 | 0       | 1    |
| NGLY1_1    | 48.83     | -0.17 | 0.02    | 1    |
| NGLY1_KO_2 | -         | -     | -       | -    |
| NGLY1_2    | 49.47     | -0.18 | 0.01    | 0.99 |

Supplement: Supplementary file 7330 [file 1]

IPI00070003.5|NAP1L5

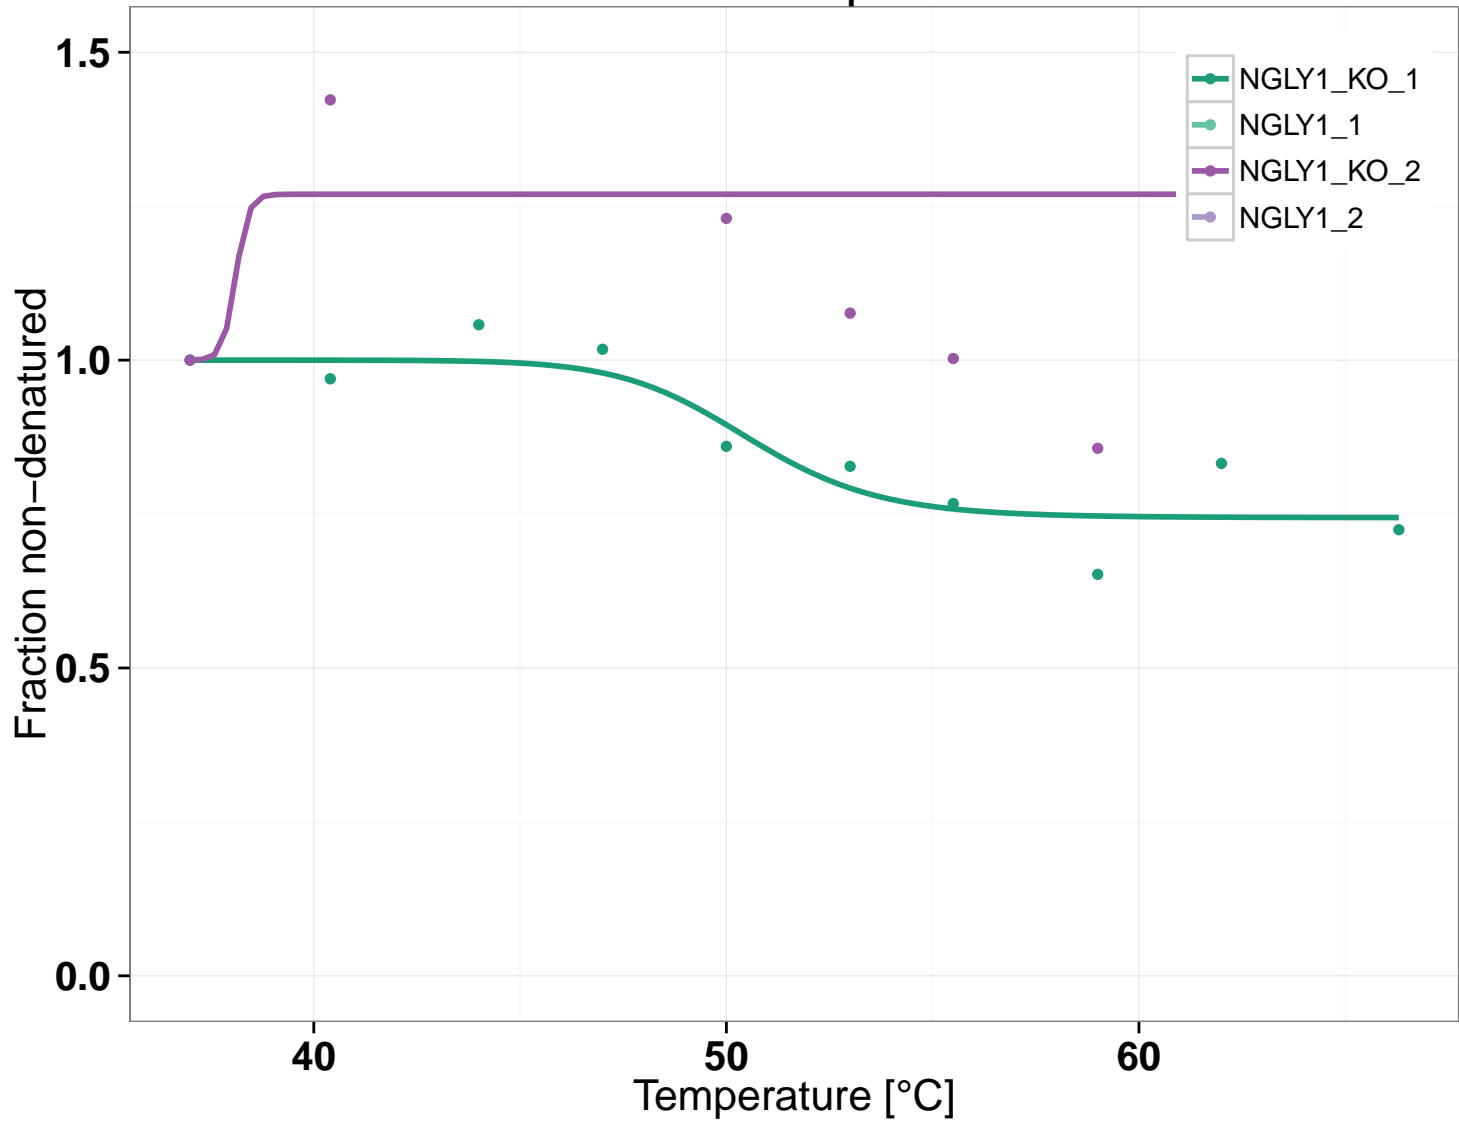

|            | meltPoint | slope  | plateau | R2   |
|------------|-----------|--------|---------|------|
| NGLY1_KO_1 | —         | -0.041 | 0.74    | 0.85 |
| NGLY1_1    | —         | —      | —       | —    |
| NGLY1_KO_2 | —         | 0.44   | 1.27    | 0.11 |
| NGLY1_2    | —         | —      | —       | —    |

Supplement: Supplementary file 7331 [file 1]

IPI00642370.1|FKSG24

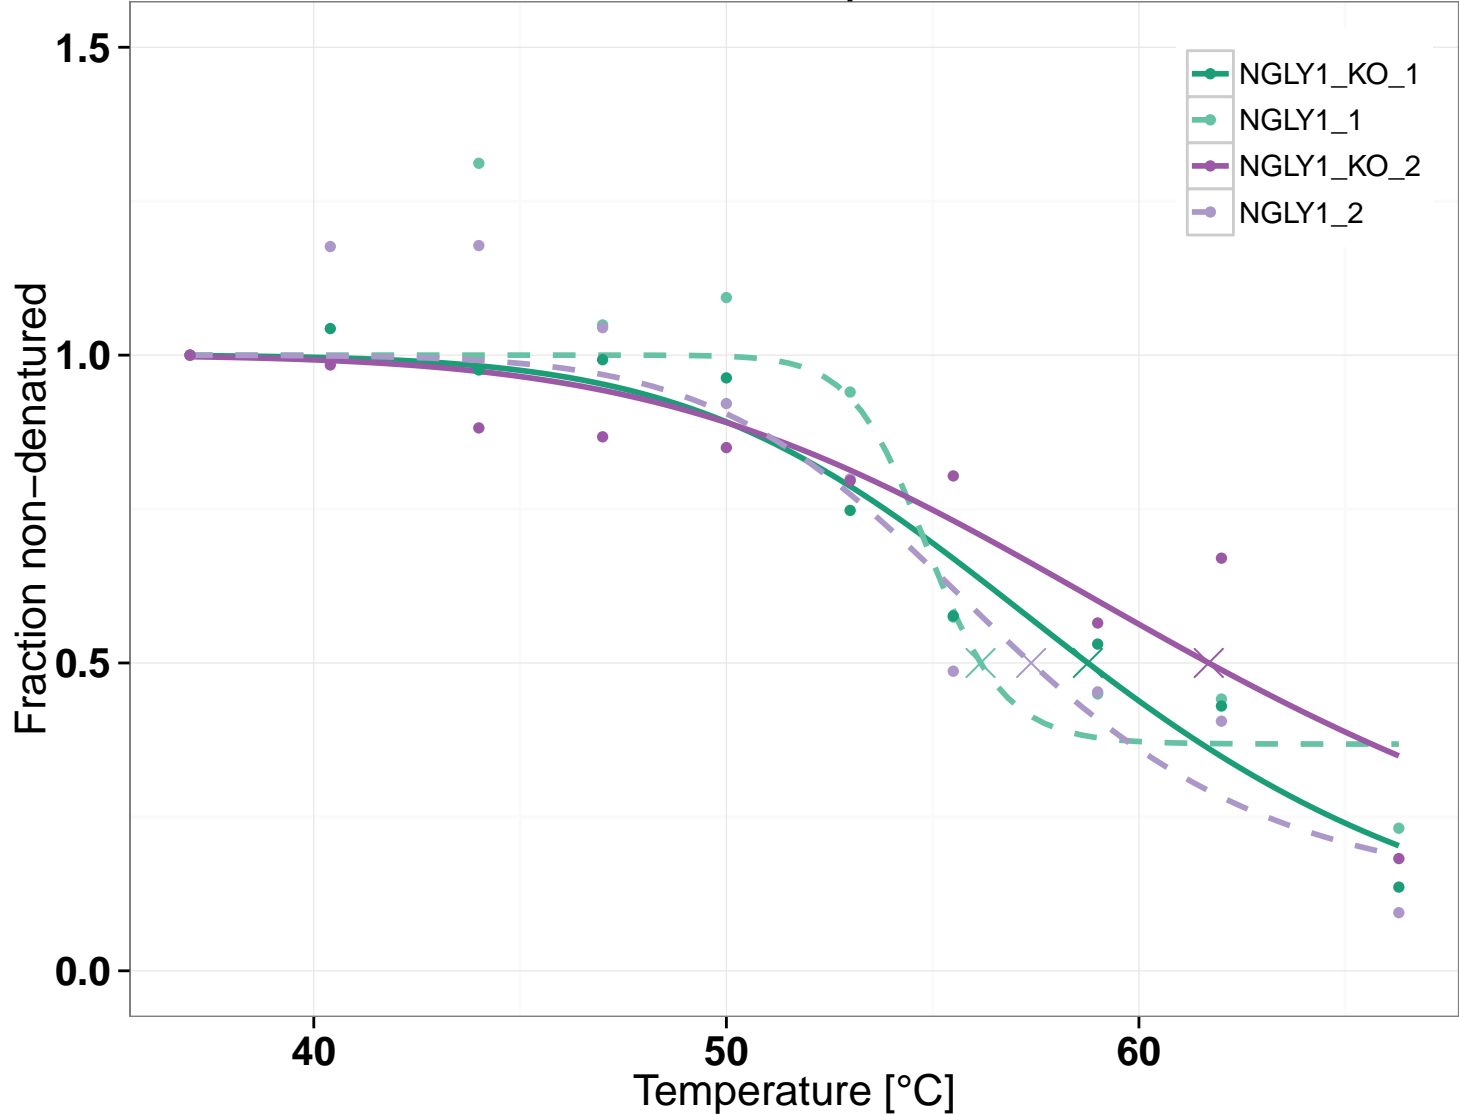

|            | meltPoint | slope  | plateau | R2   |
|------------|-----------|--------|---------|------|
| NGLY1_KO_1 | 58.76     | -0.053 | 0       | 0.96 |
| NGLY1_1    | 56.16     | -0.17  | 0.37    | 0.71 |
| NGLY1_KO_2 | 61.69     | -0.038 | 0       | 0.84 |
| NGLY1_2    | 57.39     | -0.065 | 0.12    | 0.91 |

Supplement: Supplementary file 7332 [file 1]
