# Supplementary material (part 74 of 85)
Source: publisher figshare collection journal article supplement (https://gsajournals.figshare.com/articles/dataset/_/12014913)

# IPI00073763.4|SEMA4C

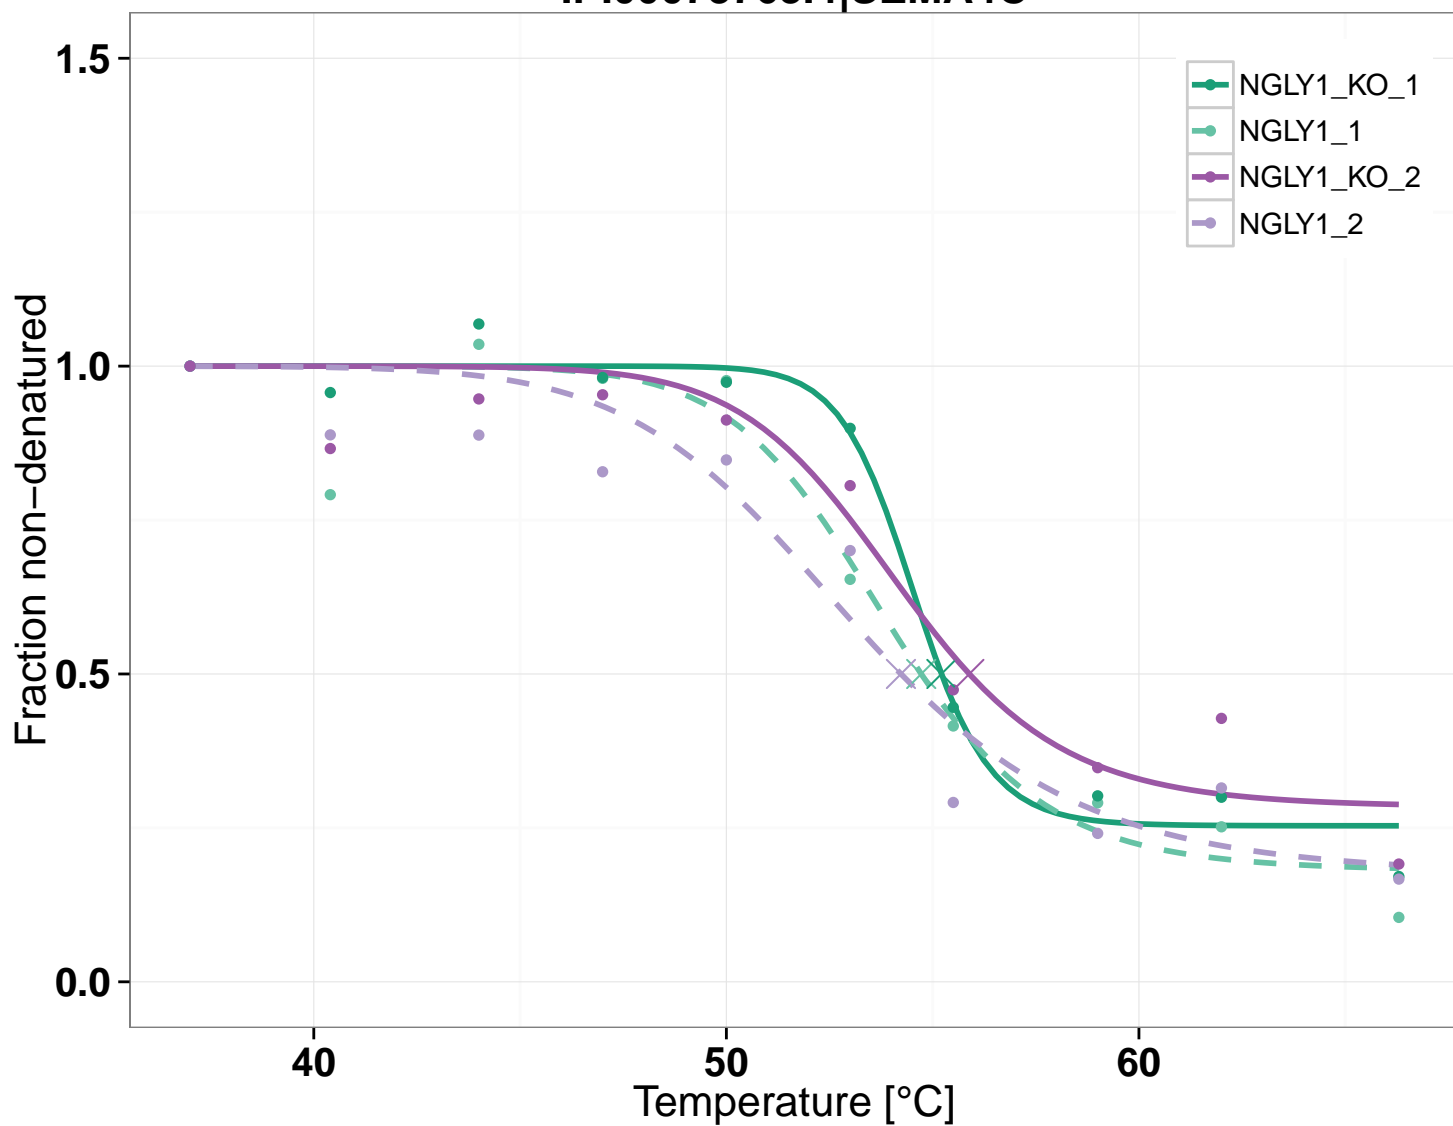

|            | meltPoint | slope  | plateau | R2   |
|------------|-----------|--------|---------|------|
| NGLY1_KO_1 | 55.21     | -0.21  | 0.25    | 0.98 |
| NGLY1_1    | 54.72     | -0.11  | 0.18    | 0.95 |
| NGLY1_KO_2 | 55.89     | -0.092 | 0.28    | 0.93 |
| NGLY1_2    | 54.23     | -0.076 | 0.17    | 0.92 |

Supplement: Supplementary file 7333 [file 1]

IPI00873106.1|MOBKL1B

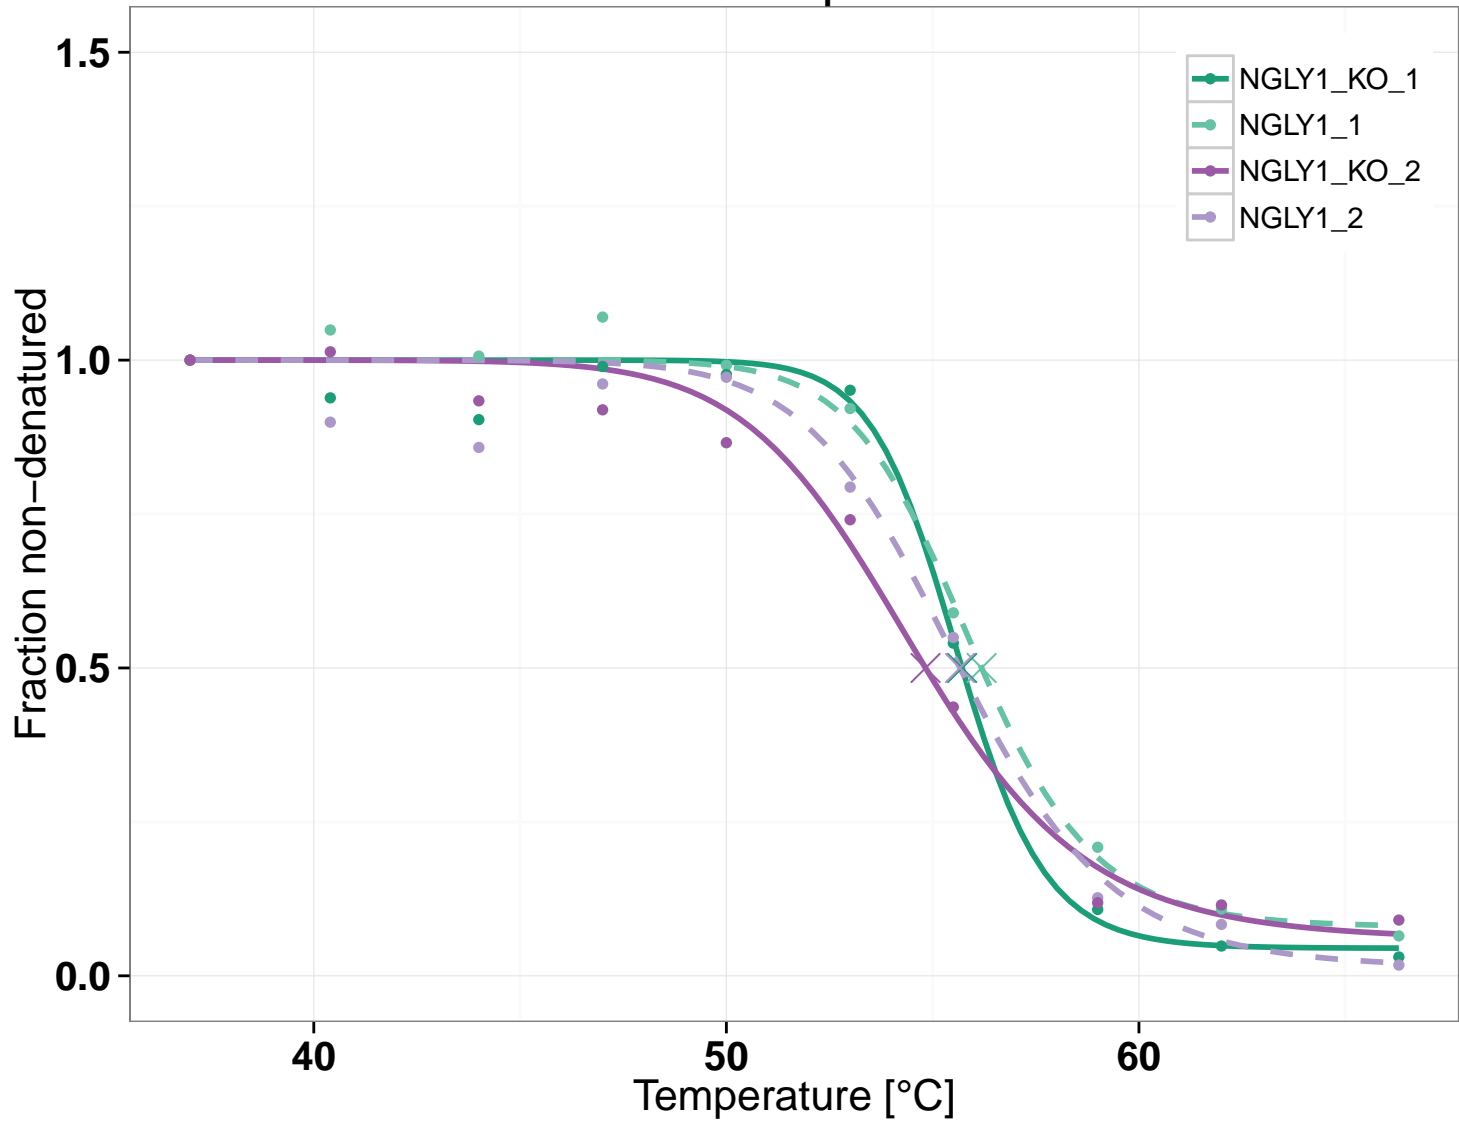

|            | meltPoint | slope | plateau | R2   |
|------------|-----------|-------|---------|------|
| NGLY1_KO_1 | 55.71     | -0.23 | 0.04    | 0.99 |
| NGLY1_1    | 56.19     | -0.16 | 0.08    | 0.99 |
| NGLY1_KO_2 | 54.83     | -0.11 | 0.06    | 0.99 |
| NGLY1_2    | 55.66     | -0.13 | 0.01    | 0.98 |

Supplement: Supplementary file 7334 [file 1]

IPI00719040.1|C1ORF77

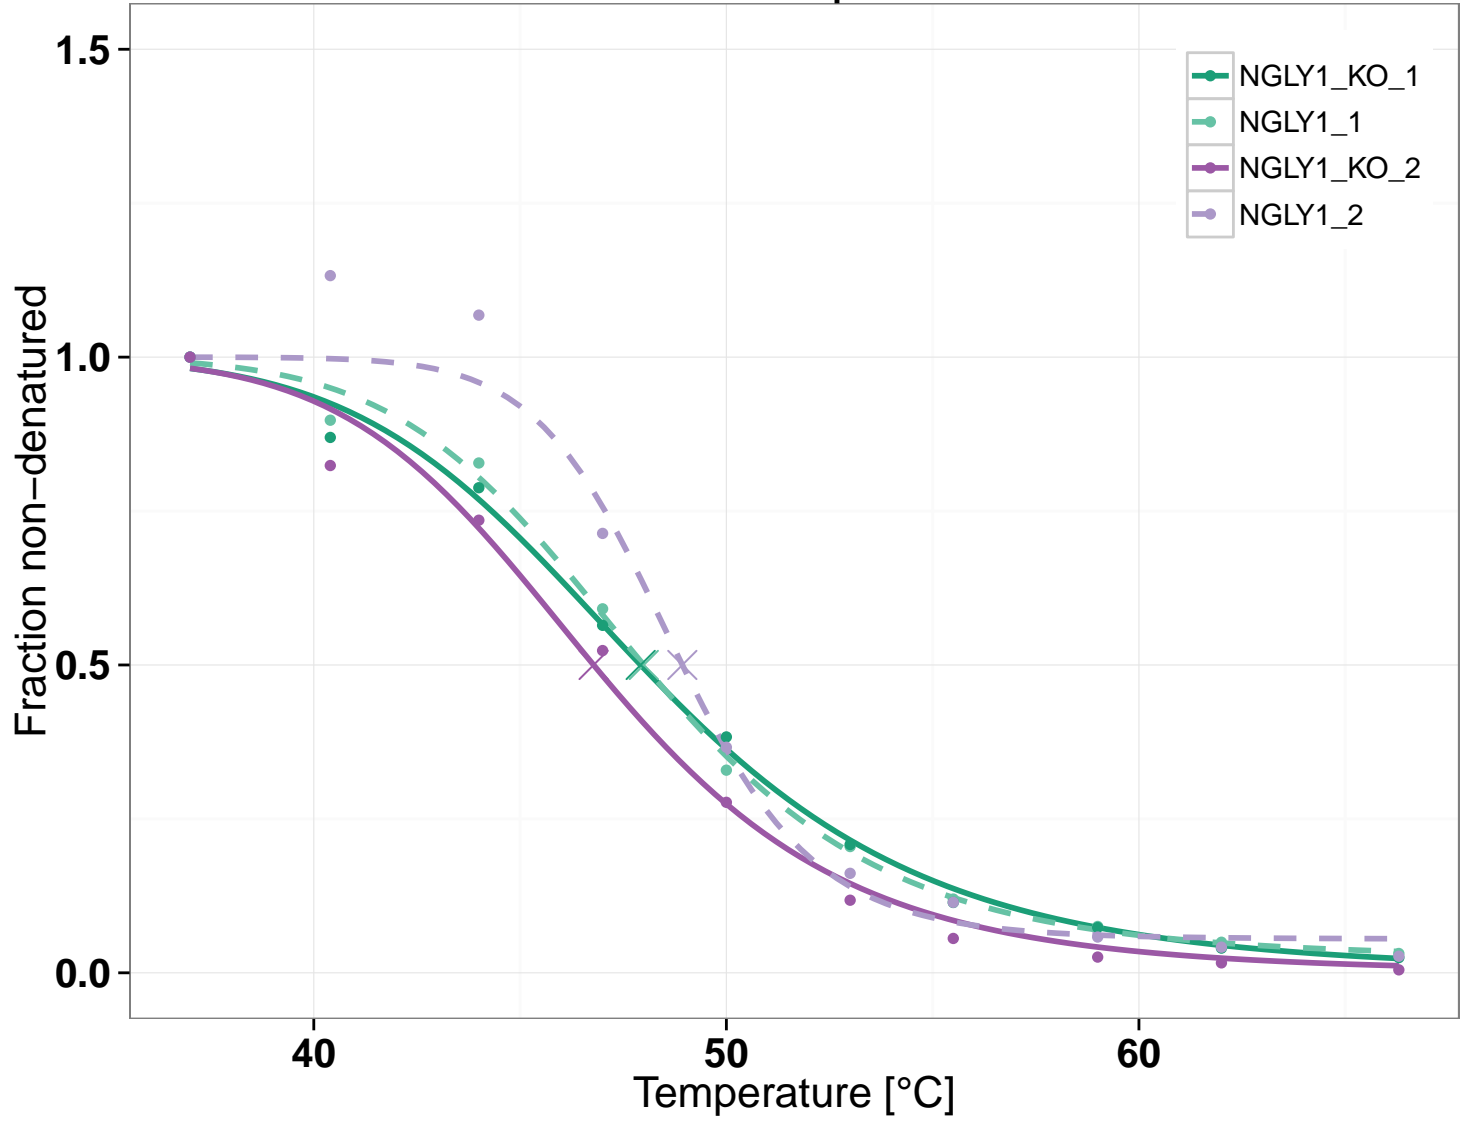

|            | meltPoint | slope  | plateau | R2   |
|------------|-----------|--------|---------|------|
| NGLY1_KO_1 | 47.92     | -0.072 | 0       | 1    |
| NGLY1_1    | 48        | -0.082 | 0.02    | 1    |
| NGLY1_KO_2 | 46.78     | -0.082 | 0       | 0.99 |
| NGLY1_2    | 48.93     | -0.14  | 0.05    | 0.98 |

Supplement: Supplementary file 7335 [file 1]

# IPI00027341.1|CAPG

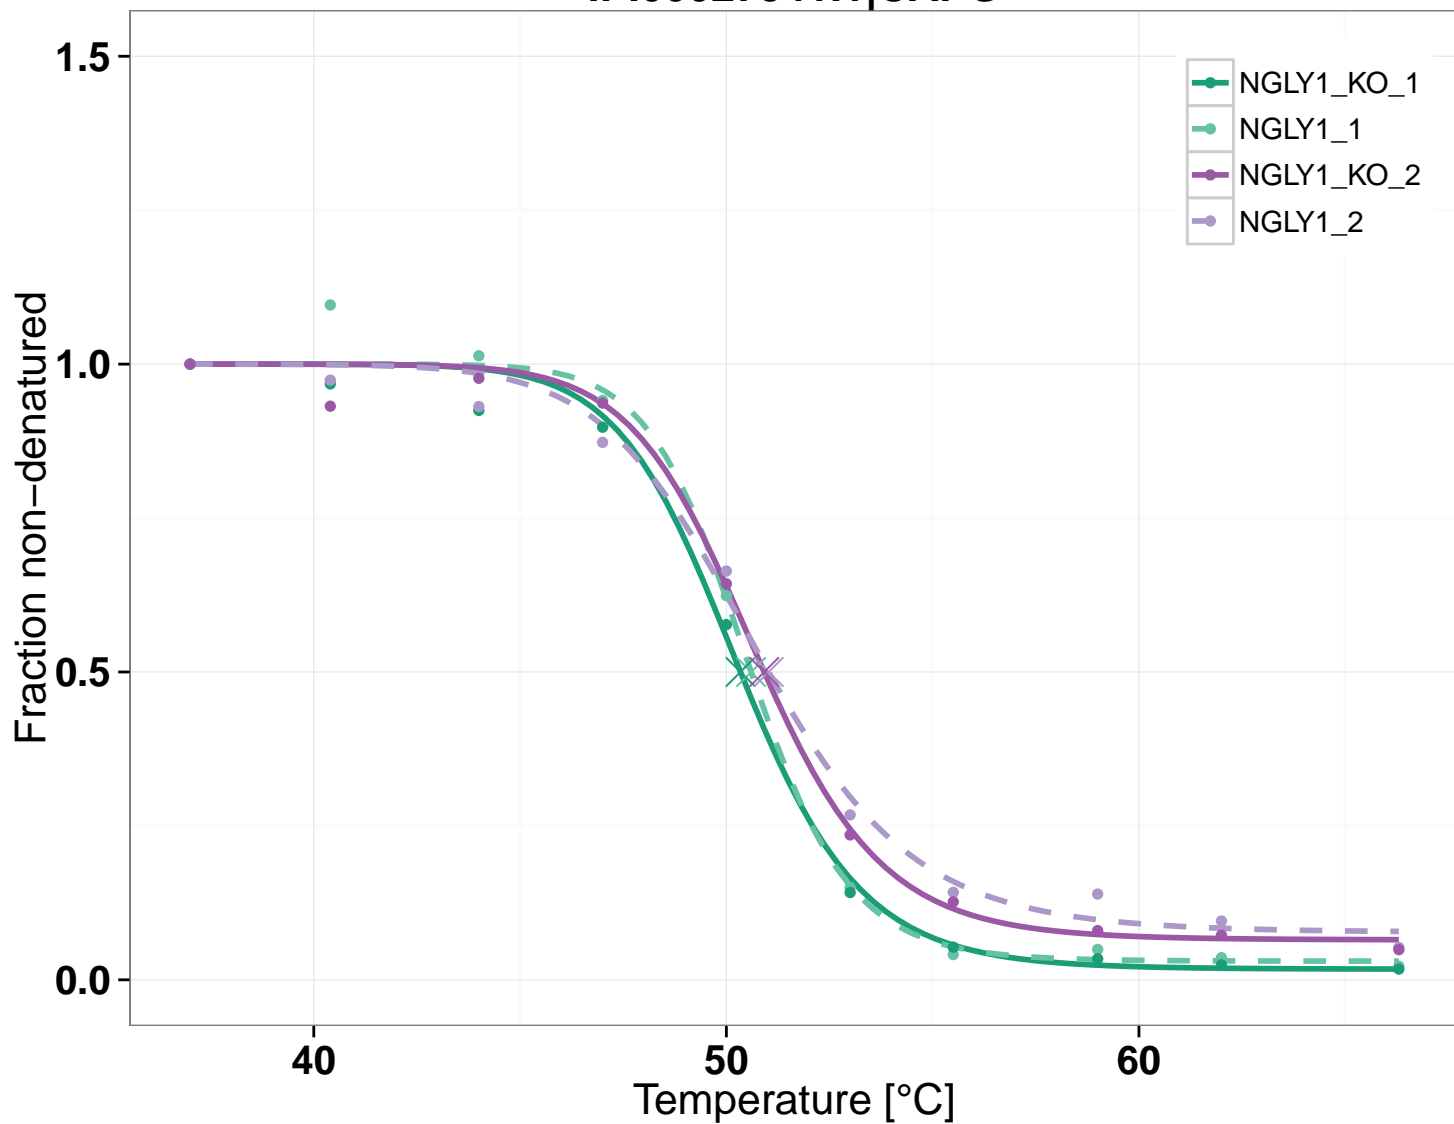

|            | meltPoint | slope | plateau | R2   |
|------------|-----------|-------|---------|------|
| NGLY1_KO_1 | 50.34     | -0.17 | 0.02    | 1    |
| NGLY1_1    | 50.6      | -0.2  | 0.03    | 0.99 |
| NGLY1_KO_2 | 50.92     | -0.15 | 0.06    | 1    |
| NGLY1_2    | 51.03     | -0.12 | 0.08    | 0.99 |

Supplement: Supplementary file 7336 [file 1]

IPI00168442.5|C9ORF79

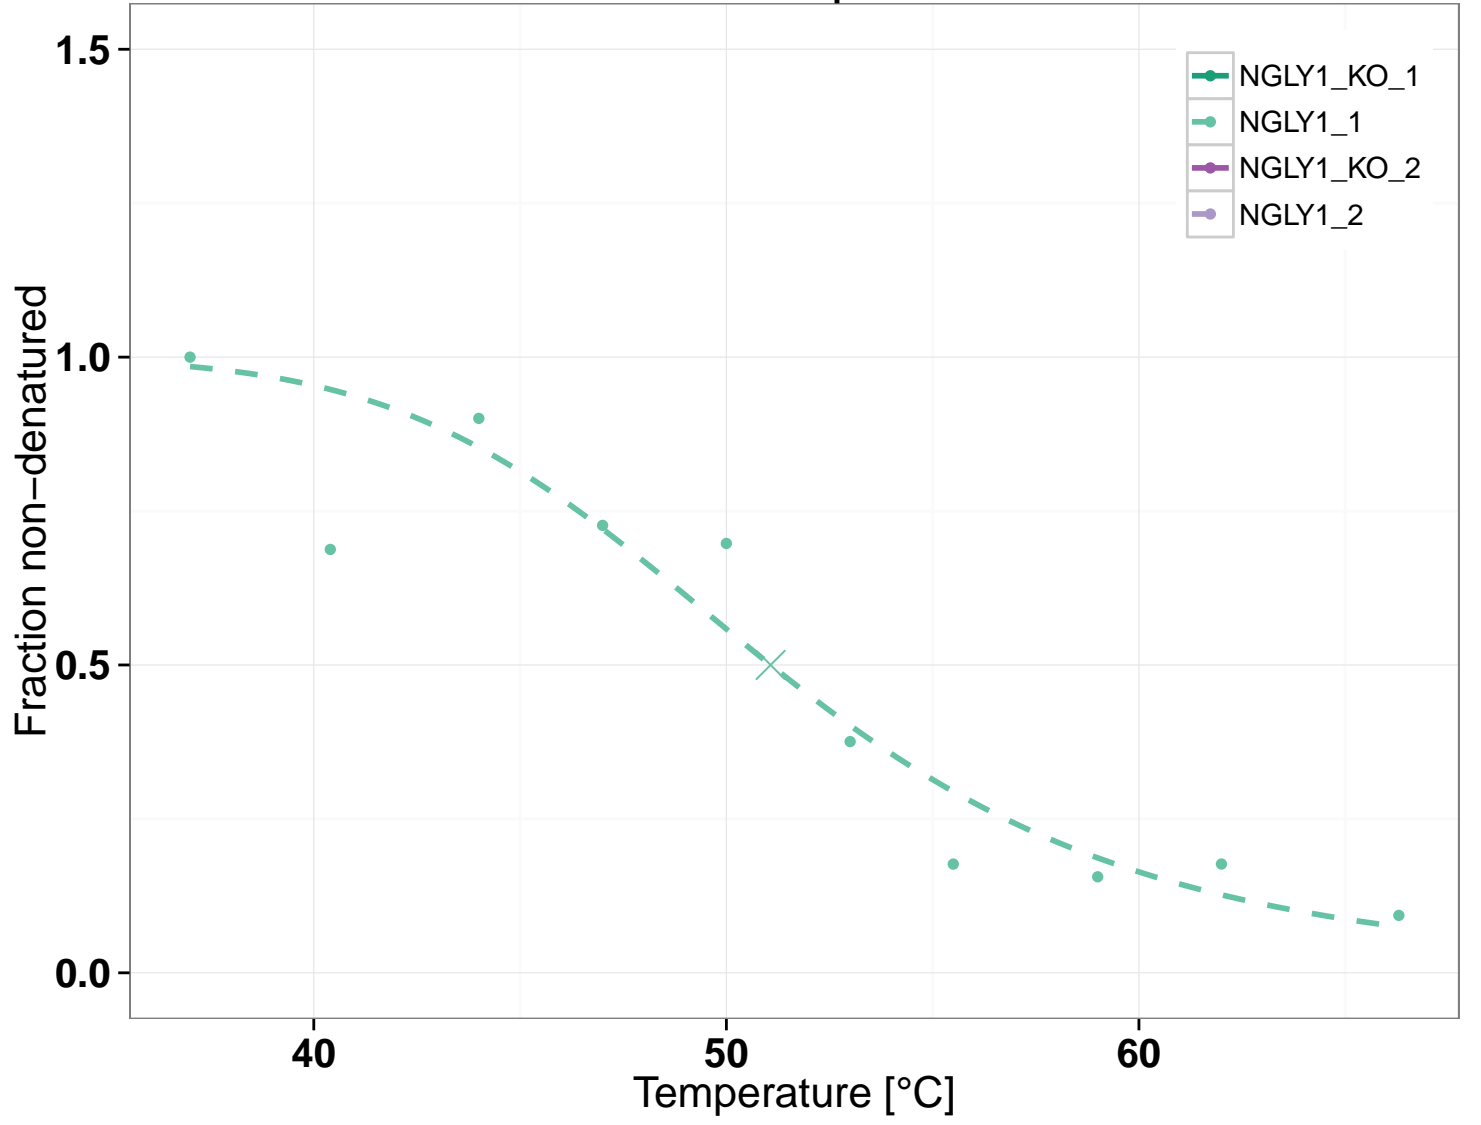

|            | meltPoint | slope  | plateau | R2  |
|------------|-----------|--------|---------|-----|
| NGLY1_KO_1 | -         | -      | -       | -   |
| NGLY1_1    | 51.07     | -0.055 | 0       | 0.9 |
| NGLY1_KO_2 | -         | -      | -       | -   |
| NGLY1_2    | -         | -      | -       | -   |

Supplement: Supplementary file 7337 [file 1]

# IPI00293350.3|TSNAX

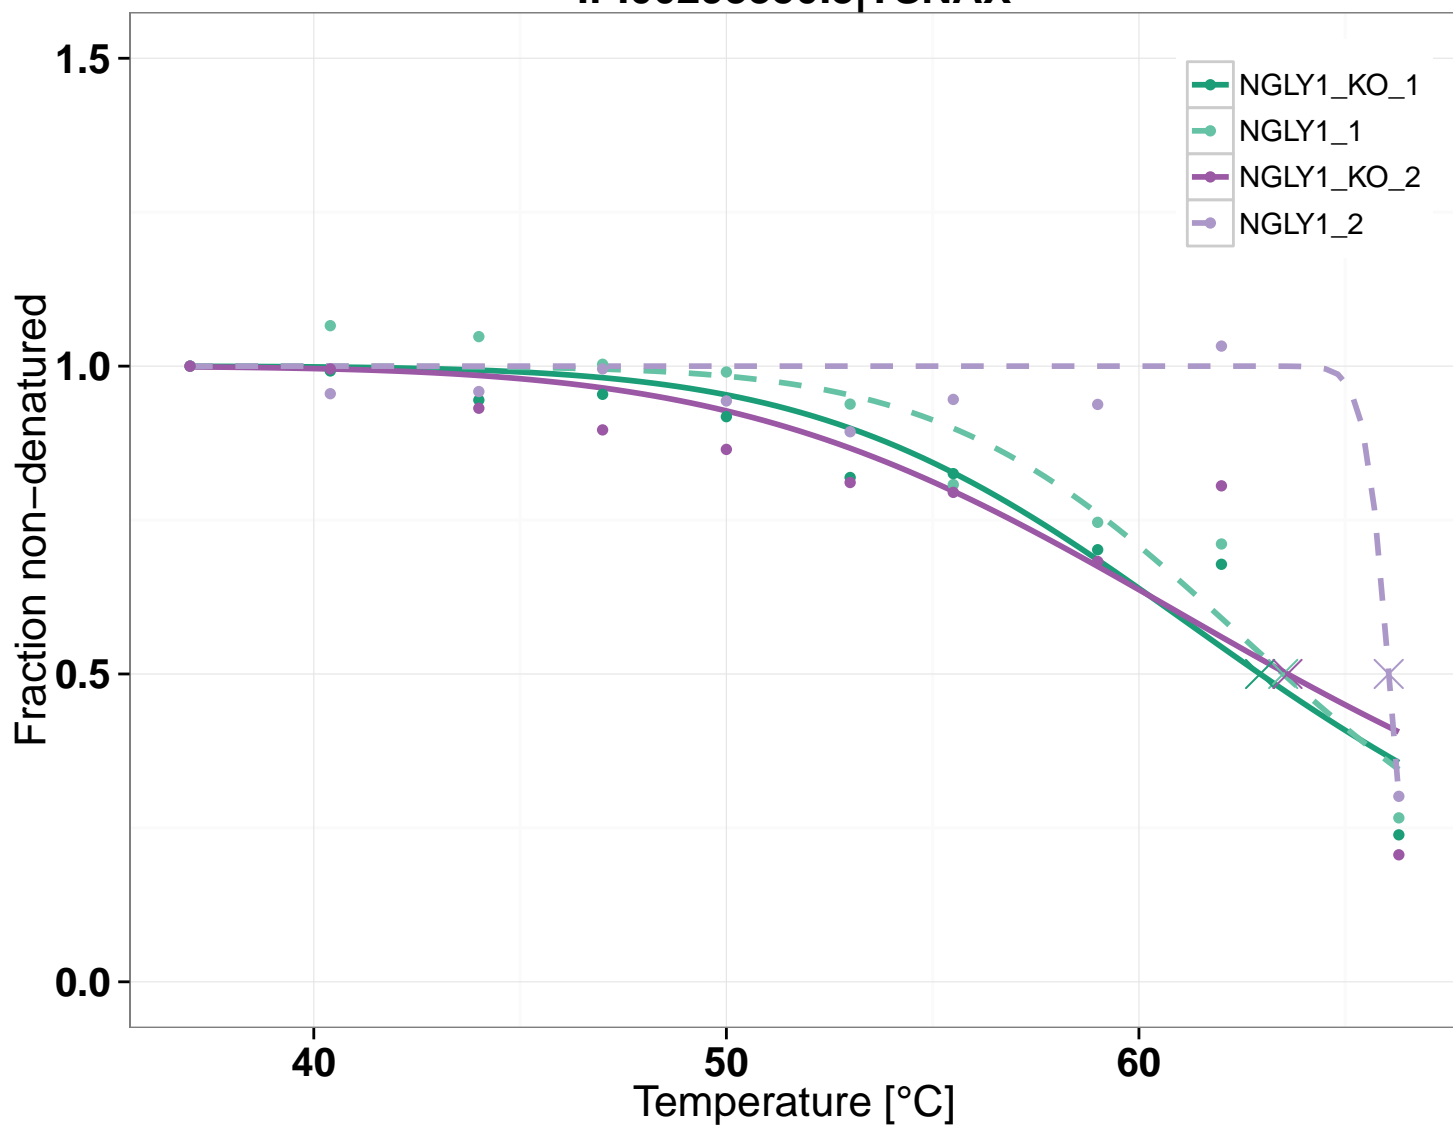

|            | meltPoint | slope  | plateau | R2   |
|------------|-----------|--------|---------|------|
| NGLY1_KO_1 | 62.94     | -0.048 | 0       | 0.91 |
| NGLY1_1    | 63.5      | -0.061 | 0       | 0.93 |
| NGLY1_KO_2 | 63.6      | -0.038 | 0       | 0.76 |
| NGLY1_2    | 66.05     | -0.86  | 0       | 0.94 |

Supplement: Supplementary file 7338 [file 1]

IPI00022421.2|COX7A2L

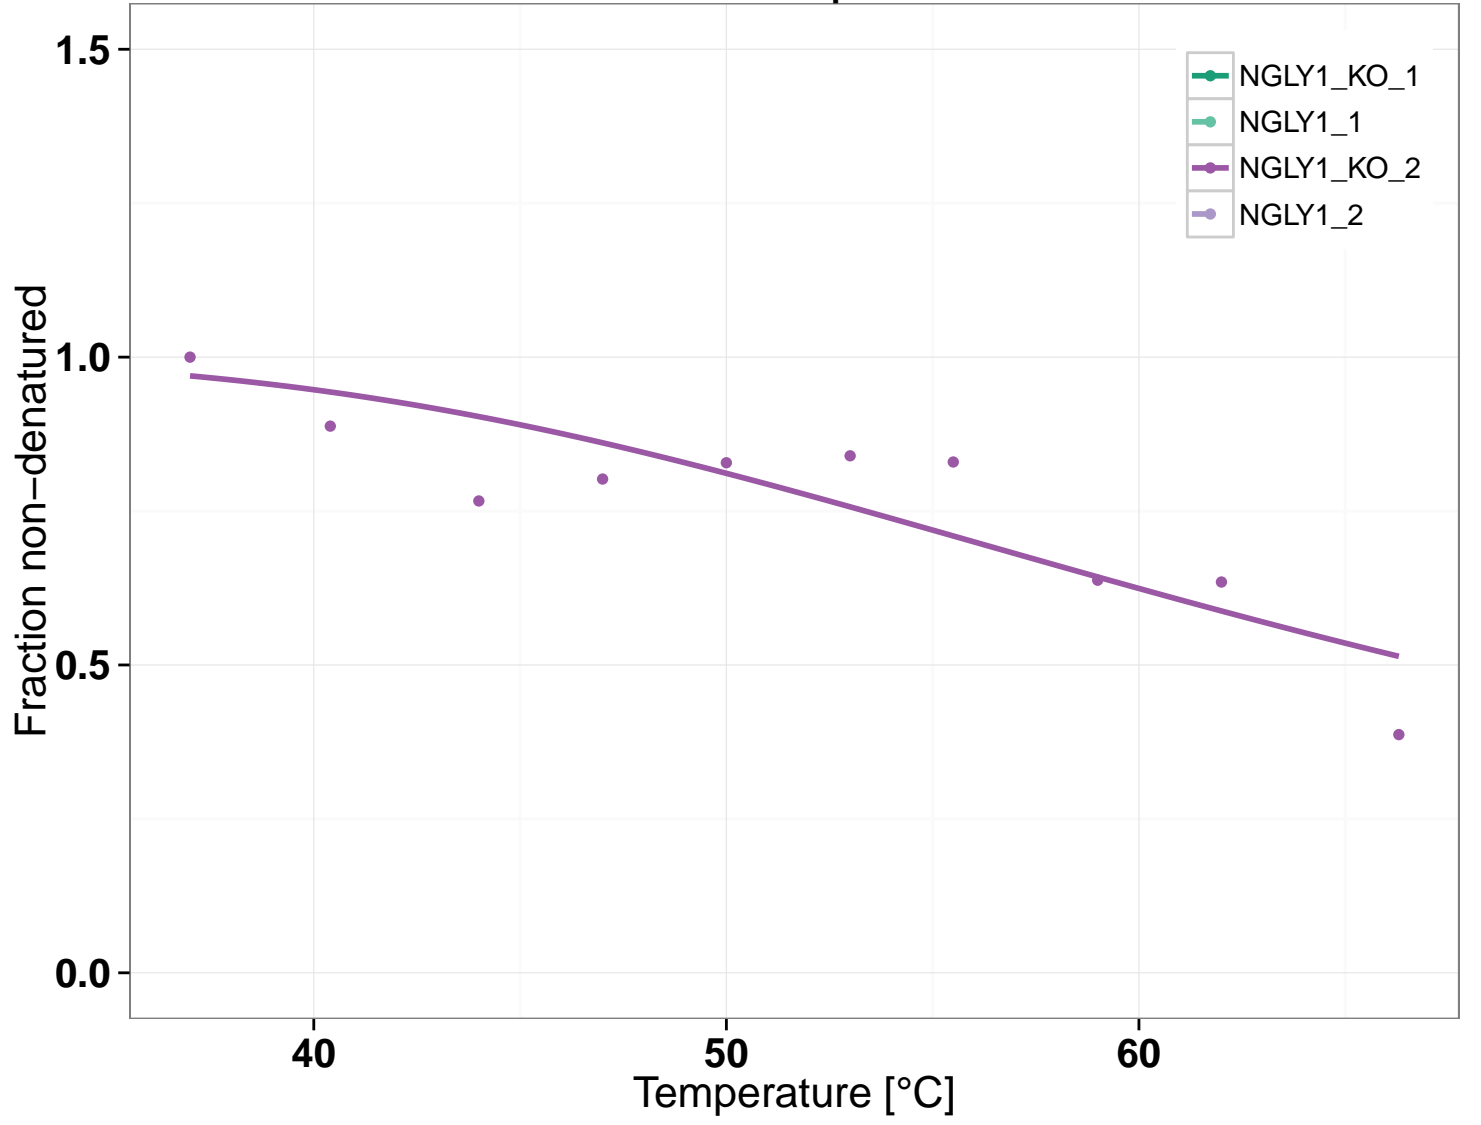

|            | meltPoint | slope  | plateau | R2   |
|------------|-----------|--------|---------|------|
| NGLY1_KO_1 | -         | -      | -       | -    |
| NGLY1_1    | -         | -      | -       | -    |
| NGLY1_KO_2 | -         | -0.019 | 0       | 0.75 |
| NGLY1_2    | -         | -      | -       | -    |

Supplement: Supplementary file 7339 [file 1]

IPI00334914.2|C1ORF25

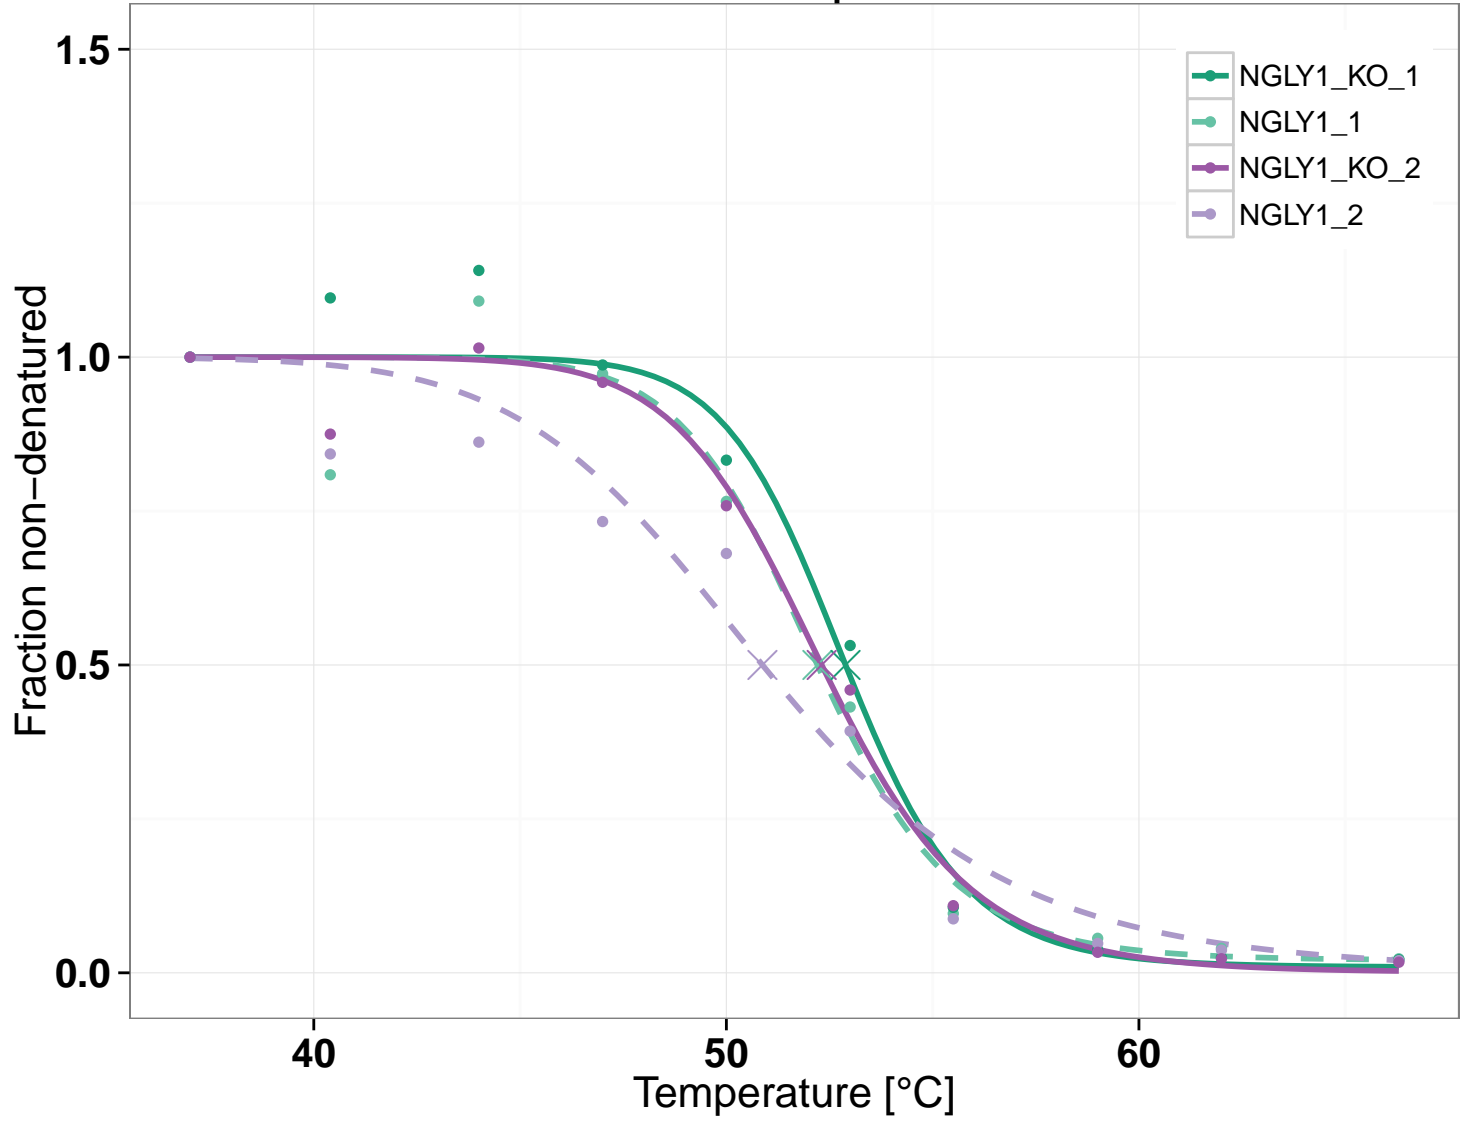

|            | meltPoint | slope  | plateau | R2   |
|------------|-----------|--------|---------|------|
| NGLY1_KO_1 | 52.89     | -0.17  | 0.01    | 0.98 |
| NGLY1_1    | 52.21     | -0.15  | 0.02    | 0.97 |
| NGLY1_KO_2 | 52.31     | -0.14  | 0       | 0.99 |
| NGLY1_2    | 50.87     | -0.083 | 0       | 0.96 |

Supplement: Supplementary file 7340 [file 1]

IPI00306170.5|GAS2L1

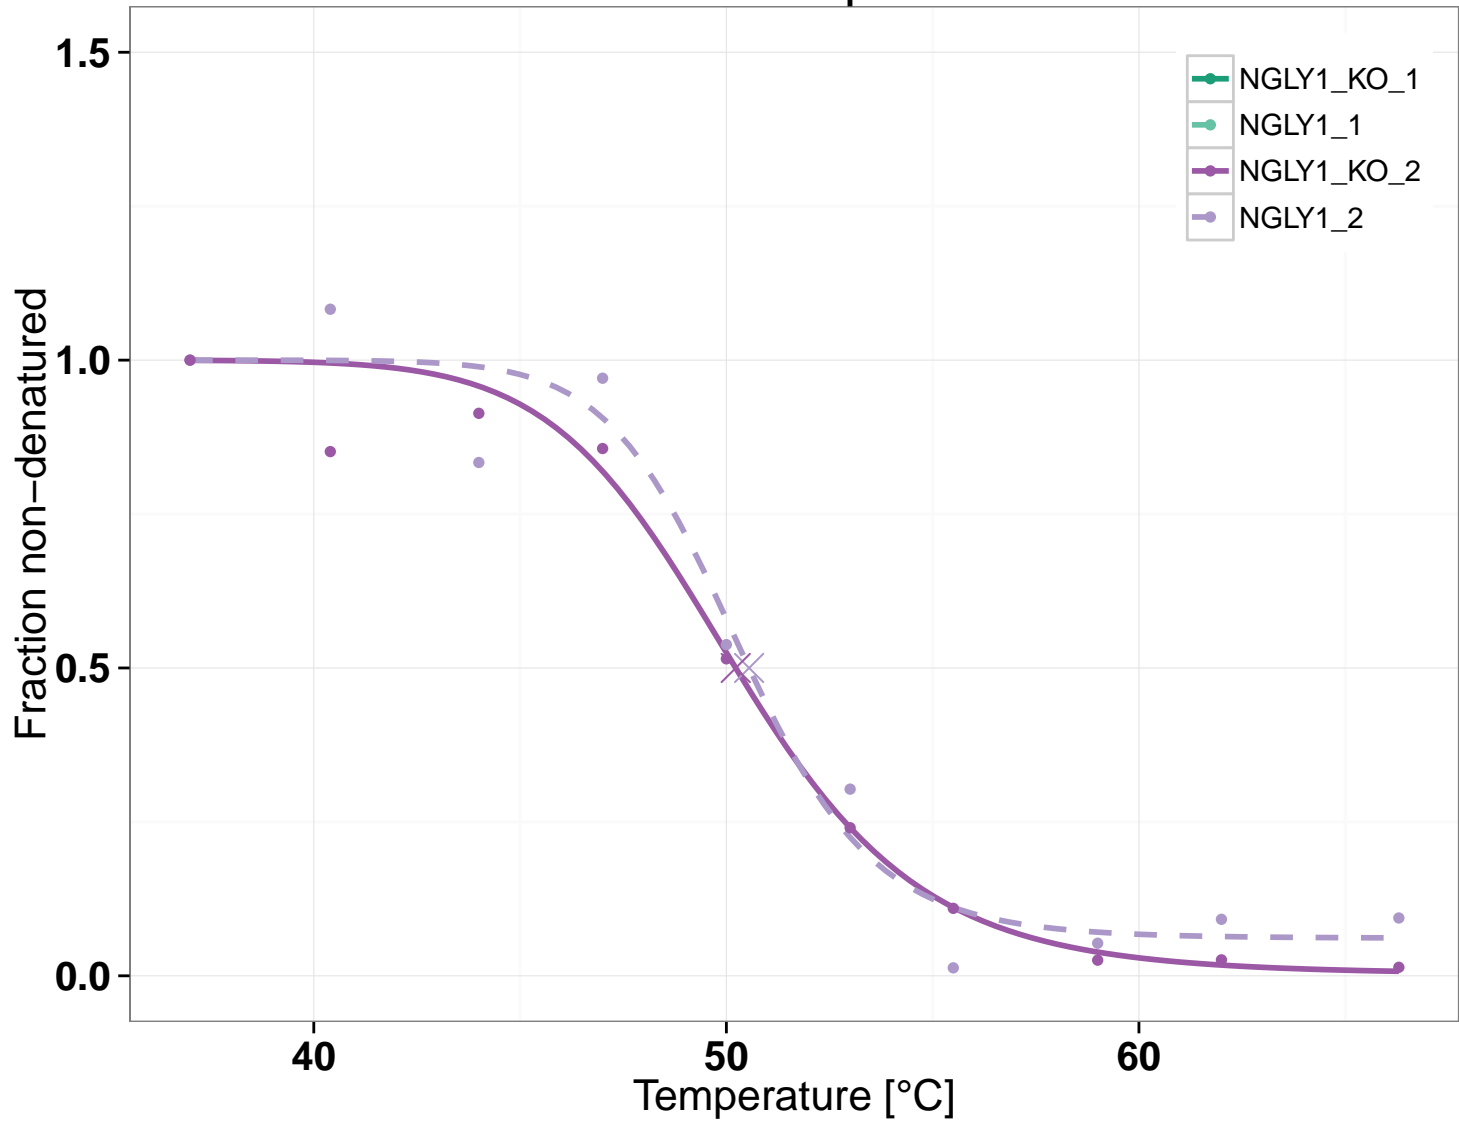

|            | meltPoint | slope | plateau | R2   |
|------------|-----------|-------|---------|------|
| NGLY1_KO_1 | —         | —     | —       | —    |
| NGLY1_1    | —         | —     | —       | —    |
| NGLY1_KO_2 | 50.23     | -0.11 | 0       | 0.98 |
| NGLY1_2    | 50.55     | -0.14 | 0.06    | 0.97 |

Supplement: Supplementary file 7341 [file 1]

# IPI00513853.2|STX12

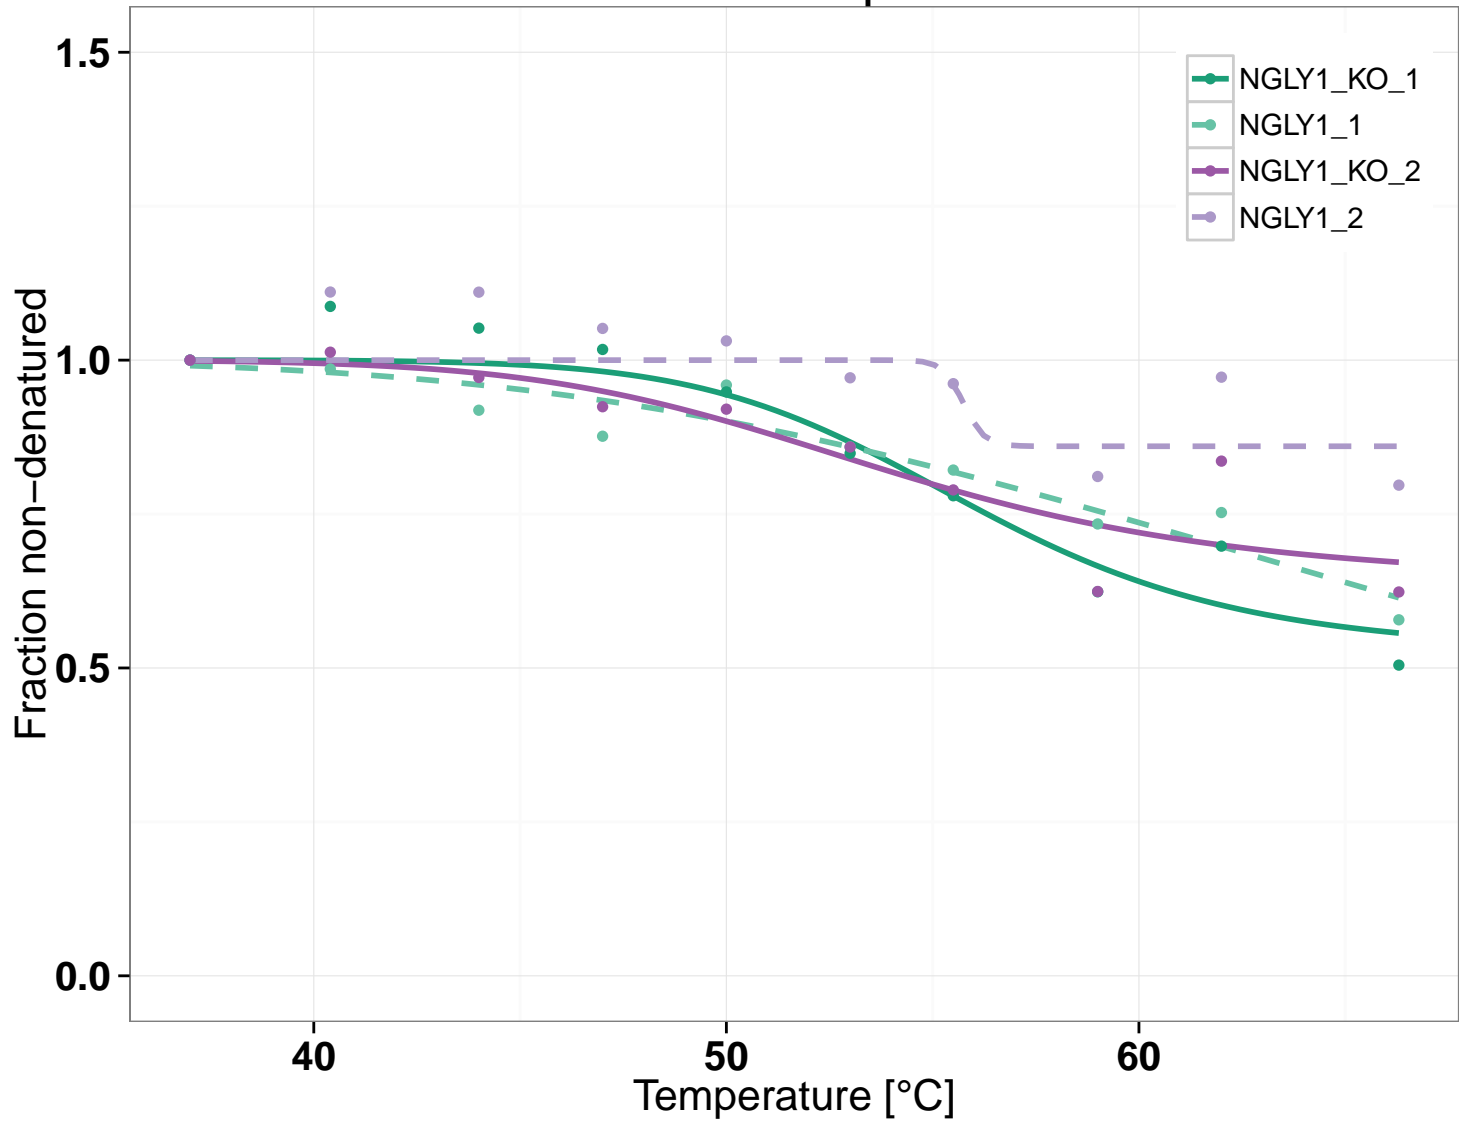

|            | meltPoint | slope  | plateau | R2   |
|------------|-----------|--------|---------|------|
| NGLY1_KO_1 | -         | -0.036 | 0.52    | 0.93 |
| NGLY1_1    | -         | -0.019 | 0       | 0.91 |
| NGLY1_KO_2 | -         | -0.021 | 0.64    | 0.81 |
| NGLY1_2    | -         | -0.14  | 0.86    | 0.54 |

Supplement: Supplementary file 7342 [file 1]

IPI00148061.3|LDHAL6A

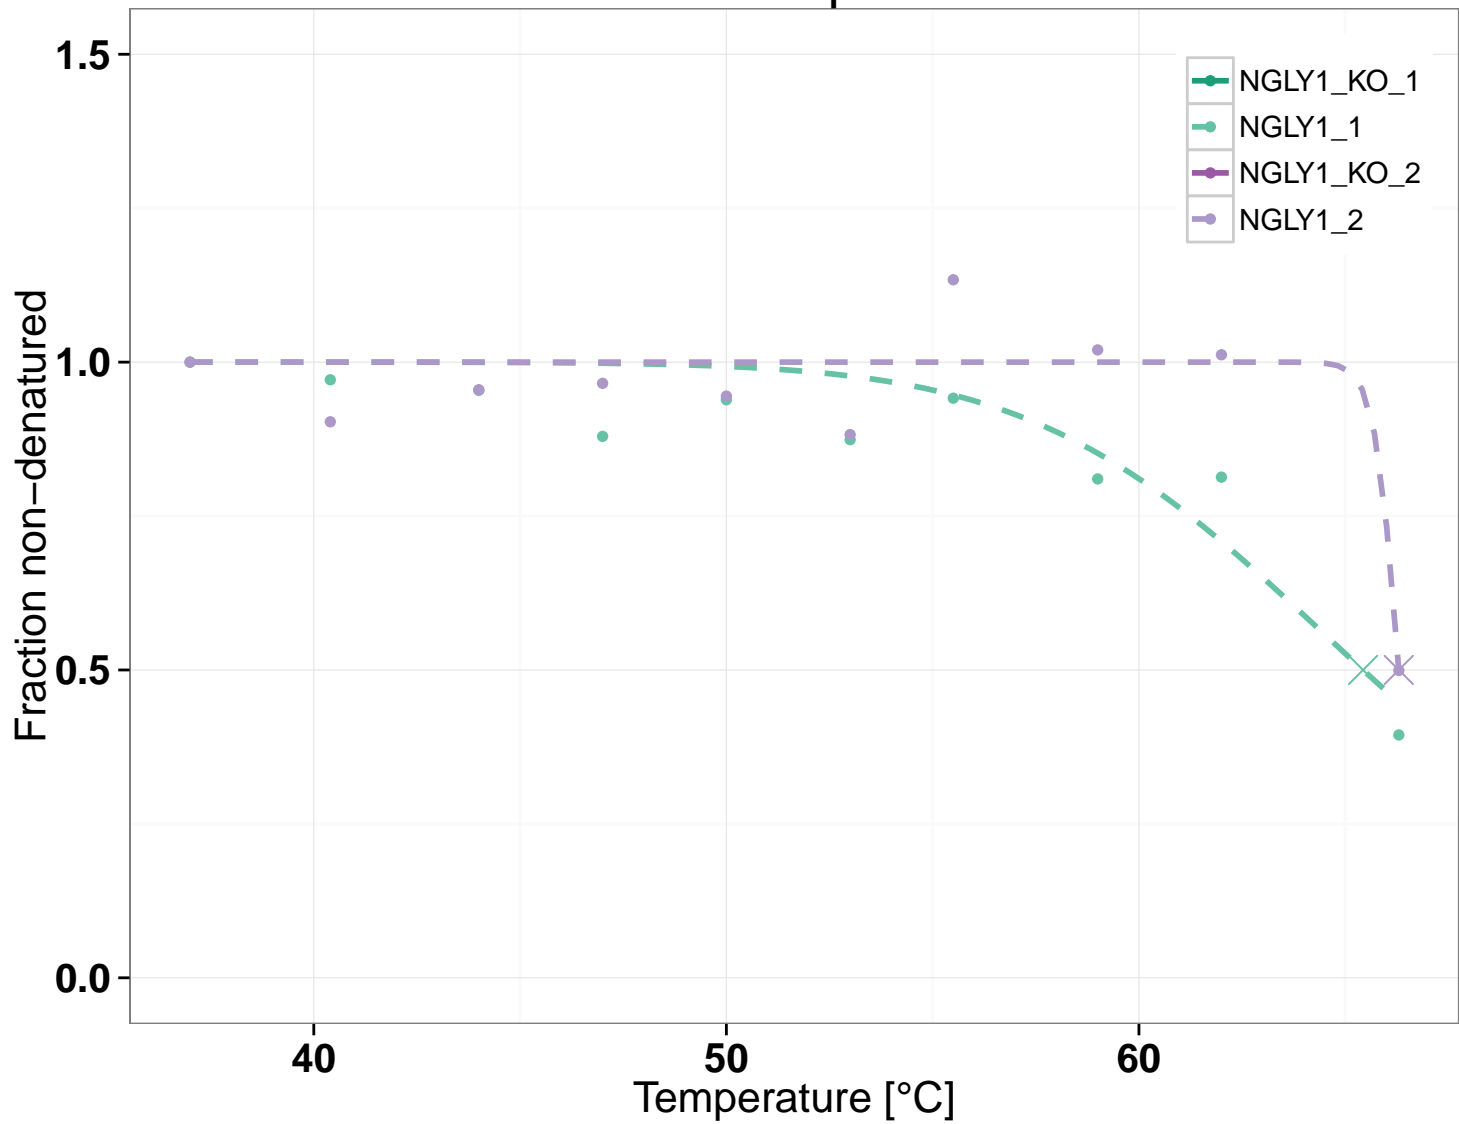

|            | meltPoint | slope  | plateau | R2   |
|------------|-----------|--------|---------|------|
| NGLY1_KO_1 | -         | -      | -       | -    |
| NGLY1_1    | 65.43     | -0.062 | 0       | 0.83 |
| NGLY1_KO_2 | -         | -      | -       | -    |
| NGLY1_2    | 66.3      | -0.85  | 0       | 0.81 |

Supplement: Supplementary file 7343 [file 1]

IPI00026665.2|QARS

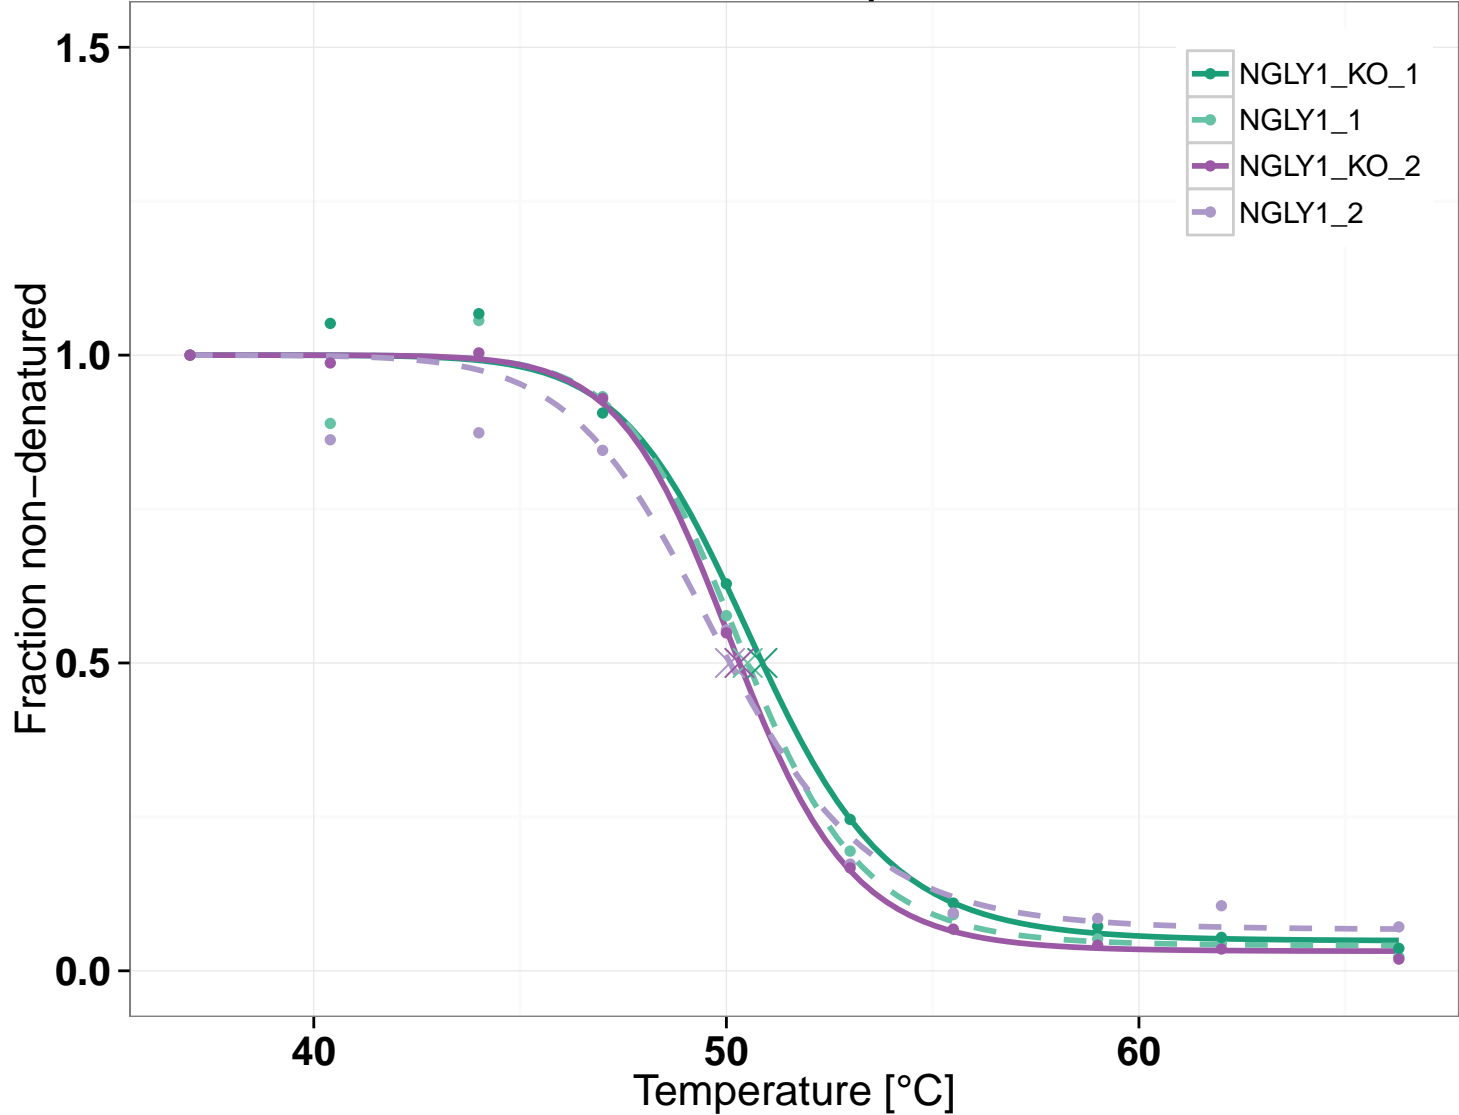

|            | meltPoint | slope | plateau | R2   |
|------------|-----------|-------|---------|------|
| NGLY1_KO_1 | 50.87     | -0.15 | 0.05    | 1    |
| NGLY1_1    | 50.52     | -0.16 | 0.04    | 0.99 |
| NGLY1_KO_2 | 50.32     | -0.17 | 0.03    | 1    |
| NGLY1_2    | 50.09     | -0.13 | 0.07    | 0.98 |

Supplement: Supplementary file 7344 [file 1]

IPI00879122.1|RBMY1F

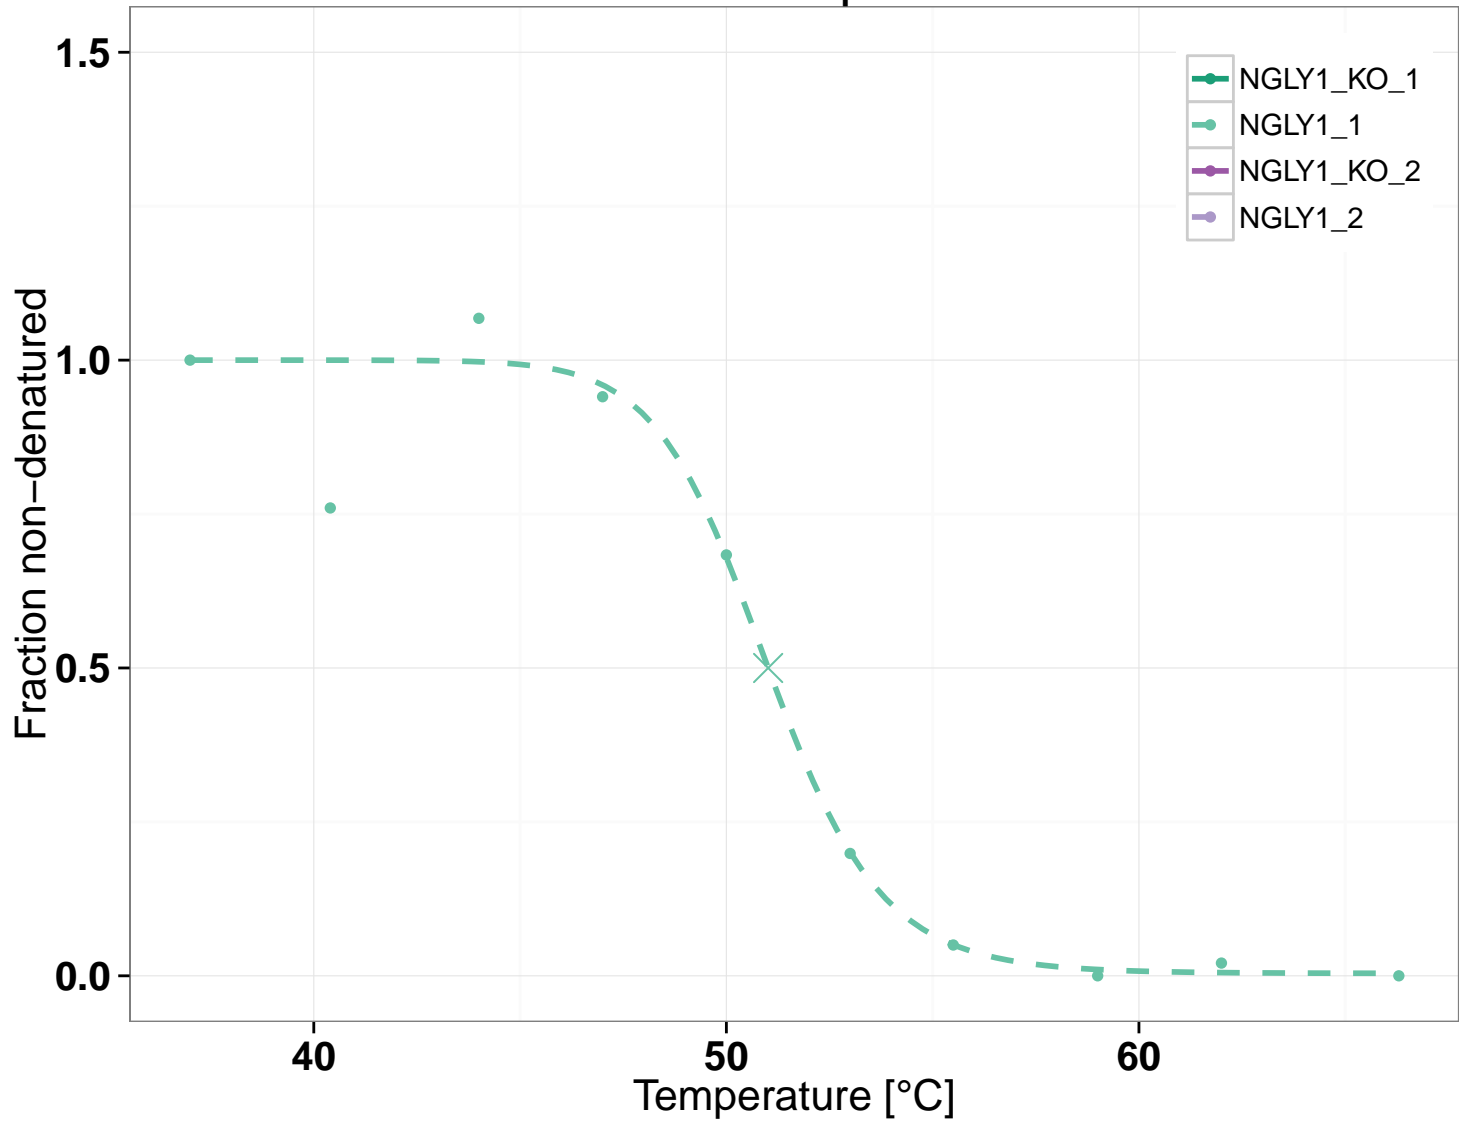

|            | meltPoint | slope | plateau | R2   |
|------------|-----------|-------|---------|------|
| NGLY1_KO_1 | -         | -     | -       | -    |
| NGLY1_1    | 51.01     | -0.18 | 0       | 0.97 |
| NGLY1_KO_2 | -         | -     | -       | -    |
| NGLY1_2    | -         | -     | -       | -    |

Supplement: Supplementary file 7345 [file 1]

# IPI00410177.2|ENSA

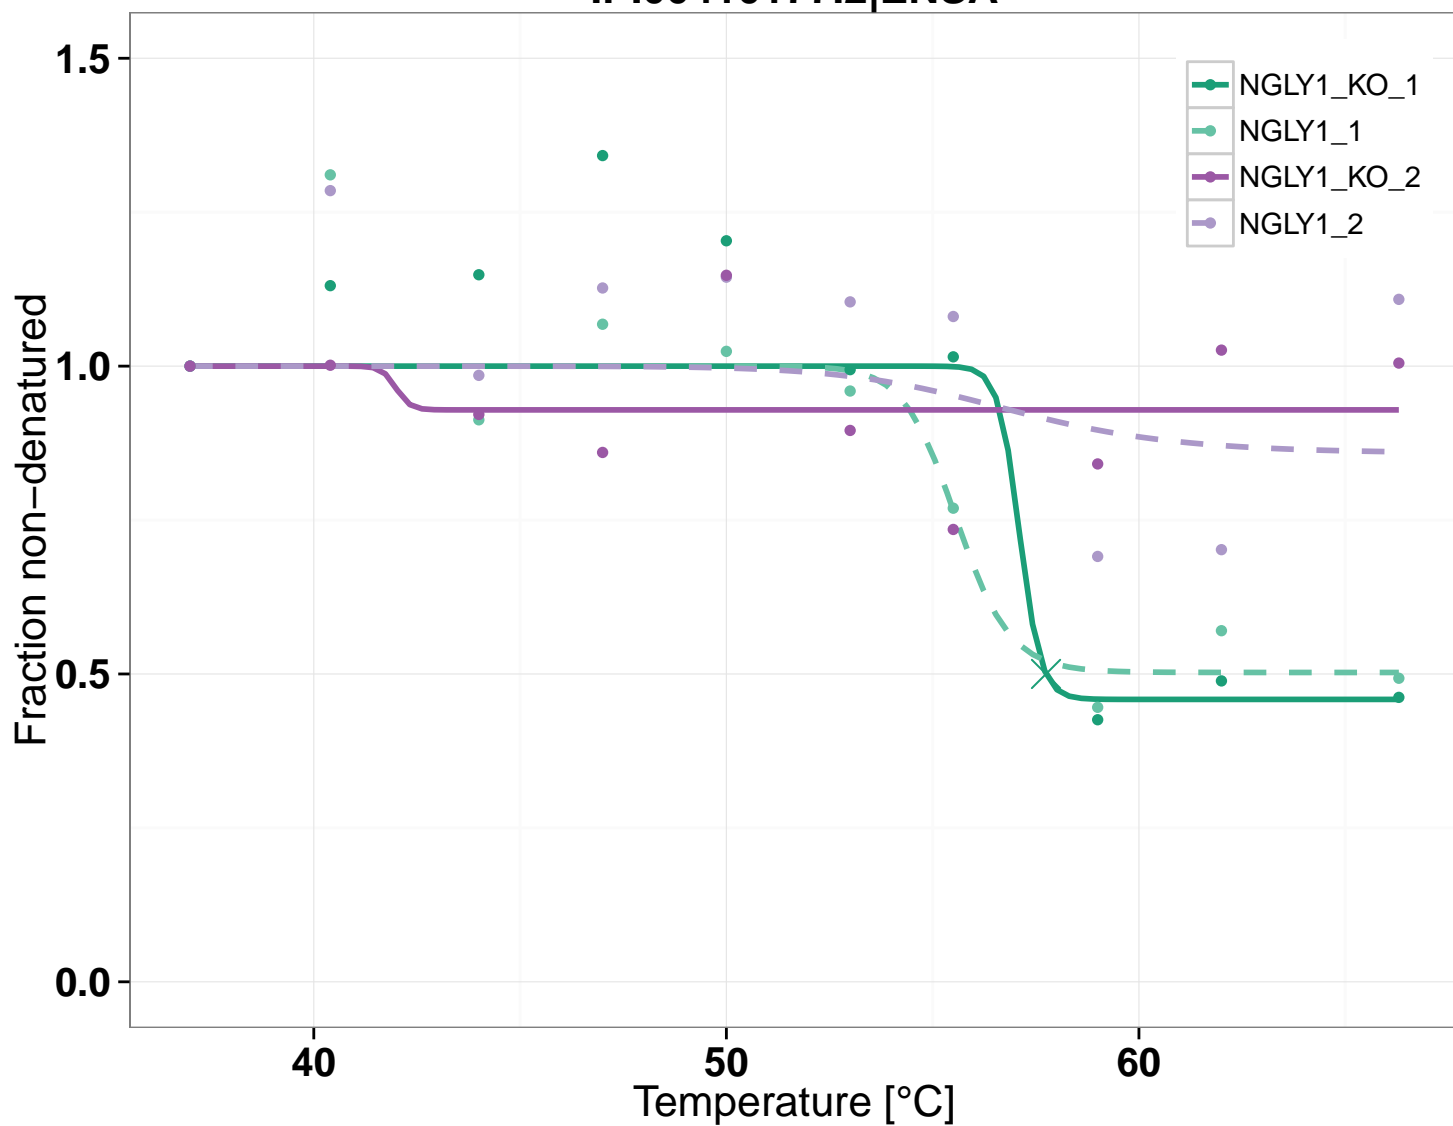

|            | meltPoint | slope  | plateau | R2   |
|------------|-----------|--------|---------|------|
| NGLY1_KO_1 | 57.75     | -0.53  | 0.46    | 0.8  |
| NGLY1_1    | –         | -0.19  | 0.5     | 0.83 |
| NGLY1_KO_2 | –         | -0.11  | 0.93    | 0.07 |
| NGLY1_2    | –         | -0.017 | 0.86    | 0.14 |

Supplement: Supplementary file 7346 [file 1]

# IPI00001287.1|C20ORF72

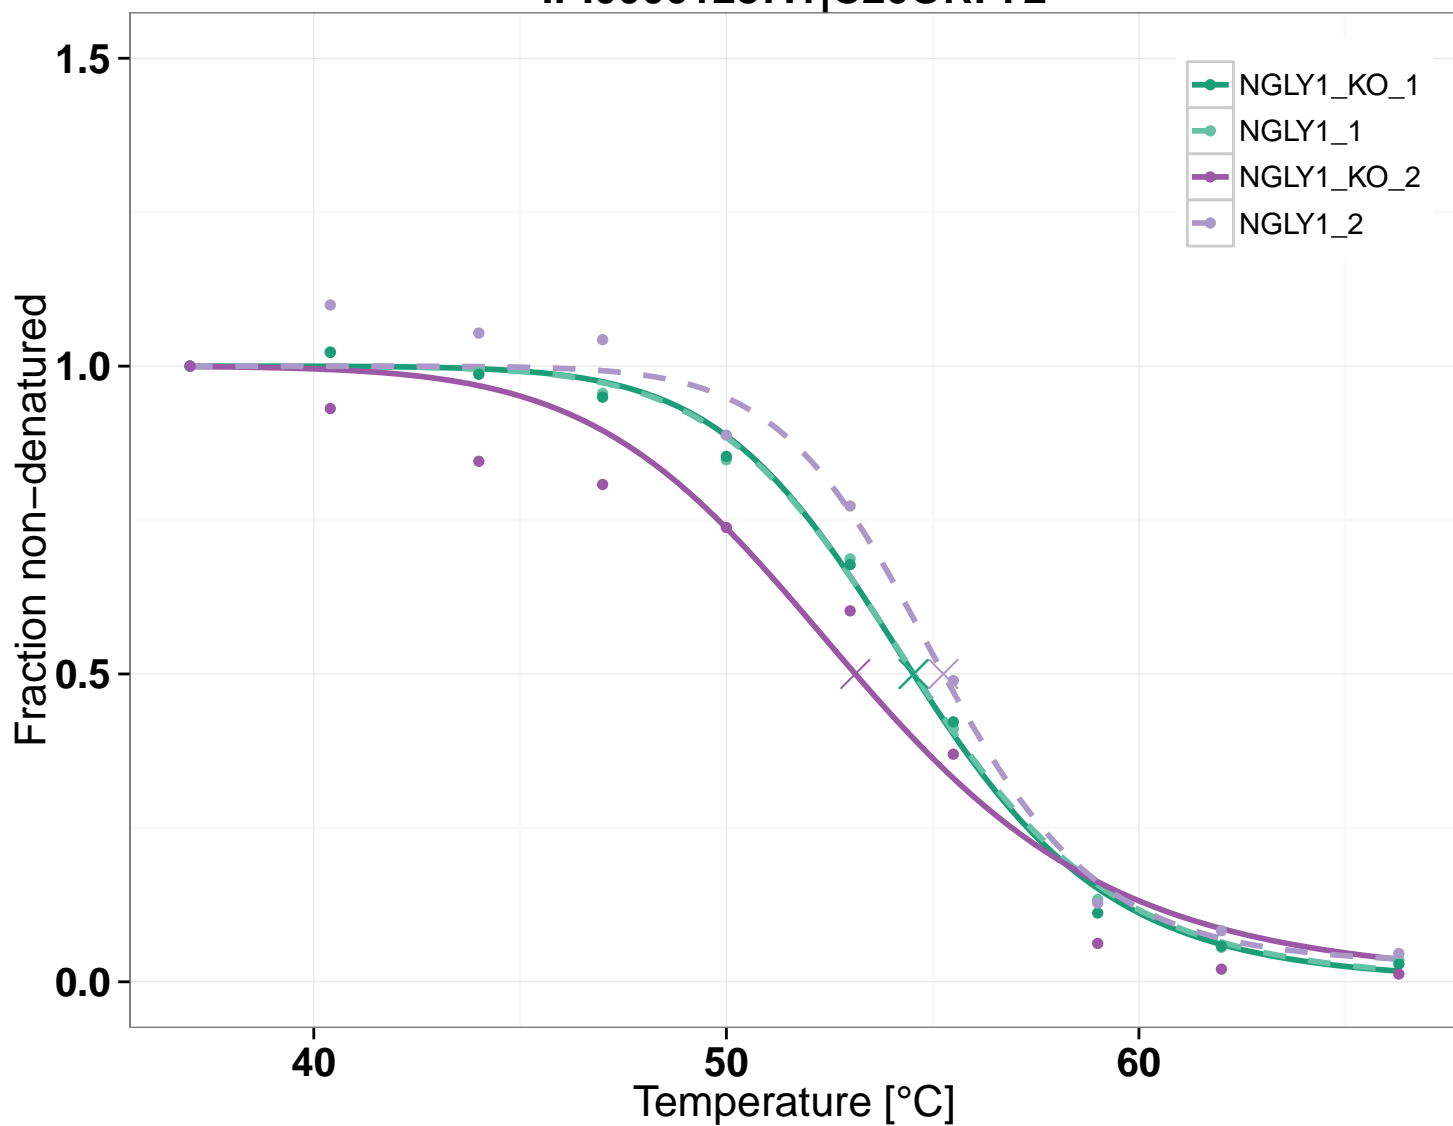

|            | meltPoint | slope  | plateau | R2   |
|------------|-----------|--------|---------|------|
| NGLY1_KO_1 | 54.53     | -0.11  | 0       | 1    |
| NGLY1_1    | 54.56     | -0.1   | 0       | 1    |
| NGLY1_KO_2 | 53.13     | -0.079 | 0       | 0.96 |
| NGLY1_2    | 55.26     | -0.12  | 0.03    | 0.99 |

Supplement: Supplementary file 7347 [file 1]

IPI00002828.3|MLF1IP

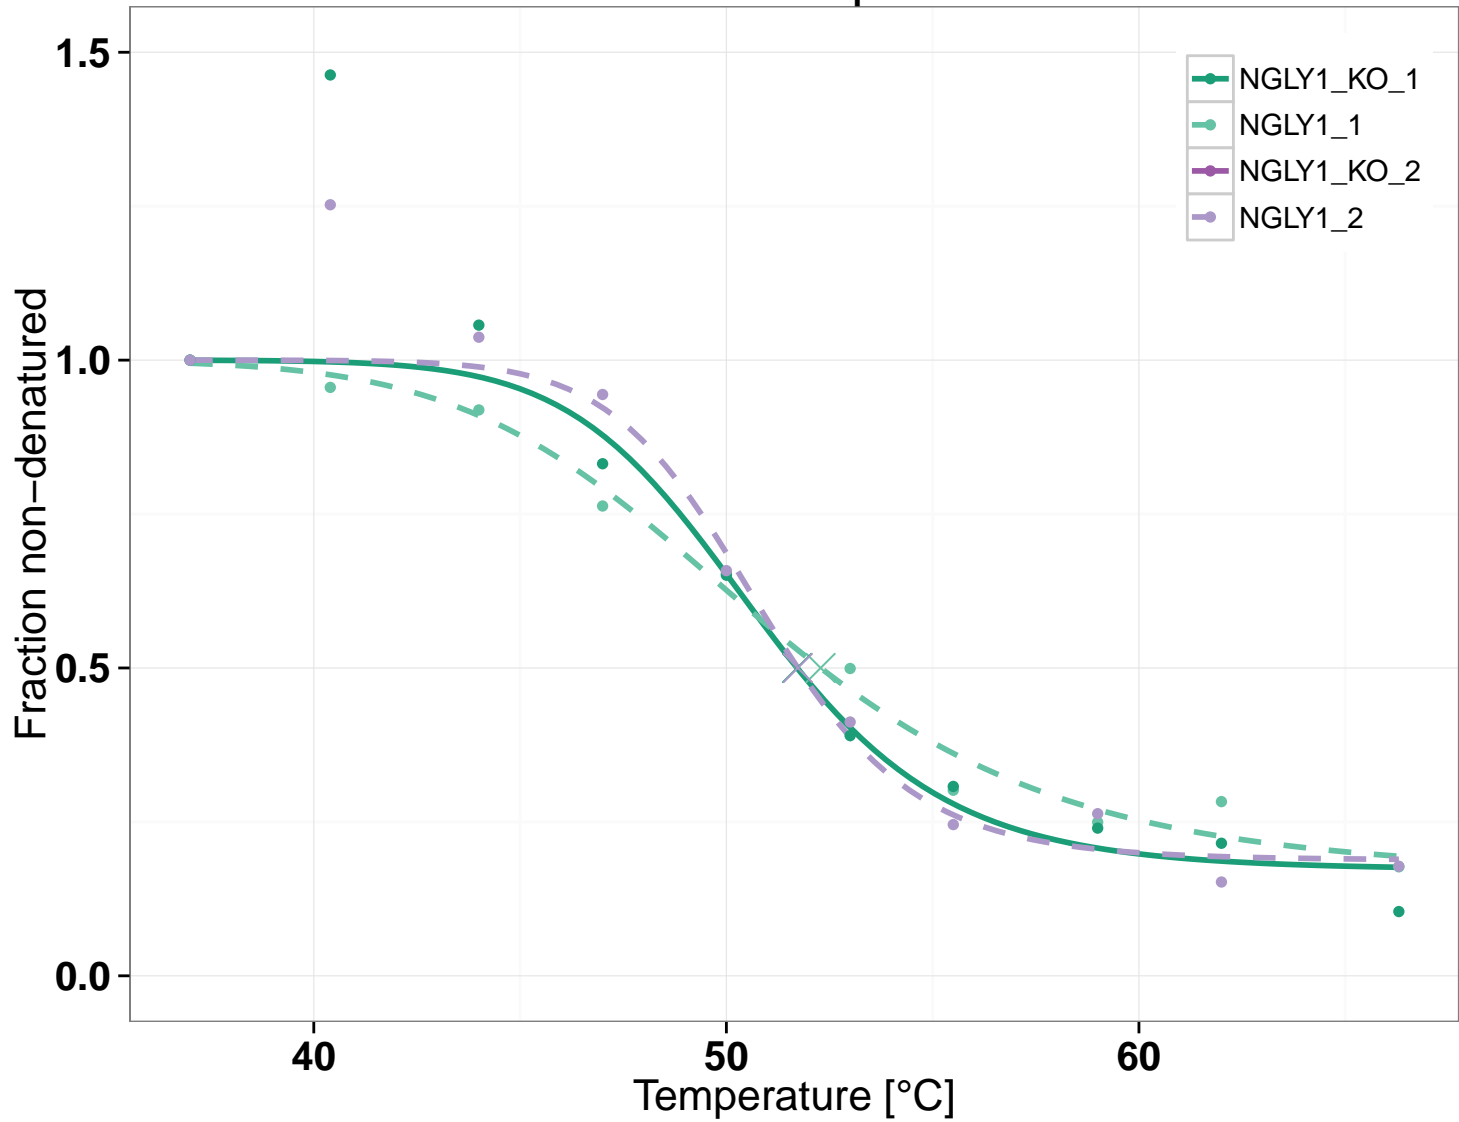

|            | meltPoint | slope  | plateau | R2   |
|------------|-----------|--------|---------|------|
| NGLY1_KO_1 | 51.72     | -0.091 | 0.17    | 0.87 |
| NGLY1_1    | 52.28     | -0.058 | 0.16    | 0.99 |
| NGLY1_KO_2 | -         | -      | -       | -    |
| NGLY1_2    | 51.73     | -0.11  | 0.19    | 0.95 |

Supplement: Supplementary file 7348 [file 1]

# IPI00218728.4|PAFAH1B1

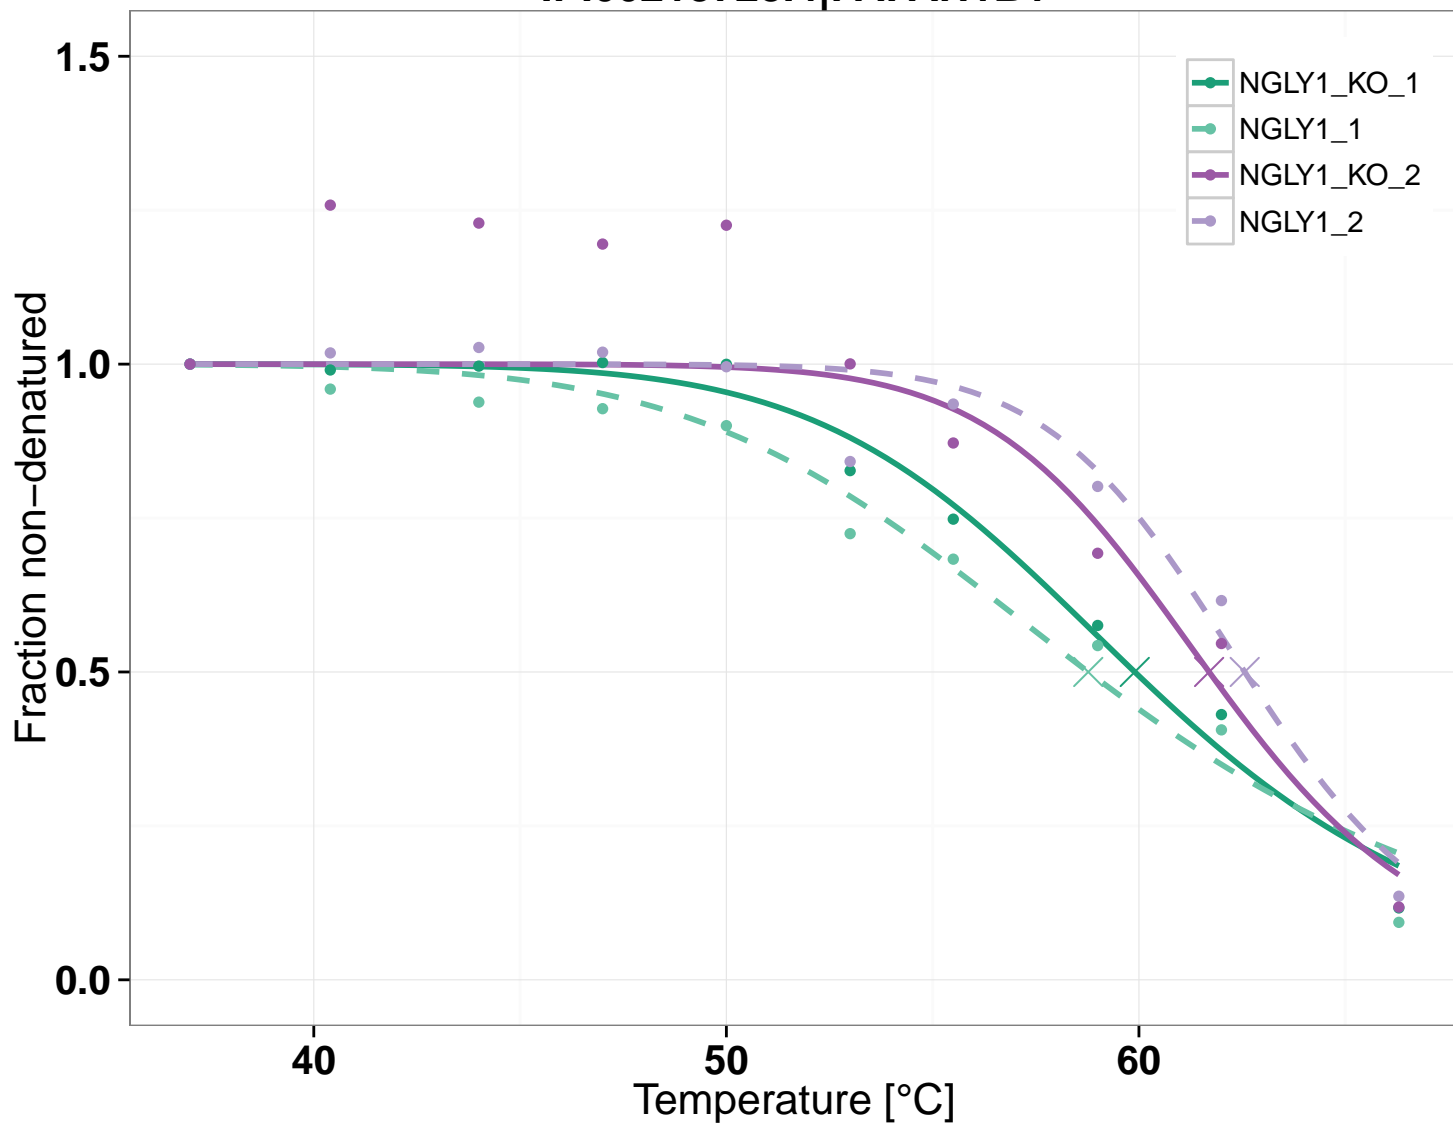

|            | meltPoint | slope  | plateau | R2   |
|------------|-----------|--------|---------|------|
| NGLY1_KO_1 | 59.9      | -0.065 | 0       | 0.98 |
| NGLY1_1    | 58.77     | -0.052 | 0       | 0.97 |
| NGLY1_KO_2 | 61.7      | -0.093 | 0       | 0.82 |
| NGLY1_2    | 62.56     | -0.1   | 0       | 0.96 |

Supplement: Supplementary file 7349 [file 1]

# IPI00019380.1|NCBP1

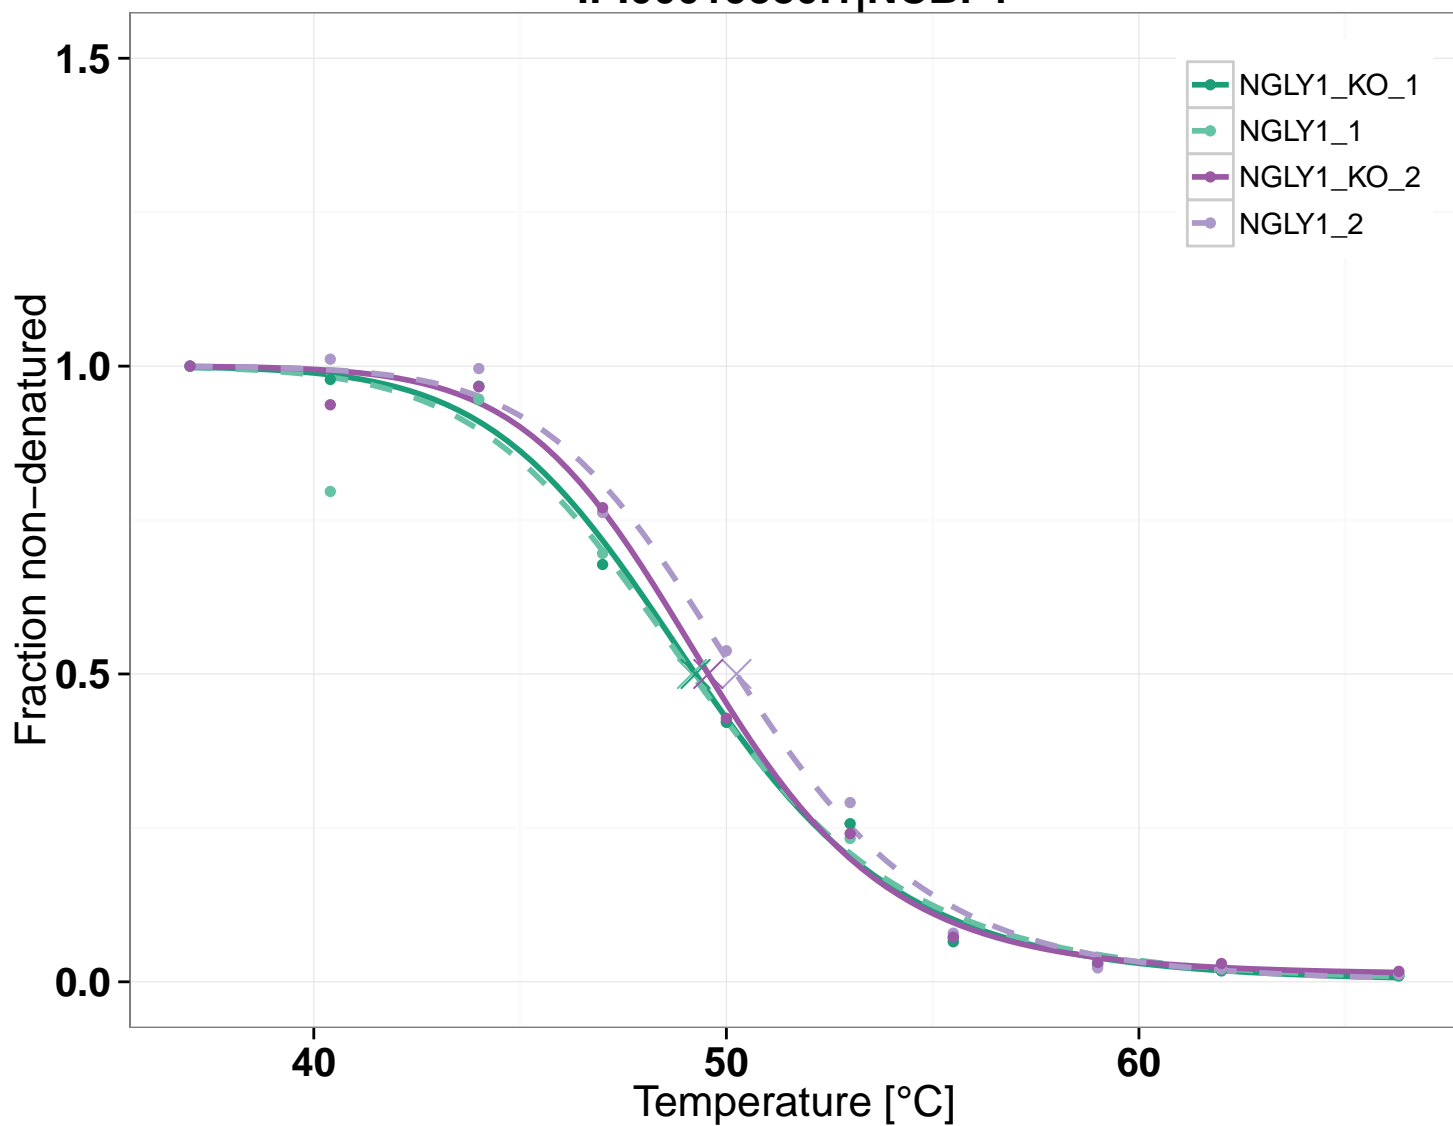

|            | meltPoint | slope  | plateau | R2   |
|------------|-----------|--------|---------|------|
| NGLY1_KO_1 | 49.25     | -0.099 | 0       | 0.99 |
| NGLY1_1    | 49.17     | -0.095 | 0       | 0.97 |
| NGLY1_KO_2 | 49.56     | -0.11  | 0.01    | 1    |
| NGLY1_2    | 50.24     | -0.1   | 0       | 1    |

Supplement: Supplementary file 7350 [file 1]

# IPI00550917.3|TWF2

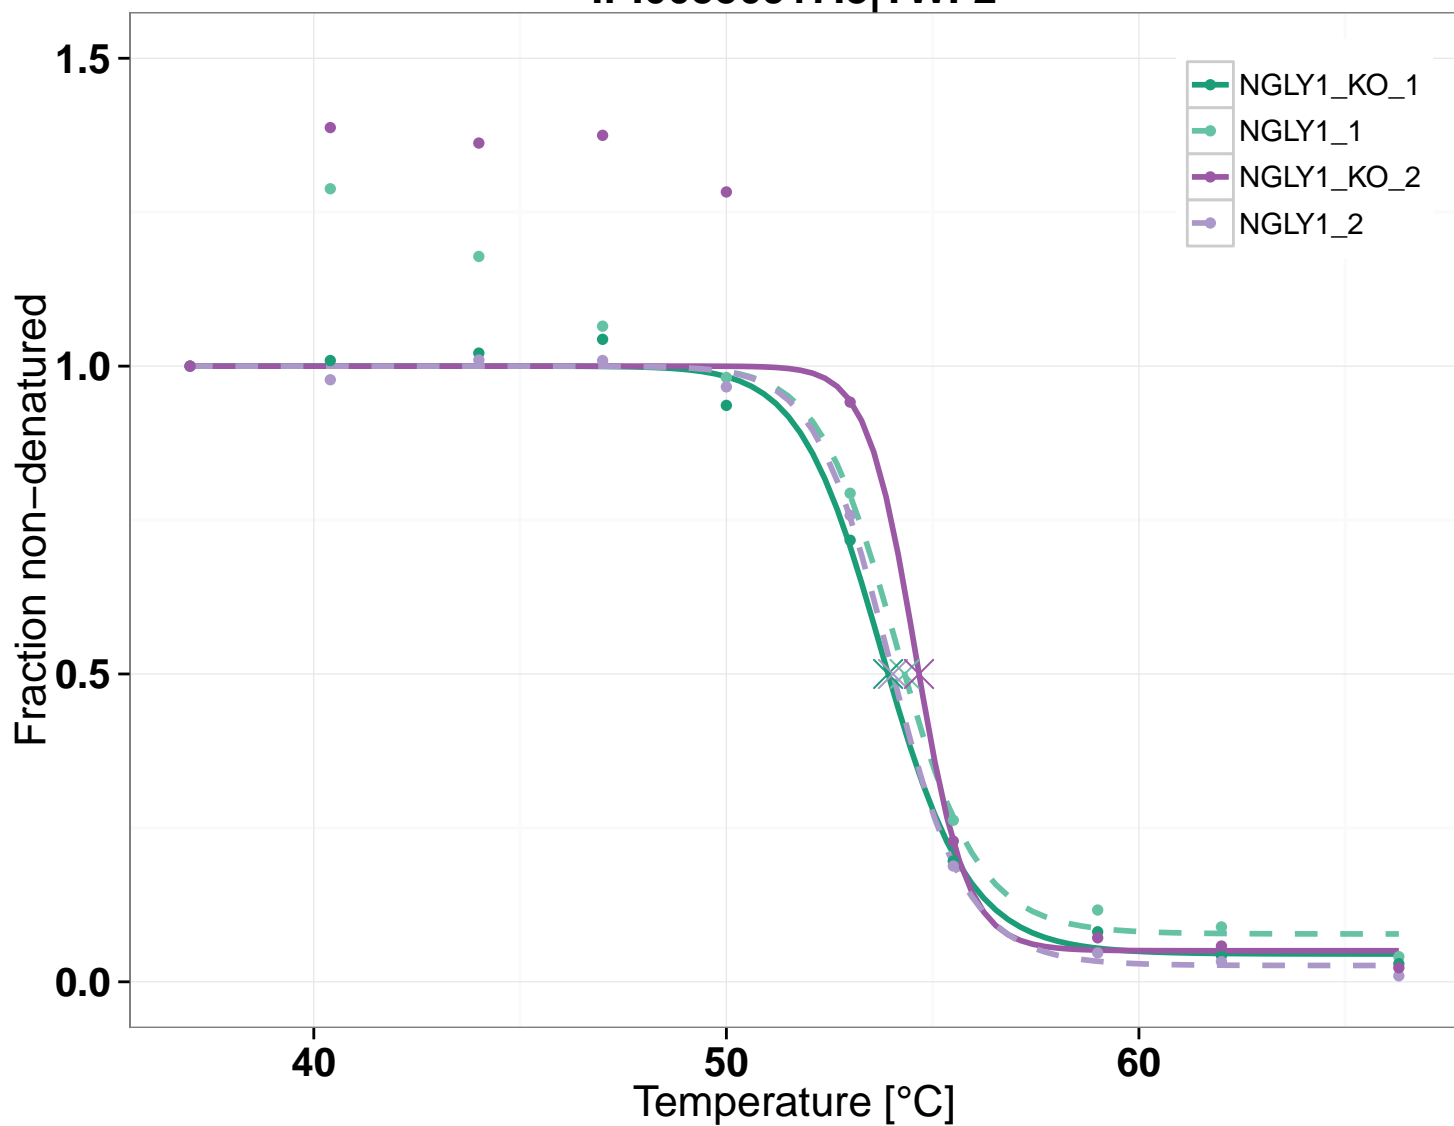

|            | meltPoint | slope | plateau | R2   |
|------------|-----------|-------|---------|------|
| NGLY1_KO_1 | 53.92     | -0.23 | 0.05    | 1    |
| NGLY1_1    | 54.32     | -0.24 | 0.08    | 0.95 |
| NGLY1_KO_2 | 54.67     | -0.4  | 0.05    | 0.85 |
| NGLY1_2    | 54.04     | -0.26 | 0.03    | 1    |

Supplement: Supplementary file 7351 [file 1]

# IPI00007736.5|EIF2C1

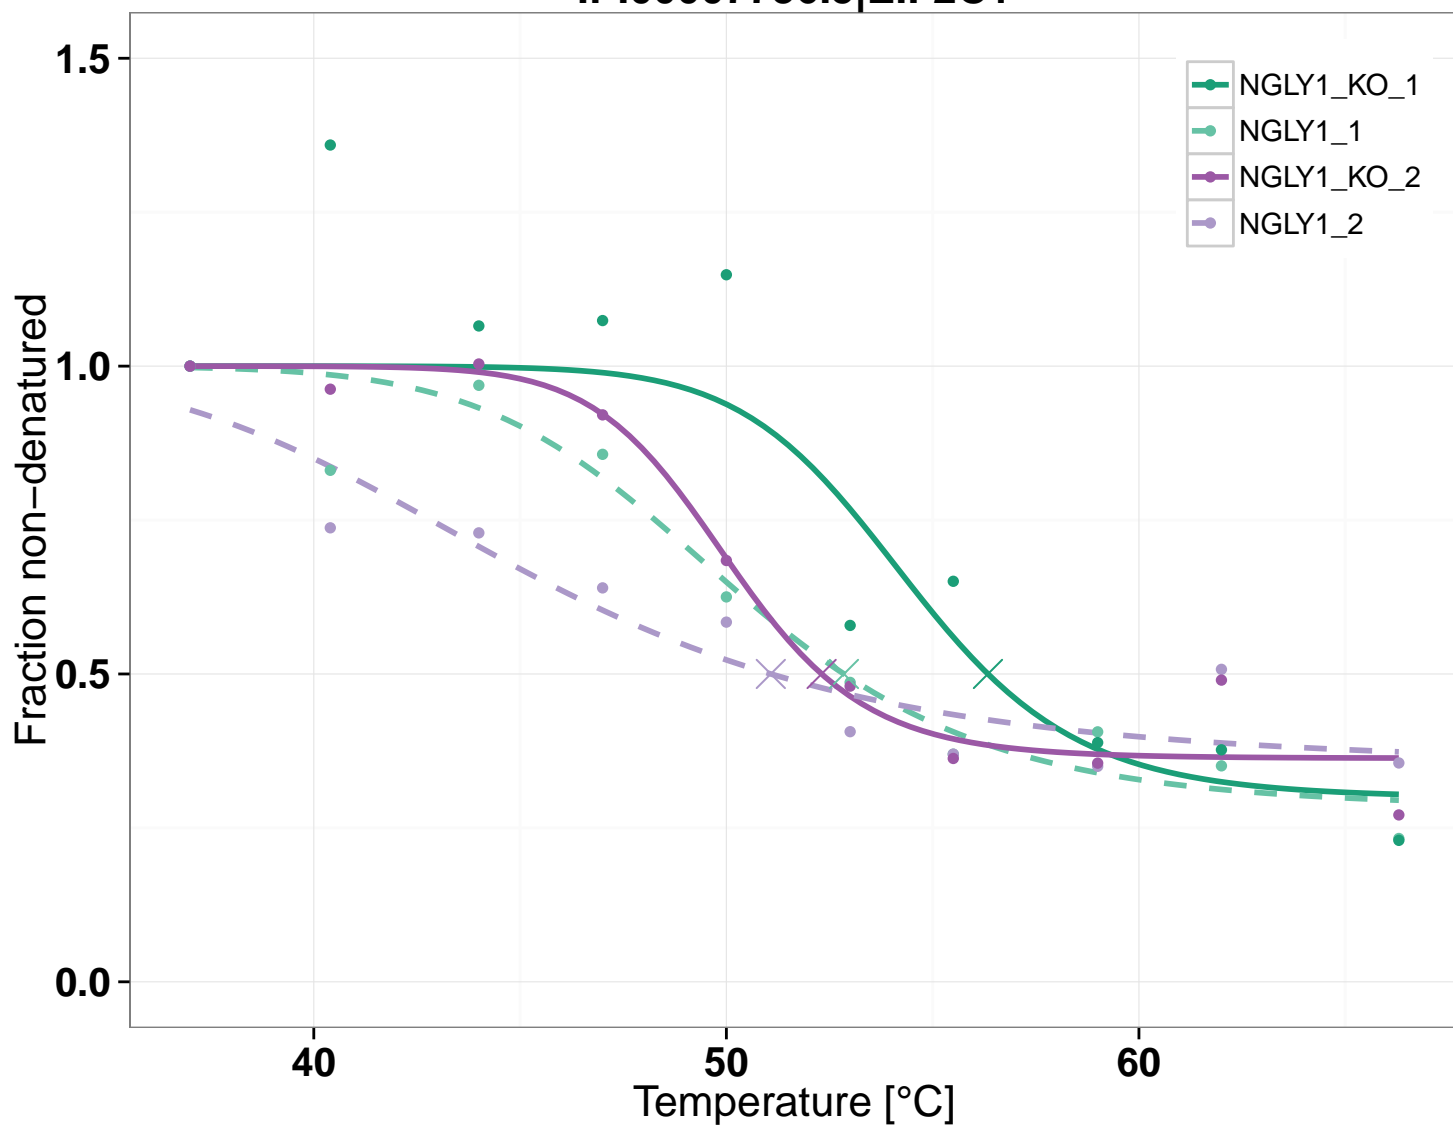

|            | meltPoint | slope  | plateau | R2   |
|------------|-----------|--------|---------|------|
| NGLY1_KO_1 | 56.34     | -0.086 | 0.3     | 0.83 |
| NGLY1_1    | 52.85     | -0.059 | 0.28    | 0.95 |
| NGLY1_KO_2 | 52.31     | -0.097 | 0.36    | 0.97 |
| NGLY1_2    | 51.08     | -0.037 | 0.35    | 0.89 |

Supplement: Supplementary file 7352 [file 1]

# IPI00915314.1|SPEG

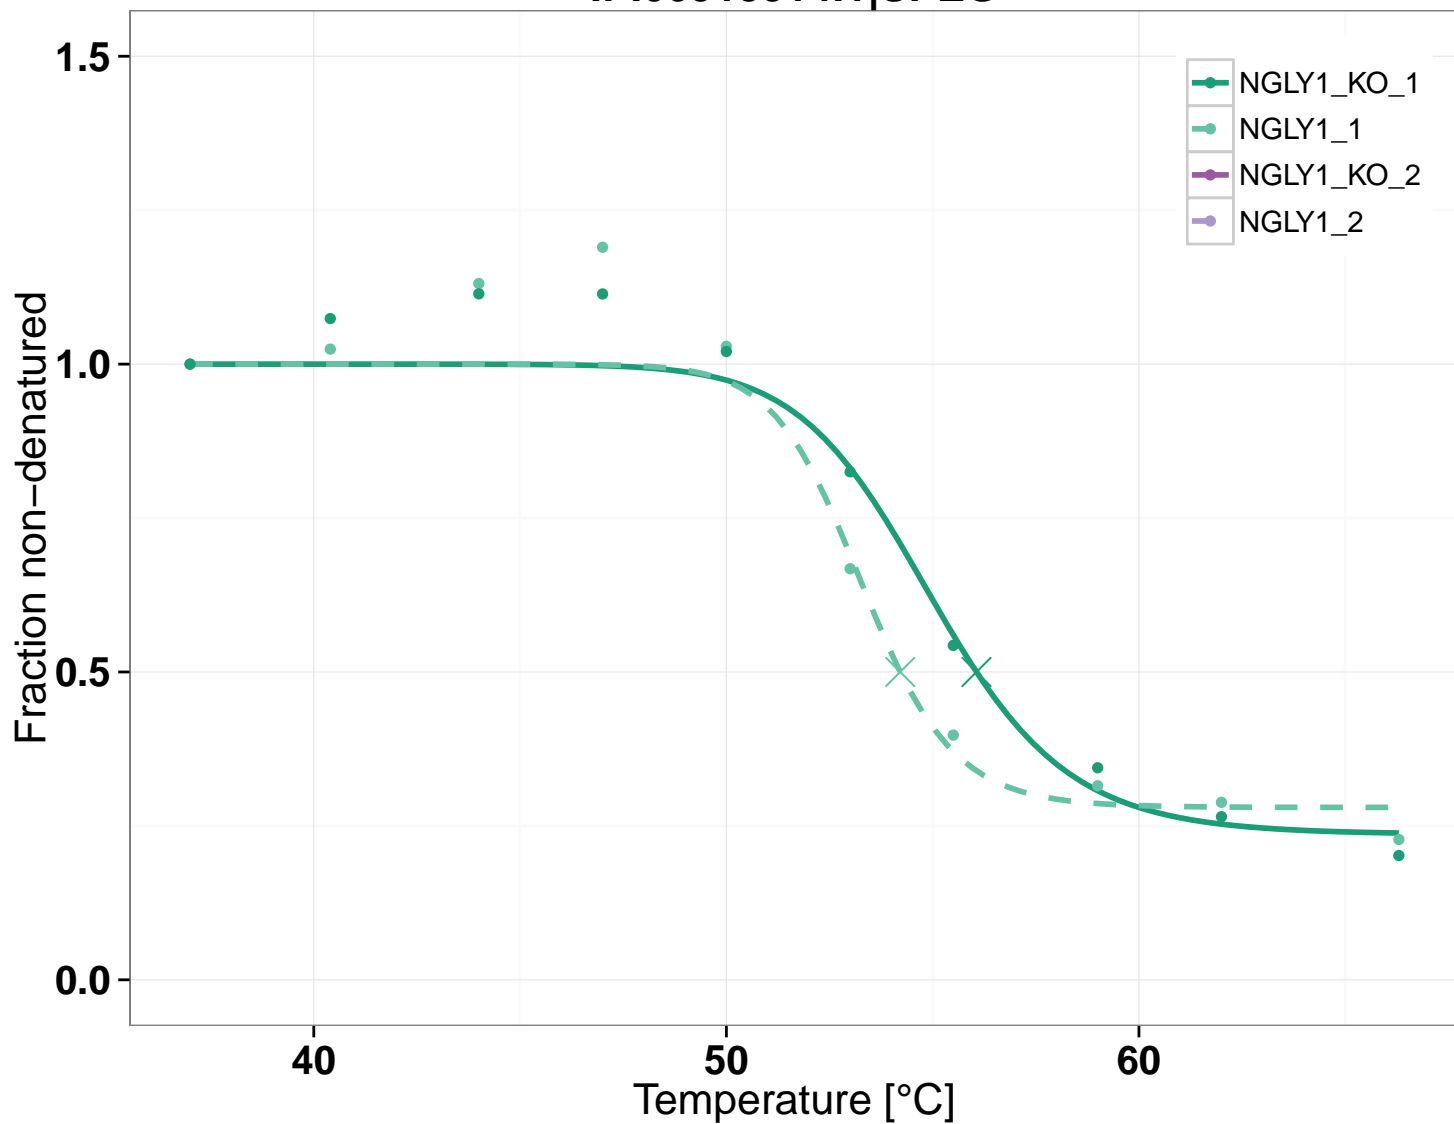

|            | meltPoint | slope | plateau | R2   |
|------------|-----------|-------|---------|------|
| NGLY1_KO_1 | 56.06     | -0.12 | 0.24    | 0.97 |
| NGLY1_1    | 54.21     | -0.17 | 0.28    | 0.95 |
| NGLY1_KO_2 | -         | -     | -       | -    |
| NGLY1_2    | -         | -     | -       | -    |

Supplement: Supplementary file 7353 [file 1]

# IPI00175092.5|RNF149

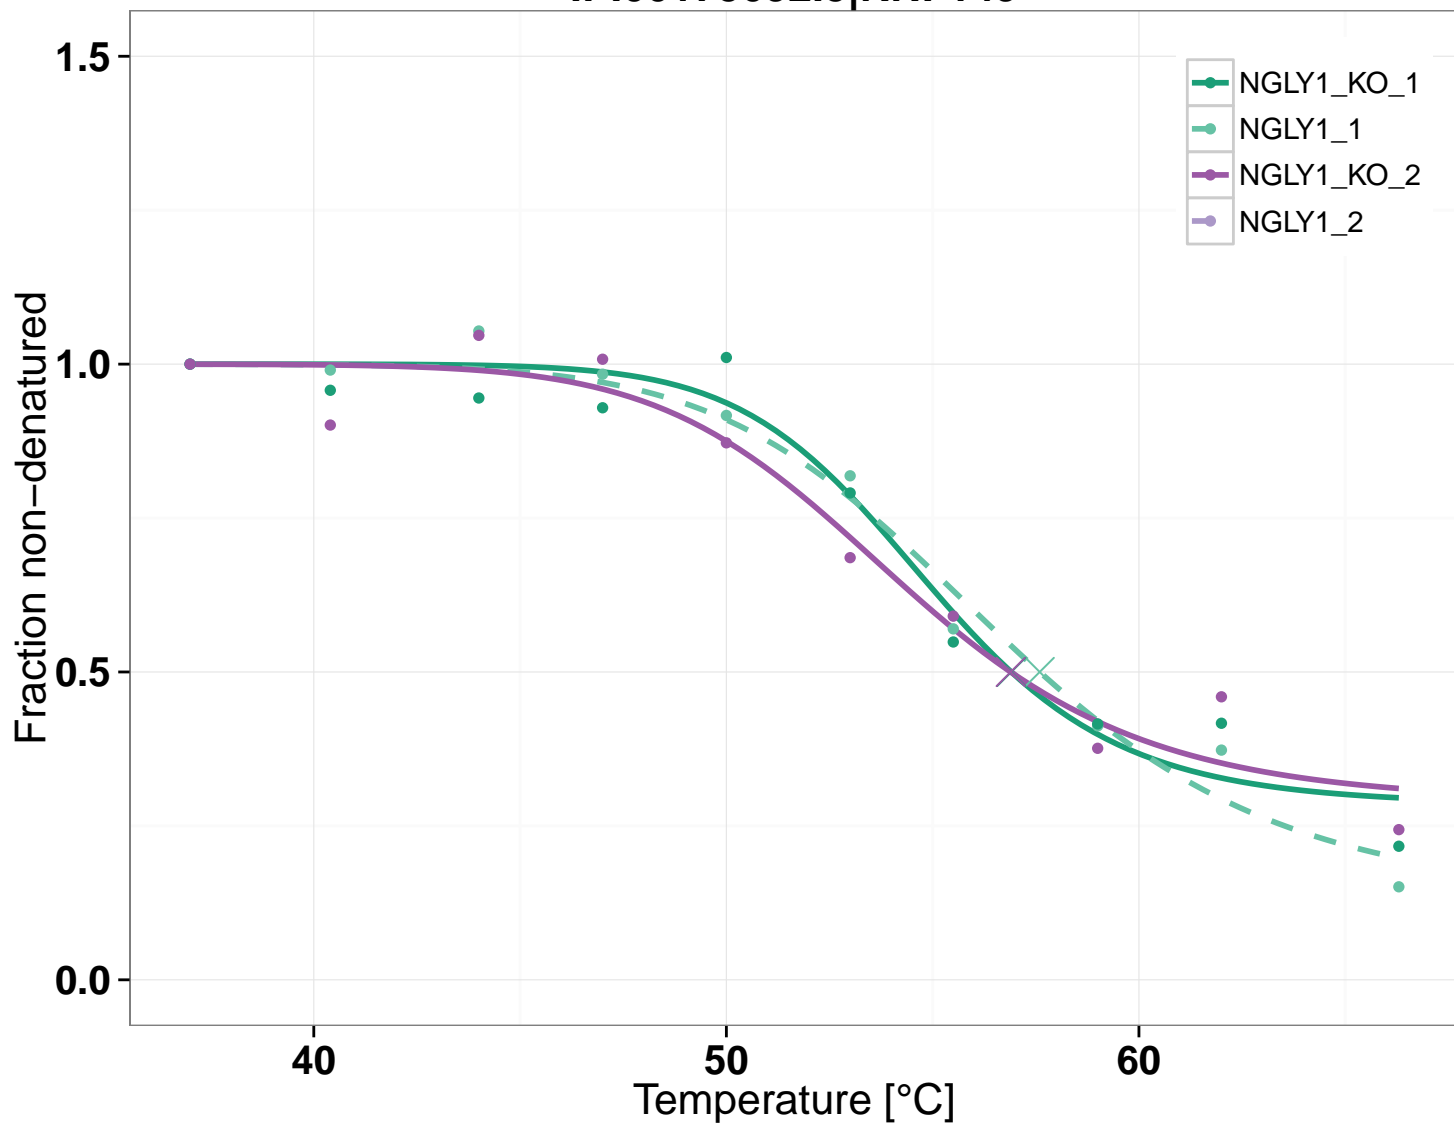

|            | meltPoint | slope  | plateau | R2   |
|------------|-----------|--------|---------|------|
| NGLY1_KO_1 | 56.91     | -0.078 | 0.28    | 0.96 |
| NGLY1_1    | 57.59     | -0.064 | 0.13    | 0.98 |
| NGLY1_KO_2 | 56.89     | -0.061 | 0.29    | 0.95 |
| NGLY1_2    | -         | -      | -       | -    |

Supplement: Supplementary file 7354 [file 1]

IPI00168624.3|TRPV4

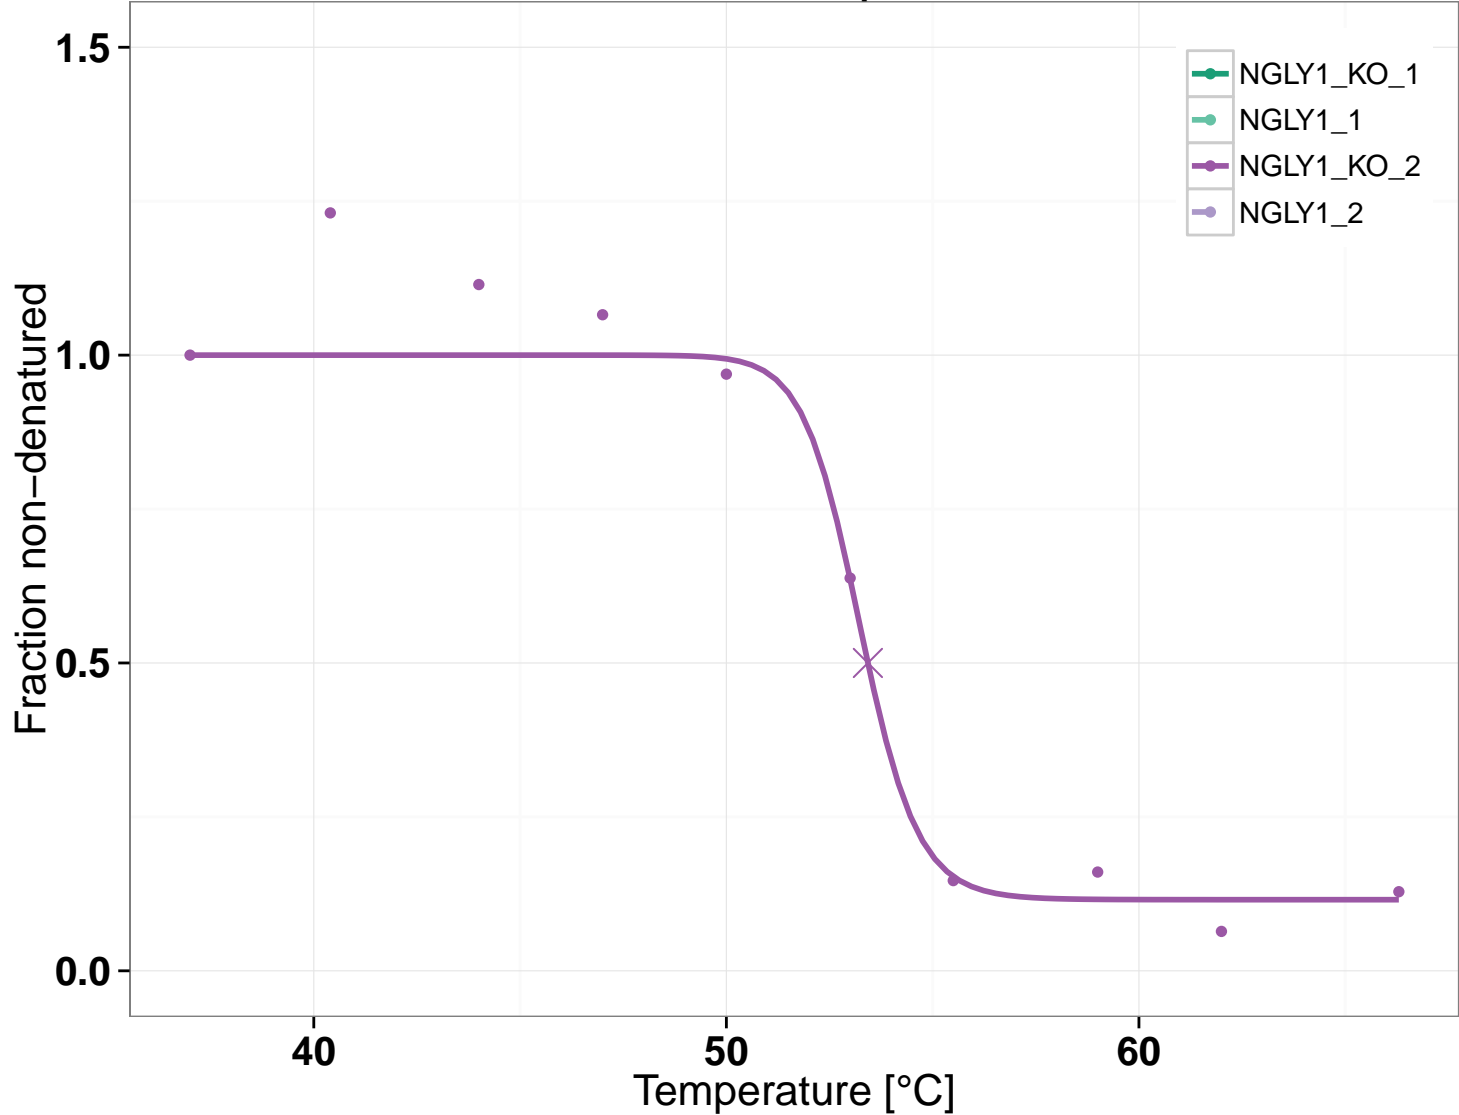

|            | meltPoint | slope | plateau | R2   |
|------------|-----------|-------|---------|------|
| NGLY1_KO_1 | —         | —     | —       | —    |
| NGLY1_1    | —         | —     | —       | —    |
| NGLY1_KO_2 | 53.43     | -0.32 | 0.12    | 0.96 |
| NGLY1_2    | —         | —     | —       | —    |

Supplement: Supplementary file 7355 [file 1]

# IPI00410657.2|RNMT

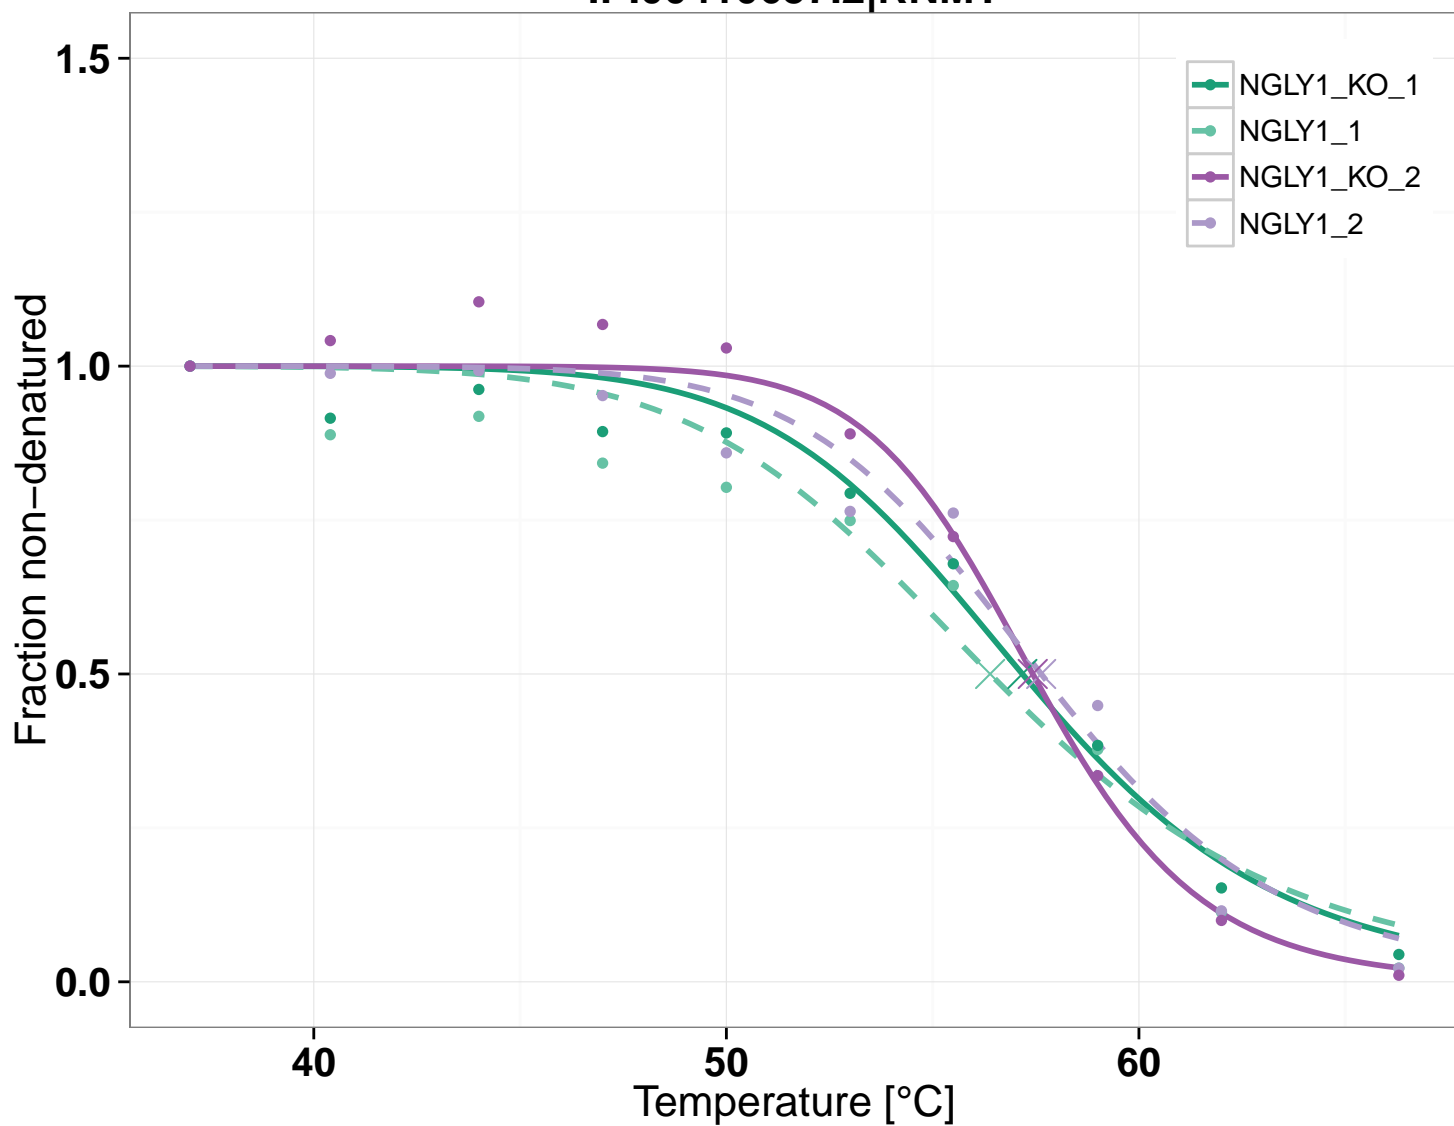

|            | meltPoint | slope  | plateau | R2   |
|------------|-----------|--------|---------|------|
| NGLY1_KO_1 | 57.17     | -0.081 | 0       | 0.98 |
| NGLY1_1    | 56.39     | -0.069 | 0       | 0.95 |
| NGLY1_KO_2 | 57.43     | -0.12  | 0       | 0.99 |
| NGLY1_2    | 57.63     | -0.087 | 0       | 0.97 |

Supplement: Supplementary file 7356 [file 1]

# IPI00218693.8|APRT

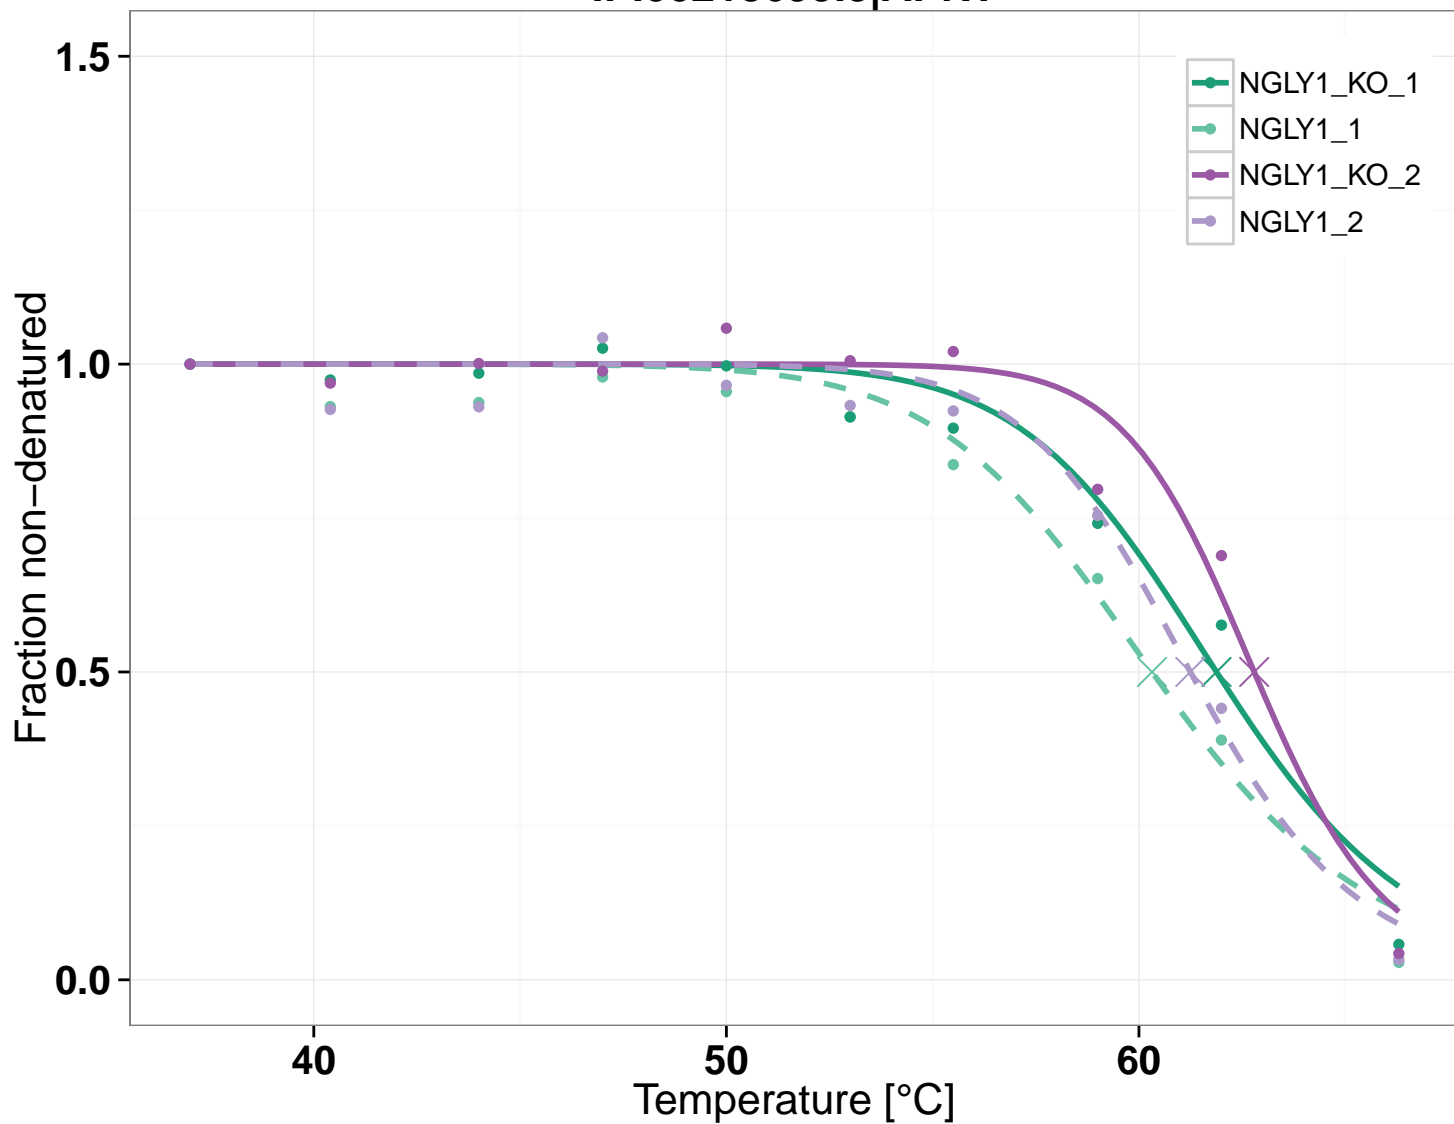

|            | meltPoint | slope  | plateau | R2   |
|------------|-----------|--------|---------|------|
| NGLY1_KO_1 | 61.88     | -0.1   | 0       | 0.97 |
| NGLY1_1    | 60.32     | -0.095 | 0       | 0.97 |
| NGLY1_KO_2 | 62.79     | -0.16  | 0       | 0.96 |
| NGLY1_2    | 61.25     | -0.12  | 0       | 0.98 |

Supplement: Supplementary file 7357 [file 1]

# IPI00009862.4|CDR2

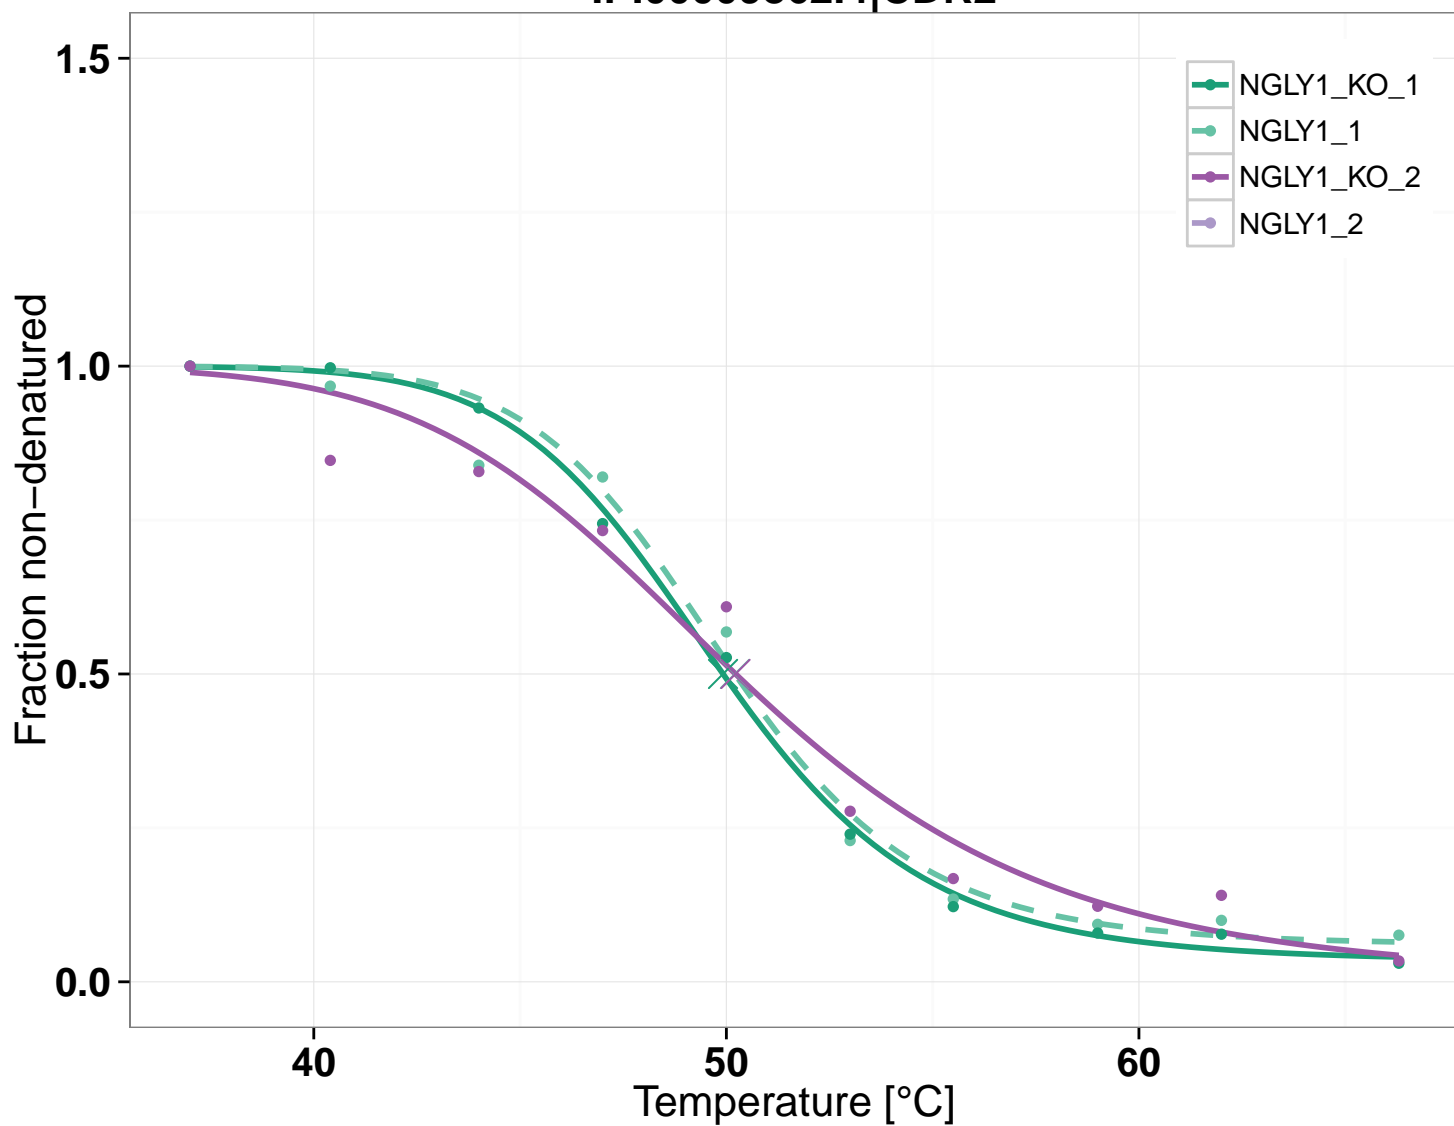

|            | meltPoint | slope  | plateau | R2   |
|------------|-----------|--------|---------|------|
| NGLY1_KO_1 | 49.92     | -0.097 | 0.03    | 1    |
| NGLY1_1    | 50.21     | -0.1   | 0.06    | 0.99 |
| NGLY1_KO_2 | 50.22     | -0.065 | 0       | 0.97 |
| NGLY1_2    | -         | -      | -       | -    |

Supplement: Supplementary file 7358 [file 1]

IPI00164215.5|TSPYL1

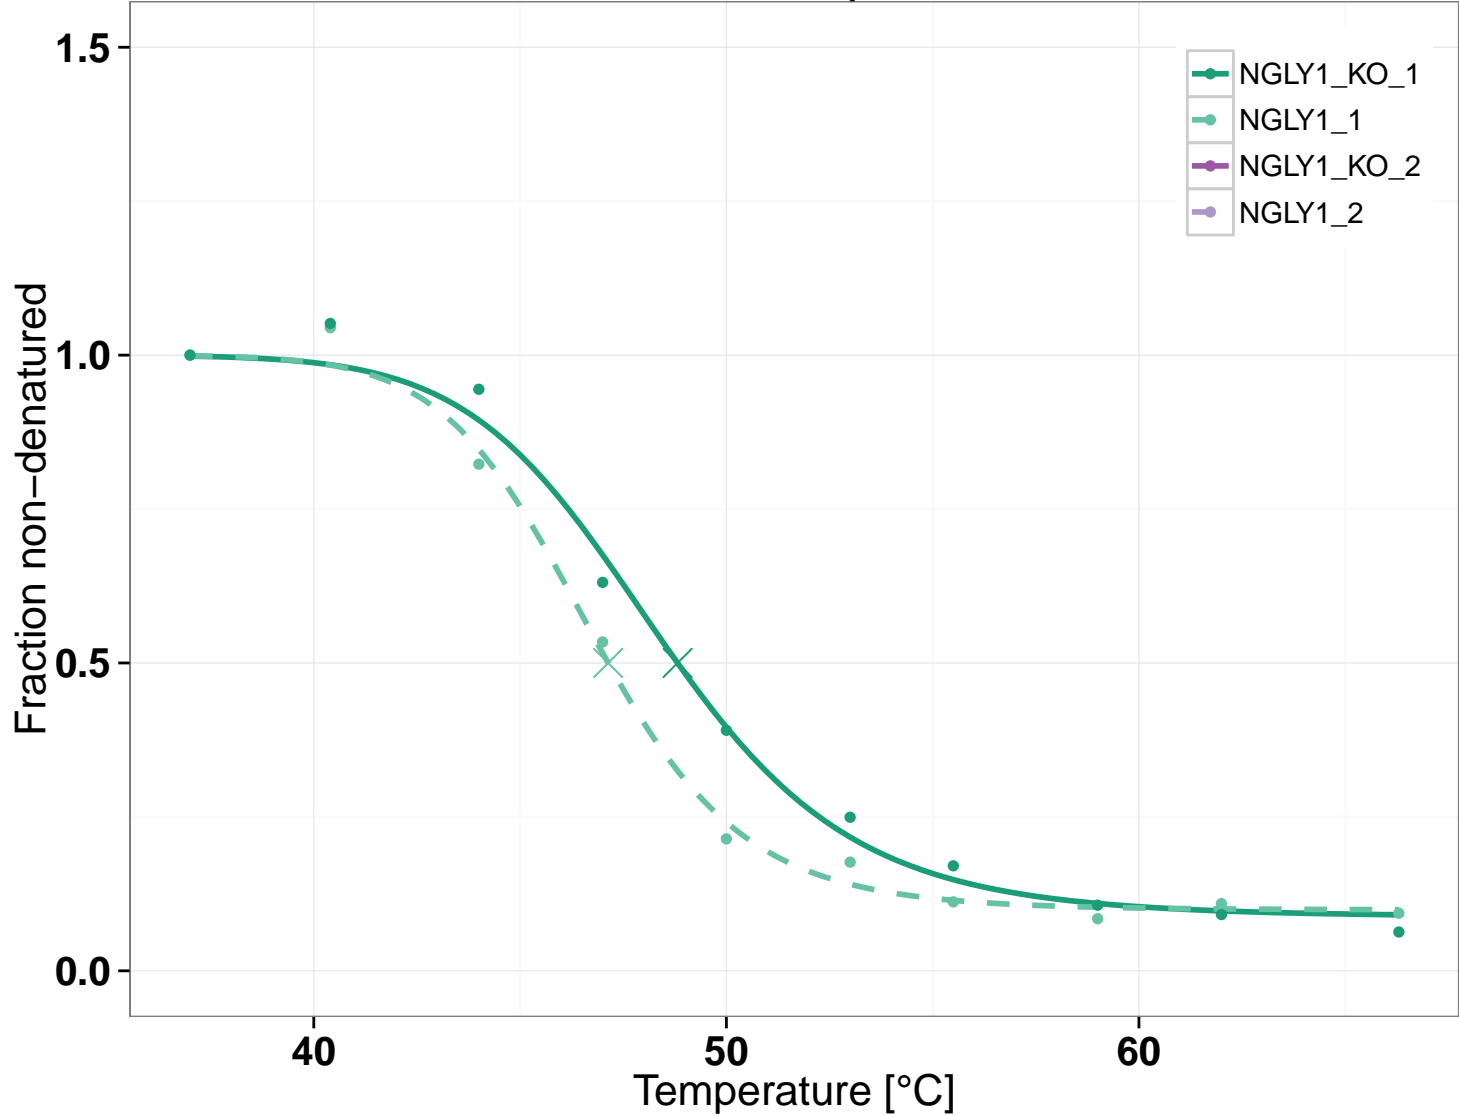

|            | meltPoint | slope  | plateau | R2   |
|------------|-----------|--------|---------|------|
| NGLY1_KO_1 | 48.82     | -0.098 | 0.09    | 0.99 |
| NGLY1_1    | 47.14     | -0.12  | 0.1     | 1    |
| NGLY1_KO_2 | -         | -      | -       | -    |
| NGLY1_2    | -         | -      | -       | -    |

Supplement: Supplementary file 7359 [file 1]

IPI00307426.6|SPRY4

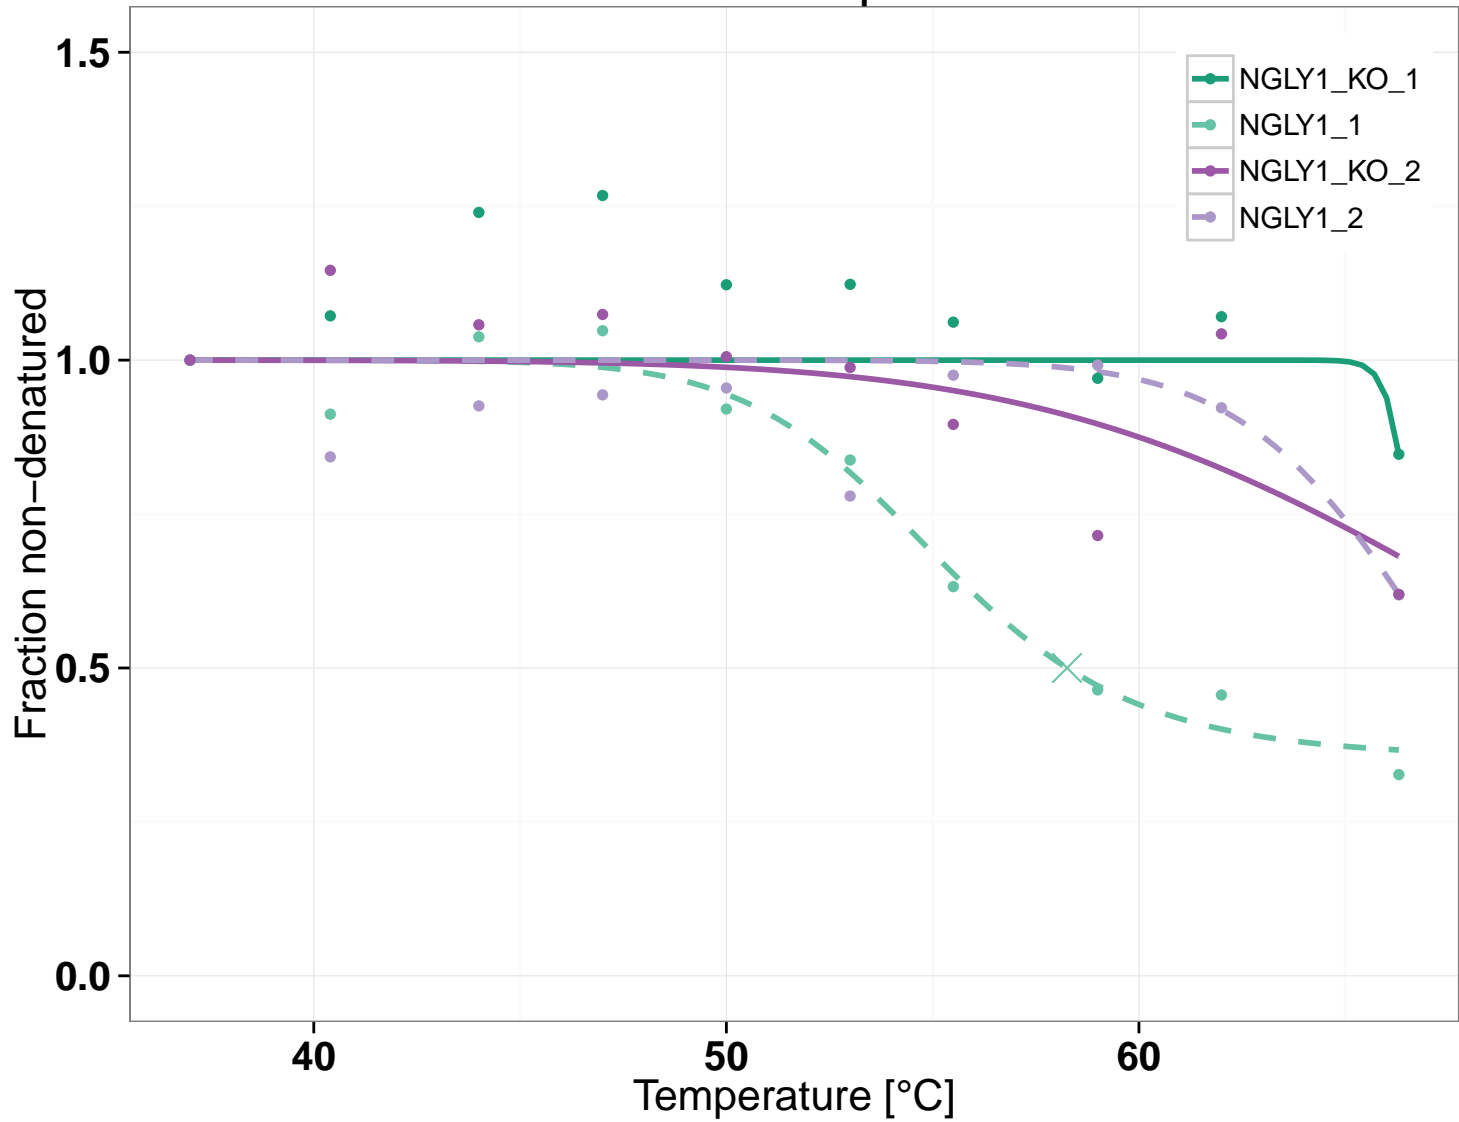

|            | meltPoint | slope  | plateau | R2    |
|------------|-----------|--------|---------|-------|
| NGLY1_KO_1 | -         | -      | 0       | -0.27 |
| NGLY1_1    | 58.26     | -0.068 | 0.35    | 0.97  |
| NGLY1_KO_2 | -         | -      | 0       | 0.52  |
| NGLY1_2    | -         | -      | 0       | 0.33  |

Supplement: Supplementary file 7360 [file 1]

IPI00792333.2|IBTK

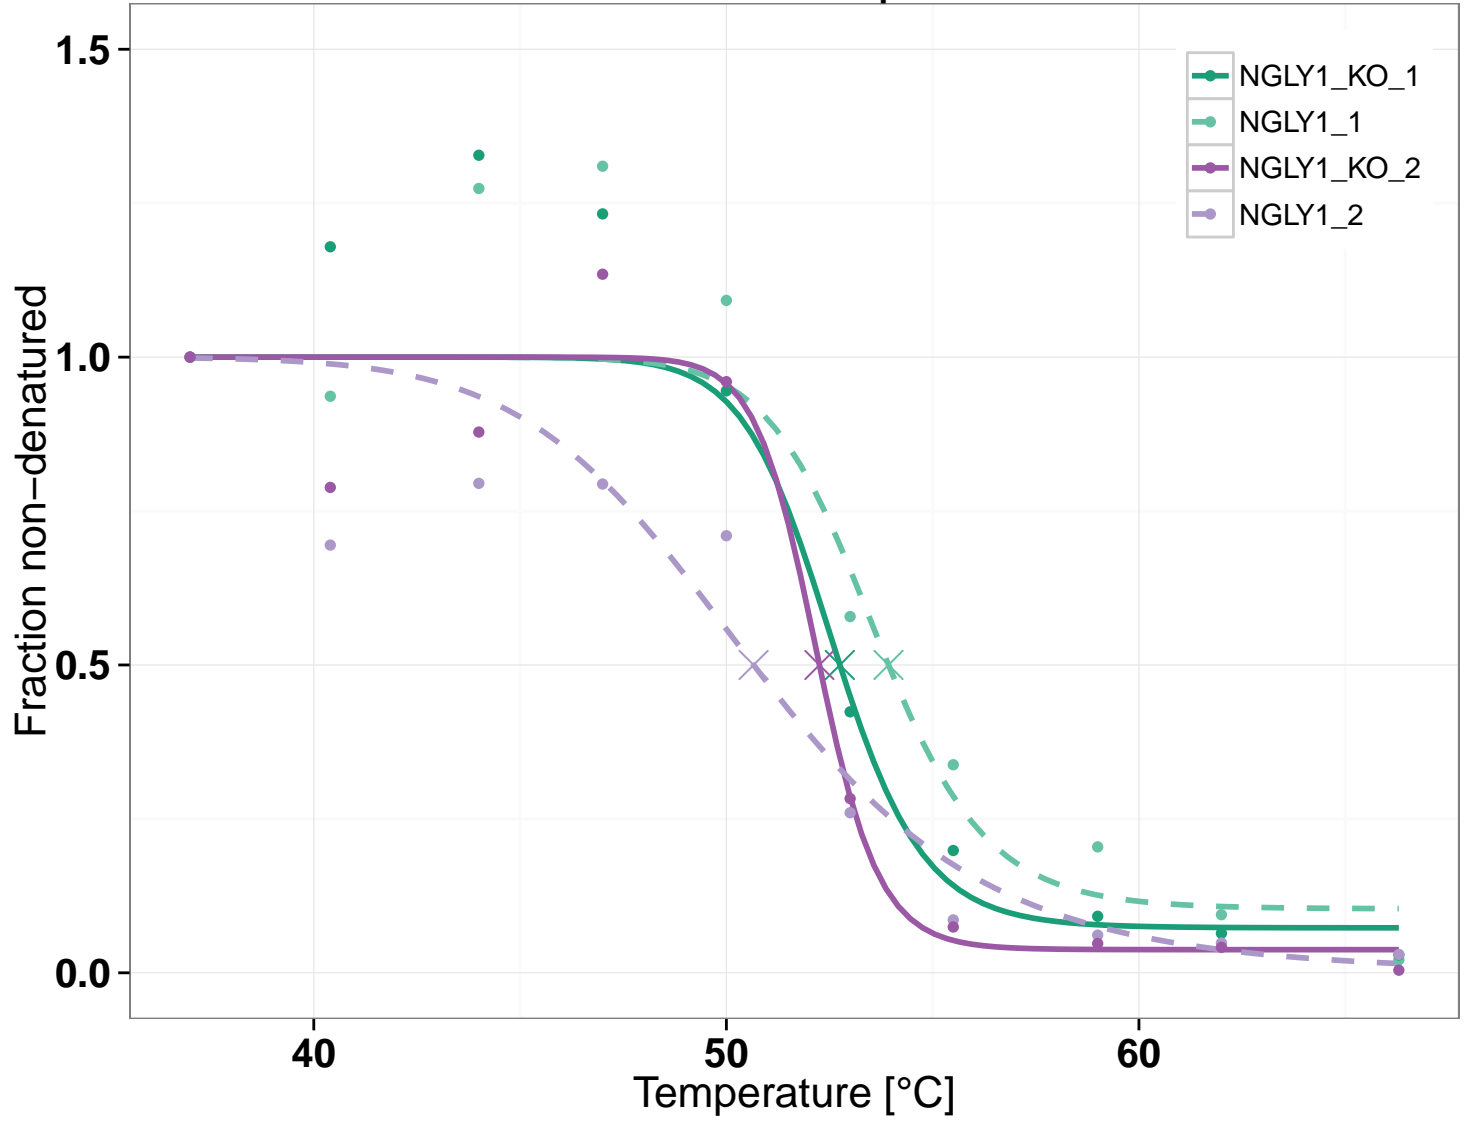

|            | meltPoint | slope  | plateau | R2   |
|------------|-----------|--------|---------|------|
| NGLY1_KO_1 | 52.75     | -0.21  | 0.07    | 0.92 |
| NGLY1_1    | 53.93     | -0.17  | 0.1     | 0.9  |
| NGLY1_KO_2 | 52.26     | -0.32  | 0.04    | 0.96 |
| NGLY1_2    | 50.66     | -0.089 | 0       | 0.89 |

Supplement: Supplementary file 7361 [file 1]

# IPI00784464.1|AOF1

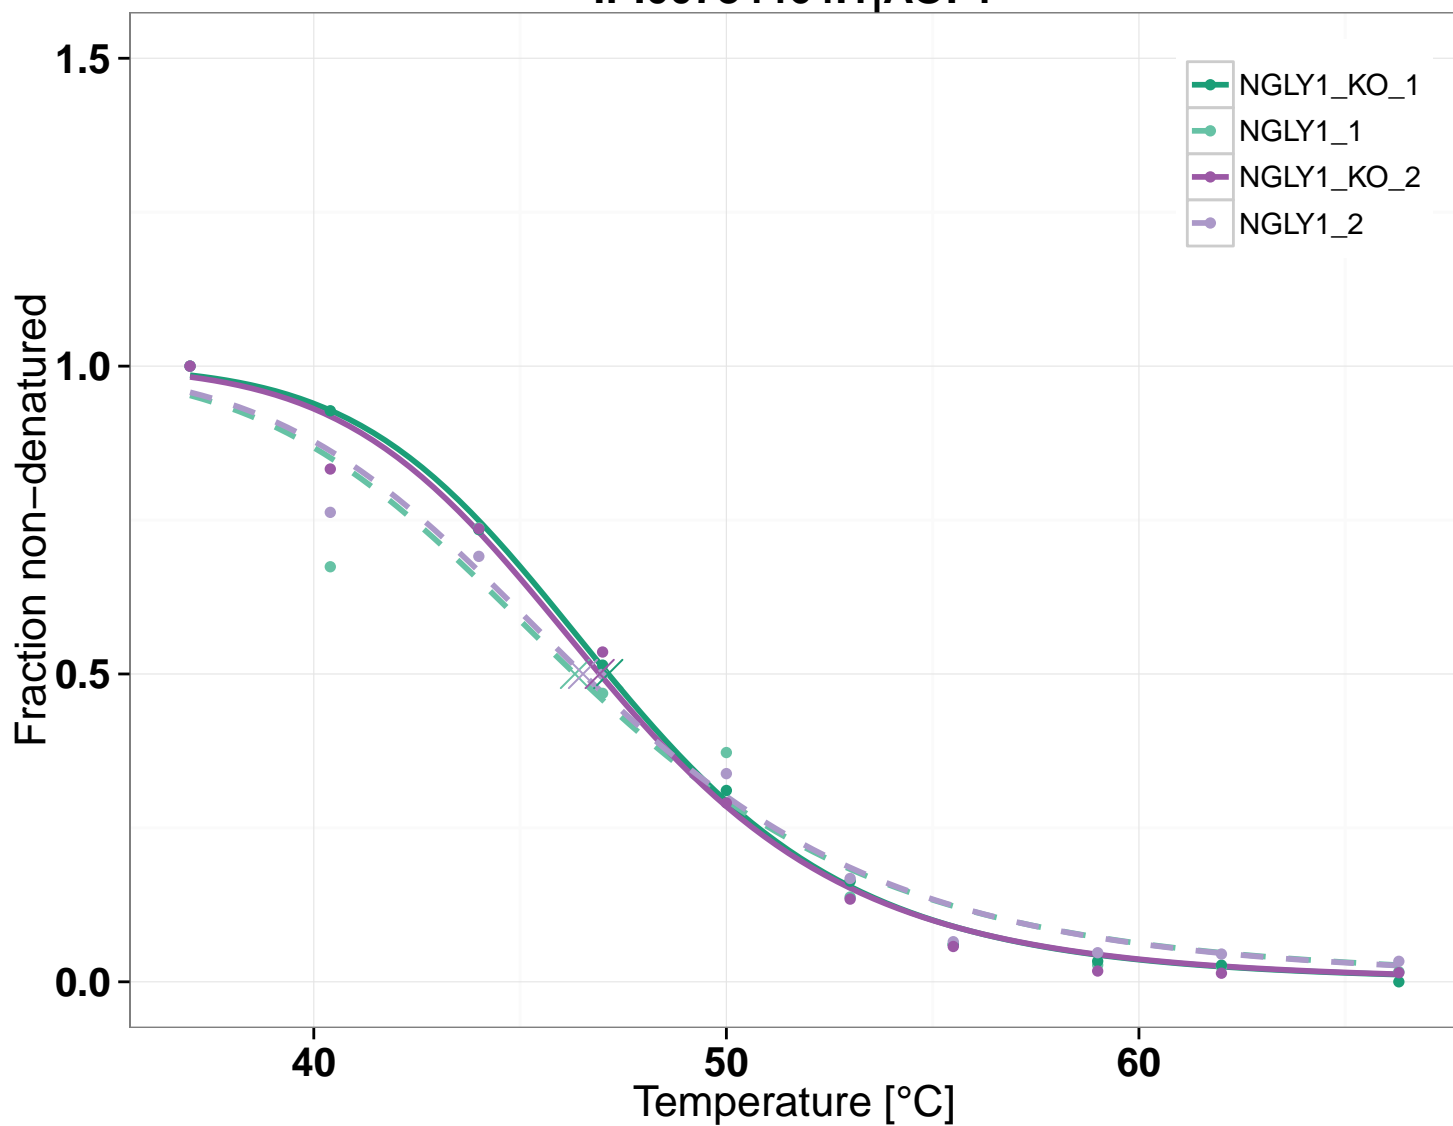

|            | meltPoint | slope  | plateau | R2   |
|------------|-----------|--------|---------|------|
| NGLY1_KO_1 | 47.14     | -0.083 | 0       | 1    |
| NGLY1_1    | 46.33     | -0.066 | 0       | 0.95 |
| NGLY1_KO_2 | 46.93     | -0.081 | 0       | 0.99 |
| NGLY1_2    | 46.52     | -0.067 | 0       | 0.98 |

Supplement: Supplementary file 7362 [file 1]

IPI00024911.1|ERP29

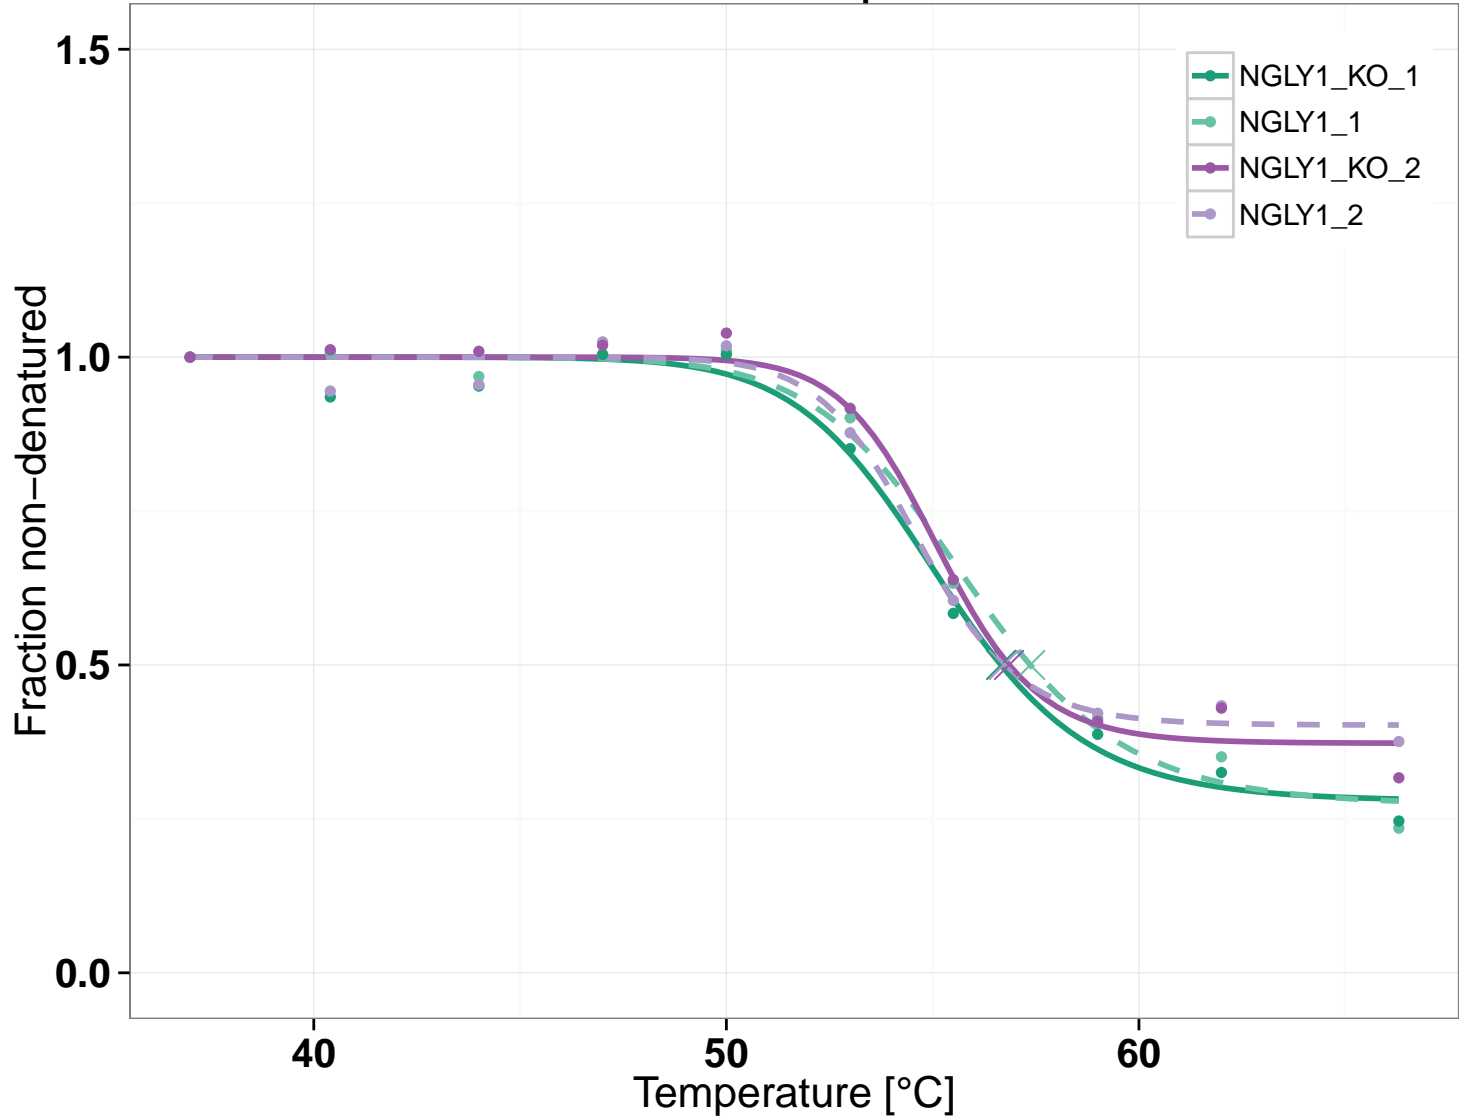

|            | meltPoint | slope  | plateau | R2   |
|------------|-----------|--------|---------|------|
| NGLY1_KO_1 | 56.66     | -0.1   | 0.28    | 0.99 |
| NGLY1_1    | 57.37     | -0.096 | 0.27    | 0.99 |
| NGLY1_KO_2 | 56.85     | -0.13  | 0.37    | 0.99 |
| NGLY1_2    | 56.72     | -0.12  | 0.4     | 0.99 |

Supplement: Supplementary file 7363 [file 1]

IPI00015894.1|CDC42EP4

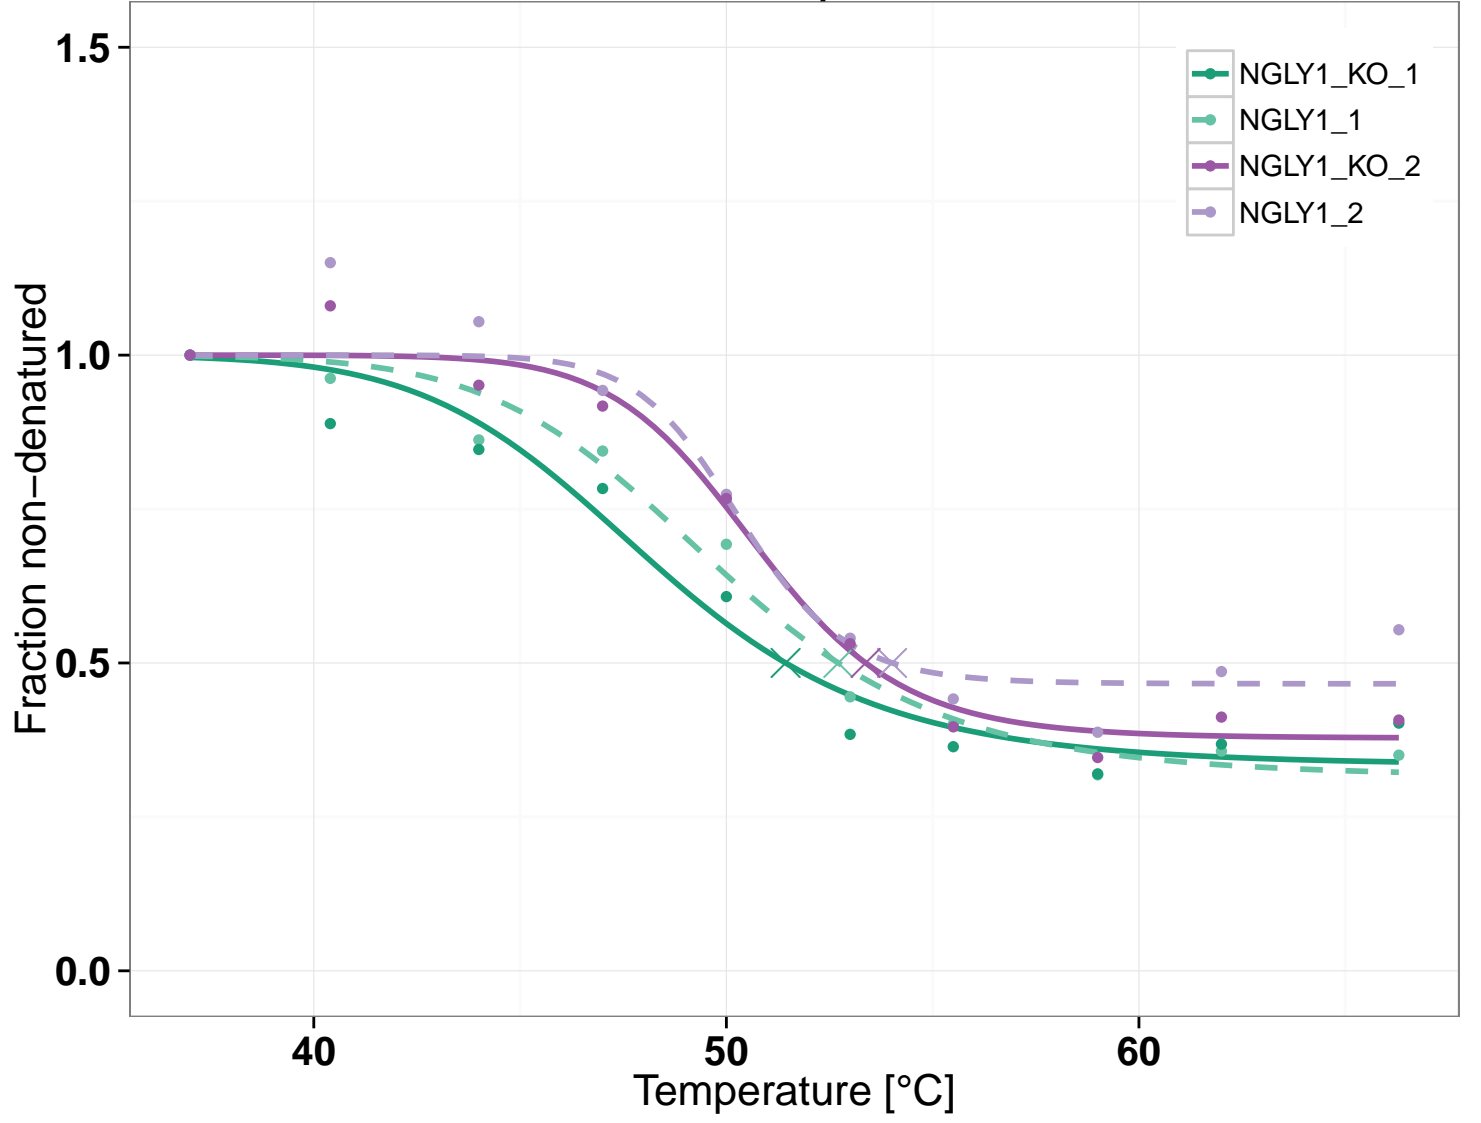

|            | meltPoint | slope  | plateau | R2   |
|------------|-----------|--------|---------|------|
| NGLY1_KO_1 | 51.44     | -0.06  | 0.33    | 0.96 |
| NGLY1_1    | 52.71     | -0.062 | 0.31    | 0.98 |
| NGLY1_KO_2 | 53.38     | -0.088 | 0.38    | 0.98 |
| NGLY1_2    | 54.02     | -0.11  | 0.47    | 0.94 |

Supplement: Supplementary file 7364 [file 1]

IPI00446765.2|INTS4

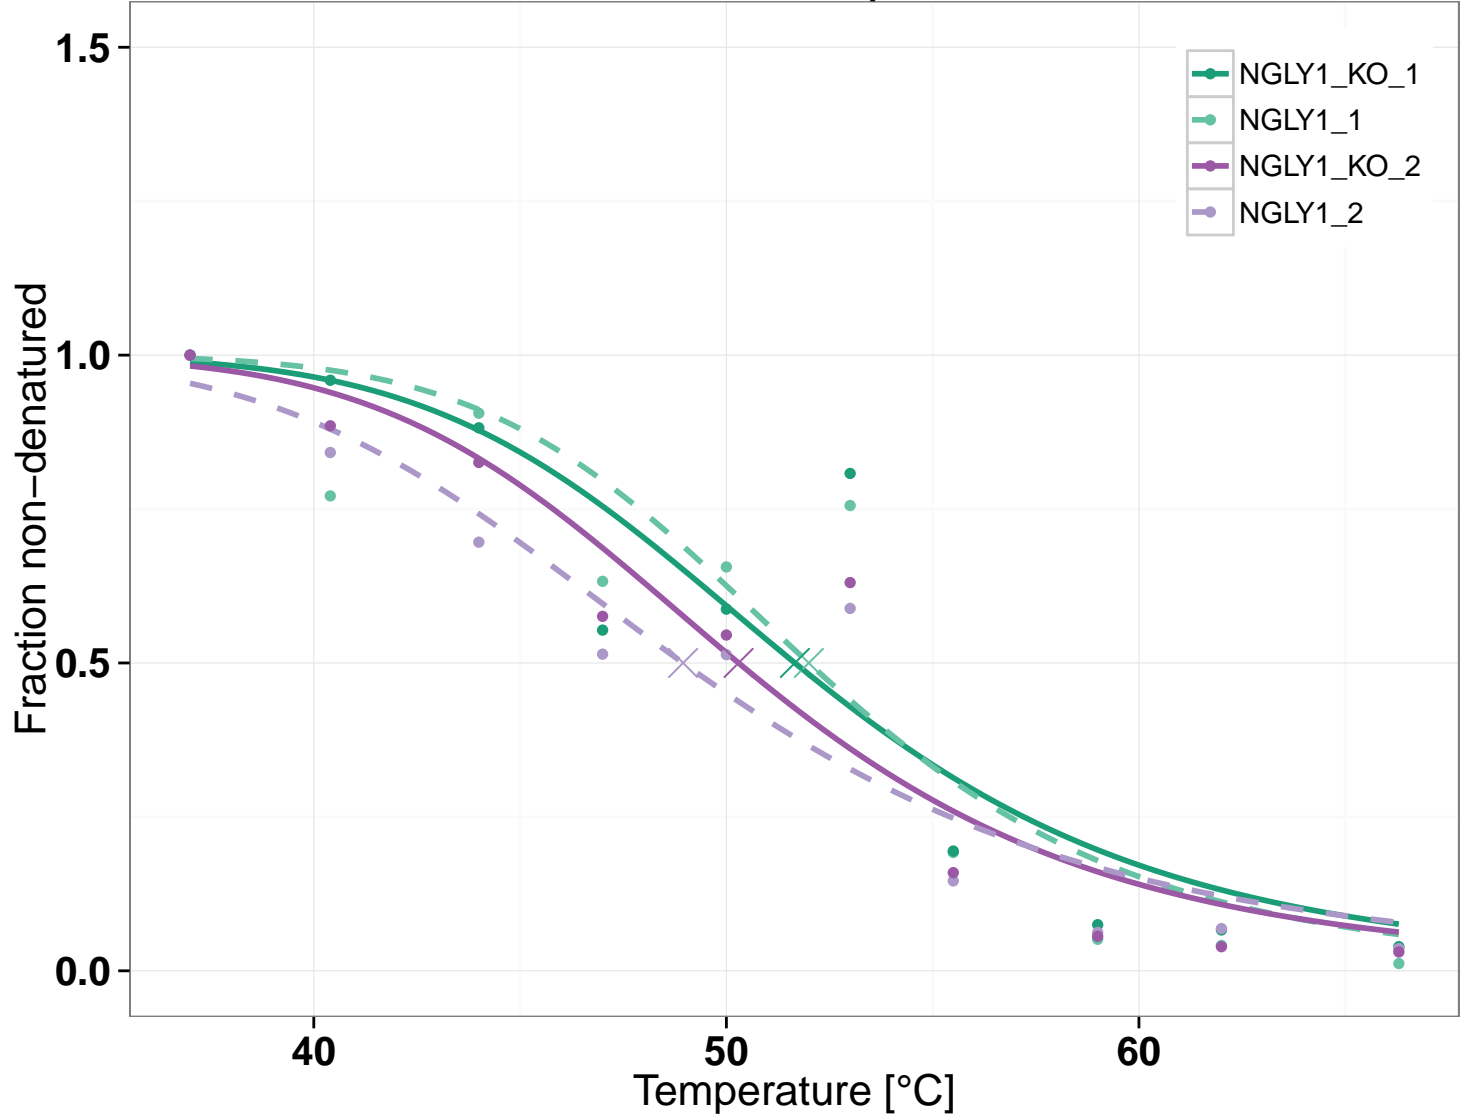

|            | meltPoint | slope  | plateau | R2   |
|------------|-----------|--------|---------|------|
| NGLY1_KO_1 | 51.66     | -0.057 | 0       | 0.84 |
| NGLY1_1    | 52        | -0.063 | 0       | 0.85 |
| NGLY1_KO_2 | 50.3      | -0.057 | 0       | 0.91 |
| NGLY1_2    | 48.95     | -0.05  | 0       | 0.9  |

Supplement: Supplementary file 7365 [file 1]

# IPI00011735.2|IFRD1

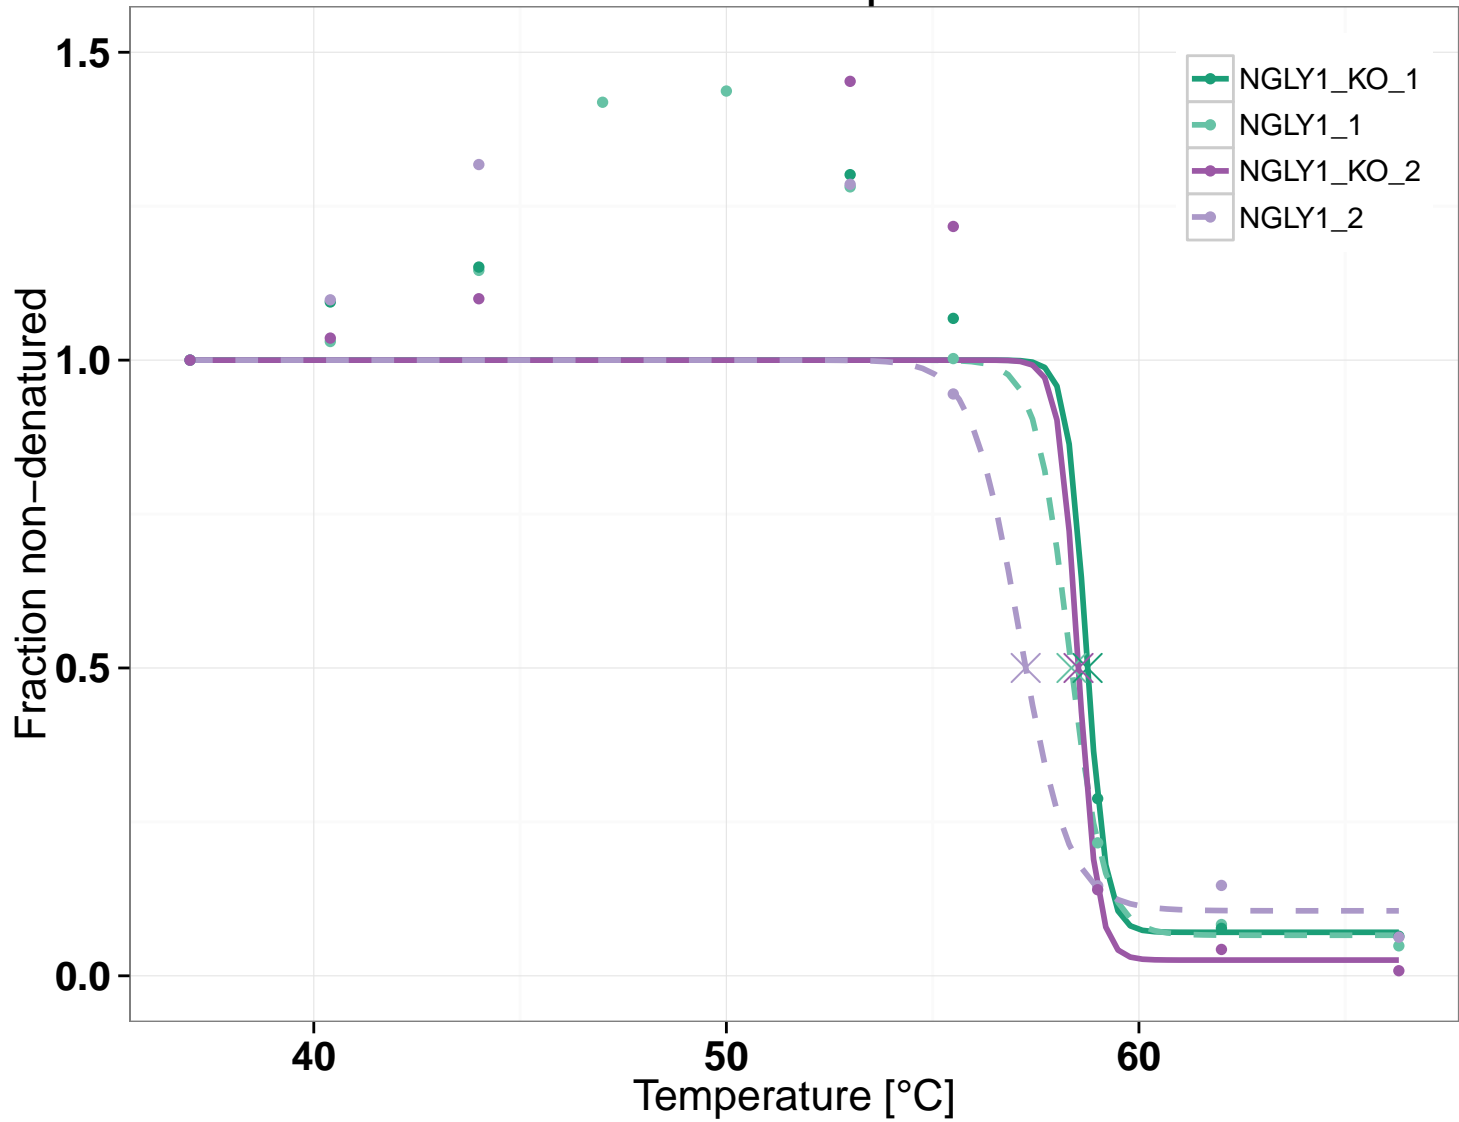

|            | meltPoint | slope | plateau | R2   |
|------------|-----------|-------|---------|------|
| NGLY1_KO_1 | 58.76     | -0.99 | 0.07    | 0.76 |
| NGLY1_1    | 58.37     | -0.56 | 0.07    | 0.82 |
| NGLY1_KO_2 | 58.54     | -1    | 0.03    | 0.73 |
| NGLY1_2    | 57.26     | -0.38 | 0.11    | 0.72 |

Supplement: Supplementary file 7366 [file 1]

IPI00024281.1|SIP1

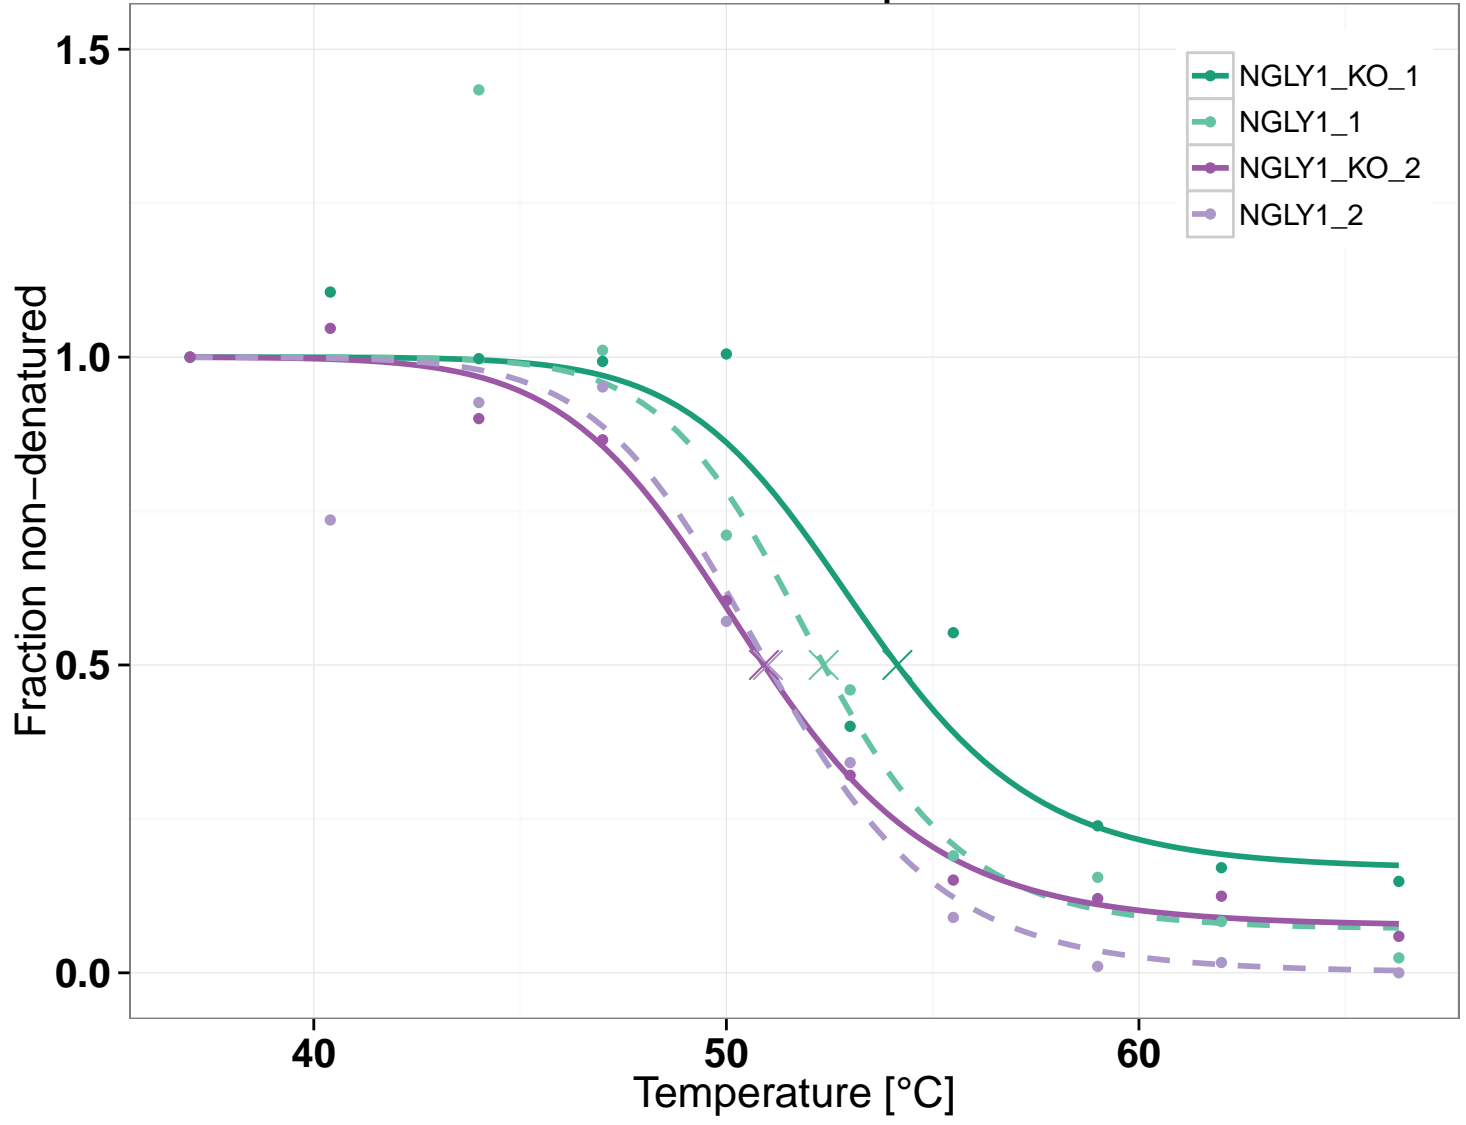

|            | meltPoint | slope  | plateau | R2   |
|------------|-----------|--------|---------|------|
| NGLY1_KO_1 | 54.14     | -0.097 | 0.17    | 0.93 |
| NGLY1_1    | 52.36     | -0.13  | 0.07    | 0.78 |
| NGLY1_KO_2 | 50.91     | -0.1   | 0.08    | 0.99 |
| NGLY1_2    | 51.01     | -0.12  | 0       | 0.95 |

Supplement: Supplementary file 7367 [file 1]

# IPI00789618.2|HDDC3

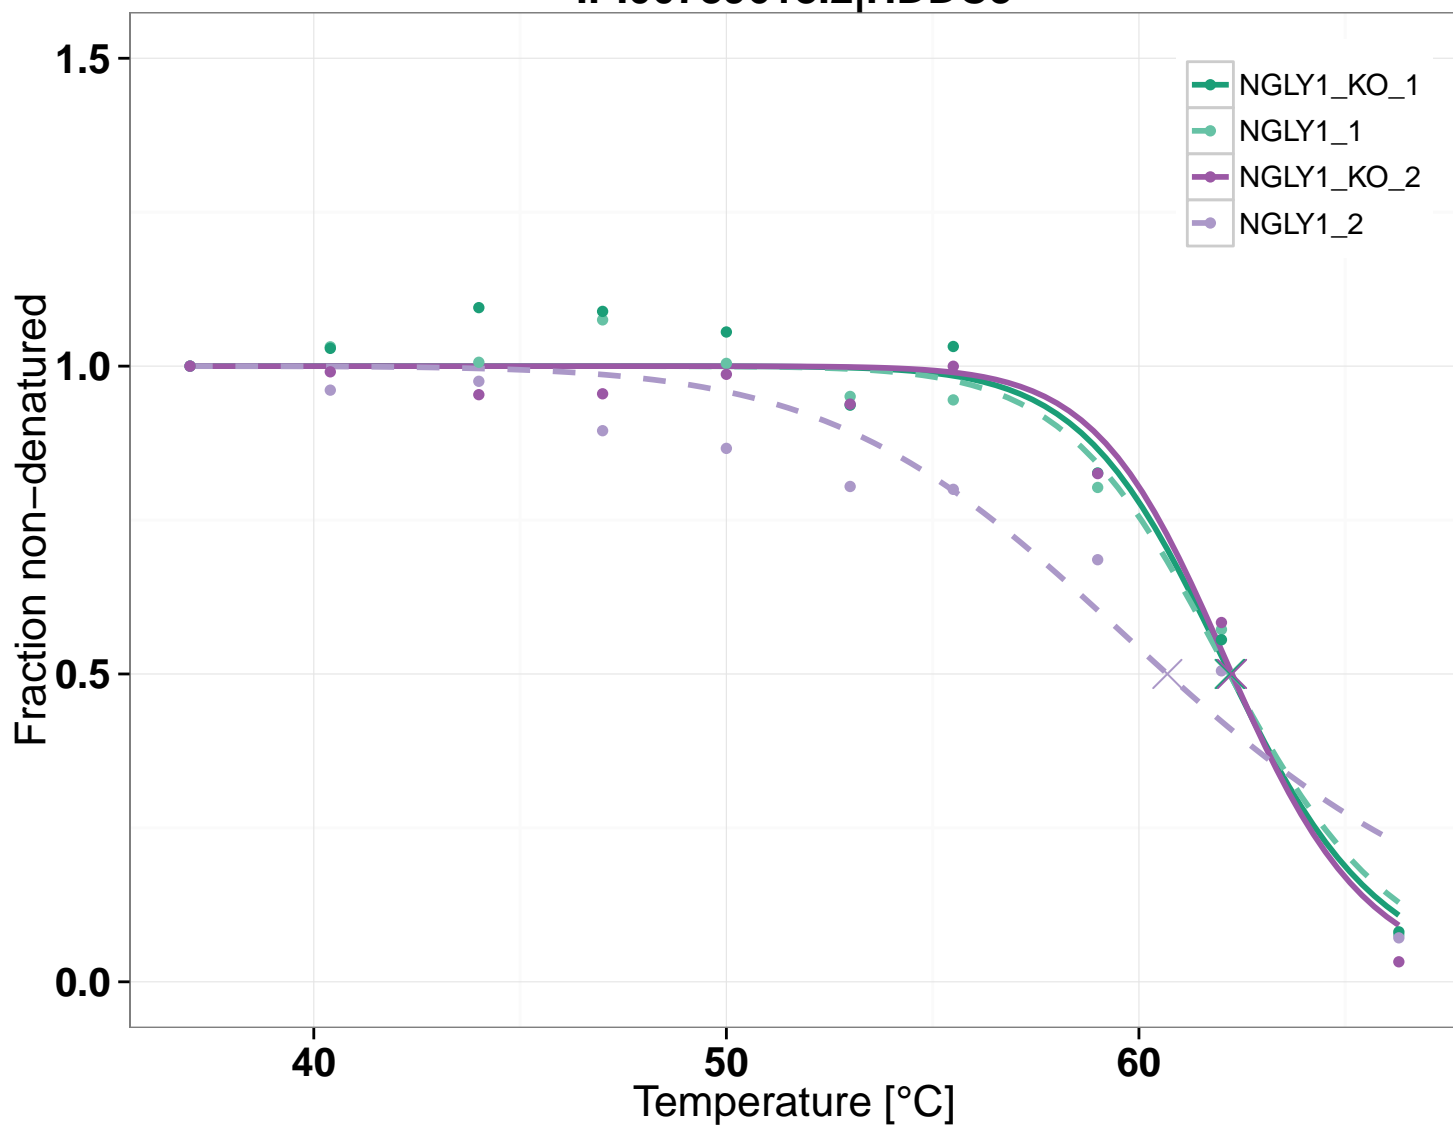

|            | meltPoint | slope  | plateau | R2   |
|------------|-----------|--------|---------|------|
| NGLY1_KO_1 | 62.21     | -0.14  | 0       | 0.97 |
| NGLY1_1    | 62.19     | -0.12  | 0       | 0.98 |
| NGLY1_KO_2 | 62.26     | -0.15  | 0       | 0.98 |
| NGLY1_2    | 60.69     | -0.062 | 0       | 0.91 |

Supplement: Supplementary file 7368 [file 1]

IPI00395702.1|RAD17

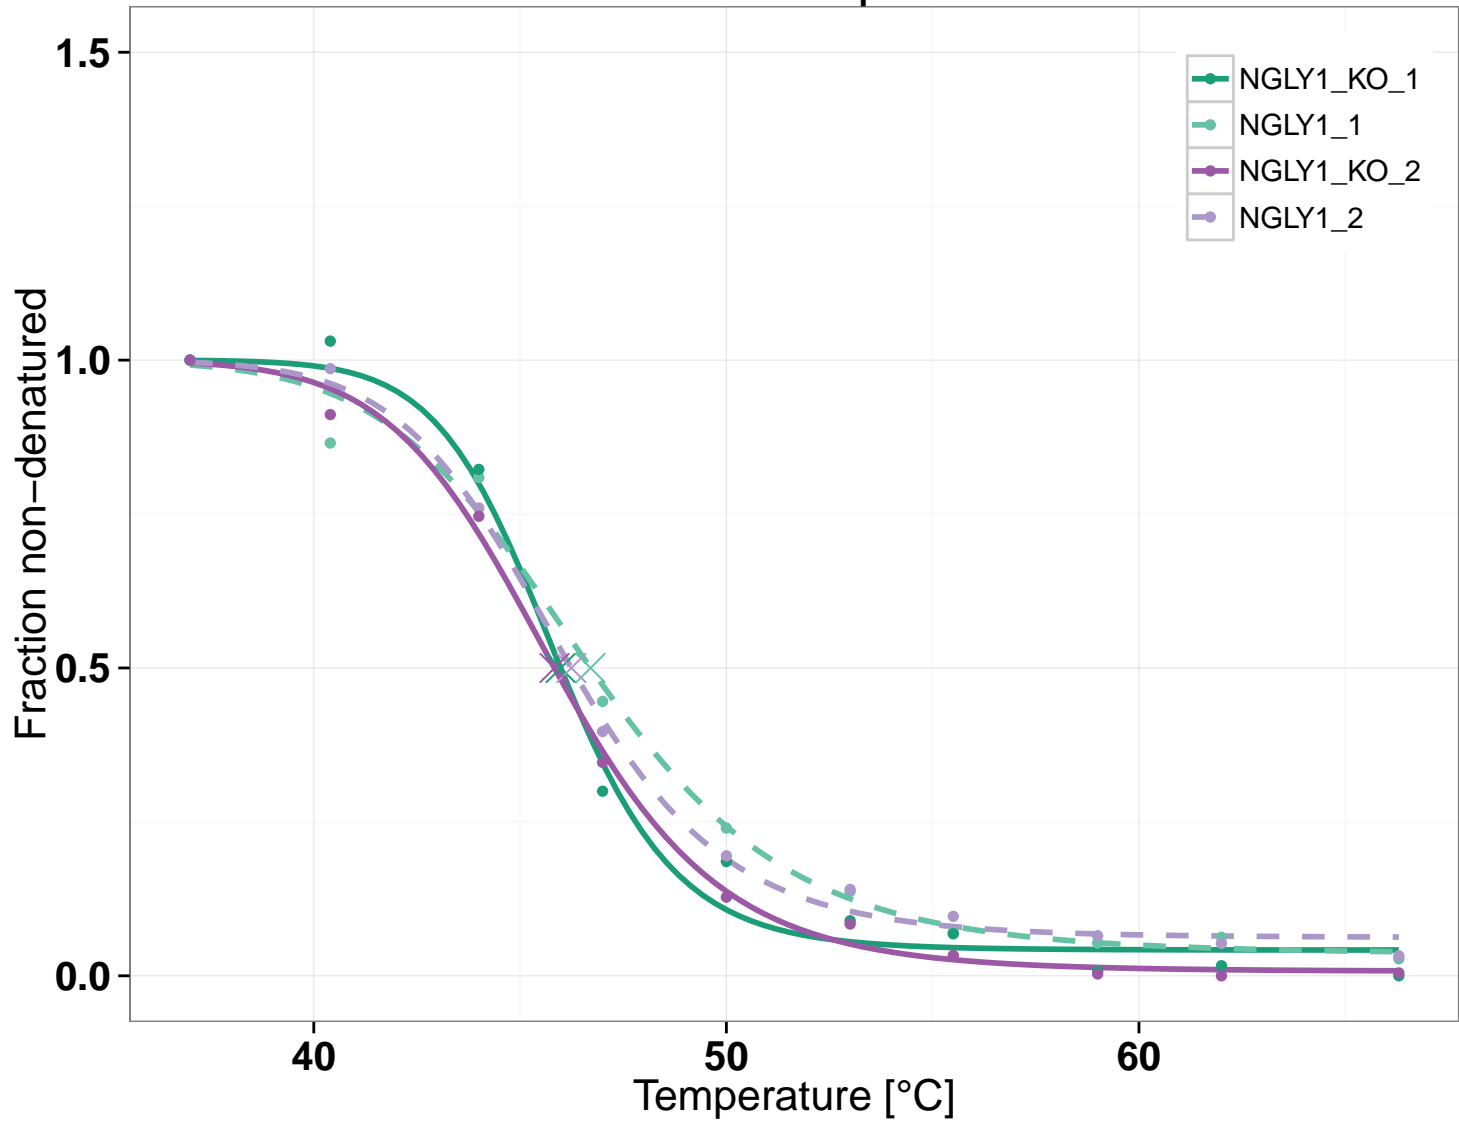

|            | meltPoint | slope  | plateau | R2   |
|------------|-----------|--------|---------|------|
| NGLY1_KO_1 | 45.98     | -0.17  | 0.04    | 0.99 |
| NGLY1_1    | 46.71     | -0.098 | 0.04    | 0.99 |
| NGLY1_KO_2 | 45.83     | -0.12  | 0.01    | 1    |
| NGLY1_2    | 46.24     | -0.12  | 0.06    | 1    |

Supplement: Supplementary file 7369 [file 1]

# IPI00021692.2|MBNL1

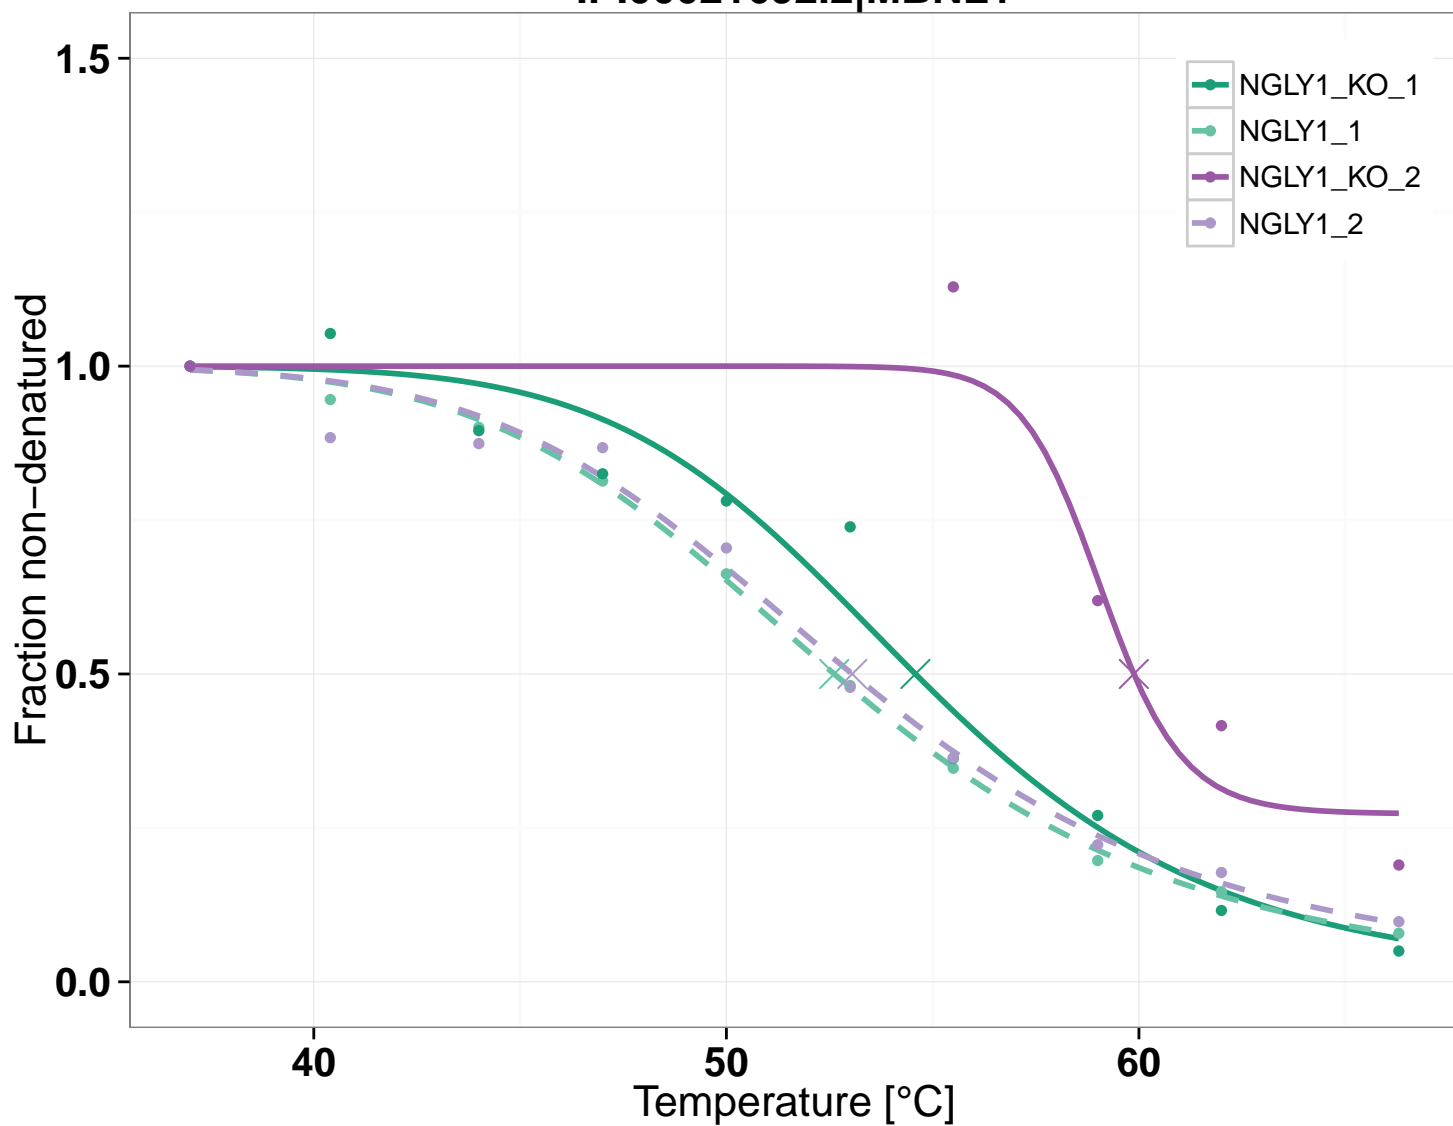

|            | meltPoint | slope  | plateau | R2    |
|------------|-----------|--------|---------|-------|
| NGLY1_KO_1 | 54.58     | -0.068 | 0       | 0.97  |
| NGLY1_1    | 52.61     | -0.059 | 0       | 1     |
| NGLY1_KO_2 | 59.88     | -0.19  | 0.27    | -0.23 |
| NGLY1_2    | 53.05     | -0.057 | 0.01    | 0.99  |

Supplement: Supplementary file 7370 [file 1]

# IPI00000686.2|RBM19

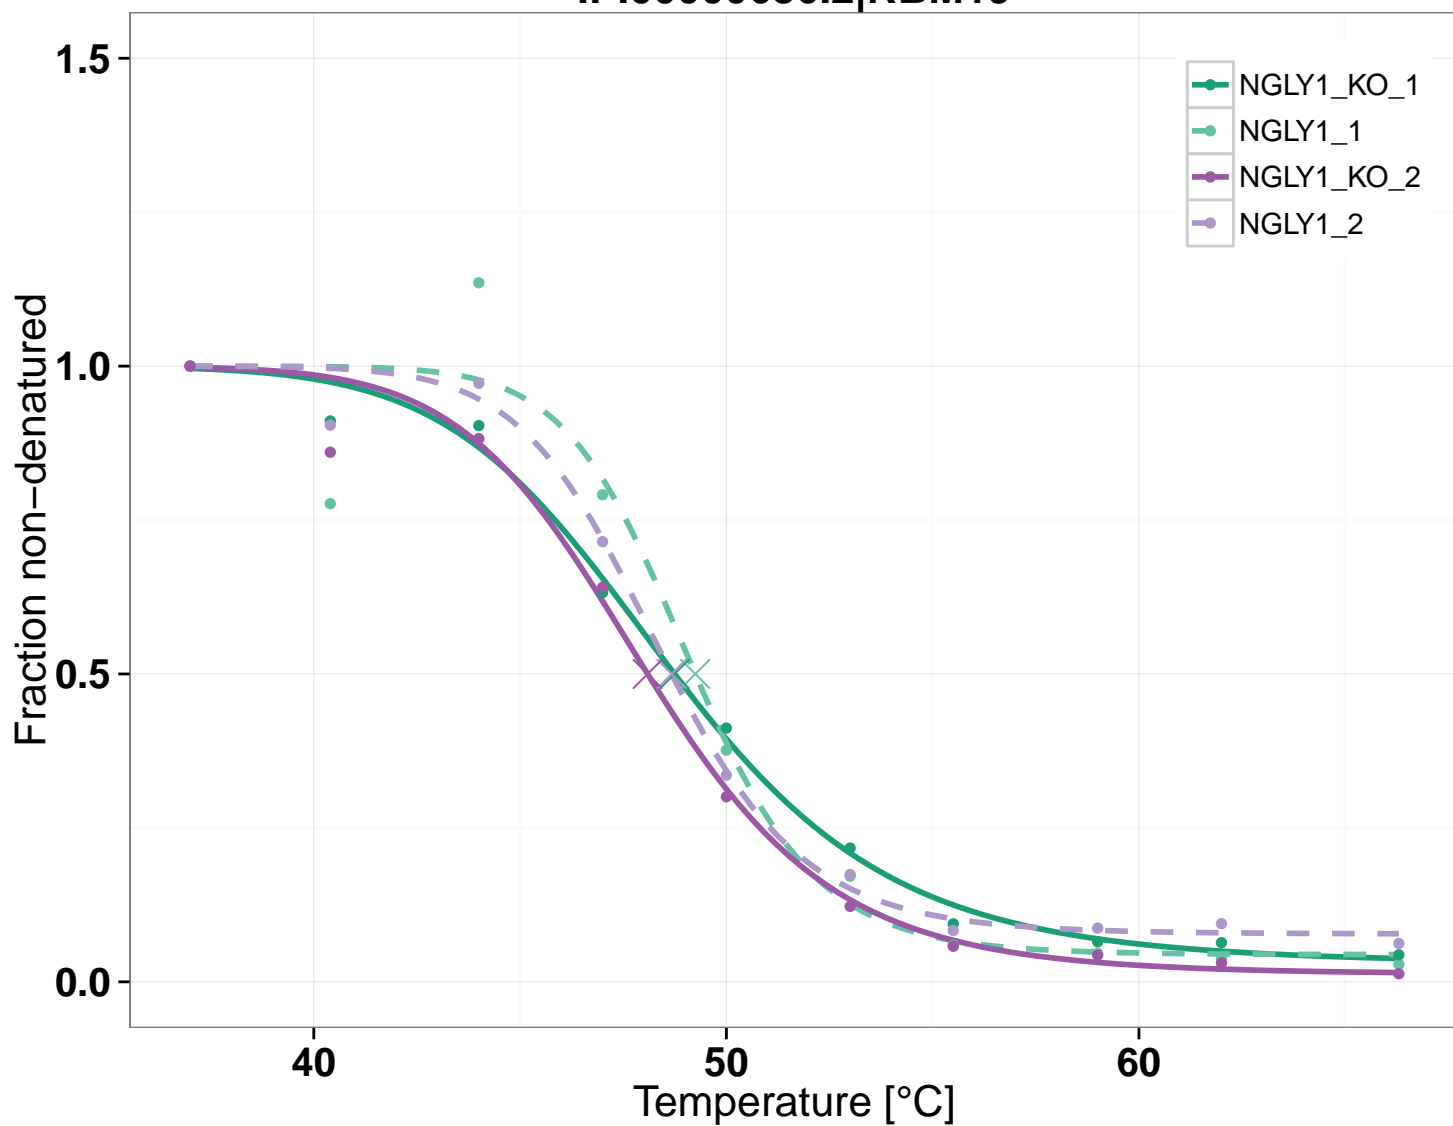

|            | meltPoint | slope | plateau | R2   |
|------------|-----------|-------|---------|------|
| NGLY1_KO_1 | 48.74     | -0.09 | 0.03    | 0.99 |
| NGLY1_1    | 49.25     | -0.16 | 0.04    | 0.96 |
| NGLY1_KO_2 | 48.09     | -0.11 | 0.01    | 0.99 |
| NGLY1_2    | 48.67     | -0.13 | 0.08    | 0.99 |

Supplement: Supplementary file 7371 [file 1]

IPI00012508.4|B3GNT5

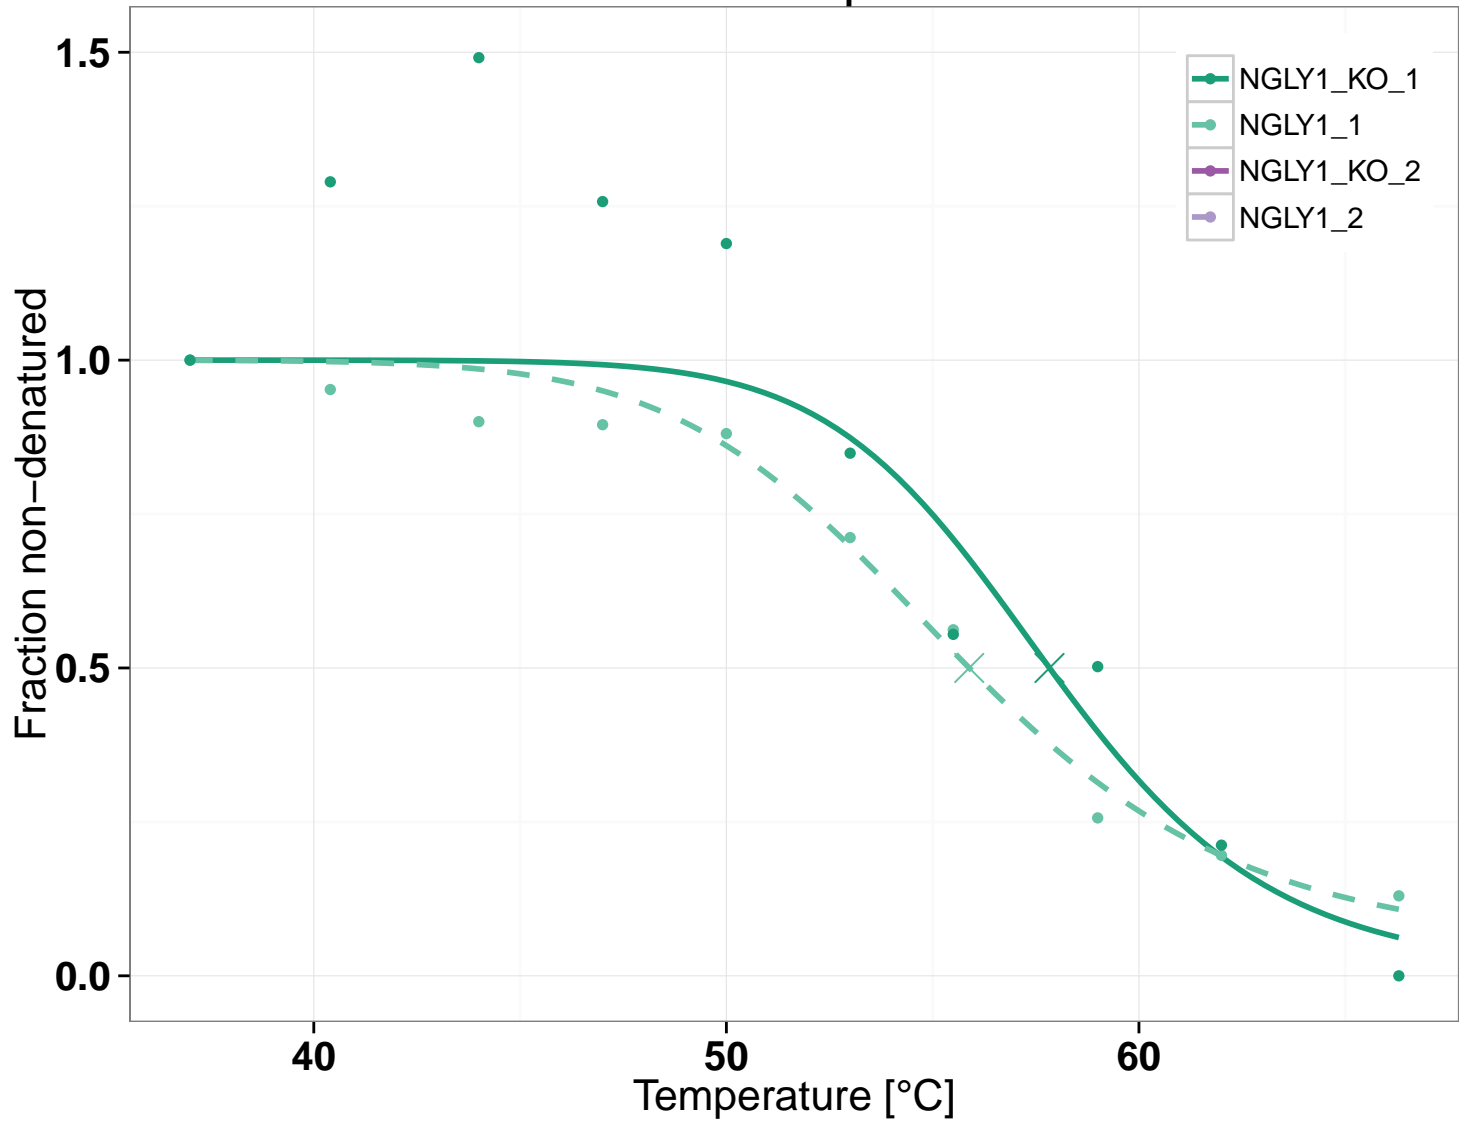

|            | meltPoint | slope  | plateau | R2   |
|------------|-----------|--------|---------|------|
| NGLY1_KO_1 | 57.83     | -0.093 | 0       | 0.78 |
| NGLY1_1    | 55.89     | -0.07  | 0.04    | 0.98 |
| NGLY1_KO_2 | -         | -      | -       | -    |
| NGLY1_2    | -         | -      | -       | -    |

Supplement: Supplementary file 7372 [file 1]

IPI00299033.1|KPNA3

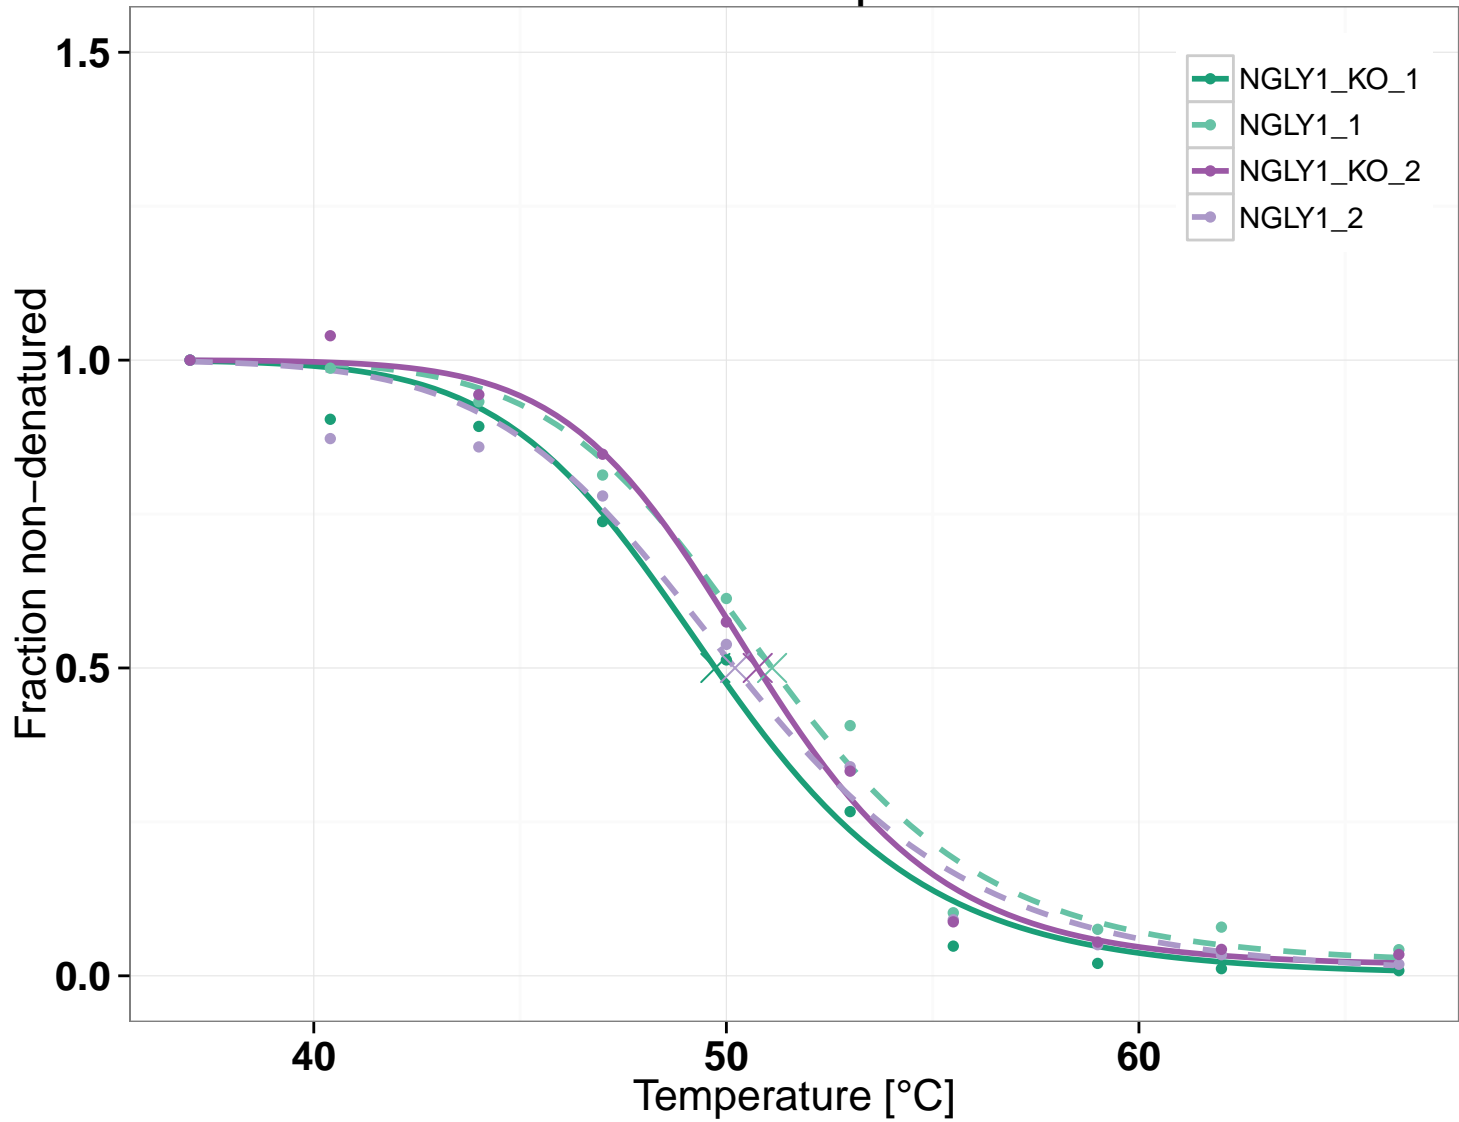

|            | meltPoint | slope  | plateau | R2   |
|------------|-----------|--------|---------|------|
| NGLY1_KO_1 | 49.73     | -0.097 | 0       | 0.99 |
| NGLY1_1    | 51.11     | -0.093 | 0.02    | 0.99 |
| NGLY1_KO_2 | 50.76     | -0.11  | 0.02    | 1    |
| NGLY1_2    | 50.21     | -0.085 | 0       | 0.98 |

Supplement: Supplementary file 7373 [file 1]

IPI00219685.5|NDUFA13

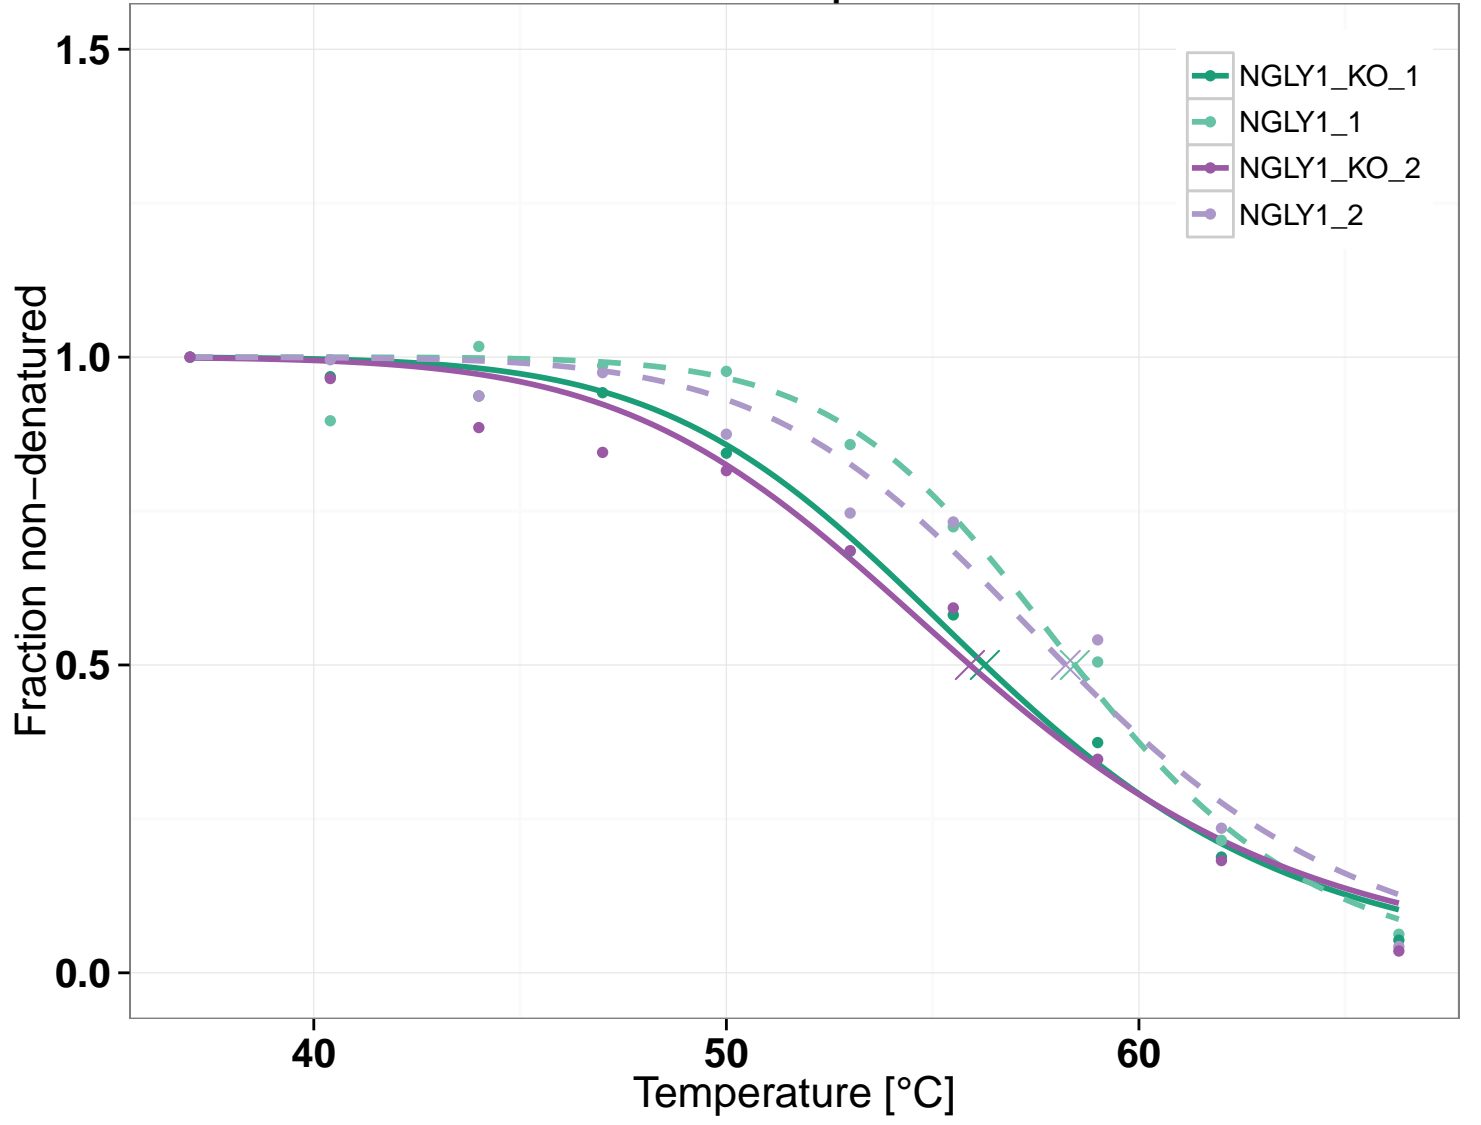

|            | meltPoint | slope  | plateau | R2   |
|------------|-----------|--------|---------|------|
| NGLY1_KO_1 | 56.27     | -0.065 | 0       | 0.99 |
| NGLY1_1    | 58.45     | -0.086 | 0       | 0.99 |
| NGLY1_KO_2 | 55.9      | -0.06  | 0       | 0.97 |
| NGLY1_2    | 58.23     | -0.069 | 0       | 0.97 |

Supplement: Supplementary file 7374 [file 1]

# IPI00746337.1|PMS2

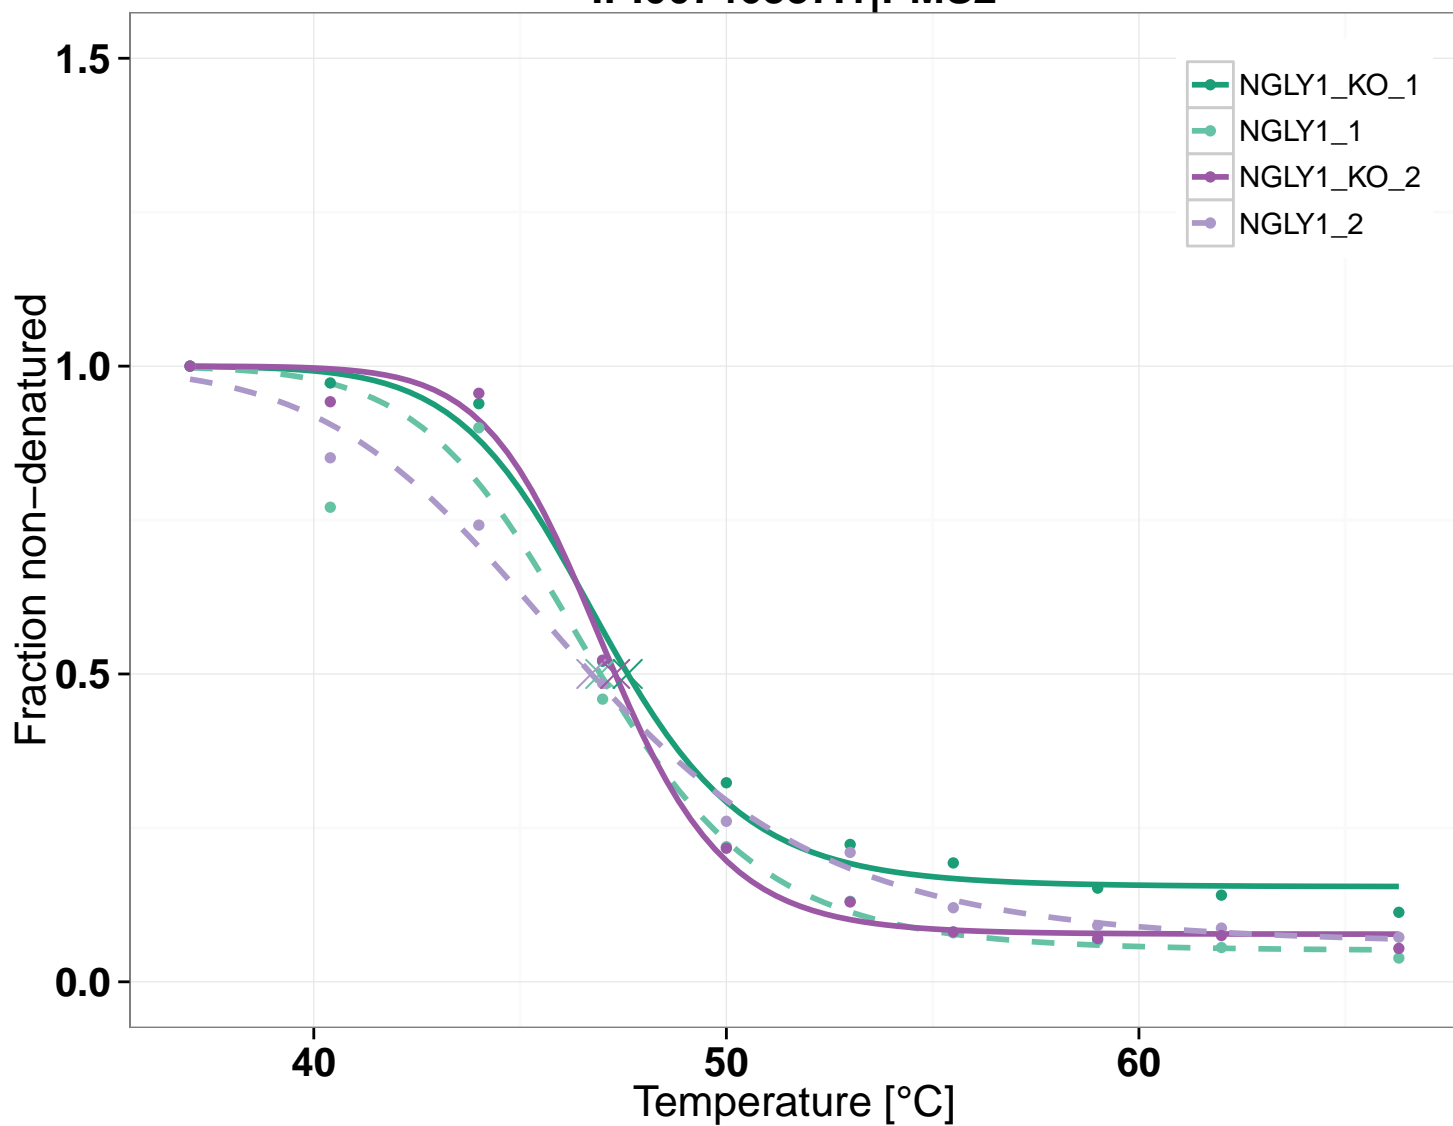

|            | meltPoint | slope  | plateau | R2   |
|------------|-----------|--------|---------|------|
| NGLY1_KO_1 | 47.61     | -0.12  | 0.15    | 0.99 |
| NGLY1_1    | 46.94     | -0.11  | 0.05    | 0.96 |
| NGLY1_KO_2 | 47.3      | -0.16  | 0.08    | 1    |
| NGLY1_2    | 46.73     | -0.077 | 0.06    | 0.99 |

Supplement: Supplementary file 7375 [file 1]

IPI00002612.2|ZNF219

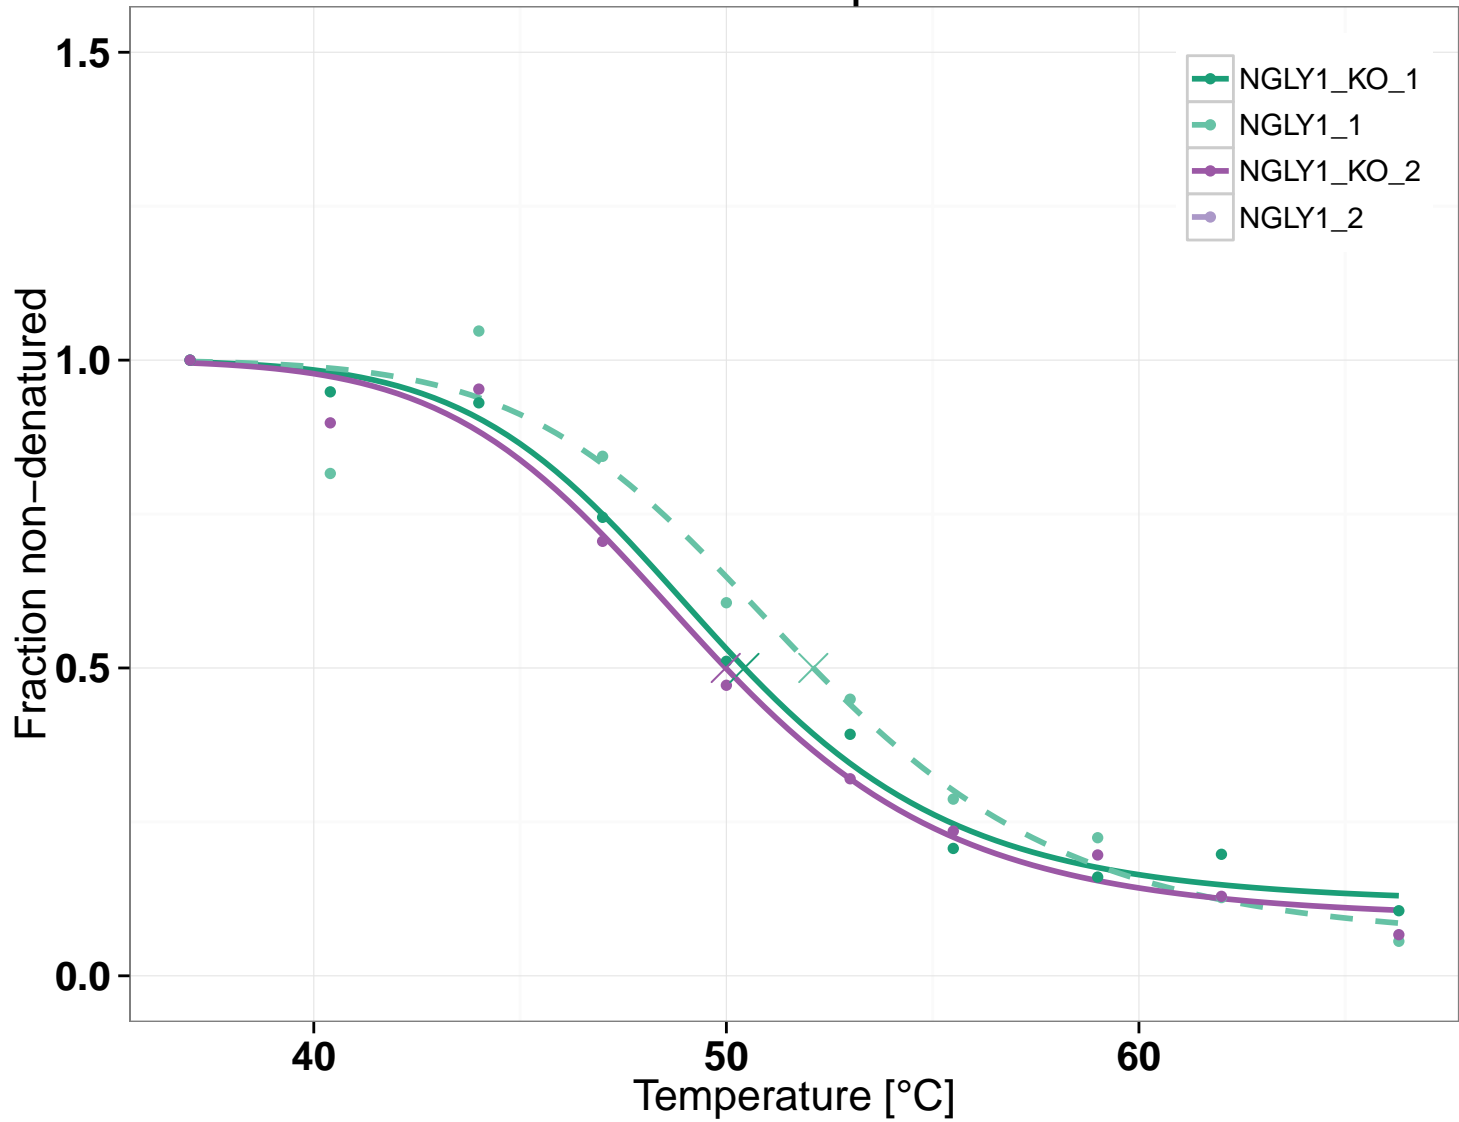

|            | meltPoint | slope  | plateau | R2   |
|------------|-----------|--------|---------|------|
| NGLY1_KO_1 | 50.44     | -0.075 | 0.12    | 0.99 |
| NGLY1_1    | 52.11     | -0.071 | 0.05    | 0.96 |
| NGLY1_KO_2 | 49.99     | -0.074 | 0.09    | 0.99 |
| NGLY1_2    | -         | -      | -       | -    |

Supplement: Supplementary file 7376 [file 1]

IPI00006606.1|MRPS26

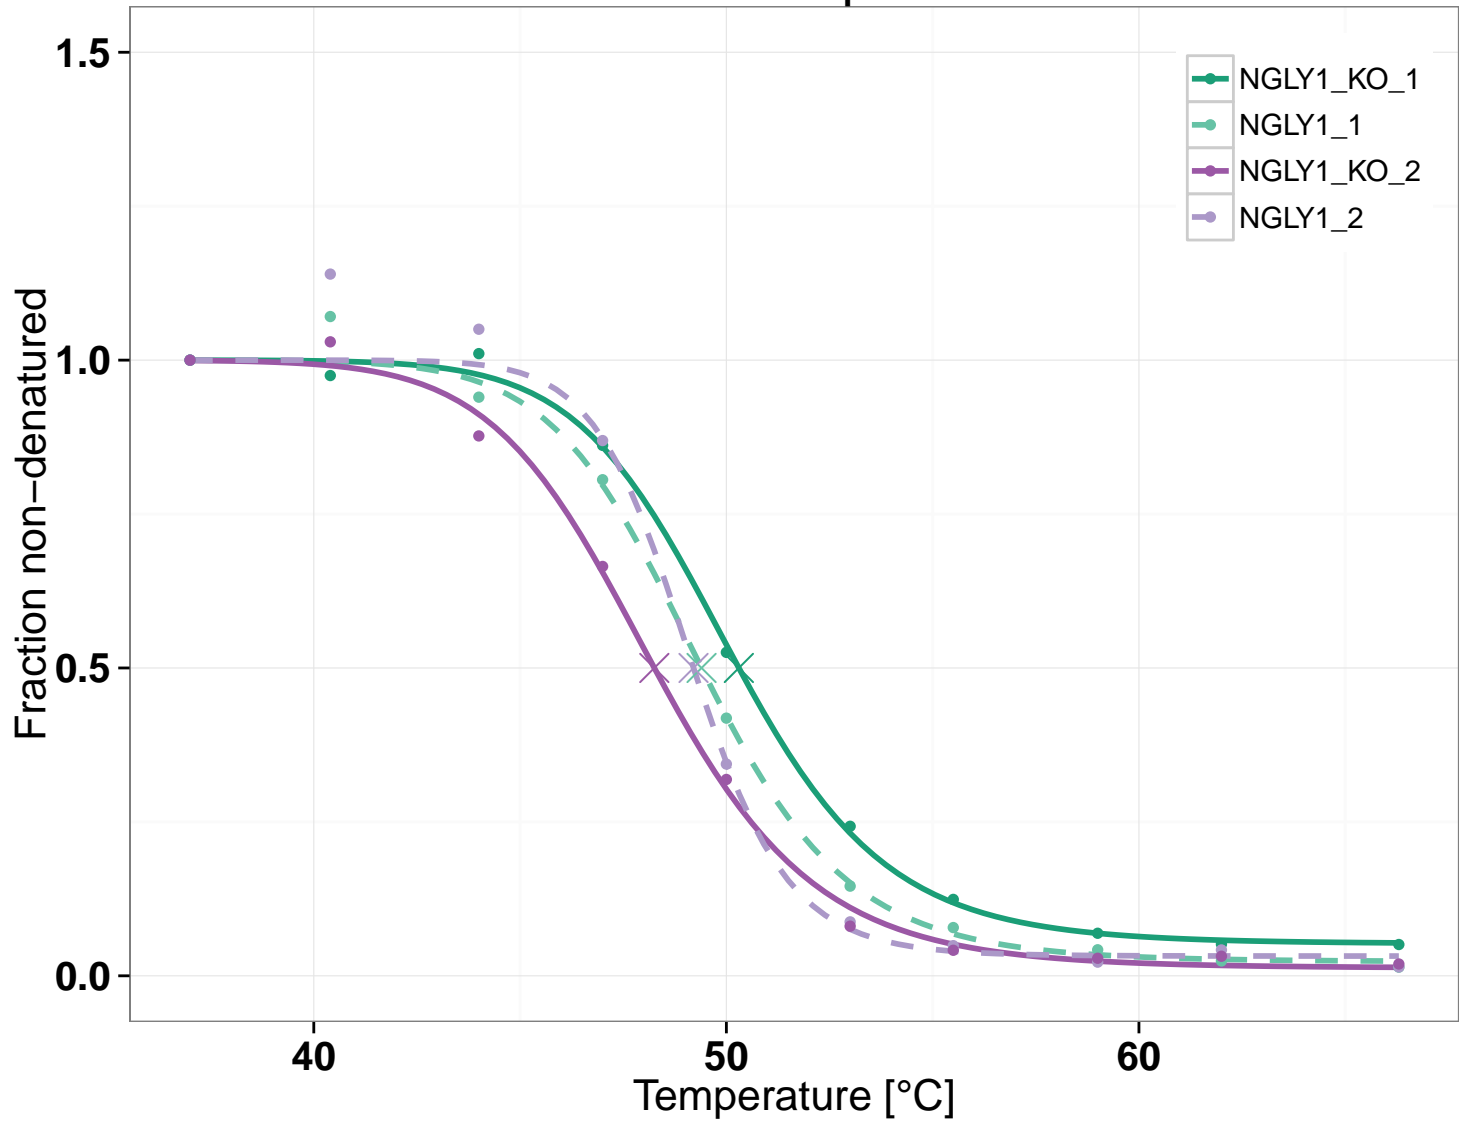

|            | meltPoint | slope | plateau | R2   |
|------------|-----------|-------|---------|------|
| NGLY1_KO_1 | 50.3      | -0.13 | 0.05    | 1    |
| NGLY1_1    | 49.4      | -0.14 | 0.02    | 1    |
| NGLY1_KO_2 | 48.25     | -0.13 | 0.01    | 1    |
| NGLY1_2    | 49.2      | -0.21 | 0.03    | 0.99 |

Supplement: Supplementary file 7377 [file 1]

IPI00002569.3|EIF4EBP1

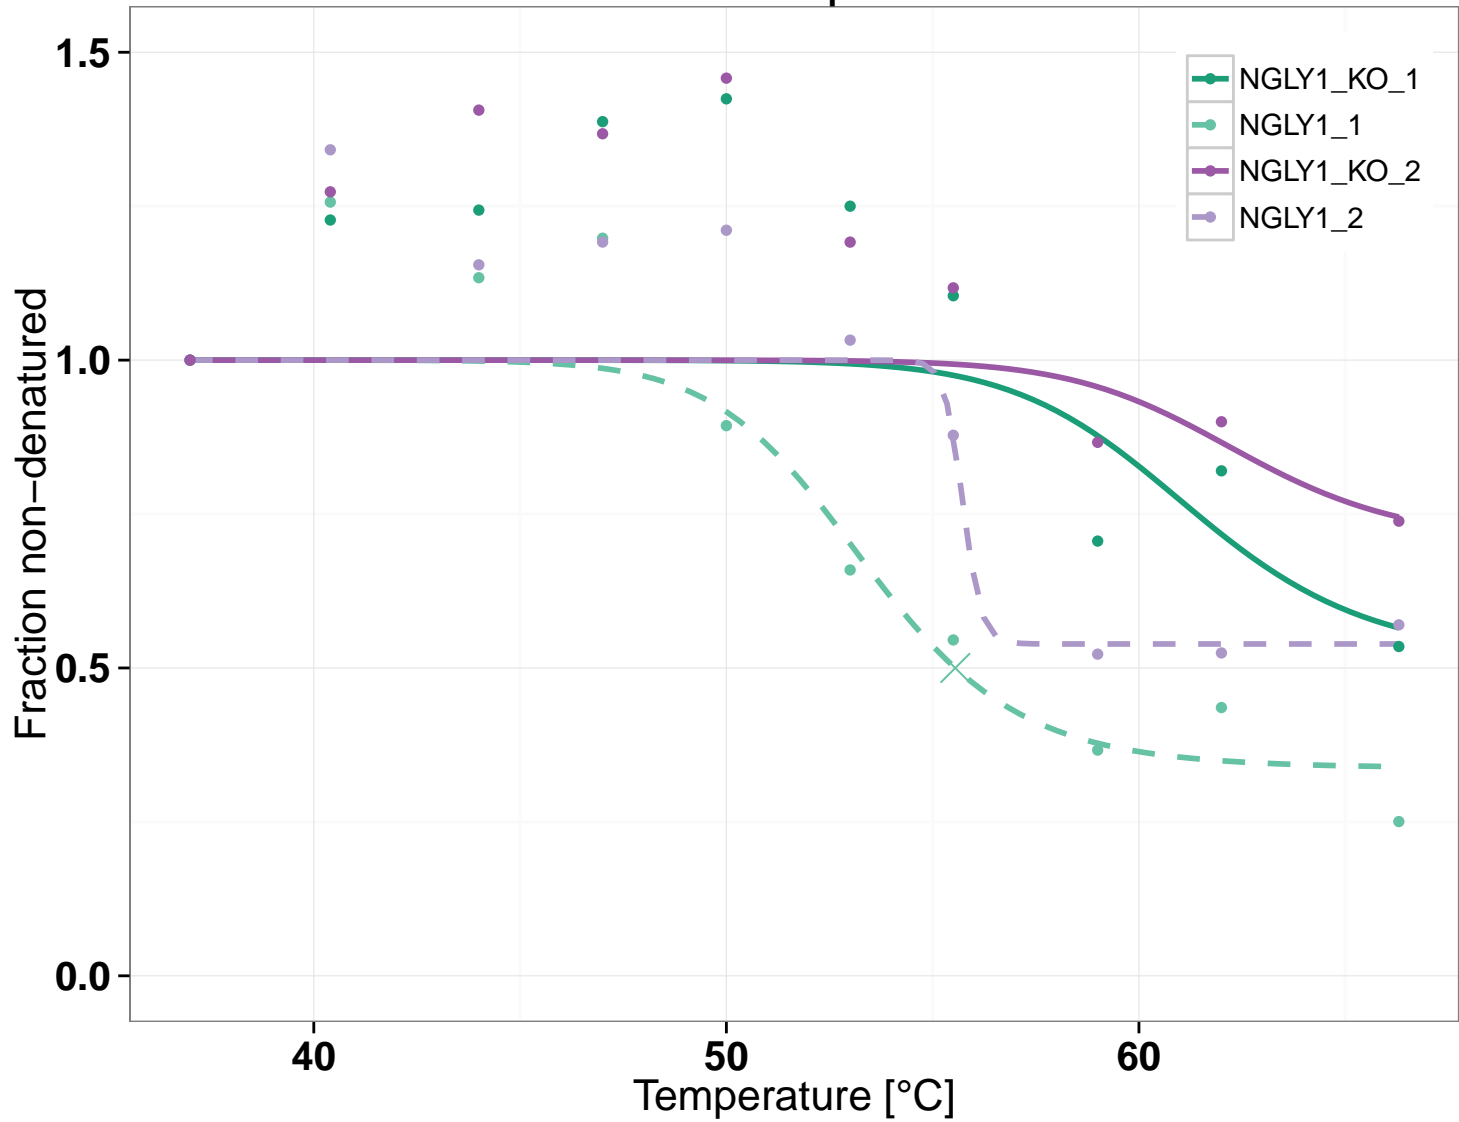

|            | meltPoint | slope  | plateau | R2    |
|------------|-----------|--------|---------|-------|
| NGLY1_KO_1 | -         | -0.056 | 0.51    | 0.29  |
| NGLY1_1    | 55.55     | -0.089 | 0.34    | 0.88  |
| NGLY1_KO_2 | -         | -0.036 | 0.7     | -0.16 |
| NGLY1_2    | -         | -0.52  | 0.54    | 0.73  |

Supplement: Supplementary file 7378 [file 1]

IPI00010402.2|SH3BGRL3

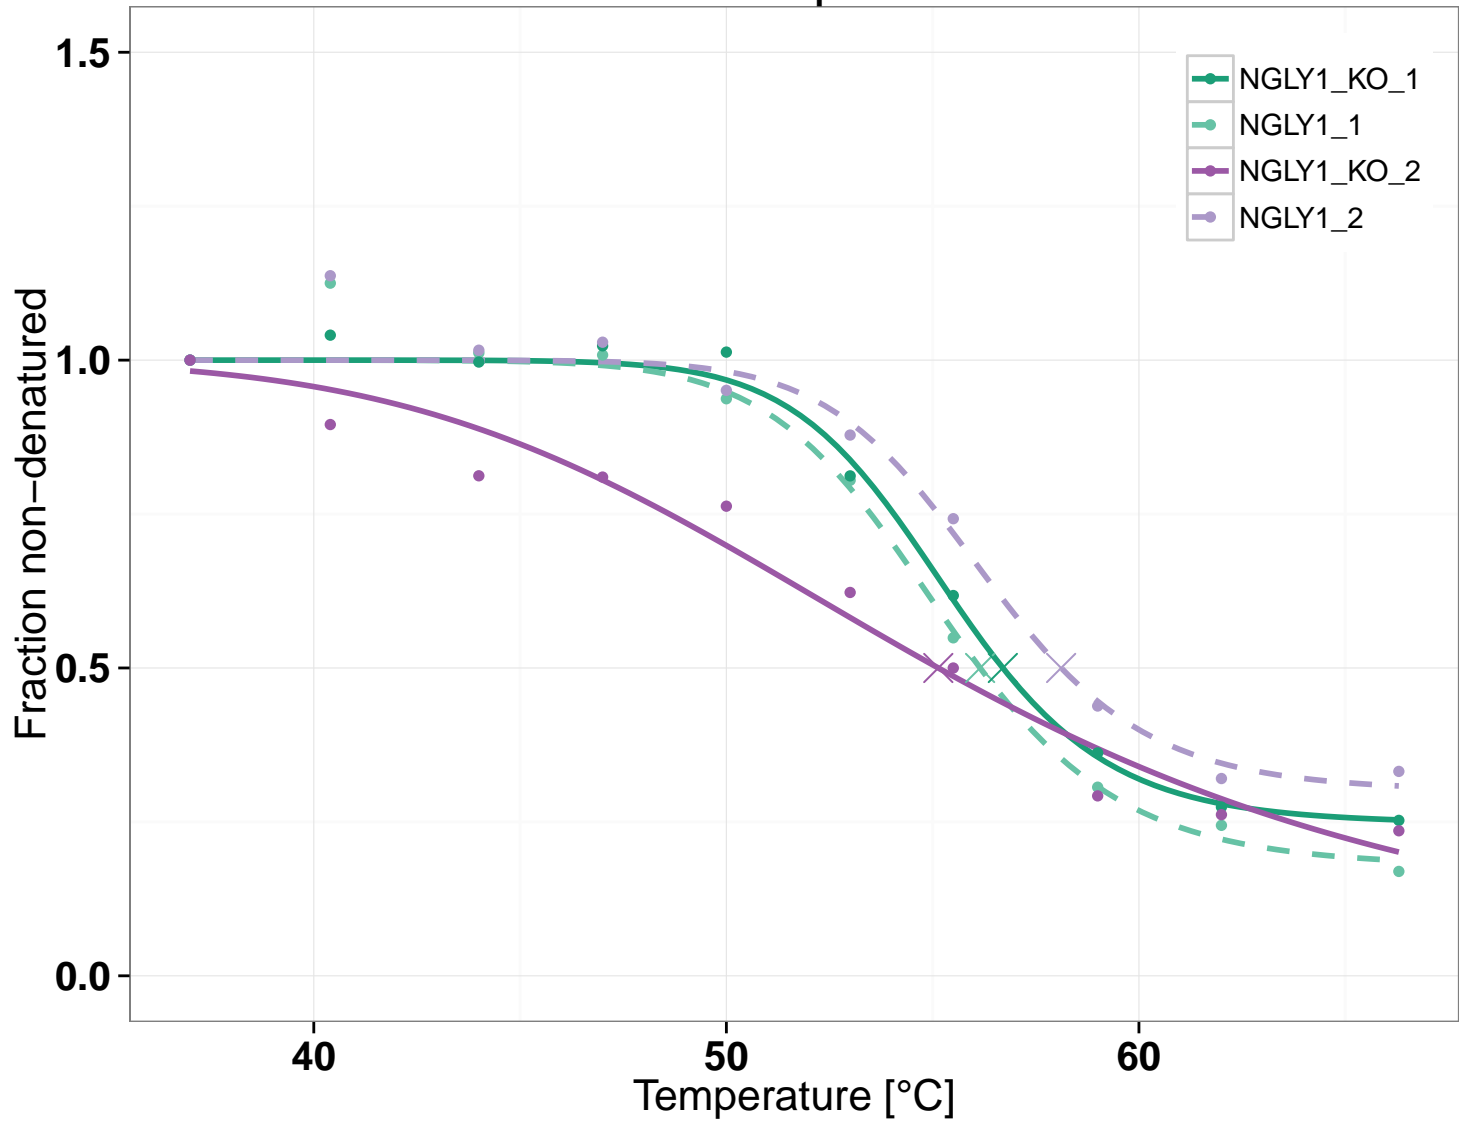

|            | meltPoint | slope  | plateau | R2   |
|------------|-----------|--------|---------|------|
| NGLY1_KO_1 | 56.7      | -0.099 | 0.25    | 0.99 |
| NGLY1_1    | 56.15     | -0.098 | 0.18    | 0.99 |
| NGLY1_KO_2 | 55.14     | -0.039 | 0       | 0.97 |
| NGLY1_2    | 58.11     | -0.09  | 0.3     | 0.97 |

Supplement: Supplementary file 7379 [file 1]

IPI00024698.1|PQBP1

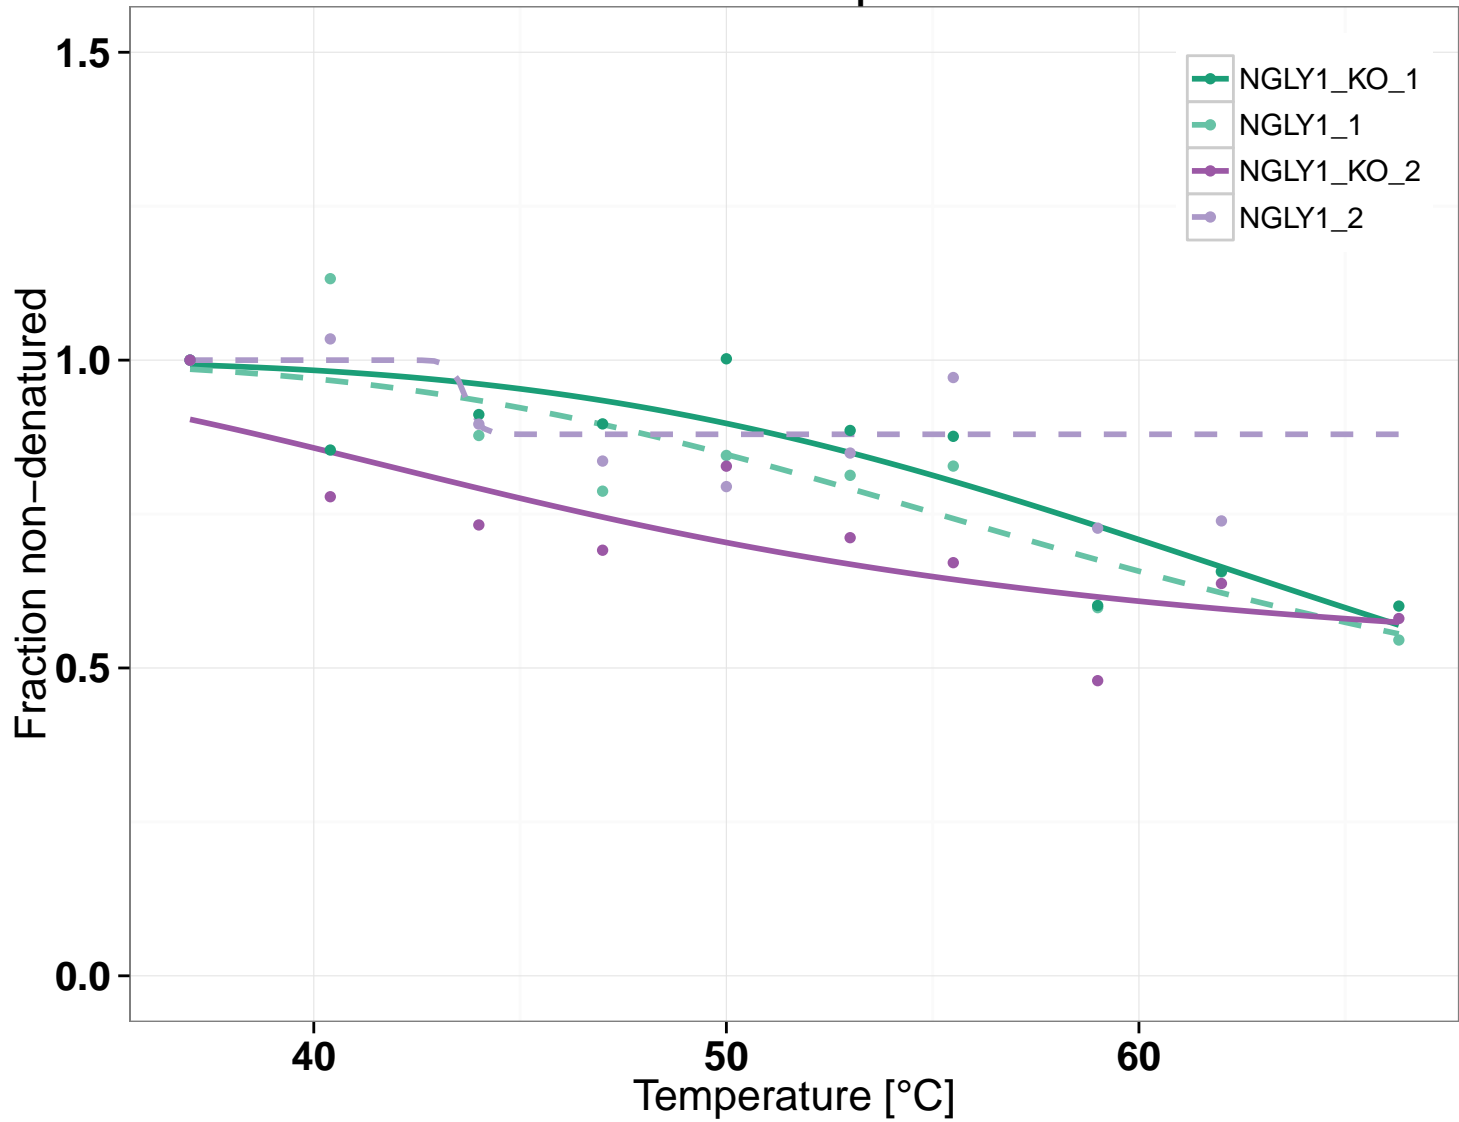

|            | meltPoint | slope  | plateau | R2   |
|------------|-----------|--------|---------|------|
| NGLY1_KO_1 | -         | -0.022 | 0       | 0.74 |
| NGLY1_1    | -         | -0.02  | 0.28    | 0.8  |
| NGLY1_KO_2 | -         | -0.017 | 0.48    | 0.67 |
| NGLY1_2    | -         | -0.17  | 0.88    | 0.13 |

Supplement: Supplementary file 7380 [file 1]

# IPI00031608.3|SPATA5L1

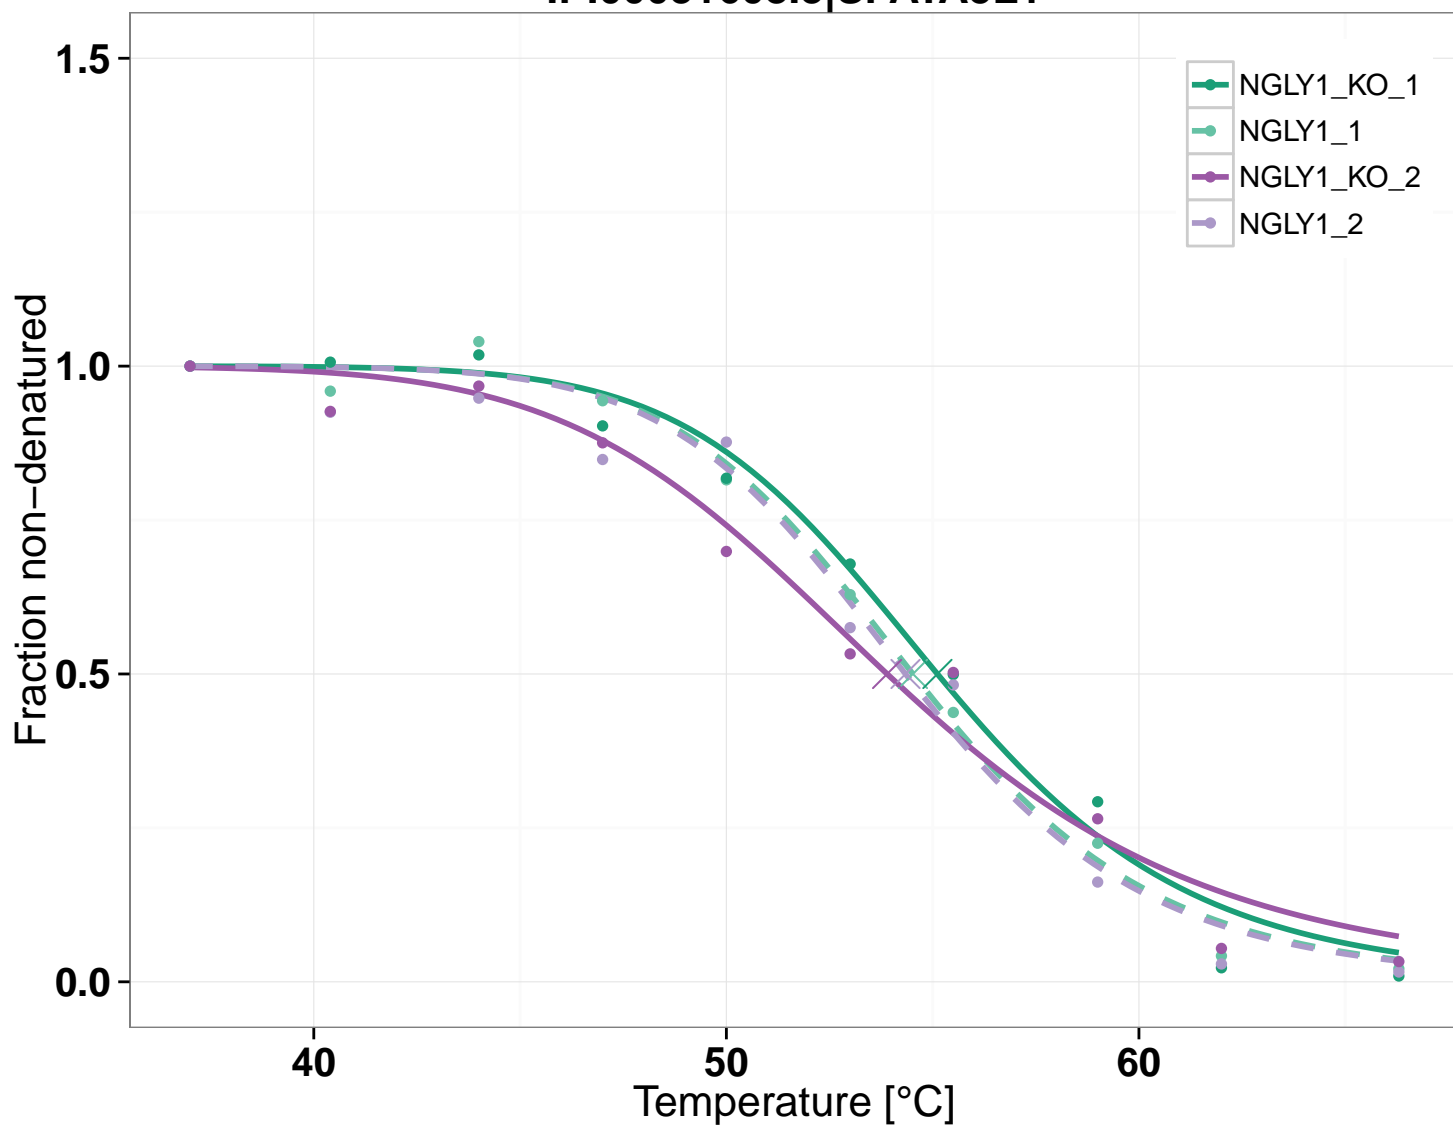

|            | meltPoint | slope  | plateau | R2   |
|------------|-----------|--------|---------|------|
| NGLY1_KO_1 | 55.12     | -0.082 | 0       | 0.99 |
| NGLY1_1    | 54.52     | -0.086 | 0       | 0.99 |
| NGLY1_KO_2 | 53.9      | -0.064 | 0       | 0.98 |
| NGLY1_2    | 54.34     | -0.087 | 0       | 0.98 |

Supplement: Supplementary file 7381 [file 1]

IPI00292787.6|ACTR5

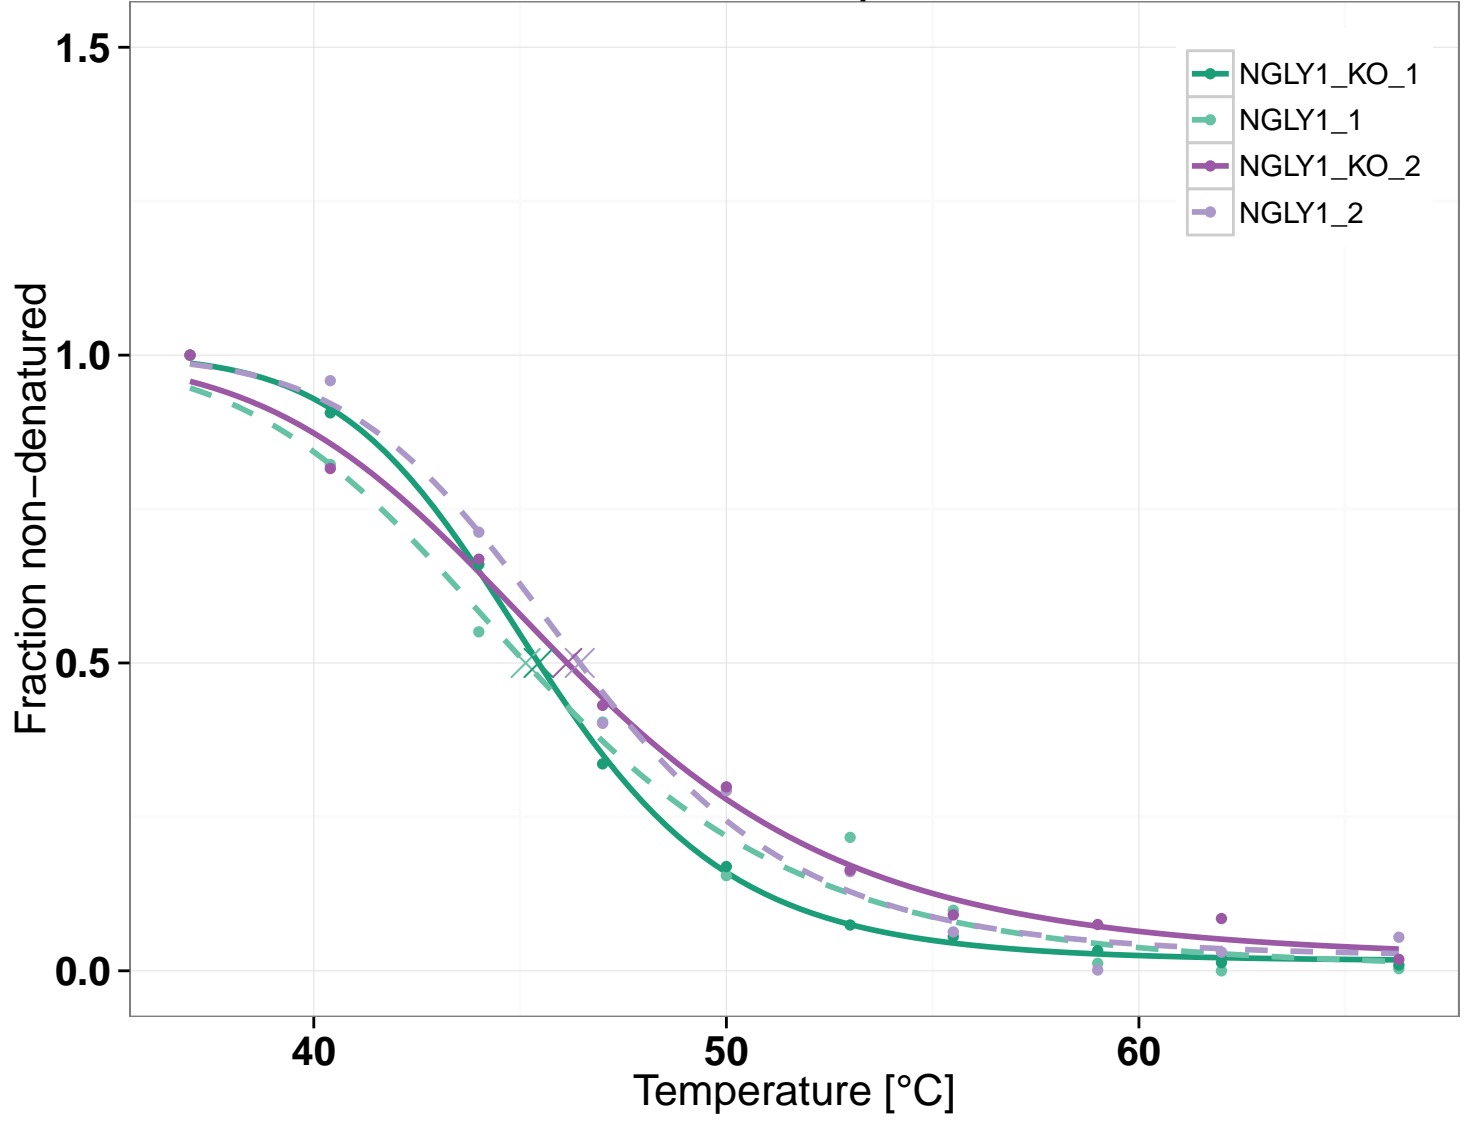

|            | meltPoint | slope  | plateau | R2   |
|------------|-----------|--------|---------|------|
| NGLY1_KO_1 | 45.45     | -0.1   | 0.02    | 1    |
| NGLY1_1    | 45.14     | -0.074 | 0       | 0.98 |
| NGLY1_KO_2 | 46.14     | -0.07  | 0.02    | 0.99 |
| NGLY1_2    | 46.45     | -0.089 | 0.02    | 0.99 |

Supplement: Supplementary file 7382 [file 1]

IPI00177437.5|CRNKL1

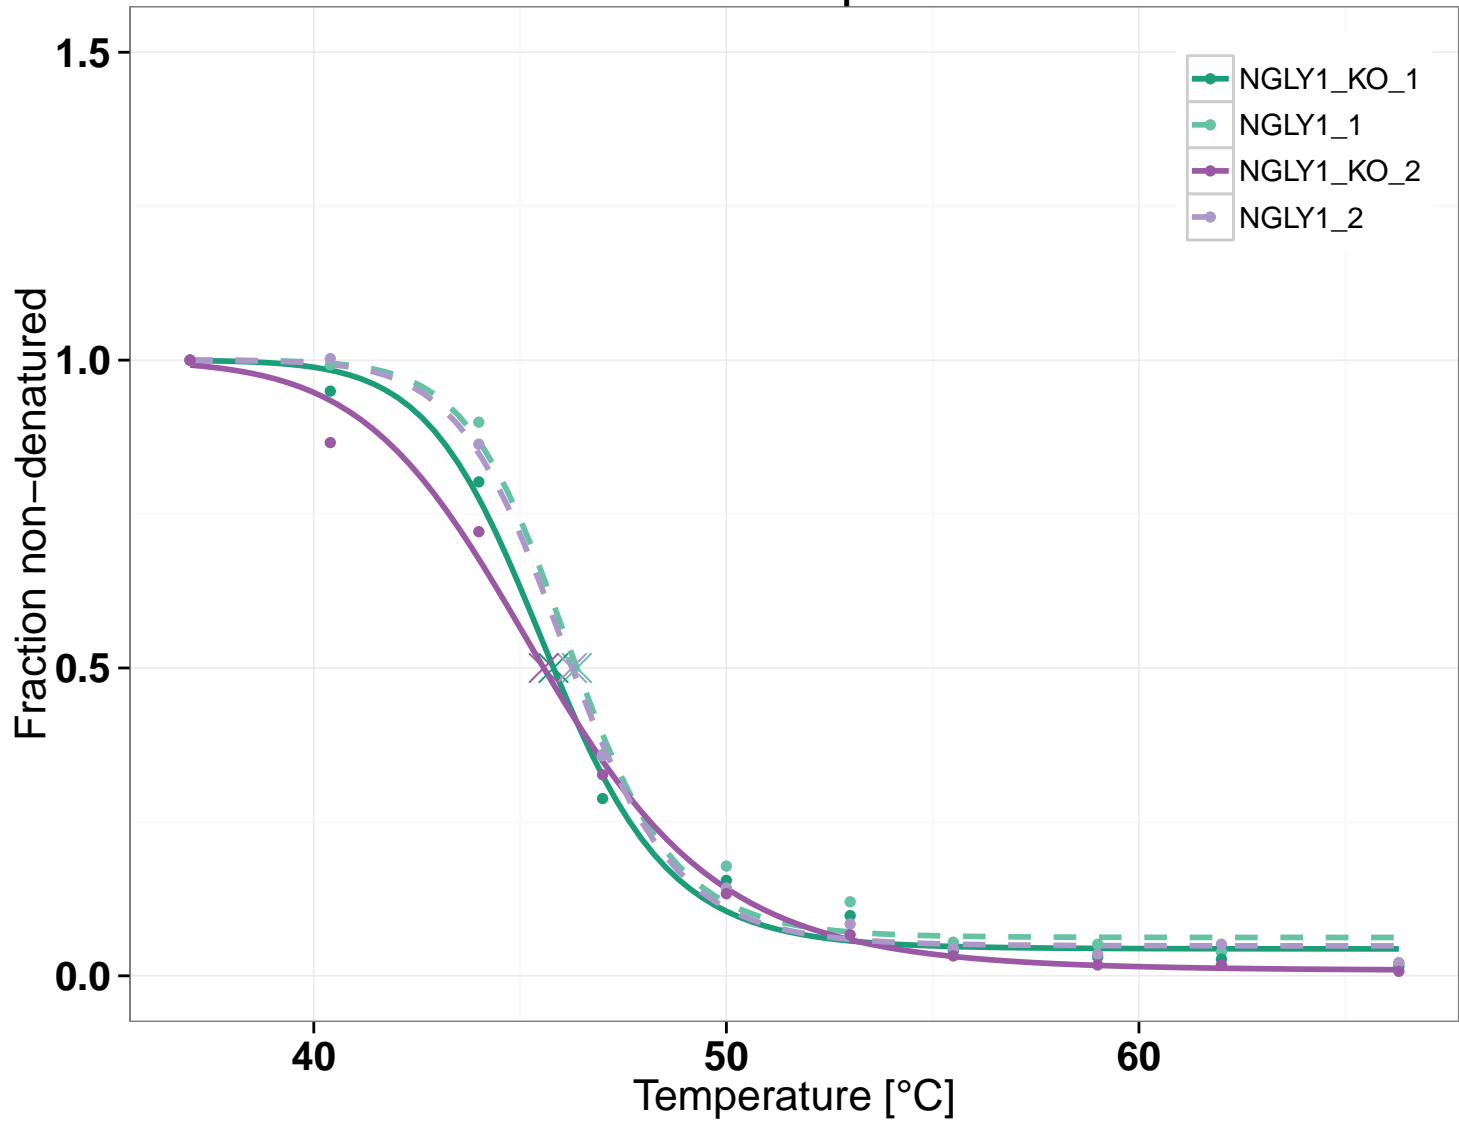

|            | meltPoint | slope | plateau | R2   |
|------------|-----------|-------|---------|------|
| NGLY1_KO_1 | 45.81     | -0.16 | 0.04    | 0.99 |
| NGLY1_1    | 46.38     | -0.18 | 0.06    | 0.99 |
| NGLY1_KO_2 | 45.57     | -0.11 | 0.01    | 0.99 |
| NGLY1_2    | 46.26     | -0.18 | 0.05    | 1    |

Supplement: Supplementary file 7383 [file 1]

# IPI00656088.4|RAPH1

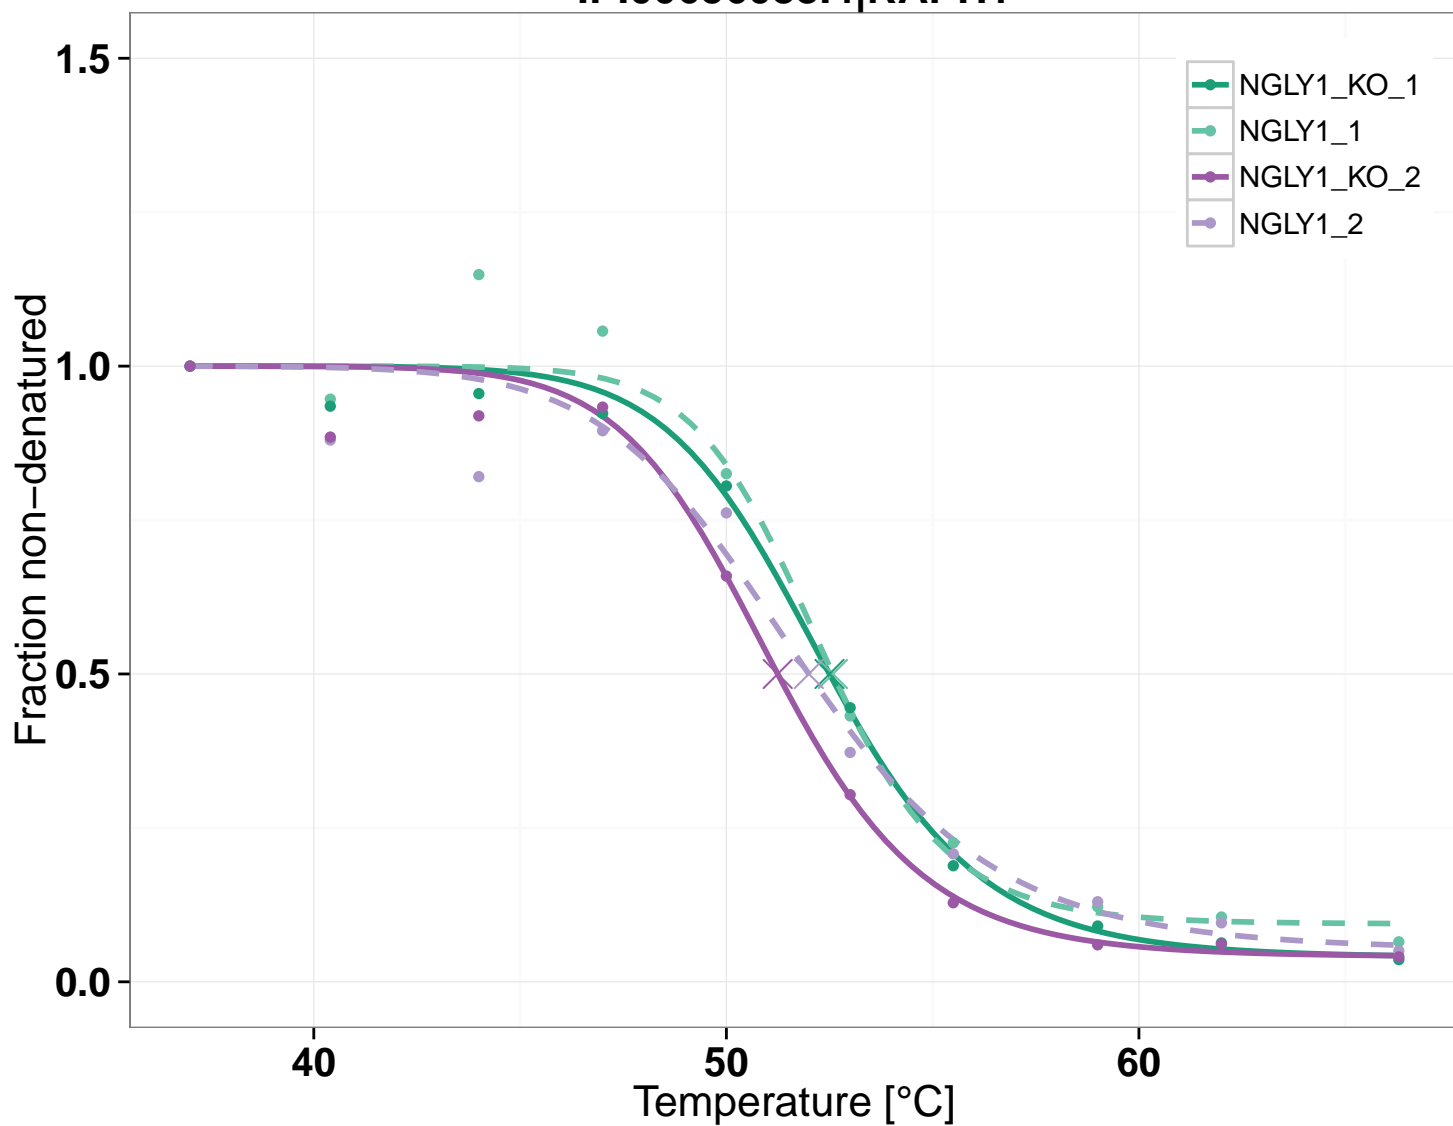

|            | meltPoint | slope  | plateau | R2   |
|------------|-----------|--------|---------|------|
| NGLY1_KO_1 | 52.5      | -0.13  | 0.04    | 1    |
| NGLY1_1    | 52.58     | -0.15  | 0.09    | 0.98 |
| NGLY1_KO_2 | 51.24     | -0.13  | 0.04    | 0.99 |
| NGLY1_2    | 52        | -0.099 | 0.05    | 0.97 |

Supplement: Supplementary file 7384 [file 1]

IPI00889009.1|LOC391282

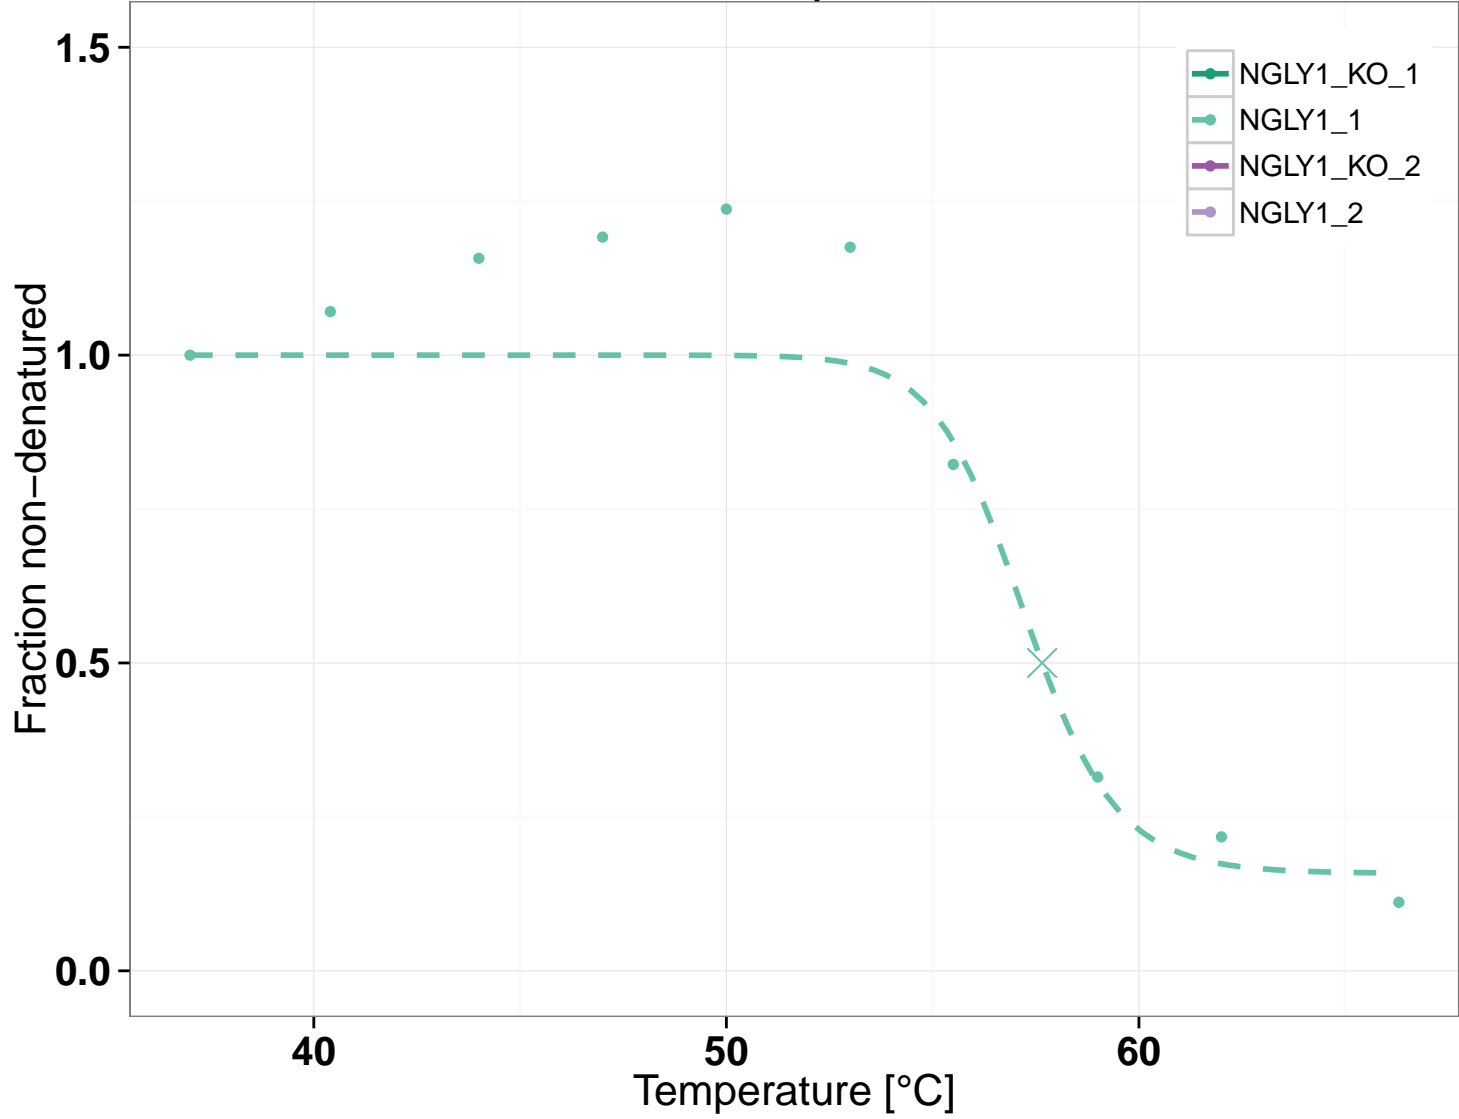

|            | meltPoint | slope | plateau | R2   |
|------------|-----------|-------|---------|------|
| NGLY1_KO_1 | -         | -     | -       | -    |
| NGLY1_1    | 57.65     | -0.19 | 0.16    | 0.91 |
| NGLY1_KO_2 | -         | -     | -       | -    |
| NGLY1_2    | -         | -     | -       | -    |

Supplement: Supplementary file 7385 [file 1]

IPI00164061.2|CNOT6L

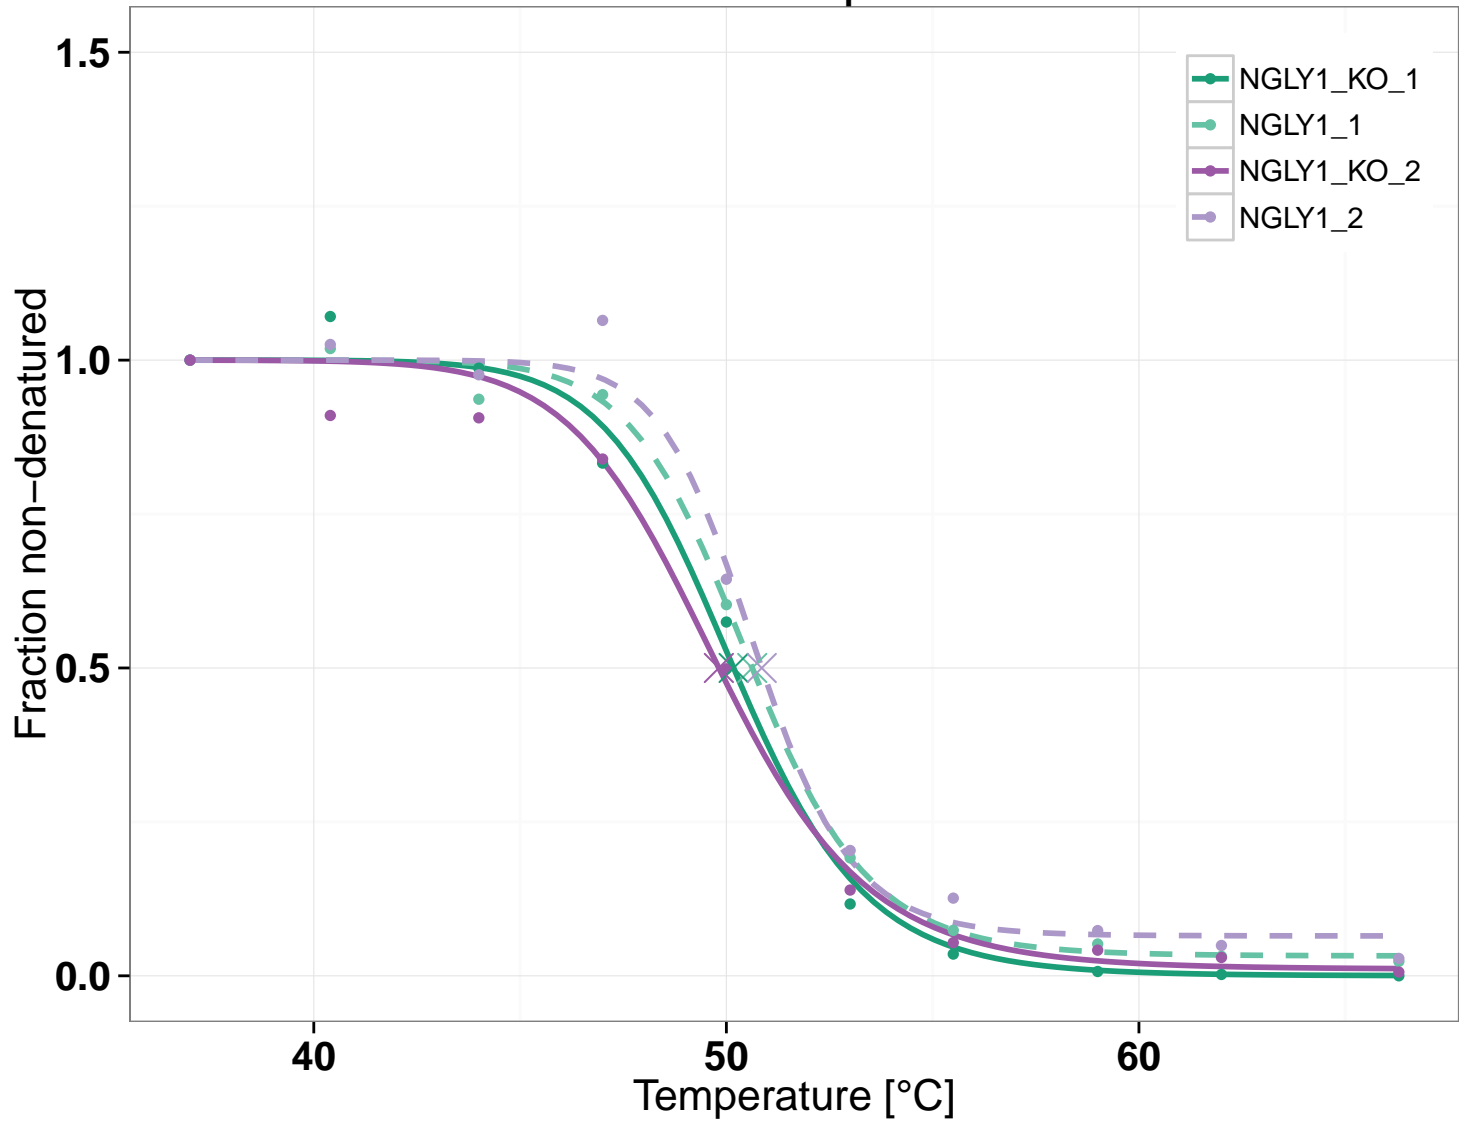

|            | meltPoint | slope | plateau | R2   |
|------------|-----------|-------|---------|------|
| NGLY1_KO_1 | 50.18     | -0.16 | 0       | 0.99 |
| NGLY1_1    | 50.63     | -0.17 | 0.03    | 1    |
| NGLY1_KO_2 | 49.82     | -0.14 | 0.01    | 0.99 |
| NGLY1_2    | 50.86     | -0.2  | 0.06    | 0.99 |

Supplement: Supplementary file 7386 [file 1]

# IPI00216406.4|NFYC

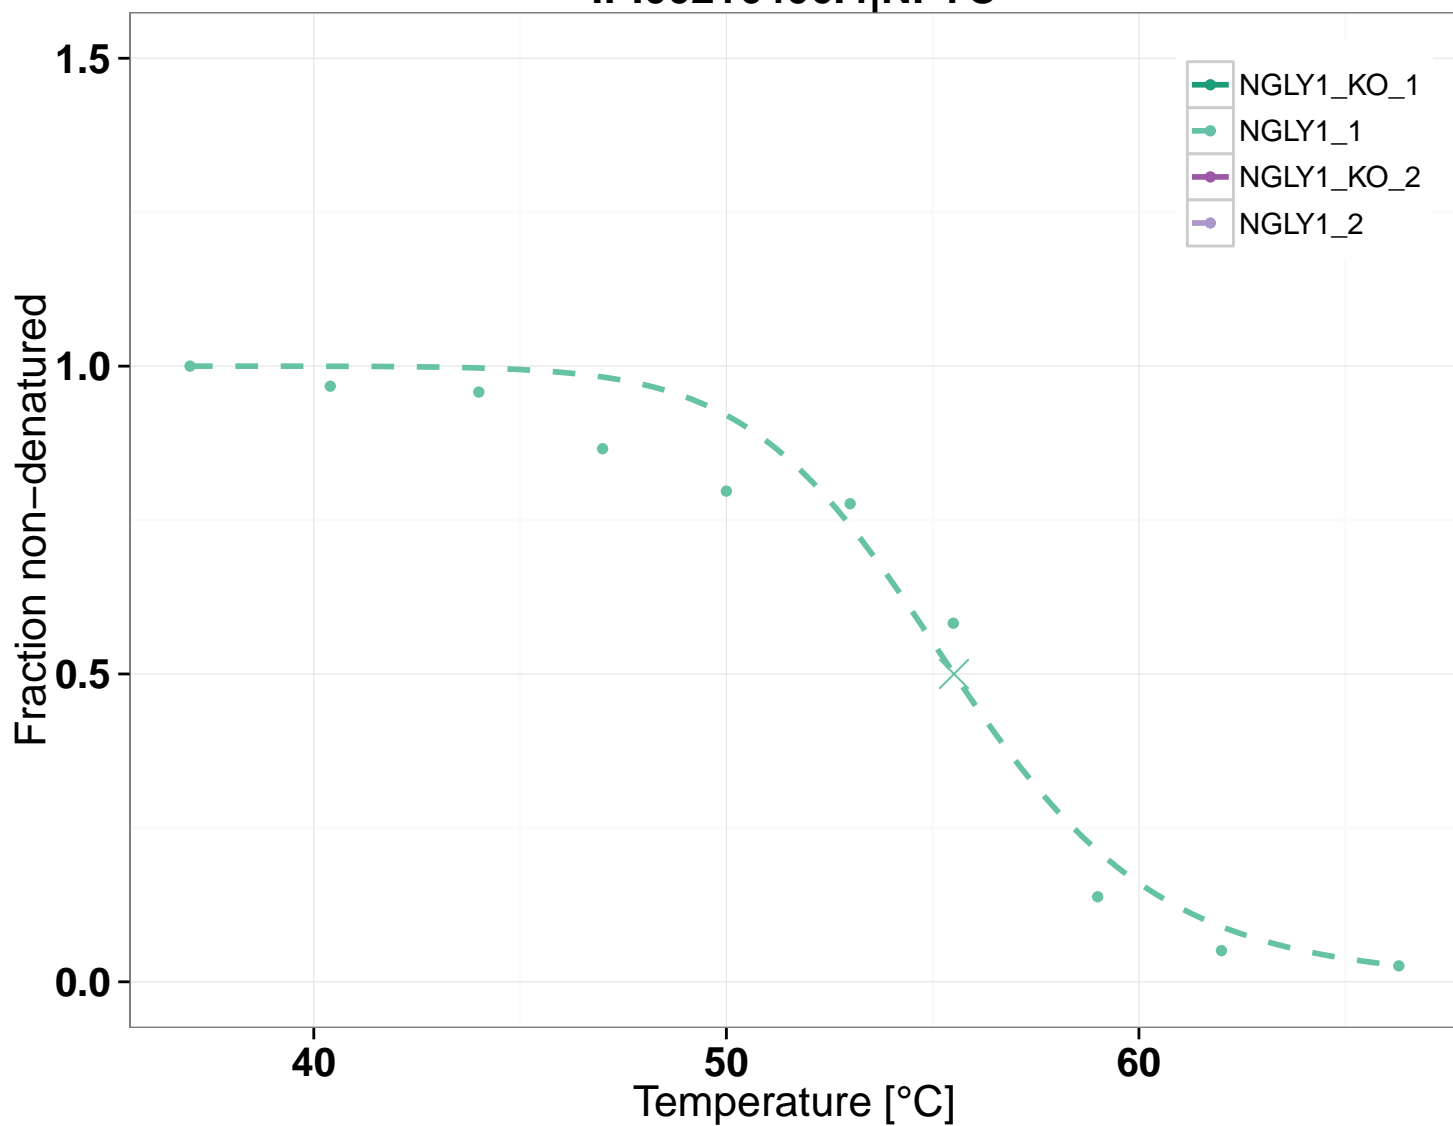

|            | meltPoint | slope | plateau | R2   |
|------------|-----------|-------|---------|------|
| NGLY1_KO_1 | –         | –     | –       | –    |
| NGLY1_1    | 55.52     | –0.1  | 0       | 0.97 |
| NGLY1_KO_2 | –         | –     | –       | –    |
| NGLY1_2    | –         | –     | –       | –    |

Supplement: Supplementary file 7387 [file 1]

IPI00177965.5|NT5DC1

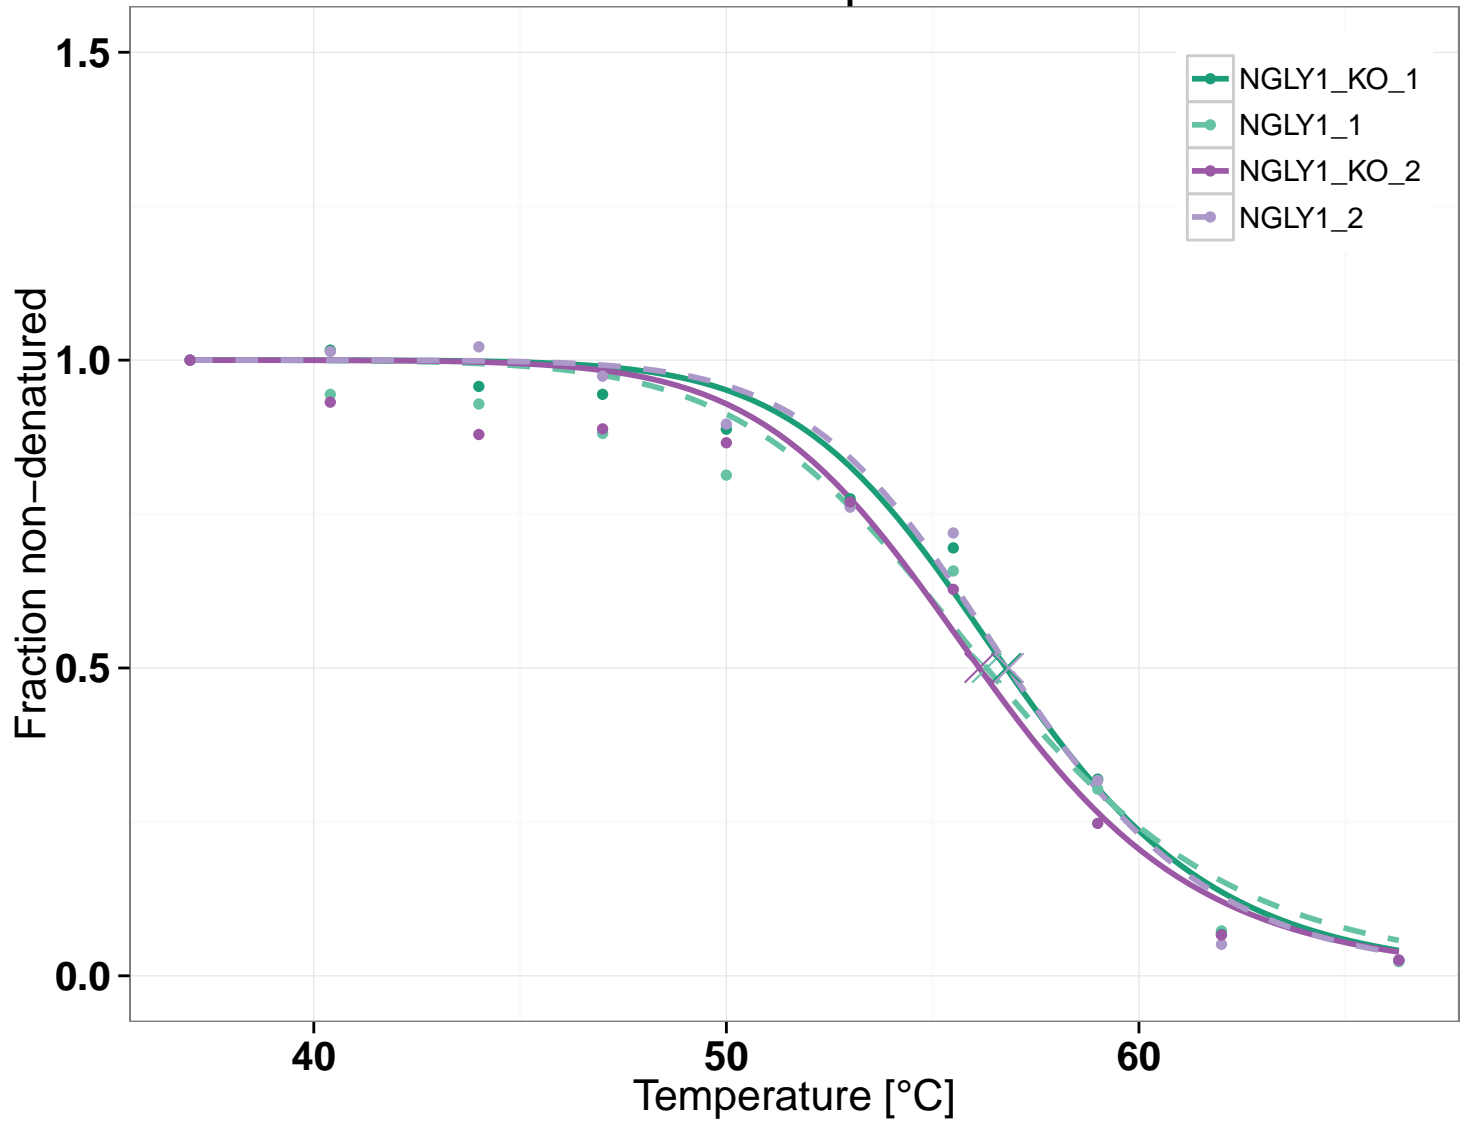

|            | meltPoint | slope  | plateau | R2   |
|------------|-----------|--------|---------|------|
| NGLY1_KO_1 | 56.78     | -0.097 | 0       | 0.98 |
| NGLY1_1    | 56.31     | -0.083 | 0       | 0.97 |
| NGLY1_KO_2 | 56.13     | -0.094 | 0       | 0.97 |
| NGLY1_2    | 56.85     | -0.1   | 0       | 0.98 |

Supplement: Supplementary file 7388 [file 1]

IPI00296789.2|FBXO3

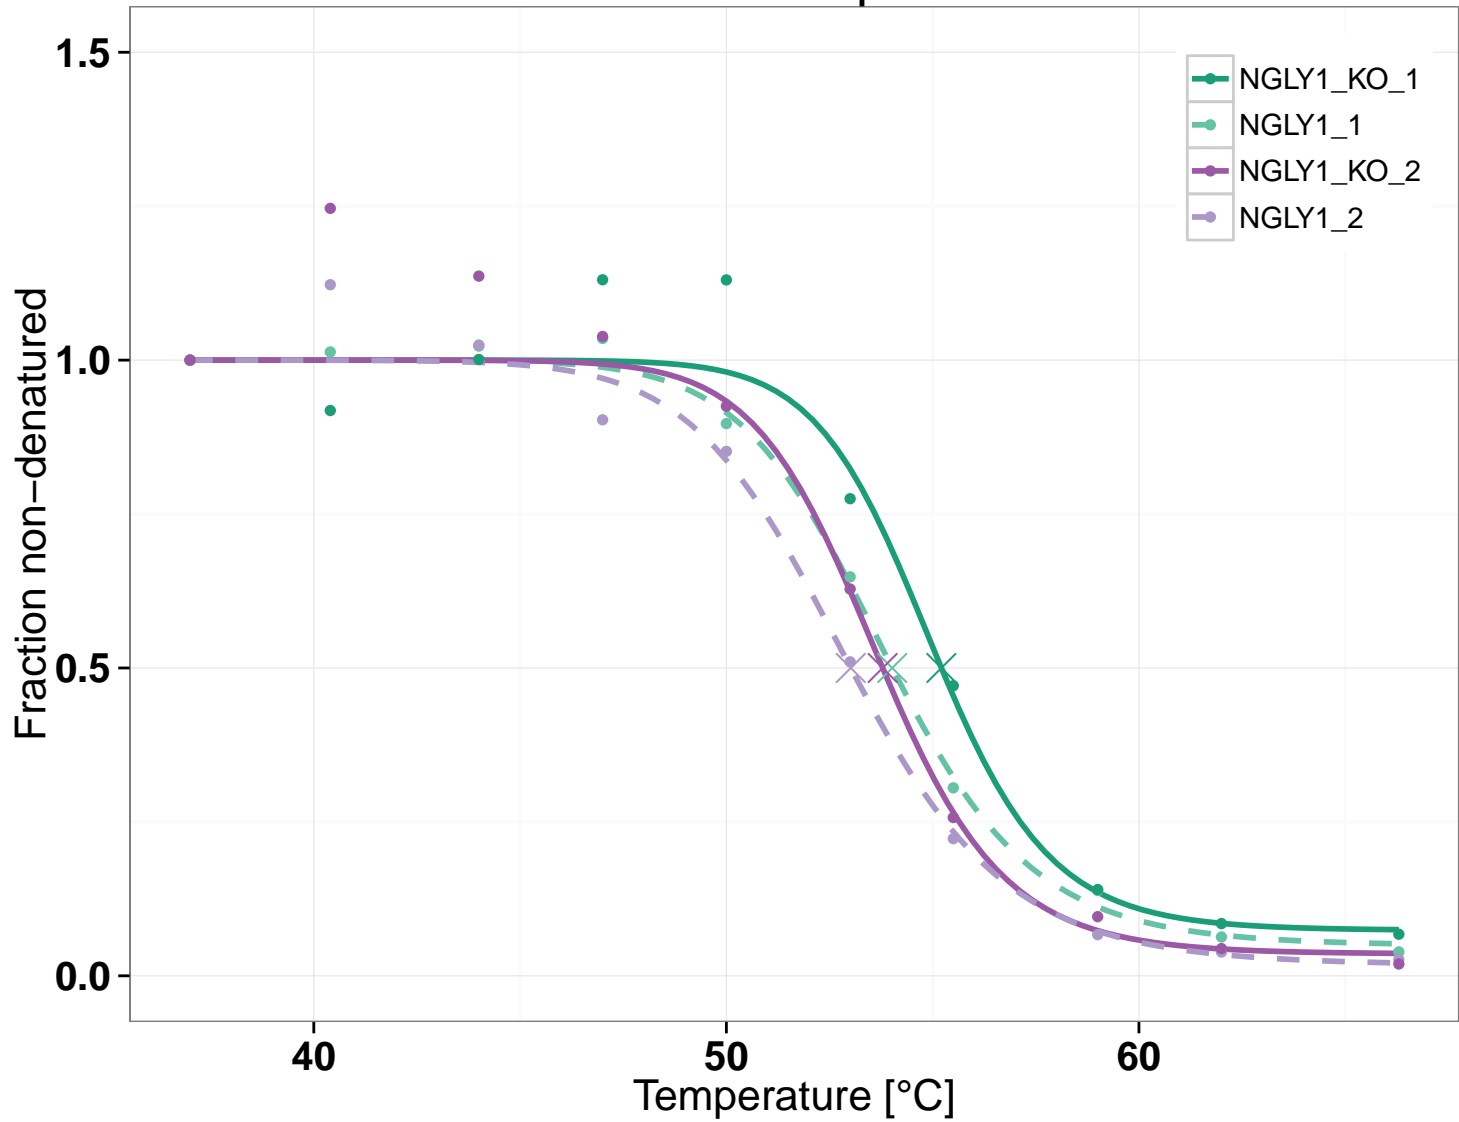

|            | meltPoint | slope | plateau | R2   |
|------------|-----------|-------|---------|------|
| NGLY1_KO_1 | 55.21     | -0.16 | 0.07    | 0.97 |
| NGLY1_1    | 54.02     | -0.13 | 0.05    | 1    |
| NGLY1_KO_2 | 53.79     | -0.16 | 0.04    | 0.96 |
| NGLY1_2    | 53.02     | -0.13 | 0.02    | 0.99 |

Supplement: Supplementary file 7389 [file 1]

# IPI00012164.1|O00572\_HUMAN

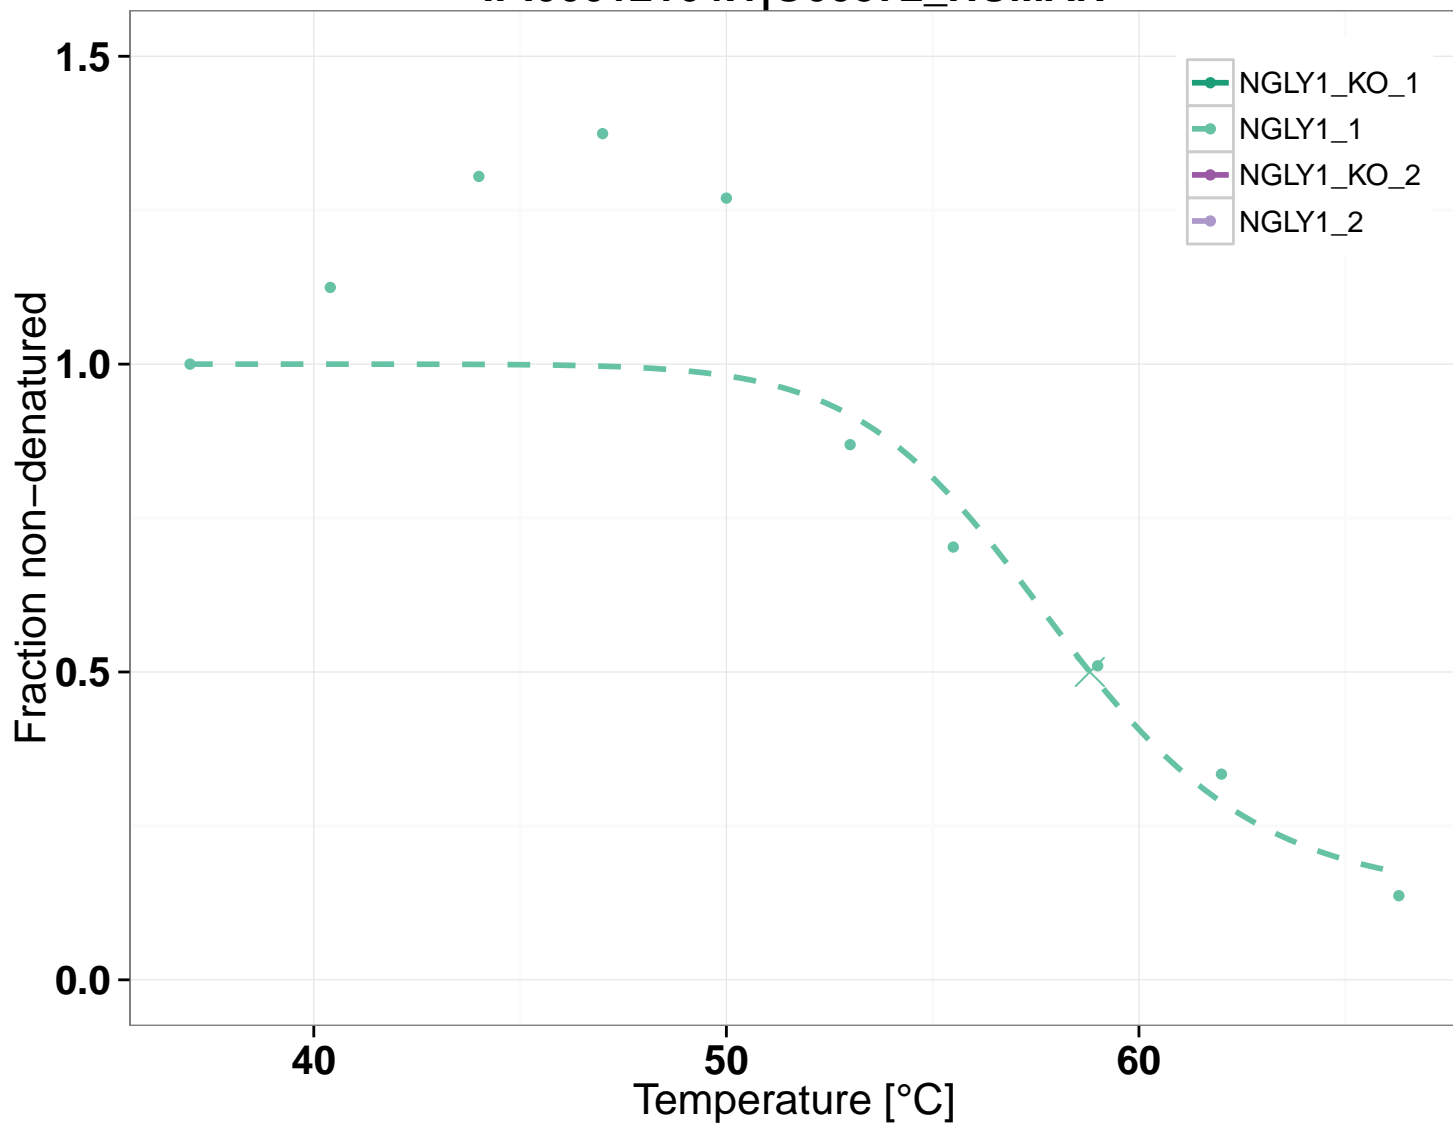

|            | meltPoint | slope  | plateau | R2   |
|------------|-----------|--------|---------|------|
| NGLY1_KO_1 | —         | —      | —       | —    |
| NGLY1_1    | 58.81     | -0.089 | 0.13    | 0.79 |
| NGLY1_KO_2 | —         | —      | —       | —    |
| NGLY1_2    | —         | —      | —       | —    |

Supplement: Supplementary file 7390 [file 1]

IPI00015213.1|DAPK3

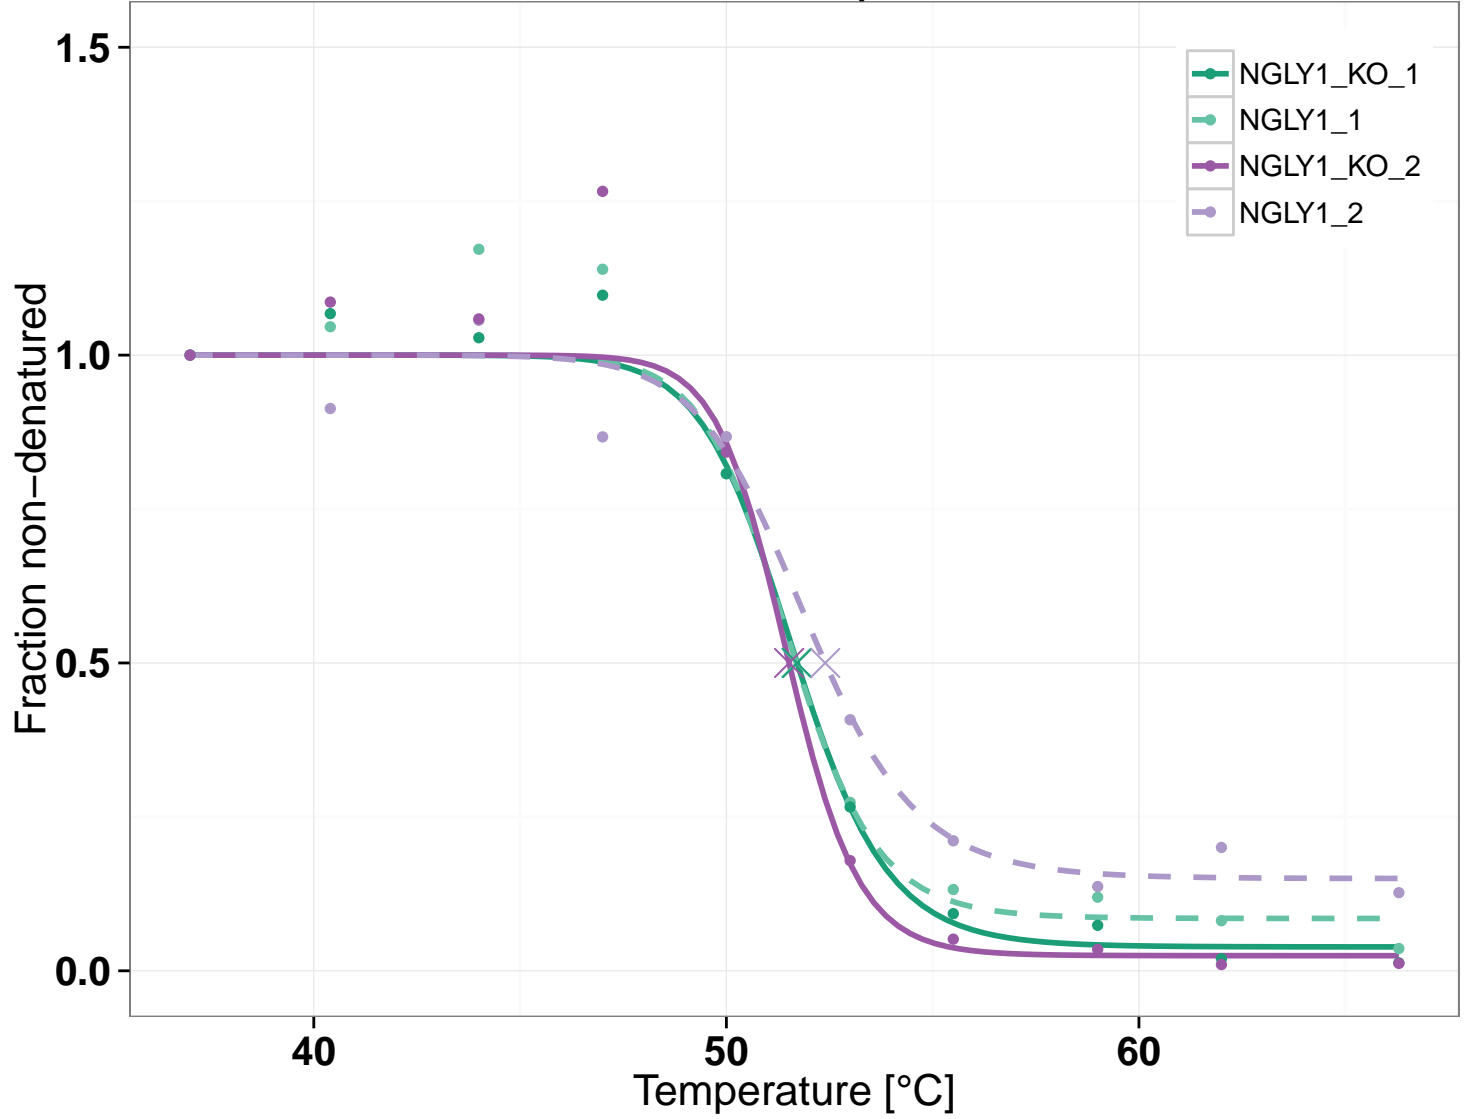

|            | meltPoint | slope | plateau | R2   |
|------------|-----------|-------|---------|------|
| NGLY1_KO_1 | 51.72     | -0.21 | 0.04    | 0.99 |
| NGLY1_1    | 51.69     | -0.21 | 0.08    | 0.97 |
| NGLY1_KO_2 | 51.52     | -0.28 | 0.02    | 0.97 |
| NGLY1_2    | 52.4      | -0.16 | 0.15    | 0.98 |

Supplement: Supplementary file 7391 [file 1]

IPI00152879.1|SLC16A10

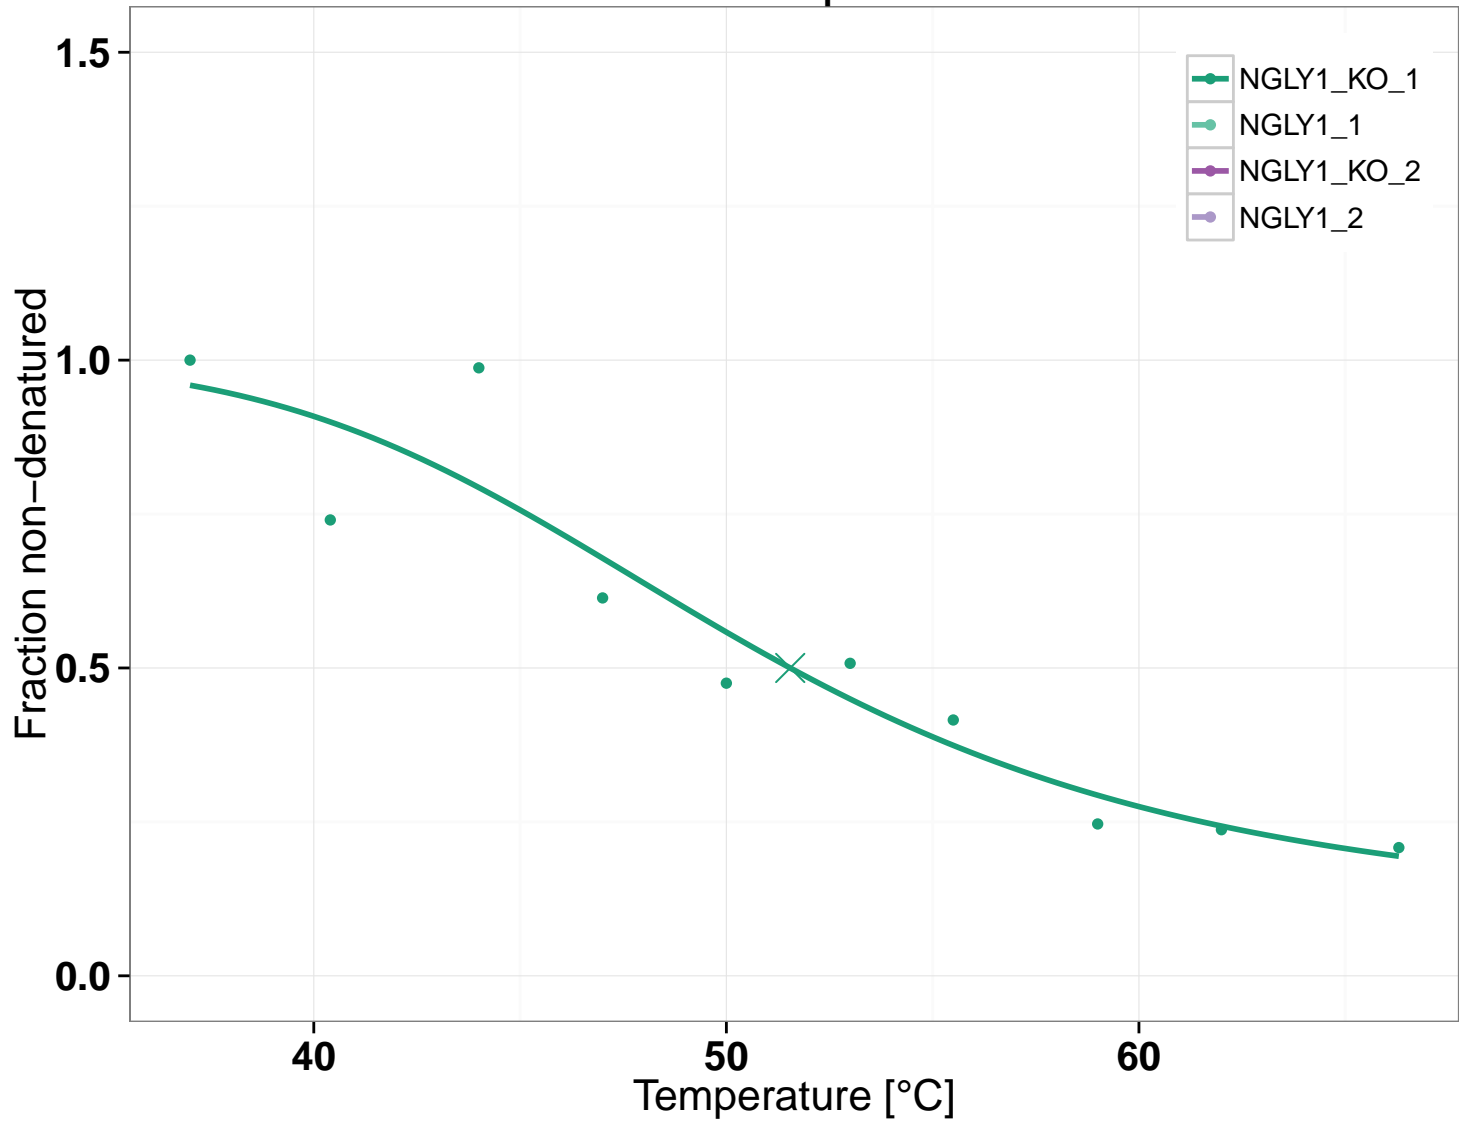

|            | meltPoint | slope | plateau | R2   |
|------------|-----------|-------|---------|------|
| NGLY1_KO_1 | 51.55     | -0.04 | 0.09    | 0.89 |
| NGLY1_1    | -         | -     | -       | -    |
| NGLY1_KO_2 | -         | -     | -       | -    |
| NGLY1_2    | -         | -     | -       | -    |

Supplement: Supplementary file 7392 [file 1]

# IPI00871281.1|PRC1

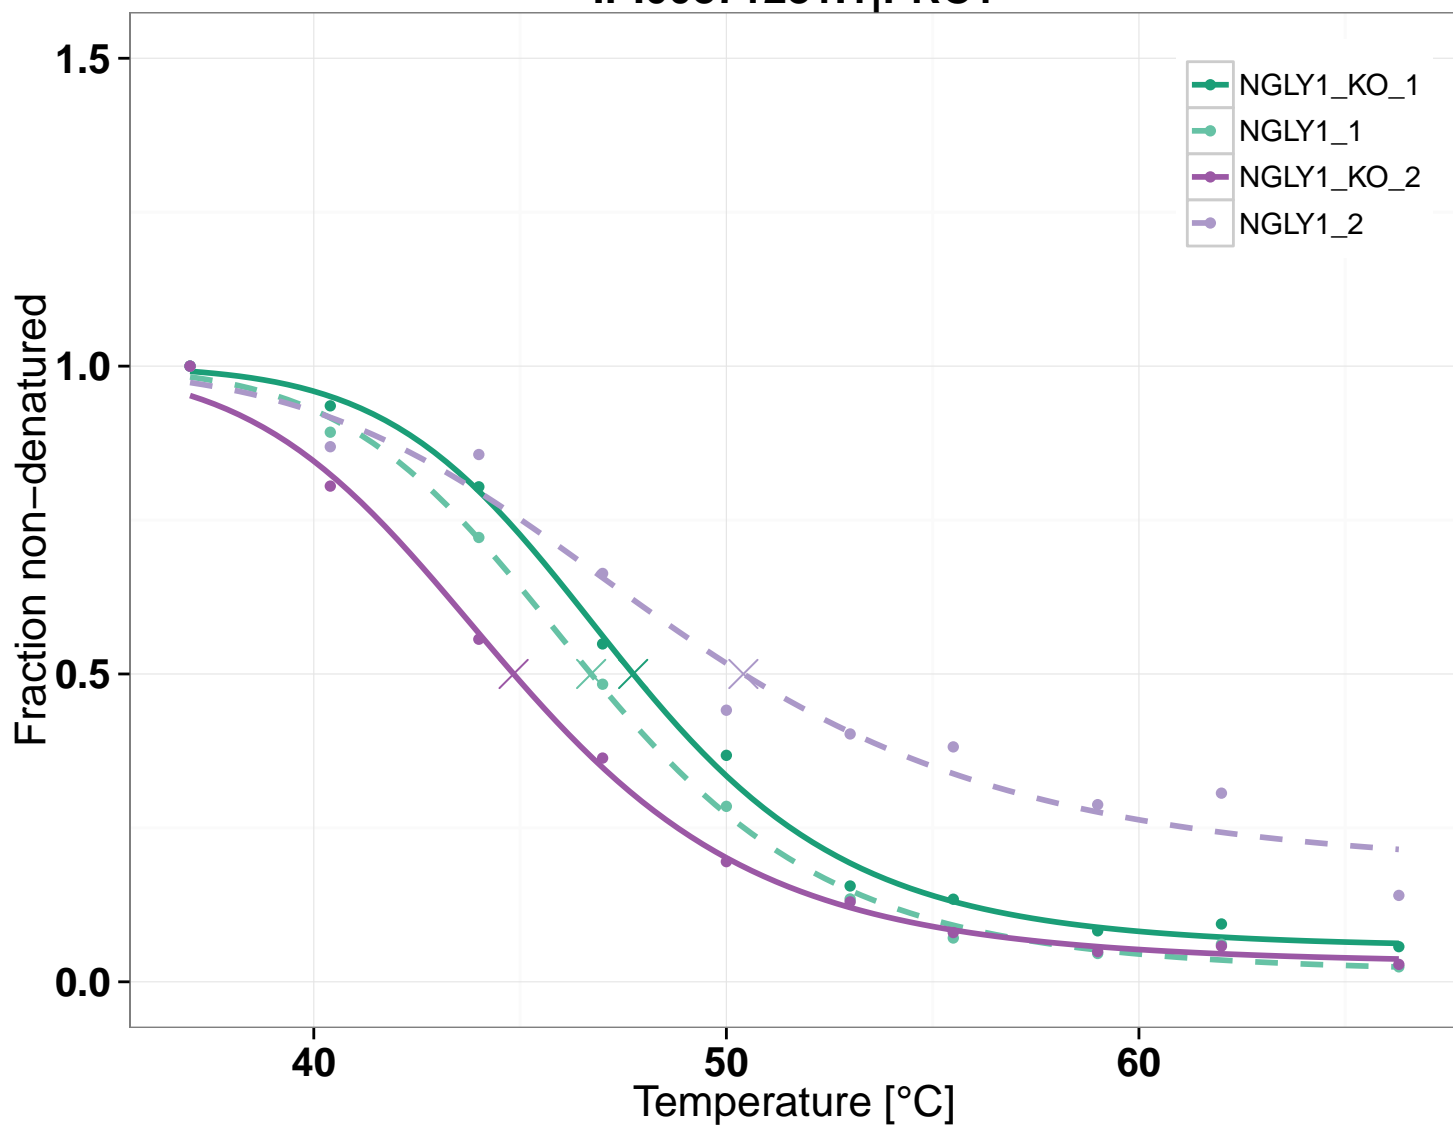

|            | meltPoint | slope  | plateau | R2   |
|------------|-----------|--------|---------|------|
| NGLY1_KO_1 | 47.74     | -0.085 | 0.05    | 1    |
| NGLY1_1    | 46.72     | -0.083 | 0.01    | 1    |
| NGLY1_KO_2 | 44.84     | -0.079 | 0.03    | 1    |
| NGLY1_2    | 50.41     | -0.048 | 0.17    | 0.97 |

Supplement: Supplementary file 7393 [file 1]

IPI00783931.3|COL18A1

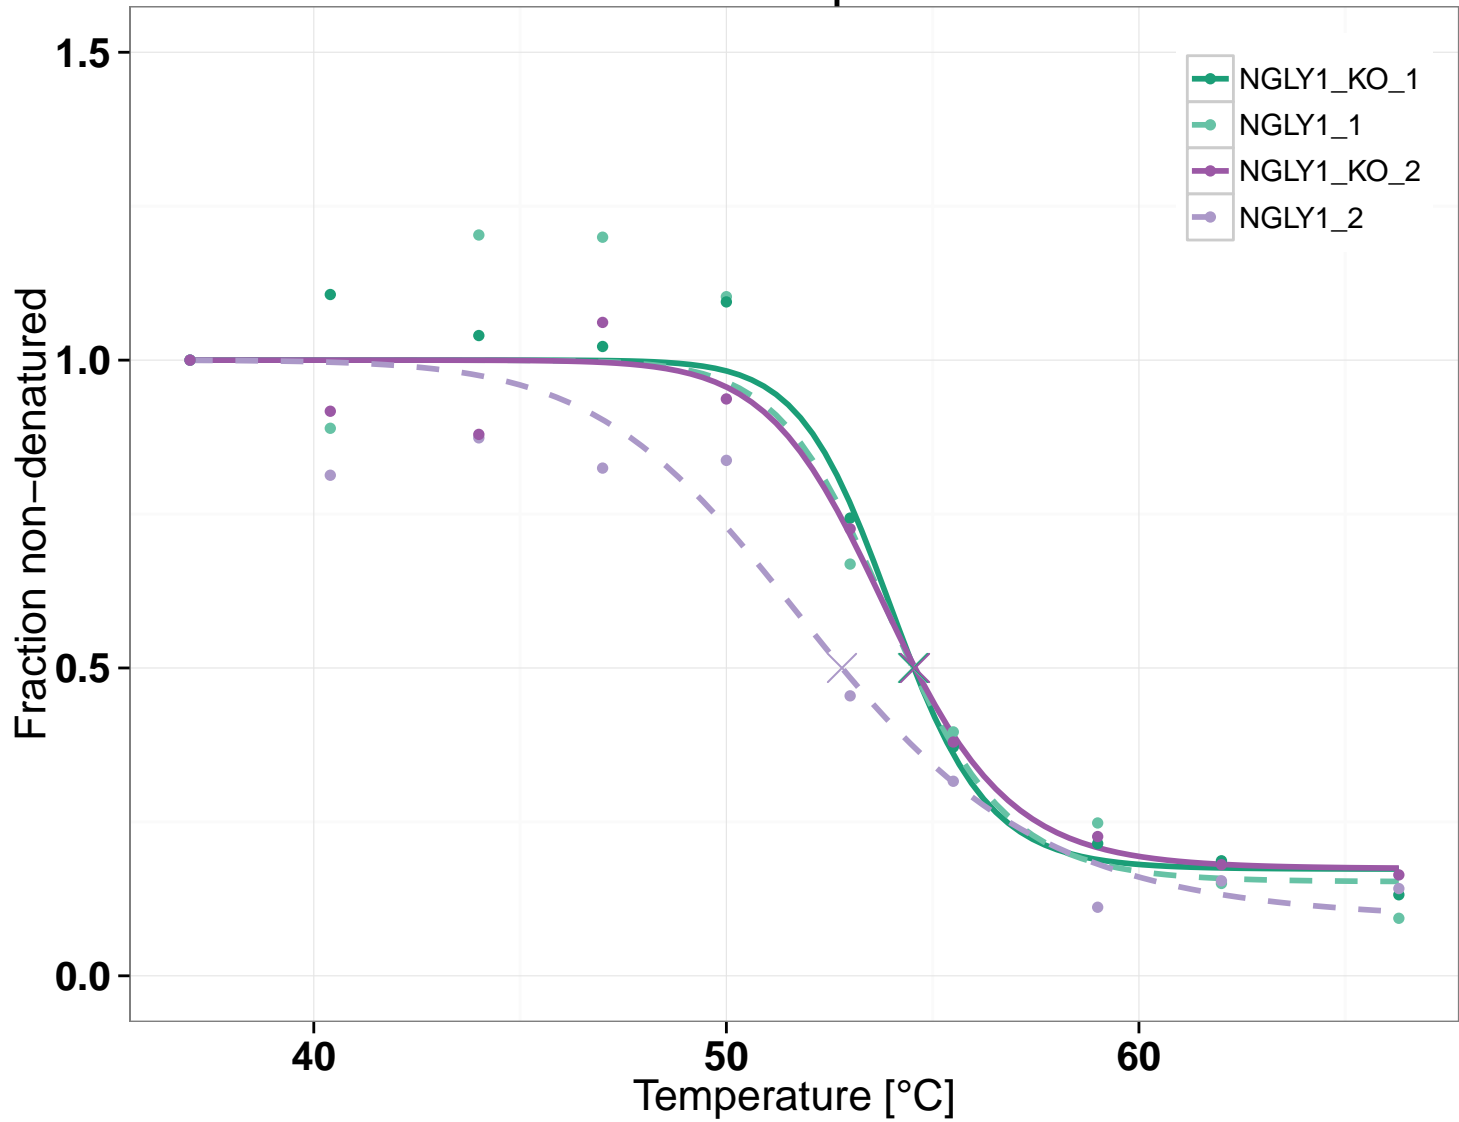

|            | meltPoint | slope  | plateau | R2   |
|------------|-----------|--------|---------|------|
| NGLY1_KO_1 | 54.54     | -0.18  | 0.17    | 0.98 |
| NGLY1_1    | 54.52     | -0.15  | 0.15    | 0.93 |
| NGLY1_KO_2 | 54.57     | -0.14  | 0.17    | 0.98 |
| NGLY1_2    | 52.8      | -0.084 | 0.09    | 0.94 |

Supplement: Supplementary file 7394 [file 1]

# IPI00006675.2|ABCC4

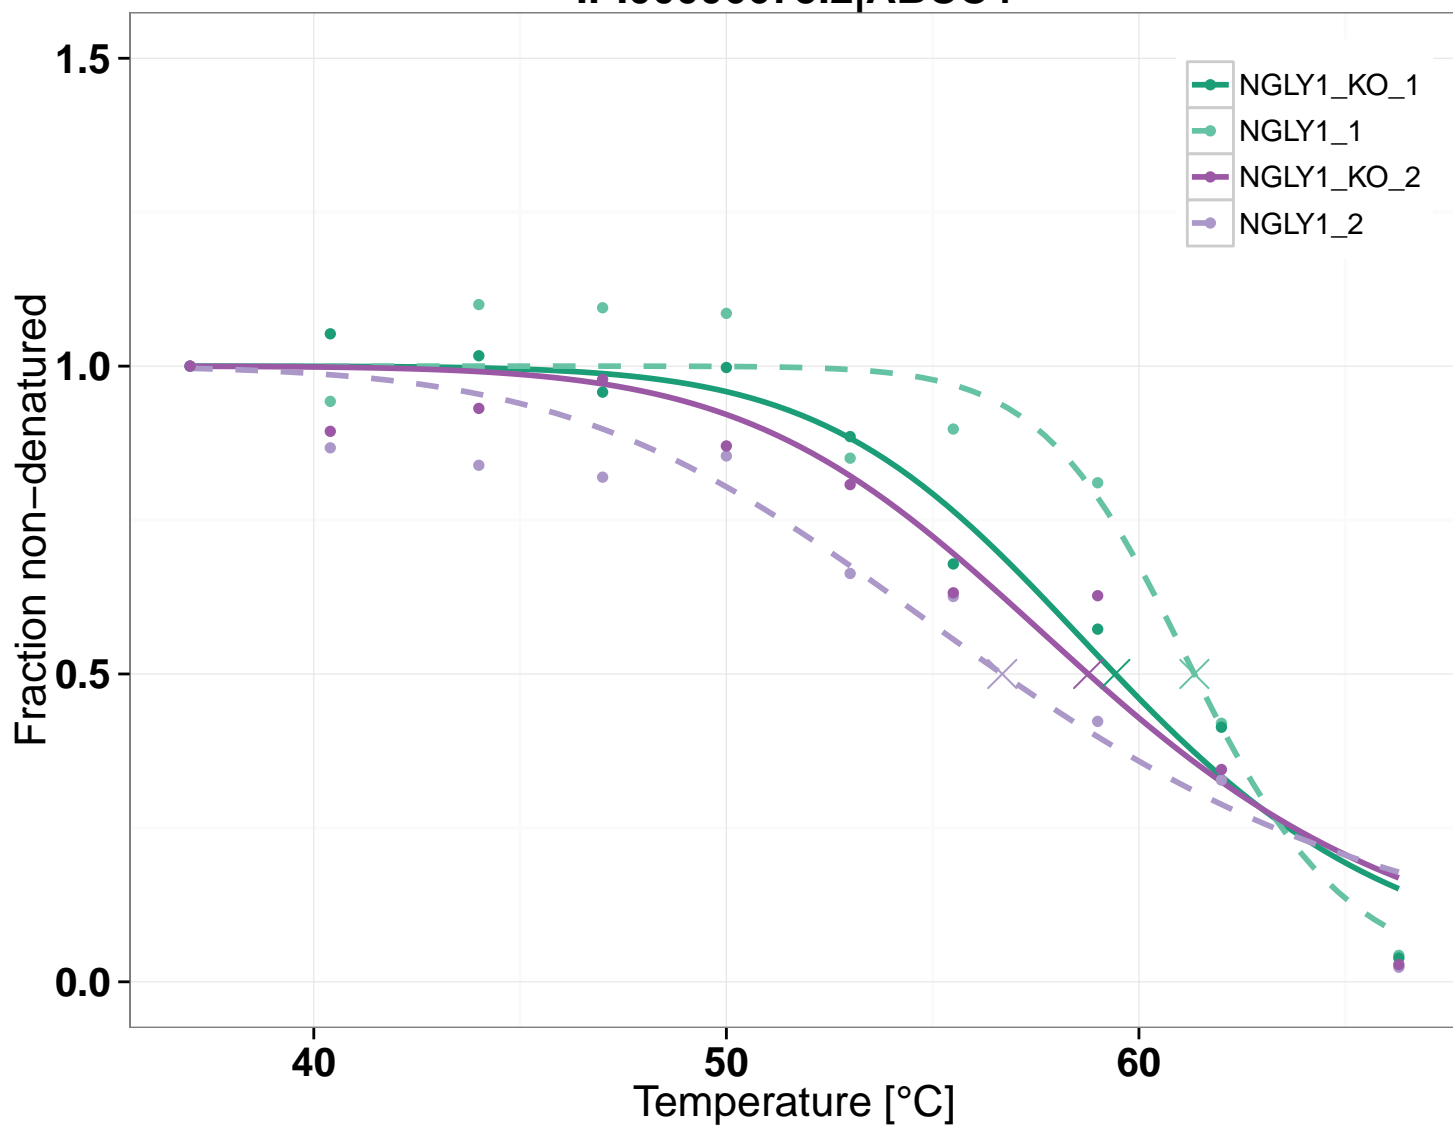

|            | meltPoint | slope  | plateau | R2   |
|------------|-----------|--------|---------|------|
| NGLY1_KO_1 | 59.43     | -0.071 | 0       | 0.97 |
| NGLY1_1    | 61.34     | -0.13  | 0       | 0.94 |
| NGLY1_KO_2 | 58.77     | -0.061 | 0       | 0.93 |
| NGLY1_2    | 56.69     | -0.048 | 0       | 0.92 |

Supplement: Supplementary file 7395 [file 1]

IPI00160369.5|PICK1

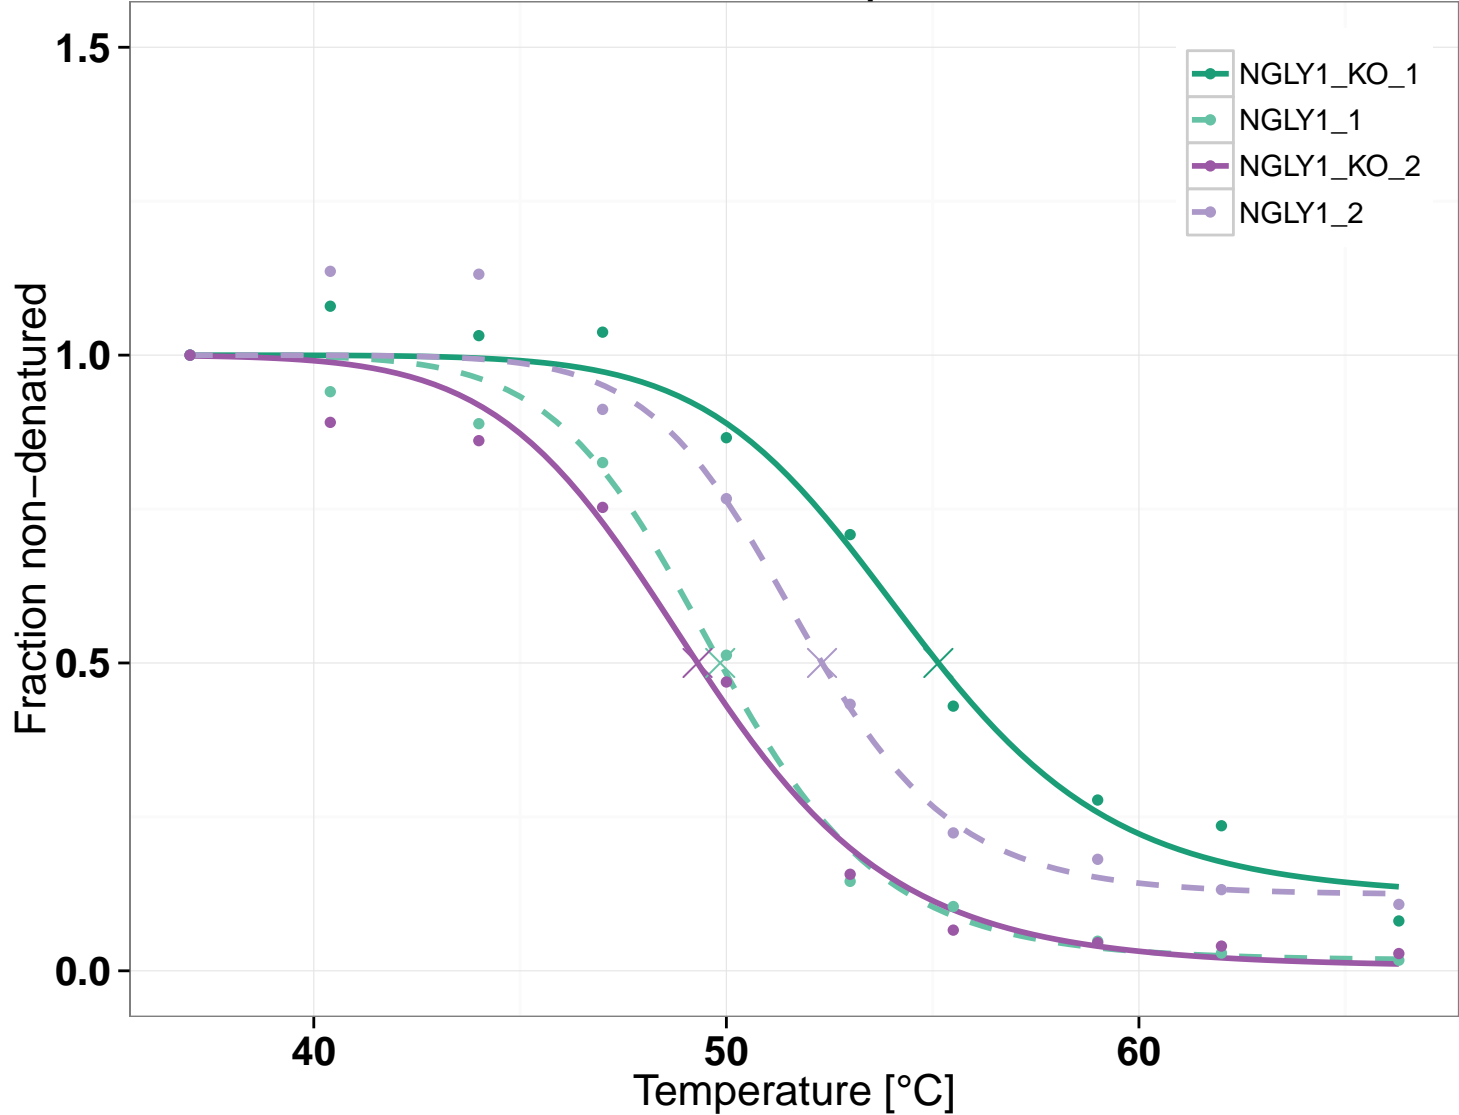

|            | meltPoint | slope  | plateau | R2   |
|------------|-----------|--------|---------|------|
| NGLY1_KO_1 | 55.14     | -0.089 | 0.12    | 0.98 |
| NGLY1_1    | 49.85     | -0.12  | 0.02    | 0.99 |
| NGLY1_KO_2 | 49.3      | -0.1   | 0.01    | 0.99 |
| NGLY1_2    | 52.32     | -0.12  | 0.12    | 0.98 |

Supplement: Supplementary file 7396 [file 1]

IPI00791720.1|SAMD4B

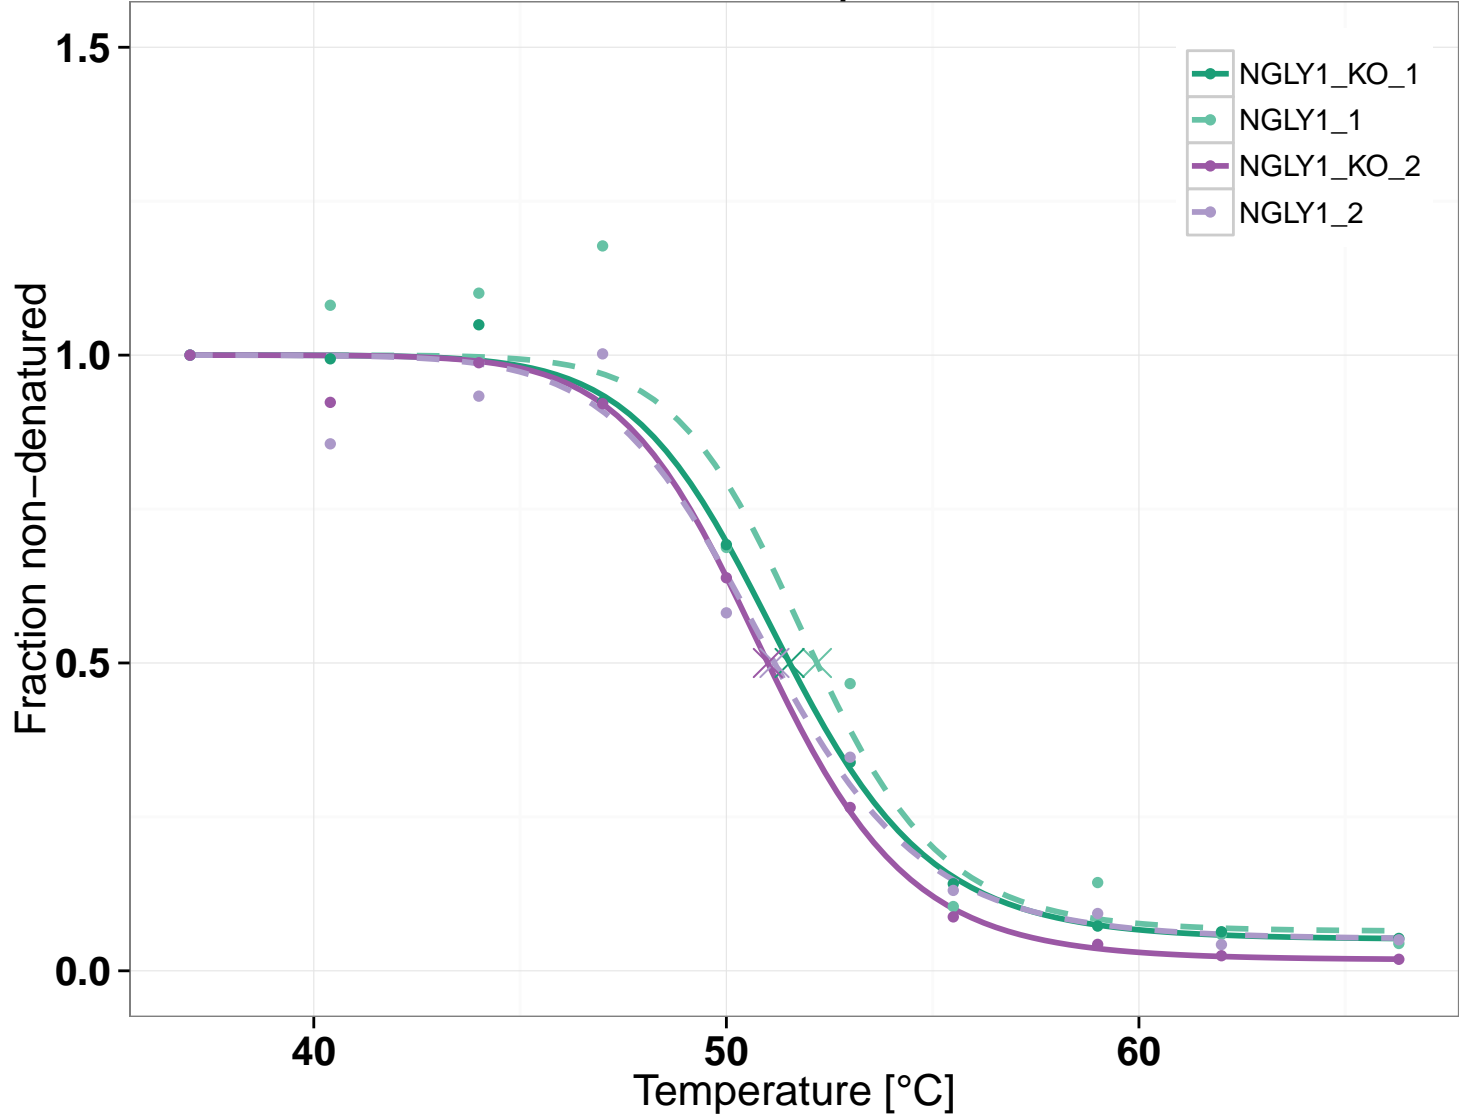

|            | meltPoint | slope | plateau | R2   |
|------------|-----------|-------|---------|------|
| NGLY1_KO_1 | 51.53     | -0.13 | 0.05    | 1    |
| NGLY1_1    | 52.2      | -0.14 | 0.06    | 0.96 |
| NGLY1_KO_2 | 51.01     | -0.14 | 0.02    | 1    |
| NGLY1_2    | 51.17     | -0.12 | 0.05    | 0.98 |

Supplement: Supplementary file 7397 [file 1]

# IPI00293464.5|DDB1

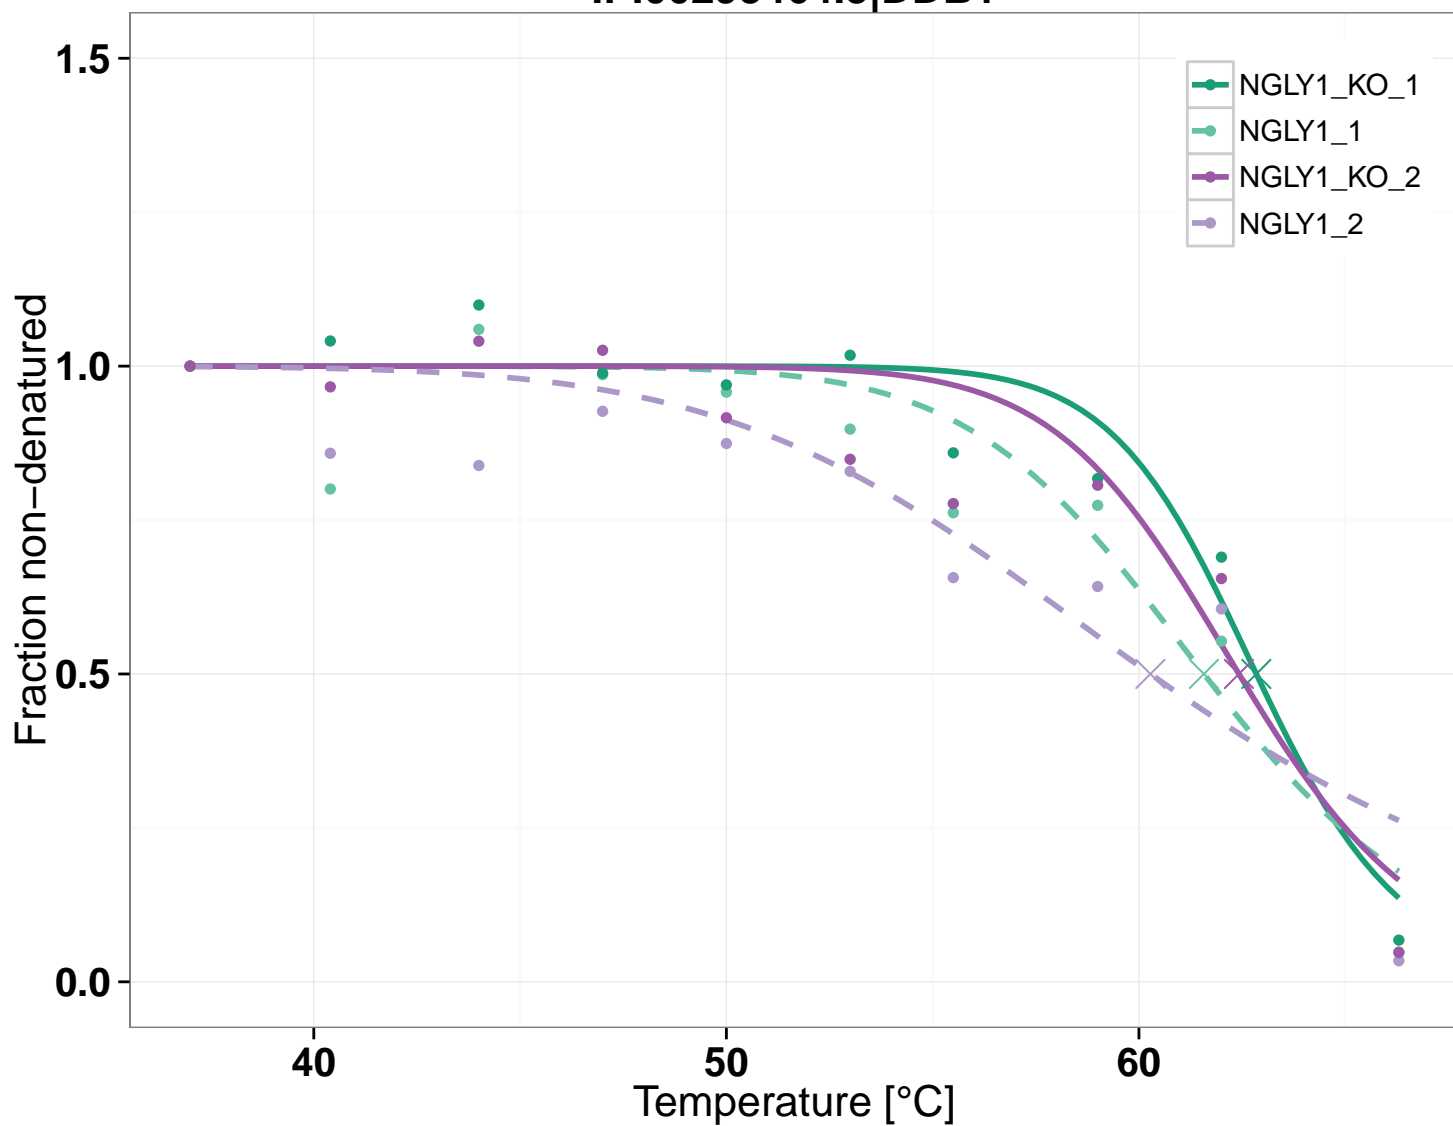

|            | meltPoint | slope  | plateau | R2   |
|------------|-----------|--------|---------|------|
| NGLY1_KO_1 | 62.85     | -0.14  | 0       | 0.94 |
| NGLY1_1    | 61.58     | -0.087 | 0       | 0.87 |
| NGLY1_KO_2 | 62.42     | -0.11  | 0       | 0.88 |
| NGLY1_2    | 60.28     | -0.049 | 0       | 0.79 |

Supplement: Supplementary file 7398 [file 1]

IPI00456630.6|FNDC3A

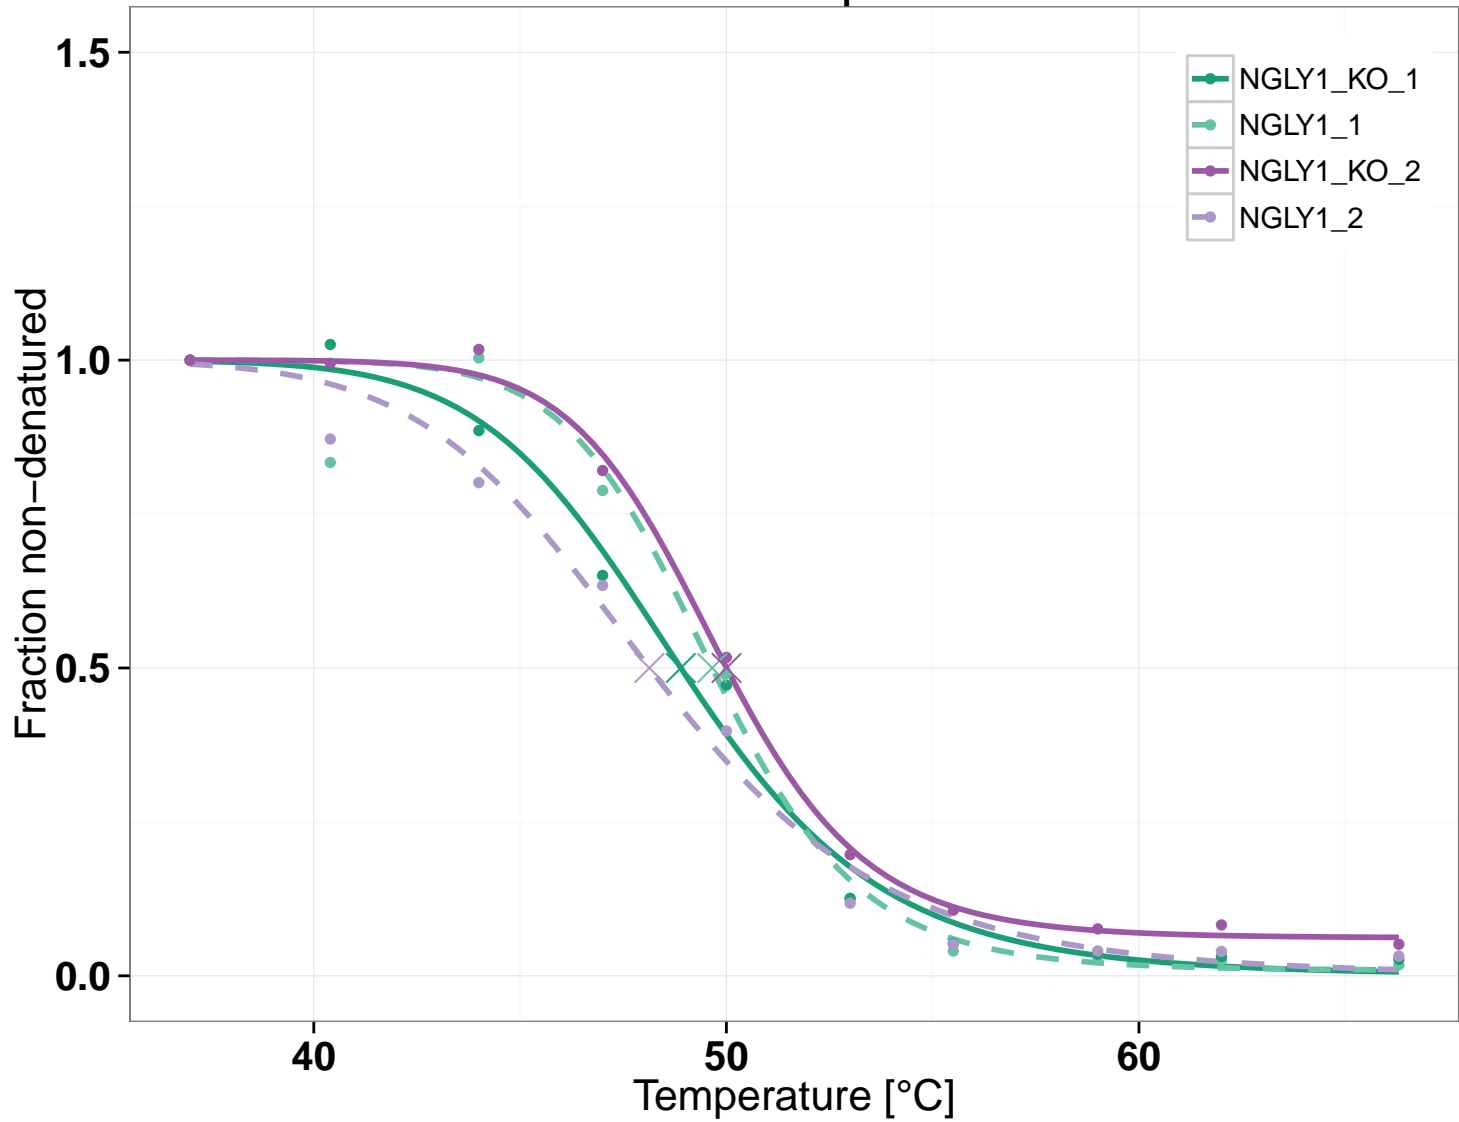

|            | meltPoint | slope  | plateau | R2   |
|------------|-----------|--------|---------|------|
| NGLY1_KO_1 | 48.9      | -0.1   | 0       | 0.99 |
| NGLY1_1    | 49.66     | -0.14  | 0.01    | 0.98 |
| NGLY1_KO_2 | 50        | -0.13  | 0.06    | 1    |
| NGLY1_2    | 48.13     | -0.088 | 0       | 0.99 |

Supplement: Supplementary file 7399 [file 1]

IPI00333913.8|NAG

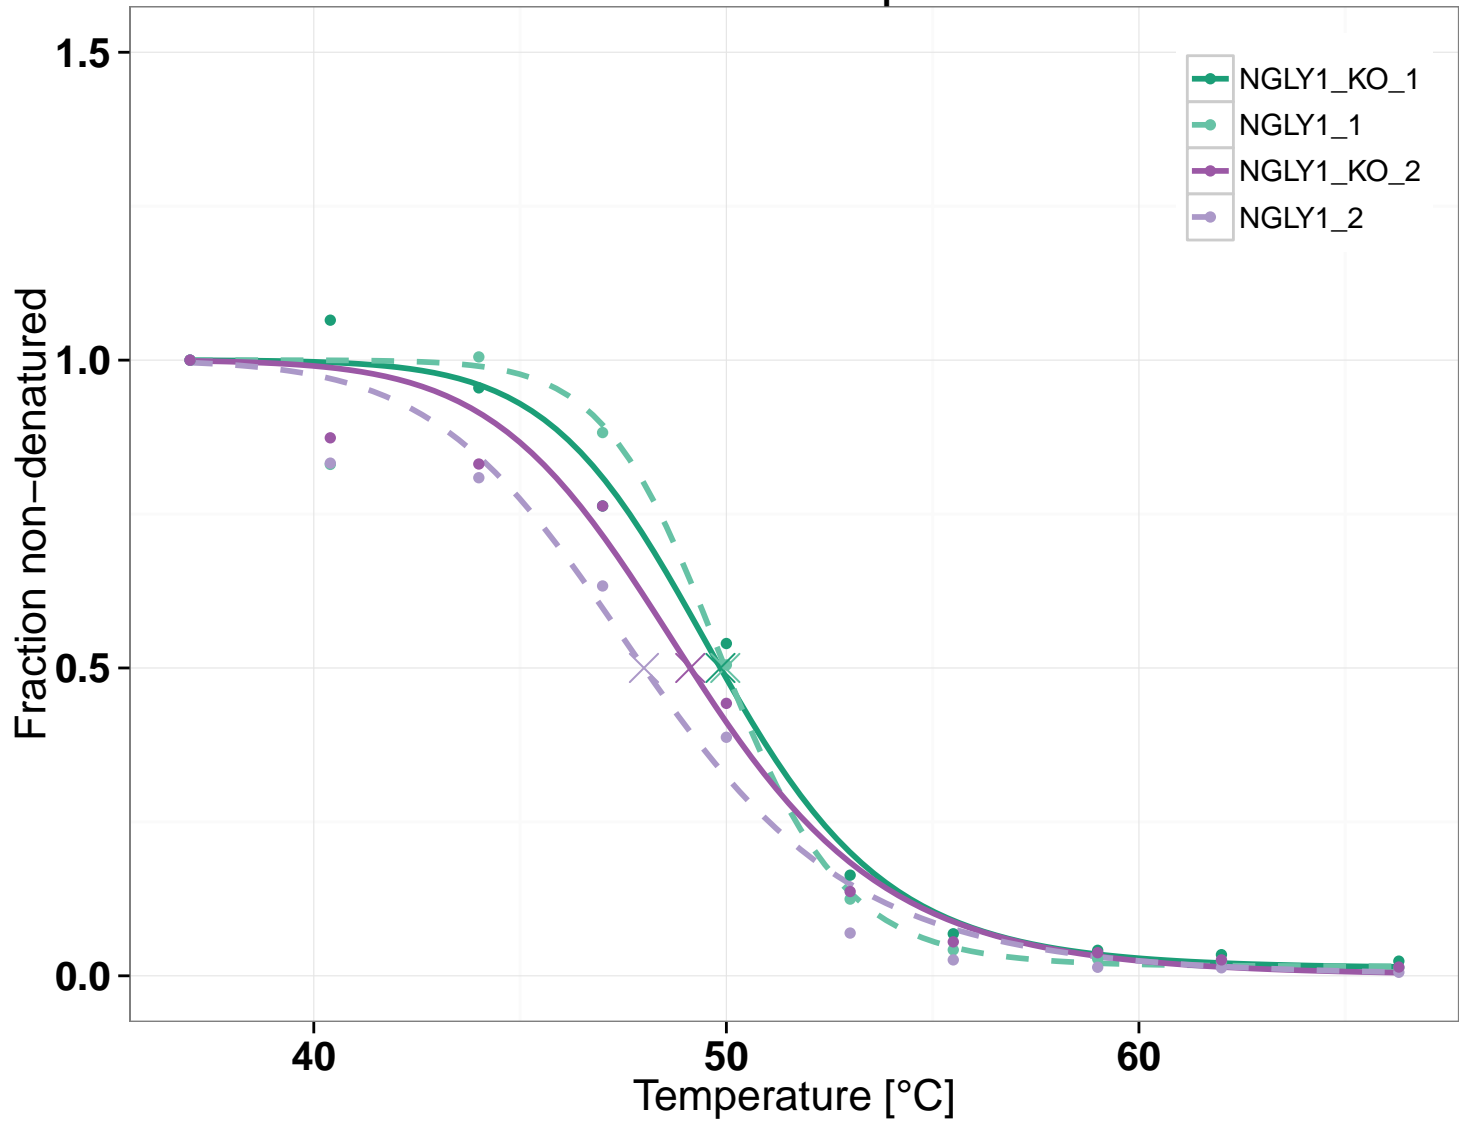

|            | meltPoint | slope  | plateau | R2   |
|------------|-----------|--------|---------|------|
| NGLY1_KO_1 | 49.86     | -0.12  | 0.01    | 0.99 |
| NGLY1_1    | 49.97     | -0.17  | 0.02    | 0.98 |
| NGLY1_KO_2 | 49.13     | -0.1   | 0       | 0.98 |
| NGLY1_2    | 48        | -0.097 | 0       | 0.98 |

Supplement: Supplementary file 7400 [file 1]

# IPI00000811.2|PSMB6

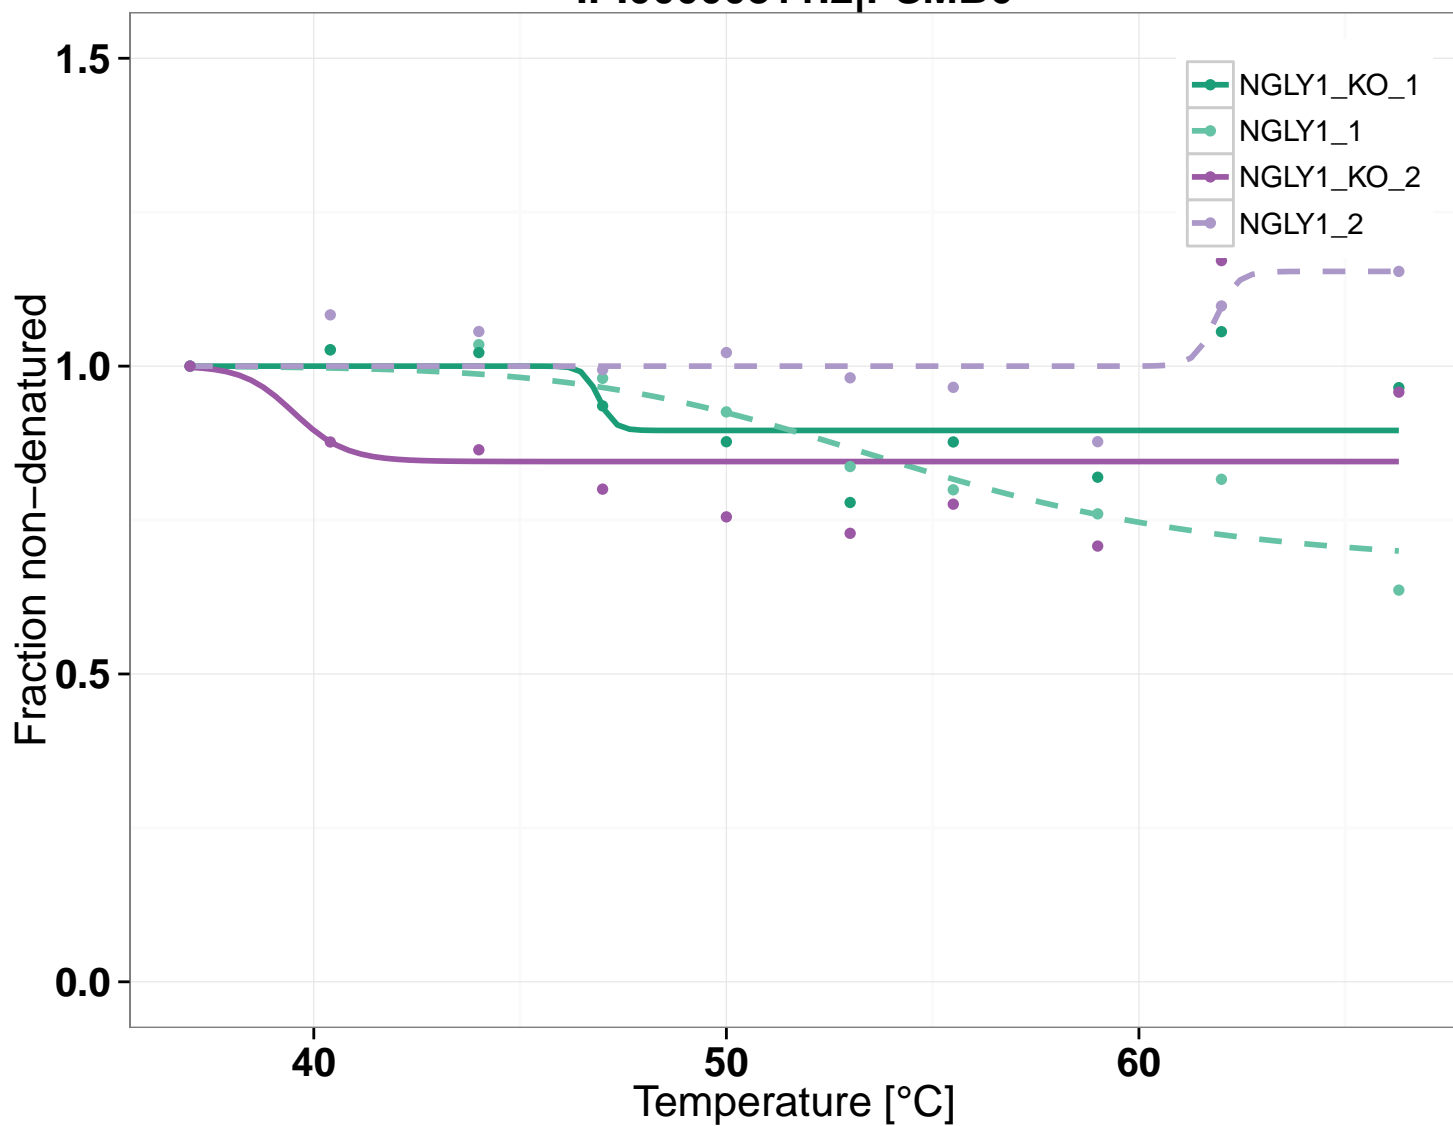

|            | meltPoint | slope  | plateau | R2   |
|------------|-----------|--------|---------|------|
| NGLY1_KO_1 | –         | –0.14  | 0.9     | 0.35 |
| NGLY1_1    | –         | –0.021 | 0.67    | 0.89 |
| NGLY1_KO_2 | –         | –0.062 | 0.84    | 0.11 |
| NGLY1_2    | –         | 0.15   | 1.15    | 0.51 |

Supplement: Supplementary file 7401 [file 1]

IPI00012197.1|XTP3TPA

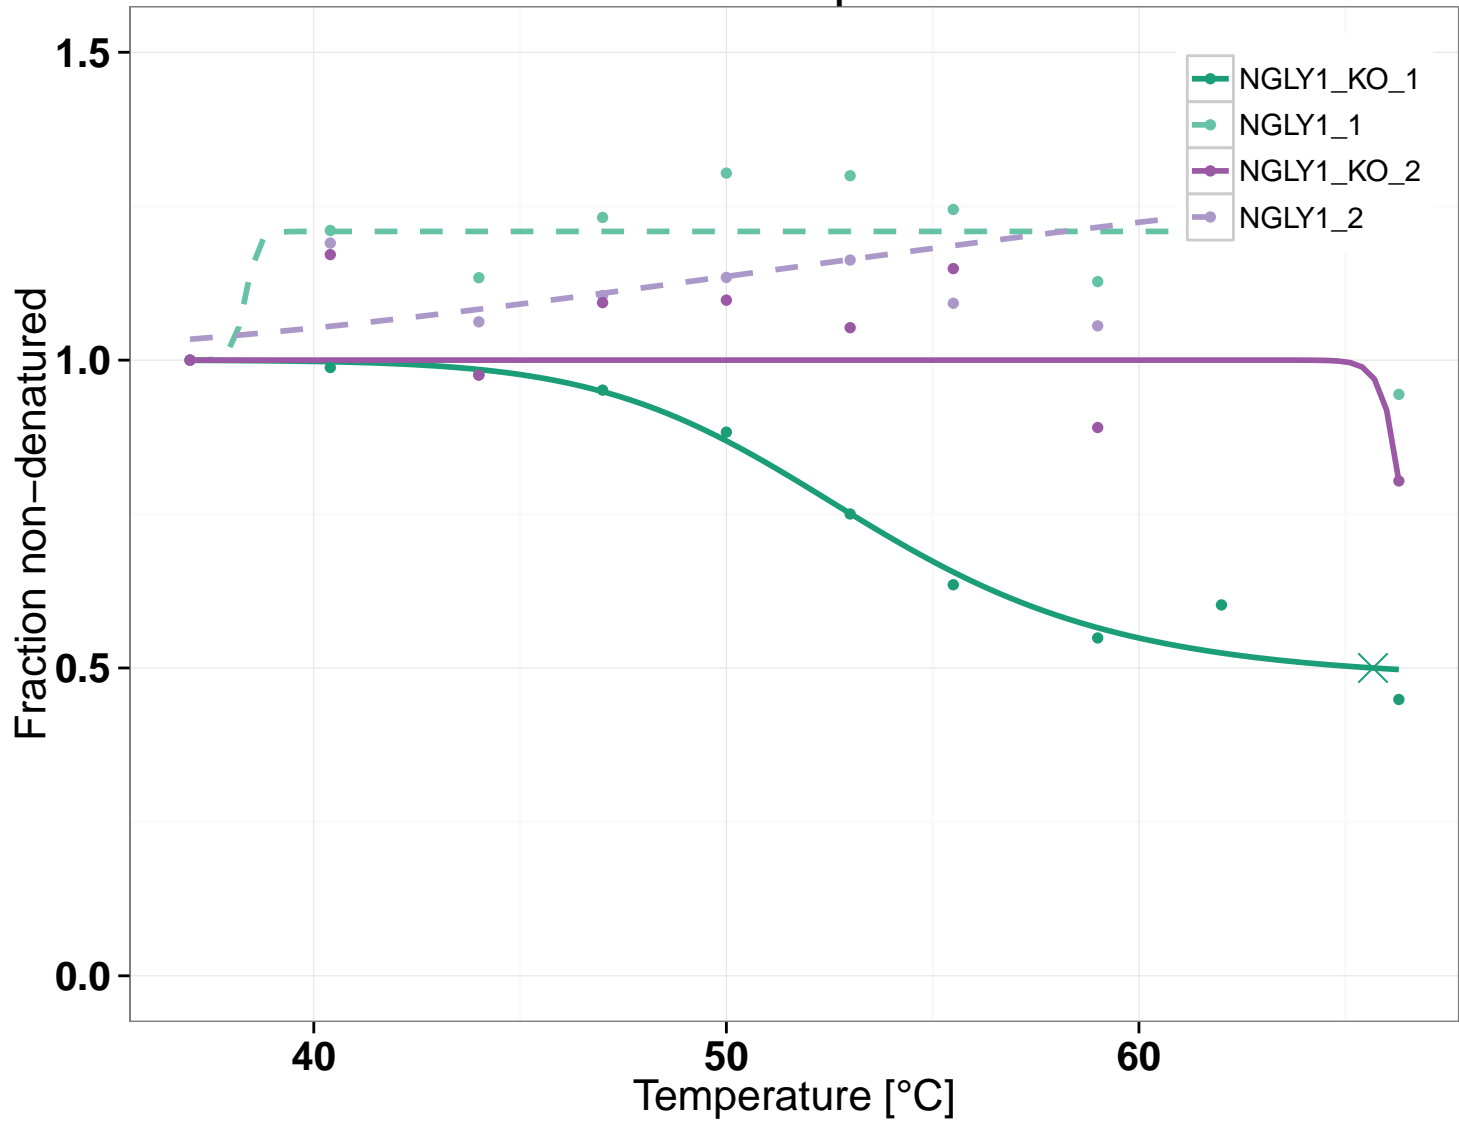

|            | meltPoint | slope  | plateau | R2   |
|------------|-----------|--------|---------|------|
| NGLY1_KO_1 | 65.67     | -0.041 | 0.48    | 0.98 |
| NGLY1_1    | -         | 0.34   | 1.21    | 0.23 |
| NGLY1_KO_2 | -         | -      | 0       | 0.1  |
| NGLY1_2    | -         | 0.0092 | 1.5     | 0.31 |

Supplement: Supplementary file 7402 [file 1]

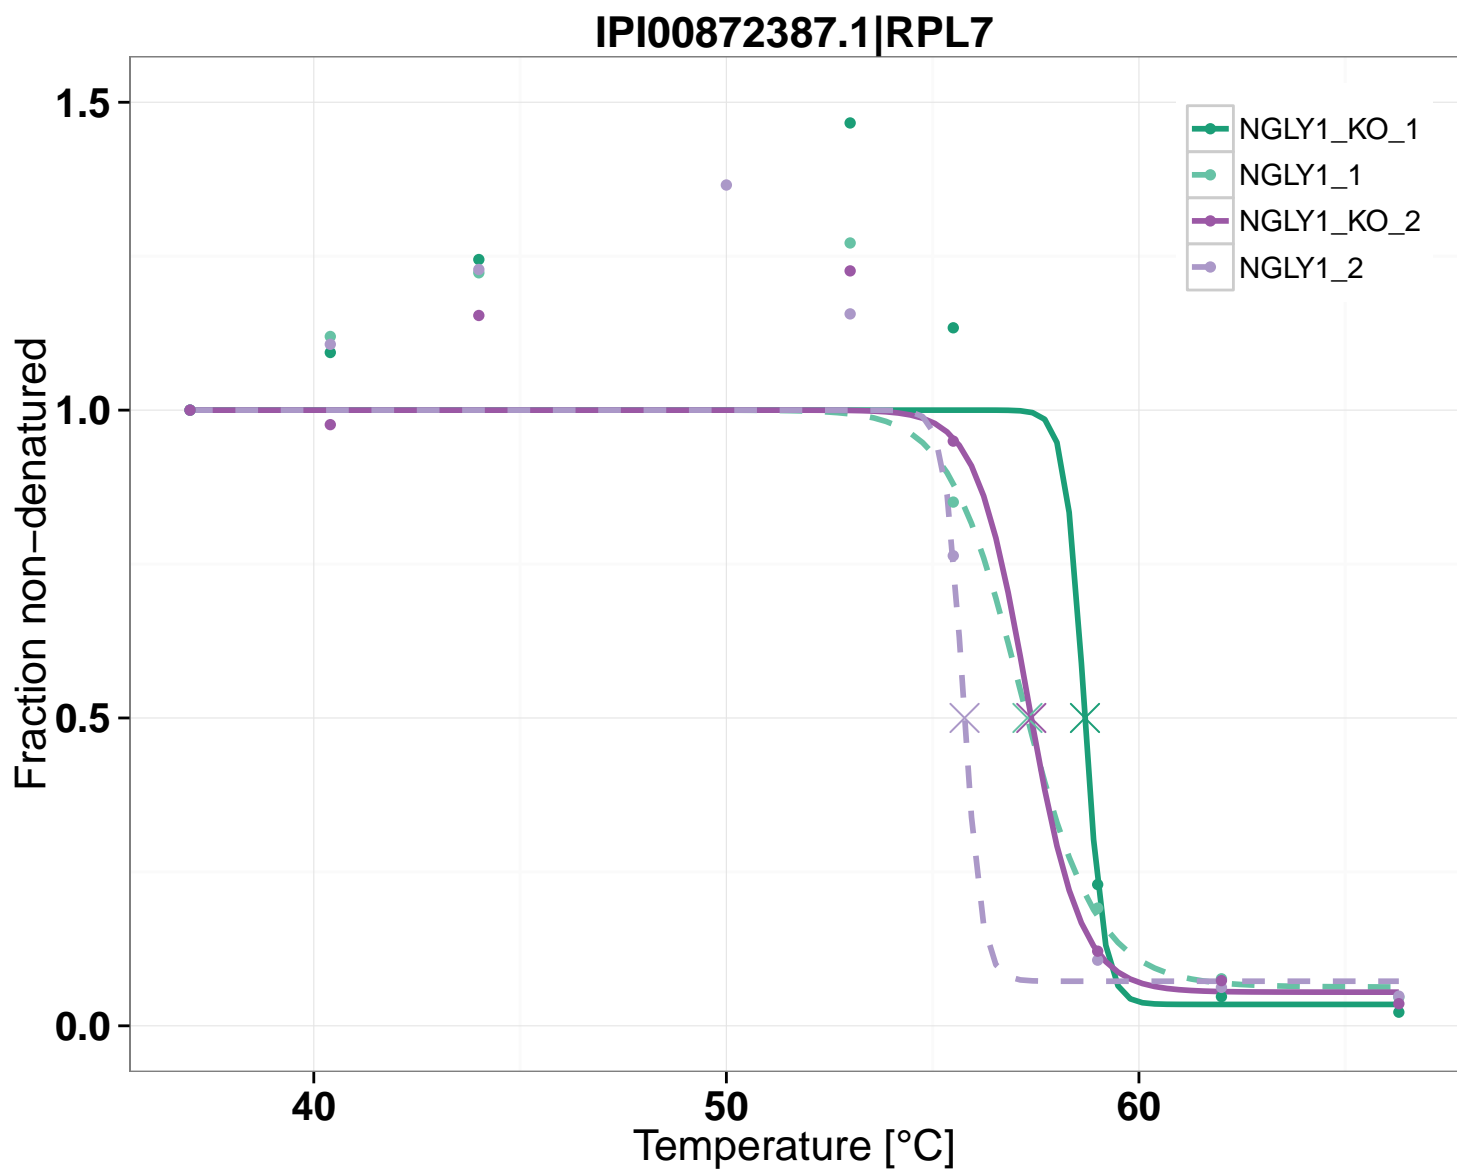

|            | meltPoint | slope | plateau | R2   |
|------------|-----------|-------|---------|------|
| NGLY1_KO_1 | 58.69     | -1    | 0.03    | 0.64 |
| NGLY1_1    | 57.3      | -0.26 | 0.06    | 0.76 |
| NGLY1_KO_2 | 57.39     | -0.38 | 0.05    | 0.78 |
| NGLY1_2    | 55.77     | -1    | 0.07    | 0.83 |

Supplement: Supplementary file 7403 [file 1]

IPI00103026.1|PRMT3

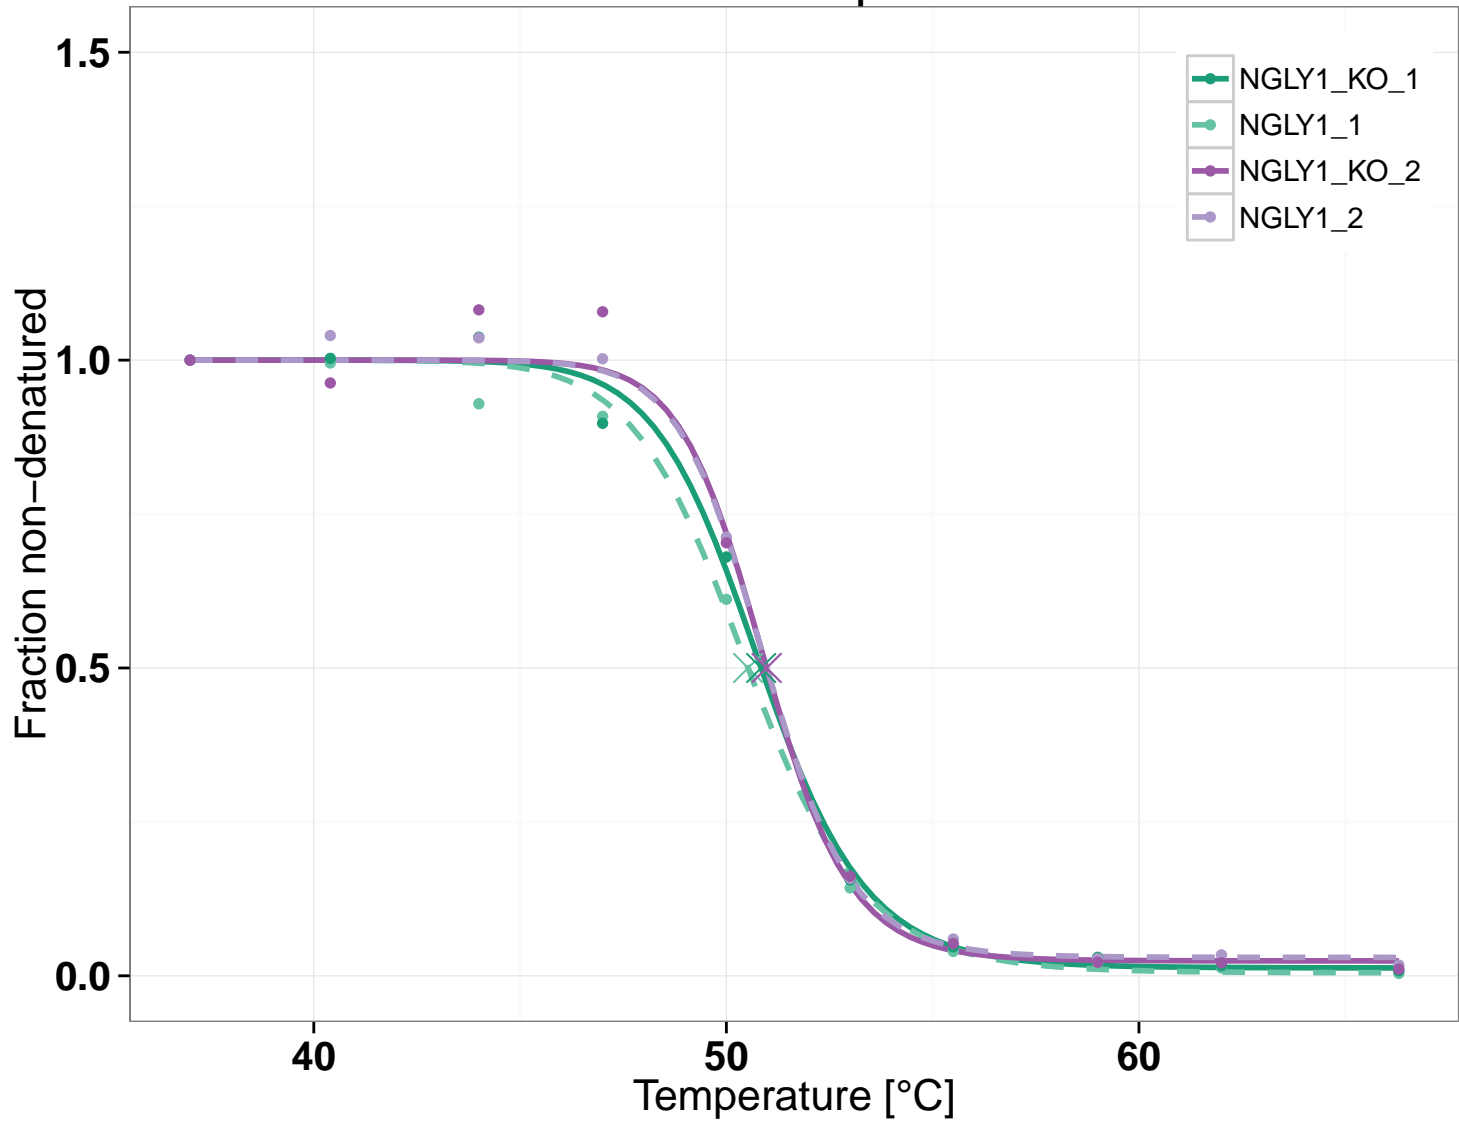

|            | meltPoint | slope | plateau | R2   |
|------------|-----------|-------|---------|------|
| NGLY1_KO_1 | 50.84     | -0.19 | 0.01    | 1    |
| NGLY1_1    | 50.53     | -0.18 | 0       | 1    |
| NGLY1_KO_2 | 50.97     | -0.24 | 0.02    | 0.99 |
| NGLY1_2    | 50.98     | -0.23 | 0.03    | 1    |

Supplement: Supplementary file 7404 [file 1]

# IPI00305286.1|HPGD

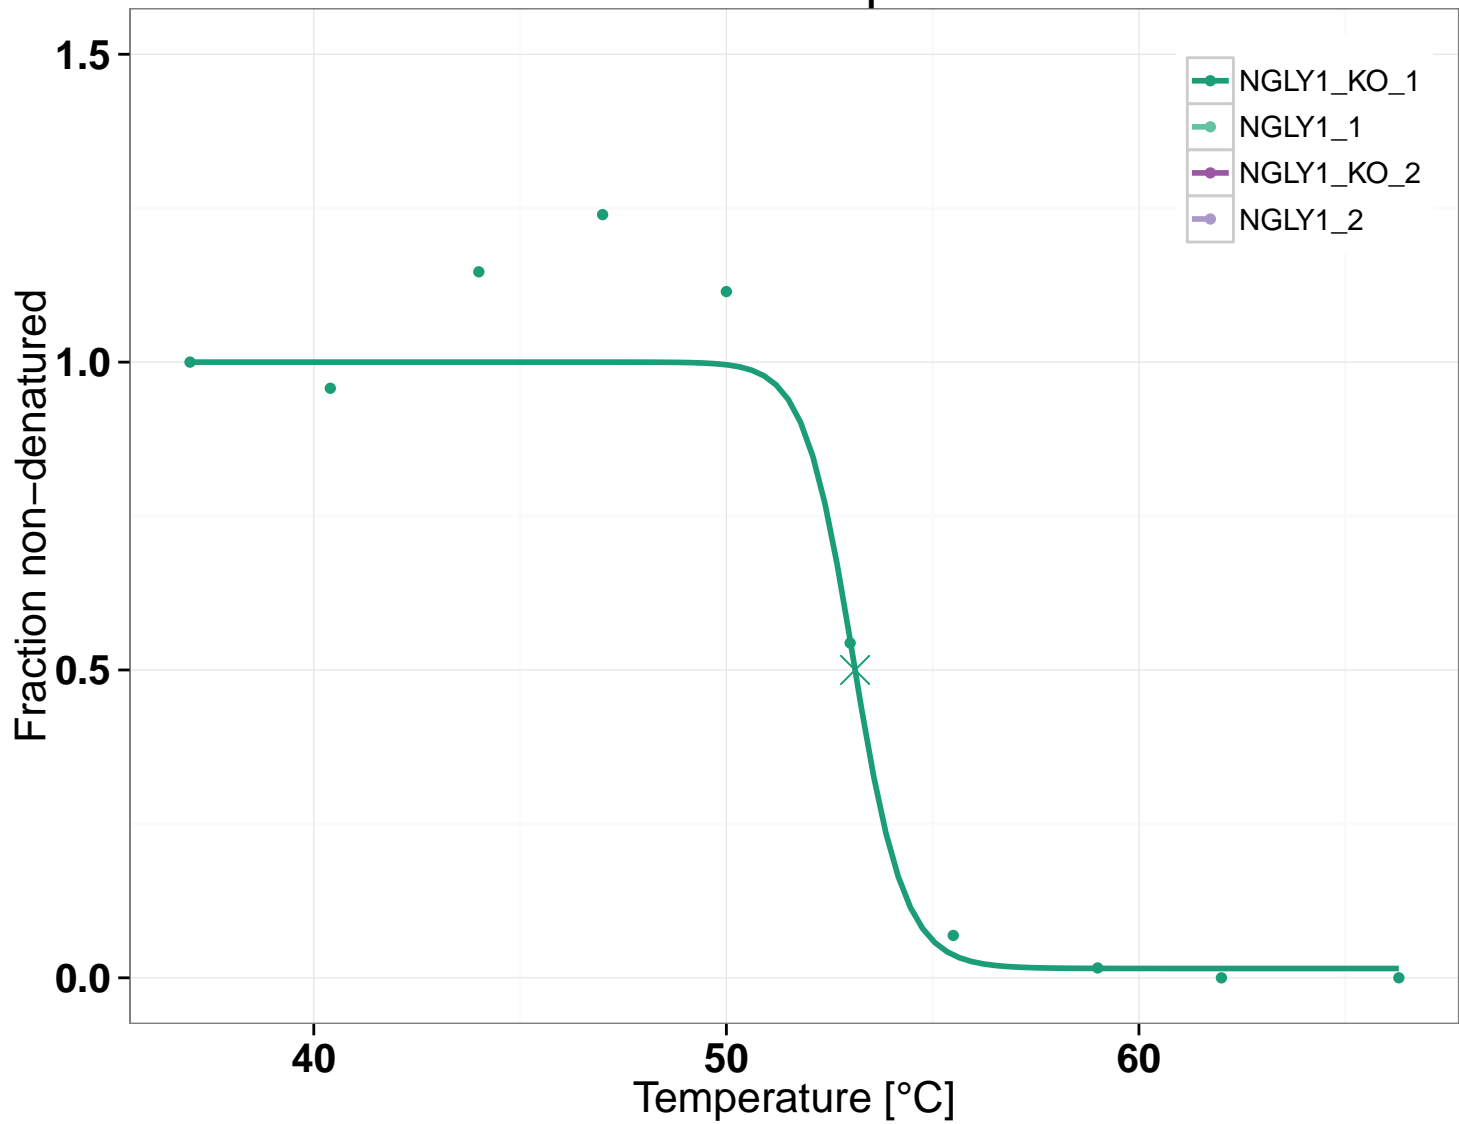

|            | meltPoint | slope | plateau | R2   |
|------------|-----------|-------|---------|------|
| NGLY1_KO_1 | 53.12     | -0.41 | 0.02    | 0.96 |
| NGLY1_1    | -         | -     | -       | -    |
| NGLY1_KO_2 | -         | -     | -       | -    |
| NGLY1_2    | -         | -     | -       | -    |

Supplement: Supplementary file 7405 [file 1]

# IPI00030554.5|MSL2

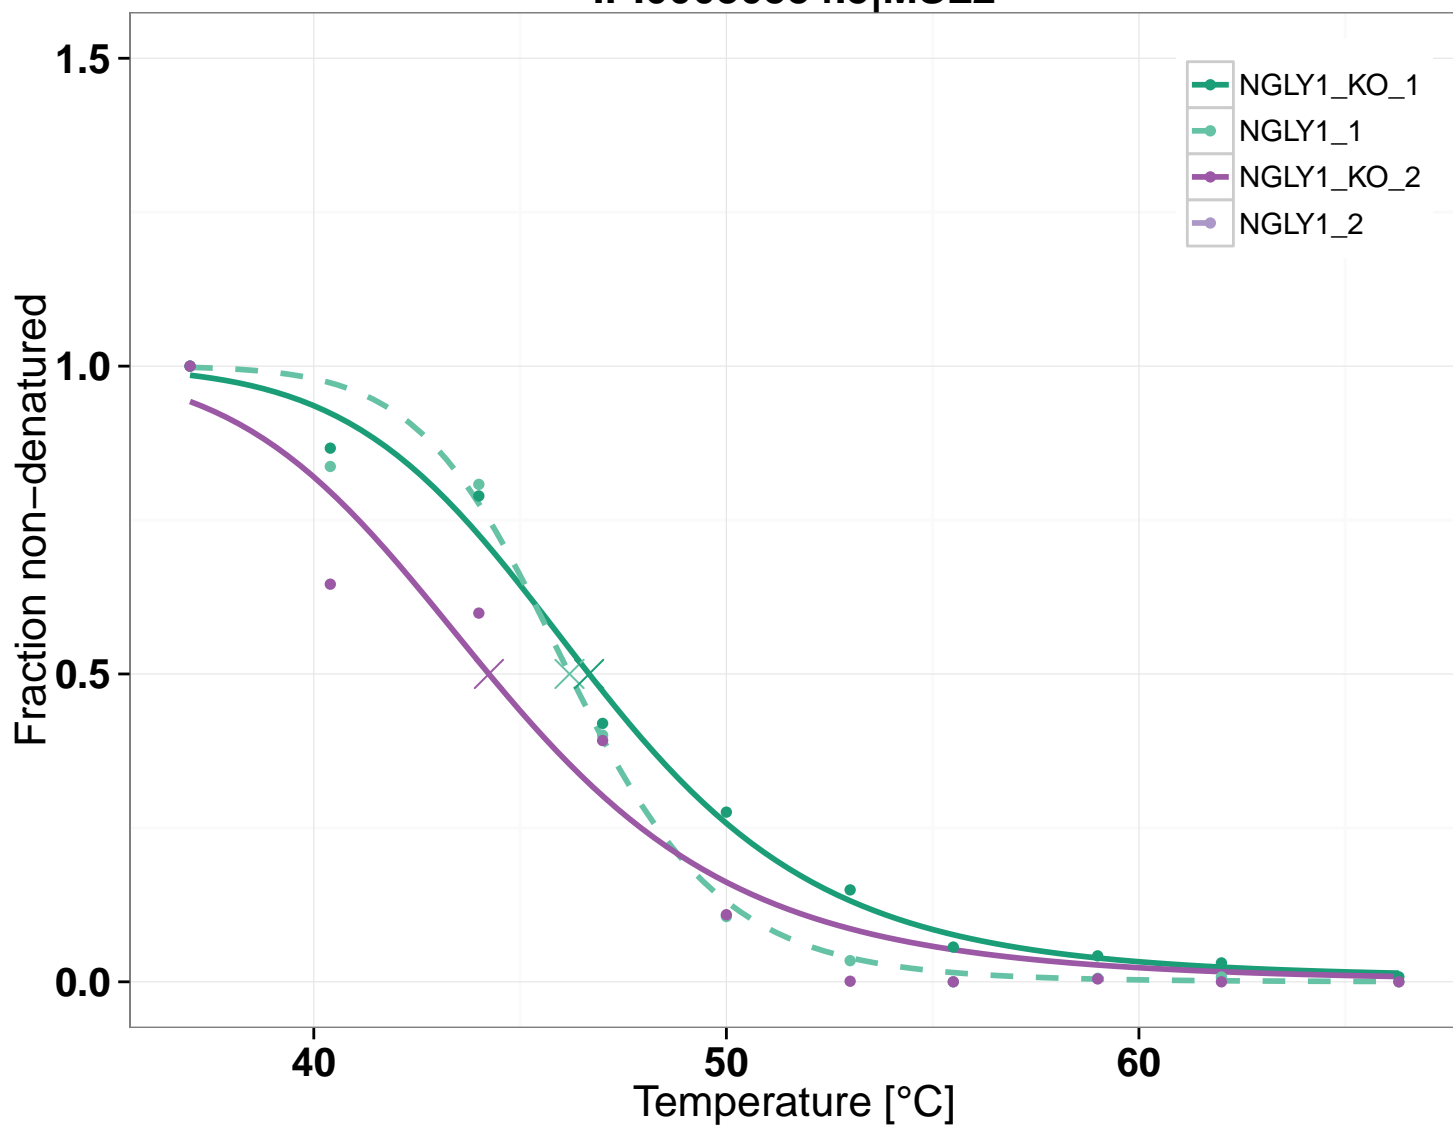

|            | meltPoint | slope  | plateau | R2   |
|------------|-----------|--------|---------|------|
| NGLY1_KO_1 | 46.67     | -0.087 | 0.01    | 0.99 |
| NGLY1_1    | 46.2      | -0.14  | 0       | 0.99 |
| NGLY1_KO_2 | 44.24     | -0.082 | 0       | 0.95 |
| NGLY1_2    | -         | -      | -       | -    |

Supplement: Supplementary file 7406 [file 1]

IPI00743157.2|WHSC1L1

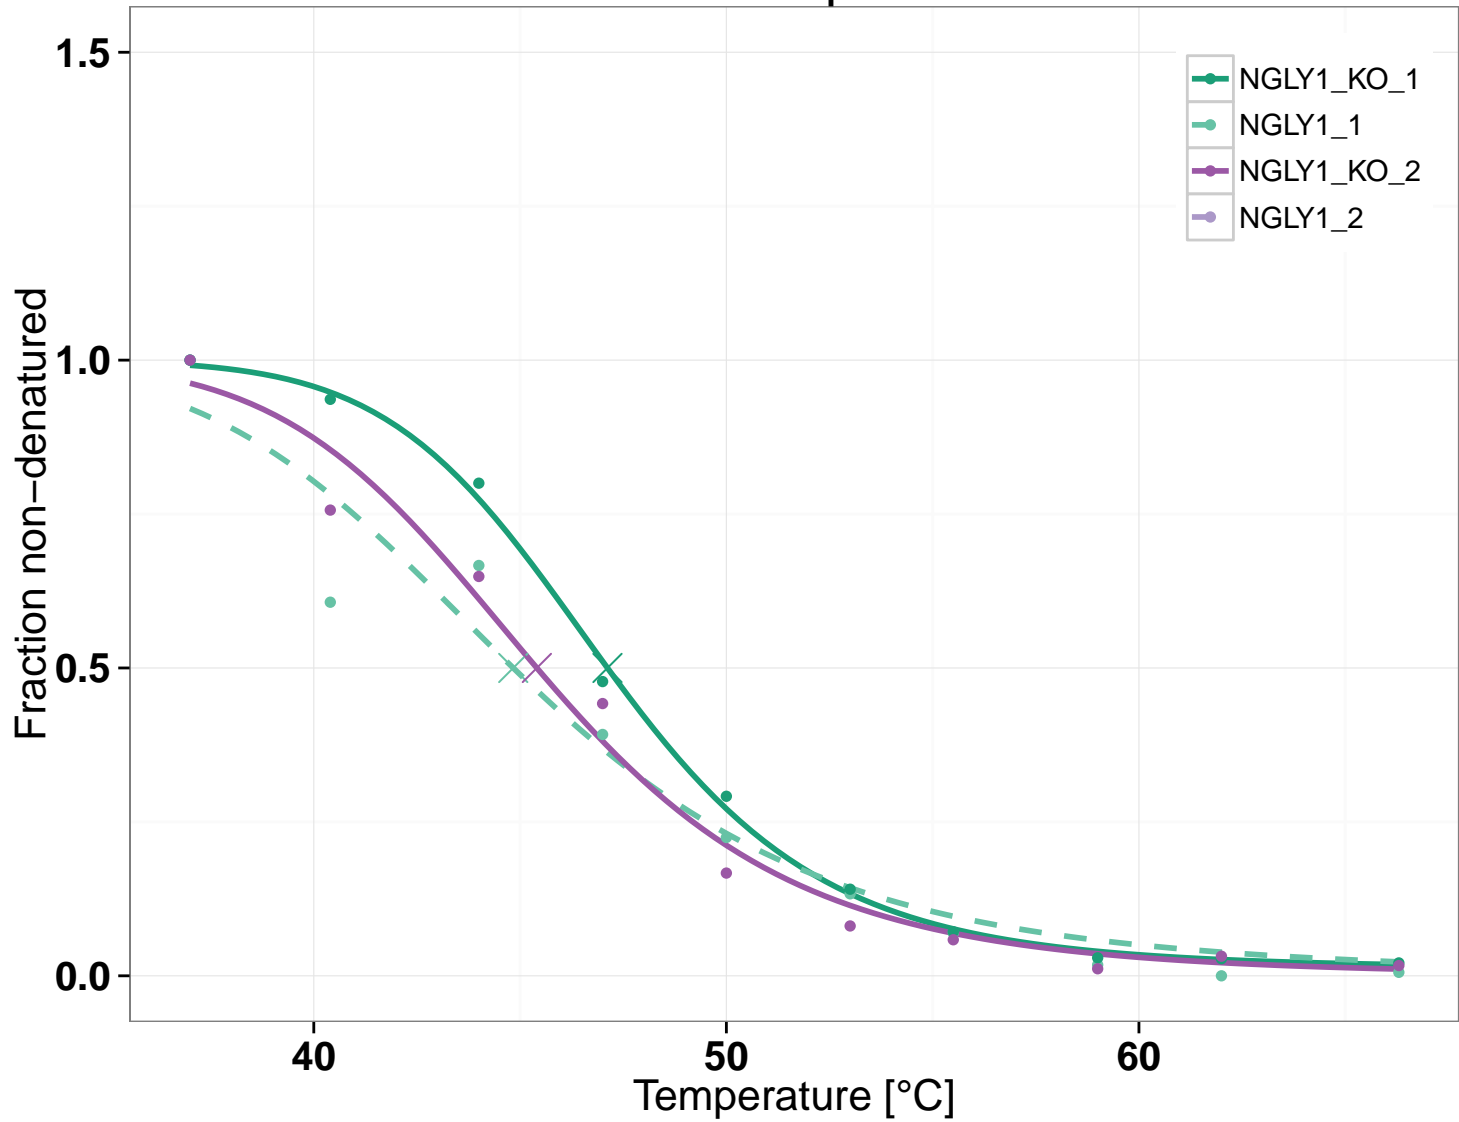

|            | meltPoint | slope  | plateau | R2   |
|------------|-----------|--------|---------|------|
| NGLY1_KO_1 | 47.12     | -0.093 | 0.01    | 1    |
| NGLY1_1    | 44.83     | -0.067 | 0       | 0.95 |
| NGLY1_KO_2 | 45.41     | -0.08  | 0       | 0.98 |
| NGLY1_2    | -         | -      | -       | -    |

Supplement: Supplementary file 7407 [file 1]

# IPI00386072.3|ALG2

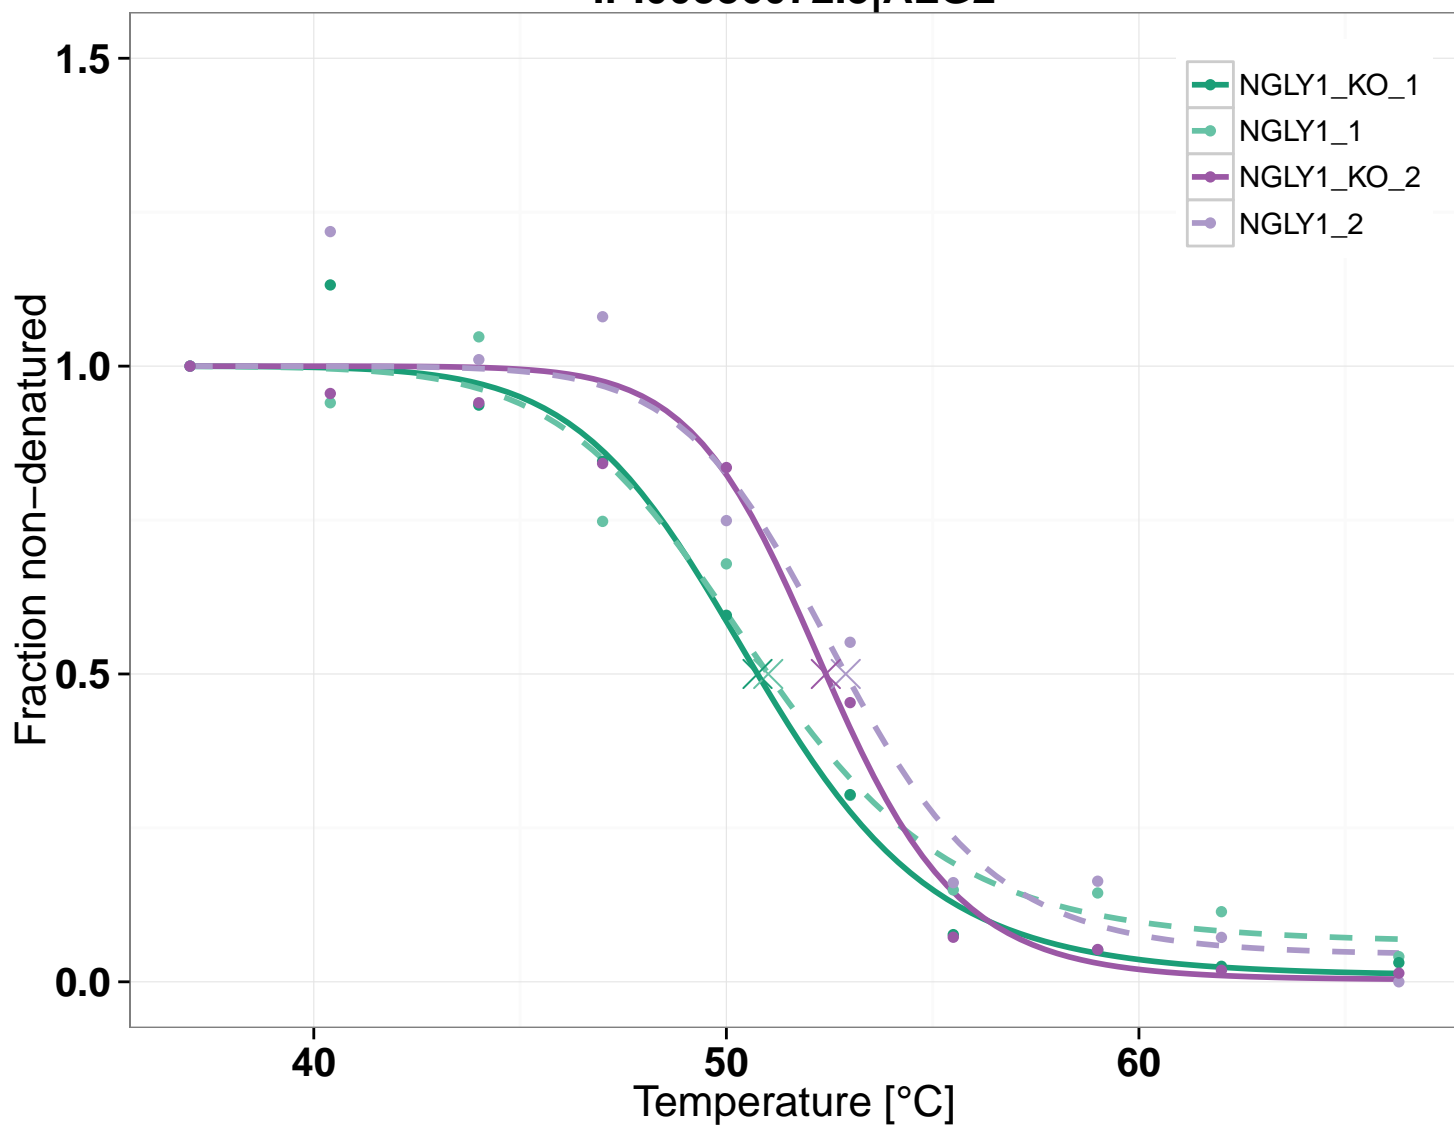

|            | meltPoint | slope  | plateau | R2   |
|------------|-----------|--------|---------|------|
| NGLY1_KO_1 | 50.76     | -0.11  | 0.01    | 0.99 |
| NGLY1_1    | 51.02     | -0.098 | 0.06    | 0.98 |
| NGLY1_KO_2 | 52.41     | -0.15  | 0       | 0.98 |
| NGLY1_2    | 52.89     | -0.13  | 0.04    | 0.96 |

Supplement: Supplementary file 7408 [file 1]

# IPI00815672.3|KIF1A

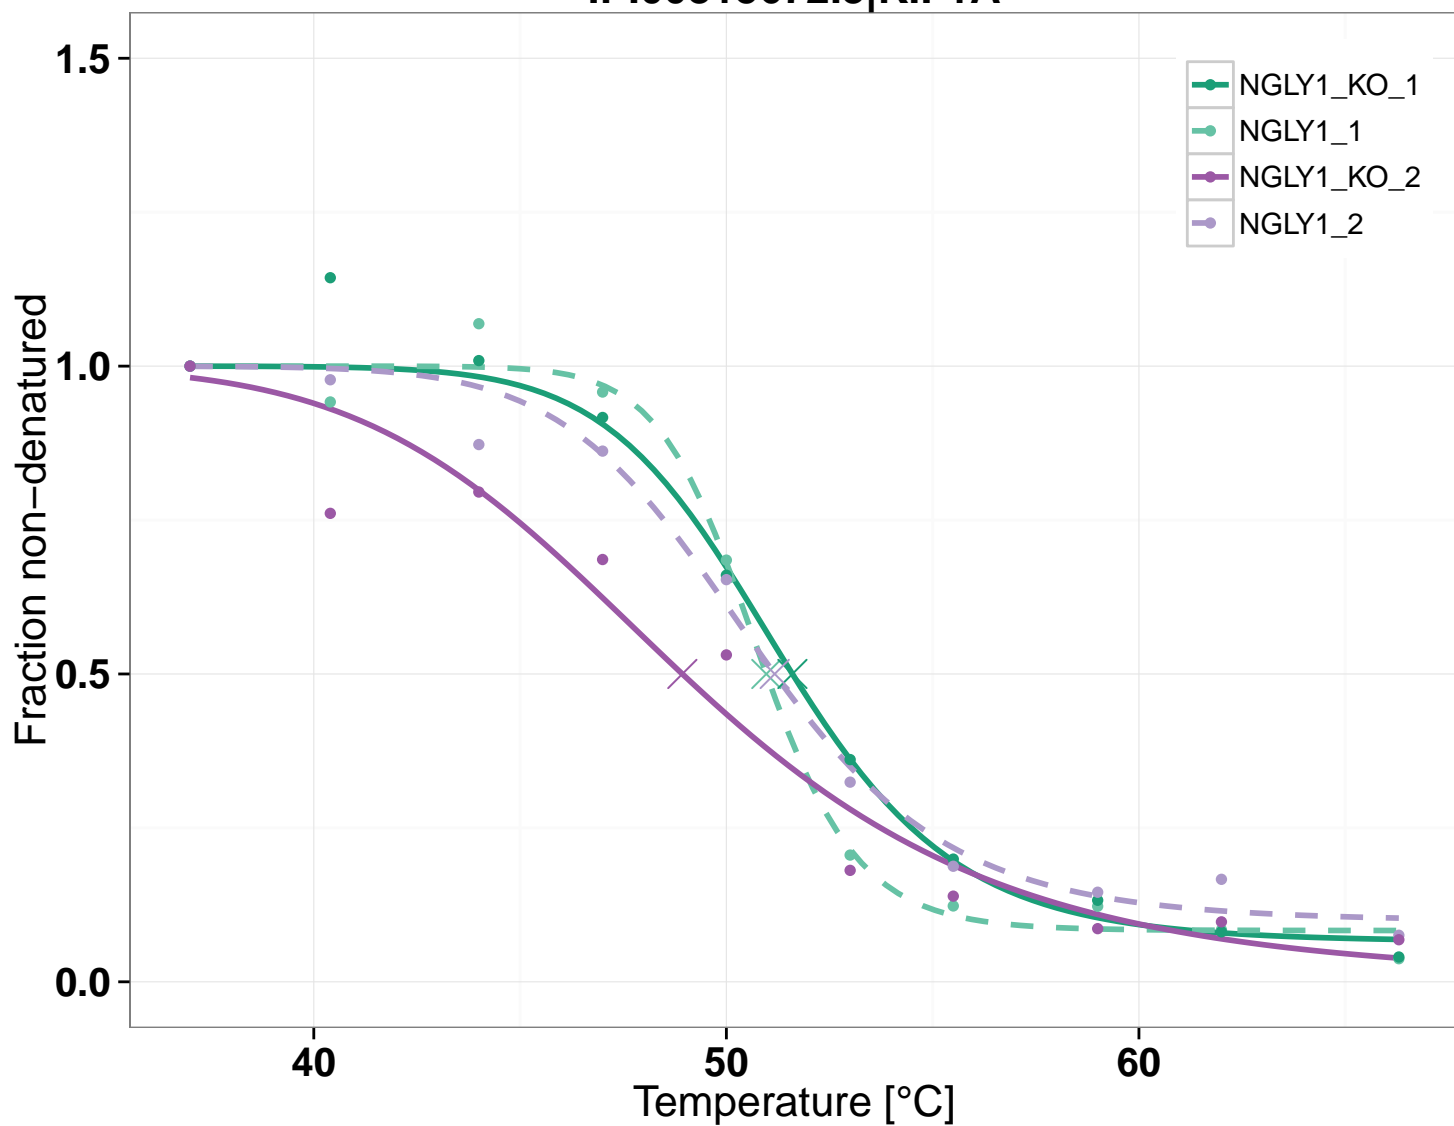

|            | meltPoint | slope  | plateau | R2   |
|------------|-----------|--------|---------|------|
| NGLY1_KO_1 | 51.6      | -0.11  | 0.06    | 0.99 |
| NGLY1_1    | 50.97     | -0.19  | 0.08    | 0.99 |
| NGLY1_KO_2 | 48.93     | -0.064 | 0       | 0.95 |
| NGLY1_2    | 51.17     | -0.096 | 0.1     | 0.99 |

Supplement: Supplementary file 7409 [file 1]

IPI00306929.9|MYO18B

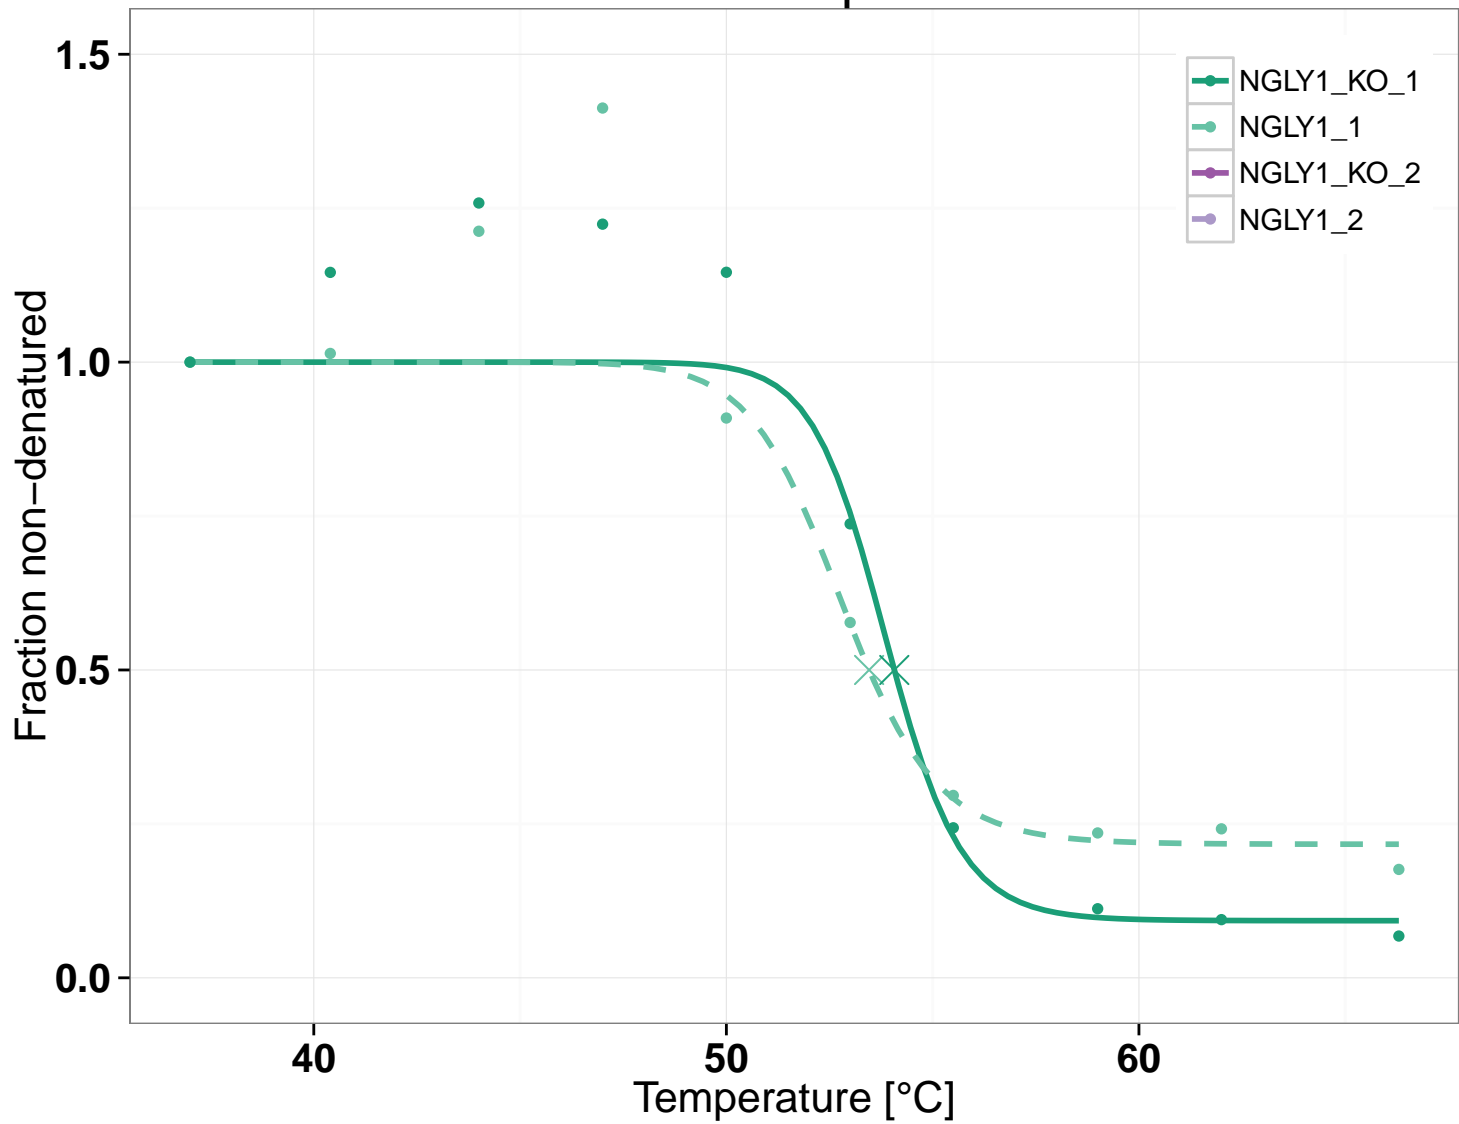

|            | meltPoint | slope | plateau | R2   |
|------------|-----------|-------|---------|------|
| NGLY1_KO_1 | 54.07     | -0.25 | 0.09    | 0.93 |
| NGLY1_1    | 53.46     | -0.17 | 0.22    | 0.88 |
| NGLY1_KO_2 | -         | -     | -       | -    |
| NGLY1_2    | -         | -     | -       | -    |

Supplement: Supplementary file 7410 [file 1]

IPI00028954.1|MCM3AP

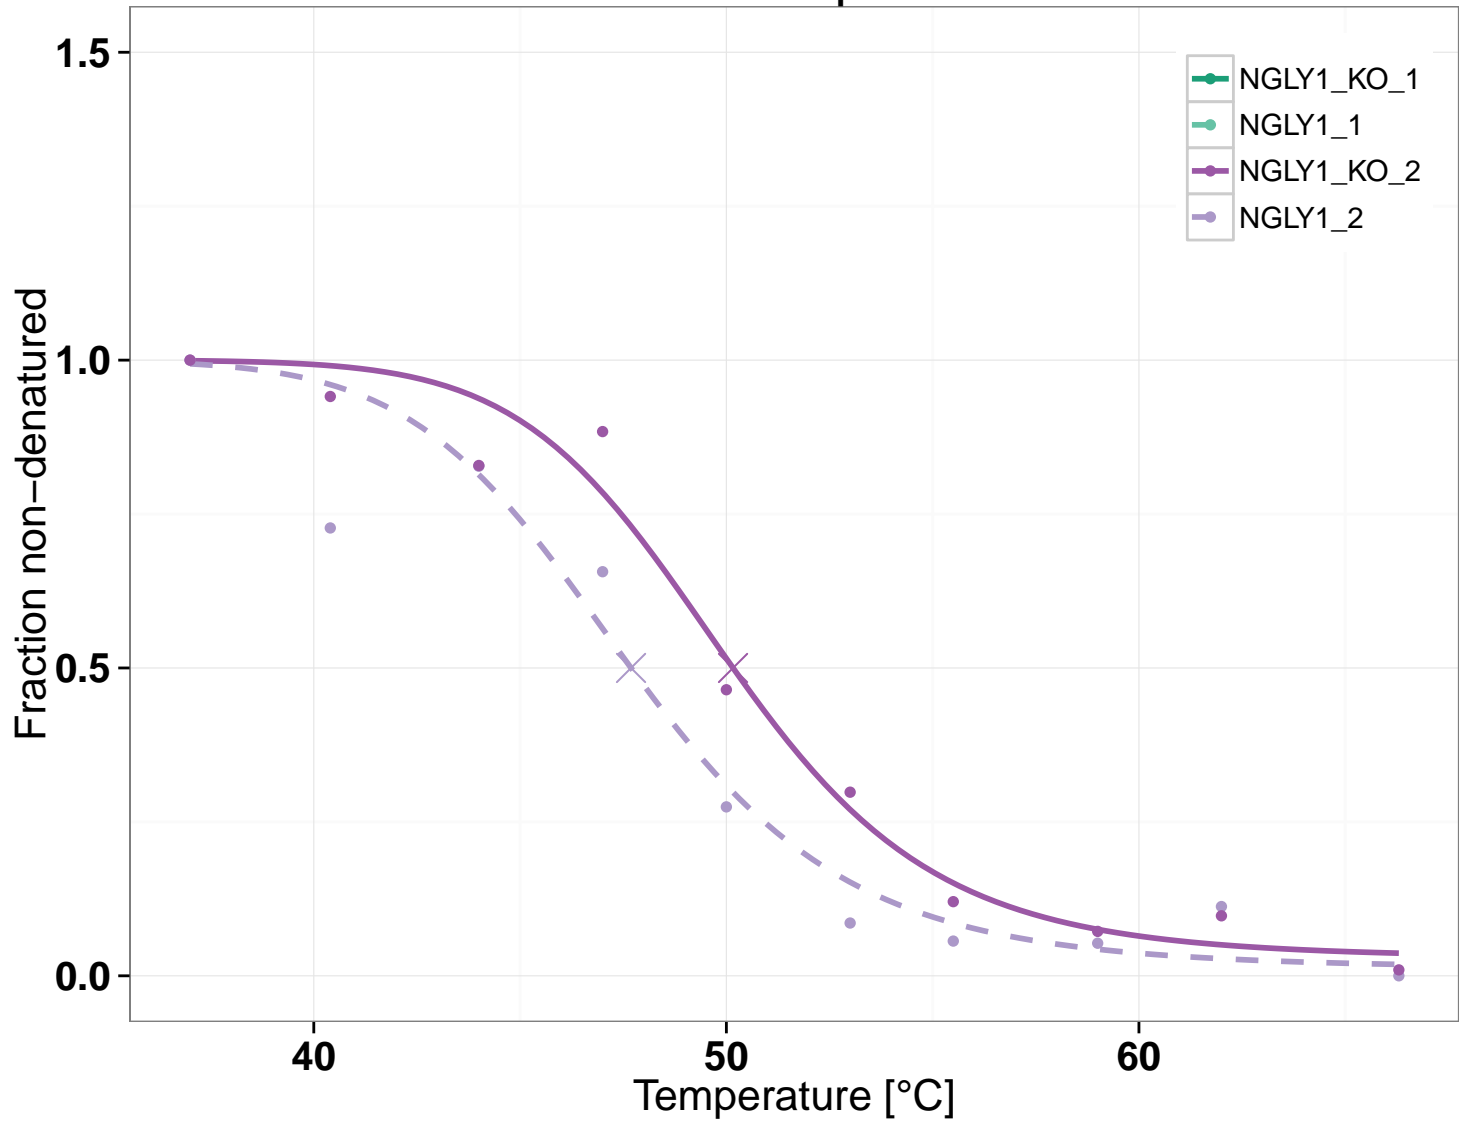

|            | meltPoint | slope  | plateau | R2   |
|------------|-----------|--------|---------|------|
| NGLY1_KO_1 | —         | —      | —       | —    |
| NGLY1_1    | —         | —      | —       | —    |
| NGLY1_KO_2 | 50.16     | -0.096 | 0.03    | 0.98 |
| NGLY1_2    | 47.69     | -0.093 | 0.01    | 0.94 |

Supplement: Supplementary file 7412 [file 1]

IPI00296938.1|TMEM57

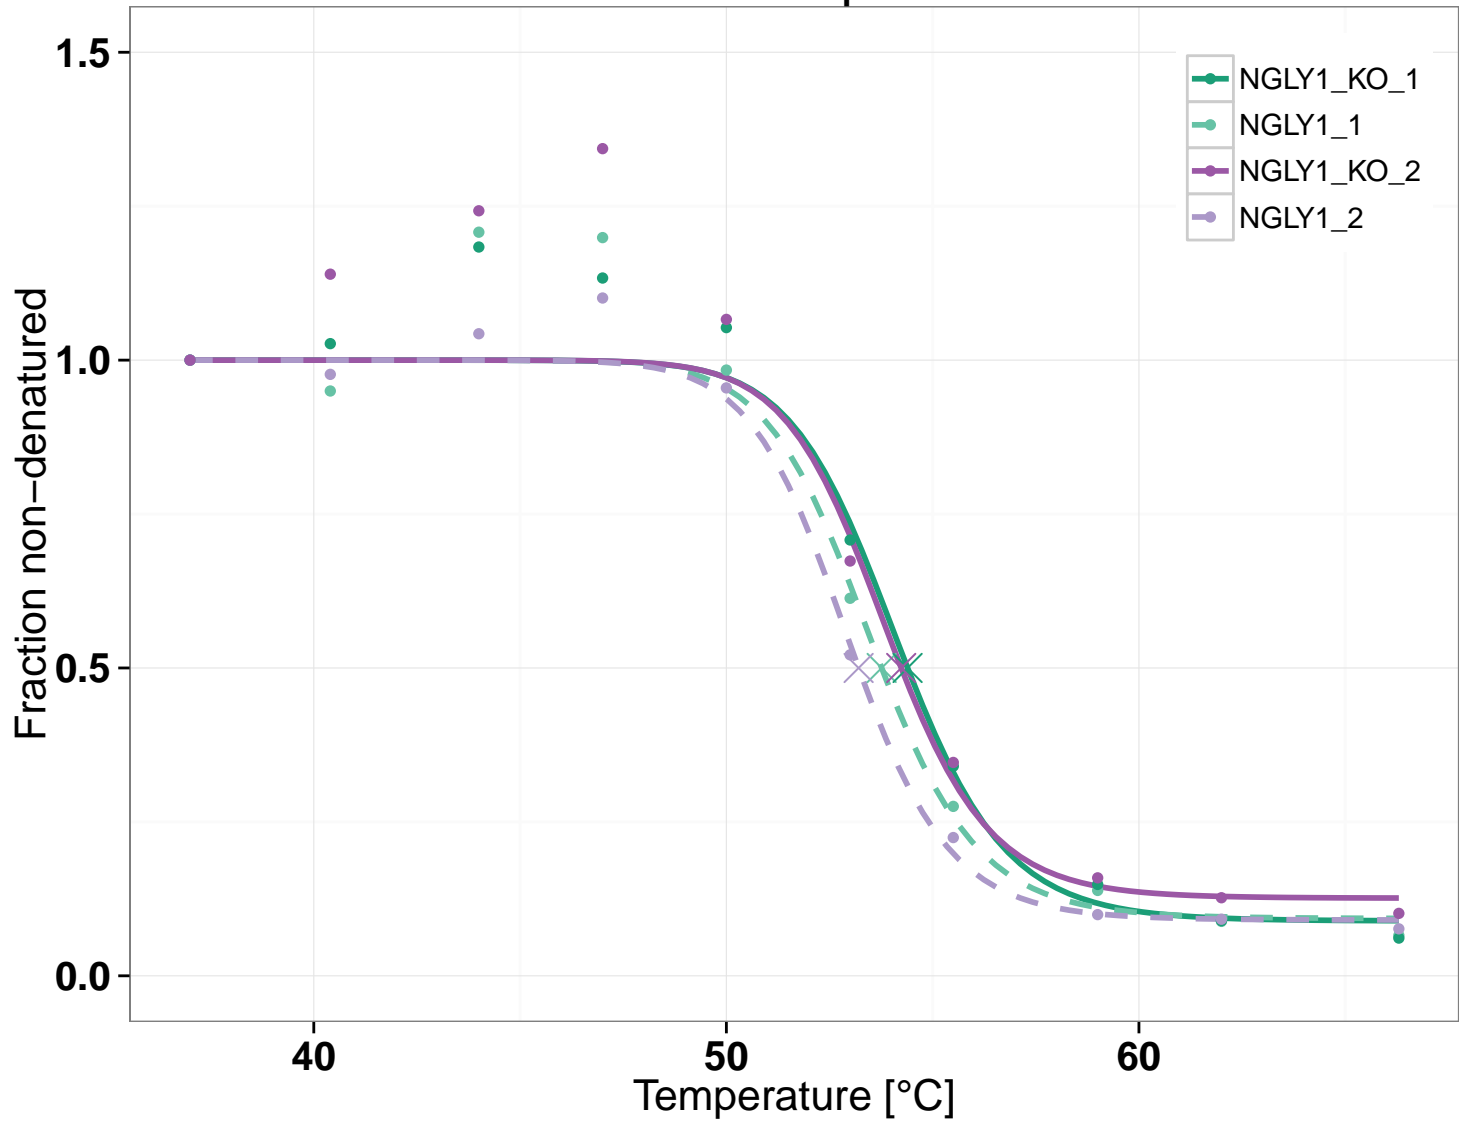

|            | meltPoint | slope | plateau | R2   |
|------------|-----------|-------|---------|------|
| NGLY1_KO_1 | 54.39     | -0.18 | 0.09    | 0.97 |
| NGLY1_1    | 53.76     | -0.18 | 0.09    | 0.96 |
| NGLY1_KO_2 | 54.24     | -0.18 | 0.13    | 0.91 |
| NGLY1_2    | 53.21     | -0.19 | 0.09    | 0.99 |

Supplement: Supplementary file 7413 [file 1]

# IPI00296927.4|PCTP

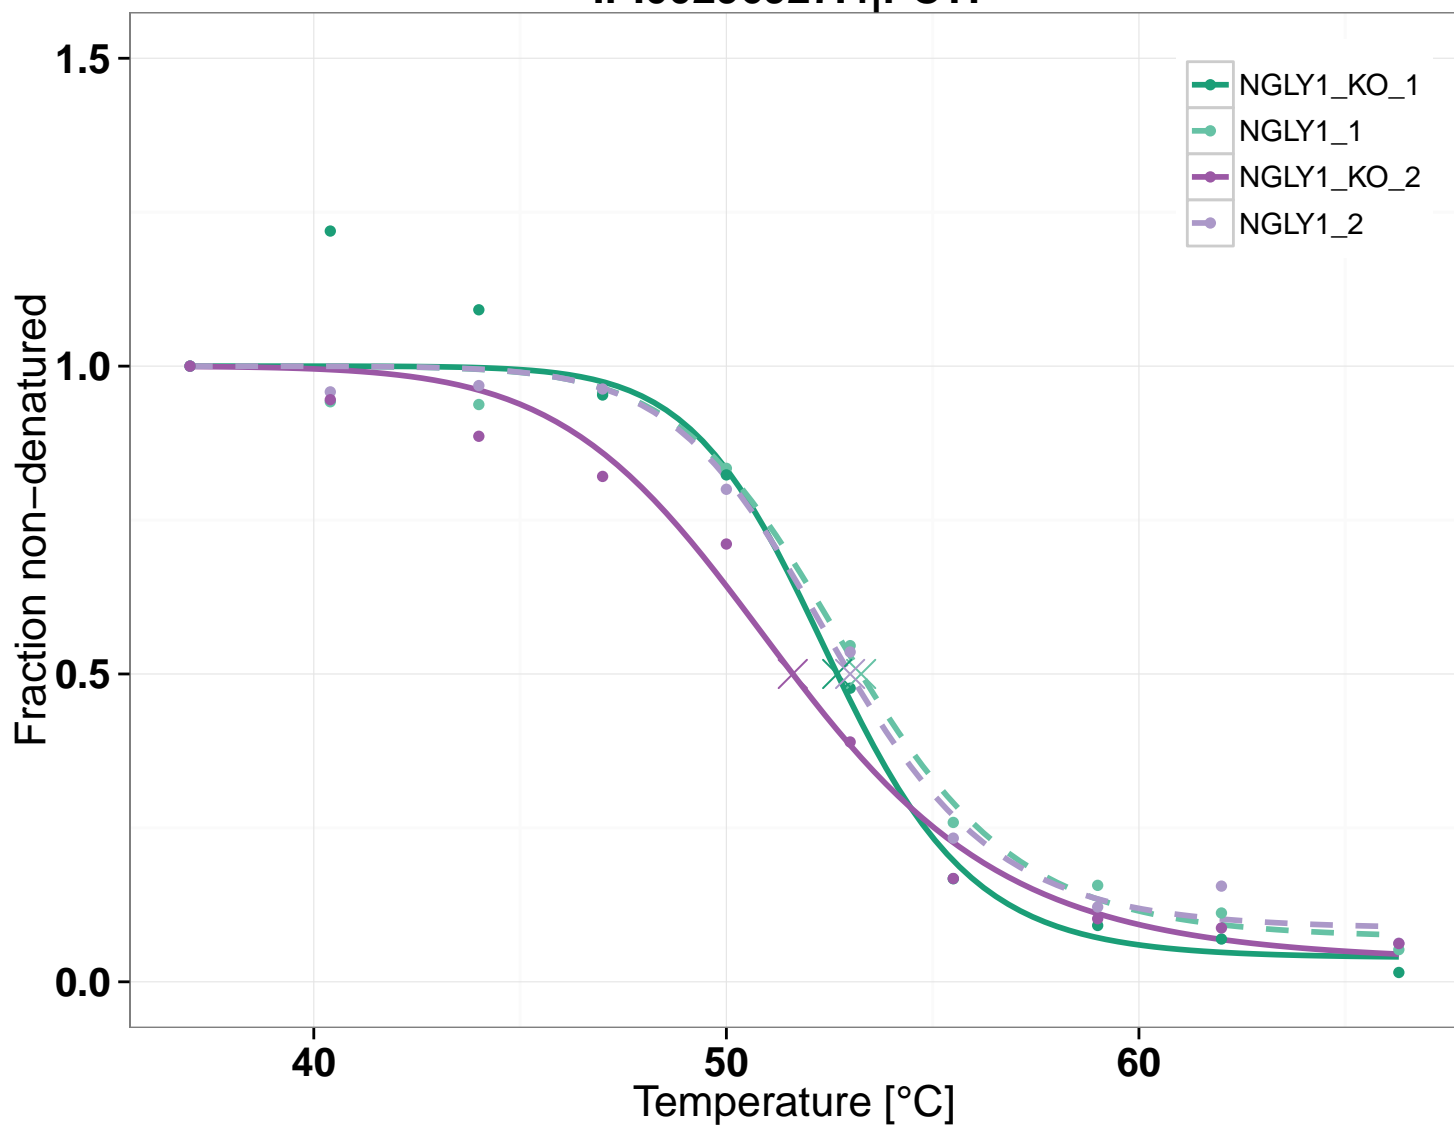

|            | meltPoint | slope  | plateau | R2   |
|------------|-----------|--------|---------|------|
| NGLY1_KO_1 | 52.69     | -0.14  | 0.04    | 0.97 |
| NGLY1_1    | 53.27     | -0.11  | 0.07    | 0.99 |
| NGLY1_KO_2 | 51.61     | -0.089 | 0.03    | 0.99 |
| NGLY1_2    | 53        | -0.12  | 0.09    | 0.99 |

Supplement: Supplementary file 7414 [file 1]

IPI00873631.1|MRPL33

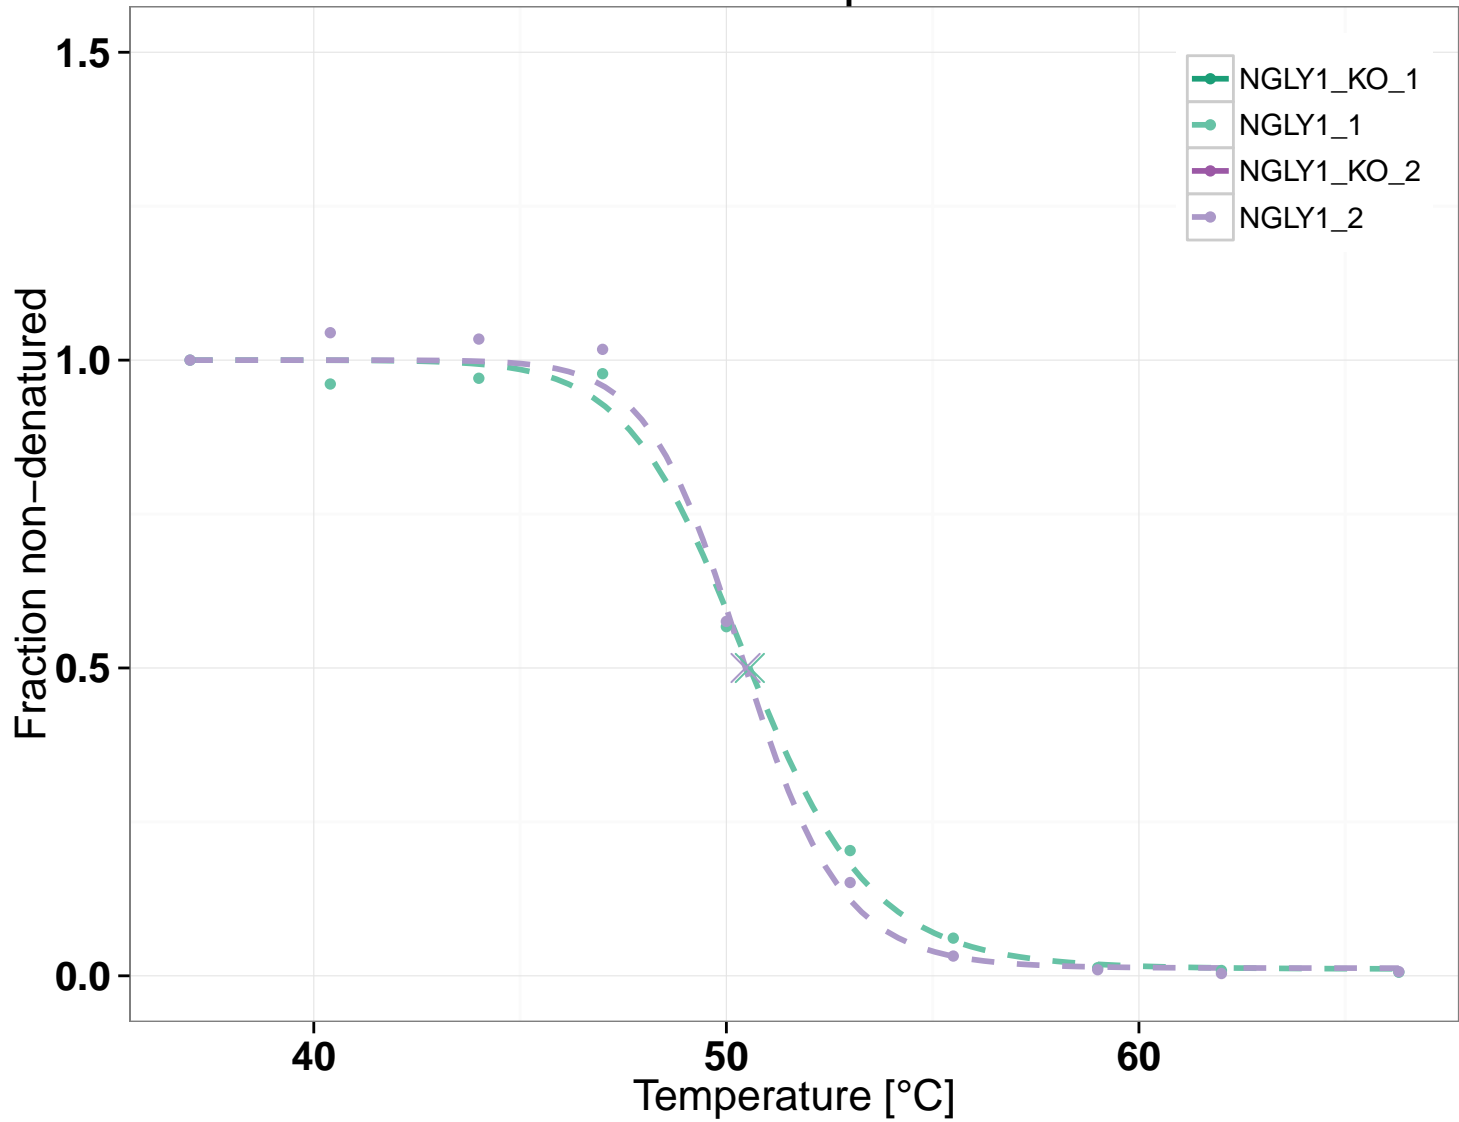

|            | meltPoint | slope | plateau | R2 |
|------------|-----------|-------|---------|----|
| NGLY1_KO_1 | -         | -     | -       | -  |
| NGLY1_1    | 50.57     | -0.17 | 0.01    | 1  |
| NGLY1_KO_2 | -         | -     | -       | -  |
| NGLY1_2    | 50.47     | -0.21 | 0.01    | 1  |

Supplement: Supplementary file 7415 [file 1]

# IPI00216408.3|DOCK9

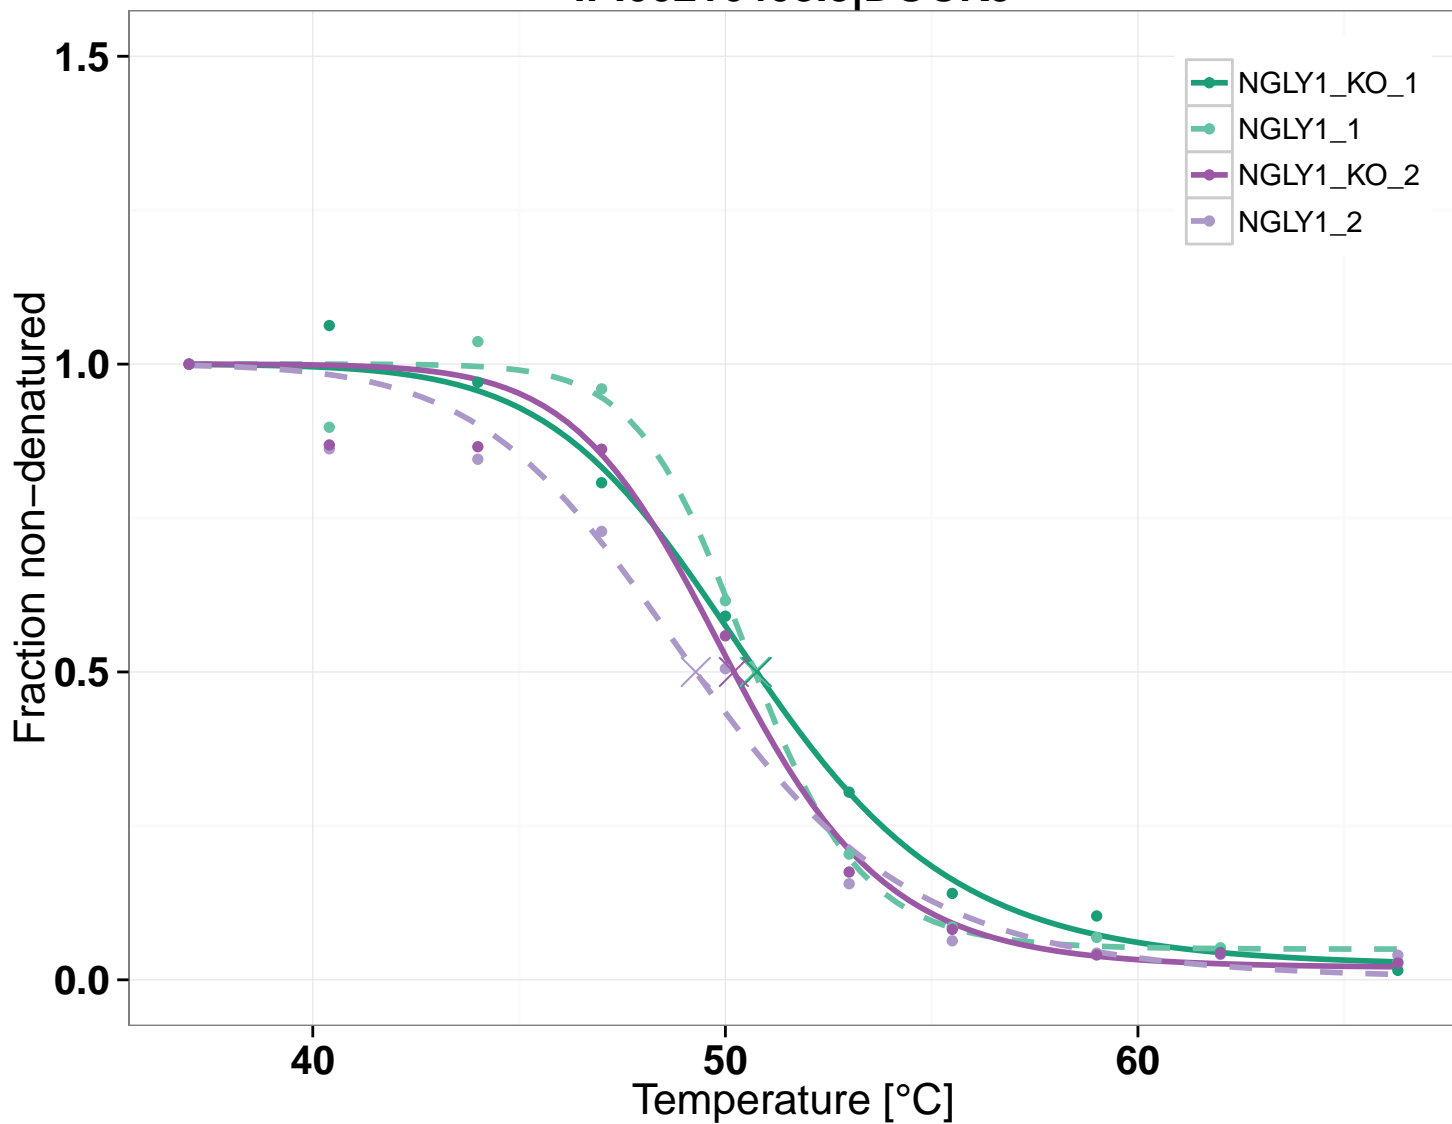

|            | meltPoint | slope  | plateau | R2   |
|------------|-----------|--------|---------|------|
| NGLY1_KO_1 | 50.76     | -0.099 | 0.02    | 1    |
| NGLY1_1    | 50.72     | -0.17  | 0.05    | 0.99 |
| NGLY1_KO_2 | 50.21     | -0.13  | 0.02    | 0.98 |
| NGLY1_2    | 49.28     | -0.095 | 0       | 0.98 |

Supplement: Supplementary file 7416 [file 1]

IPI00183171.4|SIRT3

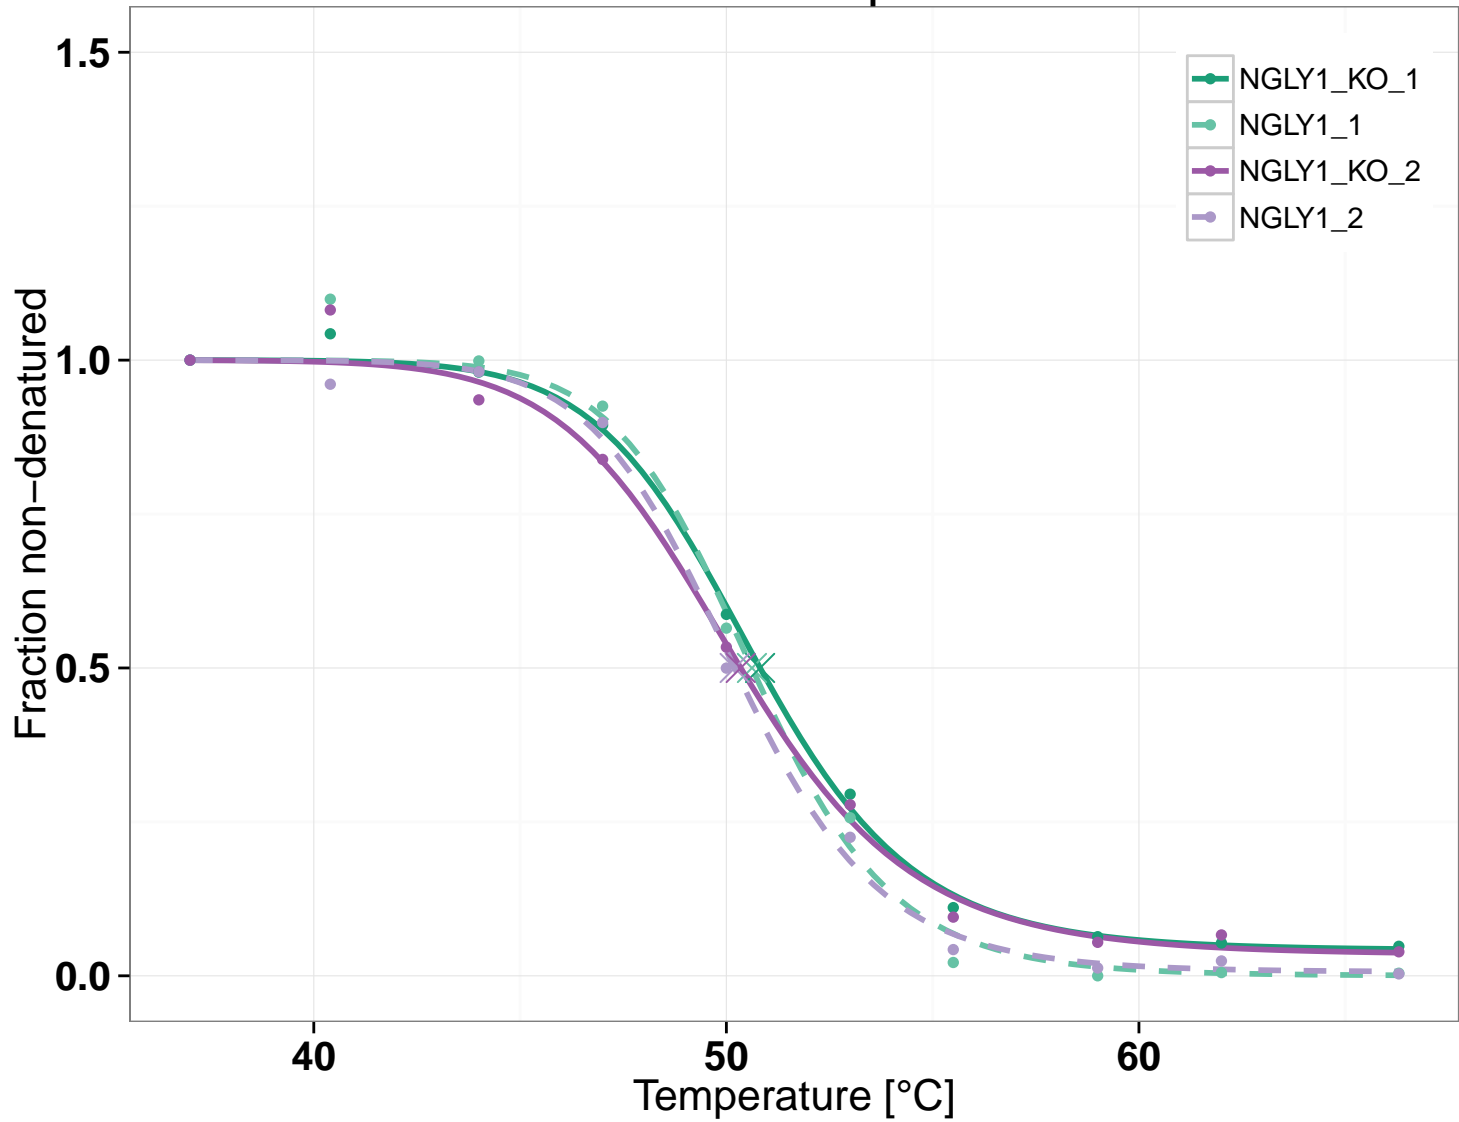

|            | meltPoint | slope | plateau | R2   |
|------------|-----------|-------|---------|------|
| NGLY1_KO_1 | 50.82     | -0.12 | 0.04    | 1    |
| NGLY1_1    | 50.62     | -0.15 | 0       | 0.99 |
| NGLY1_KO_2 | 50.35     | -0.11 | 0.03    | 0.99 |
| NGLY1_2    | 50.2      | -0.14 | 0.01    | 1    |

Supplement: Supplementary file 7417 [file 1]

IPI00060181.1|EFHD2

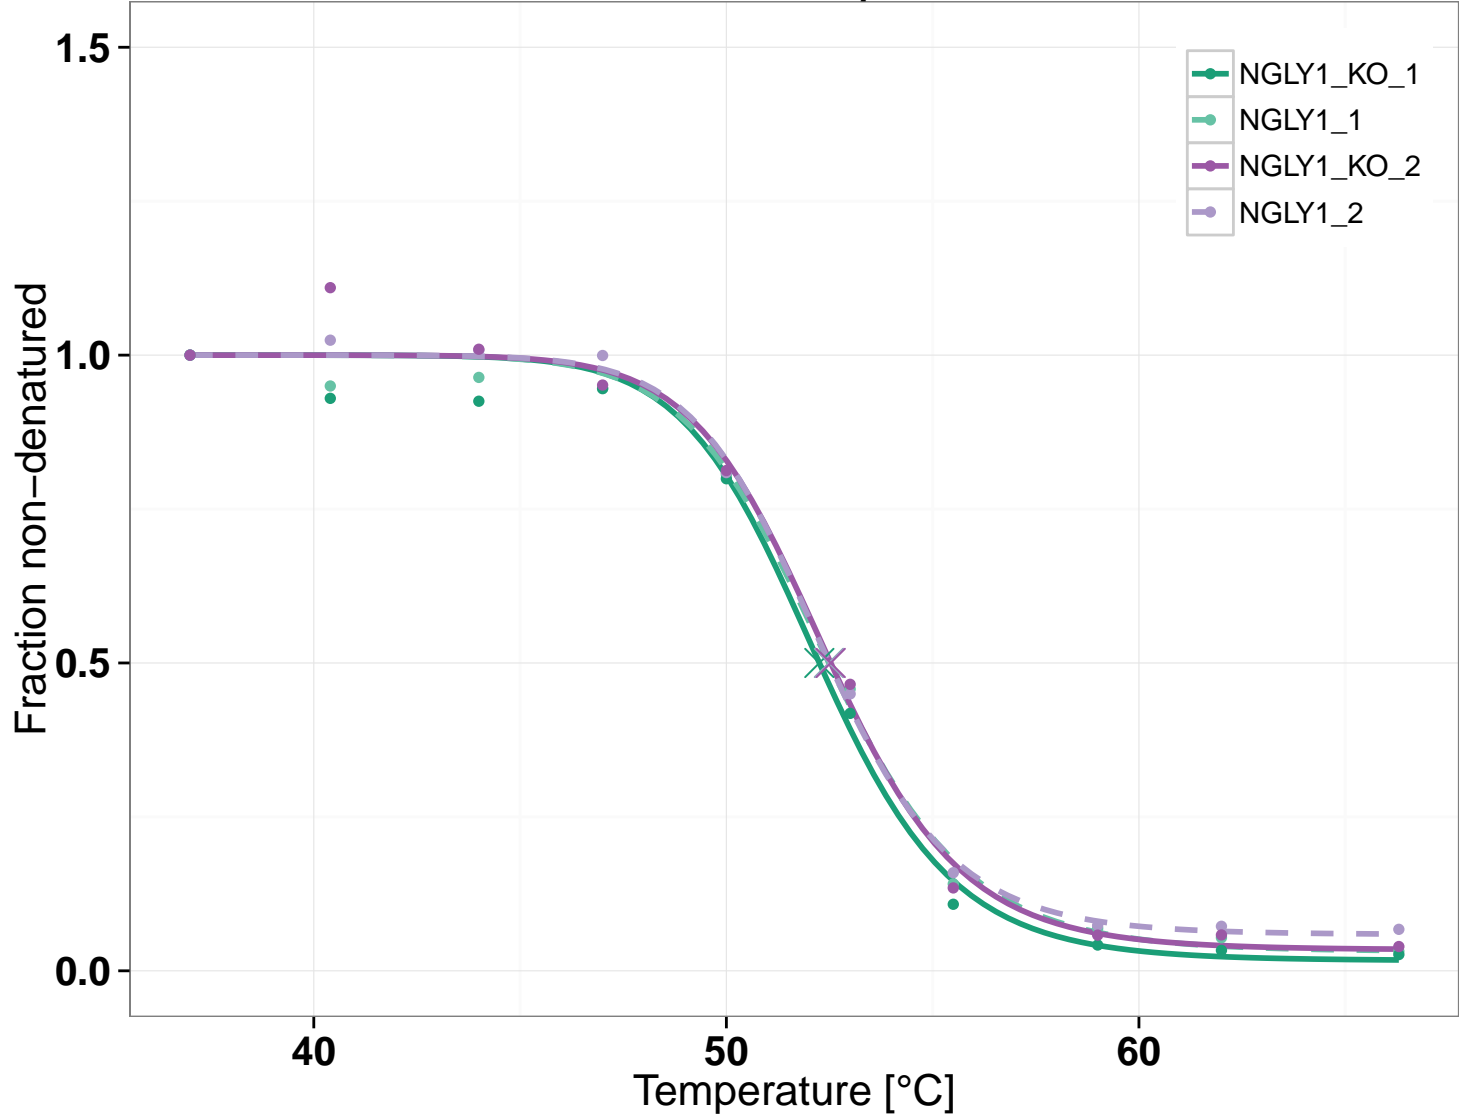

|            | meltPoint | slope | plateau | R2   |
|------------|-----------|-------|---------|------|
| NGLY1_KO_1 | 52.25     | -0.15 | 0.02    | 0.99 |
| NGLY1_1    | 52.48     | -0.14 | 0.03    | 1    |
| NGLY1_KO_2 | 52.53     | -0.15 | 0.03    | 0.99 |
| NGLY1_2    | 52.5      | -0.15 | 0.06    | 1    |

Supplement: Supplementary file 7418 [file 1]

IPI00646885.1|ARHGAP5

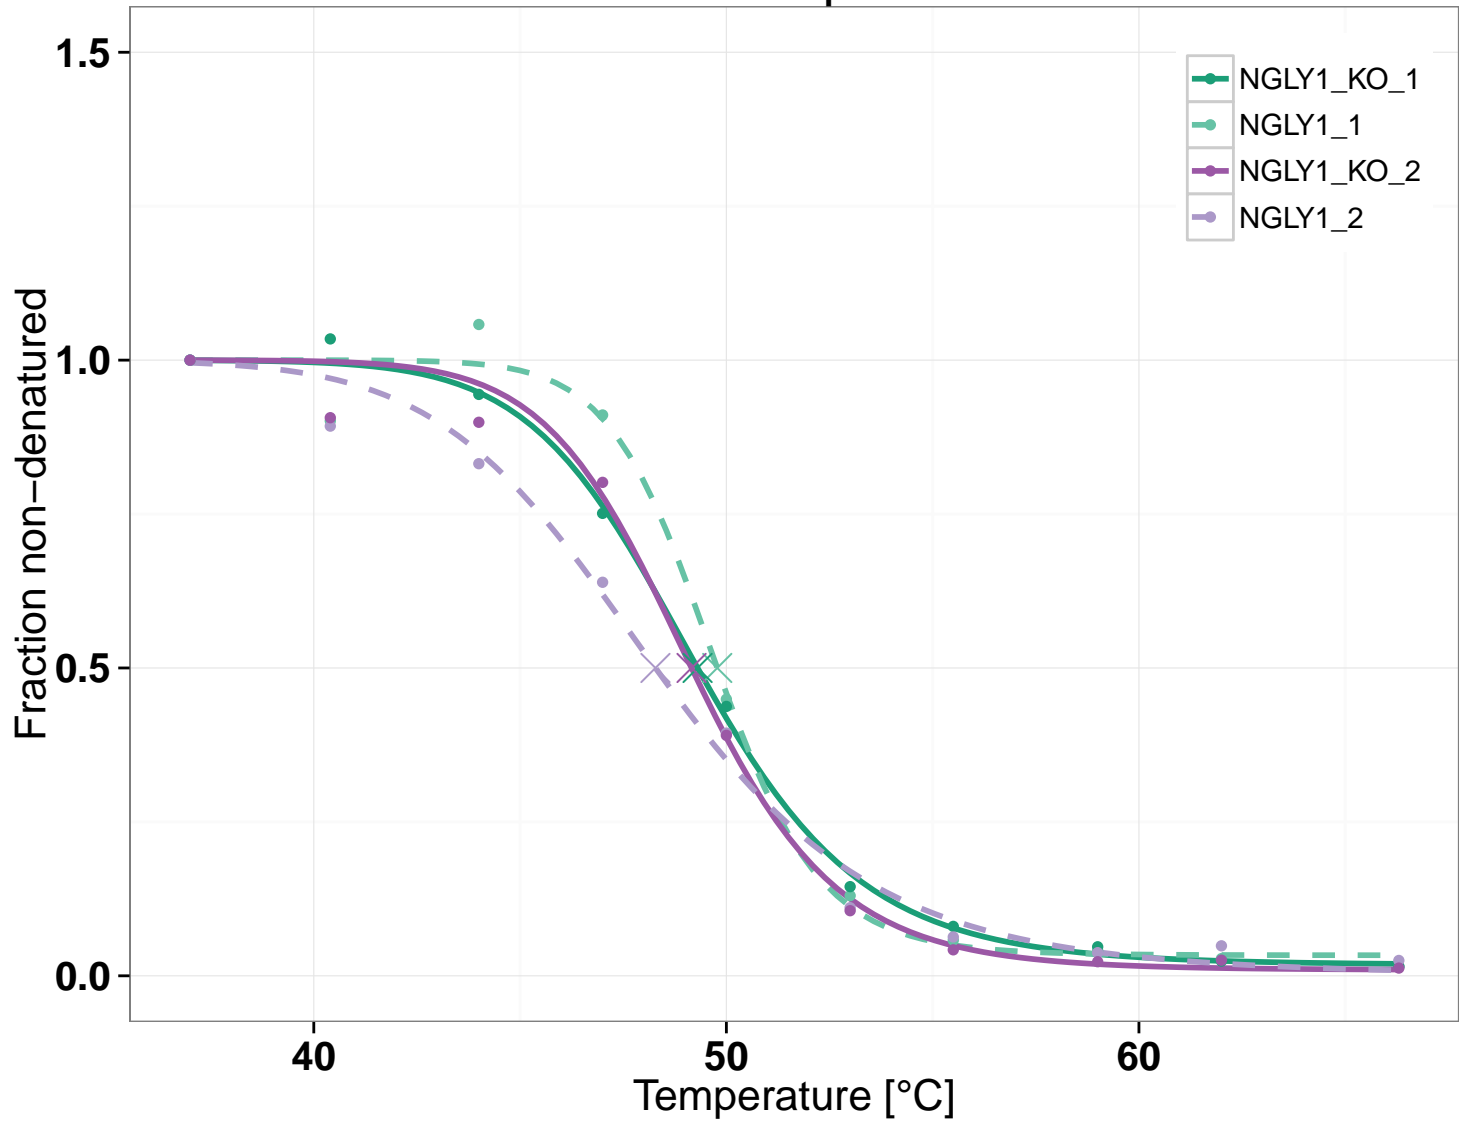

|            | meltPoint | slope  | plateau | R2   |
|------------|-----------|--------|---------|------|
| NGLY1_KO_1 | 49.3      | -0.12  | 0.02    | 1    |
| NGLY1_1    | 49.78     | -0.19  | 0.03    | 0.99 |
| NGLY1_KO_2 | 49.16     | -0.14  | 0.01    | 0.99 |
| NGLY1_2    | 48.28     | -0.094 | 0       | 0.99 |

Supplement: Supplementary file 7419 [file 1]

IPI00789442.1|ZNF16

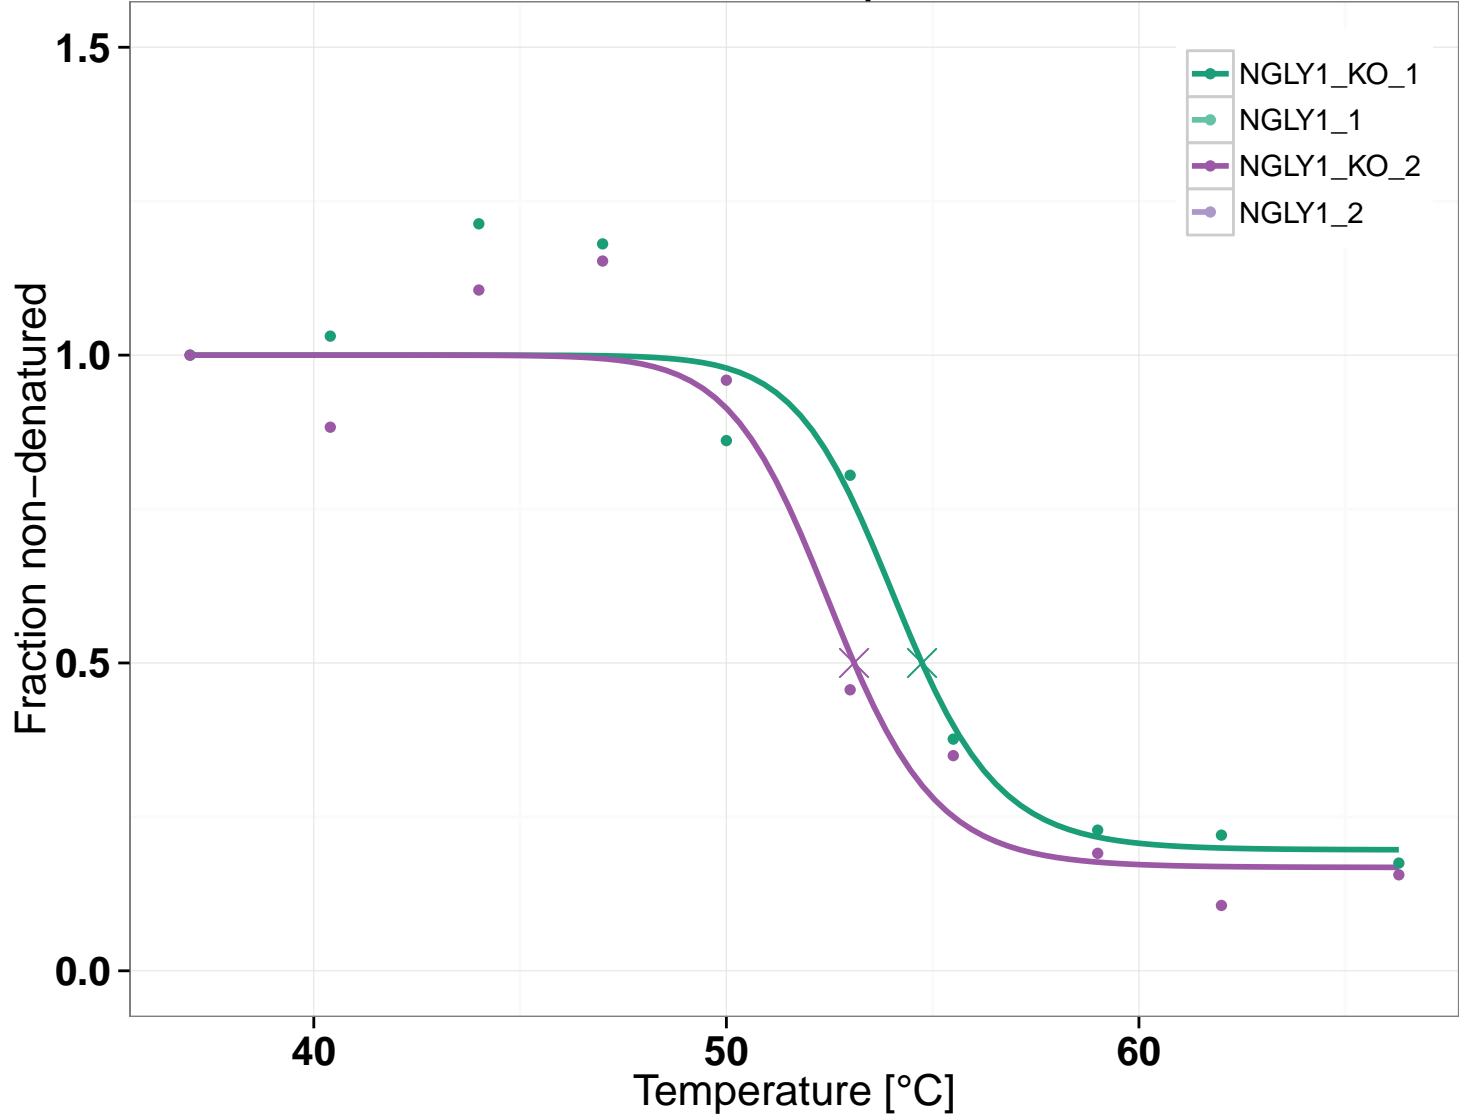

|            | meltPoint | slope | plateau | R2   |
|------------|-----------|-------|---------|------|
| NGLY1_KO_1 | 54.74     | -0.16 | 0.2     | 0.94 |
| NGLY1_1    | -         | -     | -       | -    |
| NGLY1_KO_2 | 53.09     | -0.17 | 0.17    | 0.96 |
| NGLY1_2    | -         | -     | -       | -    |

Supplement: Supplementary file 7420 [file 1]

# IPI00020961.1|BCL2

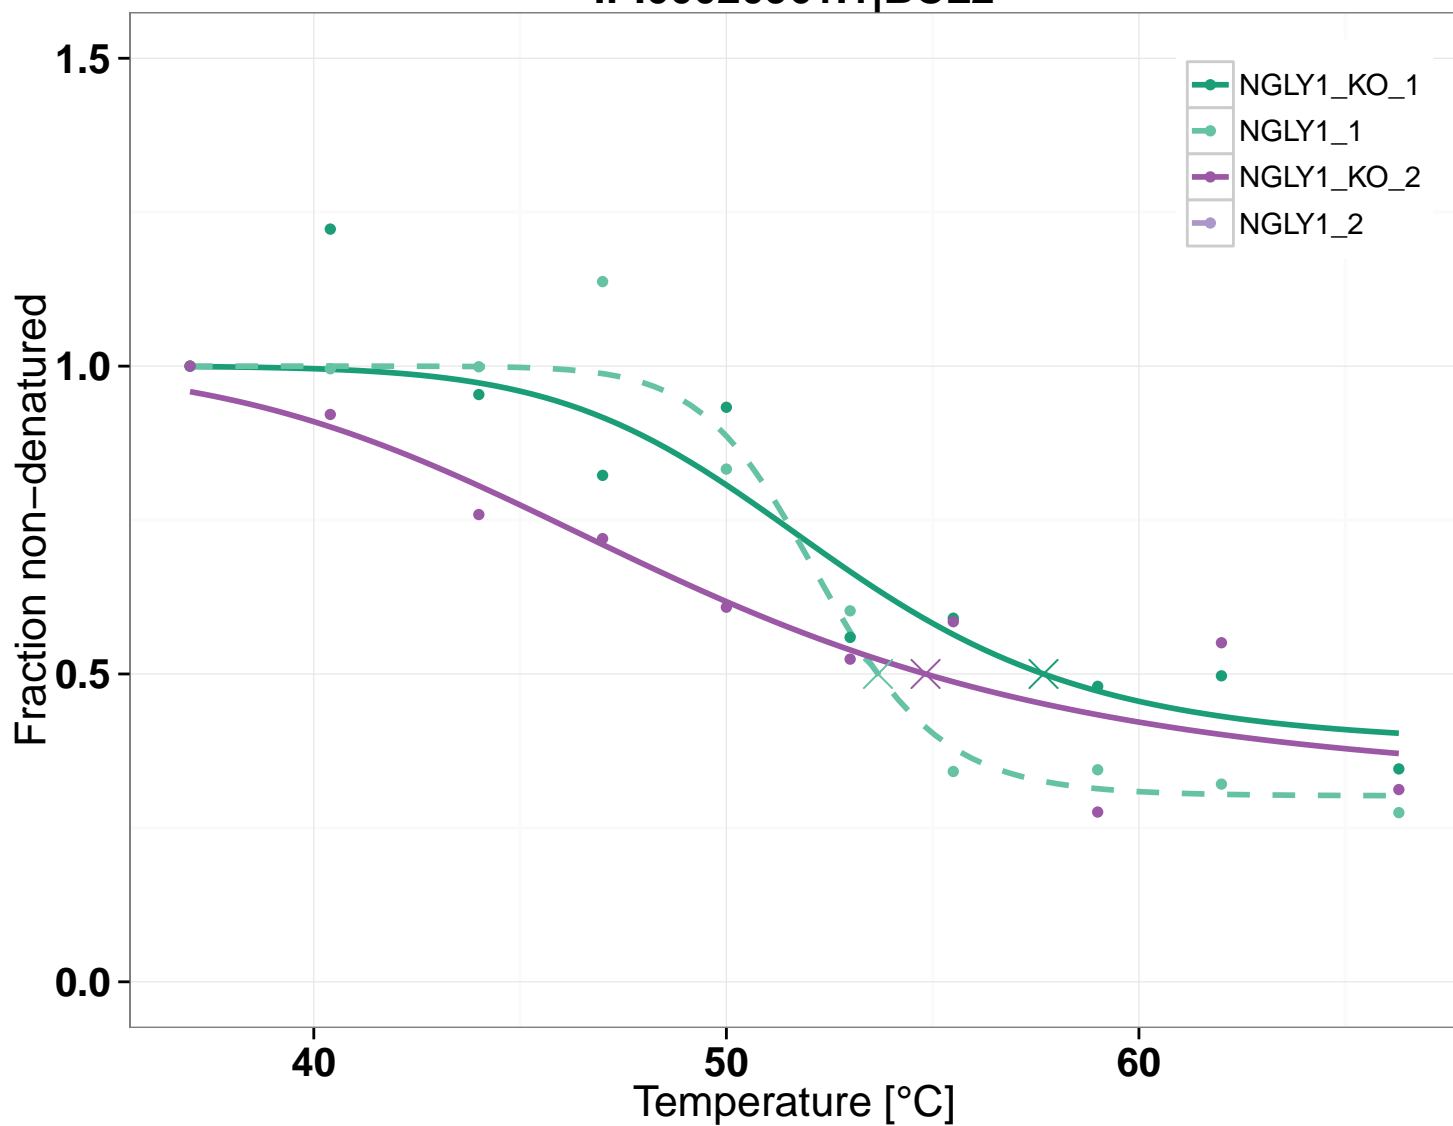

|            | meltPoint | slope  | plateau | R2   |
|------------|-----------|--------|---------|------|
| NGLY1_KO_1 | 57.69     | -0.048 | 0.38    | 0.87 |
| NGLY1_1    | 53.68     | -0.12  | 0.3     | 0.97 |
| NGLY1_KO_2 | 54.83     | -0.032 | 0.31    | 0.87 |
| NGLY1_2    | -         | -      | -       | -    |

Supplement: Supplementary file 7421 [file 1]

IPI00465186.3|PTPRF

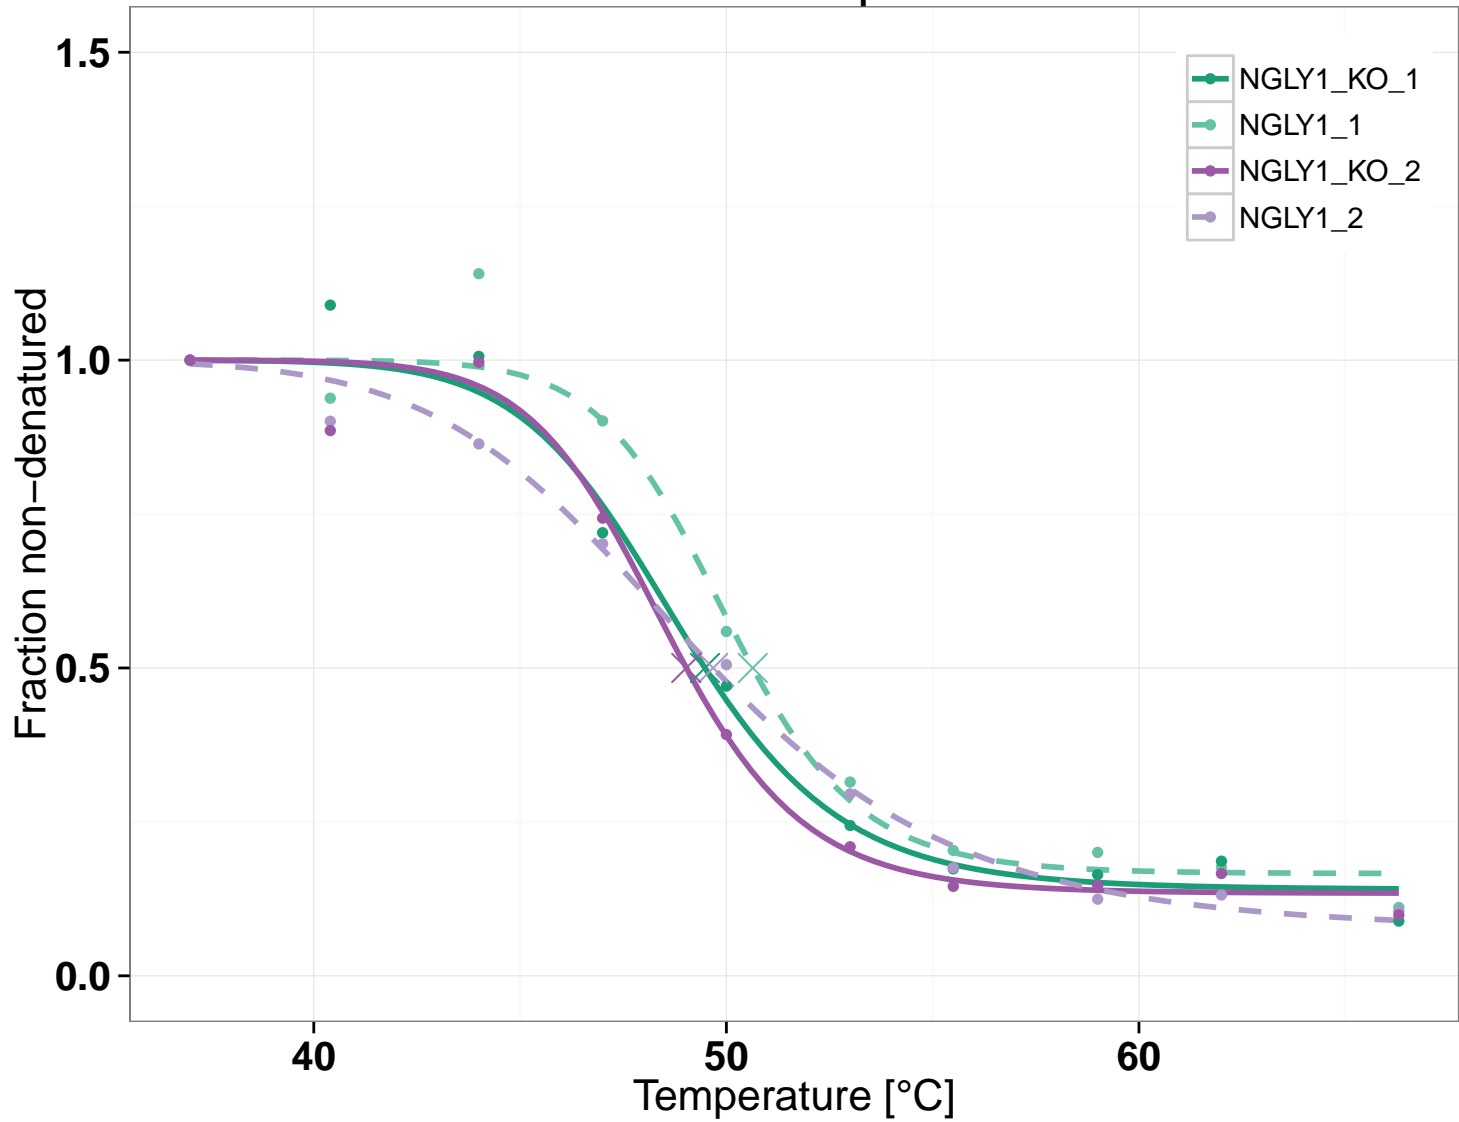

|            | meltPoint | slope  | plateau | R2   |
|------------|-----------|--------|---------|------|
| NGLY1_KO_1 | 49.48     | -0.11  | 0.14    | 0.99 |
| NGLY1_1    | 50.64     | -0.13  | 0.17    | 0.98 |
| NGLY1_KO_2 | 49.03     | -0.13  | 0.13    | 0.99 |
| NGLY1_2    | 49.68     | -0.073 | 0.07    | 0.99 |

Supplement: Supplementary file 7422 [file 1]

IPI00004928.1|EGLN1

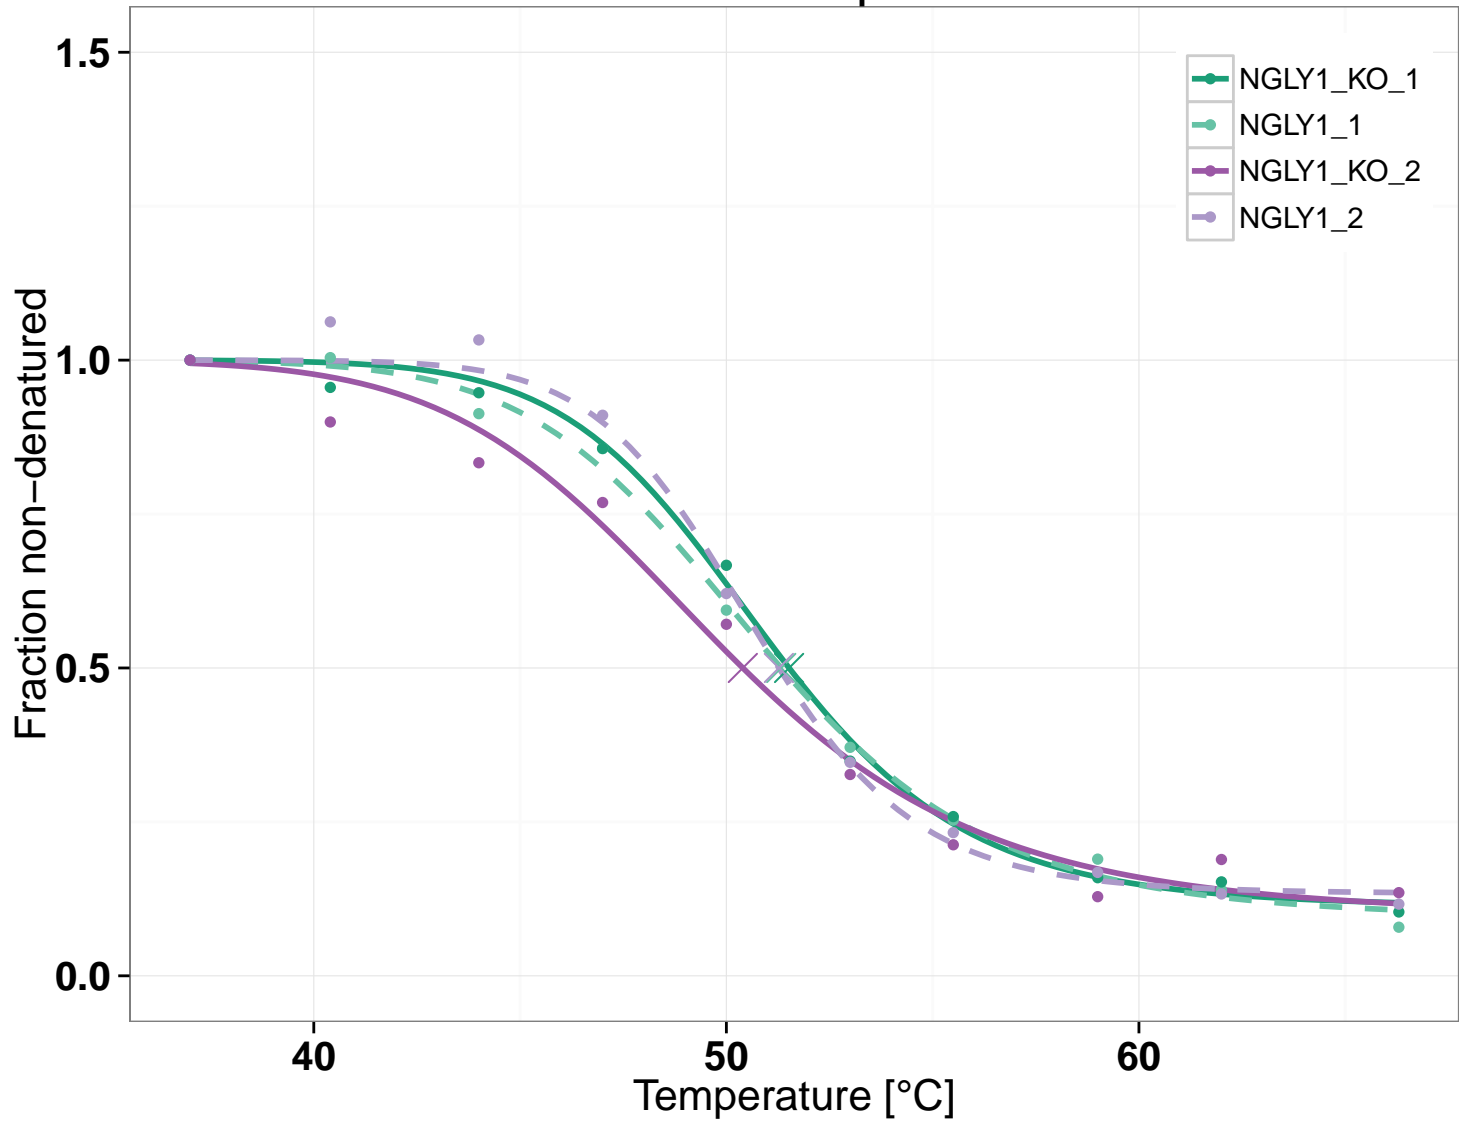

|            | meltPoint | slope  | plateau | R2   |
|------------|-----------|--------|---------|------|
| NGLY1_KO_1 | 51.52     | -0.091 | 0.11    | 1    |
| NGLY1_1    | 51.33     | -0.081 | 0.09    | 1    |
| NGLY1_KO_2 | 50.4      | -0.07  | 0.1     | 0.98 |
| NGLY1_2    | 51.27     | -0.11  | 0.13    | 0.99 |

Supplement: Supplementary file 7423 [file 1]

# IPI00031622.3|CHCHD6

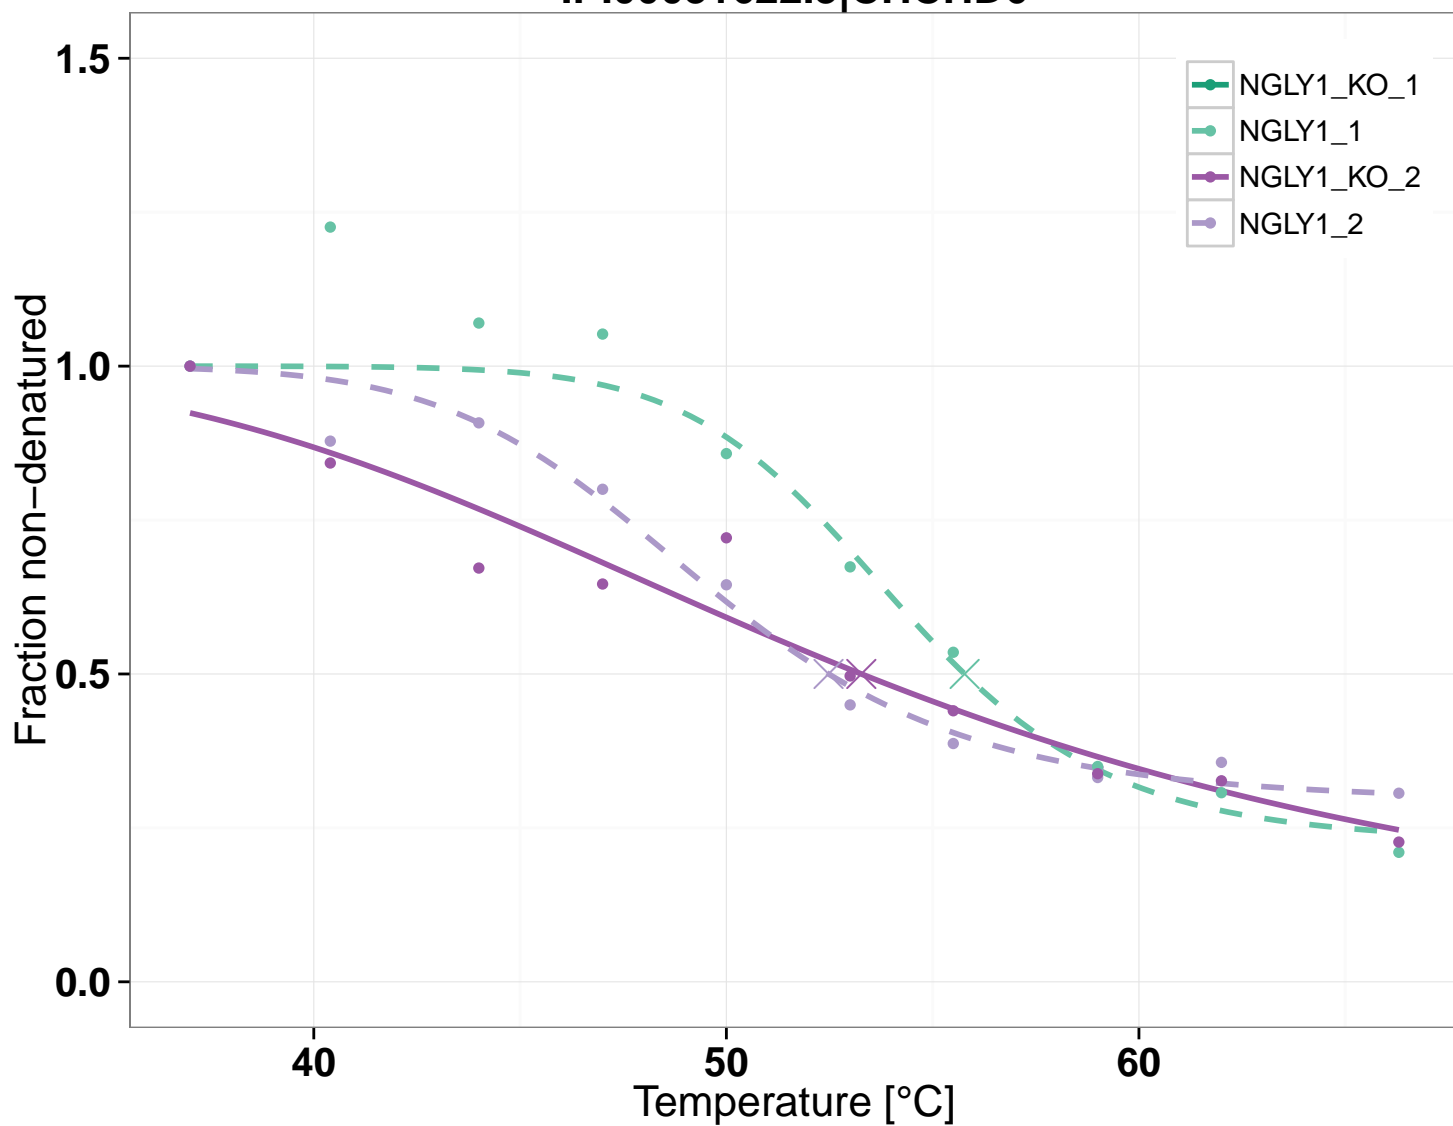

|            | meltPoint | slope  | plateau | R2   |
|------------|-----------|--------|---------|------|
| NGLY1_KO_1 | –         | –      | –       | –    |
| NGLY1_1    | 55.77     | –0.075 | 0.23    | 0.94 |
| NGLY1_KO_2 | 53.27     | –0.03  | 0       | 0.94 |
| NGLY1_2    | 52.48     | –0.056 | 0.29    | 0.98 |

Supplement: Supplementary file 7424 [file 1]

IPI00220741.6|SPTA1

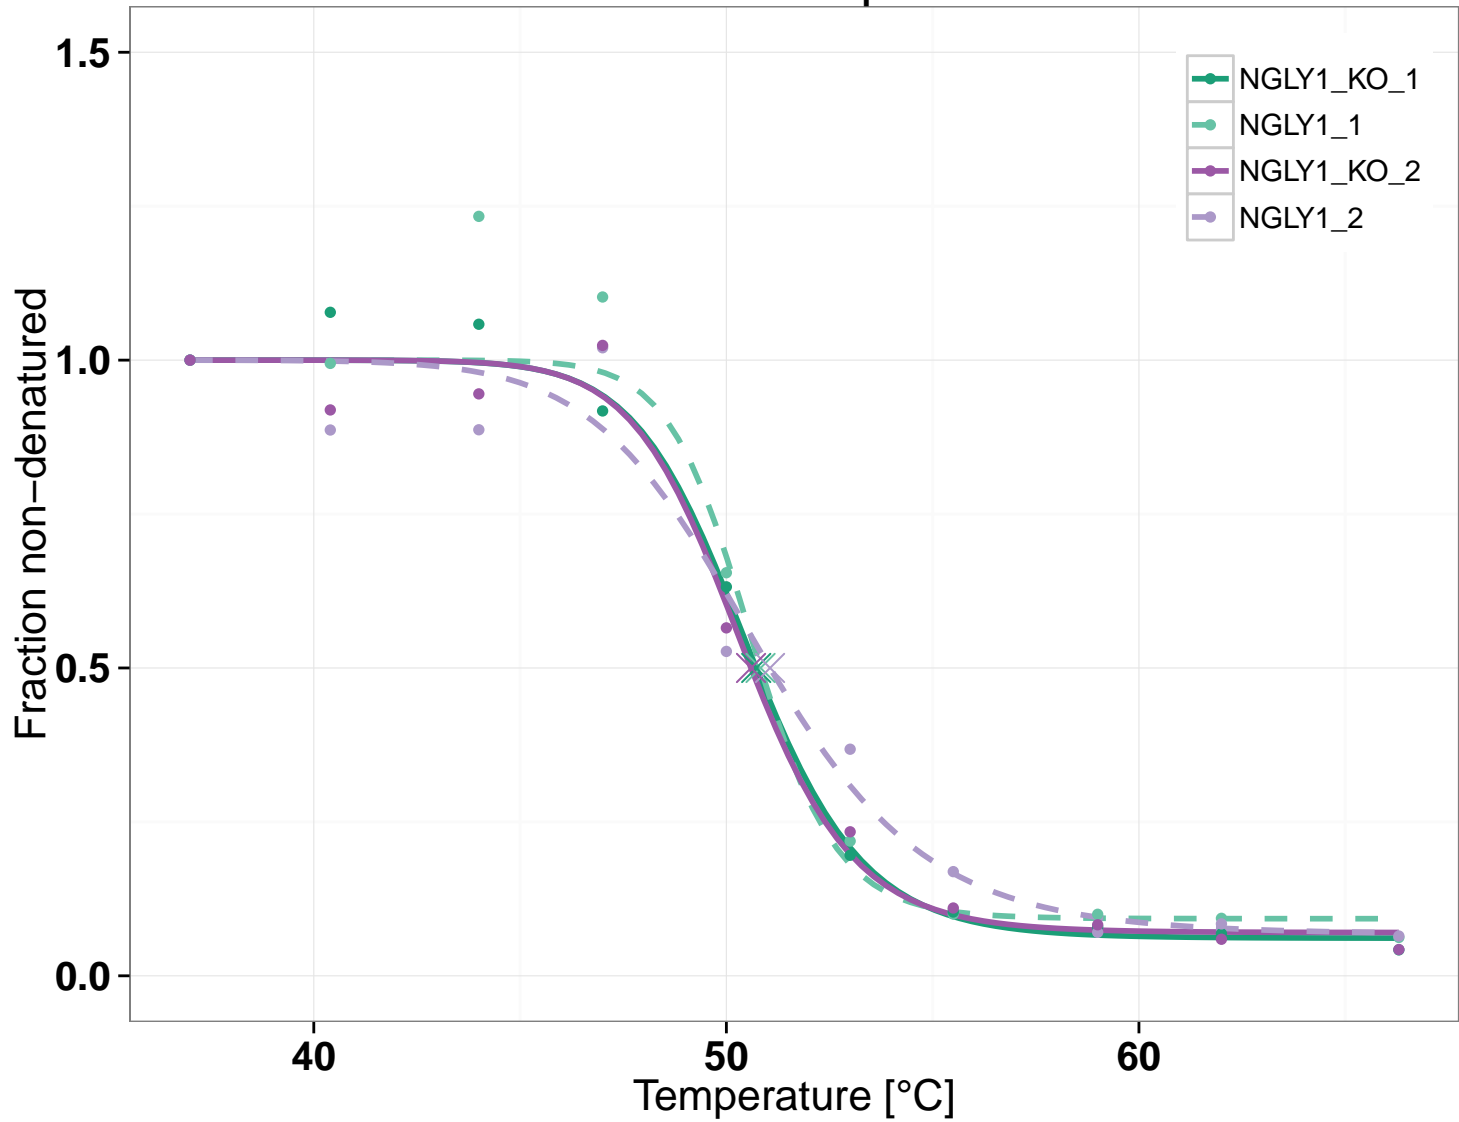

|            | meltPoint | slope | plateau | R2   |
|------------|-----------|-------|---------|------|
| NGLY1_KO_1 | 50.72     | -0.17 | 0.06    | 0.99 |
| NGLY1_1    | 50.83     | -0.22 | 0.09    | 0.97 |
| NGLY1_KO_2 | 50.6      | -0.17 | 0.07    | 0.99 |
| NGLY1_2    | 51.06     | -0.12 | 0.07    | 0.97 |

Supplement: Supplementary file 7425 [file 1]

IPI00064767.3|ARHGAP17

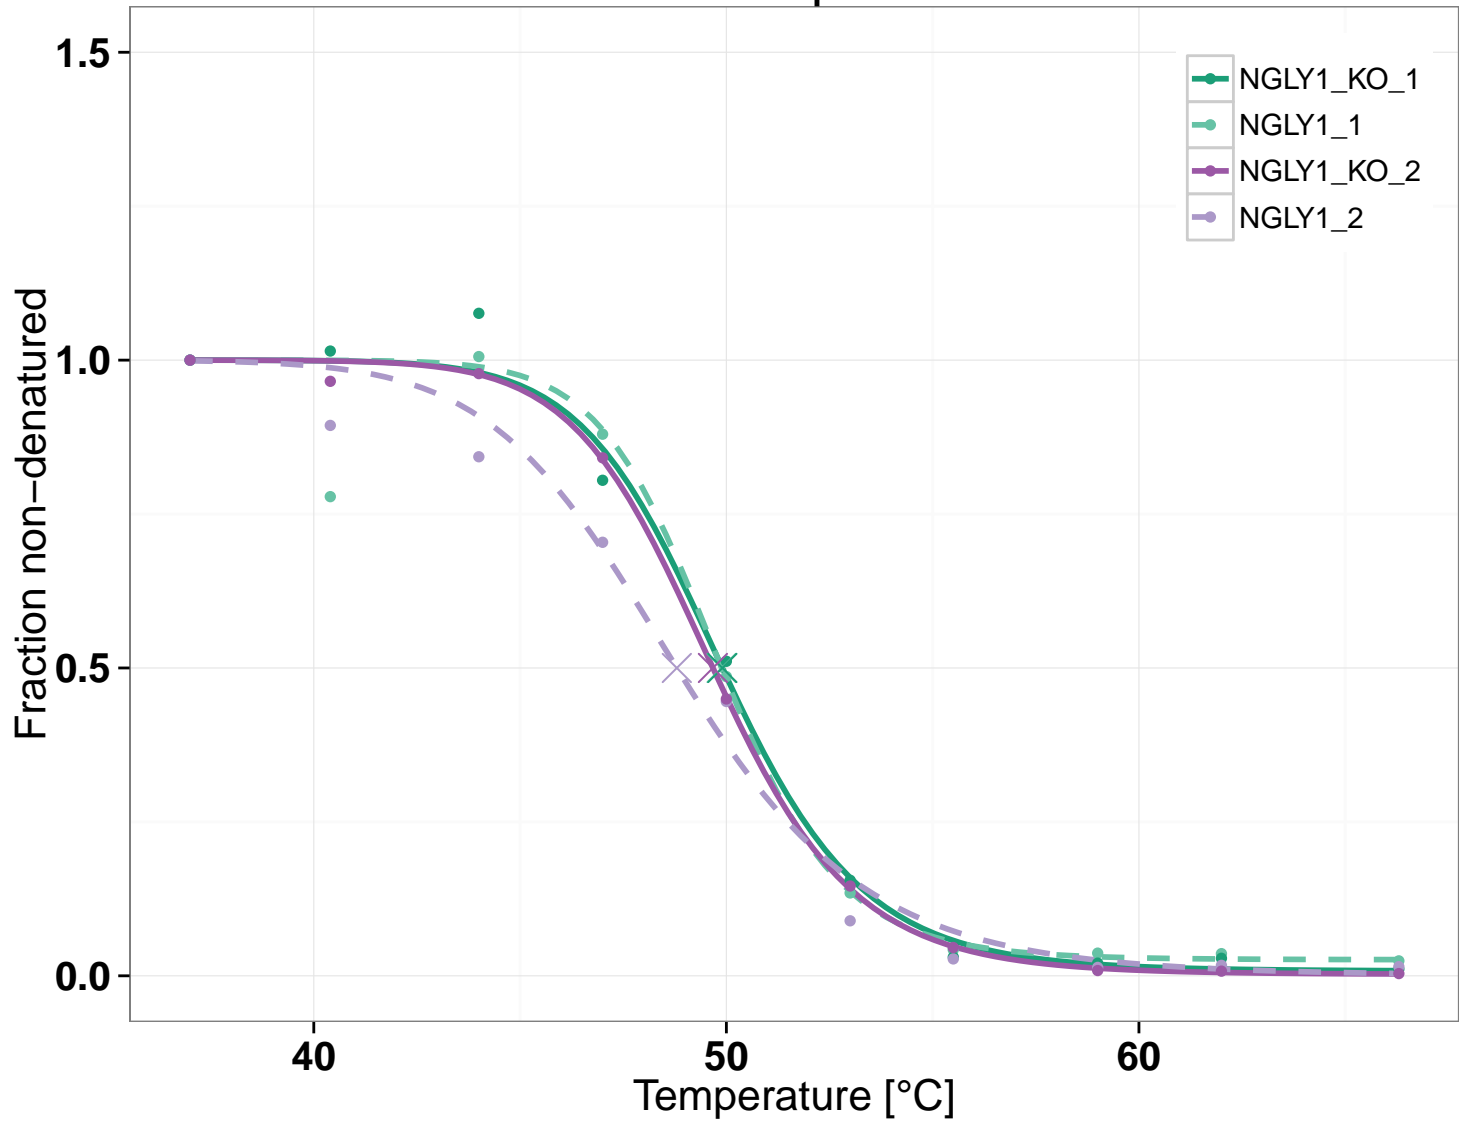

|            | meltPoint | slope | plateau | R2   |
|------------|-----------|-------|---------|------|
| NGLY1_KO_1 | 49.9      | -0.15 | 0.01    | 0.99 |
| NGLY1_1    | 49.89     | -0.17 | 0.03    | 0.97 |
| NGLY1_KO_2 | 49.67     | -0.15 | 0       | 1    |
| NGLY1_2    | 48.8      | -0.11 | 0       | 0.98 |

Supplement: Supplementary file 7426 [file 1]

IPI00873747.1|ASAP1

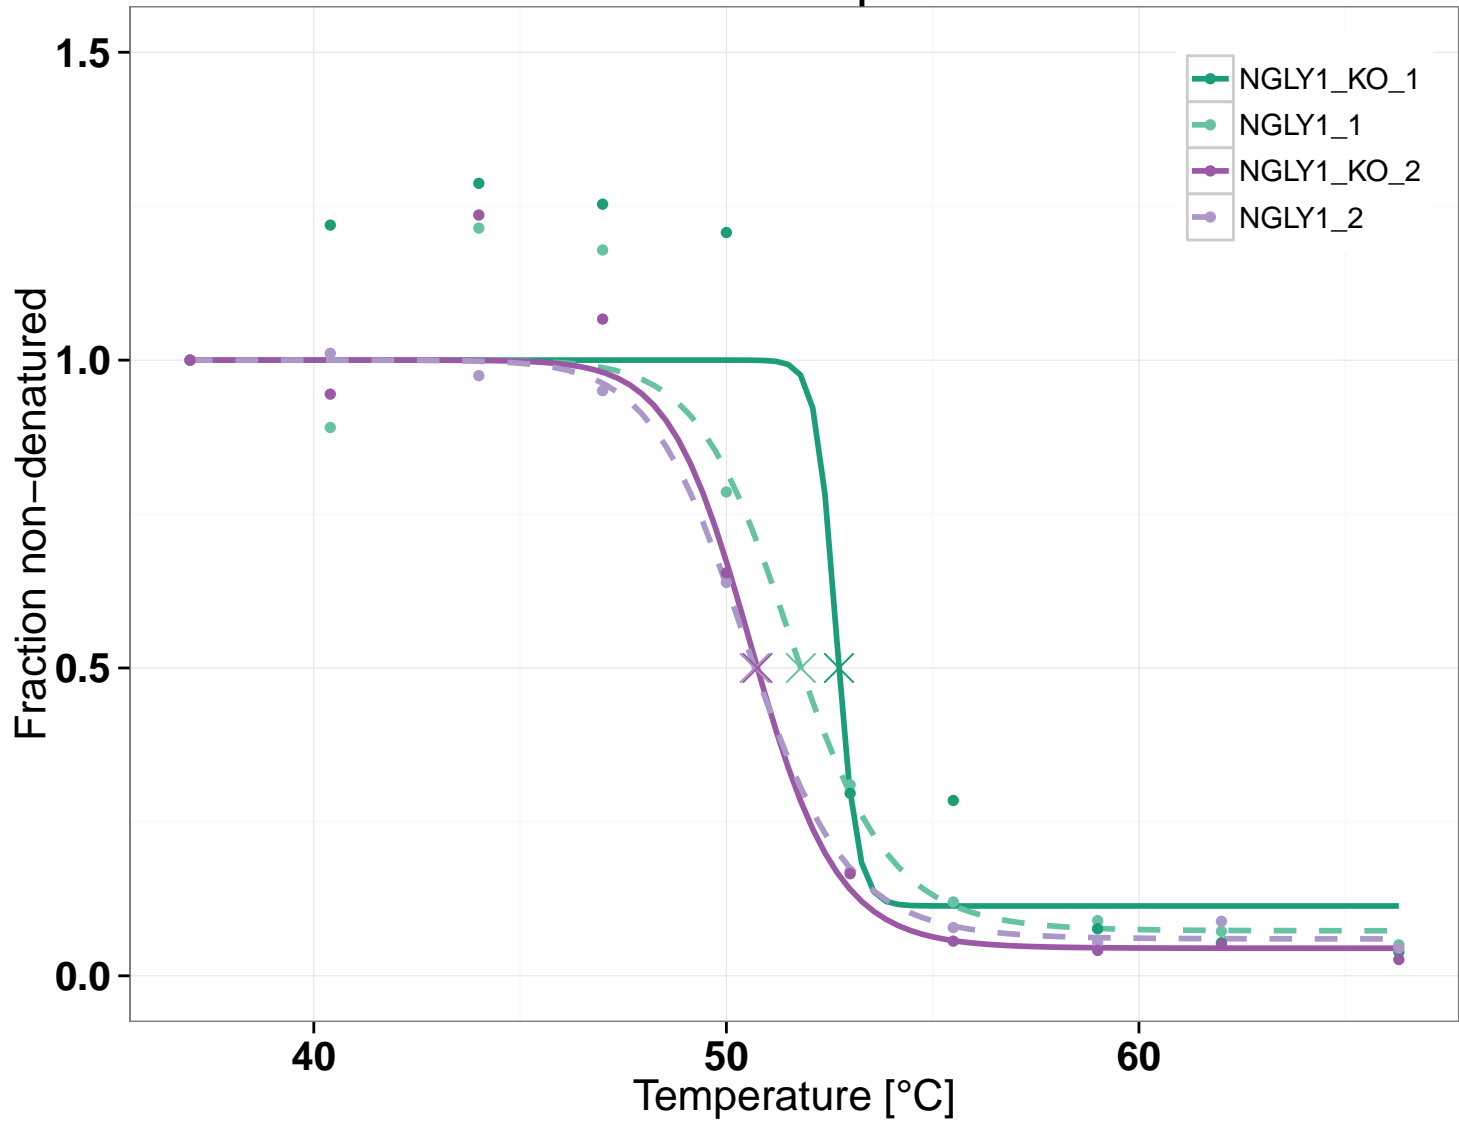

|            | meltPoint | slope | plateau | R2   |
|------------|-----------|-------|---------|------|
| NGLY1_KO_1 | 52.73     | -0.9  | 0.11    | 0.9  |
| NGLY1_1    | 51.8      | -0.2  | 0.07    | 0.95 |
| NGLY1_KO_2 | 50.75     | -0.23 | 0.04    | 0.97 |
| NGLY1_2    | 50.69     | -0.2  | 0.06    | 1    |

Supplement: Supplementary file 7427 [file 1]

IPI00872489.2|PPP3CC

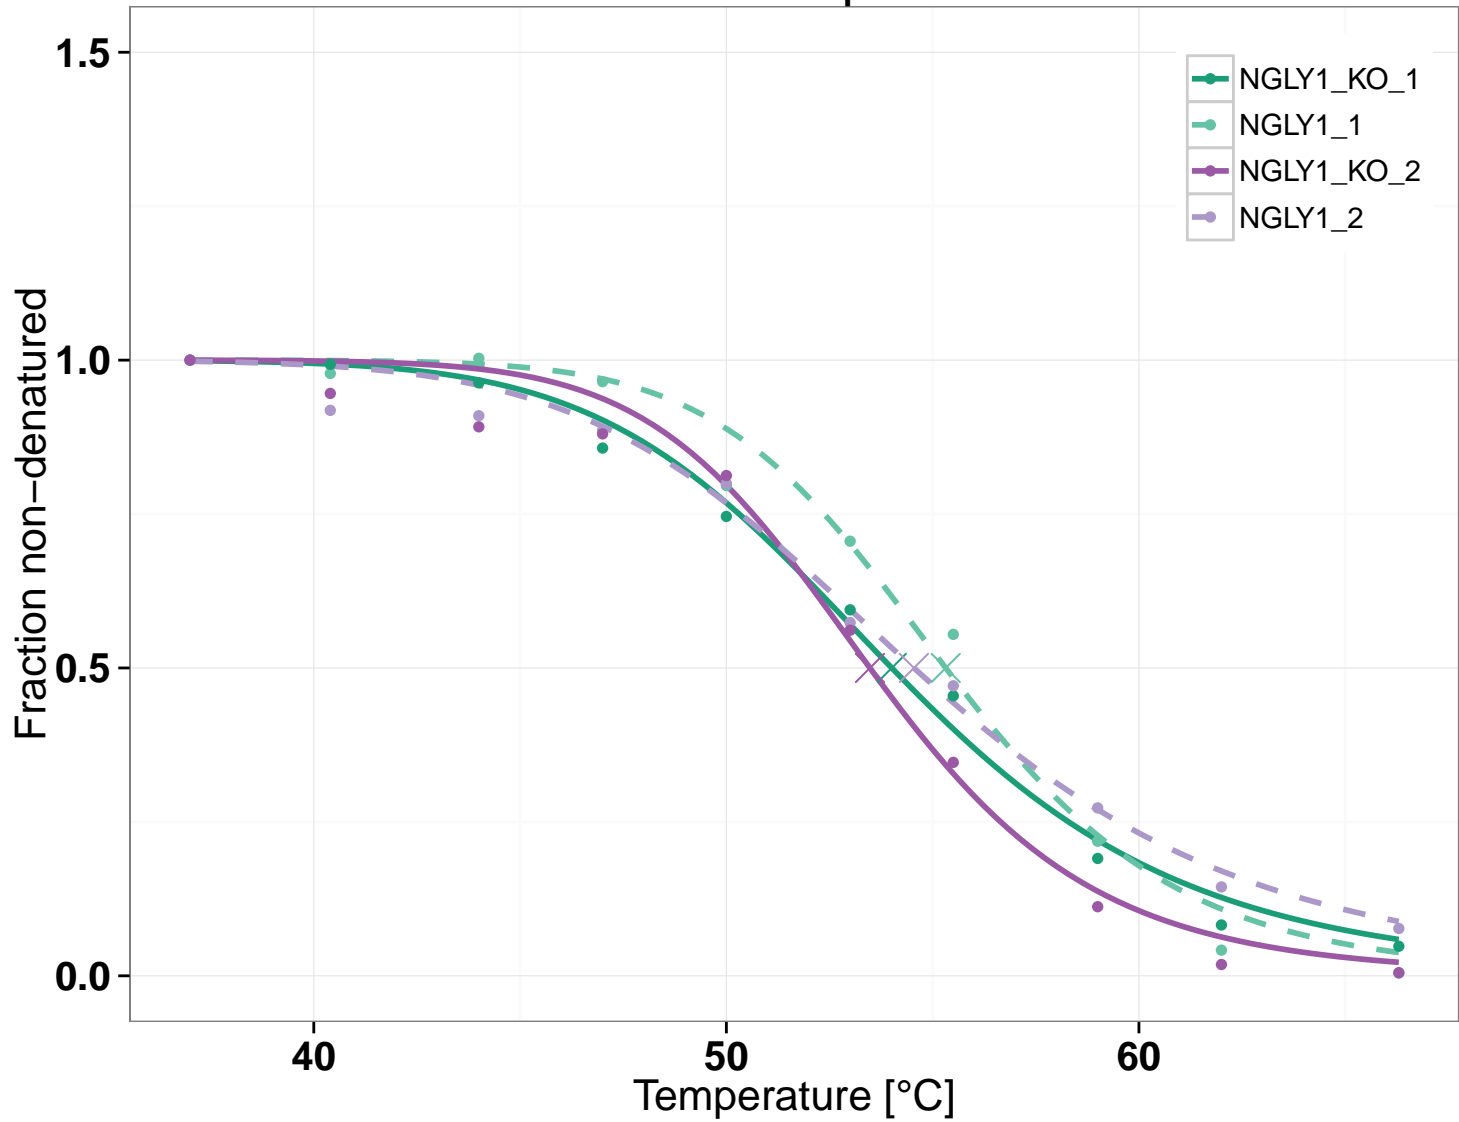

|            | meltPoint | slope  | plateau | R2   |
|------------|-----------|--------|---------|------|
| NGLY1_KO_1 | 54.01     | -0.07  | 0       | 0.99 |
| NGLY1_1    | 55.32     | -0.089 | 0       | 0.99 |
| NGLY1_KO_2 | 53.48     | -0.093 | 0       | 0.99 |
| NGLY1_2    | 54.55     | -0.062 | 0       | 0.99 |

Supplement: Supplementary file 7428 [file 1]

IPI00218262.1|CTAG2

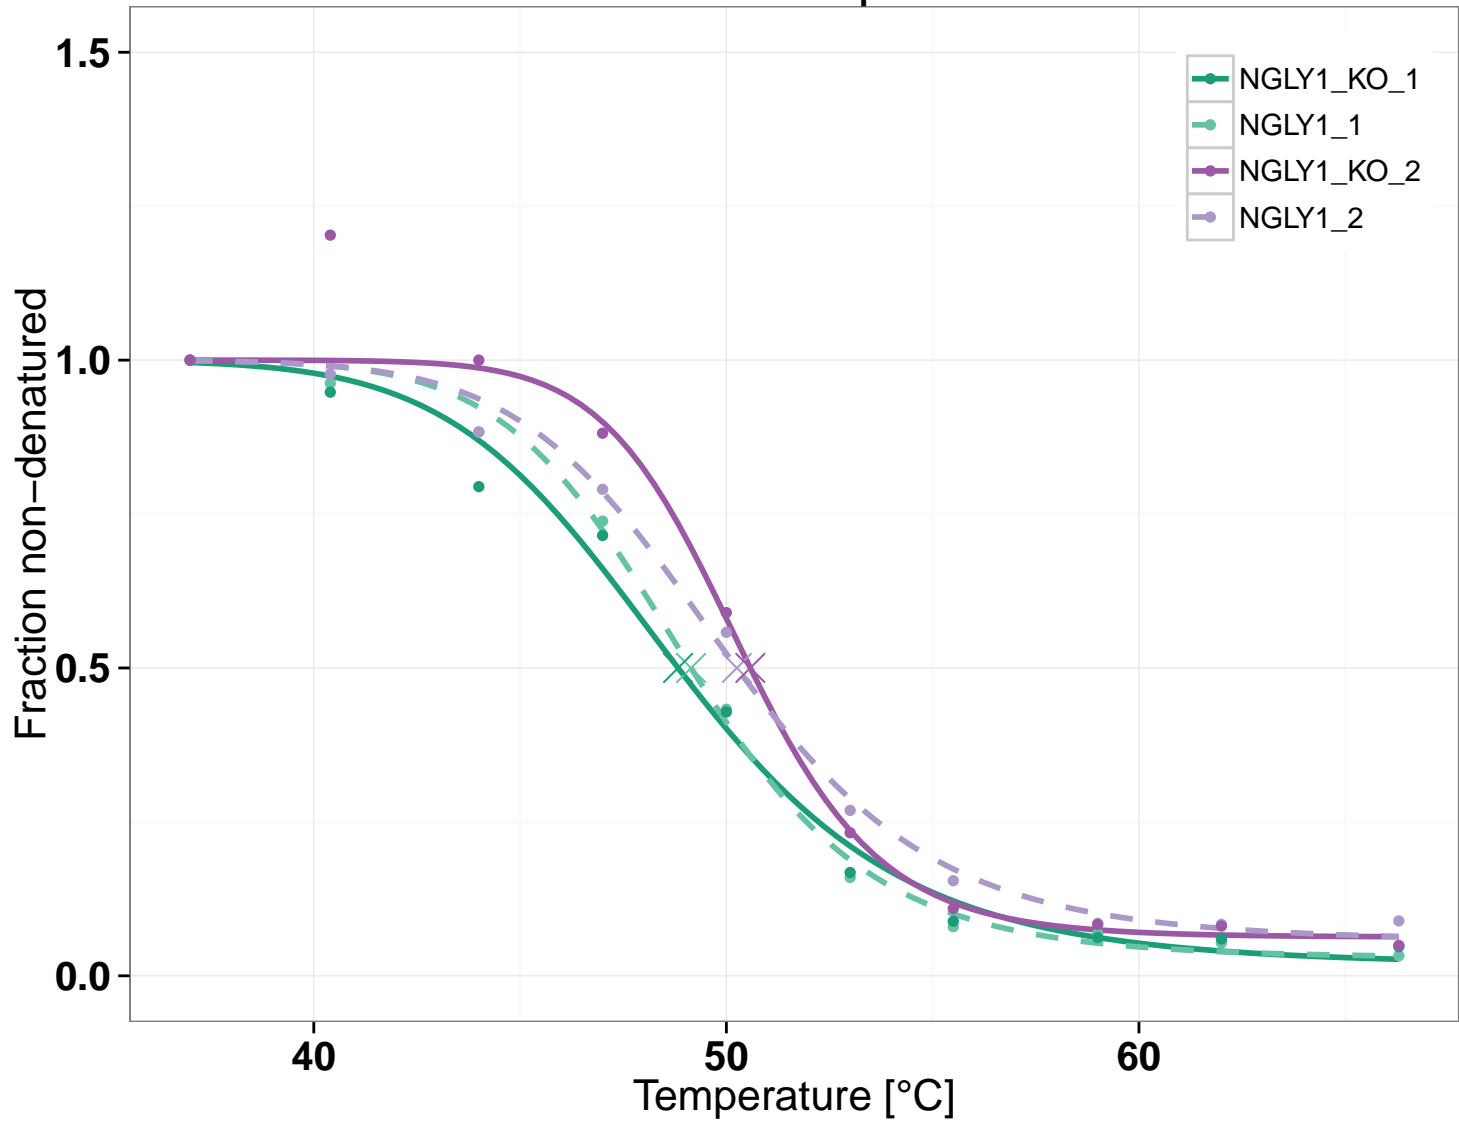

|            | meltPoint | slope  | plateau | R2   |
|------------|-----------|--------|---------|------|
| NGLY1_KO_1 | 48.83     | -0.089 | 0.02    | 0.99 |
| NGLY1_1    | 49.14     | -0.11  | 0.03    | 1    |
| NGLY1_KO_2 | 50.58     | -0.14  | 0.06    | 0.98 |
| NGLY1_2    | 50.26     | -0.093 | 0.06    | 1    |

Supplement: Supplementary file 7429 [file 1]

IPI00019349.3|SLC38A7

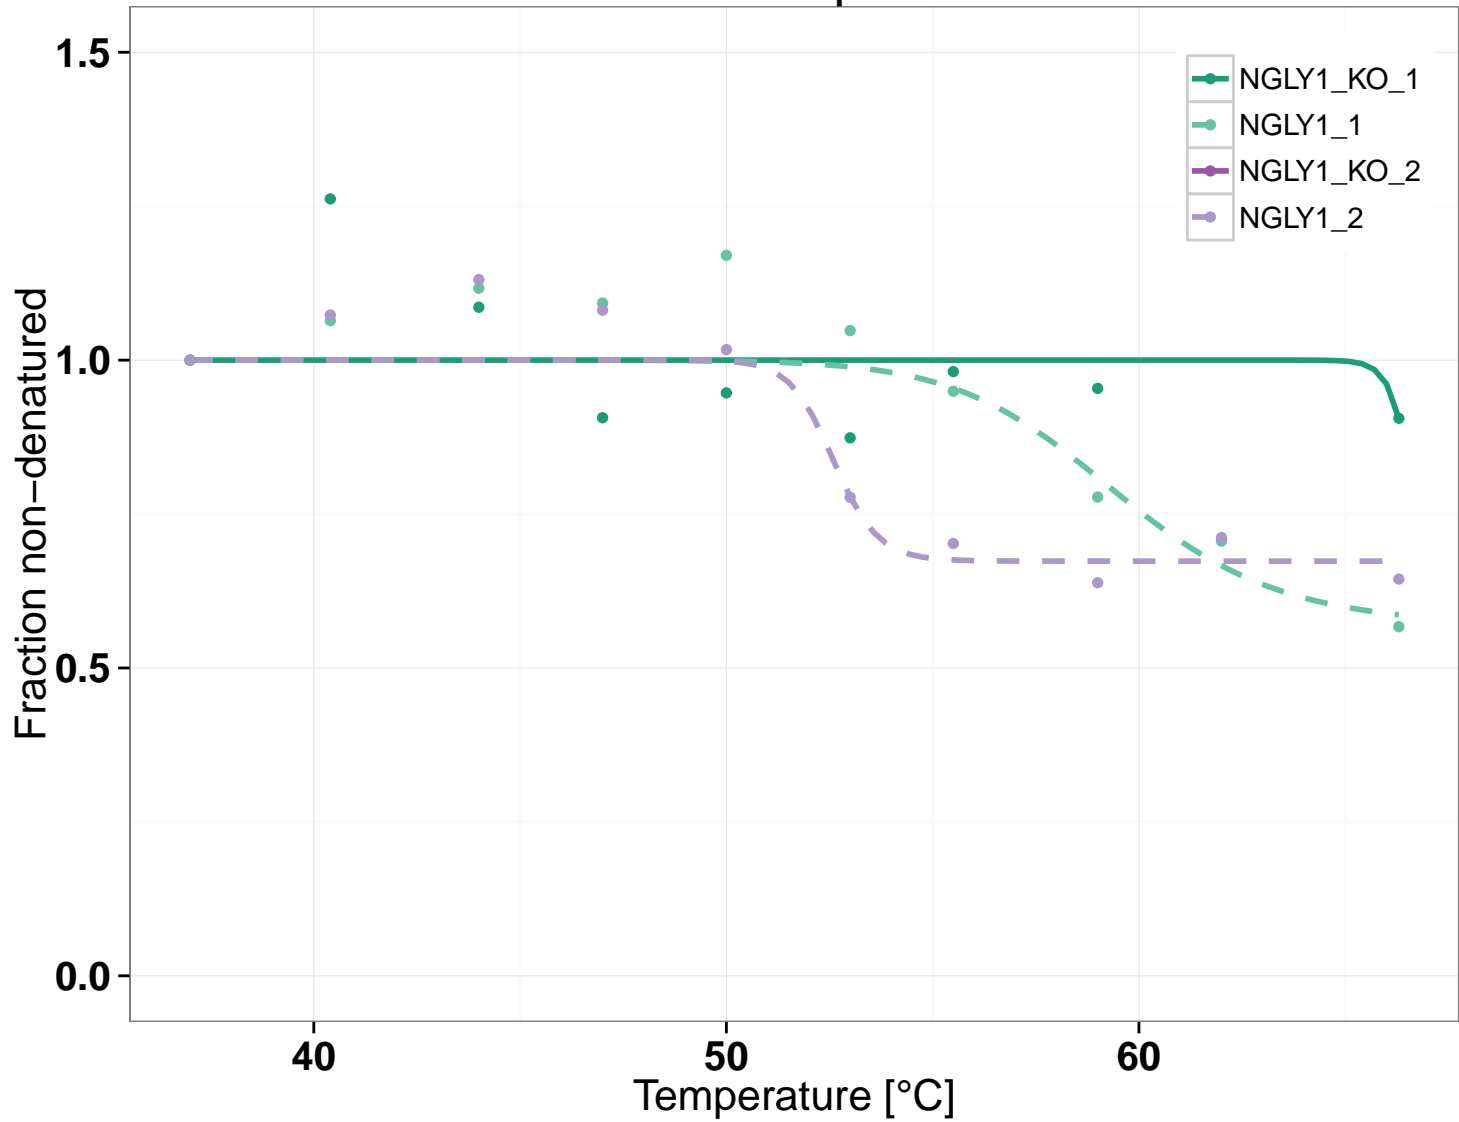

|            | meltPoint | slope  | plateau | R2   |
|------------|-----------|--------|---------|------|
| NGLY1_KO_1 | -         | -      | 0.01    | 0.05 |
| NGLY1_1    | -         | -0.055 | 0.57    | 0.83 |
| NGLY1_KO_2 | -         | -      | -       | -    |
| NGLY1_2    | -         | -0.15  | 0.67    | 0.91 |

Supplement: Supplementary file 7430 [file 1]

# IPI00045917.3|CRBN

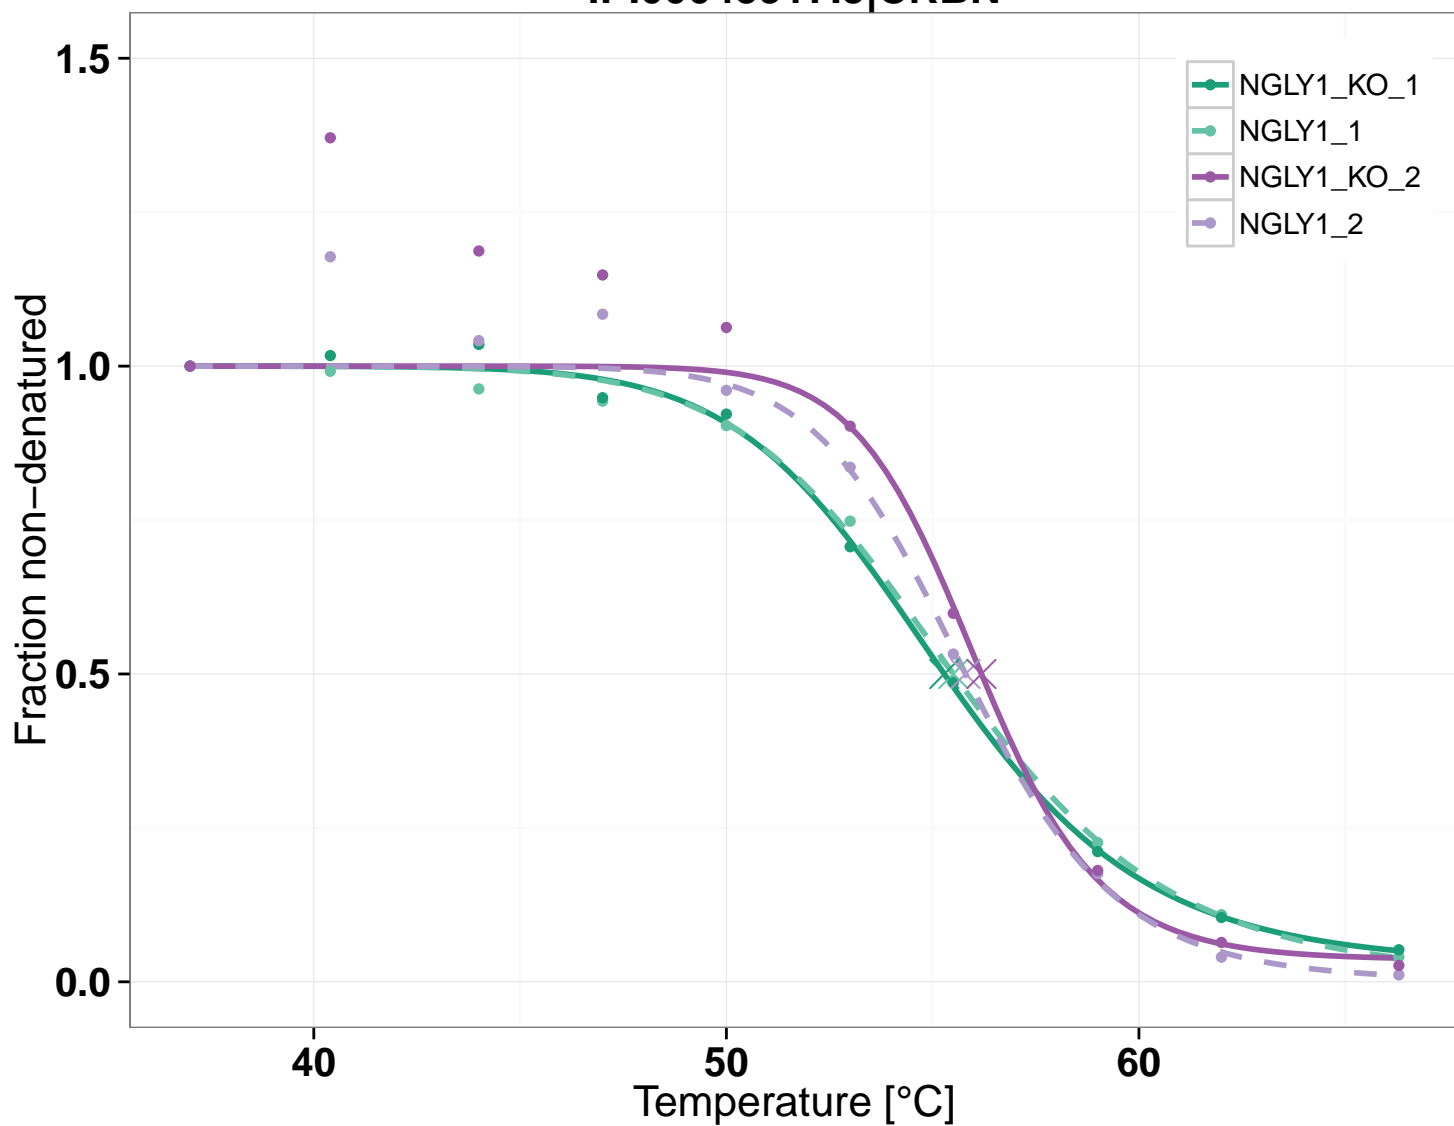

|            | meltPoint | slope  | plateau | R2   |
|------------|-----------|--------|---------|------|
| NGLY1_KO_1 | 55.28     | -0.098 | 0.03    | 1    |
| NGLY1_1    | 55.5      | -0.094 | 0.01    | 1    |
| NGLY1_KO_2 | 56.18     | -0.16  | 0.04    | 0.91 |
| NGLY1_2    | 55.8      | -0.14  | 0       | 0.98 |

Supplement: Supplementary file 7431 [file 1]

# IPI00301100.3|SLC43A3

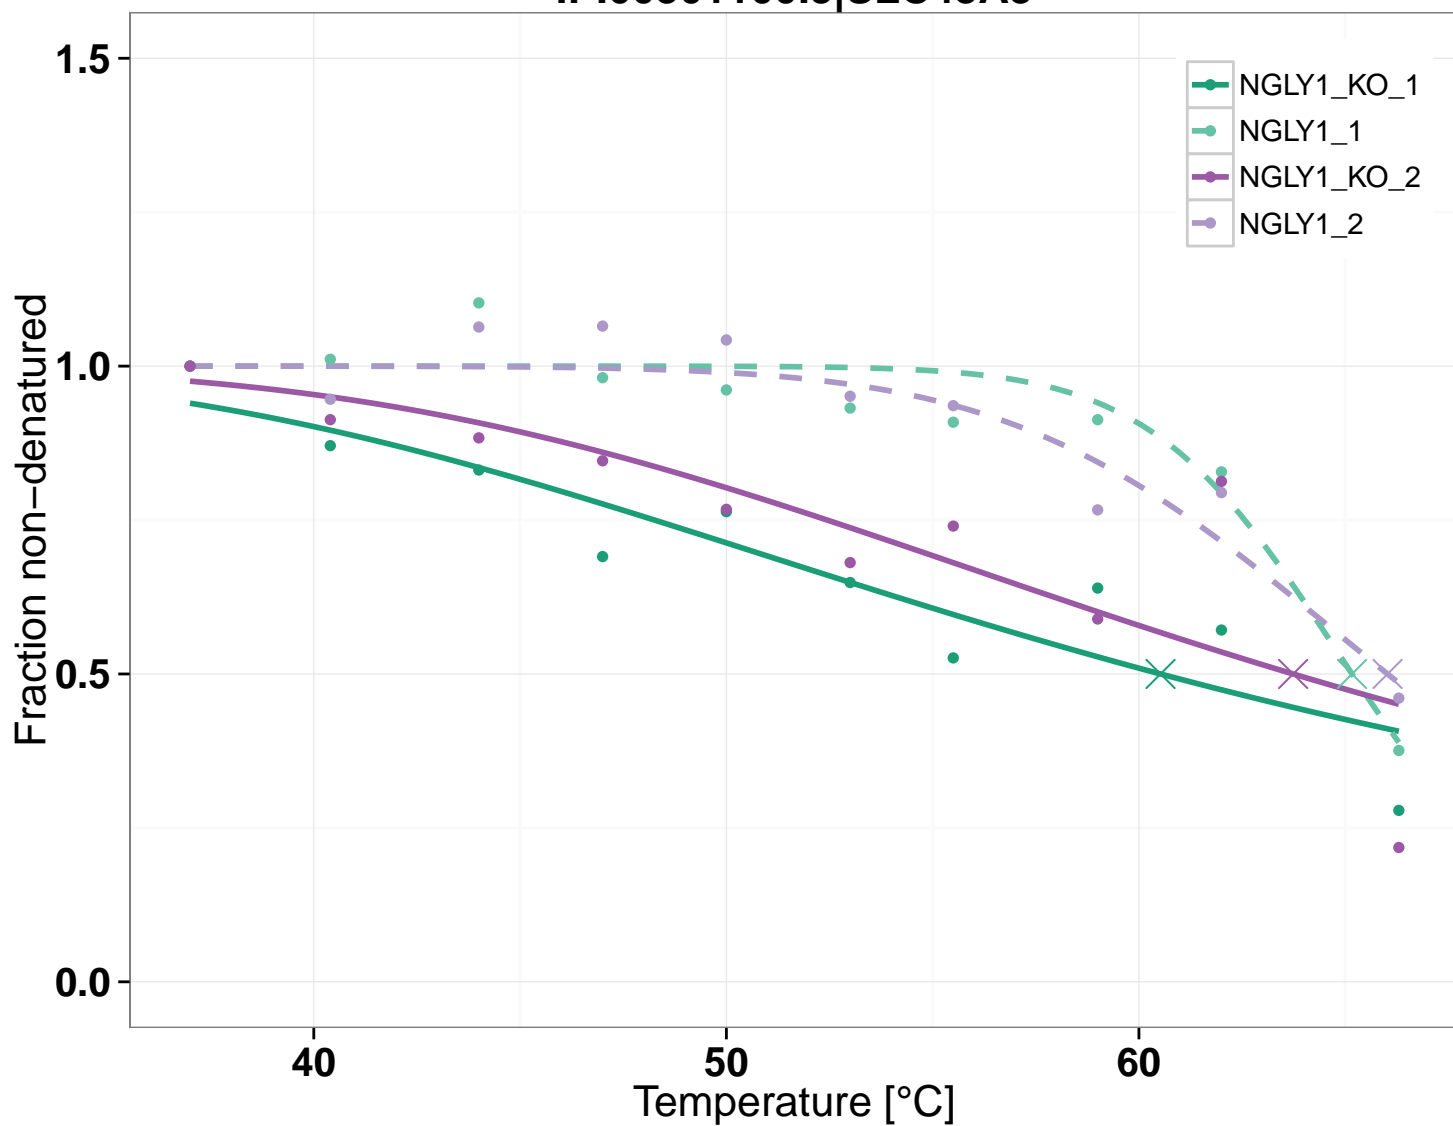

|            | meltPoint | slope  | plateau | R2   |
|------------|-----------|--------|---------|------|
| NGLY1_KO_1 | 60.52     | -0.021 | 0       | 0.84 |
| NGLY1_1    | 65.17     | -0.1   | 0       | 0.93 |
| NGLY1_KO_2 | 63.74     | -0.023 | 0       | 0.67 |
| NGLY1_2    | 66.03     | -0.055 | 0       | 0.91 |

Supplement: Supplementary file 7432 [file 1]

IPI00289330.3|AVIL

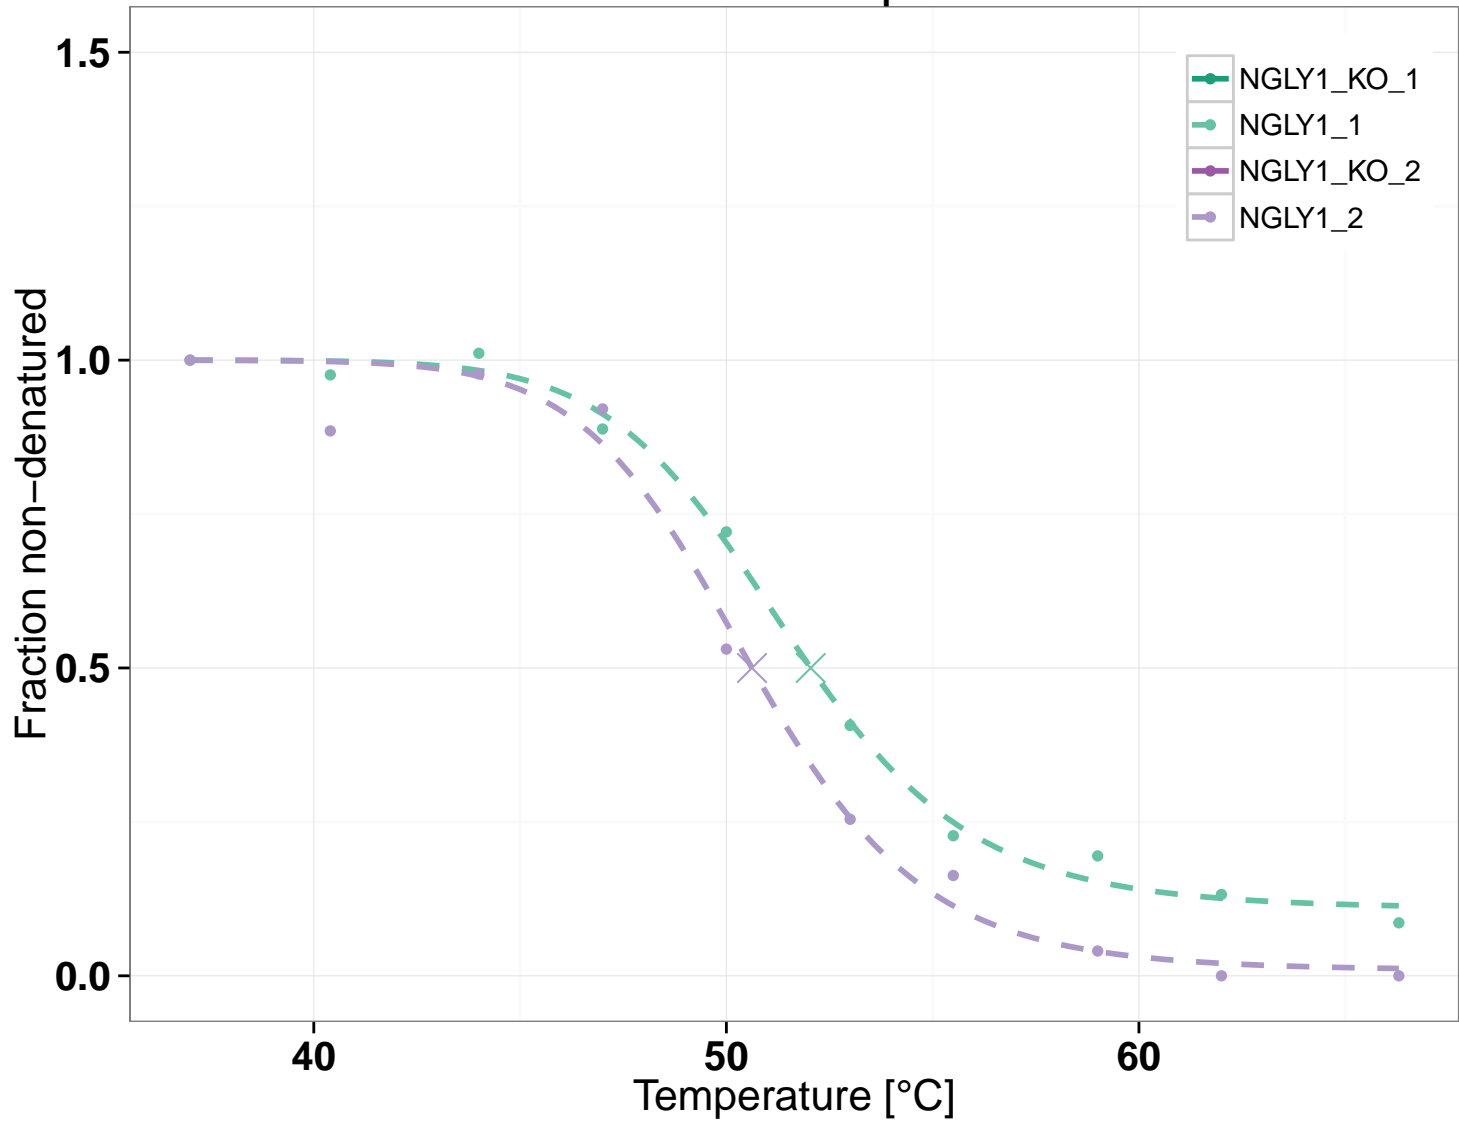

|            | meltPoint | slope | plateau | R2   |
|------------|-----------|-------|---------|------|
| NGLY1_KO_1 | -         | -     | -       | -    |
| NGLY1_1    | 52.04     | -0.1  | 0.11    | 1    |
| NGLY1_KO_2 | -         | -     | -       | -    |
| NGLY1_2    | 50.62     | -0.12 | 0.01    | 0.99 |

Supplement: Supplementary file 7433 [file 1]
