# Supplementary material (part 75 of 85)
Source: publisher figshare collection journal article supplement (https://gsajournals.figshare.com/articles/dataset/_/12014913)

IPI00103341.3|TRUB1

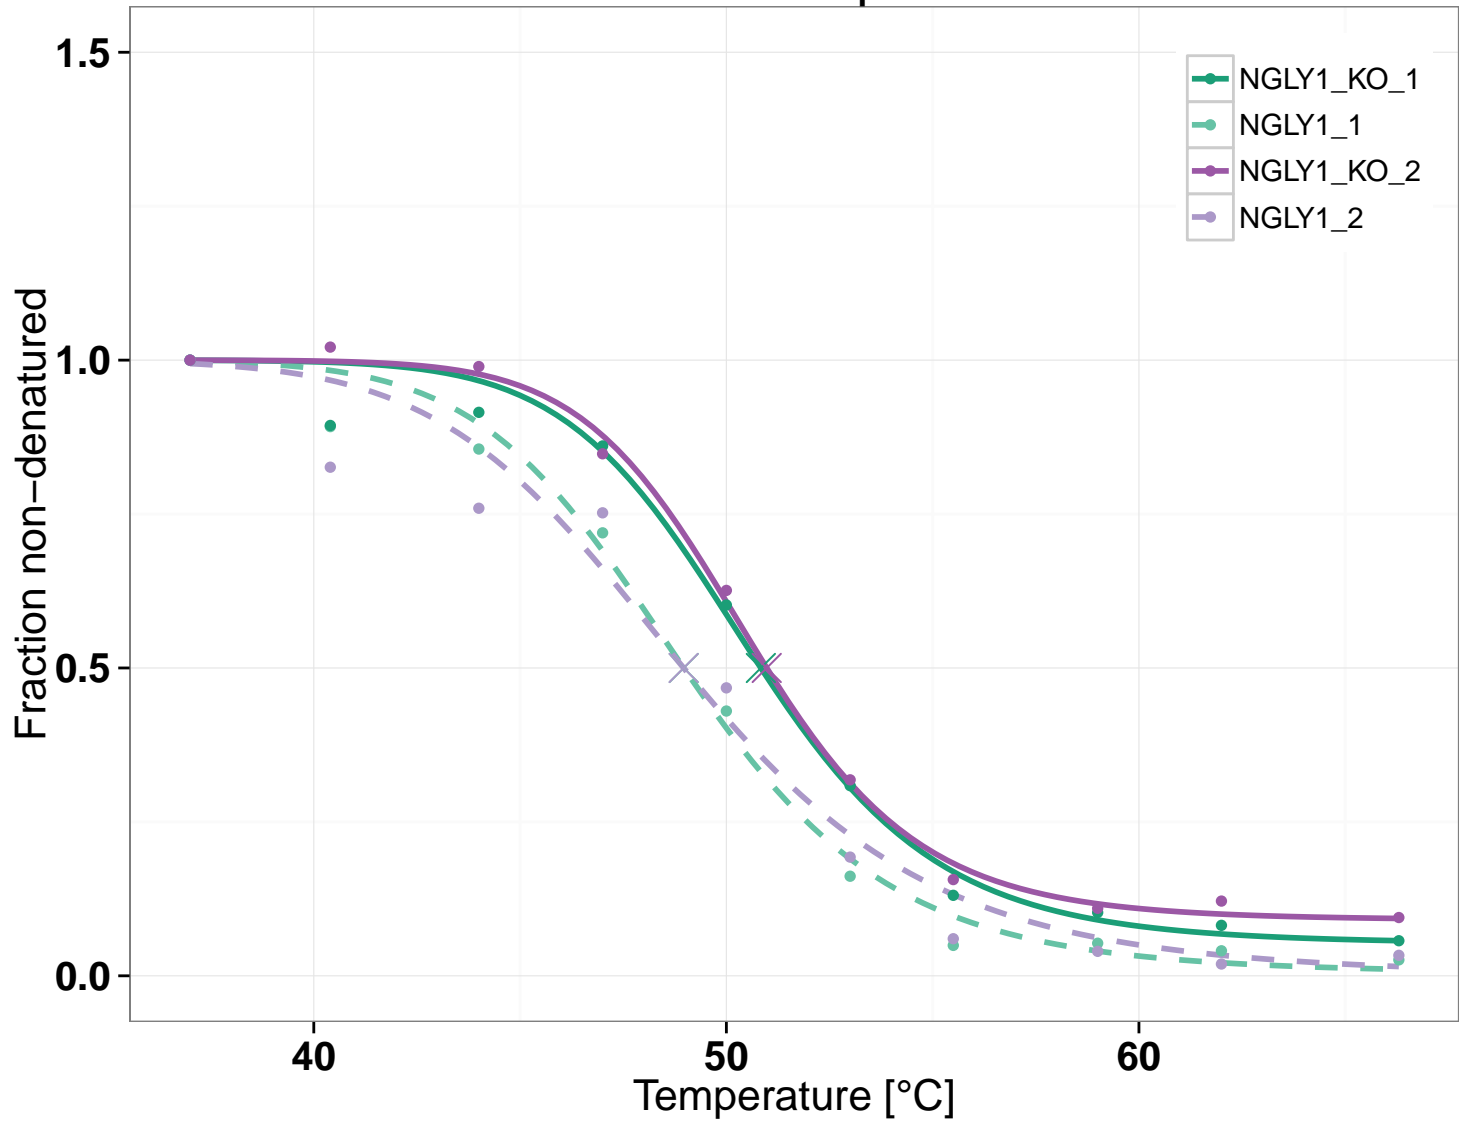

|            | meltPoint | slope  | plateau | R2   |
|------------|-----------|--------|---------|------|
| NGLY1_KO_1 | 50.84     | -0.1   | 0.05    | 0.99 |
| NGLY1_1    | 48.97     | -0.099 | 0       | 0.99 |
| NGLY1_KO_2 | 50.98     | -0.11  | 0.09    | 1    |
| NGLY1_2    | 48.96     | -0.083 | 0       | 0.96 |

Supplement: Supplementary file 7434 [file 1]

# IPI00014218.1|TRAM2

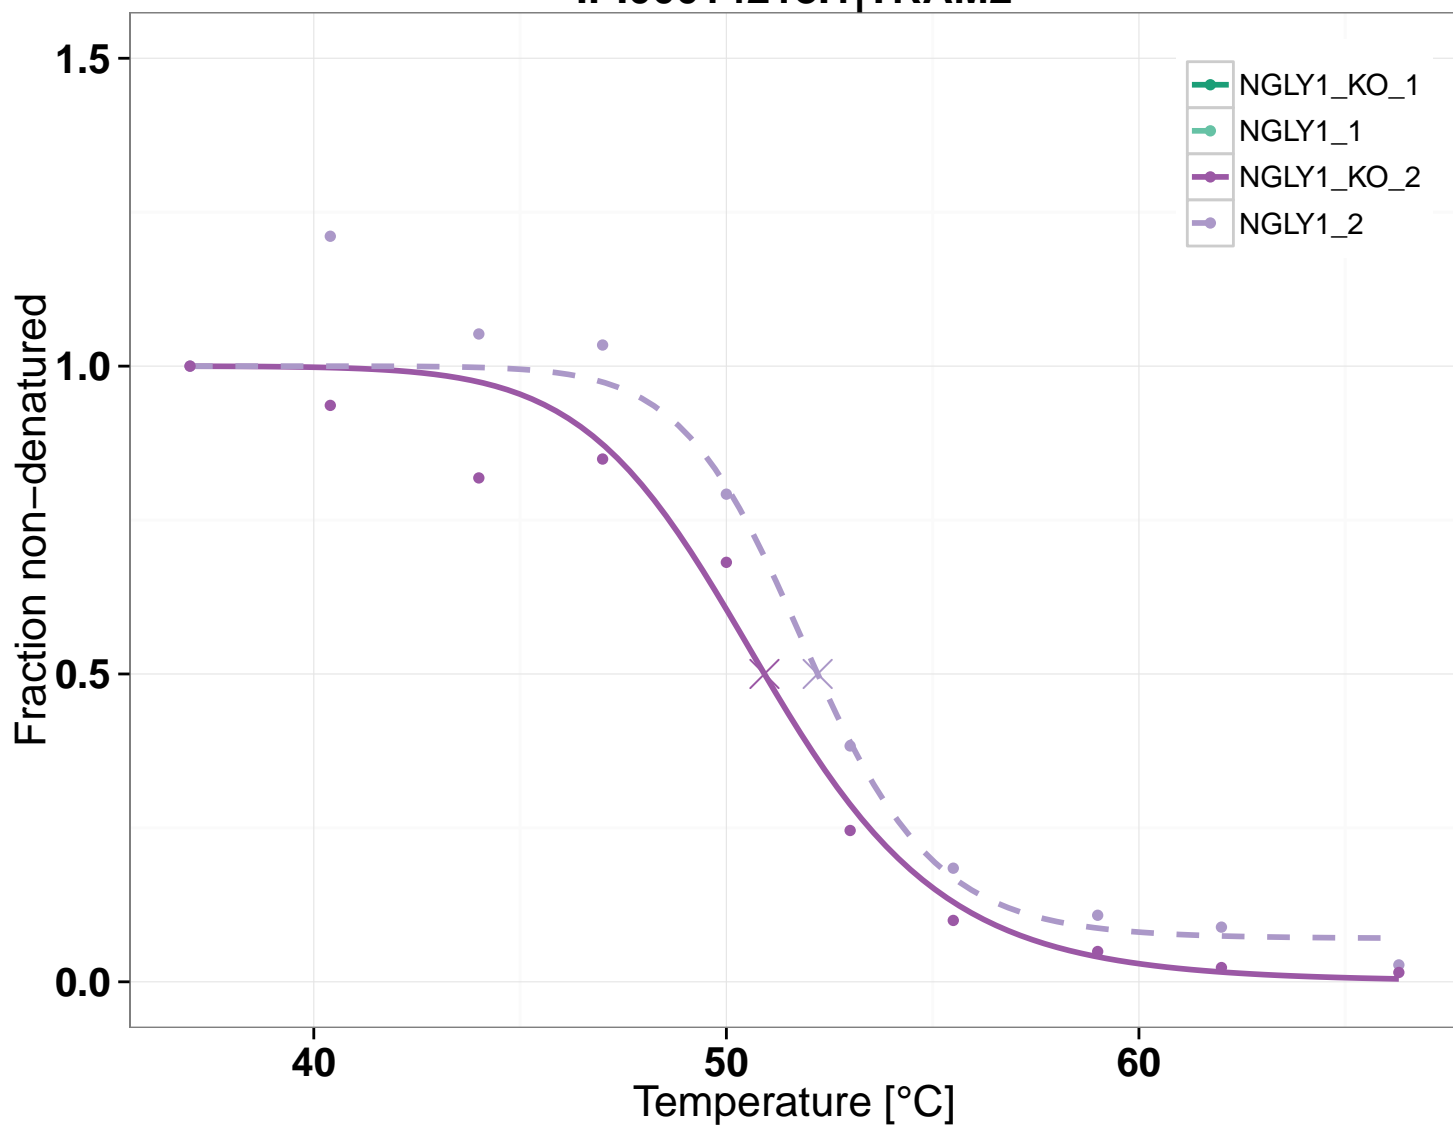

|            | meltPoint | slope | plateau | R2   |
|------------|-----------|-------|---------|------|
| NGLY1_KO_1 | —         | —     | —       | —    |
| NGLY1_1    | —         | —     | —       | —    |
| NGLY1_KO_2 | 50.92     | -0.11 | 0       | 0.98 |
| NGLY1_2    | 52.21     | -0.15 | 0.07    | 0.97 |

Supplement: Supplementary file 7435 [file 1]

IPI00306518.3|FANCI

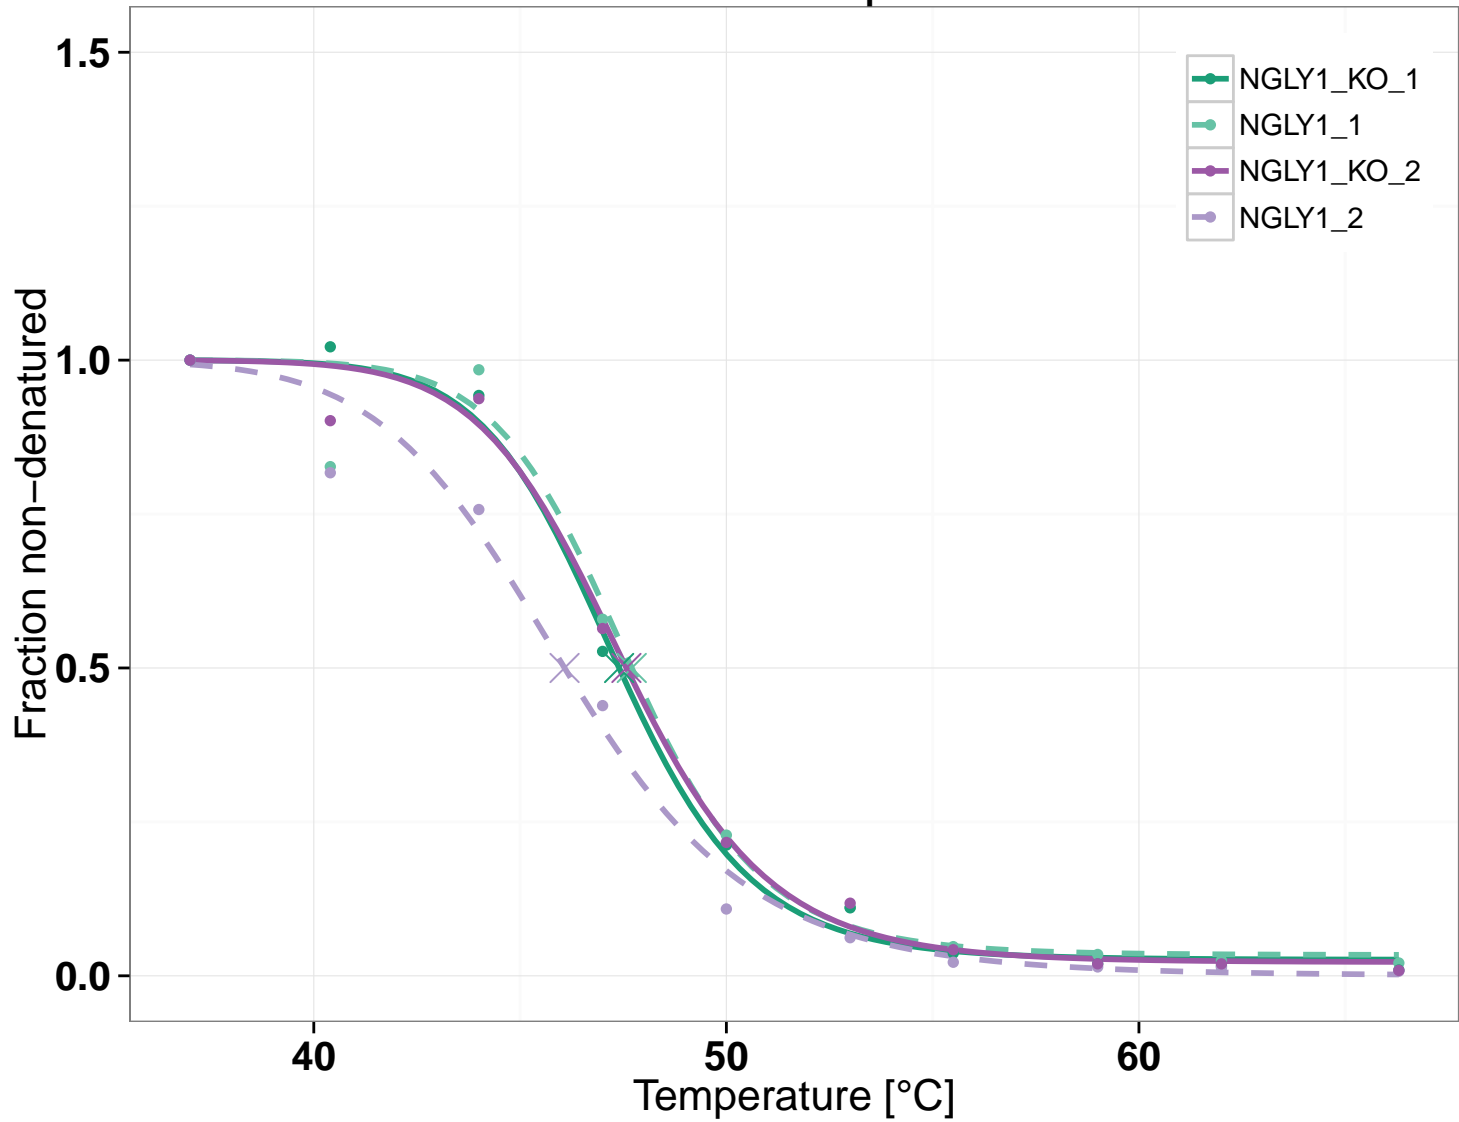

|            | meltPoint | slope | plateau | R2   |
|------------|-----------|-------|---------|------|
| NGLY1_KO_1 | 47.4      | -0.15 | 0.03    | 1    |
| NGLY1_1    | 47.71     | -0.15 | 0.03    | 0.98 |
| NGLY1_KO_2 | 47.58     | -0.14 | 0.02    | 0.99 |
| NGLY1_2    | 46.08     | -0.11 | 0       | 0.98 |

Supplement: Supplementary file 7436 [file 1]

# IPI00100313.2|PCID2

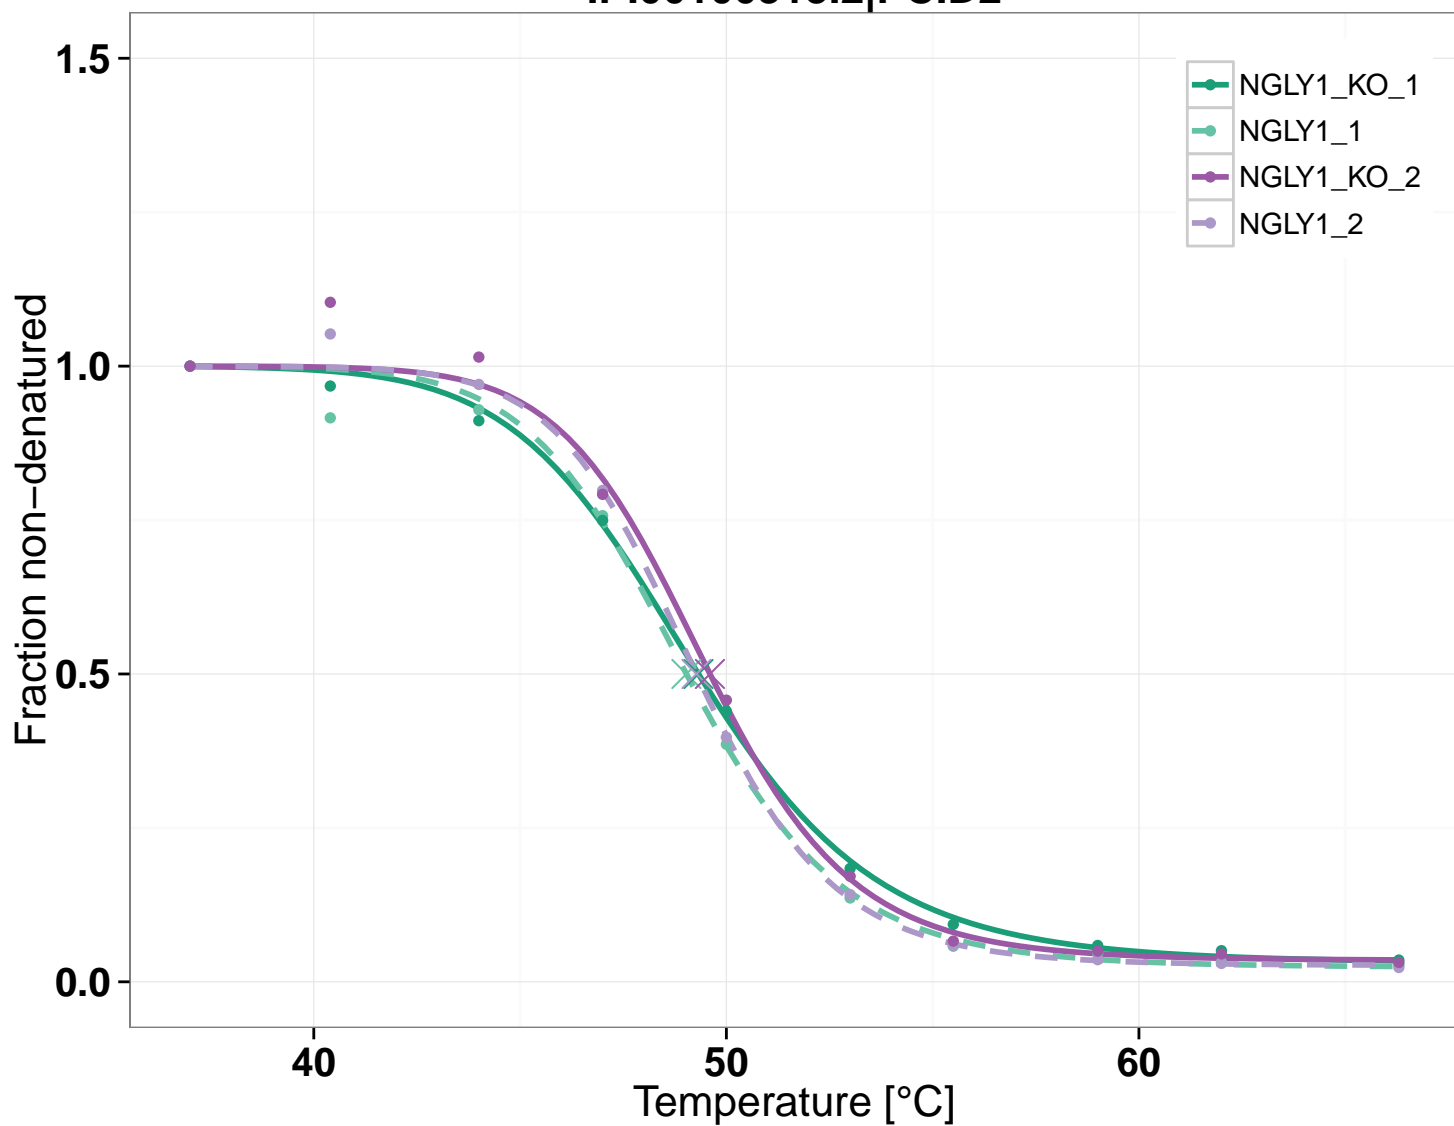

|            | meltPoint | slope | plateau | R2   |
|------------|-----------|-------|---------|------|
| NGLY1_KO_1 | 49.32     | -0.11 | 0.03    | 1    |
| NGLY1_1    | 49.03     | -0.13 | 0.02    | 1    |
| NGLY1_KO_2 | 49.6      | -0.14 | 0.03    | 0.99 |
| NGLY1_2    | 49.28     | -0.14 | 0.03    | 1    |

Supplement: Supplementary file 7437 [file 1]

IPI00748705.1|LOC643988

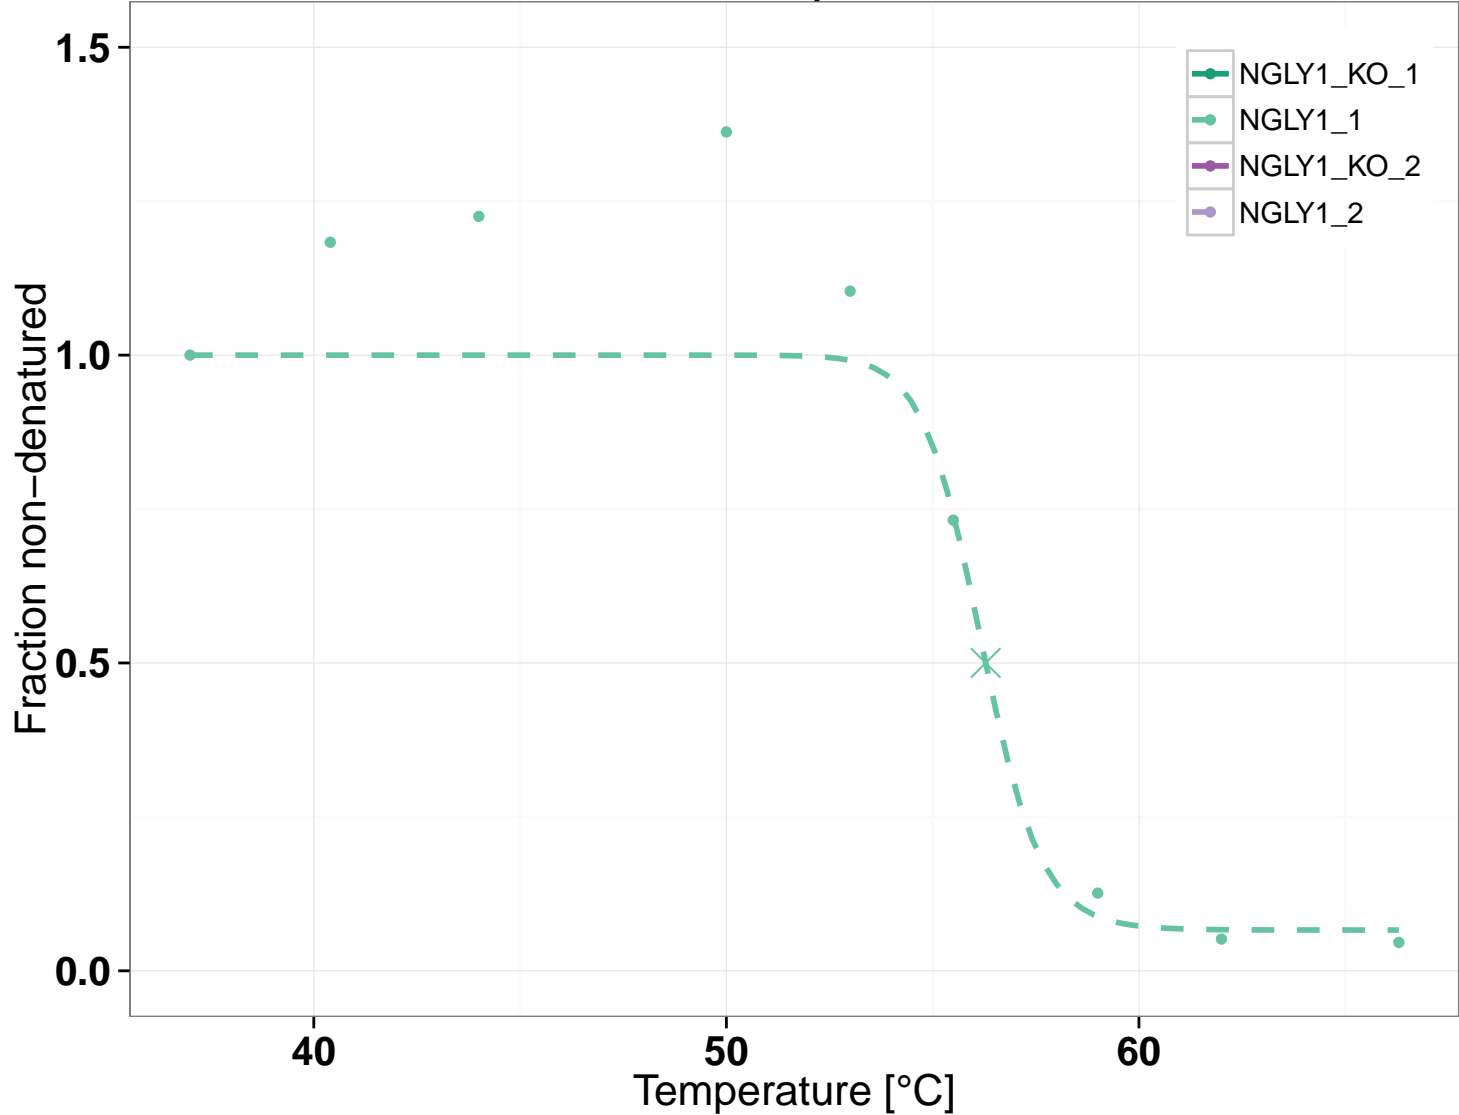

|            | meltPoint | slope | plateau | R2   |
|------------|-----------|-------|---------|------|
| NGLY1_KO_1 | -         | -     | -       | -    |
| NGLY1_1    | 56.29     | -0.32 | 0.07    | 0.82 |
| NGLY1_KO_2 | -         | -     | -       | -    |
| NGLY1_2    | -         | -     | -       | -    |

Supplement: Supplementary file 7438 [file 1]

# IPI00513833.2|TMEM9

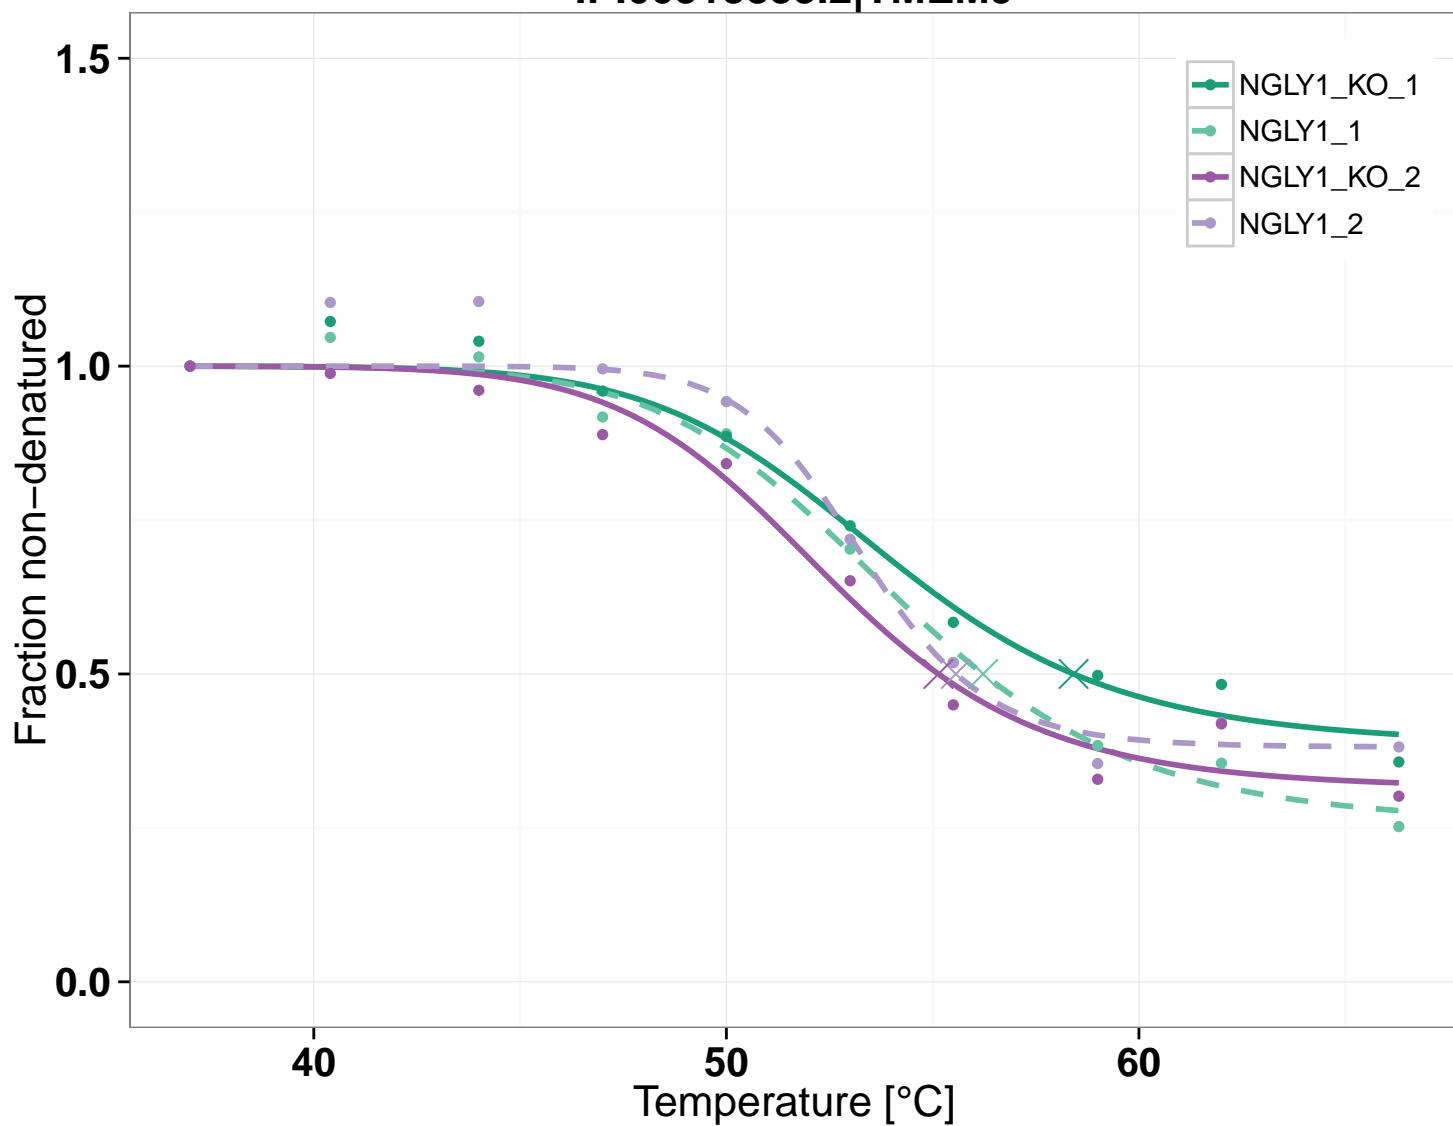

|            | meltPoint | slope  | plateau | R2   |
|------------|-----------|--------|---------|------|
| NGLY1_KO_1 | 58.42     | -0.054 | 0.38    | 0.98 |
| NGLY1_1    | 56.22     | -0.065 | 0.25    | 0.99 |
| NGLY1_KO_2 | 55.14     | -0.067 | 0.31    | 0.98 |
| NGLY1_2    | 55.56     | -0.1   | 0.38    | 0.97 |

Supplement: Supplementary file 7439 [file 1]

IPI00902984.2|FAM58A

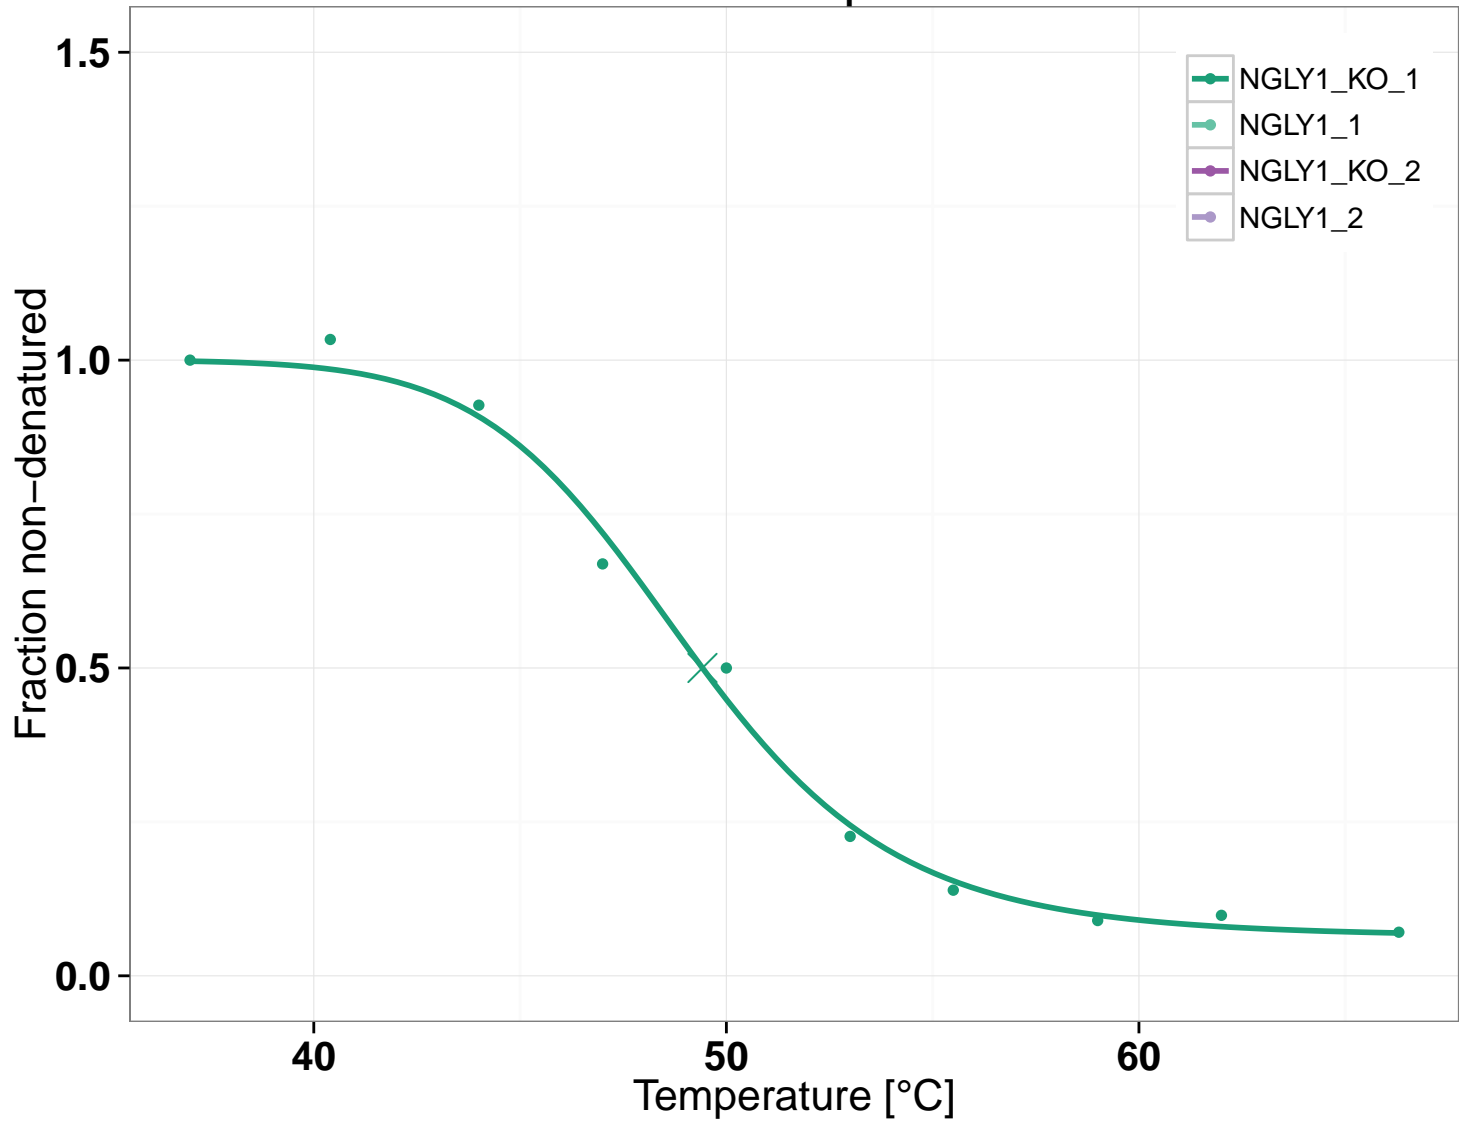

|            | meltPoint | slope  | plateau | R2   |
|------------|-----------|--------|---------|------|
| NGLY1_KO_1 | 49.42     | -0.093 | 0.06    | 0.99 |
| NGLY1_1    | -         | -      | -       | -    |
| NGLY1_KO_2 | -         | -      | -       | -    |
| NGLY1_2    | -         | -      | -       | -    |

Supplement: Supplementary file 7440 [file 1]

IPI00028050.2|EEFSEC

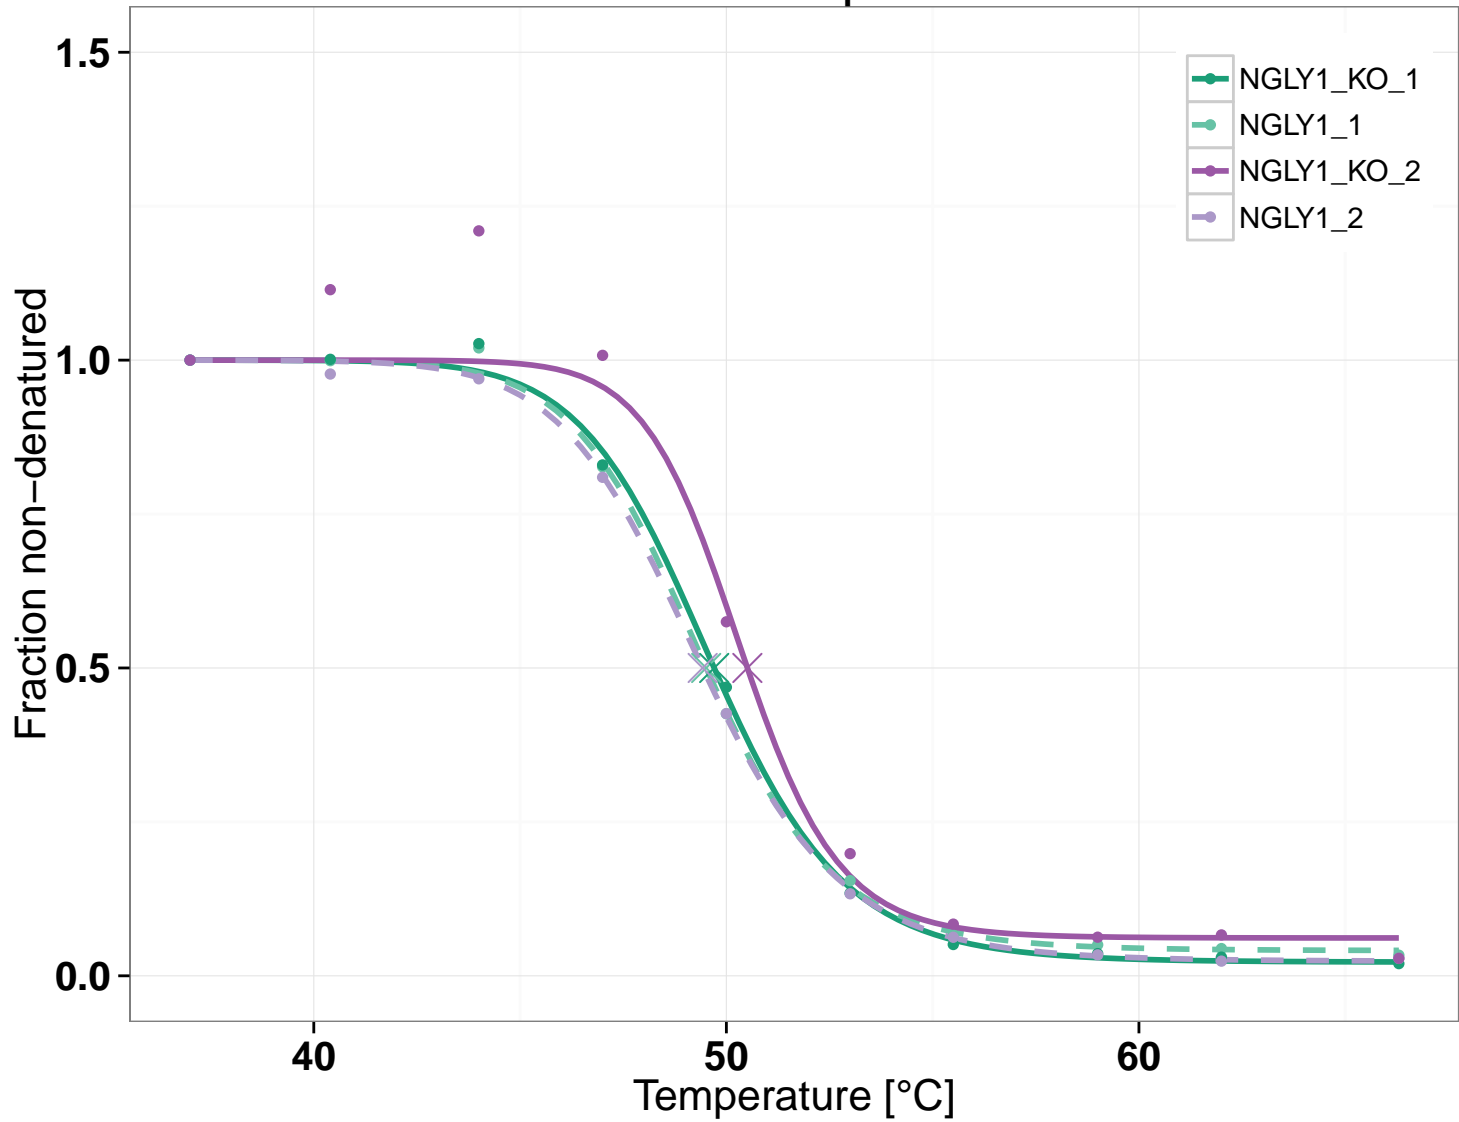

|            | meltPoint | slope | plateau | R2   |
|------------|-----------|-------|---------|------|
| NGLY1_KO_1 | 49.71     | -0.15 | 0.02    | 1    |
| NGLY1_1    | 49.51     | -0.15 | 0.04    | 1    |
| NGLY1_KO_2 | 50.51     | -0.2  | 0.06    | 0.97 |
| NGLY1_2    | 49.43     | -0.14 | 0.02    | 1    |

Supplement: Supplementary file 7441 [file 1]

# IPI00792511.1|MAF1

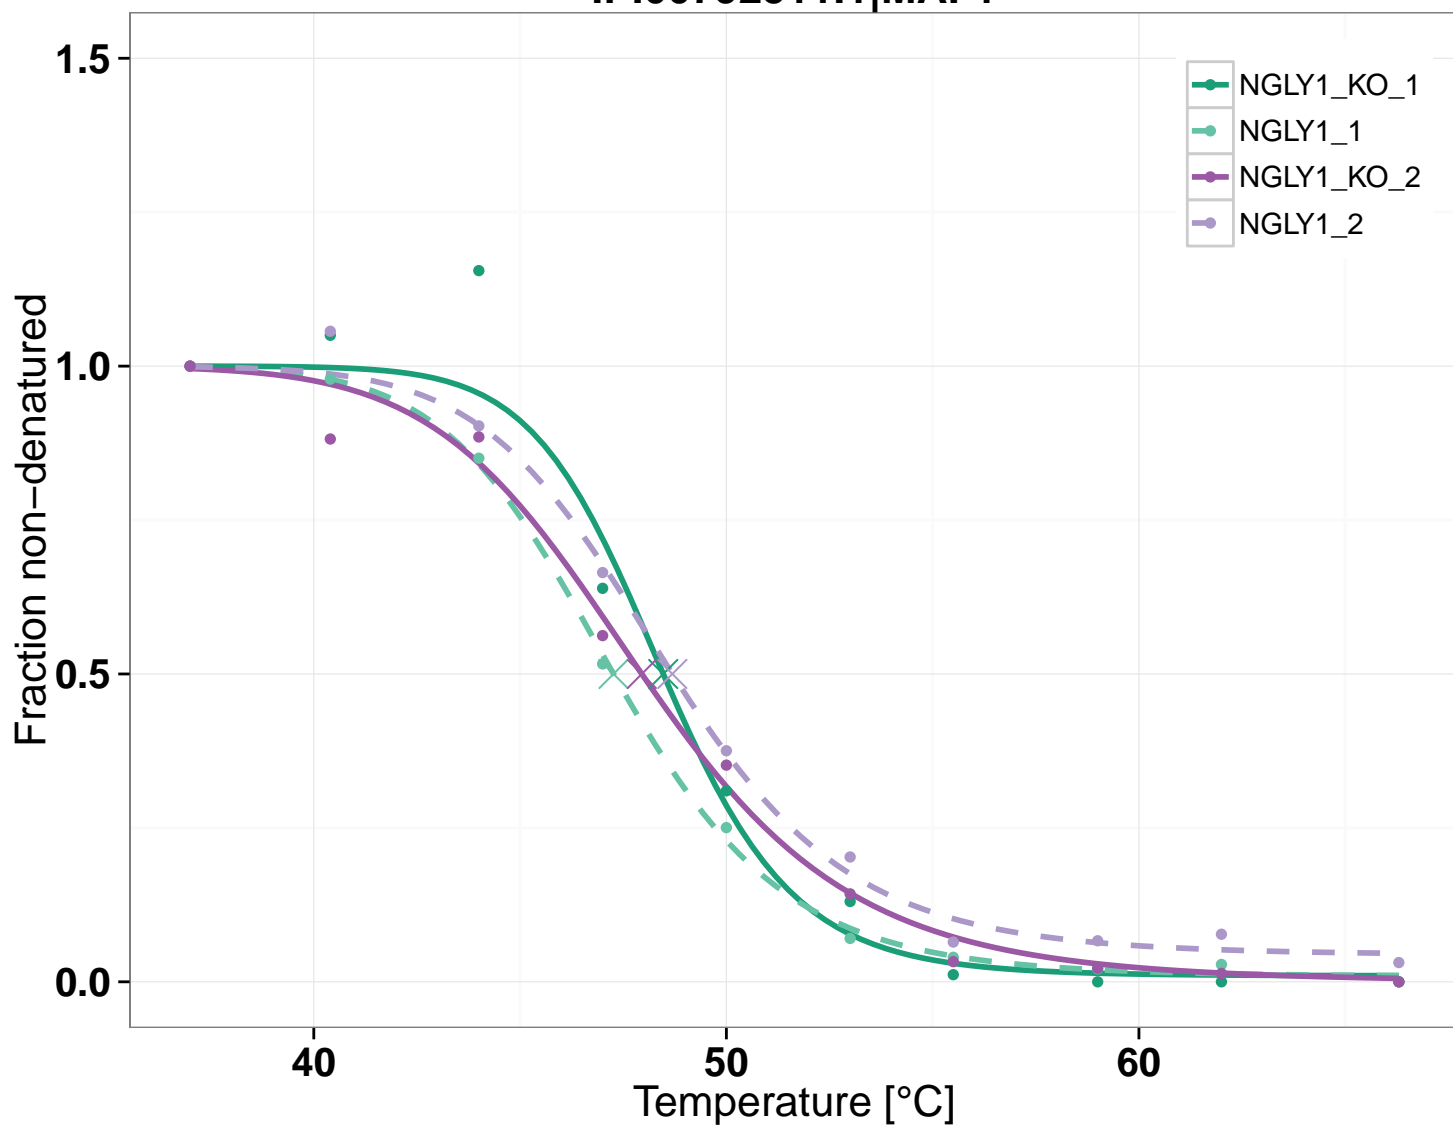

|            | meltPoint | slope  | plateau | R2   |
|------------|-----------|--------|---------|------|
| NGLY1_KO_1 | 48.47     | -0.16  | 0.01    | 0.97 |
| NGLY1_1    | 47.26     | -0.12  | 0.01    | 1    |
| NGLY1_KO_2 | 47.95     | -0.099 | 0       | 0.99 |
| NGLY1_2    | 48.69     | -0.11  | 0.04    | 0.99 |

Supplement: Supplementary file 7442 [file 1]

# IPI00007102.3|GLOD4

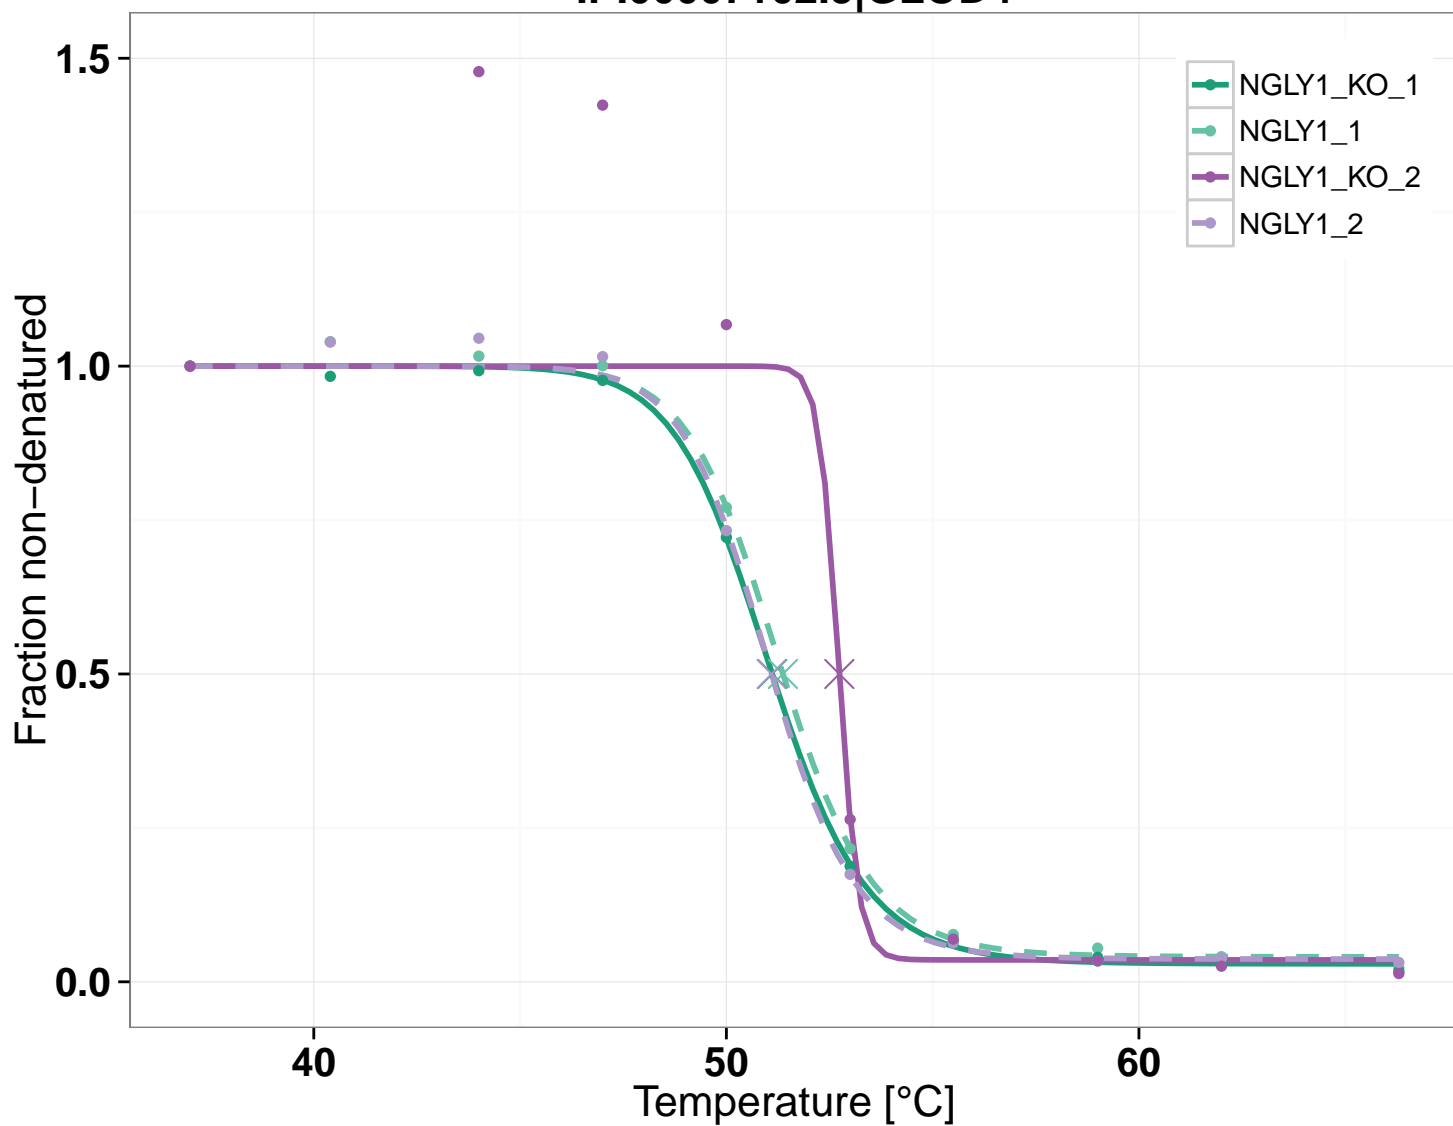

|            | meltPoint | slope | plateau | R2   |
|------------|-----------|-------|---------|------|
| NGLY1_KO_1 | 51.11     | -0.21 | 0.03    | 1    |
| NGLY1_1    | 51.37     | -0.21 | 0.04    | 1    |
| NGLY1_KO_2 | 52.74     | -1    | 0.04    | 0.82 |
| NGLY1_2    | 51.1      | -0.23 | 0.04    | 1    |

Supplement: Supplementary file 7443 [file 1]

# IPI00024853.2|PRX

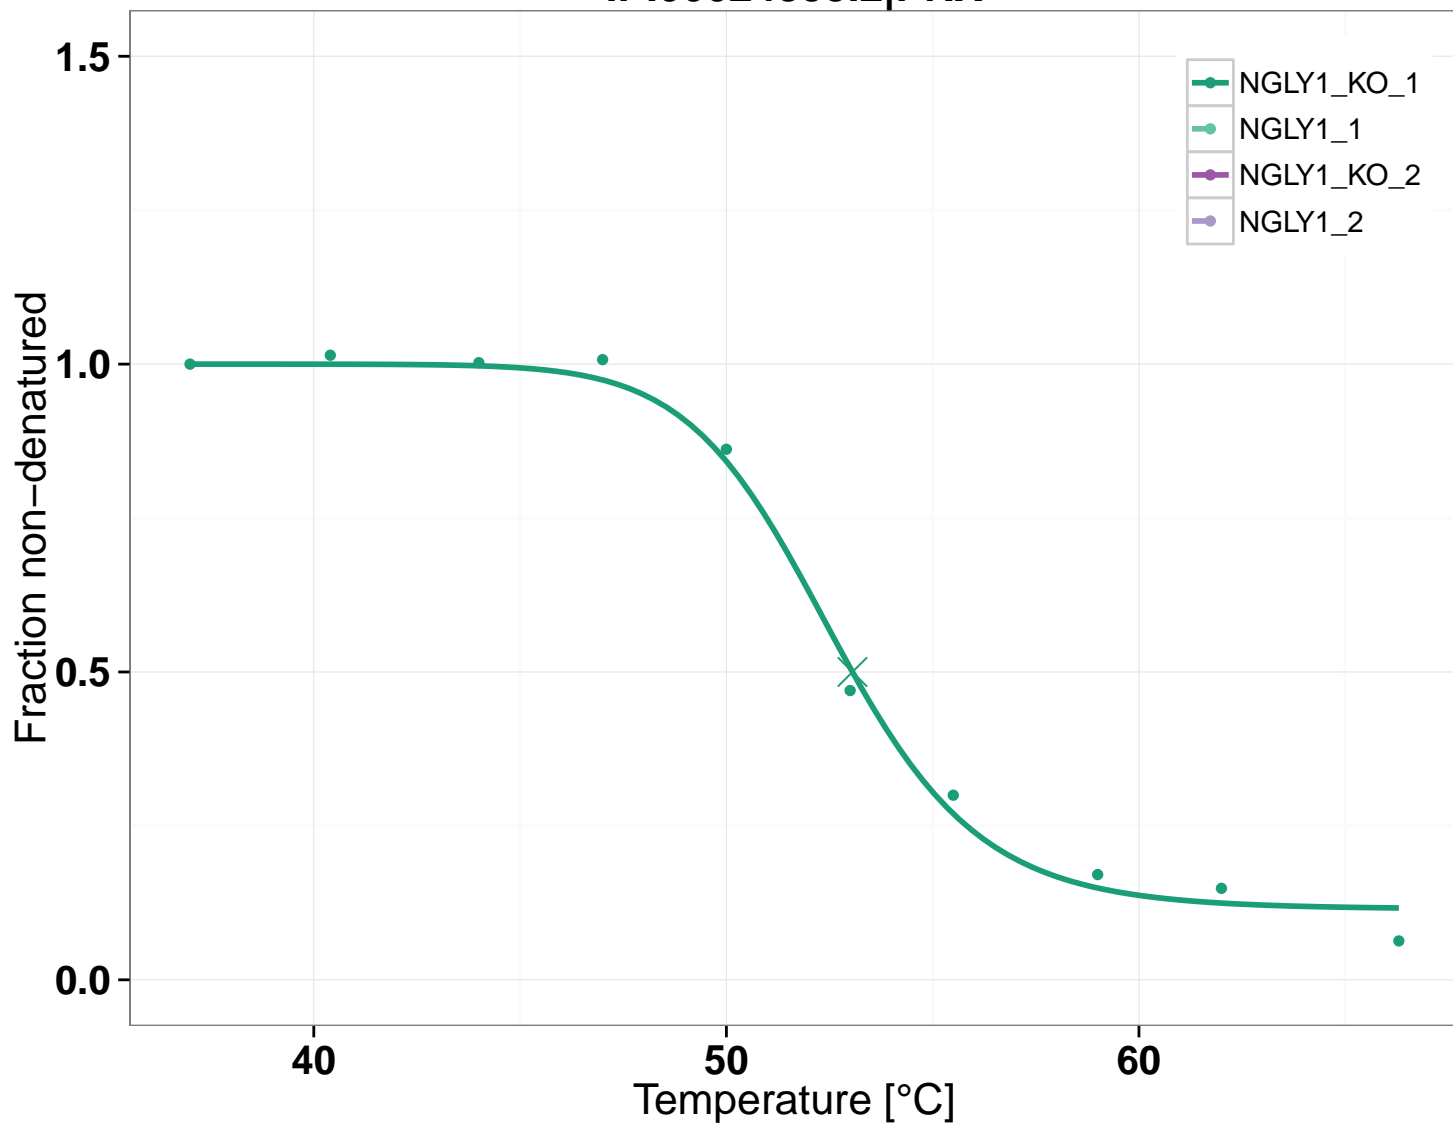

|            | meltPoint | slope | plateau | R2   |
|------------|-----------|-------|---------|------|
| NGLY1_KO_1 | 53.06     | -0.12 | 0.11    | 0.99 |
| NGLY1_1    | -         | -     | -       | -    |
| NGLY1_KO_2 | -         | -     | -       | -    |
| NGLY1_2    | -         | -     | -       | -    |

Supplement: Supplementary file 7444 [file 1]

IPI00847137.1|TBC1D12

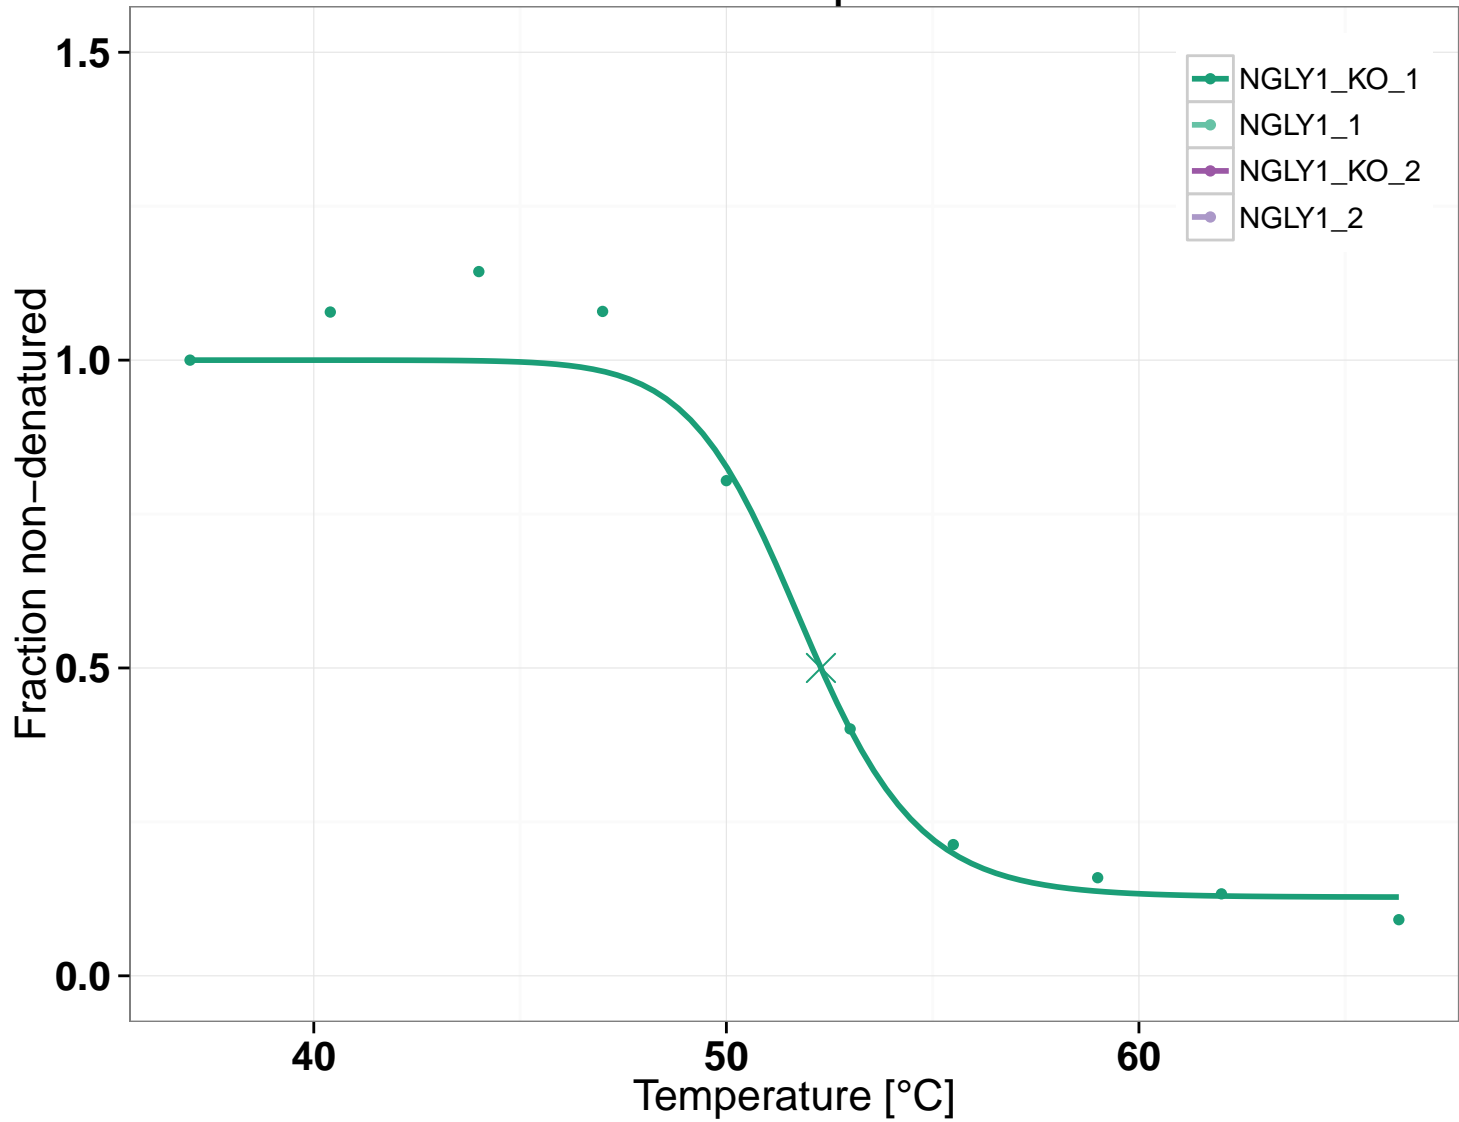

|            | meltPoint | slope | plateau | R2   |
|------------|-----------|-------|---------|------|
| NGLY1_KO_1 | 52.29     | -0.16 | 0.13    | 0.98 |
| NGLY1_1    | -         | -     | -       | -    |
| NGLY1_KO_2 | -         | -     | -       | -    |
| NGLY1_2    | -         | -     | -       | -    |

Supplement: Supplementary file 7445 [file 1]

IPI00003527.5|SLC9A3R1

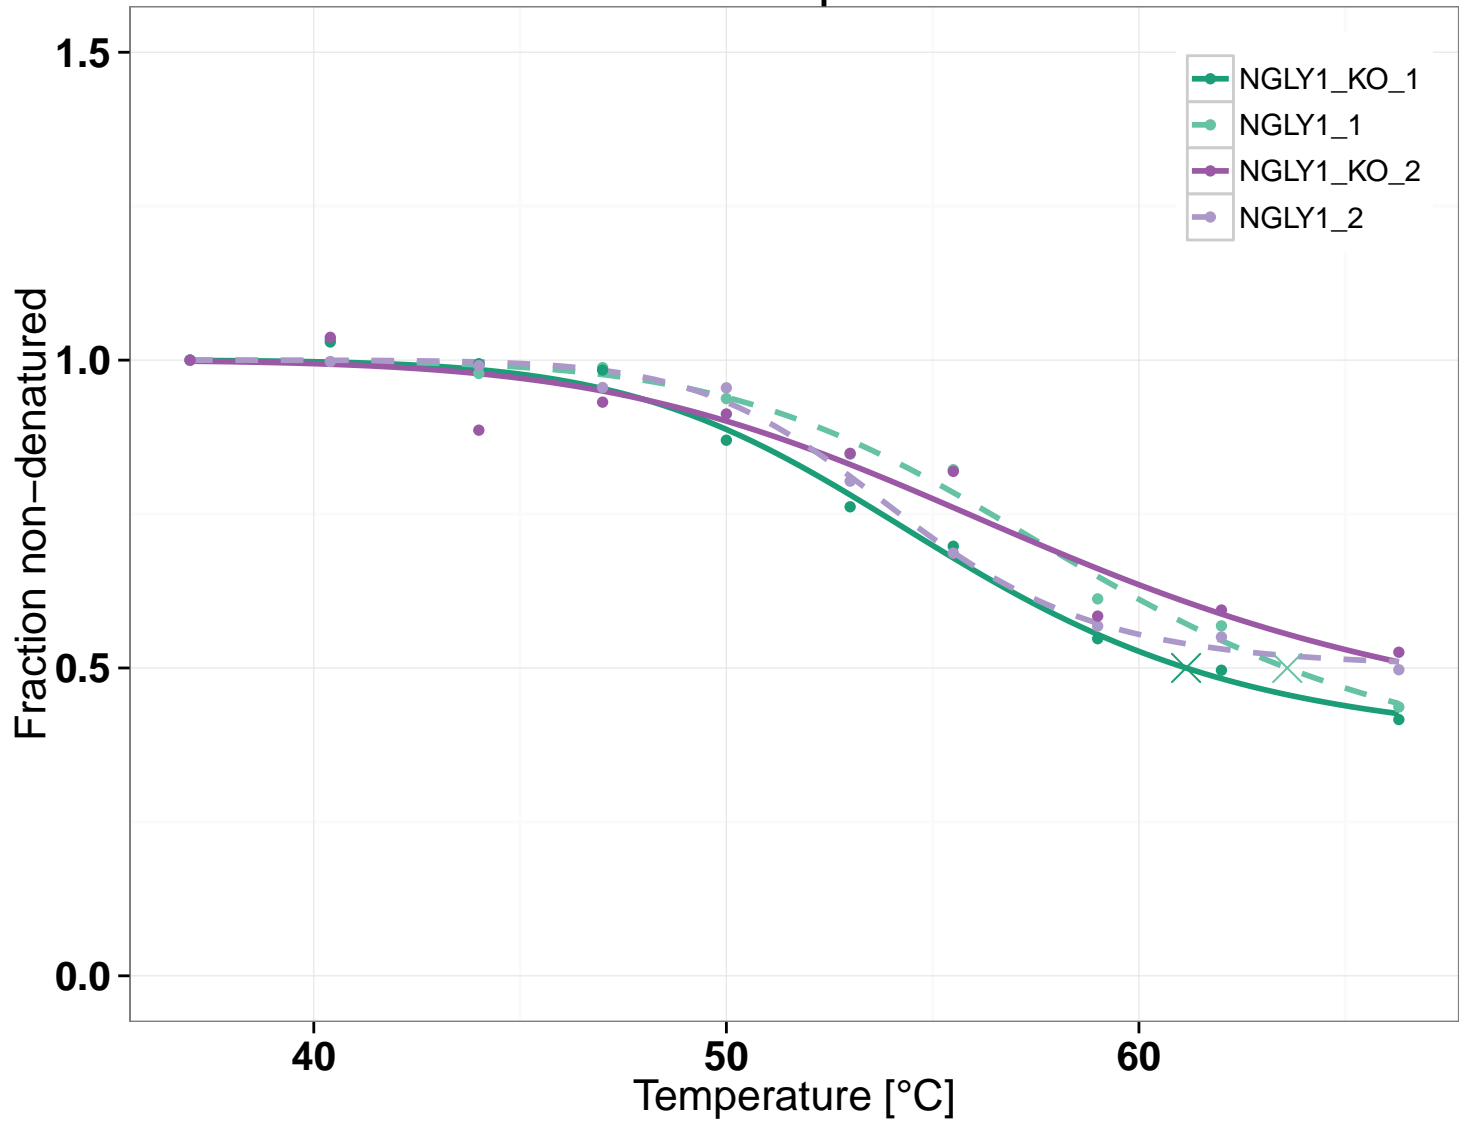

|            | meltPoint | slope  | plateau | R2   |
|------------|-----------|--------|---------|------|
| NGLY1_KO_1 | 61.14     | -0.041 | 0.37    | 0.99 |
| NGLY1_1    | 63.59     | -0.04  | 0.32    | 0.99 |
| NGLY1_KO_2 | -         | -0.029 | 0.37    | 0.93 |
| NGLY1_2    | -         | -0.051 | 0.5     | 0.99 |

Supplement: Supplementary file 7446 [file 1]

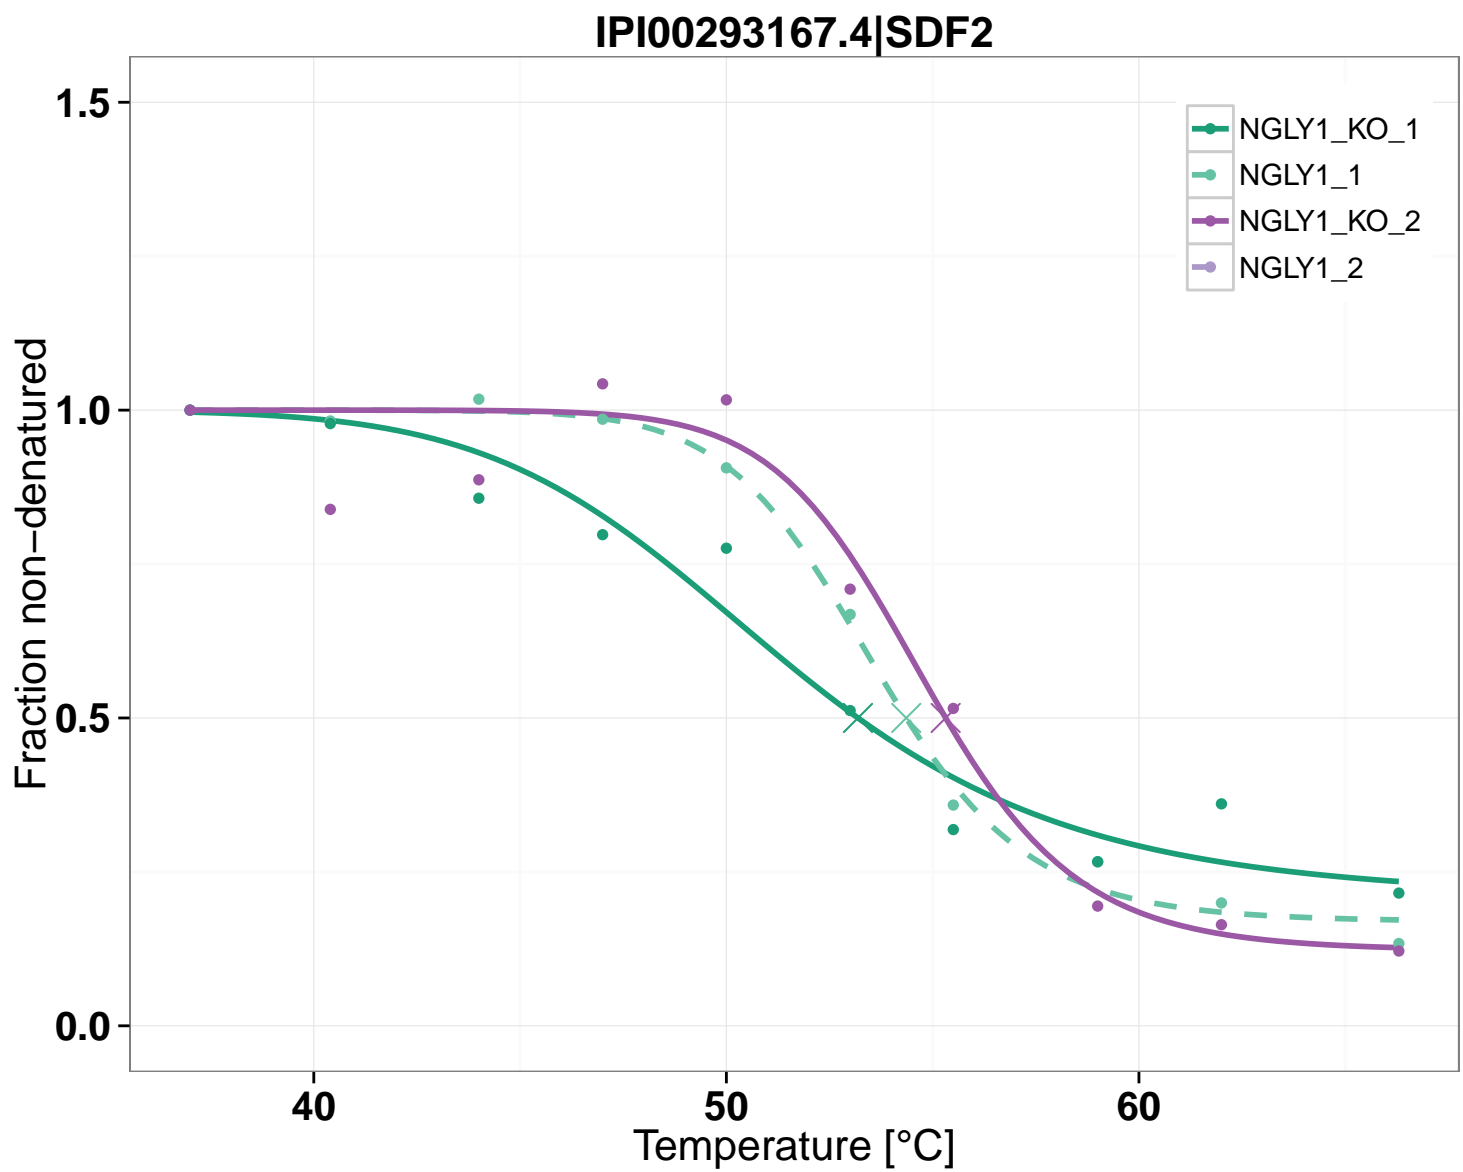

|            | meltPoint | slope  | plateau | R2   |
|------------|-----------|--------|---------|------|
| NGLY1_KO_1 | 53.19     | -0.057 | 0.2     | 0.96 |
| NGLY1_1    | 54.36     | -0.11  | 0.17    | 1    |
| NGLY1_KO_2 | 55.32     | -0.12  | 0.12    | 0.96 |
| NGLY1_2    | -         | -      | -       | -    |

Supplement: Supplementary file 7447 [file 1]

IPI00398982.1|LOC647000

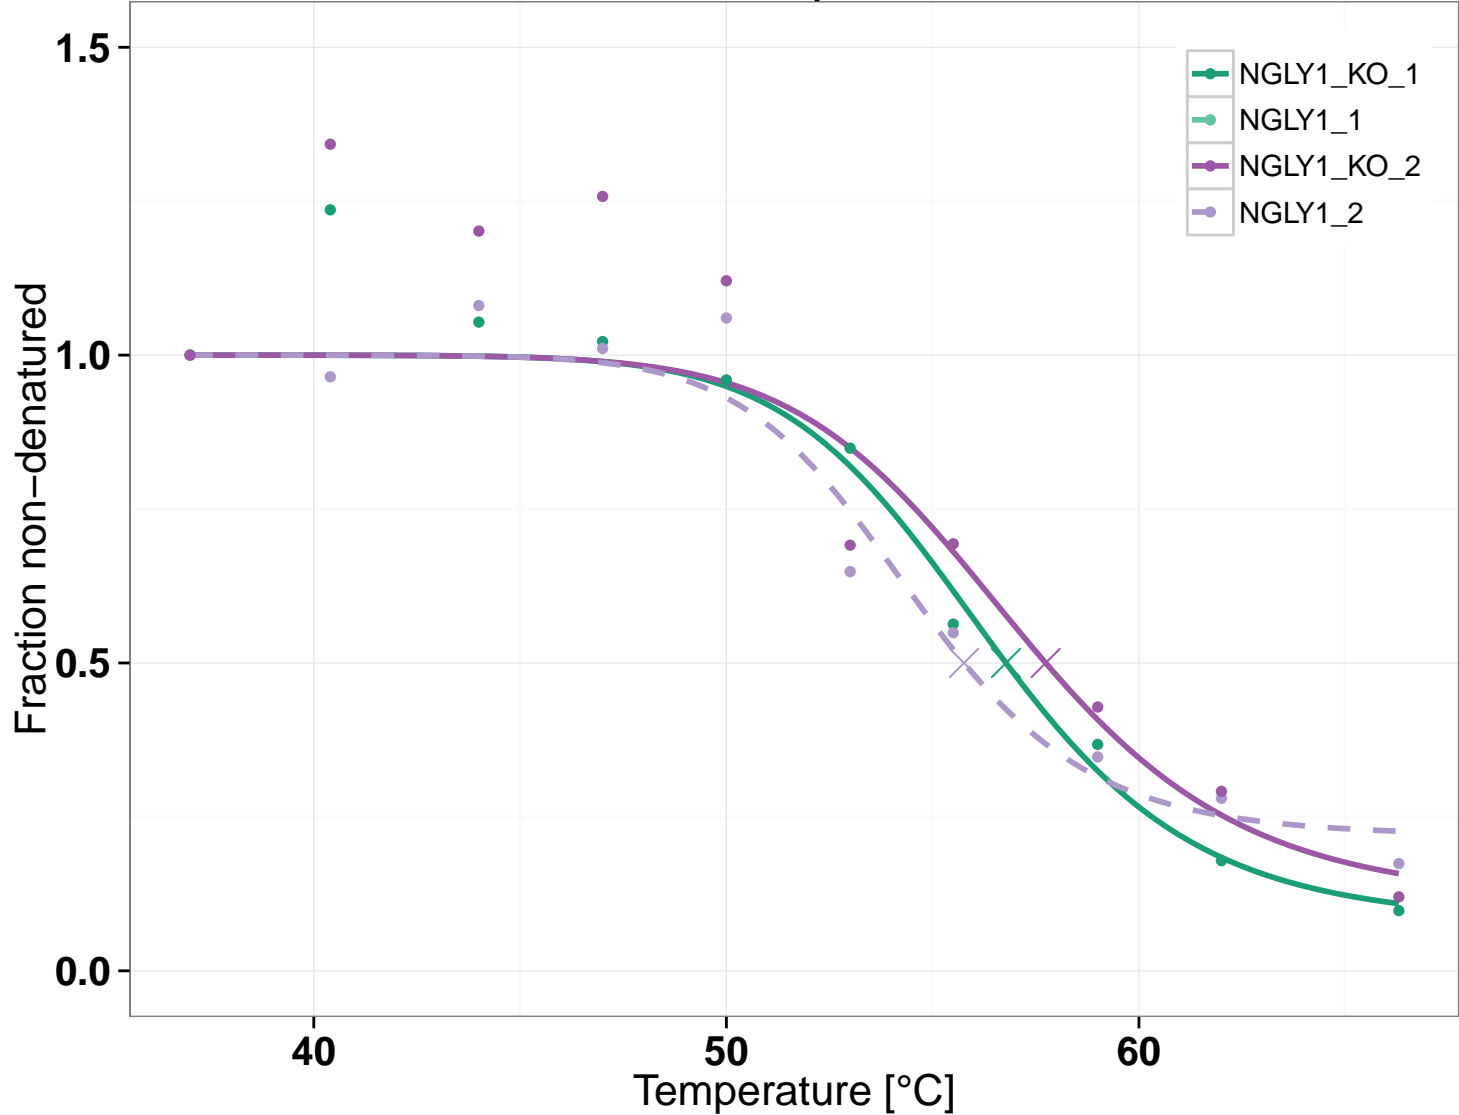

|            | meltPoint | slope  | plateau | R2   |
|------------|-----------|--------|---------|------|
| NGLY1_KO_1 | 56.78     | -0.092 | 0.08    | 0.95 |
| NGLY1_1    | -         | -      | -       | -    |
| NGLY1_KO_2 | 57.74     | -0.082 | 0.11    | 0.83 |
| NGLY1_2    | 55.76     | -0.093 | 0.22    | 0.96 |

Supplement: Supplementary file 7448 [file 1]

IPI00289667.3|POLR3H

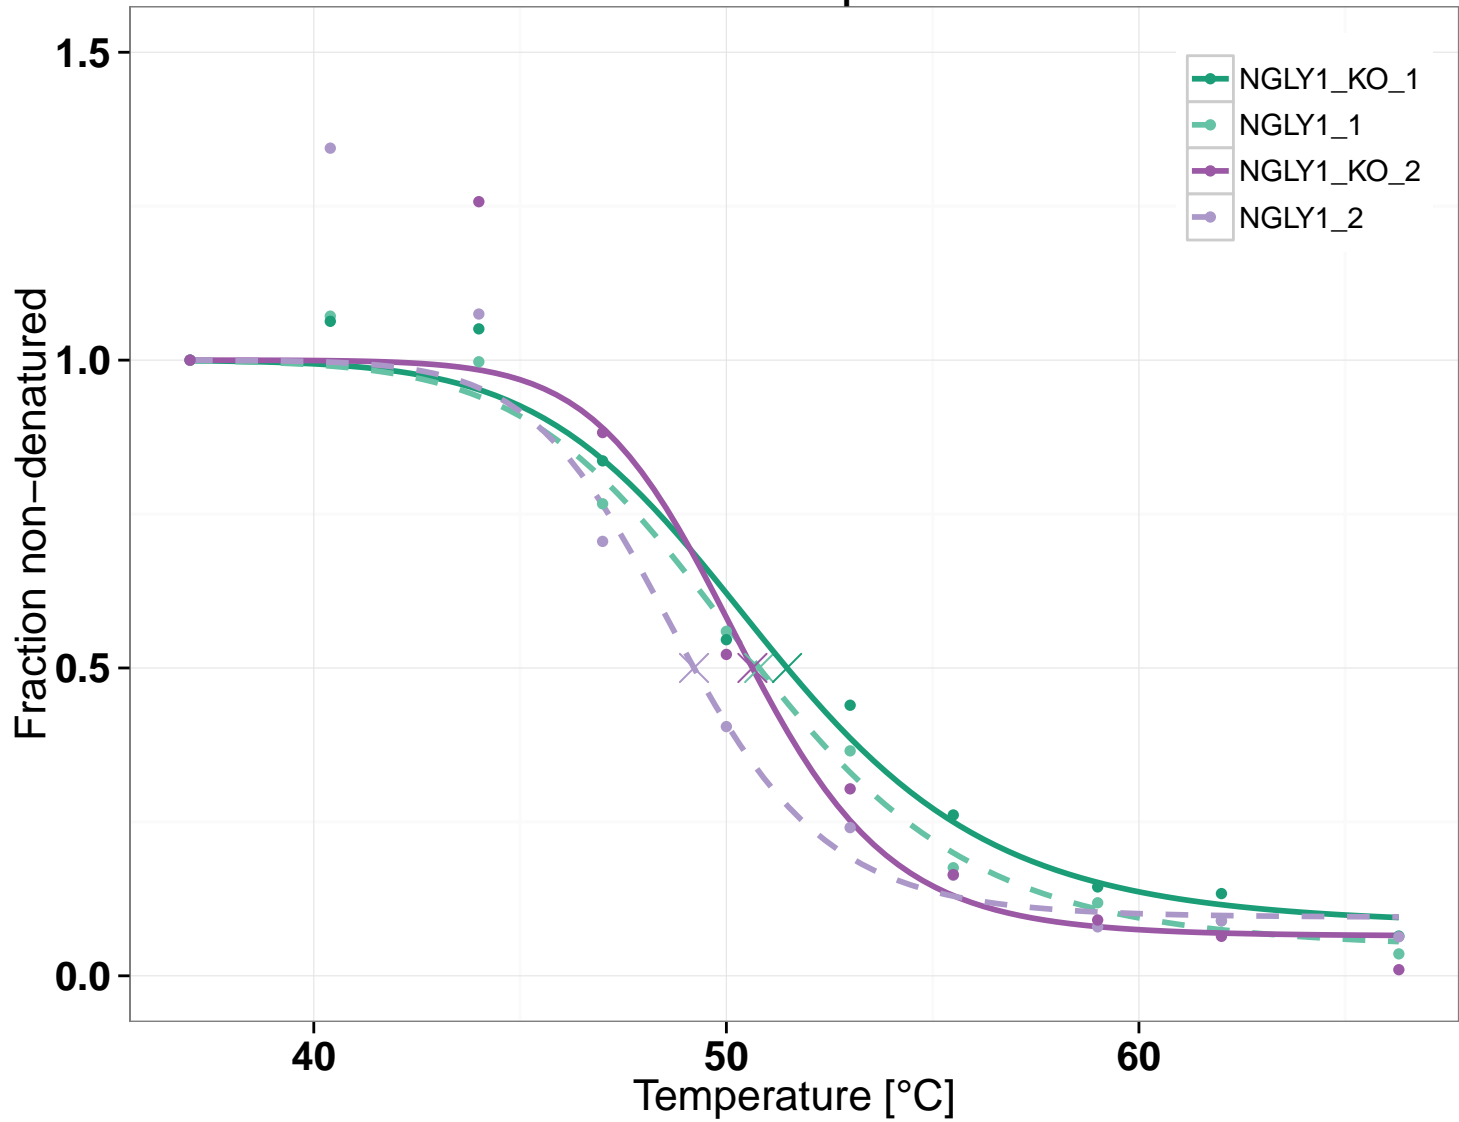

|            | meltPoint | slope  | plateau | R2   |
|------------|-----------|--------|---------|------|
| NGLY1_KO_1 | 51.47     | -0.083 | 0.08    | 0.98 |
| NGLY1_1    | 50.8      | -0.088 | 0.04    | 0.99 |
| NGLY1_KO_2 | 50.63     | -0.13  | 0.06    | 0.87 |
| NGLY1_2    | 49.22     | -0.13  | 0.09    | 0.93 |

Supplement: Supplementary file 7449 [file 1]

# IPI00009268.2|ACY1

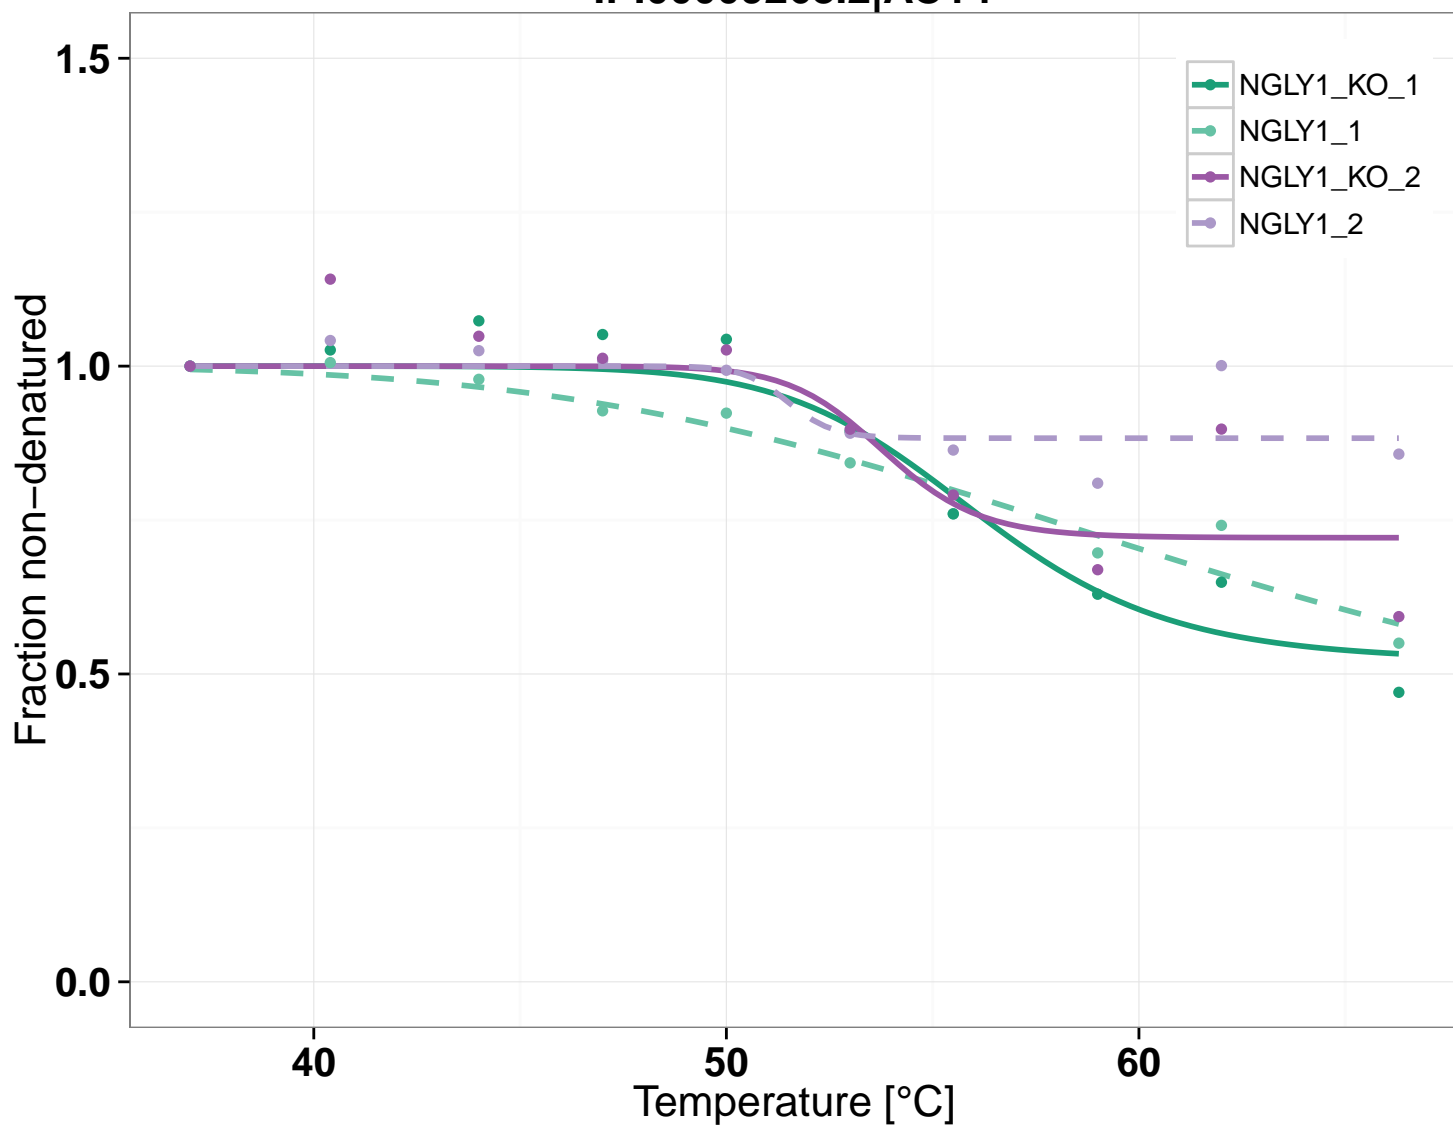

|            | meltPoint | slope  | plateau | R2   |
|------------|-----------|--------|---------|------|
| NGLY1_KO_1 | -         | -0.051 | 0.52    | 0.94 |
| NGLY1_1    | -         | -0.021 | 0.29    | 0.95 |
| NGLY1_KO_2 | -         | -0.06  | 0.72    | 0.73 |
| NGLY1_2    | -         | -0.054 | 0.88    | 0.64 |

Supplement: Supplementary file 7450 [file 1]

IPI00027860.1|HTRA4

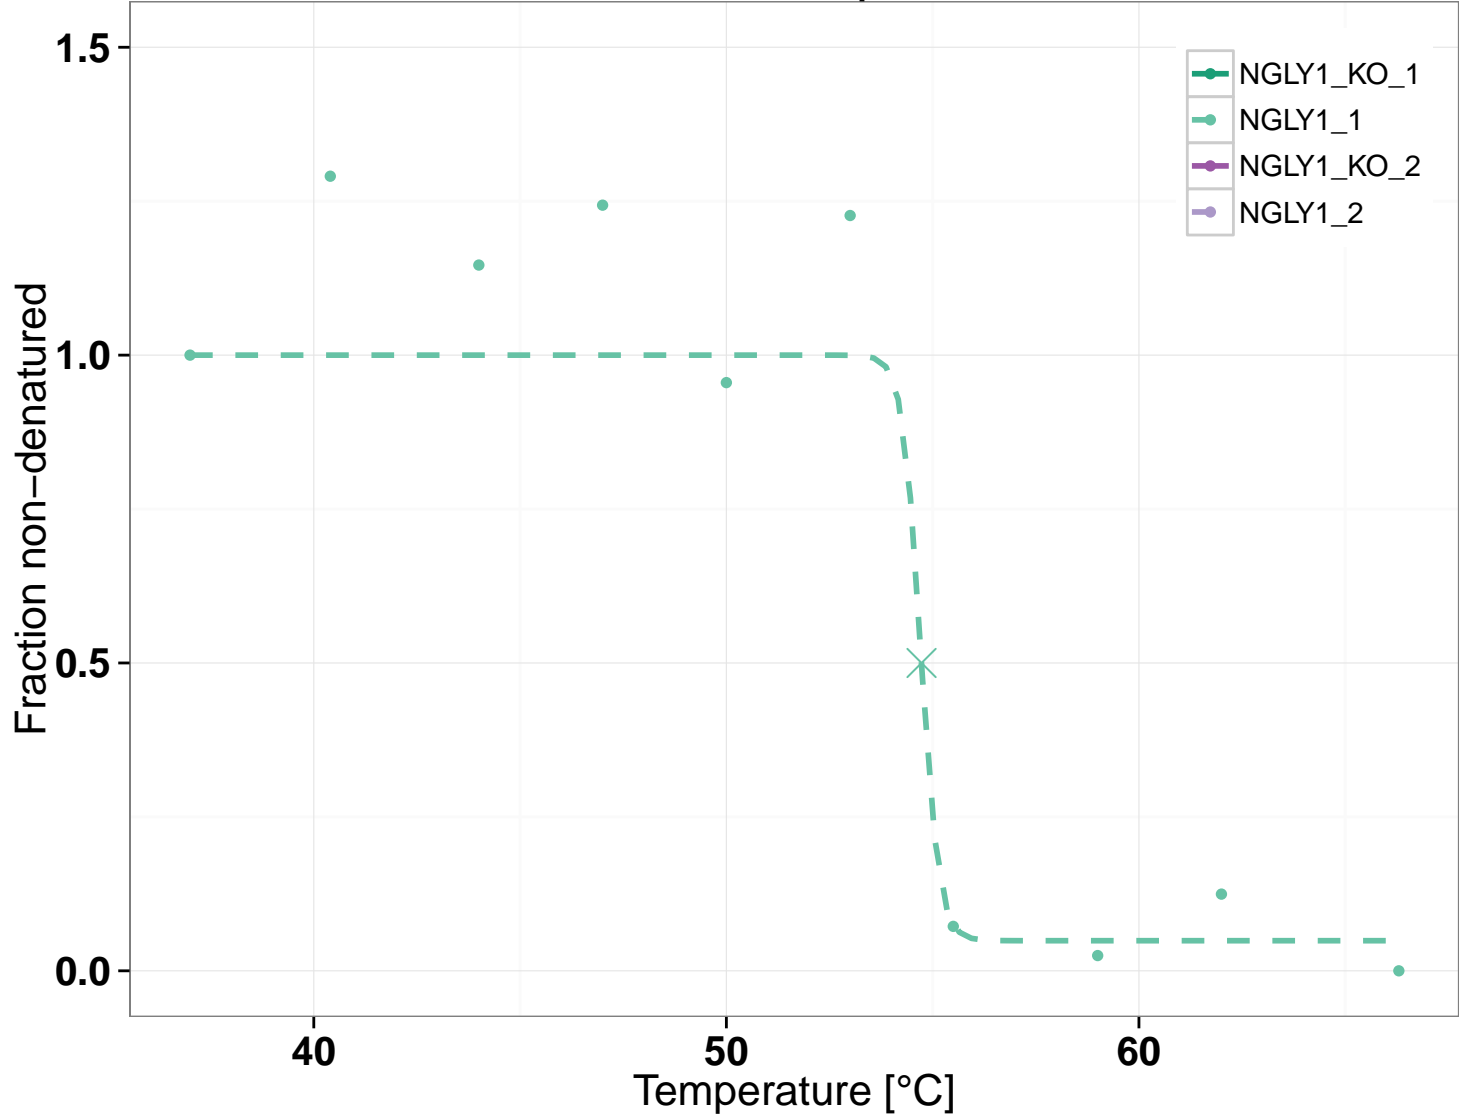

|            | meltPoint | slope | plateau | R2   |
|------------|-----------|-------|---------|------|
| NGLY1_KO_1 | -         | -     | -       | -    |
| NGLY1_1    | 54.73     | -1.1  | 0.05    | 0.92 |
| NGLY1_KO_2 | -         | -     | -       | -    |
| NGLY1_2    | -         | -     | -       | -    |

Supplement: Supplementary file 7451 [file 1]

# IPI00293126.1|TBCB

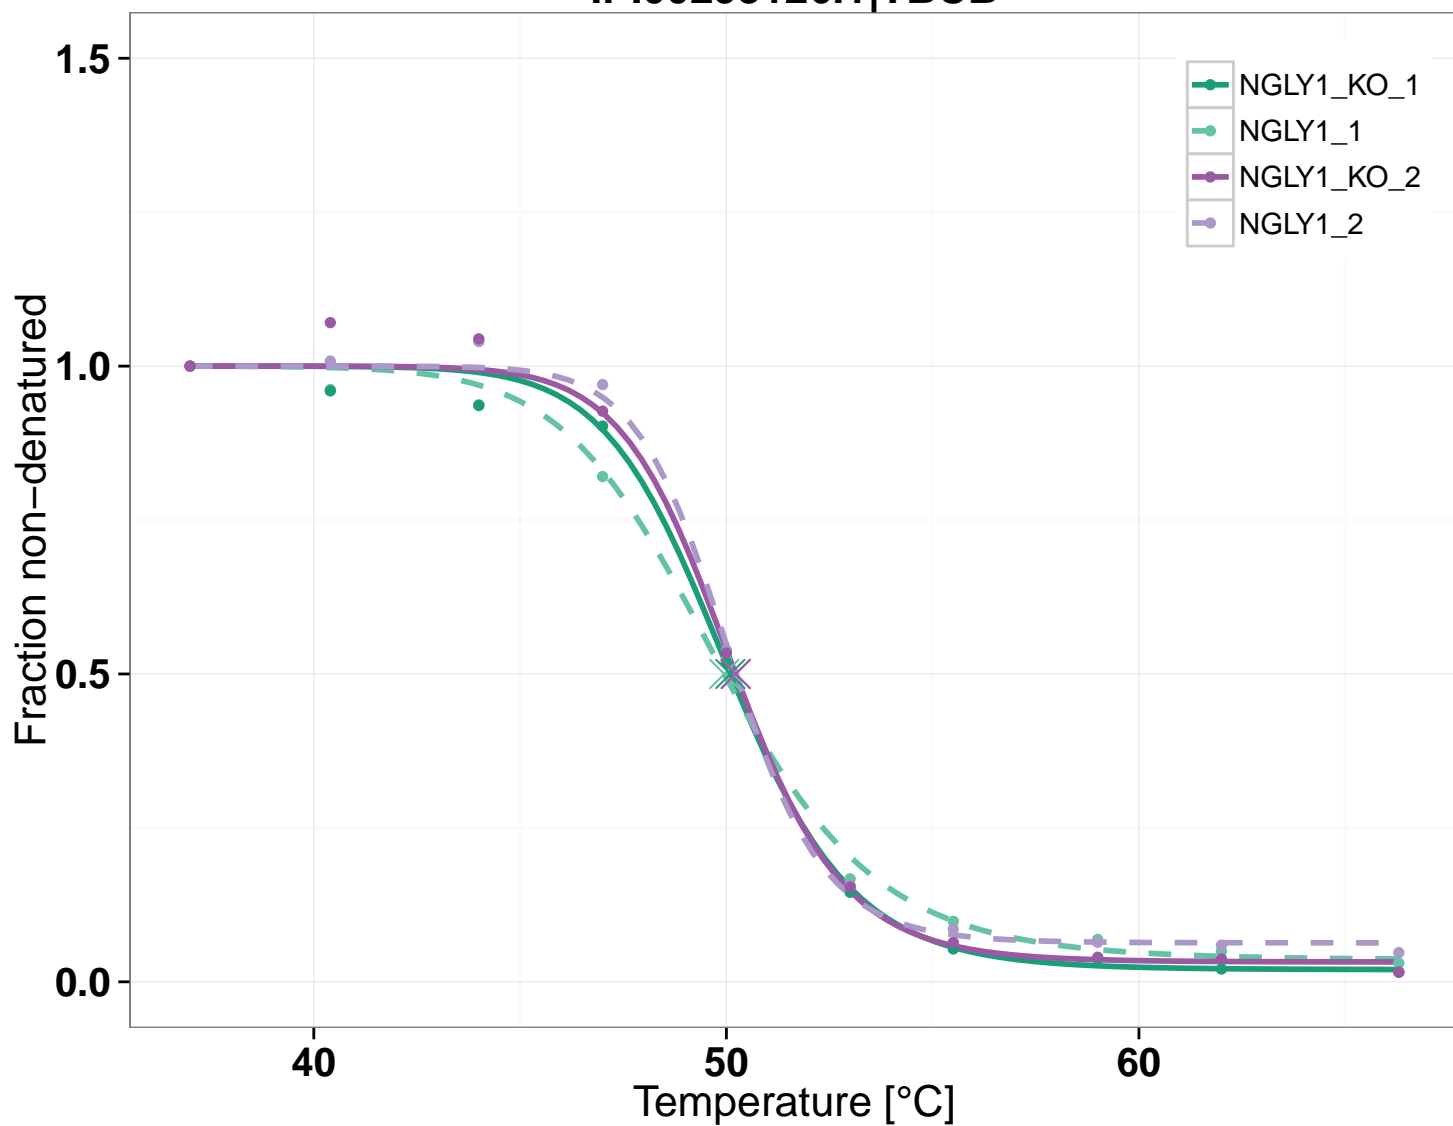

|            | meltPoint | slope | plateau | R2 |
|------------|-----------|-------|---------|----|
| NGLY1_KO_1 | 50.1      | -0.16 | 0.02    | 1  |
| NGLY1_1    | 49.95     | -0.13 | 0.04    | 1  |
| NGLY1_KO_2 | 50.22     | -0.18 | 0.03    | 1  |
| NGLY1_2    | 50.24     | -0.2  | 0.06    | 1  |

Supplement: Supplementary file 7452 [file 1]

IPI00018689.7|CENPQ

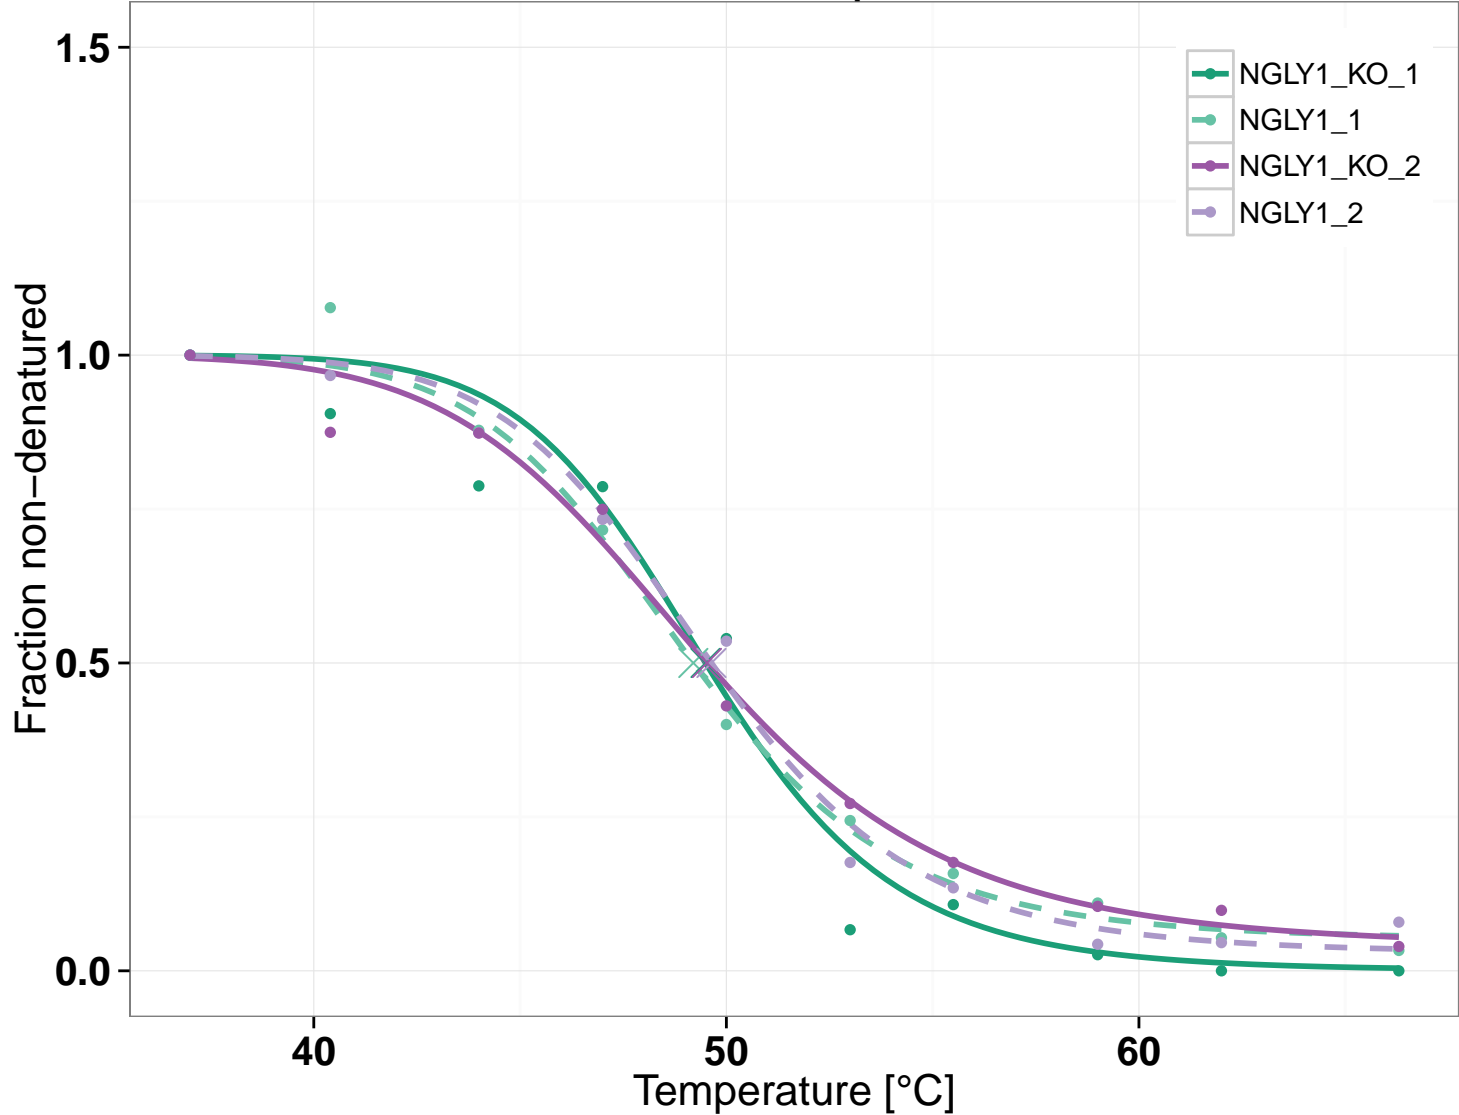

|            | meltPoint | slope  | plateau | R2   |
|------------|-----------|--------|---------|------|
| NGLY1_KO_1 | 49.5      | -0.11  | 0       | 0.96 |
| NGLY1_1    | 49.2      | -0.093 | 0.05    | 0.99 |
| NGLY1_KO_2 | 49.53     | -0.079 | 0.04    | 0.99 |
| NGLY1_2    | 49.64     | -0.096 | 0.03    | 0.99 |

Supplement: Supplementary file 7453 [file 1]

IPI00014255.1|IQCB1

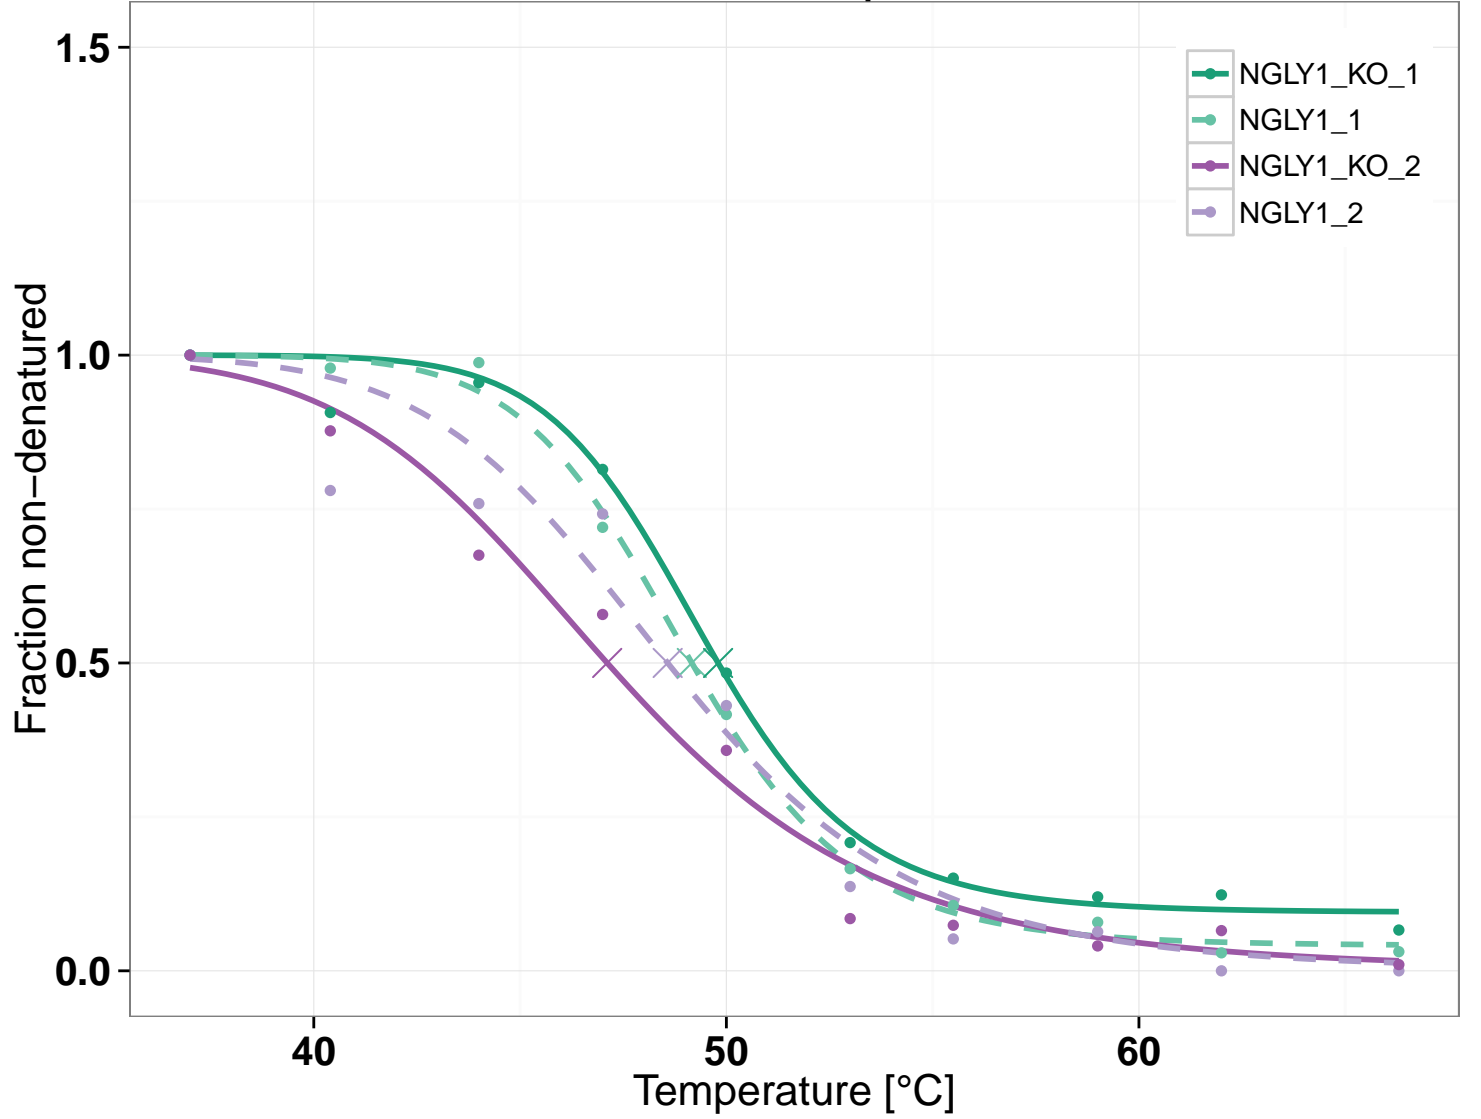

|            | meltPoint | slope  | plateau | R2   |
|------------|-----------|--------|---------|------|
| NGLY1_KO_1 | 49.8      | -0.12  | 0.09    | 0.99 |
| NGLY1_1    | 49.16     | -0.12  | 0.04    | 1    |
| NGLY1_KO_2 | 47.11     | -0.077 | 0       | 0.98 |
| NGLY1_2    | 48.58     | -0.085 | 0       | 0.95 |

Supplement: Supplementary file 7454 [file 1]

IPI00010309.3|TBXA2R

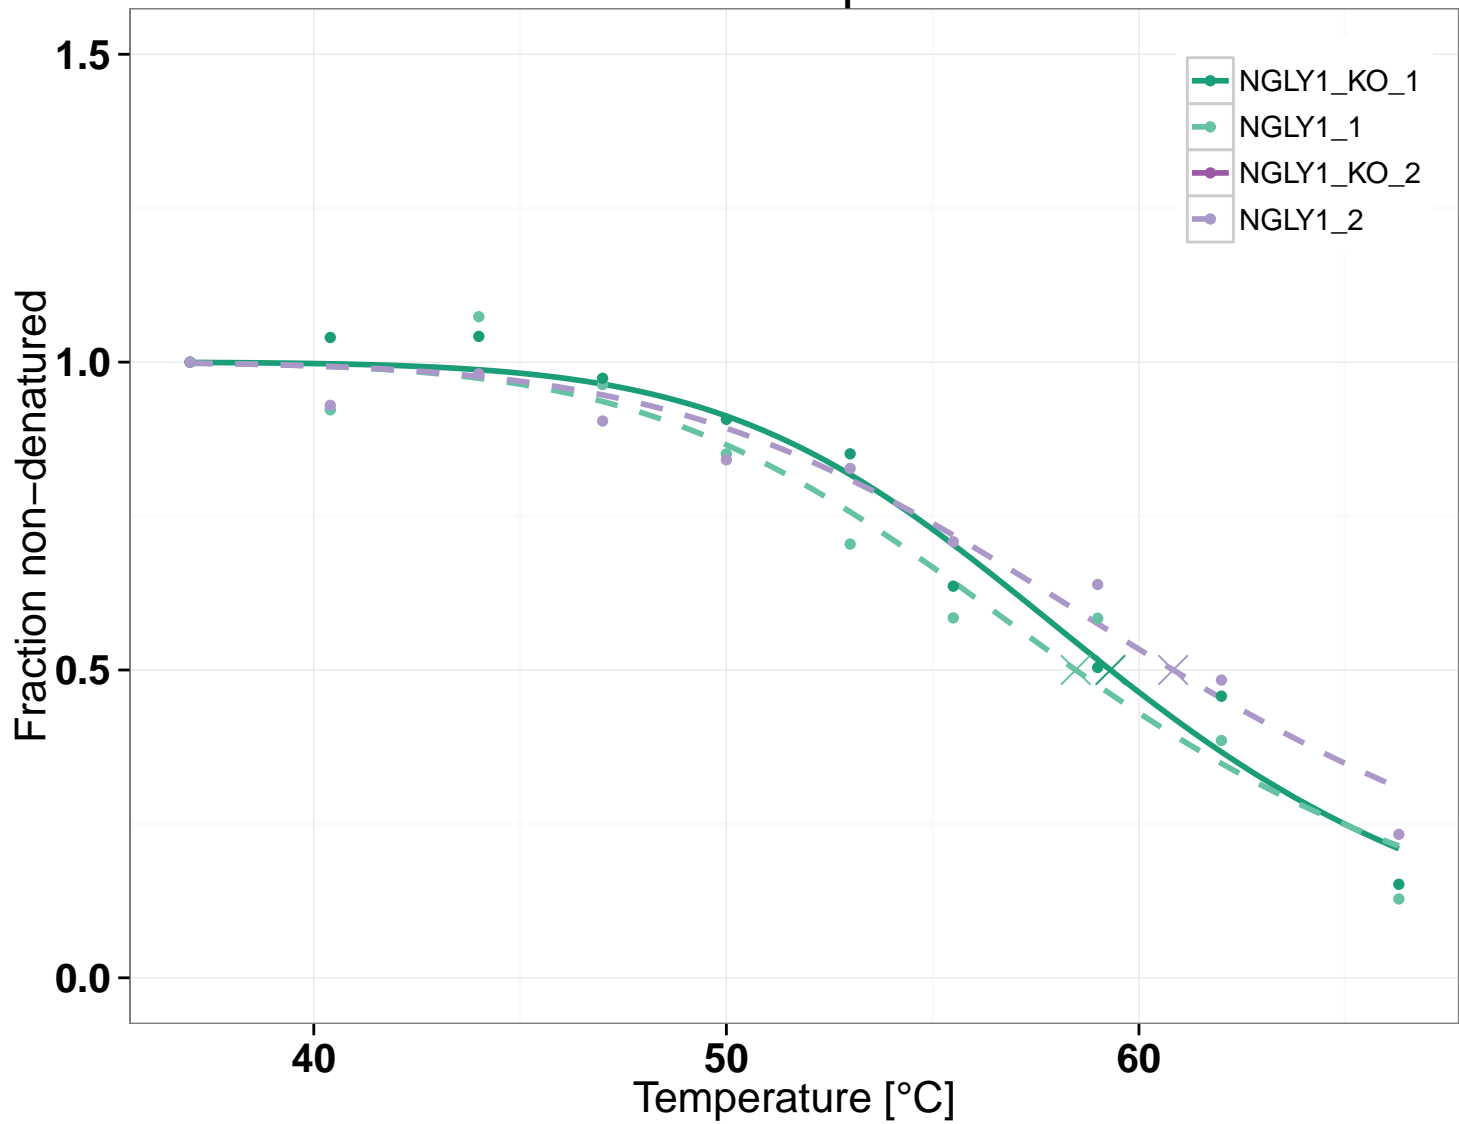

|            | meltPoint | slope  | plateau | R2   |
|------------|-----------|--------|---------|------|
| NGLY1_KO_1 | 59.31     | -0.054 | 0       | 0.97 |
| NGLY1_1    | 58.47     | -0.049 | 0       | 0.95 |
| NGLY1_KO_2 | -         | -      | -       | -    |
| NGLY1_2    | 60.83     | -0.042 | 0       | 0.96 |

Supplement: Supplementary file 7455 [file 1]

# IPI00025285.3|ATP6V1G1

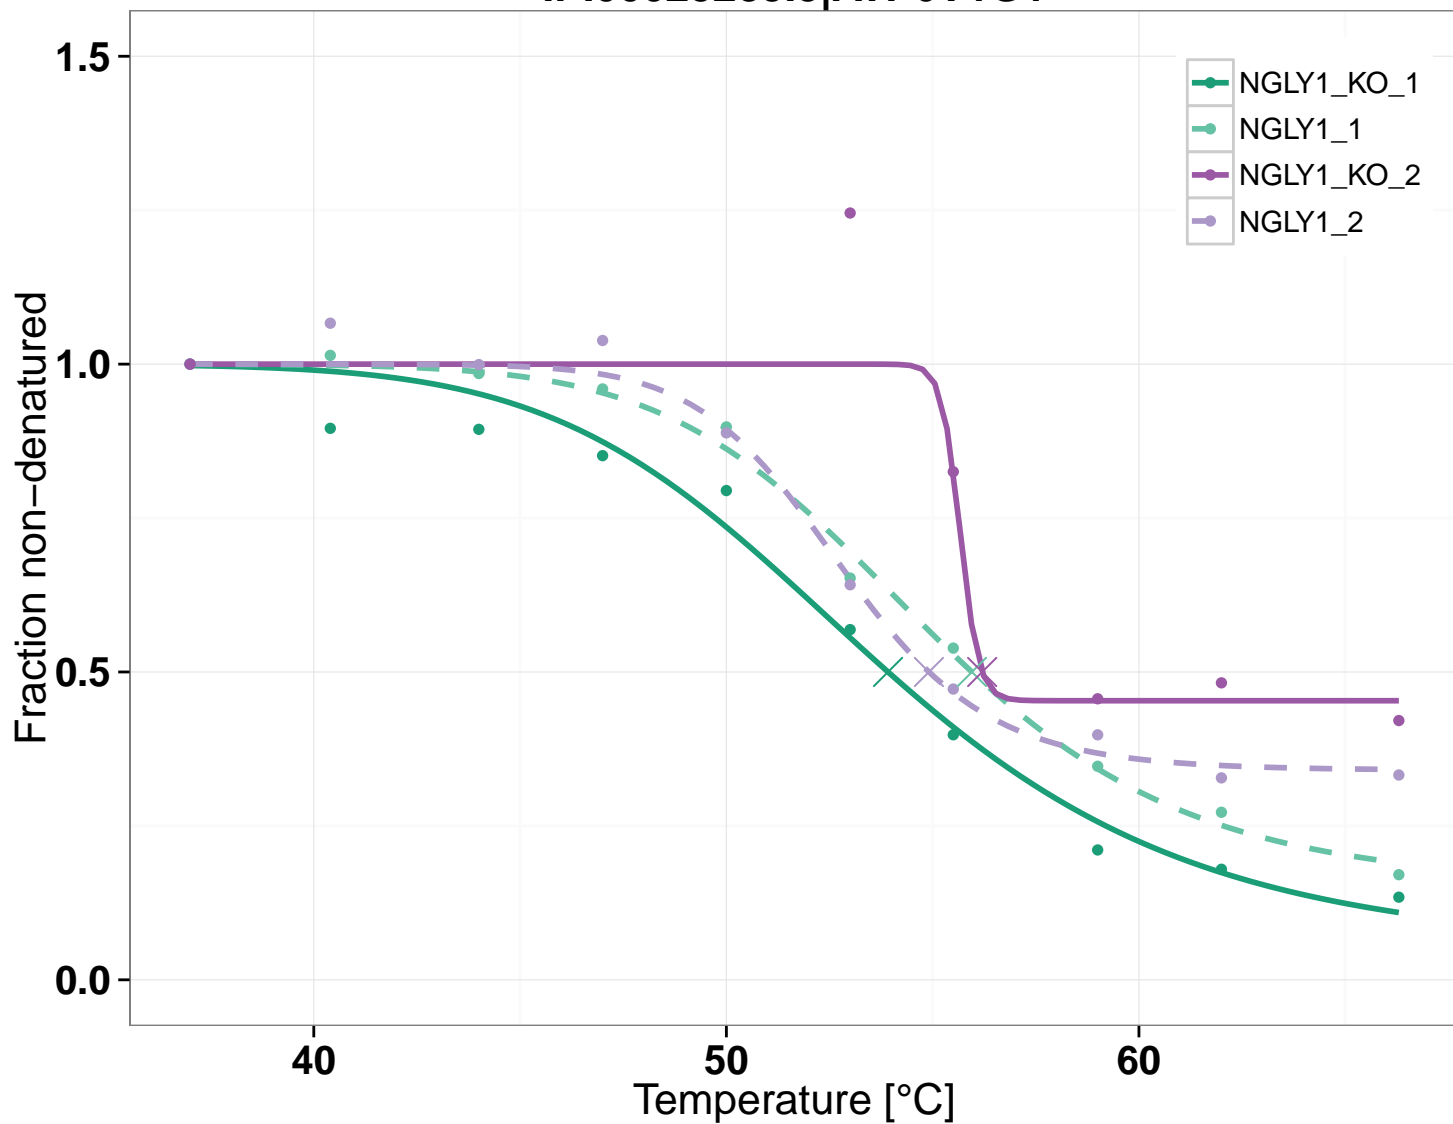

|            | meltPoint | slope  | plateau | R2   |
|------------|-----------|--------|---------|------|
| NGLY1_KO_1 | 53.92     | -0.062 | 0.04    | 0.98 |
| NGLY1_1    | 55.95     | -0.068 | 0.15    | 1    |
| NGLY1_KO_2 | 56.2      | -0.61  | 0.45    | 0.36 |
| NGLY1_2    | 54.91     | -0.093 | 0.34    | 0.99 |

Supplement: Supplementary file 7456 [file 1]

IPI00002070.6|LRRC8A

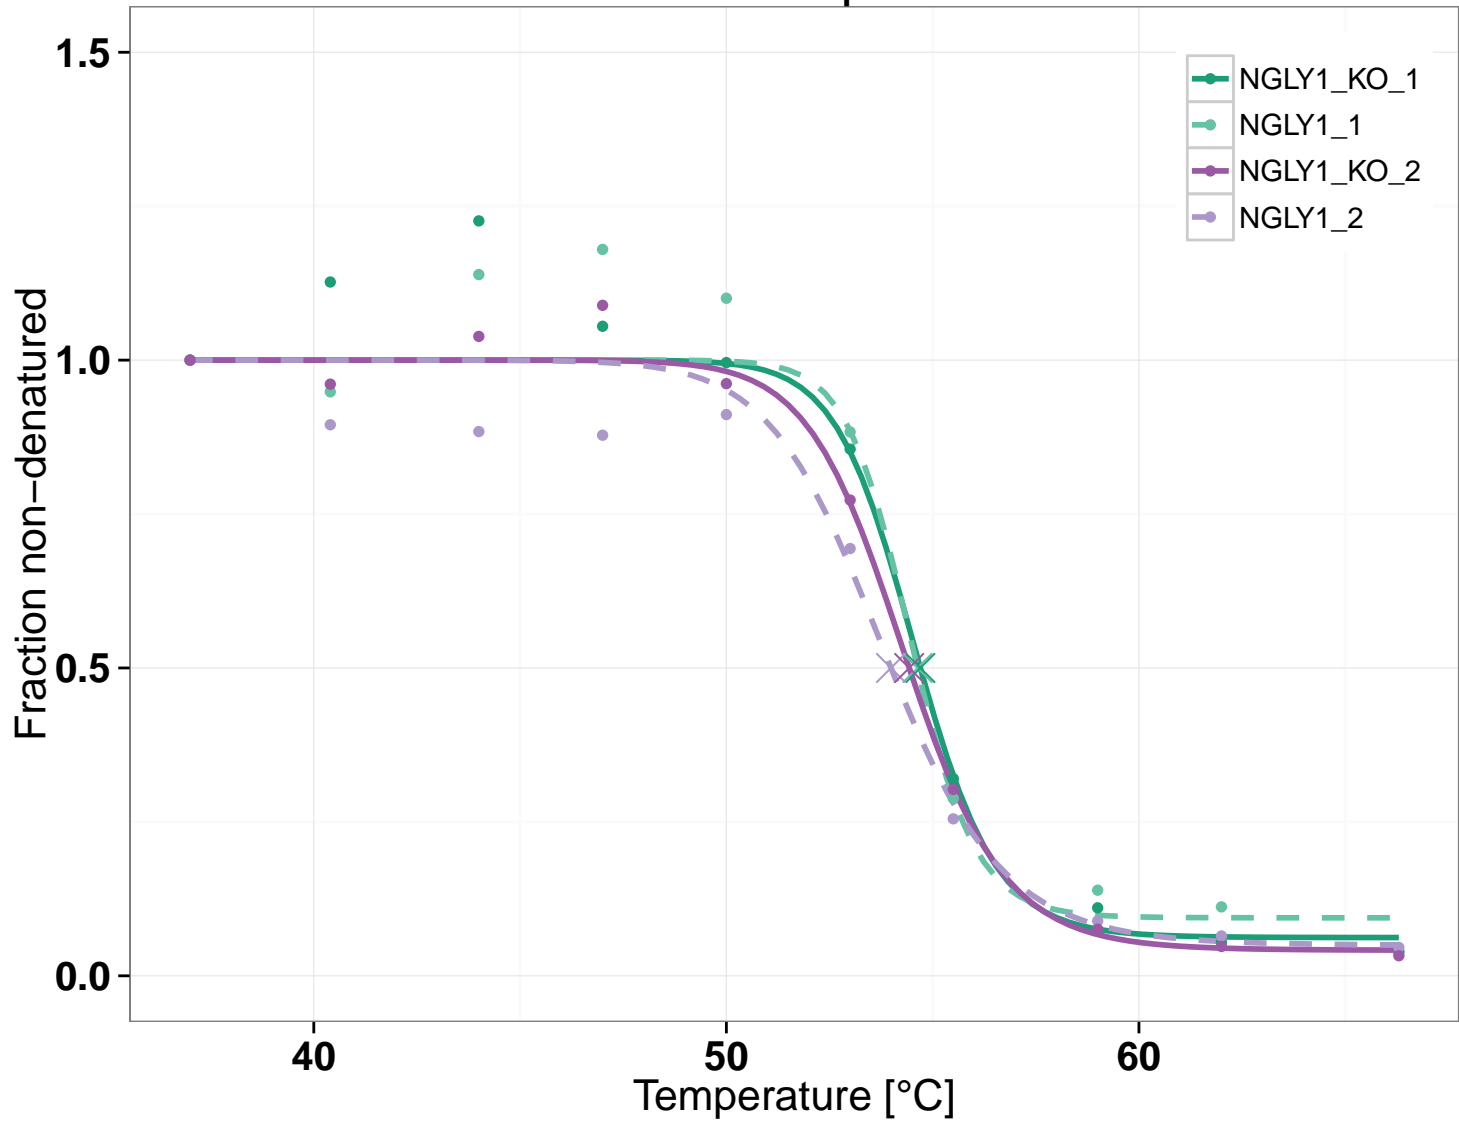

|            | meltPoint | slope | plateau | R2   |
|------------|-----------|-------|---------|------|
| NGLY1_KO_1 | 54.7      | -0.24 | 0.06    | 0.97 |
| NGLY1_1    | 54.63     | -0.29 | 0.09    | 0.97 |
| NGLY1_KO_2 | 54.43     | -0.2  | 0.04    | 0.99 |
| NGLY1_2    | 53.99     | -0.17 | 0.05    | 0.97 |

Supplement: Supplementary file 7457 [file 1]

IPI00292953.6|RAI14

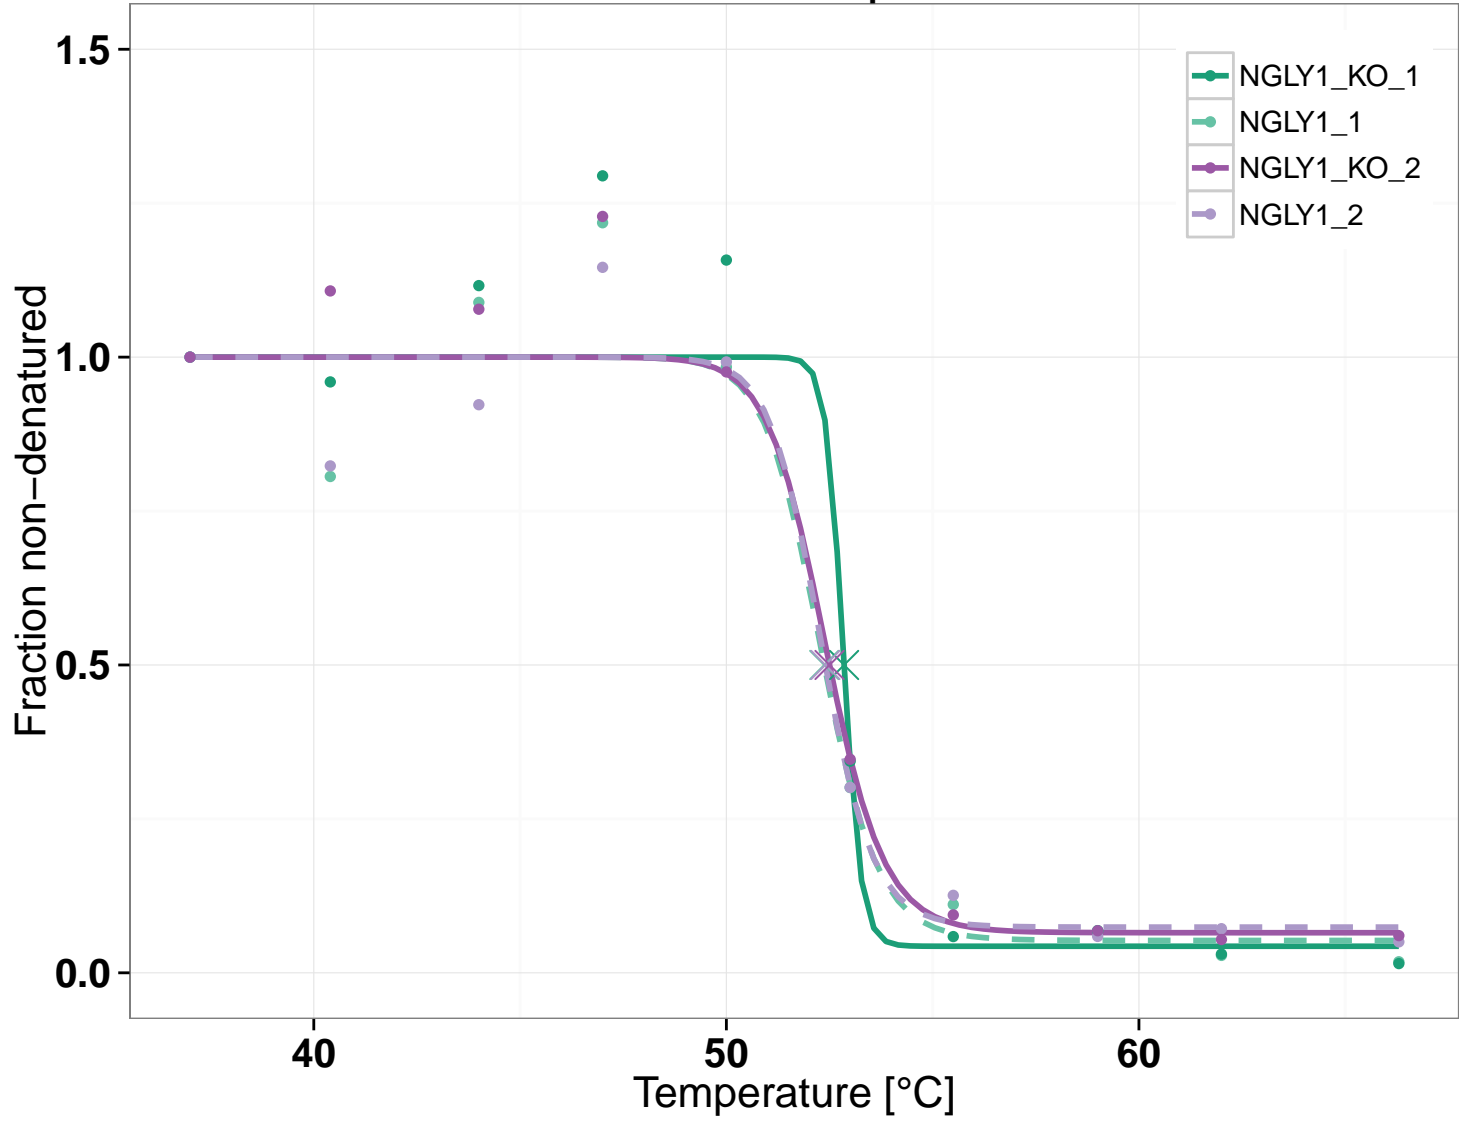

|            | meltPoint | slope | plateau | R2   |
|------------|-----------|-------|---------|------|
| NGLY1_KO_1 | 52.85     | -1.1  | 0.04    | 0.95 |
| NGLY1_1    | 52.37     | -0.34 | 0.05    | 0.96 |
| NGLY1_KO_2 | 52.5      | -0.33 | 0.07    | 0.97 |
| NGLY1_2    | 52.4      | -0.37 | 0.07    | 0.97 |

Supplement: Supplementary file 7458 [file 1]

IPI00022748.4|TMBIM6

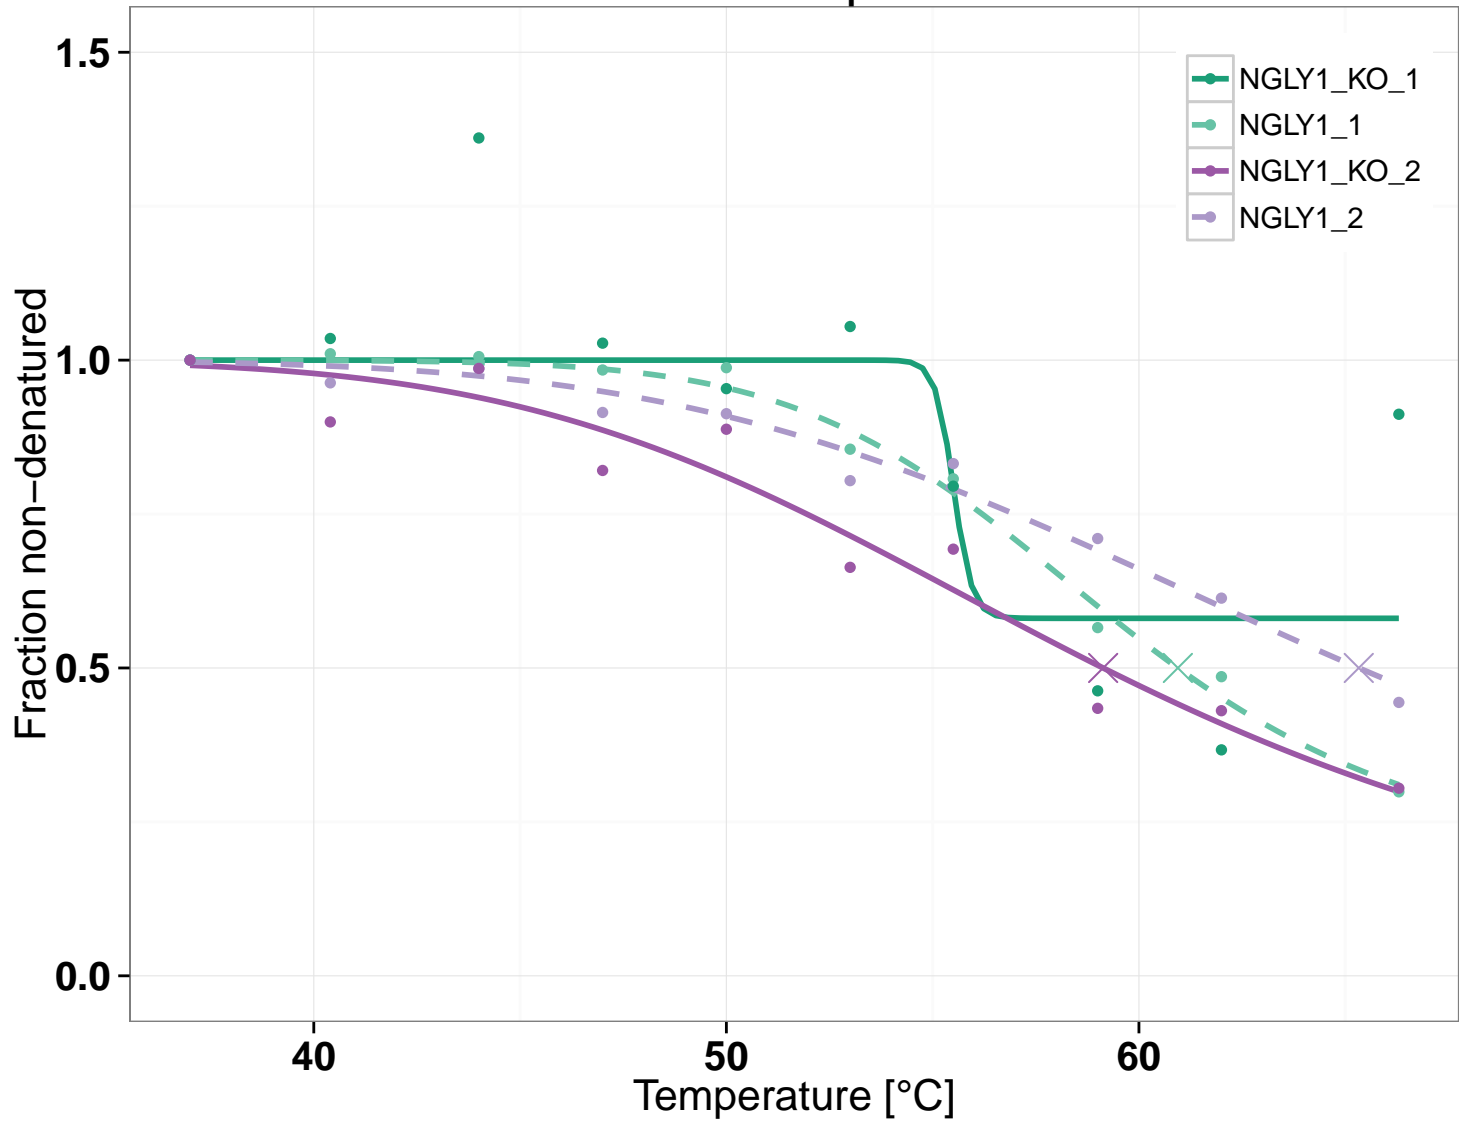

|            | meltPoint | slope  | plateau | R2   |
|------------|-----------|--------|---------|------|
| NGLY1_KO_1 | –         | –0.47  | 0.58    | 0.6  |
| NGLY1_1    | 60.94     | –0.055 | 0.18    | 0.99 |
| NGLY1_KO_2 | 59.13     | –0.036 | 0.01    | 0.95 |
| NGLY1_2    | 65.33     | –0.031 | 0       | 0.97 |

Supplement: Supplementary file 7459 [file 1]

# IPI00306280.3|DENR

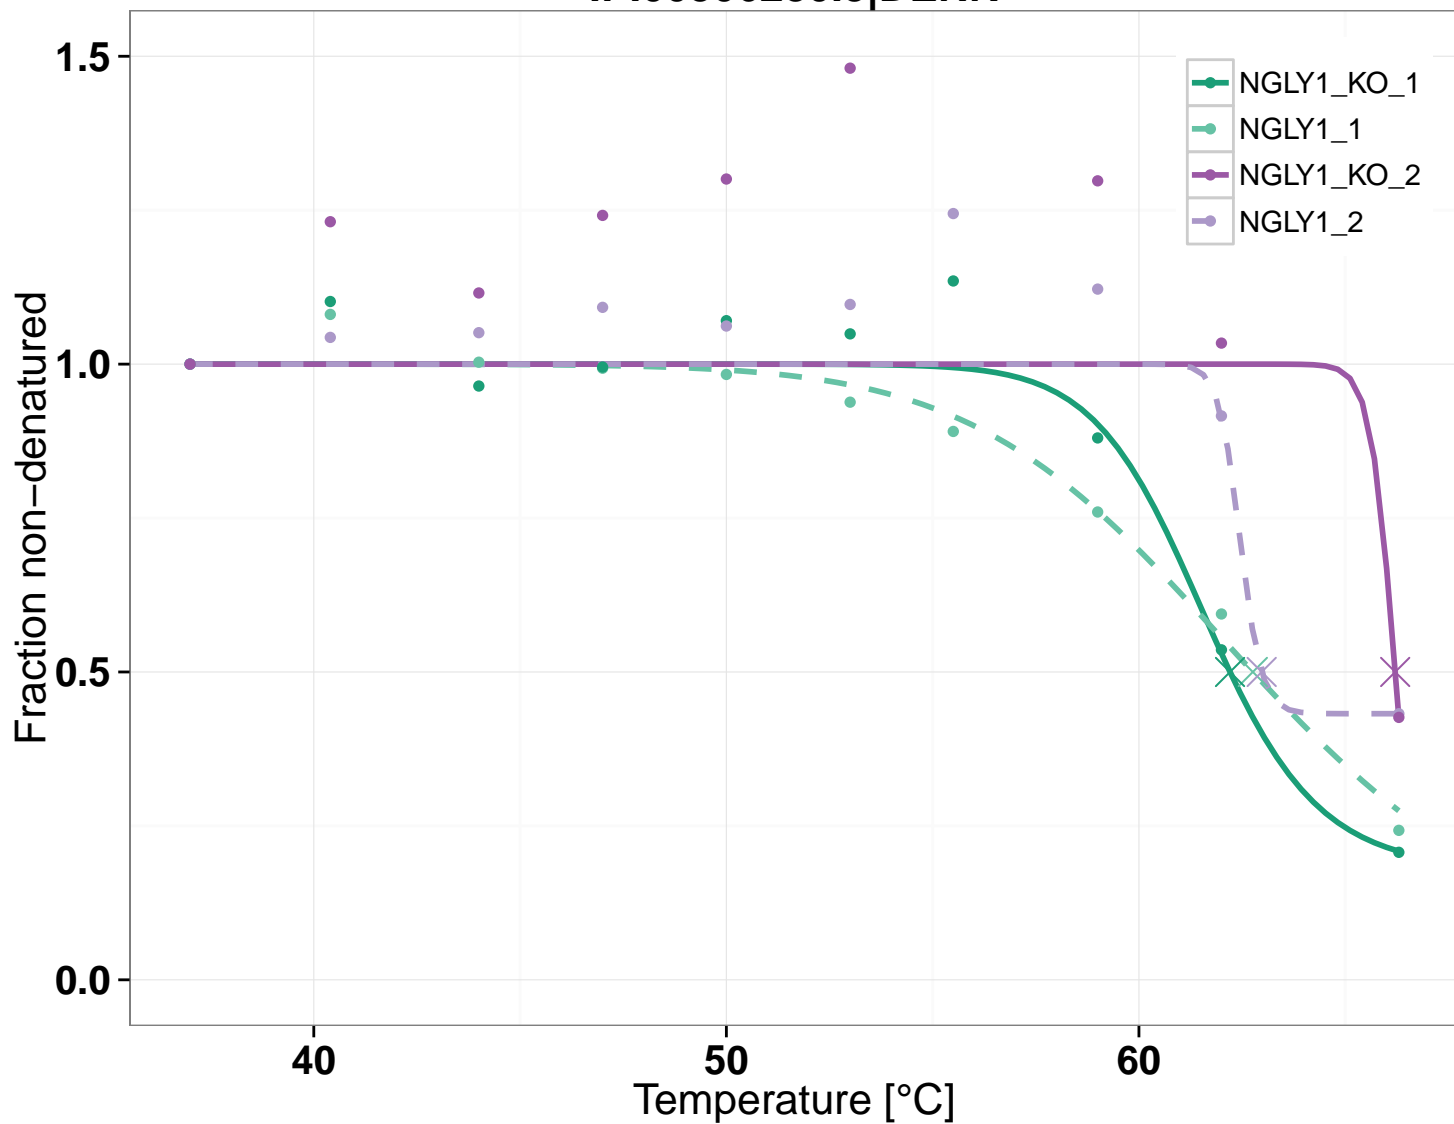

|            | meltPoint | slope  | plateau | R2   |
|------------|-----------|--------|---------|------|
| NGLY1_KO_1 | 62.21     | -0.15  | 0.18    | 0.95 |
| NGLY1_1    | 62.76     | -0.073 | 0       | 0.98 |
| NGLY1_KO_2 | 66.21     | -0.84  | 0       | 0.06 |
| NGLY1_2    | 62.98     | -0.55  | 0.43    | 0.77 |

Supplement: Supplementary file 7460 [file 1]

# IPI00291544.3|SQLE

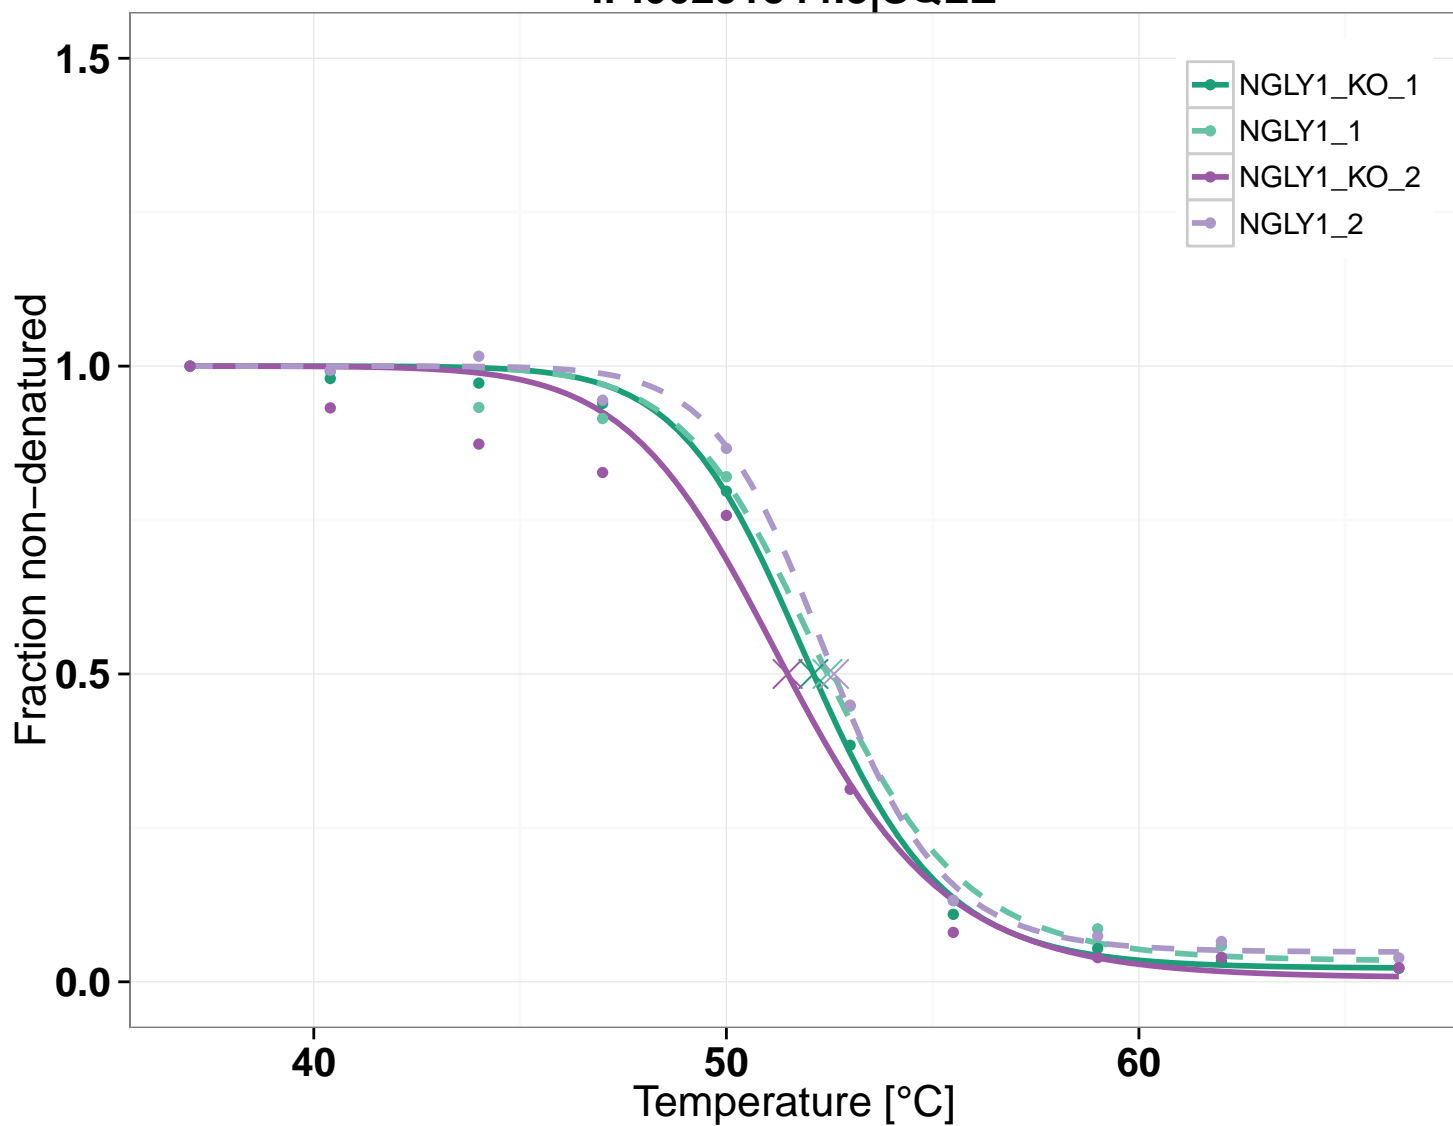

|            | meltPoint | slope | plateau | R2   |
|------------|-----------|-------|---------|------|
| NGLY1_KO_1 | 52.11     | -0.15 | 0.02    | 1    |
| NGLY1_1    | 52.45     | -0.14 | 0.03    | 0.99 |
| NGLY1_KO_2 | 51.48     | -0.13 | 0.01    | 0.98 |
| NGLY1_2    | 52.61     | -0.17 | 0.05    | 1    |

Supplement: Supplementary file 7461 [file 1]

# IPI00639925.1|XPO6

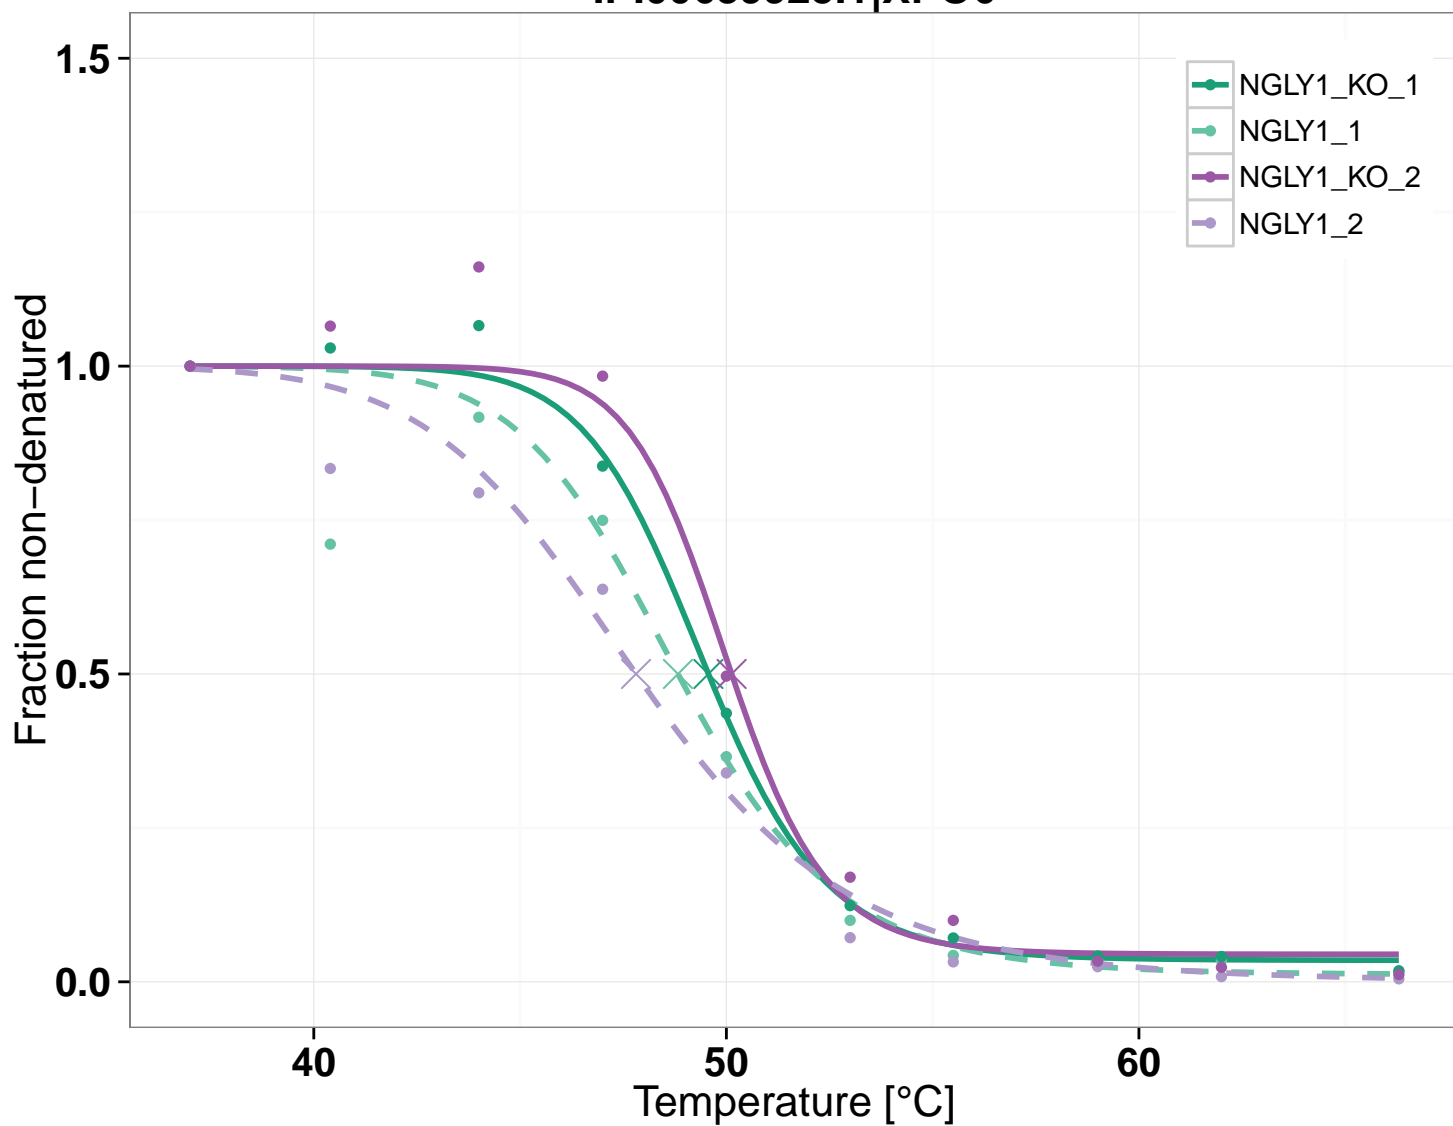

|            | meltPoint | slope  | plateau | R2   |
|------------|-----------|--------|---------|------|
| NGLY1_KO_1 | 49.57     | -0.16  | 0.03    | 1    |
| NGLY1_1    | 48.83     | -0.13  | 0.01    | 0.94 |
| NGLY1_KO_2 | 50.13     | -0.2   | 0.04    | 0.98 |
| NGLY1_2    | 47.81     | -0.097 | 0       | 0.98 |

Supplement: Supplementary file 7462 [file 1]

IPI00549239.3|PUS7L

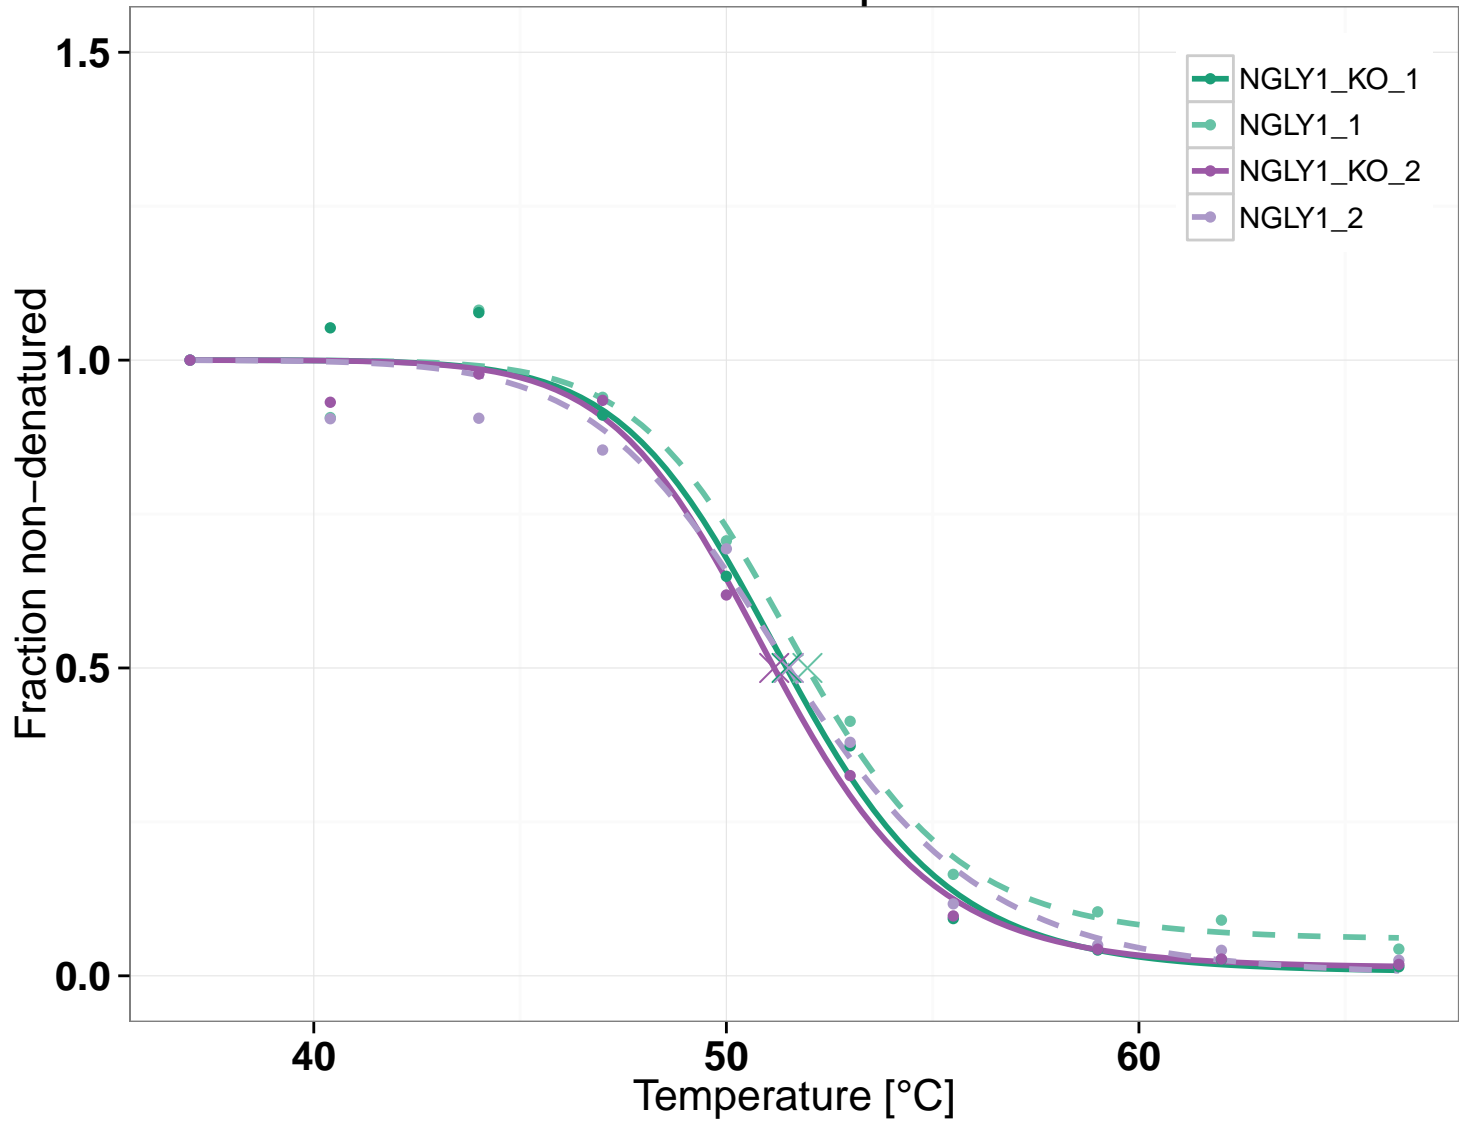

|            | meltPoint | slope | plateau | R2   |
|------------|-----------|-------|---------|------|
| NGLY1_KO_1 | 51.46     | -0.12 | 0.01    | 0.99 |
| NGLY1_1    | 51.97     | -0.12 | 0.06    | 0.99 |
| NGLY1_KO_2 | 51.16     | -0.13 | 0.01    | 1    |
| NGLY1_2    | 51.52     | -0.11 | 0       | 0.99 |

Supplement: Supplementary file 7463 [file 1]

# IPI00874235.1|ERGIC1

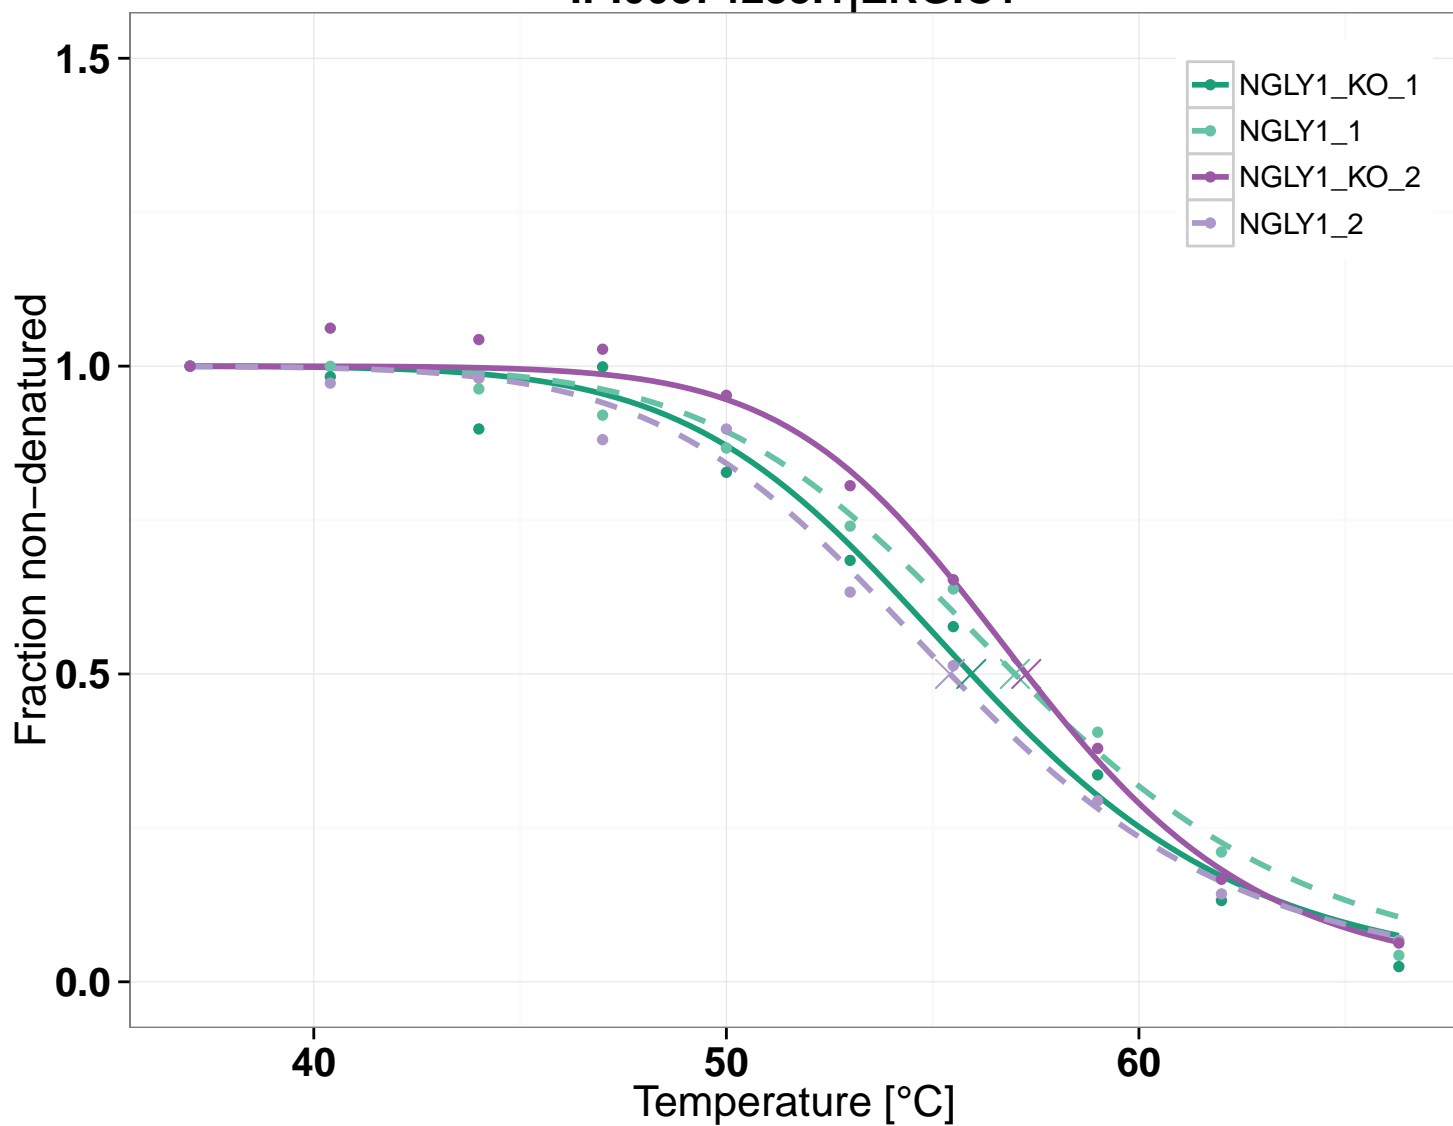

|            | meltPoint | slope  | plateau | R2   |
|------------|-----------|--------|---------|------|
| NGLY1_KO_1 | 55.94     | -0.073 | 0       | 0.98 |
| NGLY1_1    | 56.99     | -0.068 | 0       | 0.99 |
| NGLY1_KO_2 | 57.27     | -0.087 | 0       | 0.99 |
| NGLY1_2    | 55.42     | -0.071 | 0       | 0.99 |

Supplement: Supplementary file 7464 [file 1]

IPI00010845.3|NDUFS8

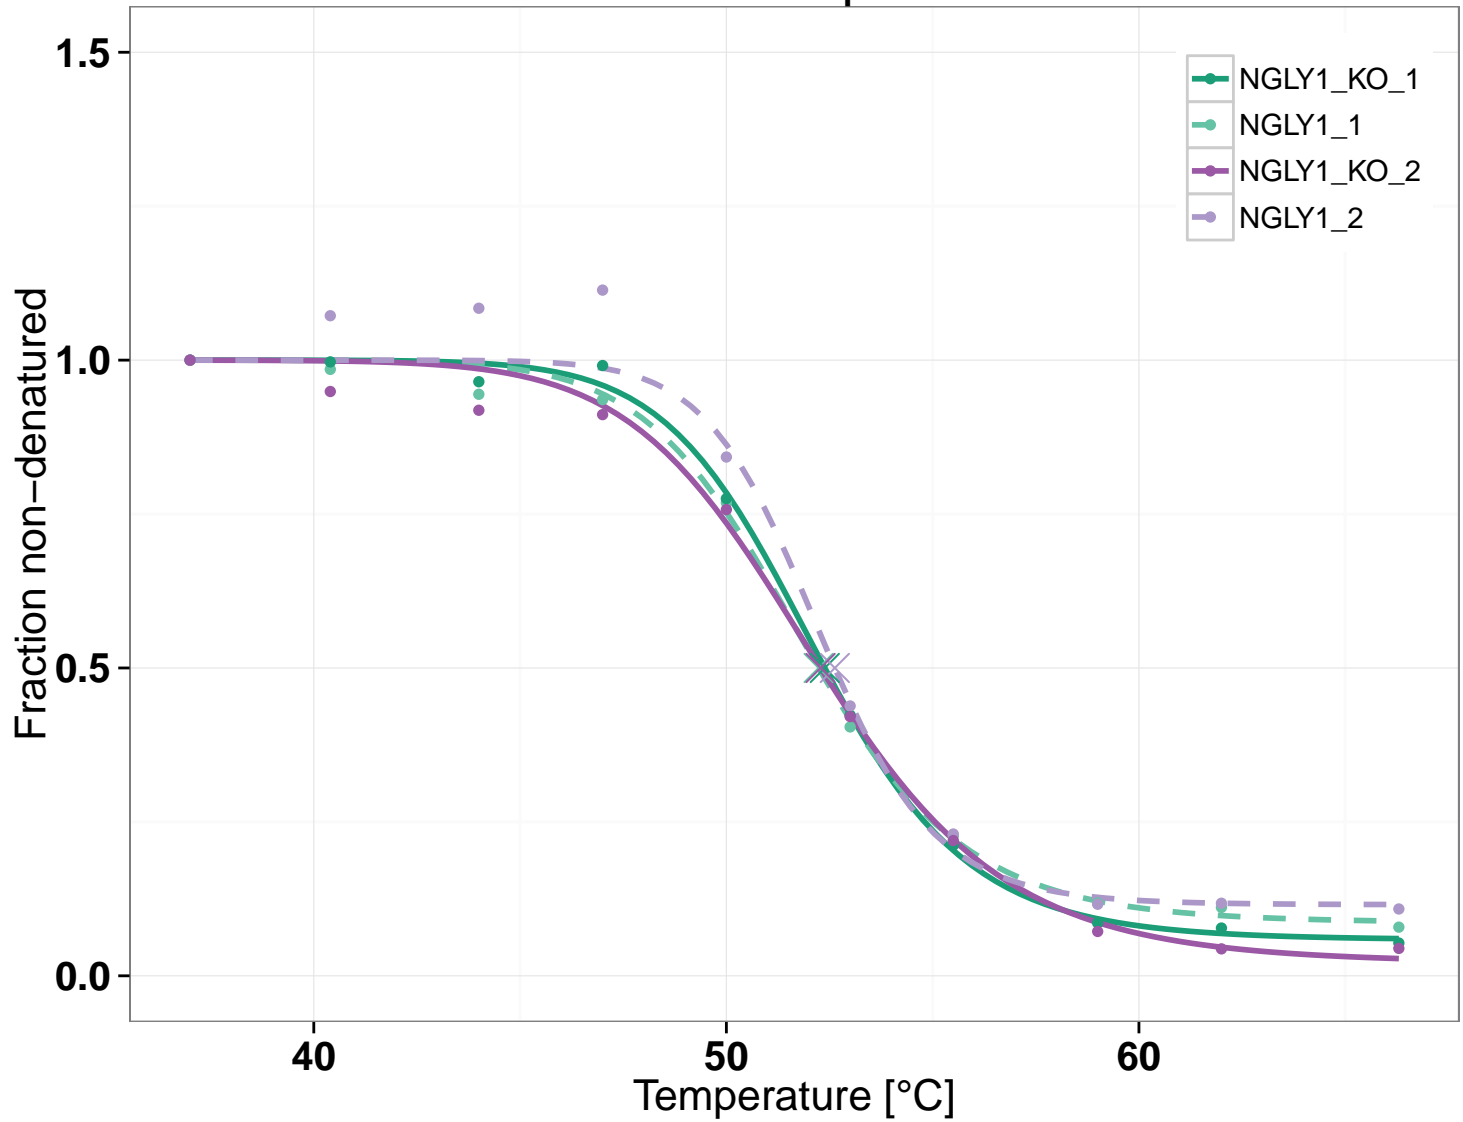

|            | meltPoint | slope | plateau | R2   |
|------------|-----------|-------|---------|------|
| NGLY1_KO_1 | 52.39     | -0.13 | 0.06    | 1    |
| NGLY1_1    | 52.24     | -0.12 | 0.09    | 1    |
| NGLY1_KO_2 | 52.28     | -0.11 | 0.02    | 0.99 |
| NGLY1_2    | 52.63     | -0.16 | 0.12    | 0.98 |

Supplement: Supplementary file 7465 [file 1]

IPI00022613.4|NOP14

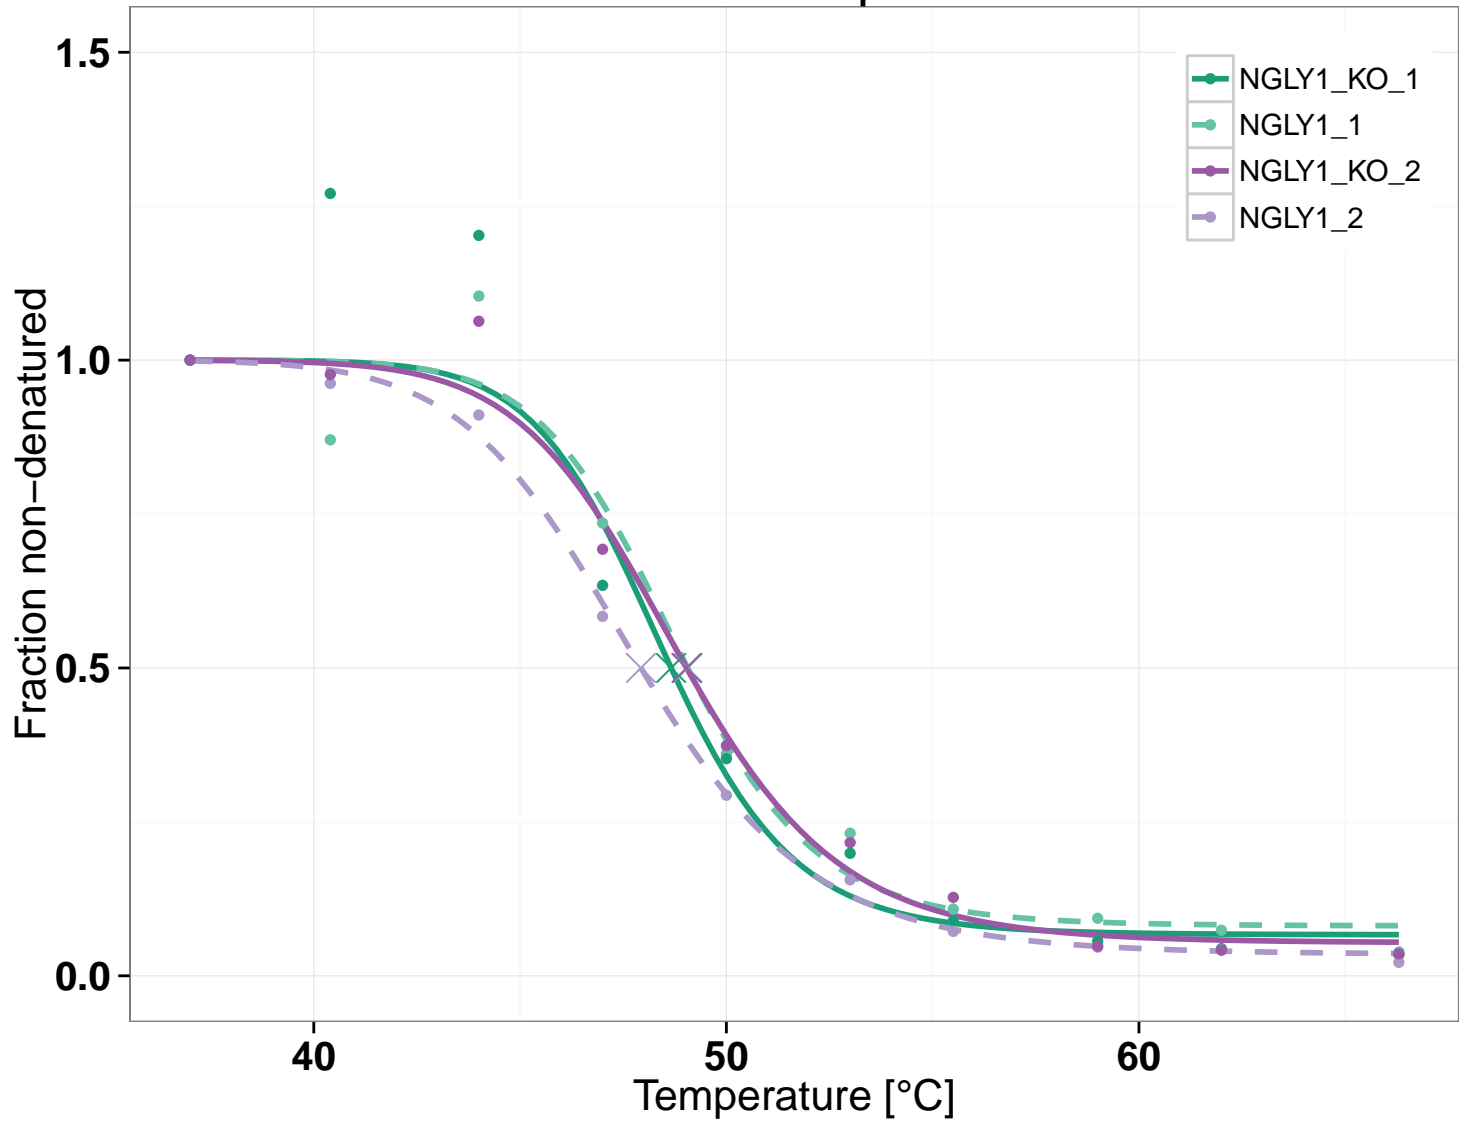

|            | meltPoint | slope | plateau | R2   |
|------------|-----------|-------|---------|------|
| NGLY1_KO_1 | 48.66     | -0.15 | 0.07    | 0.93 |
| NGLY1_1    | 49.06     | -0.14 | 0.08    | 0.97 |
| NGLY1_KO_2 | 49.04     | -0.12 | 0.05    | 0.99 |
| NGLY1_2    | 47.93     | -0.11 | 0.03    | 1    |

Supplement: Supplementary file 7466 [file 1]

IPI00853120.1|NCAPH2

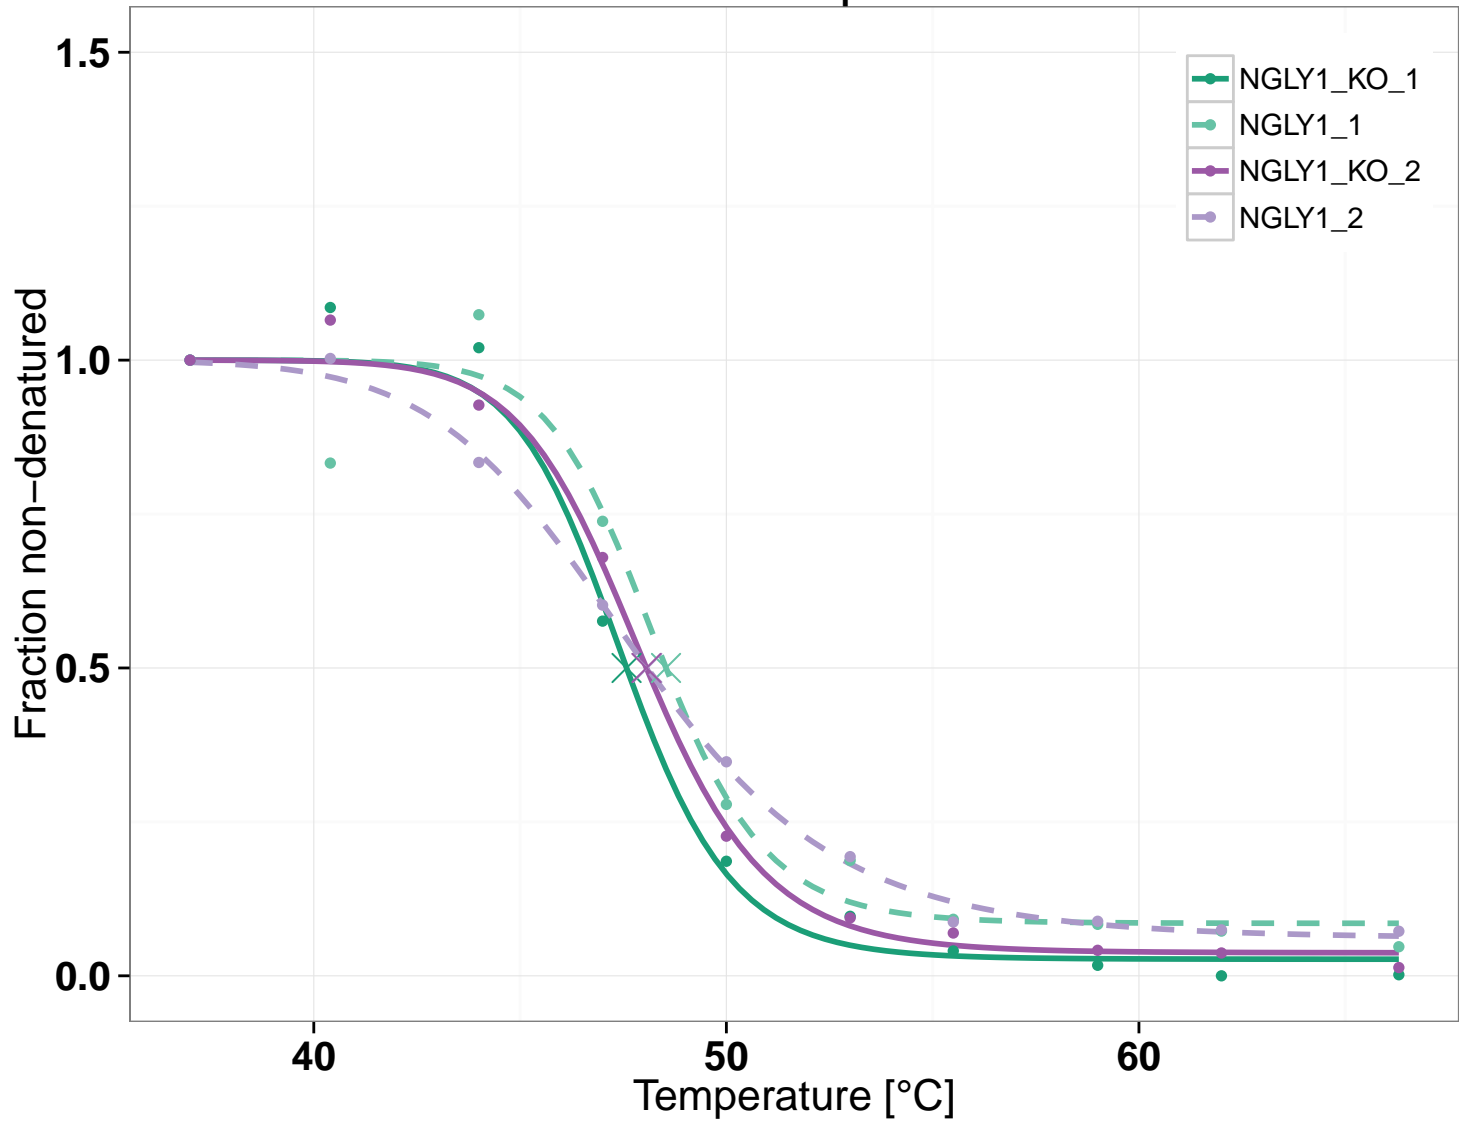

|            | meltPoint | slope  | plateau | R2   |
|------------|-----------|--------|---------|------|
| NGLY1_KO_1 | 47.58     | -0.19  | 0.03    | 0.99 |
| NGLY1_1    | 48.54     | -0.17  | 0.09    | 0.97 |
| NGLY1_KO_2 | 48.06     | -0.16  | 0.04    | 1    |
| NGLY1_2    | 48.08     | -0.096 | 0.06    | 1    |

Supplement: Supplementary file 7467 [file 1]

IPI00647558.1|FOXRED2

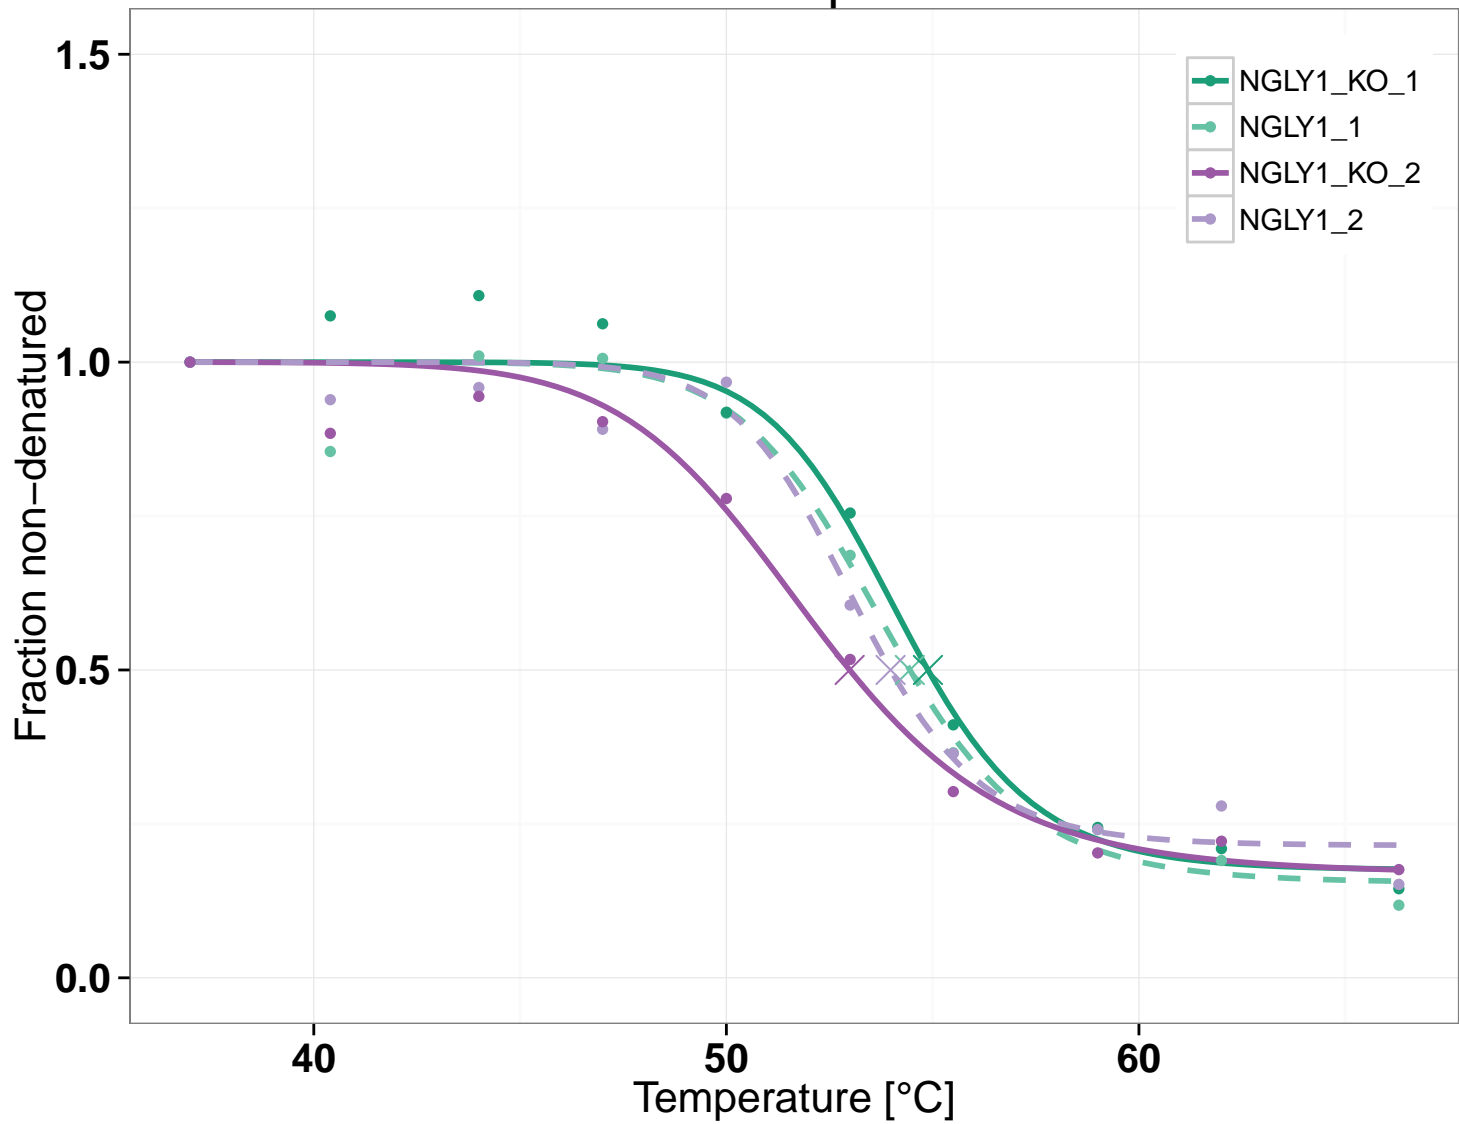

|            | meltPoint | slope | plateau | R2   |
|------------|-----------|-------|---------|------|
| NGLY1_KO_1 | 54.89     | -0.13 | 0.17    | 0.98 |
| NGLY1_1    | 54.45     | -0.12 | 0.15    | 0.98 |
| NGLY1_KO_2 | 52.99     | -0.09 | 0.17    | 0.98 |
| NGLY1_2    | 53.98     | -0.13 | 0.21    | 0.98 |

Supplement: Supplementary file 7468 [file 1]

IPI00031655.1|VPS25

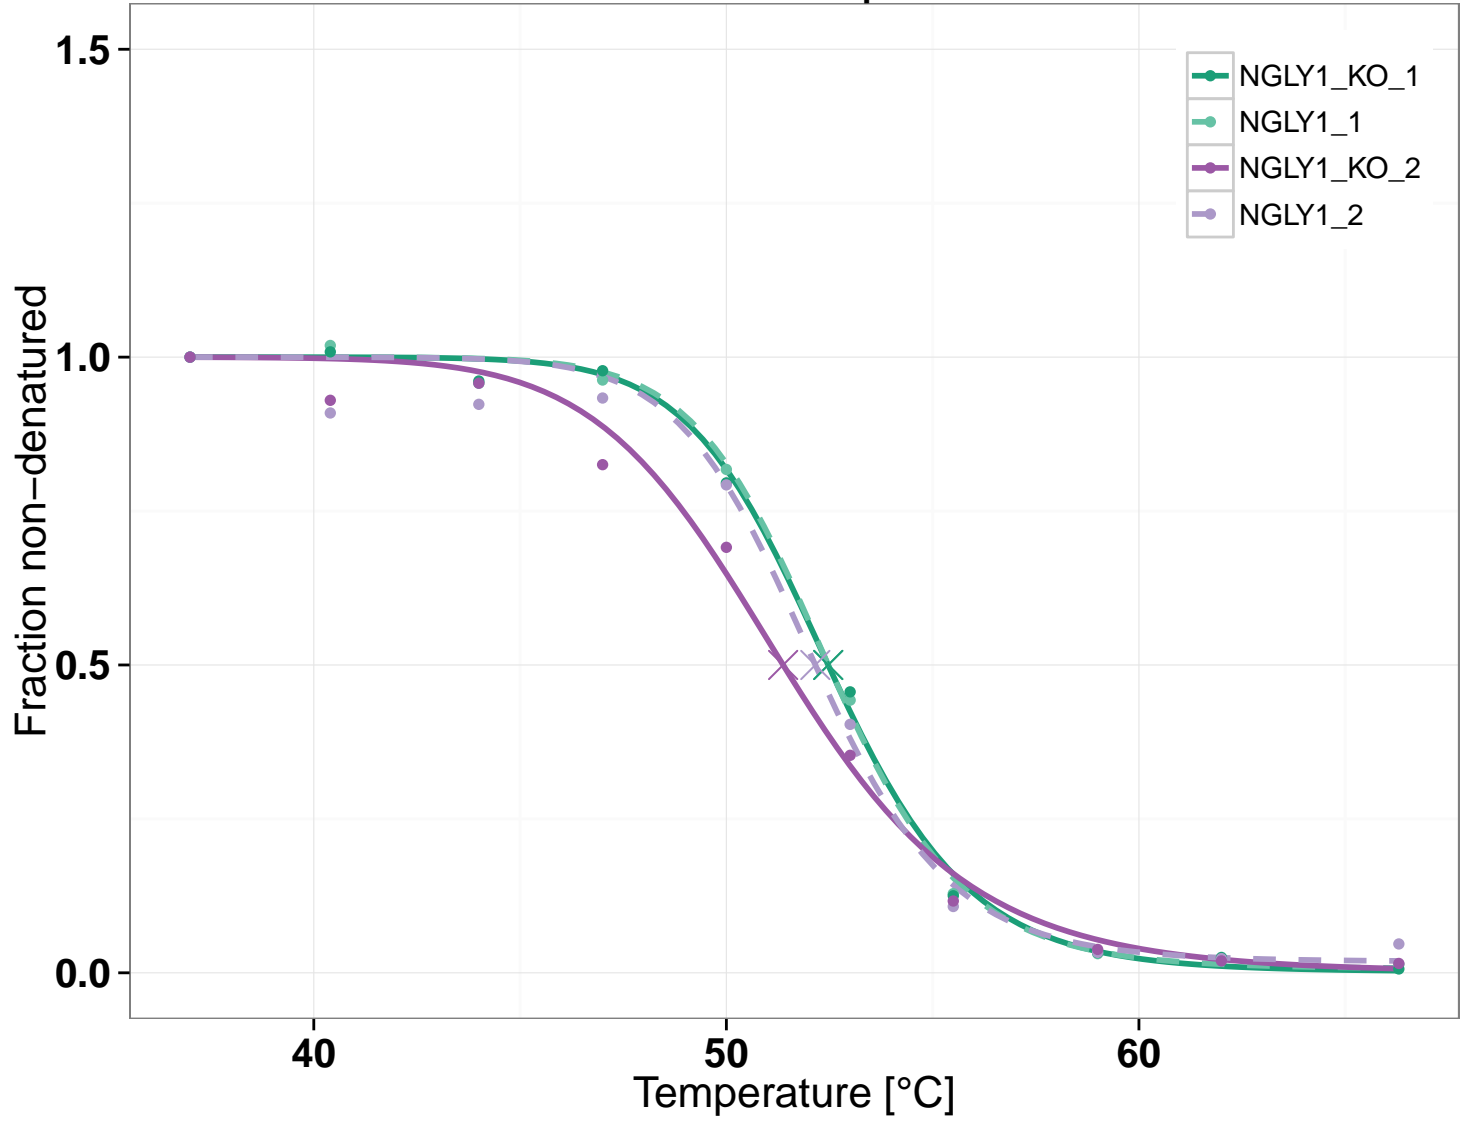

|            | meltPoint | slope | plateau | R2   |
|------------|-----------|-------|---------|------|
| NGLY1_KO_1 | 52.47     | -0.15 | 0       | 1    |
| NGLY1_1    | 52.47     | -0.15 | 0.01    | 1    |
| NGLY1_KO_2 | 51.38     | -0.11 | 0       | 0.99 |
| NGLY1_2    | 52.16     | -0.15 | 0.02    | 0.99 |

Supplement: Supplementary file 7469 [file 1]

IPI00160421.3|MRPL18

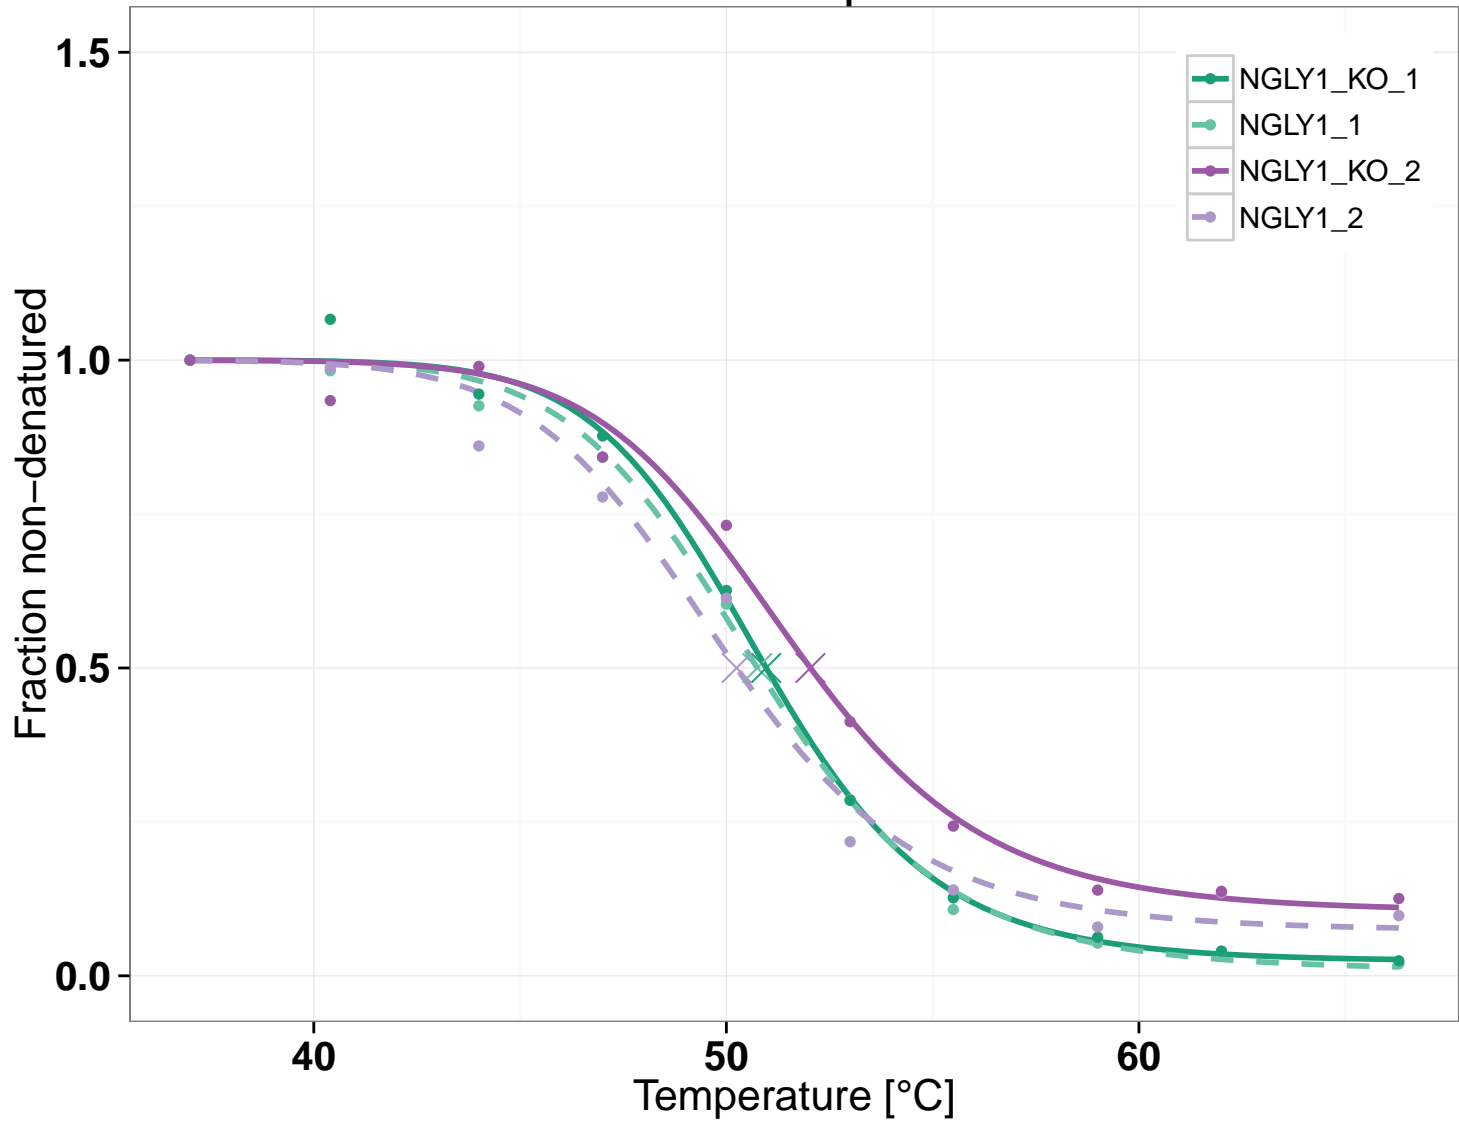

|            | meltPoint | slope  | plateau | R2   |
|------------|-----------|--------|---------|------|
| NGLY1_KO_1 | 50.97     | -0.12  | 0.02    | 1    |
| NGLY1_1    | 50.75     | -0.11  | 0.01    | 1    |
| NGLY1_KO_2 | 52.04     | -0.095 | 0.1     | 0.99 |
| NGLY1_2    | 50.25     | -0.099 | 0.07    | 0.98 |

Supplement: Supplementary file 7470 [file 1]

# IPI00166468.2|TAPT1

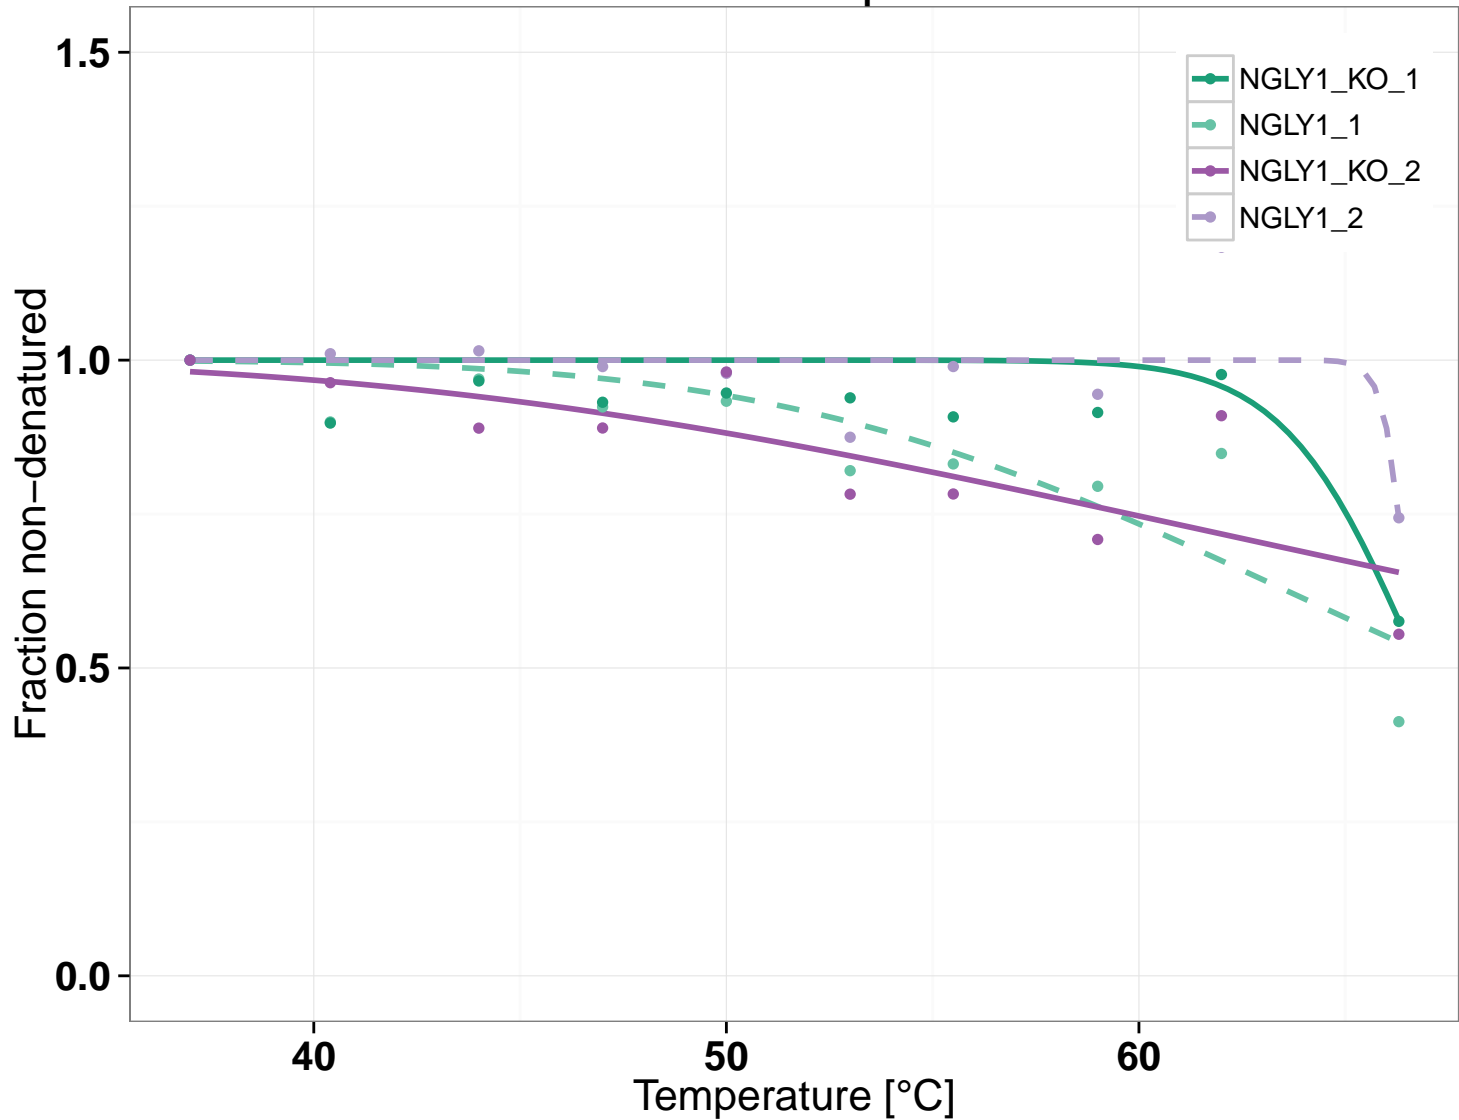

|            | meltPoint | slope  | plateau | R2   |
|------------|-----------|--------|---------|------|
| NGLY1_KO_1 | -         | -      | 0       | 0.71 |
| NGLY1_1    | -         | -0.031 | 0       | 0.73 |
| NGLY1_KO_2 | -         | -0.015 | 0       | 0.61 |
| NGLY1_2    | -         | -      | 0       | 0.52 |

Supplement: Supplementary file 7471 [file 1]

IPI00023035.2|SLC20A1

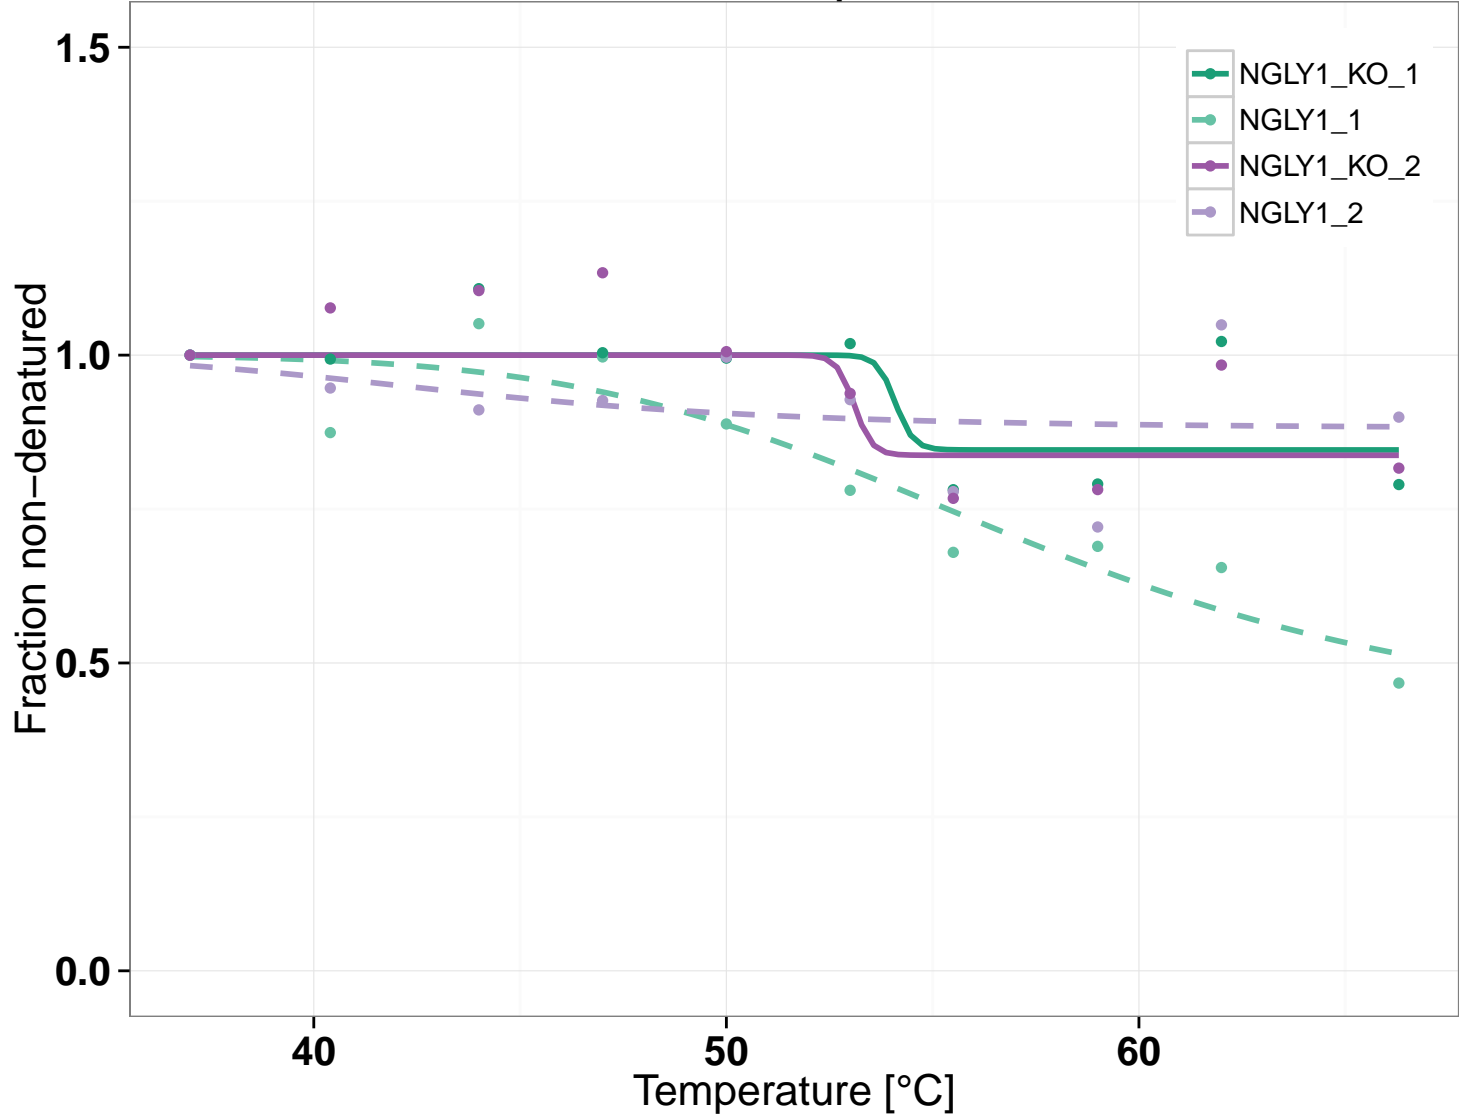

|            | meltPoint | slope   | plateau | R2   |
|------------|-----------|---------|---------|------|
| NGLY1_KO_1 | -         | -0.18   | 0.85    | 0.57 |
| NGLY1_1    | -         | -0.028  | 0.39    | 0.88 |
| NGLY1_KO_2 | -         | -0.19   | 0.84    | 0.59 |
| NGLY1_2    | -         | -0.0073 | 0.88    | 0.13 |

Supplement: Supplementary file 7472 [file 1]

IPI00106495.1|NCAPG

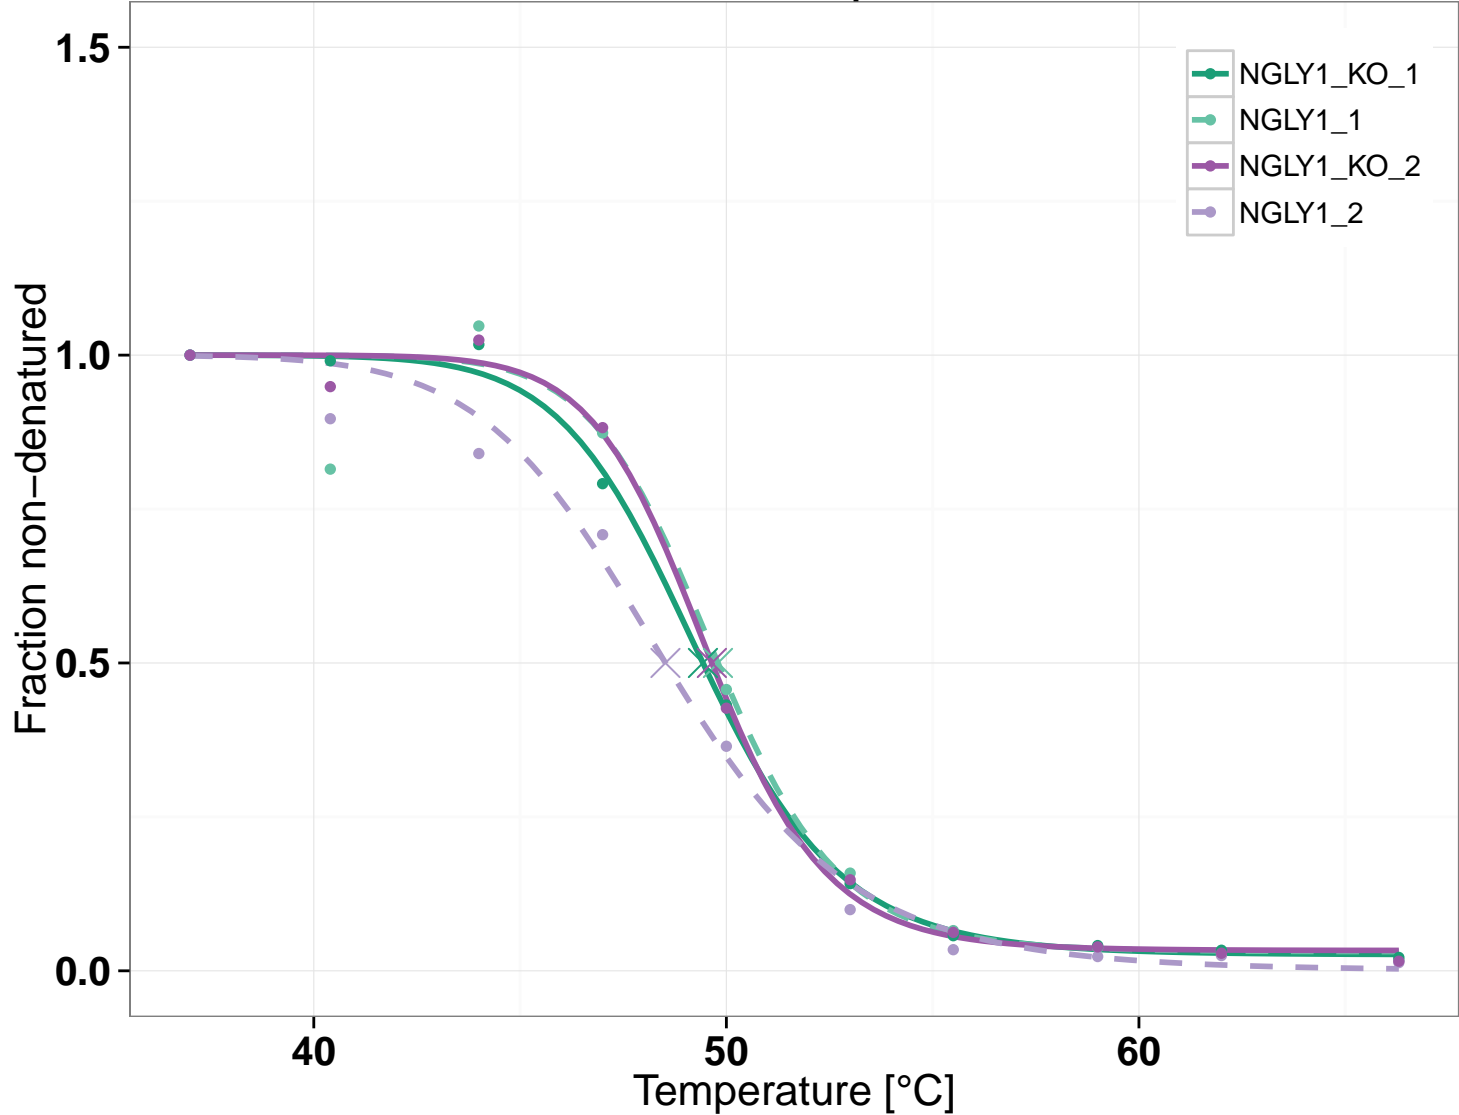

|            | meltPoint | slope | plateau | R2   |
|------------|-----------|-------|---------|------|
| NGLY1_KO_1 | 49.43     | -0.14 | 0.03    | 1    |
| NGLY1_1    | 49.8      | -0.16 | 0.03    | 0.98 |
| NGLY1_KO_2 | 49.65     | -0.17 | 0.03    | 1    |
| NGLY1_2    | 48.52     | -0.11 | 0       | 0.99 |

Supplement: Supplementary file 7473 [file 1]

# IPI00329625.5|TBRG4

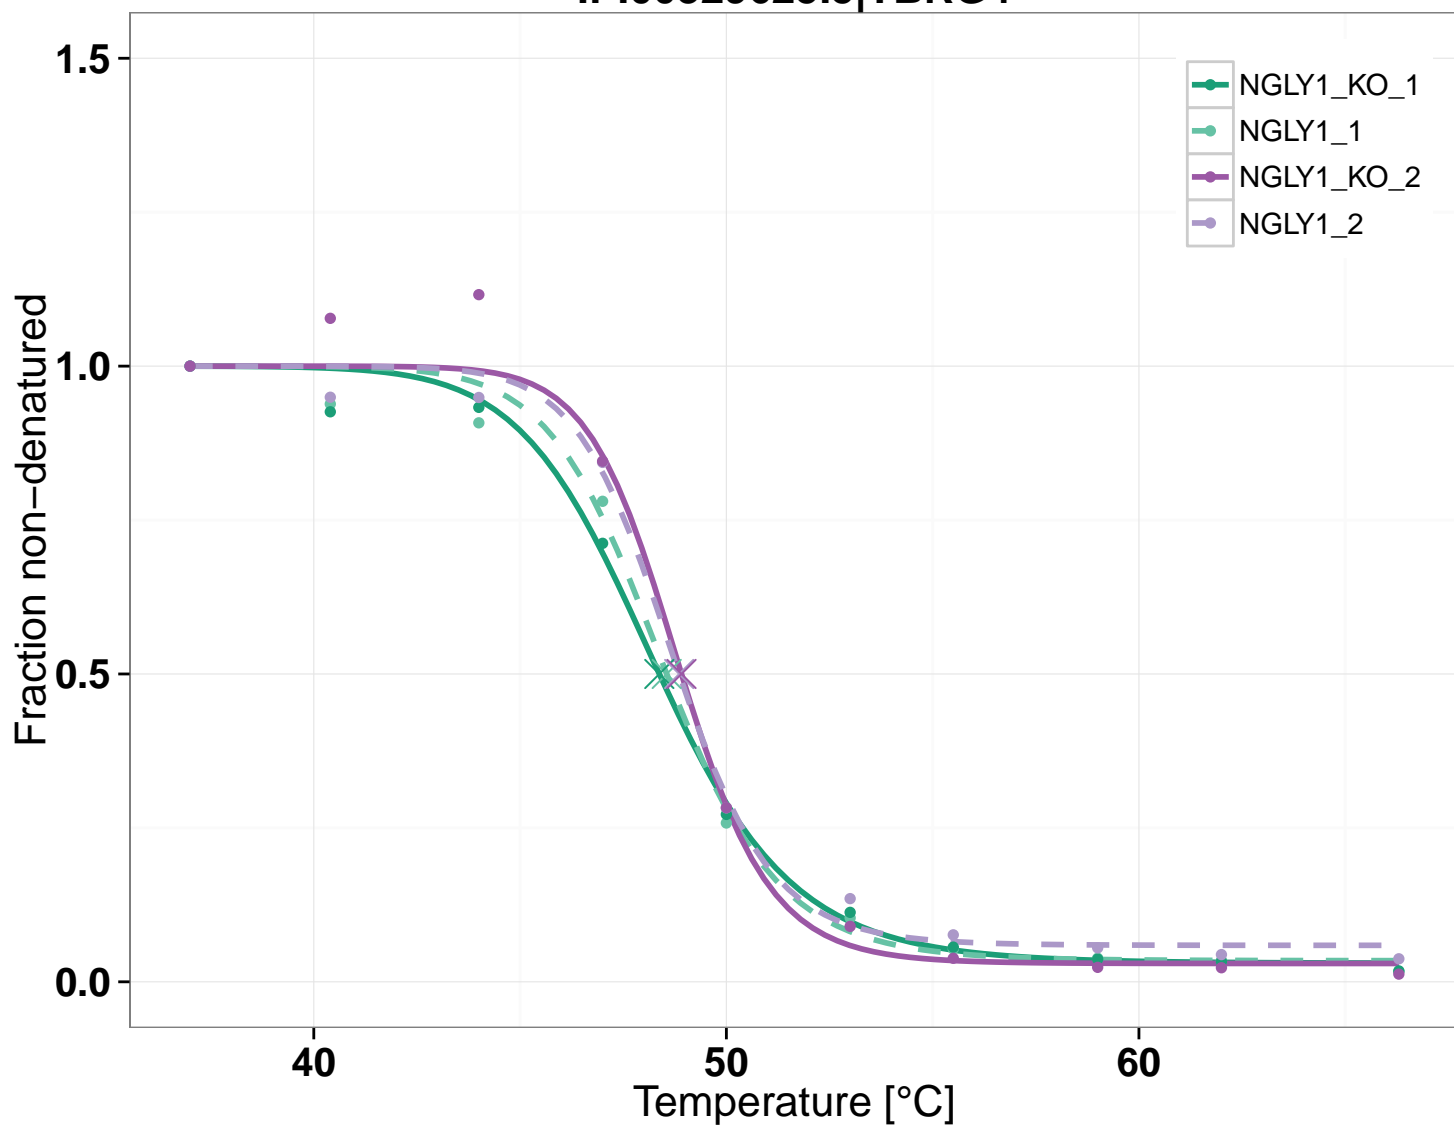

|            | meltPoint | slope | plateau | R2   |
|------------|-----------|-------|---------|------|
| NGLY1_KO_1 | 48.38     | -0.15 | 0.03    | 1    |
| NGLY1_1    | 48.55     | -0.17 | 0.03    | 0.99 |
| NGLY1_KO_2 | 48.91     | -0.22 | 0.03    | 0.99 |
| NGLY1_2    | 48.86     | -0.2  | 0.06    | 1    |

Supplement: Supplementary file 7474 [file 1]

# IPI00032342.4|TRIP12

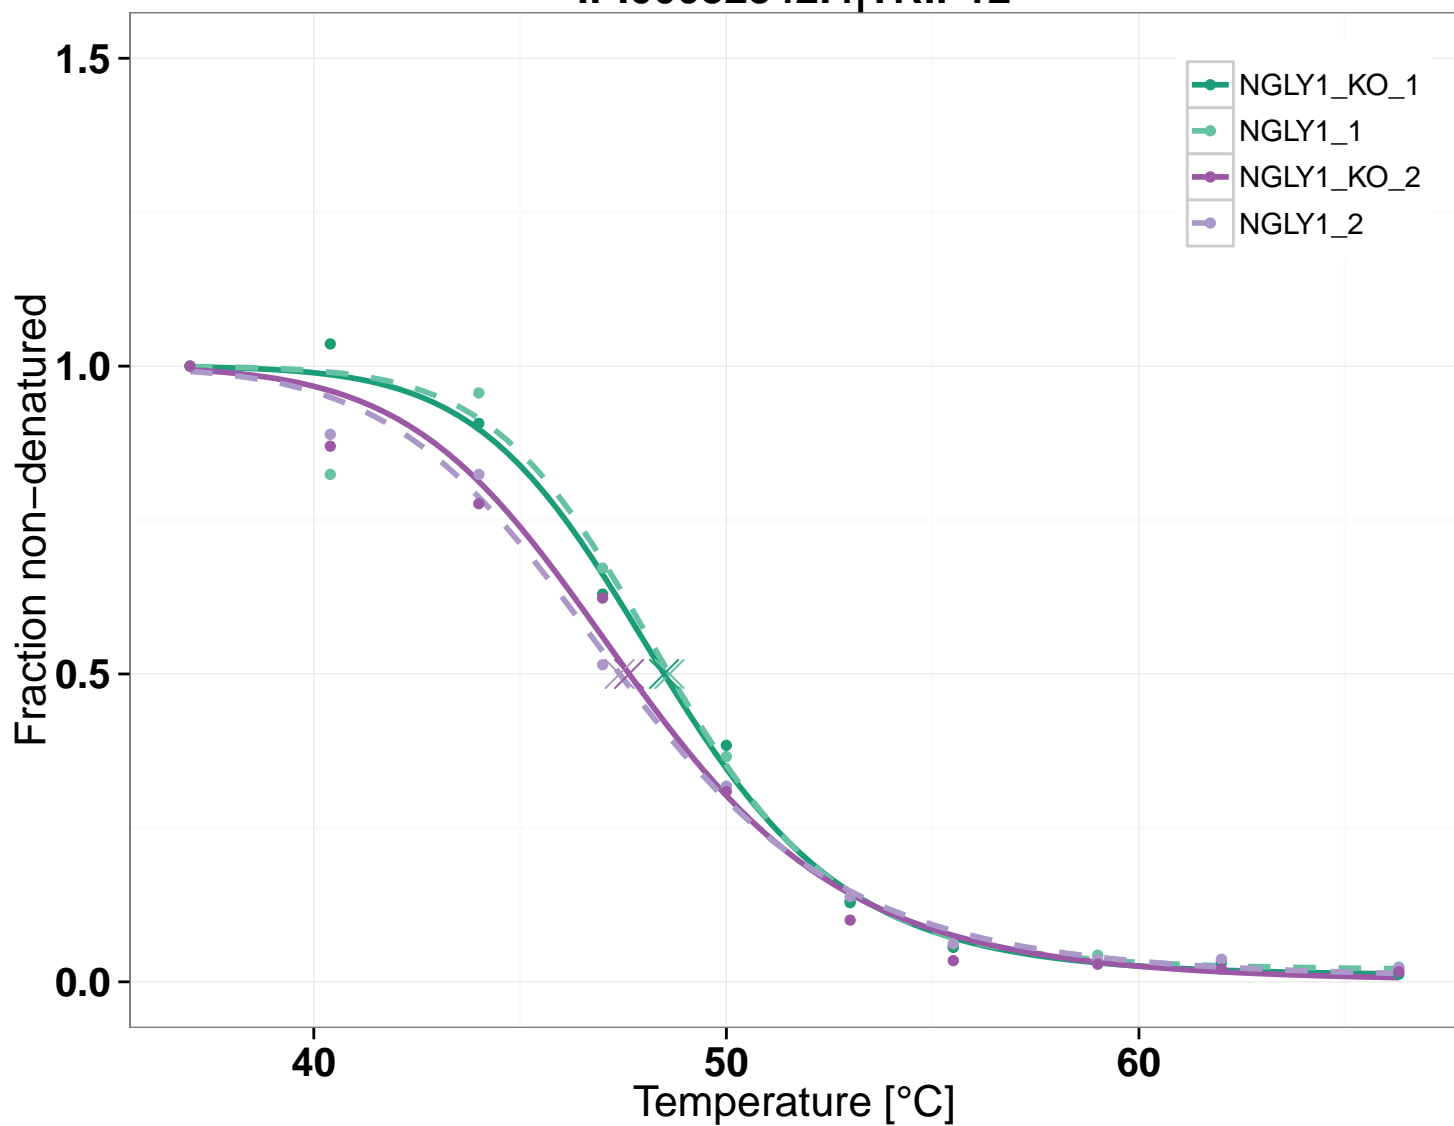

|            | meltPoint | slope  | plateau | R2   |
|------------|-----------|--------|---------|------|
| NGLY1_KO_1 | 48.49     | -0.11  | 0.01    | 1    |
| NGLY1_1    | 48.62     | -0.12  | 0.02    | 0.98 |
| NGLY1_KO_2 | 47.64     | -0.094 | 0       | 0.99 |
| NGLY1_2    | 47.41     | -0.09  | 0.01    | 1    |

Supplement: Supplementary file 7475 [file 1]

IPI00171665.1|NUP37

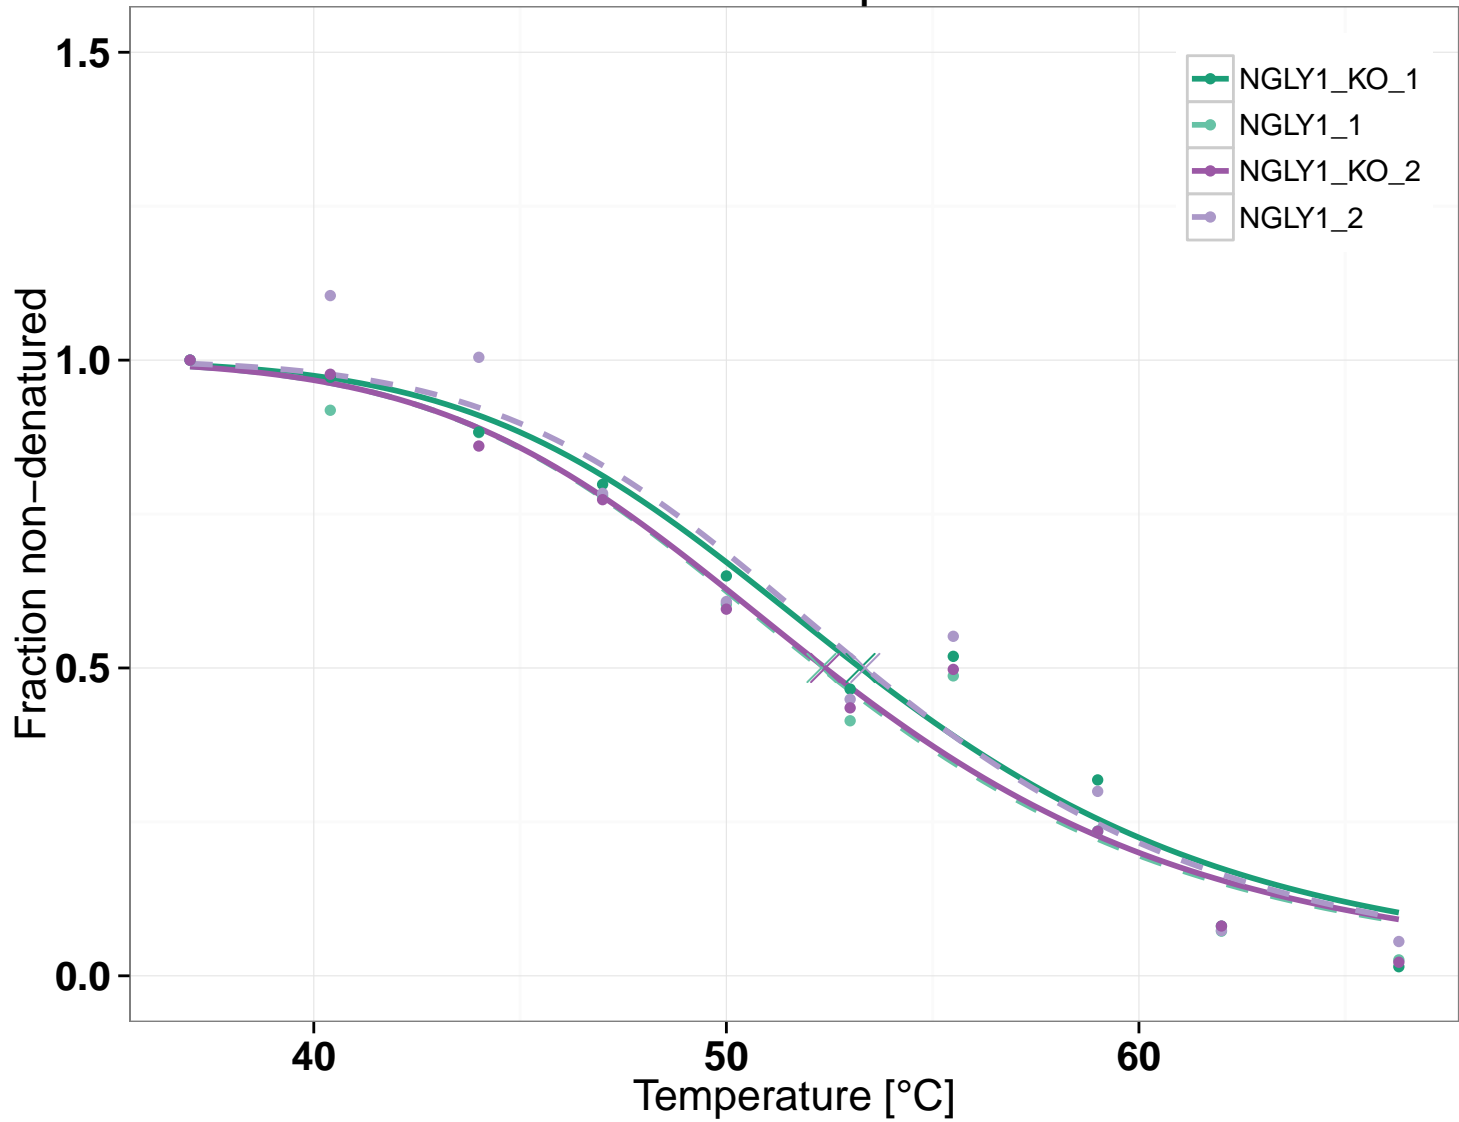

|            | meltPoint | slope  | plateau | R2   |
|------------|-----------|--------|---------|------|
| NGLY1_KO_1 | 53.25     | -0.053 | 0       | 0.96 |
| NGLY1_1    | 52.31     | -0.054 | 0       | 0.97 |
| NGLY1_KO_2 | 52.4      | -0.054 | 0       | 0.97 |
| NGLY1_2    | 53.37     | -0.056 | 0       | 0.94 |

Supplement: Supplementary file 7476 [file 1]

IPI00031566.3|CENPM

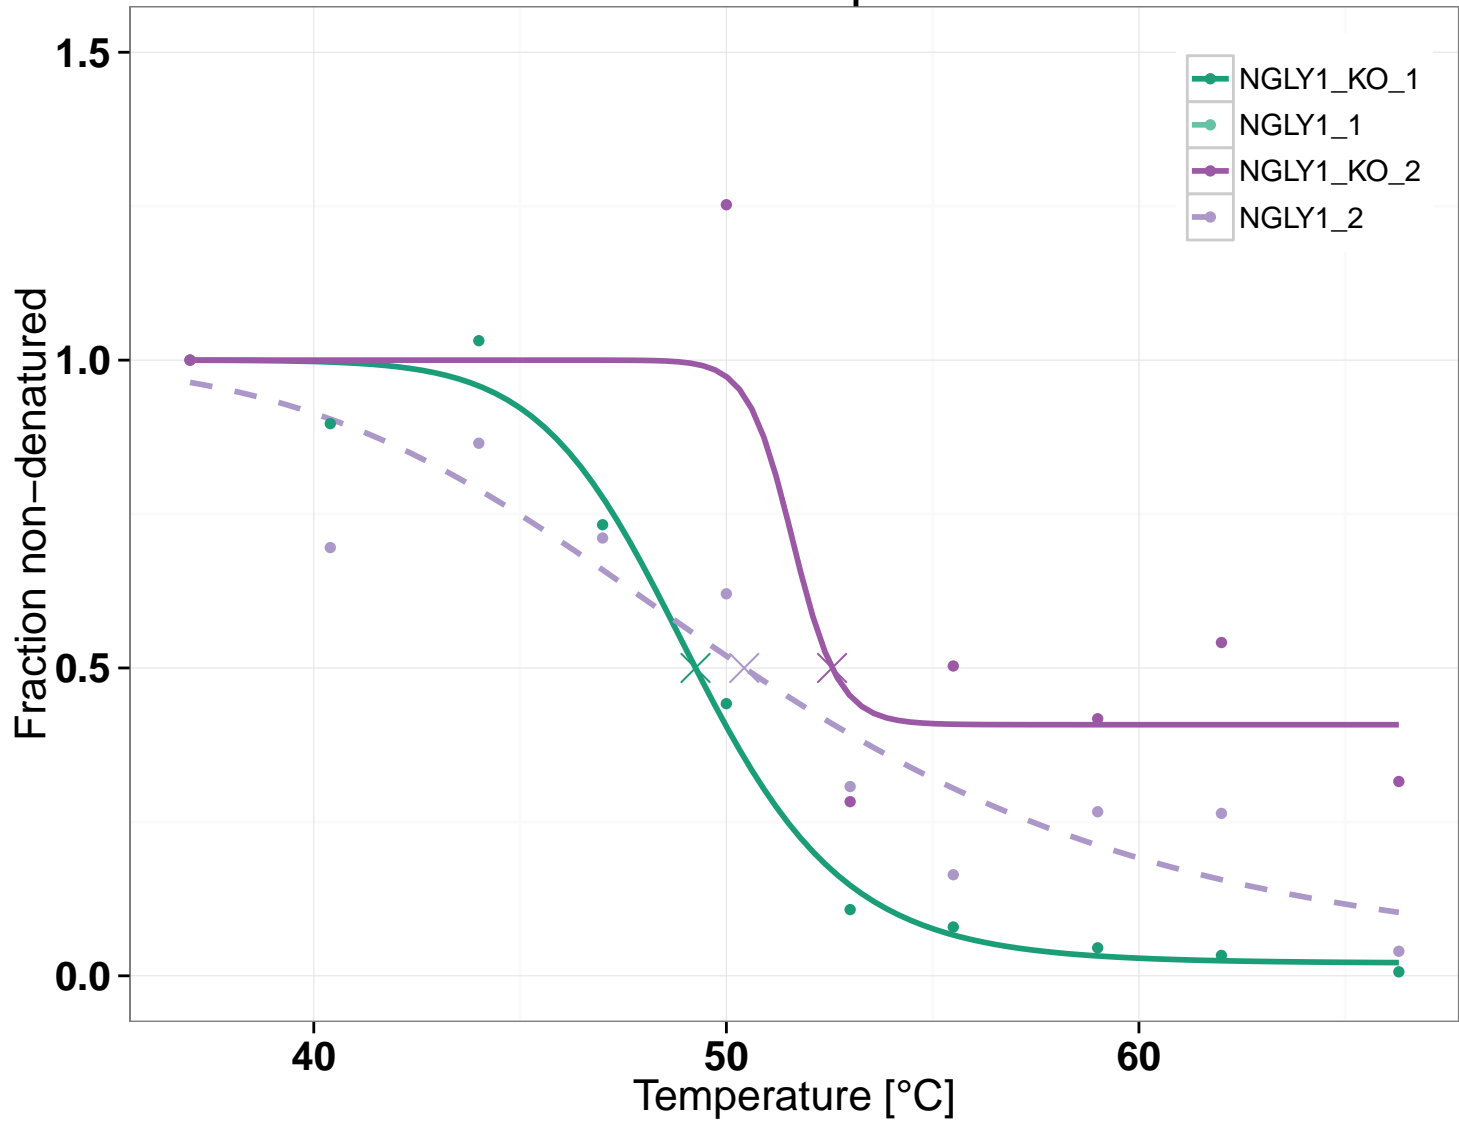

|            | meltPoint | slope  | plateau | R2   |
|------------|-----------|--------|---------|------|
| NGLY1_KO_1 | 49.25     | -0.13  | 0.02    | 0.99 |
| NGLY1_1    | -         | -      | -       | -    |
| NGLY1_KO_2 | 52.56     | -0.27  | 0.41    | 0.17 |
| NGLY1_2    | 50.43     | -0.047 | 0       | 0.89 |

Supplement: Supplementary file 7477 [file 1]

IPI00289560.3|E2F6

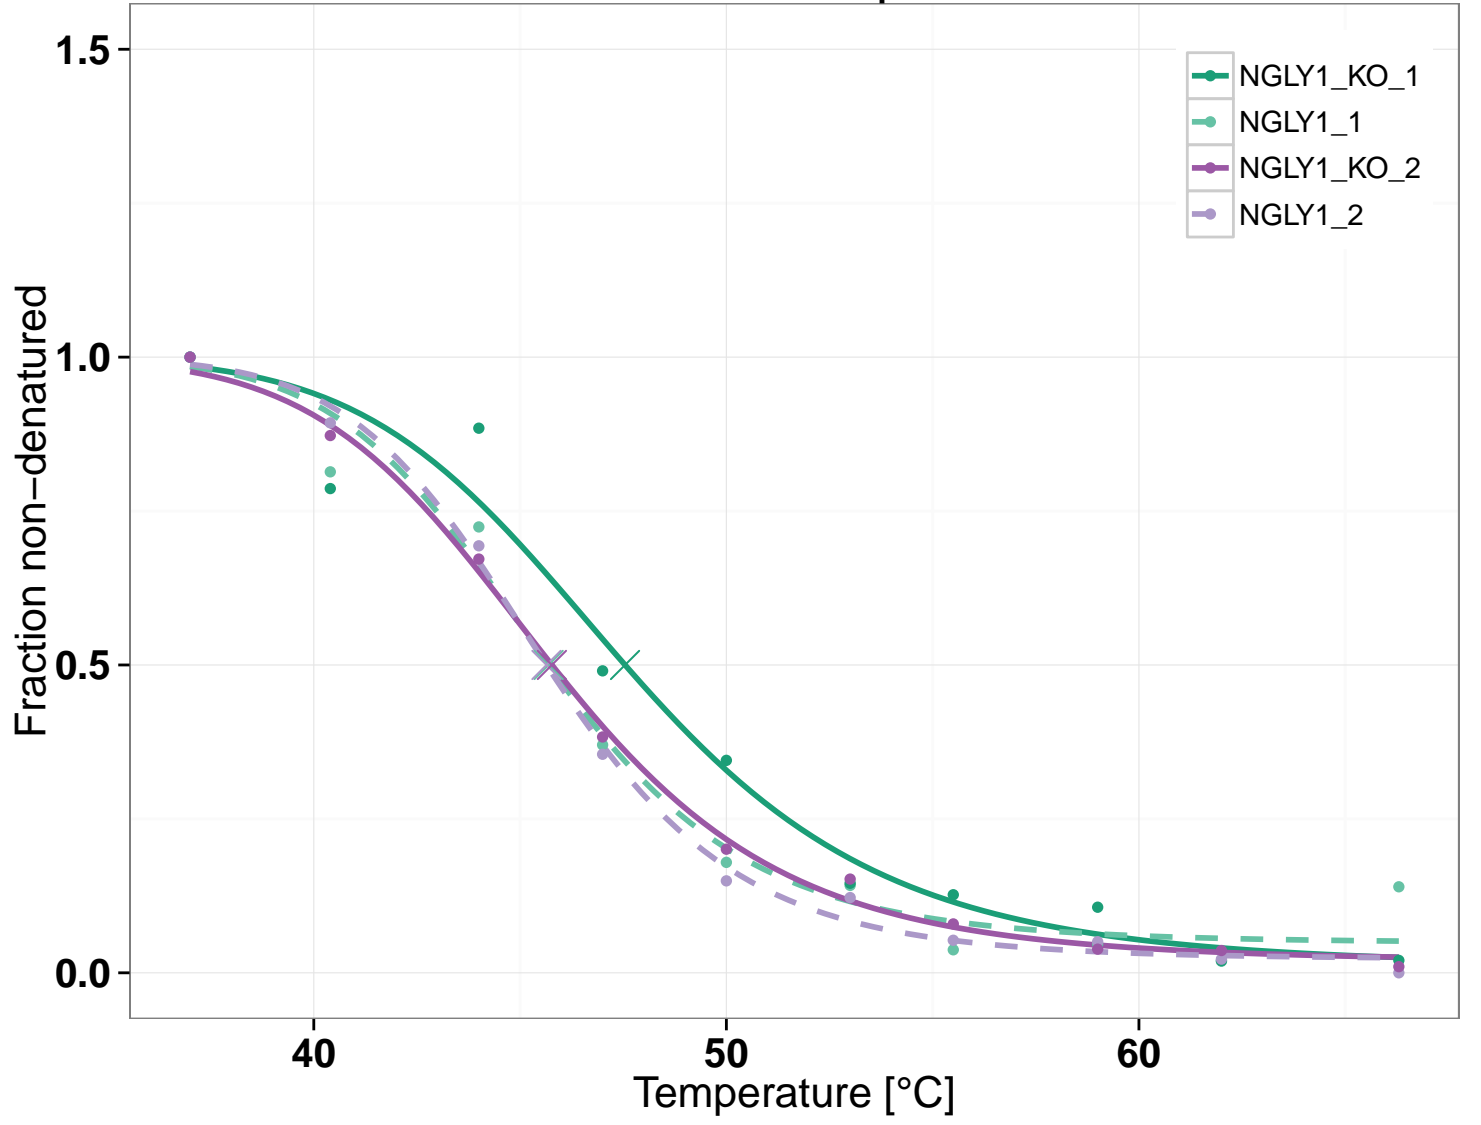

|            | meltPoint | slope  | plateau | R2   |
|------------|-----------|--------|---------|------|
| NGLY1_KO_1 | 47.54     | -0.078 | 0.01    | 0.97 |
| NGLY1_1    | 45.69     | -0.095 | 0.05    | 0.98 |
| NGLY1_KO_2 | 45.77     | -0.086 | 0.02    | 1    |
| NGLY1_2    | 45.64     | -0.1   | 0.02    | 1    |

Supplement: Supplementary file 7478 [file 1]

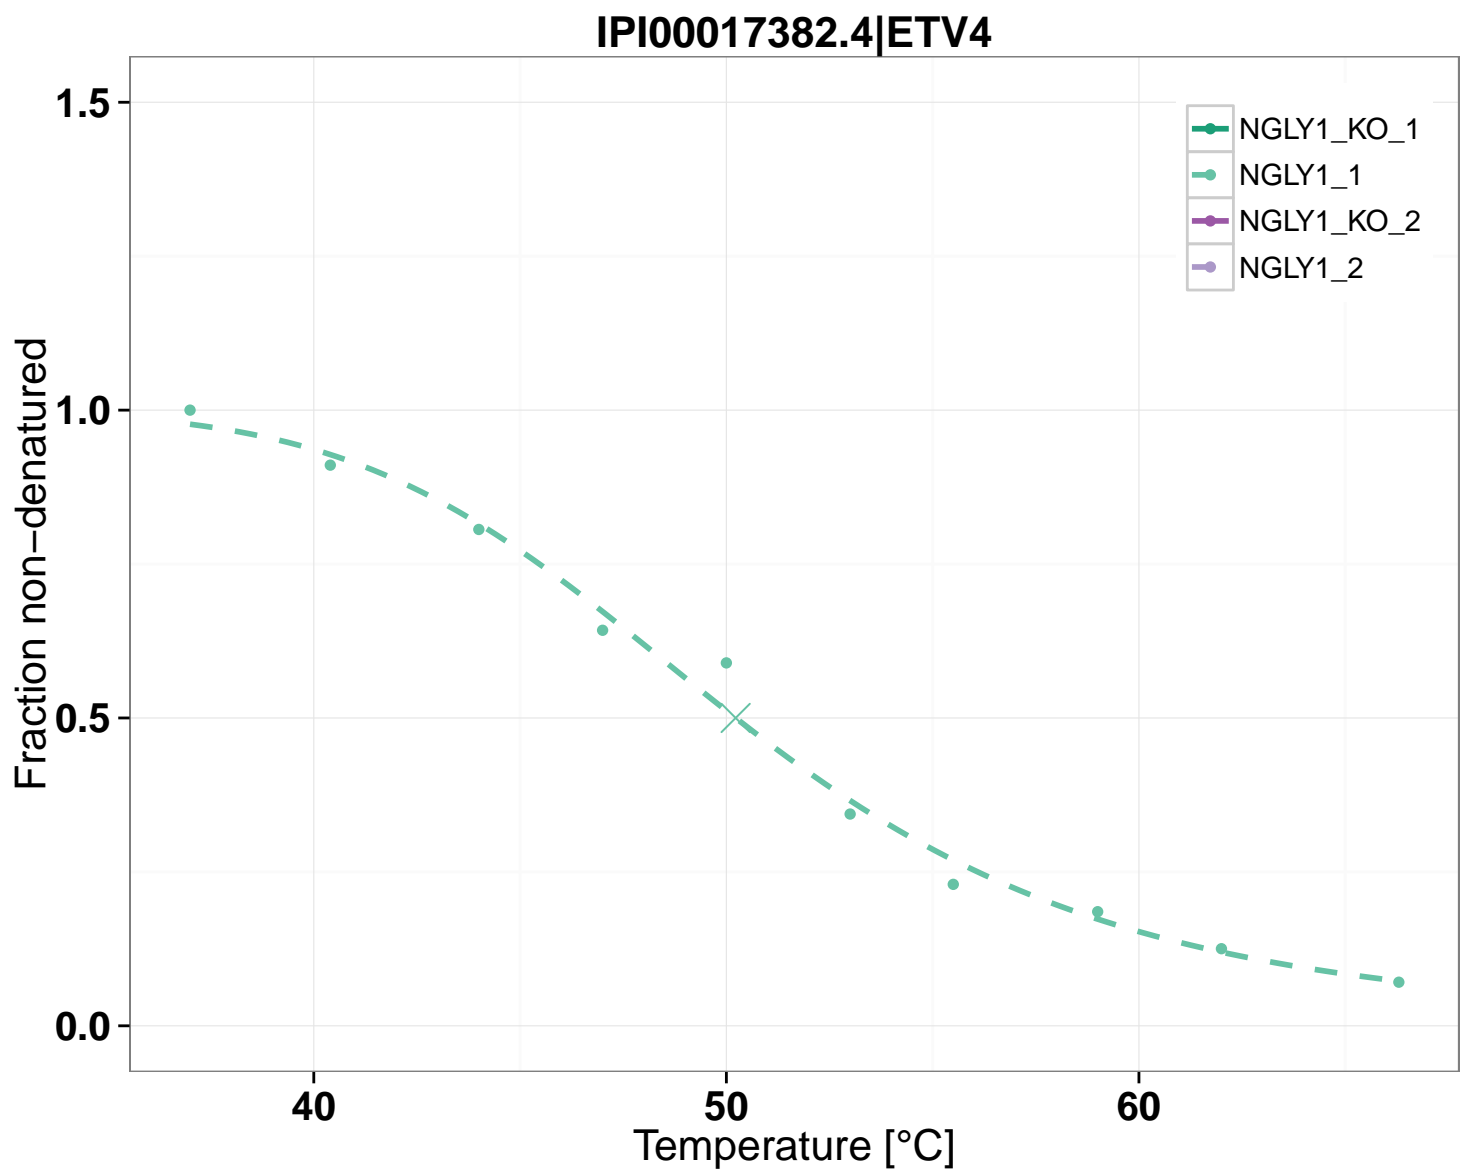

|            | meltPoint | slope  | plateau | R2   |
|------------|-----------|--------|---------|------|
| NGLY1_KO_1 | —         | —      | —       | —    |
| NGLY1_1    | 50.22     | -0.054 | 0       | 0.99 |
| NGLY1_KO_2 | —         | —      | —       | —    |
| NGLY1_2    | —         | —      | —       | —    |

Supplement: Supplementary file 7479 [file 1]

IPI00170916.1|NECAP1

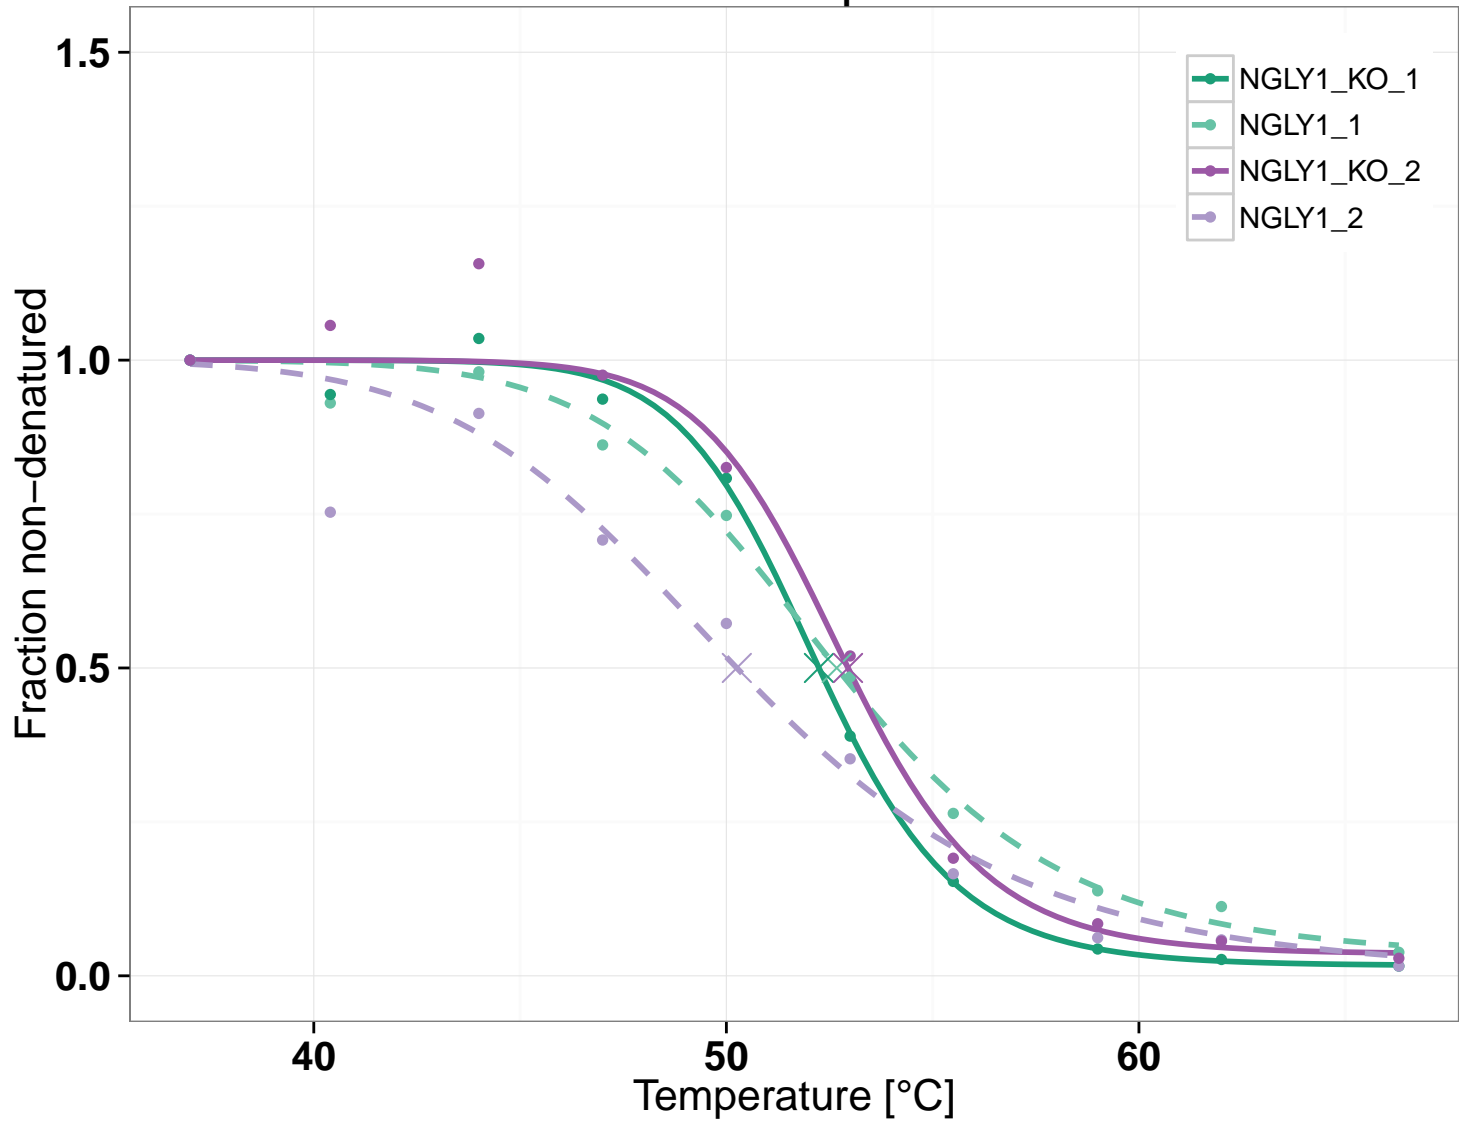

|            | meltPoint | slope  | plateau | R2   |
|------------|-----------|--------|---------|------|
| NGLY1_KO_1 | 52.24     | -0.15  | 0.02    | 1    |
| NGLY1_1    | 52.67     | -0.085 | 0.03    | 0.99 |
| NGLY1_KO_2 | 52.95     | -0.14  | 0.04    | 0.98 |
| NGLY1_2    | 50.25     | -0.071 | 0       | 0.96 |

Supplement: Supplementary file 7480 [file 1]

IPI00023086.3|MRPL15

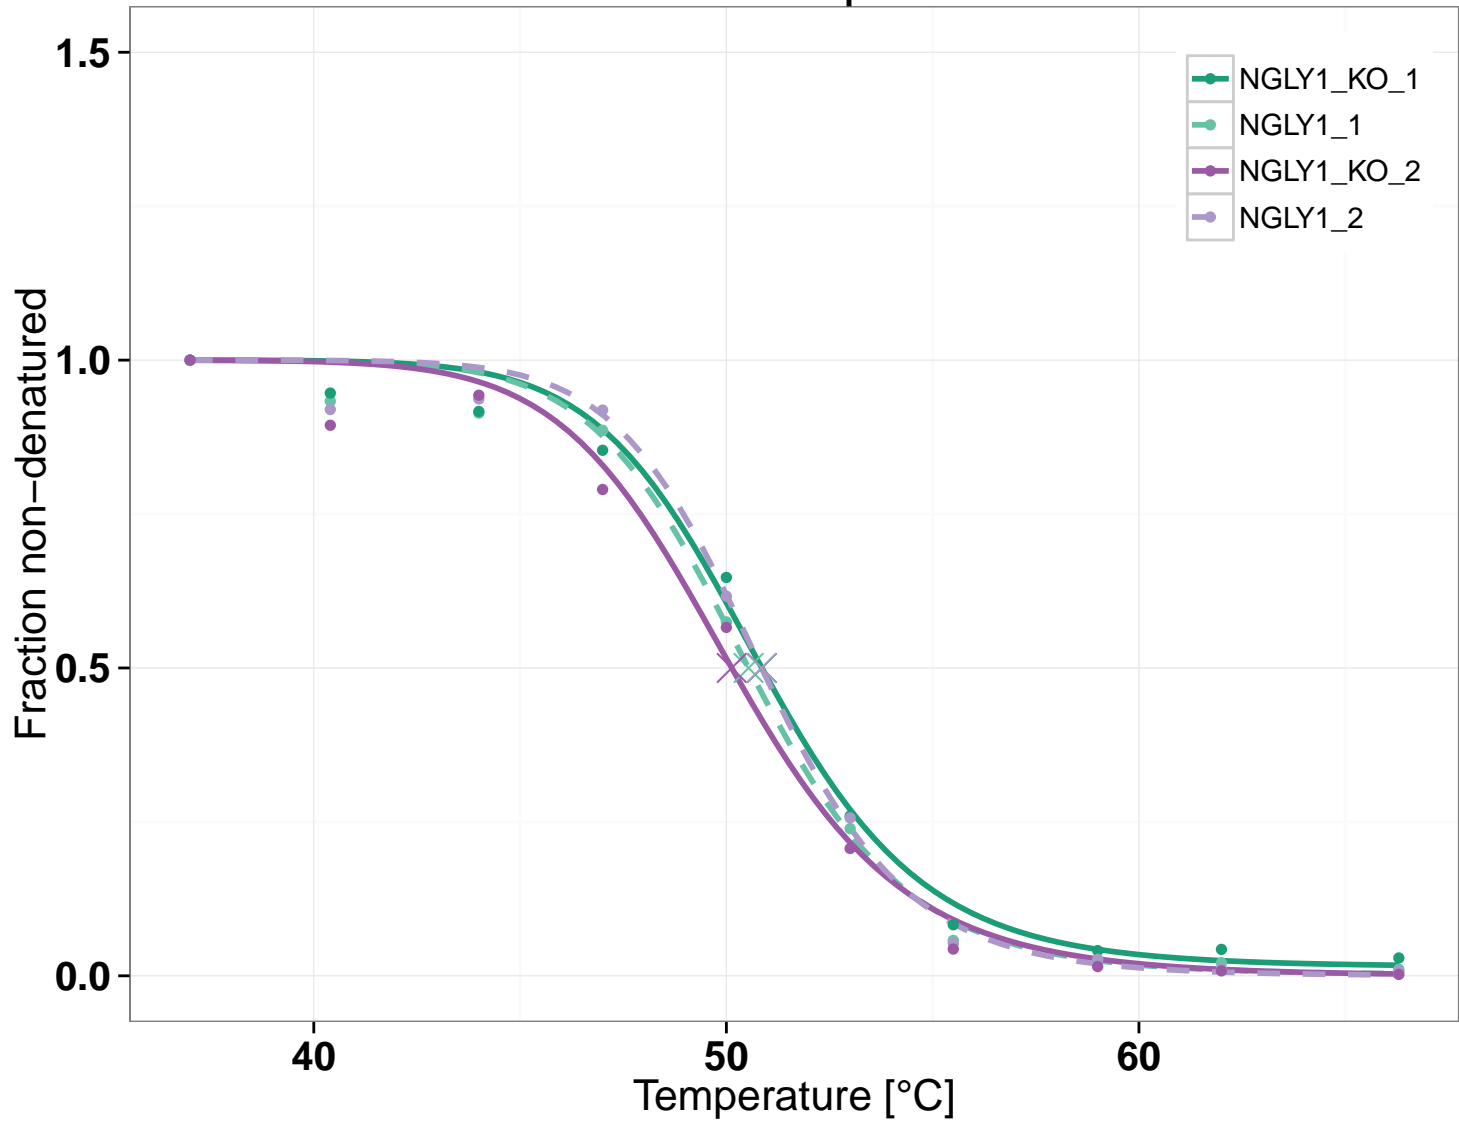

|            | meltPoint | slope | plateau | R2   |
|------------|-----------|-------|---------|------|
| NGLY1_KO_1 | 50.86     | -0.12 | 0.01    | 0.99 |
| NGLY1_1    | 50.54     | -0.13 | 0       | 0.99 |
| NGLY1_KO_2 | 50.13     | -0.12 | 0       | 0.99 |
| NGLY1_2    | 50.85     | -0.14 | 0       | 0.99 |

Supplement: Supplementary file 7481 [file 1]

# IPI00873964.1|FRY

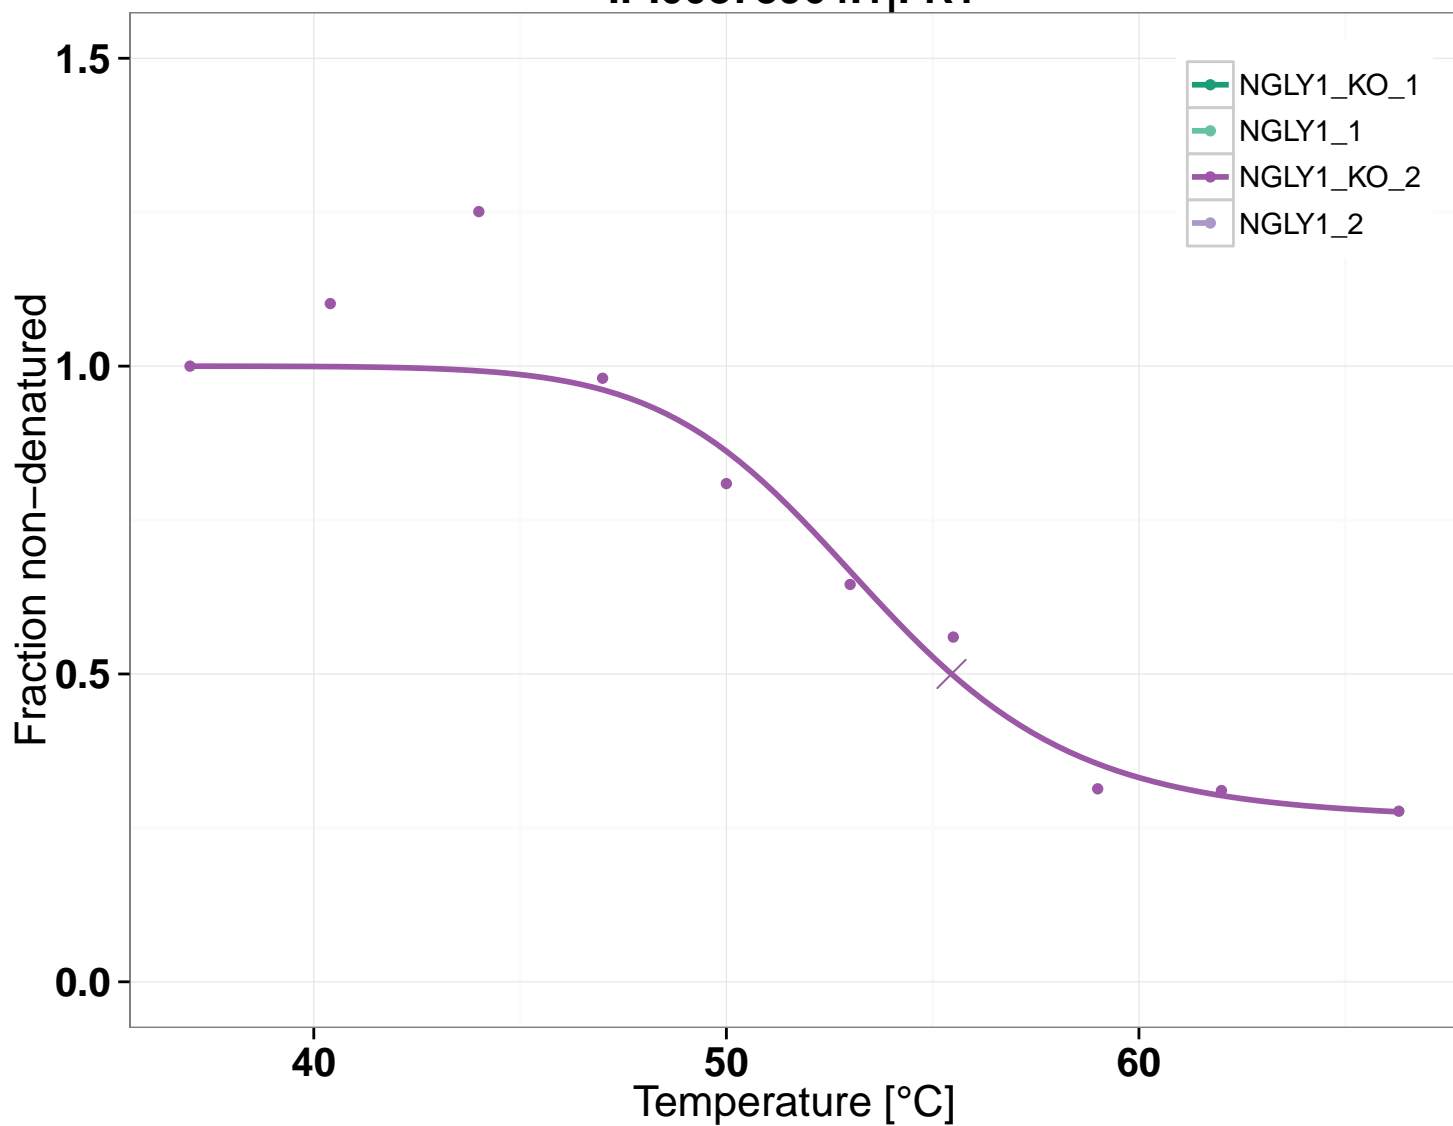

|            | meltPoint | slope  | plateau | R2   |
|------------|-----------|--------|---------|------|
| NGLY1_KO_1 | —         | —      | —       | —    |
| NGLY1_1    | —         | —      | —       | —    |
| NGLY1_KO_2 | 55.46     | -0.073 | 0.26    | 0.92 |
| NGLY1_2    | —         | —      | —       | —    |

Supplement: Supplementary file 7482 [file 1]

# IPI00010808.1|IFNGR1

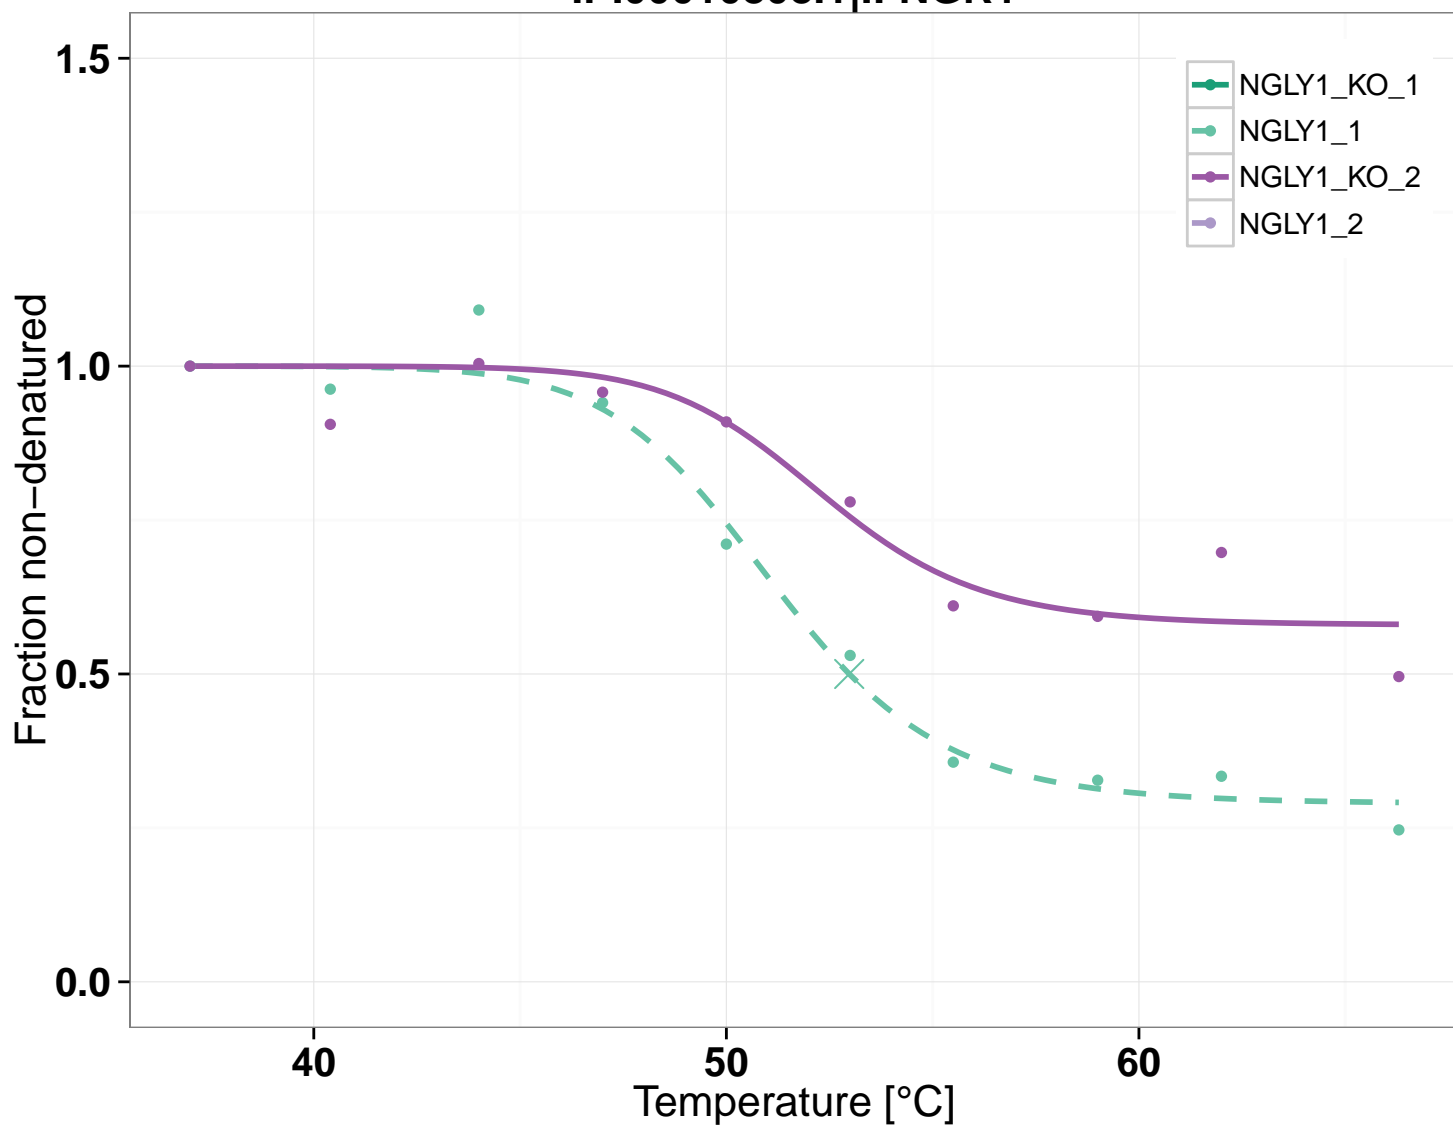

|            | meltPoint | slope  | plateau | R2   |
|------------|-----------|--------|---------|------|
| NGLY1_KO_1 | —         | —      | —       | —    |
| NGLY1_1    | 52.98     | -0.088 | 0.29    | 0.98 |
| NGLY1_KO_2 | —         | -0.055 | 0.58    | 0.9  |
| NGLY1_2    | —         | —      | —       | —    |

Supplement: Supplementary file 7483 [file 1]

IPI00292880.5|E2F4

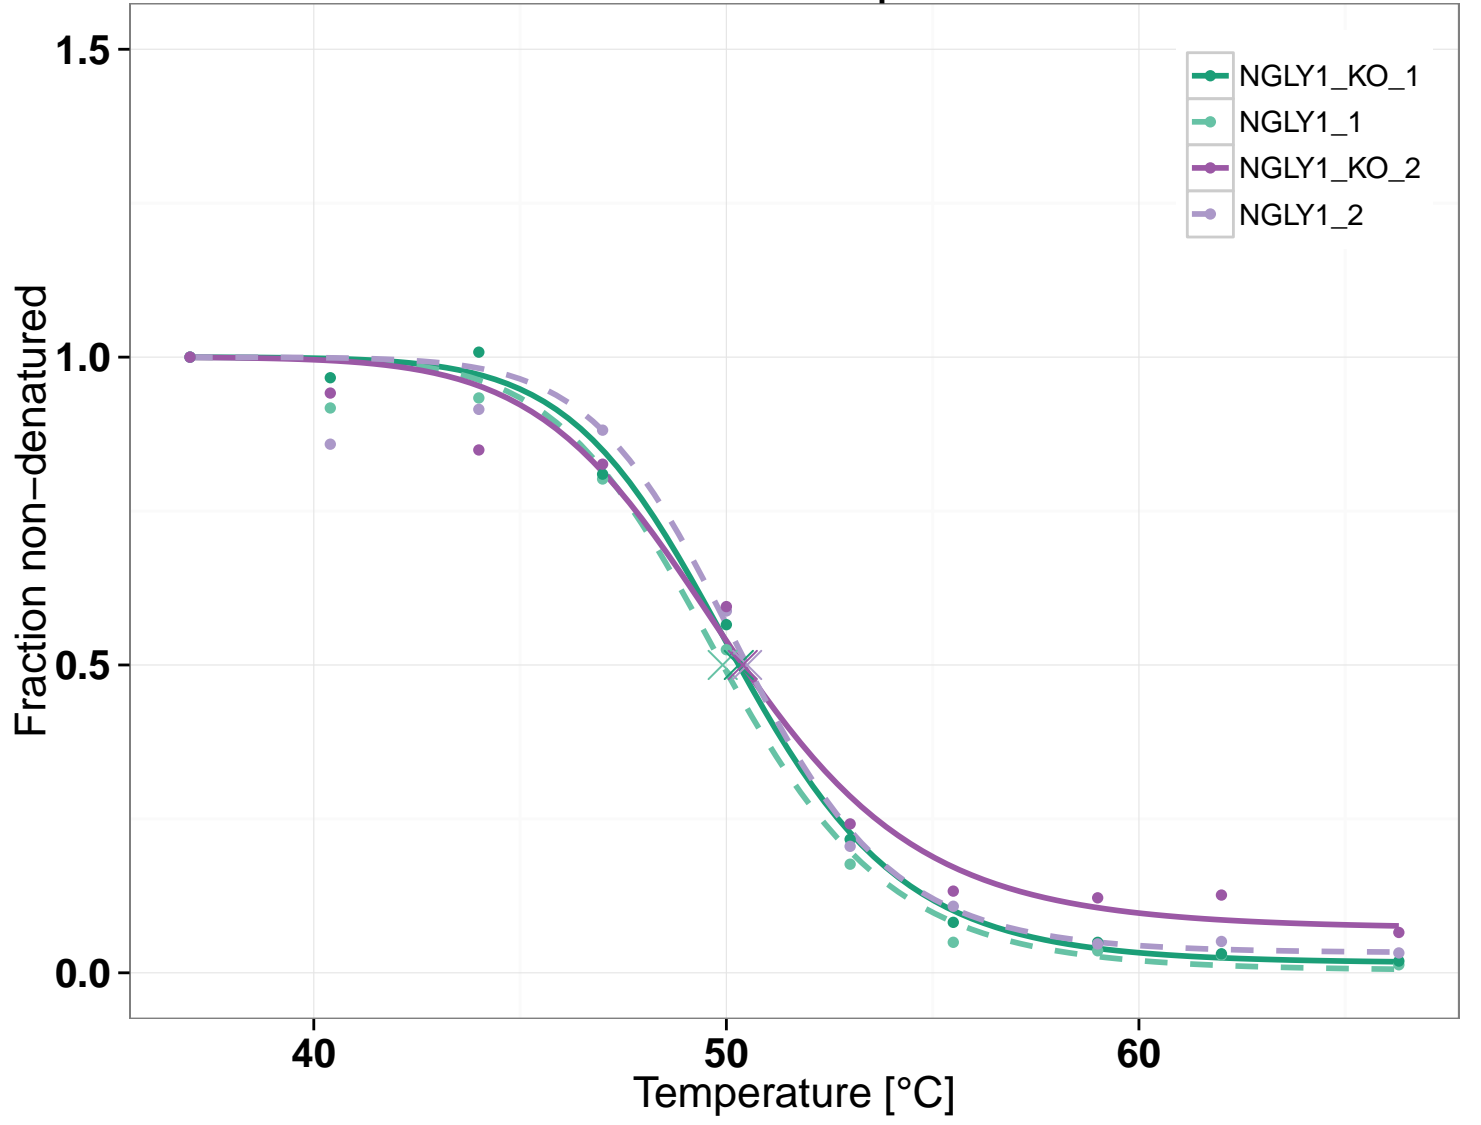

|            | meltPoint | slope | plateau | R2   |
|------------|-----------|-------|---------|------|
| NGLY1_KO_1 | 50.3      | -0.12 | 0.02    | 1    |
| NGLY1_1    | 49.91     | -0.12 | 0       | 0.99 |
| NGLY1_KO_2 | 50.4      | -0.1  | 0.07    | 0.98 |
| NGLY1_2    | 50.5      | -0.13 | 0.03    | 0.98 |

Supplement: Supplementary file 7484 [file 1]

IPI00006091.2|DMD

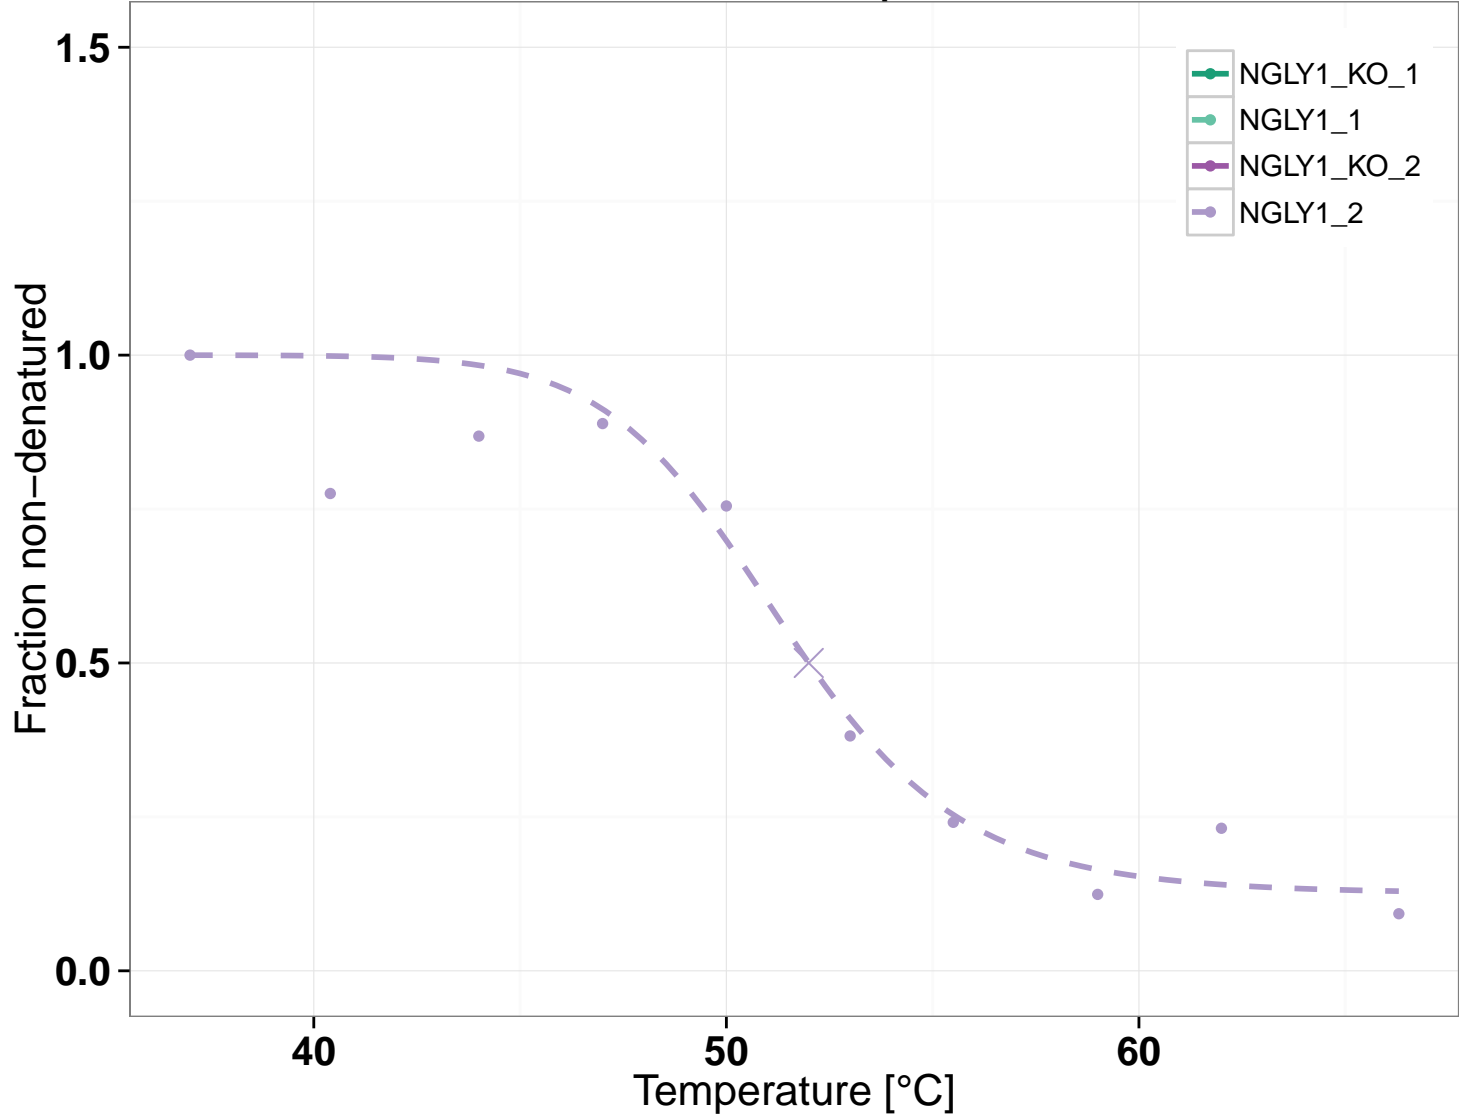

|            | meltPoint | slope | plateau | R2   |
|------------|-----------|-------|---------|------|
| NGLY1_KO_1 | -         | -     | -       | -    |
| NGLY1_1    | -         | -     | -       | -    |
| NGLY1_KO_2 | -         | -     | -       | -    |
| NGLY1_2    | 52        | -0.1  | 0.13    | 0.93 |

Supplement: Supplementary file 7485 [file 1]

IPI00479534.4|MED23

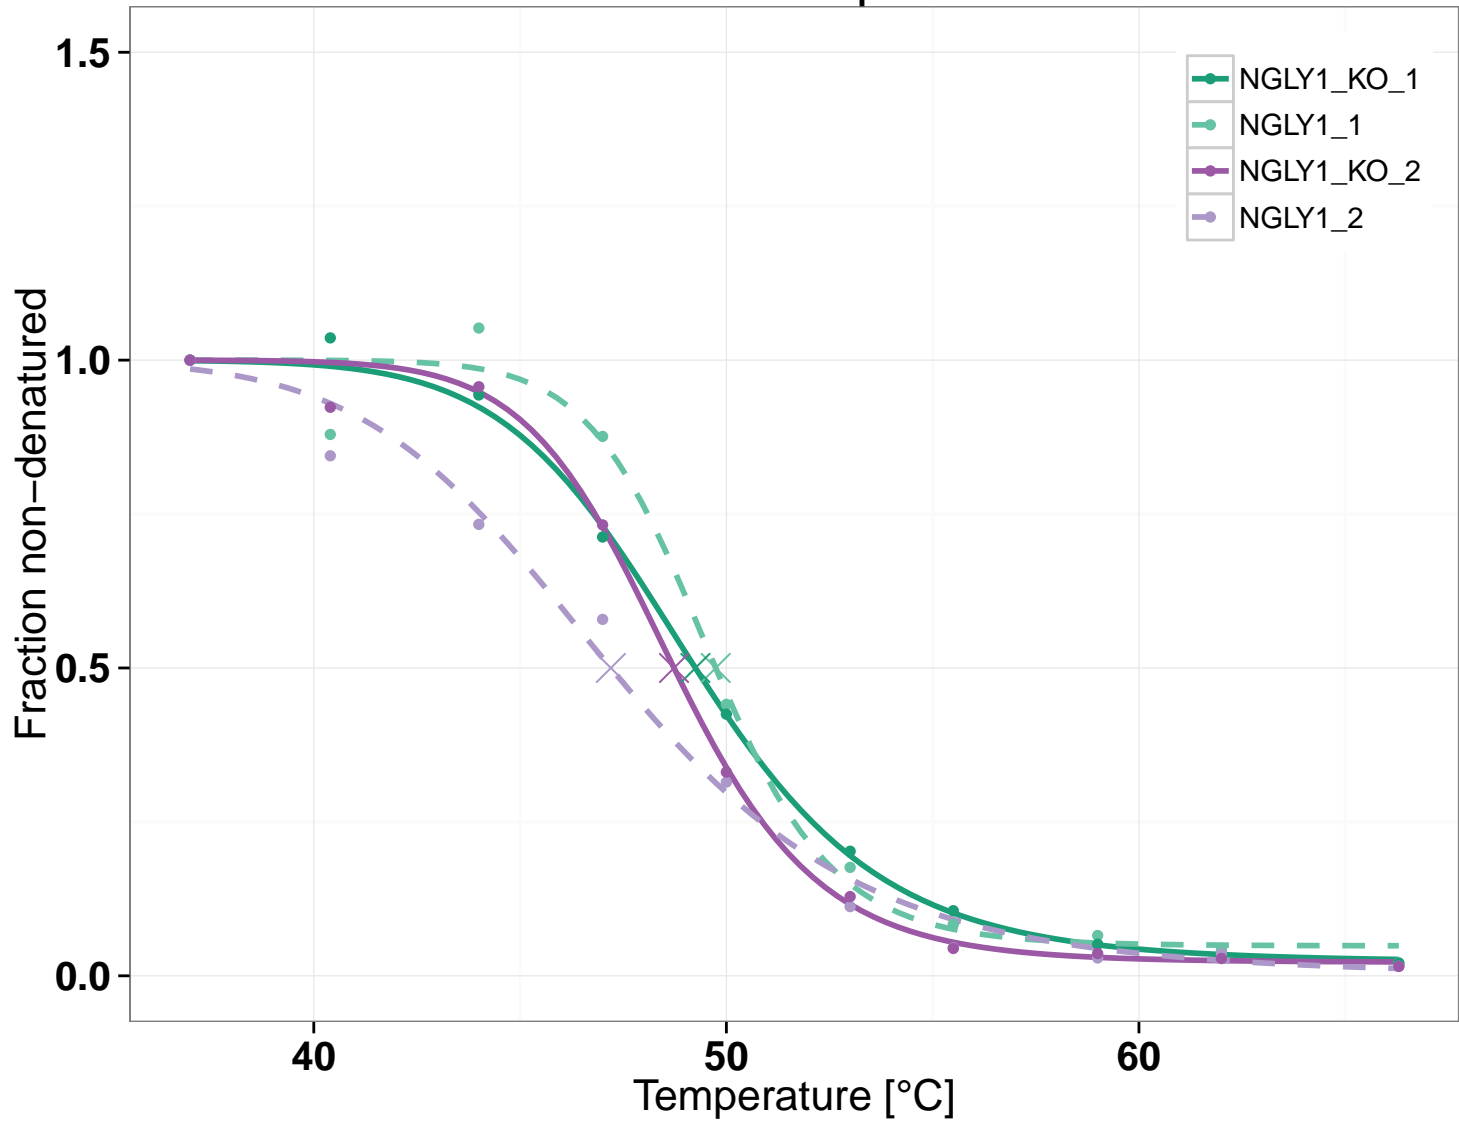

|            | meltPoint | slope  | plateau | R2   |
|------------|-----------|--------|---------|------|
| NGLY1_KO_1 | 49.25     | -0.11  | 0.02    | 1    |
| NGLY1_1    | 49.74     | -0.16  | 0.05    | 0.99 |
| NGLY1_KO_2 | 48.73     | -0.14  | 0.02    | 1    |
| NGLY1_2    | 47.2      | -0.083 | 0       | 0.99 |

Supplement: Supplementary file 7486 [file 1]

IPI00552937.1|NHLRC3

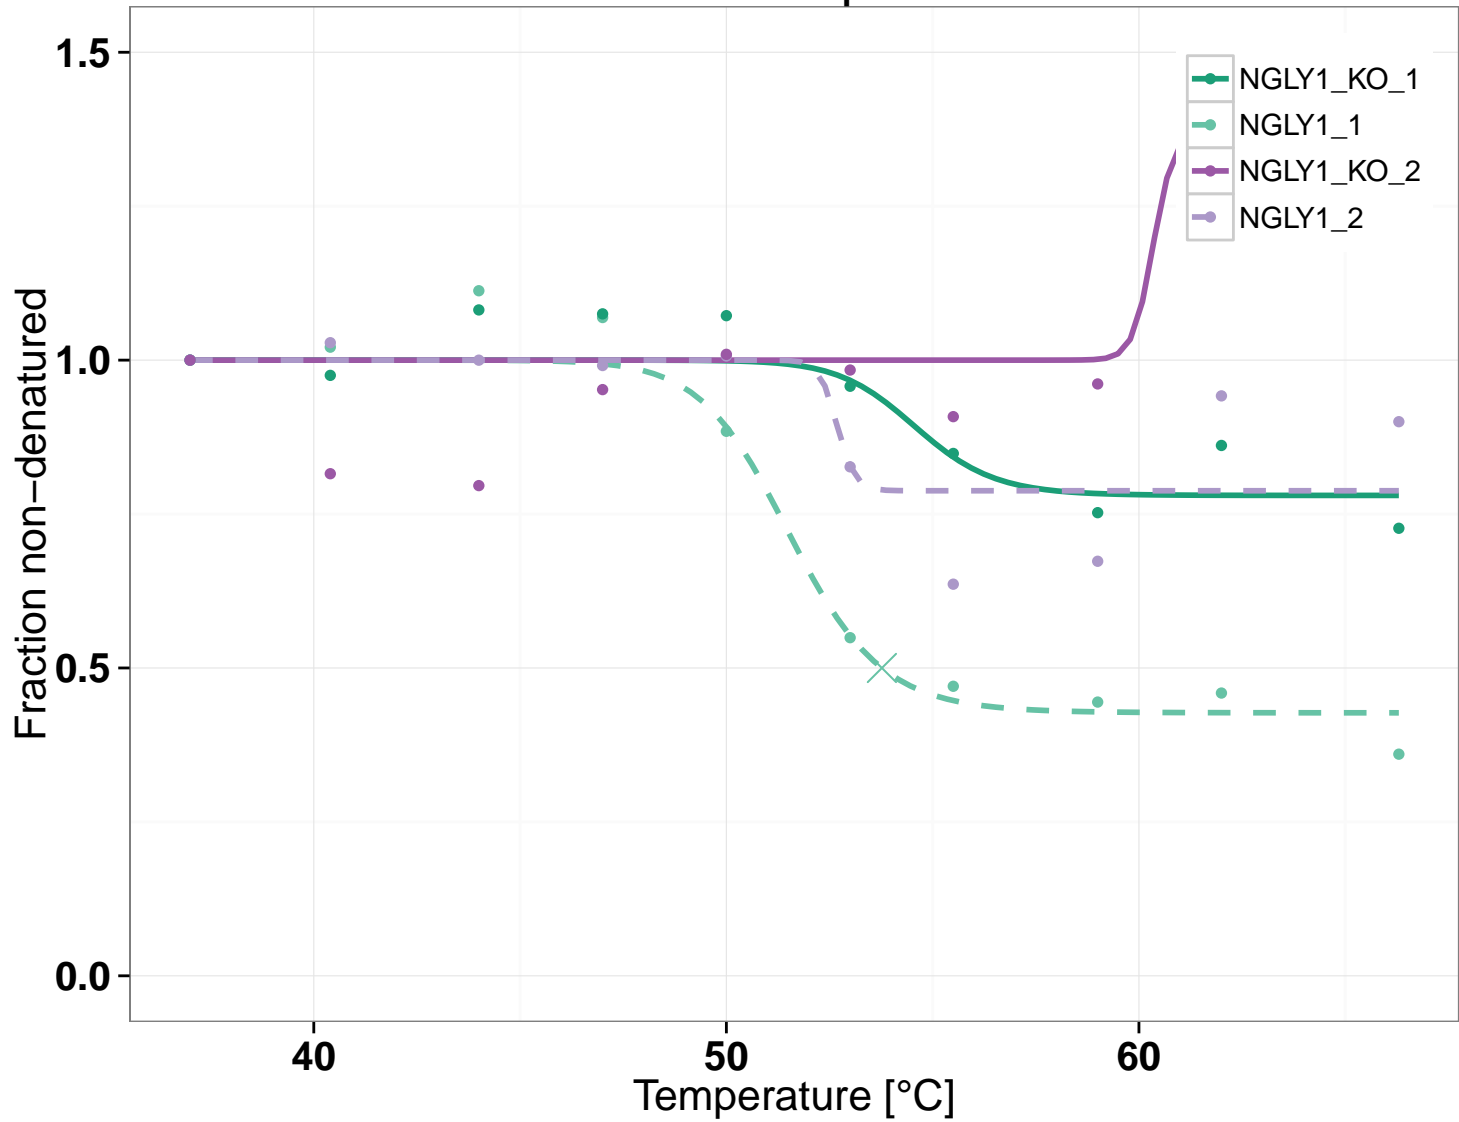

|            | meltPoint | slope  | plateau | R2   |
|------------|-----------|--------|---------|------|
| NGLY1_KO_1 | –         | –0.058 | 0.78    | 0.82 |
| NGLY1_1    | 53.77     | –0.13  | 0.43    | 0.97 |
| NGLY1_KO_2 | –         | 0.38   | 1.37    | 0.71 |
| NGLY1_2    | –         | –0.25  | 0.79    | 0.6  |

Supplement: Supplementary file 7487 [file 1]

# IPI00056349.1|FBXW7

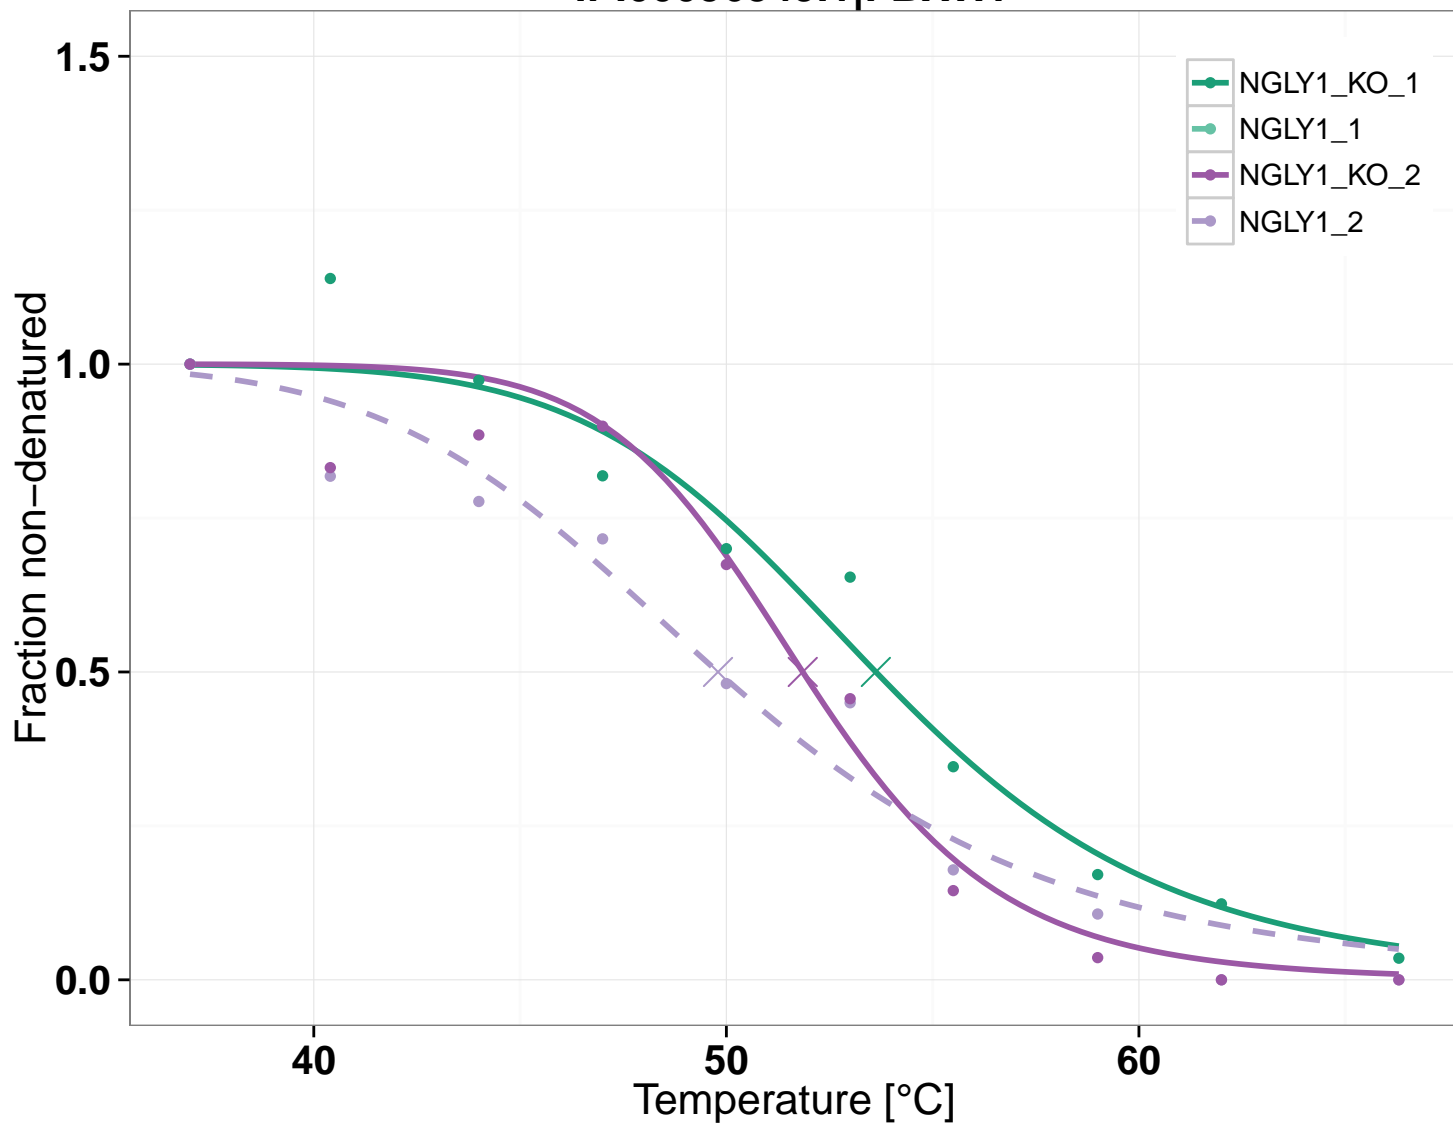

|            | meltPoint | slope  | plateau | R2   |
|------------|-----------|--------|---------|------|
| NGLY1_KO_1 | 53.62     | -0.071 | 0       | 0.97 |
| NGLY1_1    | -         | -      | -       | -    |
| NGLY1_KO_2 | 51.85     | -0.1   | 0       | 0.97 |
| NGLY1_2    | 49.8      | -0.061 | 0       | 0.96 |

Supplement: Supplementary file 7488 [file 1]

IPI00010195.4|MARCH7

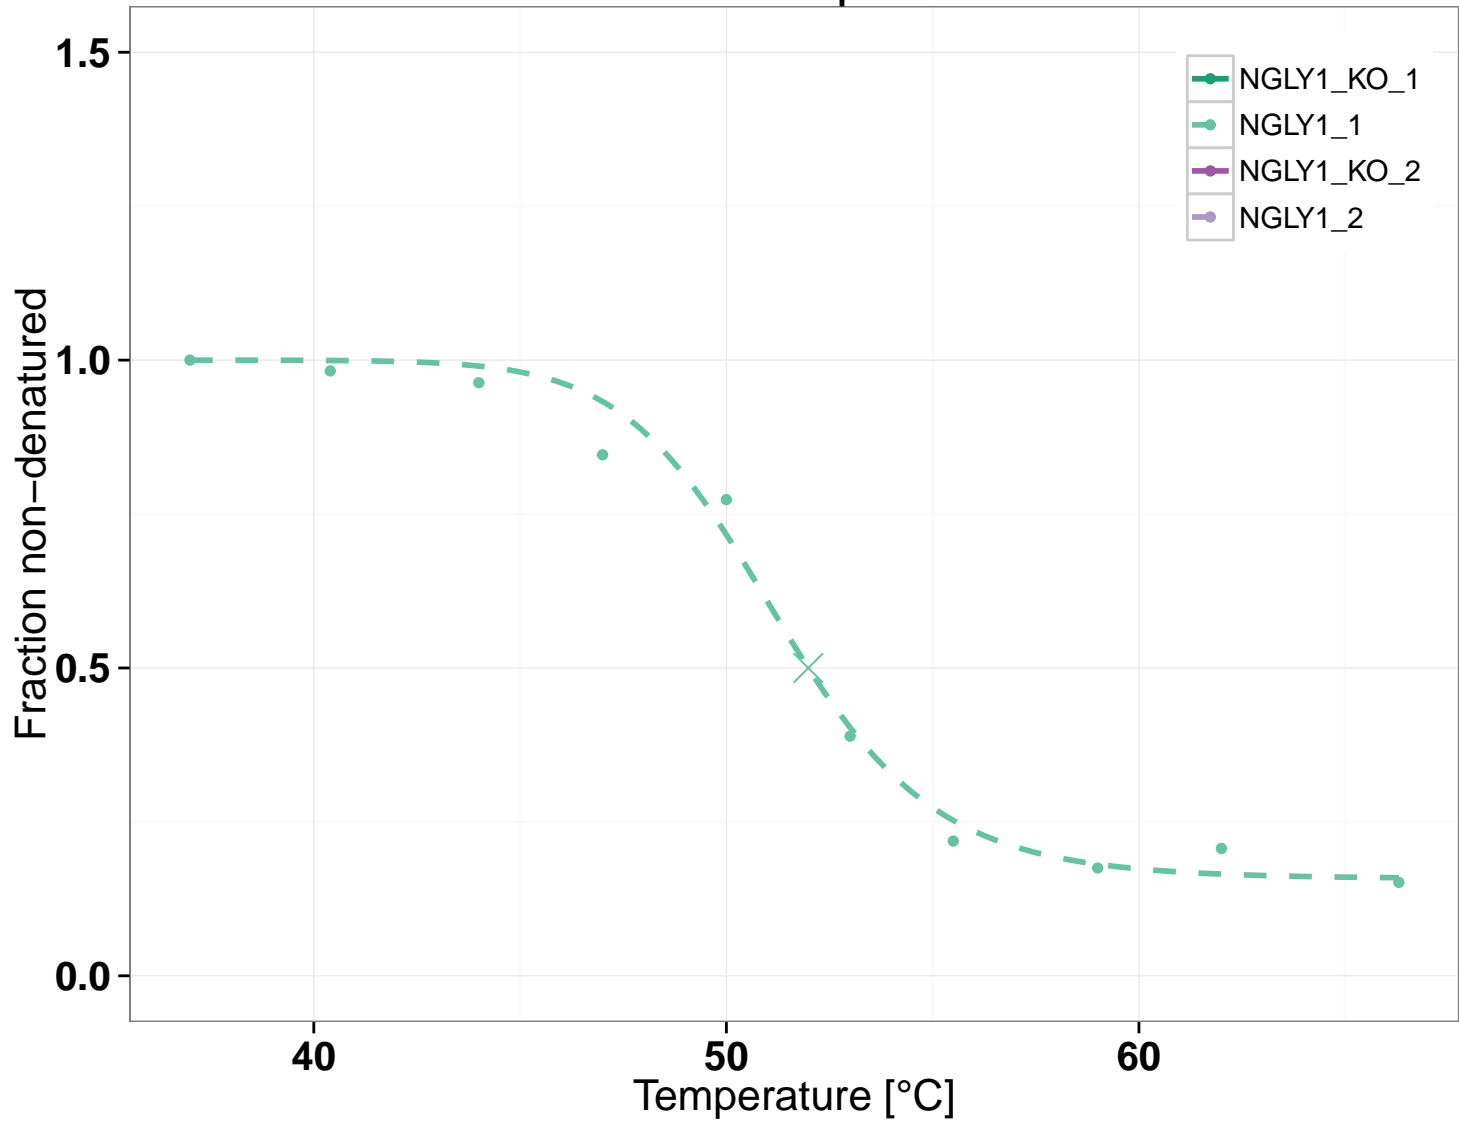

|            | meltPoint | slope | plateau | R2   |
|------------|-----------|-------|---------|------|
| NGLY1_KO_1 | -         | -     | -       | -    |
| NGLY1_1    | 51.99     | -0.11 | 0.16    | 0.99 |
| NGLY1_KO_2 | -         | -     | -       | -    |
| NGLY1_2    | -         | -     | -       | -    |

Supplement: Supplementary file 7489 [file 1]

# IPI00023080.3|CRIPT

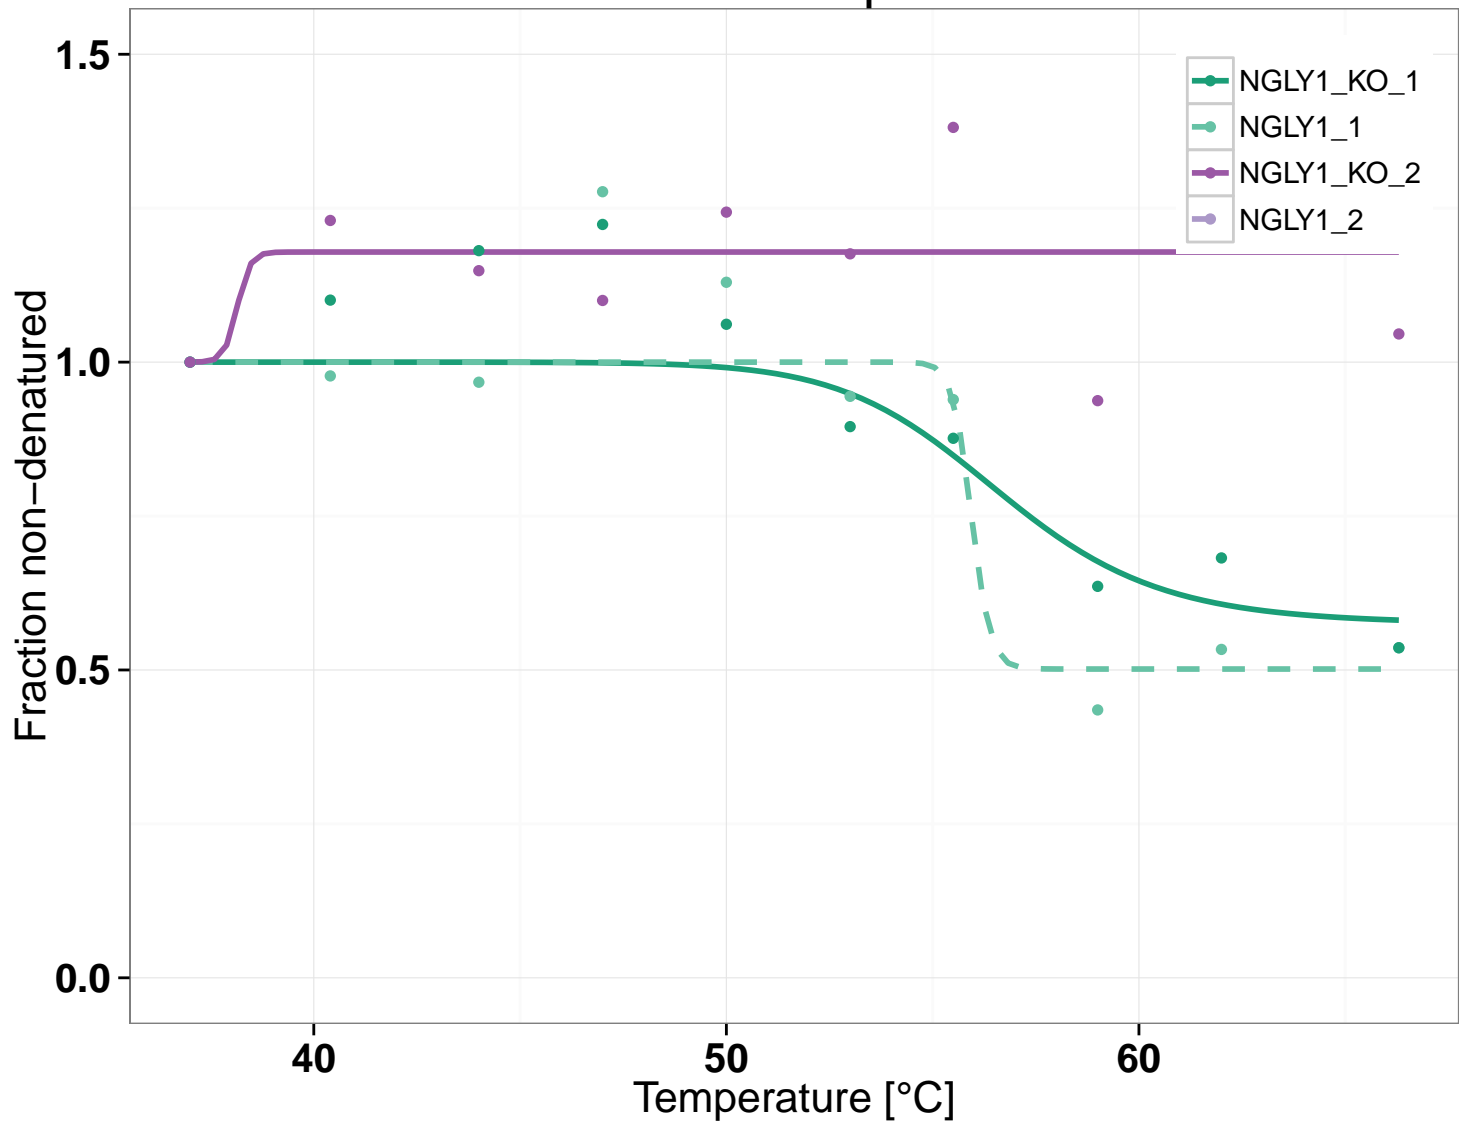

|            | meltPoint | slope  | plateau | R2   |
|------------|-----------|--------|---------|------|
| NGLY1_KO_1 | -         | -0.055 | 0.57    | 0.78 |
| NGLY1_1    | -         | -0.56  | 0.5     | 0.85 |
| NGLY1_KO_2 | -         | 0.29   | 1.18    | 0.15 |
| NGLY1_2    | -         | -      | -       | -    |

Supplement: Supplementary file 7490 [file 1]

# IPI00221002.5|PXMP2

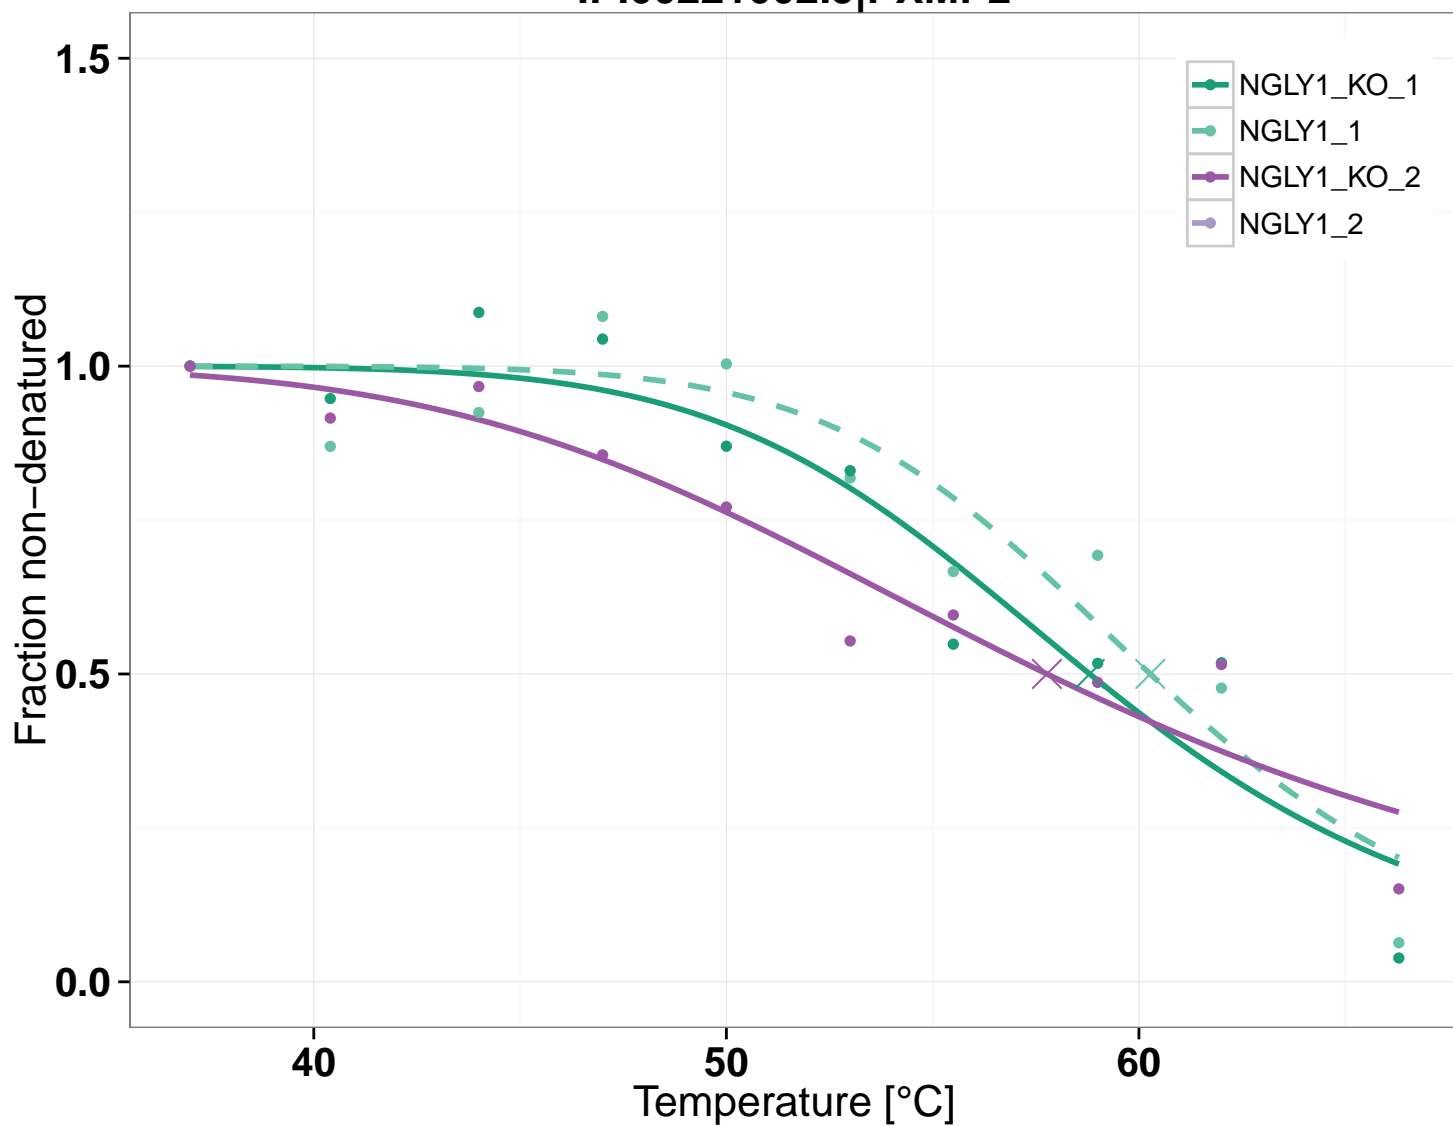

|            | meltPoint | slope  | plateau | R2   |
|------------|-----------|--------|---------|------|
| NGLY1_KO_1 | 58.81     | -0.056 | 0       | 0.9  |
| NGLY1_1    | 60.27     | -0.064 | 0       | 0.89 |
| NGLY1_KO_2 | 57.77     | -0.035 | 0       | 0.92 |
| NGLY1_2    | -         | -      | -       | -    |

Supplement: Supplementary file 7491 [file 1]

IPI00384456.4|MSH6

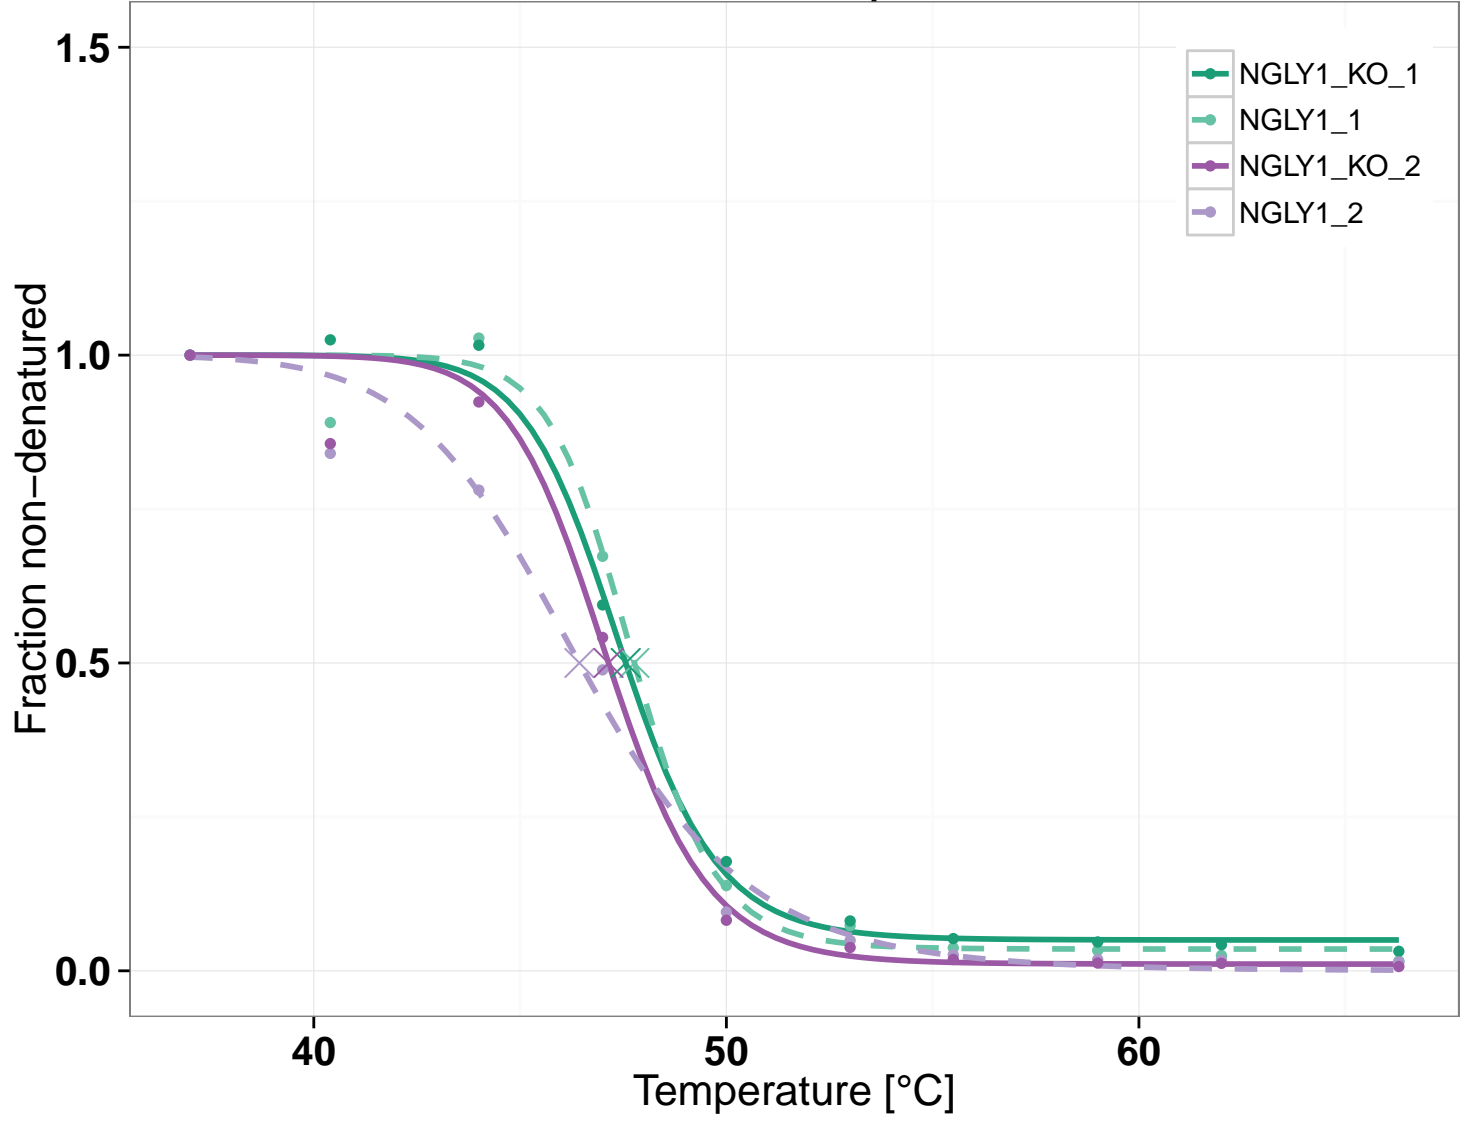

|            | meltPoint | slope | plateau | R2   |
|------------|-----------|-------|---------|------|
| NGLY1_KO_1 | 47.56     | -0.2  | 0.05    | 1    |
| NGLY1_1    | 47.77     | -0.24 | 0.04    | 0.99 |
| NGLY1_KO_2 | 47.14     | -0.2  | 0.01    | 0.99 |
| NGLY1_2    | 46.44     | -0.12 | 0       | 0.98 |

Supplement: Supplementary file 7492 [file 1]

IPI00301231.4|MFSD9

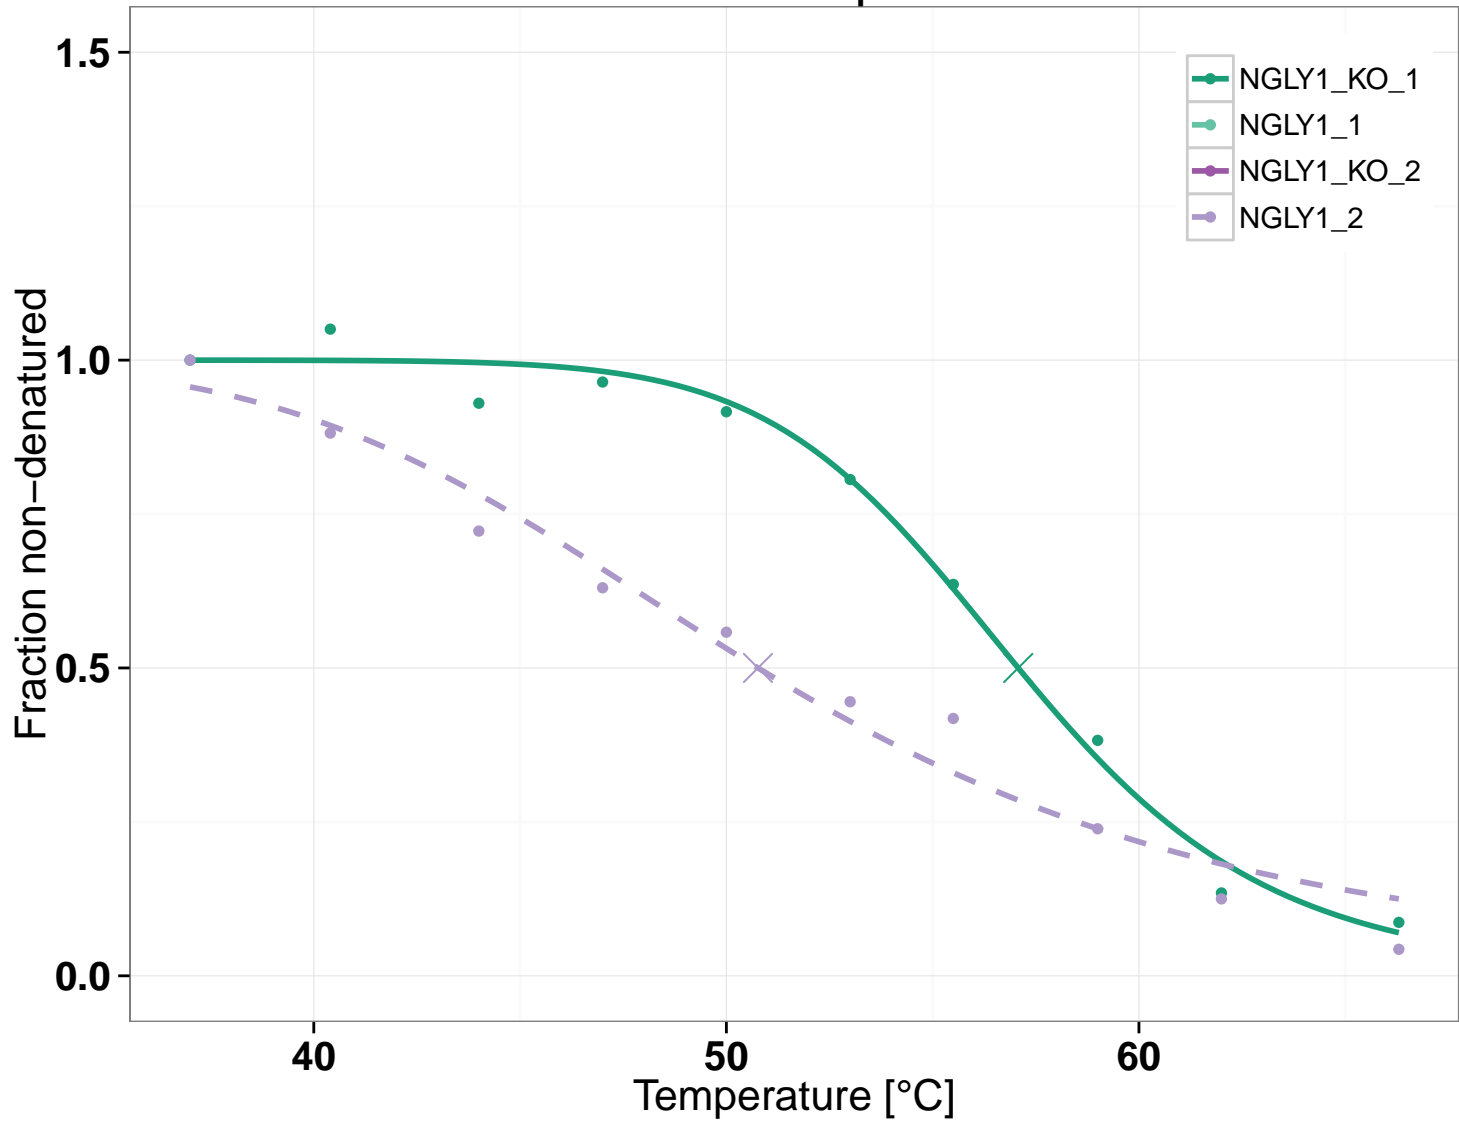

|            | meltPoint | slope  | plateau | R2   |
|------------|-----------|--------|---------|------|
| NGLY1_KO_1 | 57.07     | -0.082 | 0       | 0.99 |
| NGLY1_1    | -         | -      | -       | -    |
| NGLY1_KO_2 | -         | -      | -       | -    |
| NGLY1_2    | 50.77     | -0.043 | 0       | 0.97 |

Supplement: Supplementary file 7493 [file 1]

IPI00000760.1|DDAH2

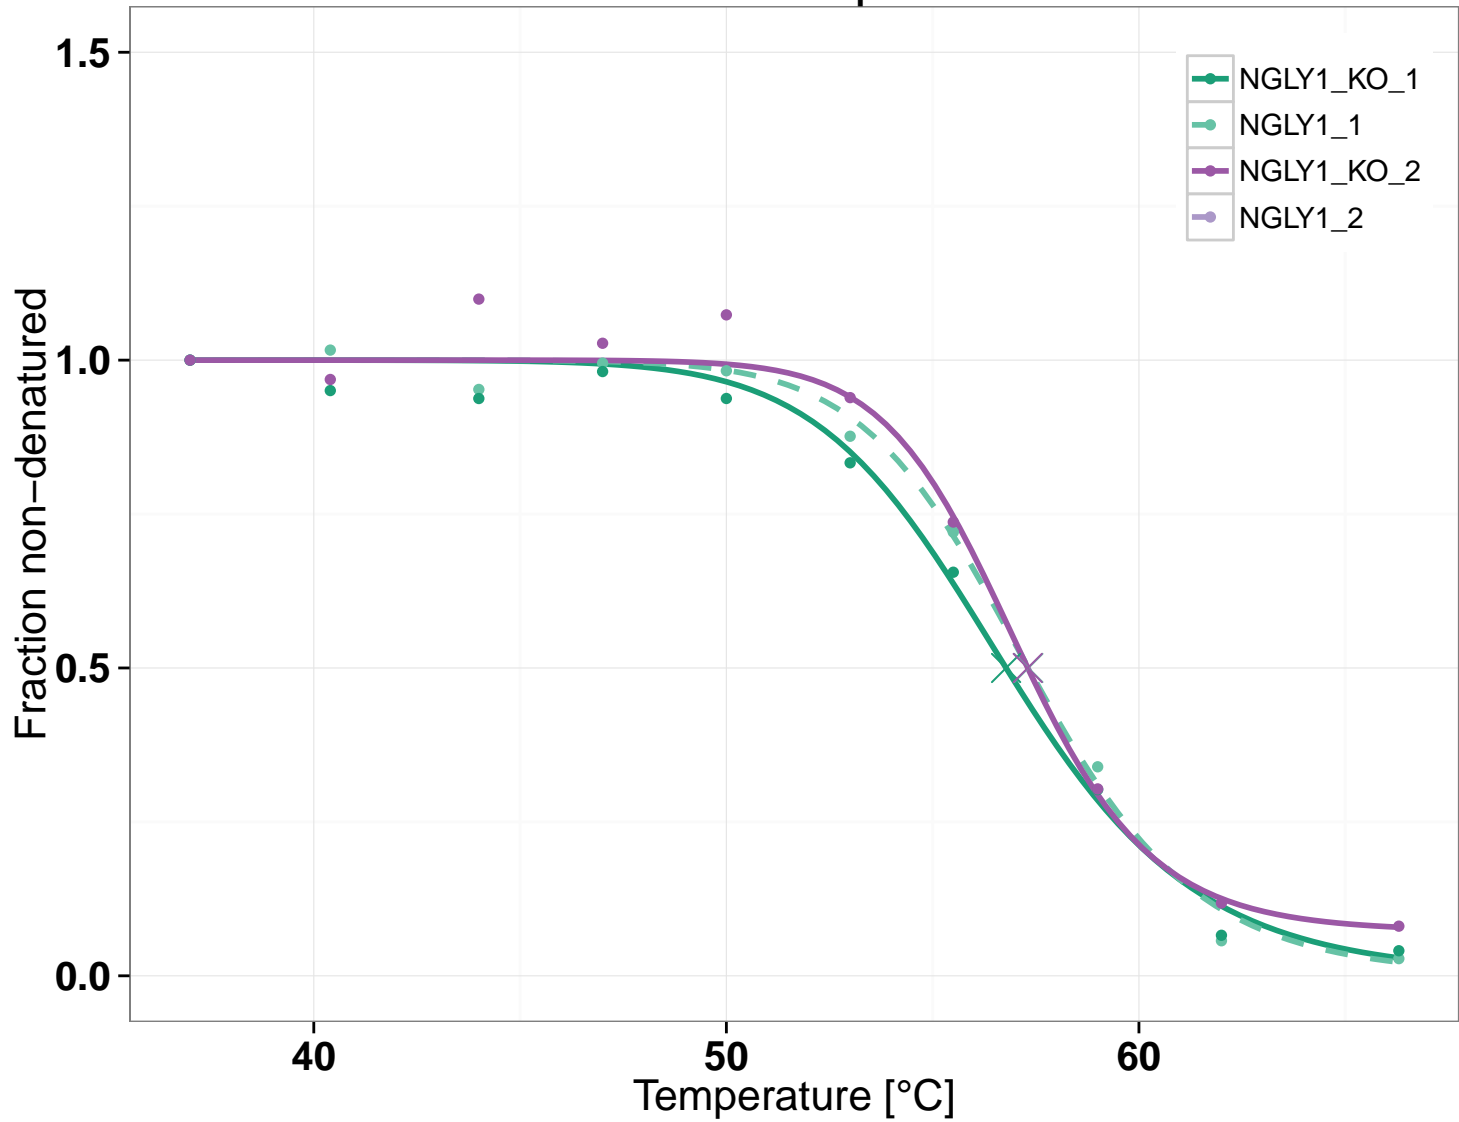

|            | meltPoint | slope | plateau | R2   |
|------------|-----------|-------|---------|------|
| NGLY1_KO_1 | 56.78     | -0.11 | 0       | 0.99 |
| NGLY1_1    | 57.32     | -0.12 | 0       | 1    |
| NGLY1_KO_2 | 57.31     | -0.14 | 0.07    | 0.99 |
| NGLY1_2    | -         | -     | -       | -    |

Supplement: Supplementary file 7494 [file 1]

# IPI00220303.6|MAN2A2

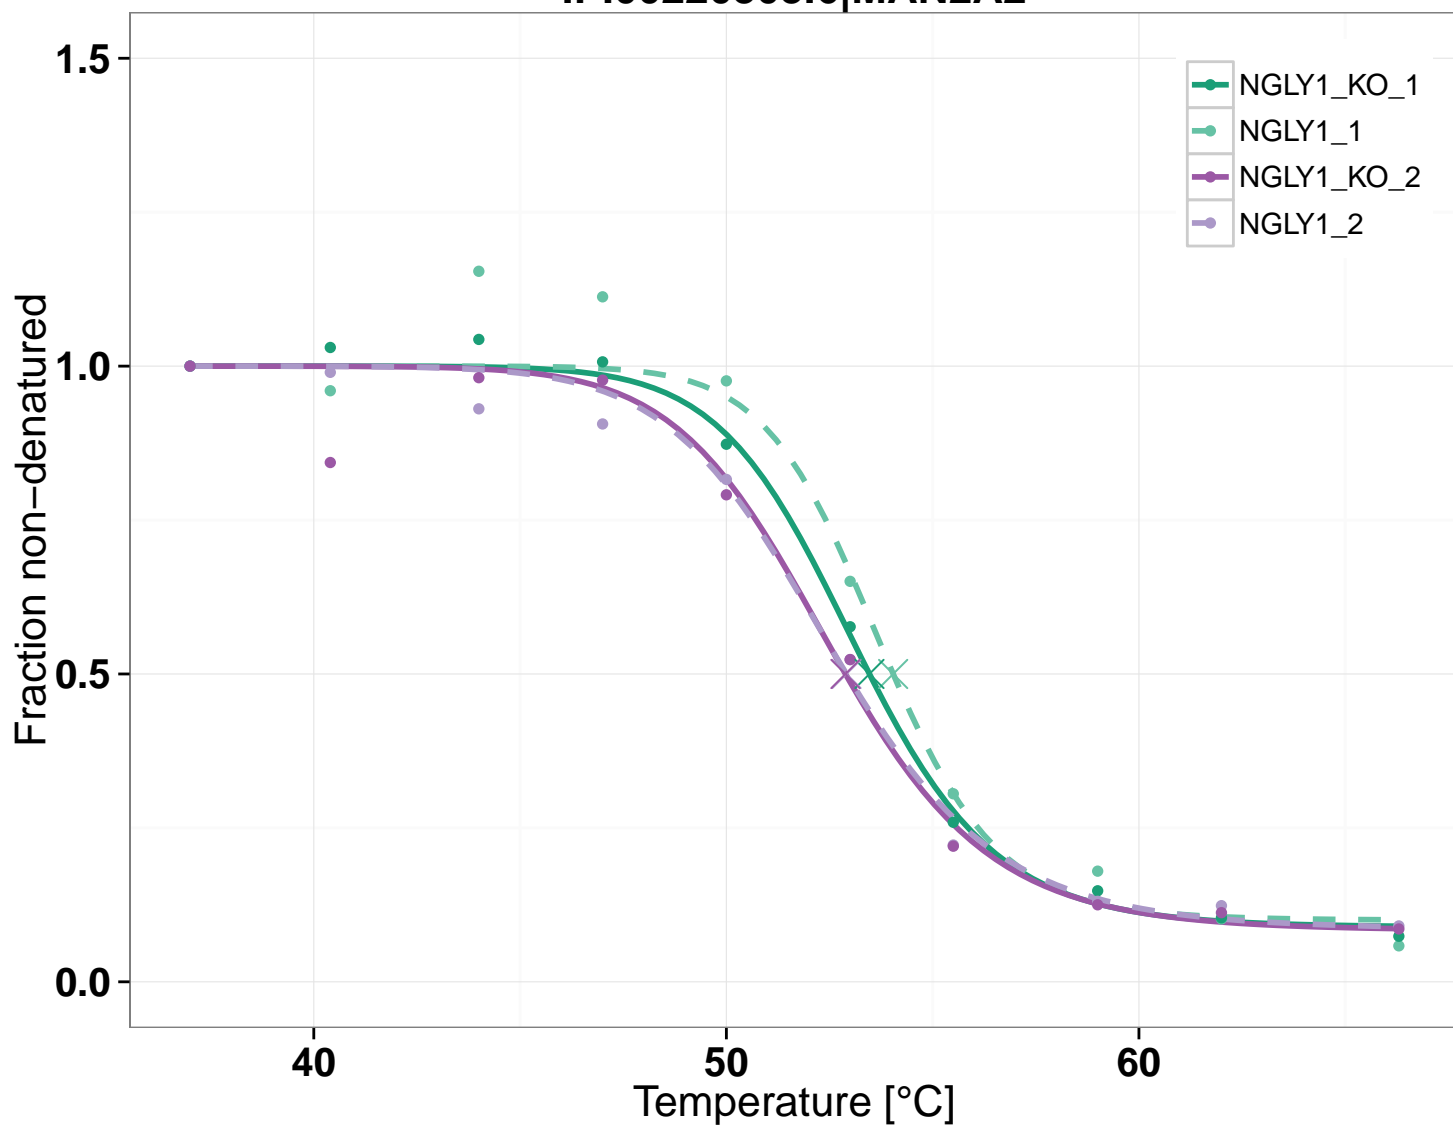

|            | meltPoint | slope | plateau | R2   |
|------------|-----------|-------|---------|------|
| NGLY1_KO_1 | 53.47     | -0.14 | 0.09    | 1    |
| NGLY1_1    | 54.04     | -0.16 | 0.1     | 0.98 |
| NGLY1_KO_2 | 52.89     | -0.12 | 0.08    | 0.98 |
| NGLY1_2    | 52.91     | -0.11 | 0.09    | 0.99 |

Supplement: Supplementary file 7495 [file 1]

IPI00027898.3|C21ORF70

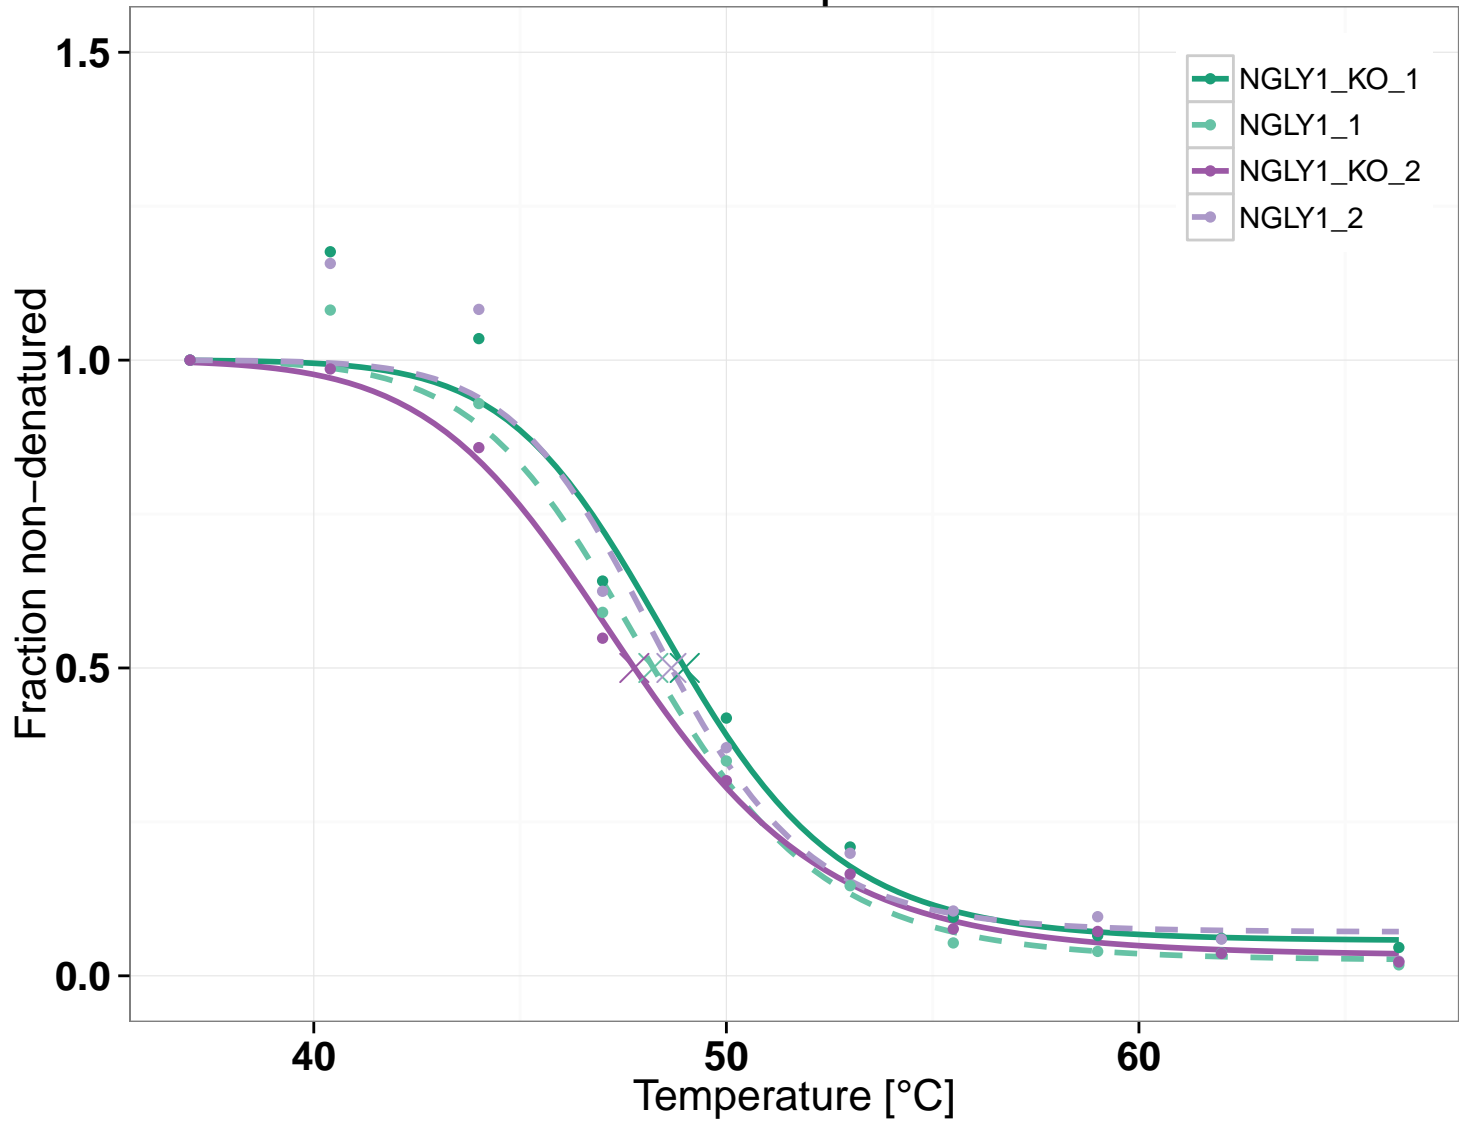

|            | meltPoint | slope | plateau | R2   |
|------------|-----------|-------|---------|------|
| NGLY1_KO_1 | 48.99     | -0.12 | 0.06    | 0.97 |
| NGLY1_1    | 48.23     | -0.12 | 0.02    | 0.99 |
| NGLY1_KO_2 | 47.77     | -0.1  | 0.03    | 1    |
| NGLY1_2    | 48.67     | -0.13 | 0.07    | 0.97 |

Supplement: Supplementary file 7496 [file 1]

# IPI00654777.2|EIF3F

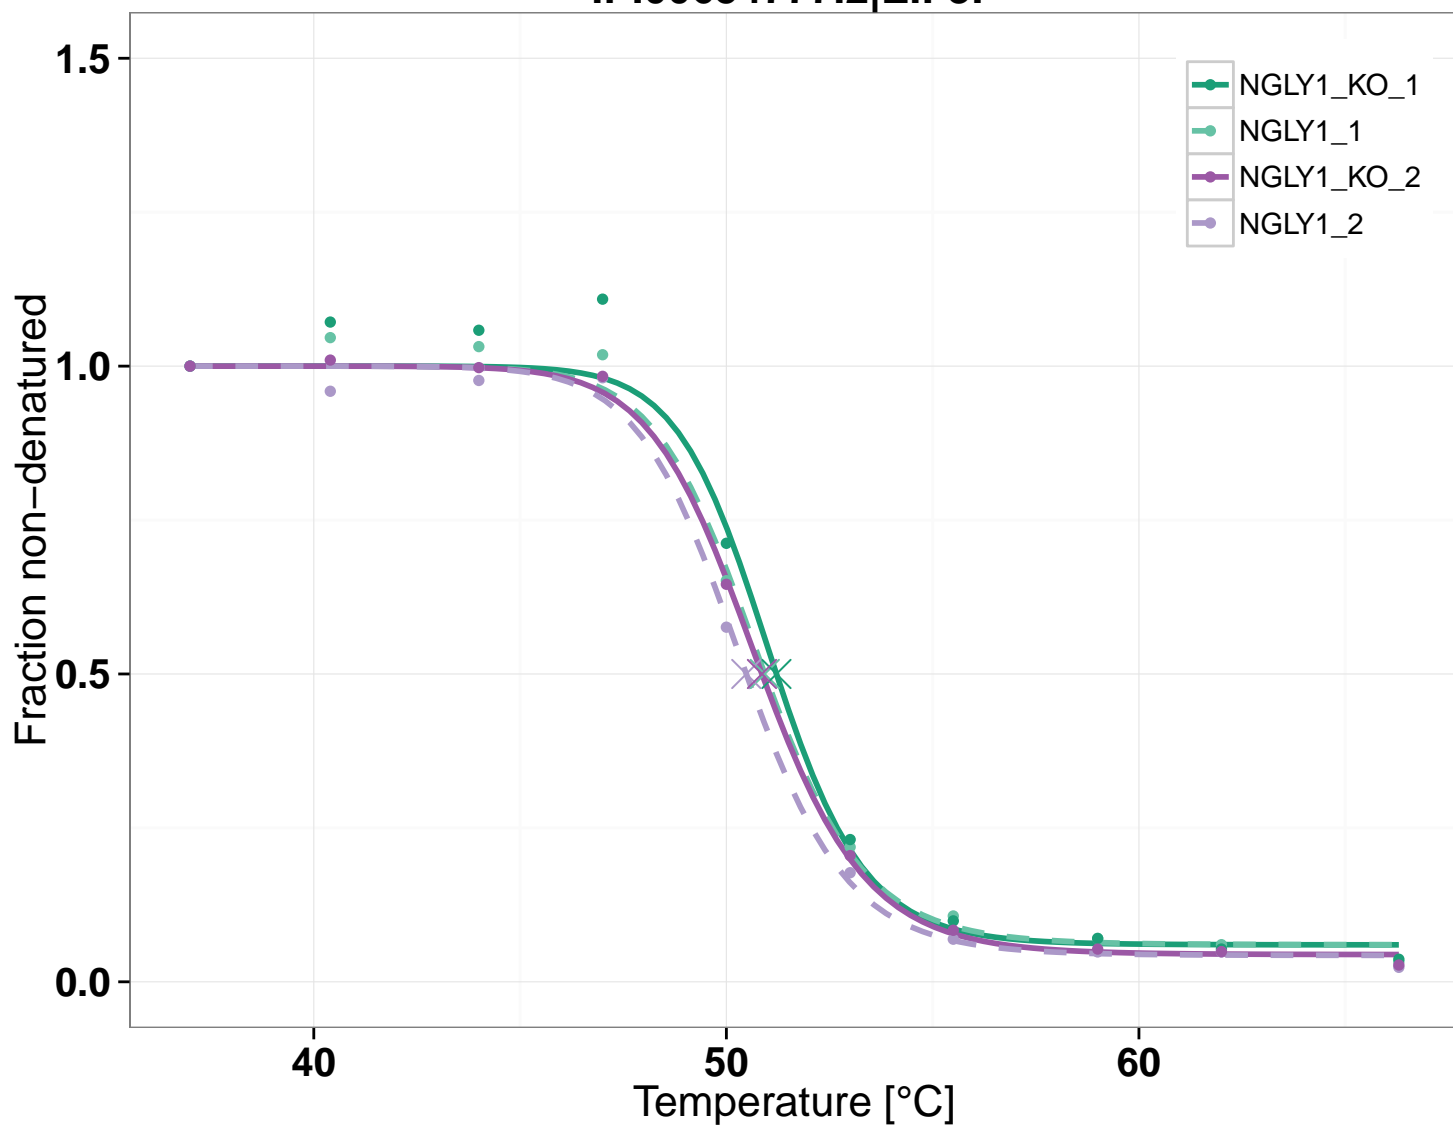

|            | meltPoint | slope | plateau | R2   |
|------------|-----------|-------|---------|------|
| NGLY1_KO_1 | 51.21     | -0.21 | 0.06    | 0.99 |
| NGLY1_1    | 50.93     | -0.19 | 0.06    | 1    |
| NGLY1_KO_2 | 50.86     | -0.18 | 0.04    | 1    |
| NGLY1_2    | 50.48     | -0.19 | 0.04    | 1    |

Supplement: Supplementary file 7497 [file 1]

IPI00419891.3|SCFD2

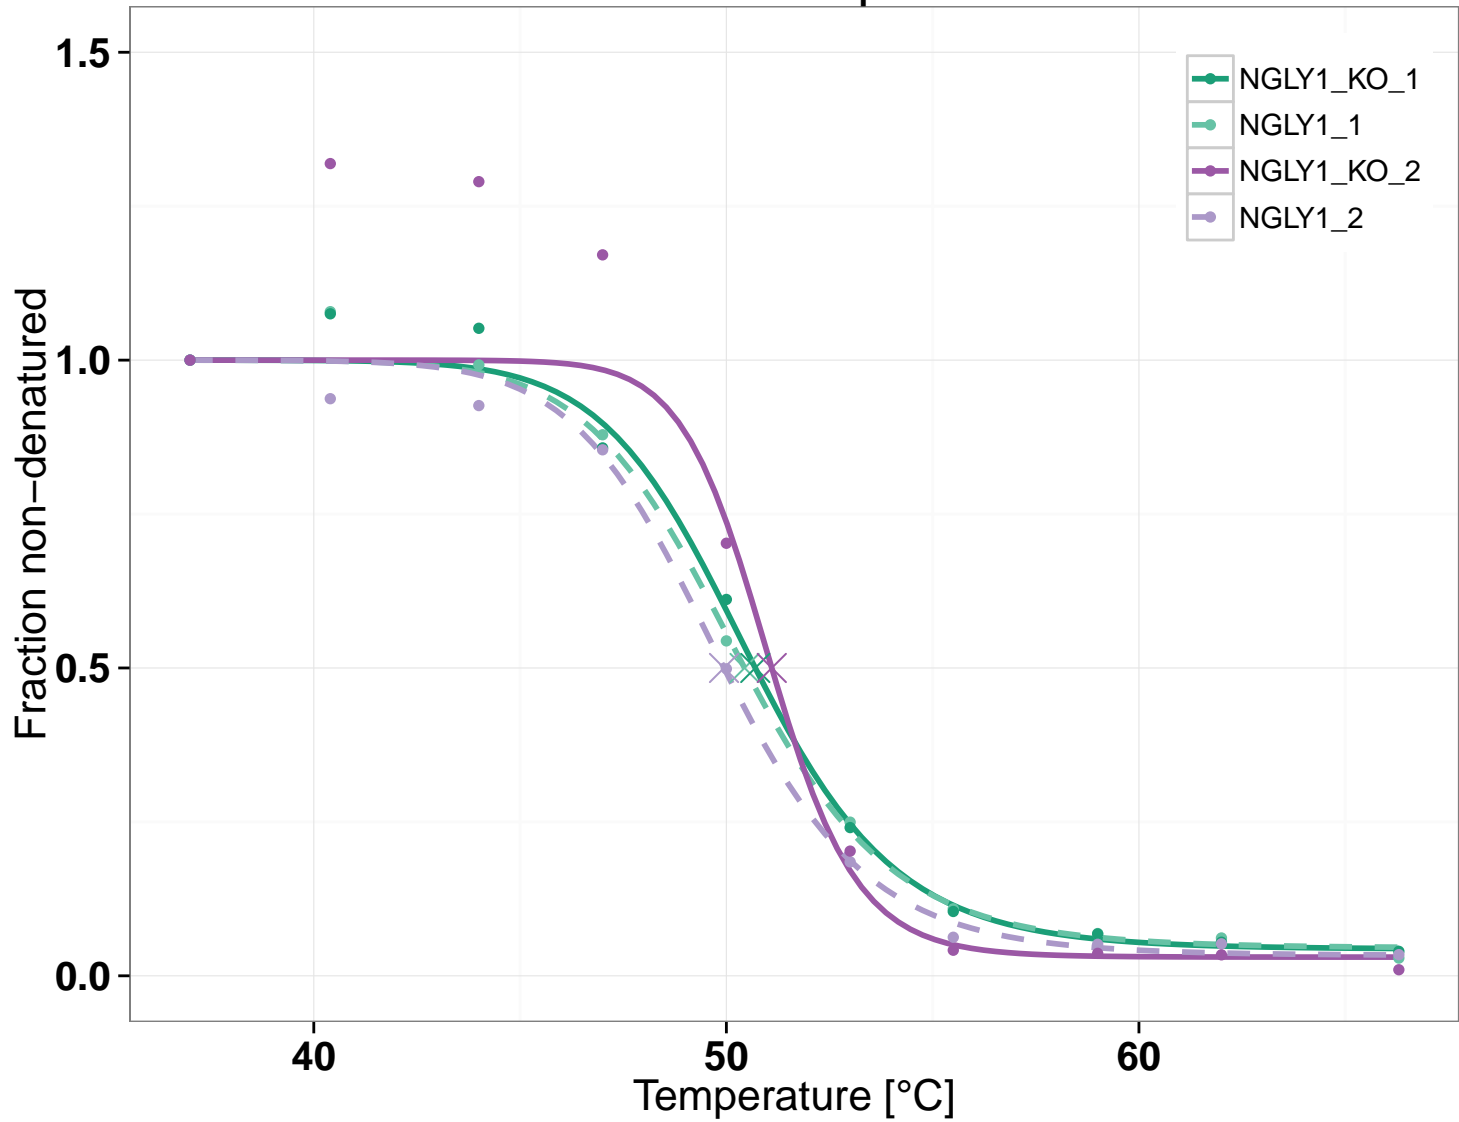

|            | meltPoint | slope | plateau | R2   |
|------------|-----------|-------|---------|------|
| NGLY1_KO_1 | 50.7      | -0.13 | 0.04    | 0.99 |
| NGLY1_1    | 50.44     | -0.13 | 0.05    | 1    |
| NGLY1_KO_2 | 51.1      | -0.23 | 0.03    | 0.92 |
| NGLY1_2    | 49.94     | -0.14 | 0.03    | 1    |

Supplement: Supplementary file 7498 [file 1]

IPI00332511.5|PPP2R2A

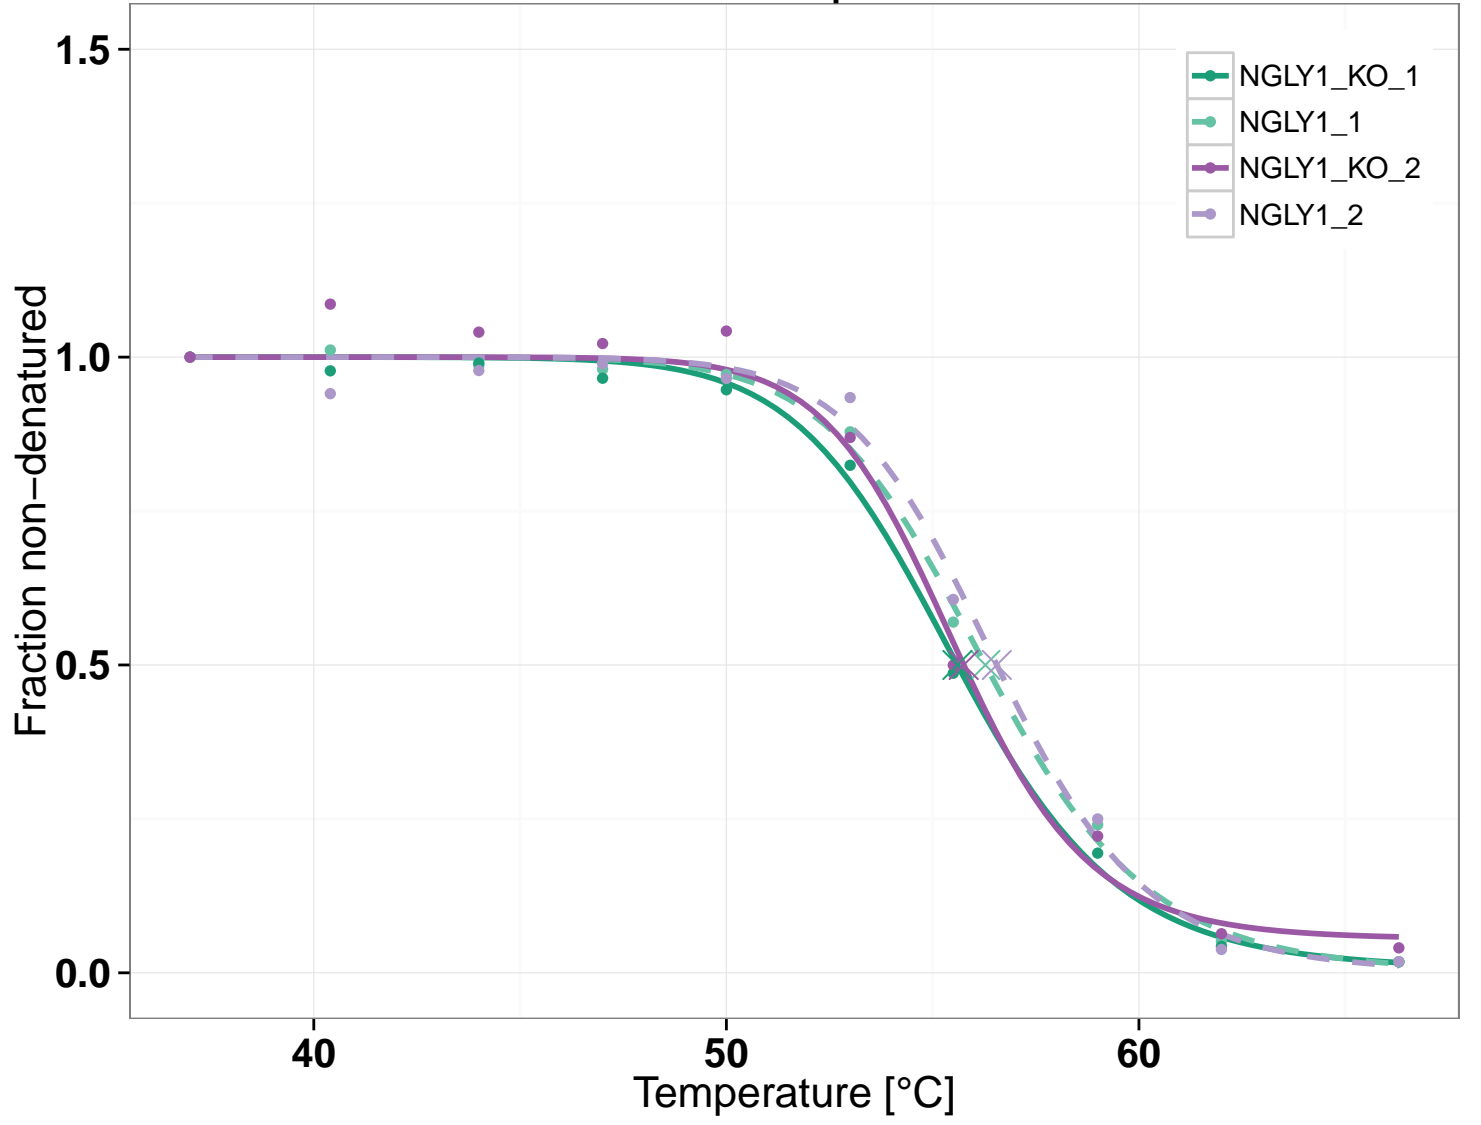

|            | meltPoint | slope | plateau | R2   |
|------------|-----------|-------|---------|------|
| NGLY1_KO_1 | 55.6      | -0.13 | 0.01    | 1    |
| NGLY1_1    | 56.28     | -0.13 | 0       | 1    |
| NGLY1_KO_2 | 55.75     | -0.15 | 0.05    | 0.99 |
| NGLY1_2    | 56.56     | -0.14 | 0       | 0.99 |

Supplement: Supplementary file 7499 [file 1]

IPI00604449.2|C7ORF42

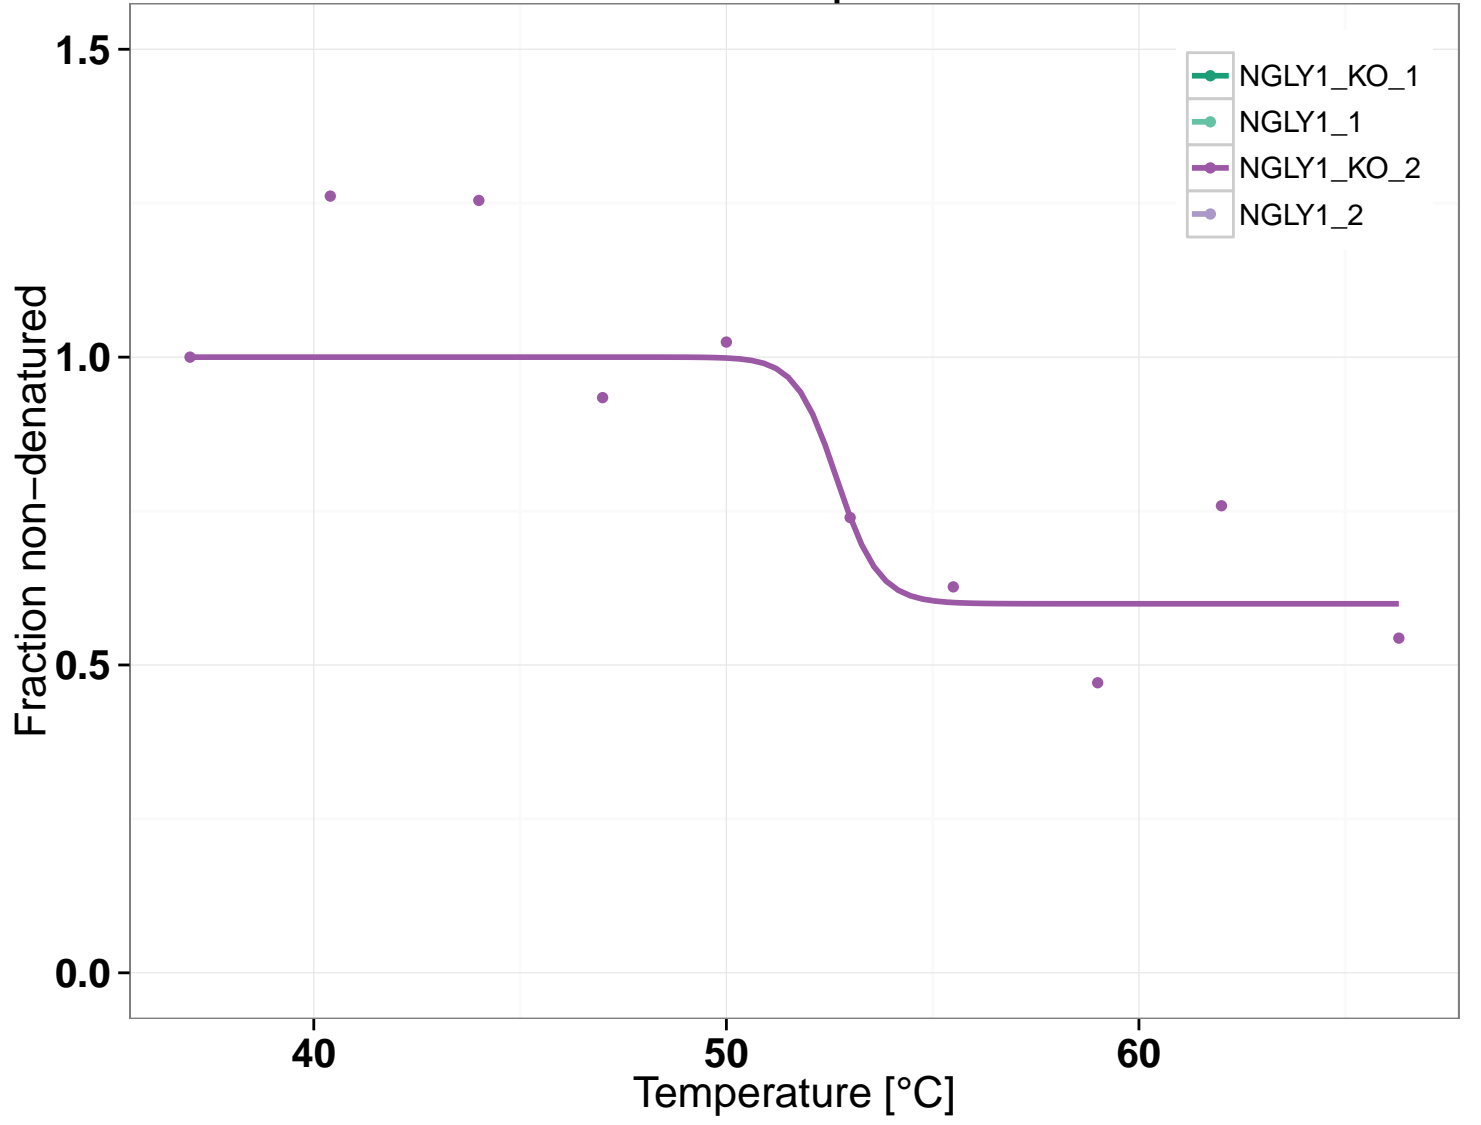

|            | meltPoint | slope | plateau | R2   |
|------------|-----------|-------|---------|------|
| NGLY1_KO_1 | -         | -     | -       | -    |
| NGLY1_1    | -         | -     | -       | -    |
| NGLY1_KO_2 | -         | -0.2  | 0.6     | 0.74 |
| NGLY1_2    | -         | -     | -       | -    |

Supplement: Supplementary file 7500 [file 1]

# IPI00024190.3|SOLH

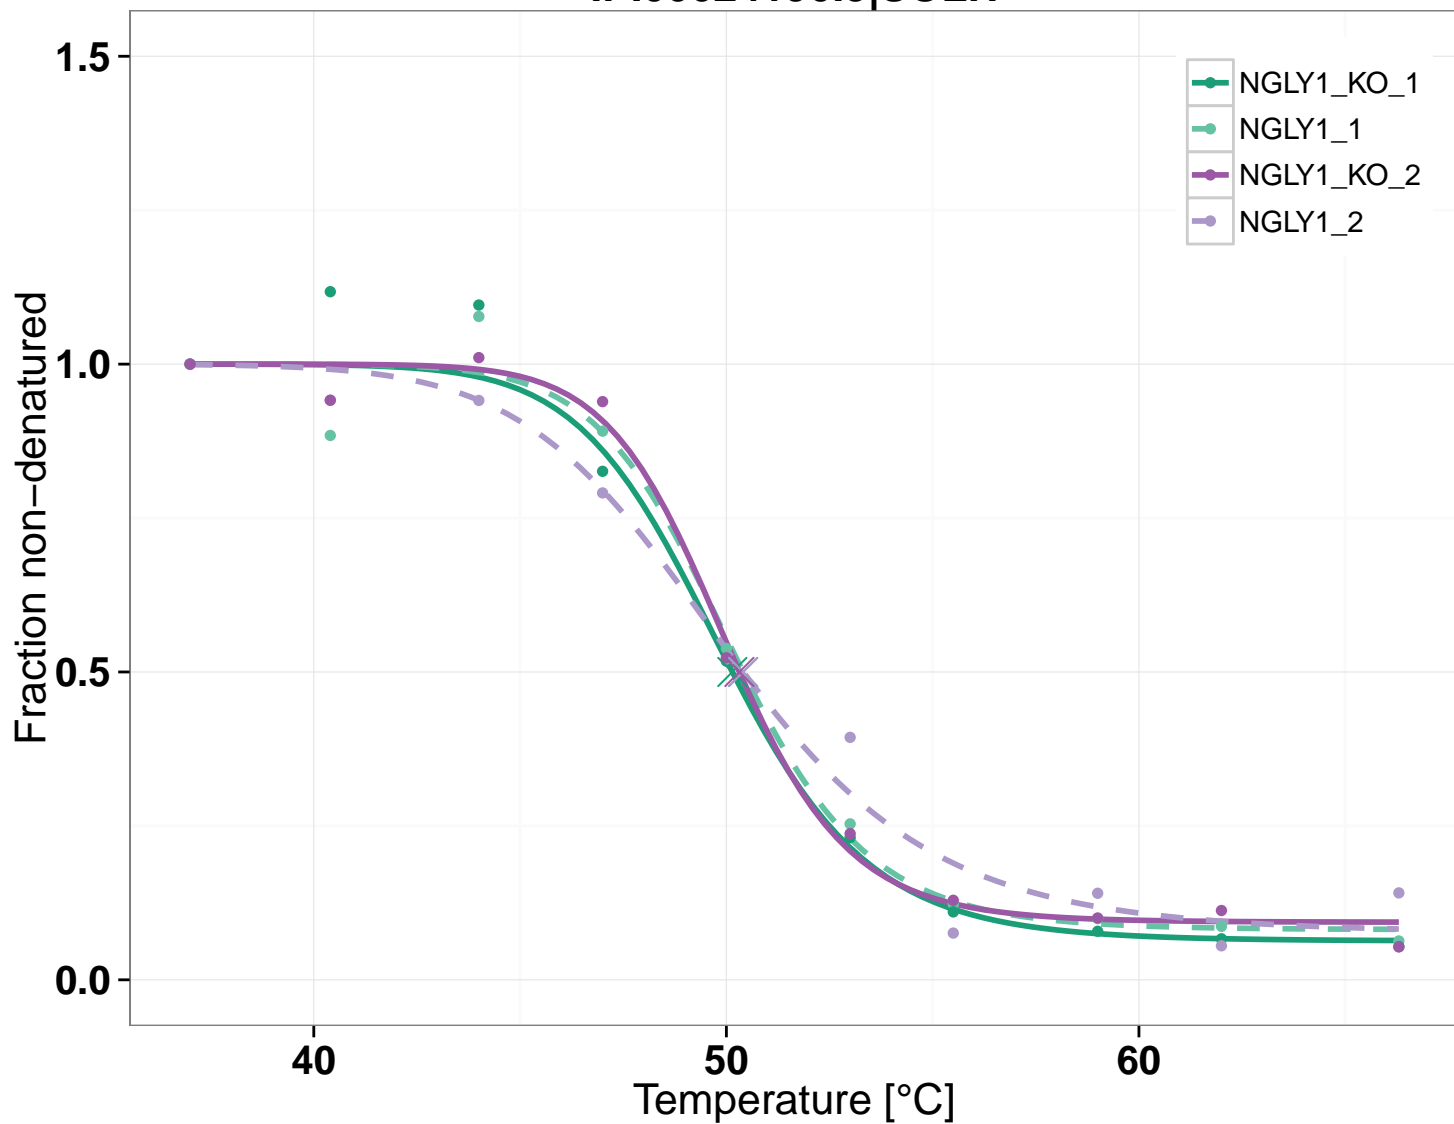

|            | meltPoint | slope  | plateau | R2   |
|------------|-----------|--------|---------|------|
| NGLY1_KO_1 | 50.15     | -0.13  | 0.06    | 0.98 |
| NGLY1_1    | 50.41     | -0.14  | 0.08    | 0.99 |
| NGLY1_KO_2 | 50.32     | -0.15  | 0.09    | 0.99 |
| NGLY1_2    | 50.41     | -0.092 | 0.08    | 0.98 |

Supplement: Supplementary file 7501 [file 1]

IPI00791157.1|RPS17

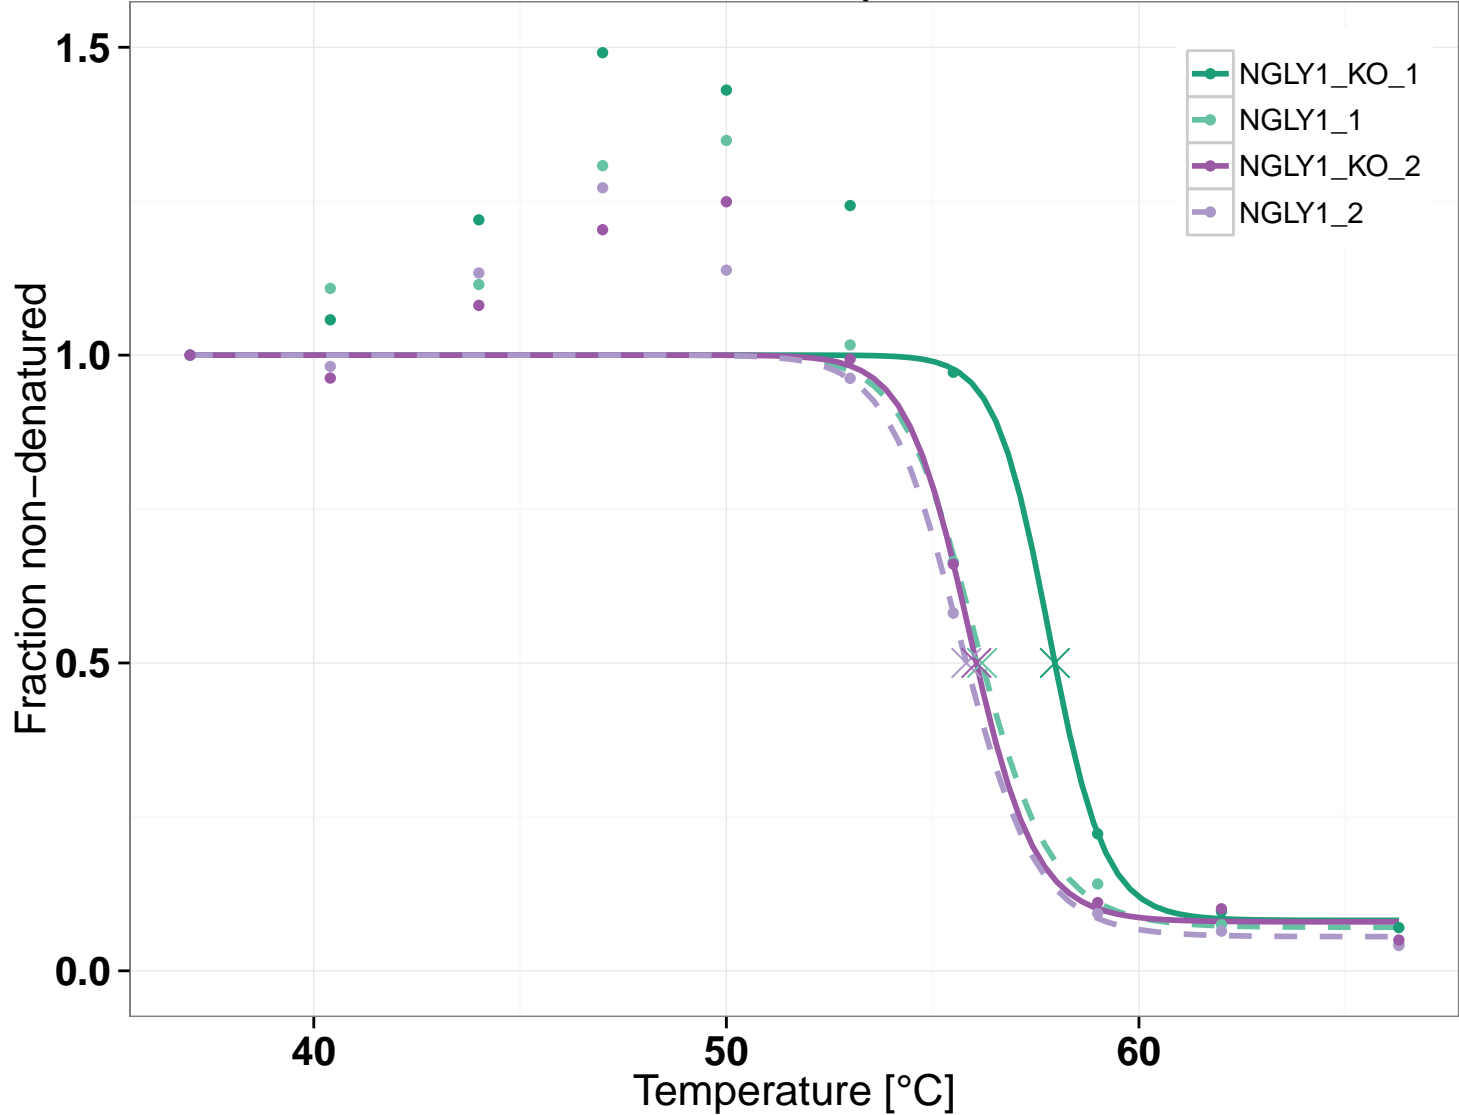

|            | meltPoint | slope | plateau | R2   |
|------------|-----------|-------|---------|------|
| NGLY1_KO_1 | 57.96     | -0.35 | 0.08    | 0.8  |
| NGLY1_1    | 56.2      | -0.26 | 0.07    | 0.9  |
| NGLY1_KO_2 | 56.06     | -0.3  | 0.08    | 0.95 |
| NGLY1_2    | 55.82     | -0.26 | 0.06    | 0.95 |

Supplement: Supplementary file 7502 [file 1]

IPI00556594.3|ZCCHC8

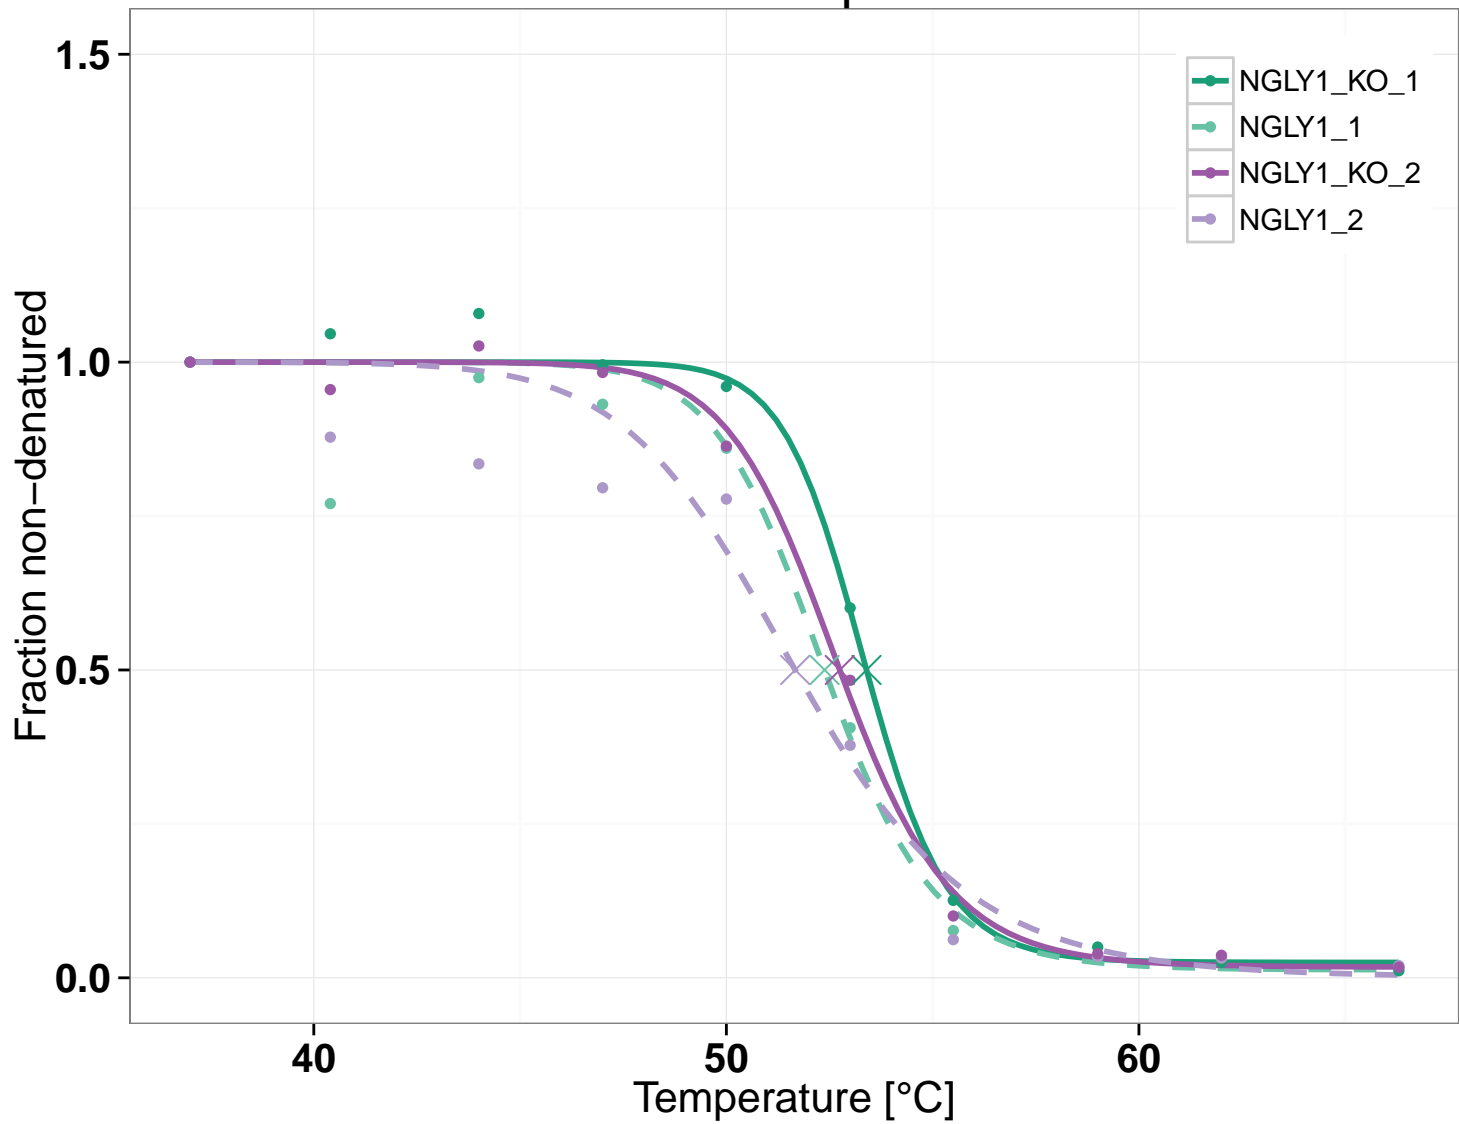

|            | meltPoint | slope | plateau | R2   |
|------------|-----------|-------|---------|------|
| NGLY1_KO_1 | 53.4      | -0.25 | 0.02    | 1    |
| NGLY1_1    | 52.38     | -0.18 | 0.01    | 0.97 |
| NGLY1_KO_2 | 52.75     | -0.18 | 0.02    | 1    |
| NGLY1_2    | 51.67     | -0.12 | 0       | 0.95 |

Supplement: Supplementary file 7503 [file 1]

IPI00014424.1|EEF1A2

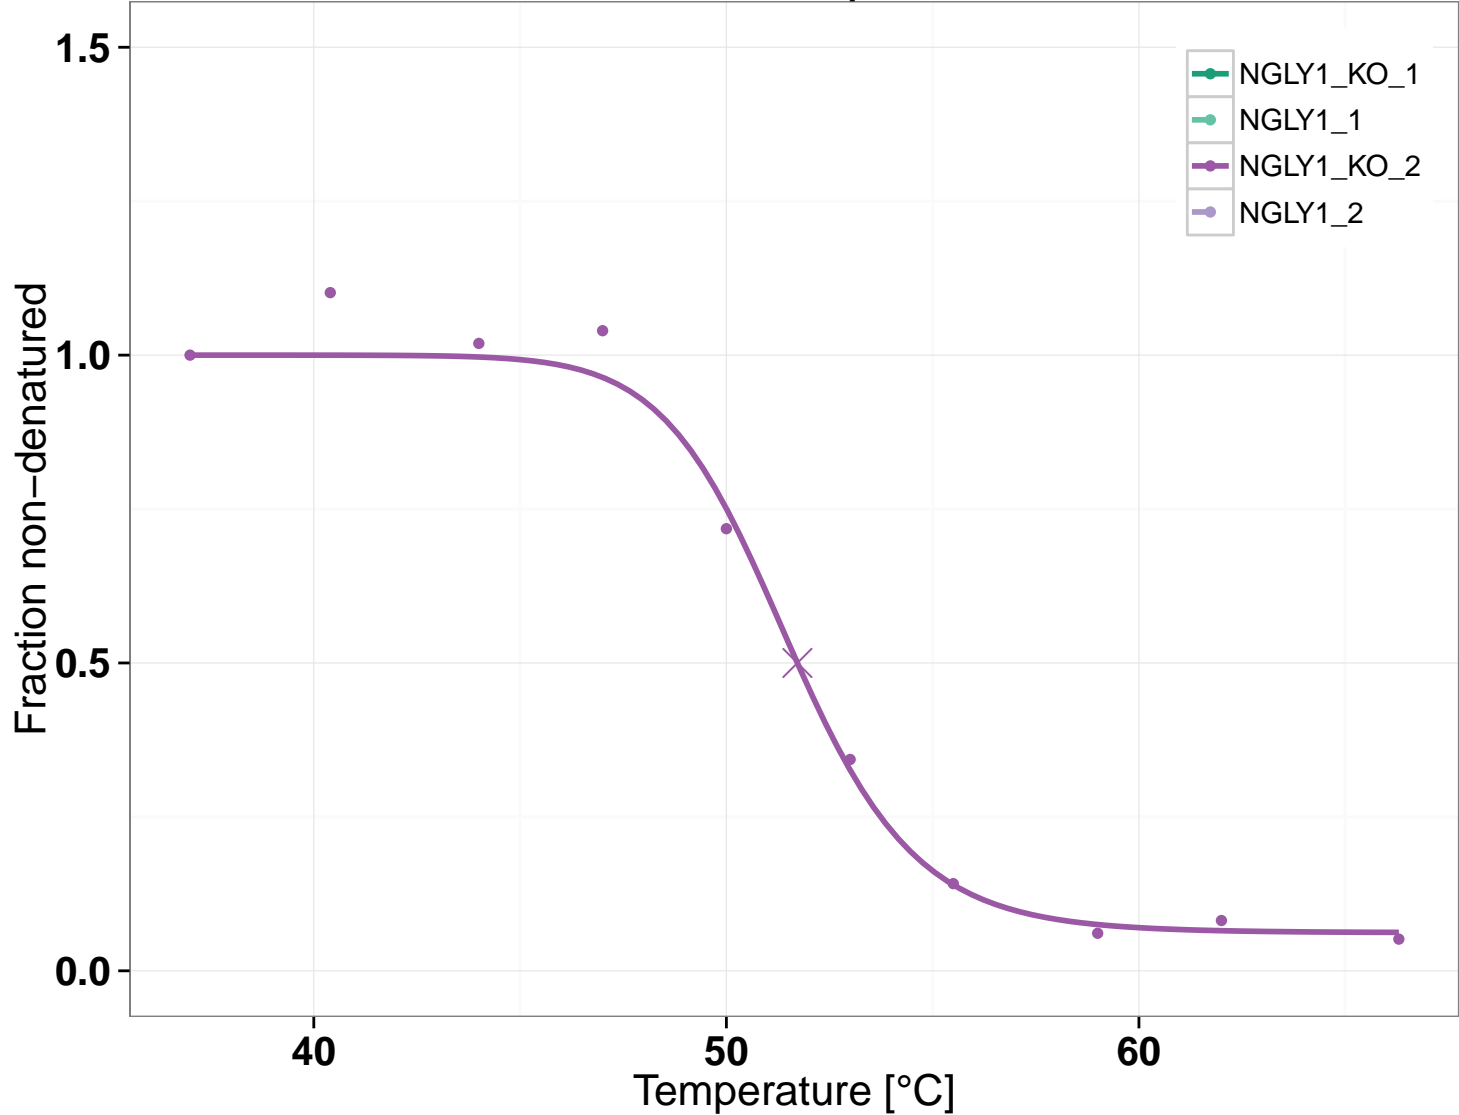

|            | meltPoint | slope | plateau | R2   |
|------------|-----------|-------|---------|------|
| NGLY1_KO_1 | —         | —     | —       | —    |
| NGLY1_1    | —         | —     | —       | —    |
| NGLY1_KO_2 | 51.72     | −0.15 | 0.06    | 0.99 |
| NGLY1_2    | —         | —     | —       | —    |

Supplement: Supplementary file 7504 [file 1]

# IPI00002375.3|TMOD1

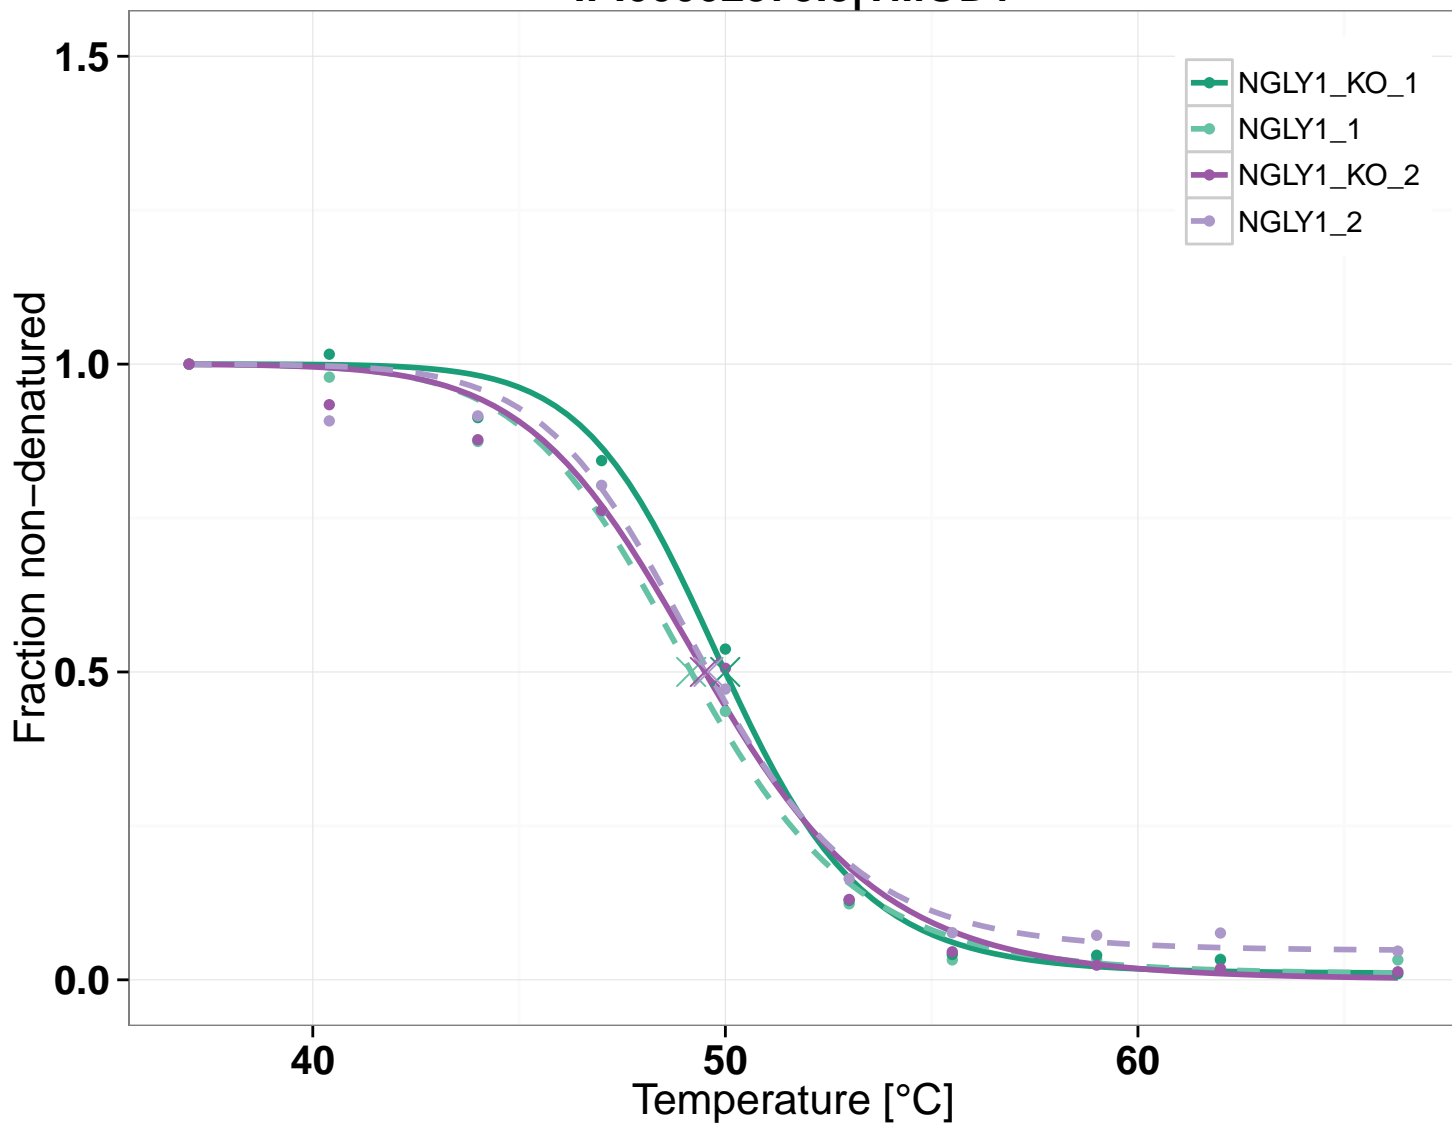

|            | meltPoint | slope | plateau | R2   |
|------------|-----------|-------|---------|------|
| NGLY1_KO_1 | 50        | -0.15 | 0.01    | 0.99 |
| NGLY1_1    | 49.17     | -0.12 | 0.01    | 0.99 |
| NGLY1_KO_2 | 49.5      | -0.12 | 0       | 0.99 |
| NGLY1_2    | 49.59     | -0.12 | 0.05    | 0.99 |

Supplement: Supplementary file 7505 [file 1]

IPI00000041.1|RHOB

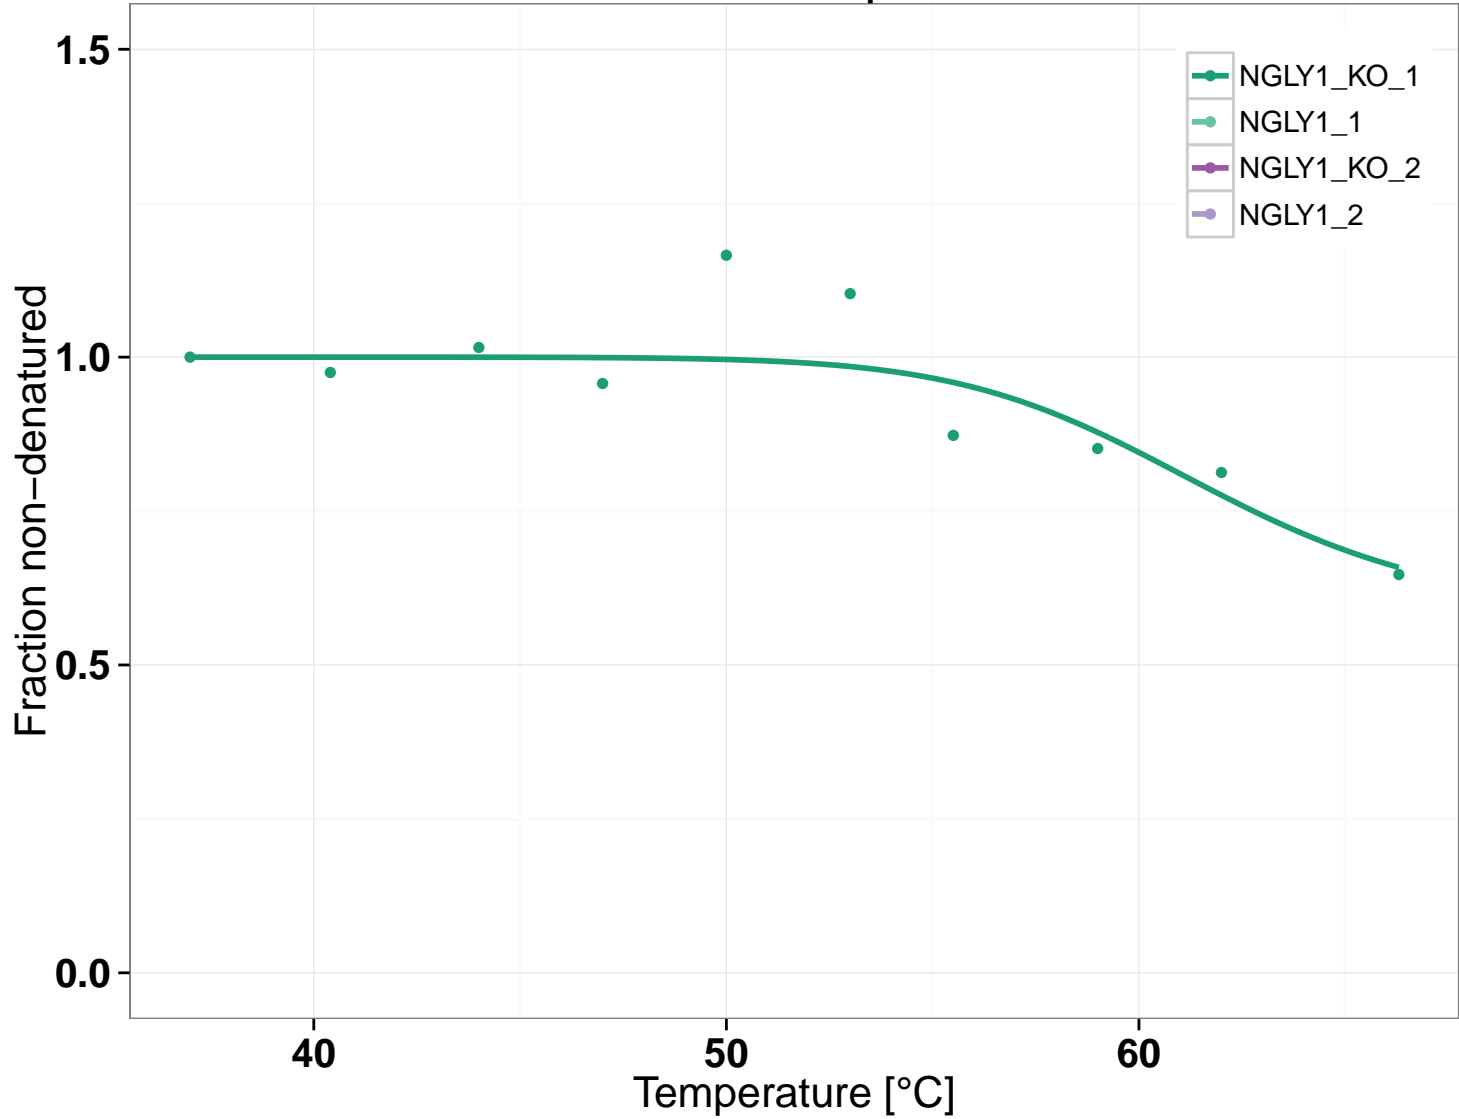

|            | meltPoint | slope  | plateau | R2   |
|------------|-----------|--------|---------|------|
| NGLY1_KO_1 | —         | −0.035 | 0.57    | 0.73 |
| NGLY1_1    | —         | —      | —       | —    |
| NGLY1_KO_2 | —         | —      | —       | —    |
| NGLY1_2    | —         | —      | —       | —    |

Supplement: Supplementary file 7506 [file 1]

IPI00103884.3|OVCA2

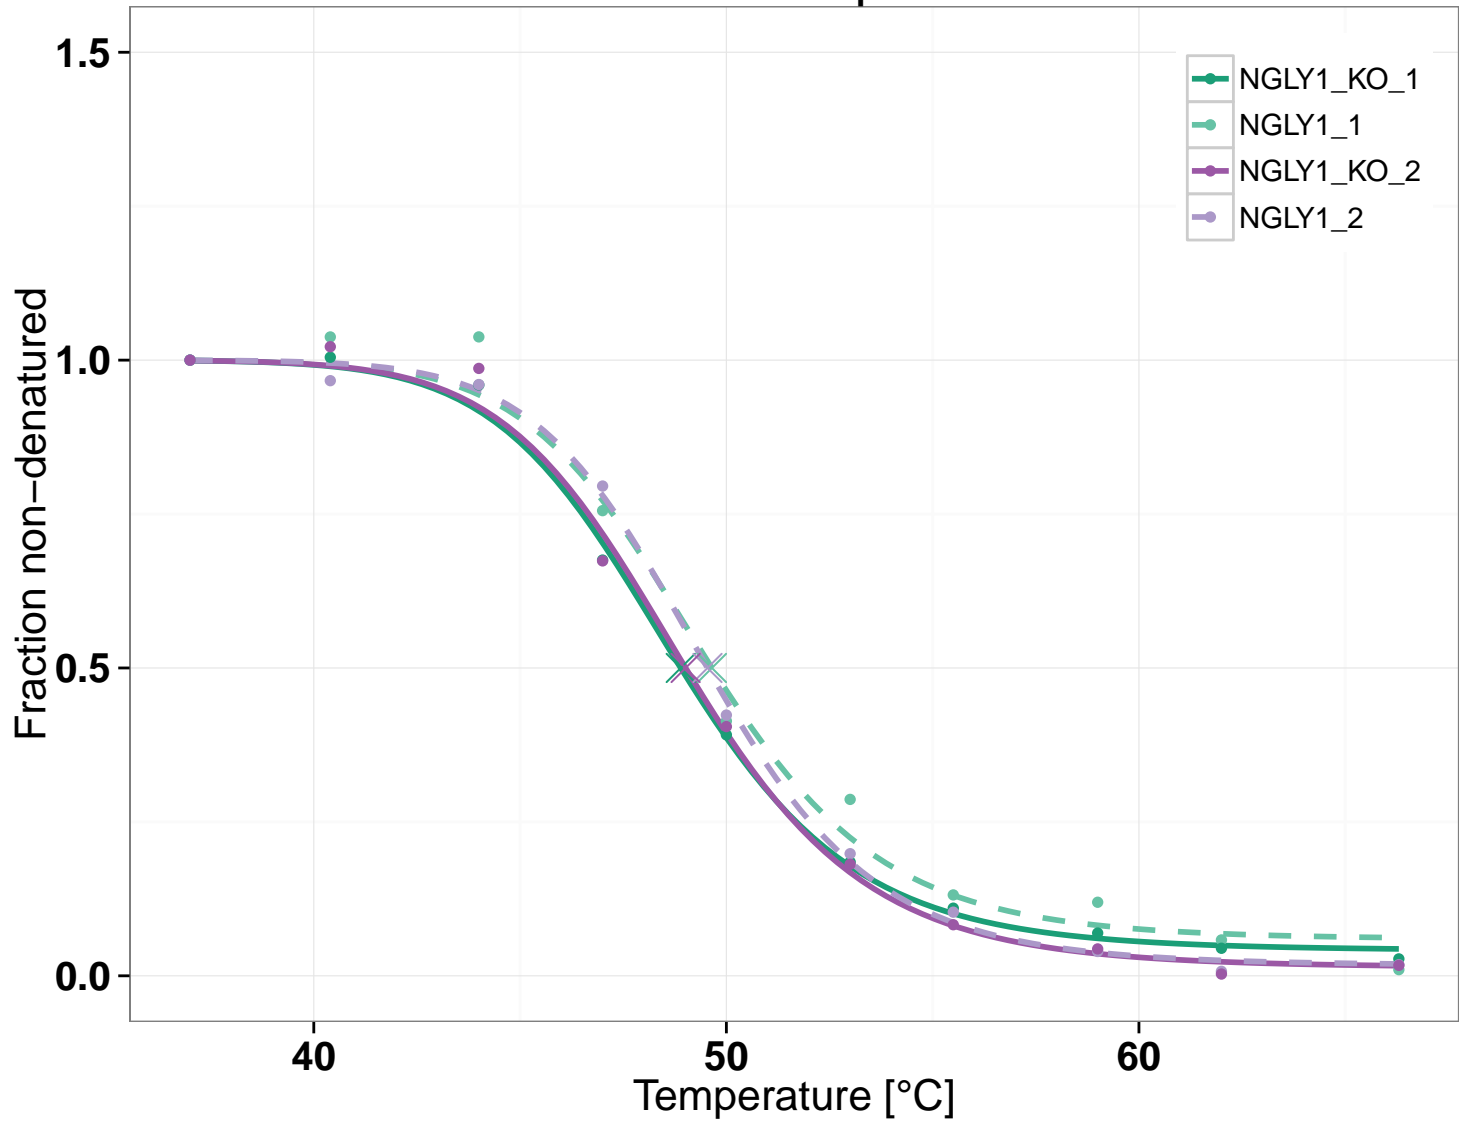

|            | meltPoint | slope | plateau | R2   |
|------------|-----------|-------|---------|------|
| NGLY1_KO_1 | 48.89     | -0.11 | 0.04    | 1    |
| NGLY1_1    | 49.65     | -0.11 | 0.06    | 0.99 |
| NGLY1_KO_2 | 49.01     | -0.11 | 0.01    | 1    |
| NGLY1_2    | 49.54     | -0.12 | 0.02    | 1    |

Supplement: Supplementary file 7507 [file 1]

IPI00103075.1|ZFAND2B

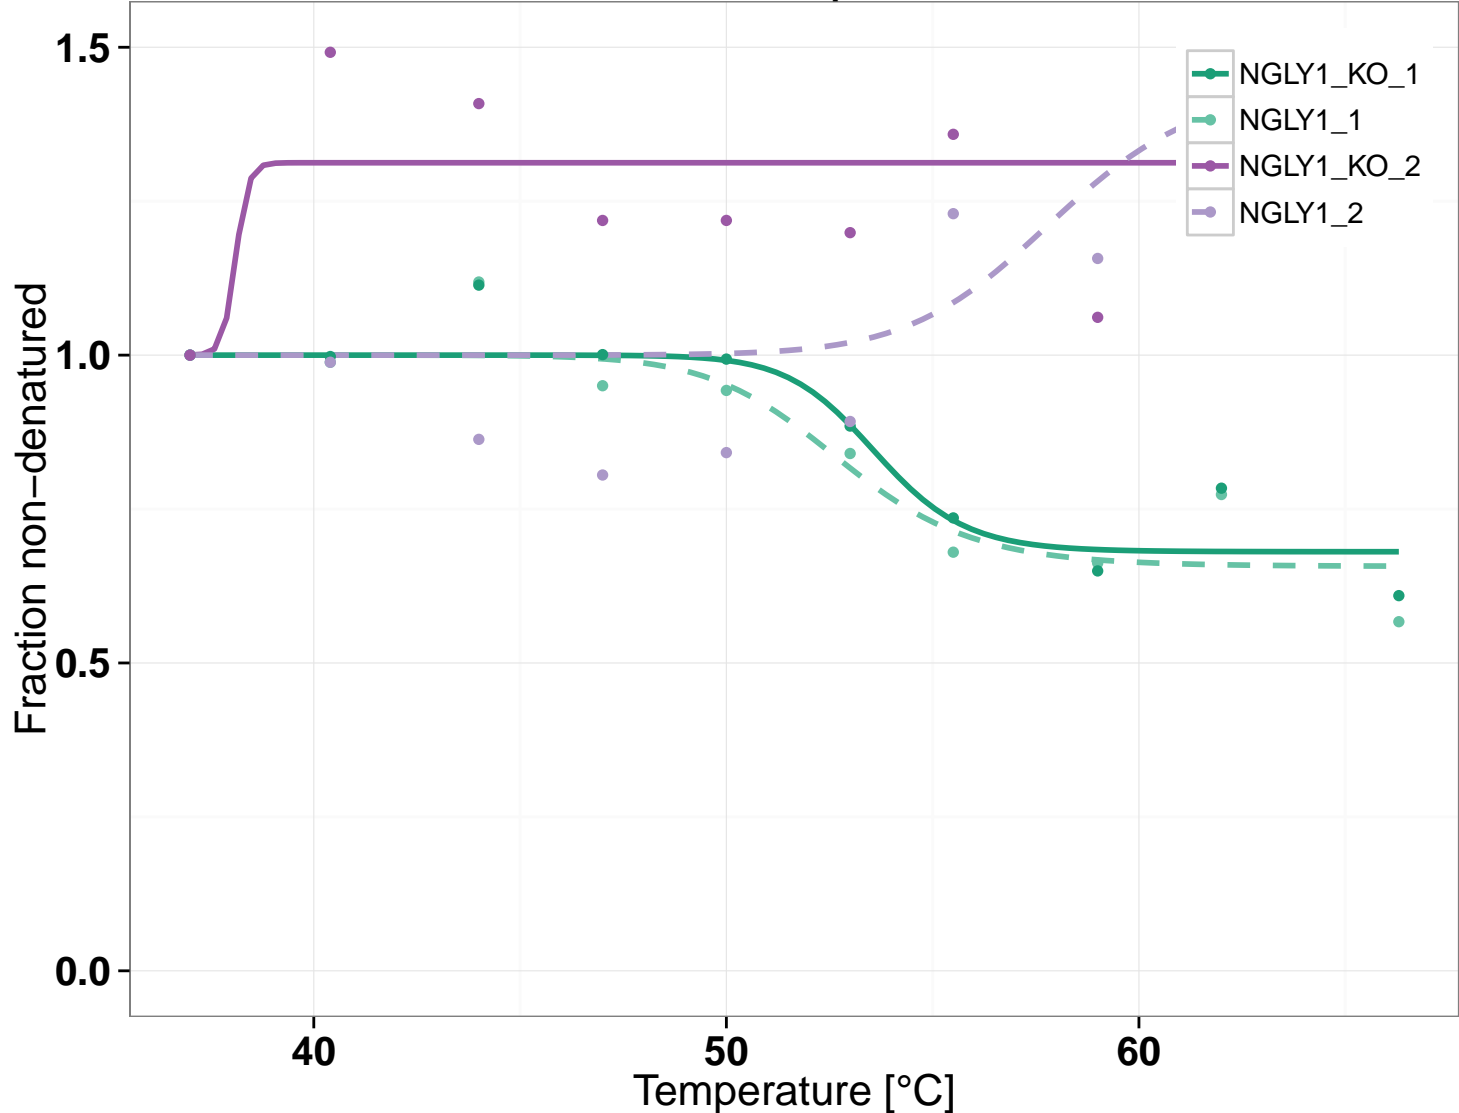

|            | meltPoint | slope  | plateau | R2   |
|------------|-----------|--------|---------|------|
| NGLY1_KO_1 | —         | -0.074 | 0.68    | 0.89 |
| NGLY1_1    | —         | -0.053 | 0.66    | 0.86 |
| NGLY1_KO_2 | —         | 0.51   | 1.31    | 0.25 |
| NGLY1_2    | —         | 0.062  | 1.45    | 0.7  |

Supplement: Supplementary file 7508 [file 1]

IPI00413500.4|COMMD4

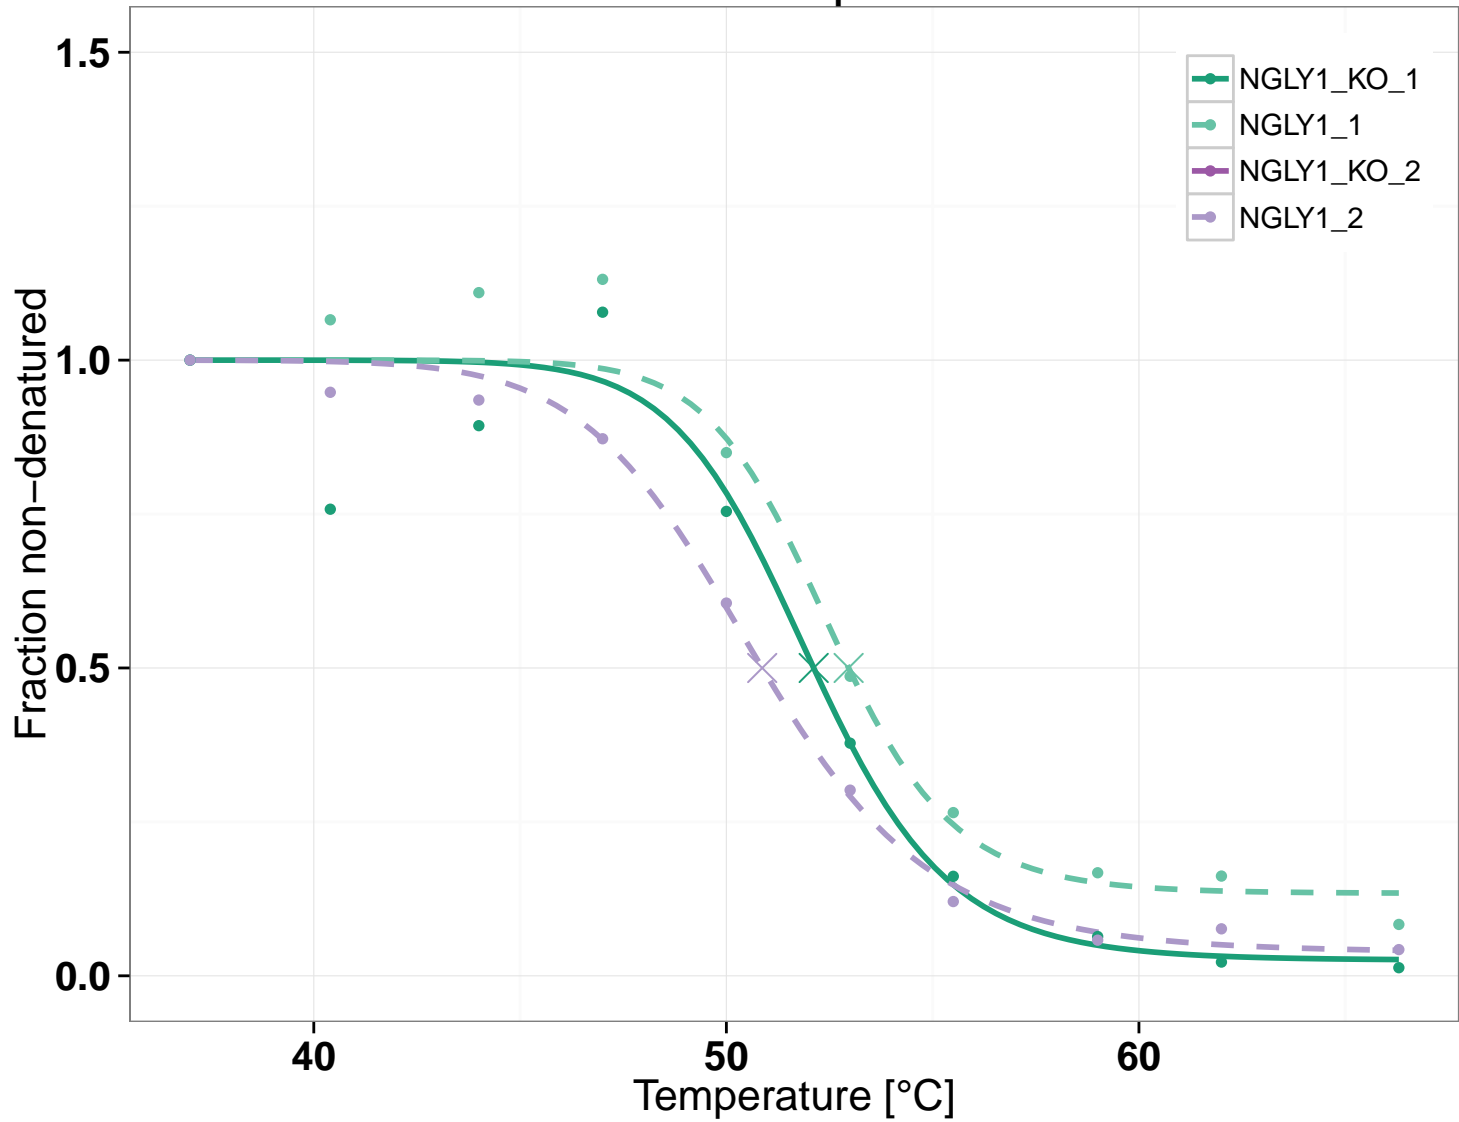

|            | meltPoint | slope | plateau | R2   |
|------------|-----------|-------|---------|------|
| NGLY1_KO_1 | 52.12     | -0.15 | 0.03    | 0.95 |
| NGLY1_1    | 52.96     | -0.15 | 0.13    | 0.98 |
| NGLY1_KO_2 | -         | -     | -       | -    |
| NGLY1_2    | 50.87     | -0.11 | 0.04    | 1    |

Supplement: Supplementary file 7509 [file 1]

# IPI00013338.2|CENPO

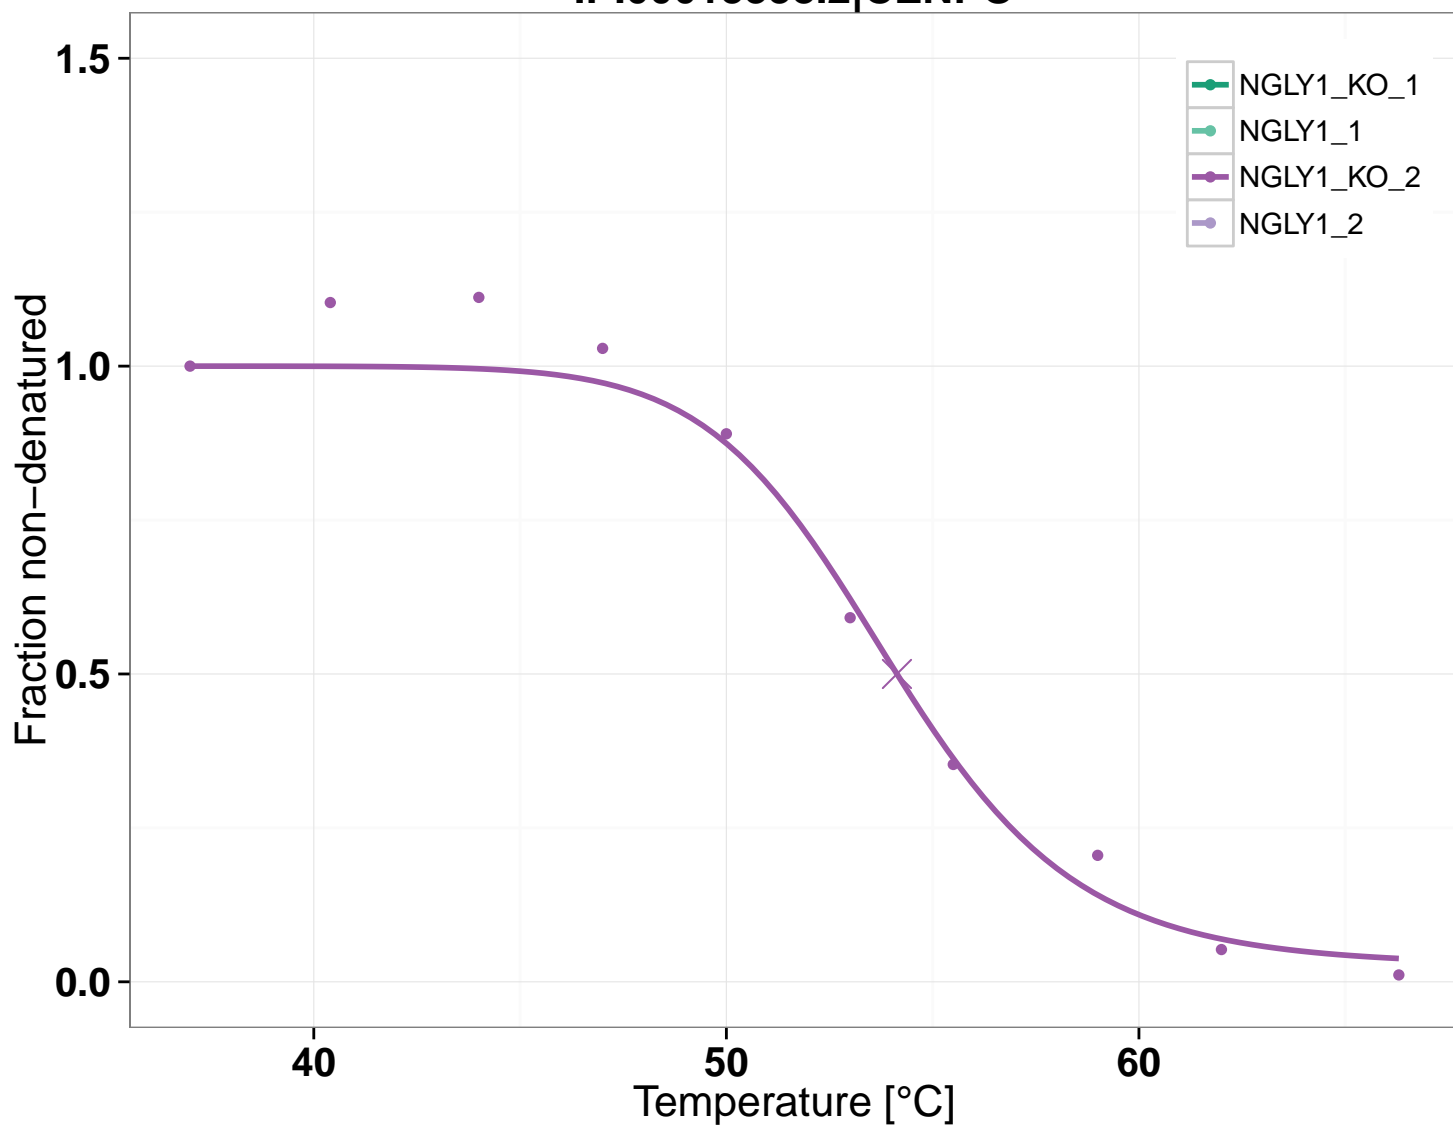

|            | meltPoint | slope | plateau | R2   |
|------------|-----------|-------|---------|------|
| NGLY1_KO_1 | —         | —     | —       | —    |
| NGLY1_1    | —         | —     | —       | —    |
| NGLY1_KO_2 | 54.13     | -0.11 | 0.03    | 0.98 |
| NGLY1_2    | —         | —     | —       | —    |

Supplement: Supplementary file 7510 [file 1]

IPI00303890.1|XIAP

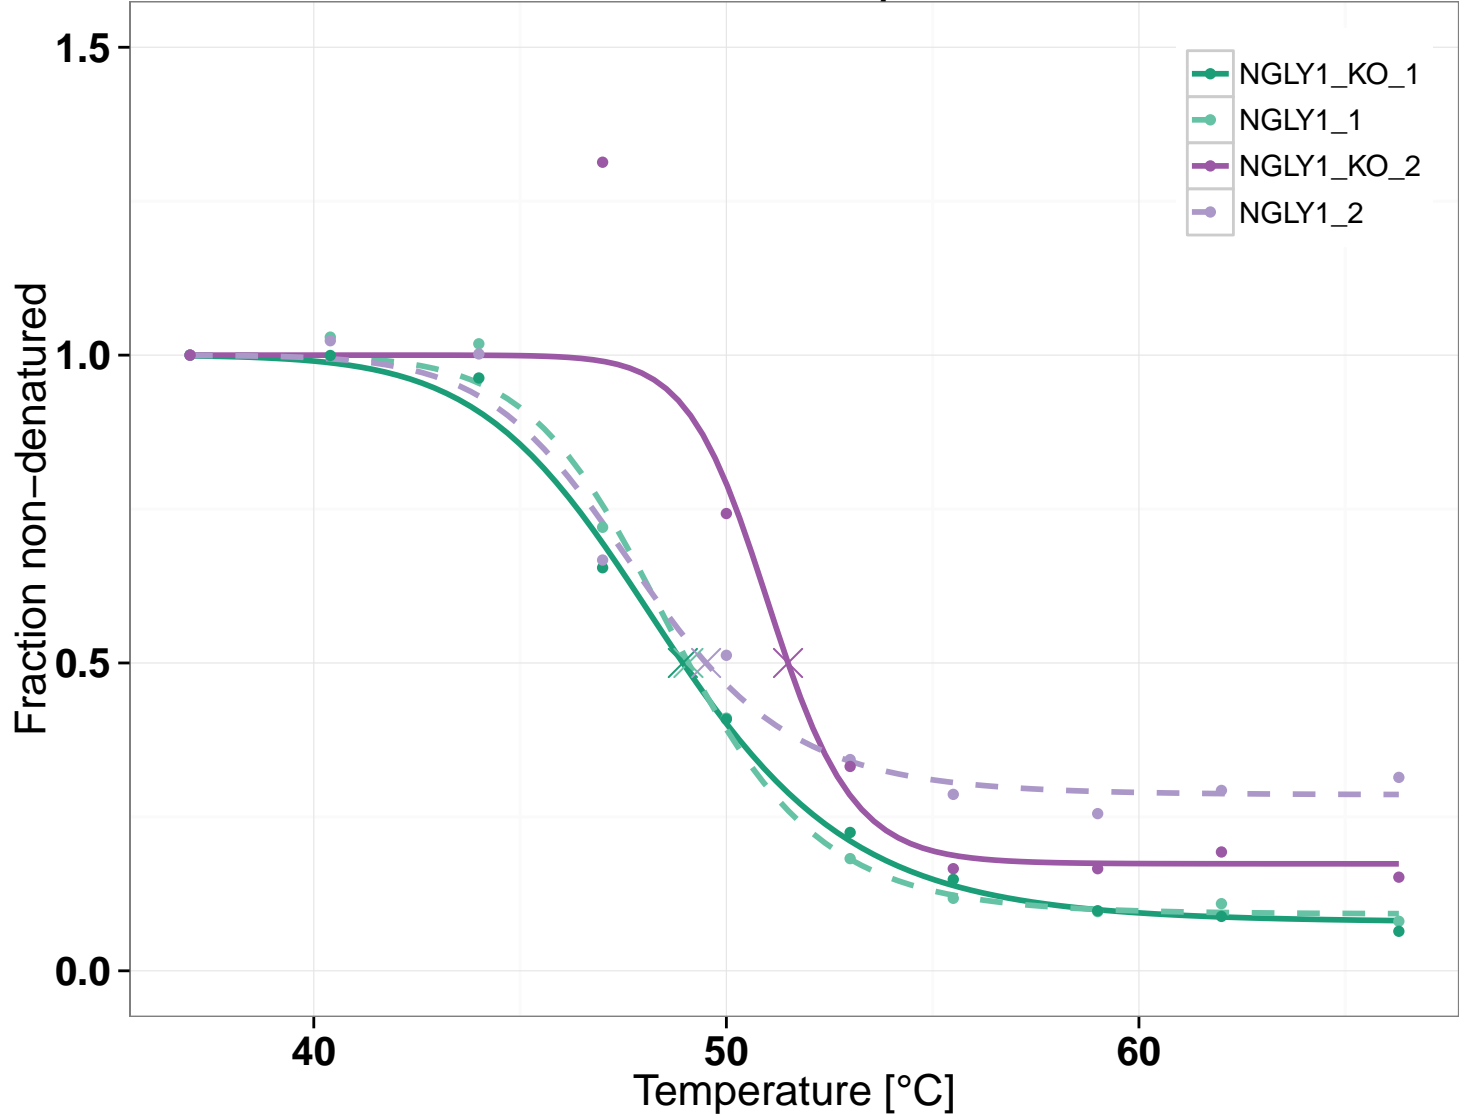

|            | meltPoint | slope  | plateau | R2   |
|------------|-----------|--------|---------|------|
| NGLY1_KO_1 | 48.95     | -0.1   | 0.08    | 1    |
| NGLY1_1    | 49.08     | -0.13  | 0.09    | 1    |
| NGLY1_KO_2 | 51.49     | -0.21  | 0.17    | 0.6  |
| NGLY1_2    | 49.51     | -0.097 | 0.29    | 0.99 |

Supplement: Supplementary file 7511 [file 1]

IPI00401988.7|ZNF507

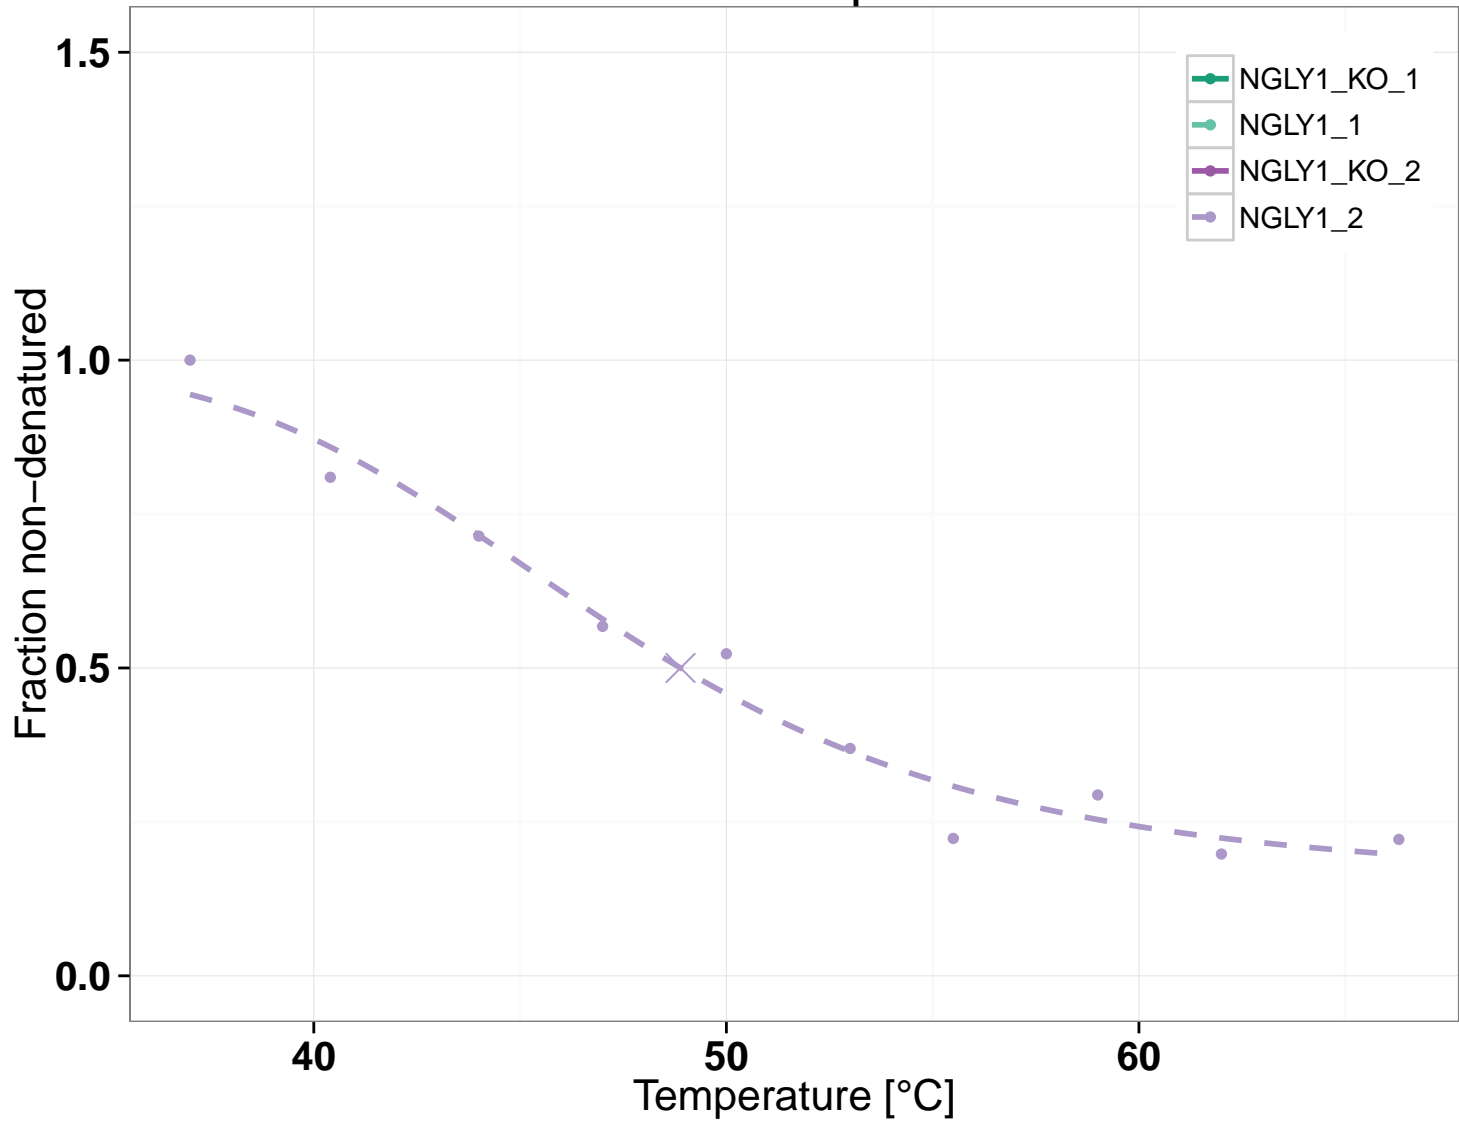

|            | meltPoint | slope  | plateau | R2   |
|------------|-----------|--------|---------|------|
| NGLY1_KO_1 | —         | —      | —       | —    |
| NGLY1_1    | —         | —      | —       | —    |
| NGLY1_KO_2 | —         | —      | —       | —    |
| NGLY1_2    | 48.89     | −0.046 | 0.15    | 0.97 |

Supplement: Supplementary file 7512 [file 1]

# IPI00027448.3|ATP5L

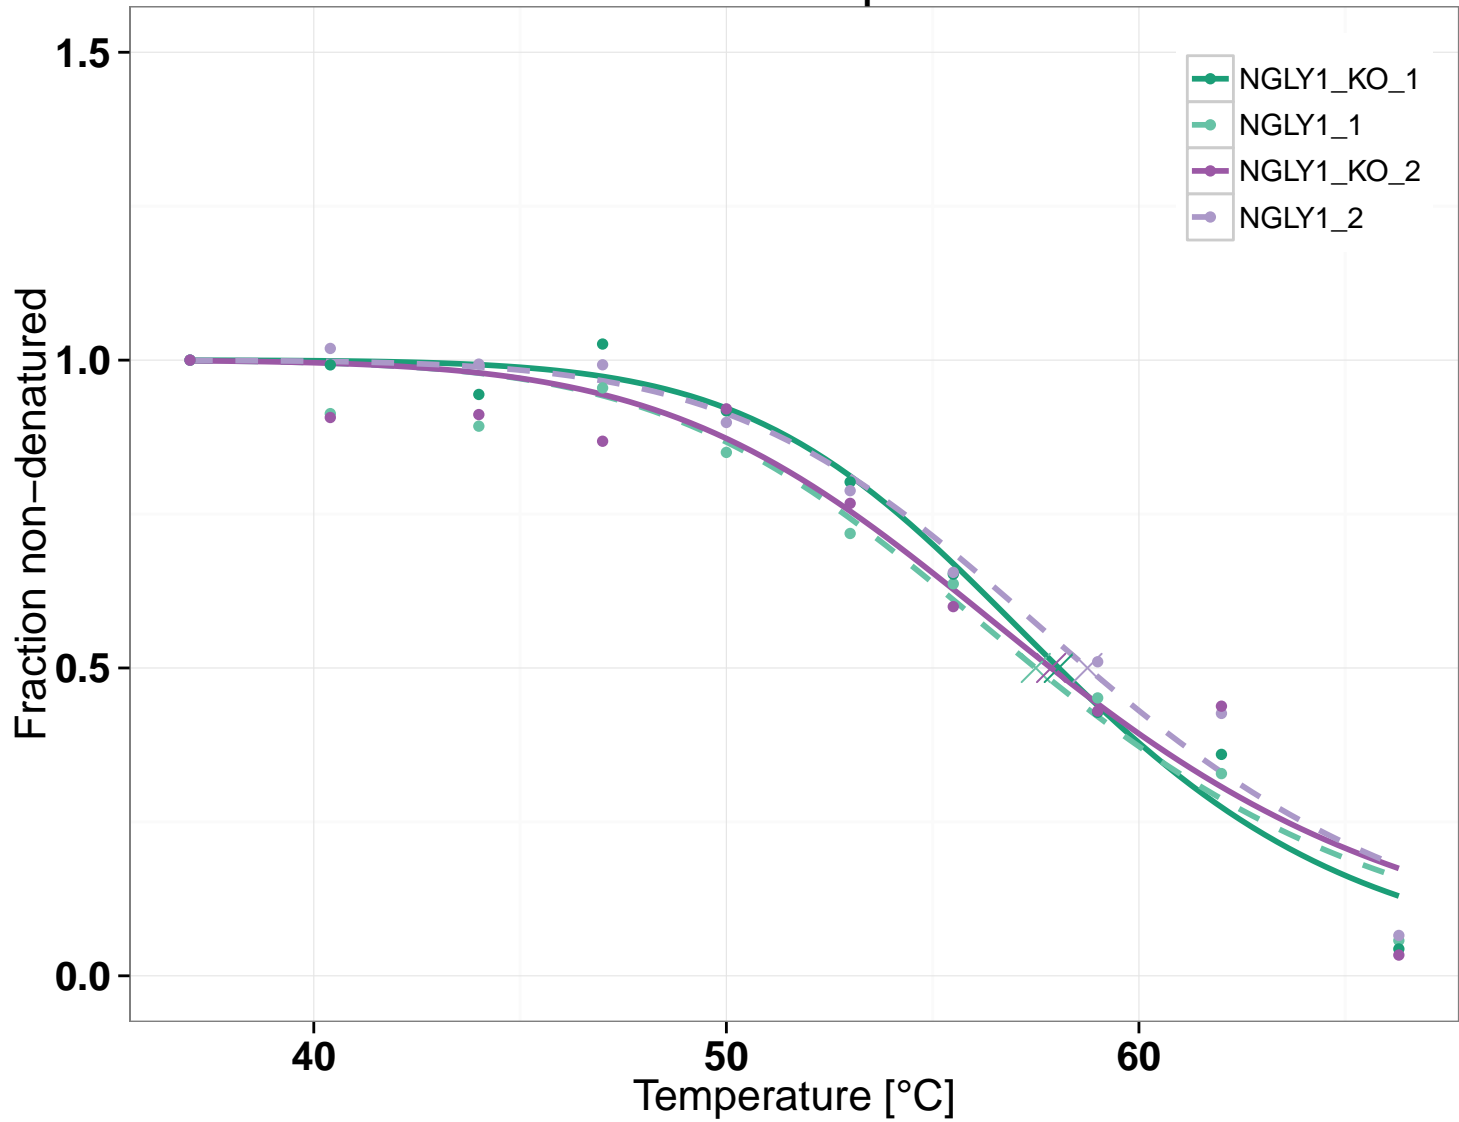

|            | meltPoint | slope  | plateau | R2   |
|------------|-----------|--------|---------|------|
| NGLY1_KO_1 | 58.06     | -0.067 | 0       | 0.98 |
| NGLY1_1    | 57.5      | -0.056 | 0       | 0.97 |
| NGLY1_KO_2 | 57.87     | -0.054 | 0       | 0.93 |
| NGLY1_2    | 58.75     | -0.058 | 0       | 0.97 |

Supplement: Supplementary file 7513 [file 1]

# IPI00411559.2|SMC4

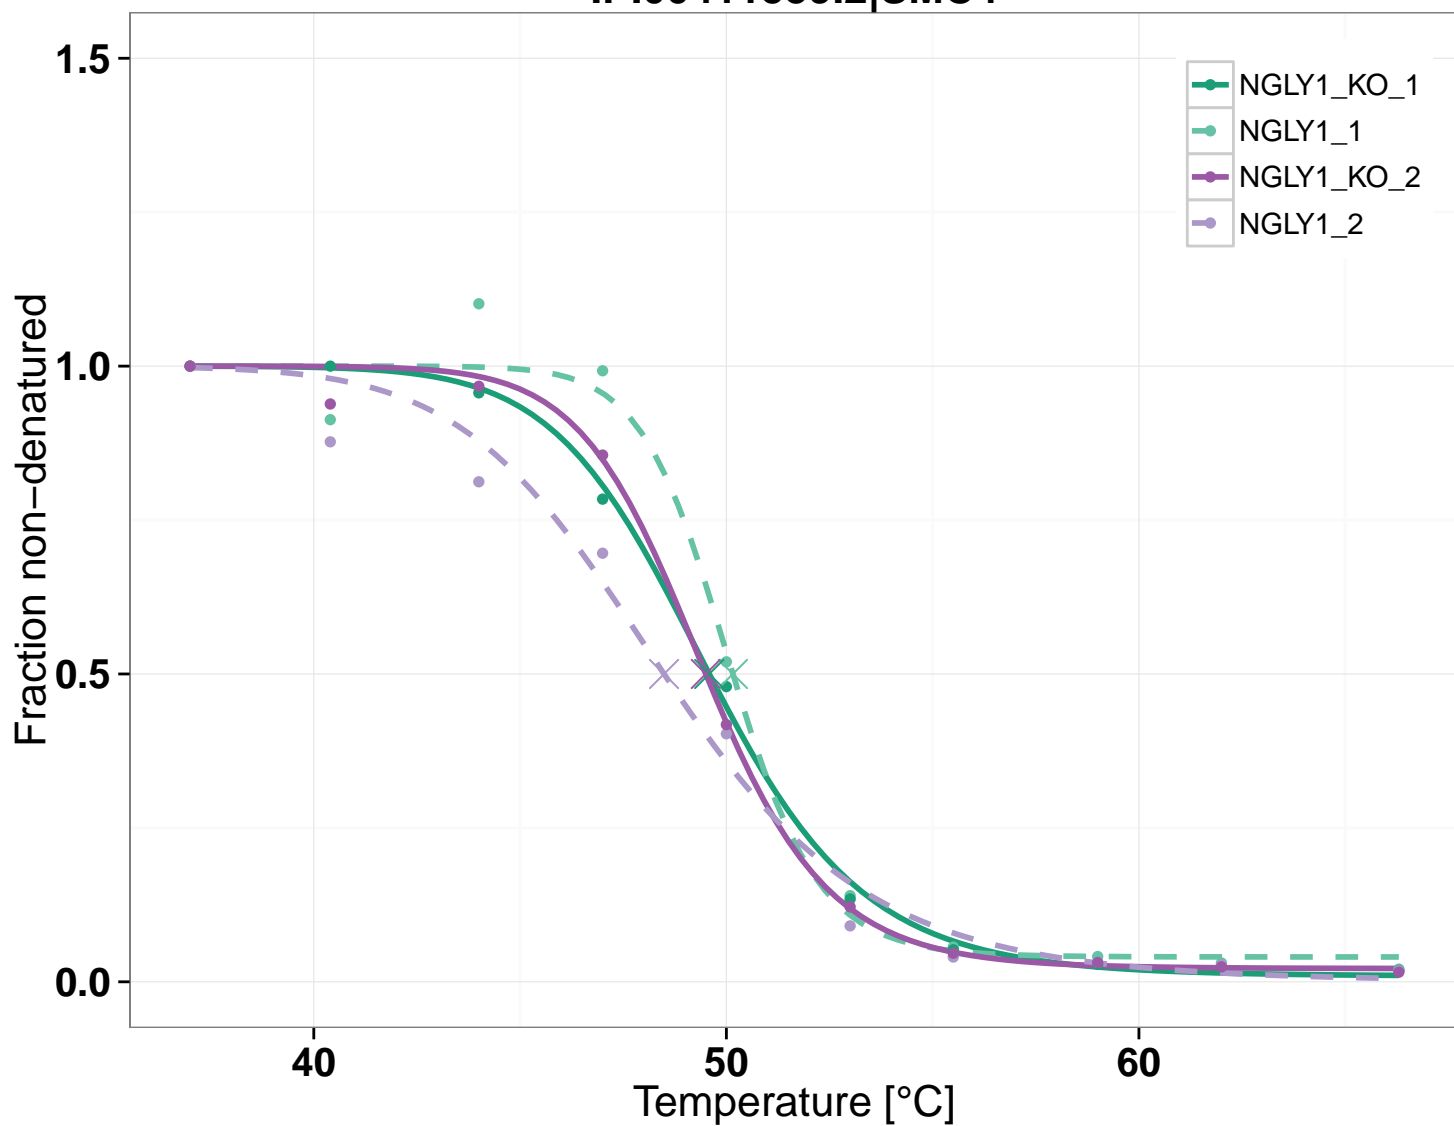

|            | meltPoint | slope | plateau | R2   |
|------------|-----------|-------|---------|------|
| NGLY1_KO_1 | 49.58     | -0.13 | 0.01    | 1    |
| NGLY1_1    | 50.16     | -0.22 | 0.04    | 0.99 |
| NGLY1_KO_2 | 49.5      | -0.16 | 0.02    | 1    |
| NGLY1_2    | 48.49     | -0.1  | 0       | 0.98 |

Supplement: Supplementary file 7514 [file 1]

IPI00302979.4|ELAC1

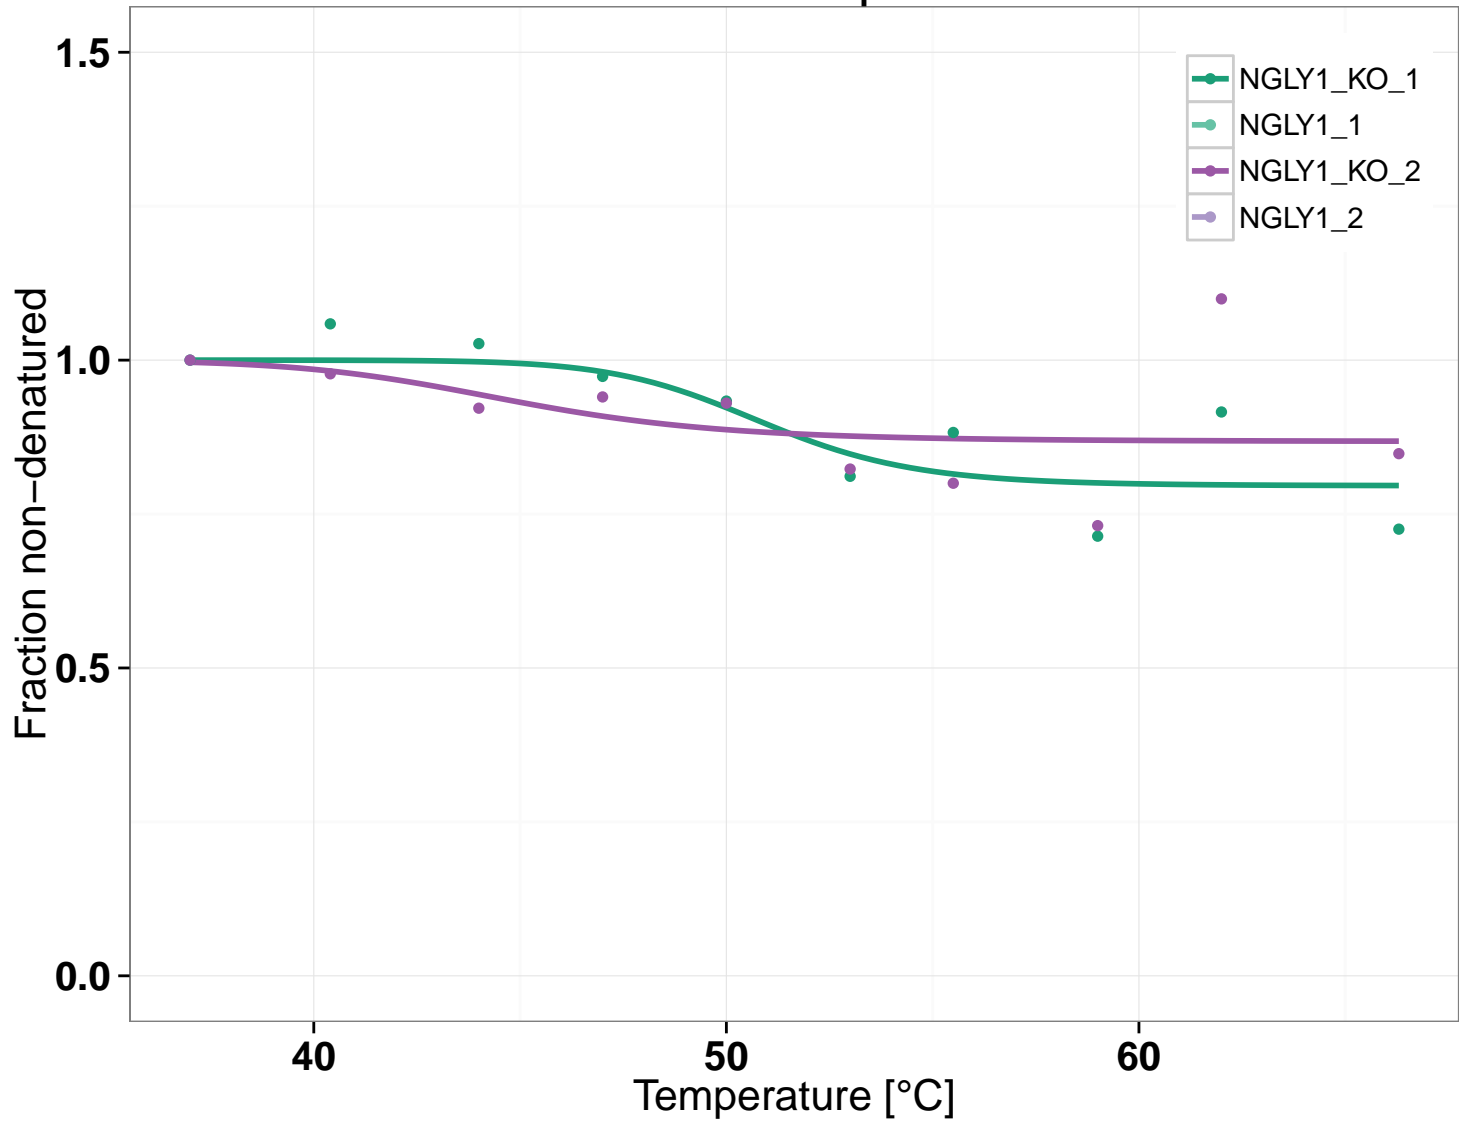

|            | meltPoint | slope  | plateau | R2   |
|------------|-----------|--------|---------|------|
| NGLY1_KO_1 | —         | −0.028 | 0.8     | 0.72 |
| NGLY1_1    | —         | —      | —       | —    |
| NGLY1_KO_2 | —         | −0.013 | 0.87    | 0.2  |
| NGLY1_2    | —         | —      | —       | —    |

Supplement: Supplementary file 7515 [file 1]

# IPI00450472.3|UBE2I

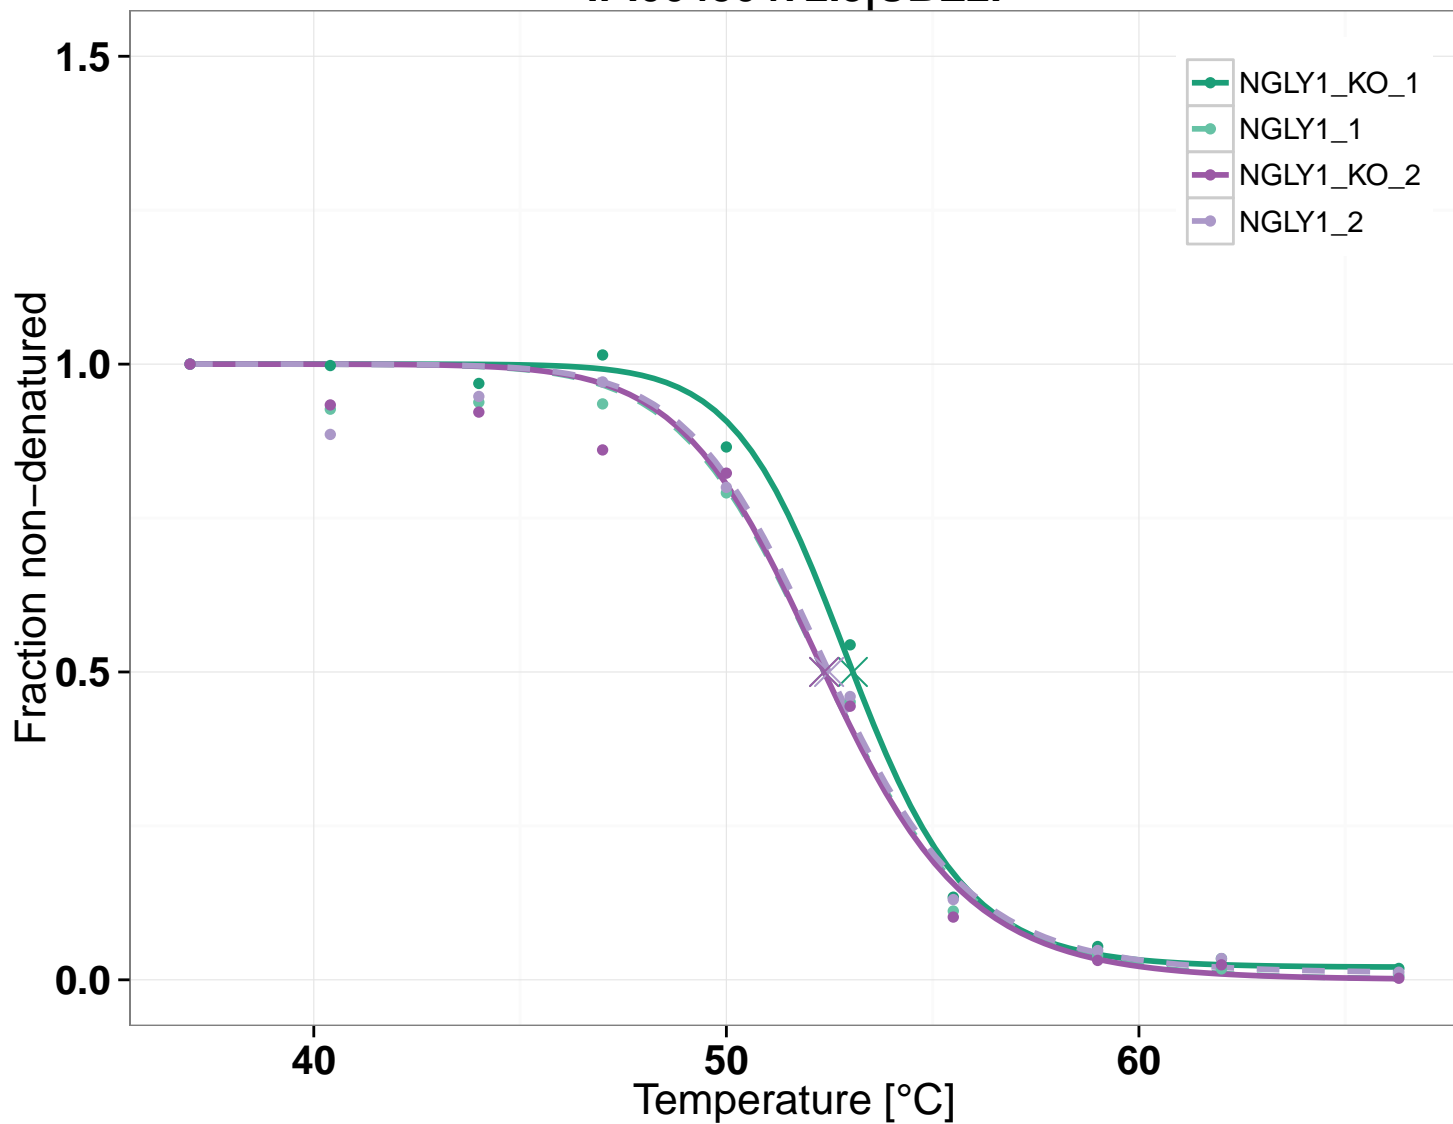

|            | meltPoint | slope | plateau | R2   |
|------------|-----------|-------|---------|------|
| NGLY1_KO_1 | 53.06     | -0.17 | 0.02    | 1    |
| NGLY1_1    | 52.37     | -0.14 | 0       | 0.99 |
| NGLY1_KO_2 | 52.37     | -0.14 | 0       | 0.98 |
| NGLY1_2    | 52.49     | -0.14 | 0.01    | 0.99 |

Supplement: Supplementary file 7516 [file 1]

# IPI00550335.4|RSAD1

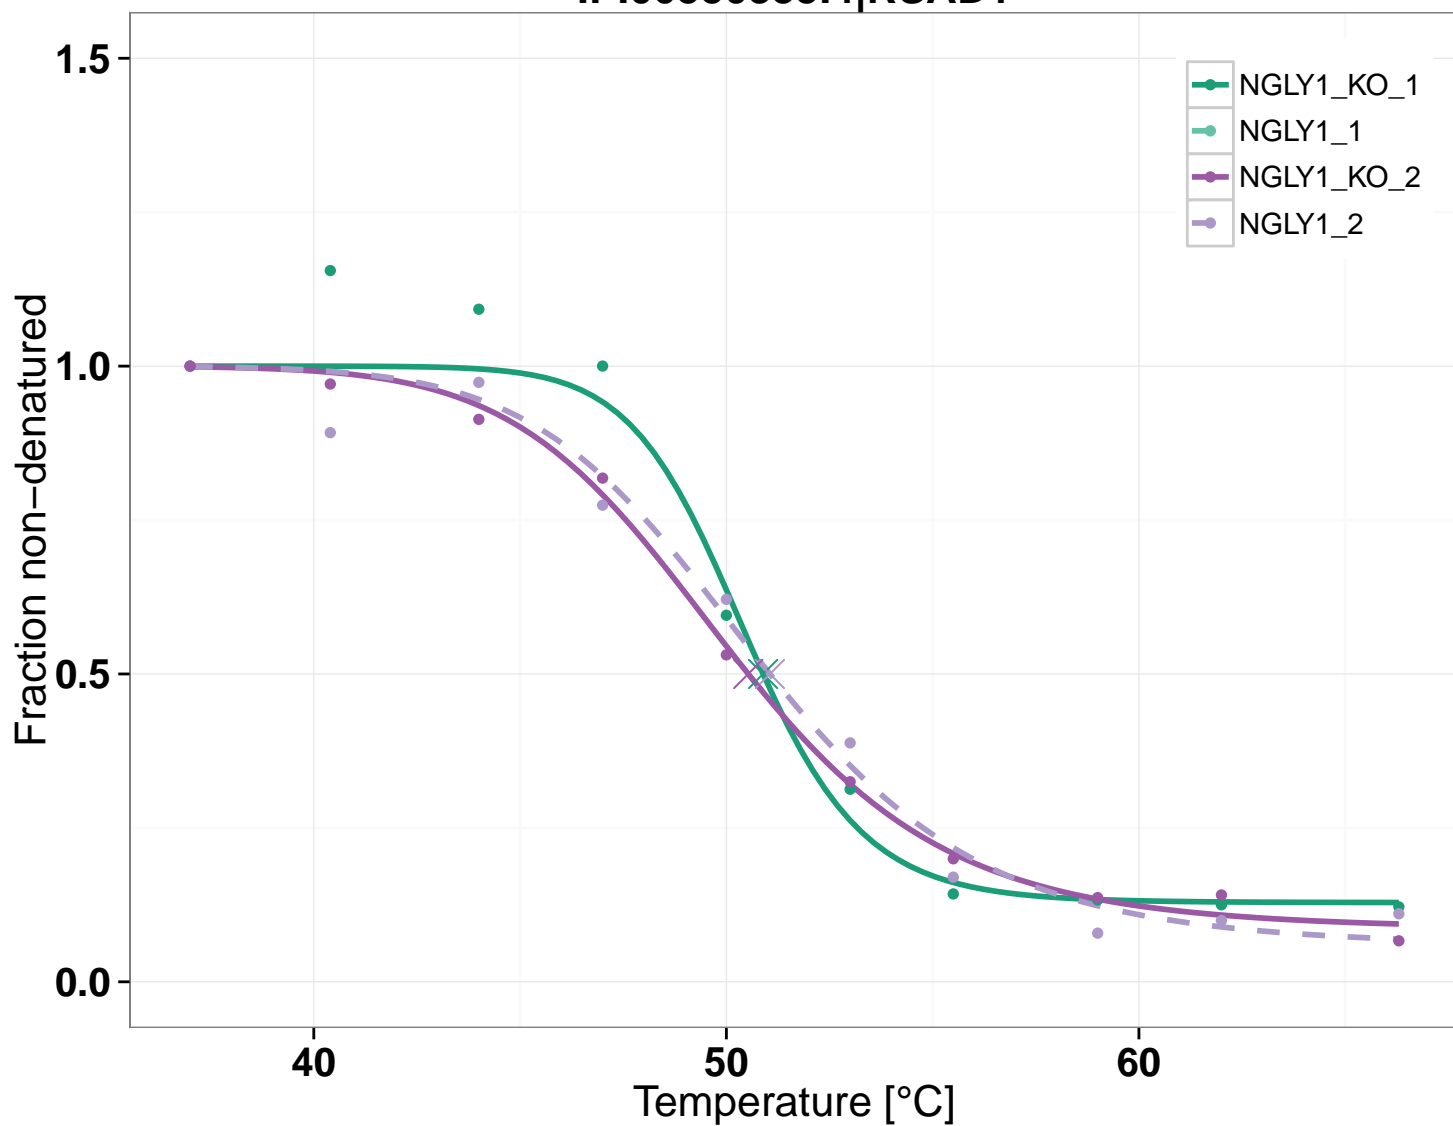

|            | meltPoint | slope  | plateau | R2   |
|------------|-----------|--------|---------|------|
| NGLY1_KO_1 | 50.89     | -0.15  | 0.13    | 0.98 |
| NGLY1_1    | -         | -      | -       | -    |
| NGLY1_KO_2 | 50.53     | -0.087 | 0.09    | 1    |
| NGLY1_2    | 51.06     | -0.086 | 0.06    | 0.98 |

Supplement: Supplementary file 7517 [file 1]

IPI00012440.7|FUCA2

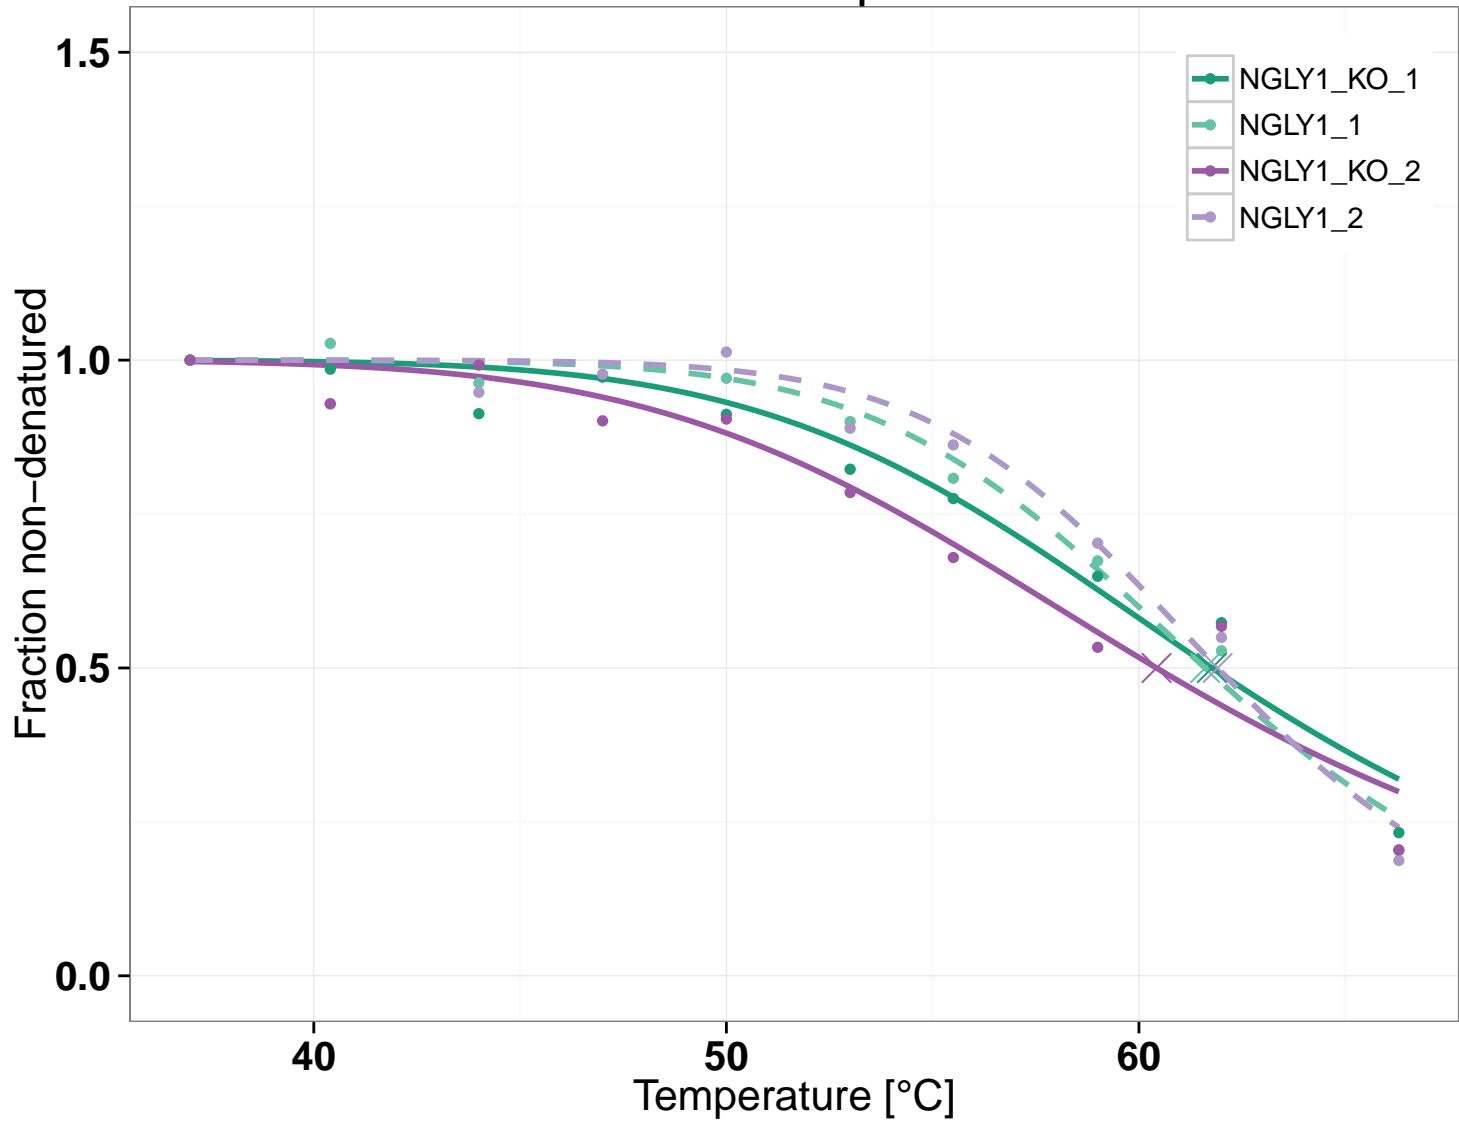

|            | meltPoint | slope  | plateau | R2   |
|------------|-----------|--------|---------|------|
| NGLY1_KO_1 | 61.77     | -0.046 | 0       | 0.96 |
| NGLY1_1    | 61.6      | -0.062 | 0       | 0.99 |
| NGLY1_KO_2 | 60.43     | -0.041 | 0       | 0.94 |
| NGLY1_2    | 61.91     | -0.071 | 0       | 0.97 |

Supplement: Supplementary file 7518 [file 1]

IPI00888378.1|GATSL2

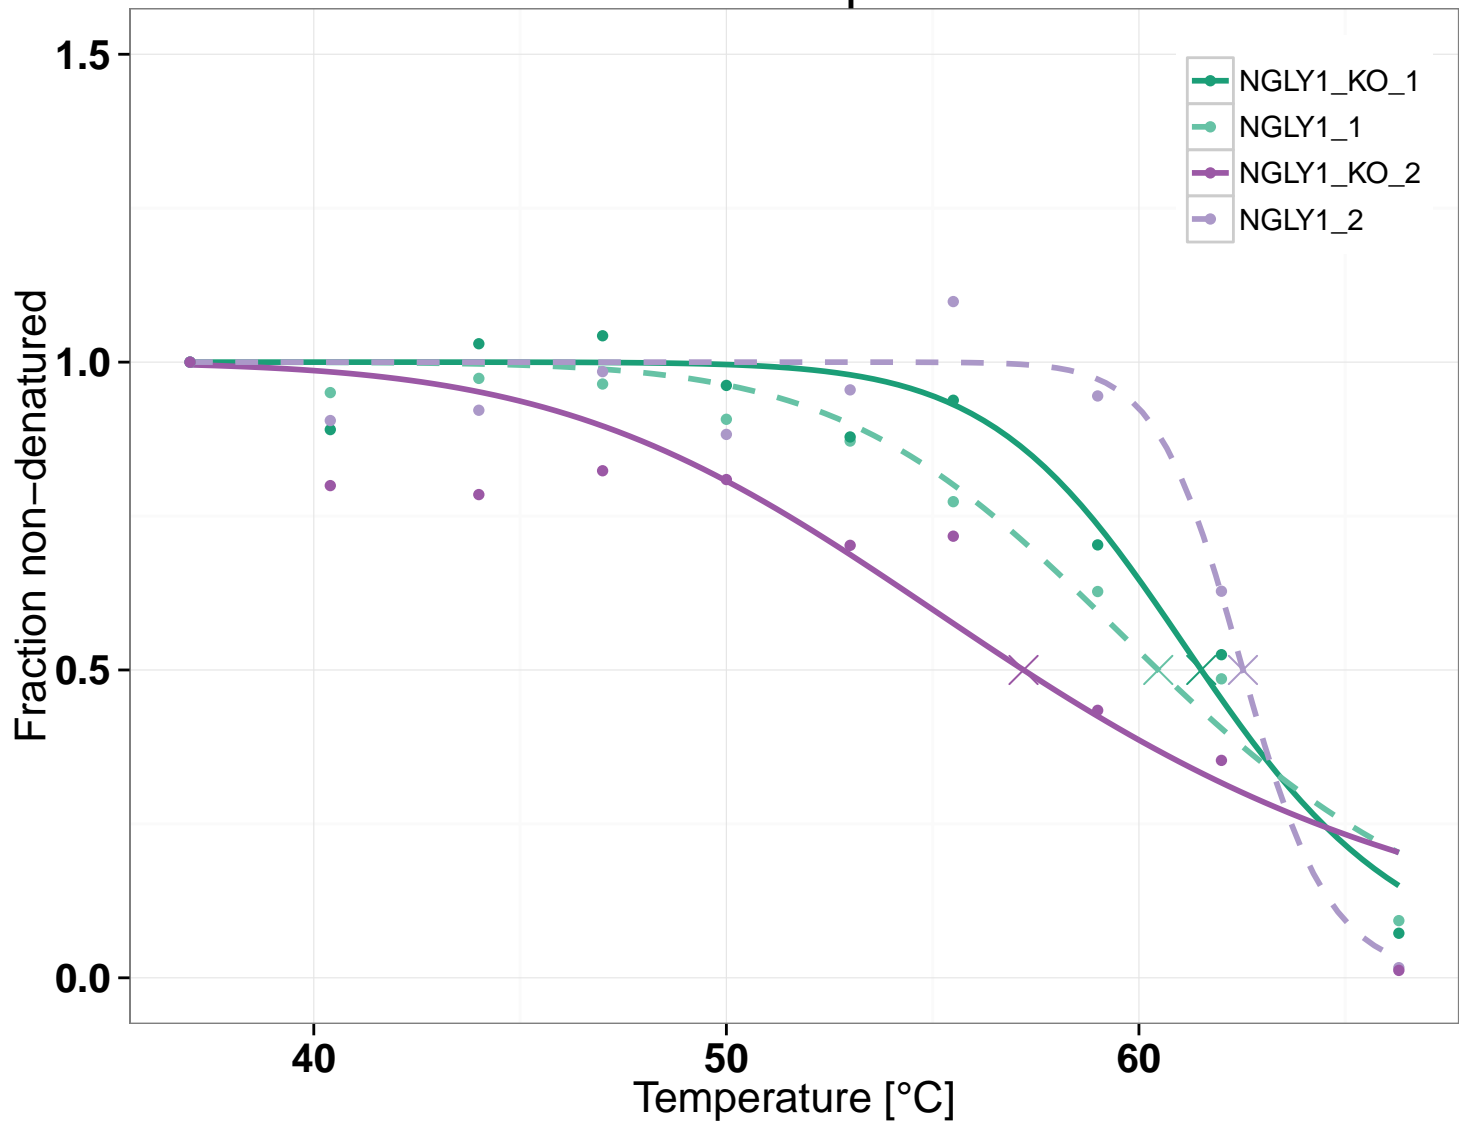

|            | meltPoint | slope  | plateau | R2   |
|------------|-----------|--------|---------|------|
| NGLY1_KO_1 | 61.51     | -0.098 | 0       | 0.95 |
| NGLY1_1    | 60.47     | -0.065 | 0       | 0.96 |
| NGLY1_KO_2 | 57.2      | -0.045 | 0       | 0.84 |
| NGLY1_2    | 62.52     | -0.24  | 0       | 0.95 |

Supplement: Supplementary file 7519 [file 1]

# IPI00012891.1|PHKG2

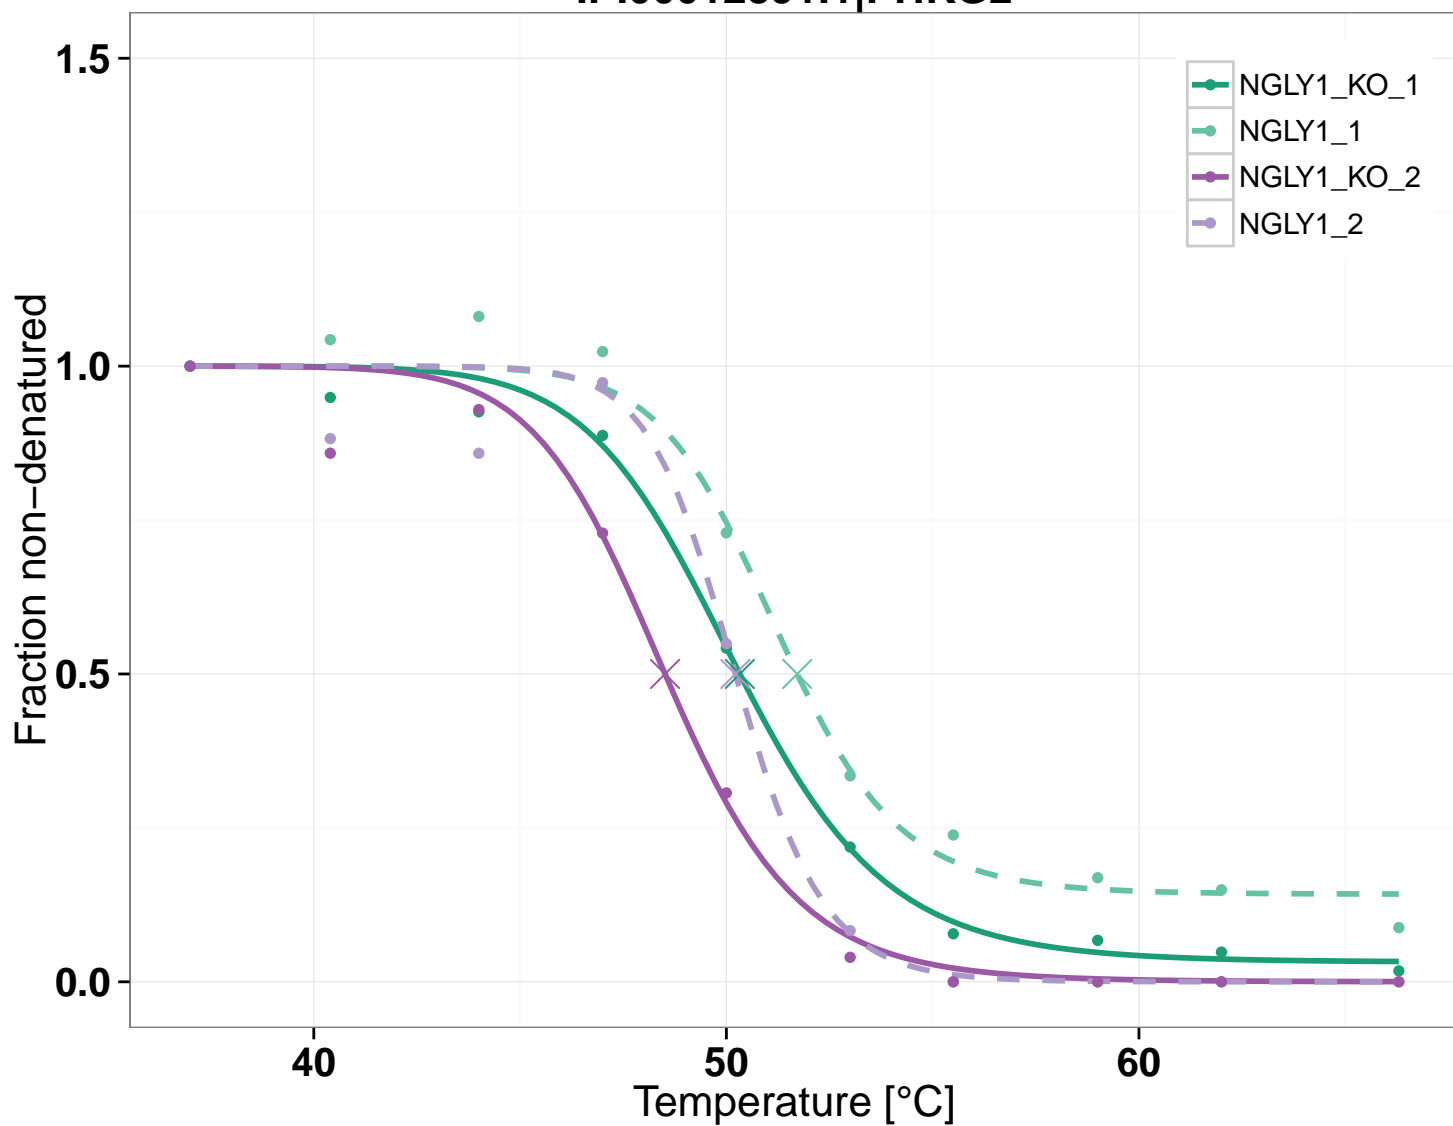

|            | meltPoint | slope | plateau | R2   |
|------------|-----------|-------|---------|------|
| NGLY1_KO_1 | 50.33     | -0.13 | 0.03    | 1    |
| NGLY1_1    | 51.72     | -0.15 | 0.14    | 0.99 |
| NGLY1_KO_2 | 48.51     | -0.16 | 0       | 0.99 |
| NGLY1_2    | 50.22     | -0.23 | 0       | 0.98 |

Supplement: Supplementary file 7520 [file 1]

# IPI00026530.4|LMAN1

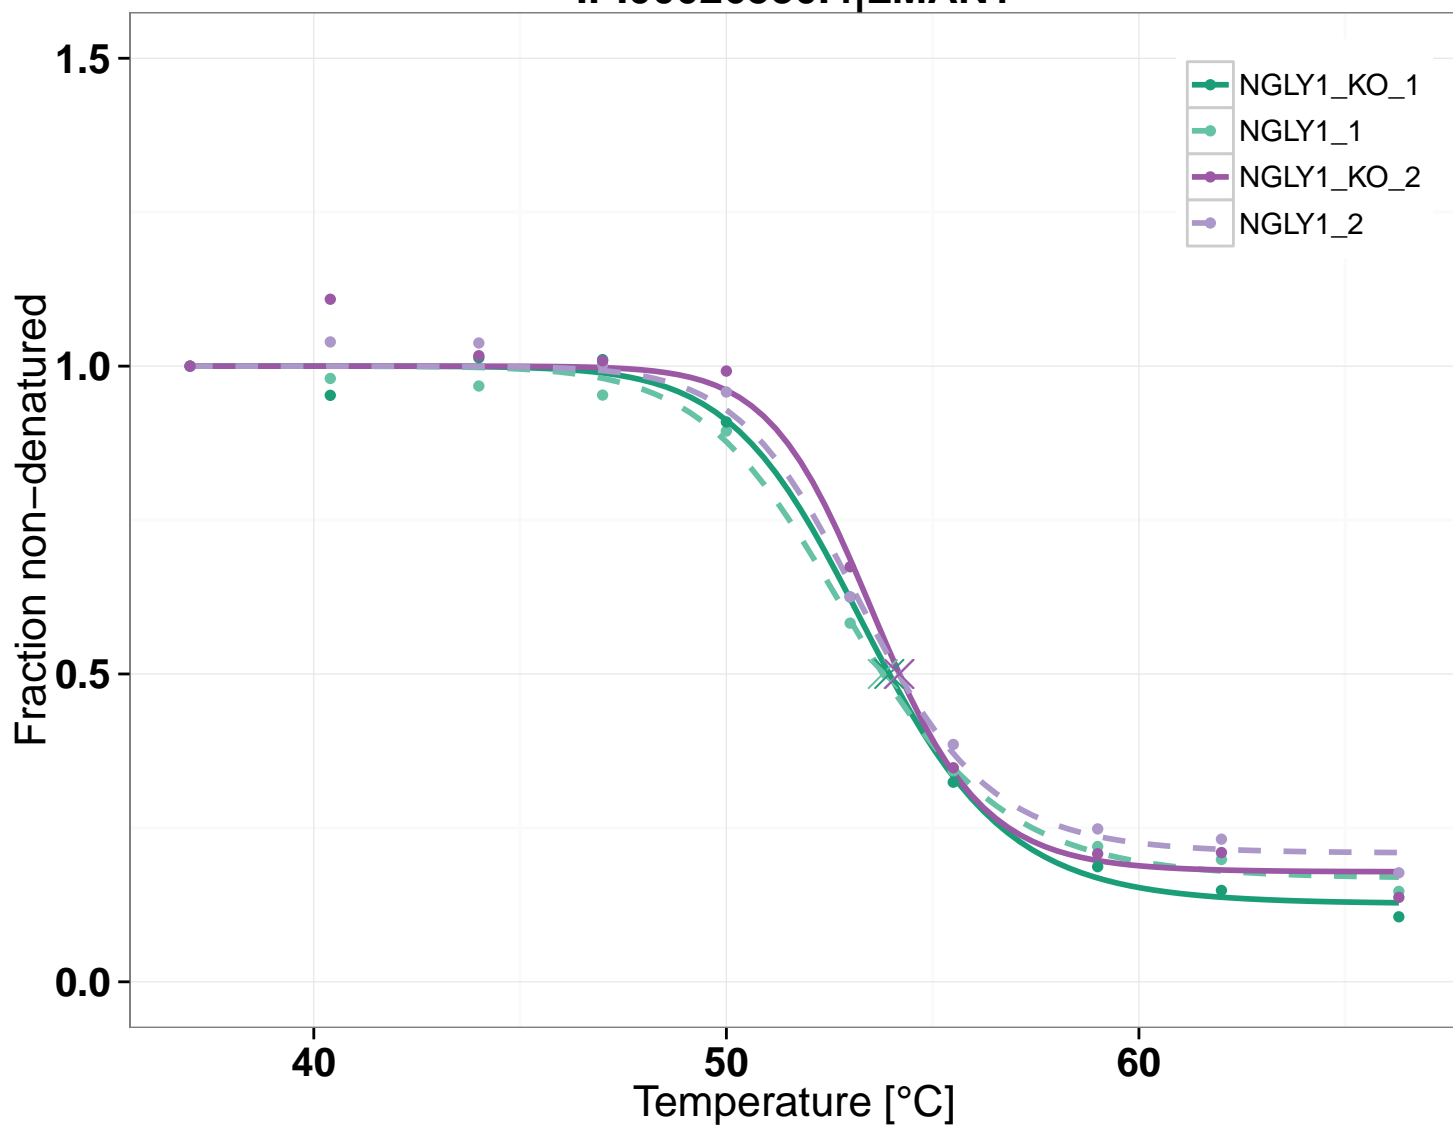

|            | meltPoint | slope | plateau | R2   |
|------------|-----------|-------|---------|------|
| NGLY1_KO_1 | 53.95     | -0.13 | 0.13    | 1    |
| NGLY1_1    | 53.79     | -0.11 | 0.17    | 1    |
| NGLY1_KO_2 | 54.2      | -0.16 | 0.18    | 0.99 |
| NGLY1_2    | 54.17     | -0.13 | 0.21    | 1    |

Supplement: Supplementary file 7521 [file 1]

IPI00306048.5|ATAD3B

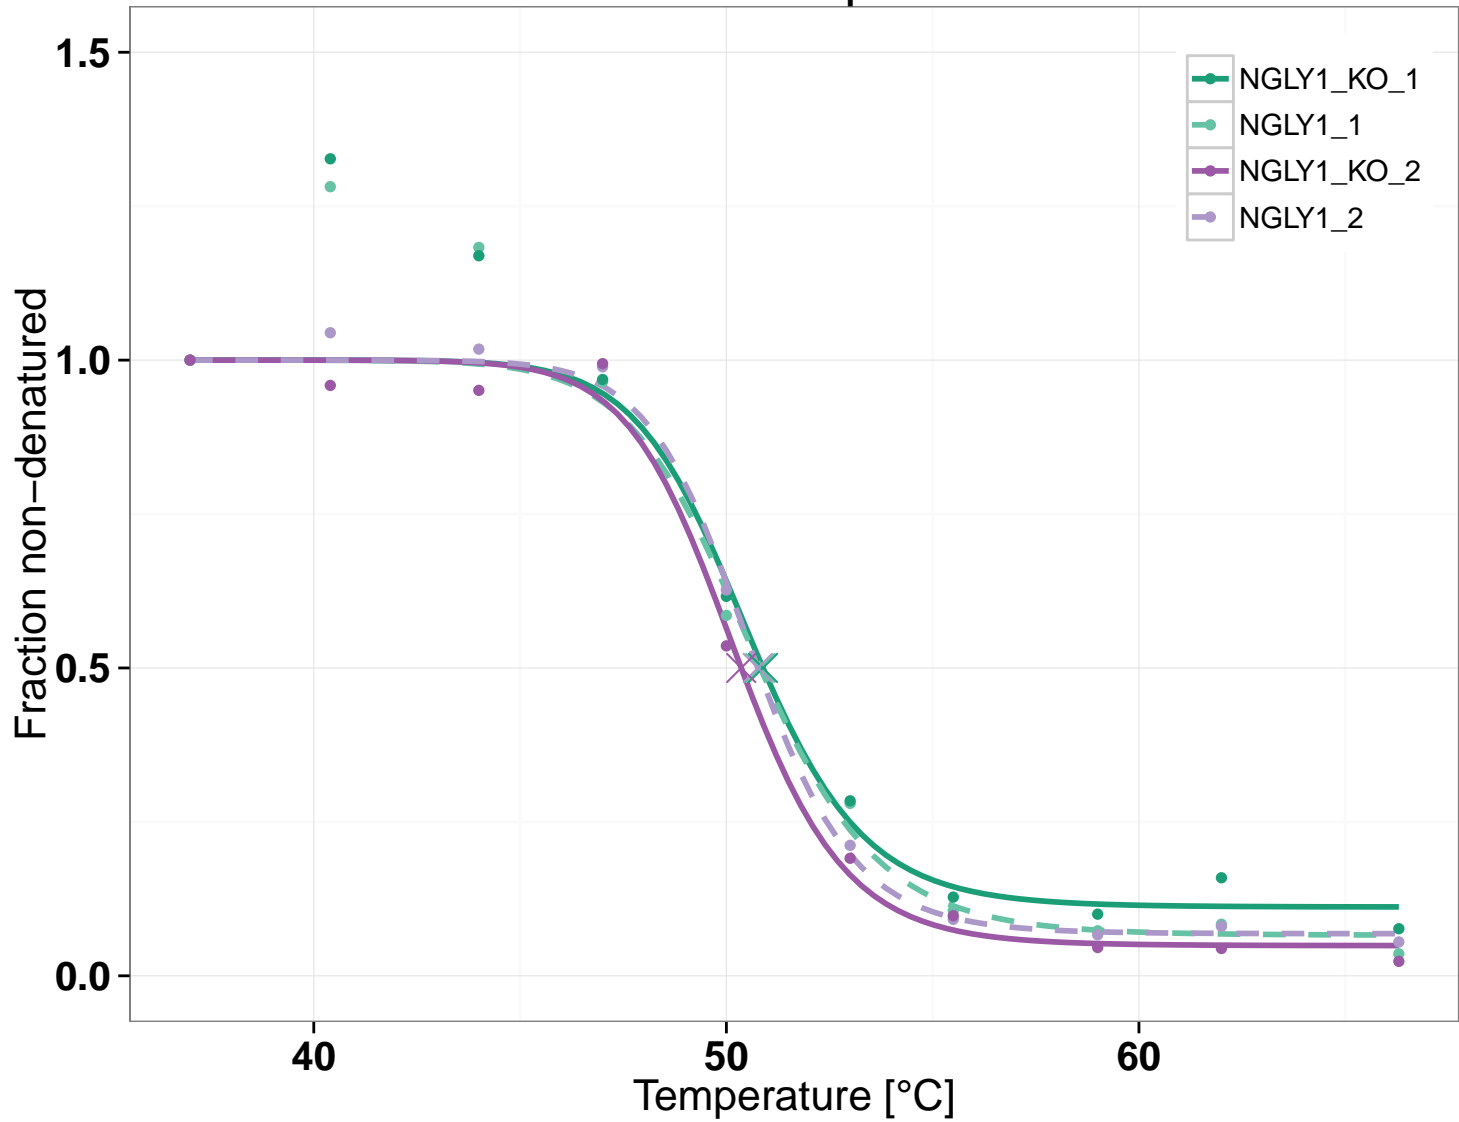

|            | meltPoint | slope | plateau | R2   |
|------------|-----------|-------|---------|------|
| NGLY1_KO_1 | 50.89     | -0.16 | 0.11    | 0.93 |
| NGLY1_1    | 50.82     | -0.15 | 0.07    | 0.95 |
| NGLY1_KO_2 | 50.36     | -0.18 | 0.05    | 0.99 |
| NGLY1_2    | 50.76     | -0.19 | 0.07    | 1    |

Supplement: Supplementary file 7522 [file 1]

# IPI00294955.3|LSM4

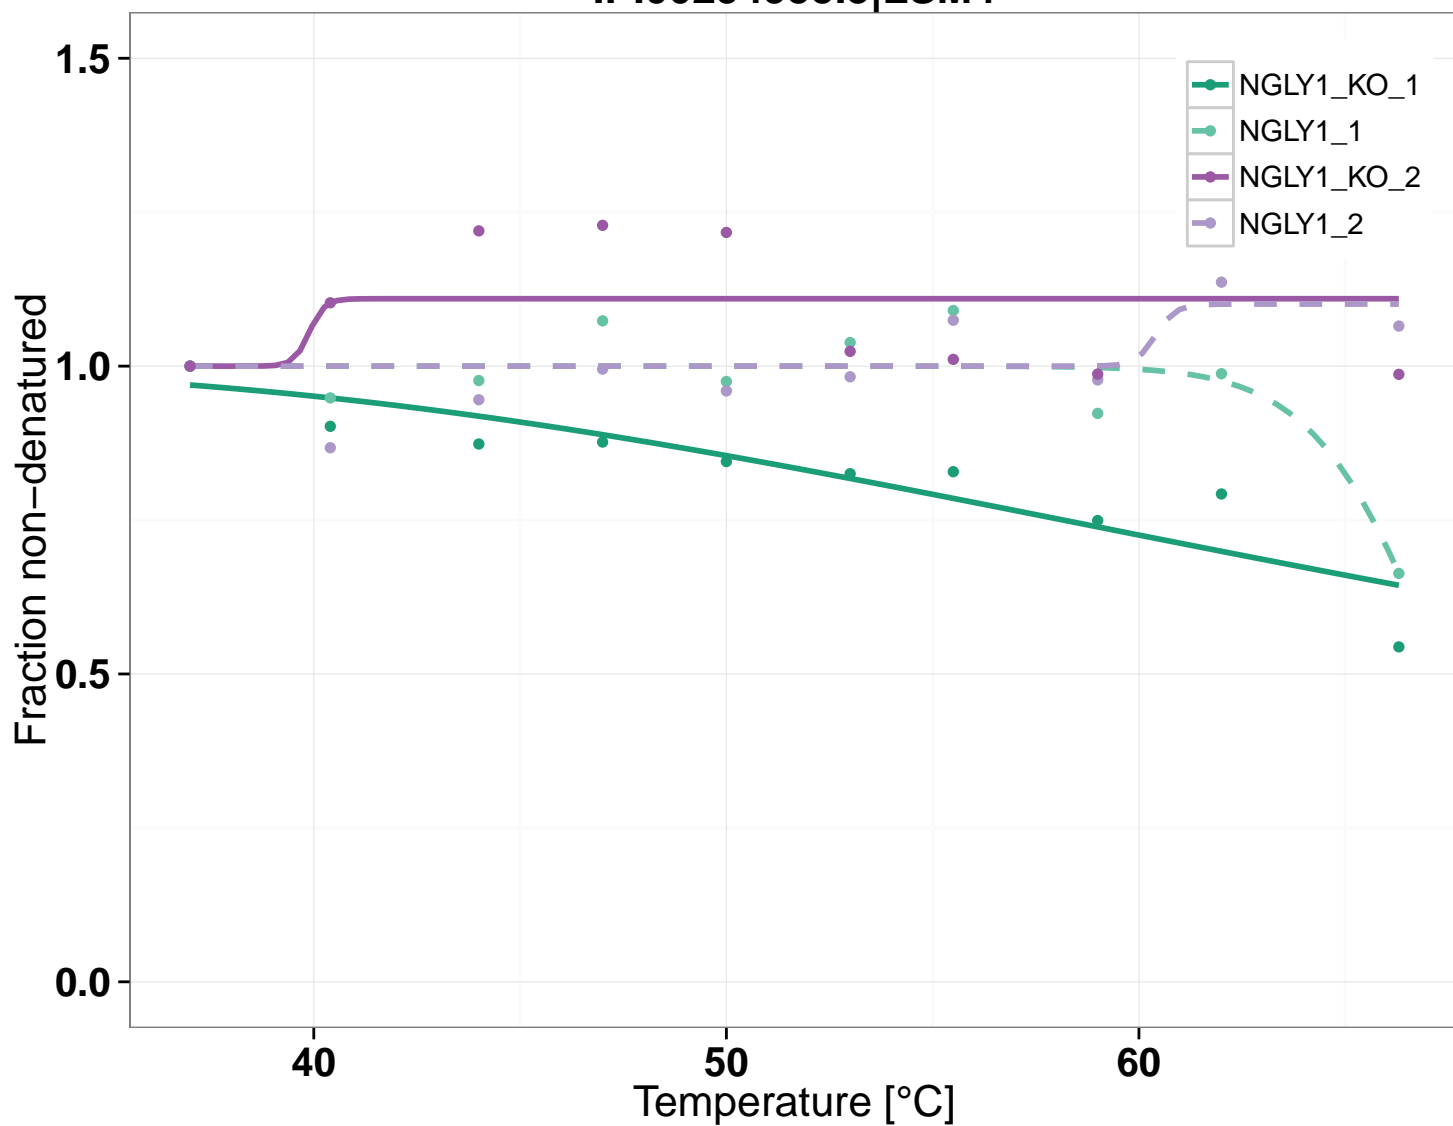

|            | meltPoint | slope  | plateau | R2   |
|------------|-----------|--------|---------|------|
| NGLY1_KO_1 | -         | -0.013 | 0       | 0.8  |
| NGLY1_1    | -         | -      | 0       | 0.81 |
| NGLY1_KO_2 | -         | 0.15   | 1.11    | 0.1  |
| NGLY1_2    | -         | 0.1    | 1.1     | 0.39 |

Supplement: Supplementary file 7523 [file 1]

IPI00394657.1|KAT5

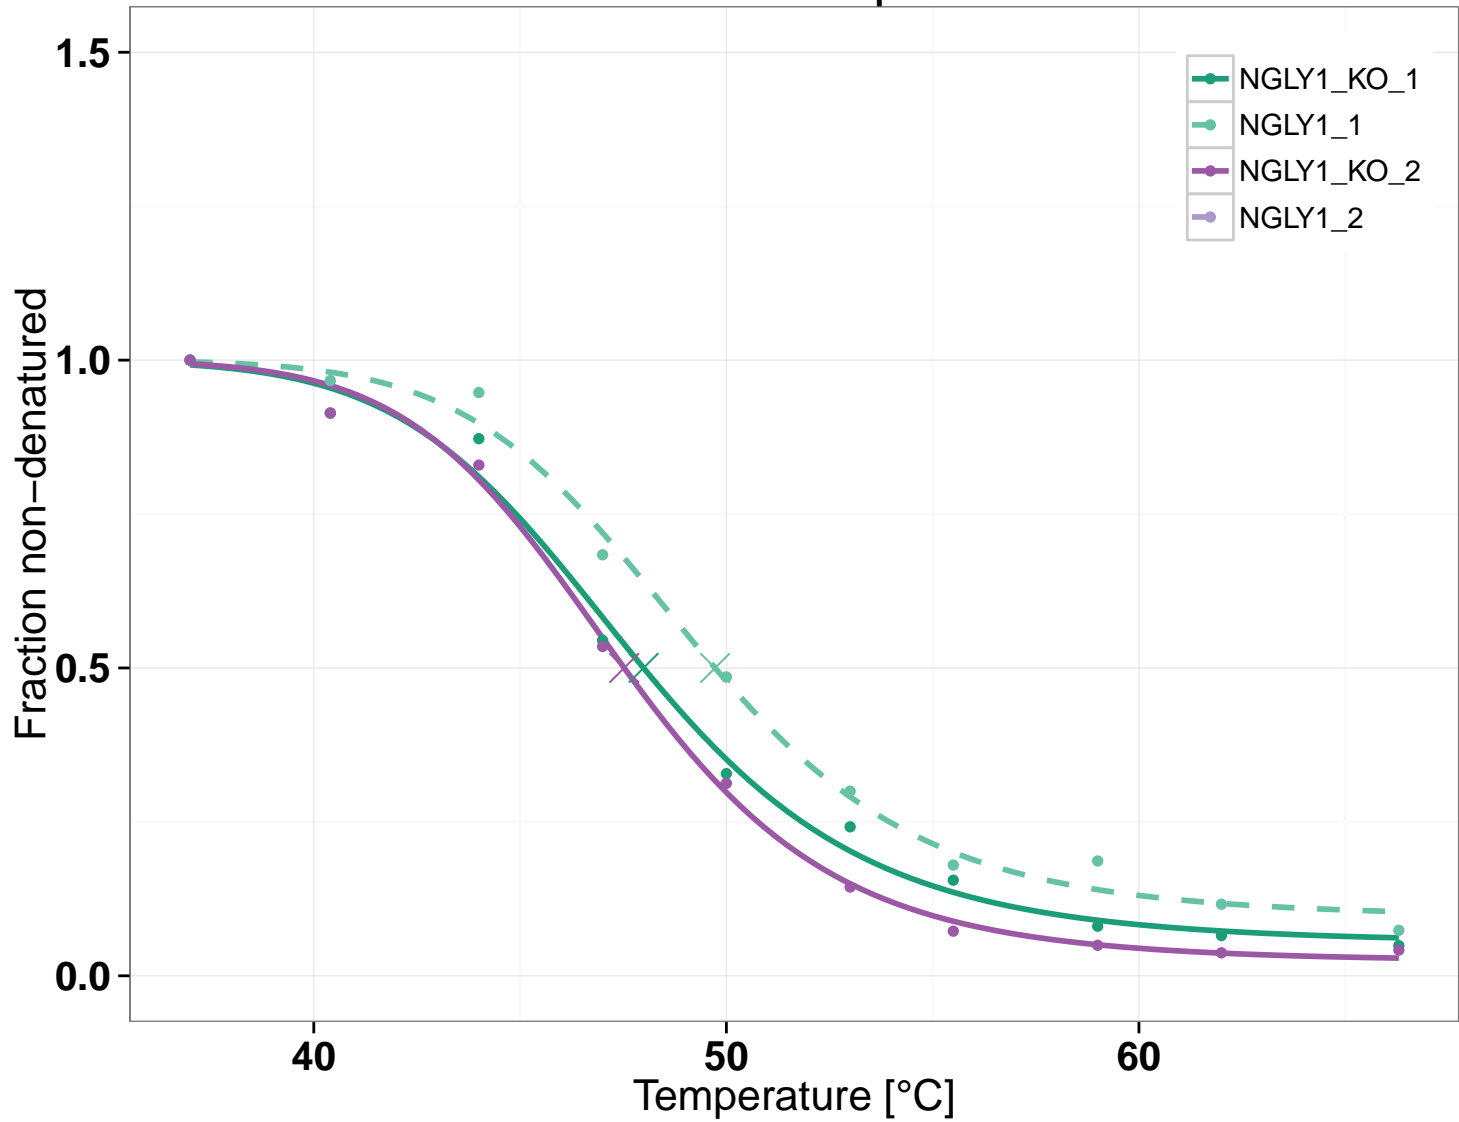

|            | meltPoint | slope  | plateau | R2   |
|------------|-----------|--------|---------|------|
| NGLY1_KO_1 | 47.99     | -0.084 | 0.05    | 0.99 |
| NGLY1_1    | 49.73     | -0.082 | 0.09    | 0.99 |
| NGLY1_KO_2 | 47.52     | -0.094 | 0.02    | 1    |
| NGLY1_2    | -         | -      | -       | -    |

Supplement: Supplementary file 7524 [file 1]

IPI00020406.3|MGAT3

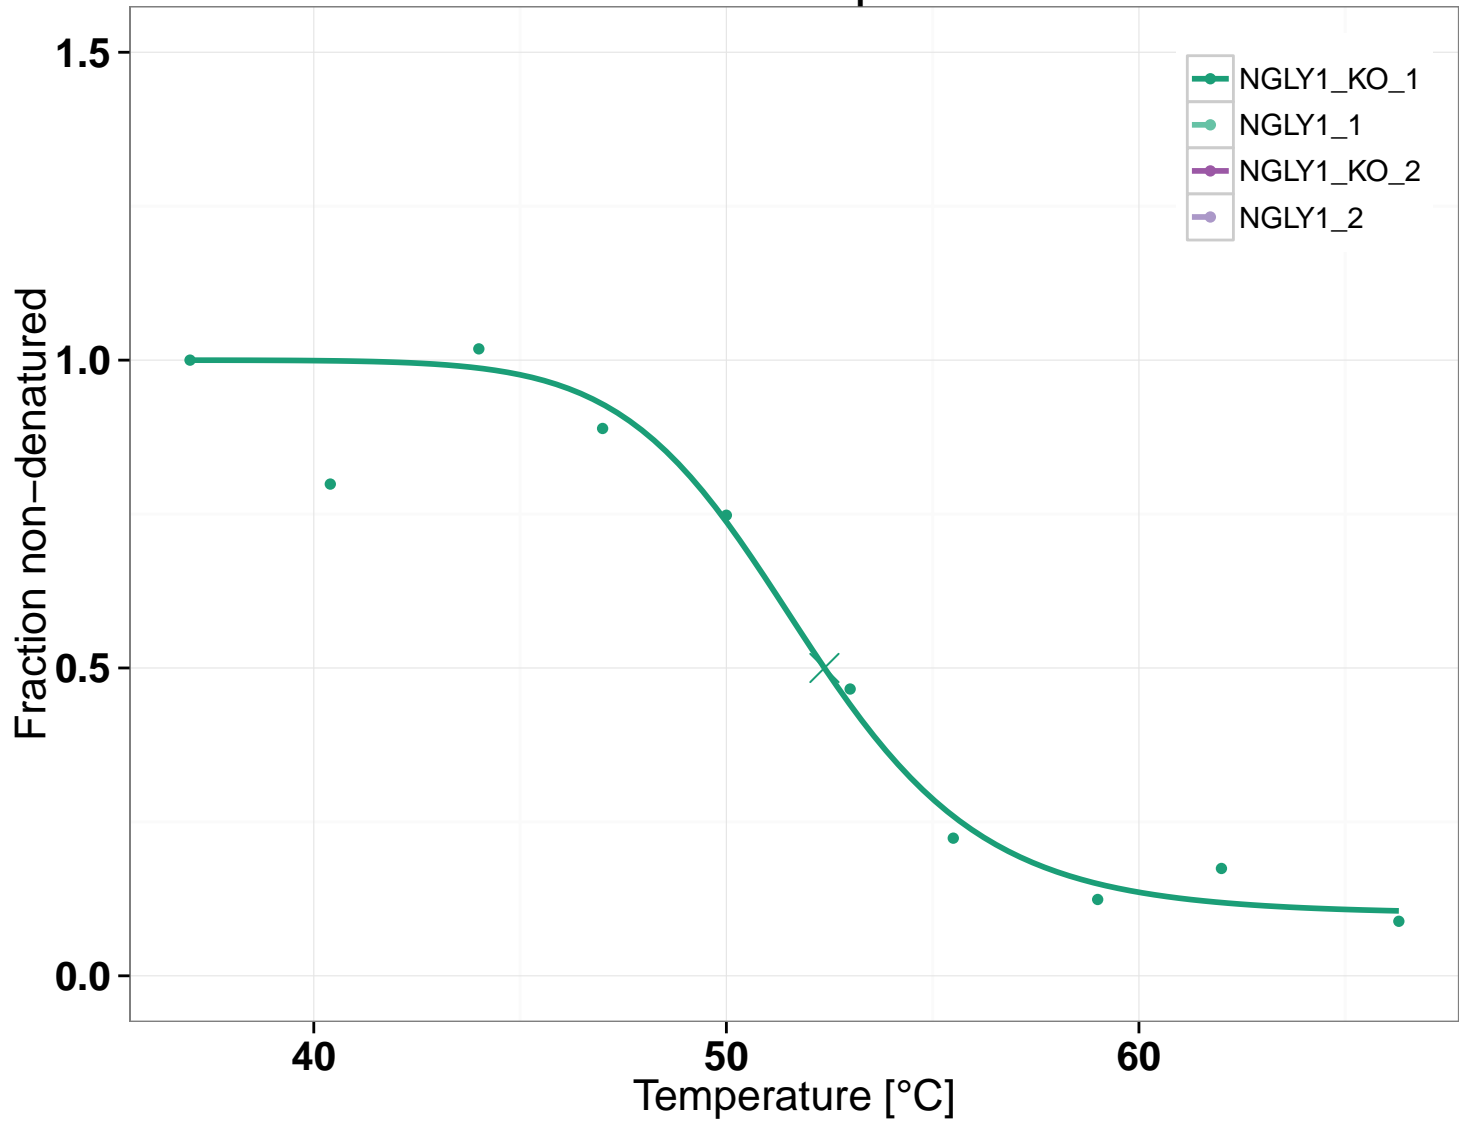

|            | meltPoint | slope | plateau | R2   |
|------------|-----------|-------|---------|------|
| NGLY1_KO_1 | 52.38     | -0.1  | 0.1     | 0.96 |
| NGLY1_1    | -         | -     | -       | -    |
| NGLY1_KO_2 | -         | -     | -       | -    |
| NGLY1_2    | -         | -     | -       | -    |

Supplement: Supplementary file 7525 [file 1]

# IPI00465248.5|ENO1

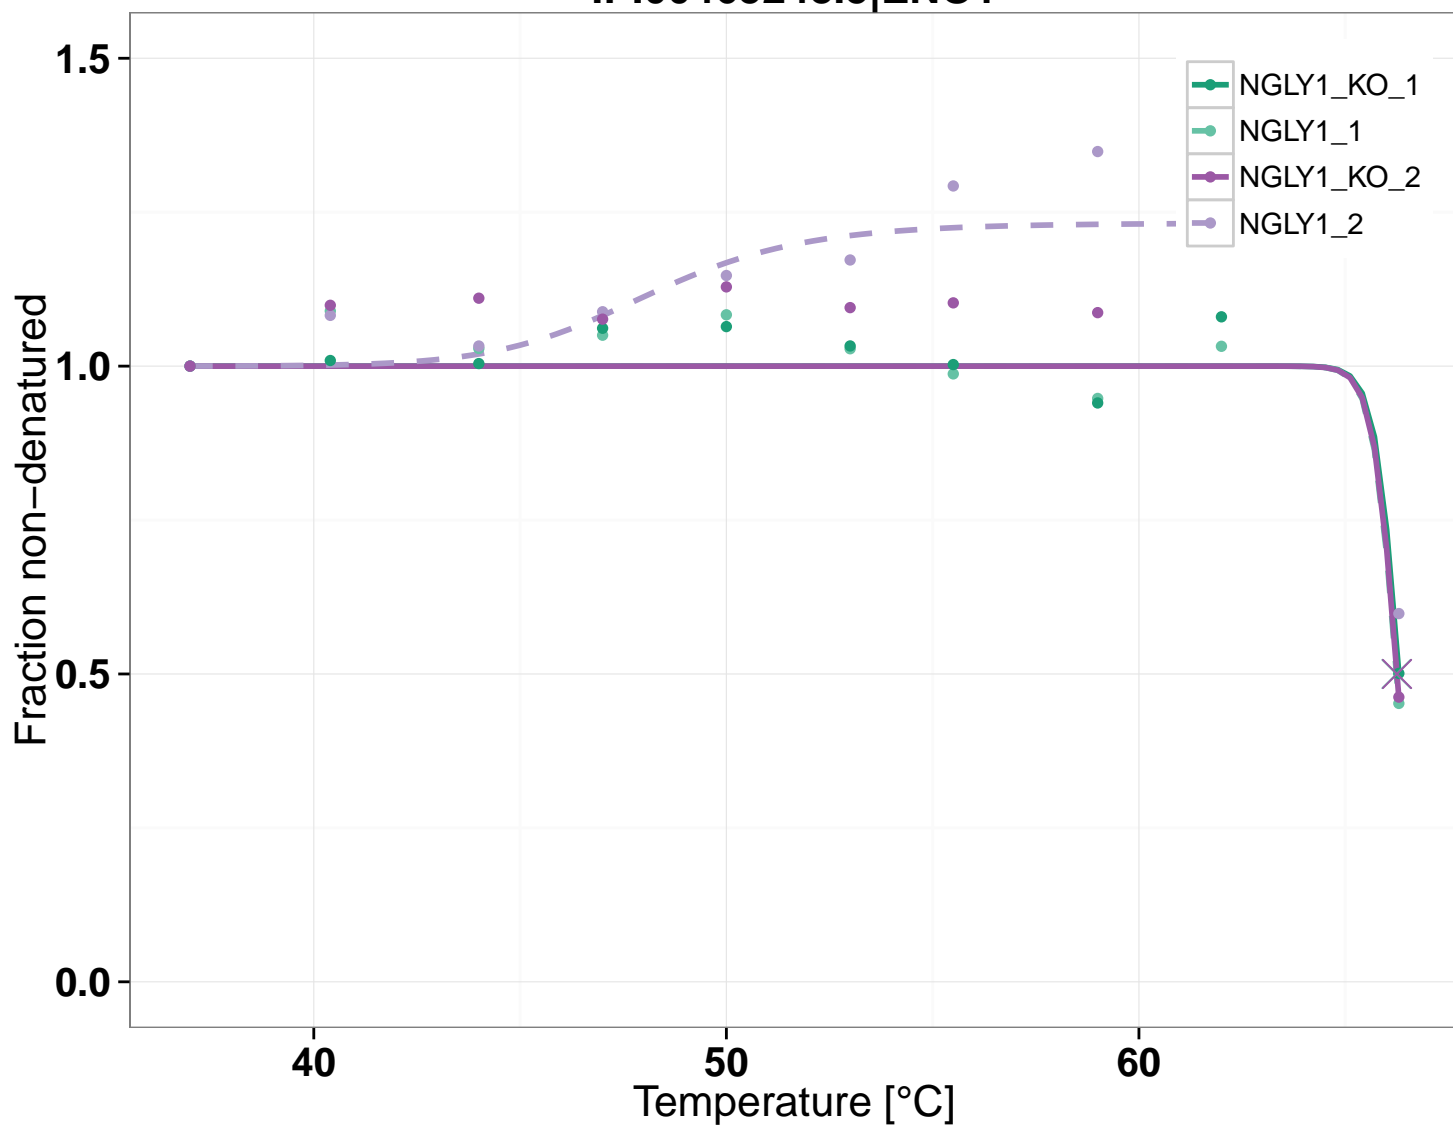

|            | meltPoint | slope | plateau | R2   |
|------------|-----------|-------|---------|------|
| NGLY1_KO_1 | –         | –0.85 | 0       | 0.93 |
| NGLY1_1    | 66.24     | –0.85 | 0       | 0.93 |
| NGLY1_KO_2 | 66.26     | –0.85 | 0       | 0.45 |
| NGLY1_2    | –         | 0.031 | 1.23    | 0.09 |

Supplement: Supplementary file 7526 [file 1]

IPI00003320.1|C11ORF10

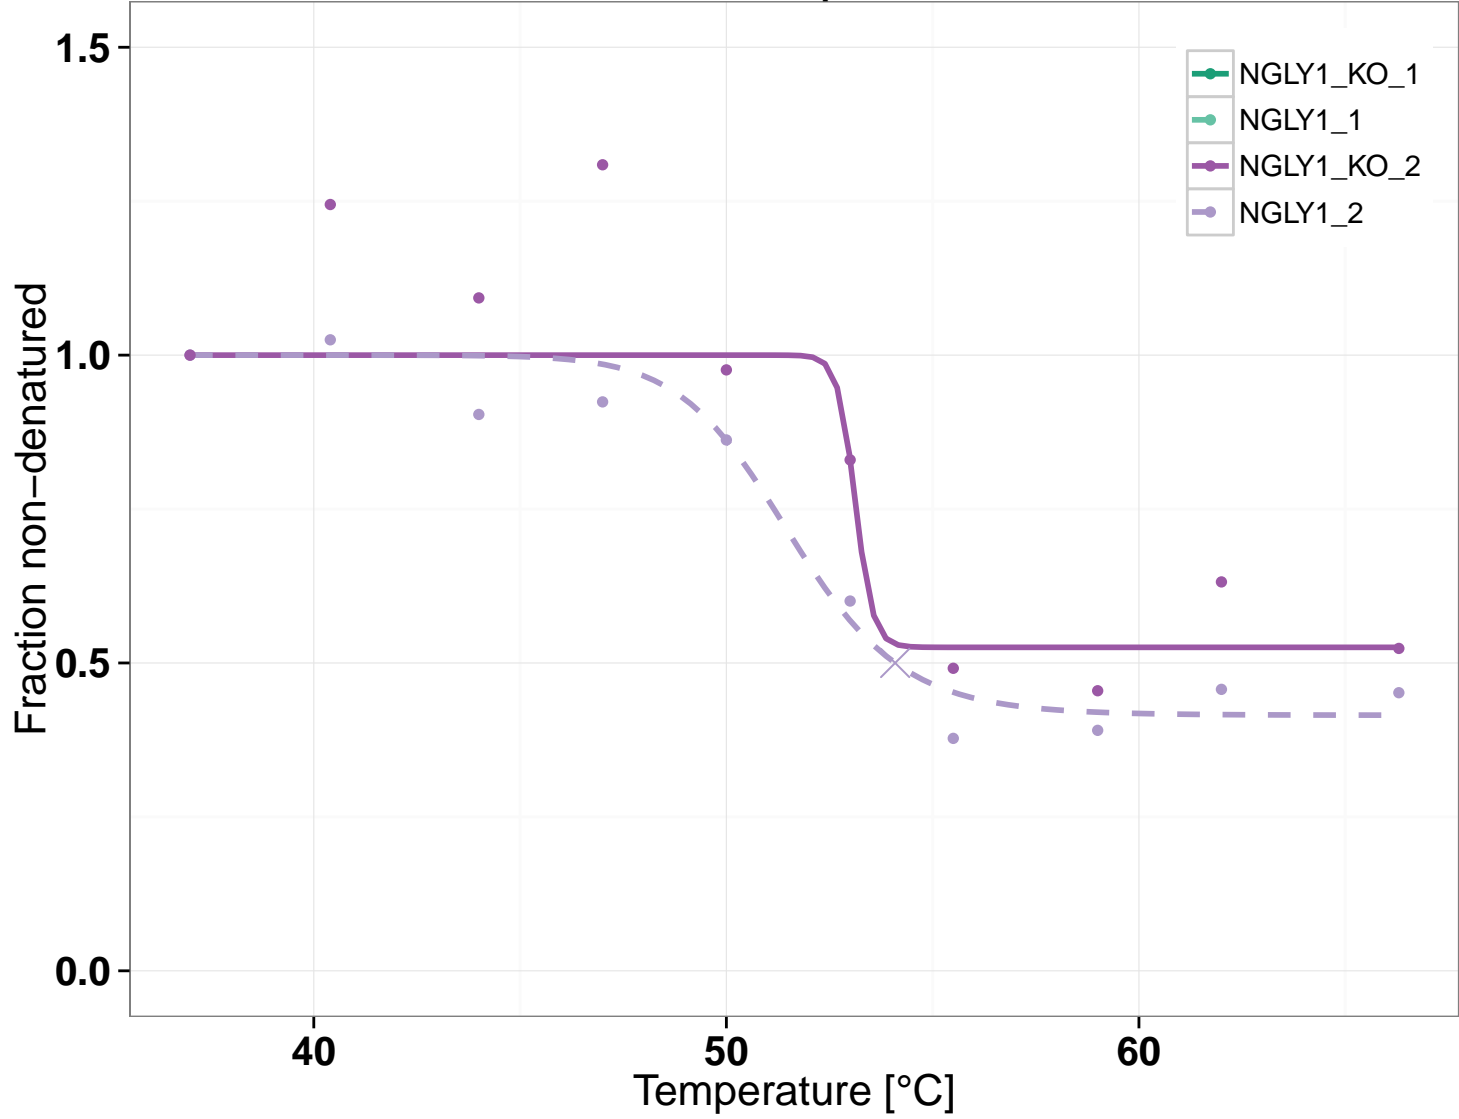

|            | meltPoint | slope | plateau | R2   |
|------------|-----------|-------|---------|------|
| NGLY1_KO_1 | -         | -     | -       | -    |
| NGLY1_1    | -         | -     | -       | -    |
| NGLY1_KO_2 | -         | -0.56 | 0.53    | 0.8  |
| NGLY1_2    | 54.09     | -0.11 | 0.42    | 0.96 |

Supplement: Supplementary file 7527 [file 1]

IPI00003269.1|ACTBL2

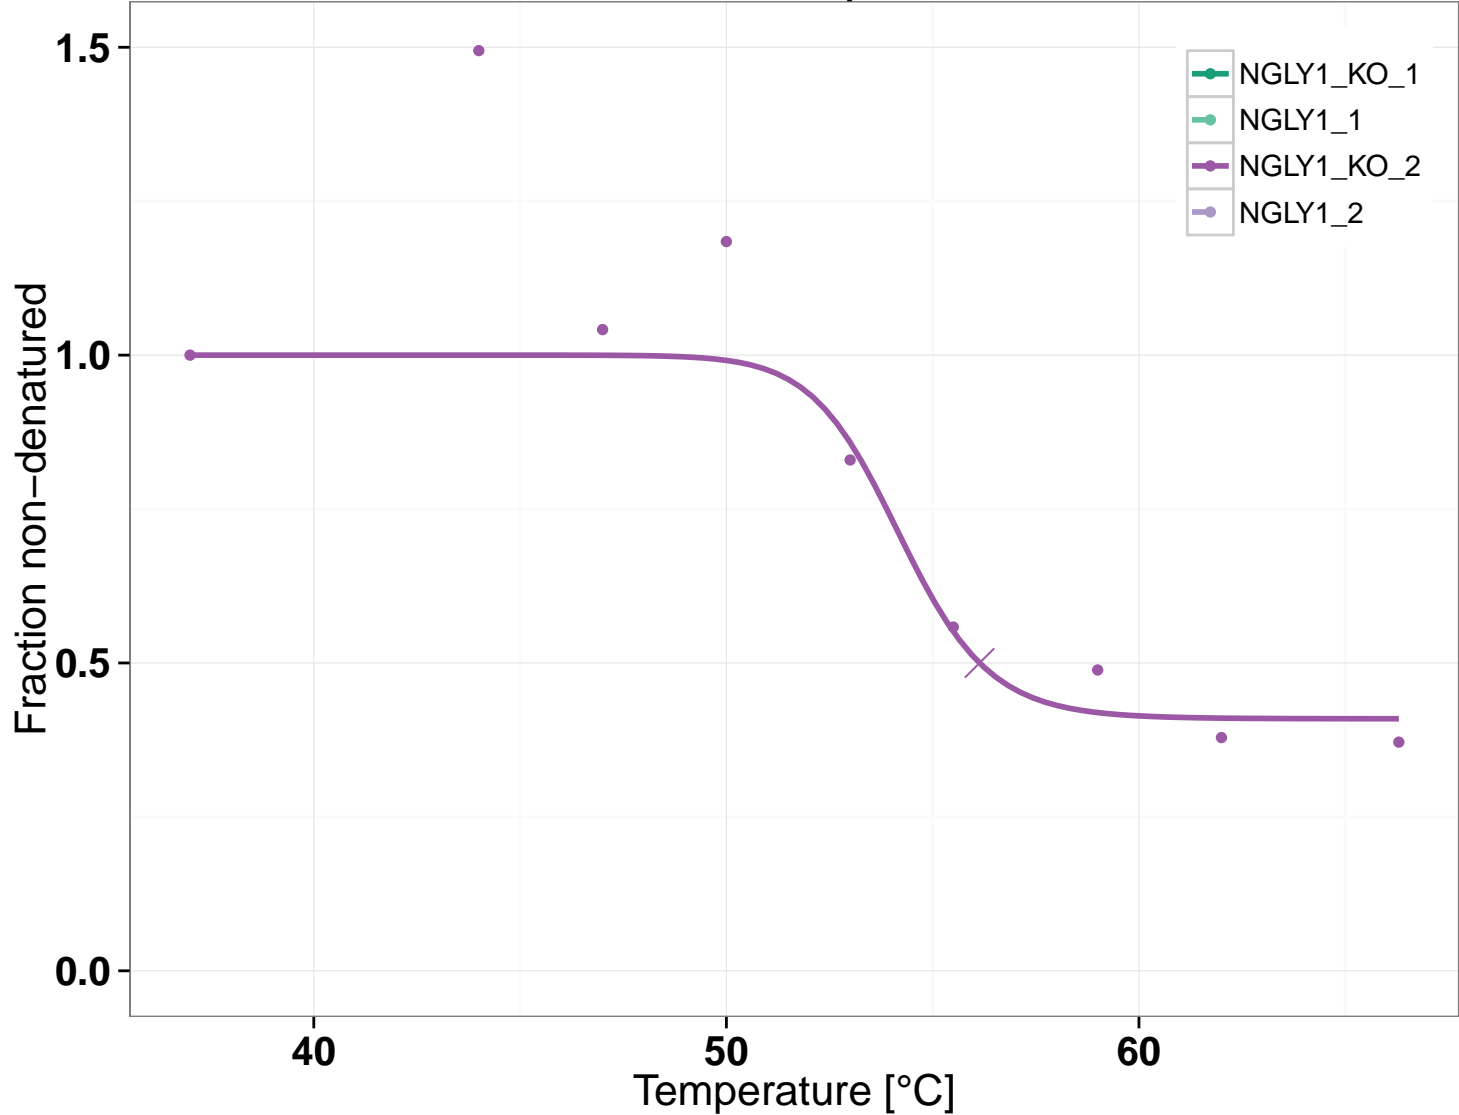

|            | meltPoint | slope | plateau | R2   |
|------------|-----------|-------|---------|------|
| NGLY1_KO_1 | —         | —     | —       | —    |
| NGLY1_1    | —         | —     | —       | —    |
| NGLY1_KO_2 | 56.14     | -0.14 | 0.41    | 0.63 |
| NGLY1_2    | —         | —     | —       | —    |

Supplement: Supplementary file 7528 [file 1]

IPI00006864.3|MRPL33

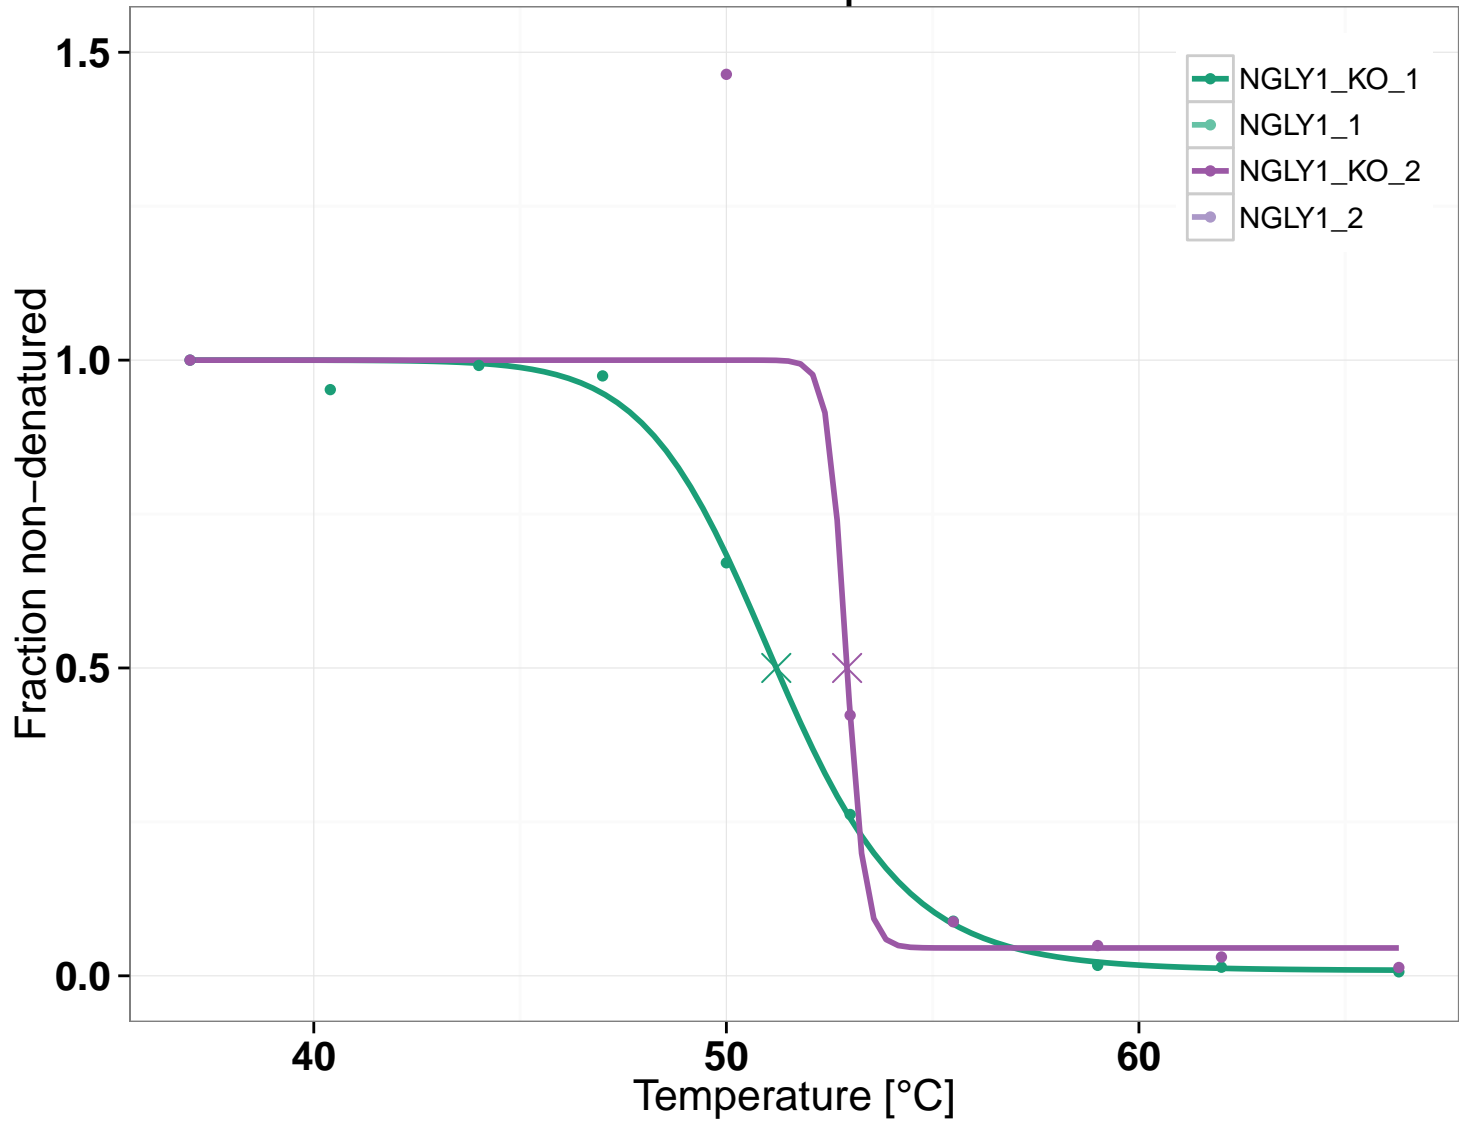

|            | meltPoint | slope | plateau | R2   |
|------------|-----------|-------|---------|------|
| NGLY1_KO_1 | 51.21     | -0.16 | 0.01    | 1    |
| NGLY1_1    | -         | -     | -       | -    |
| NGLY1_KO_2 | 52.93     | -1.1  | 0.05    | 0.41 |
| NGLY1_2    | -         | -     | -       | -    |

Supplement: Supplementary file 7529 [file 1]

IPI00296099.6|THBS1

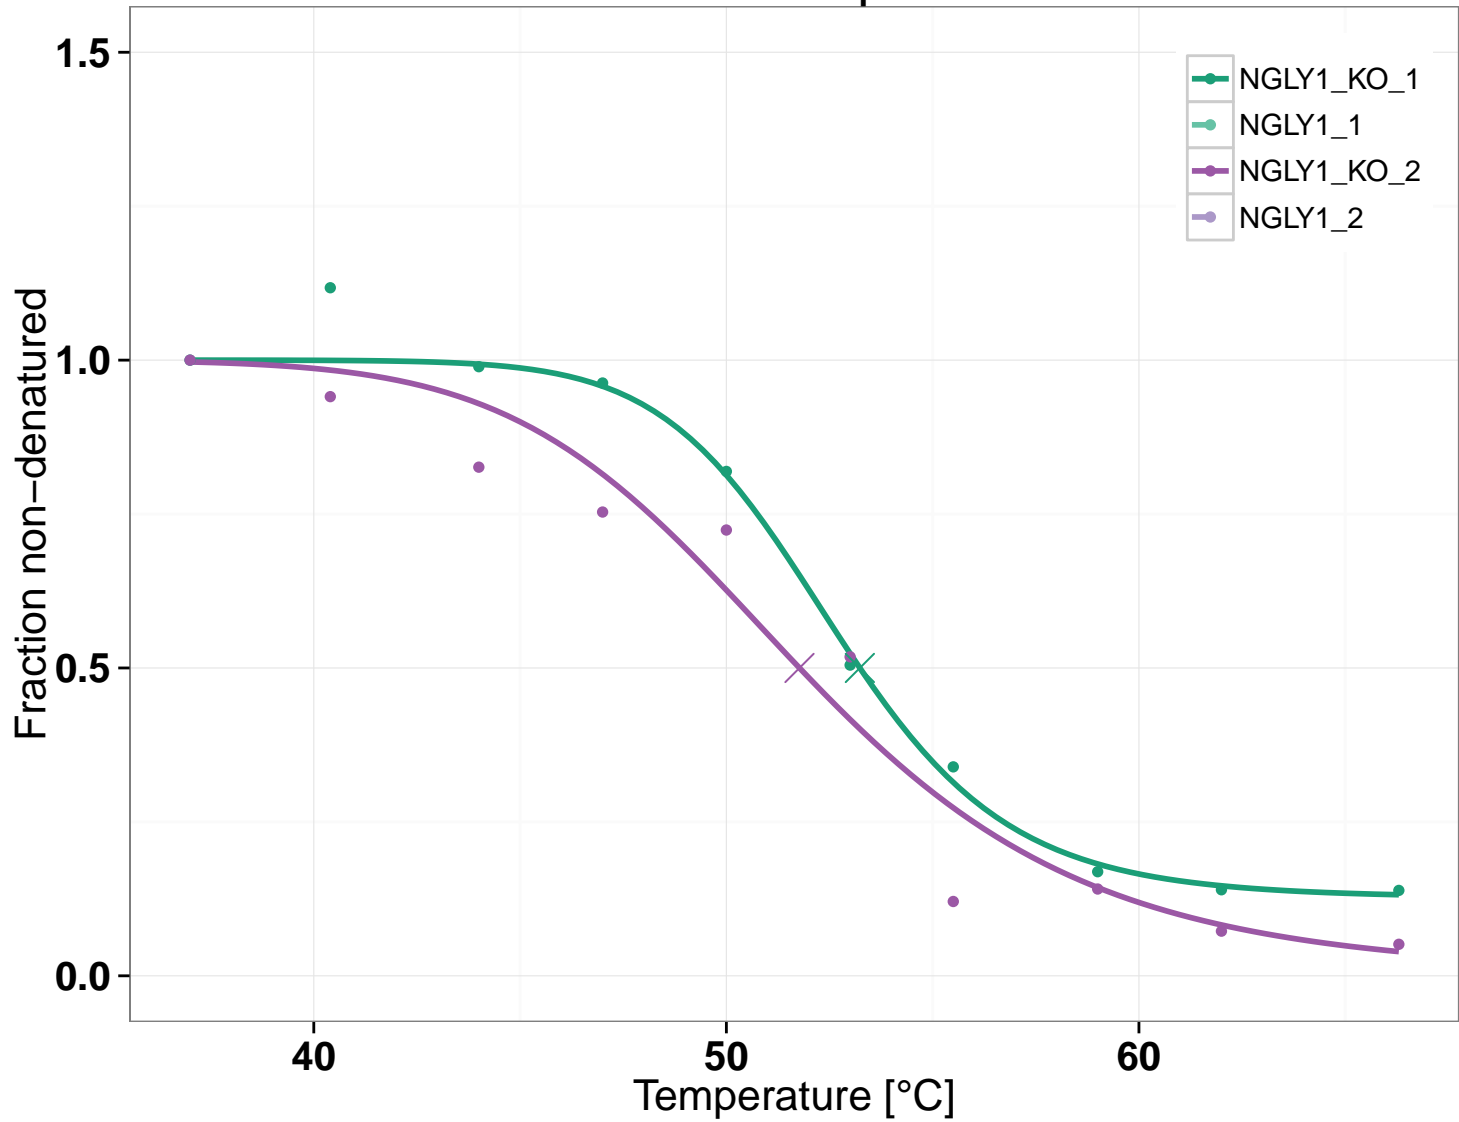

|            | meltPoint | slope  | plateau | R2   |
|------------|-----------|--------|---------|------|
| NGLY1_KO_1 | 53.24     | -0.1   | 0.13    | 0.99 |
| NGLY1_1    | -         | -      | -       | -    |
| NGLY1_KO_2 | 51.77     | -0.072 | 0       | 0.95 |
| NGLY1_2    | -         | -      | -       | -    |

Supplement: Supplementary file 7530 [file 1]

IPI00444452.3|MOV10

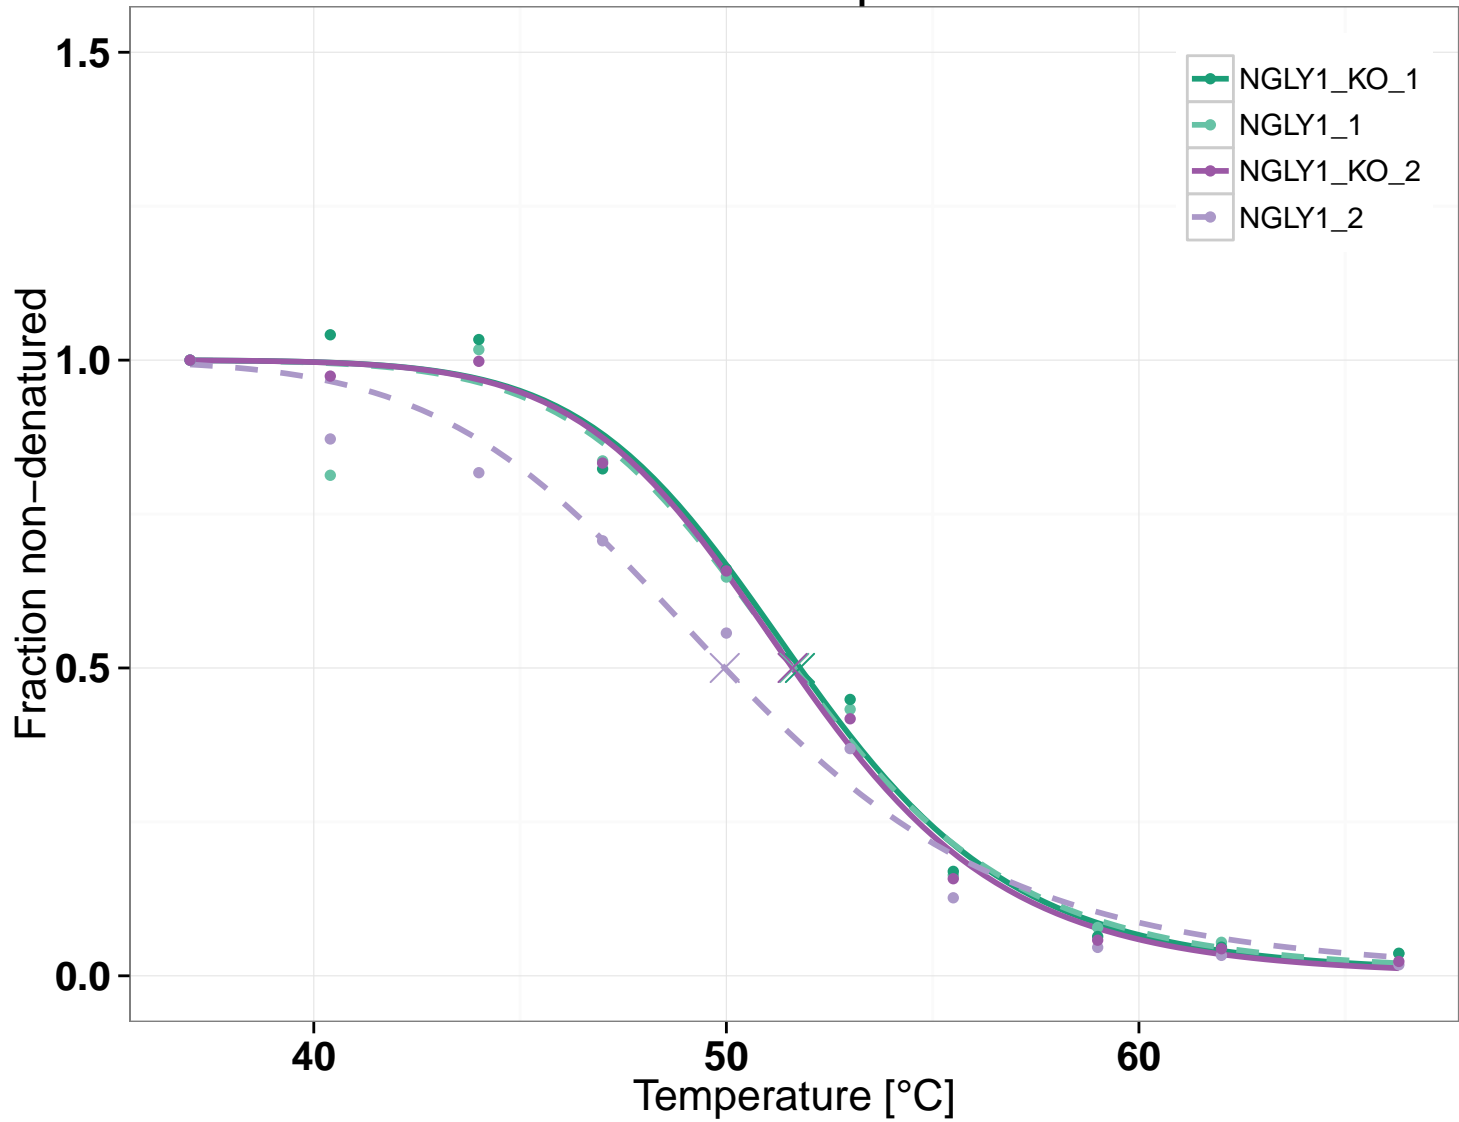

|            | meltPoint | slope  | plateau | R2   |
|------------|-----------|--------|---------|------|
| NGLY1_KO_1 | 51.78     | -0.095 | 0       | 0.99 |
| NGLY1_1    | 51.64     | -0.092 | 0.01    | 0.97 |
| NGLY1_KO_2 | 51.61     | -0.097 | 0       | 1    |
| NGLY1_2    | 49.96     | -0.072 | 0       | 0.98 |

Supplement: Supplementary file 7531 [file 1]

# IPI00015919.1|SERGEF

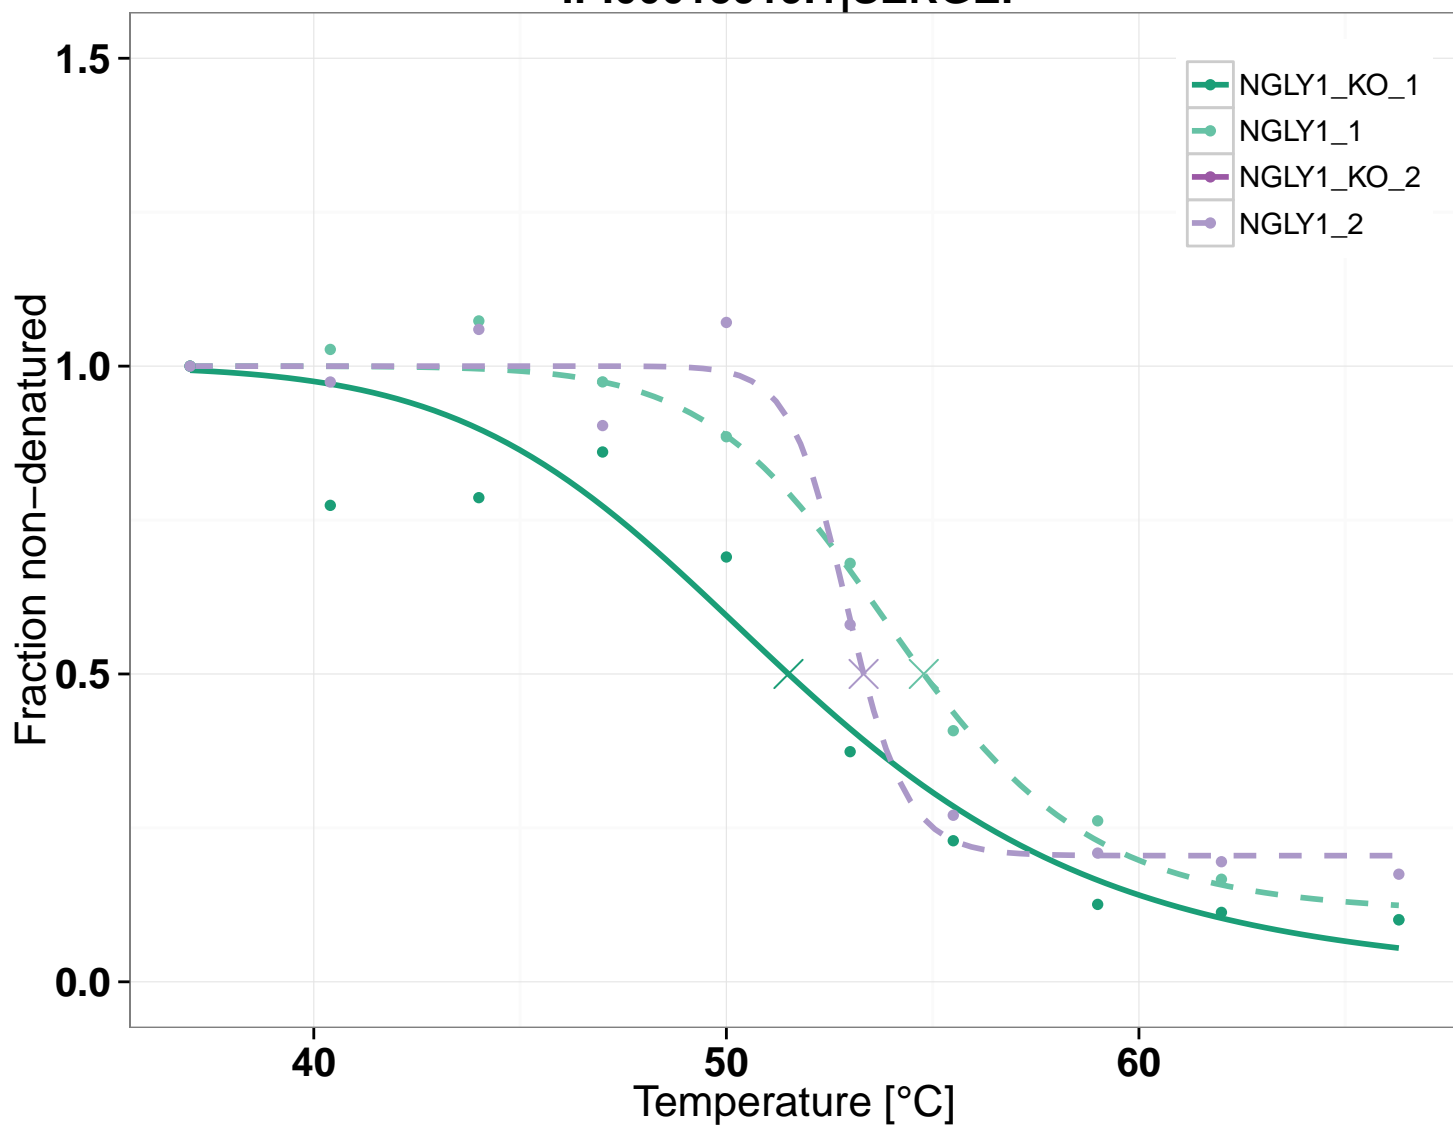

|            | meltPoint | slope  | plateau | R2   |
|------------|-----------|--------|---------|------|
| NGLY1_KO_1 | 51.51     | -0.063 | 0       | 0.93 |
| NGLY1_1    | 54.78     | -0.095 | 0.11    | 0.99 |
| NGLY1_KO_2 | -         | -      | -       | -    |
| NGLY1_2    | 53.33     | -0.28  | 0.2     | 0.98 |

Supplement: Supplementary file 7532 [file 1]

# IPI00917064.1|LIMS1

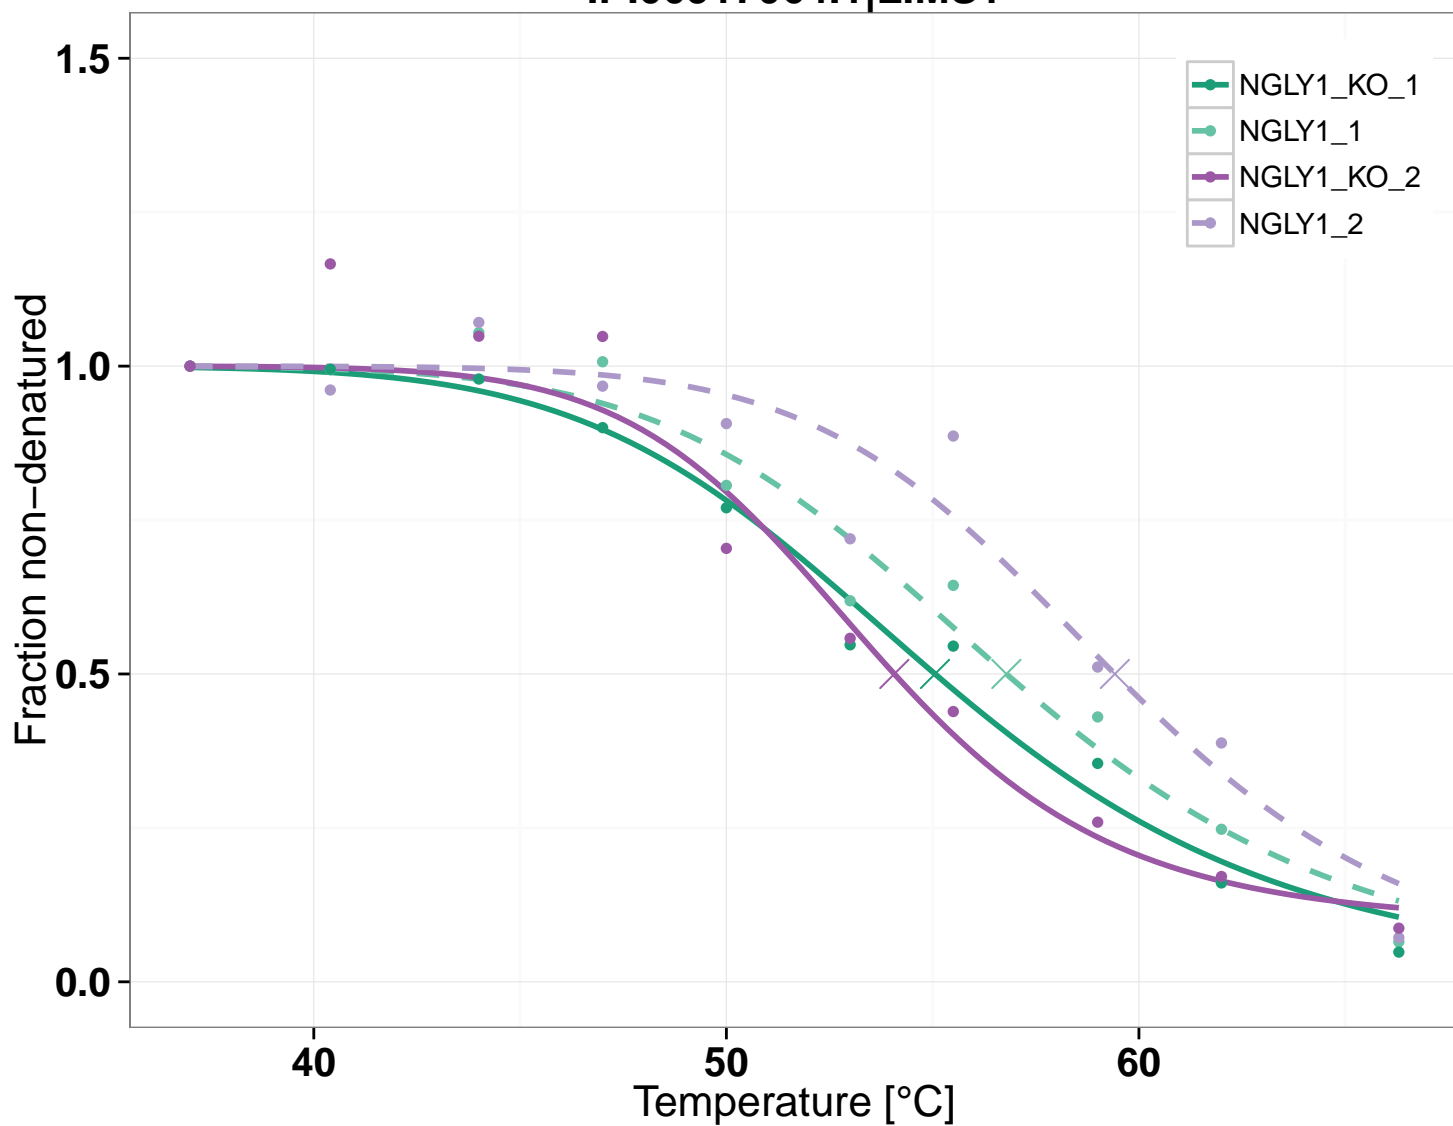

|            | meltPoint | slope  | plateau | R2   |
|------------|-----------|--------|---------|------|
| NGLY1_KO_1 | 55.06     | -0.059 | 0       | 0.98 |
| NGLY1_1    | 56.79     | -0.059 | 0       | 0.97 |
| NGLY1_KO_2 | 54.07     | -0.077 | 0.09    | 0.96 |
| NGLY1_2    | 59.42     | -0.068 | 0       | 0.94 |

Supplement: Supplementary file 7533 [file 1]
