# Supplementary material (part 76 of 85)
Source: publisher figshare collection journal article supplement (https://gsajournals.figshare.com/articles/dataset/_/12014913)

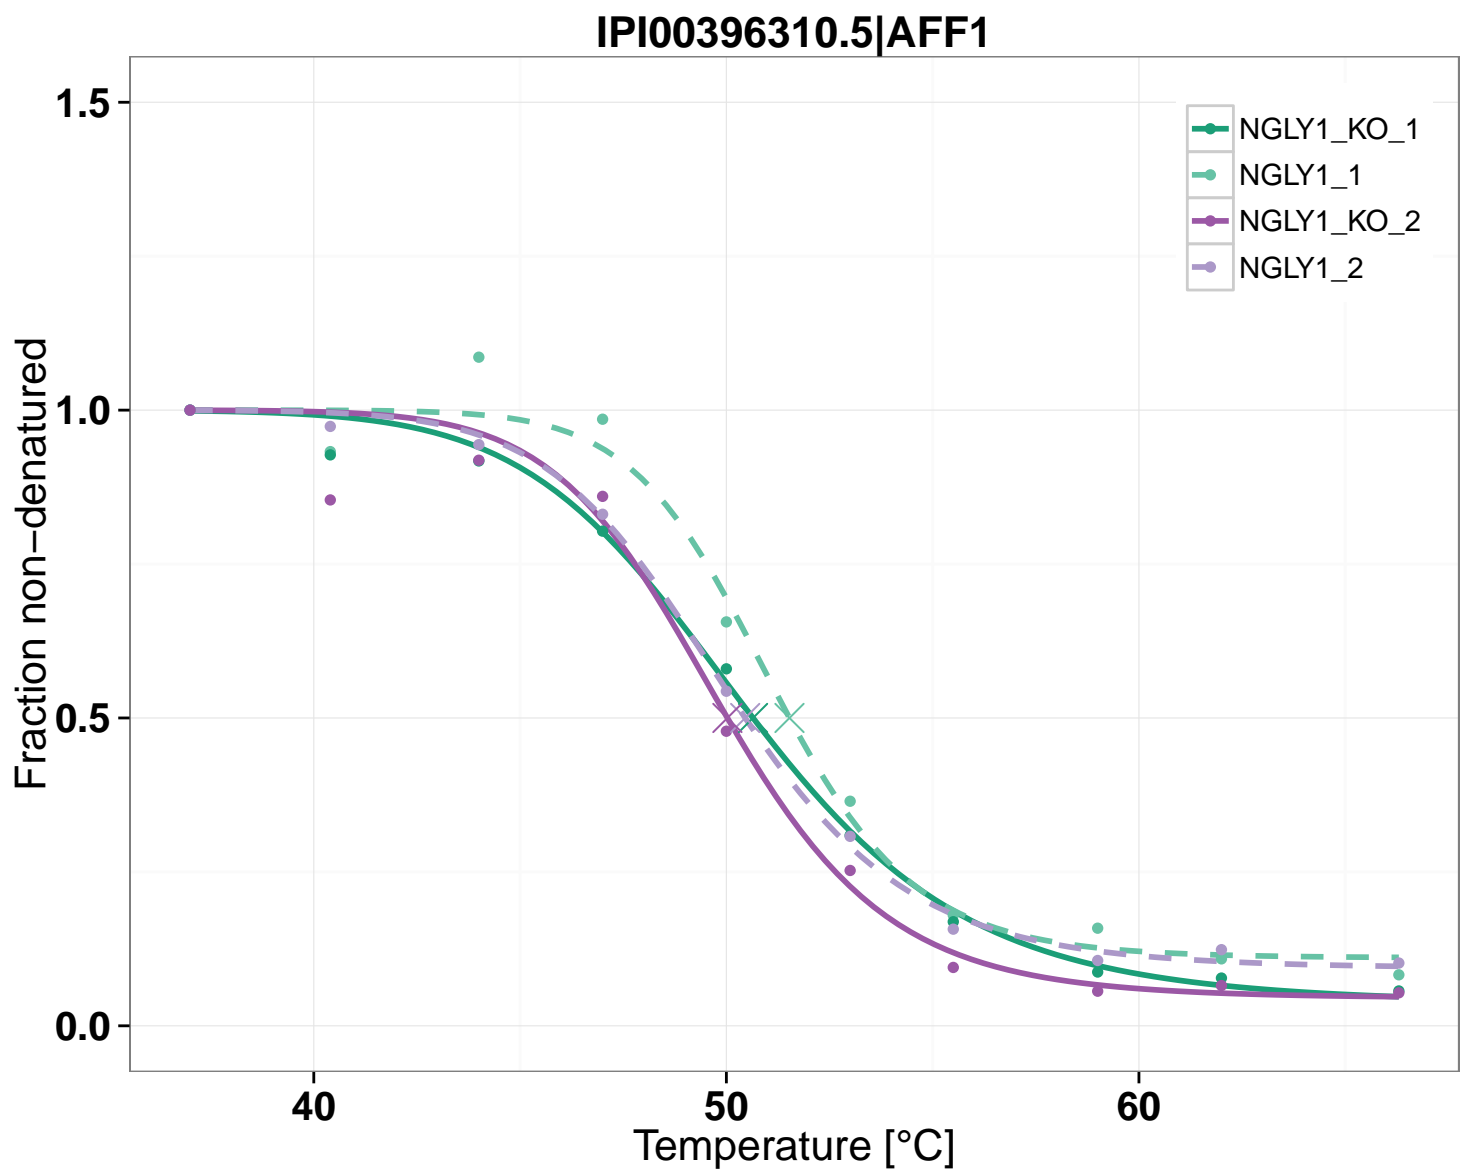

|            | meltPoint | slope  | plateau | R2   |
|------------|-----------|--------|---------|------|
| NGLY1_KO_1 | 50.65     | -0.089 | 0.04    | 1    |
| NGLY1_1    | 51.53     | -0.13  | 0.11    | 0.99 |
| NGLY1_KO_2 | 50.03     | -0.12  | 0.04    | 0.98 |
| NGLY1_2    | 50.46     | -0.1   | 0.09    | 1    |

Supplement: Supplementary file 7534 [file 1]

IPI00607777.2|KALRN

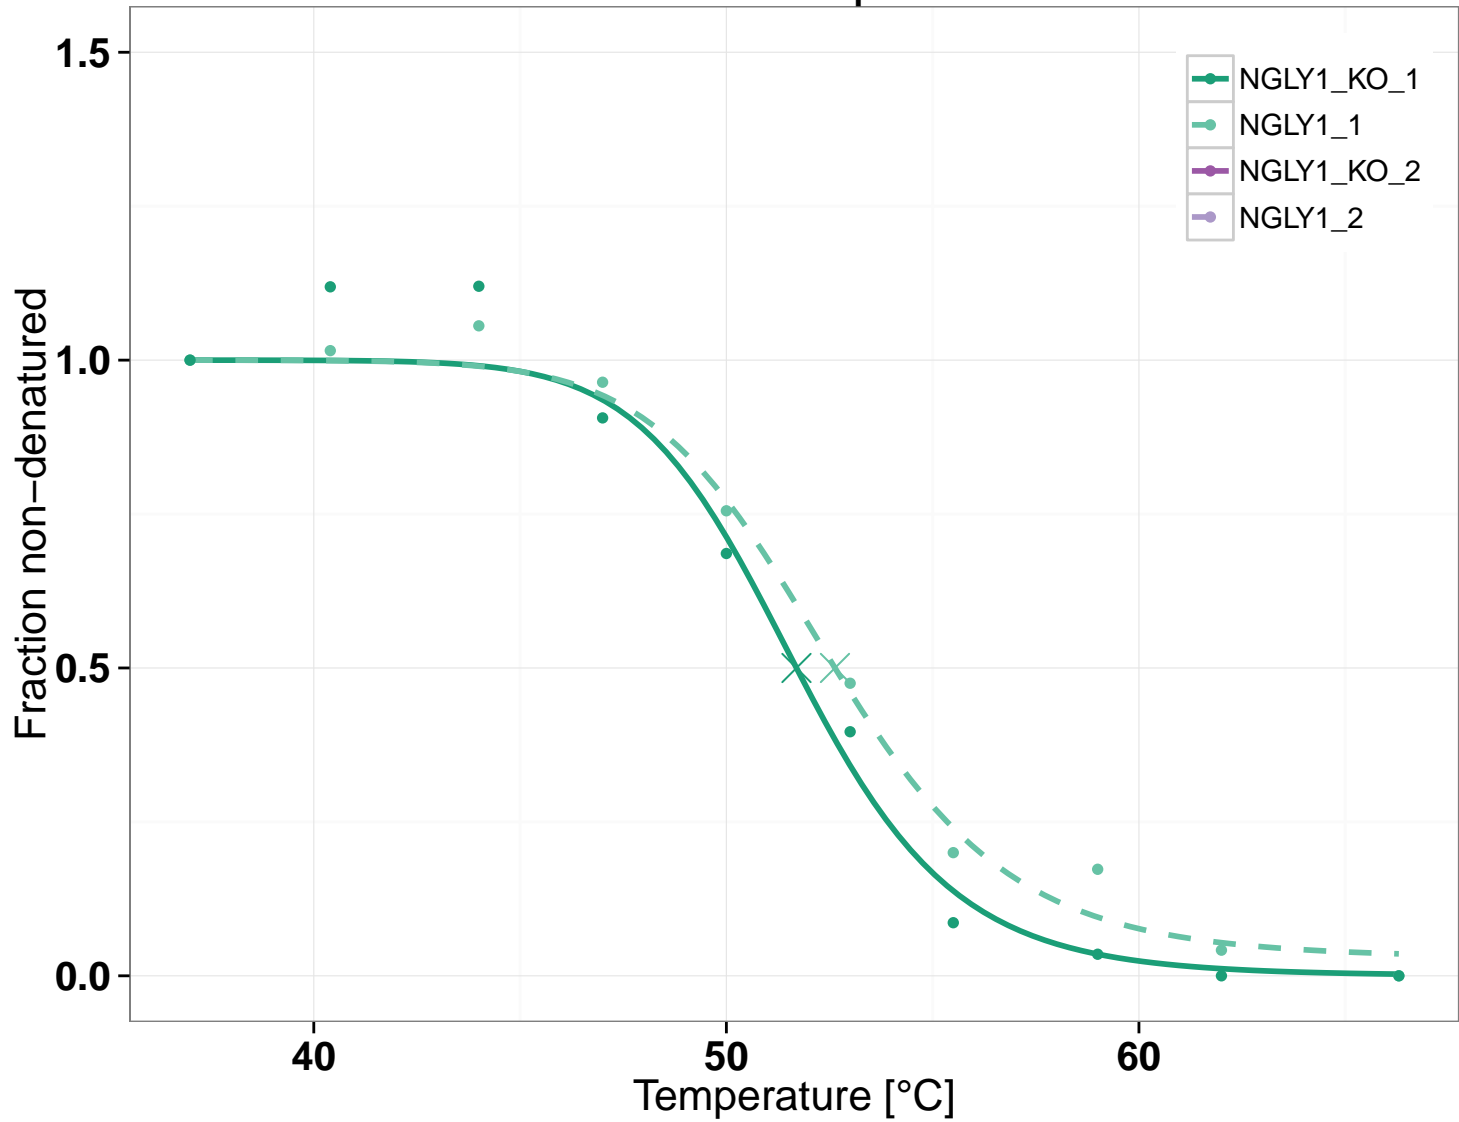

|            | meltPoint | slope | plateau | R2   |
|------------|-----------|-------|---------|------|
| NGLY1_KO_1 | 51.7      | -0.13 | 0       | 0.98 |
| NGLY1_1    | 52.63     | -0.11 | 0.03    | 0.99 |
| NGLY1_KO_2 | -         | -     | -       | -    |
| NGLY1_2    | -         | -     | -       | -    |

Supplement: Supplementary file 7535 [file 1]

IPI00218682.1|P4HA1

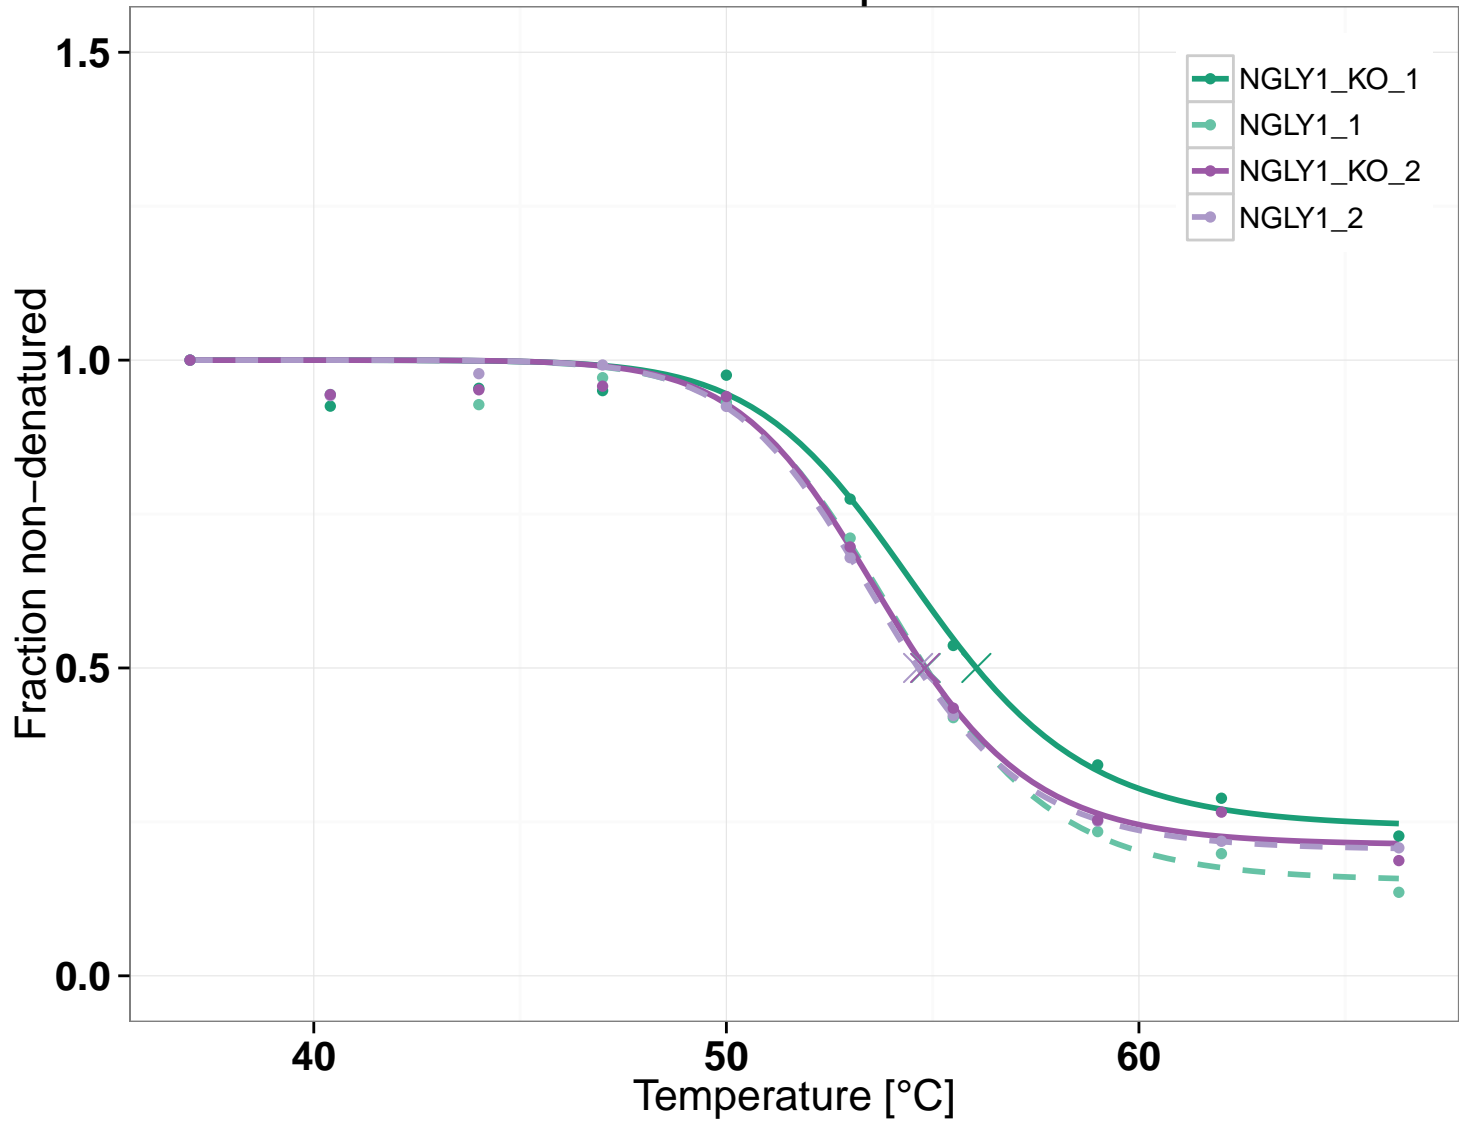

|            | meltPoint | slope  | plateau | R2   |
|------------|-----------|--------|---------|------|
| NGLY1_KO_1 | 56.06     | -0.095 | 0.24    | 0.99 |
| NGLY1_1    | 54.84     | -0.11  | 0.15    | 0.99 |
| NGLY1_KO_2 | 54.82     | -0.11  | 0.21    | 0.99 |
| NGLY1_2    | 54.65     | -0.11  | 0.2     | 1    |

Supplement: Supplementary file 7536 [file 1]

IPI00178232.8|PANK3

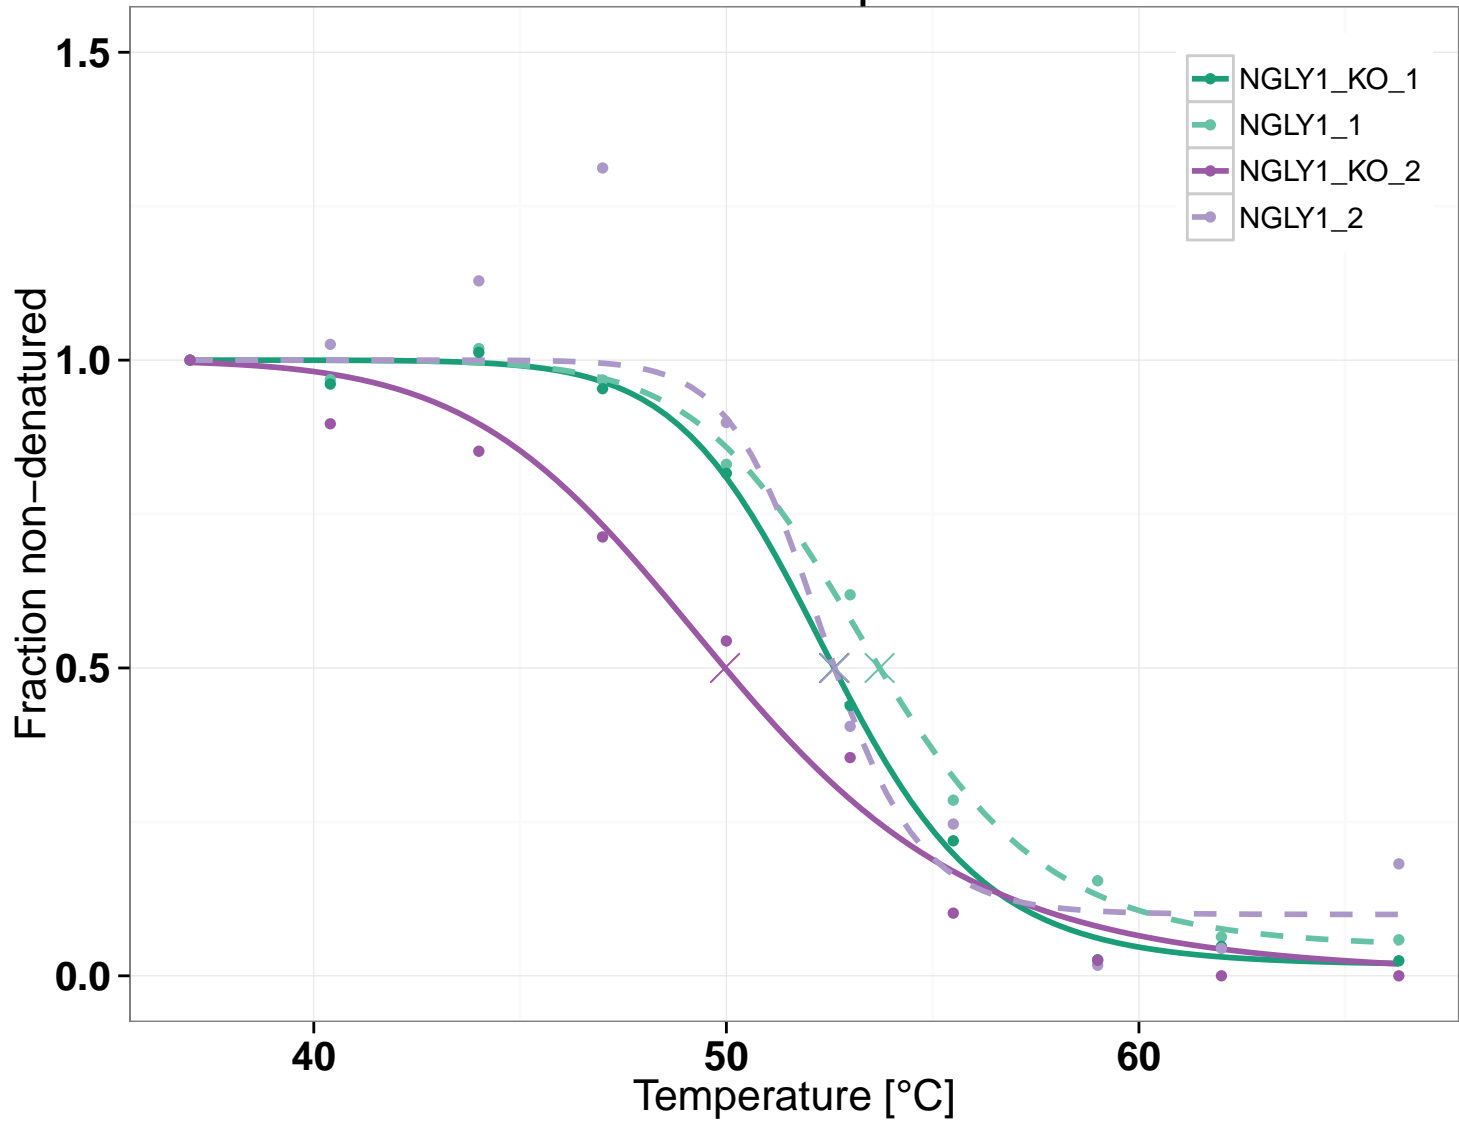

|            | meltPoint | slope  | plateau | R2   |
|------------|-----------|--------|---------|------|
| NGLY1_KO_1 | 52.61     | -0.13  | 0.02    | 1    |
| NGLY1_1    | 53.71     | -0.11  | 0.05    | 1    |
| NGLY1_KO_2 | 49.97     | -0.081 | 0       | 0.98 |
| NGLY1_2    | 52.63     | -0.2   | 0.1     | 0.93 |

Supplement: Supplementary file 7537 [file 1]

IPI00012211.4|TRAPPC6A

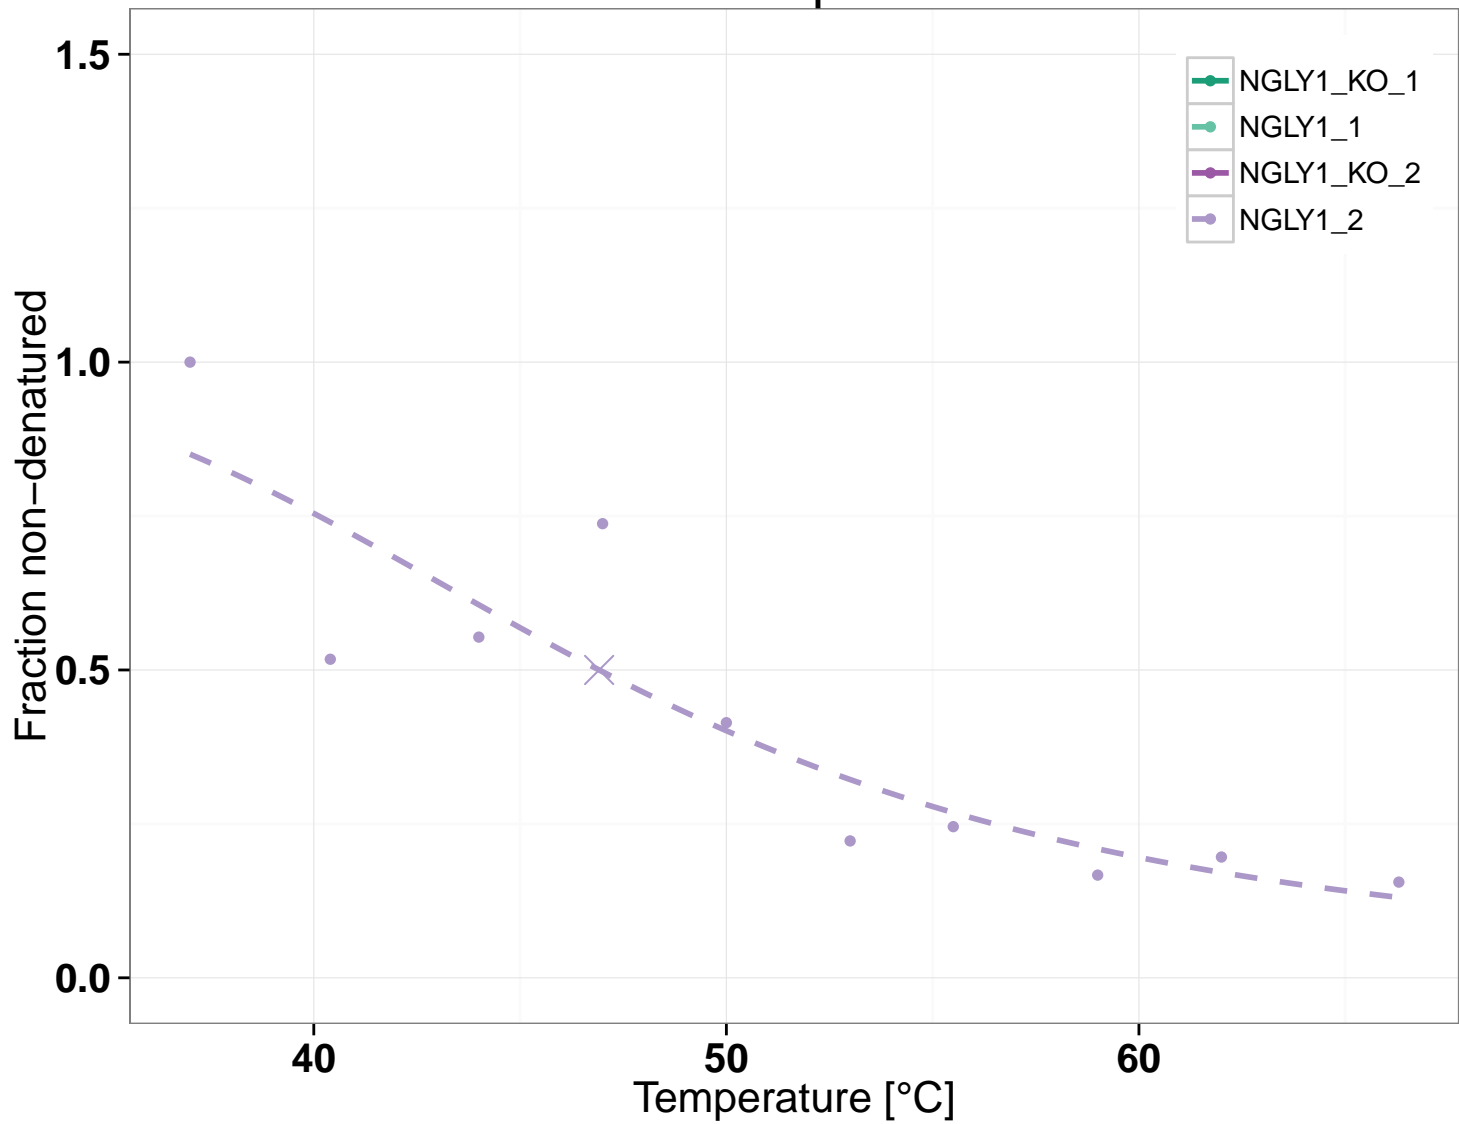

|            | meltPoint | slope  | plateau | R2  |
|------------|-----------|--------|---------|-----|
| NGLY1_KO_1 | -         | -      | -       | -   |
| NGLY1_1    | -         | -      | -       | -   |
| NGLY1_KO_2 | -         | -      | -       | -   |
| NGLY1_2    | 46.92     | -0.038 | 0       | 0.8 |

Supplement: Supplementary file 7538 [file 1]

IPI00026940.2|NUP50

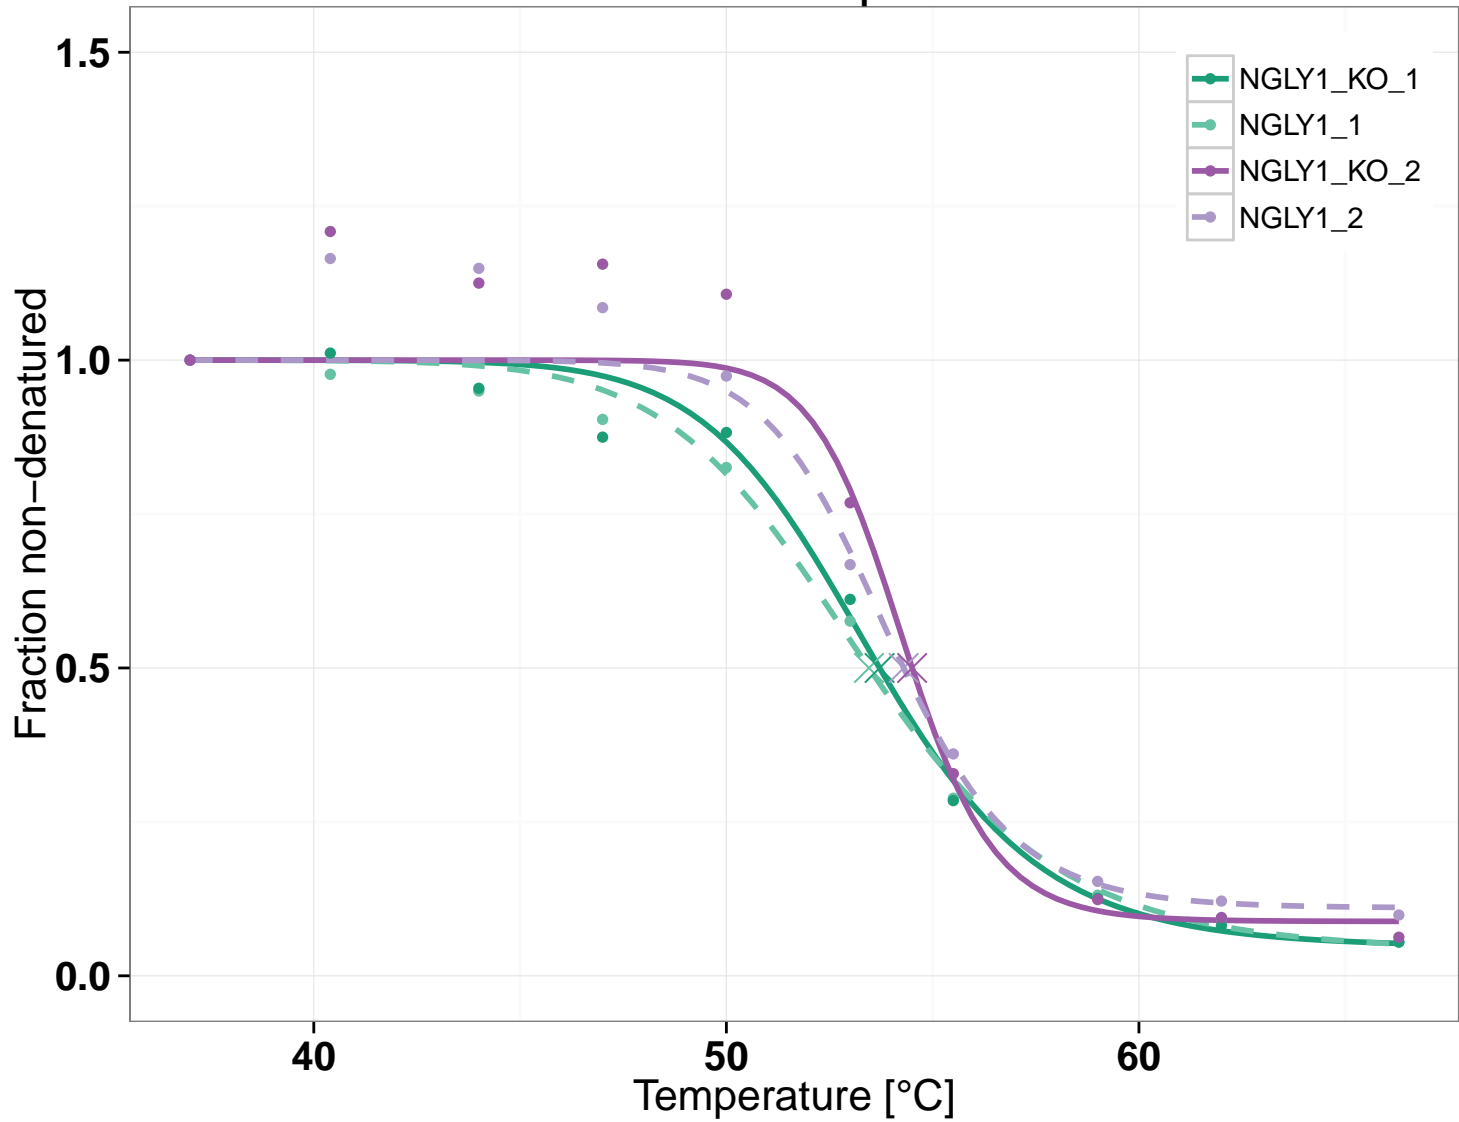

|            | meltPoint | slope | plateau | R2   |
|------------|-----------|-------|---------|------|
| NGLY1_KO_1 | 53.71     | -0.12 | 0.05    | 0.99 |
| NGLY1_1    | 53.46     | -0.1  | 0.04    | 1    |
| NGLY1_KO_2 | 54.5      | -0.21 | 0.09    | 0.95 |
| NGLY1_2    | 54.3      | -0.15 | 0.11    | 0.97 |

Supplement: Supplementary file 7539 [file 1]

# IPI00031106.1|PSMG3

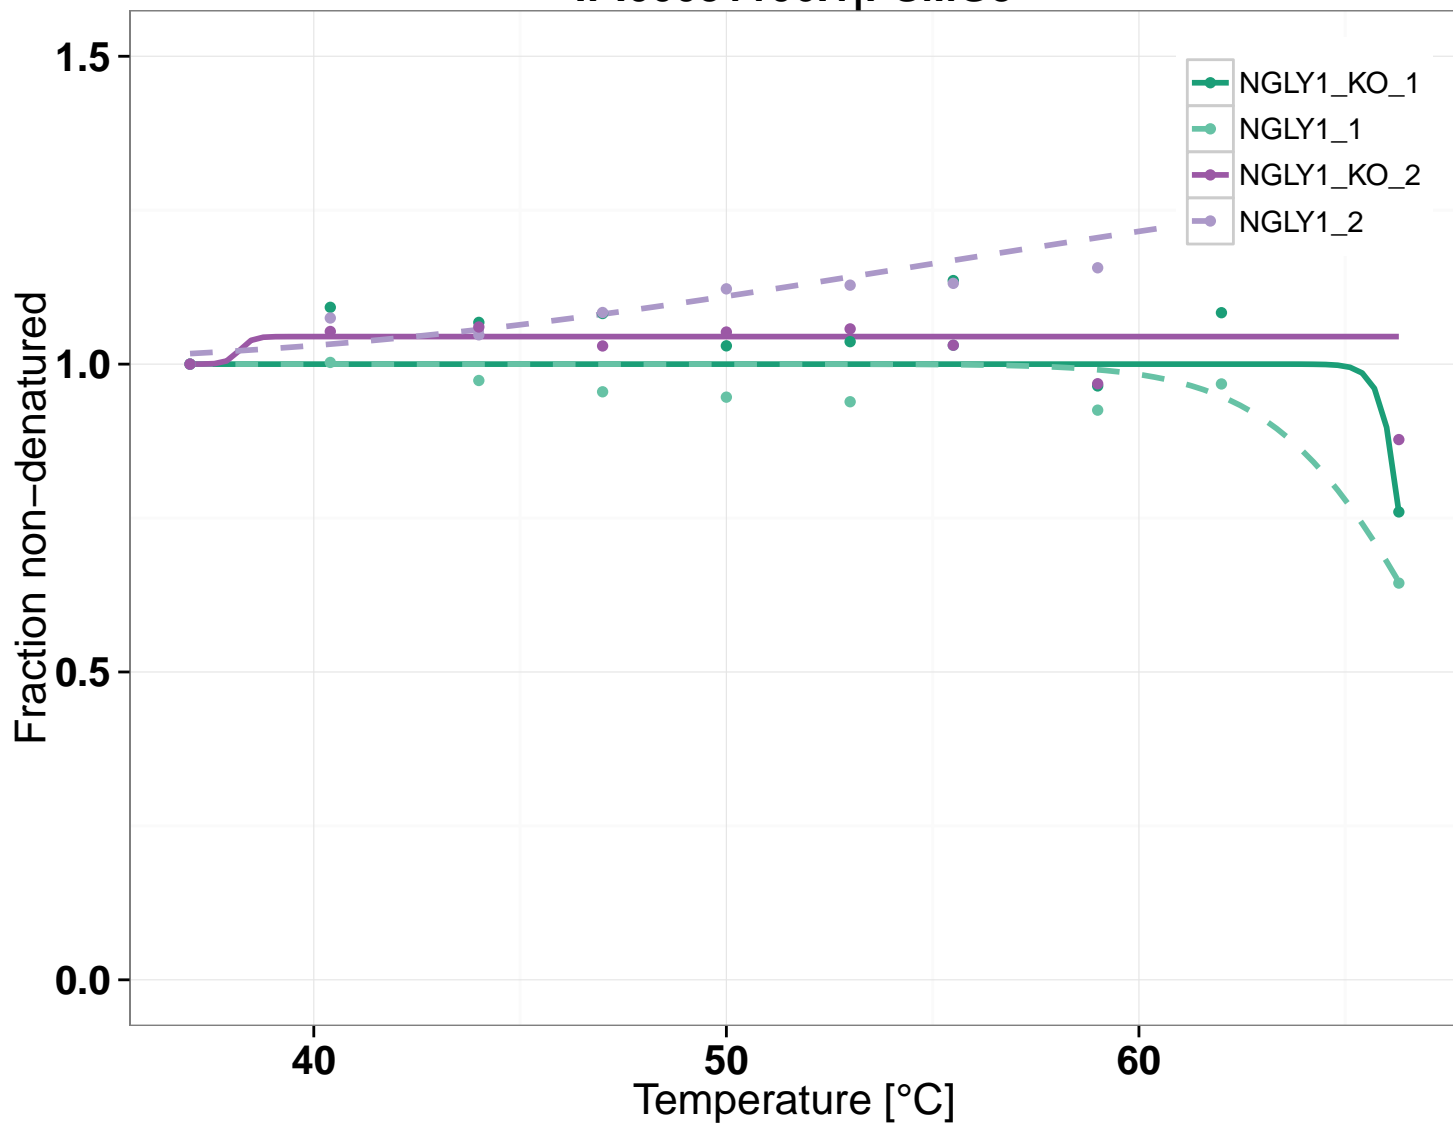

|            | meltPoint | slope | plateau | R2   |
|------------|-----------|-------|---------|------|
| NGLY1_KO_1 | —         | —     | 0       | 0.51 |
| NGLY1_1    | —         | —     | 0       | 0.86 |
| NGLY1_KO_2 | —         | 0.073 | 1.04    | 0.02 |
| NGLY1_2    | —         | 0.011 | 1.5     | 0.73 |

Supplement: Supplementary file 7540 [file 1]

IPI00008809.1|GAGE12F

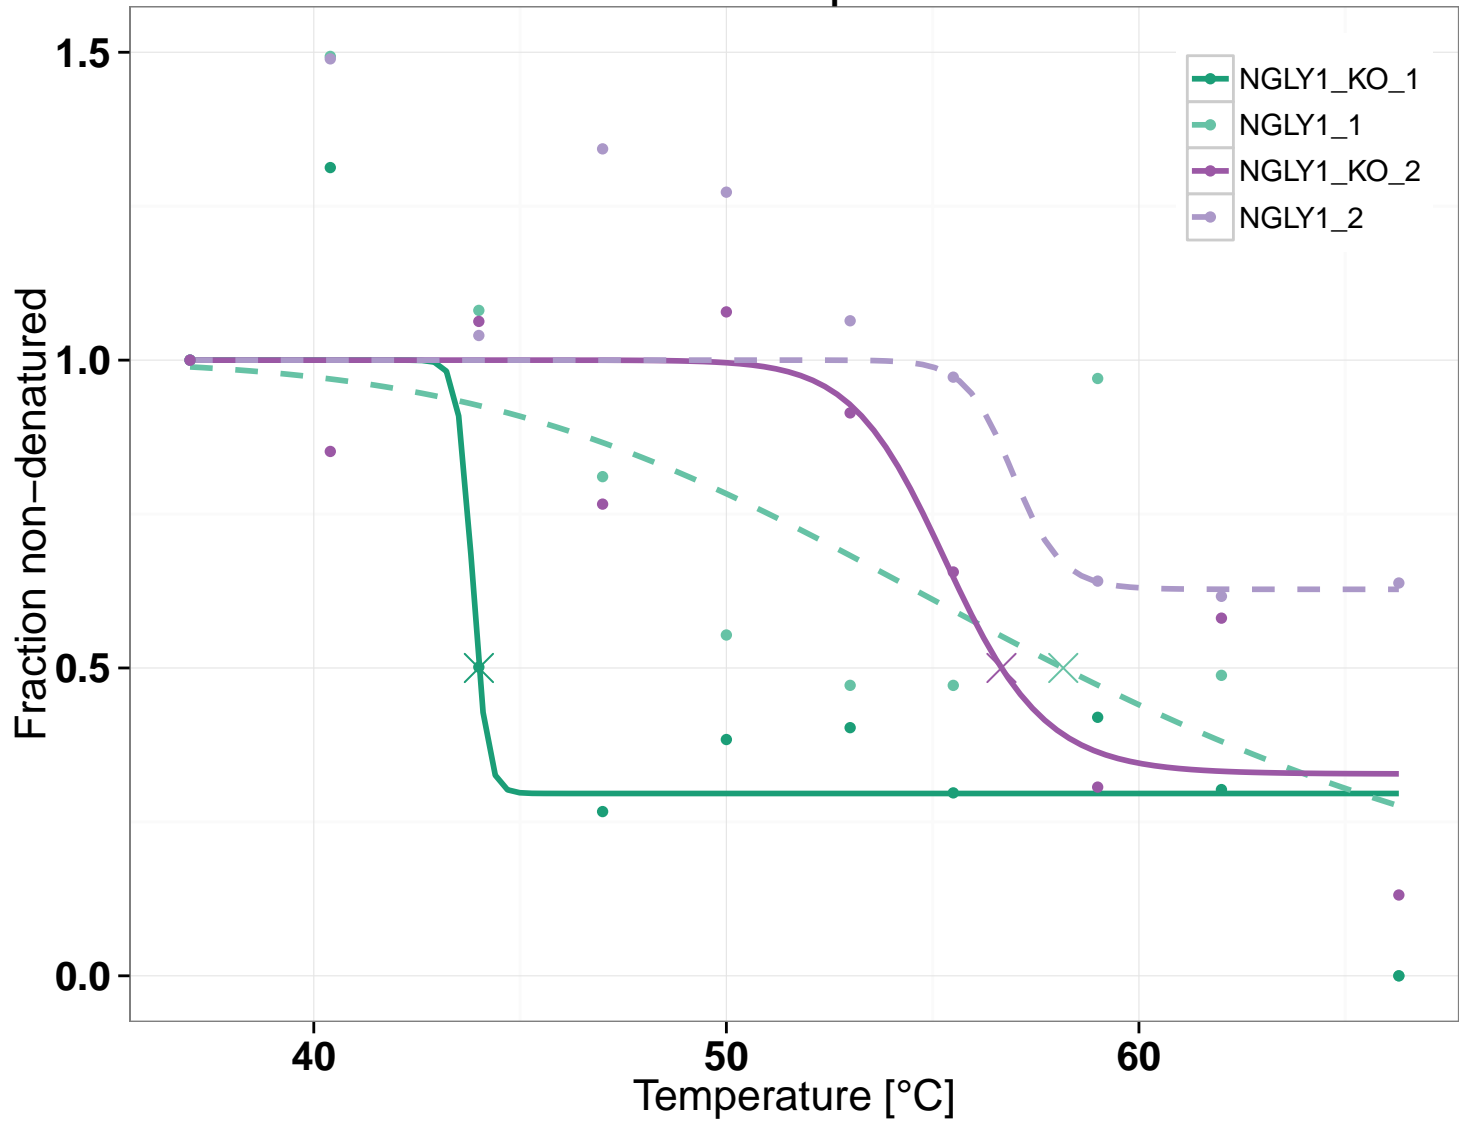

|            | meltPoint | slope  | plateau | R2   |
|------------|-----------|--------|---------|------|
| NGLY1_KO_1 | 44        | -1     | 0.3     | 0.83 |
| NGLY1_1    | 58.17     | -0.036 | 0       | 0.53 |
| NGLY1_KO_2 | 56.67     | -0.14  | 0.33    | 0.79 |
| NGLY1_2    | -         | -0.16  | 0.63    | 0.48 |

Supplement: Supplementary file 7541 [file 1]

IPI00149321.2|YY1AP1

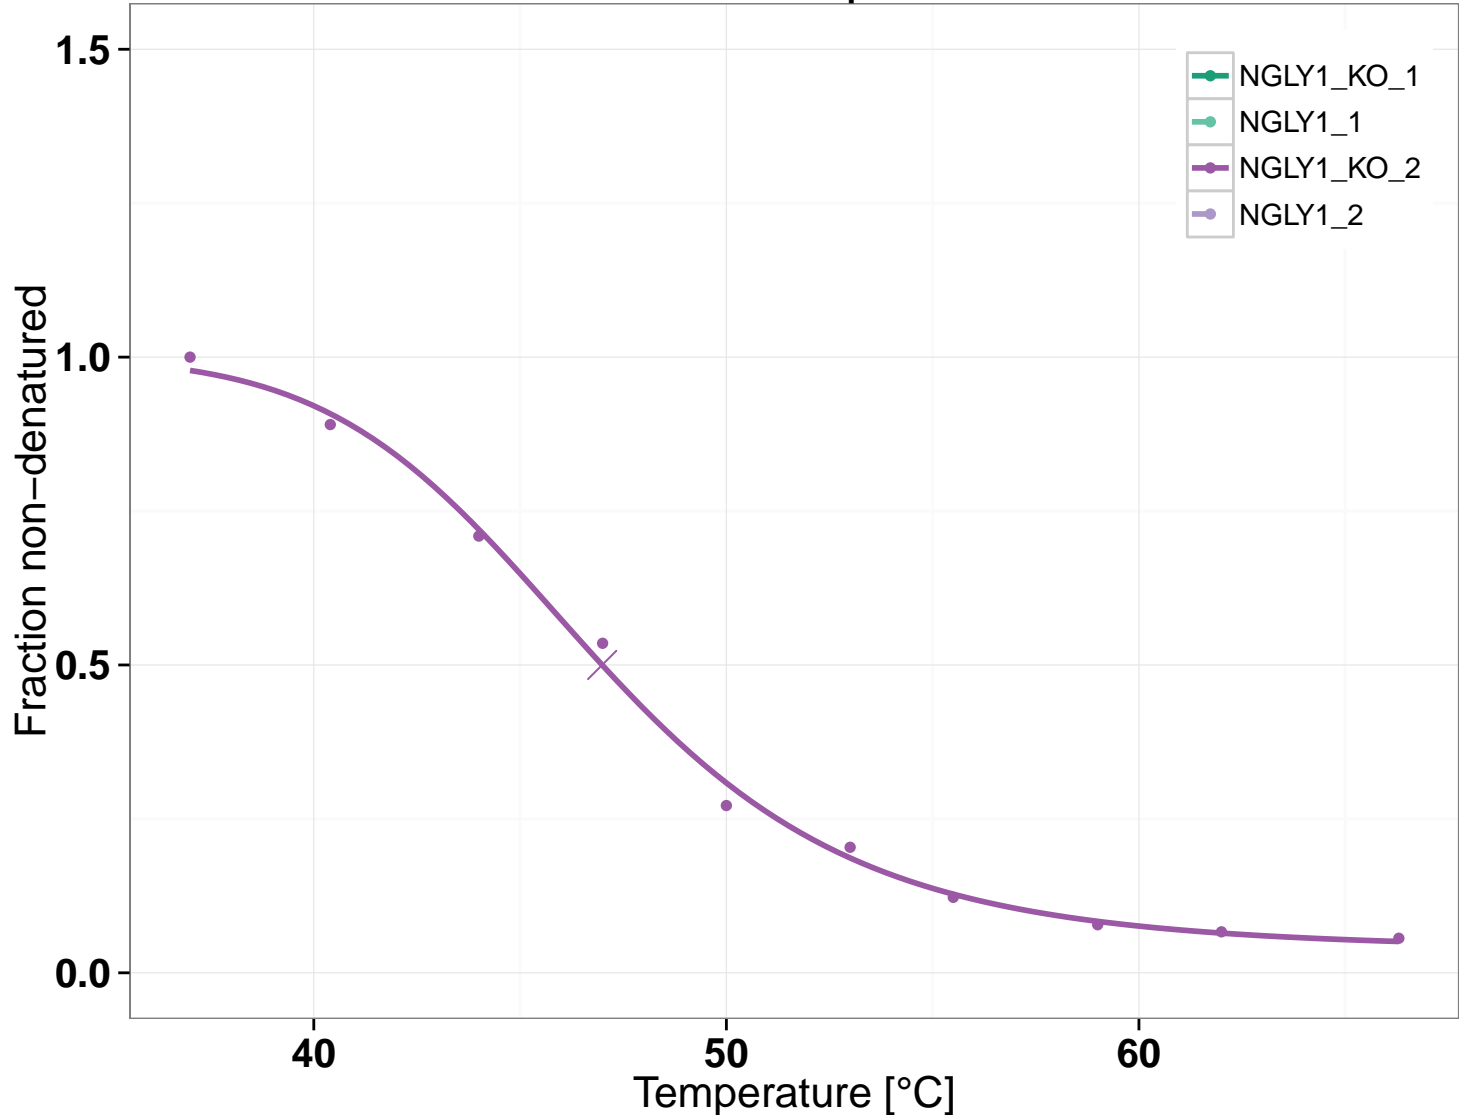

|            | meltPoint | slope  | plateau | R2 |
|------------|-----------|--------|---------|----|
| NGLY1_KO_1 | -         | -      | -       | -  |
| NGLY1_1    | -         | -      | -       | -  |
| NGLY1_KO_2 | 46.99     | -0.075 | 0.04    | 1  |
| NGLY1_2    | -         | -      | -       | -  |

Supplement: Supplementary file 7542 [file 1]

# IPI00255052.5|NDUFB9

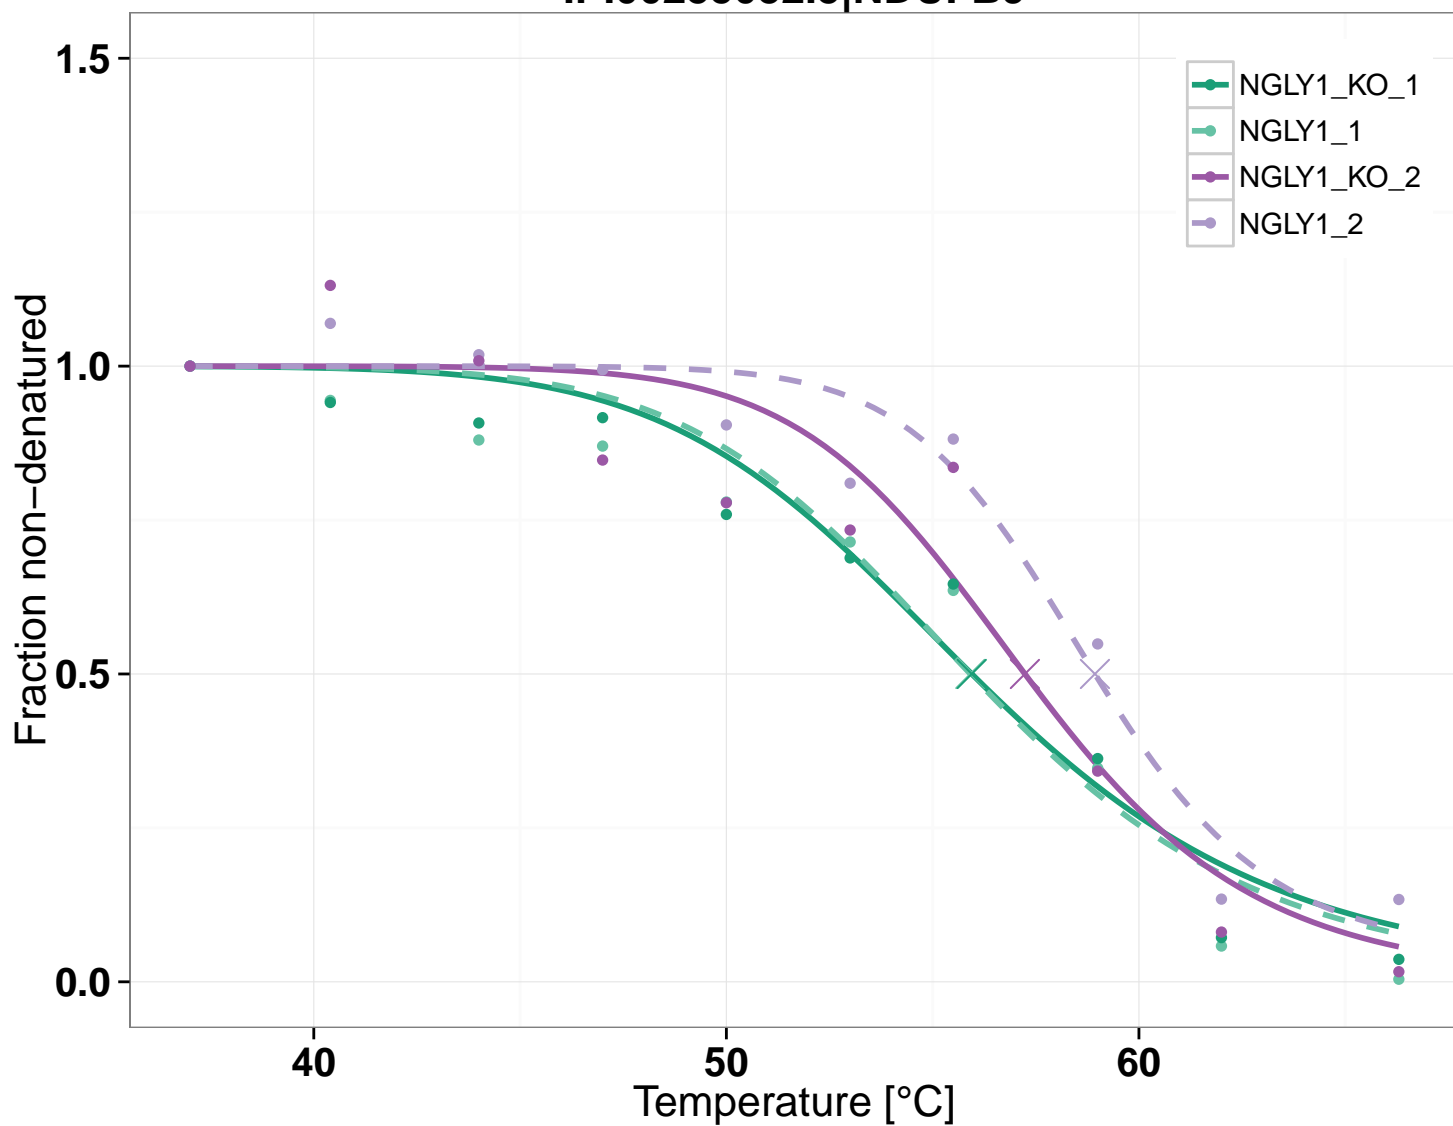

|            | meltPoint | slope  | plateau | R2   |
|------------|-----------|--------|---------|------|
| NGLY1_KO_1 | 55.95     | -0.067 | 0       | 0.96 |
| NGLY1_1    | 55.91     | -0.072 | 0       | 0.95 |
| NGLY1_KO_2 | 57.24     | -0.091 | 0       | 0.91 |
| NGLY1_2    | 58.93     | -0.11  | 0.04    | 0.96 |

Supplement: Supplementary file 7543 [file 1]

IPI00217250.1|SEDLP

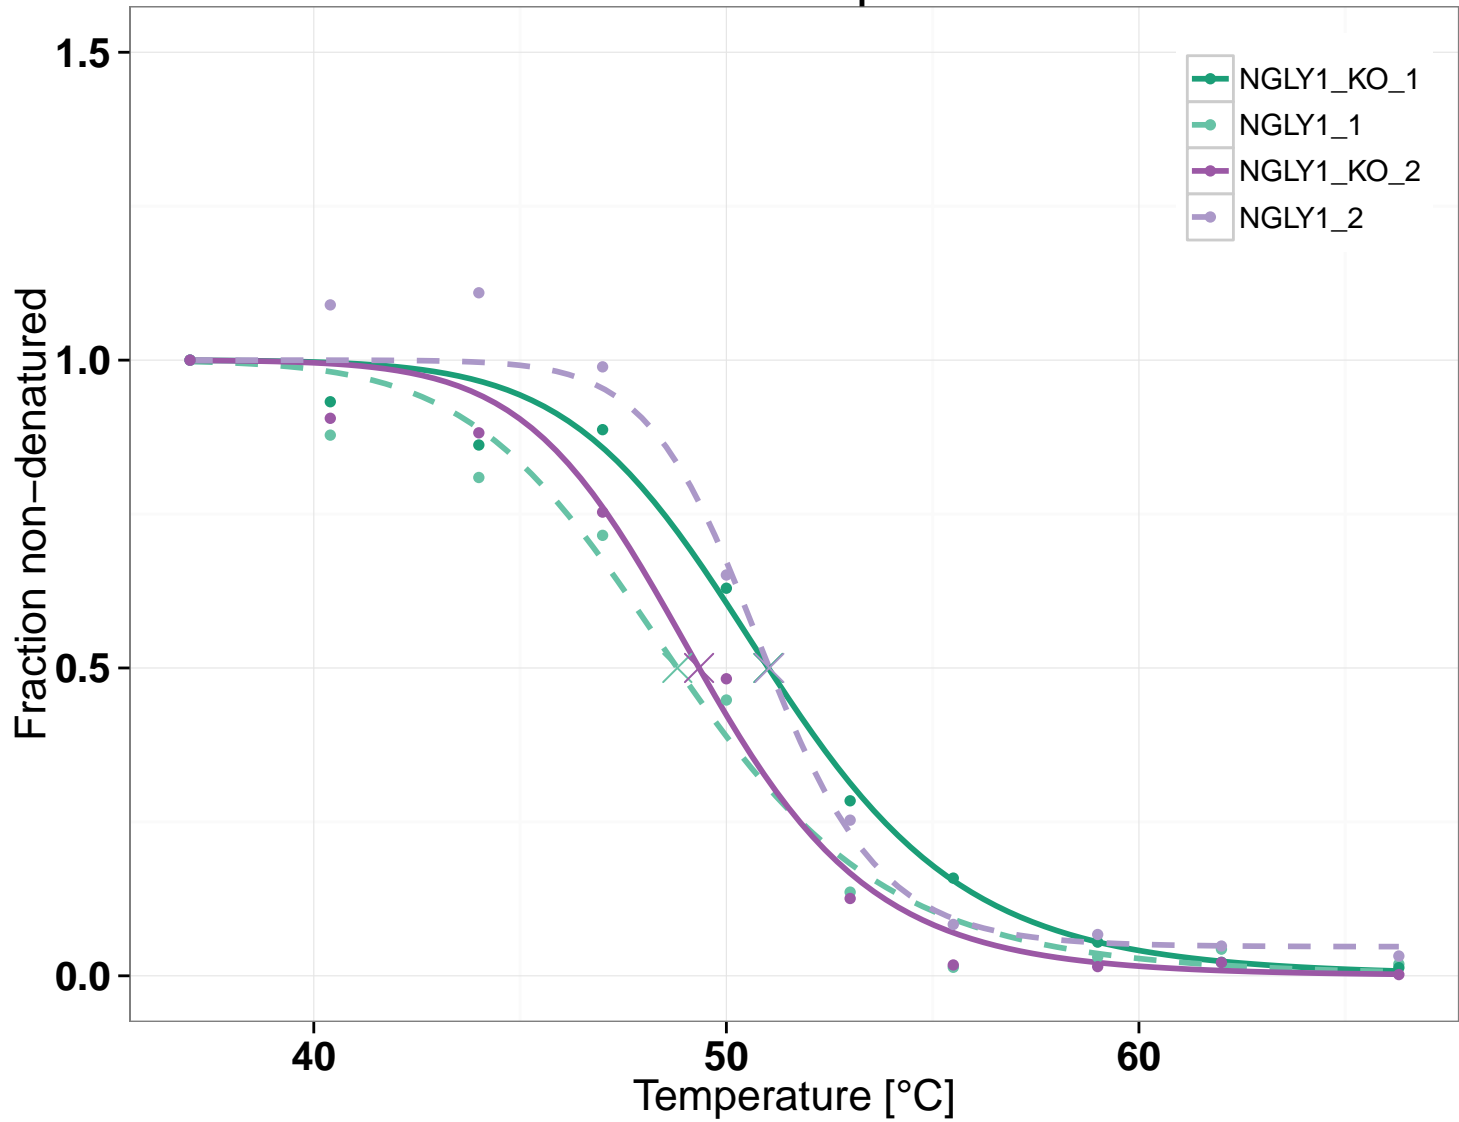

|            | meltPoint | slope  | plateau | R2   |
|------------|-----------|--------|---------|------|
| NGLY1_KO_1 | 51.02     | -0.1   | 0       | 0.99 |
| NGLY1_1    | 48.81     | -0.098 | 0       | 0.98 |
| NGLY1_KO_2 | 49.34     | -0.12  | 0       | 0.99 |
| NGLY1_2    | 51.04     | -0.17  | 0.05    | 0.99 |

Supplement: Supplementary file 7544 [file 1]

IPI00746093.1|SLC35A1

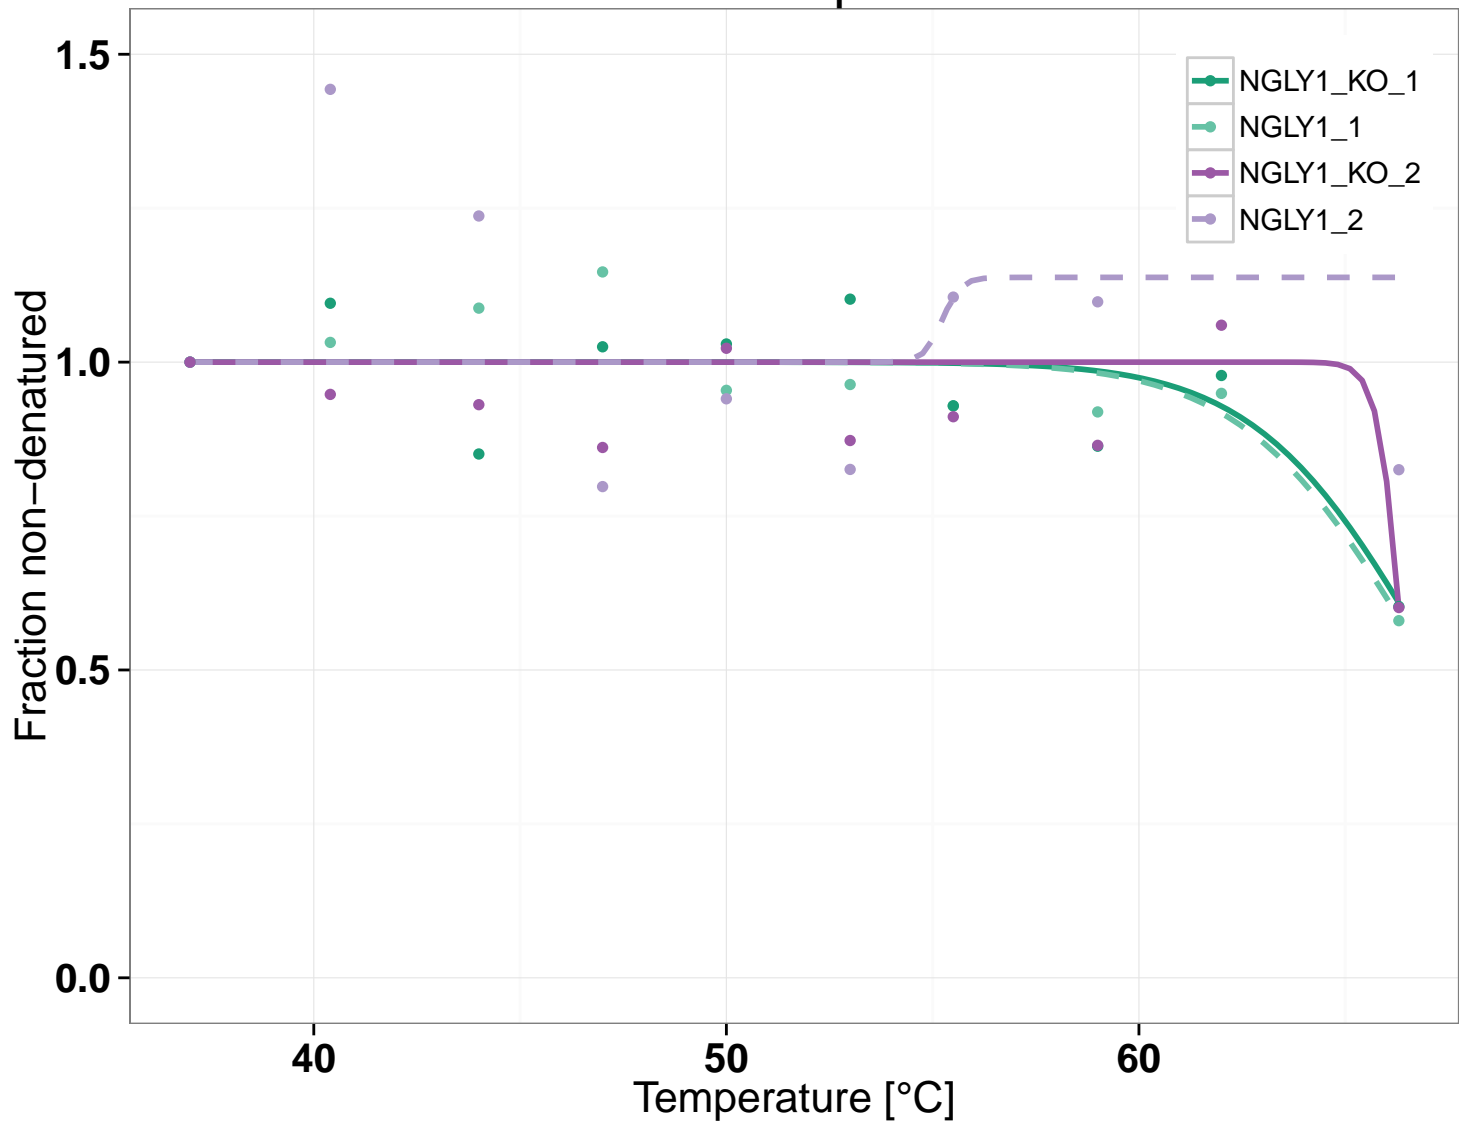

|            | meltPoint | slope | plateau | R2   |
|------------|-----------|-------|---------|------|
| NGLY1_KO_1 | —         | —     | 0       | 0.67 |
| NGLY1_1    | —         | —     | 0       | 0.79 |
| NGLY1_KO_2 | —         | —     | 0       | 0.5  |
| NGLY1_2    | —         | 0.16  | 1.14    | 0.02 |

Supplement: Supplementary file 7545 [file 1]

# IPI00170770.2|PHF3

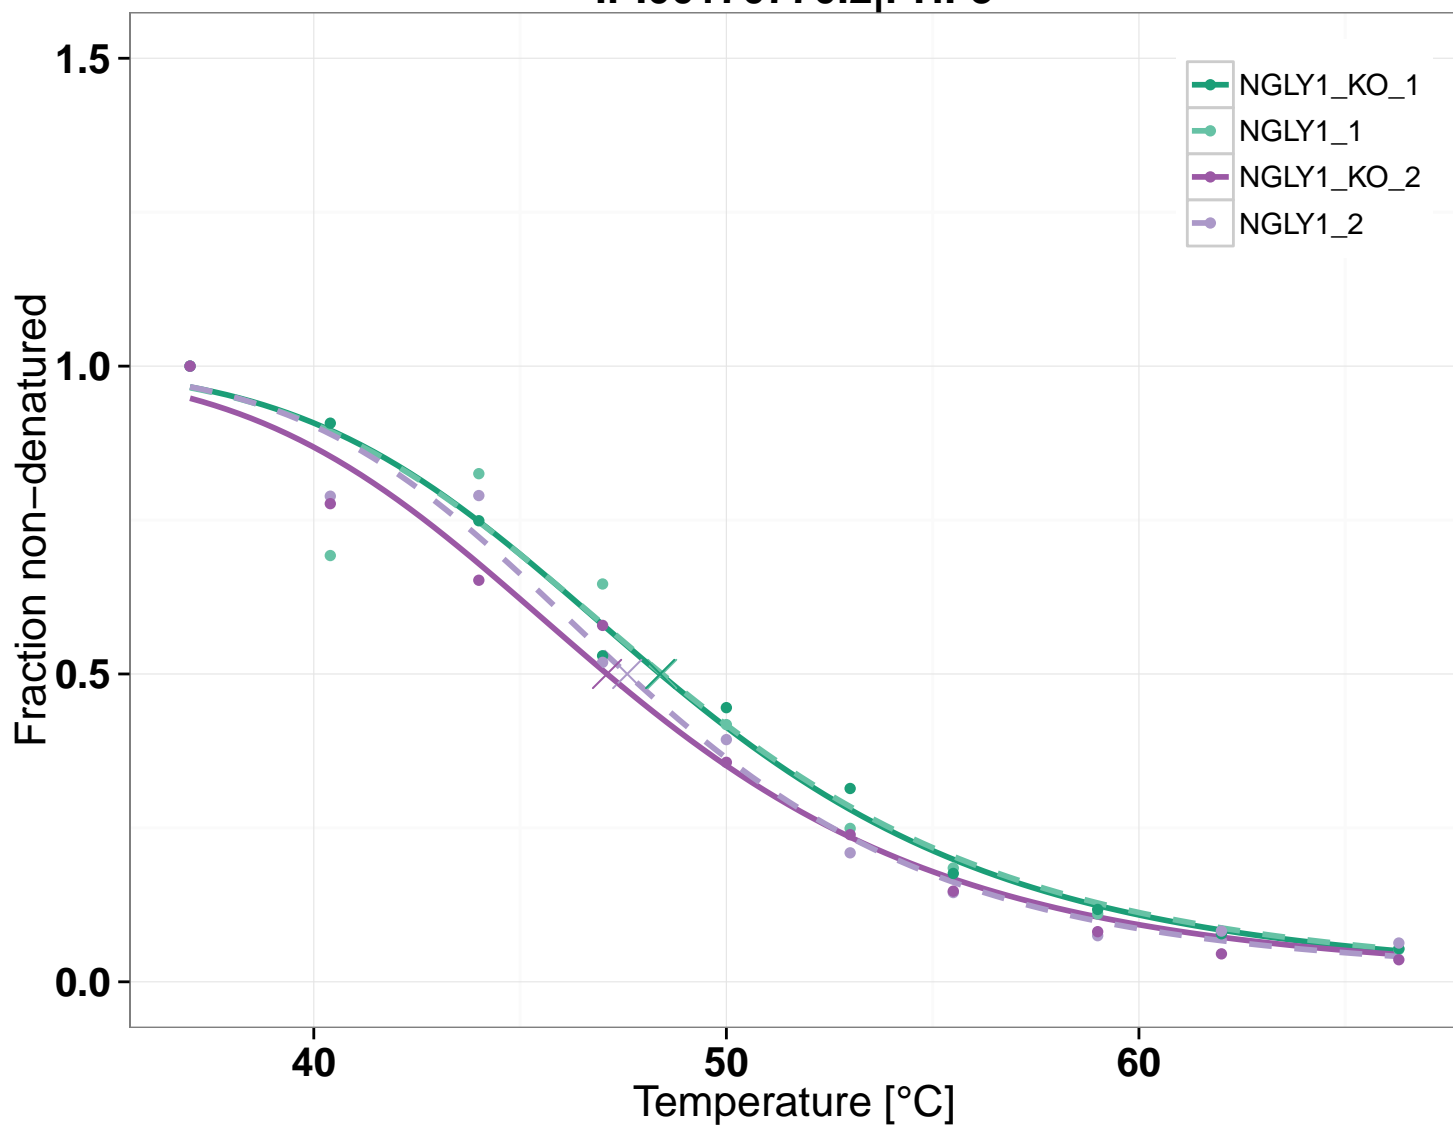

|            | meltPoint | slope  | plateau | R2   |
|------------|-----------|--------|---------|------|
| NGLY1_KO_1 | 48.4      | -0.058 | 0       | 0.99 |
| NGLY1_1    | 48.44     | -0.057 | 0       | 0.95 |
| NGLY1_KO_2 | 47.11     | -0.058 | 0       | 0.98 |
| NGLY1_2    | 47.6      | -0.063 | 0.01    | 0.98 |

Supplement: Supplementary file 7546 [file 1]

# IPI00465319.5|CHPF

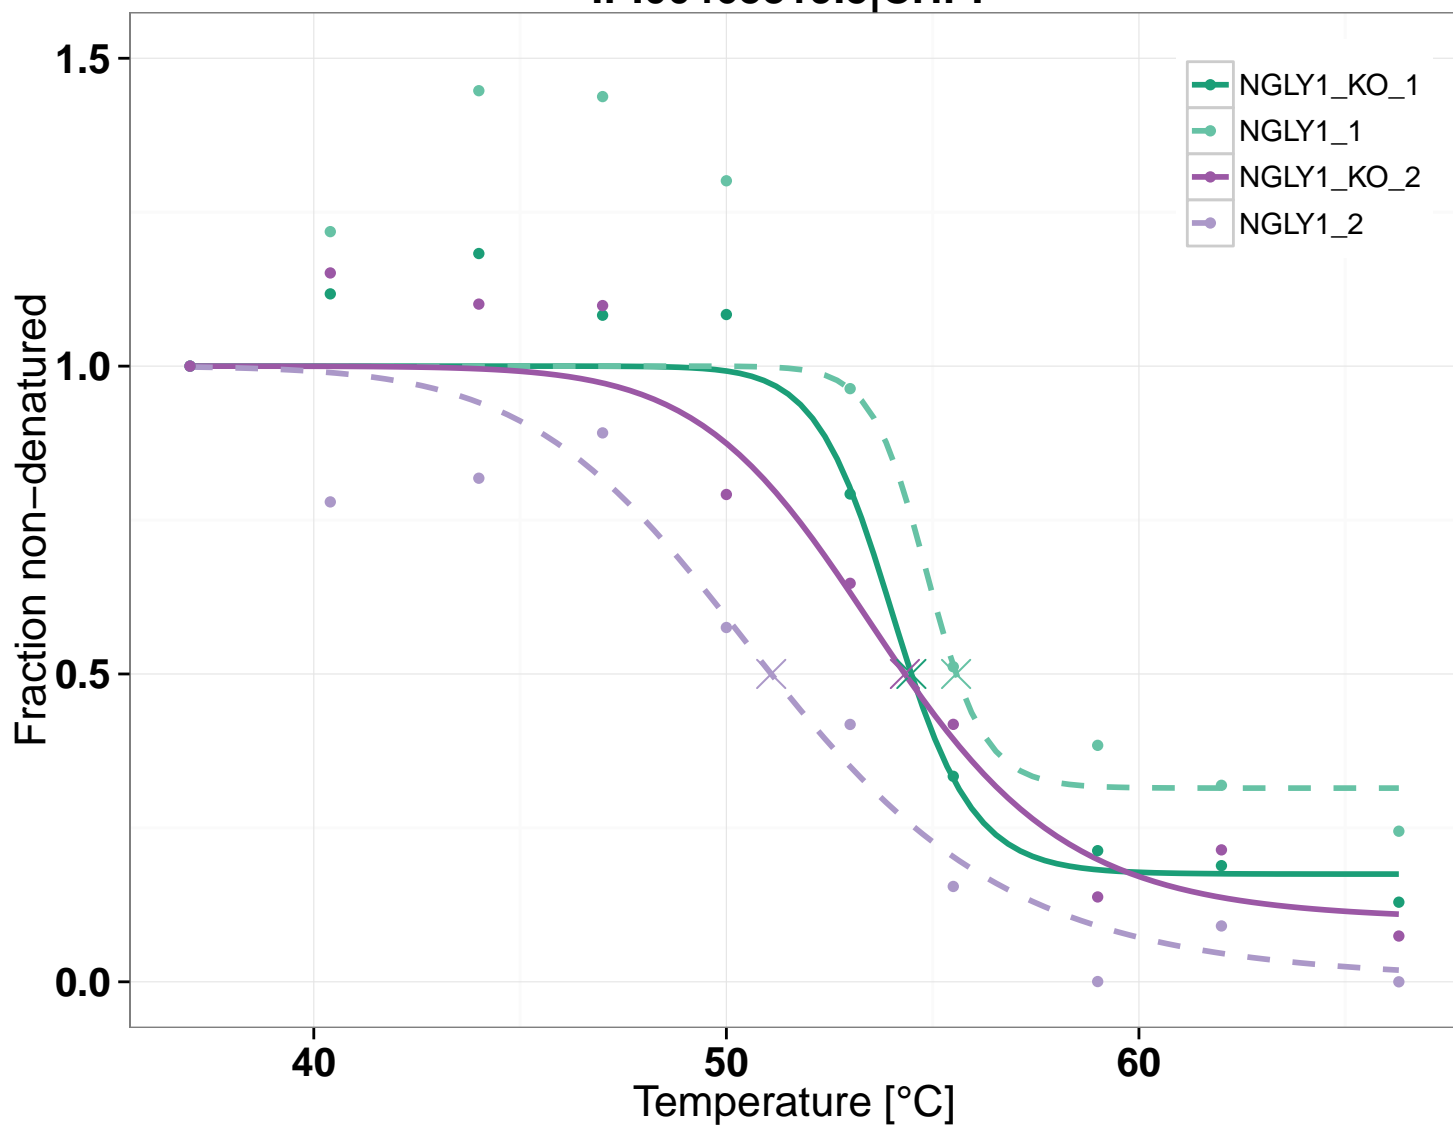

|            | meltPoint | slope  | plateau | R2   |
|------------|-----------|--------|---------|------|
| NGLY1_KO_1 | 54.48     | -0.22  | 0.17    | 0.96 |
| NGLY1_1    | 55.57     | -0.25  | 0.31    | 0.74 |
| NGLY1_KO_2 | 54.33     | -0.1   | 0.1     | 0.96 |
| NGLY1_2    | 51.09     | -0.085 | 0       | 0.94 |

Supplement: Supplementary file 7547 [file 1]

# IPI00296713.4|GRN

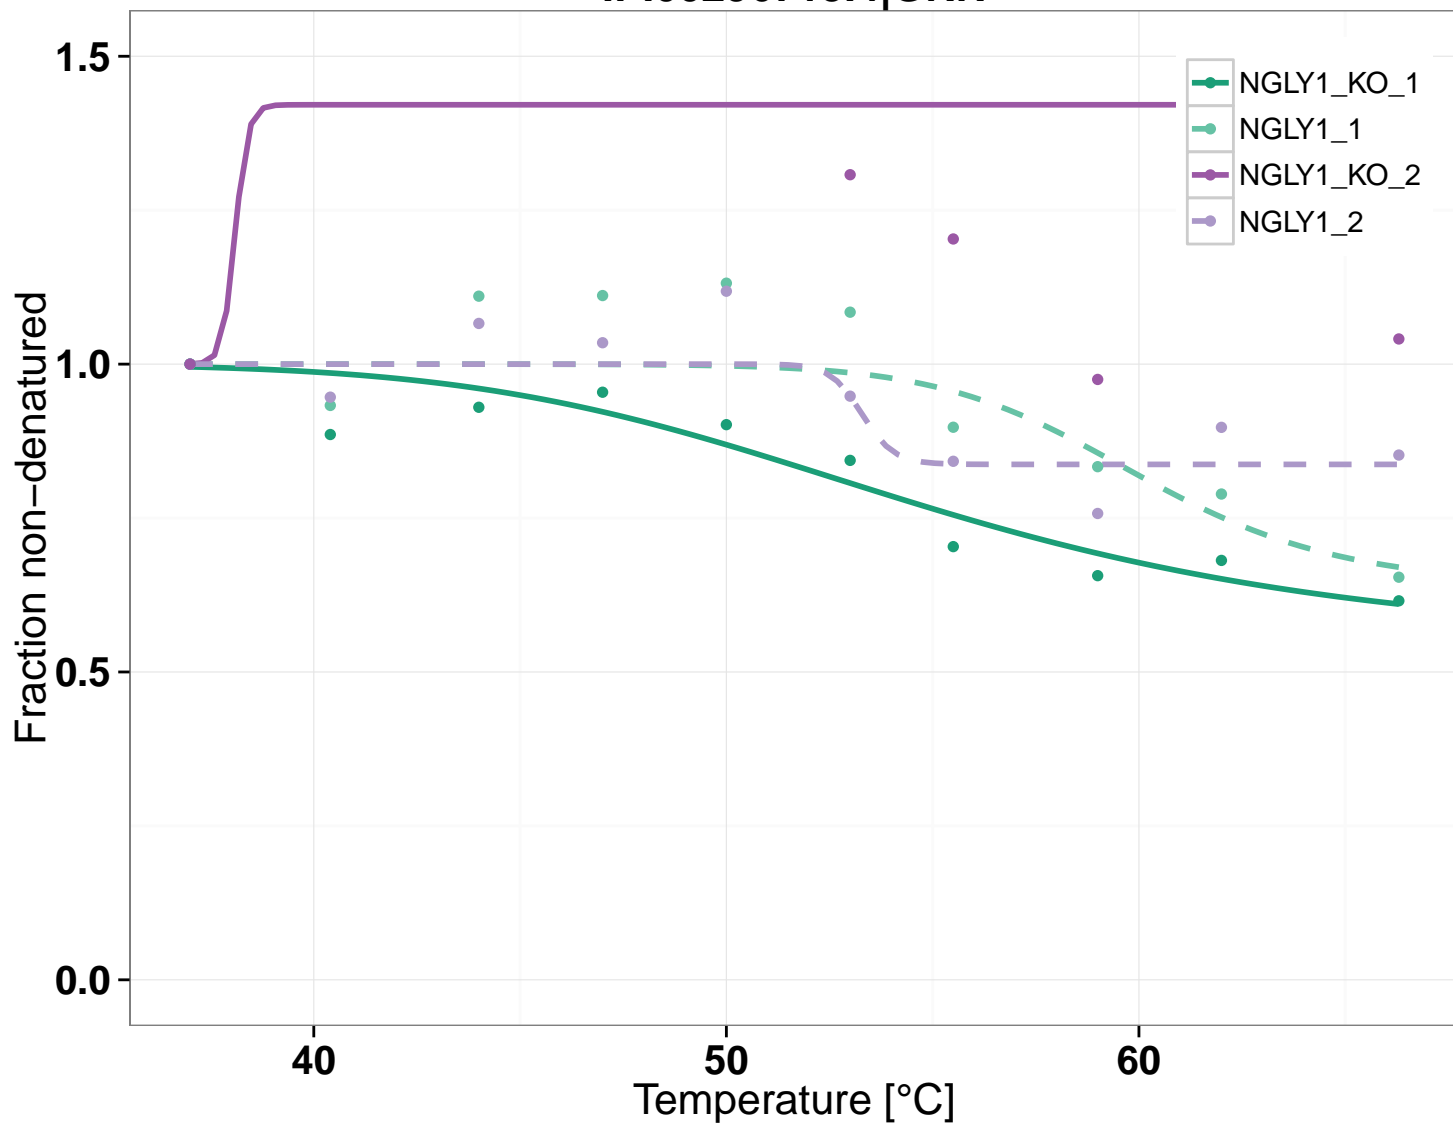

|            | meltPoint | slope  | plateau | R2   |
|------------|-----------|--------|---------|------|
| NGLY1_KO_1 | –         | –0.021 | 0.54    | 0.89 |
| NGLY1_1    | –         | –0.037 | 0.64    | 0.73 |
| NGLY1_KO_2 | –         | 0.69   | 1.42    | 0.15 |
| NGLY1_2    | –         | –0.11  | 0.84    | 0.71 |

Supplement: Supplementary file 7548 [file 1]

# IPI00021943.4|FPGT

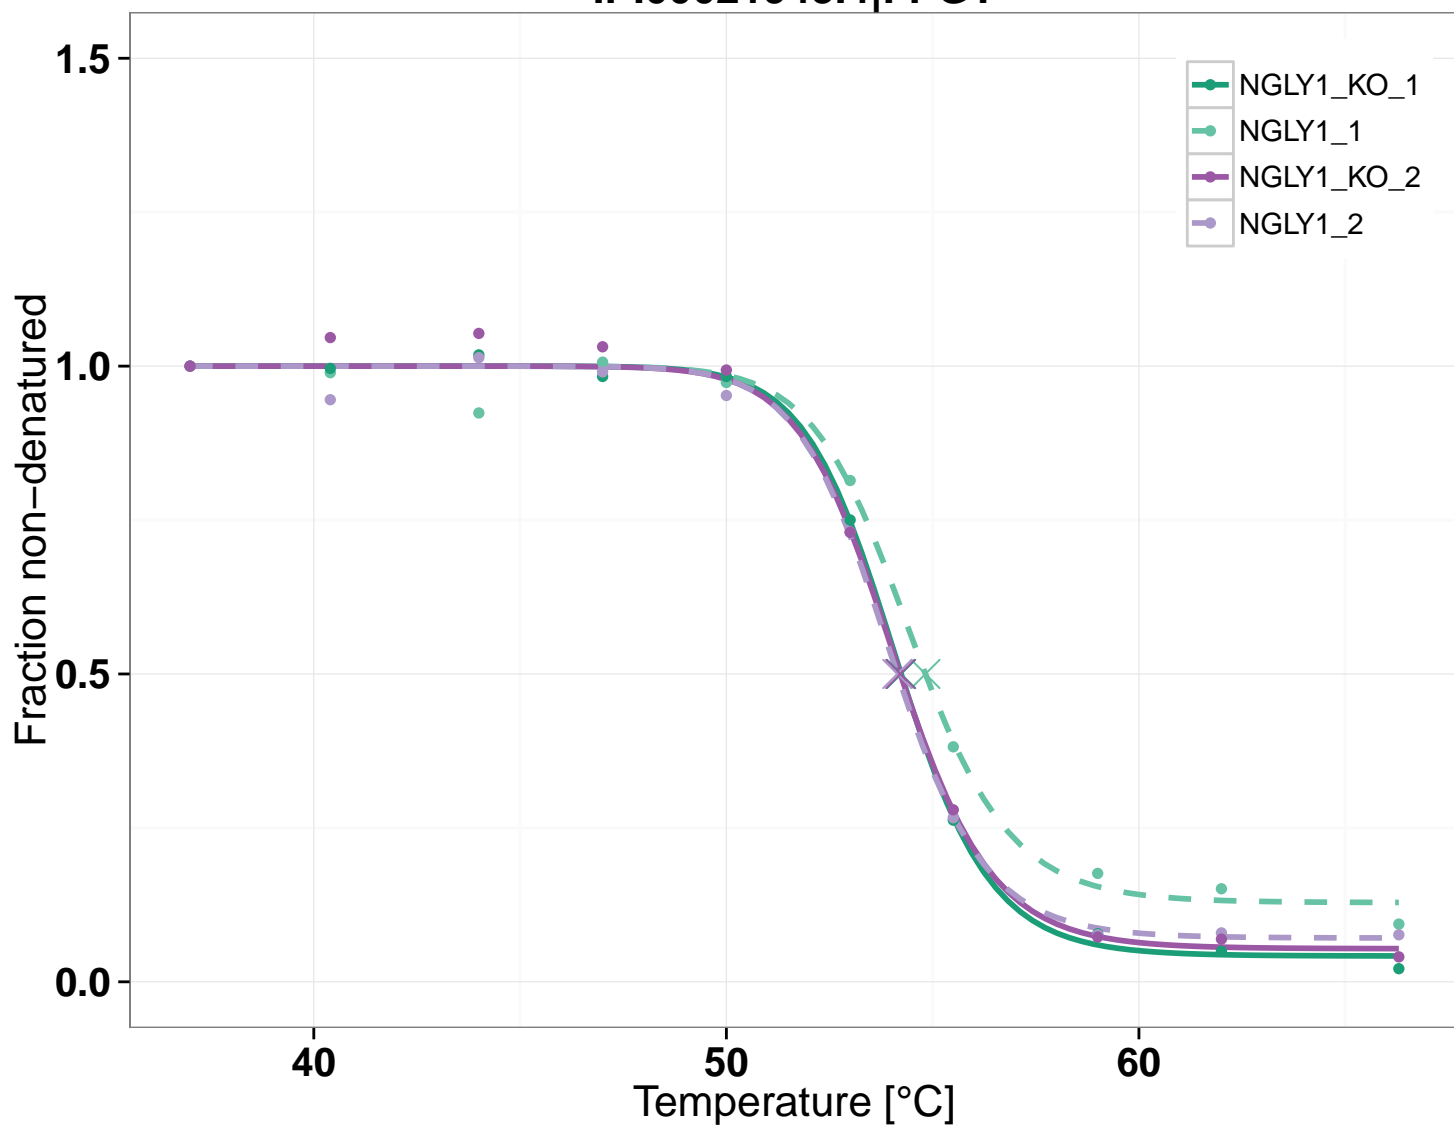

|            | meltPoint | slope | plateau | R2   |
|------------|-----------|-------|---------|------|
| NGLY1_KO_1 | 54.23     | -0.21 | 0.04    | 1    |
| NGLY1_1    | 54.83     | -0.18 | 0.13    | 0.99 |
| NGLY1_KO_2 | 54.22     | -0.2  | 0.05    | 1    |
| NGLY1_2    | 54.14     | -0.2  | 0.07    | 1    |

Supplement: Supplementary file 7549 [file 1]

IPI00477118.3|TMEM214

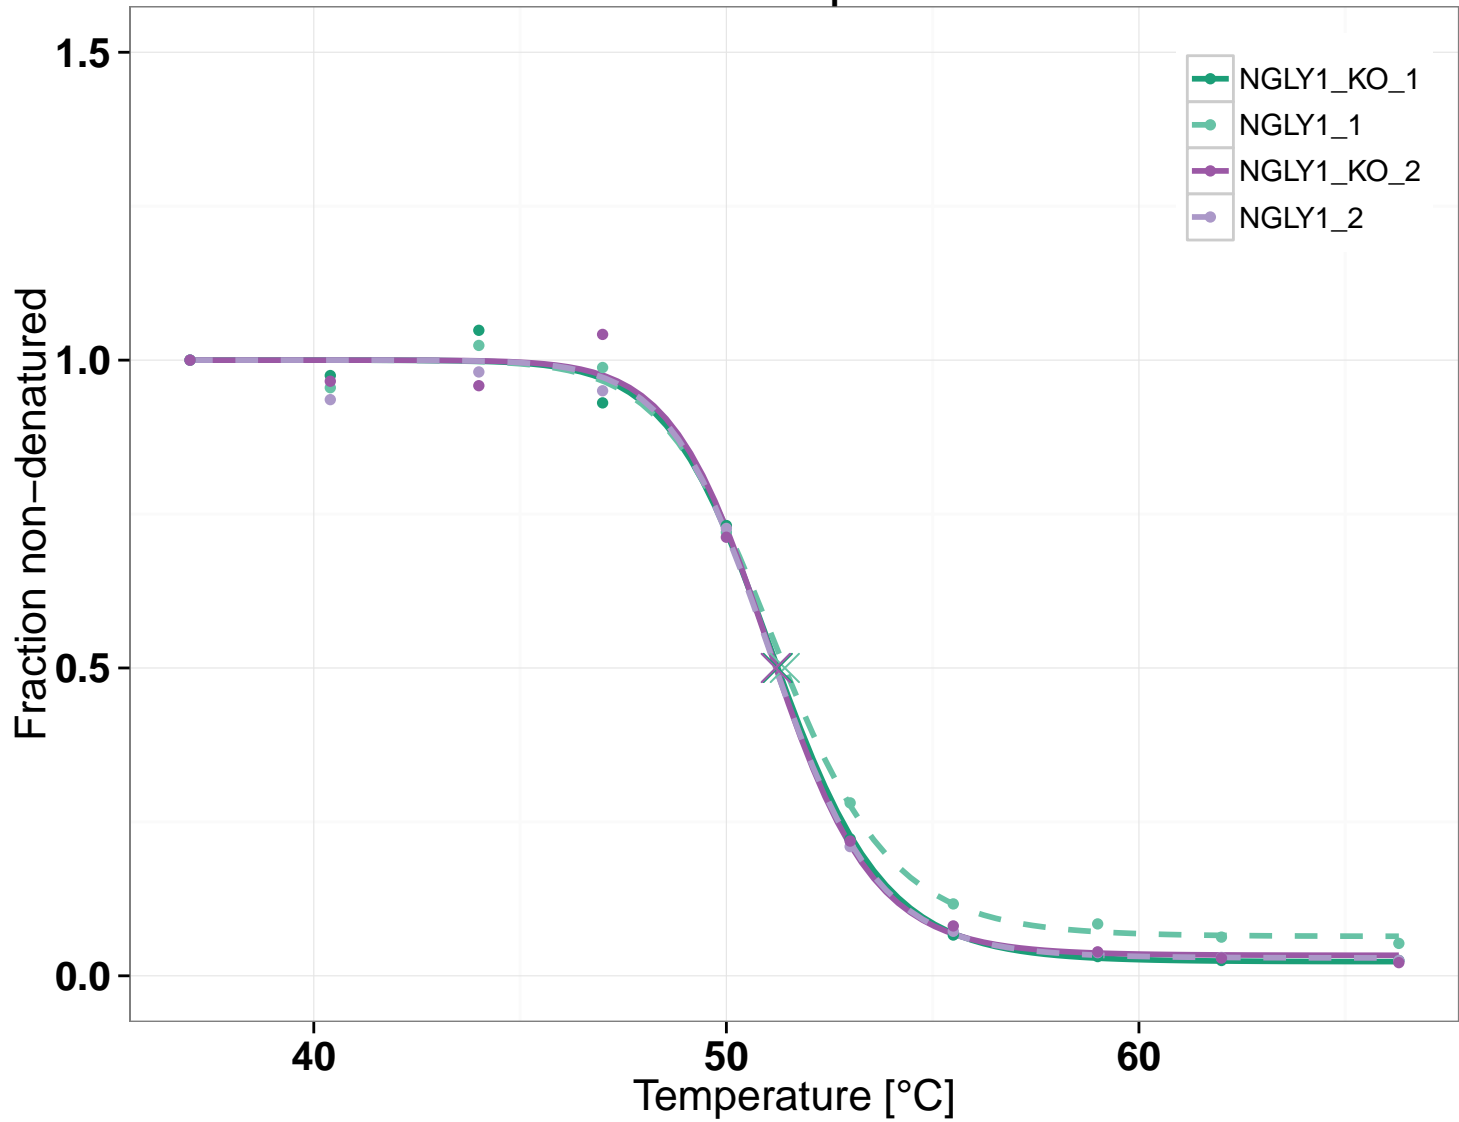

|            | meltPoint | slope | plateau | R2 |
|------------|-----------|-------|---------|----|
| NGLY1_KO_1 | 51.25     | -0.19 | 0.02    | 1  |
| NGLY1_1    | 51.42     | -0.17 | 0.06    | 1  |
| NGLY1_KO_2 | 51.2      | -0.2  | 0.03    | 1  |
| NGLY1_2    | 51.19     | -0.19 | 0.03    | 1  |

Supplement: Supplementary file 7550 [file 1]

IPI00011979.1|LYRM1

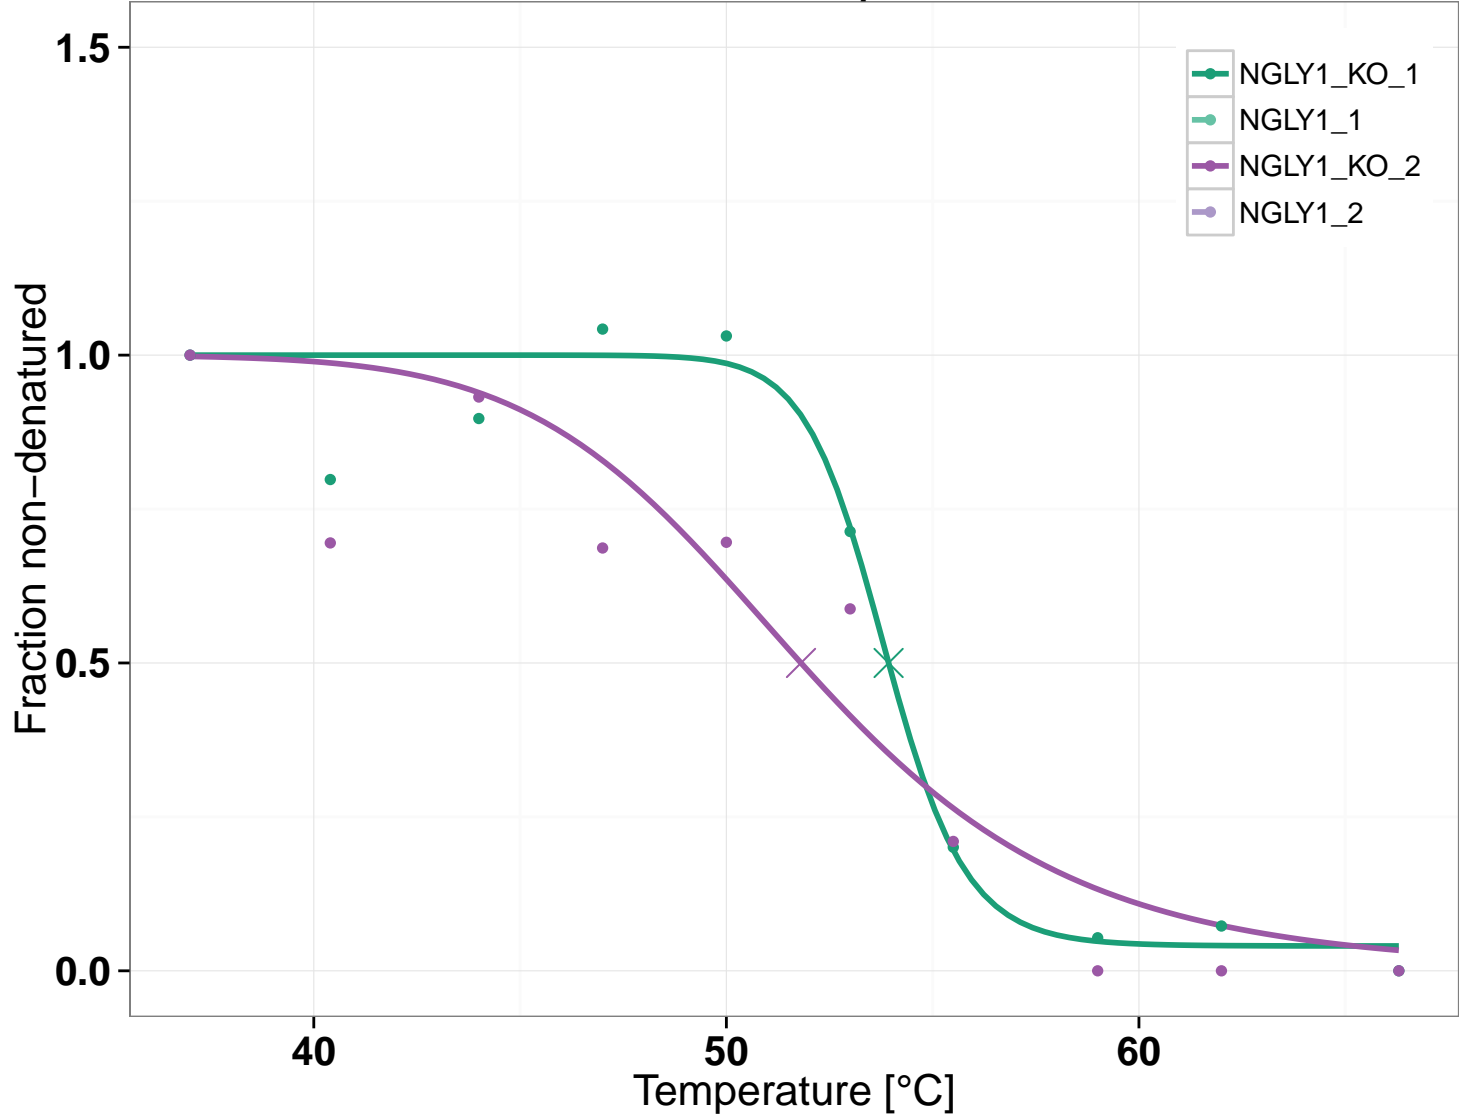

|            | meltPoint | slope  | plateau | R2   |
|------------|-----------|--------|---------|------|
| NGLY1_KO_1 | 53.93     | -0.25  | 0.04    | 0.97 |
| NGLY1_1    | -         | -      | -       | -    |
| NGLY1_KO_2 | 51.81     | -0.076 | 0       | 0.88 |
| NGLY1_2    | -         | -      | -       | -    |

Supplement: Supplementary file 7551 [file 1]

# IPI00336047.5|MYO9B

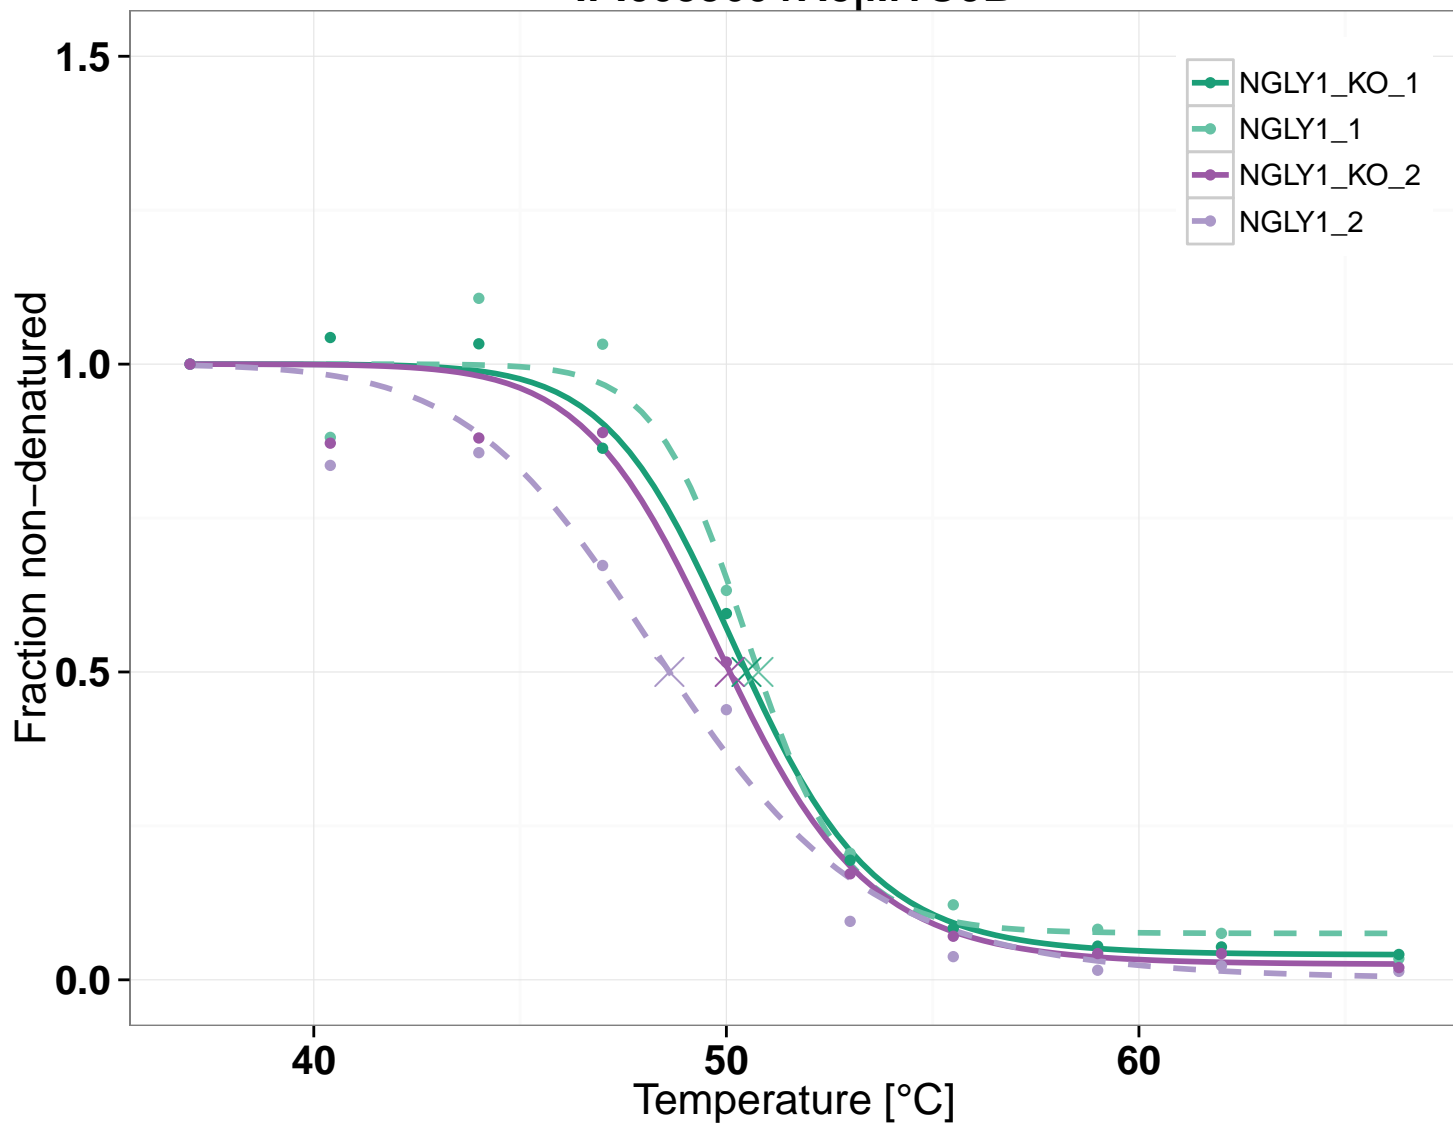

|            | meltPoint | slope | plateau | R2   |
|------------|-----------|-------|---------|------|
| NGLY1_KO_1 | 50.49     | -0.15 | 0.04    | 1    |
| NGLY1_1    | 50.78     | -0.2  | 0.08    | 0.98 |
| NGLY1_KO_2 | 50.08     | -0.14 | 0.02    | 0.98 |
| NGLY1_2    | 48.62     | -0.1  | 0       | 0.98 |

Supplement: Supplementary file 7552 [file 1]

# IPI00025721.3|COPS3

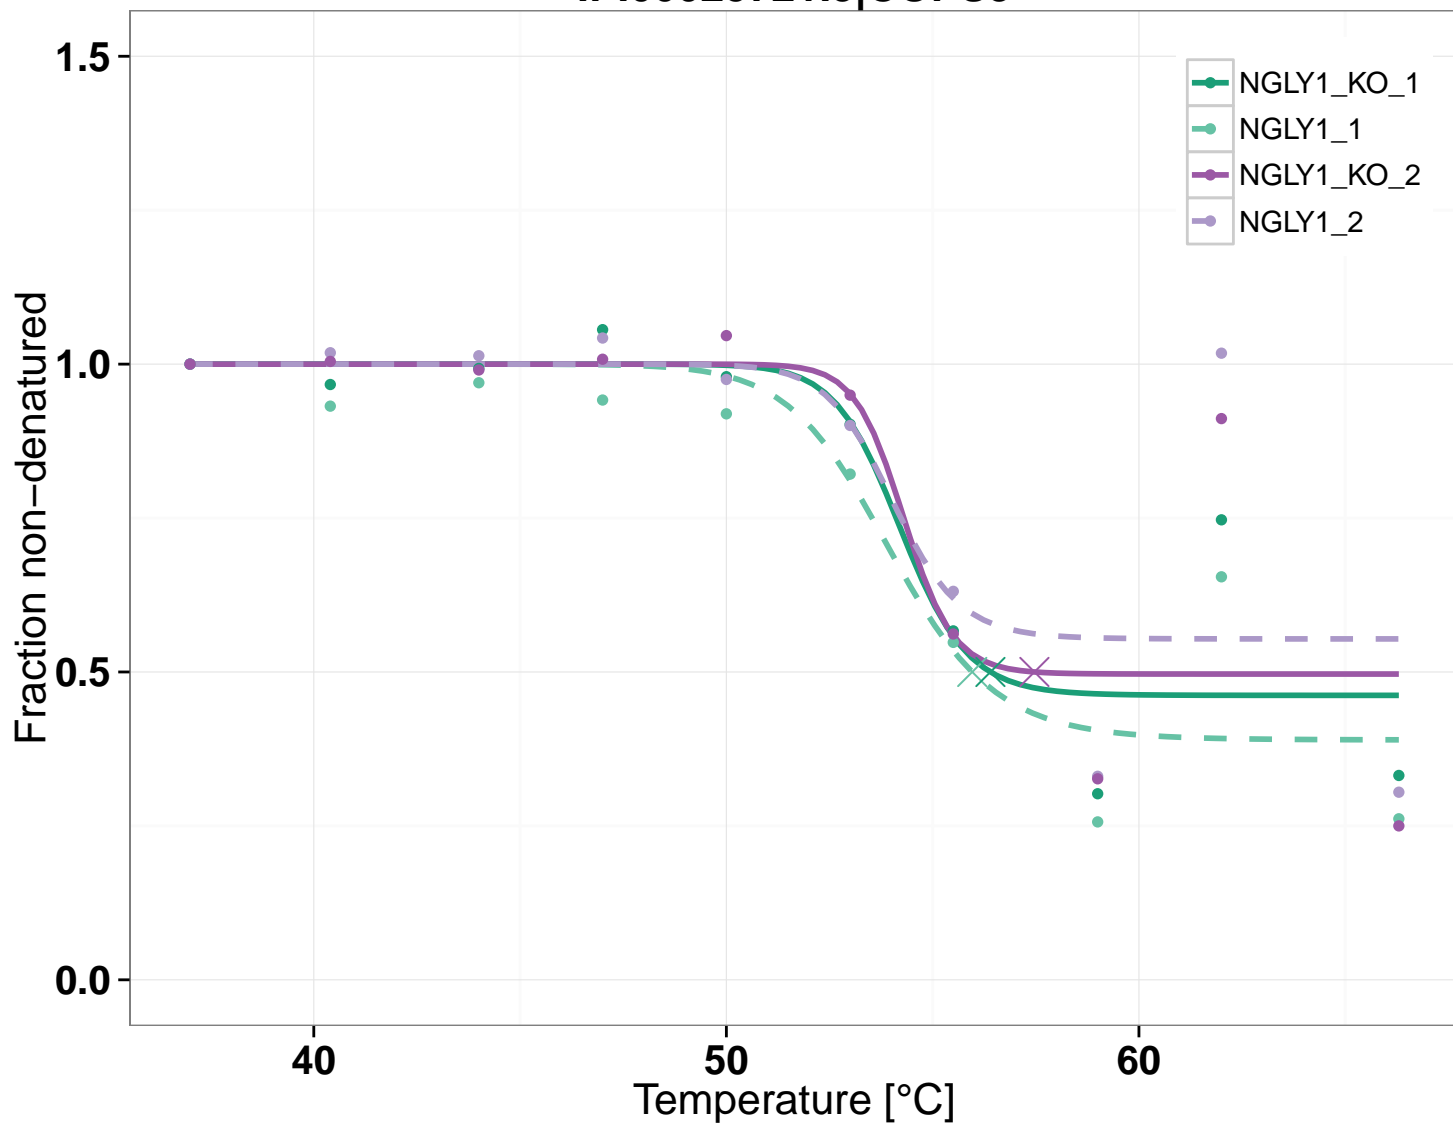

|            | meltPoint | slope | plateau | R2   |
|------------|-----------|-------|---------|------|
| NGLY1_KO_1 | 56.4      | -0.17 | 0.46    | 0.82 |
| NGLY1_1    | 55.96     | -0.12 | 0.39    | 0.84 |
| NGLY1_KO_2 | 57.47     | -0.21 | 0.5     | 0.69 |
| NGLY1_2    | -         | -0.14 | 0.55    | 0.57 |

Supplement: Supplementary file 7553 [file 1]

# IPI00025366.4|CS

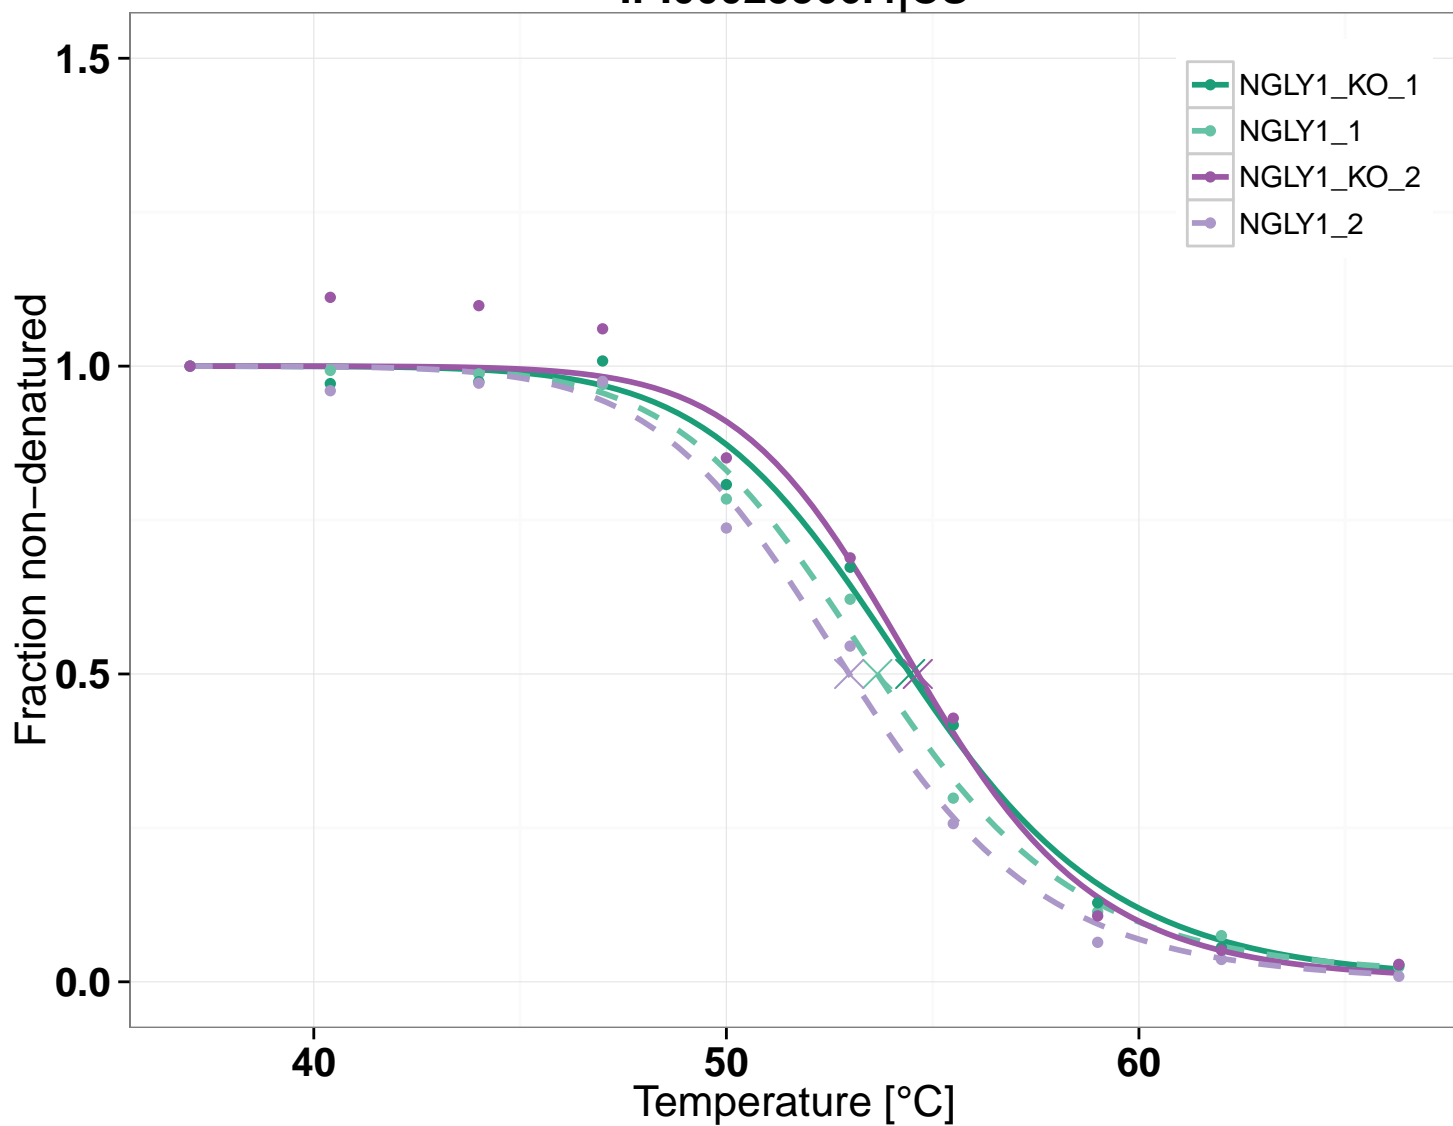

|            | meltPoint | slope | plateau | R2   |
|------------|-----------|-------|---------|------|
| NGLY1_KO_1 | 54.46     | -0.1  | 0       | 0.99 |
| NGLY1_1    | 53.66     | -0.1  | 0.01    | 1    |
| NGLY1_KO_2 | 54.64     | -0.11 | 0       | 0.98 |
| NGLY1_2    | 52.98     | -0.11 | 0       | 0.99 |

Supplement: Supplementary file 7554 [file 1]

IPI00019450.2|TROVE2

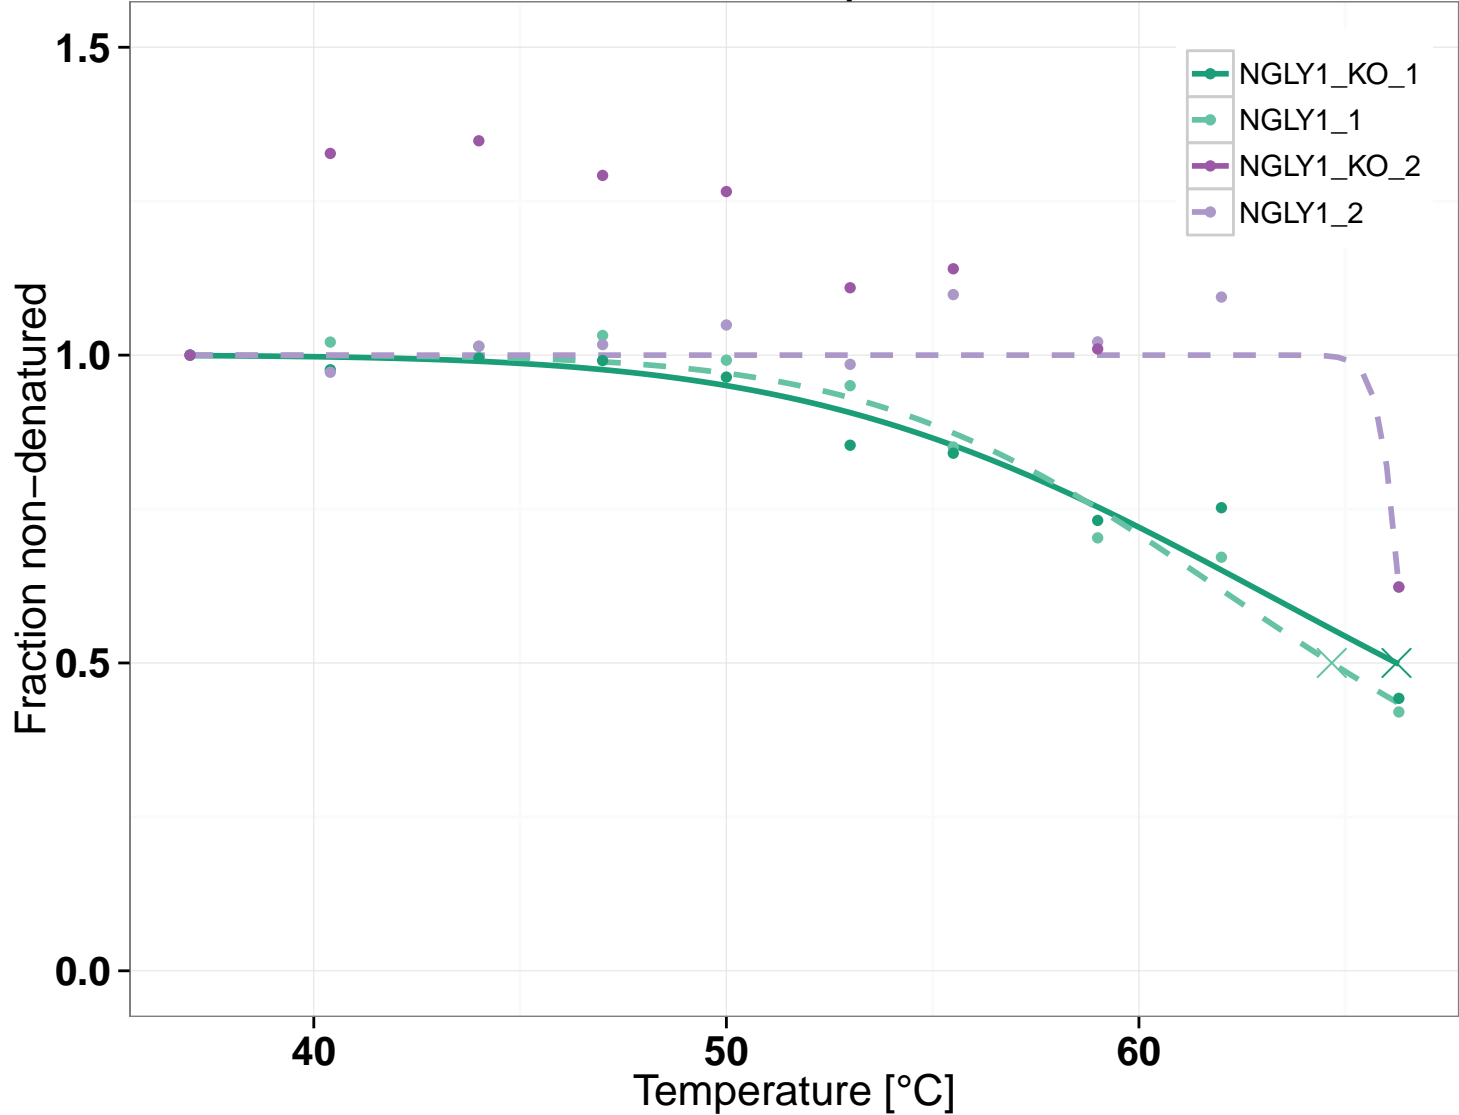

|            | meltPoint | slope  | plateau | R2   |
|------------|-----------|--------|---------|------|
| NGLY1_KO_1 | 66.24     | -0.036 | 0       | 0.94 |
| NGLY1_1    | 64.67     | -0.046 | 0.1     | 0.98 |
| NGLY1_KO_2 | -         | -      | -       | -    |
| NGLY1_2    | -         | -      | 0       | 0.86 |

Supplement: Supplementary file 7555 [file 1]

# IPI00163230.5|COPS6

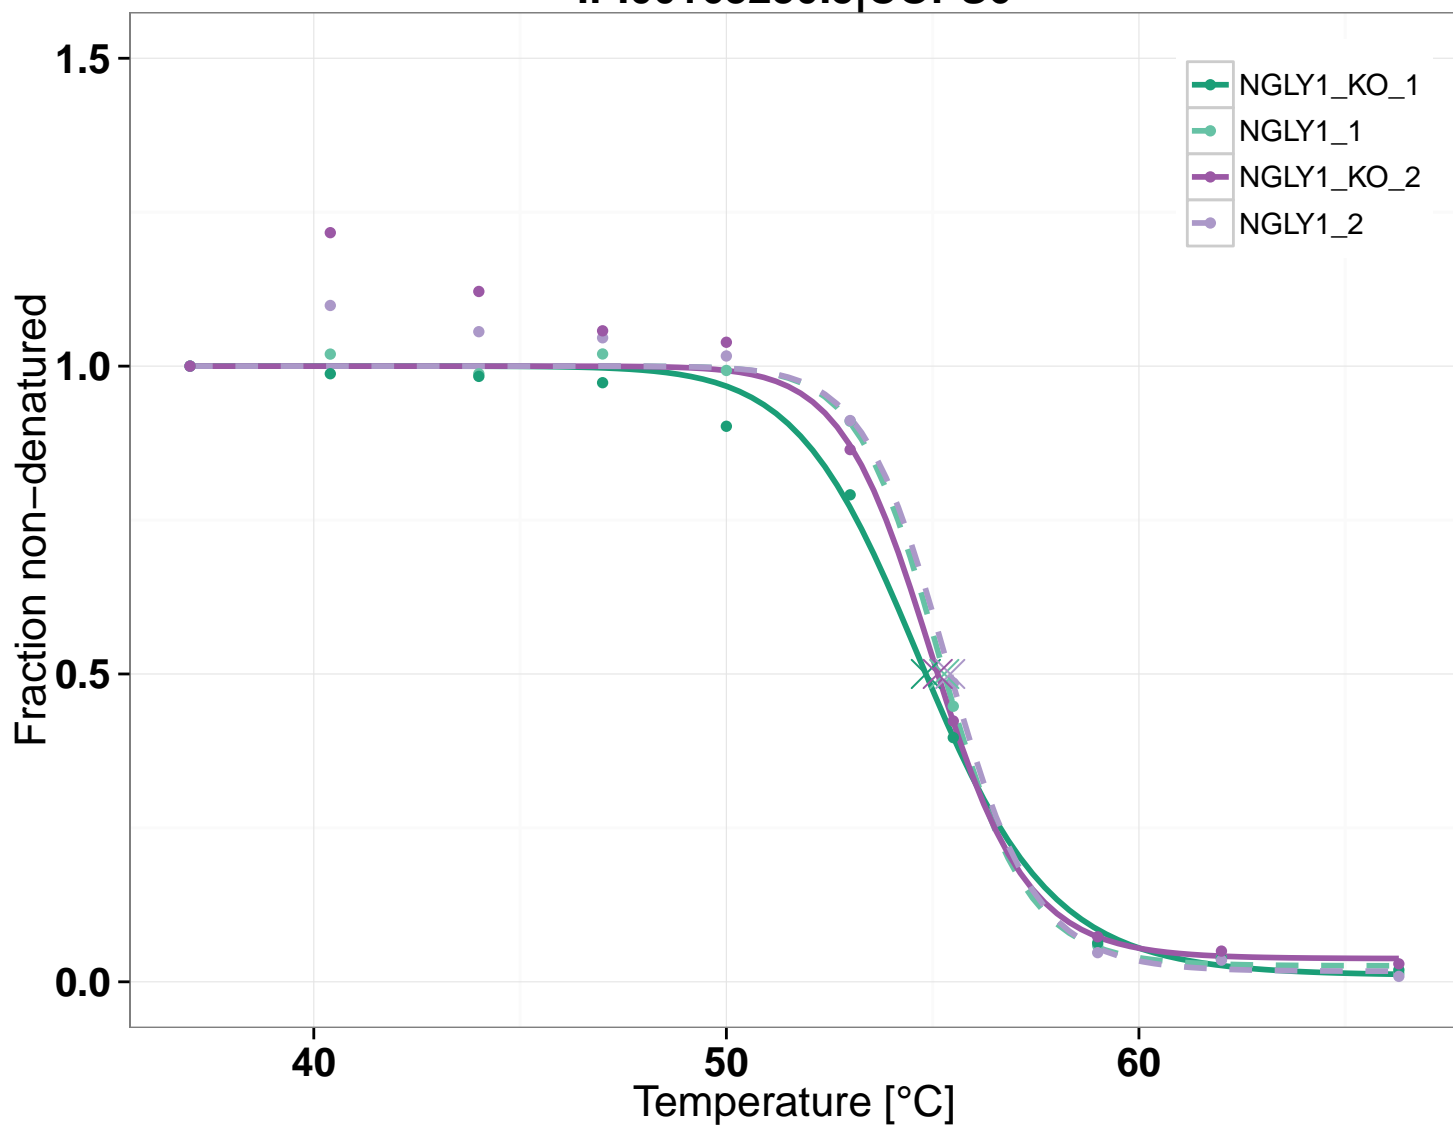

|            | meltPoint | slope | plateau | R2   |
|------------|-----------|-------|---------|------|
| NGLY1_KO_1 | 54.83     | -0.16 | 0.01    | 1    |
| NGLY1_1    | 55.28     | -0.24 | 0.03    | 1    |
| NGLY1_KO_2 | 55.12     | -0.21 | 0.04    | 0.97 |
| NGLY1_2    | 55.43     | -0.23 | 0.02    | 0.99 |

Supplement: Supplementary file 7556 [file 1]

IPI00438170.3|SNX12

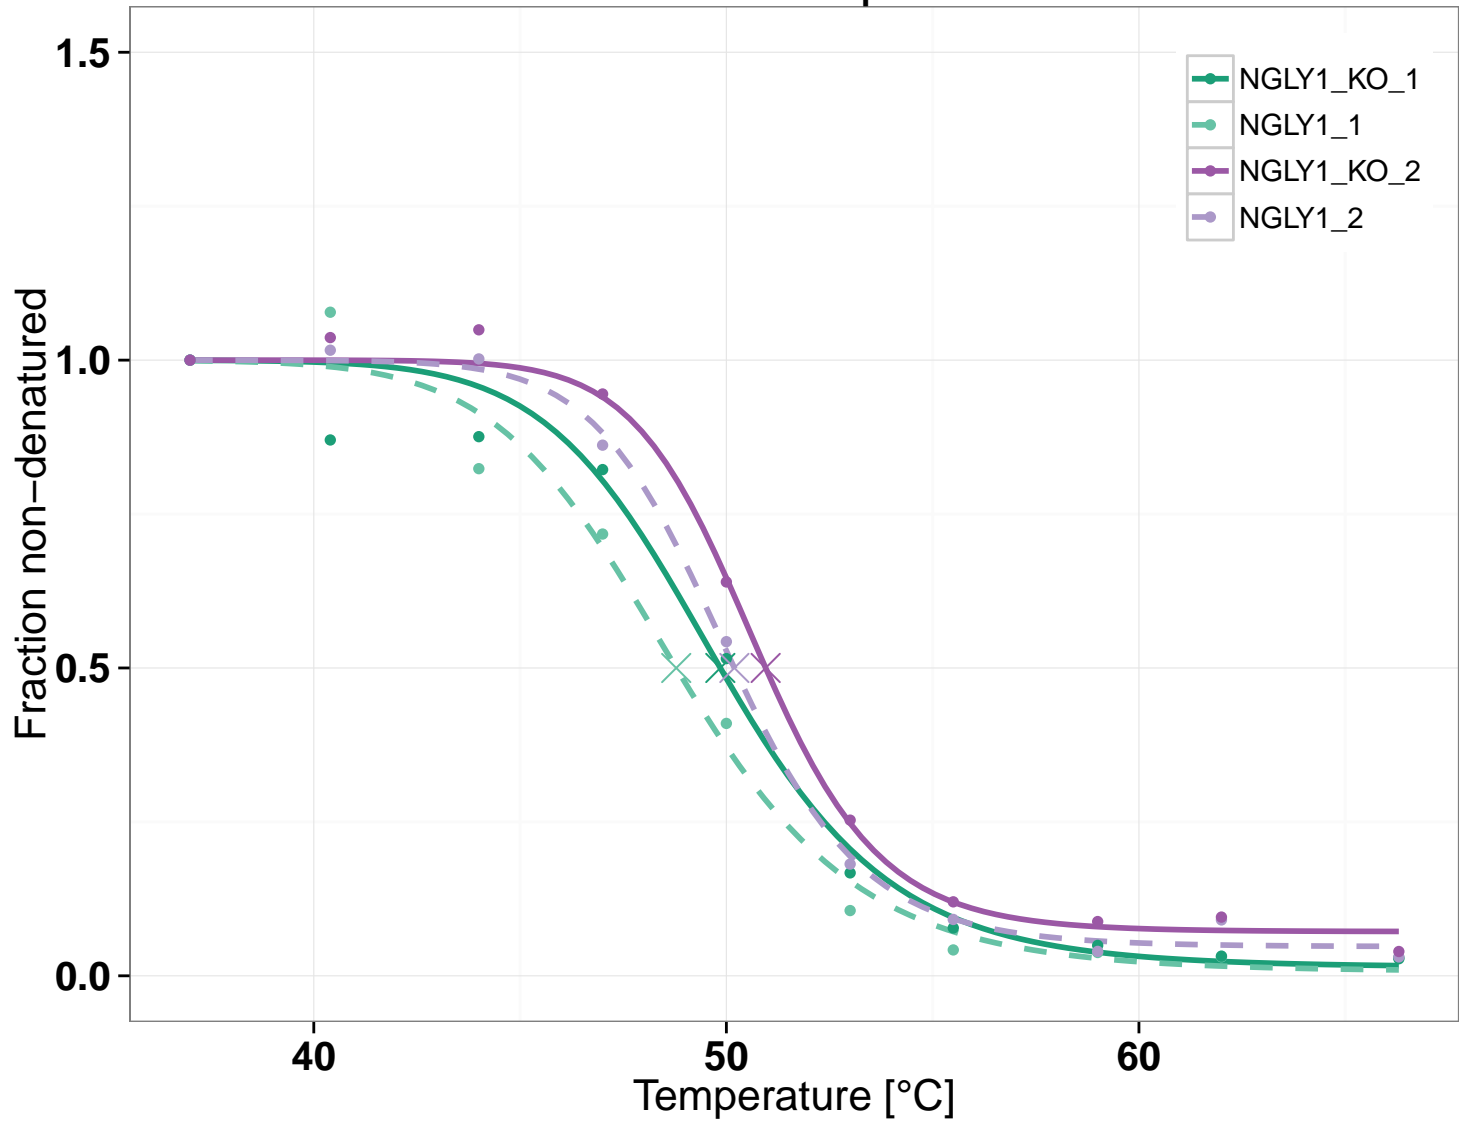

|            | meltPoint | slope | plateau | R2   |
|------------|-----------|-------|---------|------|
| NGLY1_KO_1 | 49.85     | -0.12 | 0.01    | 0.98 |
| NGLY1_1    | 48.79     | -0.11 | 0.01    | 0.99 |
| NGLY1_KO_2 | 50.95     | -0.15 | 0.07    | 1    |
| NGLY1_2    | 50.19     | -0.15 | 0.05    | 1    |

Supplement: Supplementary file 7557 [file 1]

# IPI00872099.1|UBE2CBP

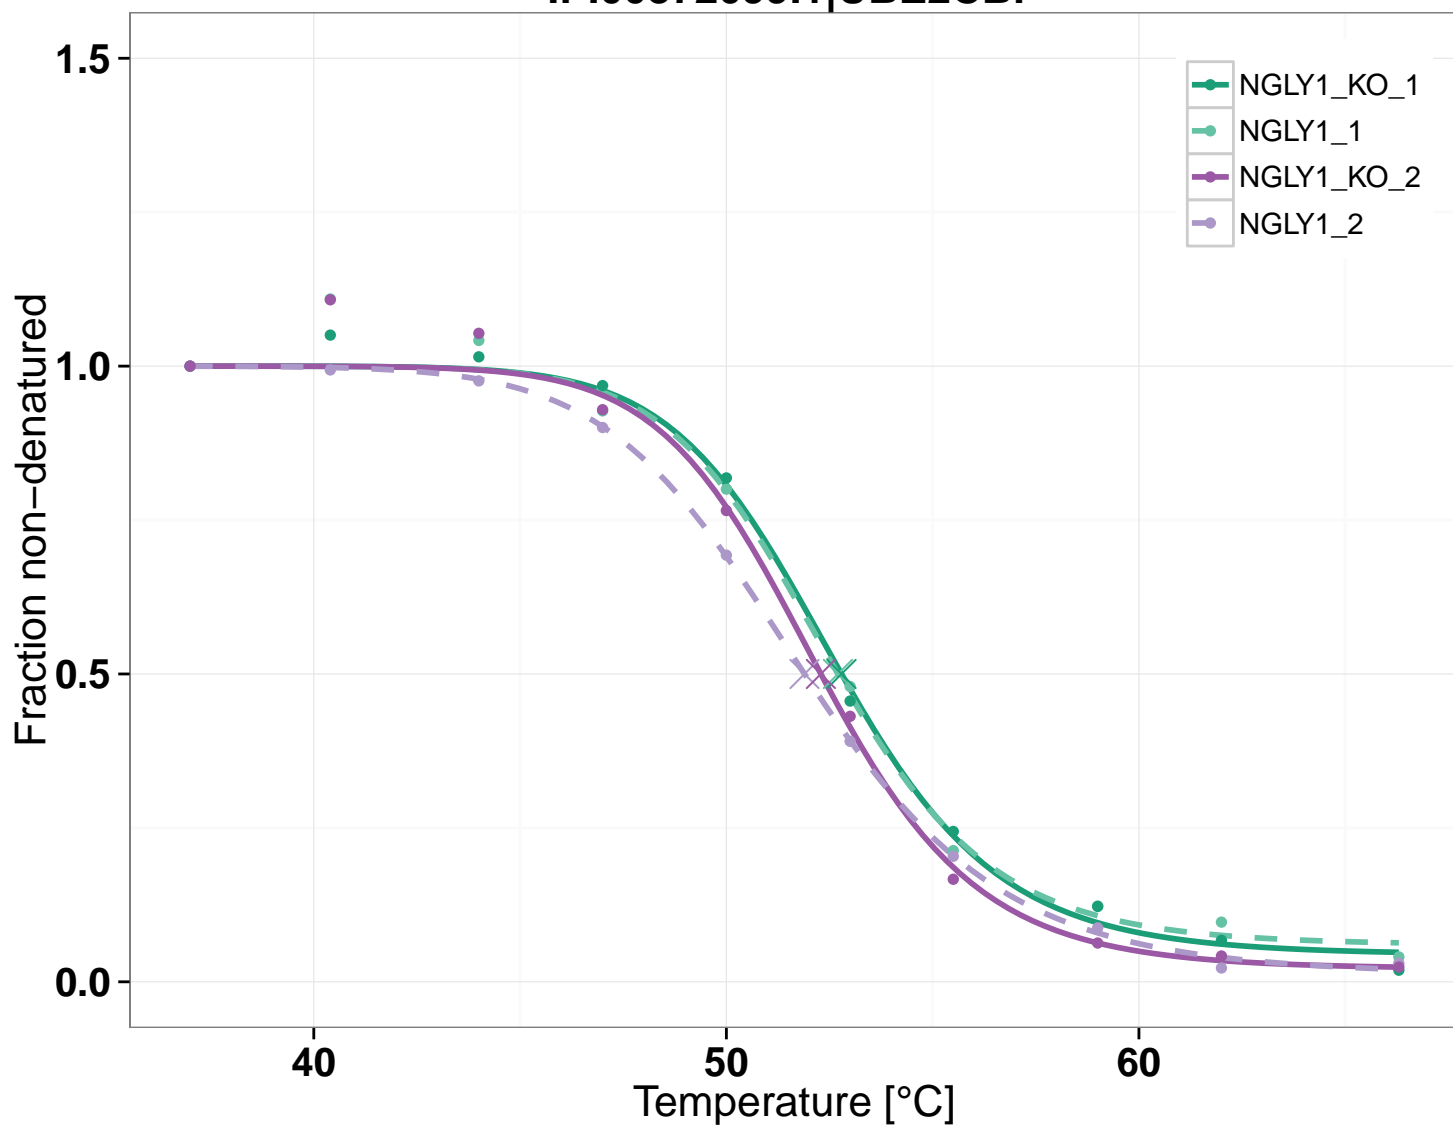

|            | meltPoint | slope | plateau | R2   |
|------------|-----------|-------|---------|------|
| NGLY1_KO_1 | 52.79     | -0.12 | 0.04    | 1    |
| NGLY1_1    | 52.7      | -0.12 | 0.06    | 0.99 |
| NGLY1_KO_2 | 52.29     | -0.13 | 0.02    | 0.99 |
| NGLY1_2    | 51.89     | -0.1  | 0.01    | 1    |

Supplement: Supplementary file 7558 [file 1]

IPI00795107.1|TATDN1

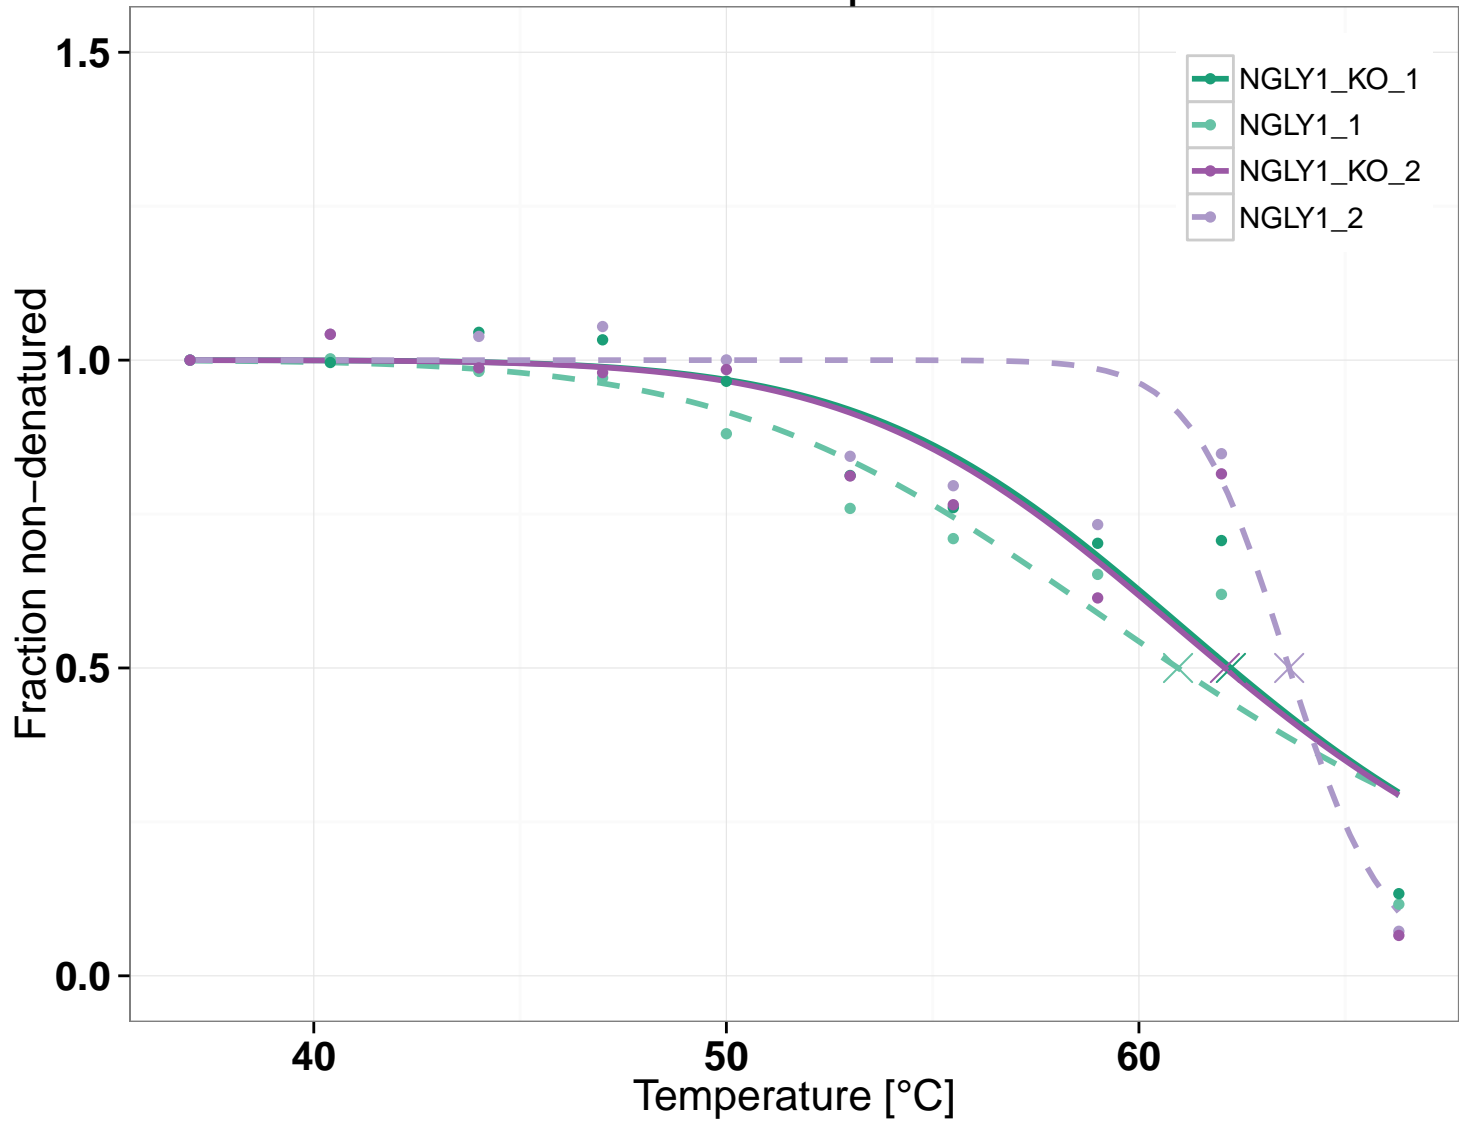

|            | meltPoint | slope  | plateau | R2   |
|------------|-----------|--------|---------|------|
| NGLY1_KO_1 | 62.23     | -0.057 | 0       | 0.87 |
| NGLY1_1    | 60.95     | -0.046 | 0       | 0.89 |
| NGLY1_KO_2 | 62.08     | -0.057 | 0       | 0.78 |
| NGLY1_2    | 63.64     | -0.21  | 0       | 0.82 |

Supplement: Supplementary file 7559 [file 1]

# IPI00797537.2|NUDCD1

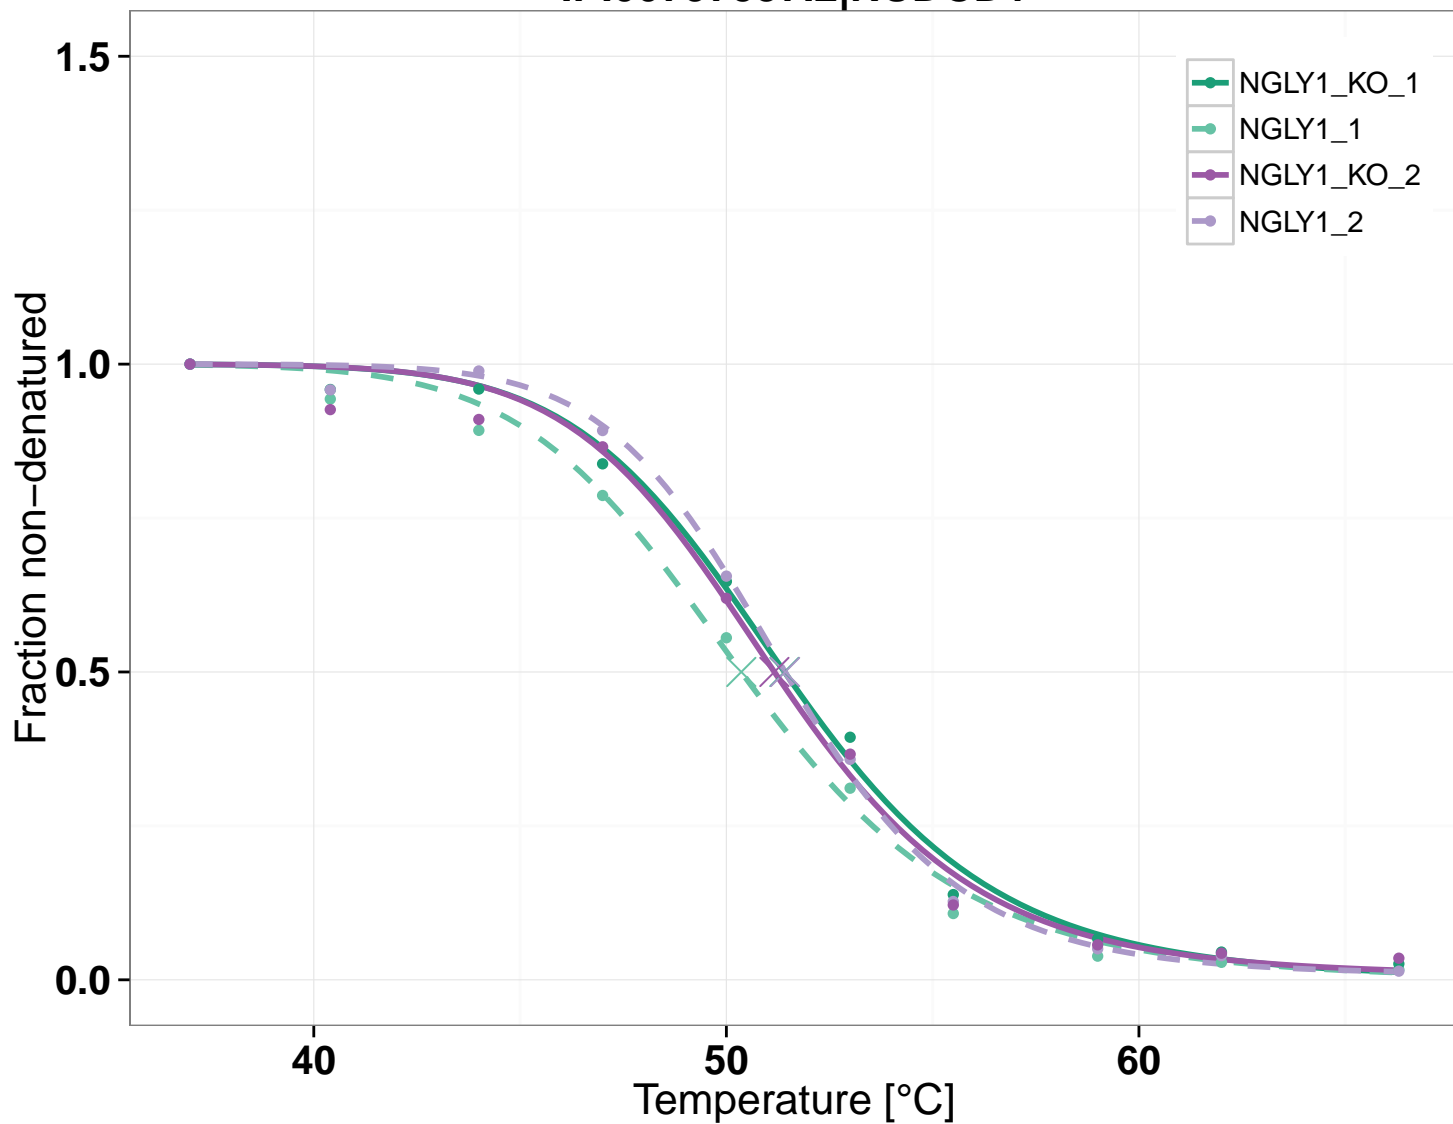

|            | meltPoint | slope  | plateau | R2   |
|------------|-----------|--------|---------|------|
| NGLY1_KO_1 | 51.41     | -0.097 | 0       | 1    |
| NGLY1_1    | 50.36     | -0.093 | 0       | 0.99 |
| NGLY1_KO_2 | 51.16     | -0.1   | 0.01    | 0.99 |
| NGLY1_2    | 51.42     | -0.11  | 0.01    | 1    |

Supplement: Supplementary file 7560 [file 1]

IPI00022442.2|NDUFAB1

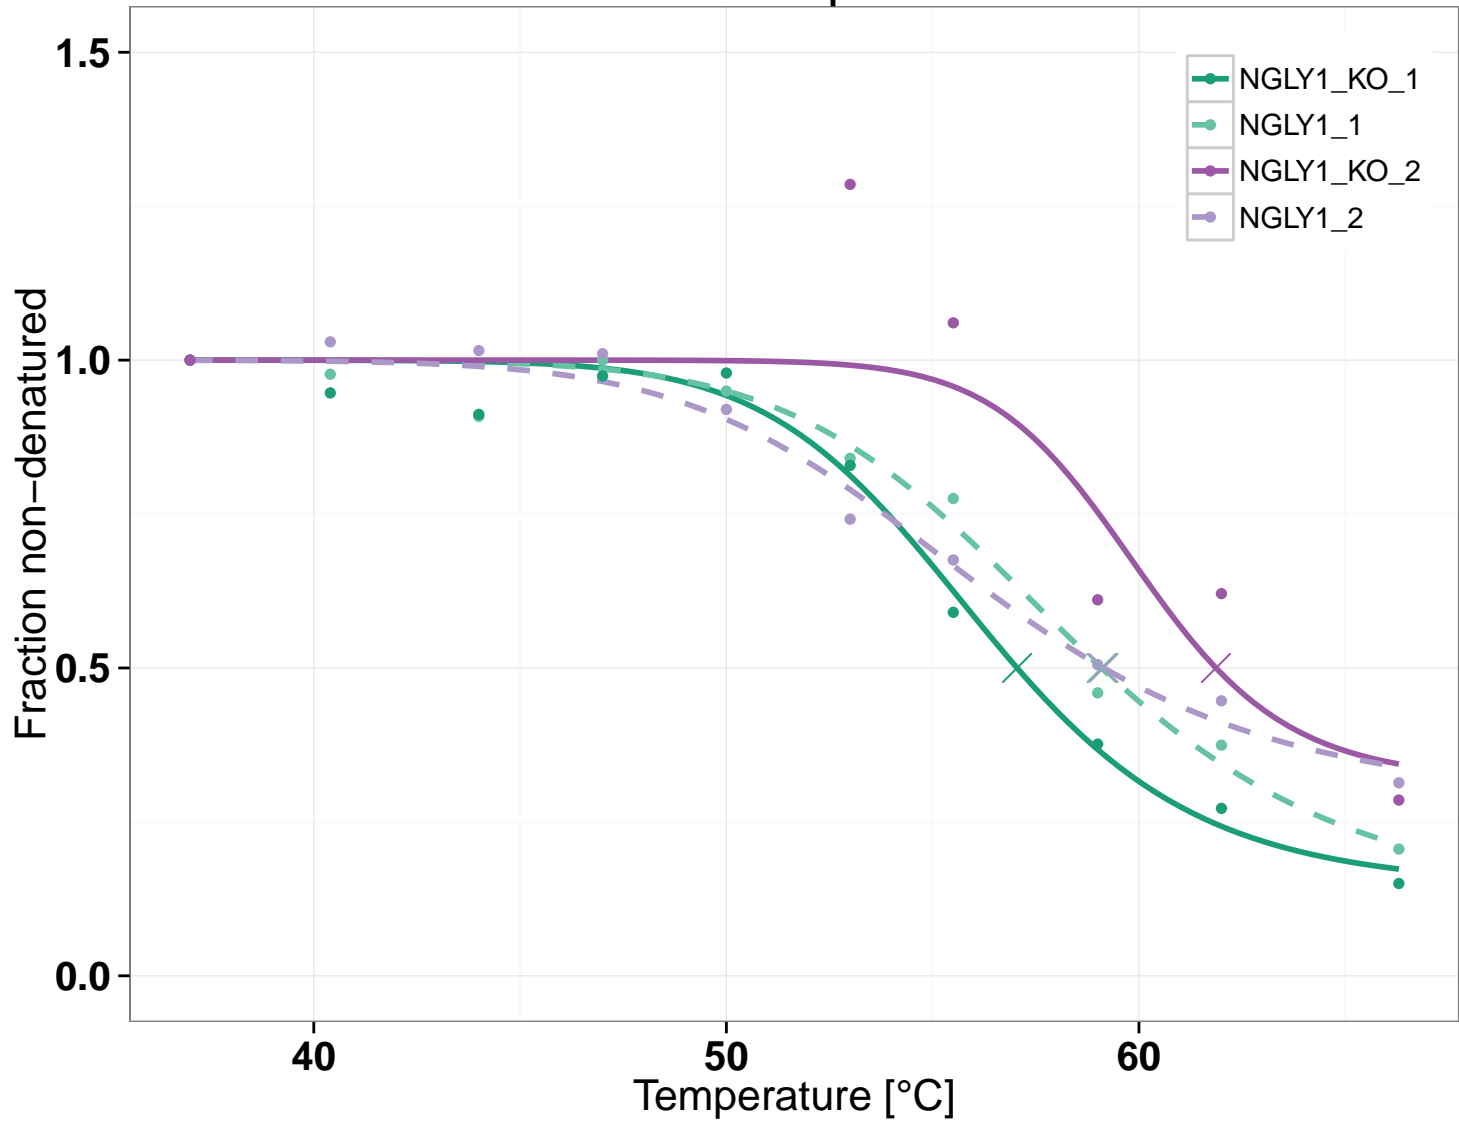

|            | meltPoint | slope  | plateau | R2   |
|------------|-----------|--------|---------|------|
| NGLY1_KO_1 | 57.05     | -0.082 | 0.14    | 0.98 |
| NGLY1_1    | 59.09     | -0.066 | 0.12    | 0.98 |
| NGLY1_KO_2 | 61.87     | -0.095 | 0.32    | 0.13 |
| NGLY1_2    | 59.14     | -0.051 | 0.28    | 0.99 |

Supplement: Supplementary file 7561 [file 1]

IPI00004669.1|GALNT2

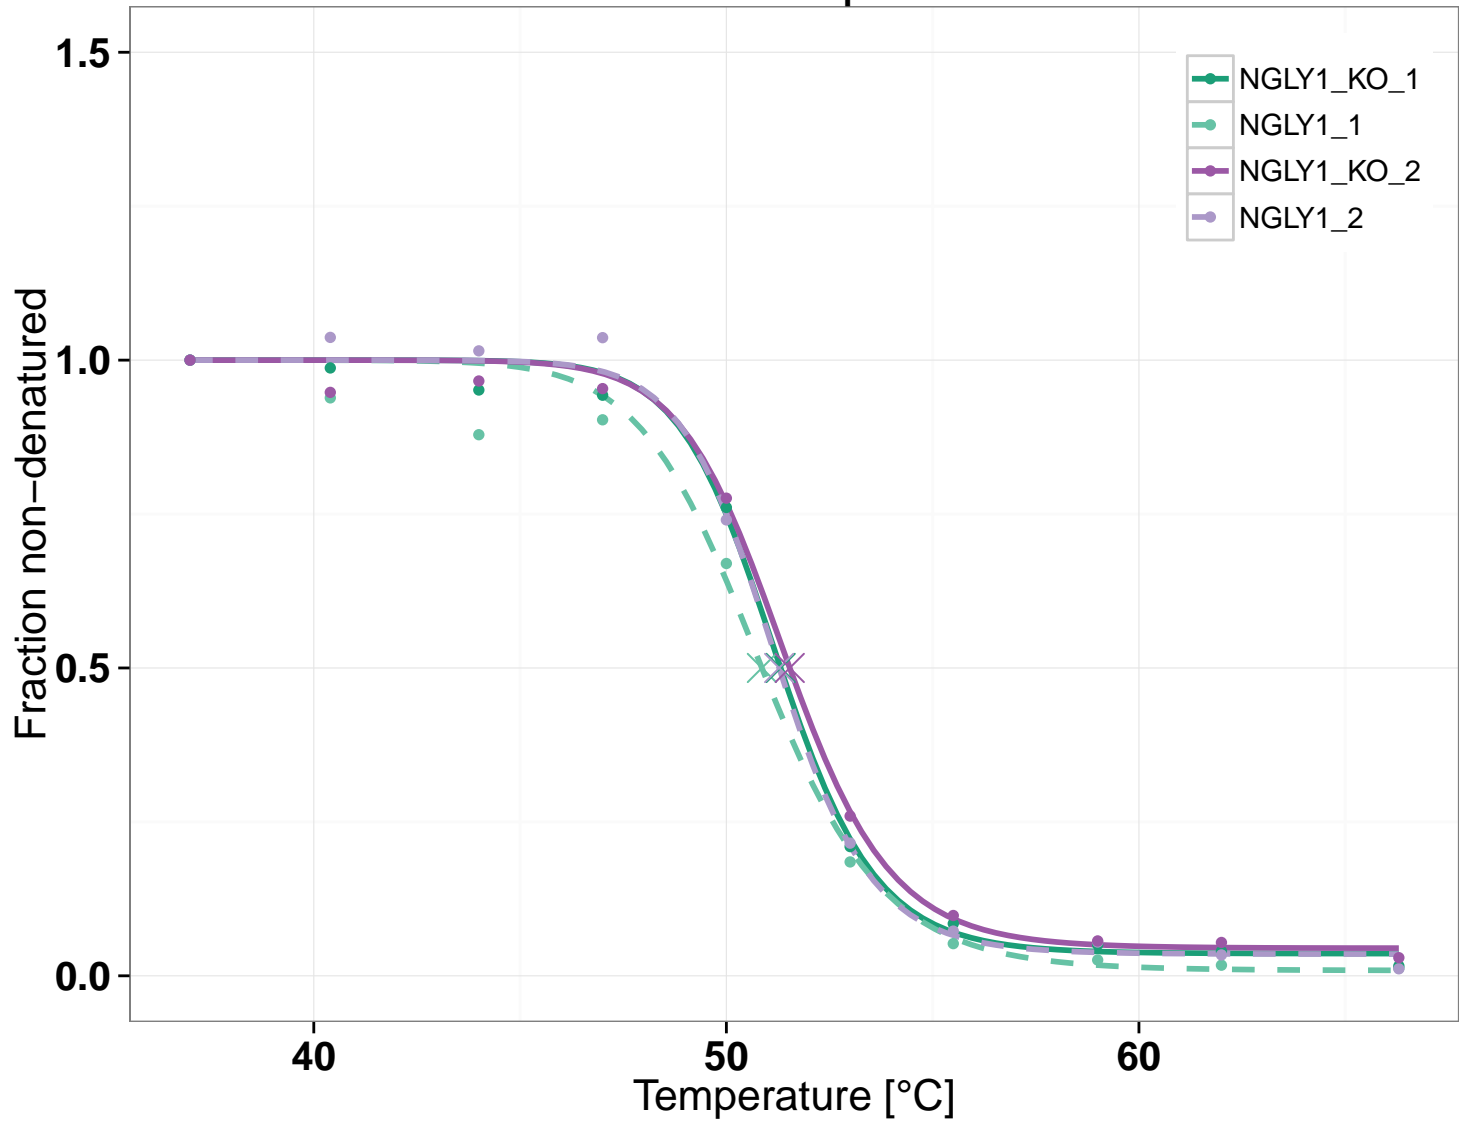

|            | meltPoint | slope | plateau | R2   |
|------------|-----------|-------|---------|------|
| NGLY1_KO_1 | 51.31     | -0.2  | 0.04    | 1    |
| NGLY1_1    | 50.86     | -0.17 | 0.01    | 0.99 |
| NGLY1_KO_2 | 51.54     | -0.19 | 0.04    | 1    |
| NGLY1_2    | 51.28     | -0.21 | 0.04    | 1    |

Supplement: Supplementary file 7562 [file 1]

# IPI00646058.2|SAFB

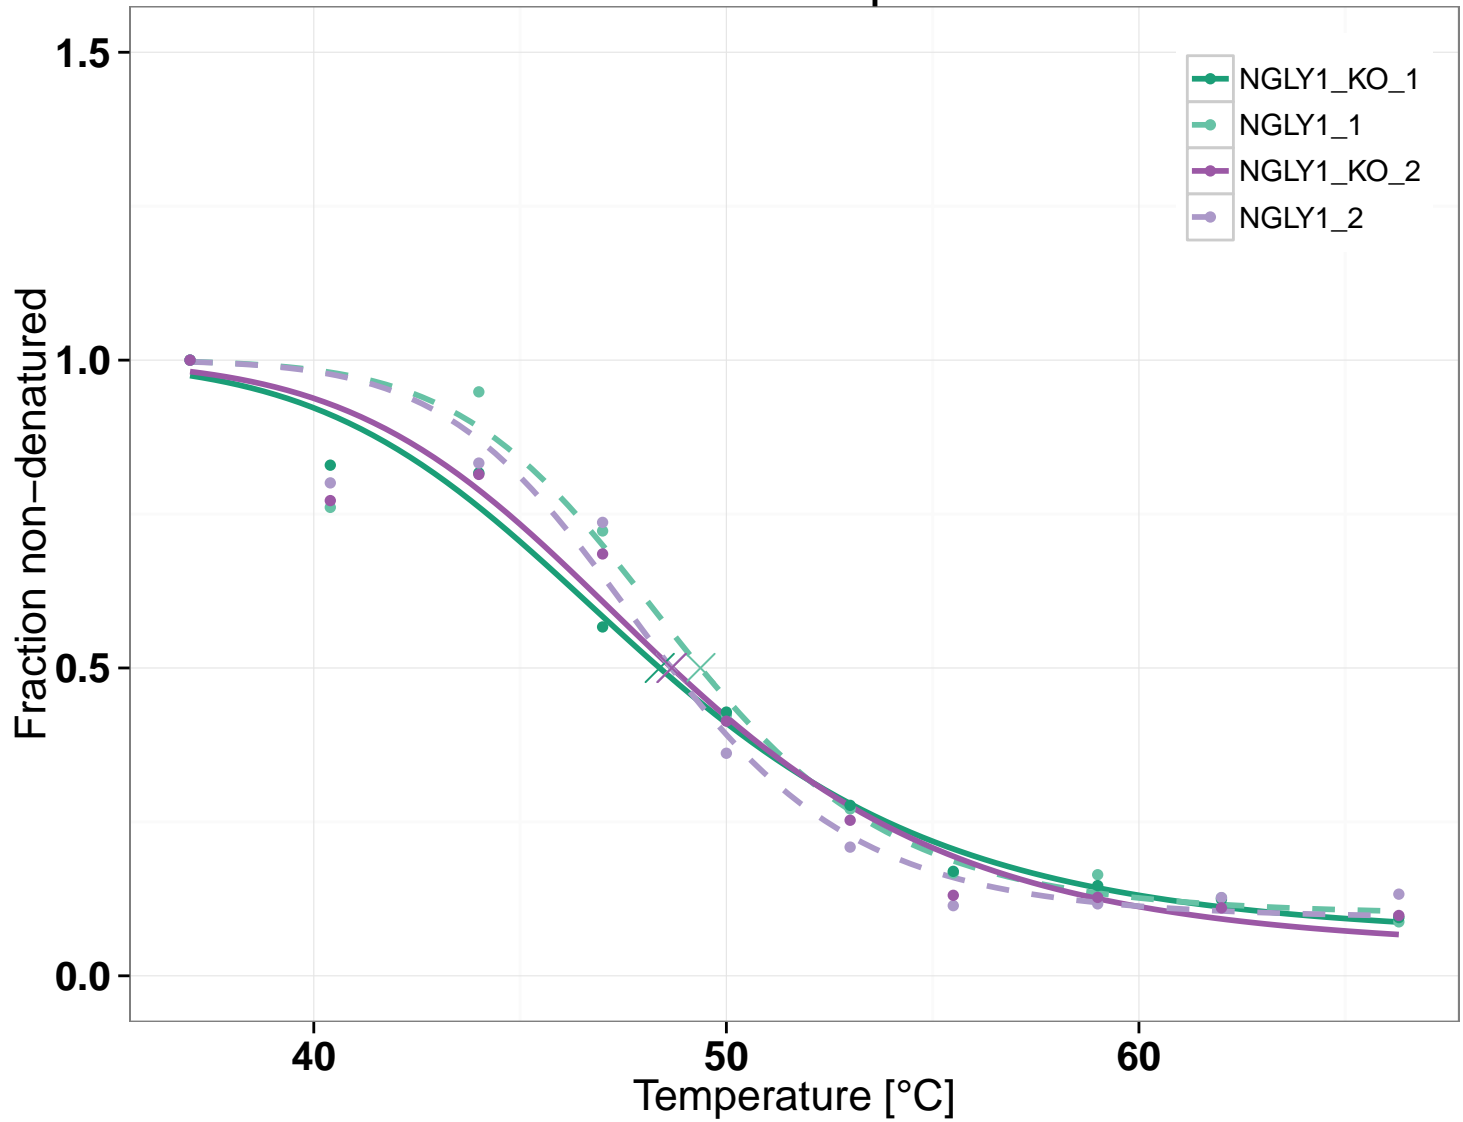

|            | meltPoint | slope  | plateau | R2   |
|------------|-----------|--------|---------|------|
| NGLY1_KO_1 | 48.38     | -0.062 | 0.06    | 0.99 |
| NGLY1_1    | 49.37     | -0.086 | 0.1     | 0.95 |
| NGLY1_KO_2 | 48.68     | -0.065 | 0.04    | 0.97 |
| NGLY1_2    | 48.66     | -0.091 | 0.09    | 0.96 |

Supplement: Supplementary file 7563 [file 1]

IPI00470631.2|COQ9

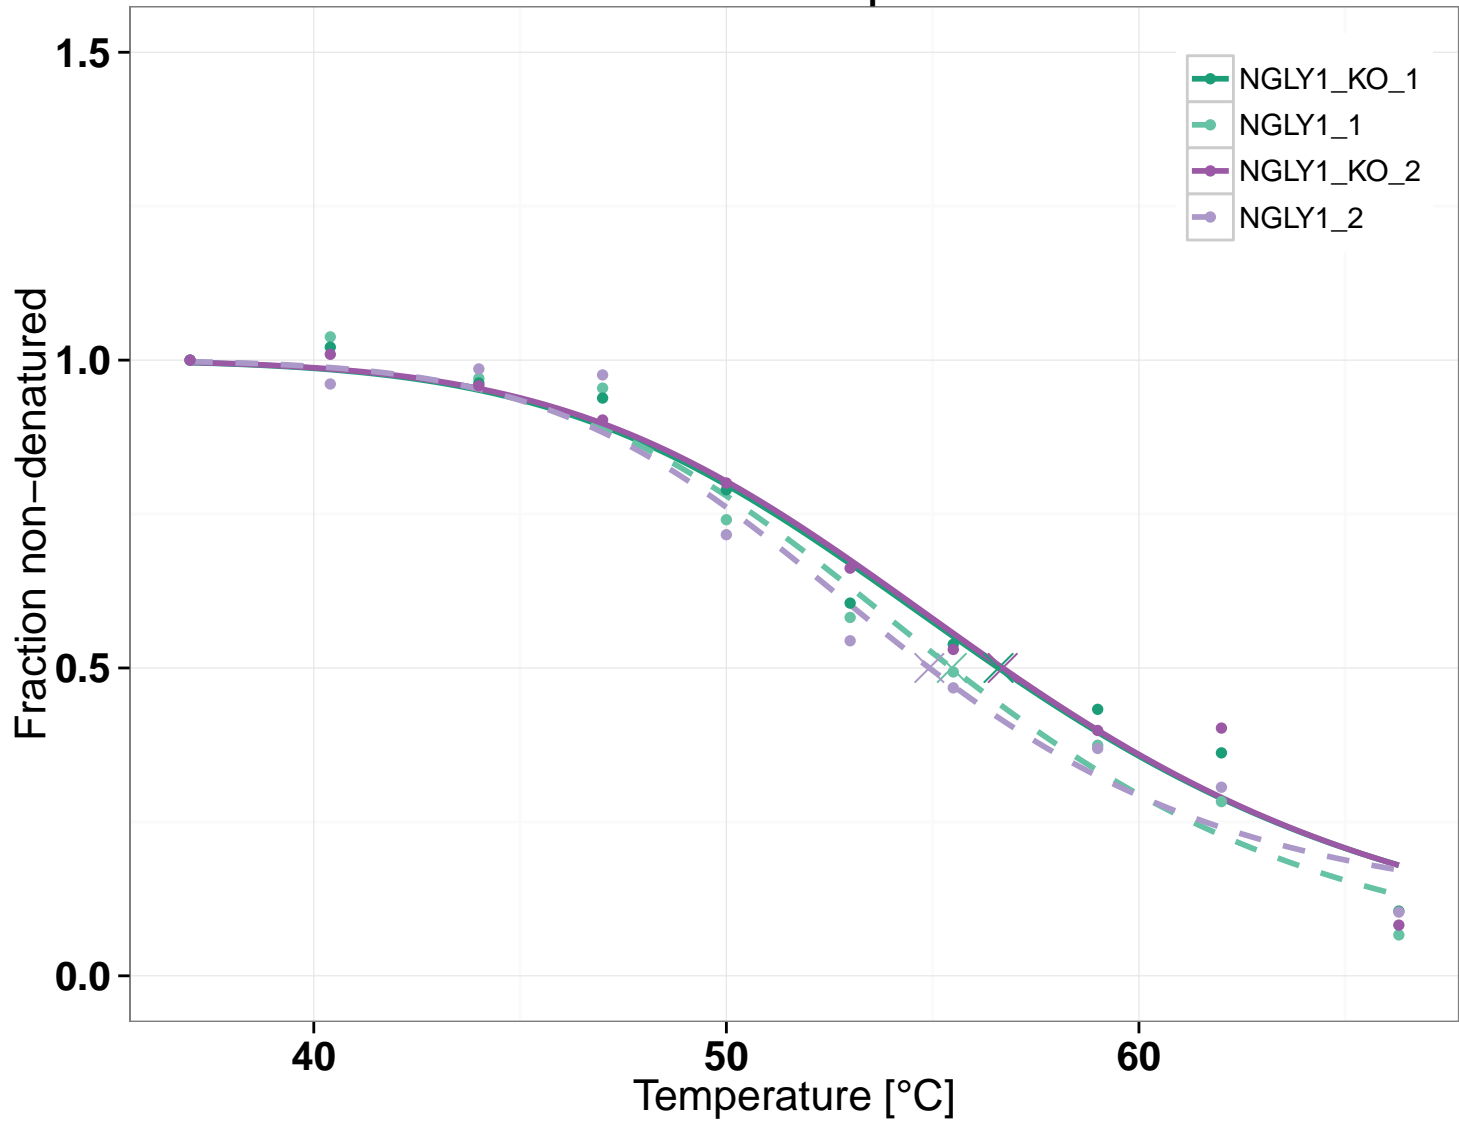

|            | meltPoint | slope  | plateau | R2   |
|------------|-----------|--------|---------|------|
| NGLY1_KO_1 | 56.6      | -0.048 | 0       | 0.98 |
| NGLY1_1    | 55.46     | -0.054 | 0       | 0.98 |
| NGLY1_KO_2 | 56.7      | -0.048 | 0       | 0.97 |
| NGLY1_2    | 54.92     | -0.055 | 0.09    | 0.97 |

Supplement: Supplementary file 7564 [file 1]

# IPI00472106.4|ECE2

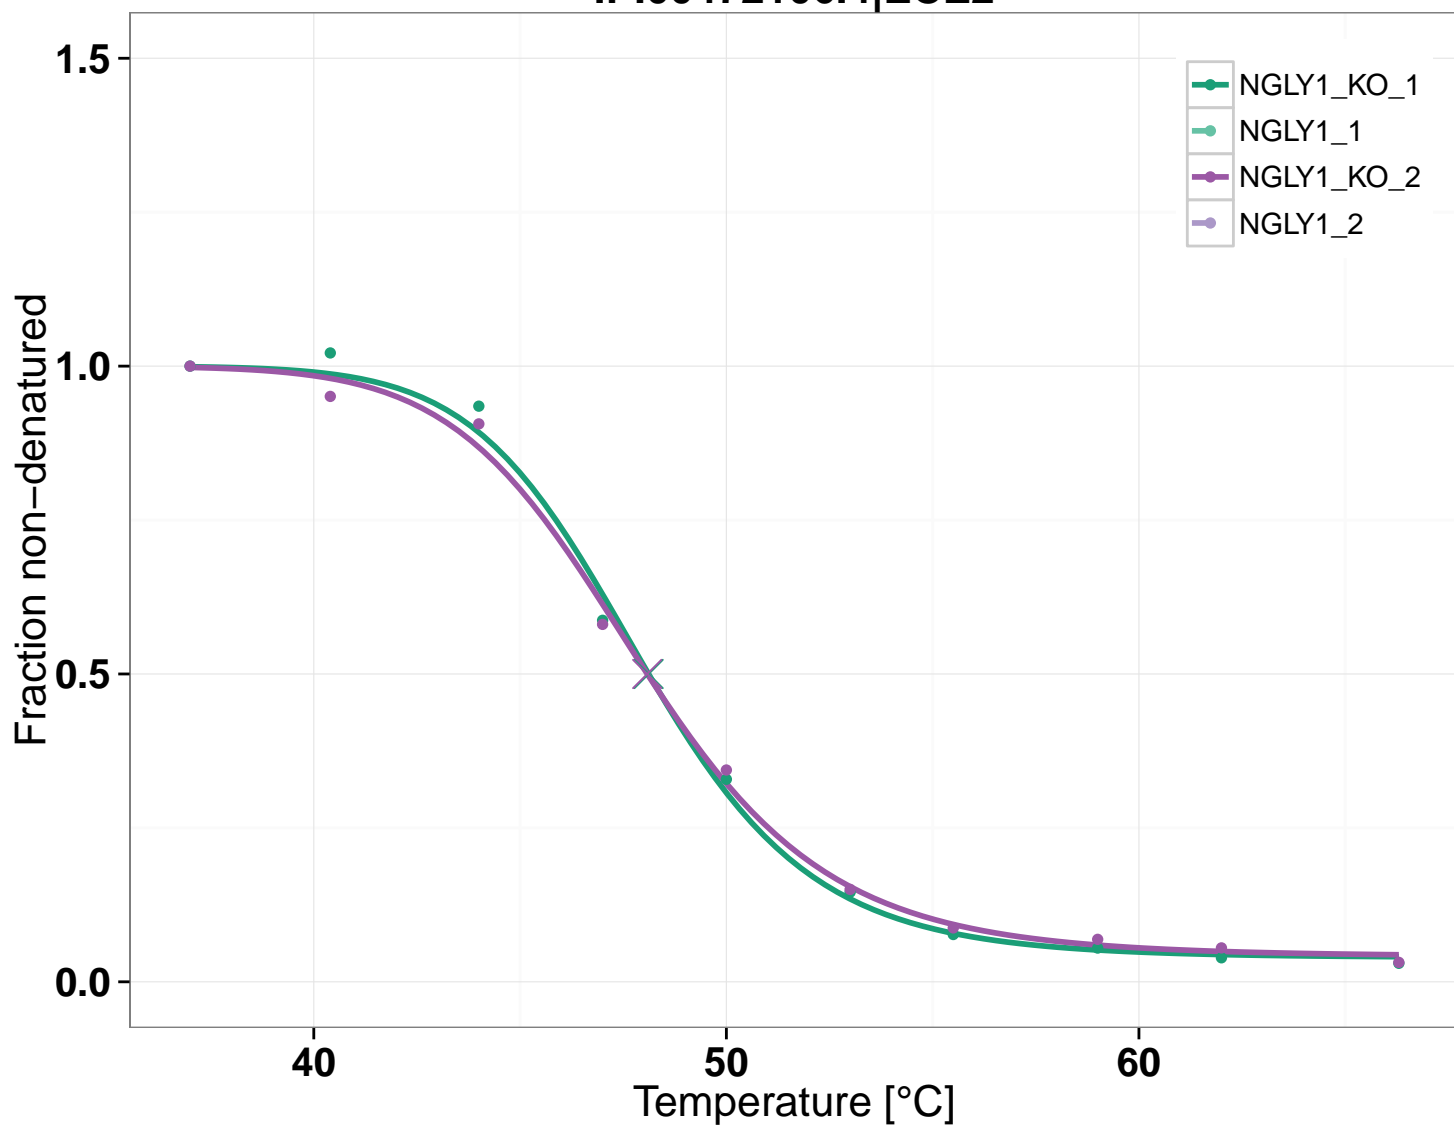

|            | meltPoint | slope | plateau | R2 |
|------------|-----------|-------|---------|----|
| NGLY1_KO_1 | 48.11     | -0.12 | 0.04    | 1  |
| NGLY1_1    | -         | -     | -       | -  |
| NGLY1_KO_2 | 48.08     | -0.11 | 0.04    | 1  |
| NGLY1_2    | -         | -     | -       | -  |

Supplement: Supplementary file 7565 [file 1]

IPI00645307.1|IDI1

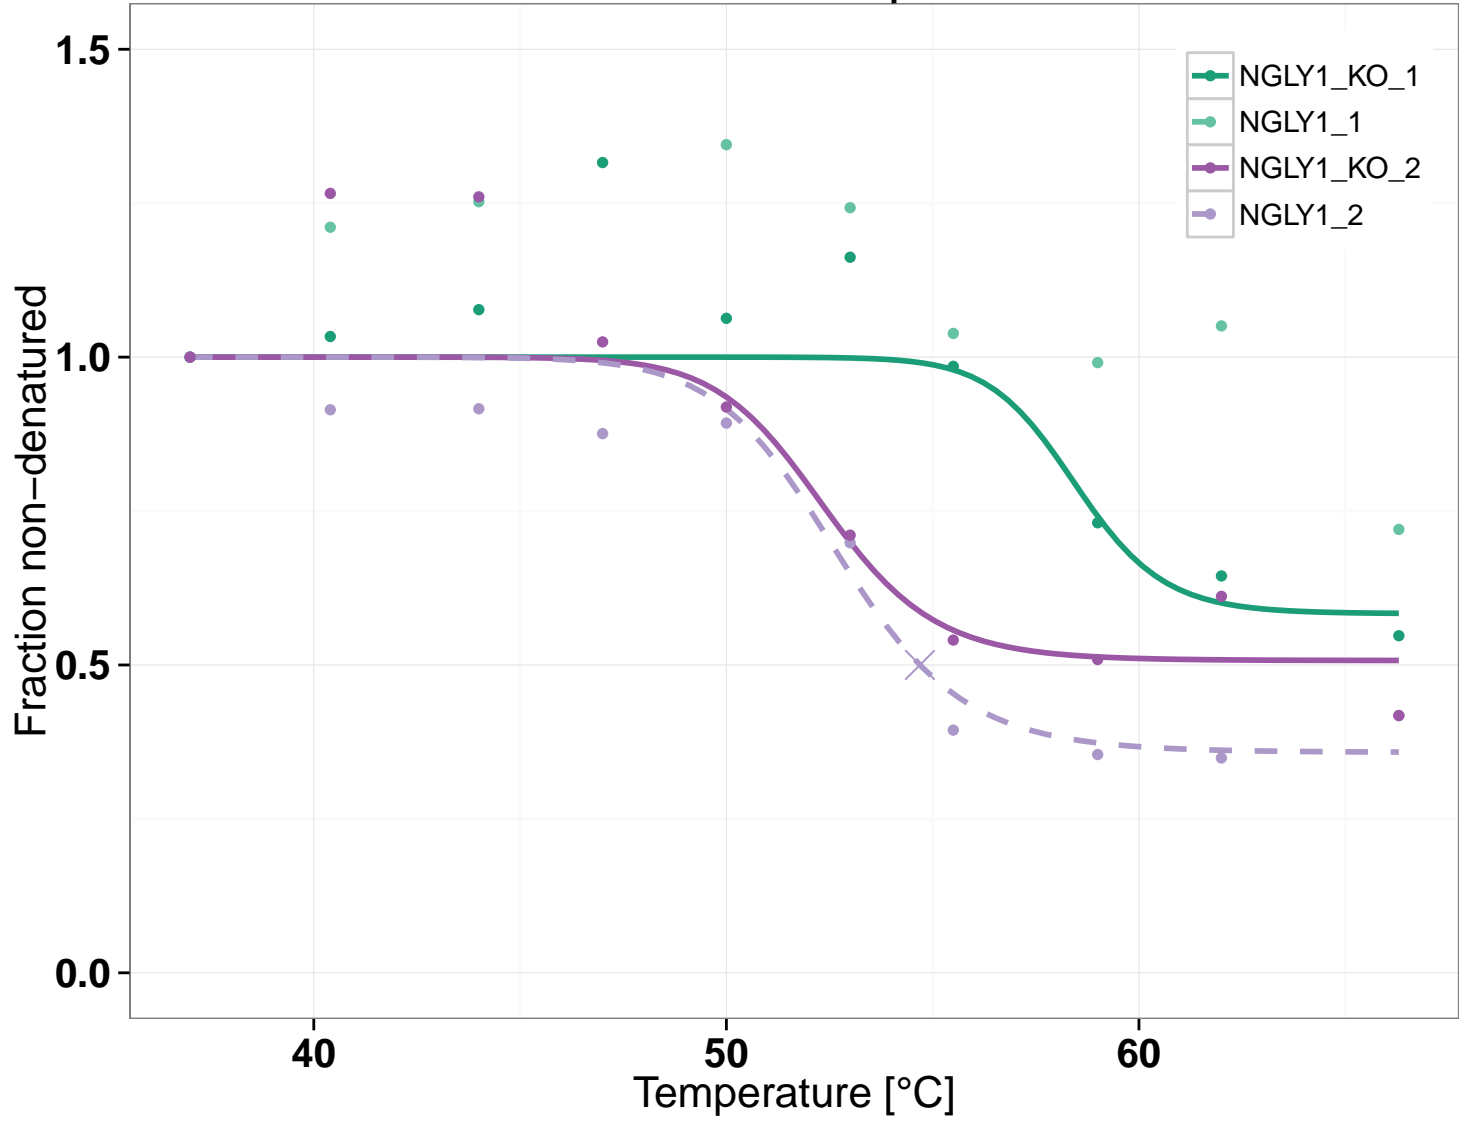

|            | meltPoint | slope  | plateau | R2   |
|------------|-----------|--------|---------|------|
| NGLY1_KO_1 | –         | –0.098 | 0.58    | 0.73 |
| NGLY1_1    | –         | –      | –       | –    |
| NGLY1_KO_2 | –         | –0.093 | 0.51    | 0.82 |
| NGLY1_2    | 54.69     | –0.11  | 0.36    | 0.94 |

Supplement: Supplementary file 7566 [file 1]

IPI00301894.2|NR1H3

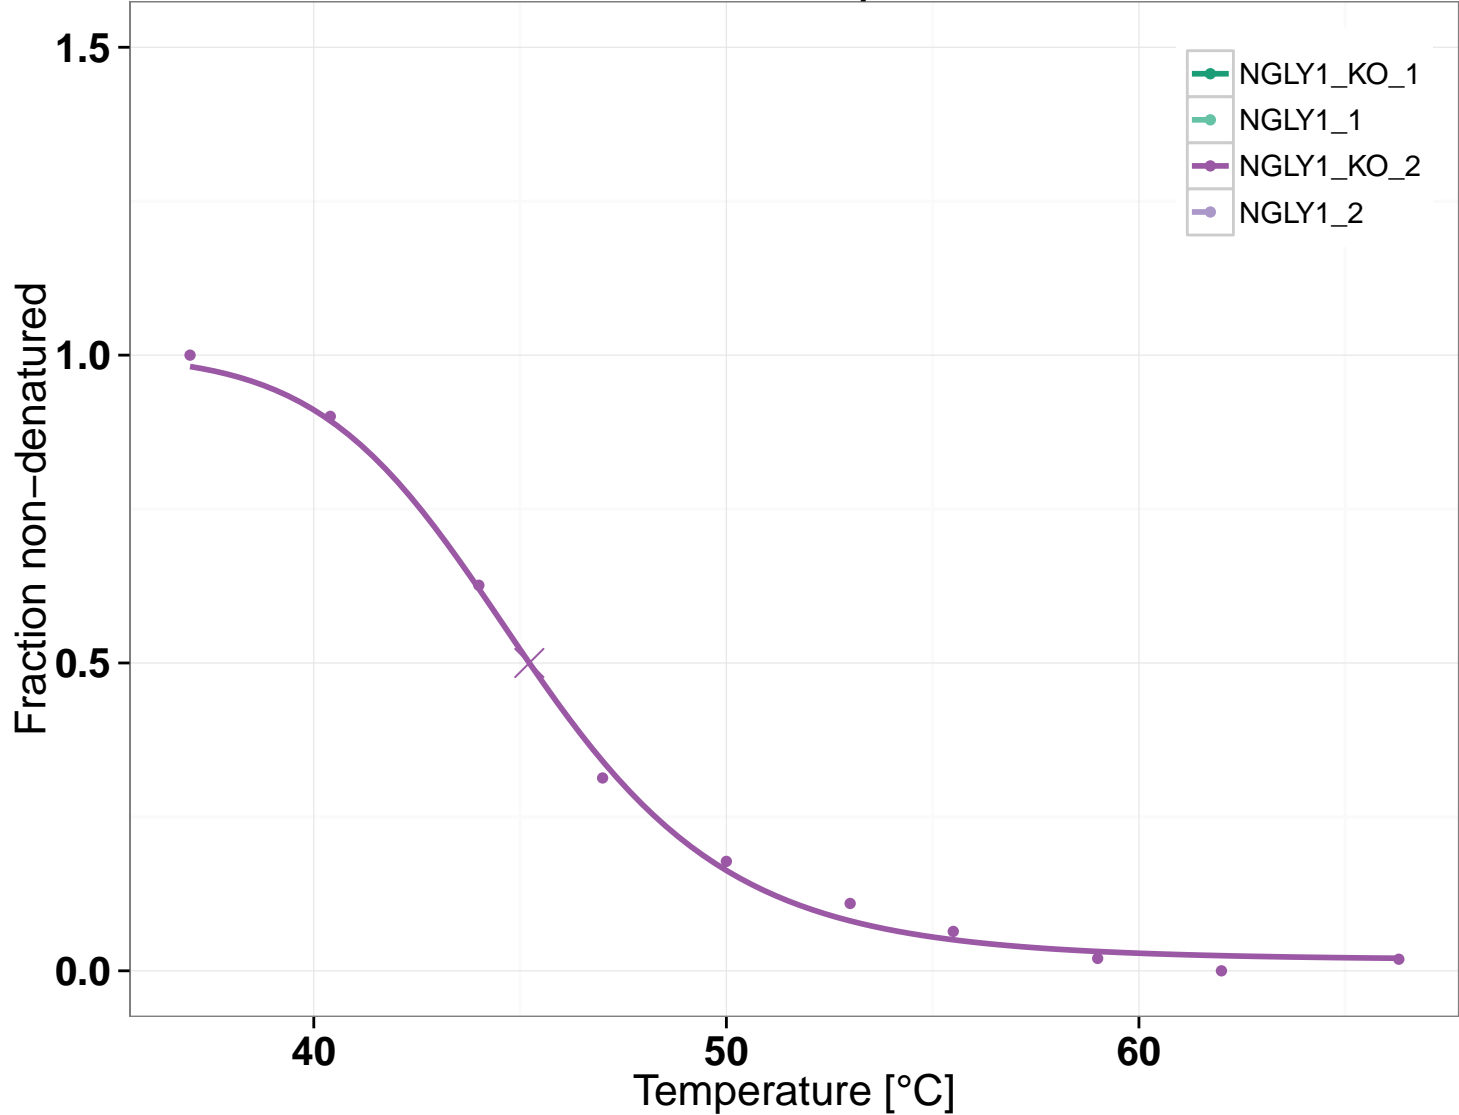

|            | meltPoint | slope  | plateau | R2 |
|------------|-----------|--------|---------|----|
| NGLY1_KO_1 | —         | —      | —       | —  |
| NGLY1_1    | —         | —      | —       | —  |
| NGLY1_KO_2 | 45.22     | -0.099 | 0.02    | 1  |
| NGLY1_2    | —         | —      | —       | —  |

Supplement: Supplementary file 7567 [file 1]

# IPI00298111.7|SNX6

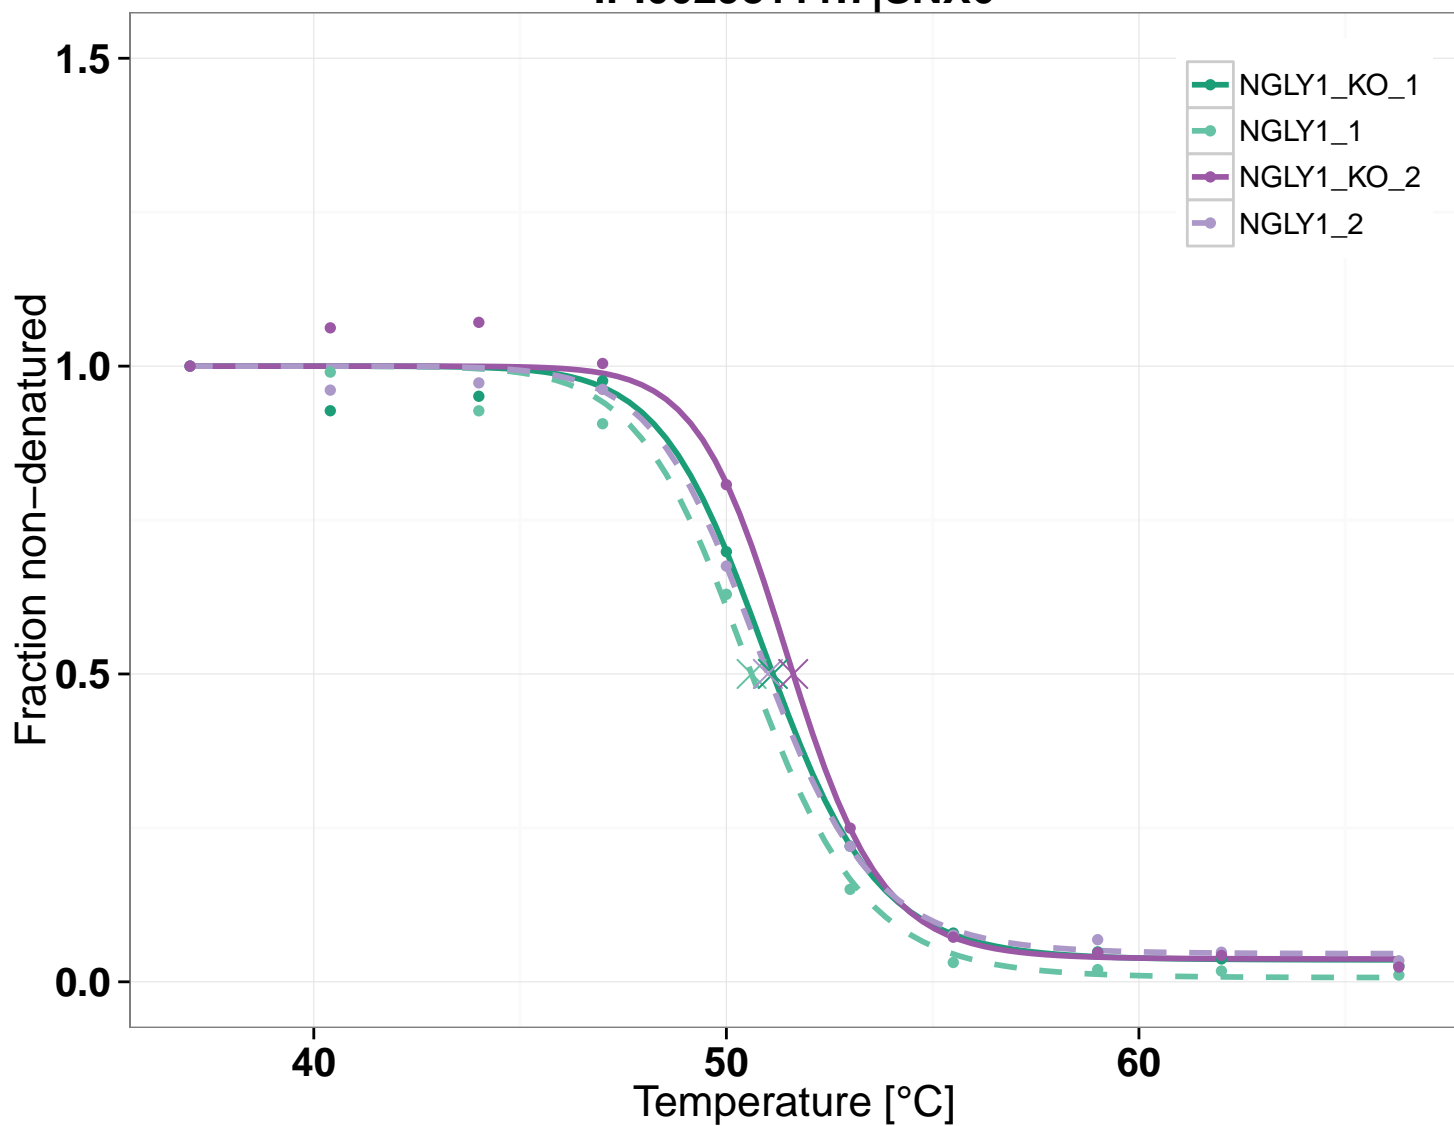

|            | meltPoint | slope | plateau | R2 |
|------------|-----------|-------|---------|----|
| NGLY1_KO_1 | 51.13     | -0.18 | 0.04    | 1  |
| NGLY1_1    | 50.61     | -0.18 | 0.01    | 1  |
| NGLY1_KO_2 | 51.62     | -0.21 | 0.04    | 1  |
| NGLY1_2    | 51.01     | -0.18 | 0.05    | 1  |

Supplement: Supplementary file 7568 [file 1]

# IPI00161600.6|C17ORF79

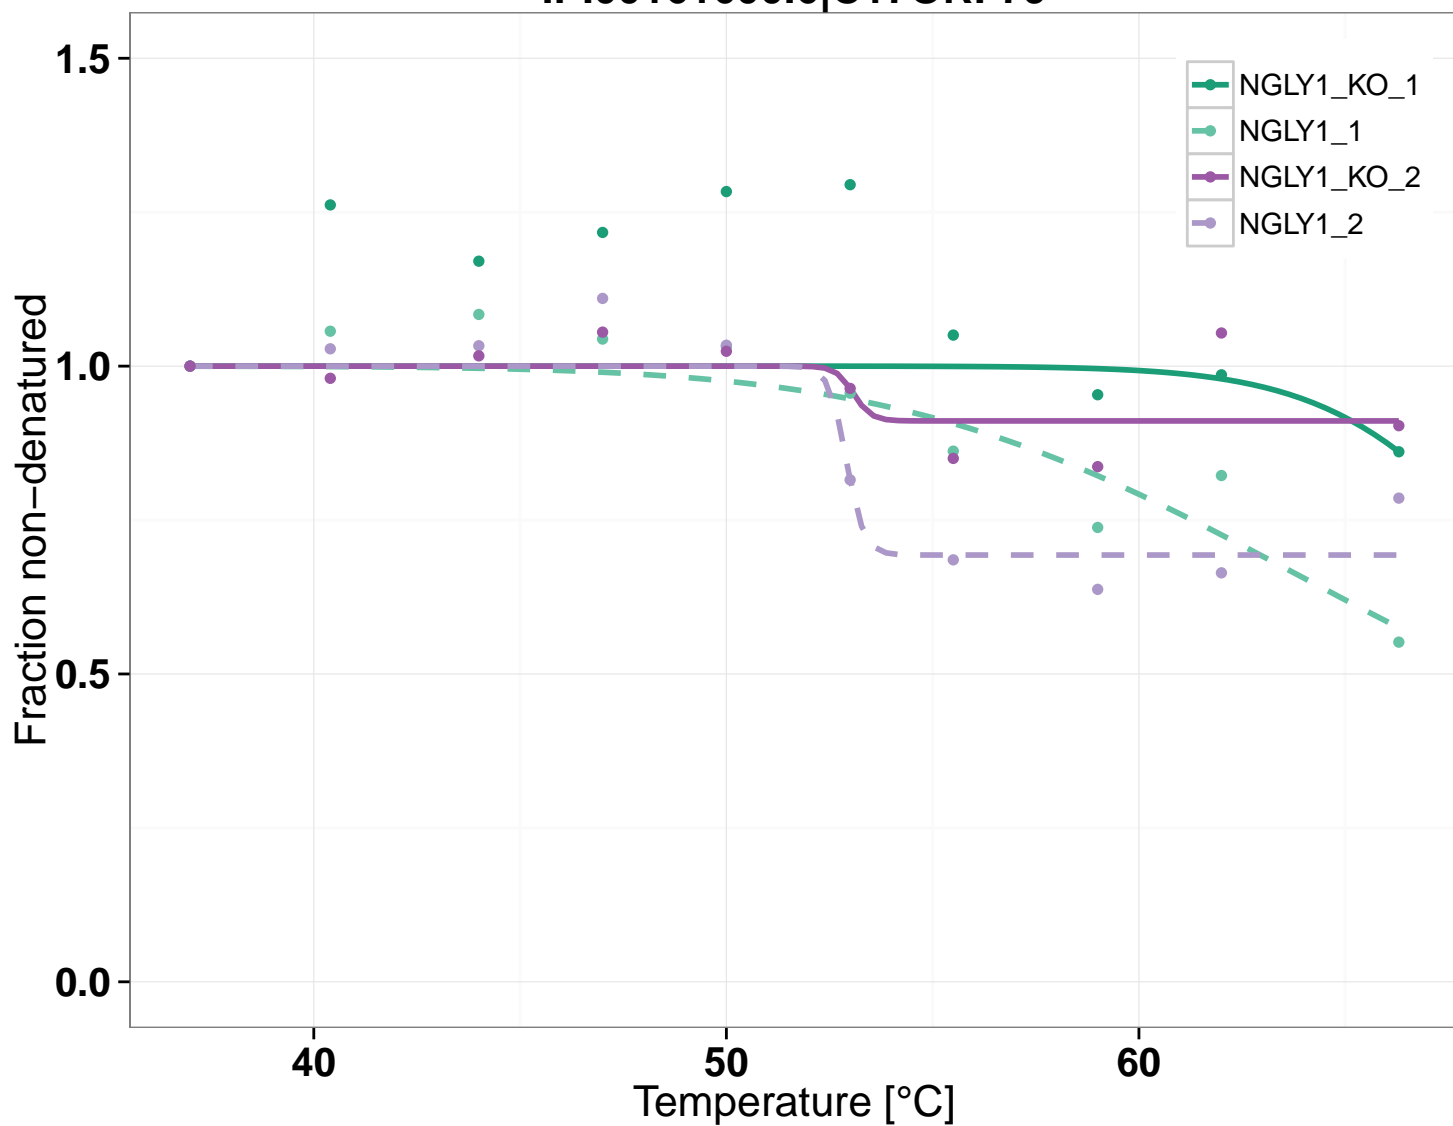

|            | meltPoint | slope  | plateau | R2    |
|------------|-----------|--------|---------|-------|
| NGLY1_KO_1 | -         | -      | 0.29    | -0.44 |
| NGLY1_1    | -         | -0.035 | 0.17    | 0.86  |
| NGLY1_KO_2 | -         | -0.1   | 0.91    | 0.4   |
| NGLY1_2    | -         | -0.36  | 0.69    | 0.91  |

Supplement: Supplementary file 7569 [file 1]

# IPI00006375.1|LIPT1

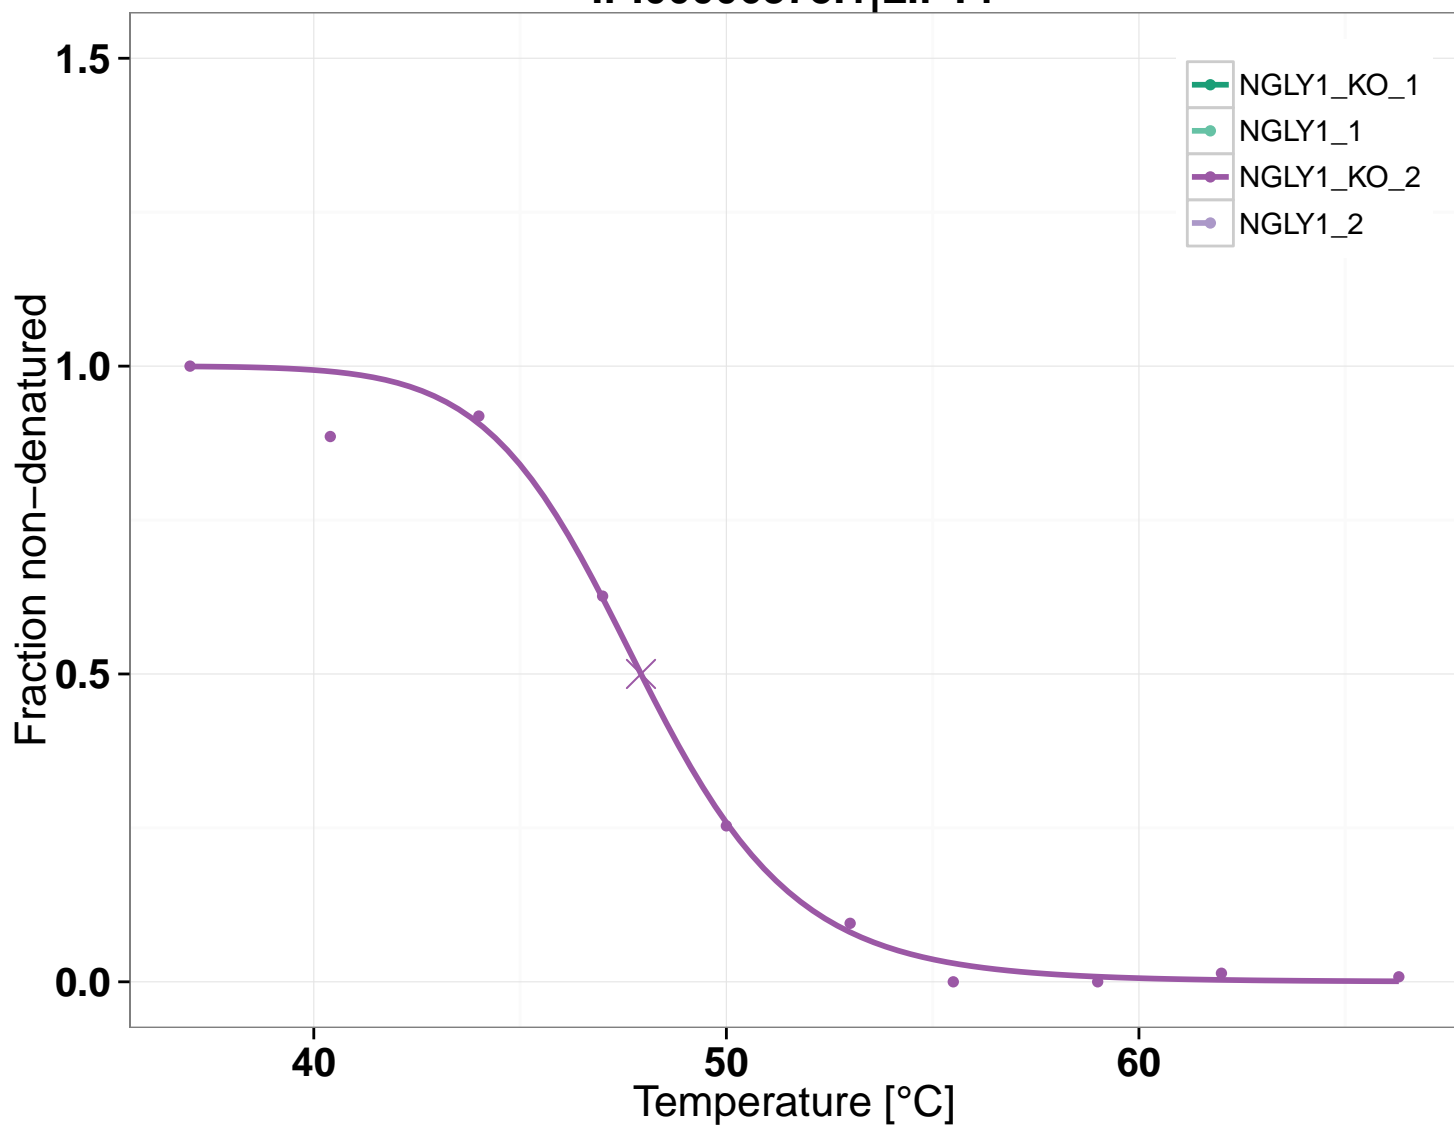

|            | meltPoint | slope | plateau | R2   |
|------------|-----------|-------|---------|------|
| NGLY1_KO_1 | —         | —     | —       | —    |
| NGLY1_1    | —         | —     | —       | —    |
| NGLY1_KO_2 | 47.93     | -0.13 | 0       | 0.99 |
| NGLY1_2    | —         | —     | —       | —    |

Supplement: Supplementary file 7570 [file 1]

# IPI00895806.1|CNBP

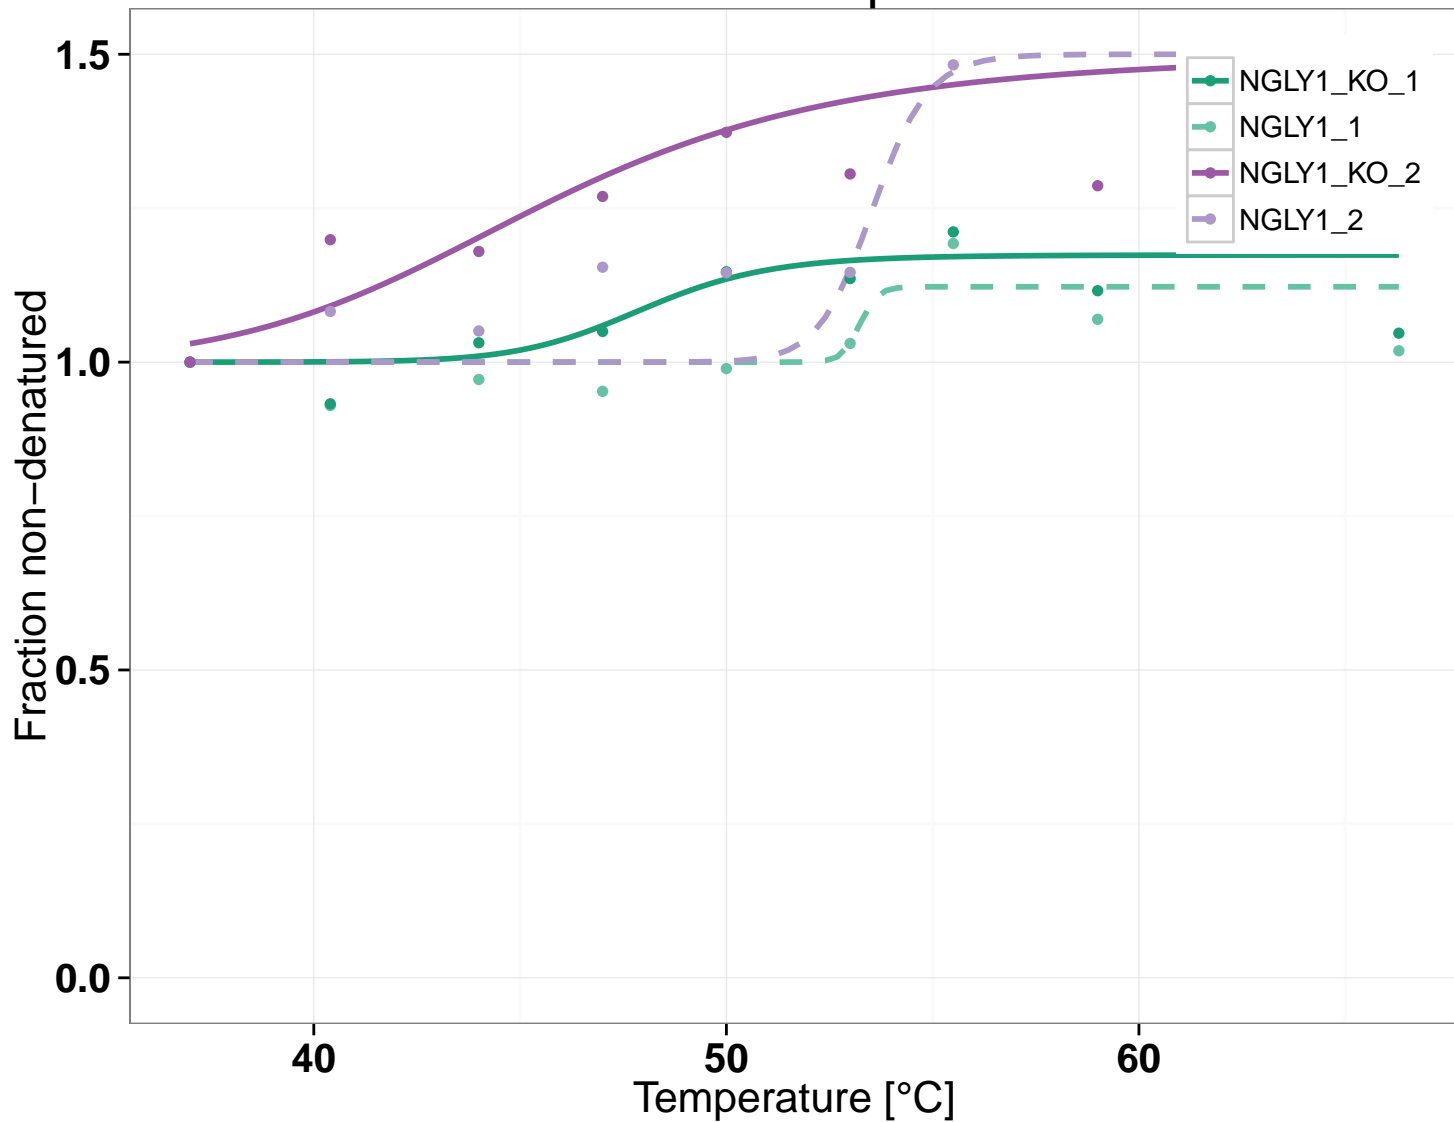

|            | meltPoint | slope | plateau | R2   |
|------------|-----------|-------|---------|------|
| NGLY1_KO_1 | –         | 0.028 | 1.17    | 0.55 |
| NGLY1_1    | –         | 0.14  | 1.12    | 0.58 |
| NGLY1_KO_2 | –         | 0.034 | 1.5     | 0.5  |
| NGLY1_2    | –         | 0.19  | 1.5     | 0.7  |

Supplement: Supplementary file 7571 [file 1]

IPI00376483.3|ZYG11BL

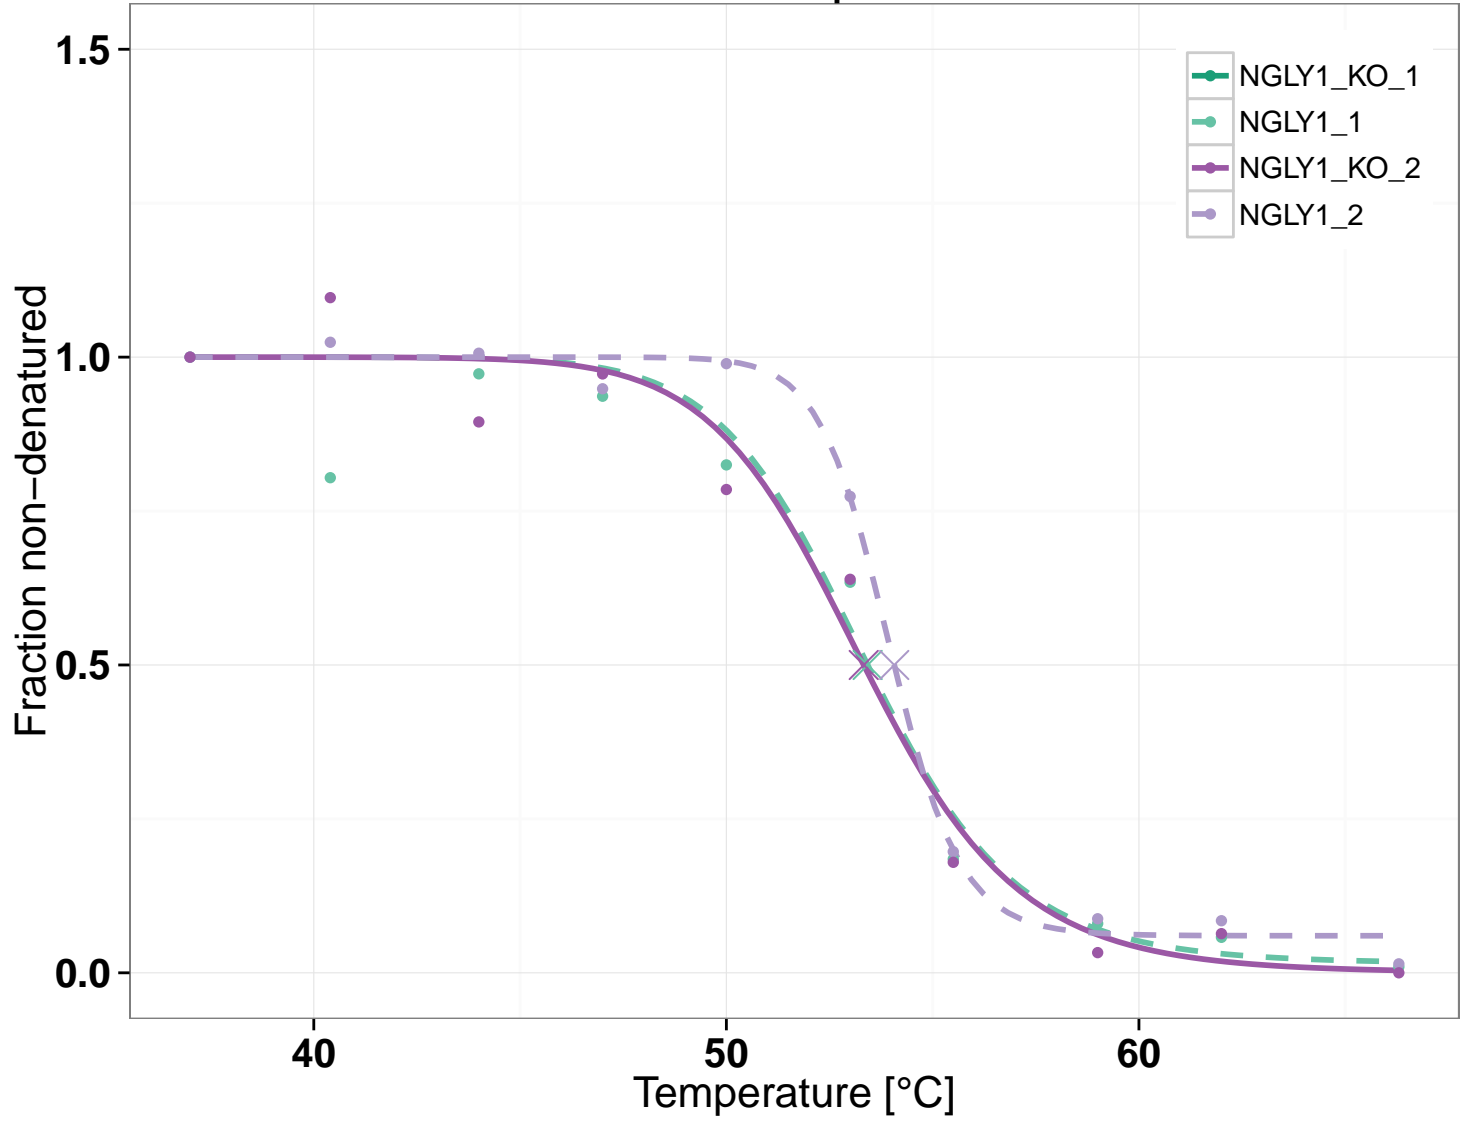

|            | meltPoint | slope | plateau | R2   |
|------------|-----------|-------|---------|------|
| NGLY1_KO_1 | –         | –     | –       | –    |
| NGLY1_1    | 53.42     | –0.14 | 0.02    | 0.96 |
| NGLY1_KO_2 | 53.33     | –0.13 | 0       | 0.98 |
| NGLY1_2    | 54.07     | –0.27 | 0.06    | 1    |

Supplement: Supplementary file 7572 [file 1]

# IPI00008833.3|JTB

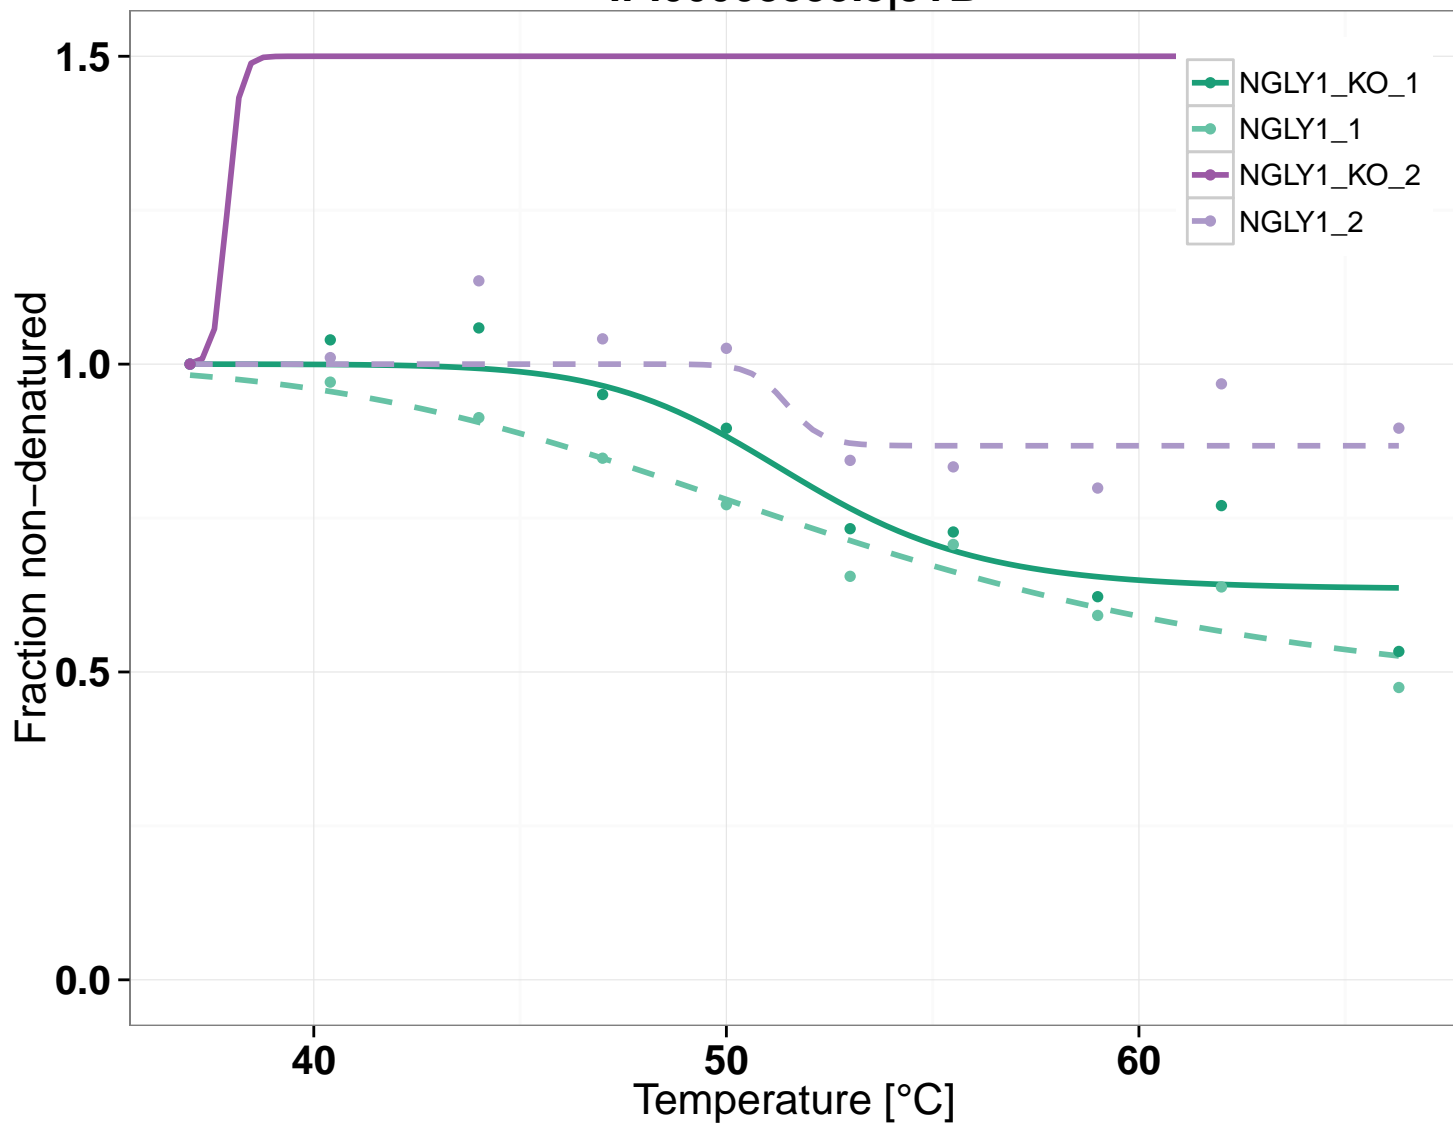

|            | meltPoint | slope  | plateau | R2    |
|------------|-----------|--------|---------|-------|
| NGLY1_KO_1 | —         | −0.04  | 0.63    | 0.88  |
| NGLY1_1    | —         | −0.023 | 0.43    | 0.95  |
| NGLY1_KO_2 | —         | 0.82   | 1.5     | −5.98 |
| NGLY1_2    | —         | −0.077 | 0.87    | 0.63  |

Supplement: Supplementary file 7573 [file 1]

IPI00854594.2|AFAP1L1

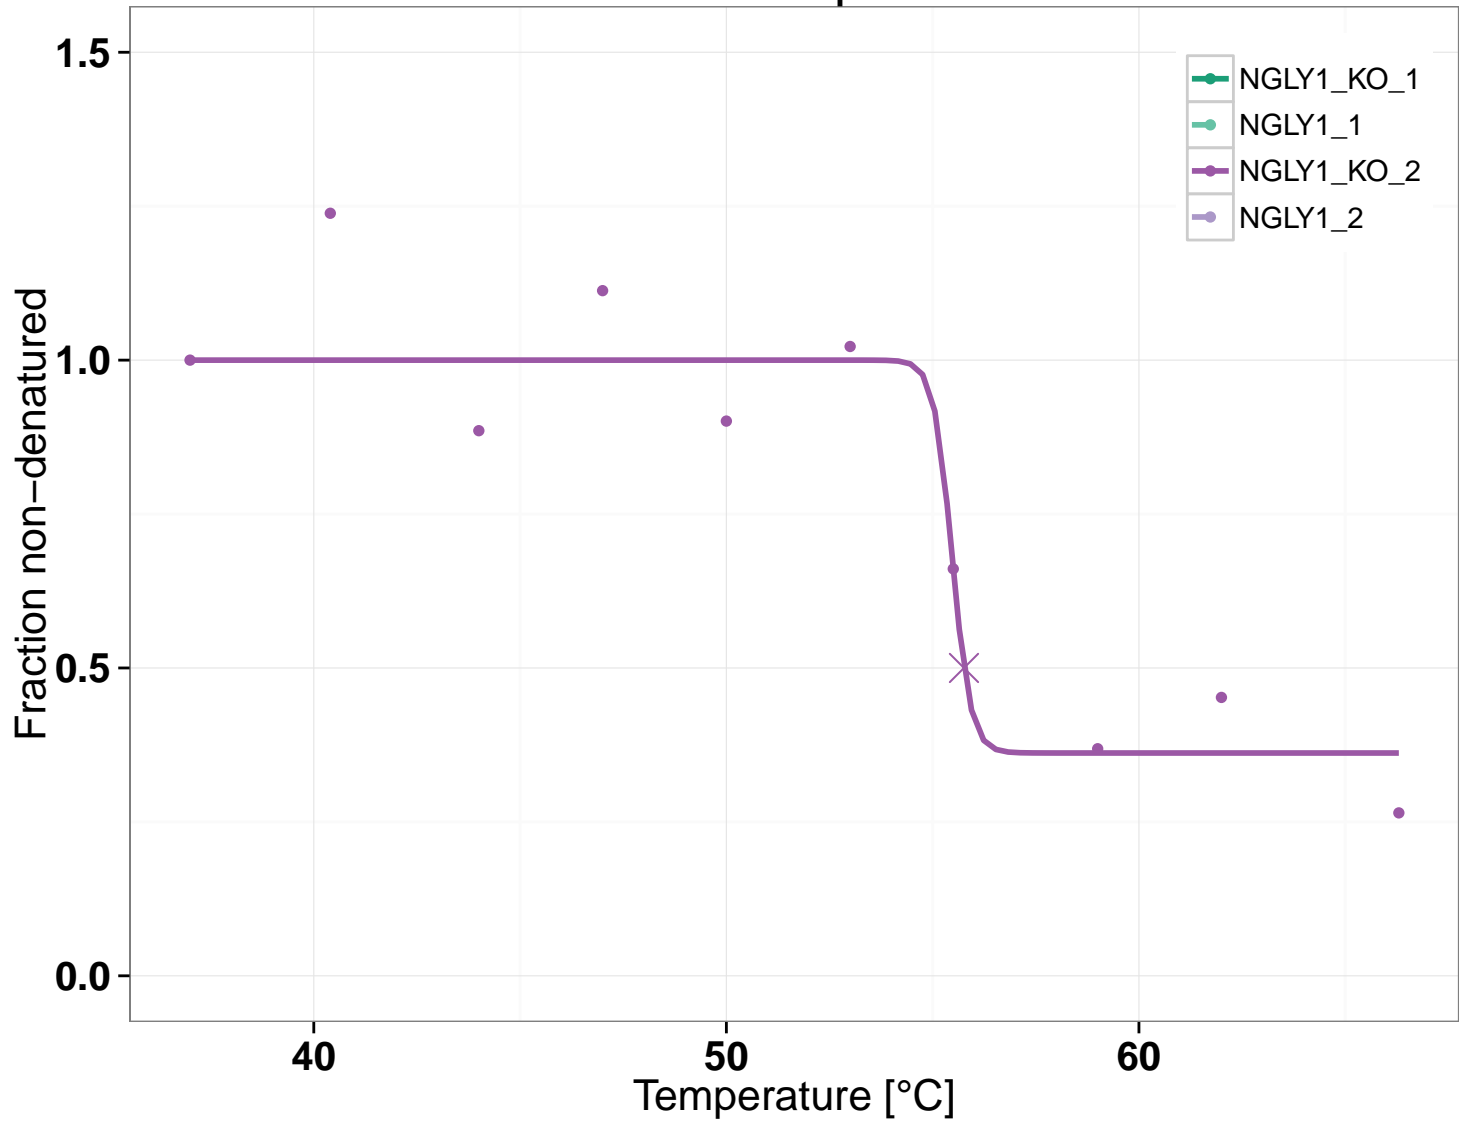

|            | meltPoint | slope | plateau | R2   |
|------------|-----------|-------|---------|------|
| NGLY1_KO_1 | —         | —     | —       | —    |
| NGLY1_1    | —         | —     | —       | —    |
| NGLY1_KO_2 | 55.76     | −0.72 | 0.36    | 0.89 |
| NGLY1_2    | —         | —     | —       | —    |

Supplement: Supplementary file 7574 [file 1]

IPI00829914.1|C1ORF122

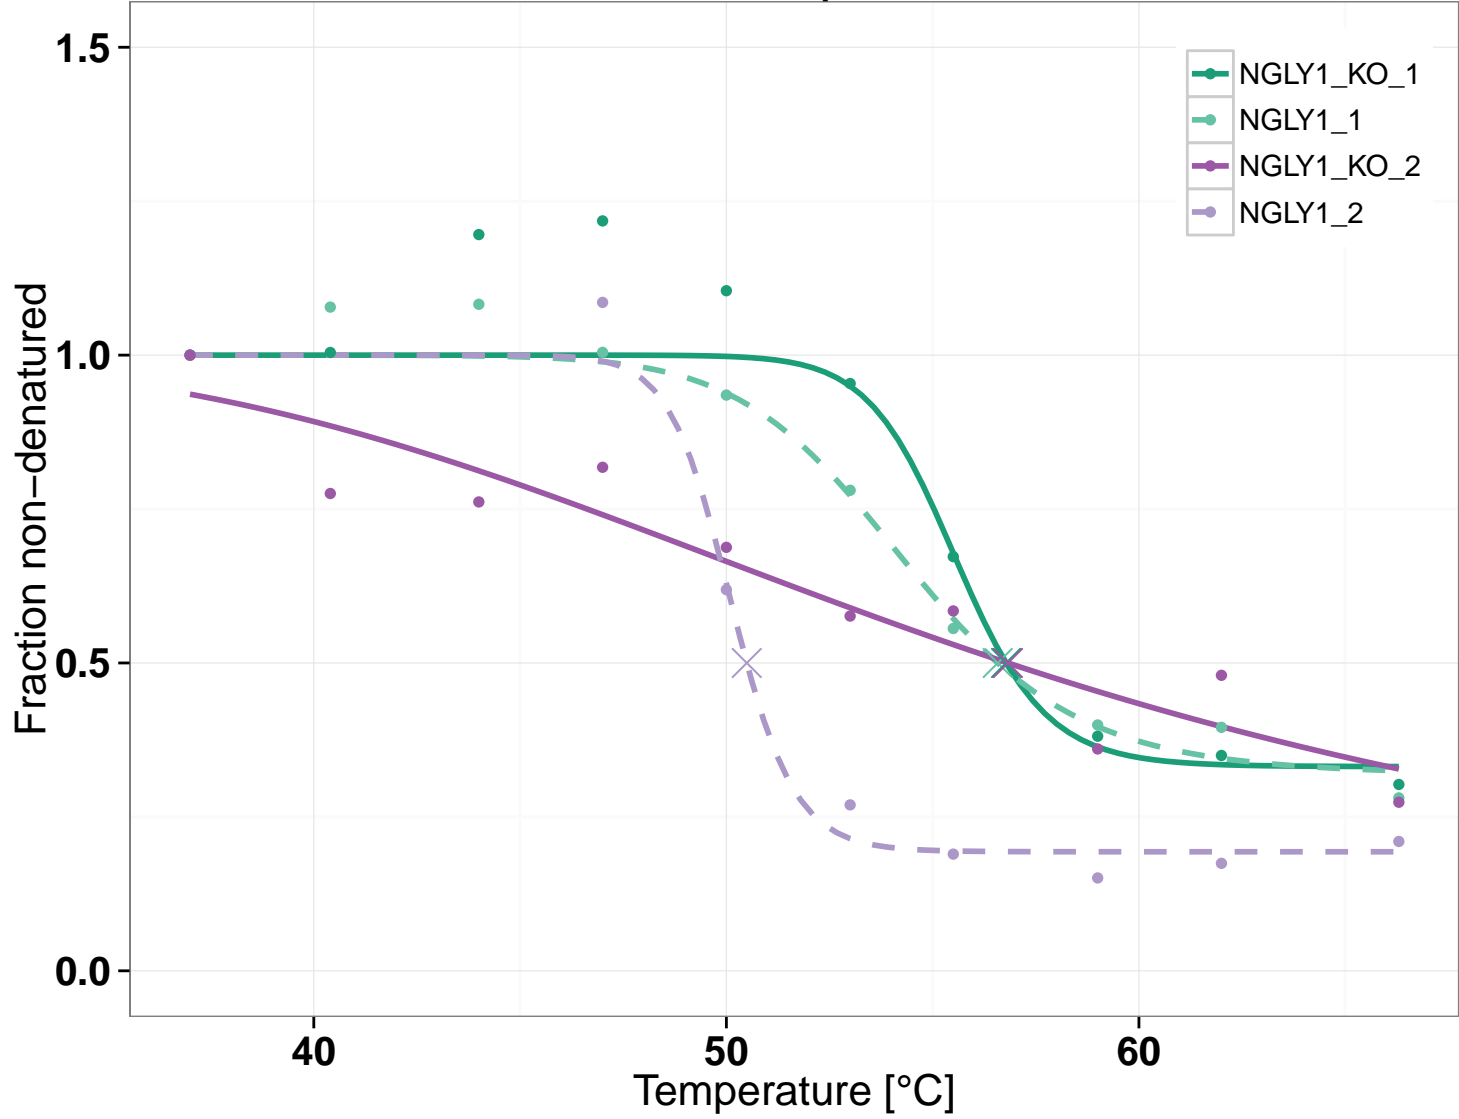

|            | meltPoint | slope  | plateau | R2   |
|------------|-----------|--------|---------|------|
| NGLY1_KO_1 | 56.78     | -0.16  | 0.33    | 0.92 |
| NGLY1_1    | 56.58     | -0.083 | 0.32    | 0.98 |
| NGLY1_KO_2 | 56.82     | -0.025 | 0       | 0.89 |
| NGLY1_2    | 50.49     | -0.27  | 0.19    | 0.81 |

Supplement: Supplementary file 7575 [file 1]

IPI00844077.1|HBS1L

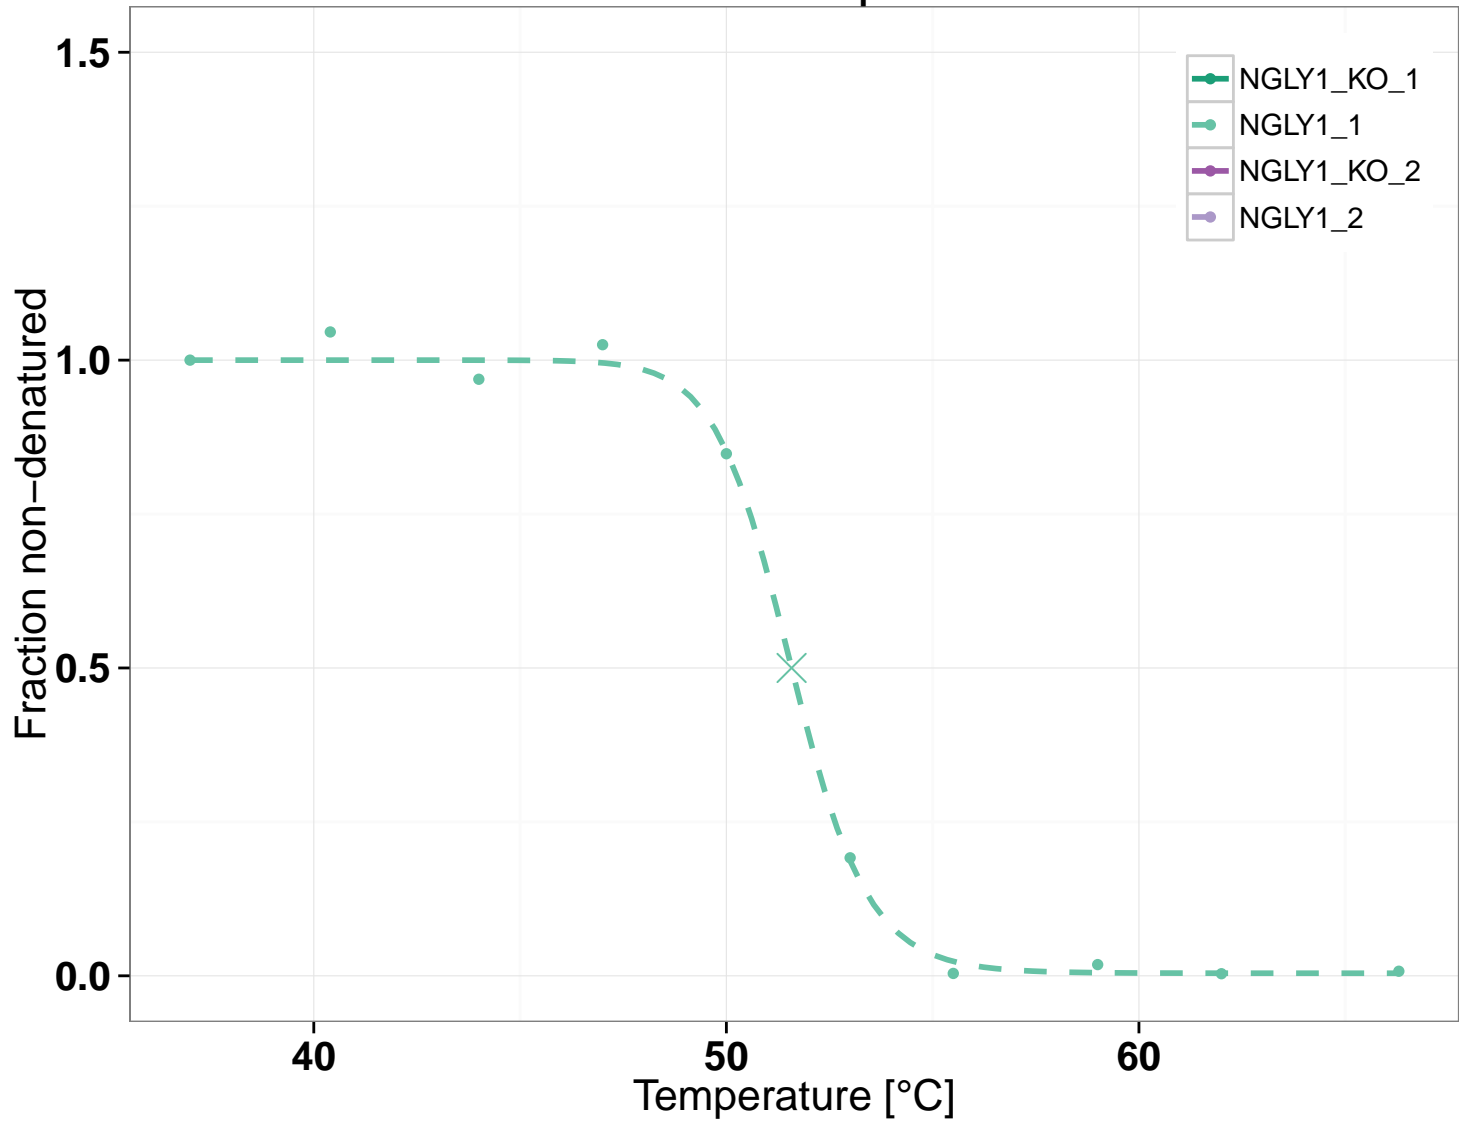

|            | meltPoint | slope | plateau | R2 |
|------------|-----------|-------|---------|----|
| NGLY1_KO_1 | -         | -     | -       | -  |
| NGLY1_1    | 51.58     | -0.27 | 0       | 1  |
| NGLY1_KO_2 | -         | -     | -       | -  |
| NGLY1_2    | -         | -     | -       | -  |

Supplement: Supplementary file 7576 [file 1]

IPI00019148.1|IGBP1

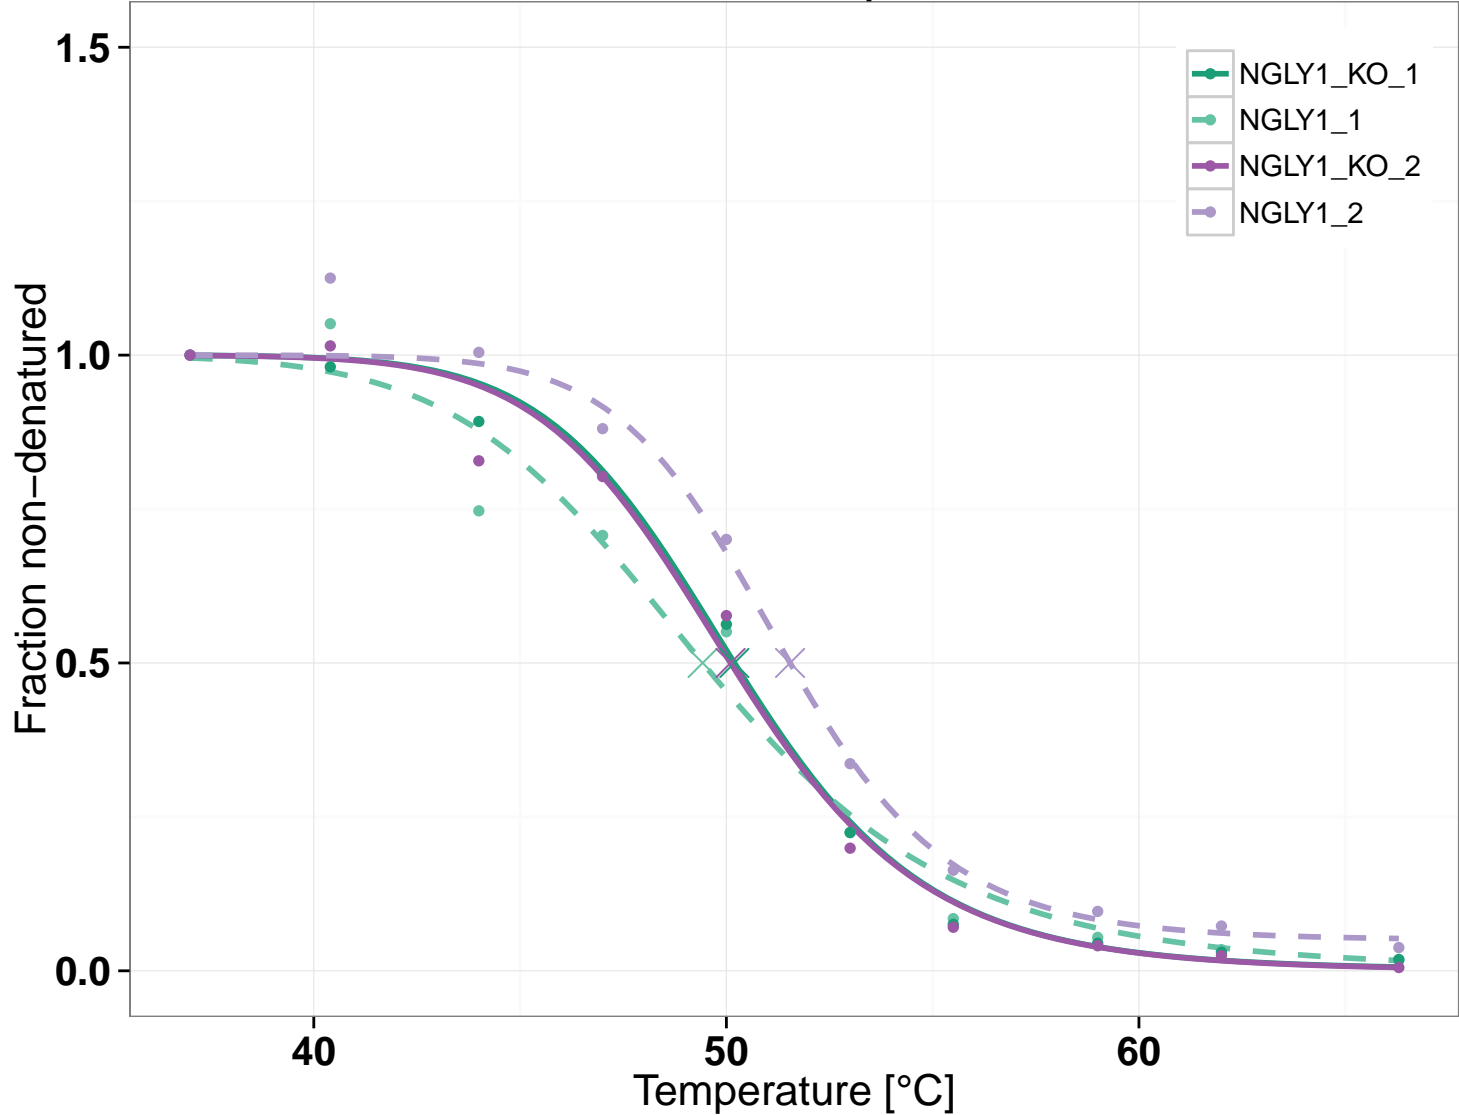

|            | meltPoint | slope  | plateau | R2   |
|------------|-----------|--------|---------|------|
| NGLY1_KO_1 | 50.19     | -0.11  | 0       | 1    |
| NGLY1_1    | 49.43     | -0.082 | 0       | 0.98 |
| NGLY1_KO_2 | 50.1      | -0.11  | 0       | 0.99 |
| NGLY1_2    | 51.54     | -0.12  | 0.05    | 0.99 |

Supplement: Supplementary file 7577 [file 1]

IPI00181160.7|TMEM161B

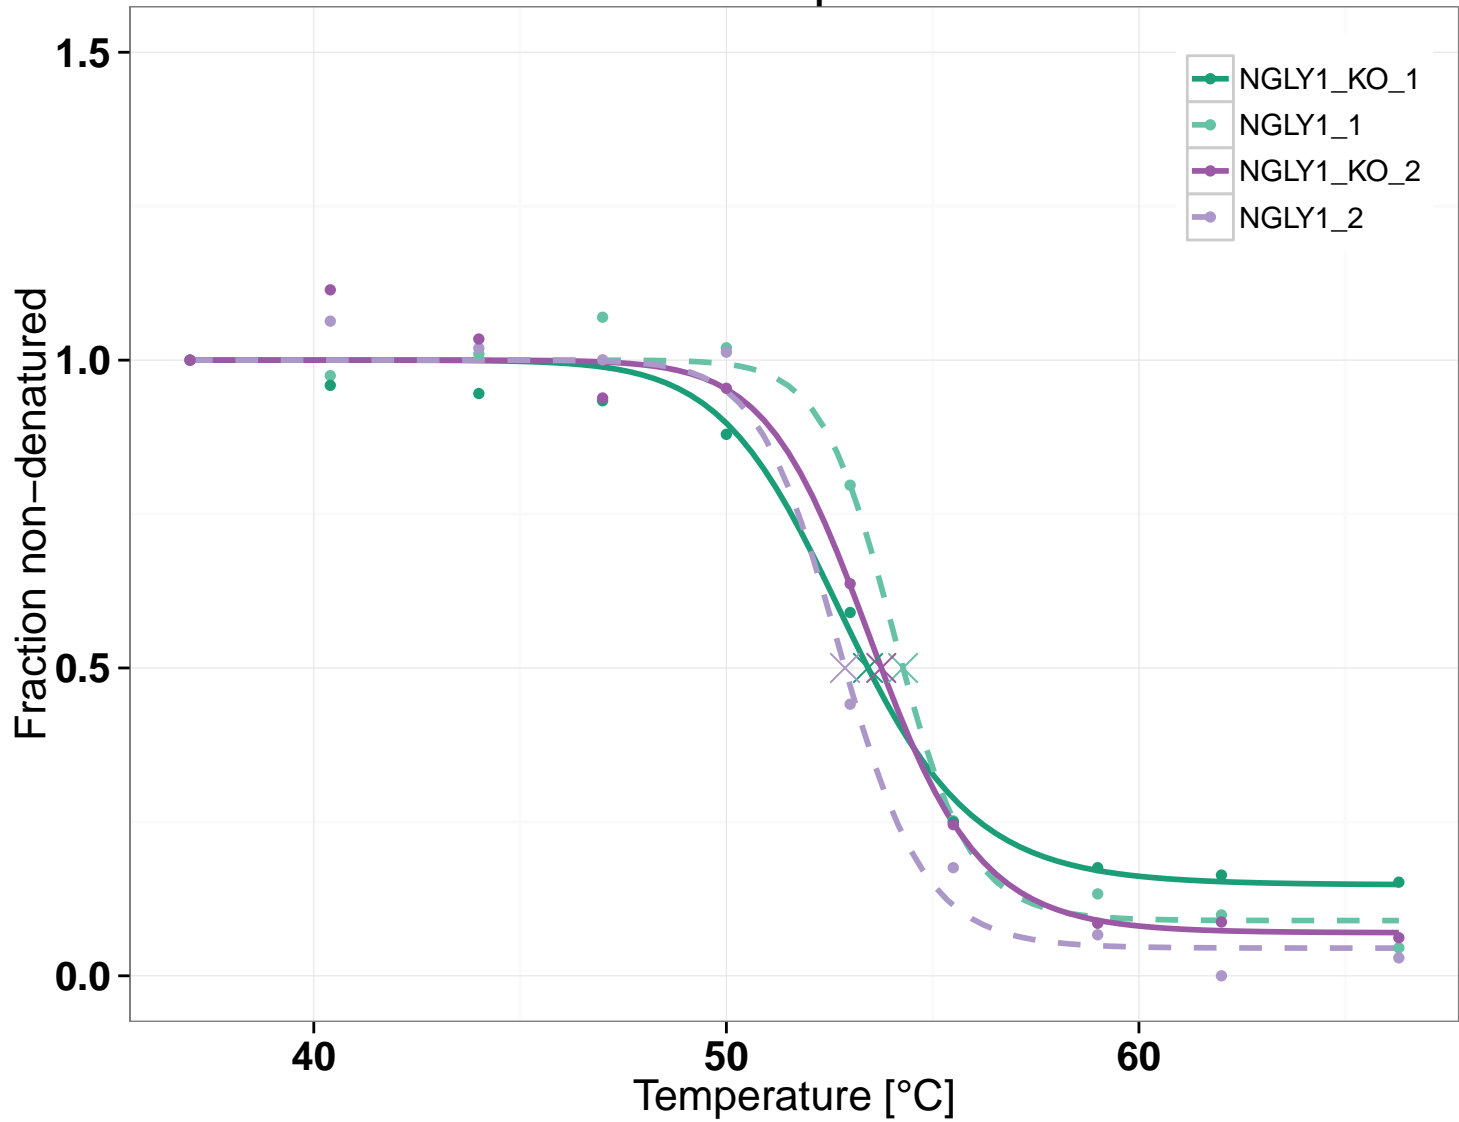

|            | meltPoint | slope | plateau | R2   |
|------------|-----------|-------|---------|------|
| NGLY1_KO_1 | 53.43     | -0.14 | 0.15    | 0.99 |
| NGLY1_1    | 54.28     | -0.25 | 0.09    | 0.99 |
| NGLY1_KO_2 | 53.76     | -0.18 | 0.07    | 0.99 |
| NGLY1_2    | 52.87     | -0.24 | 0.04    | 0.99 |

Supplement: Supplementary file 7578 [file 1]

# IPI00385038.4|NDFIP2

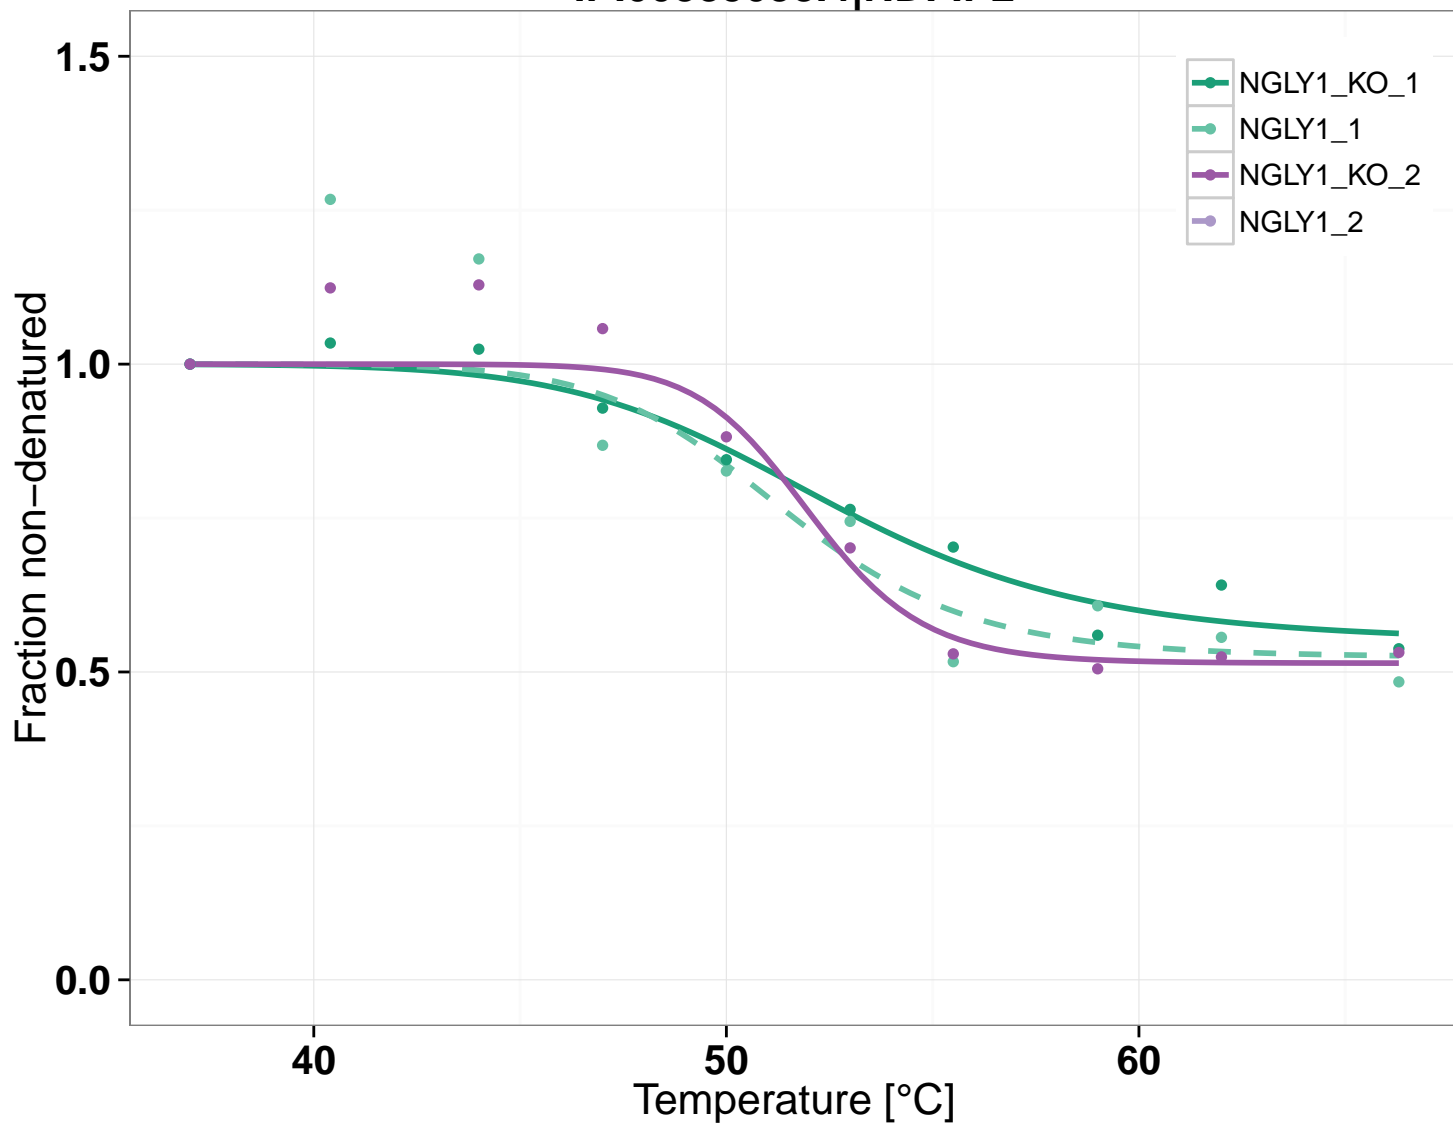

|            | meltPoint | slope  | plateau | R2   |
|------------|-----------|--------|---------|------|
| NGLY1_KO_1 | —         | −0.036 | 0.55    | 0.97 |
| NGLY1_1    | —         | −0.053 | 0.52    | 0.81 |
| NGLY1_KO_2 | —         | −0.088 | 0.51    | 0.94 |
| NGLY1_2    | —         | —      | —       | —    |

Supplement: Supplementary file 7579 [file 1]

IPI00028833.5|ZNF160

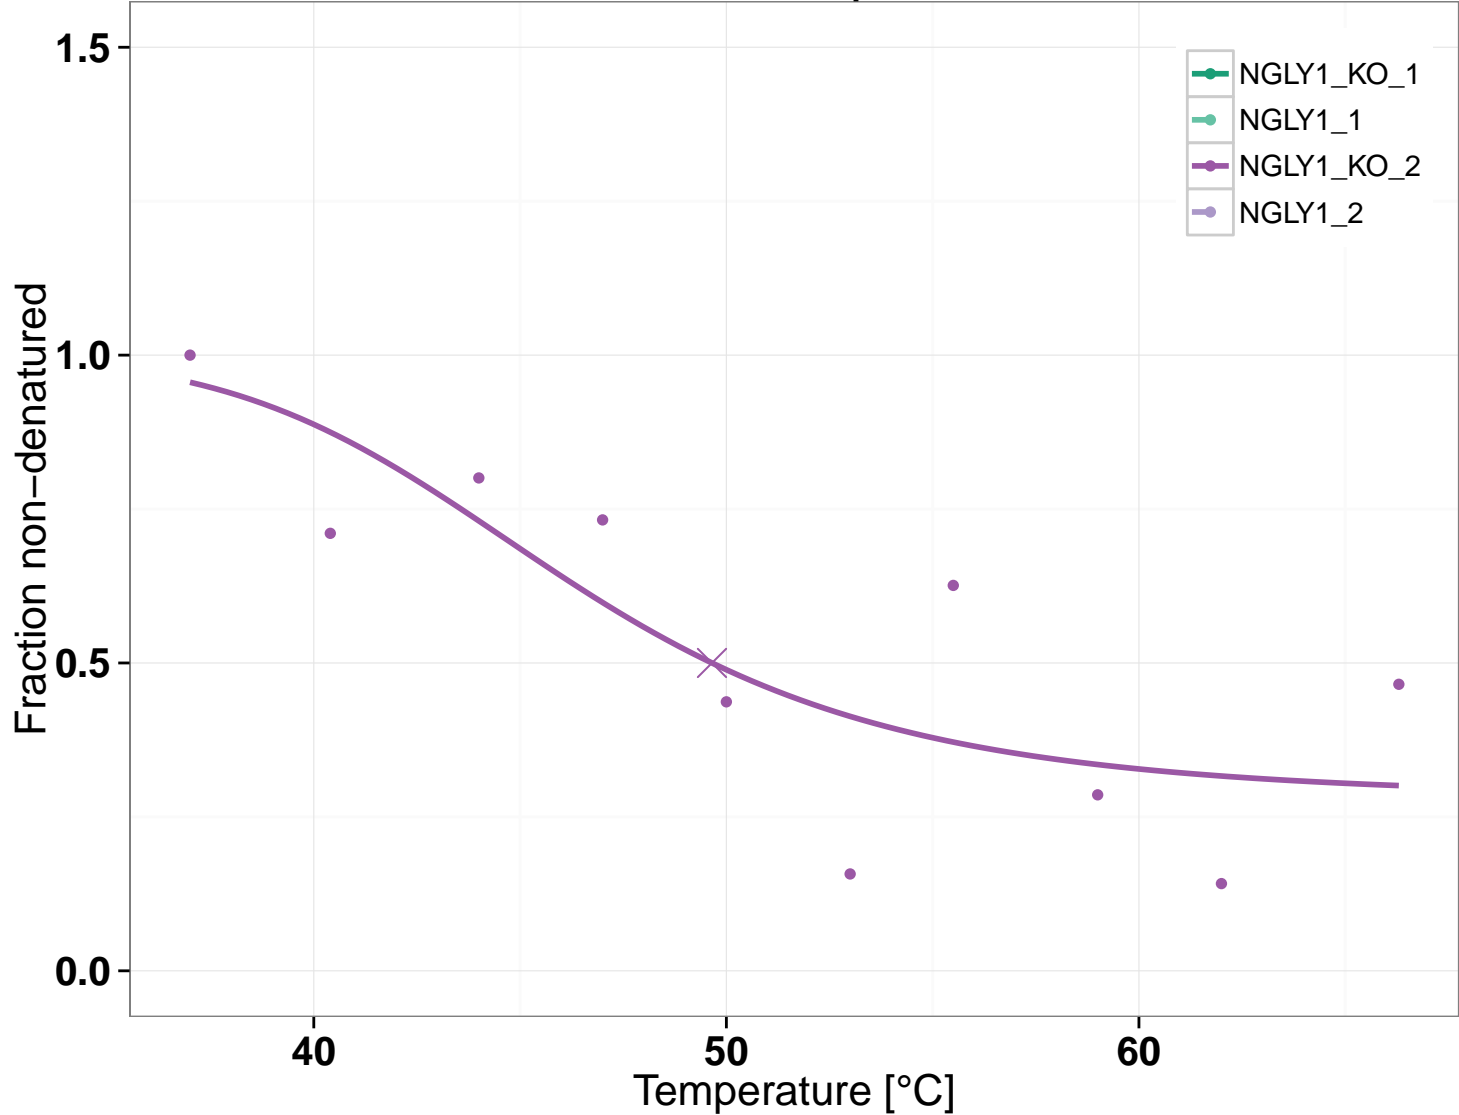

|            | meltPoint | slope  | plateau | R2   |
|------------|-----------|--------|---------|------|
| NGLY1_KO_1 | —         | —      | —       | —    |
| NGLY1_1    | —         | —      | —       | —    |
| NGLY1_KO_2 | 49.65     | -0.045 | 0.28    | 0.67 |
| NGLY1_2    | —         | —      | —       | —    |

Supplement: Supplementary file 7580 [file 1]

# IPI00043598.2|IKIP

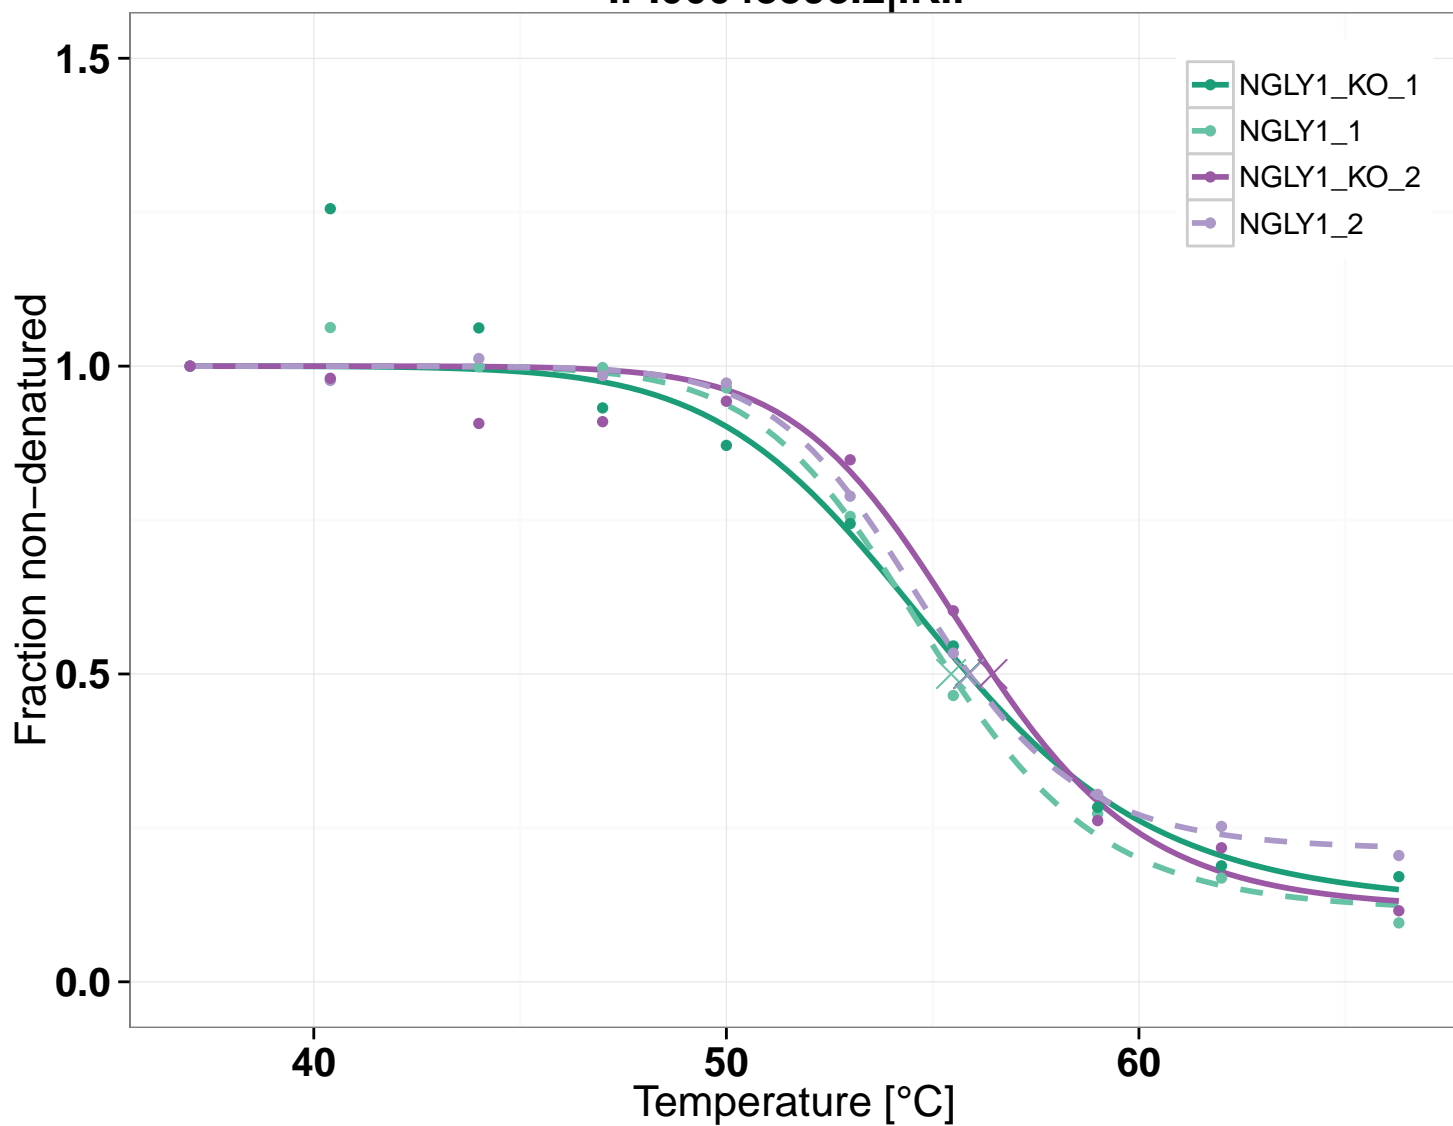

|            | meltPoint | slope  | plateau | R2   |
|------------|-----------|--------|---------|------|
| NGLY1_KO_1 | 55.86     | -0.082 | 0.12    | 0.94 |
| NGLY1_1    | 55.45     | -0.11  | 0.11    | 0.99 |
| NGLY1_KO_2 | 56.45     | -0.1   | 0.12    | 0.98 |
| NGLY1_2    | 55.88     | -0.11  | 0.21    | 1    |

Supplement: Supplementary file 7581 [file 1]

# IPI00018272.3|PNPO

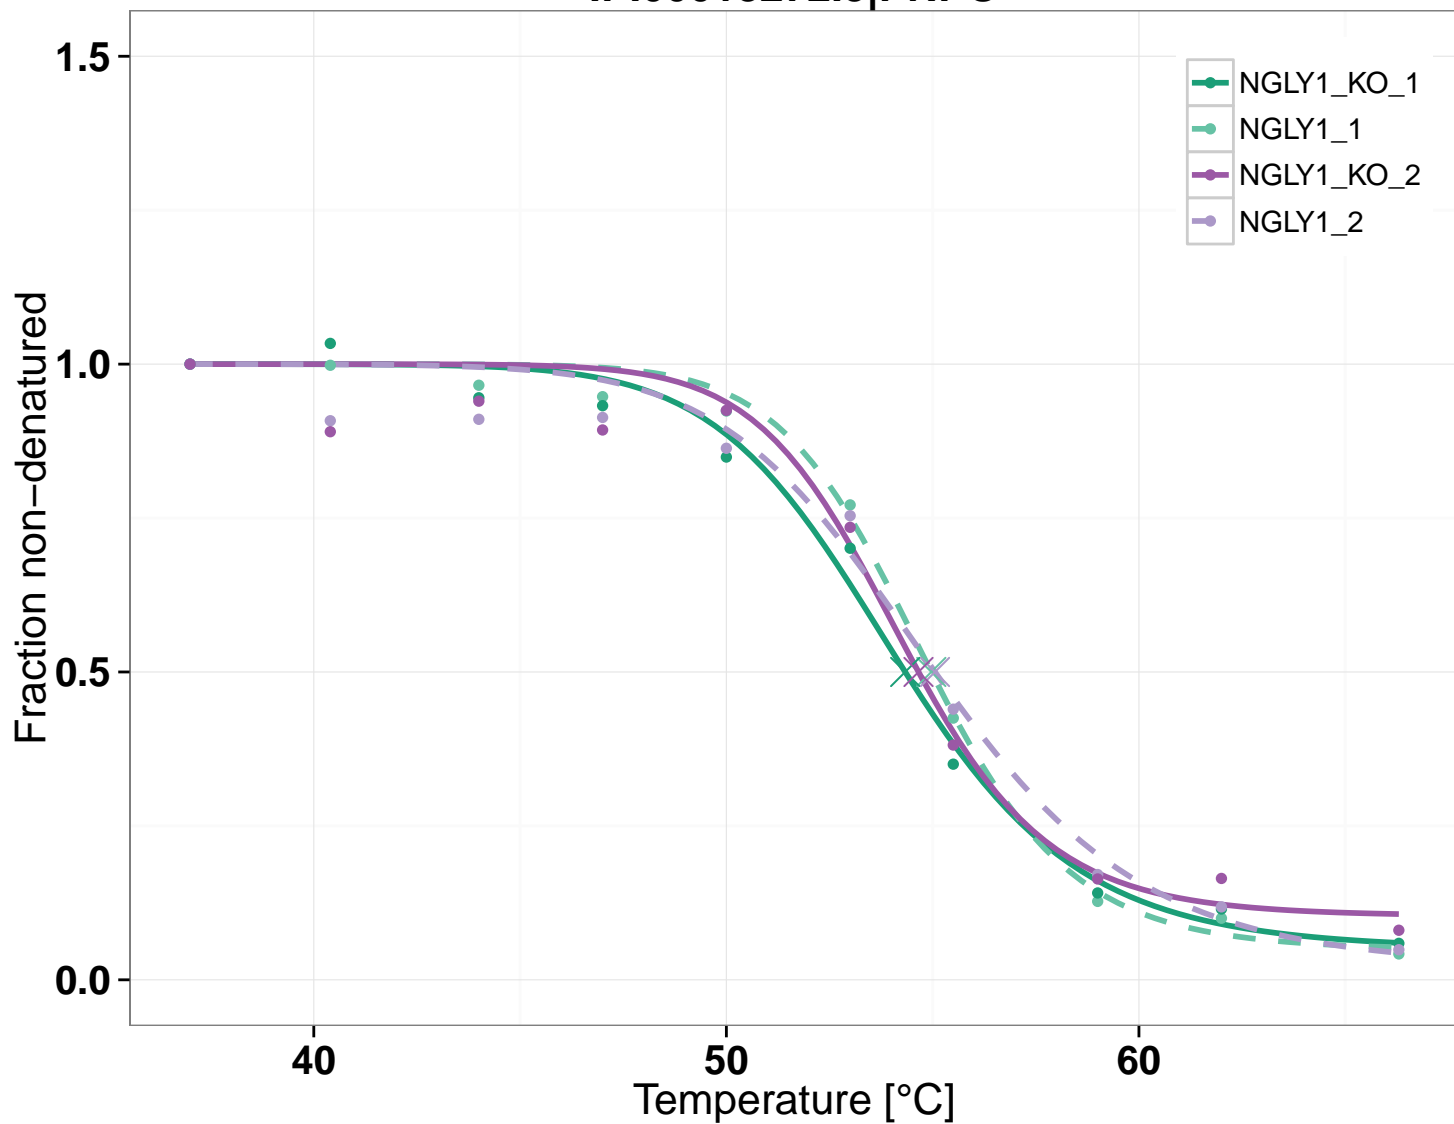

|            | meltPoint | slope  | plateau | R2   |
|------------|-----------|--------|---------|------|
| NGLY1_KO_1 | 54.33     | -0.11  | 0.05    | 0.99 |
| NGLY1_1    | 54.97     | -0.13  | 0.05    | 1    |
| NGLY1_KO_2 | 54.66     | -0.13  | 0.1     | 0.98 |
| NGLY1_2    | 55.06     | -0.096 | 0.02    | 0.98 |

Supplement: Supplementary file 7582 [file 1]

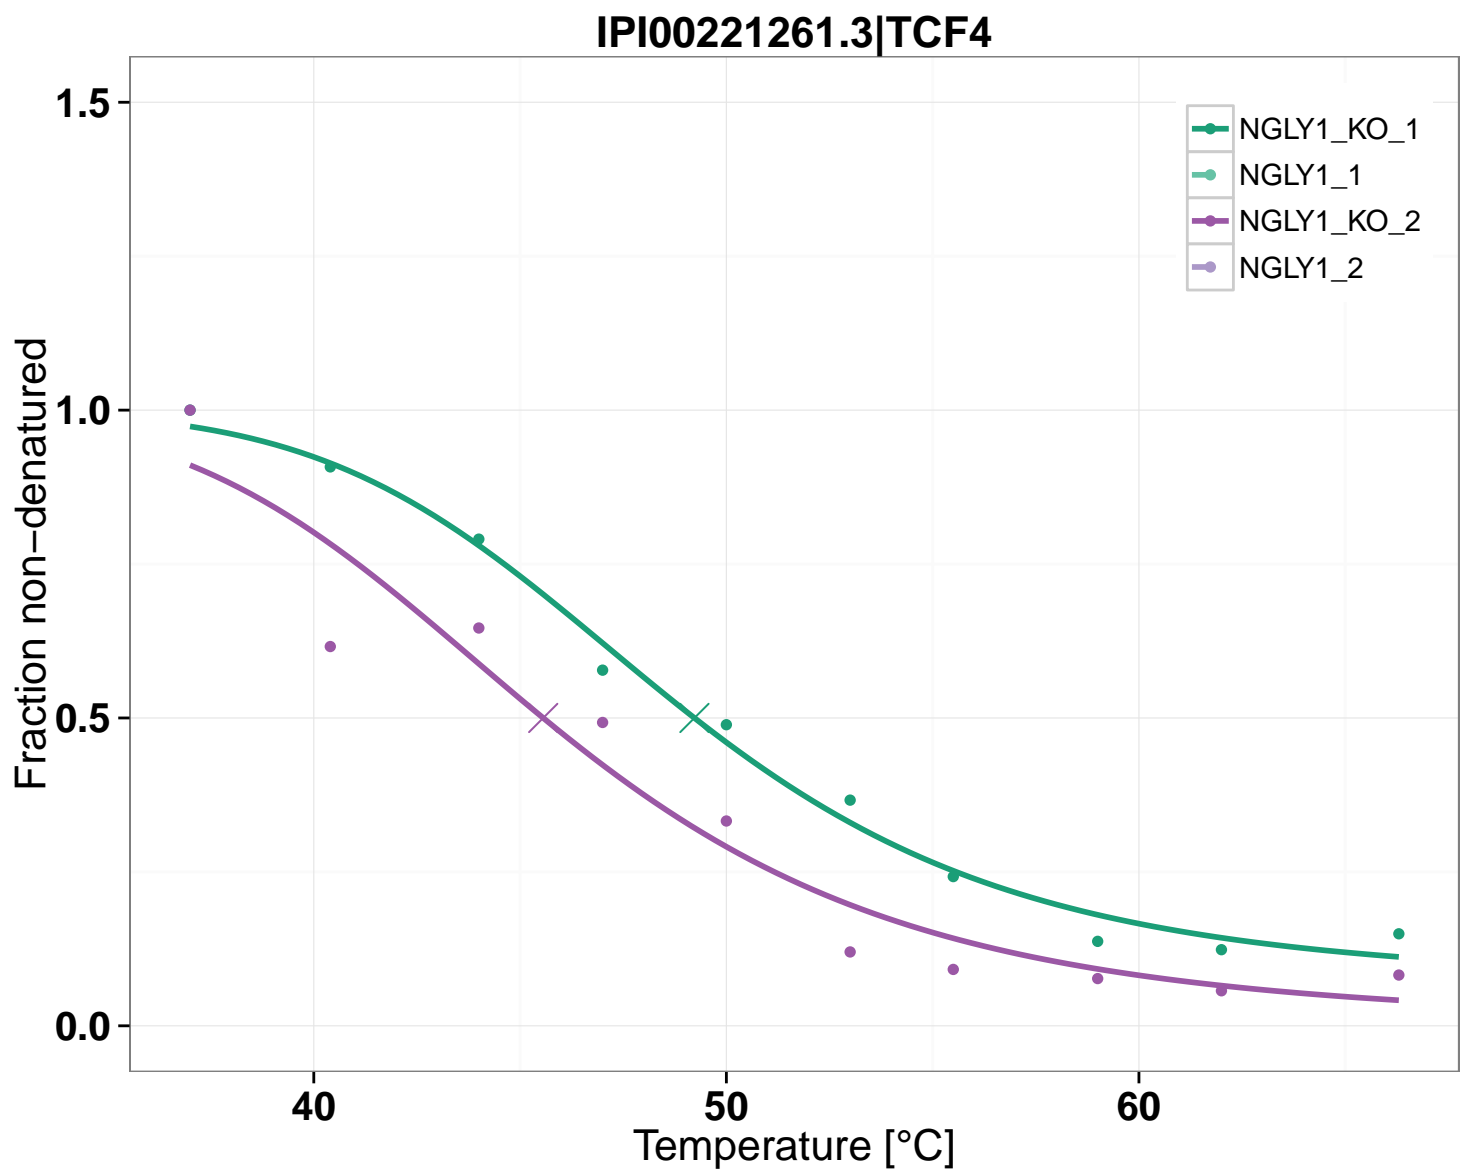

|            | meltPoint | slope  | plateau | R2   |
|------------|-----------|--------|---------|------|
| NGLY1_KO_1 | 49.23     | -0.056 | 0.07    | 0.99 |
| NGLY1_1    | —         | —      | —       | —    |
| NGLY1_KO_2 | 45.56     | -0.057 | 0       | 0.94 |
| NGLY1_2    | —         | —      | —       | —    |

Supplement: Supplementary file 7583 [file 1]

# IPI00410091.3|C11ORF73

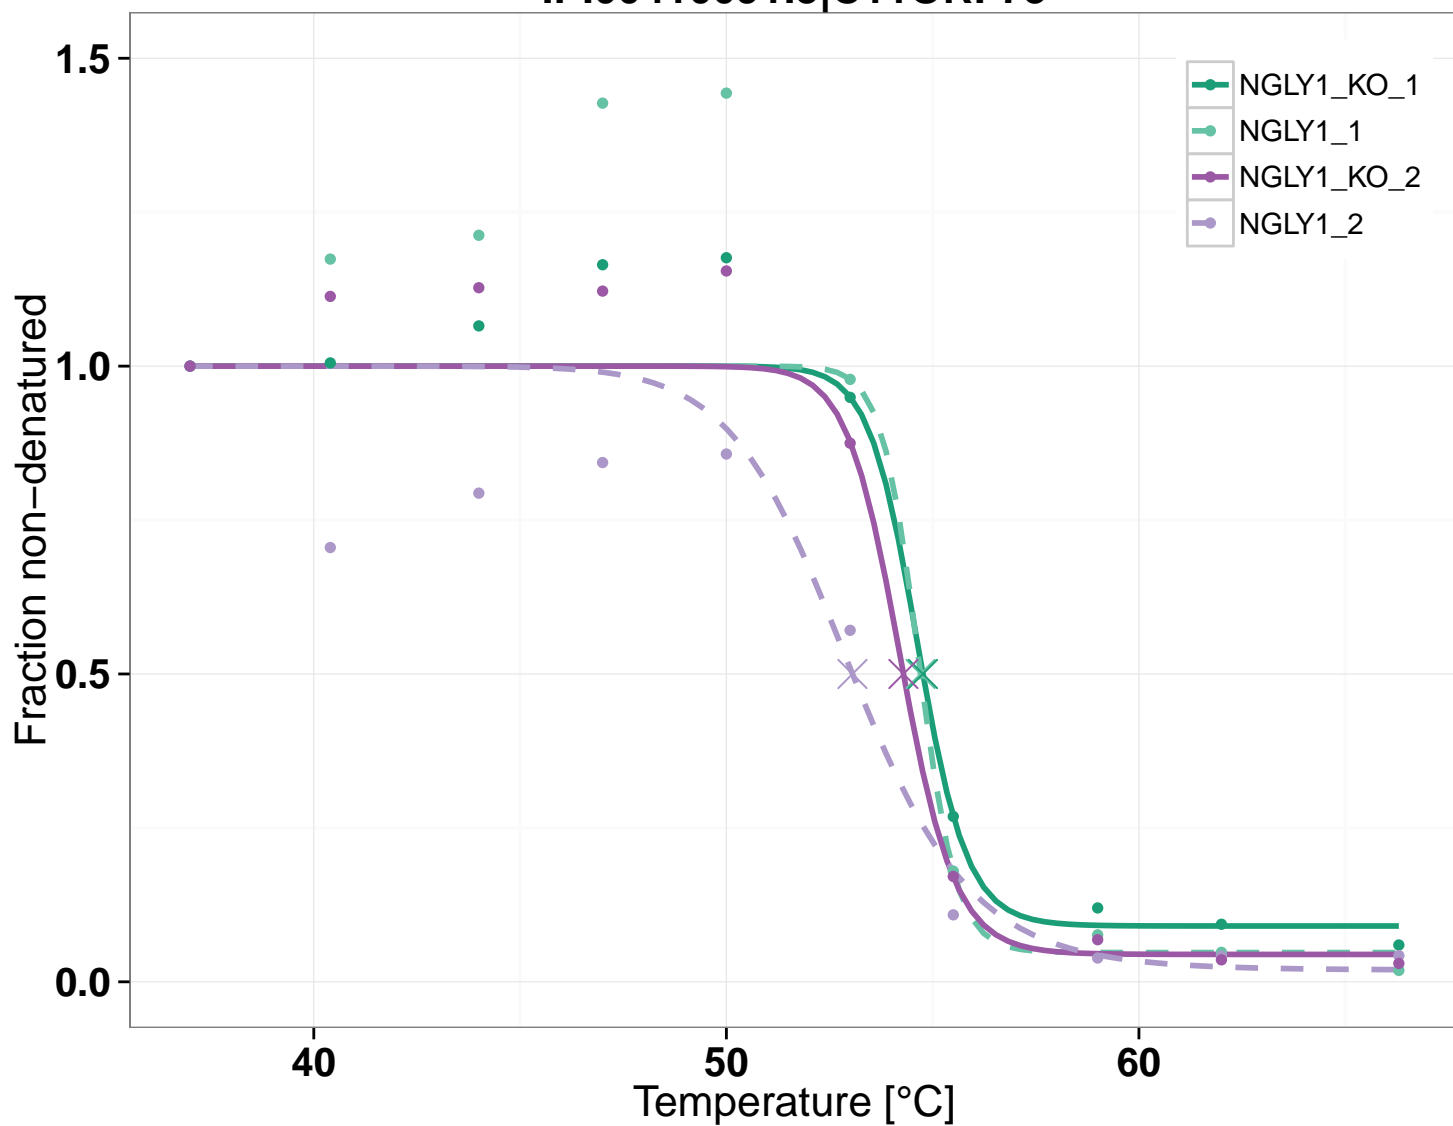

|            | meltPoint | slope | plateau | R2   |
|------------|-----------|-------|---------|------|
| NGLY1_KO_1 | 54.76     | -0.38 | 0.09    | 0.97 |
| NGLY1_1    | 54.71     | -0.53 | 0.05    | 0.86 |
| NGLY1_KO_2 | 54.29     | -0.36 | 0.04    | 0.97 |
| NGLY1_2    | 53.06     | -0.17 | 0.02    | 0.89 |

Supplement: Supplementary file 7584 [file 1]

IPI00477896.1|SLC26A6

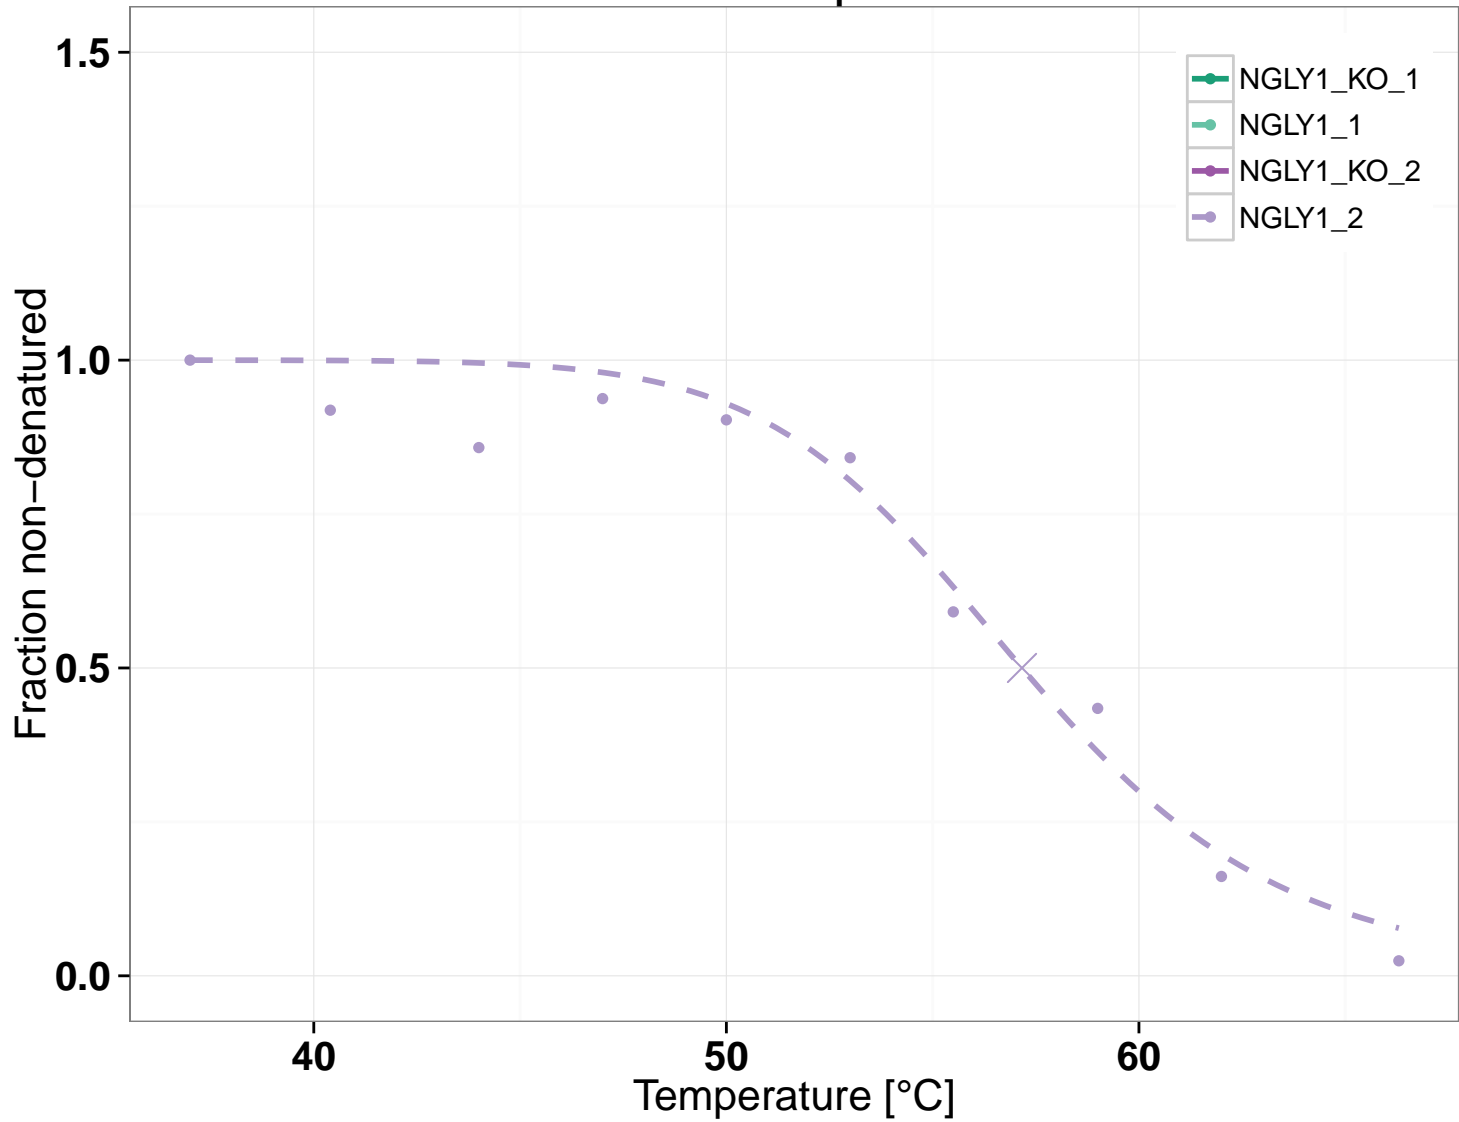

|            | meltPoint | slope | plateau | R2   |
|------------|-----------|-------|---------|------|
| NGLY1_KO_1 | -         | -     | -       | -    |
| NGLY1_1    | -         | -     | -       | -    |
| NGLY1_KO_2 | -         | -     | -       | -    |
| NGLY1_2    | 57.17     | -0.08 | 0       | 0.96 |

Supplement: Supplementary file 7585 [file 1]

# IPI00884996.1|DNAH6

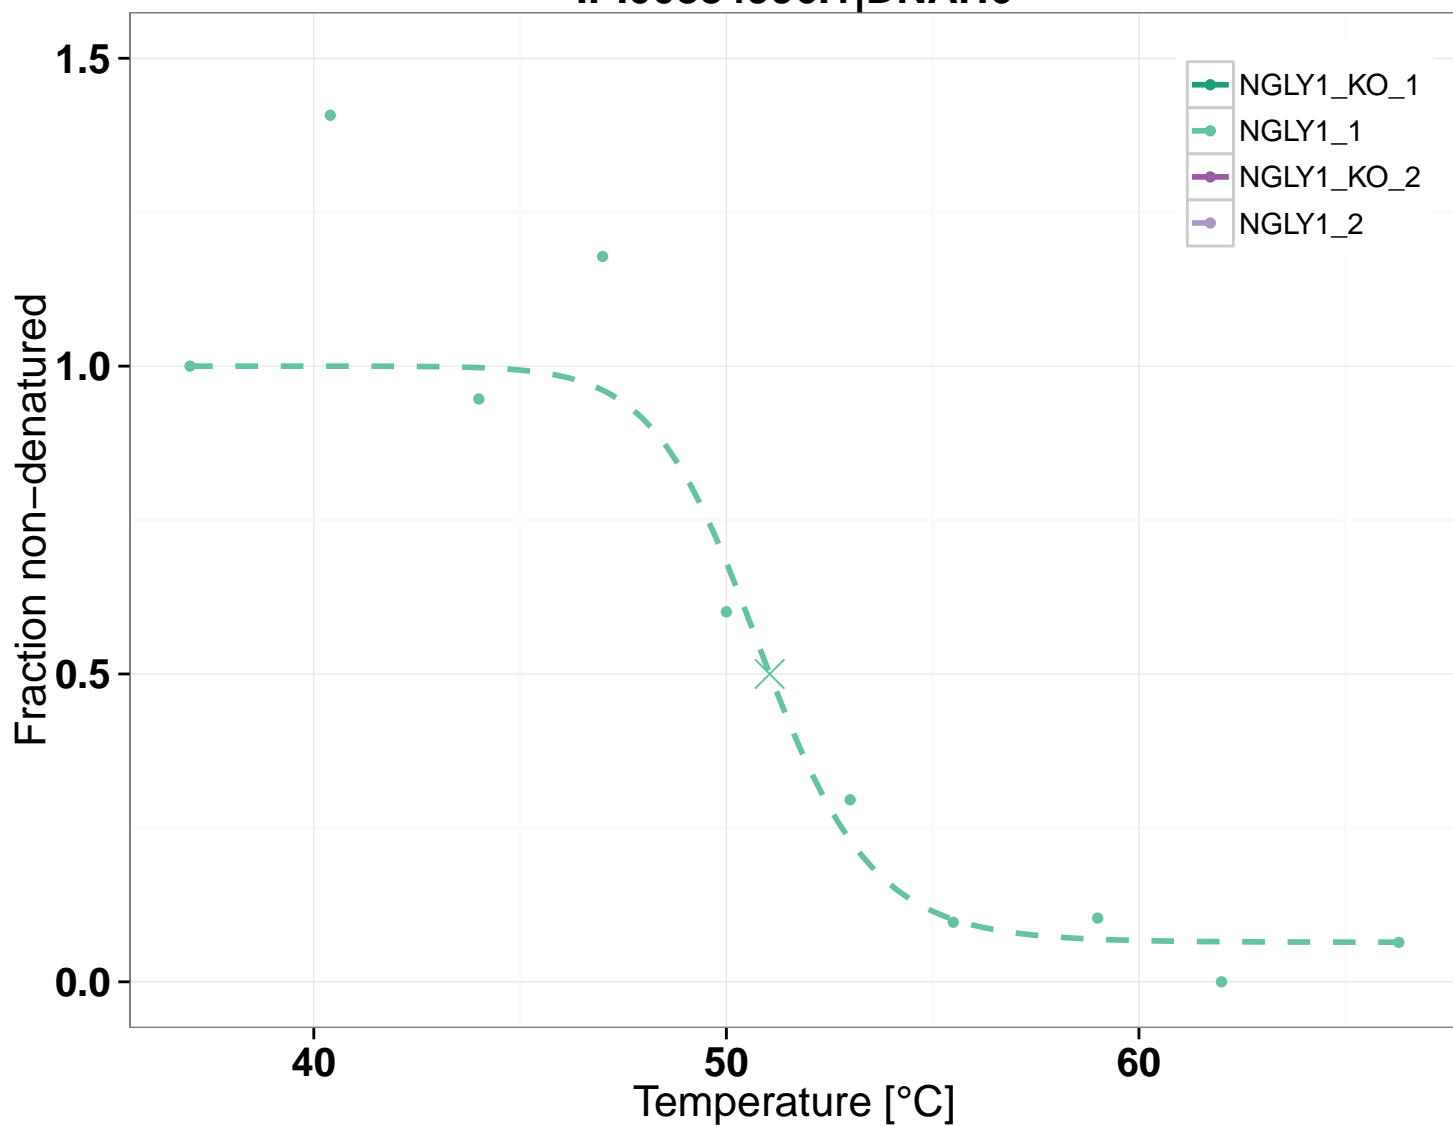

|            | meltPoint | slope | plateau | R2   |
|------------|-----------|-------|---------|------|
| NGLY1_KO_1 | -         | -     | -       | -    |
| NGLY1_1    | 51.05     | -0.18 | 0.06    | 0.91 |
| NGLY1_KO_2 | -         | -     | -       | -    |
| NGLY1_2    | -         | -     | -       | -    |

Supplement: Supplementary file 7586 [file 1]

# IPI00217023.2|MMAA

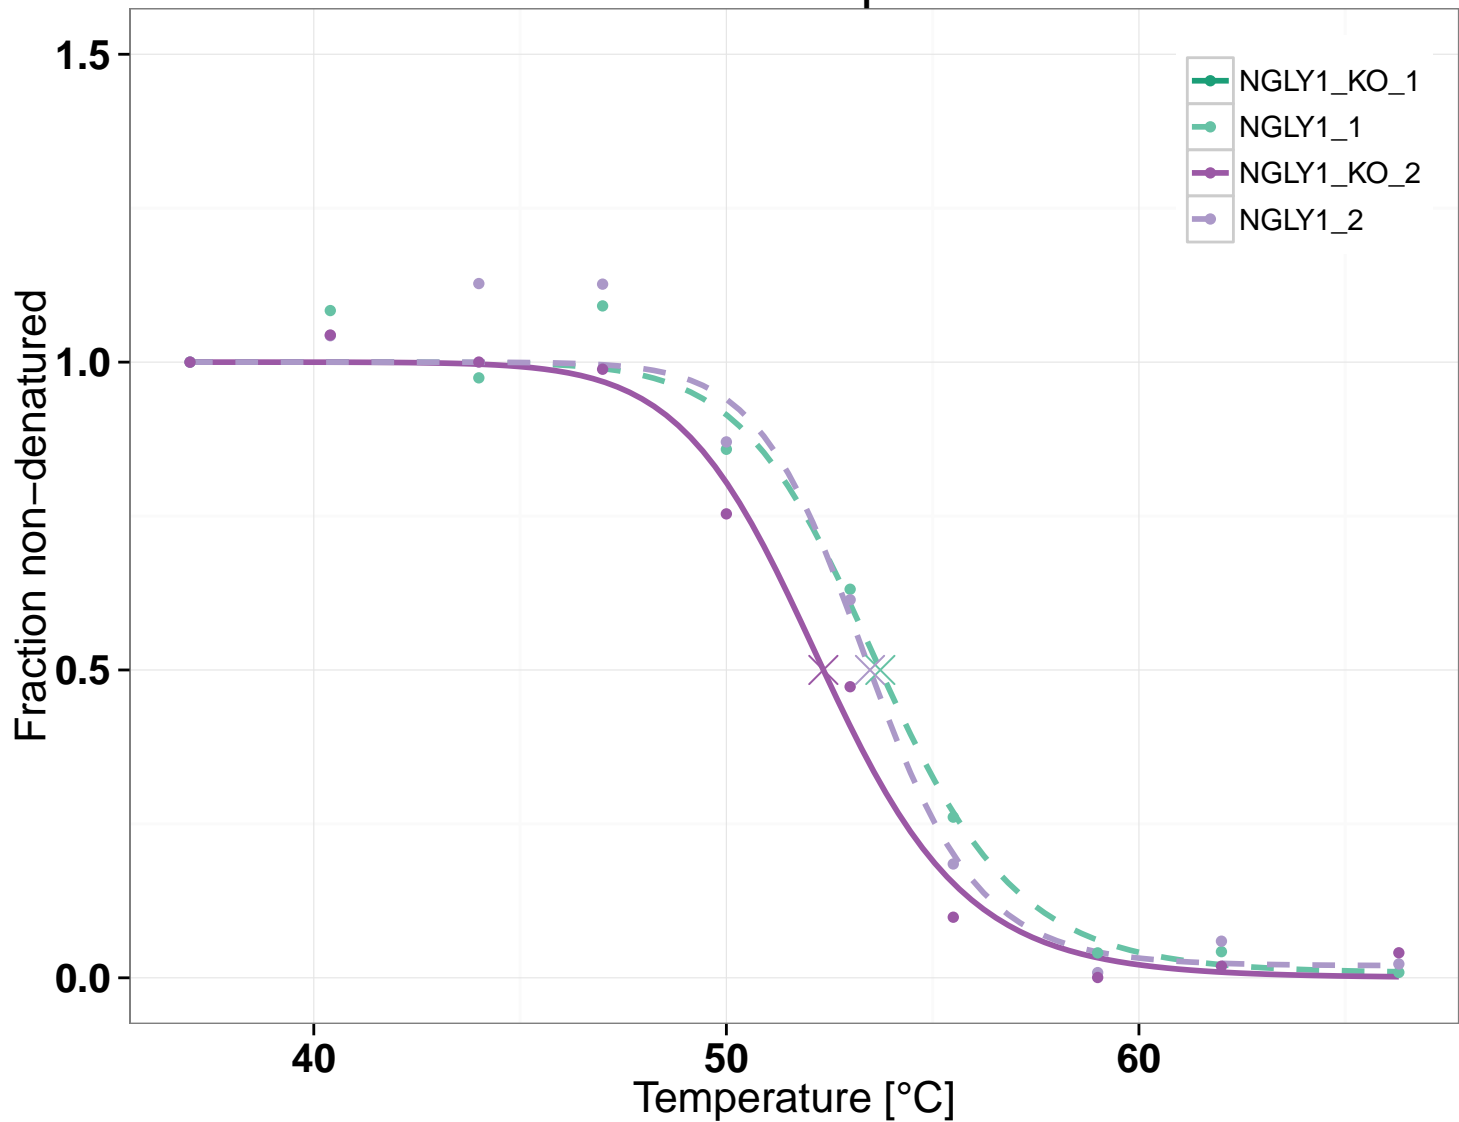

|            | meltPoint | slope | plateau | R2   |
|------------|-----------|-------|---------|------|
| NGLY1_KO_1 | -         | -     | -       | -    |
| NGLY1_1    | 53.73     | -0.15 | 0.01    | 0.99 |
| NGLY1_KO_2 | 52.35     | -0.14 | 0       | 0.99 |
| NGLY1_2    | 53.48     | -0.18 | 0.02    | 0.98 |

Supplement: Supplementary file 7587 [file 1]

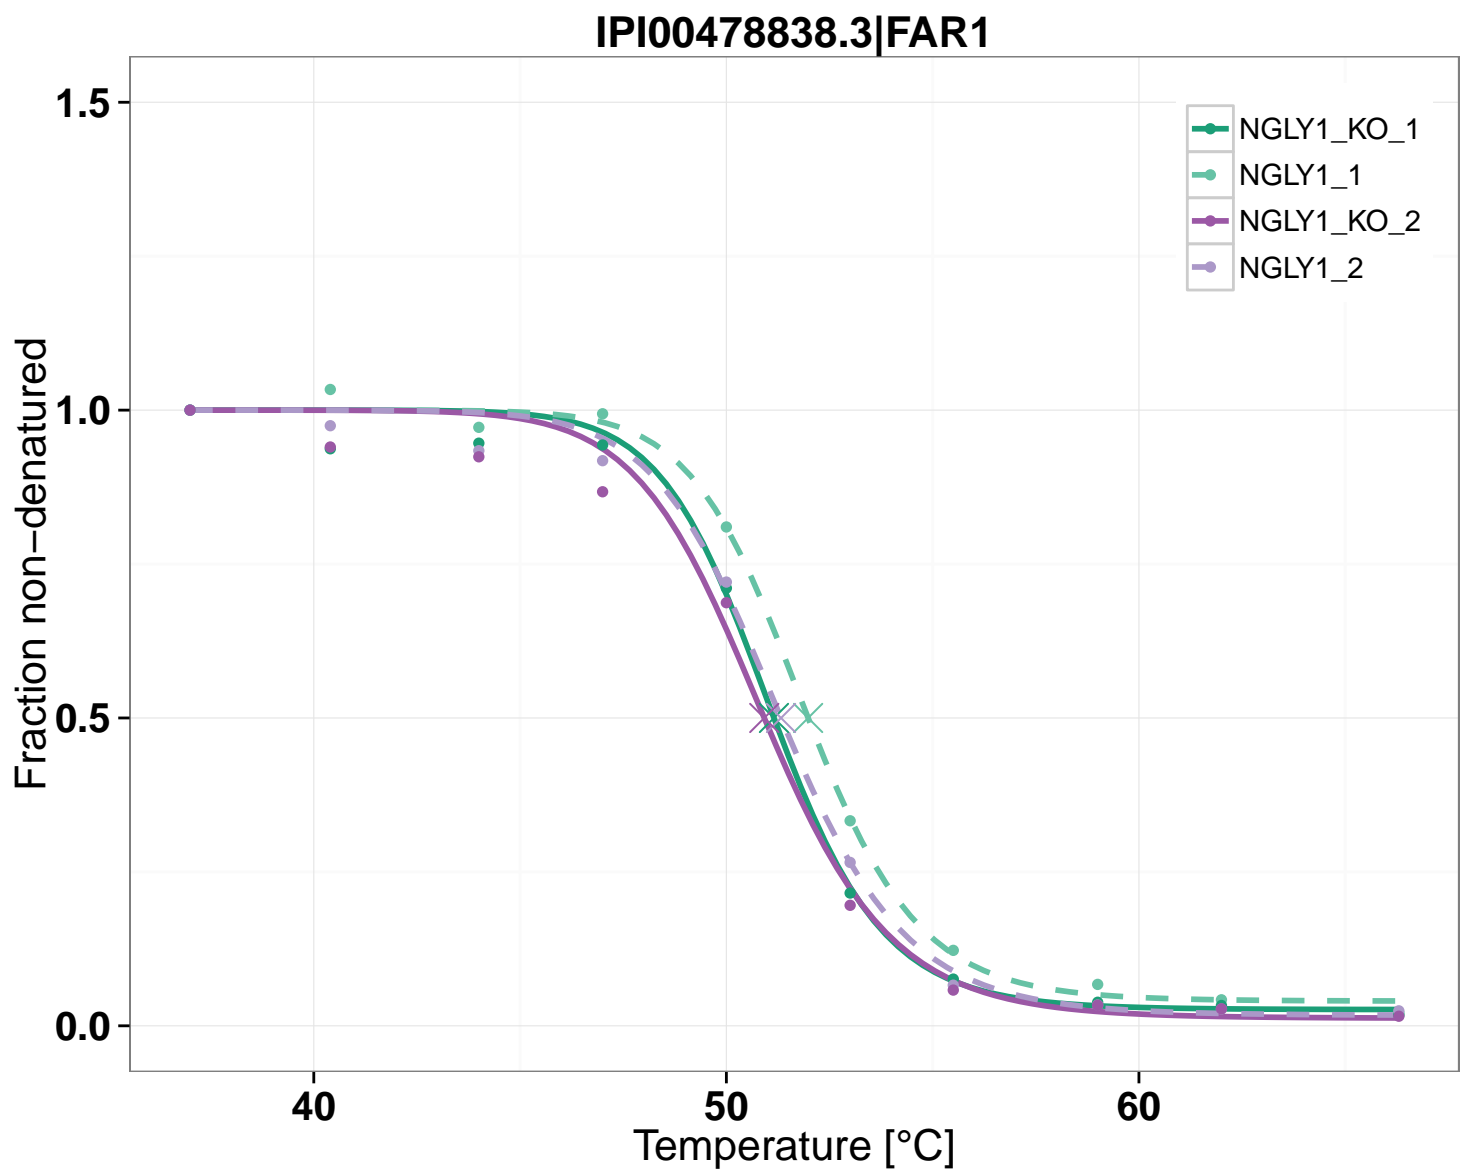

|            | meltPoint | slope | plateau | R2   |
|------------|-----------|-------|---------|------|
| NGLY1_KO_1 | 51.15     | -0.18 | 0.03    | 1    |
| NGLY1_1    | 51.98     | -0.17 | 0.04    | 1    |
| NGLY1_KO_2 | 50.92     | -0.16 | 0.01    | 0.99 |
| NGLY1_2    | 51.33     | -0.16 | 0.02    | 1    |

Supplement: Supplementary file 7588 [file 1]

# IPI00306178.3|EDEM2

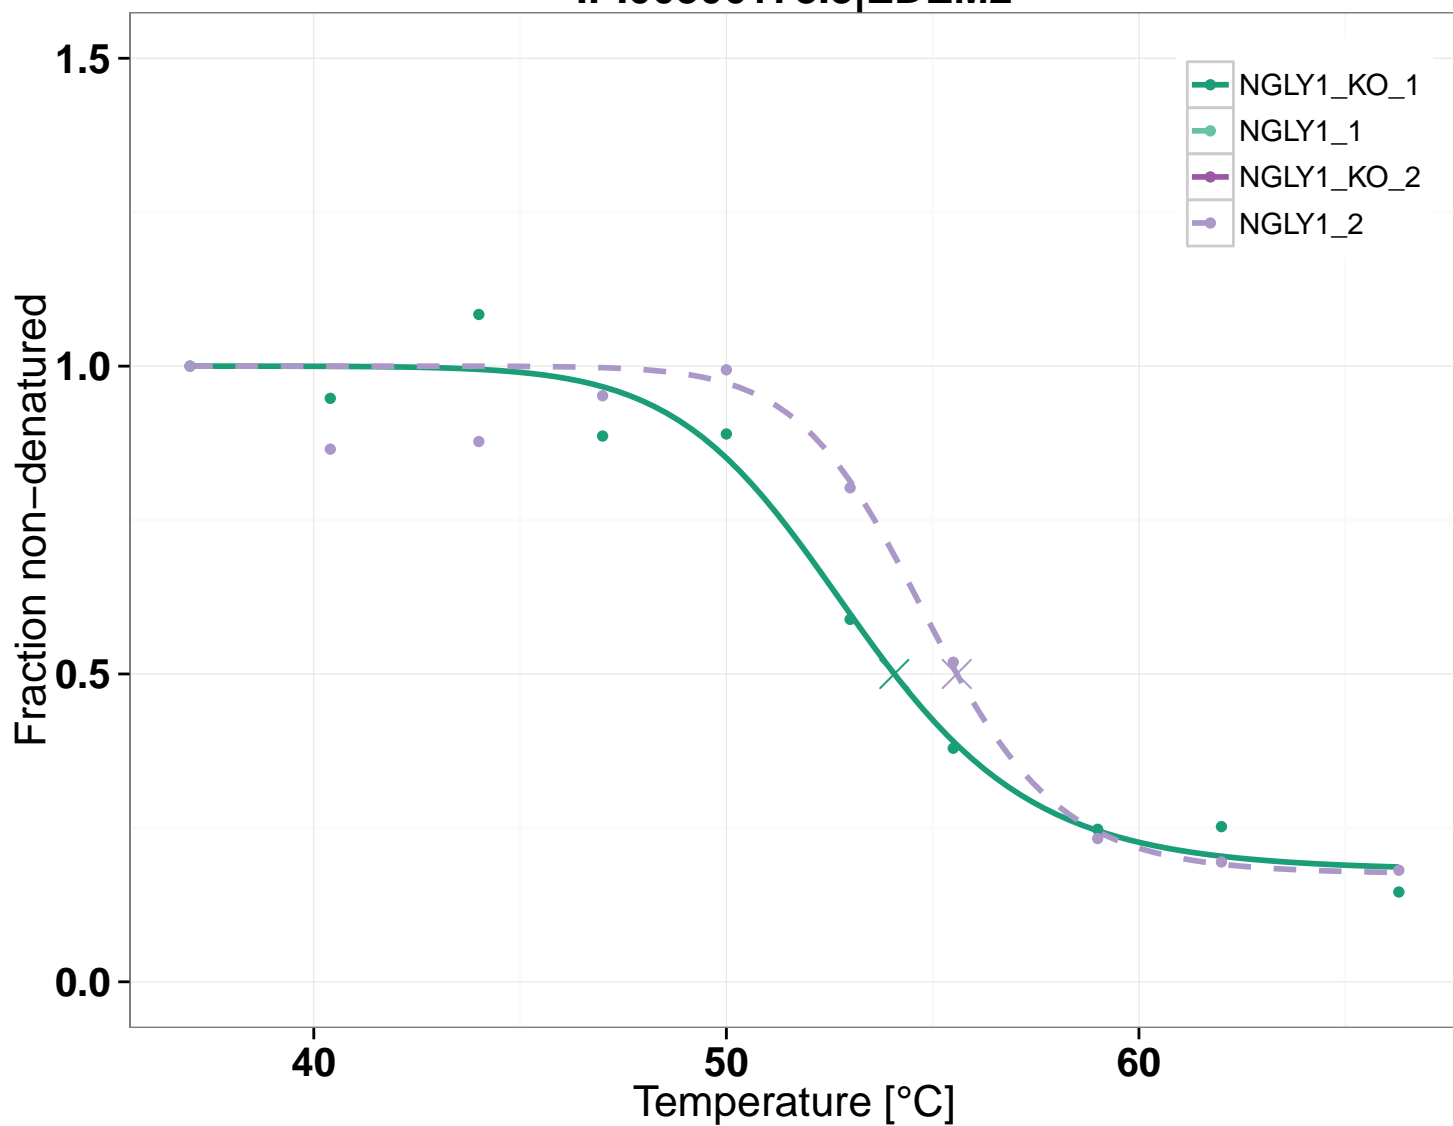

|            | meltPoint | slope  | plateau | R2   |
|------------|-----------|--------|---------|------|
| NGLY1_KO_1 | 54.07     | -0.095 | 0.18    | 0.98 |
| NGLY1_1    | -         | -      | -       | -    |
| NGLY1_KO_2 | -         | -      | -       | -    |
| NGLY1_2    | 55.59     | -0.13  | 0.18    | 0.97 |

Supplement: Supplementary file 7589 [file 1]

# IPI00643141.1|DVL3

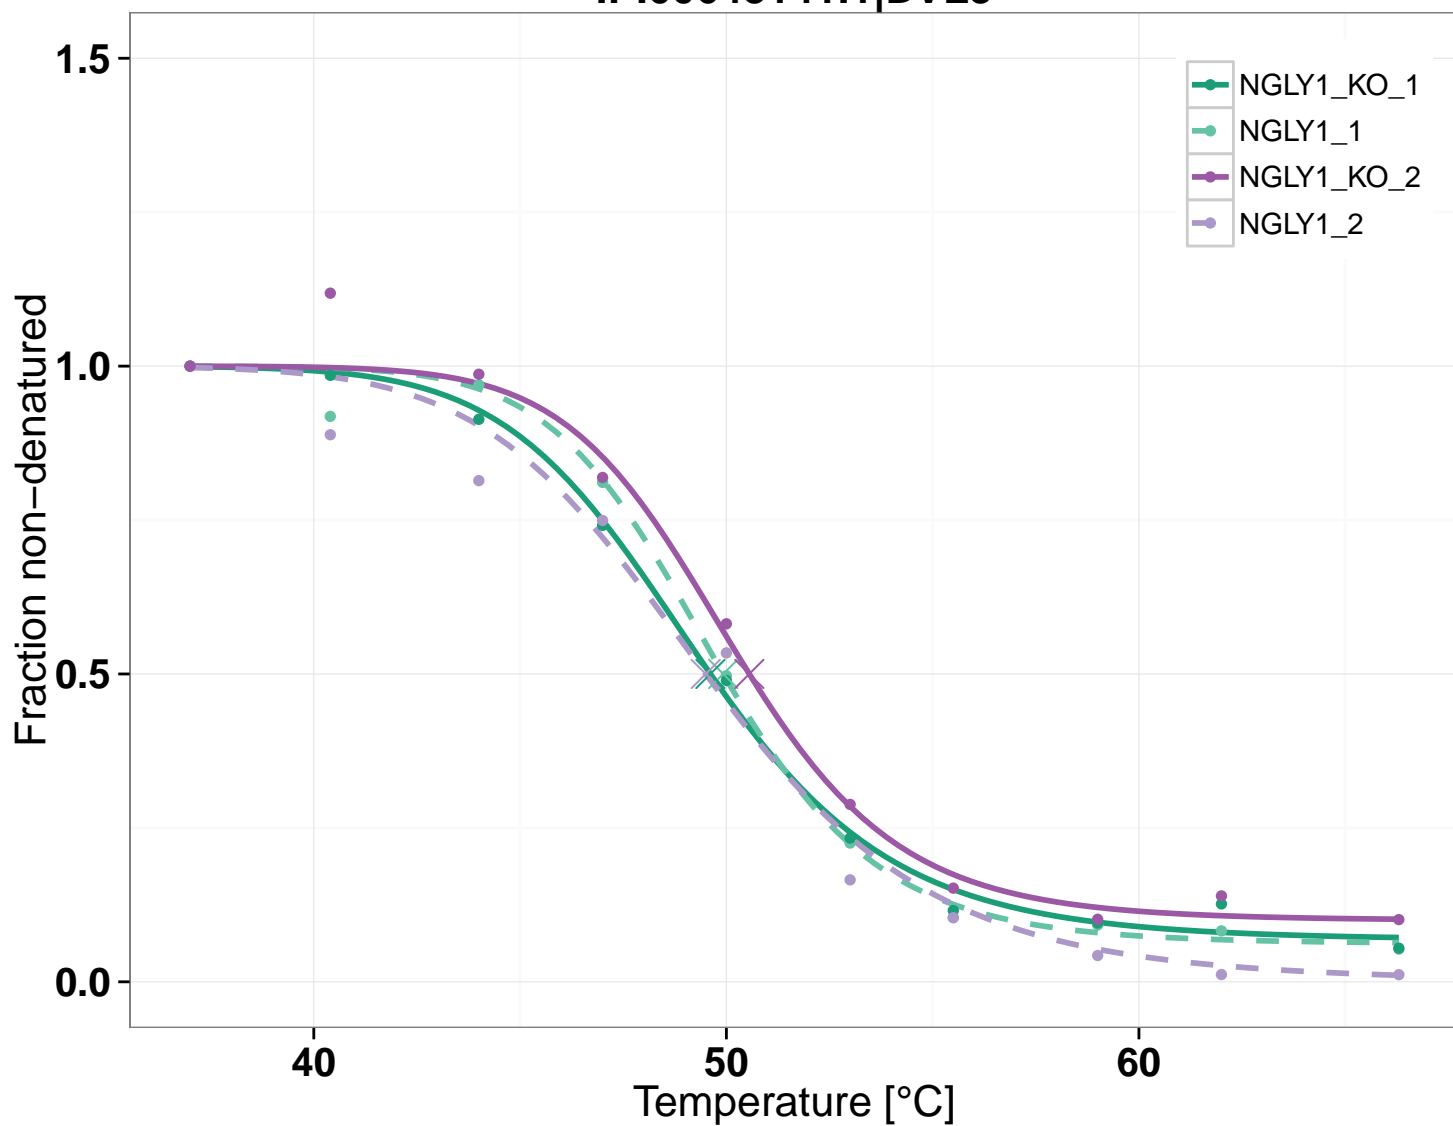

|            | meltPoint | slope  | plateau | R2   |
|------------|-----------|--------|---------|------|
| NGLY1_KO_1 | 49.61     | -0.099 | 0.07    | 1    |
| NGLY1_1    | 49.92     | -0.12  | 0.06    | 1    |
| NGLY1_KO_2 | 50.56     | -0.11  | 0.1     | 0.99 |
| NGLY1_2    | 49.5      | -0.092 | 0       | 0.98 |

Supplement: Supplementary file 7590 [file 1]

IPI00024674.2|MAP2K4

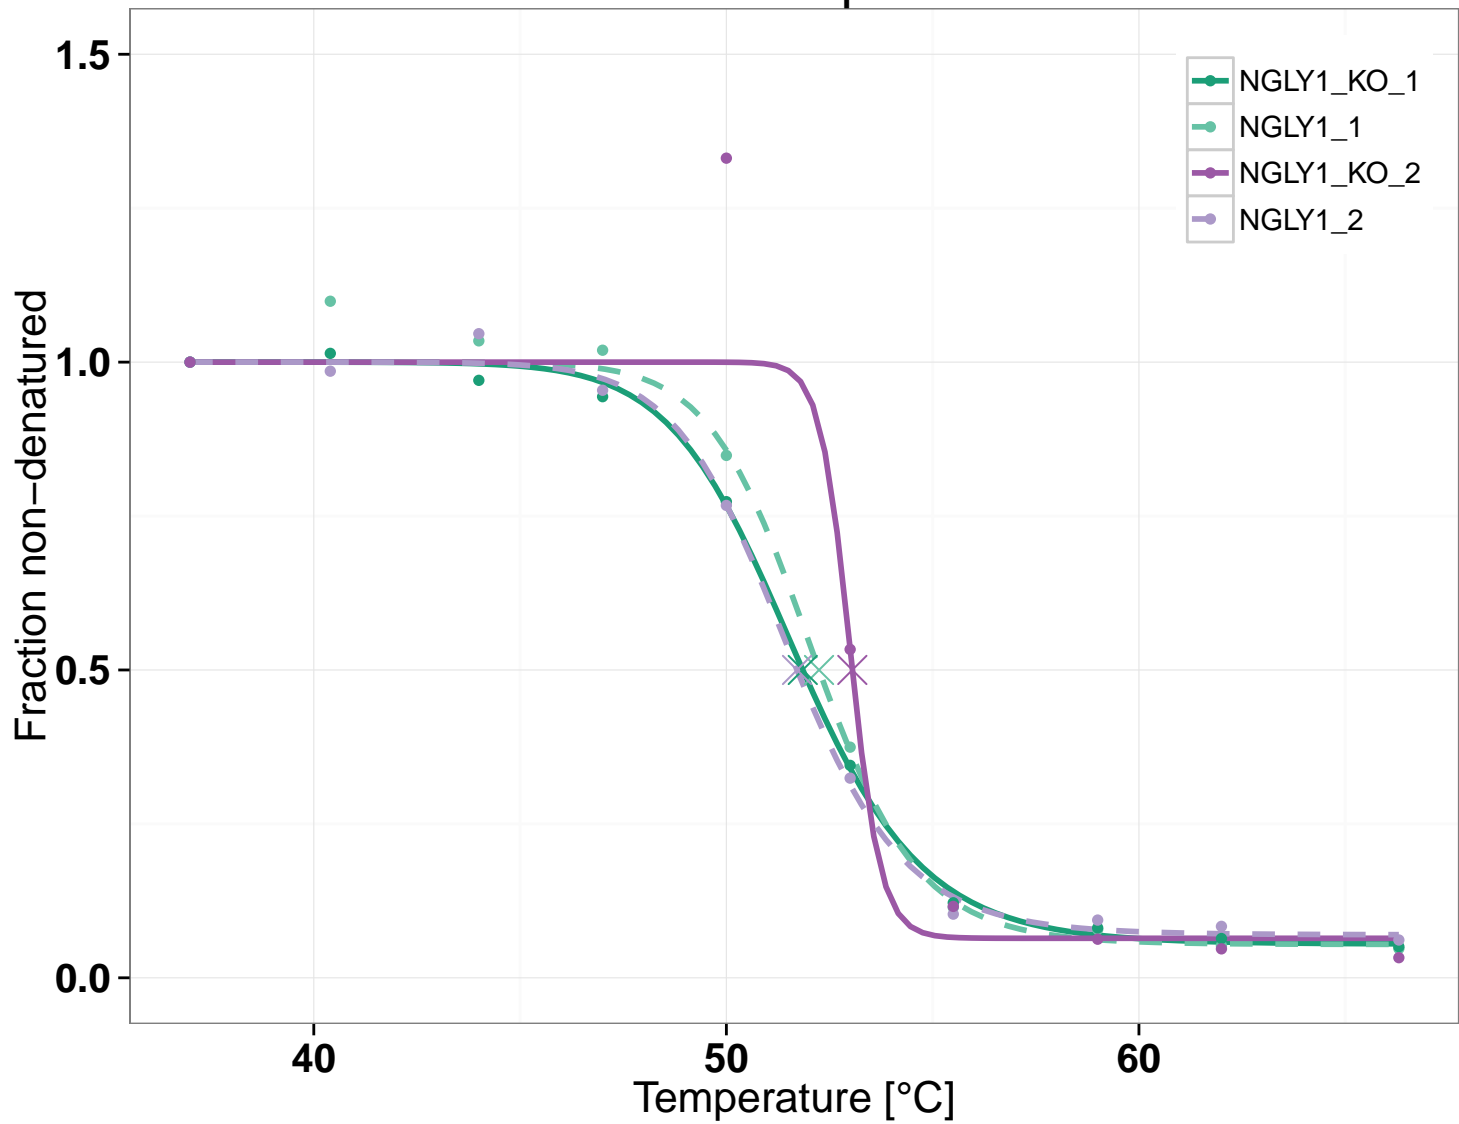

|            | meltPoint | slope | plateau | R2   |
|------------|-----------|-------|---------|------|
| NGLY1_KO_1 | 51.85     | -0.15 | 0.05    | 1    |
| NGLY1_1    | 52.25     | -0.19 | 0.05    | 0.99 |
| NGLY1_KO_2 | 53.05     | -0.64 | 0.06    | 0.75 |
| NGLY1_2    | 51.71     | -0.17 | 0.07    | 1    |

Supplement: Supplementary file 7591 [file 1]

IPI00871172.3|FAM21C

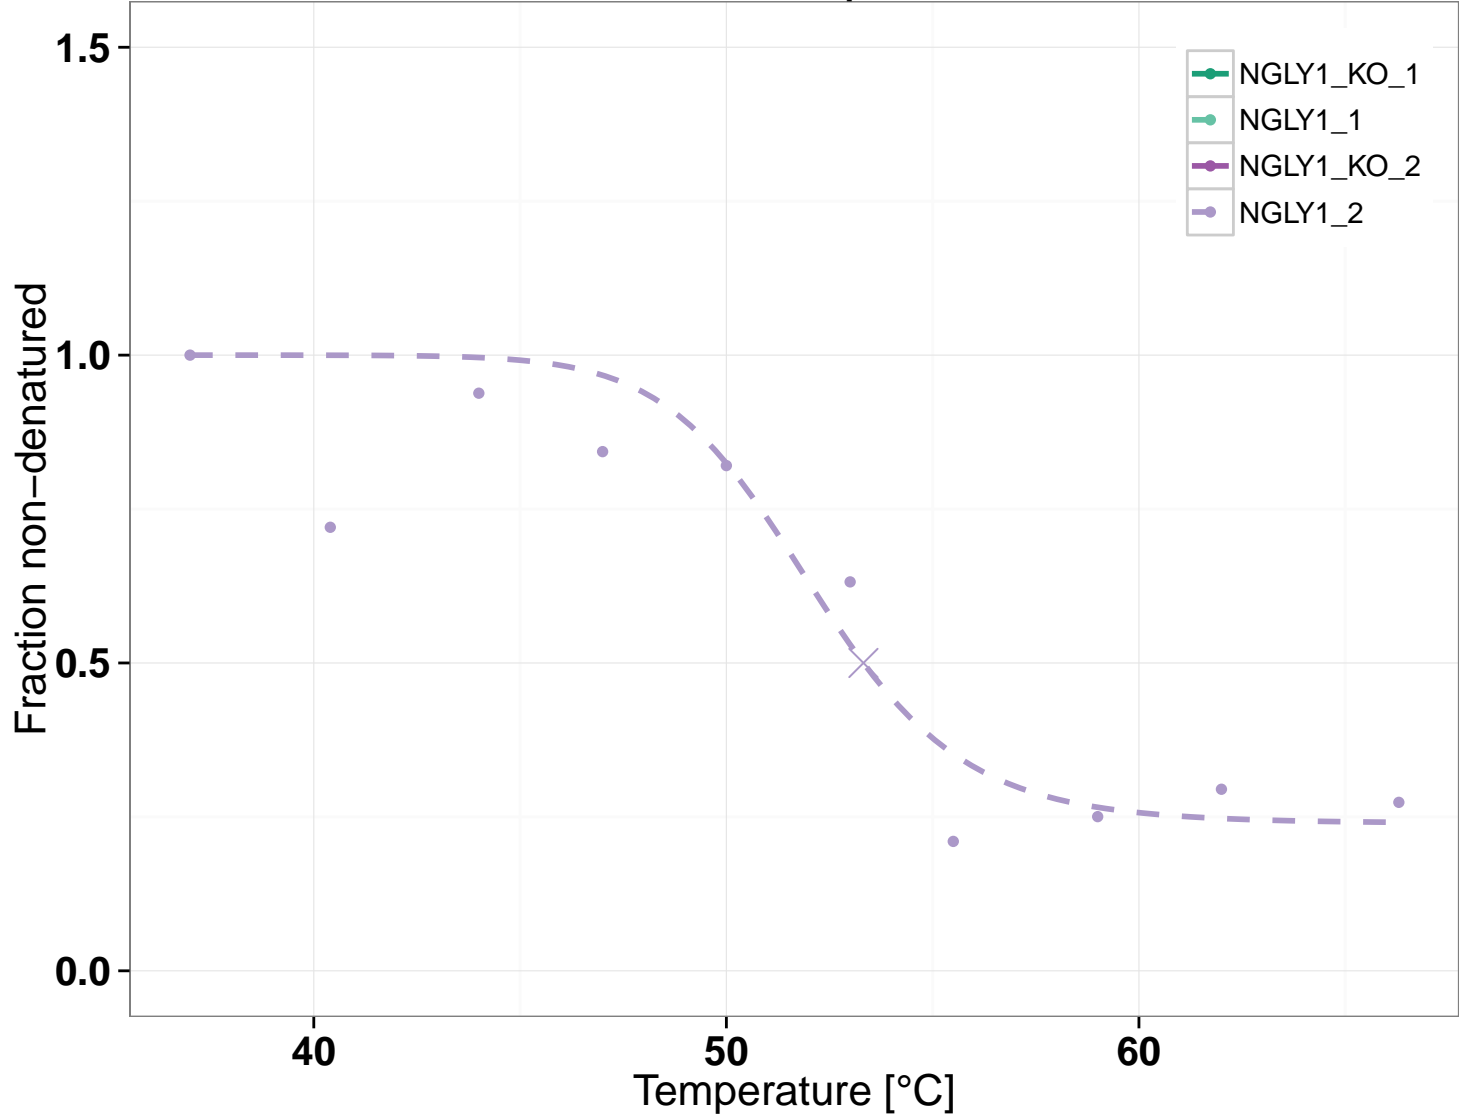

|            | meltPoint | slope | plateau | R2   |
|------------|-----------|-------|---------|------|
| NGLY1_KO_1 | —         | —     | —       | —    |
| NGLY1_1    | —         | —     | —       | —    |
| NGLY1_KO_2 | —         | —     | —       | —    |
| NGLY1_2    | 53.32     | -0.1  | 0.24    | 0.85 |

Supplement: Supplementary file 7592 [file 1]

# IPI00166840.3|MAP3K7IP3

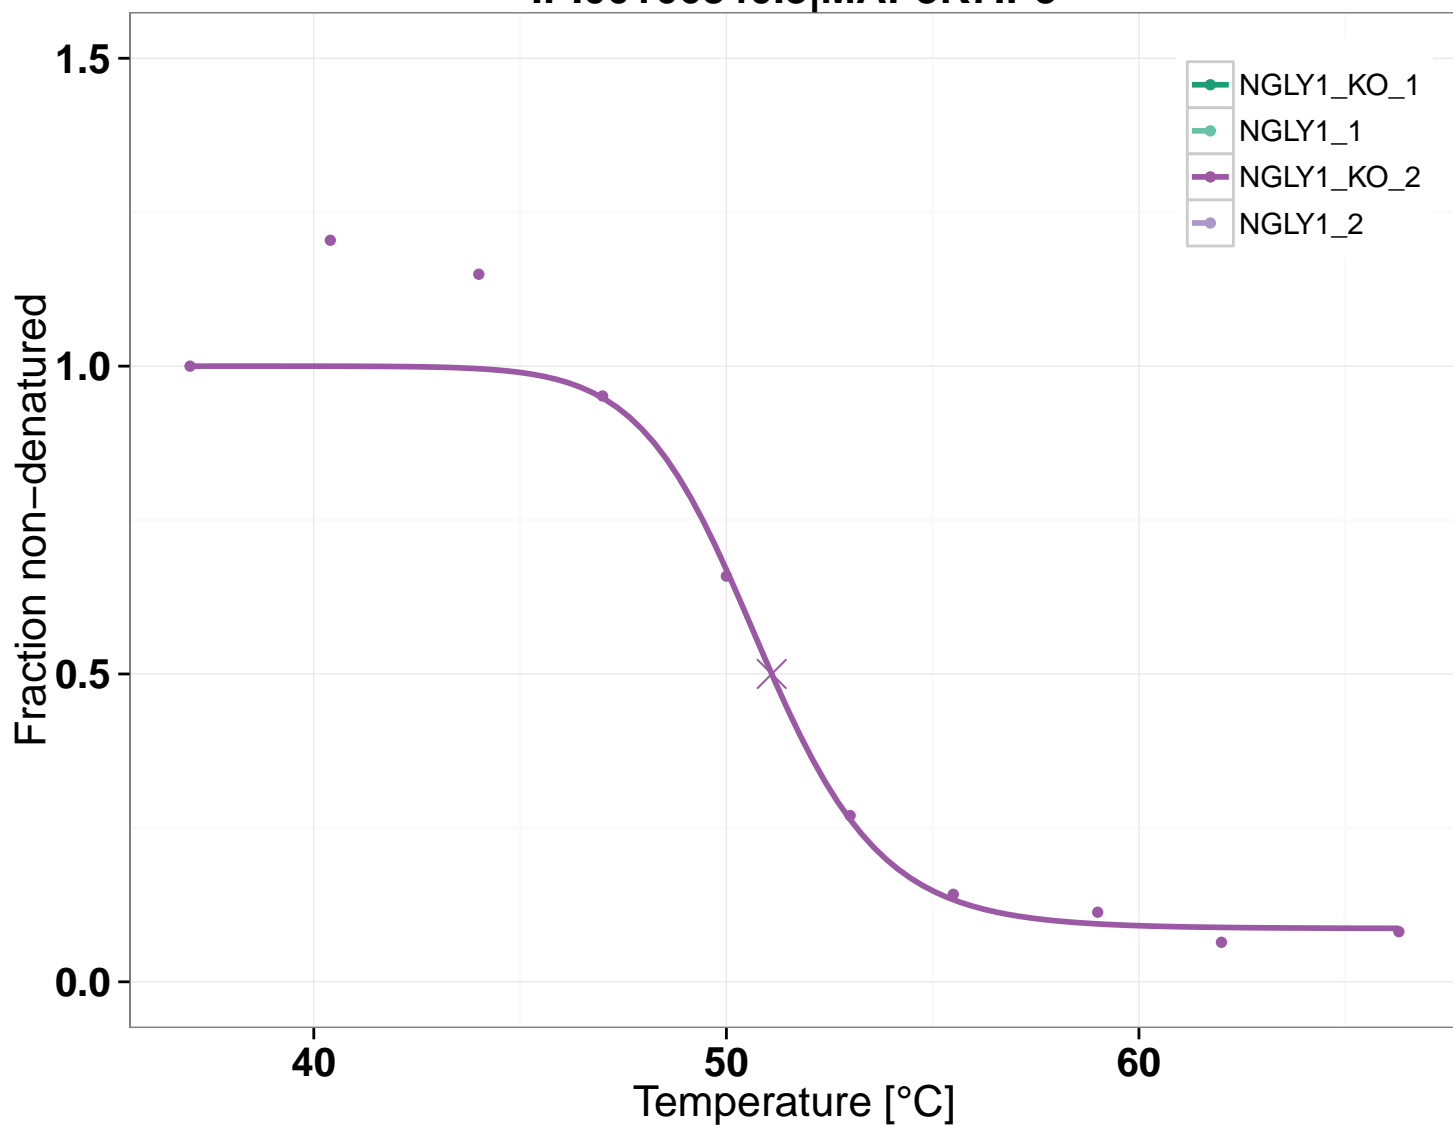

|            | meltPoint | slope | plateau | R2   |
|------------|-----------|-------|---------|------|
| NGLY1_KO_1 | —         | —     | —       | —    |
| NGLY1_1    | —         | —     | —       | —    |
| NGLY1_KO_2 | 51.1      | -0.16 | 0.09    | 0.97 |
| NGLY1_2    | —         | —     | —       | —    |

Supplement: Supplementary file 7593 [file 1]

IPI00005724.1|LANCL1

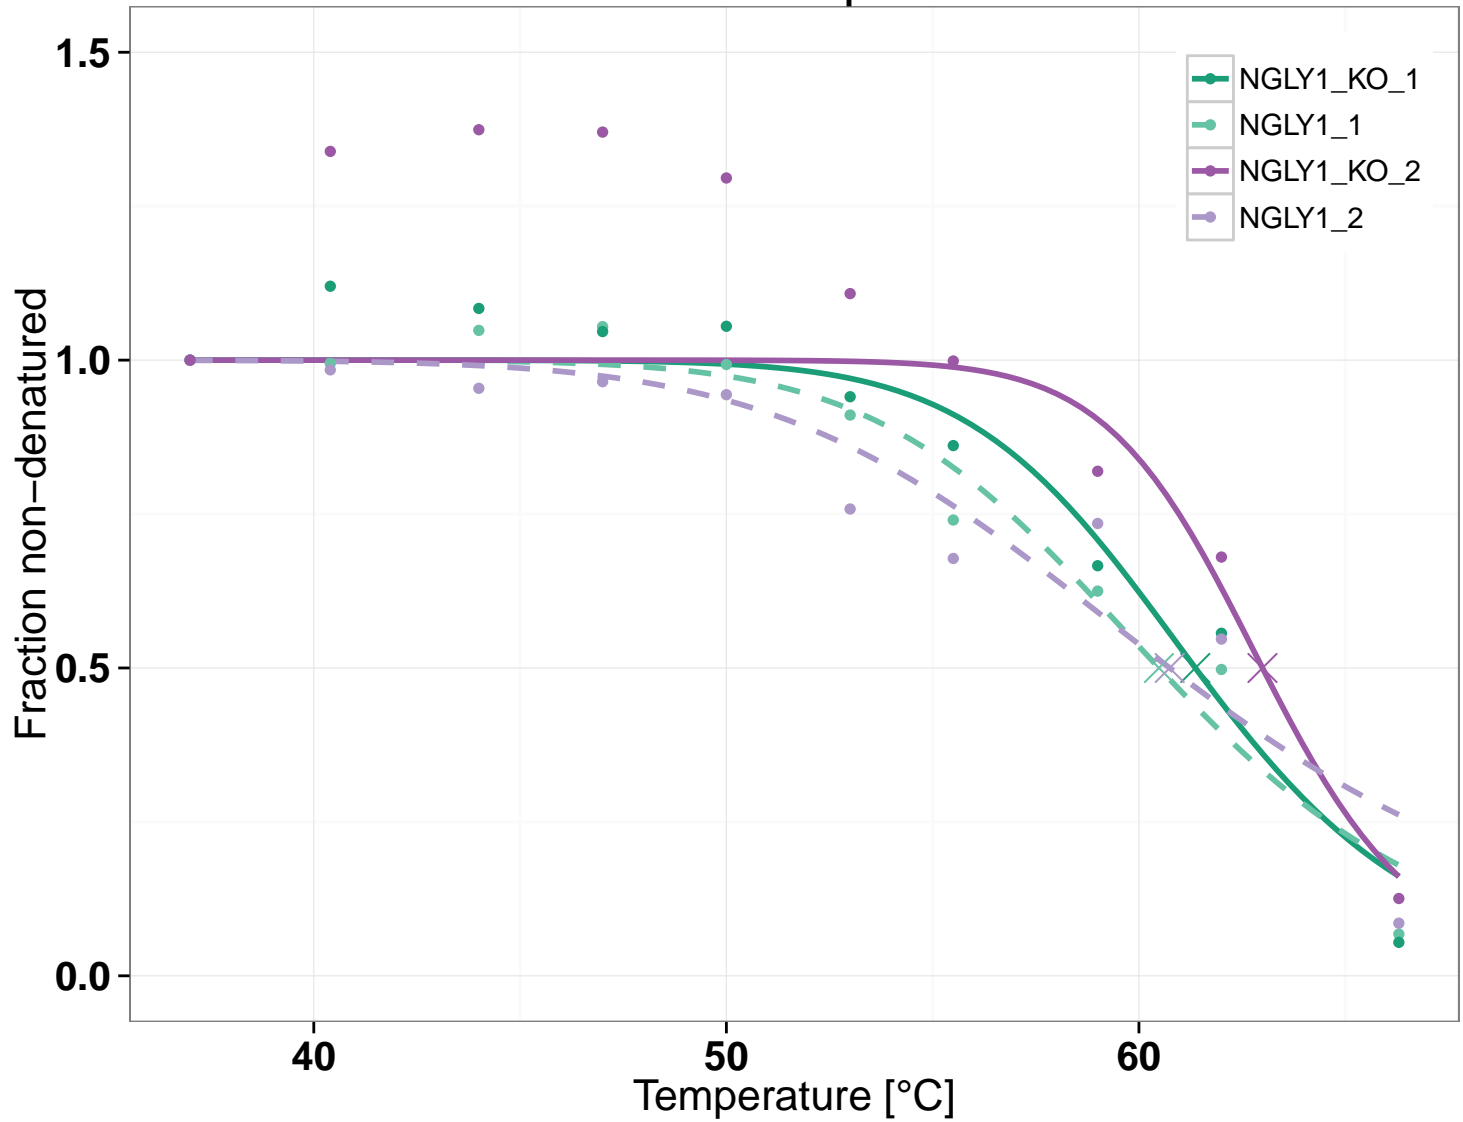

|            | meltPoint | slope  | plateau | R2   |
|------------|-----------|--------|---------|------|
| NGLY1_KO_1 | 61.37     | -0.091 | 0       | 0.94 |
| NGLY1_1    | 60.49     | -0.073 | 0       | 0.96 |
| NGLY1_KO_2 | 63        | -0.13  | 0       | 0.64 |
| NGLY1_2    | 60.75     | -0.052 | 0       | 0.89 |

Supplement: Supplementary file 7594 [file 1]

IPI00021770.1|HMGCR

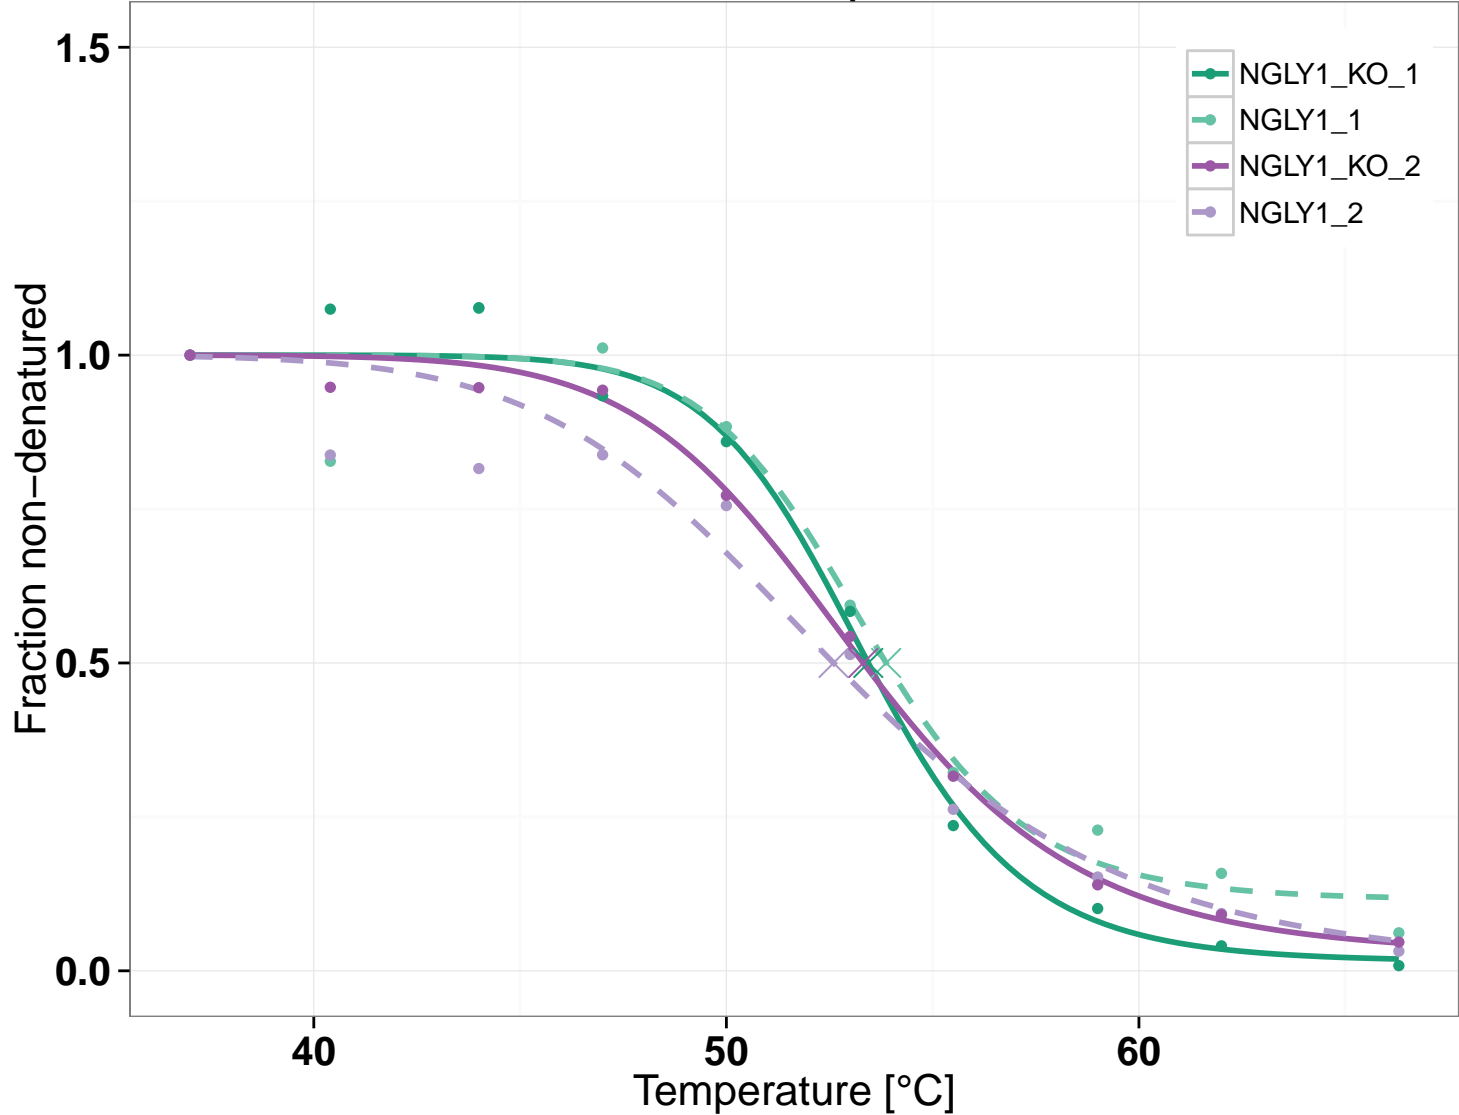

|            | meltPoint | slope | plateau | R2   |
|------------|-----------|-------|---------|------|
| NGLY1_KO_1 | 53.44     | -0.13 | 0.01    | 0.99 |
| NGLY1_1    | 53.87     | -0.11 | 0.11    | 0.97 |
| NGLY1_KO_2 | 53.32     | -0.09 | 0.02    | 1    |
| NGLY1_2    | 52.6      | -0.07 | 0       | 0.96 |

Supplement: Supplementary file 7595 [file 1]

IPI00796277.1|7 KDA PROTEIN.

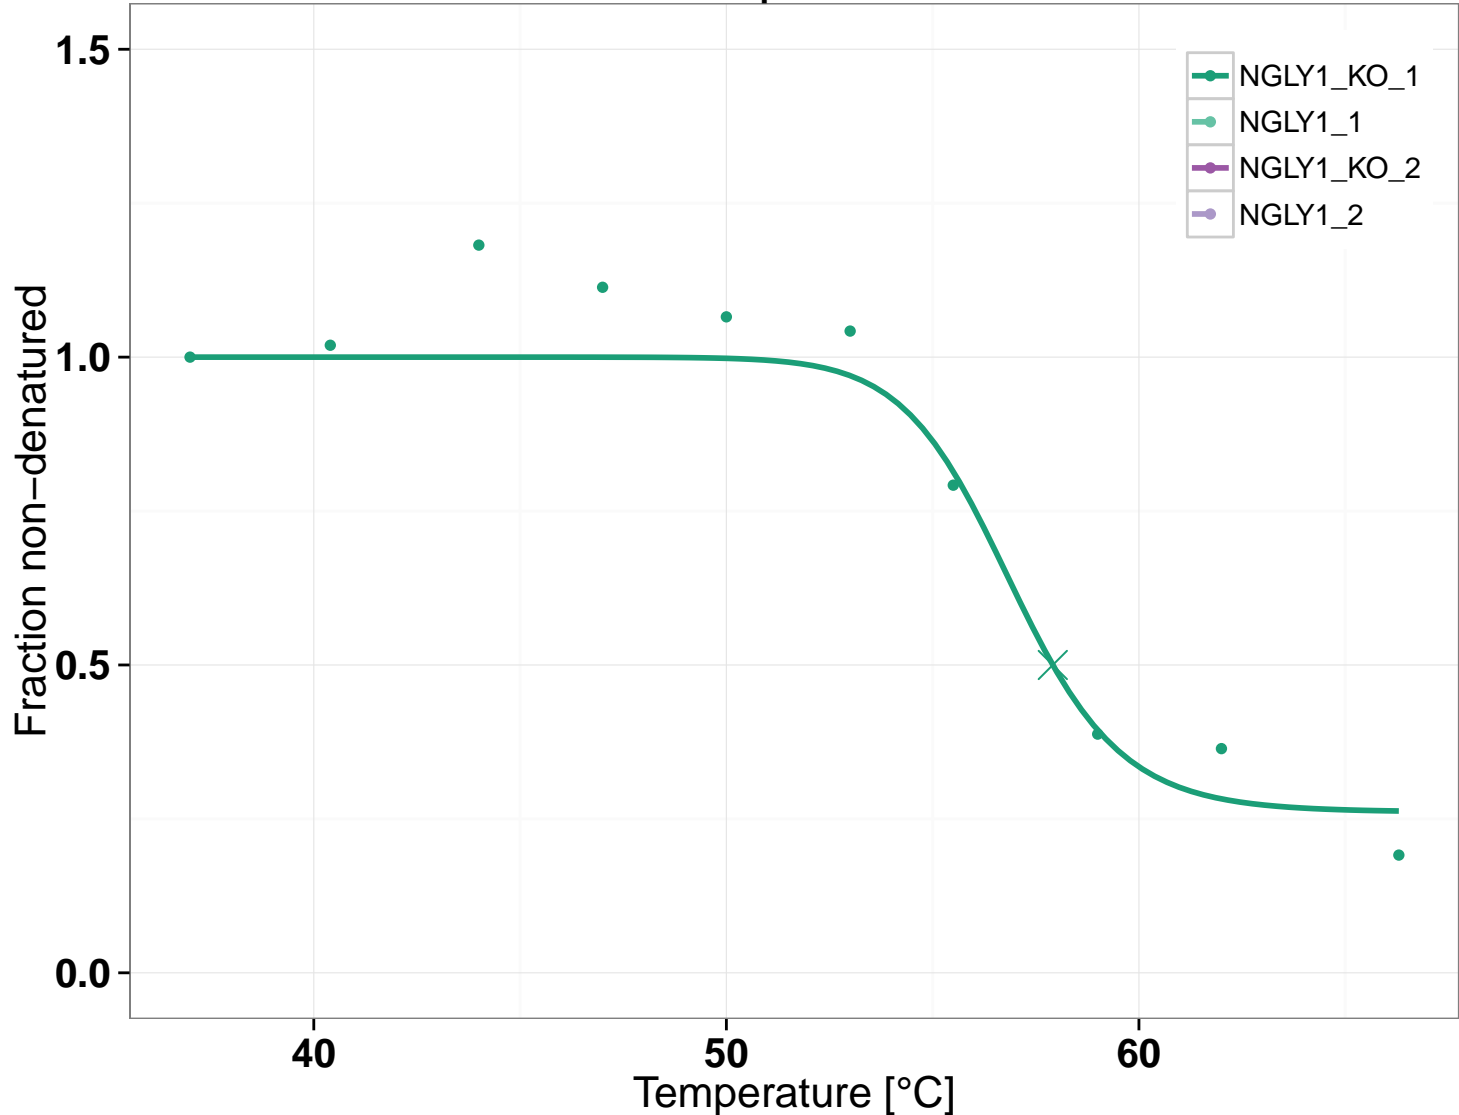

|            | meltPoint | slope | plateau | R2   |
|------------|-----------|-------|---------|------|
| NGLY1_KO_1 | 57.91     | -0.14 | 0.26    | 0.94 |
| NGLY1_1    | -         | -     | -       | -    |
| NGLY1_KO_2 | -         | -     | -       | -    |
| NGLY1_2    | -         | -     | -       | -    |

Supplement: Supplementary file 7596 [file 1]

# IPI00216750.1|RBM45

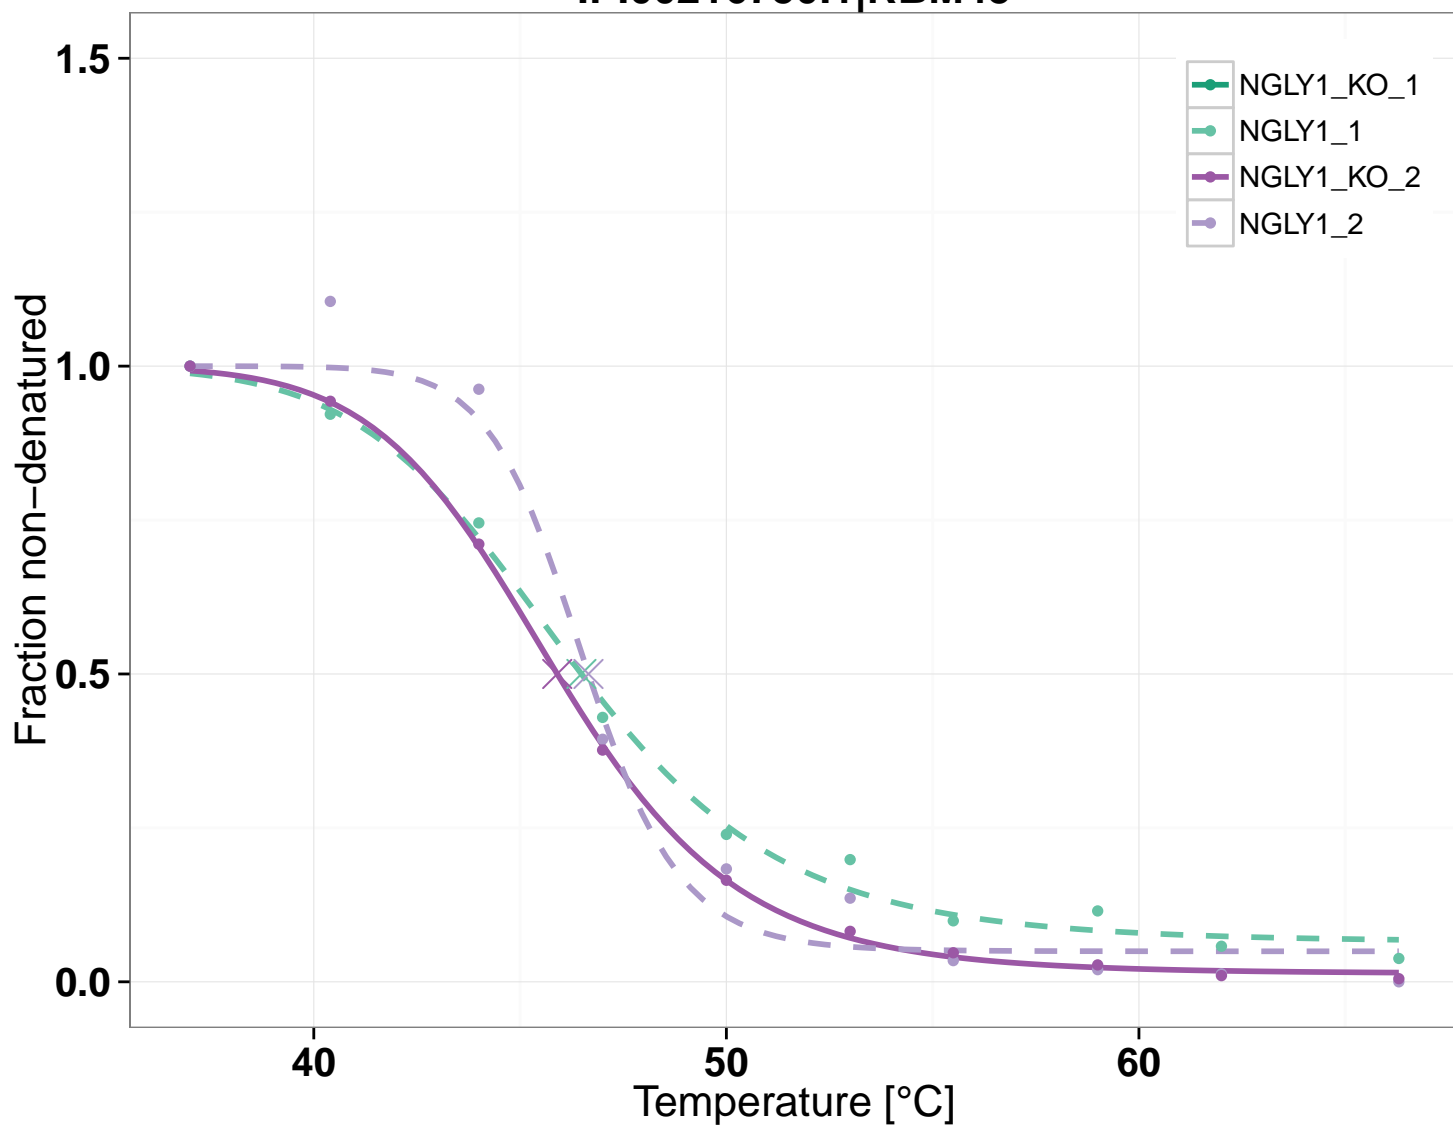

|            | meltPoint | slope  | plateau | R2   |
|------------|-----------|--------|---------|------|
| NGLY1_KO_1 | —         | —      | —       | —    |
| NGLY1_1    | 46.49     | -0.091 | 0.06    | 0.99 |
| NGLY1_KO_2 | 45.9      | -0.11  | 0.01    | 1    |
| NGLY1_2    | 46.66     | -0.2   | 0.05    | 0.98 |

Supplement: Supplementary file 7597 [file 1]

IPI00642074.2|ZNF326

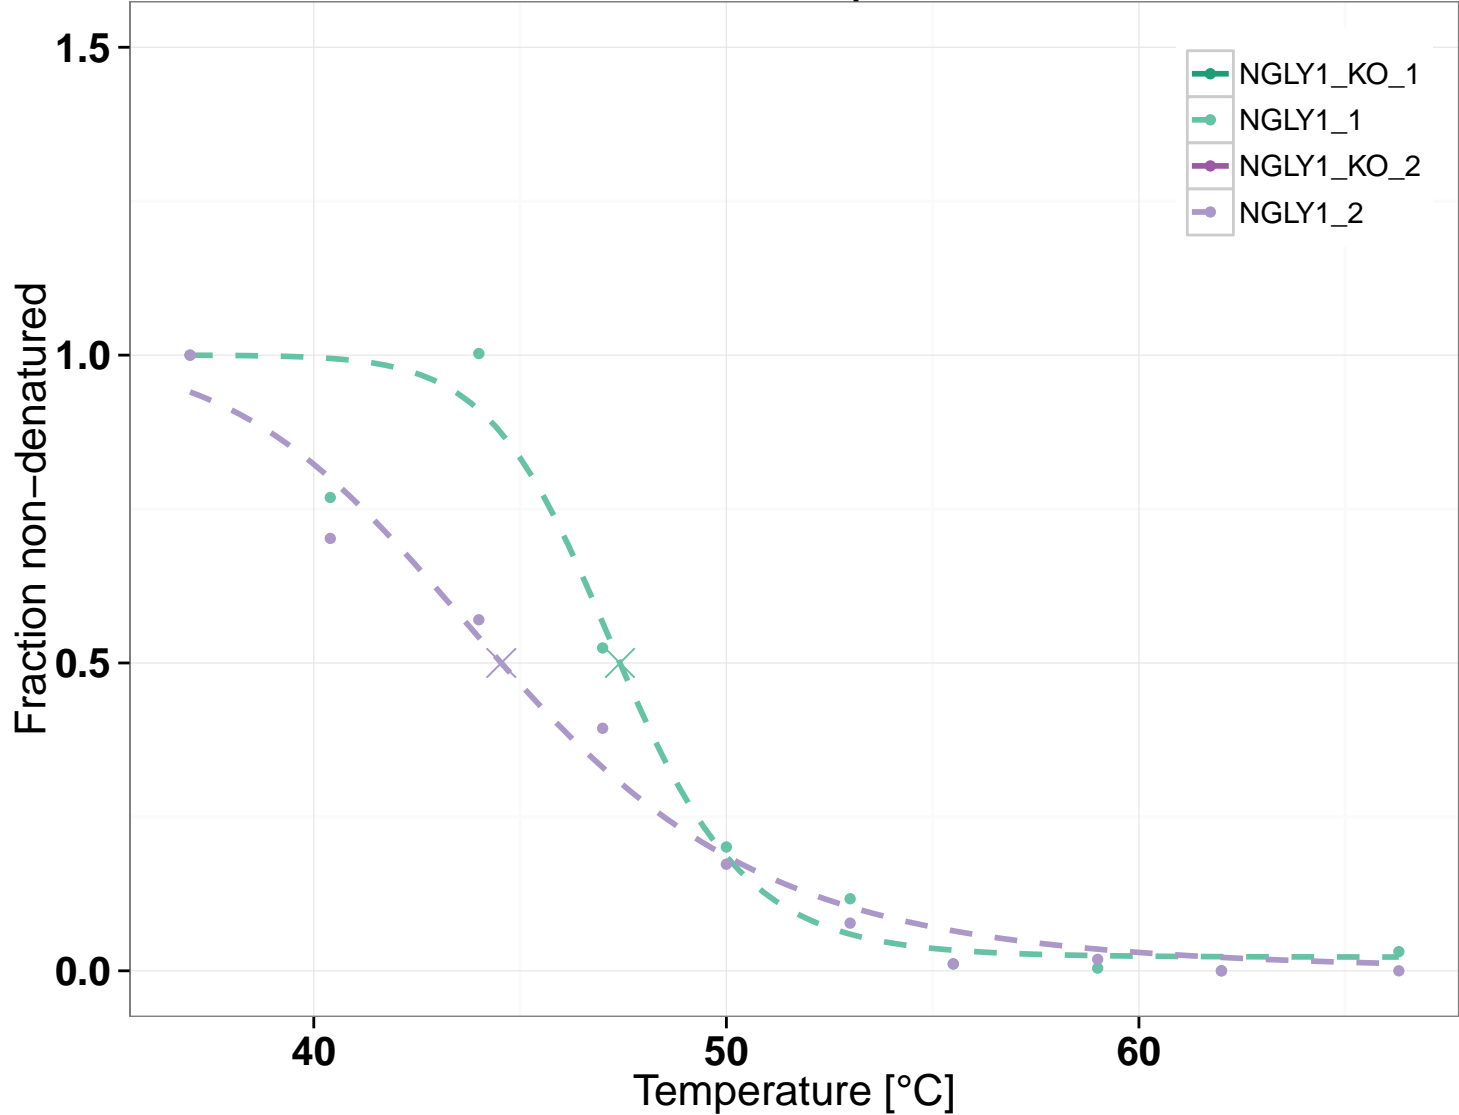

|            | meltPoint | slope  | plateau | R2   |
|------------|-----------|--------|---------|------|
| NGLY1_KO_1 | -         | -      | -       | -    |
| NGLY1_1    | 47.42     | -0.16  | 0.02    | 0.96 |
| NGLY1_KO_2 | -         | -      | -       | -    |
| NGLY1_2    | 44.54     | -0.077 | 0       | 0.98 |

Supplement: Supplementary file 7598 [file 1]

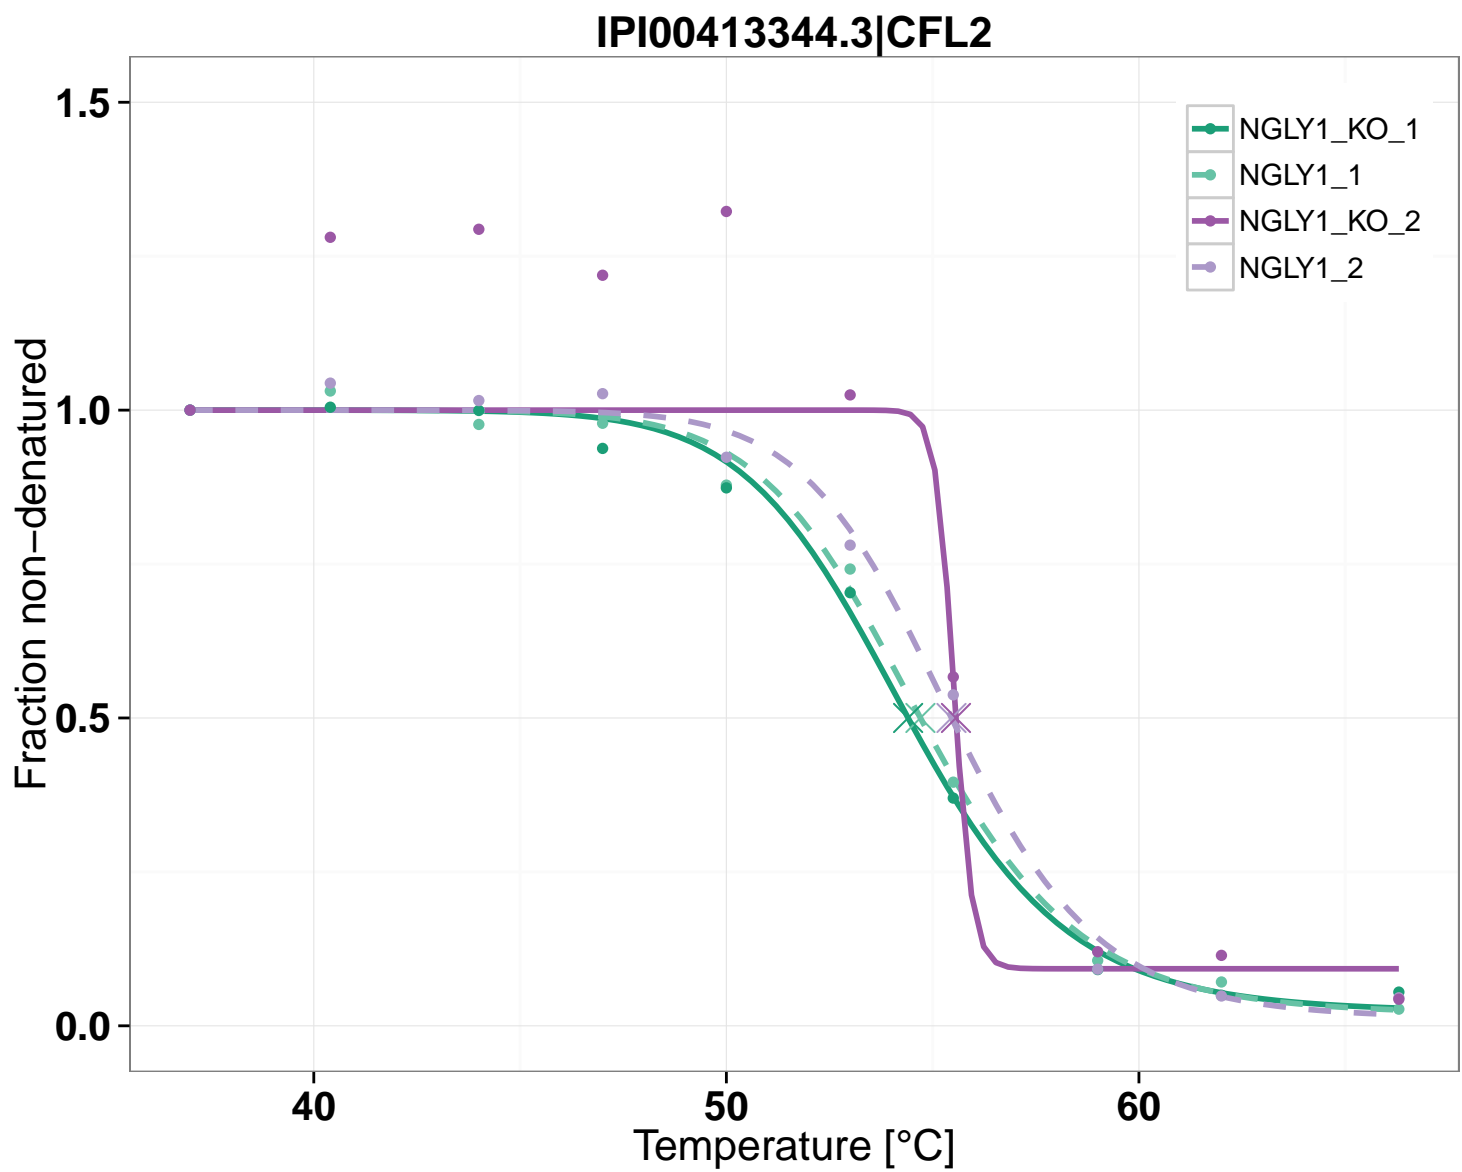

|            | meltPoint | slope | plateau | R2   |
|------------|-----------|-------|---------|------|
| NGLY1_KO_1 | 54.41     | -0.12 | 0.02    | 1    |
| NGLY1_1    | 54.7      | -0.13 | 0.02    | 1    |
| NGLY1_KO_2 | 55.57     | -1    | 0.09    | 0.88 |
| NGLY1_2    | 55.46     | -0.14 | 0.01    | 0.99 |

Supplement: Supplementary file 7599 [file 1]

# IPI00646500.1|RPA2

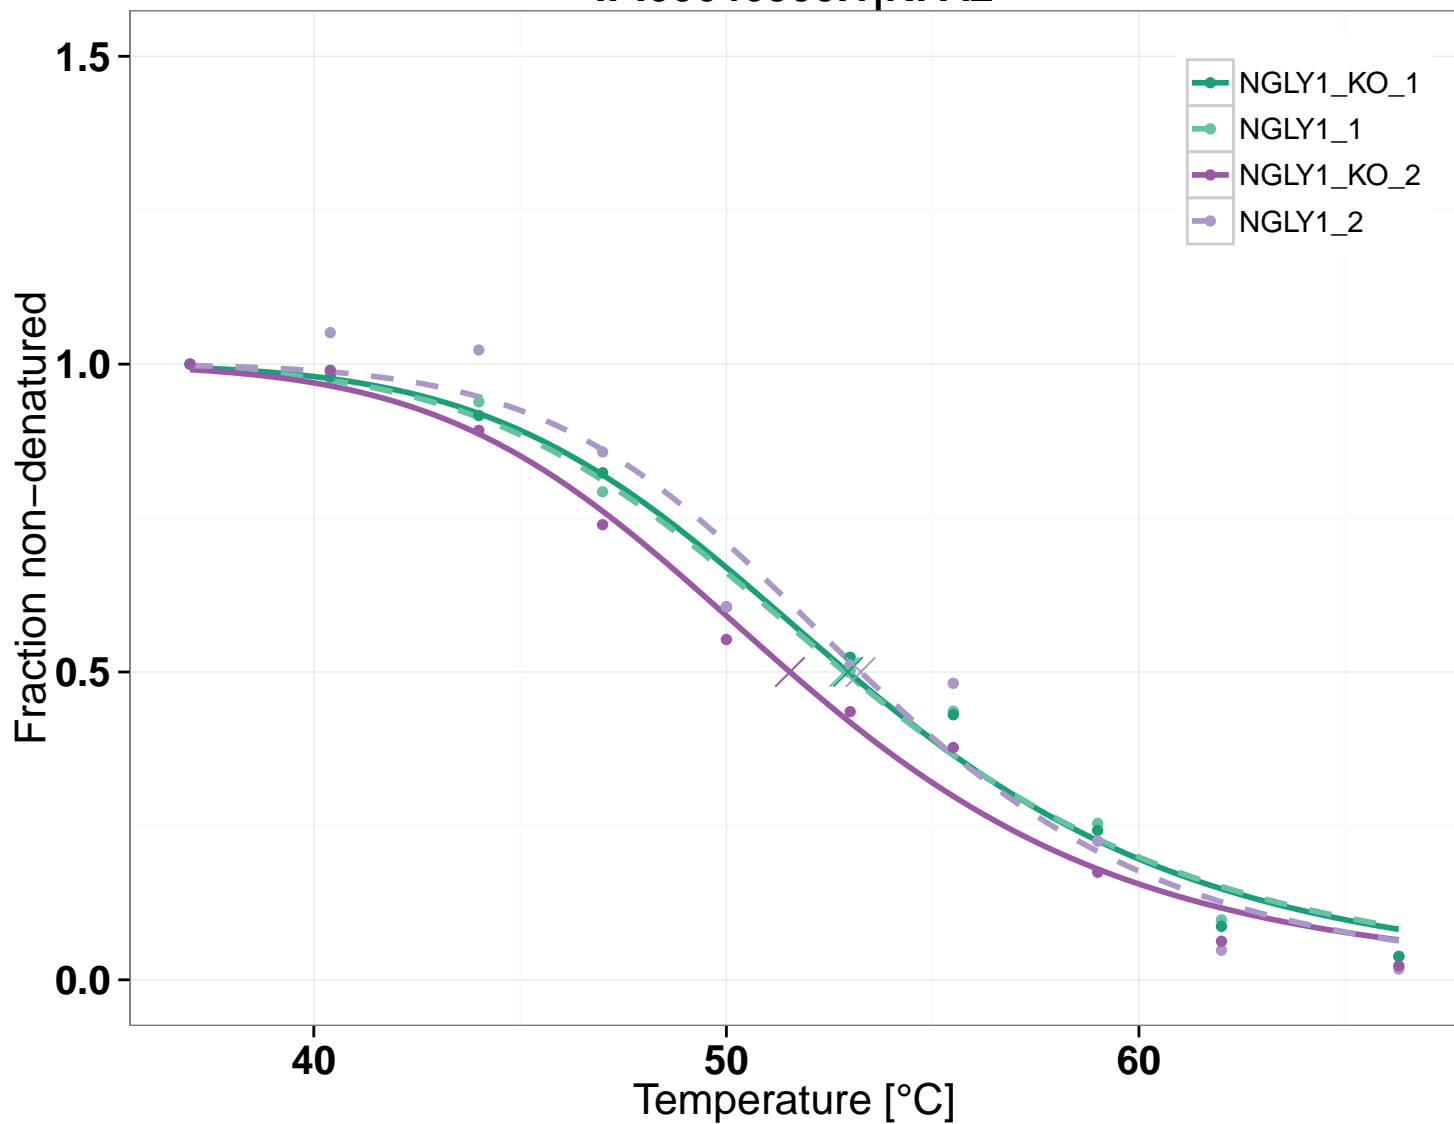

|            | meltPoint | slope  | plateau | R2   |
|------------|-----------|--------|---------|------|
| NGLY1_KO_1 | 52.95     | -0.058 | 0       | 0.99 |
| NGLY1_1    | 52.86     | -0.057 | 0       | 0.99 |
| NGLY1_KO_2 | 51.54     | -0.06  | 0       | 0.99 |
| NGLY1_2    | 53.26     | -0.066 | 0       | 0.97 |

Supplement: Supplementary file 7600 [file 1]

# IPI00010486.2|HPS5

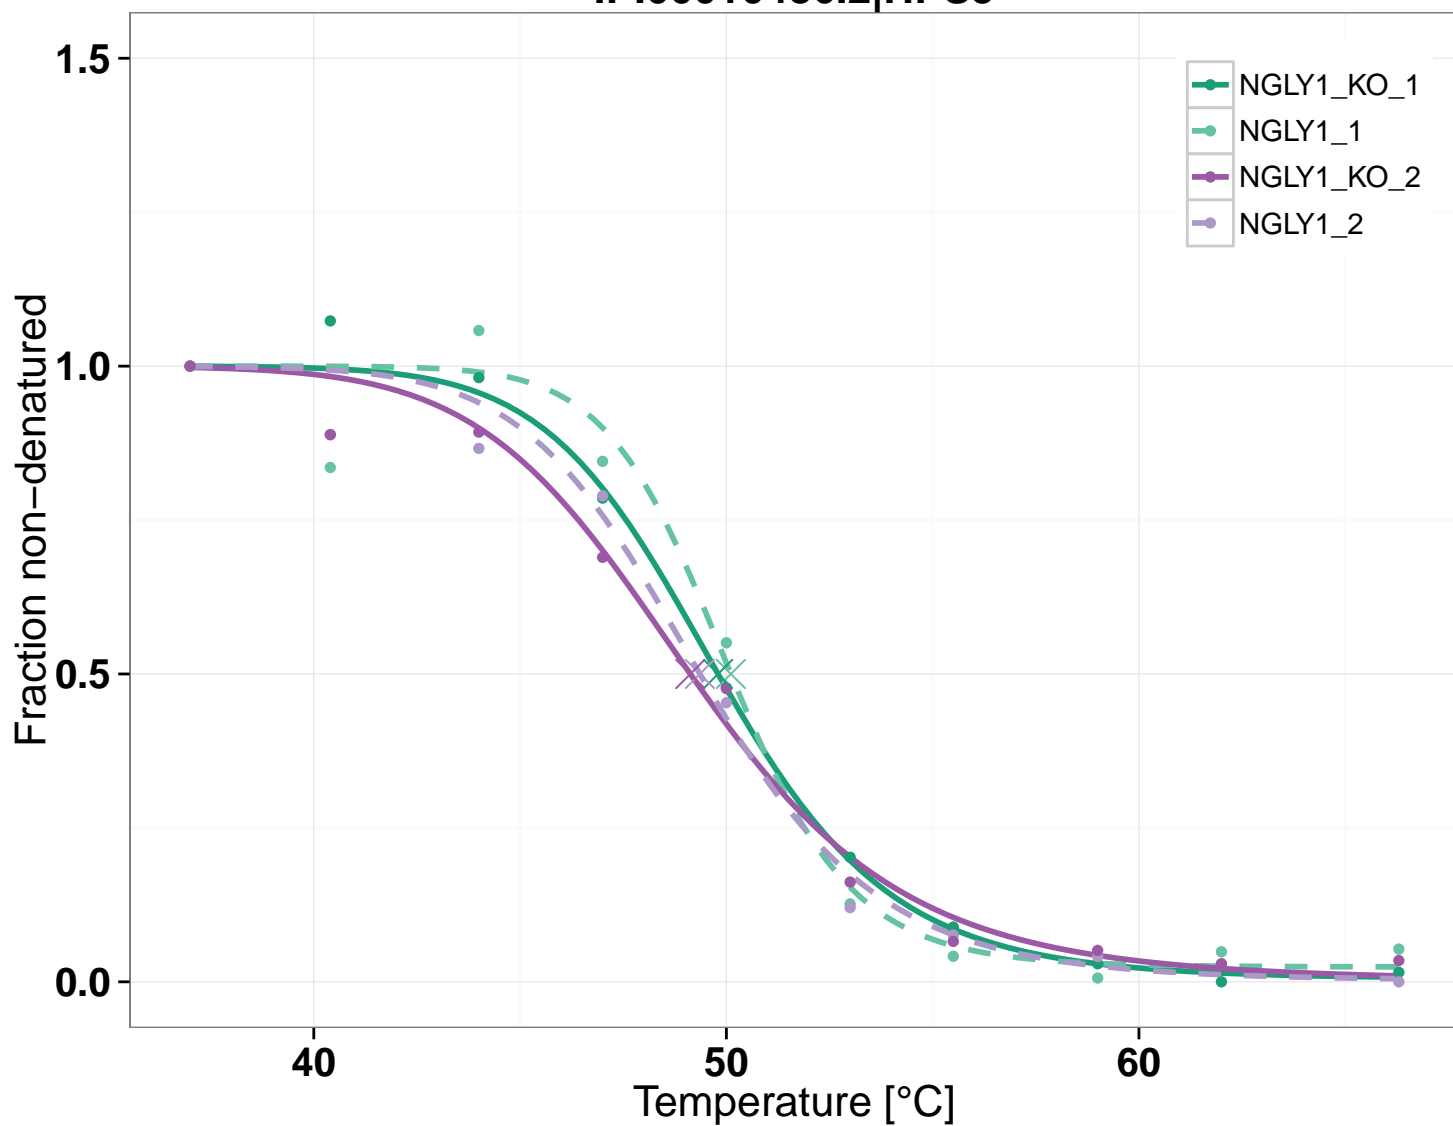

|            | meltPoint | slope  | plateau | R2   |
|------------|-----------|--------|---------|------|
| NGLY1_KO_1 | 49.8      | -0.12  | 0       | 1    |
| NGLY1_1    | 50.11     | -0.16  | 0.02    | 0.98 |
| NGLY1_KO_2 | 49.13     | -0.097 | 0       | 0.99 |
| NGLY1_2    | 49.36     | -0.12  | 0       | 0.99 |

Supplement: Supplementary file 7601 [file 1]

IPI00294653.2|DOPEY2

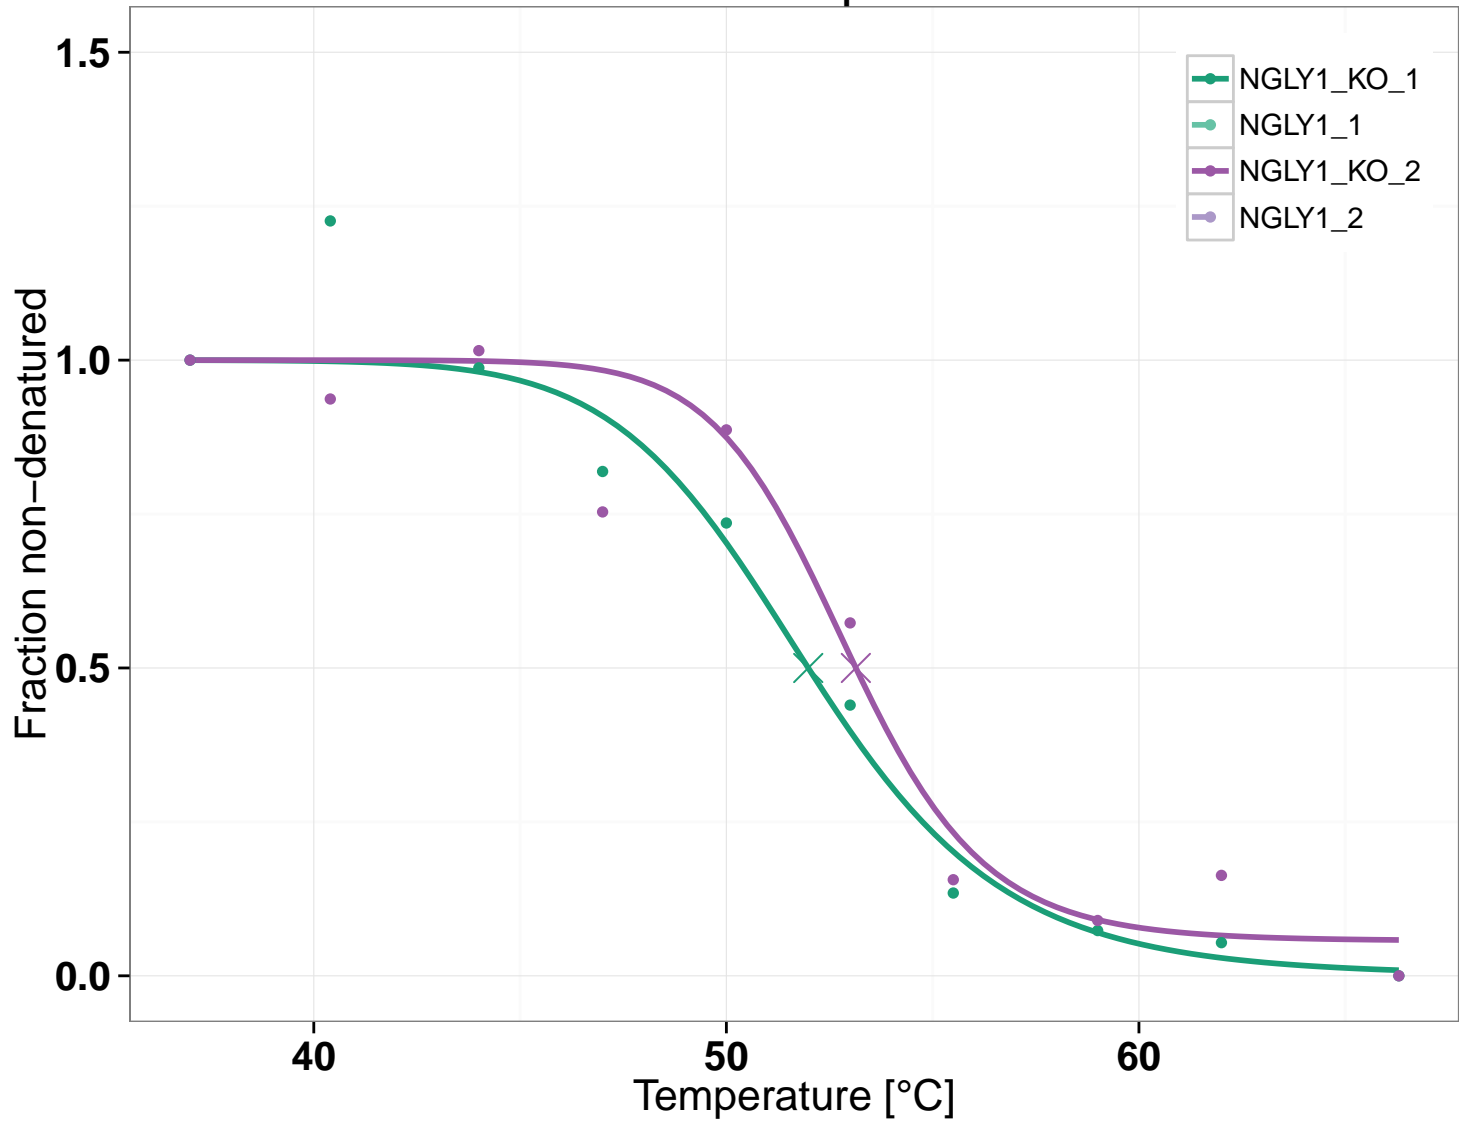

|            | meltPoint | slope | plateau | R2   |
|------------|-----------|-------|---------|------|
| NGLY1_KO_1 | 51.98     | -0.11 | 0       | 0.96 |
| NGLY1_1    | -         | -     | -       | -    |
| NGLY1_KO_2 | 53.14     | -0.14 | 0.06    | 0.95 |
| NGLY1_2    | -         | -     | -       | -    |

Supplement: Supplementary file 7602 [file 1]

IPI00796018.1|DMWD

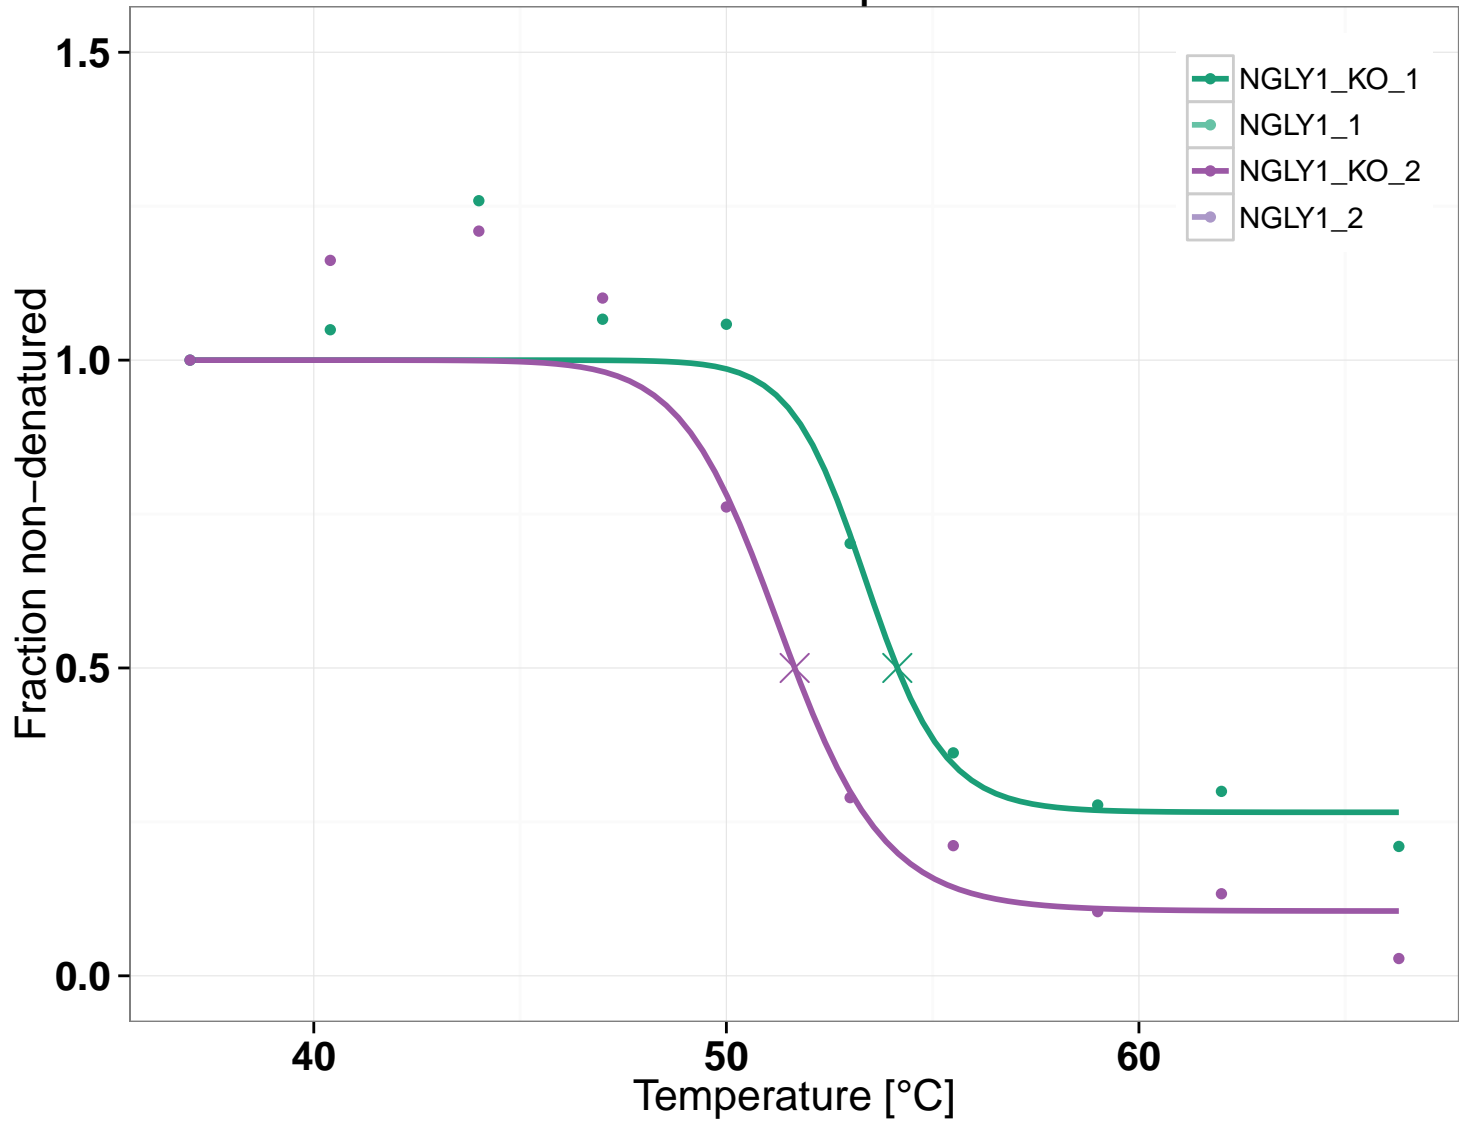

|            | meltPoint | slope | plateau | R2   |
|------------|-----------|-------|---------|------|
| NGLY1_KO_1 | 54.14     | -0.2  | 0.27    | 0.94 |
| NGLY1_1    | -         | -     | -       | -    |
| NGLY1_KO_2 | 51.66     | -0.18 | 0.11    | 0.96 |
| NGLY1_2    | -         | -     | -       | -    |

Supplement: Supplementary file 7603 [file 1]

# IPI00873622.2|WDR1

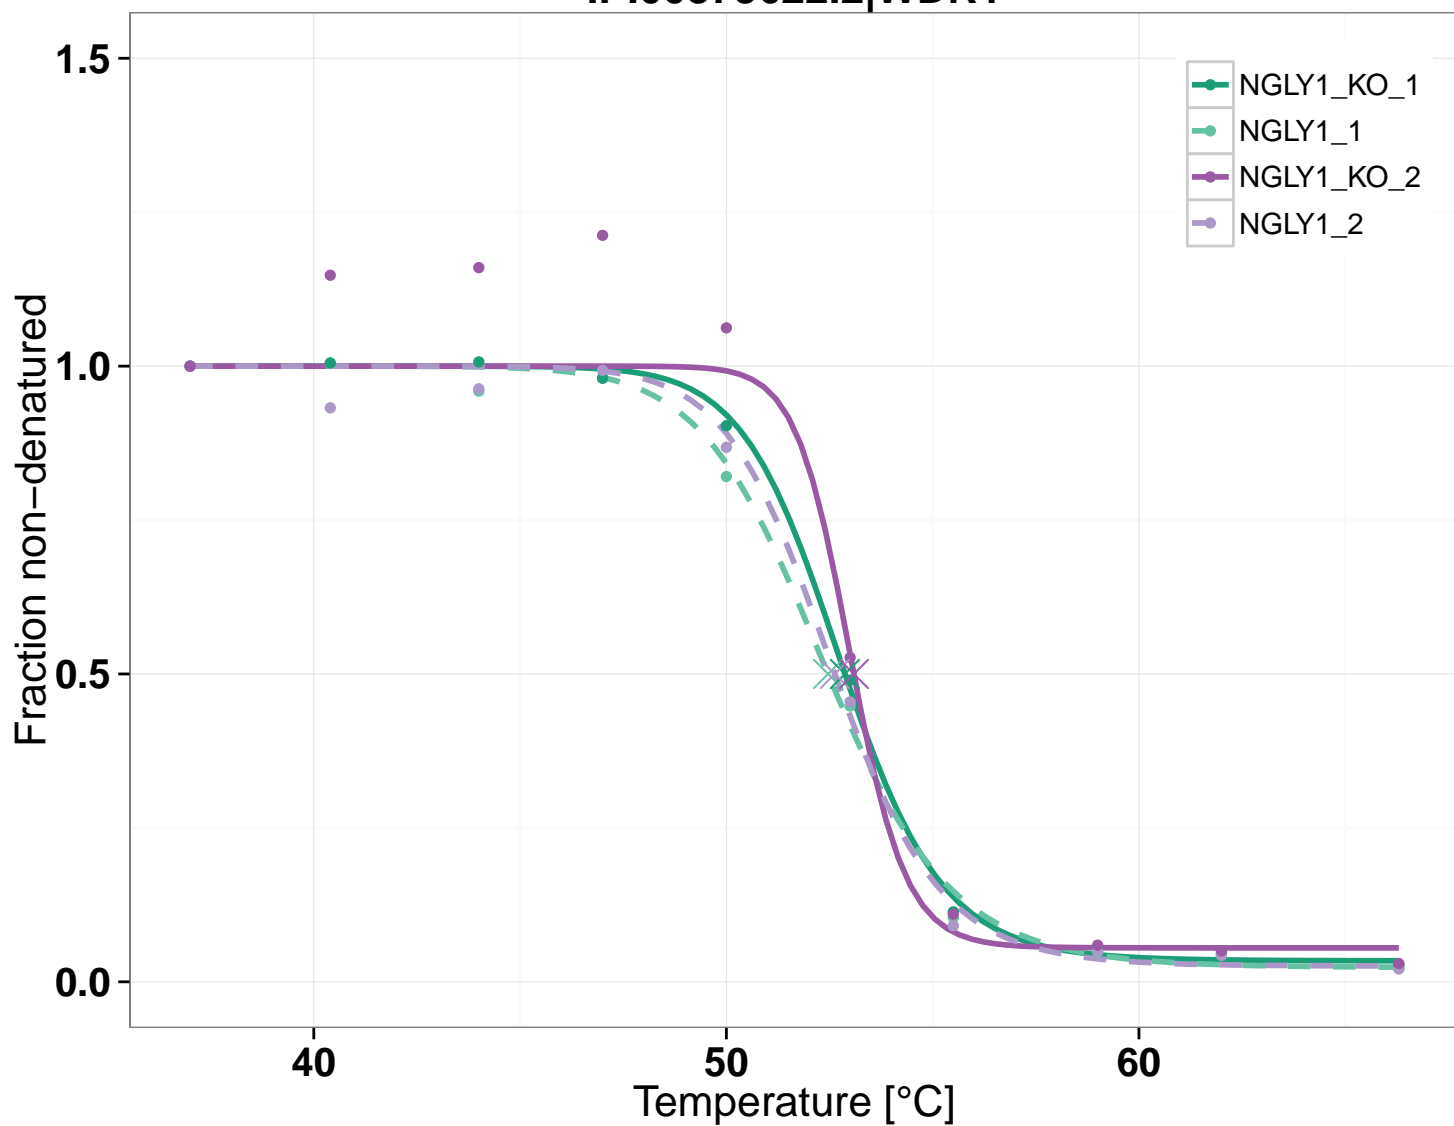

|            | meltPoint | slope | plateau | R2   |
|------------|-----------|-------|---------|------|
| NGLY1_KO_1 | 52.87     | -0.2  | 0.03    | 1    |
| NGLY1_1    | 52.47     | -0.16 | 0.02    | 1    |
| NGLY1_KO_2 | 53.09     | -0.36 | 0.06    | 0.96 |
| NGLY1_2    | 52.63     | -0.19 | 0.03    | 1    |

Supplement: Supplementary file 7604 [file 1]

# IPI00025815.2|TARDBP

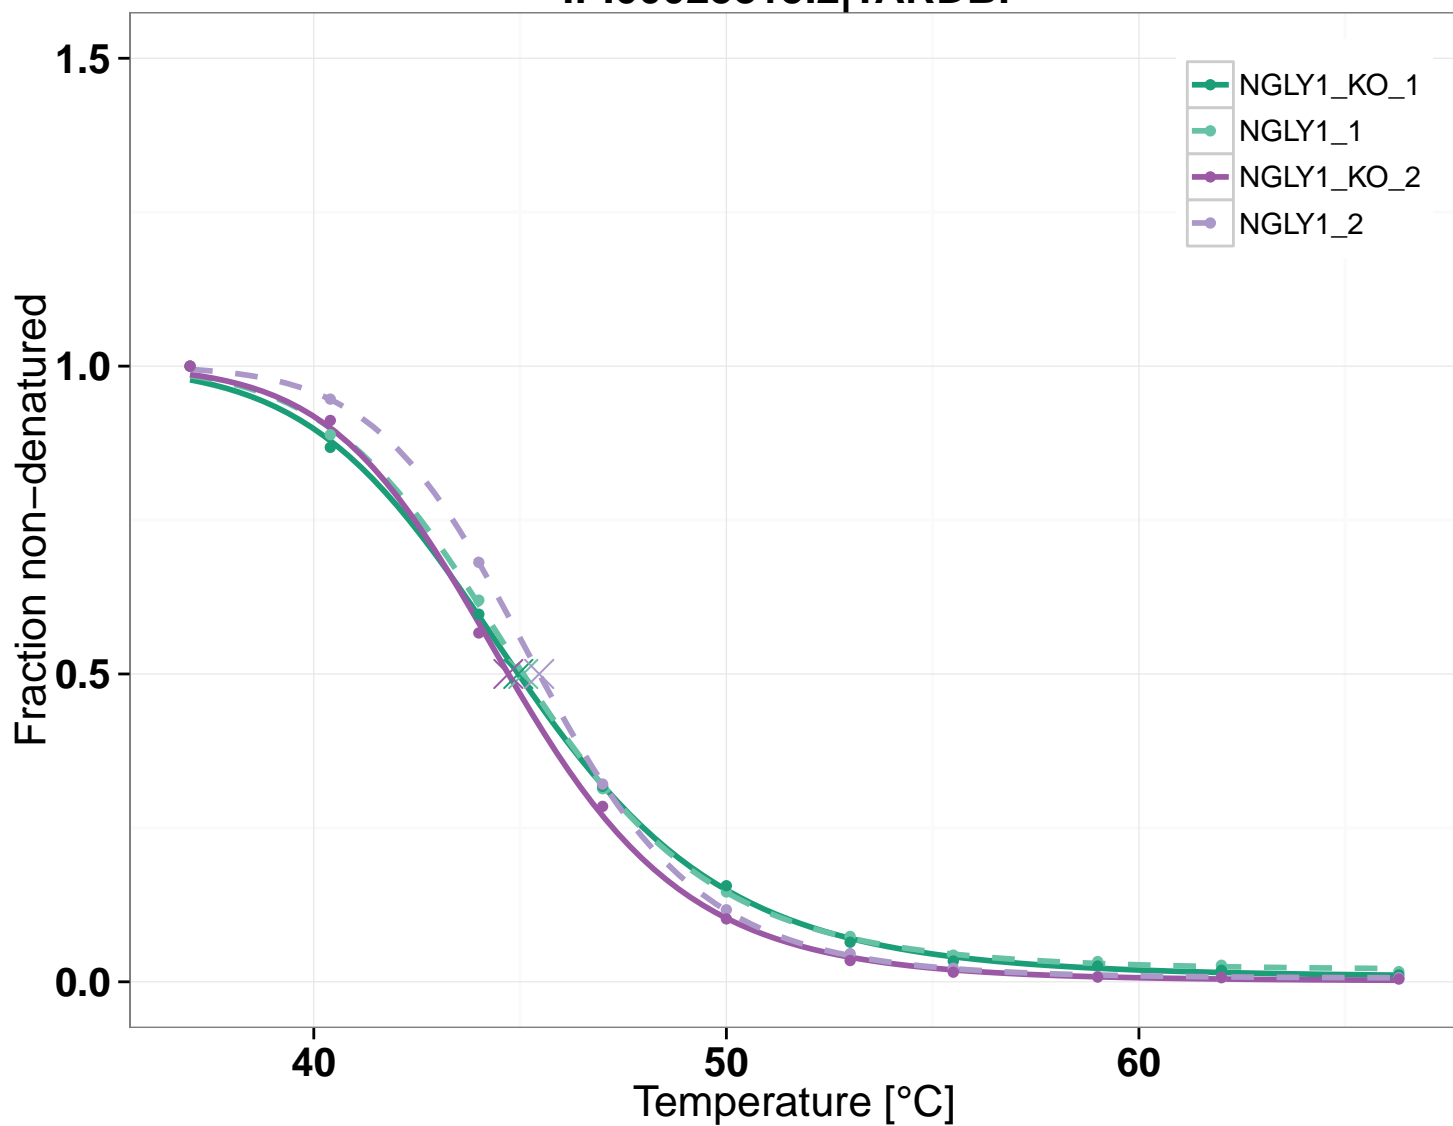

|            | meltPoint | slope  | plateau | R2 |
|------------|-----------|--------|---------|----|
| NGLY1_KO_1 | 44.96     | -0.099 | 0.01    | 1  |
| NGLY1_1    | 45.08     | -0.11  | 0.02    | 1  |
| NGLY1_KO_2 | 44.72     | -0.12  | 0       | 1  |
| NGLY1_2    | 45.46     | -0.13  | 0.01    | 1  |

Supplement: Supplementary file 7605 [file 1]

# IPI00295542.5|NUCB1

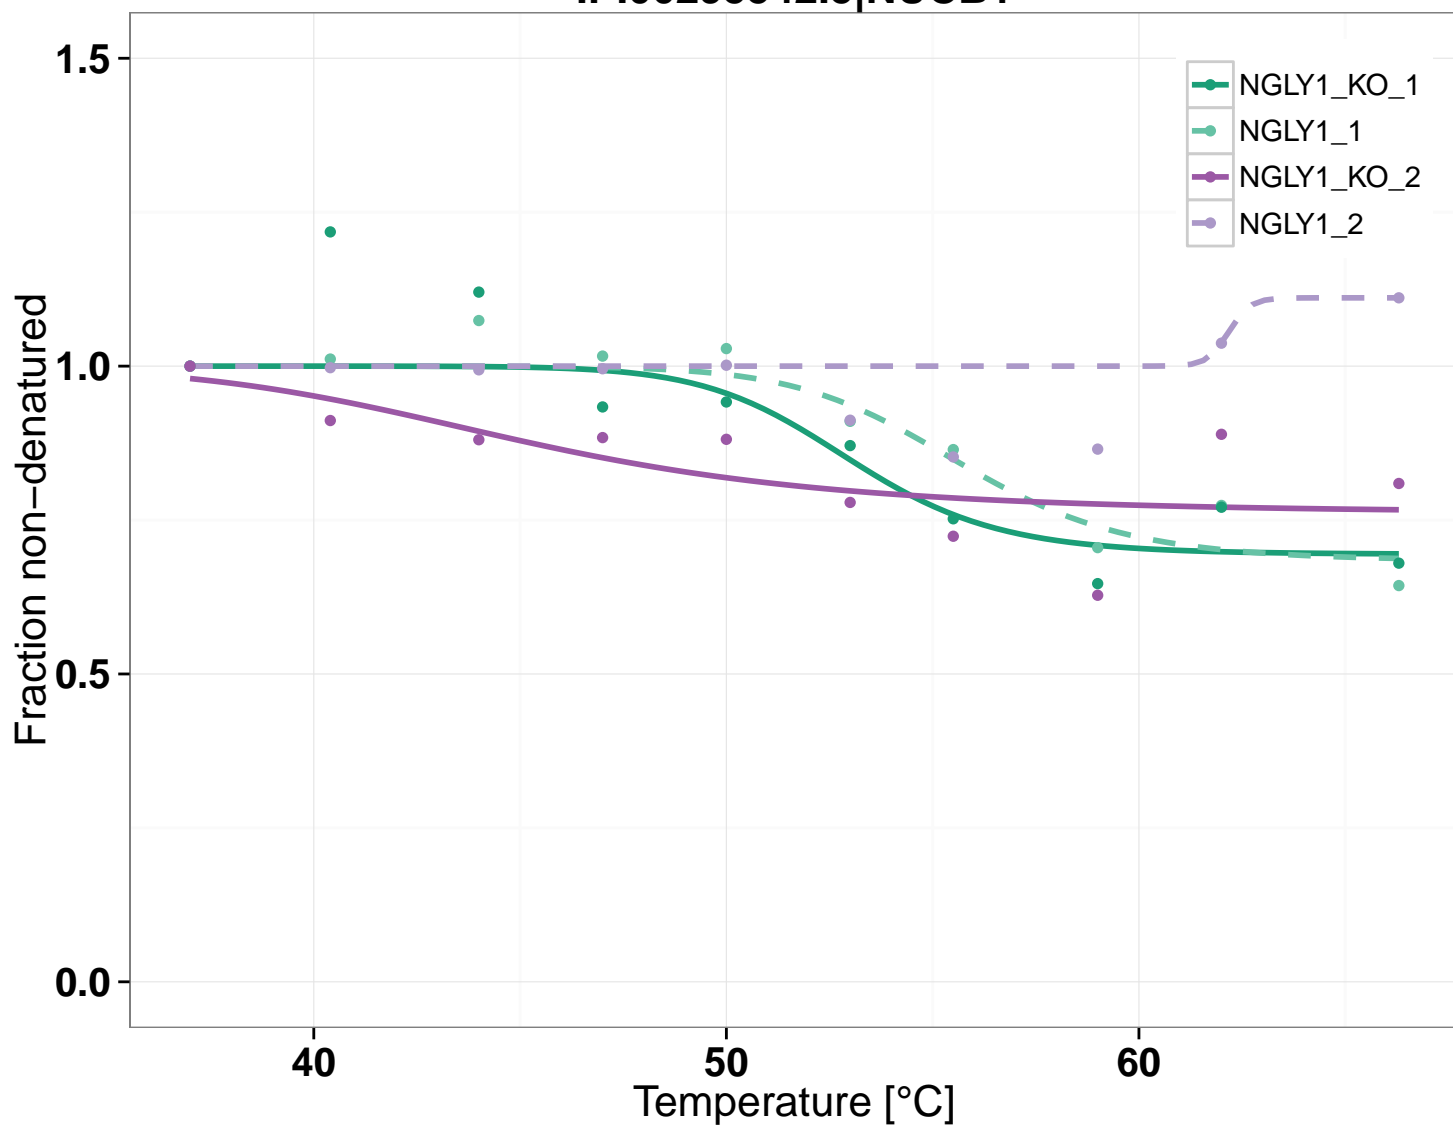

|            | meltPoint | slope  | plateau | R2   |
|------------|-----------|--------|---------|------|
| NGLY1_KO_1 | —         | −0.043 | 0.69    | 0.76 |
| NGLY1_1    | —         | −0.039 | 0.68    | 0.92 |
| NGLY1_KO_2 | —         | −0.015 | 0.76    | 0.52 |
| NGLY1_2    | —         | 0.11   | 1.11    | 0.15 |

Supplement: Supplementary file 7606 [file 1]

# IPI00305627.7|C16ORF58

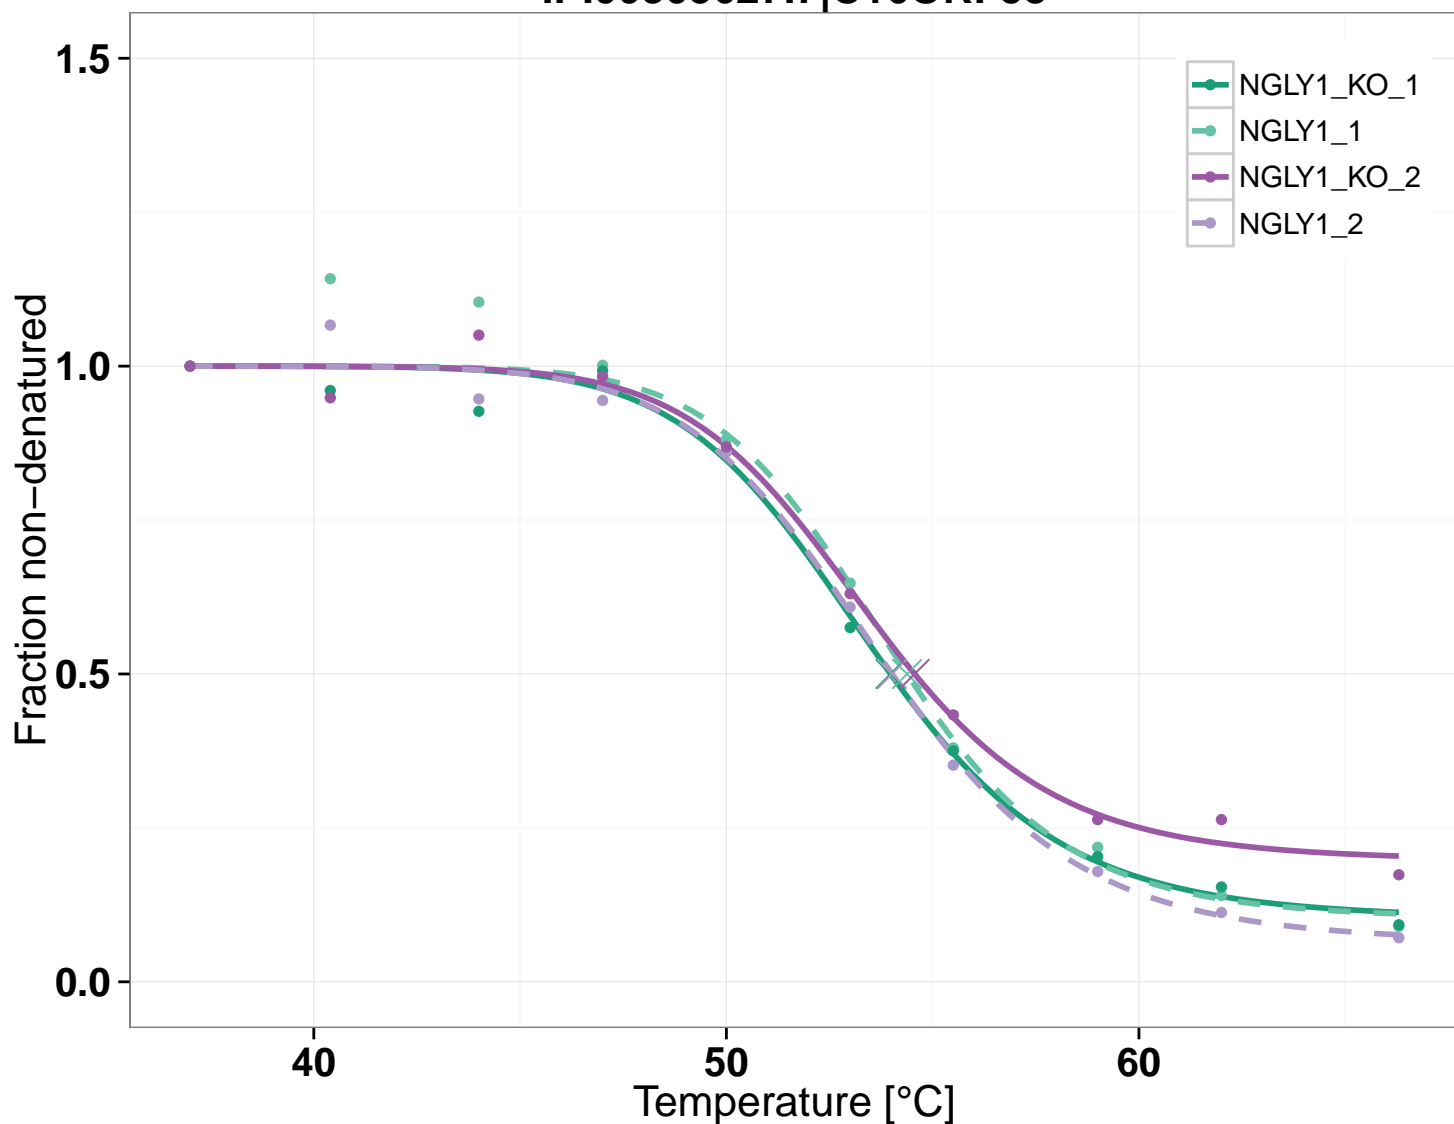

|            | meltPoint | slope  | plateau | R2   |
|------------|-----------|--------|---------|------|
| NGLY1_KO_1 | 53.98     | -0.097 | 0.1     | 0.99 |
| NGLY1_1    | 54.38     | -0.11  | 0.1     | 0.98 |
| NGLY1_KO_2 | 54.56     | -0.091 | 0.2     | 0.99 |
| NGLY1_2    | 54.02     | -0.099 | 0.06    | 0.99 |

Supplement: Supplementary file 7607 [file 1]

# IPI00328243.2|PLD3

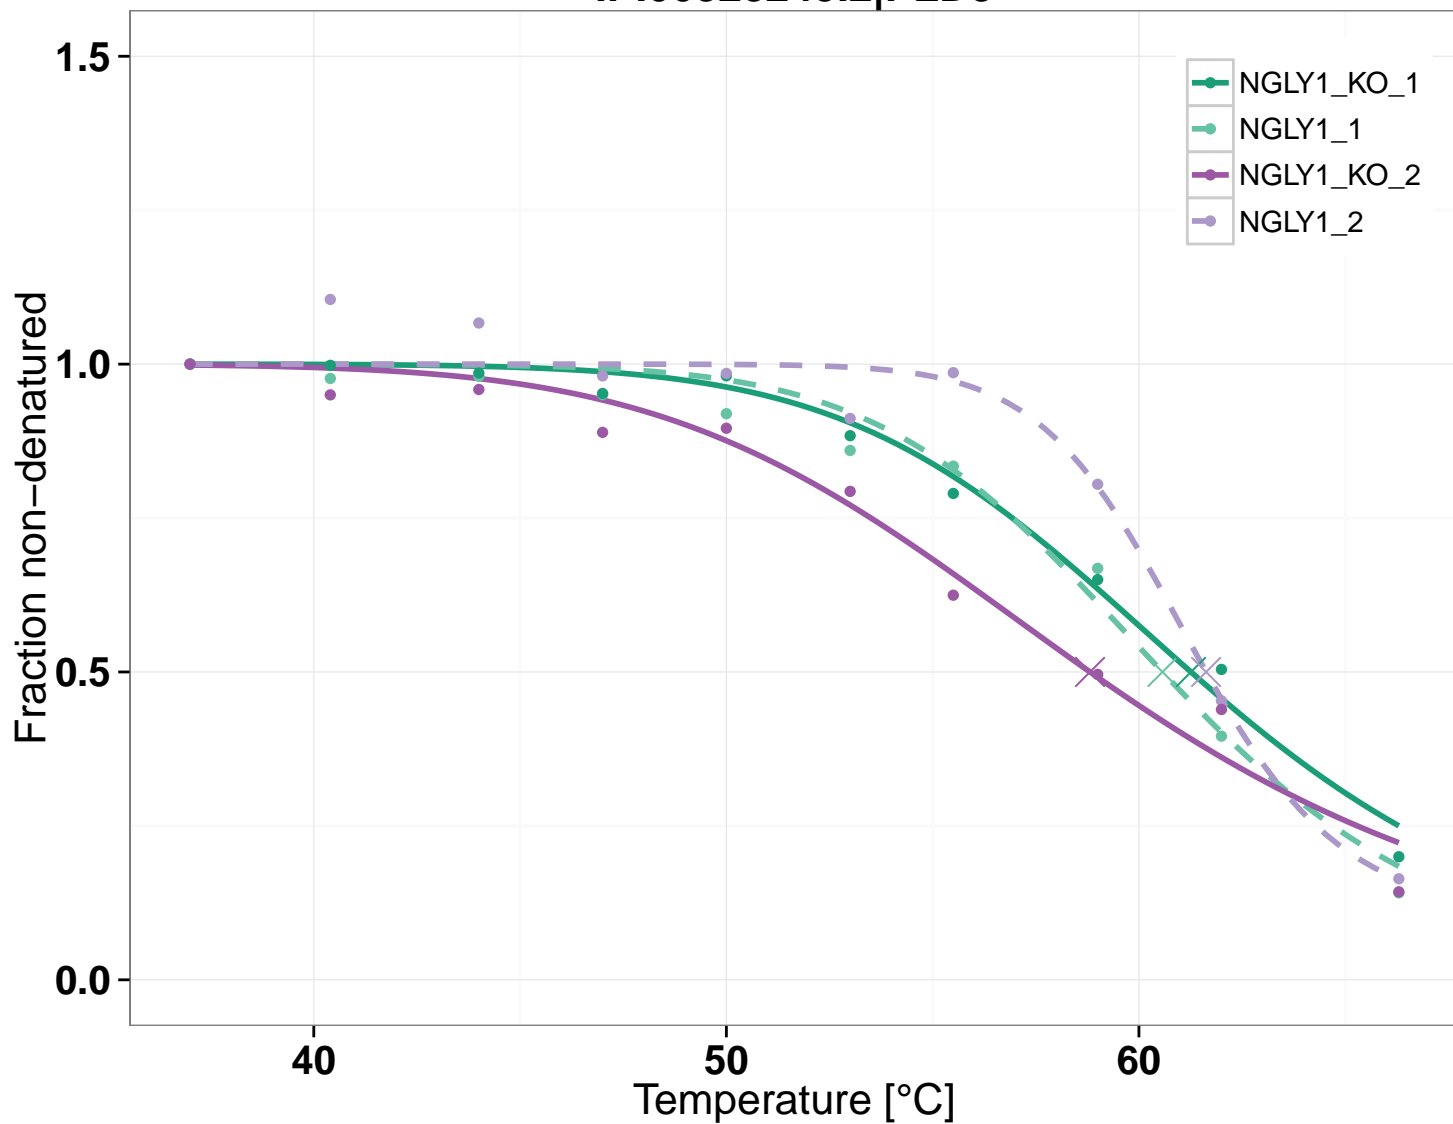

|            | meltPoint | slope  | plateau | R2   |
|------------|-----------|--------|---------|------|
| NGLY1_KO_1 | 61.26     | -0.06  | 0       | 0.99 |
| NGLY1_1    | 60.57     | -0.072 | 0       | 0.98 |
| NGLY1_KO_2 | 58.81     | -0.049 | 0       | 0.97 |
| NGLY1_2    | 61.63     | -0.12  | 0.1     | 0.97 |

Supplement: Supplementary file 7608 [file 1]

# IPI00217466.3|HIST1H1D

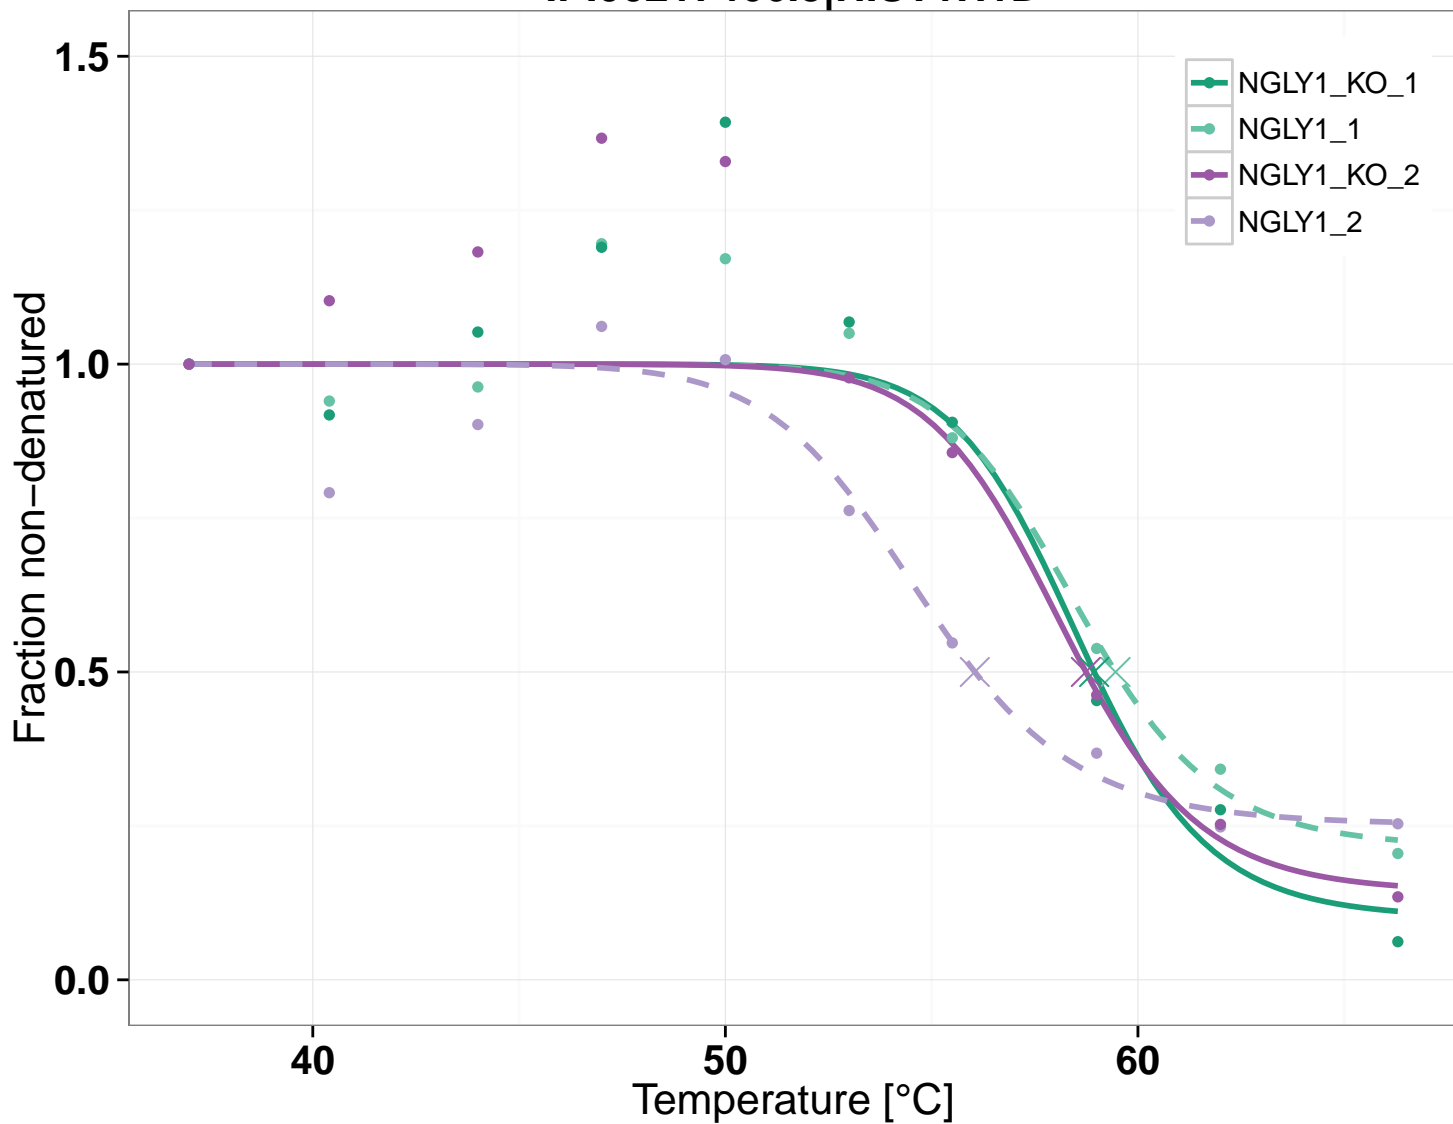

|            | meltPoint | slope | plateau | R2   |
|------------|-----------|-------|---------|------|
| NGLY1_KO_1 | 58.94     | -0.15 | 0.1     | 0.87 |
| NGLY1_1    | 59.46     | -0.12 | 0.21    | 0.93 |
| NGLY1_KO_2 | 58.74     | -0.13 | 0.14    | 0.83 |
| NGLY1_2    | 56.05     | -0.1  | 0.25    | 0.93 |

Supplement: Supplementary file 7609 [file 1]

# IPI00220929.4|PKNOX1

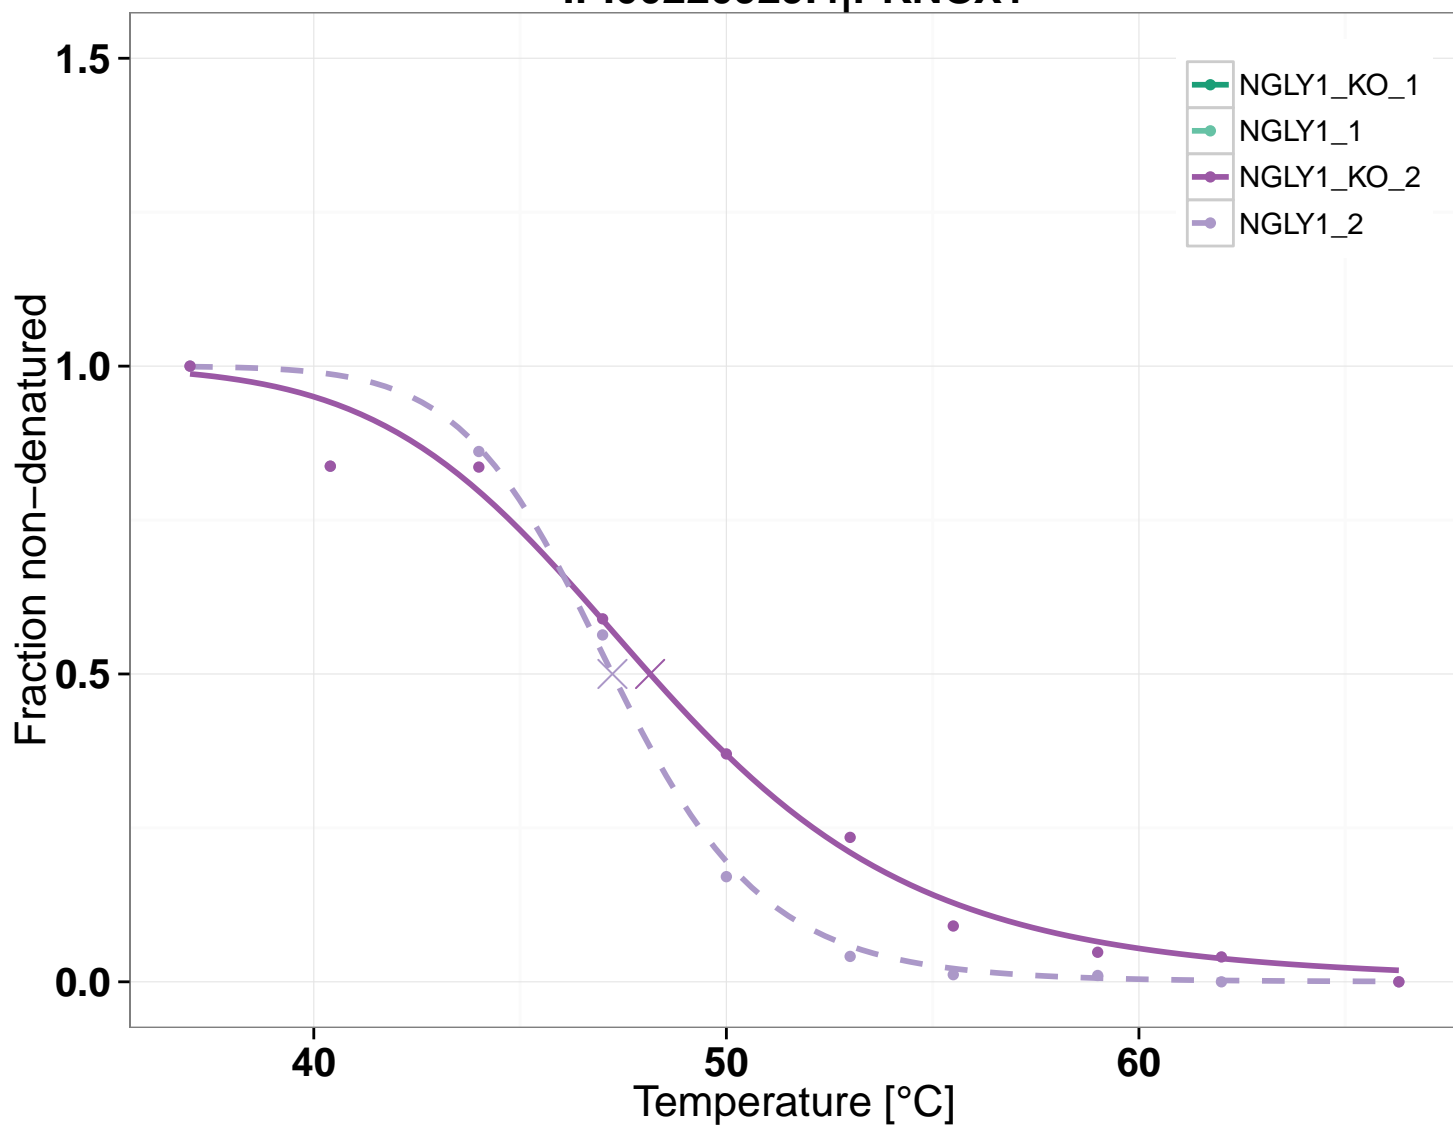

|            | meltPoint | slope  | plateau | R2   |
|------------|-----------|--------|---------|------|
| NGLY1_KO_1 | —         | —      | —       | —    |
| NGLY1_1    | —         | —      | —       | —    |
| NGLY1_KO_2 | 48.15     | -0.077 | 0       | 0.99 |
| NGLY1_2    | 47.24     | -0.14  | 0       | 0.98 |

Supplement: Supplementary file 7610 [file 1]

IPI00479997.4|STMN1

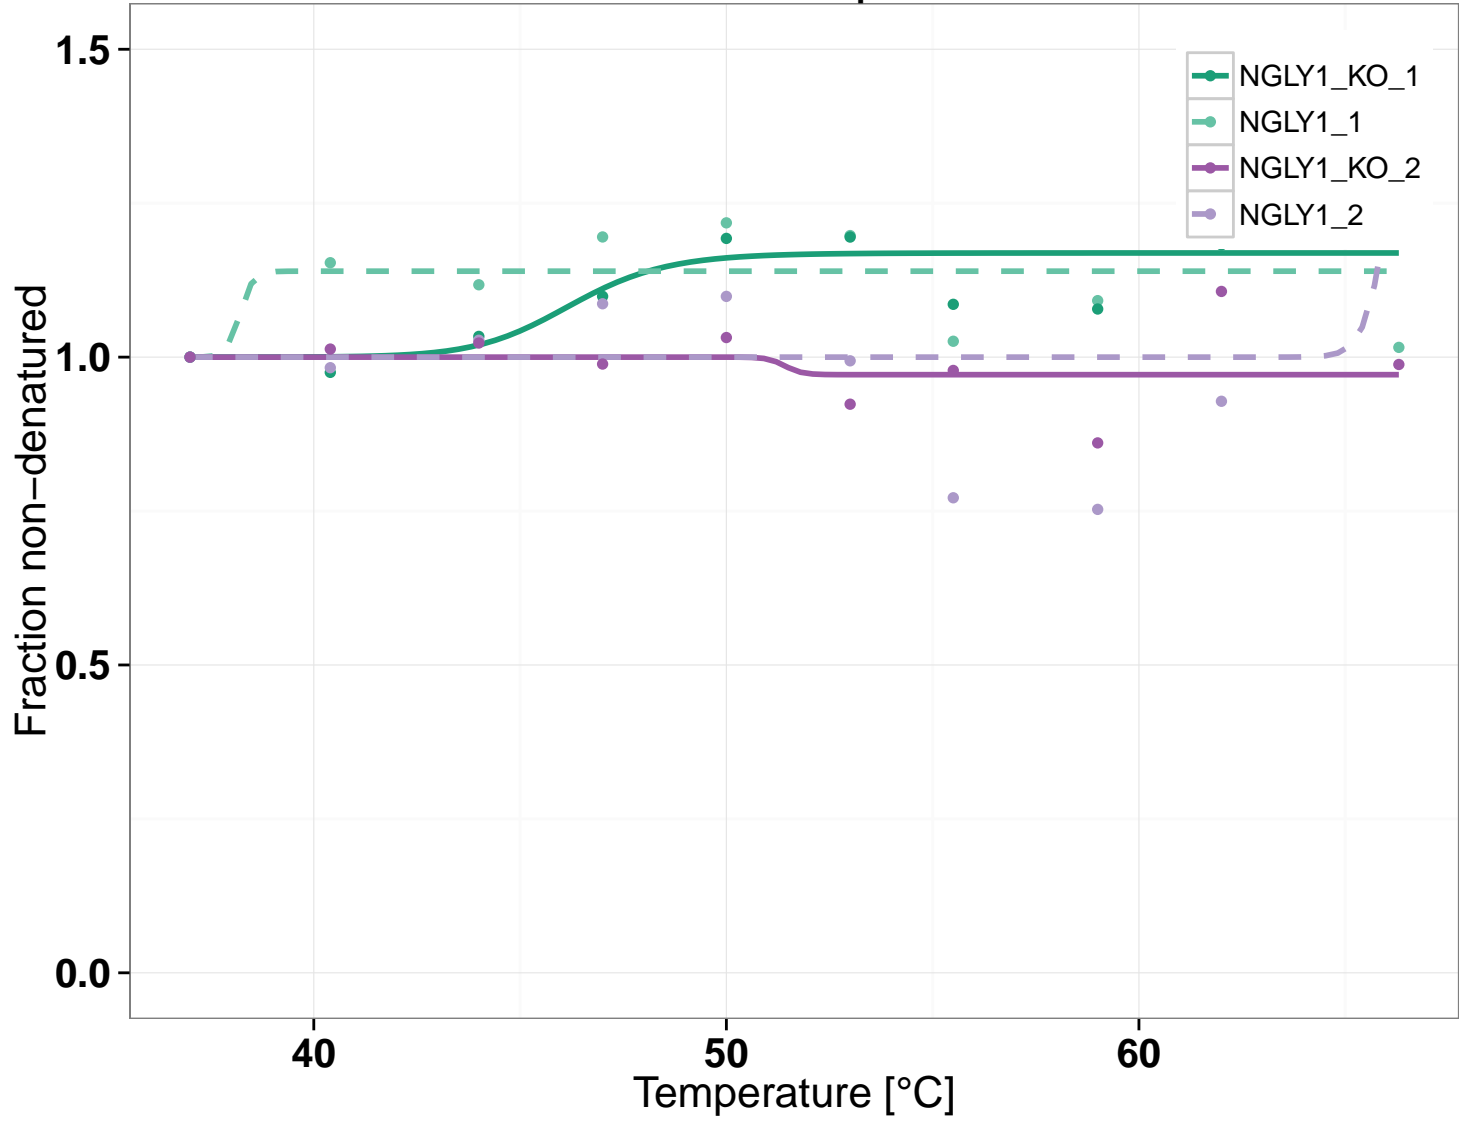

|            | meltPoint | slope  | plateau | R2   |
|------------|-----------|--------|---------|------|
| NGLY1_KO_1 | —         | 0.037  | 1.17    | 0.65 |
| NGLY1_1    | —         | 0.23   | 1.14    | 0.24 |
| NGLY1_KO_2 | —         | -0.035 | 0.97    | 0.09 |
| NGLY1_2    | —         | 0.43   | 1.5     | 0.47 |

Supplement: Supplementary file 7611 [file 1]

# IPI00163763.3|RIT2

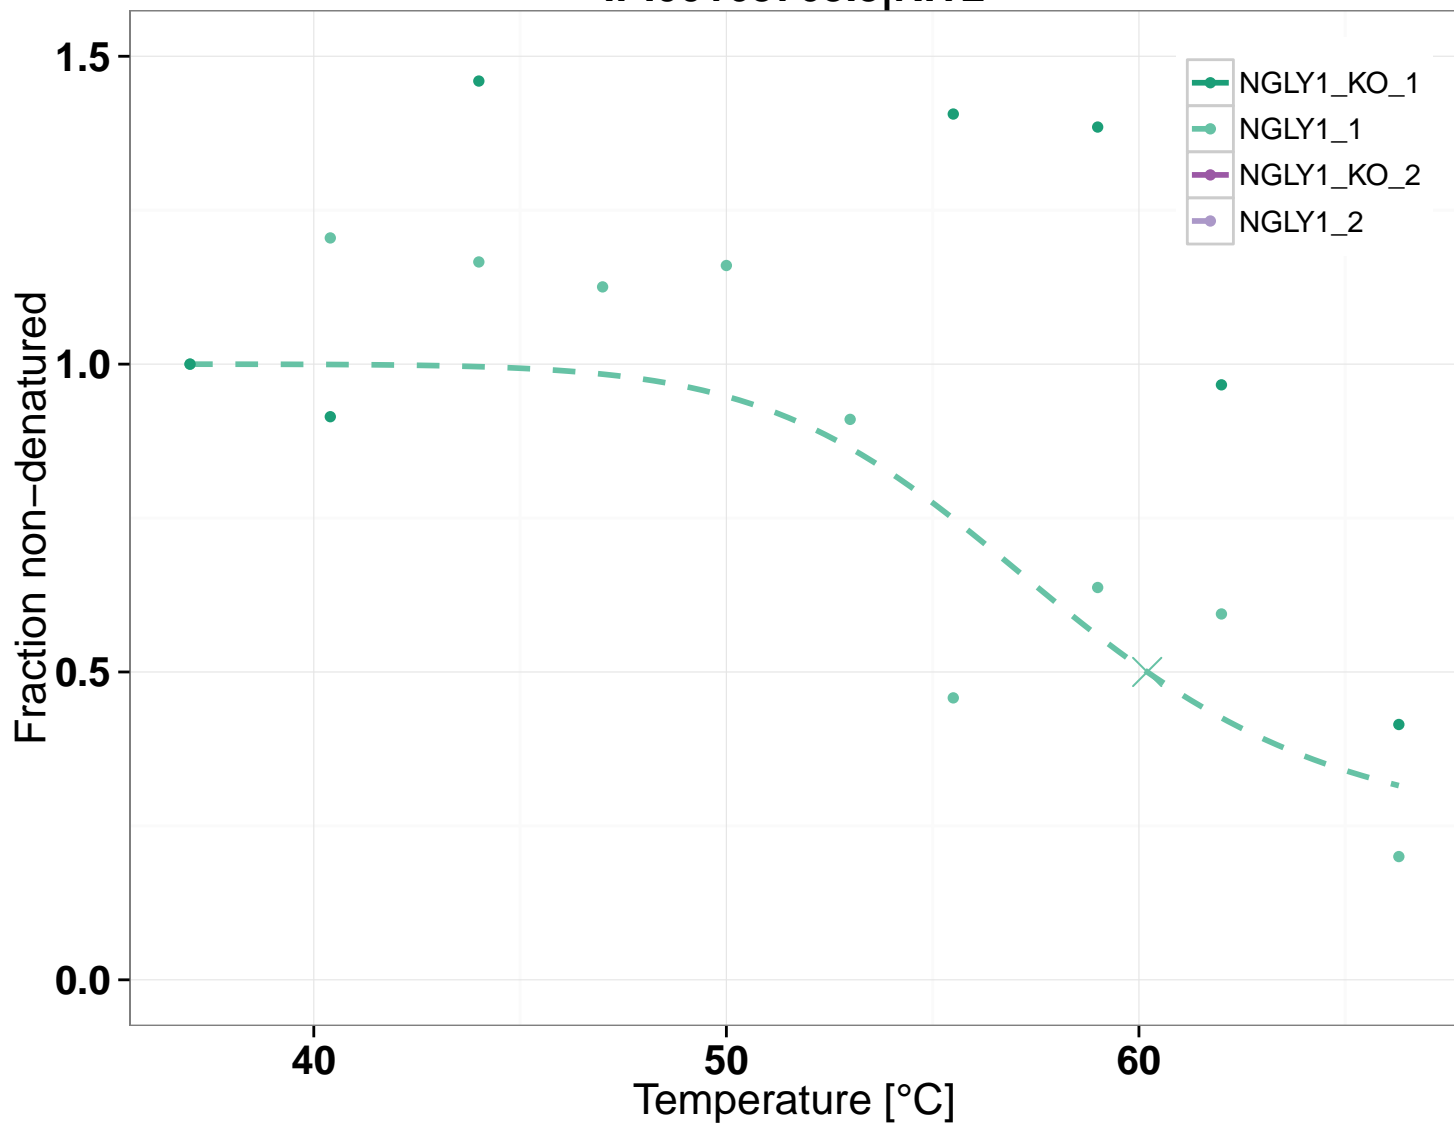

|            | meltPoint | slope  | plateau | R2   |
|------------|-----------|--------|---------|------|
| NGLY1_KO_1 | —         | —      | —       | —    |
| NGLY1_1    | 60.2      | -0.056 | 0.23    | 0.76 |
| NGLY1_KO_2 | —         | —      | —       | —    |
| NGLY1_2    | —         | —      | —       | —    |

Supplement: Supplementary file 7612 [file 1]

# IPI00013468.1|BUB3

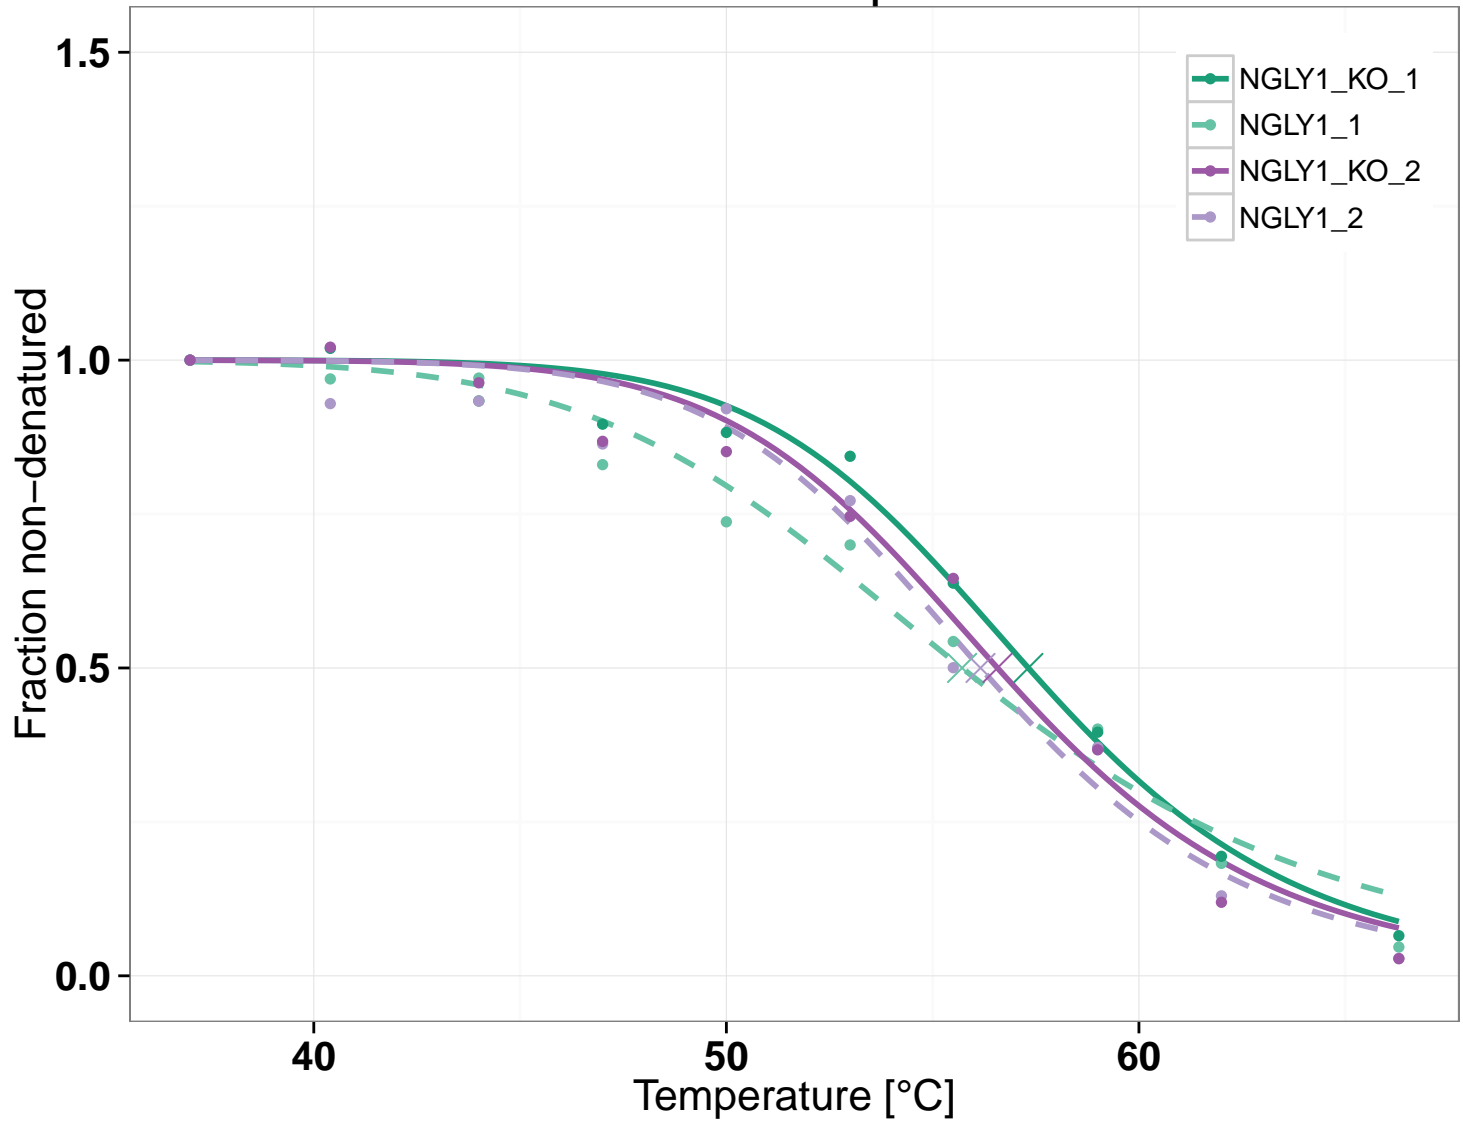

|            | meltPoint | slope  | plateau | R2   |
|------------|-----------|--------|---------|------|
| NGLY1_KO_1 | 57.32     | -0.076 | 0       | 0.99 |
| NGLY1_1    | 55.71     | -0.055 | 0       | 0.98 |
| NGLY1_KO_2 | 56.57     | -0.076 | 0       | 0.98 |
| NGLY1_2    | 56.16     | -0.077 | 0       | 0.97 |

Supplement: Supplementary file 7613 [file 1]

IPI00022431.1|AHSG

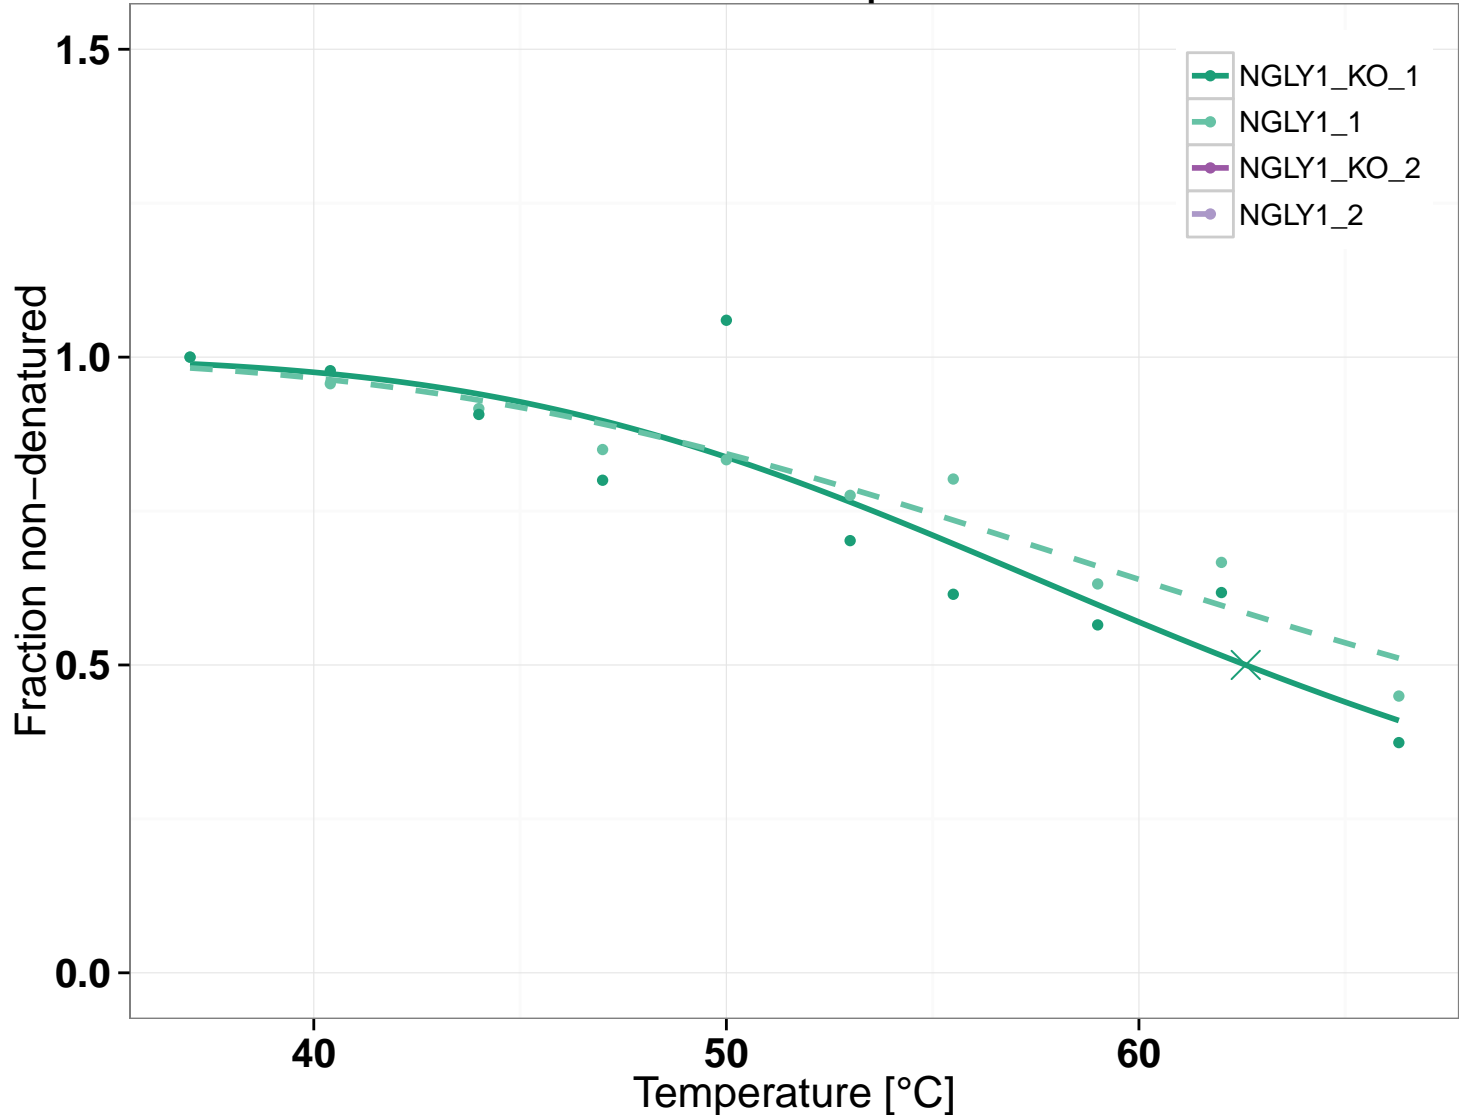

|            | meltPoint | slope  | plateau | R2   |
|------------|-----------|--------|---------|------|
| NGLY1_KO_1 | 62.59     | -0.028 | 0       | 0.81 |
| NGLY1_1    | -         | -0.021 | 0       | 0.93 |
| NGLY1_KO_2 | -         | -      | -       | -    |
| NGLY1_2    | -         | -      | -       | -    |

Supplement: Supplementary file 7614 [file 1]

IPI00646518.2|TMEM159

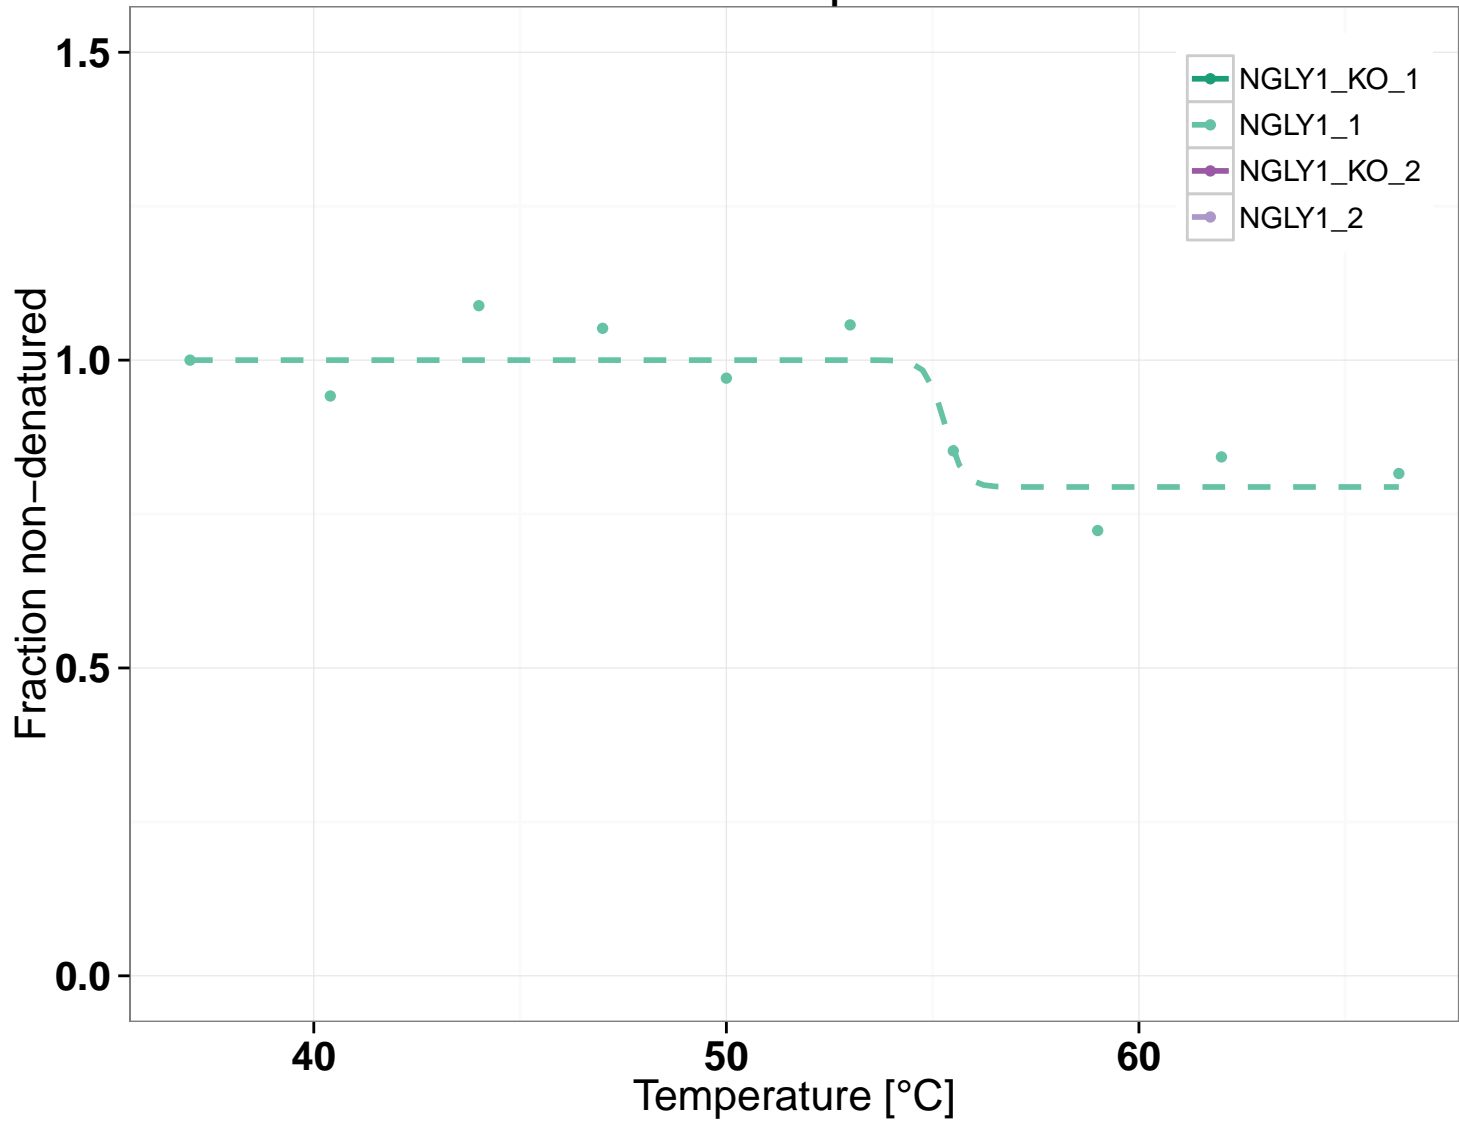

|            | meltPoint | slope | plateau | R2  |
|------------|-----------|-------|---------|-----|
| NGLY1_KO_1 | -         | -     | -       | -   |
| NGLY1_1    | -         | -0.23 | 0.79    | 0.8 |
| NGLY1_KO_2 | -         | -     | -       | -   |
| NGLY1_2    | -         | -     | -       | -   |

Supplement: Supplementary file 7615 [file 1]

IPI00074957.1|EGLN2

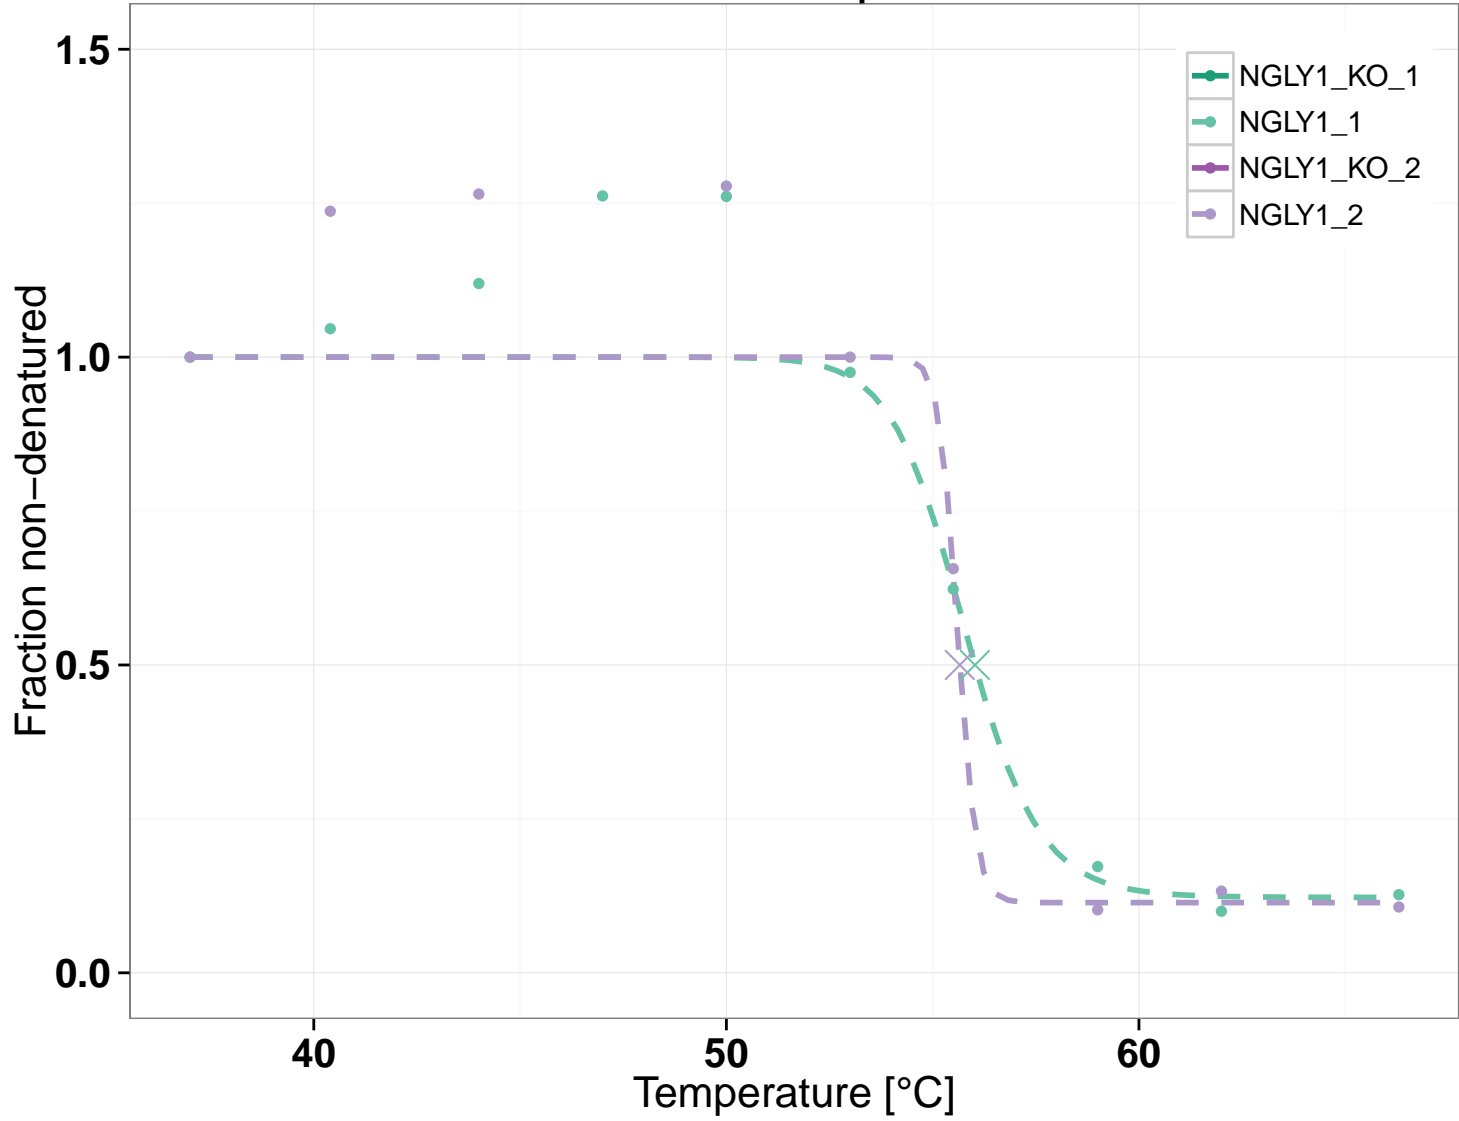

|            | meltPoint | slope | plateau | R2   |
|------------|-----------|-------|---------|------|
| NGLY1_KO_1 | -         | -     | -       | -    |
| NGLY1_1    | 56.03     | -0.25 | 0.12    | 0.92 |
| NGLY1_KO_2 | -         | -     | -       | -    |
| NGLY1_2    | 55.66     | -1    | 0.11    | 0.8  |

Supplement: Supplementary file 7616 [file 1]

# IPI00014977.5|MCM9

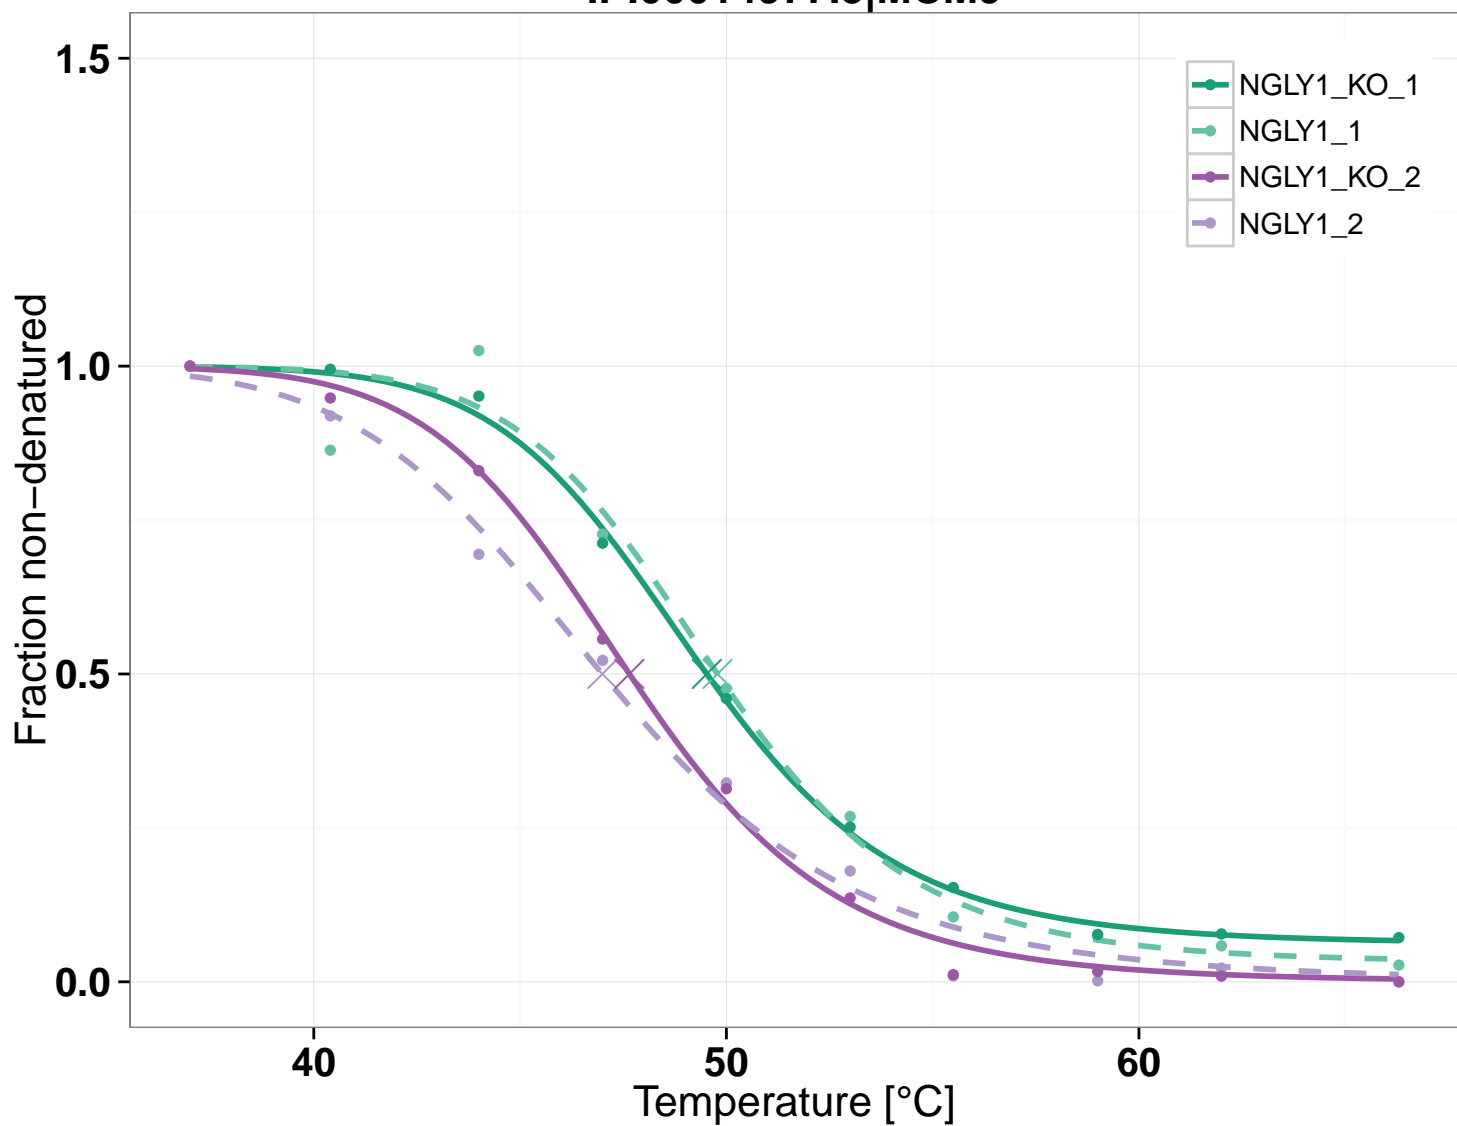

|            | meltPoint | slope  | plateau | R2   |
|------------|-----------|--------|---------|------|
| NGLY1_KO_1 | 49.53     | -0.097 | 0.06    | 1    |
| NGLY1_1    | 49.78     | -0.1   | 0.03    | 0.98 |
| NGLY1_KO_2 | 47.65     | -0.1   | 0       | 1    |
| NGLY1_2    | 46.99     | -0.082 | 0       | 0.99 |

Supplement: Supplementary file 7617 [file 1]

IPI00026305.1|HOOK1

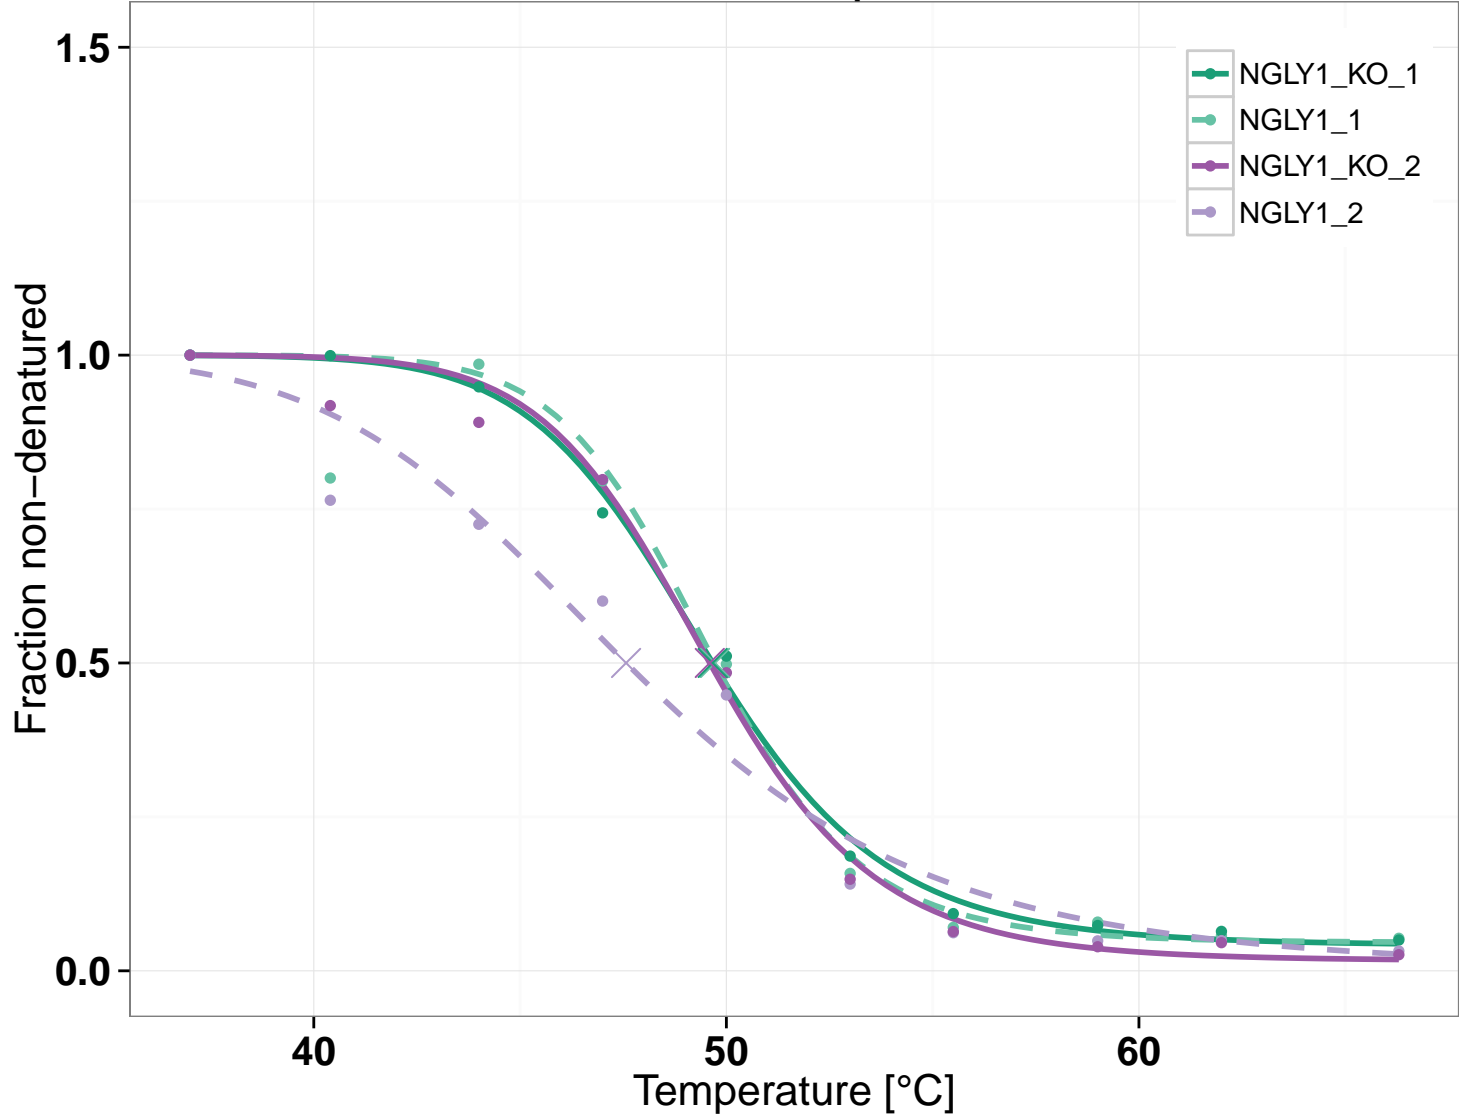

|            | meltPoint | slope  | plateau | R2   |
|------------|-----------|--------|---------|------|
| NGLY1_KO_1 | 49.67     | -0.11  | 0.04    | 1    |
| NGLY1_1    | 49.72     | -0.13  | 0.05    | 0.97 |
| NGLY1_KO_2 | 49.6      | -0.12  | 0.02    | 0.99 |
| NGLY1_2    | 47.57     | -0.068 | 0       | 0.96 |

Supplement: Supplementary file 7618 [file 1]

IPI00790553.2|C20ORF74

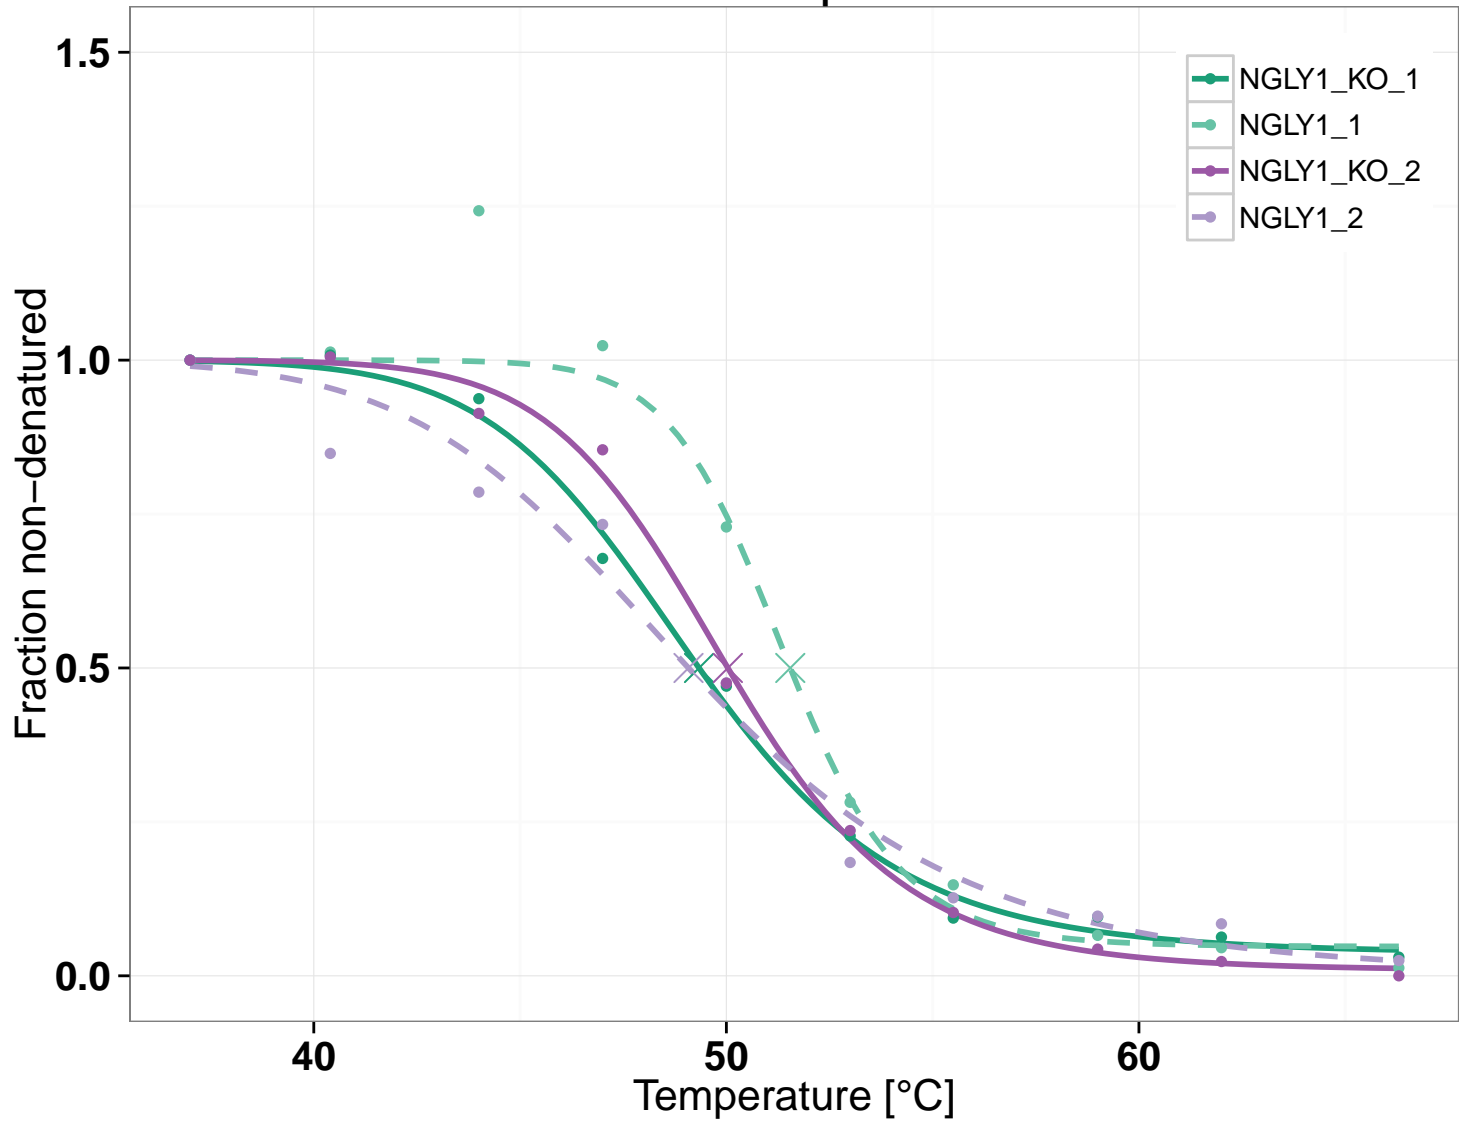

|            | meltPoint | slope  | plateau | R2   |
|------------|-----------|--------|---------|------|
| NGLY1_KO_1 | 49.34     | -0.096 | 0.04    | 1    |
| NGLY1_1    | 51.55     | -0.17  | 0.05    | 0.97 |
| NGLY1_KO_2 | 50.04     | -0.11  | 0.01    | 1    |
| NGLY1_2    | 49.08     | -0.074 | 0       | 0.98 |

Supplement: Supplementary file 7619 [file 1]

# IPI00796038.1|ARL6IP4

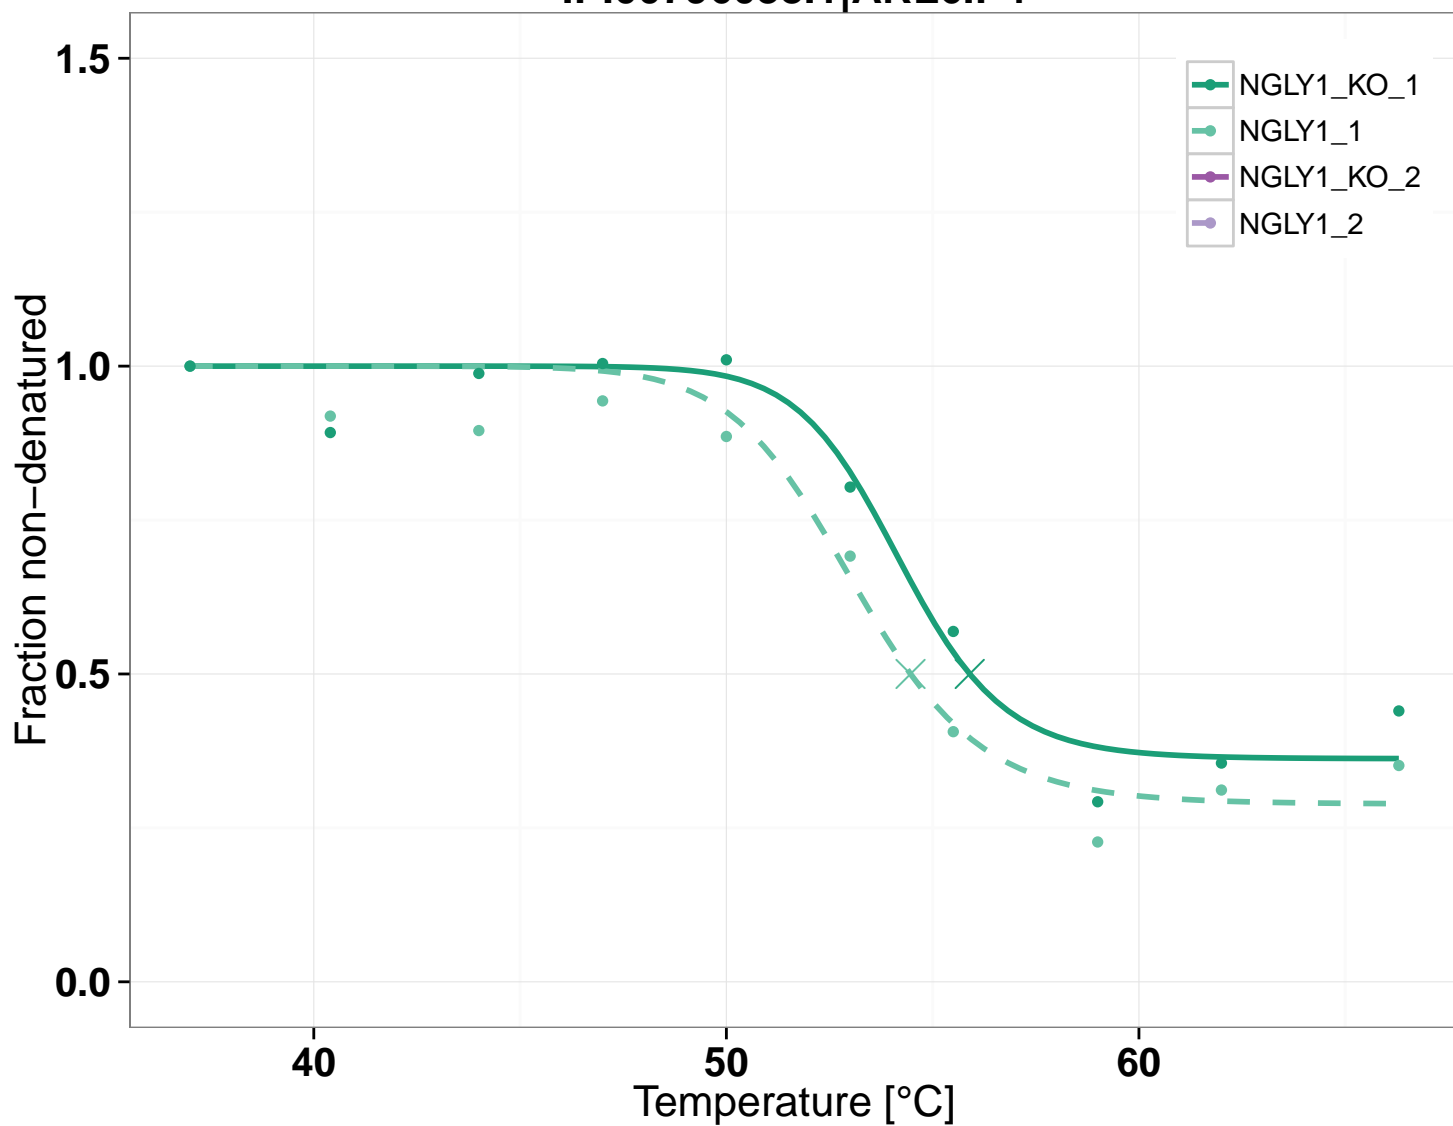

|            | meltPoint | slope | plateau | R2   |
|------------|-----------|-------|---------|------|
| NGLY1_KO_1 | 55.9      | -0.13 | 0.36    | 0.96 |
| NGLY1_1    | 54.46     | -0.12 | 0.29    | 0.96 |
| NGLY1_KO_2 | -         | -     | -       | -    |
| NGLY1_2    | -         | -     | -       | -    |

Supplement: Supplementary file 7620 [file 1]

# IPI00009410.2|EDEM3

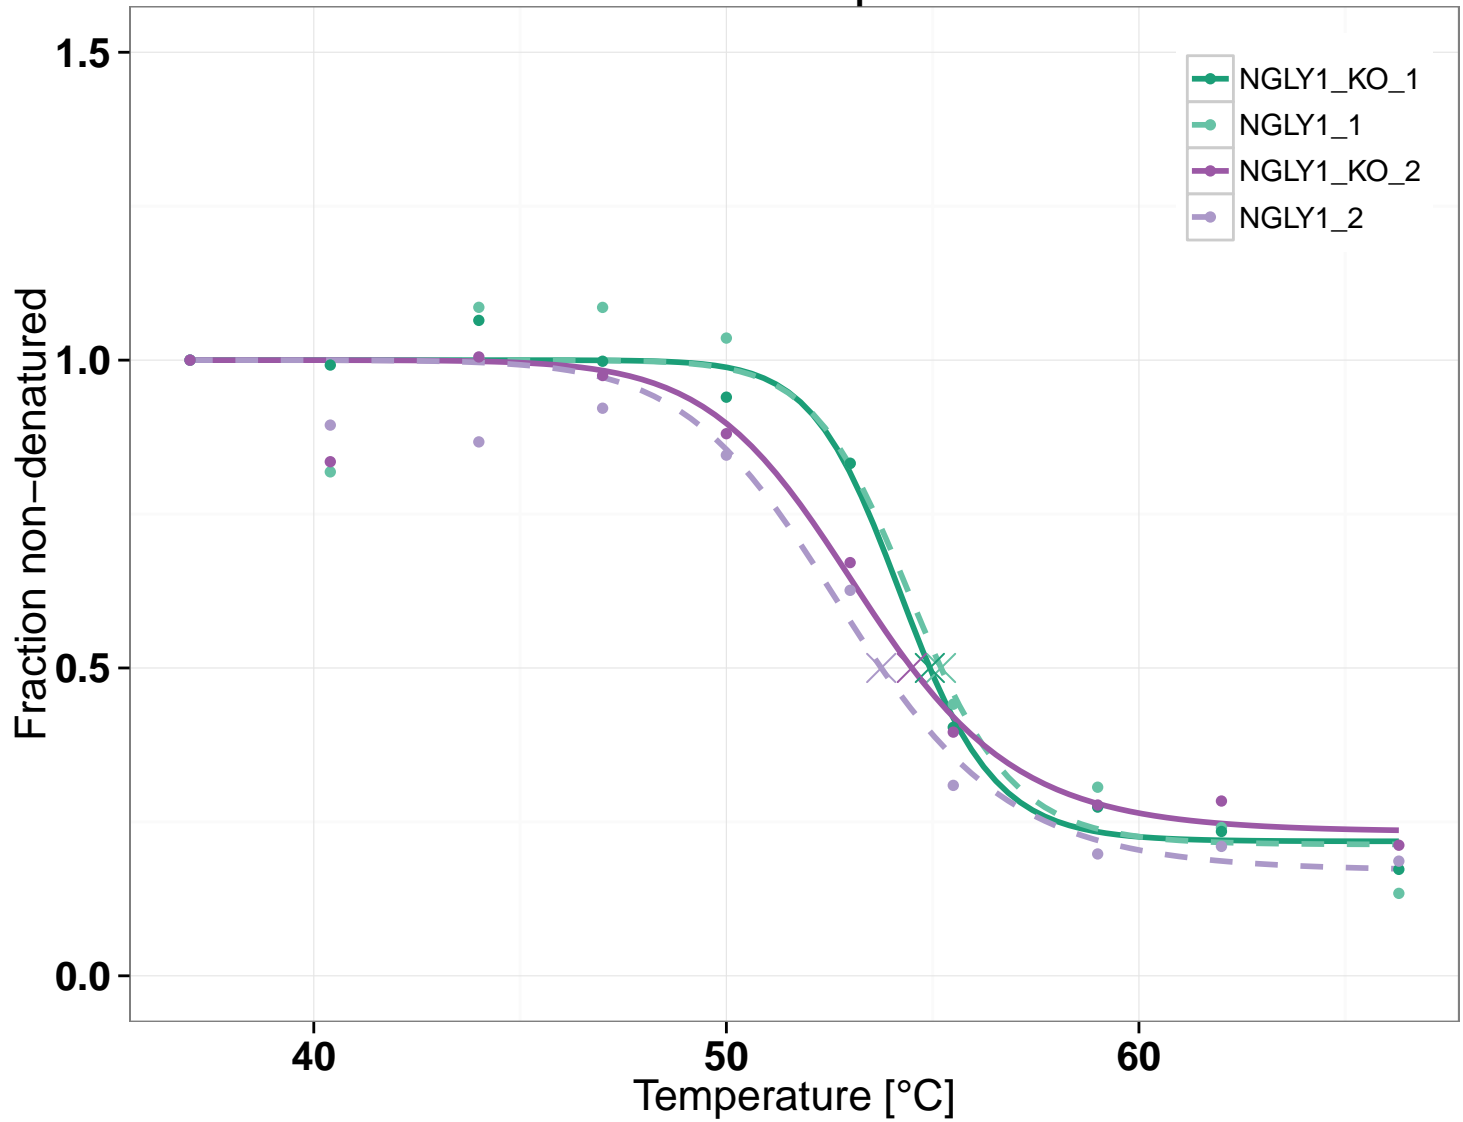

|            | meltPoint | slope | plateau | R2   |
|------------|-----------|-------|---------|------|
| NGLY1_KO_1 | 54.93     | -0.18 | 0.22    | 0.99 |
| NGLY1_1    | 55.2      | -0.16 | 0.21    | 0.95 |
| NGLY1_KO_2 | 54.5      | -0.1  | 0.23    | 0.97 |
| NGLY1_2    | 53.75     | -0.11 | 0.17    | 0.97 |

Supplement: Supplementary file 7621 [file 1]

IPI00029557.3|GRPEL1

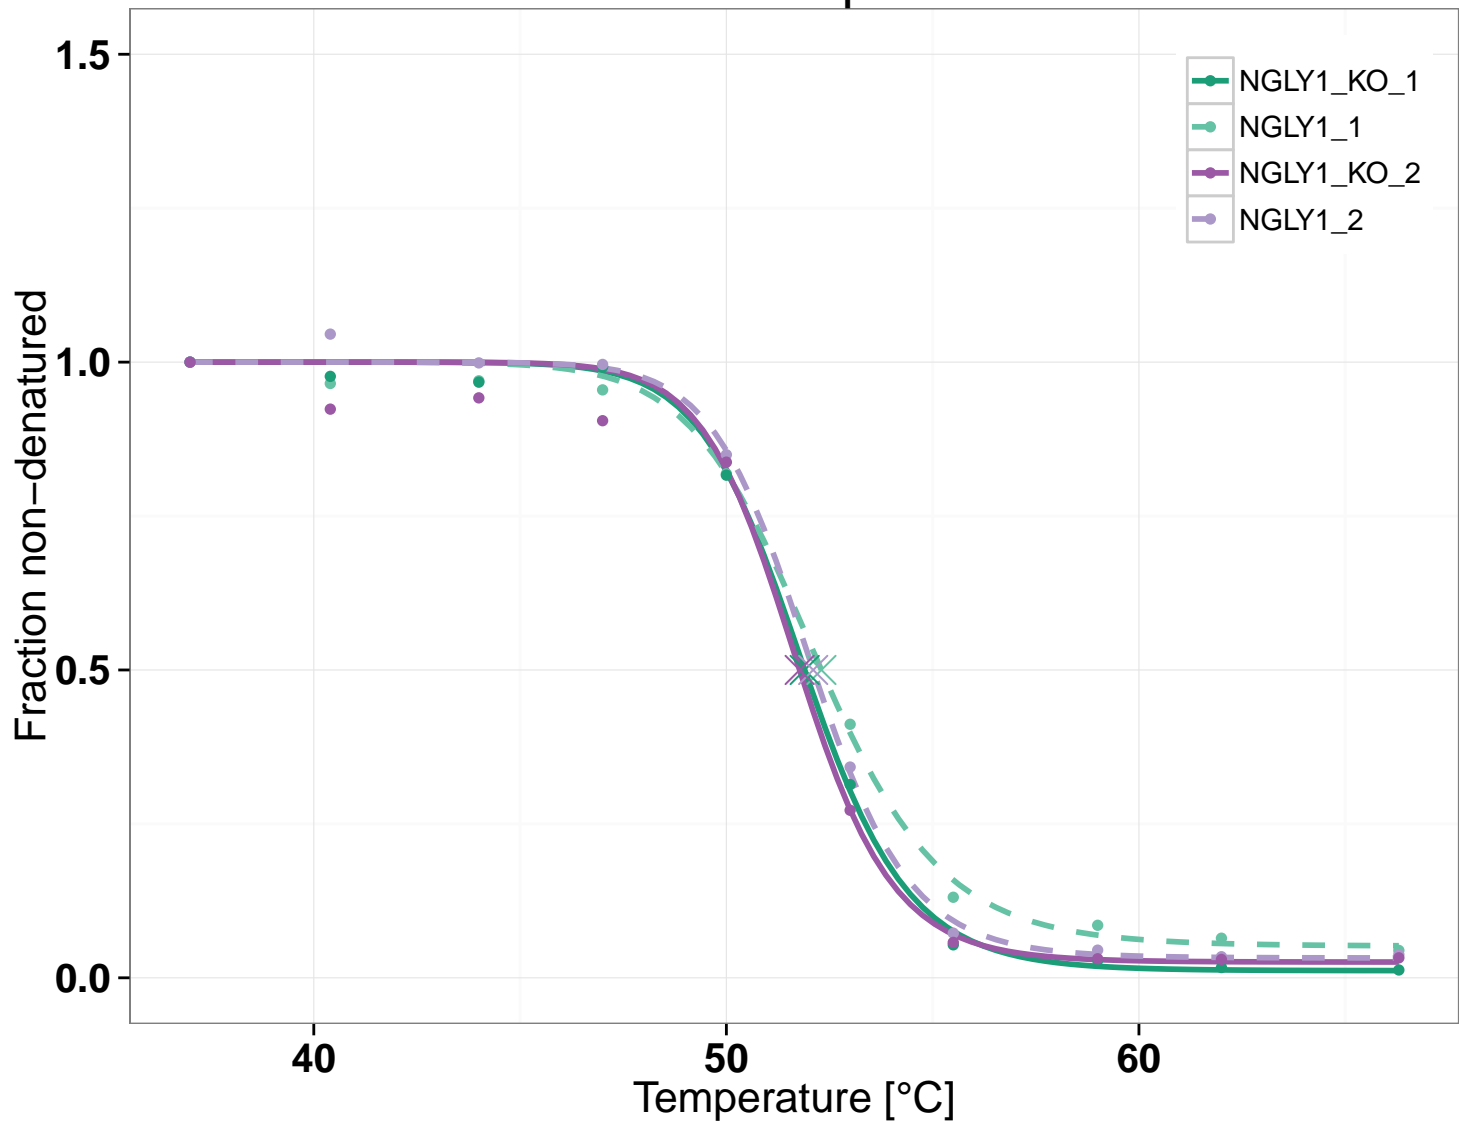

|            | meltPoint | slope | plateau | R2   |
|------------|-----------|-------|---------|------|
| NGLY1_KO_1 | 51.9      | -0.19 | 0.01    | 1    |
| NGLY1_1    | 52.3      | -0.16 | 0.05    | 1    |
| NGLY1_KO_2 | 51.78     | -0.21 | 0.03    | 0.99 |
| NGLY1_2    | 52.1      | -0.2  | 0.03    | 1    |

Supplement: Supplementary file 7622 [file 1]

# IPI00218319.3|TPM3

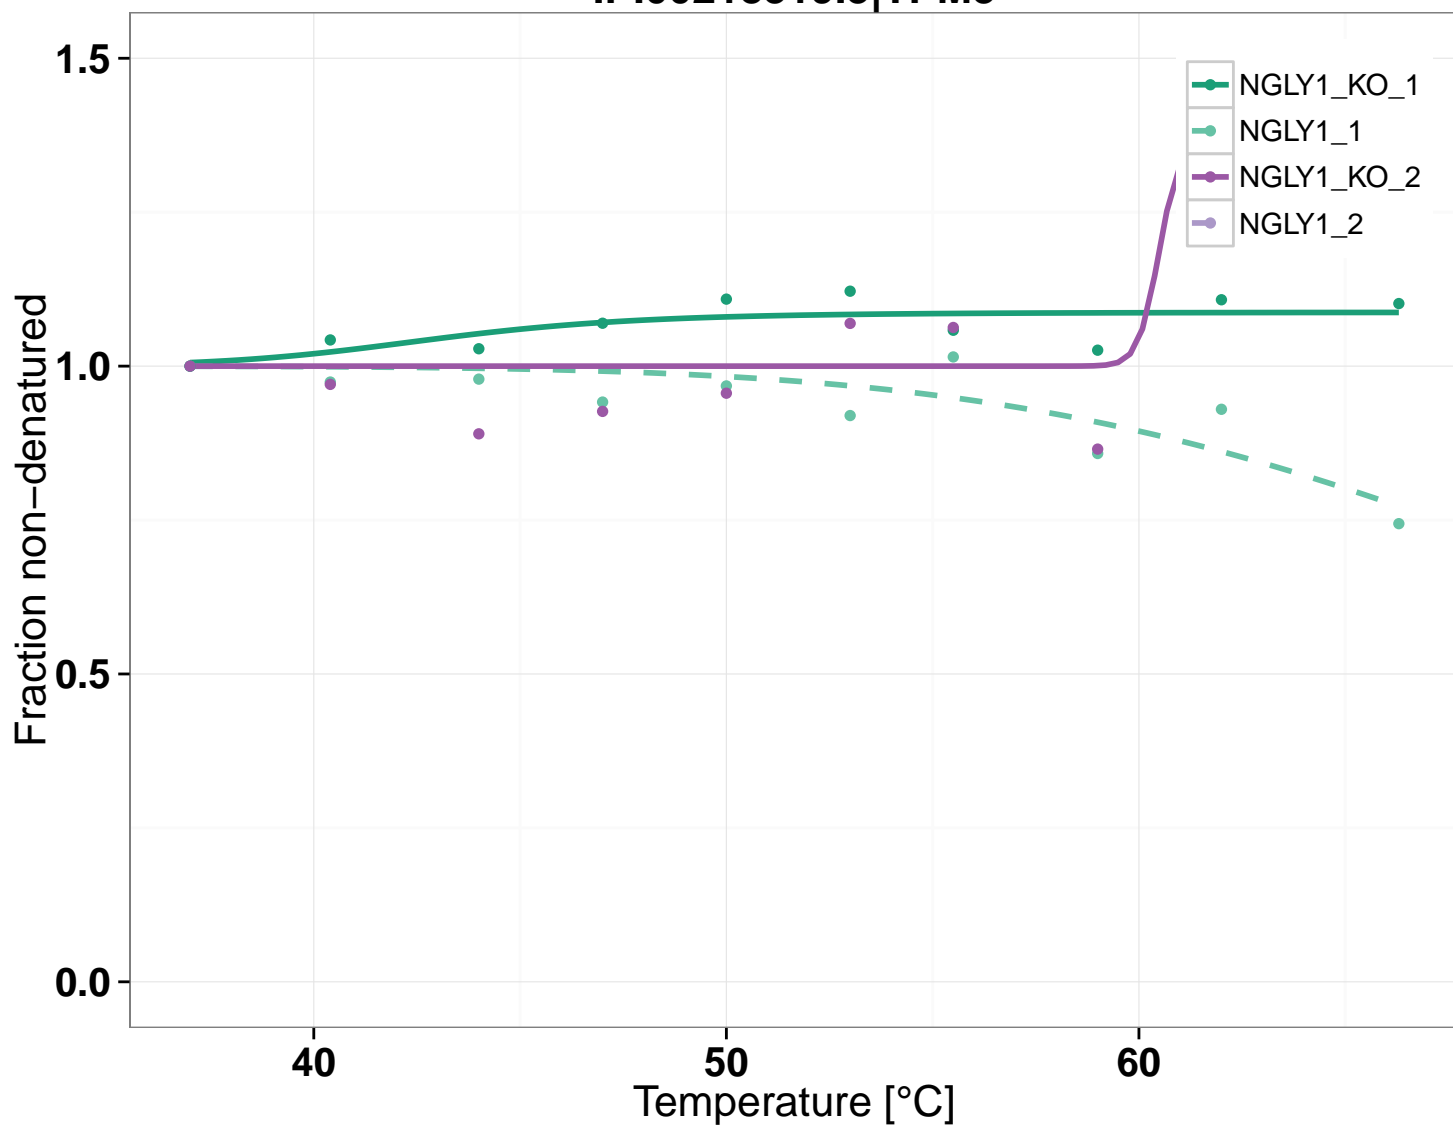

|            | meltPoint | slope  | plateau | R2   |
|------------|-----------|--------|---------|------|
| NGLY1_KO_1 | —         | 0.0086 | 1.09    | 0.48 |
| NGLY1_1    | —         | —      | 0       | 0.68 |
| NGLY1_KO_2 | —         | 0.37   | 1.36    | 0.76 |
| NGLY1_2    | —         | —      | —       | —    |

Supplement: Supplementary file 7623 [file 1]

IPI00418794.1|ENOSF1

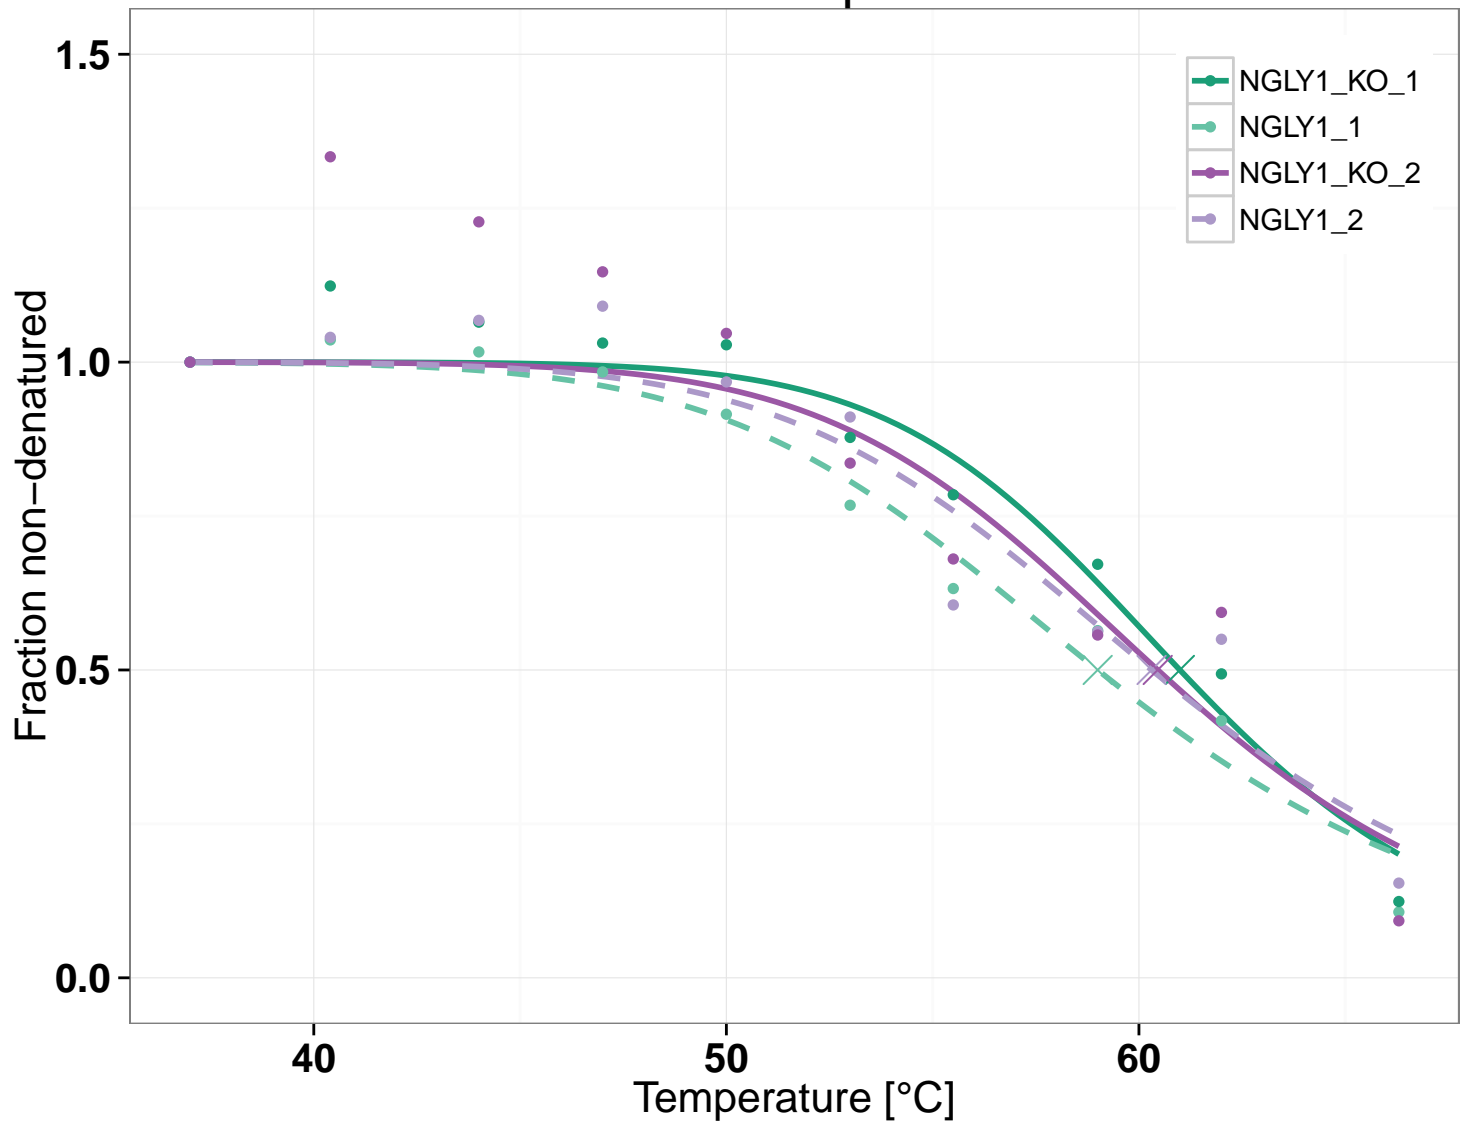

|            | meltPoint | slope  | plateau | R2   |
|------------|-----------|--------|---------|------|
| NGLY1_KO_1 | 60.99     | -0.072 | 0       | 0.95 |
| NGLY1_1    | 59        | -0.055 | 0       | 0.97 |
| NGLY1_KO_2 | 60.46     | -0.062 | 0       | 0.79 |
| NGLY1_2    | 60.31     | -0.056 | 0       | 0.92 |

Supplement: Supplementary file 7624 [file 1]

# IPI00011676.2|WASL

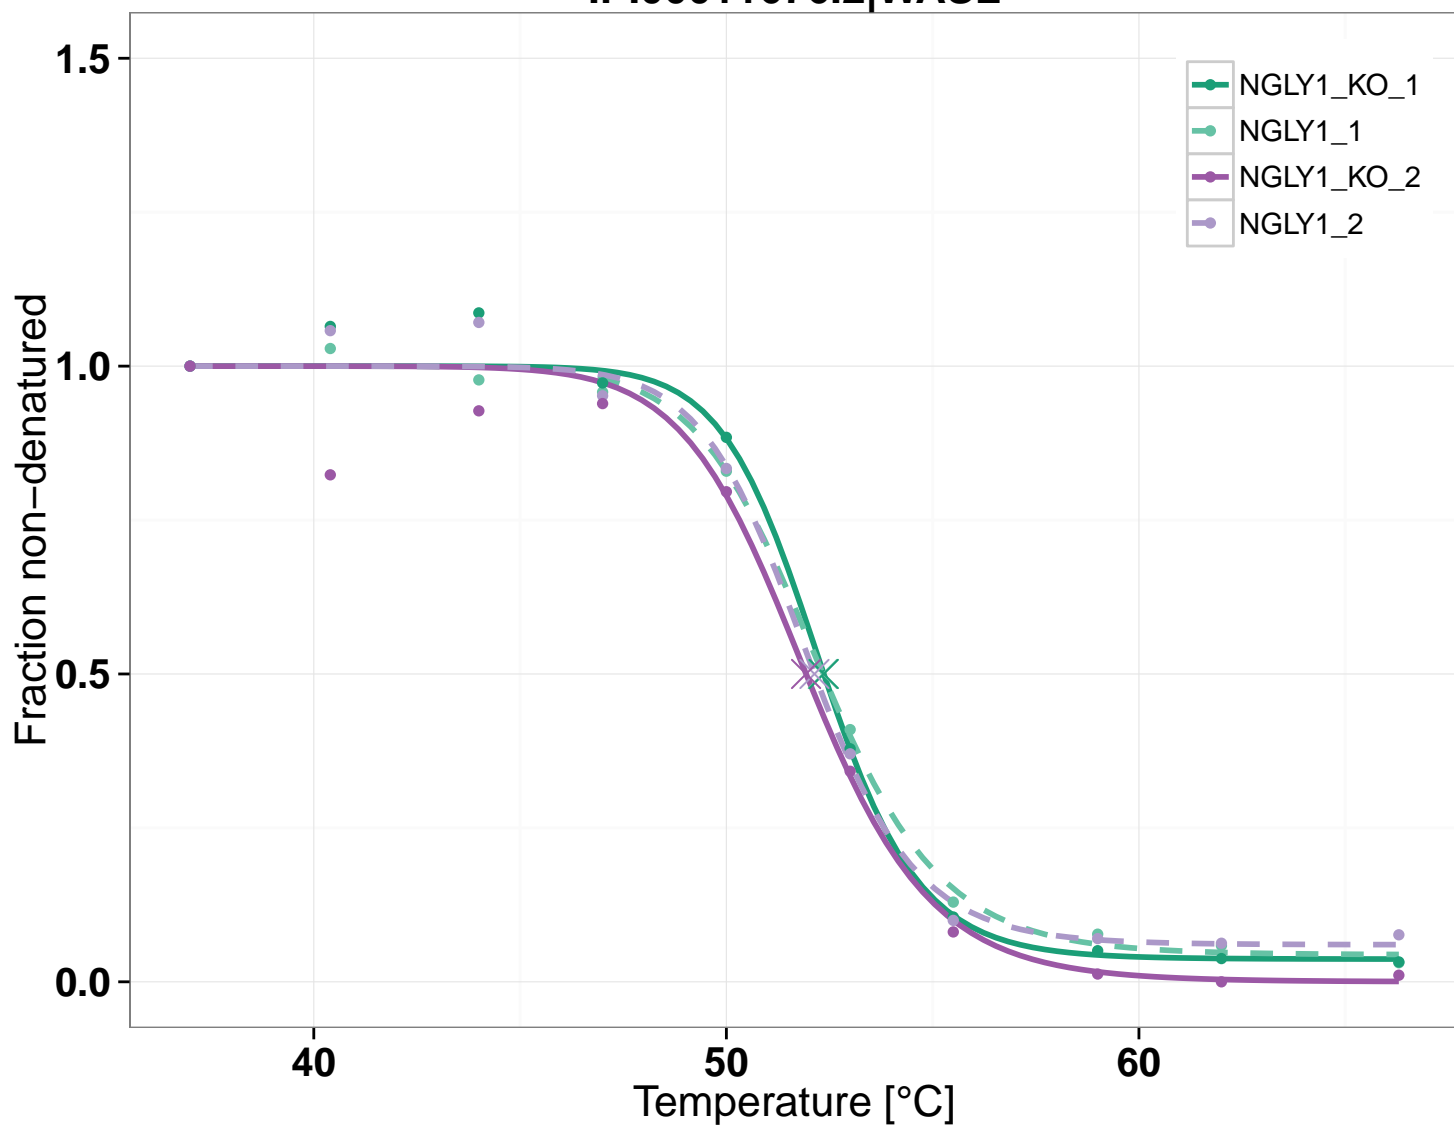

|            | meltPoint | slope | plateau | R2   |
|------------|-----------|-------|---------|------|
| NGLY1_KO_1 | 52.36     | -0.2  | 0.04    | 0.99 |
| NGLY1_1    | 52.34     | -0.16 | 0.04    | 1    |
| NGLY1_KO_2 | 51.93     | -0.17 | 0       | 0.98 |
| NGLY1_2    | 52.14     | -0.18 | 0.06    | 0.99 |

Supplement: Supplementary file 7625 [file 1]

IPI00396527.4|KLRAQ1

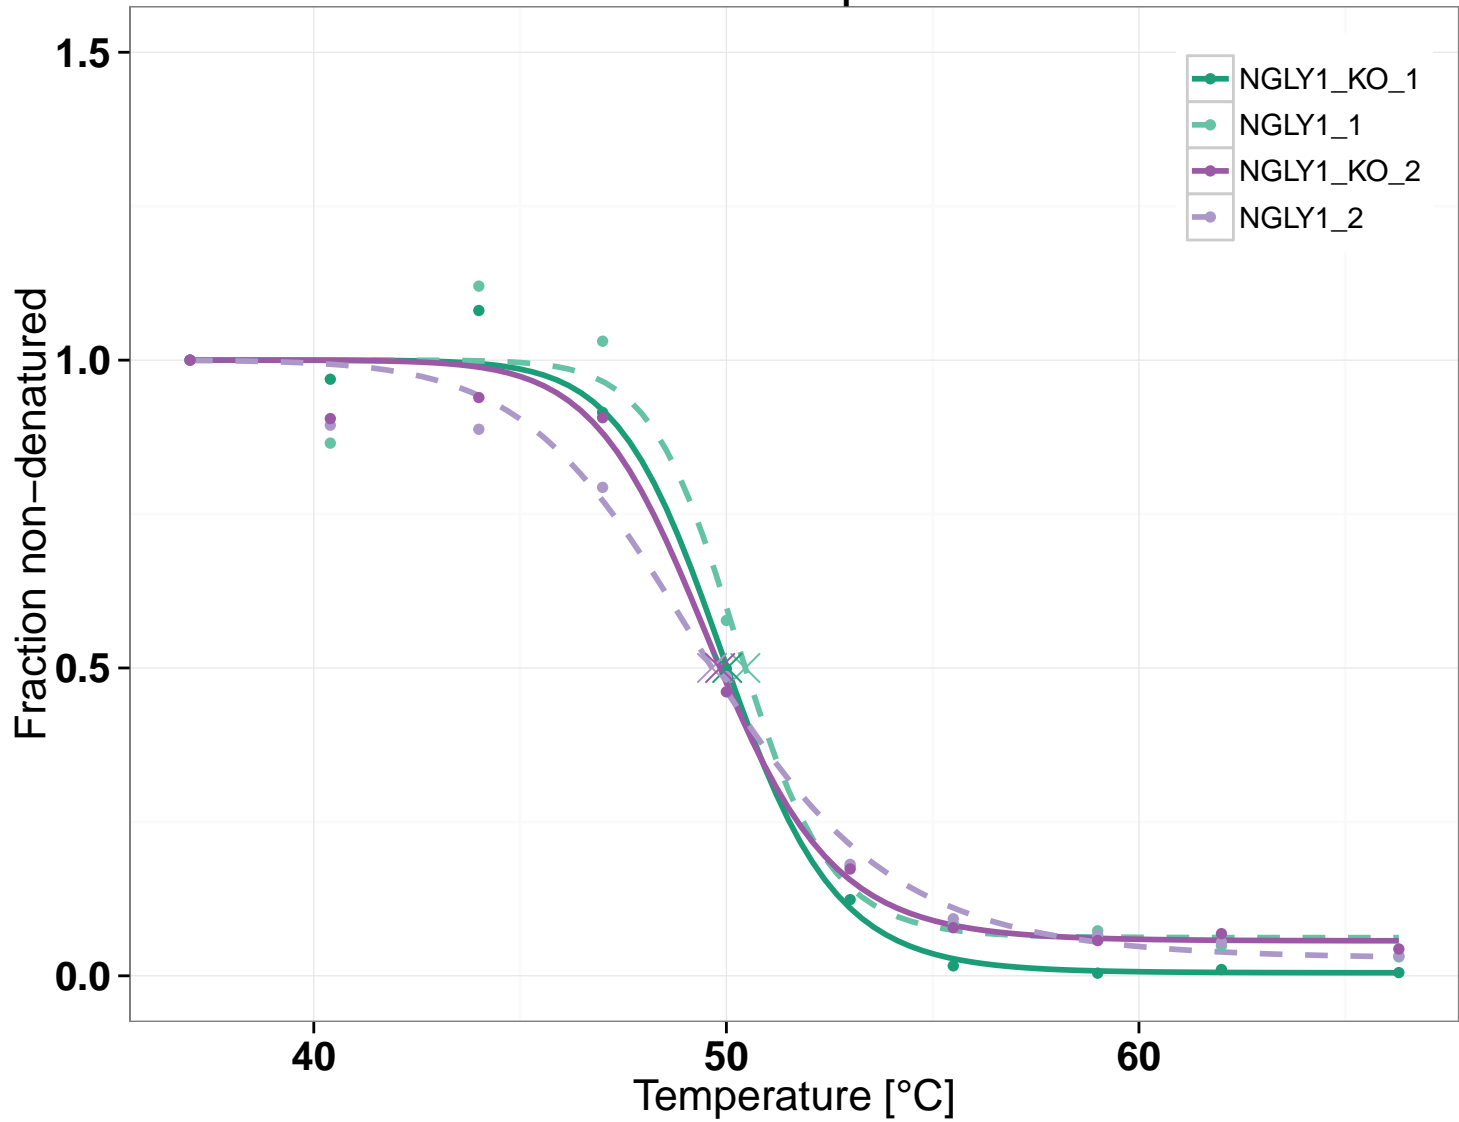

|            | meltPoint | slope | plateau | R2   |
|------------|-----------|-------|---------|------|
| NGLY1_KO_1 | 50.02     | -0.19 | 0       | 1    |
| NGLY1_1    | 50.46     | -0.22 | 0.06    | 0.98 |
| NGLY1_KO_2 | 49.85     | -0.16 | 0.06    | 0.99 |
| NGLY1_2    | 49.65     | -0.11 | 0.03    | 0.99 |

Supplement: Supplementary file 7626 [file 1]

# IPI00217472.3|HBQ1

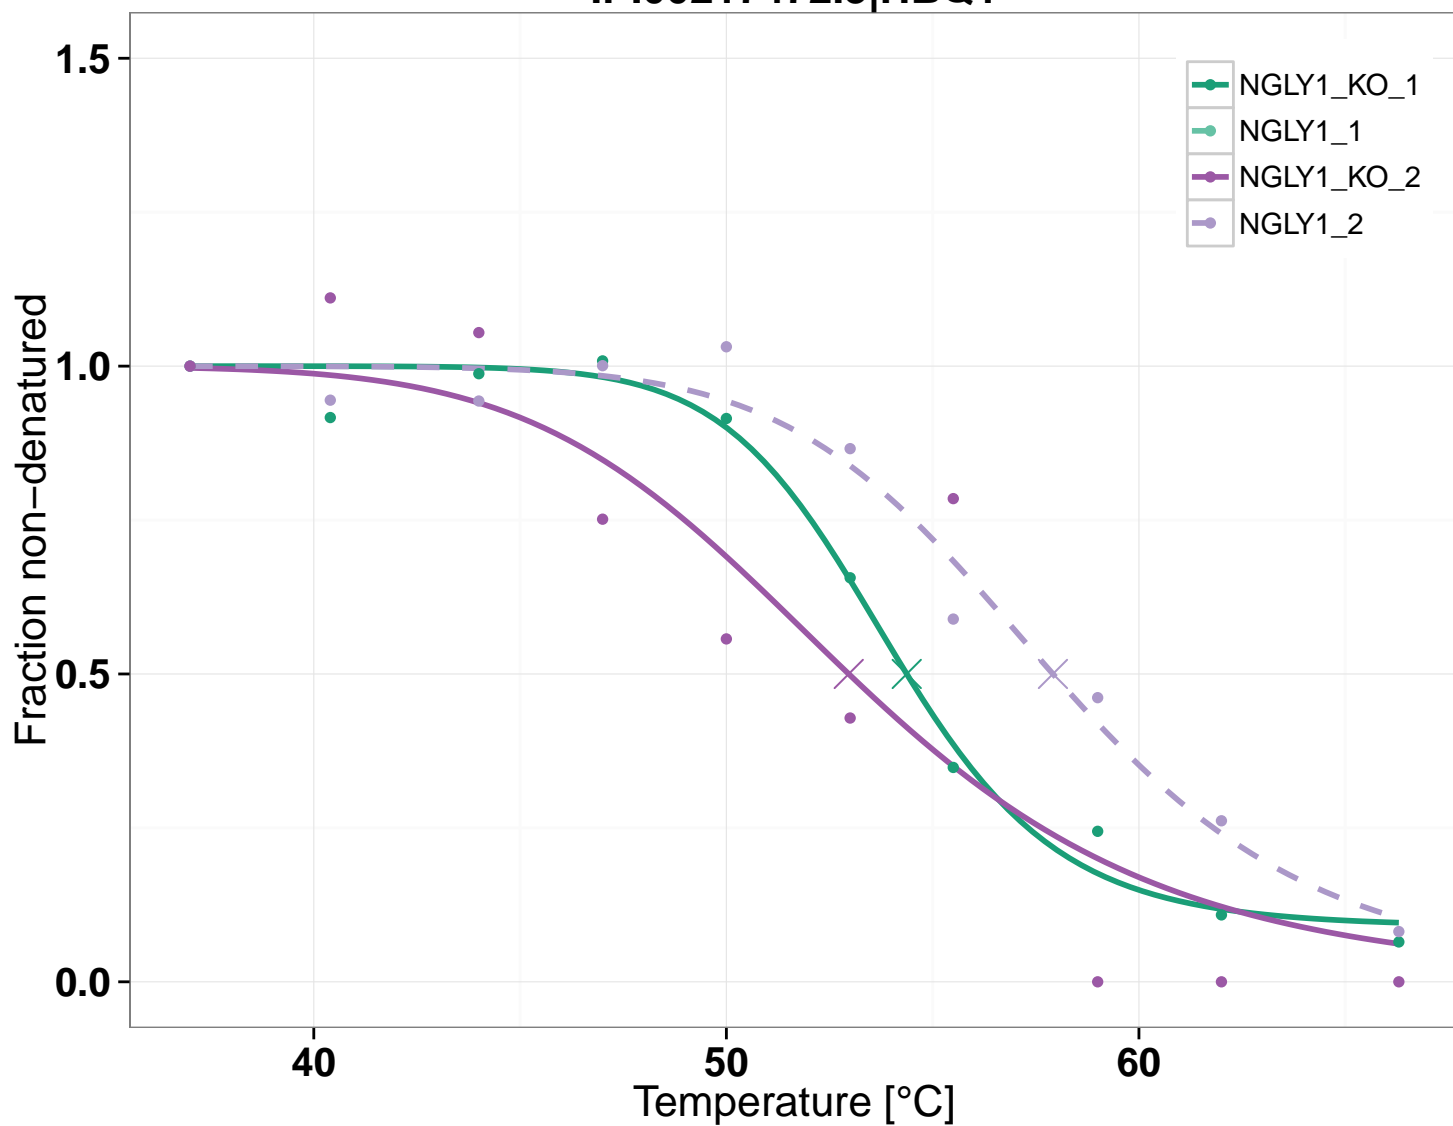

|            | meltPoint | slope  | plateau | R2   |
|------------|-----------|--------|---------|------|
| NGLY1_KO_1 | 54.37     | -0.11  | 0.09    | 0.99 |
| NGLY1_1    | —         | —      | —       | —    |
| NGLY1_KO_2 | 52.97     | -0.065 | 0       | 0.83 |
| NGLY1_2    | 57.92     | -0.077 | 0.01    | 0.98 |

Supplement: Supplementary file 7627 [file 1]

IPI00293009.4|RABEP1

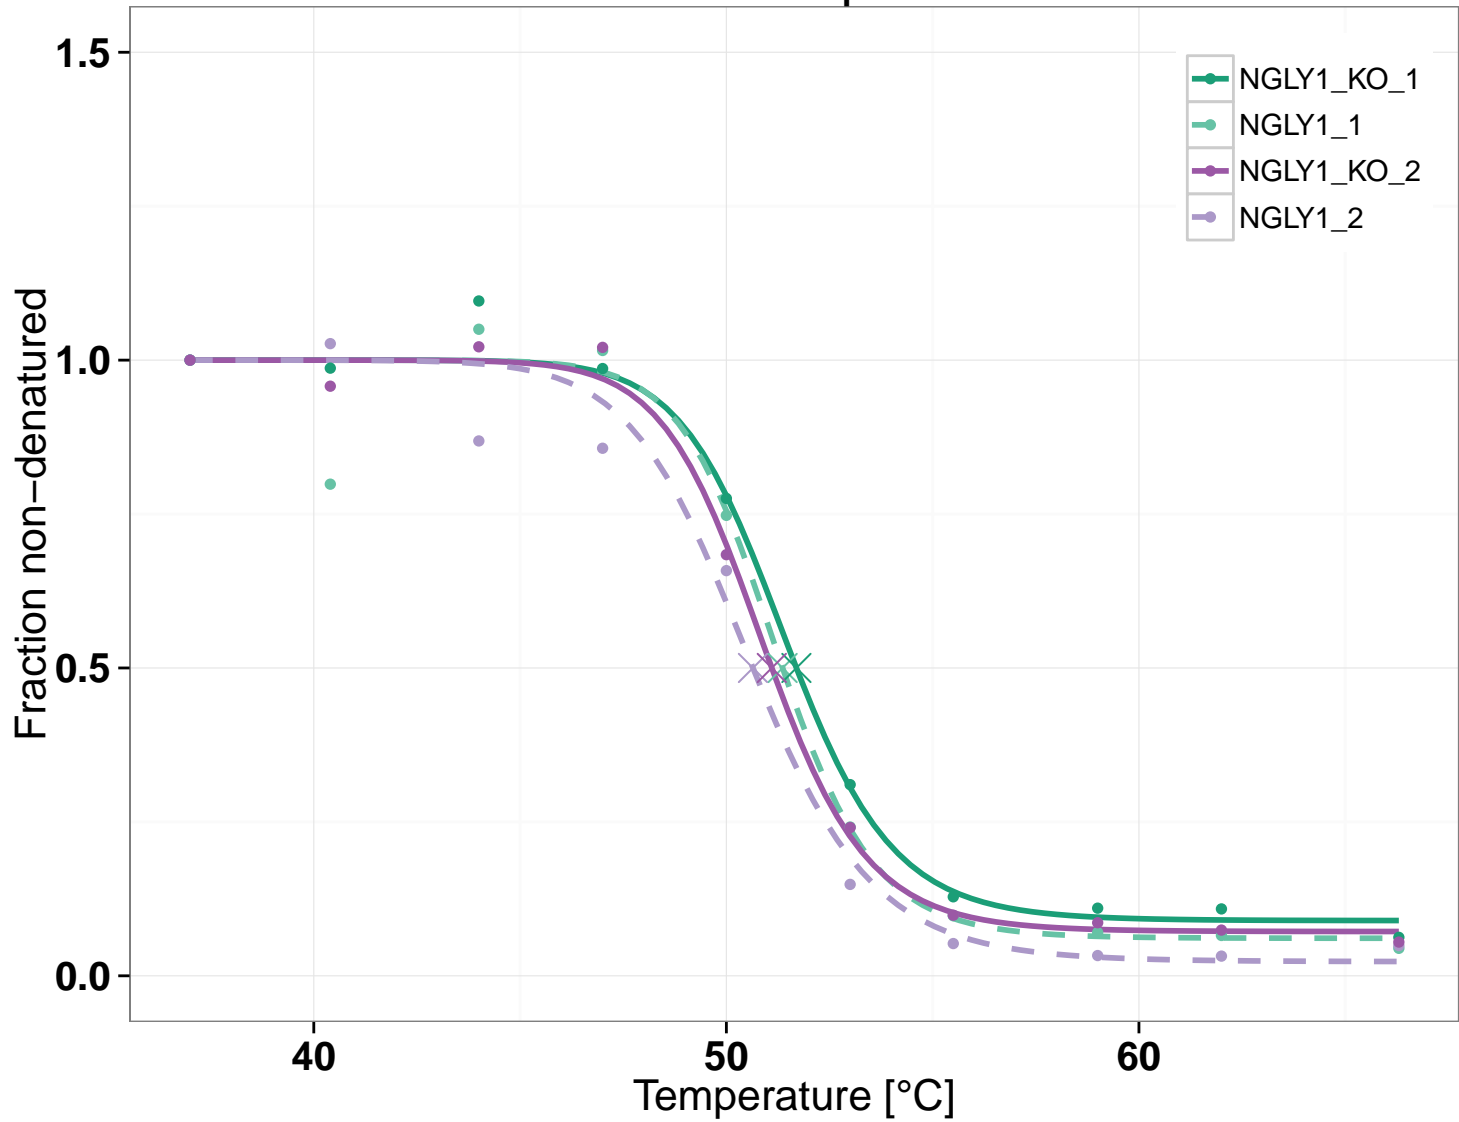

|            | meltPoint | slope | plateau | R2   |
|------------|-----------|-------|---------|------|
| NGLY1_KO_1 | 51.7      | -0.18 | 0.09    | 0.99 |
| NGLY1_1    | 51.36     | -0.2  | 0.06    | 0.97 |
| NGLY1_KO_2 | 51.1      | -0.19 | 0.07    | 1    |
| NGLY1_2    | 50.64     | -0.17 | 0.02    | 0.98 |

Supplement: Supplementary file 7628 [file 1]

# IPI00473011.3|HBD

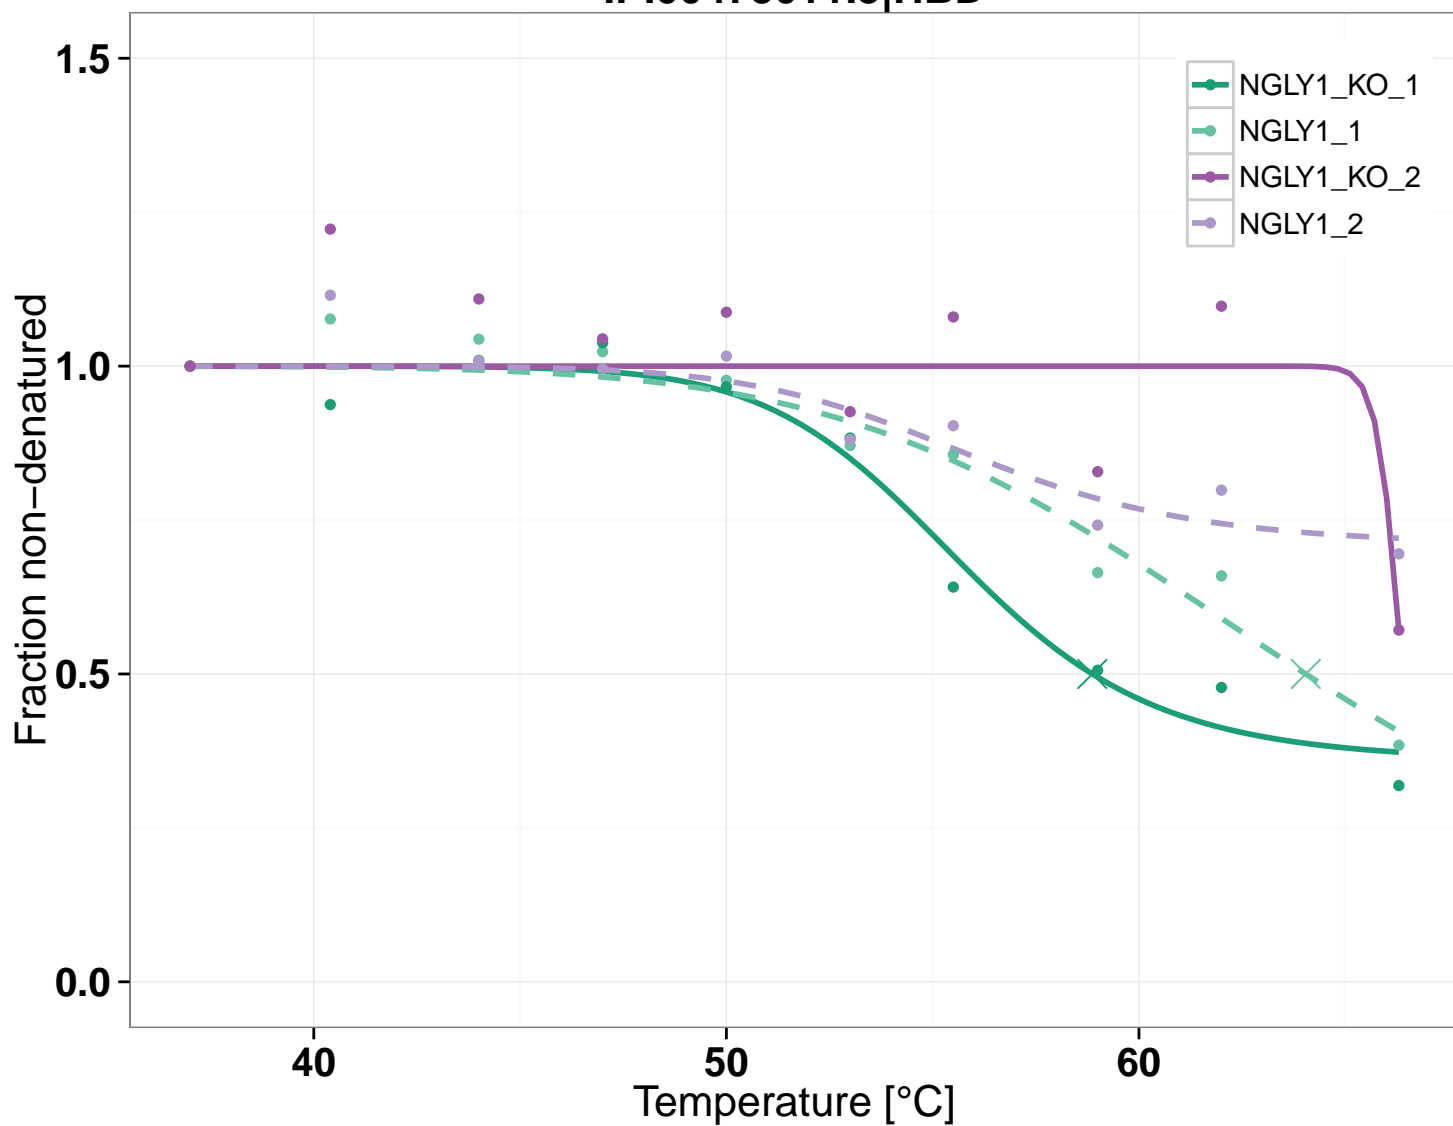

|            | meltPoint | slope  | plateau | R2   |
|------------|-----------|--------|---------|------|
| NGLY1_KO_1 | 58.87     | -0.068 | 0.36    | 0.97 |
| NGLY1_1    | 64.04     | -0.045 | 0       | 0.95 |
| NGLY1_KO_2 | -         | -      | 0       | 0.6  |
| NGLY1_2    | -         | -0.026 | 0.71    | 0.85 |

Supplement: Supplementary file 7629 [file 1]

IPI00305316.5|ZNF143

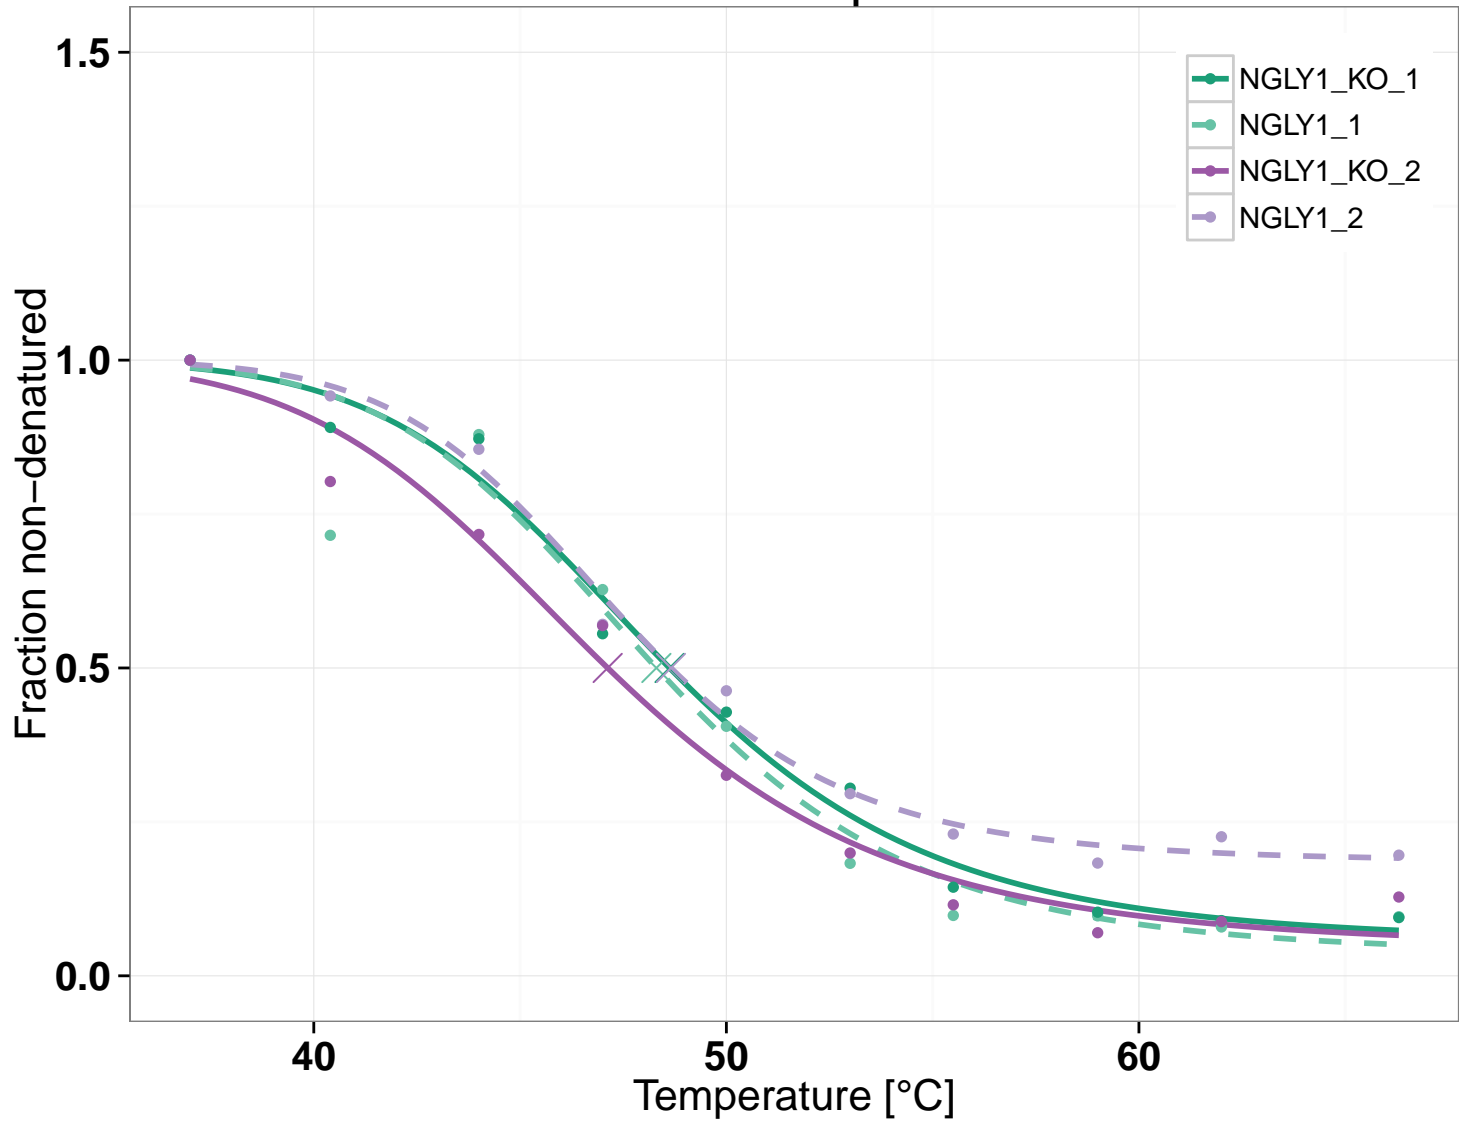

|            | meltPoint | slope  | plateau | R2   |
|------------|-----------|--------|---------|------|
| NGLY1_KO_1 | 48.62     | -0.071 | 0.05    | 0.99 |
| NGLY1_1    | 48.3      | -0.075 | 0.03    | 0.94 |
| NGLY1_KO_2 | 47.12     | -0.067 | 0.04    | 0.98 |
| NGLY1_2    | 48.66     | -0.074 | 0.19    | 0.99 |

Supplement: Supplementary file 7630 [file 1]

IPI00021978.1|PEX11B

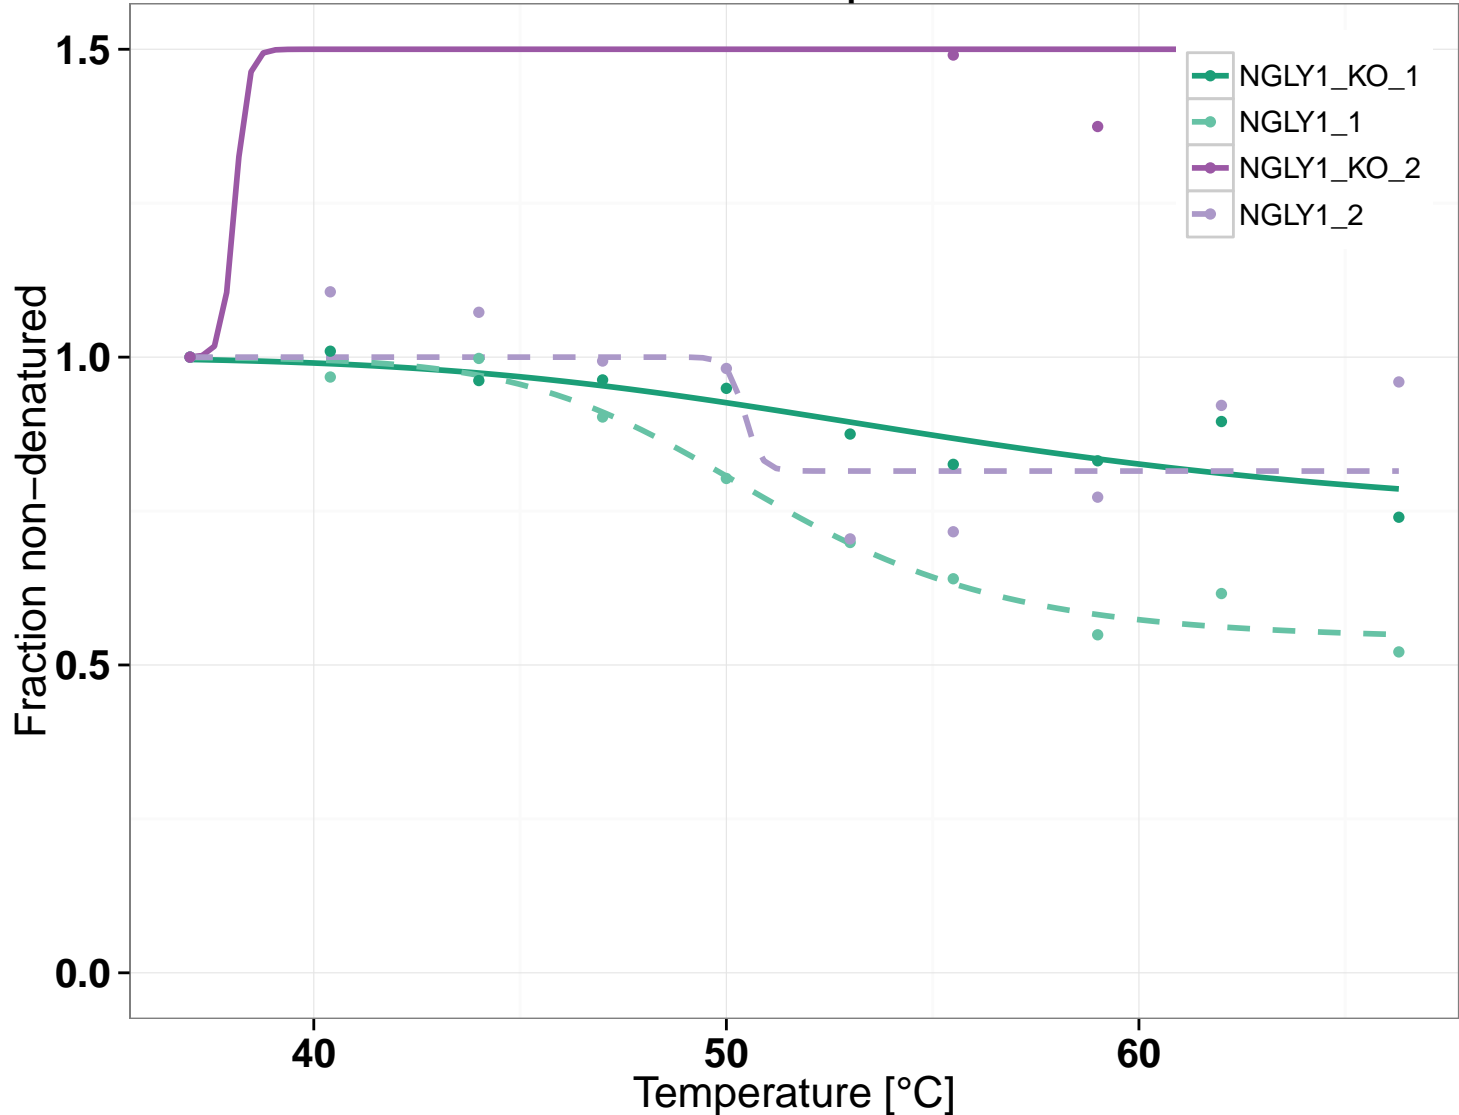

|            | meltPoint | slope  | plateau | R2   |
|------------|-----------|--------|---------|------|
| NGLY1_KO_1 | —         | -0.011 | 0.73    | 0.82 |
| NGLY1_1    | —         | -0.039 | 0.54    | 0.98 |
| NGLY1_KO_2 | —         | 0.82   | 1.5     | 0.05 |
| NGLY1_2    | —         | -0.23  | 0.81    | 0.61 |

Supplement: Supplementary file 7631 [file 1]

IPI00465428.2|VPS13C

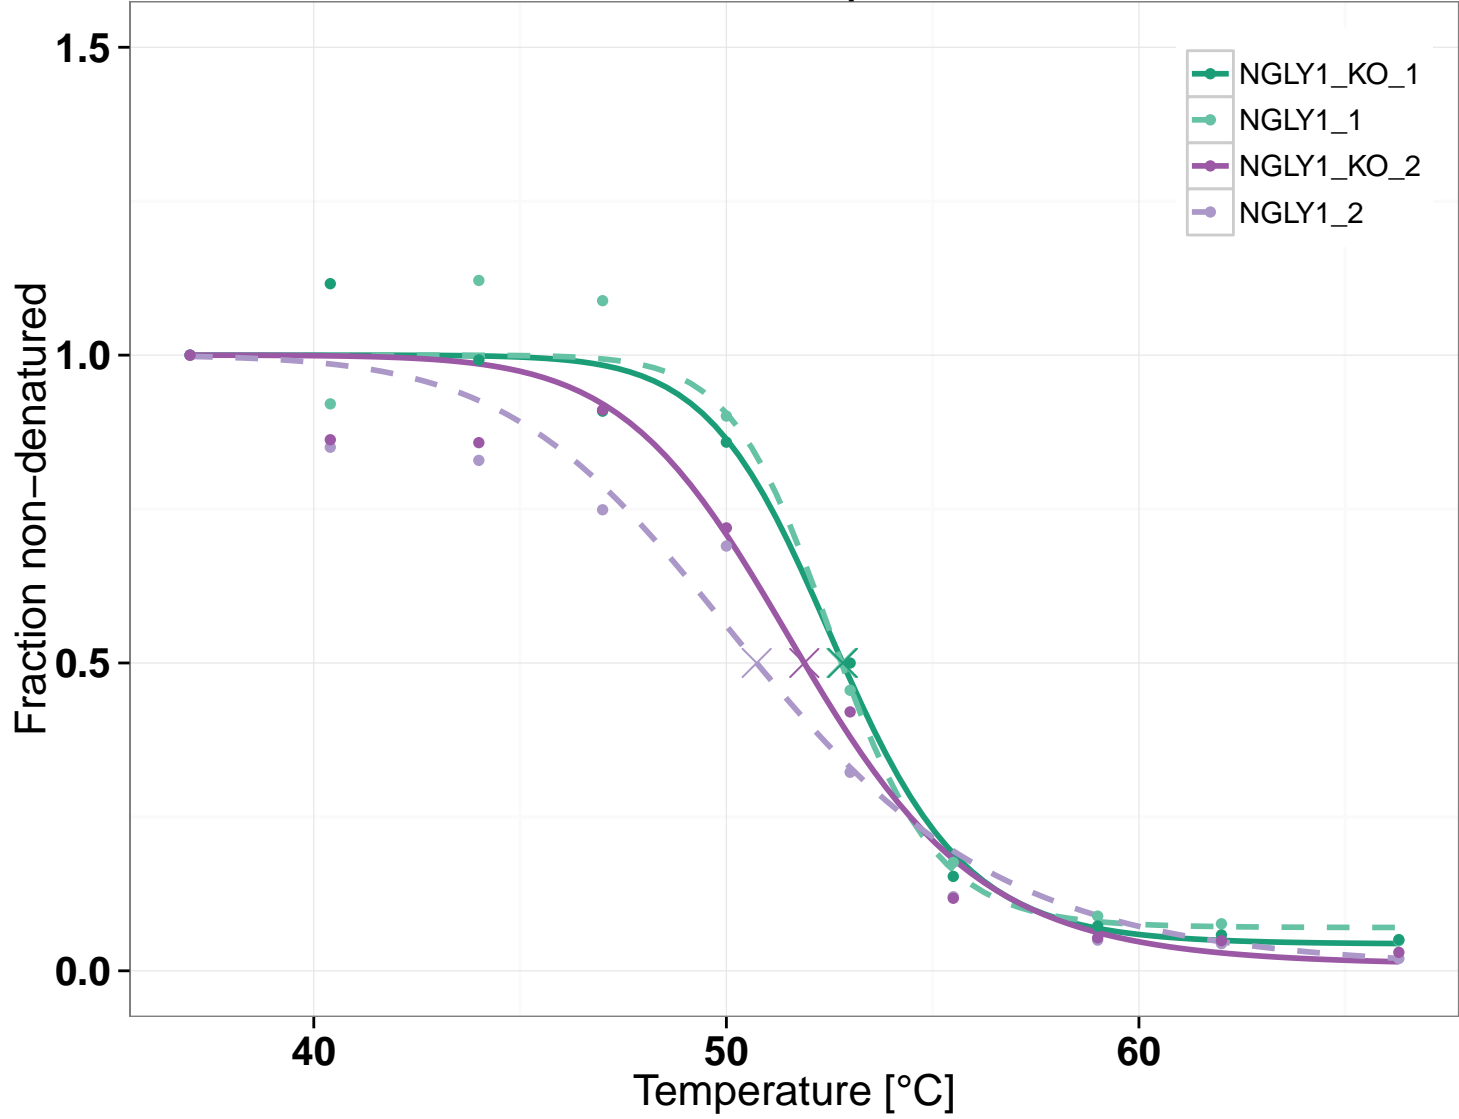

|            | meltPoint | slope  | plateau | R2   |
|------------|-----------|--------|---------|------|
| NGLY1_KO_1 | 52.82     | -0.15  | 0.04    | 0.99 |
| NGLY1_1    | 52.79     | -0.19  | 0.07    | 0.98 |
| NGLY1_KO_2 | 51.89     | -0.11  | 0.01    | 0.97 |
| NGLY1_2    | 50.73     | -0.083 | 0       | 0.96 |

Supplement: Supplementary file 7632 [file 1]

# IPI00016745.1|FPGS

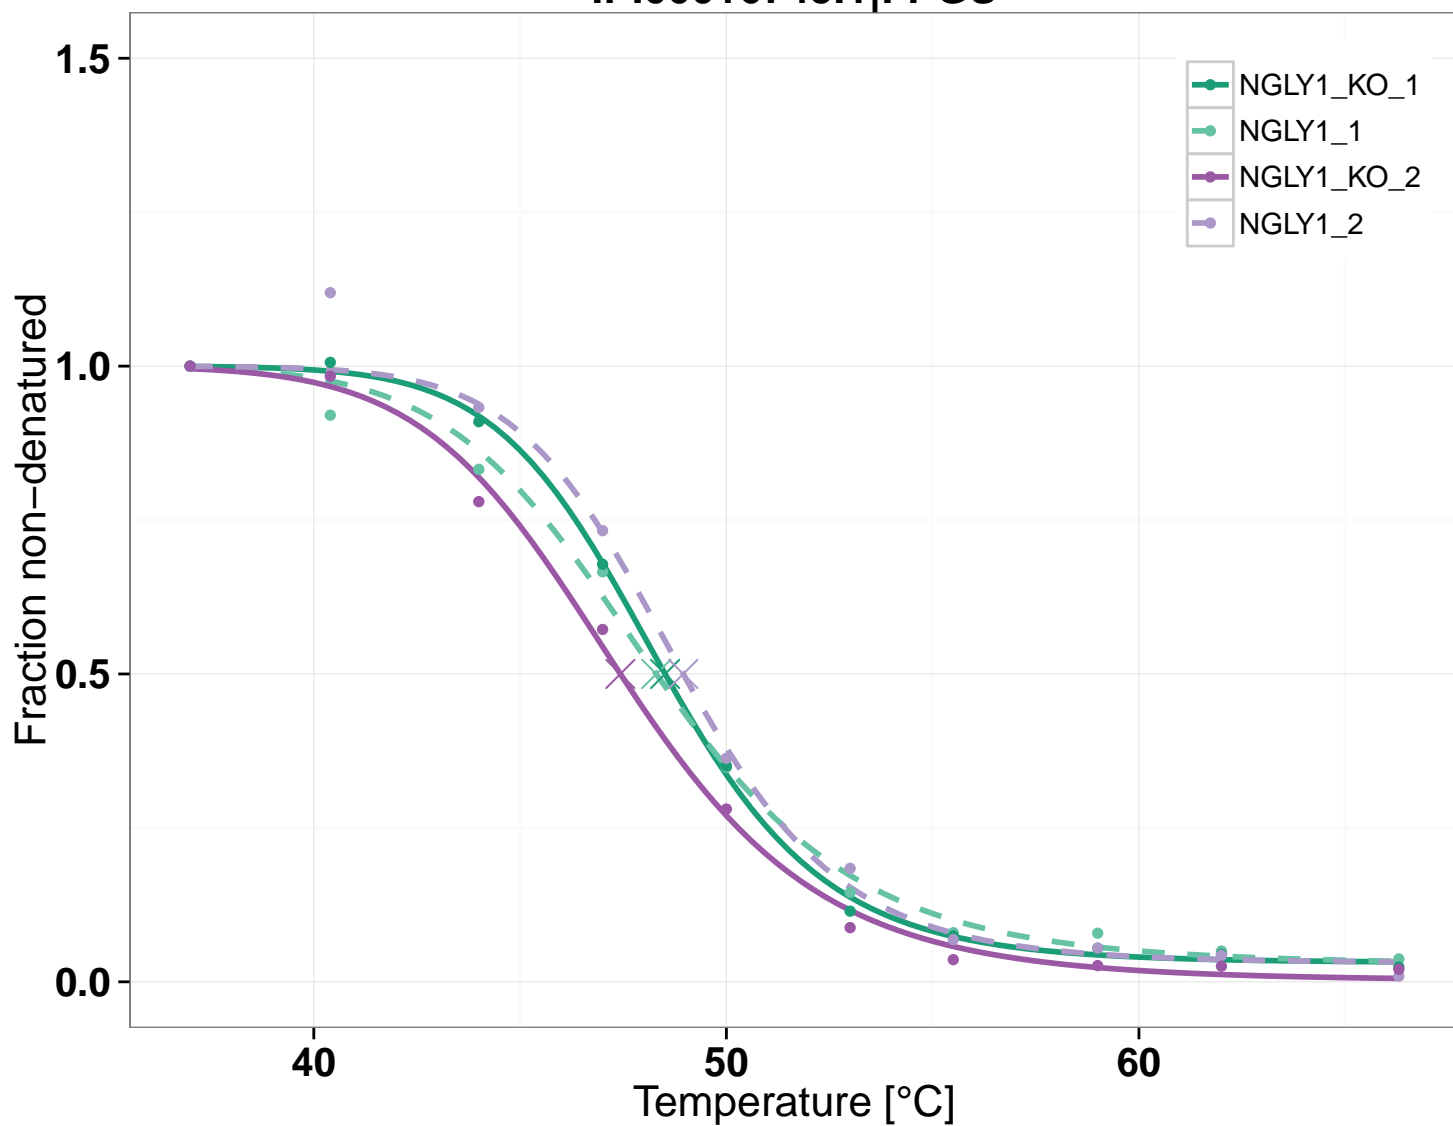

|            | meltPoint | slope  | plateau | R2   |
|------------|-----------|--------|---------|------|
| NGLY1_KO_1 | 48.51     | -0.12  | 0.03    | 1    |
| NGLY1_1    | 48.3      | -0.097 | 0.03    | 0.99 |
| NGLY1_KO_2 | 47.43     | -0.1   | 0       | 1    |
| NGLY1_2    | 48.96     | -0.12  | 0.03    | 0.99 |

Supplement: Supplementary file 7633 [file 1]
