# Supplementary material (part 77 of 85)
Source: publisher figshare collection journal article supplement (https://gsajournals.figshare.com/articles/dataset/_/12014913)

# IPI00013281.1|FKRP

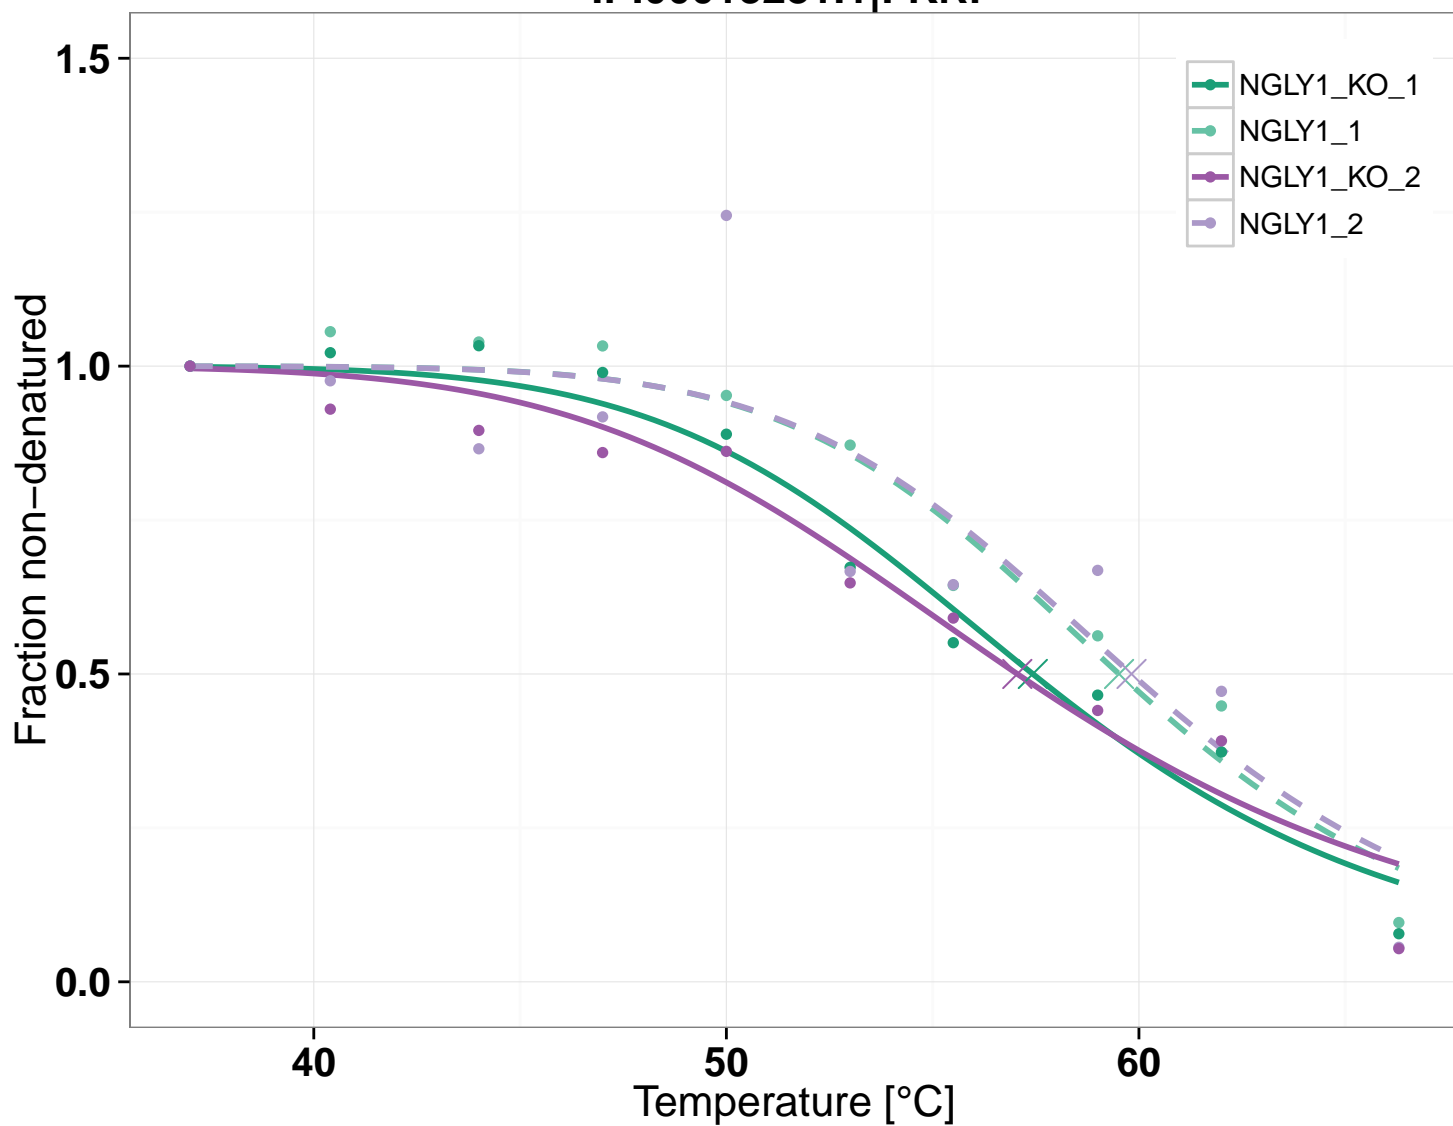

|            | meltPoint | slope  | plateau | R2   |
|------------|-----------|--------|---------|------|
| NGLY1_KO_1 | 57.43     | -0.055 | 0       | 0.97 |
| NGLY1_1    | 59.52     | -0.062 | 0       | 0.96 |
| NGLY1_KO_2 | 57.05     | -0.047 | 0       | 0.95 |
| NGLY1_2    | 59.82     | -0.06  | 0       | 0.79 |

Supplement: Supplementary file 7634 [file 1]

IPI00221106.5|SF3B2

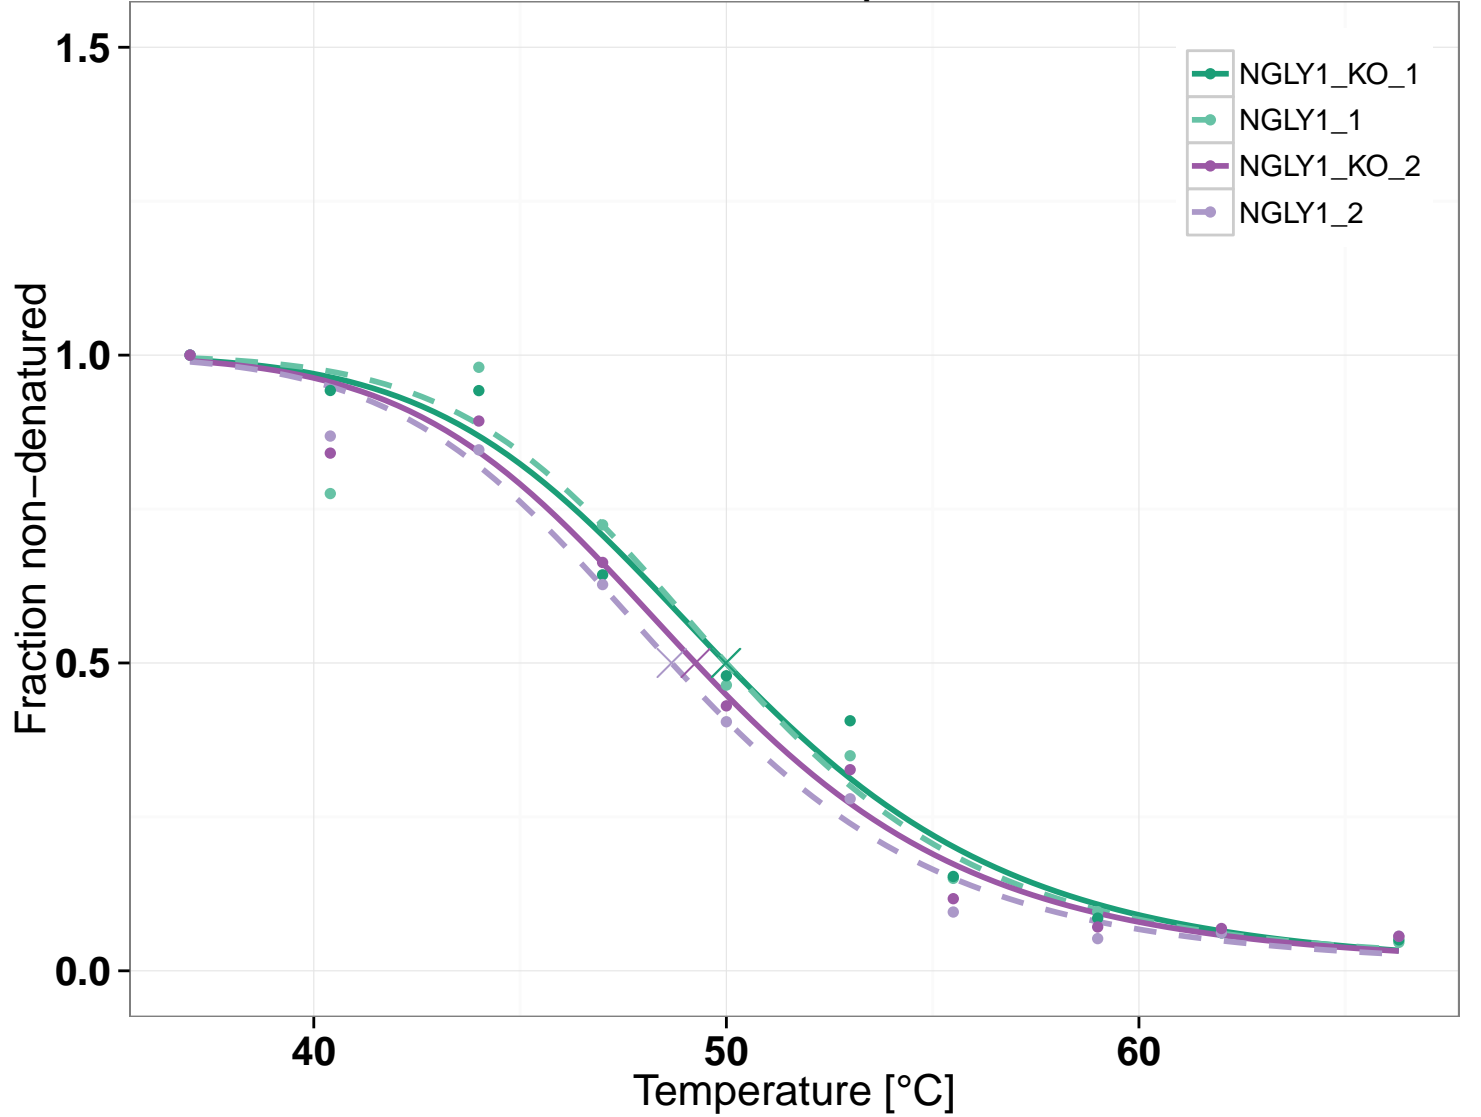

|            | meltPoint | slope  | plateau | R2   |
|------------|-----------|--------|---------|------|
| NGLY1_KO_1 | 49.99     | -0.071 | 0       | 0.98 |
| NGLY1_1    | 50        | -0.077 | 0.01    | 0.96 |
| NGLY1_KO_2 | 49.25     | -0.073 | 0.01    | 0.98 |
| NGLY1_2    | 48.67     | -0.075 | 0.01    | 0.99 |

Supplement: Supplementary file 7635 [file 1]

IPI00063666.3|TMEM101

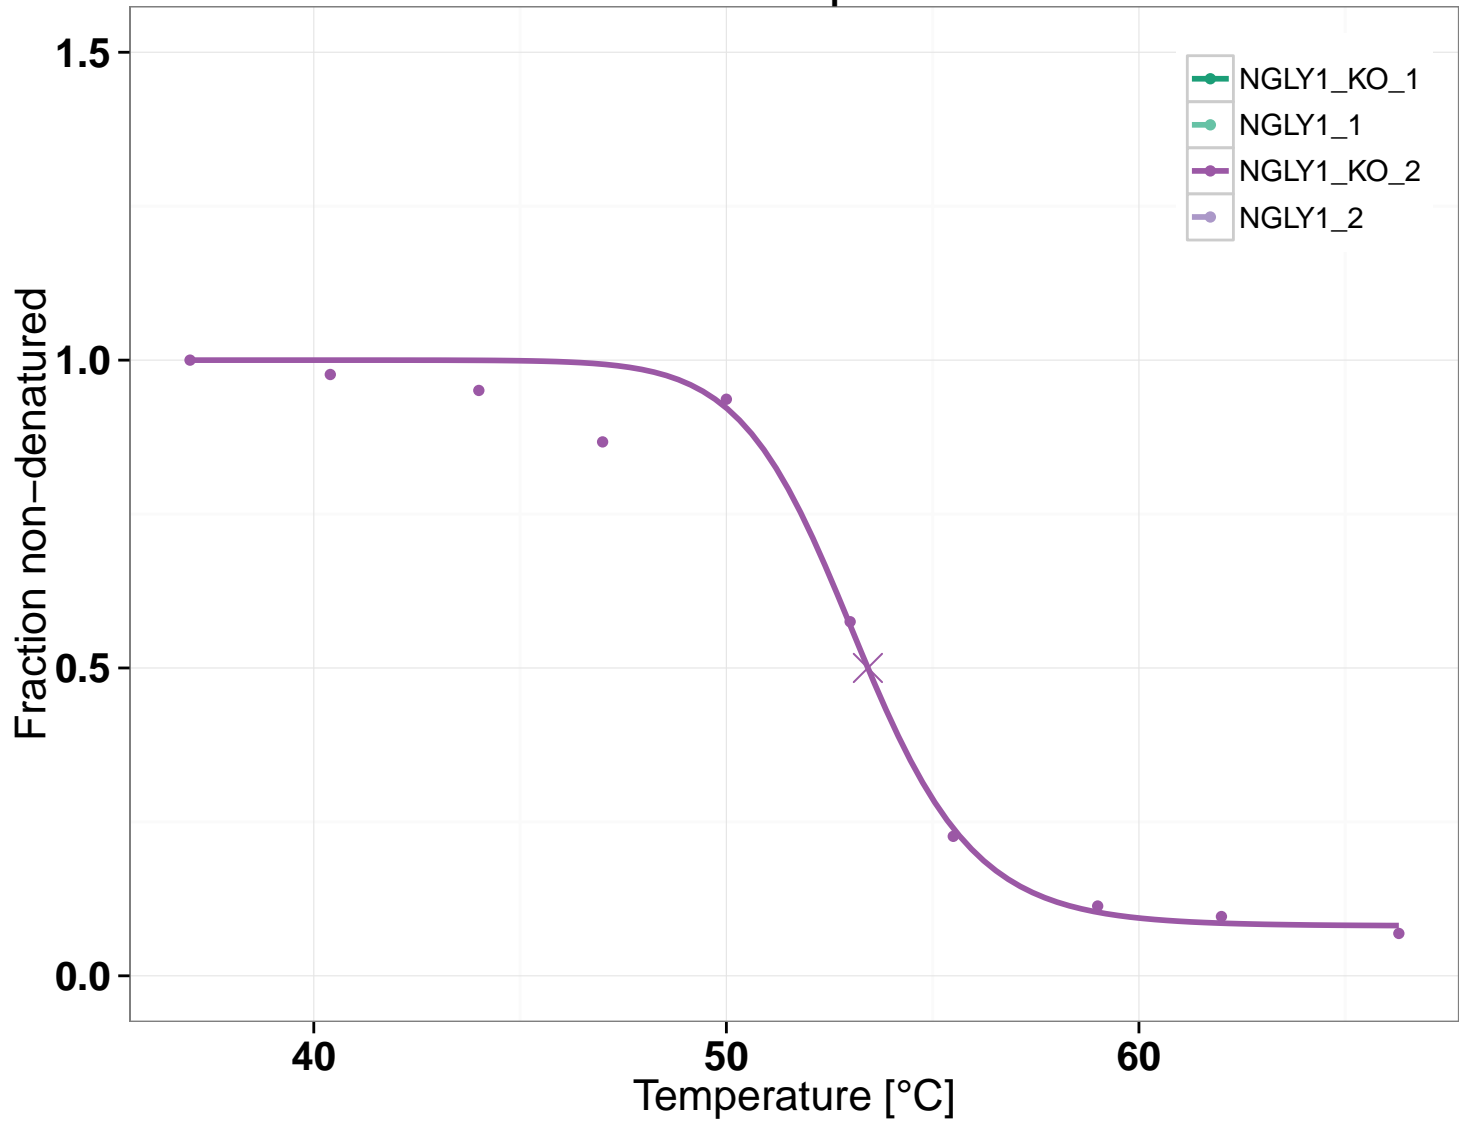

|            | meltPoint | slope | plateau | R2   |
|------------|-----------|-------|---------|------|
| NGLY1_KO_1 | —         | —     | —       | —    |
| NGLY1_1    | —         | —     | —       | —    |
| NGLY1_KO_2 | 53.43     | -0.16 | 0.08    | 0.99 |
| NGLY1_2    | —         | —     | —       | —    |

Supplement: Supplementary file 7636 [file 1]

IPI00303812.7|C9ORF82

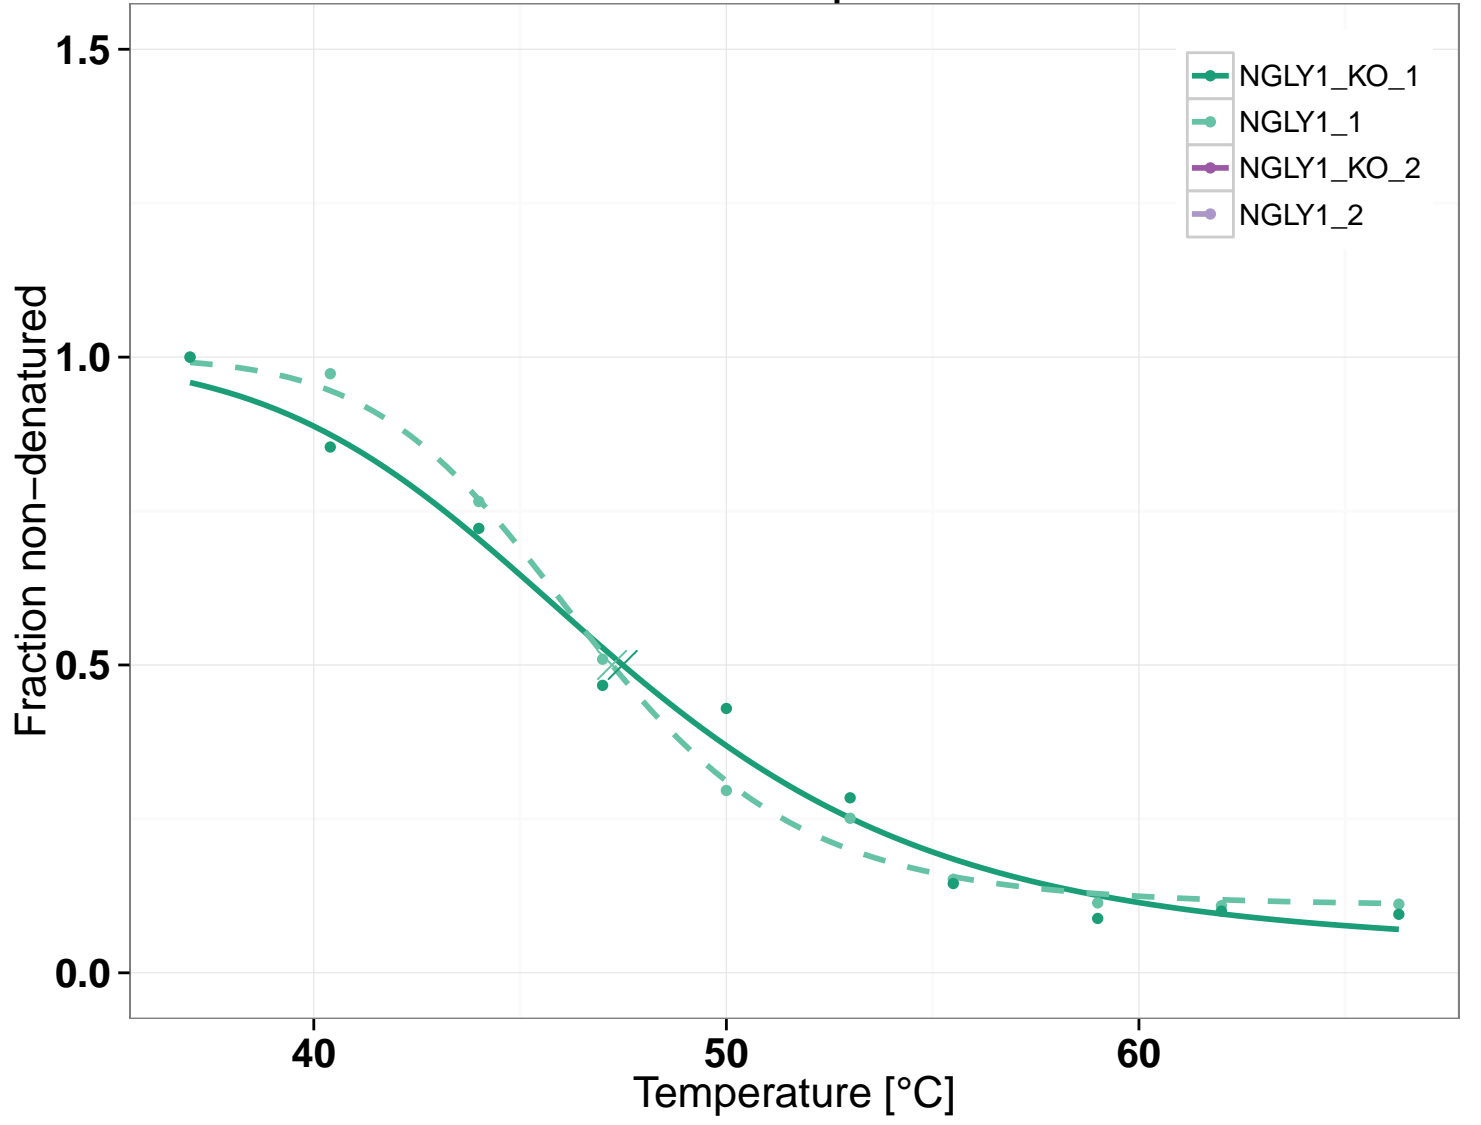

|            | meltPoint | slope  | plateau | R2   |
|------------|-----------|--------|---------|------|
| NGLY1_KO_1 | 47.49     | -0.06  | 0.03    | 0.99 |
| NGLY1_1    | 47.23     | -0.087 | 0.11    | 1    |
| NGLY1_KO_2 | -         | -      | -       | -    |
| NGLY1_2    | -         | -      | -       | -    |

Supplement: Supplementary file 7637 [file 1]

# IPI00853009.1|CUGBP1

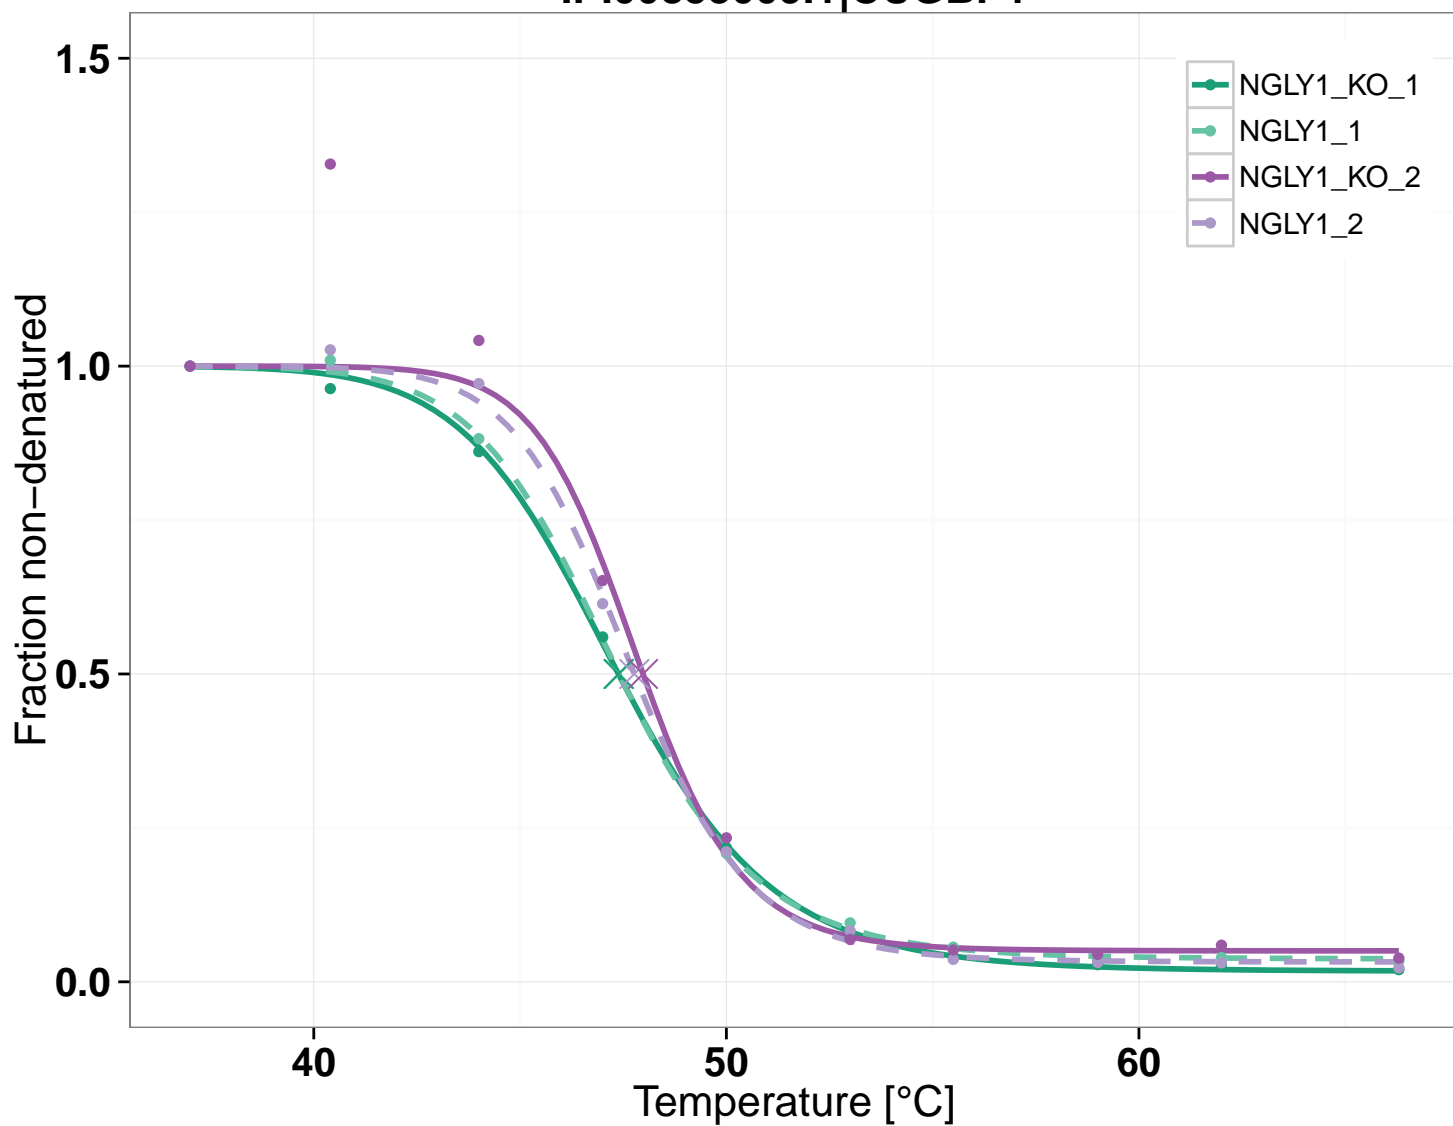

|            | meltPoint | slope | plateau | R2   |
|------------|-----------|-------|---------|------|
| NGLY1_KO_1 | 47.38     | -0.13 | 0.02    | 1    |
| NGLY1_1    | 47.41     | -0.14 | 0.04    | 1    |
| NGLY1_KO_2 | 47.98     | -0.19 | 0.05    | 0.95 |
| NGLY1_2    | 47.77     | -0.17 | 0.03    | 1    |

Supplement: Supplementary file 7638 [file 1]

IPI00102962.2|CNPY4

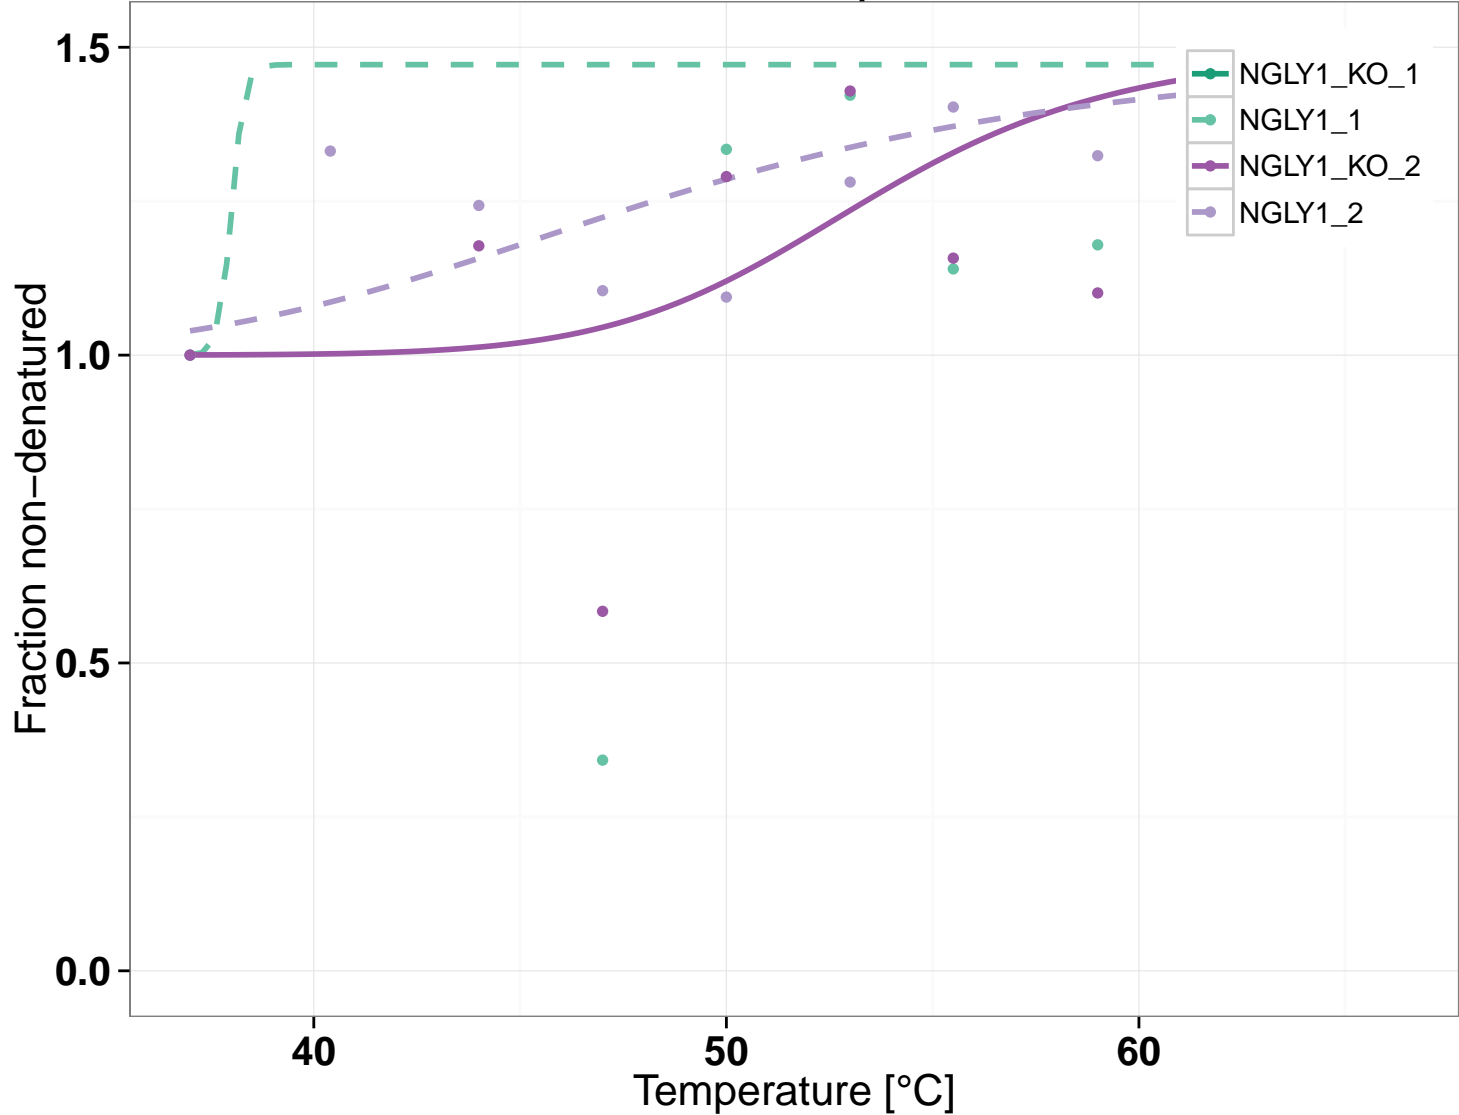

|            | meltPoint | slope | plateau | R2   |
|------------|-----------|-------|---------|------|
| NGLY1_KO_1 | -         | -     | -       | -    |
| NGLY1_1    | -         | 0.78  | 1.47    | 0.04 |
| NGLY1_KO_2 | -         | 0.04  | 1.5     | 0.09 |
| NGLY1_2    | -         | 0.022 | 1.5     | 0.48 |

Supplement: Supplementary file 7639 [file 1]

# IPI00744230.2|MGAT4B

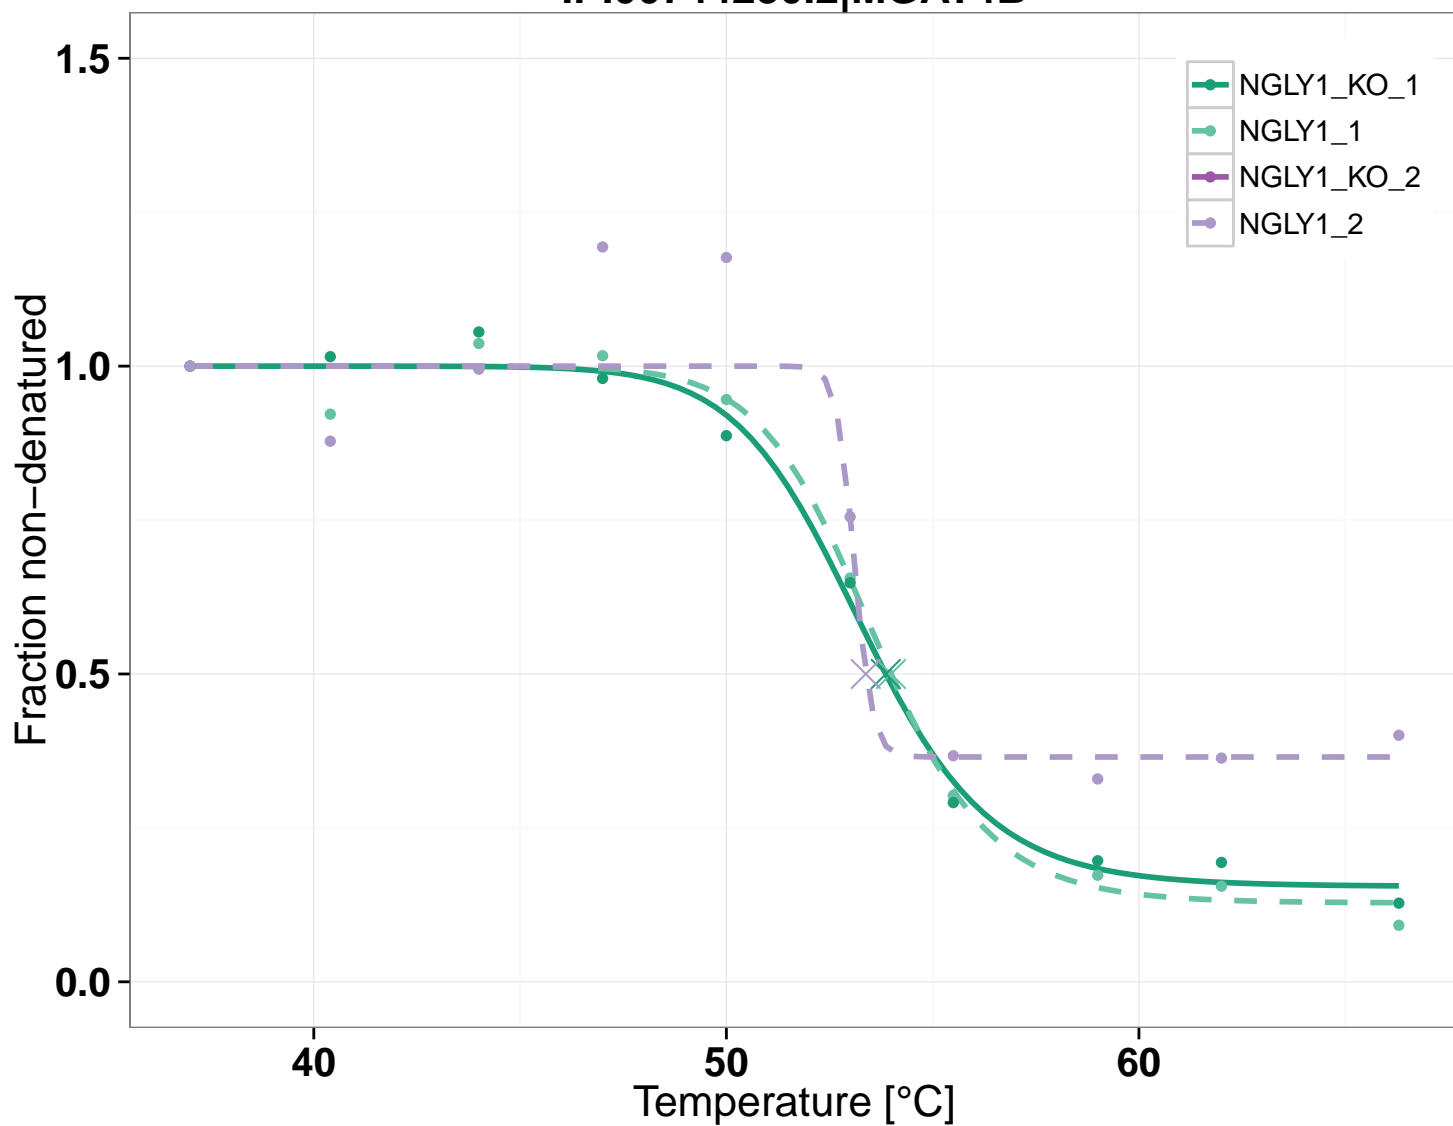

|            | meltPoint | slope | plateau | R2   |
|------------|-----------|-------|---------|------|
| NGLY1_KO_1 | 53.87     | -0.14 | 0.15    | 0.99 |
| NGLY1_1    | 53.99     | -0.16 | 0.13    | 0.99 |
| NGLY1_KO_2 | -         | -     | -       | -    |
| NGLY1_2    | 53.38     | -0.75 | 0.37    | 0.92 |

Supplement: Supplementary file 7640 [file 1]

IPI00140201.4|COG8

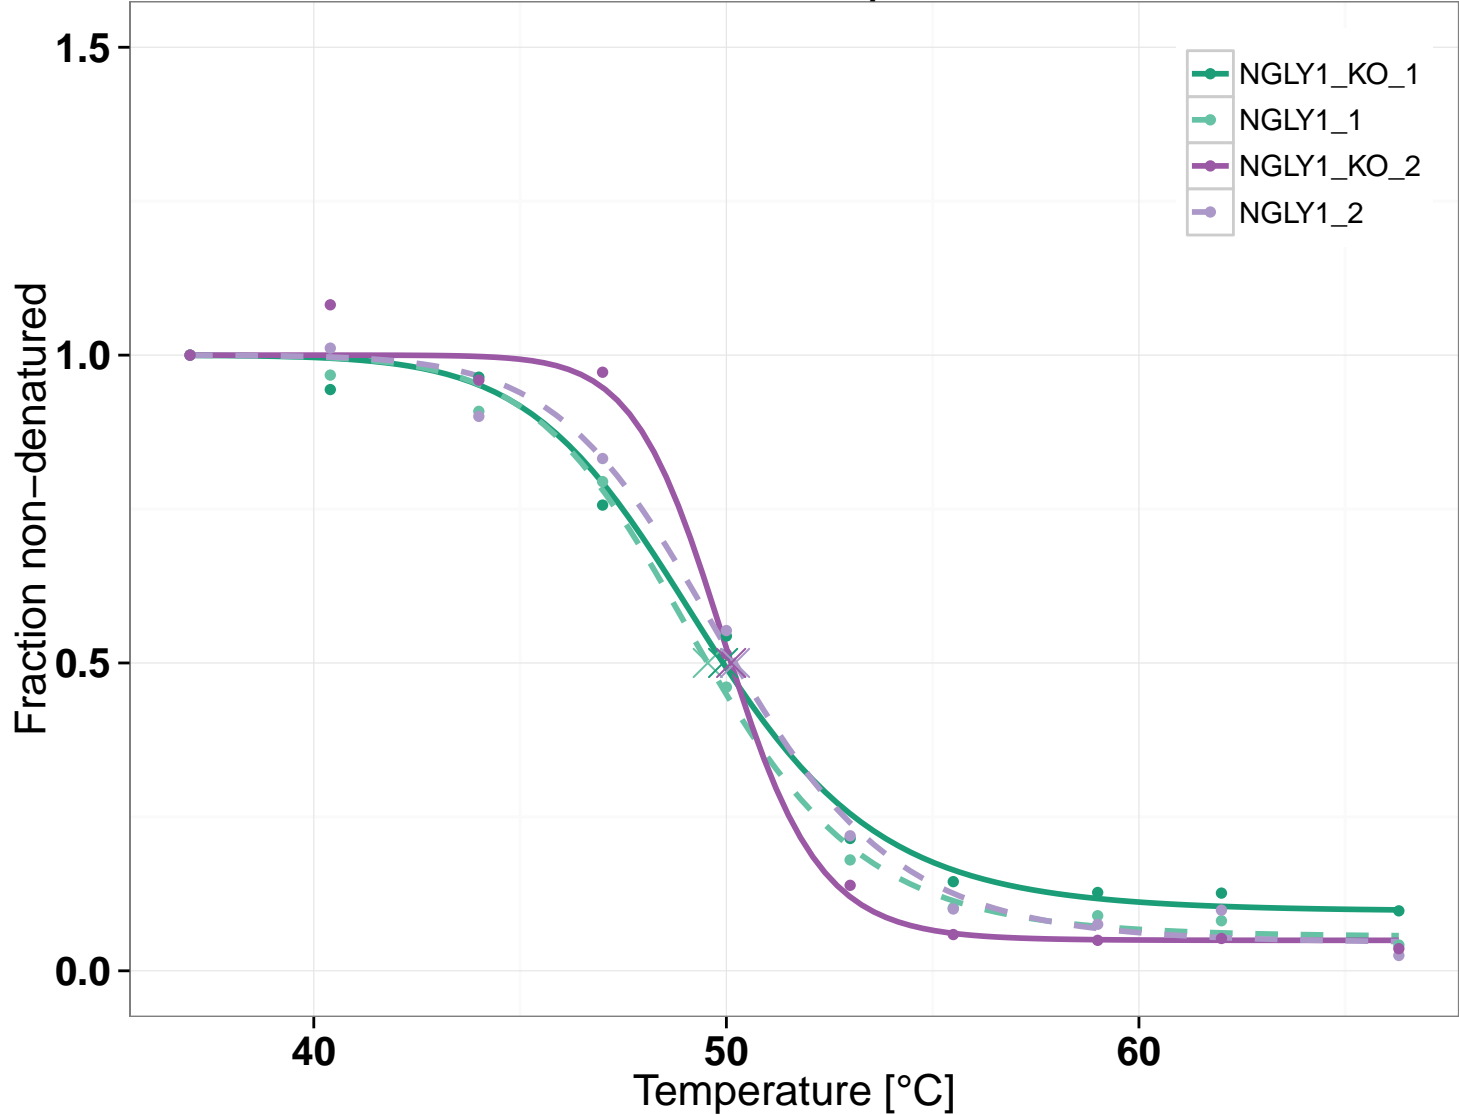

|            | meltPoint | slope | plateau | R2   |
|------------|-----------|-------|---------|------|
| NGLY1_KO_1 | 49.92     | -0.11 | 0.1     | 0.99 |
| NGLY1_1    | 49.55     | -0.12 | 0.06    | 1    |
| NGLY1_KO_2 | 50.12     | -0.21 | 0.05    | 1    |
| NGLY1_2    | 50.21     | -0.12 | 0.05    | 0.99 |

Supplement: Supplementary file 7641 [file 1]

# IPI00007853.1||FI30

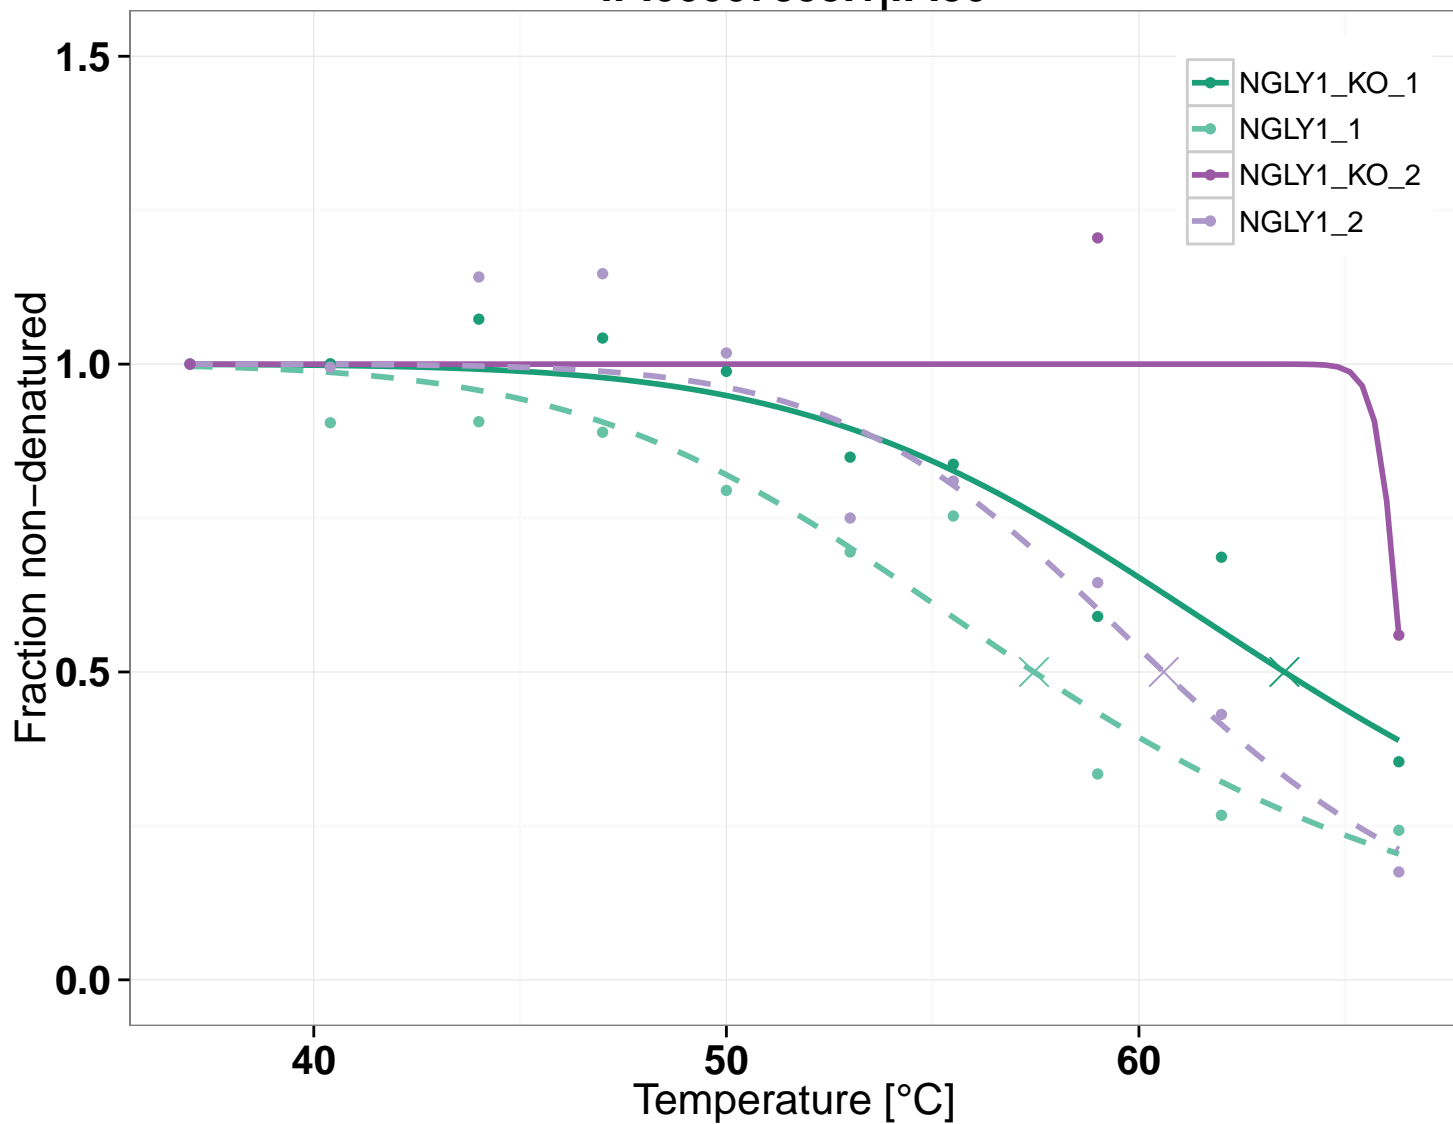

|            | meltPoint | slope  | plateau | R2    |
|------------|-----------|--------|---------|-------|
| NGLY1_KO_1 | 63.53     | -0.044 | 0       | 0.92  |
| NGLY1_1    | 57.46     | -0.046 | 0       | 0.93  |
| NGLY1_KO_2 | -         | -      | 0       | -1.25 |
| NGLY1_2    | 60.6      | -0.064 | 0       | 0.92  |

Supplement: Supplementary file 7642 [file 1]

IPI00843759.2|YTHDF1

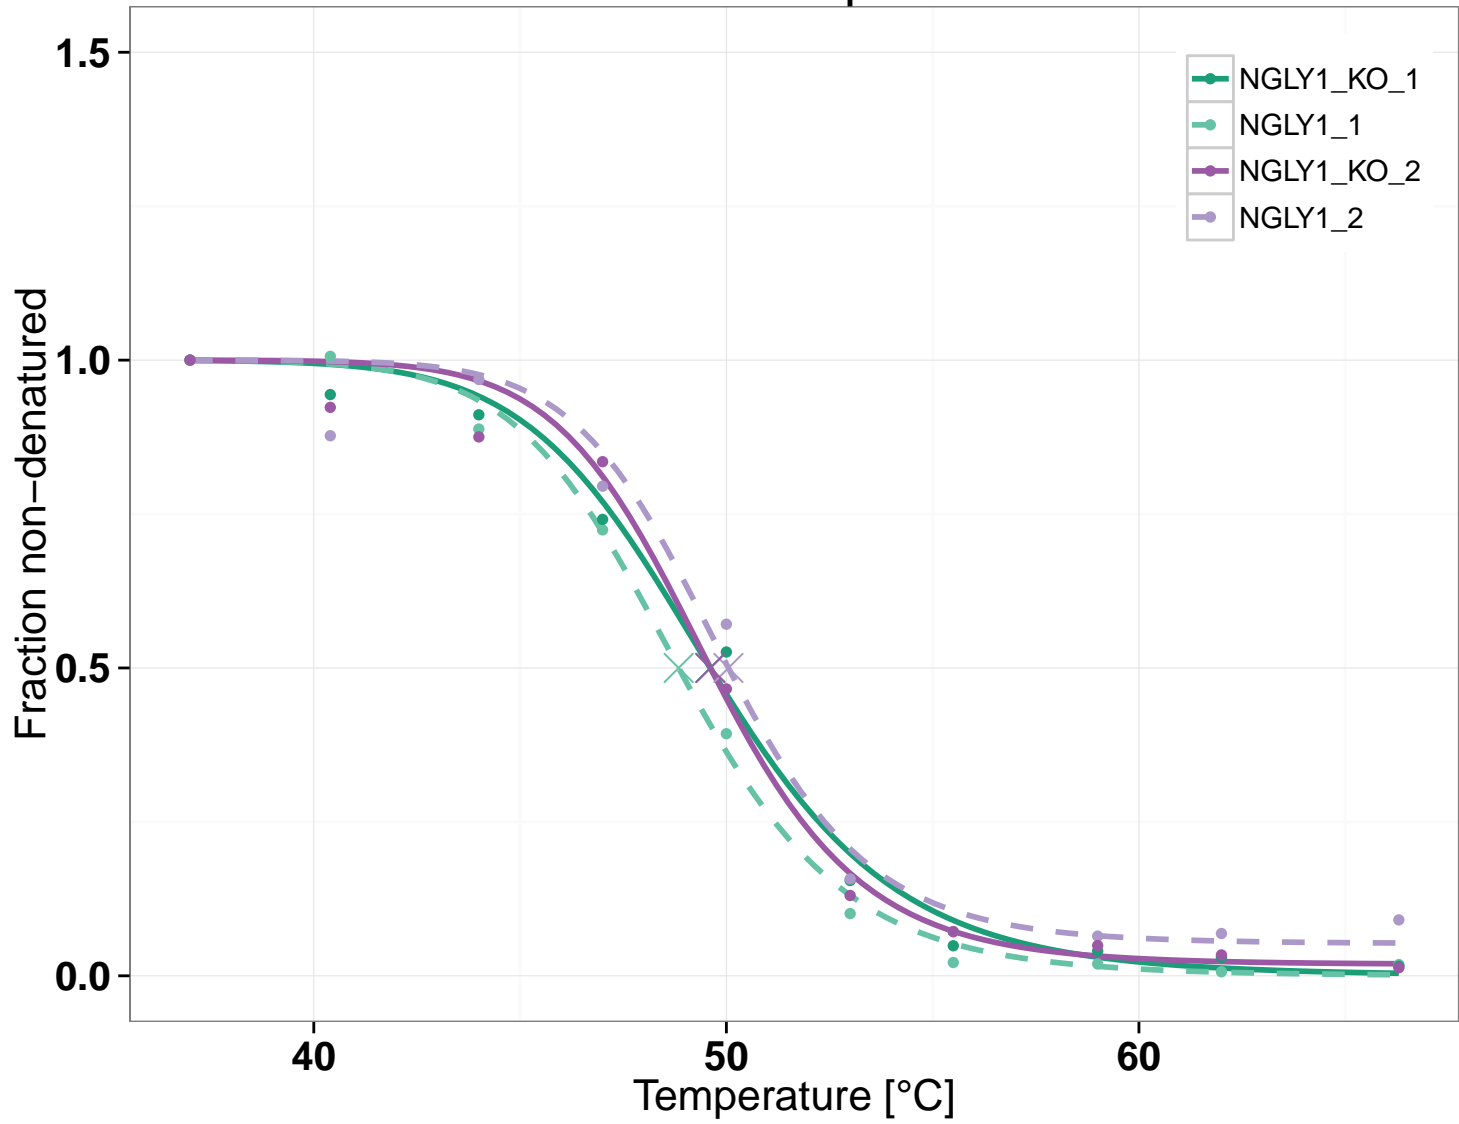

|            | meltPoint | slope | plateau | R2   |
|------------|-----------|-------|---------|------|
| NGLY1_KO_1 | 49.61     | -0.11 | 0       | 0.99 |
| NGLY1_1    | 48.84     | -0.12 | 0       | 1    |
| NGLY1_KO_2 | 49.62     | -0.13 | 0.02    | 0.99 |
| NGLY1_2    | 50.05     | -0.13 | 0.05    | 0.98 |

Supplement: Supplementary file 7643 [file 1]

IPI00289034.3|DOT1L

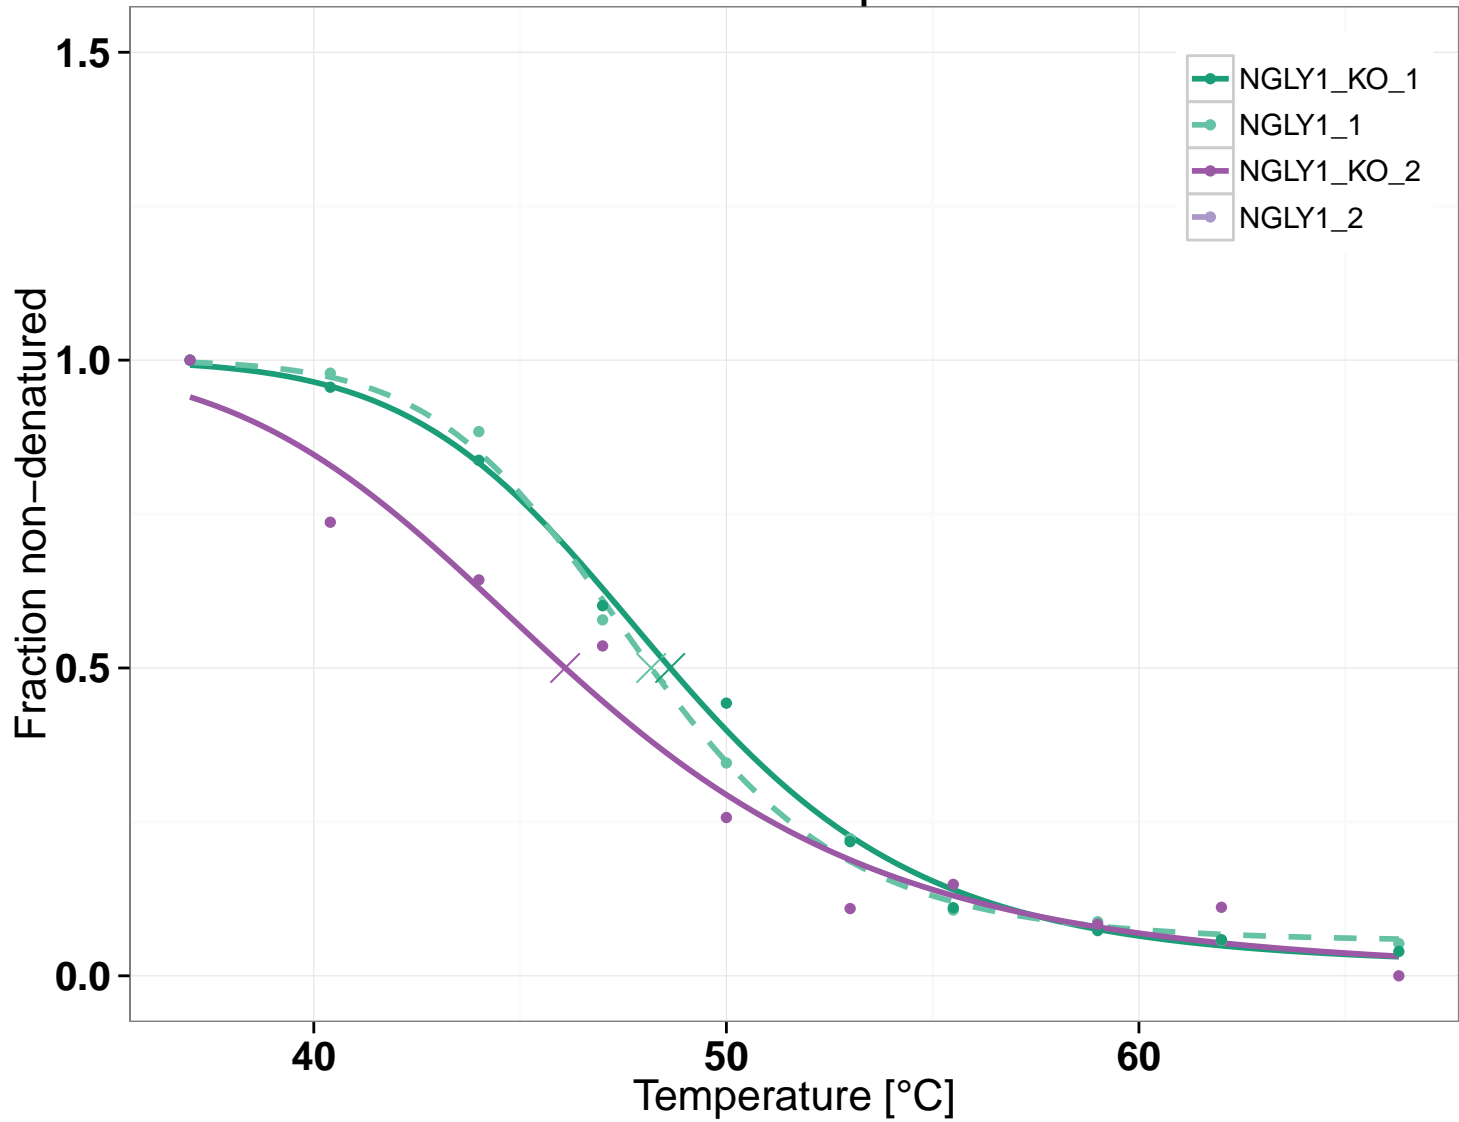

|            | meltPoint | slope  | plateau | R2   |
|------------|-----------|--------|---------|------|
| NGLY1_KO_1 | 48.64     | -0.079 | 0.02    | 1    |
| NGLY1_1    | 48.18     | -0.094 | 0.05    | 1    |
| NGLY1_KO_2 | 46.09     | -0.063 | 0       | 0.97 |
| NGLY1_2    | -         | -      | -       | -    |

Supplement: Supplementary file 7644 [file 1]

IPI00006298.1|PPIG

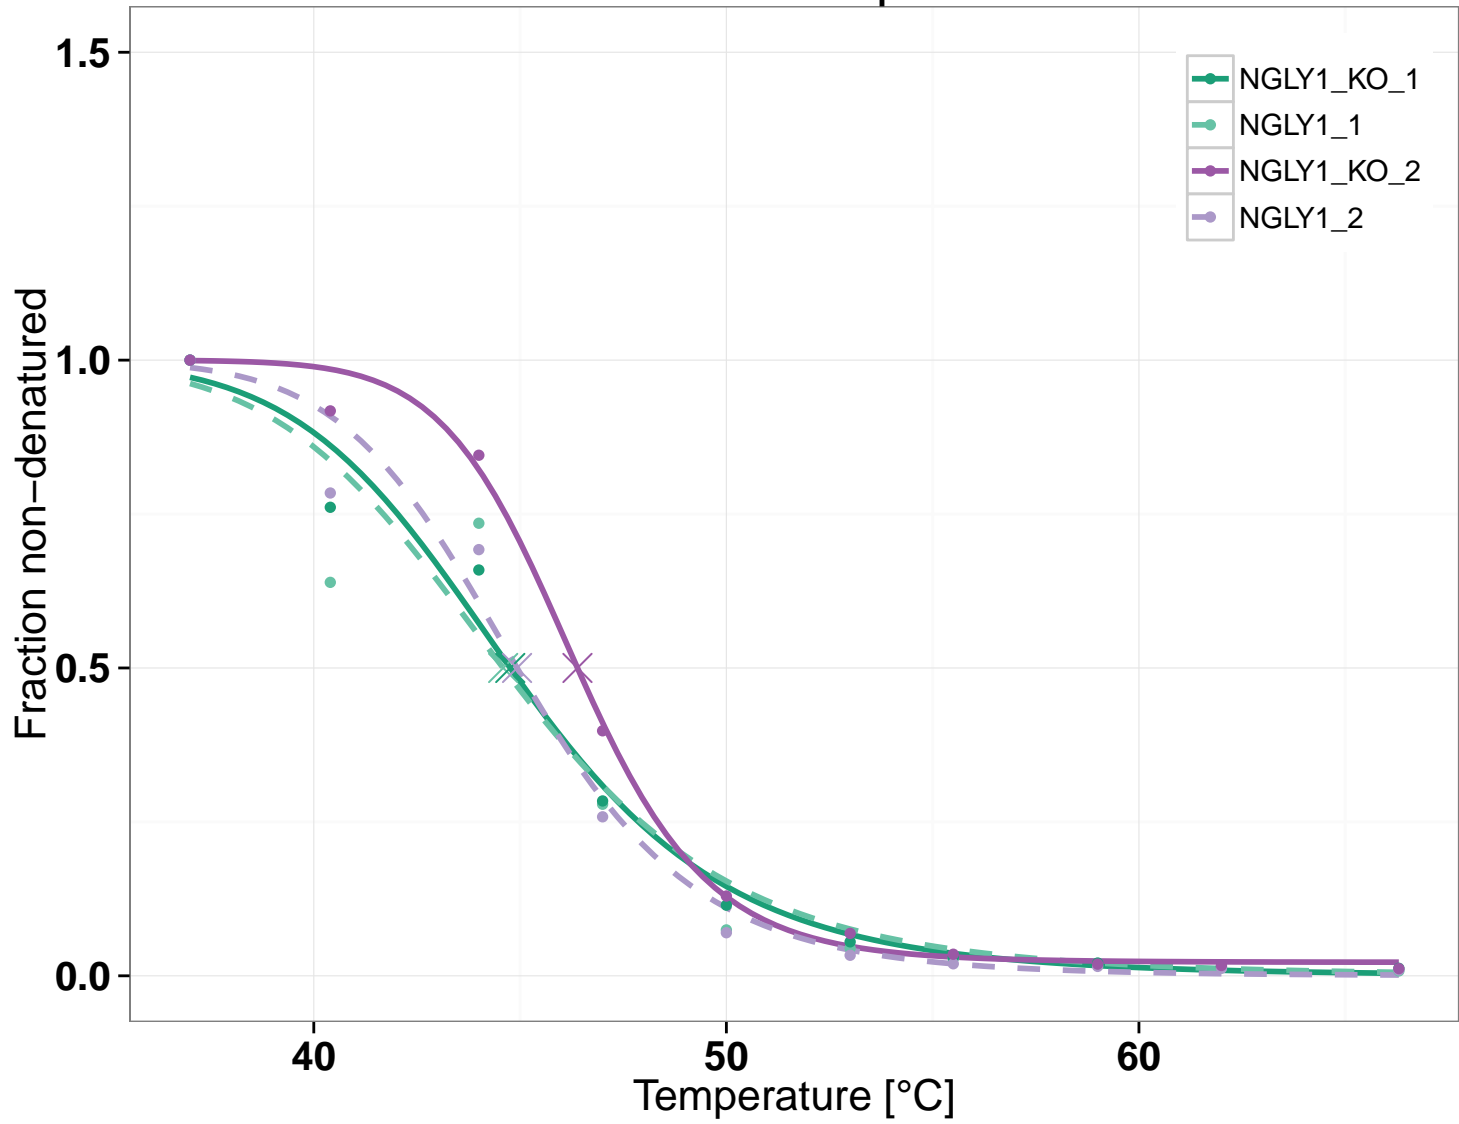

|            | meltPoint | slope  | plateau | R2   |
|------------|-----------|--------|---------|------|
| NGLY1_KO_1 | 44.76     | -0.096 | 0       | 0.98 |
| NGLY1_1    | 44.59     | -0.09  | 0       | 0.93 |
| NGLY1_KO_2 | 46.39     | -0.15  | 0.02    | 1    |
| NGLY1_2    | 44.93     | -0.12  | 0       | 0.98 |

Supplement: Supplementary file 7645 [file 1]

IPI00021250.3|DAPK1

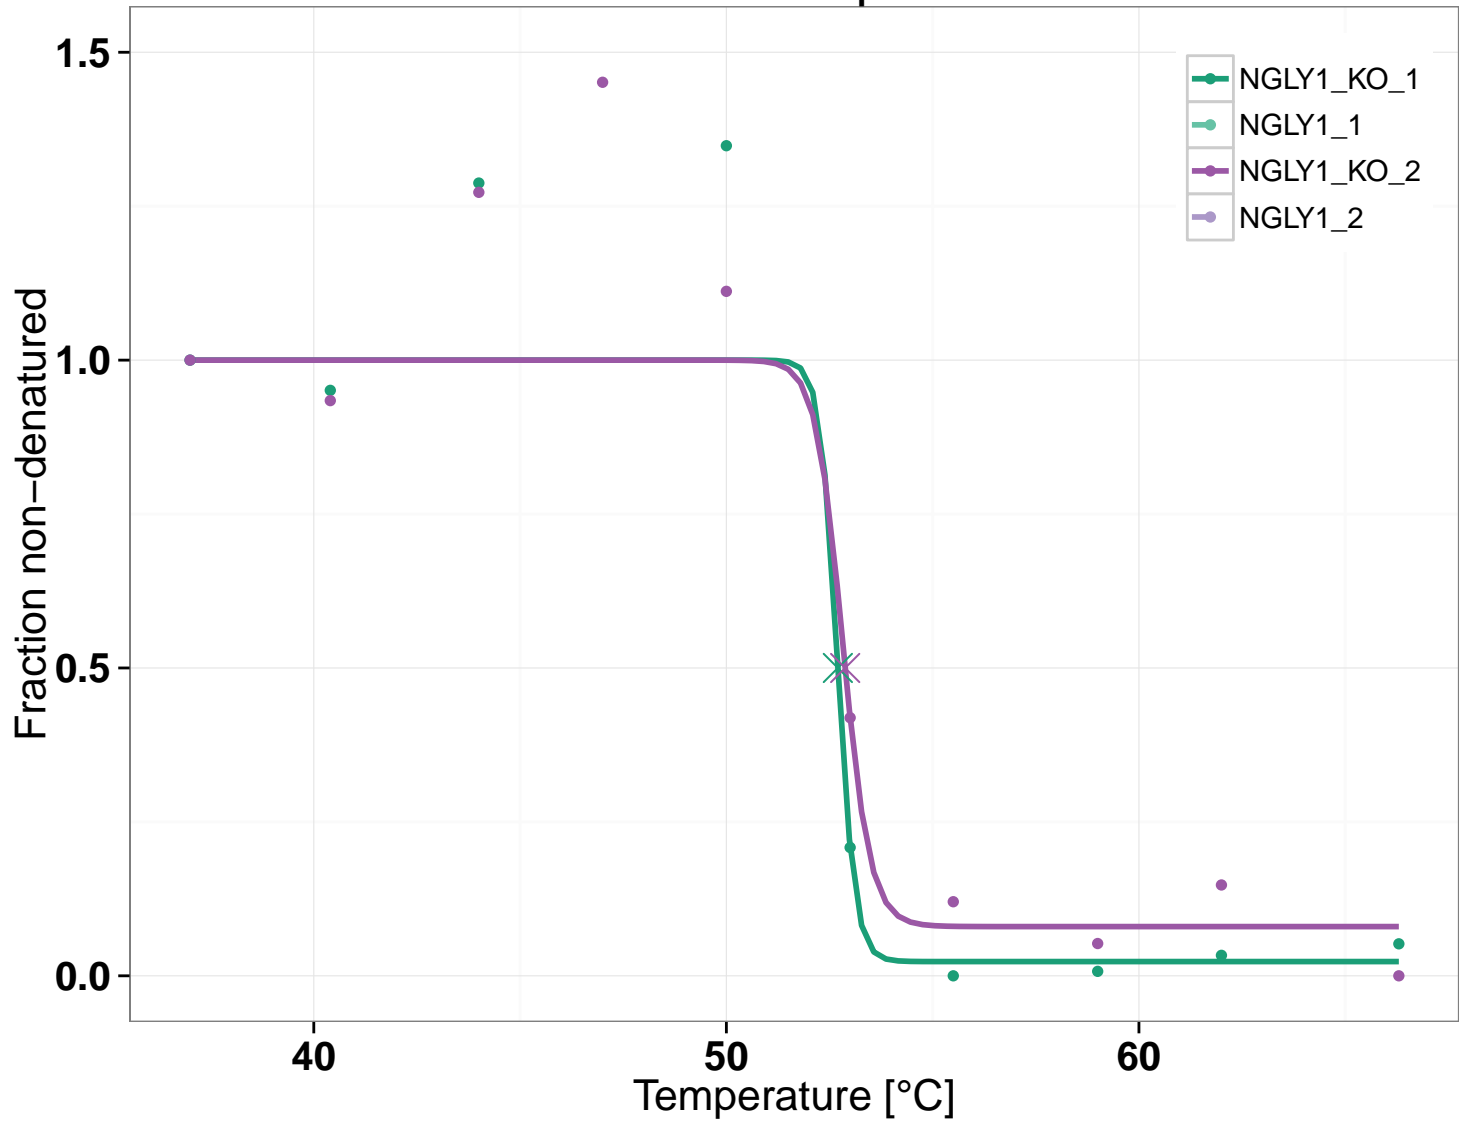

|            | meltPoint | slope | plateau | R2   |
|------------|-----------|-------|---------|------|
| NGLY1_KO_1 | 52.7      | -1.2  | 0.02    | 0.87 |
| NGLY1_1    | -         | -     | -       | -    |
| NGLY1_KO_2 | 52.88     | -0.7  | 0.08    | 0.89 |
| NGLY1_2    | -         | -     | -       | -    |

Supplement: Supplementary file 7646 [file 1]

# IPI00894143.1|BAT2

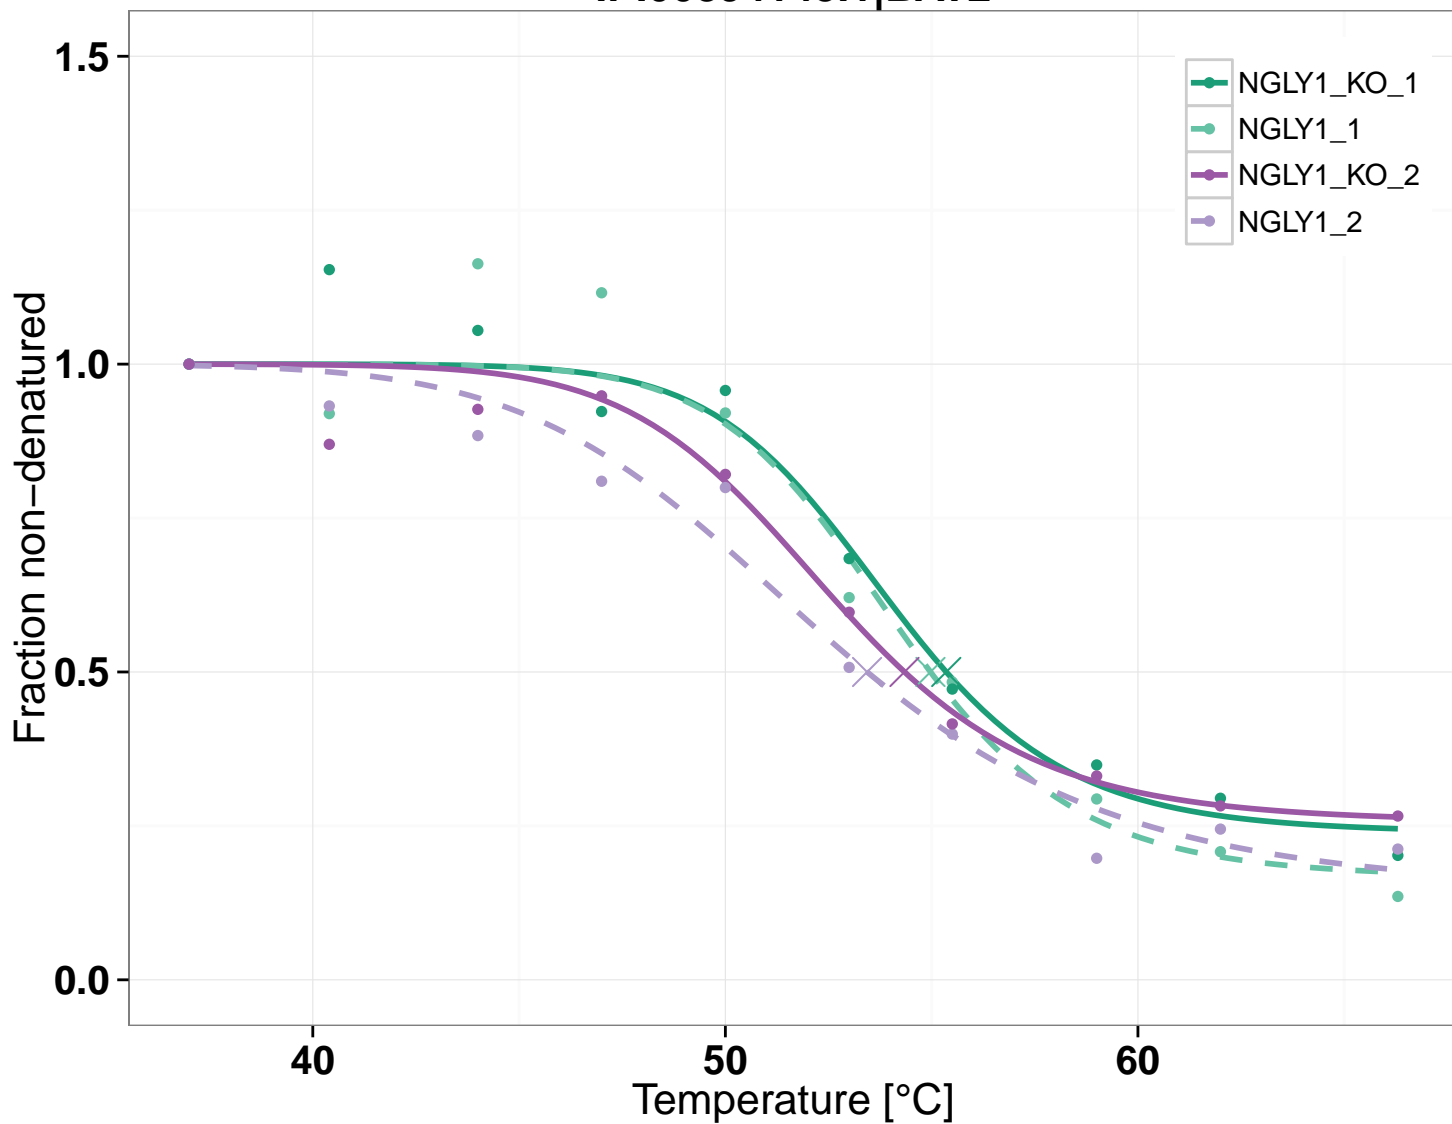

|            | meltPoint | slope  | plateau | R2   |
|------------|-----------|--------|---------|------|
| NGLY1_KO_1 | 55.35     | -0.089 | 0.24    | 0.97 |
| NGLY1_1    | 54.97     | -0.096 | 0.17    | 0.96 |
| NGLY1_KO_2 | 54.34     | -0.076 | 0.26    | 0.97 |
| NGLY1_2    | 53.44     | -0.06  | 0.14    | 0.97 |

Supplement: Supplementary file 7647 [file 1]

IPI00045496.1|USP28

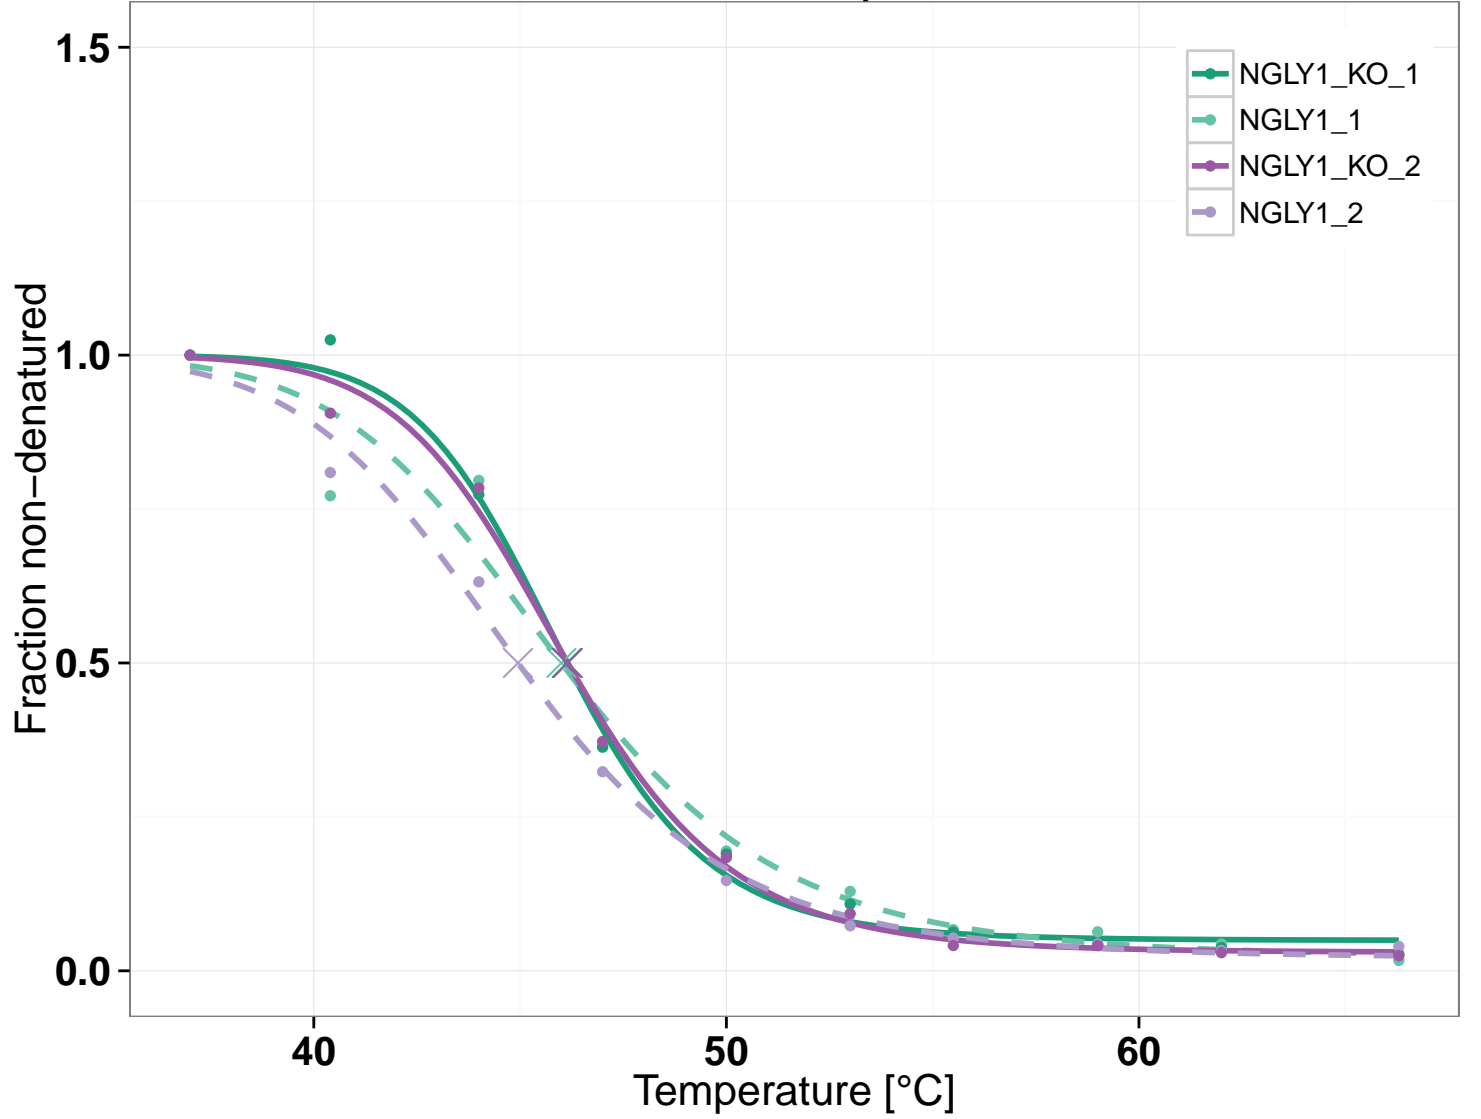

|            | meltPoint | slope  | plateau | R2   |
|------------|-----------|--------|---------|------|
| NGLY1_KO_1 | 46.14     | -0.13  | 0.05    | 1    |
| NGLY1_1    | 46        | -0.091 | 0.02    | 0.97 |
| NGLY1_KO_2 | 46.16     | -0.12  | 0.03    | 1    |
| NGLY1_2    | 44.95     | -0.094 | 0.02    | 0.99 |

Supplement: Supplementary file 7648 [file 1]

# IPI00873341.1|PTPRG

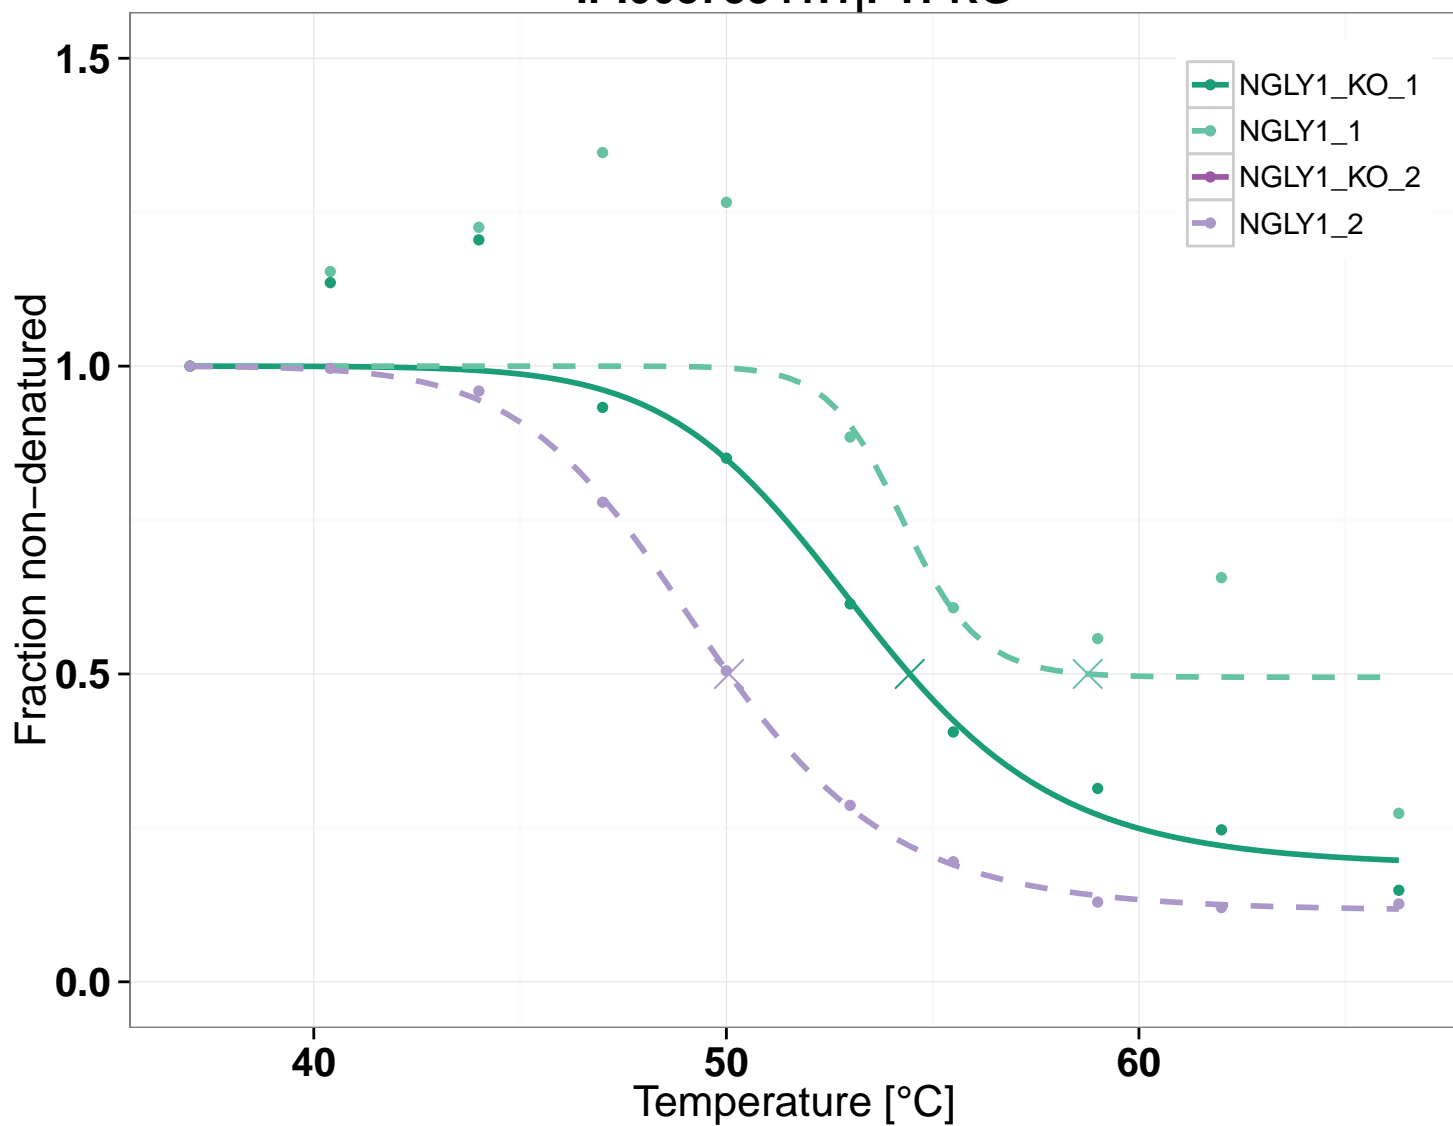

|            | meltPoint | slope  | plateau | R2   |
|------------|-----------|--------|---------|------|
| NGLY1_KO_1 | 54.44     | -0.086 | 0.19    | 0.95 |
| NGLY1_1    | 58.76     | -0.14  | 0.49    | 0.7  |
| NGLY1_KO_2 | —         | —      | —       | —    |
| NGLY1_2    | 50.06     | -0.099 | 0.11    | 1    |

Supplement: Supplementary file 7649 [file 1]

IPI00792984.1|ARPP-19

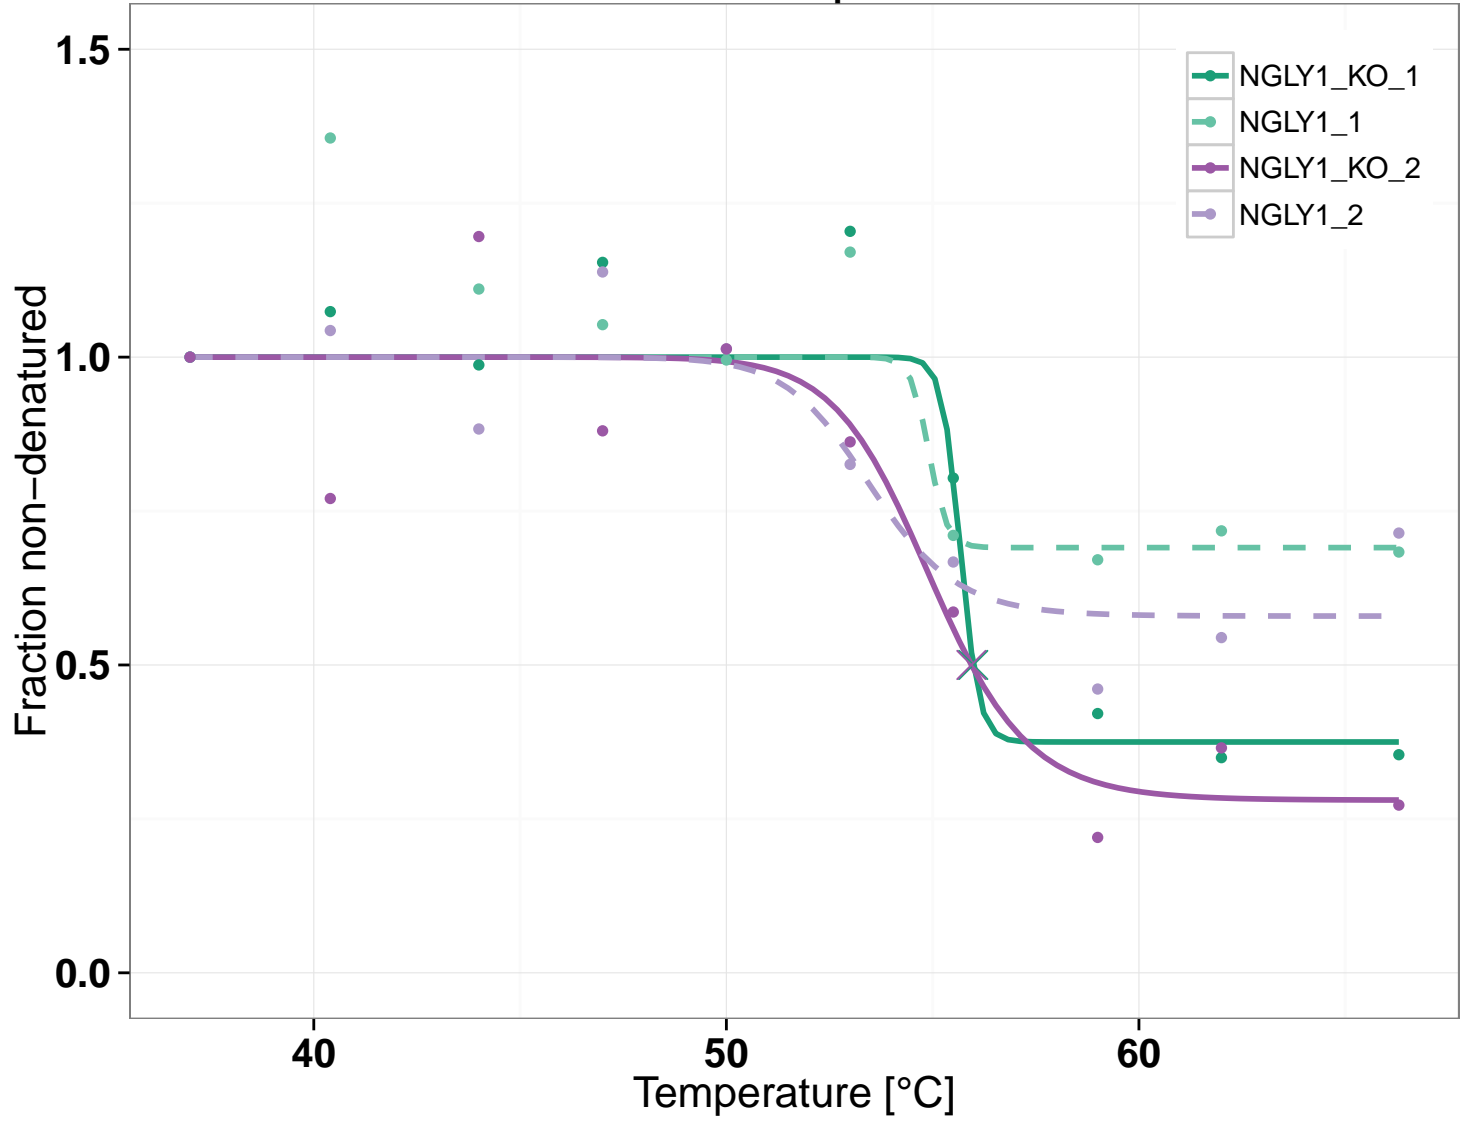

|            | meltPoint | slope | plateau | R2   |
|------------|-----------|-------|---------|------|
| NGLY1_KO_1 | 55.98     | -0.7  | 0.37    | 0.74 |
| NGLY1_1    | -         | -0.35 | 0.69    | 0.67 |
| NGLY1_KO_2 | 55.94     | -0.15 | 0.28    | 0.88 |
| NGLY1_2    | -         | -0.1  | 0.58    | 0.85 |

Supplement: Supplementary file 7650 [file 1]

# IPI00103517.1|ATRIP

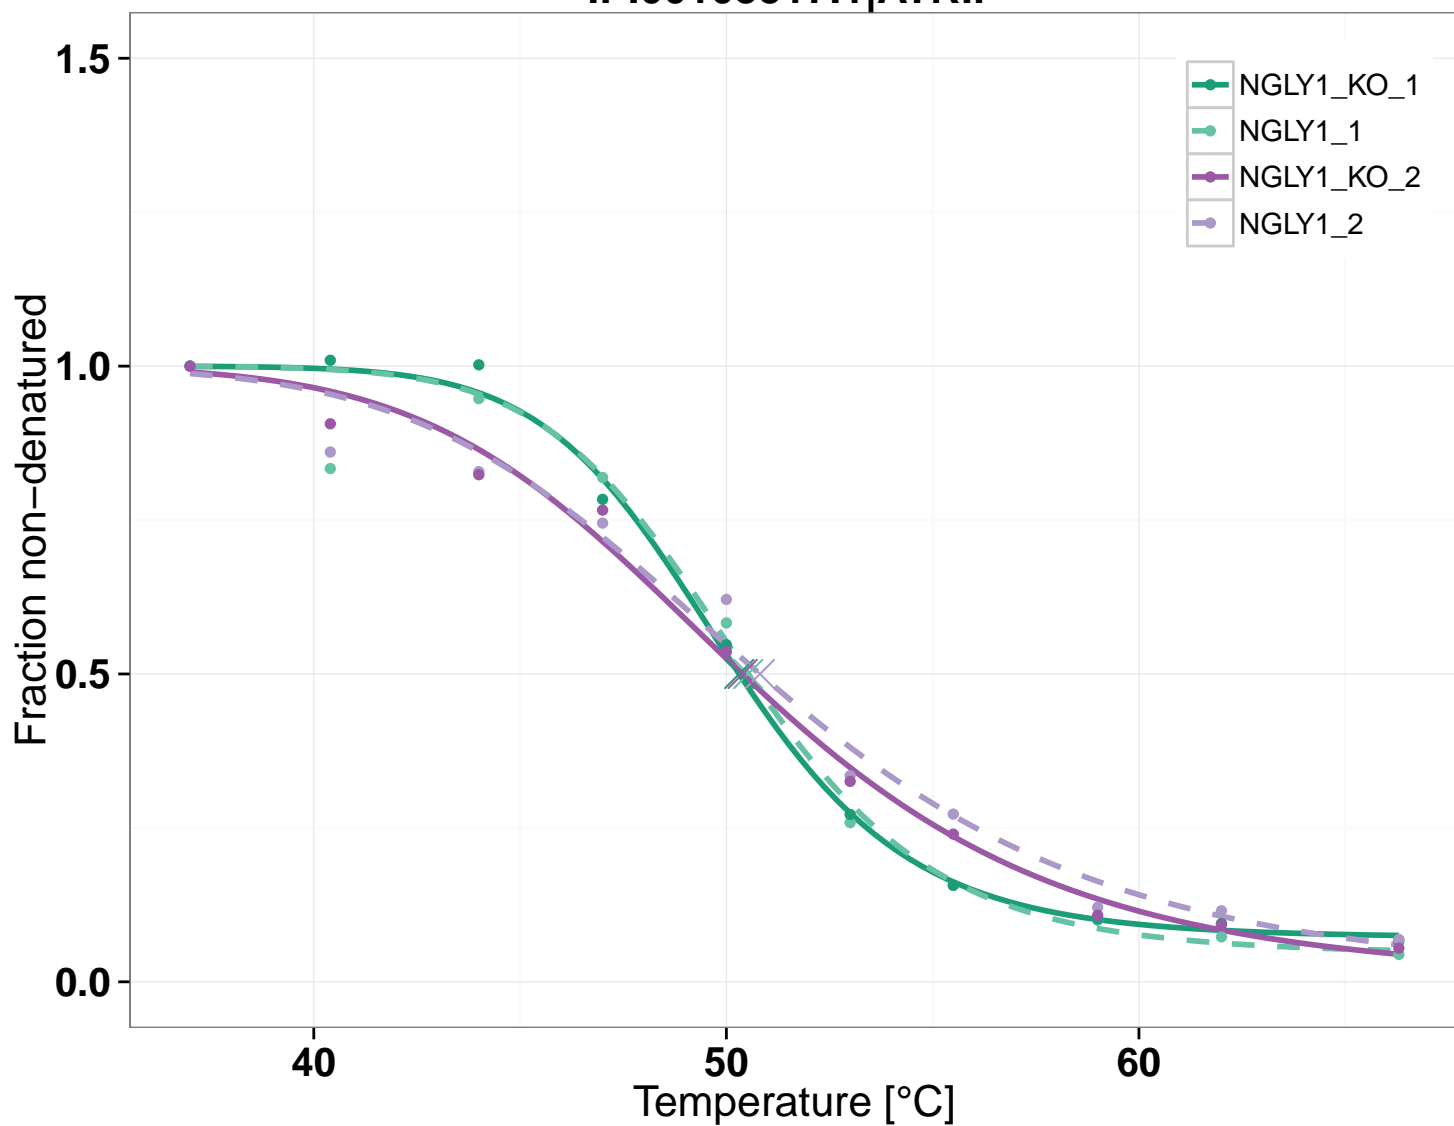

|            | meltPoint | slope  | plateau | R2   |
|------------|-----------|--------|---------|------|
| NGLY1_KO_1 | 50.31     | -0.1   | 0.07    | 1    |
| NGLY1_1    | 50.53     | -0.1   | 0.04    | 0.98 |
| NGLY1_KO_2 | 50.39     | -0.065 | 0       | 0.99 |
| NGLY1_2    | 50.81     | -0.06  | 0       | 0.98 |

Supplement: Supplementary file 7651 [file 1]

# IPI00386189.2|NARG1

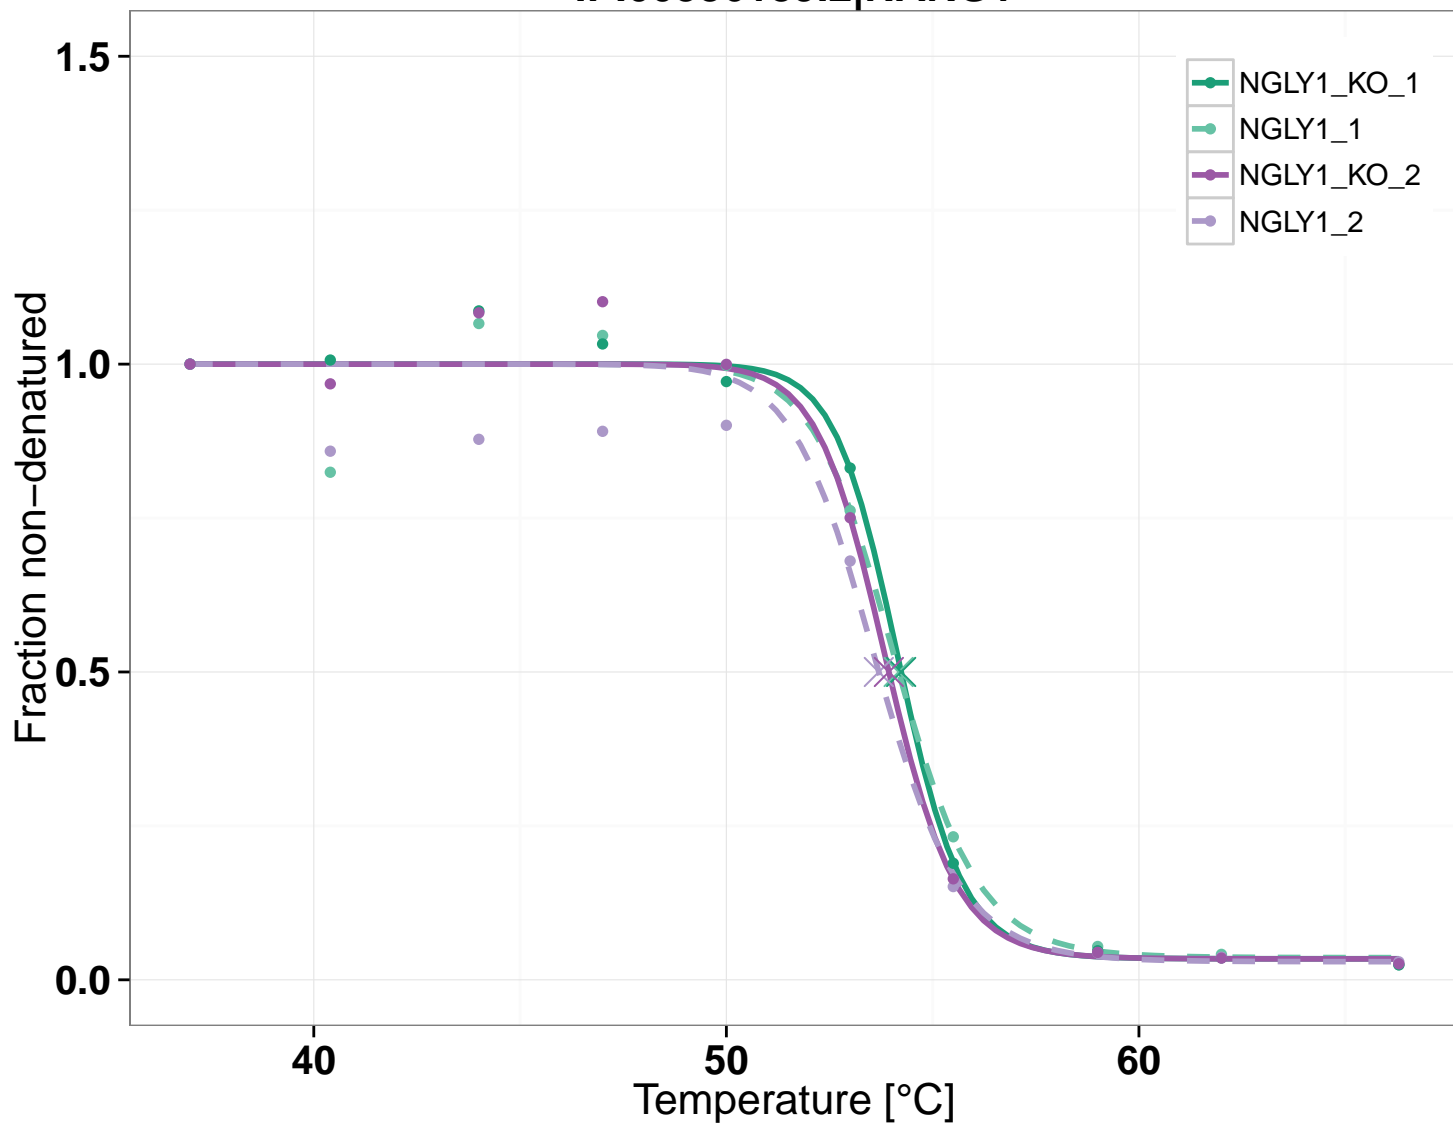

|            | meltPoint | slope | plateau | R2   |
|------------|-----------|-------|---------|------|
| NGLY1_KO_1 | 54.24     | -0.31 | 0.03    | 1    |
| NGLY1_1    | 54.18     | -0.24 | 0.04    | 0.98 |
| NGLY1_KO_2 | 53.94     | -0.29 | 0.03    | 0.99 |
| NGLY1_2    | 53.7      | -0.24 | 0.03    | 0.97 |

Supplement: Supplementary file 7652 [file 1]

# IPI00550181.2|CHMP2B

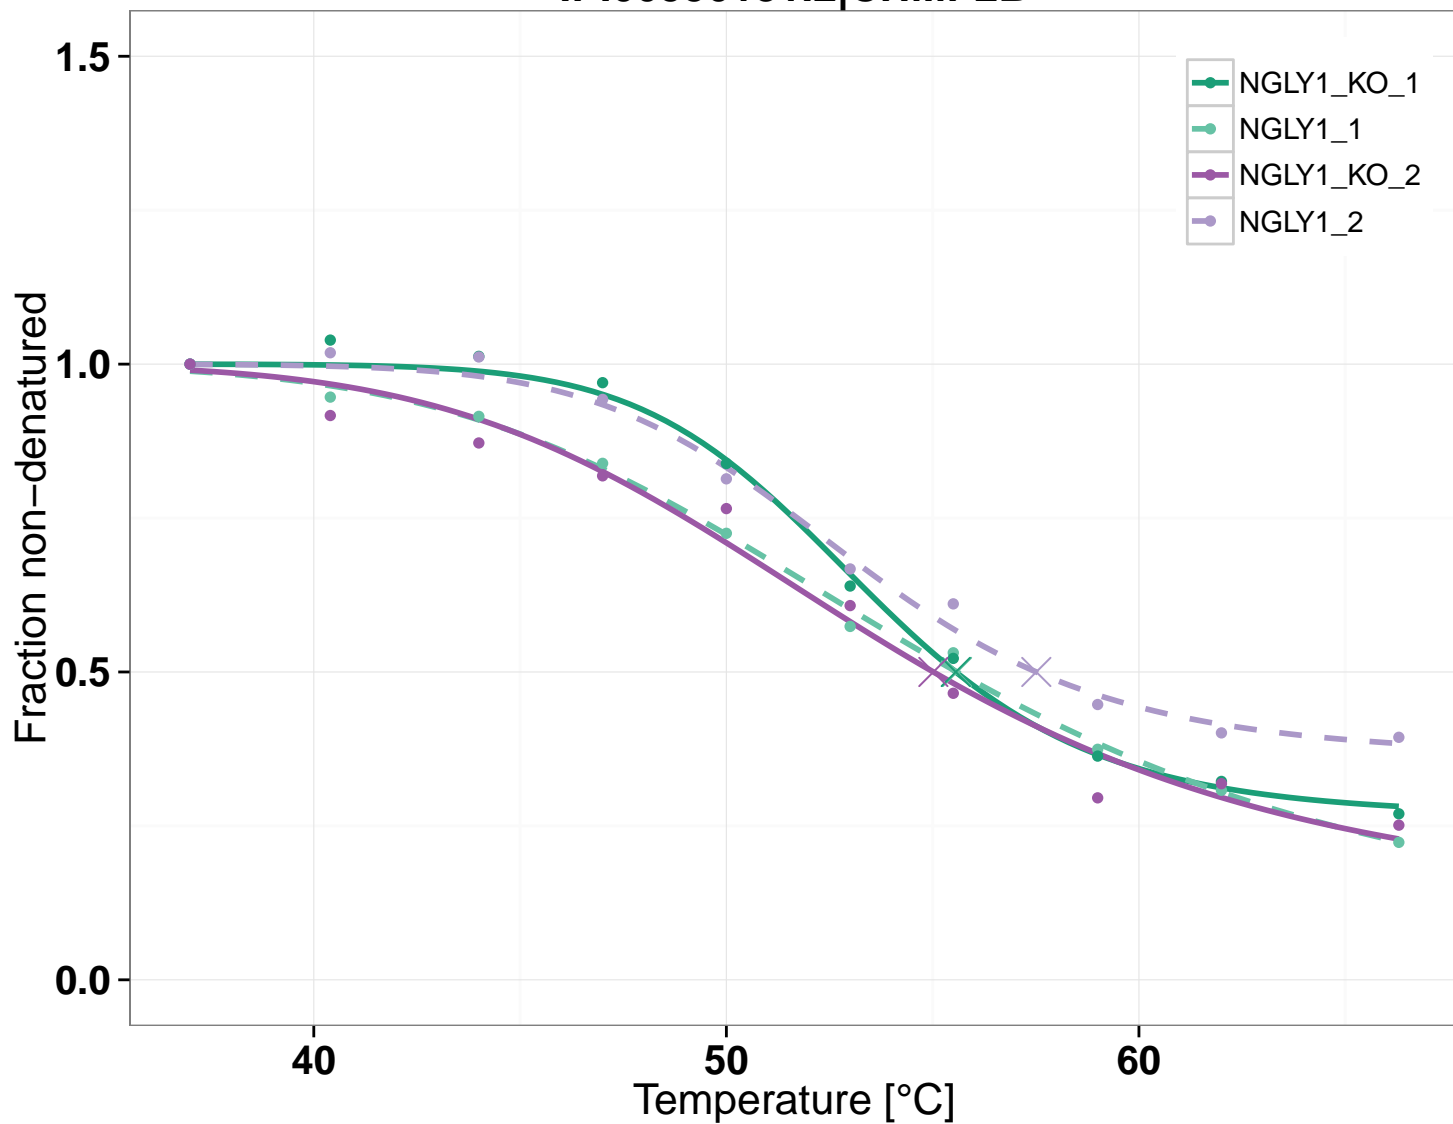

|            | meltPoint | slope  | plateau | R2   |
|------------|-----------|--------|---------|------|
| NGLY1_KO_1 | 55.56     | -0.067 | 0.27    | 1    |
| NGLY1_1    | 55.59     | -0.041 | 0.07    | 1    |
| NGLY1_KO_2 | 55.02     | -0.043 | 0.12    | 0.98 |
| NGLY1_2    | 57.51     | -0.051 | 0.36    | 0.99 |

Supplement: Supplementary file 7653 [file 1]

IPI00218054.2|C11ORF31

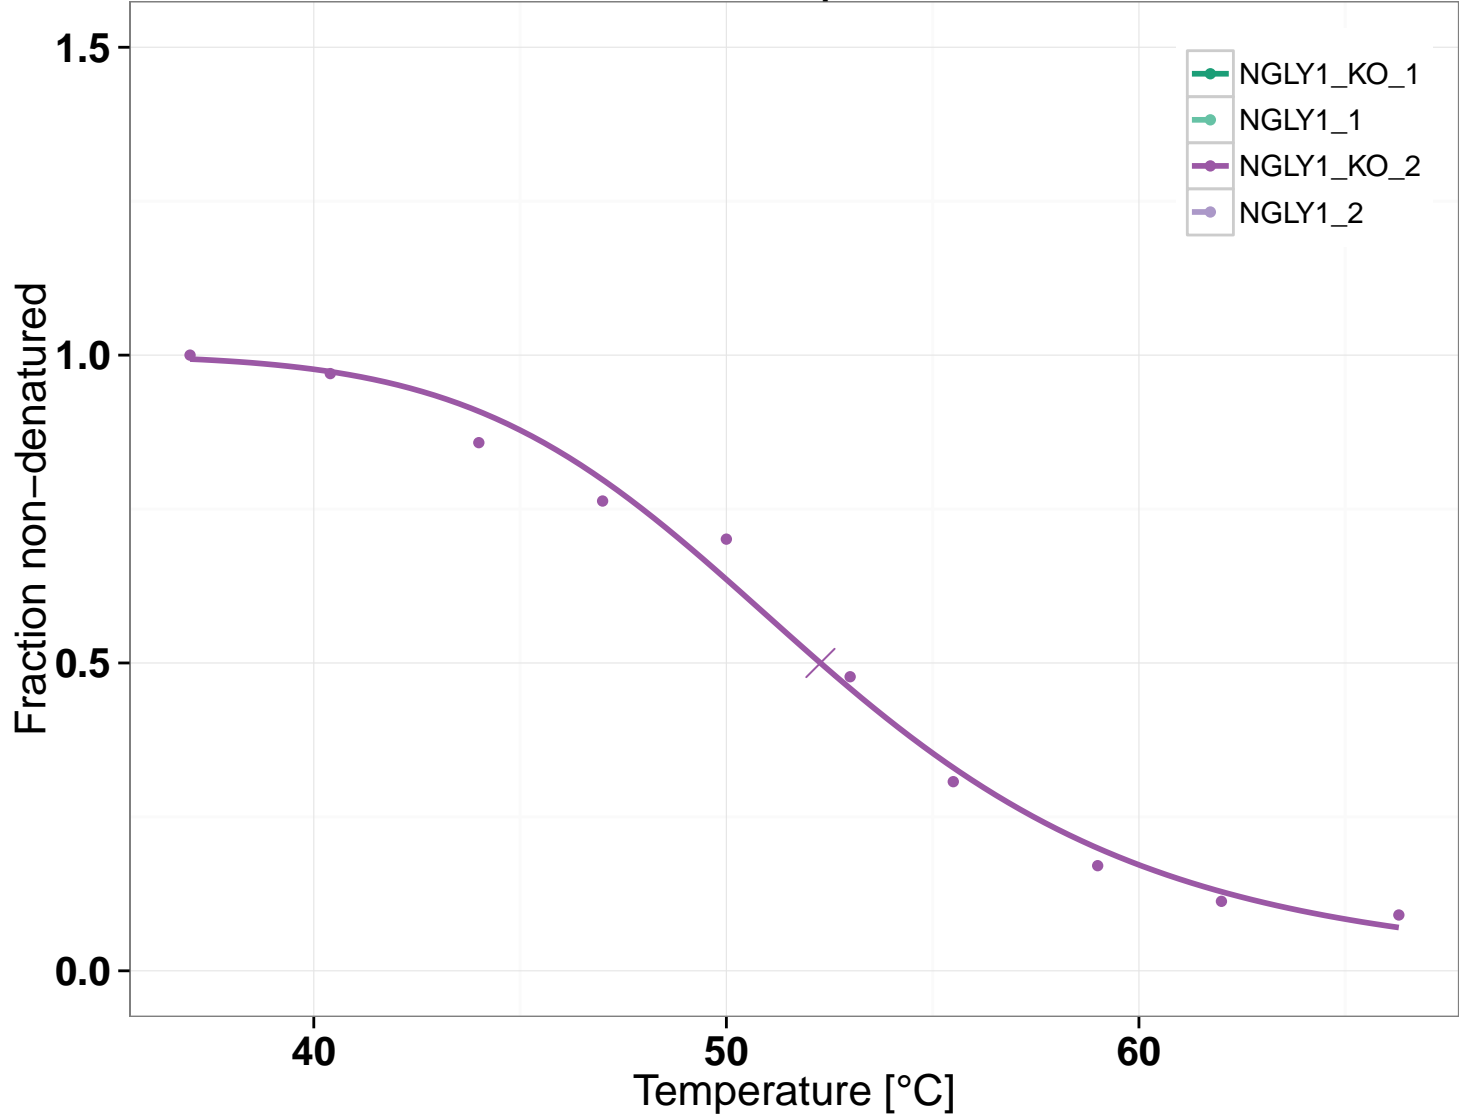

|            | meltPoint | slope | plateau | R2   |
|------------|-----------|-------|---------|------|
| NGLY1_KO_1 | —         | —     | —       | —    |
| NGLY1_1    | —         | —     | —       | —    |
| NGLY1_KO_2 | 52.28     | -0.06 | 0       | 0.99 |
| NGLY1_2    | —         | —     | —       | —    |

Supplement: Supplementary file 7654 [file 1]

IPI00853219.1|RAPGEF2

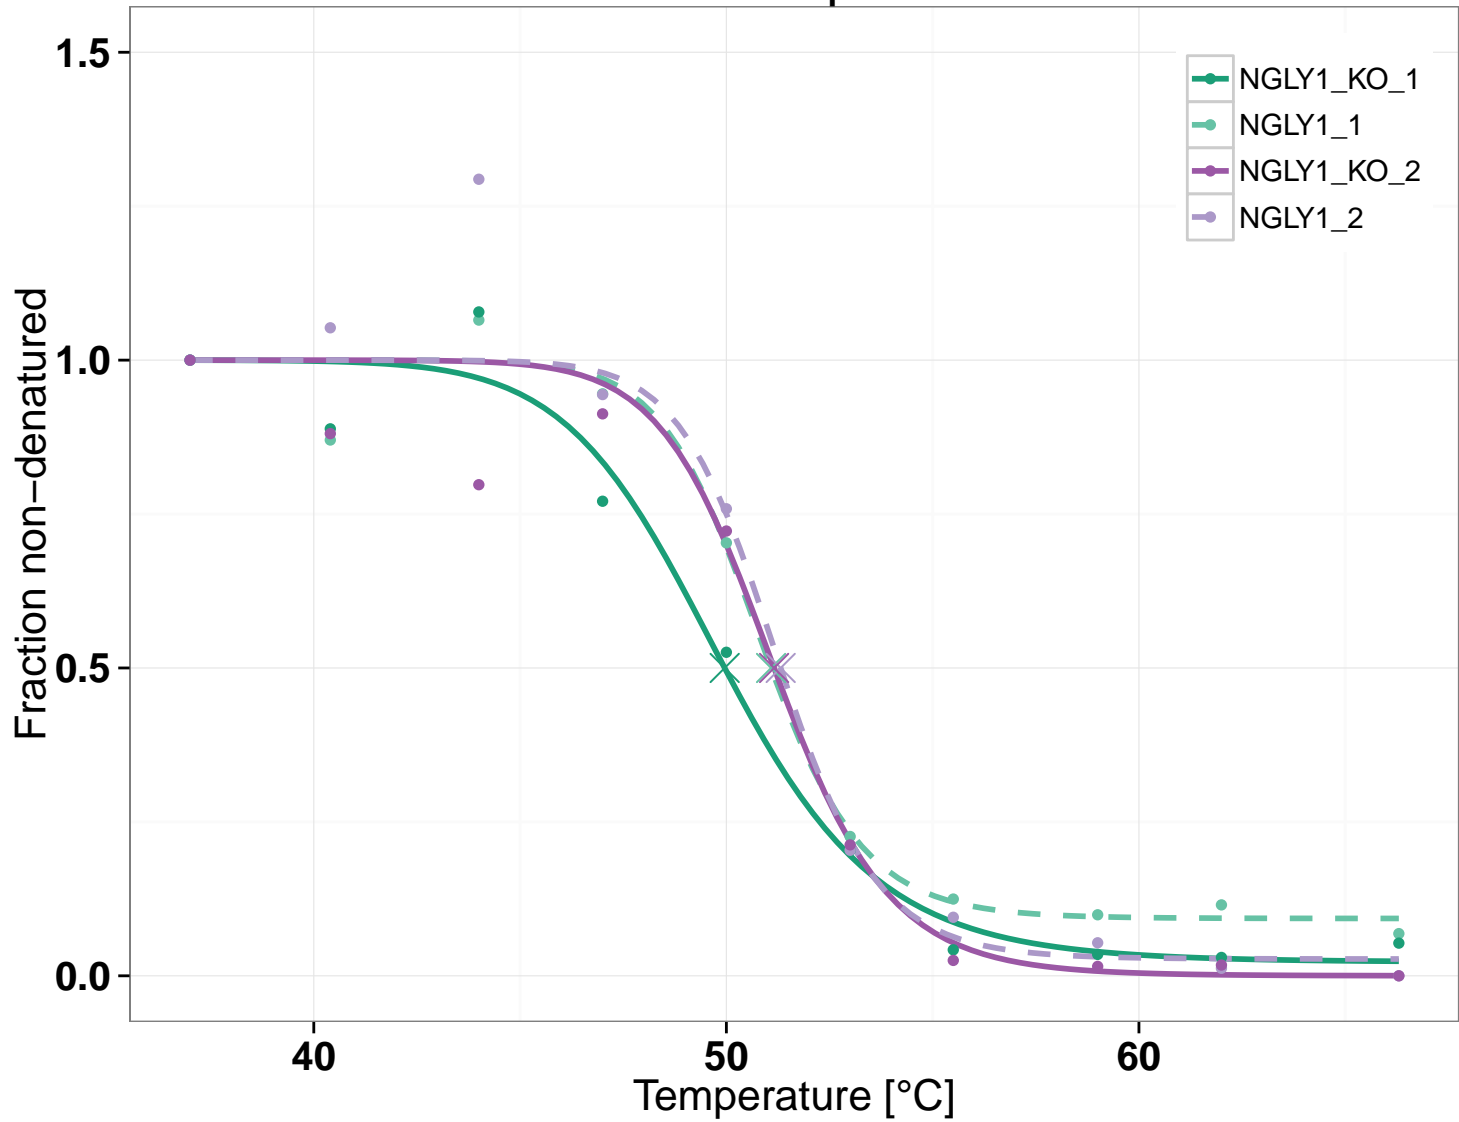

|            | meltPoint | slope | plateau | R2   |
|------------|-----------|-------|---------|------|
| NGLY1_KO_1 | 49.96     | -0.13 | 0.02    | 0.98 |
| NGLY1_1    | 51.08     | -0.19 | 0.09    | 0.99 |
| NGLY1_KO_2 | 51.16     | -0.18 | 0       | 0.97 |
| NGLY1_2    | 51.32     | -0.2  | 0.03    | 0.96 |

Supplement: Supplementary file 7655 [file 1]

IPI00456146.1|SMARCD3

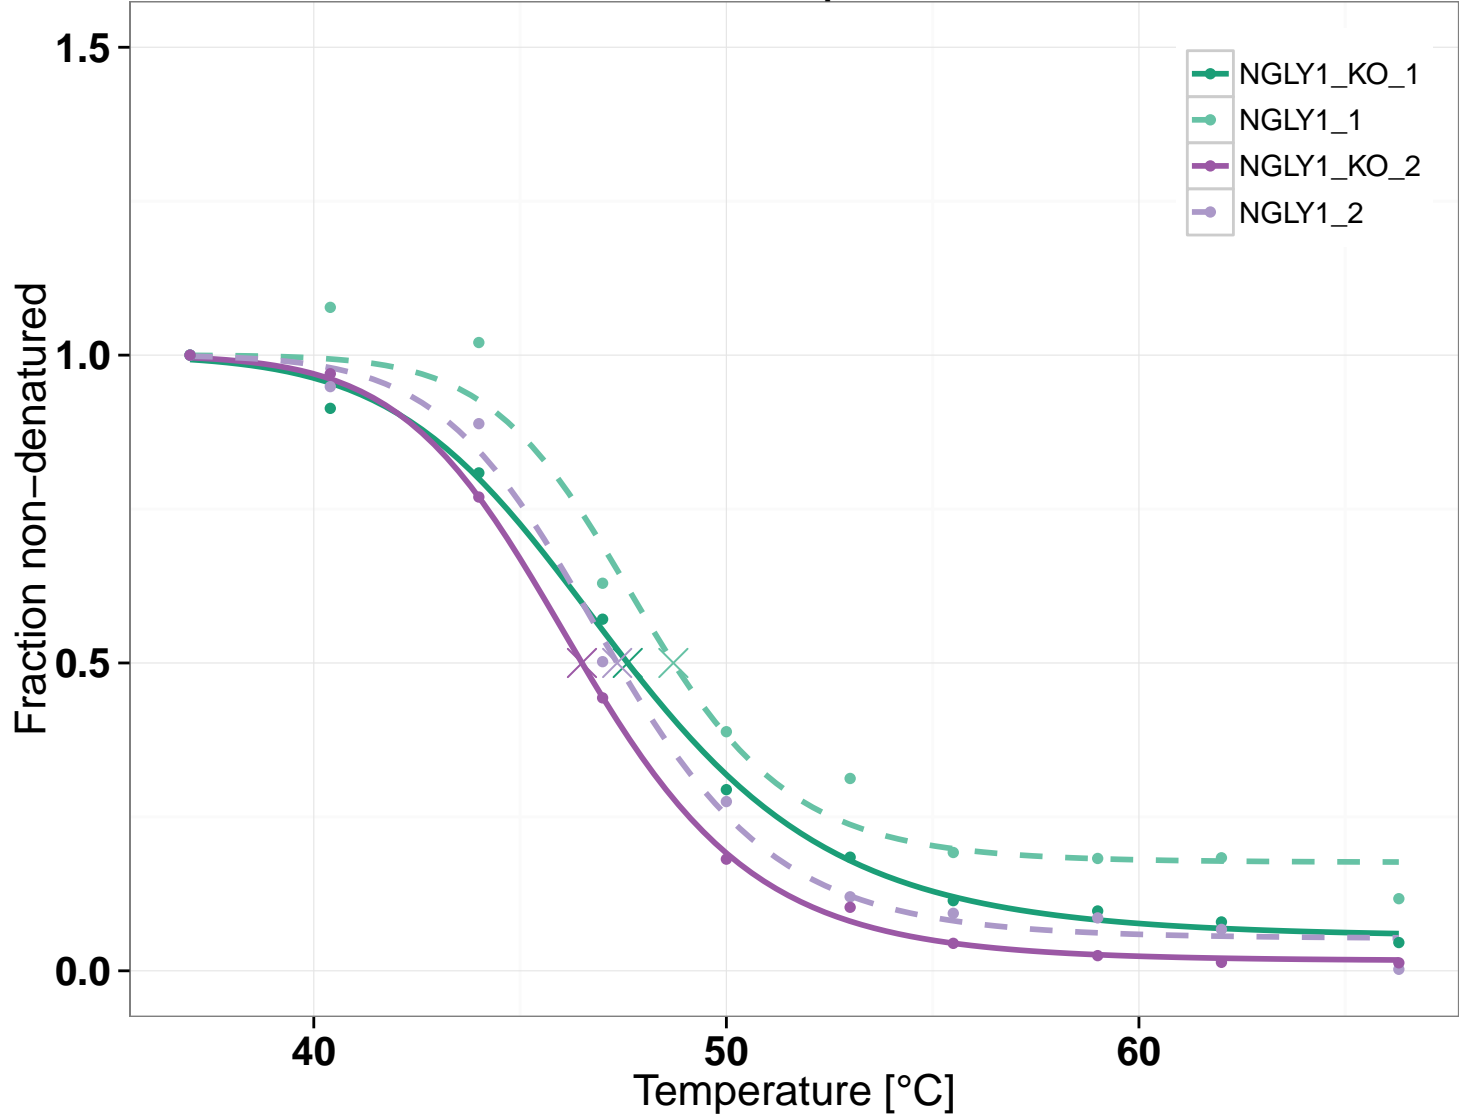

|            | meltPoint | slope  | plateau | R2   |
|------------|-----------|--------|---------|------|
| NGLY1_KO_1 | 47.61     | -0.089 | 0.05    | 1    |
| NGLY1_1    | 48.72     | -0.11  | 0.18    | 0.98 |
| NGLY1_KO_2 | 46.5      | -0.11  | 0.02    | 1    |
| NGLY1_2    | 47.35     | -0.12  | 0.05    | 0.99 |

Supplement: Supplementary file 7656 [file 1]

IPI00796337.1|PCBP2

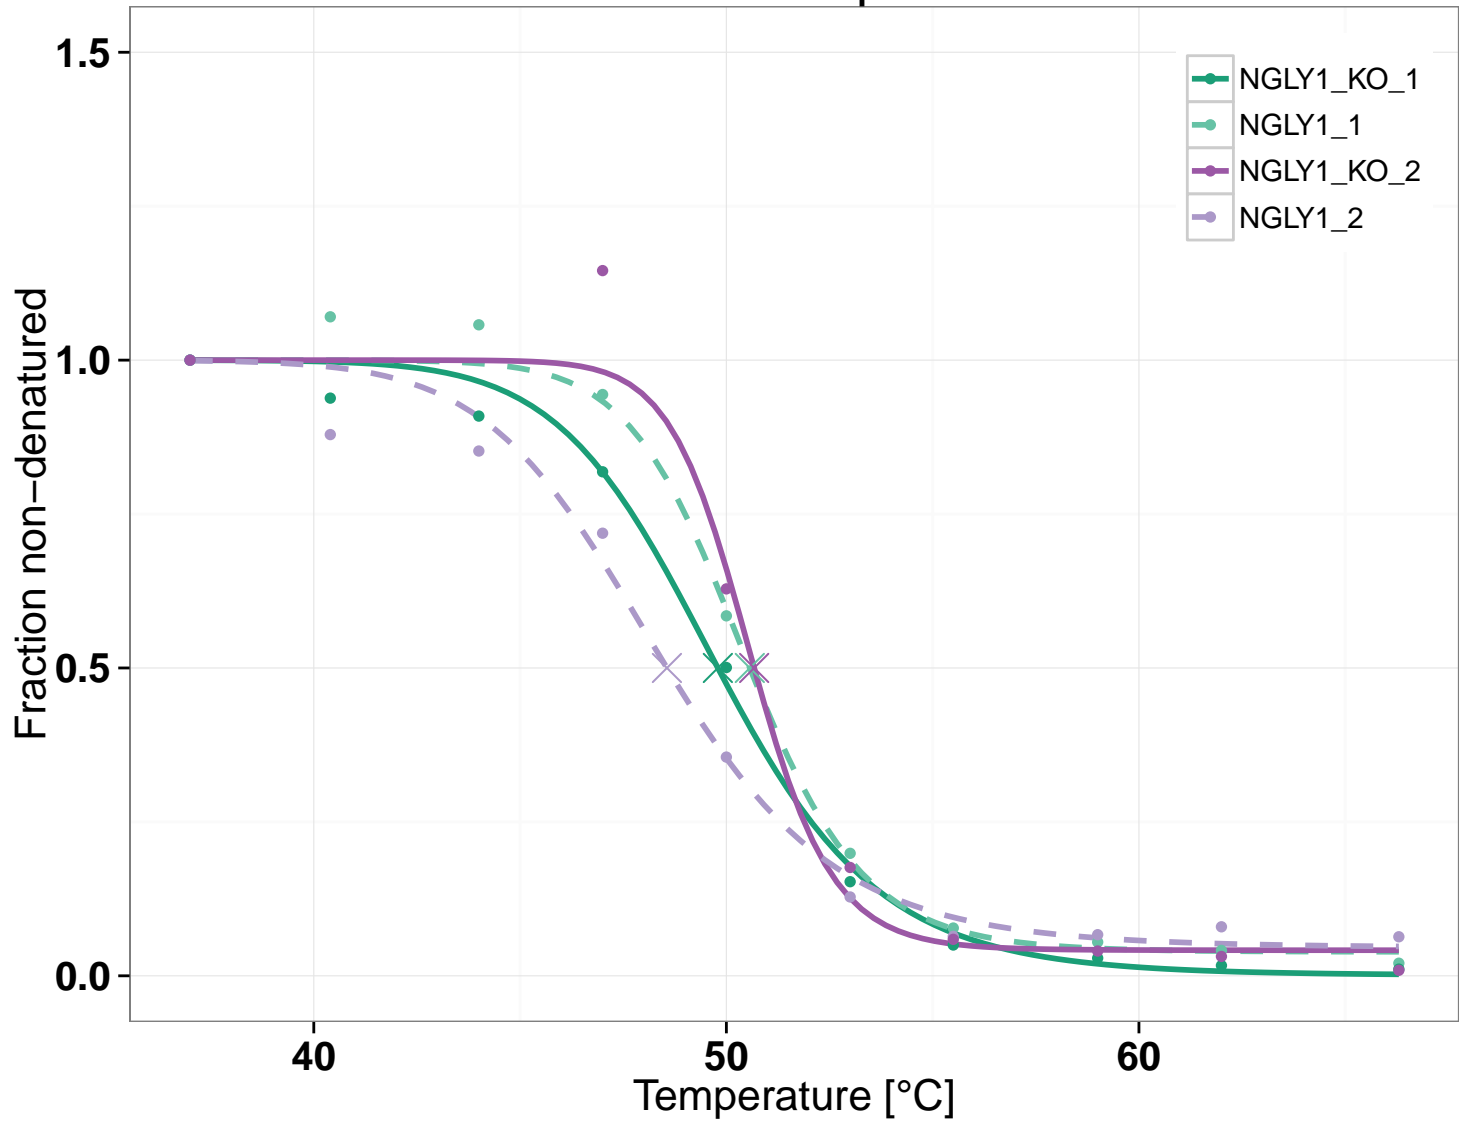

|            | meltPoint | slope | plateau | R2   |
|------------|-----------|-------|---------|------|
| NGLY1_KO_1 | 49.79     | -0.13 | 0       | 0.99 |
| NGLY1_1    | 50.57     | -0.17 | 0.04    | 1    |
| NGLY1_KO_2 | 50.67     | -0.24 | 0.04    | 0.8  |
| NGLY1_2    | 48.56     | -0.11 | 0.05    | 0.99 |

Supplement: Supplementary file 7657 [file 1]

IPI00514787.5|DHDDS

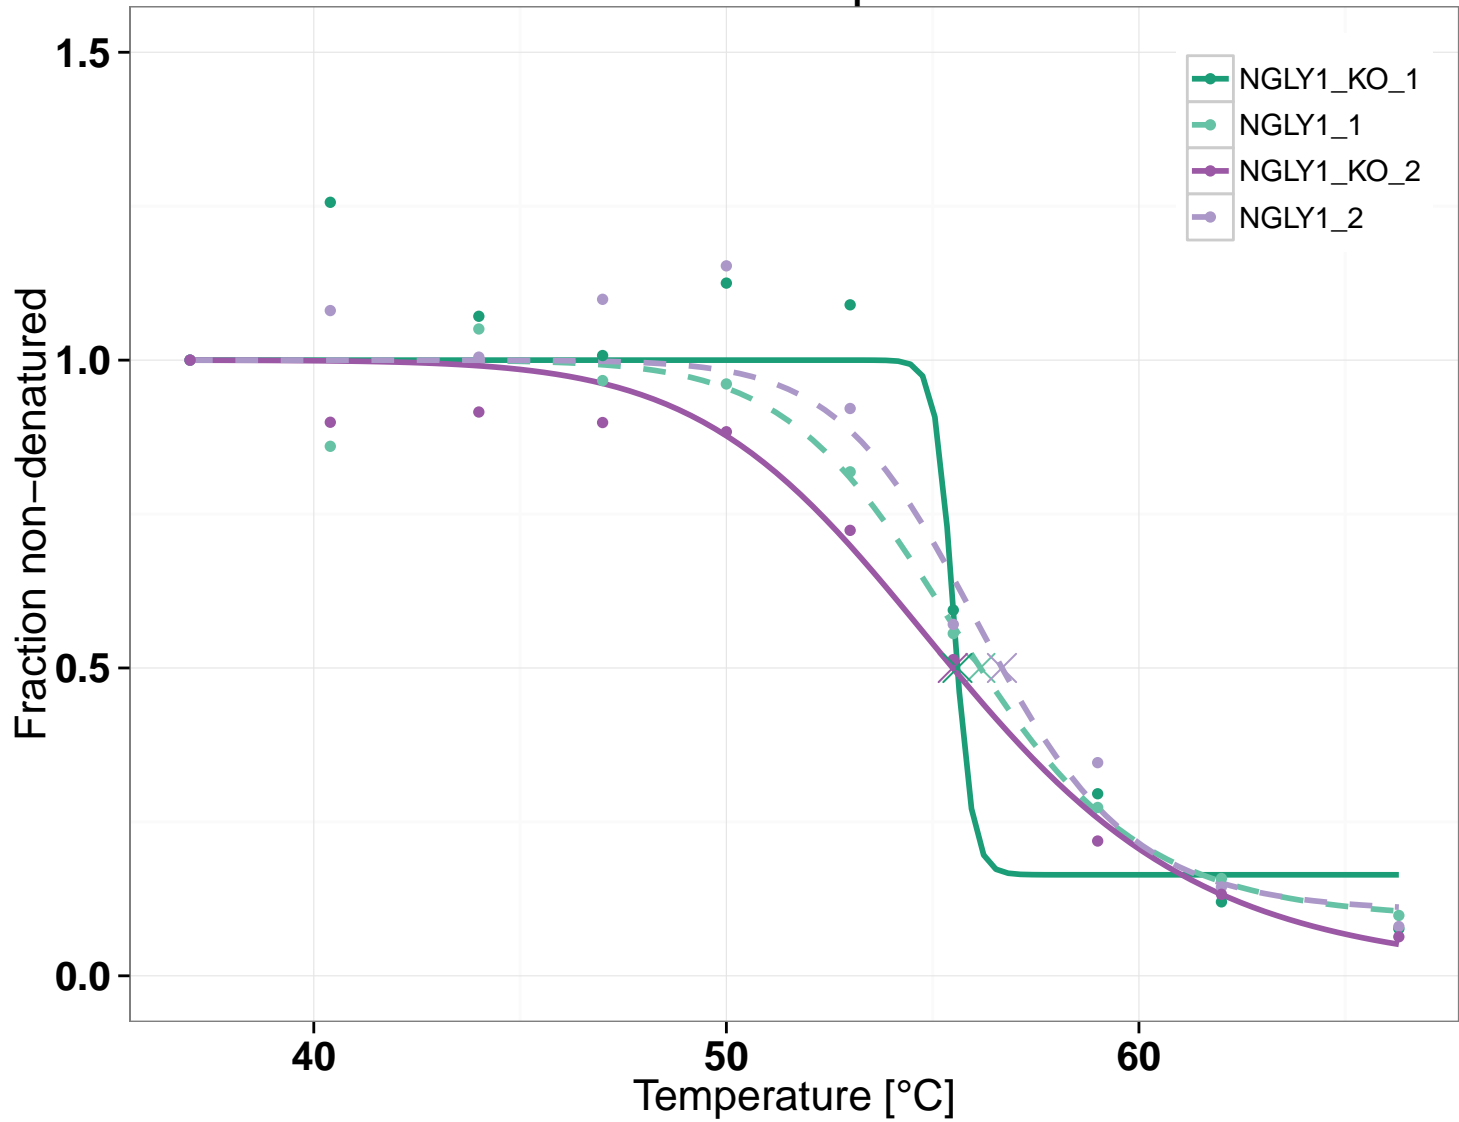

|            | meltPoint | slope  | plateau | R2   |
|------------|-----------|--------|---------|------|
| NGLY1_KO_1 | 55.6      | -0.94  | 0.16    | 0.93 |
| NGLY1_1    | 56.16     | -0.11  | 0.09    | 0.98 |
| NGLY1_KO_2 | 55.49     | -0.082 | 0       | 0.98 |
| NGLY1_2    | 56.68     | -0.13  | 0.1     | 0.96 |

Supplement: Supplementary file 7658 [file 1]

IPI00016820.1|SNX15

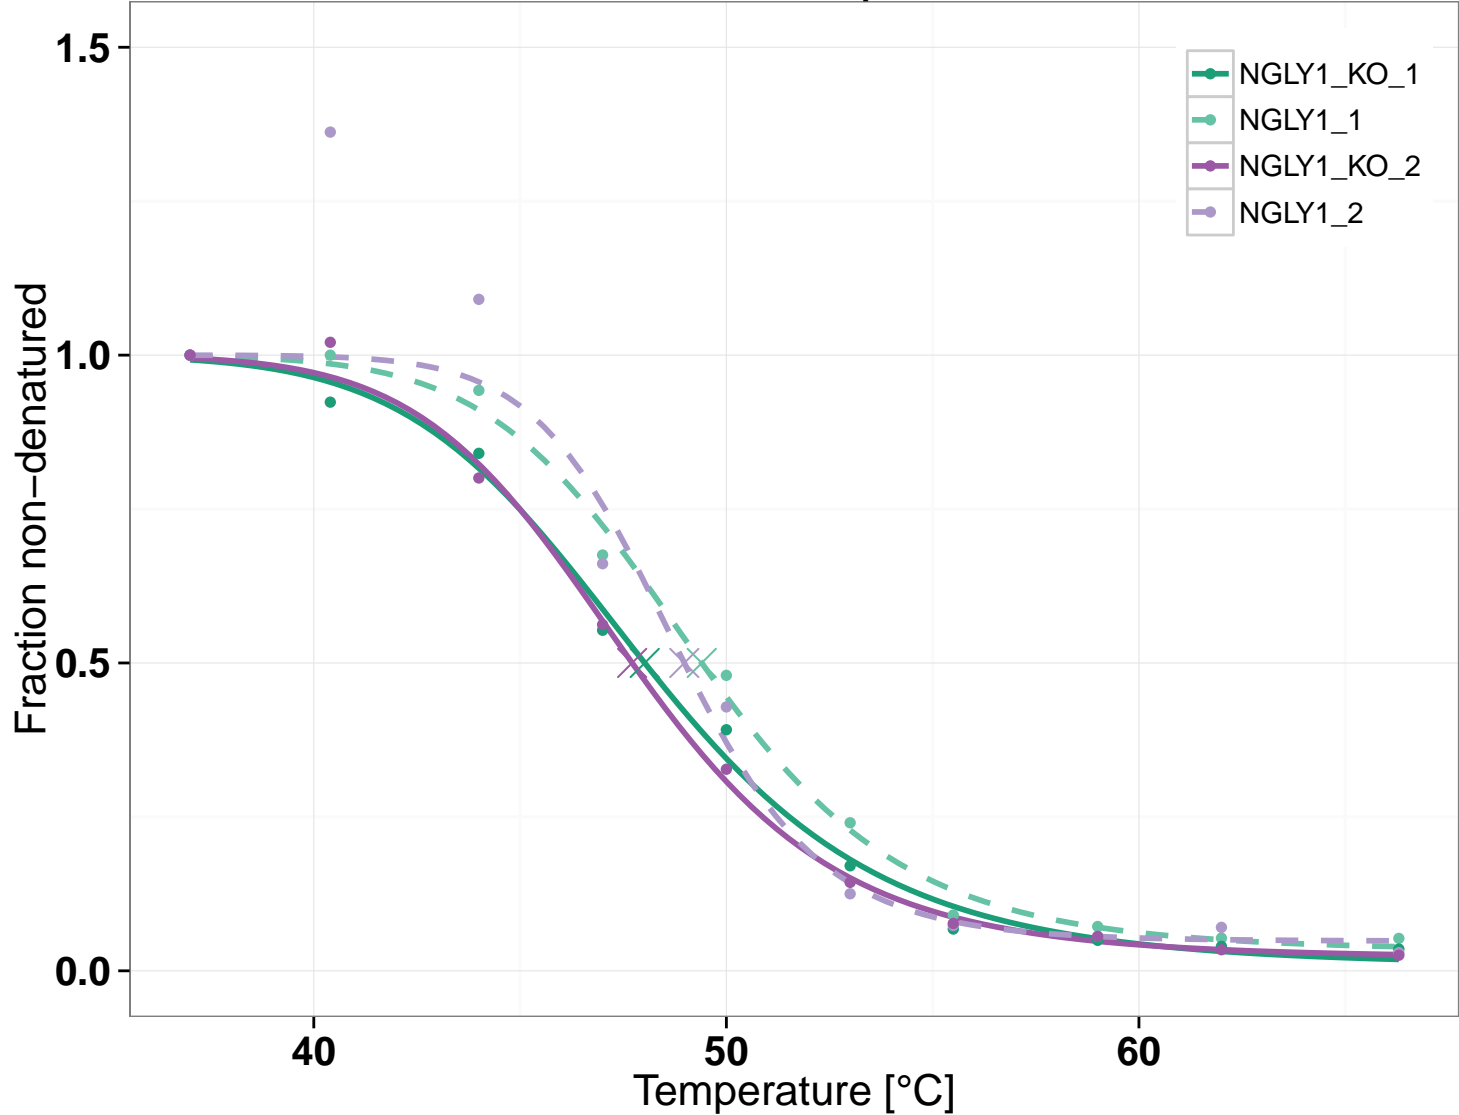

|            | meltPoint | slope  | plateau | R2   |
|------------|-----------|--------|---------|------|
| NGLY1_KO_1 | 48.02     | -0.086 | 0.01    | 1    |
| NGLY1_1    | 49.4      | -0.096 | 0.03    | 1    |
| NGLY1_KO_2 | 47.72     | -0.096 | 0.02    | 1    |
| NGLY1_2    | 48.98     | -0.14  | 0.05    | 0.93 |

Supplement: Supplementary file 7659 [file 1]

IPI00410575.2|SIX5

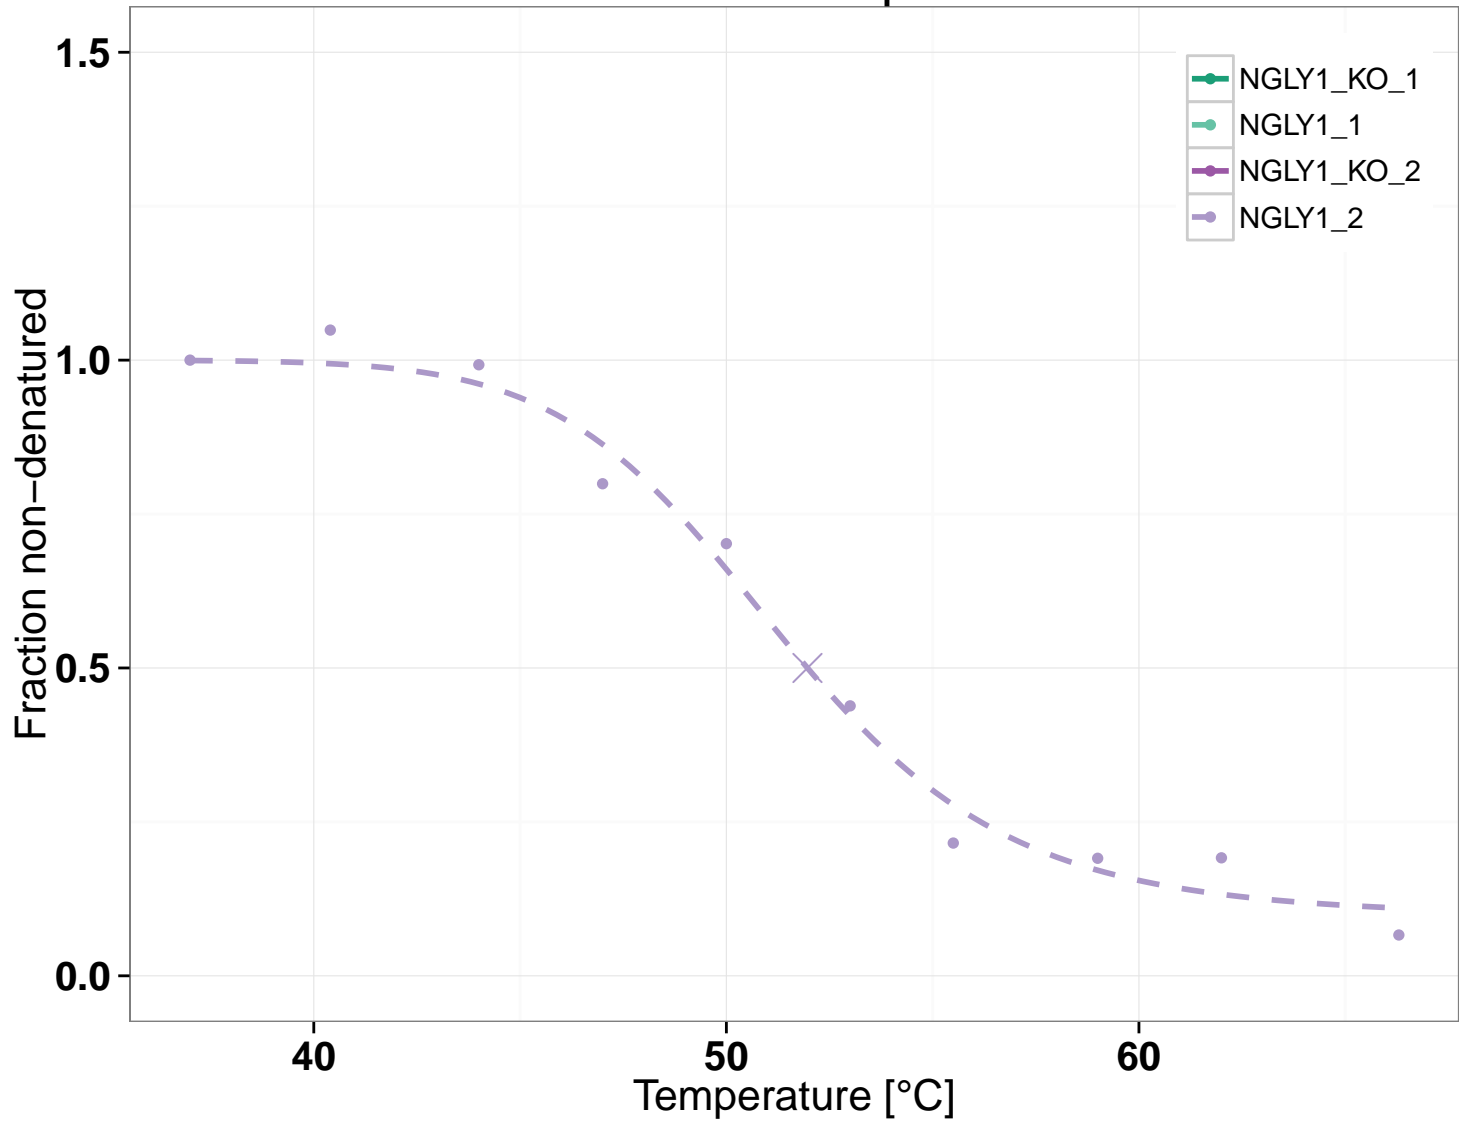

|            | meltPoint | slope  | plateau | R2   |
|------------|-----------|--------|---------|------|
| NGLY1_KO_1 | —         | —      | —       | —    |
| NGLY1_1    | —         | —      | —       | —    |
| NGLY1_KO_2 | —         | —      | —       | —    |
| NGLY1_2    | 51.97     | −0.083 | 0.1     | 0.99 |

Supplement: Supplementary file 7660 [file 1]

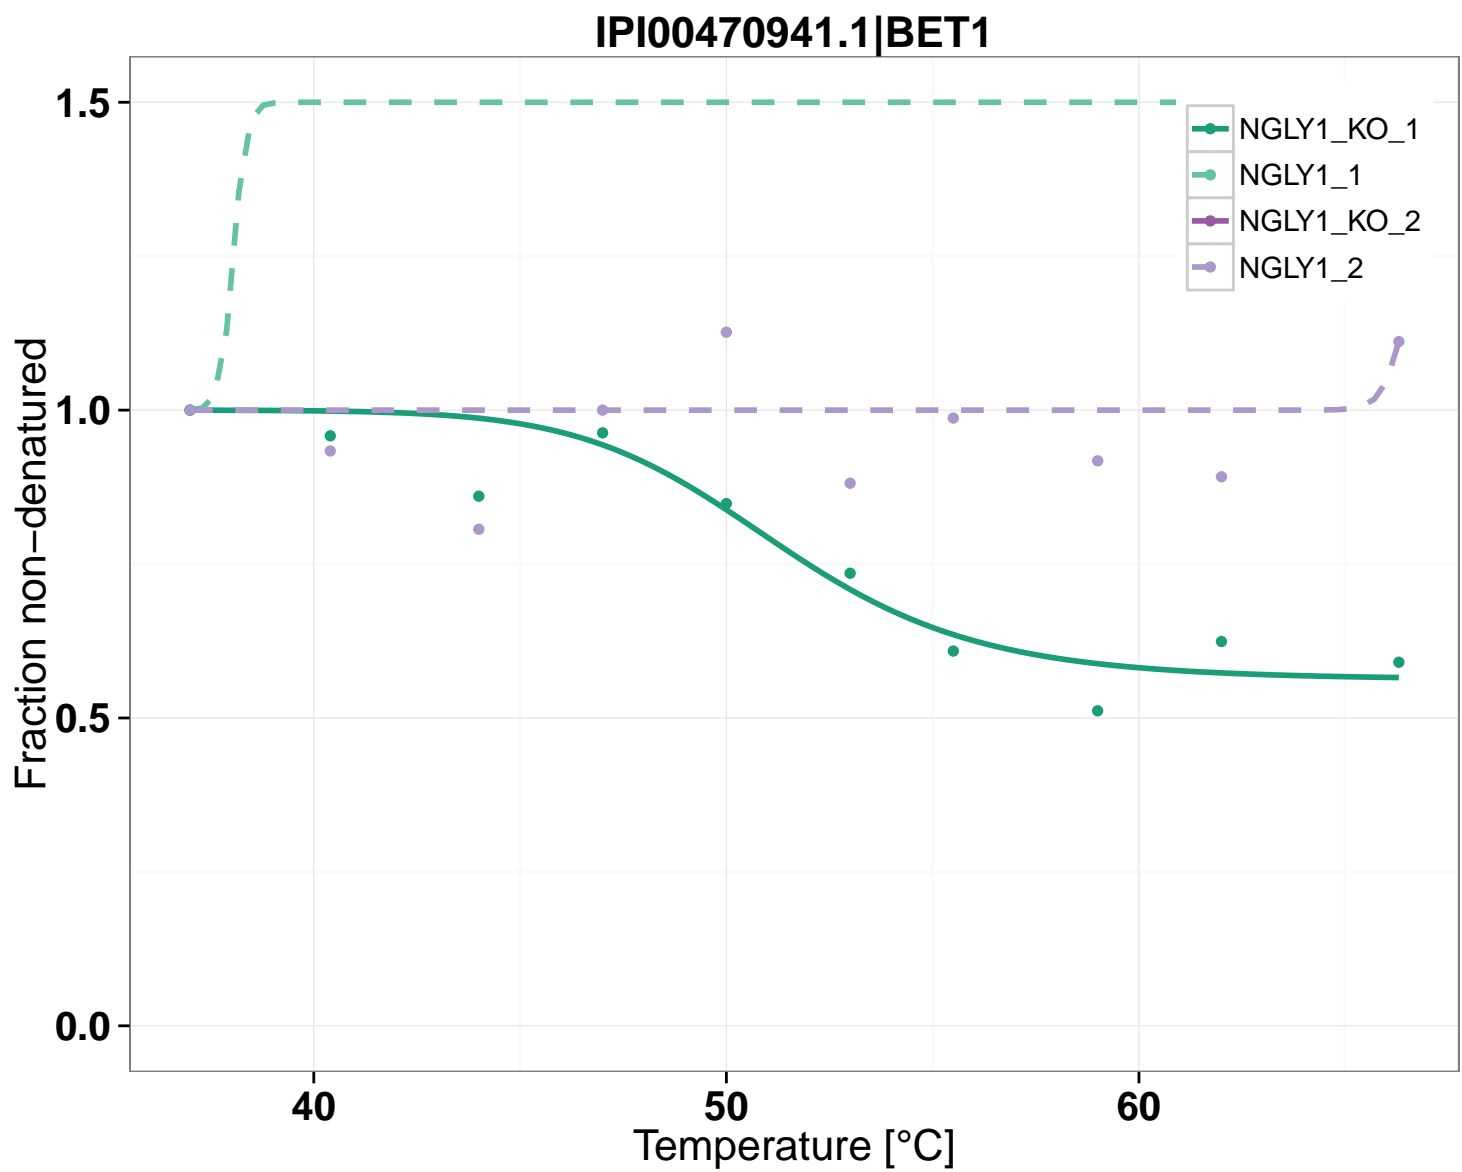

|            | meltPoint | slope  | plateau | R2    |
|------------|-----------|--------|---------|-------|
| NGLY1_KO_1 | —         | −0.045 | 0.56    | 0.9   |
| NGLY1_1    | —         | 0.82   | 1.5     | −2.66 |
| NGLY1_KO_2 | —         | —      | —       | —     |
| NGLY1_2    | —         | —      | 1.5     | 0.01  |

Supplement: Supplementary file 7661 [file 1]

IPI00646504.2|RWDD3

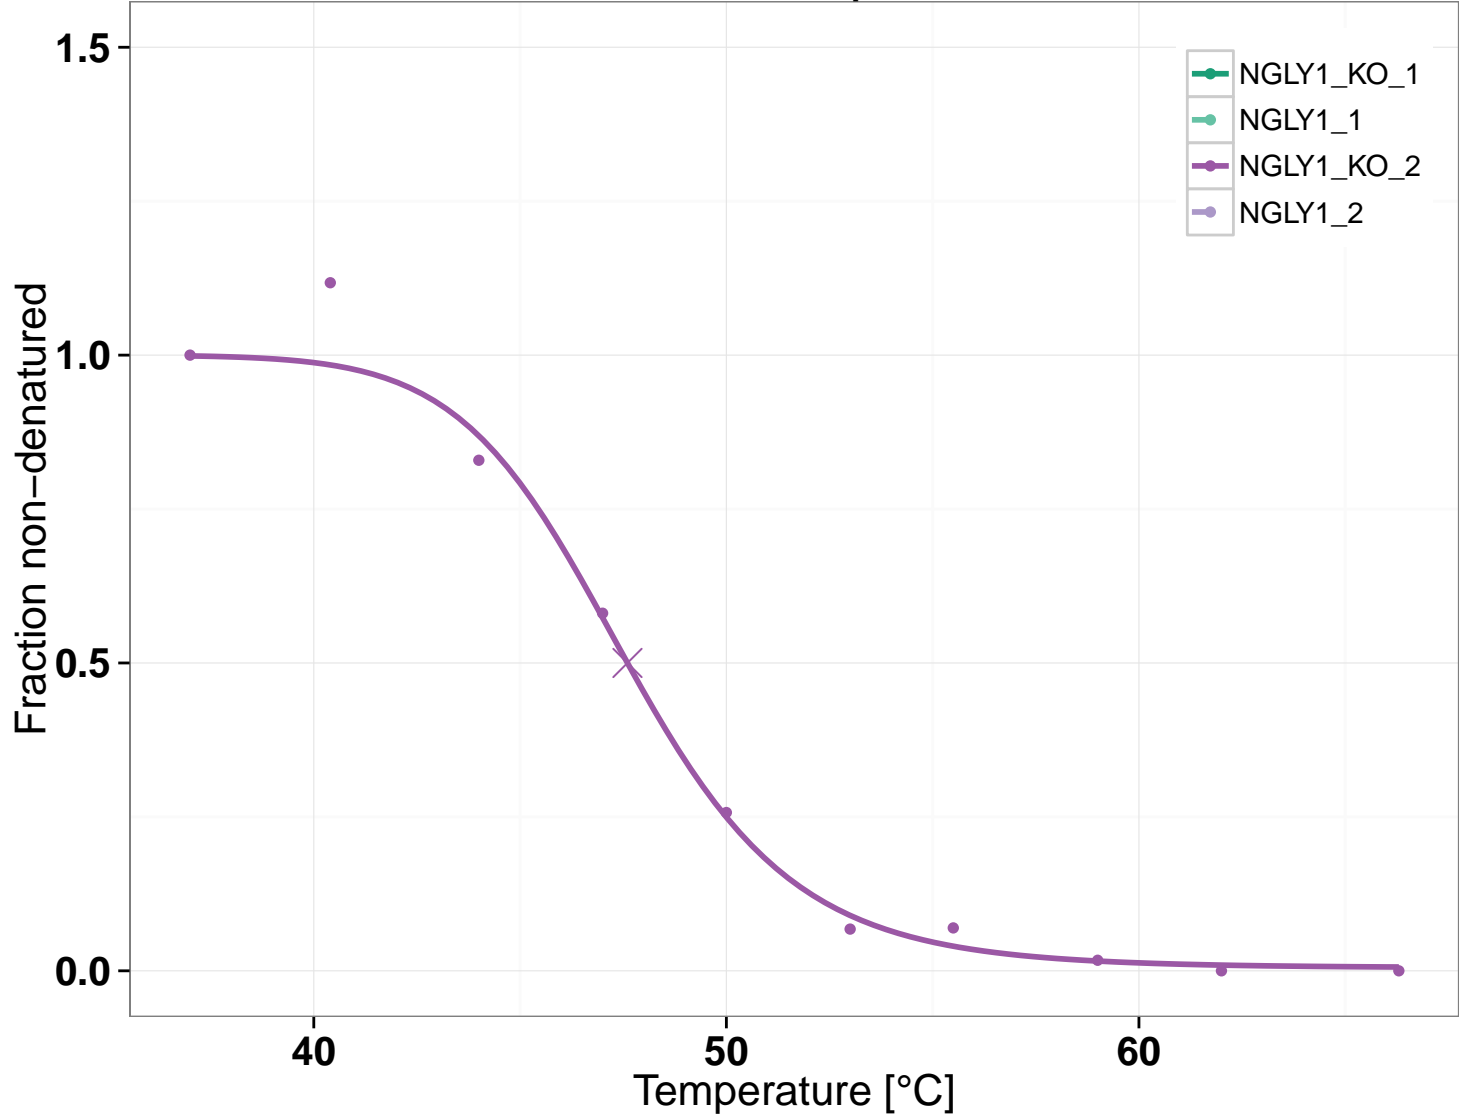

|            | meltPoint | slope | plateau | R2   |
|------------|-----------|-------|---------|------|
| NGLY1_KO_1 | —         | —     | —       | —    |
| NGLY1_1    | —         | —     | —       | —    |
| NGLY1_KO_2 | 47.6      | -0.12 | 0       | 0.99 |
| NGLY1_2    | —         | —     | —       | —    |

Supplement: Supplementary file 7662 [file 1]

# IPI00298306.3|ATM

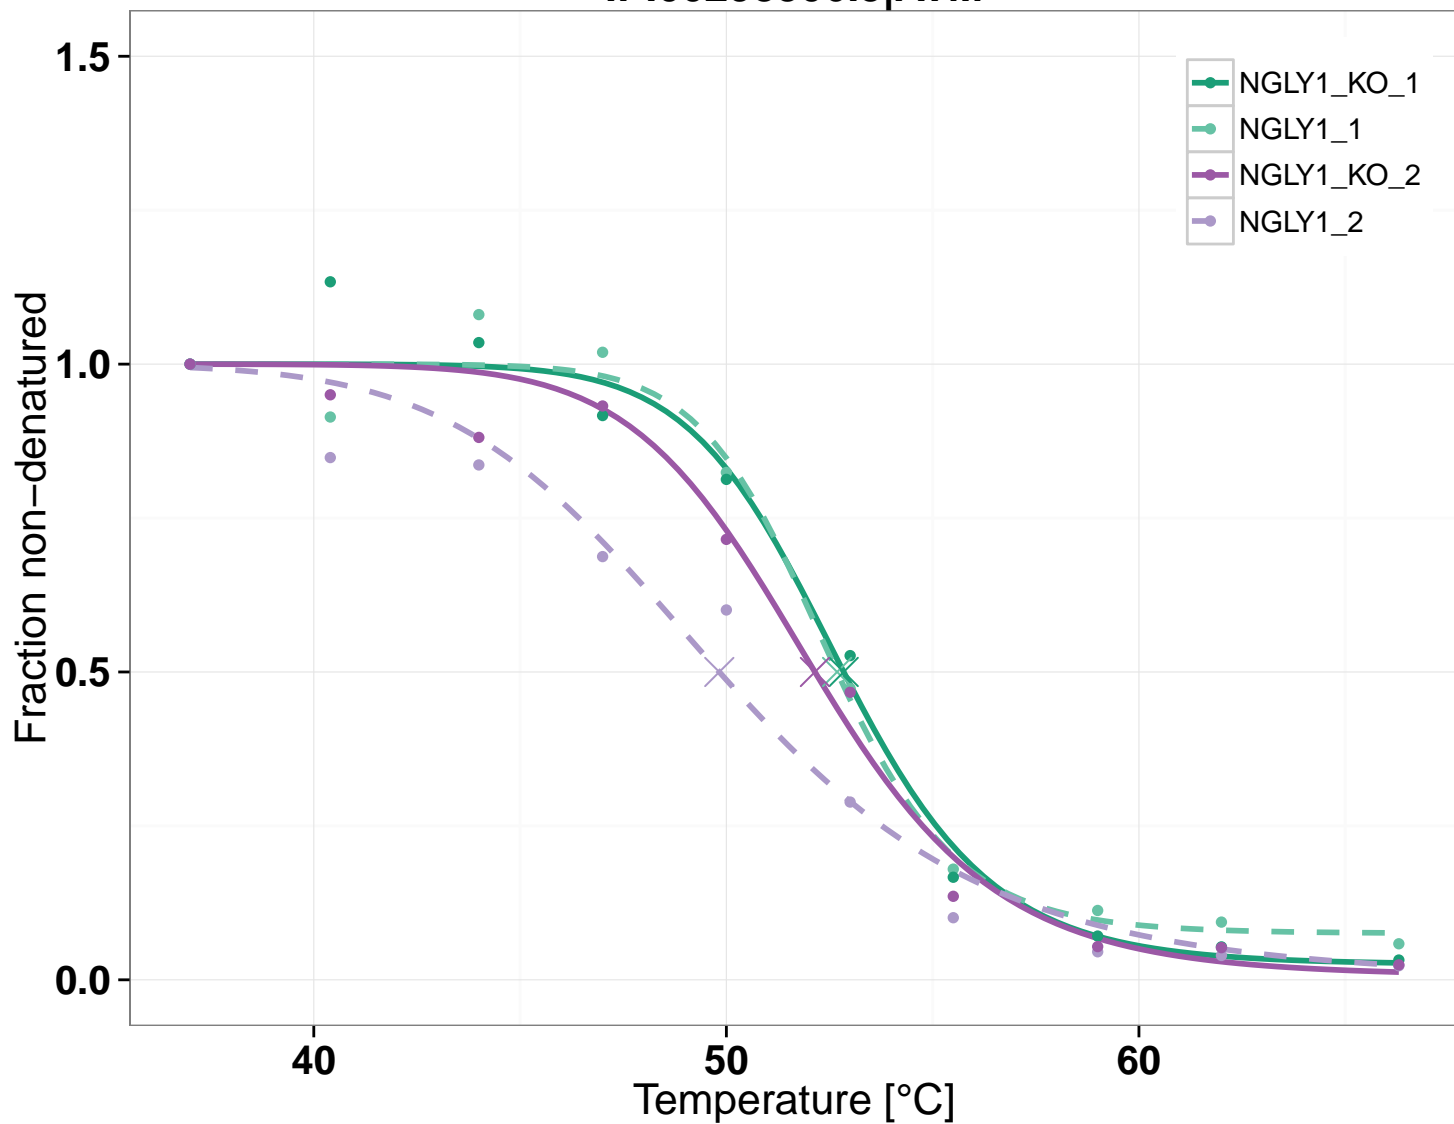

|            | meltPoint | slope  | plateau | R2   |
|------------|-----------|--------|---------|------|
| NGLY1_KO_1 | 52.84     | -0.13  | 0.02    | 0.99 |
| NGLY1_1    | 52.68     | -0.15  | 0.08    | 0.99 |
| NGLY1_KO_2 | 52.15     | -0.11  | 0.01    | 0.99 |
| NGLY1_2    | 49.83     | -0.077 | 0       | 0.97 |

Supplement: Supplementary file 7663 [file 1]

IPI00041127.6|ASF1B

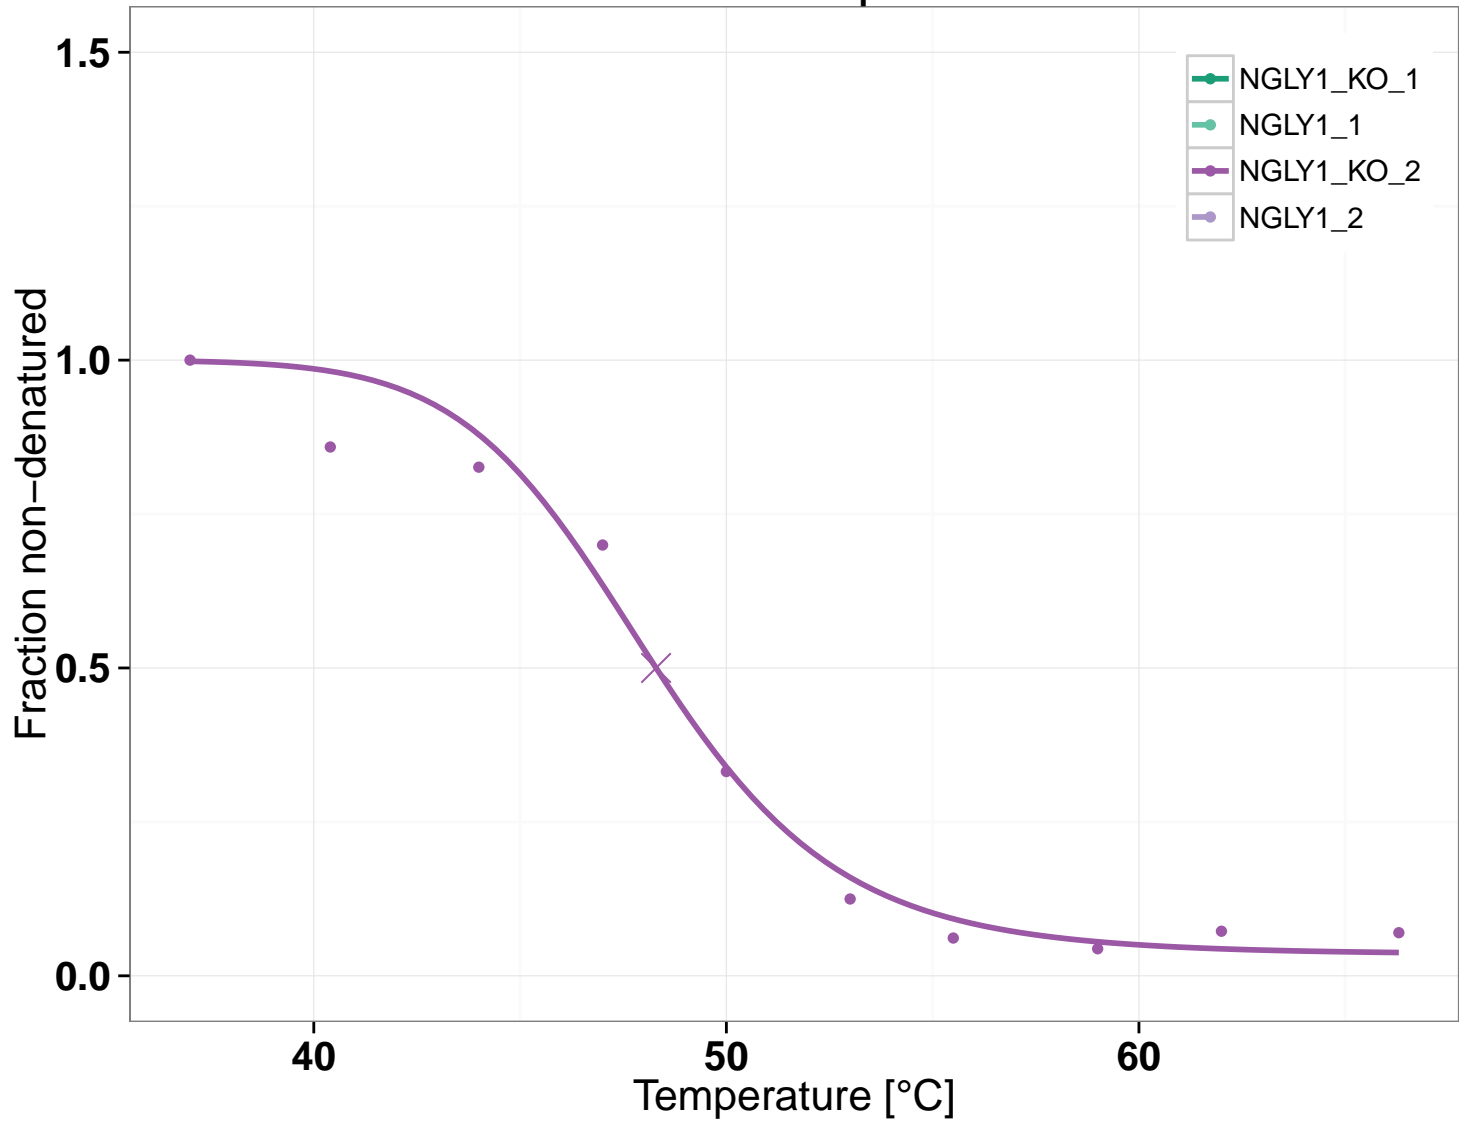

|            | meltPoint | slope | plateau | R2   |
|------------|-----------|-------|---------|------|
| NGLY1_KO_1 | —         | —     | —       | —    |
| NGLY1_1    | —         | —     | —       | —    |
| NGLY1_KO_2 | 48.3      | −0.1  | 0.03    | 0.98 |
| NGLY1_2    | —         | —     | —       | —    |

Supplement: Supplementary file 7664 [file 1]

IPI00181821.3|C4ORF8

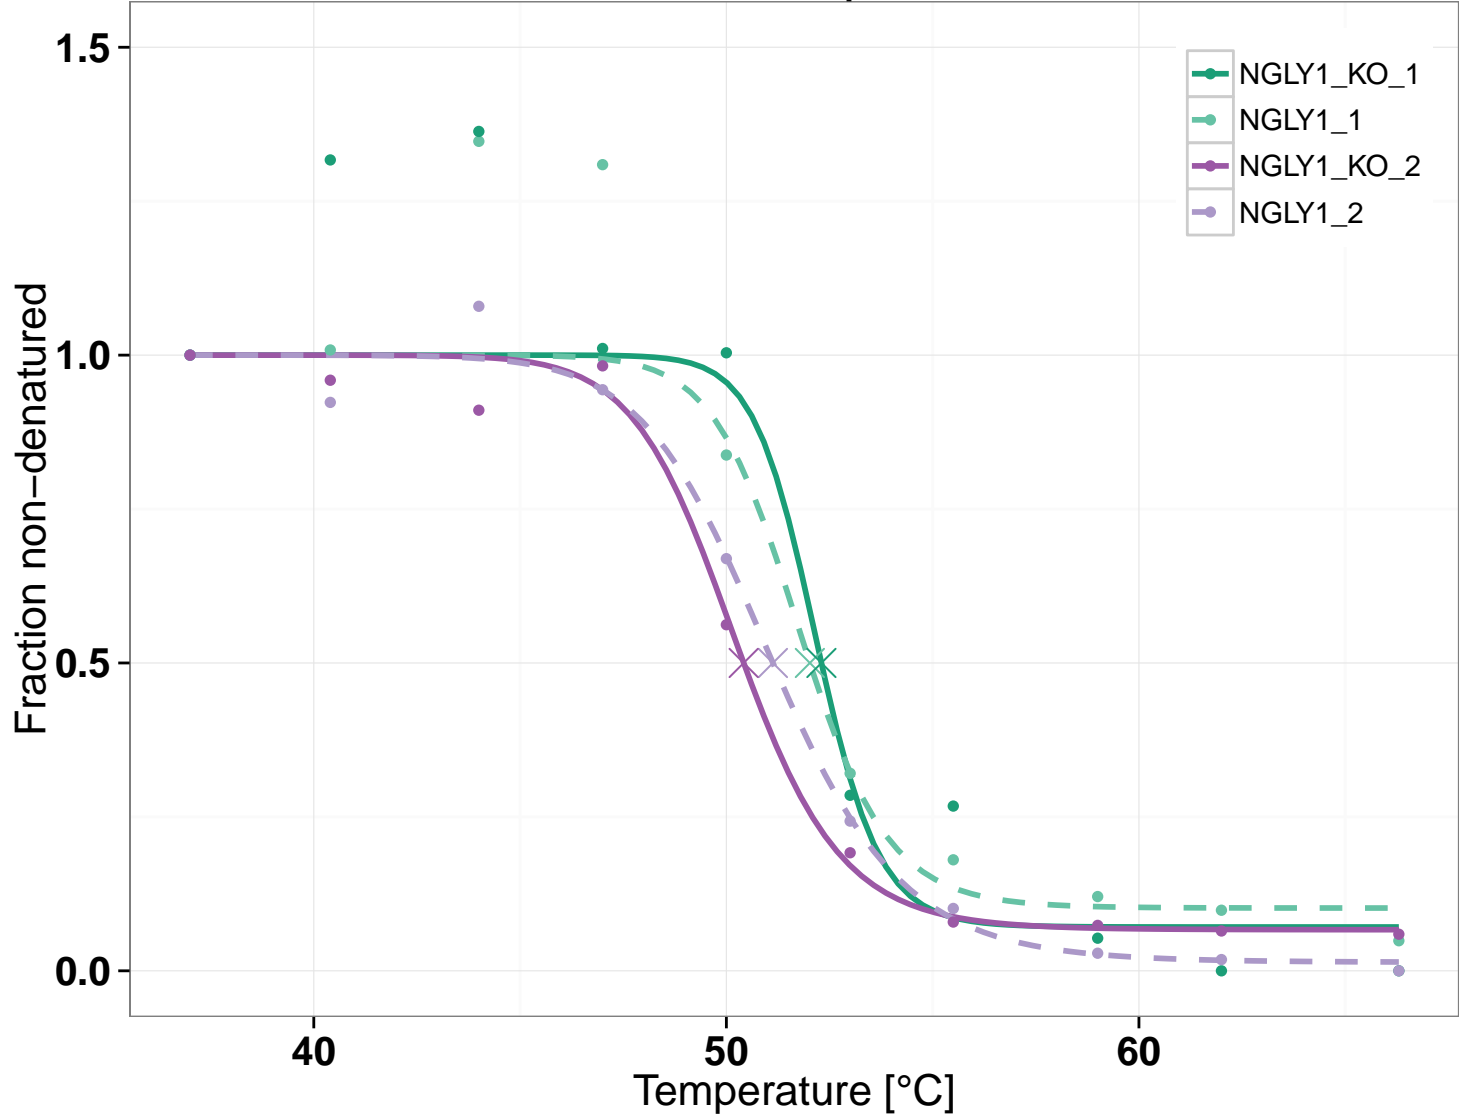

|            | meltPoint | slope | plateau | R2   |
|------------|-----------|-------|---------|------|
| NGLY1_KO_1 | 52.3      | -0.31 | 0.07    | 0.9  |
| NGLY1_1    | 52.02     | -0.21 | 0.1     | 0.91 |
| NGLY1_KO_2 | 50.42     | -0.19 | 0.07    | 0.99 |
| NGLY1_2    | 51.13     | -0.16 | 0.01    | 0.99 |

Supplement: Supplementary file 7665 [file 1]

IPI00027456.1|SNAPC5

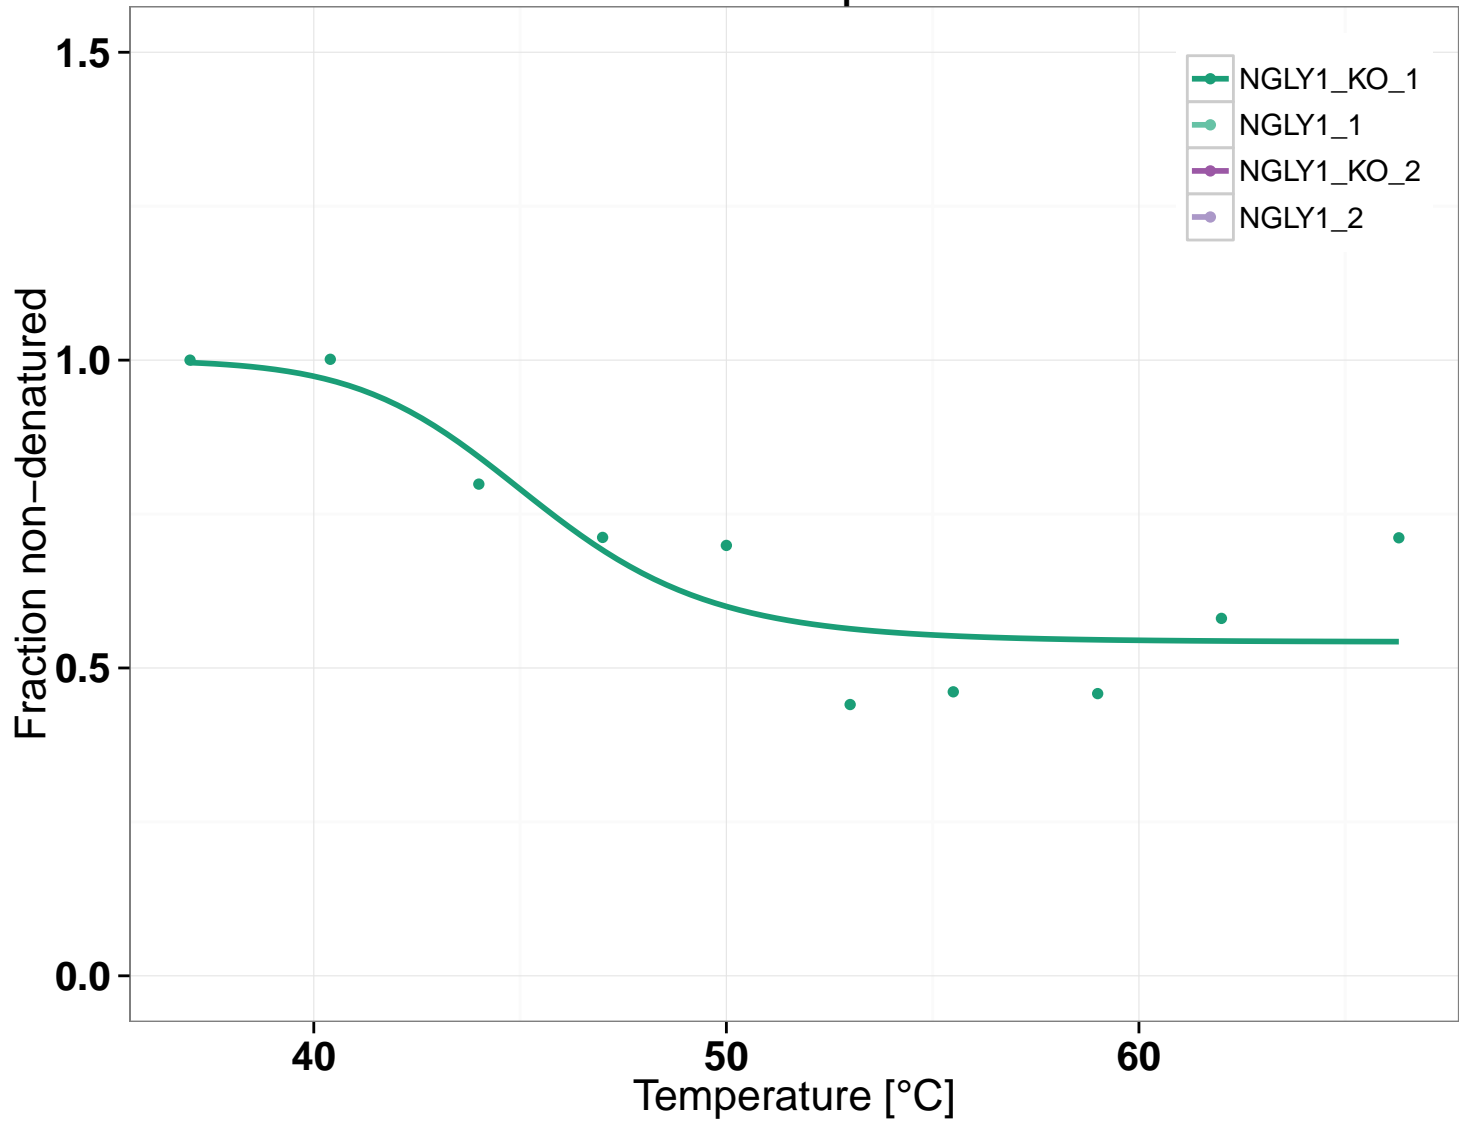

|            | meltPoint | slope  | plateau | R2   |
|------------|-----------|--------|---------|------|
| NGLY1_KO_1 | —         | −0.053 | 0.54    | 0.81 |
| NGLY1_1    | —         | —      | —       | —    |
| NGLY1_KO_2 | —         | —      | —       | —    |
| NGLY1_2    | —         | —      | —       | —    |

Supplement: Supplementary file 7666 [file 1]

IPI00396321.1|LRRC59

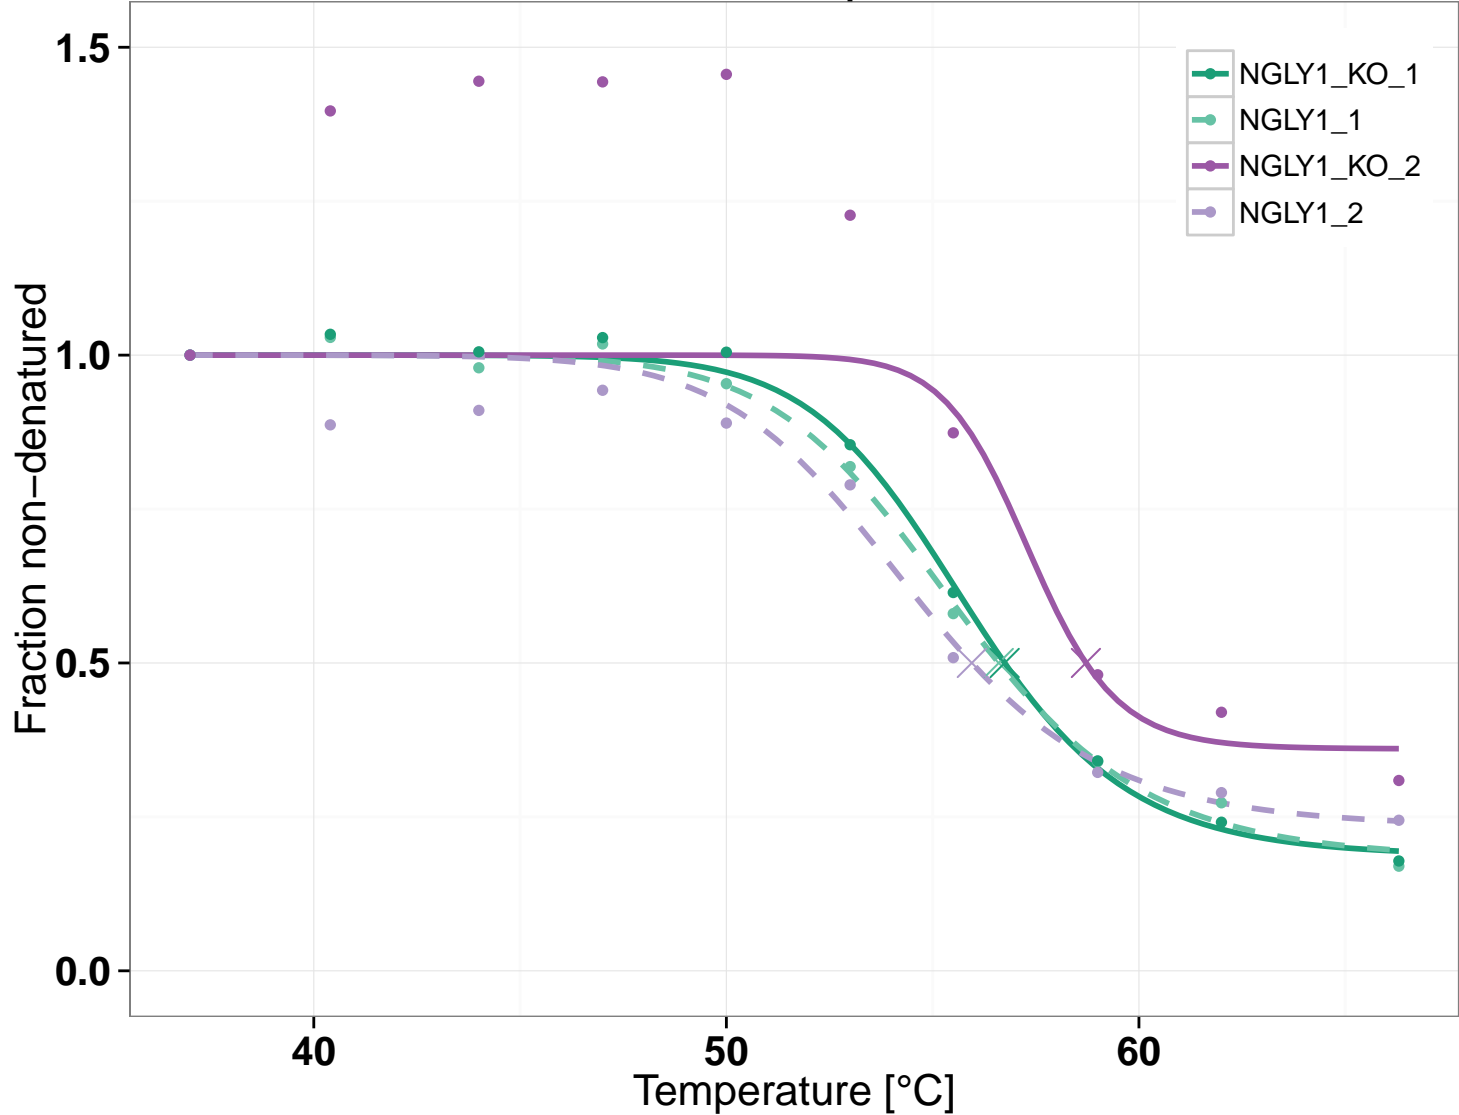

|            | meltPoint | slope  | plateau | R2   |
|------------|-----------|--------|---------|------|
| NGLY1_KO_1 | 56.75     | -0.11  | 0.19    | 1    |
| NGLY1_1    | 56.6      | -0.091 | 0.18    | 1    |
| NGLY1_KO_2 | 58.71     | -0.15  | 0.36    | 0.57 |
| NGLY1_2    | 55.95     | -0.085 | 0.23    | 0.97 |

Supplement: Supplementary file 7667 [file 1]

IPI00514506.3|MRPL24

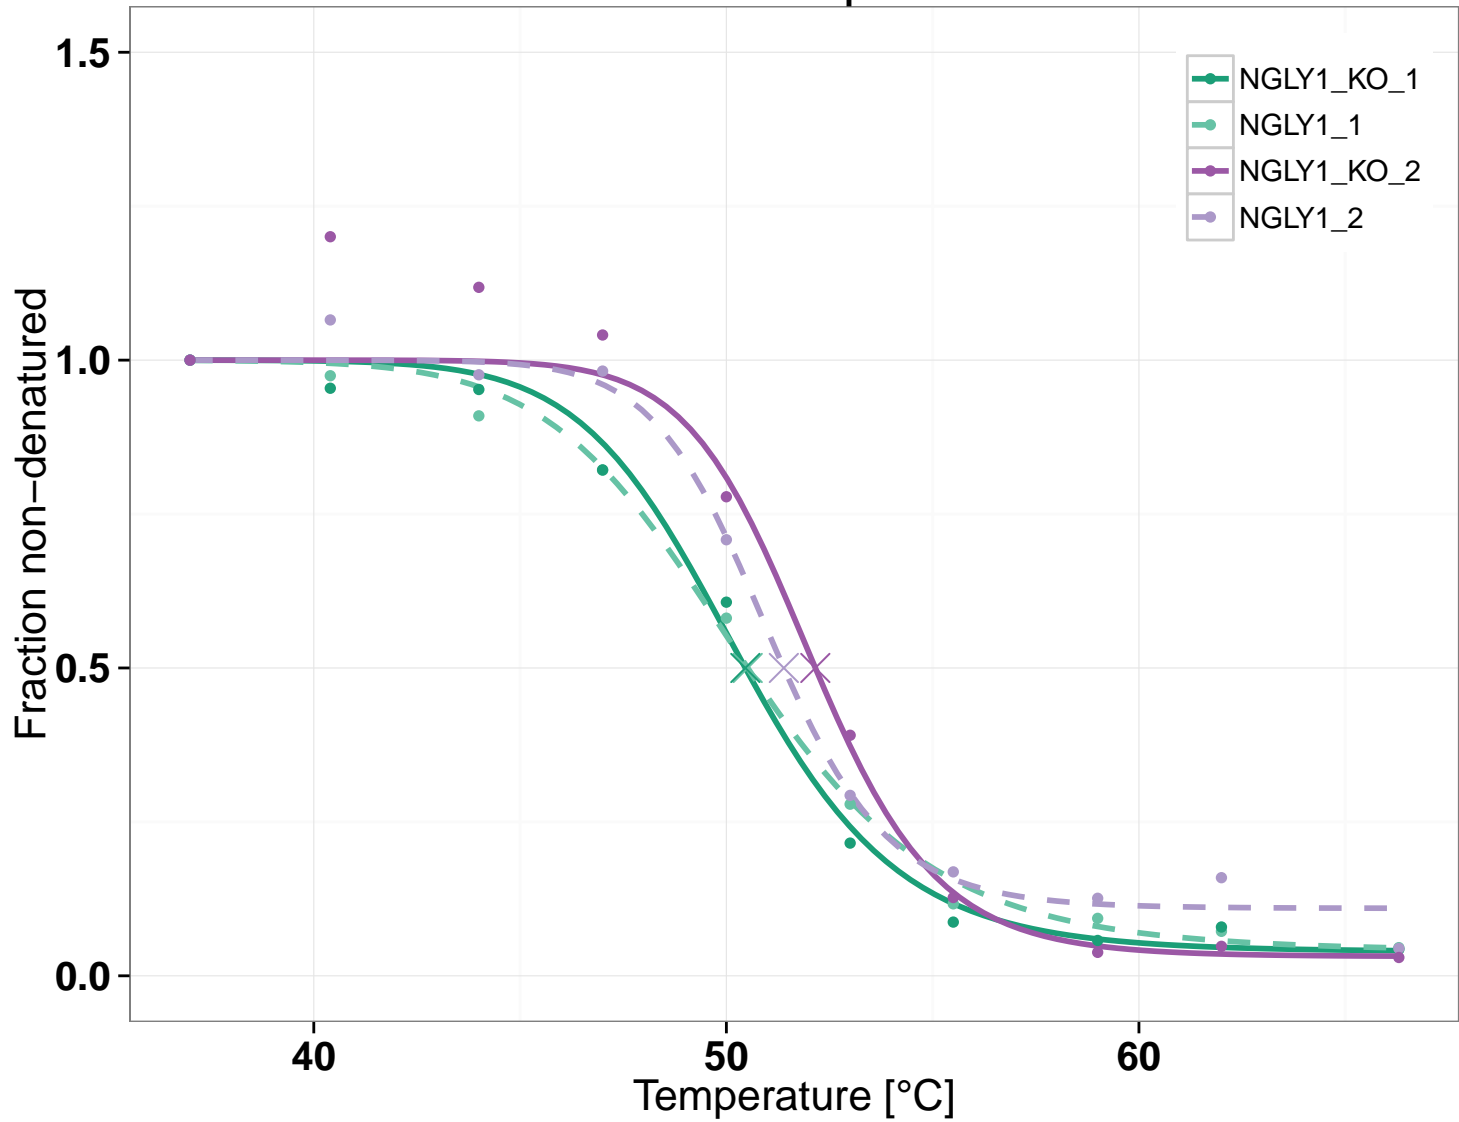

|            | meltPoint | slope | plateau | R2   |
|------------|-----------|-------|---------|------|
| NGLY1_KO_1 | 50.46     | -0.12 | 0.04    | 0.99 |
| NGLY1_1    | 50.52     | -0.1  | 0.04    | 1    |
| NGLY1_KO_2 | 52.16     | -0.16 | 0.03    | 0.97 |
| NGLY1_2    | 51.39     | -0.16 | 0.11    | 0.99 |

Supplement: Supplementary file 7668 [file 1]

# IPI00029015.1|KDSR

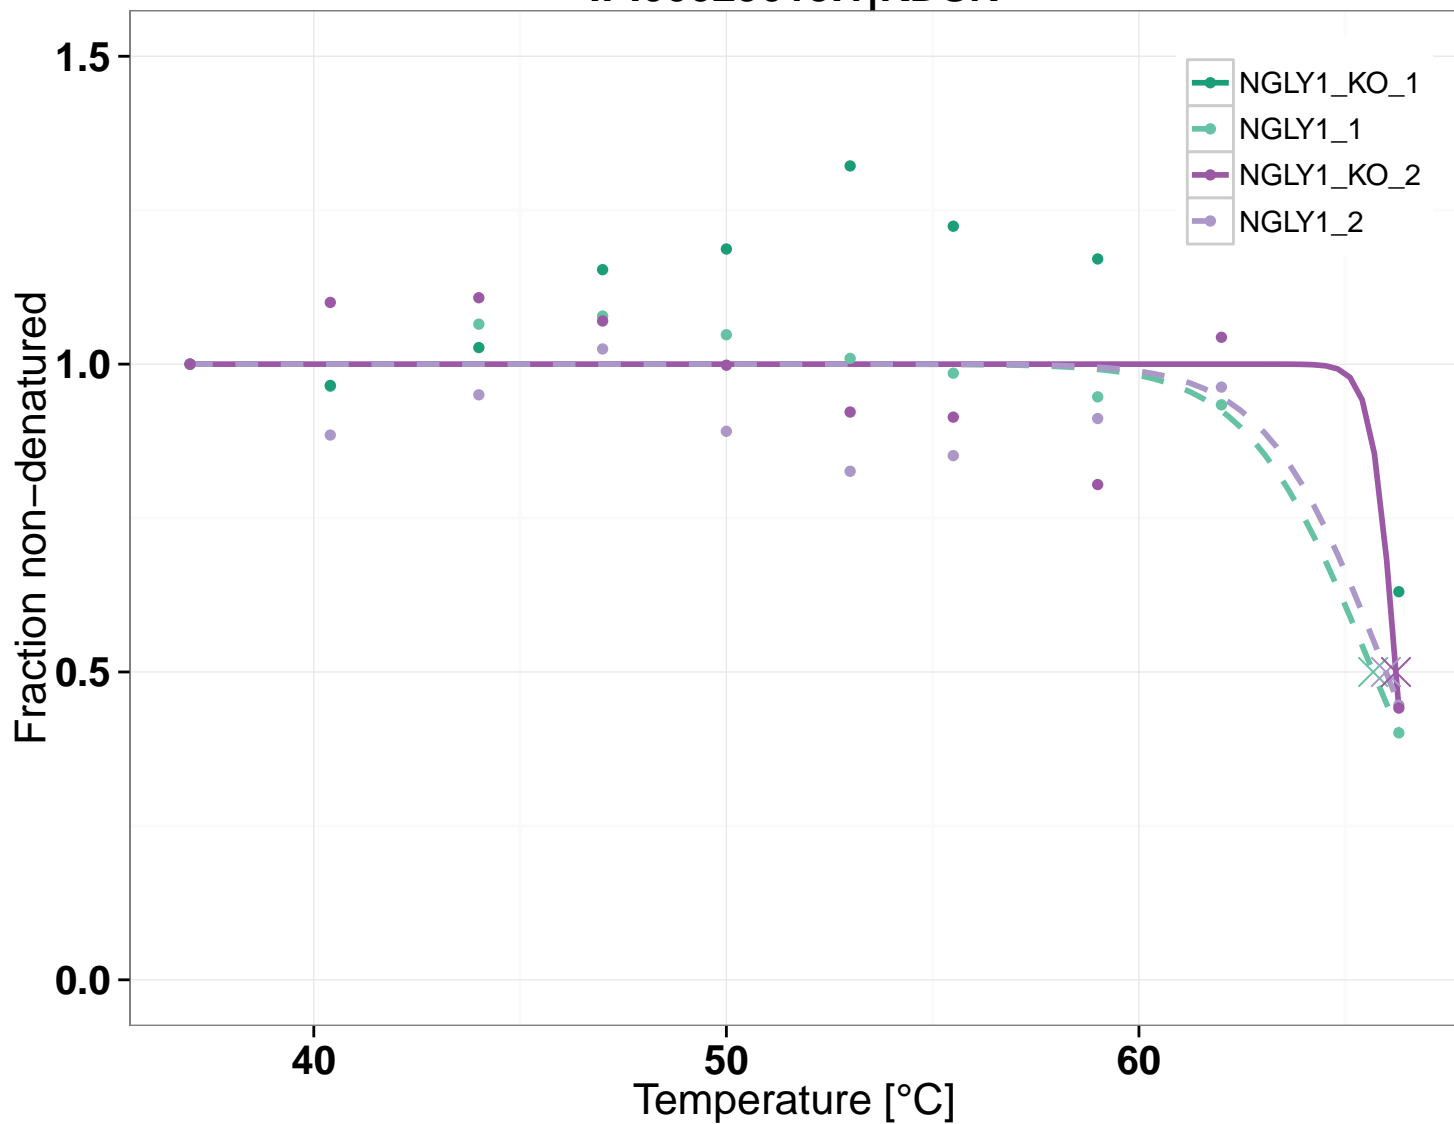

|            | meltPoint | slope | plateau | R2   |
|------------|-----------|-------|---------|------|
| NGLY1_KO_1 | —         | —     | —       | —    |
| NGLY1_1    | 65.68     | -0.16 | 0       | 0.95 |
| NGLY1_KO_2 | 66.23     | -0.84 | 0       | 0.77 |
| NGLY1_2    | 65.99     | -0.17 | 0       | 0.63 |

Supplement: Supplementary file 7669 [file 1]

# IPI00291042.2|HIATL1

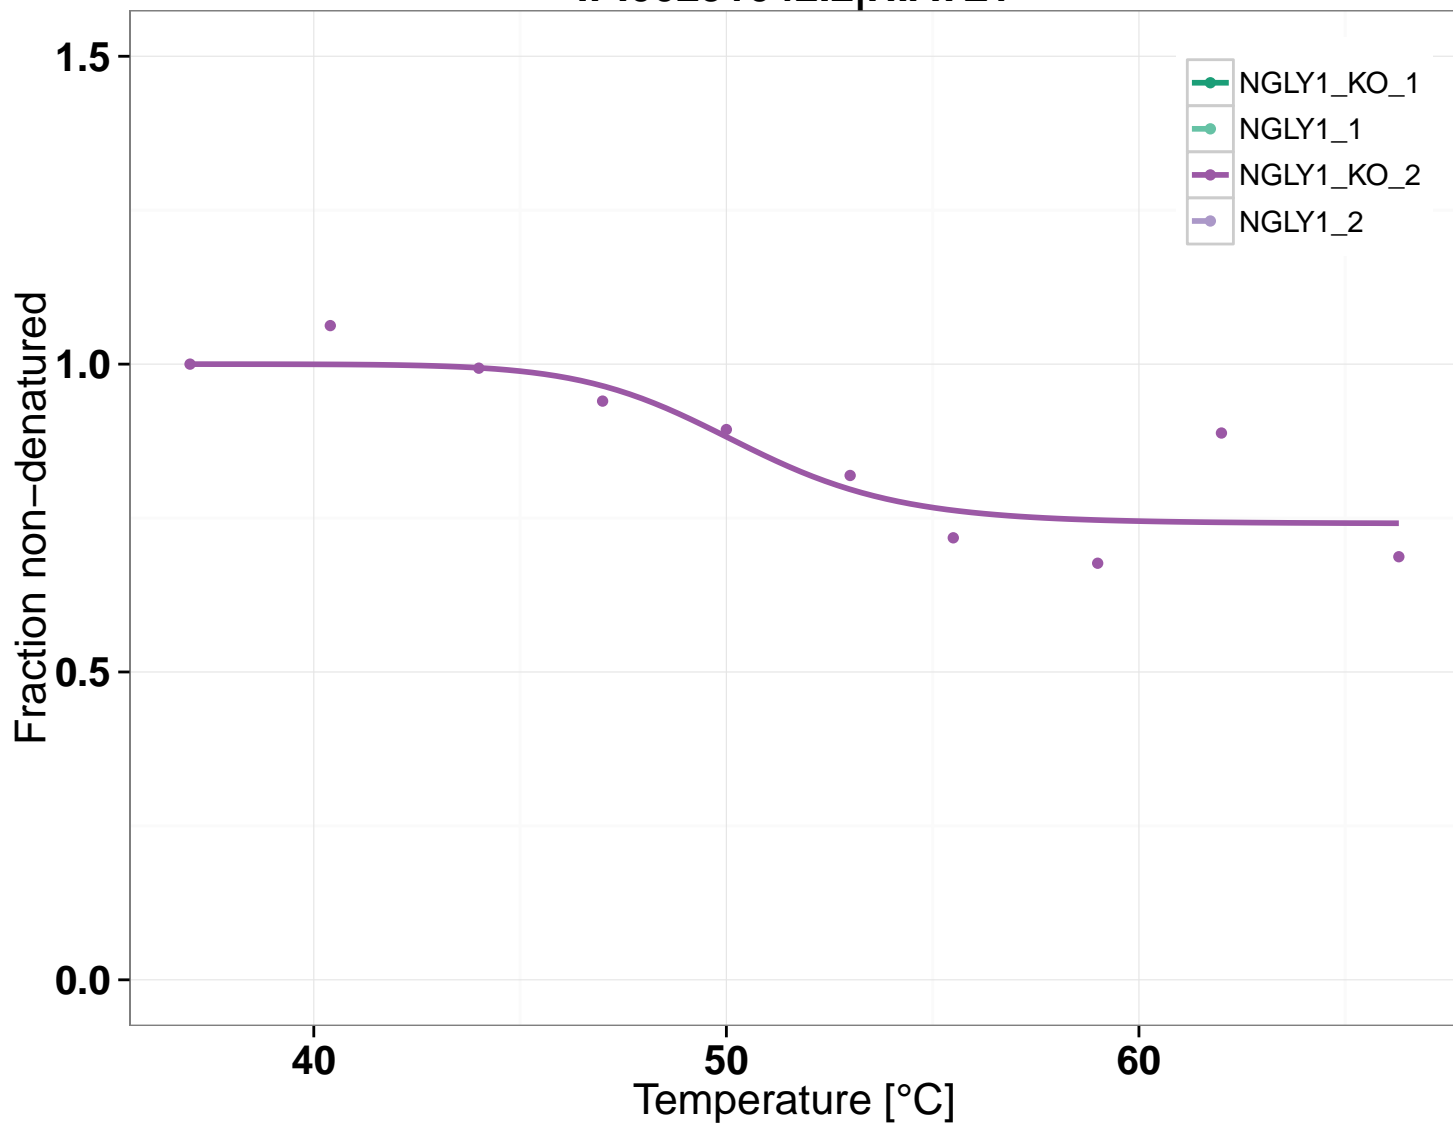

|            | meltPoint | slope  | plateau | R2   |
|------------|-----------|--------|---------|------|
| NGLY1_KO_1 | —         | —      | —       | —    |
| NGLY1_1    | —         | —      | —       | —    |
| NGLY1_KO_2 | —         | -0.034 | 0.74    | 0.79 |
| NGLY1_2    | —         | —      | —       | —    |

Supplement: Supplementary file 7670 [file 1]

# IPI00328293.2|SRRM1

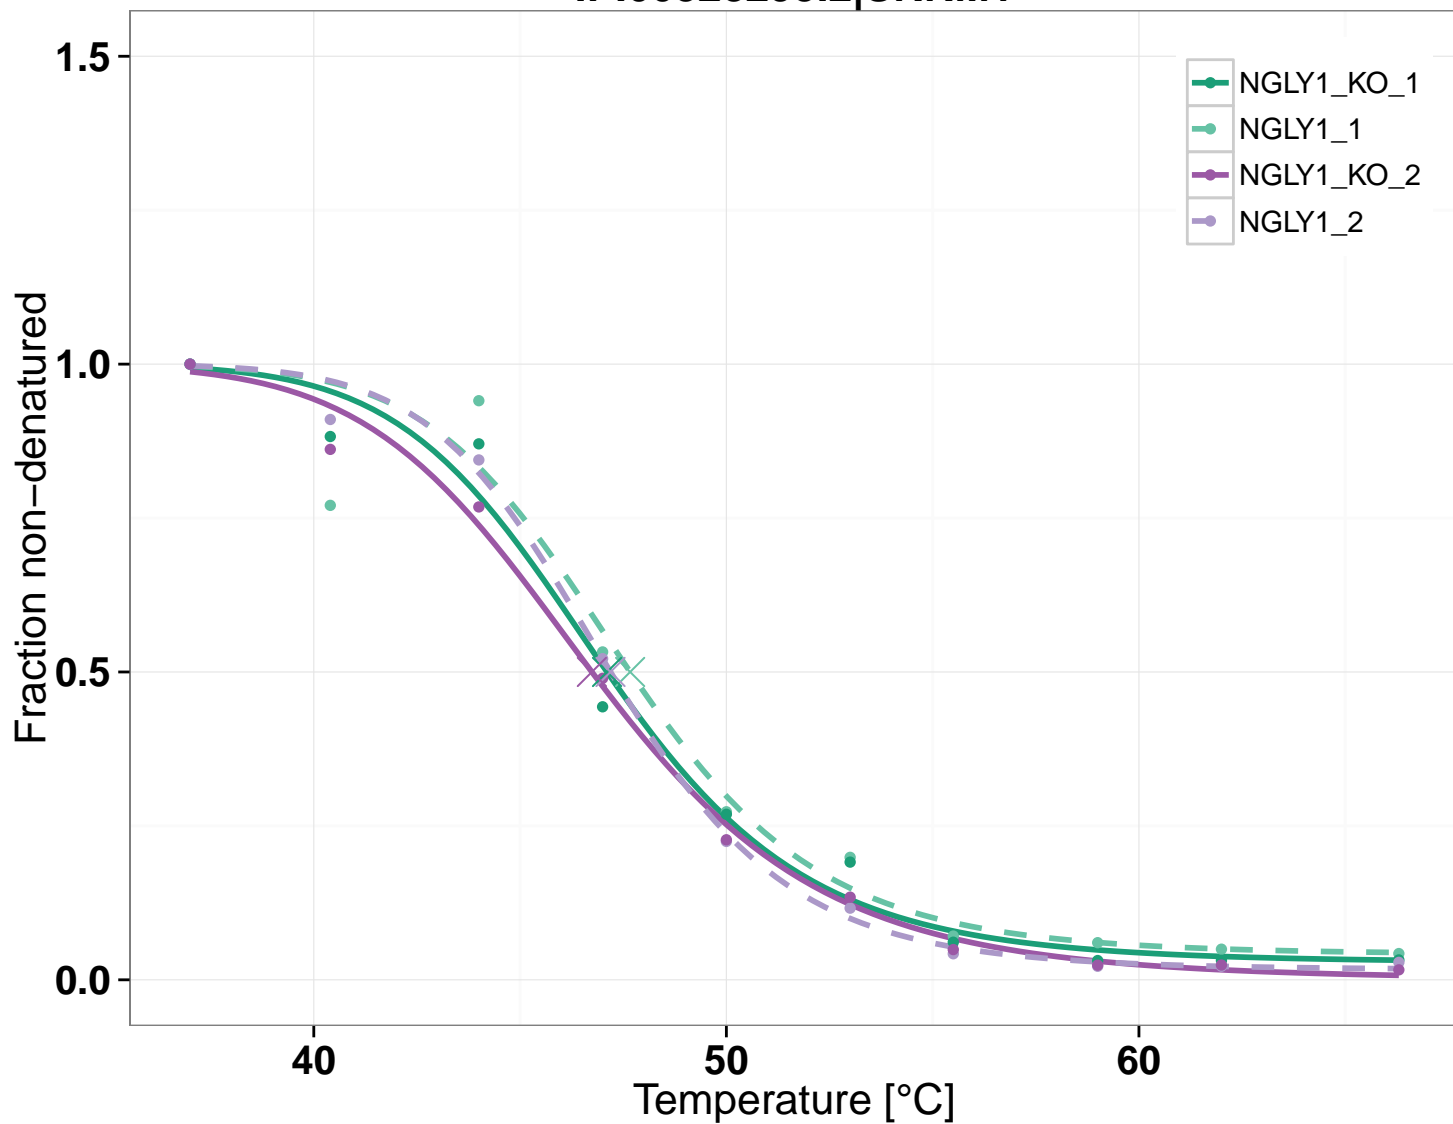

|            | meltPoint | slope  | plateau | R2   |
|------------|-----------|--------|---------|------|
| NGLY1_KO_1 | 47.11     | -0.098 | 0.03    | 0.98 |
| NGLY1_1    | 47.67     | -0.1   | 0.04    | 0.96 |
| NGLY1_KO_2 | 46.74     | -0.09  | 0       | 0.99 |
| NGLY1_2    | 47.19     | -0.11  | 0.02    | 1    |

Supplement: Supplementary file 7671 [file 1]

# IPI00005578.1|EHD4

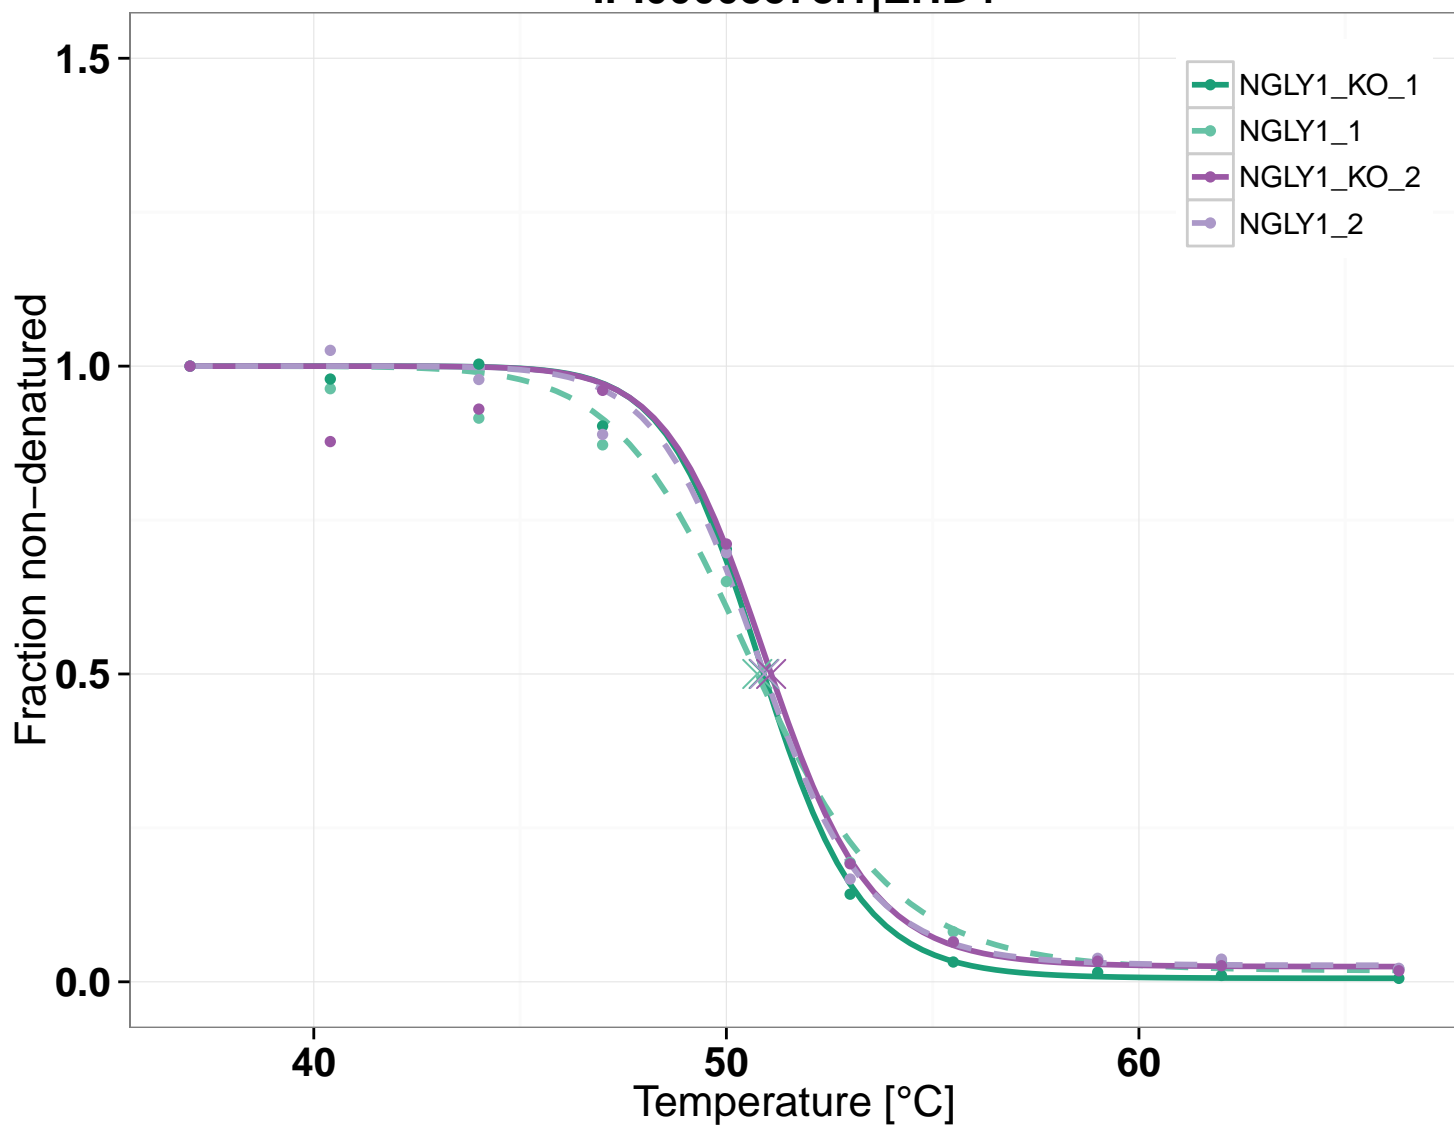

|            | meltPoint | slope | plateau | R2   |
|------------|-----------|-------|---------|------|
| NGLY1_KO_1 | 50.91     | -0.21 | 0.01    | 1    |
| NGLY1_1    | 50.75     | -0.15 | 0.02    | 0.99 |
| NGLY1_KO_2 | 51.09     | -0.2  | 0.02    | 0.99 |
| NGLY1_2    | 50.92     | -0.19 | 0.03    | 1    |

Supplement: Supplementary file 7672 [file 1]

IPI00219592.3|PRKACG

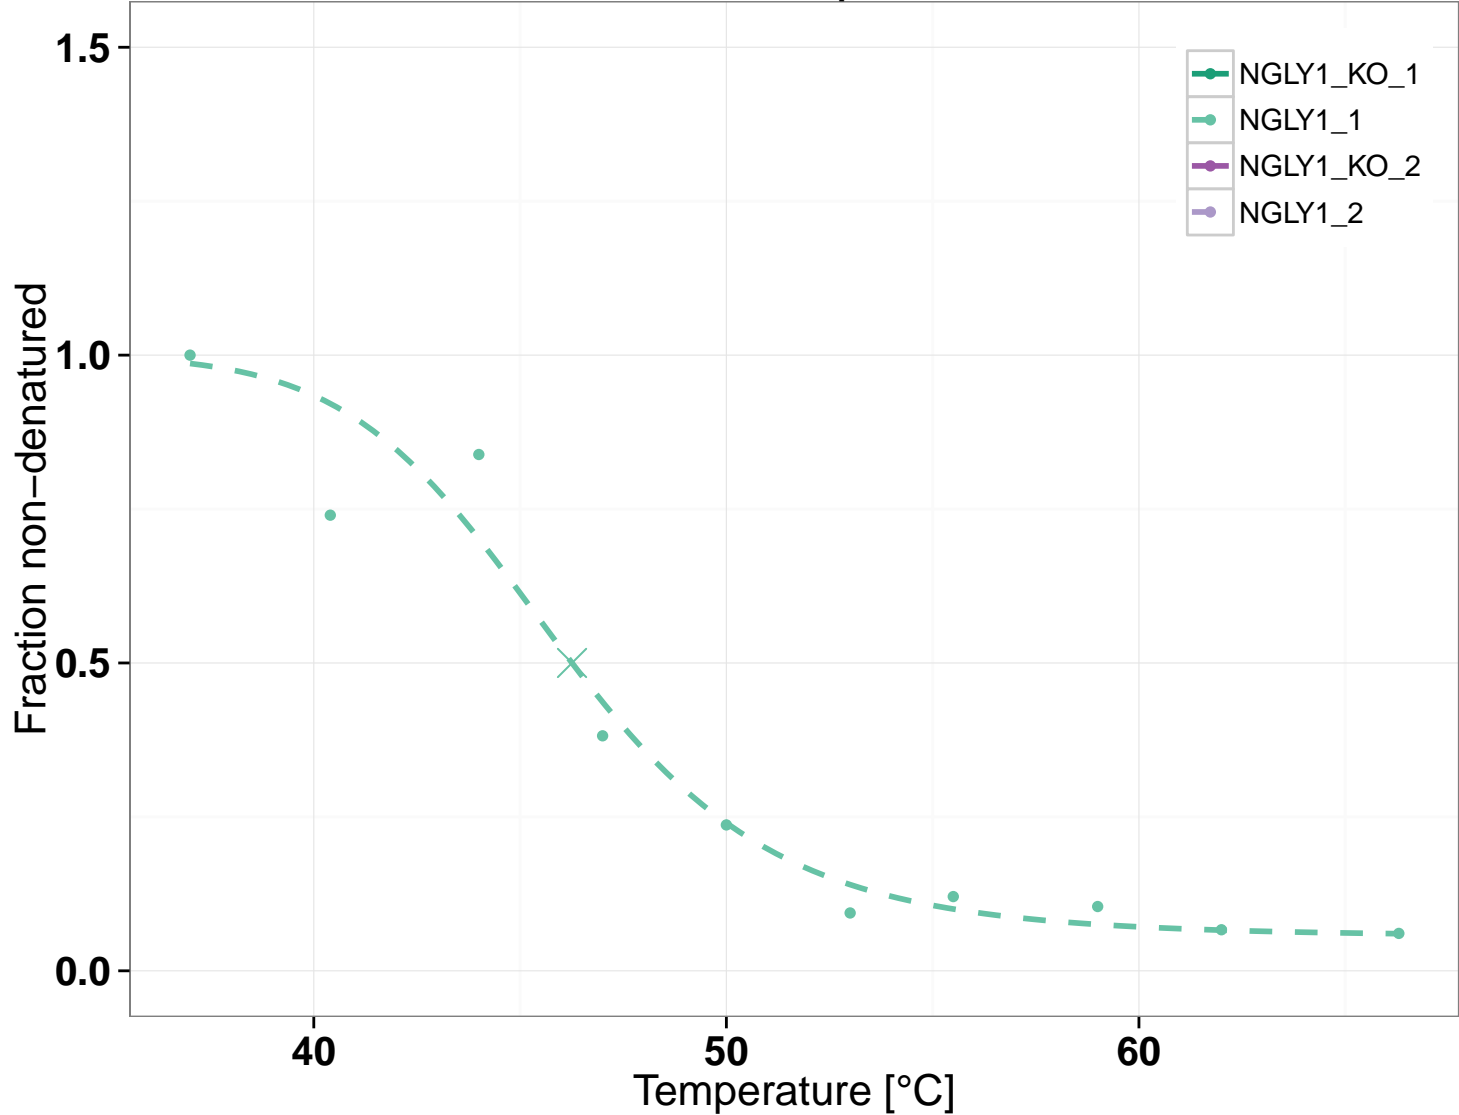

|            | meltPoint | slope  | plateau | R2   |
|------------|-----------|--------|---------|------|
| NGLY1_KO_1 | -         | -      | -       | -    |
| NGLY1_1    | 46.26     | -0.091 | 0.06    | 0.95 |
| NGLY1_KO_2 | -         | -      | -       | -    |
| NGLY1_2    | -         | -      | -       | -    |

Supplement: Supplementary file 7673 [file 1]

IPI00002150.4|AP4B1

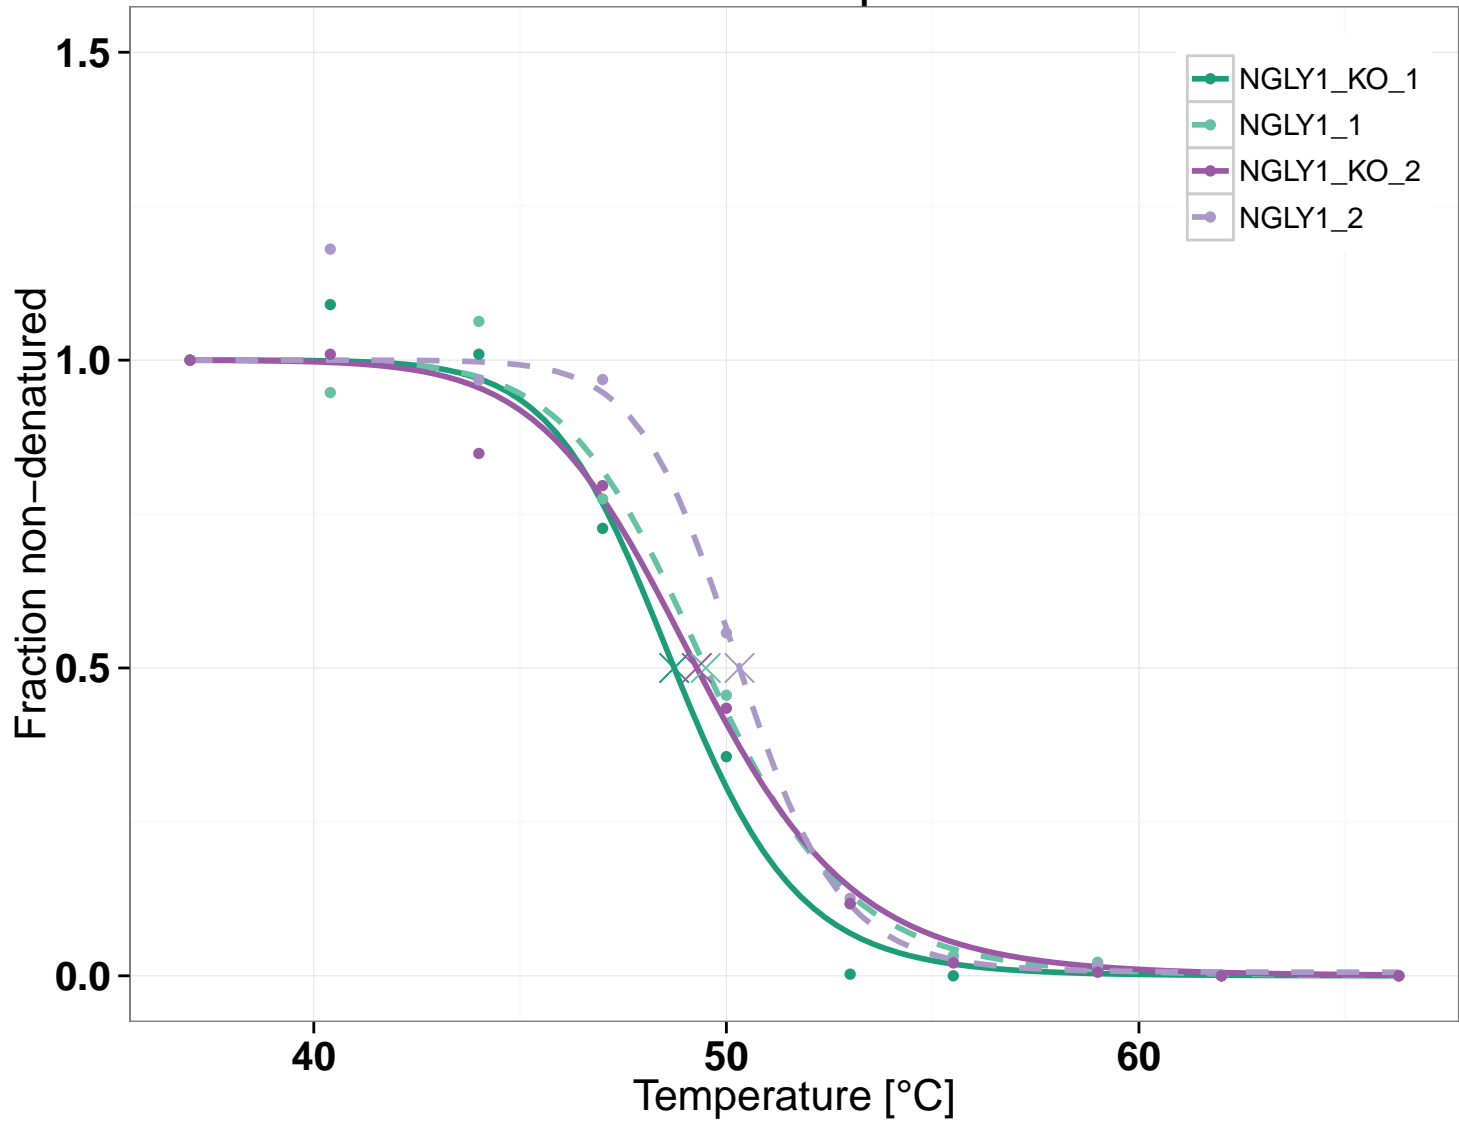

|            | meltPoint | slope | plateau | R2   |
|------------|-----------|-------|---------|------|
| NGLY1_KO_1 | 48.73     | -0.17 | 0       | 0.99 |
| NGLY1_1    | 49.5      | -0.15 | 0       | 0.99 |
| NGLY1_KO_2 | 49.28     | -0.13 | 0       | 0.99 |
| NGLY1_2    | 50.32     | -0.2  | 0.01    | 0.98 |

Supplement: Supplementary file 7674 [file 1]

IPI00477330.3|ARHGAP11A

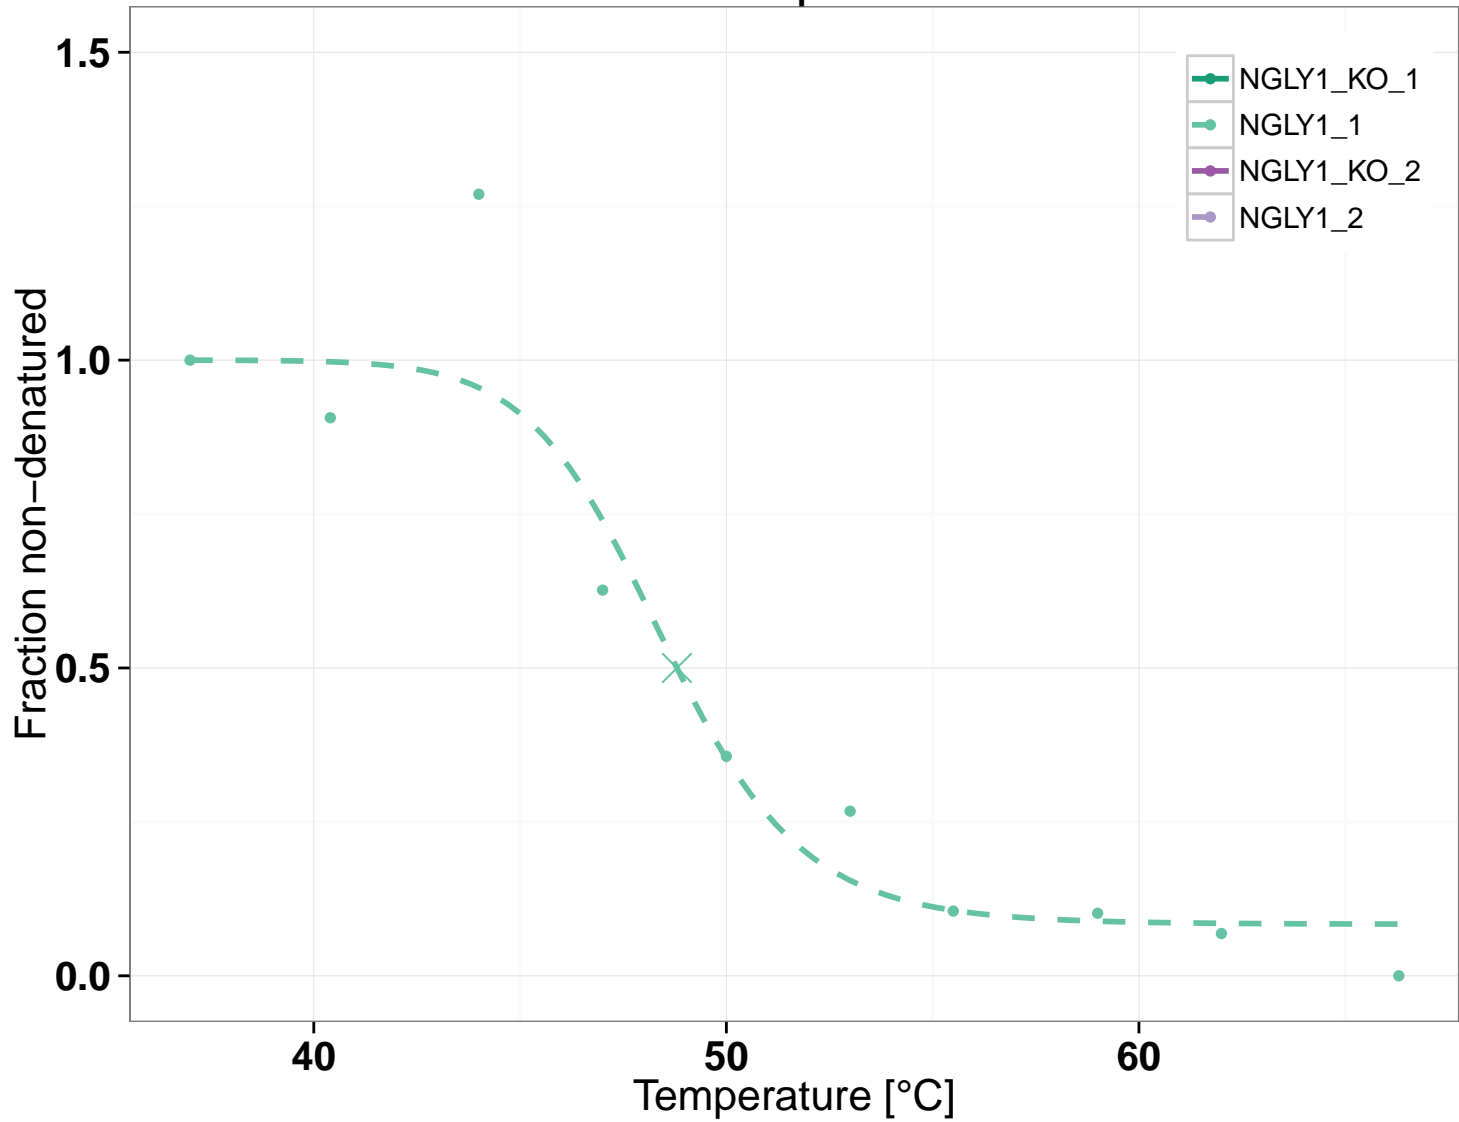

|            | meltPoint | slope | plateau | R2   |
|------------|-----------|-------|---------|------|
| NGLY1_KO_1 | -         | -     | -       | -    |
| NGLY1_1    | 48.8      | -0.14 | 0.08    | 0.92 |
| NGLY1_KO_2 | -         | -     | -       | -    |
| NGLY1_2    | -         | -     | -       | -    |

Supplement: Supplementary file 7675 [file 1]

# IPI00607582.1|DHR SX

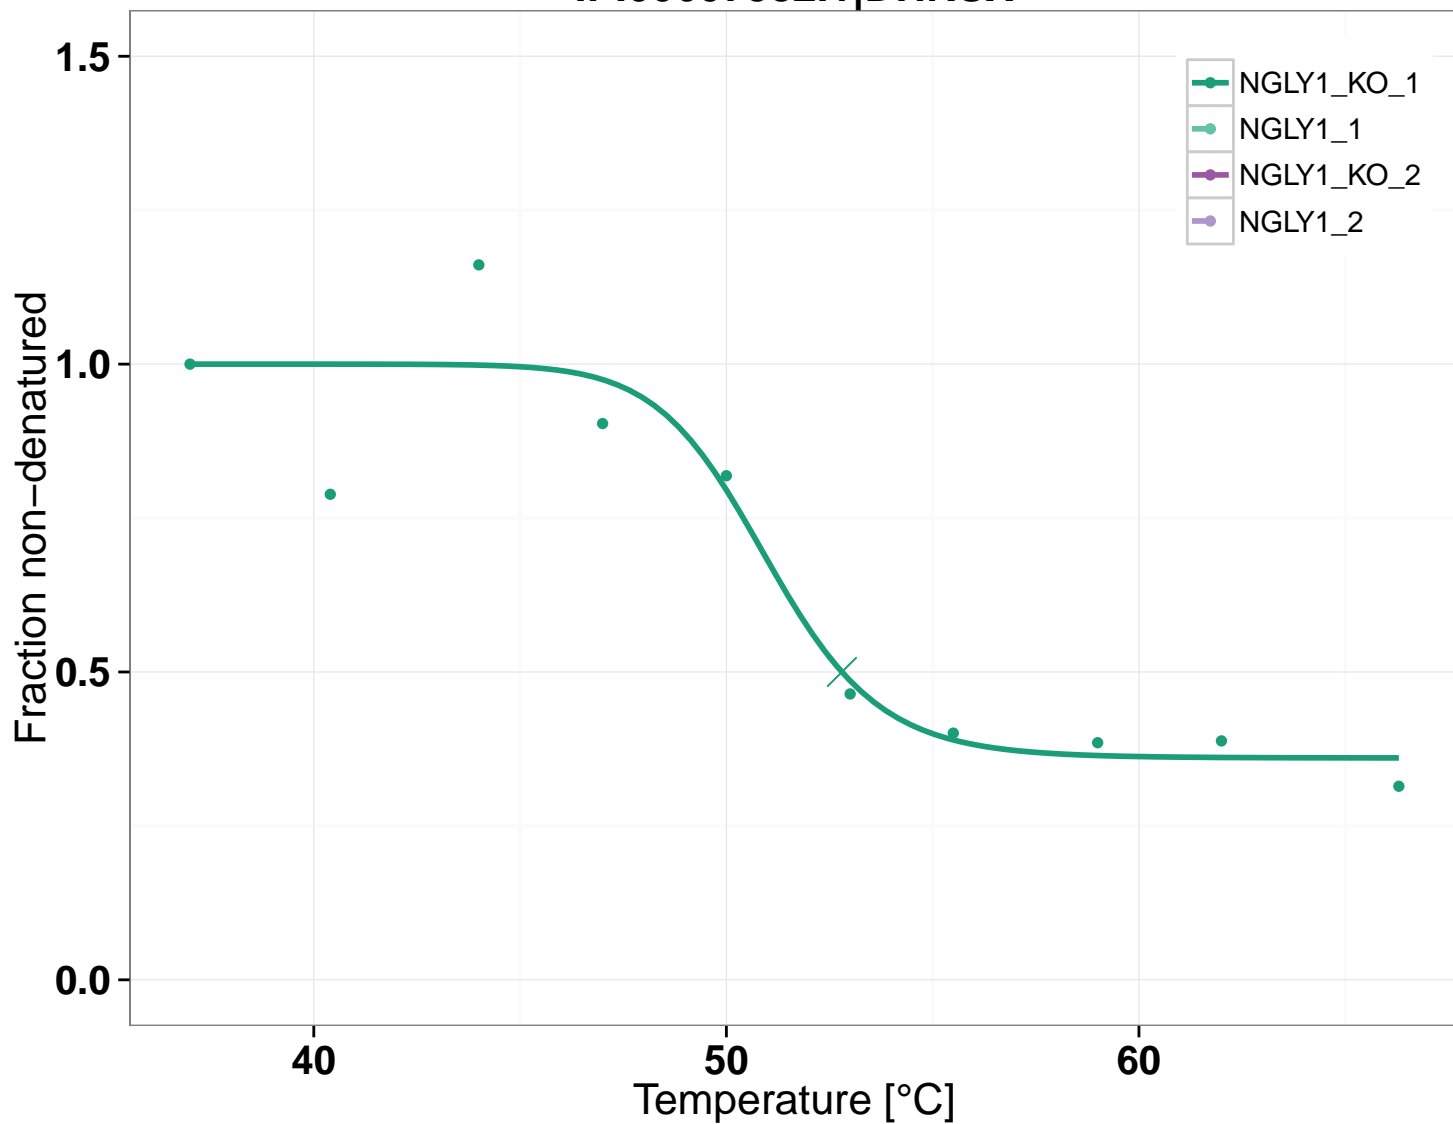

|            | meltPoint | slope | plateau | R2  |
|------------|-----------|-------|---------|-----|
| NGLY1_KO_1 | 52.8      | -0.12 | 0.36    | 0.9 |
| NGLY1_1    | -         | -     | -       | -   |
| NGLY1_KO_2 | -         | -     | -       | -   |
| NGLY1_2    | -         | -     | -       | -   |

Supplement: Supplementary file 7676 [file 1]

IPI00555647.3|SFRS10

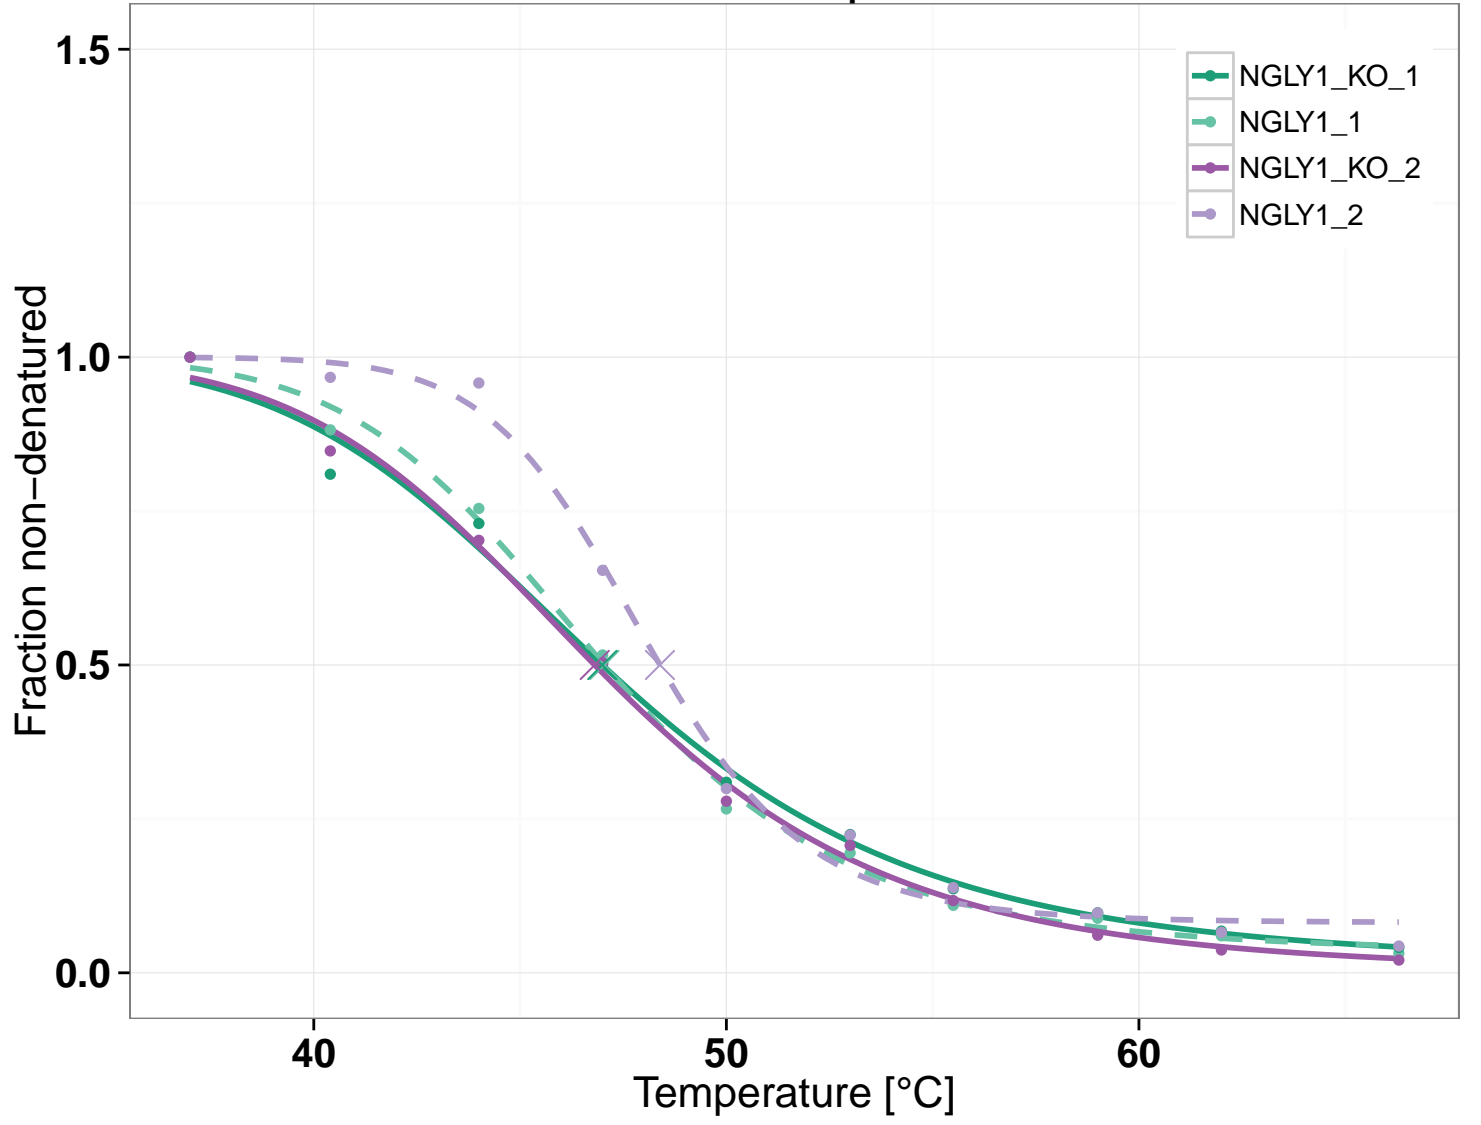

|            | meltPoint | slope  | plateau | R2   |
|------------|-----------|--------|---------|------|
| NGLY1_KO_1 | 46.99     | -0.064 | 0.01    | 0.99 |
| NGLY1_1    | 47.04     | -0.079 | 0.03    | 1    |
| NGLY1_KO_2 | 46.81     | -0.07  | 0       | 1    |
| NGLY1_2    | 48.39     | -0.12  | 0.08    | 0.99 |

Supplement: Supplementary file 7677 [file 1]

IPI00100041.3|L3MBTL2

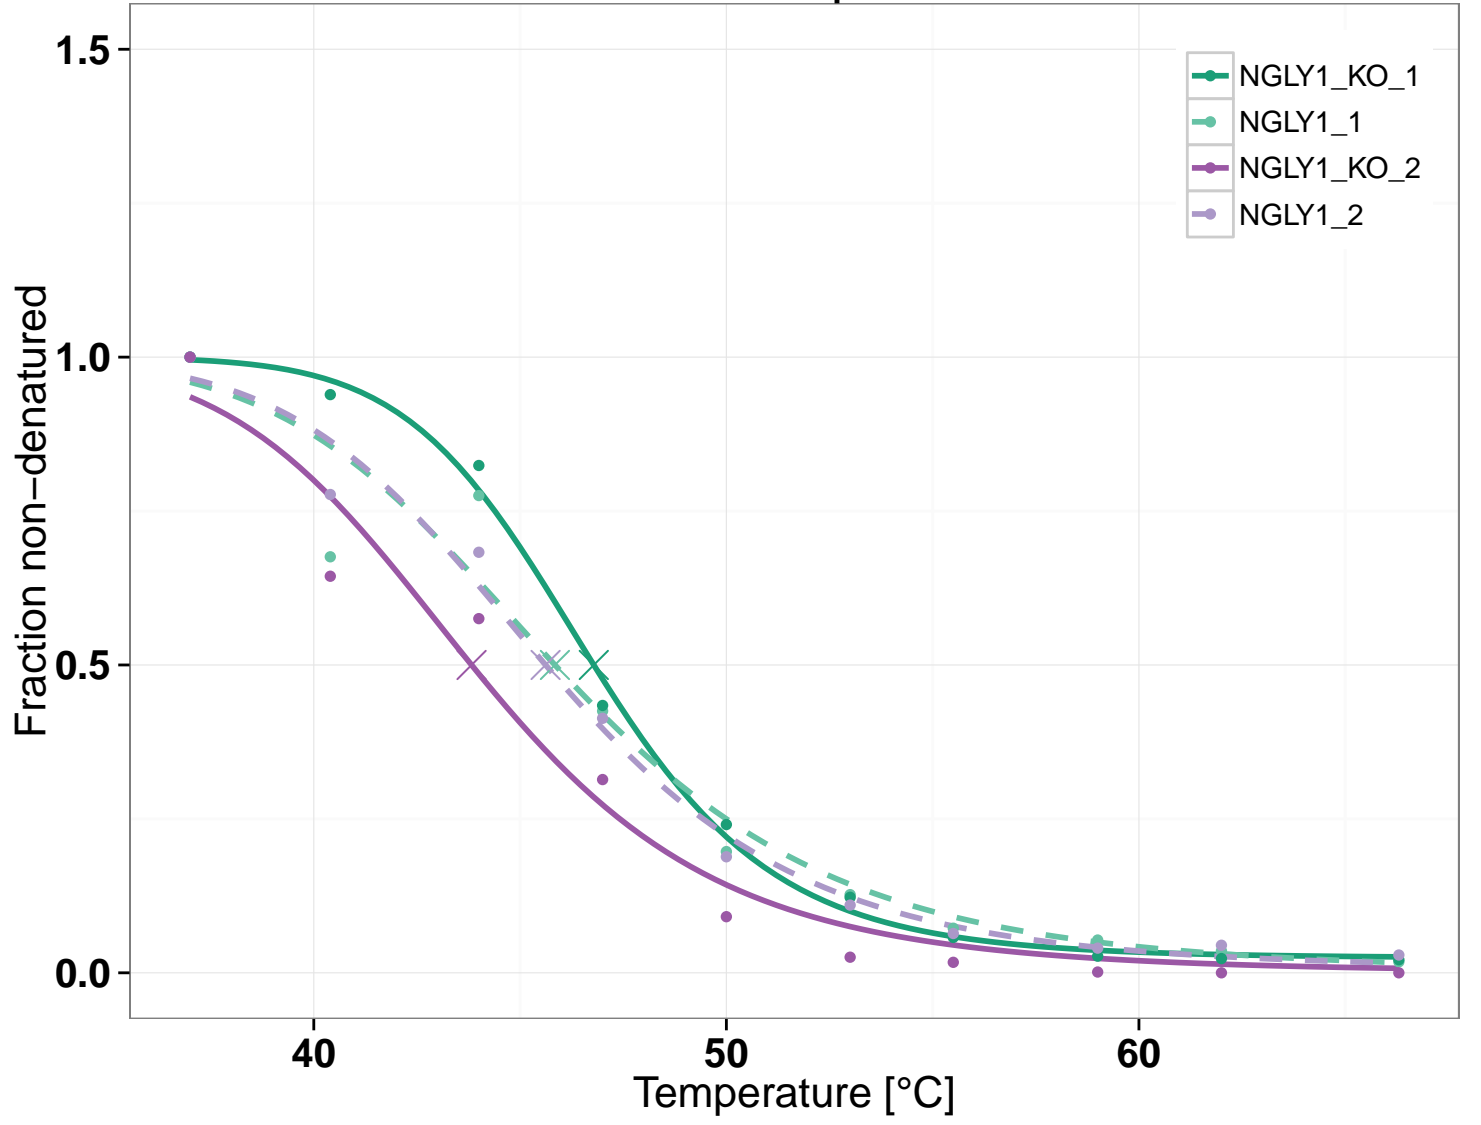

|            | meltPoint | slope  | plateau | R2   |
|------------|-----------|--------|---------|------|
| NGLY1_KO_1 | 46.79     | -0.11  | 0.02    | 1    |
| NGLY1_1    | 45.84     | -0.074 | 0       | 0.95 |
| NGLY1_KO_2 | 43.82     | -0.084 | 0       | 0.97 |
| NGLY1_2    | 45.62     | -0.08  | 0       | 0.99 |

Supplement: Supplementary file 7678 [file 1]

IPI00073436.3|NECAP2

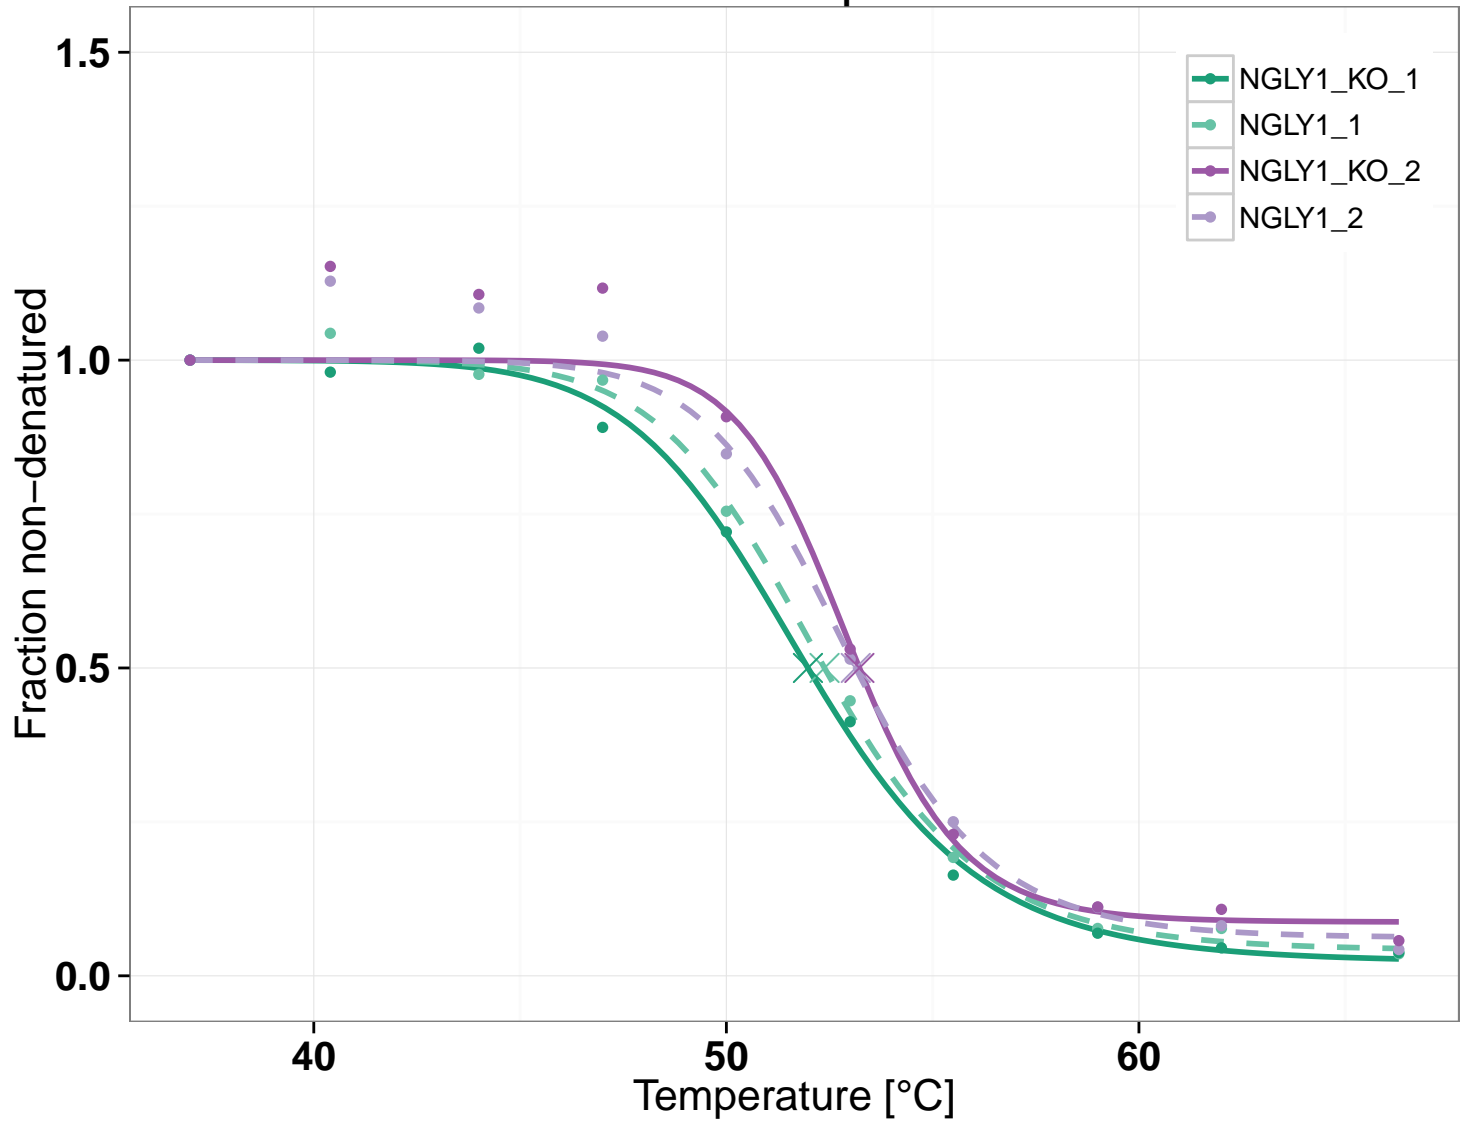

|            | meltPoint | slope | plateau | R2   |
|------------|-----------|-------|---------|------|
| NGLY1_KO_1 | 51.98     | -0.11 | 0.02    | 1    |
| NGLY1_1    | 52.38     | -0.12 | 0.04    | 1    |
| NGLY1_KO_2 | 53.22     | -0.17 | 0.09    | 0.97 |
| NGLY1_2    | 53.14     | -0.14 | 0.06    | 0.98 |

Supplement: Supplementary file 7679 [file 1]

IPI00166528.4|RICTOR

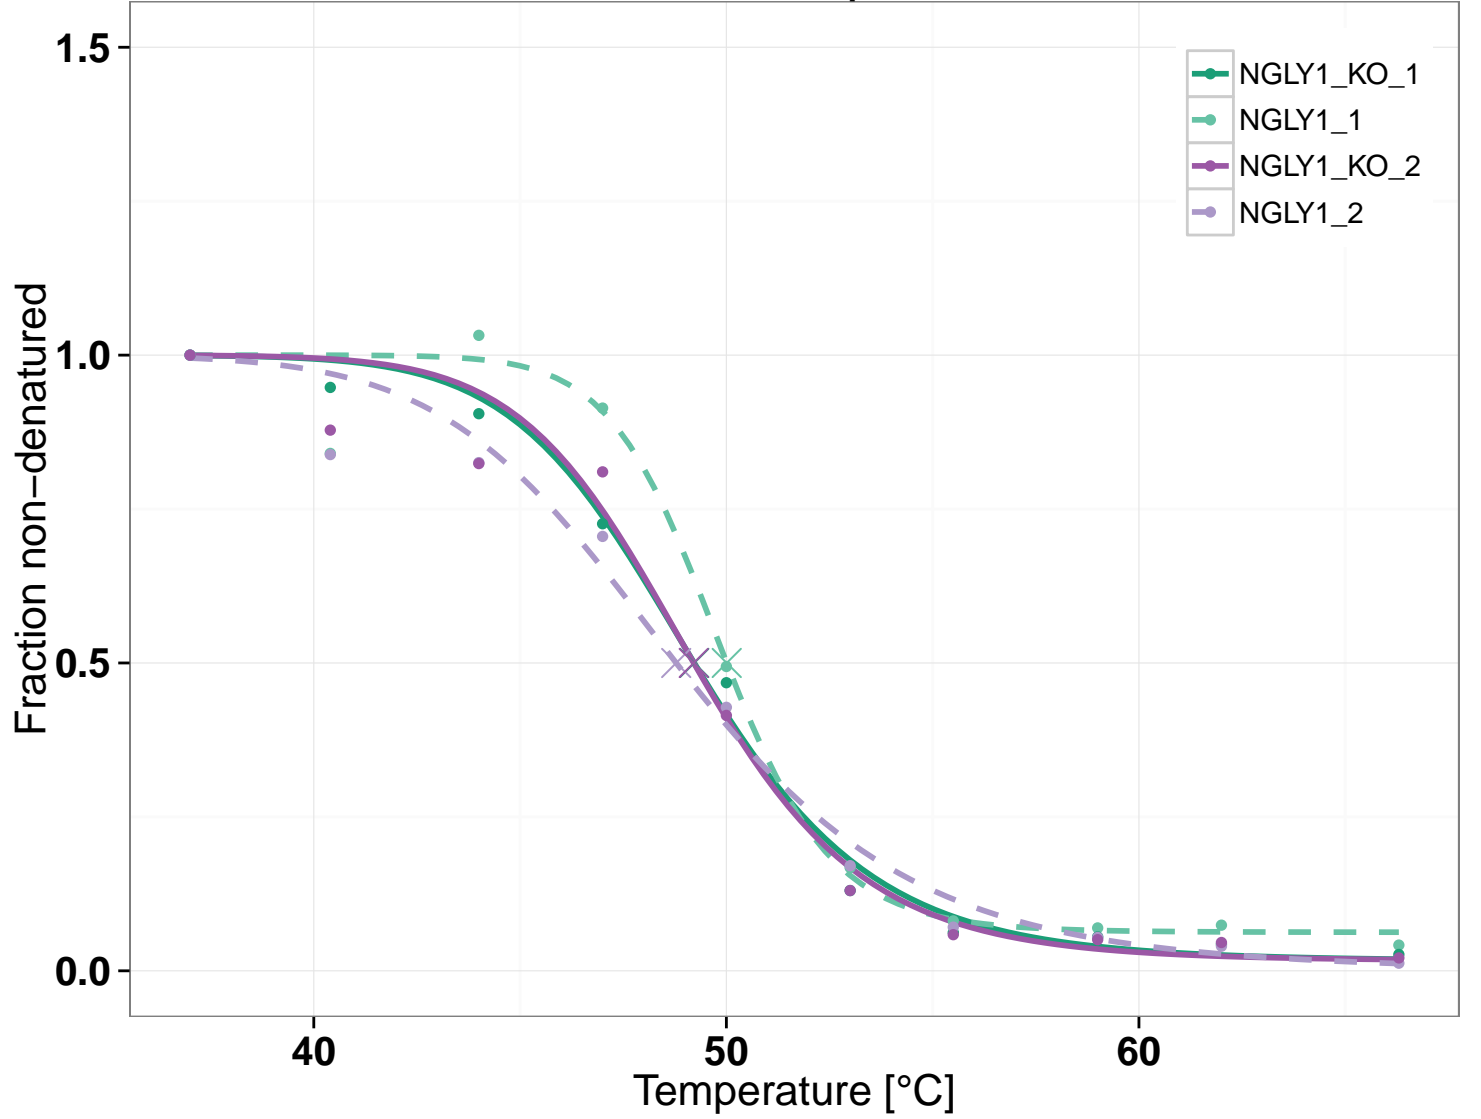

|            | meltPoint | slope  | plateau | R2   |
|------------|-----------|--------|---------|------|
| NGLY1_KO_1 | 49.22     | -0.11  | 0.02    | 0.99 |
| NGLY1_1    | 50.01     | -0.17  | 0.06    | 0.98 |
| NGLY1_KO_2 | 49.21     | -0.12  | 0.02    | 0.98 |
| NGLY1_2    | 48.78     | -0.087 | 0       | 0.98 |

Supplement: Supplementary file 7680 [file 1]

# IPI00419237.3|LAP3

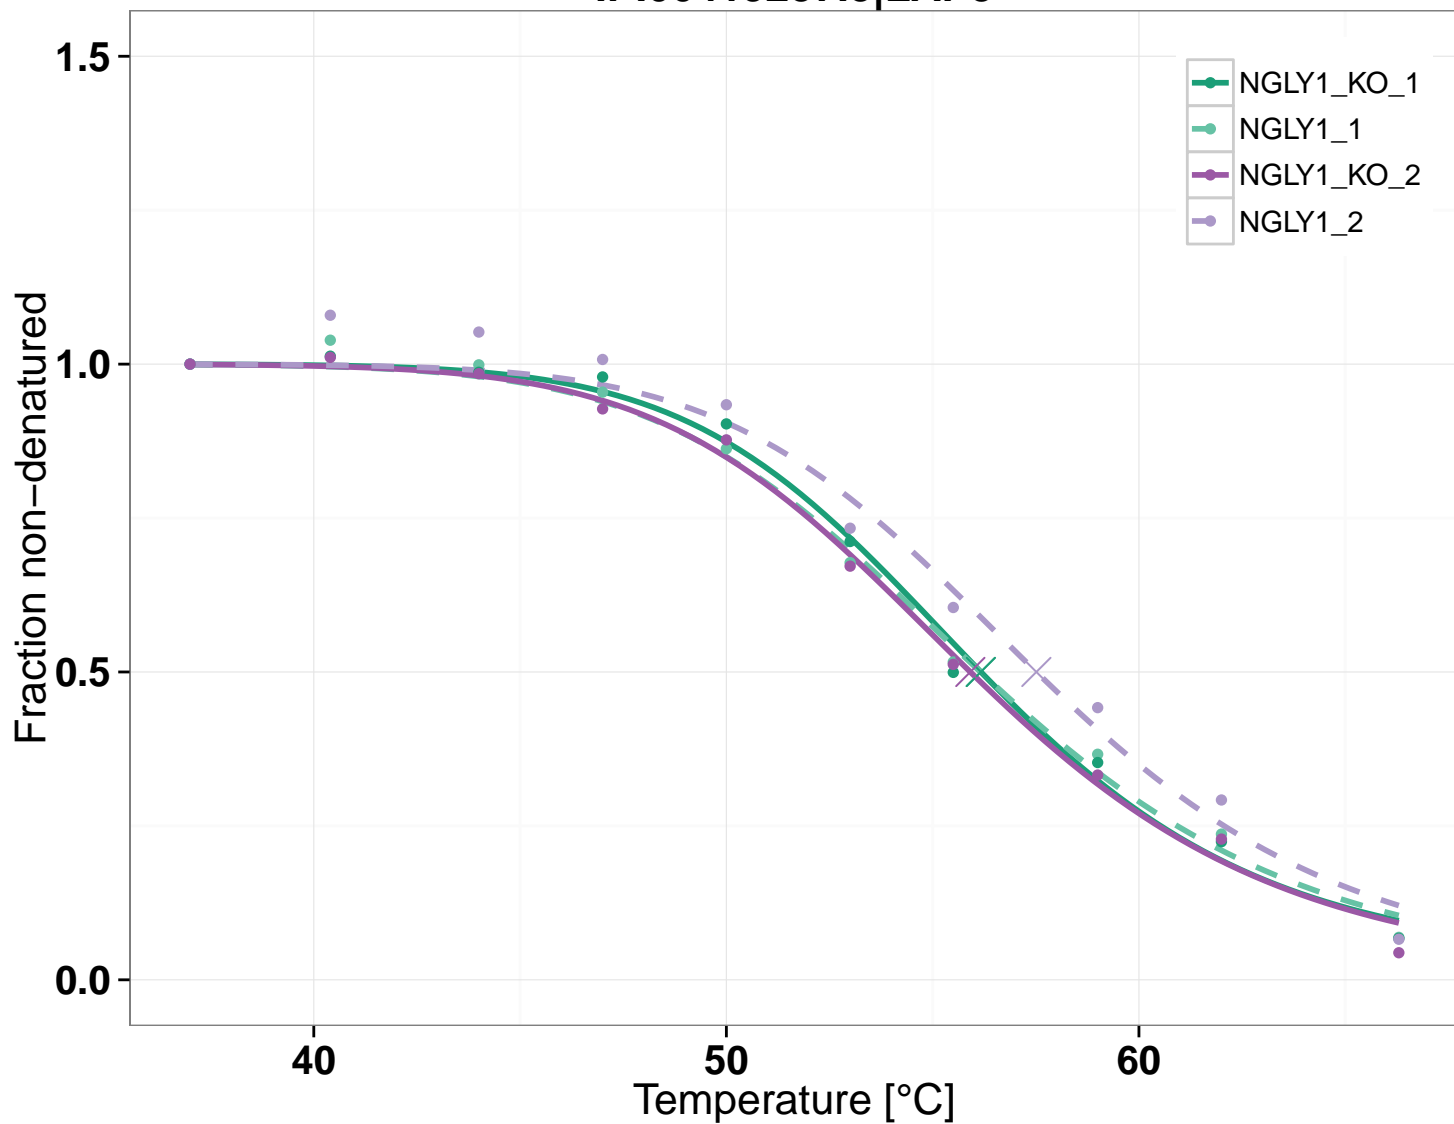

|            | meltPoint | slope  | plateau | R2   |
|------------|-----------|--------|---------|------|
| NGLY1_KO_1 | 56.17     | -0.07  | 0.02    | 0.99 |
| NGLY1_1    | 56.16     | -0.064 | 0       | 0.99 |
| NGLY1_KO_2 | 55.91     | -0.066 | 0       | 1    |
| NGLY1_2    | 57.51     | -0.066 | 0       | 0.98 |

Supplement: Supplementary file 7681 [file 1]

# IPI00550272.3|INTS10

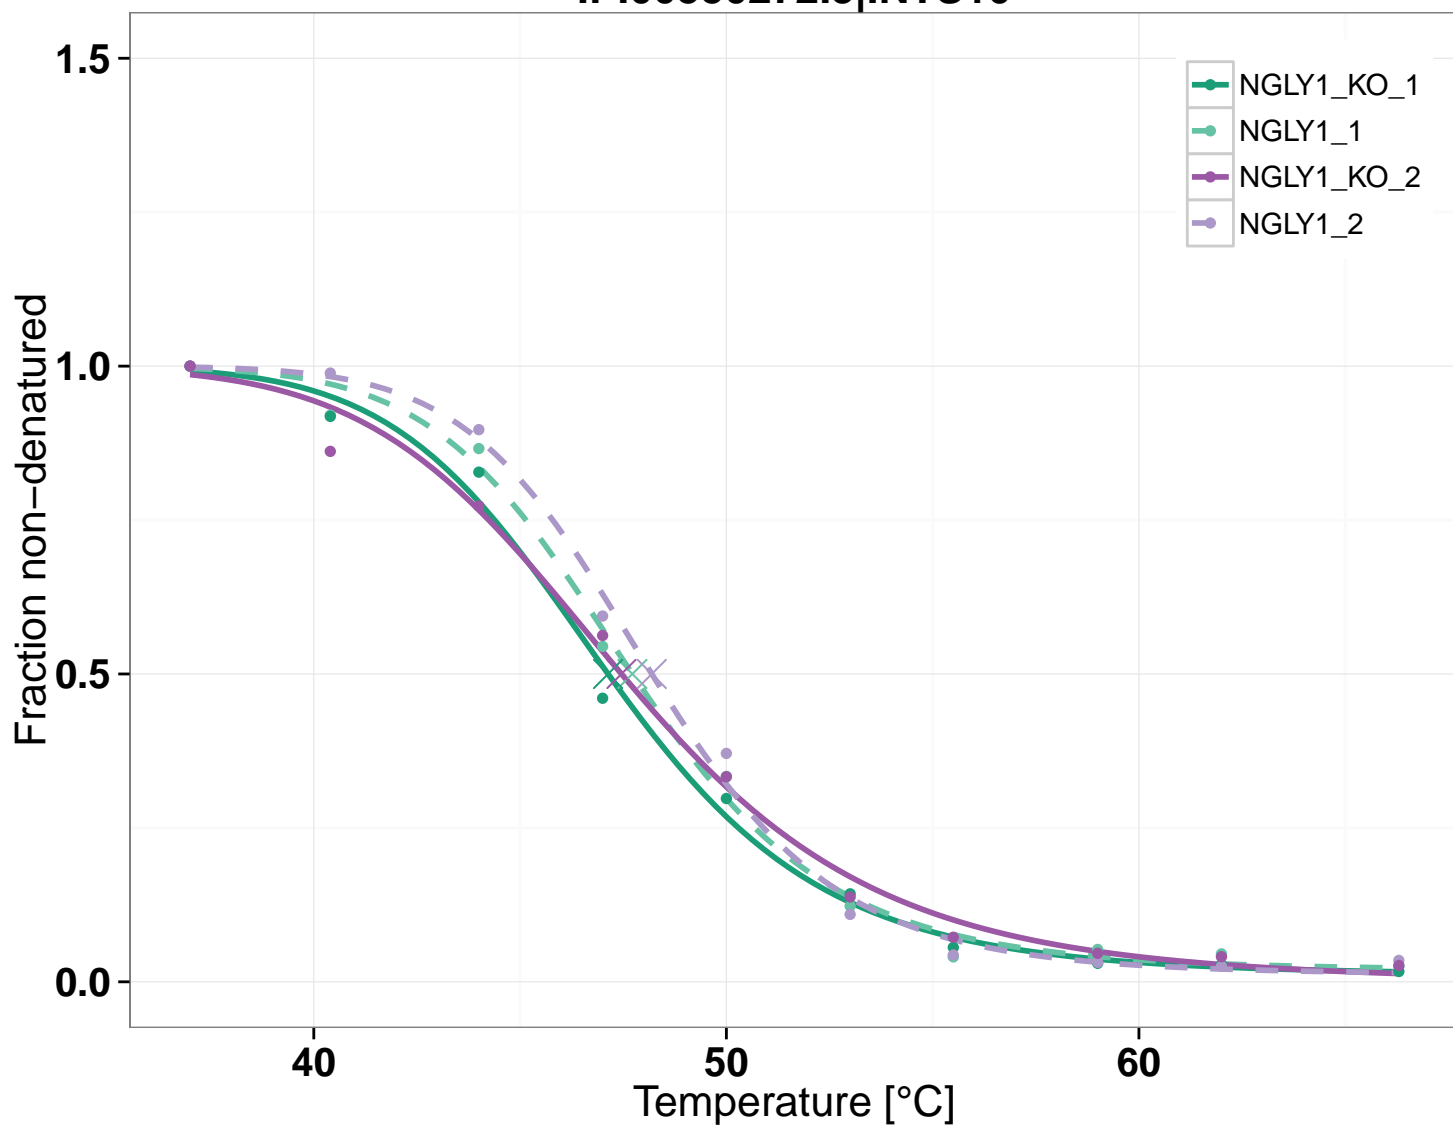

|            | meltPoint | slope  | plateau | R2   |
|------------|-----------|--------|---------|------|
| NGLY1_KO_1 | 47.13     | -0.095 | 0.01    | 0.99 |
| NGLY1_1    | 47.72     | -0.1   | 0.02    | 0.99 |
| NGLY1_KO_2 | 47.46     | -0.081 | 0       | 0.99 |
| NGLY1_2    | 48.19     | -0.11  | 0.01    | 1    |

Supplement: Supplementary file 7682 [file 1]

# IPI00018924.3|HMG20A

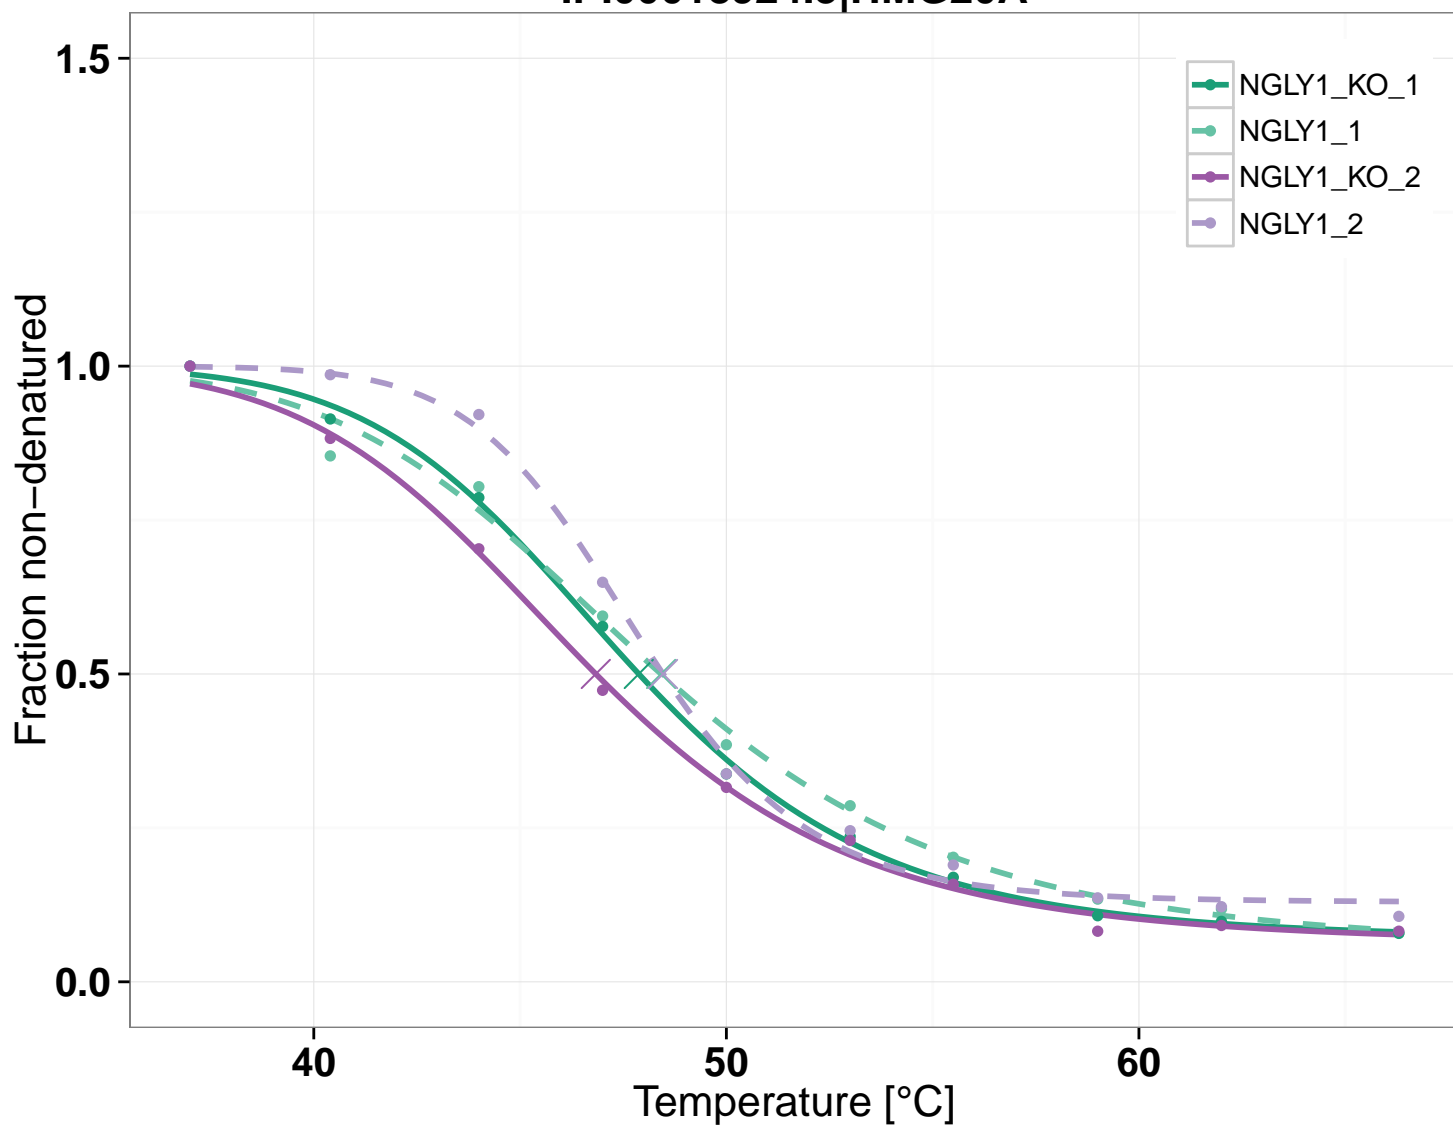

|            | meltPoint | slope  | plateau | R2   |
|------------|-----------|--------|---------|------|
| NGLY1_KO_1 | 47.88     | -0.075 | 0.07    | 1    |
| NGLY1_1    | 48.42     | -0.062 | 0.05    | 0.99 |
| NGLY1_KO_2 | 46.84     | -0.07  | 0.06    | 1    |
| NGLY1_2    | 48.46     | -0.11  | 0.13    | 1    |

Supplement: Supplementary file 7683 [file 1]

IPI00902946.1|ZDHHC9

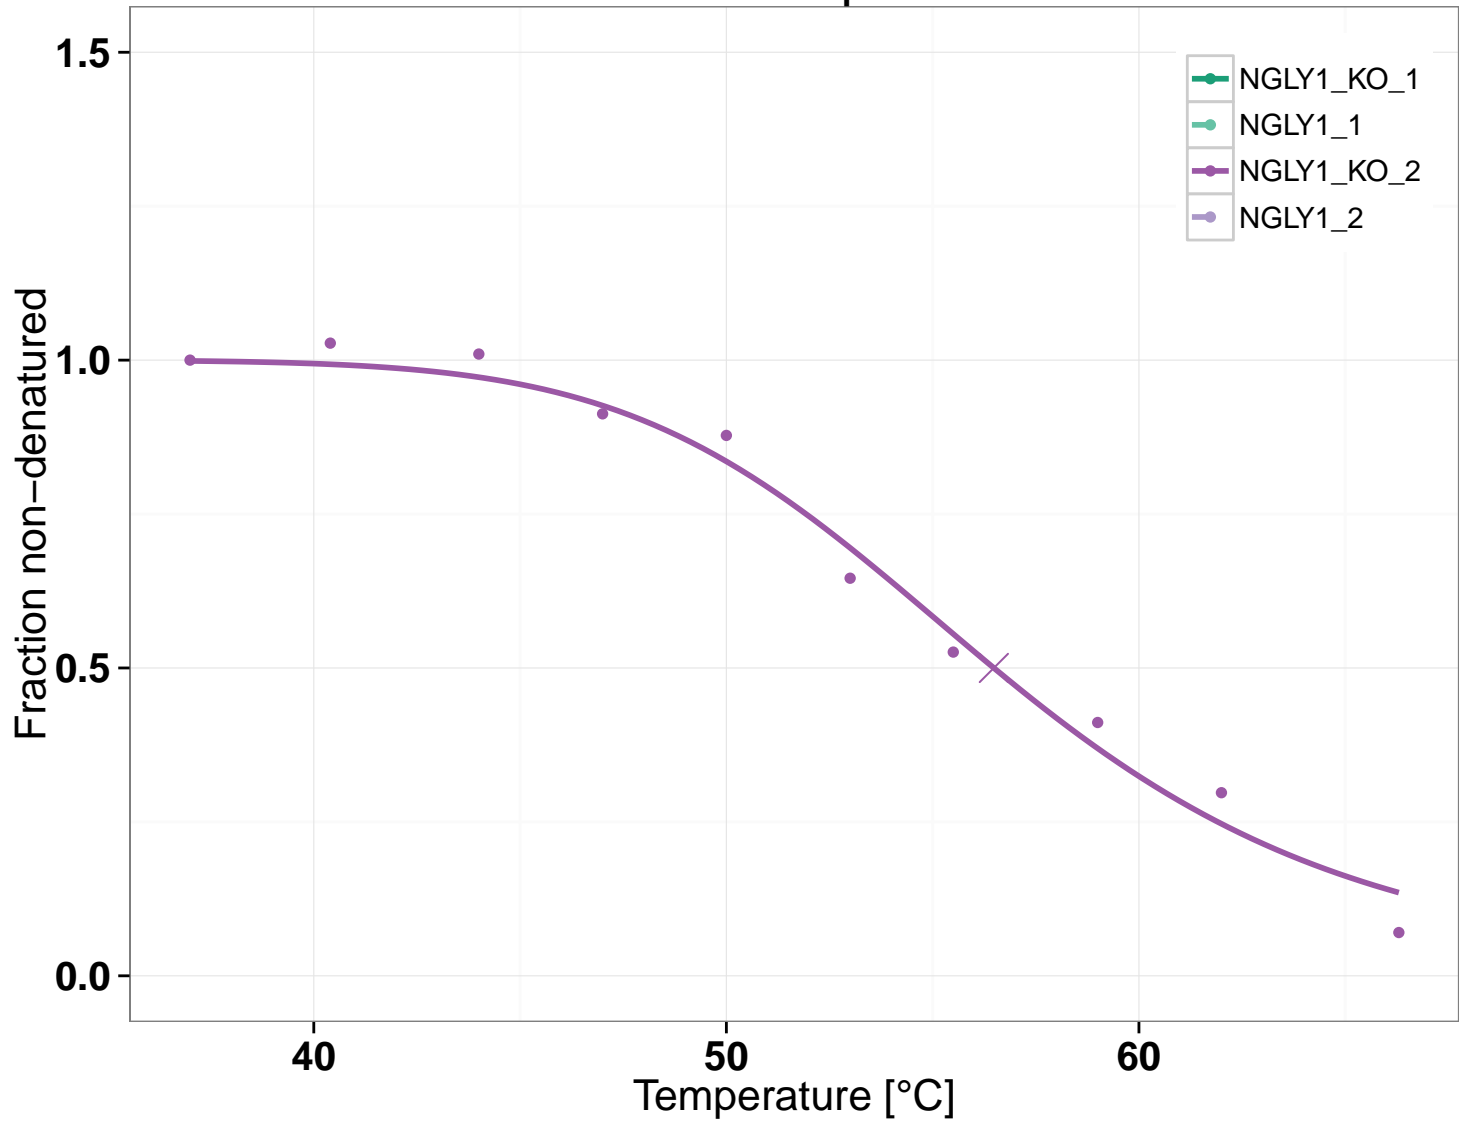

|            | meltPoint | slope  | plateau | R2   |
|------------|-----------|--------|---------|------|
| NGLY1_KO_1 | -         | -      | -       | -    |
| NGLY1_1    | -         | -      | -       | -    |
| NGLY1_KO_2 | 56.48     | -0.057 | 0       | 0.98 |
| NGLY1_2    | -         | -      | -       | -    |

Supplement: Supplementary file 7684 [file 1]

# IPI00479306.1|PSMB5

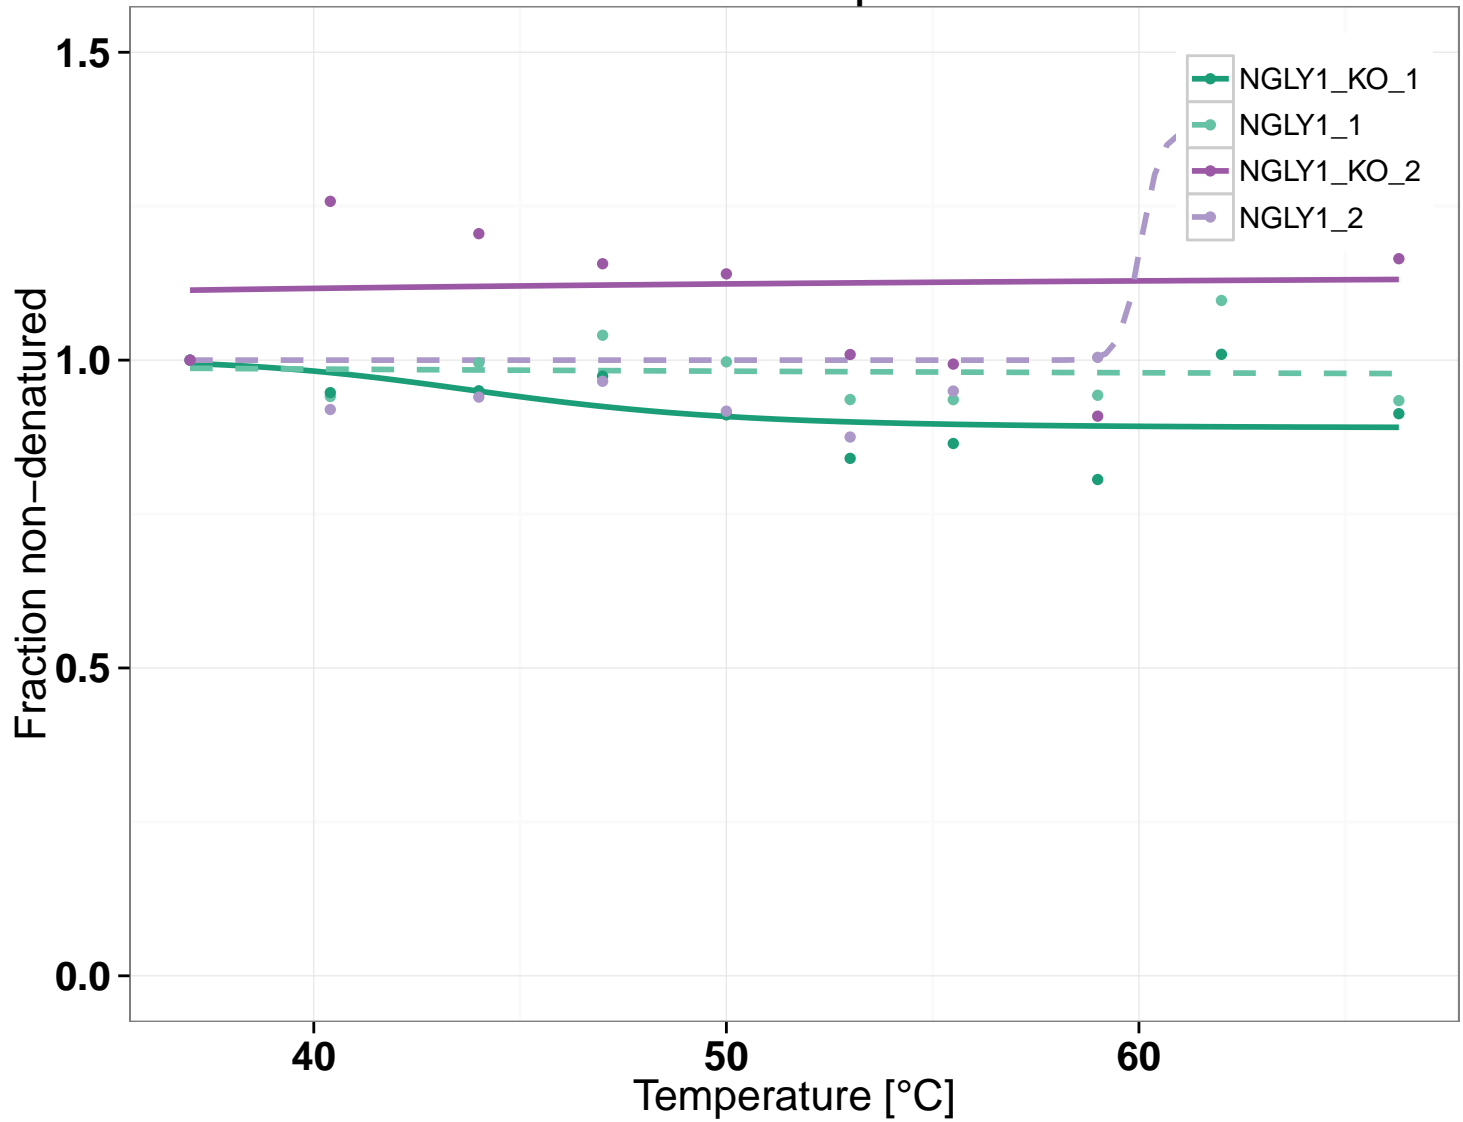

|            | meltPoint | slope   | plateau | R2   |
|------------|-----------|---------|---------|------|
| NGLY1_KO_1 | –         | –0.0092 | 0.89    | 0.28 |
| NGLY1_1    | –         | –       | 0.93    | 0    |
| NGLY1_KO_2 | –         | –       | 1.31    | 0    |
| NGLY1_2    | –         | 0.39    | 1.37    | 0.88 |

Supplement: Supplementary file 7685 [file 1]

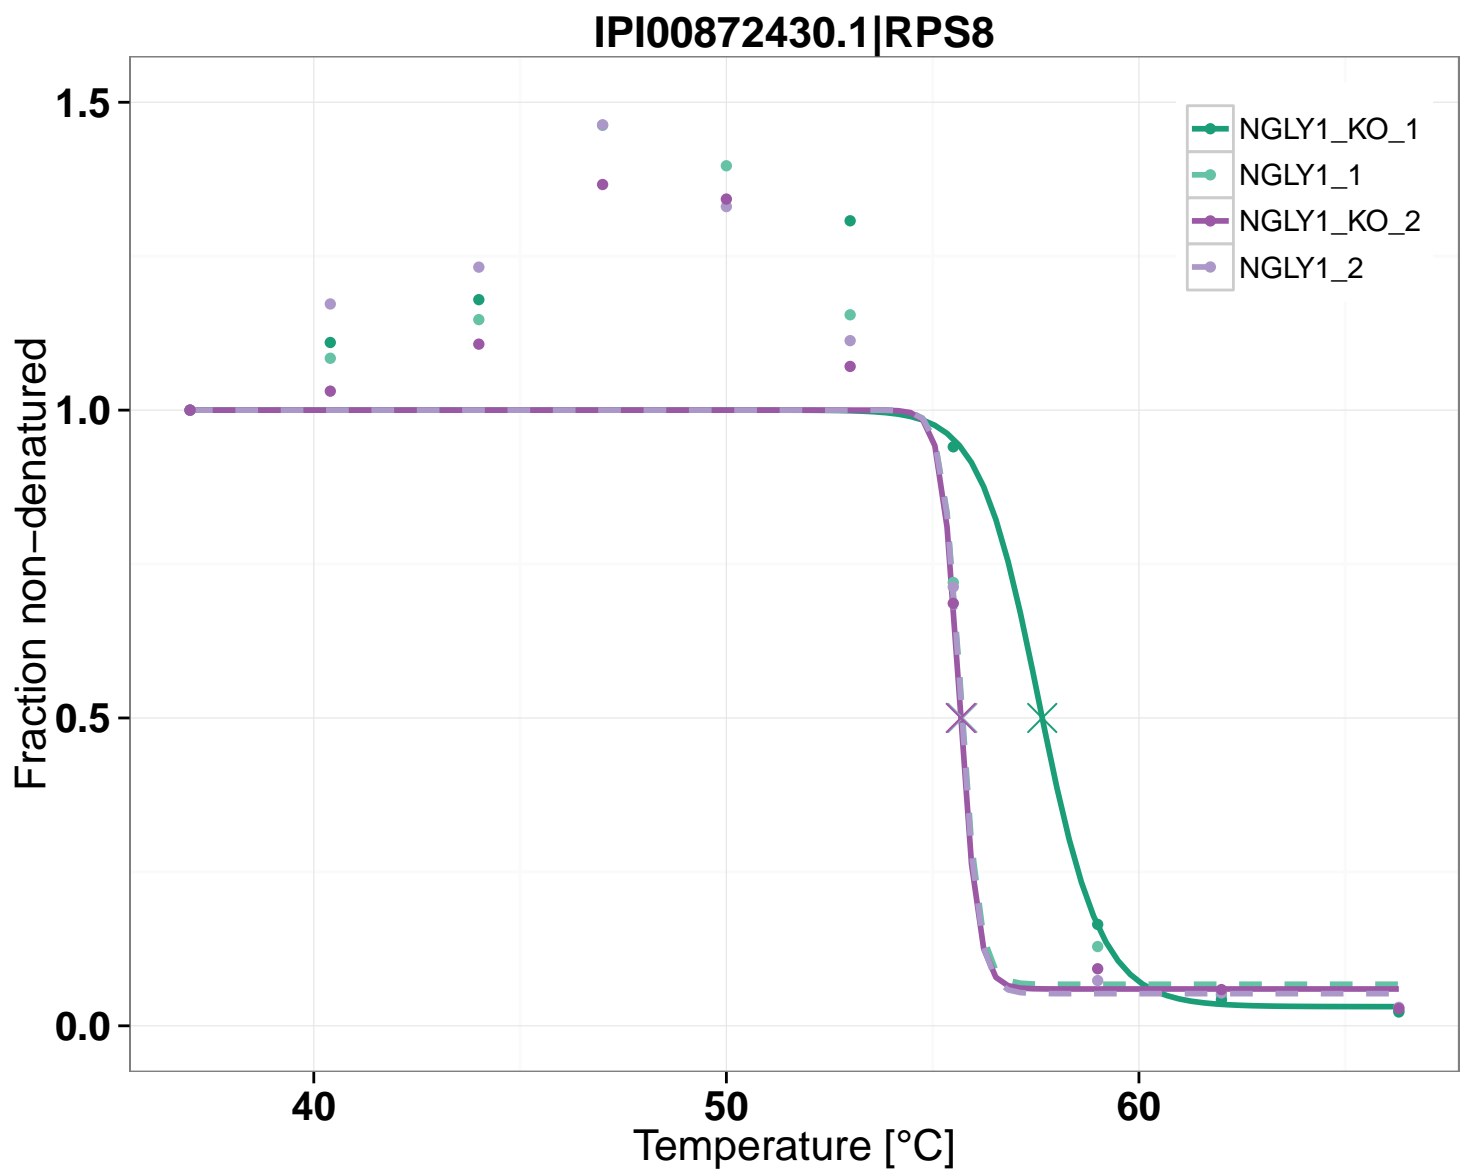

|            | meltPoint | slope | plateau | R2   |
|------------|-----------|-------|---------|------|
| NGLY1_KO_1 | 57.66     | -0.33 | 0.03    | 0.76 |
| NGLY1_1    | 55.72     | -1    | 0.07    | 0.85 |
| NGLY1_KO_2 | 55.68     | -1.1  | 0.06    | 0.89 |
| NGLY1_2    | 55.71     | -1.1  | 0.05    | 0.85 |

Supplement: Supplementary file 7686 [file 1]

# IPI00161085.5|NOL8

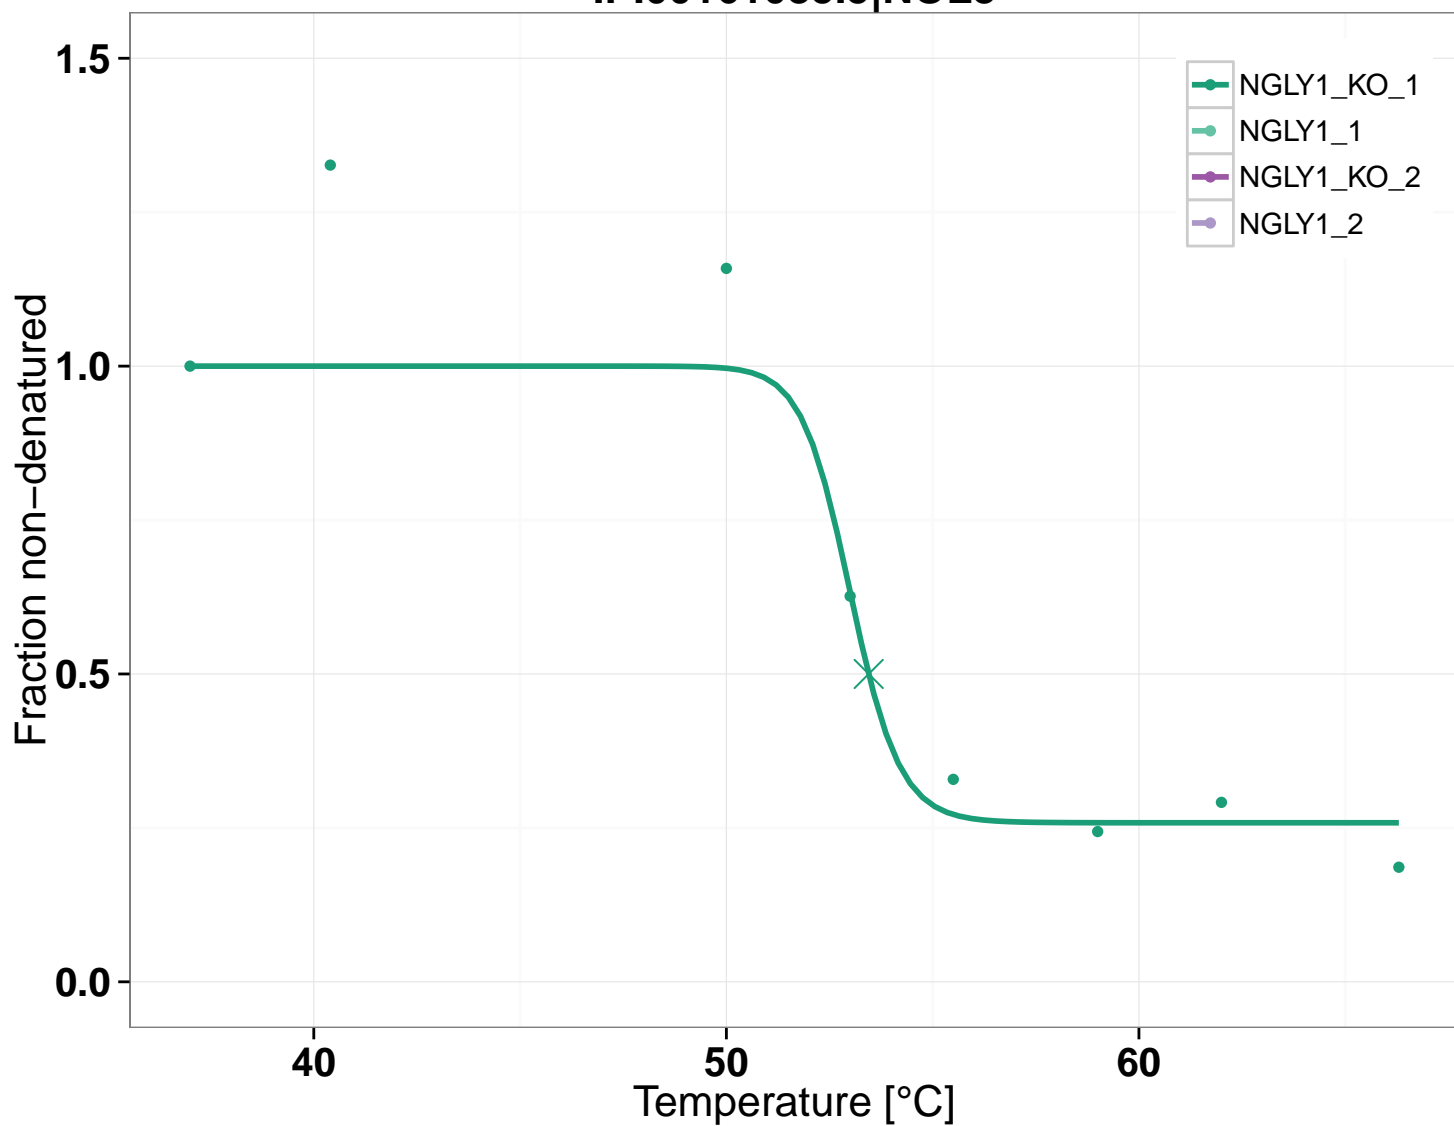

|            | meltPoint | slope | plateau | R2   |
|------------|-----------|-------|---------|------|
| NGLY1_KO_1 | 53.45     | -0.31 | 0.26    | 0.68 |
| NGLY1_1    | -         | -     | -       | -    |
| NGLY1_KO_2 | -         | -     | -       | -    |
| NGLY1_2    | -         | -     | -       | -    |

Supplement: Supplementary file 7687 [file 1]

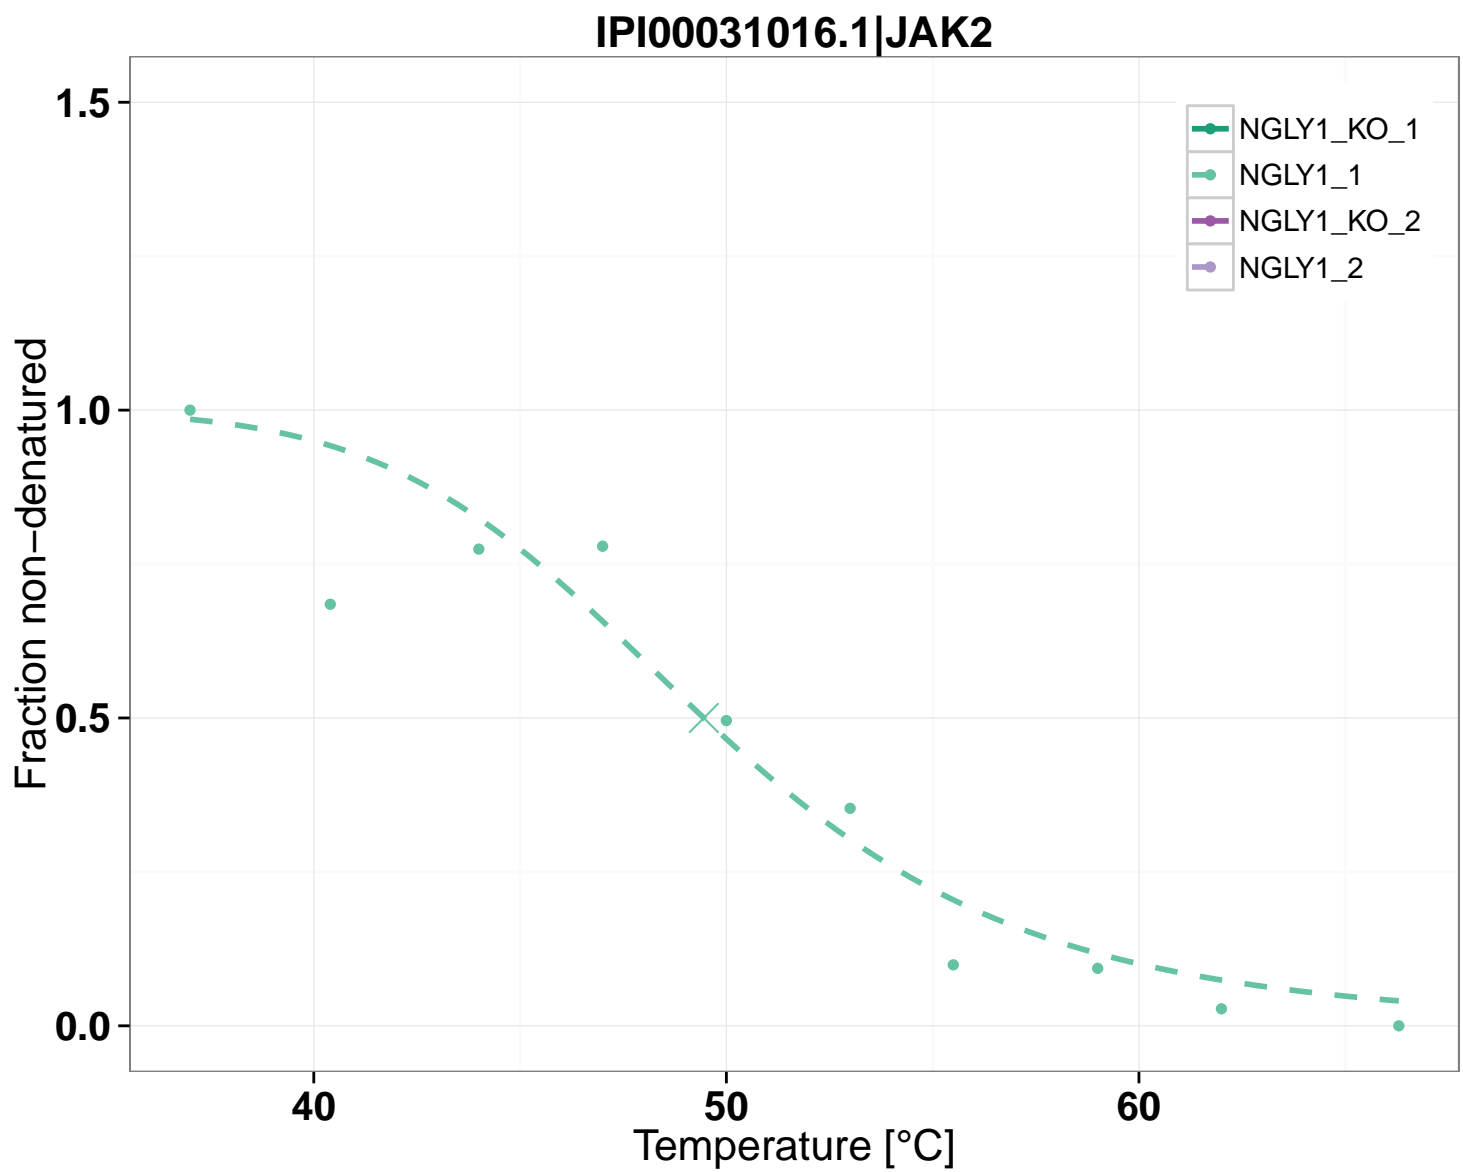

|            | meltPoint | slope  | plateau | R2   |
|------------|-----------|--------|---------|------|
| NGLY1_KO_1 | —         | —      | —       | —    |
| NGLY1_1    | 49.45     | -0.065 | 0       | 0.91 |
| NGLY1_KO_2 | —         | —      | —       | —    |
| NGLY1_2    | —         | —      | —       | —    |

Supplement: Supplementary file 7688 [file 1]

IPI00168341.1|NETO2

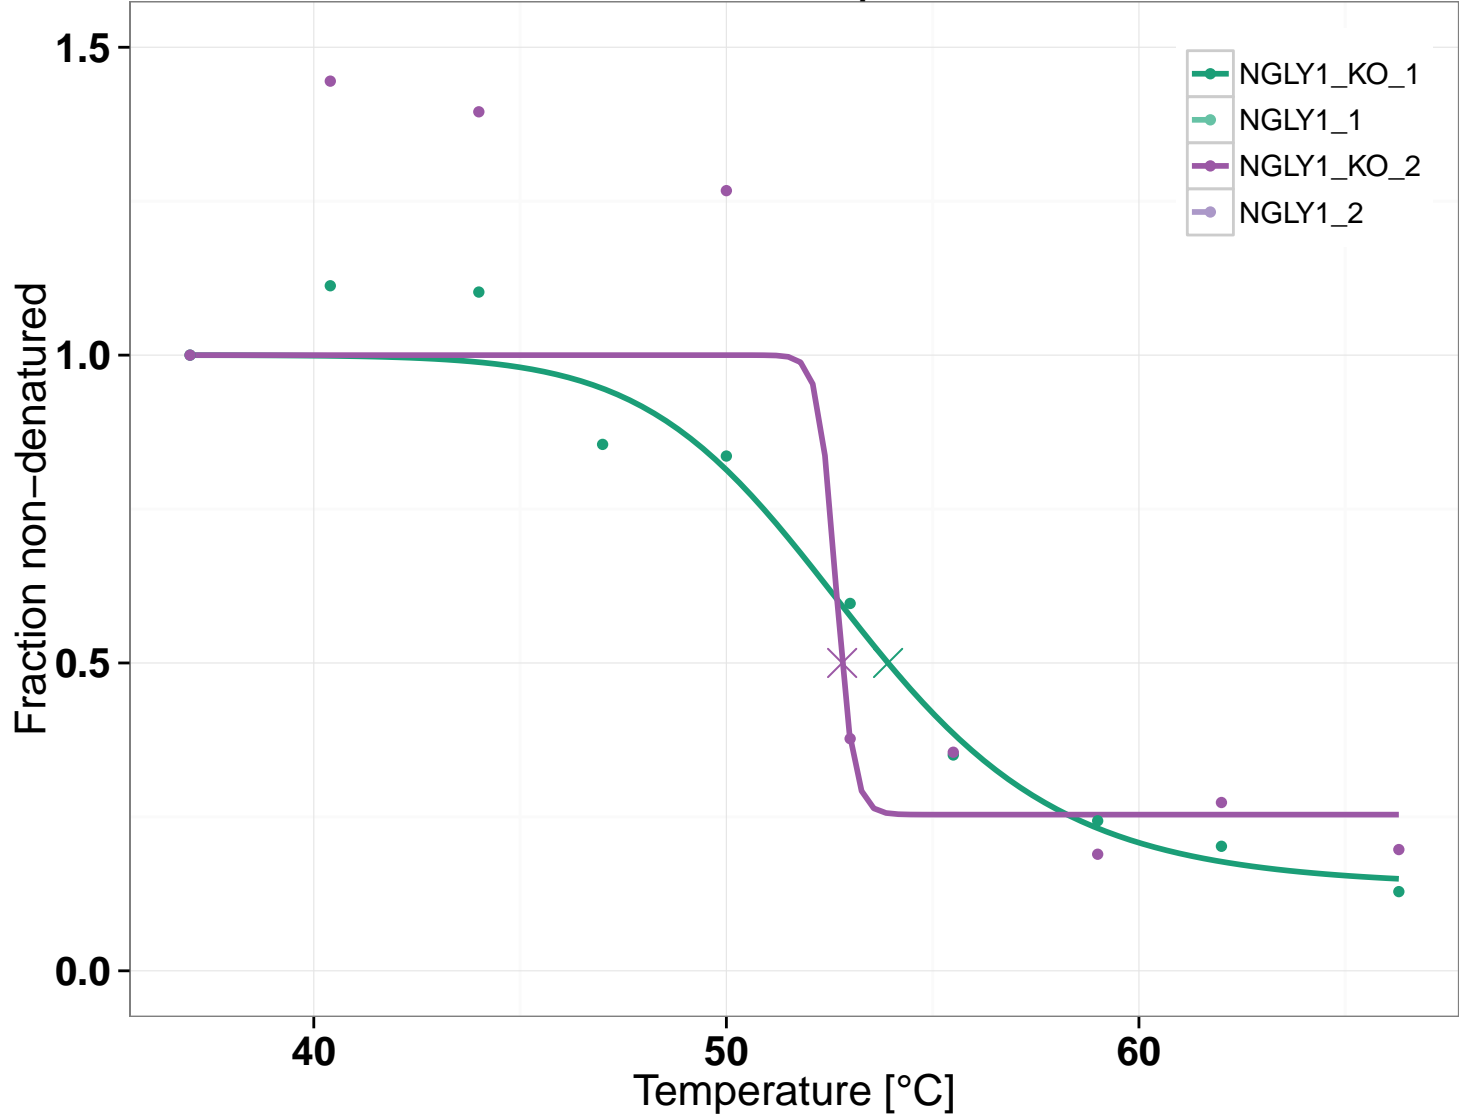

|            | meltPoint | slope  | plateau | R2   |
|------------|-----------|--------|---------|------|
| NGLY1_KO_1 | 53.92     | -0.086 | 0.14    | 0.97 |
| NGLY1_1    | -         | -      | -       | -    |
| NGLY1_KO_2 | 52.81     | -0.89  | 0.25    | 0.75 |
| NGLY1_2    | -         | -      | -       | -    |

Supplement: Supplementary file 7689 [file 1]

# IPI00304648.4|MYLK3

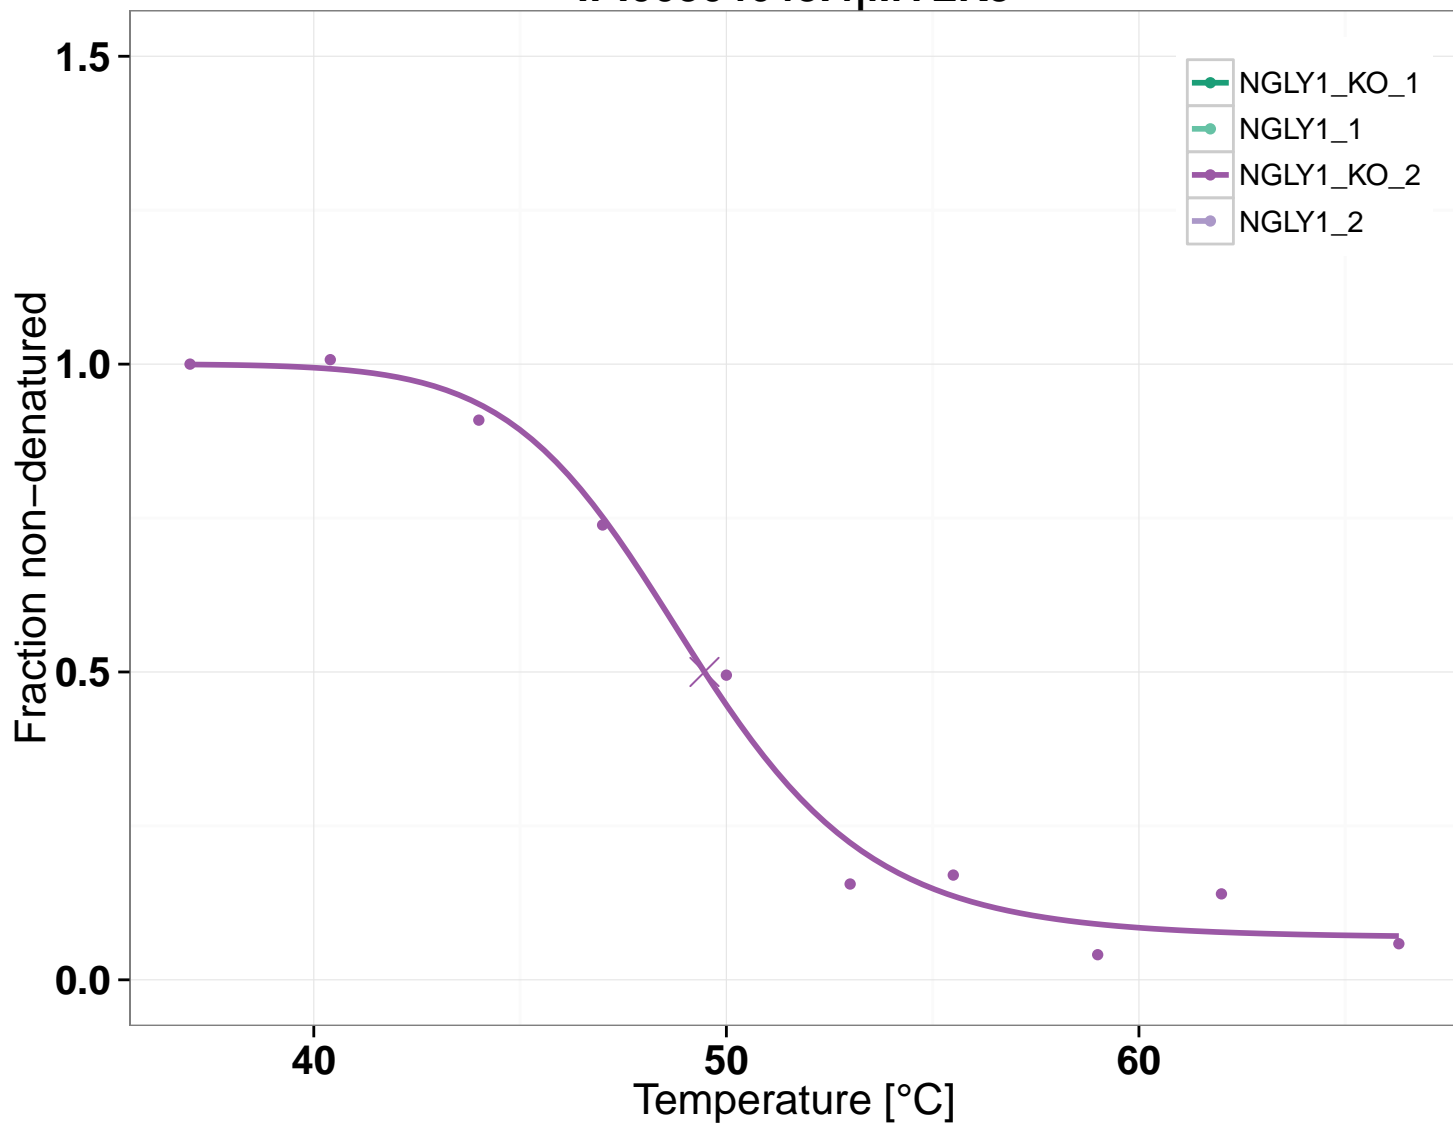

|            | meltPoint | slope | plateau | R2   |
|------------|-----------|-------|---------|------|
| NGLY1_KO_1 | —         | —     | —       | —    |
| NGLY1_1    | —         | —     | —       | —    |
| NGLY1_KO_2 | 49.47     | -0.11 | 0.07    | 0.99 |
| NGLY1_2    | —         | —     | —       | —    |

Supplement: Supplementary file 7690 [file 1]

IPI00550882.3|PYCR1

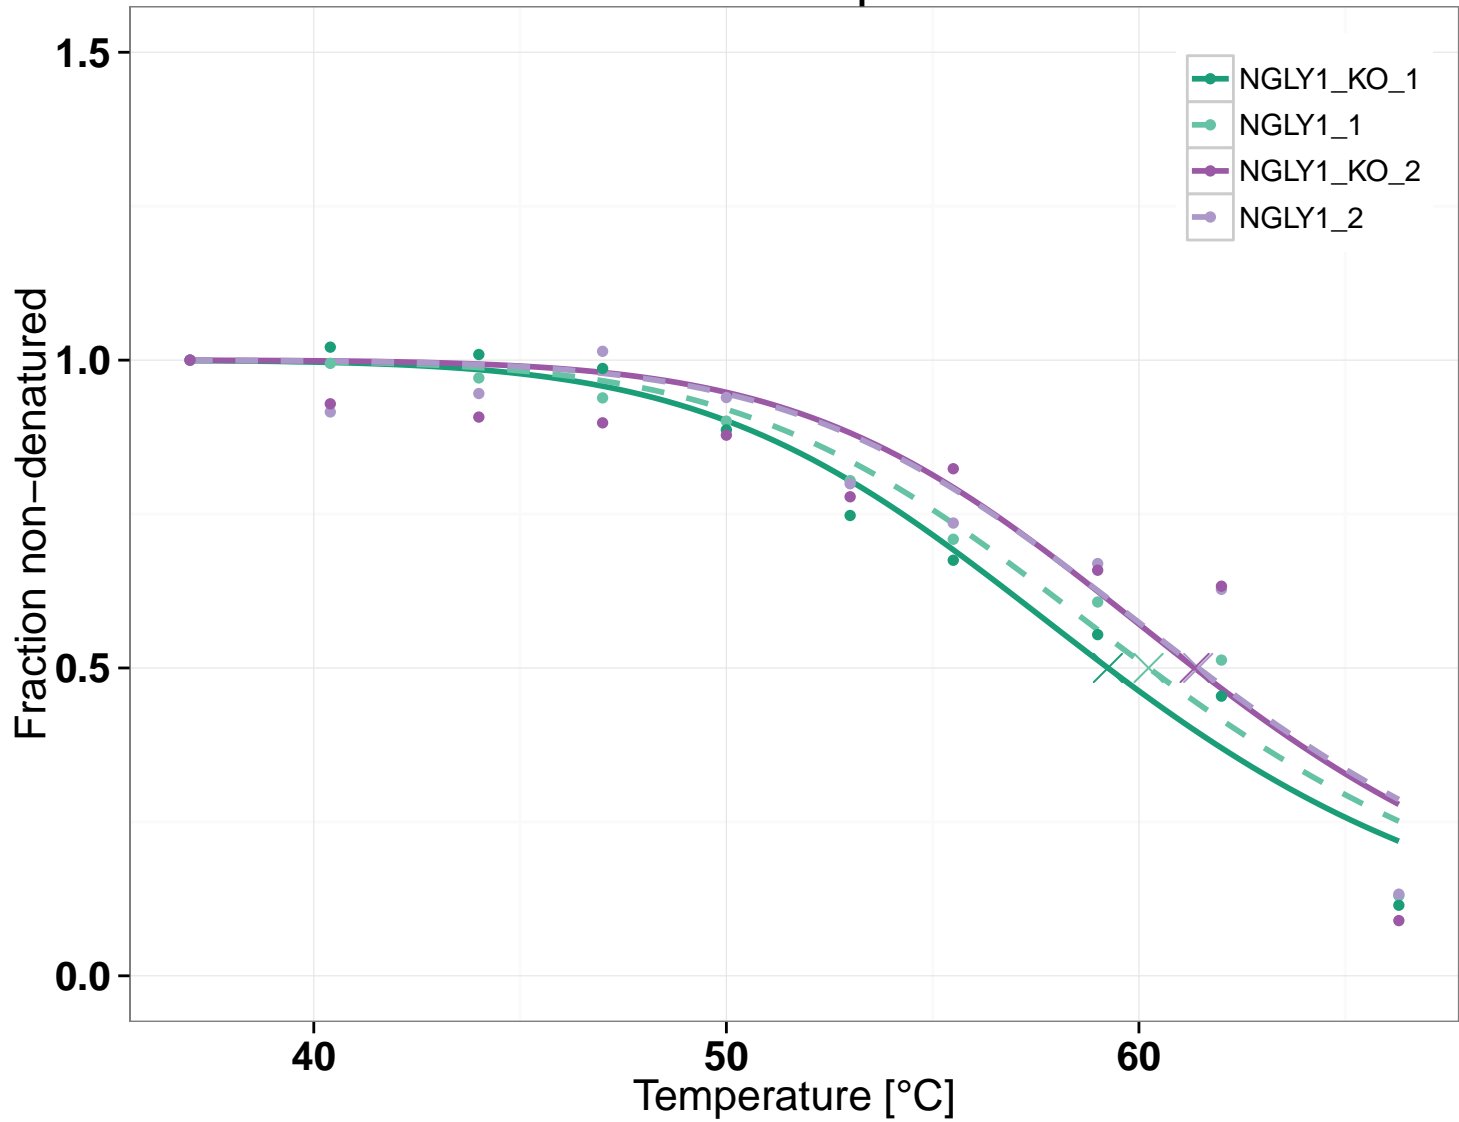

|            | meltPoint | slope  | plateau | R2   |
|------------|-----------|--------|---------|------|
| NGLY1_KO_1 | 59.25     | -0.052 | 0       | 0.97 |
| NGLY1_1    | 60.23     | -0.051 | 0       | 0.96 |
| NGLY1_KO_2 | 61.35     | -0.053 | 0       | 0.84 |
| NGLY1_2    | 61.44     | -0.052 | 0       | 0.89 |

Supplement: Supplementary file 7691 [file 1]

# IPI00298409.3|PDCL

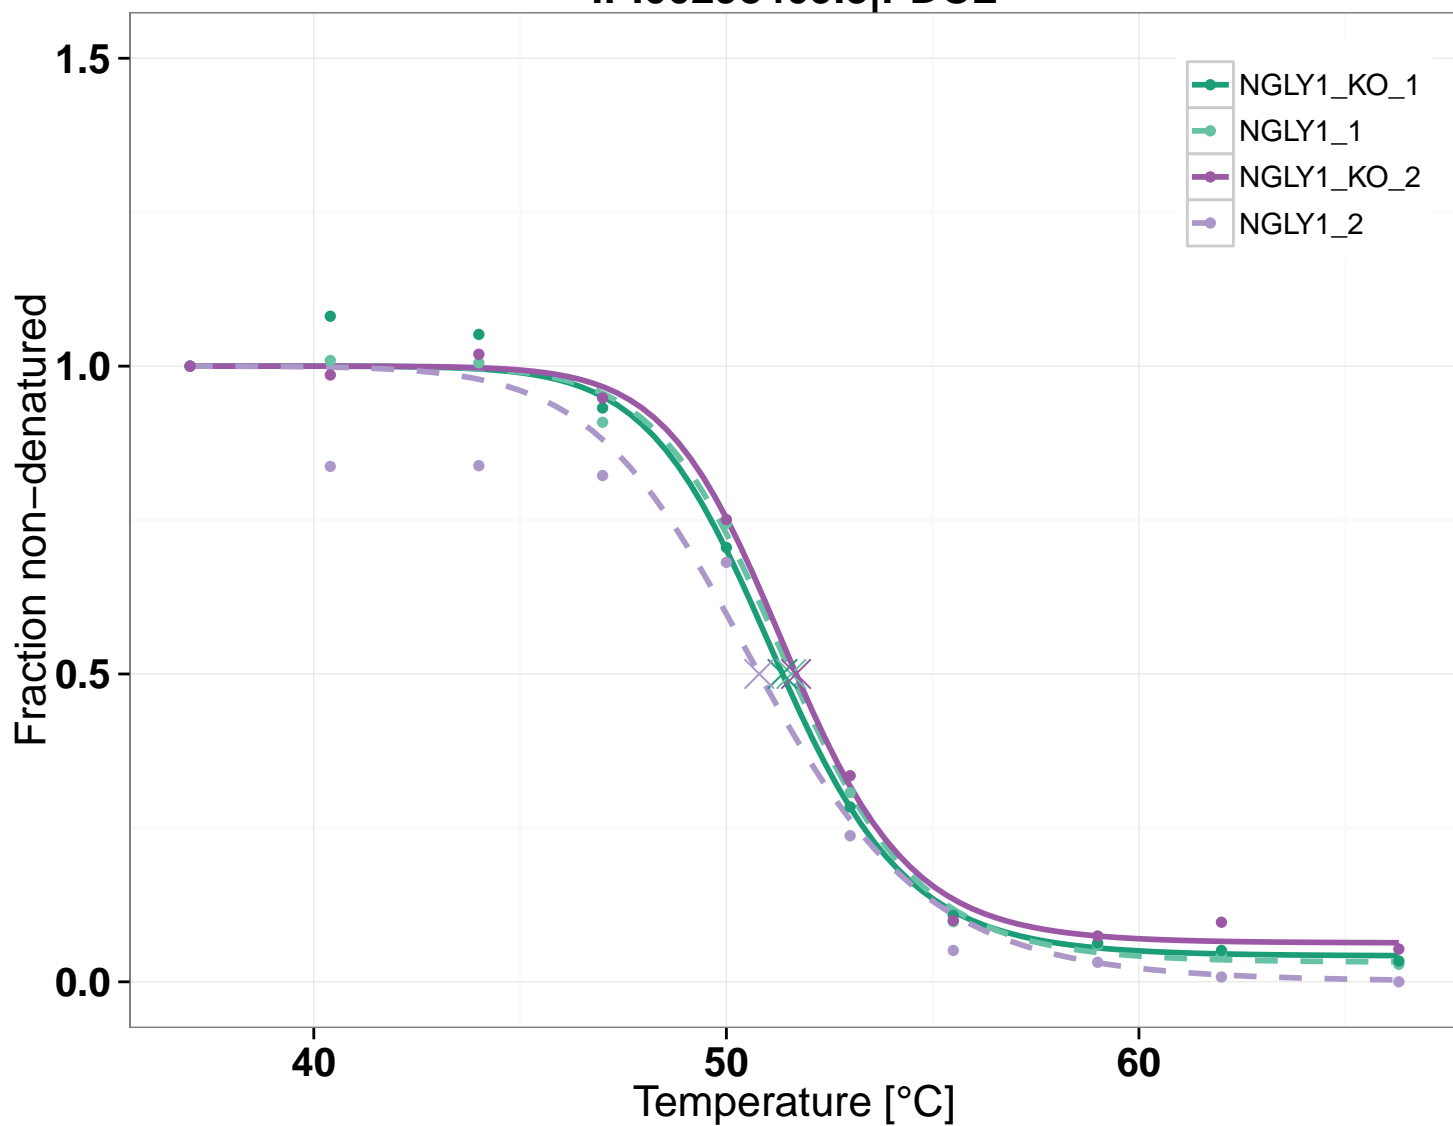

|            | meltPoint | slope | plateau | R2   |
|------------|-----------|-------|---------|------|
| NGLY1_KO_1 | 51.36     | -0.15 | 0.04    | 0.99 |
| NGLY1_1    | 51.58     | -0.15 | 0.03    | 1    |
| NGLY1_KO_2 | 51.69     | -0.16 | 0.06    | 1    |
| NGLY1_2    | 50.8      | -0.12 | 0       | 0.96 |

Supplement: Supplementary file 7692 [file 1]

IPI00101374.5|TM9SF1

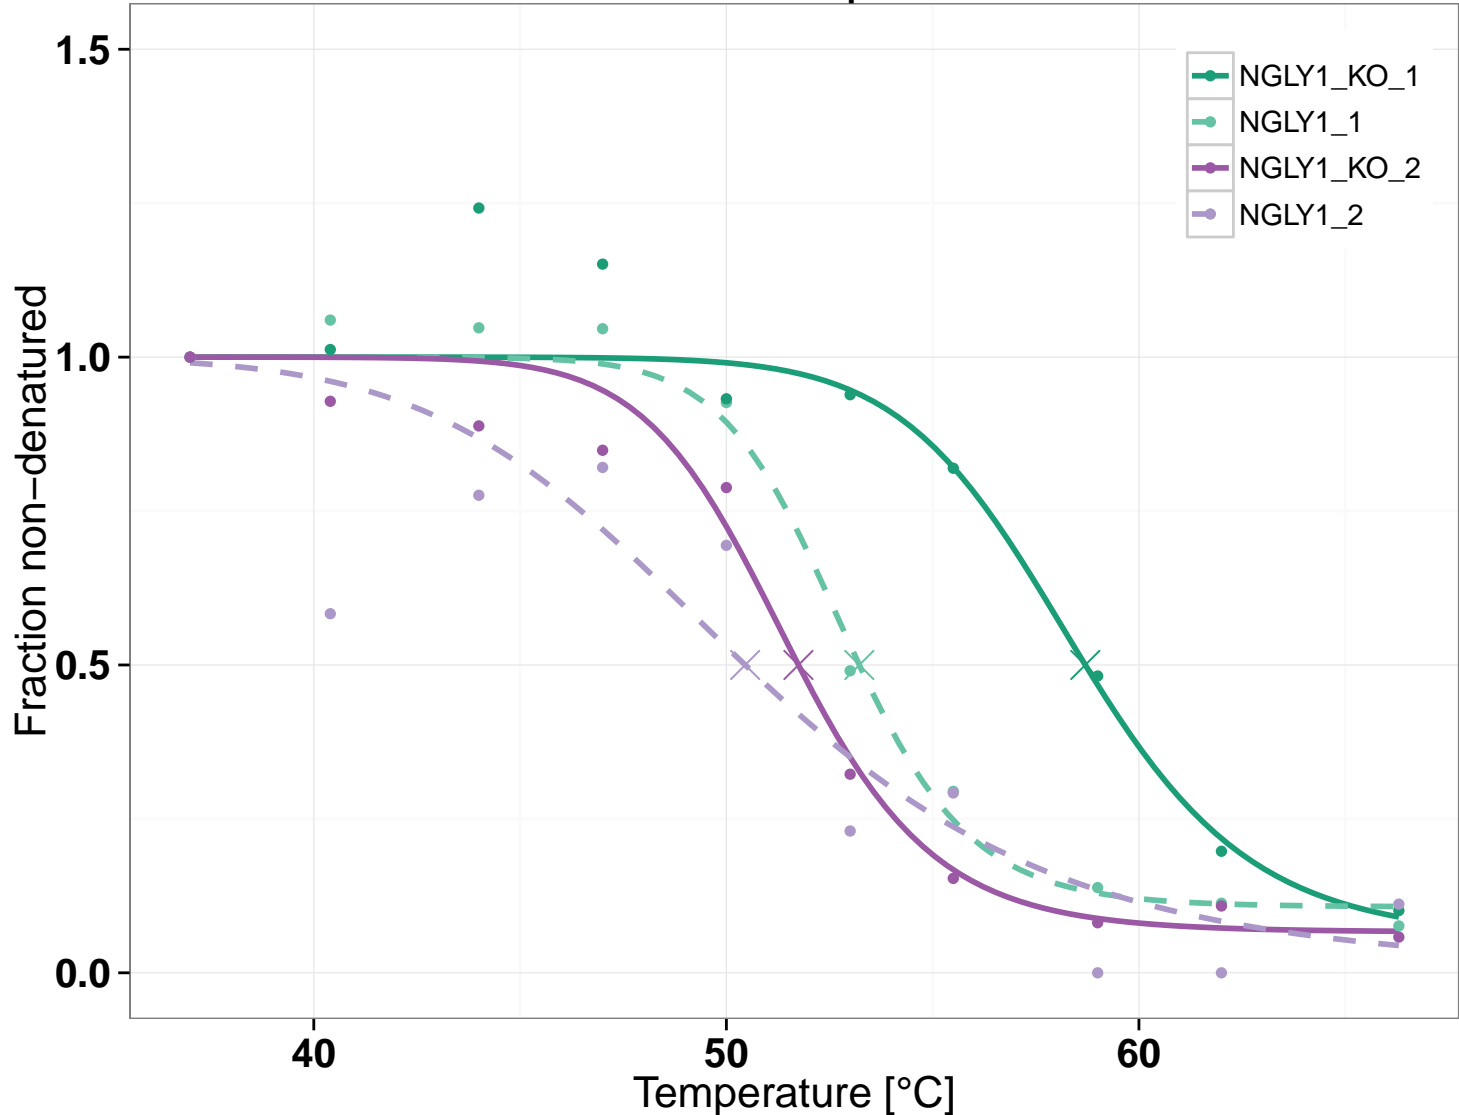

|            | meltPoint | slope  | plateau | R2   |
|------------|-----------|--------|---------|------|
| NGLY1_KO_1 | 58.7      | -0.11  | 0.06    | 0.94 |
| NGLY1_1    | 53.22     | -0.15  | 0.11    | 0.99 |
| NGLY1_KO_2 | 51.75     | -0.13  | 0.07    | 0.98 |
| NGLY1_2    | 50.46     | -0.065 | 0       | 0.81 |

Supplement: Supplementary file 7693 [file 1]

# IPI00867739.3|KIF3A

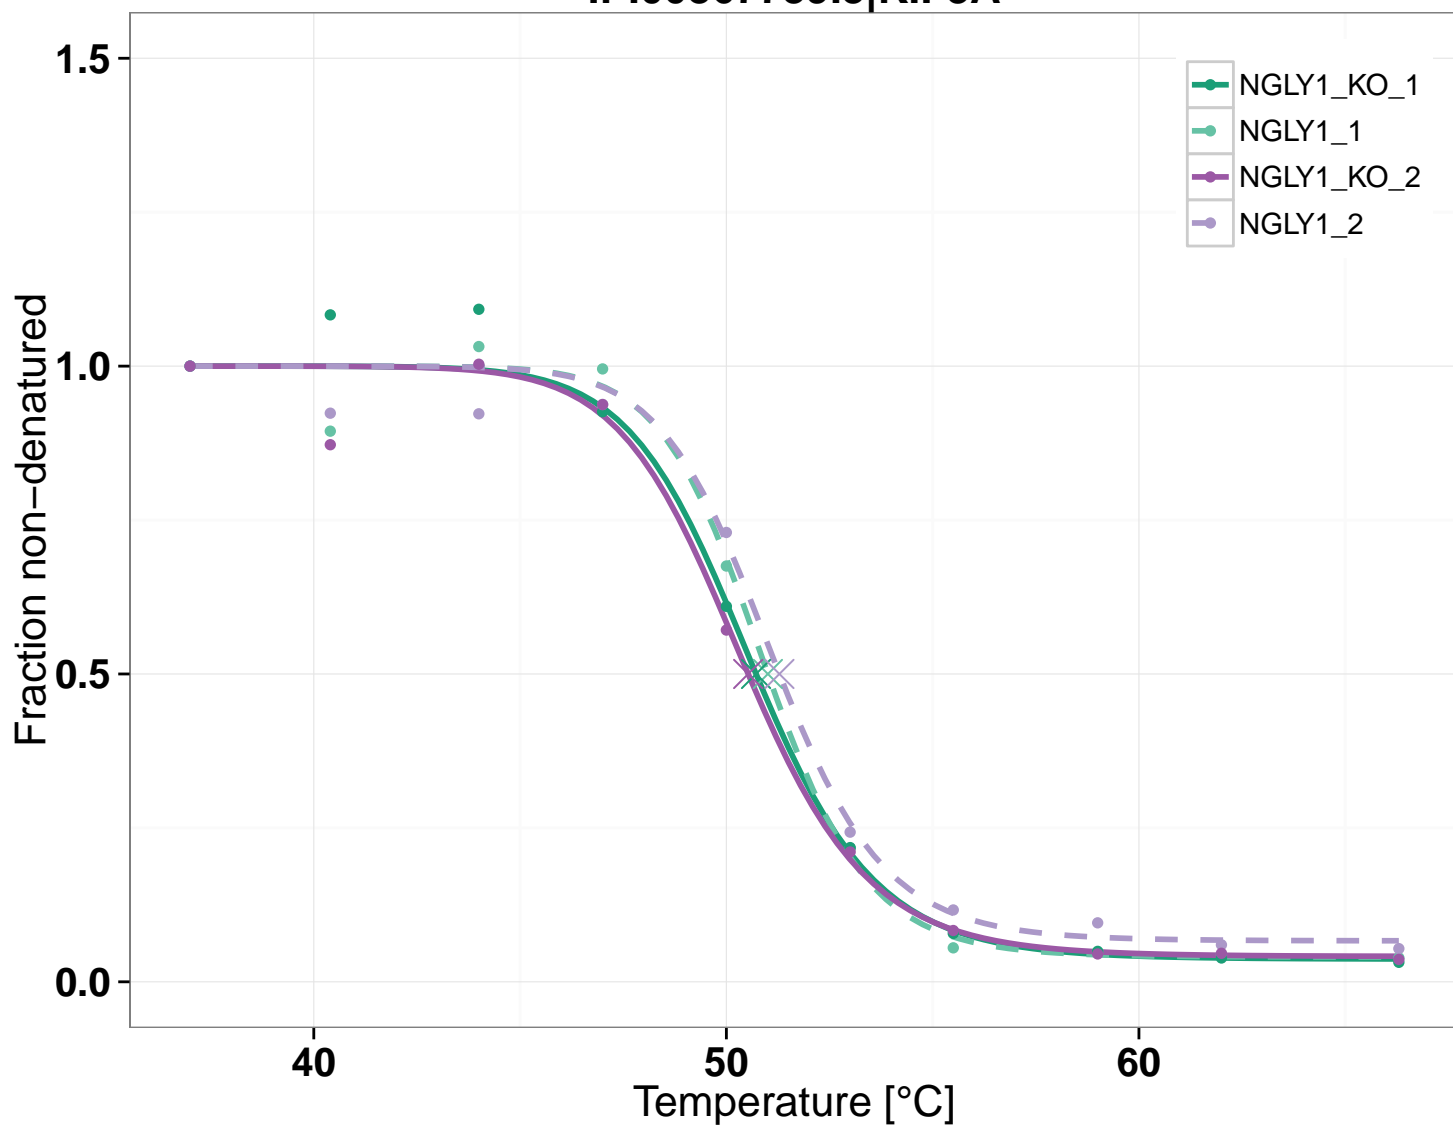

|            | meltPoint | slope | plateau | R2   |
|------------|-----------|-------|---------|------|
| NGLY1_KO_1 | 50.72     | -0.16 | 0.04    | 0.99 |
| NGLY1_1    | 51.01     | -0.19 | 0.04    | 0.99 |
| NGLY1_KO_2 | 50.53     | -0.16 | 0.04    | 0.99 |
| NGLY1_2    | 51.29     | -0.17 | 0.07    | 0.99 |

Supplement: Supplementary file 7694 [file 1]

IPI00141561.3|COG1

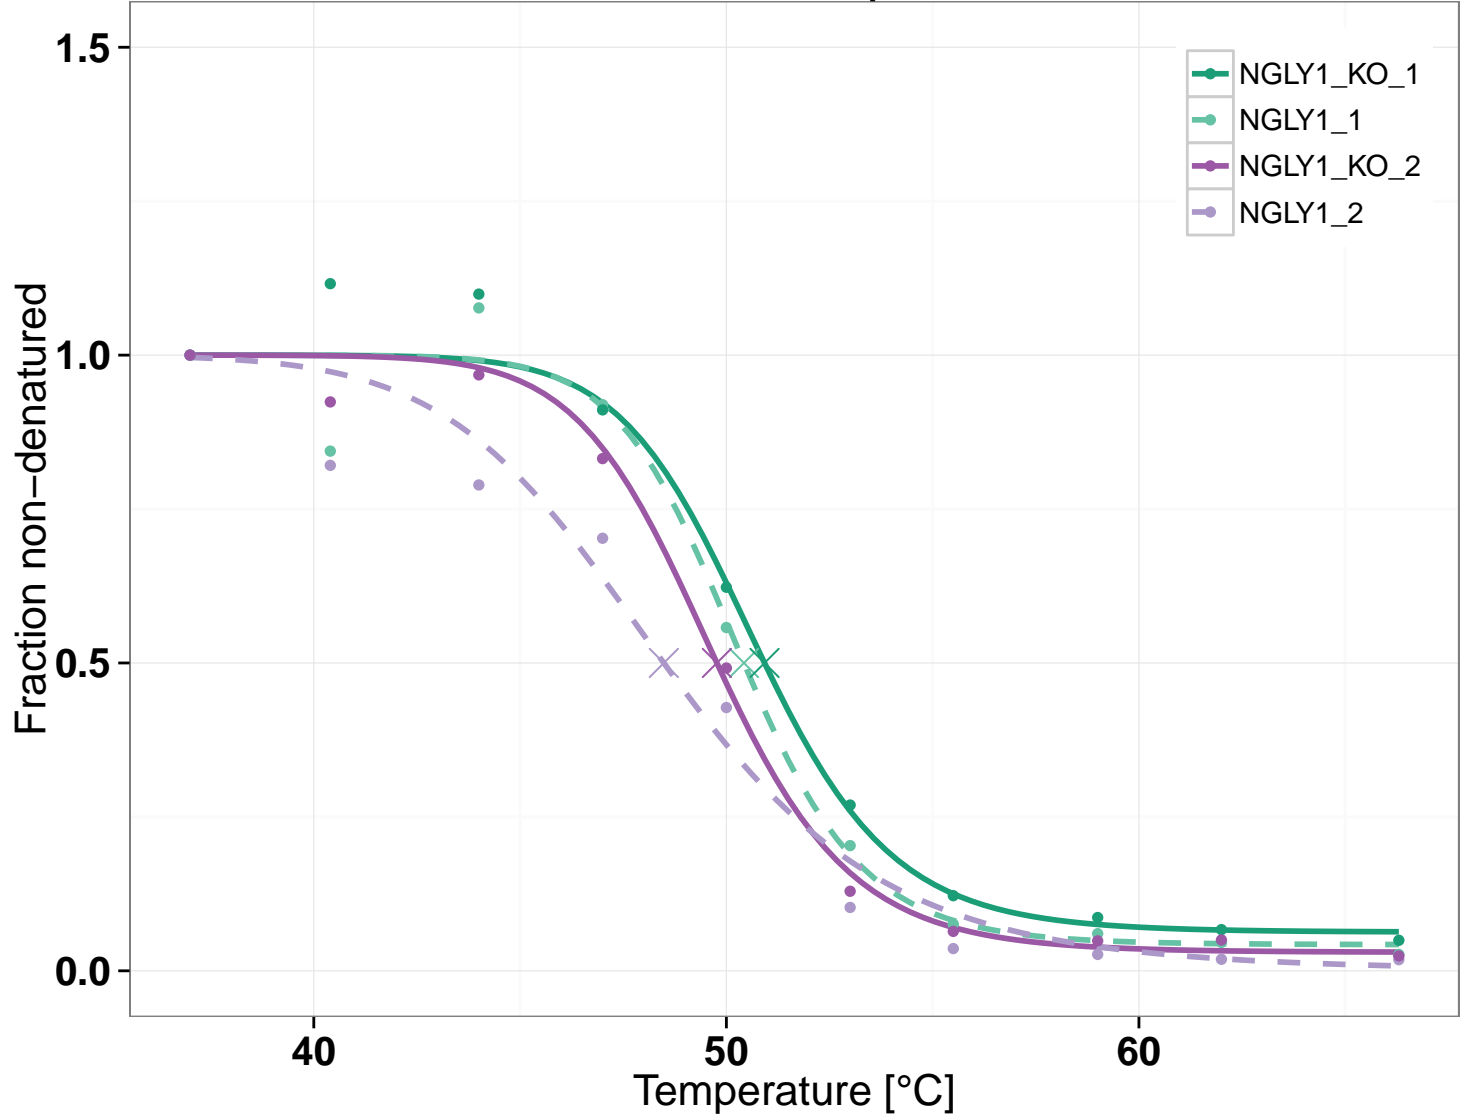

|            | meltPoint | slope  | plateau | R2   |
|------------|-----------|--------|---------|------|
| NGLY1_KO_1 | 50.93     | -0.14  | 0.06    | 0.99 |
| NGLY1_1    | 50.43     | -0.16  | 0.04    | 0.98 |
| NGLY1_KO_2 | 49.77     | -0.15  | 0.03    | 1    |
| NGLY1_2    | 48.48     | -0.094 | 0       | 0.97 |

Supplement: Supplementary file 7695 [file 1]

IPI00456676.2|FBXO38

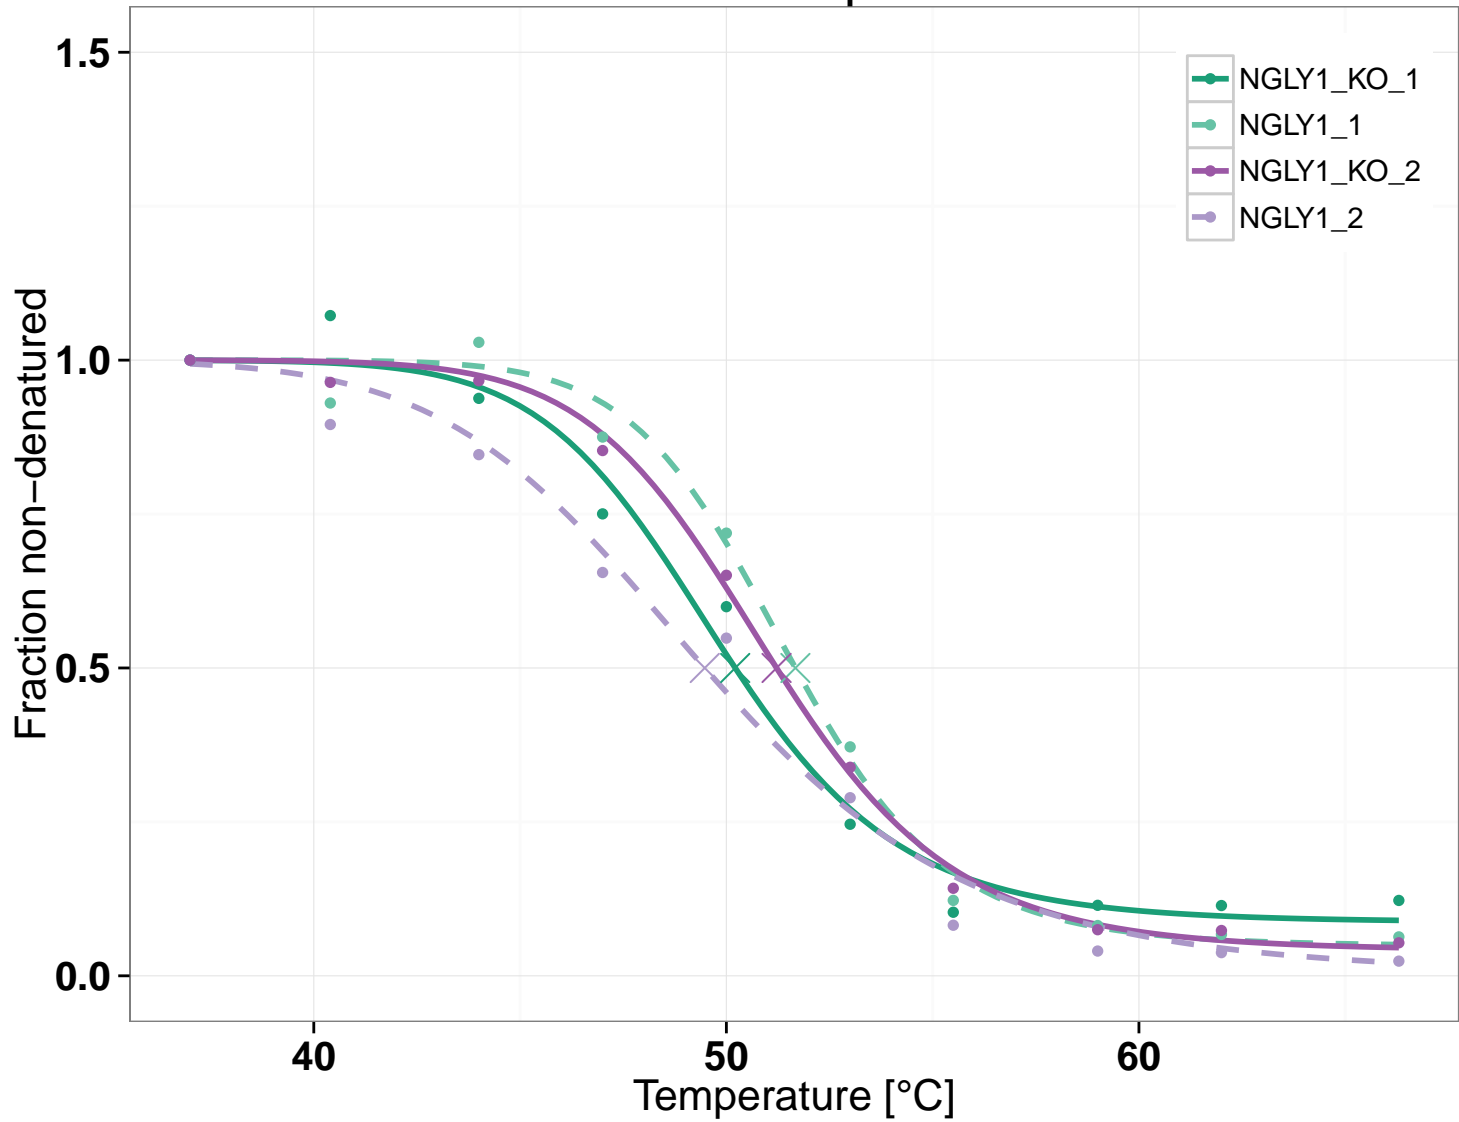

|            | meltPoint | slope  | plateau | R2   |
|------------|-----------|--------|---------|------|
| NGLY1_KO_1 | 50.21     | -0.1   | 0.09    | 0.99 |
| NGLY1_1    | 51.67     | -0.12  | 0.05    | 0.99 |
| NGLY1_KO_2 | 51.22     | -0.11  | 0.04    | 1    |
| NGLY1_2    | 49.48     | -0.078 | 0       | 0.98 |

Supplement: Supplementary file 7696 [file 1]

IPI00410215.6|BPNT1

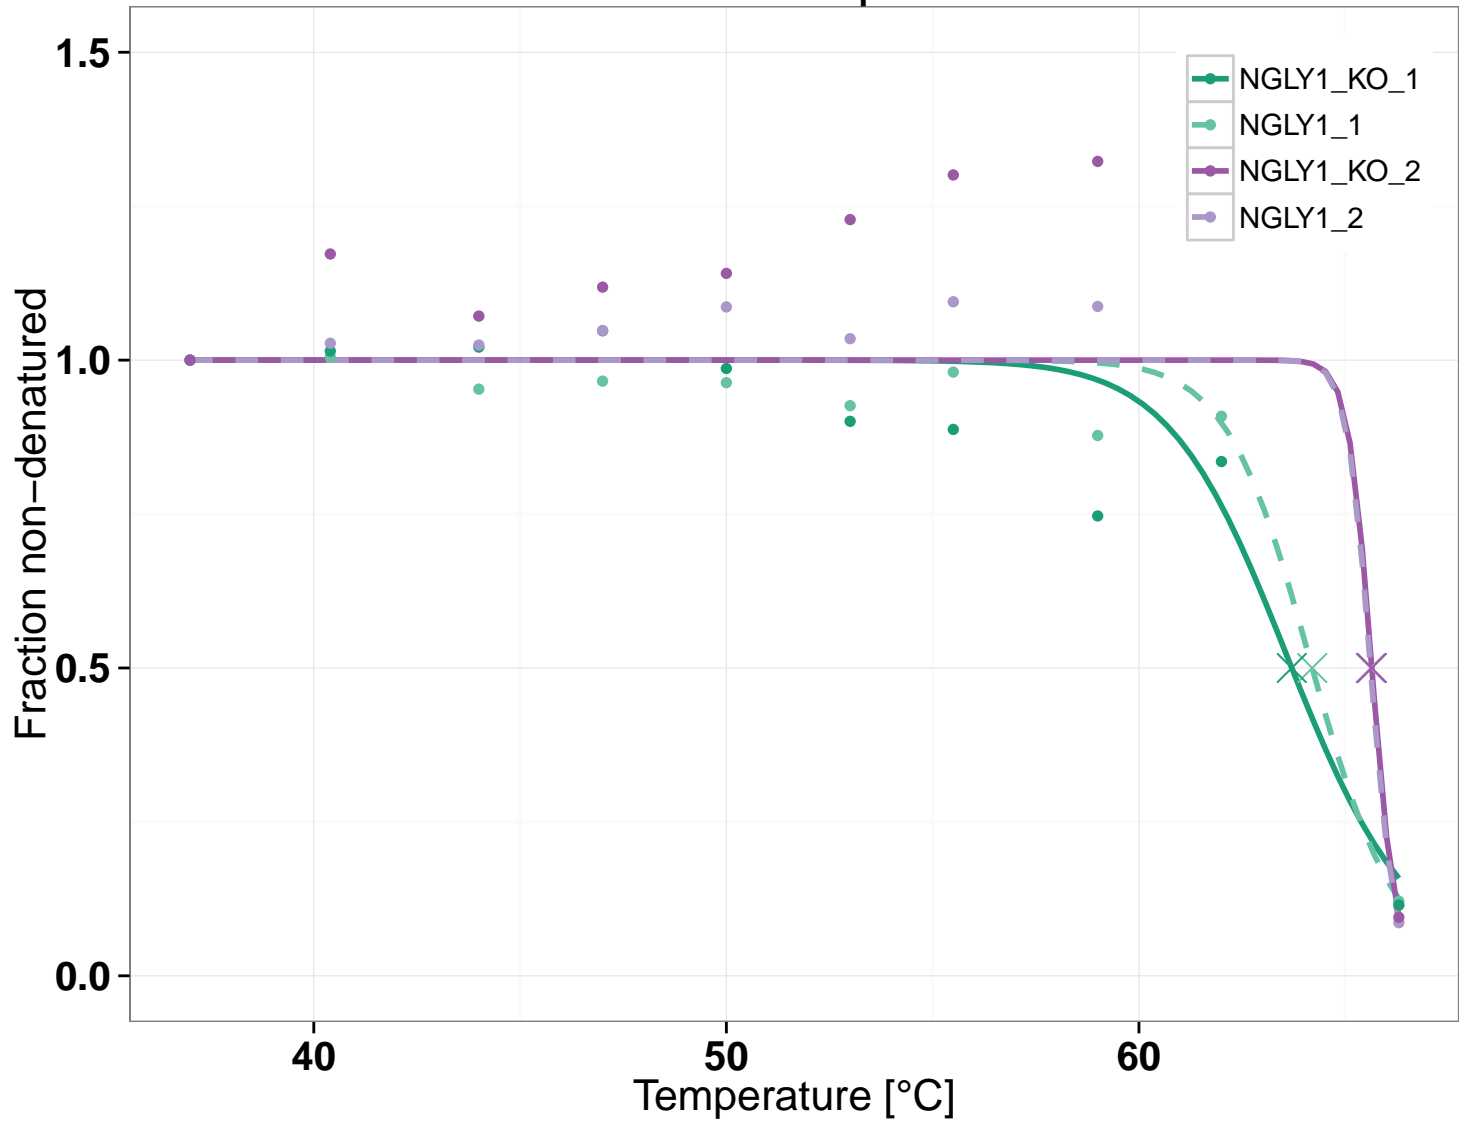

|            | meltPoint | slope | plateau | R2   |
|------------|-----------|-------|---------|------|
| NGLY1_KO_1 | 63.7      | -0.17 | 0       | 0.88 |
| NGLY1_1    | 64.2      | -0.24 | 0       | 0.96 |
| NGLY1_KO_2 | 65.65     | -0.87 | 0       | 0.44 |
| NGLY1_2    | 65.62     | -0.87 | 0       | 0.91 |

Supplement: Supplementary file 7697 [file 1]

# IPI00646645.3|SETX

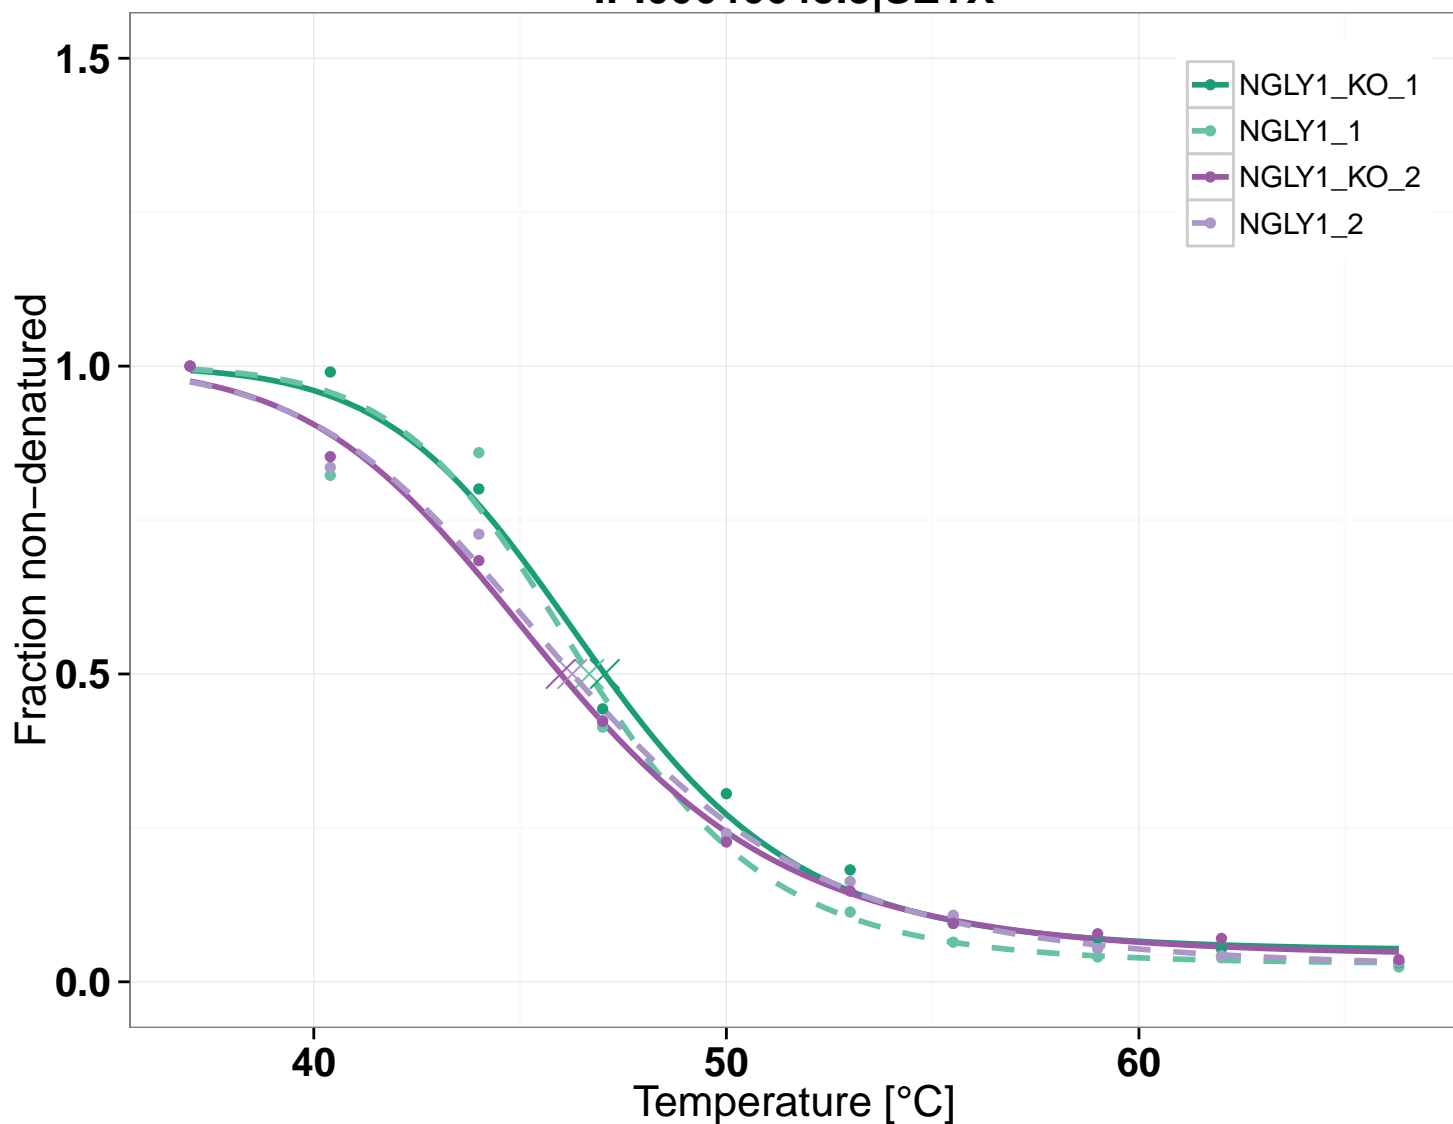

|            | meltPoint | slope  | plateau | R2   |
|------------|-----------|--------|---------|------|
| NGLY1_KO_1 | 47.05     | -0.095 | 0.05    | 0.99 |
| NGLY1_1    | 46.68     | -0.11  | 0.03    | 0.98 |
| NGLY1_KO_2 | 45.98     | -0.082 | 0.04    | 1    |
| NGLY1_2    | 46.26     | -0.079 | 0.02    | 0.99 |

Supplement: Supplementary file 7698 [file 1]

IPI00783781.1|NUP205

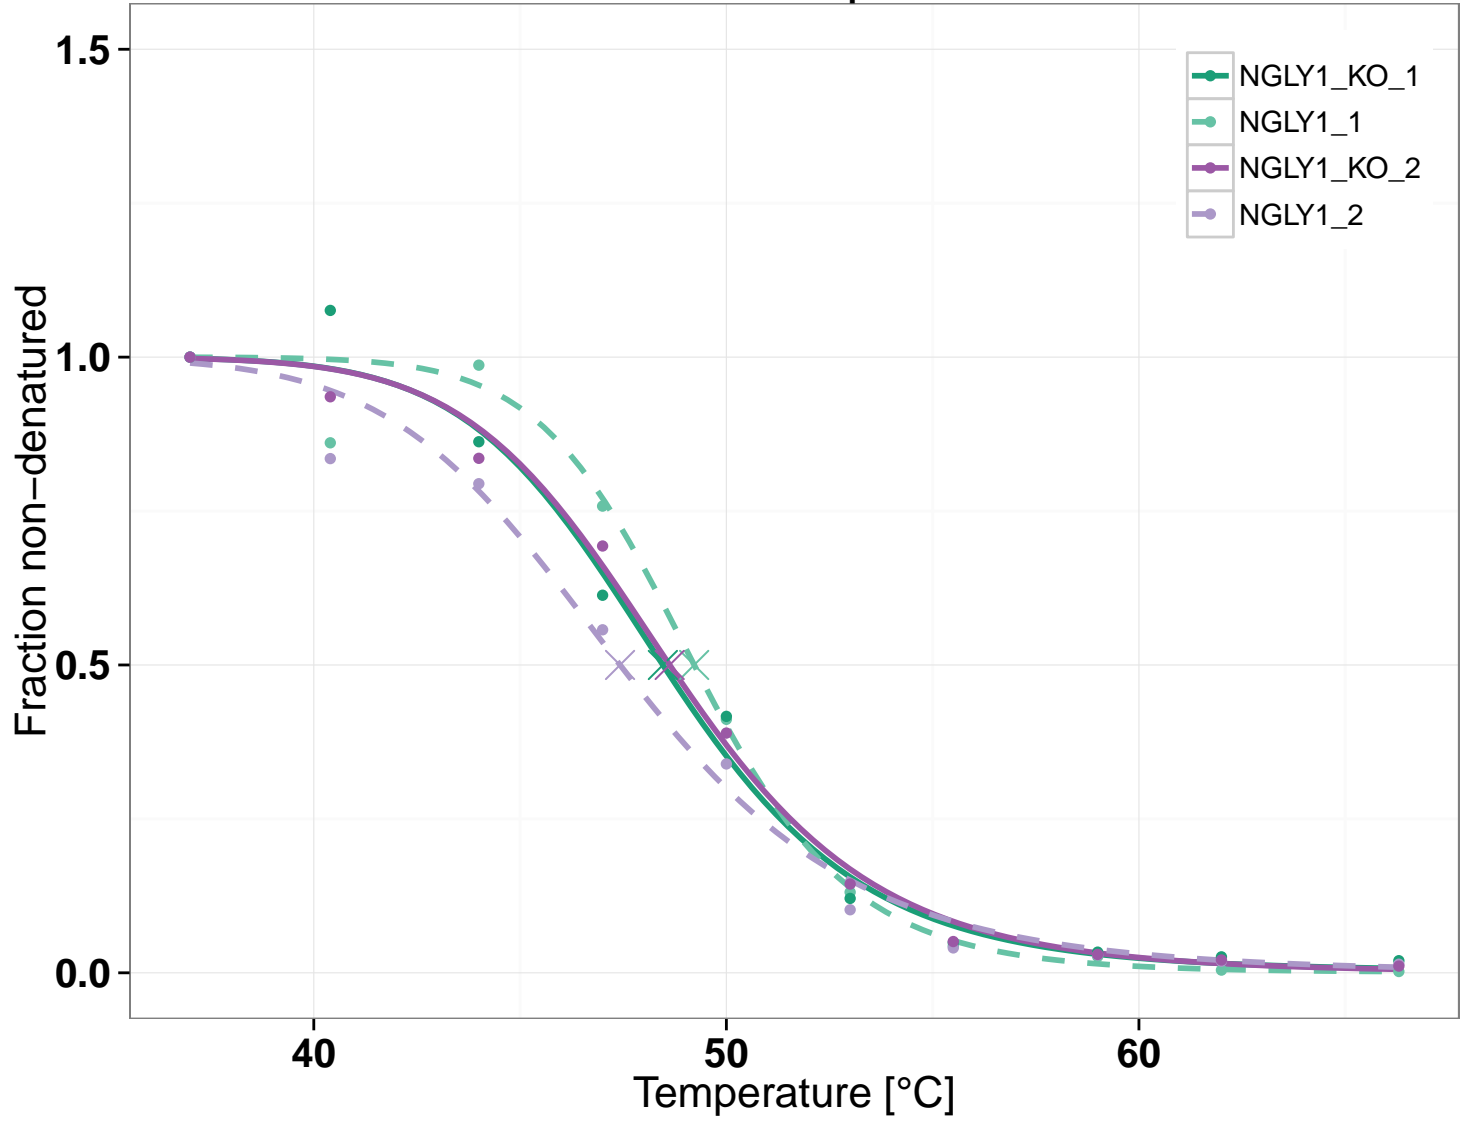

|            | meltPoint | slope  | plateau | R2   |
|------------|-----------|--------|---------|------|
| NGLY1_KO_1 | 48.46     | -0.1   | 0       | 0.99 |
| NGLY1_1    | 49.22     | -0.13  | 0       | 0.99 |
| NGLY1_KO_2 | 48.63     | -0.1   | 0       | 1    |
| NGLY1_2    | 47.42     | -0.088 | 0       | 0.99 |

Supplement: Supplementary file 7699 [file 1]

# IPI00026612.1|PPM1B

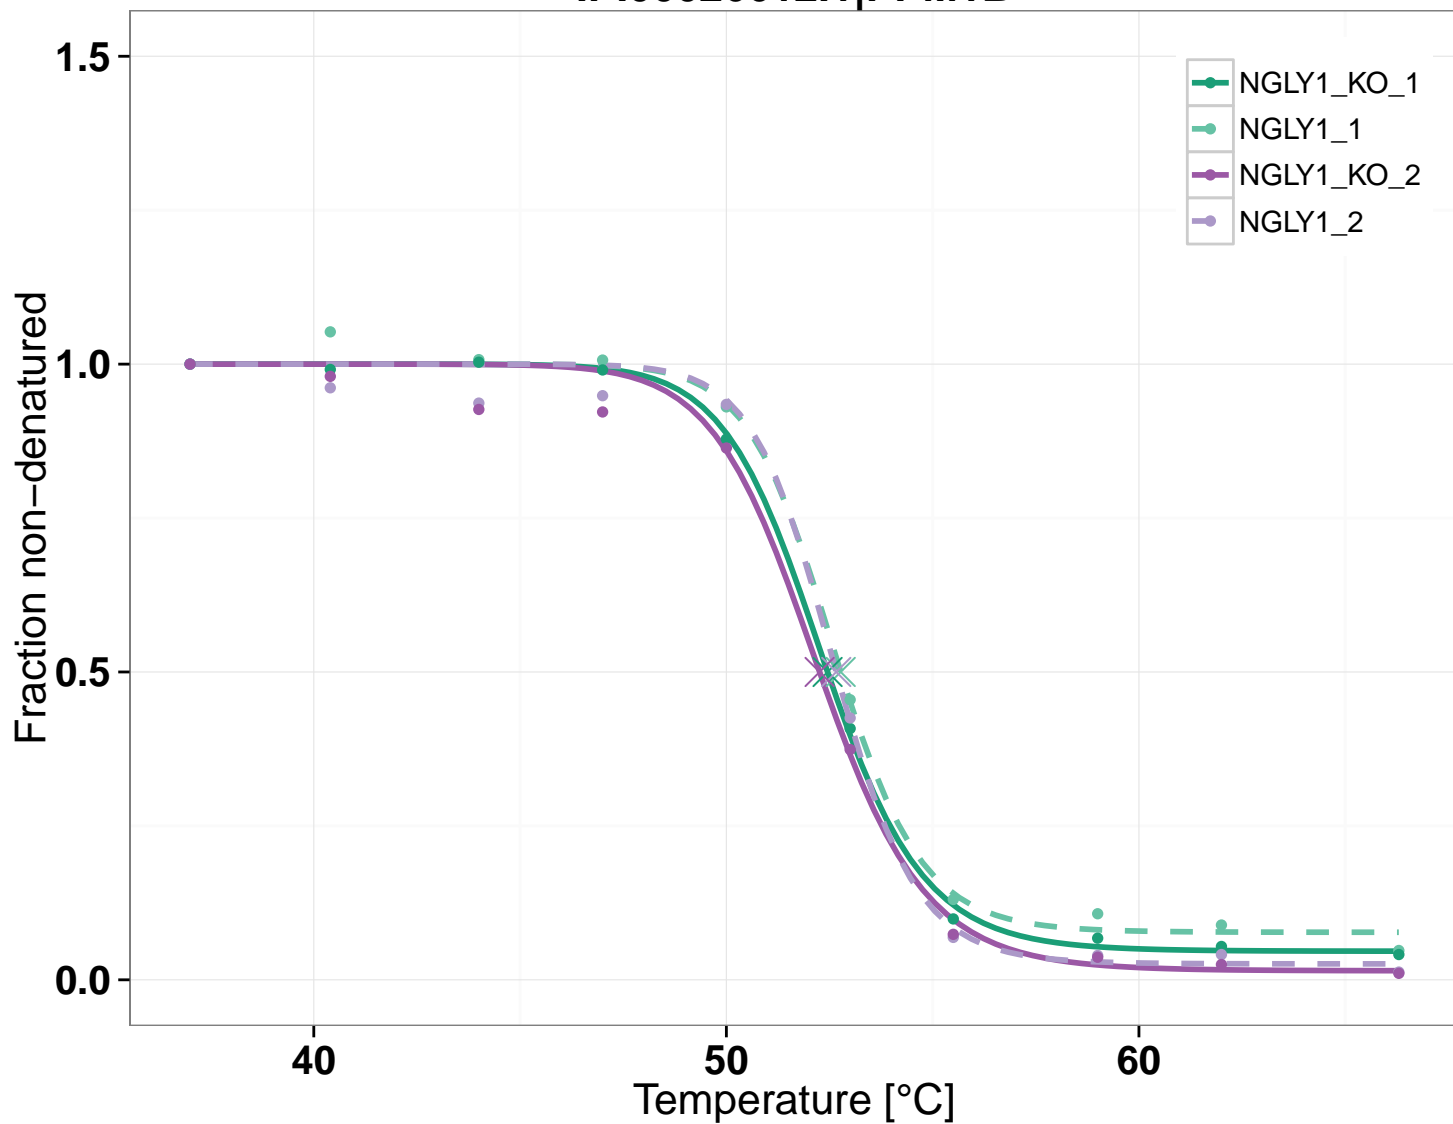

|            | meltPoint | slope | plateau | R2   |
|------------|-----------|-------|---------|------|
| NGLY1_KO_1 | 52.45     | -0.2  | 0.05    | 1    |
| NGLY1_1    | 52.77     | -0.22 | 0.08    | 1    |
| NGLY1_KO_2 | 52.26     | -0.19 | 0.01    | 0.99 |
| NGLY1_2    | 52.66     | -0.24 | 0.03    | 1    |

Supplement: Supplementary file 7700 [file 1]

# IPI00294776.4|RELN

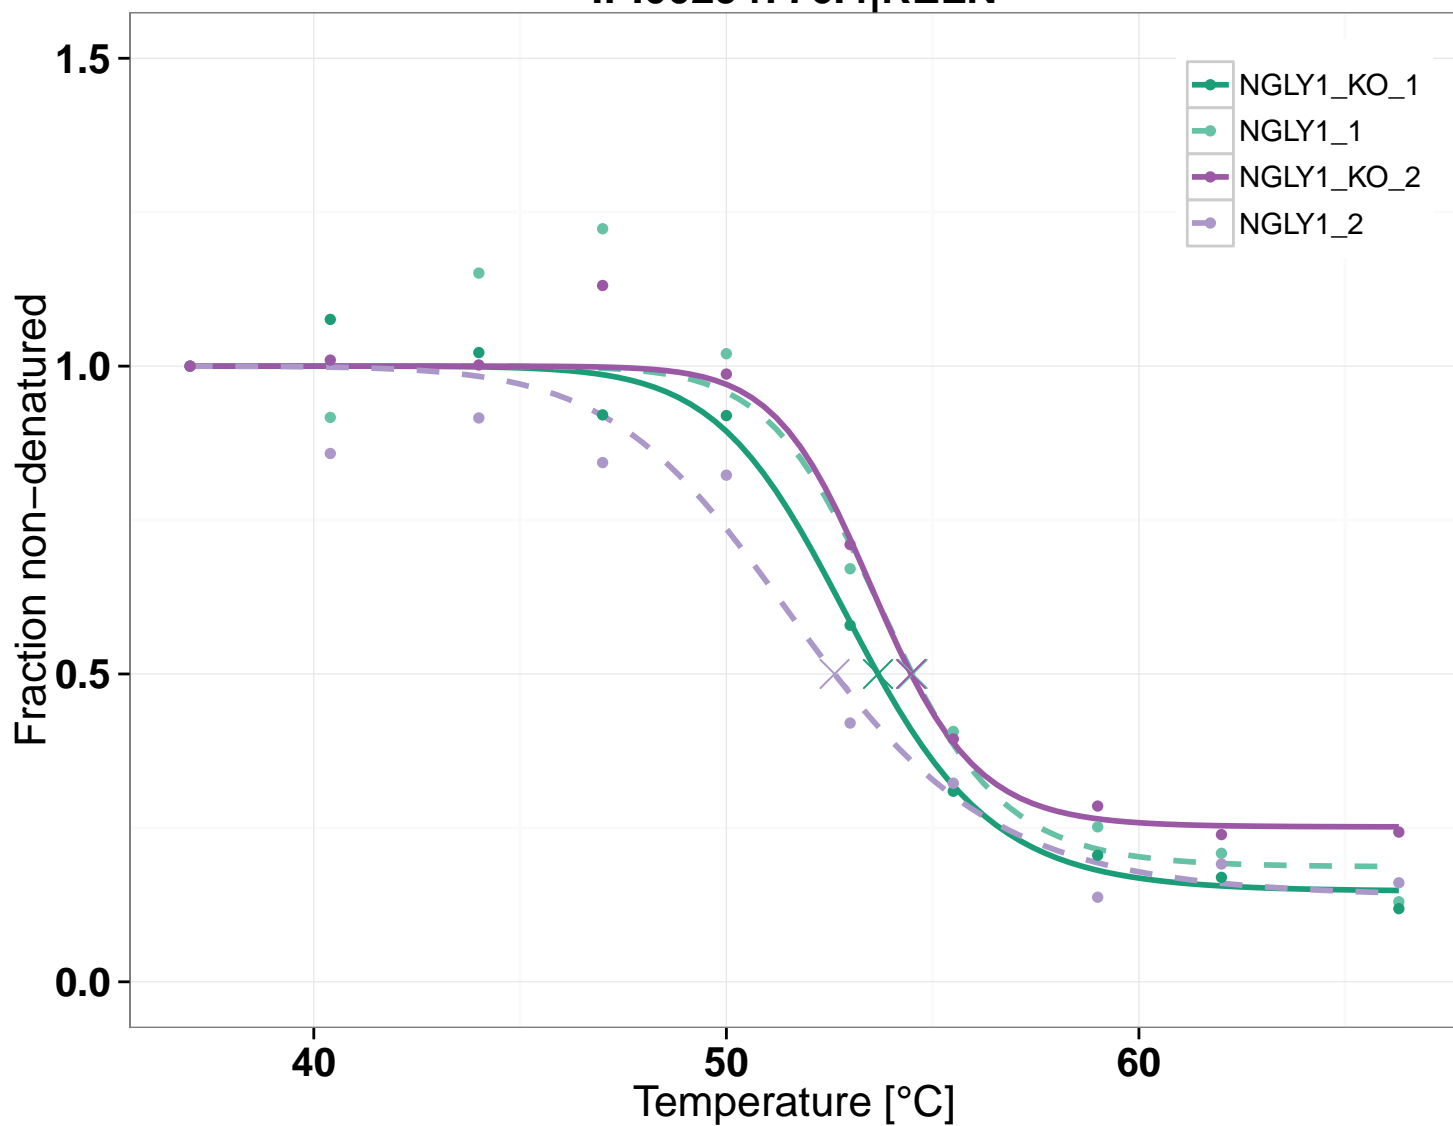

|            | meltPoint | slope  | plateau | R2   |
|------------|-----------|--------|---------|------|
| NGLY1_KO_1 | 53.68     | -0.13  | 0.15    | 0.99 |
| NGLY1_1    | 54.51     | -0.14  | 0.19    | 0.94 |
| NGLY1_KO_2 | 54.48     | -0.15  | 0.25    | 0.98 |
| NGLY1_2    | 52.62     | -0.092 | 0.14    | 0.96 |

Supplement: Supplementary file 7701 [file 1]

# IPI00893172.1|GINS3

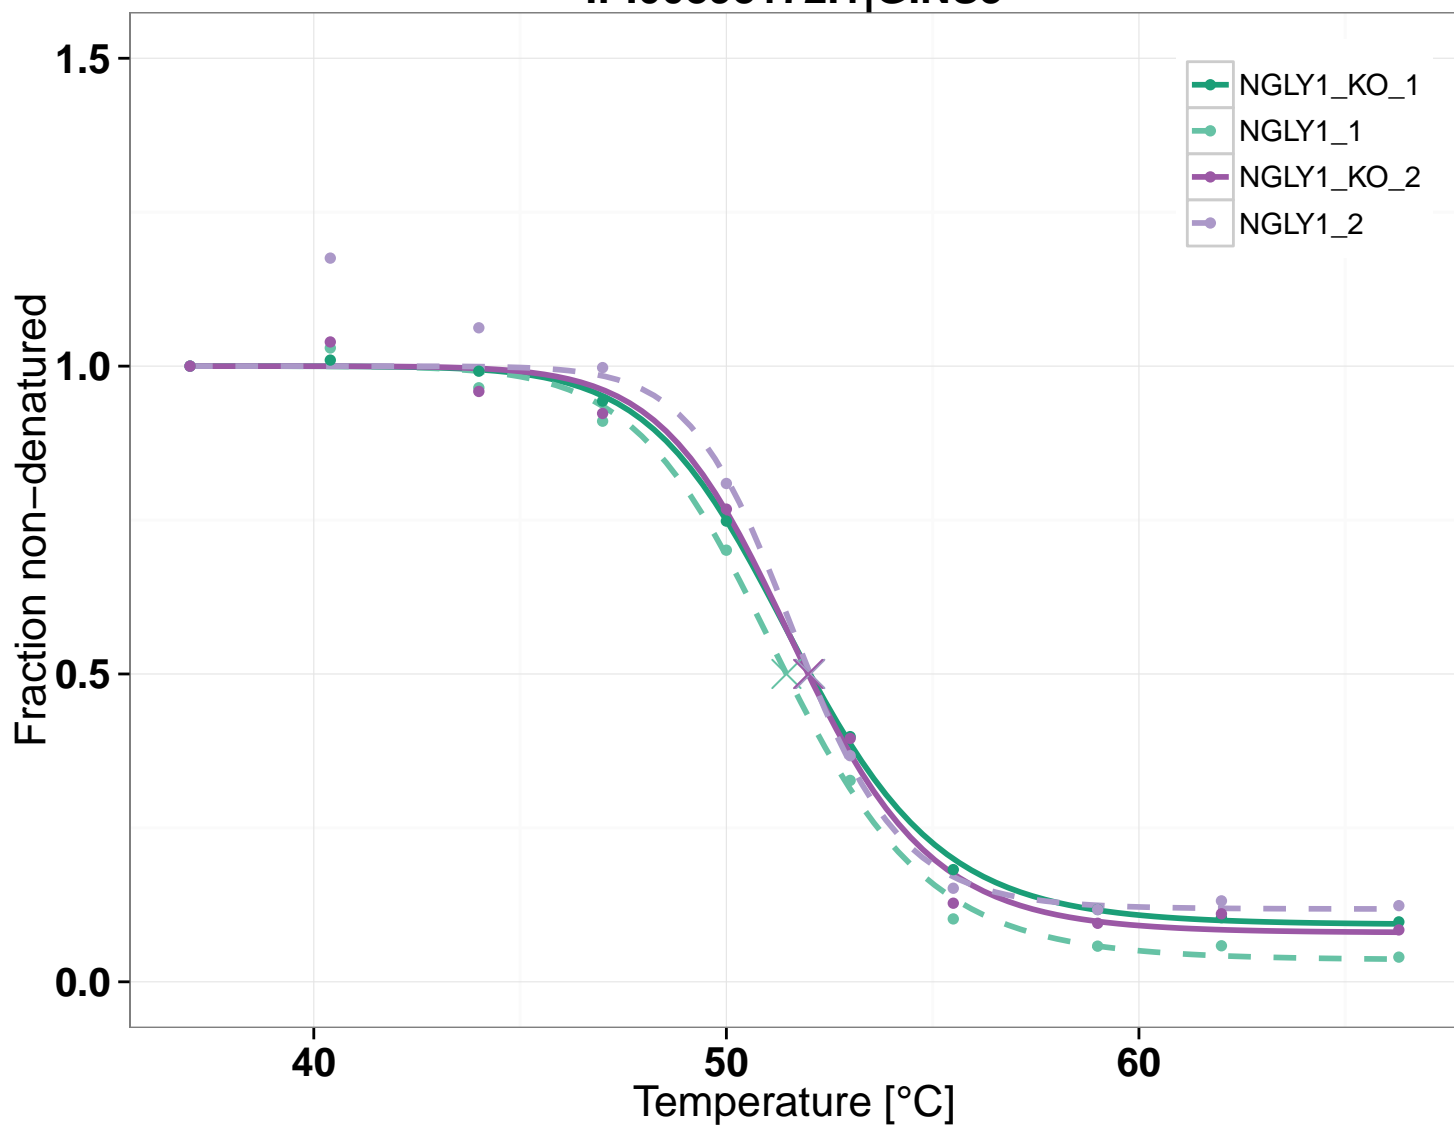

|            | meltPoint | slope | plateau | R2   |
|------------|-----------|-------|---------|------|
| NGLY1_KO_1 | 52.03     | -0.13 | 0.09    | 1    |
| NGLY1_1    | 51.46     | -0.14 | 0.04    | 1    |
| NGLY1_KO_2 | 51.98     | -0.14 | 0.08    | 1    |
| NGLY1_2    | 52.03     | -0.17 | 0.12    | 0.98 |

Supplement: Supplementary file 7702 [file 1]

IPI00794169.1|ANO10

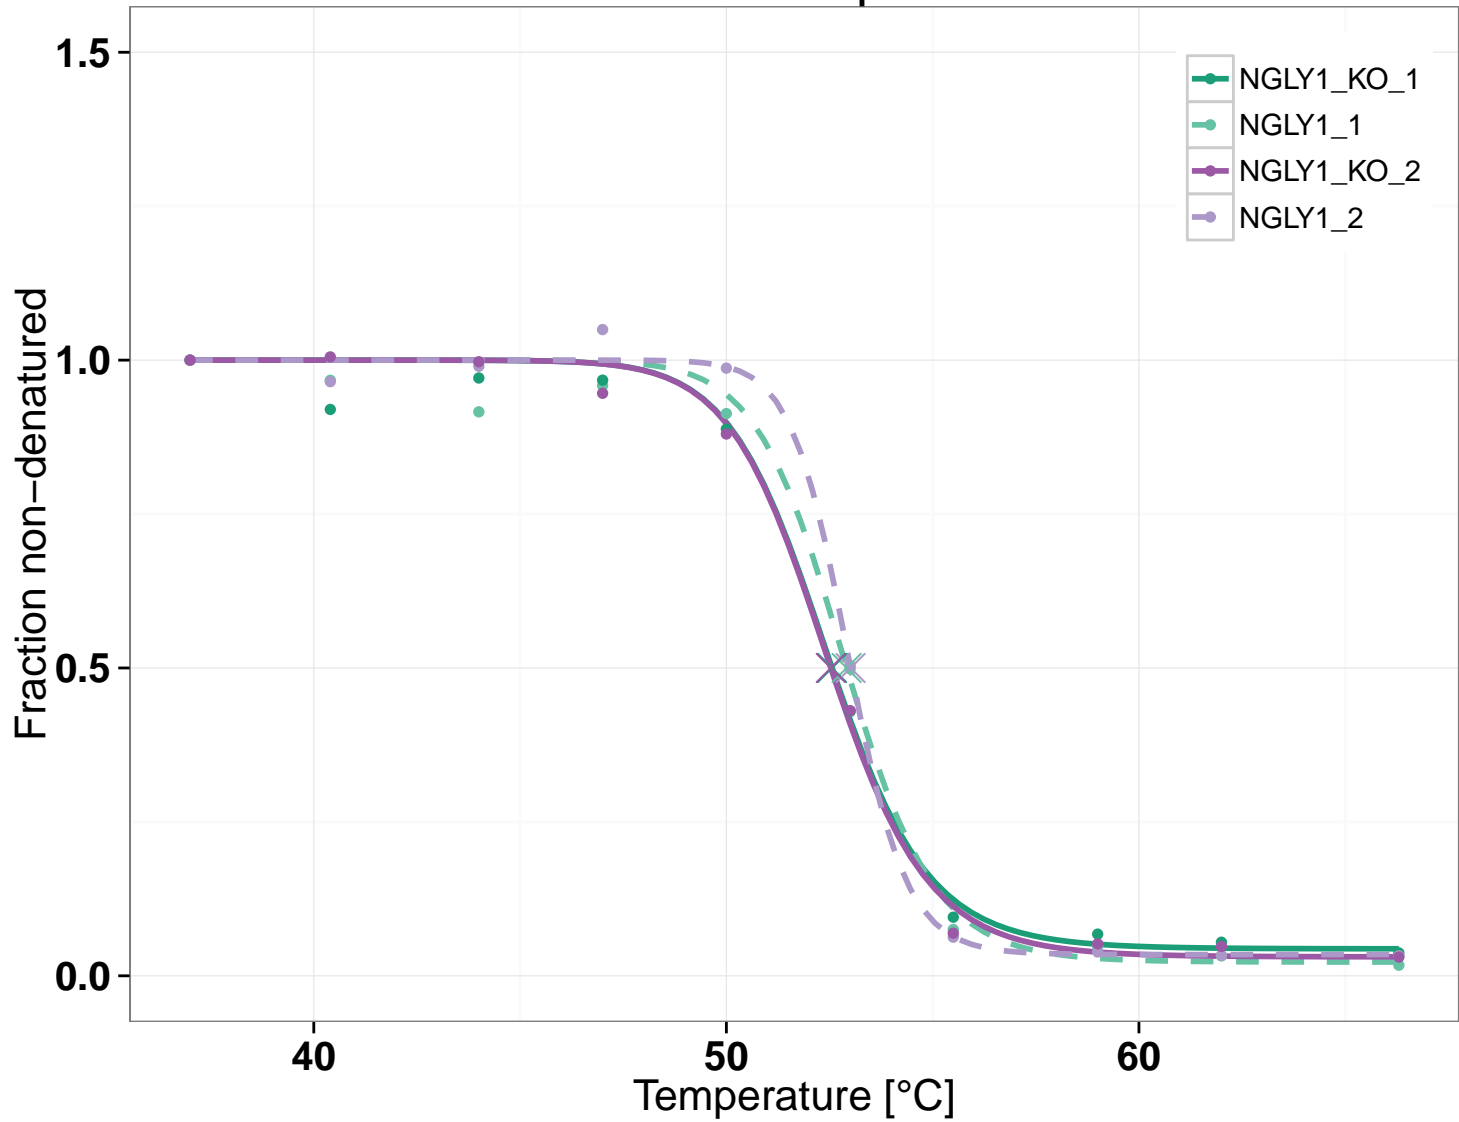

|            | meltPoint | slope | plateau | R2   |
|------------|-----------|-------|---------|------|
| NGLY1_KO_1 | 52.56     | -0.2  | 0.04    | 0.99 |
| NGLY1_1    | 52.91     | -0.23 | 0.02    | 0.99 |
| NGLY1_KO_2 | 52.53     | -0.2  | 0.03    | 1    |
| NGLY1_2    | 53.01     | -0.35 | 0.03    | 1    |

Supplement: Supplementary file 7703 [file 1]

IPI00915363.1|RPS24

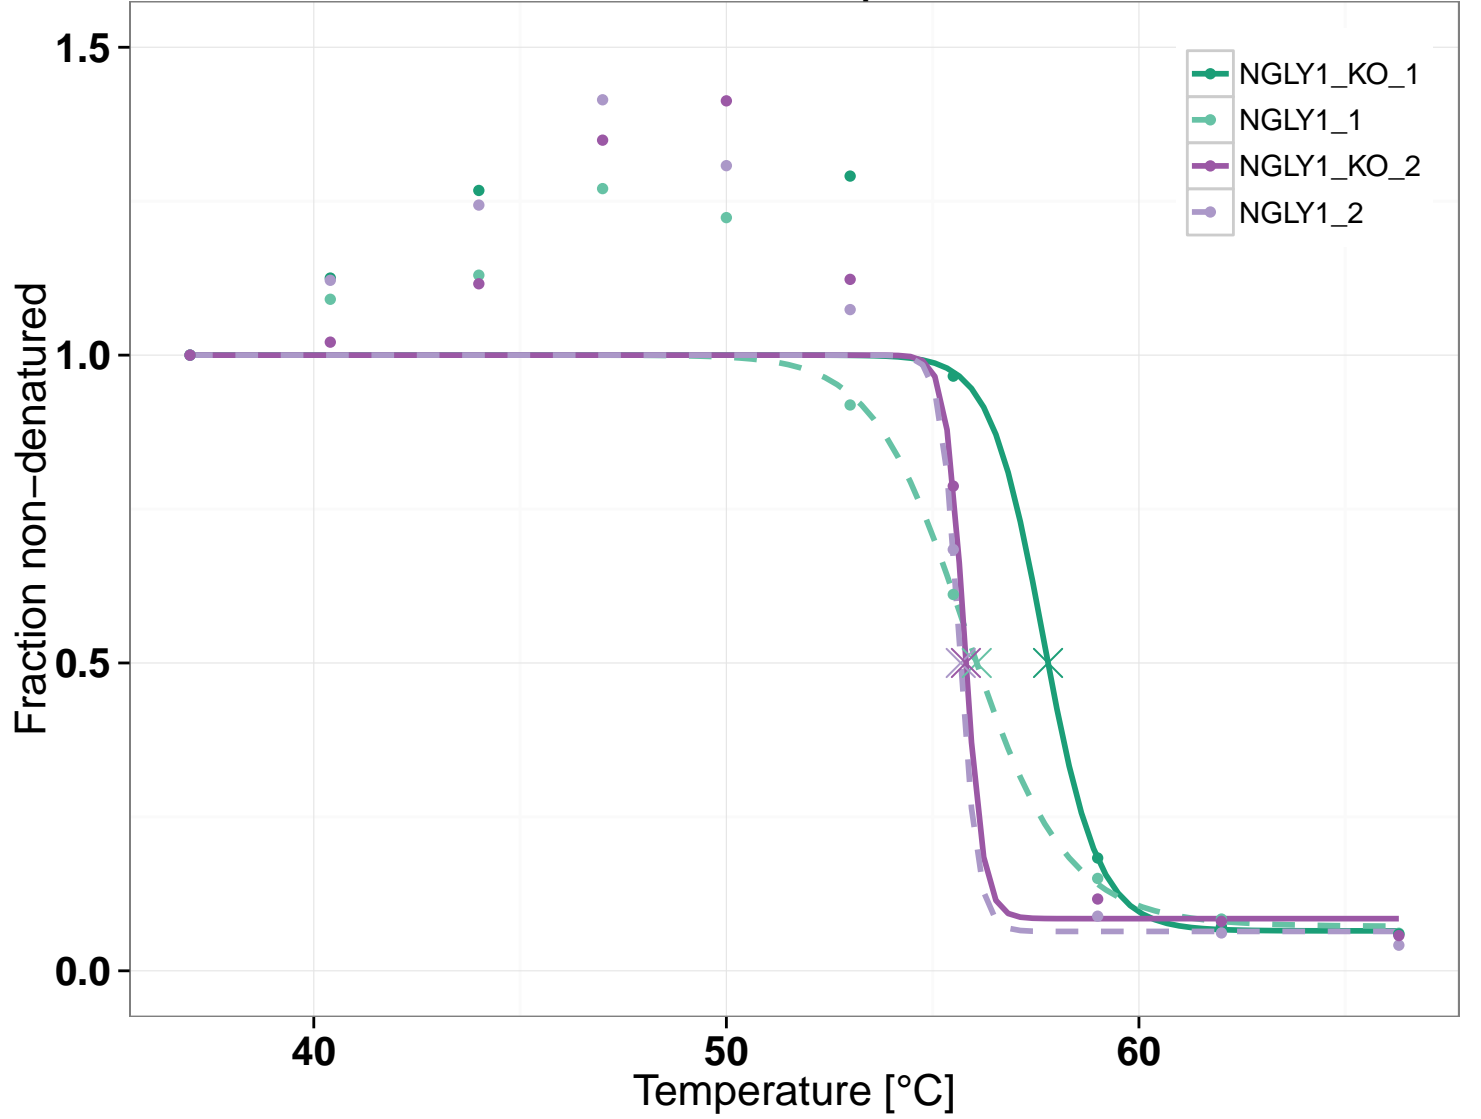

|            | meltPoint | slope | plateau | R2   |
|------------|-----------|-------|---------|------|
| NGLY1_KO_1 | 57.8      | -0.36 | 0.06    | 0.73 |
| NGLY1_1    | 56.07     | -0.2  | 0.07    | 0.93 |
| NGLY1_KO_2 | 55.81     | -1    | 0.08    | 0.87 |
| NGLY1_2    | 55.68     | -1.1  | 0.06    | 0.87 |

Supplement: Supplementary file 7704 [file 1]

IPI00647655.1|POLA1

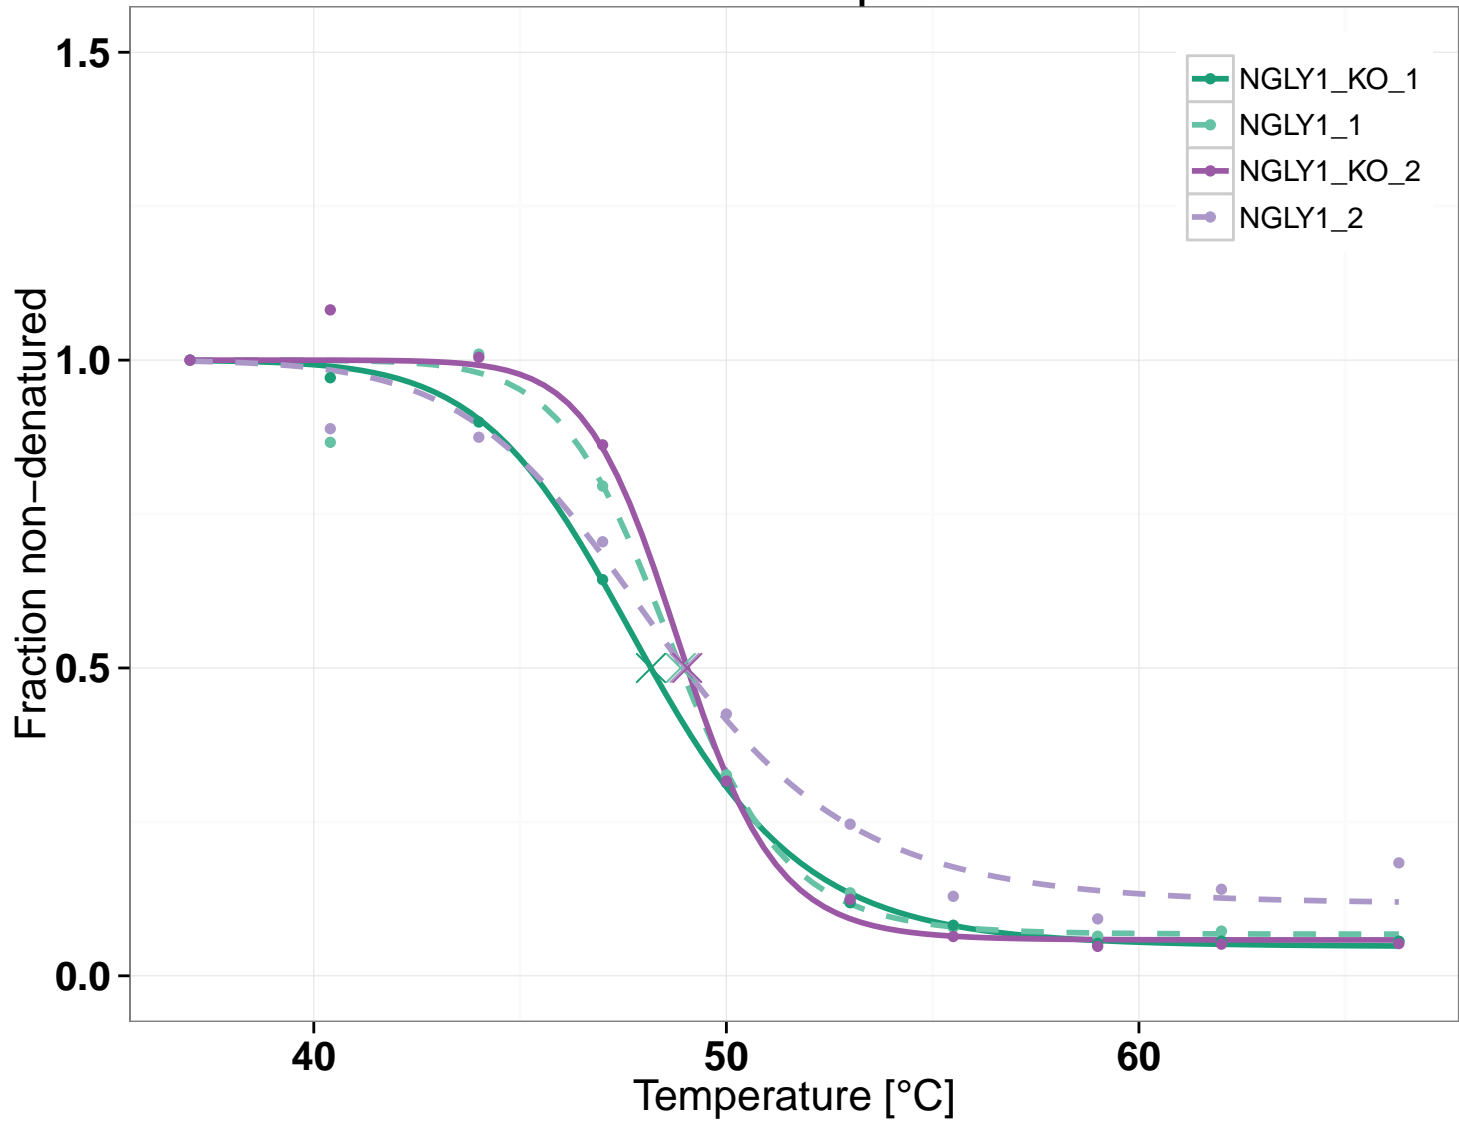

|            | meltPoint | slope  | plateau | R2   |
|------------|-----------|--------|---------|------|
| NGLY1_KO_1 | 48.17     | -0.12  | 0.05    | 1    |
| NGLY1_1    | 48.89     | -0.17  | 0.07    | 0.99 |
| NGLY1_KO_2 | 49.05     | -0.2   | 0.06    | 1    |
| NGLY1_2    | 48.99     | -0.093 | 0.12    | 0.98 |

Supplement: Supplementary file 7705 [file 1]

IPI00023013.3|LOC100130224

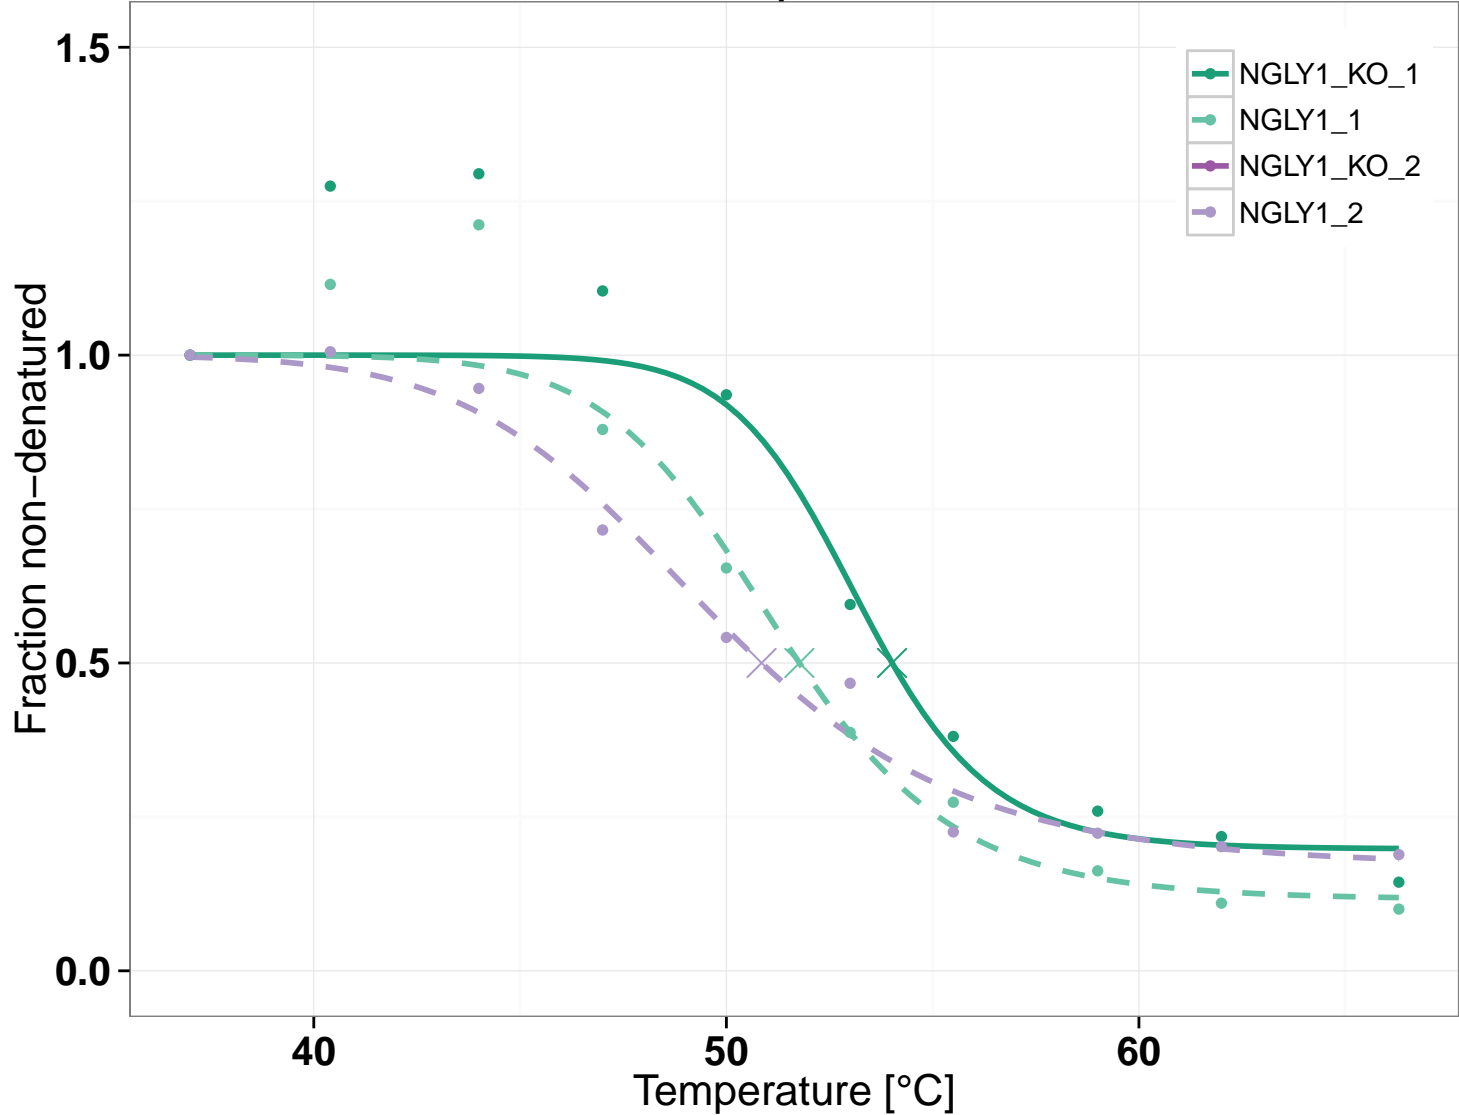

|            | meltPoint | slope | plateau | R2   |
|------------|-----------|-------|---------|------|
| NGLY1_KO_1 | 54.02     | -0.13 | 0.2     | 0.9  |
| NGLY1_1    | 51.77     | -0.1  | 0.12    | 0.96 |
| NGLY1_KO_2 | -         | -     | -       | -    |
| NGLY1_2    | 50.85     | -0.07 | 0.17    | 0.99 |

Supplement: Supplementary file 7706 [file 1]

IPI00022208.1|CEBPG

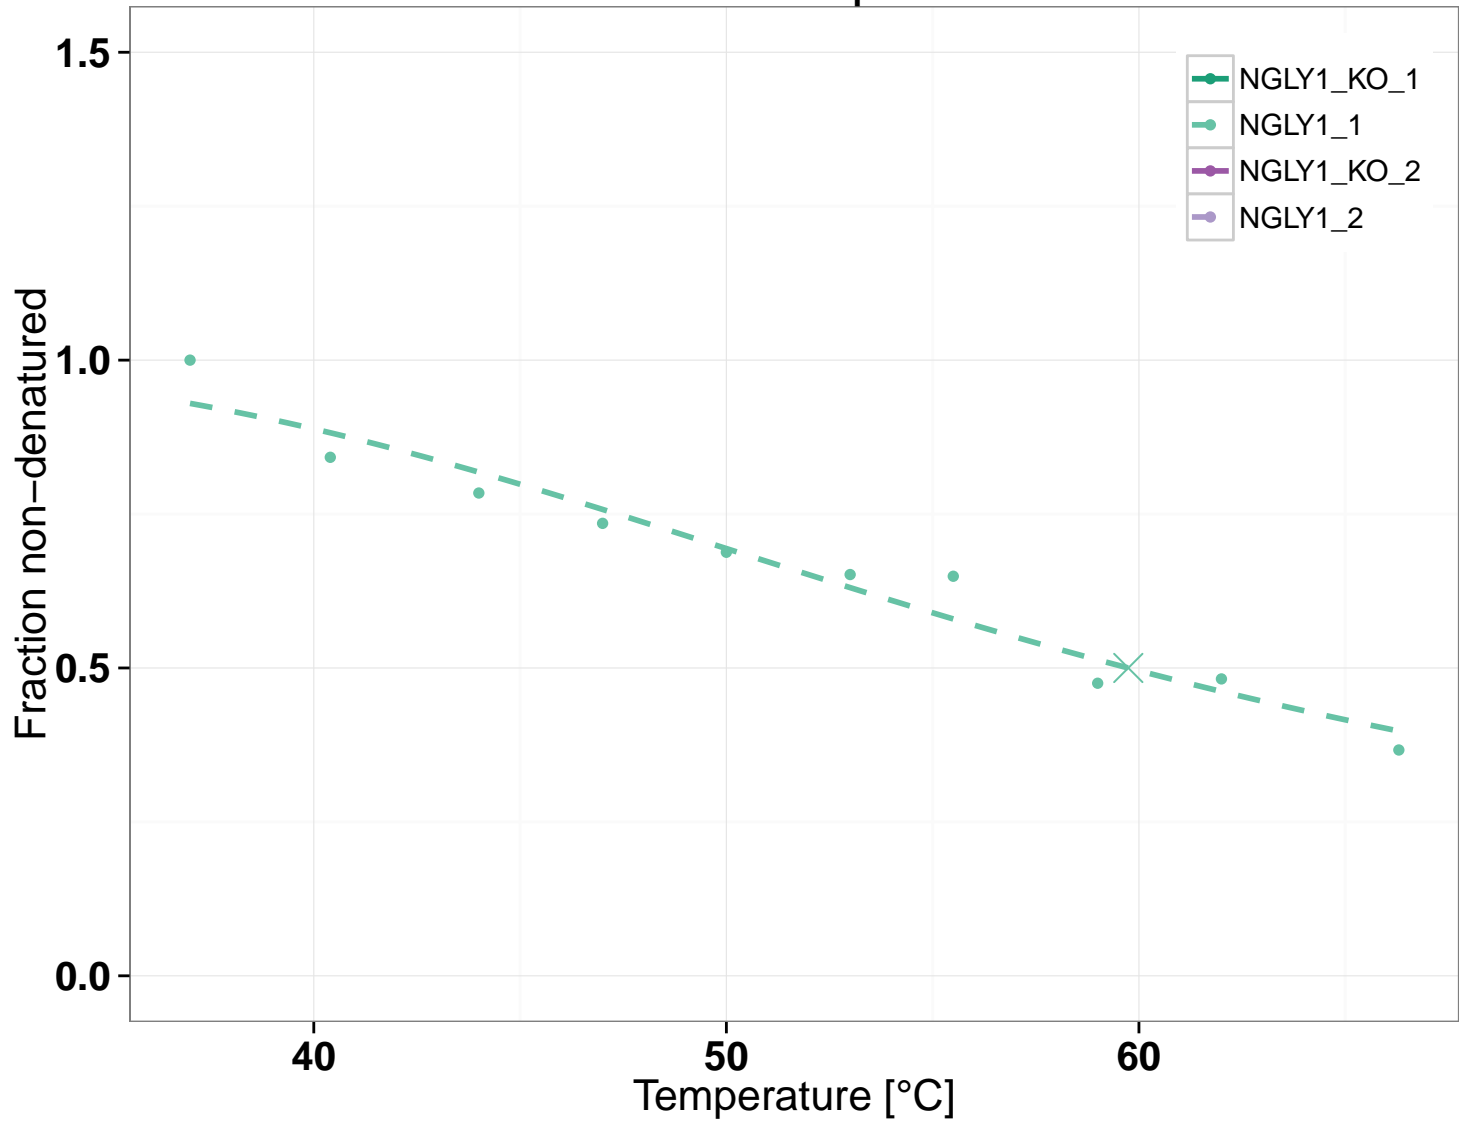

|            | meltPoint | slope  | plateau | R2   |
|------------|-----------|--------|---------|------|
| NGLY1_KO_1 | -         | -      | -       | -    |
| NGLY1_1    | 59.74     | -0.021 | 0       | 0.95 |
| NGLY1_KO_2 | -         | -      | -       | -    |
| NGLY1_2    | -         | -      | -       | -    |

Supplement: Supplementary file 7707 [file 1]

# IPI00022865.1|CCNA2

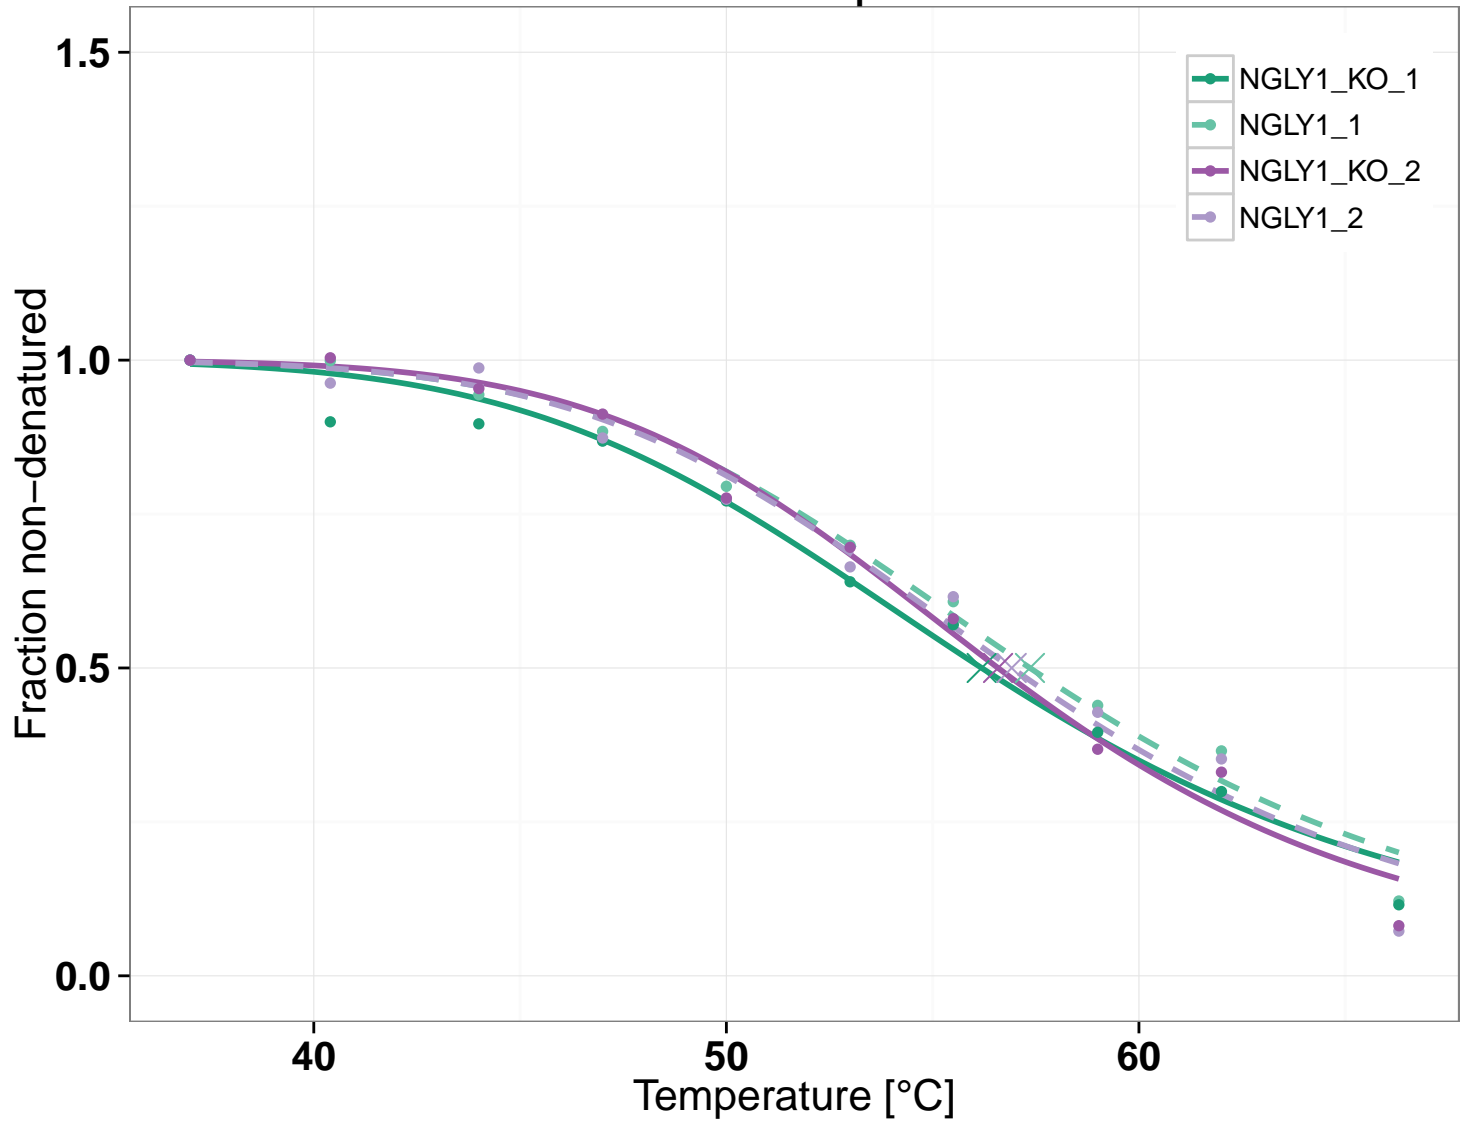

|            | meltPoint | slope  | plateau | R2   |
|------------|-----------|--------|---------|------|
| NGLY1_KO_1 | 56.19     | -0.045 | 0       | 0.98 |
| NGLY1_1    | 57.36     | -0.046 | 0       | 0.99 |
| NGLY1_KO_2 | 56.59     | -0.052 | 0       | 0.99 |
| NGLY1_2    | 56.92     | -0.048 | 0       | 0.97 |

Supplement: Supplementary file 7708 [file 1]

IPI00307259.11|DNAJC13

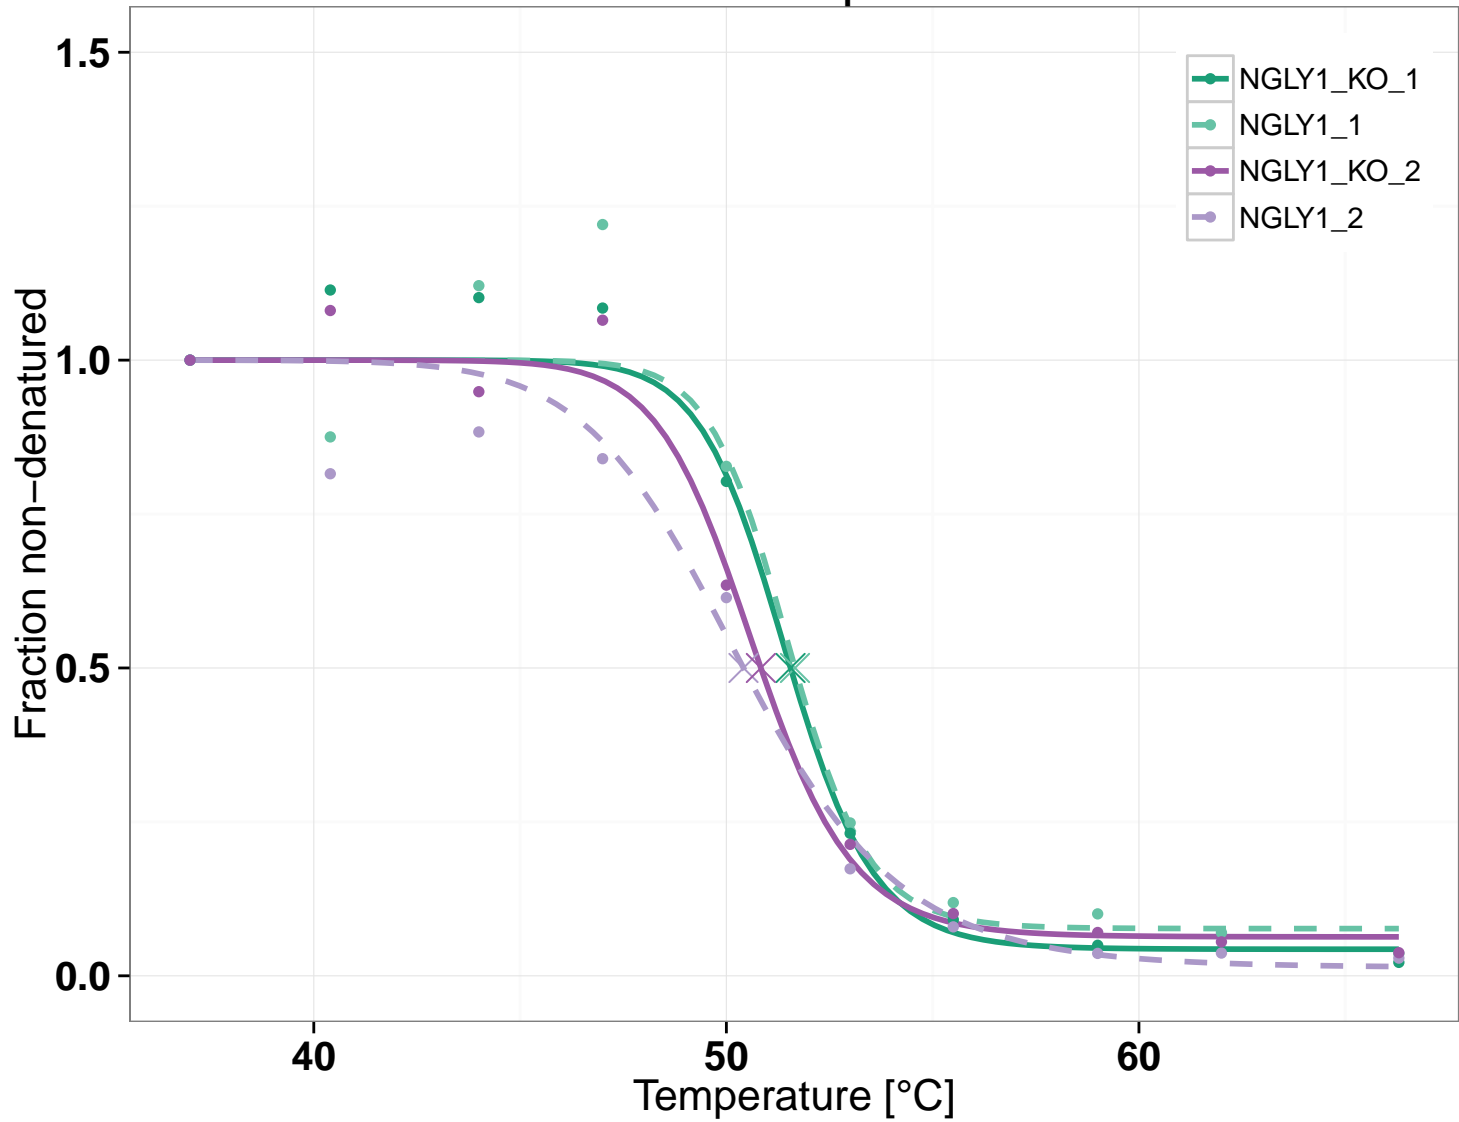

|            | meltPoint | slope | plateau | R2   |
|------------|-----------|-------|---------|------|
| NGLY1_KO_1 | 51.56     | -0.23 | 0.04    | 0.99 |
| NGLY1_1    | 51.66     | -0.24 | 0.08    | 0.96 |
| NGLY1_KO_2 | 50.84     | -0.2  | 0.06    | 0.99 |
| NGLY1_2    | 50.41     | -0.13 | 0.01    | 0.97 |

Supplement: Supplementary file 7709 [file 1]

# IPI00647044.1|MGST3

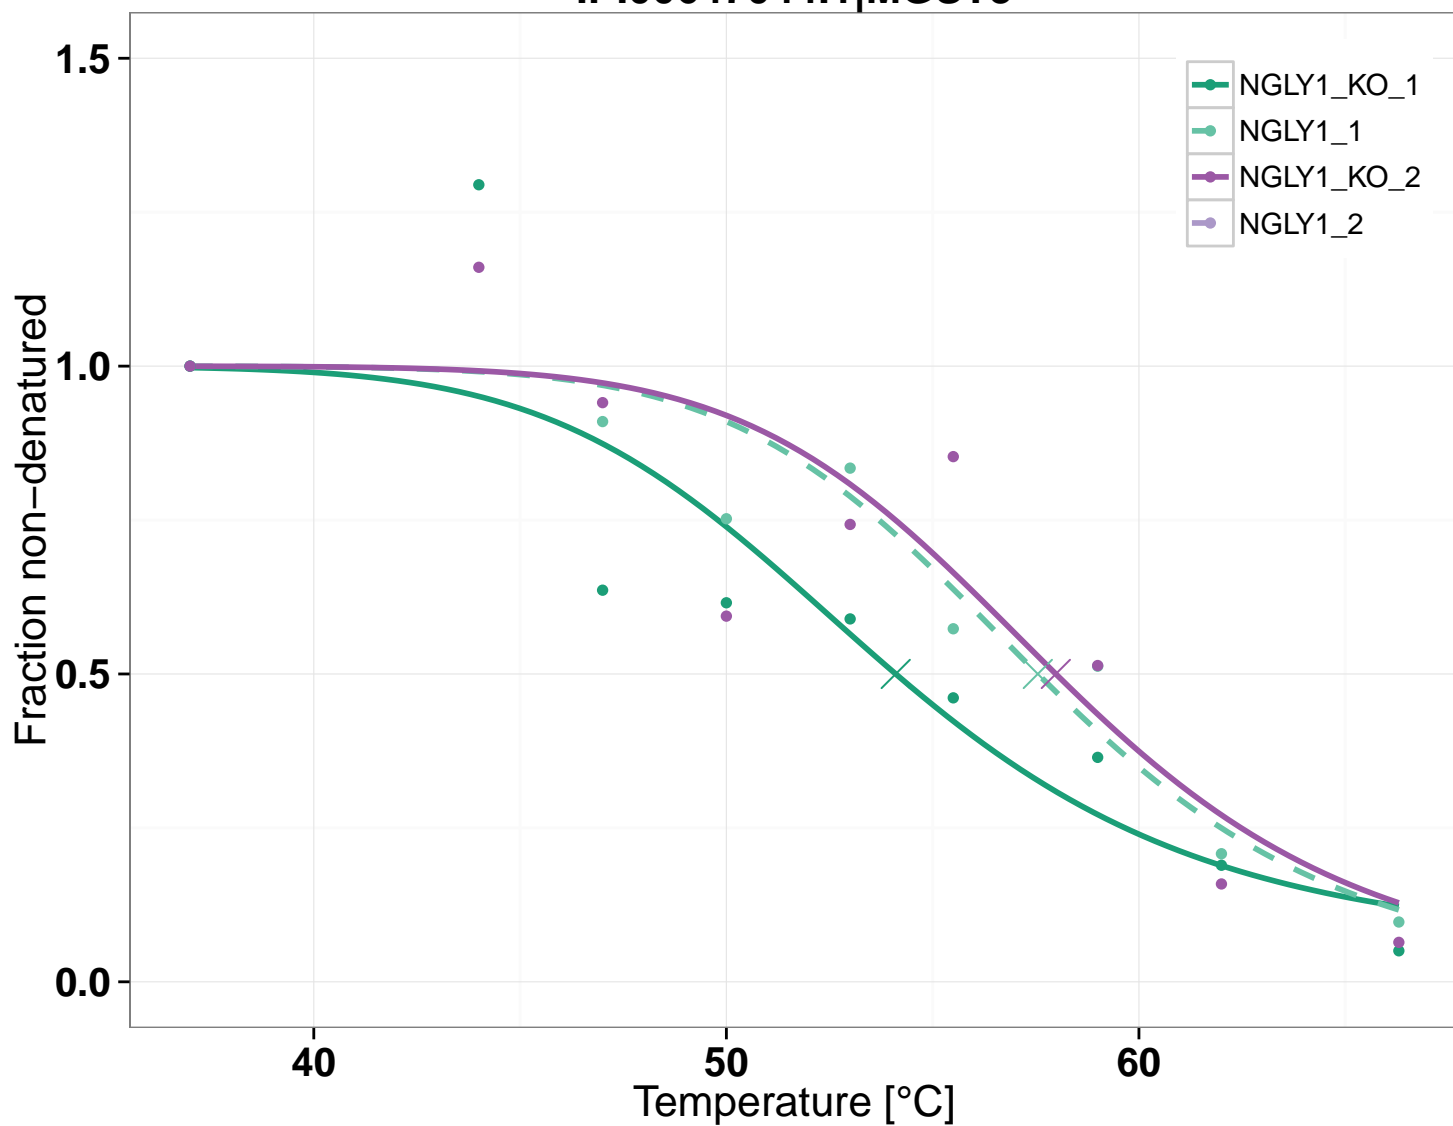

|            | meltPoint | slope  | plateau | R2   |
|------------|-----------|--------|---------|------|
| NGLY1_KO_1 | 54.11     | -0.06  | 0.05    | 0.71 |
| NGLY1_1    | 57.55     | -0.068 | 0       | 0.64 |
| NGLY1_KO_2 | 57.99     | -0.067 | 0       | 0.47 |
| NGLY1_2    | -         | -      | -       | -    |

Supplement: Supplementary file 7710 [file 1]

IPI00028414.3|GMFG

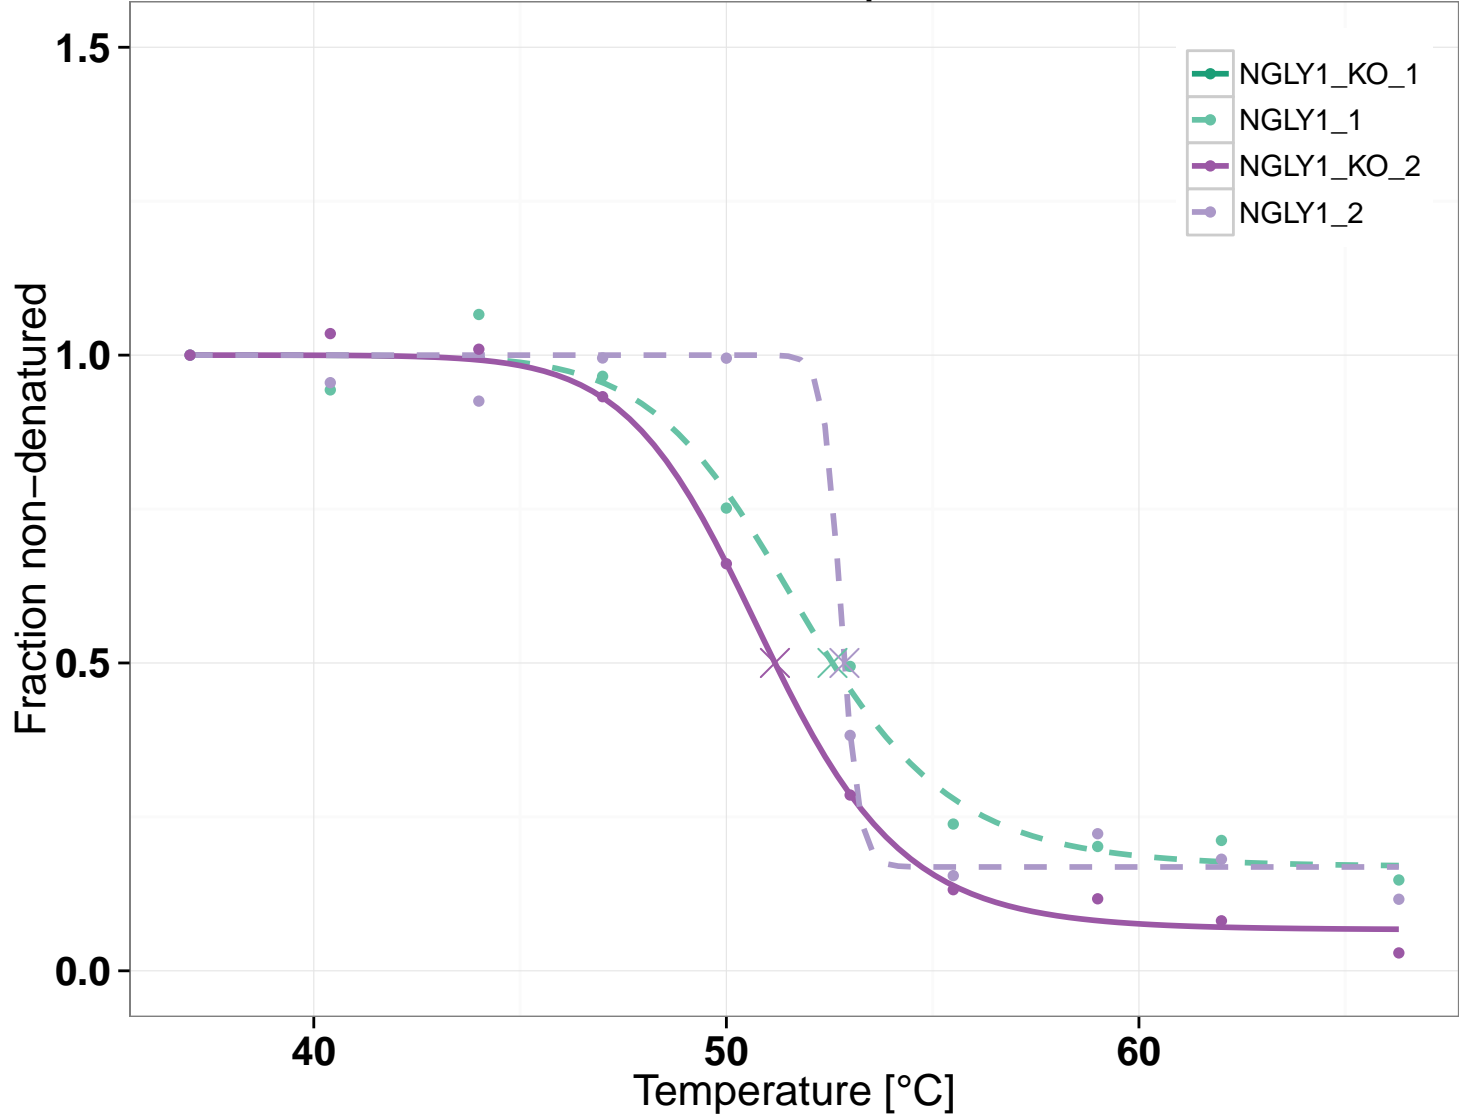

|            | meltPoint | slope | plateau | R2   |
|------------|-----------|-------|---------|------|
| NGLY1_KO_1 | -         | -     | -       | -    |
| NGLY1_1    | 52.57     | -0.11 | 0.17    | 0.99 |
| NGLY1_KO_2 | 51.18     | -0.14 | 0.07    | 1    |
| NGLY1_2    | 52.86     | -0.98 | 0.17    | 0.99 |

Supplement: Supplementary file 7711 [file 1]

IPI00013070.2|HNRNPUL1

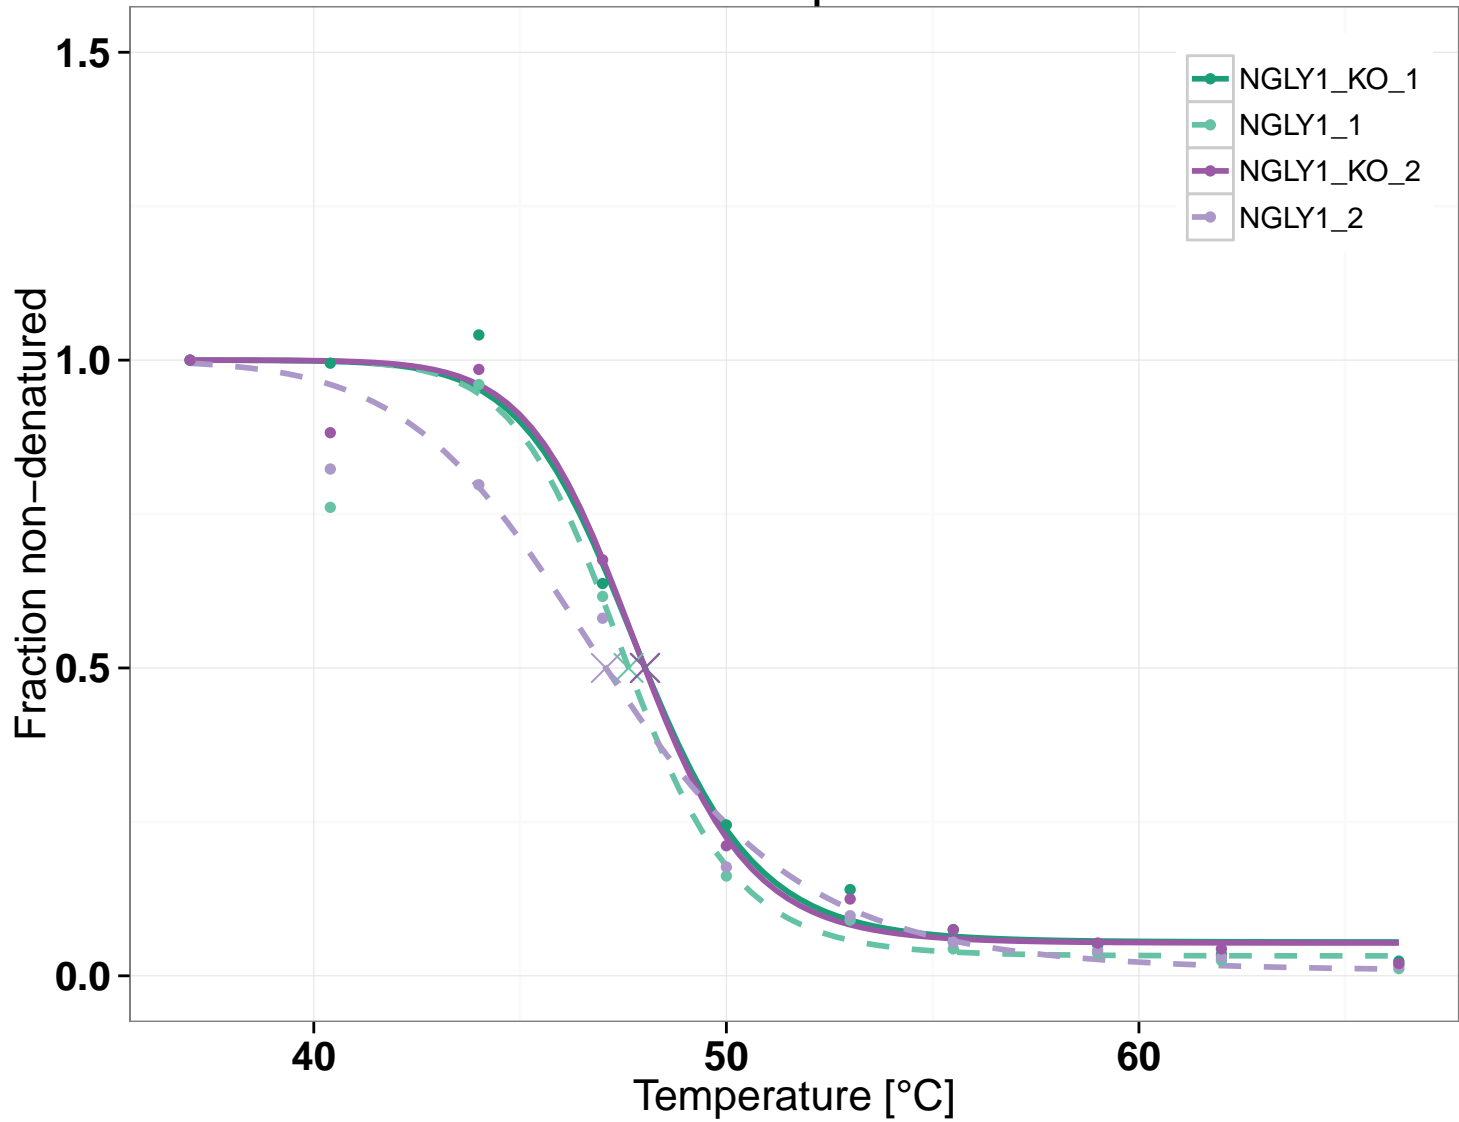

|            | meltPoint | slope | plateau | R2   |
|------------|-----------|-------|---------|------|
| NGLY1_KO_1 | 48.03     | -0.17 | 0.05    | 0.99 |
| NGLY1_1    | 47.63     | -0.18 | 0.03    | 0.96 |
| NGLY1_KO_2 | 48.02     | -0.18 | 0.05    | 0.99 |
| NGLY1_2    | 47.08     | -0.1  | 0.01    | 0.98 |

Supplement: Supplementary file 7712 [file 1]

IPI00015806.3|GTF3C3

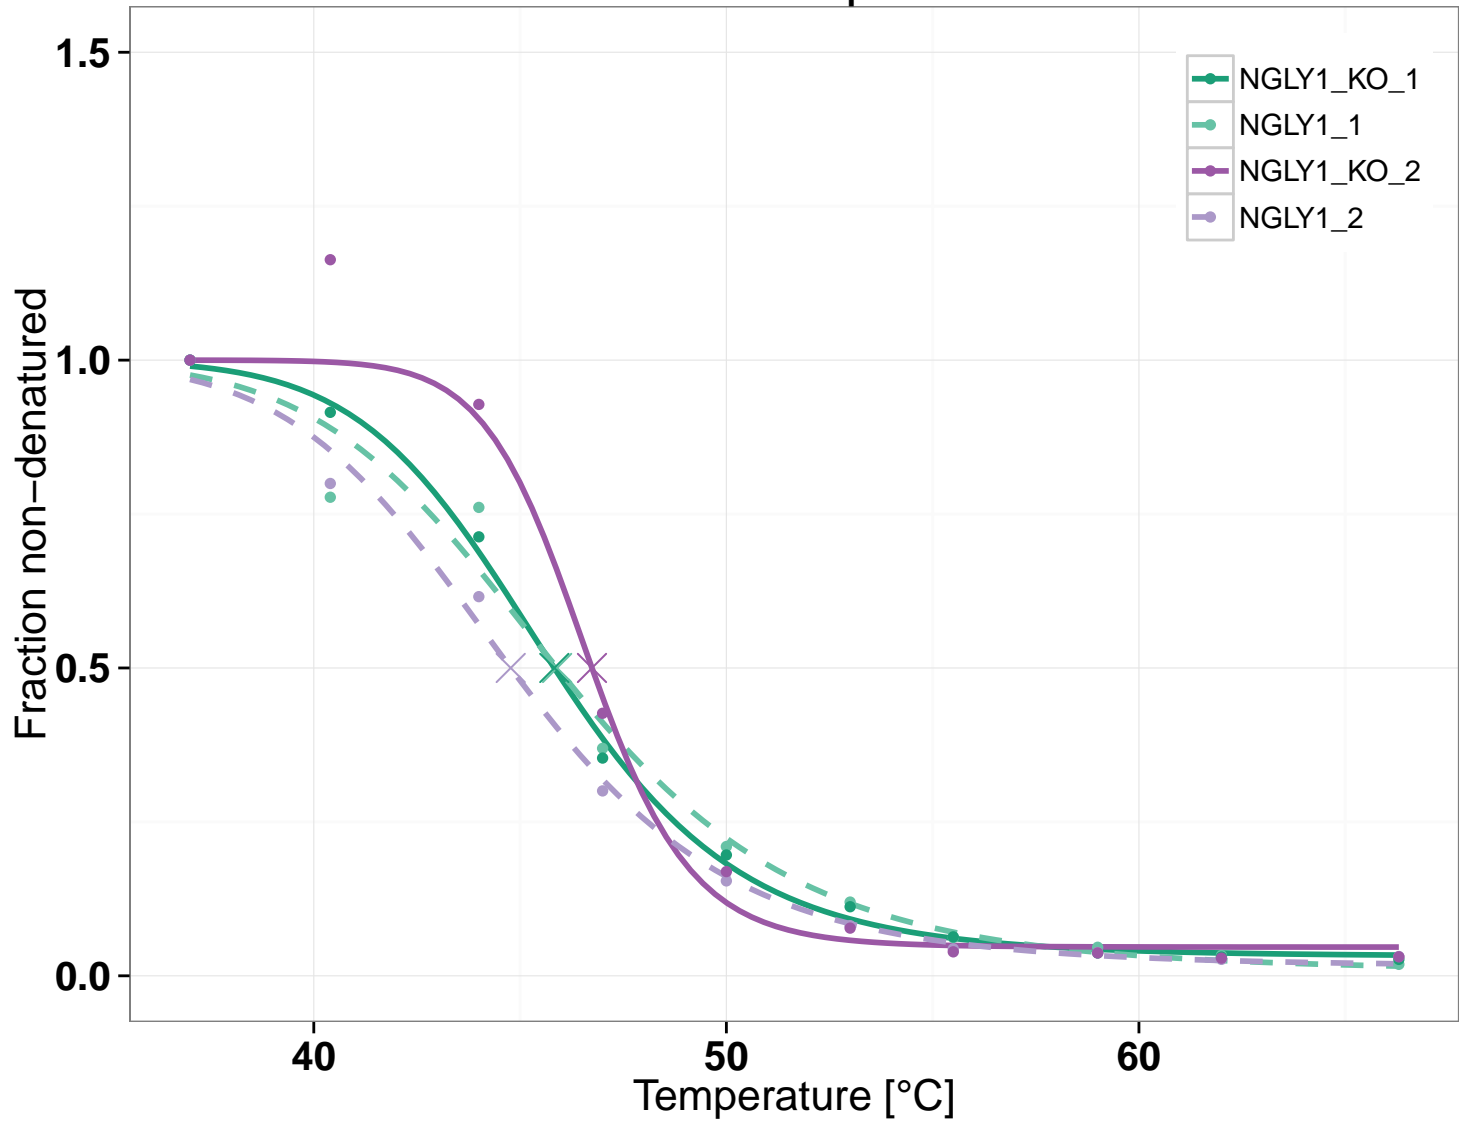

|            | meltPoint | slope  | plateau | R2   |
|------------|-----------|--------|---------|------|
| NGLY1_KO_1 | 45.83     | -0.1   | 0.03    | 1    |
| NGLY1_1    | 45.9      | -0.085 | 0.01    | 0.98 |
| NGLY1_KO_2 | 46.74     | -0.19  | 0.05    | 0.98 |
| NGLY1_2    | 44.77     | -0.092 | 0.01    | 0.99 |

Supplement: Supplementary file 7713 [file 1]

# IPI00001146.1|LSM6

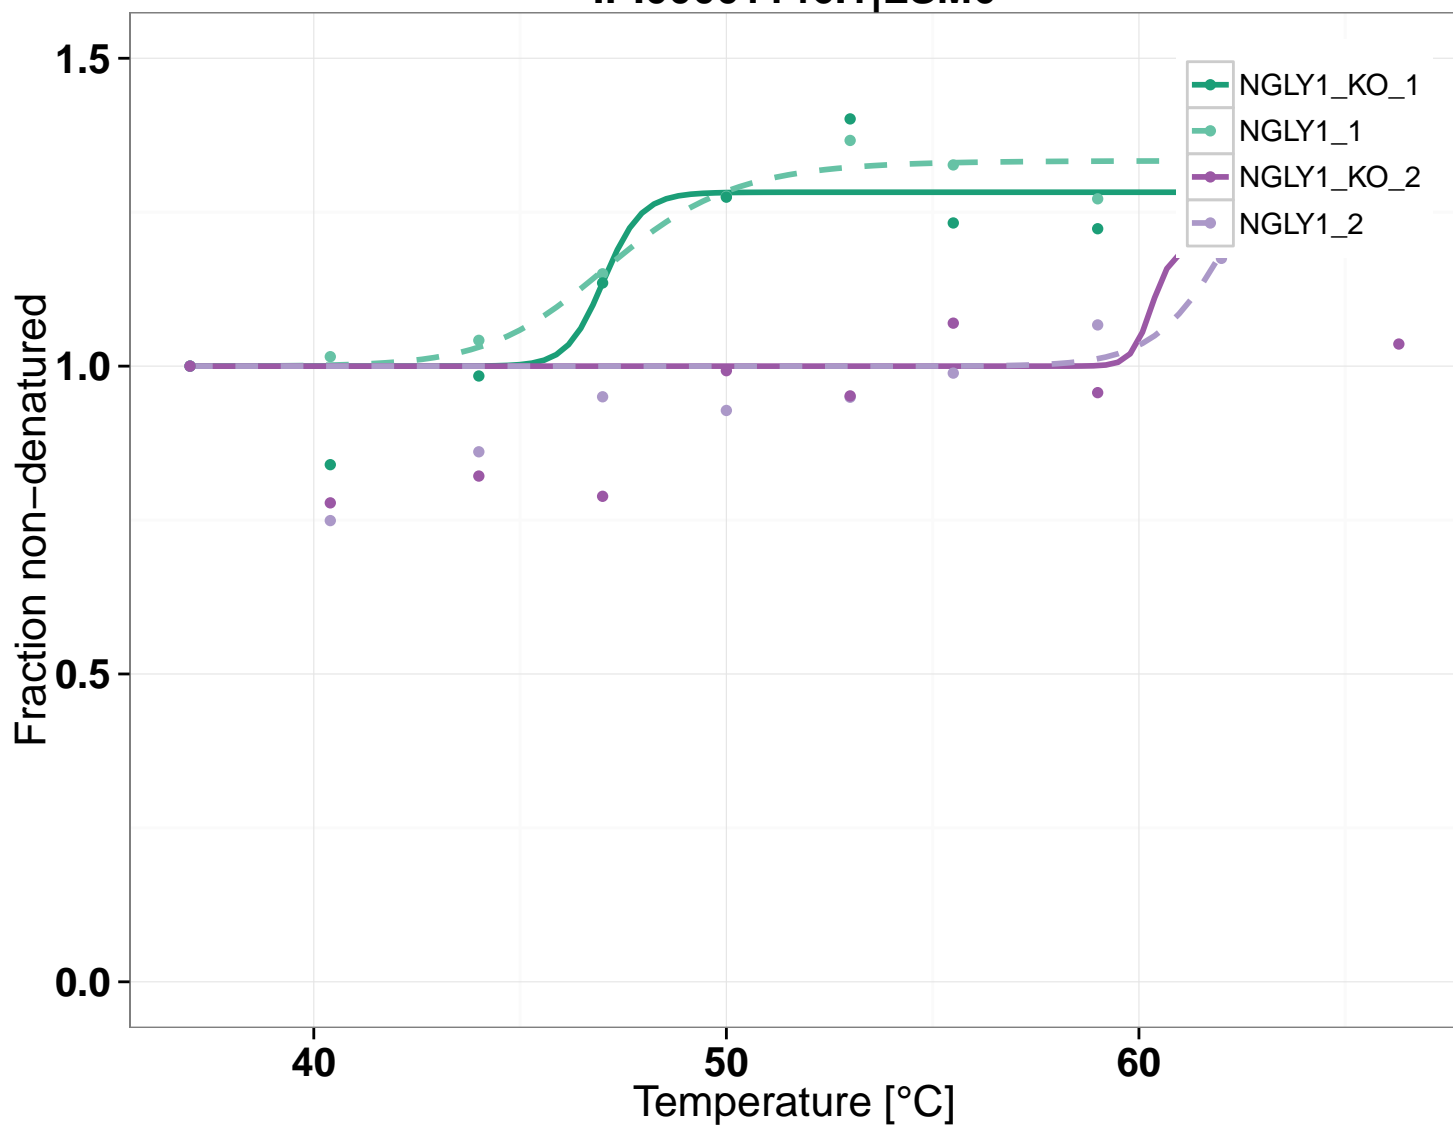

|            | meltPoint | slope | plateau | R2   |
|------------|-----------|-------|---------|------|
| NGLY1_KO_1 | —         | 0.16  | 1.28    | 0.83 |
| NGLY1_1    | —         | 0.056 | 1.33    | 0.86 |
| NGLY1_KO_2 | —         | 0.2   | 1.19    | 0.27 |
| NGLY1_2    | —         | 0.12  | 1.5     | 0.75 |

Supplement: Supplementary file 7714 [file 1]

# IPI00074587.8|FUSIP1

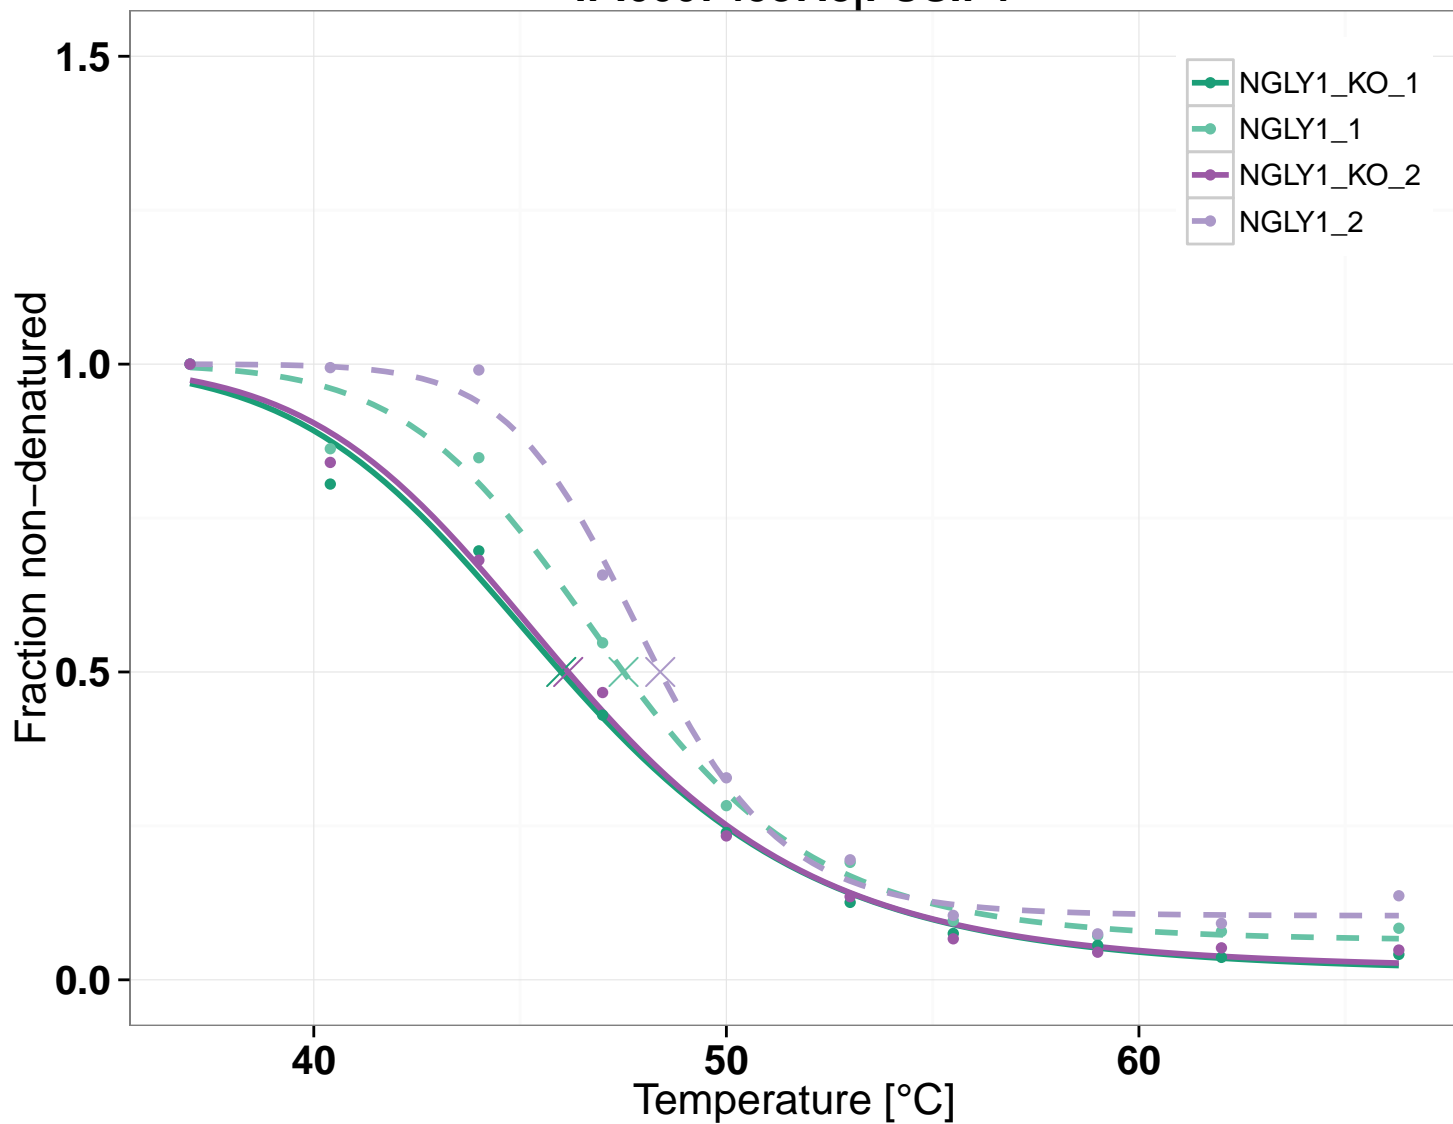

|            | meltPoint | slope  | plateau | R2   |
|------------|-----------|--------|---------|------|
| NGLY1_KO_1 | 46        | -0.078 | 0.01    | 0.99 |
| NGLY1_1    | 47.51     | -0.094 | 0.06    | 0.99 |
| NGLY1_KO_2 | 46.17     | -0.08  | 0.02    | 1    |
| NGLY1_2    | 48.4      | -0.13  | 0.1     | 1    |

Supplement: Supplementary file 7715 [file 1]

IPI00044681.1|UHRF2

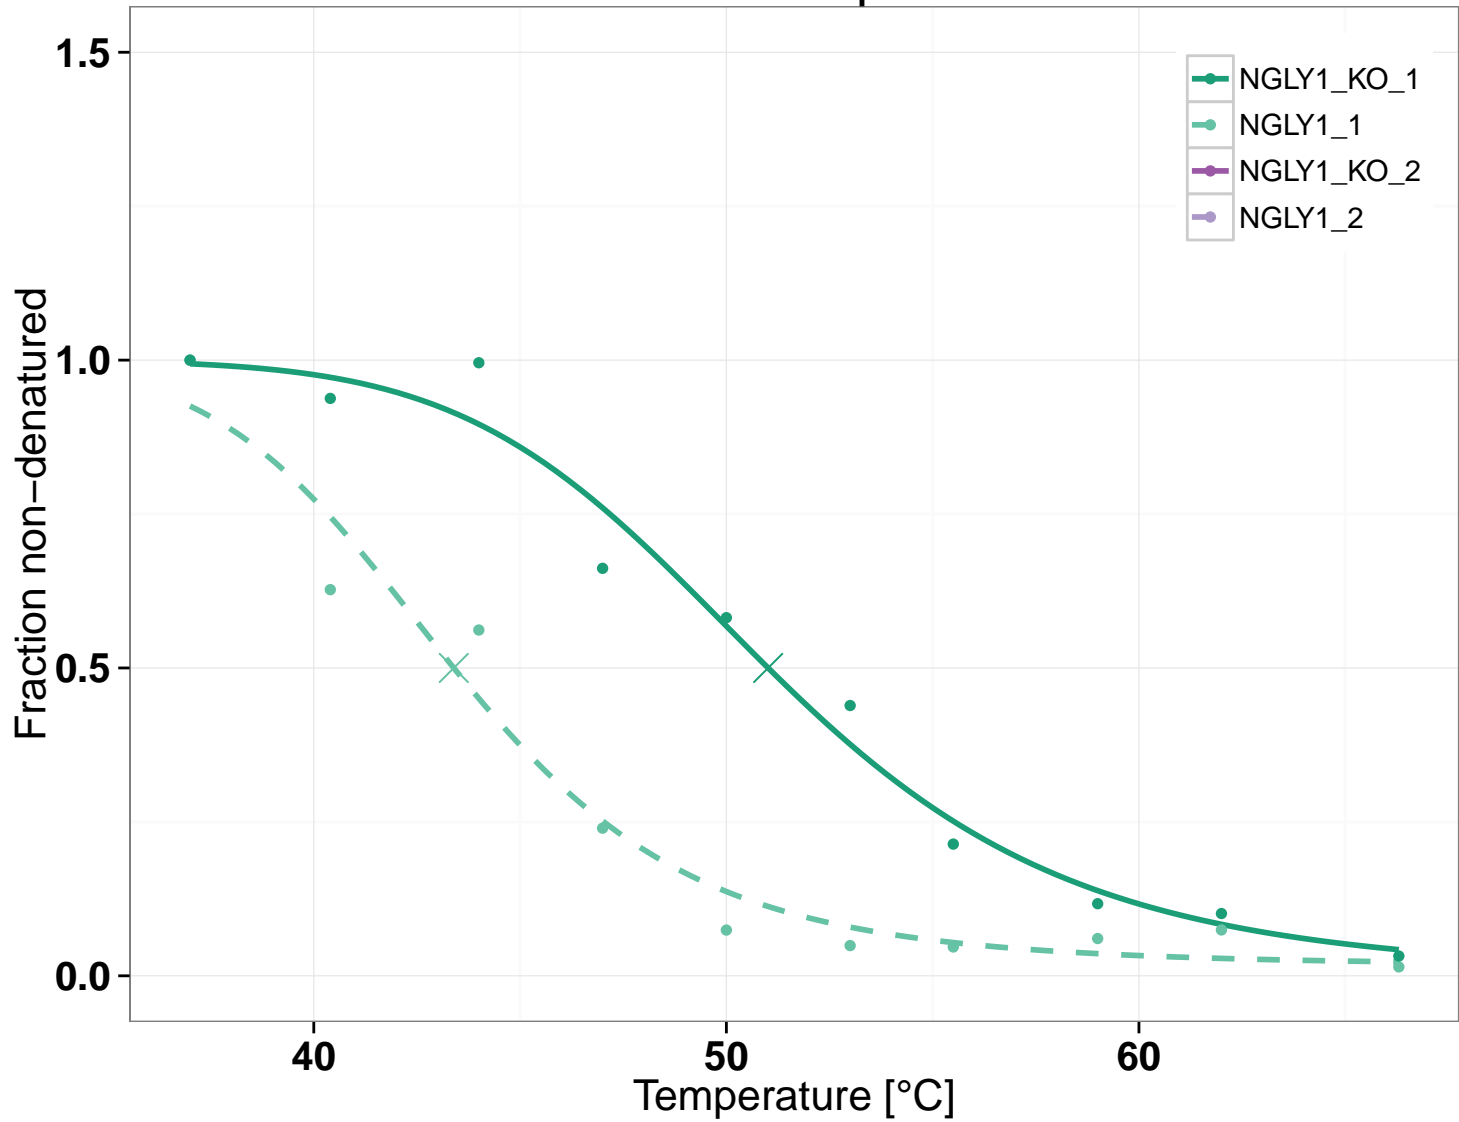

|            | meltPoint | slope  | plateau | R2   |
|------------|-----------|--------|---------|------|
| NGLY1_KO_1 | 51.01     | -0.068 | 0       | 0.98 |
| NGLY1_1    | 43.39     | -0.085 | 0.02    | 0.96 |
| NGLY1_KO_2 | -         | -      | -       | -    |
| NGLY1_2    | -         | -      | -       | -    |

Supplement: Supplementary file 7716 [file 1]

IPI00642451.3|VARs2

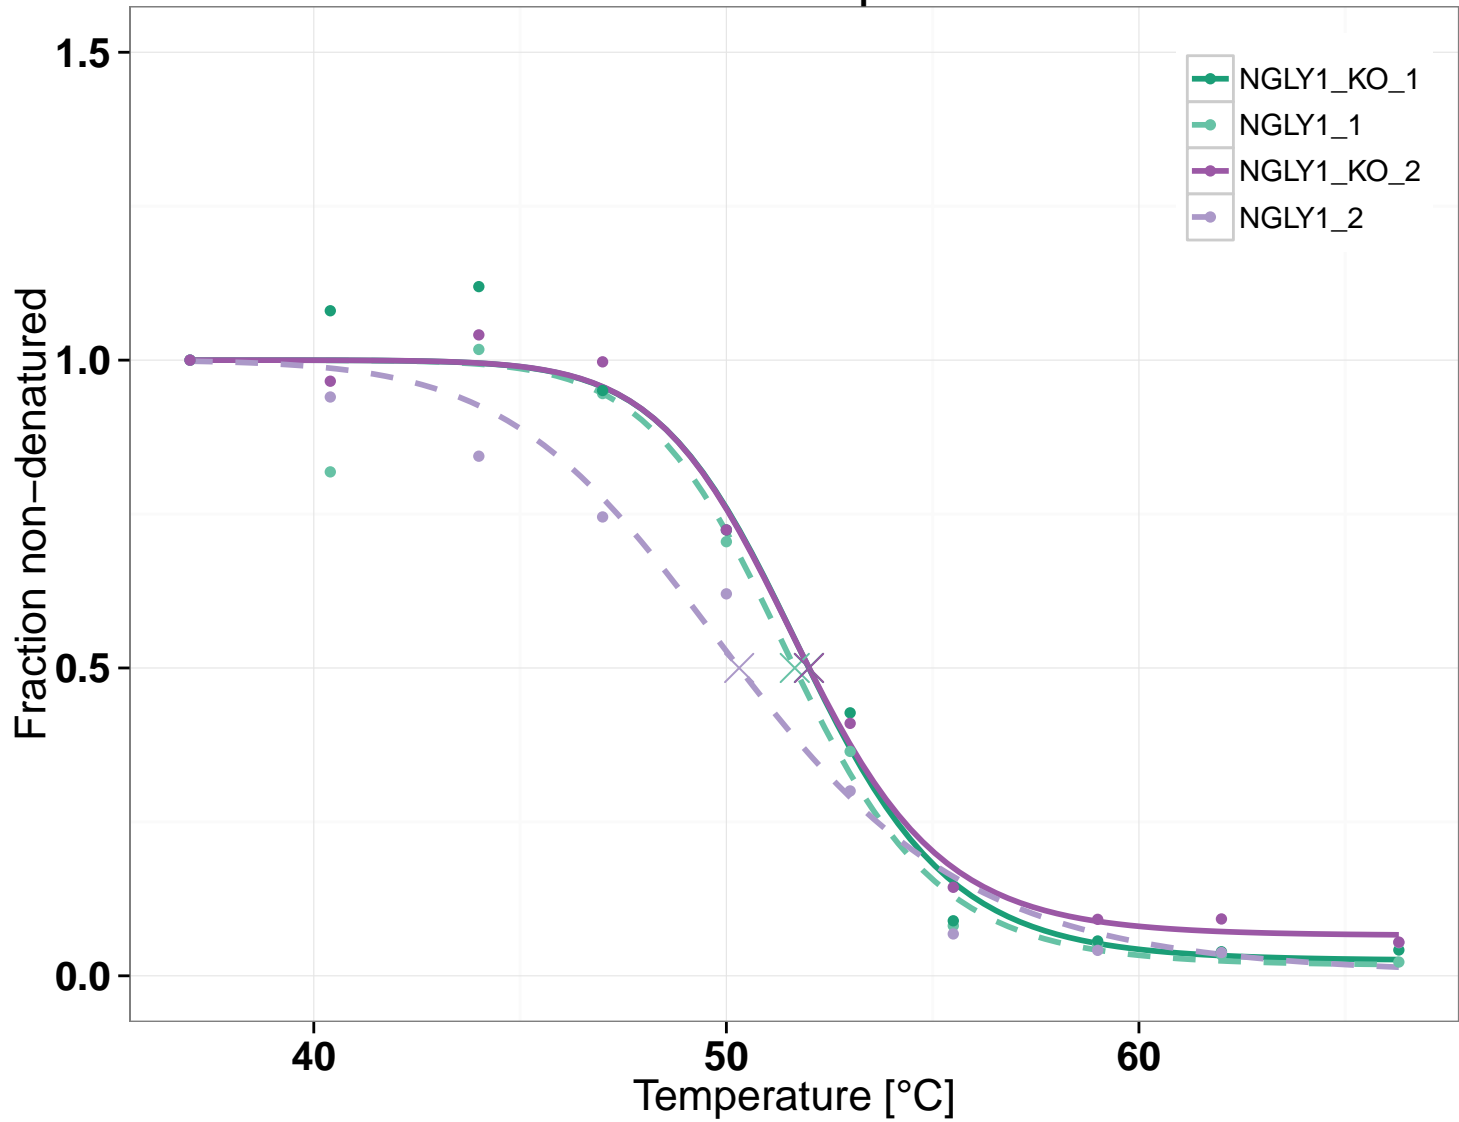

|            | meltPoint | slope  | plateau | R2   |
|------------|-----------|--------|---------|------|
| NGLY1_KO_1 | 52        | -0.14  | 0.02    | 0.98 |
| NGLY1_1    | 51.66     | -0.14  | 0.02    | 0.98 |
| NGLY1_KO_2 | 52.01     | -0.14  | 0.07    | 0.99 |
| NGLY1_2    | 50.31     | -0.089 | 0       | 0.98 |

Supplement: Supplementary file 7717 [file 1]

IPI00166976.3|LACE1

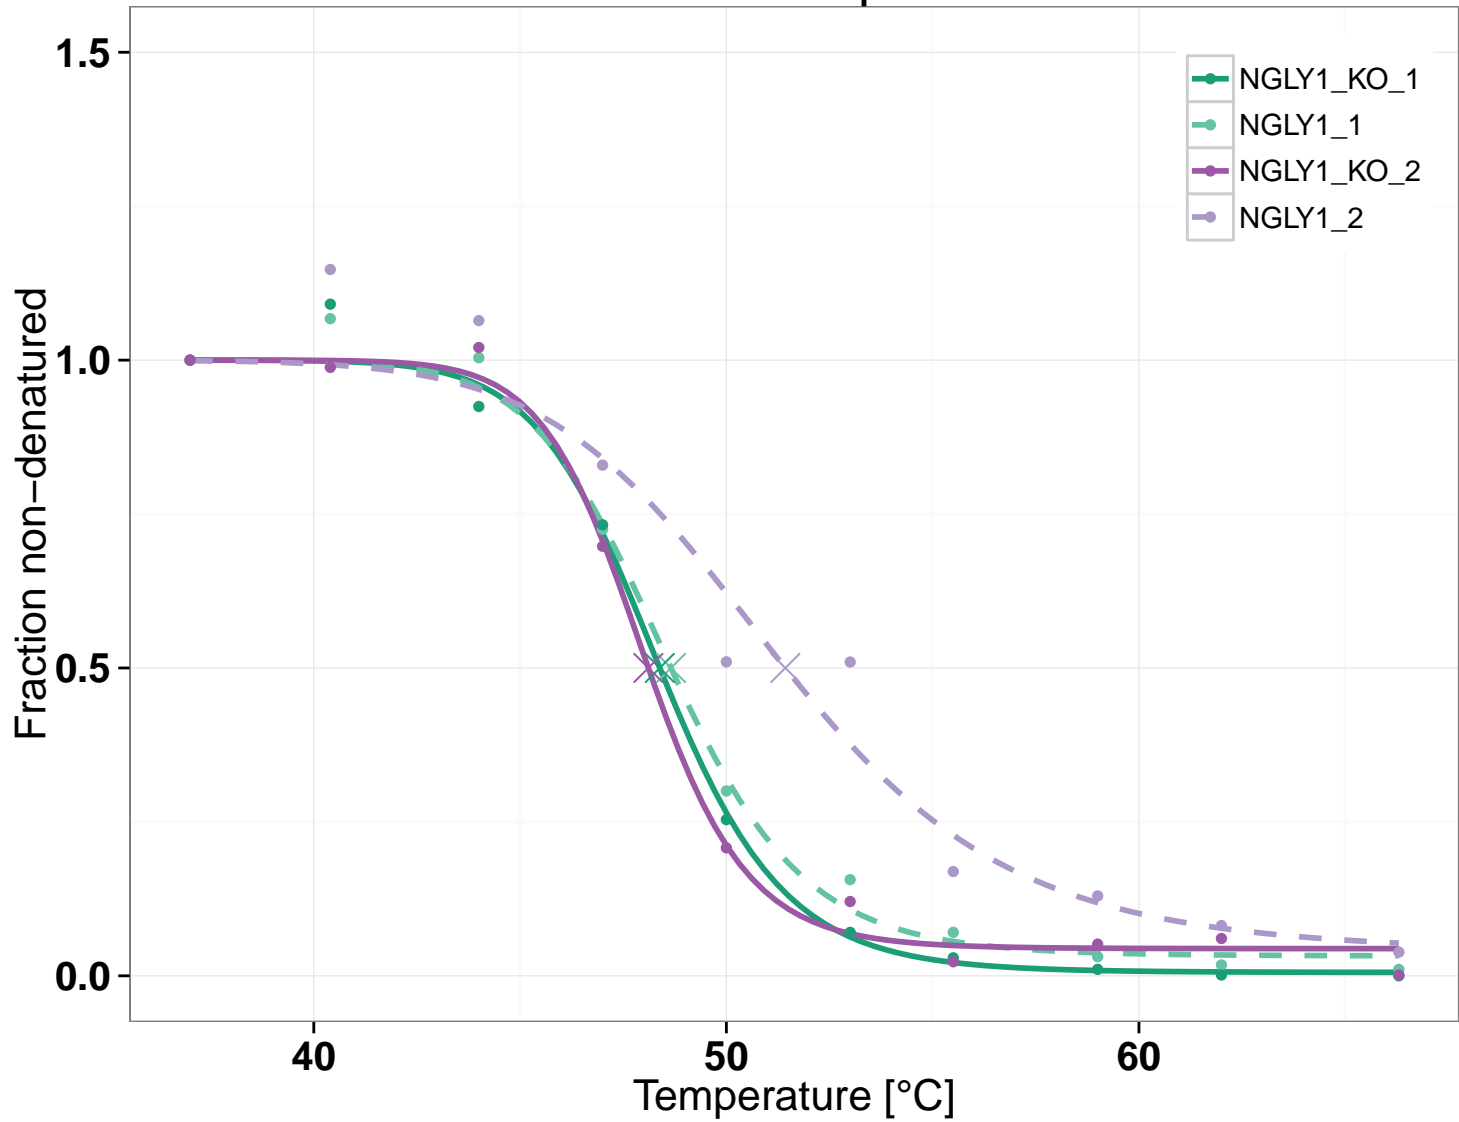

|            | meltPoint | slope  | plateau | R2   |
|------------|-----------|--------|---------|------|
| NGLY1_KO_1 | 48.39     | -0.16  | 0.01    | 0.99 |
| NGLY1_1    | 48.66     | -0.15  | 0.03    | 0.99 |
| NGLY1_KO_2 | 48.11     | -0.19  | 0.04    | 1    |
| NGLY1_2    | 51.43     | -0.086 | 0.04    | 0.96 |

Supplement: Supplementary file 7718 [file 1]

IPI00179589.4|LUZP6

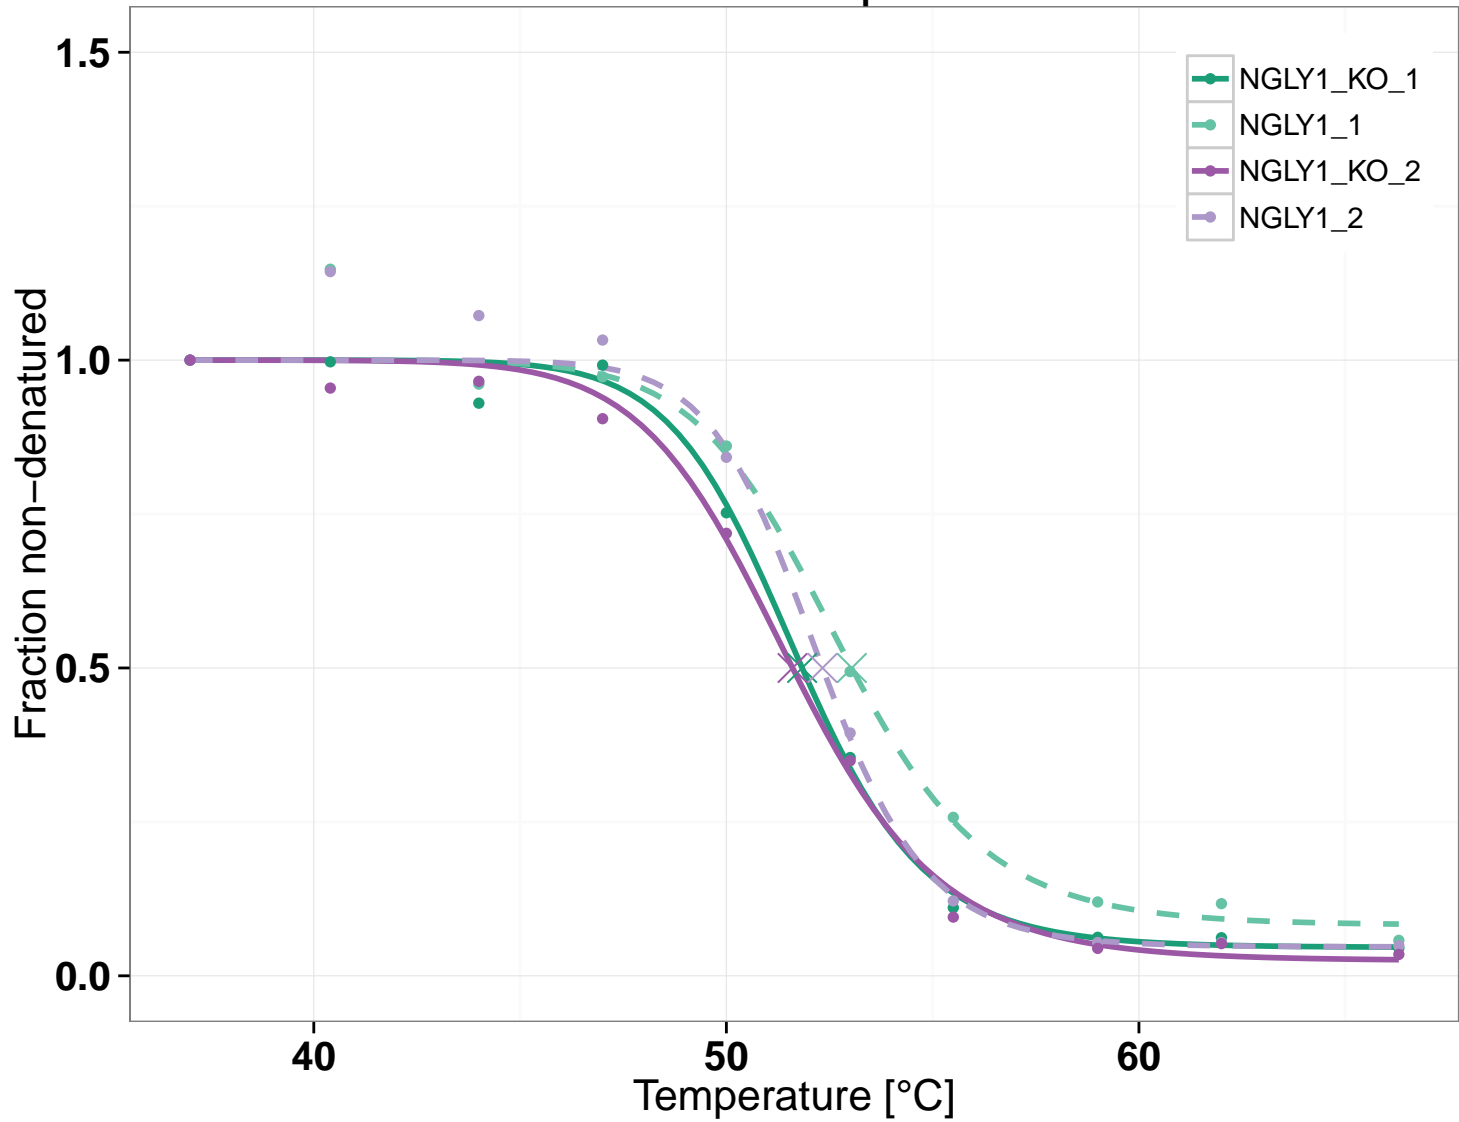

|            | meltPoint | slope | plateau | R2   |
|------------|-----------|-------|---------|------|
| NGLY1_KO_1 | 51.84     | -0.15 | 0.05    | 1    |
| NGLY1_1    | 53.04     | -0.13 | 0.08    | 0.99 |
| NGLY1_KO_2 | 51.6      | -0.13 | 0.02    | 1    |
| NGLY1_2    | 52.33     | -0.18 | 0.05    | 0.99 |

Supplement: Supplementary file 7719 [file 1]

IPI00026546.1|PAFAH1B2

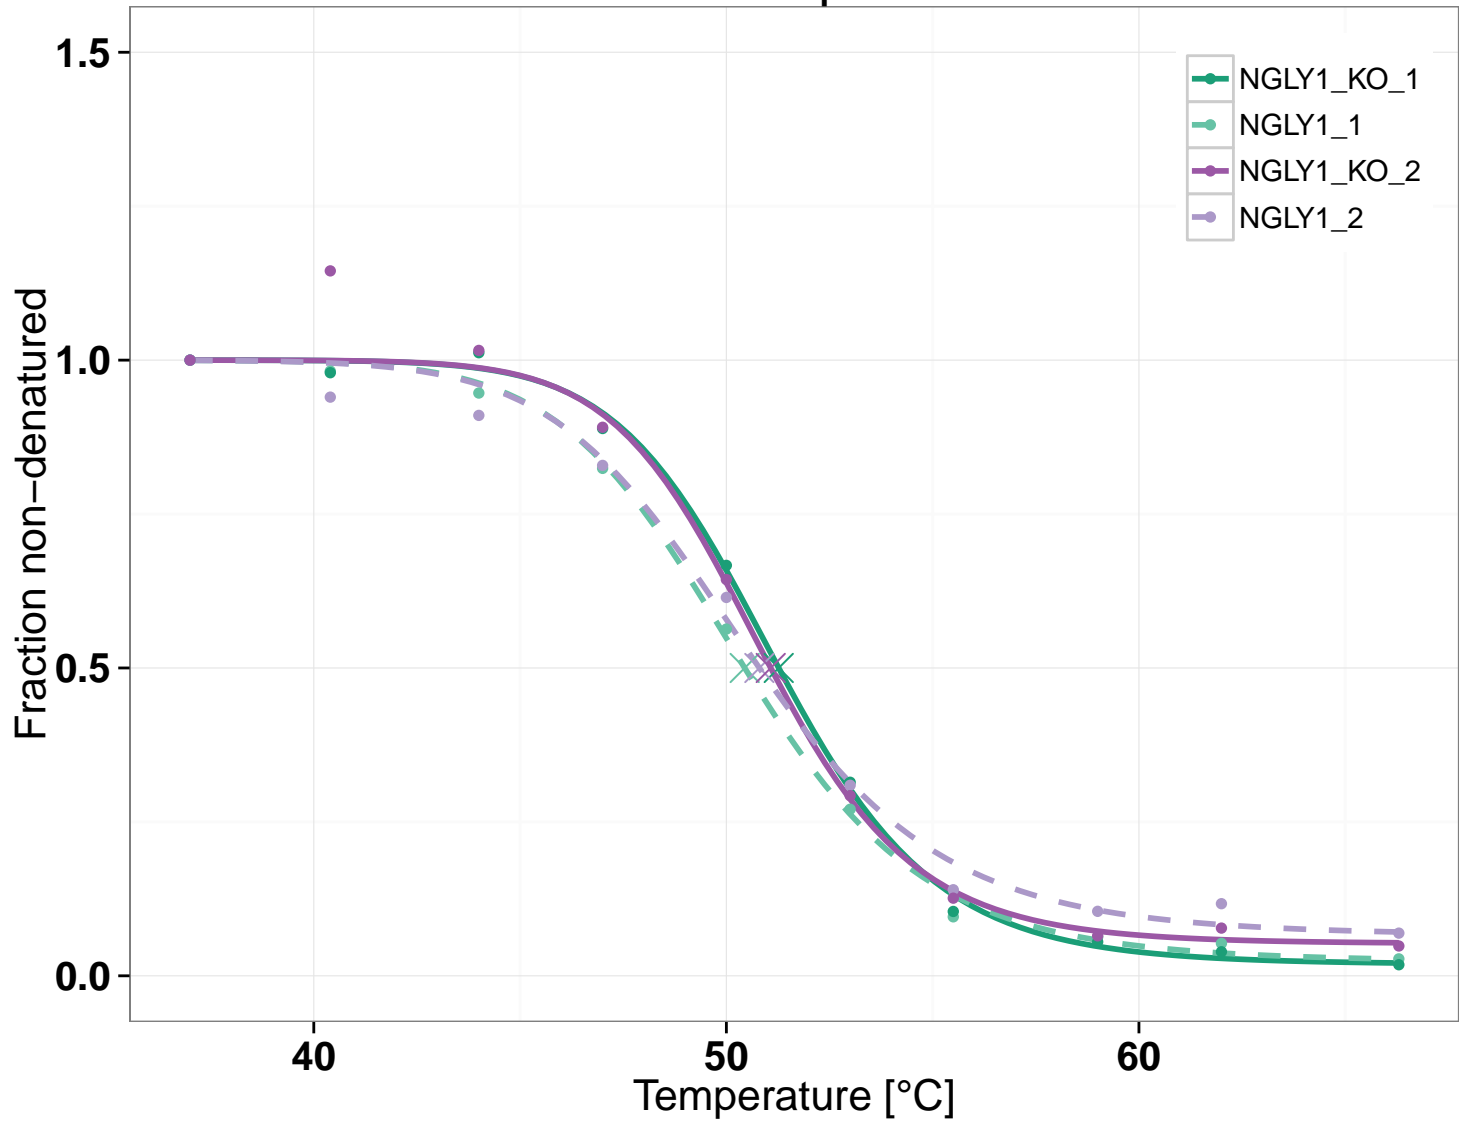

|            | meltPoint | slope  | plateau | R2   |
|------------|-----------|--------|---------|------|
| NGLY1_KO_1 | 51.27     | -0.13  | 0.02    | 1    |
| NGLY1_1    | 50.44     | -0.11  | 0.02    | 1    |
| NGLY1_KO_2 | 51.08     | -0.13  | 0.05    | 0.99 |
| NGLY1_2    | 50.8      | -0.099 | 0.07    | 0.99 |

Supplement: Supplementary file 7720 [file 1]

IPI00063300.3|TMEM141

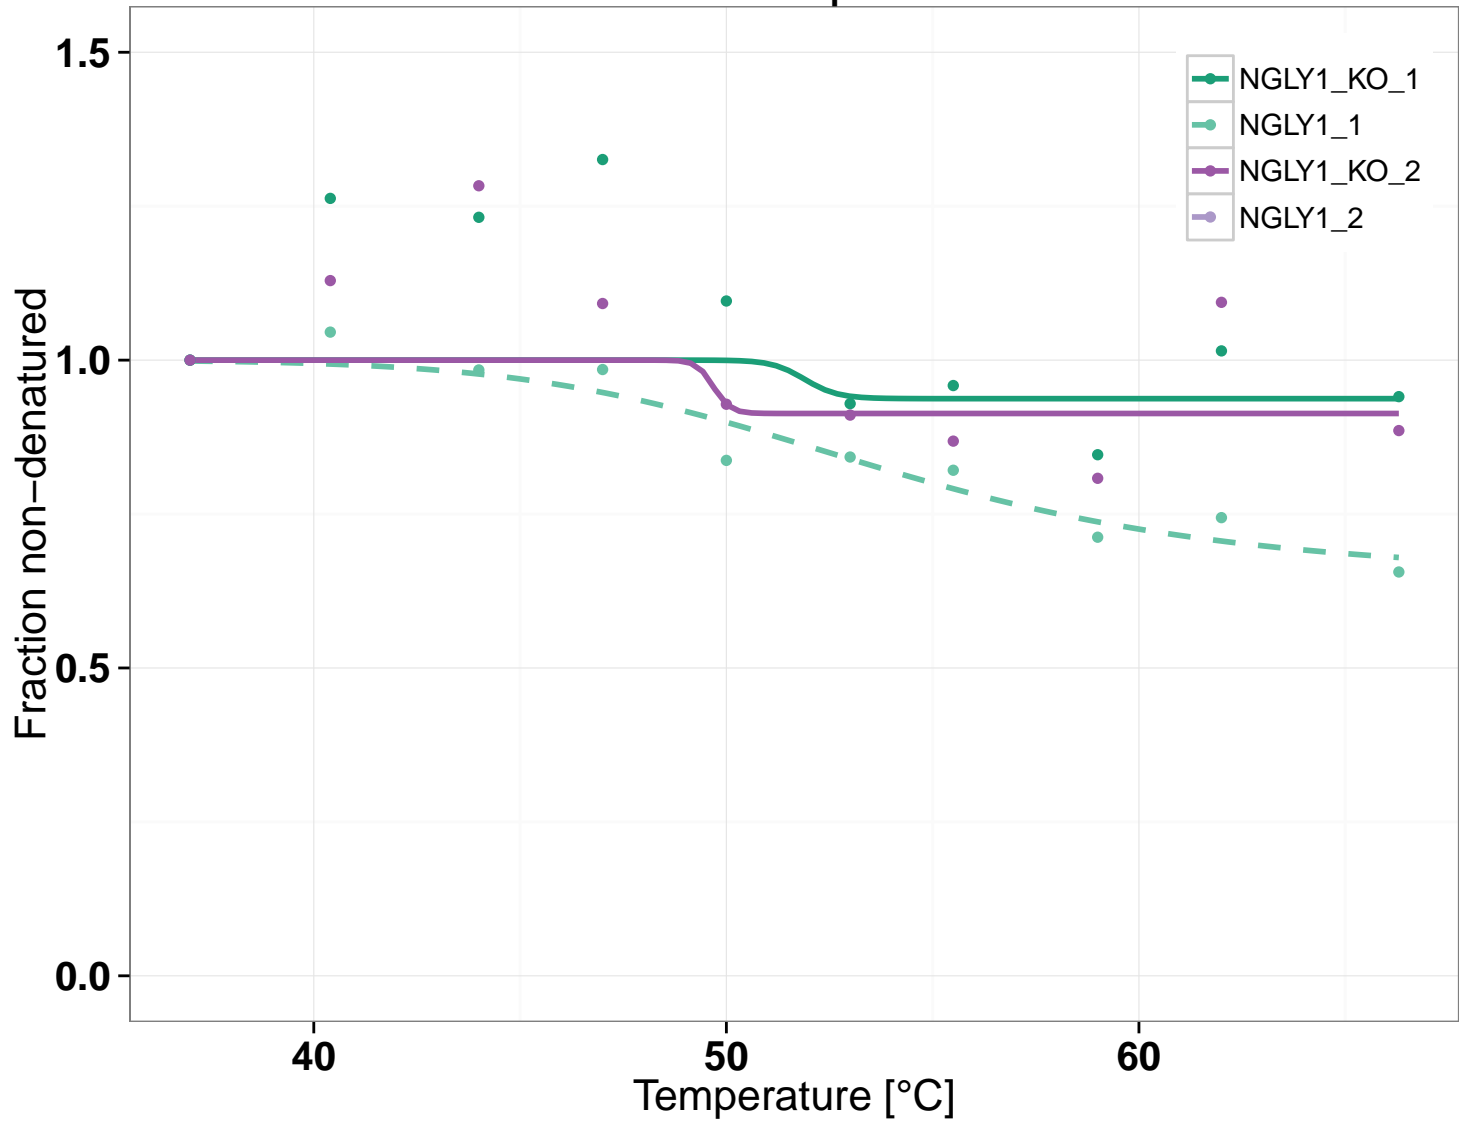

|            | meltPoint | slope  | plateau | R2    |
|------------|-----------|--------|---------|-------|
| NGLY1_KO_1 | -         | -0.039 | 0.94    | -0.08 |
| NGLY1_1    | -         | -0.02  | 0.65    | 0.93  |
| NGLY1_KO_2 | -         | -0.11  | 0.91    | 0.22  |
| NGLY1_2    | -         | -      | -       | -     |

Supplement: Supplementary file 7721 [file 1]

# IPI00297779.7|CCT2

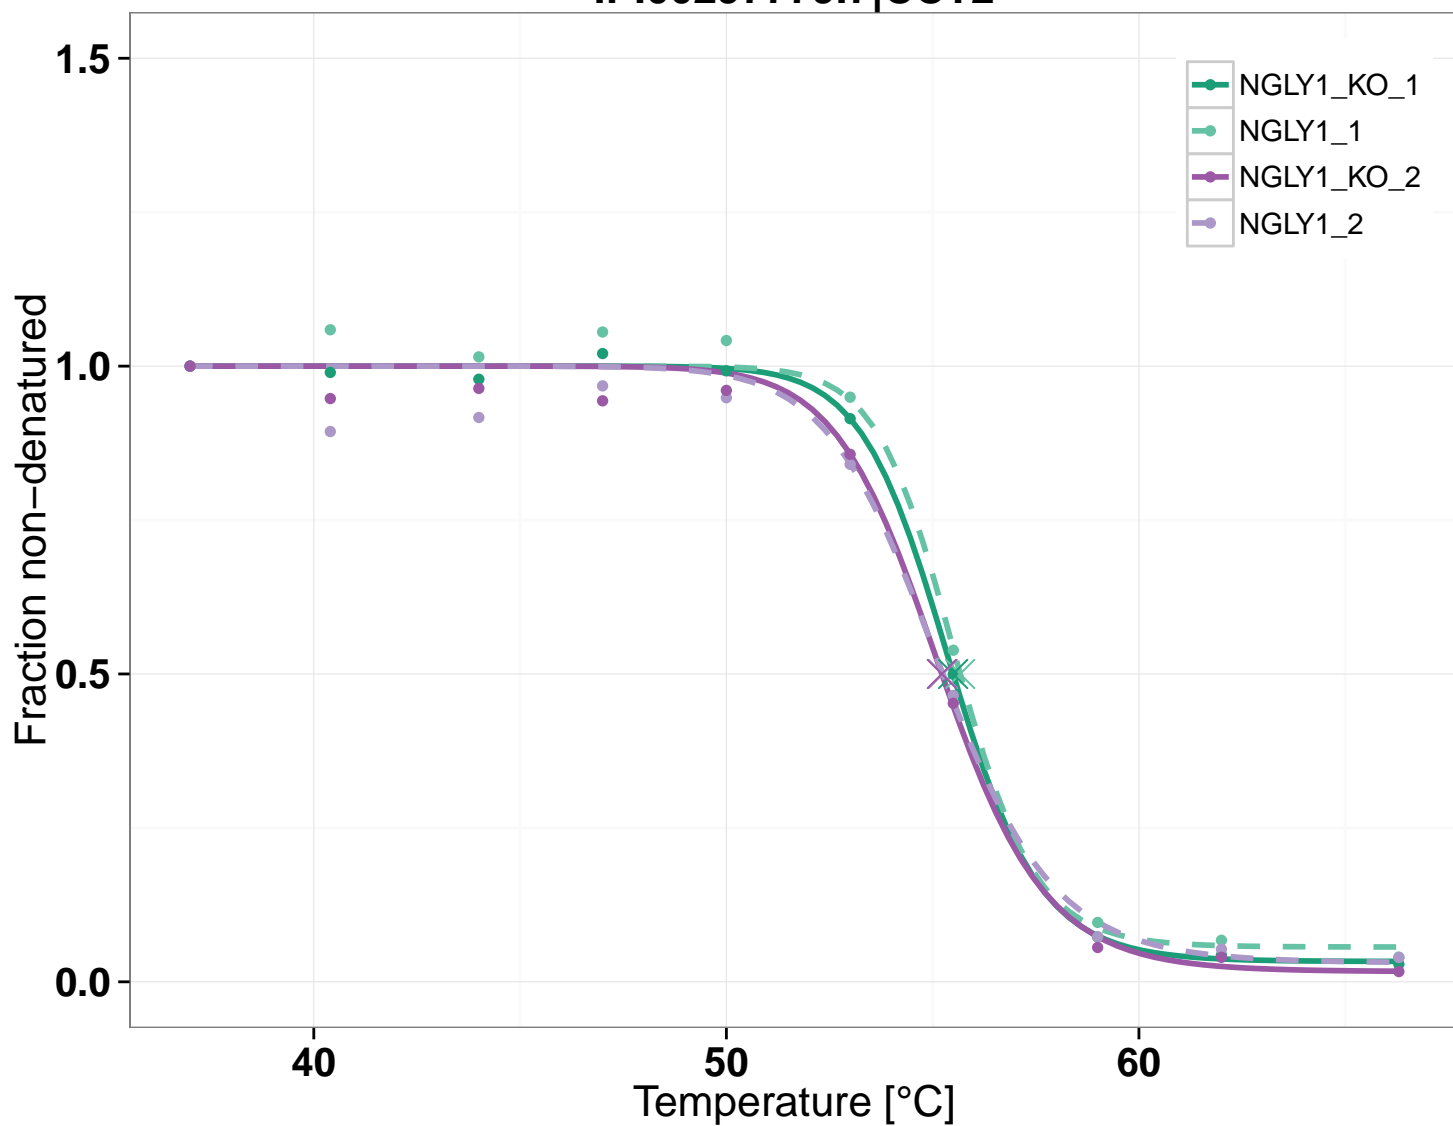

|            | meltPoint | slope | plateau | R2   |
|------------|-----------|-------|---------|------|
| NGLY1_KO_1 | 55.5      | -0.22 | 0.03    | 1    |
| NGLY1_1    | 55.67     | -0.25 | 0.06    | 1    |
| NGLY1_KO_2 | 55.22     | -0.19 | 0.02    | 0.99 |
| NGLY1_2    | 55.25     | -0.18 | 0.03    | 0.99 |

Supplement: Supplementary file 7722 [file 1]

IPI00006932.3|LUC7L2

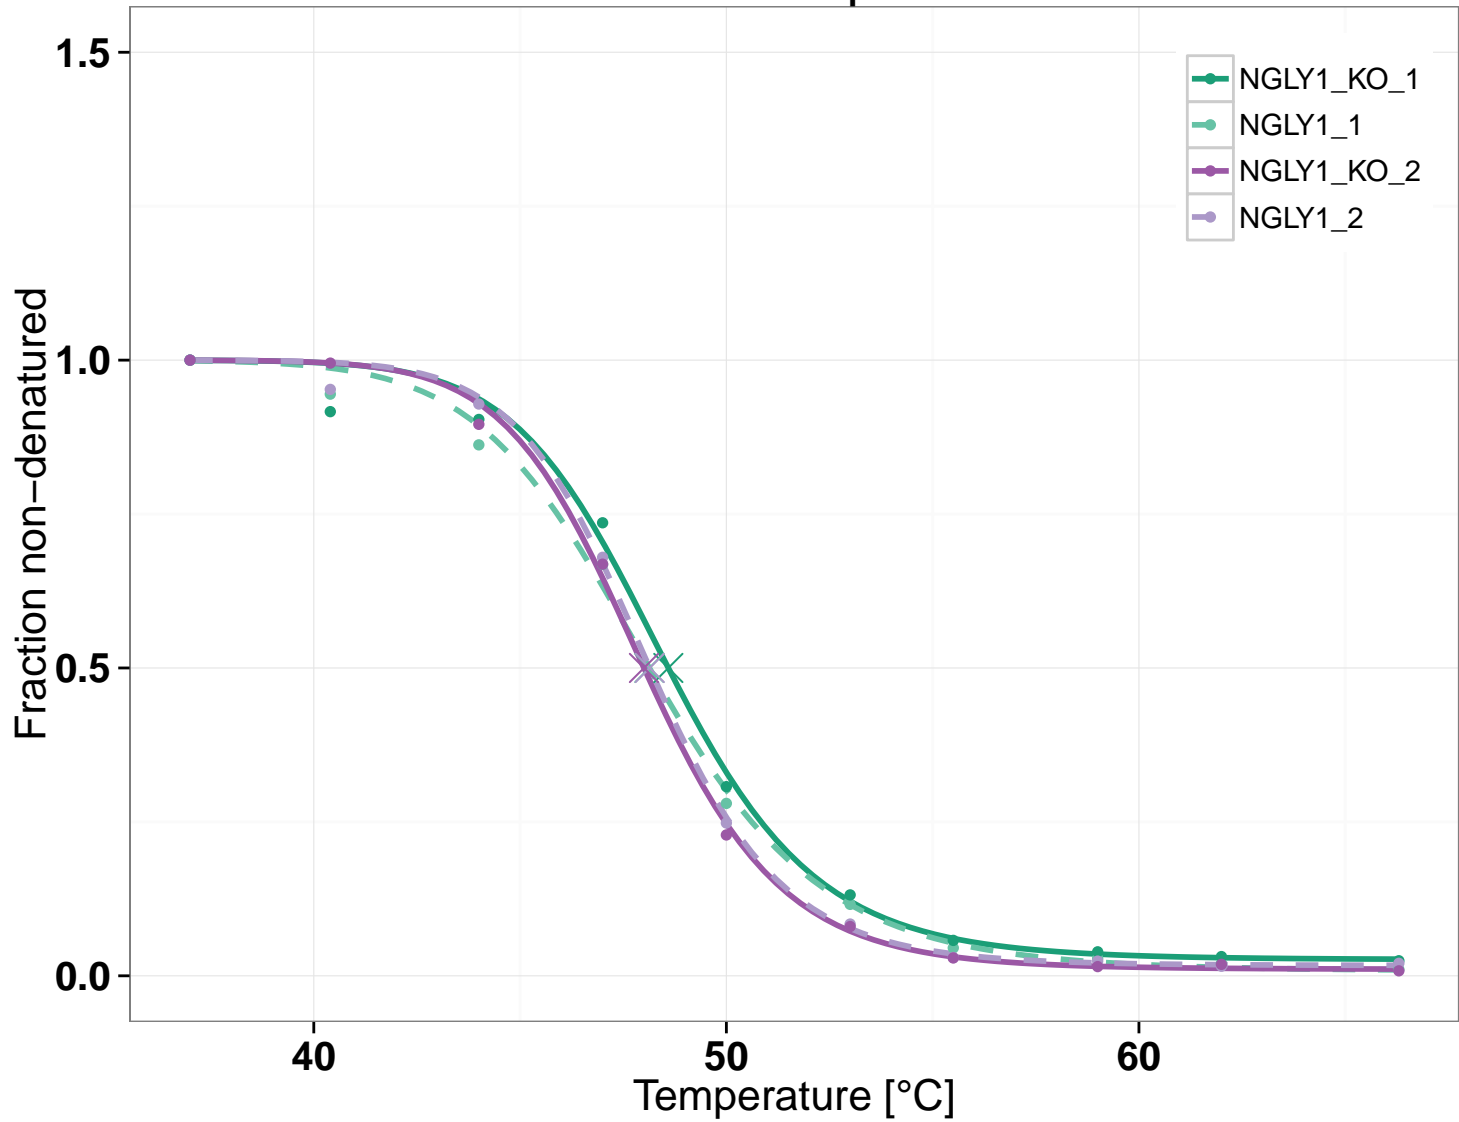

|            | meltPoint | slope | plateau | R2   |
|------------|-----------|-------|---------|------|
| NGLY1_KO_1 | 48.59     | -0.13 | 0.03    | 0.99 |
| NGLY1_1    | 48.13     | -0.12 | 0.01    | 1    |
| NGLY1_KO_2 | 48        | -0.15 | 0.01    | 1    |
| NGLY1_2    | 48.14     | -0.15 | 0.02    | 1    |

Supplement: Supplementary file 7723 [file 1]

IPI00292905.5|FAM63A

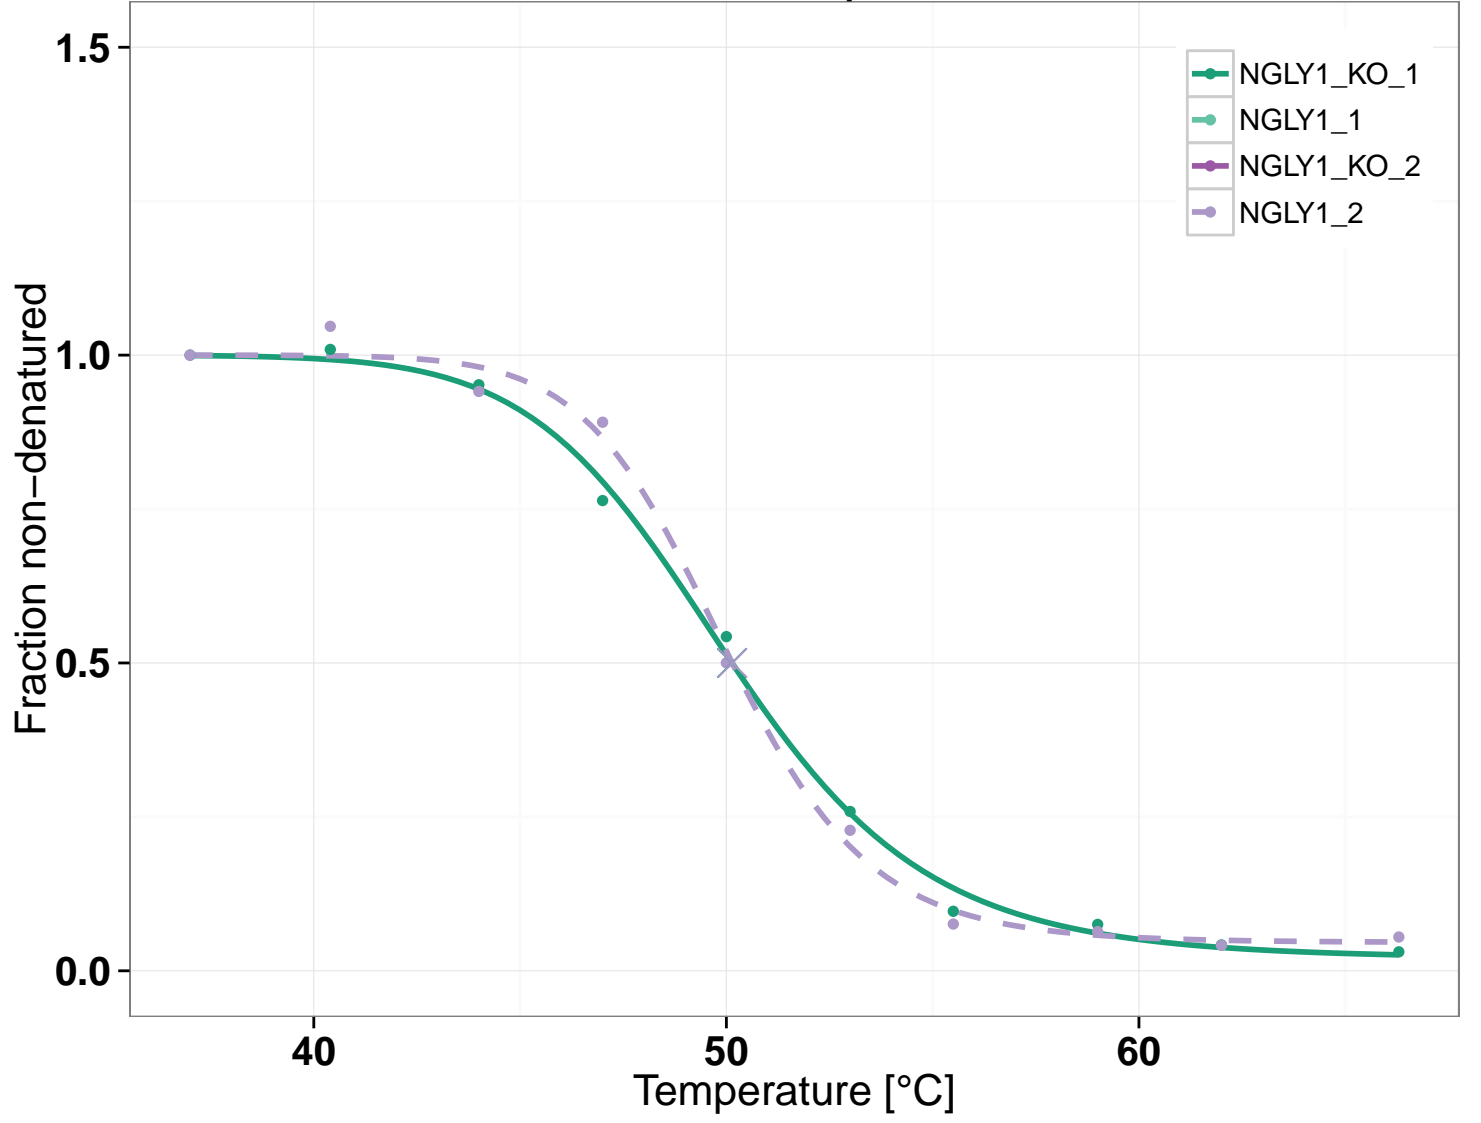

|            | meltPoint | slope | plateau | R2 |
|------------|-----------|-------|---------|----|
| NGLY1_KO_1 | 50.14     | -0.1  | 0.02    | 1  |
| NGLY1_1    | -         | -     | -       | -  |
| NGLY1_KO_2 | -         | -     | -       | -  |
| NGLY1_2    | 50.14     | -0.14 | 0.05    | 1  |

Supplement: Supplementary file 7724 [file 1]

IPI00010157.1|MAT2A

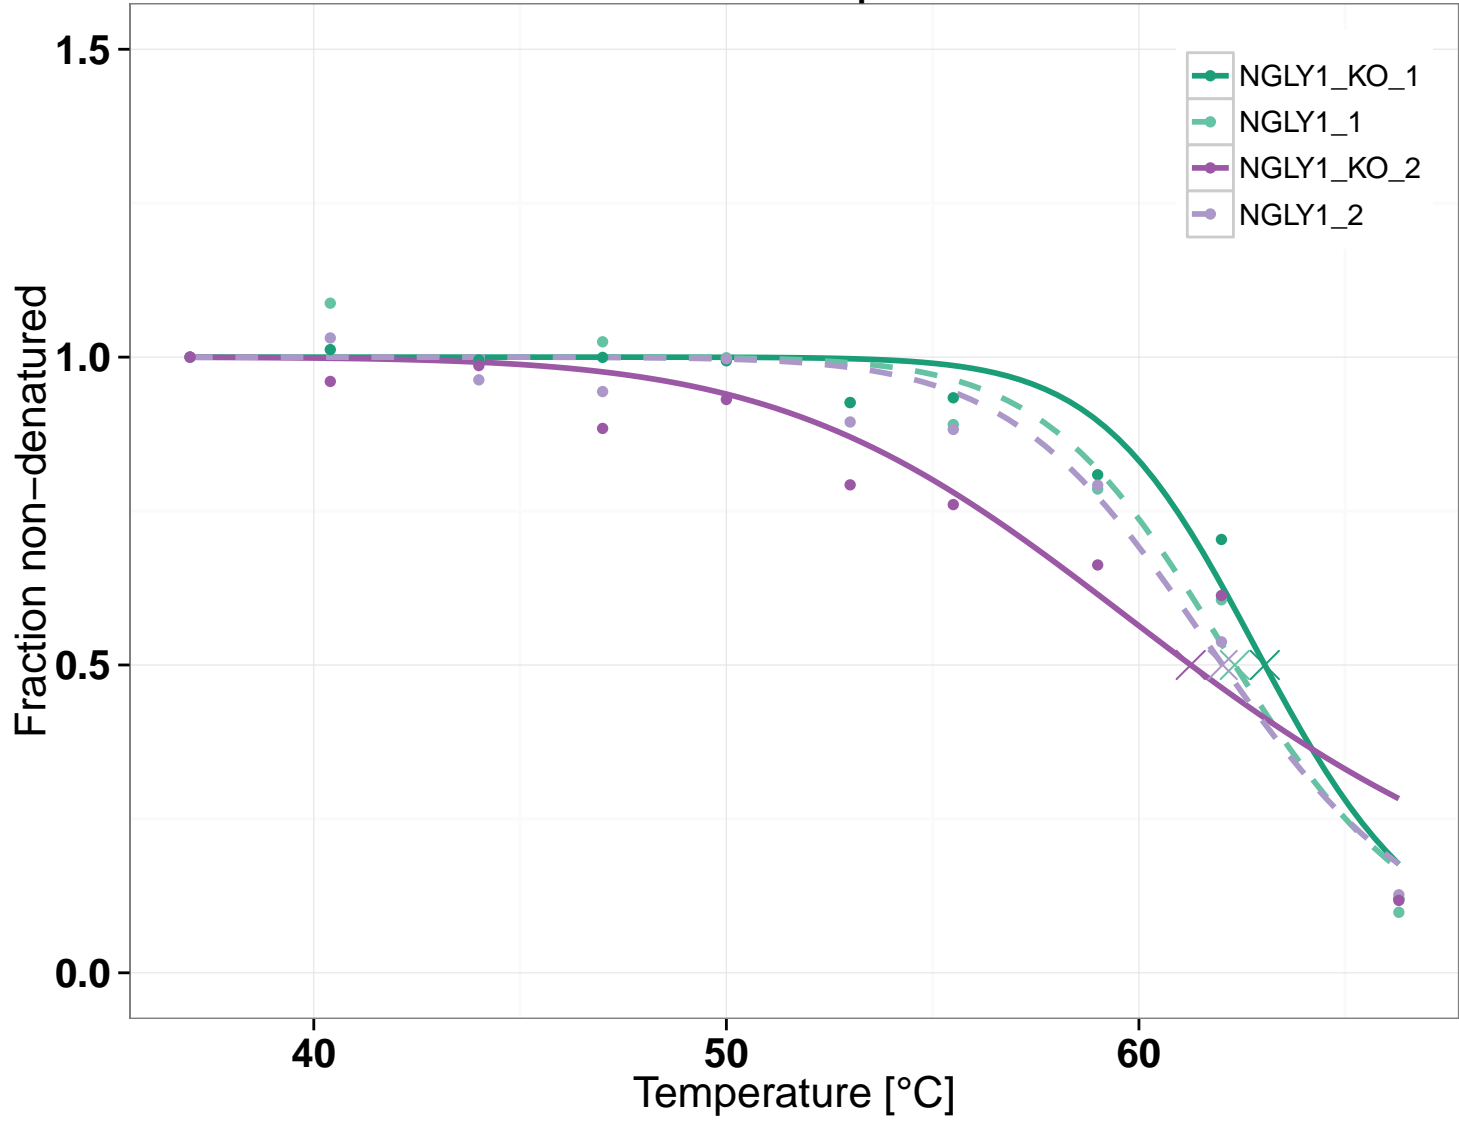

|            | meltPoint | slope  | plateau | R2   |
|------------|-----------|--------|---------|------|
| NGLY1_KO_1 | 63.05     | -0.13  | 0       | 0.96 |
| NGLY1_1    | 62.32     | -0.11  | 0       | 0.96 |
| NGLY1_KO_2 | 61.25     | -0.051 | 0       | 0.89 |
| NGLY1_2    | 62.03     | -0.097 | 0       | 0.97 |

Supplement: Supplementary file 7725 [file 1]

IPI00102059.2|SCYL1

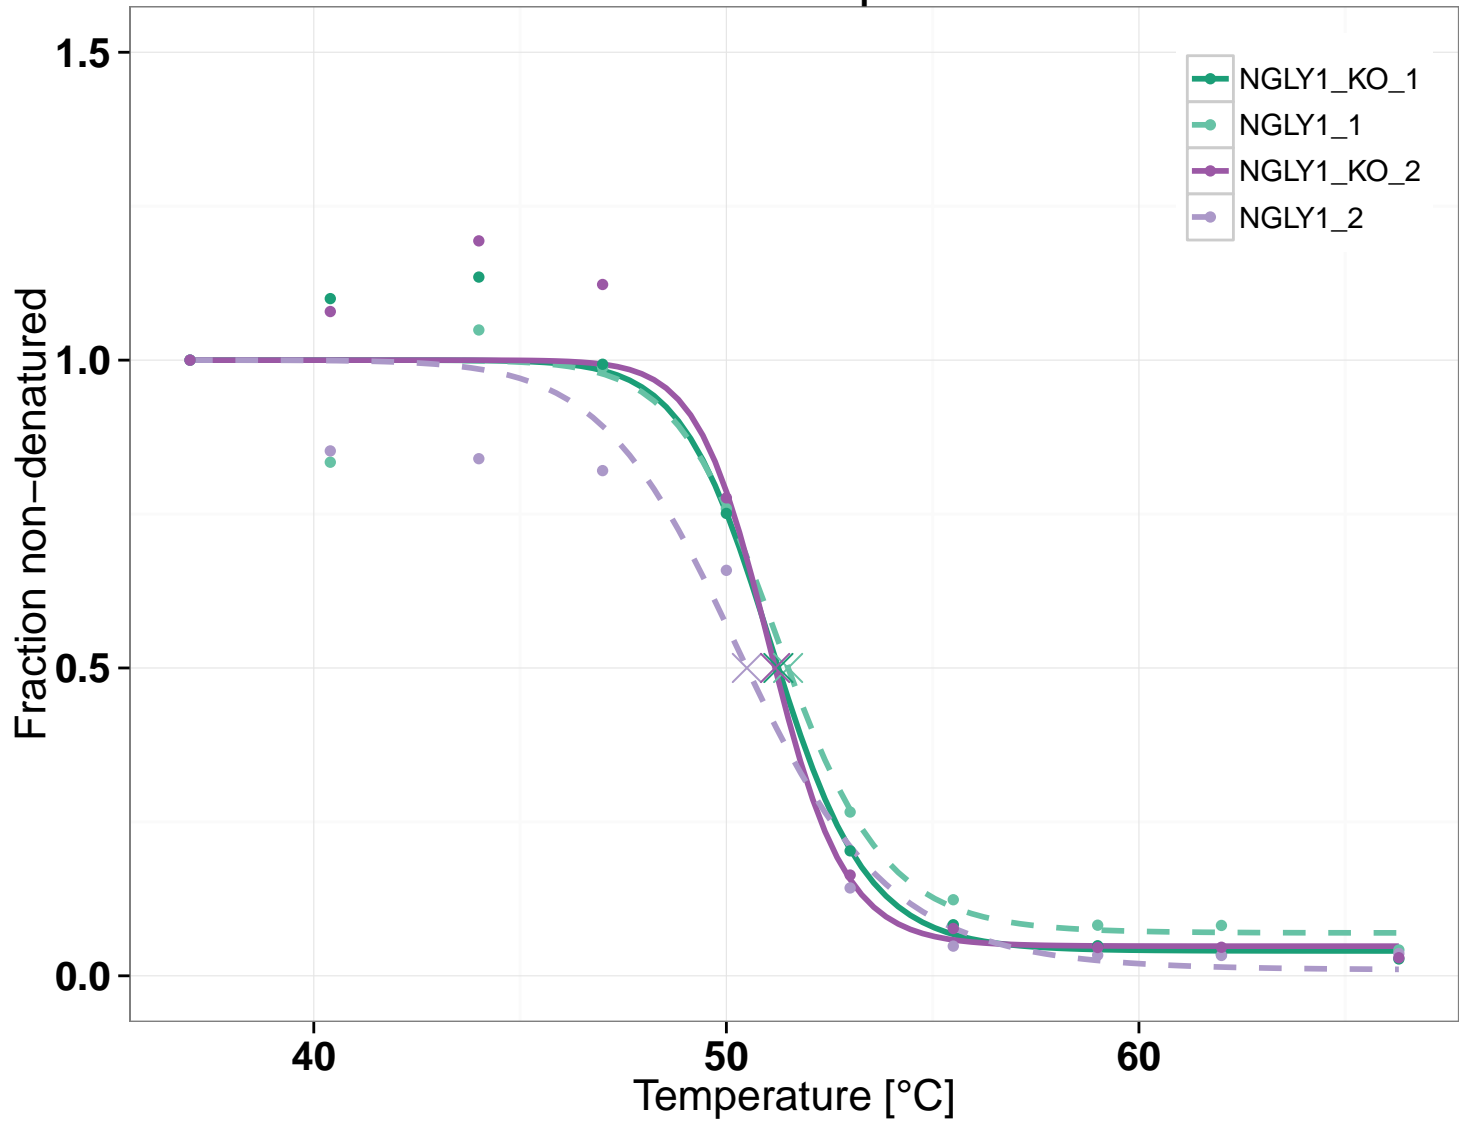

|            | meltPoint | slope | plateau | R2   |
|------------|-----------|-------|---------|------|
| NGLY1_KO_1 | 51.26     | -0.21 | 0.04    | 0.99 |
| NGLY1_1    | 51.5      | -0.18 | 0.07    | 0.98 |
| NGLY1_KO_2 | 51.18     | -0.27 | 0.05    | 0.97 |
| NGLY1_2    | 50.5      | -0.14 | 0.01    | 0.96 |

Supplement: Supplementary file 7726 [file 1]

# IPI00465152.2|SP1

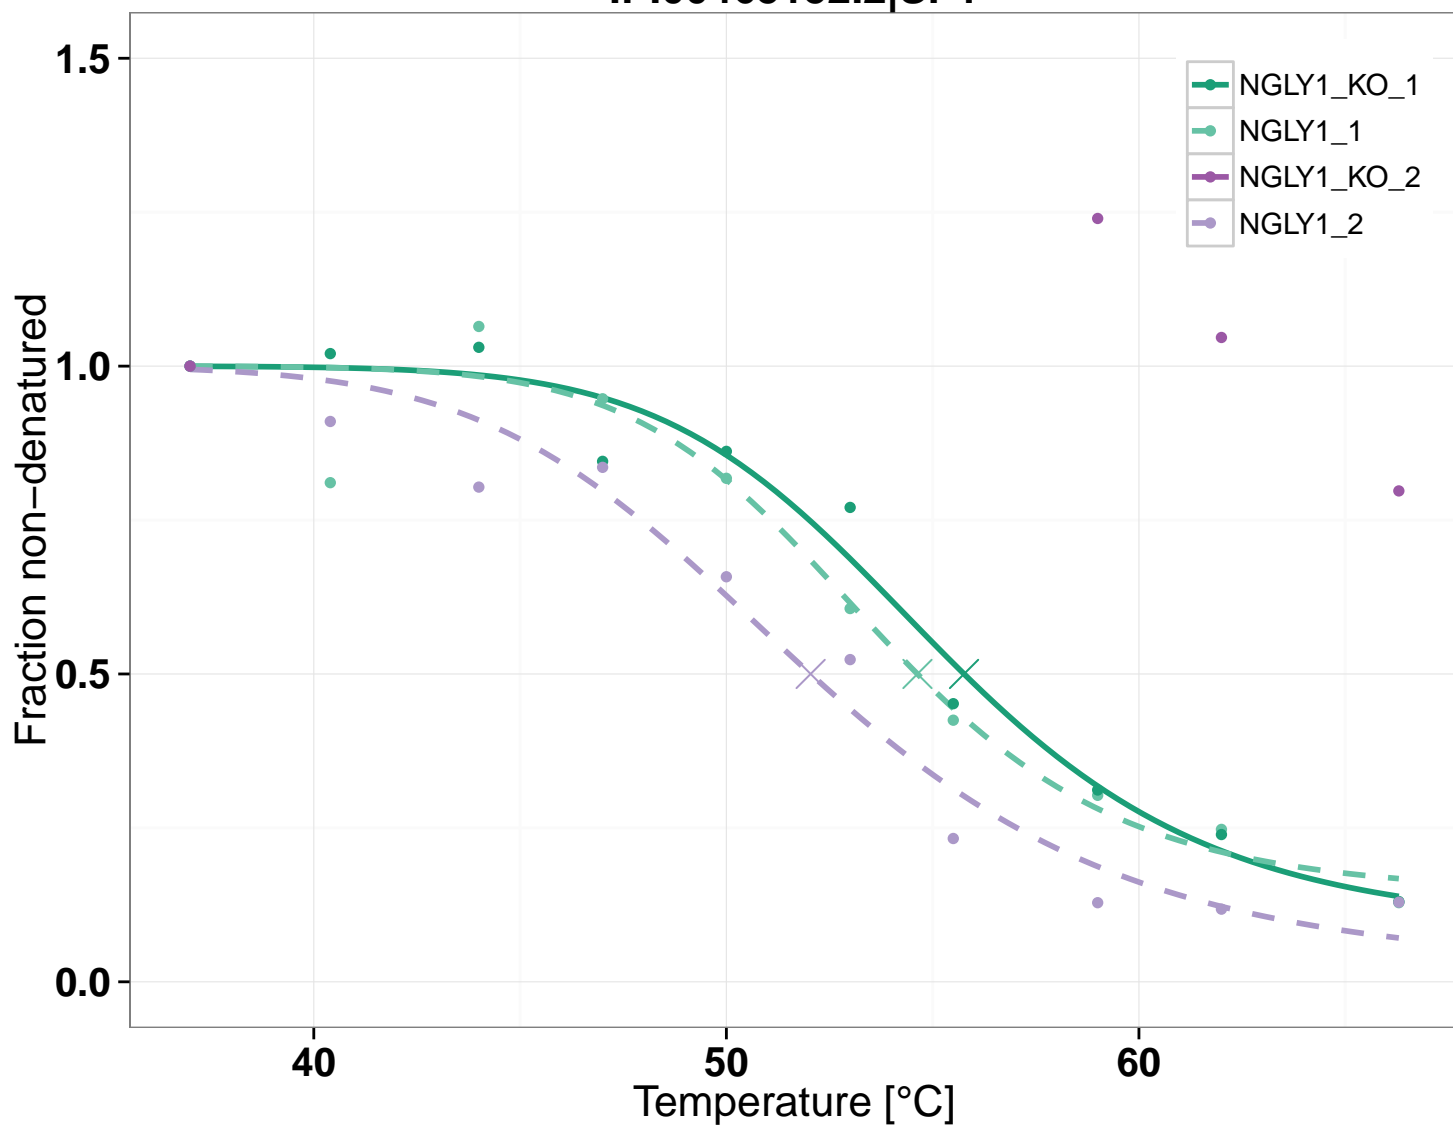

|            | meltPoint | slope  | plateau | R2   |
|------------|-----------|--------|---------|------|
| NGLY1_KO_1 | 55.76     | -0.069 | 0.08    | 0.98 |
| NGLY1_1    | 54.63     | -0.073 | 0.14    | 0.96 |
| NGLY1_KO_2 | -         | -      | -       | -    |
| NGLY1_2    | 52.04     | -0.063 | 0.01    | 0.97 |

Supplement: Supplementary file 7727 [file 1]

IPI00061492.3|C7ORF30

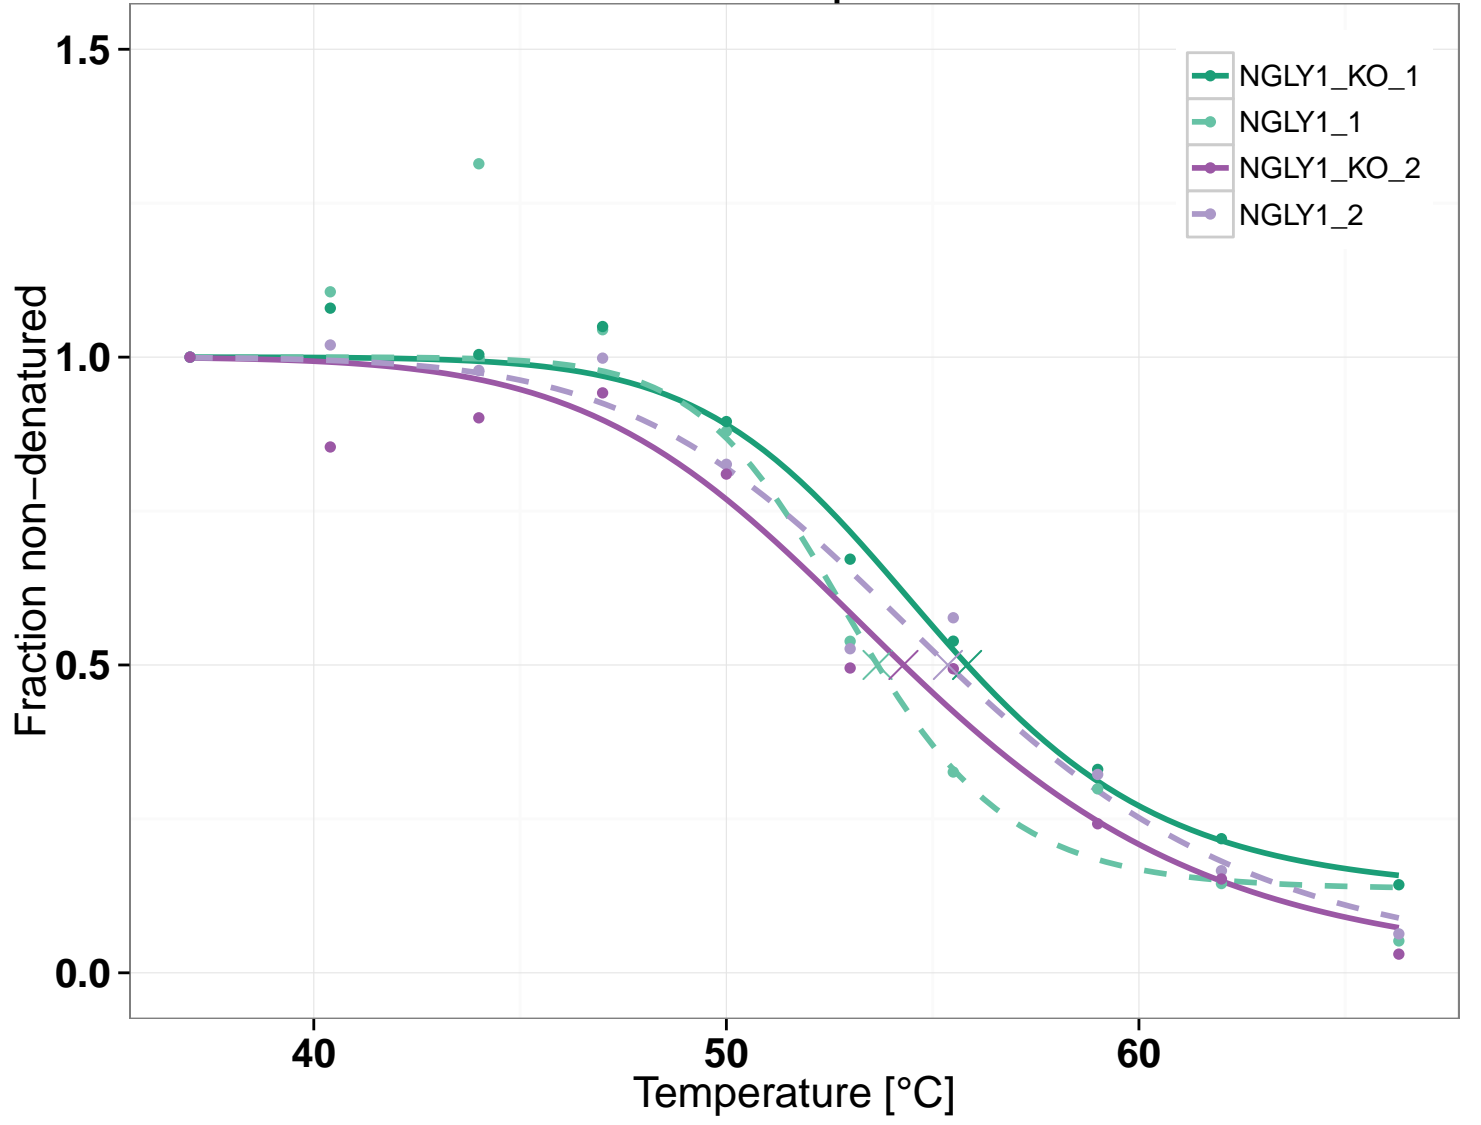

|            | meltPoint | slope  | plateau | R2   |
|------------|-----------|--------|---------|------|
| NGLY1_KO_1 | 55.83     | -0.078 | 0.13    | 0.99 |
| NGLY1_1    | 53.66     | -0.11  | 0.14    | 0.92 |
| NGLY1_KO_2 | 54.29     | -0.066 | 0       | 0.96 |
| NGLY1_2    | 55.37     | -0.065 | 0       | 0.97 |

Supplement: Supplementary file 7728 [file 1]

# IPI00878595.1|46 KDA PROTEIN.

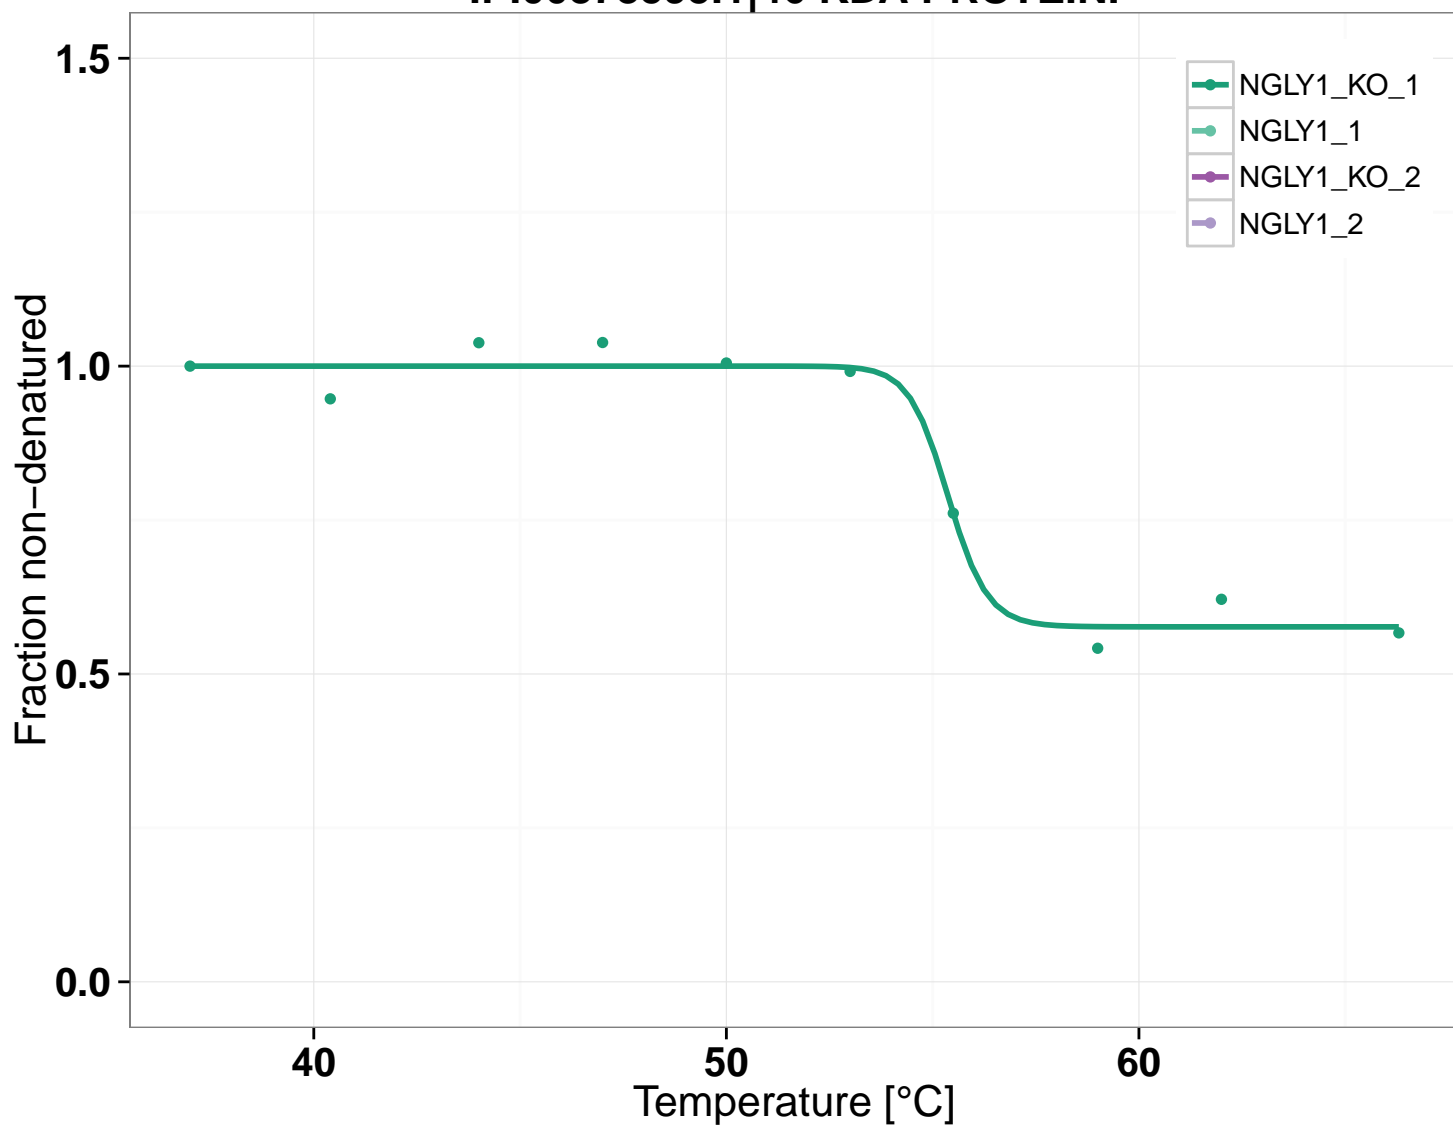

|            | meltPoint | slope | plateau | R2   |
|------------|-----------|-------|---------|------|
| NGLY1_KO_1 | —         | -0.22 | 0.58    | 0.98 |
| NGLY1_1    | —         | —     | —       | —    |
| NGLY1_KO_2 | —         | —     | —       | —    |
| NGLY1_2    | —         | —     | —       | —    |

Supplement: Supplementary file 7729 [file 1]

IPI00107357.7|CLPTM1

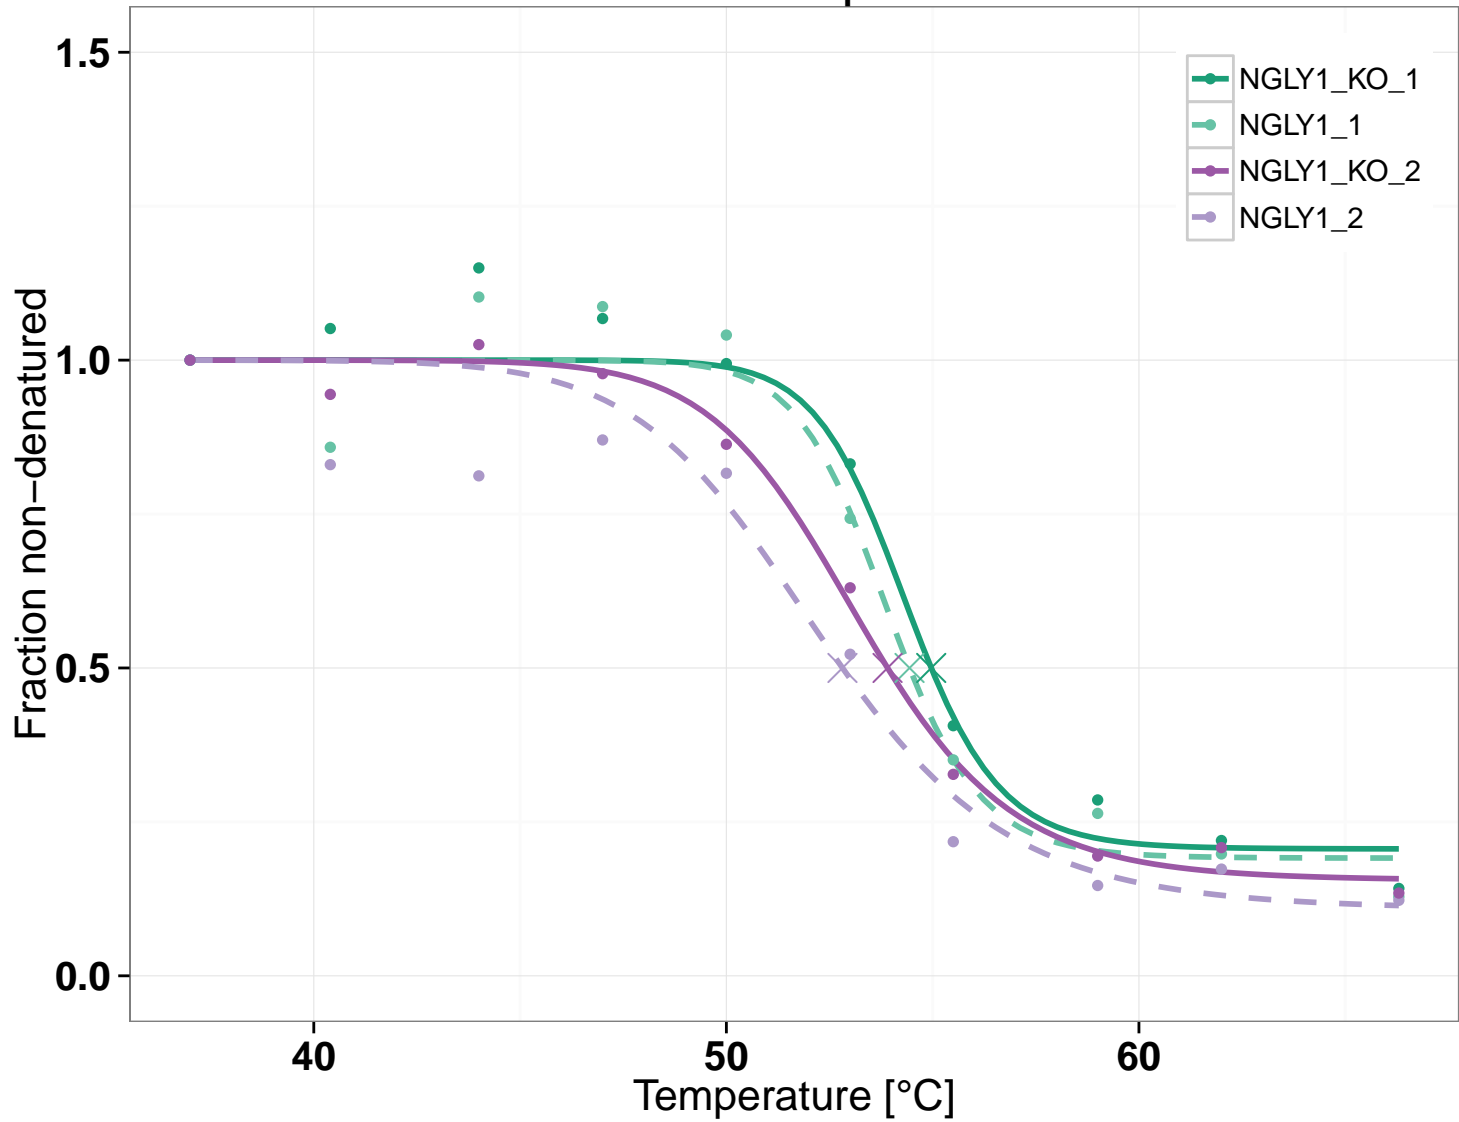

|            | meltPoint | slope  | plateau | R2   |
|------------|-----------|--------|---------|------|
| NGLY1_KO_1 | 54.97     | -0.18  | 0.21    | 0.97 |
| NGLY1_1    | 54.44     | -0.18  | 0.19    | 0.97 |
| NGLY1_KO_2 | 53.91     | -0.12  | 0.15    | 0.99 |
| NGLY1_2    | 52.81     | -0.099 | 0.11    | 0.93 |

Supplement: Supplementary file 7730 [file 1]

IPI00657720.1|KIAA0999

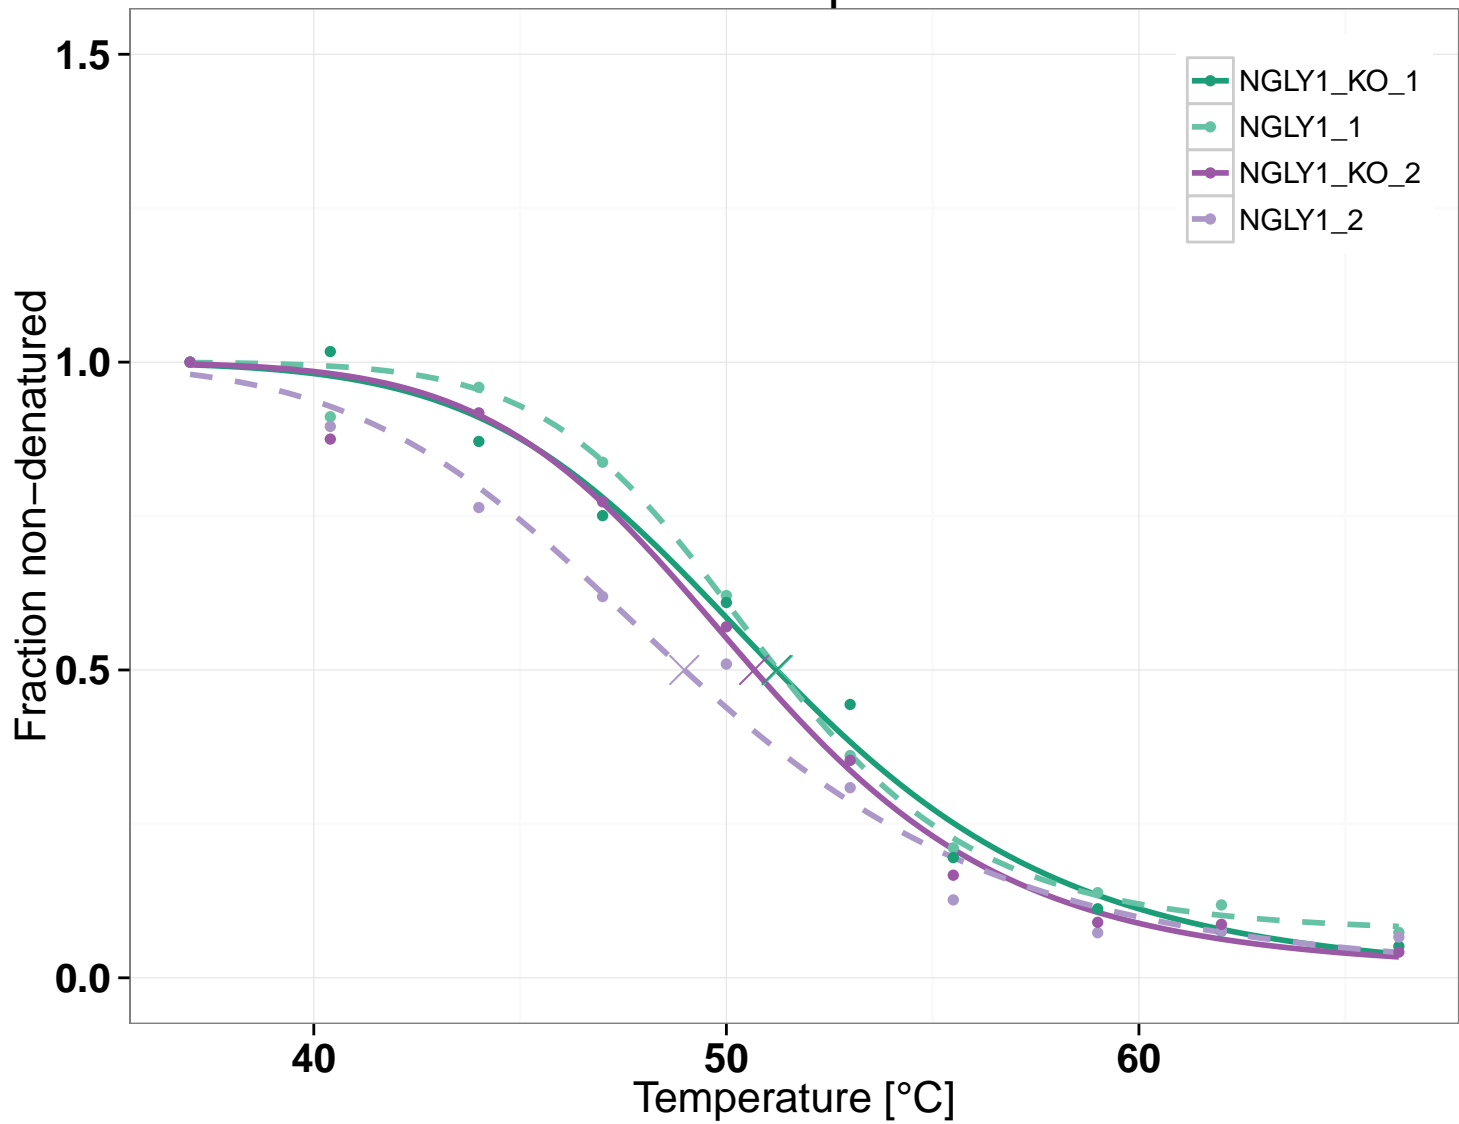

|            | meltPoint | slope  | plateau | R2   |
|------------|-----------|--------|---------|------|
| NGLY1_KO_1 | 51.22     | -0.07  | 0       | 0.99 |
| NGLY1_1    | 51.25     | -0.088 | 0.07    | 0.99 |
| NGLY1_KO_2 | 50.67     | -0.078 | 0.01    | 0.99 |
| NGLY1_2    | 48.98     | -0.063 | 0       | 0.99 |

Supplement: Supplementary file 7731 [file 1]

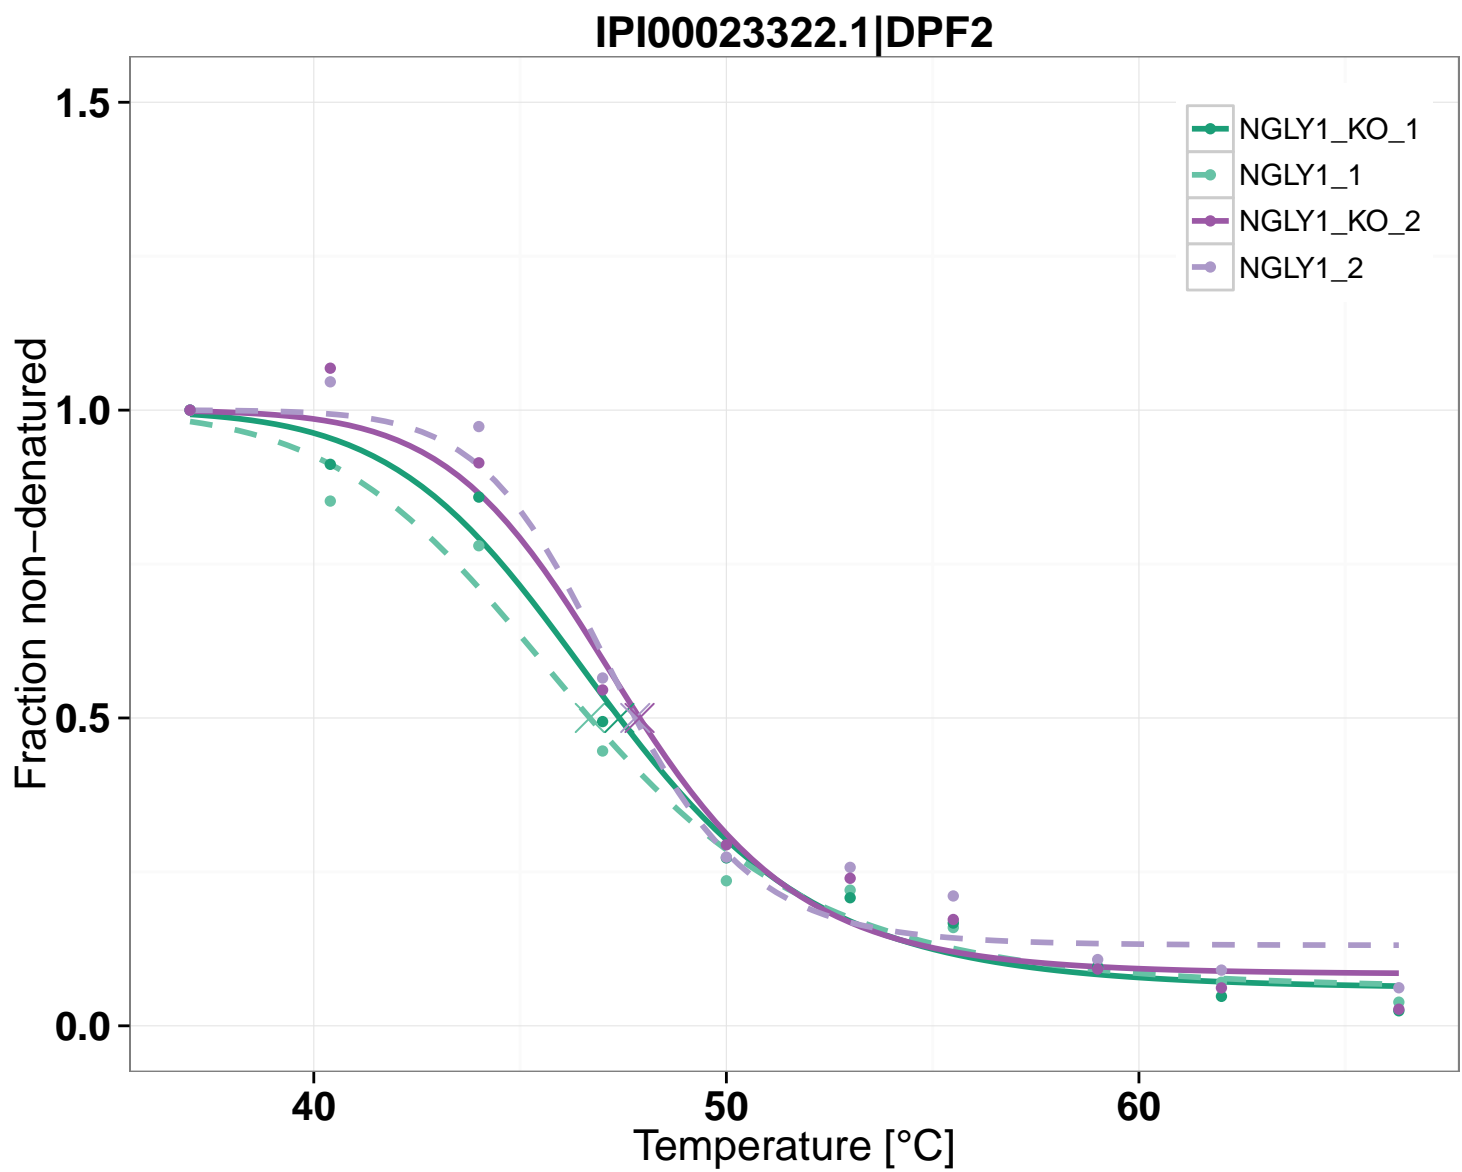

|            | meltPoint | slope  | plateau | R2   |
|------------|-----------|--------|---------|------|
| NGLY1_KO_1 | 47.41     | -0.091 | 0.06    | 0.99 |
| NGLY1_1    | 46.69     | -0.08  | 0.06    | 0.99 |
| NGLY1_KO_2 | 47.9      | -0.11  | 0.08    | 0.98 |
| NGLY1_2    | 47.79     | -0.13  | 0.13    | 0.98 |

Supplement: Supplementary file 7732 [file 1]

# IPI00029754.1|MLH1

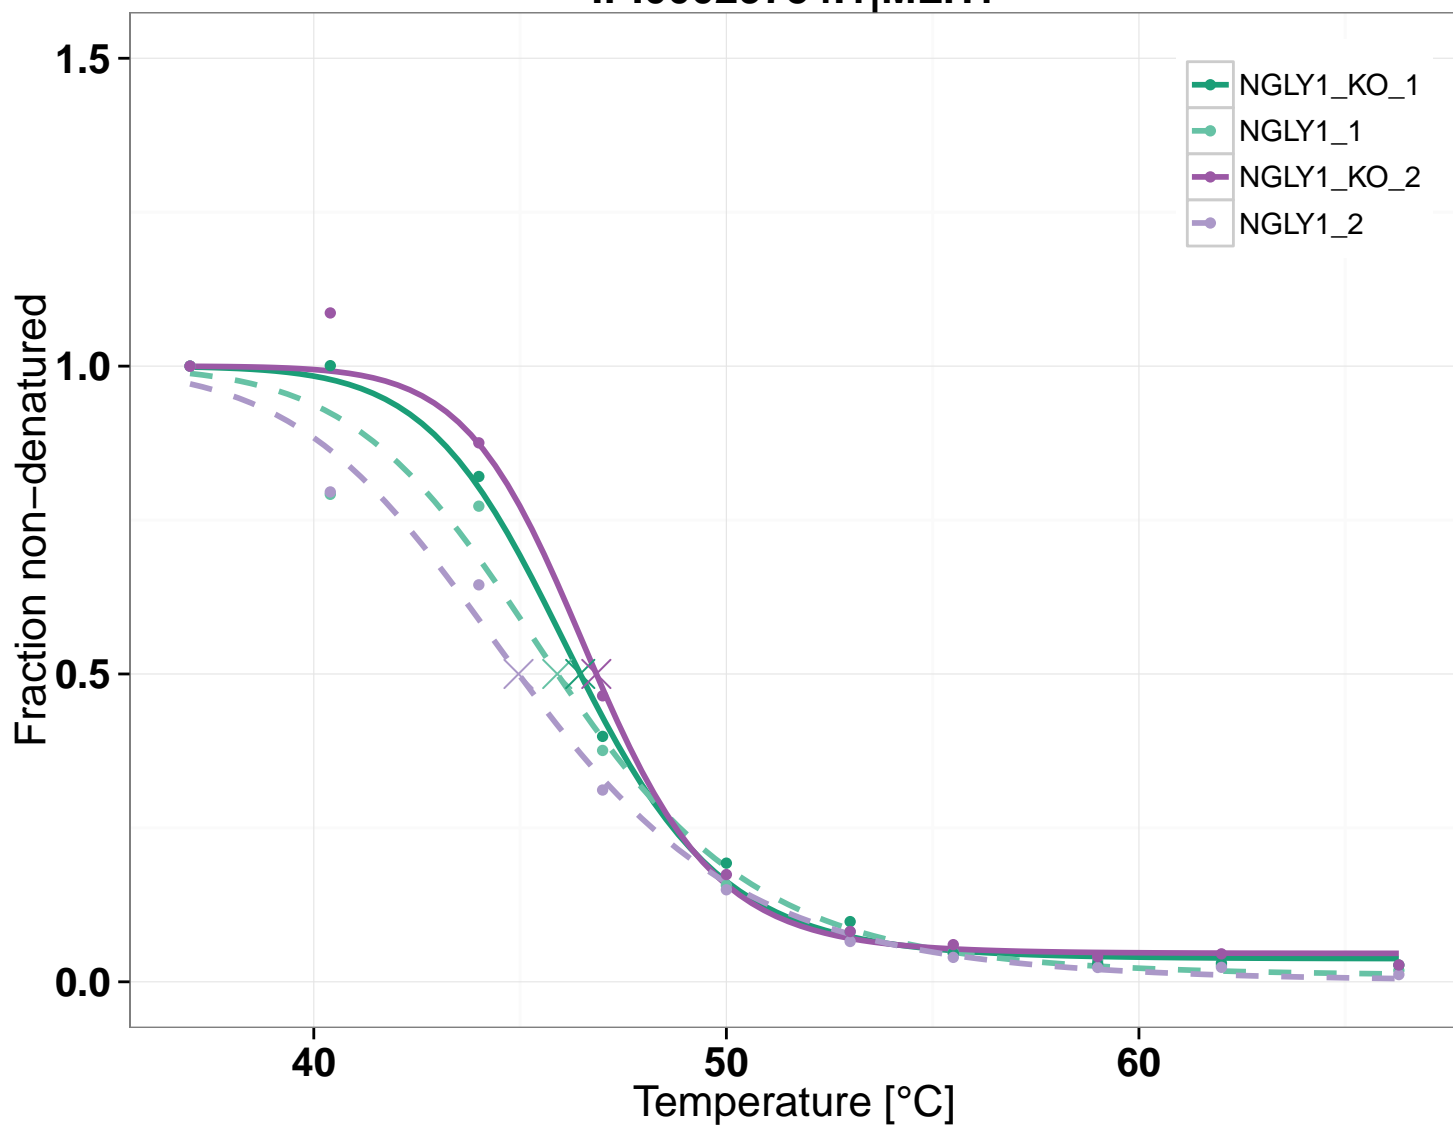

|            | meltPoint | slope  | plateau | R2   |
|------------|-----------|--------|---------|------|
| NGLY1_KO_1 | 46.46     | -0.13  | 0.04    | 1    |
| NGLY1_1    | 45.9      | -0.1   | 0.01    | 0.98 |
| NGLY1_KO_2 | 46.85     | -0.16  | 0.05    | 0.99 |
| NGLY1_2    | 44.96     | -0.092 | 0       | 0.99 |

Supplement: Supplementary file 7733 [file 1]
