# Supplementary material (part 78 of 85)
Source: publisher figshare collection journal article supplement (https://gsajournals.figshare.com/articles/dataset/_/12014913)

IPI00003293.1|DGKE

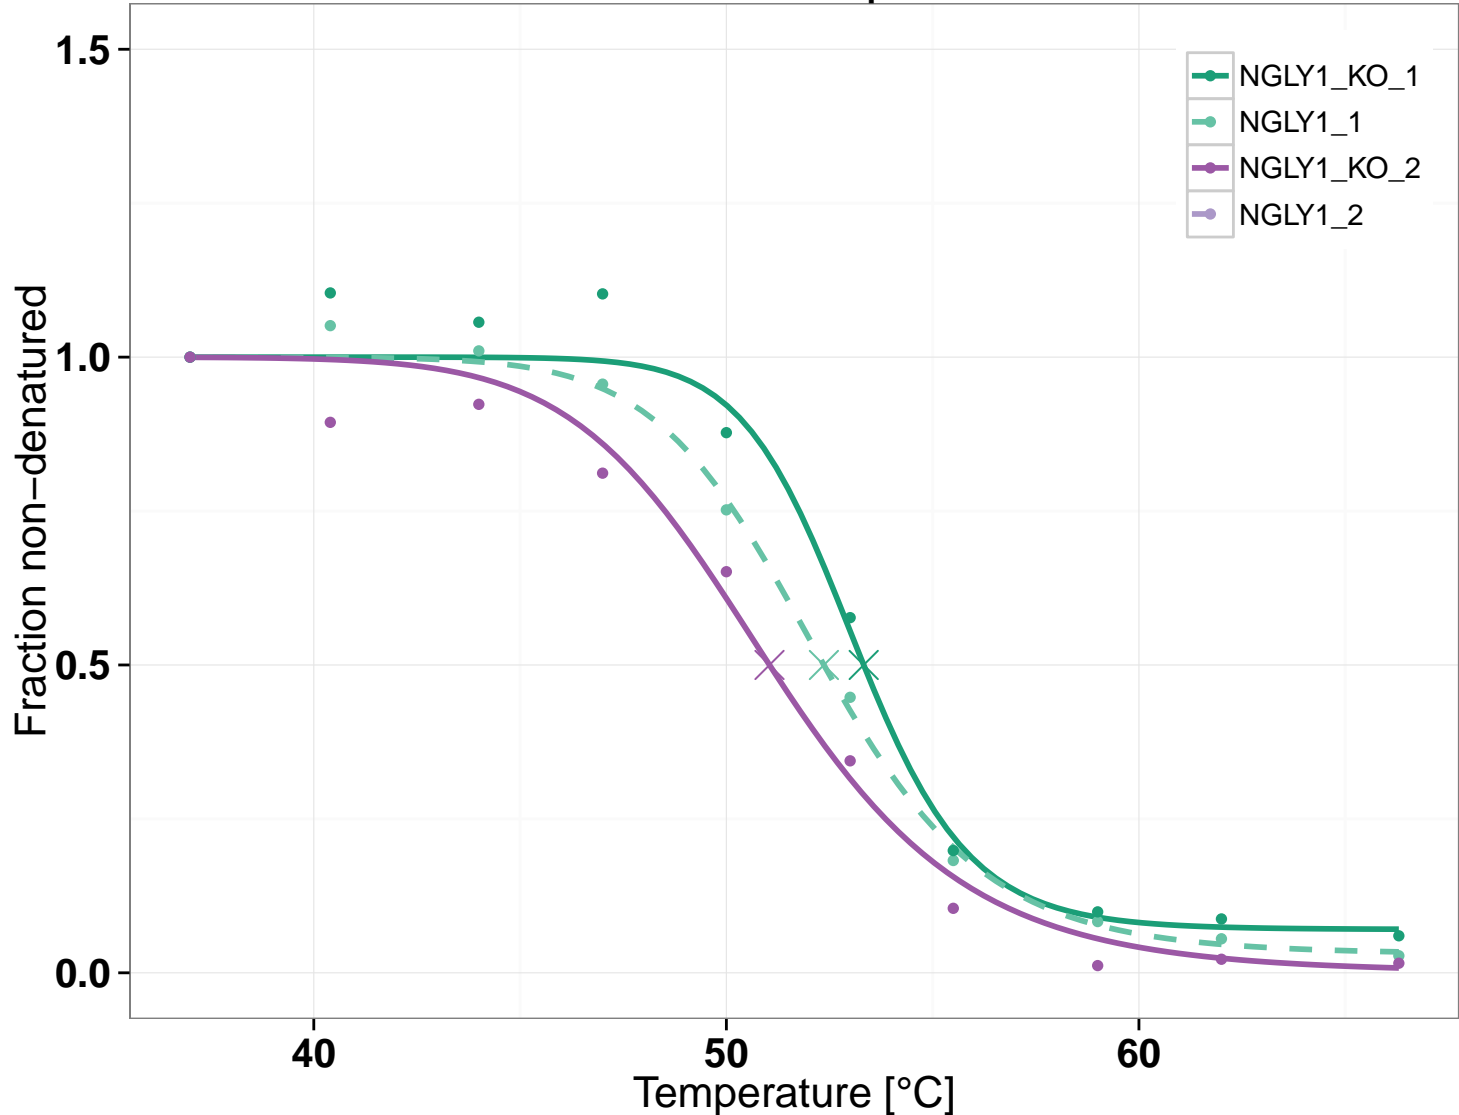

|            | meltPoint | slope | plateau | R2   |
|------------|-----------|-------|---------|------|
| NGLY1_KO_1 | 53.33     | -0.17 | 0.07    | 0.98 |
| NGLY1_1    | 52.36     | -0.12 | 0.03    | 1    |
| NGLY1_KO_2 | 51.05     | -0.1  | 0       | 0.99 |
| NGLY1_2    | -         | -     | -       | -    |

Supplement: Supplementary file 7734 [file 1]

# IPI00001578.2|C17ORF62

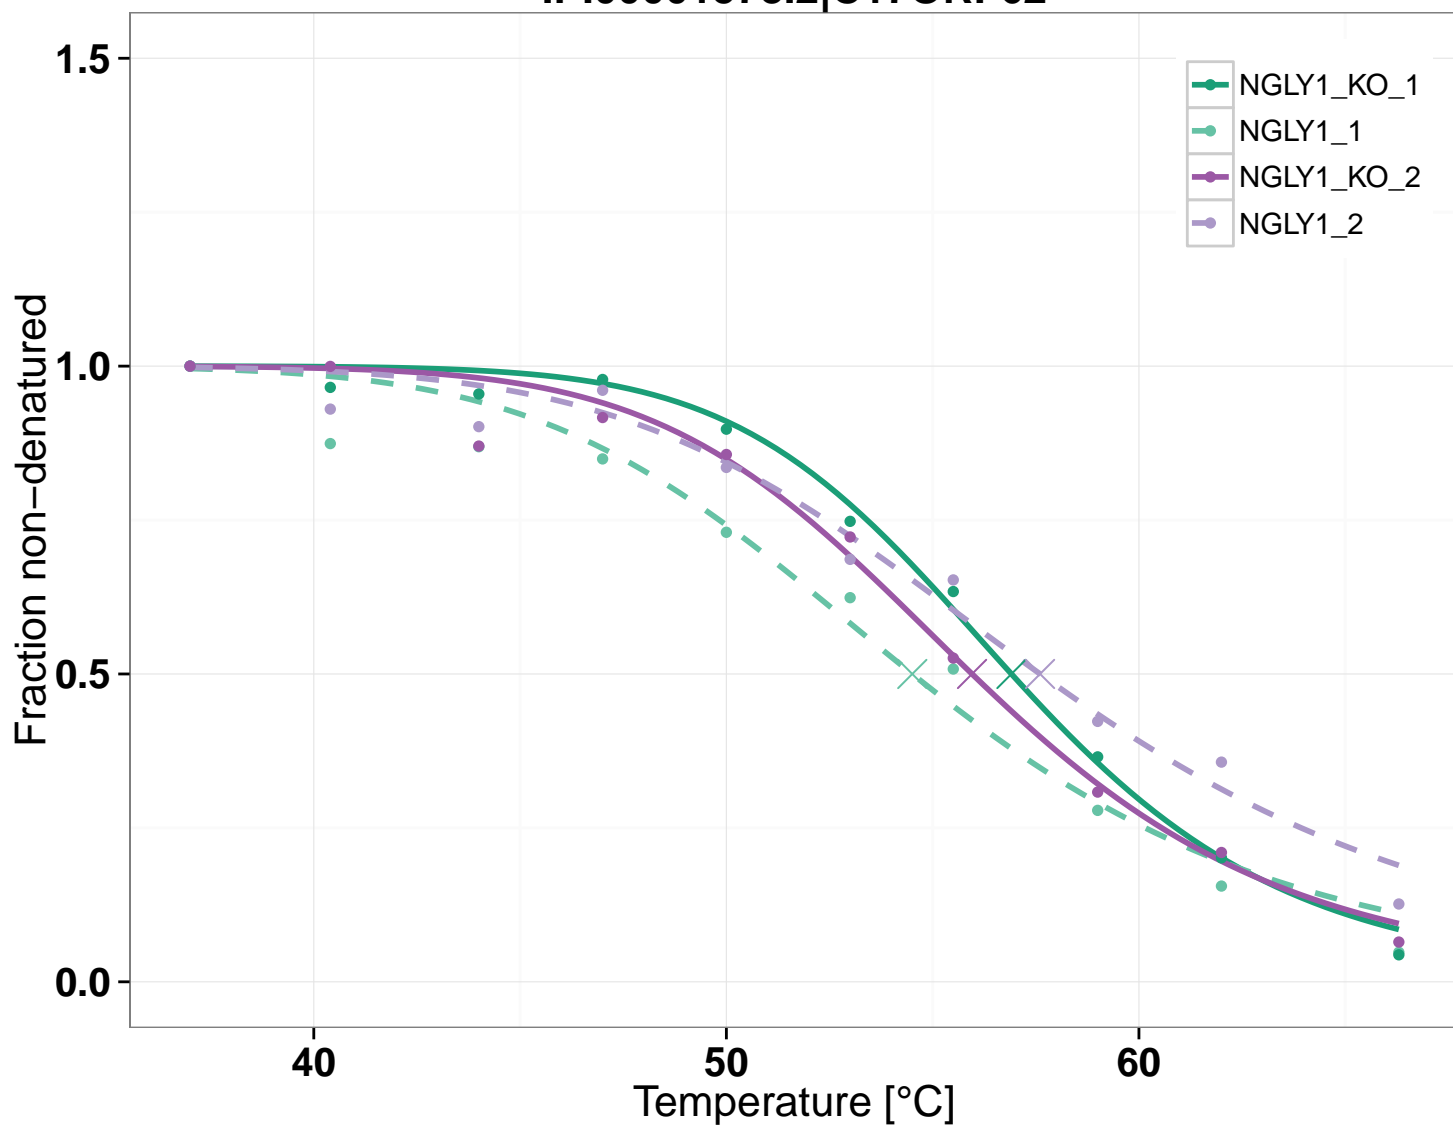

|            | meltPoint | slope  | plateau | R2   |
|------------|-----------|--------|---------|------|
| NGLY1_KO_1 | 56.91     | -0.075 | 0       | 0.99 |
| NGLY1_1    | 54.51     | -0.055 | 0       | 0.97 |
| NGLY1_KO_2 | 55.95     | -0.066 | 0       | 0.99 |
| NGLY1_2    | 57.6      | -0.05  | 0       | 0.98 |

Supplement: Supplementary file 7735 [file 1]

IPI00016070.3|AGPAT6

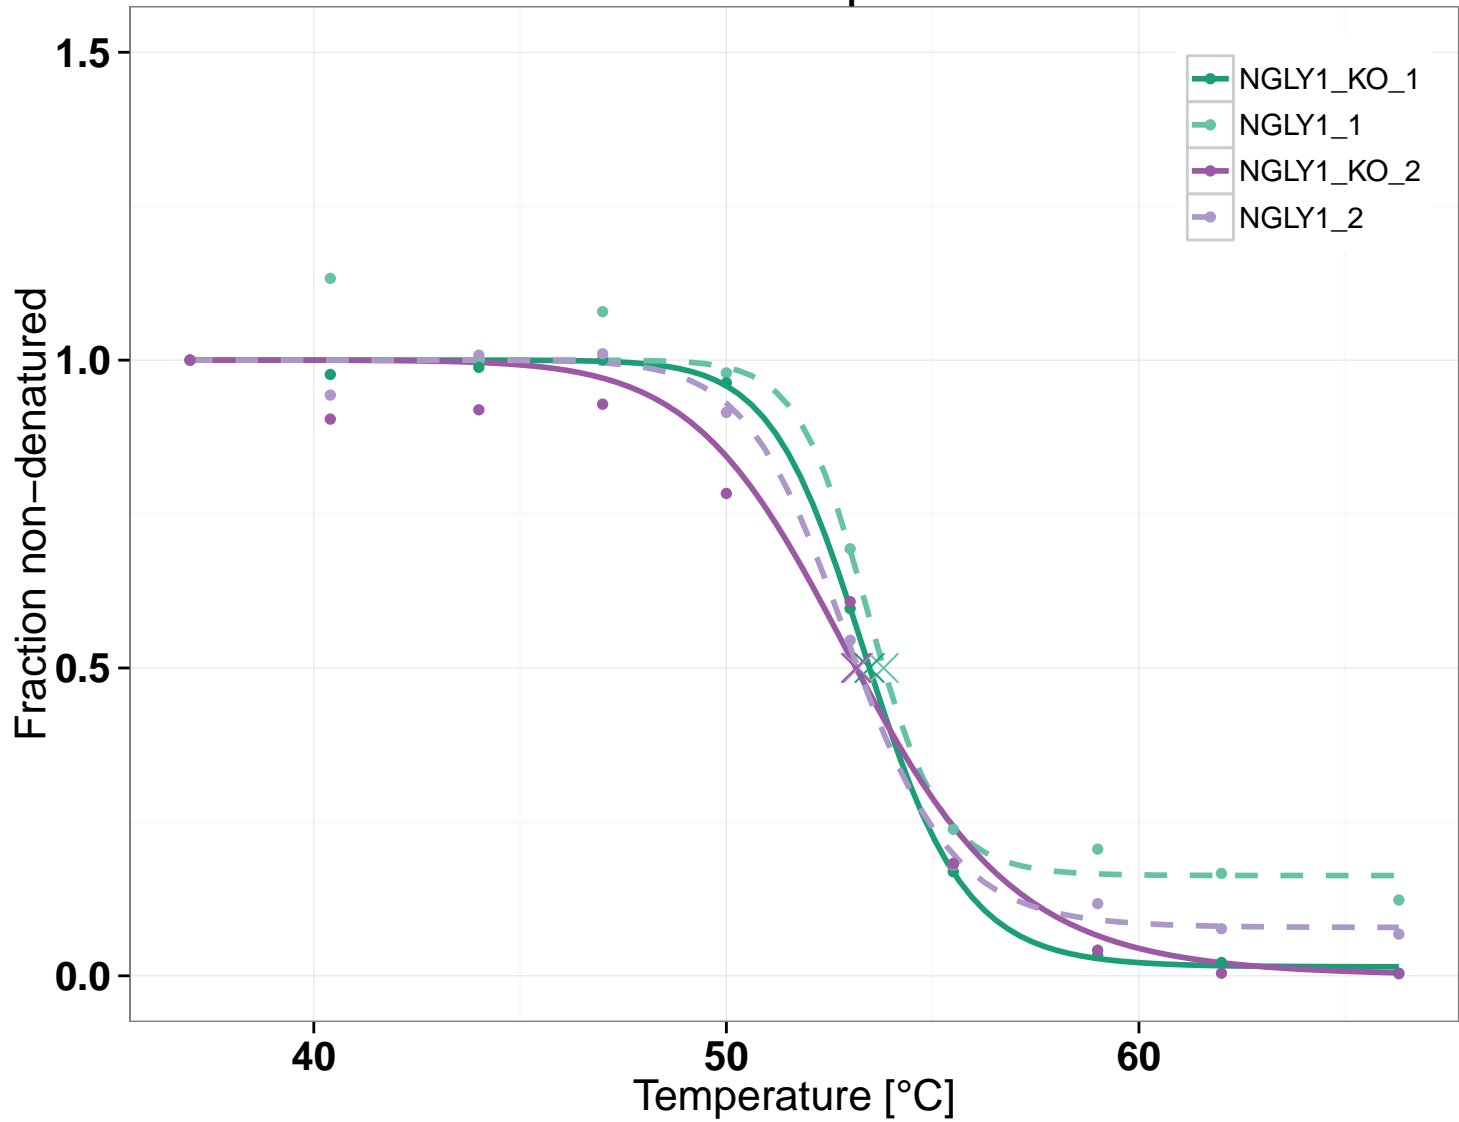

|            | meltPoint | slope | plateau | R2   |
|------------|-----------|-------|---------|------|
| NGLY1_KO_1 | 53.47     | -0.21 | 0.01    | 1    |
| NGLY1_1    | 53.81     | -0.24 | 0.16    | 0.98 |
| NGLY1_KO_2 | 53.14     | -0.13 | 0       | 0.98 |
| NGLY1_2    | 53.19     | -0.18 | 0.08    | 1    |

Supplement: Supplementary file 7736 [file 1]

# IPI00477468.1|CTR9

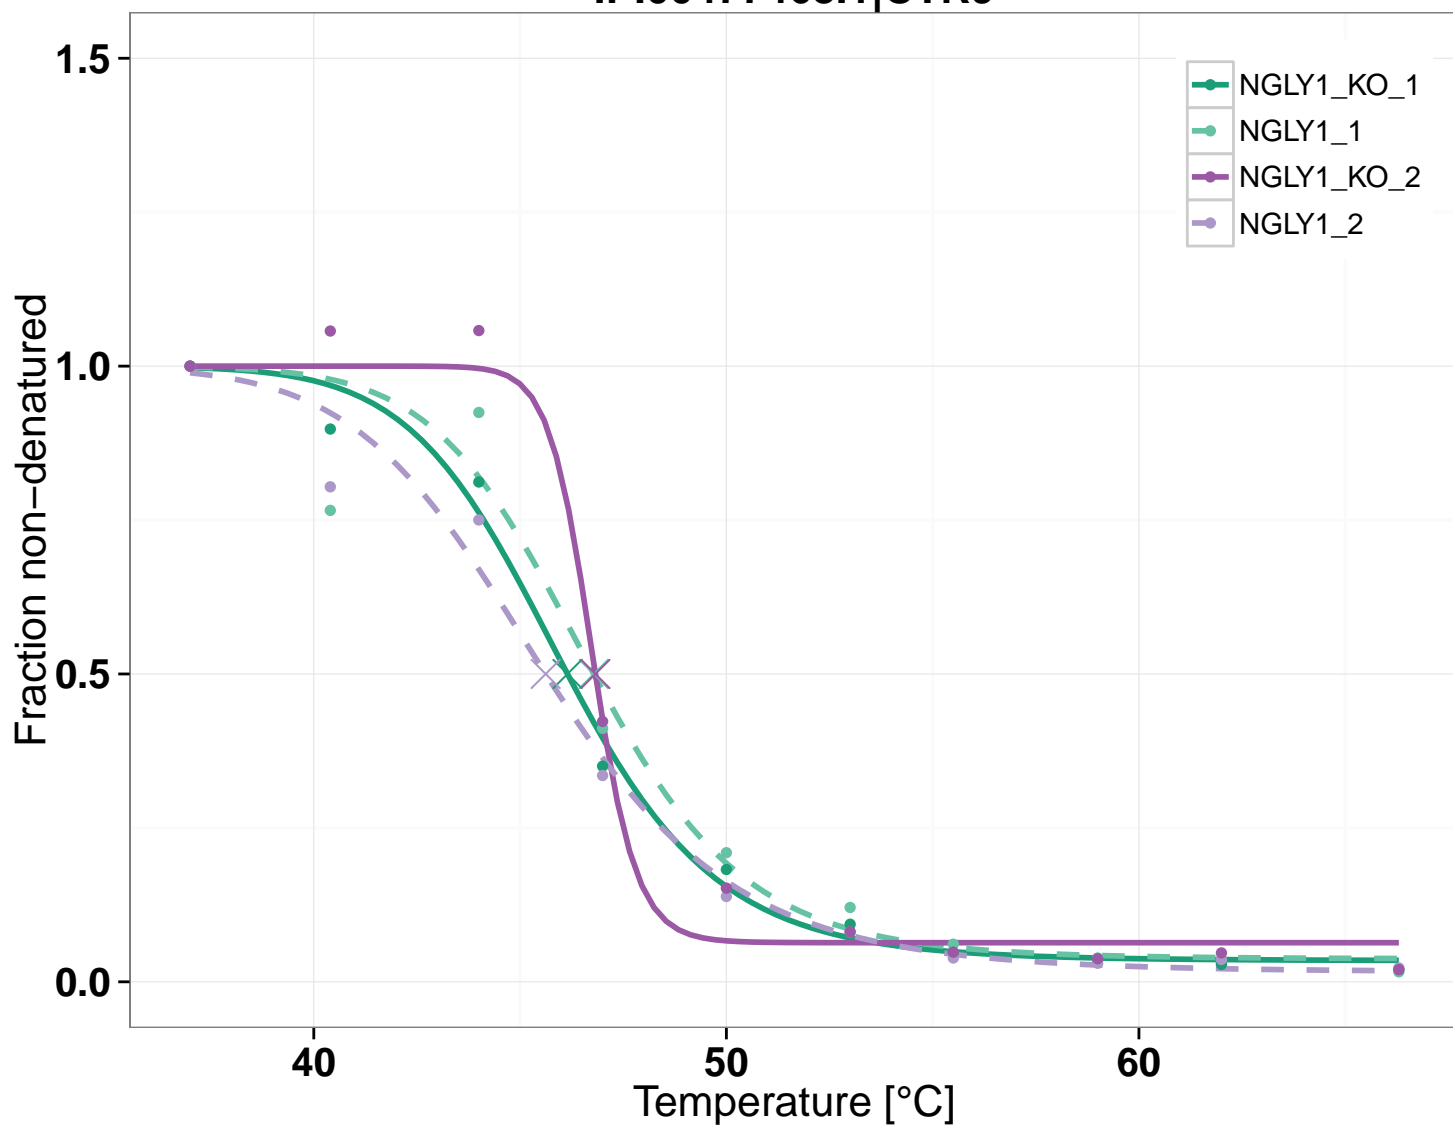

|            | meltPoint | slope | plateau | R2   |
|------------|-----------|-------|---------|------|
| NGLY1_KO_1 | 46.15     | -0.13 | 0.03    | 0.99 |
| NGLY1_1    | 46.79     | -0.13 | 0.04    | 0.96 |
| NGLY1_KO_2 | 46.83     | -0.44 | 0.06    | 0.99 |
| NGLY1_2    | 45.62     | -0.11 | 0.02    | 0.98 |

Supplement: Supplementary file 7737 [file 1]

IPI00217631.5|ADAT2

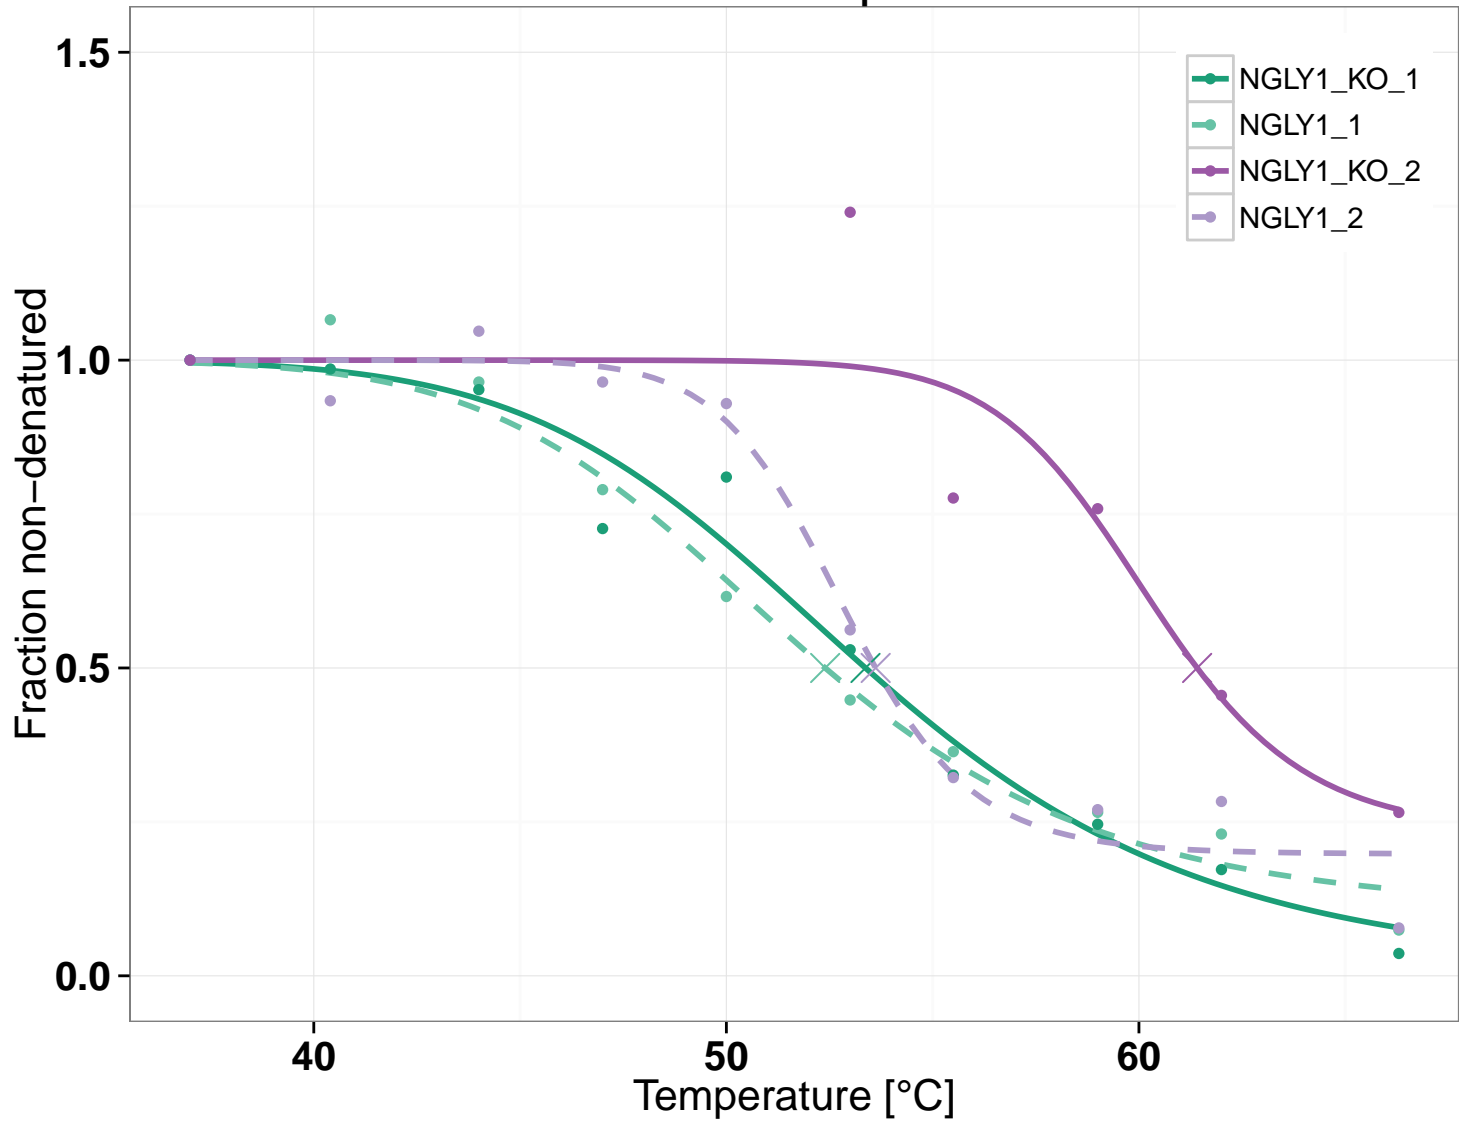

|            | meltPoint | slope  | plateau | R2   |
|------------|-----------|--------|---------|------|
| NGLY1_KO_1 | 53.37     | -0.061 | 0       | 0.97 |
| NGLY1_1    | 52.4      | -0.061 | 0.1     | 0.98 |
| NGLY1_KO_2 | 61.41     | -0.1   | 0.23    | -0.2 |
| NGLY1_2    | 53.62     | -0.13  | 0.2     | 0.97 |

Supplement: Supplementary file 7738 [file 1]

IPI00018781.5|MTERFD3

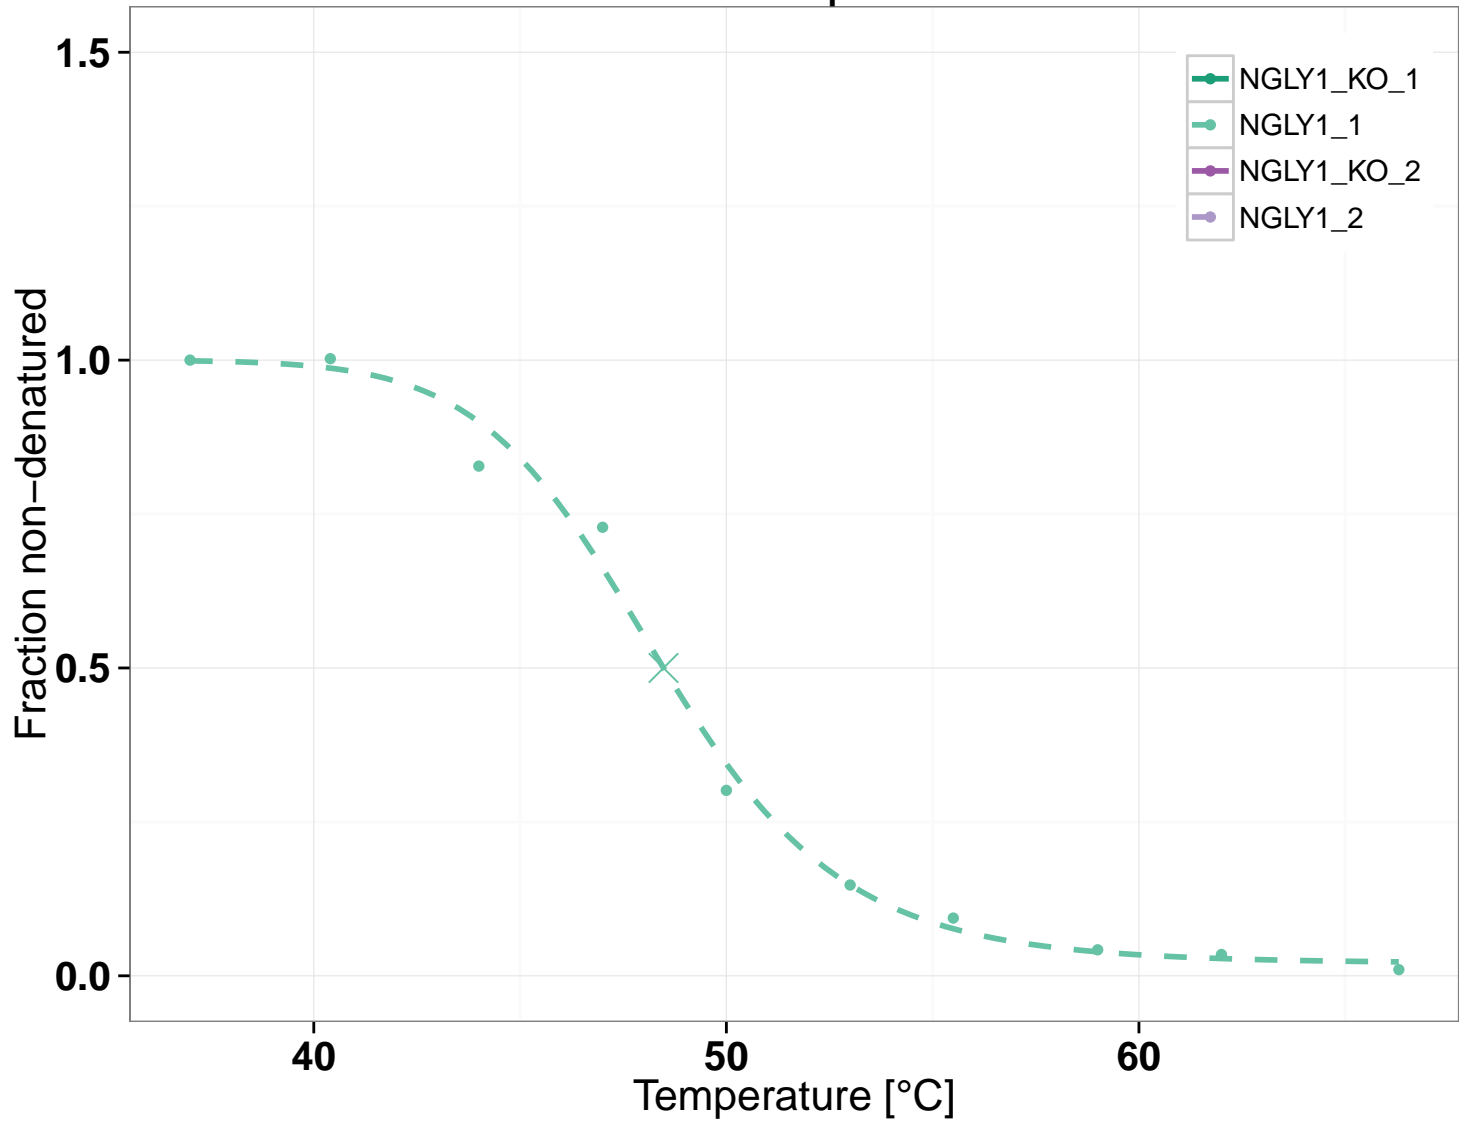

|            | meltPoint | slope | plateau | R2   |
|------------|-----------|-------|---------|------|
| NGLY1_KO_1 | -         | -     | -       | -    |
| NGLY1_1    | 48.48     | -0.11 | 0.02    | 0.99 |
| NGLY1_KO_2 | -         | -     | -       | -    |
| NGLY1_2    | -         | -     | -       | -    |

Supplement: Supplementary file 7739 [file 1]

IPI00217056.2|LEPREL2

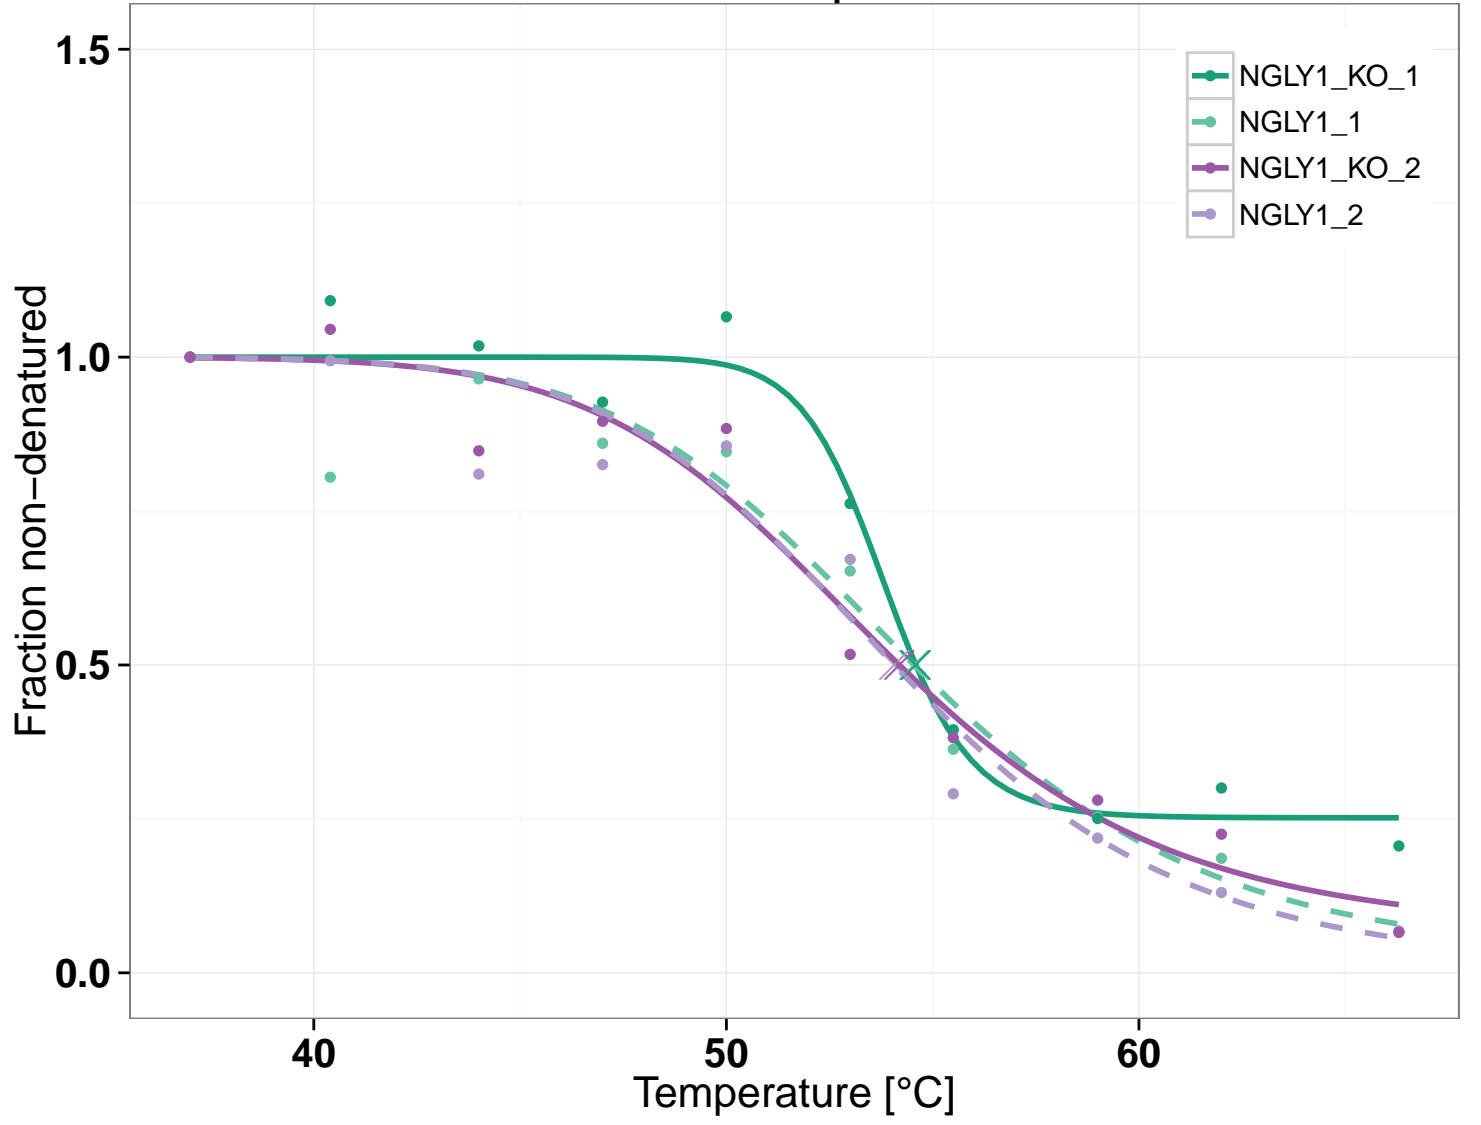

|            | meltPoint | slope  | plateau | R2   |
|------------|-----------|--------|---------|------|
| NGLY1_KO_1 | 54.59     | -0.18  | 0.25    | 0.98 |
| NGLY1_1    | 54.55     | -0.068 | 0.01    | 0.95 |
| NGLY1_KO_2 | 54.19     | -0.068 | 0.06    | 0.96 |
| NGLY1_2    | 54.07     | -0.072 | 0       | 0.95 |

Supplement: Supplementary file 7740 [file 1]

IPI00815851.1|LRRRIQ1

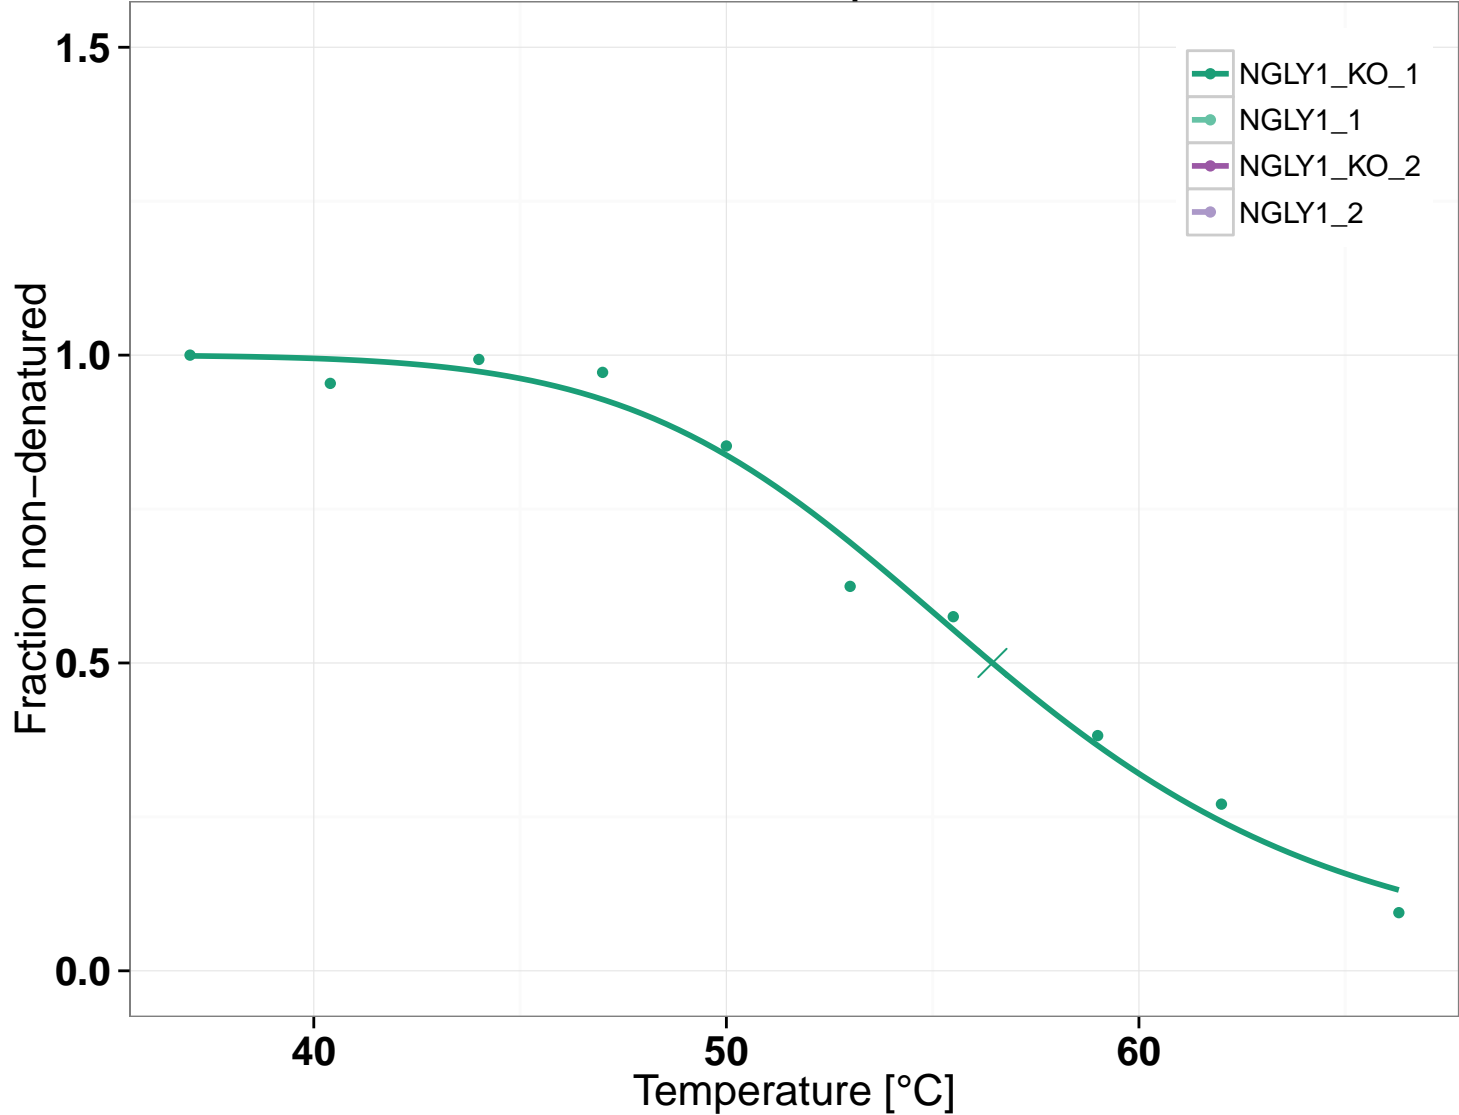

|            | meltPoint | slope  | plateau | R2   |
|------------|-----------|--------|---------|------|
| NGLY1_KO_1 | 56.45     | -0.058 | 0       | 0.99 |
| NGLY1_1    | -         | -      | -       | -    |
| NGLY1_KO_2 | -         | -      | -       | -    |
| NGLY1_2    | -         | -      | -       | -    |

Supplement: Supplementary file 7741 [file 1]

# IPI00002816.1|CTSF

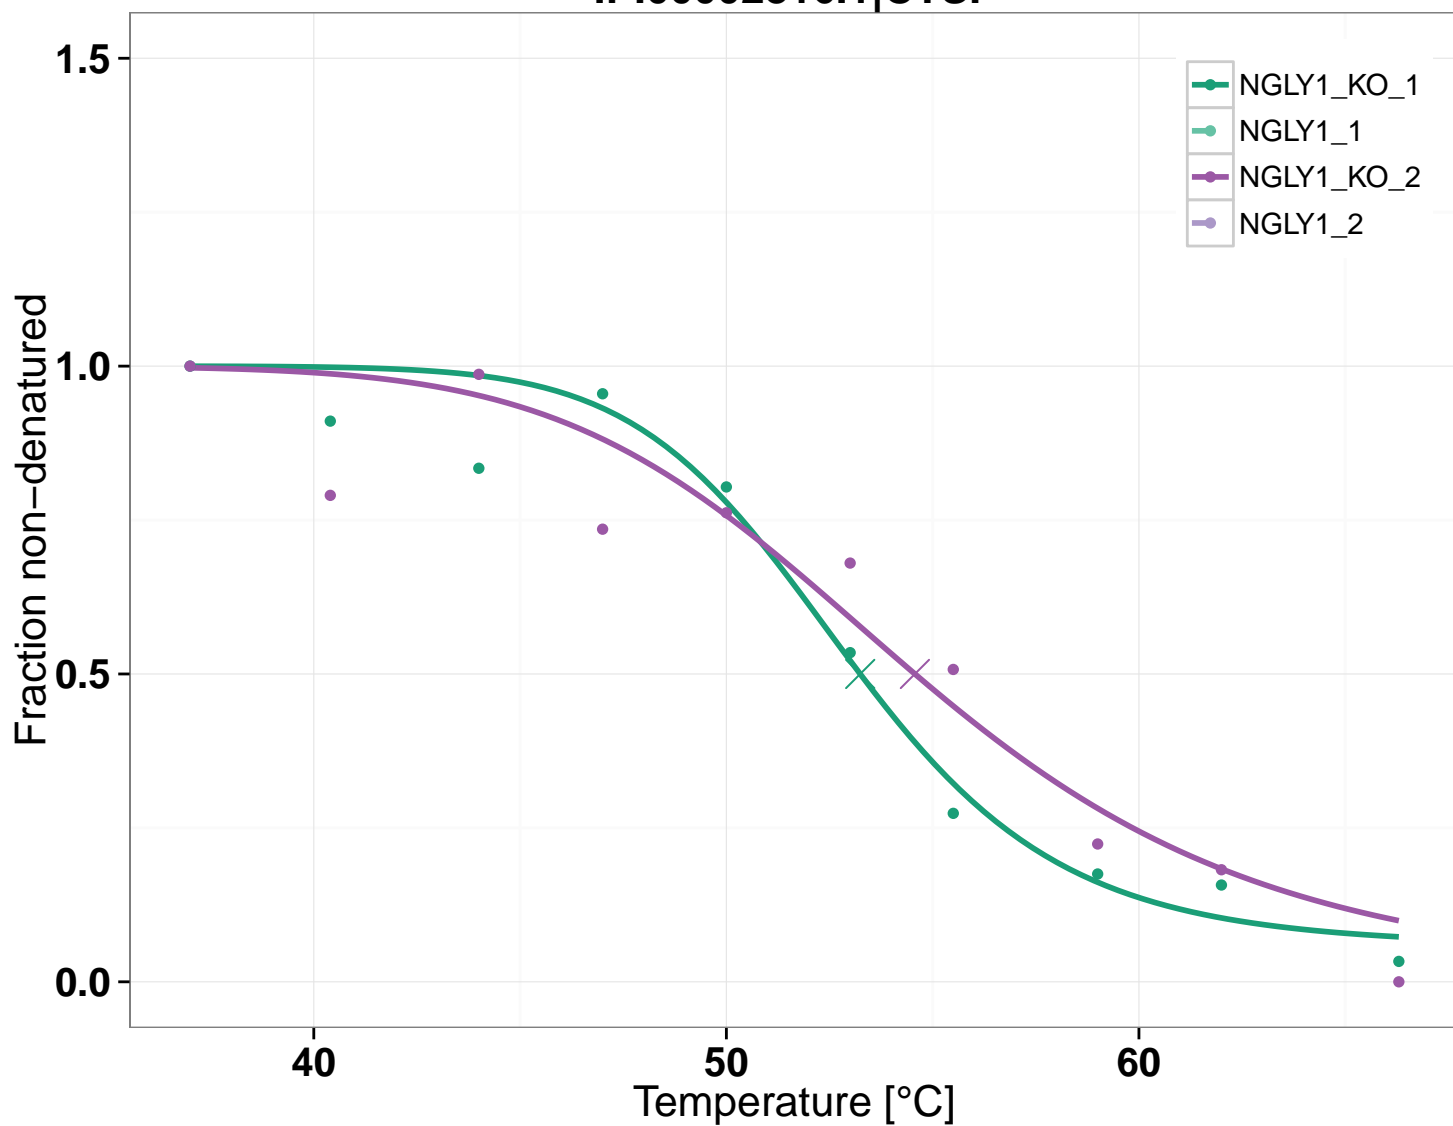

|            | meltPoint | slope  | plateau | R2   |
|------------|-----------|--------|---------|------|
| NGLY1_KO_1 | 53.24     | -0.091 | 0.06    | 0.97 |
| NGLY1_1    | -         | -      | -       | -    |
| NGLY1_KO_2 | 54.57     | -0.059 | 0       | 0.92 |
| NGLY1_2    | -         | -      | -       | -    |

Supplement: Supplementary file 7742 [file 1]

# IPI00742670.2|PON2

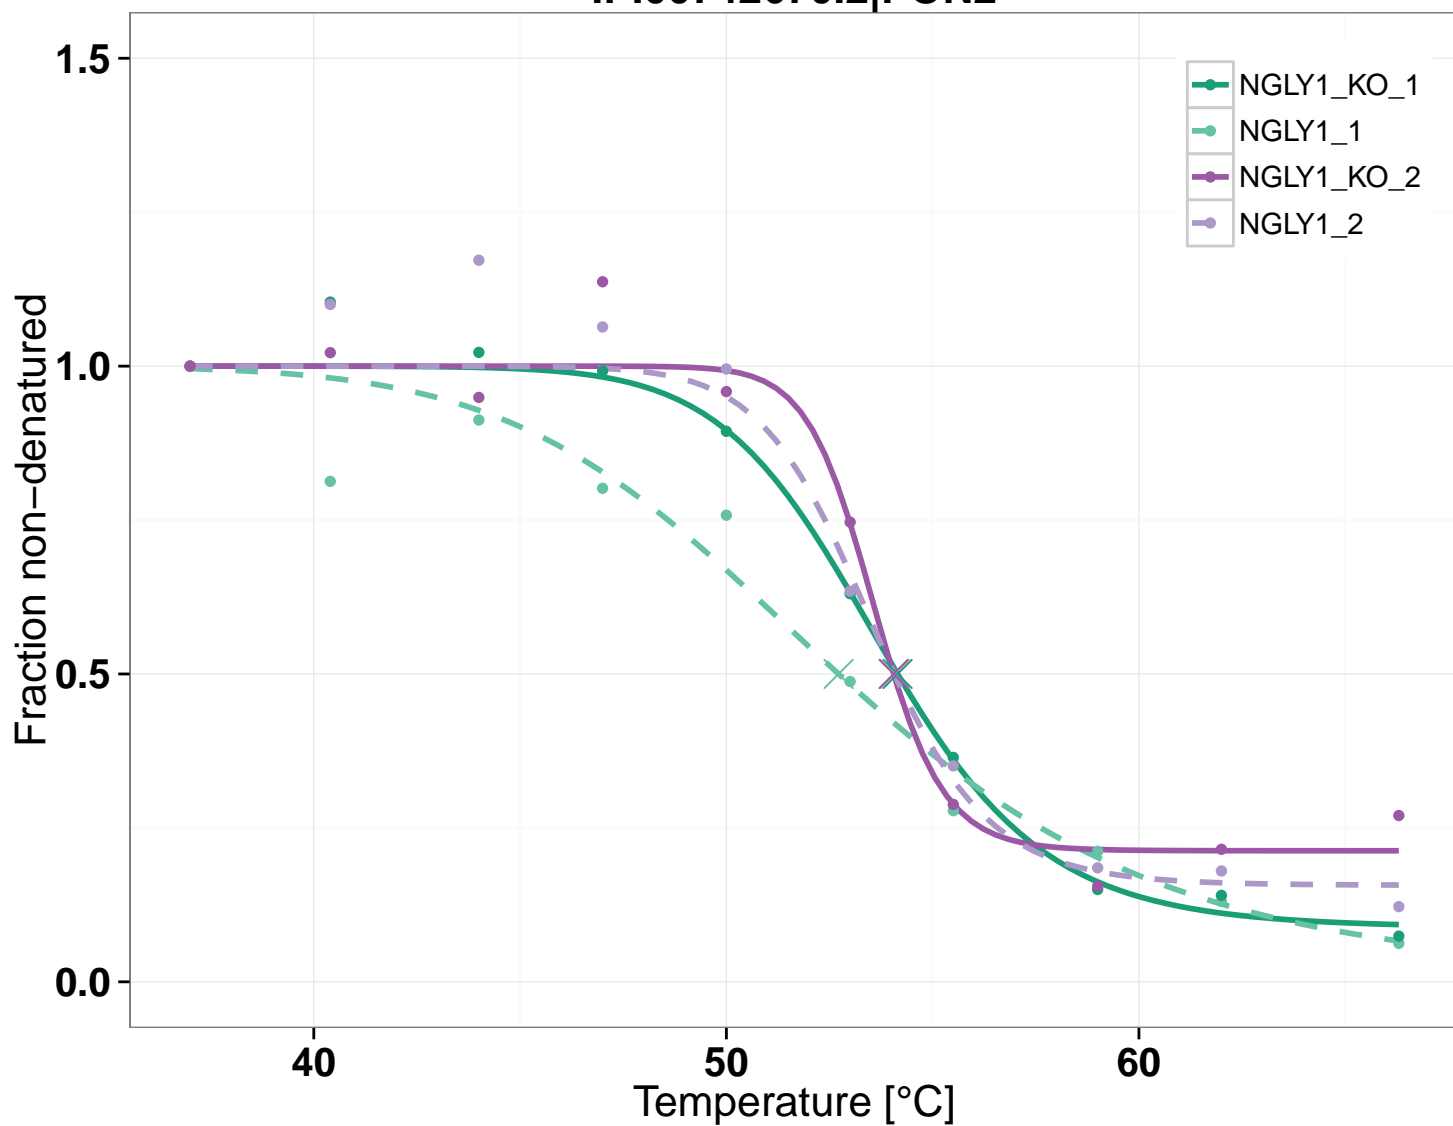

|            | meltPoint | slope  | plateau | R2   |
|------------|-----------|--------|---------|------|
| NGLY1_KO_1 | 54.15     | -0.12  | 0.09    | 0.99 |
| NGLY1_1    | 52.72     | -0.063 | 0       | 0.96 |
| NGLY1_KO_2 | 54.05     | -0.24  | 0.21    | 0.98 |
| NGLY1_2    | 54.07     | -0.15  | 0.16    | 0.97 |

Supplement: Supplementary file 7743 [file 1]

IPI00464999.2|HEATR6

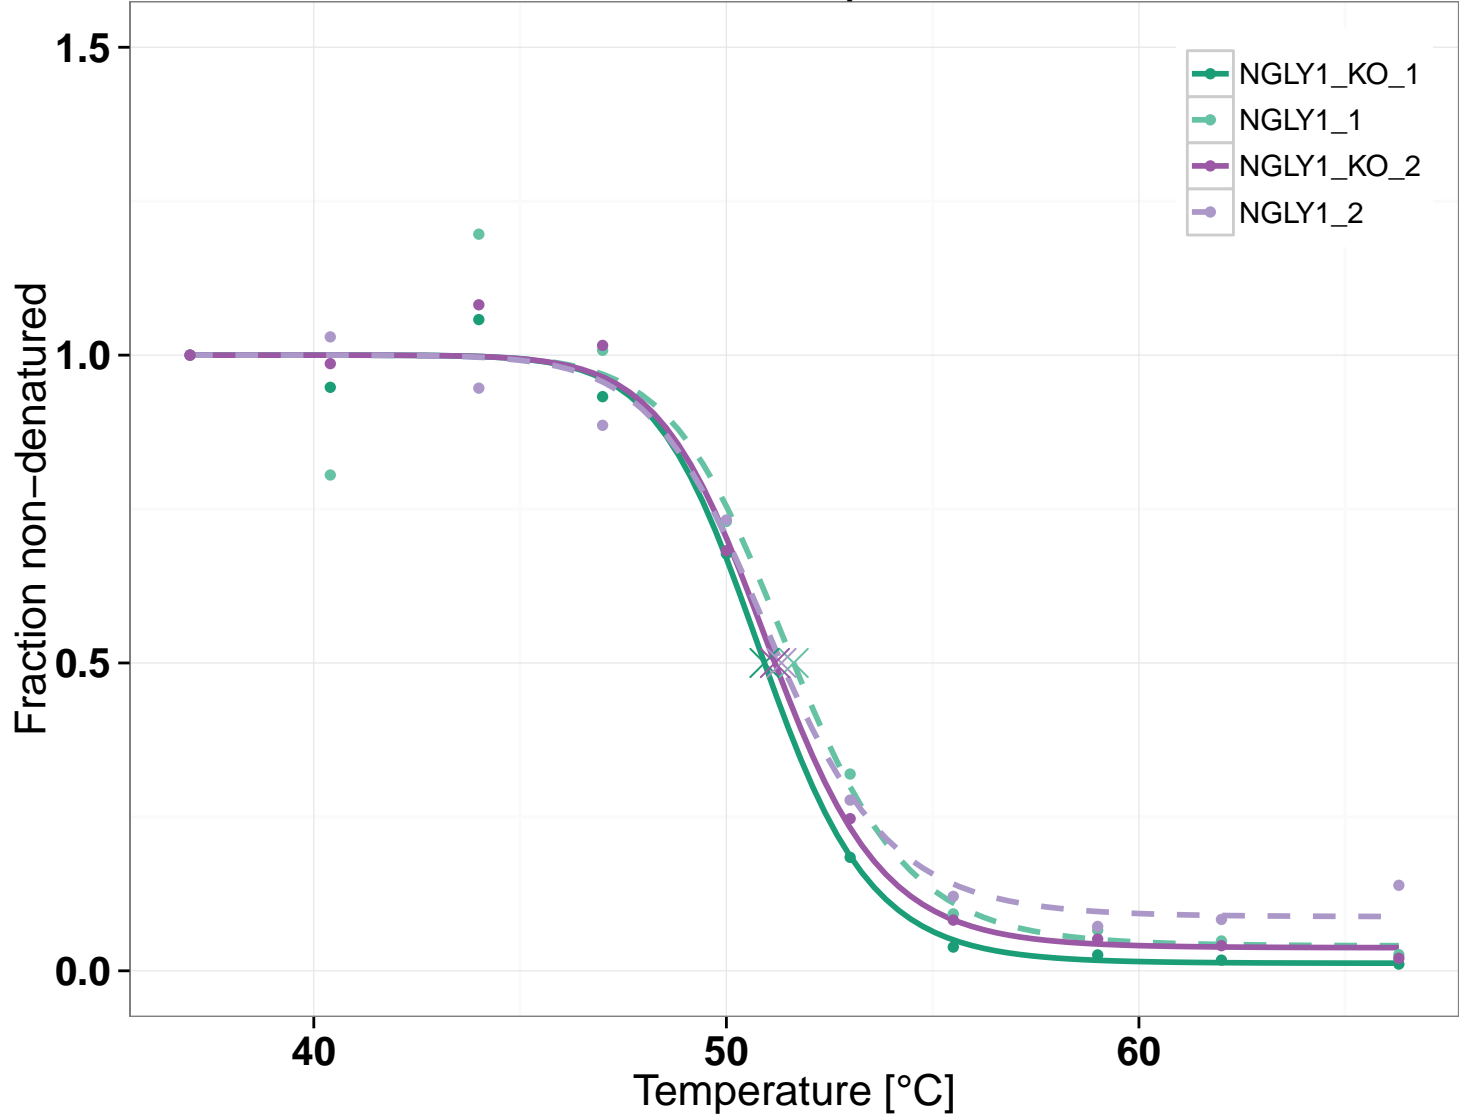

|            | meltPoint | slope | plateau | R2   |
|------------|-----------|-------|---------|------|
| NGLY1_KO_1 | 50.92     | -0.19 | 0.01    | 1    |
| NGLY1_1    | 51.63     | -0.17 | 0.04    | 0.96 |
| NGLY1_KO_2 | 51.18     | -0.18 | 0.04    | 0.99 |
| NGLY1_2    | 51.34     | -0.16 | 0.09    | 0.99 |

Supplement: Supplementary file 7744 [file 1]

# IPI00166931.4|PRUNE

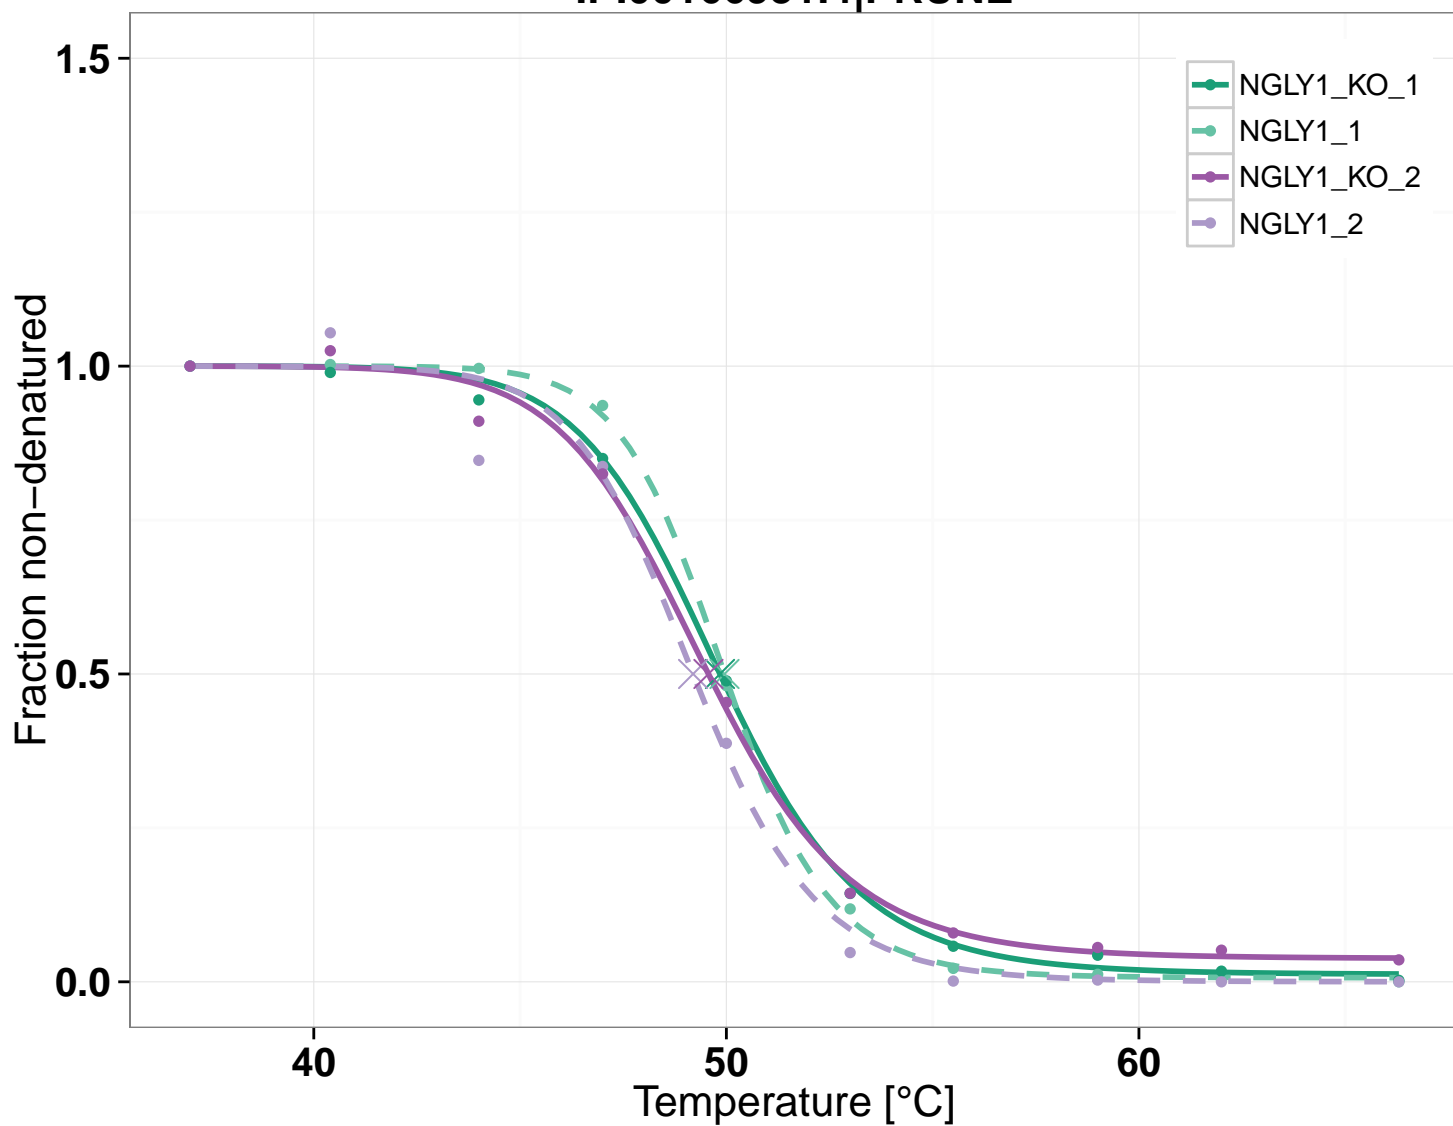

|            | meltPoint | slope | plateau | R2   |
|------------|-----------|-------|---------|------|
| NGLY1_KO_1 | 49.85     | -0.14 | 0.01    | 1    |
| NGLY1_1    | 49.95     | -0.19 | 0.01    | 1    |
| NGLY1_KO_2 | 49.57     | -0.14 | 0.04    | 1    |
| NGLY1_2    | 49.19     | -0.17 | 0       | 0.99 |

Supplement: Supplementary file 7745 [file 1]

IPI00187140.1|RPS26L1

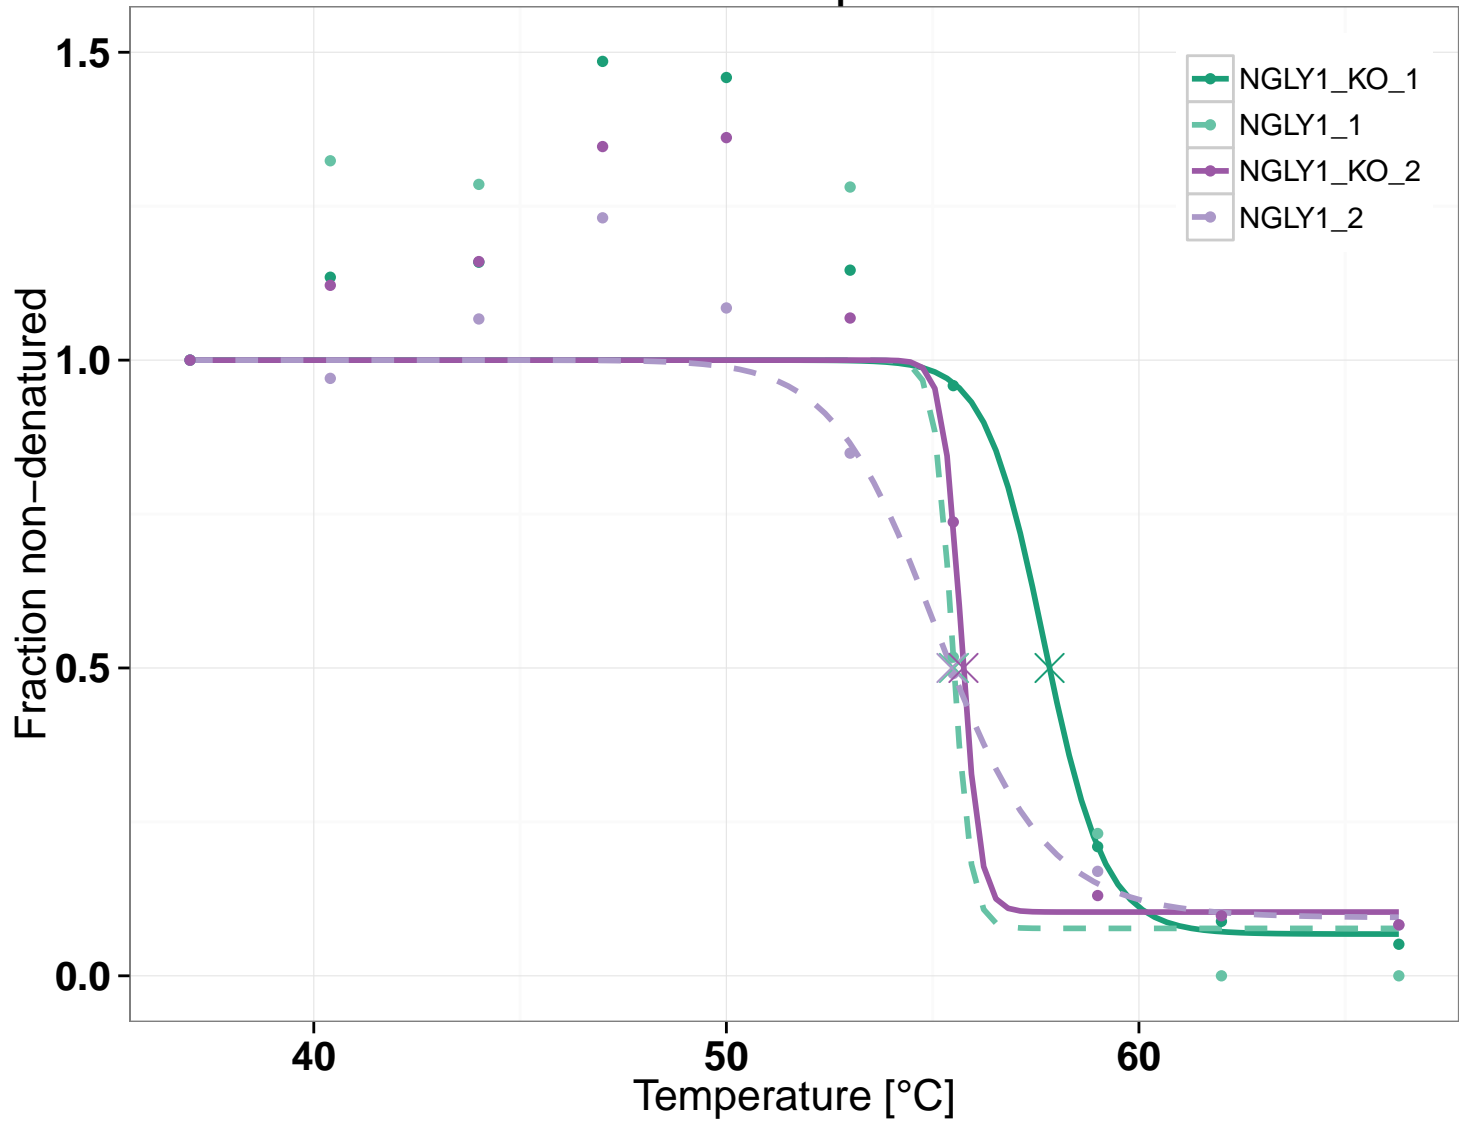

|            | meltPoint | slope | plateau | R2   |
|------------|-----------|-------|---------|------|
| NGLY1_KO_1 | 57.83     | -0.32 | 0.07    | 0.81 |
| NGLY1_1    | 55.52     | -1    | 0.08    | 0.65 |
| NGLY1_KO_2 | 55.75     | -1    | 0.1     | 0.88 |
| NGLY1_2    | 55.46     | -0.17 | 0.09    | 0.96 |

Supplement: Supplementary file 7746 [file 1]

IPI00154975.3|DNAJC9

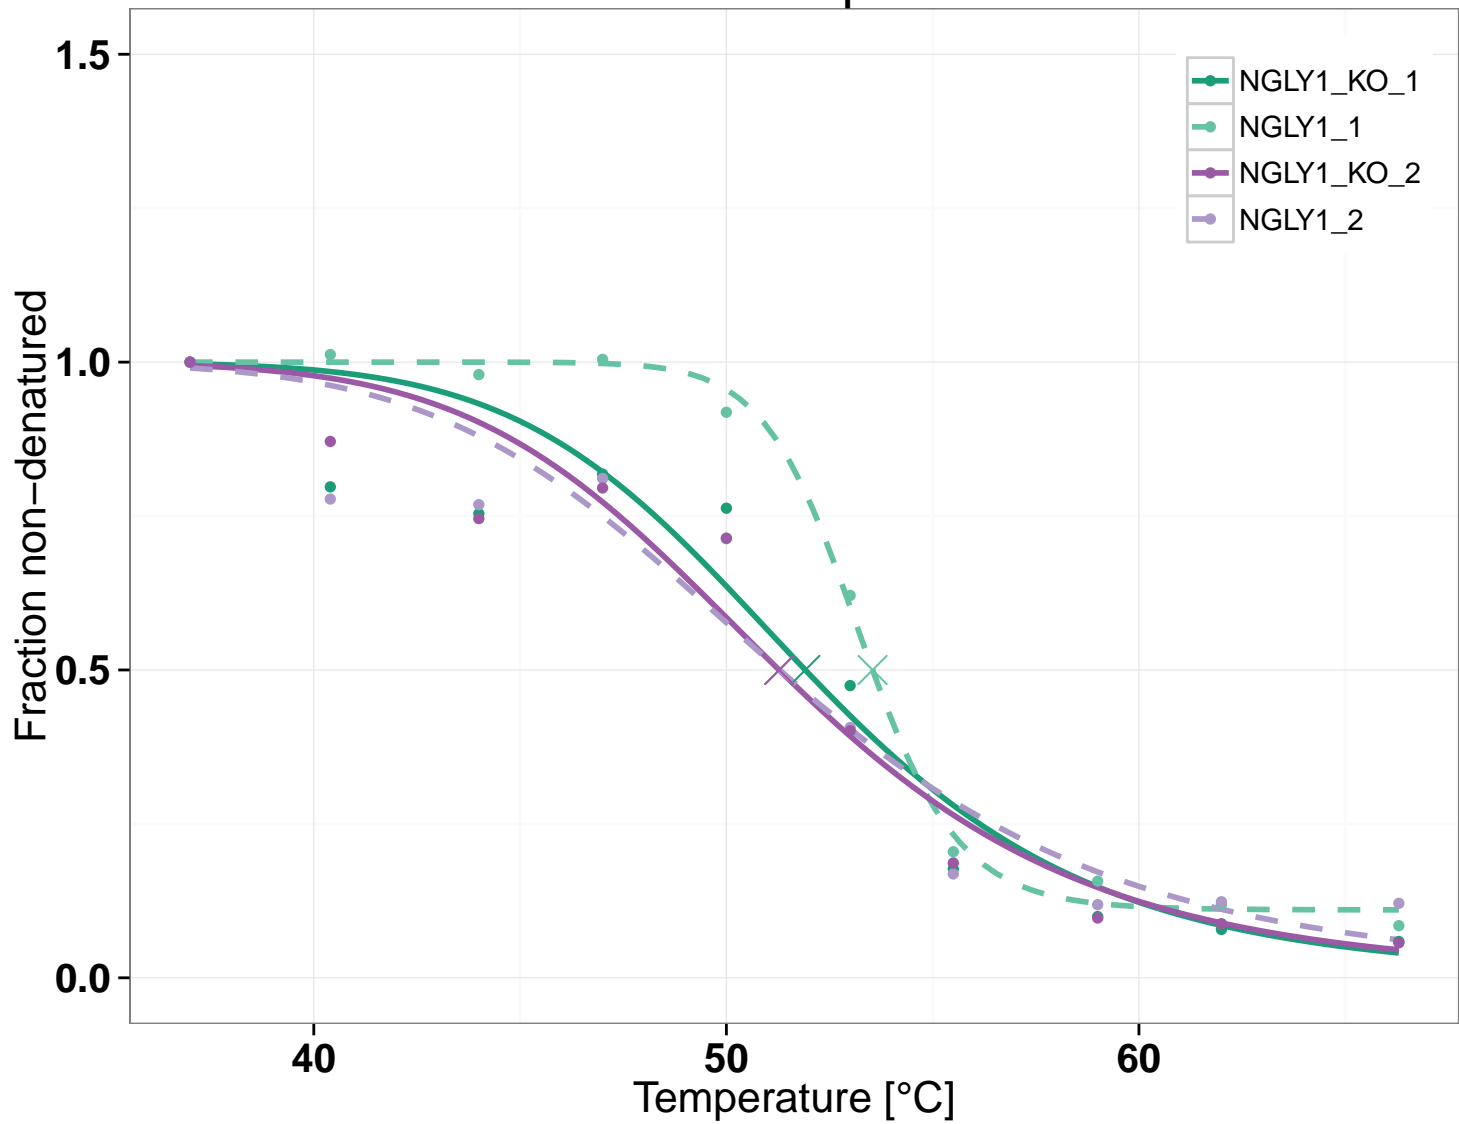

|            | meltPoint | slope  | plateau | R2   |
|------------|-----------|--------|---------|------|
| NGLY1_KO_1 | 51.91     | -0.072 | 0       | 0.92 |
| NGLY1_1    | 53.54     | -0.19  | 0.11    | 1    |
| NGLY1_KO_2 | 51.28     | -0.067 | 0       | 0.95 |
| NGLY1_2    | 51.29     | -0.06  | 0       | 0.92 |

Supplement: Supplementary file 7747 [file 1]

# IPI00001676.9|NPLOC4

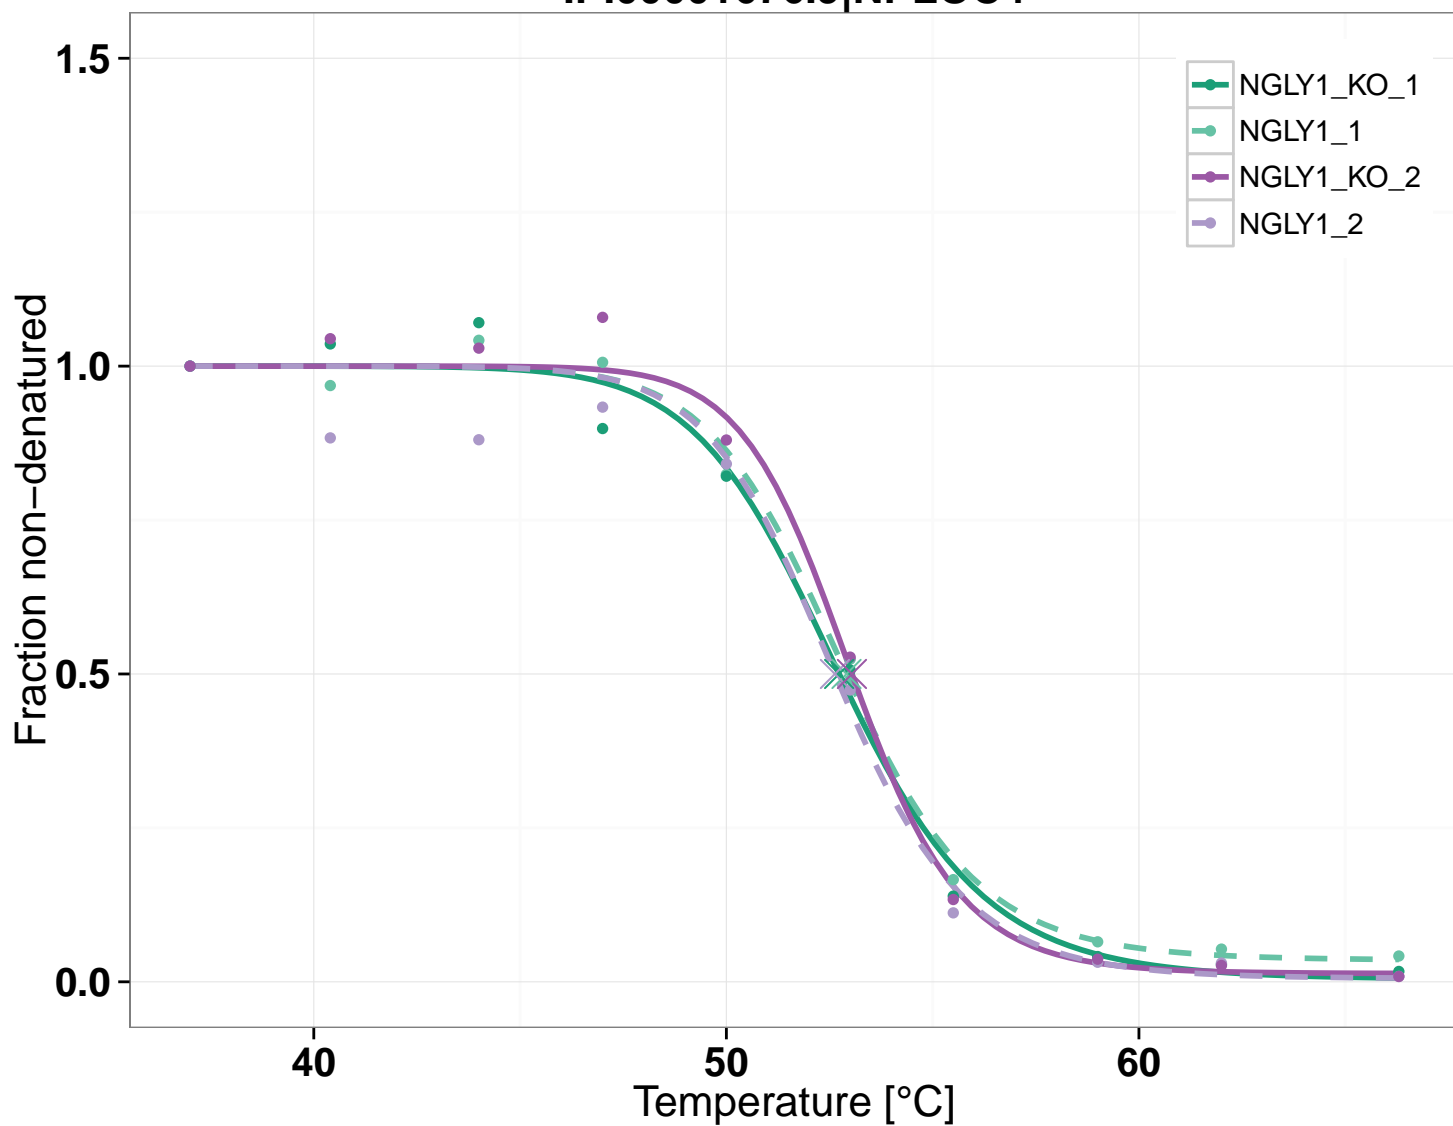

|            | meltPoint | slope | plateau | R2   |
|------------|-----------|-------|---------|------|
| NGLY1_KO_1 | 52.73     | -0.14 | 0       | 0.99 |
| NGLY1_1    | 52.91     | -0.15 | 0.03    | 1    |
| NGLY1_KO_2 | 53.04     | -0.19 | 0.01    | 0.99 |
| NGLY1_2    | 52.63     | -0.16 | 0.01    | 0.98 |

Supplement: Supplementary file 7748 [file 1]

IPI00790491.1|KIAA0101

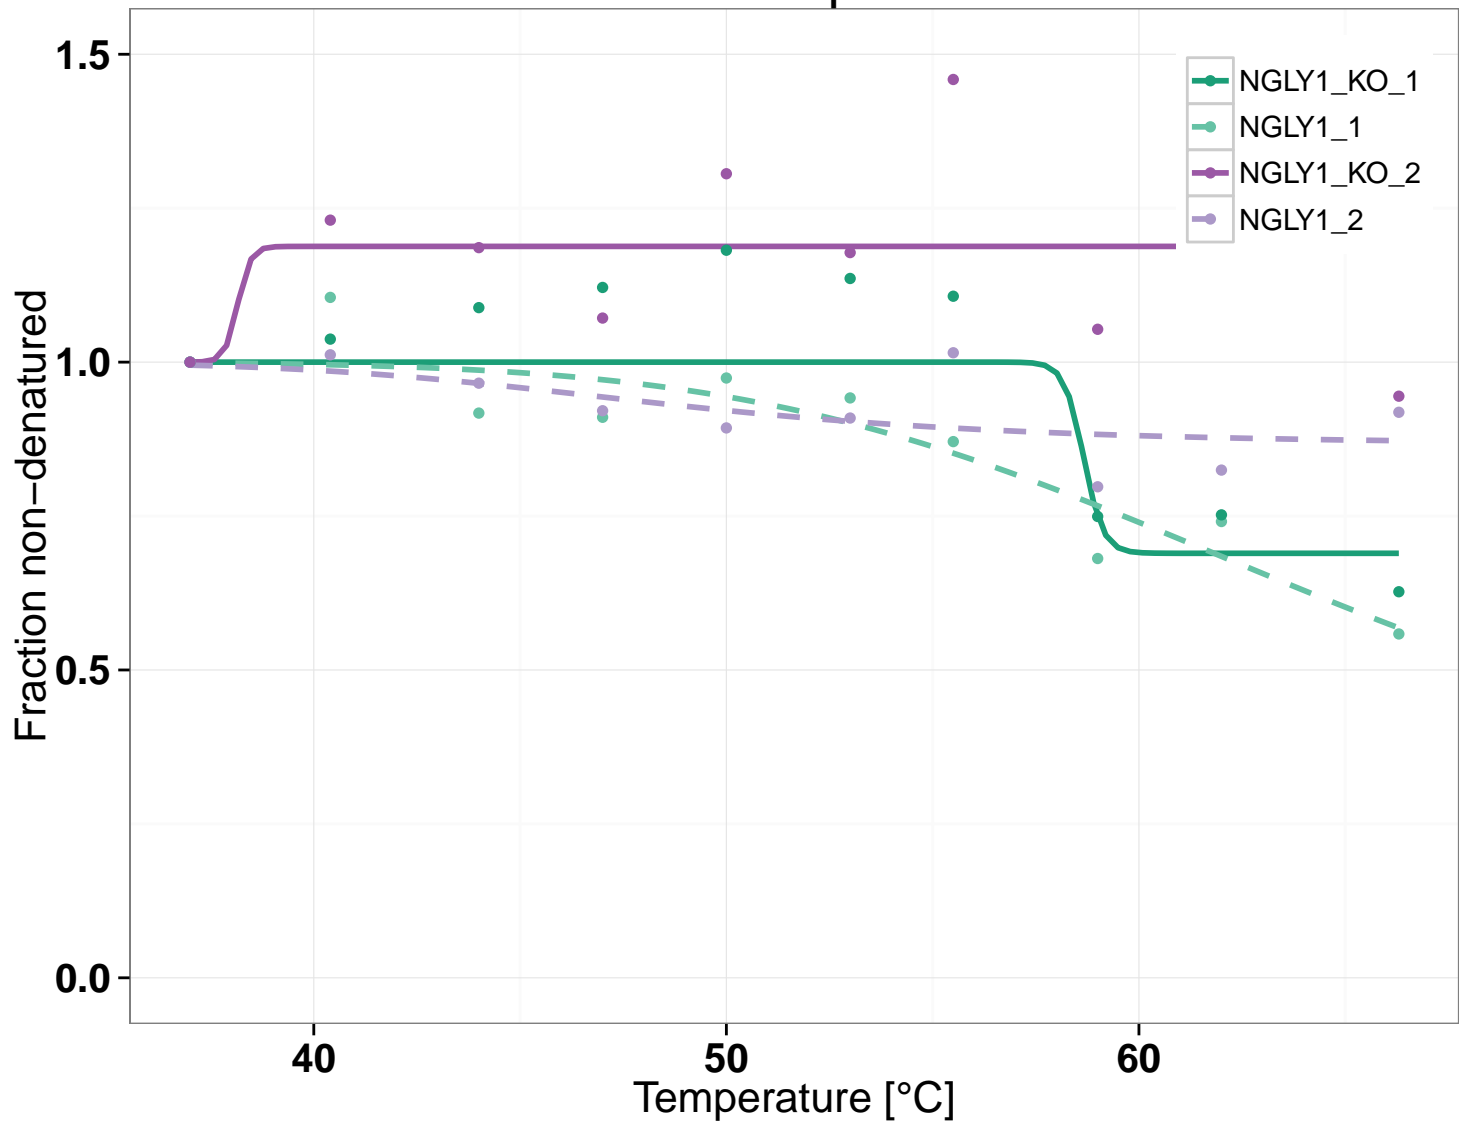

|            | meltPoint | slope   | plateau | R2   |
|------------|-----------|---------|---------|------|
| NGLY1_KO_1 | —         | −0.33   | 0.69    | 0.73 |
| NGLY1_1    | —         | −0.028  | 0.19    | 0.86 |
| NGLY1_KO_2 | —         | 0.31    | 1.19    | 0.15 |
| NGLY1_2    | —         | −0.0076 | 0.87    | 0.42 |

Supplement: Supplementary file 7749 [file 1]

IPI00604647.1|MAP4K4

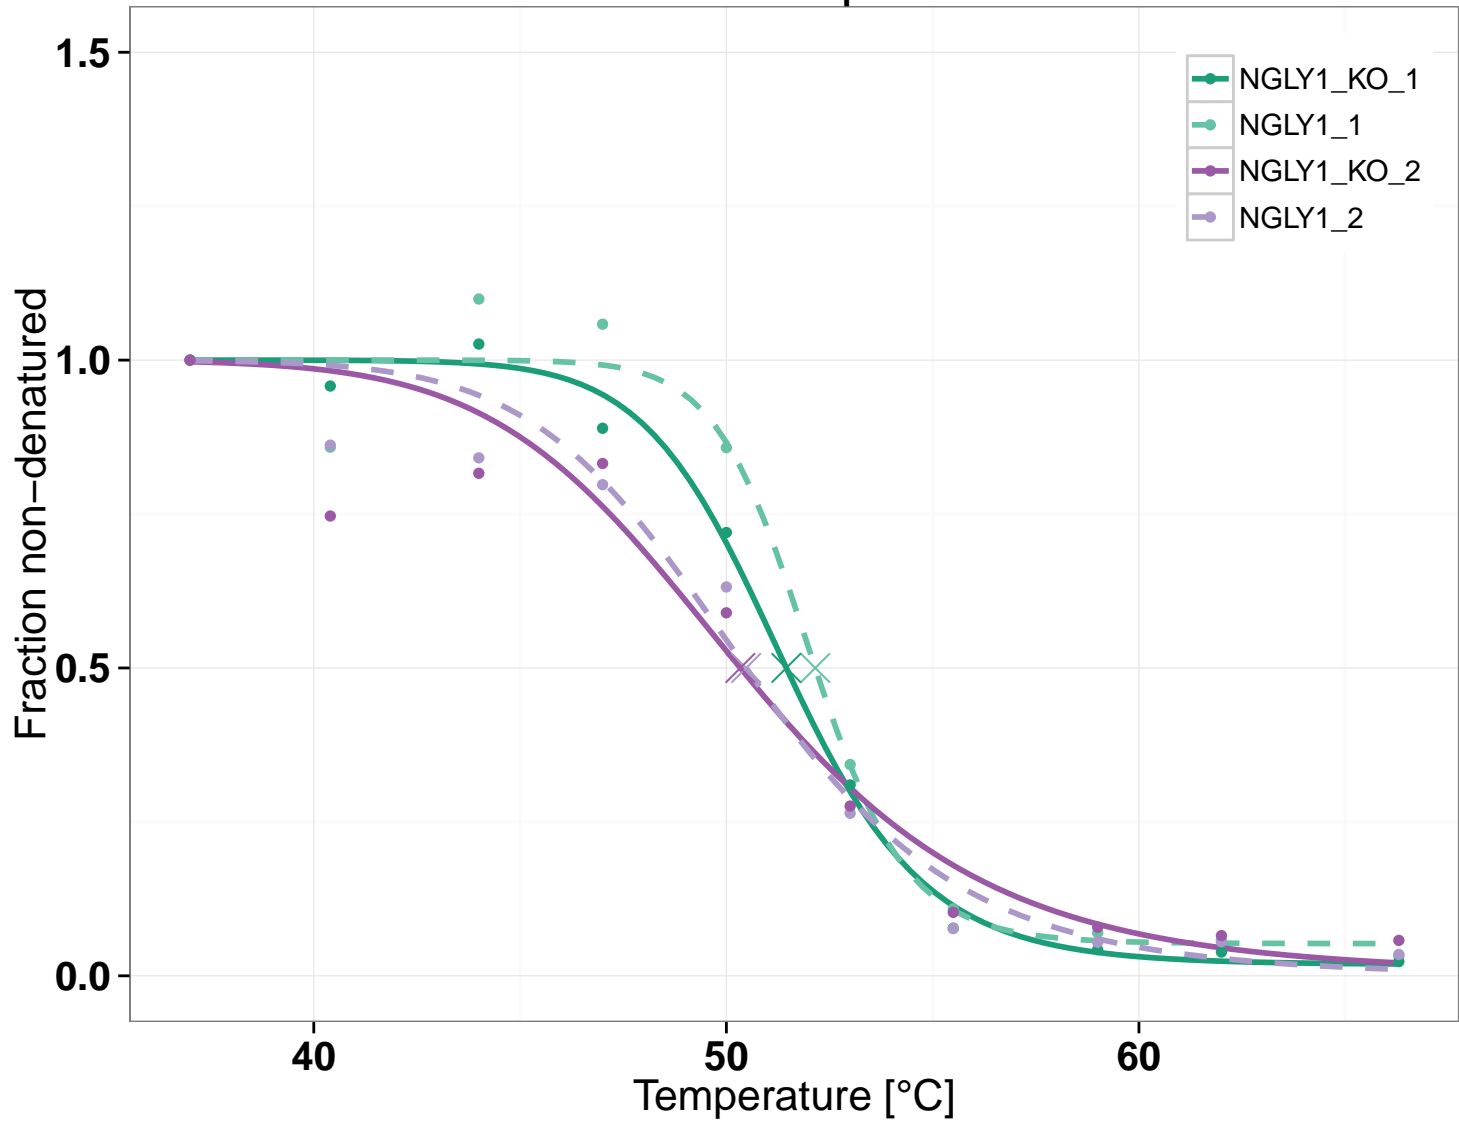

|            | meltPoint | slope  | plateau | R2   |
|------------|-----------|--------|---------|------|
| NGLY1_KO_1 | 51.45     | -0.14  | 0.02    | 1    |
| NGLY1_1    | 52.15     | -0.2   | 0.05    | 0.98 |
| NGLY1_KO_2 | 50.34     | -0.083 | 0       | 0.94 |
| NGLY1_2    | 50.48     | -0.095 | 0       | 0.97 |

Supplement: Supplementary file 7750 [file 1]

# IPI00908318.1|OXR1

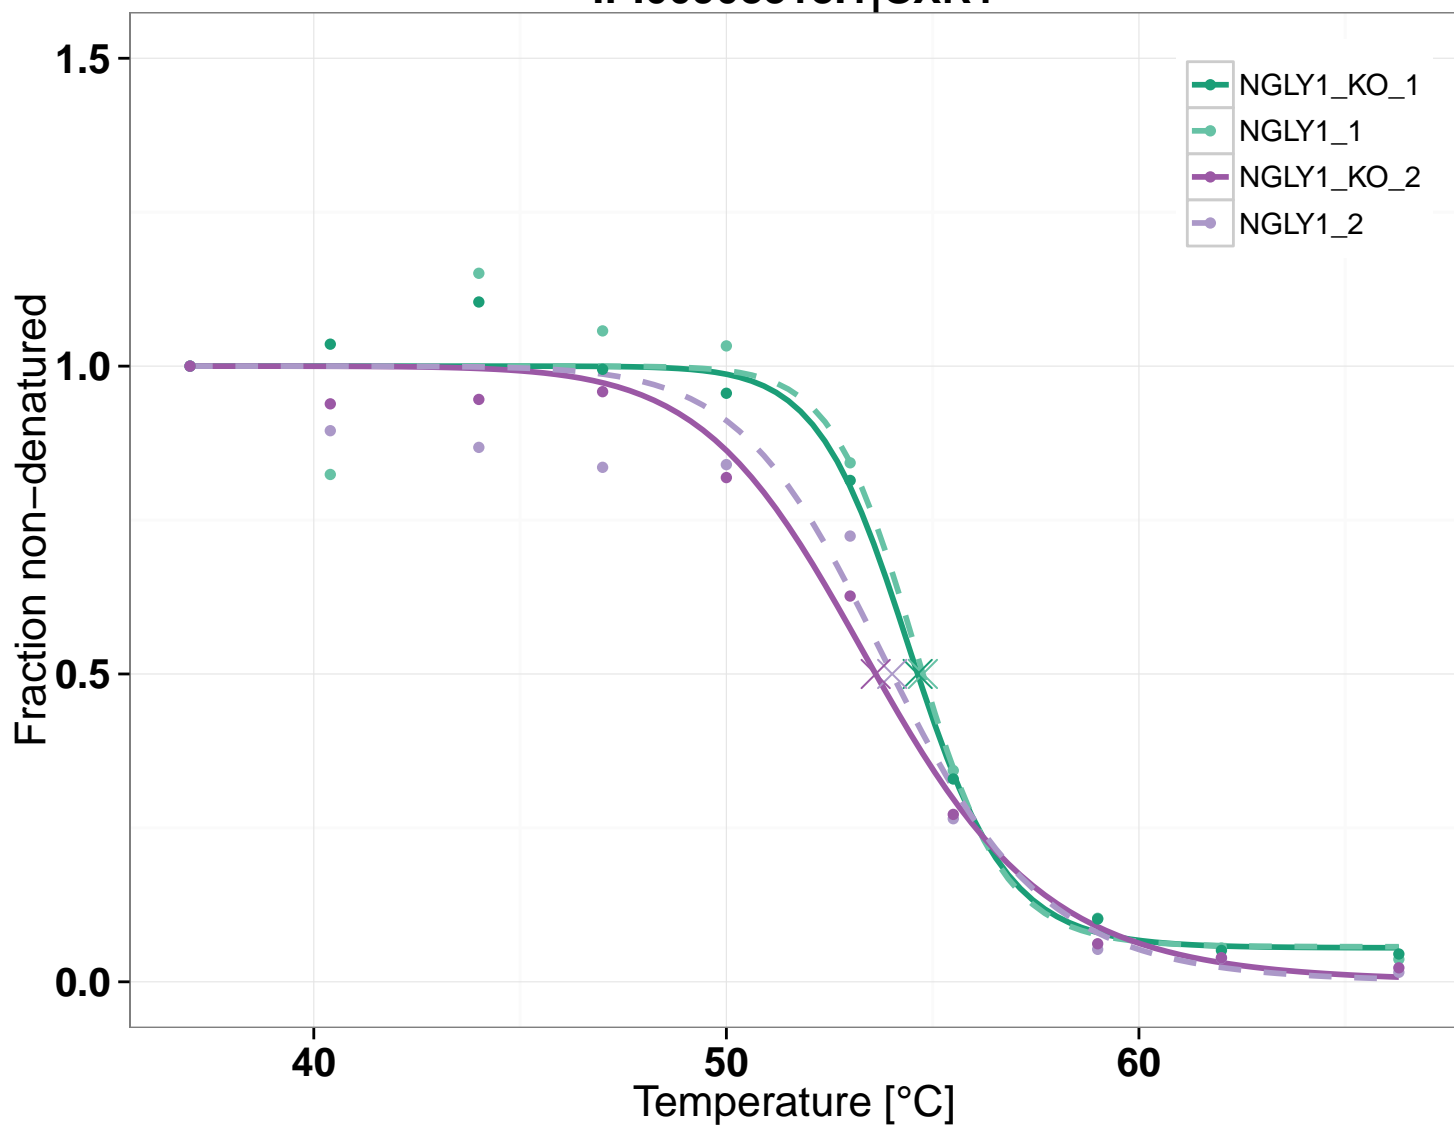

|            | meltPoint | slope | plateau | R2   |
|------------|-----------|-------|---------|------|
| NGLY1_KO_1 | 54.64     | -0.21 | 0.06    | 0.99 |
| NGLY1_1    | 54.76     | -0.23 | 0.06    | 0.97 |
| NGLY1_KO_2 | 53.62     | -0.12 | 0       | 0.99 |
| NGLY1_2    | 54.02     | -0.13 | 0       | 0.95 |

Supplement: Supplementary file 7751 [file 1]

IPI00186004.8|ANKRD36B

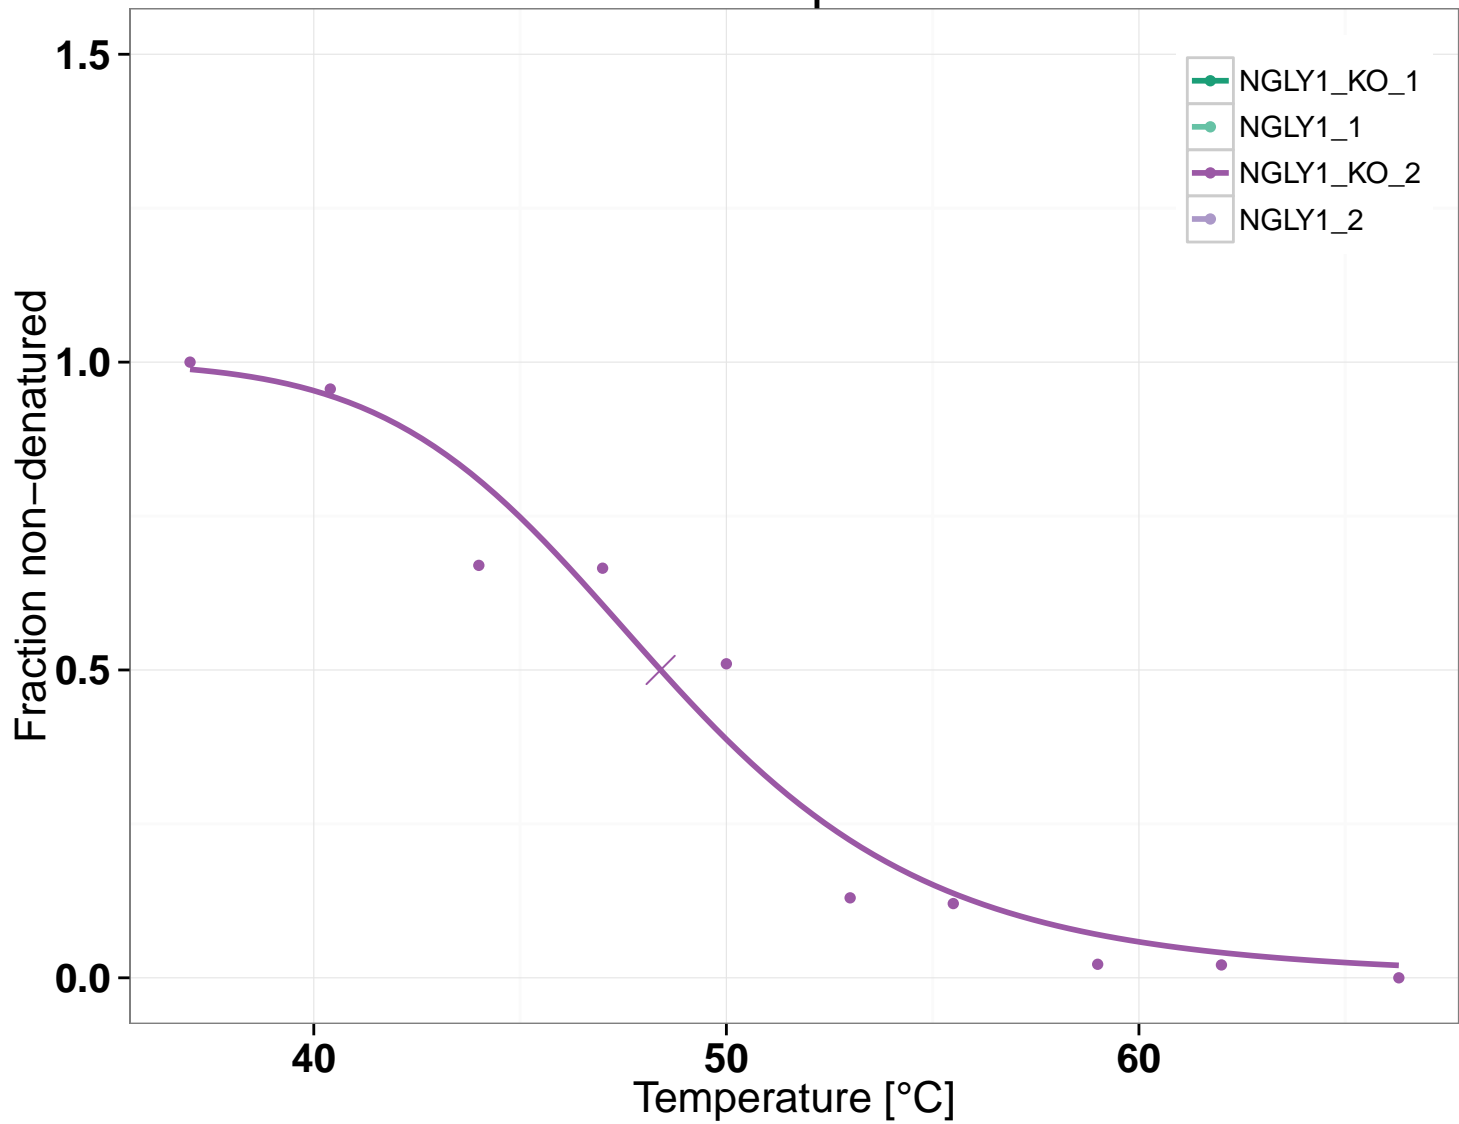

|            | meltPoint | slope  | plateau | R2   |
|------------|-----------|--------|---------|------|
| NGLY1_KO_1 | —         | —      | —       | —    |
| NGLY1_1    | —         | —      | —       | —    |
| NGLY1_KO_2 | 48.41     | -0.076 | 0       | 0.96 |
| NGLY1_2    | —         | —      | —       | —    |

Supplement: Supplementary file 7752 [file 1]

IPI00153023.7|CCDC51

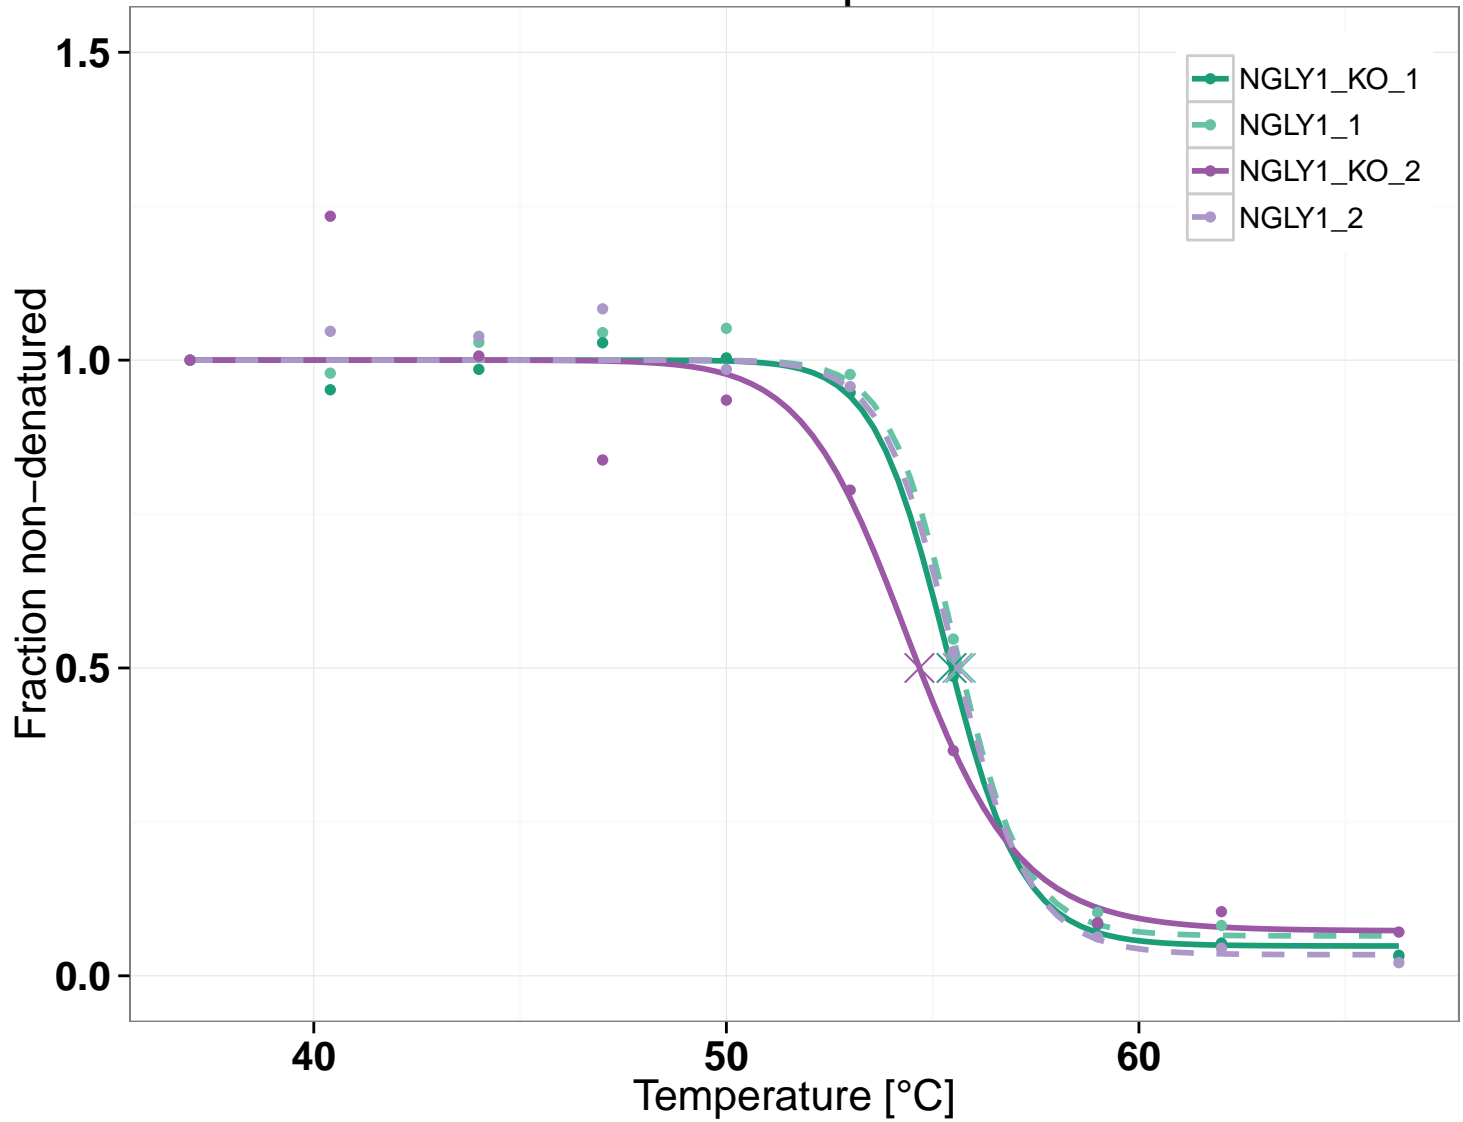

|            | meltPoint | slope | plateau | R2   |
|------------|-----------|-------|---------|------|
| NGLY1_KO_1 | 55.46     | -0.26 | 0.05    | 1    |
| NGLY1_1    | 55.68     | -0.28 | 0.06    | 1    |
| NGLY1_KO_2 | 54.68     | -0.18 | 0.07    | 0.95 |
| NGLY1_2    | 55.6      | -0.27 | 0.03    | 0.99 |

Supplement: Supplementary file 7753 [file 1]

# IPI00304028.4|RBL2

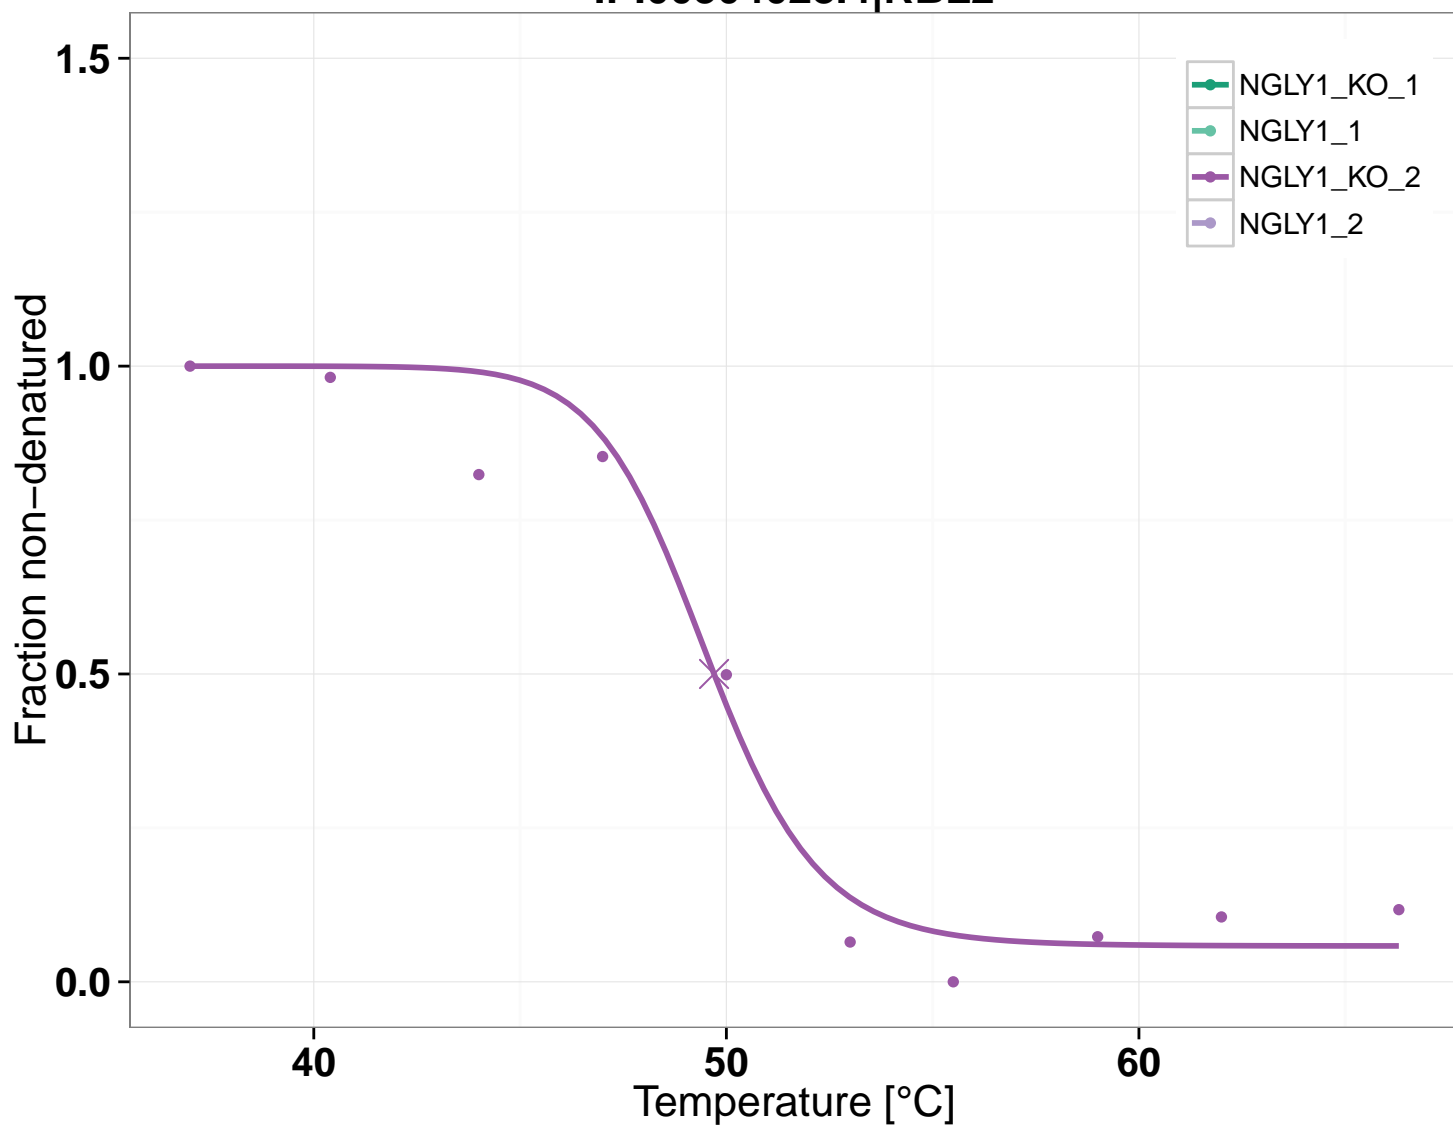

|            | meltPoint | slope | plateau | R2   |
|------------|-----------|-------|---------|------|
| NGLY1_KO_1 | —         | —     | —       | —    |
| NGLY1_1    | —         | —     | —       | —    |
| NGLY1_KO_2 | 49.7      | -0.17 | 0.06    | 0.97 |
| NGLY1_2    | —         | —     | —       | —    |

Supplement: Supplementary file 7754 [file 1]

IPI00871494.1|SECISBP2

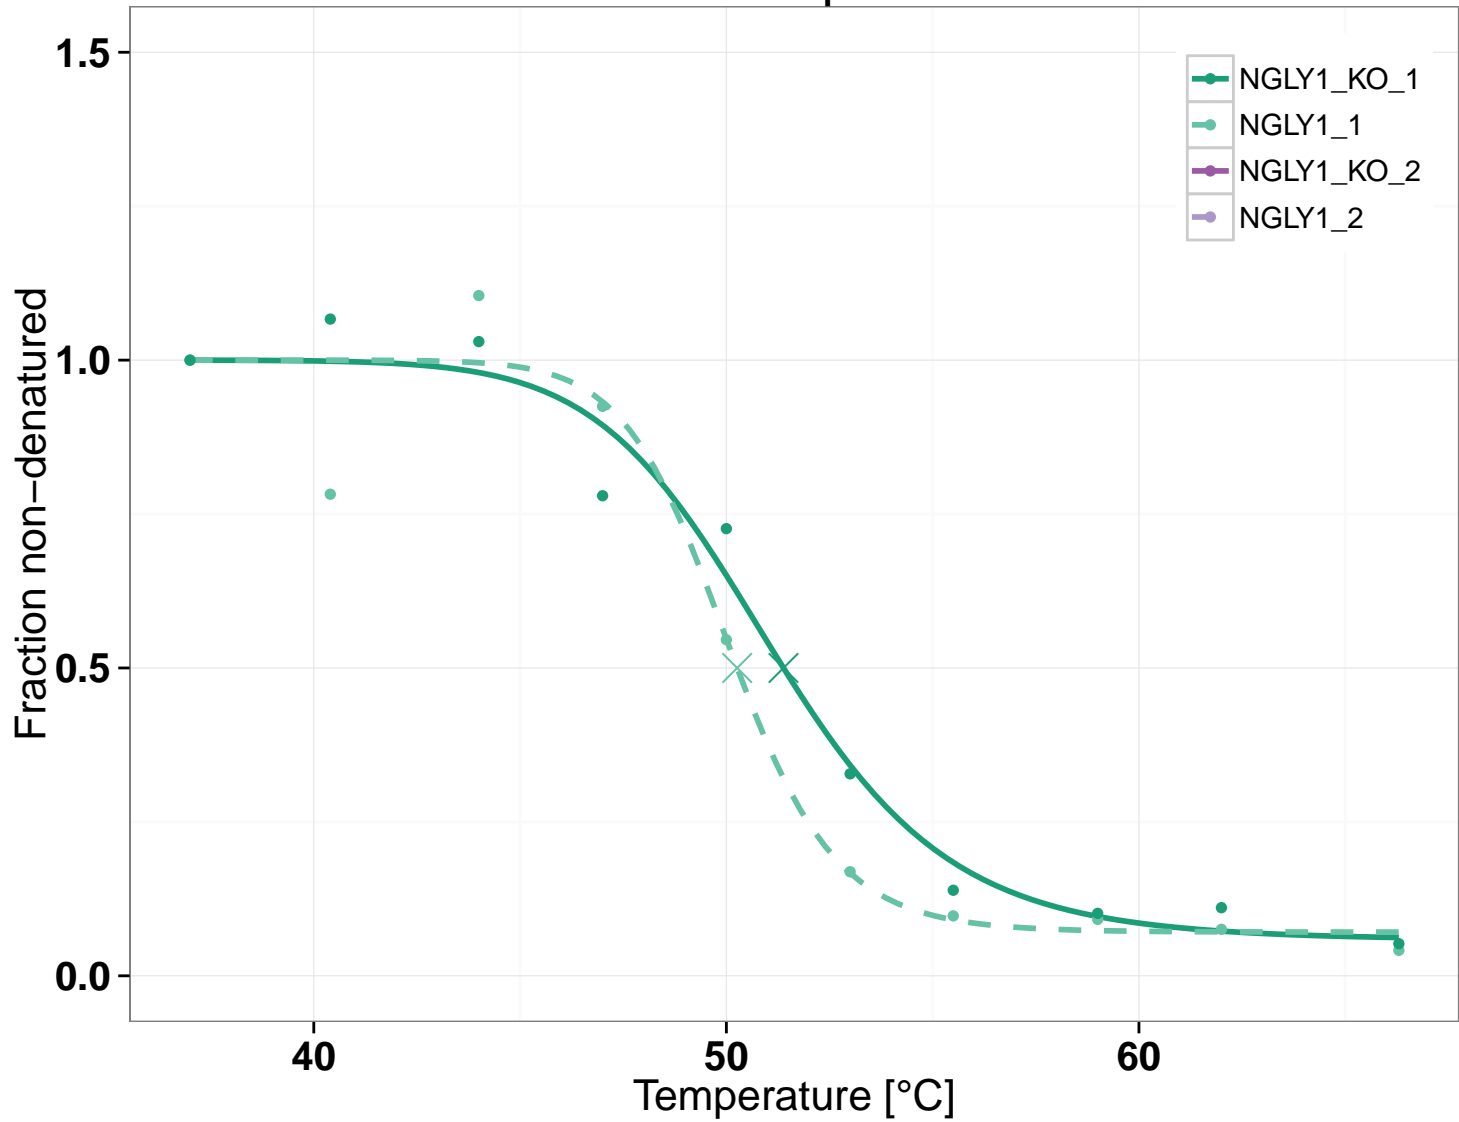

|            | meltPoint | slope | plateau | R2   |
|------------|-----------|-------|---------|------|
| NGLY1_KO_1 | 51.38     | -0.11 | 0.06    | 0.98 |
| NGLY1_1    | 50.26     | -0.18 | 0.07    | 0.96 |
| NGLY1_KO_2 | -         | -     | -       | -    |
| NGLY1_2    | -         | -     | -       | -    |

Supplement: Supplementary file 7755 [file 1]

IPI00551002.2|NDEL1

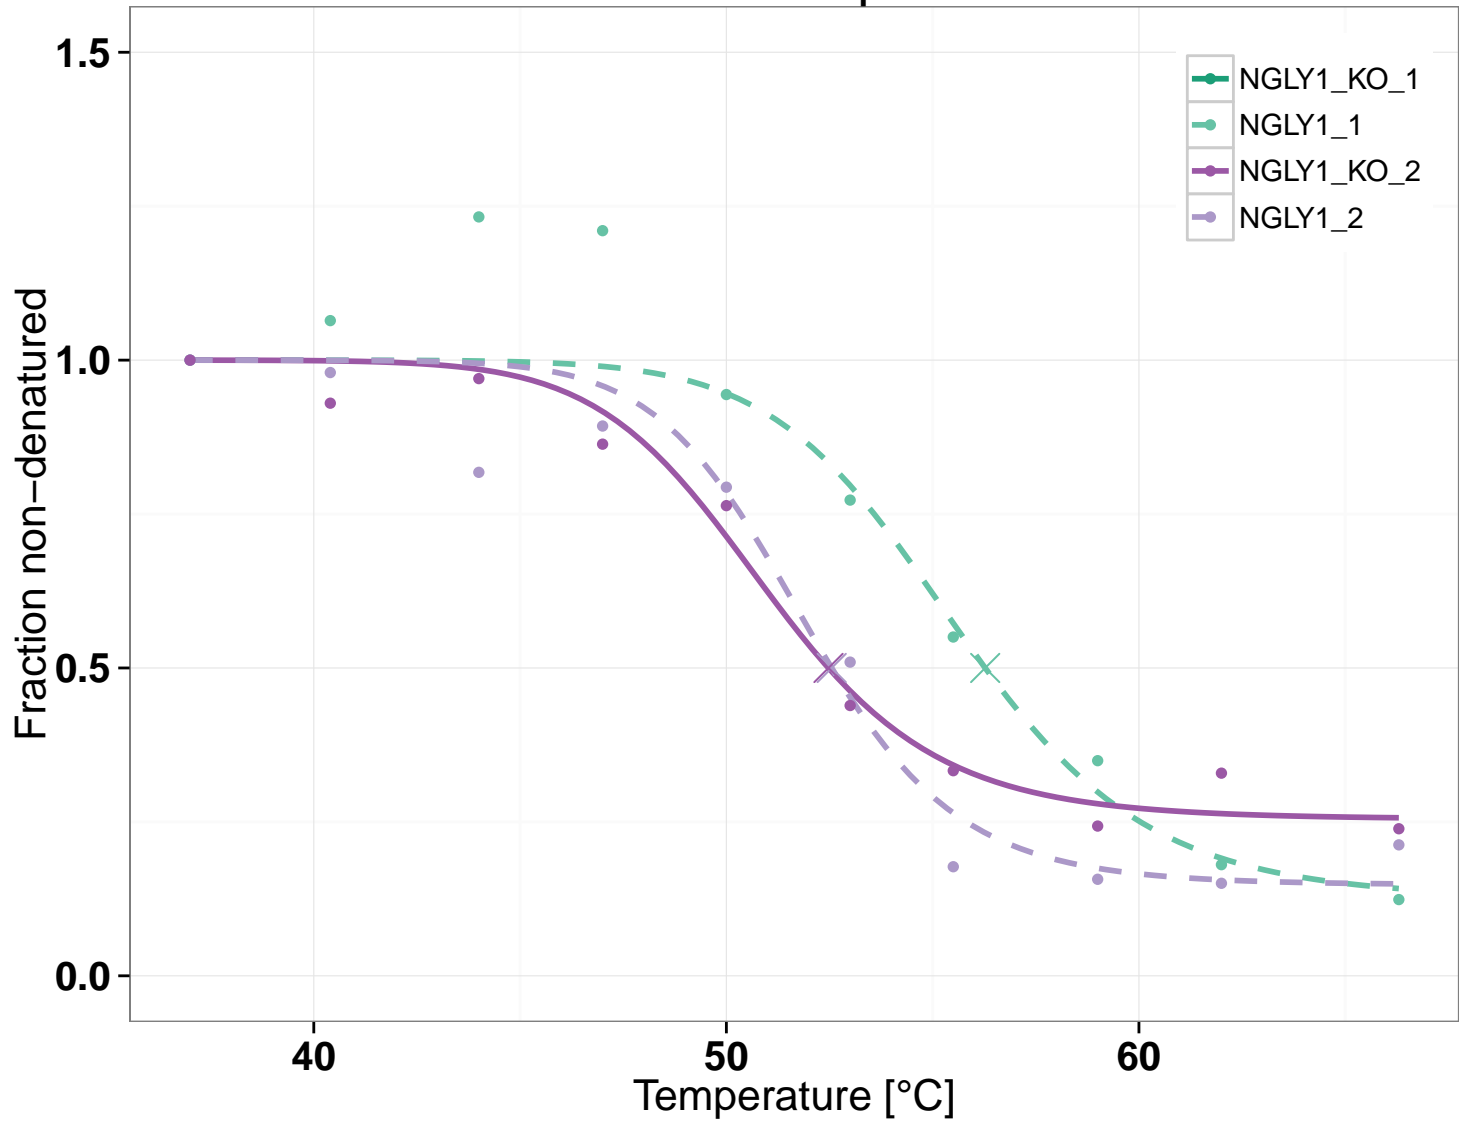

|            | meltPoint | slope  | plateau | R2   |
|------------|-----------|--------|---------|------|
| NGLY1_KO_1 | –         | –      | –       | –    |
| NGLY1_1    | 56.27     | –0.096 | 0.12    | 0.93 |
| NGLY1_KO_2 | 52.48     | –0.091 | 0.25    | 0.98 |
| NGLY1_2    | 52.55     | –0.12  | 0.15    | 0.96 |

Supplement: Supplementary file 7756 [file 1]

# IPI00020672.4|DPP3

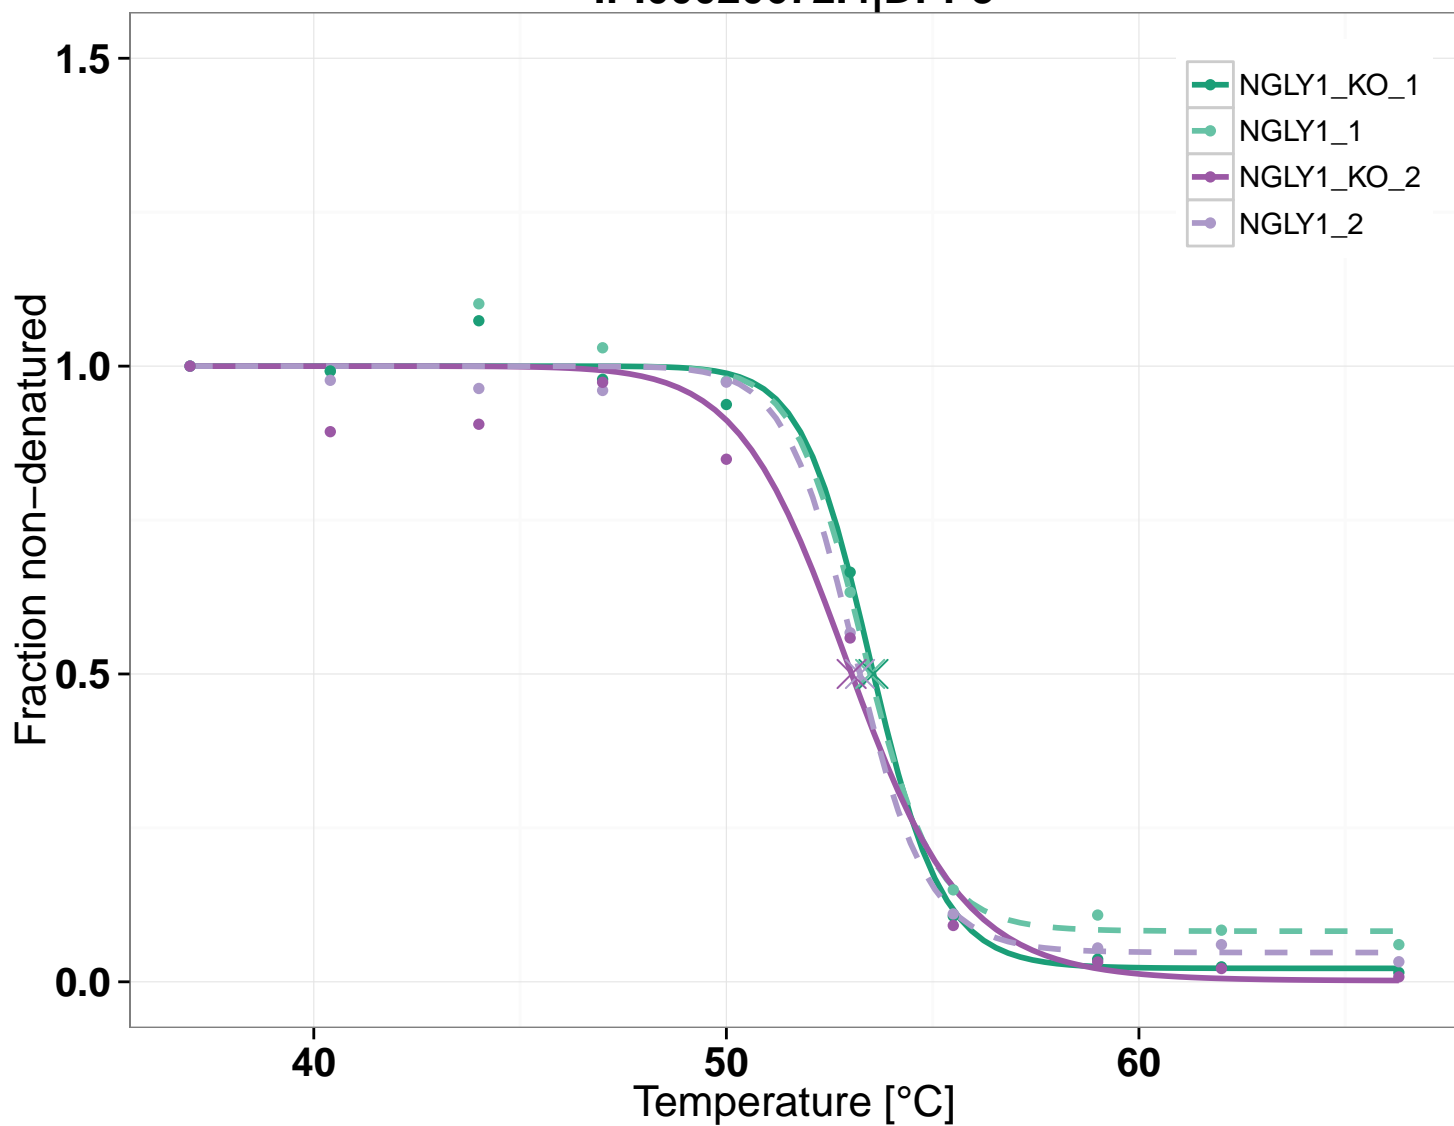

|            | meltPoint | slope | plateau | R2   |
|------------|-----------|-------|---------|------|
| NGLY1_KO_1 | 53.57     | -0.29 | 0.02    | 1    |
| NGLY1_1    | 53.48     | -0.27 | 0.08    | 0.99 |
| NGLY1_KO_2 | 53.04     | -0.18 | 0       | 0.98 |
| NGLY1_2    | 53.24     | -0.27 | 0.05    | 1    |

Supplement: Supplementary file 7757 [file 1]

IPI00007909.6|RABAC1

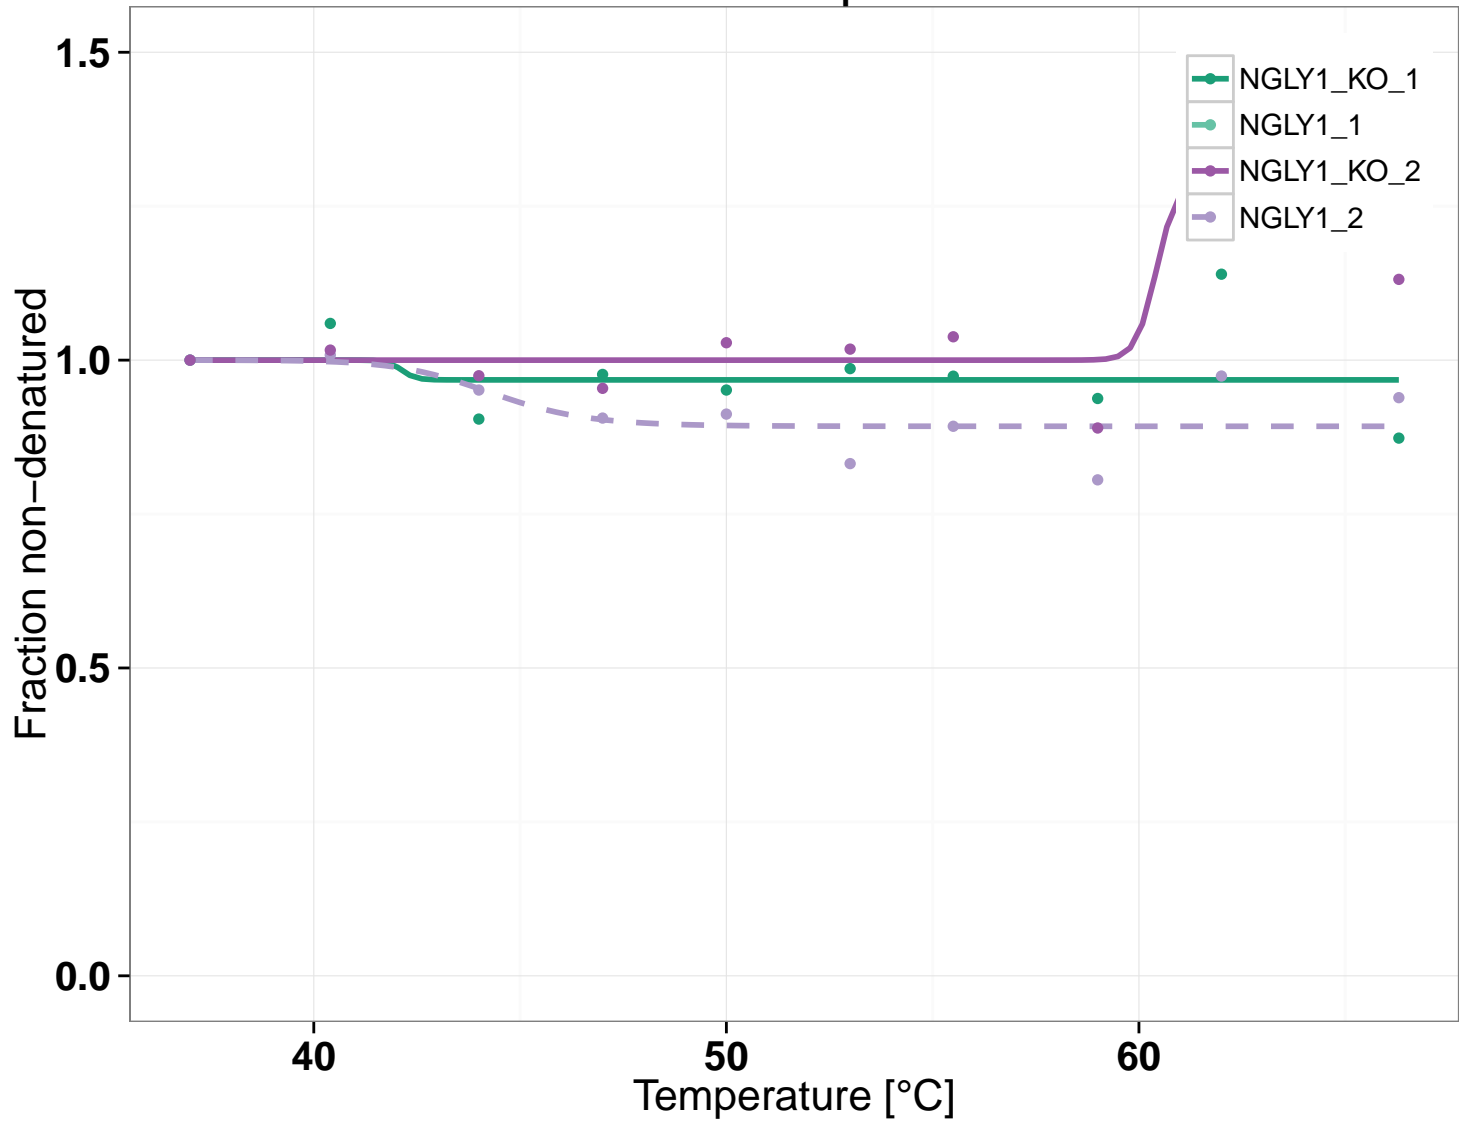

|            | meltPoint | slope  | plateau | R2   |
|------------|-----------|--------|---------|------|
| NGLY1_KO_1 | —         | -0.048 | 0.97    | 0.08 |
| NGLY1_1    | —         | —      | —       | —    |
| NGLY1_KO_2 | —         | 0.3    | 1.29    | 0.68 |
| NGLY1_2    | —         | -0.023 | 0.89    | 0.49 |

Supplement: Supplementary file 7758 [file 1]

IPI00376955.3|PCTK2

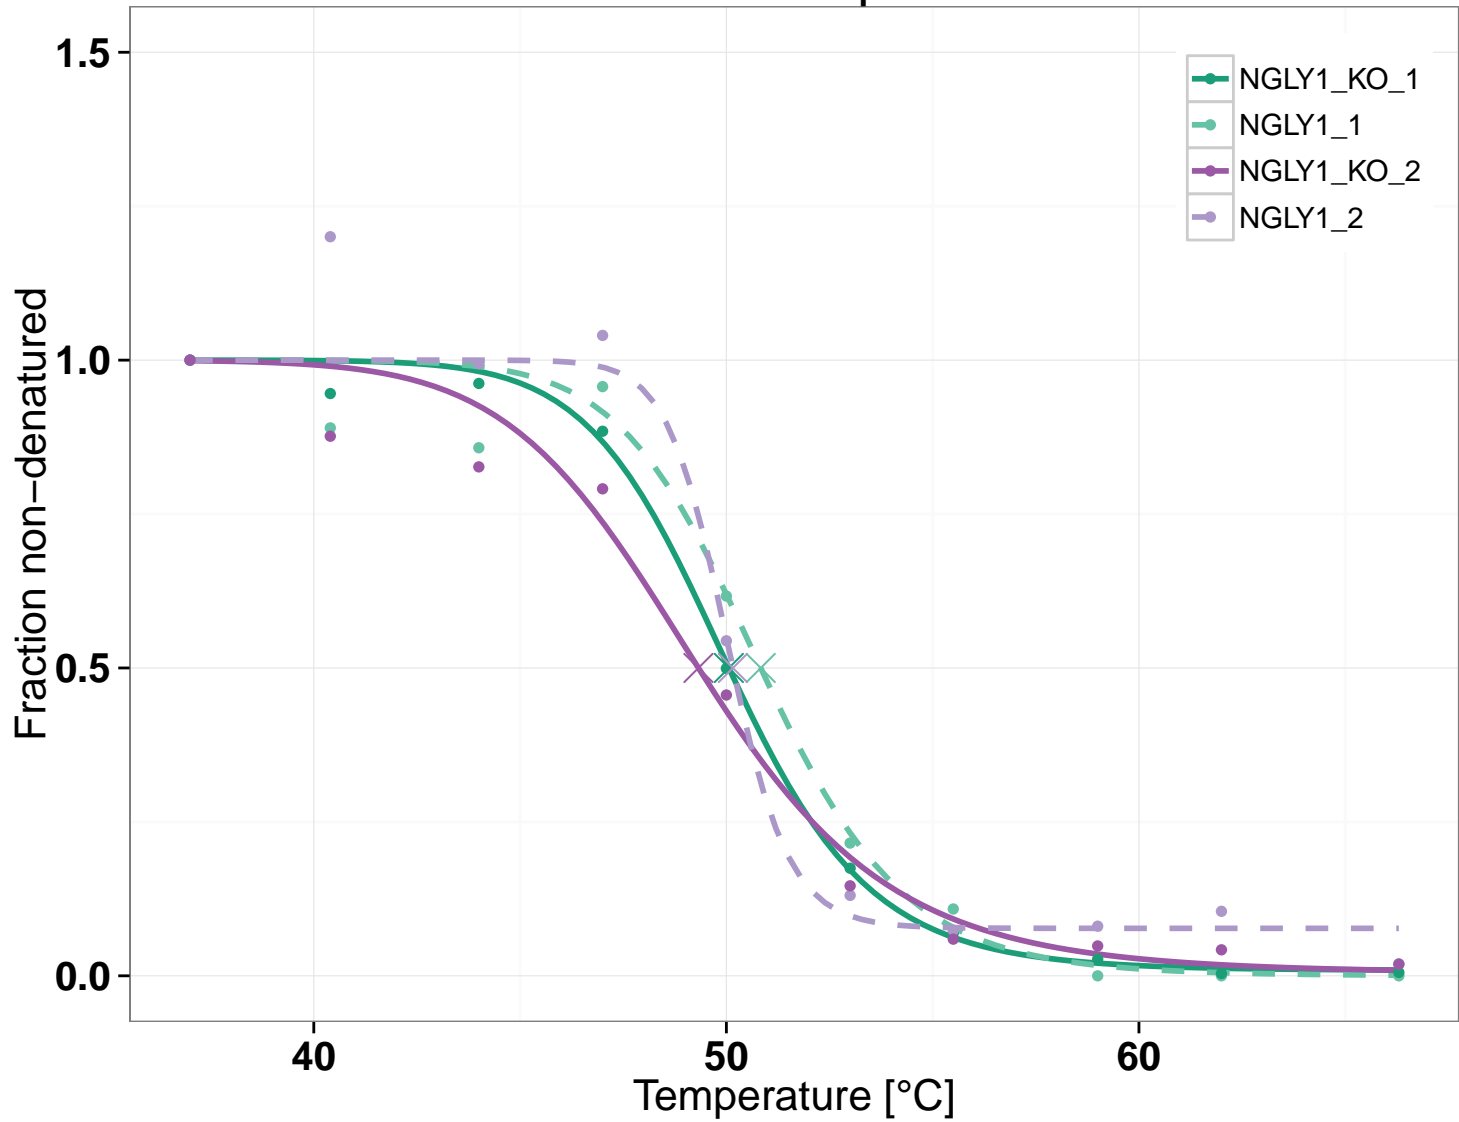

|            | meltPoint | slope | plateau | R2   |
|------------|-----------|-------|---------|------|
| NGLY1_KO_1 | 50.06     | -0.14 | 0.01    | 1    |
| NGLY1_1    | 50.83     | -0.14 | 0       | 0.98 |
| NGLY1_KO_2 | 49.32     | -0.11 | 0       | 0.98 |
| NGLY1_2    | 50.16     | -0.31 | 0.08    | 0.98 |

Supplement: Supplementary file 7759 [file 1]

# IPI00383581.4|GANAB

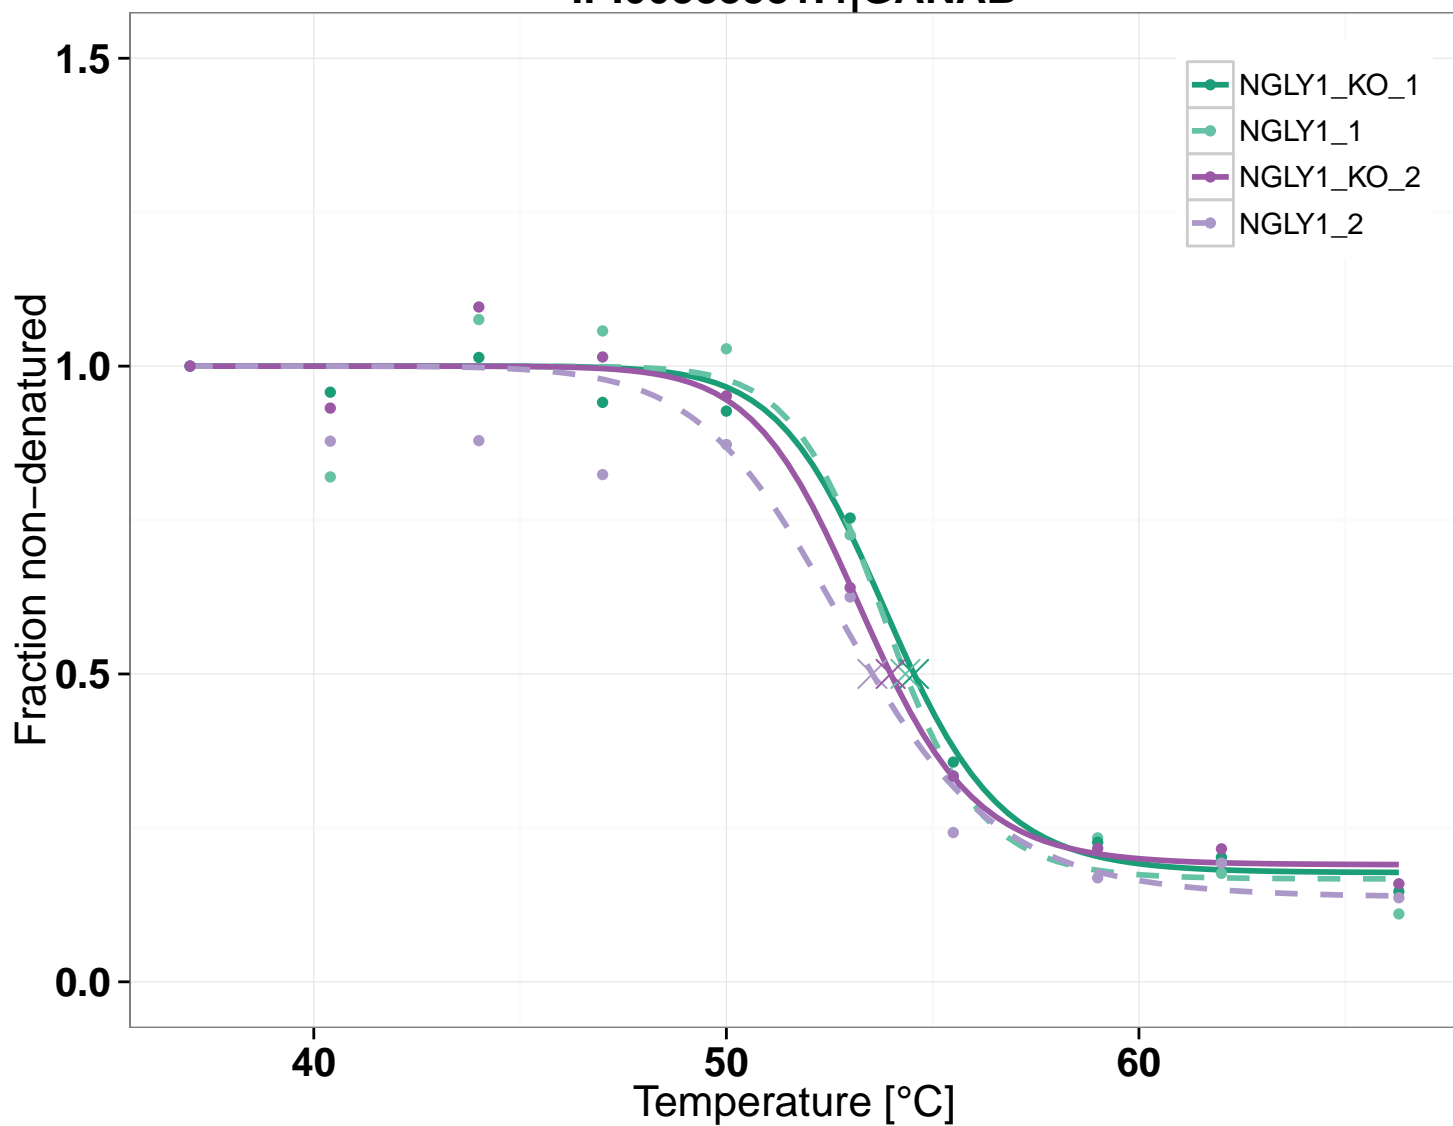

|            | meltPoint | slope | plateau | R2   |
|------------|-----------|-------|---------|------|
| NGLY1_KO_1 | 54.55     | -0.15 | 0.18    | 0.99 |
| NGLY1_1    | 54.34     | -0.18 | 0.17    | 0.97 |
| NGLY1_KO_2 | 53.98     | -0.15 | 0.19    | 0.99 |
| NGLY1_2    | 53.54     | -0.12 | 0.14    | 0.94 |

Supplement: Supplementary file 7760 [file 1]

# IPI00299155.5|PSMA4

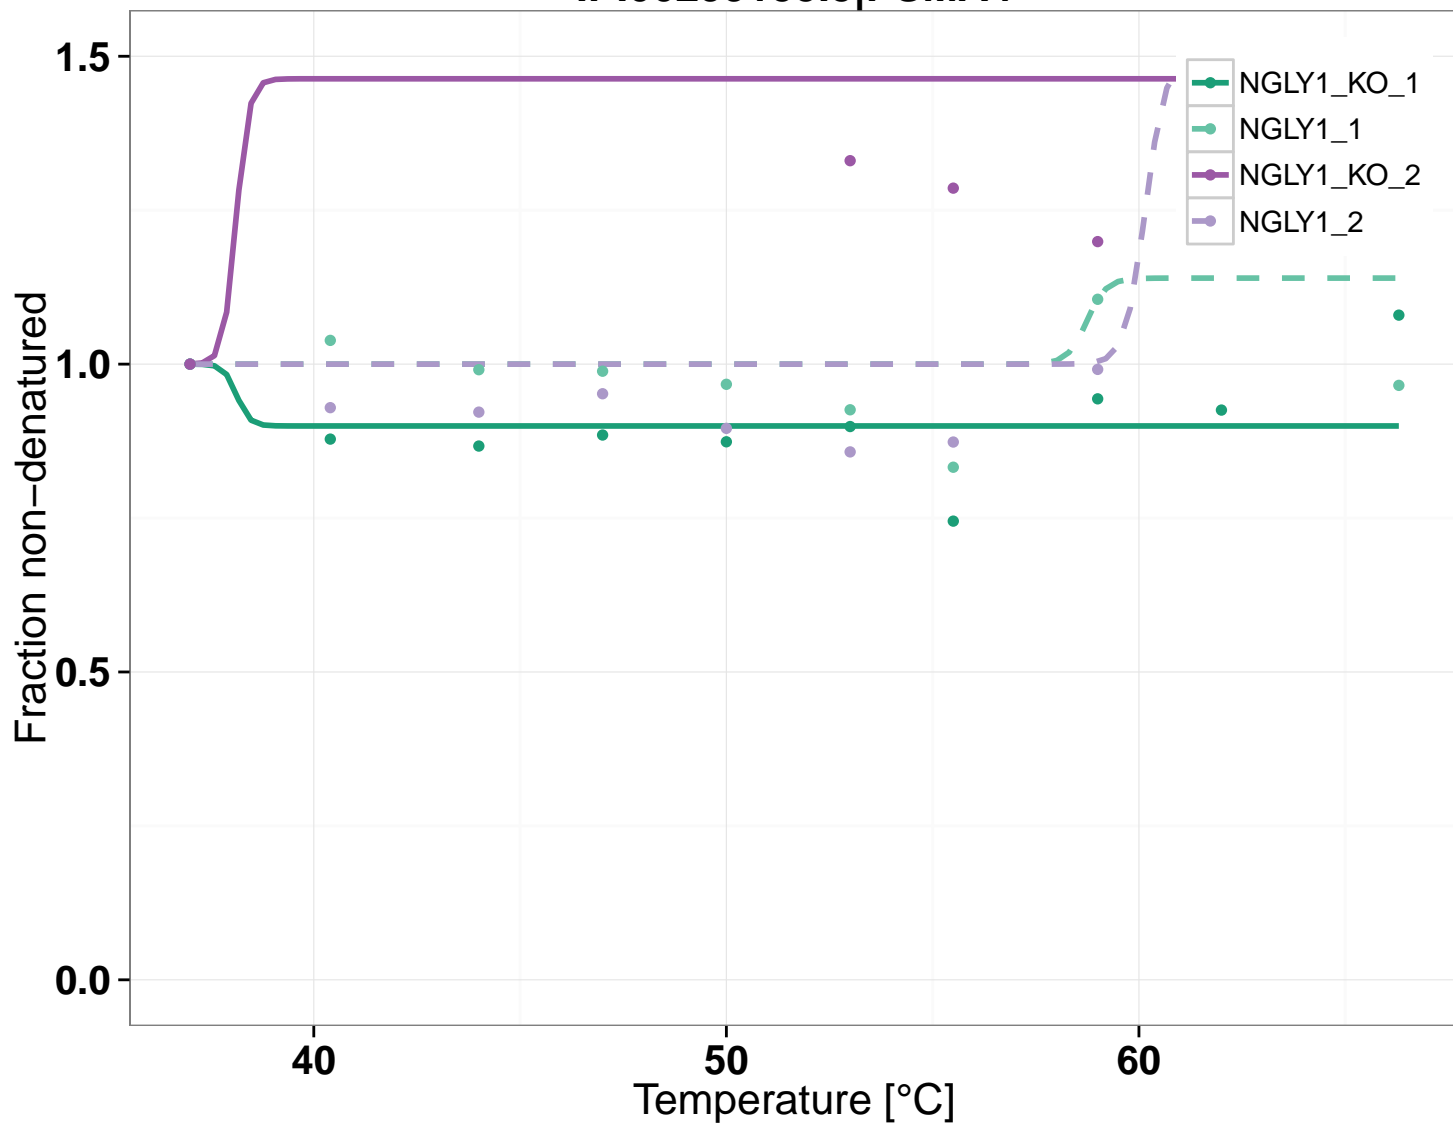

|            | meltPoint | slope | plateau | R2   |
|------------|-----------|-------|---------|------|
| NGLY1_KO_1 | -         | -0.16 | 0.9     | 0.13 |
| NGLY1_1    | -         | 0.15  | 1.14    | 0.33 |
| NGLY1_KO_2 | -         | 0.76  | 1.46    | 0.41 |
| NGLY1_2    | -         | 0.52  | 1.5     | 0.77 |

Supplement: Supplementary file 7761 [file 1]

# IPI00018248.1|KDELR2

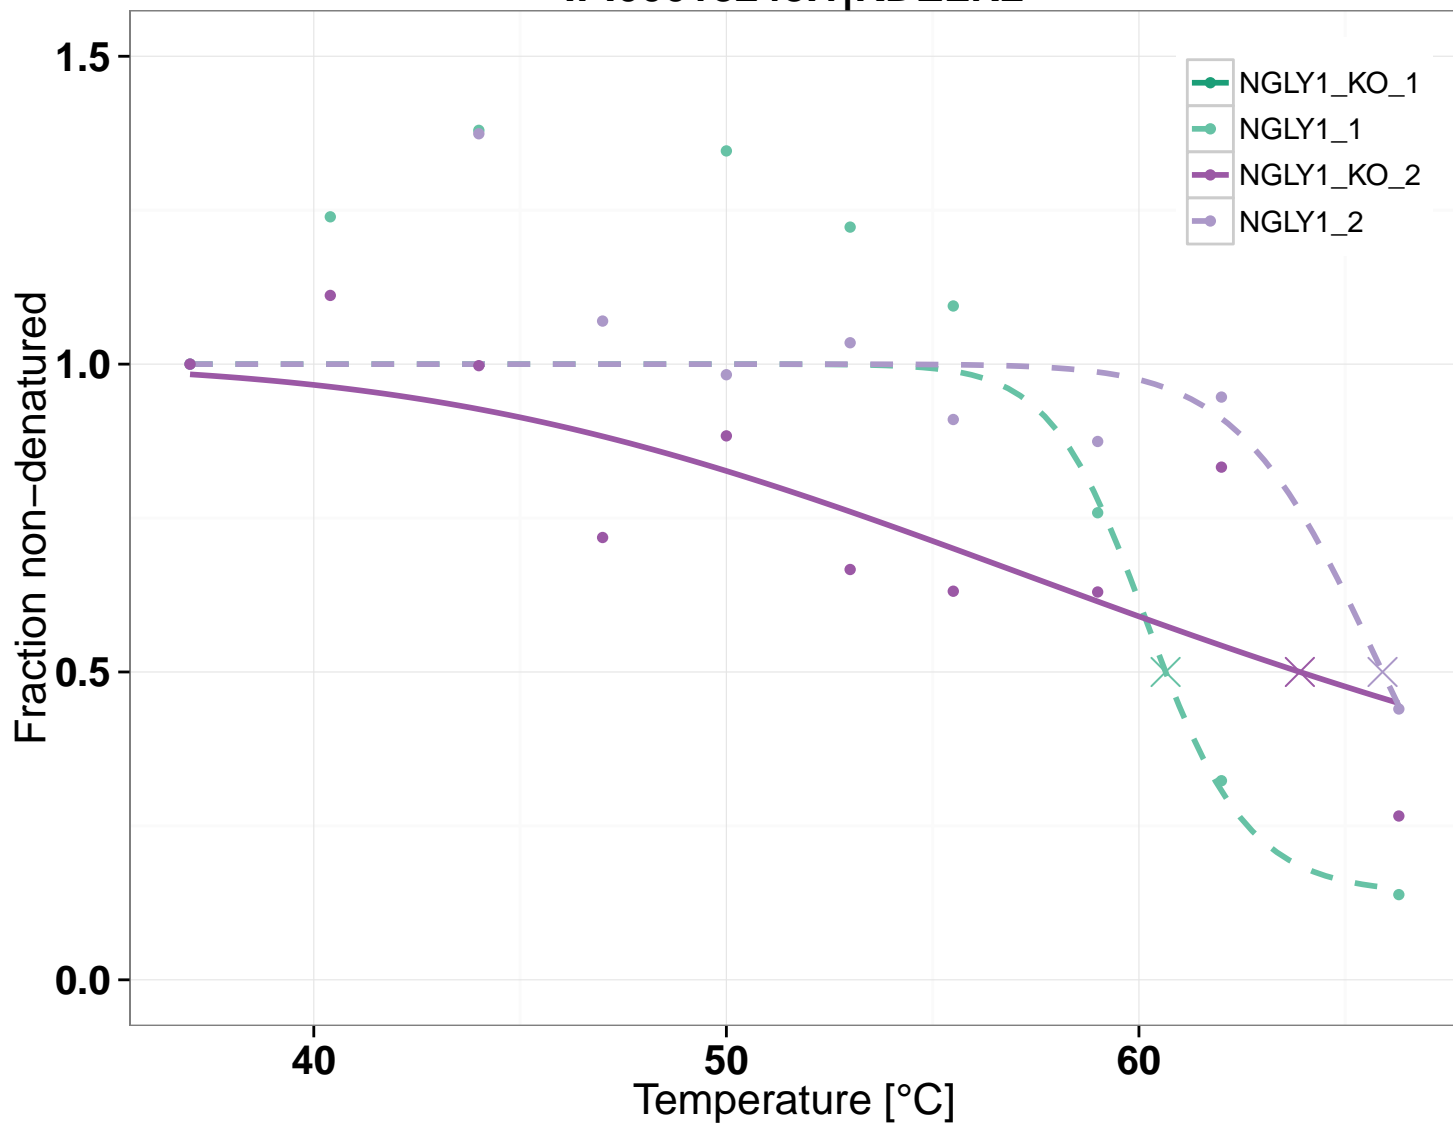

|            | meltPoint | slope  | plateau | R2   |
|------------|-----------|--------|---------|------|
| NGLY1_KO_1 | –         | –      | –       | –    |
| NGLY1_1    | 60.65     | –0.18  | 0.14    | 0.66 |
| NGLY1_KO_2 | 63.9      | –0.025 | 0       | 0.65 |
| NGLY1_2    | 65.91     | –0.14  | 0       | 0.28 |

Supplement: Supplementary file 7762 [file 1]

IPI00847139.1|ATP13A3

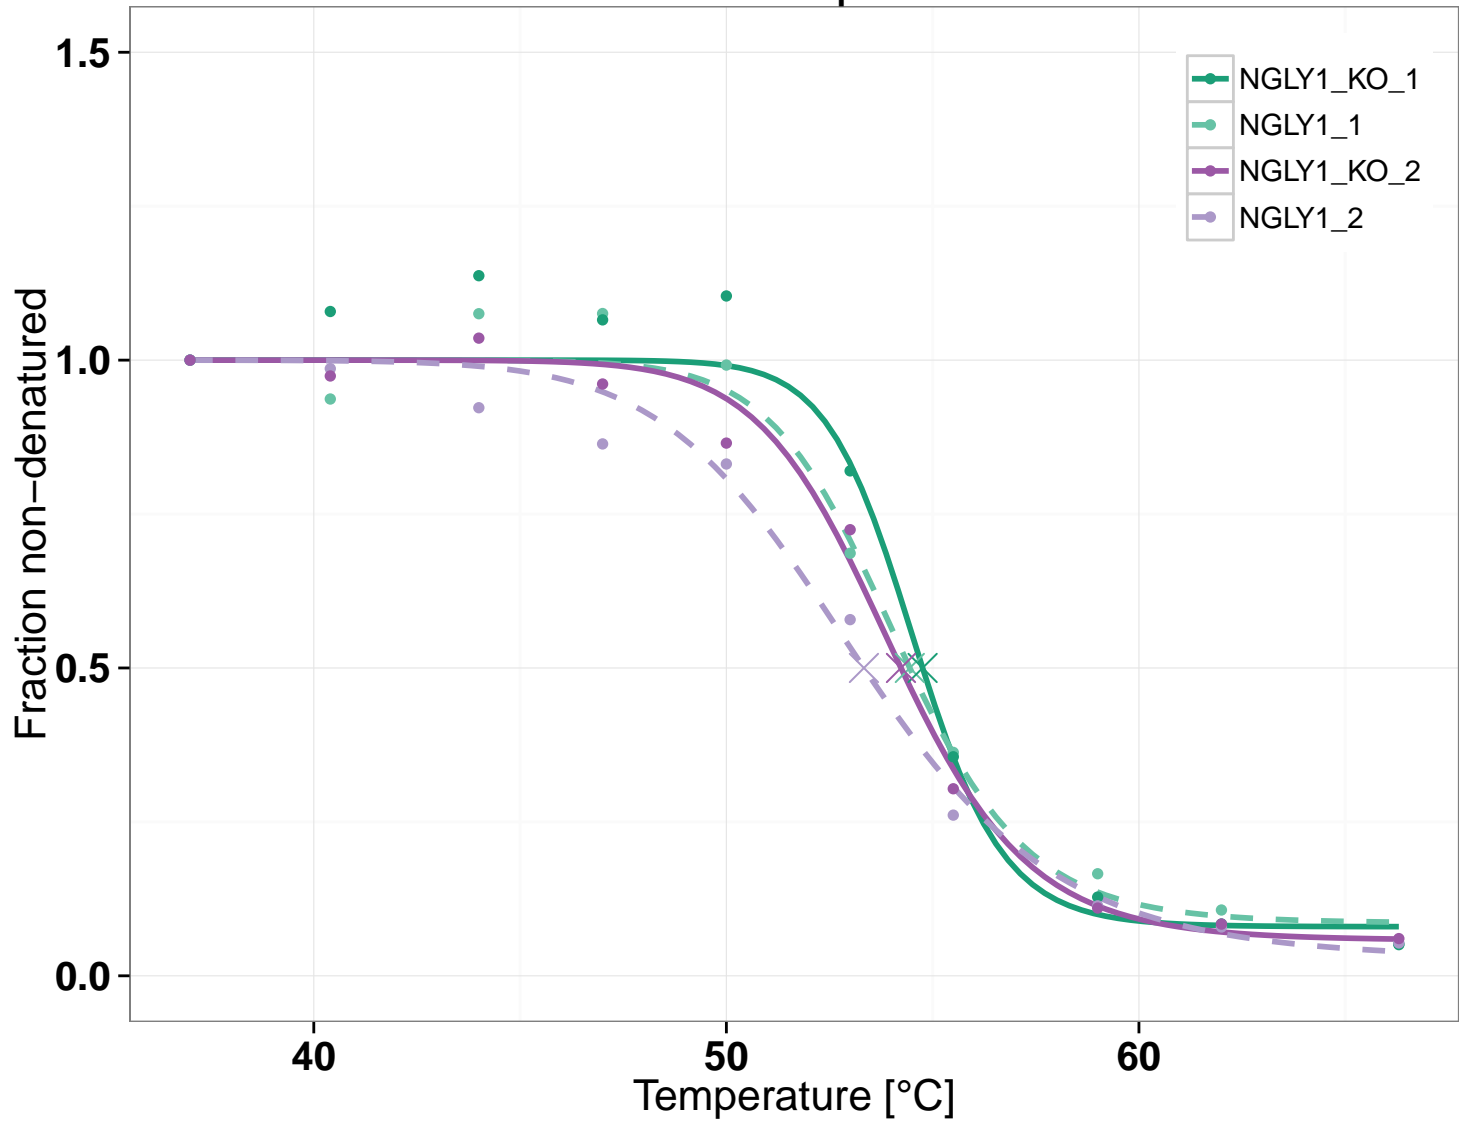

|            | meltPoint | slope | plateau | R2   |
|------------|-----------|-------|---------|------|
| NGLY1_KO_1 | 54.76     | -0.21 | 0.08    | 0.98 |
| NGLY1_1    | 54.45     | -0.15 | 0.09    | 0.99 |
| NGLY1_KO_2 | 54.23     | -0.14 | 0.06    | 0.99 |
| NGLY1_2    | 53.33     | -0.1  | 0.03    | 0.99 |

Supplement: Supplementary file 7763 [file 1]

IPI00103105.6|C6ORF57

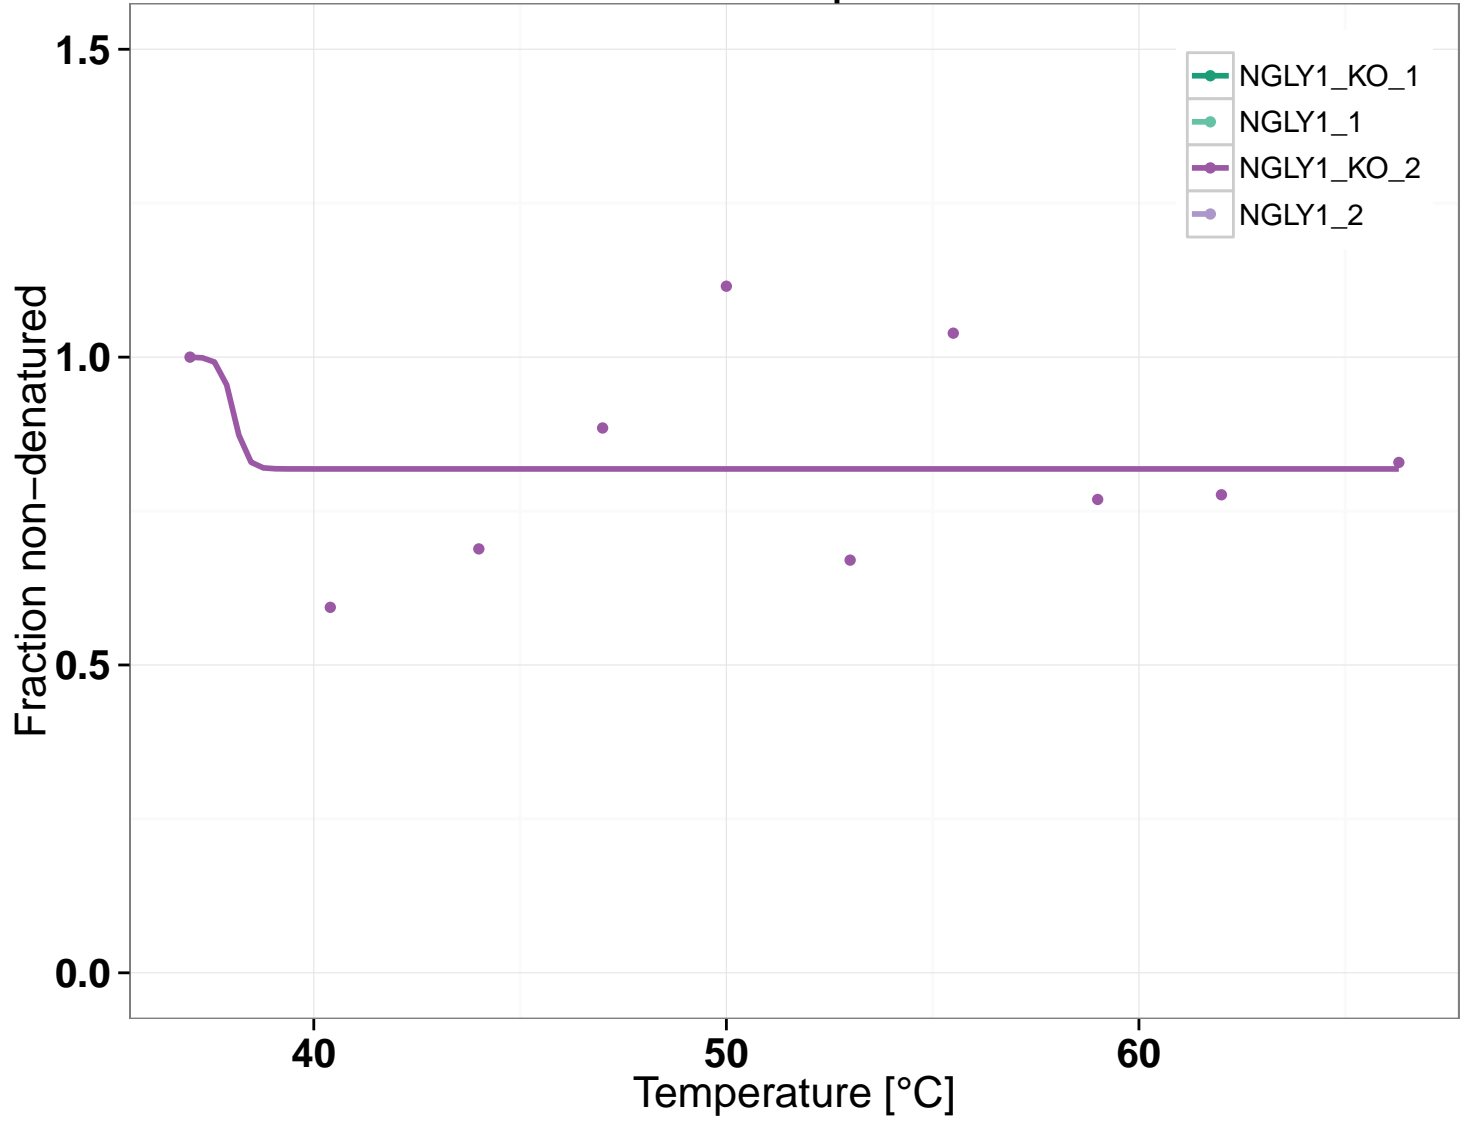

|            | meltPoint | slope | plateau | R2   |
|------------|-----------|-------|---------|------|
| NGLY1_KO_1 | —         | —     | —       | —    |
| NGLY1_1    | —         | —     | —       | —    |
| NGLY1_KO_2 | —         | -0.3  | 0.82    | 0.11 |
| NGLY1_2    | —         | —     | —       | —    |

Supplement: Supplementary file 7764 [file 1]

# IPI00152535.1|CHD5

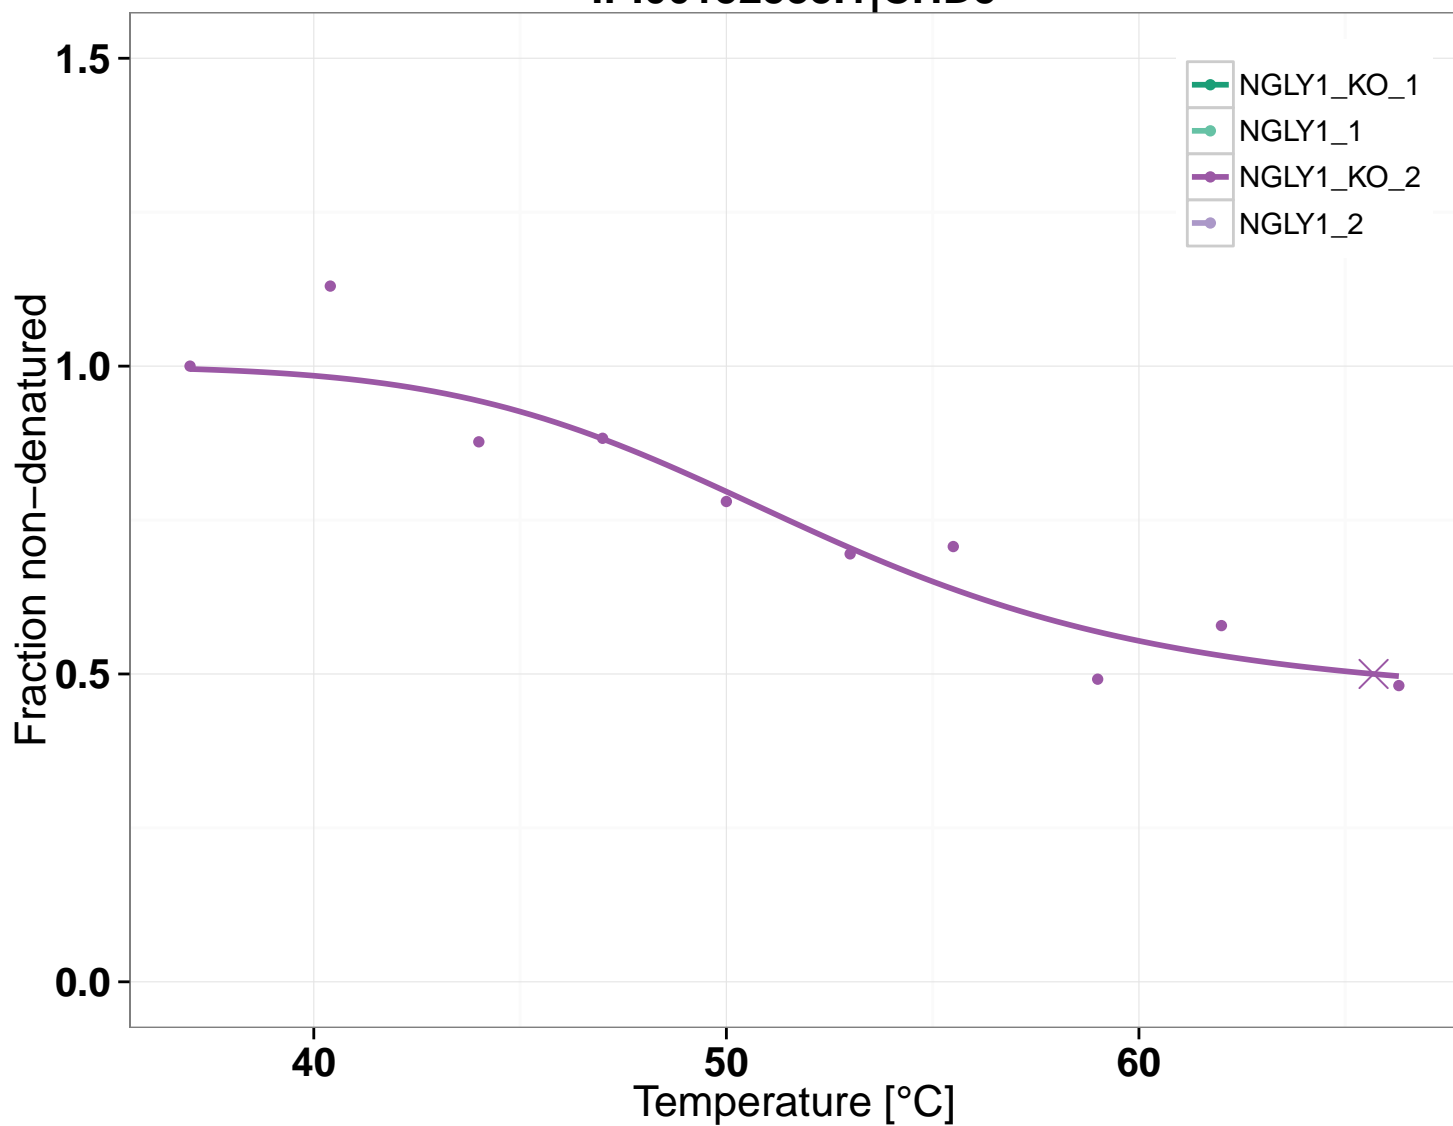

|            | meltPoint | slope  | plateau | R2  |
|------------|-----------|--------|---------|-----|
| NGLY1_KO_1 | —         | —      | —       | —   |
| NGLY1_1    | —         | —      | —       | —   |
| NGLY1_KO_2 | 65.69     | −0.031 | 0.45    | 0.9 |
| NGLY1_2    | —         | —      | —       | —   |

Supplement: Supplementary file 7765 [file 1]

# IPI00644191.1|ZNF90

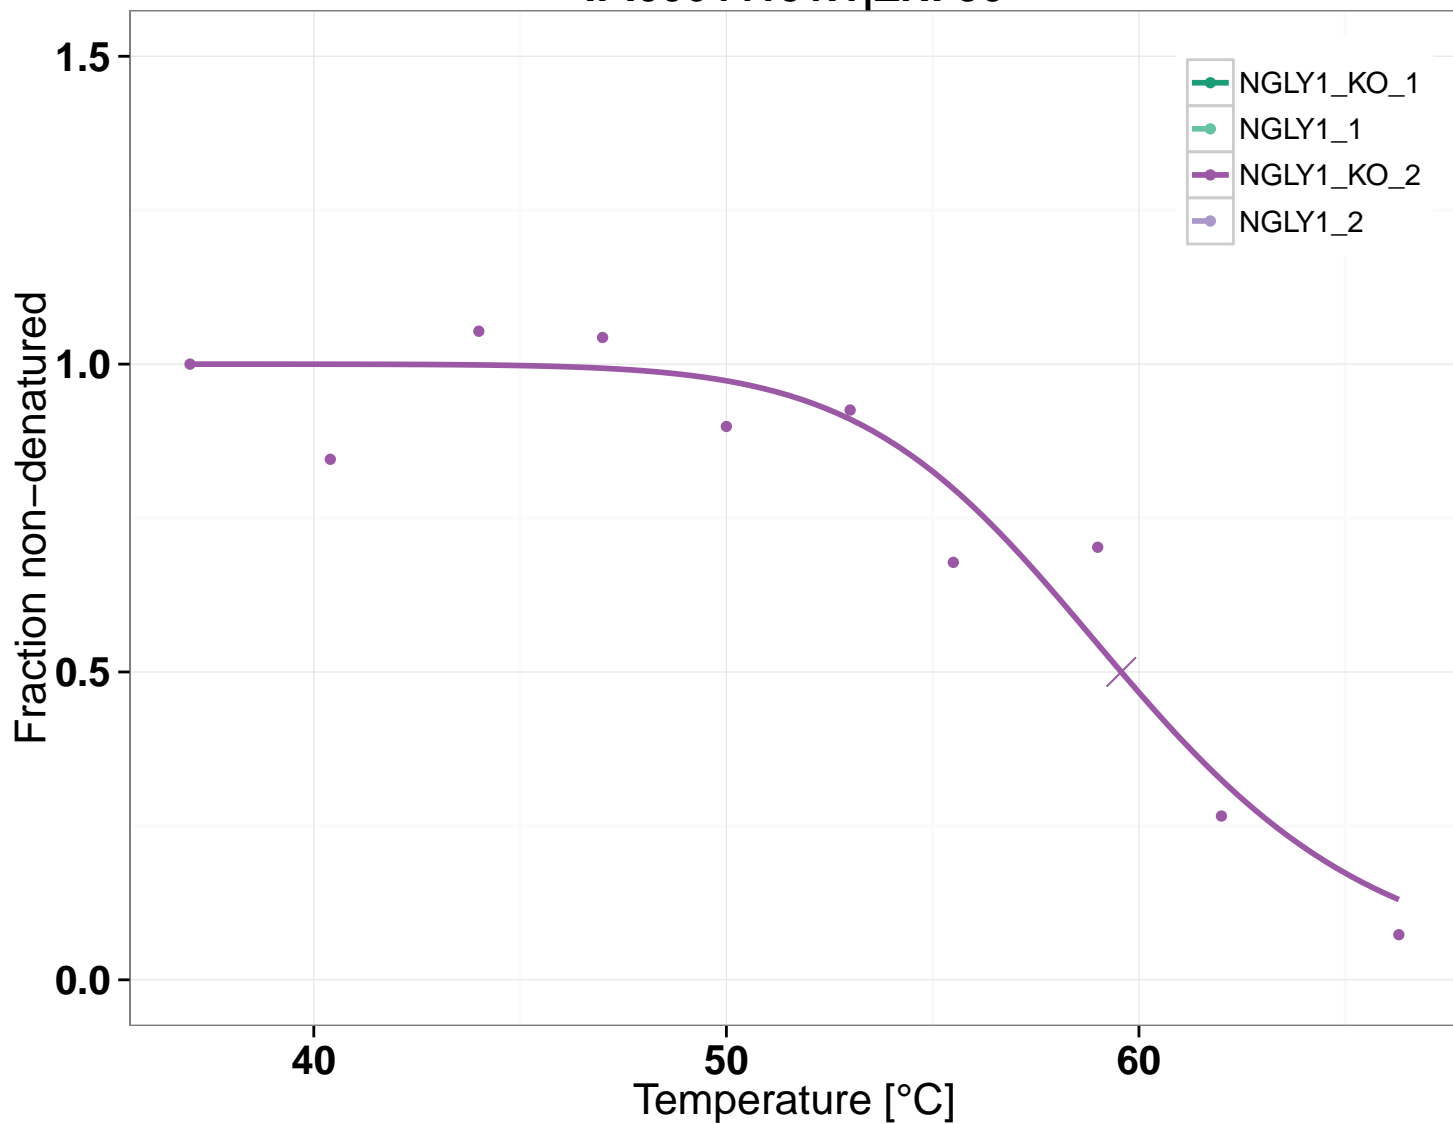

|            | meltPoint | slope  | plateau | R2   |
|------------|-----------|--------|---------|------|
| NGLY1_KO_1 | —         | —      | —       | —    |
| NGLY1_1    | —         | —      | —       | —    |
| NGLY1_KO_2 | 59.57     | -0.079 | 0       | 0.92 |
| NGLY1_2    | —         | —      | —       | —    |

Supplement: Supplementary file 7766 [file 1]

IPI00086099.2|SIMILAR TO ACTININ, ALPHA 4.

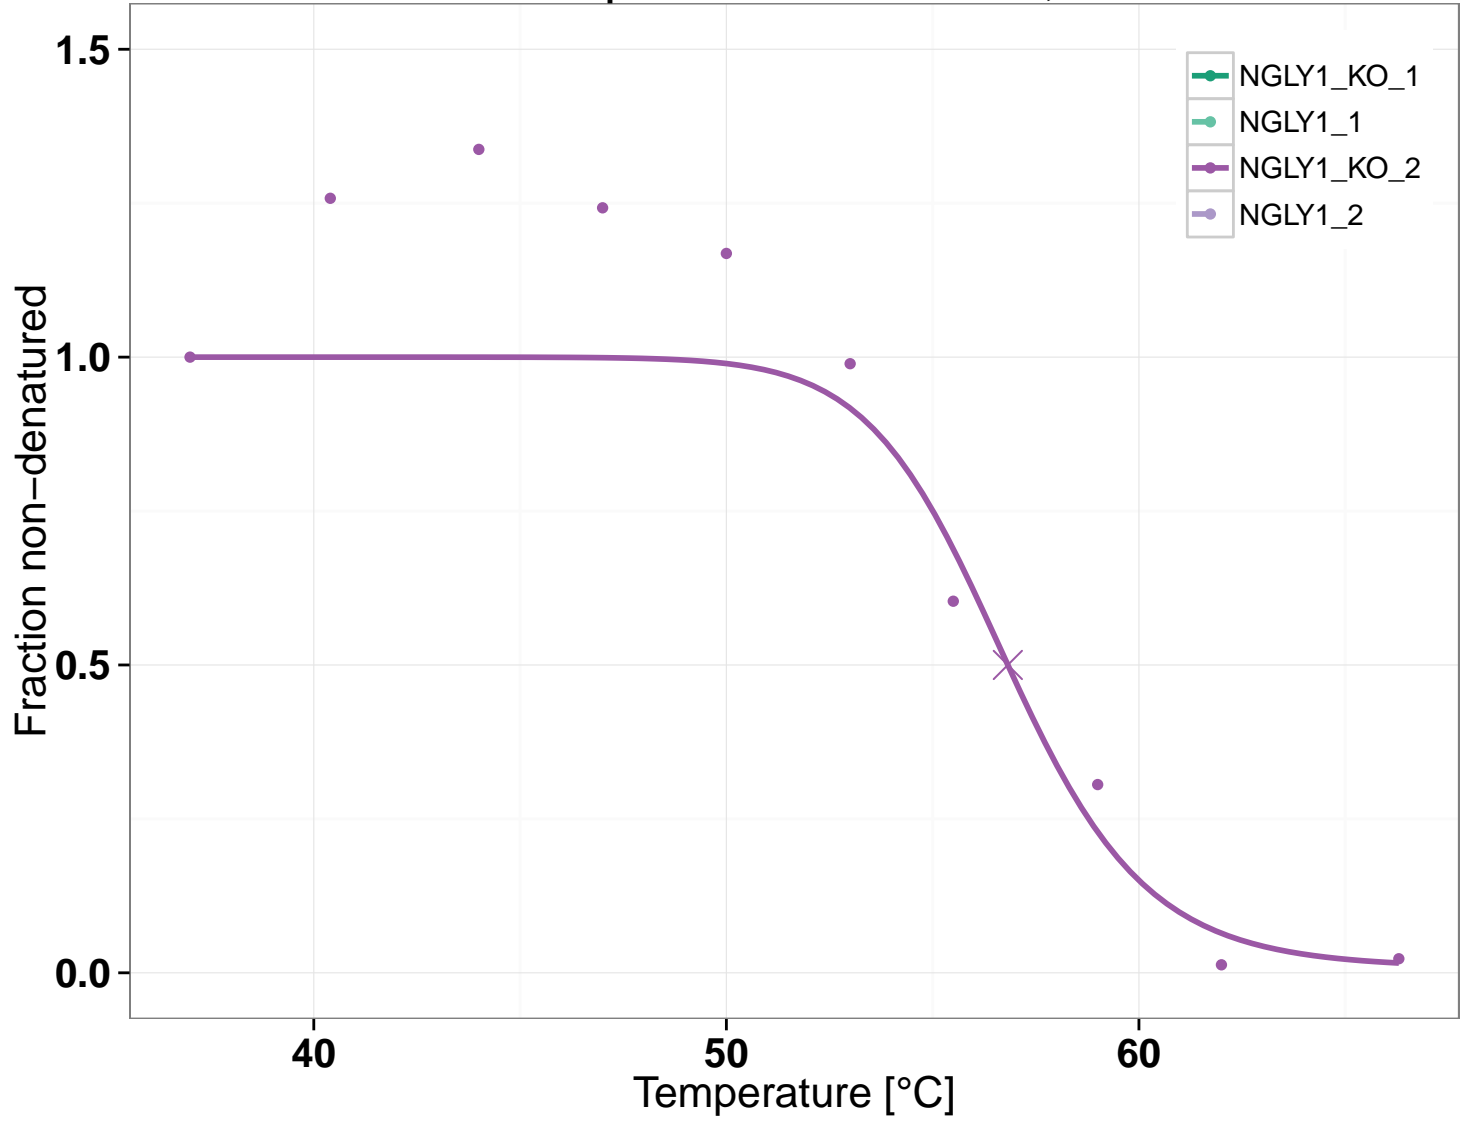

|            | meltPoint | slope | plateau | R2   |
|------------|-----------|-------|---------|------|
| NGLY1_KO_1 | -         | -     | -       | -    |
| NGLY1_1    | -         | -     | -       | -    |
| NGLY1_KO_2 | 56.82     | -0.15 | 0.01    | 0.88 |
| NGLY1_2    | -         | -     | -       | -    |

Supplement: Supplementary file 7767 [file 1]

IPI00100630.6|MLLT1

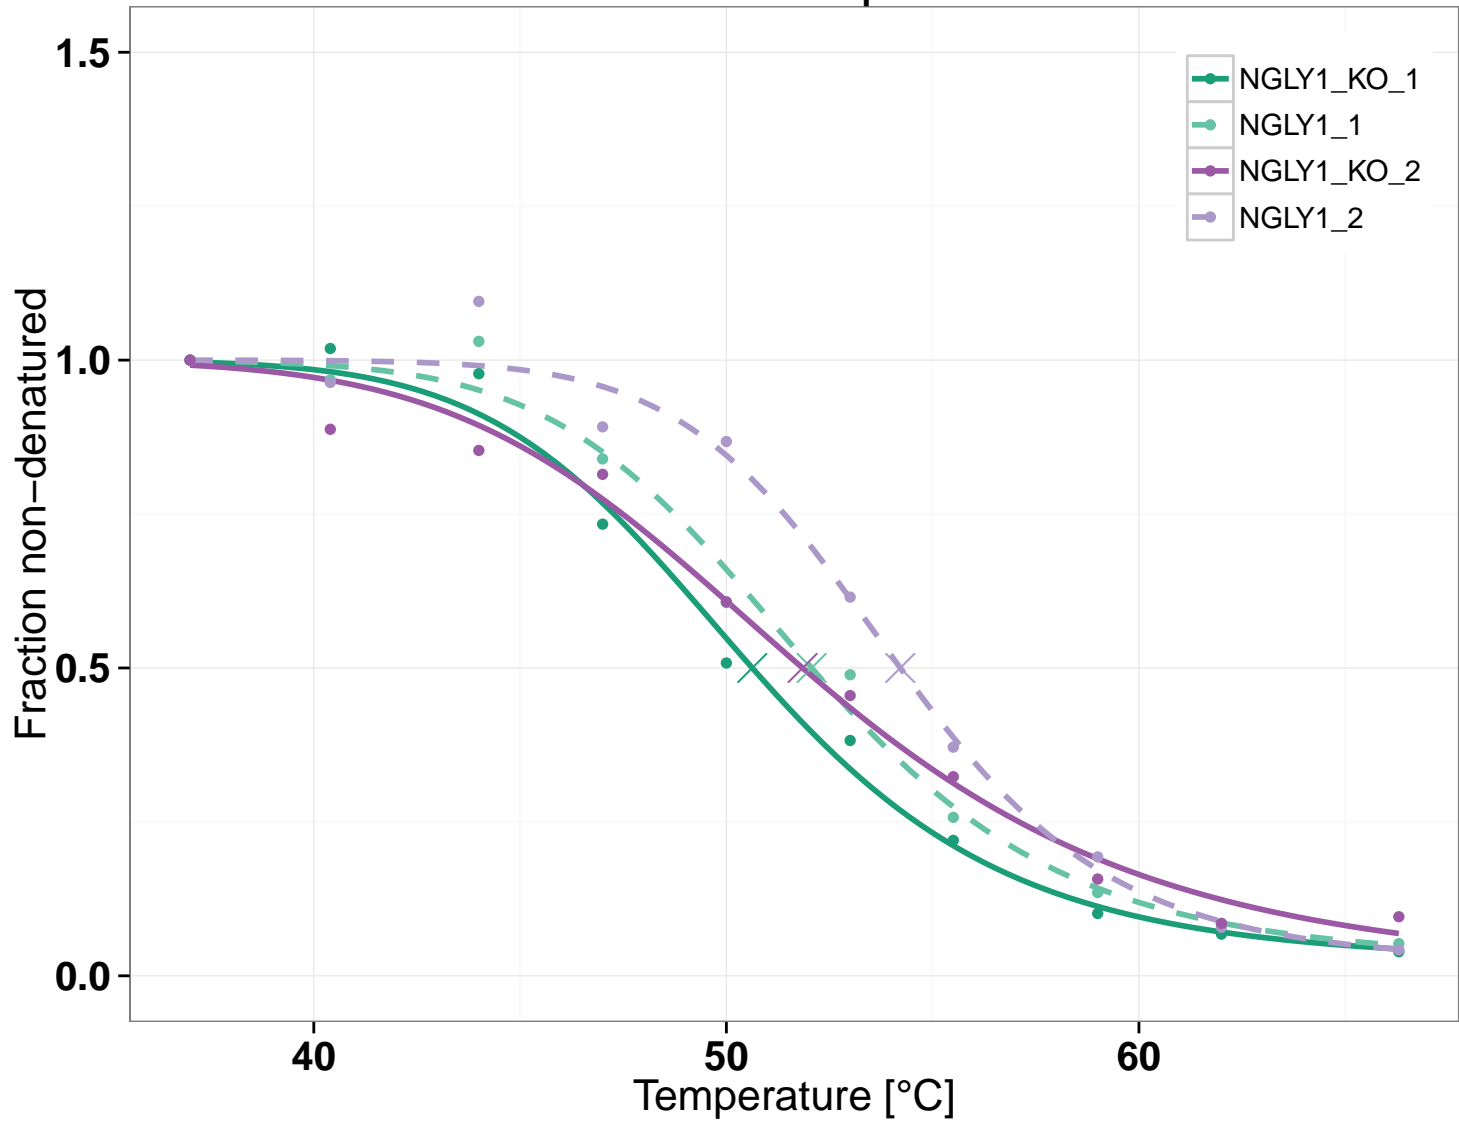

|            | meltPoint | slope  | plateau | R2   |
|------------|-----------|--------|---------|------|
| NGLY1_KO_1 | 50.63     | -0.078 | 0.02    | 0.99 |
| NGLY1_1    | 52.07     | -0.078 | 0.02    | 0.99 |
| NGLY1_KO_2 | 51.85     | -0.059 | 0       | 0.99 |
| NGLY1_2    | 54.22     | -0.093 | 0.02    | 0.99 |

Supplement: Supplementary file 7768 [file 1]

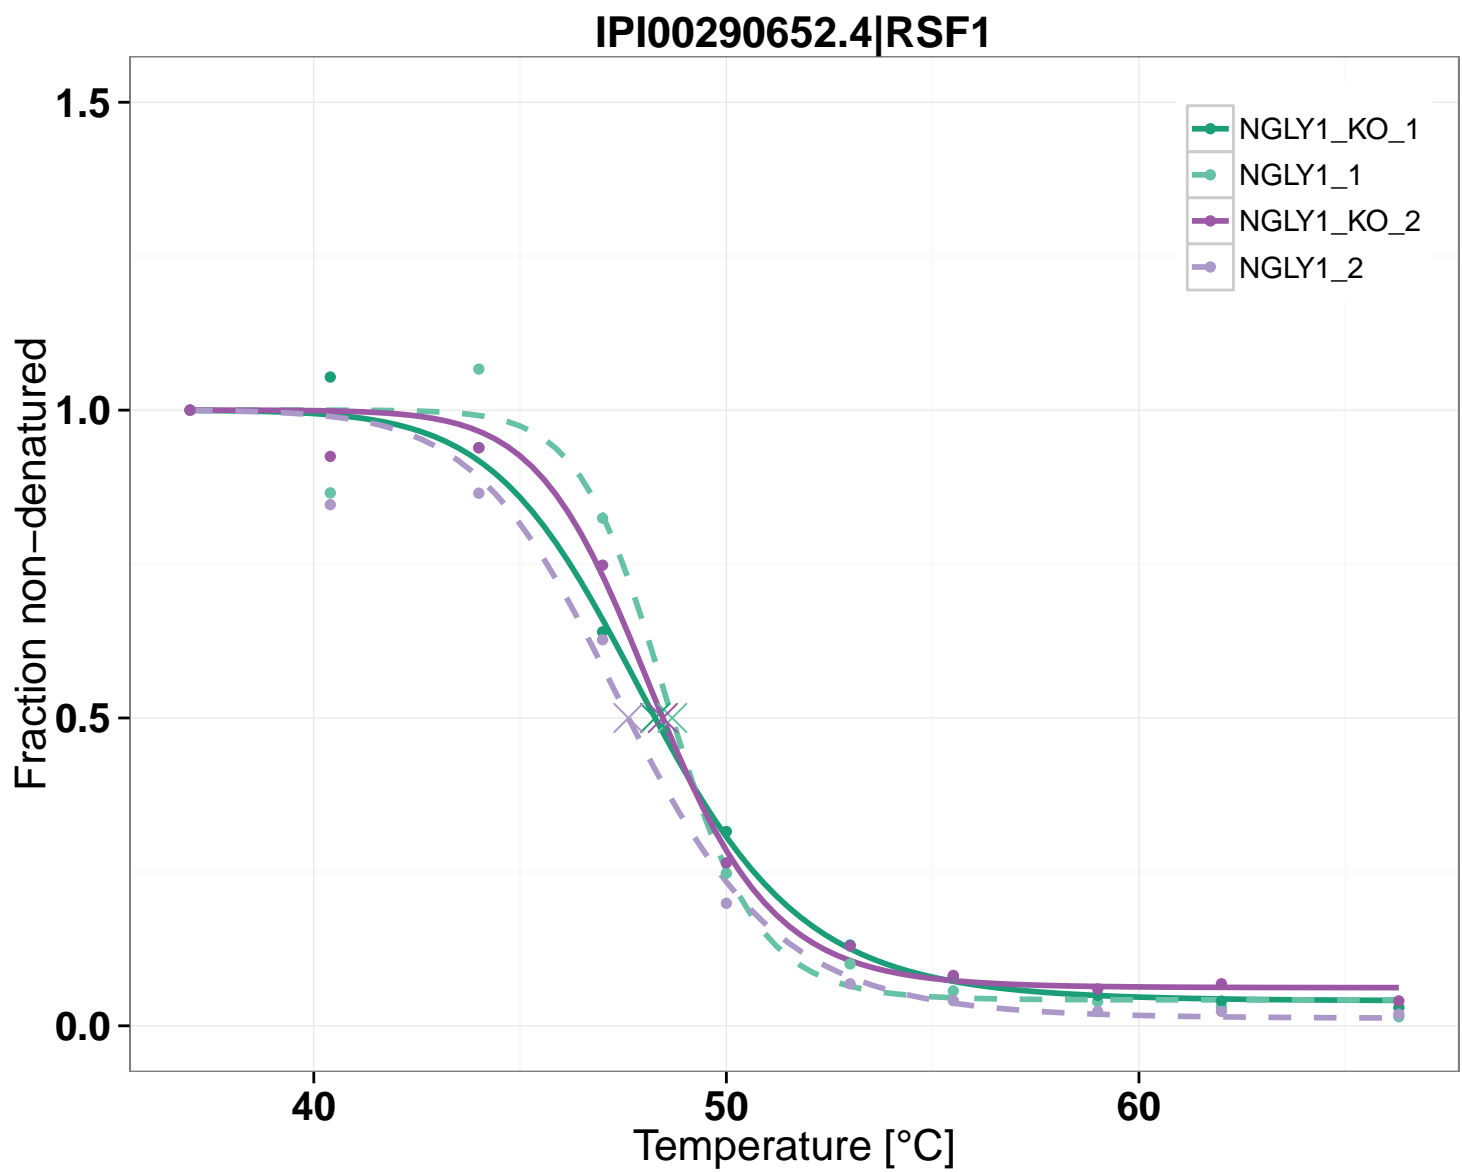

|            | meltPoint | slope | plateau | R2   |
|------------|-----------|-------|---------|------|
| NGLY1_KO_1 | 48.27     | -0.13 | 0.04    | 1    |
| NGLY1_1    | 48.69     | -0.22 | 0.04    | 0.99 |
| NGLY1_KO_2 | 48.46     | -0.16 | 0.06    | 0.99 |
| NGLY1_2    | 47.63     | -0.13 | 0.01    | 0.98 |

Supplement: Supplementary file 7769 [file 1]

IPI00018027.2|AGGF1

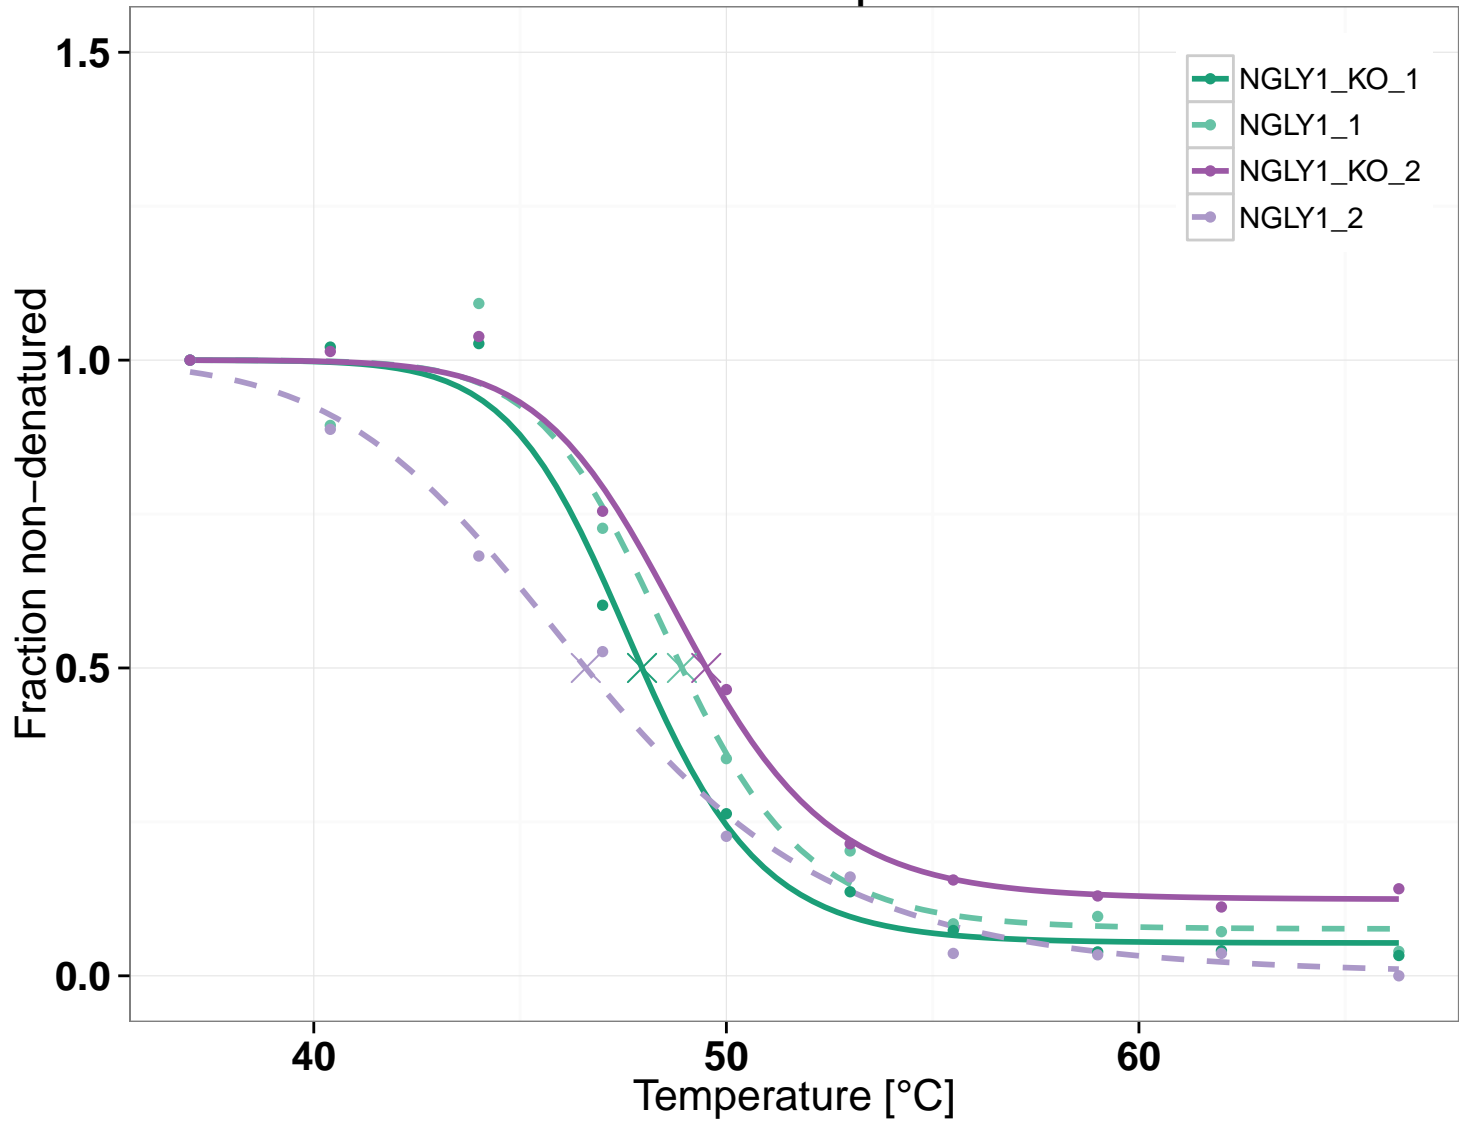

|            | meltPoint | slope  | plateau | R2   |
|------------|-----------|--------|---------|------|
| NGLY1_KO_1 | 47.96     | -0.15  | 0.05    | 0.99 |
| NGLY1_1    | 48.92     | -0.14  | 0.08    | 0.98 |
| NGLY1_KO_2 | 49.51     | -0.12  | 0.12    | 0.99 |
| NGLY1_2    | 46.59     | -0.083 | 0       | 0.99 |

Supplement: Supplementary file 7770 [file 1]

# IPI00021685.1|ARL6

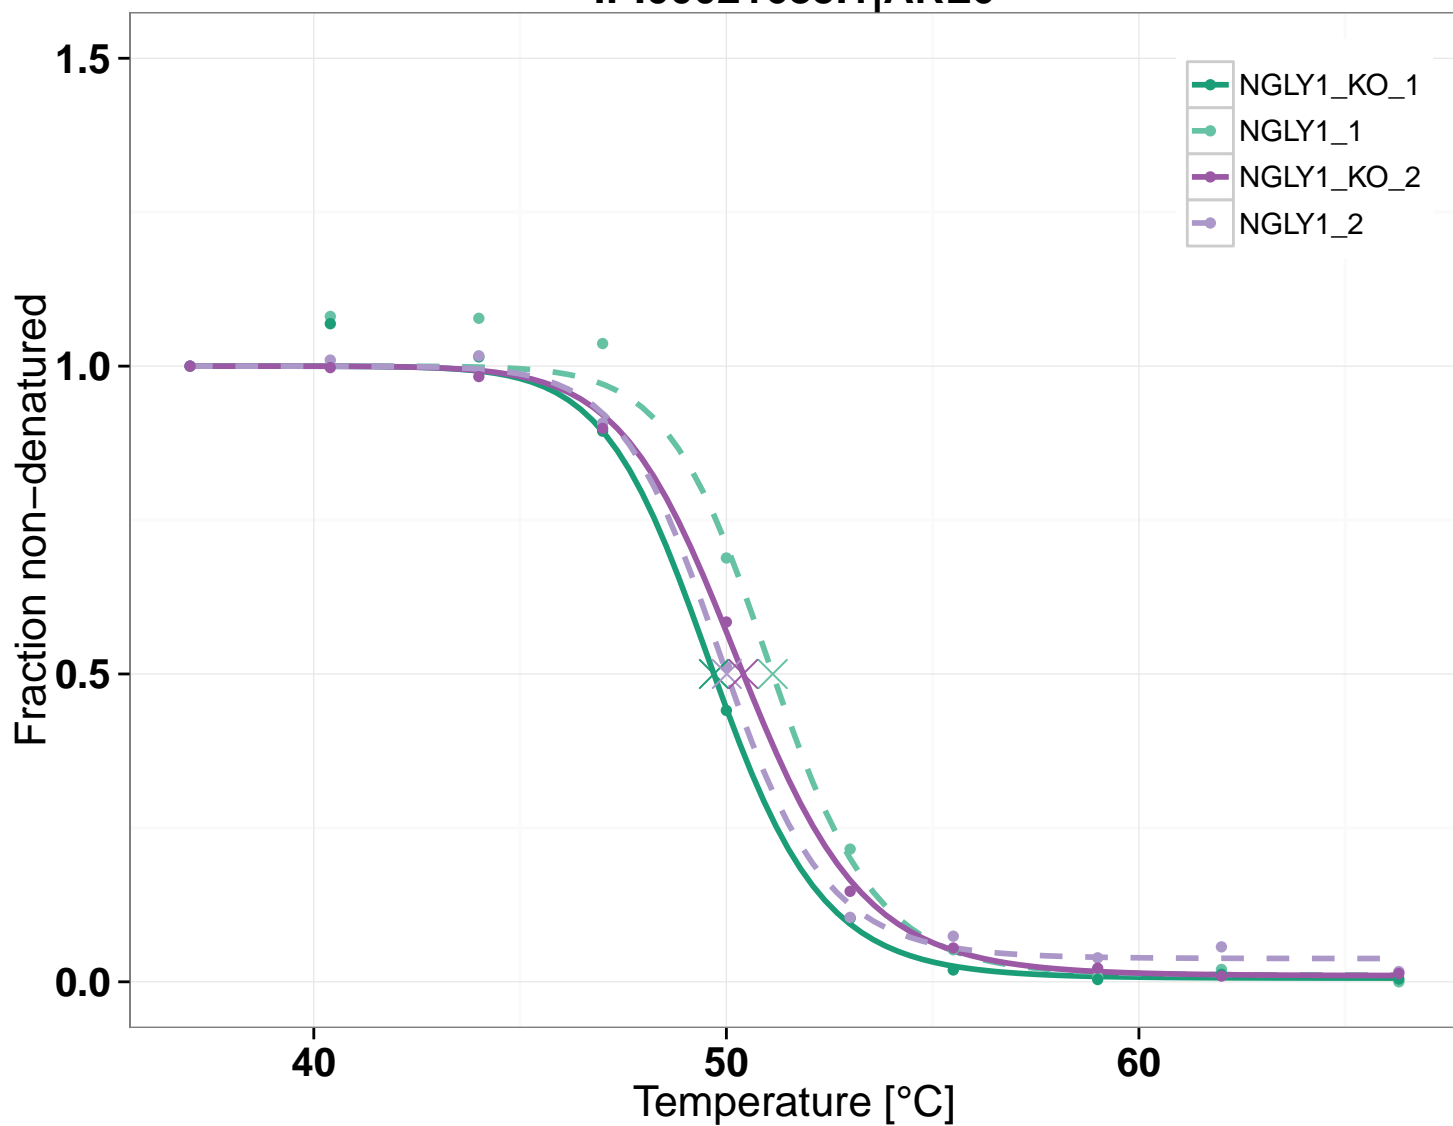

|            | meltPoint | slope | plateau | R2   |
|------------|-----------|-------|---------|------|
| NGLY1_KO_1 | 49.7      | -0.19 | 0.01    | 1    |
| NGLY1_1    | 51.12     | -0.19 | 0.01    | 0.99 |
| NGLY1_KO_2 | 50.41     | -0.17 | 0.01    | 1    |
| NGLY1_2    | 50.01     | -0.19 | 0.04    | 1    |

Supplement: Supplementary file 7771 [file 1]

IPI00220648.5|PMVK

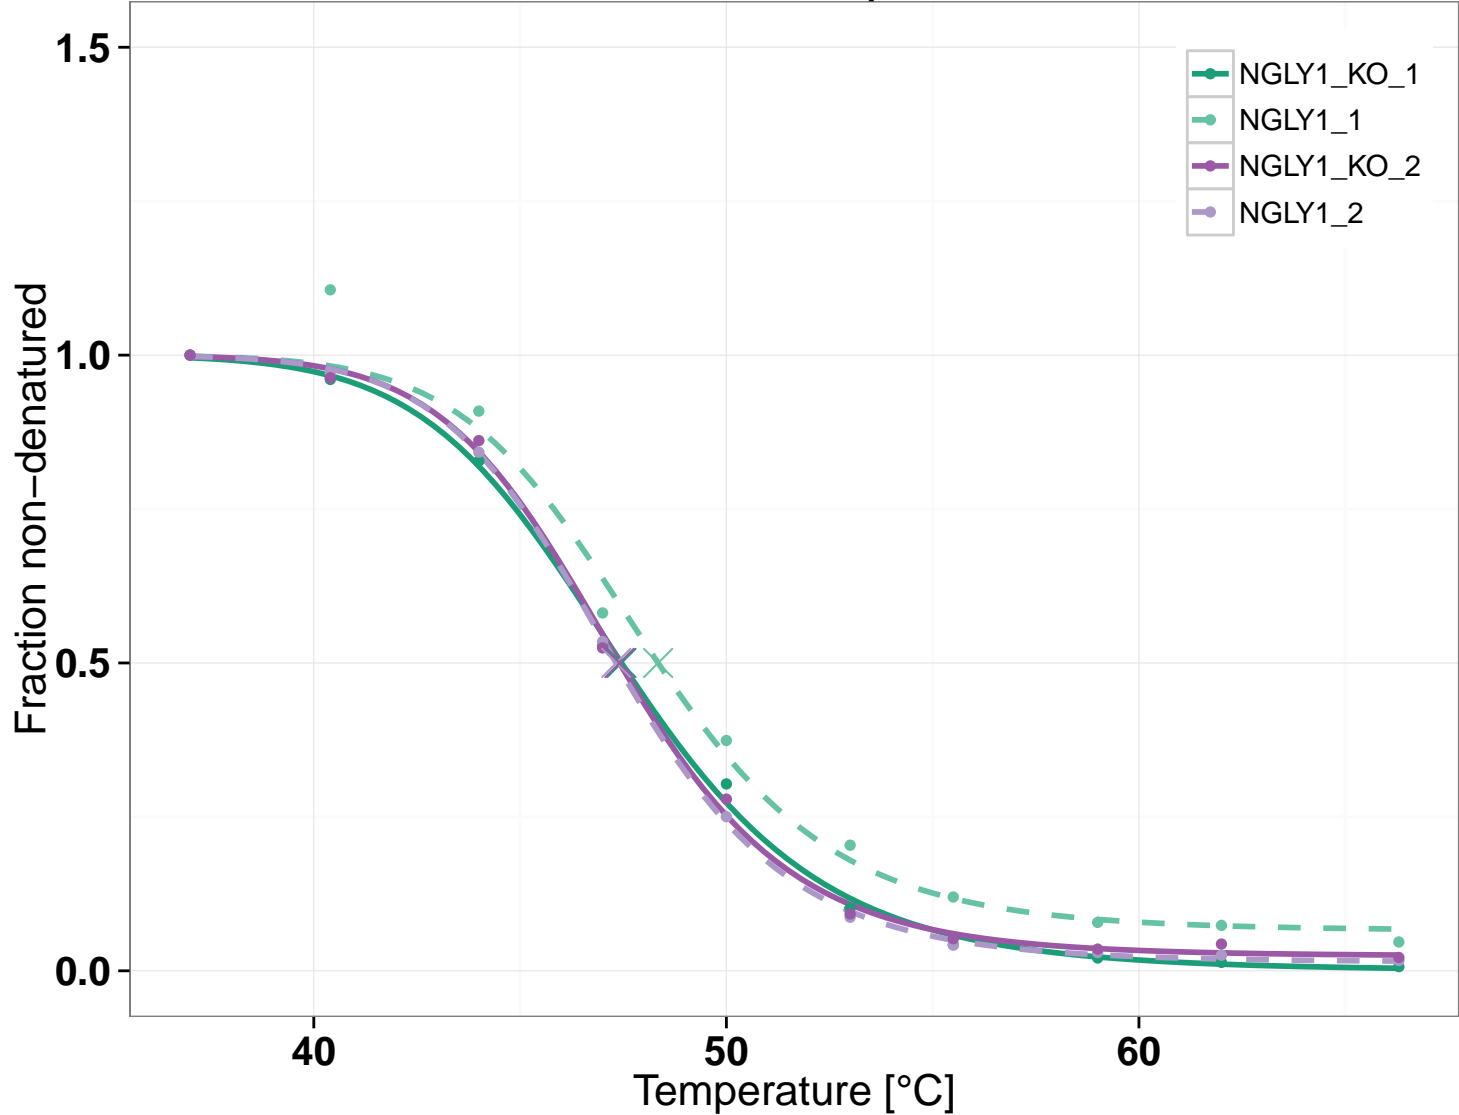

|            | meltPoint | slope | plateau | R2   |
|------------|-----------|-------|---------|------|
| NGLY1_KO_1 | 47.46     | -0.1  | 0       | 1    |
| NGLY1_1    | 48.35     | -0.1  | 0.06    | 0.99 |
| NGLY1_KO_2 | 47.41     | -0.11 | 0.02    | 1    |
| NGLY1_2    | 47.33     | -0.12 | 0.01    | 1    |

Supplement: Supplementary file 7772 [file 1]

# IPI00336016.3|CARS2

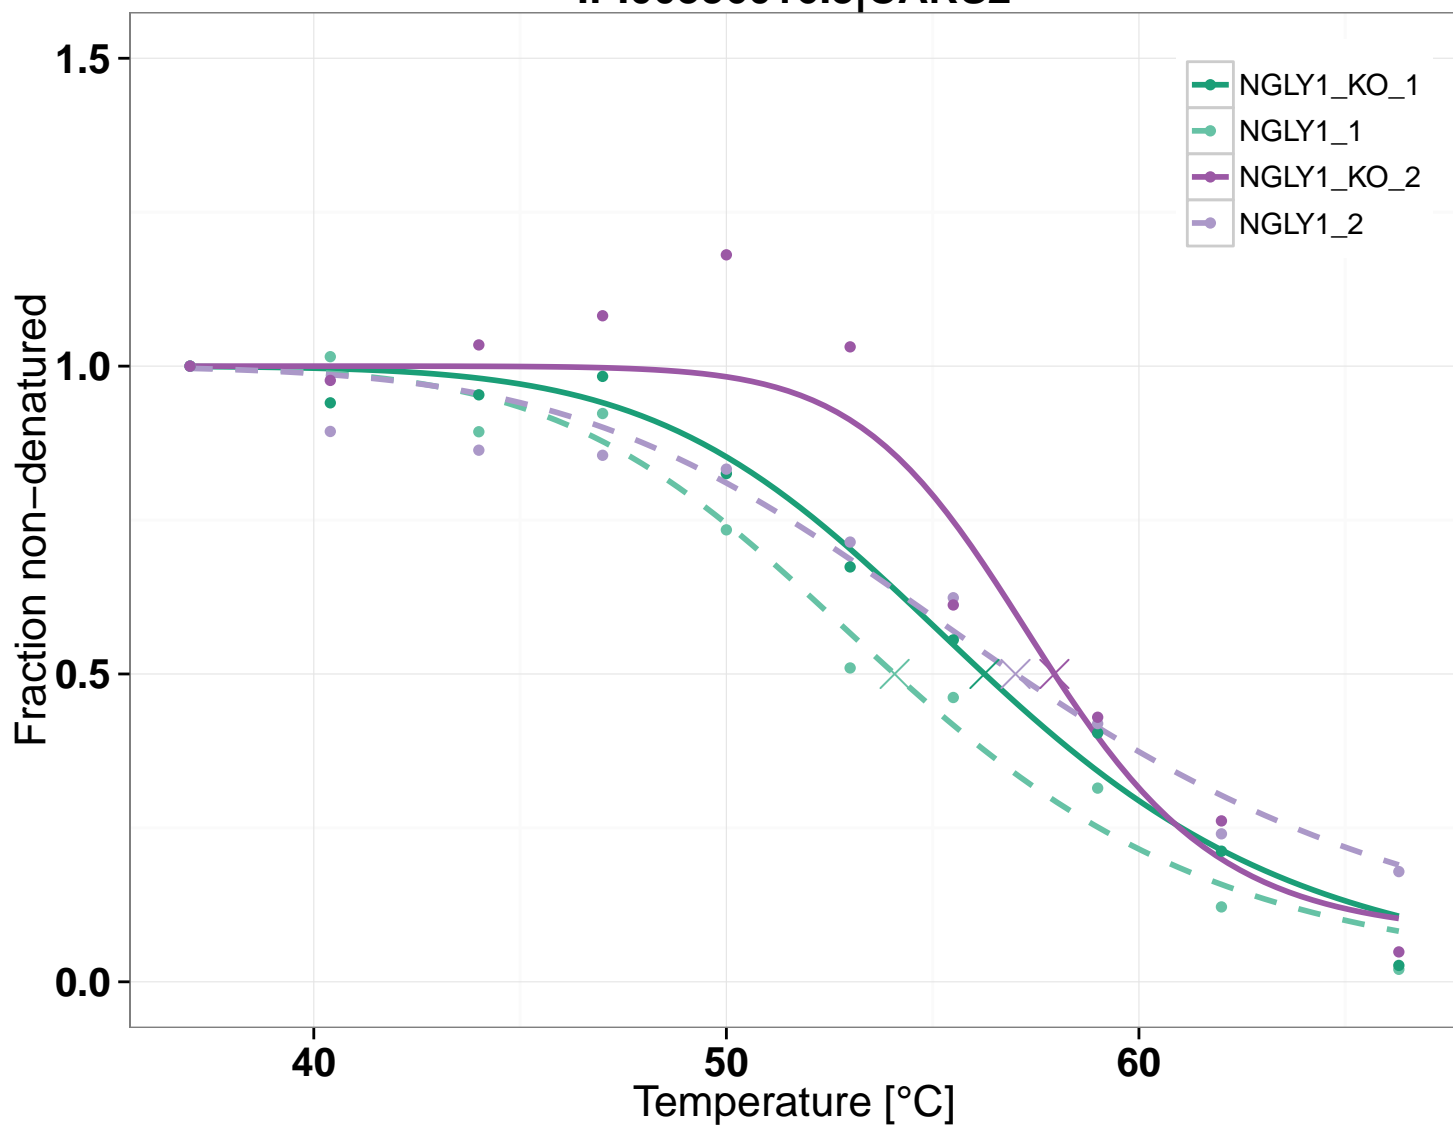

|            | meltPoint | slope  | plateau | R2   |
|------------|-----------|--------|---------|------|
| NGLY1_KO_1 | 56.26     | -0.064 | 0       | 0.98 |
| NGLY1_1    | 54.08     | -0.062 | 0       | 0.98 |
| NGLY1_KO_2 | 57.95     | -0.11  | 0.07    | 0.94 |
| NGLY1_2    | 57.01     | -0.047 | 0       | 0.96 |

Supplement: Supplementary file 7773 [file 1]

IPI00306840.2|SGPP1

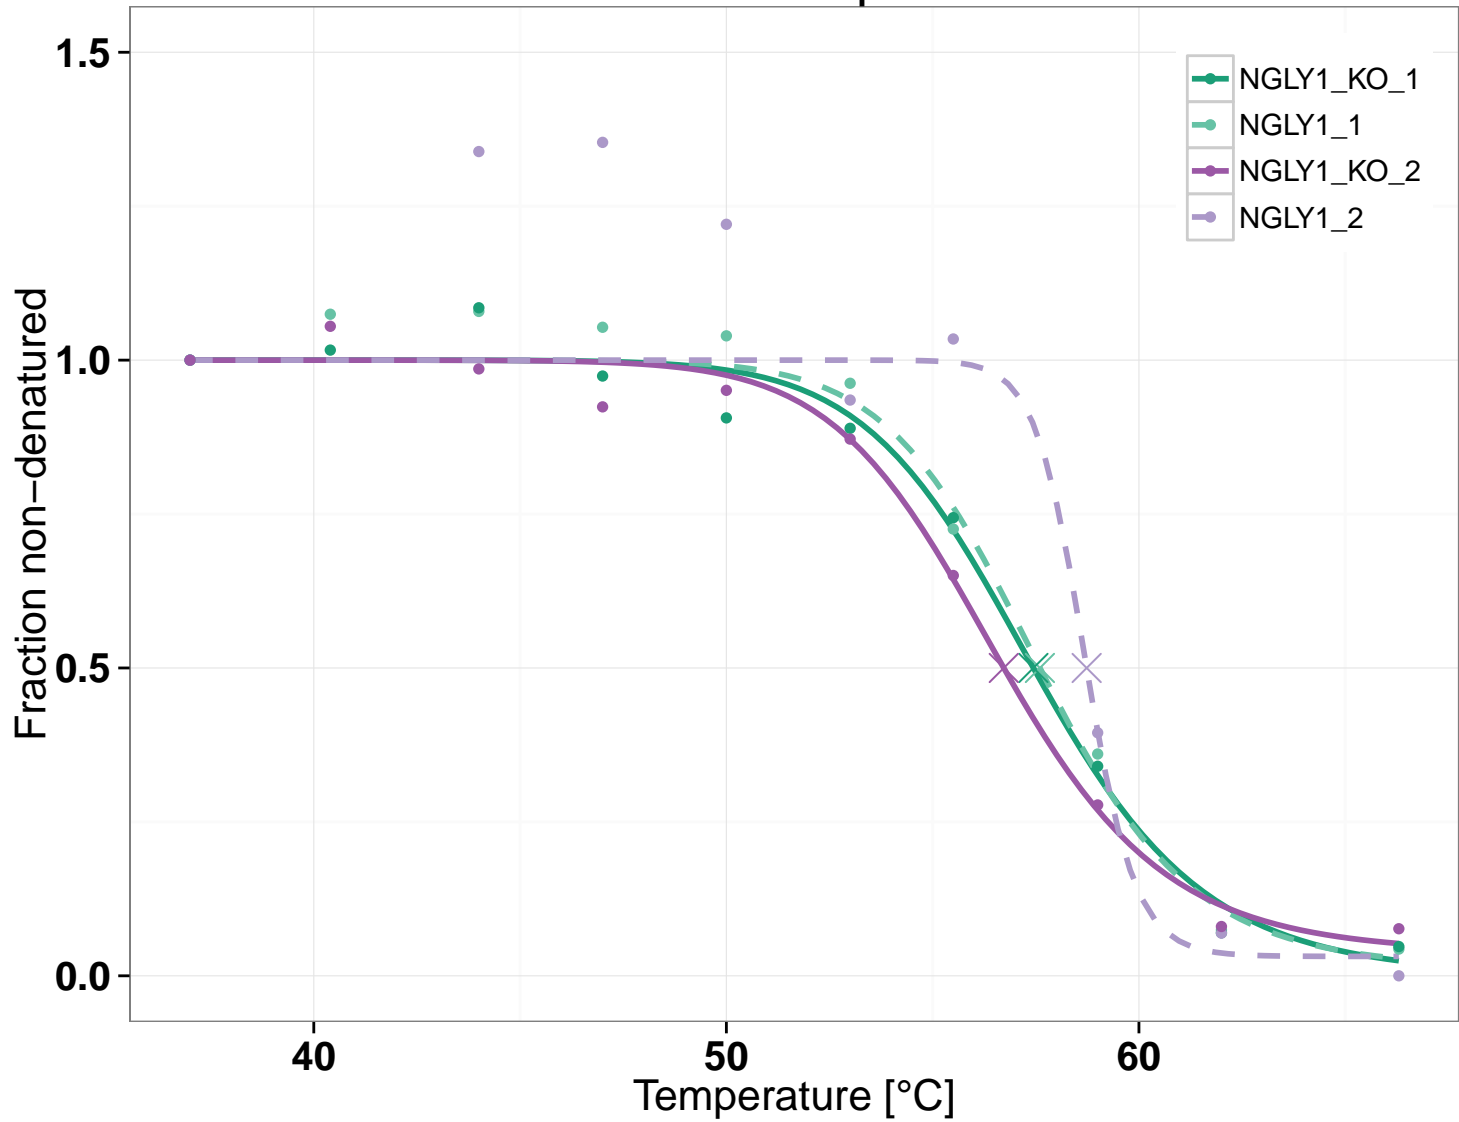

|            | meltPoint | slope | plateau | R2   |
|------------|-----------|-------|---------|------|
| NGLY1_KO_1 | 57.44     | -0.12 | 0       | 0.99 |
| NGLY1_1    | 57.6      | -0.13 | 0.01    | 0.99 |
| NGLY1_KO_2 | 56.72     | -0.12 | 0.04    | 0.99 |
| NGLY1_2    | 58.73     | -0.4  | 0.03    | 0.78 |

Supplement: Supplementary file 7774 [file 1]

# IPI00759542.1|TTN

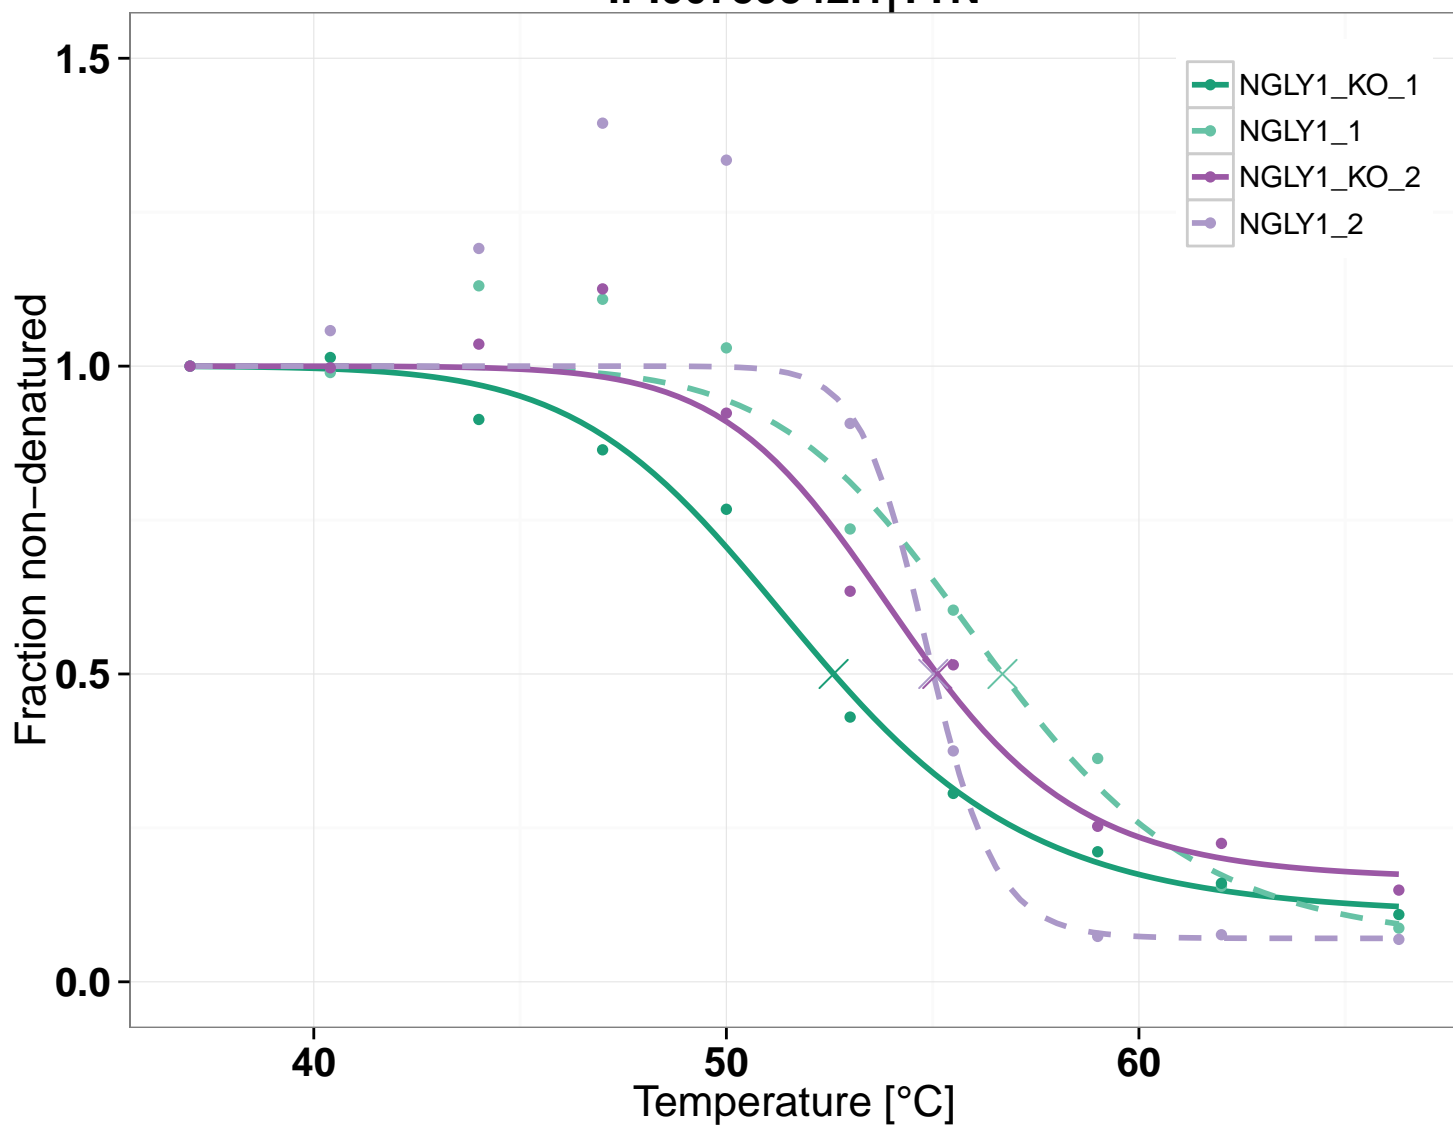

|            | meltPoint | slope  | plateau | R2   |
|------------|-----------|--------|---------|------|
| NGLY1_KO_1 | 52.6      | -0.081 | 0.11    | 0.99 |
| NGLY1_1    | 56.69     | -0.092 | 0.06    | 0.97 |
| NGLY1_KO_2 | 55.11     | -0.097 | 0.17    | 0.98 |
| NGLY1_2    | 55.02     | -0.28  | 0.07    | 0.88 |

Supplement: Supplementary file 7775 [file 1]

# IPI00412408.1|BRCA2

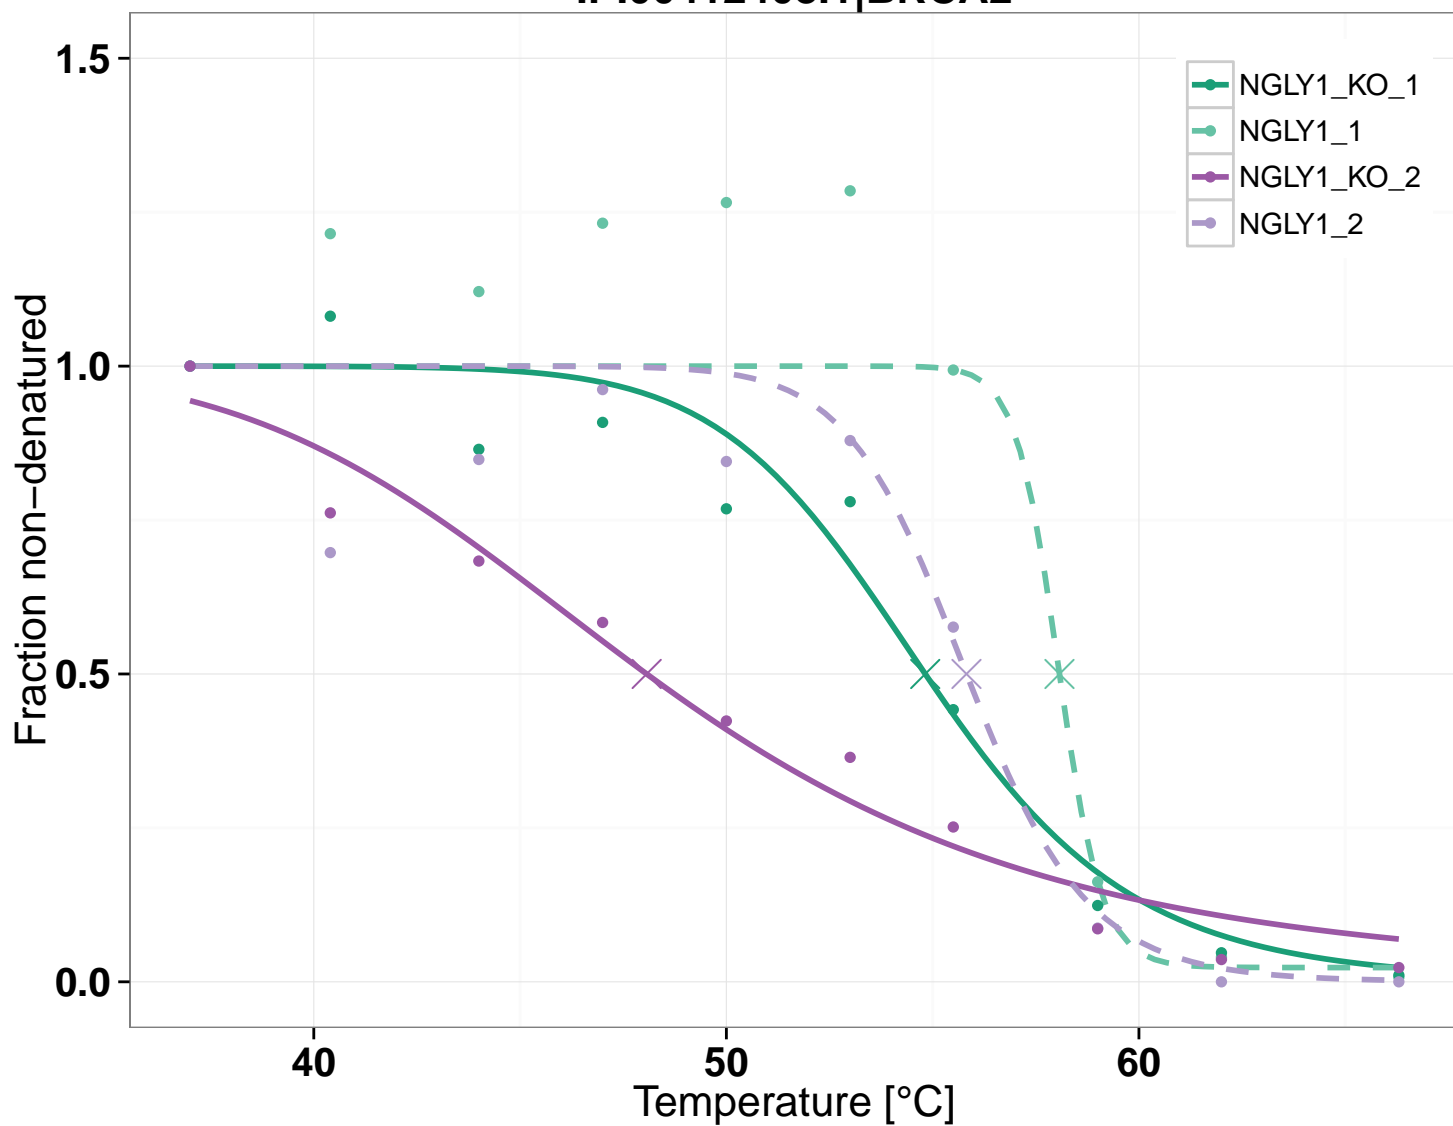

|            | meltPoint | slope  | plateau | R2   |
|------------|-----------|--------|---------|------|
| NGLY1_KO_1 | 54.82     | -0.1   | 0       | 0.96 |
| NGLY1_1    | 58.07     | -0.47  | 0.02    | 0.9  |
| NGLY1_KO_2 | 48.07     | -0.051 | 0       | 0.97 |
| NGLY1_2    | 55.82     | -0.17  | 0       | 0.91 |

Supplement: Supplementary file 7776 [file 1]

IPI00384028.5|PAPOLA

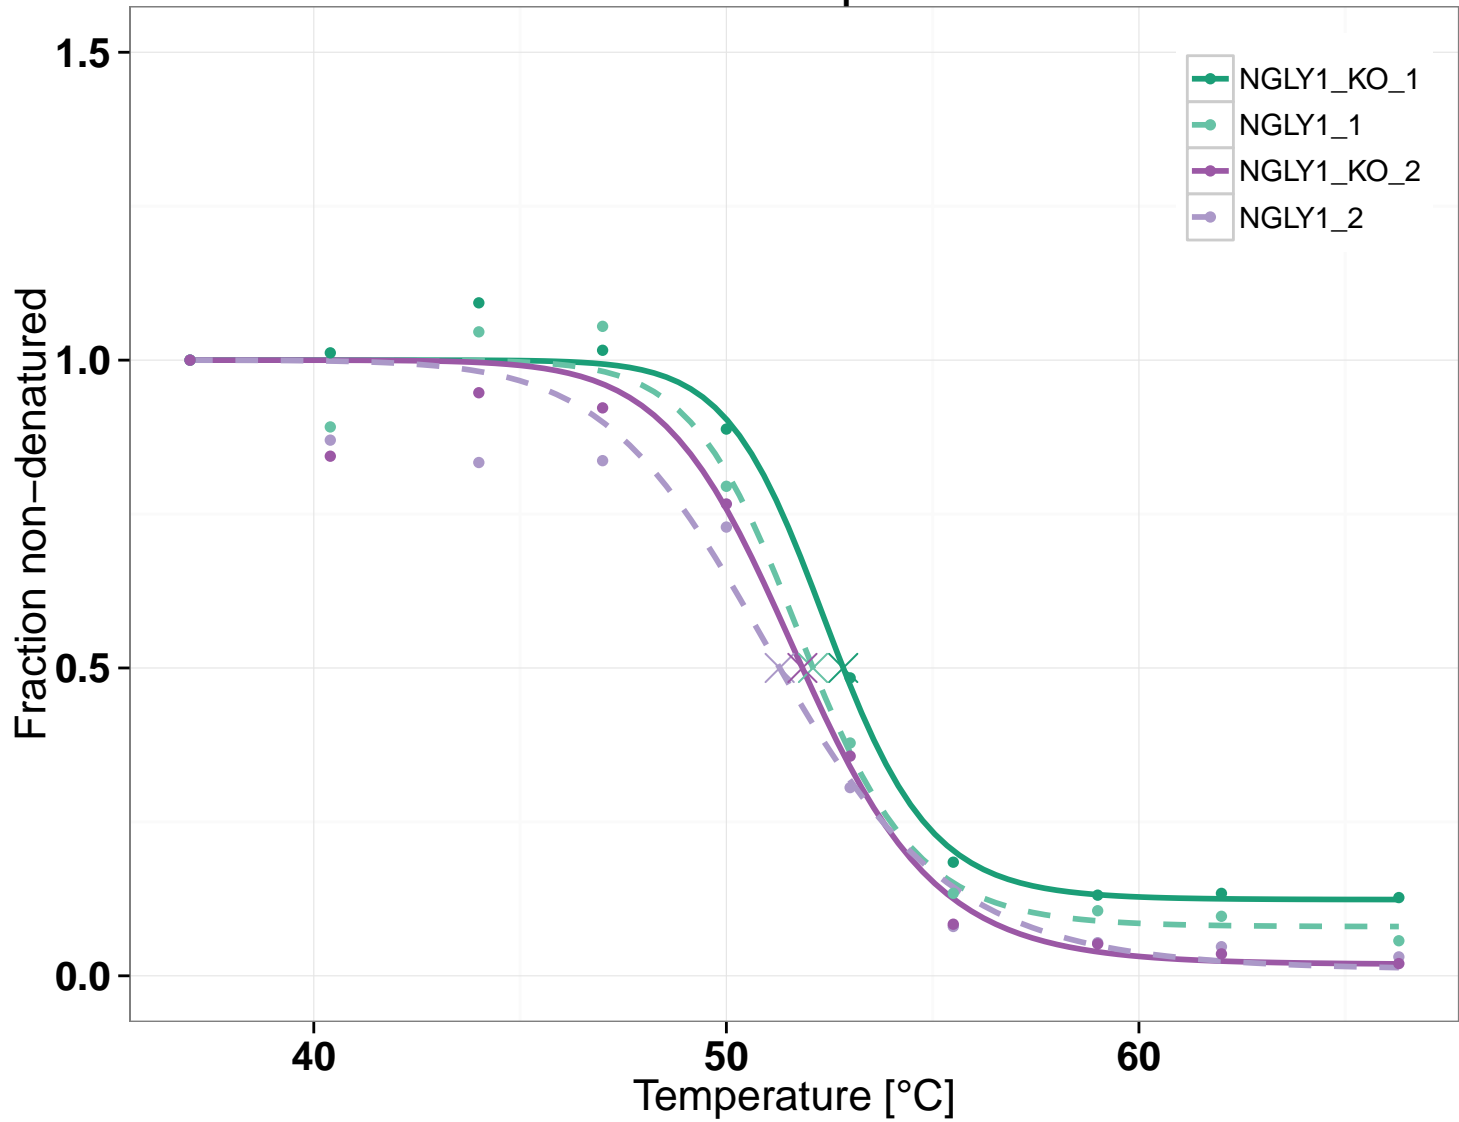

|            | meltPoint | slope | plateau | R2   |
|------------|-----------|-------|---------|------|
| NGLY1_KO_1 | 52.83     | -0.18 | 0.12    | 0.99 |
| NGLY1_1    | 52.1      | -0.17 | 0.08    | 0.99 |
| NGLY1_KO_2 | 51.84     | -0.15 | 0.02    | 0.98 |
| NGLY1_2    | 51.29     | -0.12 | 0.01    | 0.96 |

Supplement: Supplementary file 7777 [file 1]

# IPI00008239.1|GPRC5B

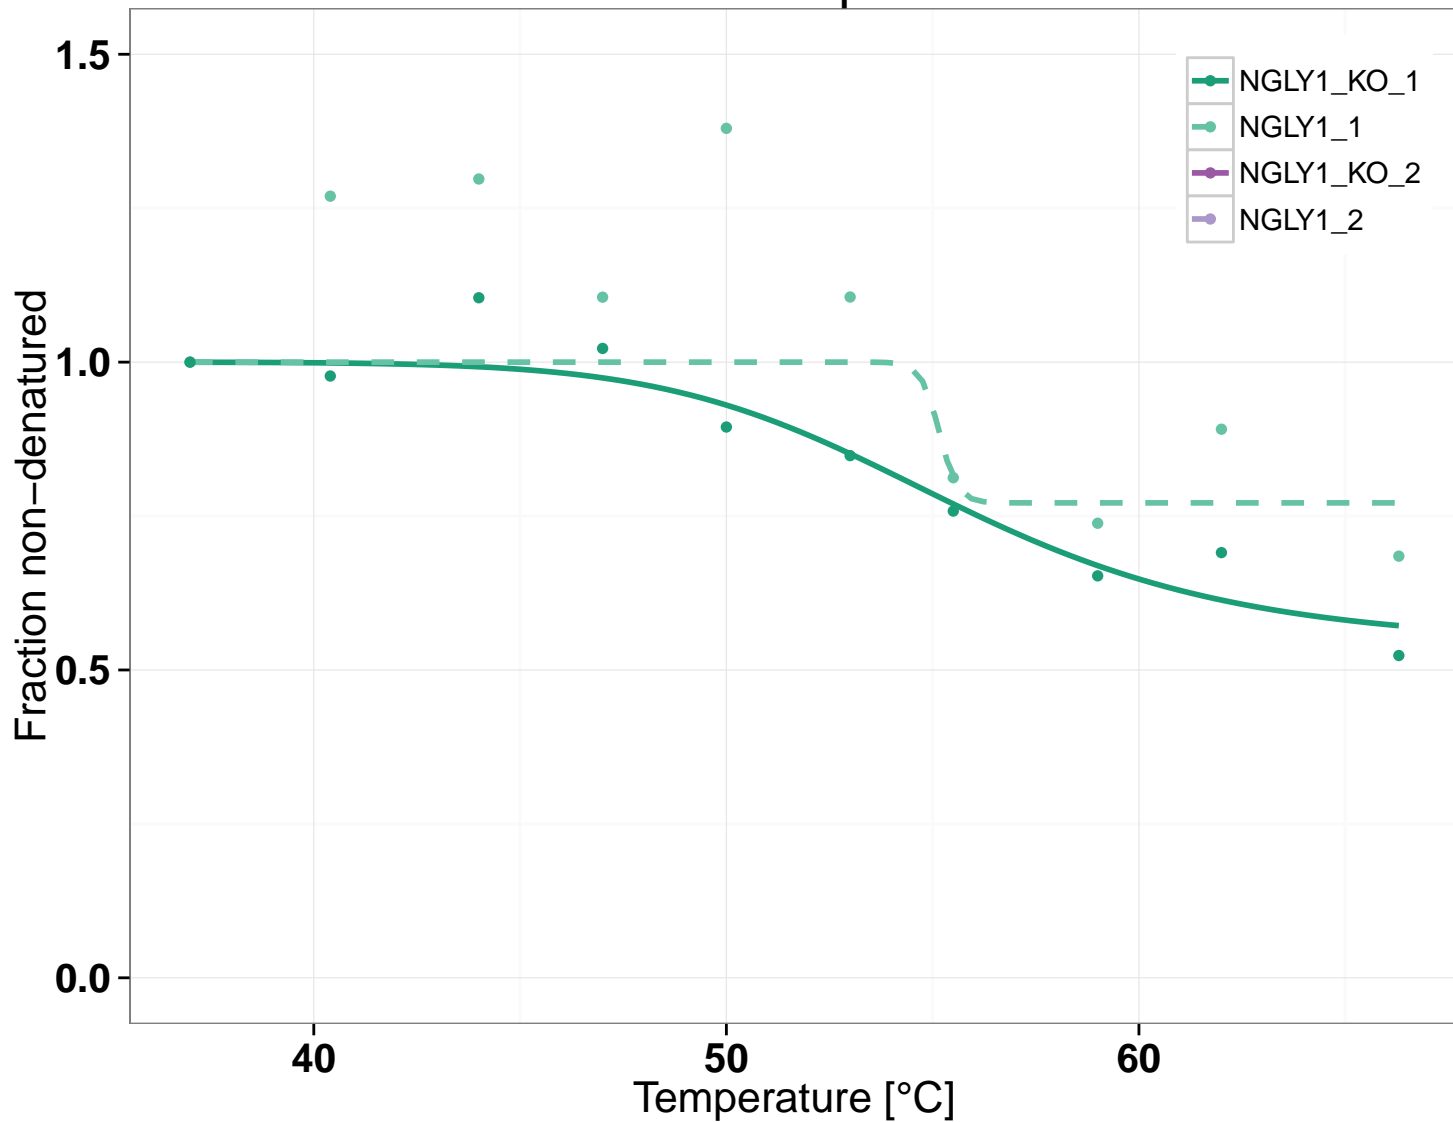

|            | meltPoint | slope  | plateau | R2   |
|------------|-----------|--------|---------|------|
| NGLY1_KO_1 | —         | −0.033 | 0.54    | 0.92 |
| NGLY1_1    | —         | −0.26  | 0.77    | 0.34 |
| NGLY1_KO_2 | —         | —      | —       | —    |
| NGLY1_2    | —         | —      | —       | —    |

Supplement: Supplementary file 7778 [file 1]

IPI00419509.2|PPRC1

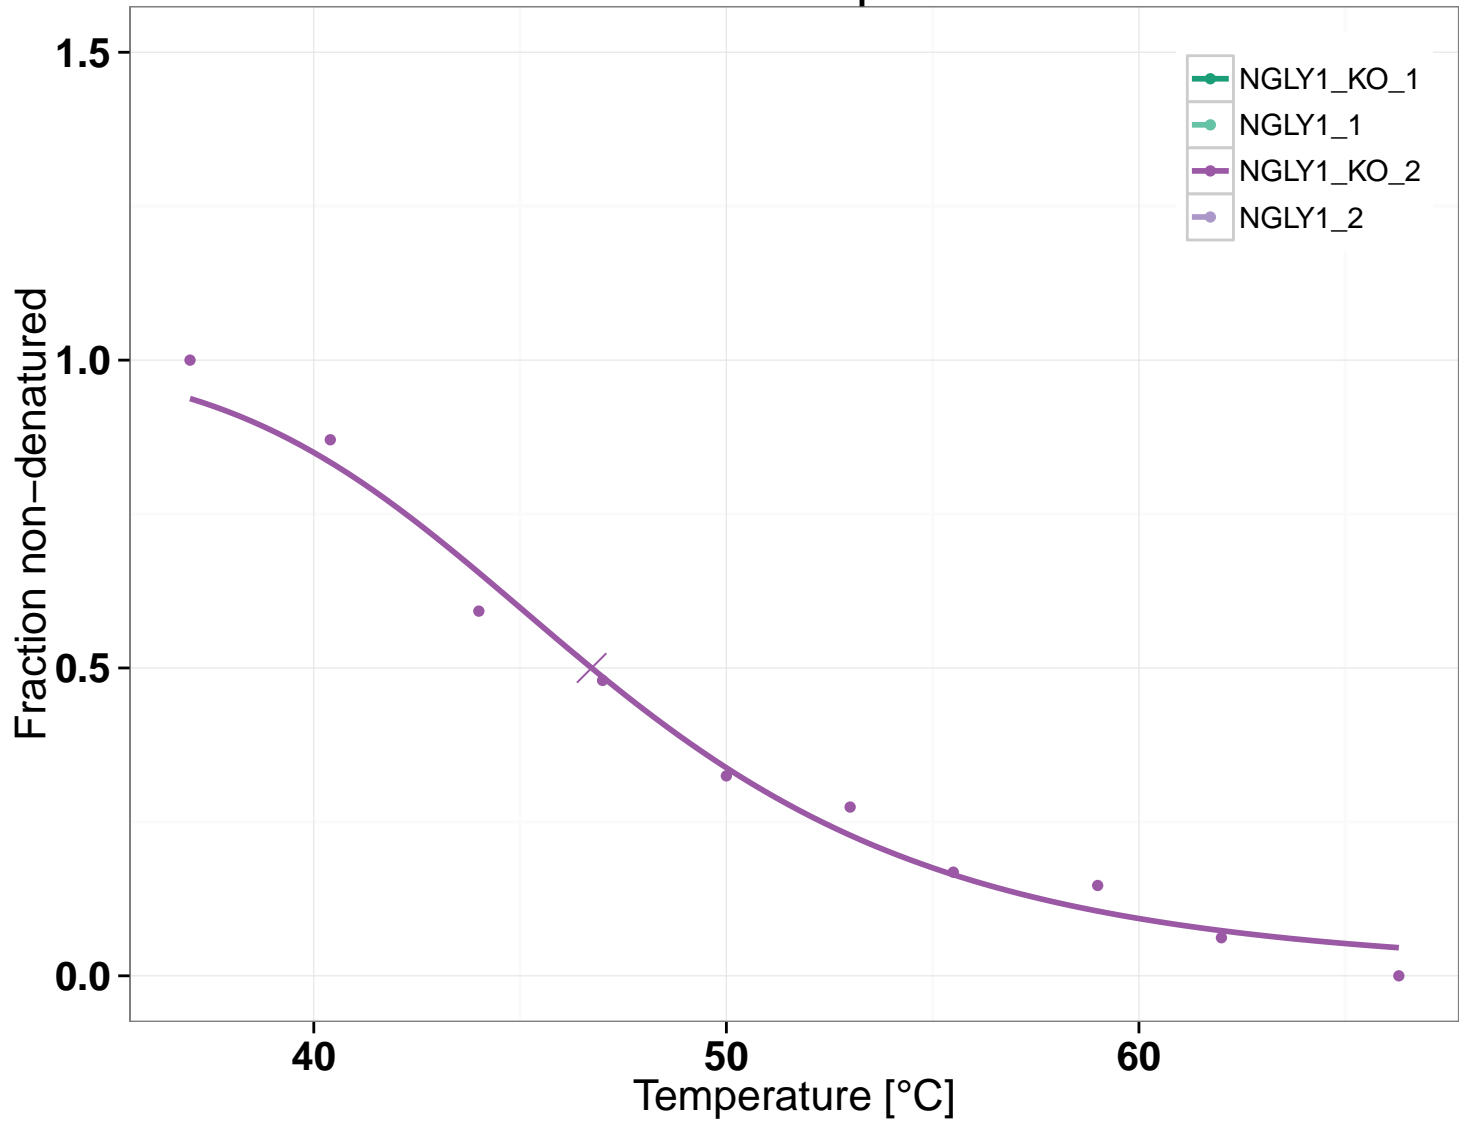

|            | meltPoint | slope  | plateau | R2   |
|------------|-----------|--------|---------|------|
| NGLY1_KO_1 | -         | -      | -       | -    |
| NGLY1_1    | -         | -      | -       | -    |
| NGLY1_KO_2 | 46.73     | -0.057 | 0       | 0.99 |
| NGLY1_2    | -         | -      | -       | -    |

Supplement: Supplementary file 7779 [file 1]

IPI00008200.2|YEATS2

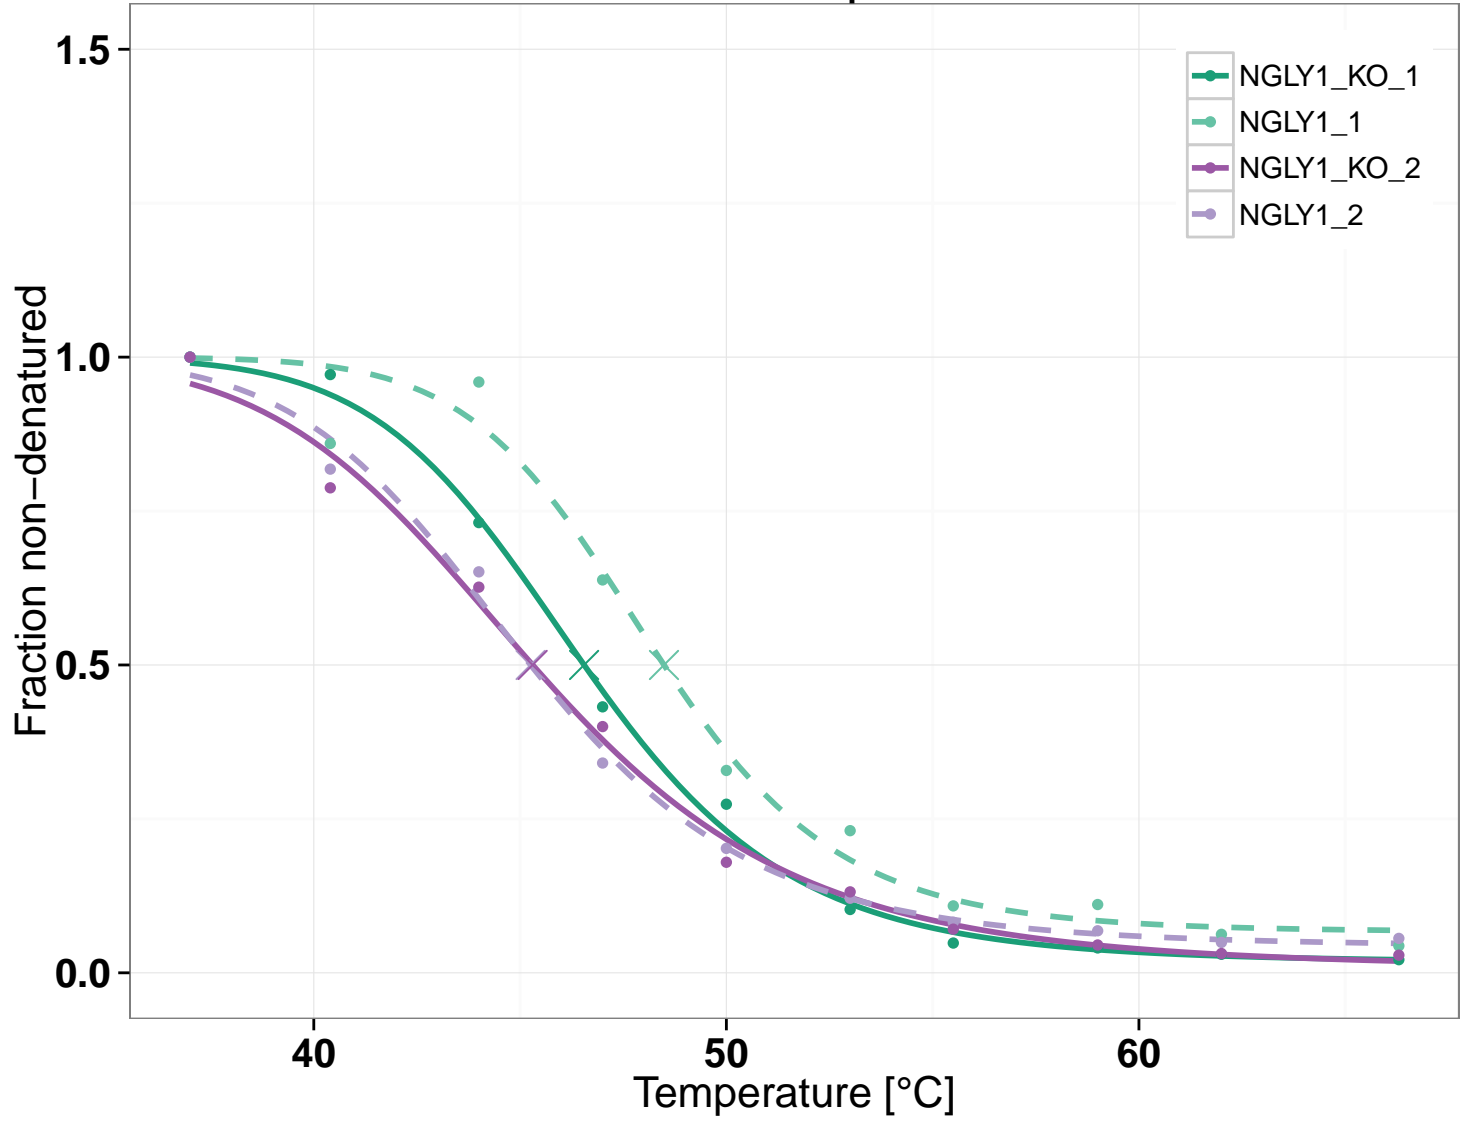

|            | meltPoint | slope  | plateau | R2   |
|------------|-----------|--------|---------|------|
| NGLY1_KO_1 | 46.55     | -0.097 | 0.02    | 1    |
| NGLY1_1    | 48.49     | -0.1   | 0.07    | 0.98 |
| NGLY1_KO_2 | 45.3      | -0.078 | 0.01    | 0.99 |
| NGLY1_2    | 45.26     | -0.087 | 0.04    | 0.99 |

Supplement: Supplementary file 7780 [file 1]

IPI00171779.3|ACTR6

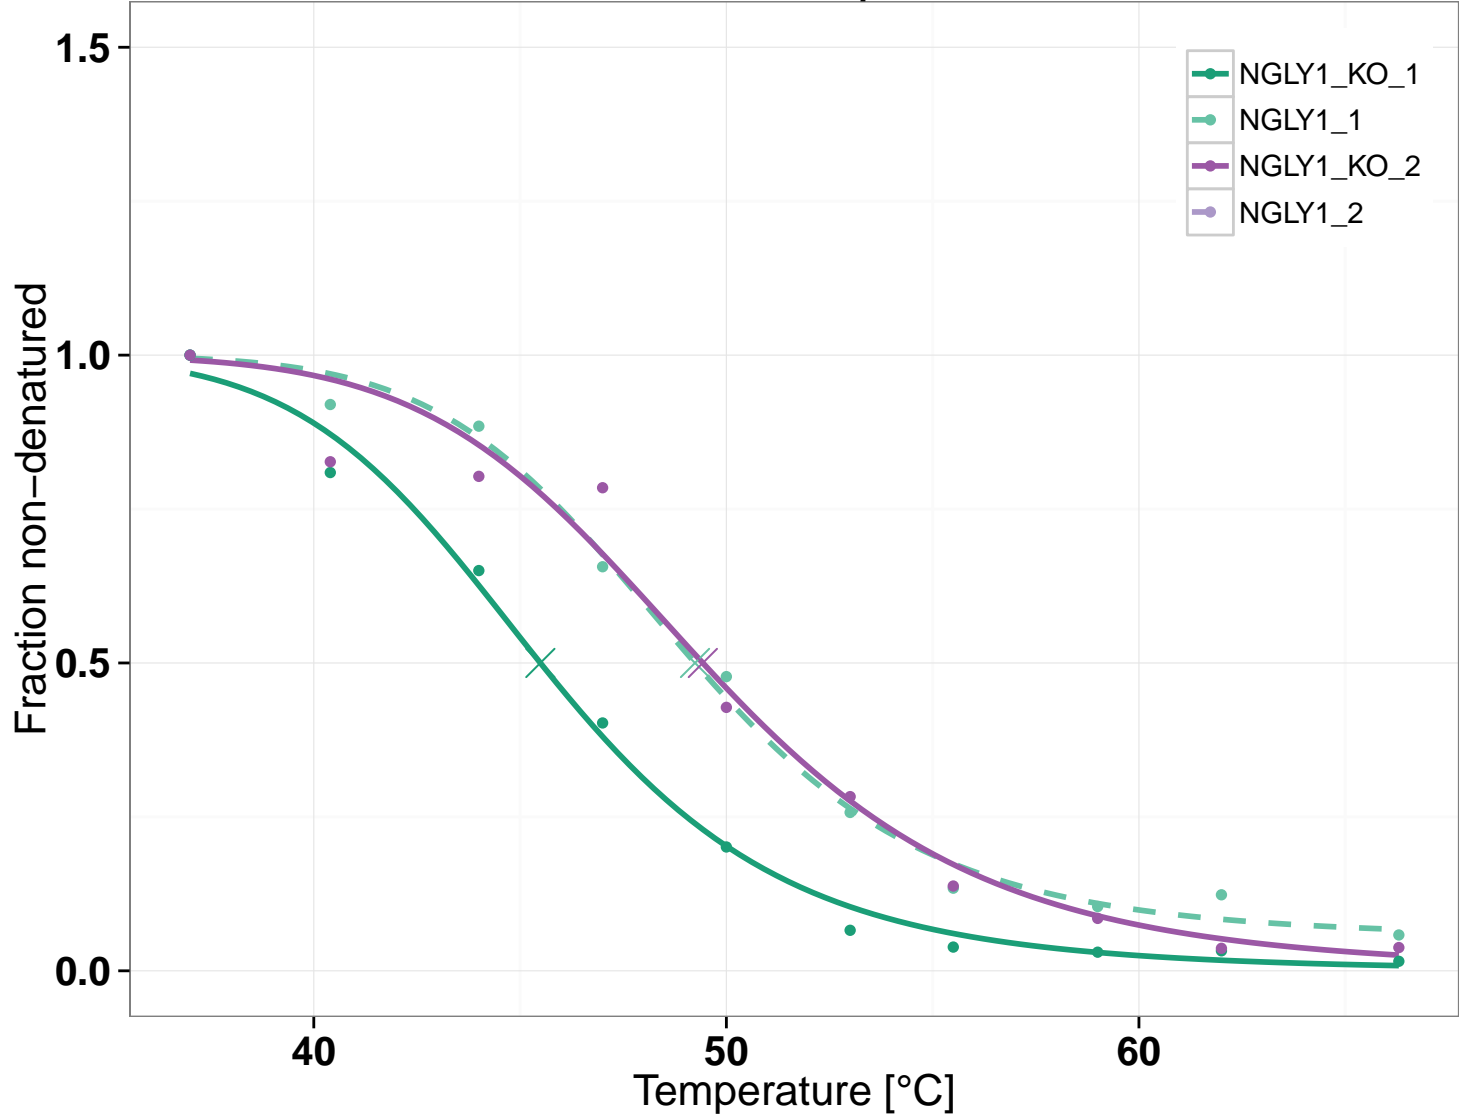

|            | meltPoint | slope  | plateau | R2   |
|------------|-----------|--------|---------|------|
| NGLY1_KO_1 | 45.49     | -0.085 | 0       | 0.99 |
| NGLY1_1    | 49.24     | -0.08  | 0.05    | 0.99 |
| NGLY1_KO_2 | 49.43     | -0.074 | 0       | 0.97 |
| NGLY1_2    | -         | -      | -       | -    |

Supplement: Supplementary file 7781 [file 1]

IPI00003985.1|BCS1L

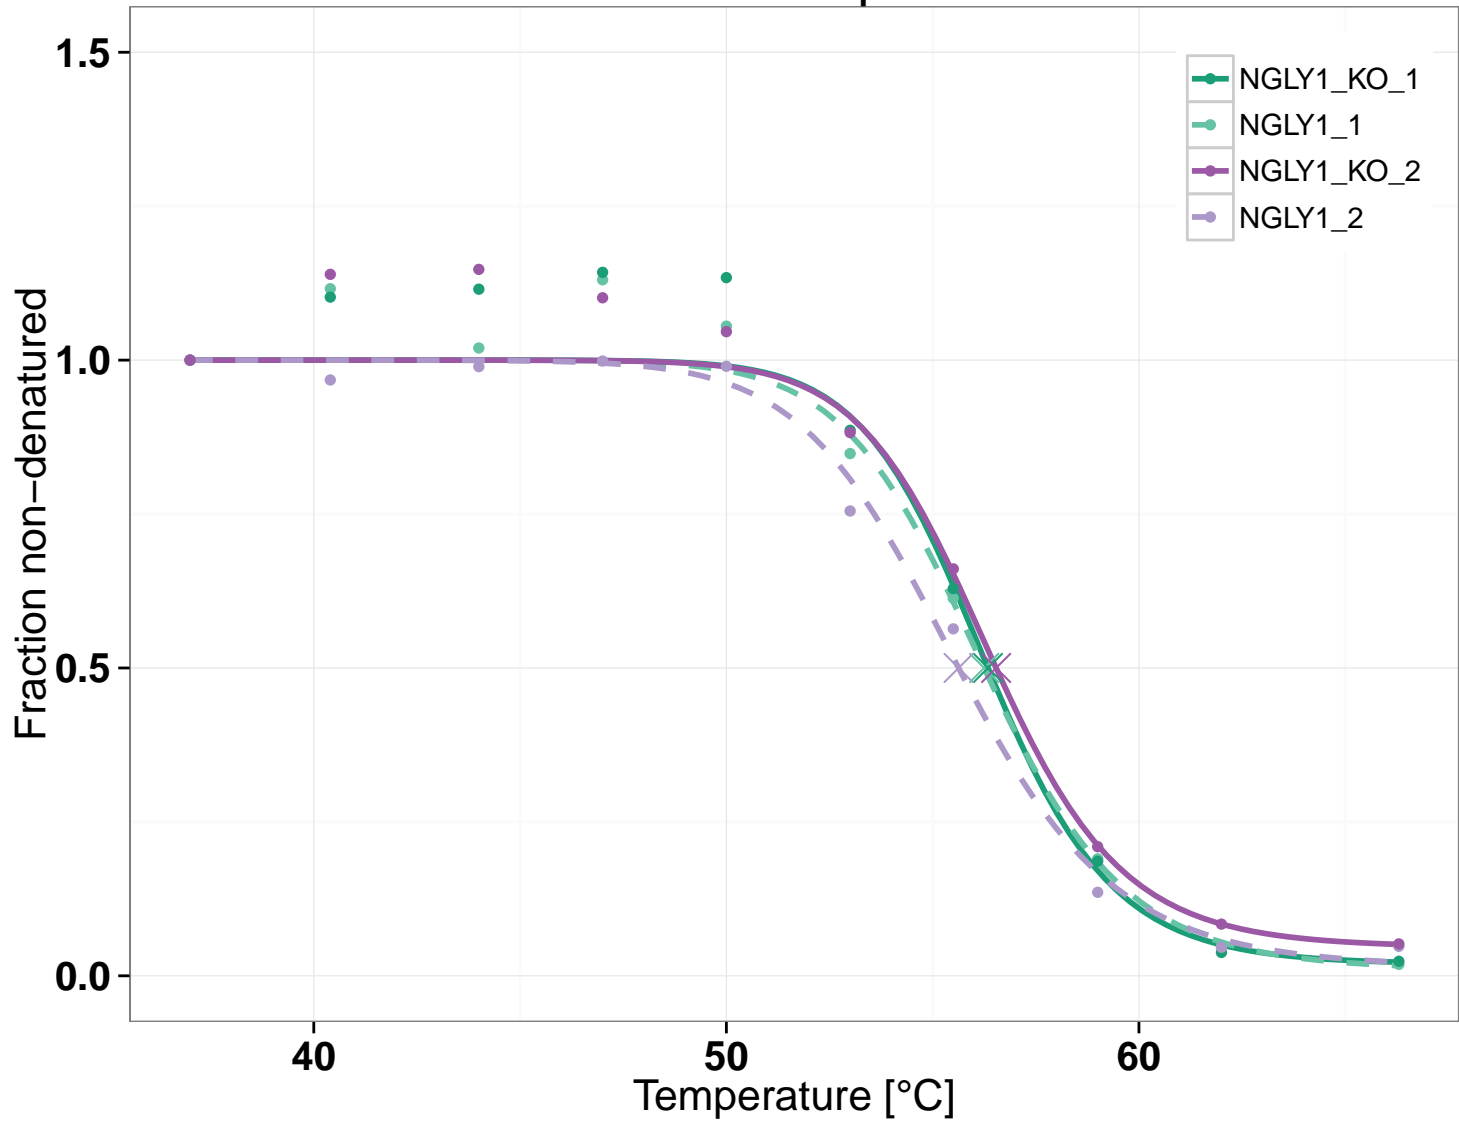

|            | meltPoint | slope | plateau | R2   |
|------------|-----------|-------|---------|------|
| NGLY1_KO_1 | 56.34     | -0.16 | 0.02    | 0.97 |
| NGLY1_1    | 56.25     | -0.14 | 0.01    | 0.98 |
| NGLY1_KO_2 | 56.54     | -0.15 | 0.05    | 0.97 |
| NGLY1_2    | 55.63     | -0.13 | 0.01    | 0.99 |

Supplement: Supplementary file 7782 [file 1]

IPI00292537.3|NFKB1

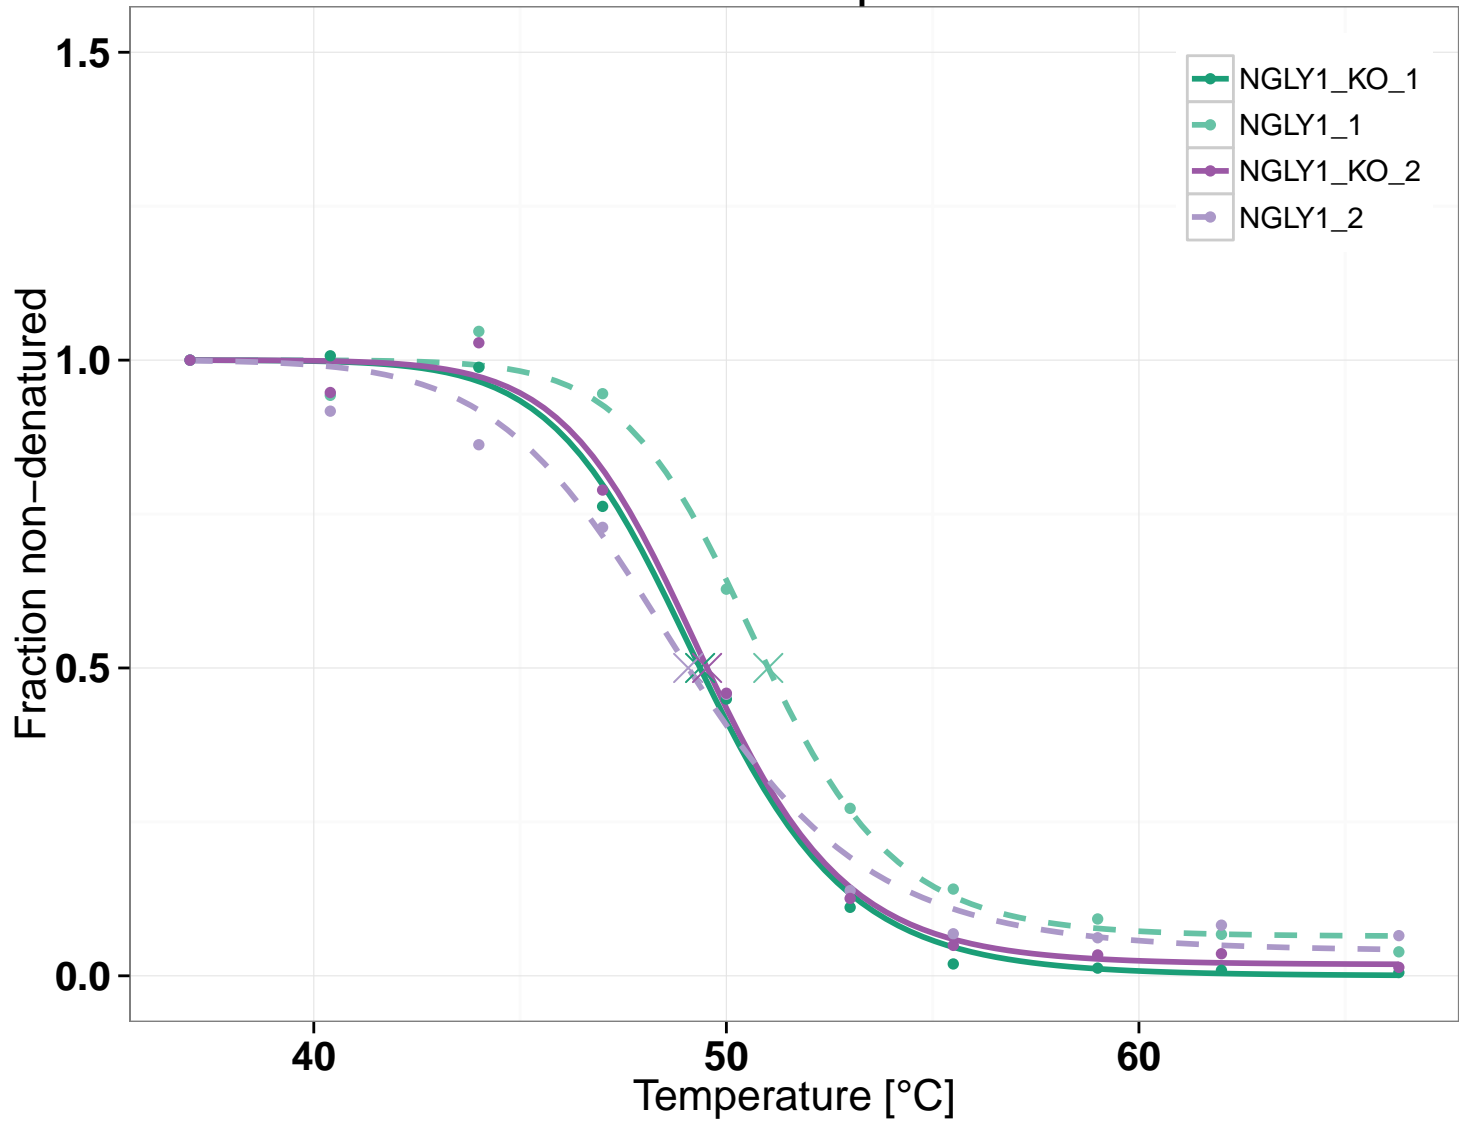

|            | meltPoint | slope | plateau | R2   |
|------------|-----------|-------|---------|------|
| NGLY1_KO_1 | 49.36     | -0.14 | 0       | 1    |
| NGLY1_1    | 51.02     | -0.14 | 0.06    | 1    |
| NGLY1_KO_2 | 49.53     | -0.14 | 0.02    | 1    |
| NGLY1_2    | 49.08     | -0.11 | 0.04    | 0.99 |

Supplement: Supplementary file 7783 [file 1]

IPI00329526.3|CDC20

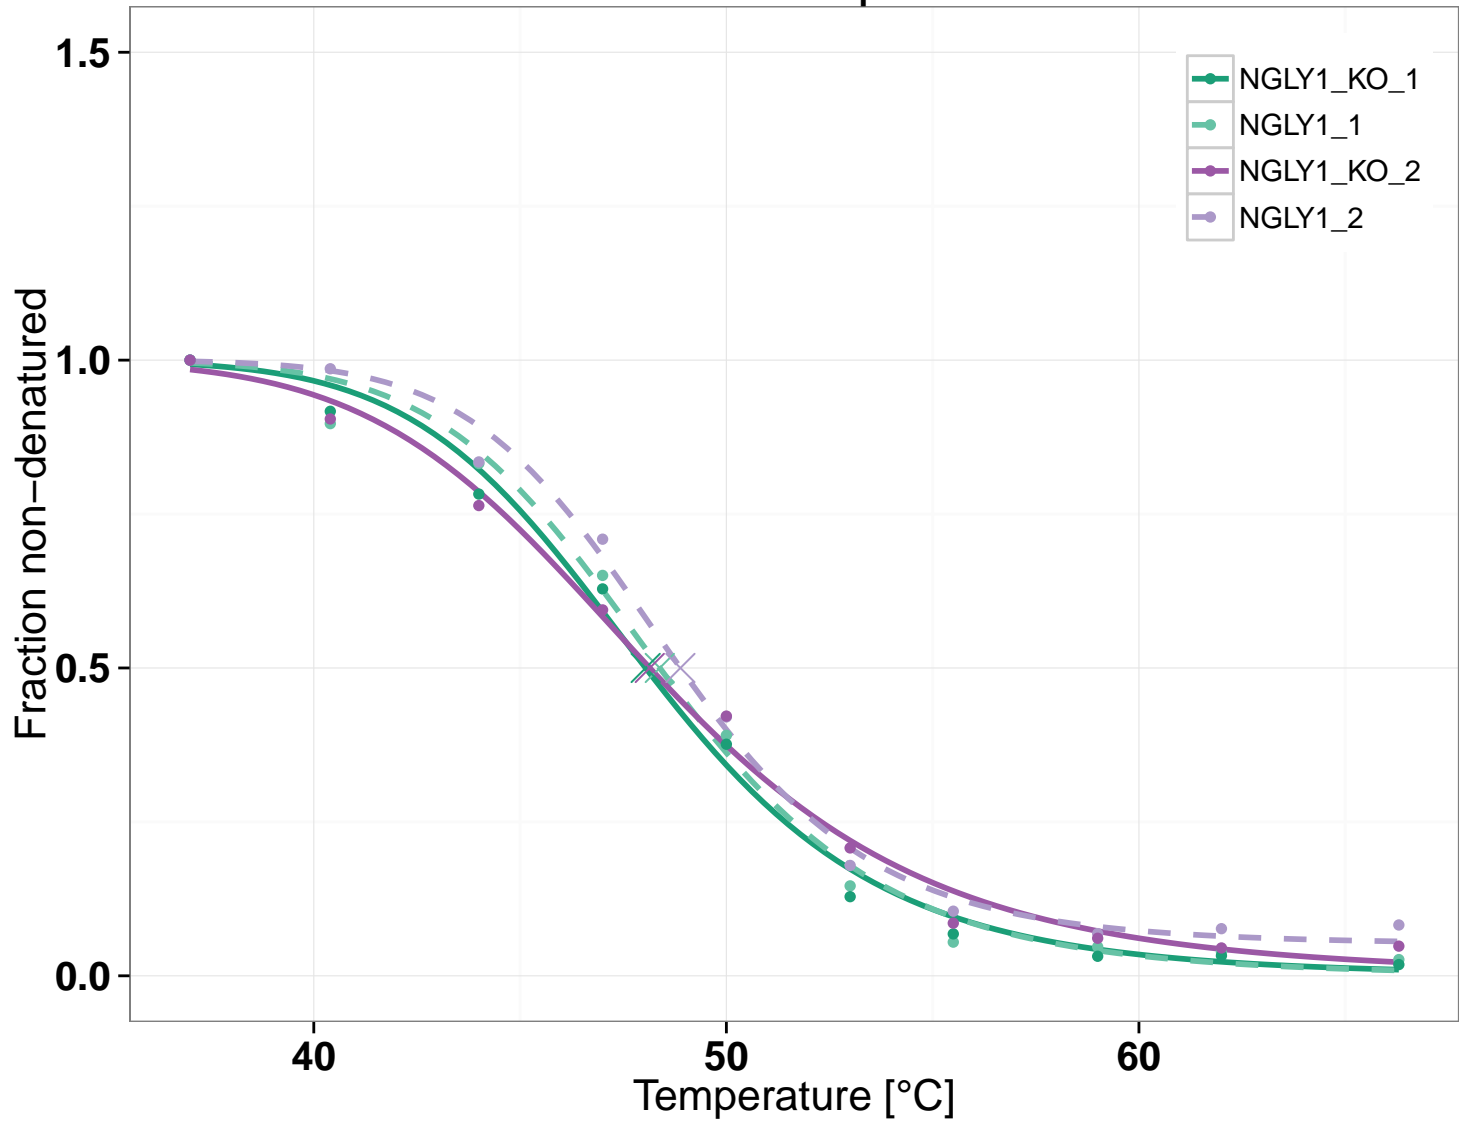

|            | meltPoint | slope  | plateau | R2   |
|------------|-----------|--------|---------|------|
| NGLY1_KO_1 | 48.04     | -0.088 | 0       | 0.99 |
| NGLY1_1    | 48.39     | -0.092 | 0       | 0.99 |
| NGLY1_KO_2 | 48.14     | -0.073 | 0       | 0.99 |
| NGLY1_2    | 48.89     | -0.097 | 0.05    | 1    |

Supplement: Supplementary file 7784 [file 1]

# IPI00383105.5|CHD9

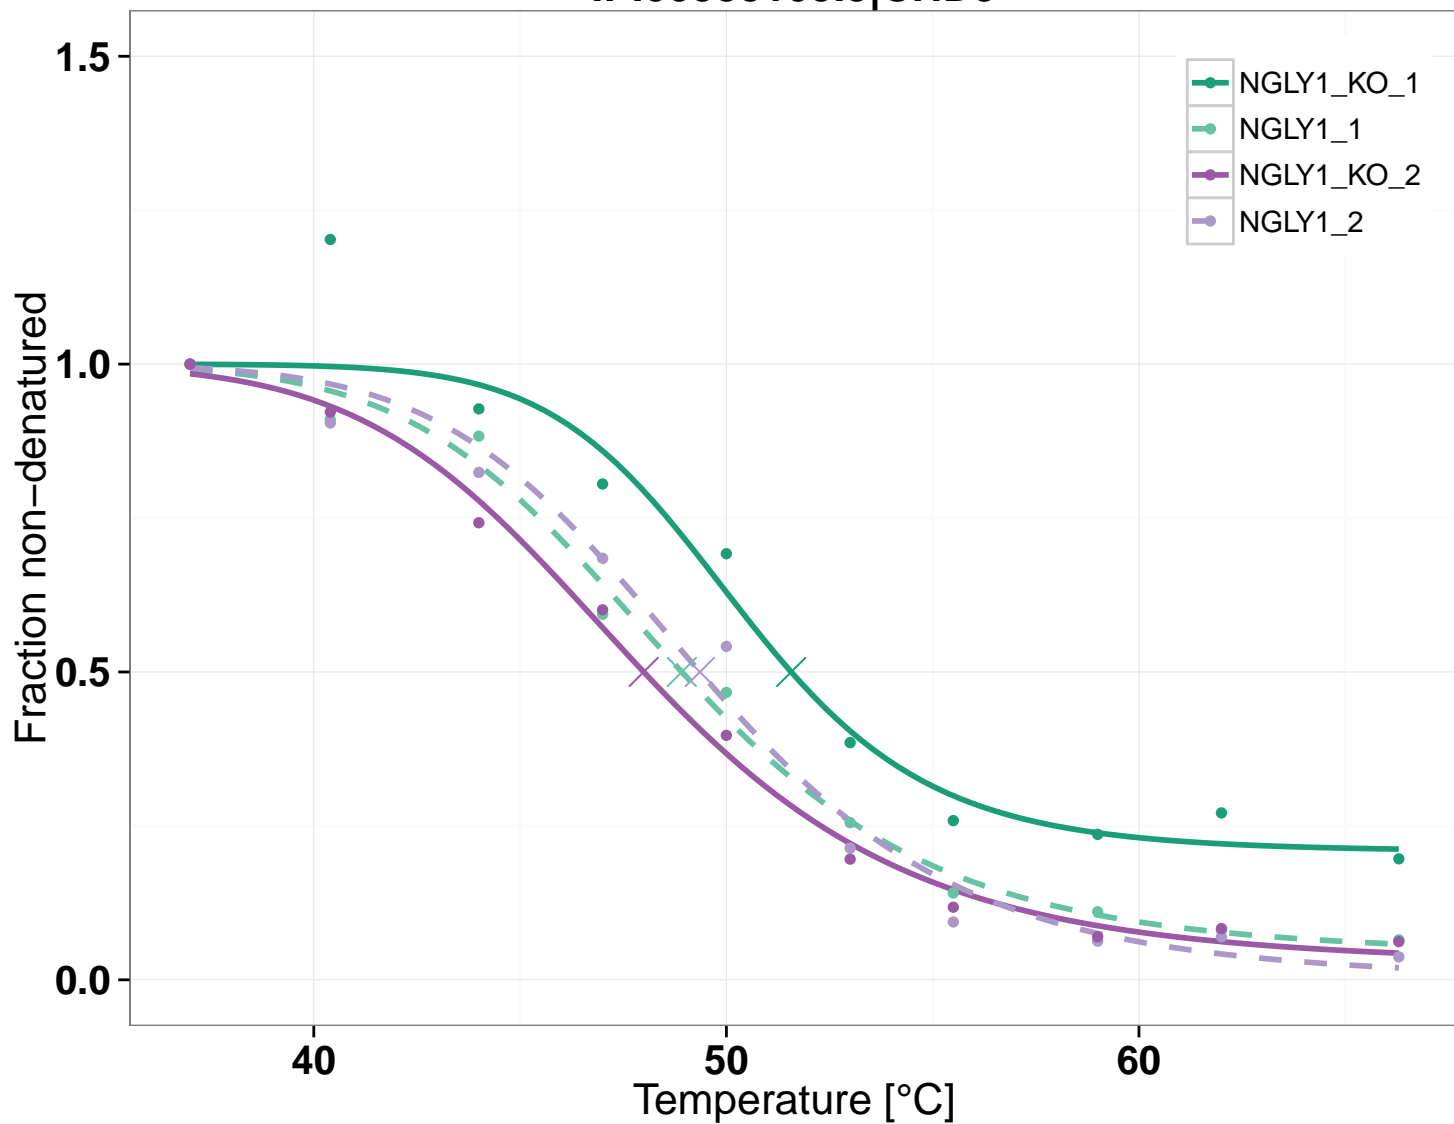

|            | meltPoint | slope  | plateau | R2   |
|------------|-----------|--------|---------|------|
| NGLY1_KO_1 | 51.57     | -0.087 | 0.21    | 0.96 |
| NGLY1_1    | 48.92     | -0.075 | 0.04    | 0.99 |
| NGLY1_KO_2 | 48        | -0.073 | 0.02    | 1    |
| NGLY1_2    | 49.36     | -0.079 | 0       | 0.98 |

Supplement: Supplementary file 7785 [file 1]

IPI00025616.1|POLD2

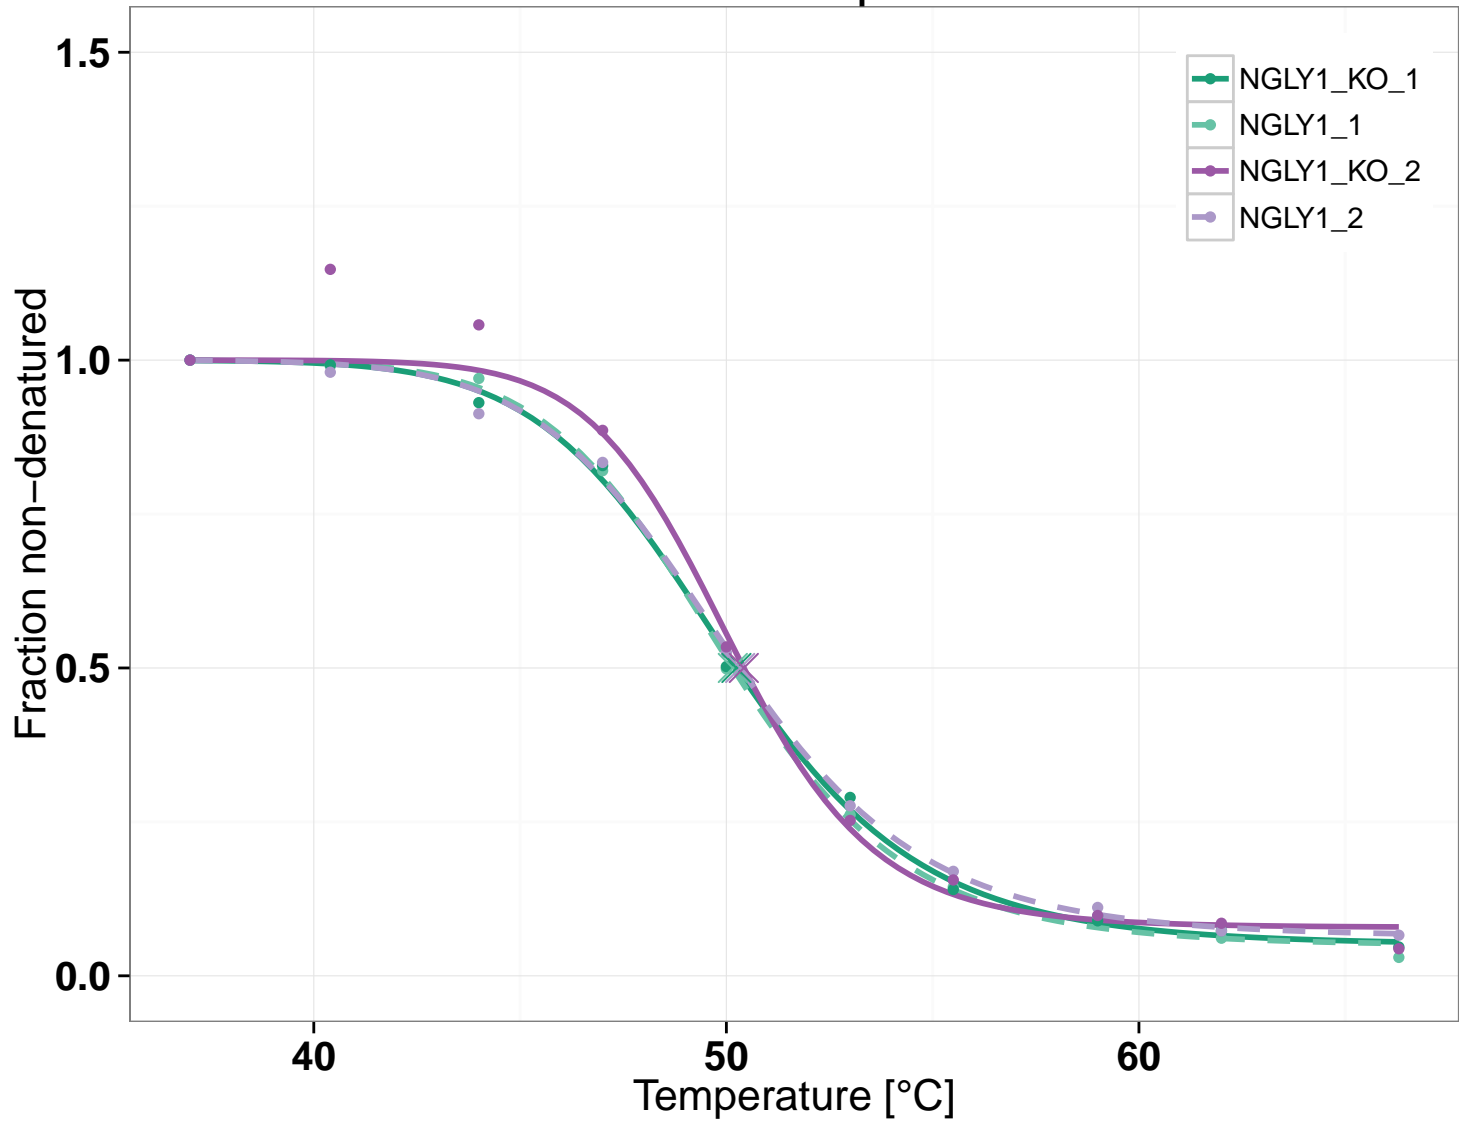

|            | meltPoint | slope  | plateau | R2   |
|------------|-----------|--------|---------|------|
| NGLY1_KO_1 | 50.24     | -0.1   | 0.05    | 1    |
| NGLY1_1    | 50.16     | -0.11  | 0.05    | 1    |
| NGLY1_KO_2 | 50.42     | -0.13  | 0.08    | 0.98 |
| NGLY1_2    | 50.33     | -0.099 | 0.06    | 1    |

Supplement: Supplementary file 7786 [file 1]

IPI00165616.4|SENP8

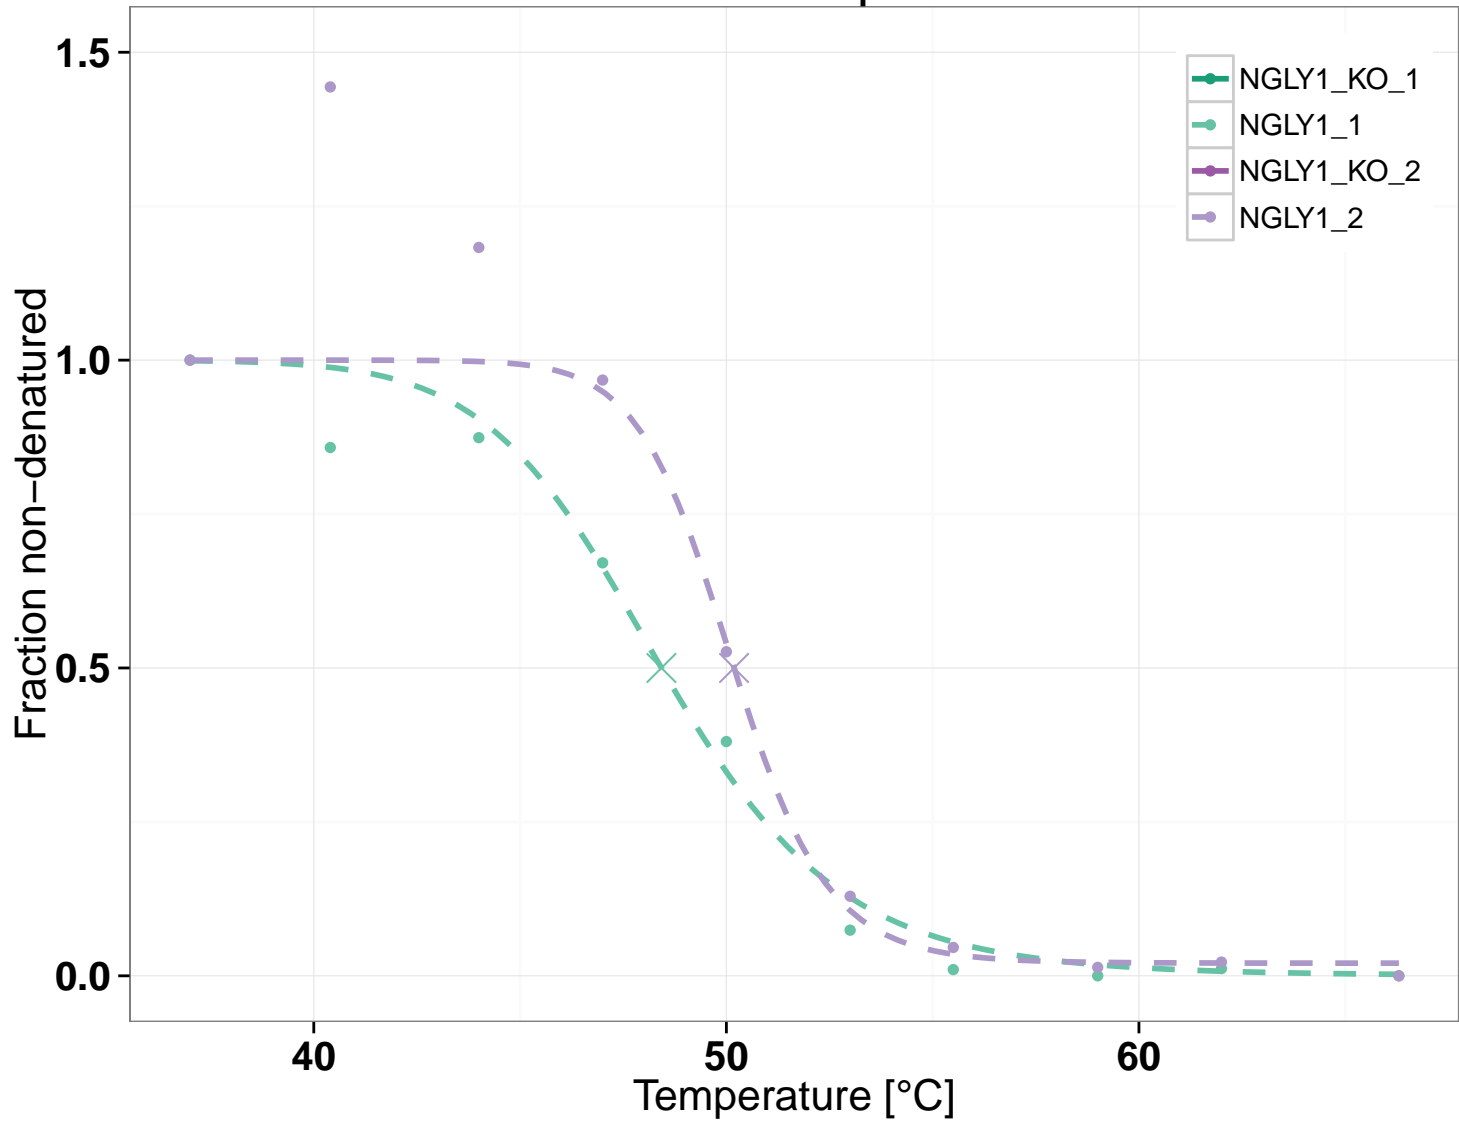

|            | meltPoint | slope | plateau | R2   |
|------------|-----------|-------|---------|------|
| NGLY1_KO_1 | -         | -     | -       | -    |
| NGLY1_1    | 48.43     | -0.12 | 0       | 0.98 |
| NGLY1_KO_2 | -         | -     | -       | -    |
| NGLY1_2    | 50.19     | -0.21 | 0.02    | 0.92 |

Supplement: Supplementary file 7787 [file 1]

IPI00855985.2|MAP3K1

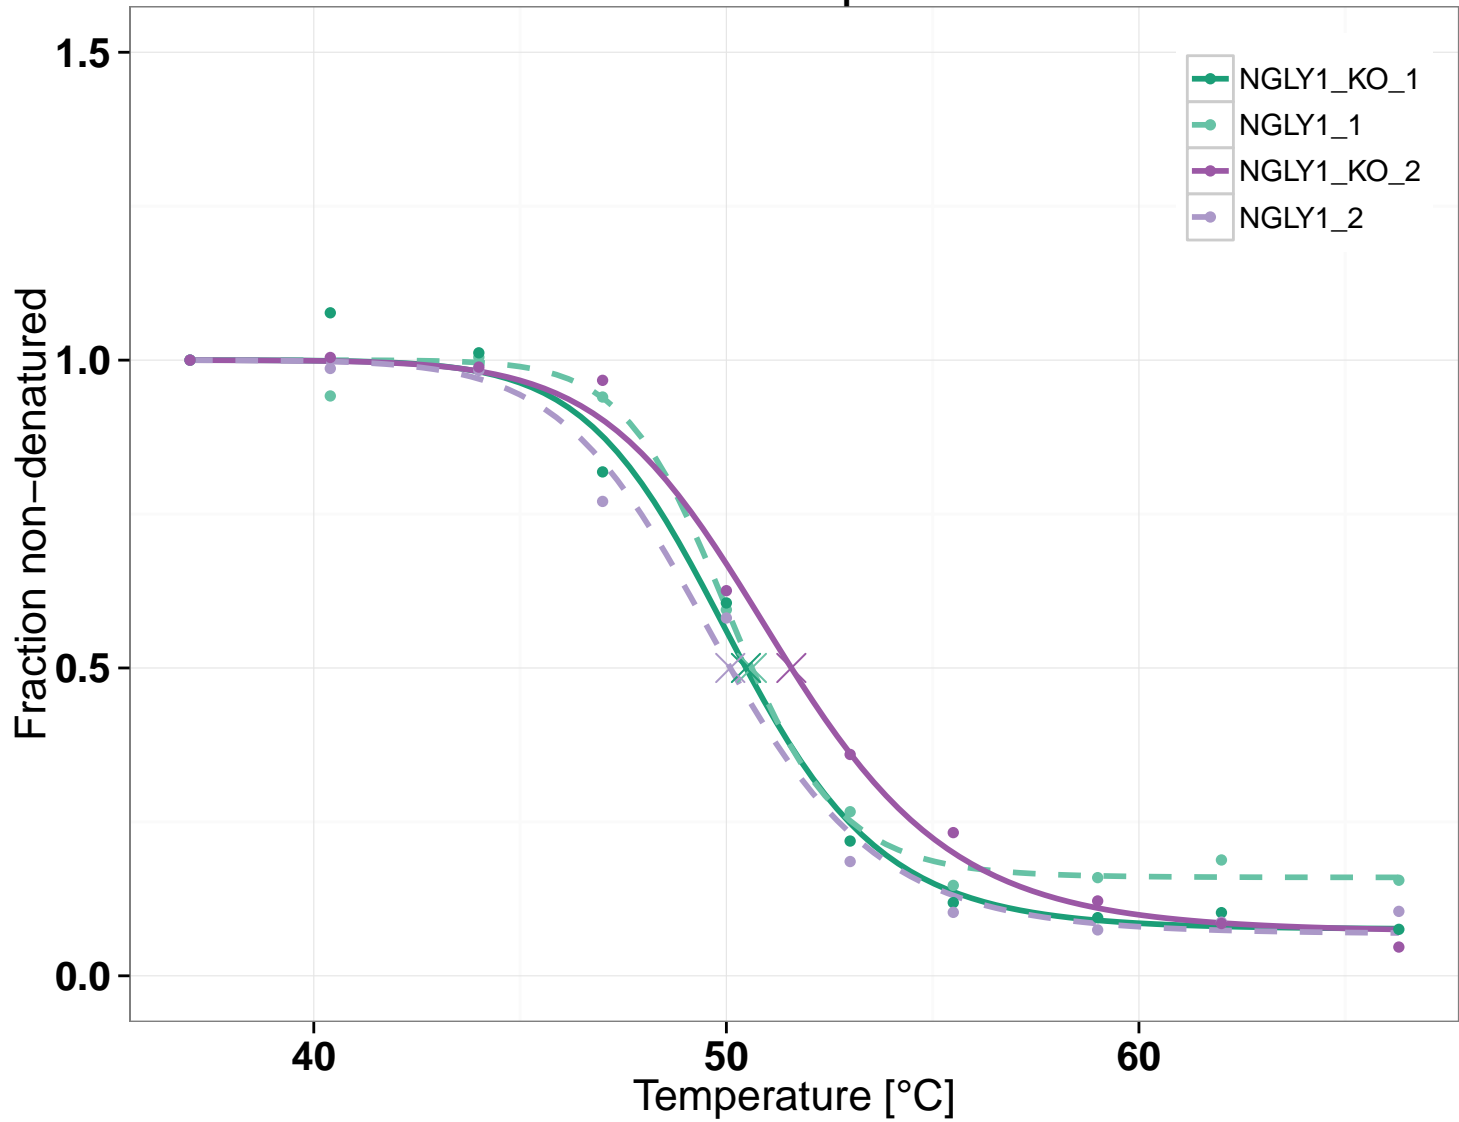

|            | meltPoint | slope | plateau | R2   |
|------------|-----------|-------|---------|------|
| NGLY1_KO_1 | 50.48     | -0.13 | 0.08    | 0.99 |
| NGLY1_1    | 50.62     | -0.16 | 0.16    | 1    |
| NGLY1_KO_2 | 51.57     | -0.11 | 0.07    | 0.99 |
| NGLY1_2    | 50.1      | -0.12 | 0.07    | 0.99 |

Supplement: Supplementary file 7788 [file 1]

IPI00303882.2|M6PRBP1

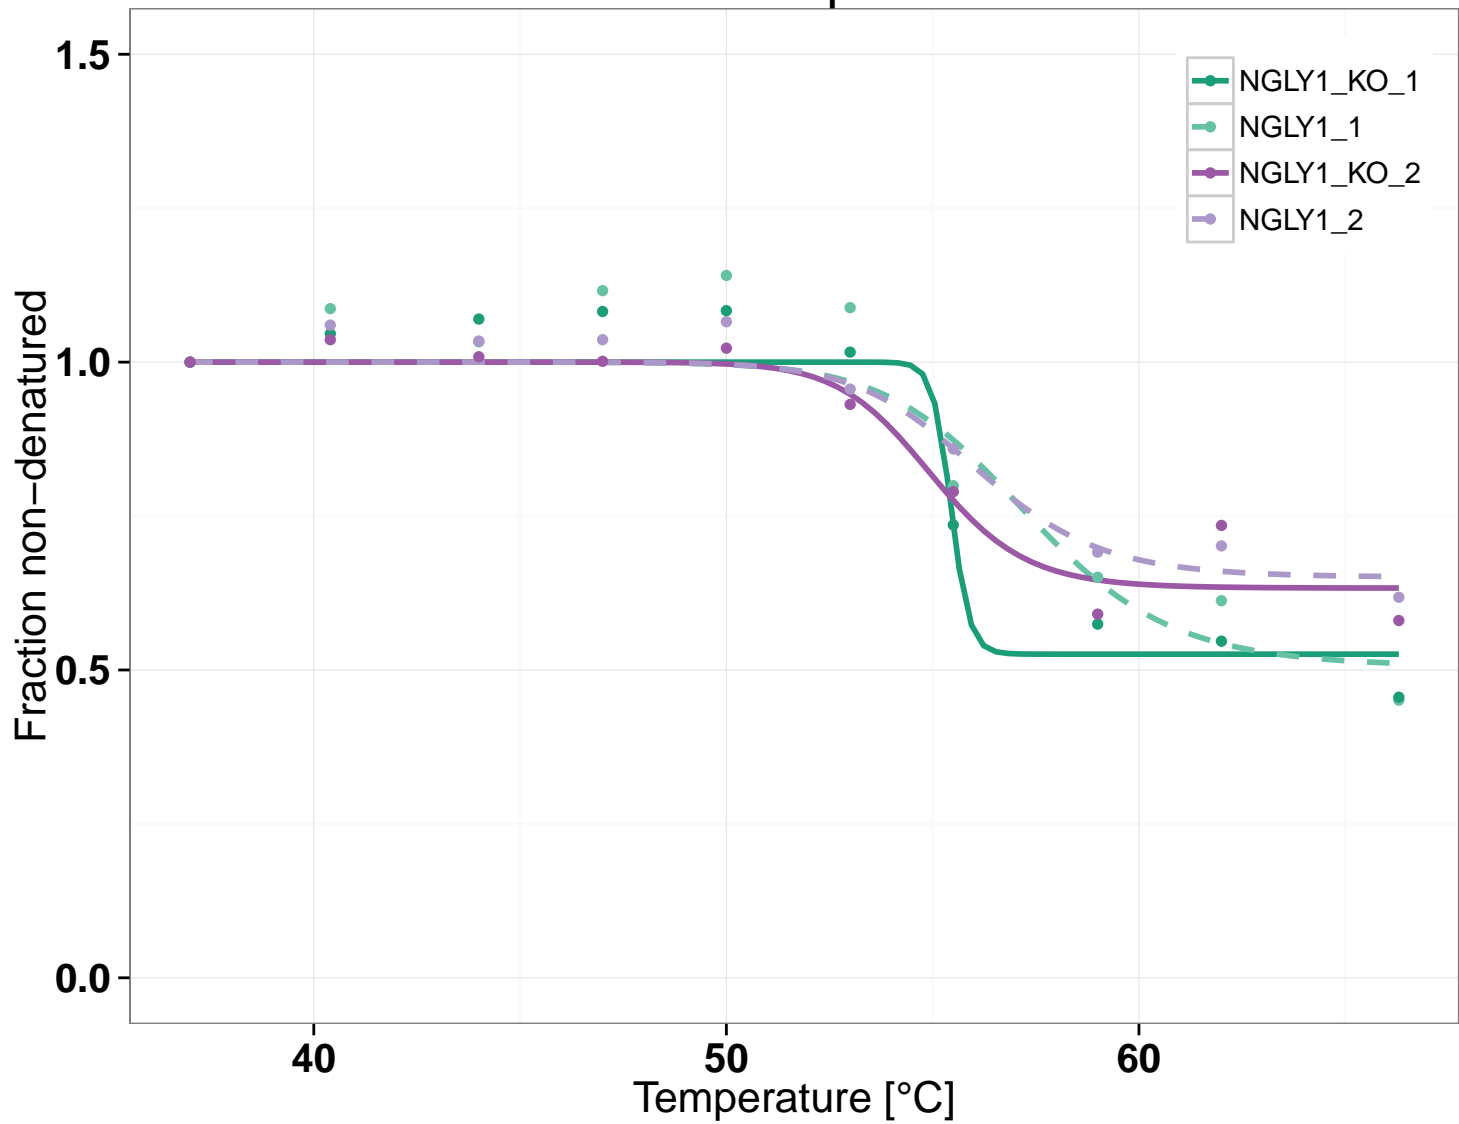

|            | meltPoint | slope  | plateau | R2   |
|------------|-----------|--------|---------|------|
| NGLY1_KO_1 | -         | -0.53  | 0.53    | 0.95 |
| NGLY1_1    | -         | -0.071 | 0.51    | 0.87 |
| NGLY1_KO_2 | -         | -0.081 | 0.63    | 0.94 |
| NGLY1_2    | -         | -0.058 | 0.65    | 0.95 |

Supplement: Supplementary file 7789 [file 1]

# IPI00006165.2|NPL

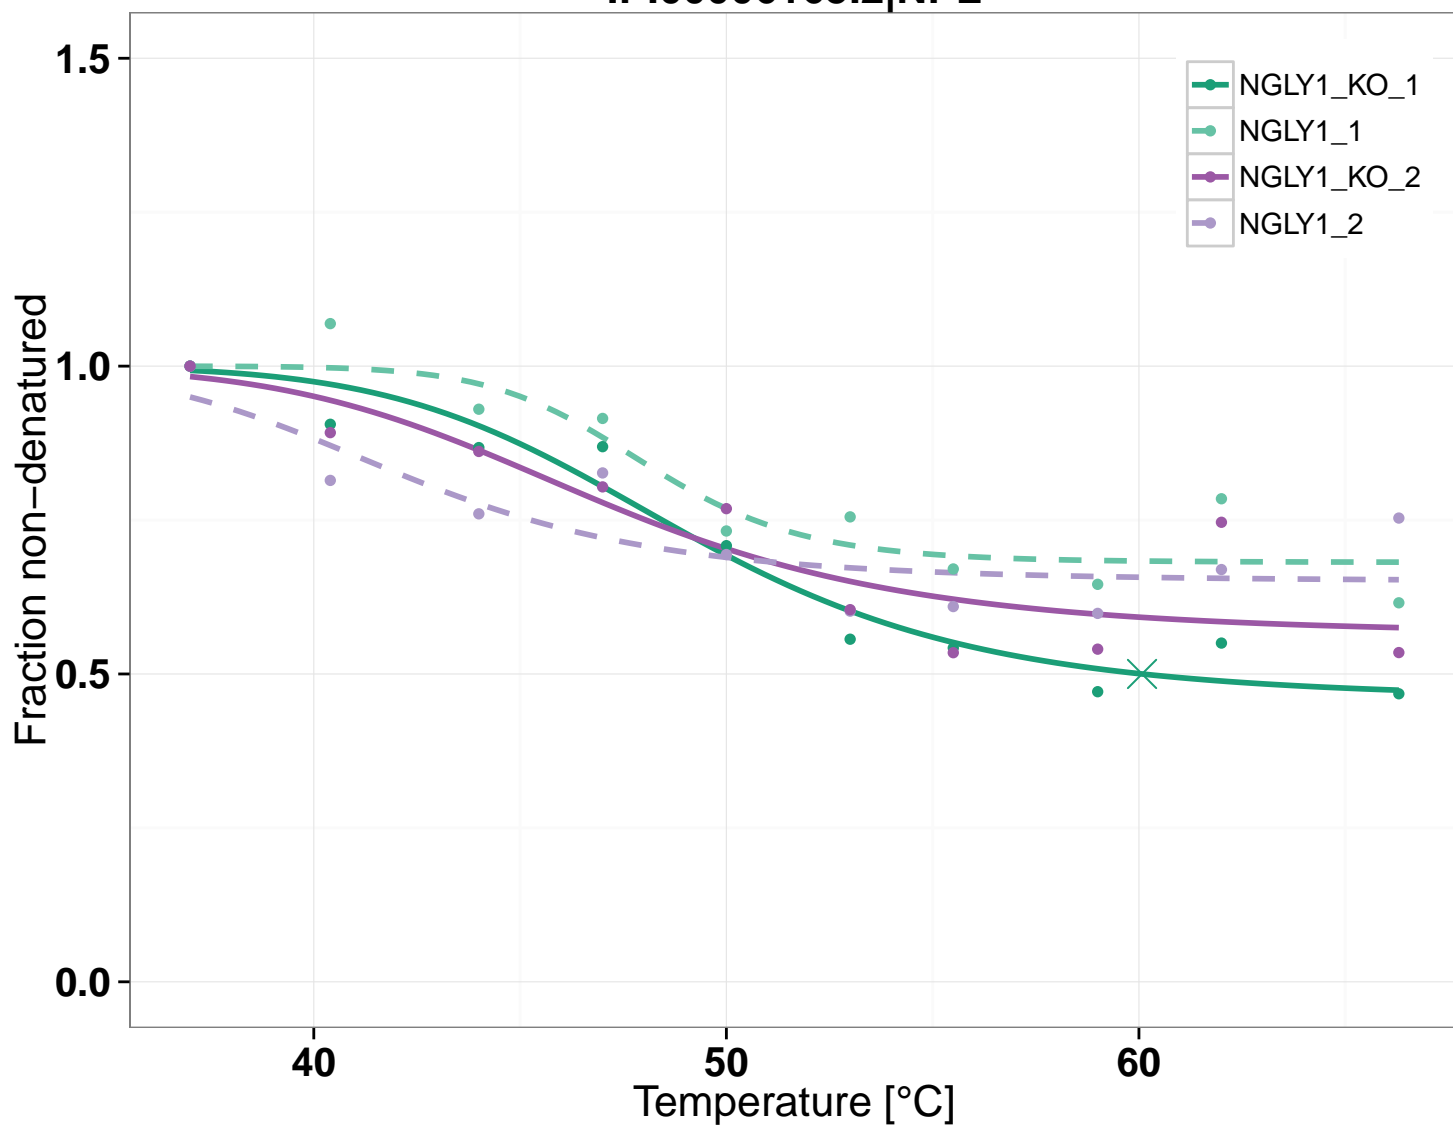

|            | meltPoint | slope  | plateau | R2   |
|------------|-----------|--------|---------|------|
| NGLY1_KO_1 | 60.08     | -0.038 | 0.46    | 0.95 |
| NGLY1_1    | -         | -0.042 | 0.68    | 0.87 |
| NGLY1_KO_2 | -         | -0.029 | 0.56    | 0.81 |
| NGLY1_2    | -         | -0.028 | 0.65    | 0.73 |

Supplement: Supplementary file 7790 [file 1]

# IPI00166749.3|PMPCA

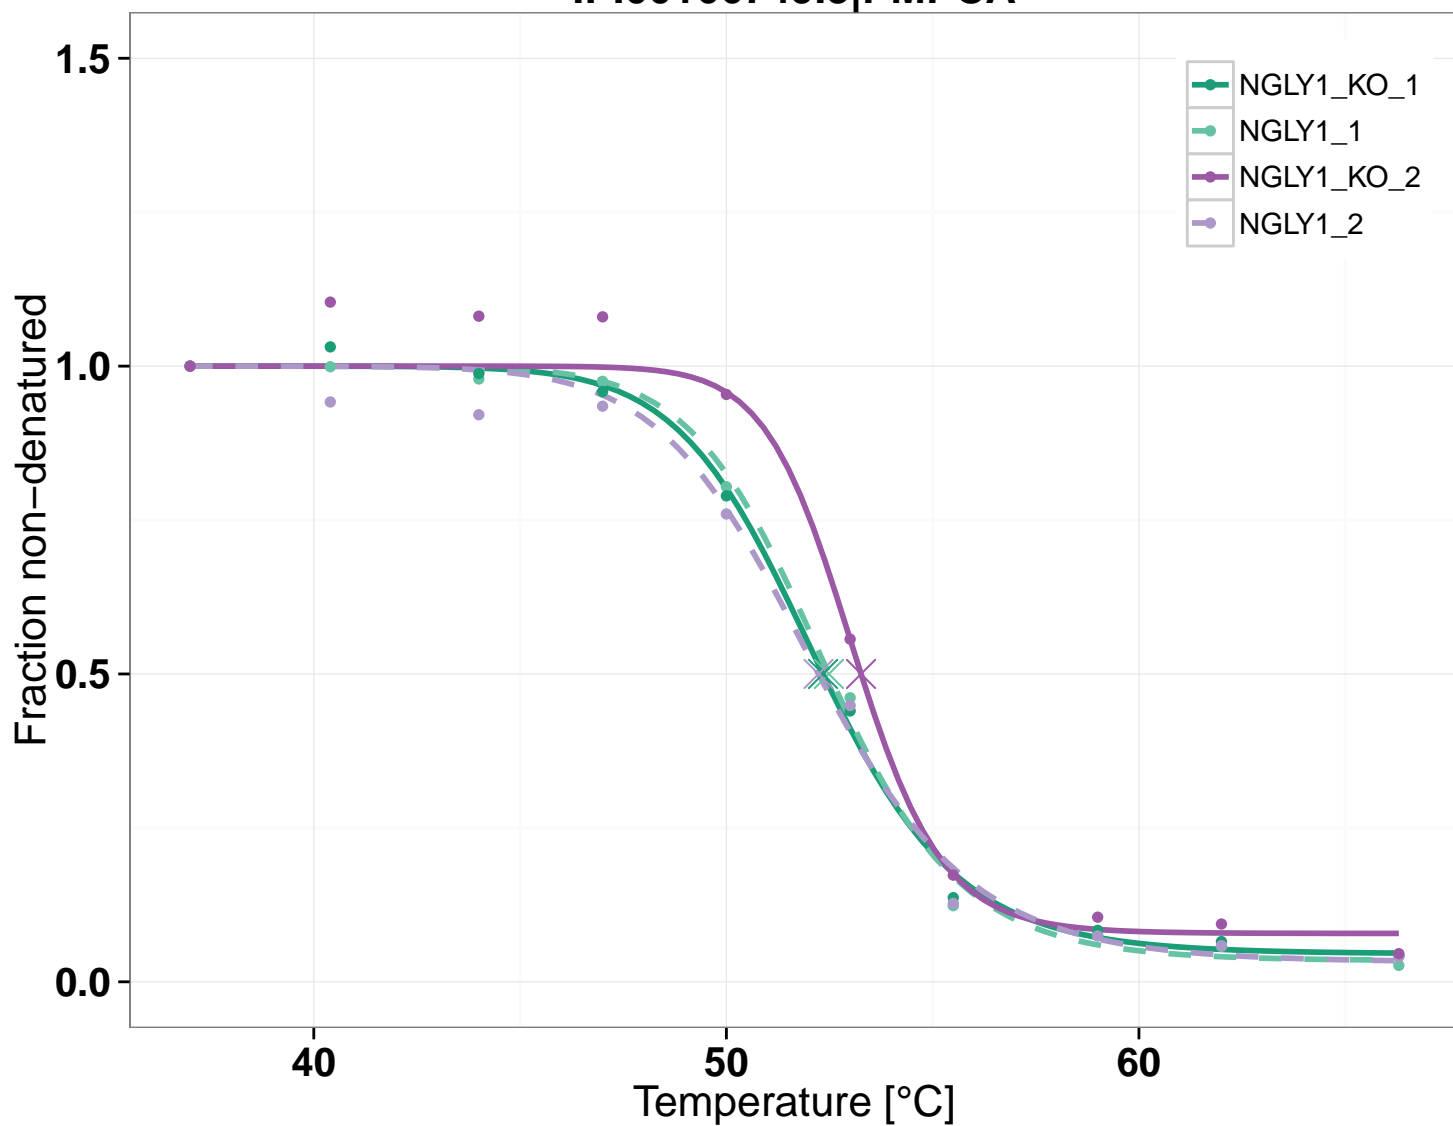

|            | meltPoint | slope | plateau | R2   |
|------------|-----------|-------|---------|------|
| NGLY1_KO_1 | 52.34     | -0.14 | 0.05    | 1    |
| NGLY1_1    | 52.49     | -0.15 | 0.03    | 1    |
| NGLY1_KO_2 | 53.27     | -0.21 | 0.08    | 0.99 |
| NGLY1_2    | 52.23     | -0.13 | 0.03    | 0.99 |

Supplement: Supplementary file 7791 [file 1]

IPI00871279.1|SLC38A1

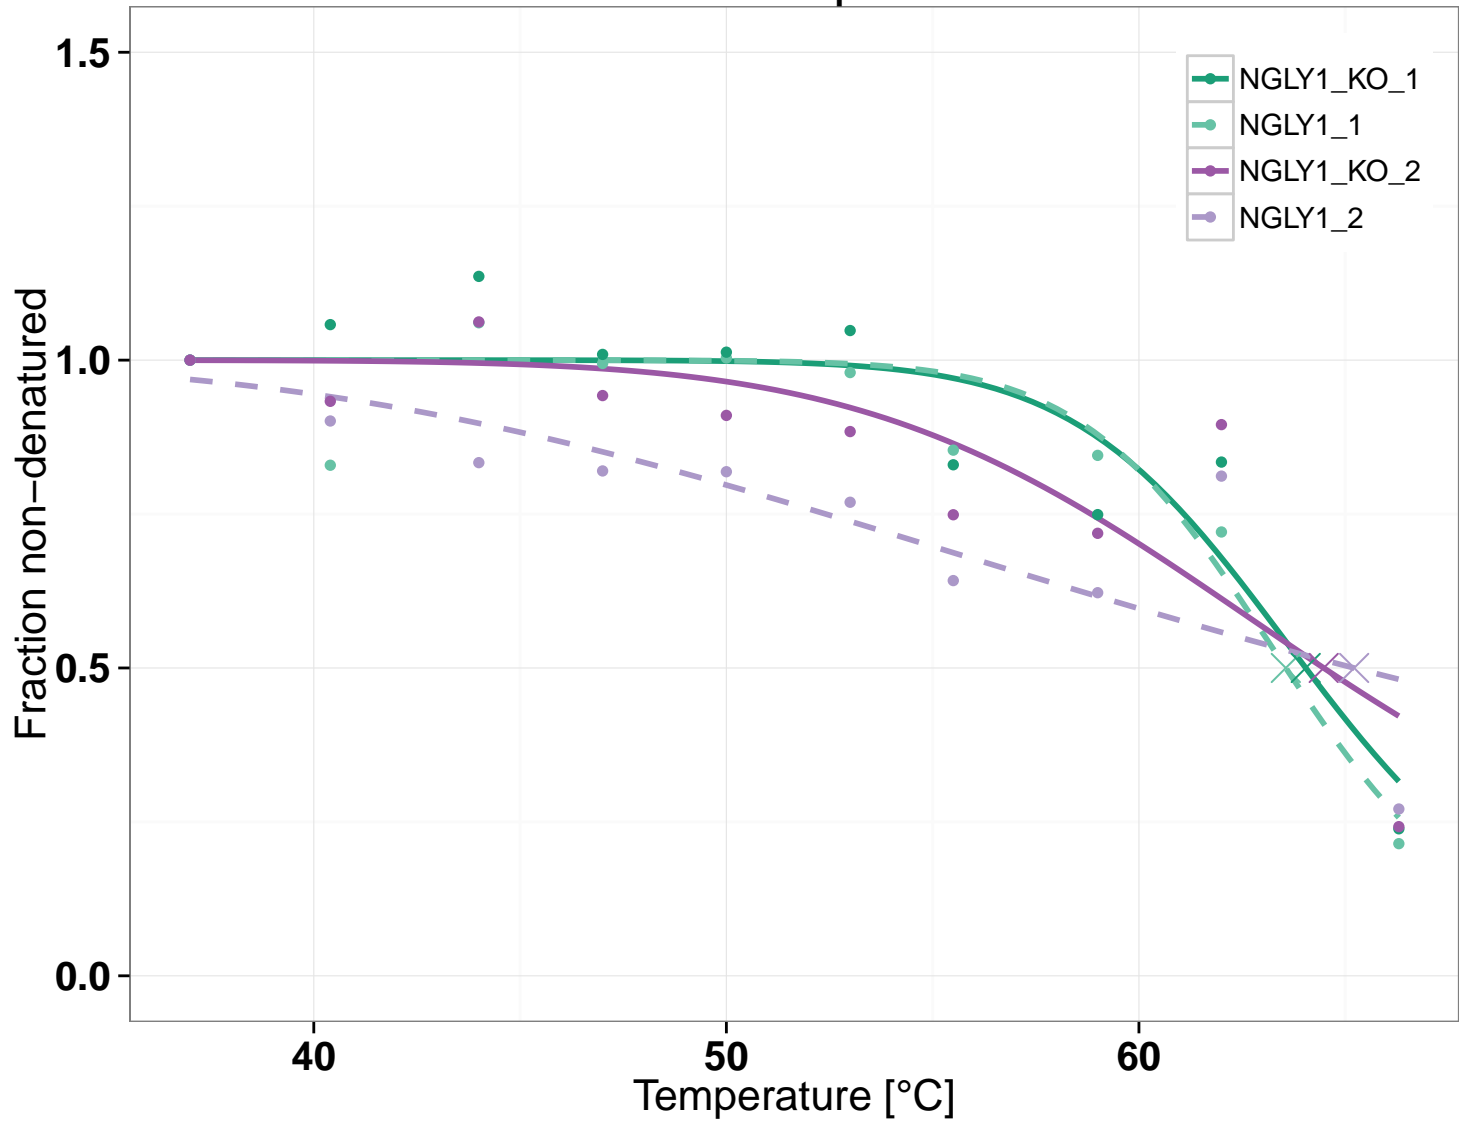

|            | meltPoint | slope  | plateau | R2   |
|------------|-----------|--------|---------|------|
| NGLY1_KO_1 | 64.04     | -0.089 | 0       | 0.85 |
| NGLY1_1    | 63.56     | -0.1   | 0       | 0.9  |
| NGLY1_KO_2 | 64.48     | -0.046 | 0       | 0.71 |
| NGLY1_2    | 65.22     | -0.02  | 0       | 0.67 |

Supplement: Supplementary file 7792 [file 1]

IPI00795922.1|MRPS28

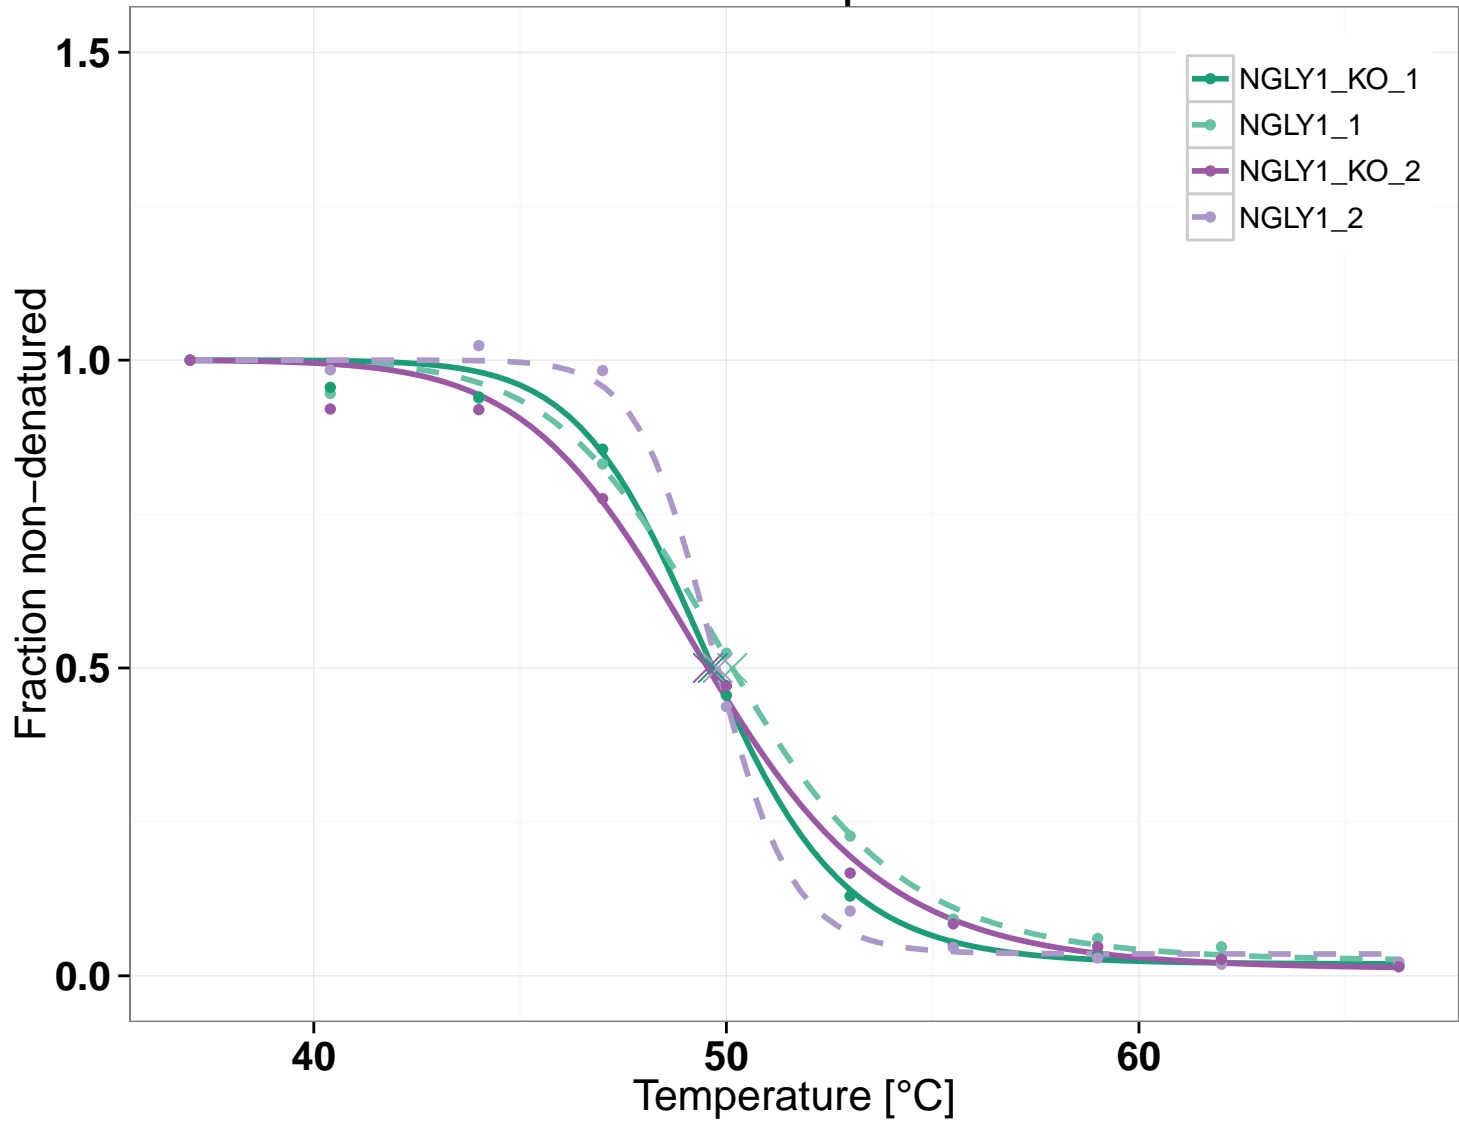

|            | meltPoint | slope | plateau | R2 |
|------------|-----------|-------|---------|----|
| NGLY1_KO_1 | 49.67     | -0.15 | 0.02    | 1  |
| NGLY1_1    | 50.14     | -0.12 | 0.02    | 1  |
| NGLY1_KO_2 | 49.55     | -0.11 | 0.01    | 1  |
| NGLY1_2    | 49.79     | -0.26 | 0.04    | 1  |

Supplement: Supplementary file 7793 [file 1]

IPI00748304.1|CASP9

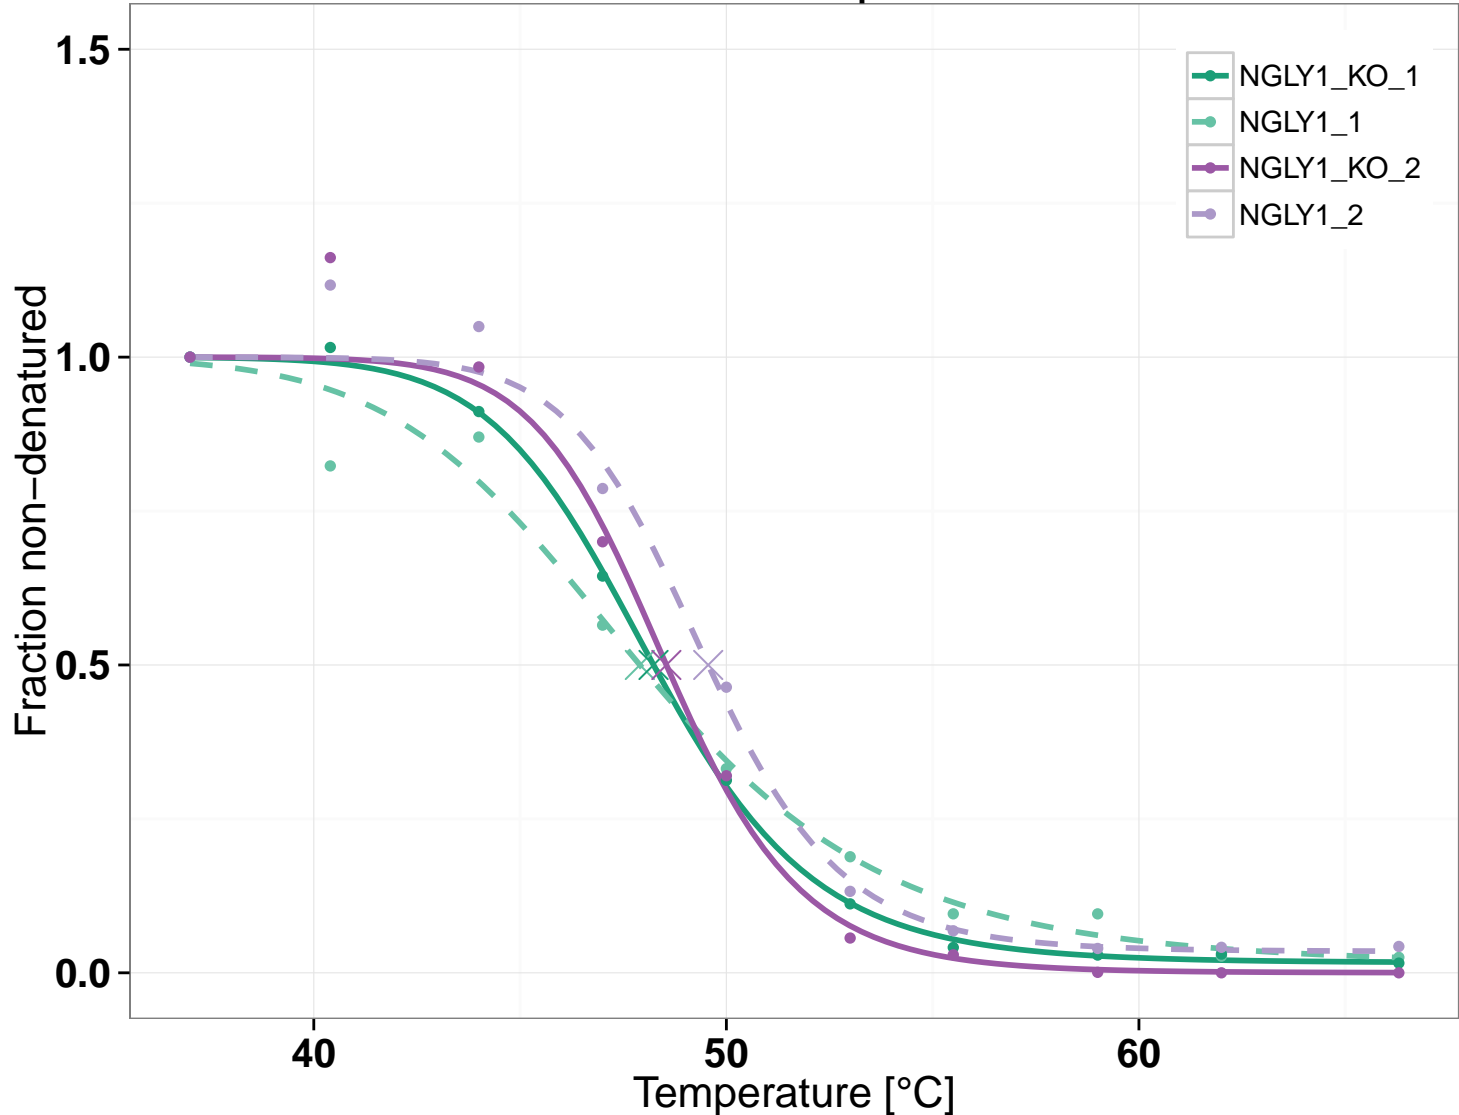

|            | meltPoint | slope  | plateau | R2   |
|------------|-----------|--------|---------|------|
| NGLY1_KO_1 | 48.23     | -0.12  | 0.02    | 1    |
| NGLY1_1    | 47.9      | -0.082 | 0.01    | 0.98 |
| NGLY1_KO_2 | 48.55     | -0.15  | 0       | 0.99 |
| NGLY1_2    | 49.56     | -0.15  | 0.03    | 0.99 |

Supplement: Supplementary file 7794 [file 1]

IPI00873482.1|TP53BP2

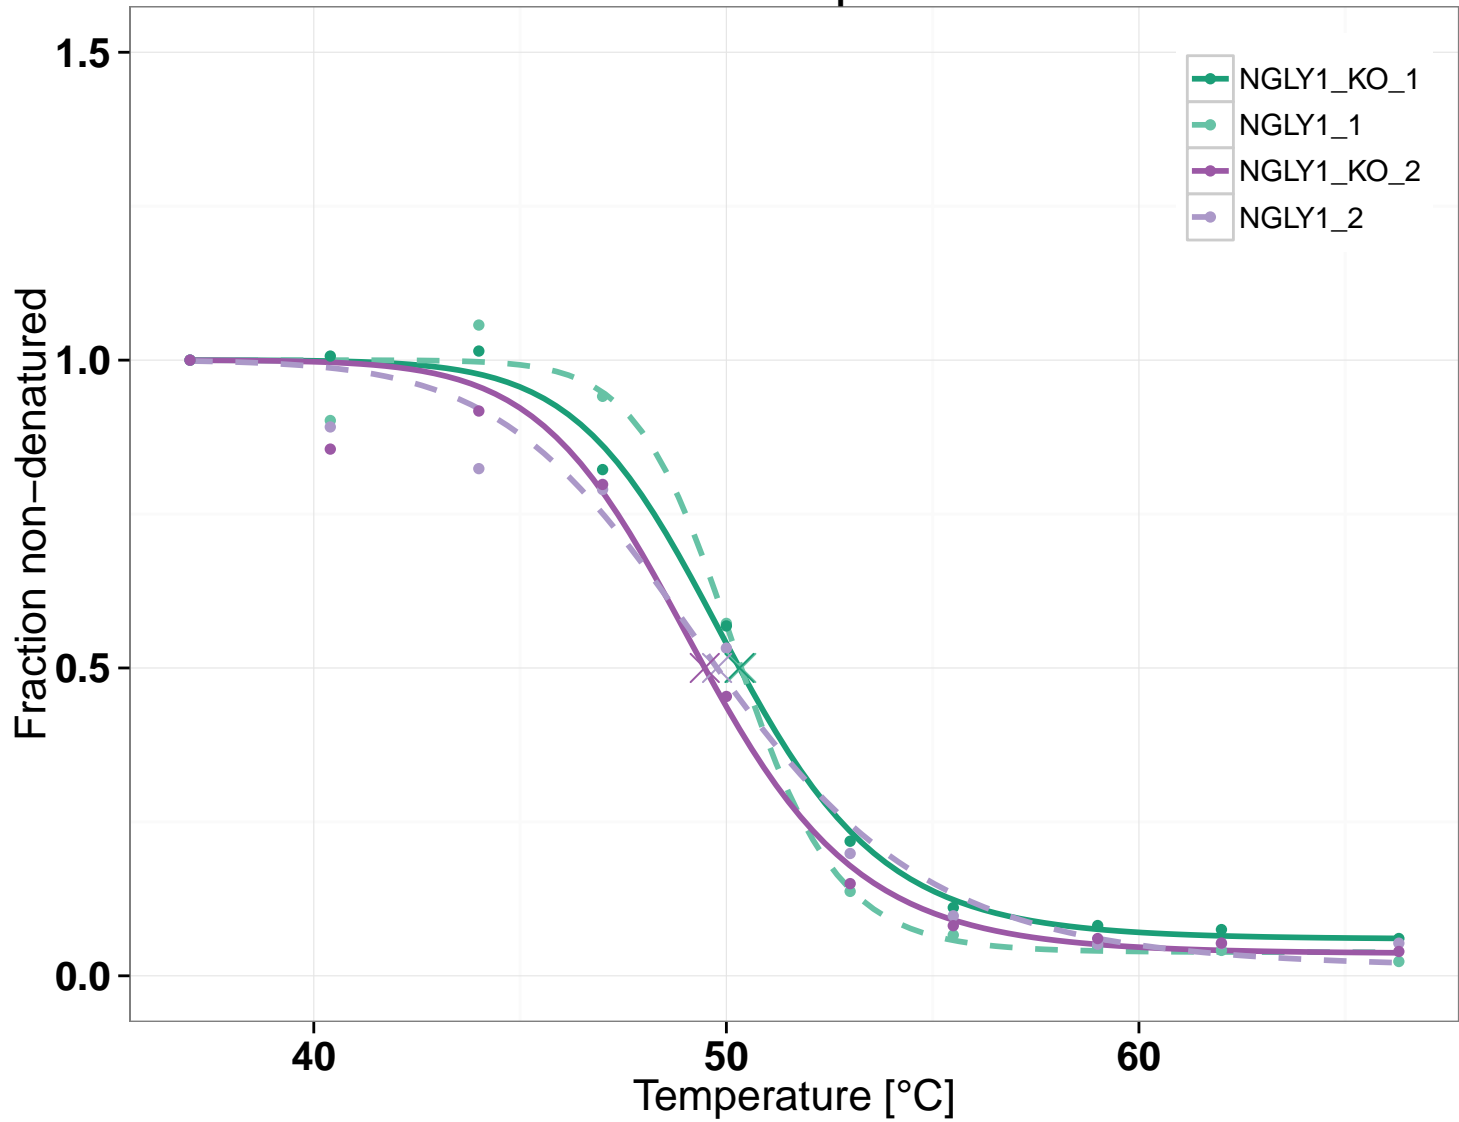

|            | meltPoint | slope  | plateau | R2   |
|------------|-----------|--------|---------|------|
| NGLY1_KO_1 | 50.32     | -0.13  | 0.06    | 1    |
| NGLY1_1    | 50.36     | -0.2   | 0.04    | 0.99 |
| NGLY1_KO_2 | 49.48     | -0.12  | 0.04    | 0.98 |
| NGLY1_2    | 49.77     | -0.095 | 0.01    | 0.98 |

Supplement: Supplementary file 7795 [file 1]

IPI00887307.1|LOC729643

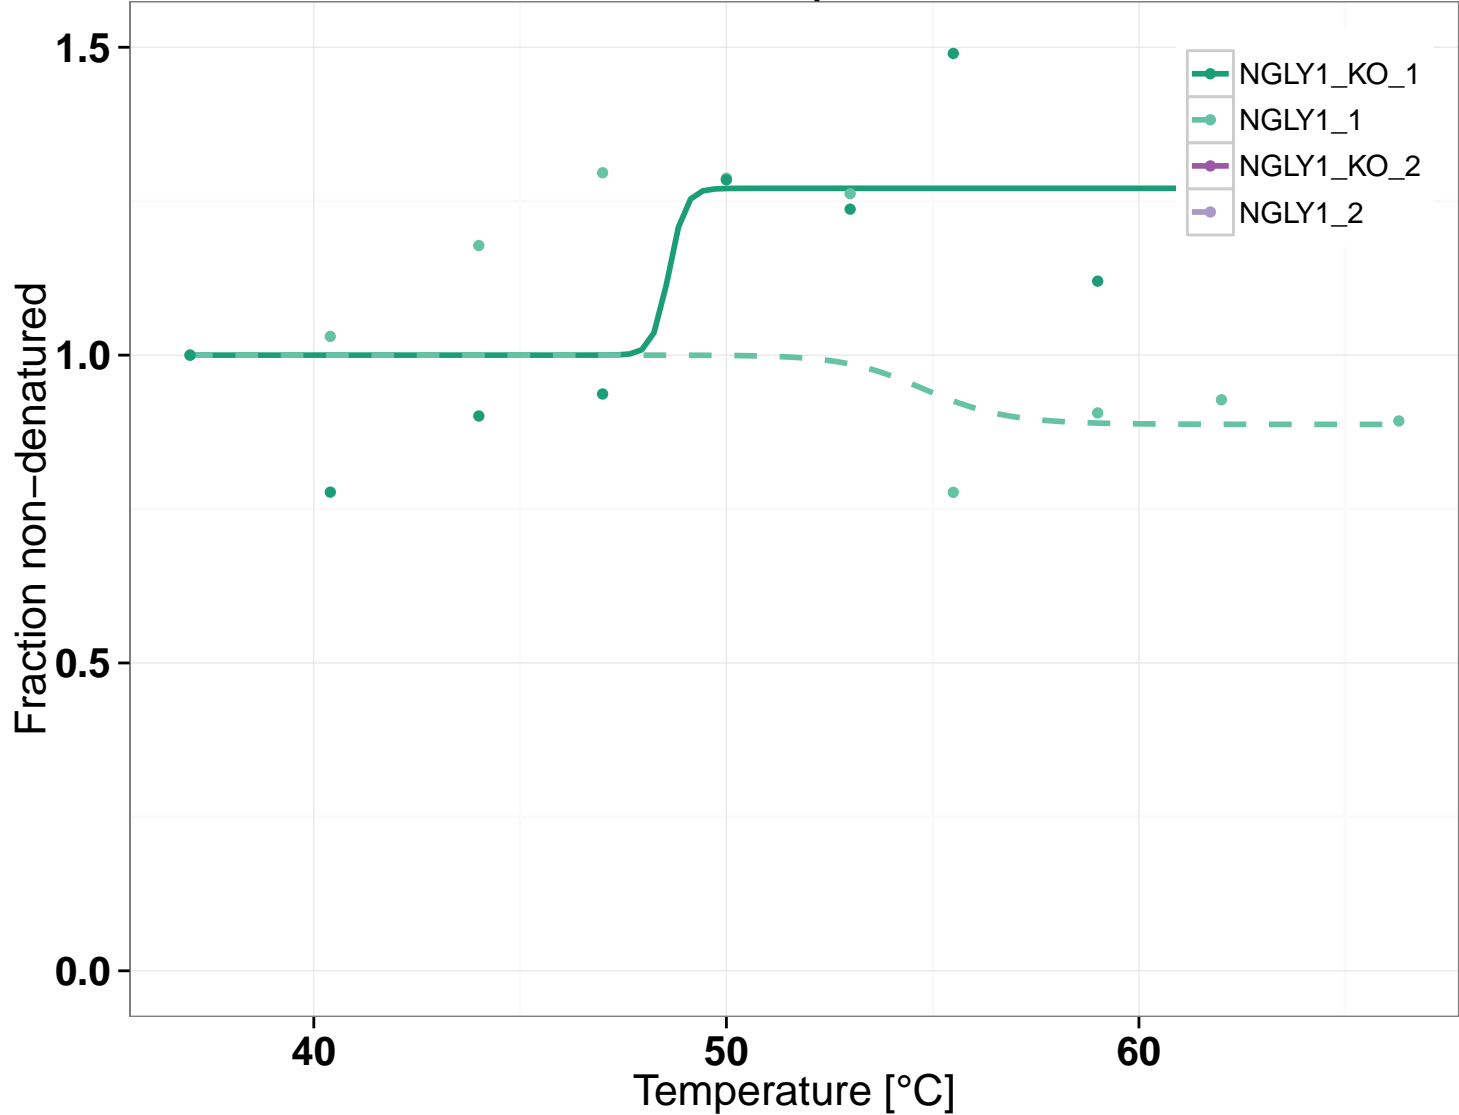

|            | meltPoint | slope  | plateau | R2   |
|------------|-----------|--------|---------|------|
| NGLY1_KO_1 | —         | 0.35   | 1.27    | 0.67 |
| NGLY1_1    | —         | -0.029 | 0.89    | 0.04 |
| NGLY1_KO_2 | —         | —      | —       | —    |
| NGLY1_2    | —         | —      | —       | —    |

Supplement: Supplementary file 7796 [file 1]

IPI00008494.4|ICAM1

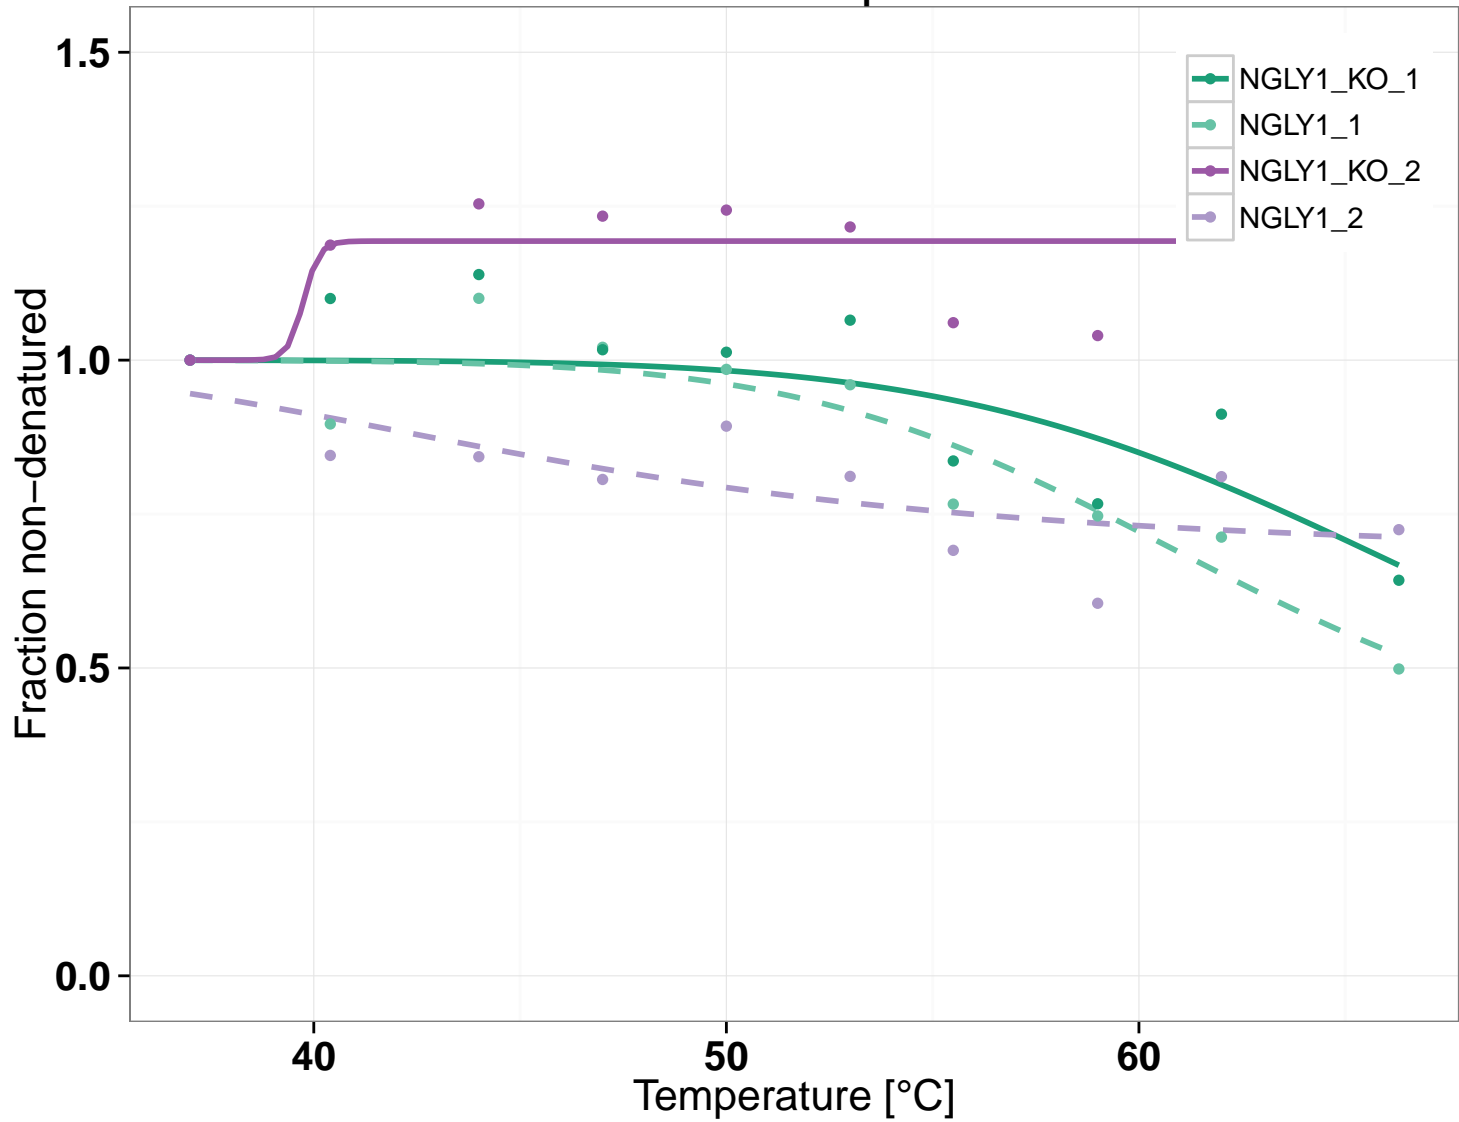

|            | meltPoint | slope  | plateau | R2   |
|------------|-----------|--------|---------|------|
| NGLY1_KO_1 | -         | -0.032 | 0.19    | 0.66 |
| NGLY1_1    | -         | -0.034 | 0.27    | 0.87 |
| NGLY1_KO_2 | -         | 0.25   | 1.19    | 0.35 |
| NGLY1_2    | -         | -0.013 | 0.68    | 0.56 |

Supplement: Supplementary file 7797 [file 1]

IPI00893500.1|STK25

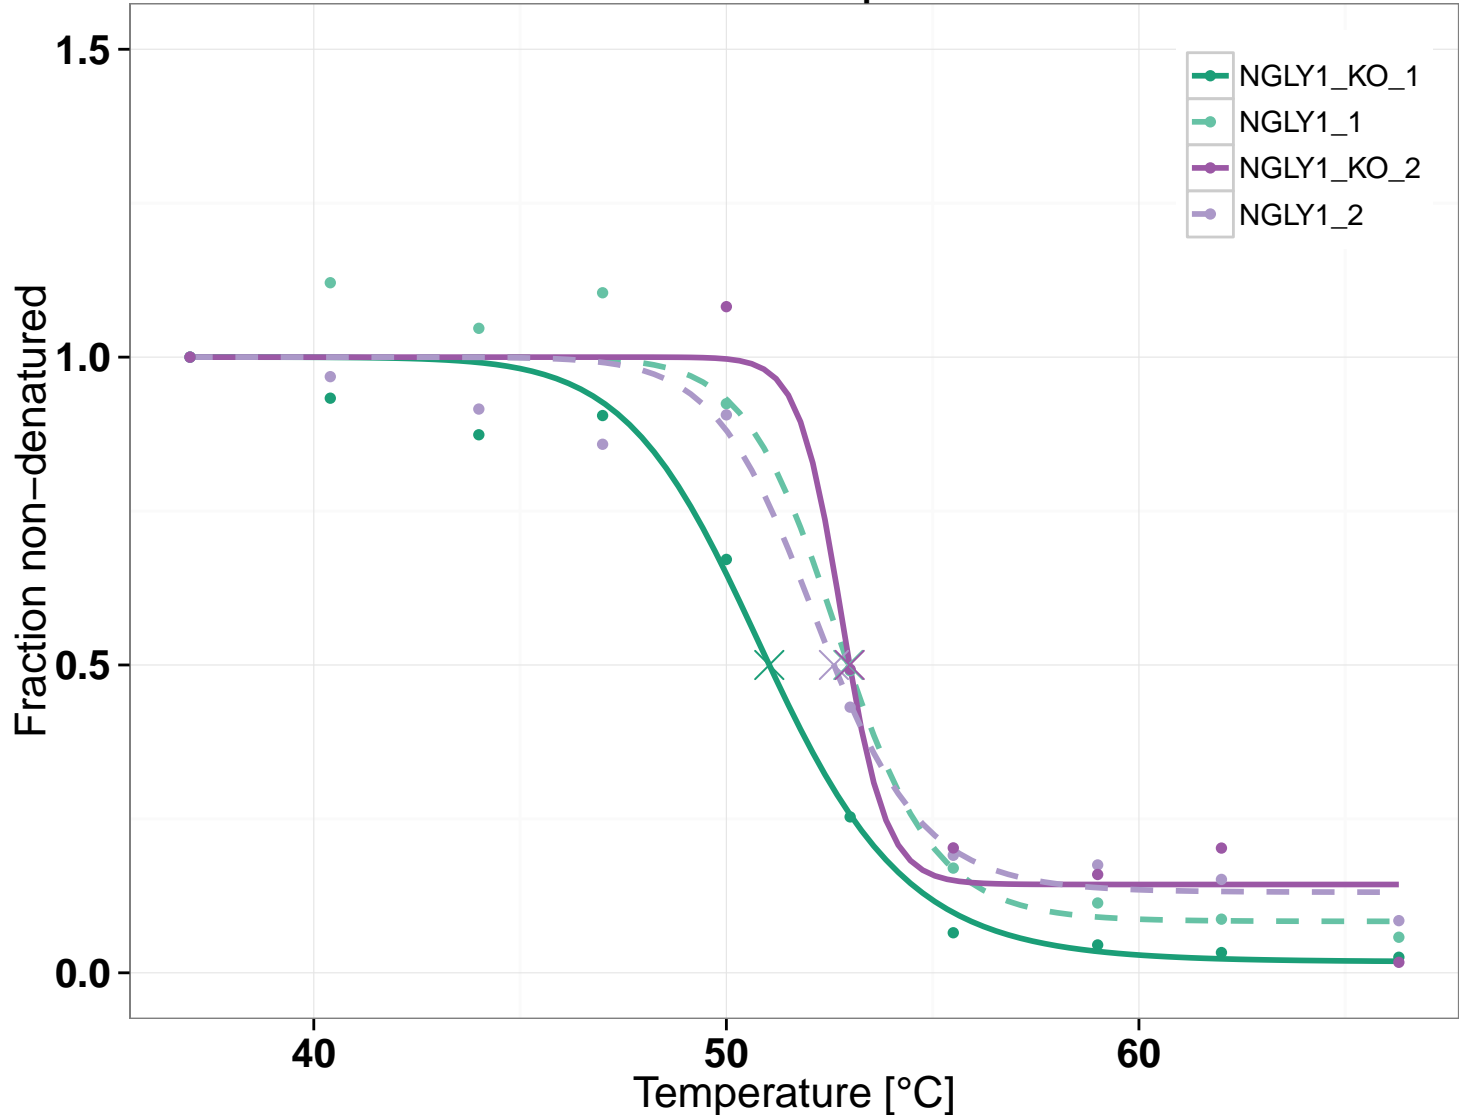

|            | meltPoint | slope | plateau | R2   |
|------------|-----------|-------|---------|------|
| NGLY1_KO_1 | 51.04     | -0.14 | 0.02    | 0.99 |
| NGLY1_1    | 52.96     | -0.2  | 0.08    | 0.99 |
| NGLY1_KO_2 | 52.99     | -0.41 | 0.14    | 0.71 |
| NGLY1_2    | 52.61     | -0.17 | 0.13    | 0.98 |

Supplement: Supplementary file 7798 [file 1]

IPI00329367.1|LRRC33

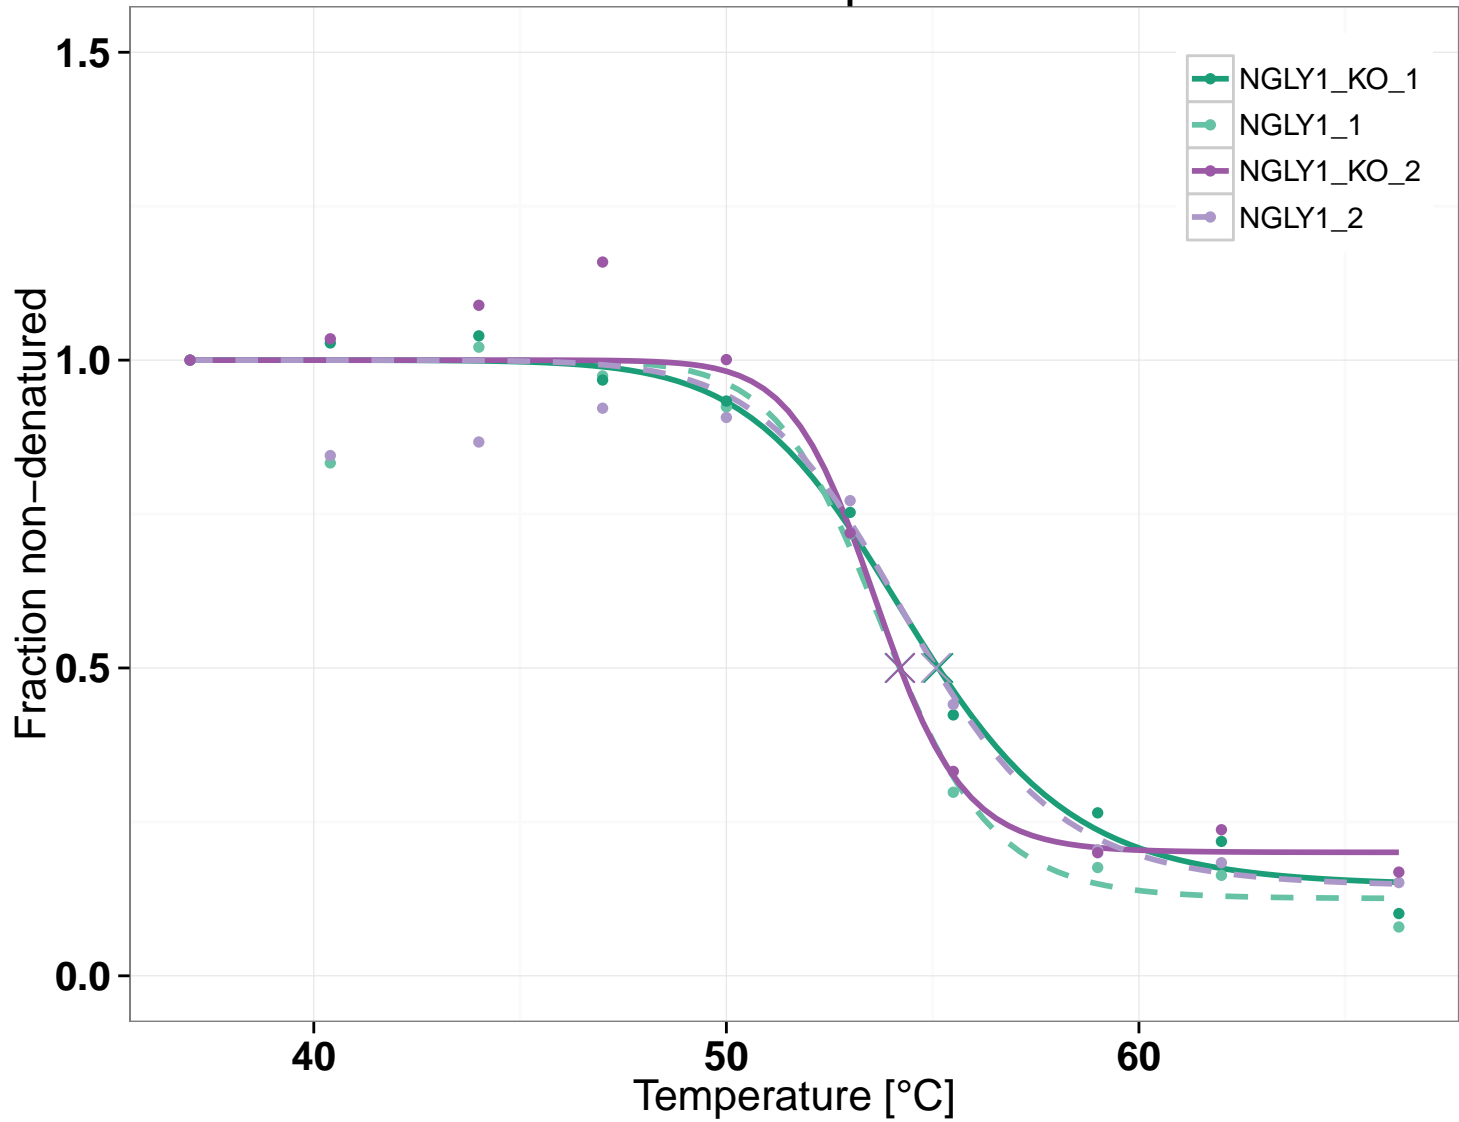

|            | meltPoint | slope | plateau | R2   |
|------------|-----------|-------|---------|------|
| NGLY1_KO_1 | 55.14     | -0.11 | 0.15    | 0.99 |
| NGLY1_1    | 54.2      | -0.17 | 0.13    | 0.97 |
| NGLY1_KO_2 | 54.21     | -0.19 | 0.2     | 0.98 |
| NGLY1_2    | 55.08     | -0.12 | 0.15    | 0.95 |

Supplement: Supplementary file 7799 [file 1]

IPI00147874.1|NANS

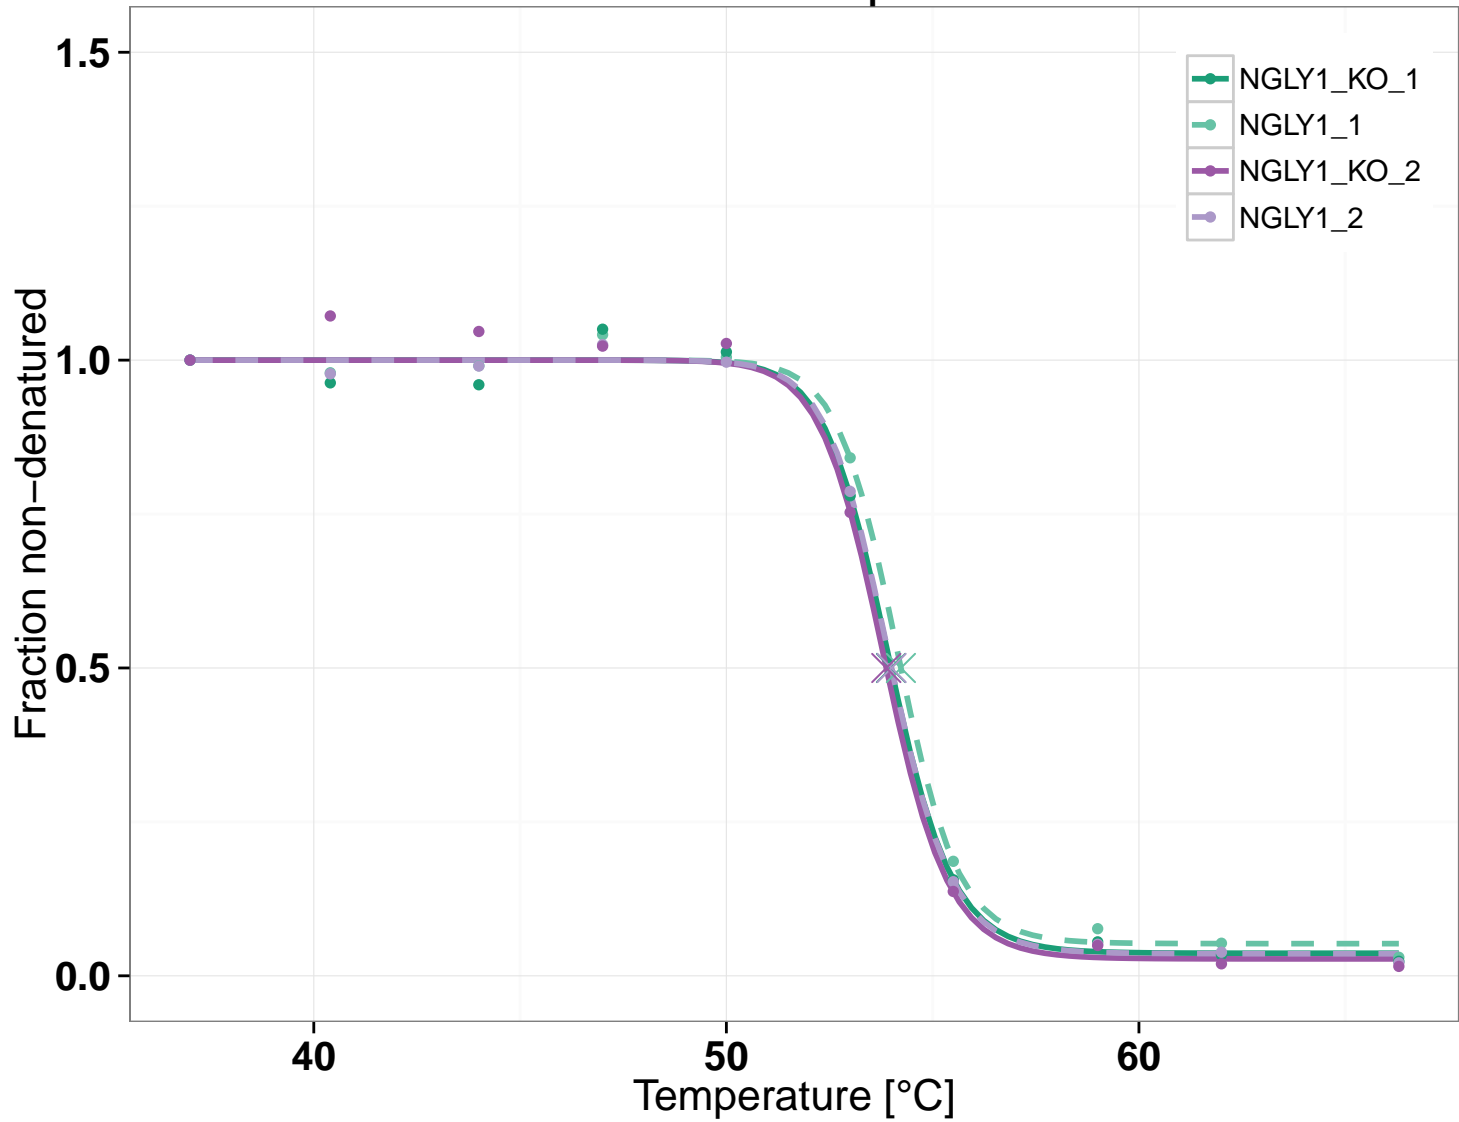

|            | meltPoint | slope | plateau | R2 |
|------------|-----------|-------|---------|----|
| NGLY1_KO_1 | 53.99     | -0.31 | 0.04    | 1  |
| NGLY1_1    | 54.23     | -0.32 | 0.05    | 1  |
| NGLY1_KO_2 | 53.88     | -0.31 | 0.03    | 1  |
| NGLY1_2    | 54        | -0.32 | 0.04    | 1  |

Supplement: Supplementary file 7800 [file 1]

IPI00014216.1|HERC3

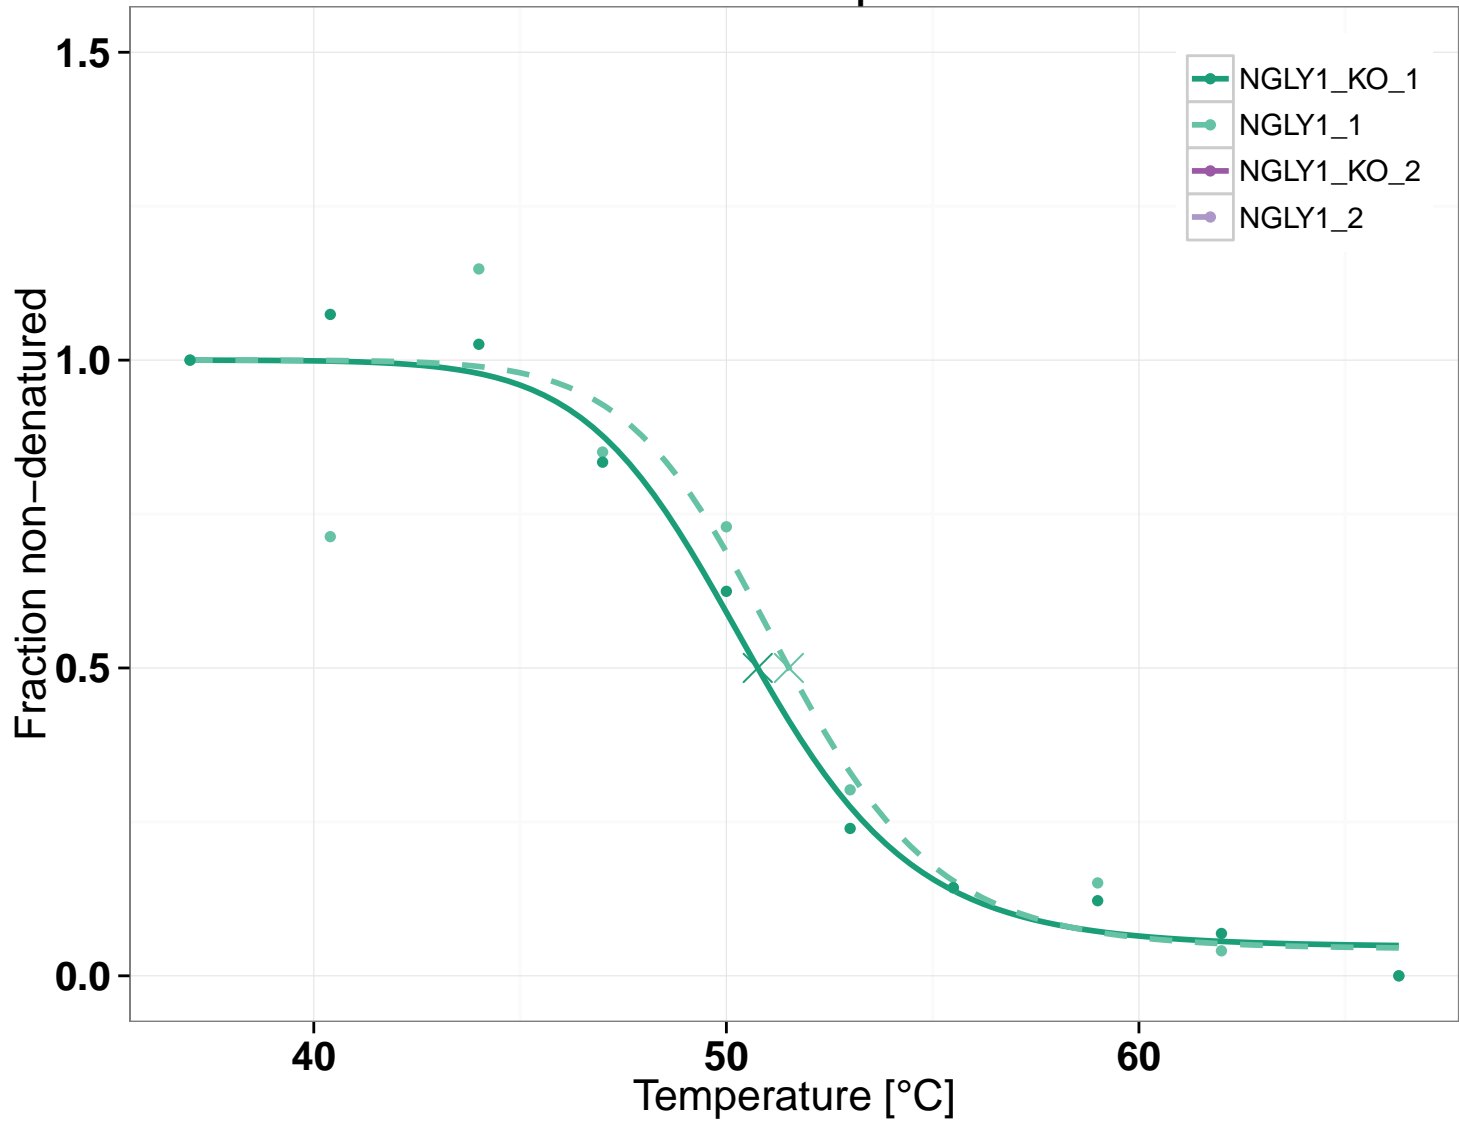

|            | meltPoint | slope | plateau | R2   |
|------------|-----------|-------|---------|------|
| NGLY1_KO_1 | 50.76     | -0.12 | 0.05    | 0.99 |
| NGLY1_1    | 51.52     | -0.13 | 0.04    | 0.92 |
| NGLY1_KO_2 | -         | -     | -       | -    |
| NGLY1_2    | -         | -     | -       | -    |

Supplement: Supplementary file 7801 [file 1]

# IPI00334053.1|BTG3

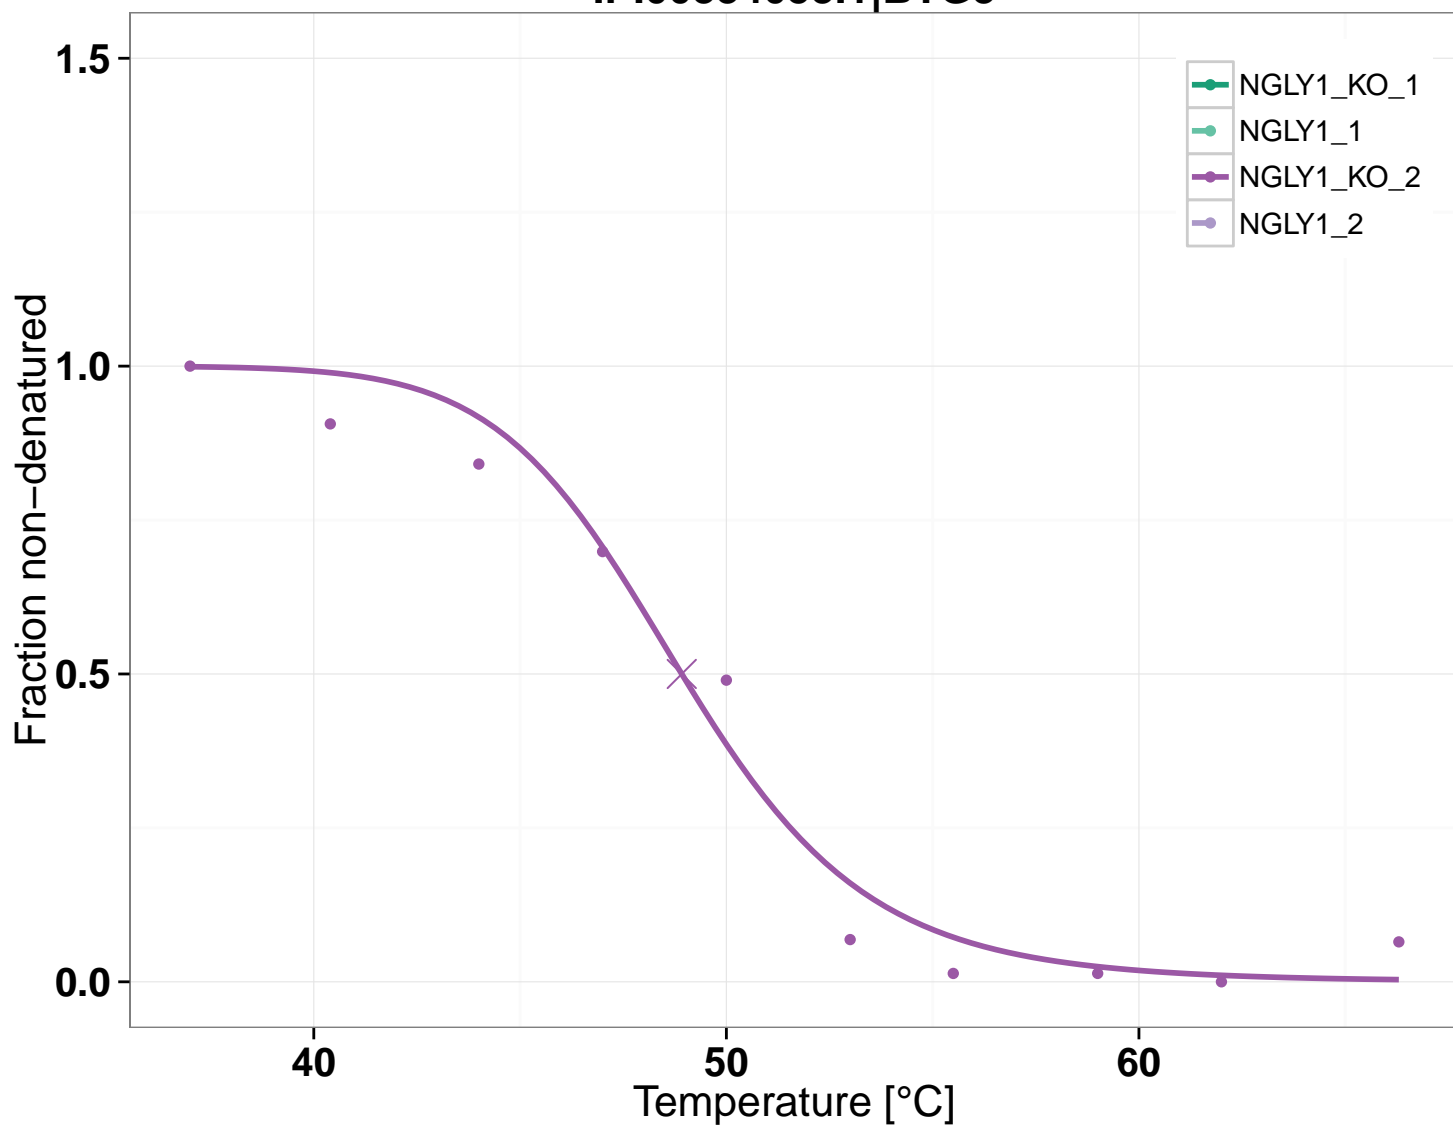

|            | meltPoint | slope | plateau | R2   |
|------------|-----------|-------|---------|------|
| NGLY1_KO_1 | -         | -     | -       | -    |
| NGLY1_1    | -         | -     | -       | -    |
| NGLY1_KO_2 | 48.92     | -0.11 | 0       | 0.98 |
| NGLY1_2    | -         | -     | -       | -    |

Supplement: Supplementary file 7803 [file 1]

# IPI00008994.2|NDRG2

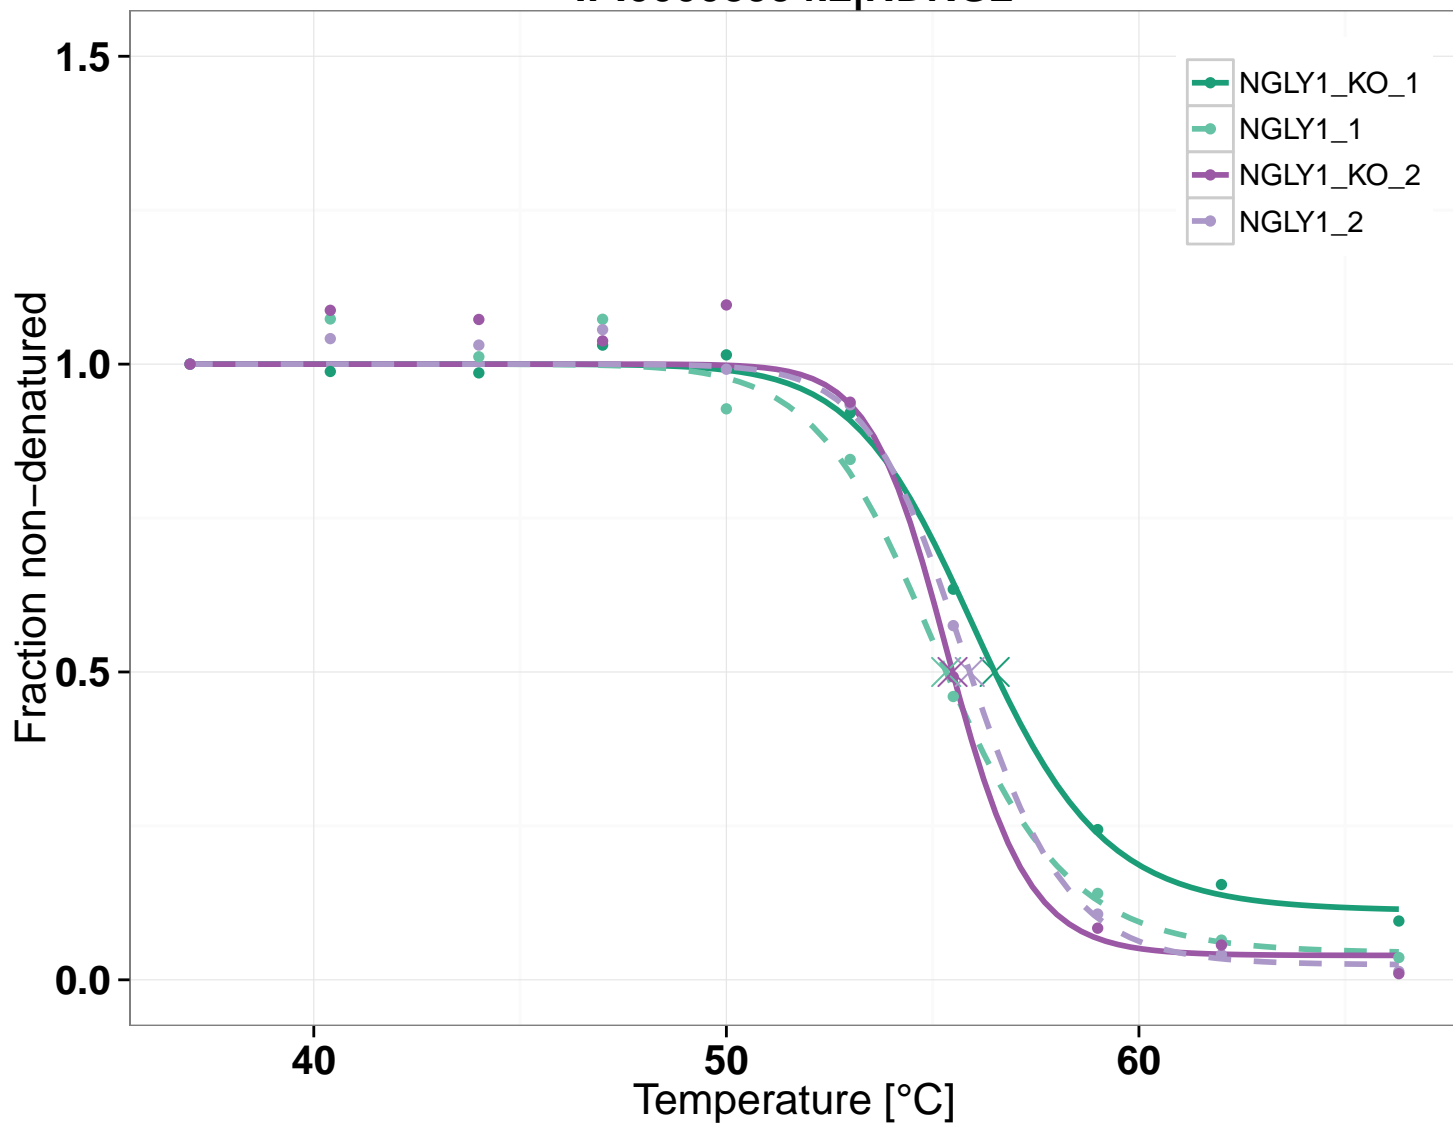

|            | meltPoint | slope | plateau | R2   |
|------------|-----------|-------|---------|------|
| NGLY1_KO_1 | 56.5      | -0.15 | 0.11    | 1    |
| NGLY1_1    | 55.33     | -0.16 | 0.04    | 0.99 |
| NGLY1_KO_2 | 55.48     | -0.25 | 0.04    | 0.99 |
| NGLY1_2    | 55.9      | -0.2  | 0.02    | 1    |

Supplement: Supplementary file 7804 [file 1]

# IPI00009471.1|WDR3

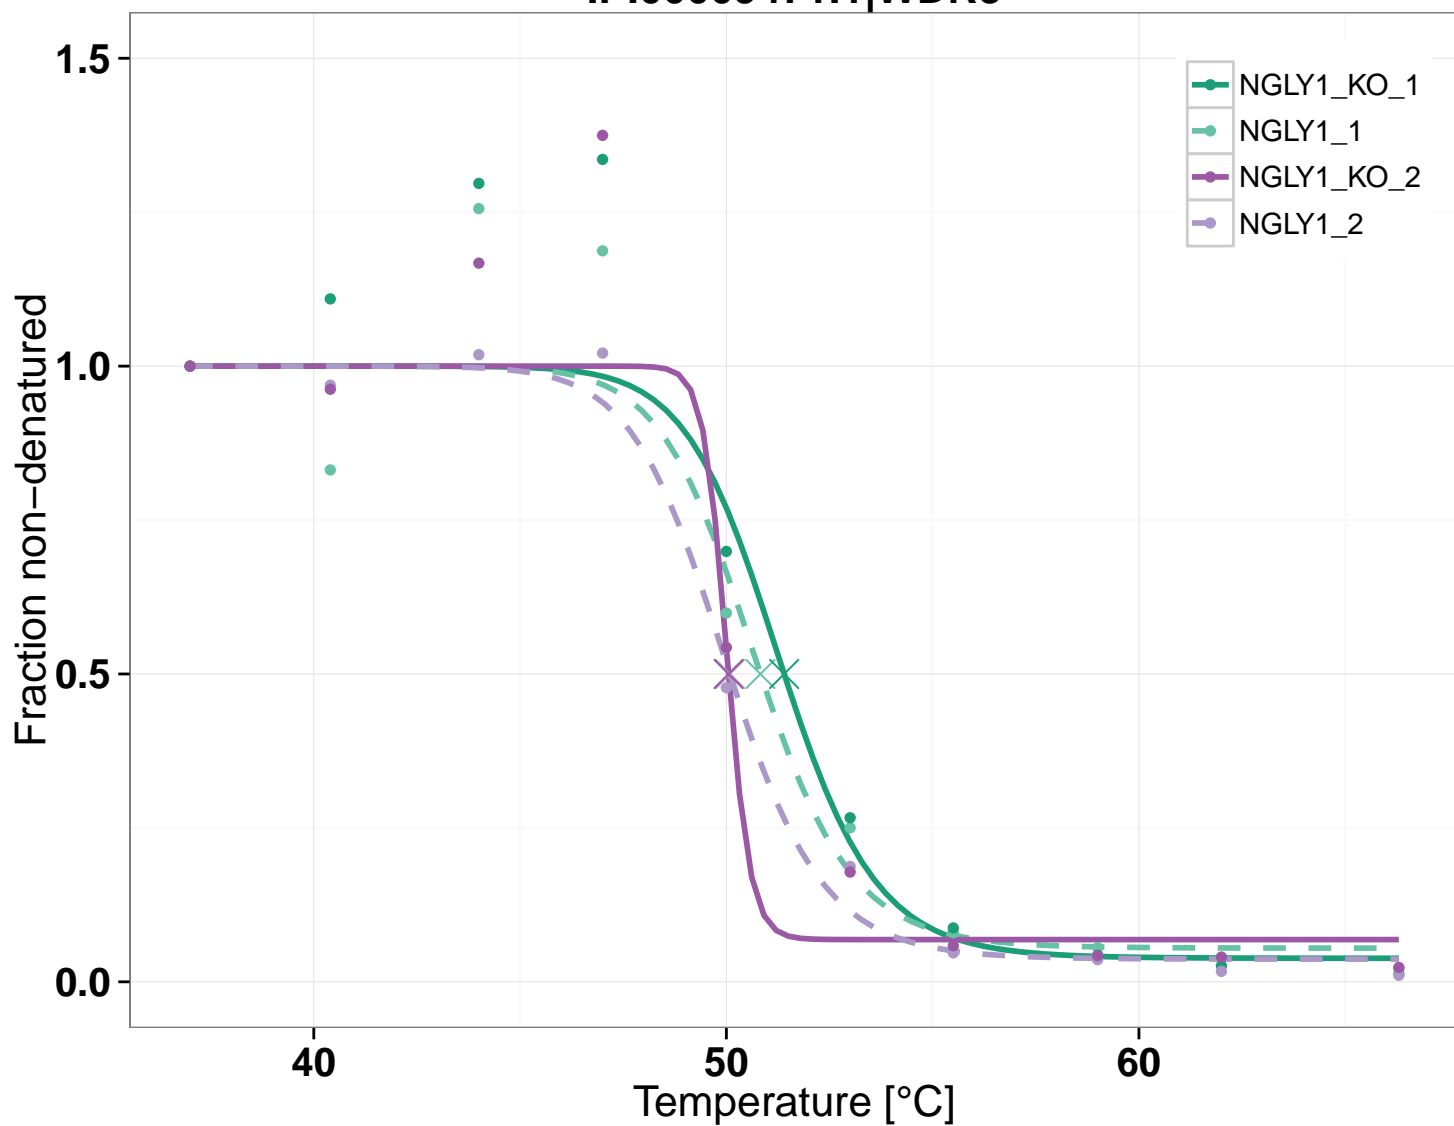

|            | meltPoint | slope | plateau | R2   |
|------------|-----------|-------|---------|------|
| NGLY1_KO_1 | 51.4      | -0.21 | 0.04    | 0.92 |
| NGLY1_1    | 50.83     | -0.2  | 0.05    | 0.93 |
| NGLY1_KO_2 | 50.05     | -0.82 | 0.07    | 0.93 |
| NGLY1_2    | 50.09     | -0.21 | 0.04    | 0.99 |

Supplement: Supplementary file 7805 [file 1]

IPI00386271.4|SLC25A12

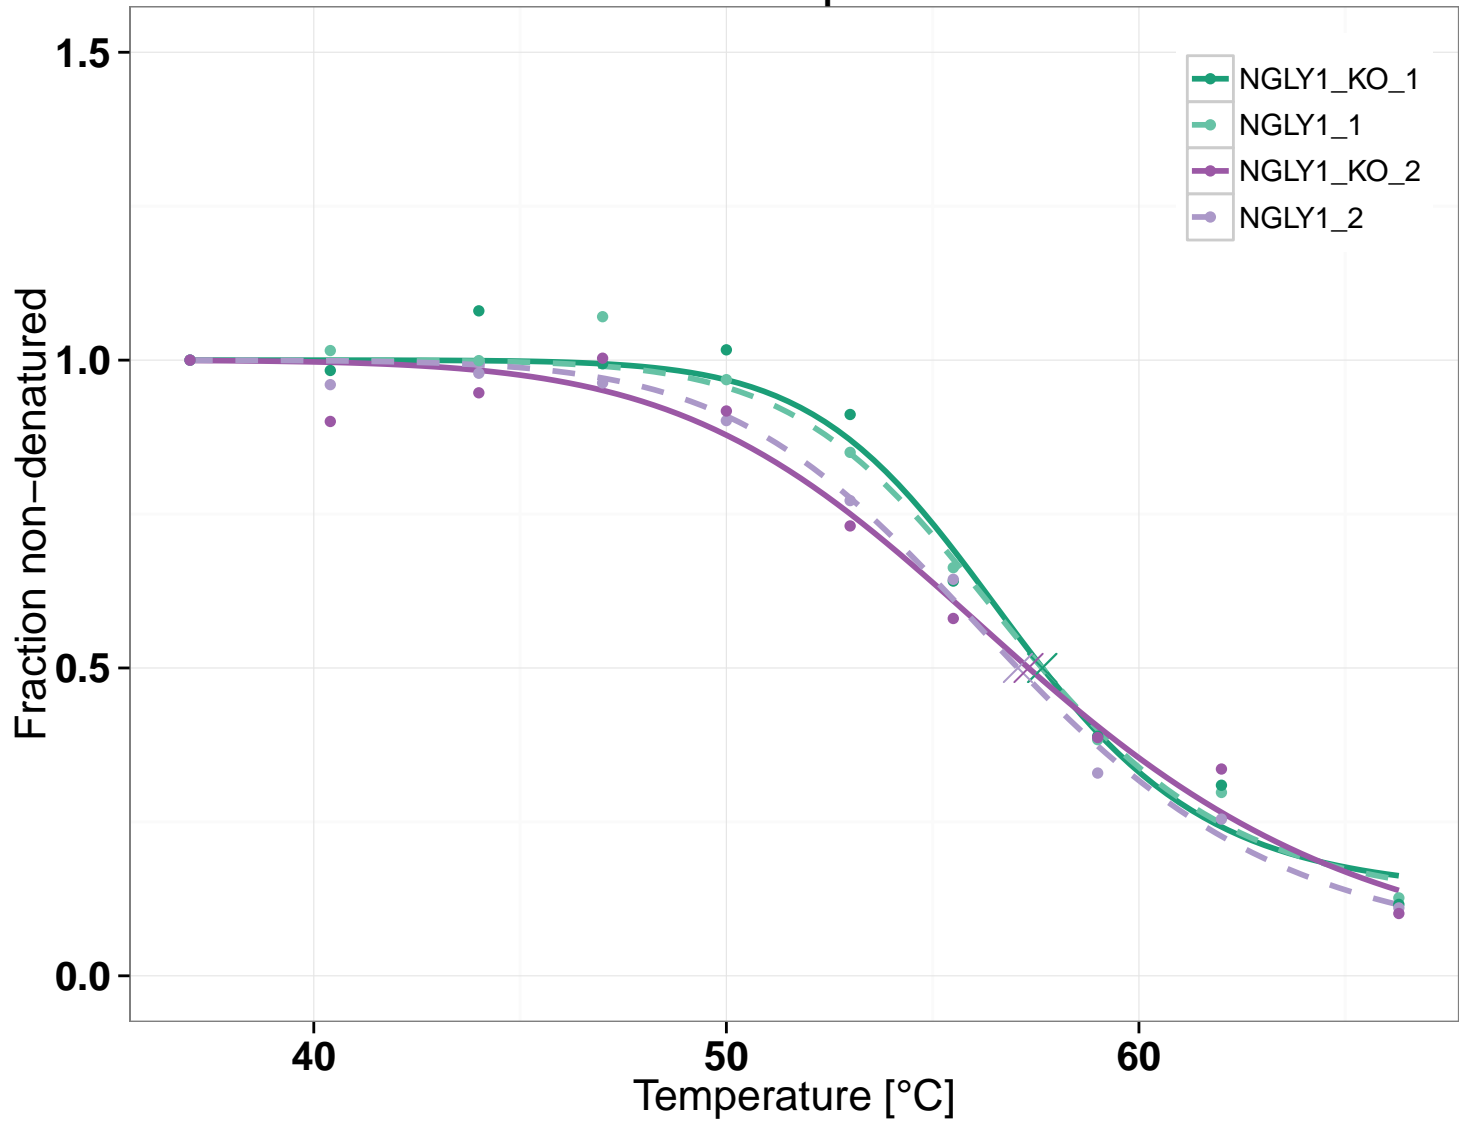

|            | meltPoint | slope  | plateau | R2   |
|------------|-----------|--------|---------|------|
| NGLY1_KO_1 | 57.66     | -0.091 | 0.13    | 0.98 |
| NGLY1_1    | 57.65     | -0.083 | 0.11    | 0.99 |
| NGLY1_KO_2 | 57.32     | -0.06  | 0       | 0.98 |
| NGLY1_2    | 57.07     | -0.072 | 0.03    | 0.99 |

Supplement: Supplementary file 7806 [file 1]

IPI00219616.7|PRPS1

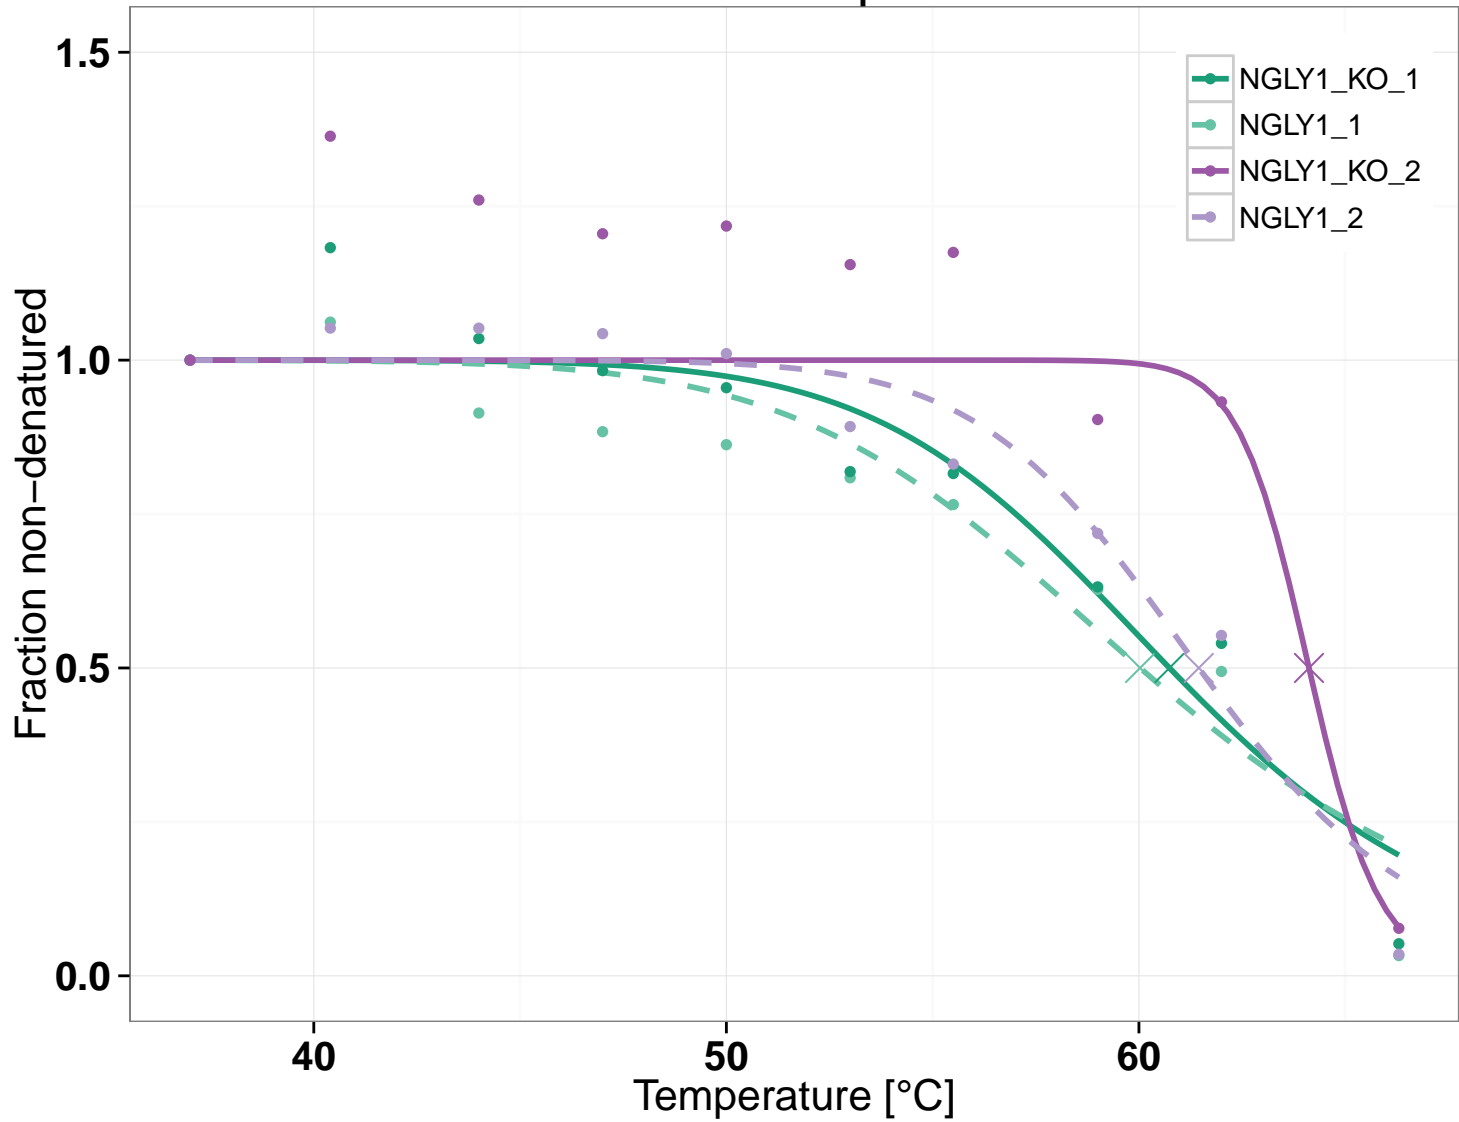

|            | meltPoint | slope  | plateau | R2   |
|------------|-----------|--------|---------|------|
| NGLY1_KO_1 | 60.74     | -0.07  | 0       | 0.91 |
| NGLY1_1    | 60.03     | -0.059 | 0       | 0.91 |
| NGLY1_KO_2 | 64.12     | -0.29  | 0       | 0.71 |
| NGLY1_2    | 61.45     | -0.093 | 0       | 0.95 |

Supplement: Supplementary file 7807 [file 1]

# IPI00005107.2|NPC1

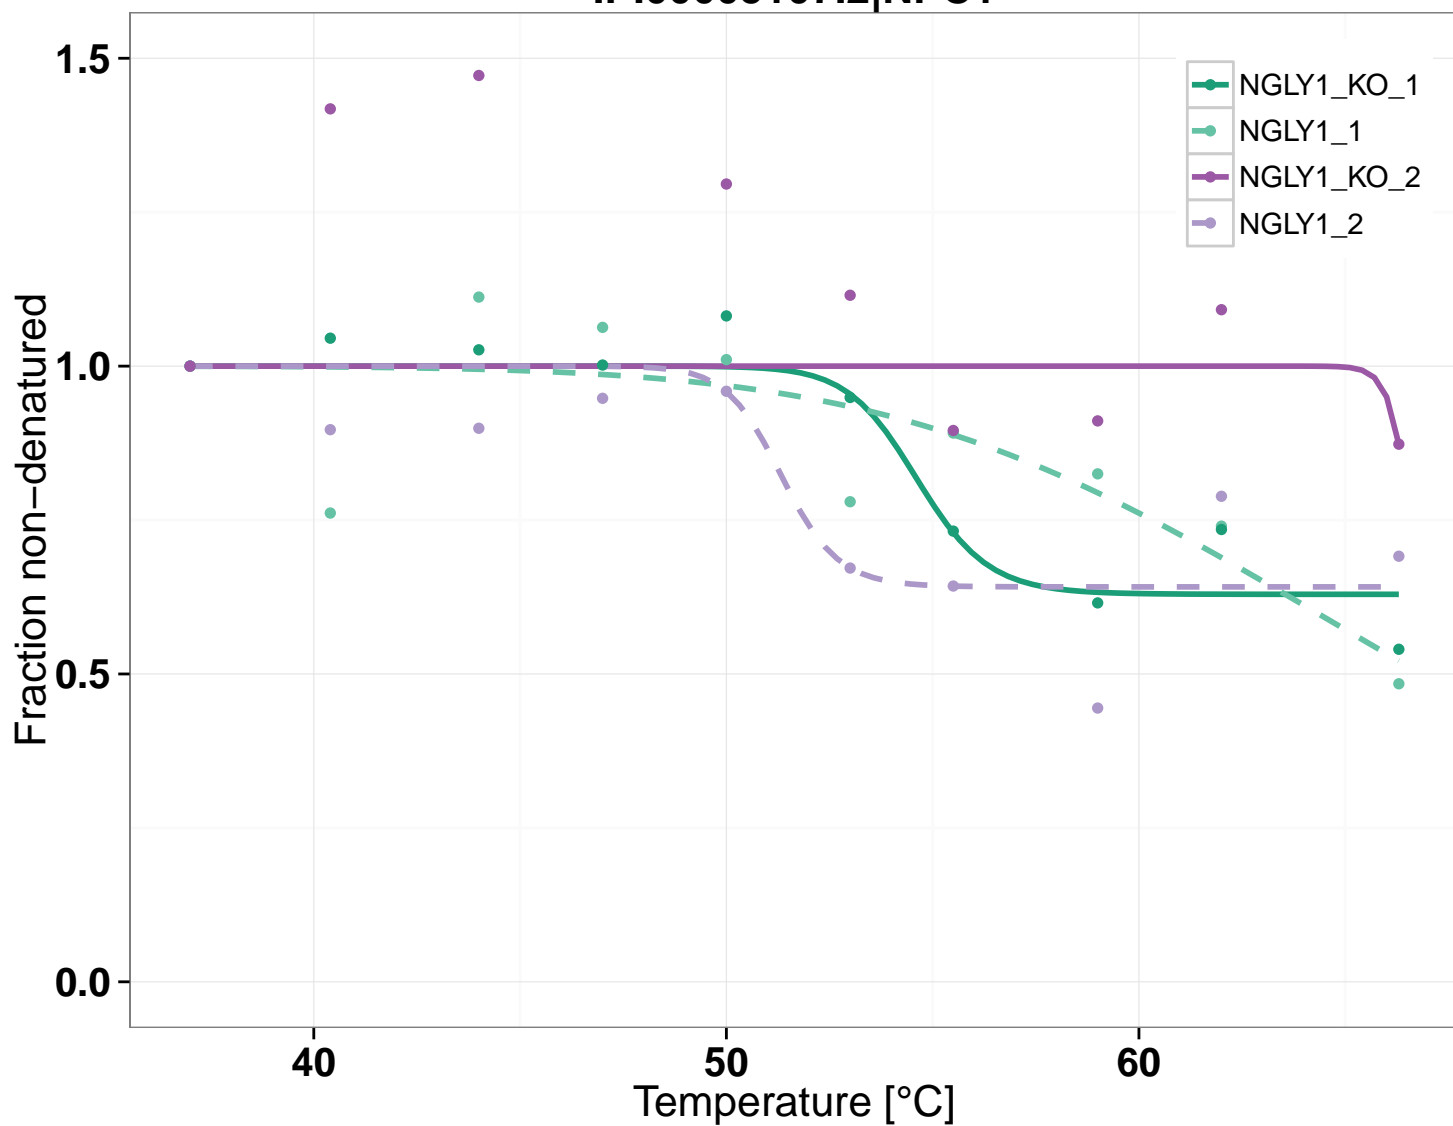

|            | meltPoint | slope  | plateau | R2    |
|------------|-----------|--------|---------|-------|
| NGLY1_KO_1 | —         | −0.11  | 0.63    | 0.92  |
| NGLY1_1    | —         | −0.039 | 0       | 0.67  |
| NGLY1_KO_2 | —         | —      | 0       | −0.43 |
| NGLY1_2    | —         | −0.13  | 0.64    | 0.7   |

Supplement: Supplementary file 7808 [file 1]

IPI00218916.3|ALOX5

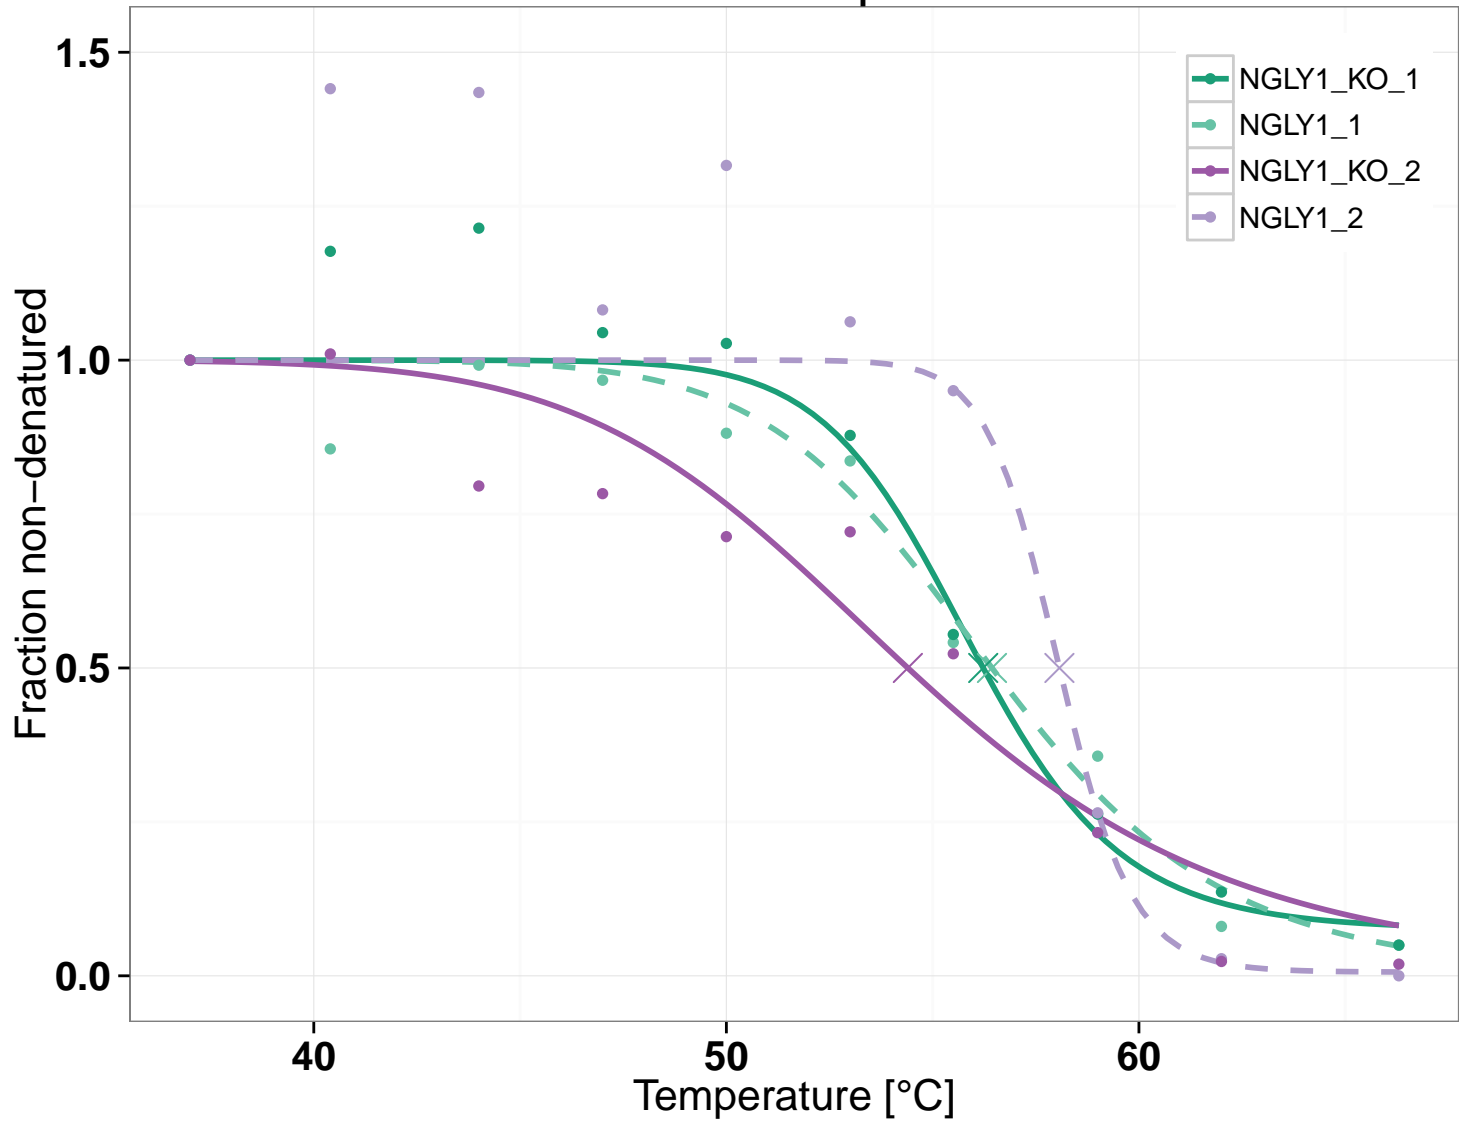

|            | meltPoint | slope  | plateau | R2   |
|------------|-----------|--------|---------|------|
| NGLY1_KO_1 | 56.23     | -0.13  | 0.07    | 0.95 |
| NGLY1_1    | 56.44     | -0.09  | 0       | 0.97 |
| NGLY1_KO_2 | 54.4      | -0.063 | 0       | 0.93 |
| NGLY1_2    | 58.07     | -0.28  | 0.01    | 0.82 |

Supplement: Supplementary file 7809 [file 1]

# IPI00219682.6|STOM

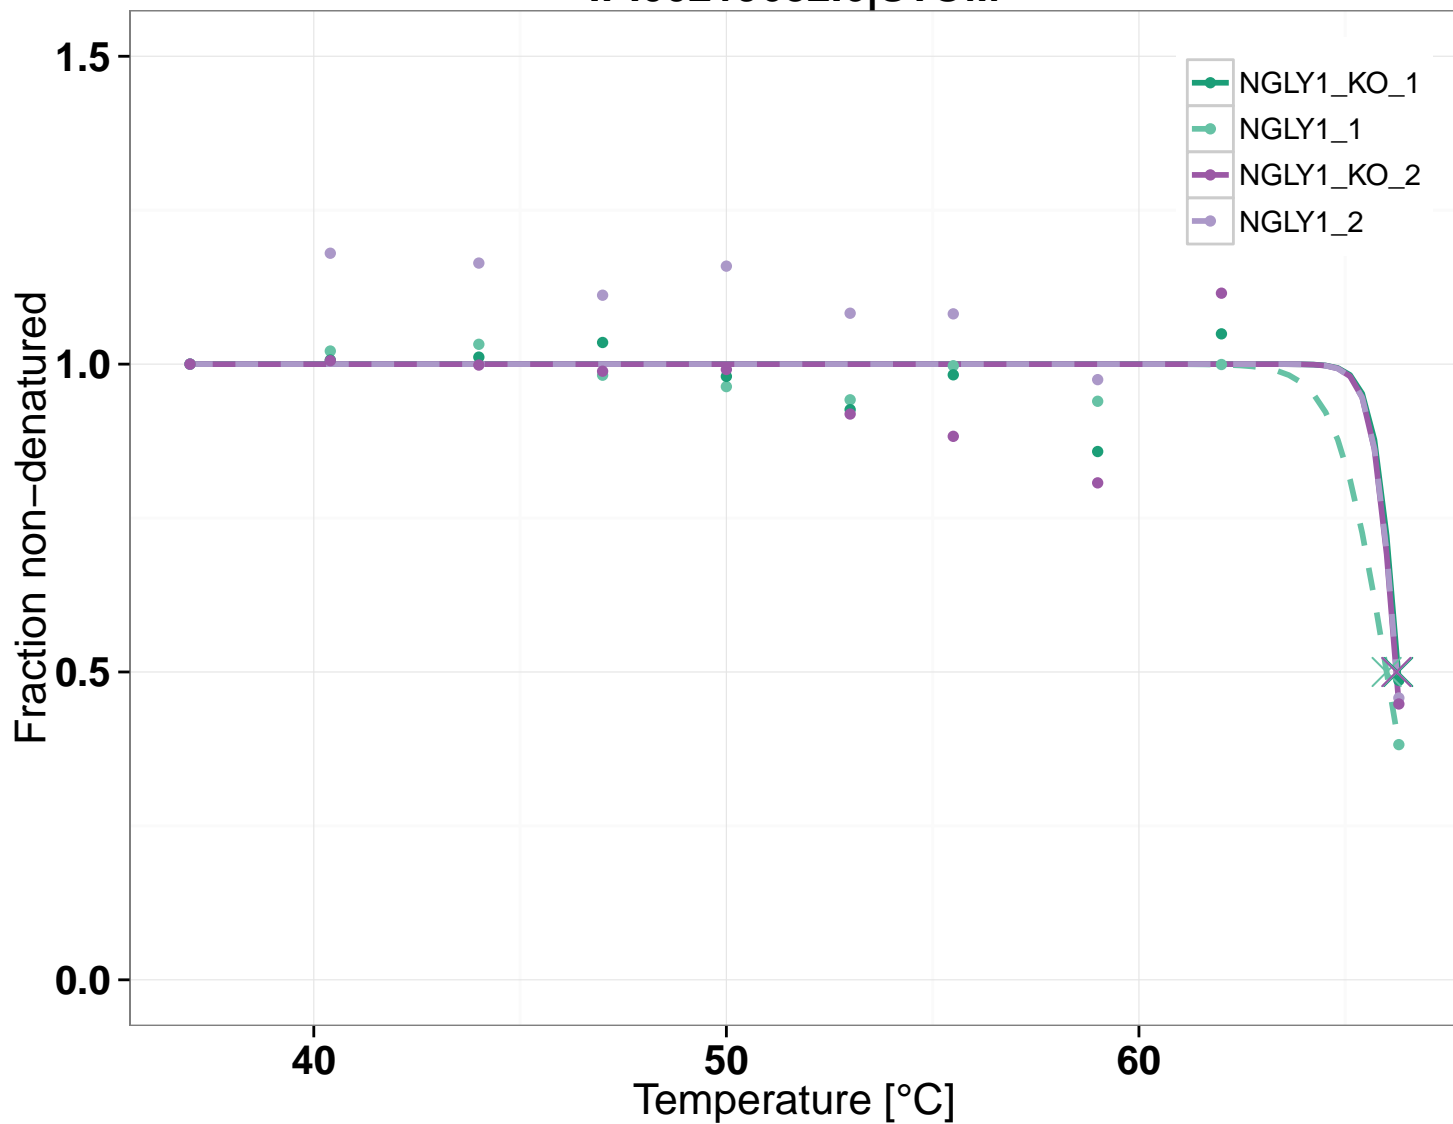

|            | meltPoint | slope | plateau | R2   |
|------------|-----------|-------|---------|------|
| NGLY1_KO_1 | 66.28     | -0.85 | 0       | 0.88 |
| NGLY1_1    | 66        | -0.41 | 0       | 0.97 |
| NGLY1_KO_2 | 66.24     | -0.85 | 0       | 0.77 |
| NGLY1_2    | 66.25     | -0.84 | 0       | 0.59 |

Supplement: Supplementary file 7810 [file 1]

IPI00007765.5|HSPA9

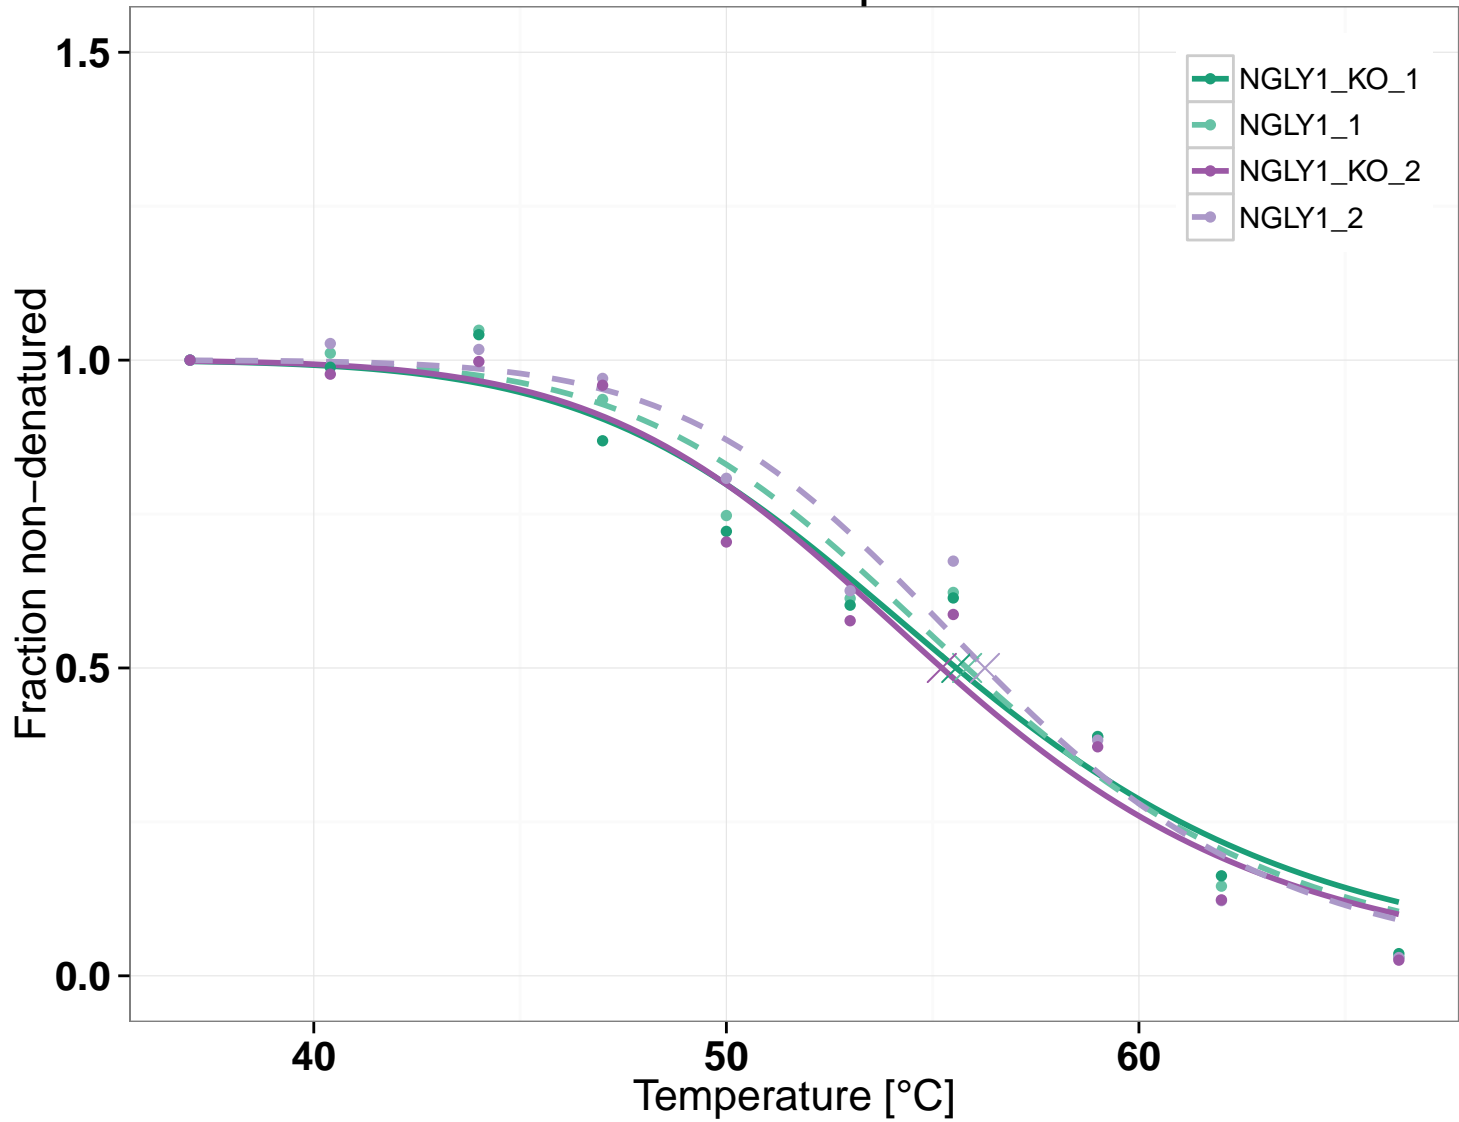

|            | meltPoint | slope  | plateau | R2   |
|------------|-----------|--------|---------|------|
| NGLY1_KO_1 | 55.57     | -0.057 | 0       | 0.96 |
| NGLY1_1    | 55.84     | -0.062 | 0       | 0.97 |
| NGLY1_KO_2 | 55.22     | -0.061 | 0       | 0.97 |
| NGLY1_2    | 56.27     | -0.069 | 0       | 0.97 |

Supplement: Supplementary file 7811 [file 1]

IPI00022239.7|METAP1

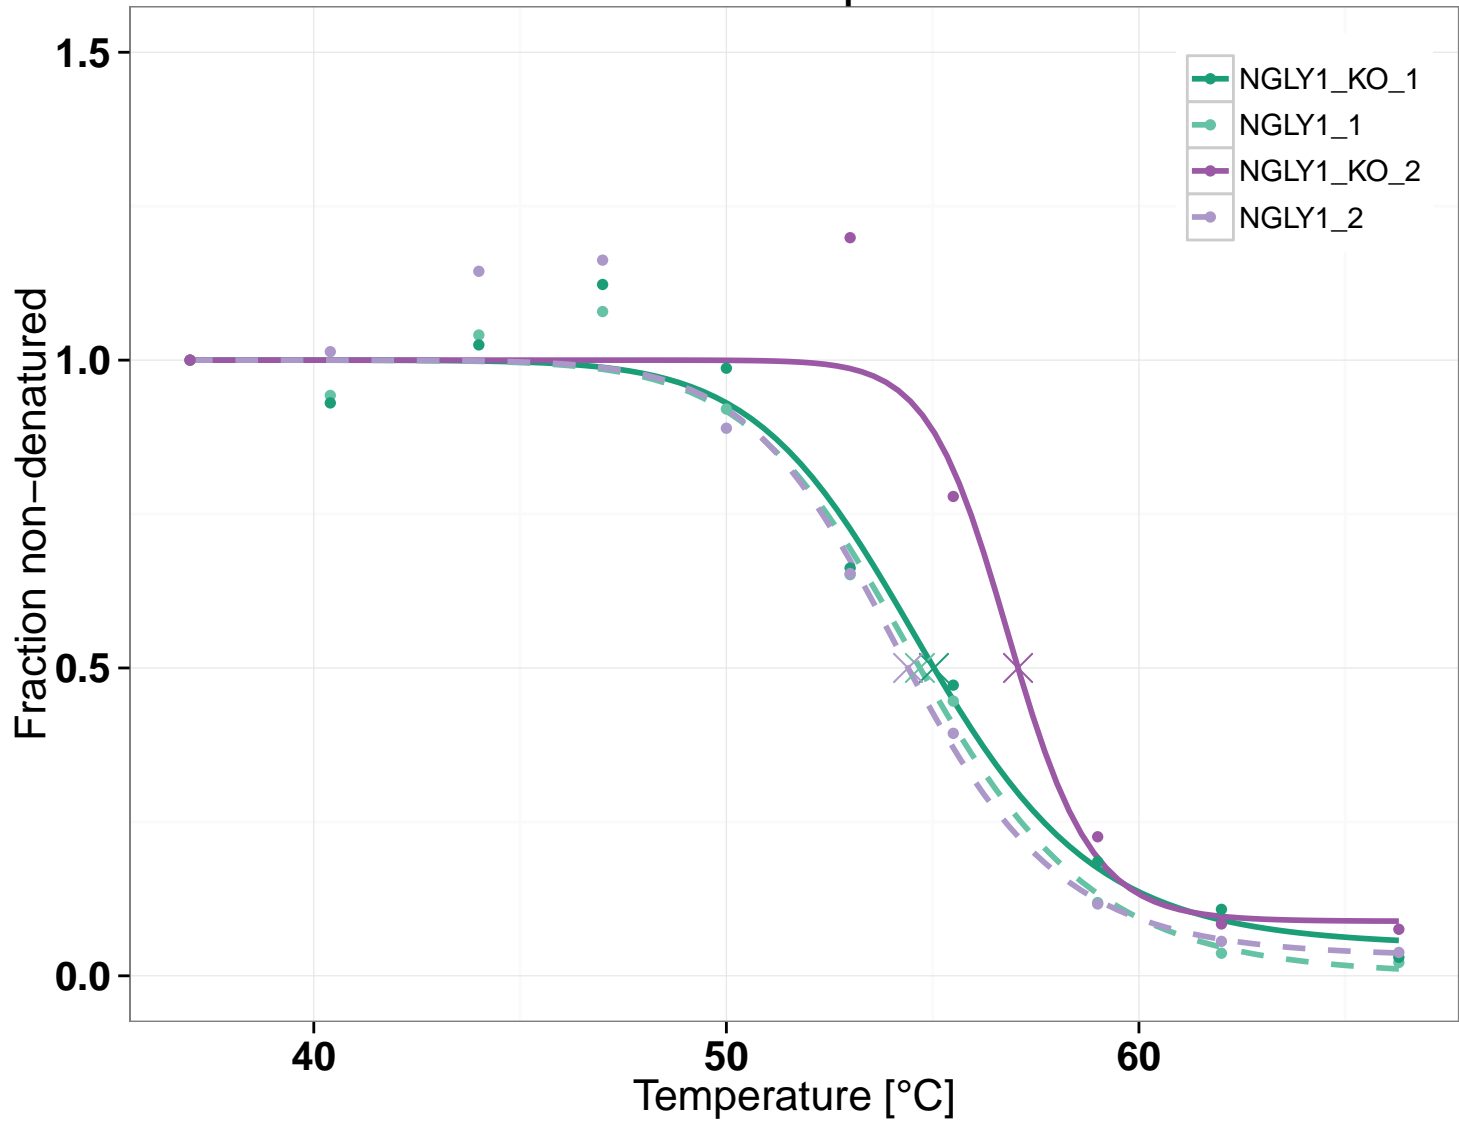

|            | meltPoint | slope | plateau | R2   |
|------------|-----------|-------|---------|------|
| NGLY1_KO_1 | 55.03     | -0.12 | 0.05    | 0.98 |
| NGLY1_1    | 54.69     | -0.12 | 0       | 0.99 |
| NGLY1_KO_2 | 57.07     | -0.23 | 0.09    | 0.32 |
| NGLY1_2    | 54.41     | -0.13 | 0.03    | 0.97 |

Supplement: Supplementary file 7812 [file 1]

IPI00480022.1|GOLGA7

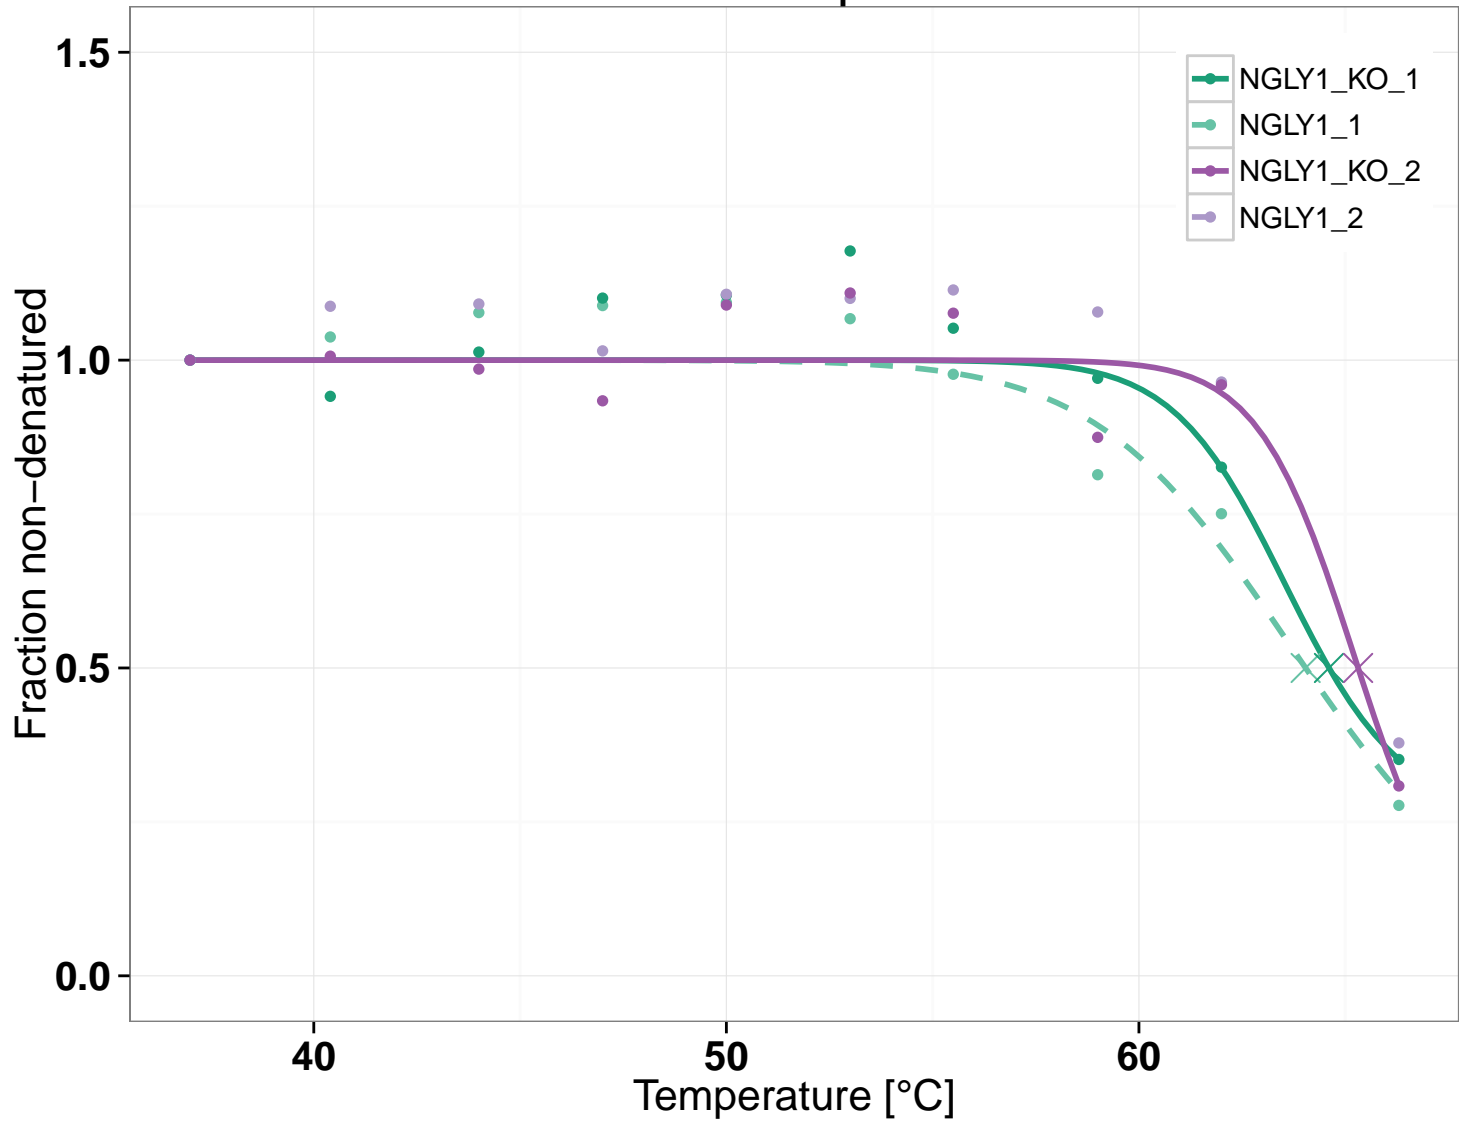

|            | meltPoint | slope  | plateau | R2   |
|------------|-----------|--------|---------|------|
| NGLY1_KO_1 | 64.61     | -0.13  | 0.25    | 0.88 |
| NGLY1_1    | 64.04     | -0.098 | 0       | 0.93 |
| NGLY1_KO_2 | 65.31     | -0.21  | 0       | 0.91 |
| NGLY1_2    | -         | -      | -       | -    |

Supplement: Supplementary file 7813 [file 1]

IPI00888774.1|LOC100129243

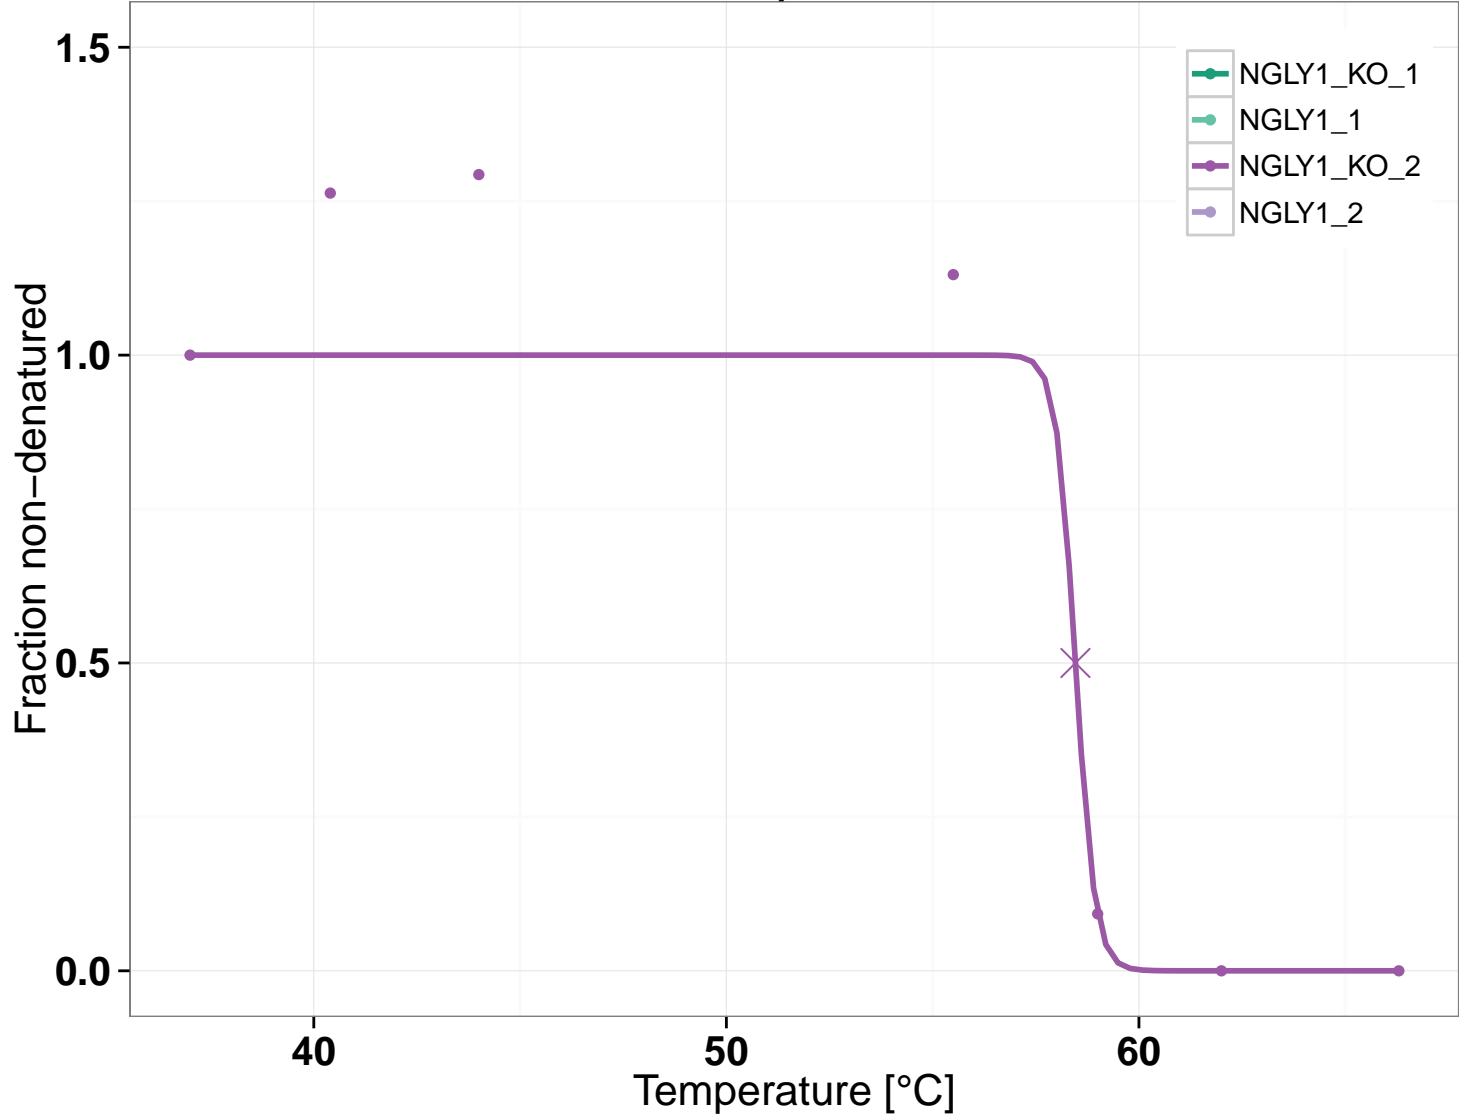

|            | meltPoint | slope | plateau | R2   |
|------------|-----------|-------|---------|------|
| NGLY1_KO_1 | -         | -     | -       | -    |
| NGLY1_1    | -         | -     | -       | -    |
| NGLY1_KO_2 | 58.46     | -1.1  | 0       | 0.59 |
| NGLY1_2    | -         | -     | -       | -    |

Supplement: Supplementary file 7814 [file 1]

# IPI00431082.3|CCDC5

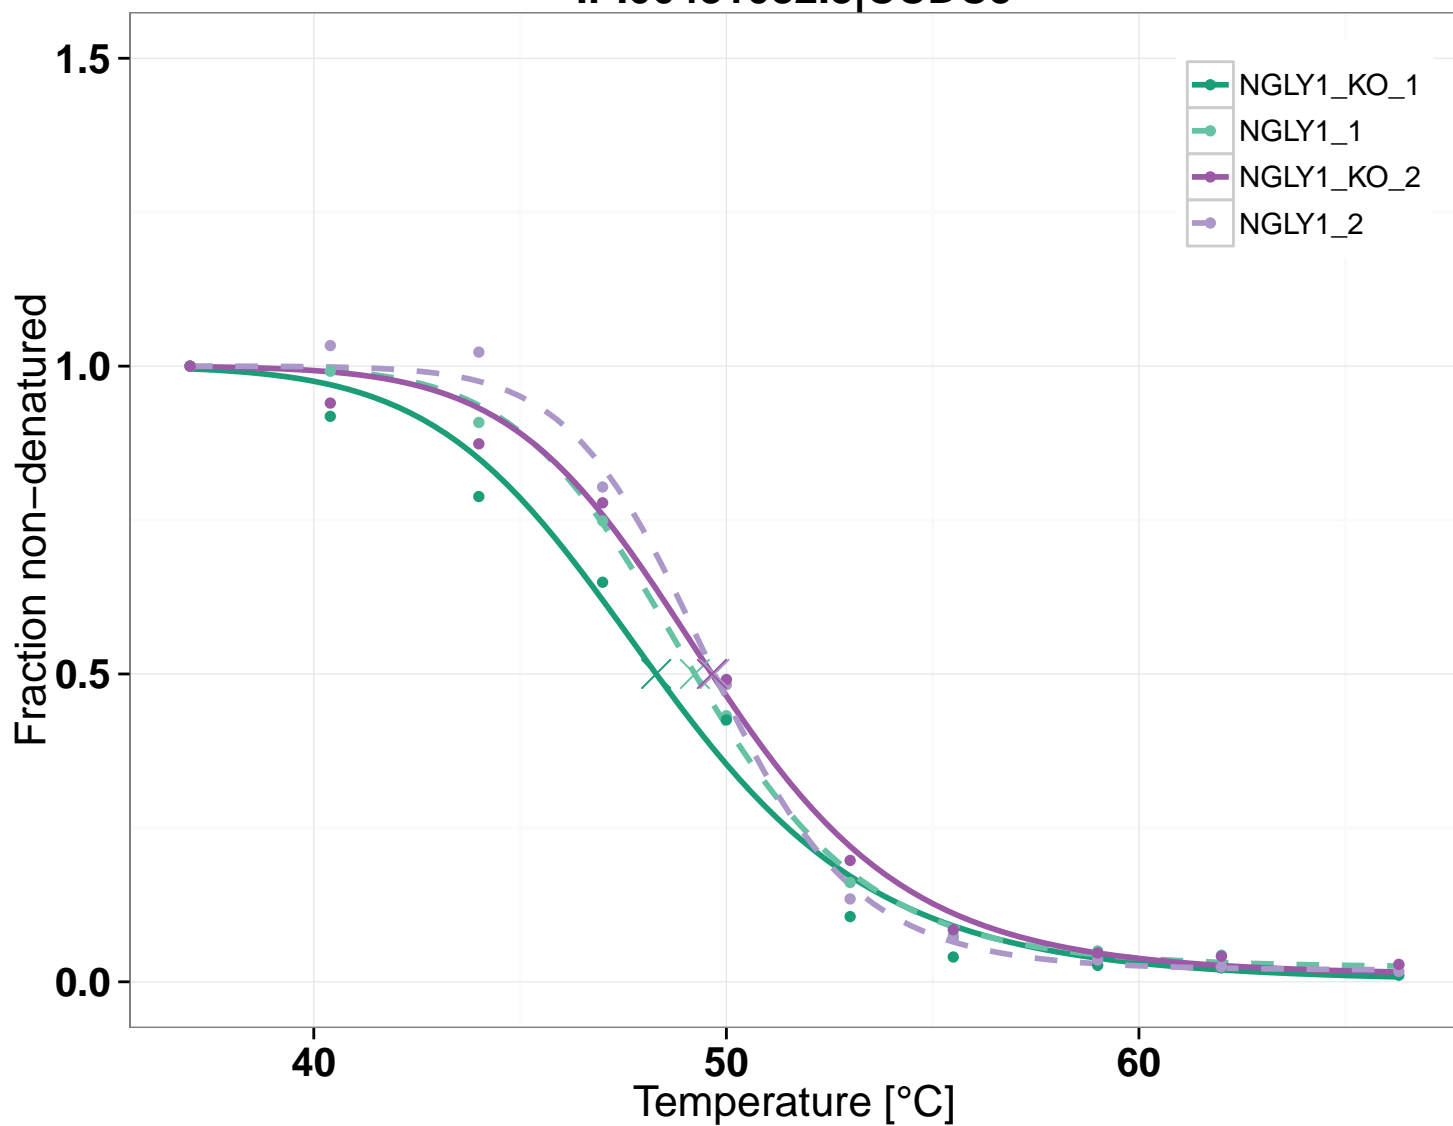

|            | meltPoint | slope  | plateau | R2   |
|------------|-----------|--------|---------|------|
| NGLY1_KO_1 | 48.3      | -0.093 | 0       | 0.99 |
| NGLY1_1    | 49.24     | -0.11  | 0.02    | 1    |
| NGLY1_KO_2 | 49.65     | -0.1   | 0.01    | 0.99 |
| NGLY1_2    | 49.71     | -0.14  | 0.02    | 1    |

Supplement: Supplementary file 7815 [file 1]

# IPI00477442.2|C10ORF35

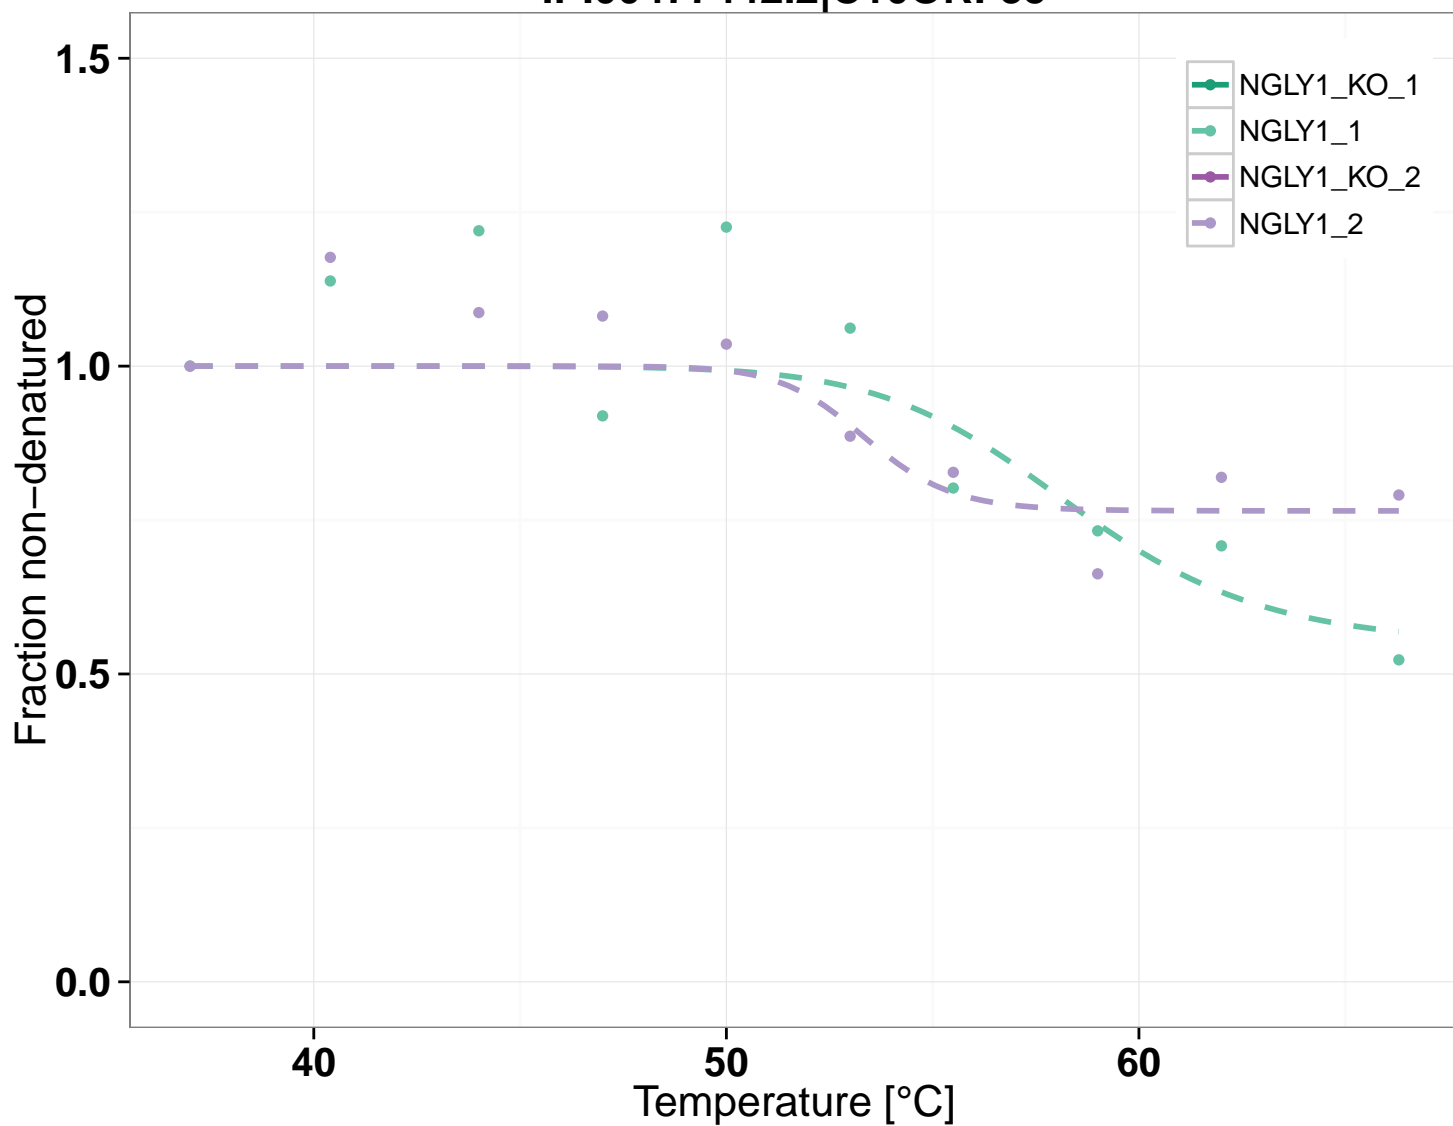

|            | meltPoint | slope  | plateau | R2   |
|------------|-----------|--------|---------|------|
| NGLY1_KO_1 | —         | —      | —       | —    |
| NGLY1_1    | —         | -0.048 | 0.55    | 0.69 |
| NGLY1_KO_2 | —         | —      | —       | —    |
| NGLY1_2    | —         | -0.056 | 0.76    | 0.74 |

Supplement: Supplementary file 7816 [file 1]

IPI00012434.1|STARD3NL

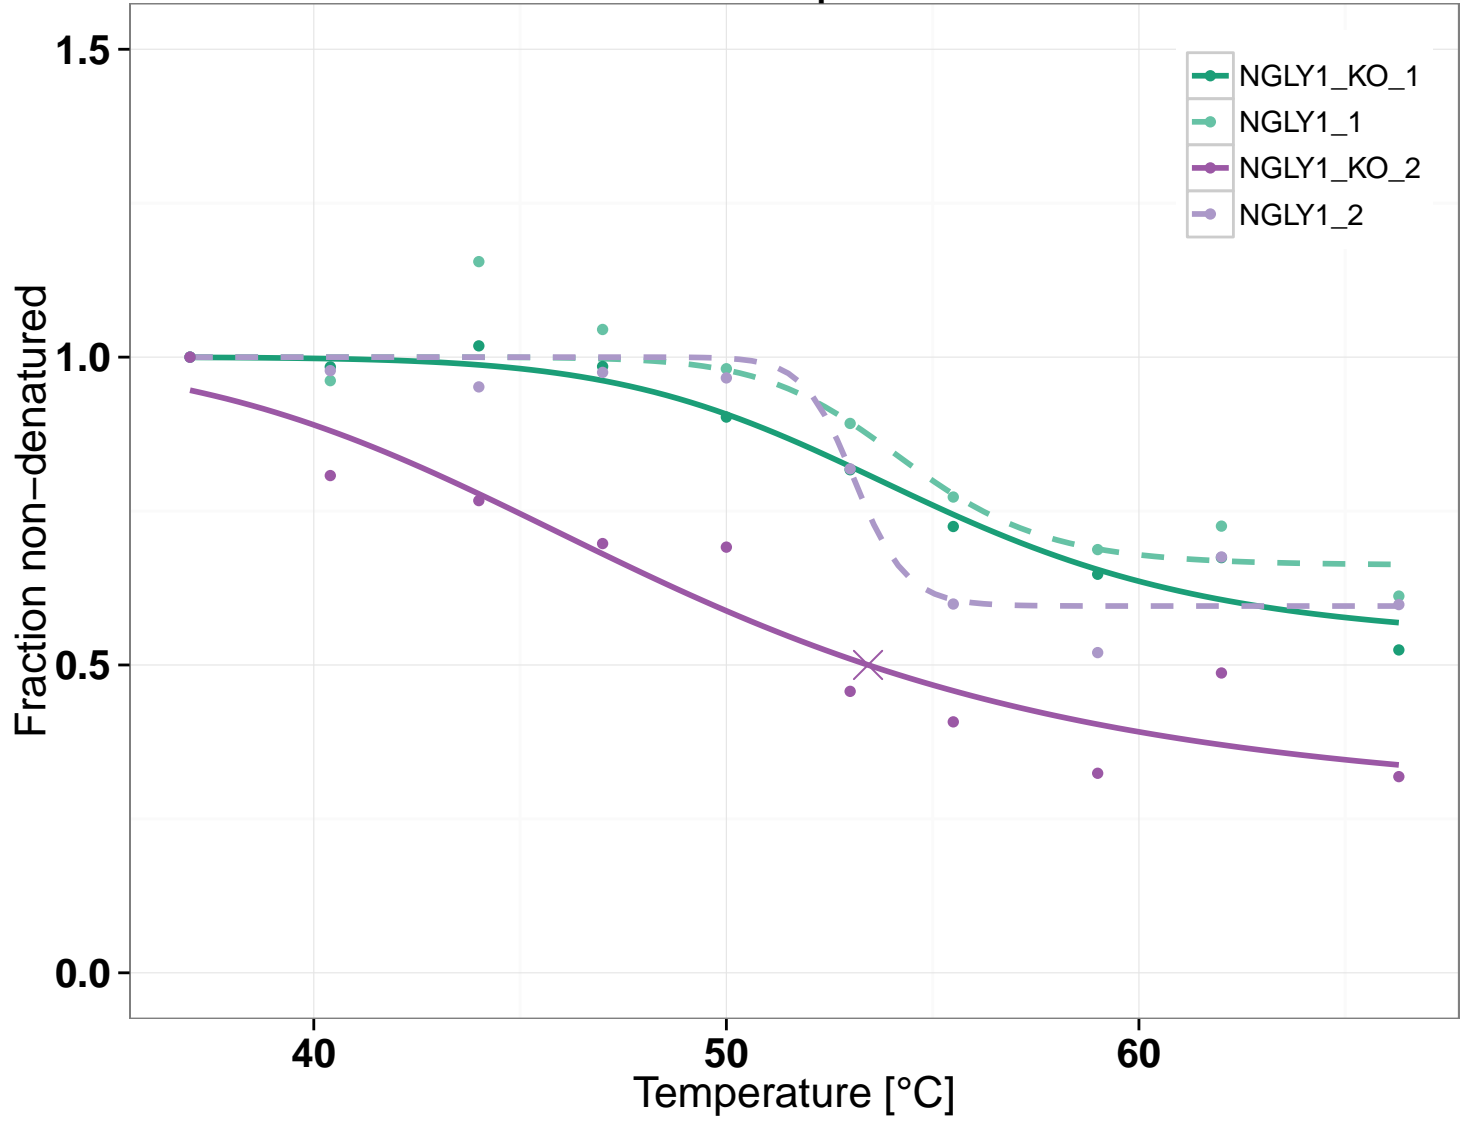

|            | meltPoint | slope  | plateau | R2   |
|------------|-----------|--------|---------|------|
| NGLY1_KO_1 | -         | -0.032 | 0.54    | 0.97 |
| NGLY1_1    | -         | -0.049 | 0.66    | 0.88 |
| NGLY1_KO_2 | 53.43     | -0.033 | 0.26    | 0.91 |
| NGLY1_2    | -         | -0.16  | 0.6     | 0.95 |

Supplement: Supplementary file 7817 [file 1]

IPI00006952.3|LACTB2

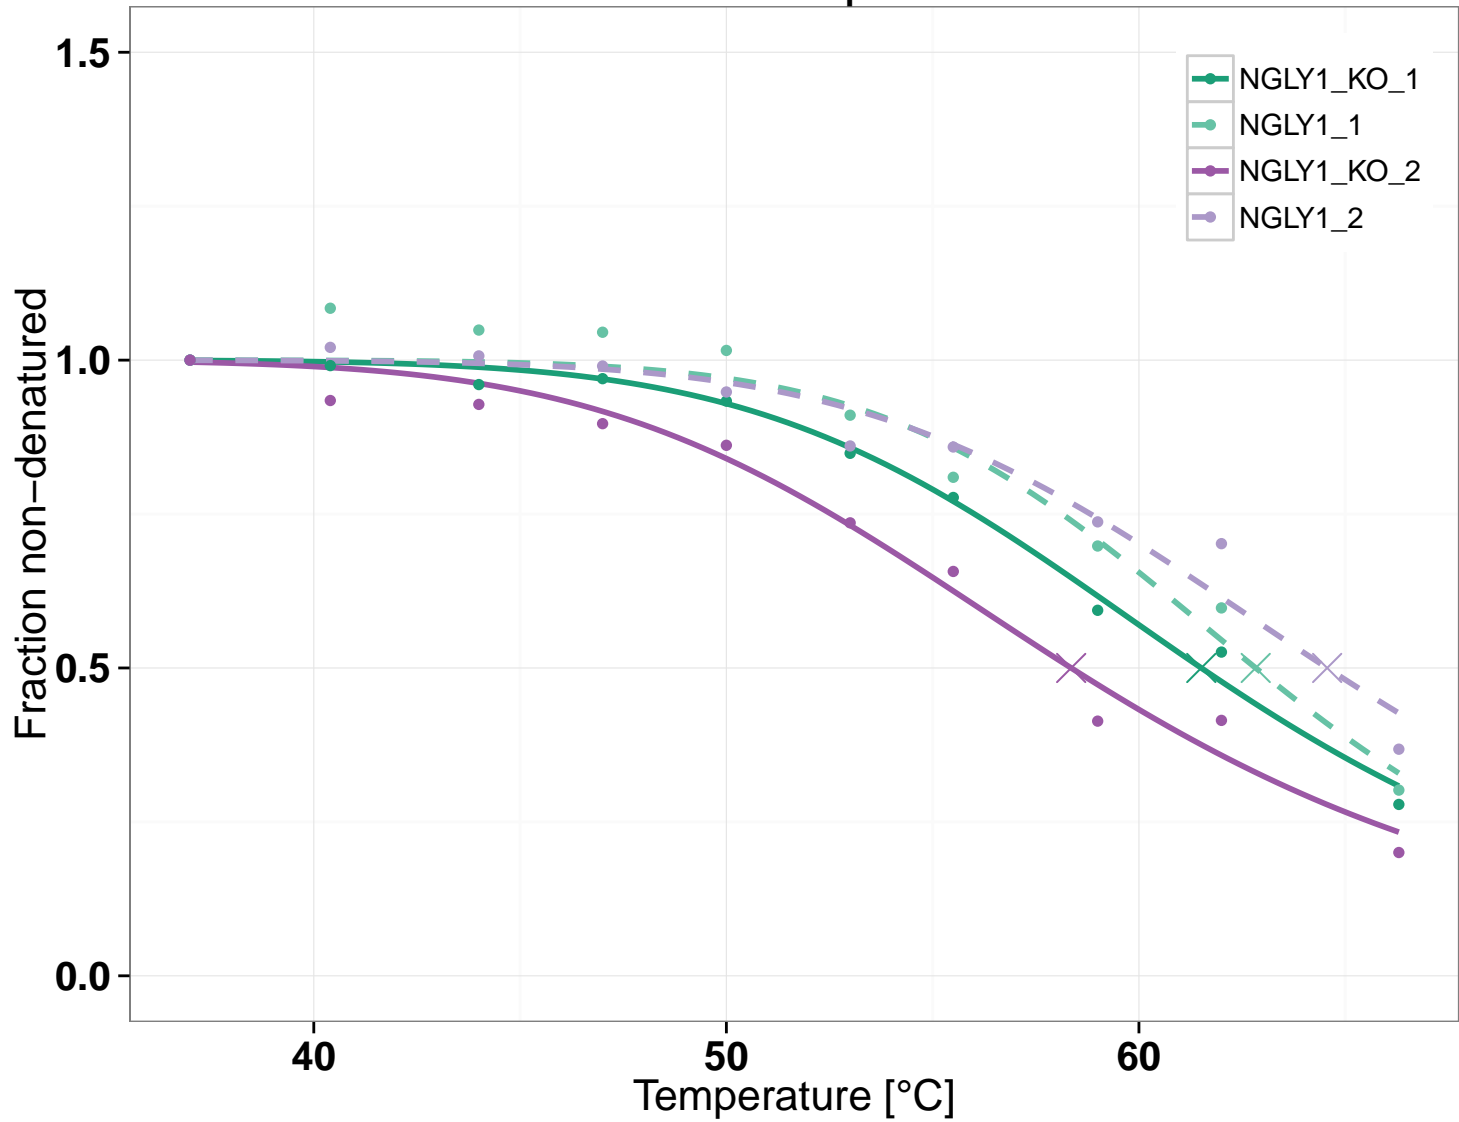

|            | meltPoint | slope  | plateau | R2   |
|------------|-----------|--------|---------|------|
| NGLY1_KO_1 | 61.51     | -0.047 | 0       | 0.99 |
| NGLY1_1    | 62.83     | -0.055 | 0       | 0.96 |
| NGLY1_KO_2 | 58.36     | -0.044 | 0       | 0.98 |
| NGLY1_2    | 64.56     | -0.045 | 0       | 0.96 |

Supplement: Supplementary file 7818 [file 1]

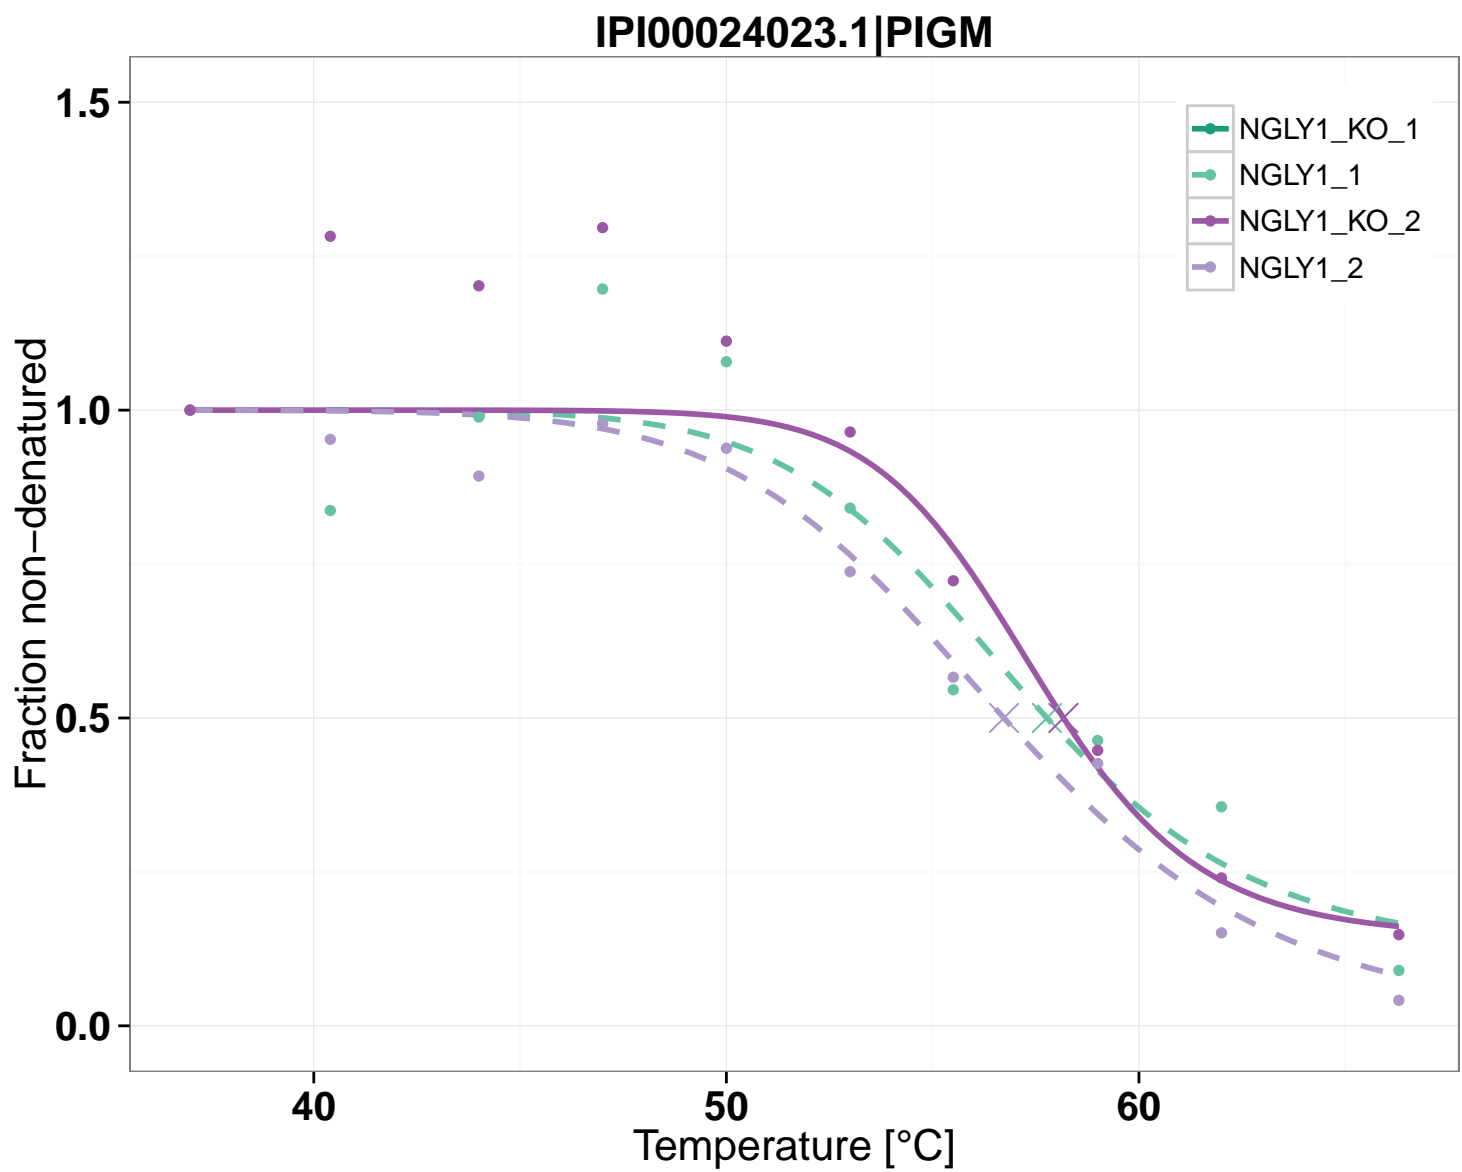

|            | meltPoint | slope  | plateau | R2   |
|------------|-----------|--------|---------|------|
| NGLY1_KO_1 | —         | —      | —       | —    |
| NGLY1_1    | 57.77     | -0.078 | 0.12    | 0.9  |
| NGLY1_KO_2 | 58.17     | -0.11  | 0.14    | 0.86 |
| NGLY1_2    | 56.73     | -0.075 | 0       | 0.98 |

Supplement: Supplementary file 7819 [file 1]

IPI00008524.1|PABPC1

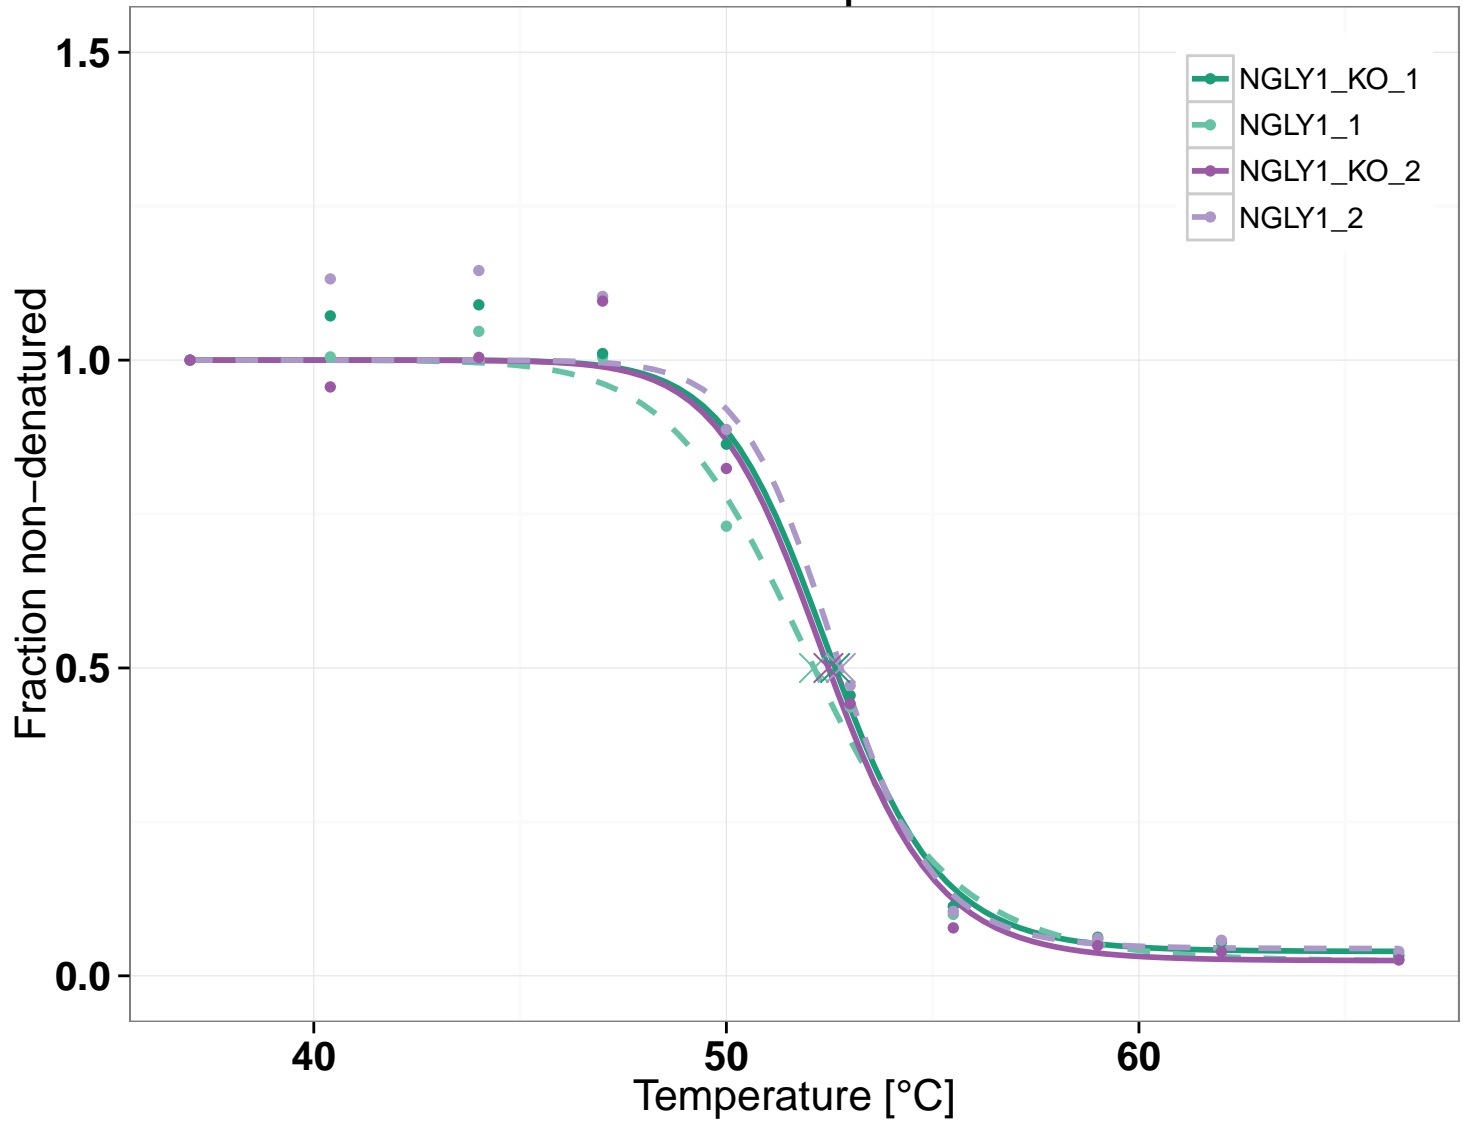

|            | meltPoint | slope | plateau | R2   |
|------------|-----------|-------|---------|------|
| NGLY1_KO_1 | 52.64     | -0.18 | 0.04    | 0.99 |
| NGLY1_1    | 52.12     | -0.14 | 0.02    | 0.99 |
| NGLY1_KO_2 | 52.47     | -0.18 | 0.02    | 0.99 |
| NGLY1_2    | 52.77     | -0.2  | 0.04    | 0.98 |

Supplement: Supplementary file 7820 [file 1]

IPI00477116.5|TMEM18

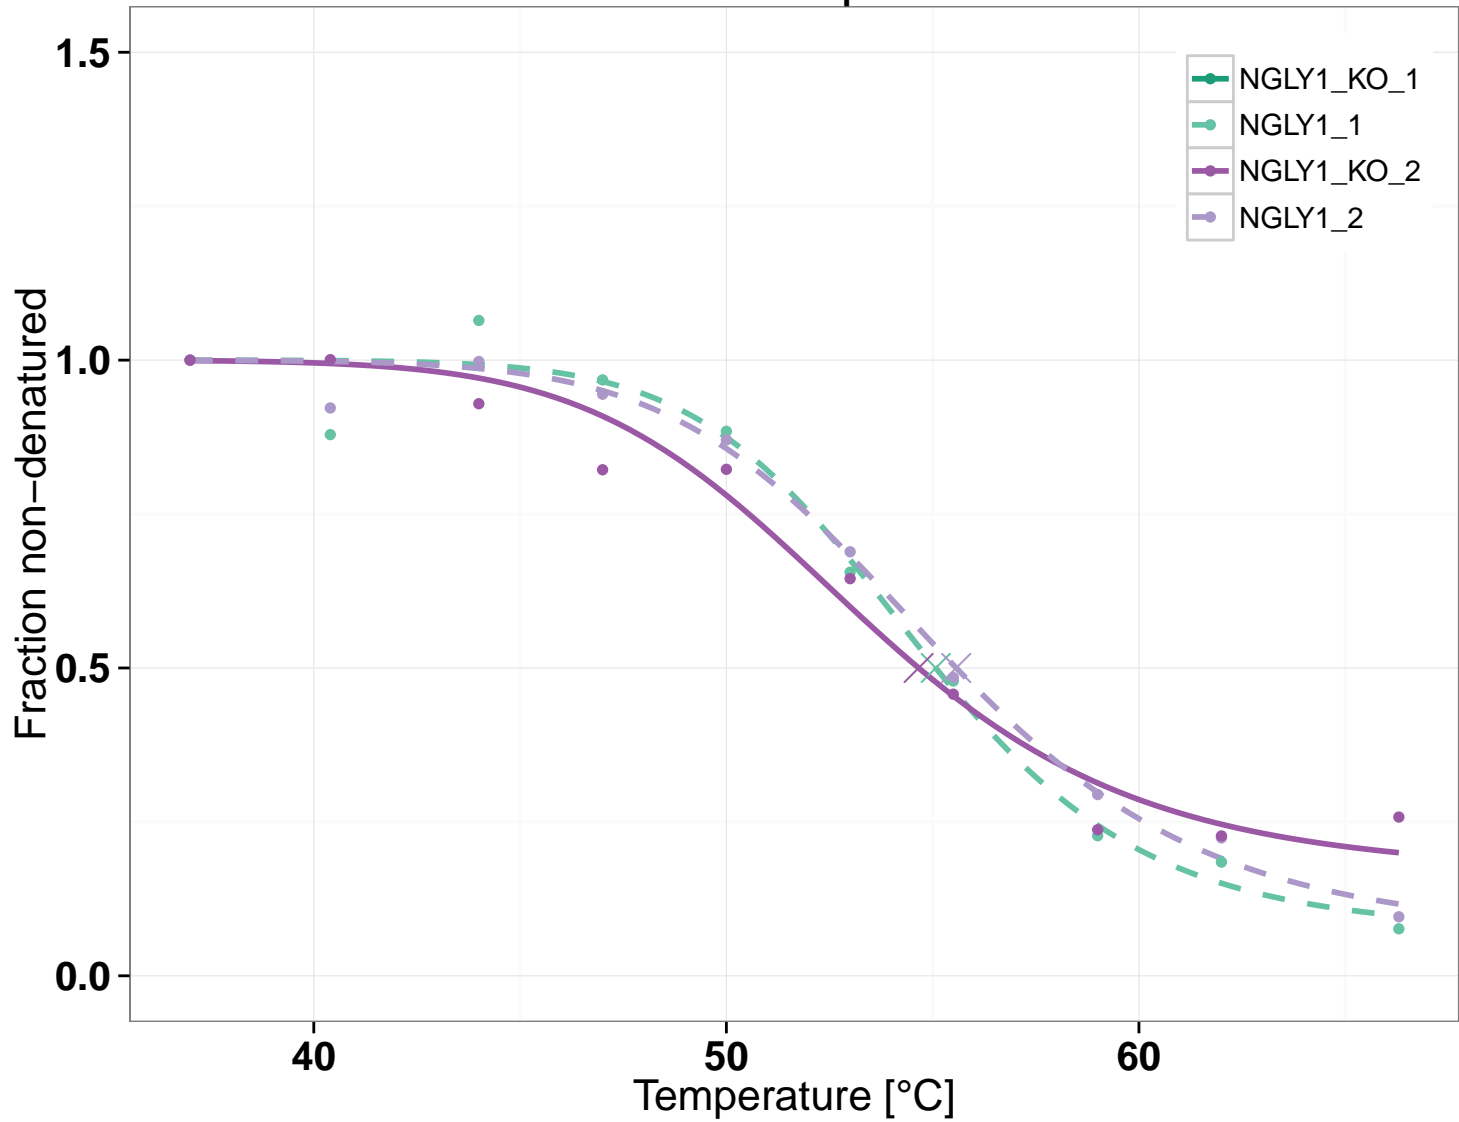

|            | meltPoint | slope  | plateau | R2   |
|------------|-----------|--------|---------|------|
| NGLY1_KO_1 | —         | —      | —       | —    |
| NGLY1_1    | 55.08     | -0.086 | 0.07    | 0.98 |
| NGLY1_KO_2 | 54.66     | -0.063 | 0.16    | 0.98 |
| NGLY1_2    | 55.57     | -0.072 | 0.06    | 0.99 |

Supplement: Supplementary file 7821 [file 1]

# IPI00028071.3|CLK2

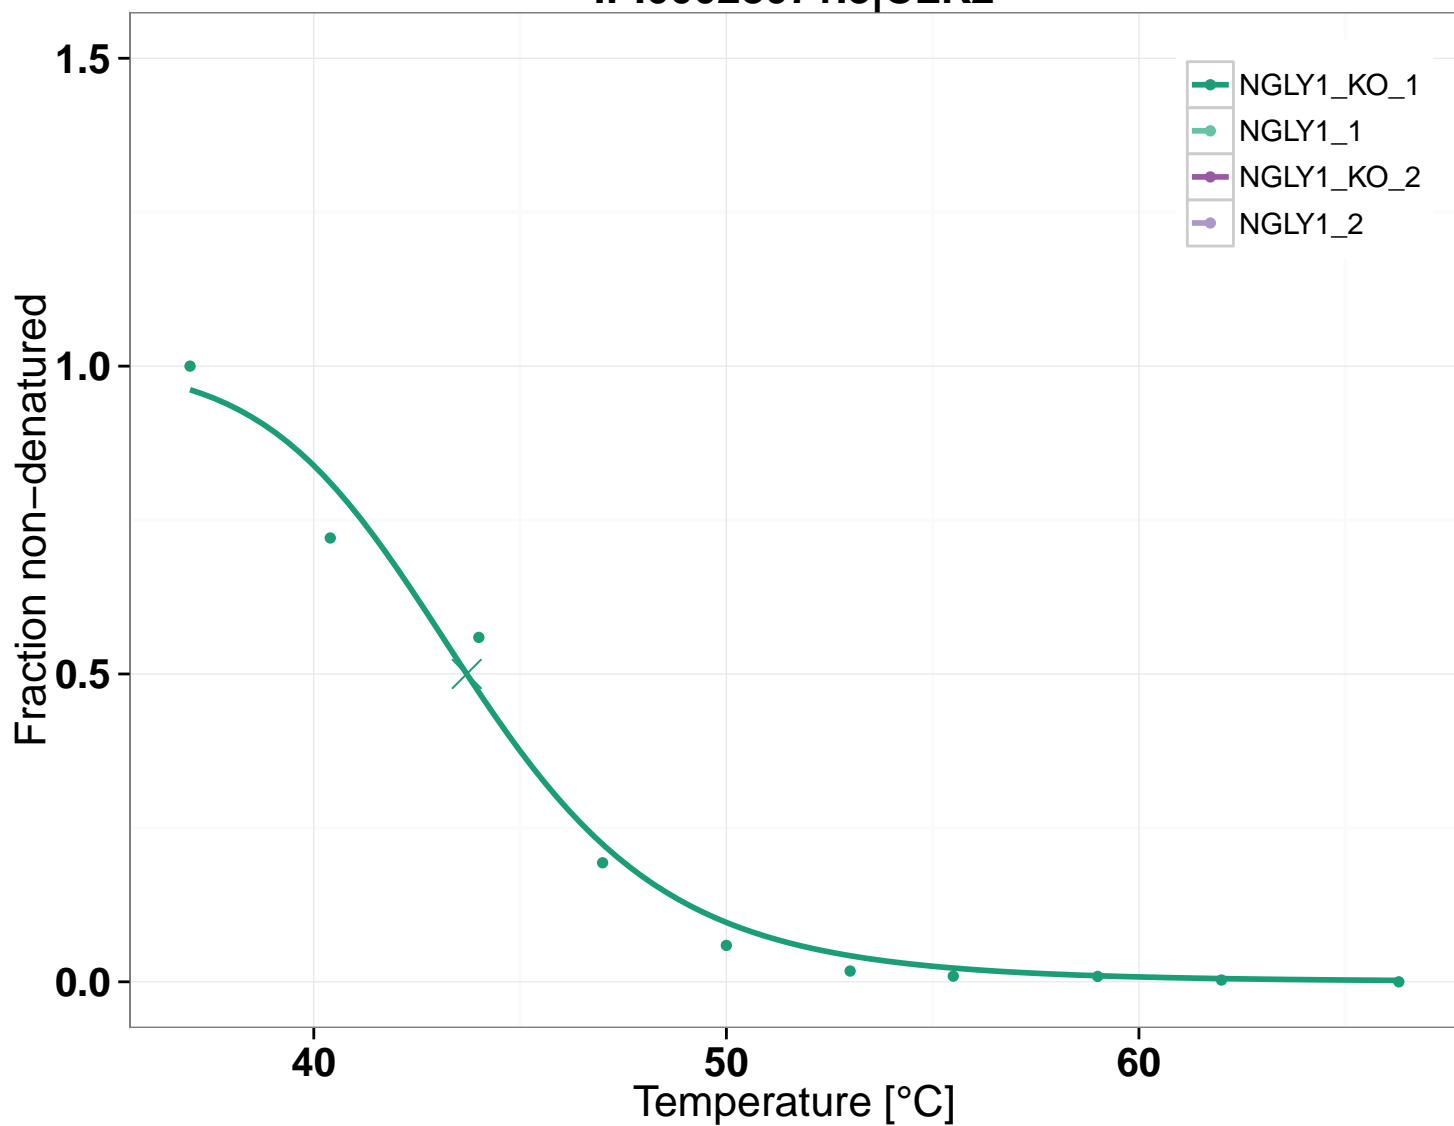

|            | meltPoint | slope | plateau | R2   |
|------------|-----------|-------|---------|------|
| NGLY1_KO_1 | 43.71     | -0.1  | 0       | 0.98 |
| NGLY1_1    | -         | -     | -       | -    |
| NGLY1_KO_2 | -         | -     | -       | -    |
| NGLY1_2    | -         | -     | -       | -    |

Supplement: Supplementary file 7822 [file 1]

IPI00478128.2|GATAD2A

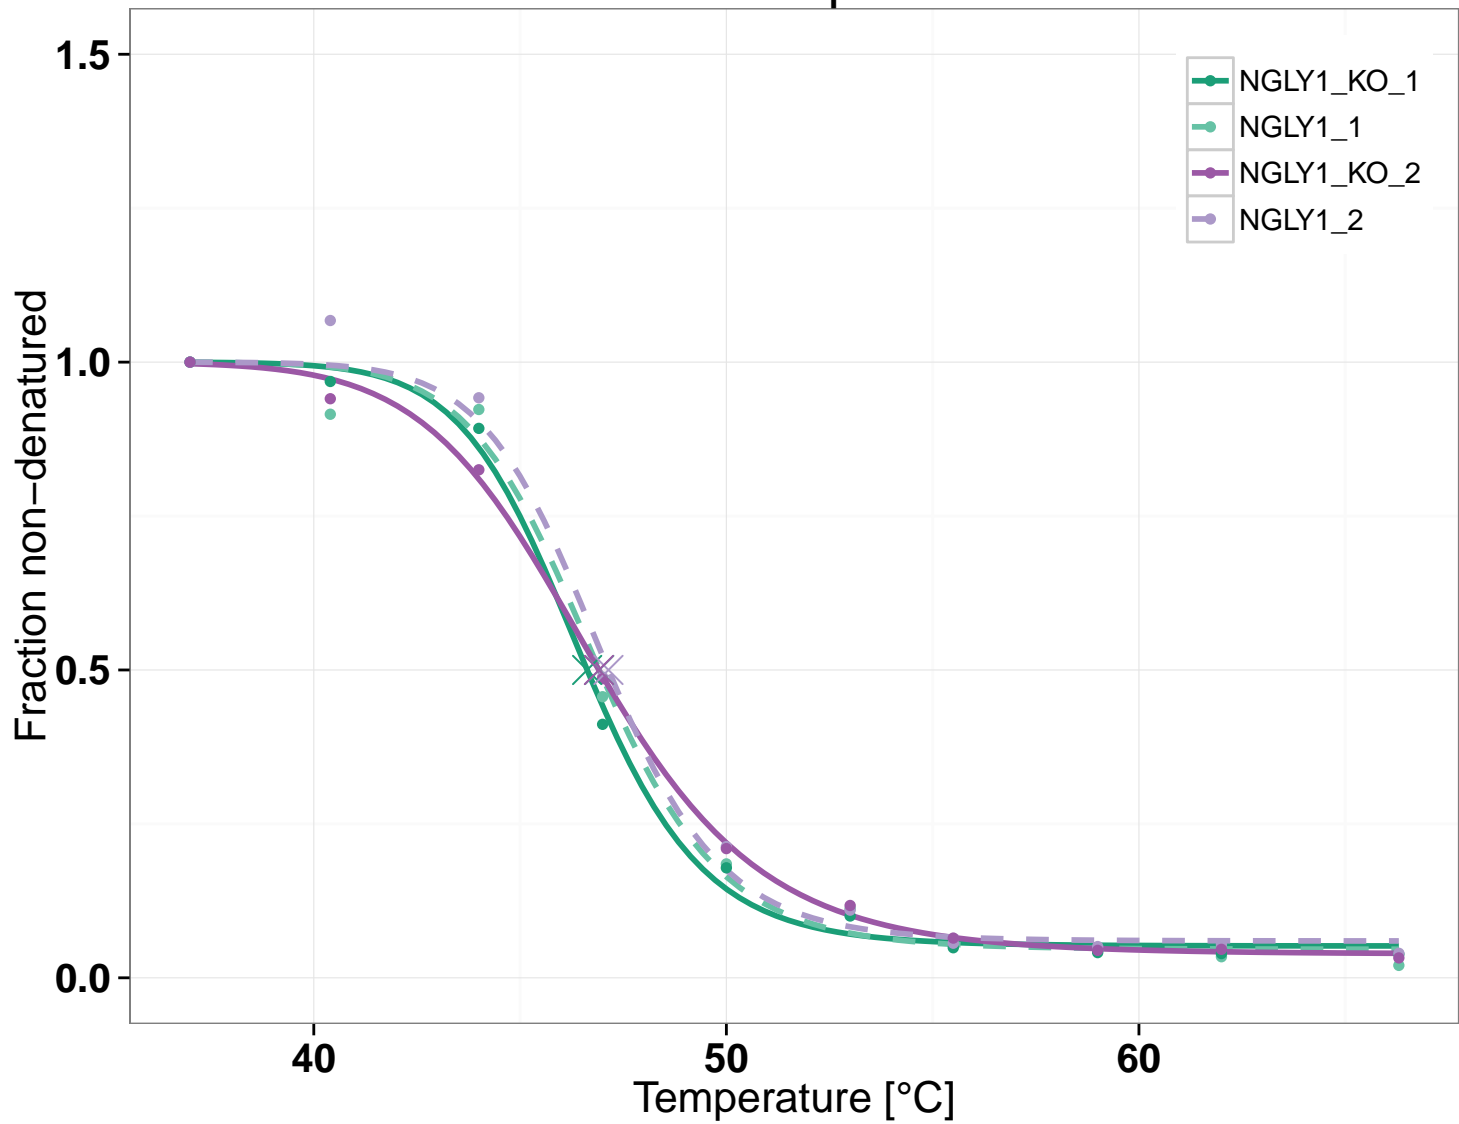

|            | meltPoint | slope | plateau | R2   |
|------------|-----------|-------|---------|------|
| NGLY1_KO_1 | 46.63     | -0.16 | 0.05    | 1    |
| NGLY1_1    | 46.92     | -0.16 | 0.05    | 0.99 |
| NGLY1_KO_2 | 46.91     | -0.12 | 0.04    | 1    |
| NGLY1_2    | 47.14     | -0.16 | 0.06    | 0.99 |

Supplement: Supplementary file 7823 [file 1]

IPI00023555.1|OSBPL3

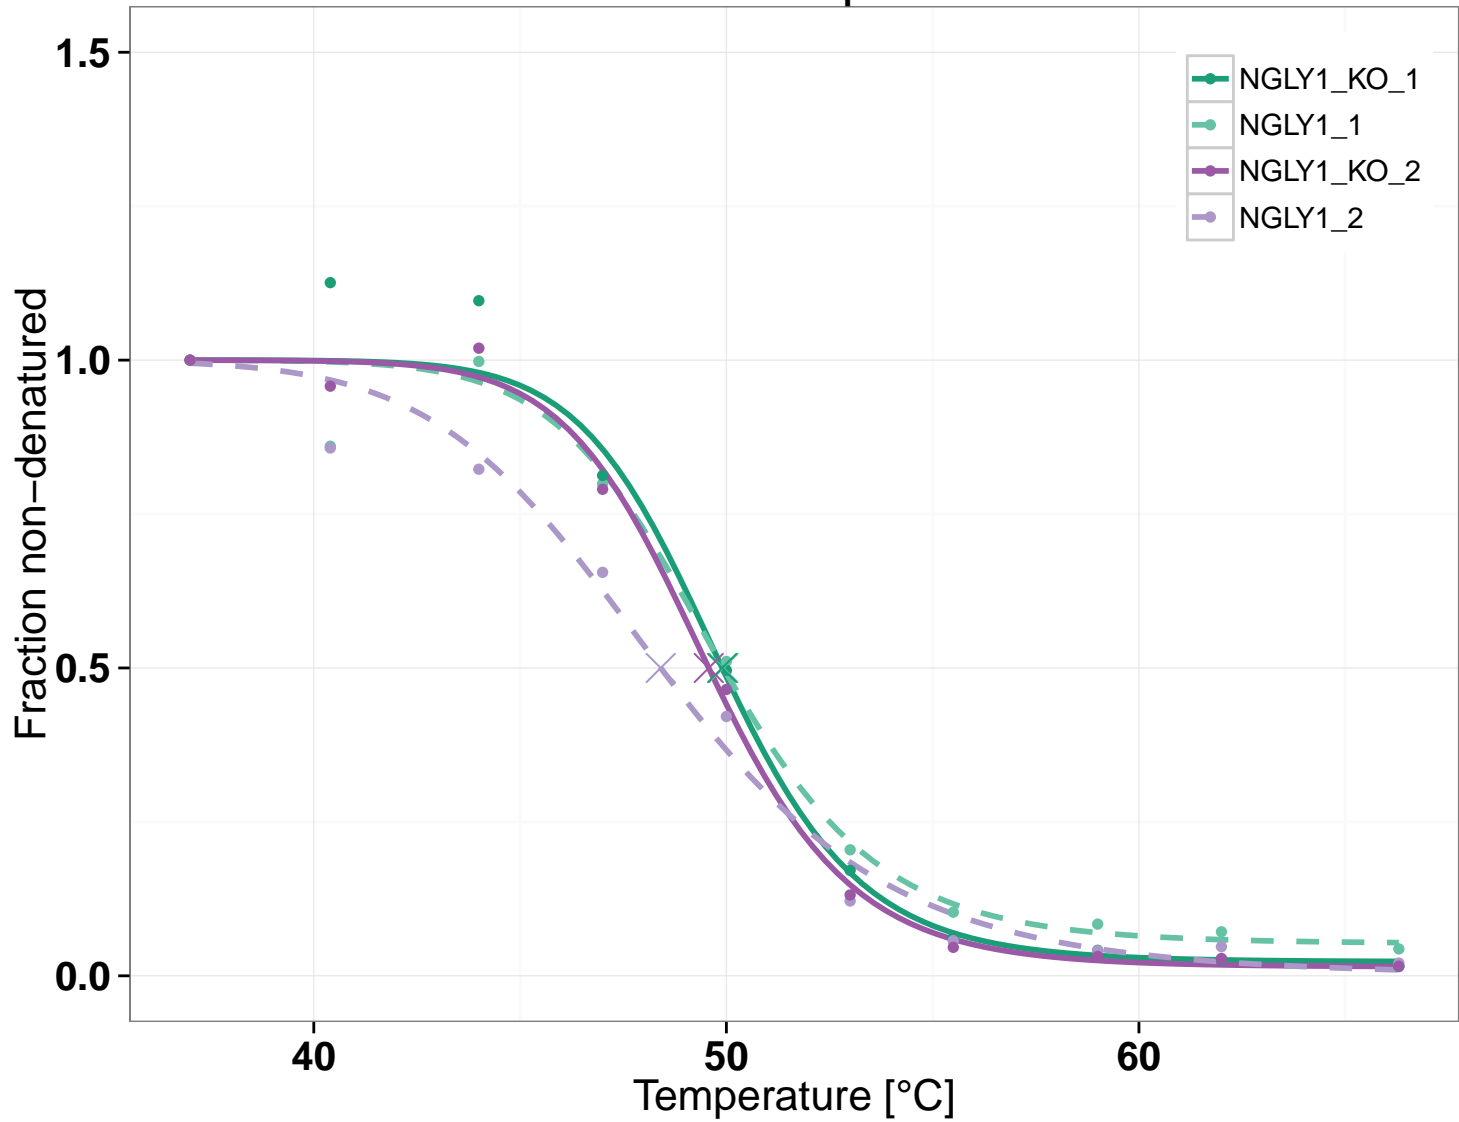

|            | meltPoint | slope | plateau | R2   |
|------------|-----------|-------|---------|------|
| NGLY1_KO_1 | 49.9      | -0.14 | 0.02    | 0.98 |
| NGLY1_1    | 49.93     | -0.12 | 0.05    | 0.99 |
| NGLY1_KO_2 | 49.57     | -0.14 | 0.01    | 1    |
| NGLY1_2    | 48.41     | -0.09 | 0       | 0.98 |

Supplement: Supplementary file 7824 [file 1]

IPI00917041.1|METTL5

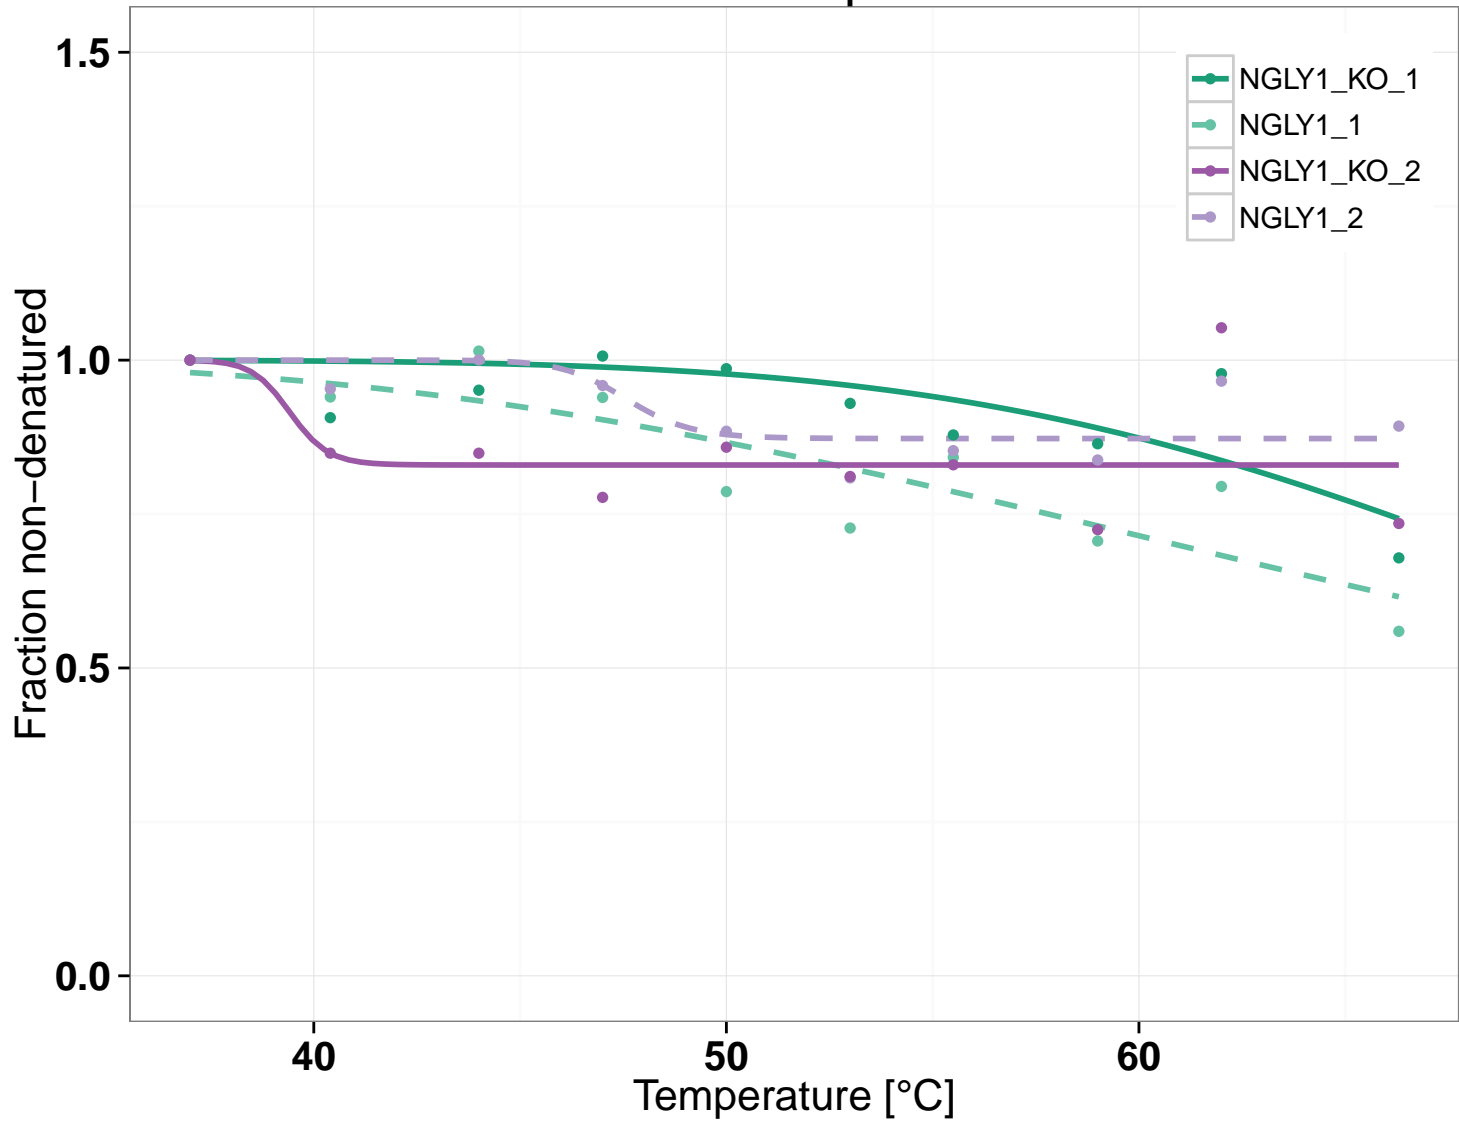

|            | meltPoint | slope  | plateau | R2   |
|------------|-----------|--------|---------|------|
| NGLY1_KO_1 | -         | -      | 0       | 0.54 |
| NGLY1_1    | -         | -0.016 | 0.03    | 0.77 |
| NGLY1_KO_2 | -         | -0.092 | 0.83    | 0.26 |
| NGLY1_2    | -         | -0.041 | 0.87    | 0.6  |

Supplement: Supplementary file 7825 [file 1]

IPI00297578.5|FILIP1L

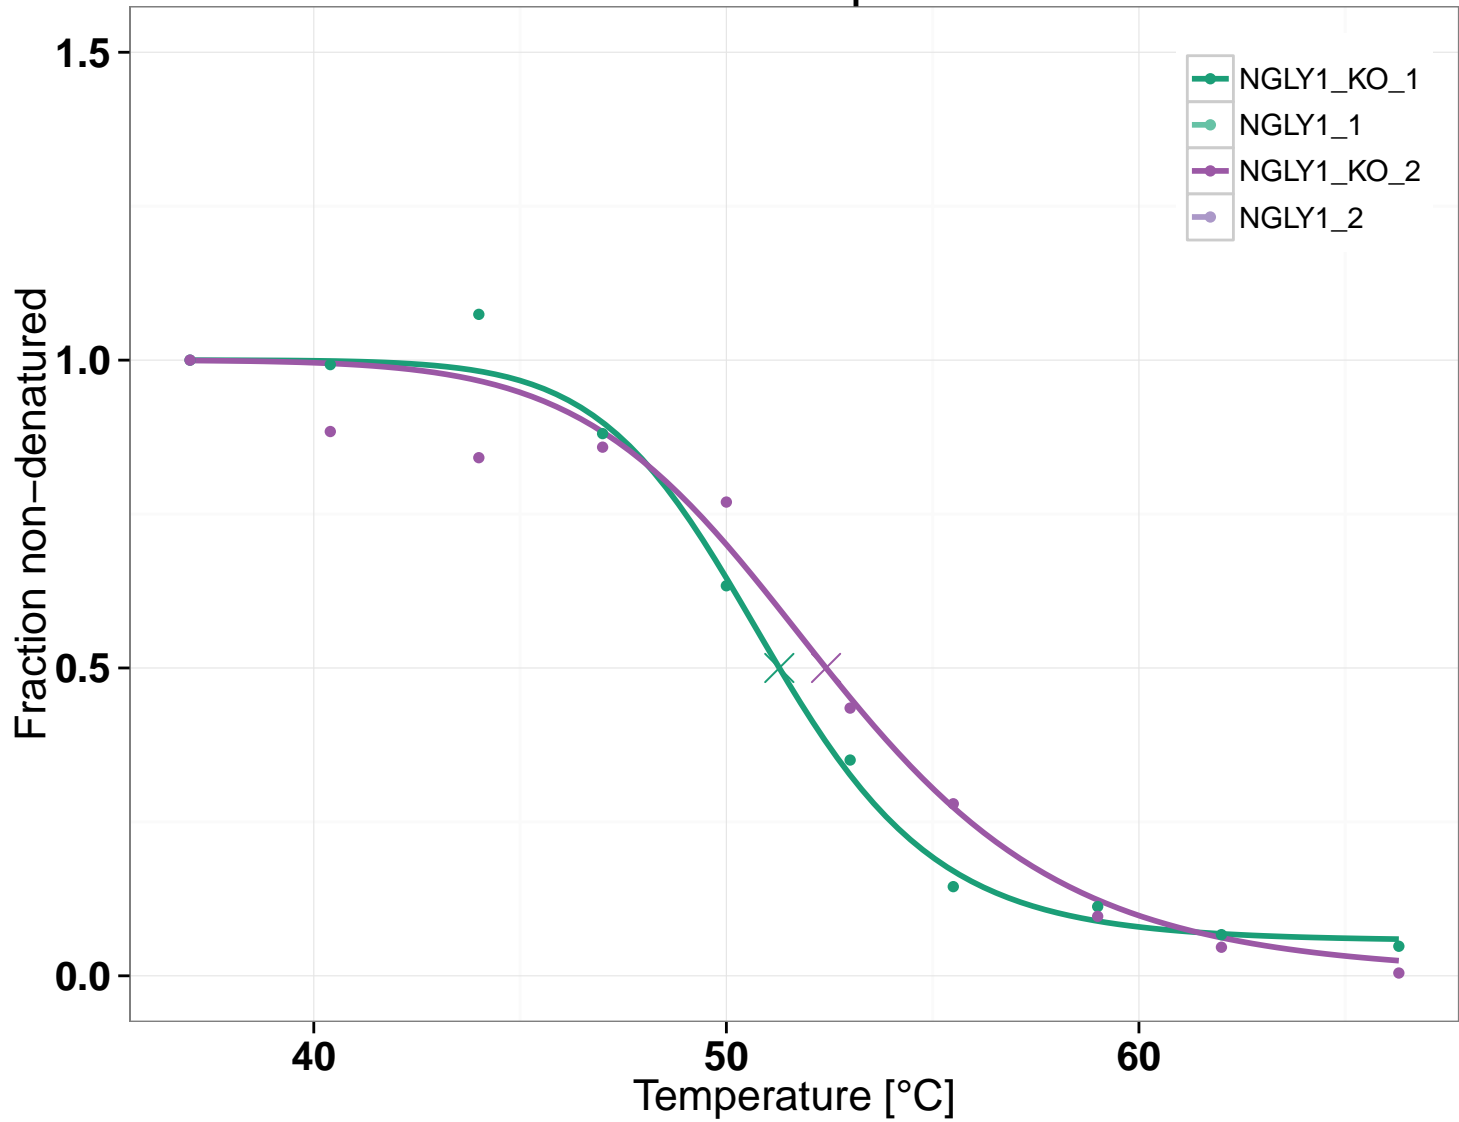

|            | meltPoint | slope  | plateau | R2   |
|------------|-----------|--------|---------|------|
| NGLY1_KO_1 | 51.28     | -0.11  | 0.06    | 0.99 |
| NGLY1_1    | -         | -      | -       | -    |
| NGLY1_KO_2 | 52.42     | -0.085 | 0       | 0.97 |
| NGLY1_2    | -         | -      | -       | -    |

Supplement: Supplementary file 7826 [file 1]

# IPI00000877.1|HYOU1

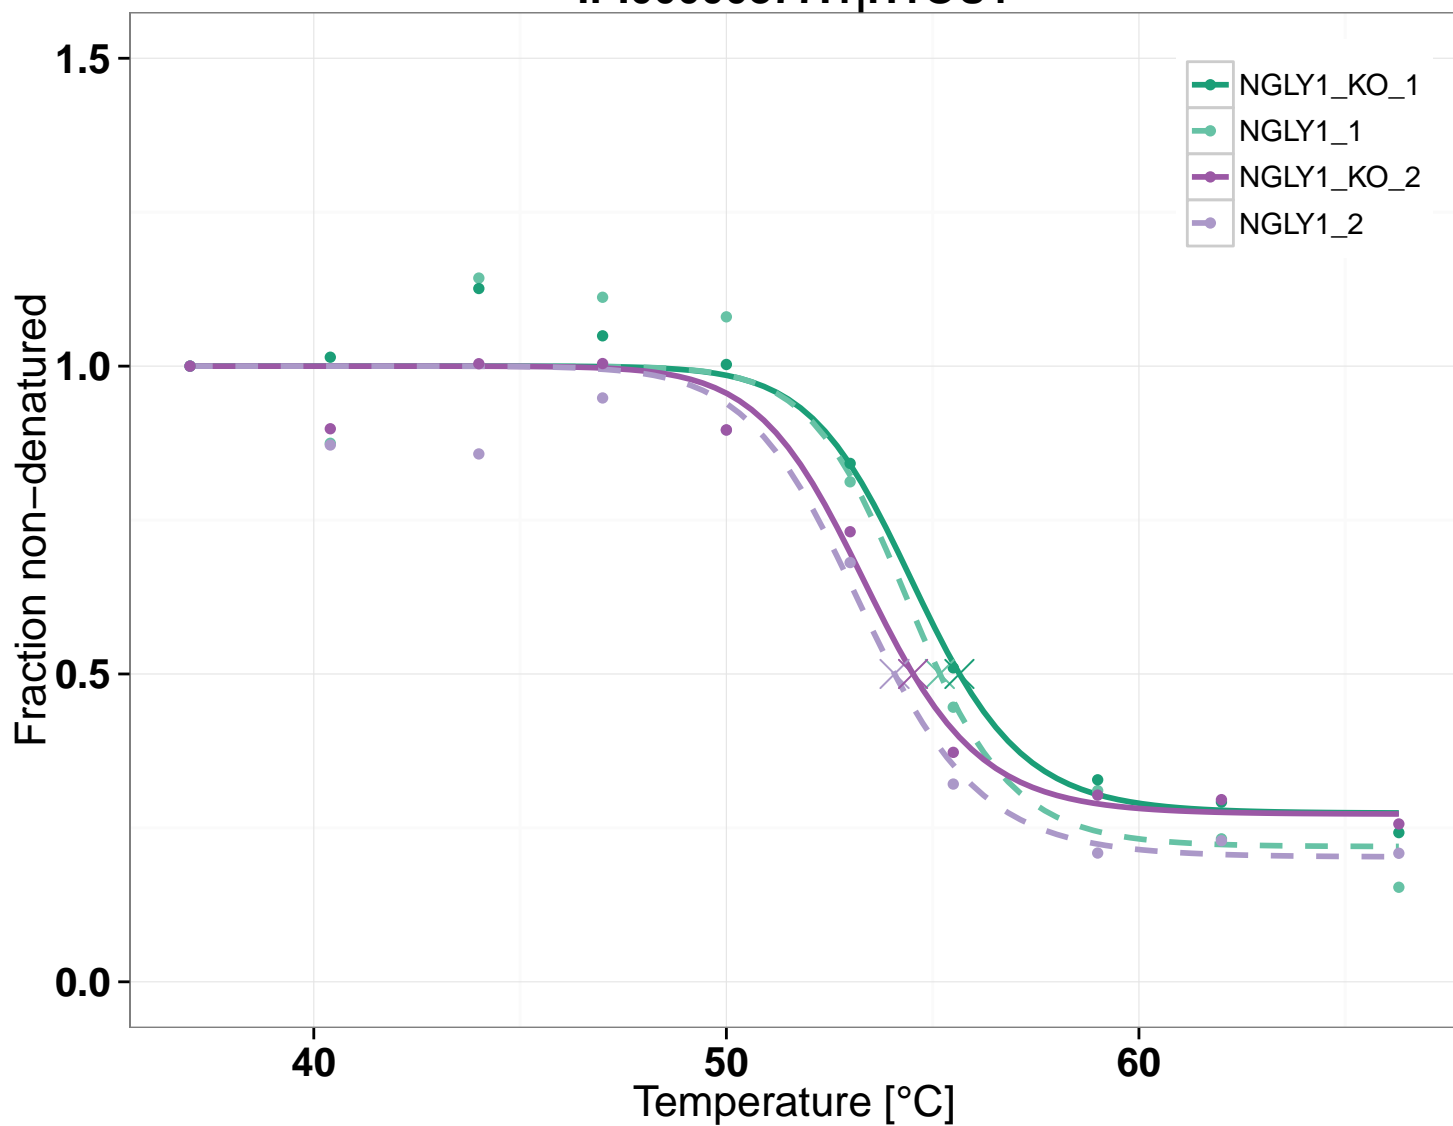

|            | meltPoint | slope | plateau | R2   |
|------------|-----------|-------|---------|------|
| NGLY1_KO_1 | 55.65     | -0.14 | 0.27    | 0.98 |
| NGLY1_1    | 55.17     | -0.16 | 0.22    | 0.95 |
| NGLY1_KO_2 | 54.52     | -0.14 | 0.27    | 0.98 |
| NGLY1_2    | 54.08     | -0.14 | 0.2     | 0.96 |

Supplement: Supplementary file 7827 [file 1]

# IPI00783550.2|ADAL

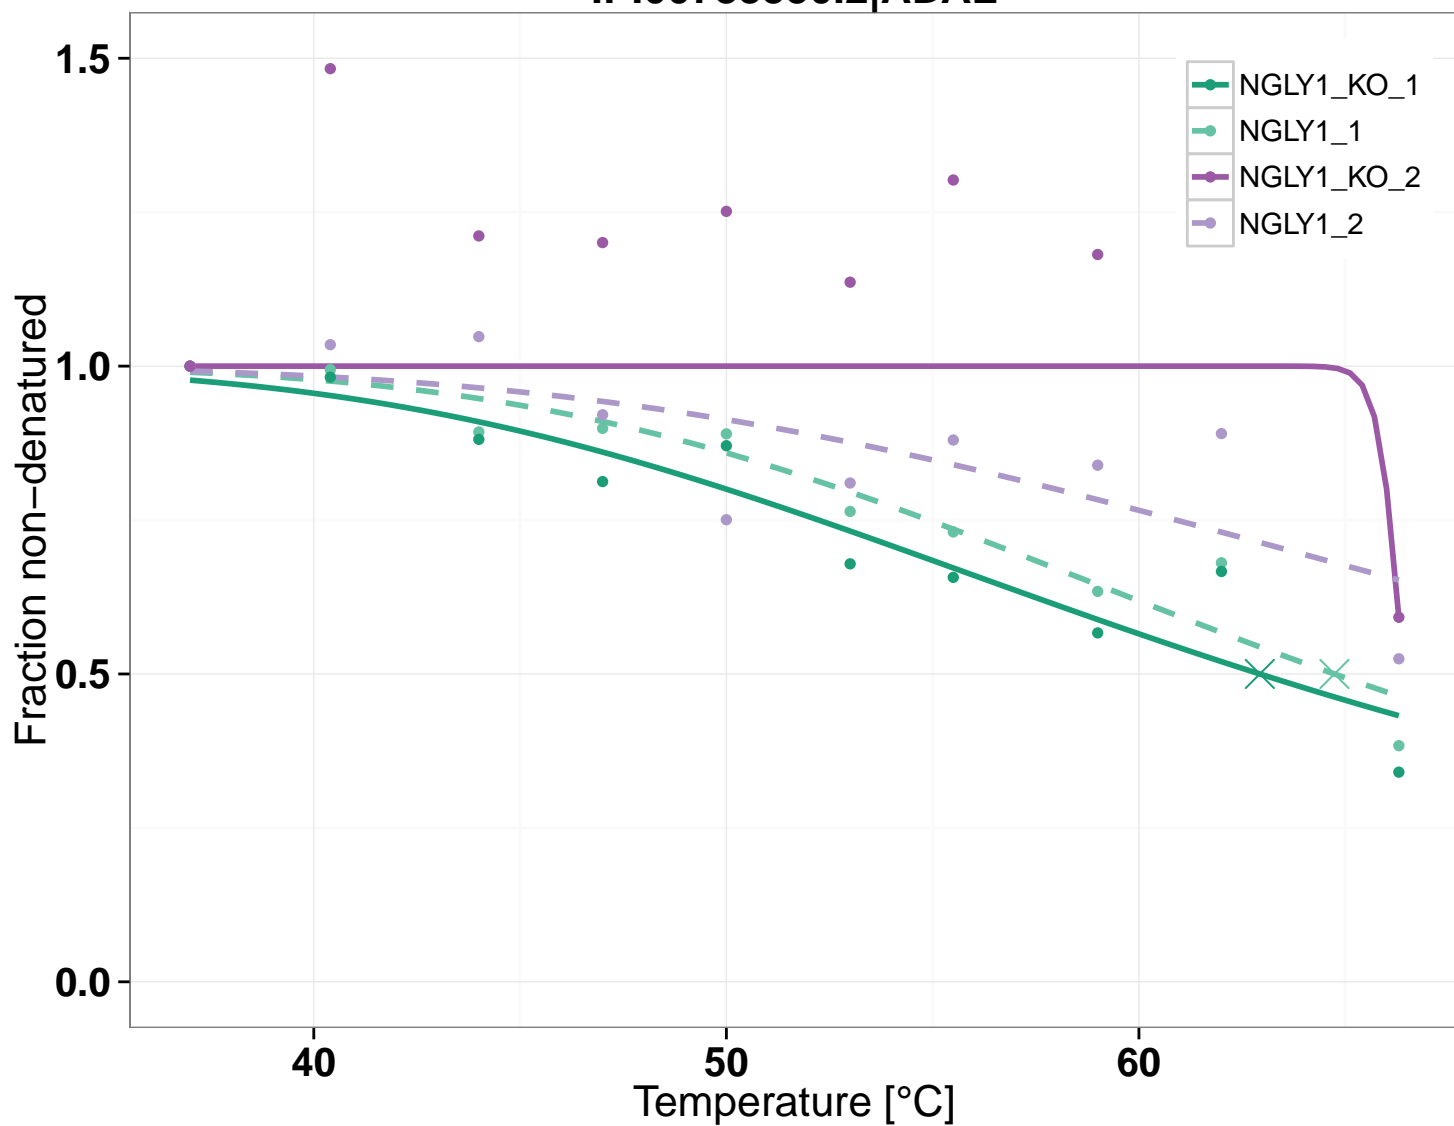

|            | meltPoint | slope  | plateau | R2   |
|------------|-----------|--------|---------|------|
| NGLY1_KO_1 | 62.93     | -0.024 | 0       | 0.89 |
| NGLY1_1    | 64.74     | -0.026 | 0       | 0.92 |
| NGLY1_KO_2 | -         | -      | 0       | -0.3 |
| NGLY1_2    | -         | -0.018 | 0       | 0.6  |

Supplement: Supplementary file 7828 [file 1]

# IPI00107753.2|OPA1

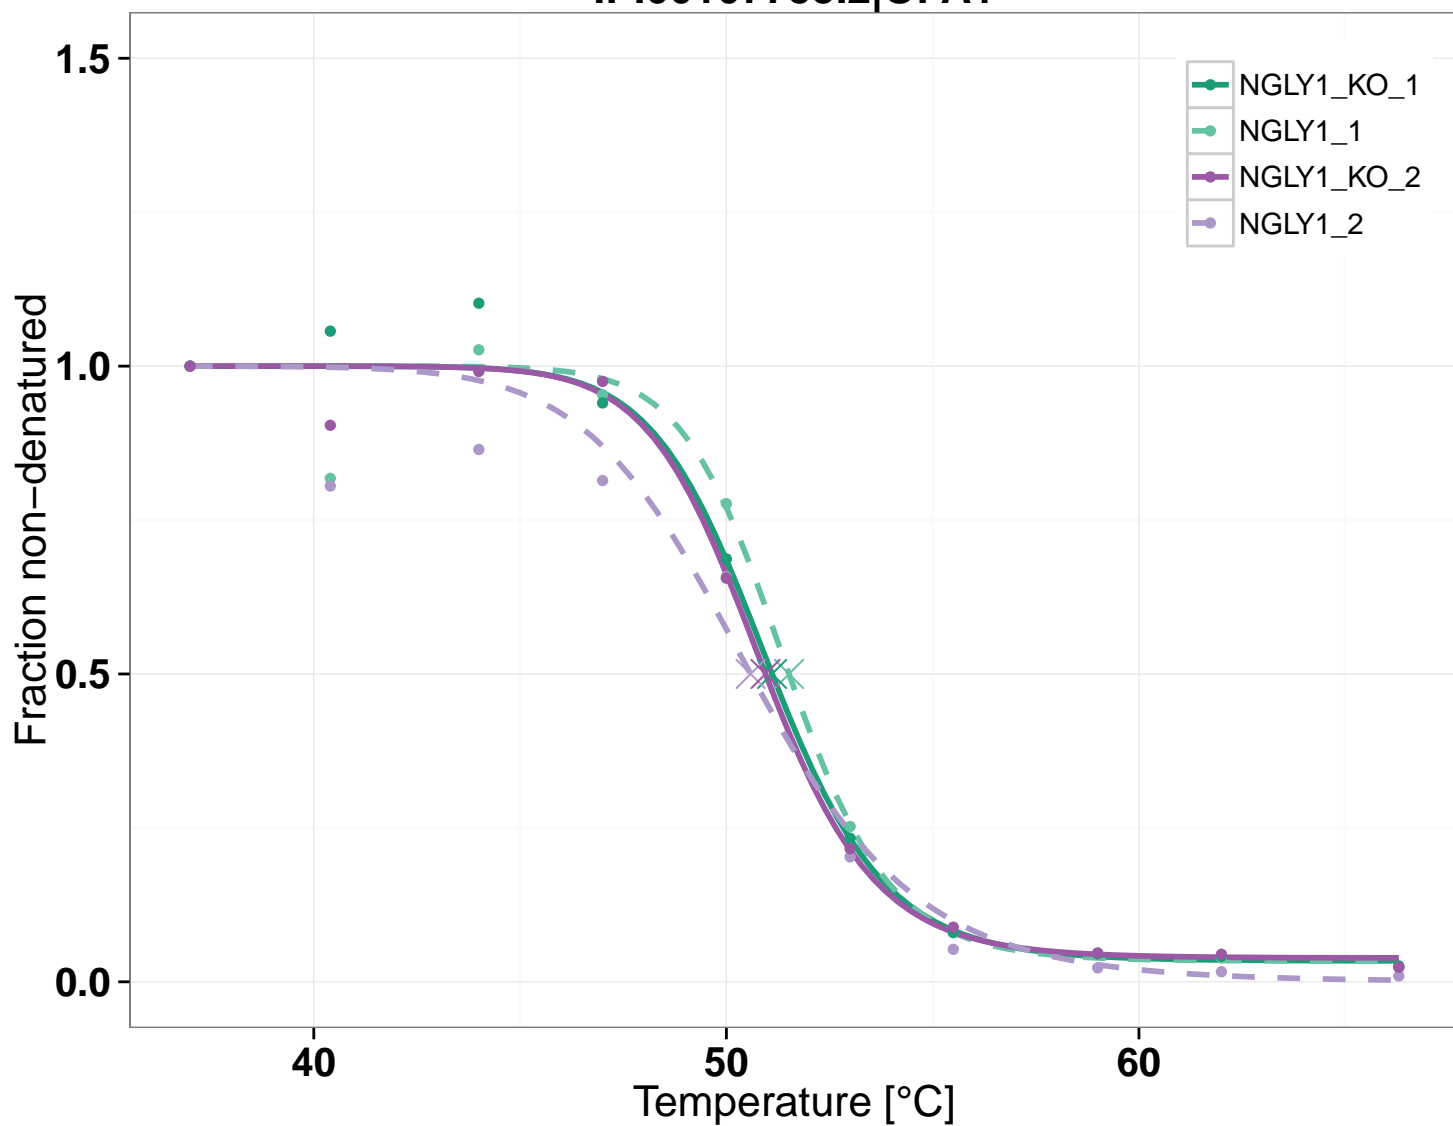

|            | meltPoint | slope | plateau | R2   |
|------------|-----------|-------|---------|------|
| NGLY1_KO_1 | 51.11     | -0.17 | 0.03    | 0.99 |
| NGLY1_1    | 51.52     | -0.19 | 0.03    | 0.98 |
| NGLY1_KO_2 | 50.95     | -0.17 | 0.04    | 0.99 |
| NGLY1_2    | 50.59     | -0.12 | 0       | 0.96 |

Supplement: Supplementary file 7829 [file 1]

IPI00783895.4|KIAA0528

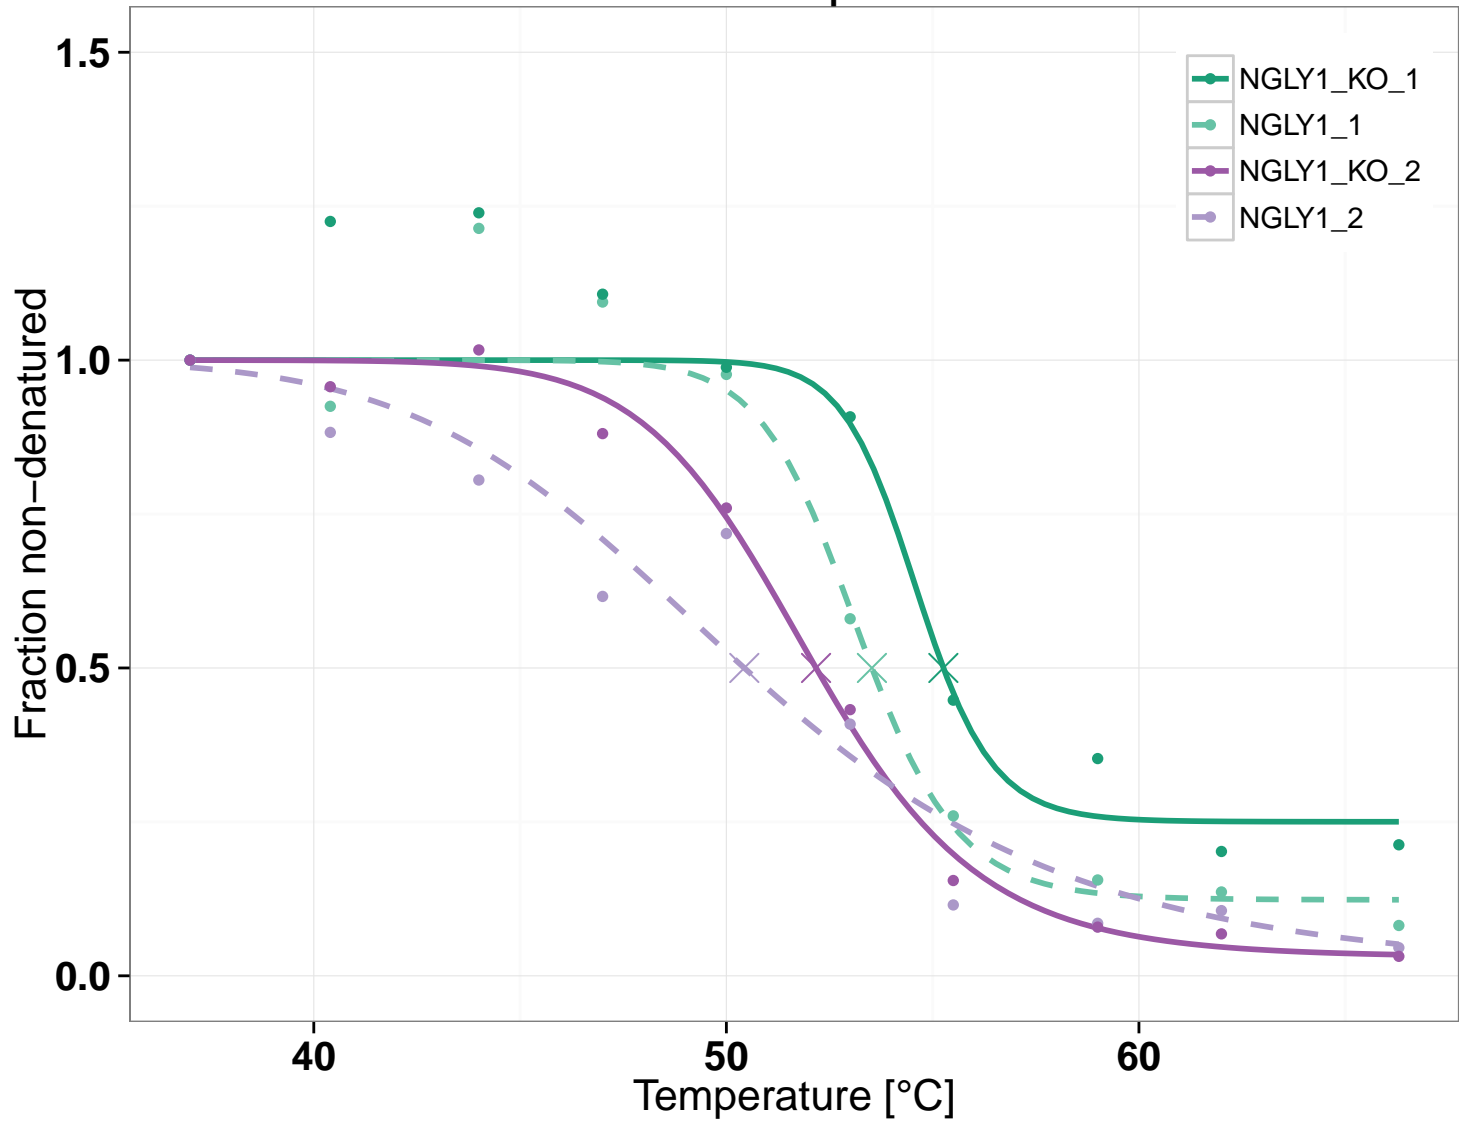

|            | meltPoint | slope  | plateau | R2   |
|------------|-----------|--------|---------|------|
| NGLY1_KO_1 | 55.26     | -0.21  | 0.25    | 0.92 |
| NGLY1_1    | 53.53     | -0.18  | 0.12    | 0.96 |
| NGLY1_KO_2 | 52.17     | -0.12  | 0.03    | 0.99 |
| NGLY1_2    | 50.43     | -0.062 | 0       | 0.94 |

Supplement: Supplementary file 7830 [file 1]

IPI00216132.1|RPS6KB1

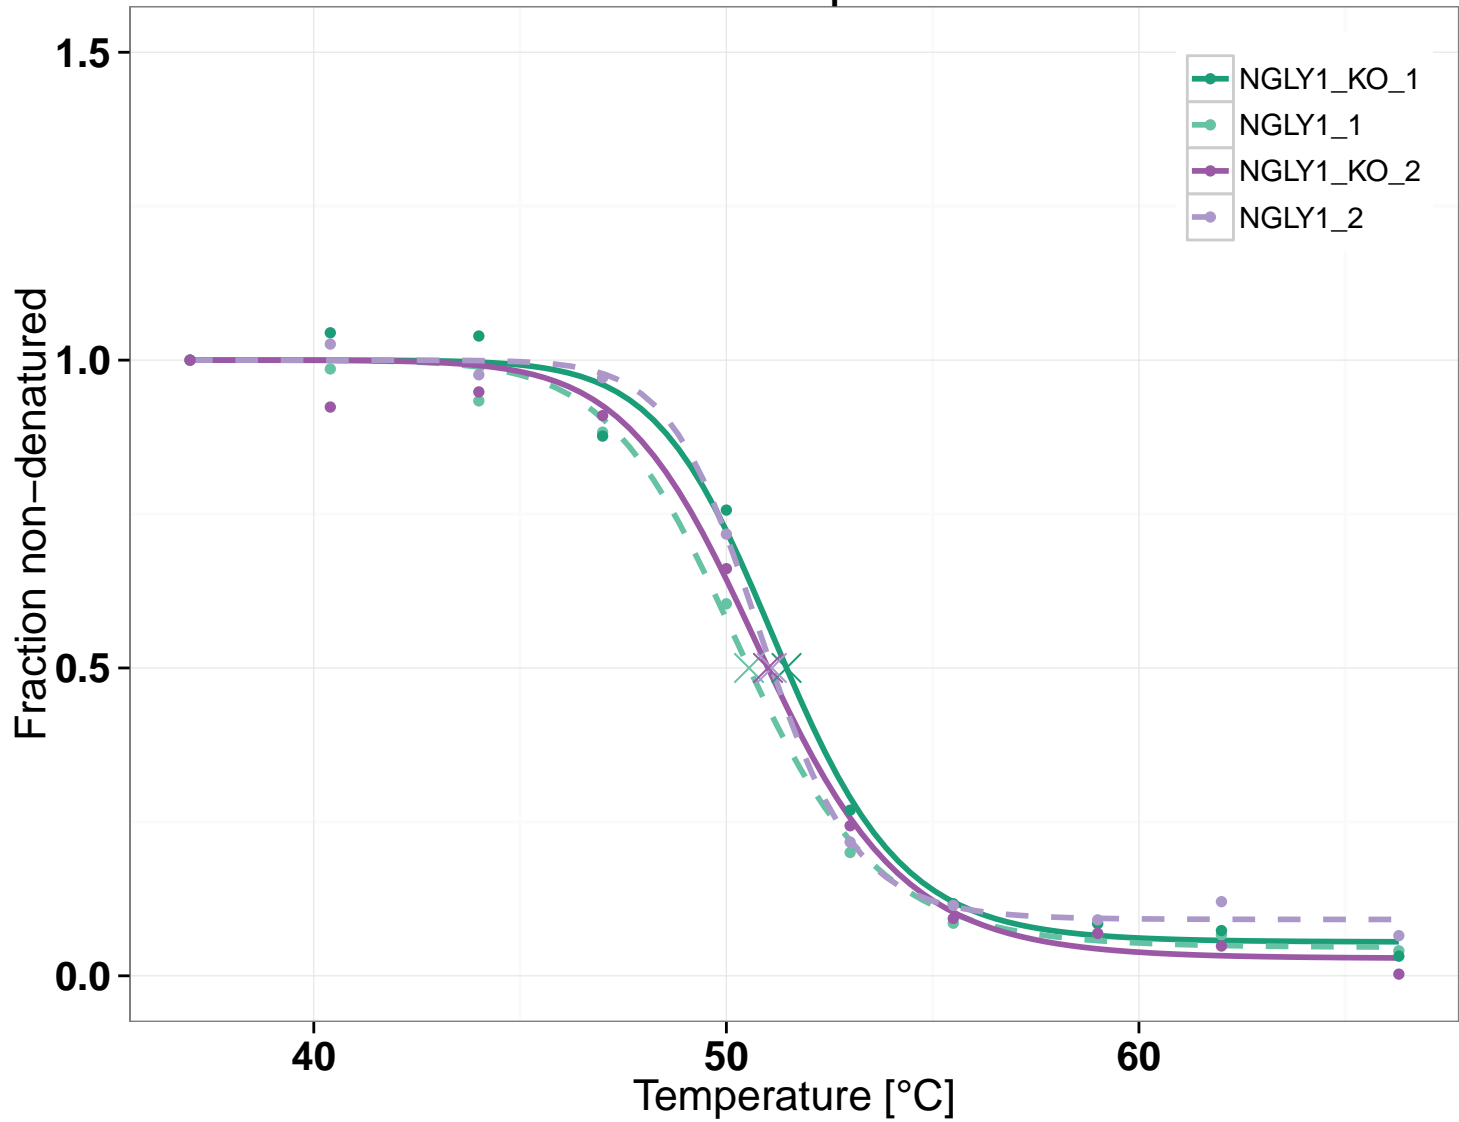

|            | meltPoint | slope | plateau | R2   |
|------------|-----------|-------|---------|------|
| NGLY1_KO_1 | 51.46     | -0.16 | 0.05    | 0.99 |
| NGLY1_1    | 50.55     | -0.14 | 0.05    | 1    |
| NGLY1_KO_2 | 51.01     | -0.14 | 0.03    | 0.99 |
| NGLY1_2    | 51.1      | -0.2  | 0.09    | 1    |

Supplement: Supplementary file 7831 [file 1]

# IPI00010270.1|RAC2

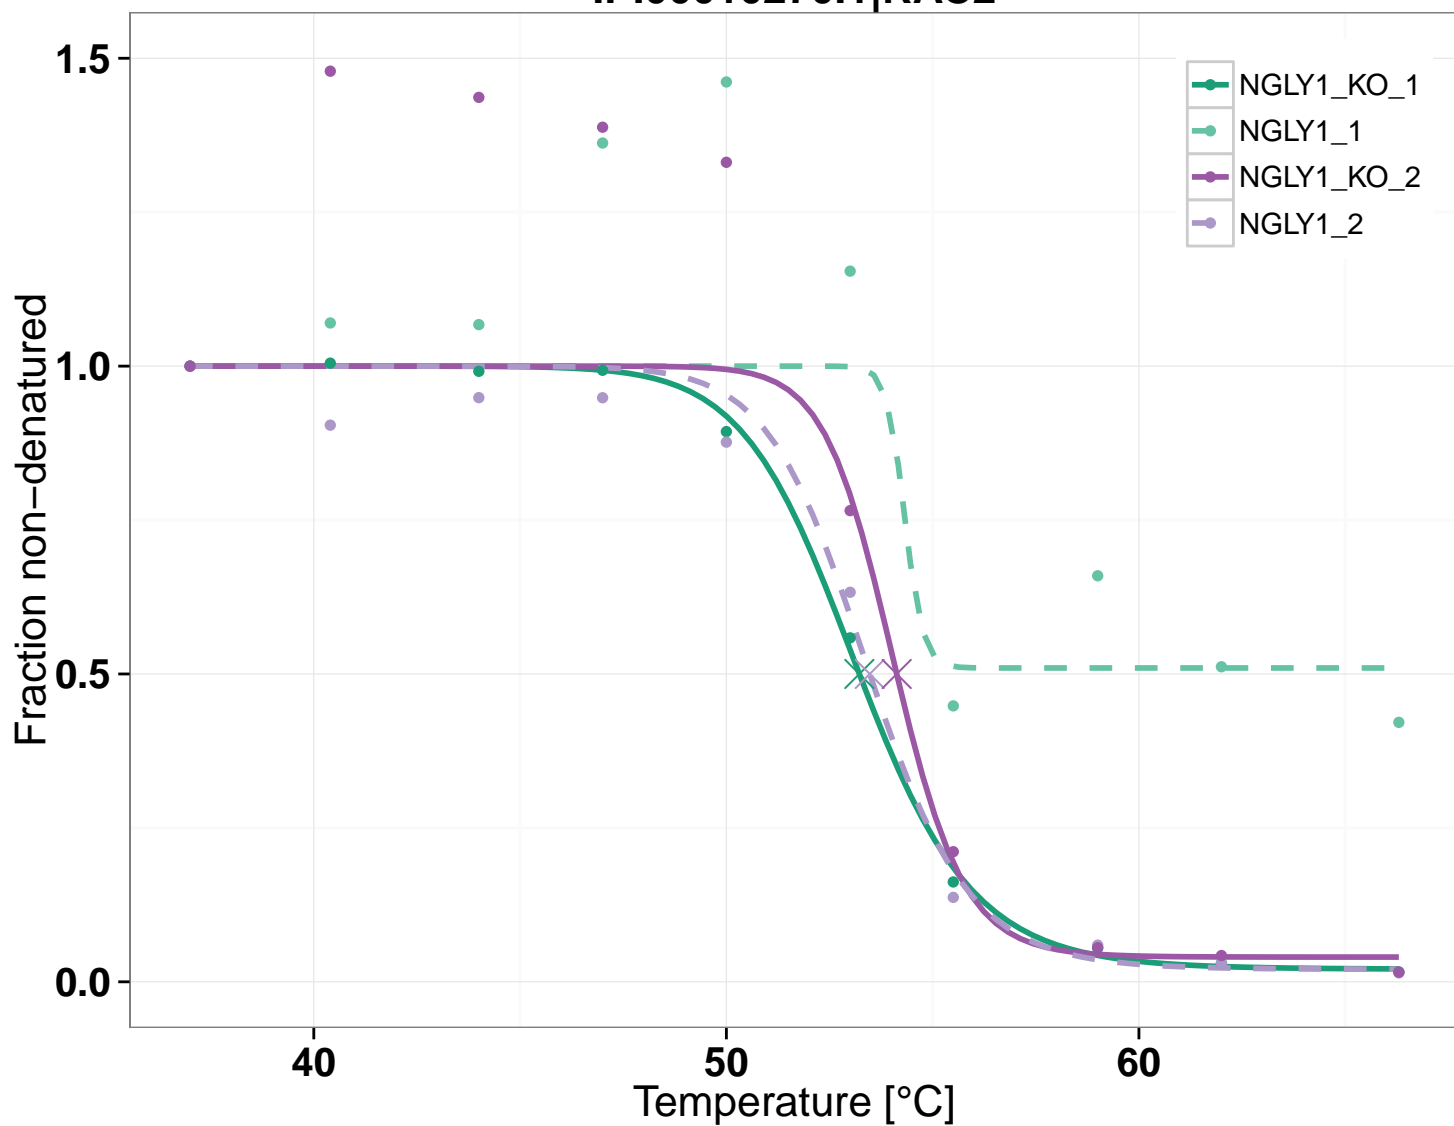

|            | meltPoint | slope | plateau | R2   |
|------------|-----------|-------|---------|------|
| NGLY1_KO_1 | 53.22     | -0.18 | 0.02    | 1    |
| NGLY1_1    | -         | -0.56 | 0.51    | 0.68 |
| NGLY1_KO_2 | 54.13     | -0.28 | 0.04    | 0.81 |
| NGLY1_2    | 53.48     | -0.2  | 0.02    | 0.99 |

Supplement: Supplementary file 7832 [file 1]

# IPI00298793.4|MANBA

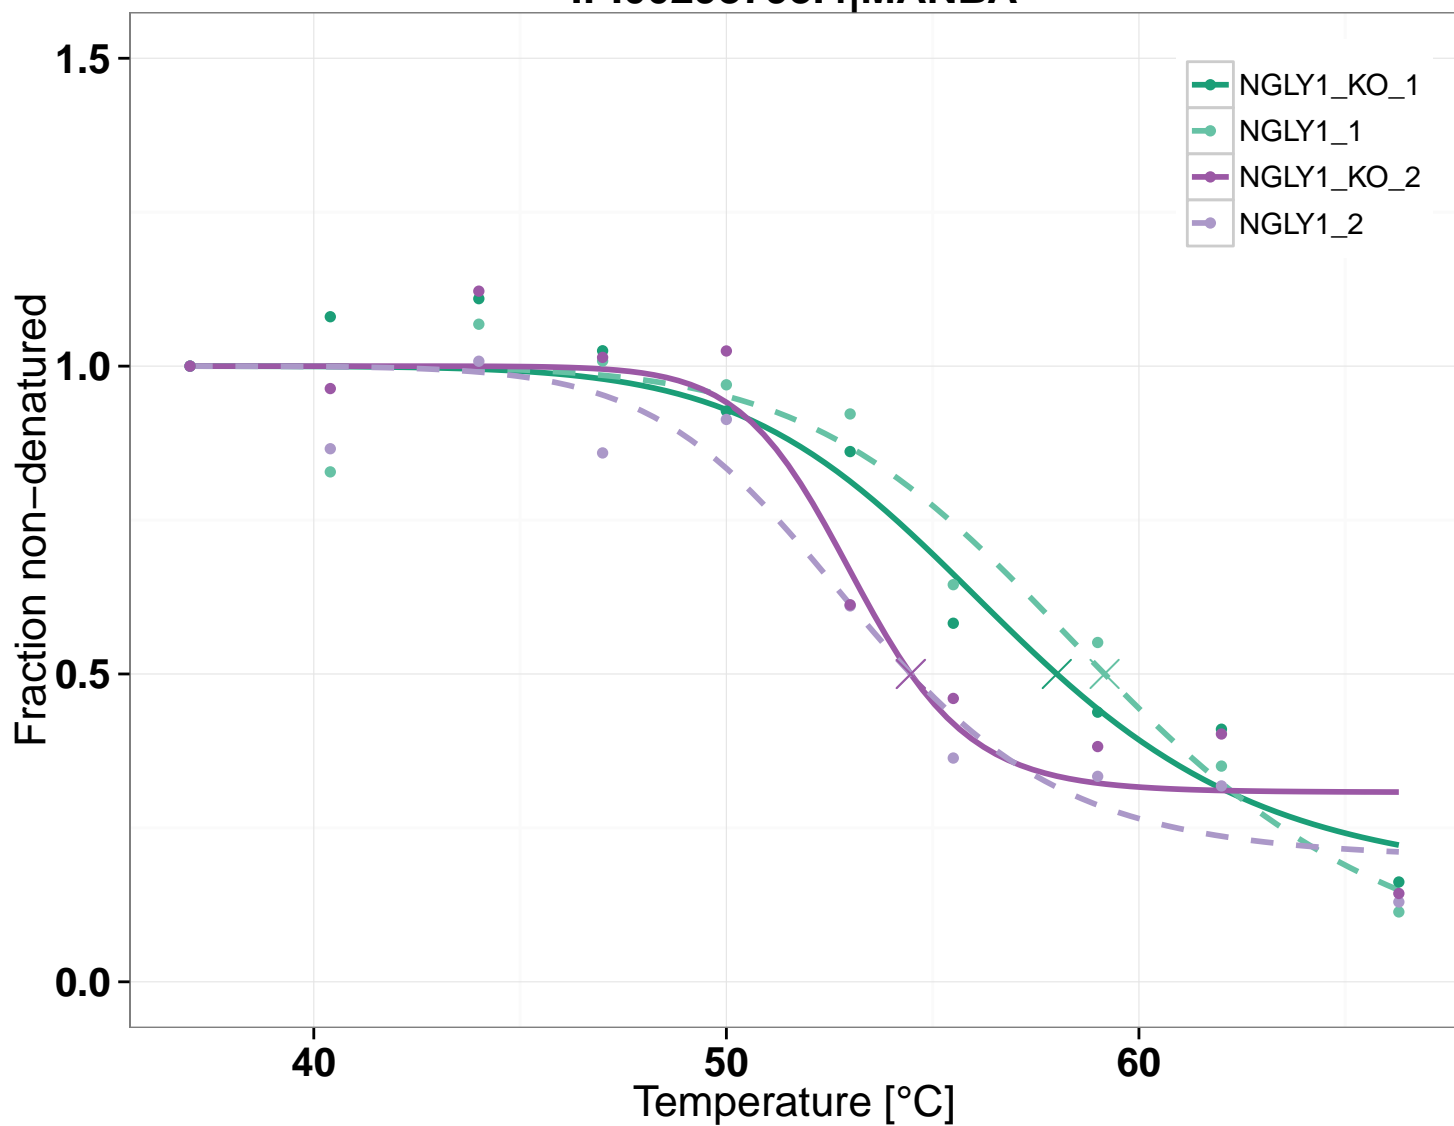

|            | meltPoint | slope  | plateau | R2   |
|------------|-----------|--------|---------|------|
| NGLY1_KO_1 | 58.01     | -0.066 | 0.16    | 0.96 |
| NGLY1_1    | 59.17     | -0.069 | 0       | 0.94 |
| NGLY1_KO_2 | 54.47     | -0.13  | 0.31    | 0.94 |
| NGLY1_2    | 54.48     | -0.08  | 0.2     | 0.95 |

Supplement: Supplementary file 7833 [file 1]

# IPI00401026.5|CRYBG3

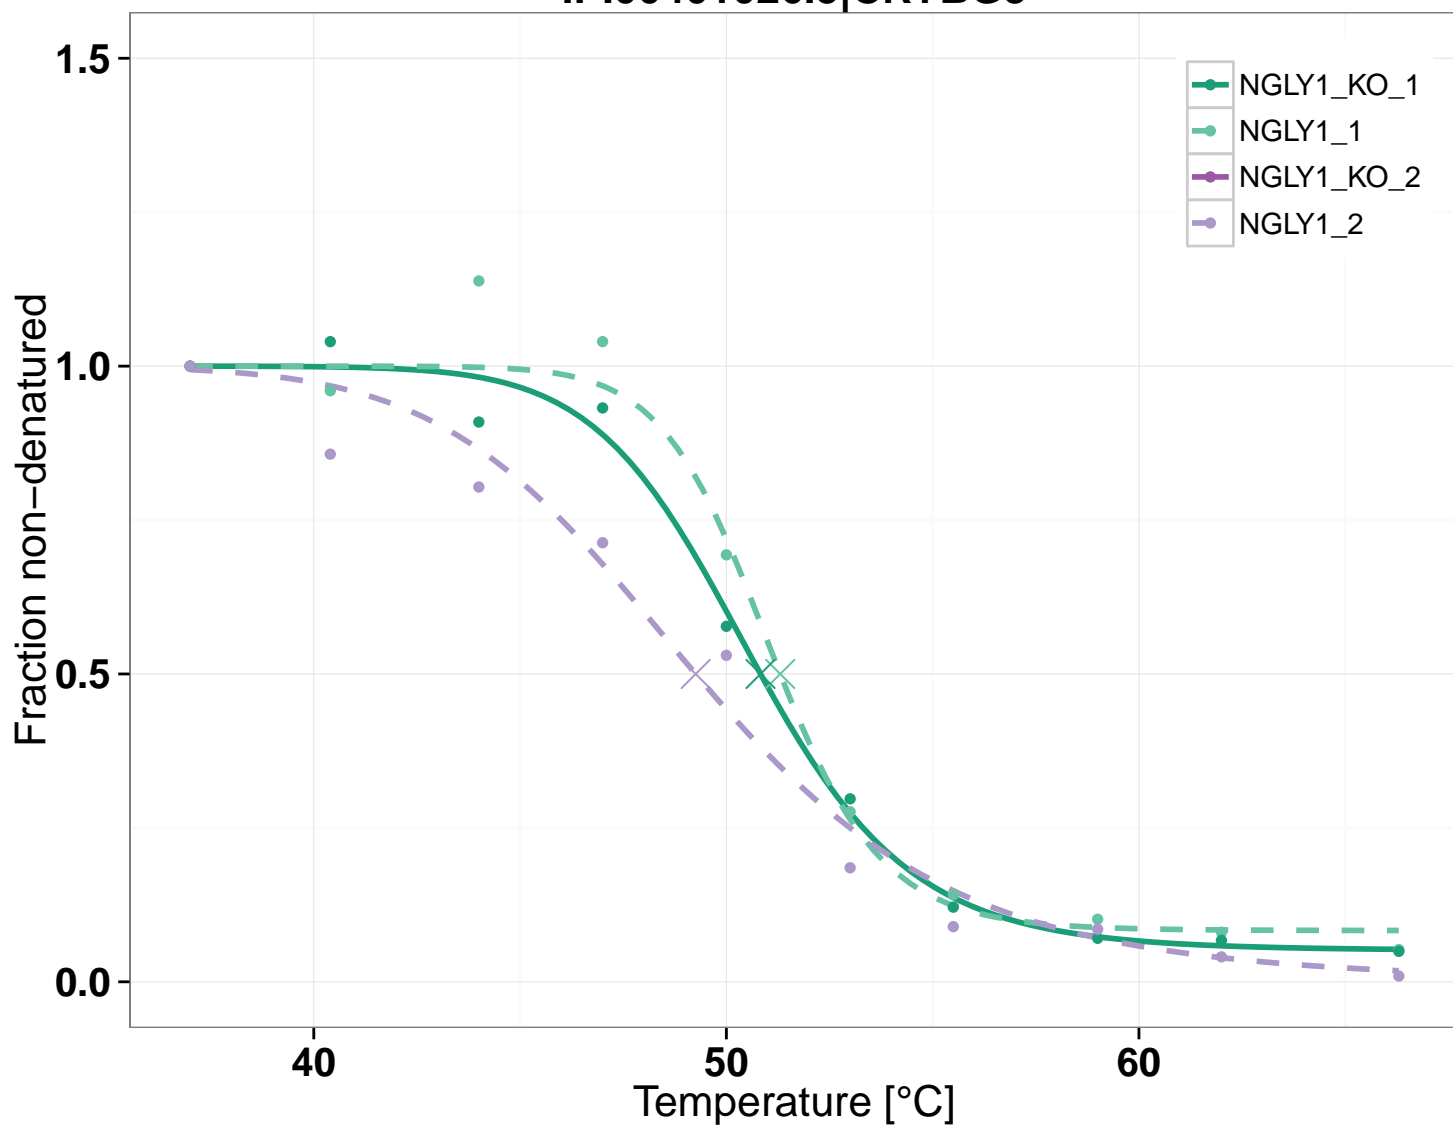

|            | meltPoint | slope | plateau | R2   |
|------------|-----------|-------|---------|------|
| NGLY1_KO_1 | 50.83     | -0.12 | 0.05    | 0.99 |
| NGLY1_1    | 51.31     | -0.17 | 0.08    | 0.98 |
| NGLY1_KO_2 | -         | -     | -       | -    |
| NGLY1_2    | 49.26     | -0.08 | 0       | 0.98 |

Supplement: Supplementary file 7834 [file 1]
