# Supplementary material (part 79 of 85)
Source: publisher figshare collection journal article supplement (https://gsajournals.figshare.com/articles/dataset/_/12014913)

IPI00550380.3|TMEM160

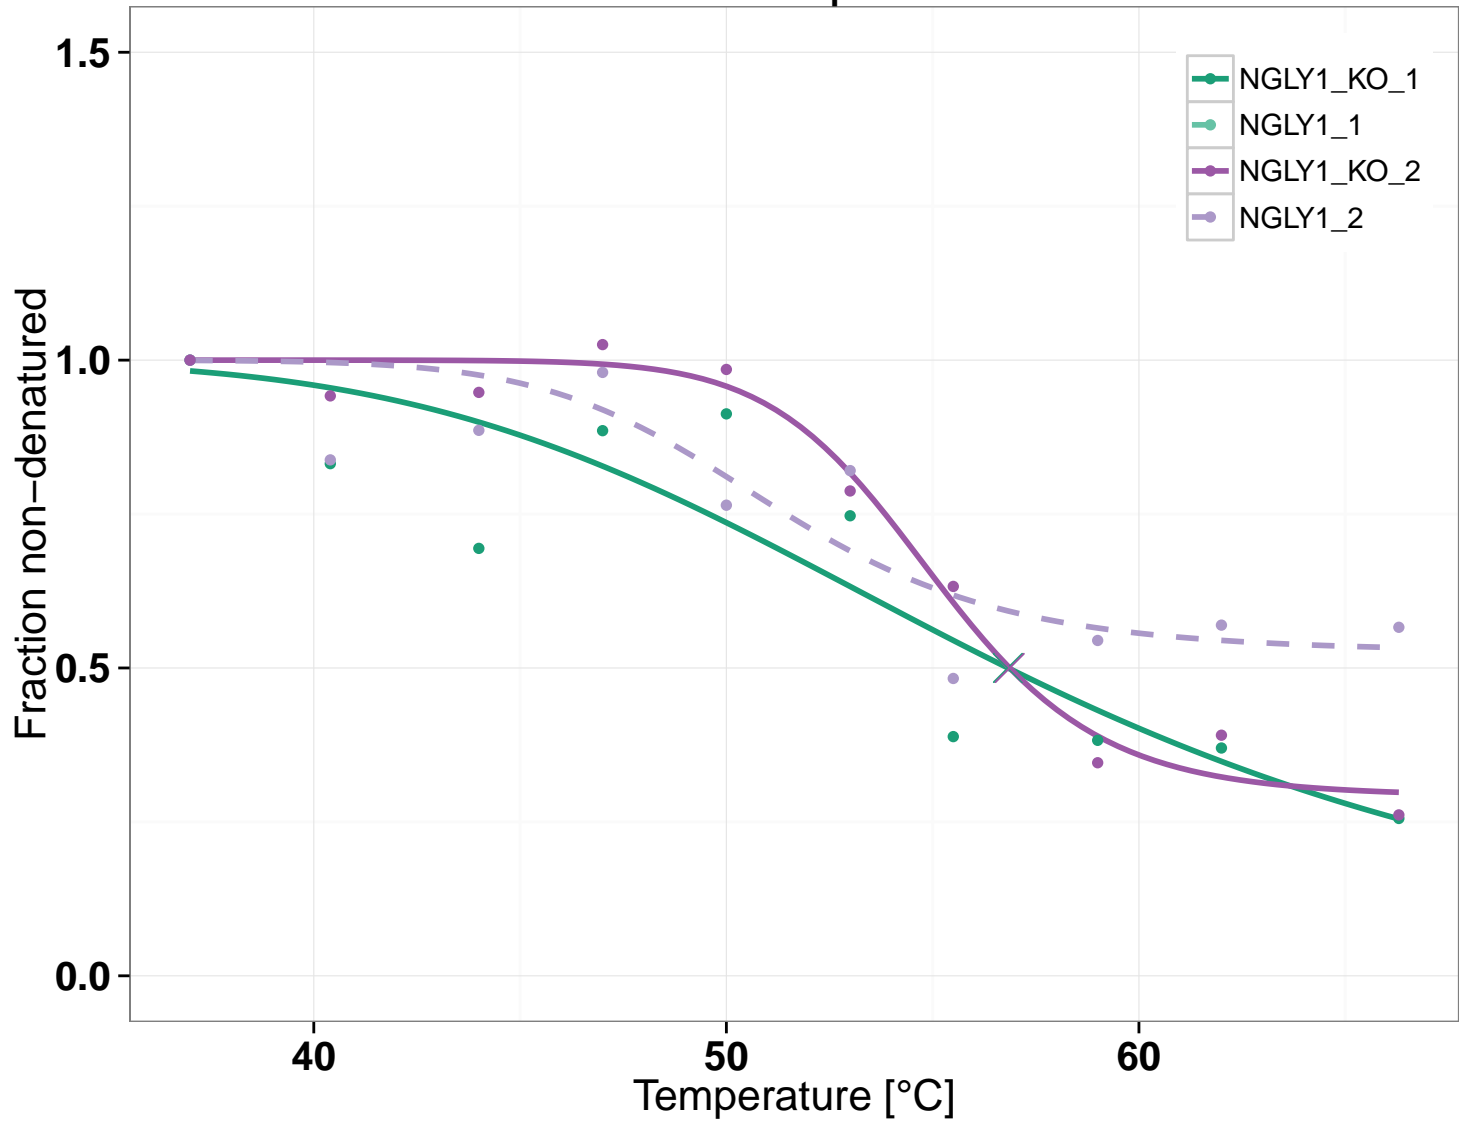

|            | meltPoint | slope  | plateau | R2   |
|------------|-----------|--------|---------|------|
| NGLY1_KO_1 | 56.83     | -0.035 | 0       | 0.8  |
| NGLY1_1    | -         | -      | -       | -    |
| NGLY1_KO_2 | 56.87     | -0.088 | 0.29    | 0.98 |
| NGLY1_2    | -         | -0.042 | 0.53    | 0.77 |

Supplement: Supplementary file 7835 [file 1]

IPI00217346.2|ZFPM1

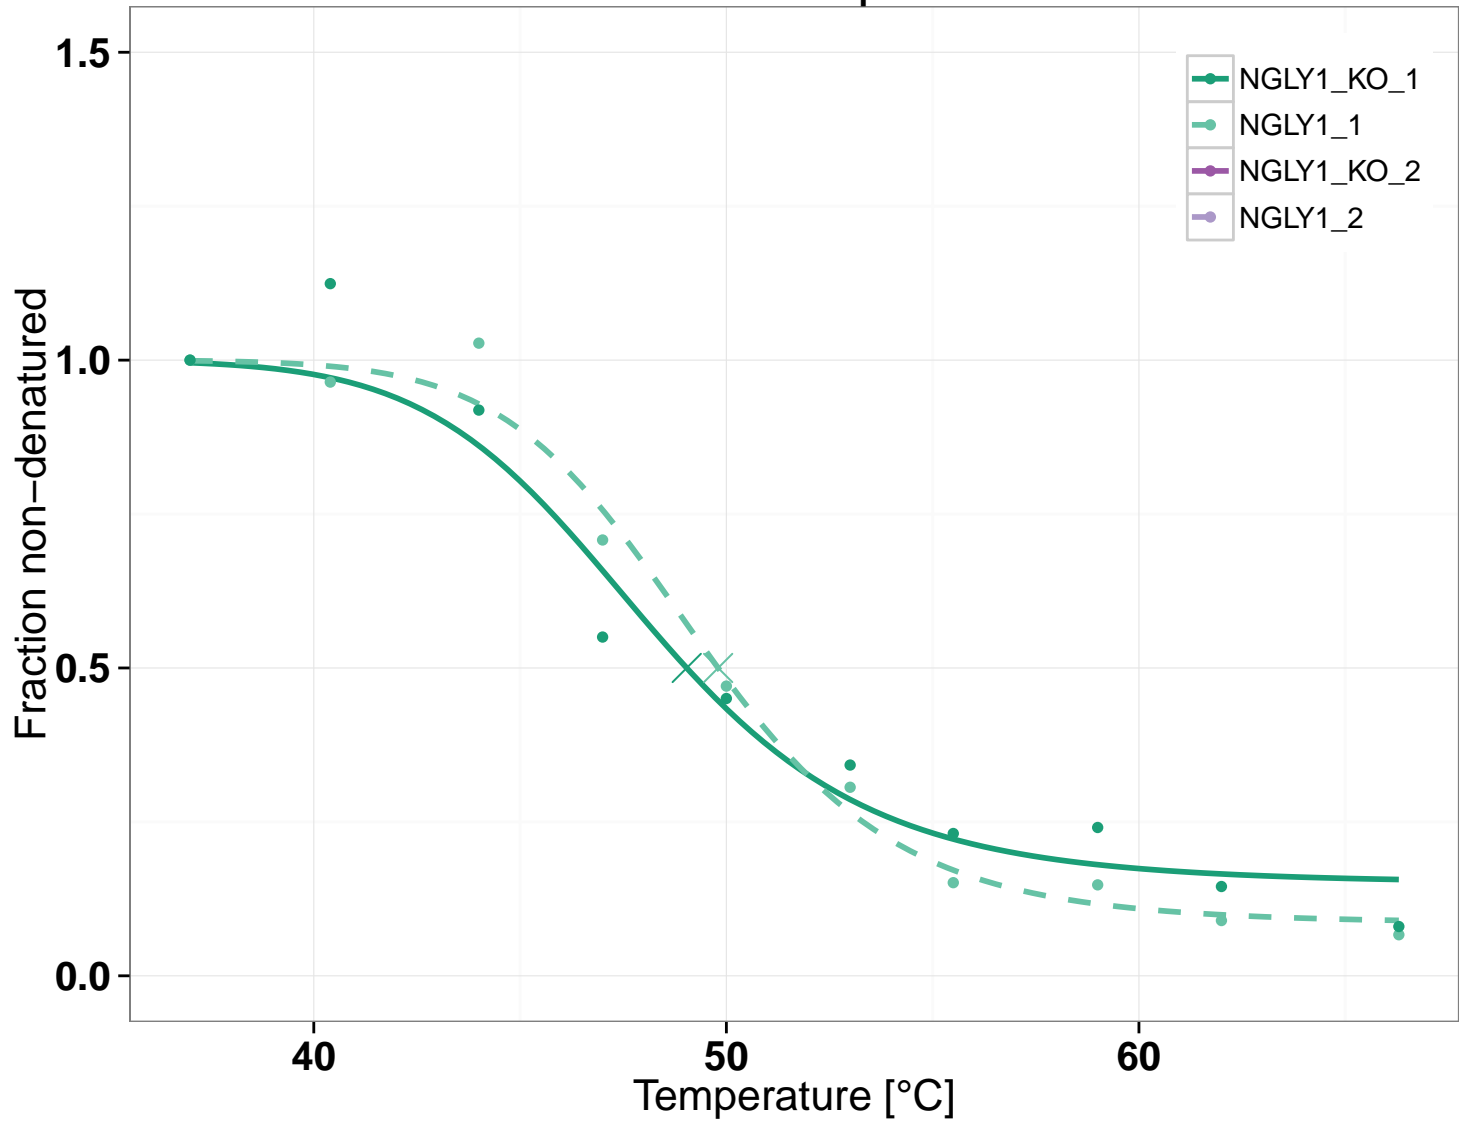

|            | meltPoint | slope  | plateau | R2   |
|------------|-----------|--------|---------|------|
| NGLY1_KO_1 | 49.04     | -0.079 | 0.15    | 0.96 |
| NGLY1_1    | 49.8      | -0.095 | 0.09    | 0.99 |
| NGLY1_KO_2 | -         | -      | -       | -    |
| NGLY1_2    | -         | -      | -       | -    |

Supplement: Supplementary file 7836 [file 1]

# IPI00023526.4|RAB6A

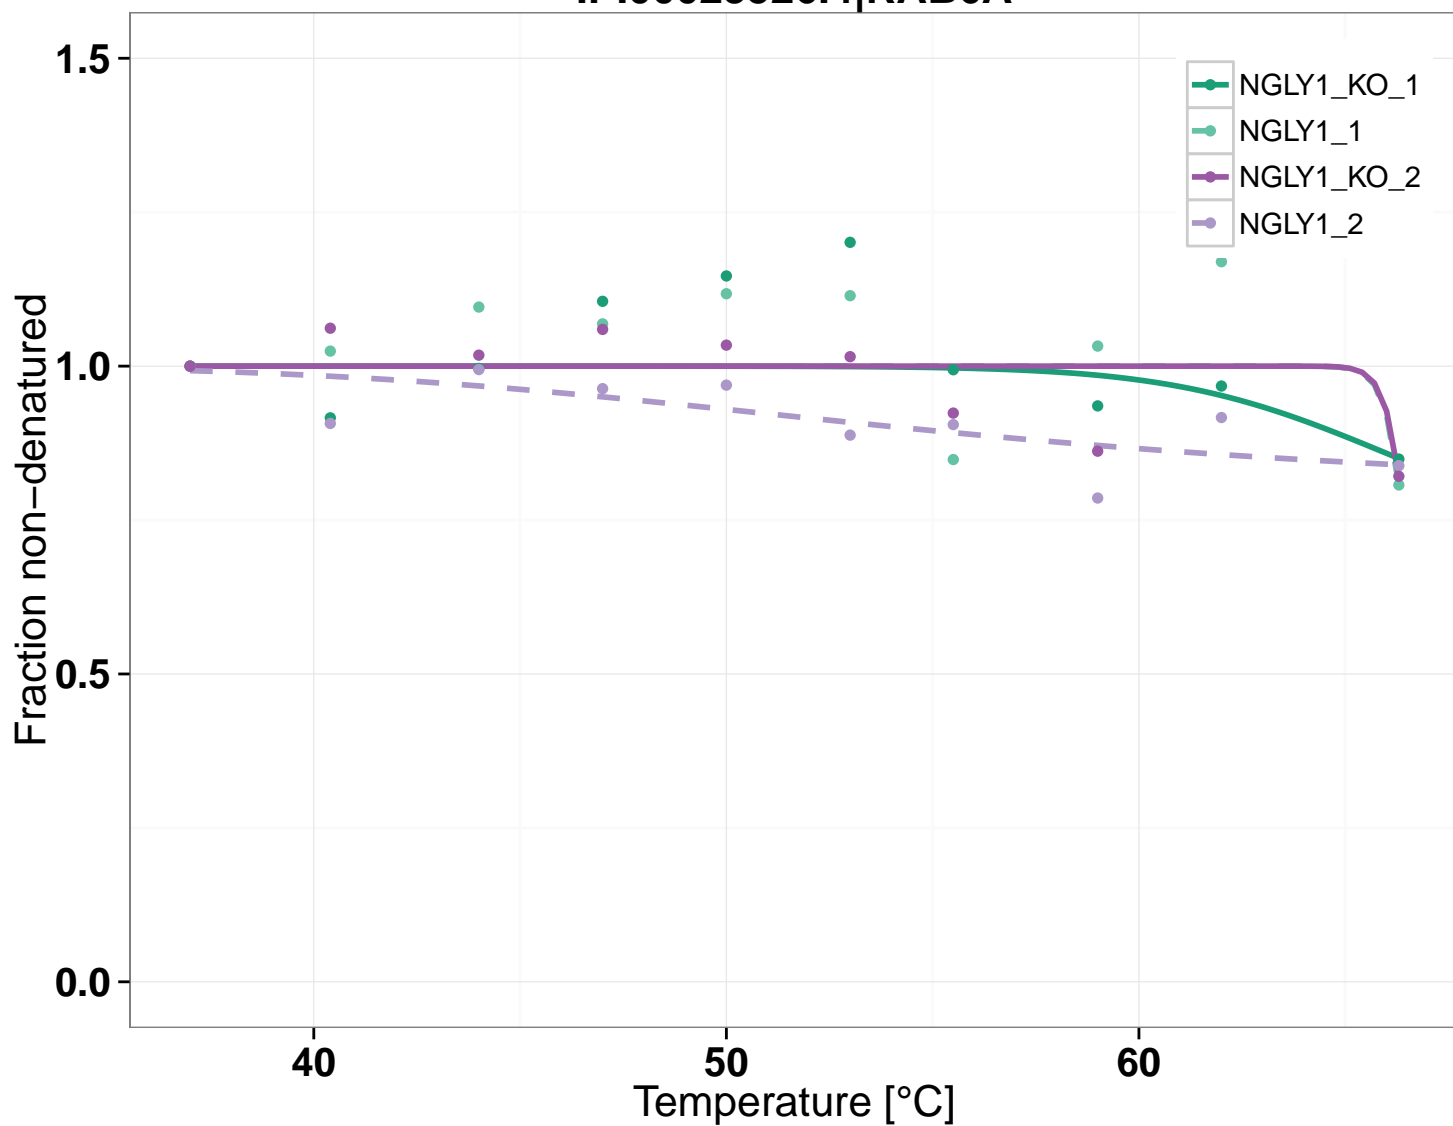

|            | meltPoint | slope   | plateau | R2   |
|------------|-----------|---------|---------|------|
| NGLY1_KO_1 | —         | −0.028  | 0.69    | 0.22 |
| NGLY1_1    | —         | —       | 0       | 0.24 |
| NGLY1_KO_2 | —         | —       | 0       | 0.24 |
| NGLY1_2    | —         | −0.0071 | 0.79    | 0.53 |

Supplement: Supplementary file 7837 [file 1]

IPI00061168.3|ANKRD40

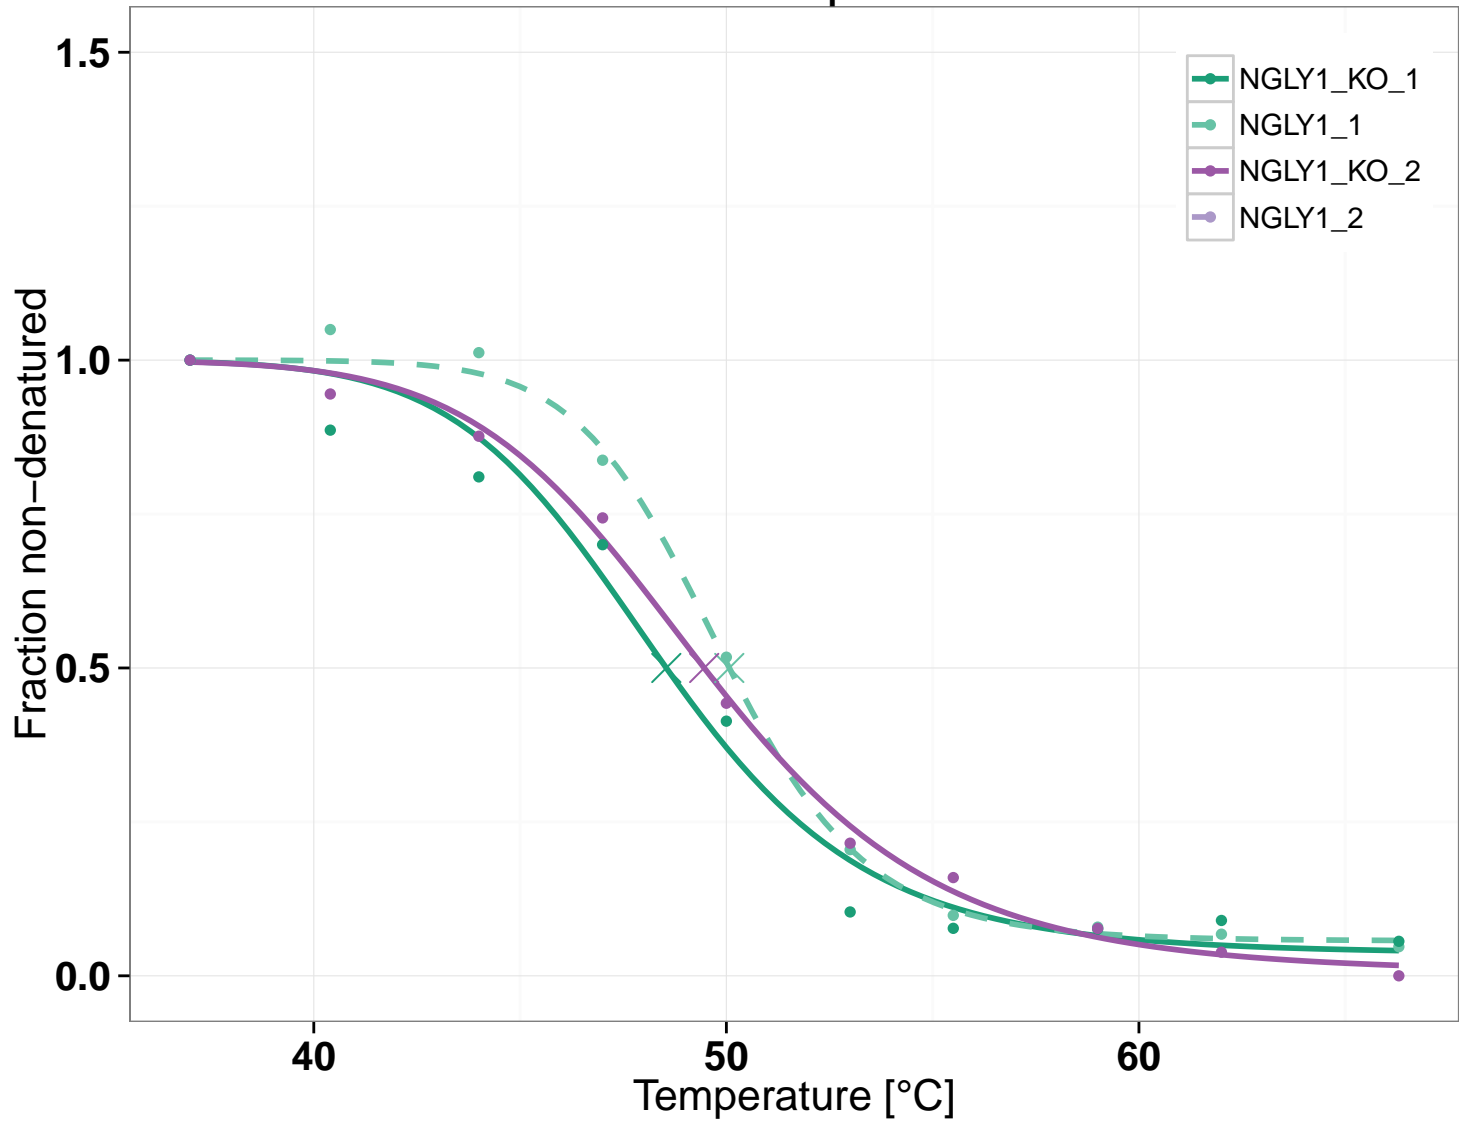

|            | meltPoint | slope  | plateau | R2   |
|------------|-----------|--------|---------|------|
| NGLY1_KO_1 | 48.54     | -0.097 | 0.04    | 0.98 |
| NGLY1_1    | 50.07     | -0.13  | 0.06    | 1    |
| NGLY1_KO_2 | 49.46     | -0.088 | 0       | 1    |
| NGLY1_2    | -         | -      | -       | -    |

Supplement: Supplementary file 7838 [file 1]

# IPI00100933.1|PTER

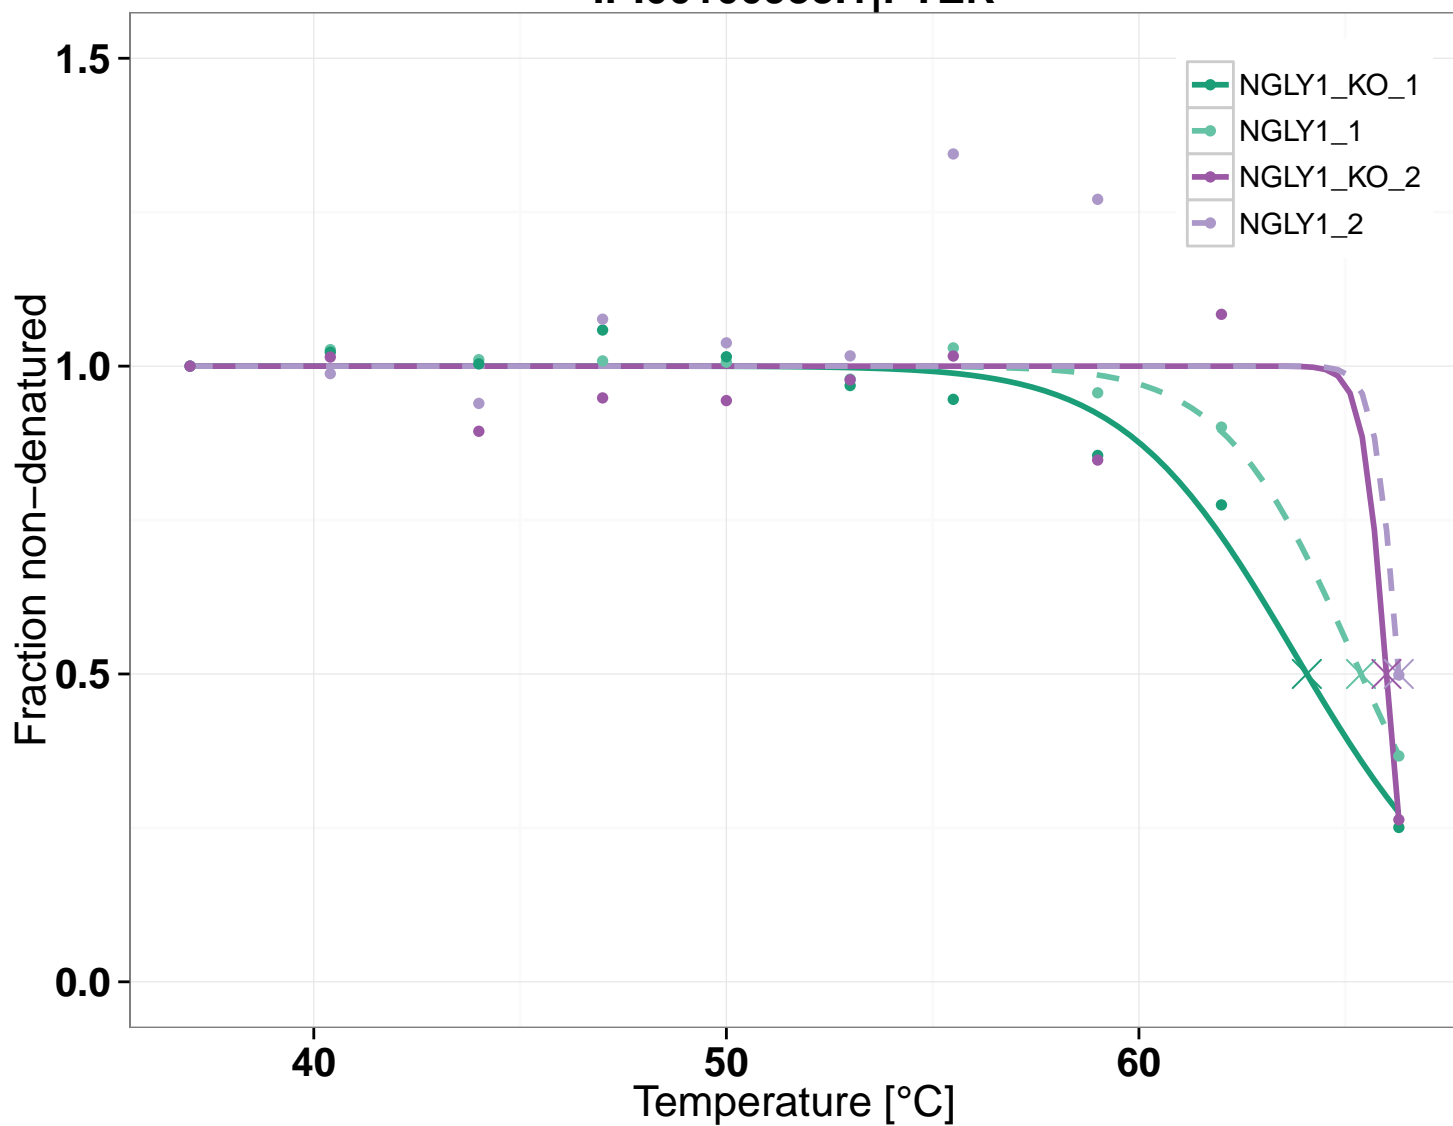

|            | meltPoint | slope | plateau | R2   |
|------------|-----------|-------|---------|------|
| NGLY1_KO_1 | 64.07     | -0.11 | 0       | 0.97 |
| NGLY1_1    | 65.38     | -0.15 | 0       | 0.99 |
| NGLY1_KO_2 | 66        | -0.86 | 0       | 0.9  |
| NGLY1_2    | 66.3      | -0.85 | 0       | 0.28 |

Supplement: Supplementary file 7839 [file 1]

IPI00885067.1|THAP9

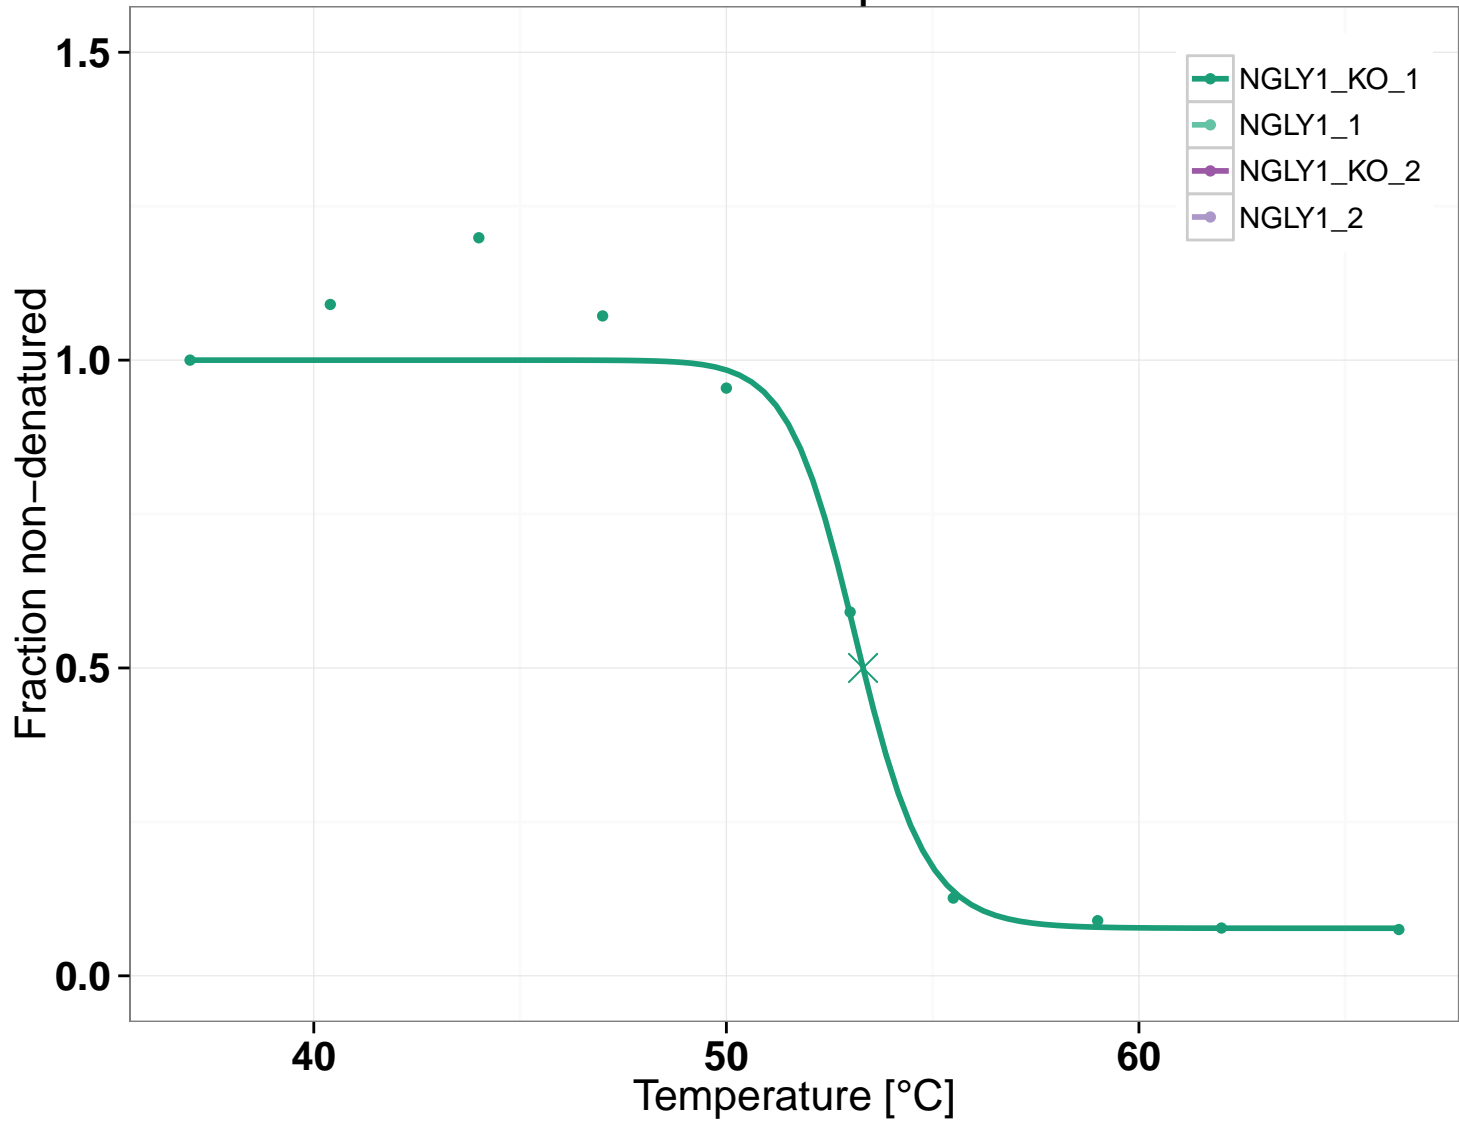

|            | meltPoint | slope | plateau | R2   |
|------------|-----------|-------|---------|------|
| NGLY1_KO_1 | 53.31     | -0.28 | 0.08    | 0.97 |
| NGLY1_1    | -         | -     | -       | -    |
| NGLY1_KO_2 | -         | -     | -       | -    |
| NGLY1_2    | -         | -     | -       | -    |

Supplement: Supplementary file 7840 [file 1]

IPI00171542.3|NUP85

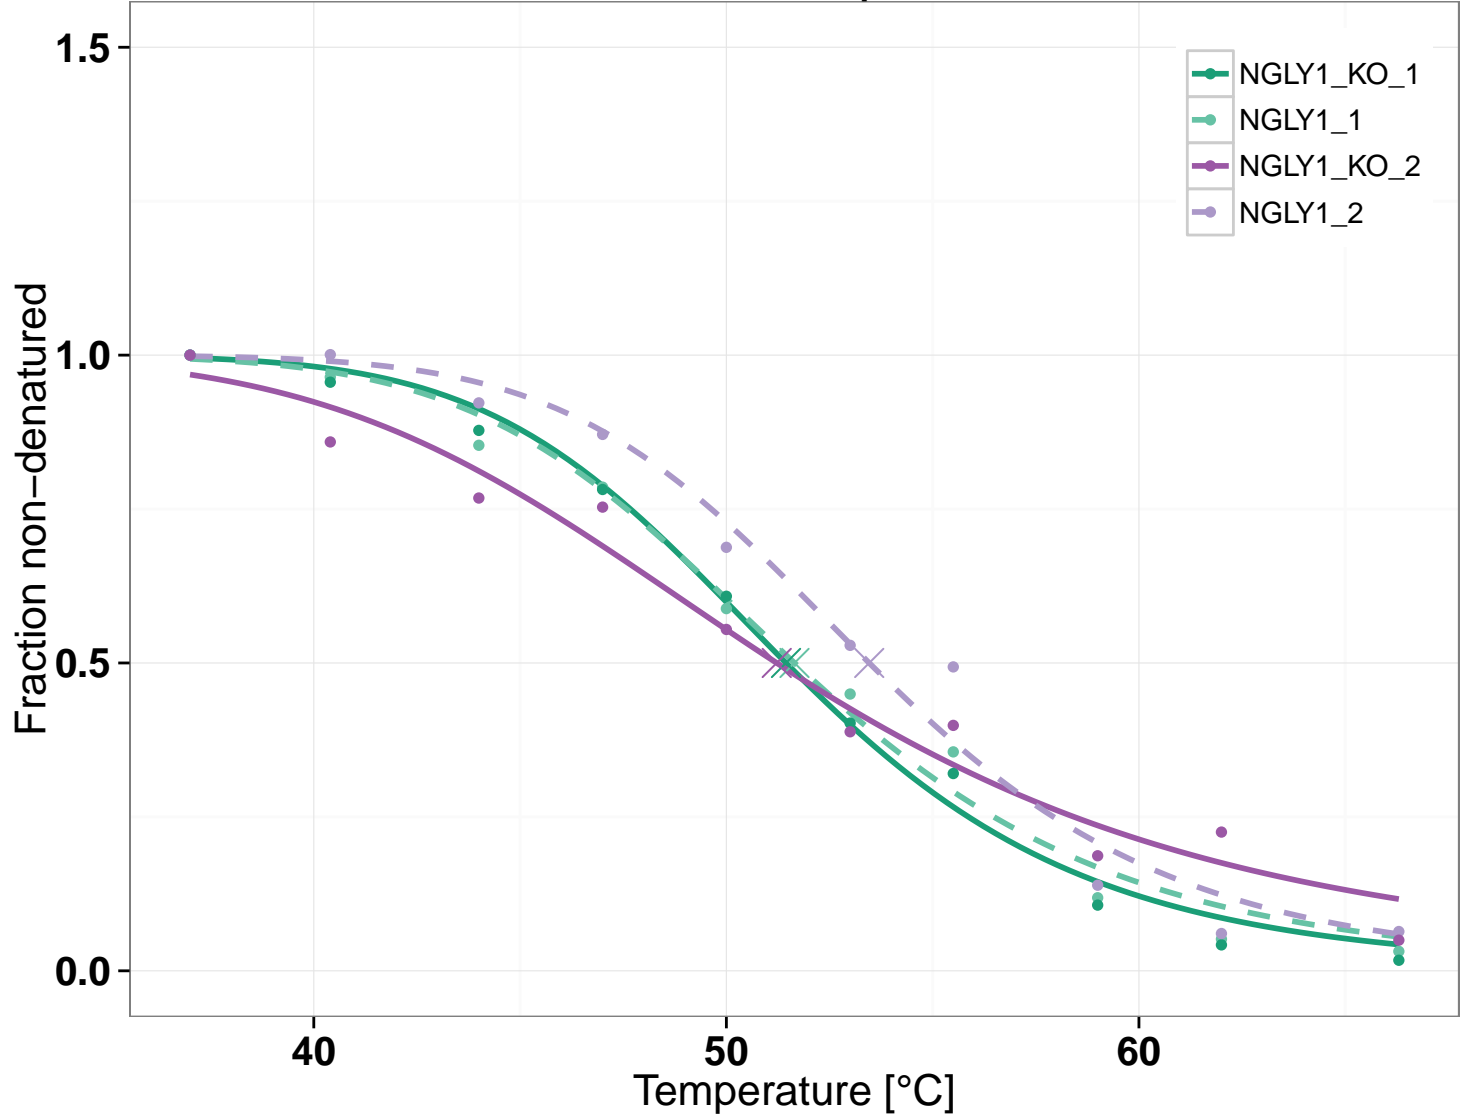

|            | meltPoint | slope  | plateau | R2   |
|------------|-----------|--------|---------|------|
| NGLY1_KO_1 | 51.45     | -0.069 | 0       | 0.99 |
| NGLY1_1    | 51.65     | -0.064 | 0       | 0.99 |
| NGLY1_KO_2 | 51.22     | -0.046 | 0       | 0.97 |
| NGLY1_2    | 53.46     | -0.068 | 0       | 0.98 |

Supplement: Supplementary file 7841 [file 1]

IPI00795043.1|SREBF1

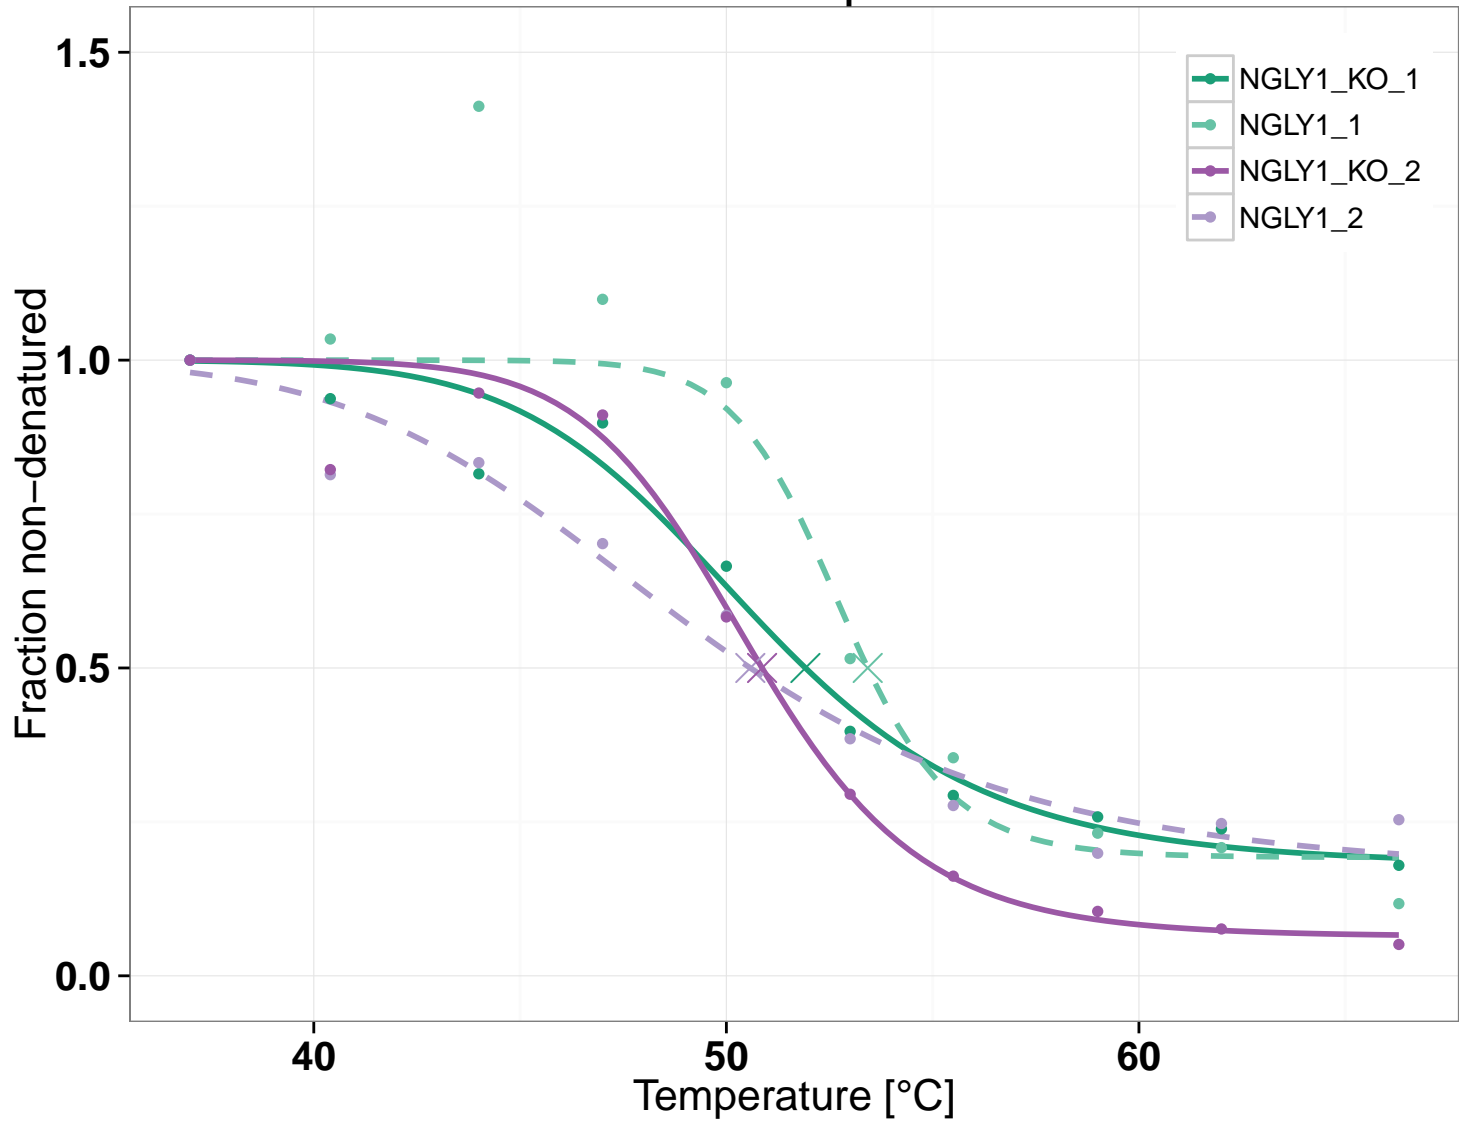

|            | meltPoint | slope  | plateau | R2   |
|------------|-----------|--------|---------|------|
| NGLY1_KO_1 | 51.92     | -0.072 | 0.18    | 0.97 |
| NGLY1_1    | 53.43     | -0.15  | 0.19    | 0.9  |
| NGLY1_KO_2 | 50.87     | -0.11  | 0.06    | 0.98 |
| NGLY1_2    | 50.58     | -0.051 | 0.16    | 0.96 |

Supplement: Supplementary file 7842 [file 1]

IPI00028005.1|NUP107

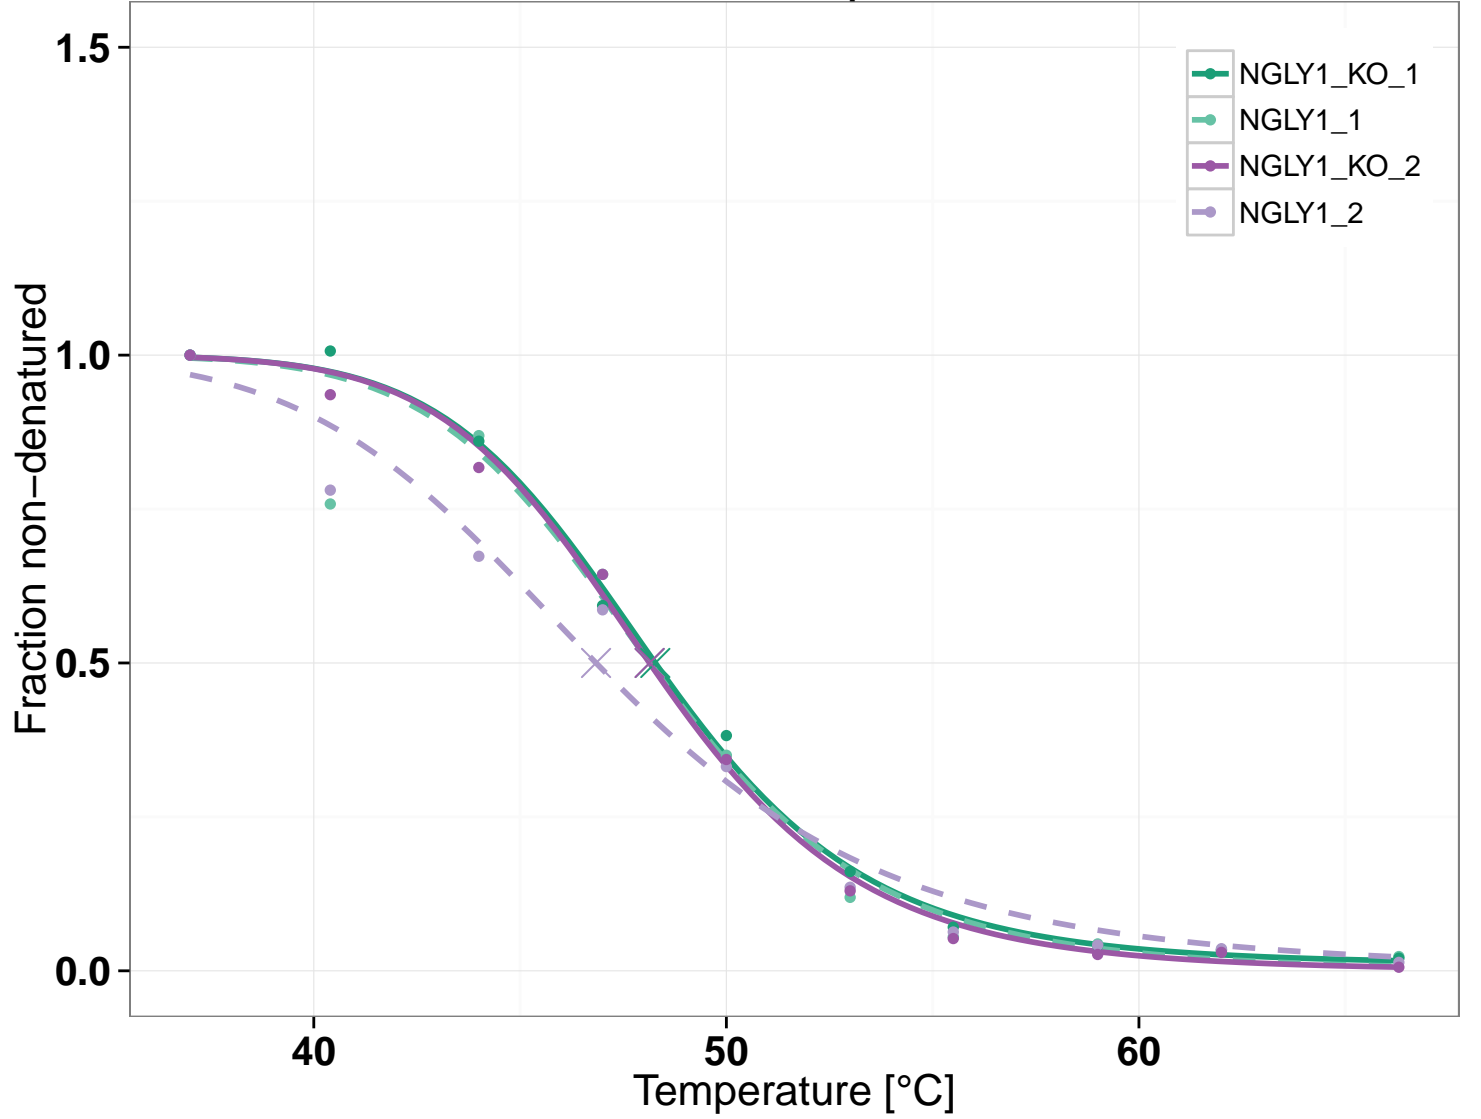

|            | meltPoint | slope  | plateau | R2   |
|------------|-----------|--------|---------|------|
| NGLY1_KO_1 | 48.28     | -0.096 | 0.01    | 1    |
| NGLY1_1    | 48.15     | -0.093 | 0       | 0.96 |
| NGLY1_KO_2 | 48.14     | -0.098 | 0       | 1    |
| NGLY1_2    | 46.84     | -0.07  | 0       | 0.98 |

Supplement: Supplementary file 7843 [file 1]

# IPI00010810.1|ETFA

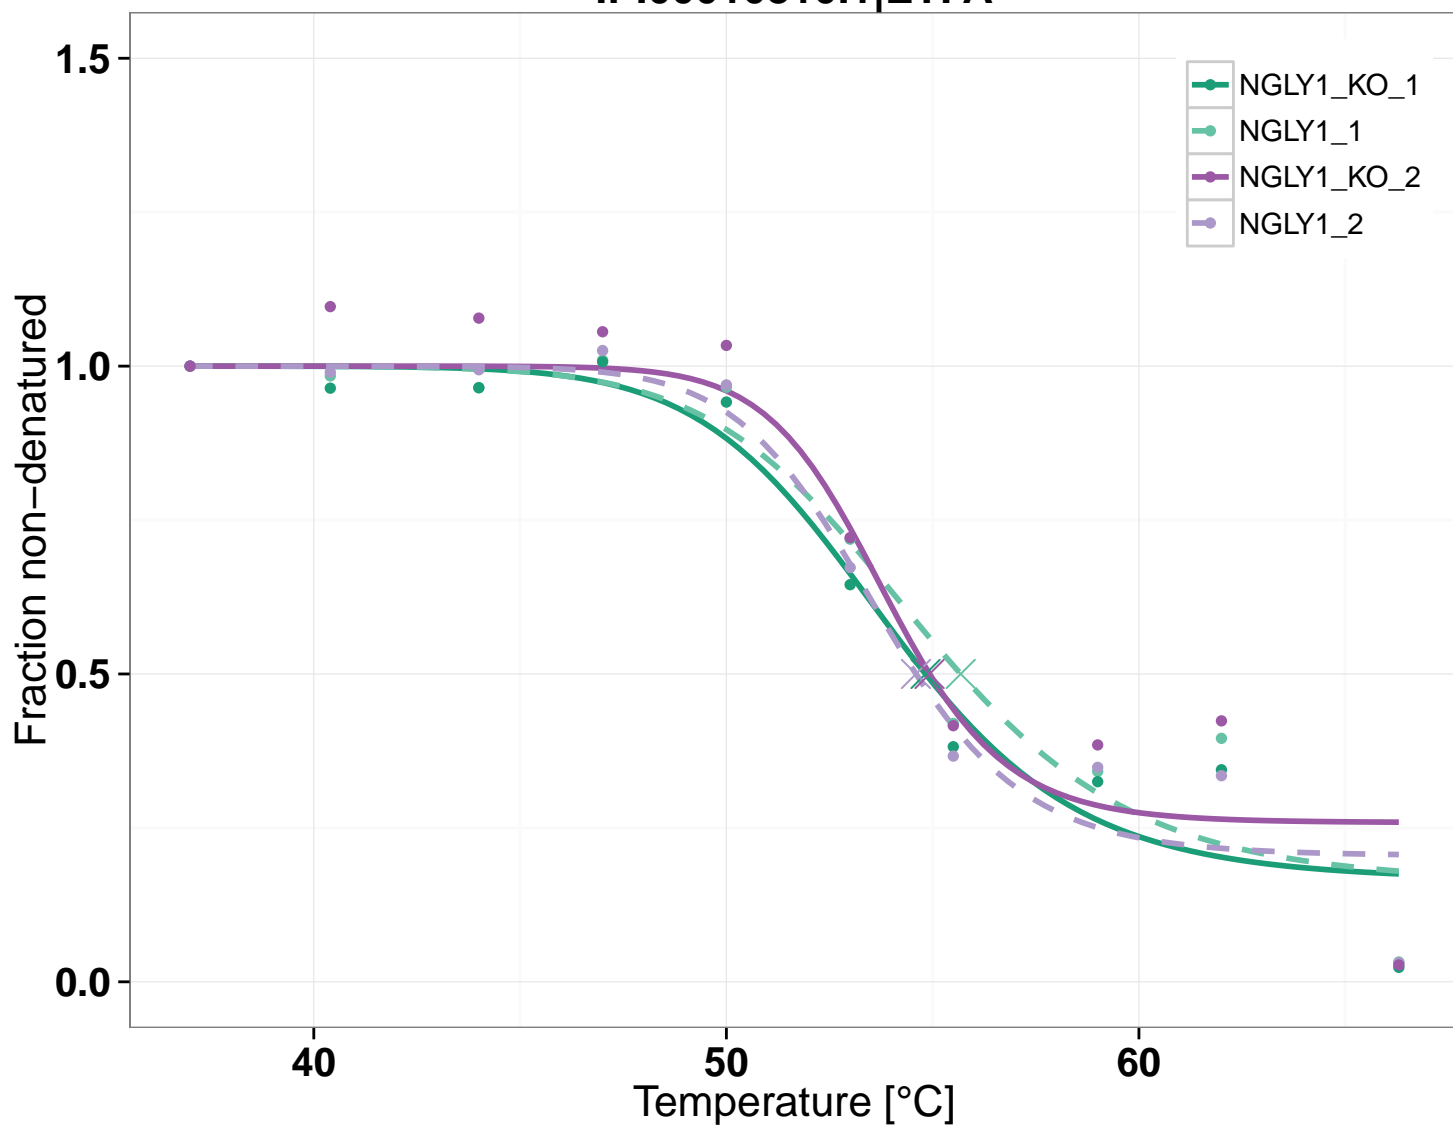

|            | meltPoint | slope  | plateau | R2   |
|------------|-----------|--------|---------|------|
| NGLY1_KO_1 | 54.83     | -0.091 | 0.16    | 0.95 |
| NGLY1_1    | 55.68     | -0.082 | 0.16    | 0.94 |
| NGLY1_KO_2 | 54.93     | -0.13  | 0.26    | 0.91 |
| NGLY1_2    | 54.6      | -0.11  | 0.2     | 0.95 |

Supplement: Supplementary file 7844 [file 1]

# IPI00031514.1|RFC5

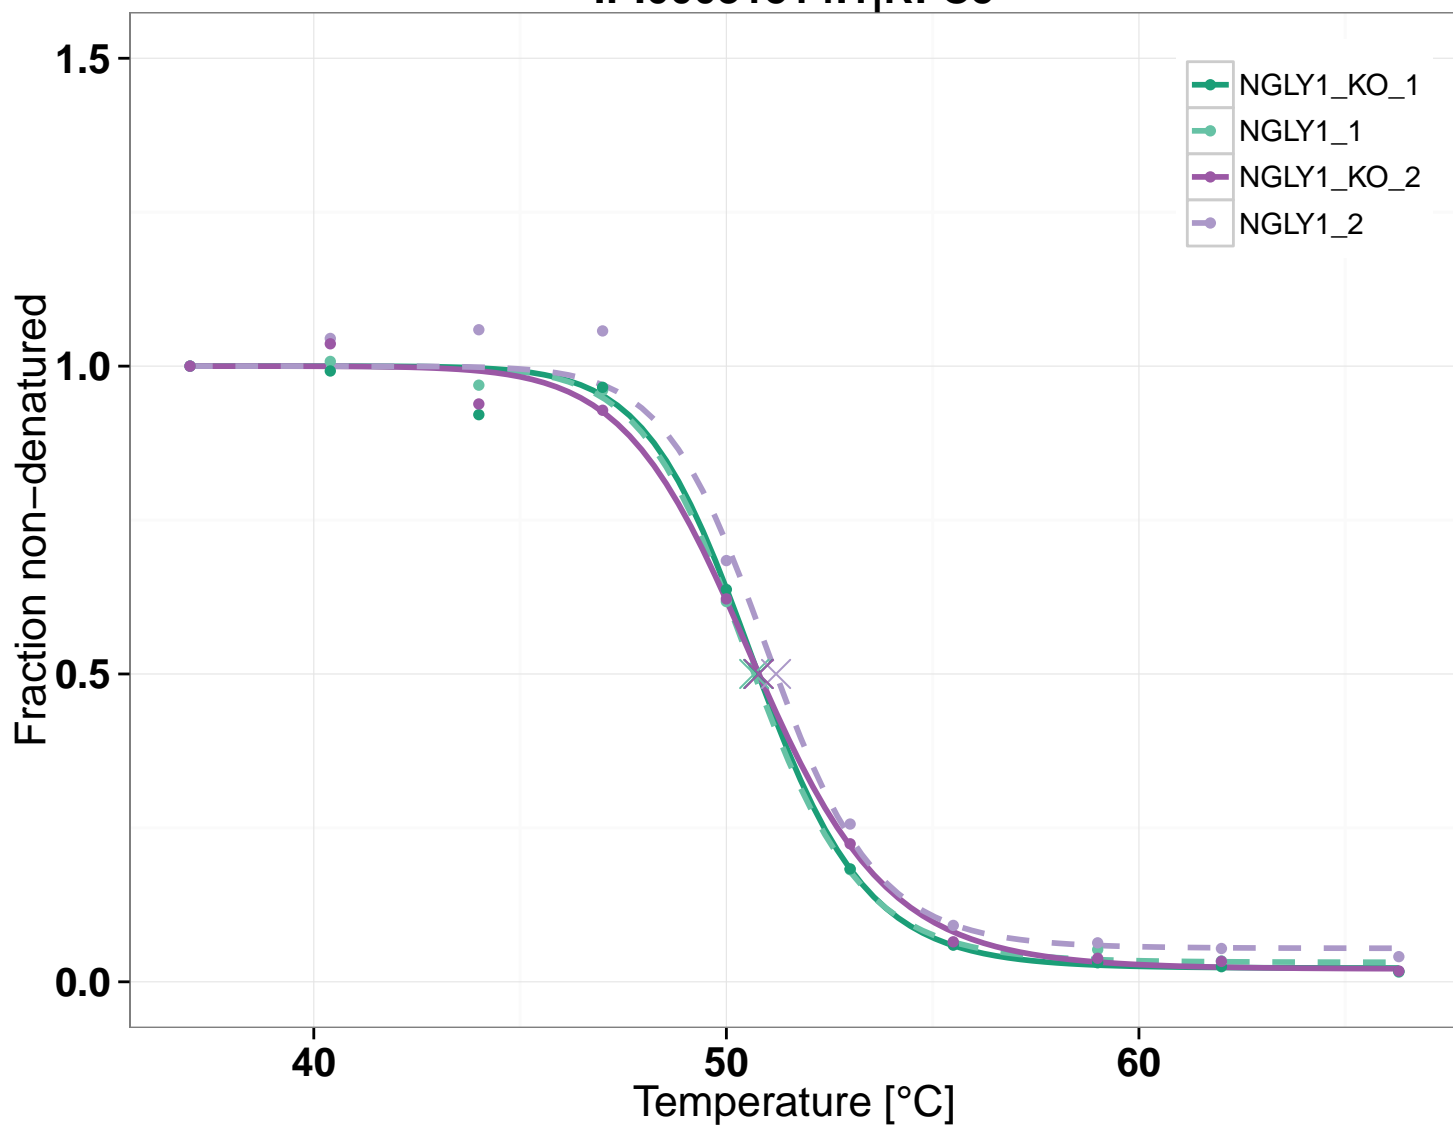

|            | meltPoint | slope | plateau | R2   |
|------------|-----------|-------|---------|------|
| NGLY1_KO_1 | 50.77     | -0.18 | 0.02    | 1    |
| NGLY1_1    | 50.67     | -0.18 | 0.03    | 1    |
| NGLY1_KO_2 | 50.79     | -0.15 | 0.02    | 1    |
| NGLY1_2    | 51.2      | -0.18 | 0.05    | 0.99 |

Supplement: Supplementary file 7845 [file 1]

# IPI00399089.4|MESDC2

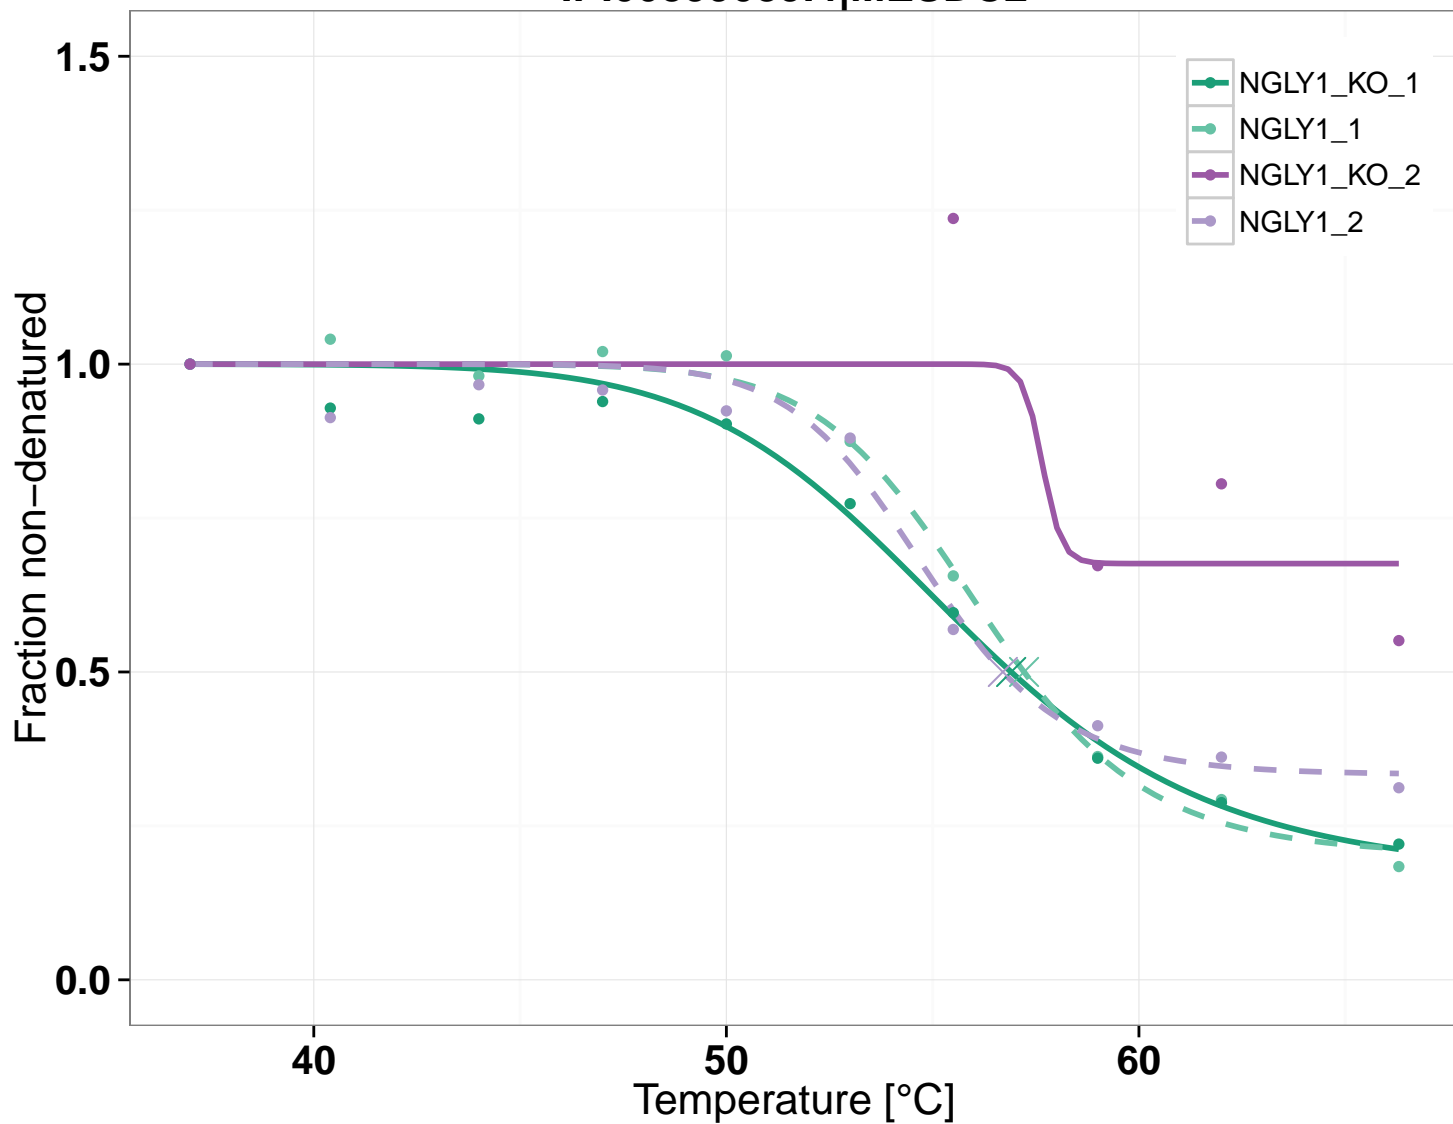

|            | meltPoint | slope  | plateau | R2    |
|------------|-----------|--------|---------|-------|
| NGLY1_KO_1 | 56.9      | -0.067 | 0.17    | 0.98  |
| NGLY1_1    | 57.22     | -0.1   | 0.2     | 0.99  |
| NGLY1_KO_2 | -         | -0.35  | 0.68    | -0.26 |
| NGLY1_2    | 56.7      | -0.1   | 0.33    | 0.98  |

Supplement: Supplementary file 7846 [file 1]

IPI00297574.2|LRRC37A3

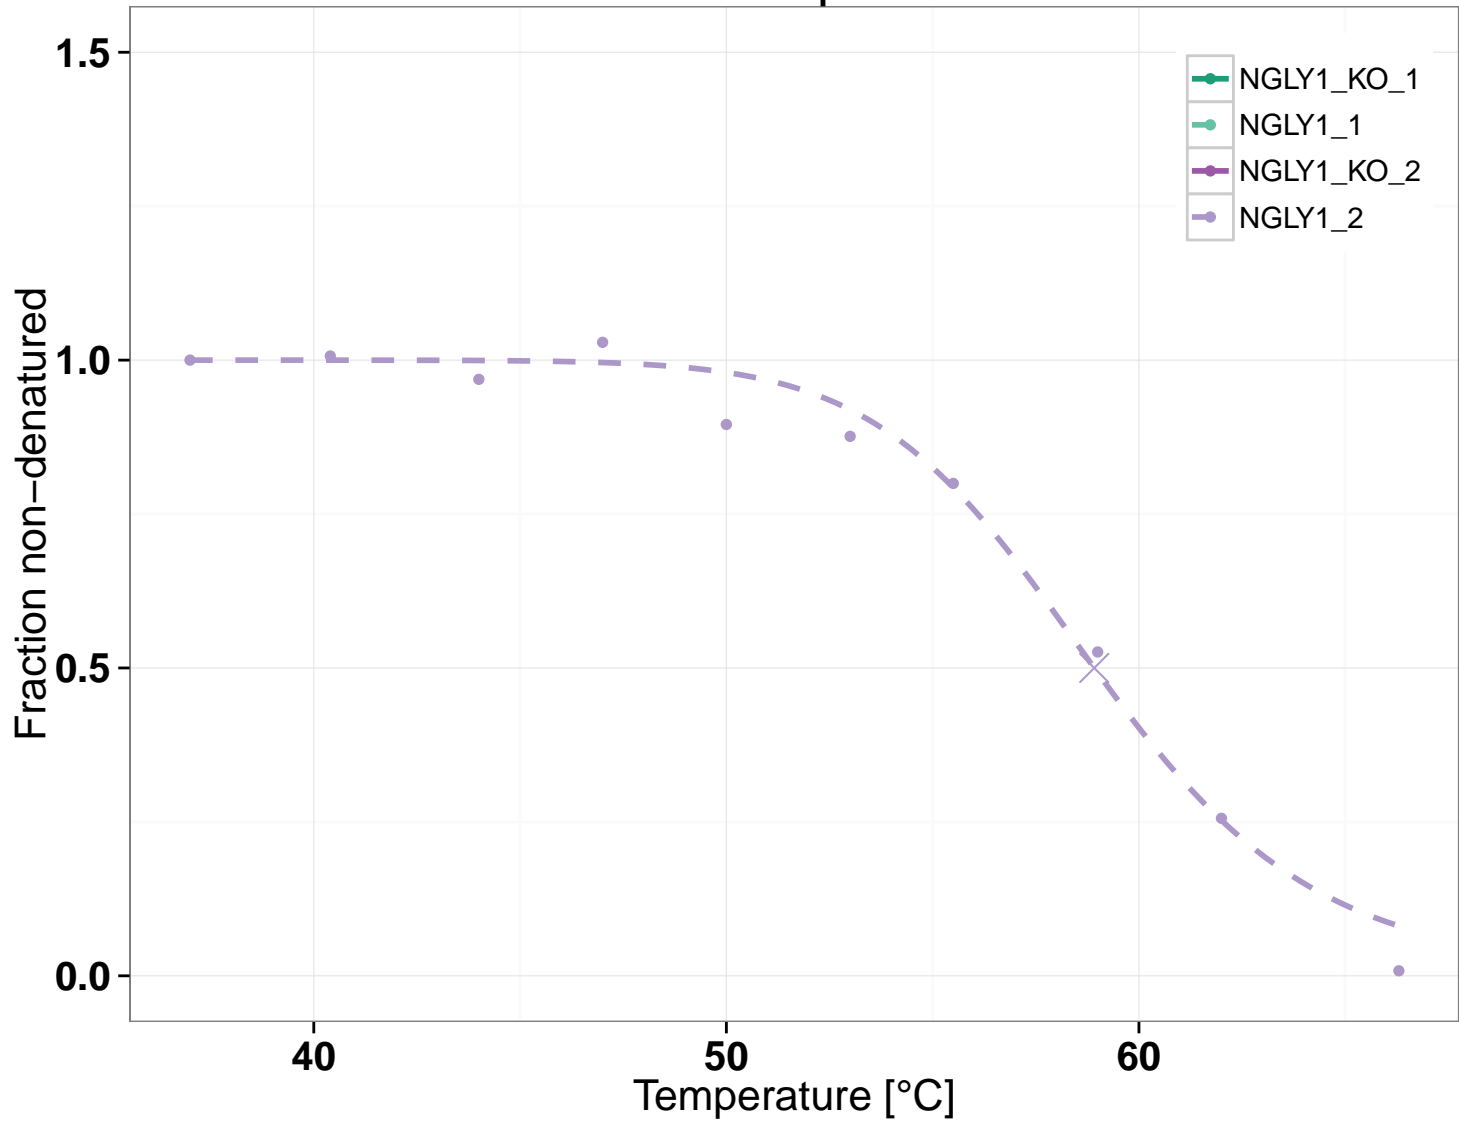

|            | meltPoint | slope  | plateau | R2   |
|------------|-----------|--------|---------|------|
| NGLY1_KO_1 | —         | —      | —       | —    |
| NGLY1_1    | —         | —      | —       | —    |
| NGLY1_KO_2 | —         | —      | —       | —    |
| NGLY1_2    | 58.92     | -0.093 | 0       | 0.98 |

Supplement: Supplementary file 7847 [file 1]

IPI00025818.1|GALNT1

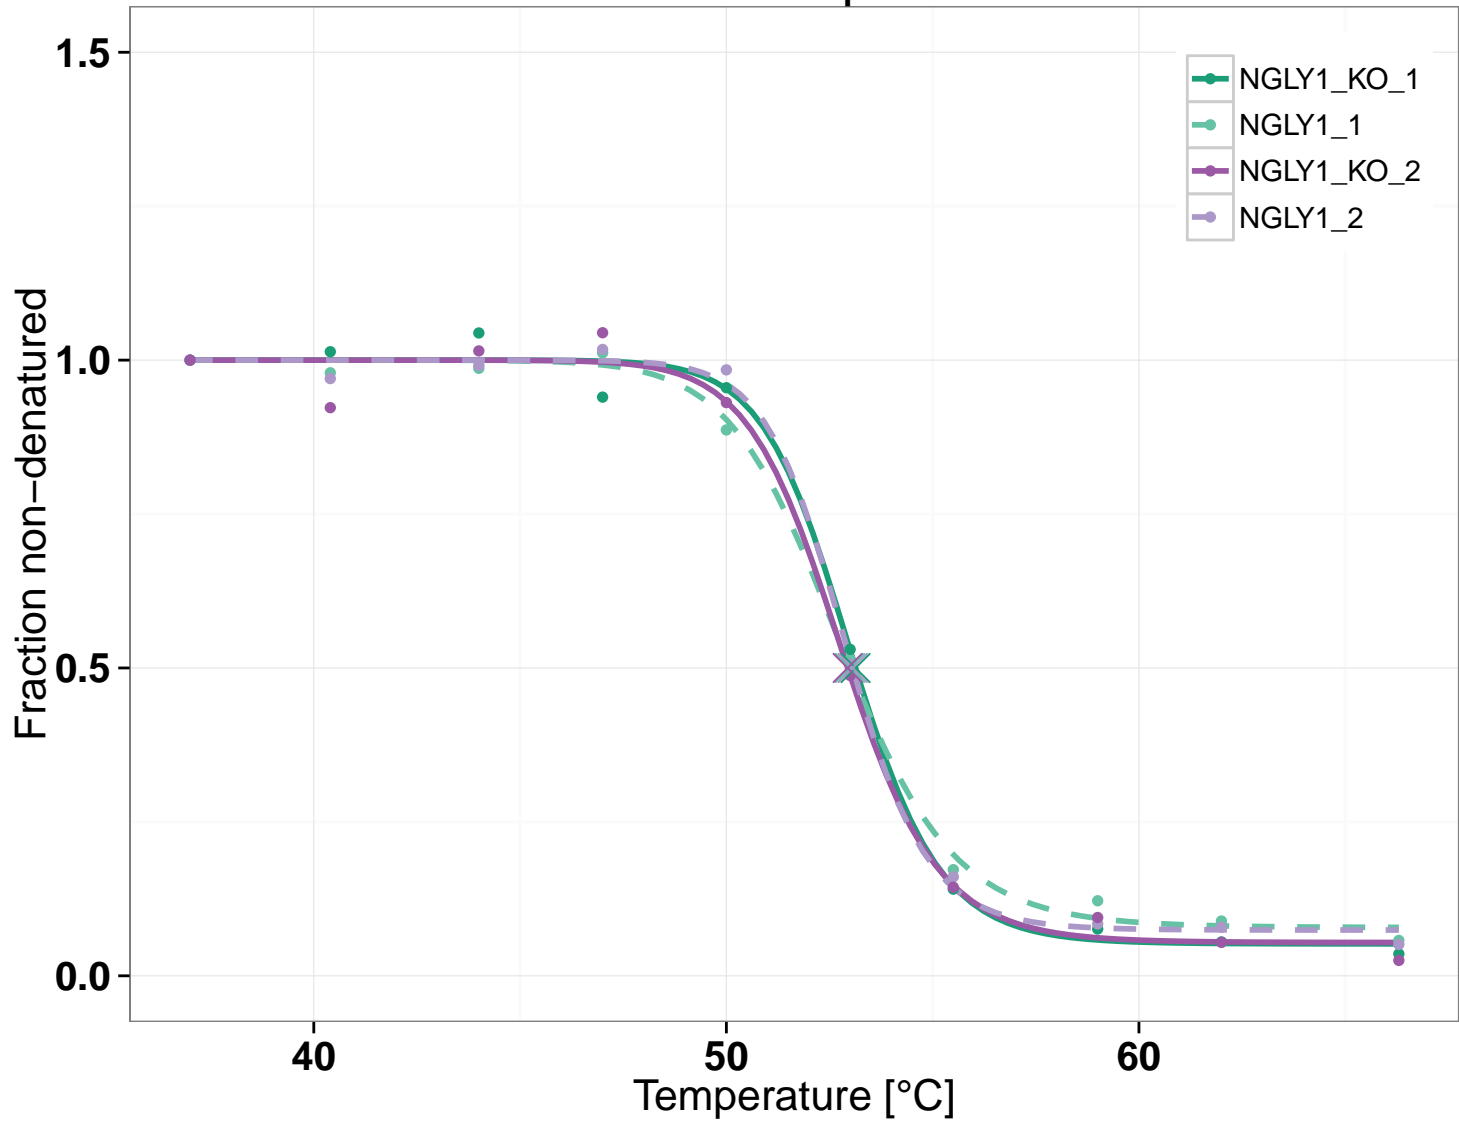

|            | meltPoint | slope | plateau | R2   |
|------------|-----------|-------|---------|------|
| NGLY1_KO_1 | 53.13     | -0.22 | 0.05    | 1    |
| NGLY1_1    | 53        | -0.17 | 0.08    | 1    |
| NGLY1_KO_2 | 52.94     | -0.21 | 0.05    | 0.99 |
| NGLY1_2    | 53.06     | -0.24 | 0.07    | 1    |

Supplement: Supplementary file 7848 [file 1]

# IPI00155601.1|MACROD1

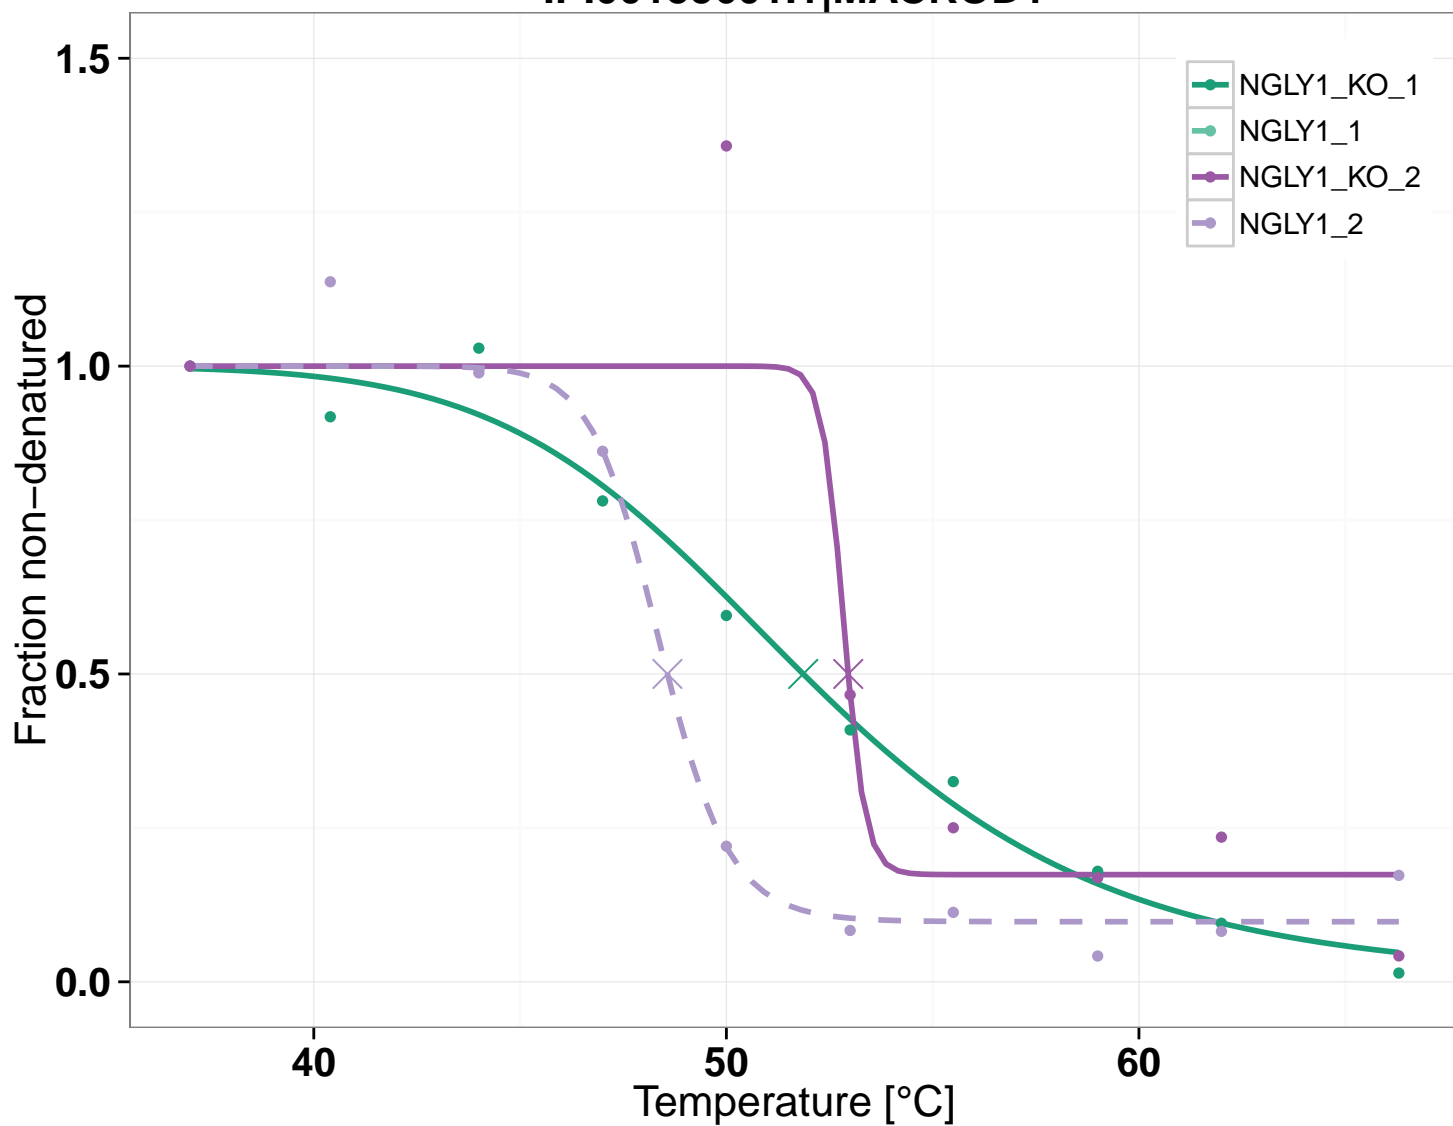

|            | meltPoint | slope  | plateau | R2    |
|------------|-----------|--------|---------|-------|
| NGLY1_KO_1 | 51.86     | -0.068 | 0       | 0.98  |
| NGLY1_1    | -         | -      | -       | -     |
| NGLY1_KO_2 | 52.95     | -0.79  | 0.17    | -0.07 |
| NGLY1_2    | 48.57     | -0.27  | 0.1     | 0.99  |

Supplement: Supplementary file 7849 [file 1]

IPI00445559.1|Q6ZUE0\_HUMAN

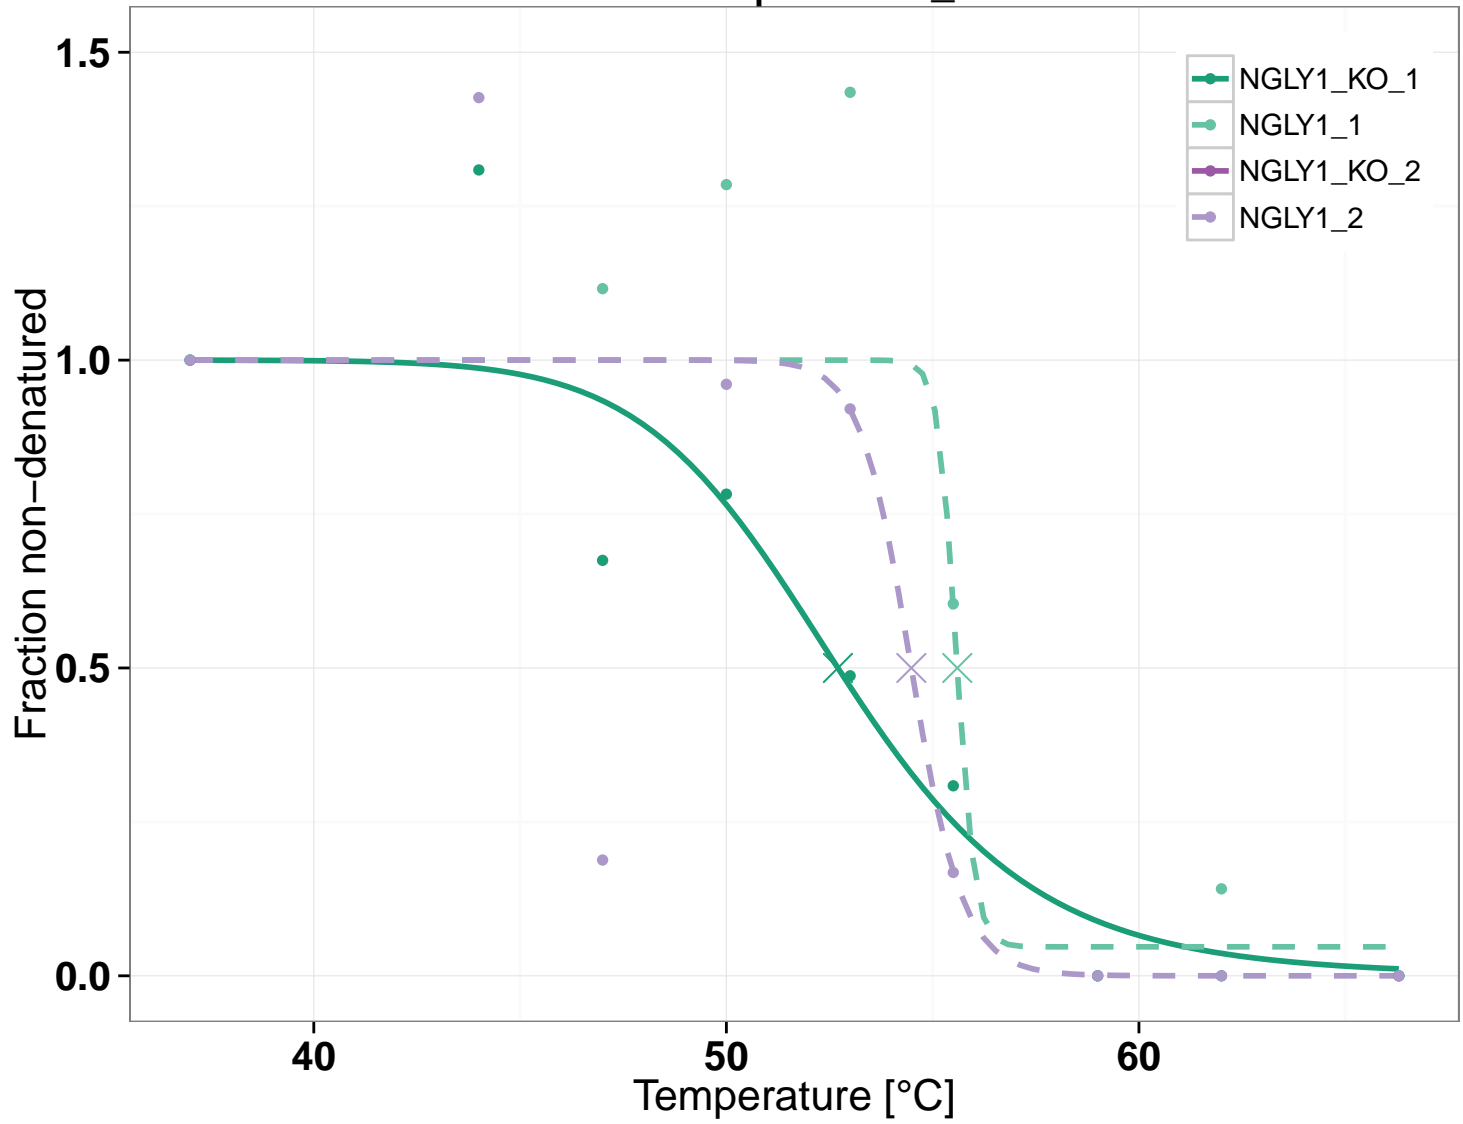

|            | meltPoint | slope | plateau | R2   |
|------------|-----------|-------|---------|------|
| NGLY1_KO_1 | 52.7      | -0.1  | 0       | 0.57 |
| NGLY1_1    | 55.6      | -1.1  | 0.05    | 0.2  |
| NGLY1_KO_2 | -         | -     | -       | -    |
| NGLY1_2    | 54.48     | -0.4  | 0       | 0.56 |

Supplement: Supplementary file 7850 [file 1]

IPI00845373.1|NFKB2

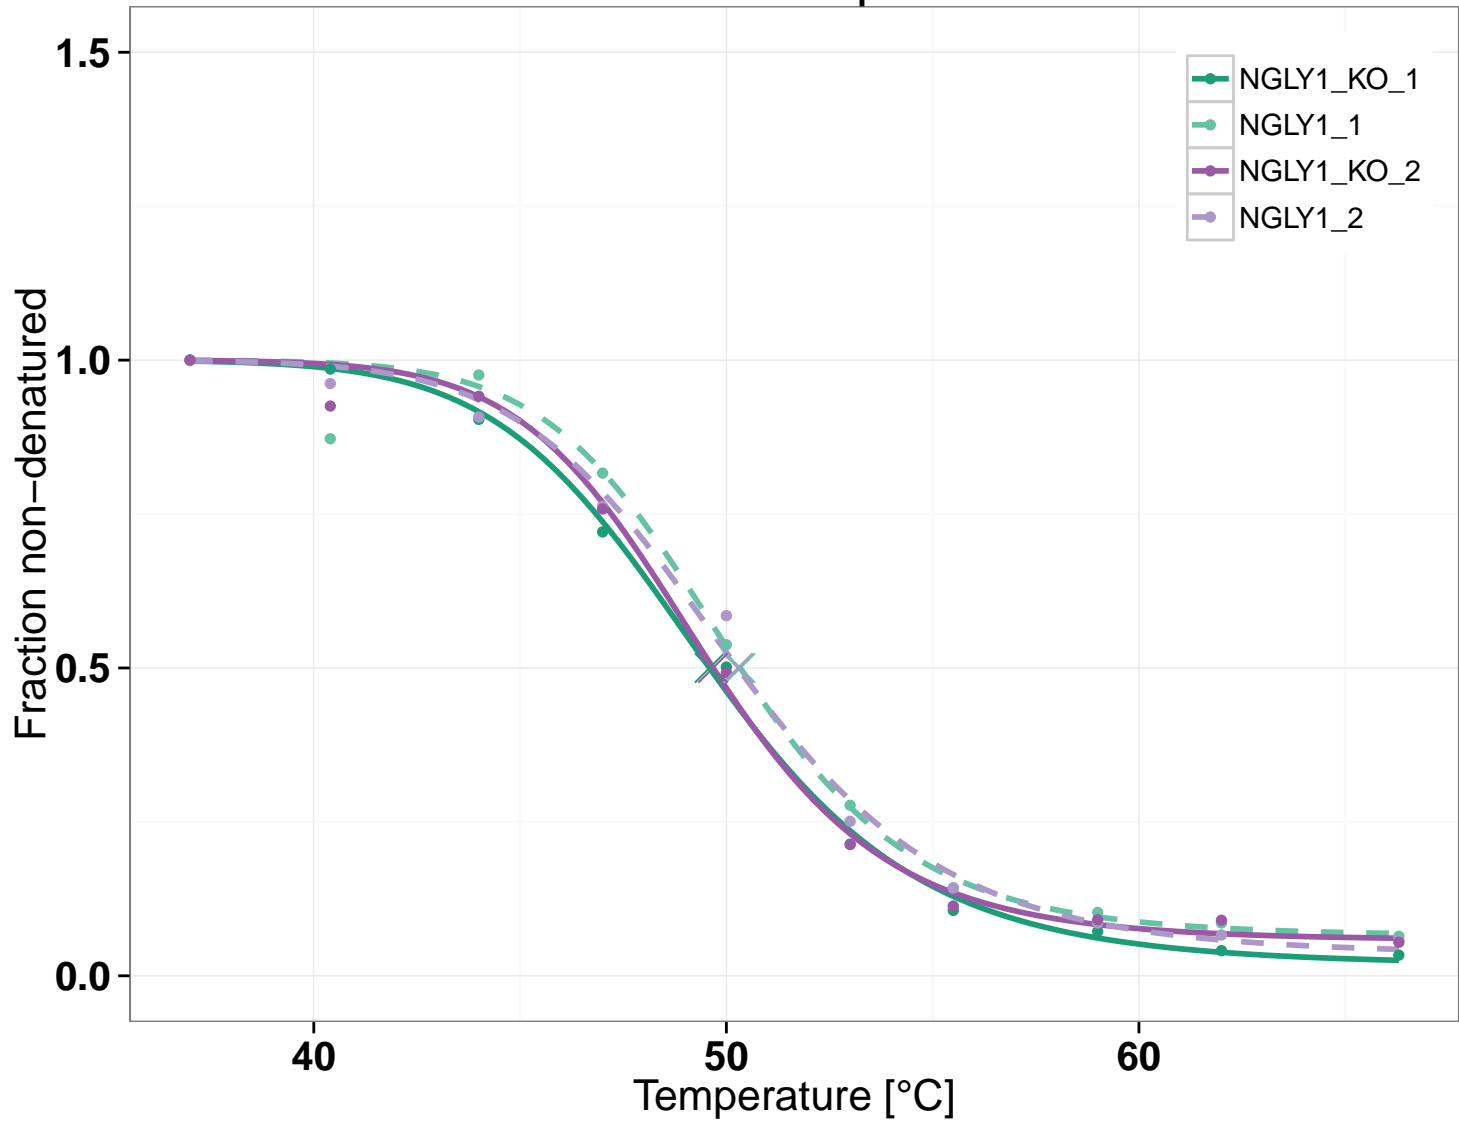

|            | meltPoint | slope  | plateau | R2   |
|------------|-----------|--------|---------|------|
| NGLY1_KO_1 | 49.59     | -0.095 | 0.02    | 1    |
| NGLY1_1    | 50.34     | -0.1   | 0.06    | 0.99 |
| NGLY1_KO_2 | 49.68     | -0.11  | 0.06    | 1    |
| NGLY1_2    | 50.28     | -0.093 | 0.03    | 0.99 |

Supplement: Supplementary file 7851 [file 1]

IPI00848004.1|CONSERVED HYPOTHETICAL PROTEIN.

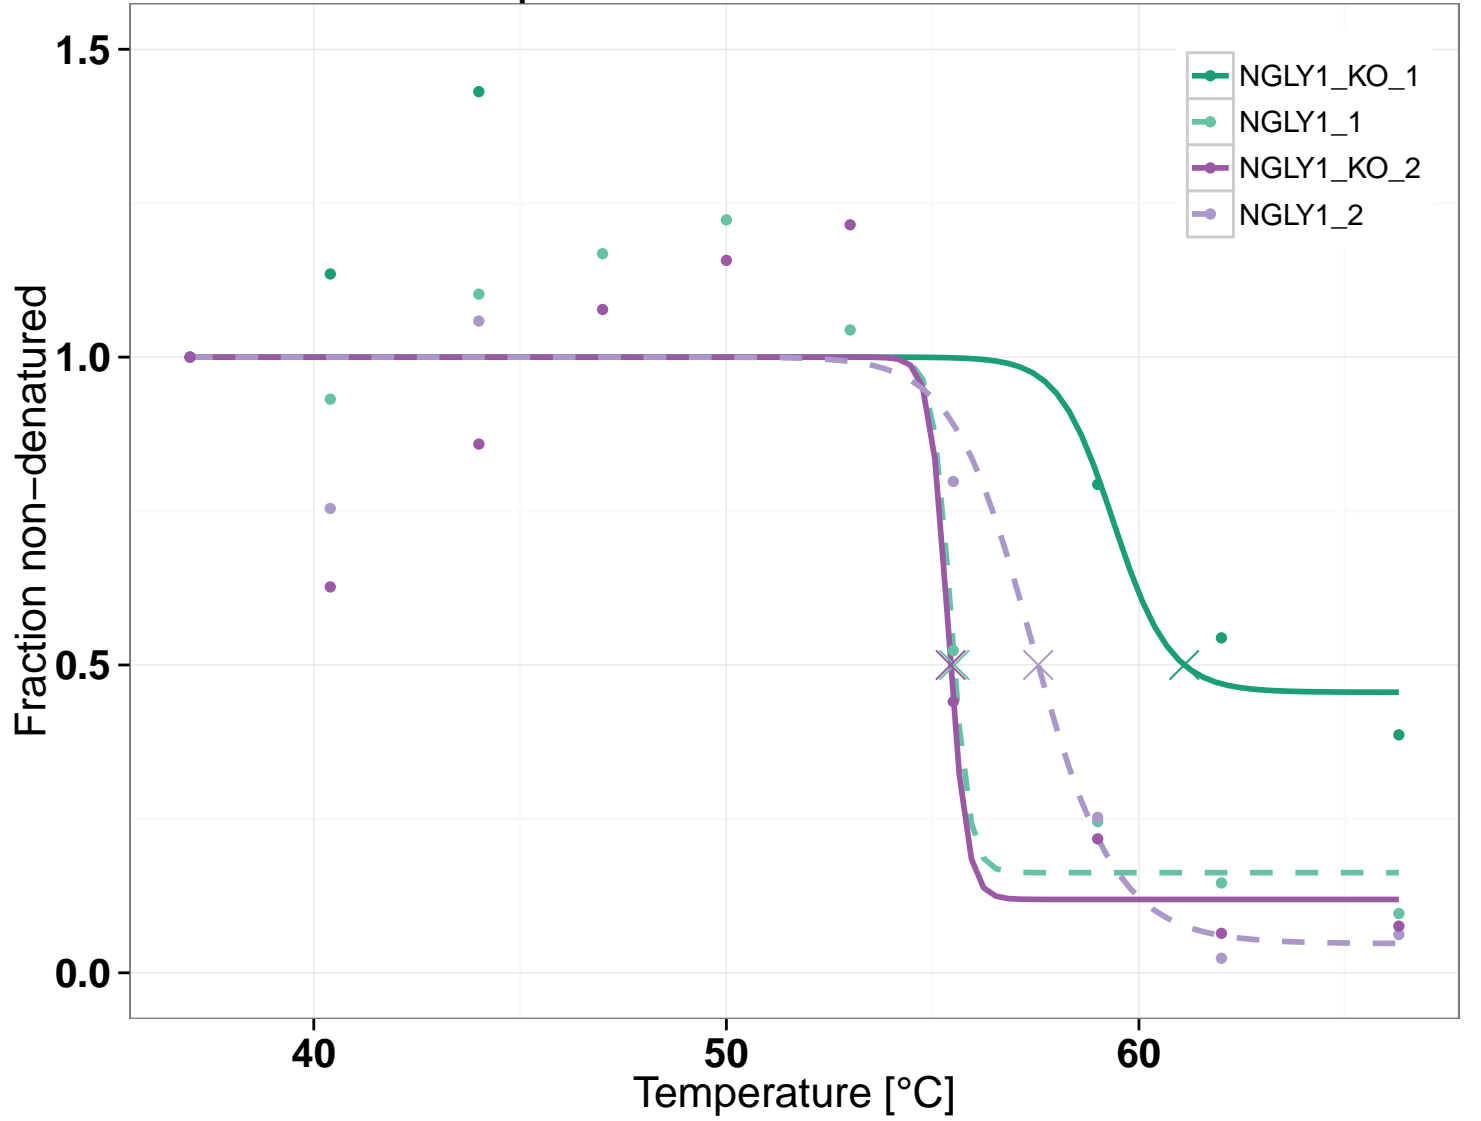

|            | meltPoint | slope | plateau | R2    |
|------------|-----------|-------|---------|-------|
| NGLY1_KO_1 | 61.1      | -0.2  | 0.46    | -0.12 |
| NGLY1_1    | 55.53     | -0.94 | 0.16    | 0.94  |
| NGLY1_KO_2 | 55.44     | -0.99 | 0.12    | 0.86  |
| NGLY1_2    | 57.56     | -0.24 | 0.05    | 0.56  |

Supplement: Supplementary file 7852 [file 1]

IPI00010490.1|ARVCF

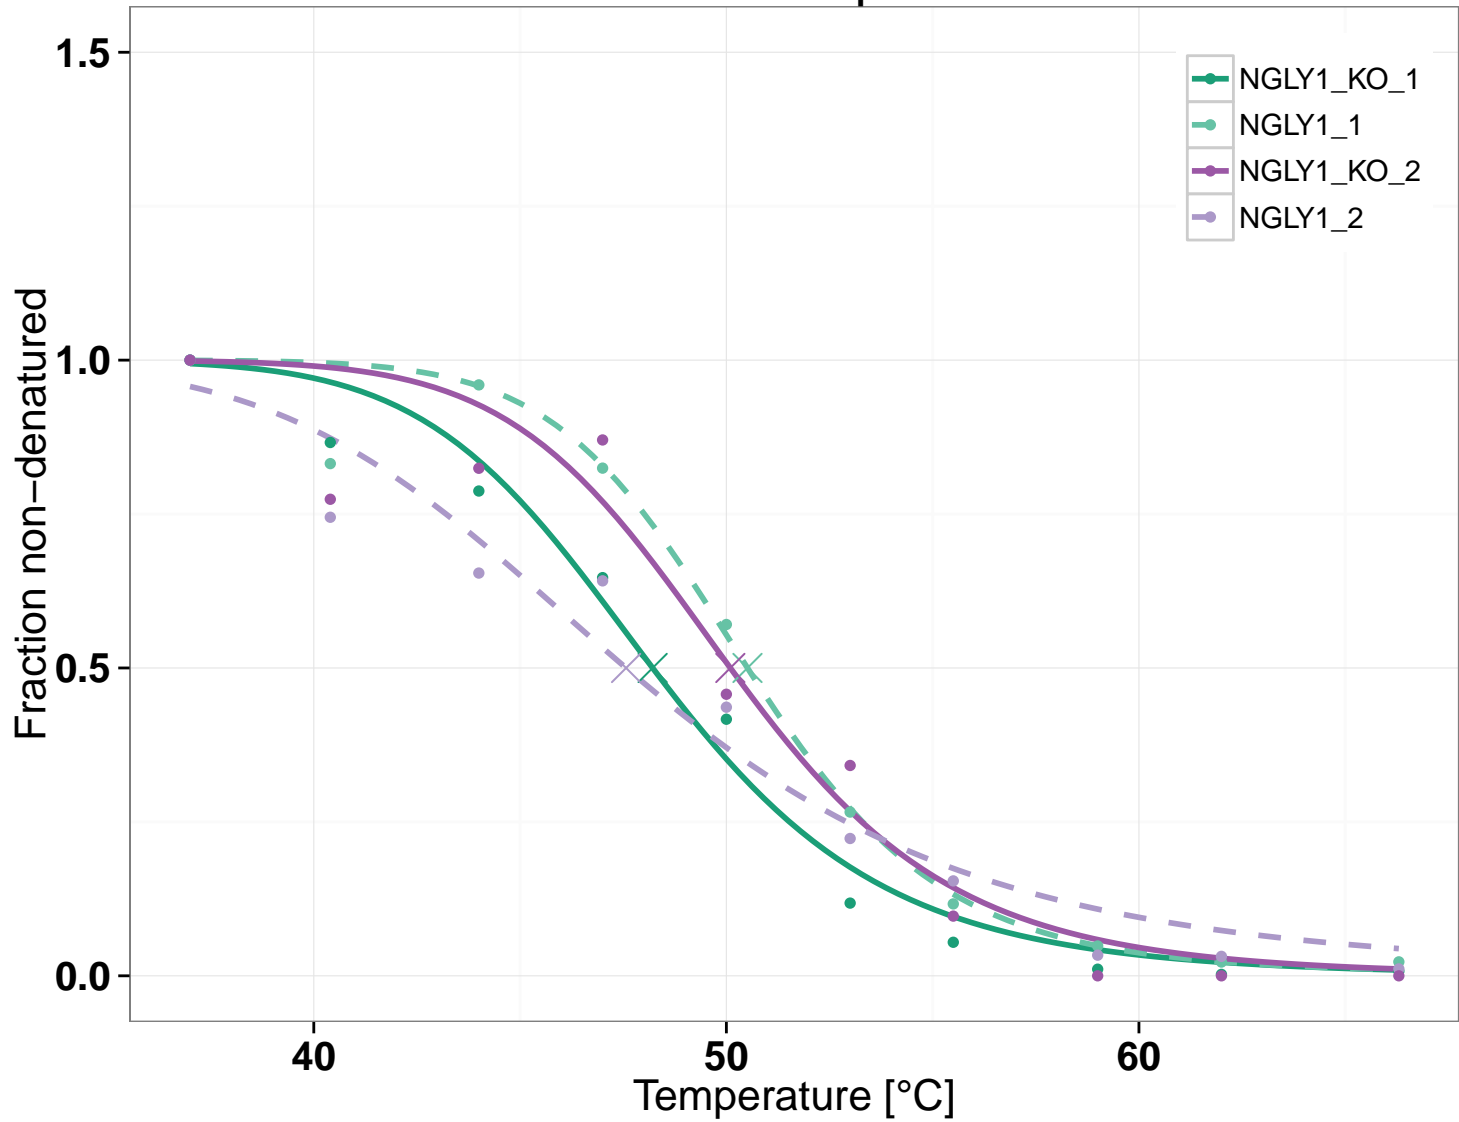

|            | meltPoint | slope  | plateau | R2   |
|------------|-----------|--------|---------|------|
| NGLY1_KO_1 | 48.21     | -0.09  | 0       | 0.98 |
| NGLY1_1    | 50.51     | -0.11  | 0       | 0.98 |
| NGLY1_KO_2 | 50.1      | -0.093 | 0       | 0.94 |
| NGLY1_2    | 47.57     | -0.059 | 0       | 0.96 |

Supplement: Supplementary file 7853 [file 1]

# IPI00009790.1|PFKP

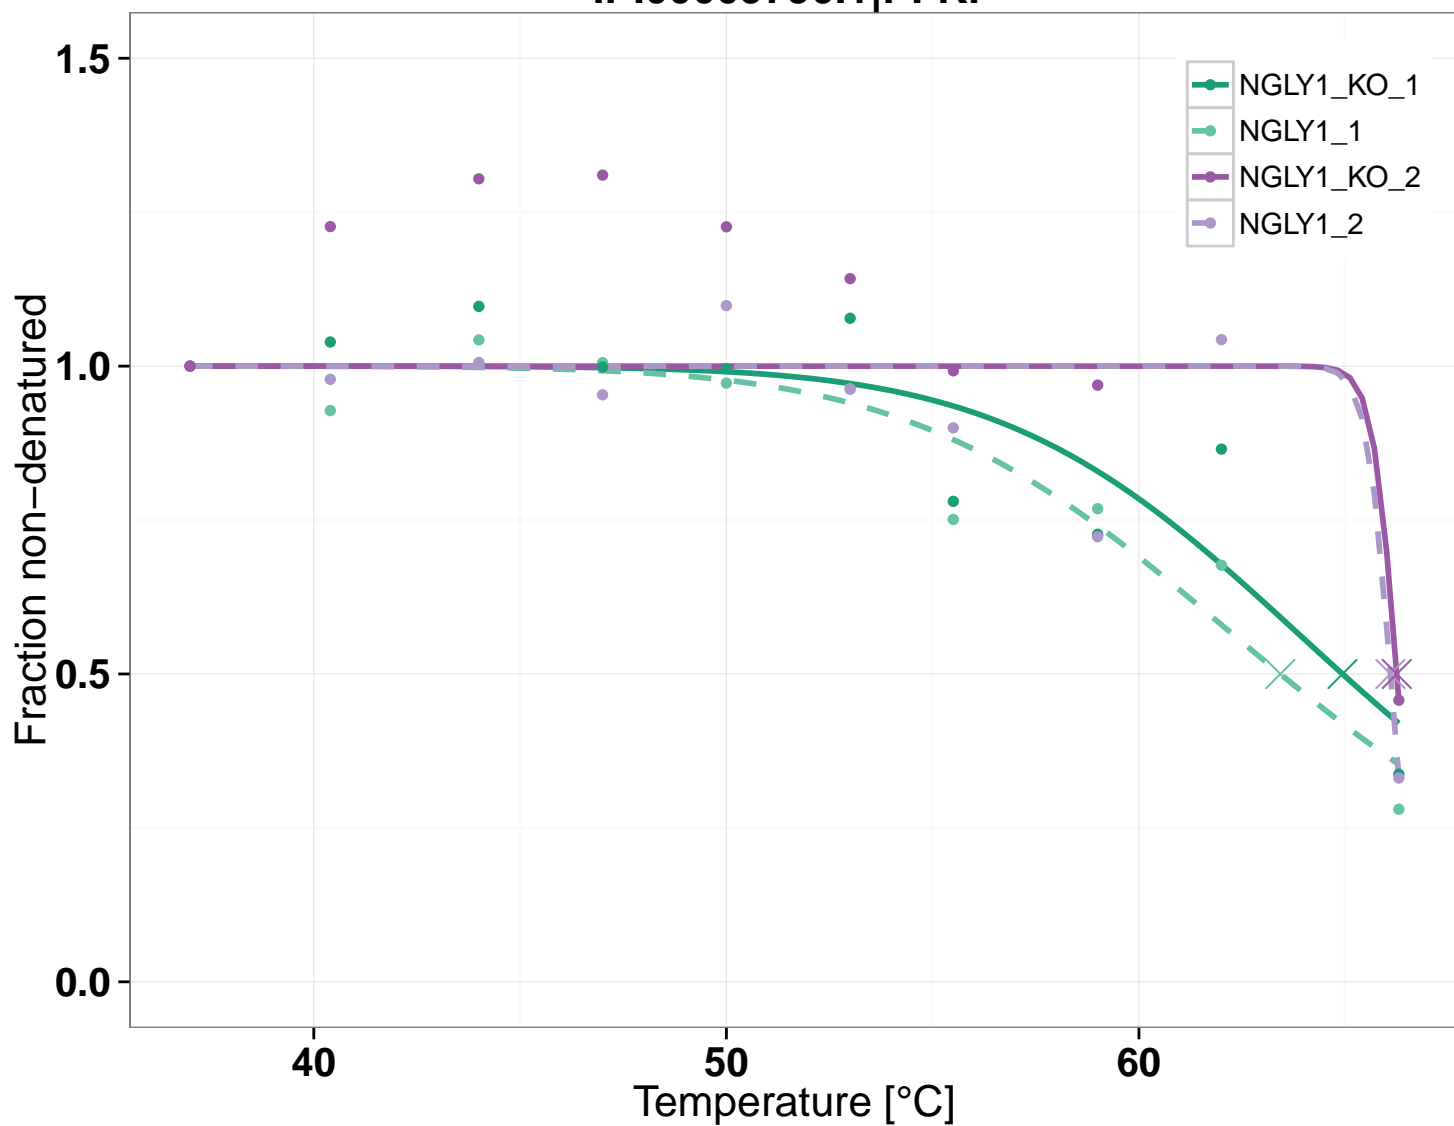

|            | meltPoint | slope  | plateau | R2   |
|------------|-----------|--------|---------|------|
| NGLY1_KO_1 | 64.93     | -0.061 | 0       | 0.79 |
| NGLY1_1    | 63.43     | -0.056 | 0       | 0.92 |
| NGLY1_KO_2 | 66.25     | -0.85  | 0       | 0.37 |
| NGLY1_2    | 66.09     | -0.86  | 0       | 0.77 |

Supplement: Supplementary file 7854 [file 1]

# IPI00218397.3|SBF1

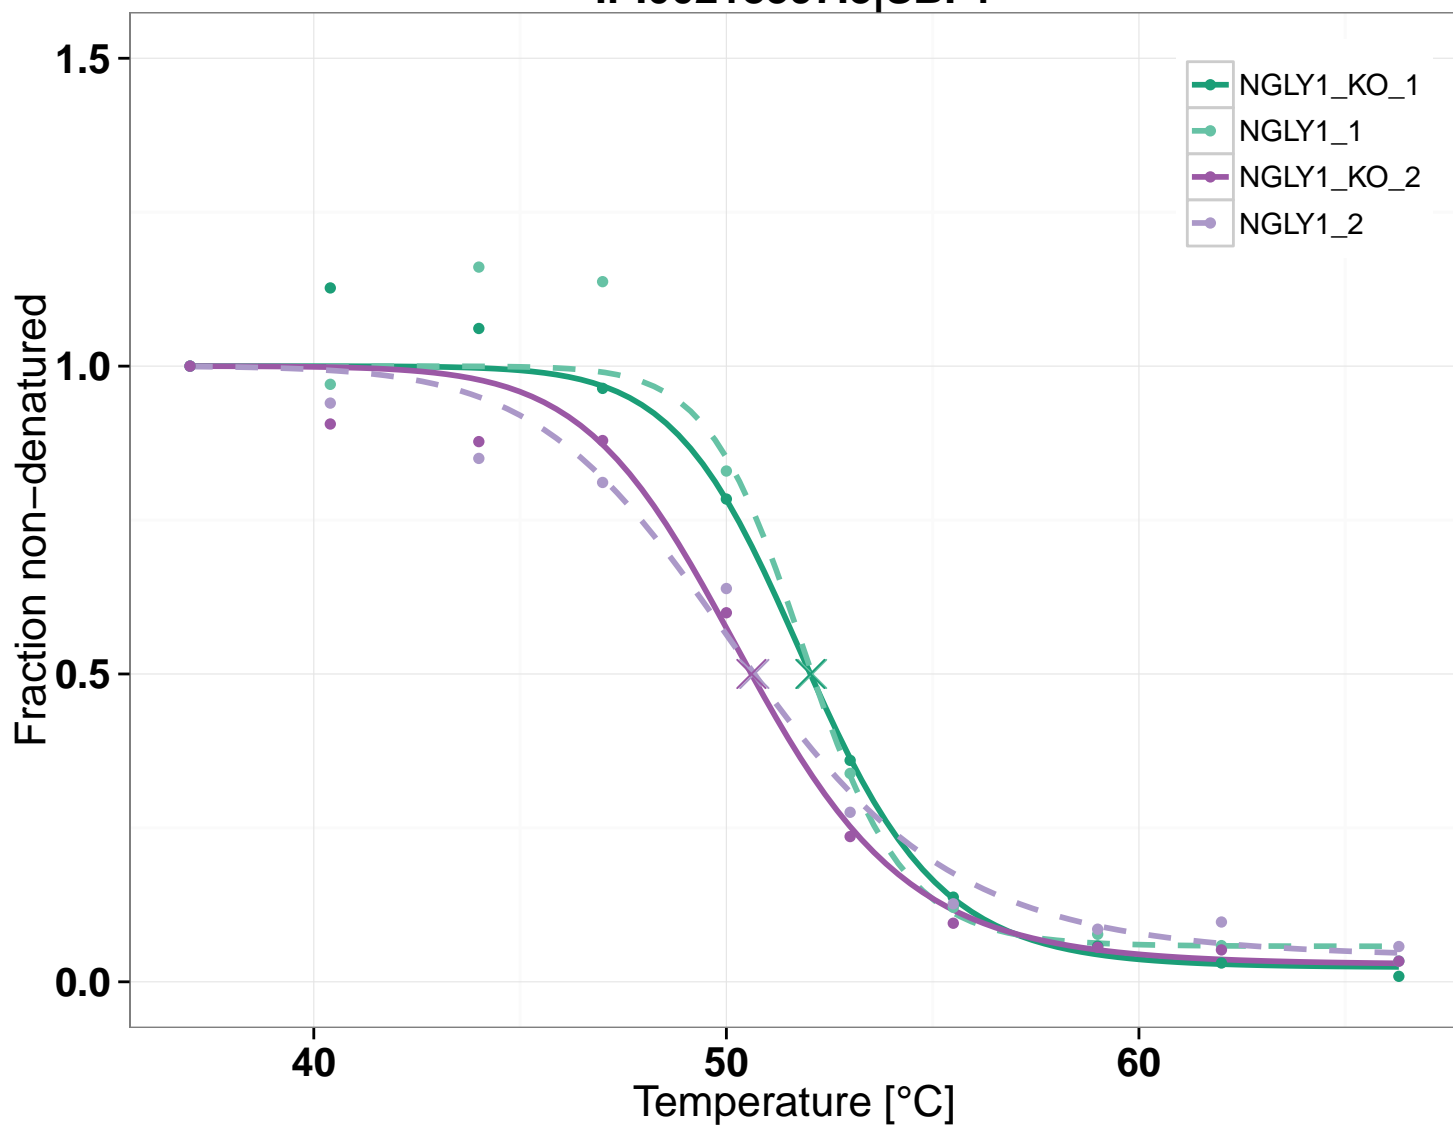

|            | meltPoint | slope  | plateau | R2   |
|------------|-----------|--------|---------|------|
| NGLY1_KO_1 | 52.04     | -0.15  | 0.02    | 0.99 |
| NGLY1_1    | 52.08     | -0.2   | 0.06    | 0.98 |
| NGLY1_KO_2 | 50.61     | -0.12  | 0.03    | 0.99 |
| NGLY1_2    | 50.68     | -0.095 | 0.04    | 0.98 |

Supplement: Supplementary file 7855 [file 1]

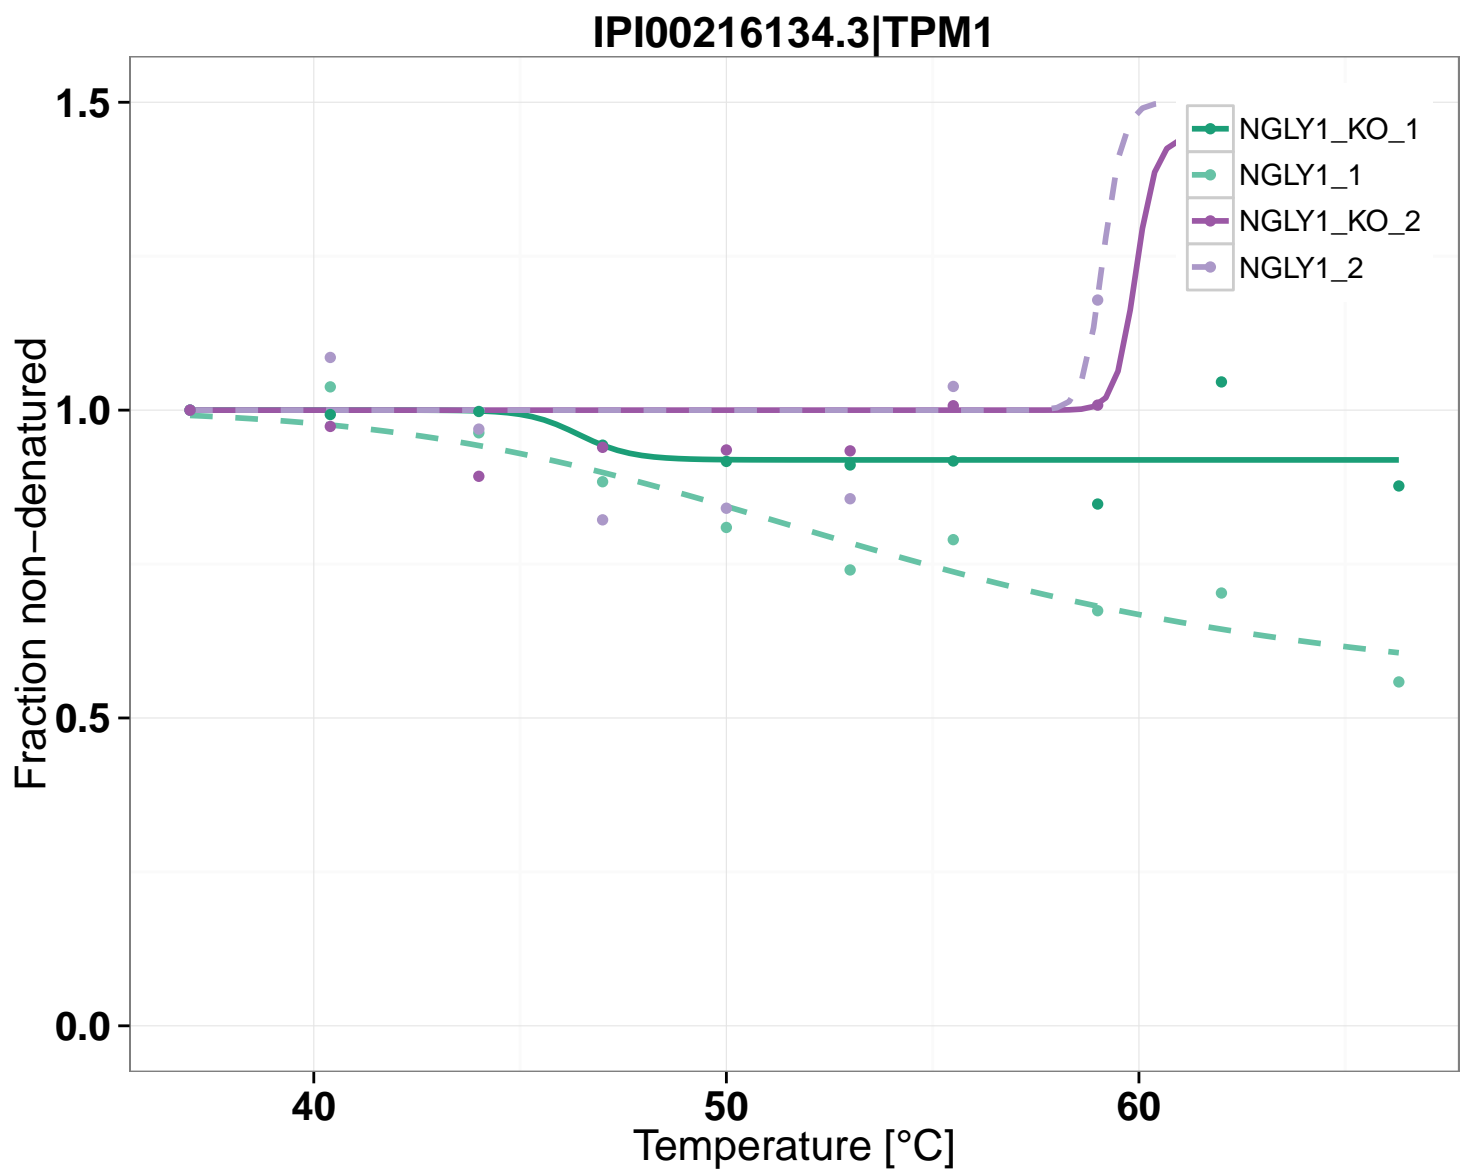

|            | meltPoint | slope  | plateau | R2   |
|------------|-----------|--------|---------|------|
| NGLY1_KO_1 | —         | -0.032 | 0.92    | 0.34 |
| NGLY1_1    | —         | -0.02  | 0.52    | 0.92 |
| NGLY1_KO_2 | —         | 0.46   | 1.44    | 0.92 |
| NGLY1_2    | —         | 0.53   | 1.5     | 0.85 |

Supplement: Supplementary file 7856 [file 1]

# IPI00299182.1|PEX6

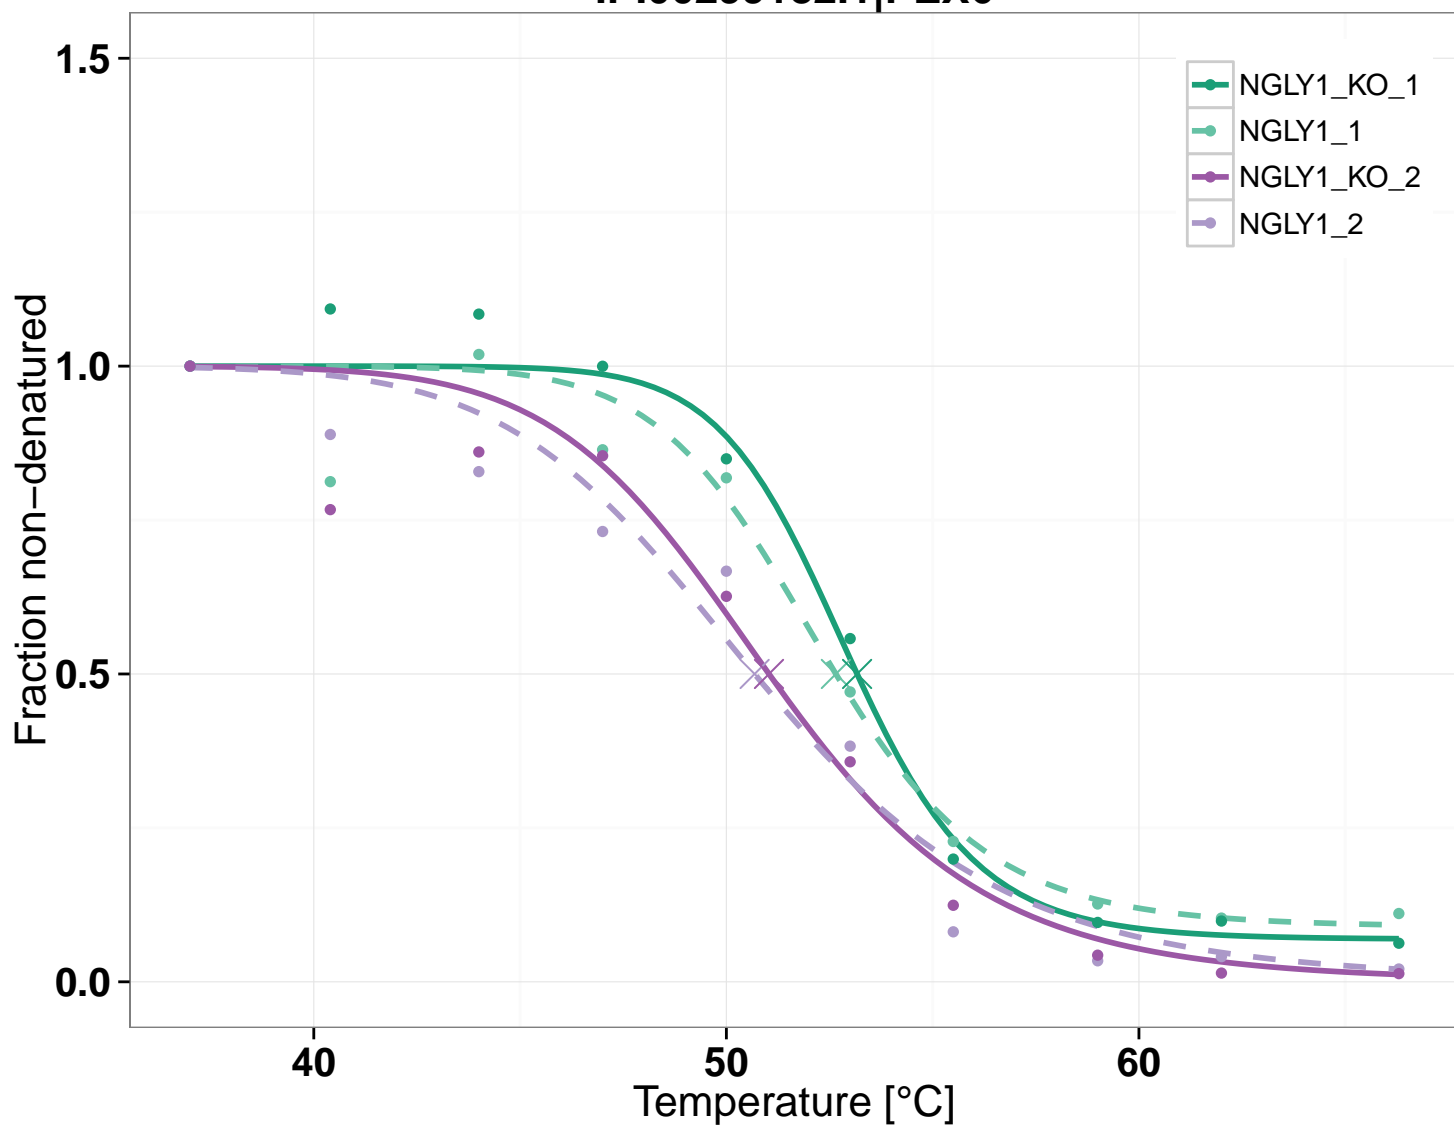

|            | meltPoint | slope  | plateau | R2   |
|------------|-----------|--------|---------|------|
| NGLY1_KO_1 | 53.17     | -0.15  | 0.07    | 0.99 |
| NGLY1_1    | 52.65     | -0.11  | 0.09    | 0.97 |
| NGLY1_KO_2 | 51.03     | -0.095 | 0       | 0.95 |
| NGLY1_2    | 50.68     | -0.082 | 0       | 0.96 |

Supplement: Supplementary file 7857 [file 1]

IPI00152946.1|RACGAP1

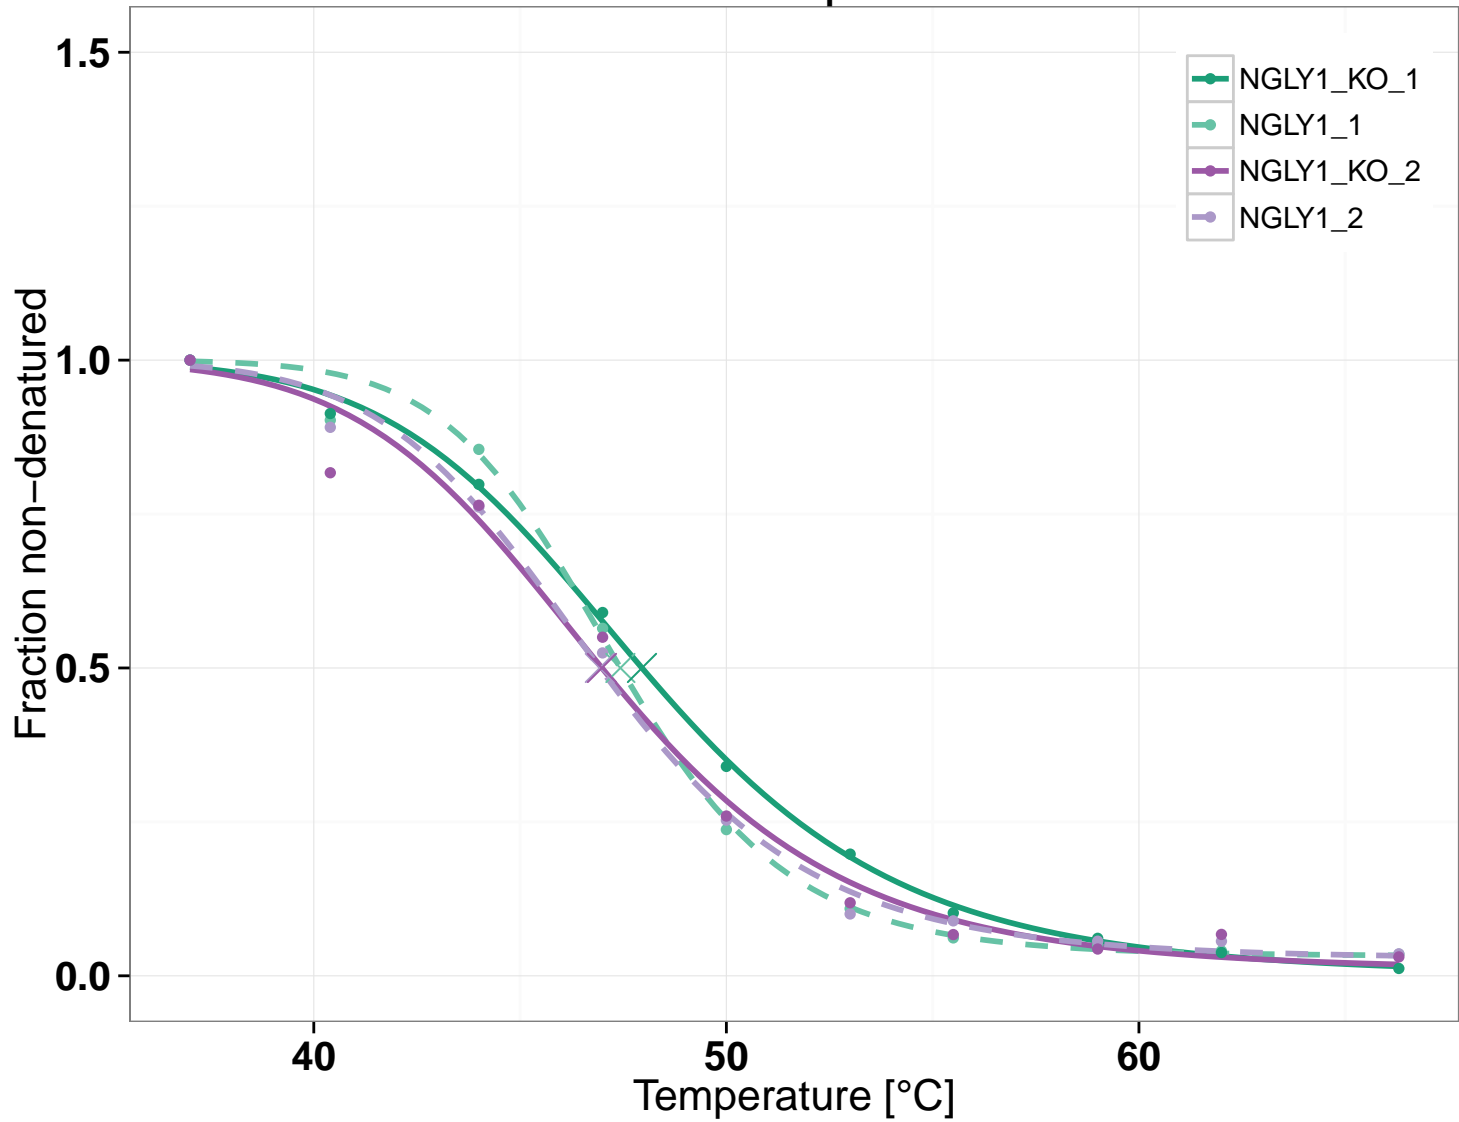

|            | meltPoint | slope  | plateau | R2   |
|------------|-----------|--------|---------|------|
| NGLY1_KO_1 | 47.95     | -0.08  | 0       | 1    |
| NGLY1_1    | 47.43     | -0.12  | 0.03    | 1    |
| NGLY1_KO_2 | 46.98     | -0.083 | 0.01    | 0.98 |
| NGLY1_2    | 46.93     | -0.093 | 0.03    | 1    |

Supplement: Supplementary file 7858 [file 1]

IPI00784154.1|HSPD1

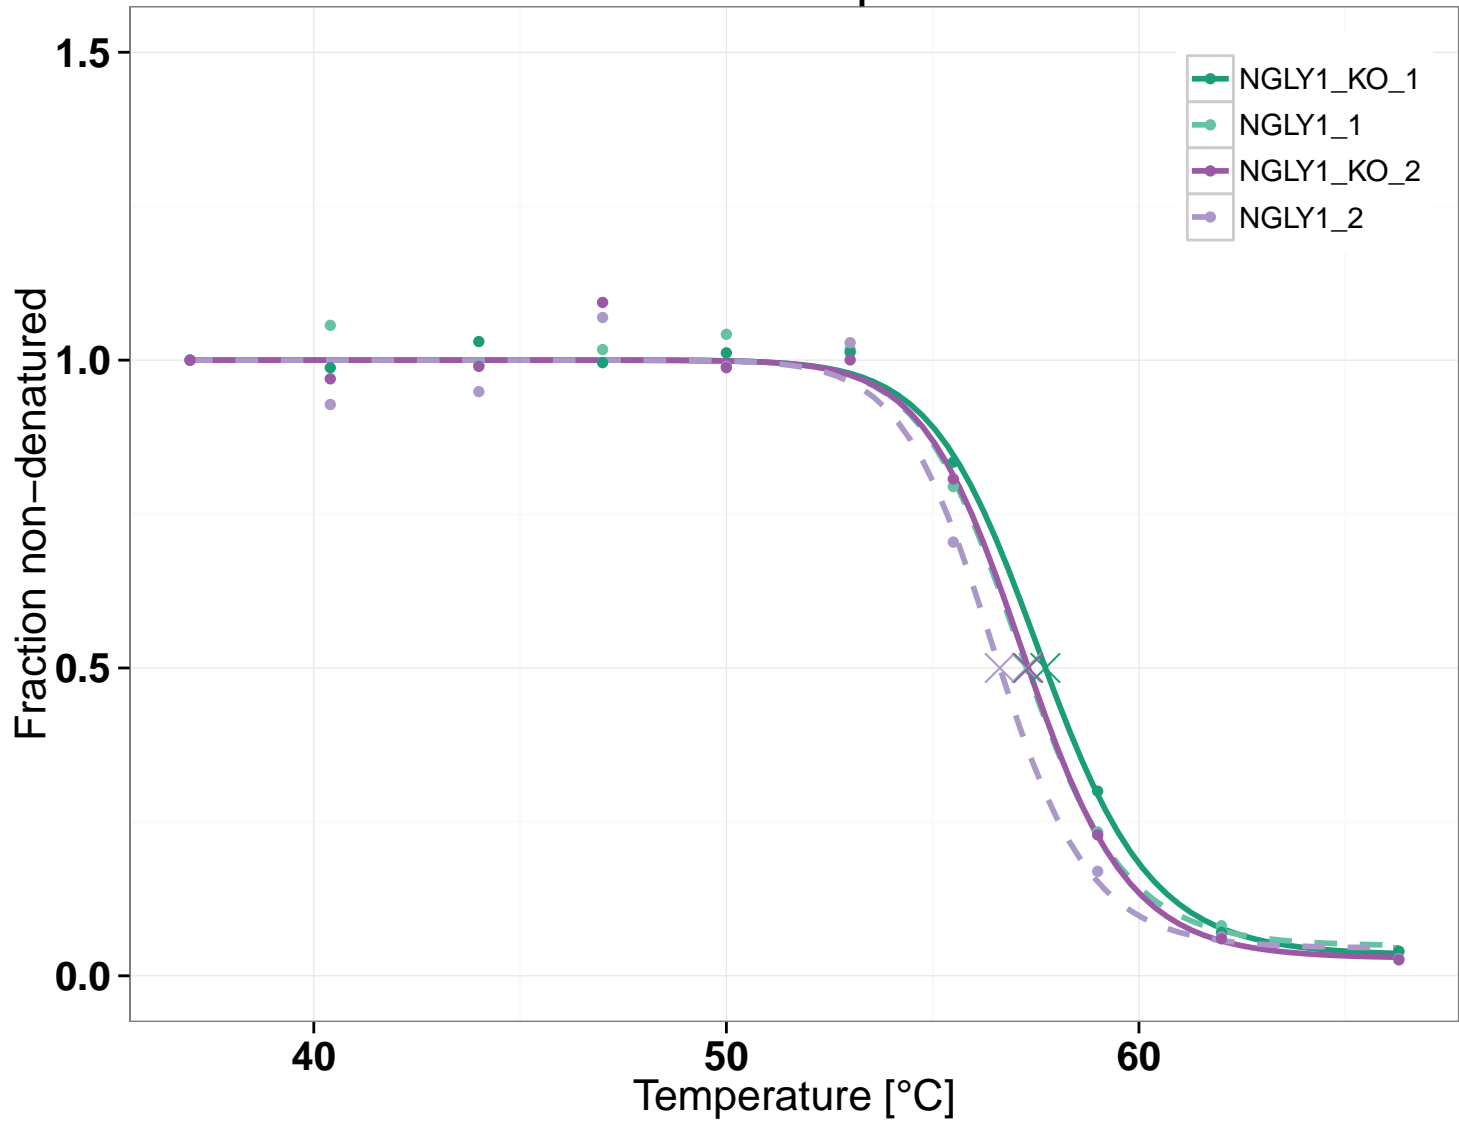

|            | meltPoint | slope | plateau | R2   |
|------------|-----------|-------|---------|------|
| NGLY1_KO_1 | 57.73     | -0.18 | 0.03    | 1    |
| NGLY1_1    | 57.27     | -0.19 | 0.05    | 1    |
| NGLY1_KO_2 | 57.32     | -0.19 | 0.03    | 0.99 |
| NGLY1_2    | 56.63     | -0.21 | 0.04    | 0.99 |

Supplement: Supplementary file 7859 [file 1]

# IPI00002540.2|CRY1

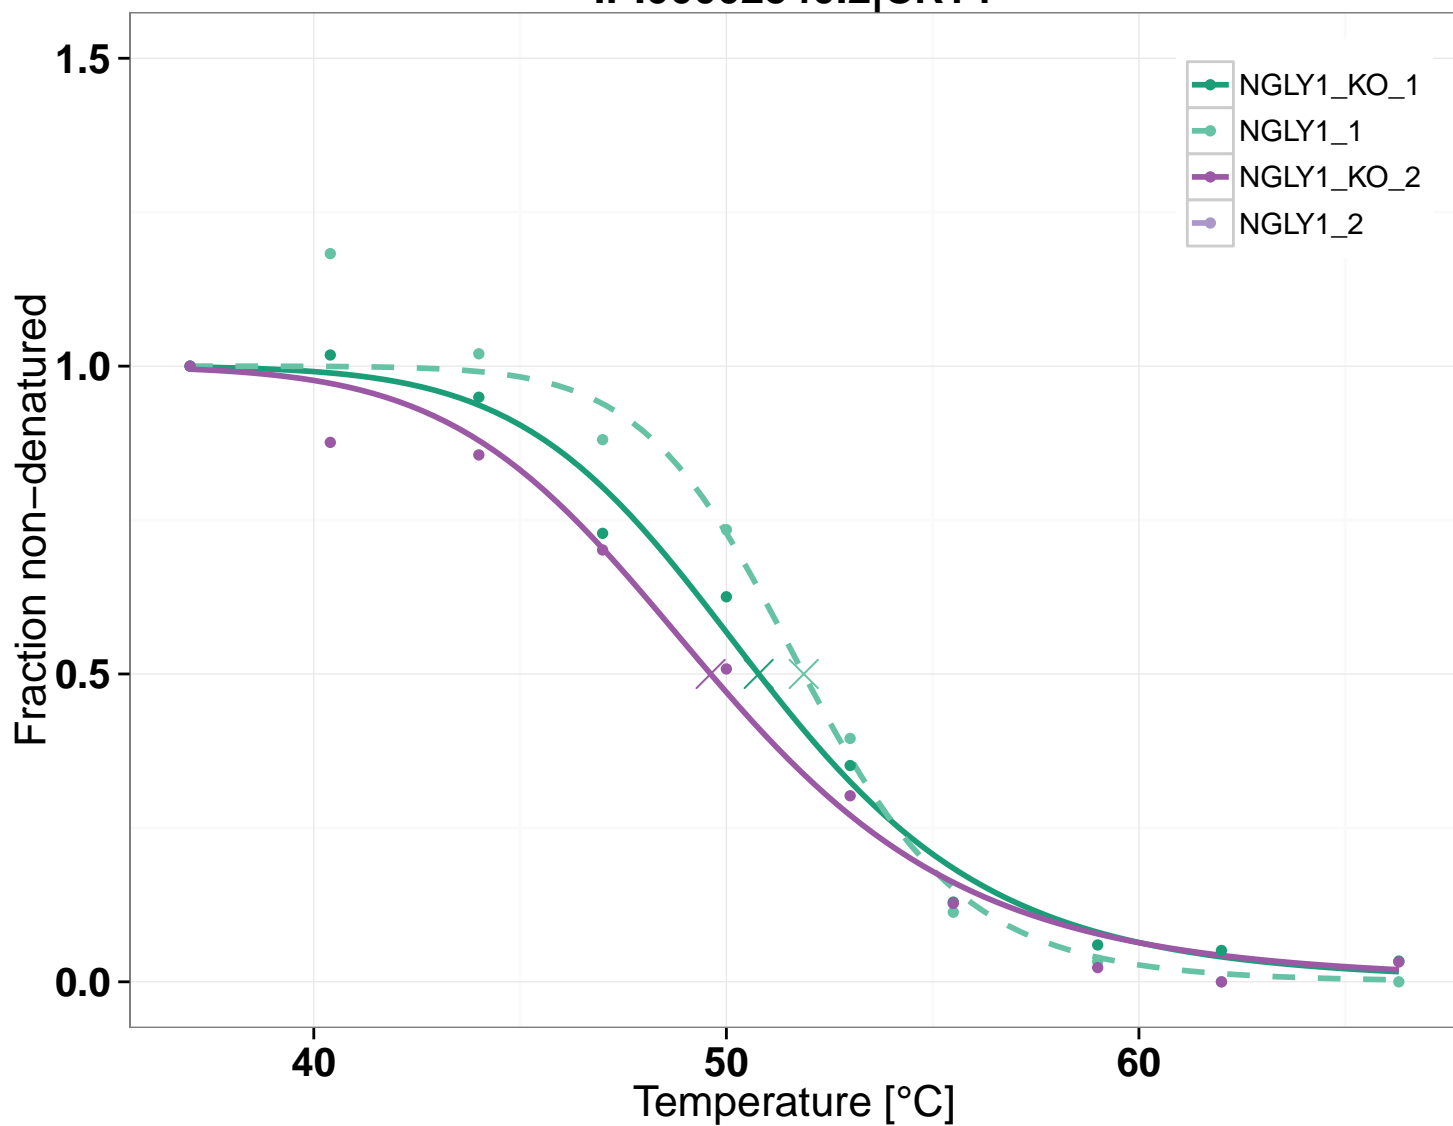

|            | meltPoint | slope  | plateau | R2   |
|------------|-----------|--------|---------|------|
| NGLY1_KO_1 | 50.78     | -0.087 | 0       | 0.99 |
| NGLY1_1    | 51.87     | -0.13  | 0       | 0.98 |
| NGLY1_KO_2 | 49.62     | -0.08  | 0       | 0.99 |
| NGLY1_2    | -         | -      | -       | -    |

Supplement: Supplementary file 7860 [file 1]

IPI00024425.5|KIAA0664

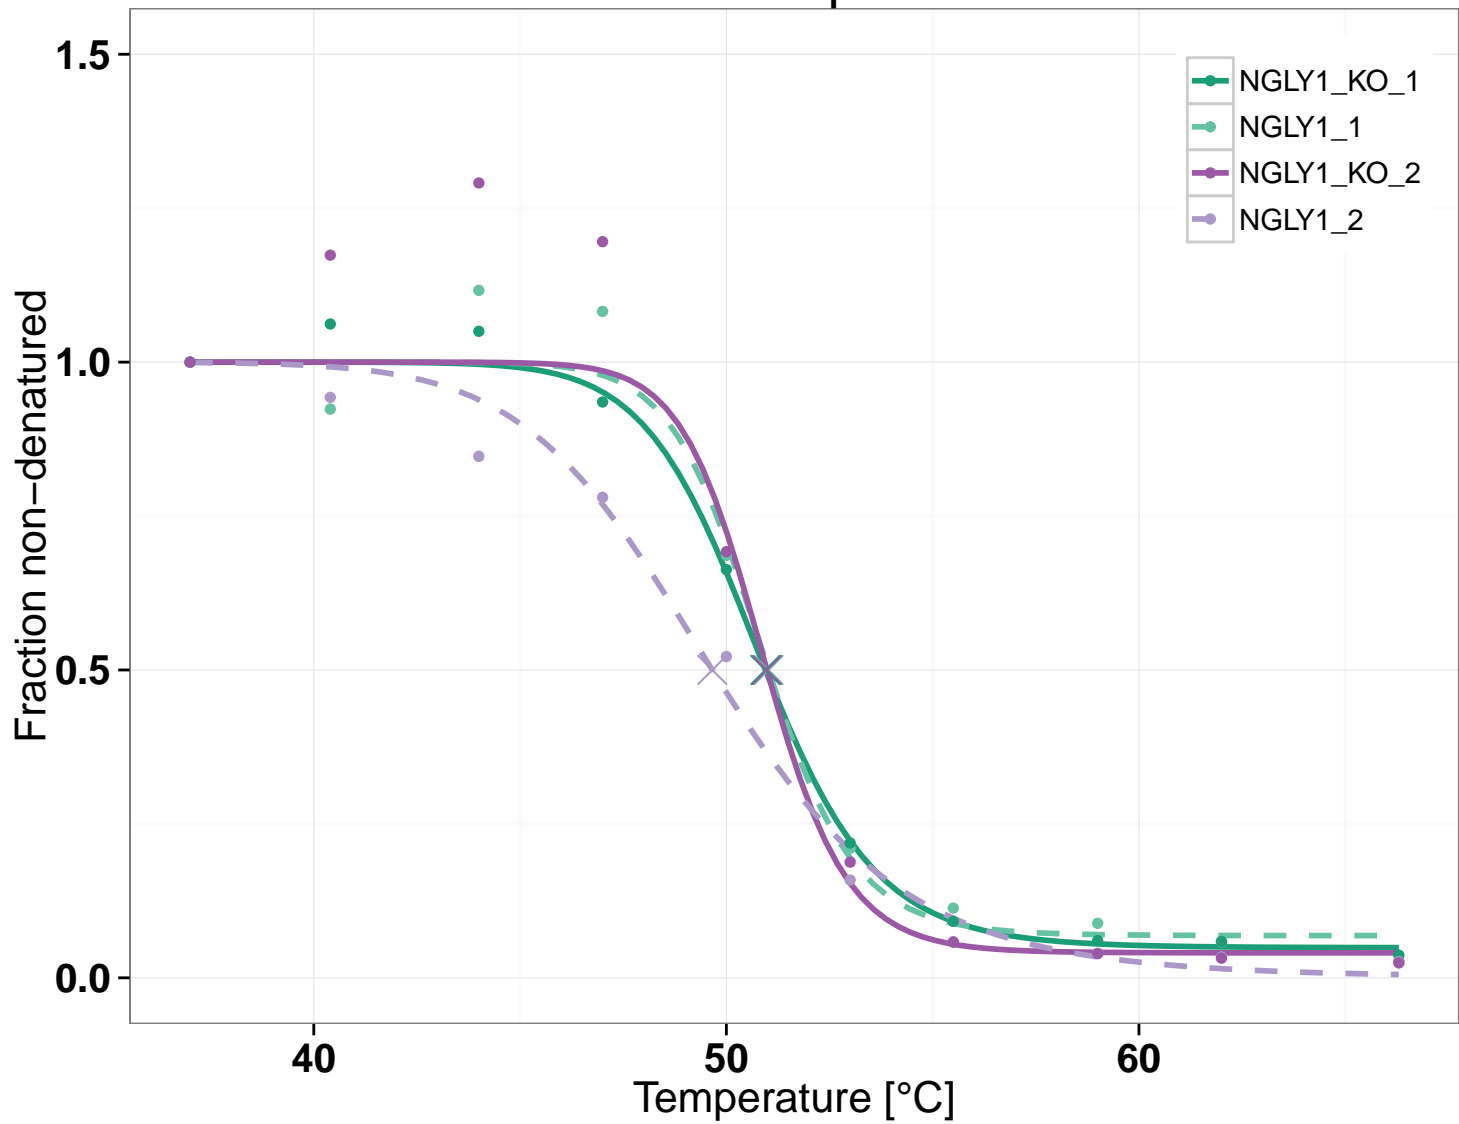

|            | meltPoint | slope | plateau | R2   |
|------------|-----------|-------|---------|------|
| NGLY1_KO_1 | 50.95     | -0.17 | 0.05    | 1    |
| NGLY1_1    | 51.02     | -0.21 | 0.07    | 0.98 |
| NGLY1_KO_2 | 50.98     | -0.24 | 0.04    | 0.94 |
| NGLY1_2    | 49.66     | -0.11 | 0       | 0.99 |

Supplement: Supplementary file 7861 [file 1]

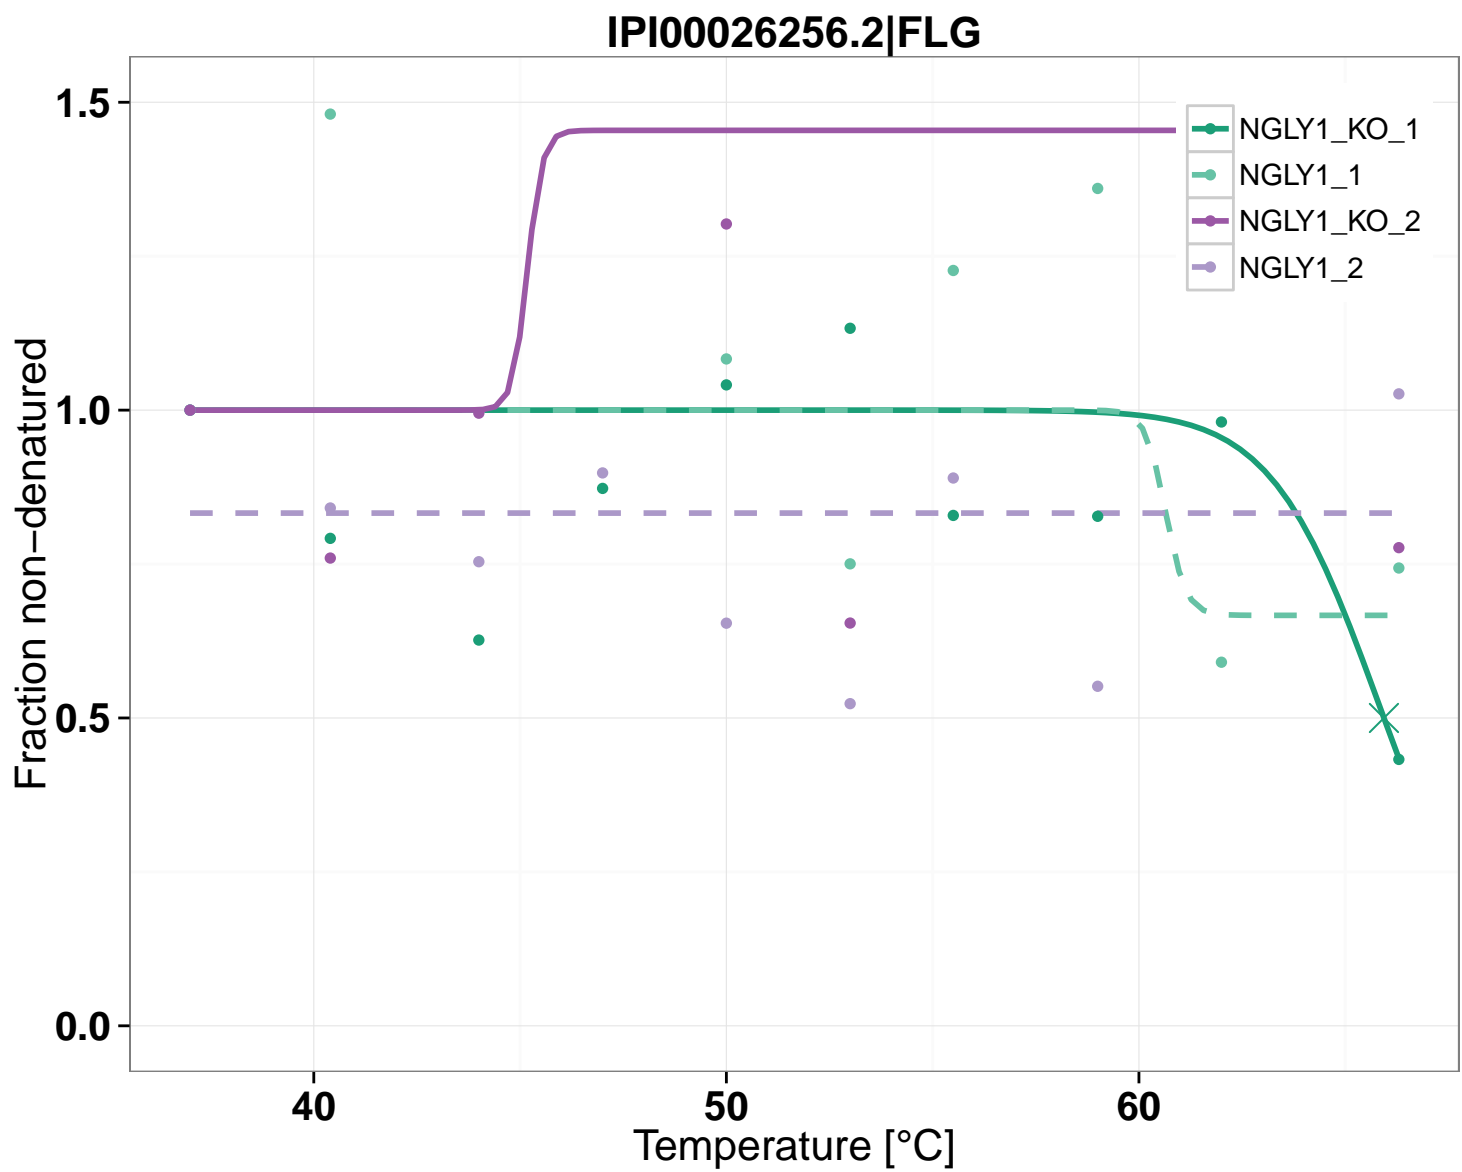

|            | meltPoint | slope | plateau | R2    |
|------------|-----------|-------|---------|-------|
| NGLY1_KO_1 | 65.94     | -0.18 | 0       | 0.28  |
| NGLY1_1    | -         | -0.34 | 0.67    | -0.11 |
| NGLY1_KO_2 | -         | 0.63  | 1.45    | 0.18  |
| NGLY1_2    | -         | -     | 0.67    | 0     |

Supplement: Supplementary file 7862 [file 1]

IPI00012198.3|C1ORF50

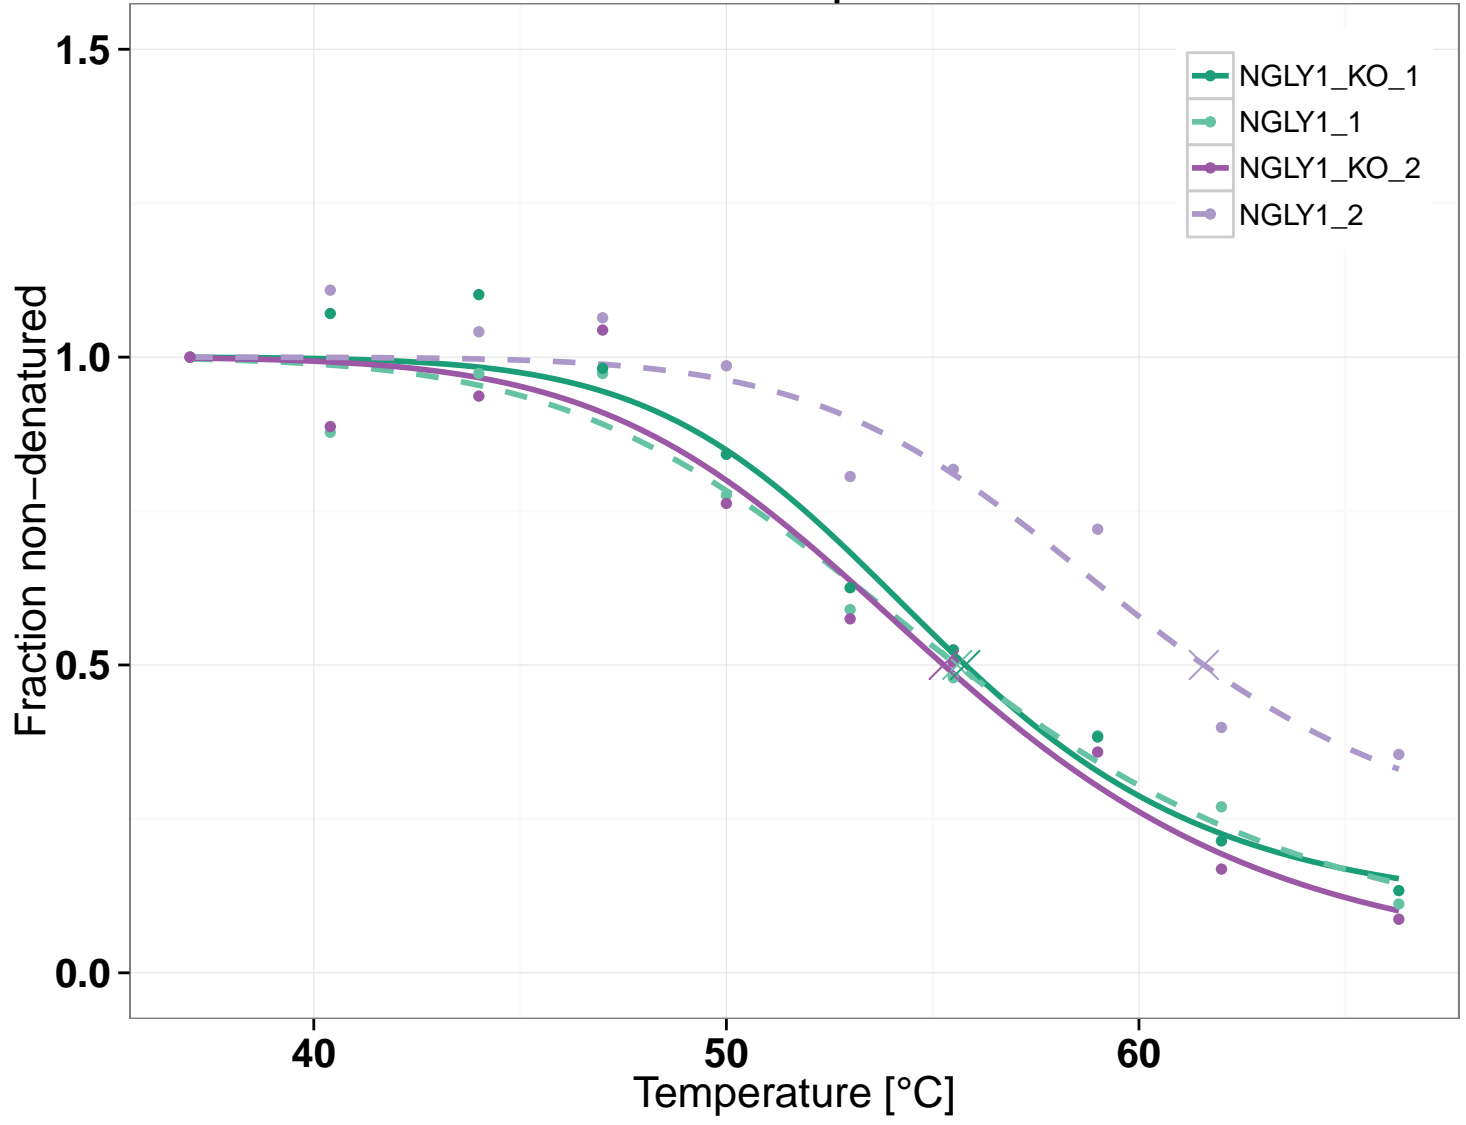

|            | meltPoint | slope  | plateau | R2   |
|------------|-----------|--------|---------|------|
| NGLY1_KO_1 | 55.79     | -0.066 | 0.1     | 0.98 |
| NGLY1_1    | 55.6      | -0.053 | 0.02    | 0.97 |
| NGLY1_KO_2 | 55.27     | -0.061 | 0       | 0.96 |
| NGLY1_2    | 61.57     | -0.054 | 0.19    | 0.93 |

Supplement: Supplementary file 7863 [file 1]

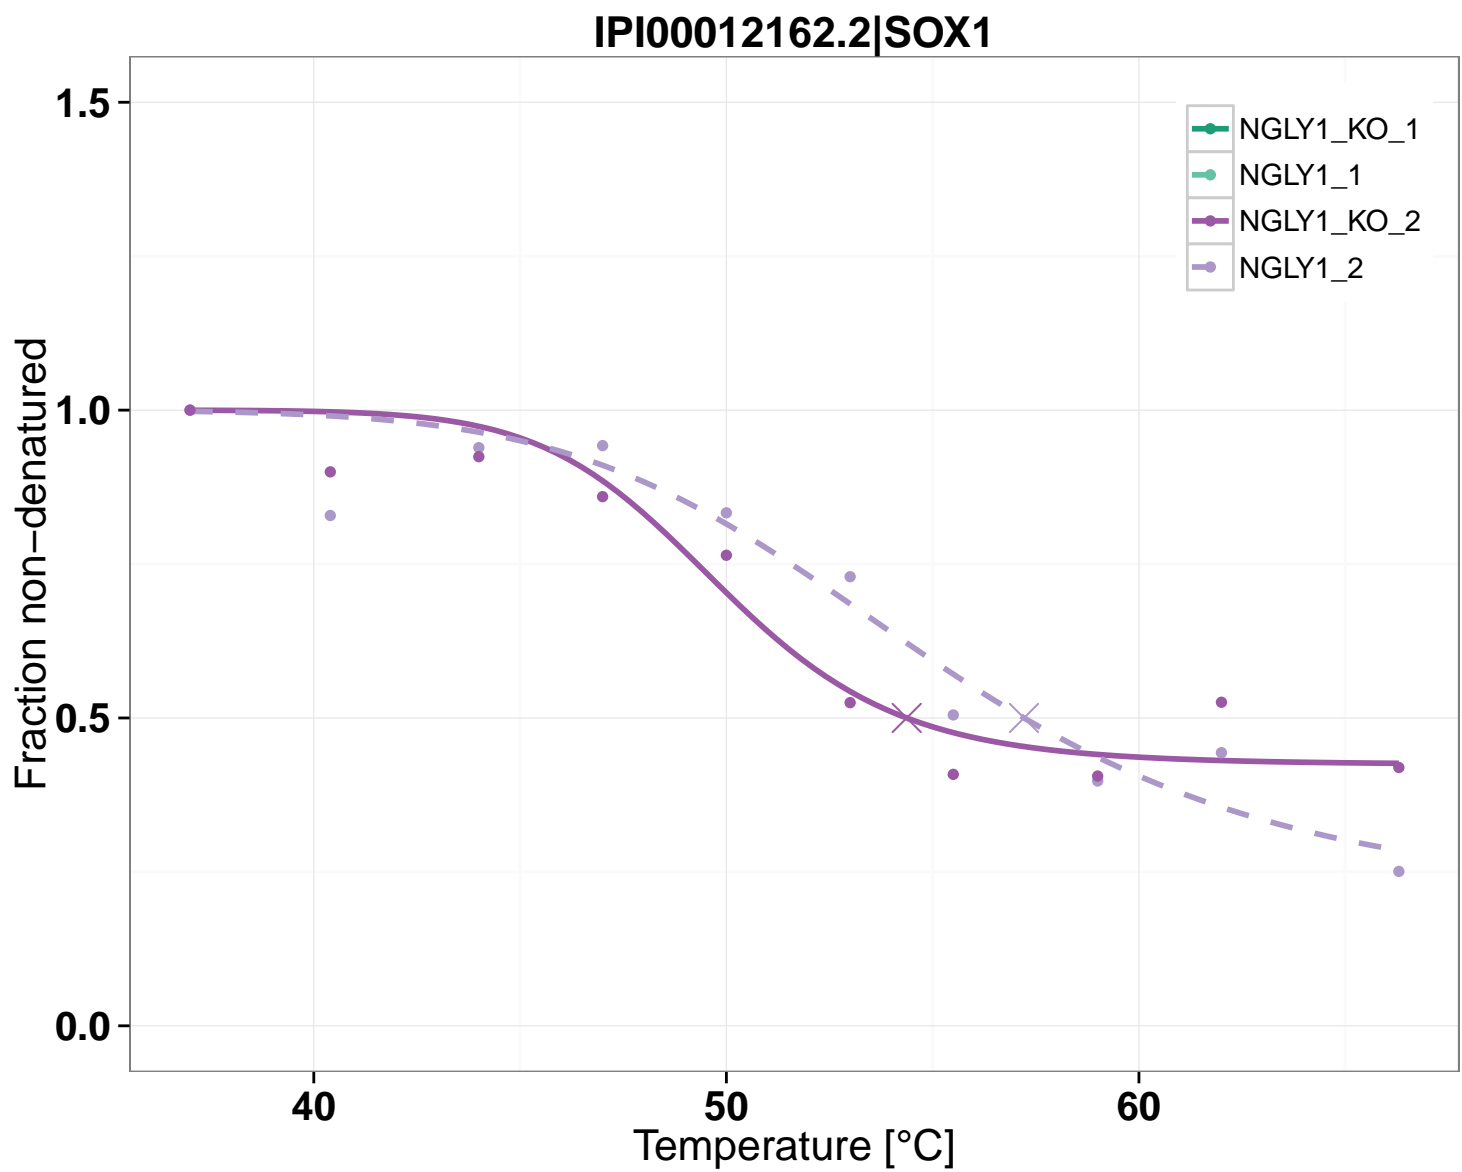

|            | meltPoint | slope  | plateau | R2   |
|------------|-----------|--------|---------|------|
| NGLY1_KO_1 | —         | —      | —       | —    |
| NGLY1_1    | —         | —      | —       | —    |
| NGLY1_KO_2 | 54.37     | −0.066 | 0.42    | 0.94 |
| NGLY1_2    | 57.21     | −0.046 | 0.2     | 0.93 |

Supplement: Supplementary file 7864 [file 1]

# IPI00747362.2|PAN2

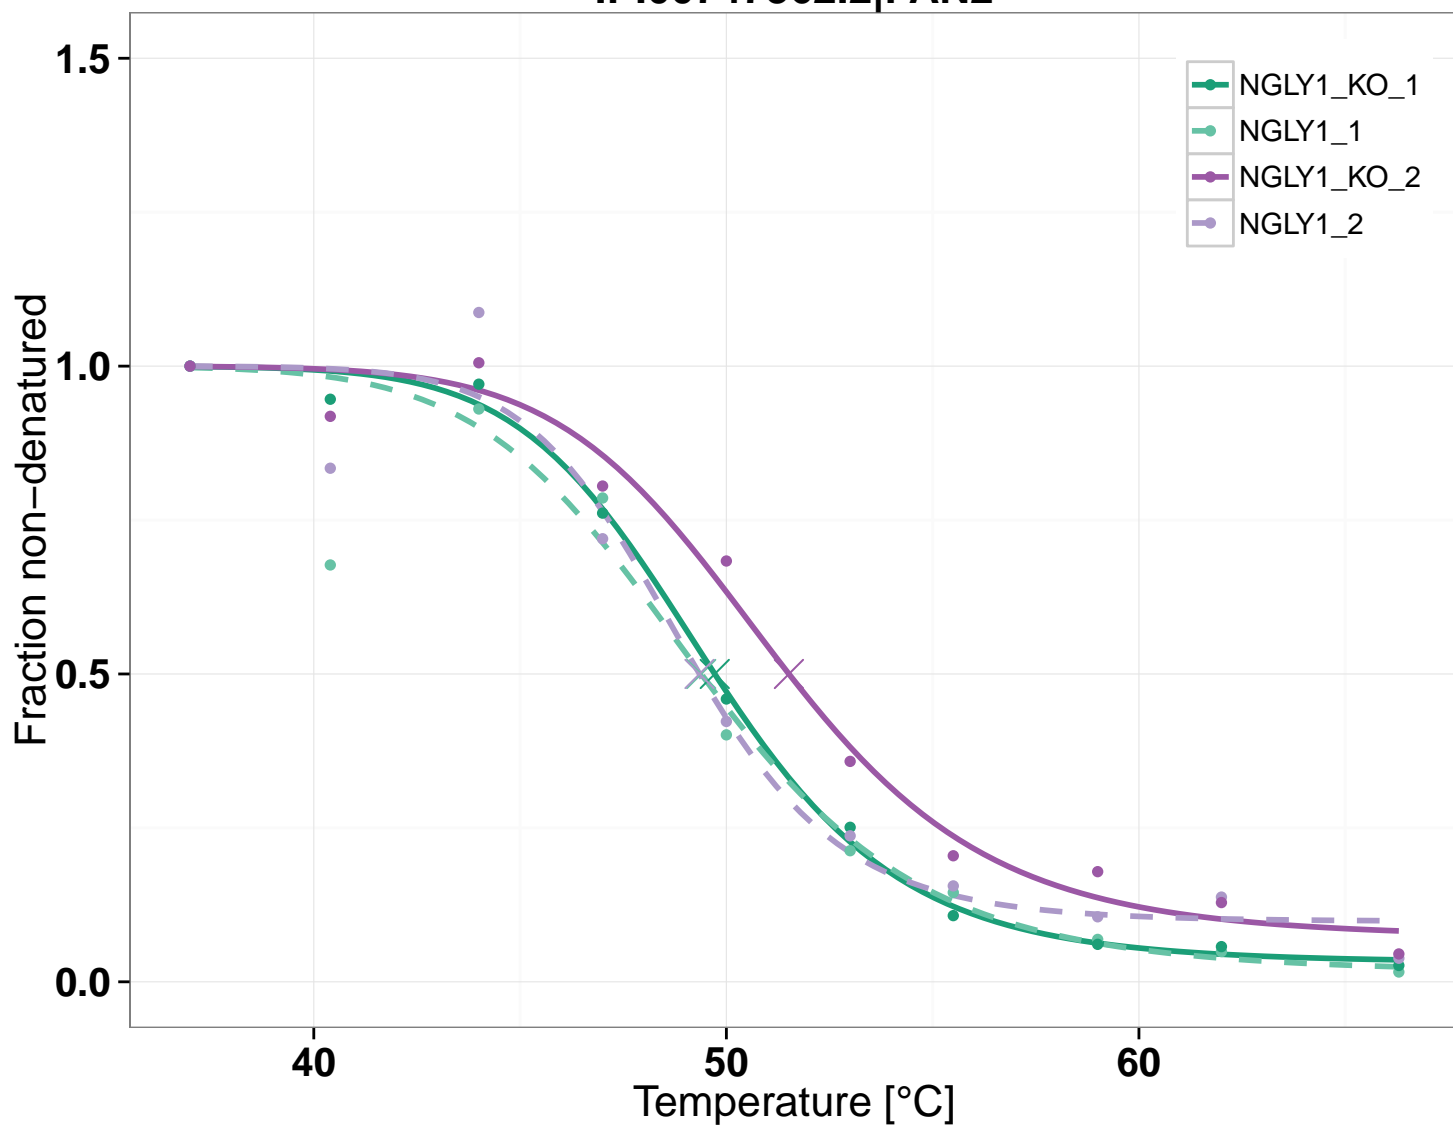

|            | meltPoint | slope  | plateau | R2   |
|------------|-----------|--------|---------|------|
| NGLY1_KO_1 | 49.72     | -0.1   | 0.03    | 1    |
| NGLY1_1    | 49.39     | -0.092 | 0.02    | 0.92 |
| NGLY1_KO_2 | 51.52     | -0.089 | 0.07    | 0.99 |
| NGLY1_2    | 49.35     | -0.12  | 0.1     | 0.96 |

Supplement: Supplementary file 7865 [file 1]

IPI00329629.6|DNAJC7

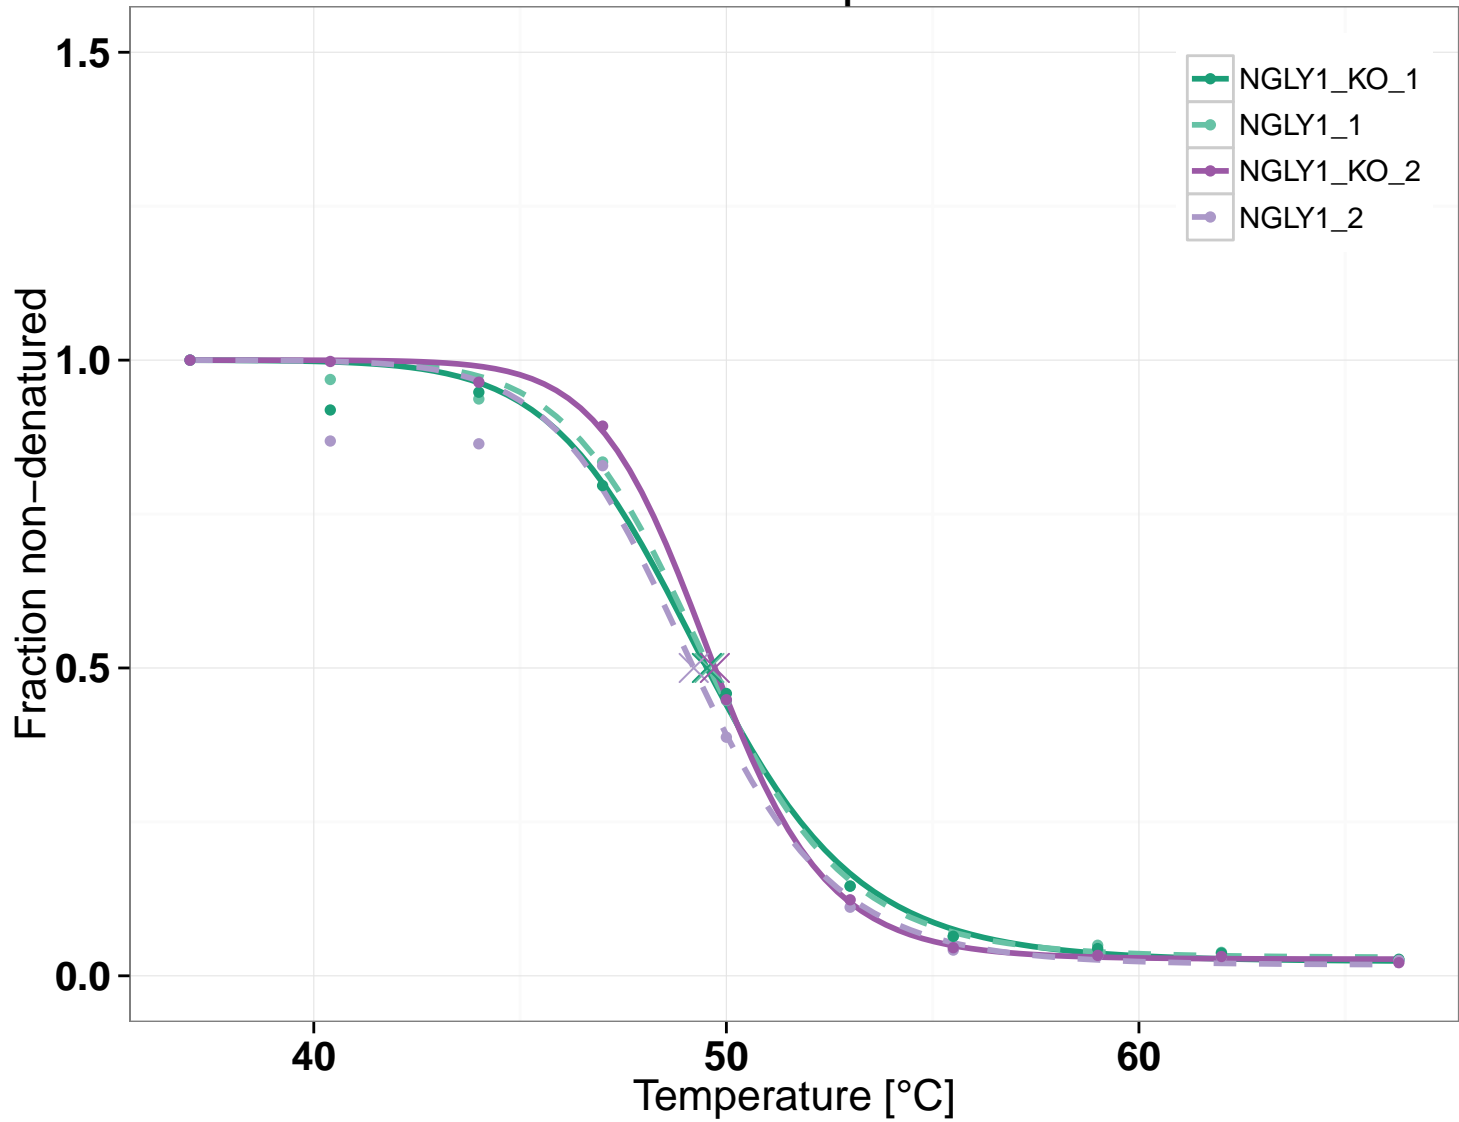

|            | meltPoint | slope | plateau | R2   |
|------------|-----------|-------|---------|------|
| NGLY1_KO_1 | 49.53     | -0.13 | 0.02    | 1    |
| NGLY1_1    | 49.59     | -0.14 | 0.03    | 1    |
| NGLY1_KO_2 | 49.72     | -0.18 | 0.03    | 1    |
| NGLY1_2    | 49.21     | -0.14 | 0.02    | 0.98 |

Supplement: Supplementary file 7866 [file 1]

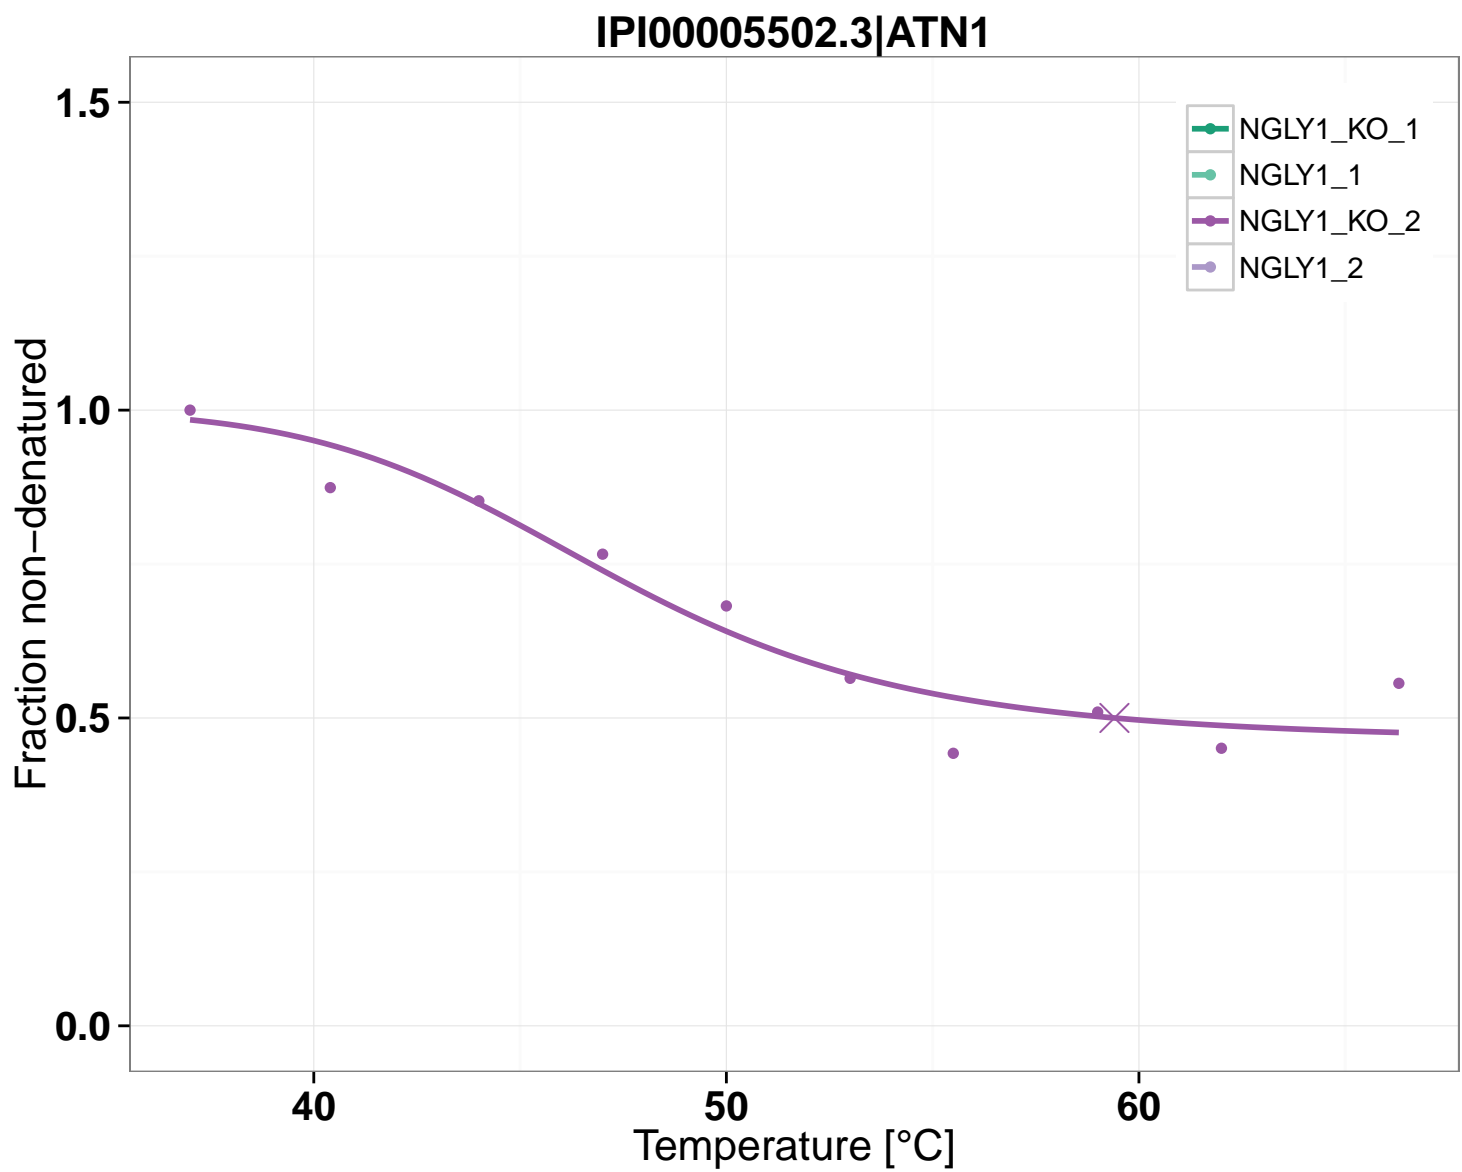

|            | meltPoint | slope  | plateau | R2   |
|------------|-----------|--------|---------|------|
| NGLY1_KO_1 | —         | —      | —       | —    |
| NGLY1_1    | —         | —      | —       | —    |
| NGLY1_KO_2 | 59.41     | -0.037 | 0.46    | 0.93 |
| NGLY1_2    | —         | —      | —       | —    |

Supplement: Supplementary file 7867 [file 1]

IPI00005881.3|ATG12

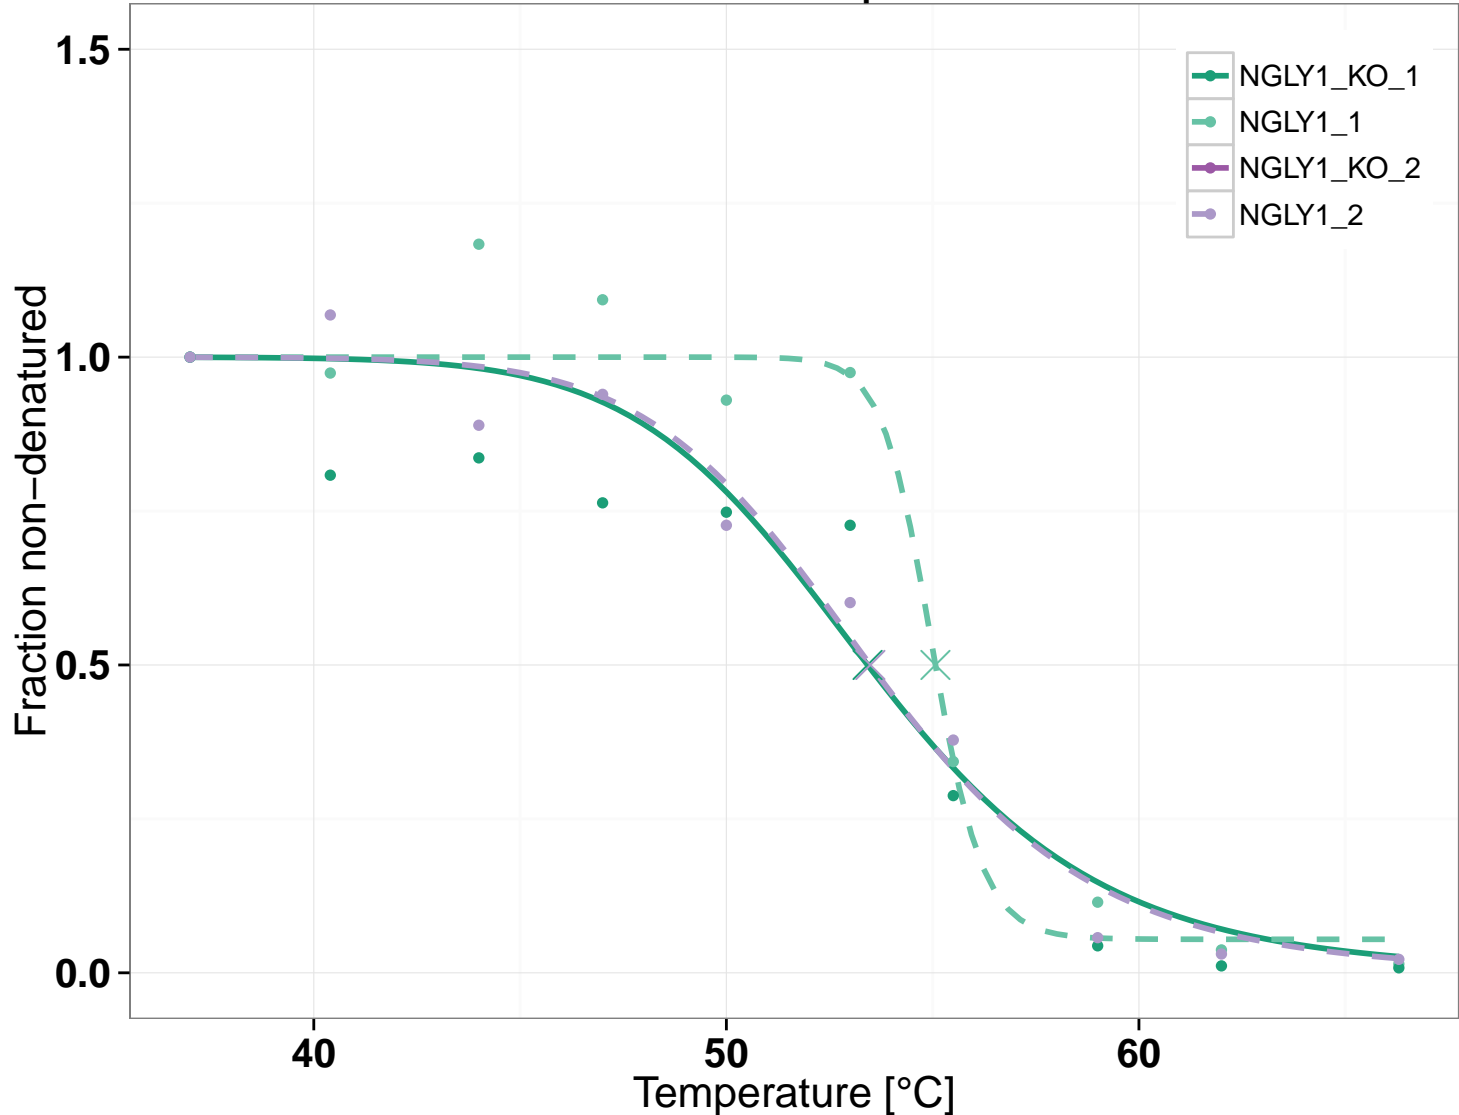

|            | meltPoint | slope  | plateau | R2   |
|------------|-----------|--------|---------|------|
| NGLY1_KO_1 | 53.42     | -0.088 | 0       | 0.9  |
| NGLY1_1    | 55.07     | -0.39  | 0.05    | 0.97 |
| NGLY1_KO_2 | -         | -      | -       | -    |
| NGLY1_2    | 53.49     | -0.091 | 0       | 0.98 |

Supplement: Supplementary file 7868 [file 1]

IPI00012843.2|PDE3B

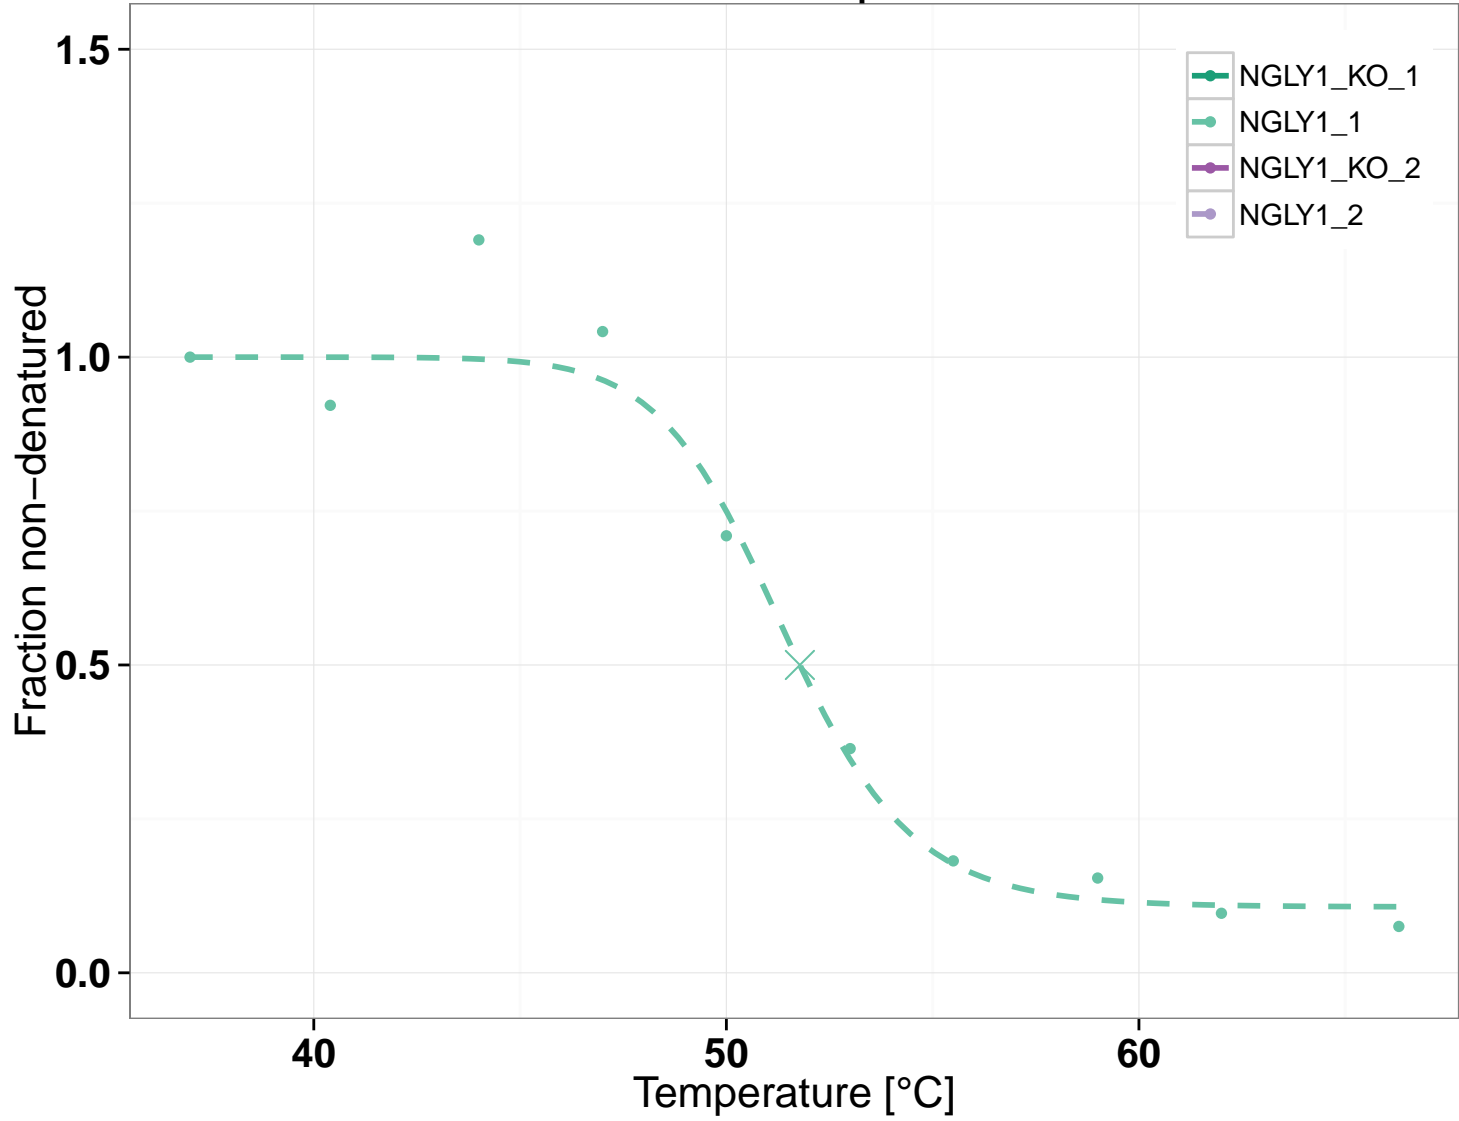

|            | meltPoint | slope | plateau | R2   |
|------------|-----------|-------|---------|------|
| NGLY1_KO_1 | -         | -     | -       | -    |
| NGLY1_1    | 51.78     | -0.15 | 0.11    | 0.97 |
| NGLY1_KO_2 | -         | -     | -       | -    |
| NGLY1_2    | -         | -     | -       | -    |

Supplement: Supplementary file 7869 [file 1]

IPI00549569.4|ISYNA1

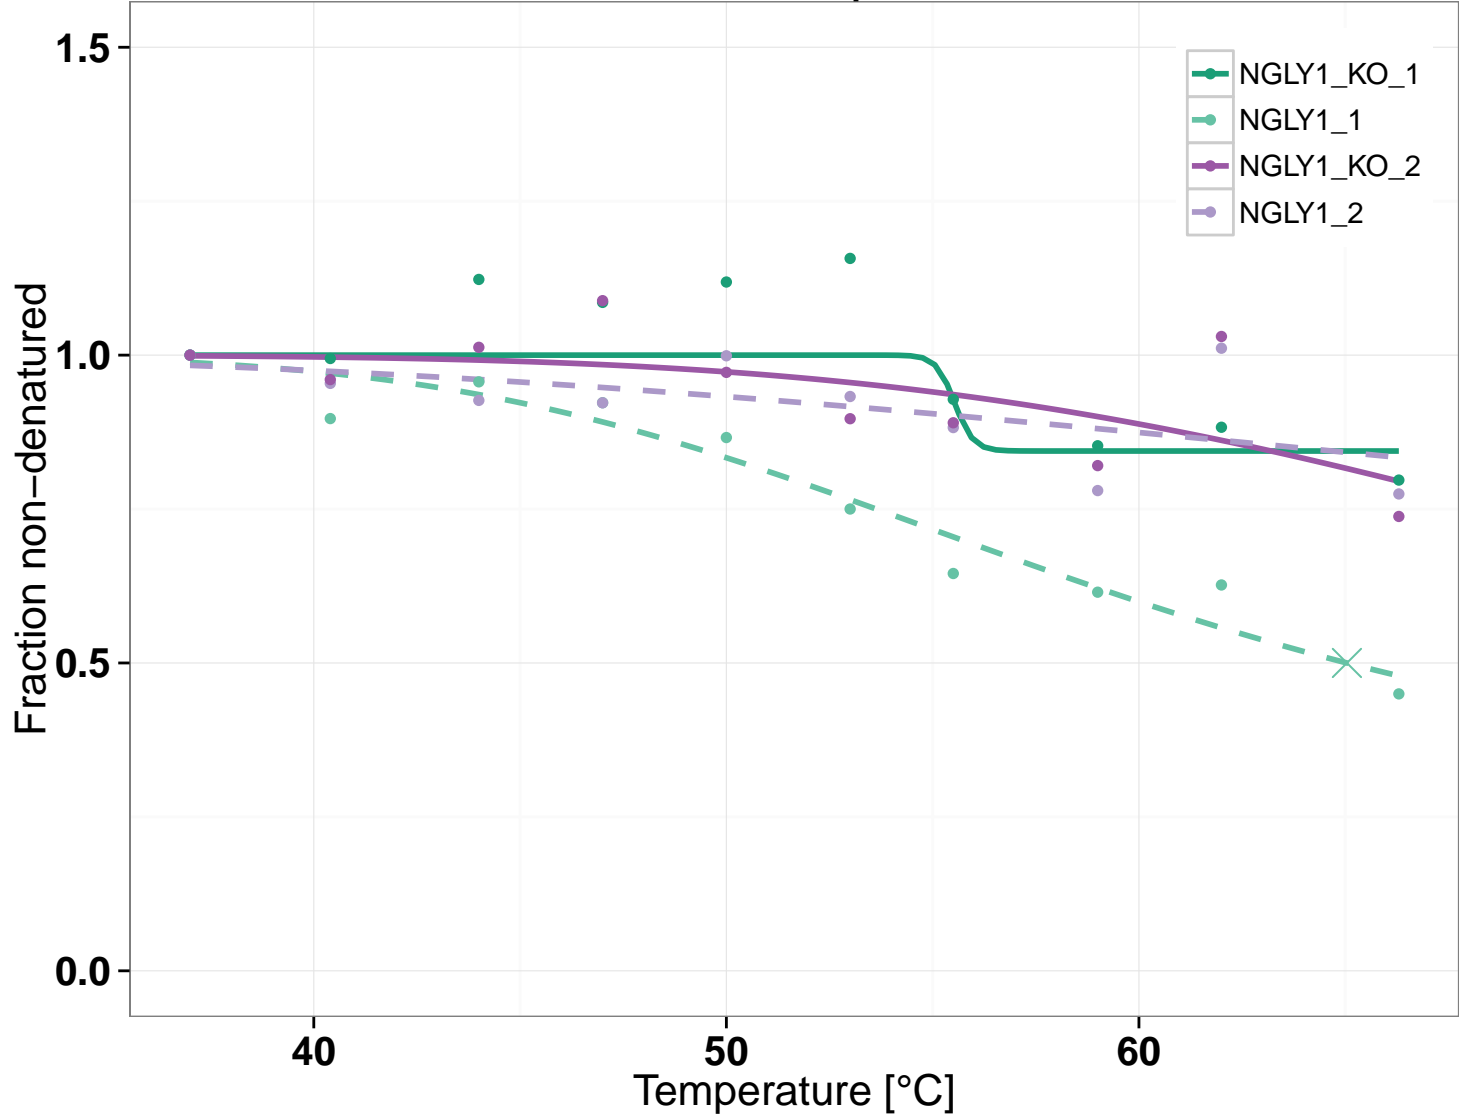

|            | meltPoint | slope  | plateau | R2   |
|------------|-----------|--------|---------|------|
| NGLY1_KO_1 | –         | –0.18  | 0.84    | 0.54 |
| NGLY1_1    | 65.04     | –0.024 | 0.22    | 0.94 |
| NGLY1_KO_2 | –         | –      | 0       | 0.44 |
| NGLY1_2    | –         | –      | 0       | 0.33 |

Supplement: Supplementary file 7870 [file 1]

# IPI00013930.1|STX6

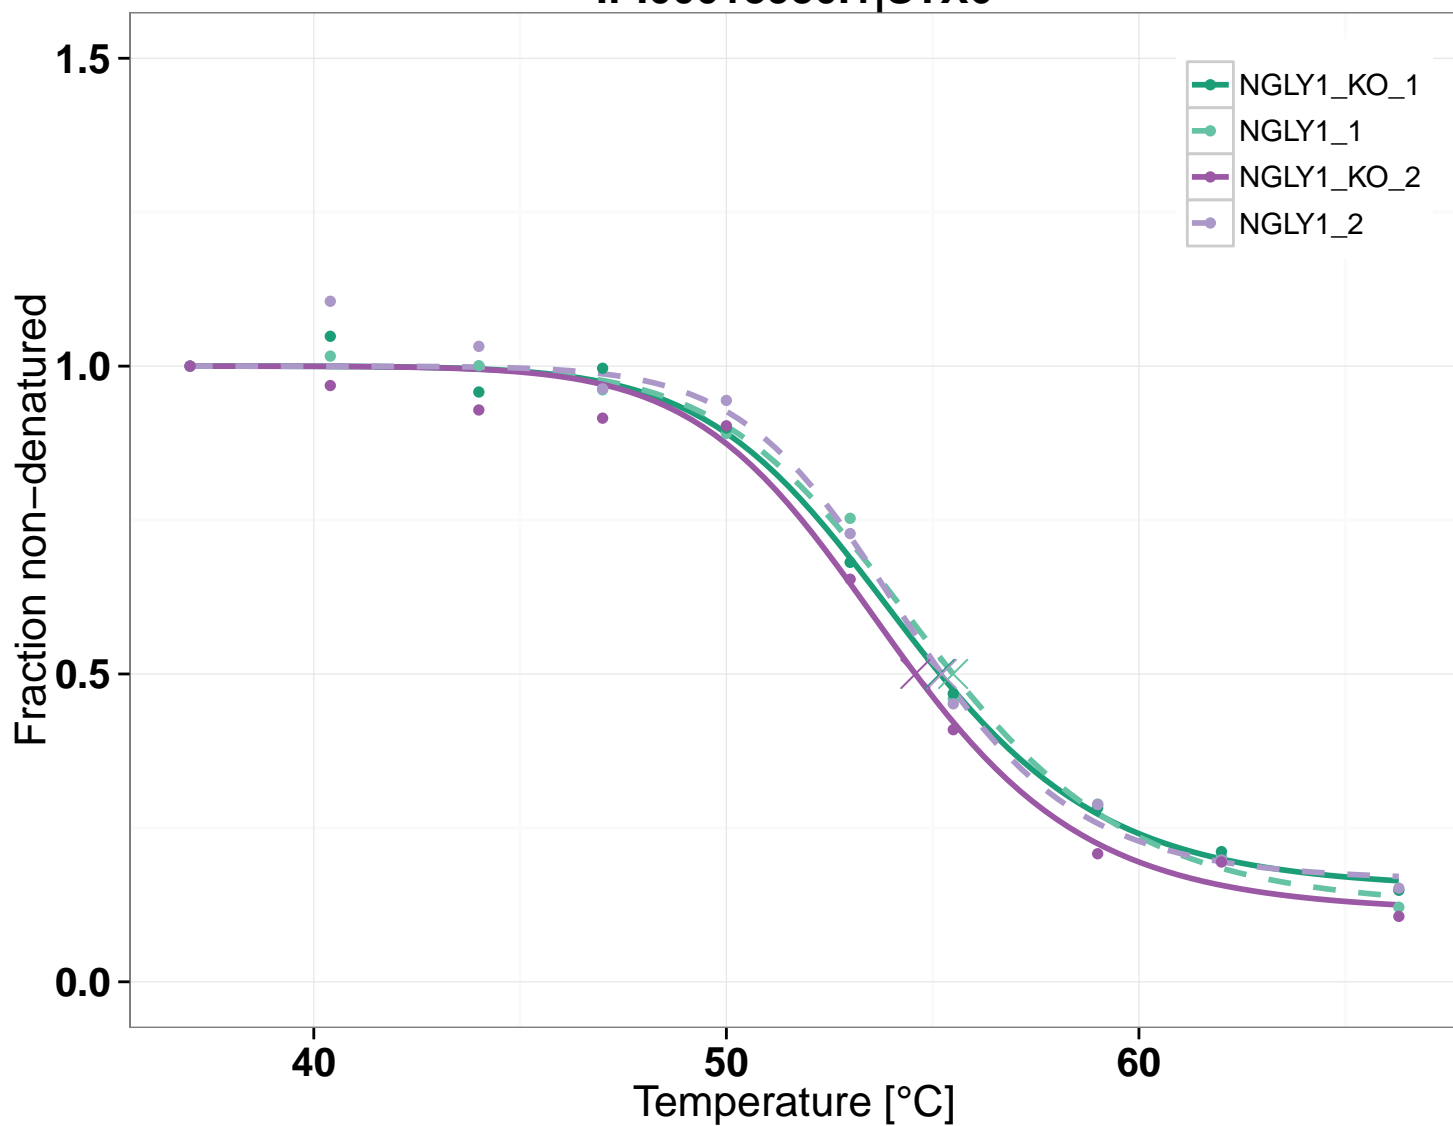

|            | meltPoint | slope  | plateau | R2   |
|------------|-----------|--------|---------|------|
| NGLY1_KO_1 | 55.18     | -0.088 | 0.15    | 1    |
| NGLY1_1    | 55.5      | -0.088 | 0.12    | 1    |
| NGLY1_KO_2 | 54.58     | -0.094 | 0.11    | 0.99 |
| NGLY1_2    | 55.22     | -0.1   | 0.16    | 0.99 |

Supplement: Supplementary file 7871 [file 1]

# IPI00555956.2|PSMB4

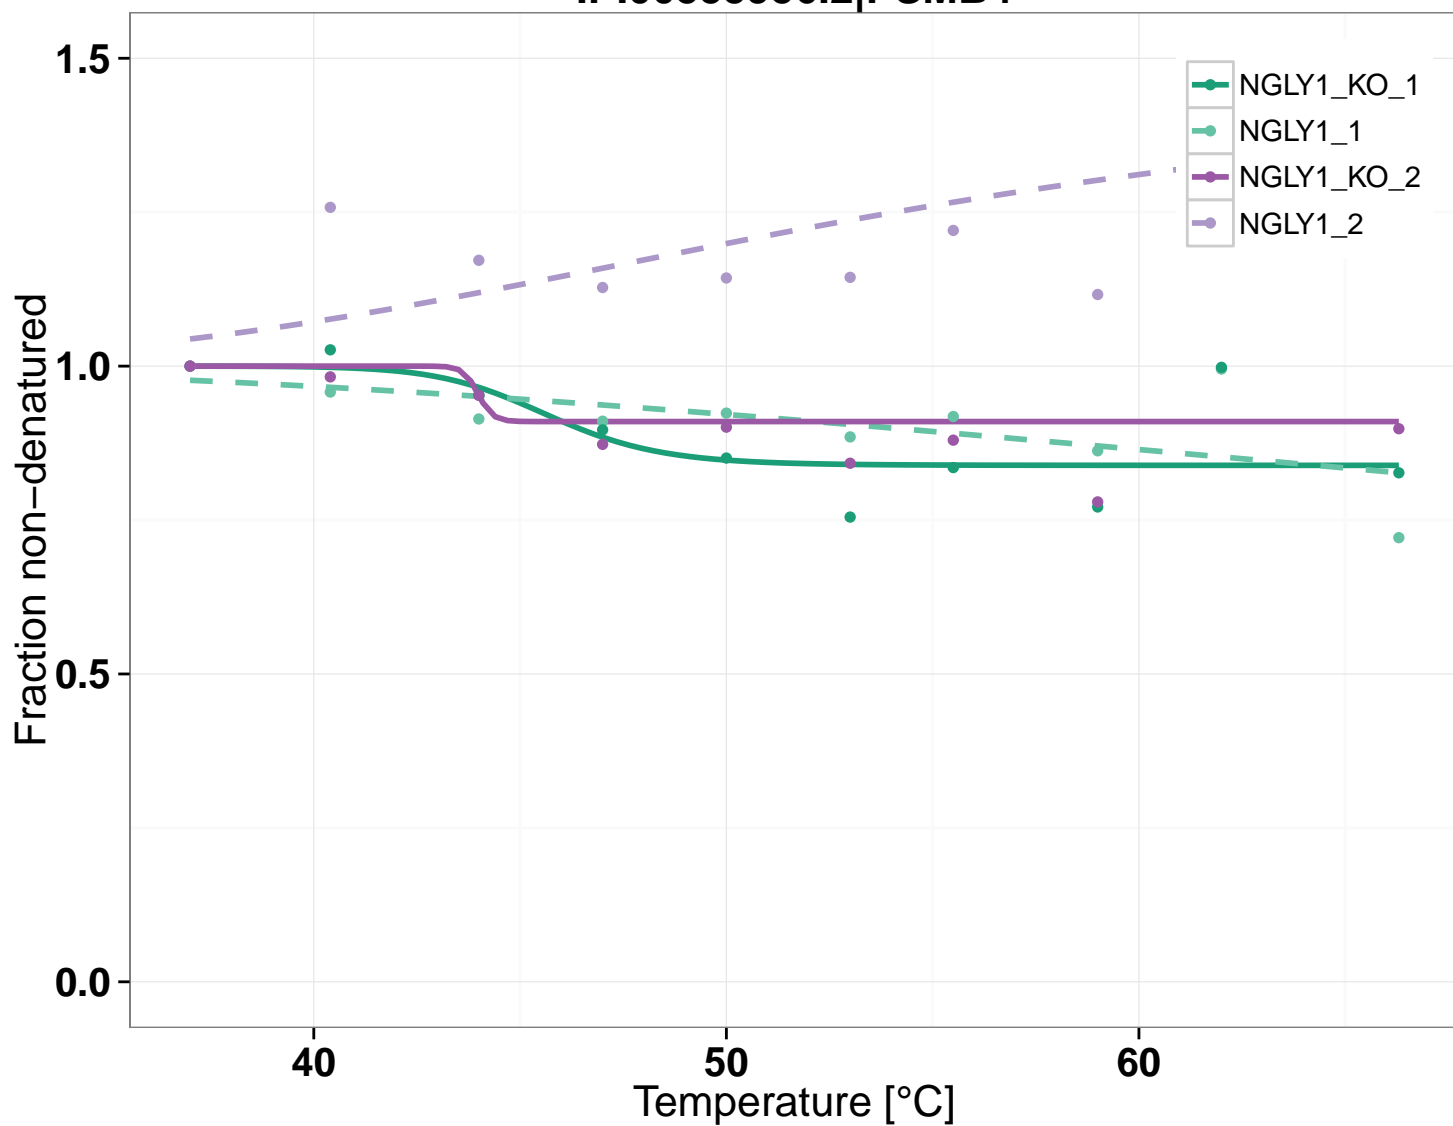

|            | meltPoint | slope  | plateau | R2   |
|------------|-----------|--------|---------|------|
| NGLY1_KO_1 | —         | −0.03  | 0.84    | 0.56 |
| NGLY1_1    | —         | −0.006 | 0       | 0.37 |
| NGLY1_KO_2 | —         | −0.13  | 0.91    | 0.09 |
| NGLY1_2    | —         | 0.013  | 1.5     | 0.41 |

Supplement: Supplementary file 7872 [file 1]

IPI00018871.2|ARL8B

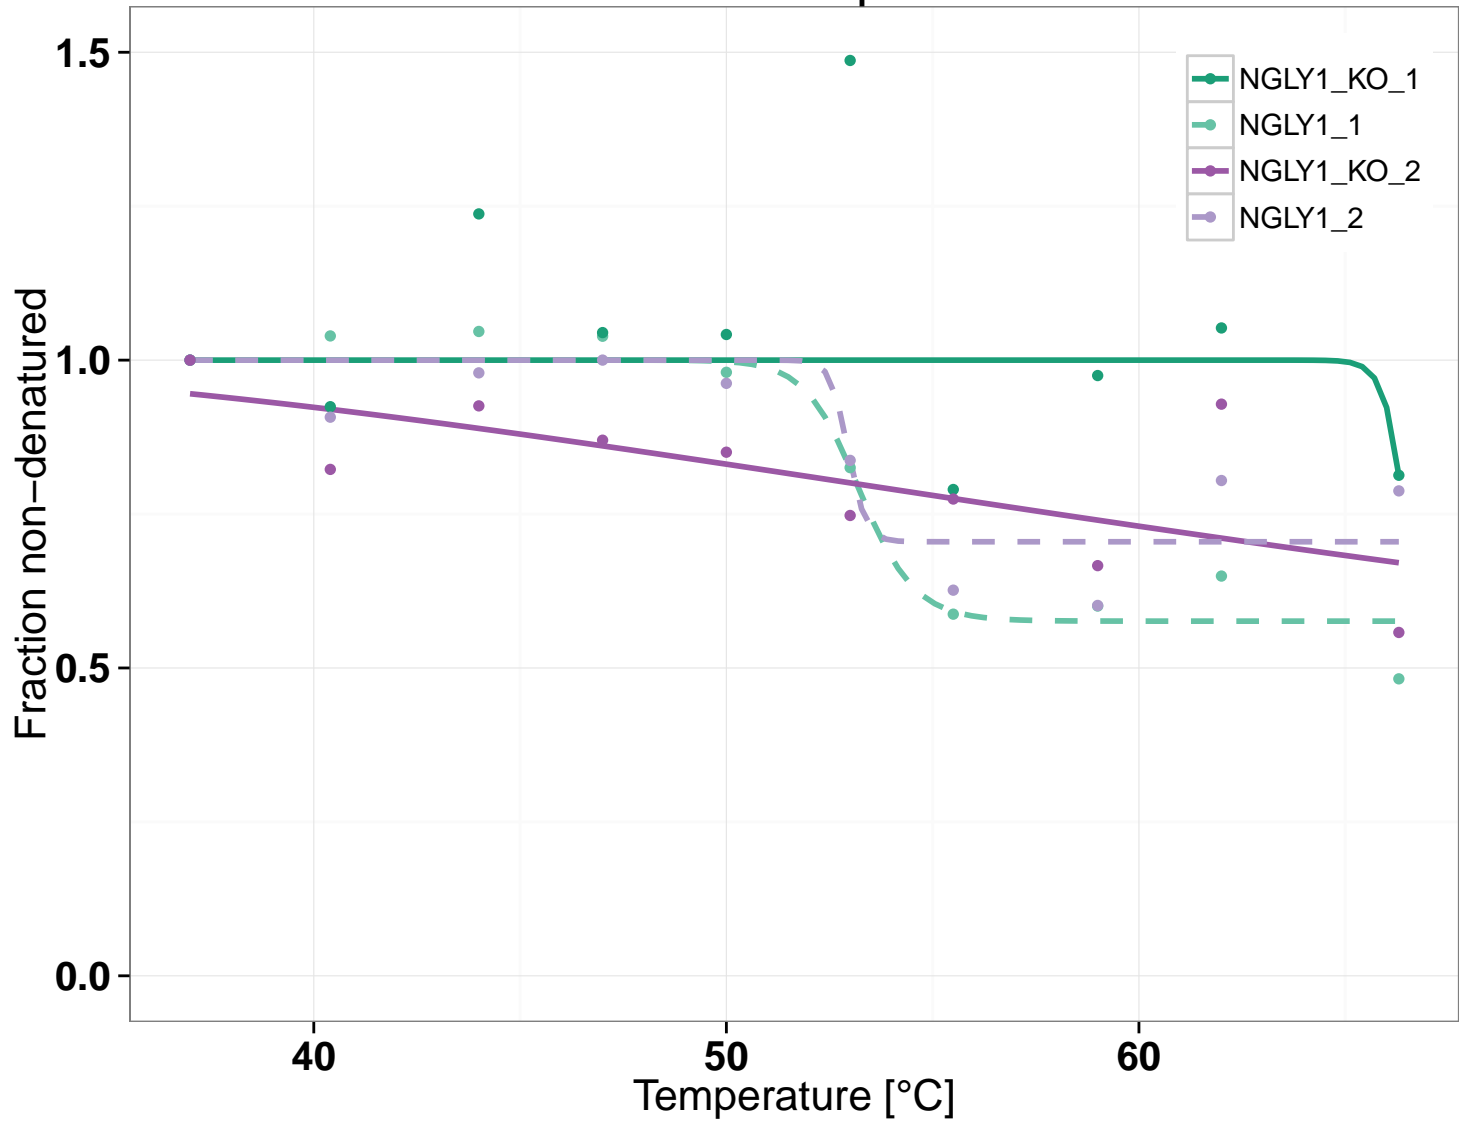

|            | meltPoint | slope | plateau | R2   |
|------------|-----------|-------|---------|------|
| NGLY1_KO_1 | -         | -     | 0       | 0.06 |
| NGLY1_1    | -         | -0.16 | 0.58    | 0.96 |
| NGLY1_KO_2 | -         | -0.01 | 0       | 0.48 |
| NGLY1_2    | -         | -0.35 | 0.7     | 0.77 |

Supplement: Supplementary file 7873 [file 1]

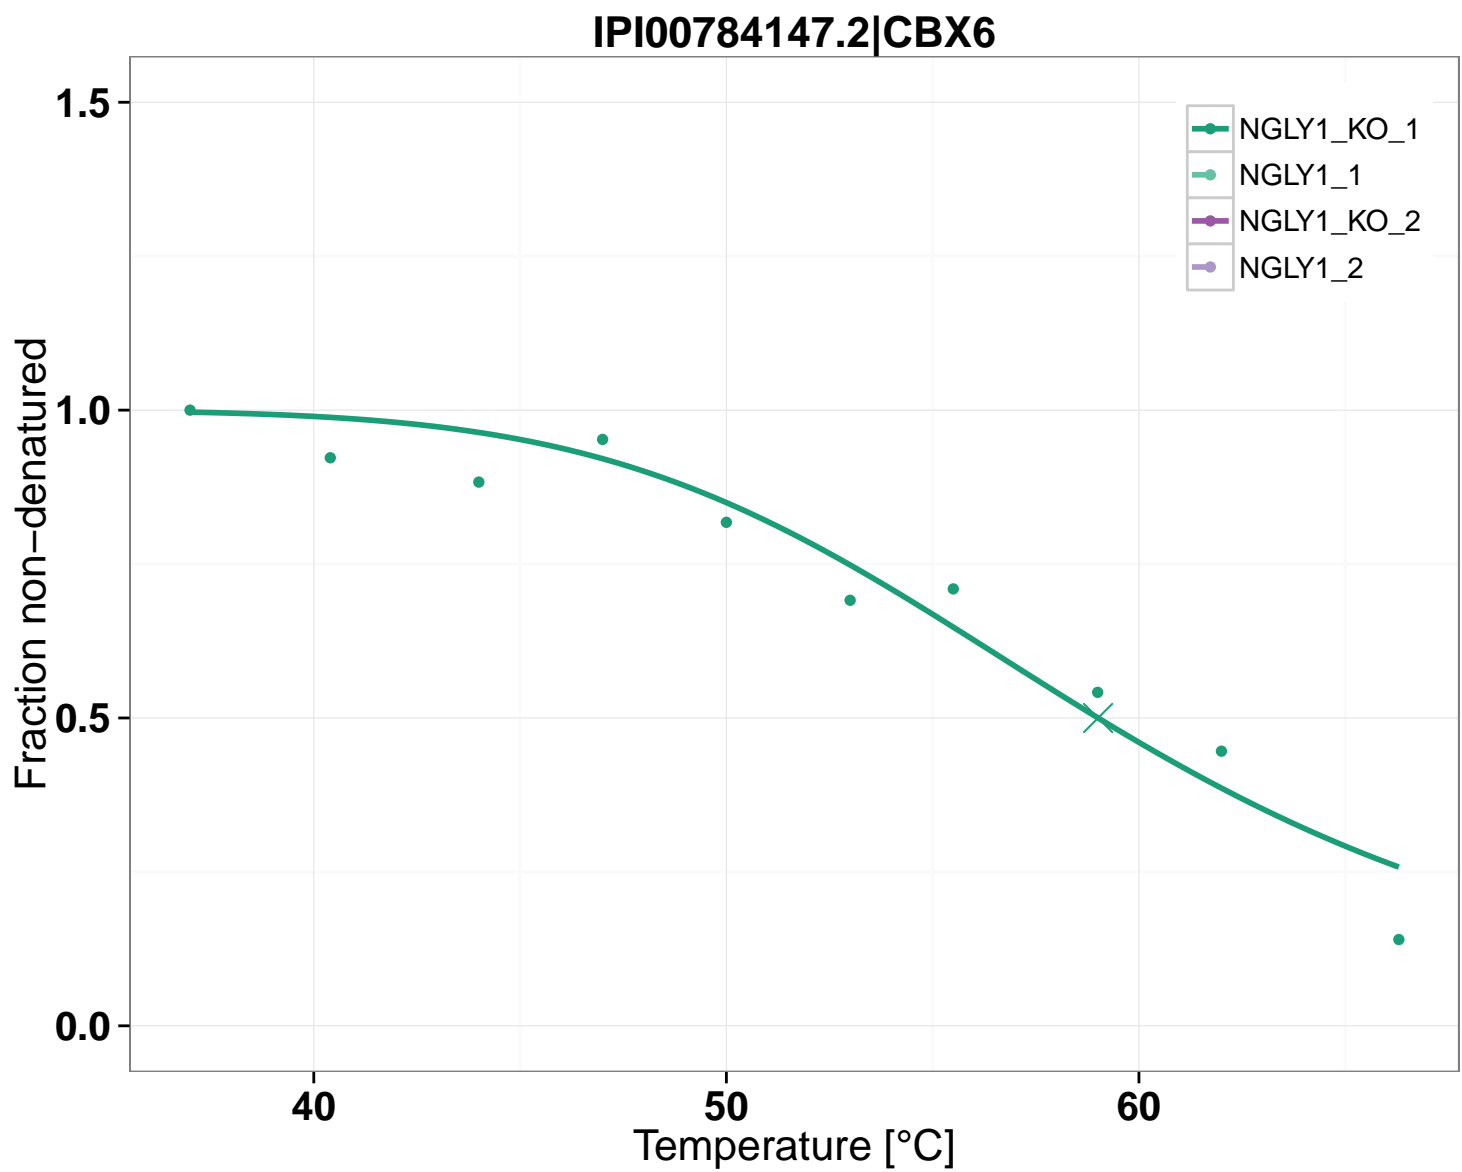

|            | meltPoint | slope  | plateau | R2   |
|------------|-----------|--------|---------|------|
| NGLY1_KO_1 | 59.01     | -0.042 | 0       | 0.94 |
| NGLY1_1    | -         | -      | -       | -    |
| NGLY1_KO_2 | -         | -      | -       | -    |
| NGLY1_2    | -         | -      | -       | -    |

Supplement: Supplementary file 7874 [file 1]

IPI00746398.1|DENND4C

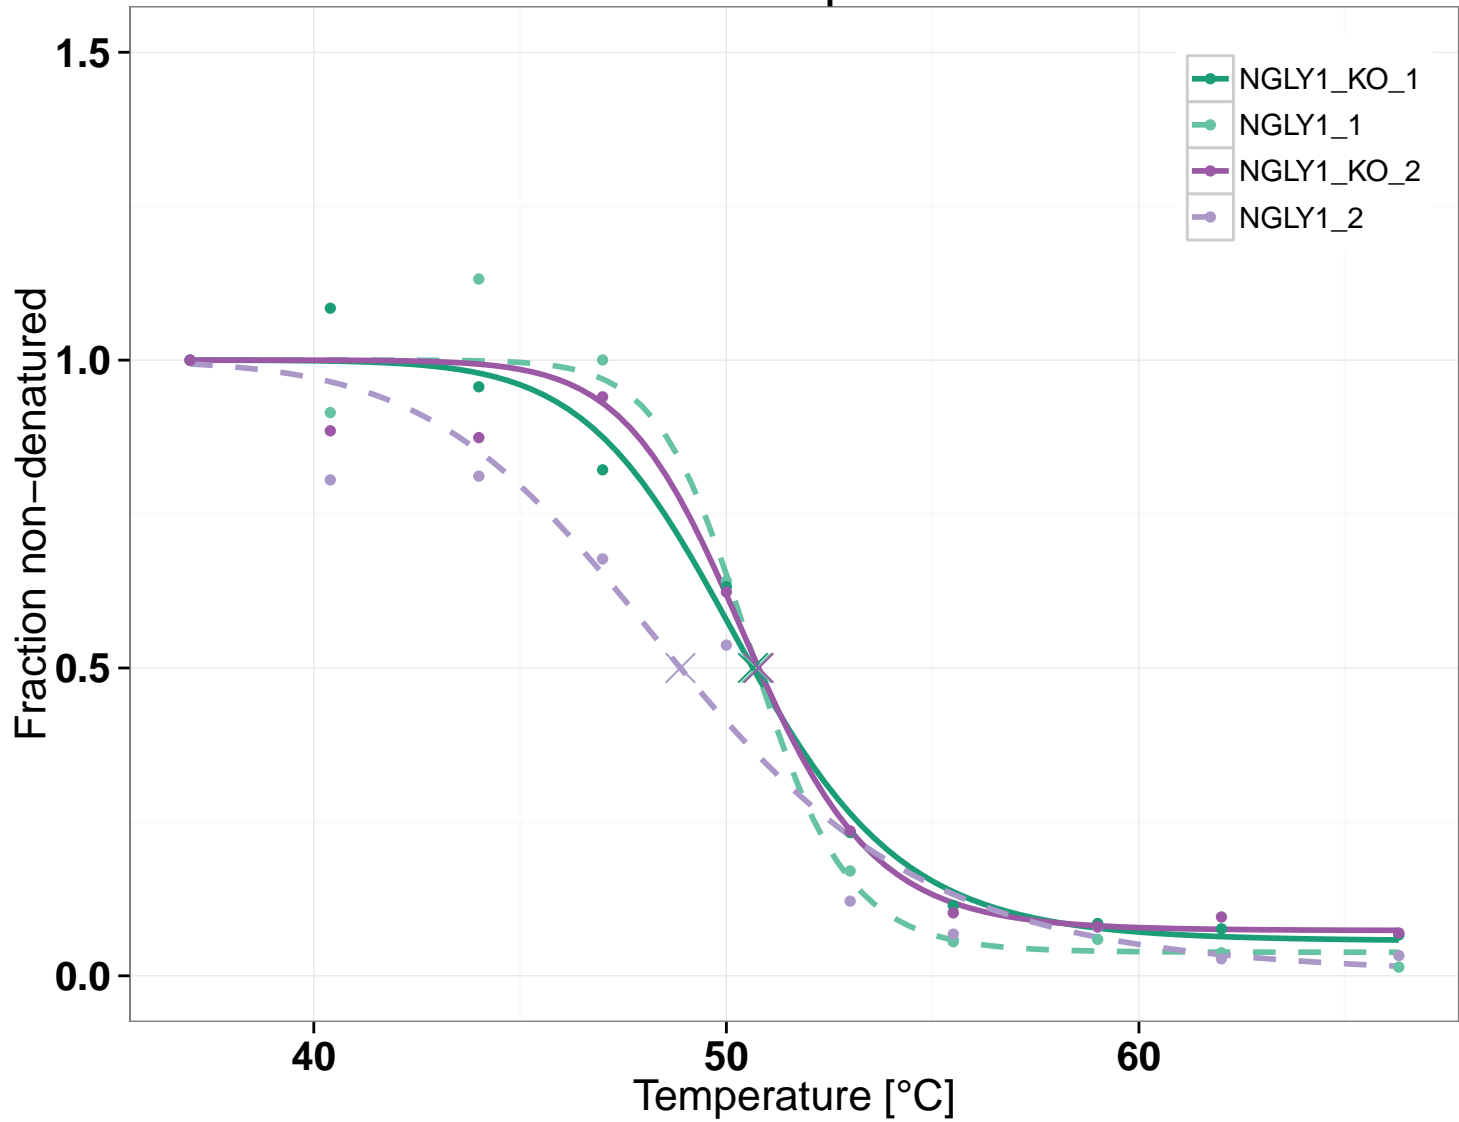

|            | meltPoint | slope  | plateau | R2   |
|------------|-----------|--------|---------|------|
| NGLY1_KO_1 | 50.64     | -0.12  | 0.06    | 0.99 |
| NGLY1_1    | 50.73     | -0.21  | 0.04    | 0.99 |
| NGLY1_KO_2 | 50.78     | -0.15  | 0.07    | 0.98 |
| NGLY1_2    | 48.89     | -0.082 | 0       | 0.96 |

Supplement: Supplementary file 7875 [file 1]

IPI00009258.1|ADPRH

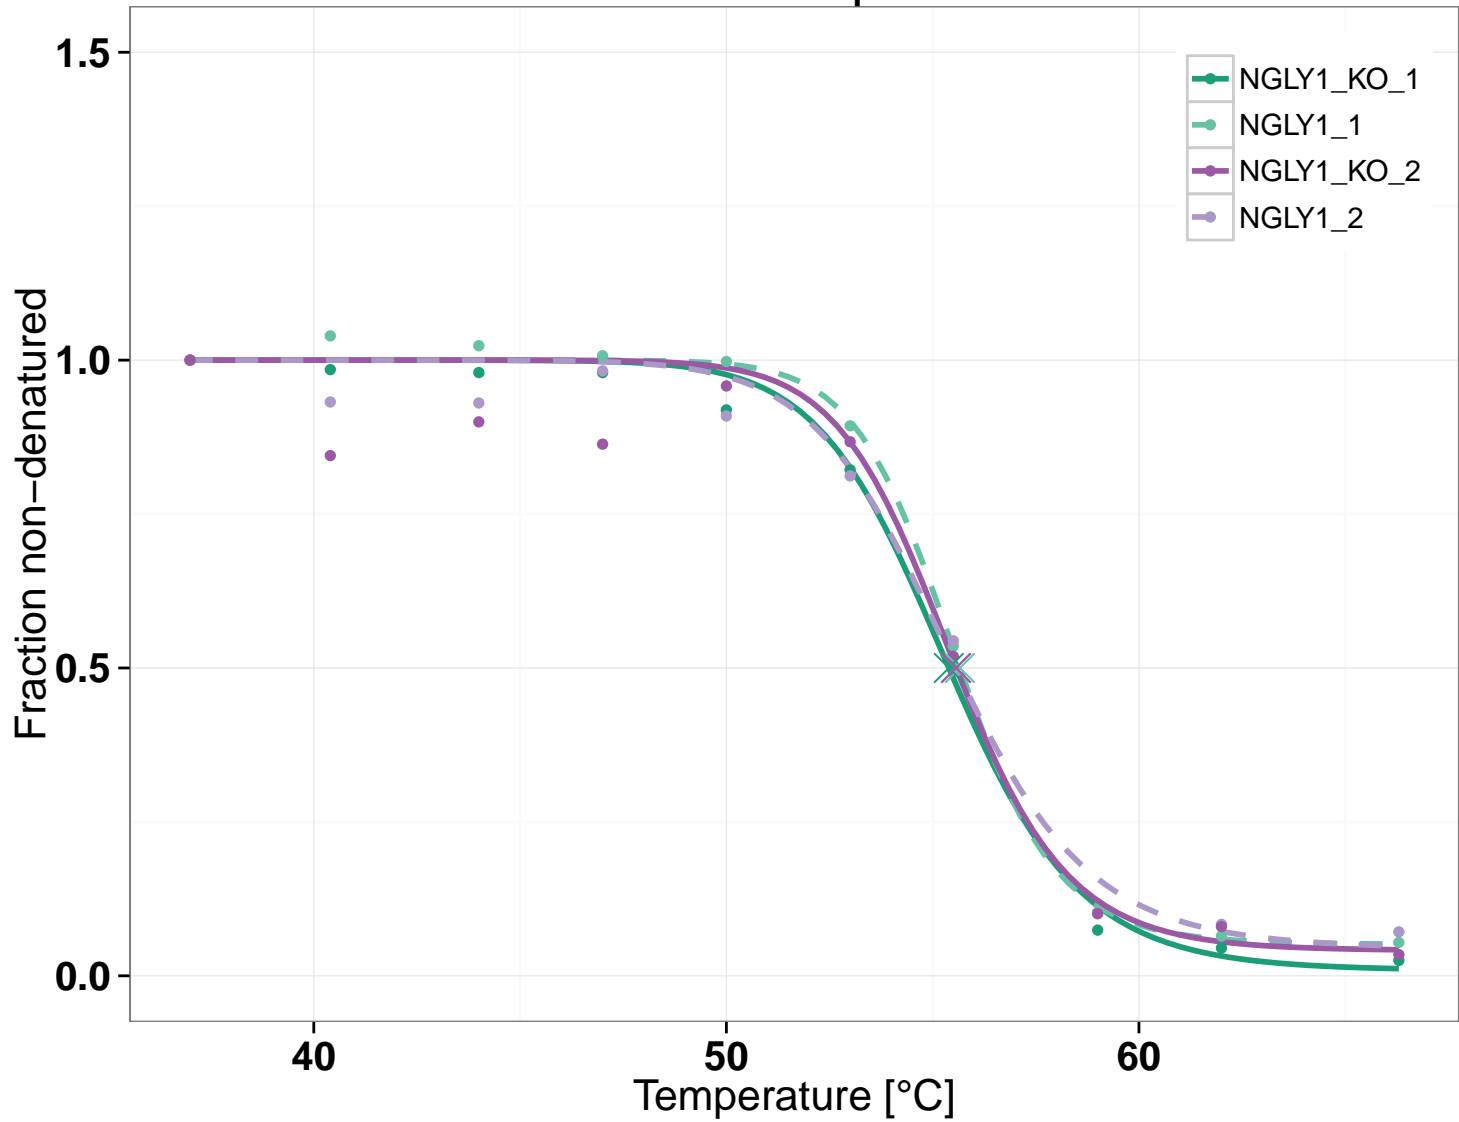

|            | meltPoint | slope | plateau | R2   |
|------------|-----------|-------|---------|------|
| NGLY1_KO_1 | 55.39     | -0.16 | 0.01    | 1    |
| NGLY1_1    | 55.66     | -0.19 | 0.05    | 1    |
| NGLY1_KO_2 | 55.57     | -0.17 | 0.04    | 0.96 |
| NGLY1_2    | 55.56     | -0.14 | 0.04    | 0.99 |

Supplement: Supplementary file 7876 [file 1]

IPI00402209.3|ADNP2

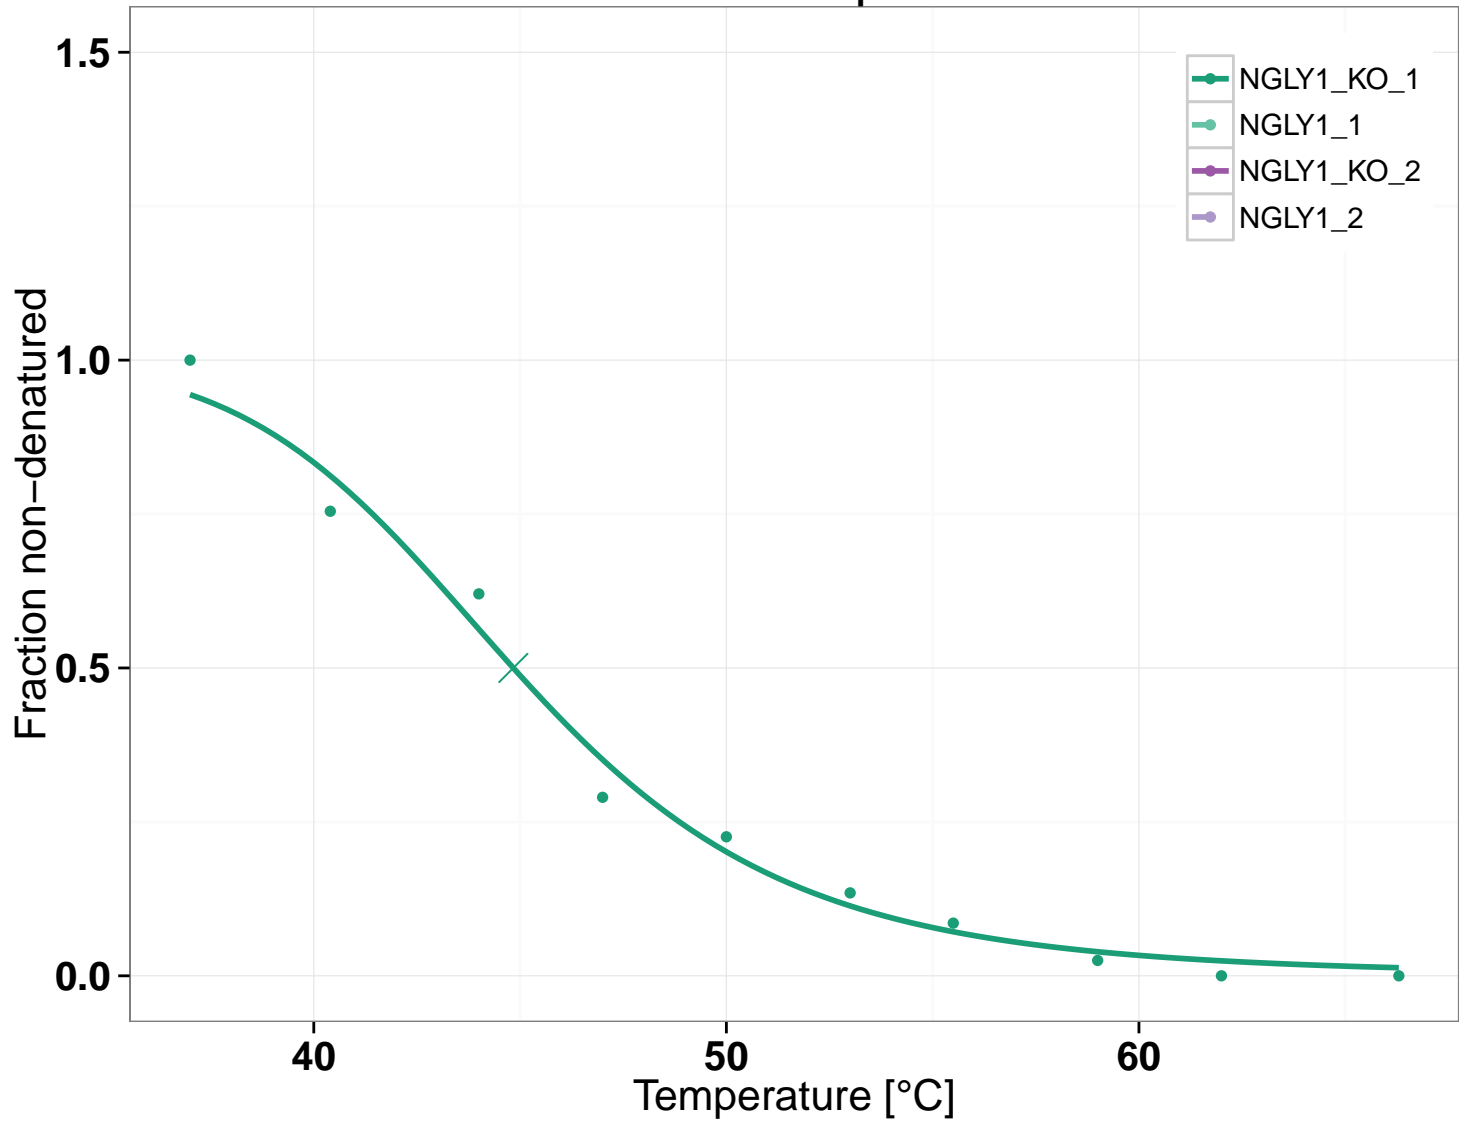

|            | meltPoint | slope  | plateau | R2   |
|------------|-----------|--------|---------|------|
| NGLY1_KO_1 | 44.84     | -0.076 | 0       | 0.99 |
| NGLY1_1    | -         | -      | -       | -    |
| NGLY1_KO_2 | -         | -      | -       | -    |
| NGLY1_2    | -         | -      | -       | -    |

Supplement: Supplementary file 7877 [file 1]

IPI00292917.4|KLHL8

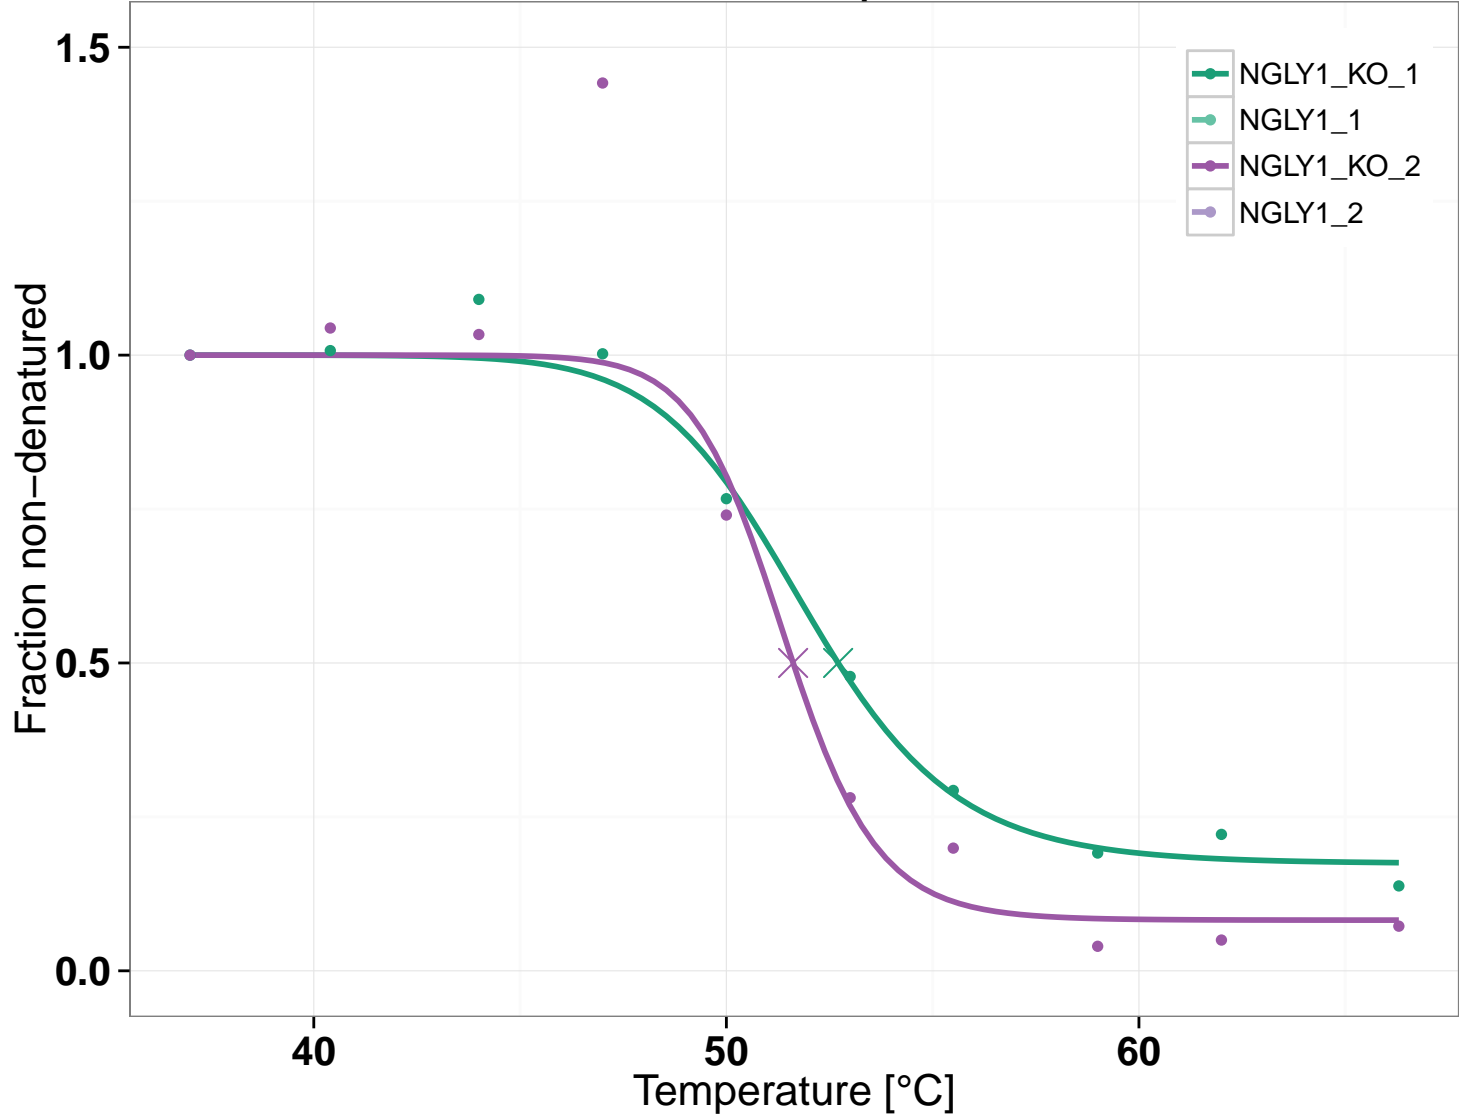

|            | meltPoint | slope | plateau | R2   |
|------------|-----------|-------|---------|------|
| NGLY1_KO_1 | 52.71     | -0.11 | 0.17    | 0.99 |
| NGLY1_1    | -         | -     | -       | -    |
| NGLY1_KO_2 | 51.62     | -0.21 | 0.08    | 0.91 |
| NGLY1_2    | -         | -     | -       | -    |

Supplement: Supplementary file 7878 [file 1]

IPI00719725.1|SAPS3

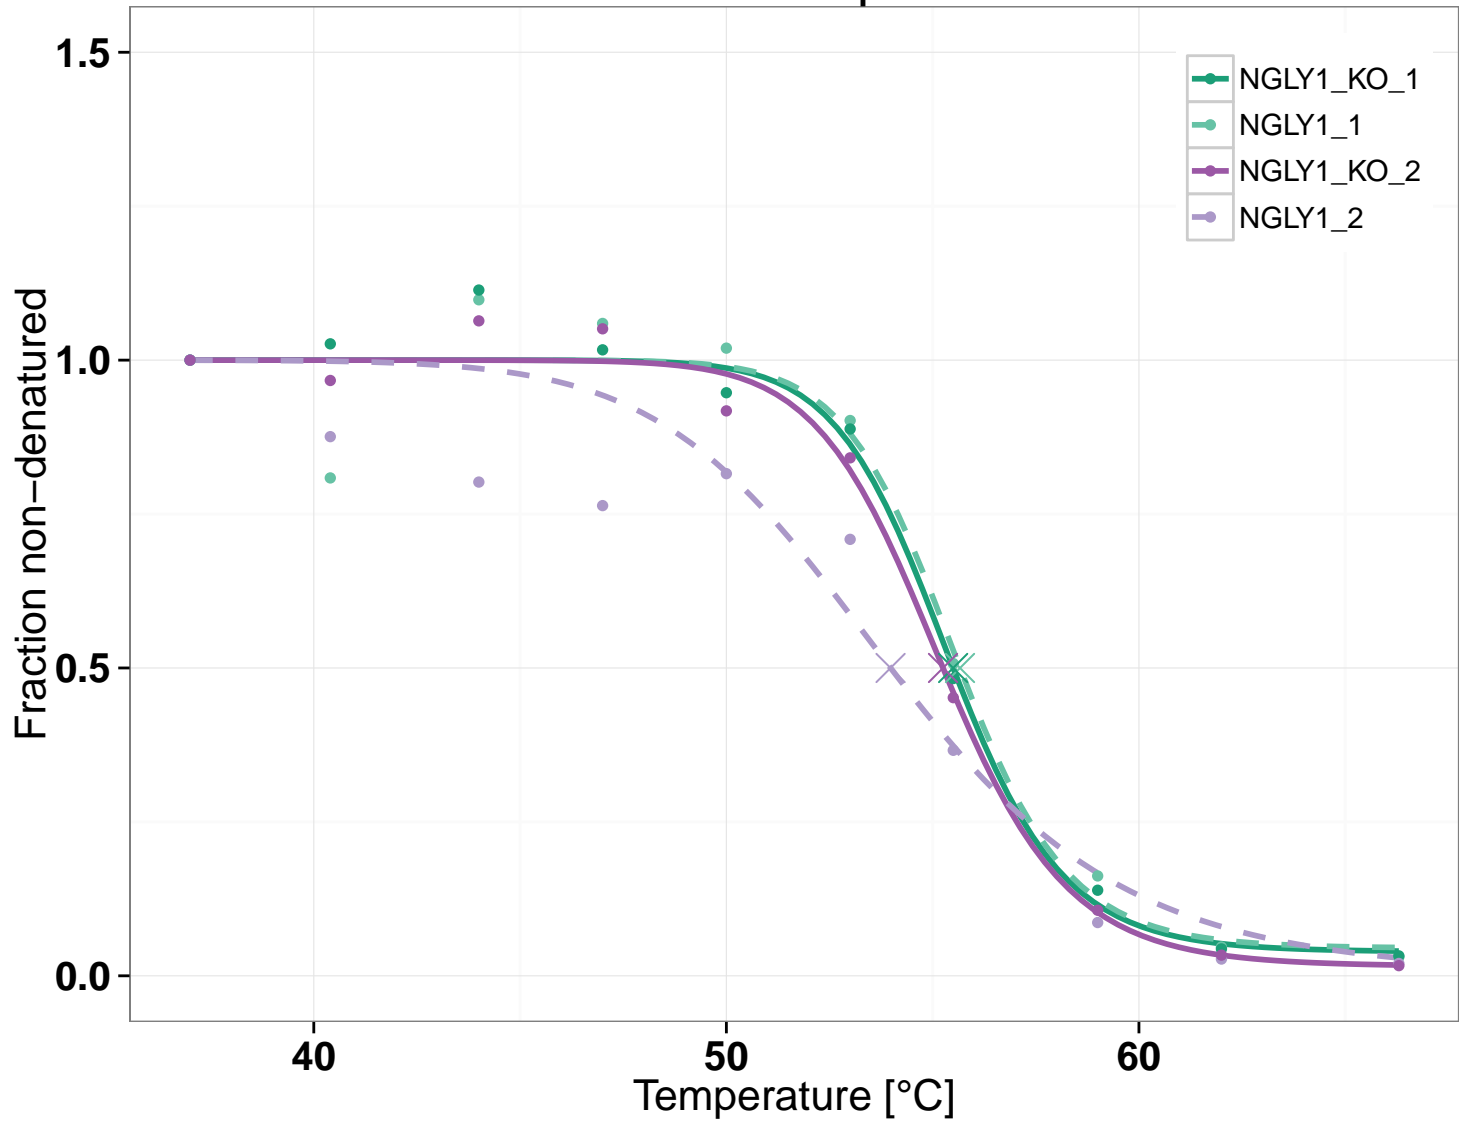

|            | meltPoint | slope  | plateau | R2   |
|------------|-----------|--------|---------|------|
| NGLY1_KO_1 | 55.5      | -0.17  | 0.04    | 0.99 |
| NGLY1_1    | 55.66     | -0.18  | 0.04    | 0.97 |
| NGLY1_KO_2 | 55.25     | -0.16  | 0.02    | 0.99 |
| NGLY1_2    | 53.98     | -0.088 | 0       | 0.92 |

Supplement: Supplementary file 7879 [file 1]

# IPI00102107.1|NSD1

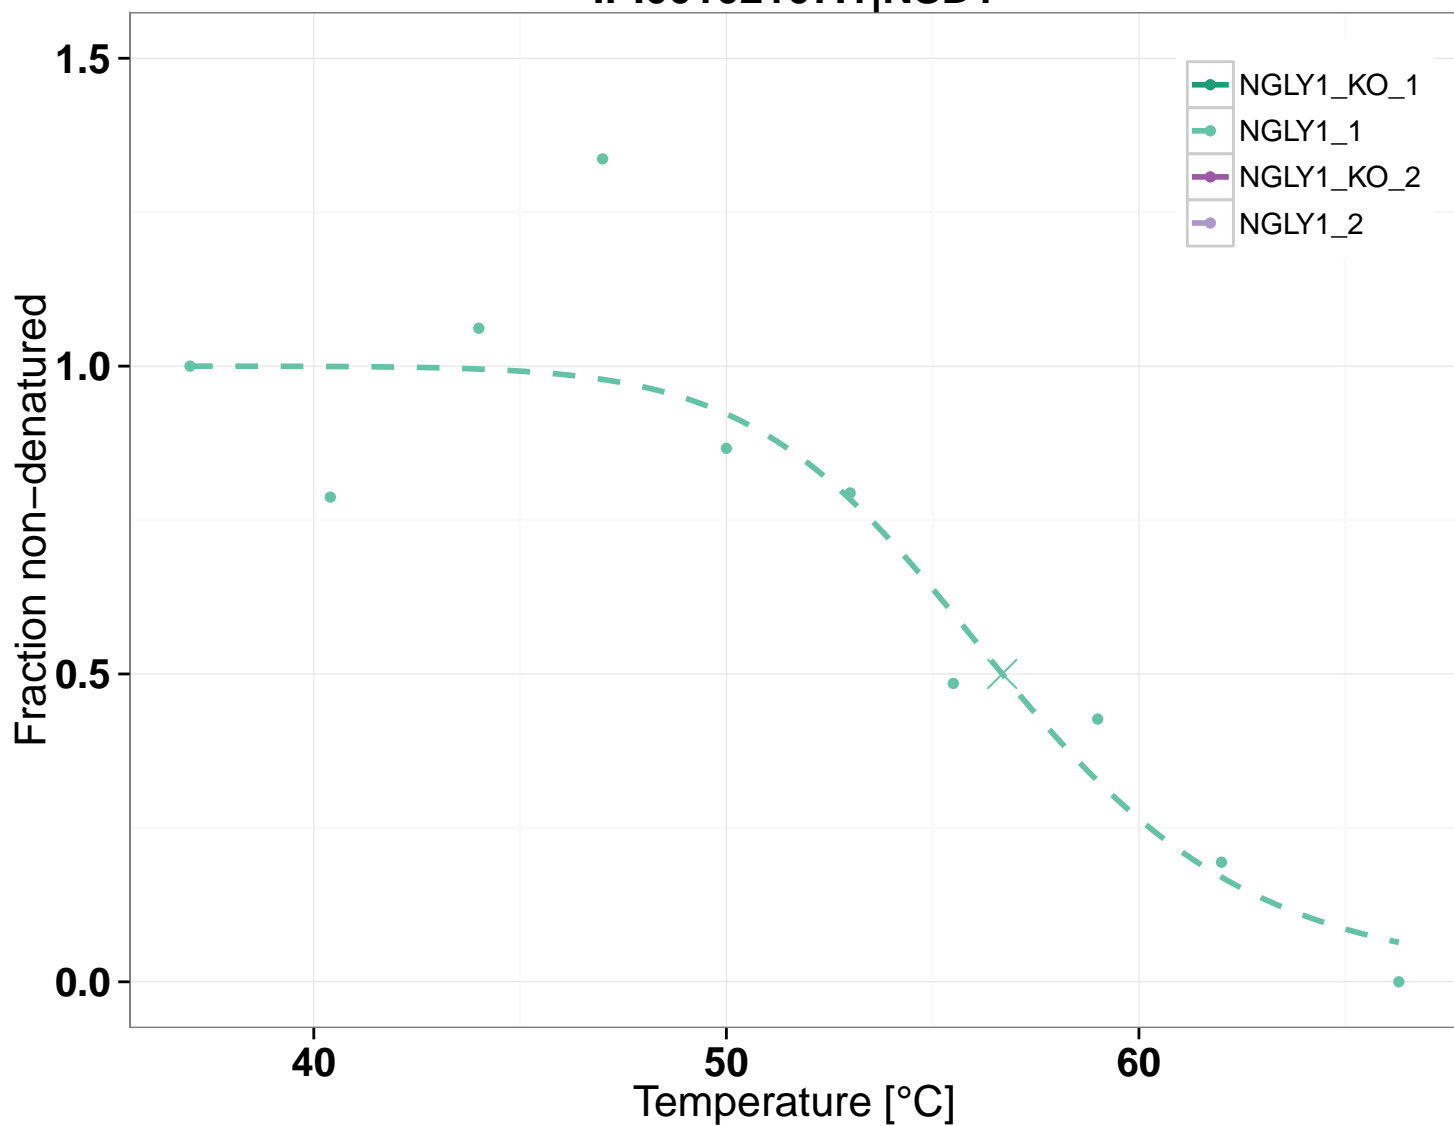

|            | meltPoint | slope  | plateau | R2   |
|------------|-----------|--------|---------|------|
| NGLY1_KO_1 | —         | —      | —       | —    |
| NGLY1_1    | 56.69     | -0.083 | 0       | 0.86 |
| NGLY1_KO_2 | —         | —      | —       | —    |
| NGLY1_2    | —         | —      | —       | —    |

Supplement: Supplementary file 7880 [file 1]

IPI00855833.1|PRR12

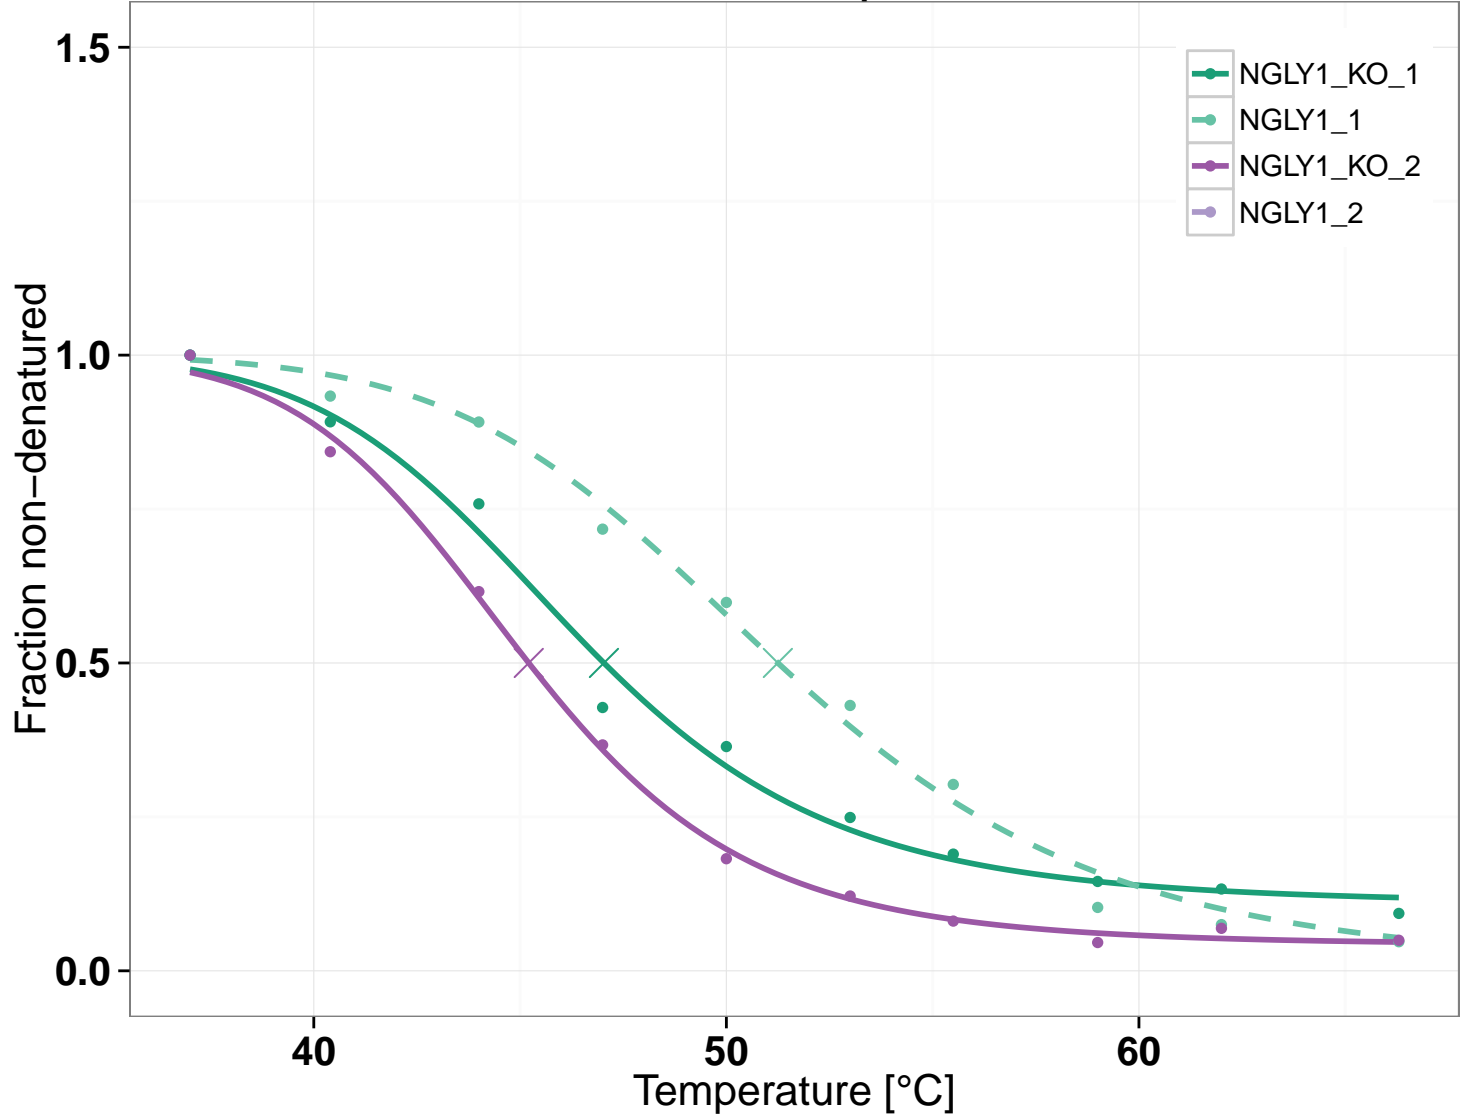

|            | meltPoint | slope  | plateau | R2   |
|------------|-----------|--------|---------|------|
| NGLY1_KO_1 | 47.03     | -0.071 | 0.11    | 0.99 |
| NGLY1_1    | 51.25     | -0.063 | 0       | 0.99 |
| NGLY1_KO_2 | 45.21     | -0.088 | 0.04    | 1    |
| NGLY1_2    | -         | -      | -       | -    |

Supplement: Supplementary file 7881 [file 1]

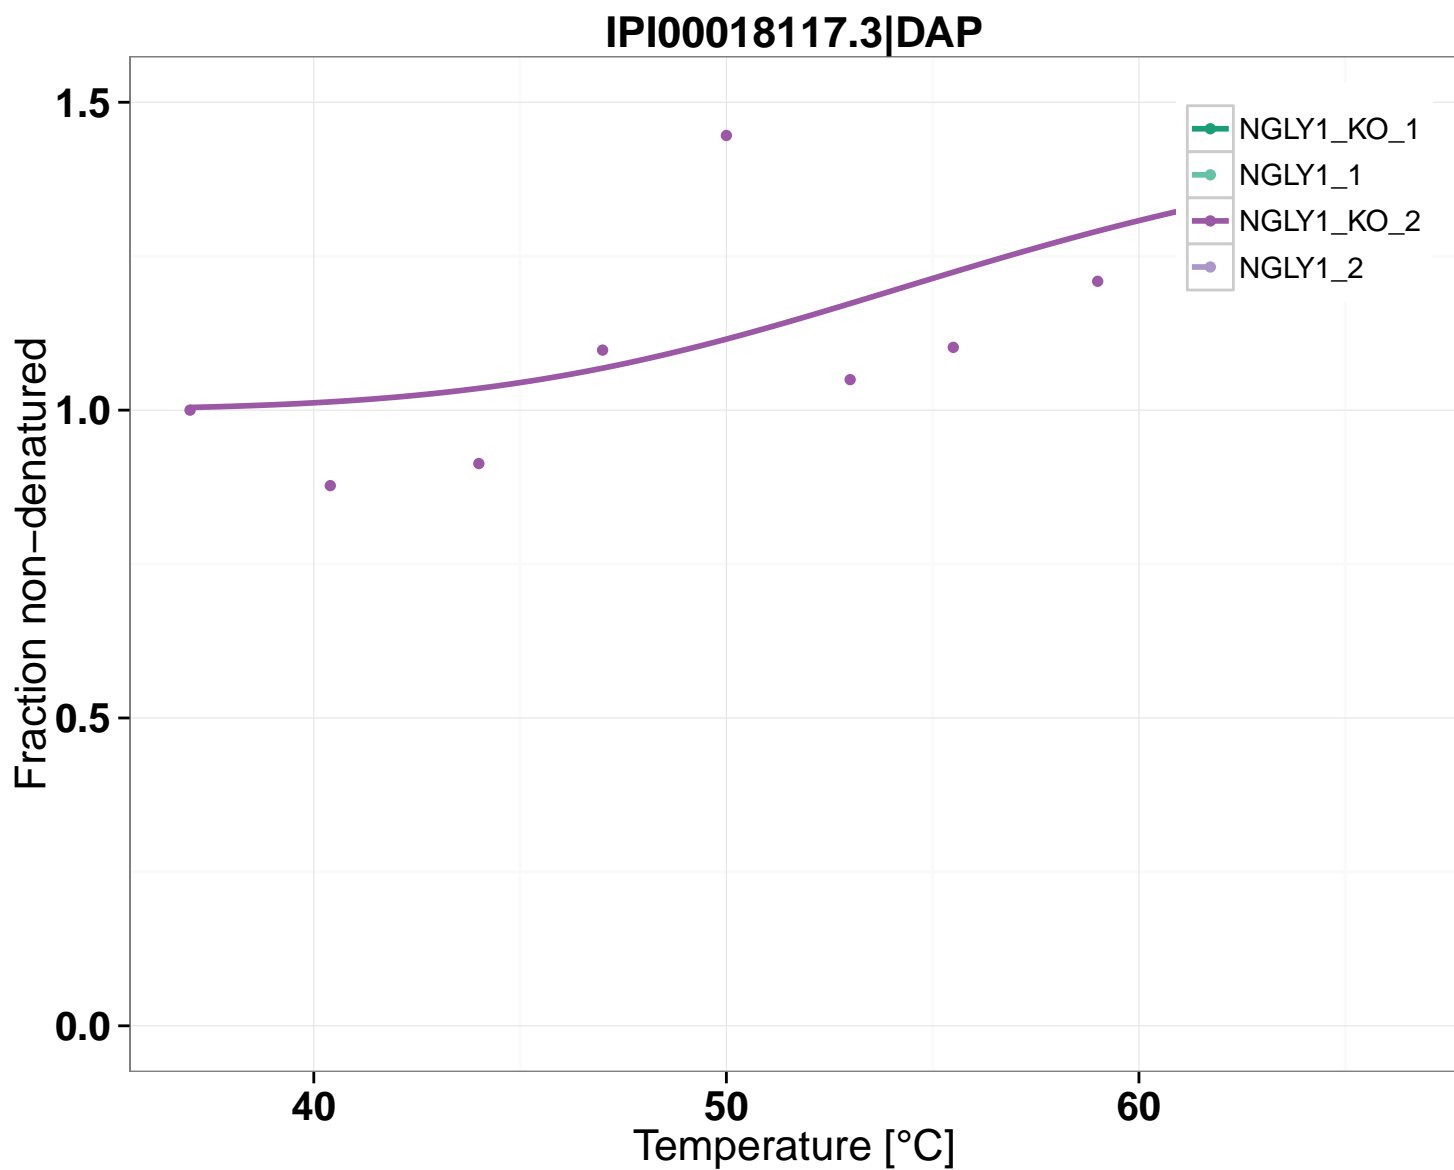

|            | meltPoint | slope | plateau | R2   |
|------------|-----------|-------|---------|------|
| NGLY1_KO_1 | —         | —     | —       | —    |
| NGLY1_1    | —         | —     | —       | —    |
| NGLY1_KO_2 | —         | 0.02  | 1.5     | 0.55 |
| NGLY1_2    | —         | —     | —       | —    |

Supplement: Supplementary file 7882 [file 1]

# IPI00299571.5|PDIA6

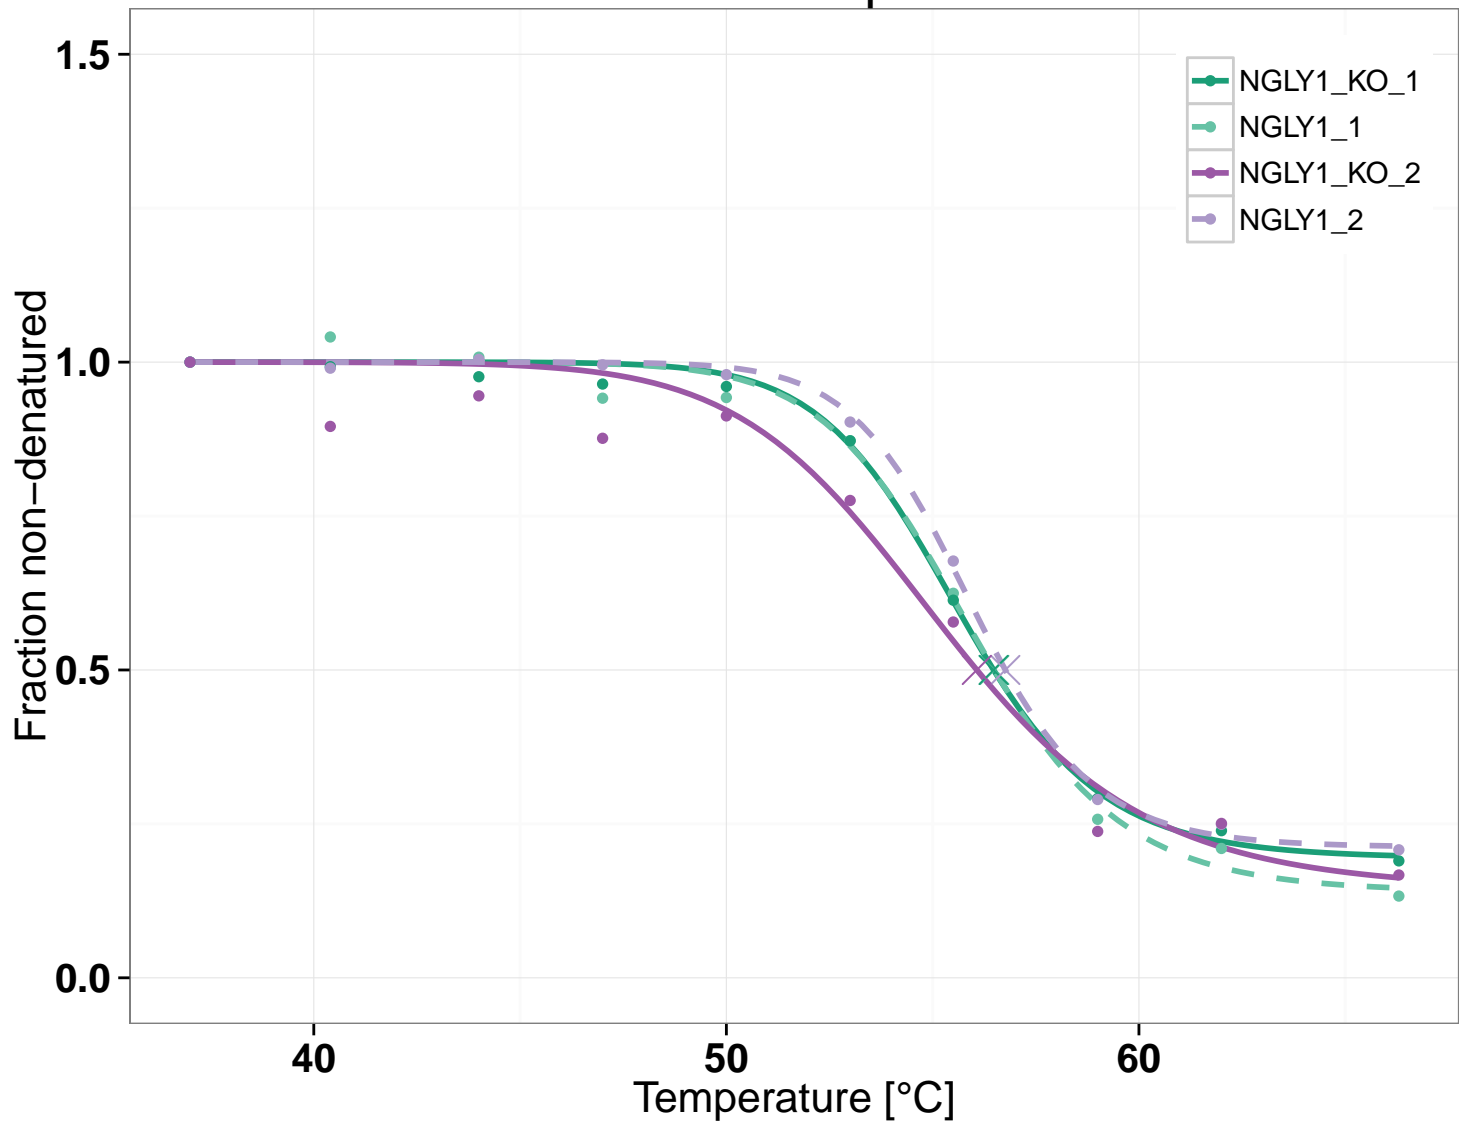

|            | meltPoint | slope  | plateau | R2   |
|------------|-----------|--------|---------|------|
| NGLY1_KO_1 | 56.48     | -0.12  | 0.19    | 1    |
| NGLY1_1    | 56.49     | -0.12  | 0.14    | 0.99 |
| NGLY1_KO_2 | 56.07     | -0.086 | 0.14    | 0.97 |
| NGLY1_2    | 56.76     | -0.13  | 0.21    | 1    |

Supplement: Supplementary file 7883 [file 1]

IPI00009244.4|AP1S2

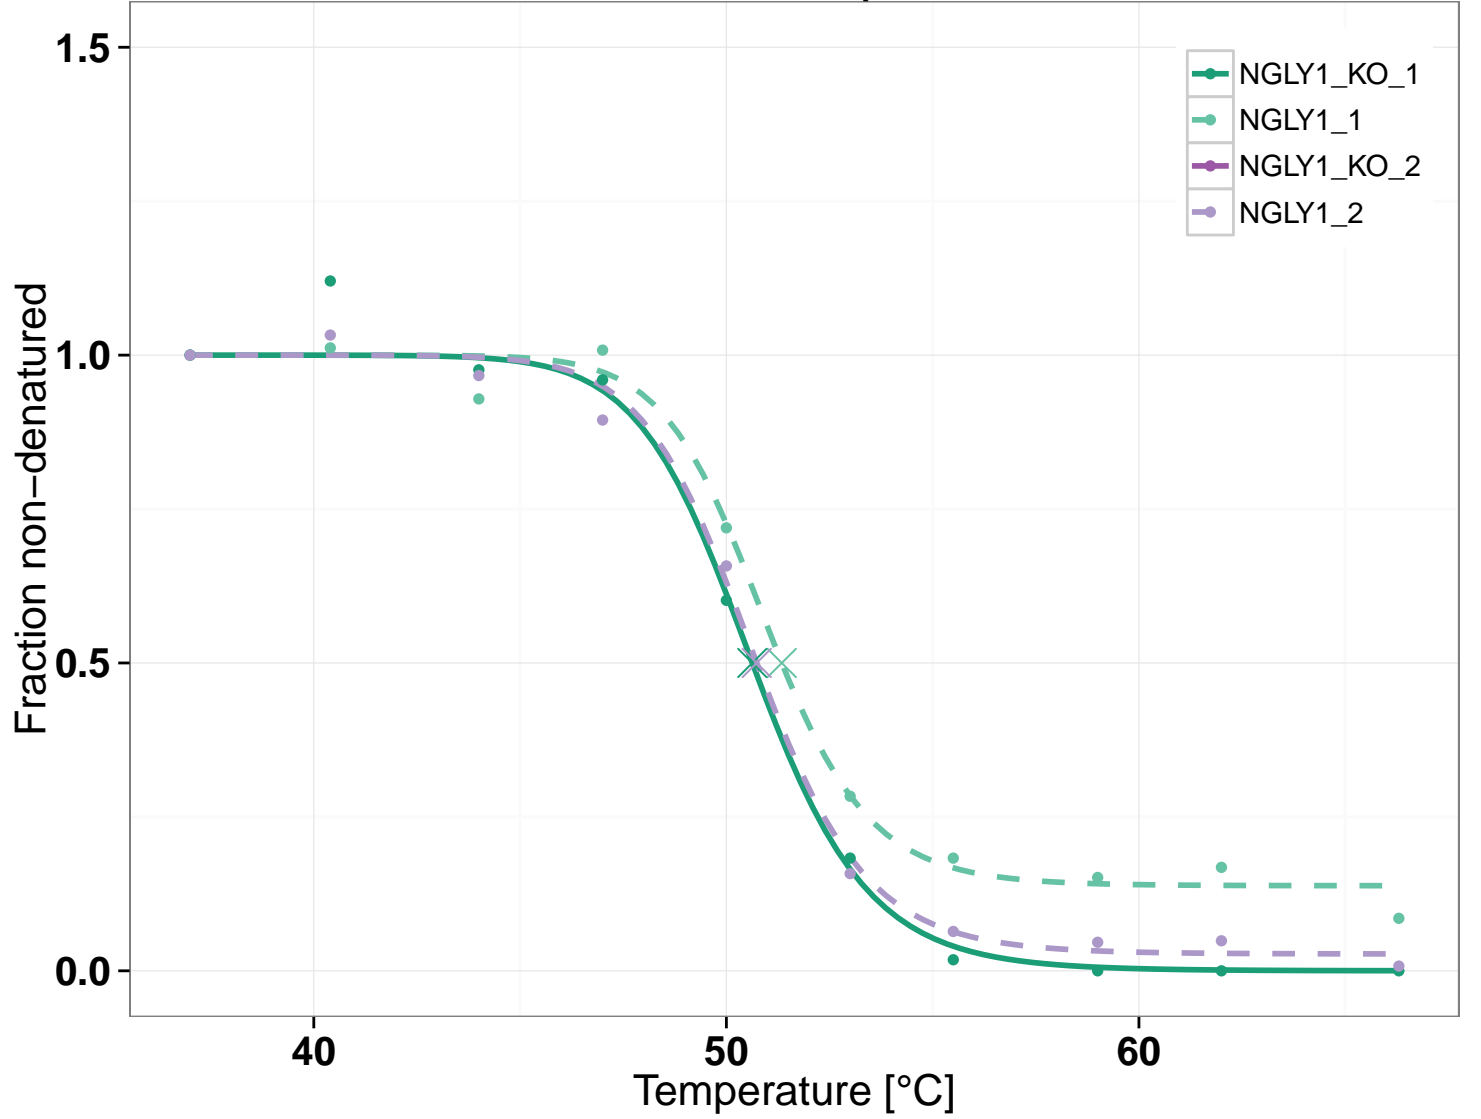

|            | meltPoint | slope | plateau | R2   |
|------------|-----------|-------|---------|------|
| NGLY1_KO_1 | 50.63     | -0.18 | 0       | 0.99 |
| NGLY1_1    | 51.34     | -0.17 | 0.14    | 0.99 |
| NGLY1_KO_2 | -         | -     | -       | -    |
| NGLY1_2    | 50.74     | -0.18 | 0.03    | 1    |

Supplement: Supplementary file 7884 [file 1]

IPI00291093.3|POLR2E

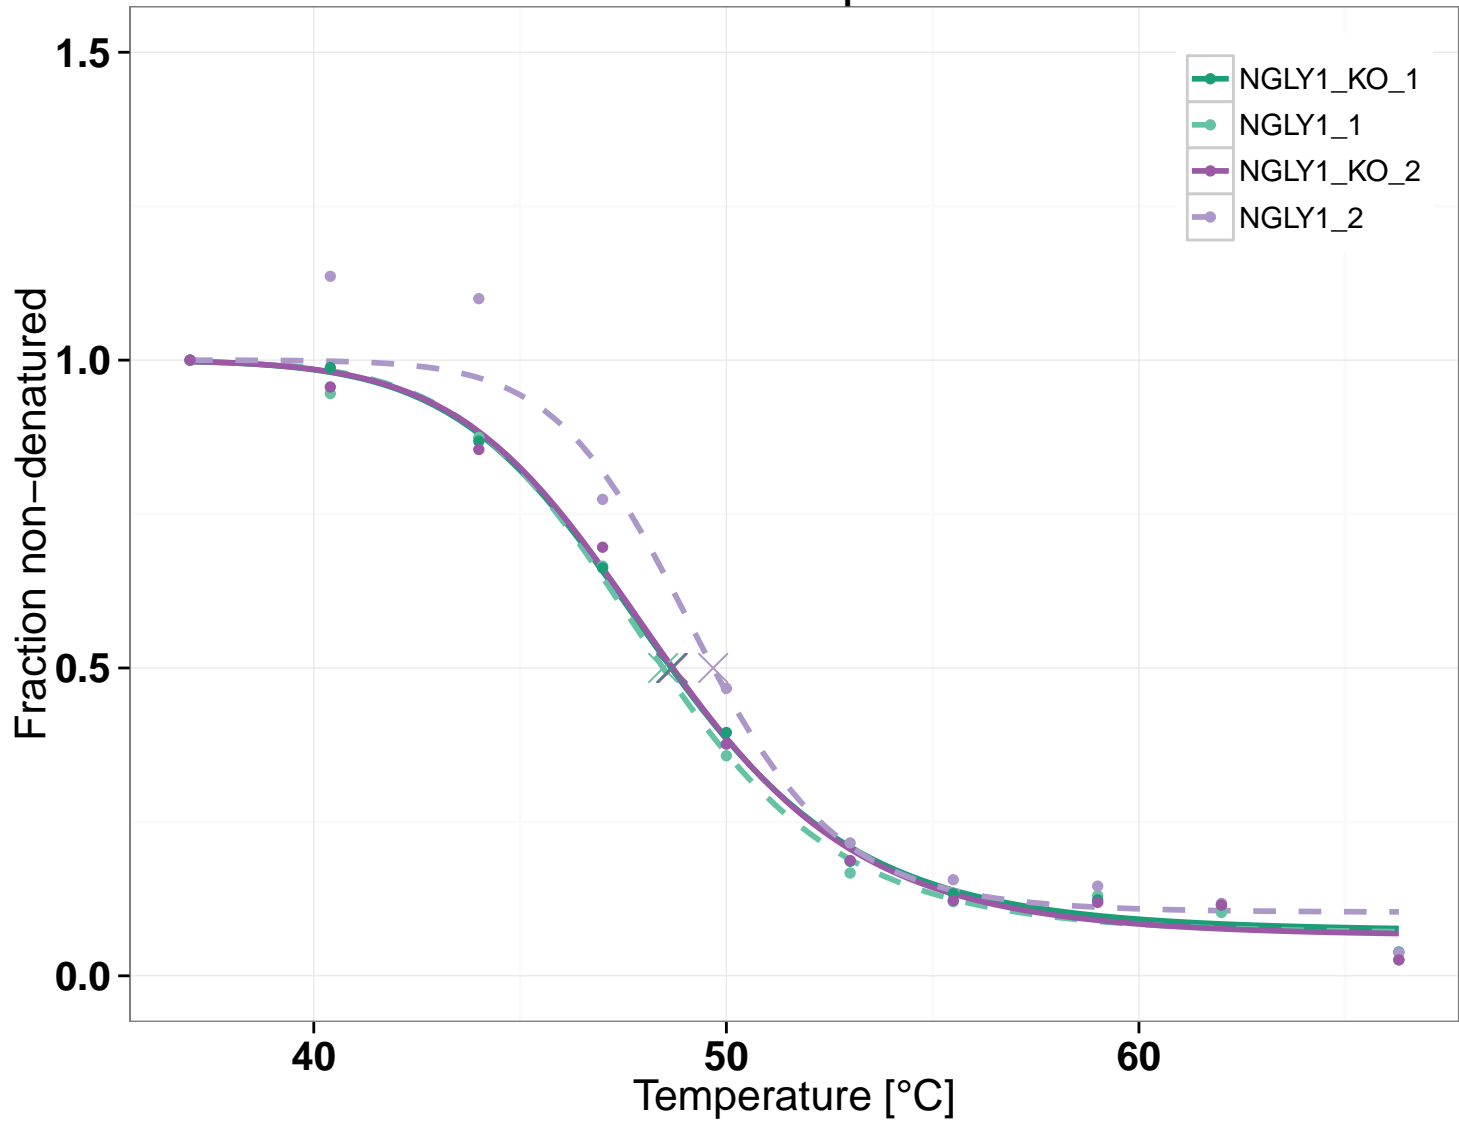

|            | meltPoint | slope  | plateau | R2   |
|------------|-----------|--------|---------|------|
| NGLY1_KO_1 | 48.66     | -0.095 | 0.07    | 1    |
| NGLY1_1    | 48.47     | -0.1   | 0.07    | 1    |
| NGLY1_KO_2 | 48.7      | -0.096 | 0.06    | 0.99 |
| NGLY1_2    | 49.68     | -0.13  | 0.1     | 0.98 |

Supplement: Supplementary file 7885 [file 1]

IPI00011232.3|CALCOCO1

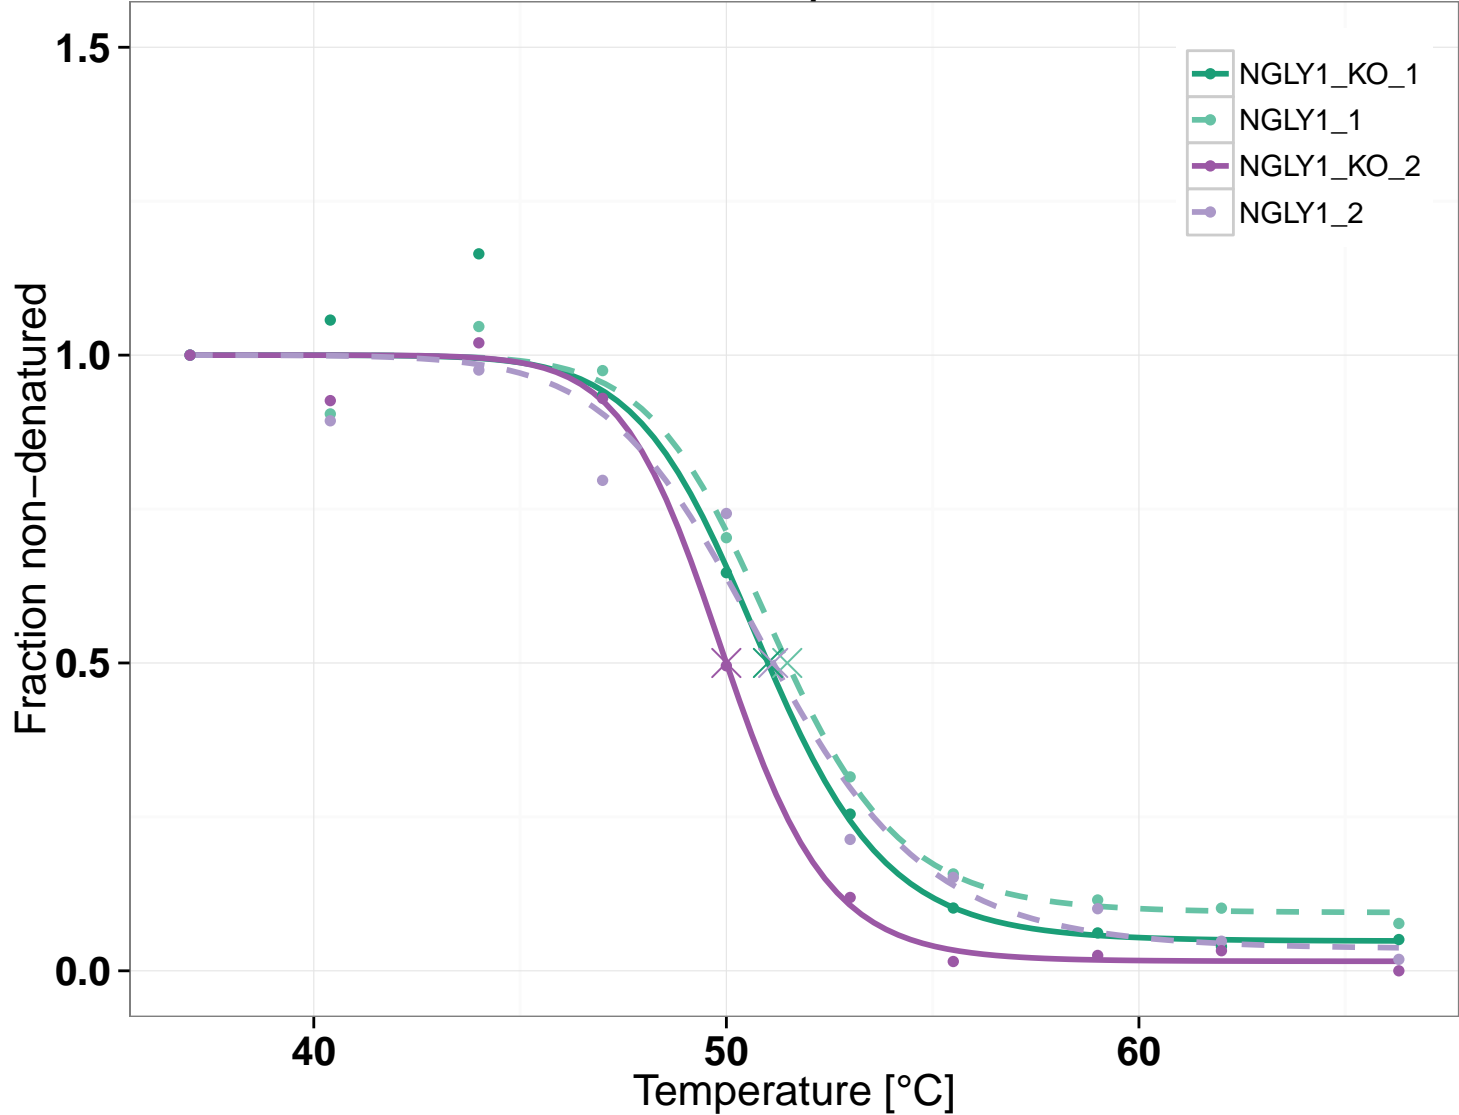

|            | meltPoint | slope | plateau | R2   |
|------------|-----------|-------|---------|------|
| NGLY1_KO_1 | 51.01     | -0.16 | 0.05    | 0.98 |
| NGLY1_1    | 51.48     | -0.15 | 0.09    | 0.99 |
| NGLY1_KO_2 | 50        | -0.2  | 0.02    | 1    |
| NGLY1_2    | 51.13     | -0.12 | 0.04    | 0.97 |

Supplement: Supplementary file 7886 [file 1]

IPI00216318.5|YWHAB

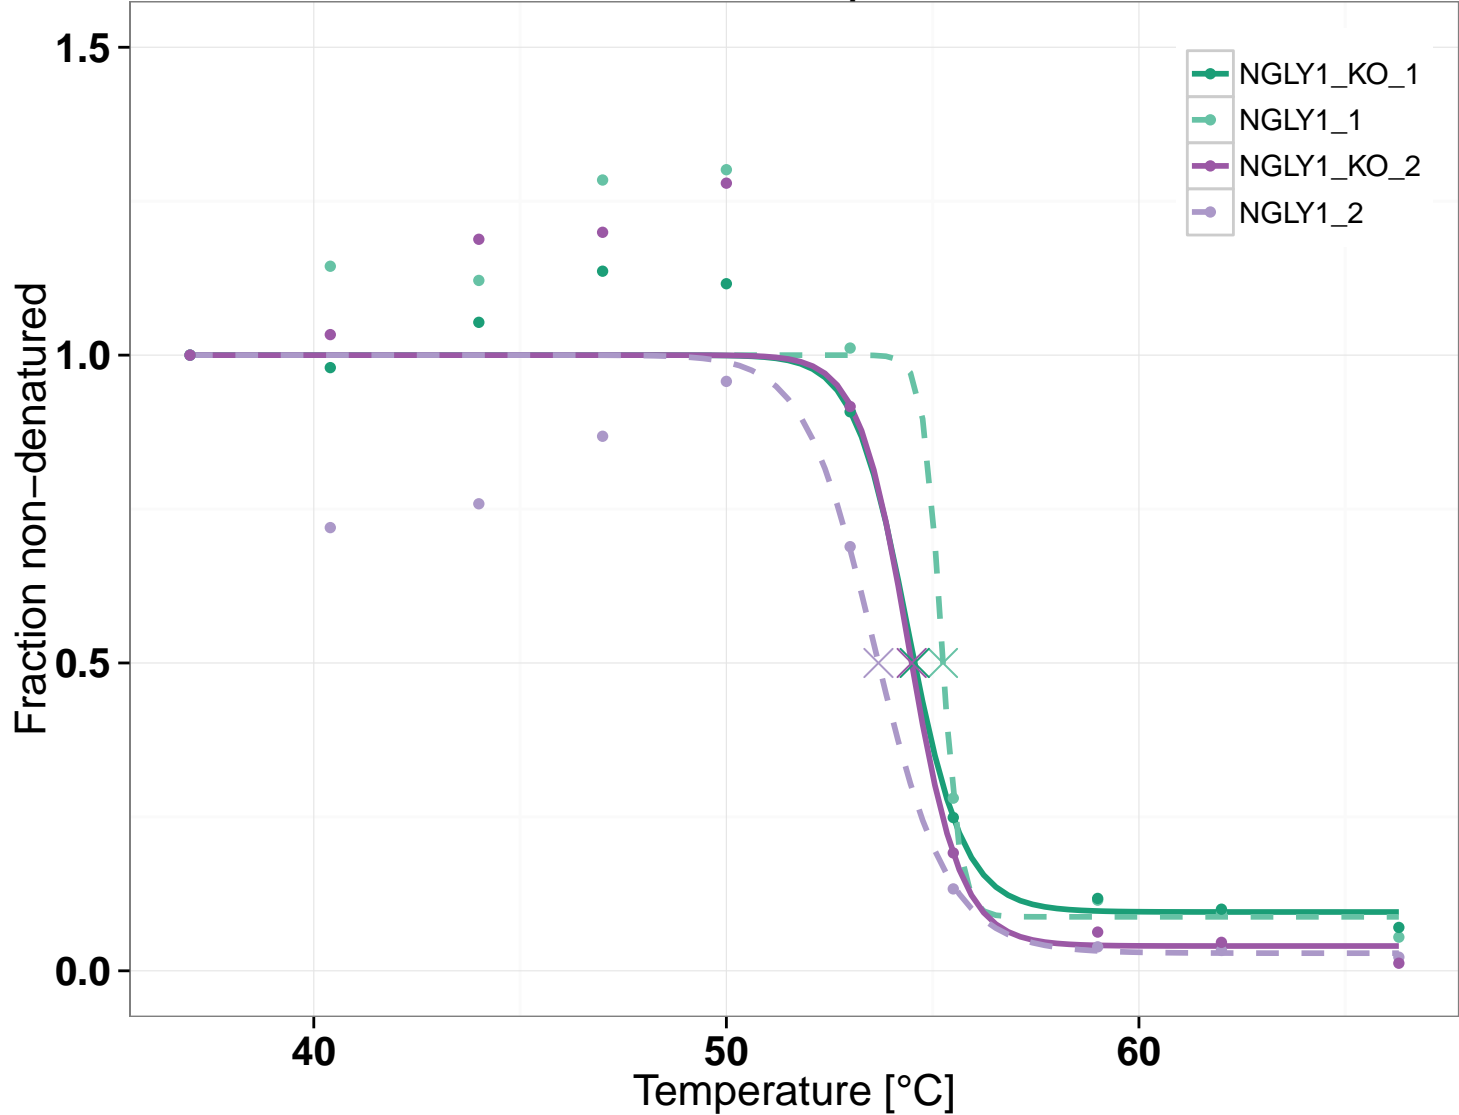

|            | meltPoint | slope | plateau | R2   |
|------------|-----------|-------|---------|------|
| NGLY1_KO_1 | 54.56     | -0.34 | 0.1     | 0.98 |
| NGLY1_1    | 55.25     | -1    | 0.09    | 0.92 |
| NGLY1_KO_2 | 54.49     | -0.39 | 0.04    | 0.94 |
| NGLY1_2    | 53.69     | -0.28 | 0.03    | 0.9  |

Supplement: Supplementary file 7887 [file 1]

# IPI00336119.4|NAB1

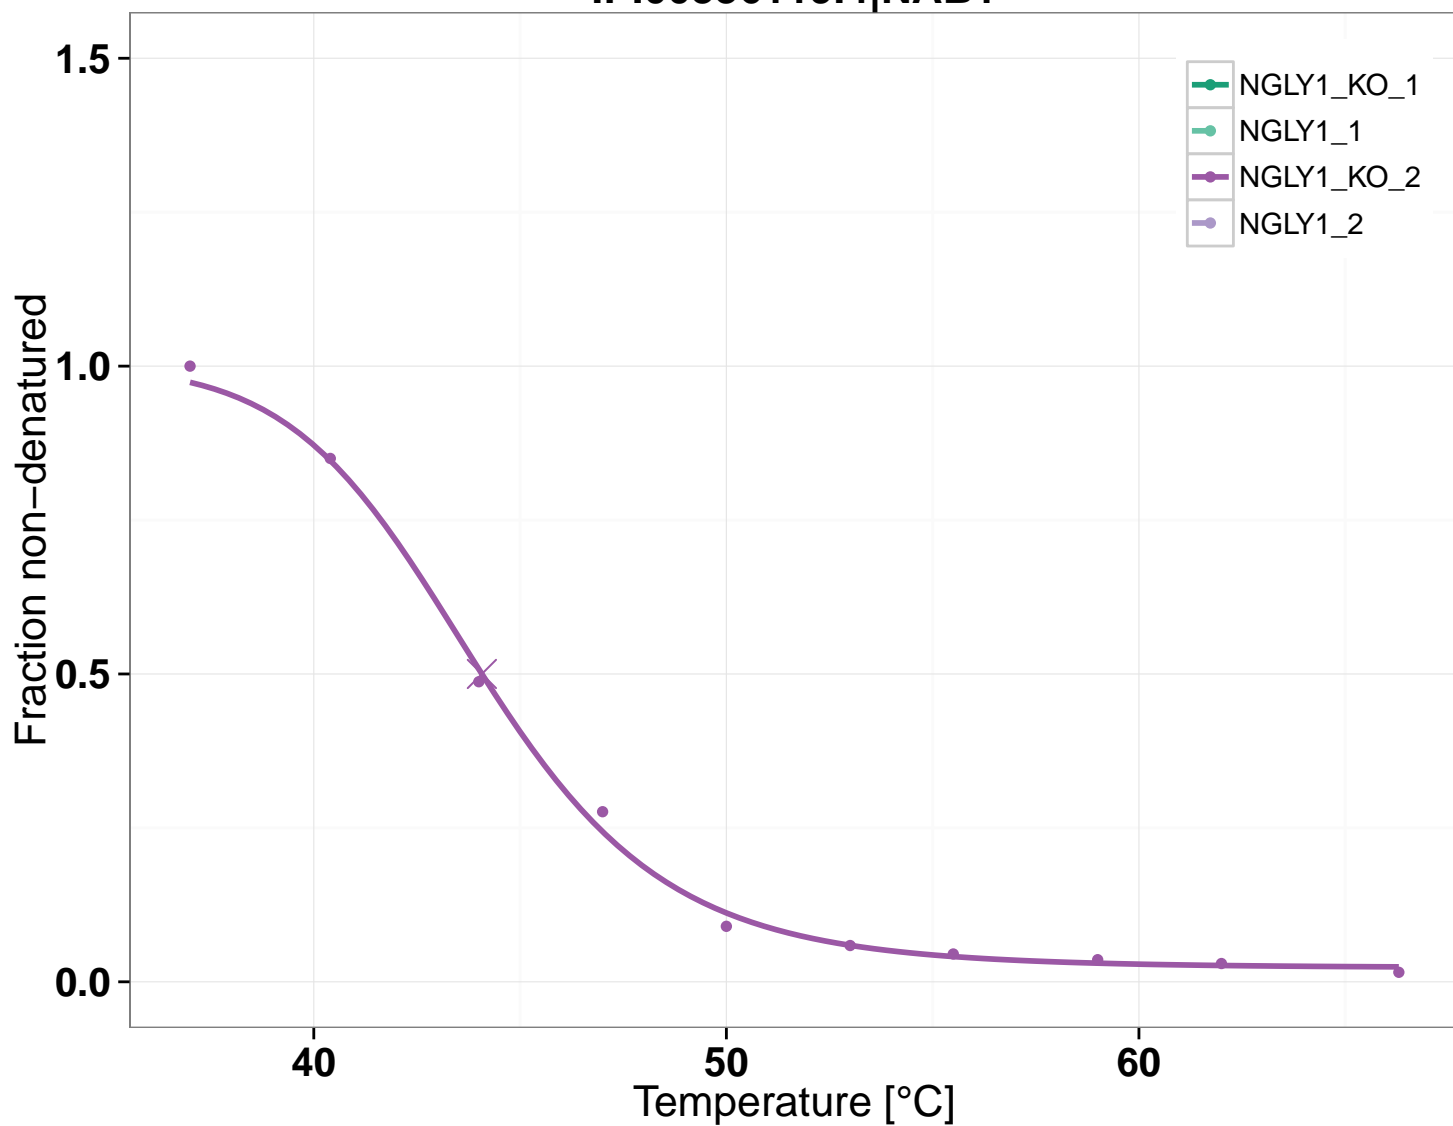

|            | meltPoint | slope | plateau | R2 |
|------------|-----------|-------|---------|----|
| NGLY1_KO_1 | —         | —     | —       | —  |
| NGLY1_1    | —         | —     | —       | —  |
| NGLY1_KO_2 | 44.07     | -0.11 | 0.02    | 1  |
| NGLY1_2    | —         | —     | —       | —  |

Supplement: Supplementary file 7888 [file 1]

IPI00472939.2|SPCS2

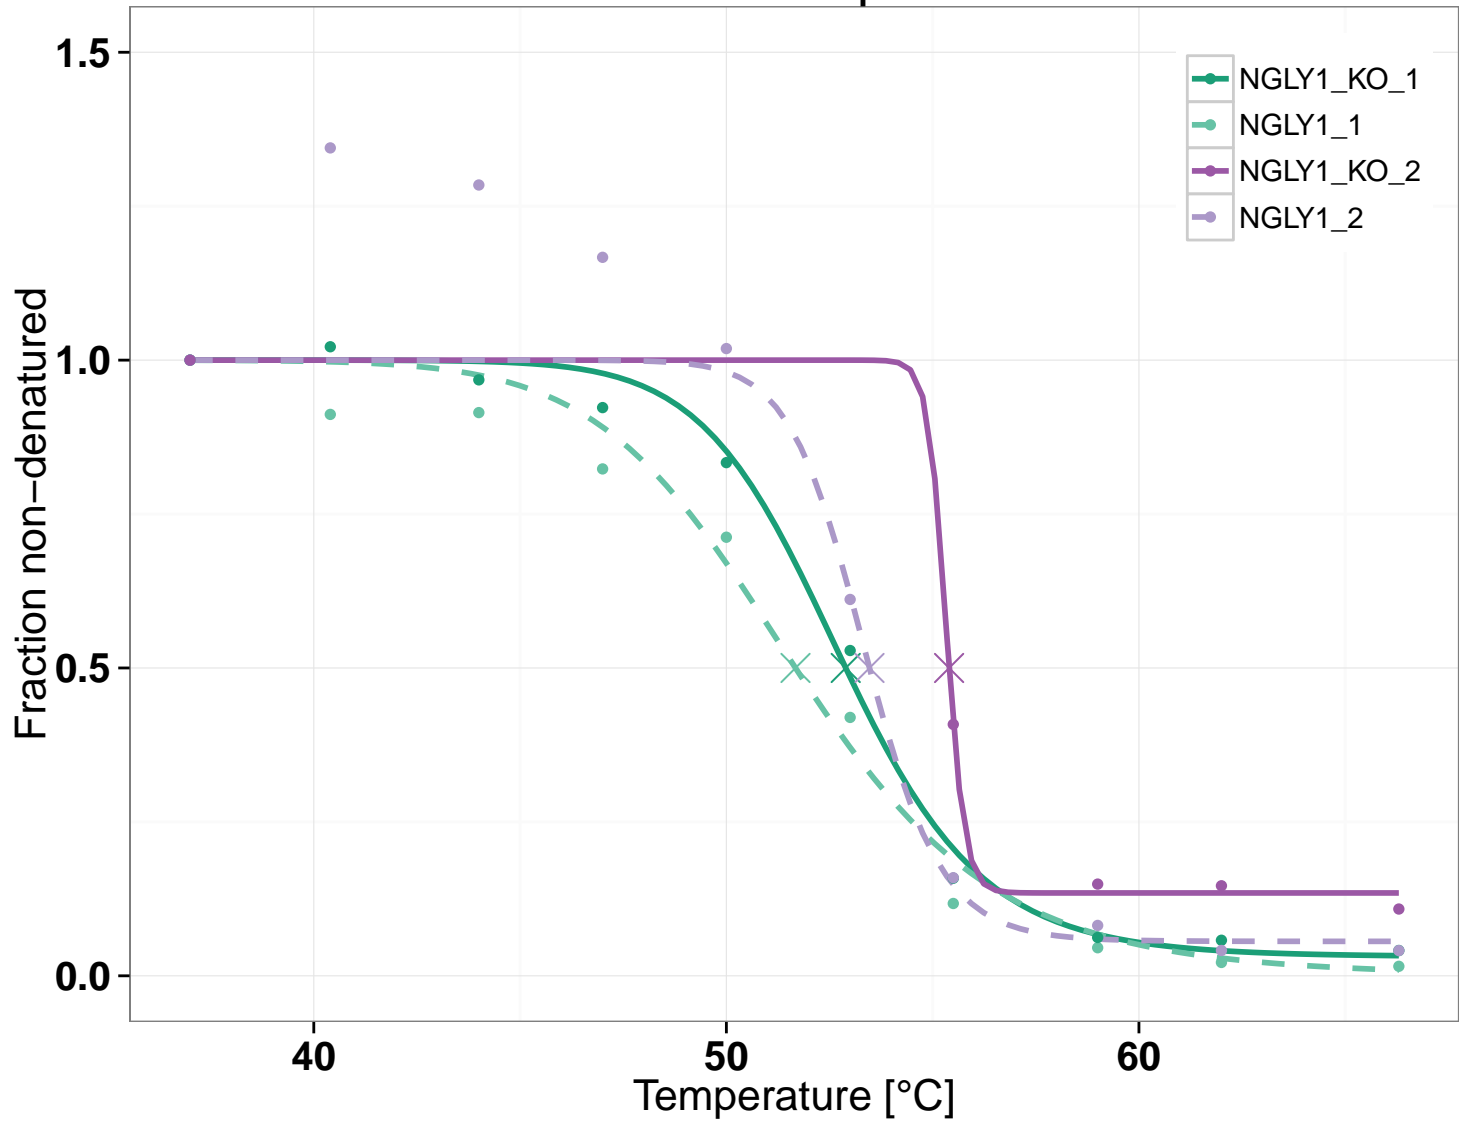

|            | meltPoint | slope | plateau | R2    |
|------------|-----------|-------|---------|-------|
| NGLY1_KO_1 | 52.89     | -0.14 | 0.03    | 0.99  |
| NGLY1_1    | 51.68     | -0.1  | 0       | 0.98  |
| NGLY1_KO_2 | 55.4      | -0.98 | 0.13    | -0.04 |
| NGLY1_2    | 53.47     | -0.26 | 0.06    | 0.92  |

Supplement: Supplementary file 7889 [file 1]

IPI00165026.3|SETD3

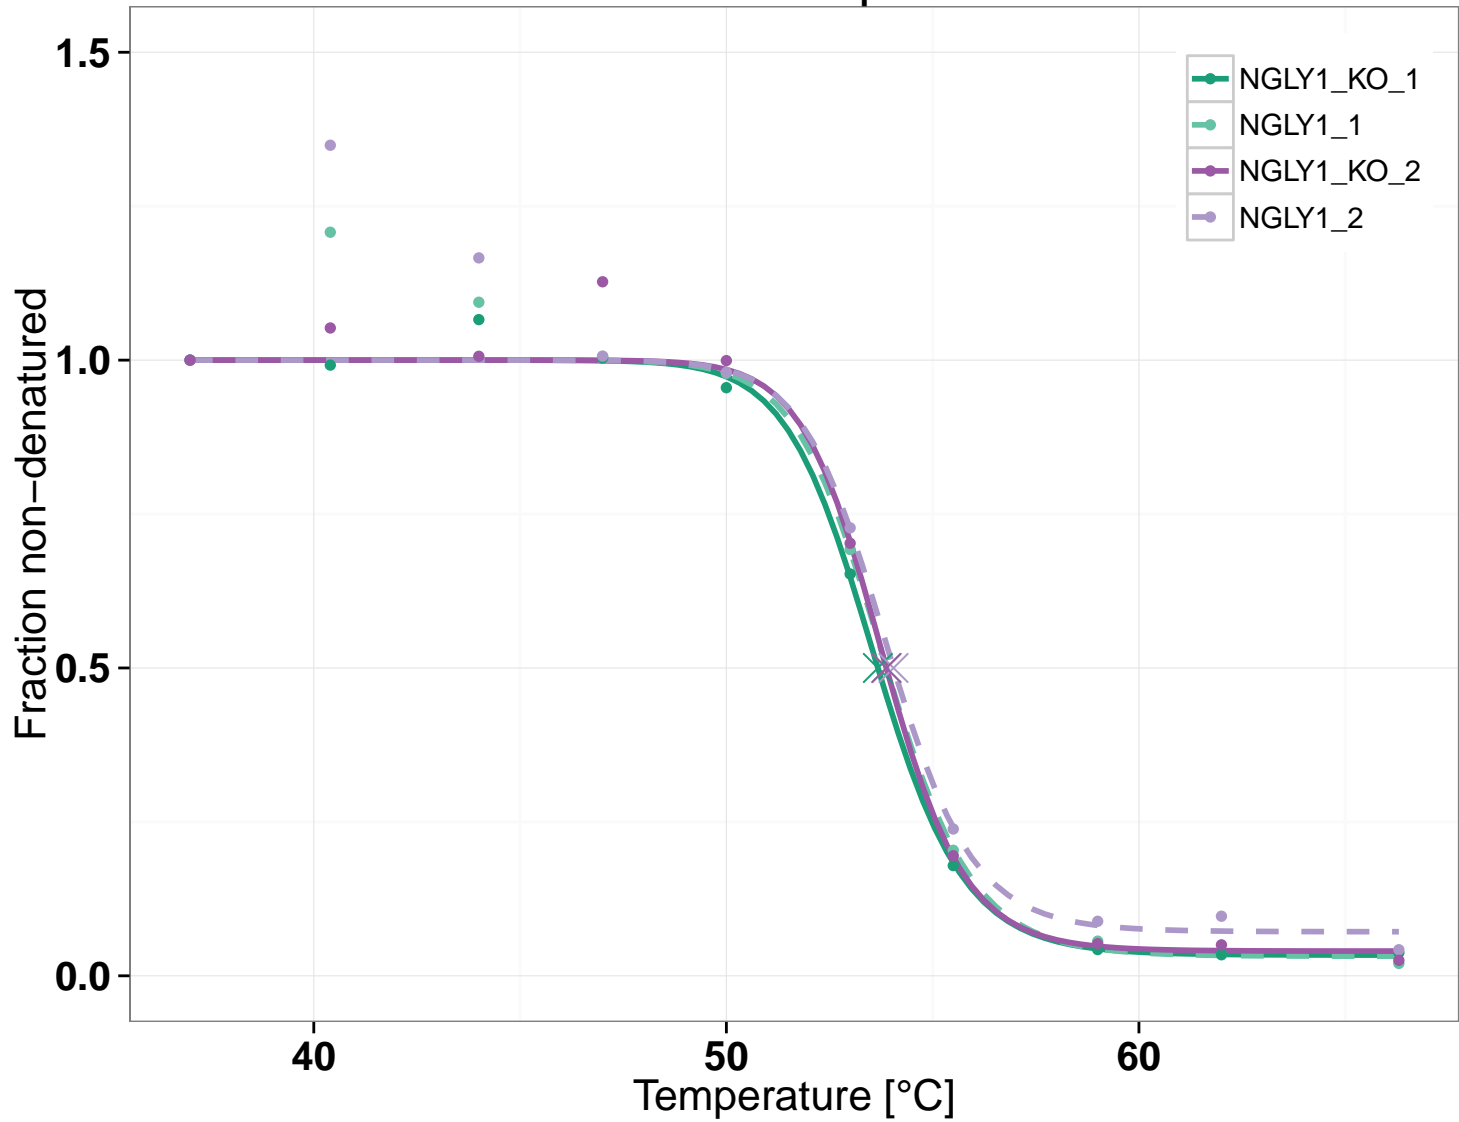

|            | meltPoint | slope | plateau | R2   |
|------------|-----------|-------|---------|------|
| NGLY1_KO_1 | 53.67     | -0.22 | 0.03    | 1    |
| NGLY1_1    | 53.88     | -0.22 | 0.03    | 0.98 |
| NGLY1_KO_2 | 53.88     | -0.24 | 0.04    | 0.99 |
| NGLY1_2    | 54.05     | -0.22 | 0.07    | 0.93 |

Supplement: Supplementary file 7890 [file 1]

IPI00290893.5|USP12

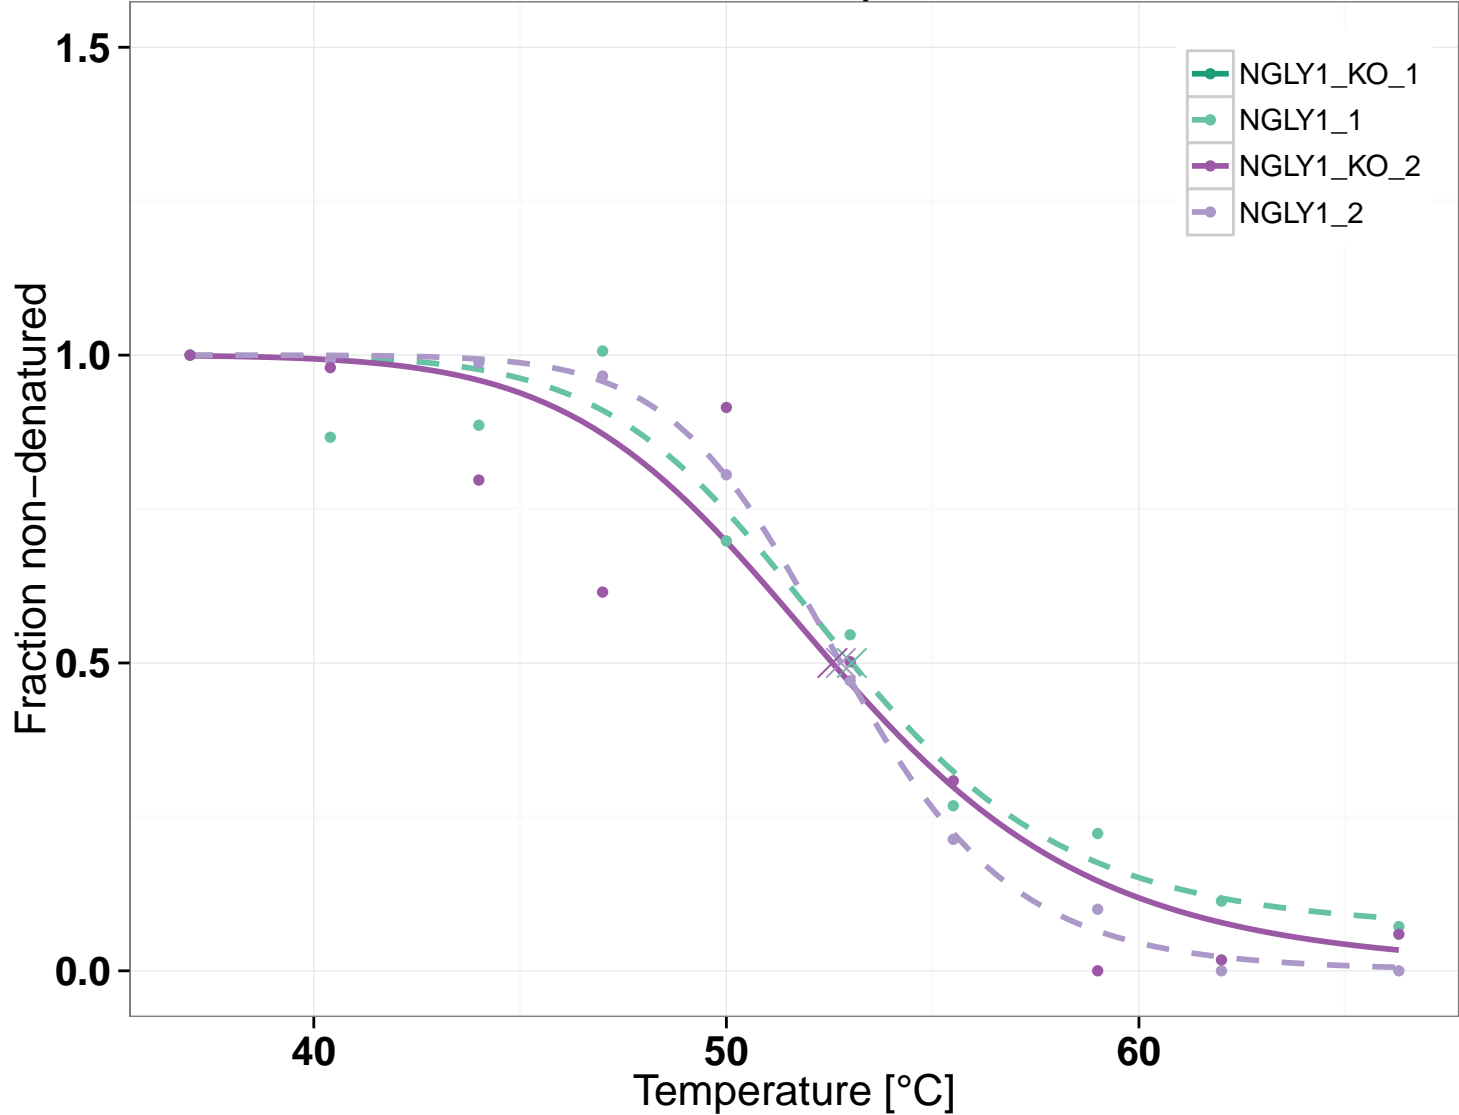

|            | meltPoint | slope  | plateau | R2   |
|------------|-----------|--------|---------|------|
| NGLY1_KO_1 | -         | -      | -       | -    |
| NGLY1_1    | 53.04     | -0.084 | 0.07    | 0.96 |
| NGLY1_KO_2 | 52.57     | -0.078 | 0       | 0.89 |
| NGLY1_2    | 52.78     | -0.12  | 0       | 1    |

Supplement: Supplementary file 7891 [file 1]

# IPI00386616.4|C1ORF212

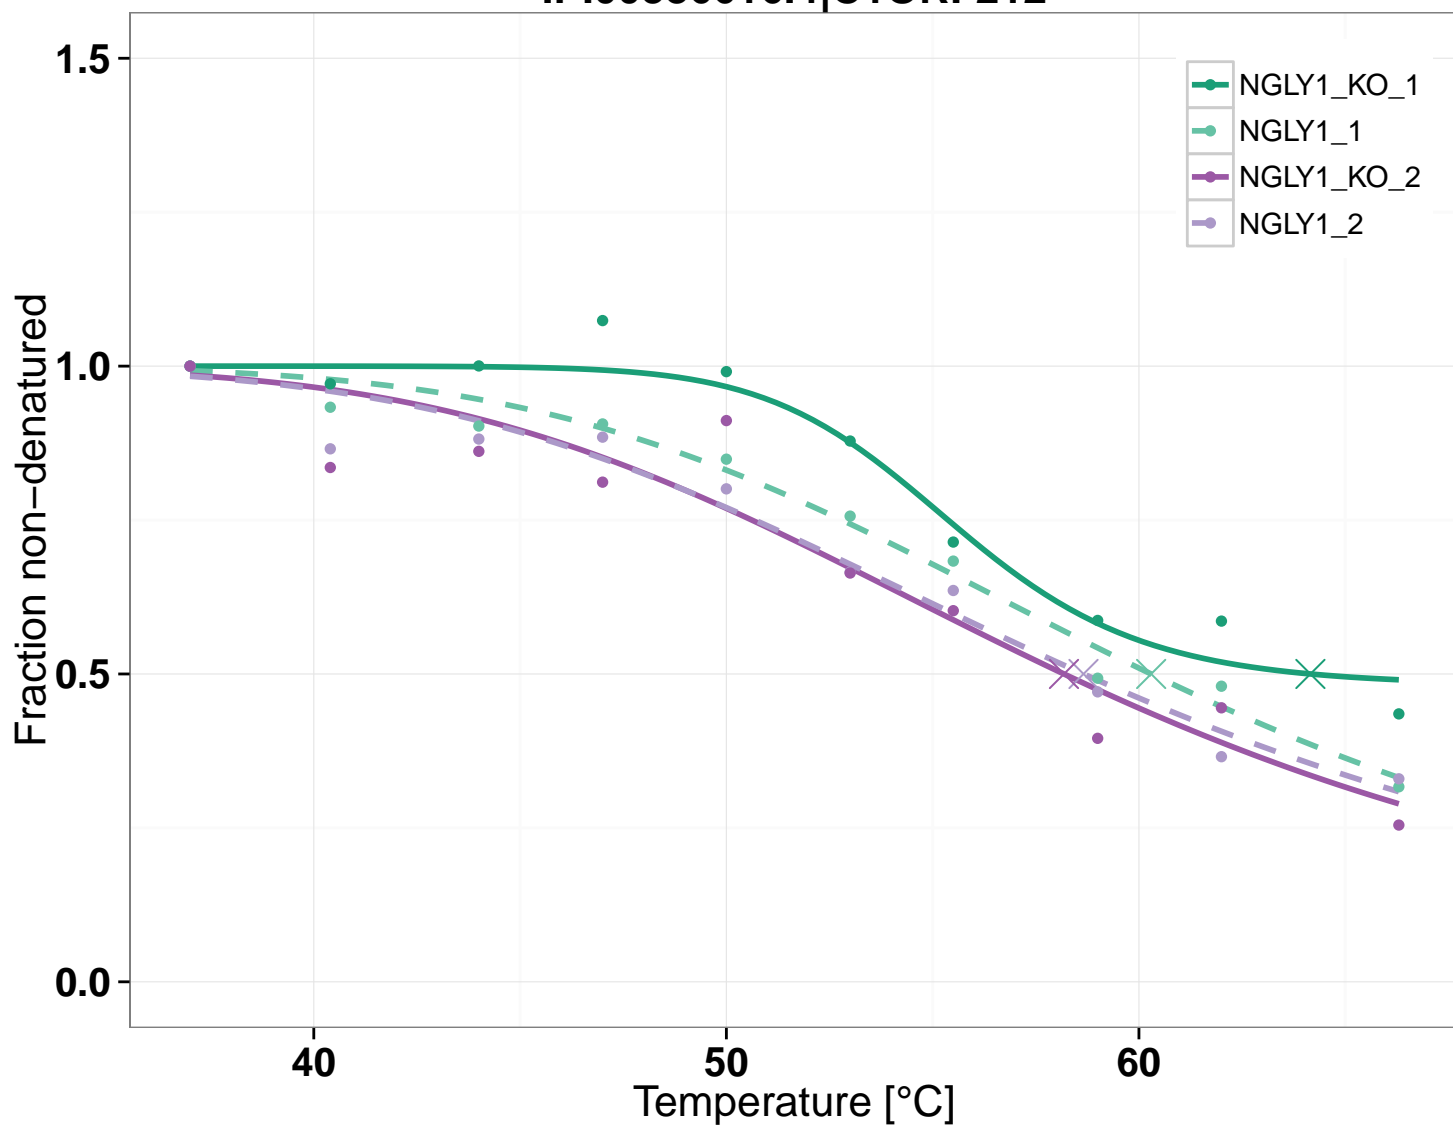

|            | meltPoint | slope  | plateau | R2   |
|------------|-----------|--------|---------|------|
| NGLY1_KO_1 | 64.16     | -0.057 | 0.48    | 0.96 |
| NGLY1_1    | 60.3      | -0.034 | 0       | 0.98 |
| NGLY1_KO_2 | 58.18     | -0.034 | 0       | 0.91 |
| NGLY1_2    | 58.66     | -0.032 | 0       | 0.97 |

Supplement: Supplementary file 7892 [file 1]

IPI00171525.2|SENP3

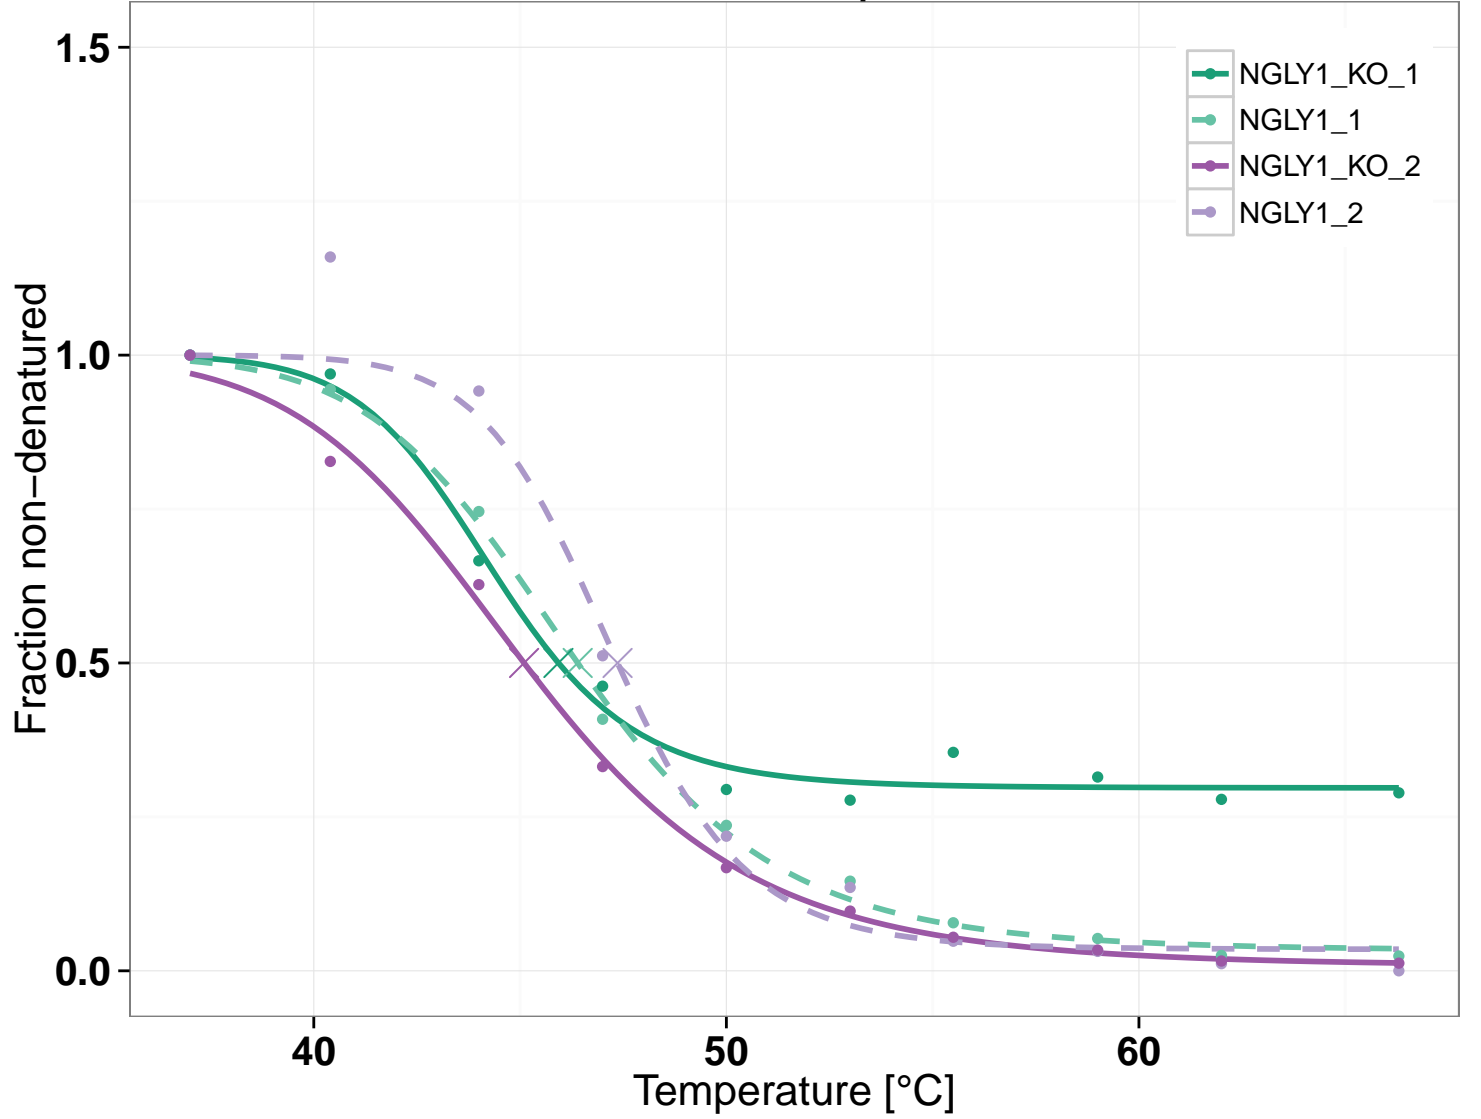

|            | meltPoint | slope  | plateau | R2   |
|------------|-----------|--------|---------|------|
| NGLY1_KO_1 | 45.93     | -0.1   | 0.3     | 0.99 |
| NGLY1_1    | 46.4      | -0.098 | 0.03    | 1    |
| NGLY1_KO_2 | 45.1      | -0.089 | 0.01    | 1    |
| NGLY1_2    | 47.36     | -0.15  | 0.03    | 0.98 |

Supplement: Supplementary file 7893 [file 1]

# IPI00465265.3|SHQ1

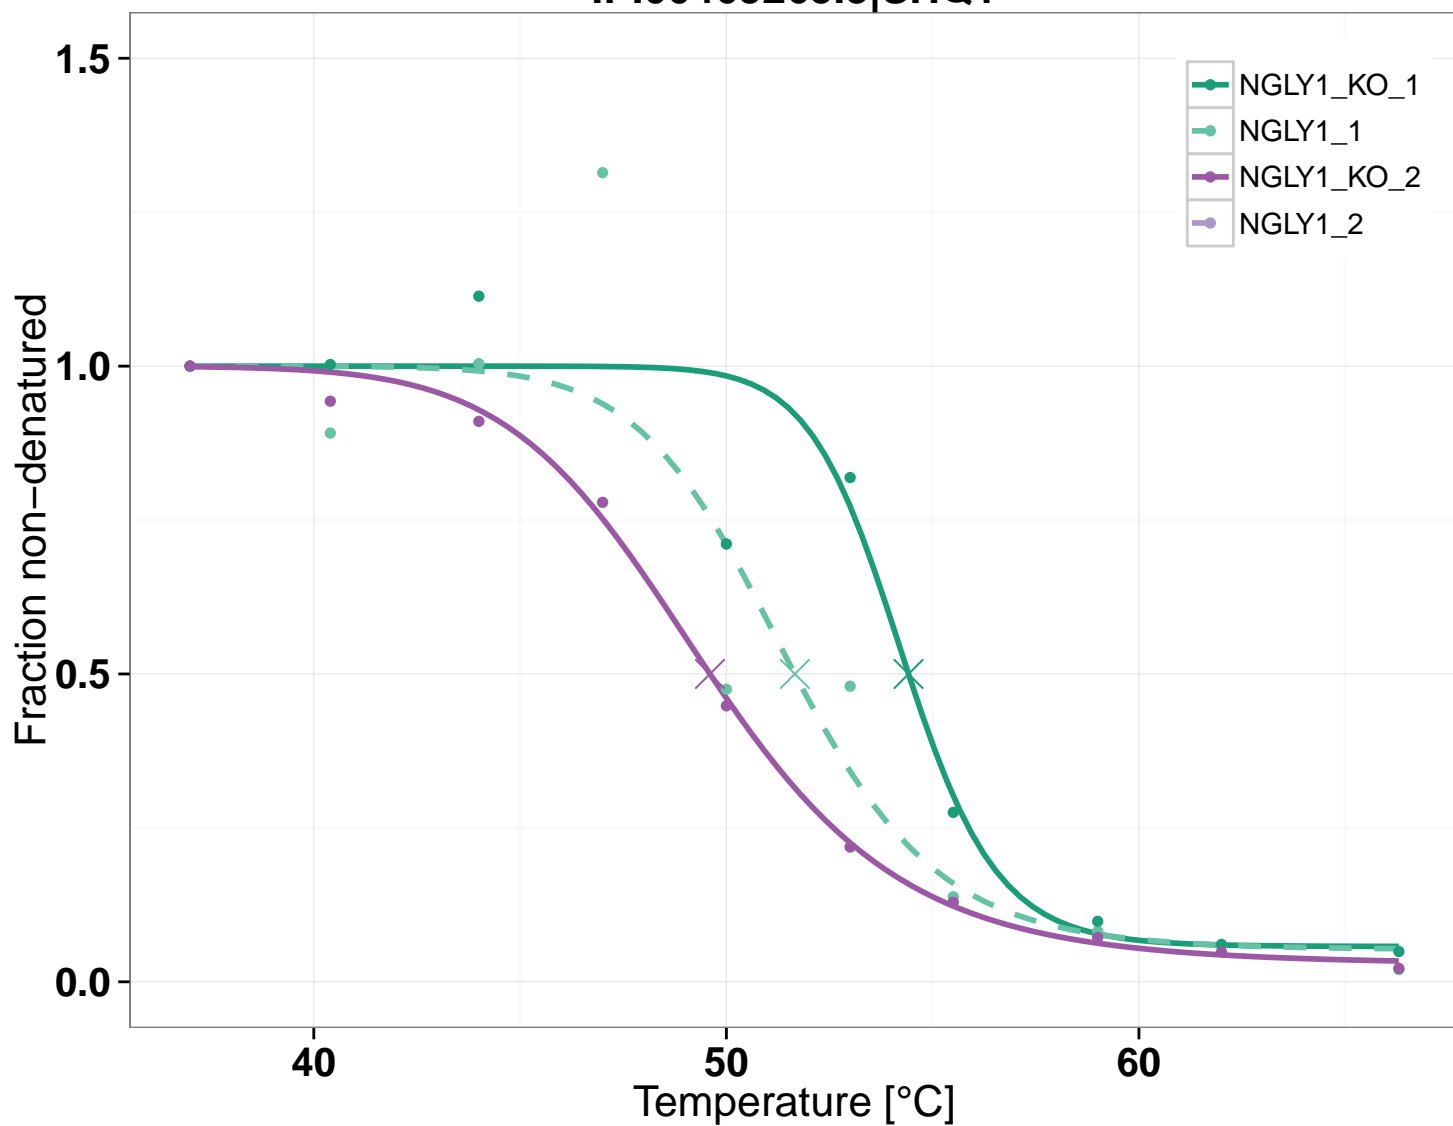

|            | meltPoint | slope | plateau | R2   |
|------------|-----------|-------|---------|------|
| NGLY1_KO_1 | 54.42     | -0.21 | 0.06    | 0.67 |
| NGLY1_1    | 51.66     | -0.13 | 0.05    | 0.89 |
| NGLY1_KO_2 | 49.6      | -0.1  | 0.03    | 1    |
| NGLY1_2    | -         | -     | -       | -    |

Supplement: Supplementary file 7894 [file 1]

IPI00018798.3|DNAJC17

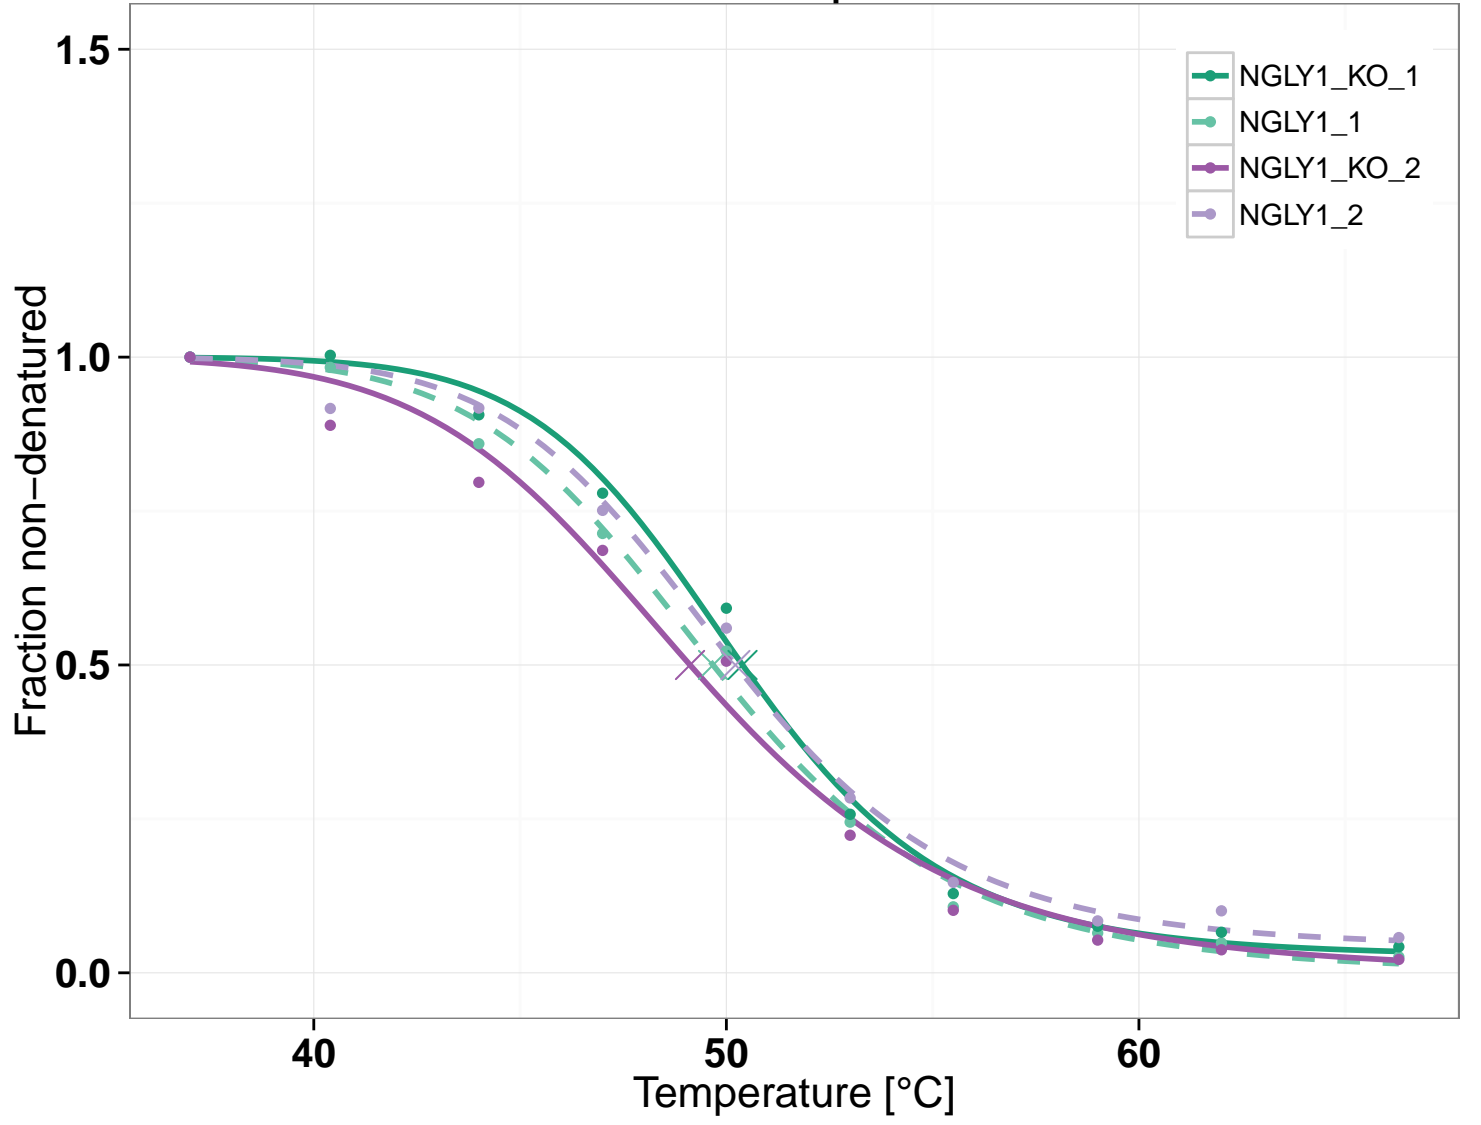

|            | meltPoint | slope  | plateau | R2   |
|------------|-----------|--------|---------|------|
| NGLY1_KO_1 | 50.39     | -0.097 | 0.03    | 1    |
| NGLY1_1    | 49.68     | -0.085 | 0       | 1    |
| NGLY1_KO_2 | 49.12     | -0.077 | 0       | 0.99 |
| NGLY1_2    | 50.22     | -0.087 | 0.04    | 0.99 |

Supplement: Supplementary file 7895 [file 1]

# IPI00219729.3|SLC25A11

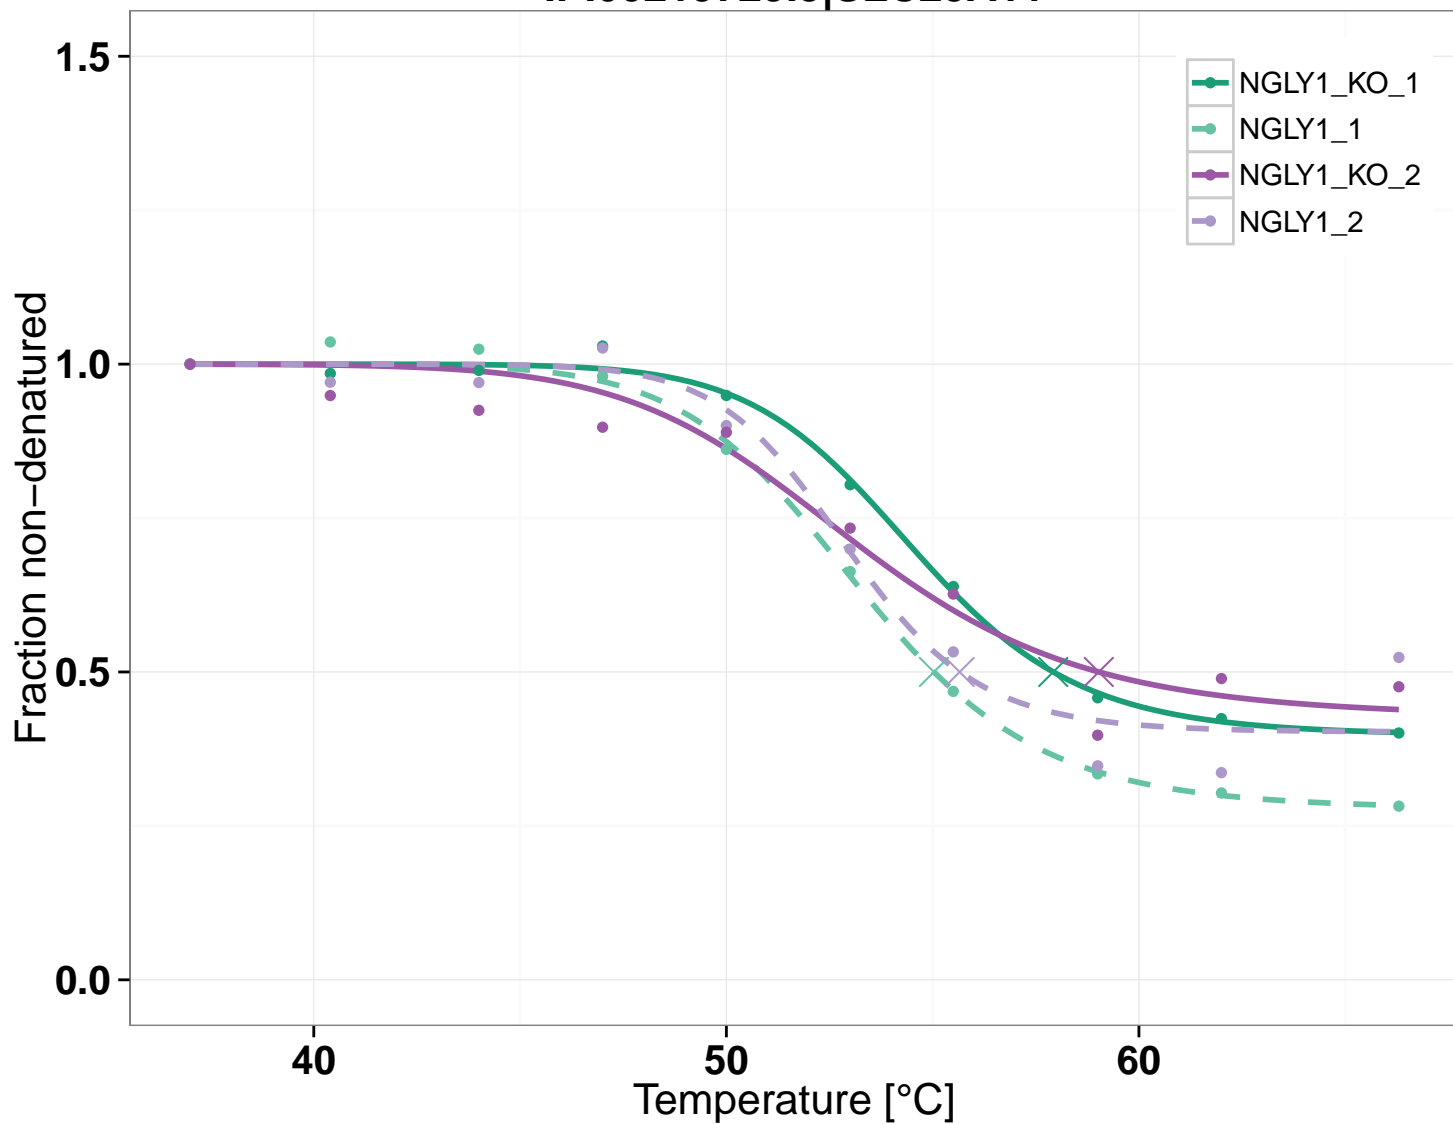

|            | meltPoint | slope  | plateau | R2   |
|------------|-----------|--------|---------|------|
| NGLY1_KO_1 | 57.92     | -0.075 | 0.4     | 1    |
| NGLY1_1    | 55.03     | -0.083 | 0.28    | 1    |
| NGLY1_KO_2 | 59.03     | -0.052 | 0.43    | 0.95 |
| NGLY1_2    | 55.65     | -0.094 | 0.4     | 0.96 |

Supplement: Supplementary file 7896 [file 1]

# IPI00640525.2|CTSA

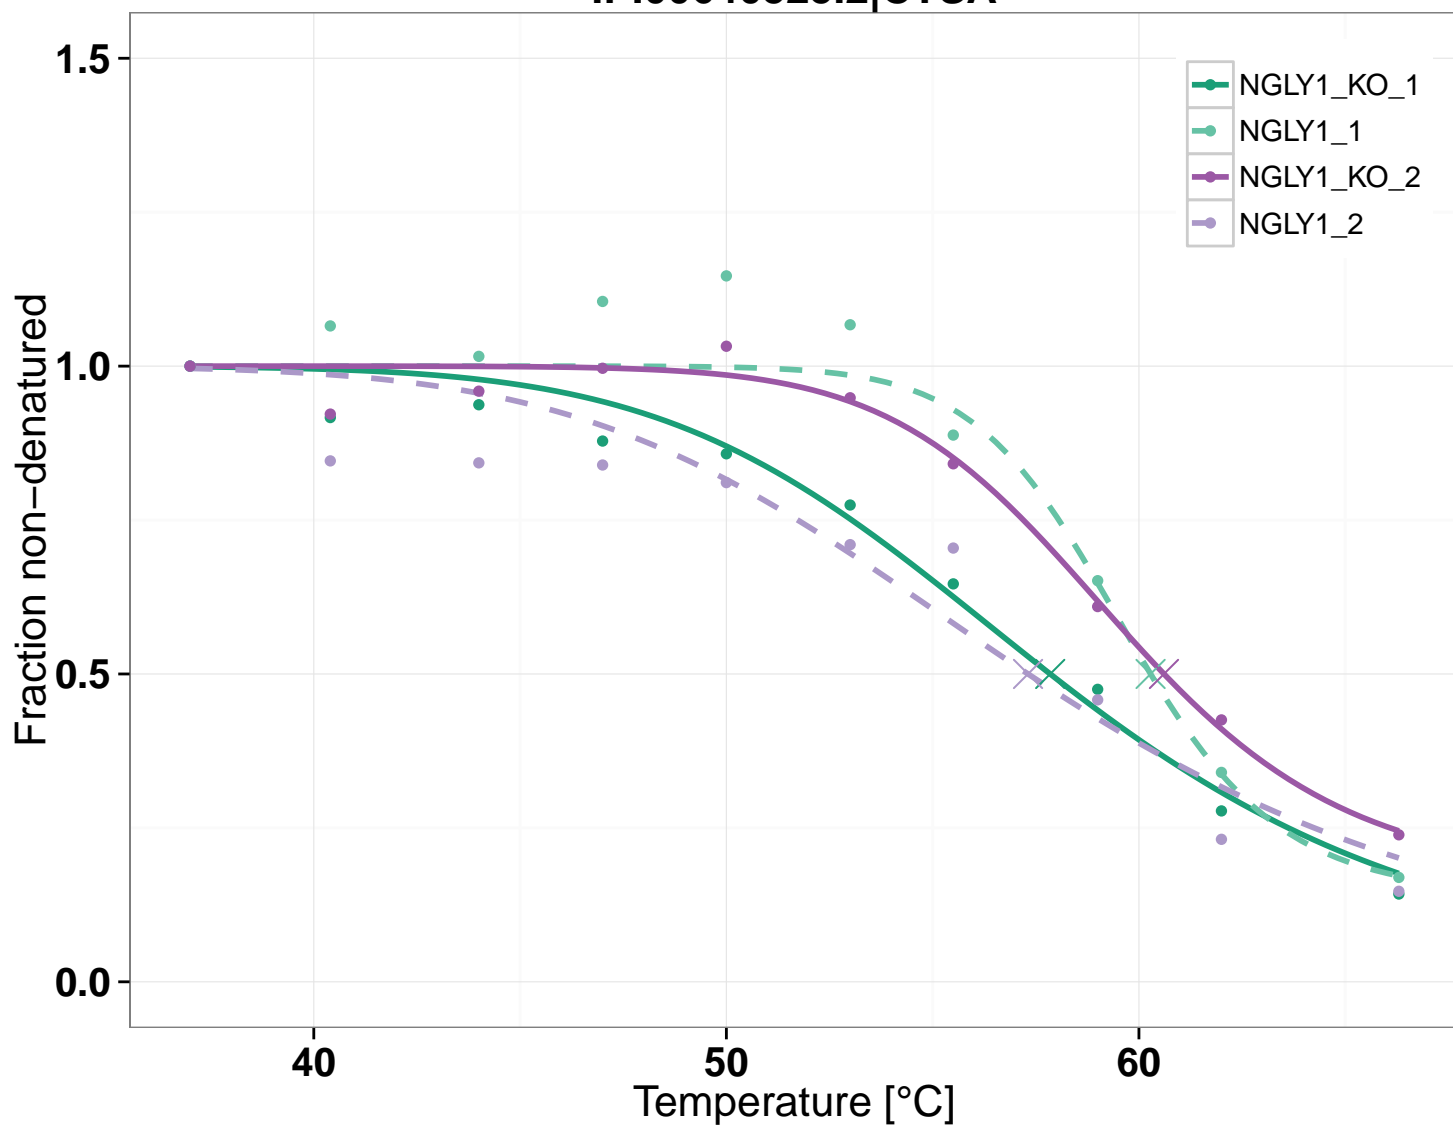

|            | meltPoint | slope  | plateau | R2   |
|------------|-----------|--------|---------|------|
| NGLY1_KO_1 | 57.85     | -0.054 | 0       | 0.98 |
| NGLY1_1    | 60.28     | -0.12  | 0.14    | 0.96 |
| NGLY1_KO_2 | 60.61     | -0.076 | 0.16    | 0.98 |
| NGLY1_2    | 57.31     | -0.046 | 0       | 0.91 |

Supplement: Supplementary file 7897 [file 1]

IPI00217384.3|TAPBP

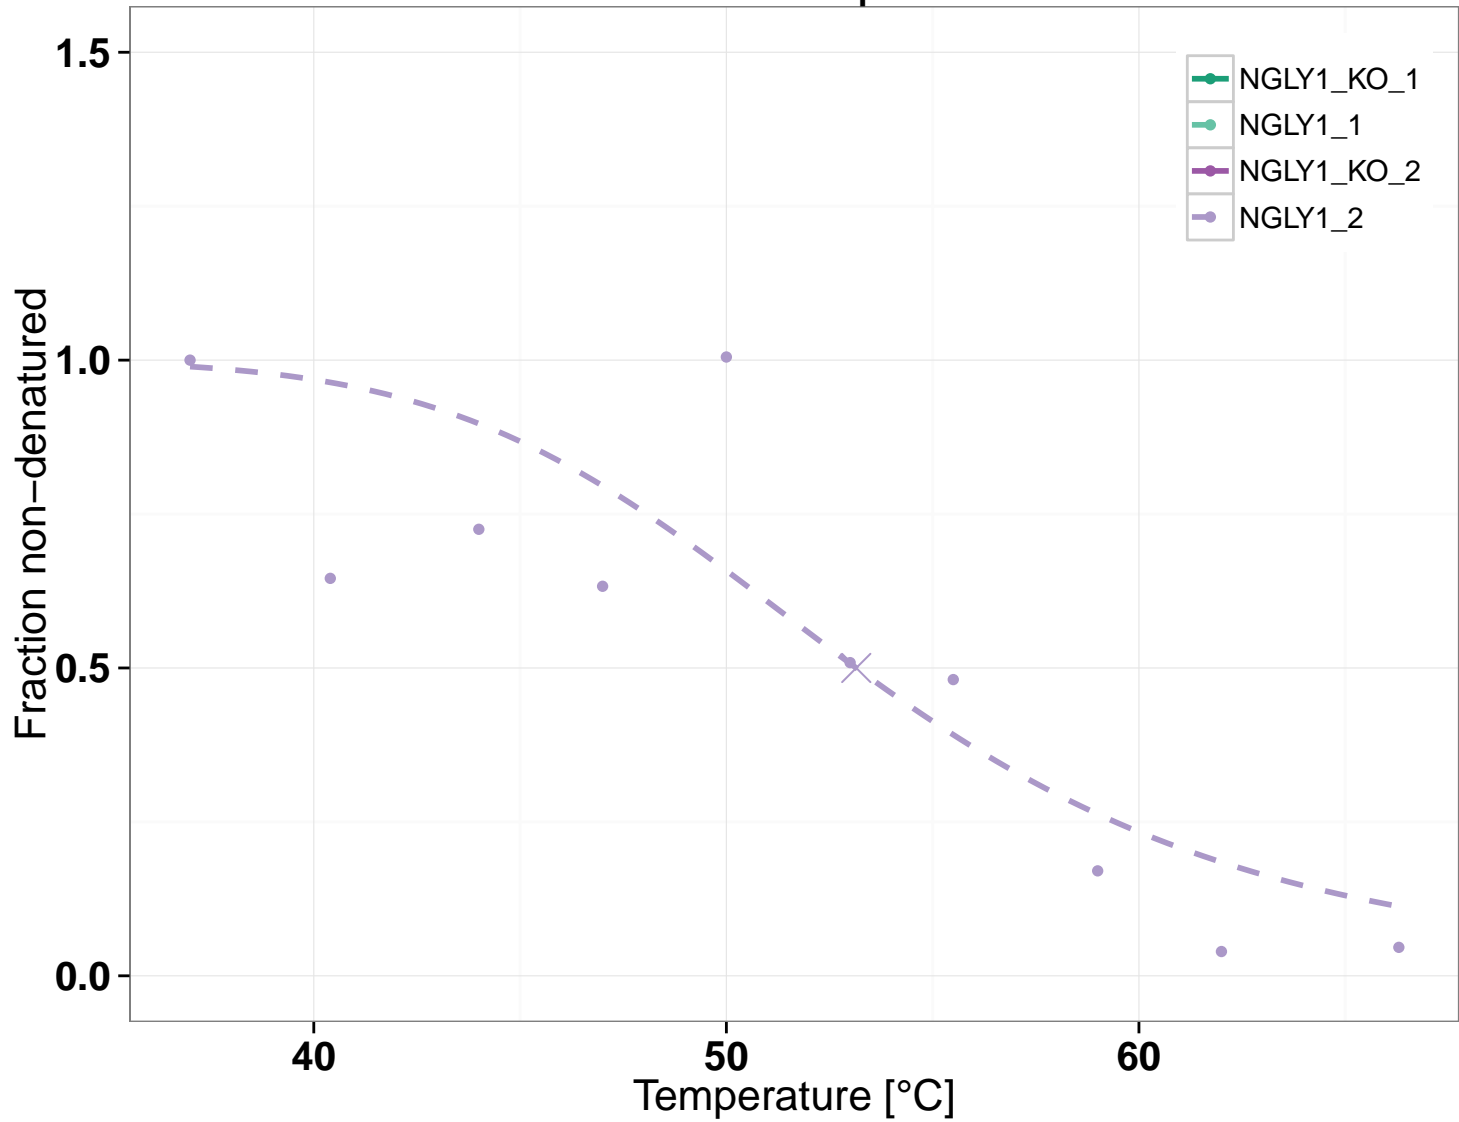

|            | meltPoint | slope  | plateau | R2   |
|------------|-----------|--------|---------|------|
| NGLY1_KO_1 | -         | -      | -       | -    |
| NGLY1_1    | -         | -      | -       | -    |
| NGLY1_KO_2 | -         | -      | -       | -    |
| NGLY1_2    | 53.15     | -0.051 | 0       | 0.71 |

Supplement: Supplementary file 7898 [file 1]

IPI00003419.1|C11ORF58

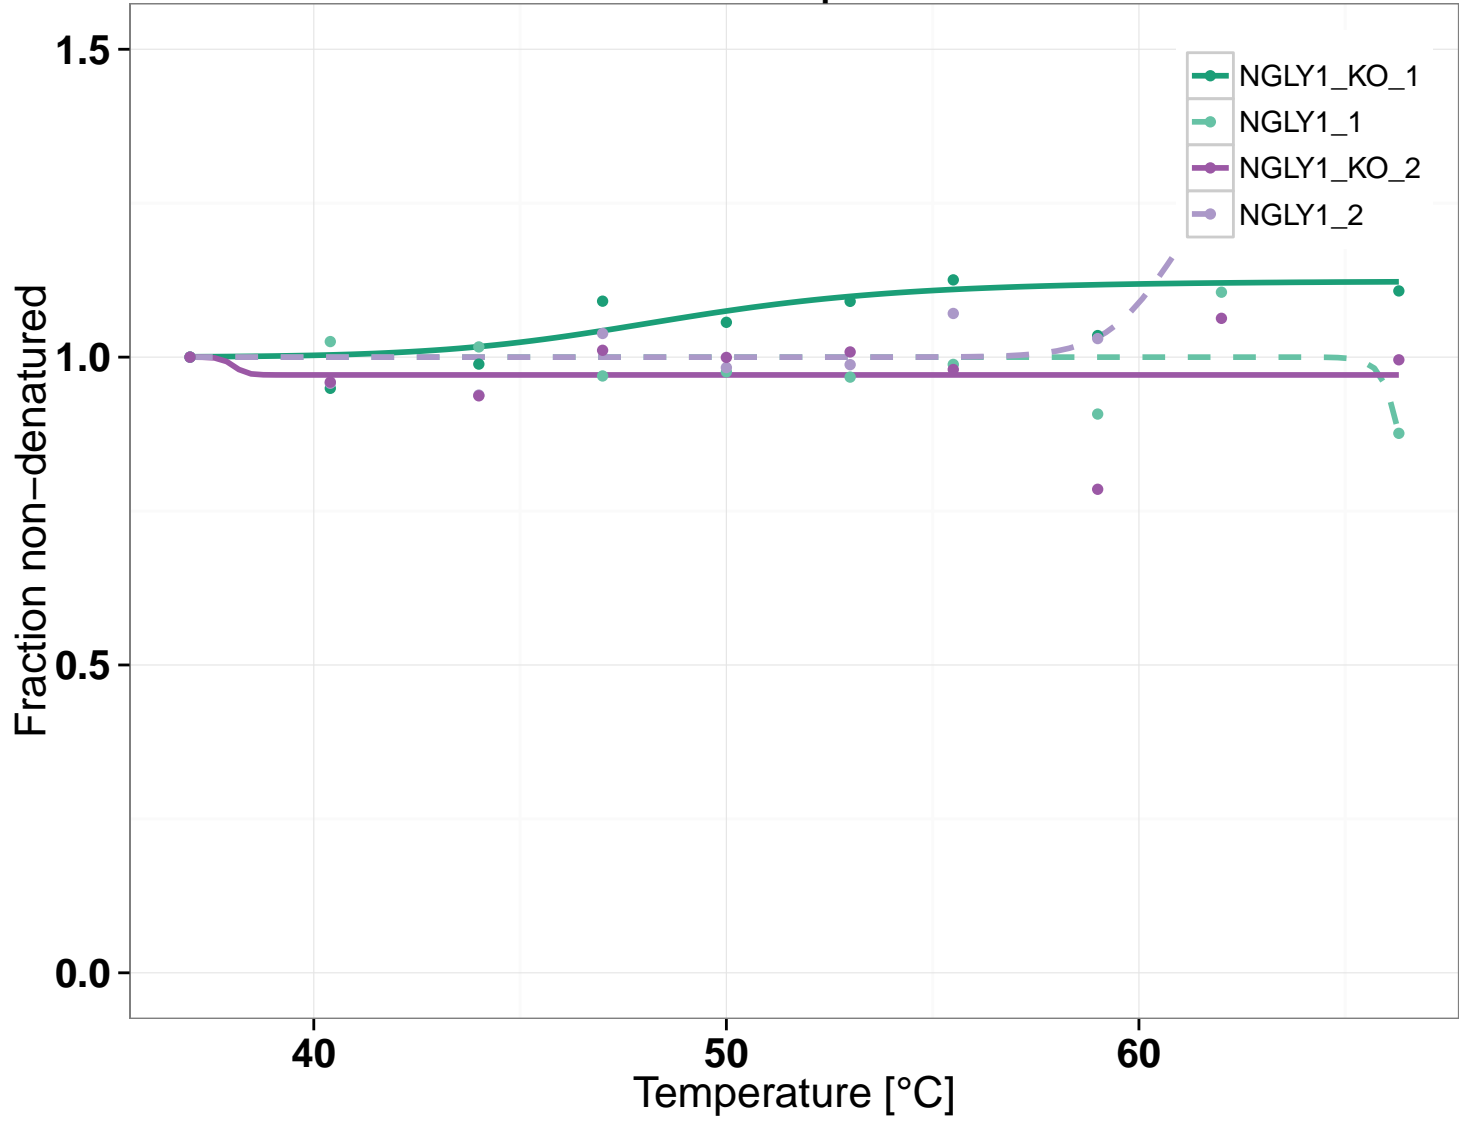

|            | meltPoint | slope  | plateau | R2   |
|------------|-----------|--------|---------|------|
| NGLY1_KO_1 | -         | 0.011  | 1.12    | 0.59 |
| NGLY1_1    | -         | -      | 0       | 0.35 |
| NGLY1_KO_2 | -         | -0.048 | 0.97    | 0.02 |
| NGLY1_2    | -         | 0.099  | 1.34    | 0.92 |

Supplement: Supplementary file 7899 [file 1]

IPI00337328.2|ASTE1

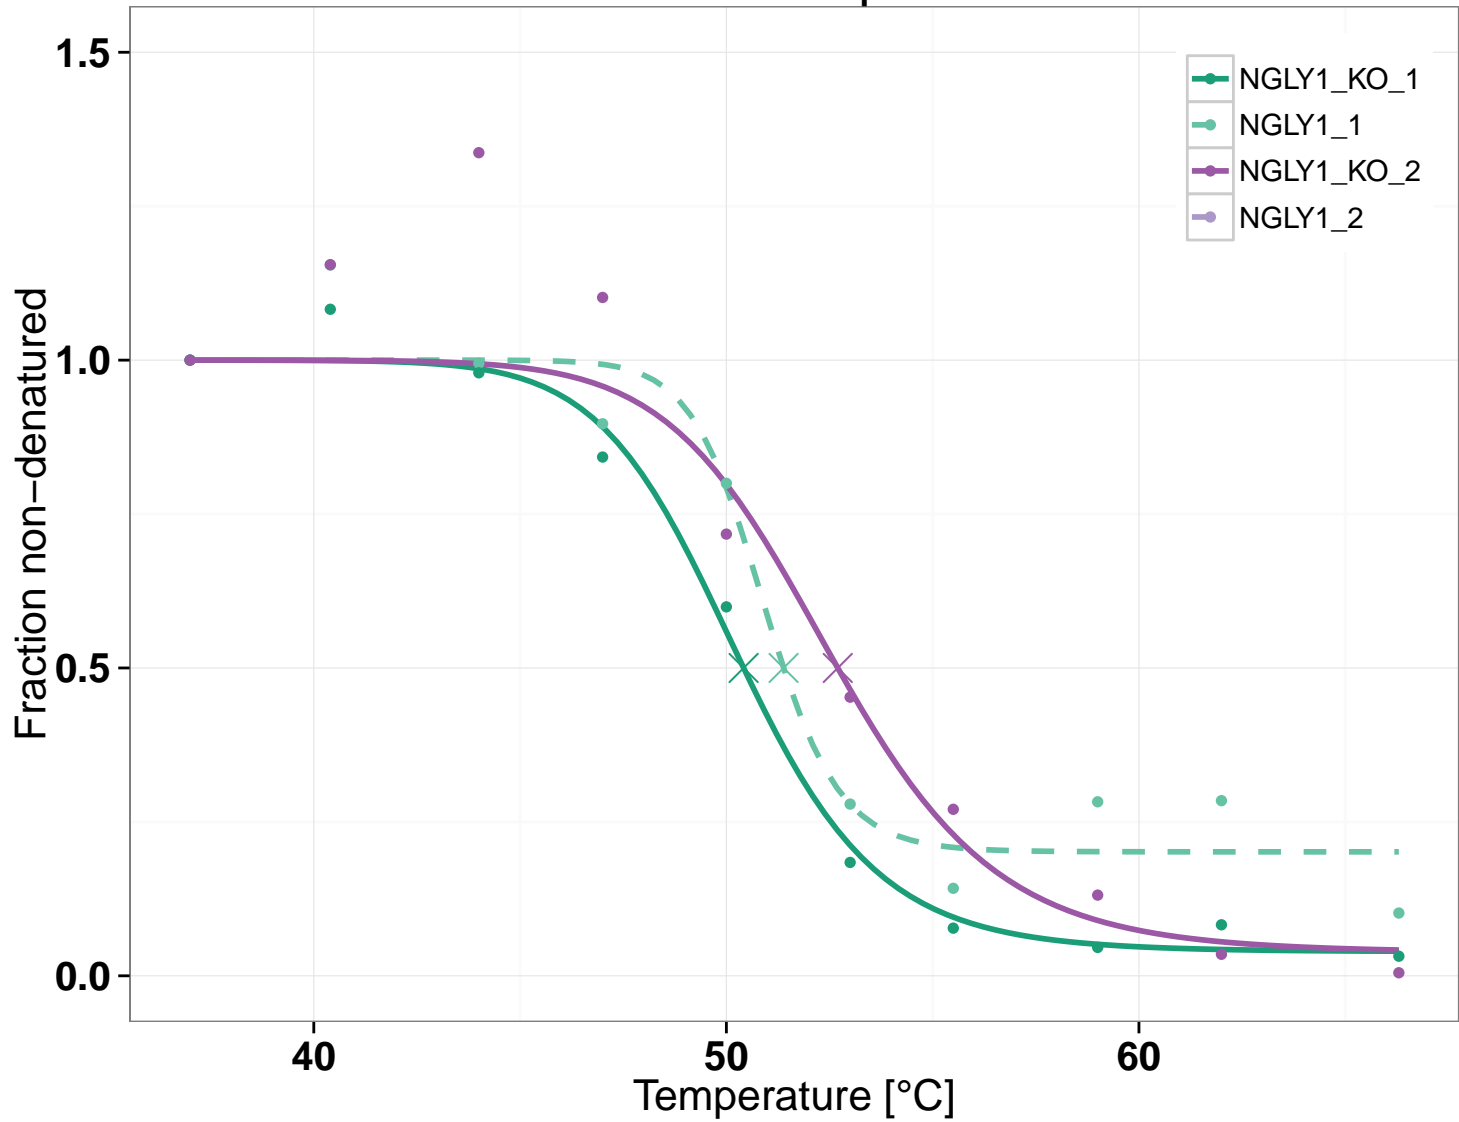

|            | meltPoint | slope | plateau | R2   |
|------------|-----------|-------|---------|------|
| NGLY1_KO_1 | 50.42     | -0.14 | 0.04    | 0.99 |
| NGLY1_1    | 51.39     | -0.22 | 0.2     | 0.96 |
| NGLY1_KO_2 | 52.7      | -0.12 | 0.04    | 0.92 |
| NGLY1_2    | -         | -     | -       | -    |

Supplement: Supplementary file 7900 [file 1]

IPI00553067.4|CCDC132

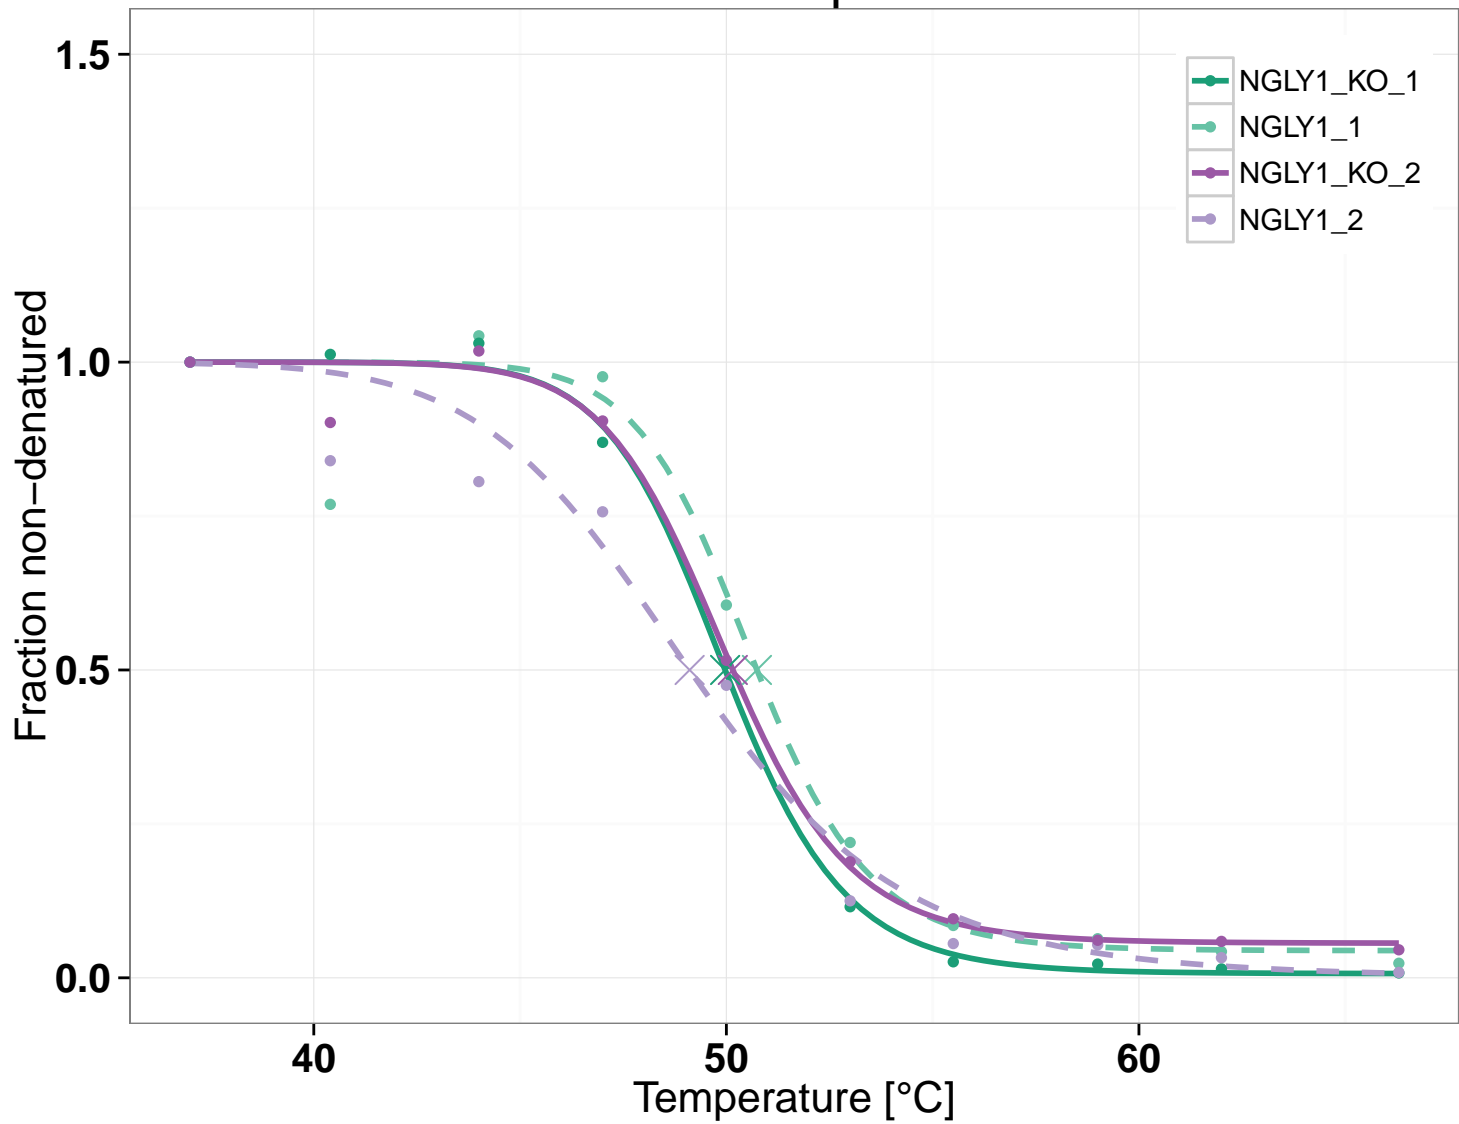

|            | meltPoint | slope  | plateau | R2   |
|------------|-----------|--------|---------|------|
| NGLY1_KO_1 | 49.97     | -0.17  | 0.01    | 1    |
| NGLY1_1    | 50.74     | -0.17  | 0.04    | 0.97 |
| NGLY1_KO_2 | 50.16     | -0.16  | 0.06    | 0.99 |
| NGLY1_2    | 49.11     | -0.097 | 0       | 0.97 |

Supplement: Supplementary file 7901 [file 1]

IPI00002325.1|POLM

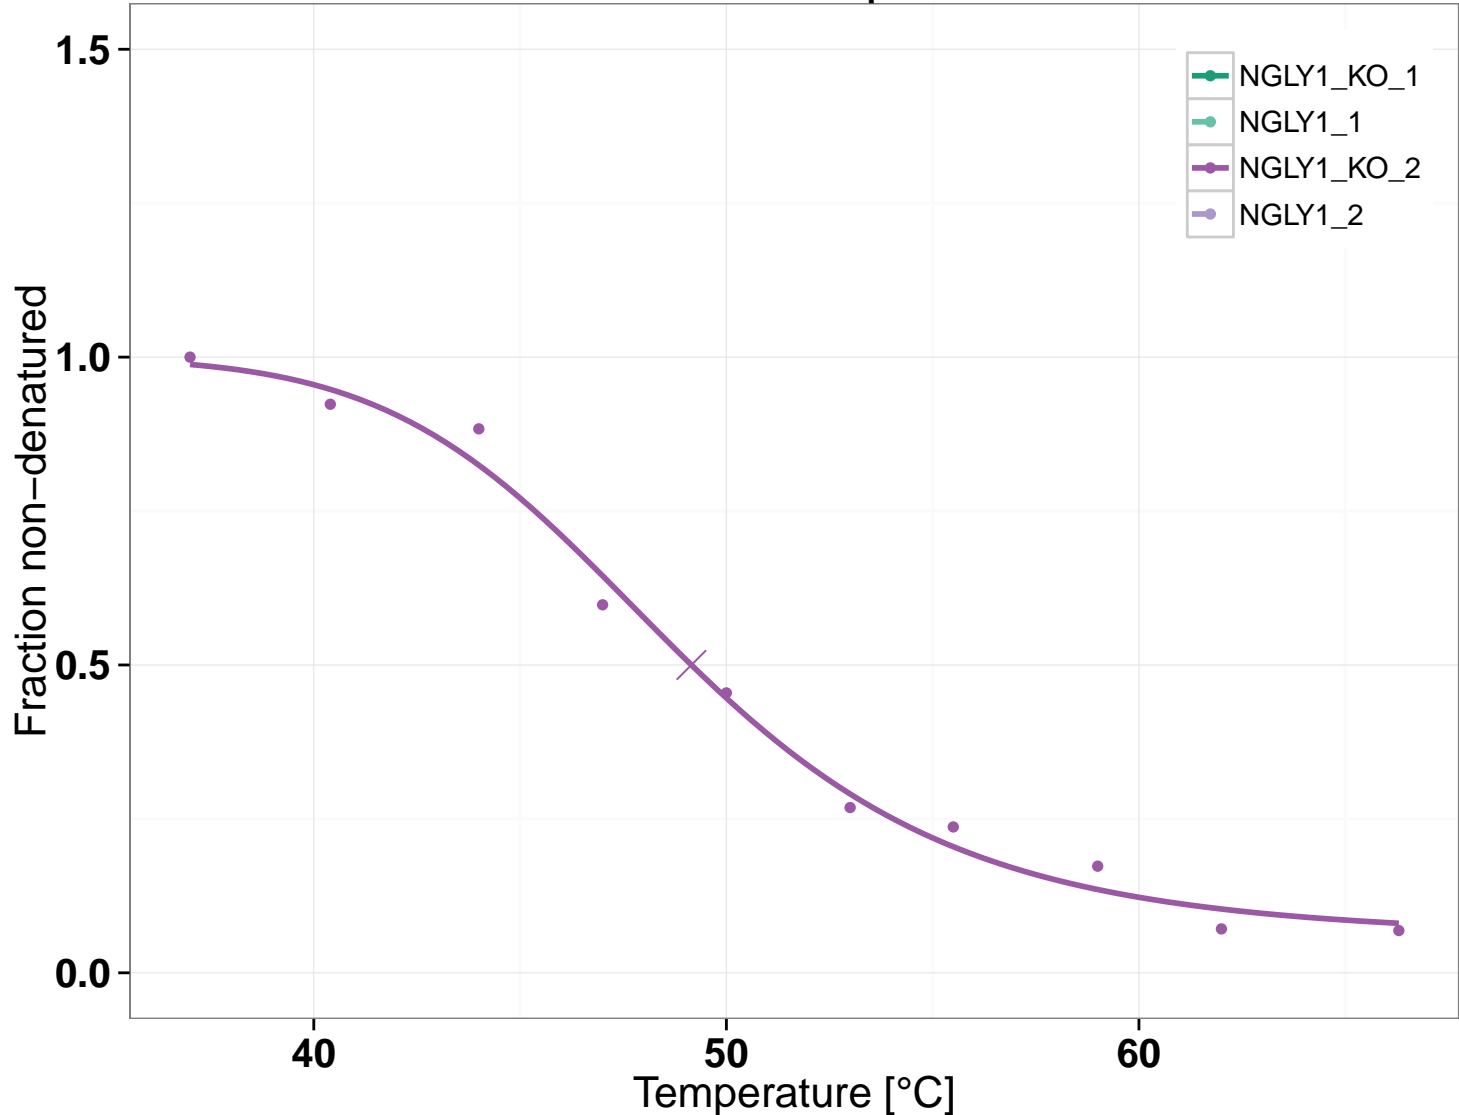

|            | meltPoint | slope  | plateau | R2   |
|------------|-----------|--------|---------|------|
| NGLY1_KO_1 | —         | —      | —       | —    |
| NGLY1_1    | —         | —      | —       | —    |
| NGLY1_KO_2 | 49.15     | -0.068 | 0.06    | 0.99 |
| NGLY1_2    | —         | —      | —       | —    |

Supplement: Supplementary file 7902 [file 1]

IPI00375879.6|KIAA1467

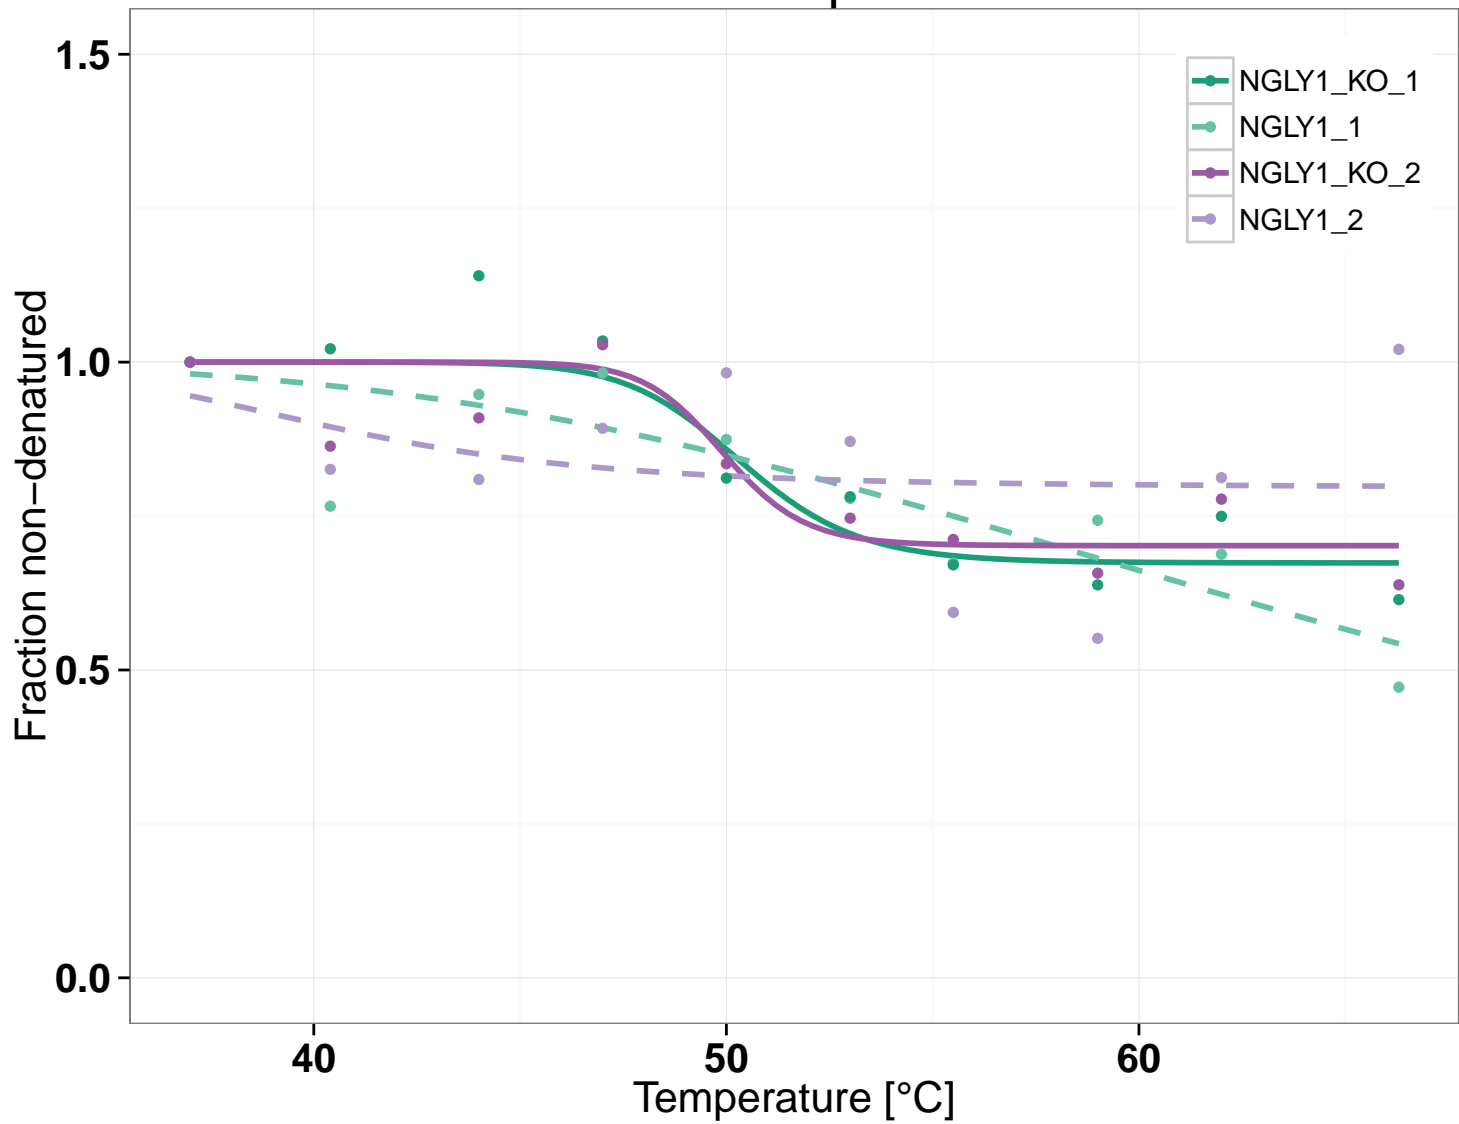

|            | meltPoint | slope  | plateau | R2   |
|------------|-----------|--------|---------|------|
| NGLY1_KO_1 | -         | -0.058 | 0.67    | 0.87 |
| NGLY1_1    | -         | -0.02  | 0       | 0.72 |
| NGLY1_KO_2 | -         | -0.077 | 0.7     | 0.75 |
| NGLY1_2    | -         | -0.015 | 0.8     | 0.11 |

Supplement: Supplementary file 7903 [file 1]

IPI00013205.6|JMJD2B

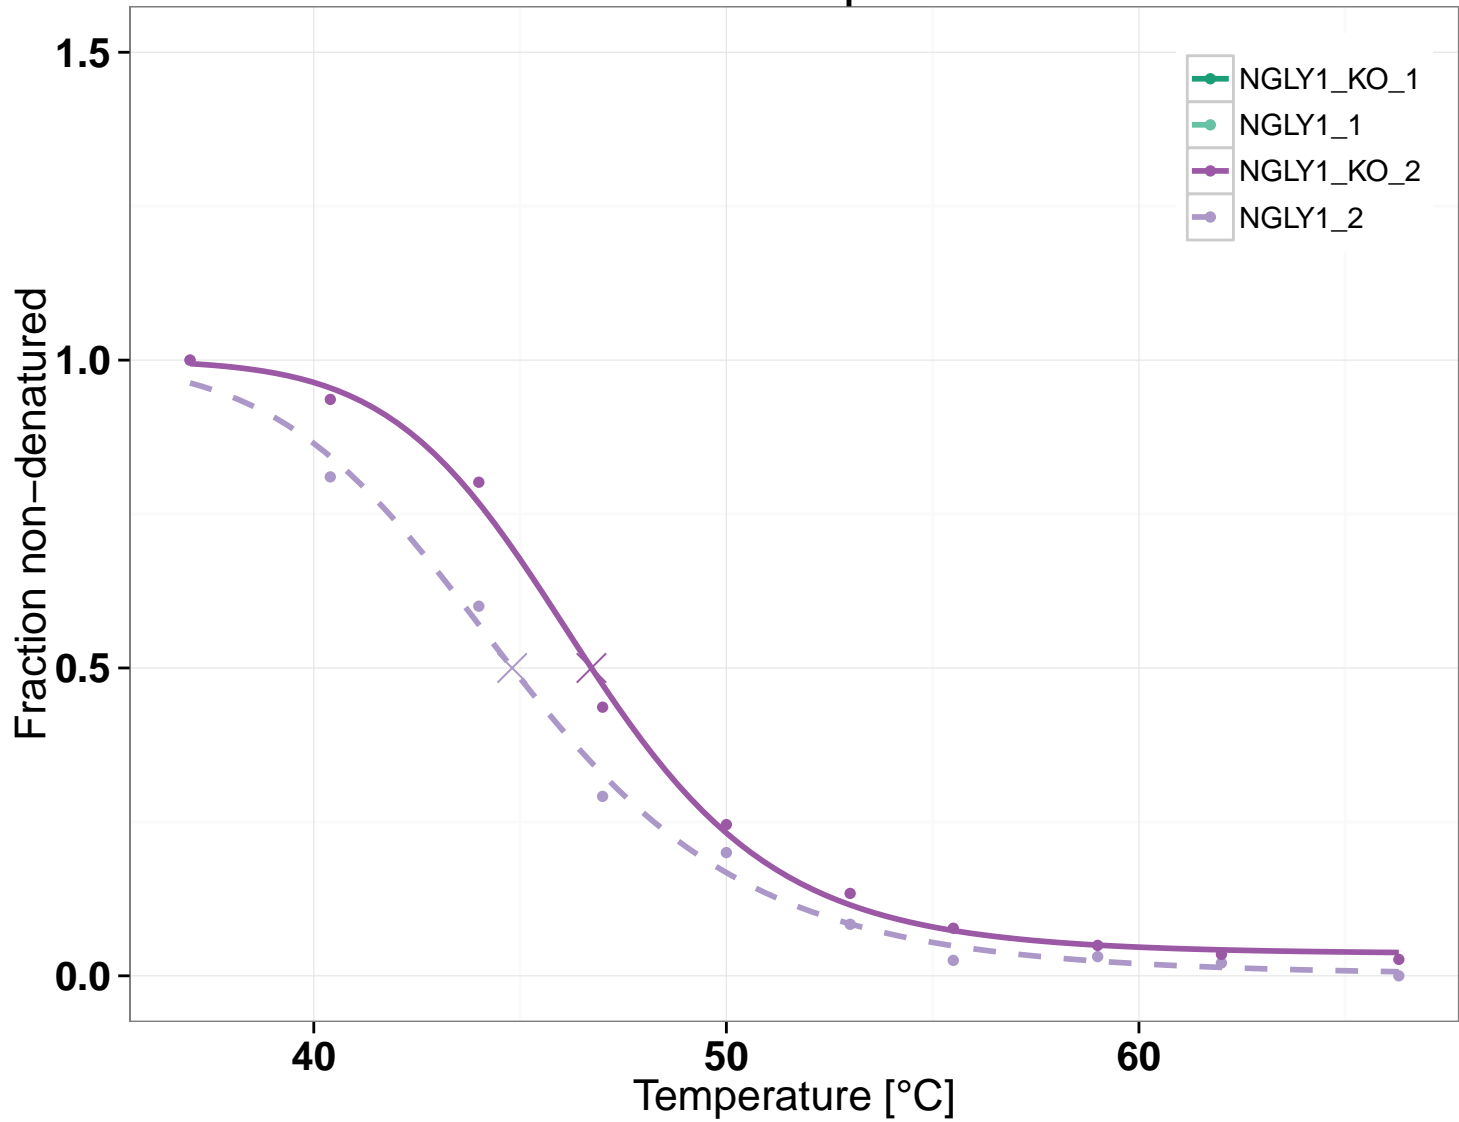

|            | meltPoint | slope  | plateau | R2   |
|------------|-----------|--------|---------|------|
| NGLY1_KO_1 | —         | —      | —       | —    |
| NGLY1_1    | —         | —      | —       | —    |
| NGLY1_KO_2 | 46.73     | -0.1   | 0.04    | 1    |
| NGLY1_2    | 44.81     | -0.088 | 0       | 0.99 |

Supplement: Supplementary file 7904 [file 1]

IPI00025239.2|NDUFS2

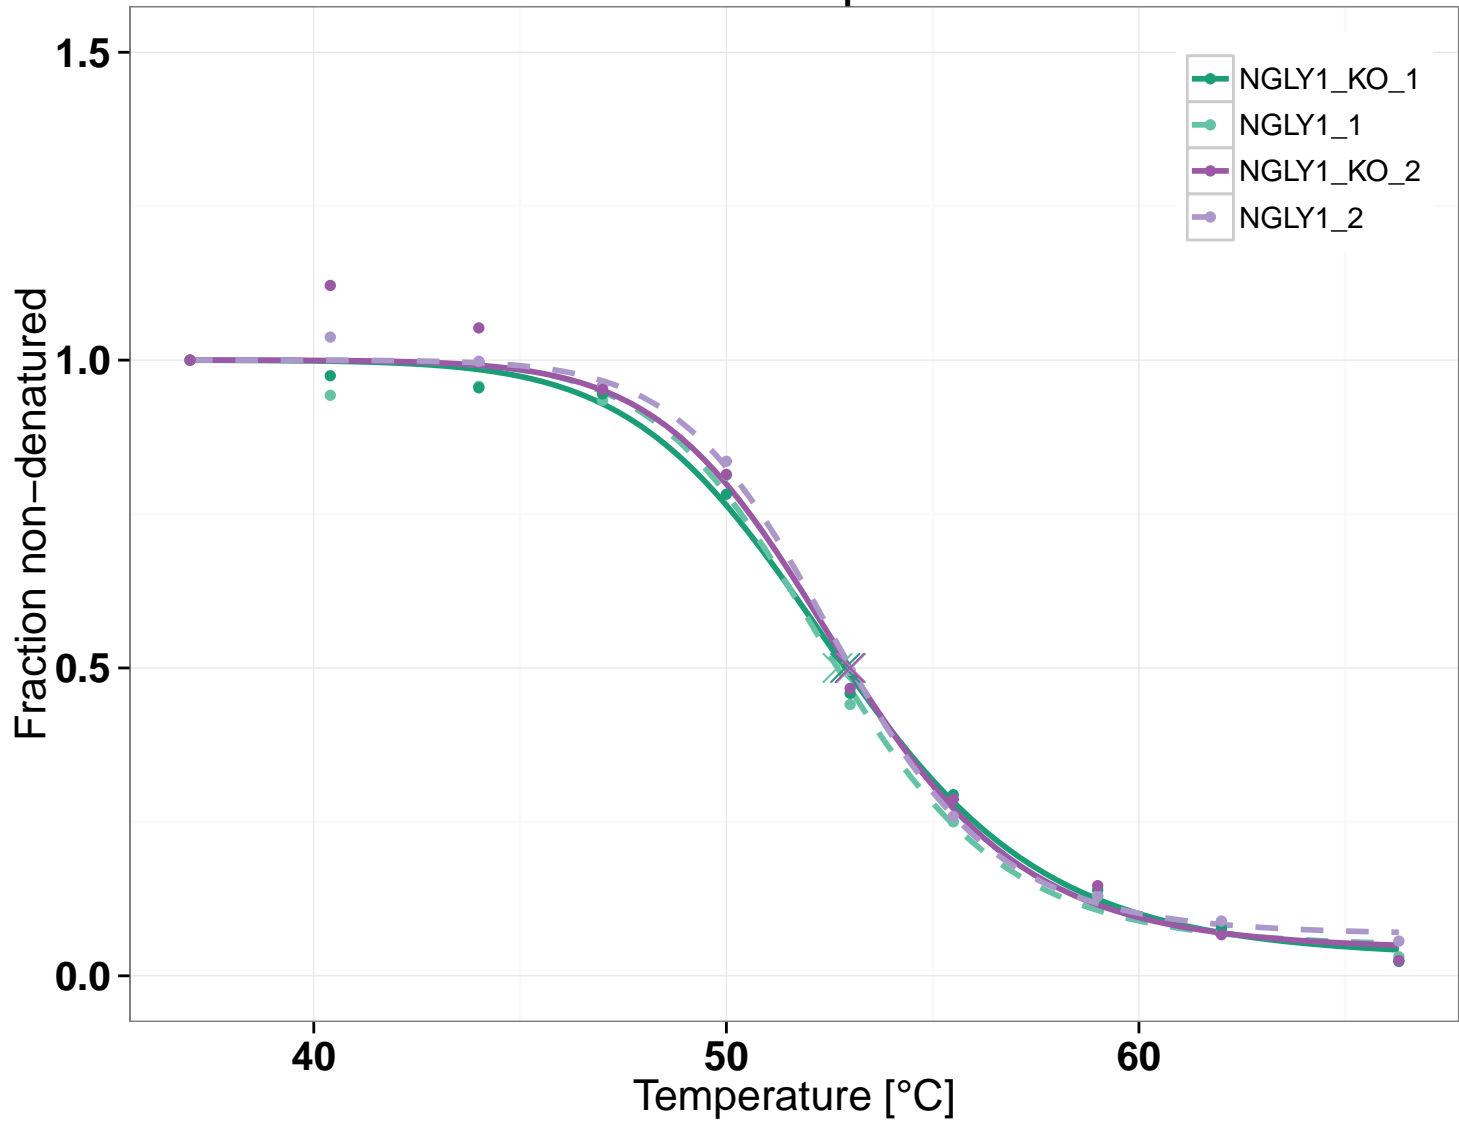

|            | meltPoint | slope  | plateau | R2   |
|------------|-----------|--------|---------|------|
| NGLY1_KO_1 | 52.88     | -0.097 | 0.03    | 1    |
| NGLY1_1    | 52.69     | -0.11  | 0.05    | 1    |
| NGLY1_KO_2 | 52.99     | -0.11  | 0.04    | 0.99 |
| NGLY1_2    | 53.02     | -0.12  | 0.07    | 1    |

Supplement: Supplementary file 7905 [file 1]

# IPI00218568.7|PCBD1

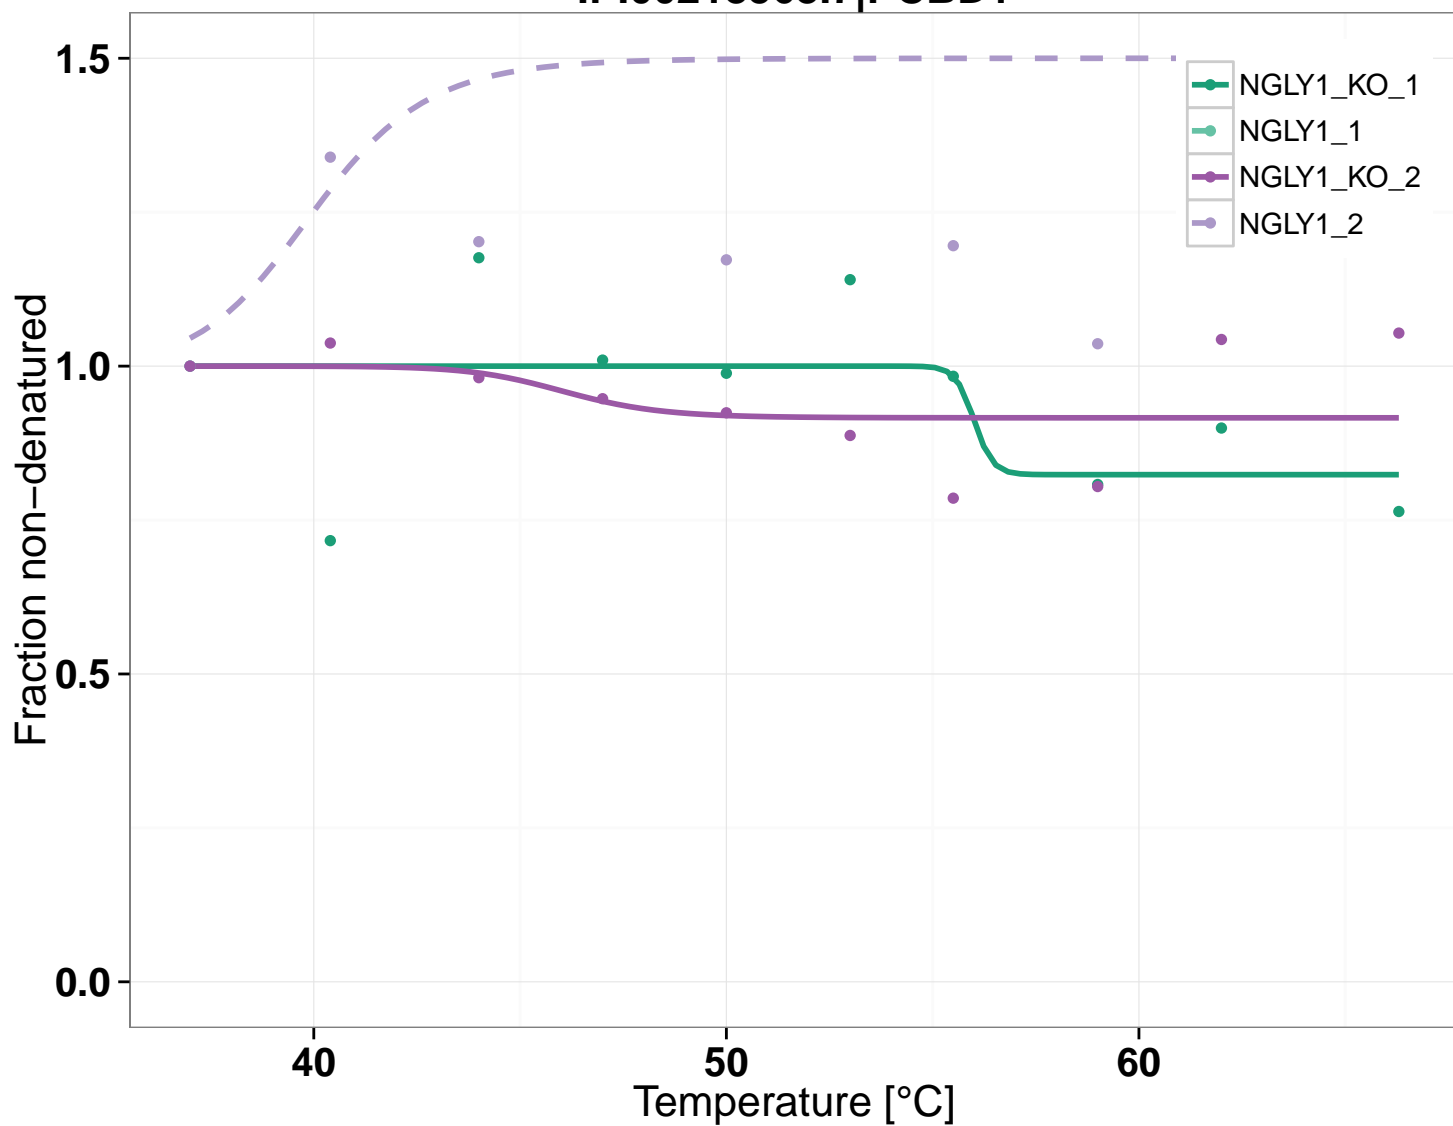

|            | meltPoint | slope  | plateau | R2   |
|------------|-----------|--------|---------|------|
| NGLY1_KO_1 | —         | -0.2   | 0.82    | 0.32 |
| NGLY1_1    | —         | —      | —       | —    |
| NGLY1_KO_2 | —         | -0.018 | 0.92    | 0.2  |
| NGLY1_2    | —         | 0.09   | 1.5     | 0.17 |

Supplement: Supplementary file 7906 [file 1]

# IPI00874031.1|HMGN3

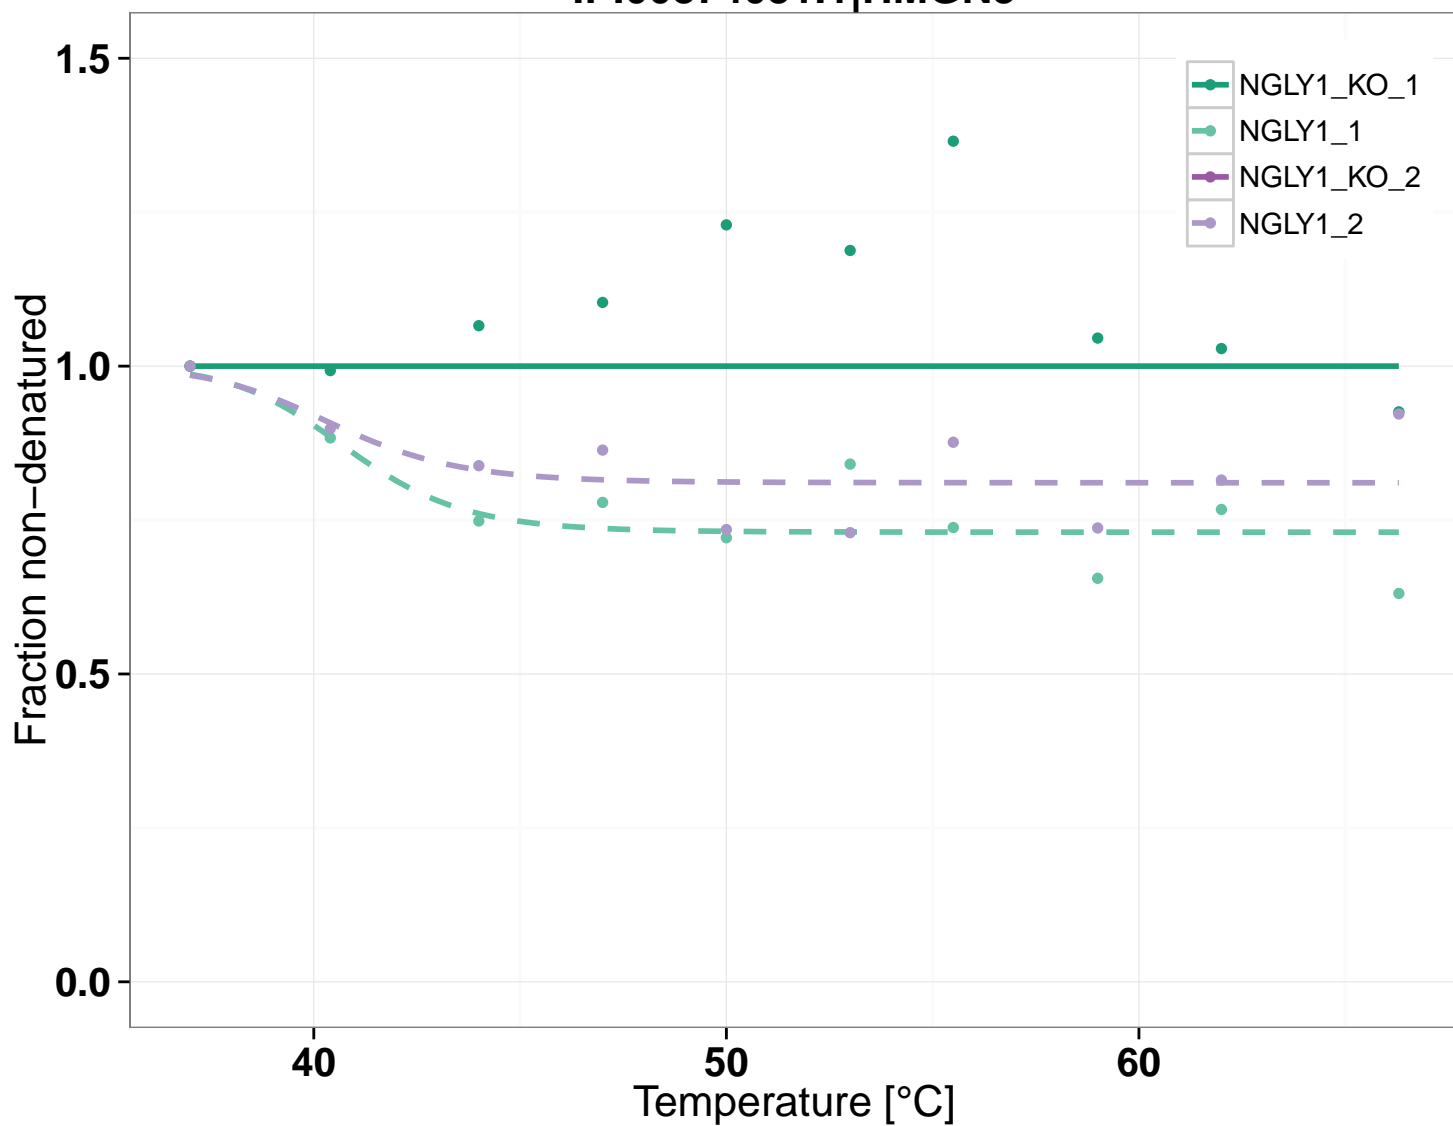

|            | meltPoint | slope  | plateau | R2    |
|------------|-----------|--------|---------|-------|
| NGLY1_KO_1 | —         | —      | 0       | −0.57 |
| NGLY1_1    | —         | −0.048 | 0.73    | 0.71  |
| NGLY1_KO_2 | —         | —      | —       | —     |
| NGLY1_2    | —         | −0.031 | 0.81    | 0.48  |

Supplement: Supplementary file 7907 [file 1]

# IPI00514230.2|IFNGR1

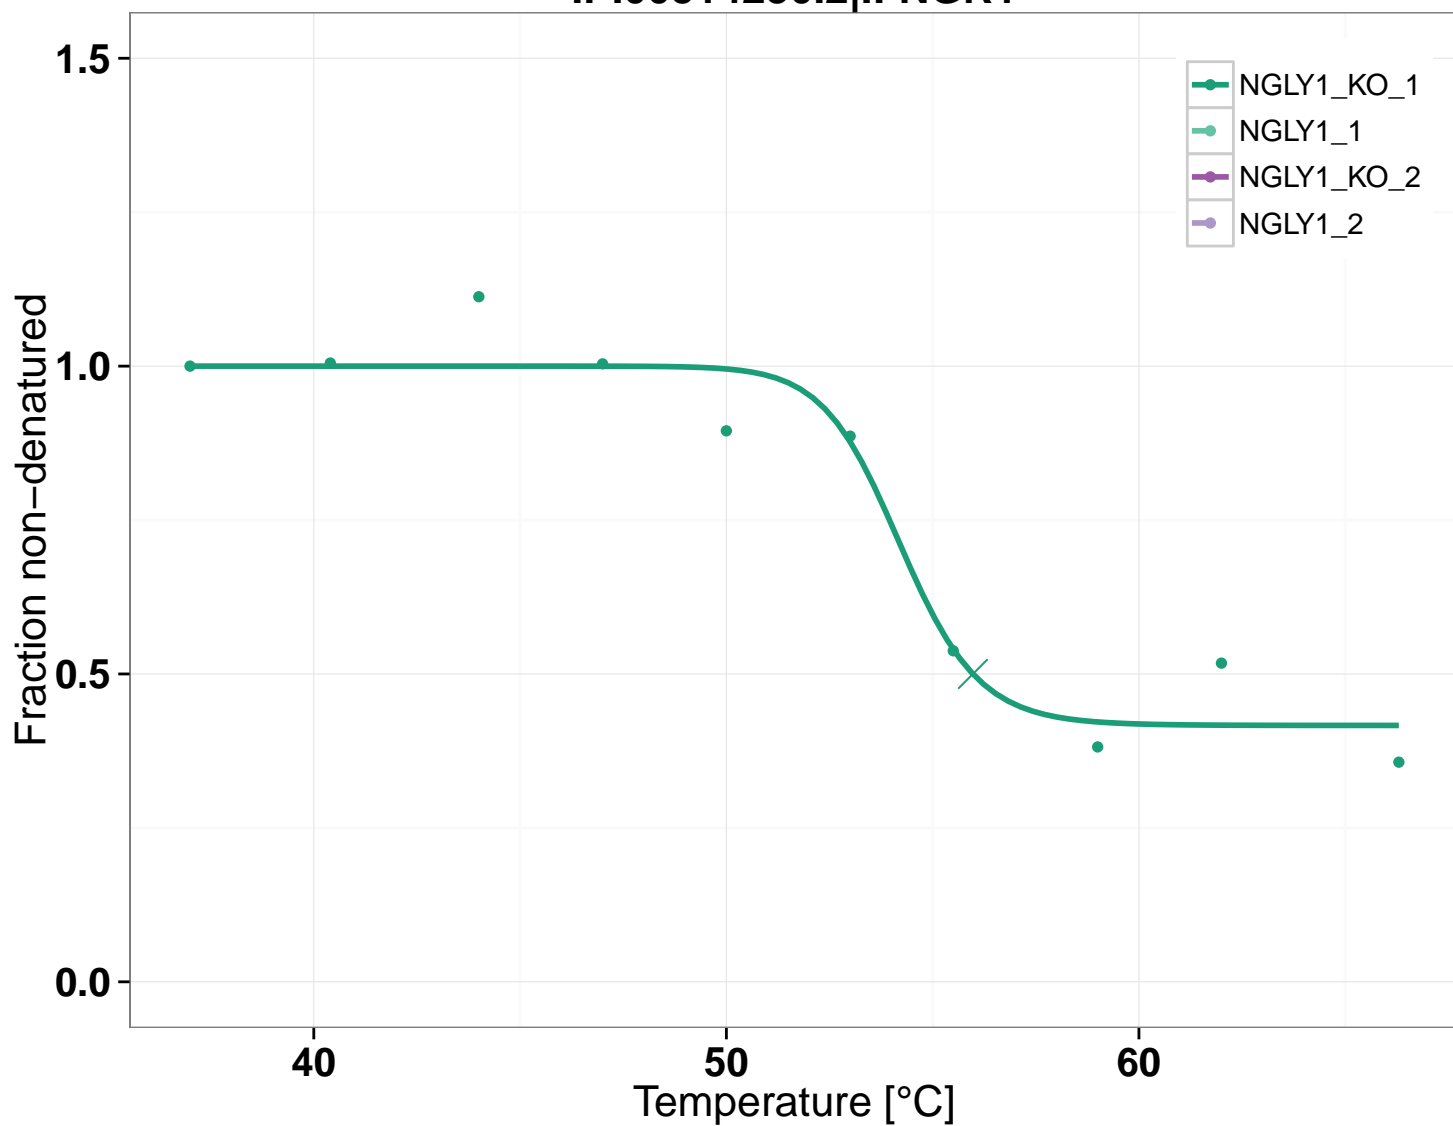

|            | meltPoint | slope | plateau | R2   |
|------------|-----------|-------|---------|------|
| NGLY1_KO_1 | 55.98     | -0.15 | 0.42    | 0.95 |
| NGLY1_1    | —         | —     | —       | —    |
| NGLY1_KO_2 | —         | —     | —       | —    |
| NGLY1_2    | —         | —     | —       | —    |

Supplement: Supplementary file 7908 [file 1]

# IPI00003768.1|PES1

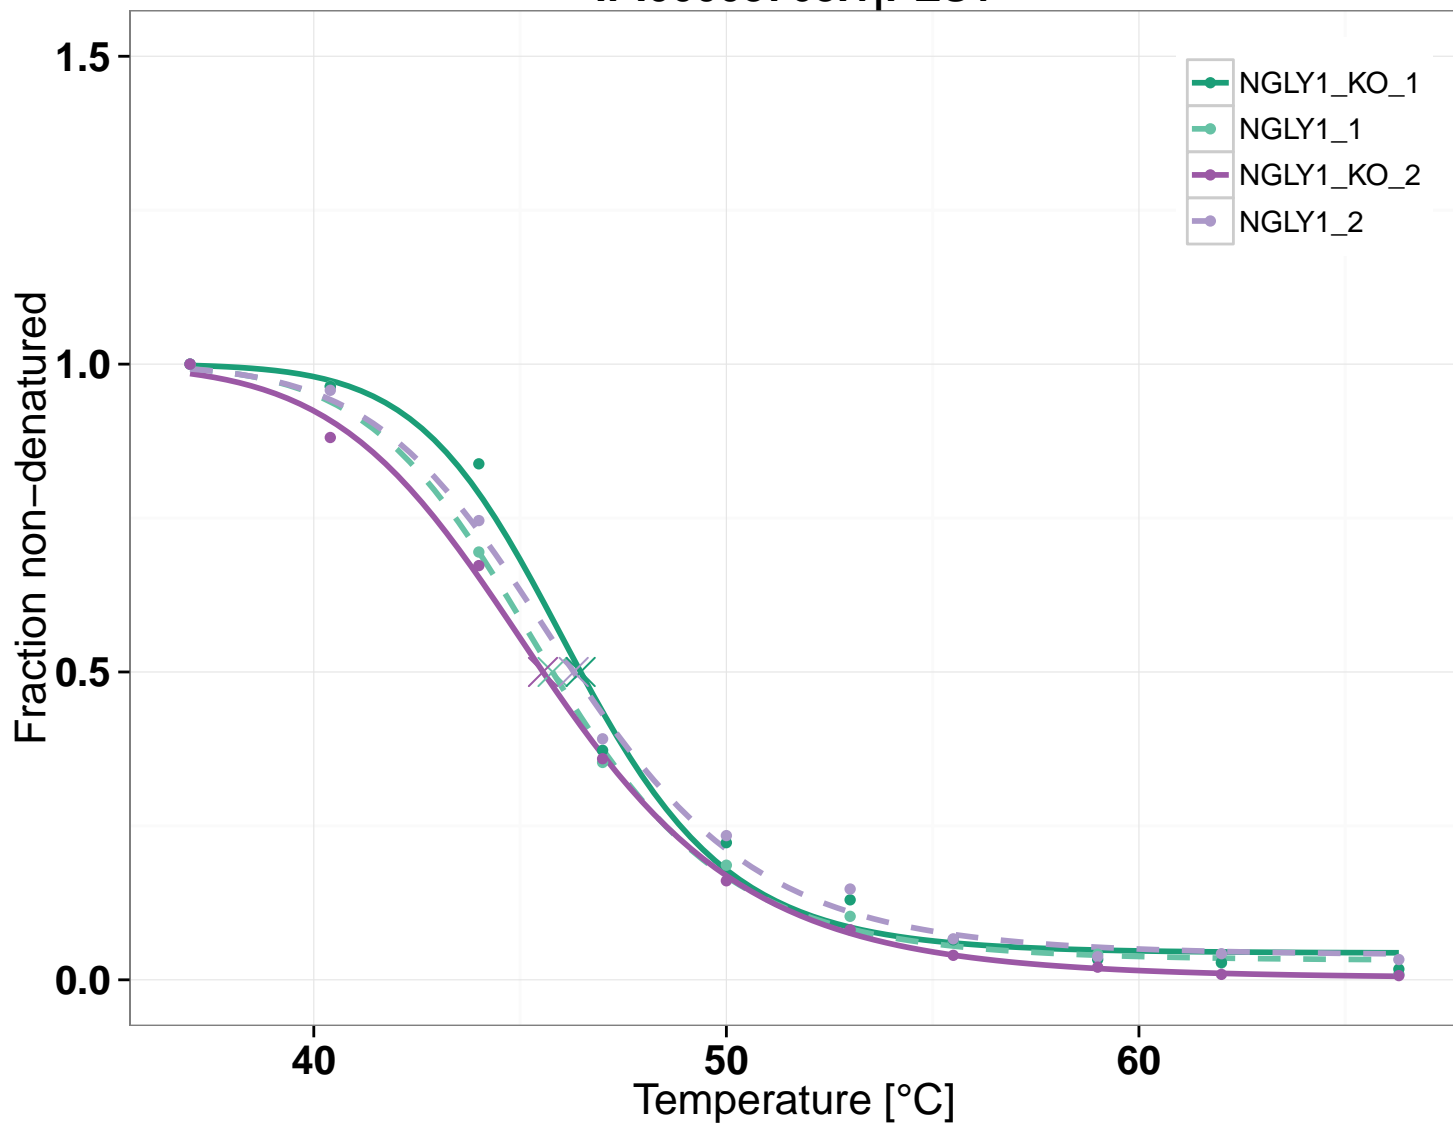

|            | meltPoint | slope | plateau | R2   |
|------------|-----------|-------|---------|------|
| NGLY1_KO_1 | 46.47     | -0.13 | 0.04    | 0.99 |
| NGLY1_1    | 45.79     | -0.11 | 0.03    | 1    |
| NGLY1_KO_2 | 45.56     | -0.1  | 0       | 1    |
| NGLY1_2    | 46.3      | -0.1  | 0.04    | 1    |

Supplement: Supplementary file 7909 [file 1]

IPI00740019.2|CCDC88C

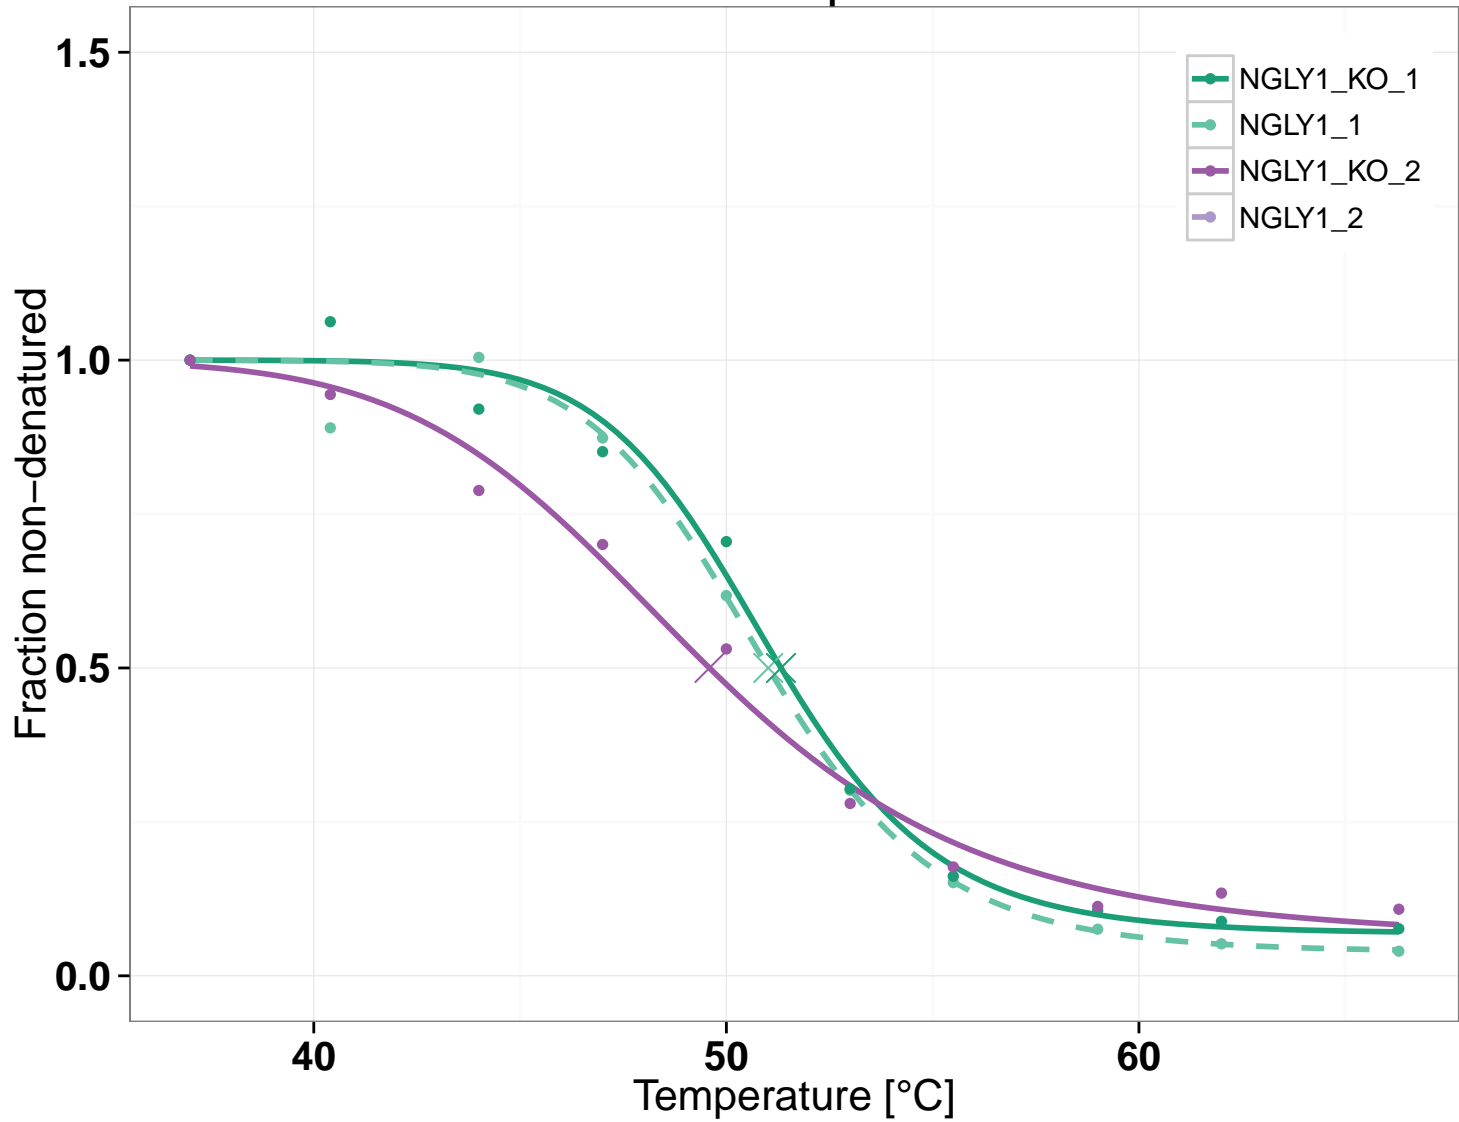

|            | meltPoint | slope  | plateau | R2   |
|------------|-----------|--------|---------|------|
| NGLY1_KO_1 | 51.32     | -0.11  | 0.07    | 0.99 |
| NGLY1_1    | 51.02     | -0.11  | 0.04    | 0.99 |
| NGLY1_KO_2 | 49.59     | -0.068 | 0.06    | 0.99 |
| NGLY1_2    | -         | -      | -       | -    |

Supplement: Supplementary file 7910 [file 1]

# IPI00031564.1|GGCT

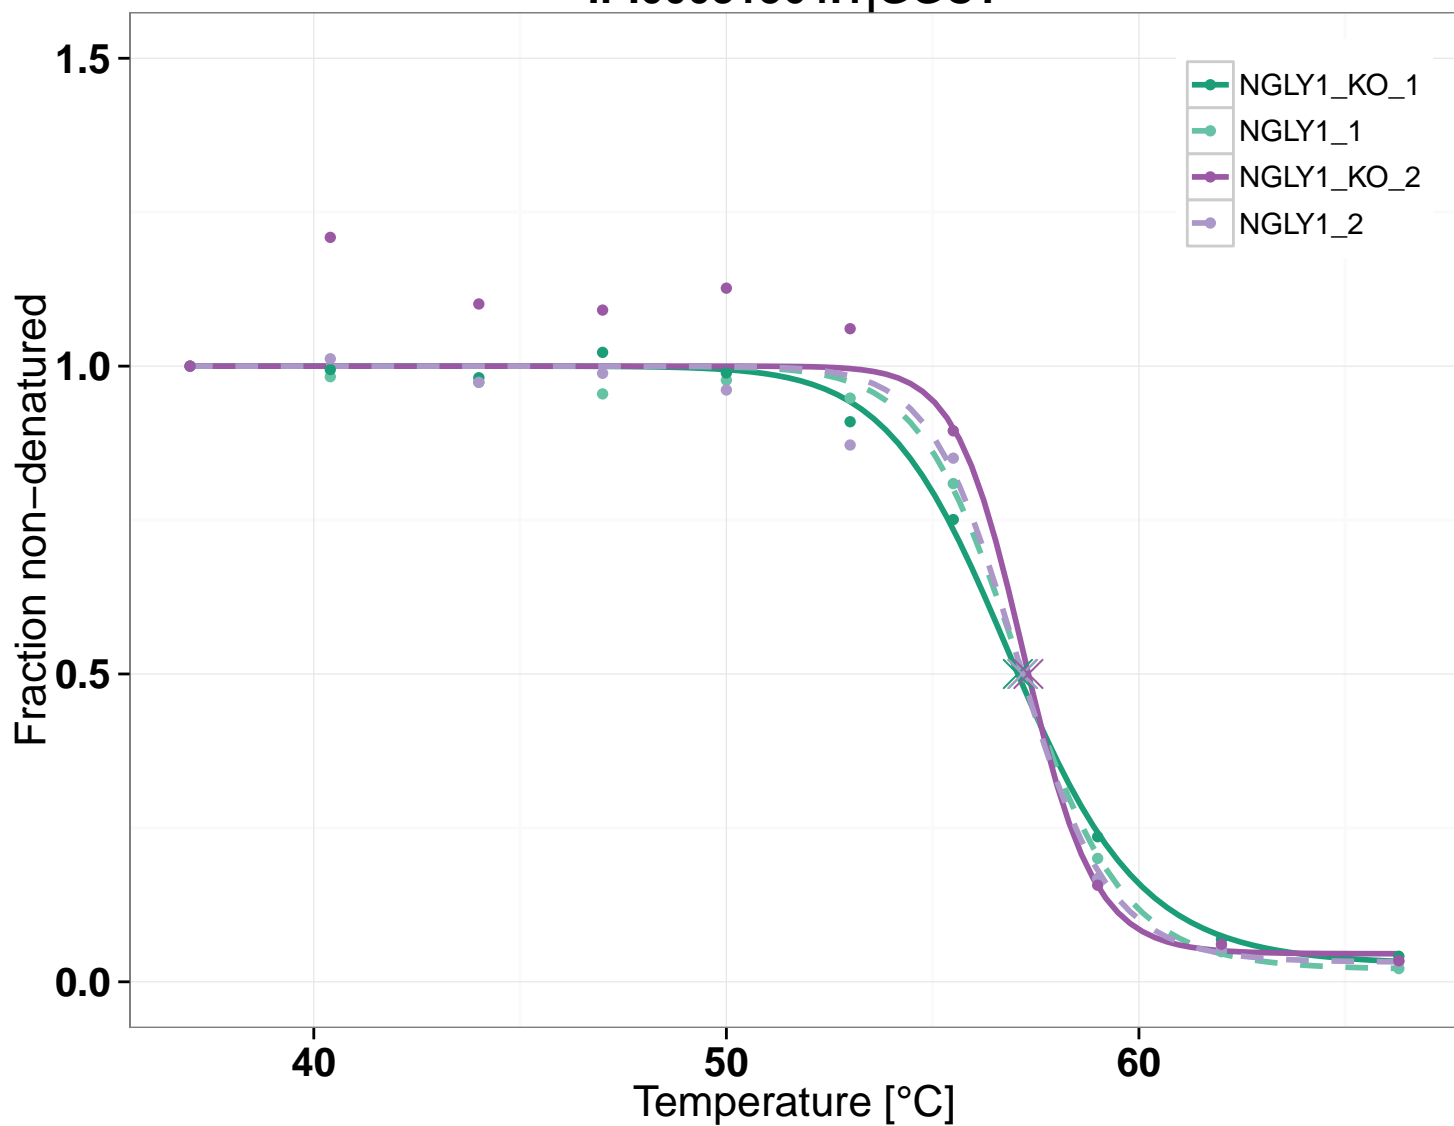

|            | meltPoint | slope | plateau | R2   |
|------------|-----------|-------|---------|------|
| NGLY1_KO_1 | 57.07     | -0.16 | 0.03    | 1    |
| NGLY1_1    | 57.19     | -0.2  | 0.02    | 1    |
| NGLY1_KO_2 | 57.32     | -0.29 | 0.05    | 0.96 |
| NGLY1_2    | 57.17     | -0.22 | 0.03    | 0.99 |

Supplement: Supplementary file 7911 [file 1]

IPI00867585.1|JAKMIP2

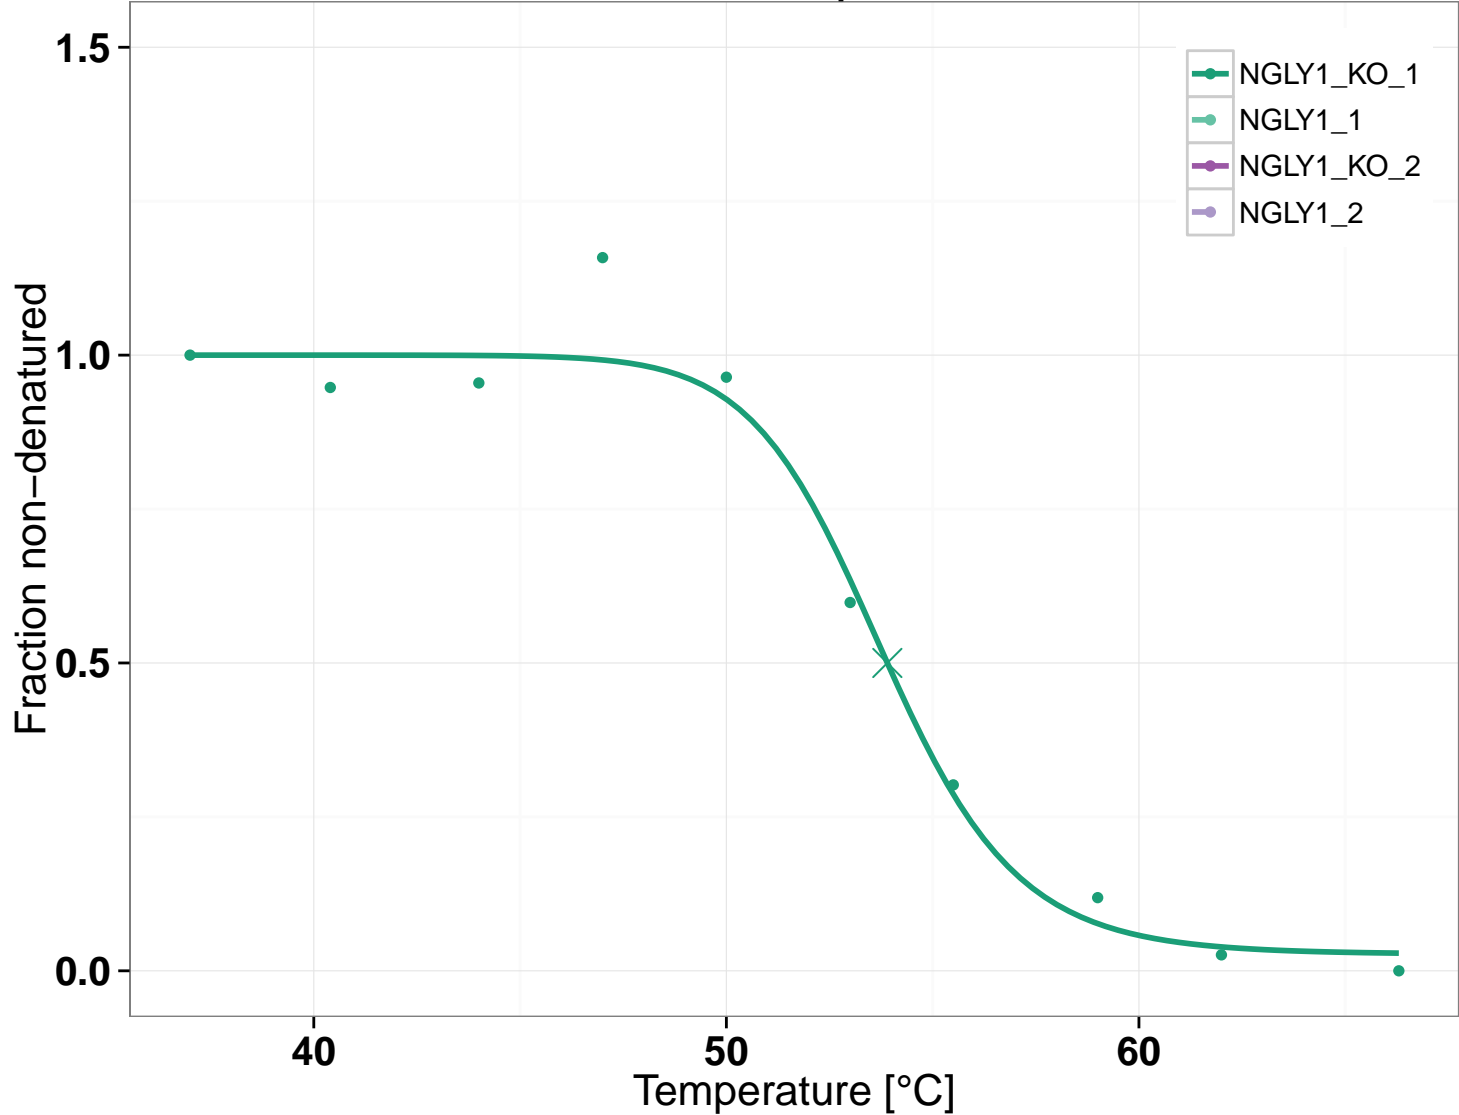

|            | meltPoint | slope | plateau | R2   |
|------------|-----------|-------|---------|------|
| NGLY1_KO_1 | 53.9      | -0.15 | 0.03    | 0.98 |
| NGLY1_1    | -         | -     | -       | -    |
| NGLY1_KO_2 | -         | -     | -       | -    |
| NGLY1_2    | -         | -     | -       | -    |

Supplement: Supplementary file 7912 [file 1]

IPI00385649.2|LRCH3

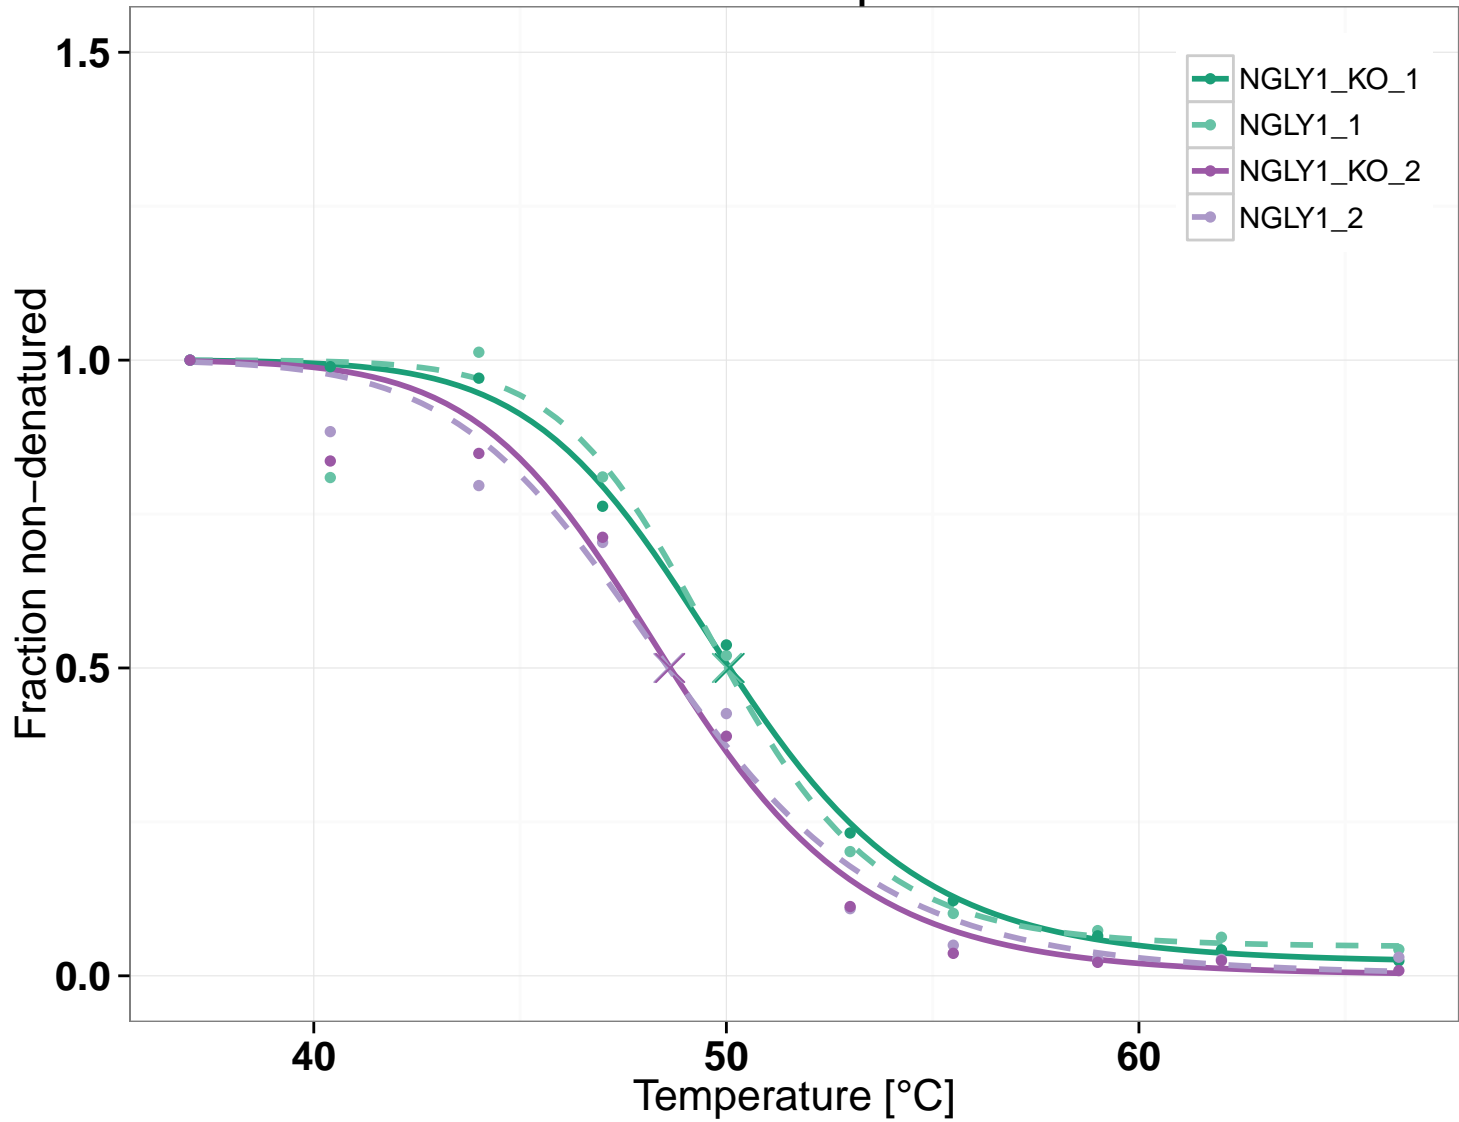

|            | meltPoint | slope  | plateau | R2   |
|------------|-----------|--------|---------|------|
| NGLY1_KO_1 | 50.08     | -0.1   | 0.02    | 1    |
| NGLY1_1    | 50.01     | -0.12  | 0.05    | 0.97 |
| NGLY1_KO_2 | 48.64     | -0.11  | 0       | 0.98 |
| NGLY1_2    | 48.6      | -0.096 | 0       | 0.98 |

Supplement: Supplementary file 7913 [file 1]

# IPI00376317.4|EDC4

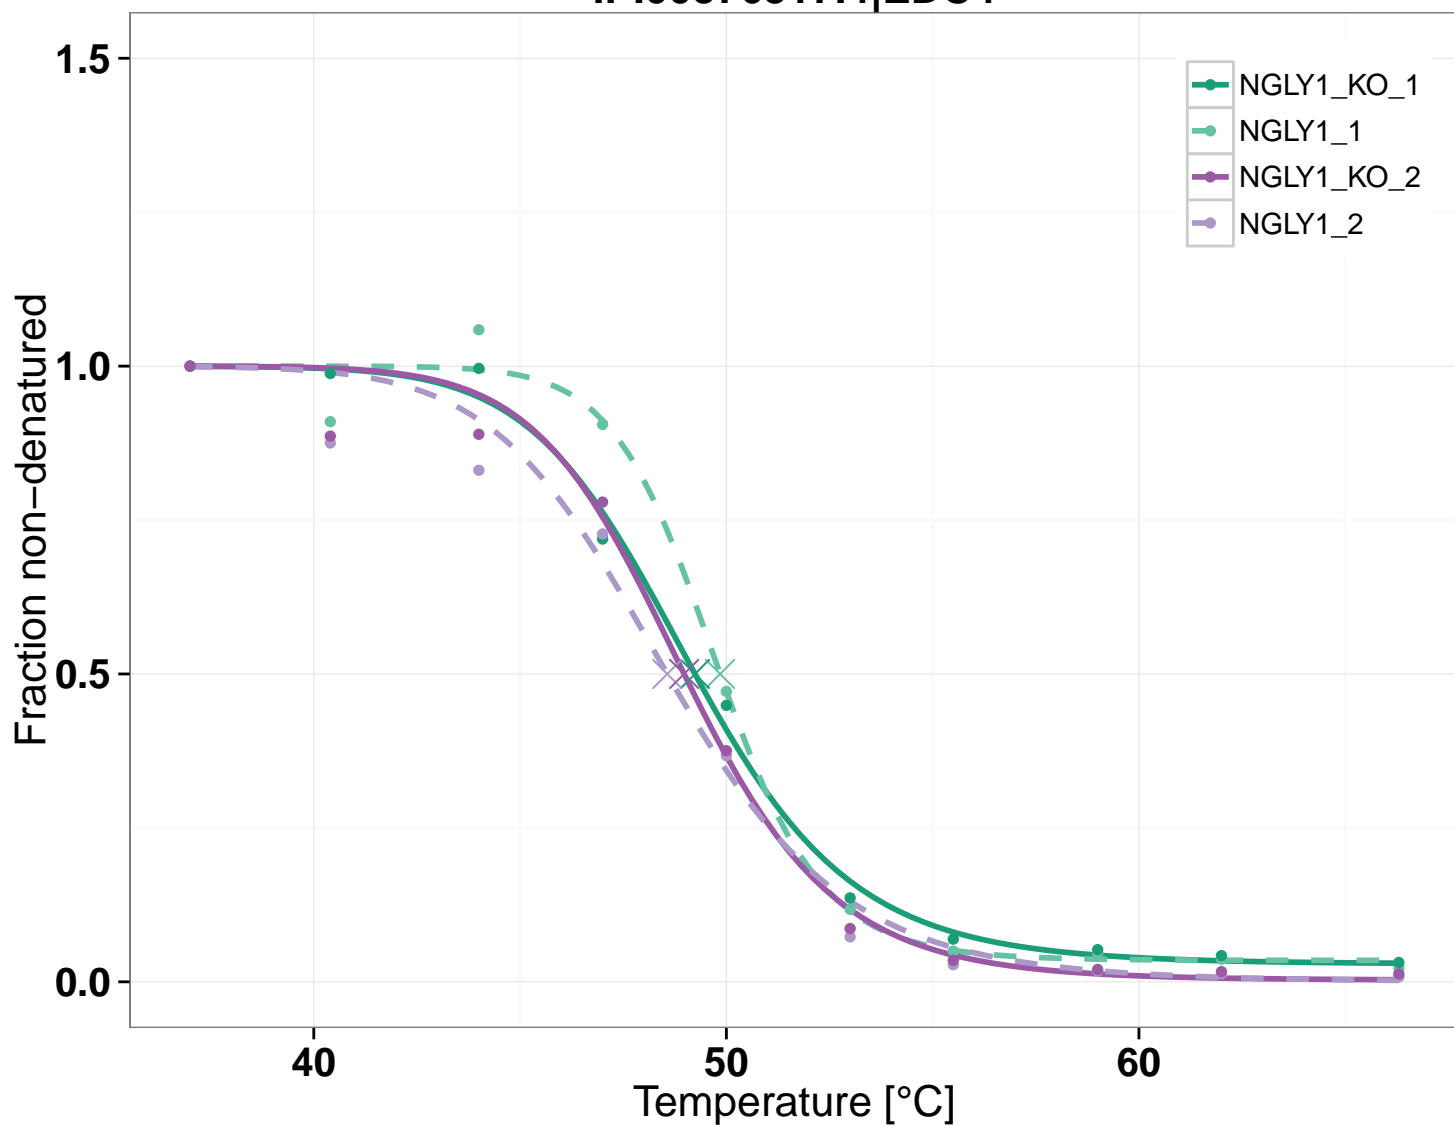

|            | meltPoint | slope | plateau | R2   |
|------------|-----------|-------|---------|------|
| NGLY1_KO_1 | 49.24     | -0.12 | 0.03    | 1    |
| NGLY1_1    | 49.85     | -0.19 | 0.03    | 0.99 |
| NGLY1_KO_2 | 48.98     | -0.14 | 0       | 0.99 |
| NGLY1_2    | 48.57     | -0.12 | 0       | 0.98 |

Supplement: Supplementary file 7914 [file 1]

# IPI00006158.1|LRMP

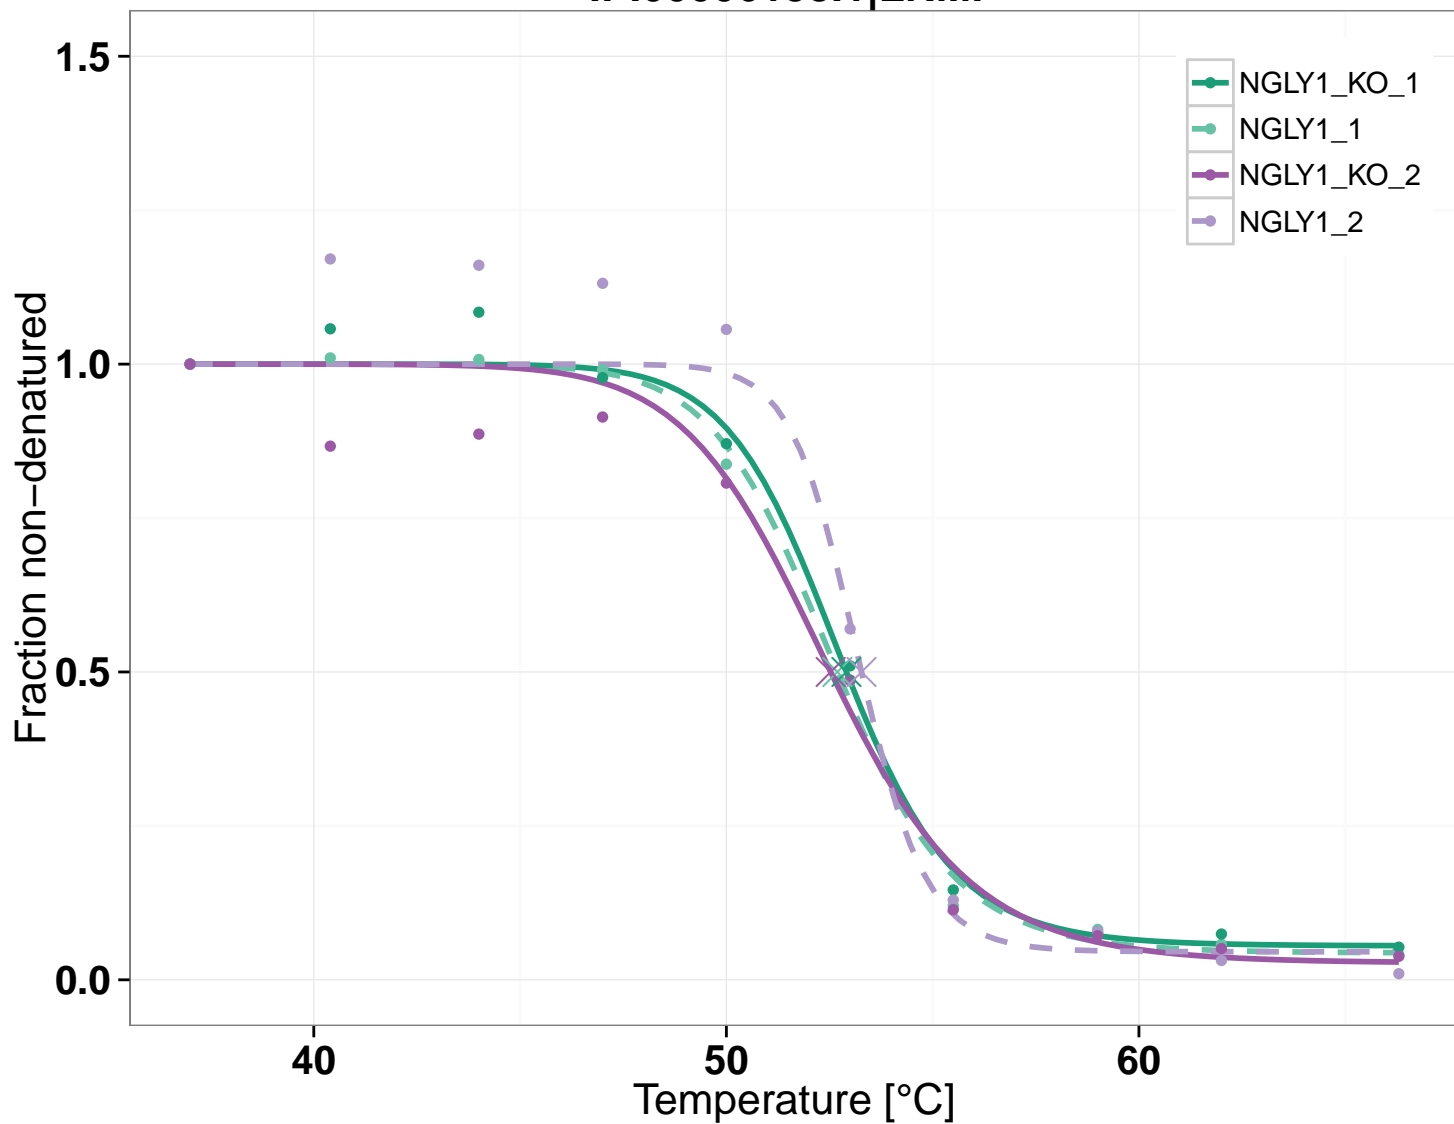

|            | meltPoint | slope | plateau | R2   |
|------------|-----------|-------|---------|------|
| NGLY1_KO_1 | 52.91     | -0.17 | 0.06    | 0.99 |
| NGLY1_1    | 52.69     | -0.16 | 0.04    | 1    |
| NGLY1_KO_2 | 52.53     | -0.14 | 0.03    | 0.97 |
| NGLY1_2    | 53.28     | -0.29 | 0.05    | 0.97 |

Supplement: Supplementary file 7915 [file 1]

IPI00000865.2|STARD3

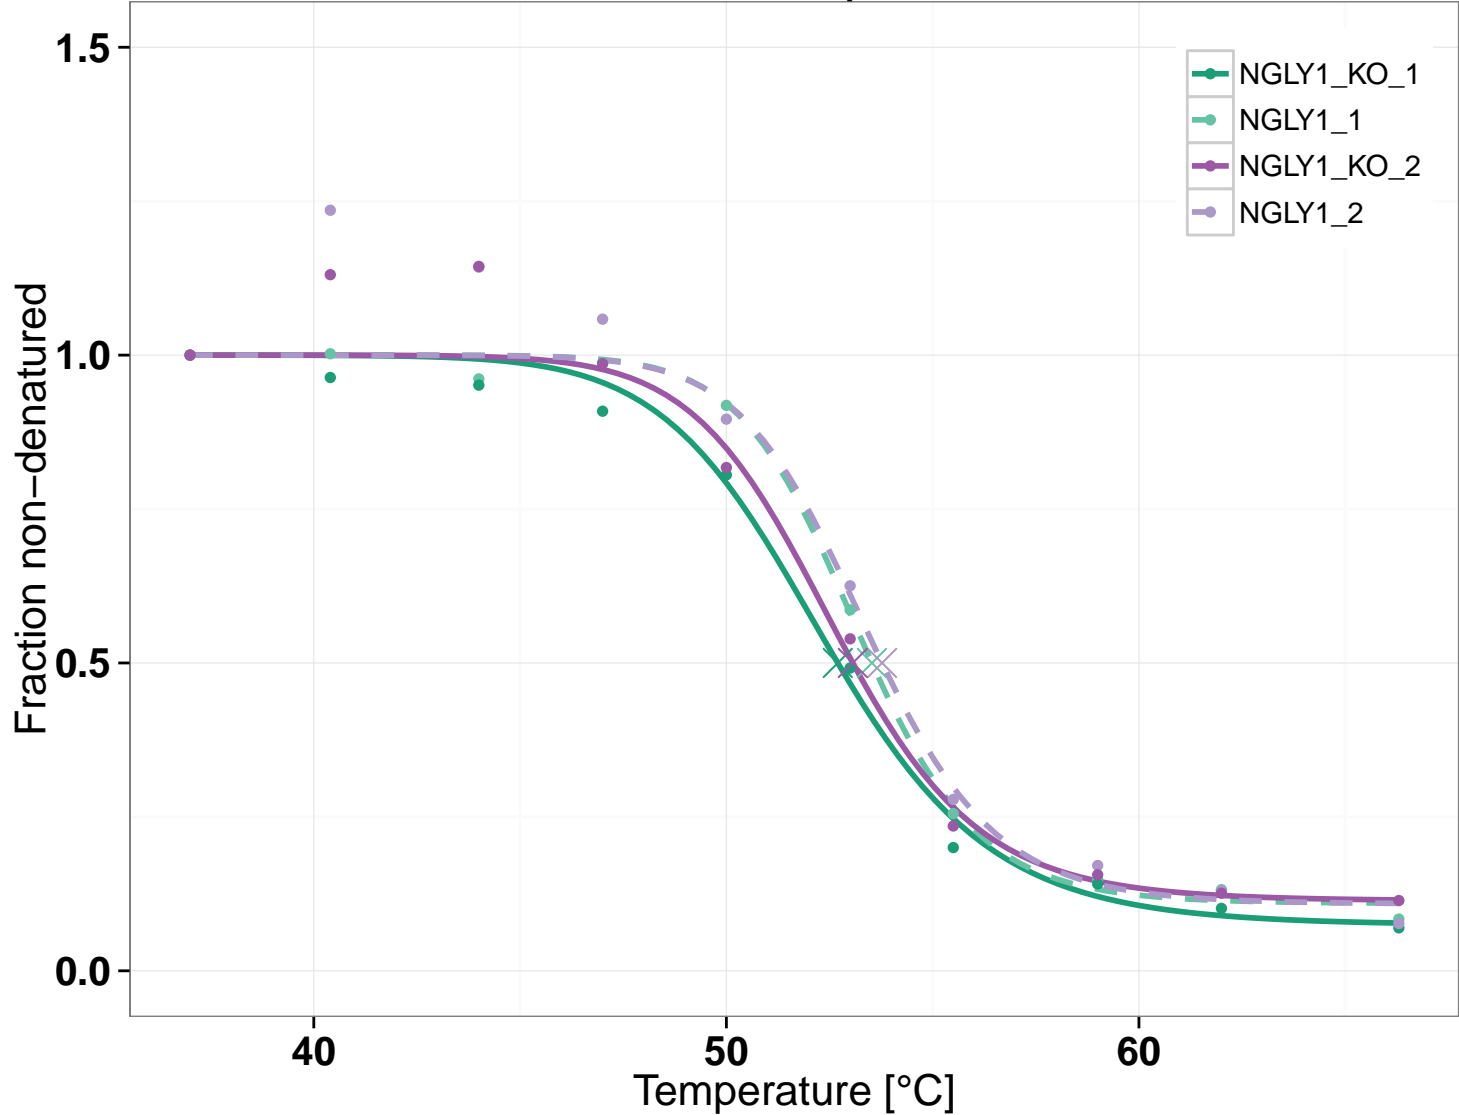

|            | meltPoint | slope | plateau | R2   |
|------------|-----------|-------|---------|------|
| NGLY1_KO_1 | 52.7      | -0.12 | 0.07    | 0.99 |
| NGLY1_1    | 53.53     | -0.15 | 0.11    | 1    |
| NGLY1_KO_2 | 53.06     | -0.13 | 0.11    | 0.98 |
| NGLY1_2    | 53.77     | -0.14 | 0.11    | 0.96 |

Supplement: Supplementary file 7916 [file 1]

IPI00886807.1|LOC646670

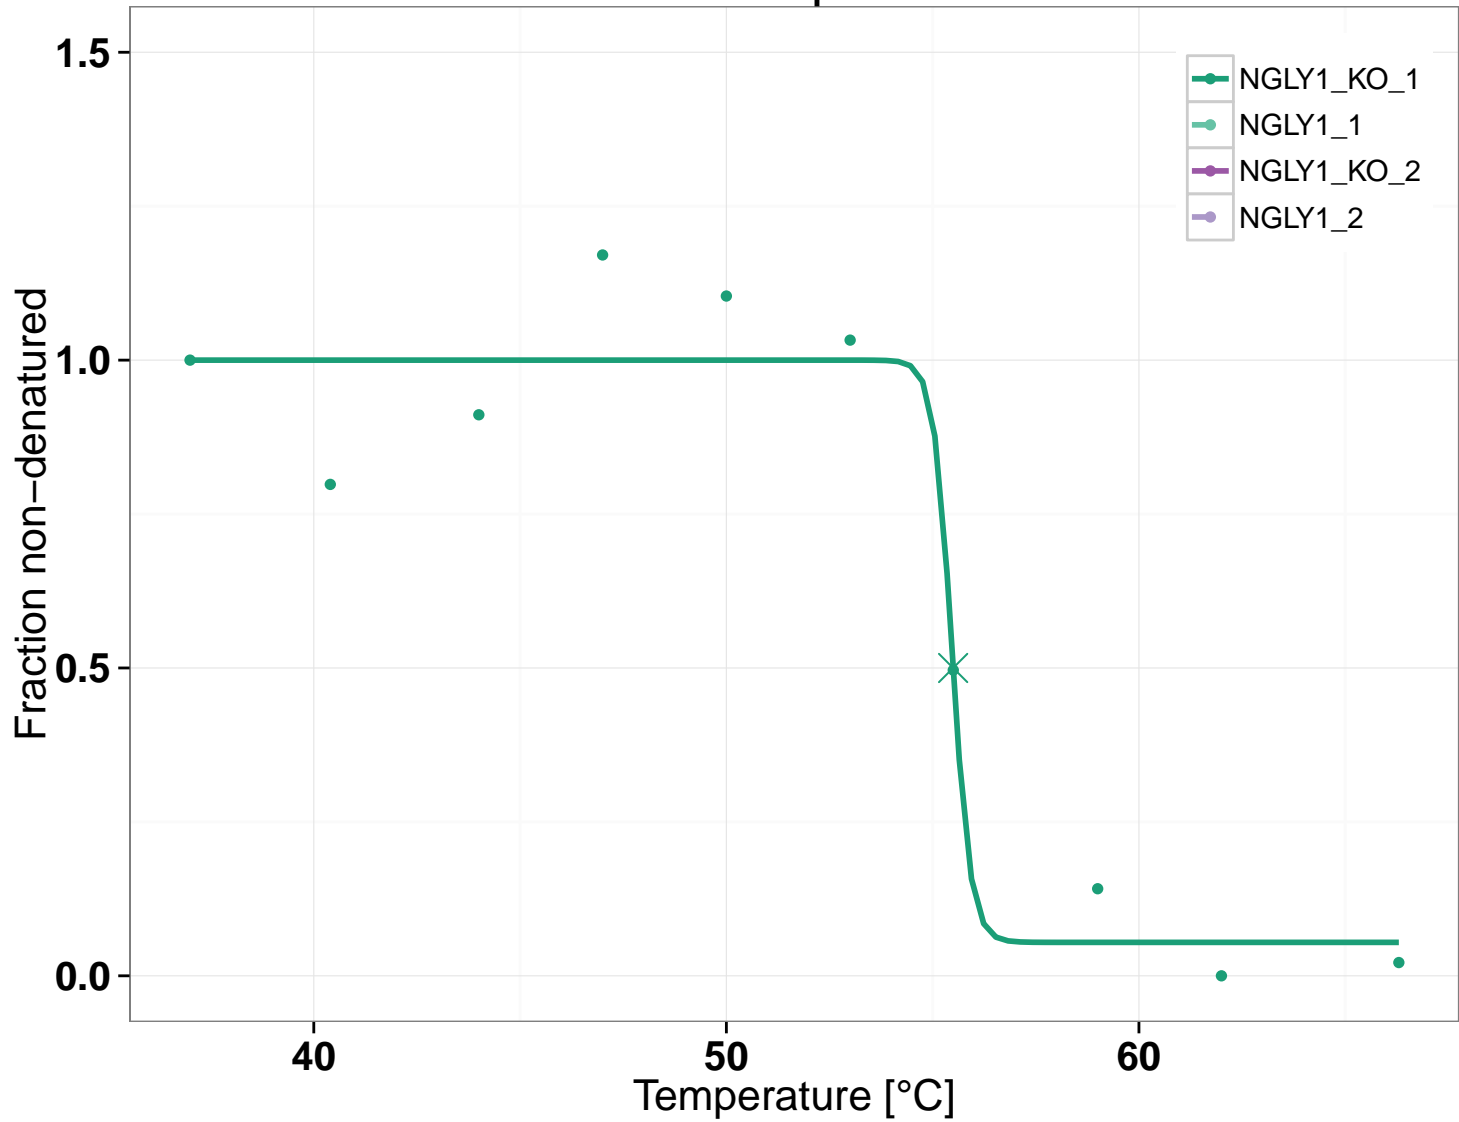

|            | meltPoint | slope | plateau | R2   |
|------------|-----------|-------|---------|------|
| NGLY1_KO_1 | 55.5      | -1.1  | 0.05    | 0.95 |
| NGLY1_1    | -         | -     | -       | -    |
| NGLY1_KO_2 | -         | -     | -       | -    |
| NGLY1_2    | -         | -     | -       | -    |

Supplement: Supplementary file 7917 [file 1]

IPI00020407.1|MGAT5

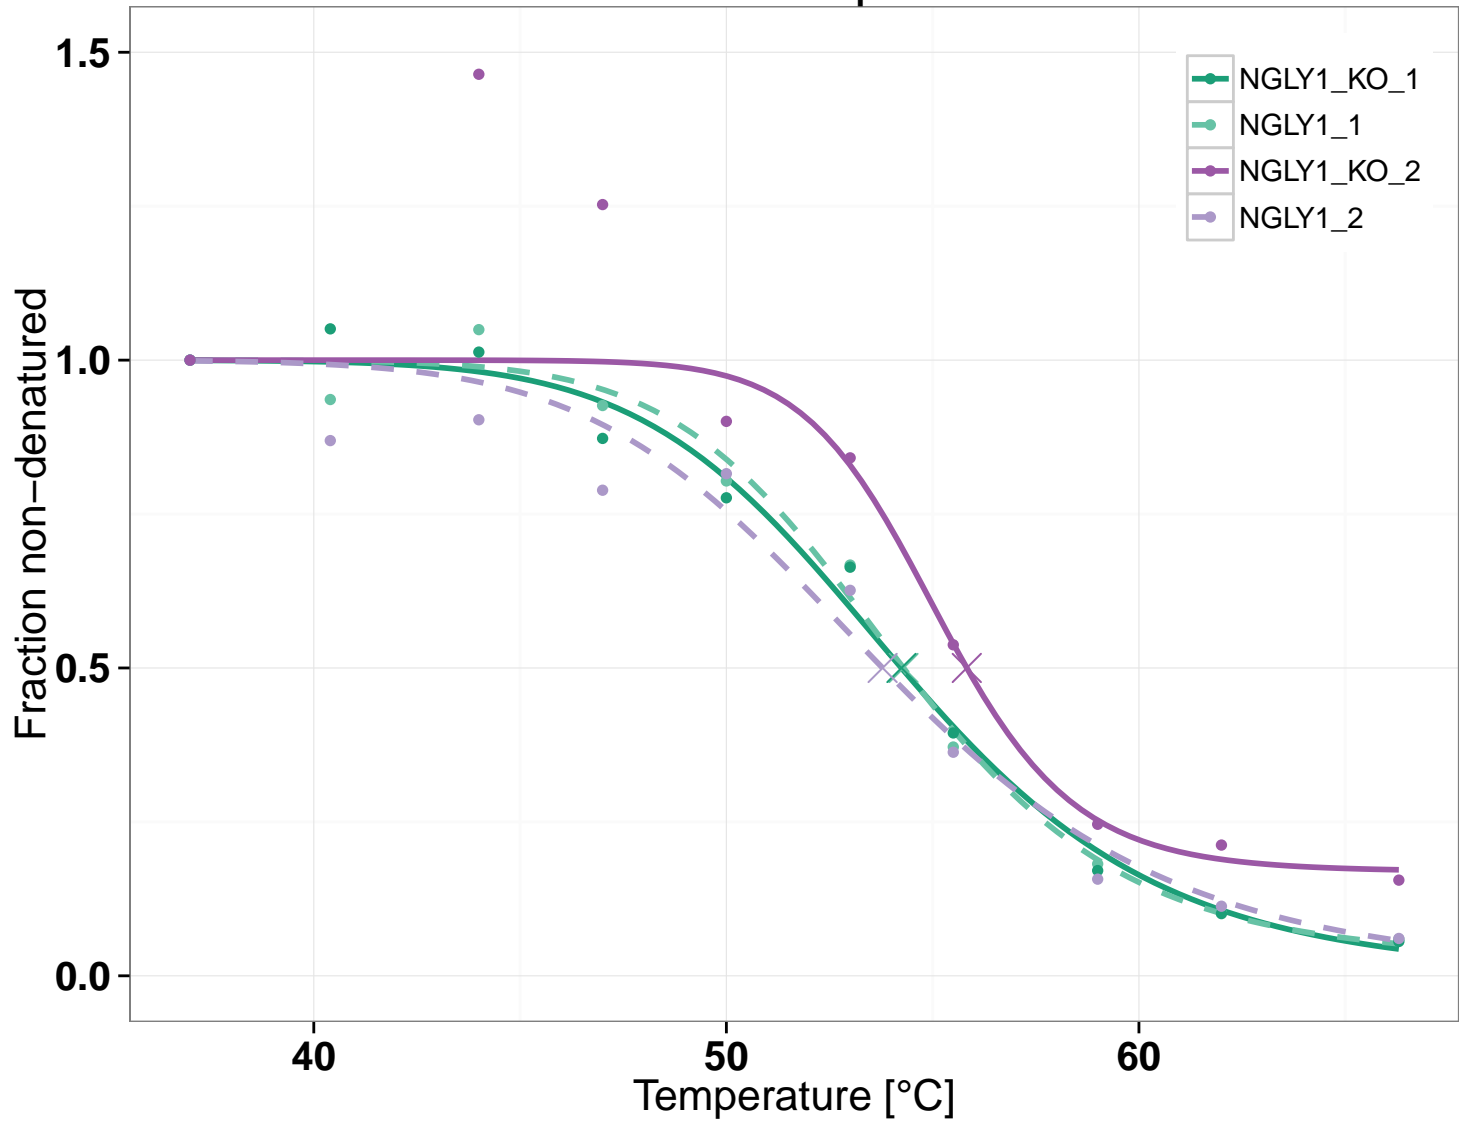

|            | meltPoint | slope  | plateau | R2   |
|------------|-----------|--------|---------|------|
| NGLY1_KO_1 | 54.24     | -0.079 | 0       | 0.99 |
| NGLY1_1    | 54.29     | -0.089 | 0.03    | 0.99 |
| NGLY1_KO_2 | 55.83     | -0.13  | 0.17    | 0.74 |
| NGLY1_2    | 53.79     | -0.07  | 0       | 0.96 |

Supplement: Supplementary file 7918 [file 1]

IPI00005733.1|TGFB1

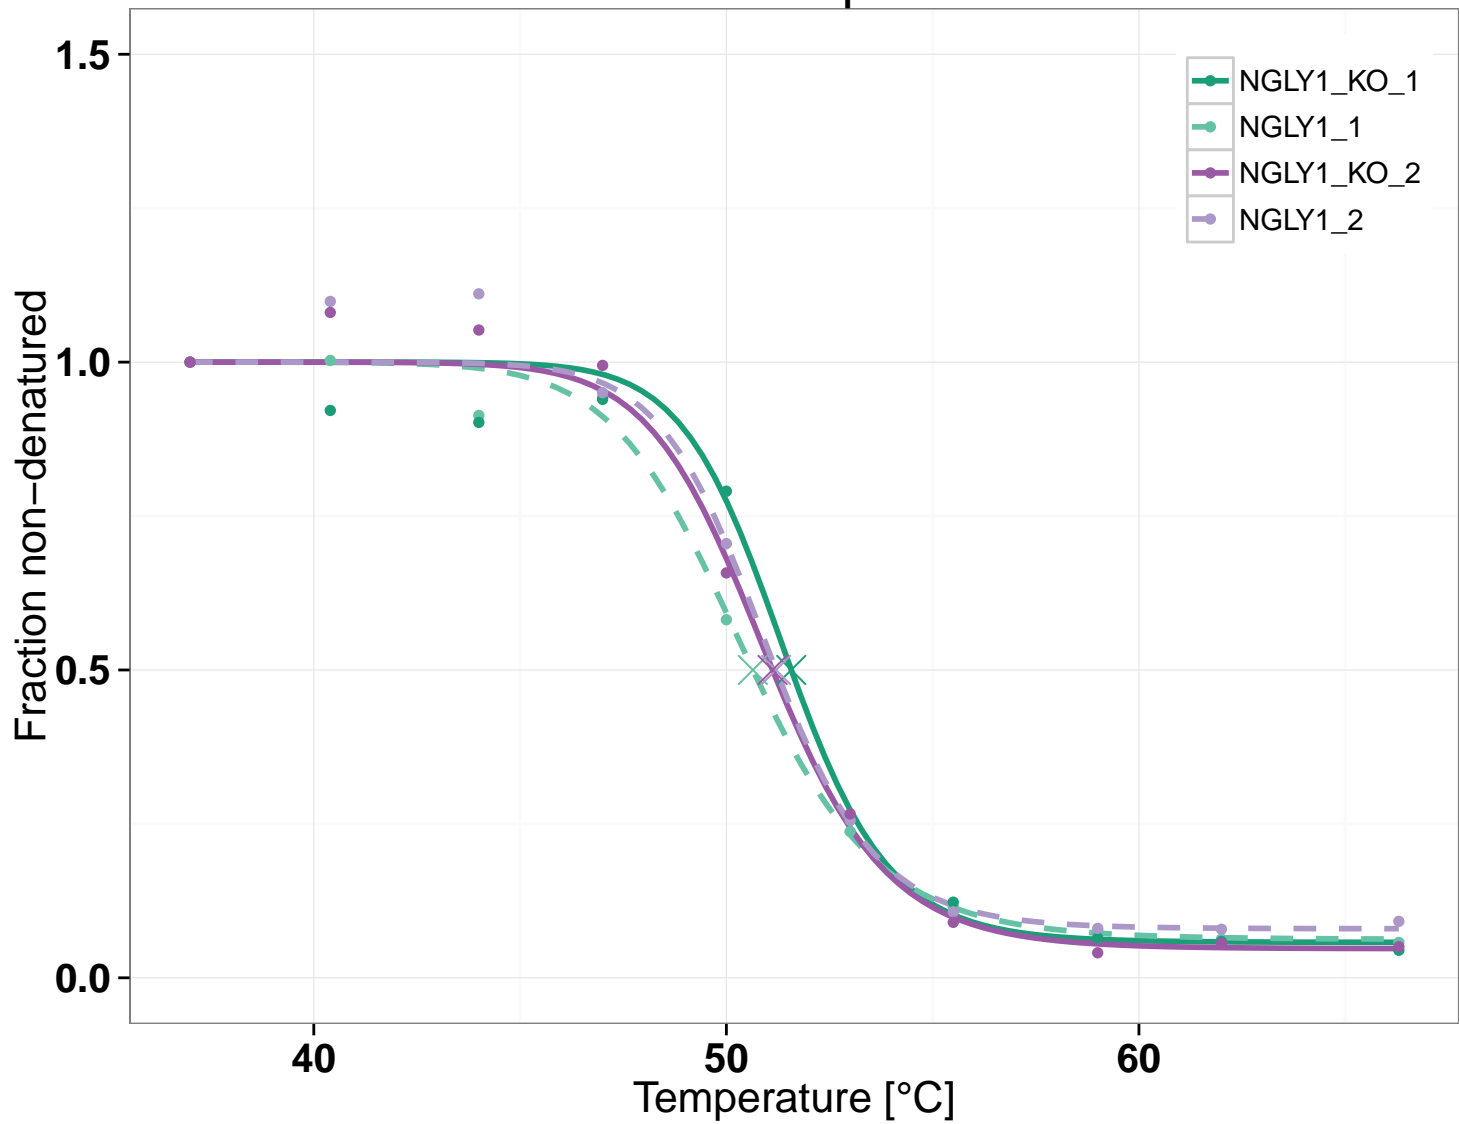

|            | meltPoint | slope | plateau | R2   |
|------------|-----------|-------|---------|------|
| NGLY1_KO_1 | 51.57     | -0.19 | 0.06    | 0.99 |
| NGLY1_1    | 50.64     | -0.15 | 0.06    | 1    |
| NGLY1_KO_2 | 51.12     | -0.17 | 0.05    | 0.99 |
| NGLY1_2    | 51.2      | -0.17 | 0.08    | 0.99 |

Supplement: Supplementary file 7919 [file 1]

# IPI00329707.7|BCORL1

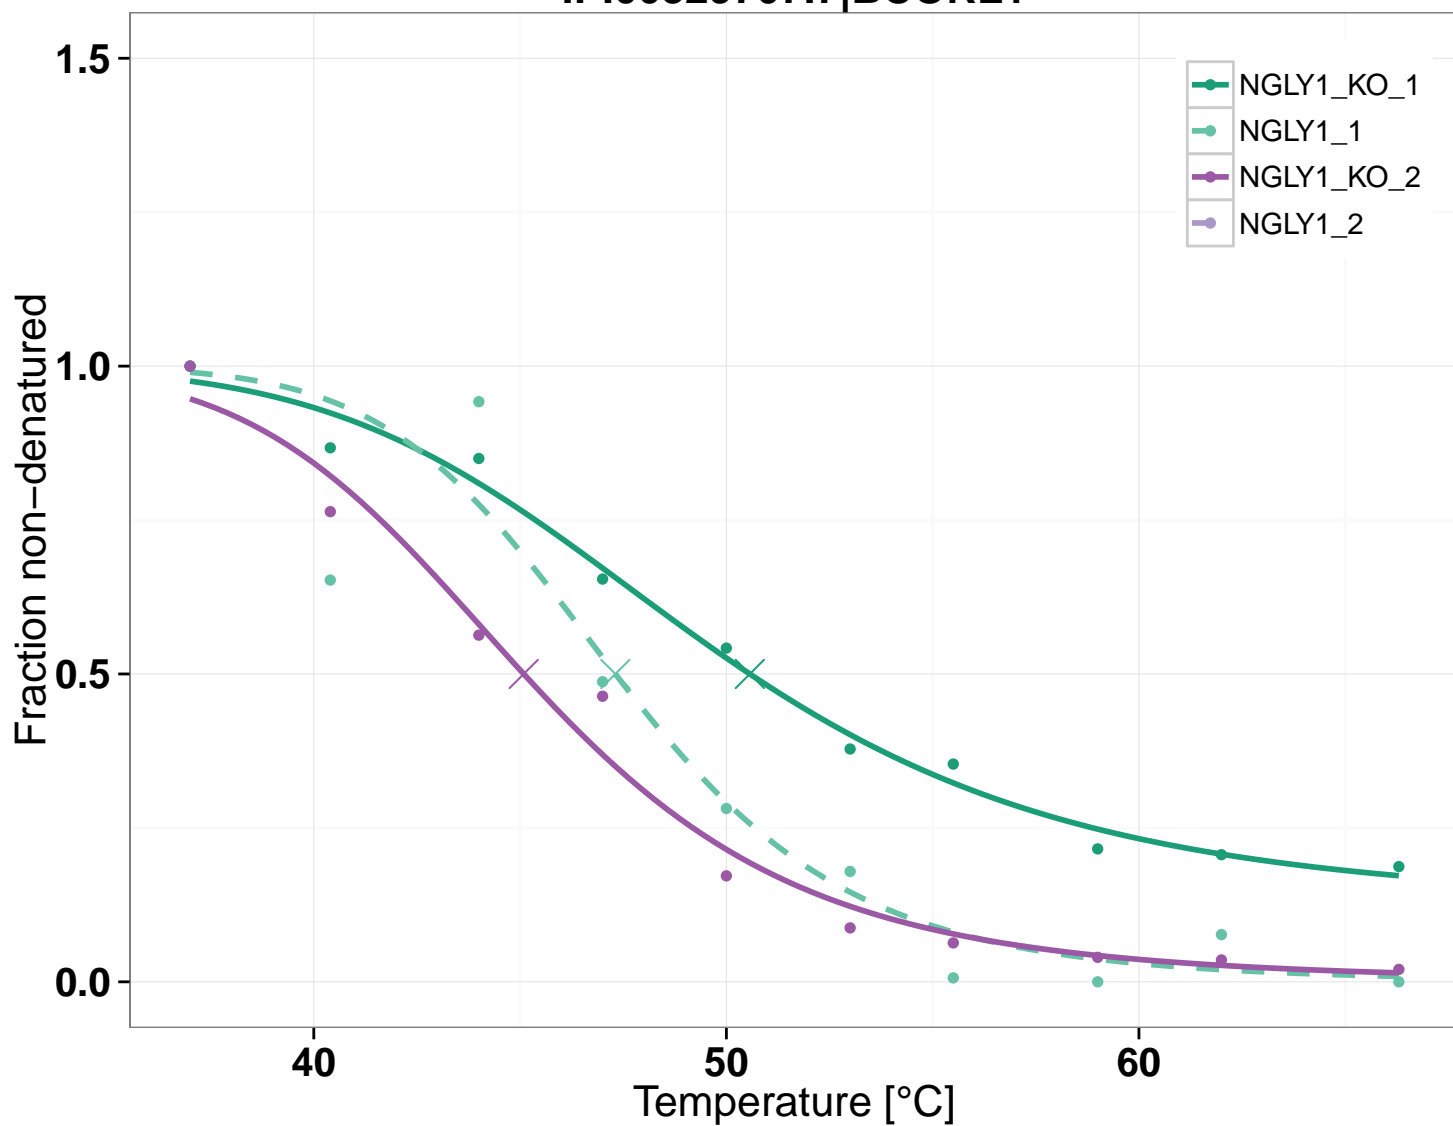

|            | meltPoint | slope  | plateau | R2   |
|------------|-----------|--------|---------|------|
| NGLY1_KO_1 | 50.57     | -0.05  | 0.12    | 0.99 |
| NGLY1_1    | 47.31     | -0.088 | 0       | 0.91 |
| NGLY1_KO_2 | 45.09     | -0.075 | 0       | 0.98 |
| NGLY1_2    | -         | -      | -       | -    |

Supplement: Supplementary file 7920 [file 1]

# IPI00216873.3|ERI1

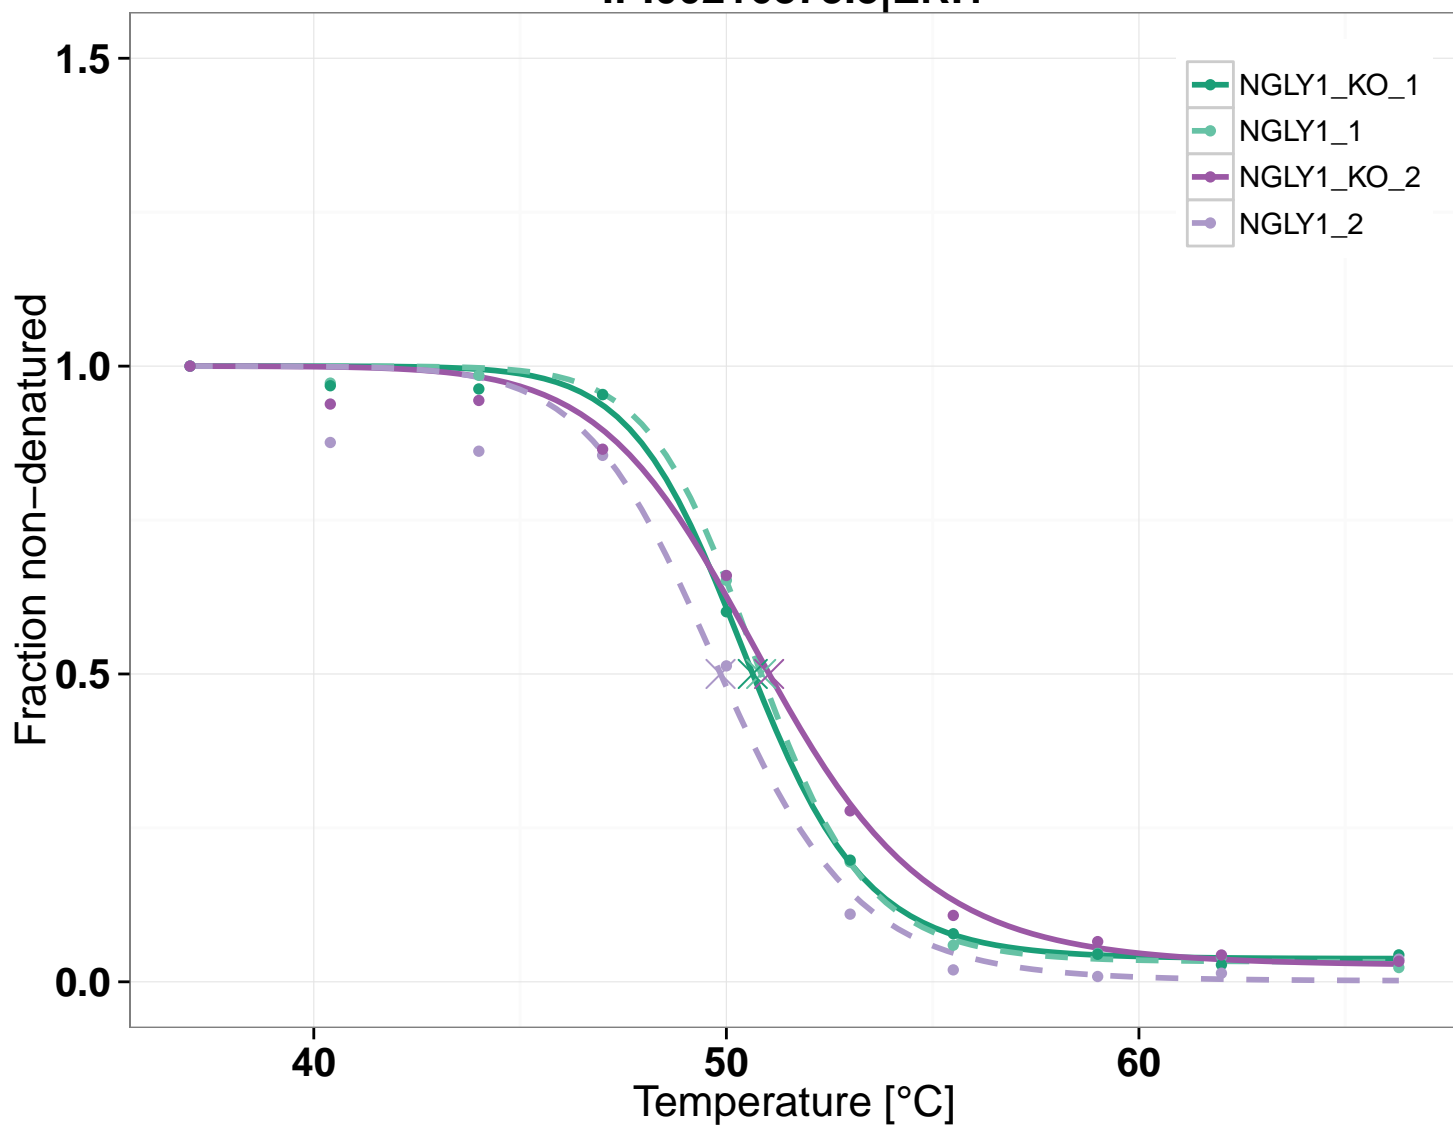

|            | meltPoint | slope | plateau | R2   |
|------------|-----------|-------|---------|------|
| NGLY1_KO_1 | 50.64     | -0.17 | 0.04    | 1    |
| NGLY1_1    | 50.84     | -0.18 | 0.03    | 1    |
| NGLY1_KO_2 | 51.04     | -0.12 | 0.03    | 0.99 |
| NGLY1_2    | 49.86     | -0.15 | 0       | 0.98 |

Supplement: Supplementary file 7921 [file 1]

IPI00795475.1|C13ORF34

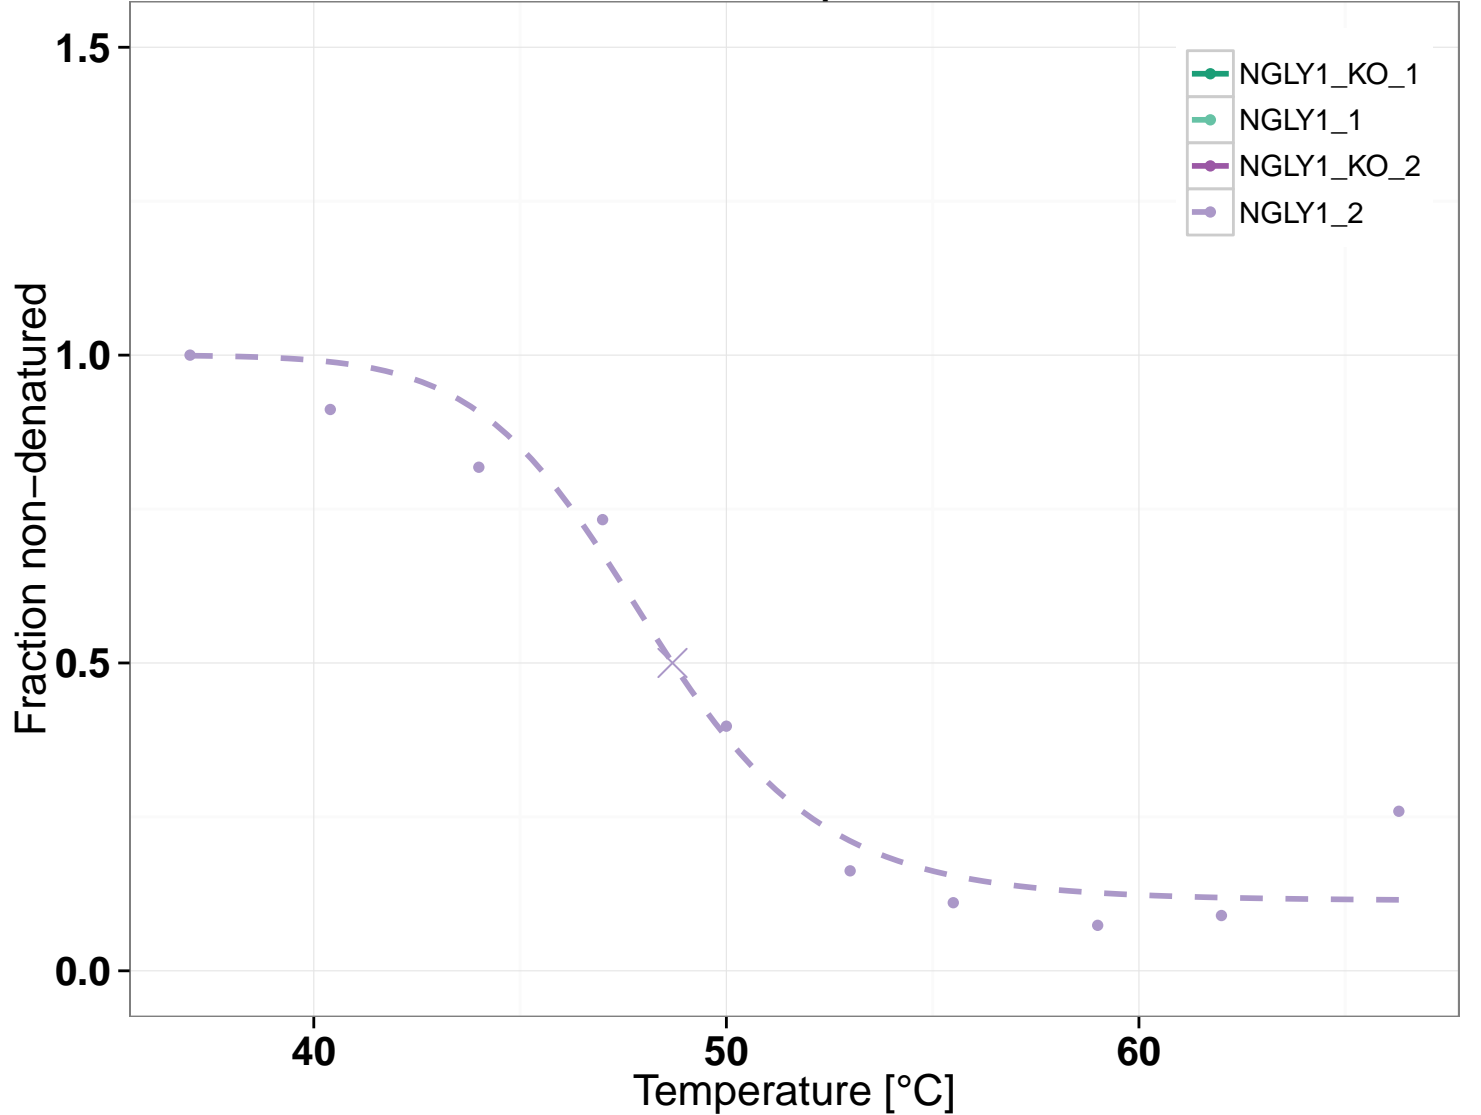

|            | meltPoint | slope | plateau | R2   |
|------------|-----------|-------|---------|------|
| NGLY1_KO_1 | -         | -     | -       | -    |
| NGLY1_1    | -         | -     | -       | -    |
| NGLY1_KO_2 | -         | -     | -       | -    |
| NGLY1_2    | 48.69     | -0.11 | 0.11    | 0.96 |

Supplement: Supplementary file 7922 [file 1]

IPI00015713.4|CDKAL1

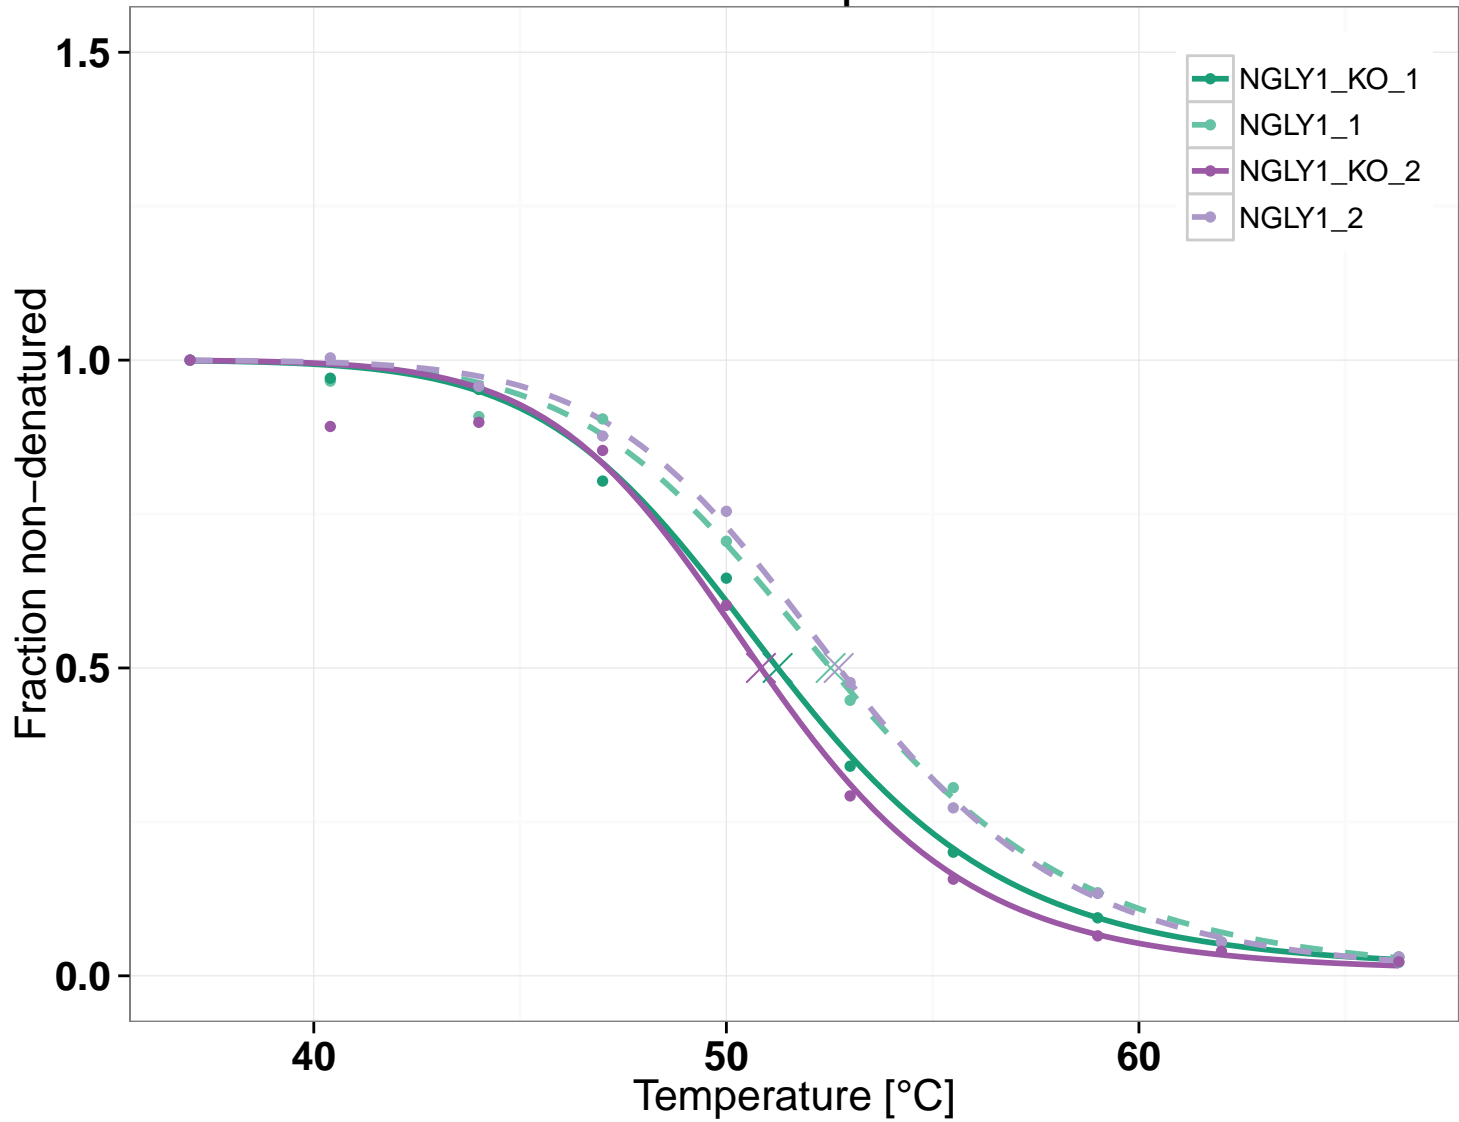

|            | meltPoint | slope  | plateau | R2   |
|------------|-----------|--------|---------|------|
| NGLY1_KO_1 | 51.24     | -0.088 | 0.01    | 1    |
| NGLY1_1    | 52.53     | -0.081 | 0       | 1    |
| NGLY1_KO_2 | 50.84     | -0.097 | 0.01    | 0.99 |
| NGLY1_2    | 52.72     | -0.088 | 0       | 1    |

Supplement: Supplementary file 7923 [file 1]

# IPI00026262.3|RASA1

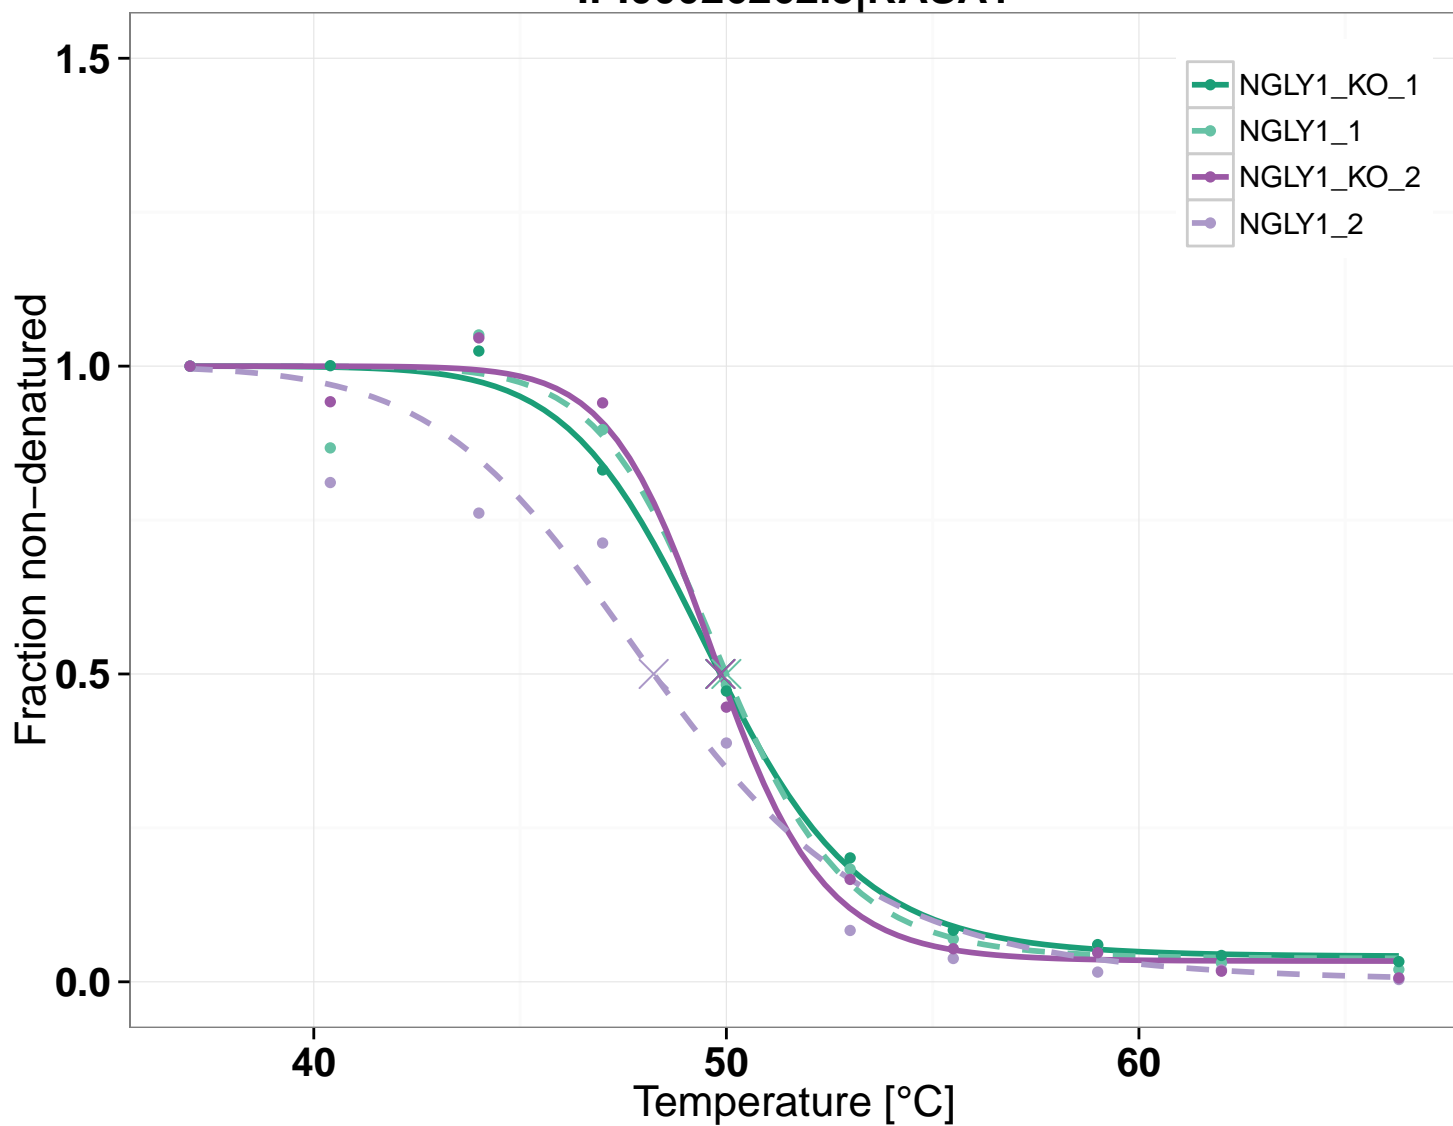

|            | meltPoint | slope  | plateau | R2   |
|------------|-----------|--------|---------|------|
| NGLY1_KO_1 | 49.85     | -0.14  | 0.04    | 1    |
| NGLY1_1    | 50        | -0.16  | 0.04    | 0.99 |
| NGLY1_KO_2 | 49.86     | -0.19  | 0.03    | 0.99 |
| NGLY1_2    | 48.24     | -0.094 | 0       | 0.96 |

Supplement: Supplementary file 7924 [file 1]

# IPI00017469.1|SPR

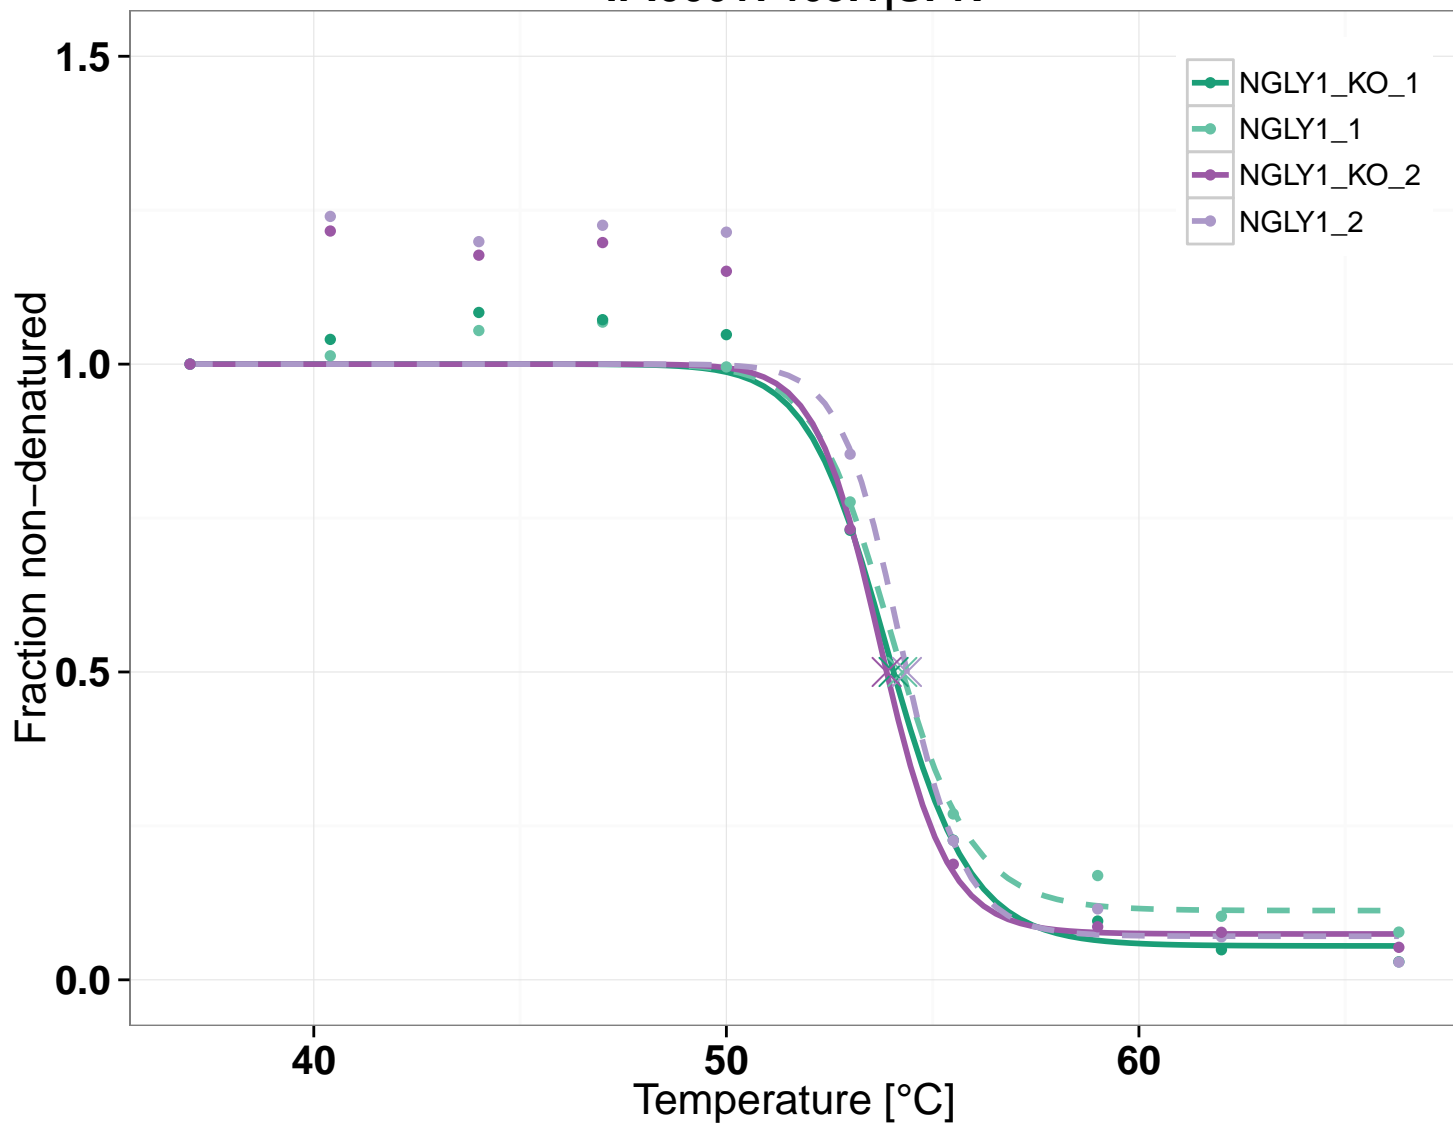

|            | meltPoint | slope | plateau | R2   |
|------------|-----------|-------|---------|------|
| NGLY1_KO_1 | 54.05     | -0.24 | 0.06    | 0.99 |
| NGLY1_1    | 54.26     | -0.23 | 0.11    | 0.99 |
| NGLY1_KO_2 | 53.88     | -0.29 | 0.07    | 0.94 |
| NGLY1_2    | 54.38     | -0.31 | 0.07    | 0.92 |

Supplement: Supplementary file 7925 [file 1]

IPI00465154.4|C1ORF71

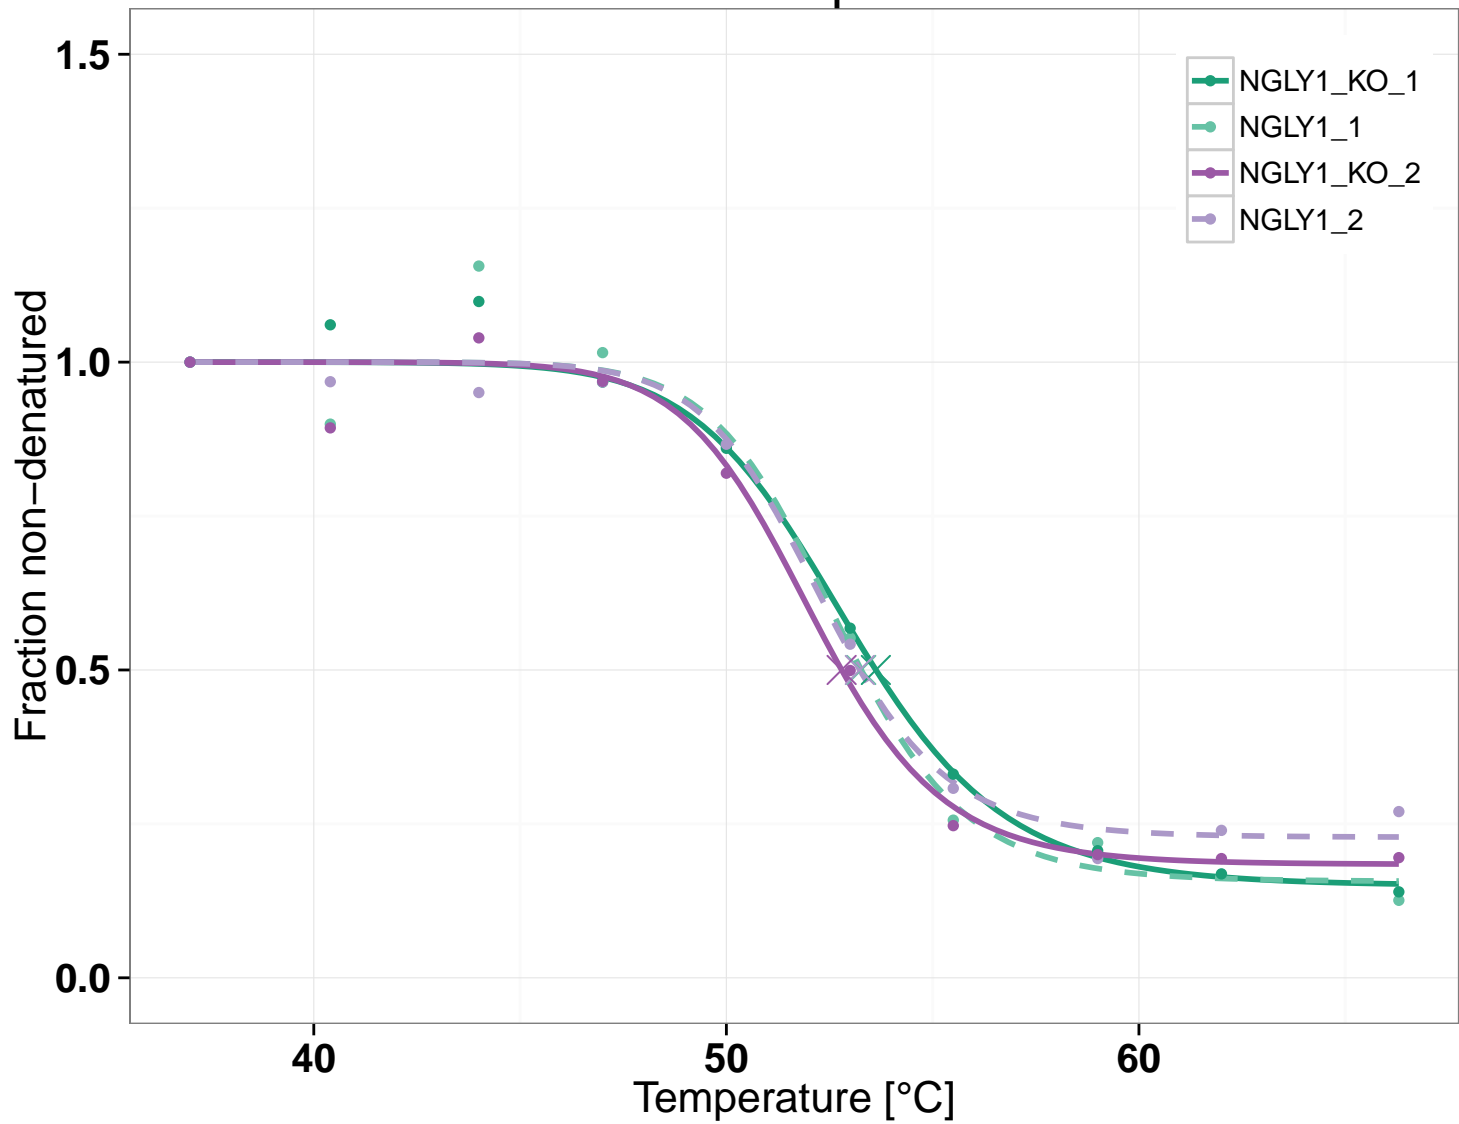

|            | meltPoint | slope | plateau | R2   |
|------------|-----------|-------|---------|------|
| NGLY1_KO_1 | 53.62     | -0.11 | 0.15    | 0.99 |
| NGLY1_1    | 53.27     | -0.14 | 0.16    | 0.97 |
| NGLY1_KO_2 | 52.79     | -0.13 | 0.18    | 0.99 |
| NGLY1_2    | 53.24     | -0.13 | 0.23    | 0.99 |

Supplement: Supplementary file 7926 [file 1]

IPI00909387.1|GHITM

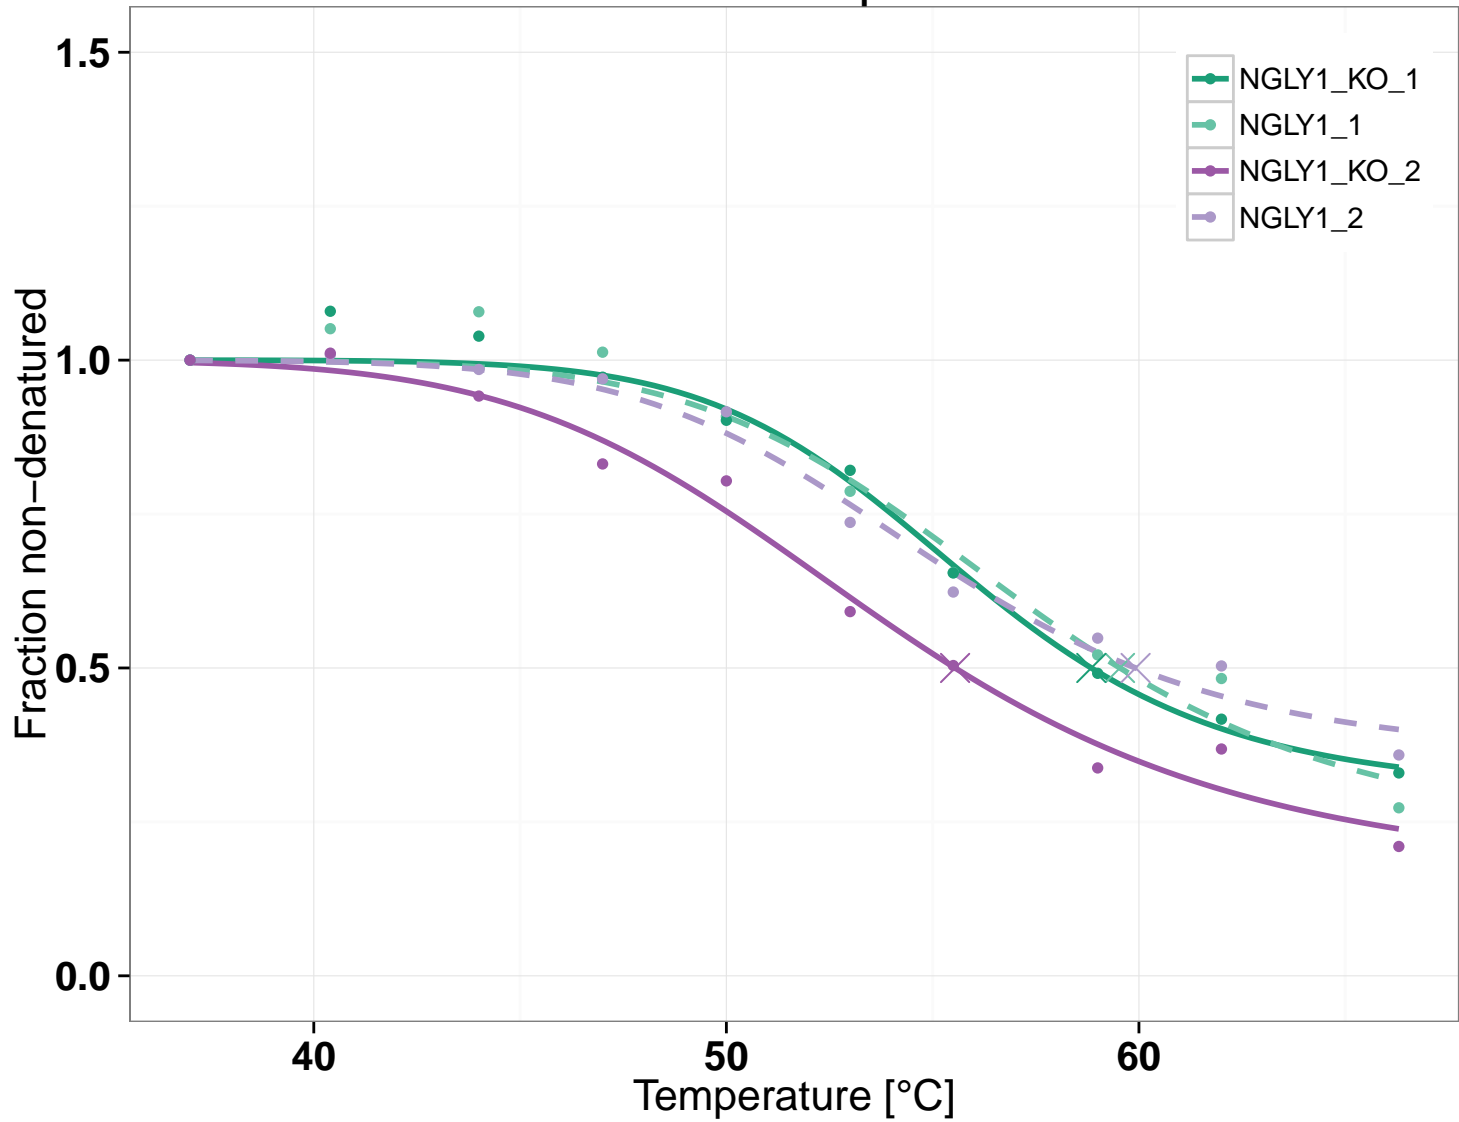

|            | meltPoint | slope  | plateau | R2   |
|------------|-----------|--------|---------|------|
| NGLY1_KO_1 | 58.85     | -0.056 | 0.3     | 0.99 |
| NGLY1_1    | 59.54     | -0.049 | 0.22    | 0.97 |
| NGLY1_KO_2 | 55.54     | -0.048 | 0.16    | 0.98 |
| NGLY1_2    | 59.92     | -0.045 | 0.35    | 0.98 |

Supplement: Supplementary file 7927 [file 1]

# IPI00011201.1|ME2

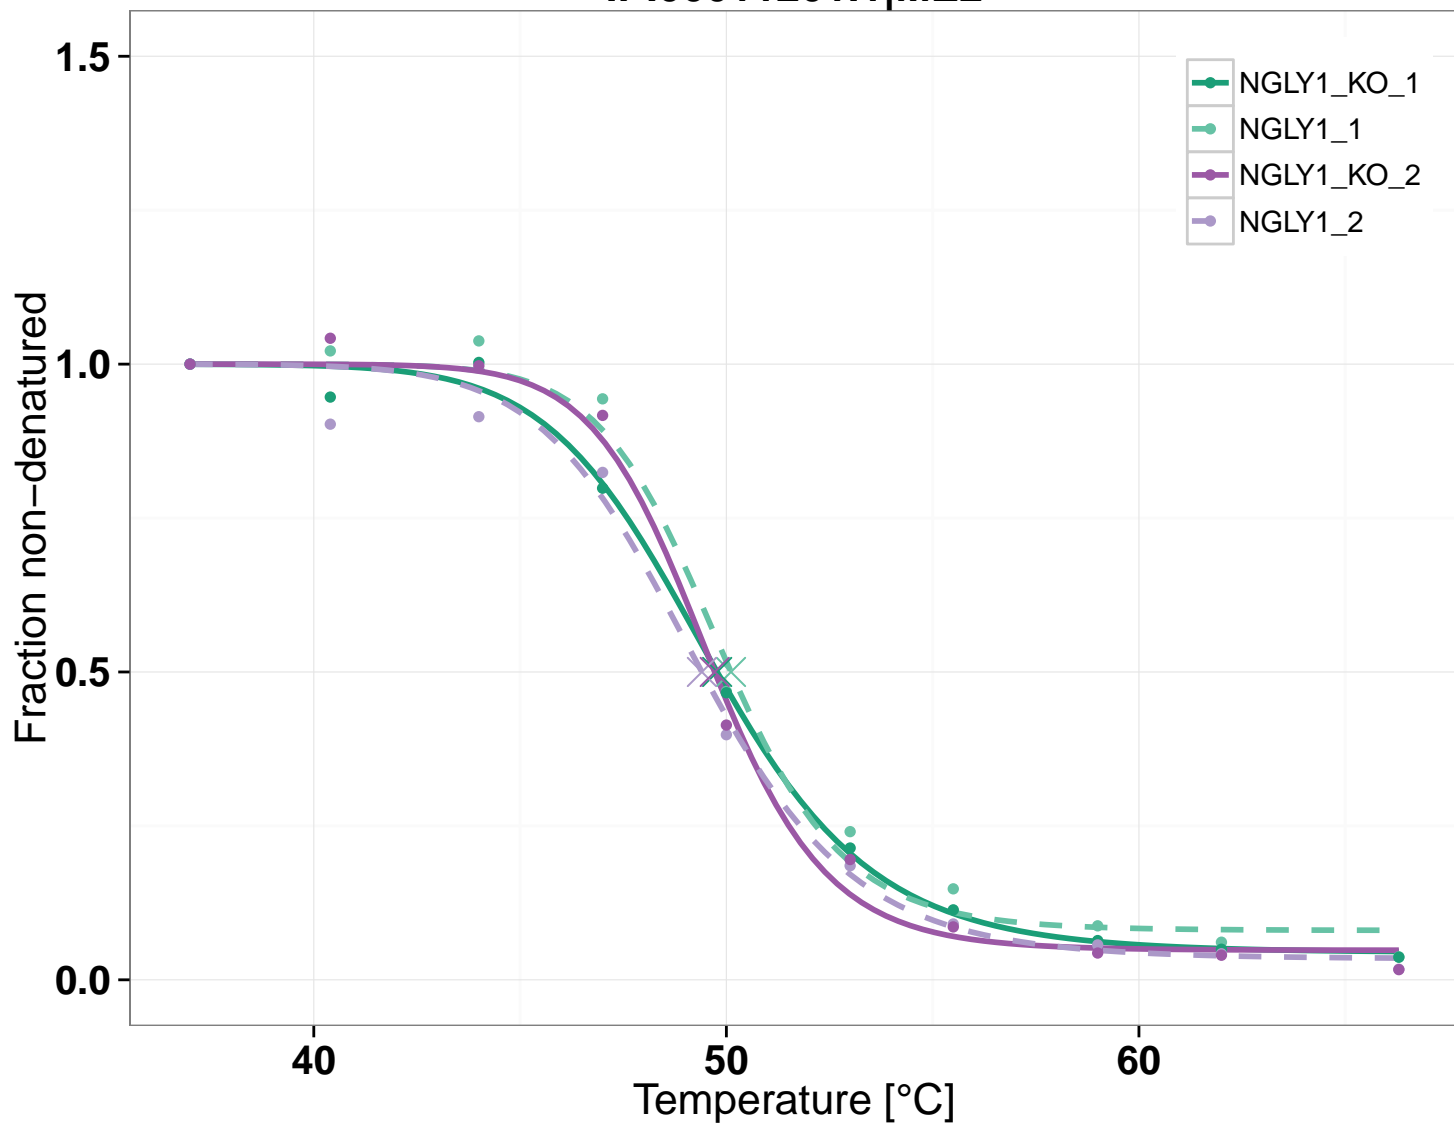

|            | meltPoint | slope | plateau | R2   |
|------------|-----------|-------|---------|------|
| NGLY1_KO_1 | 49.78     | -0.12 | 0.04    | 1    |
| NGLY1_1    | 50.11     | -0.15 | 0.08    | 0.99 |
| NGLY1_KO_2 | 49.72     | -0.17 | 0.05    | 0.99 |
| NGLY1_2    | 49.41     | -0.13 | 0.03    | 0.99 |

Supplement: Supplementary file 7928 [file 1]

IPI00003780.3|SMUG1

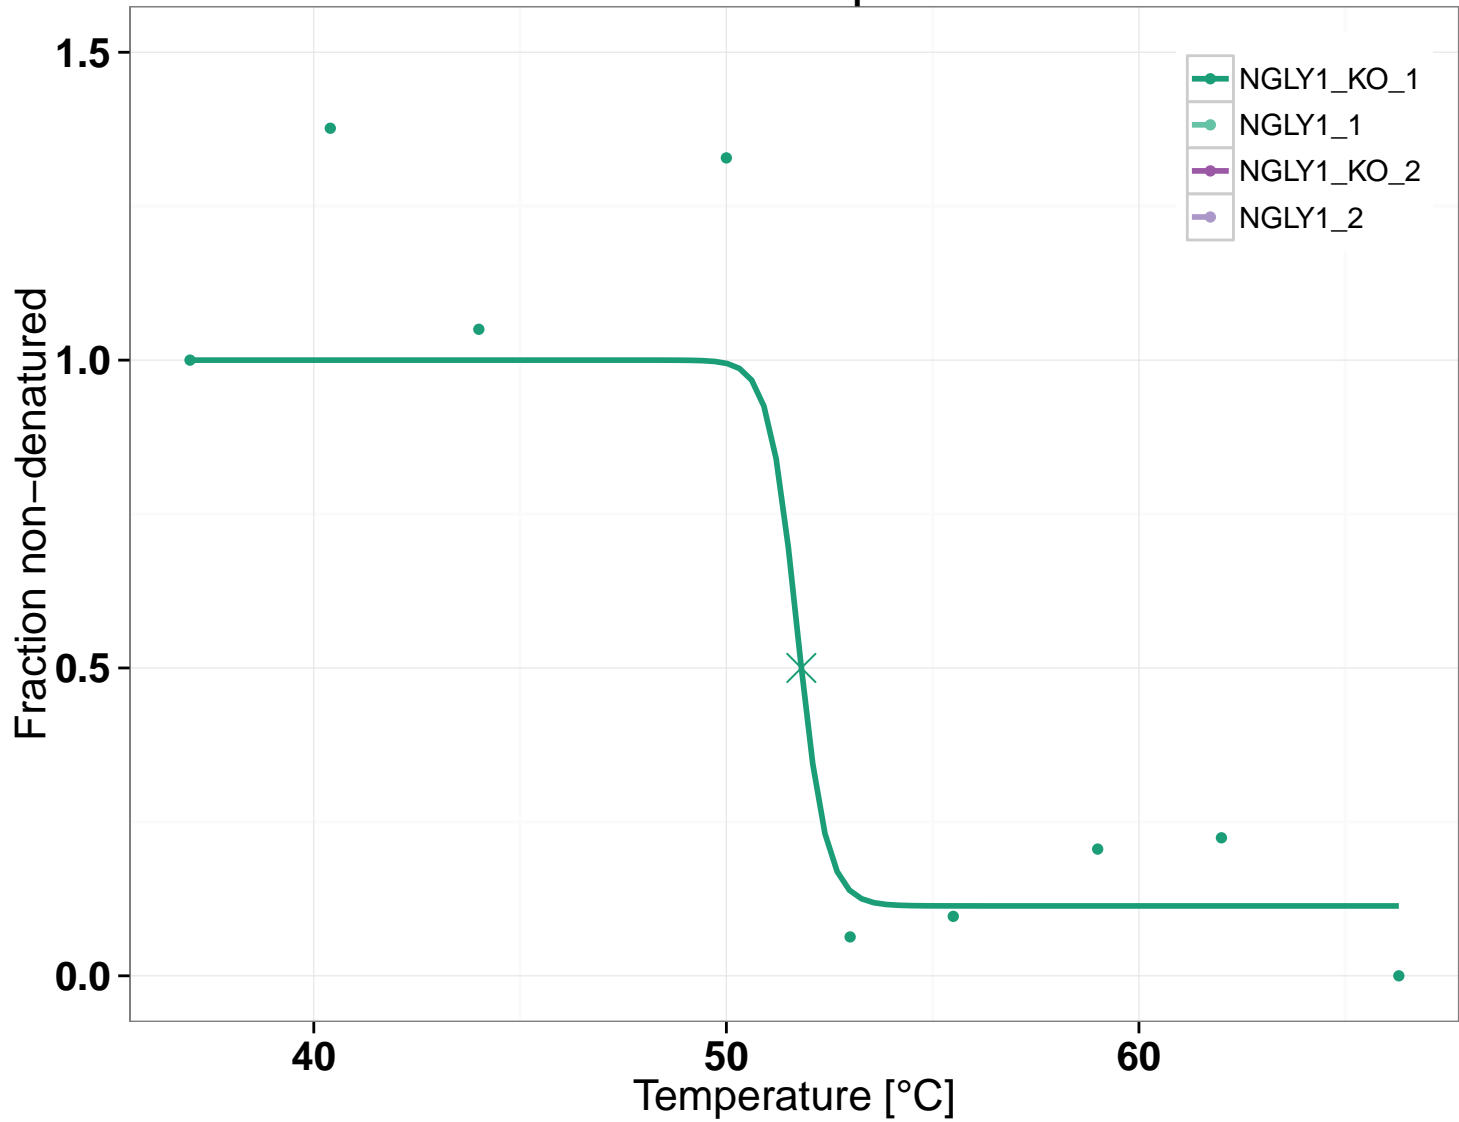

|            | meltPoint | slope | plateau | R2   |
|------------|-----------|-------|---------|------|
| NGLY1_KO_1 | 51.82     | -0.64 | 0.11    | 0.77 |
| NGLY1_1    | -         | -     | -       | -    |
| NGLY1_KO_2 | -         | -     | -       | -    |
| NGLY1_2    | -         | -     | -       | -    |

Supplement: Supplementary file 7929 [file 1]

# IPI00063729.4|THOC3

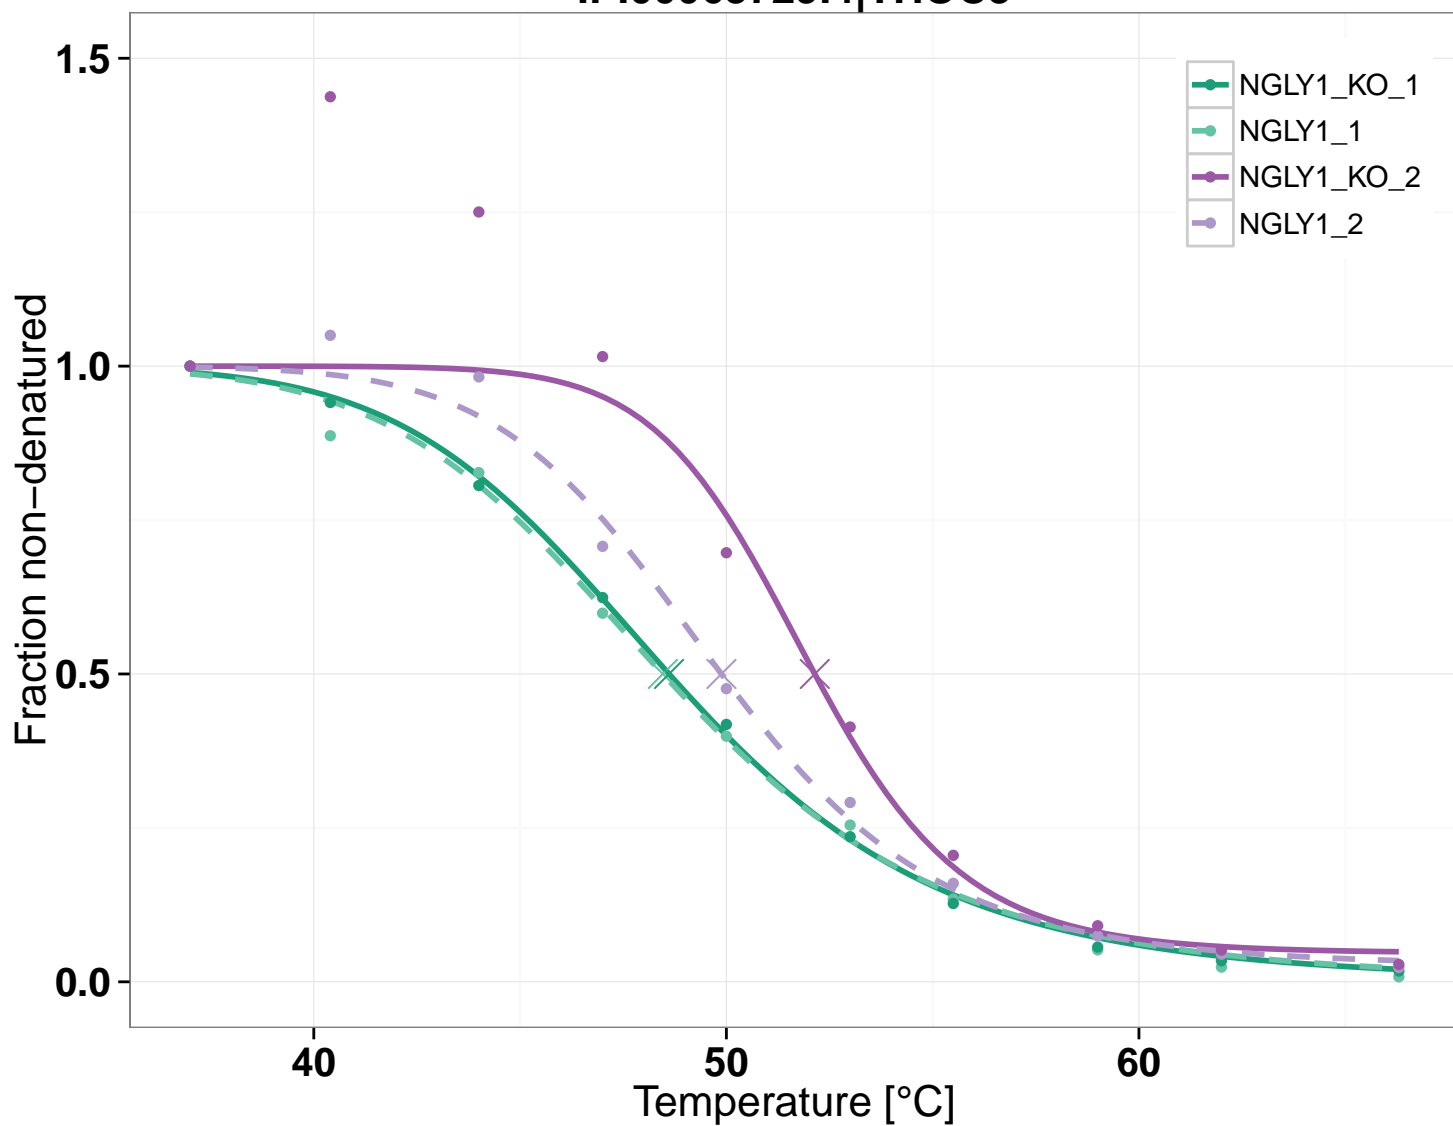

|            | meltPoint | slope  | plateau | R2   |
|------------|-----------|--------|---------|------|
| NGLY1_KO_1 | 48.61     | -0.076 | 0       | 1    |
| NGLY1_1    | 48.46     | -0.074 | 0       | 1    |
| NGLY1_KO_2 | 52.14     | -0.13  | 0.05    | 0.89 |
| NGLY1_2    | 49.88     | -0.091 | 0.02    | 0.99 |

Supplement: Supplementary file 7930 [file 1]

IPI00291457.1|STK35

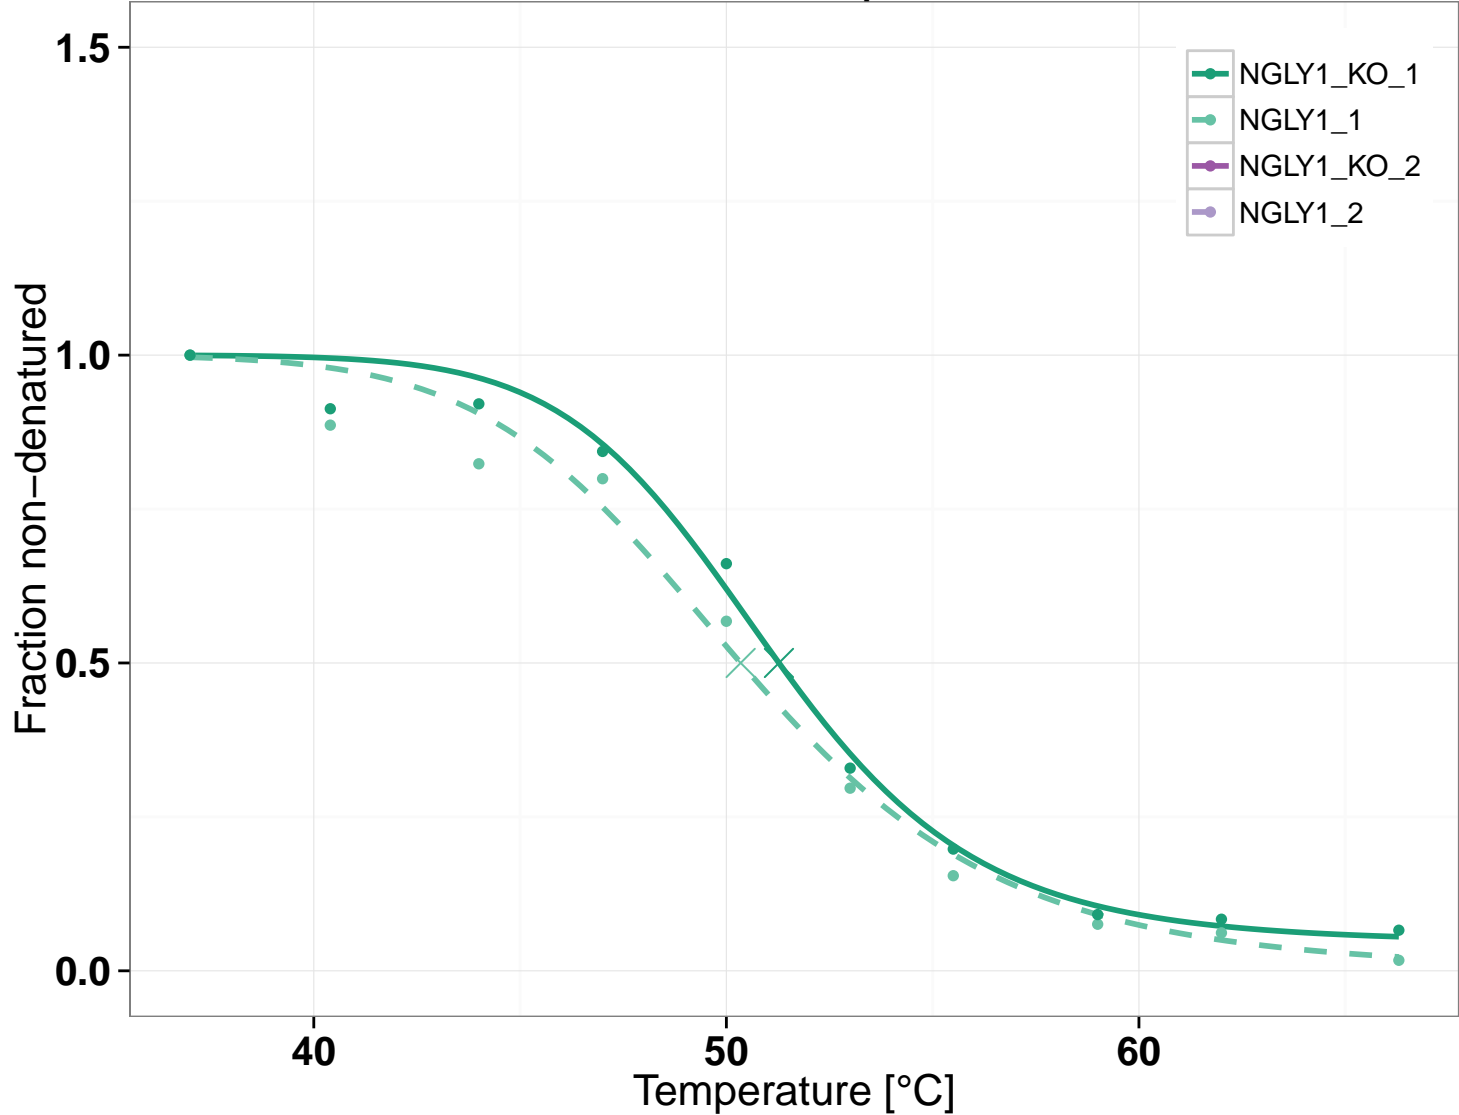

|            | meltPoint | slope  | plateau | R2   |
|------------|-----------|--------|---------|------|
| NGLY1_KO_1 | 51.27     | -0.095 | 0.05    | 0.99 |
| NGLY1_1    | 50.35     | -0.079 | 0       | 0.98 |
| NGLY1_KO_2 | -         | -      | -       | -    |
| NGLY1_2    | -         | -      | -       | -    |

Supplement: Supplementary file 7931 [file 1]

# IPI00376199.3|IRF2BP2

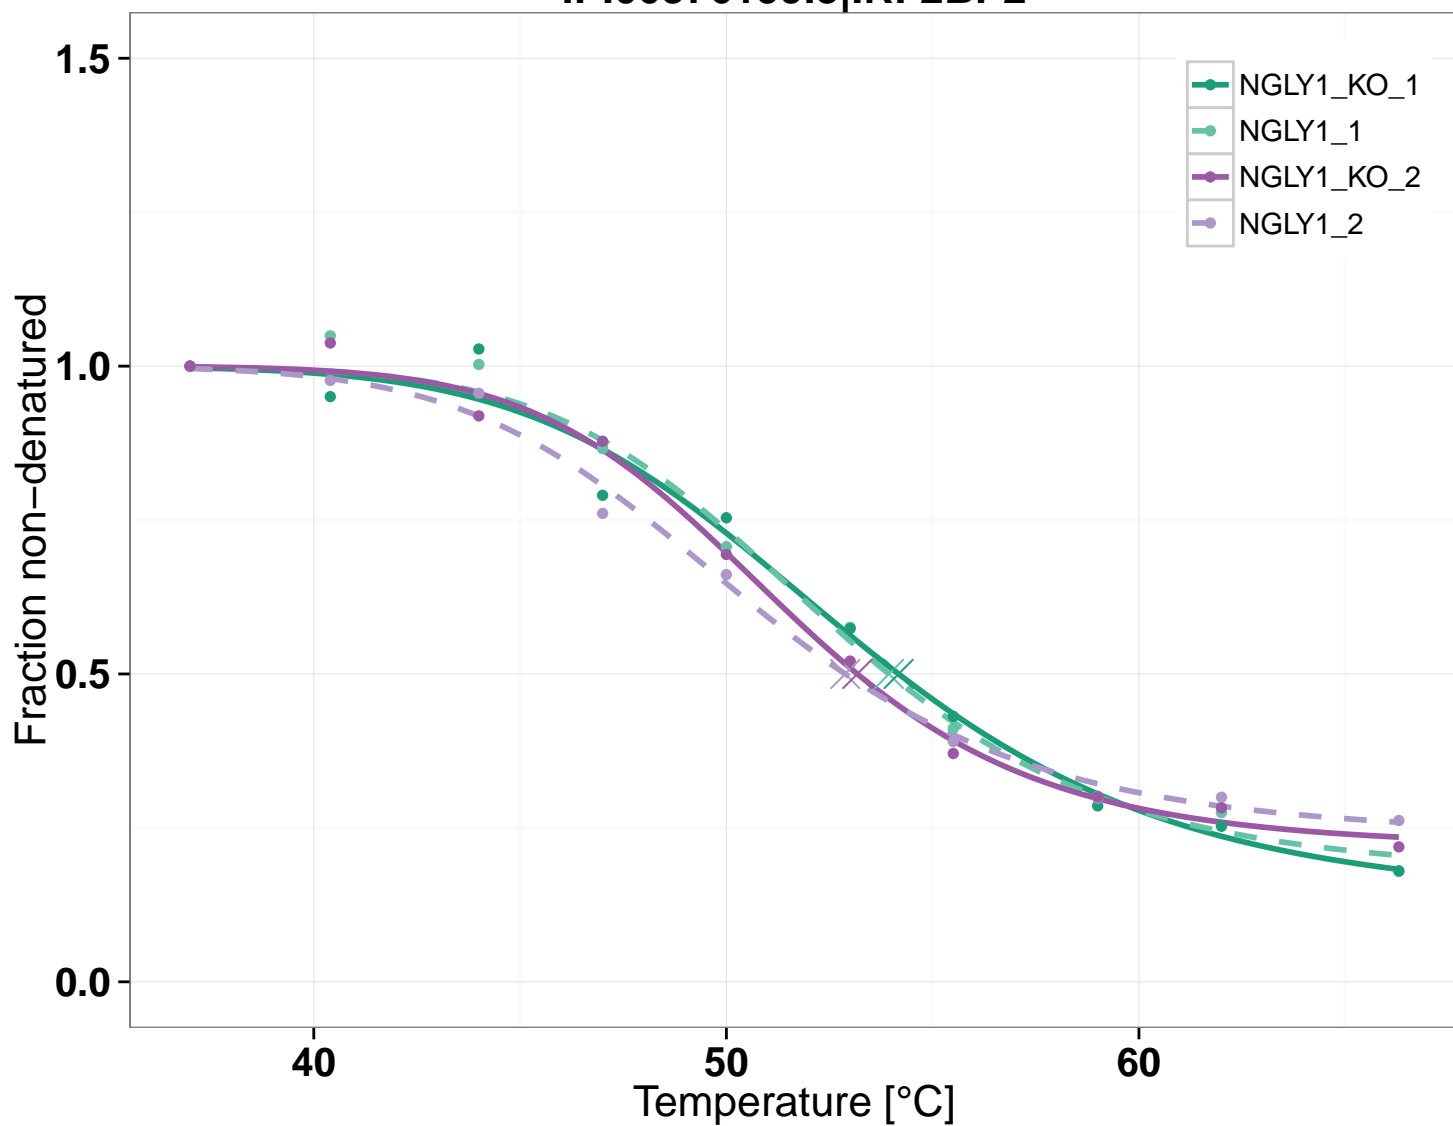

|            | meltPoint | slope  | plateau | R2   |
|------------|-----------|--------|---------|------|
| NGLY1_KO_1 | 54.17     | -0.056 | 0.13    | 0.98 |
| NGLY1_1    | 53.94     | -0.061 | 0.17    | 0.99 |
| NGLY1_KO_2 | 53.17     | -0.065 | 0.22    | 0.99 |
| NGLY1_2    | 52.88     | -0.055 | 0.23    | 0.99 |

Supplement: Supplementary file 7932 [file 1]

IPI00440703.1|GSTK1

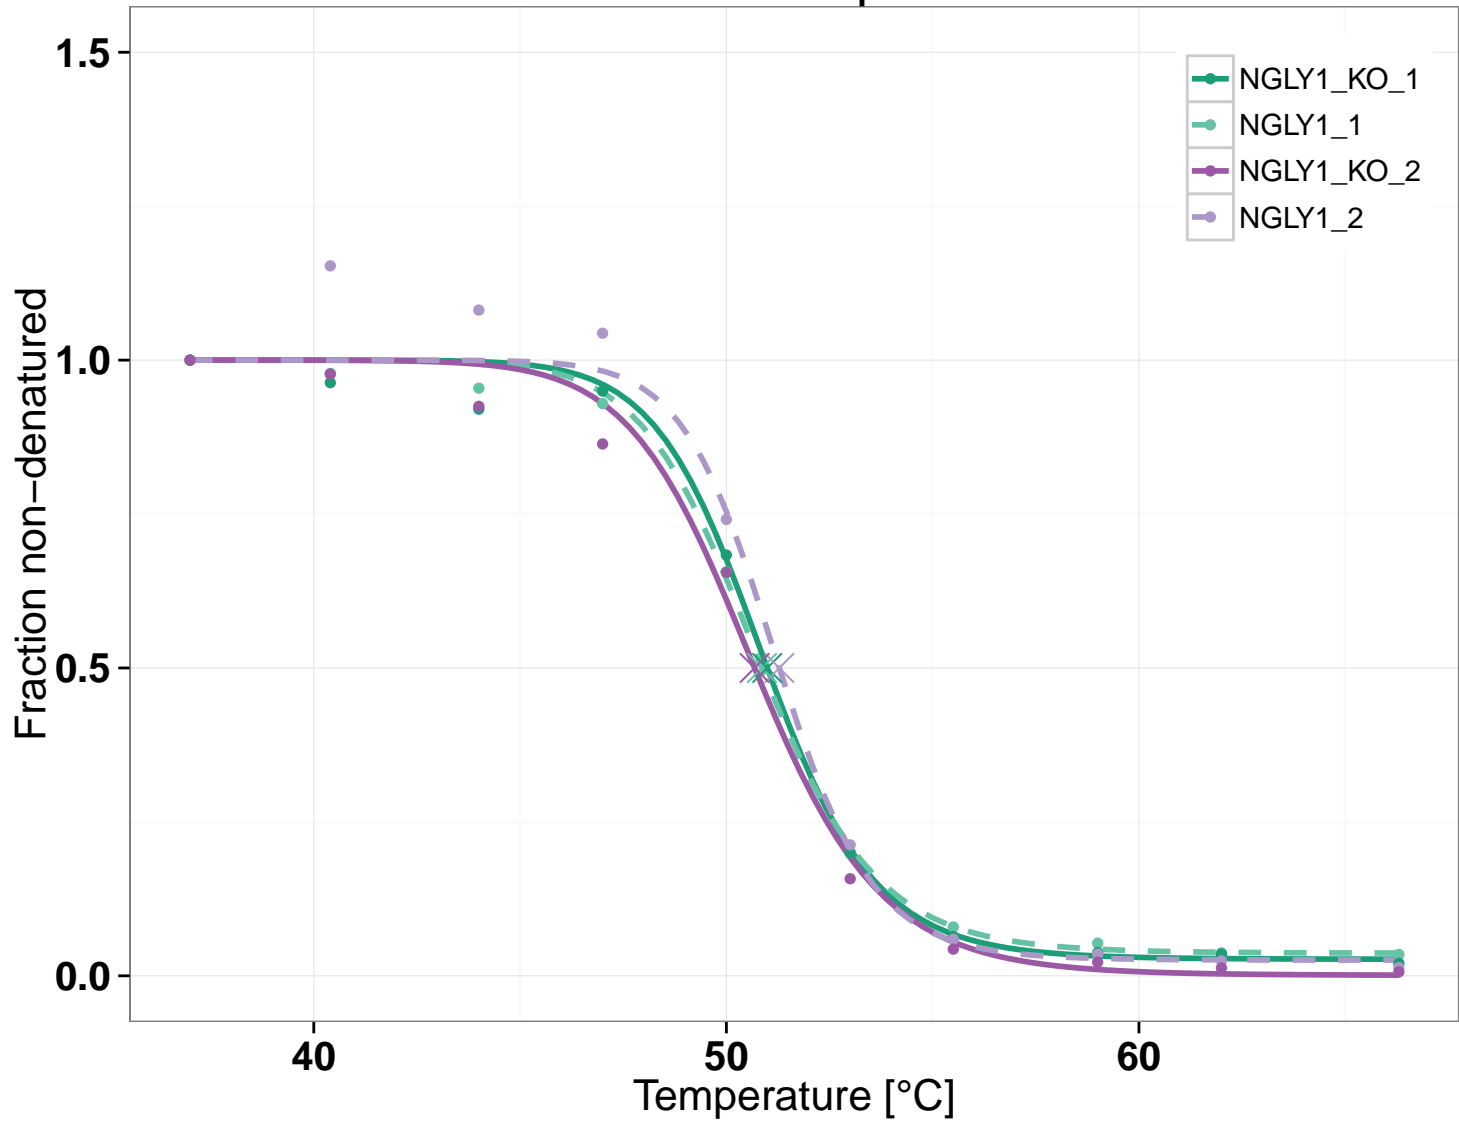

|            | meltPoint | slope | plateau | R2   |
|------------|-----------|-------|---------|------|
| NGLY1_KO_1 | 50.99     | -0.18 | 0.03    | 1    |
| NGLY1_1    | 50.86     | -0.17 | 0.04    | 1    |
| NGLY1_KO_2 | 50.68     | -0.16 | 0       | 0.99 |
| NGLY1_2    | 51.28     | -0.21 | 0.03    | 0.99 |

Supplement: Supplementary file 7933 [file 1]

IPI00386122.4|MOBKL3

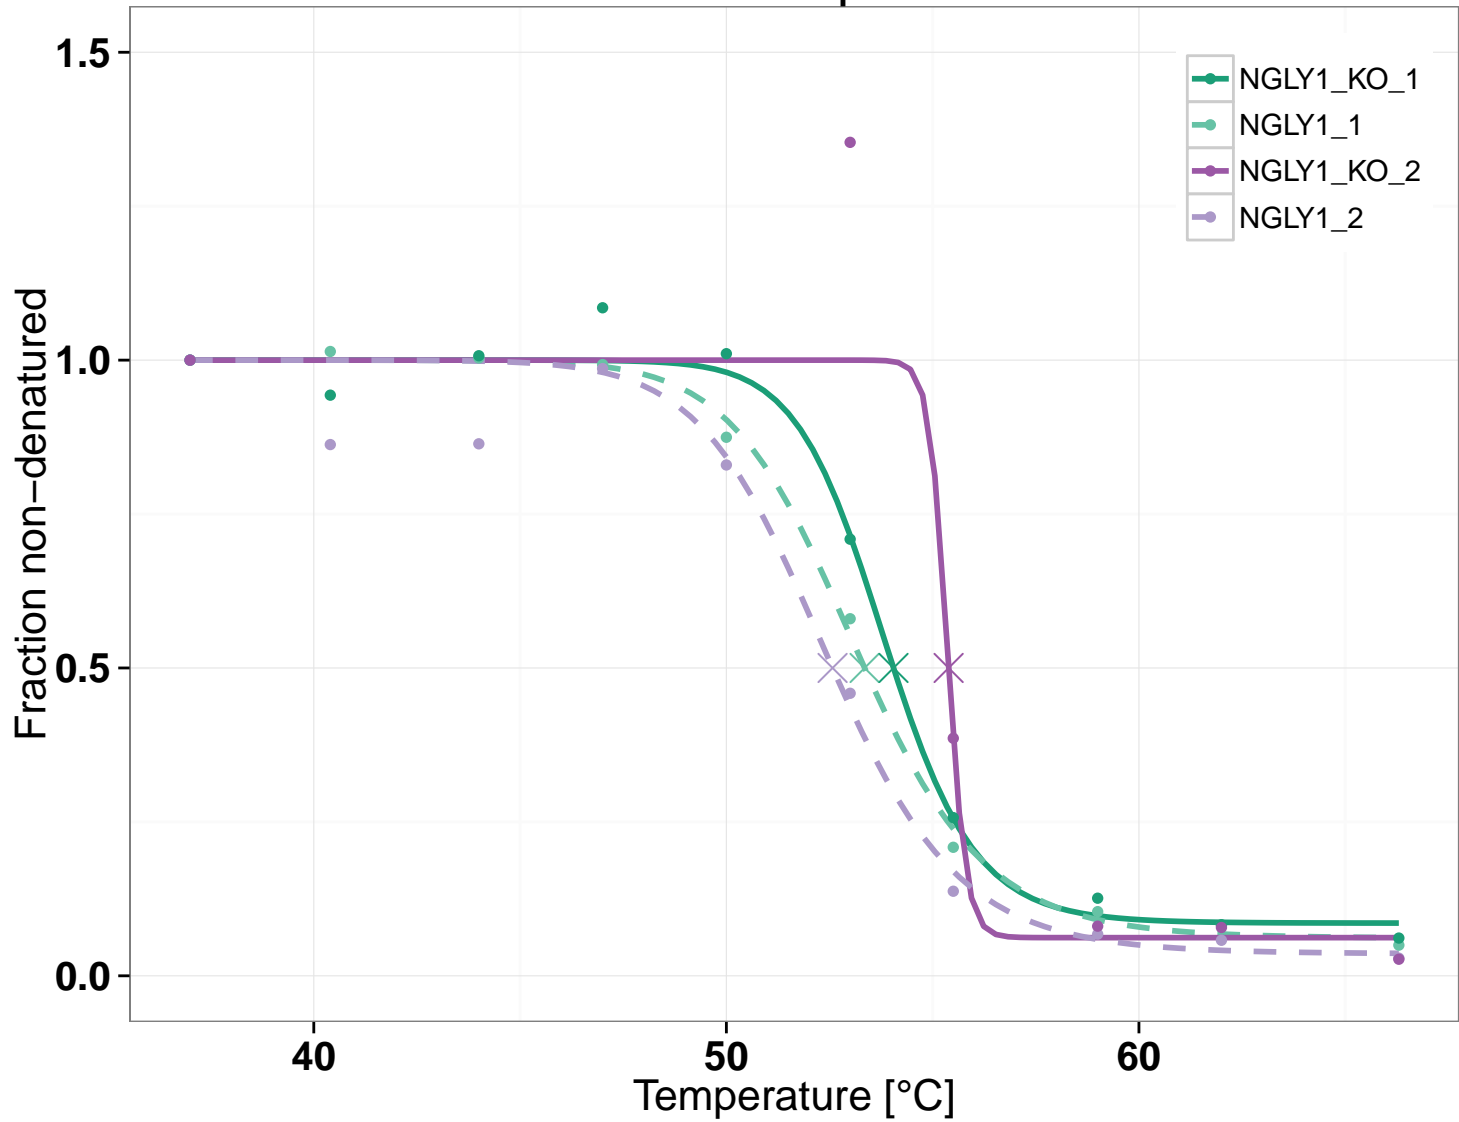

|            | meltPoint | slope | plateau | R2   |
|------------|-----------|-------|---------|------|
| NGLY1_KO_1 | 54.05     | -0.21 | 0.09    | 0.99 |
| NGLY1_1    | 53.35     | -0.15 | 0.06    | 1    |
| NGLY1_KO_2 | 55.39     | -1.1  | 0.06    | 0.22 |
| NGLY1_2    | 52.57     | -0.15 | 0.04    | 0.98 |

Supplement: Supplementary file 7934 [file 1]
