# Supplementary material (part 80 of 85)
Source: publisher figshare collection journal article supplement (https://gsajournals.figshare.com/articles/dataset/_/12014913)

# IPI00828125.1|SMPD4

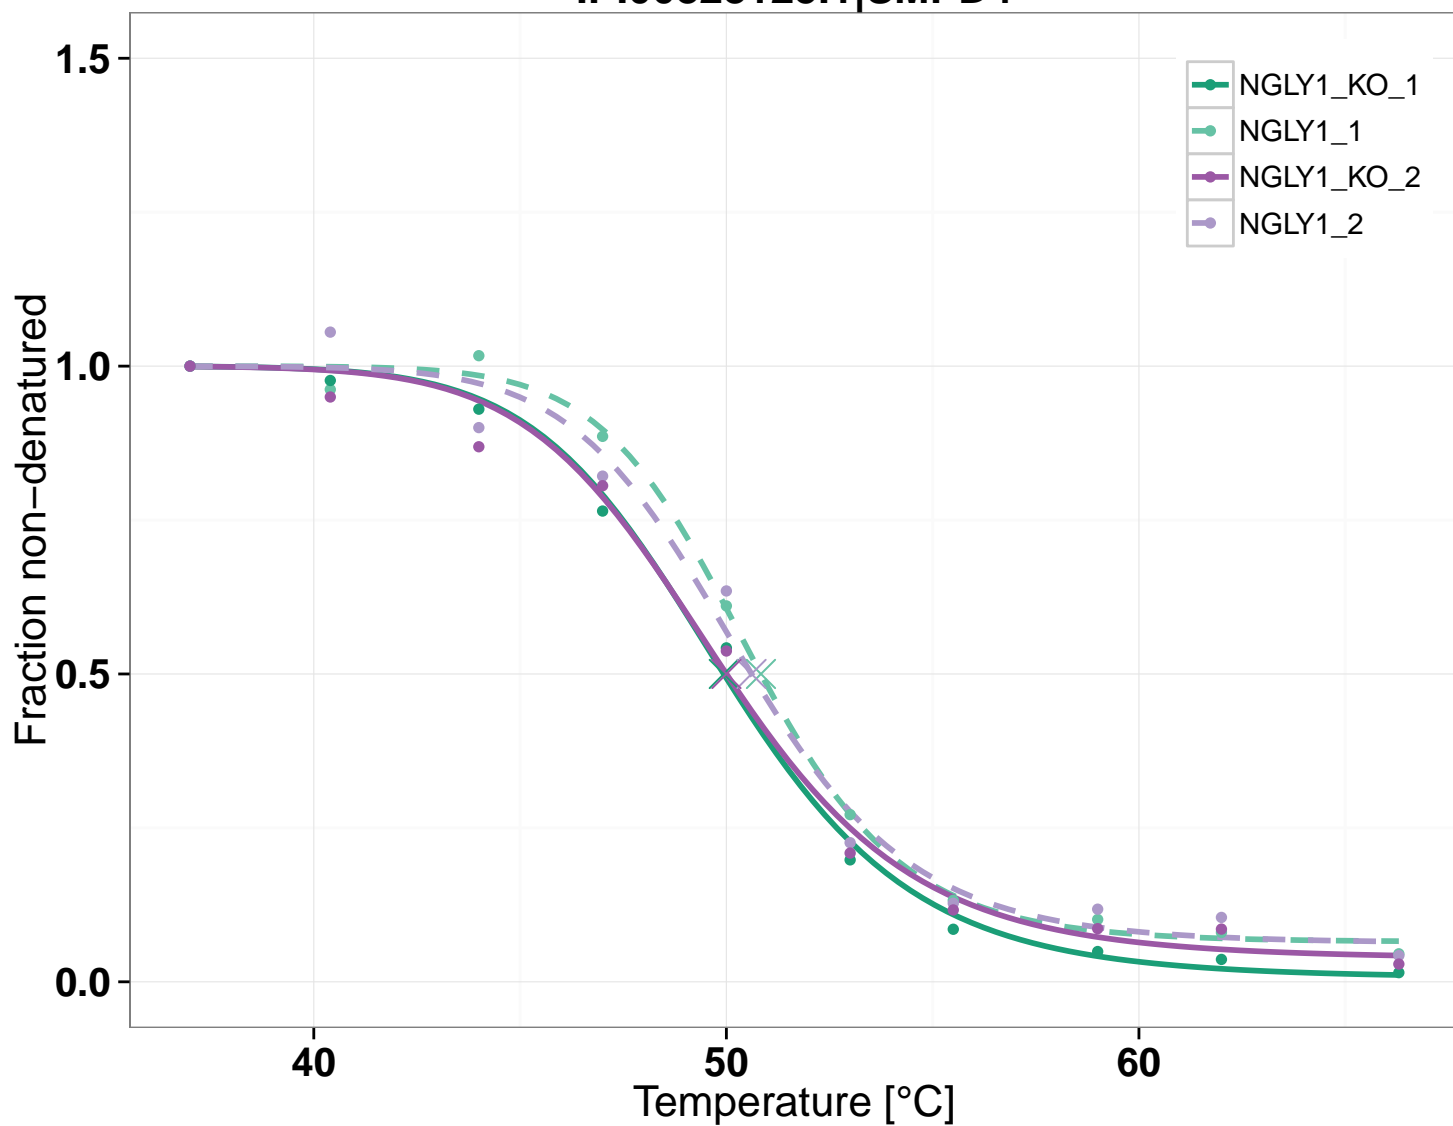

|            | meltPoint | slope | plateau | R2   |
|------------|-----------|-------|---------|------|
| NGLY1_KO_1 | 49.94     | -0.11 | 0.01    | 1    |
| NGLY1_1    | 50.84     | -0.13 | 0.06    | 1    |
| NGLY1_KO_2 | 50        | -0.1  | 0.04    | 0.99 |
| NGLY1_2    | 50.61     | -0.11 | 0.06    | 0.99 |

Supplement: Supplementary file 7935 [file 1]

# IPI00016670.3|C11ORF59

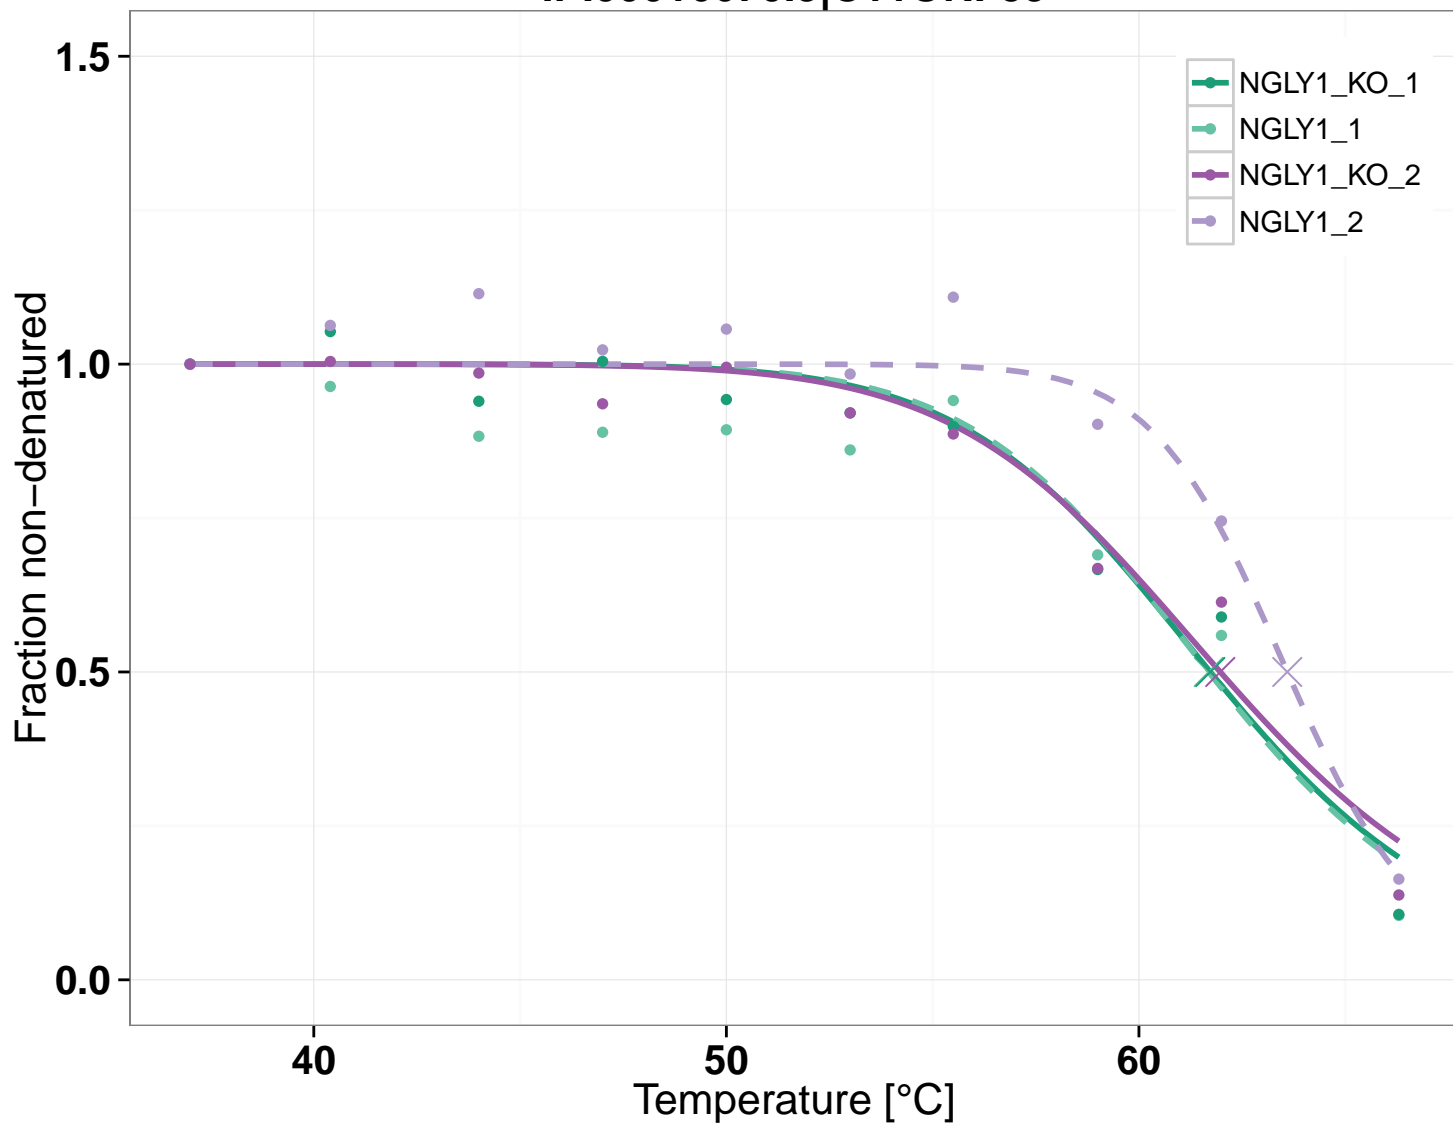

|            | meltPoint | slope  | plateau | R2   |
|------------|-----------|--------|---------|------|
| NGLY1_KO_1 | 61.73     | -0.083 | 0       | 0.95 |
| NGLY1_1    | 61.69     | -0.086 | 0       | 0.9  |
| NGLY1_KO_2 | 61.97     | -0.077 | 0       | 0.96 |
| NGLY1_2    | 63.6      | -0.15  | 0       | 0.95 |

Supplement: Supplementary file 7936 [file 1]

IPI00018038.3|MAGEA2

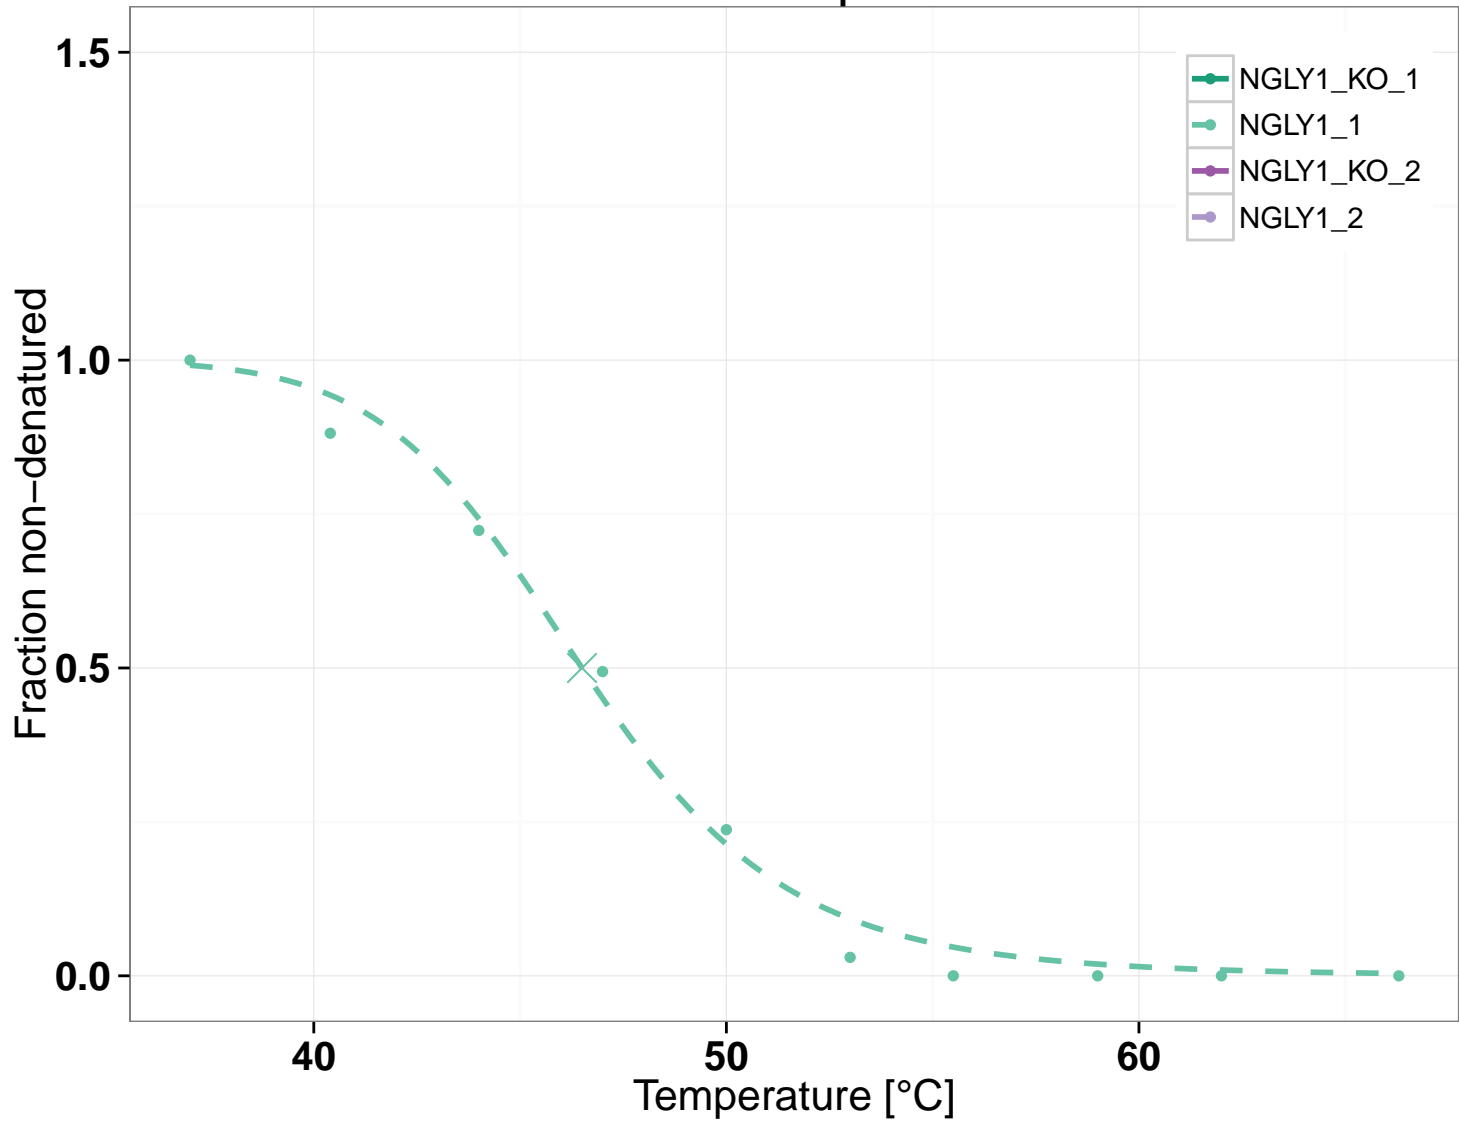

|            | meltPoint | slope | plateau | R2   |
|------------|-----------|-------|---------|------|
| NGLY1_KO_1 | -         | -     | -       | -    |
| NGLY1_1    | 46.5      | -0.1  | 0       | 0.99 |
| NGLY1_KO_2 | -         | -     | -       | -    |
| NGLY1_2    | -         | -     | -       | -    |

Supplement: Supplementary file 7937 [file 1]

# IPI00782974.1|C17ORF85

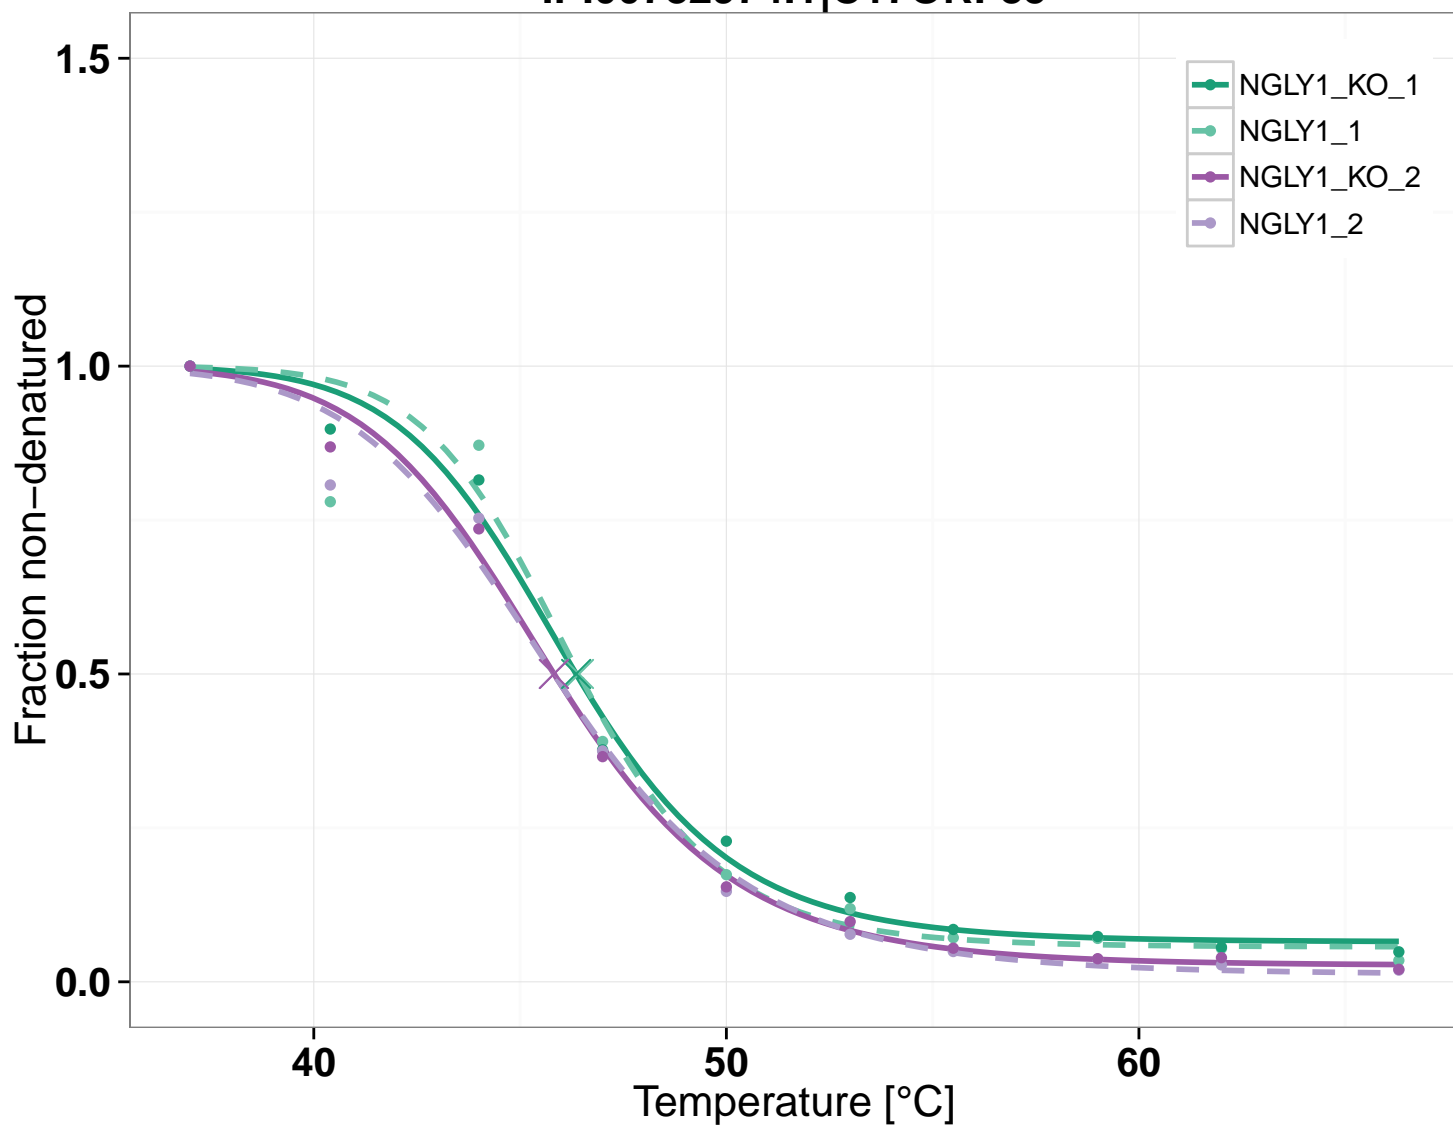

|            | meltPoint | slope | plateau | R2   |
|------------|-----------|-------|---------|------|
| NGLY1_KO_1 | 46.36     | -0.11 | 0.06    | 0.99 |
| NGLY1_1    | 46.43     | -0.13 | 0.06    | 0.96 |
| NGLY1_KO_2 | 45.82     | -0.11 | 0.03    | 0.99 |
| NGLY1_2    | 45.81     | -0.1  | 0.01    | 0.98 |

Supplement: Supplementary file 7938 [file 1]

IPI00784265.1|NOP16

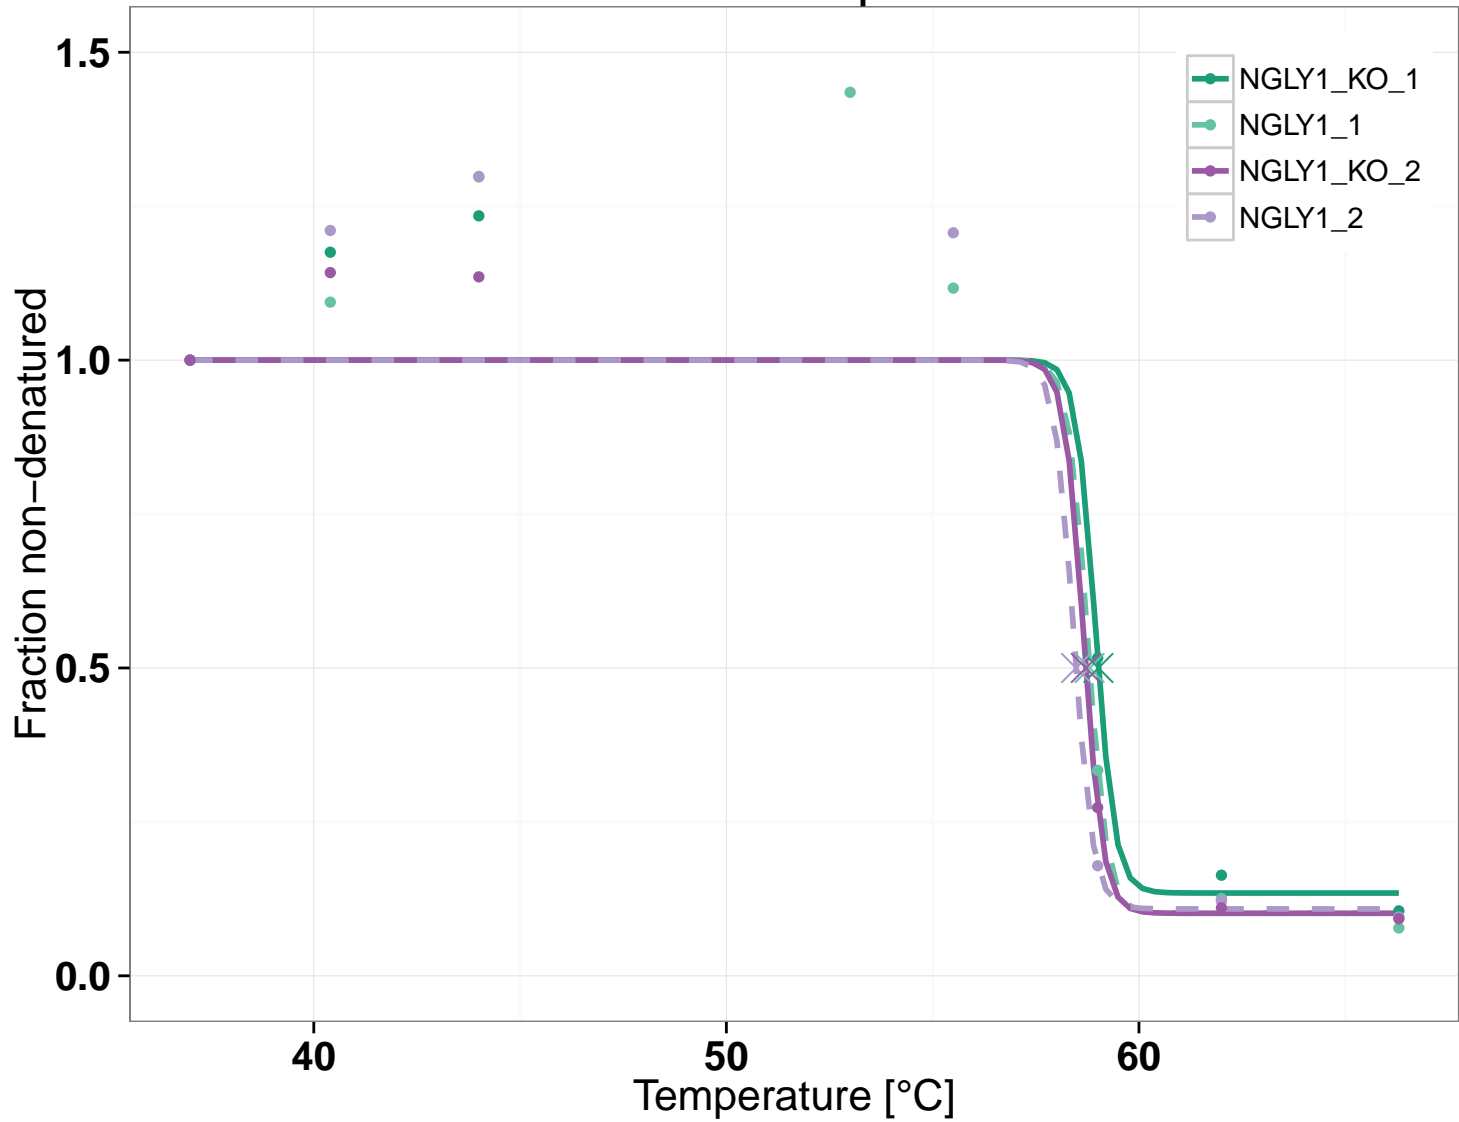

|            | meltPoint | slope | plateau | R2   |
|------------|-----------|-------|---------|------|
| NGLY1_KO_1 | 59.02     | -0.92 | 0.13    | 0.41 |
| NGLY1_1    | 58.8      | -0.96 | 0.1     | 0.64 |
| NGLY1_KO_2 | 58.71     | -0.96 | 0.1     | 0.42 |
| NGLY1_2    | 58.48     | -0.95 | 0.11    | 0.6  |

Supplement: Supplementary file 7939 [file 1]

IPI00000075.3|TGFB1

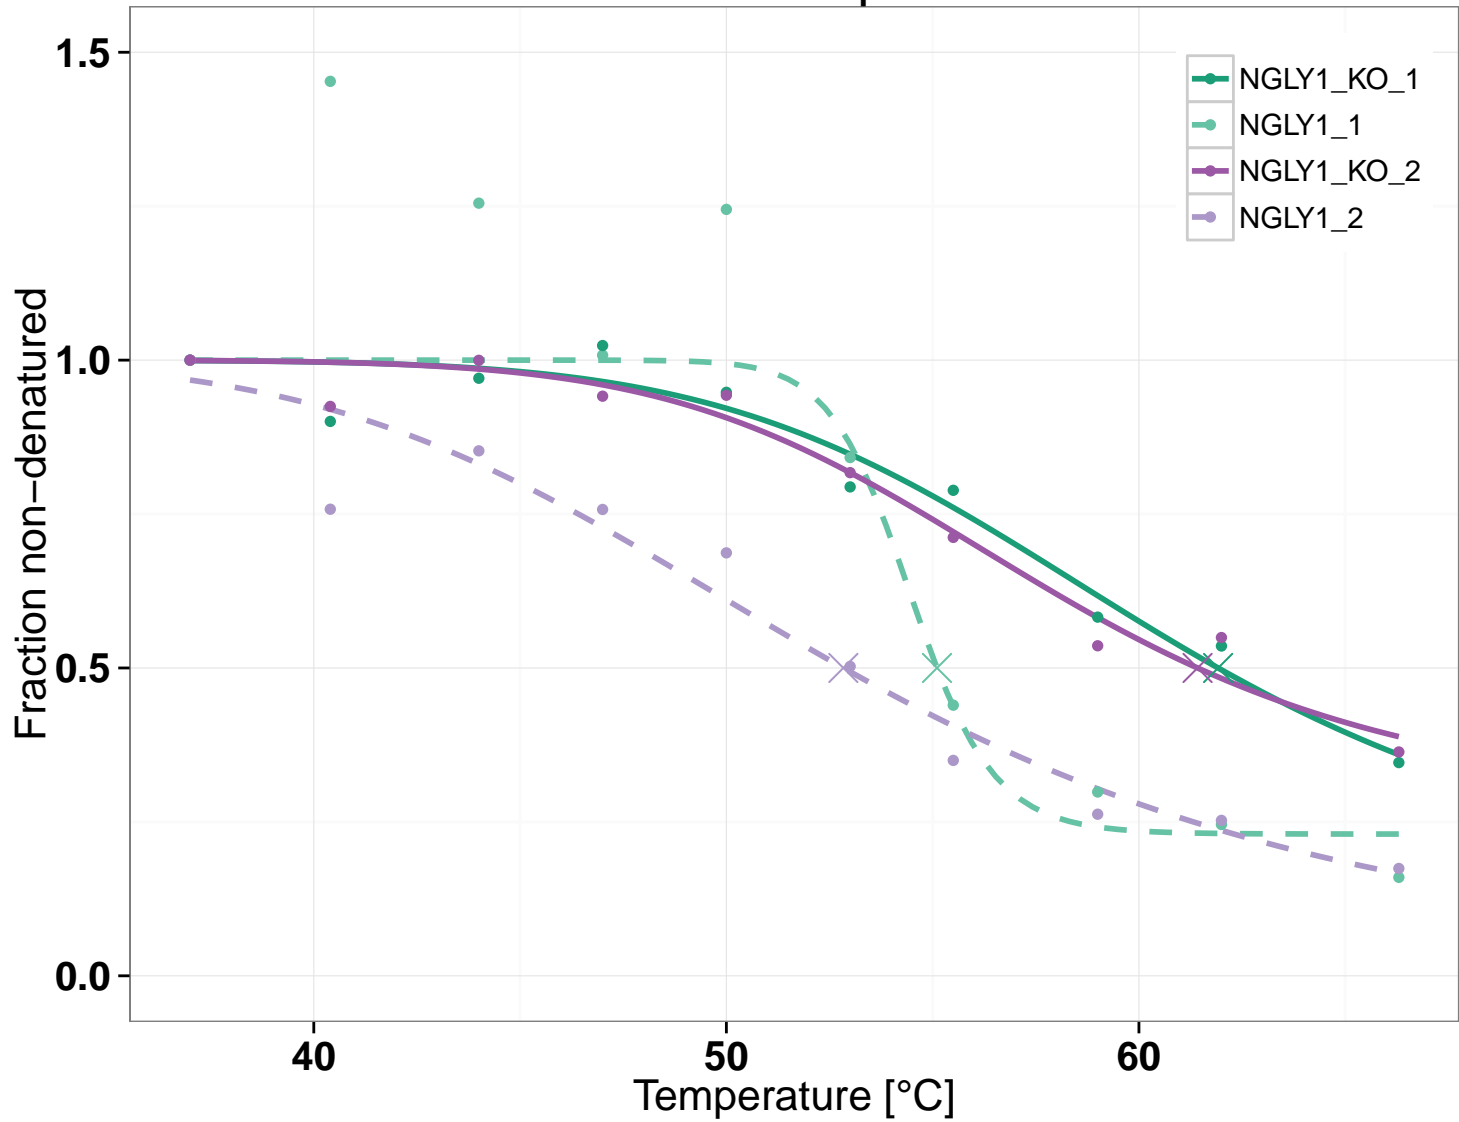

|            | meltPoint | slope  | plateau | R2   |
|------------|-----------|--------|---------|------|
| NGLY1_KO_1 | 61.92     | -0.042 | 0.13    | 0.96 |
| NGLY1_1    | 55.11     | -0.19  | 0.23    | 0.83 |
| NGLY1_KO_2 | 61.42     | -0.041 | 0.27    | 0.97 |
| NGLY1_2    | 52.84     | -0.04  | 0       | 0.95 |

Supplement: Supplementary file 7940 [file 1]

# IPI00017669.5|SMARCE1

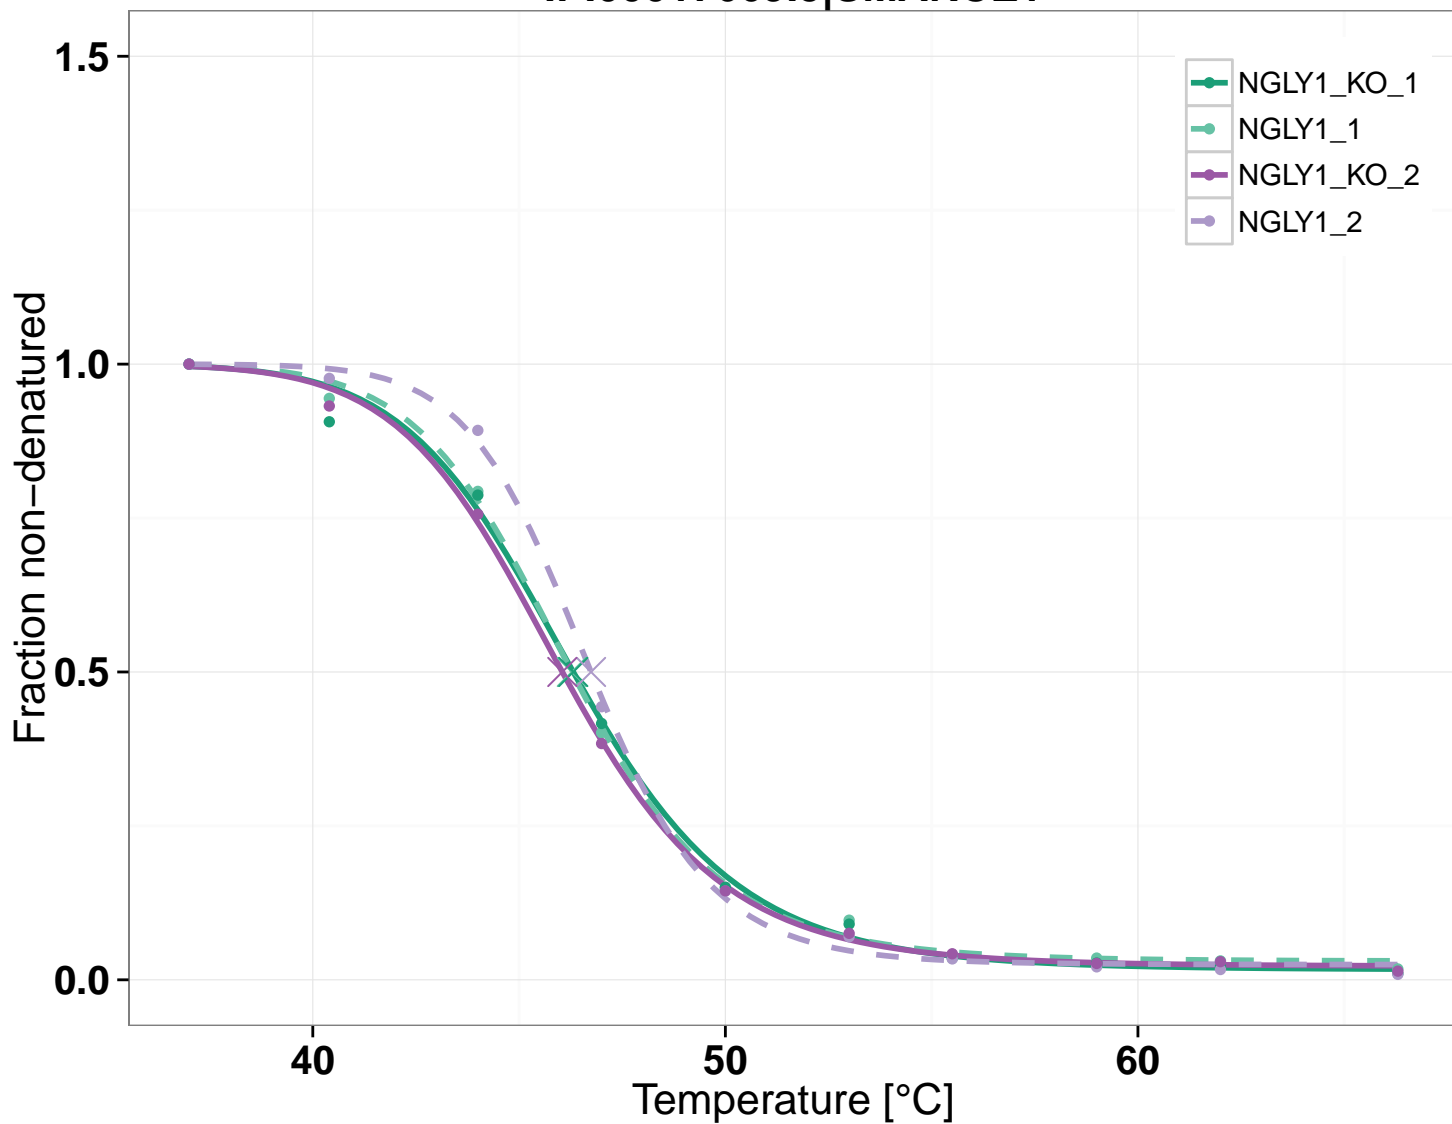

|            | meltPoint | slope | plateau | R2 |
|------------|-----------|-------|---------|----|
| NGLY1_KO_1 | 46.31     | -0.12 | 0.02    | 1  |
| NGLY1_1    | 46.28     | -0.13 | 0.03    | 1  |
| NGLY1_KO_2 | 46.05     | -0.12 | 0.02    | 1  |
| NGLY1_2    | 46.74     | -0.16 | 0.02    | 1  |

Supplement: Supplementary file 7941 [file 1]

# IPI00894223.1|84 KDA PROTEIN.

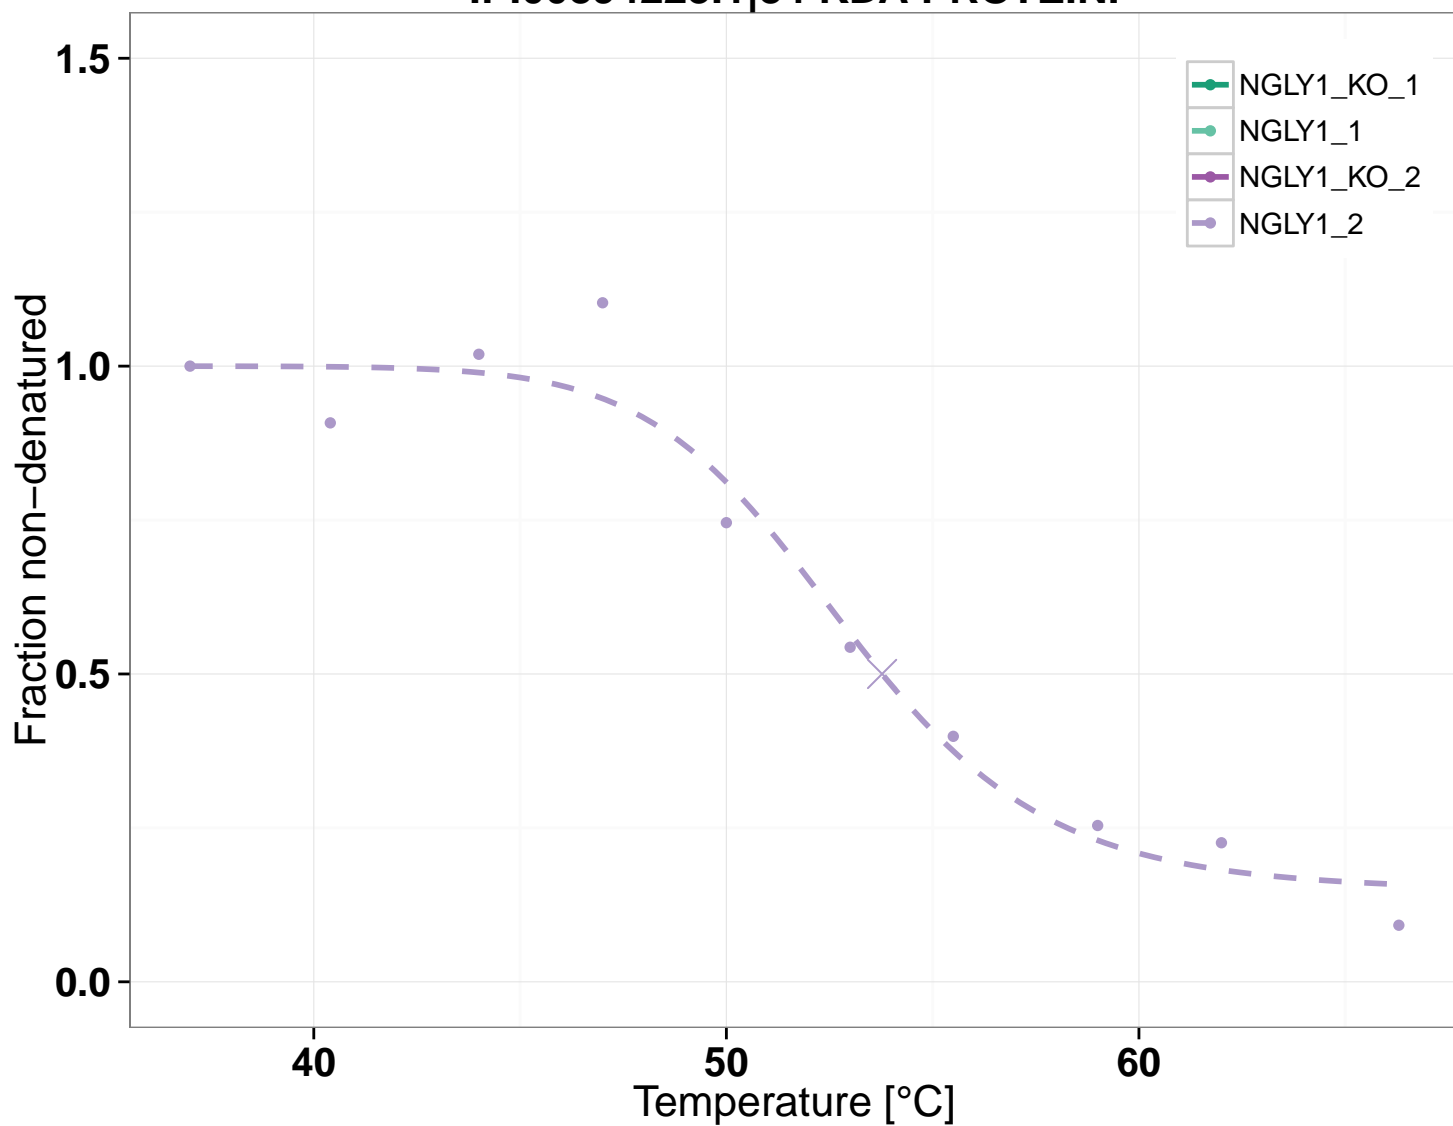

|            | meltPoint | slope  | plateau | R2   |
|------------|-----------|--------|---------|------|
| NGLY1_KO_1 | —         | —      | —       | —    |
| NGLY1_1    | —         | —      | —       | —    |
| NGLY1_KO_2 | —         | —      | —       | —    |
| NGLY1_2    | 53.77     | -0.088 | 0.15    | 0.96 |

Supplement: Supplementary file 7942 [file 1]

# IPI00290435.3|KIF2C

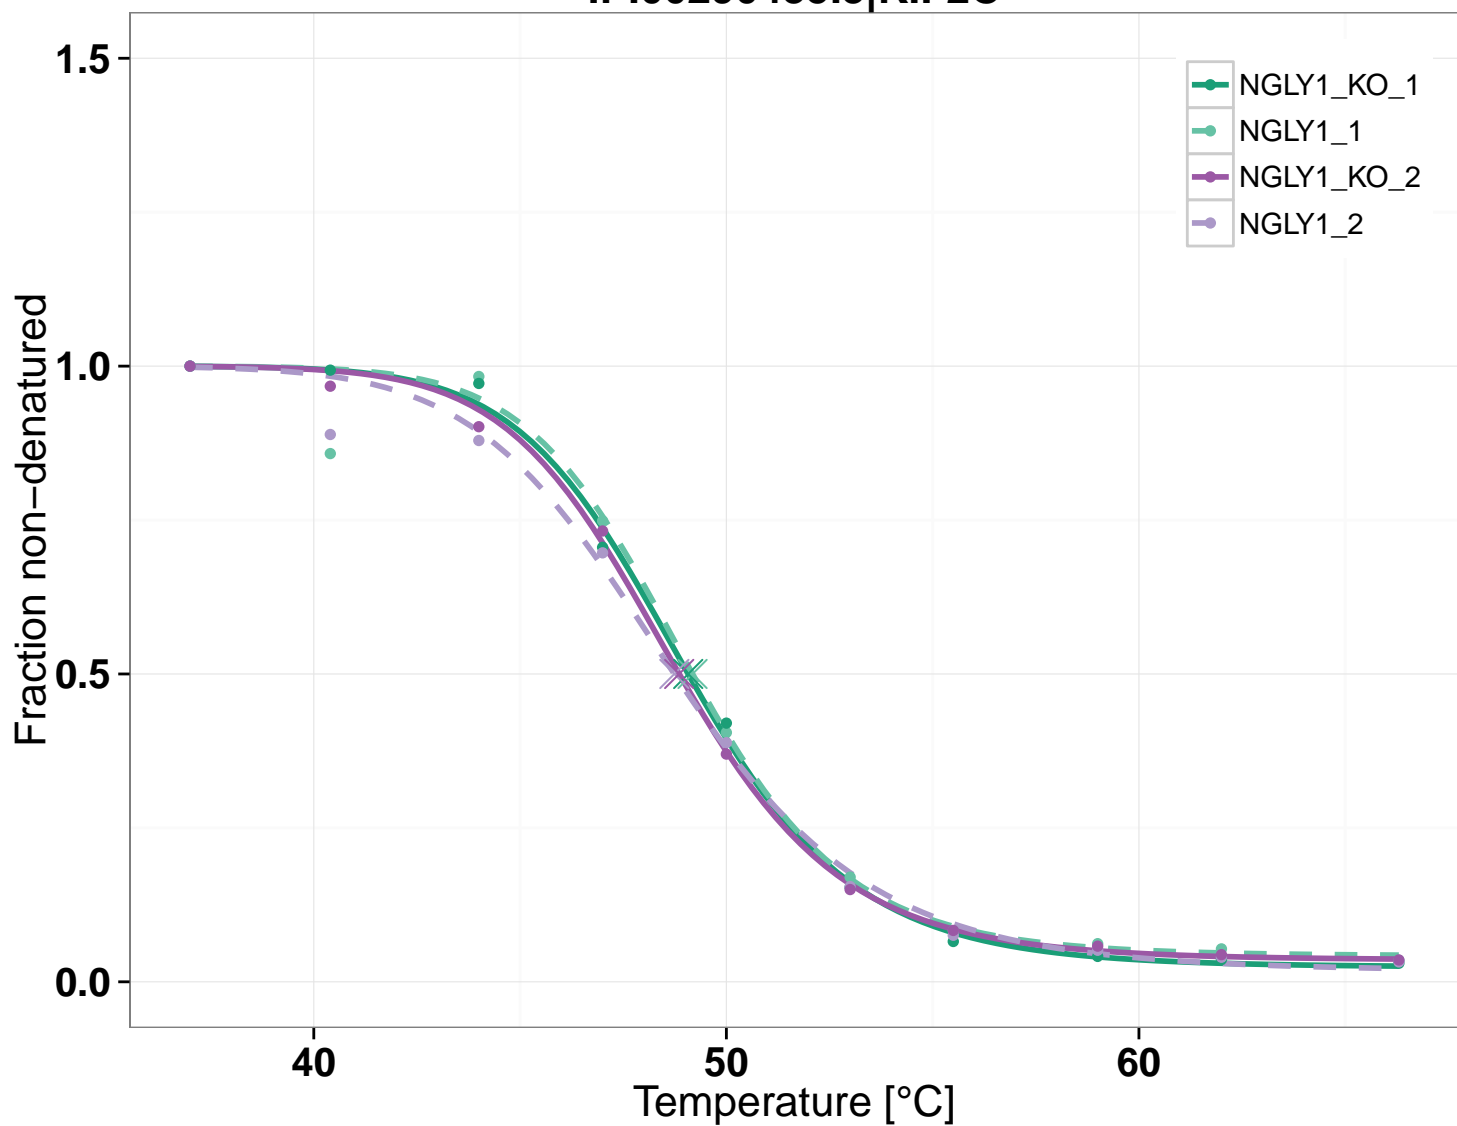

|            | meltPoint | slope | plateau | R2   |
|------------|-----------|-------|---------|------|
| NGLY1_KO_1 | 49.08     | -0.12 | 0.02    | 1    |
| NGLY1_1    | 49.18     | -0.12 | 0.04    | 0.99 |
| NGLY1_KO_2 | 48.86     | -0.12 | 0.04    | 1    |
| NGLY1_2    | 48.74     | -0.1  | 0.02    | 0.99 |

Supplement: Supplementary file 7943 [file 1]

# IPI00879501.2|HNRNPA1L2

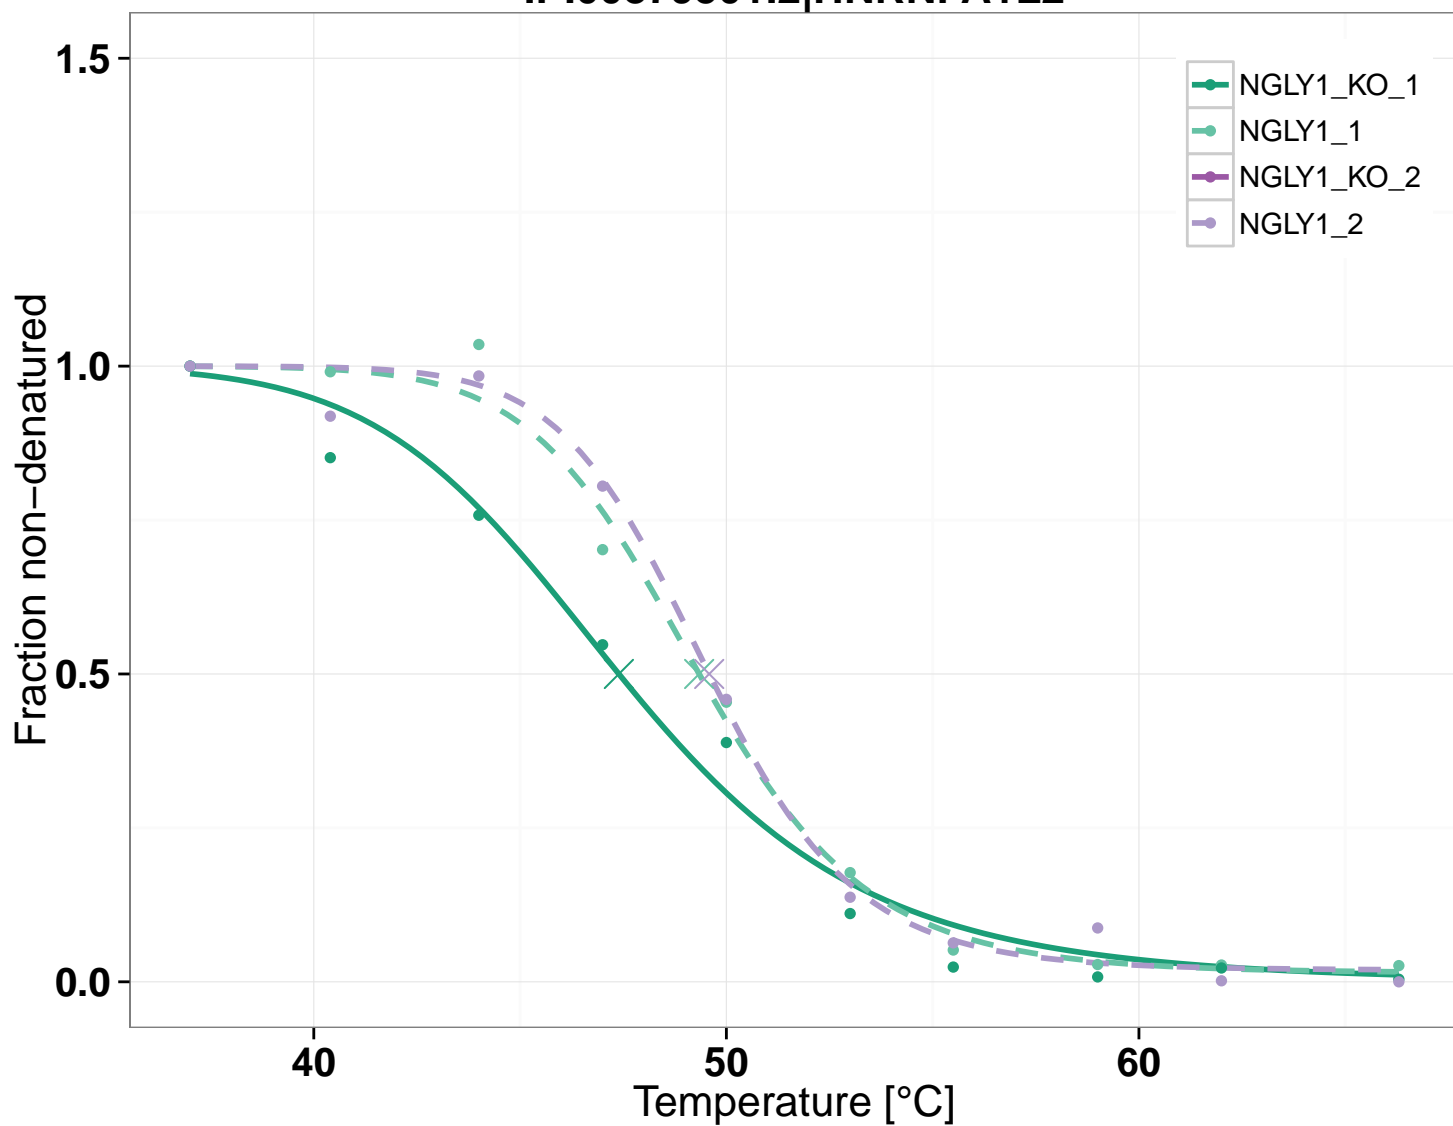

|            | meltPoint | slope  | plateau | R2   |
|------------|-----------|--------|---------|------|
| NGLY1_KO_1 | 47.39     | -0.084 | 0       | 0.98 |
| NGLY1_1    | 49.34     | -0.12  | 0.01    | 0.99 |
| NGLY1_KO_2 | -         | -      | -       | -    |
| NGLY1_2    | 49.58     | -0.14  | 0.02    | 0.99 |

Supplement: Supplementary file 7944 [file 1]

IPI00293336.5|LOC153364

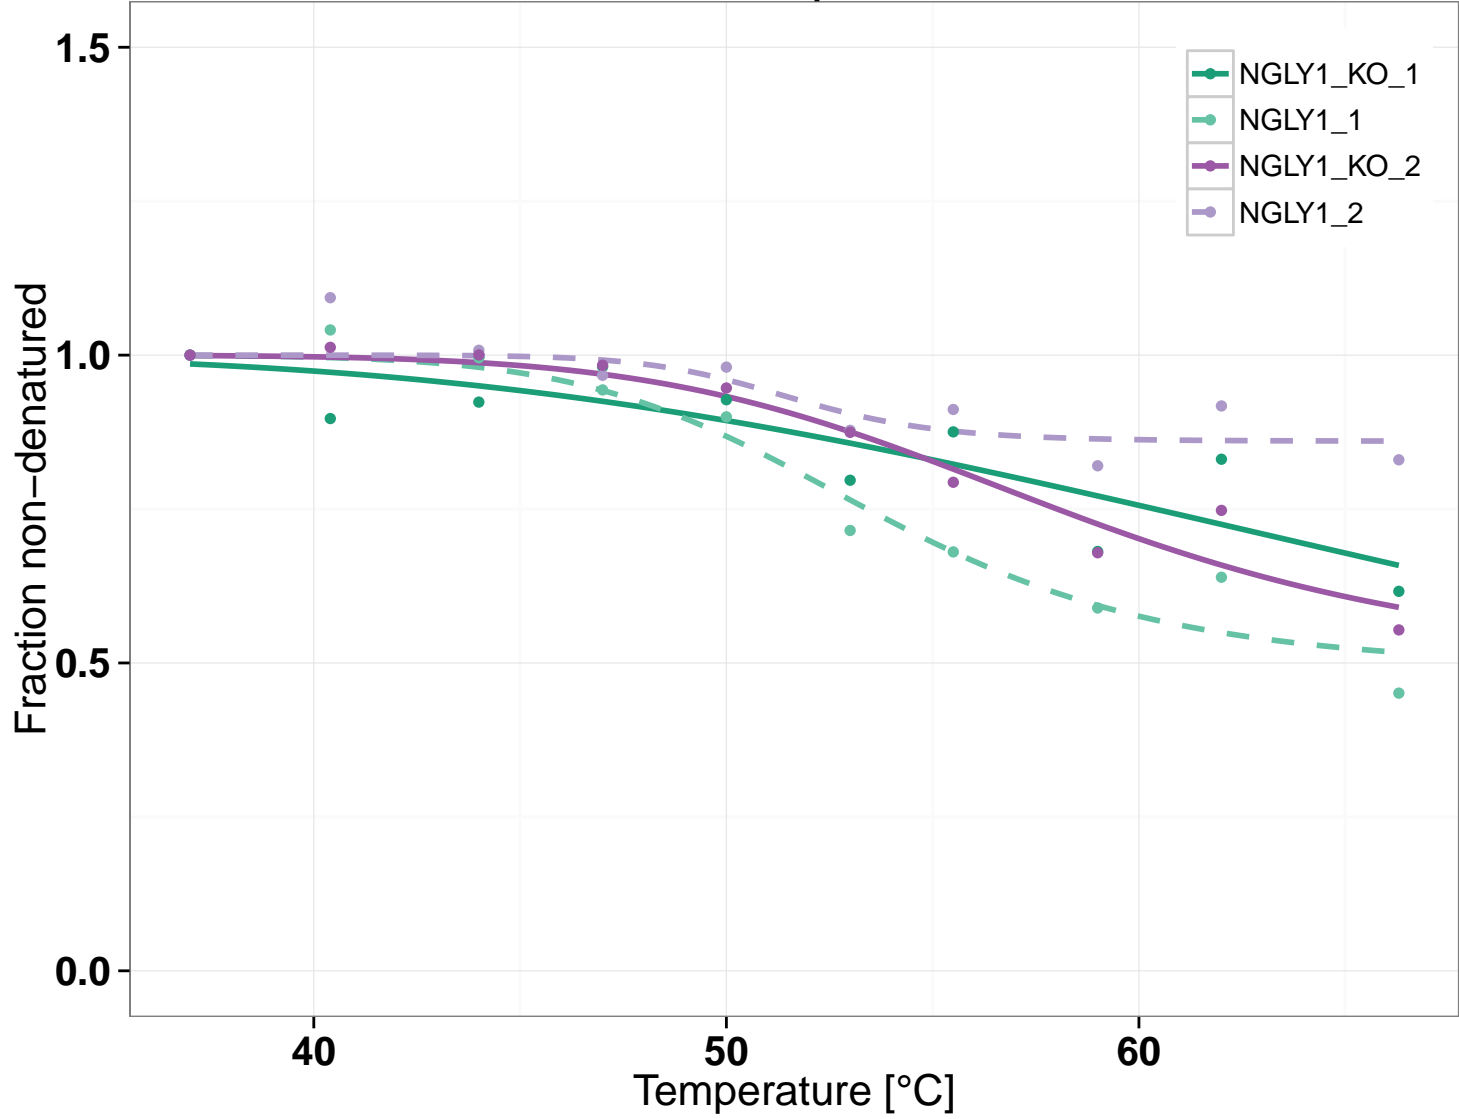

|            | meltPoint | slope  | plateau | R2   |
|------------|-----------|--------|---------|------|
| NGLY1_KO_1 | -         | -0.016 | 0       | 0.73 |
| NGLY1_1    | -         | -0.036 | 0.49    | 0.95 |
| NGLY1_KO_2 | -         | -0.026 | 0.49    | 0.94 |
| NGLY1_2    | -         | -0.02  | 0.86    | 0.73 |

Supplement: Supplementary file 7945 [file 1]

# IPI00029264.3|CYC1

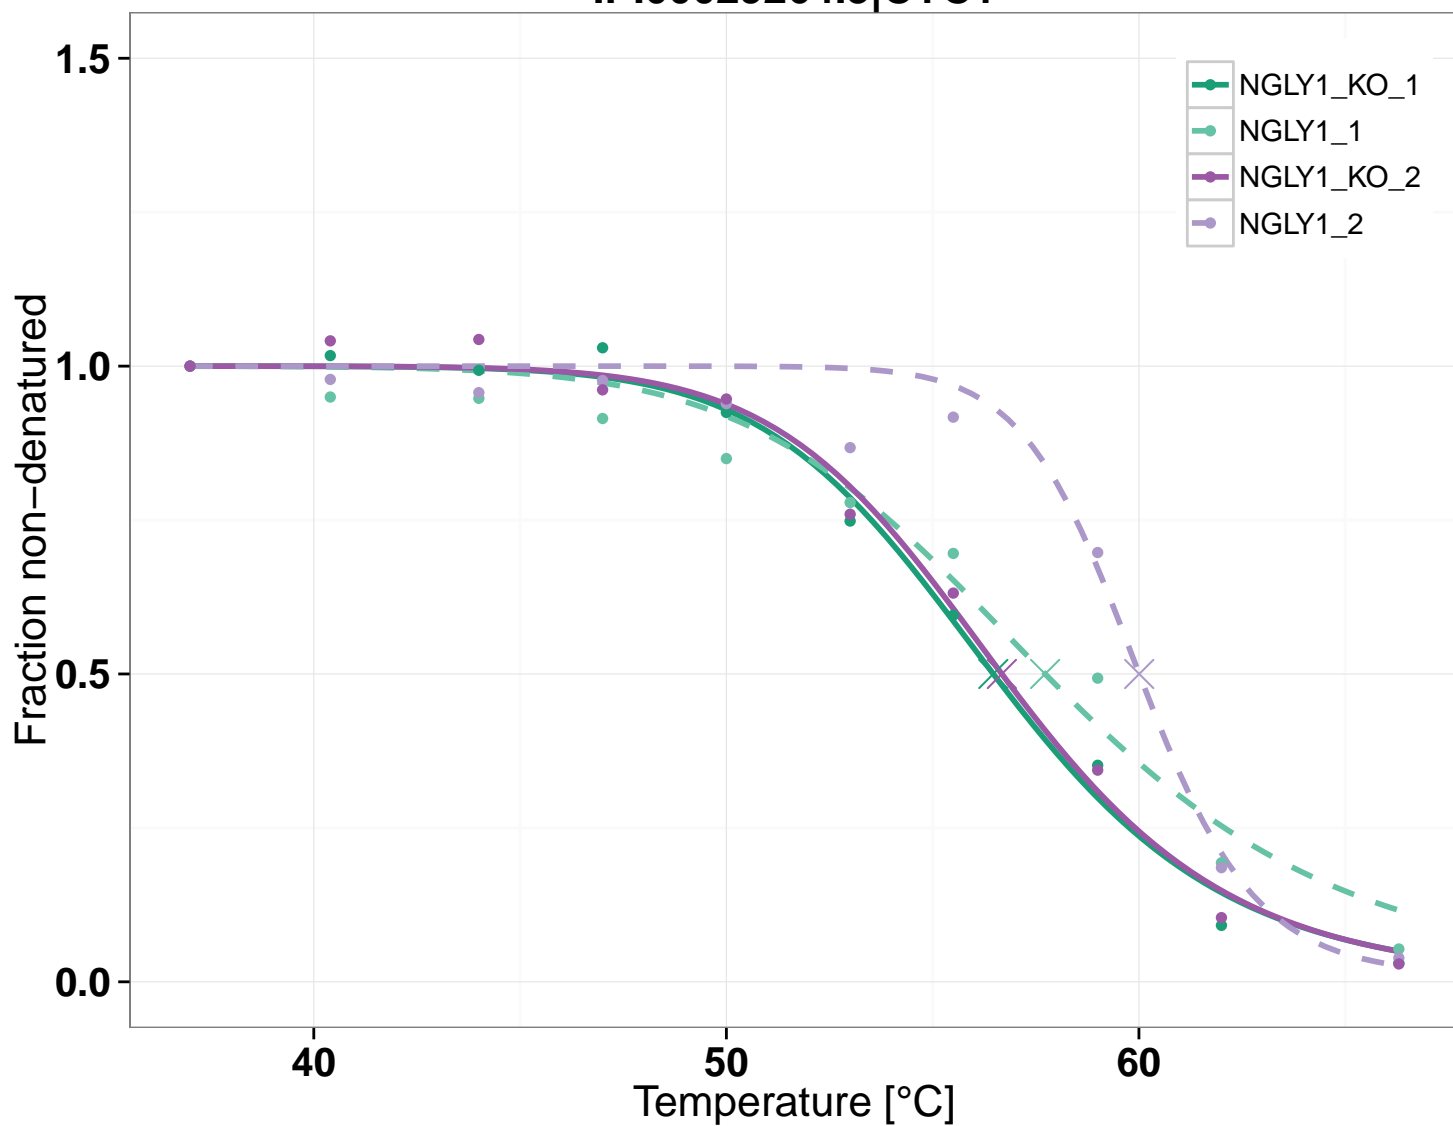

|            | meltPoint | slope  | plateau | R2   |
|------------|-----------|--------|---------|------|
| NGLY1_KO_1 | 56.47     | -0.089 | 0       | 0.99 |
| NGLY1_1    | 57.73     | -0.069 | 0       | 0.97 |
| NGLY1_KO_2 | 56.68     | -0.091 | 0       | 0.99 |
| NGLY1_2    | 60.01     | -0.18  | 0.01    | 0.98 |

Supplement: Supplementary file 7946 [file 1]

IPI00031421.3|TPST2

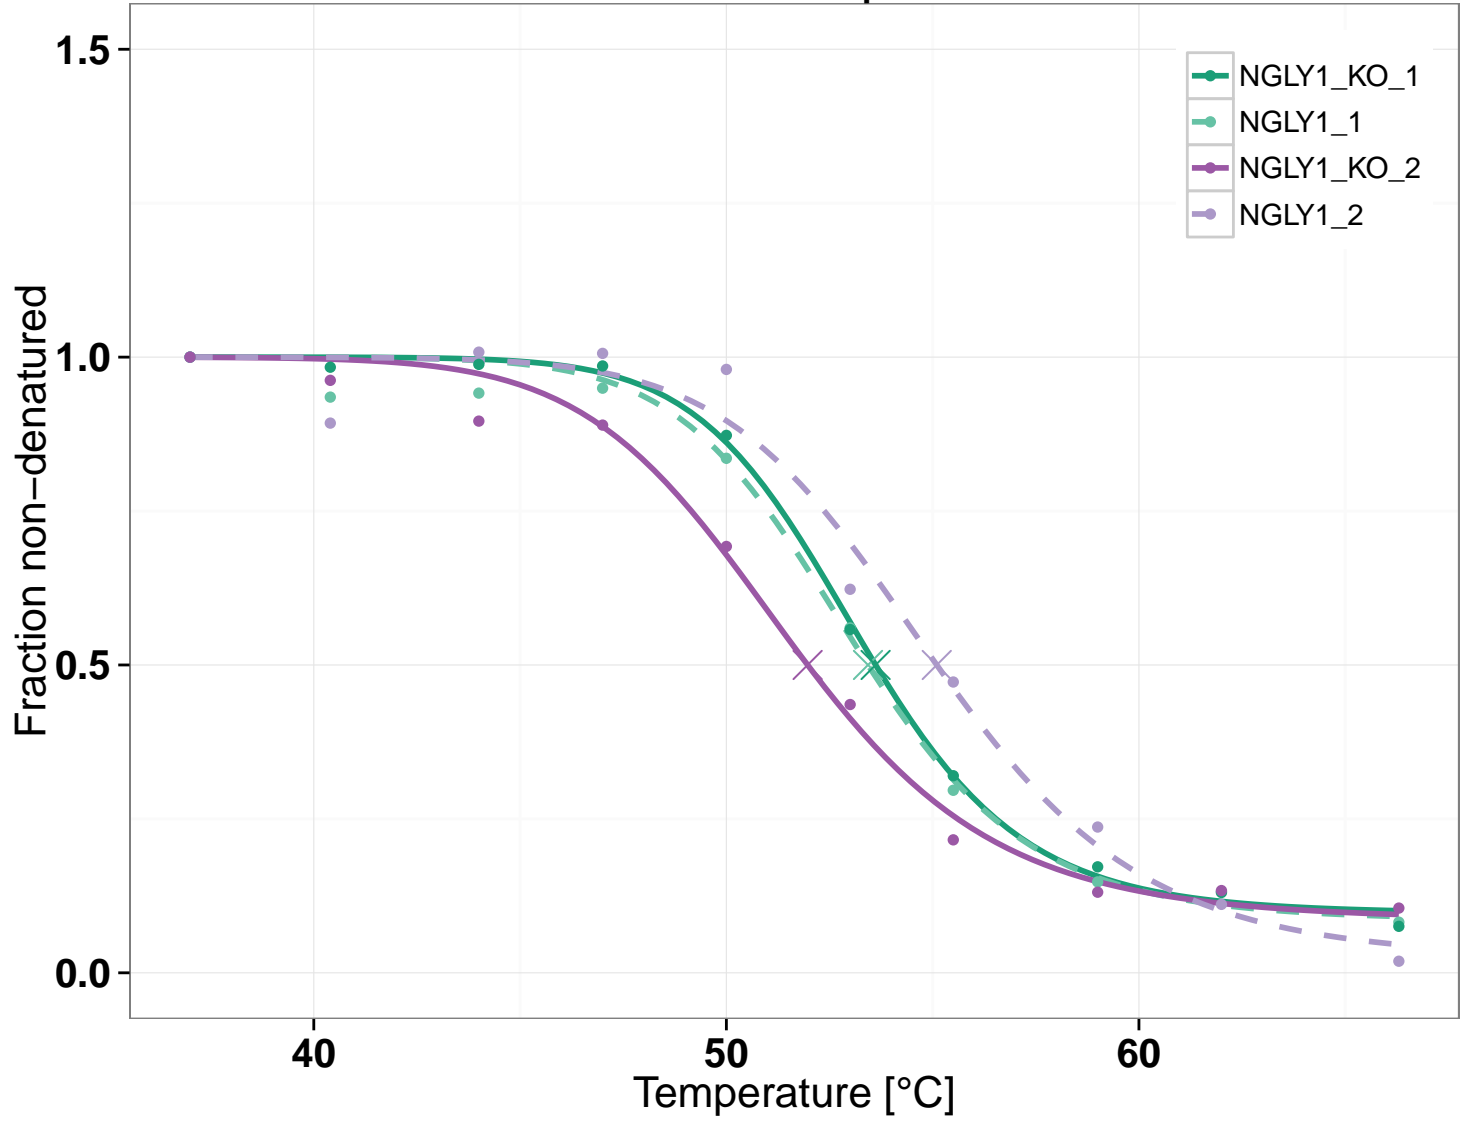

|            | meltPoint | slope  | plateau | R2   |
|------------|-----------|--------|---------|------|
| NGLY1_KO_1 | 53.62     | -0.11  | 0.1     | 1    |
| NGLY1_1    | 53.43     | -0.11  | 0.09    | 0.99 |
| NGLY1_KO_2 | 51.97     | -0.092 | 0.09    | 0.99 |
| NGLY1_2    | 55.1      | -0.096 | 0.02    | 0.98 |

Supplement: Supplementary file 7947 [file 1]

# IPI00386114.1|SF1

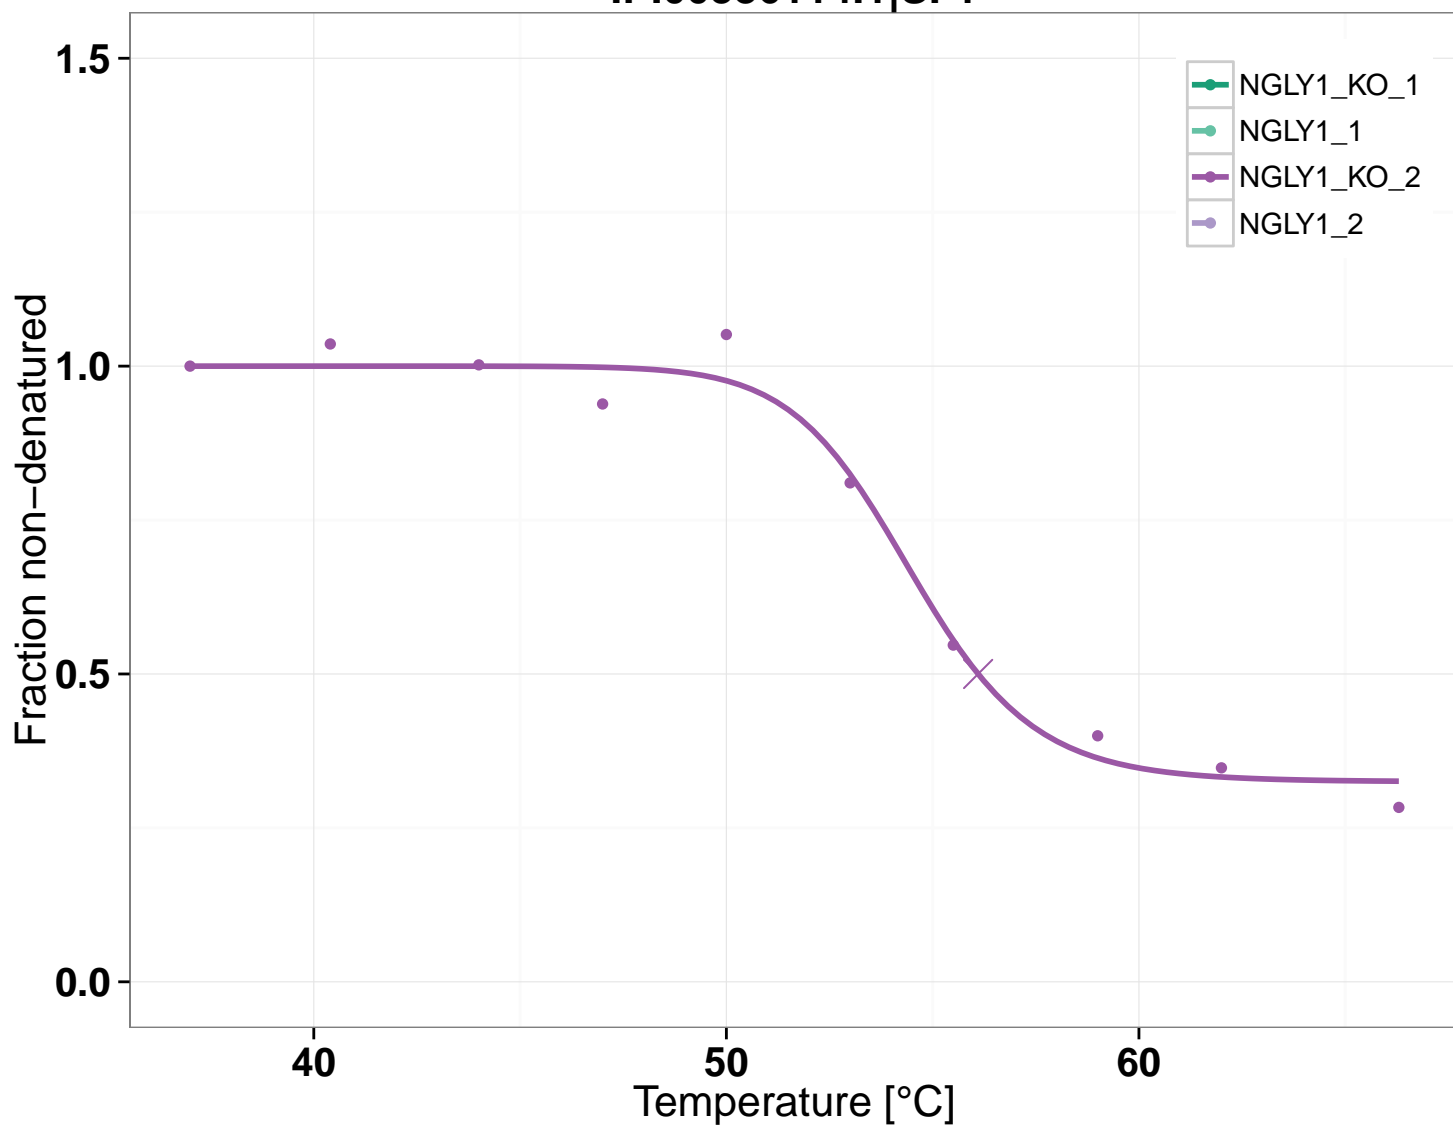

|            | meltPoint | slope | plateau | R2   |
|------------|-----------|-------|---------|------|
| NGLY1_KO_1 | —         | —     | —       | —    |
| NGLY1_1    | —         | —     | —       | —    |
| NGLY1_KO_2 | 56.1      | -0.11 | 0.32    | 0.98 |
| NGLY1_2    | —         | —     | —       | —    |

Supplement: Supplementary file 7948 [file 1]

IPI00855767.1|RAP1GDS1

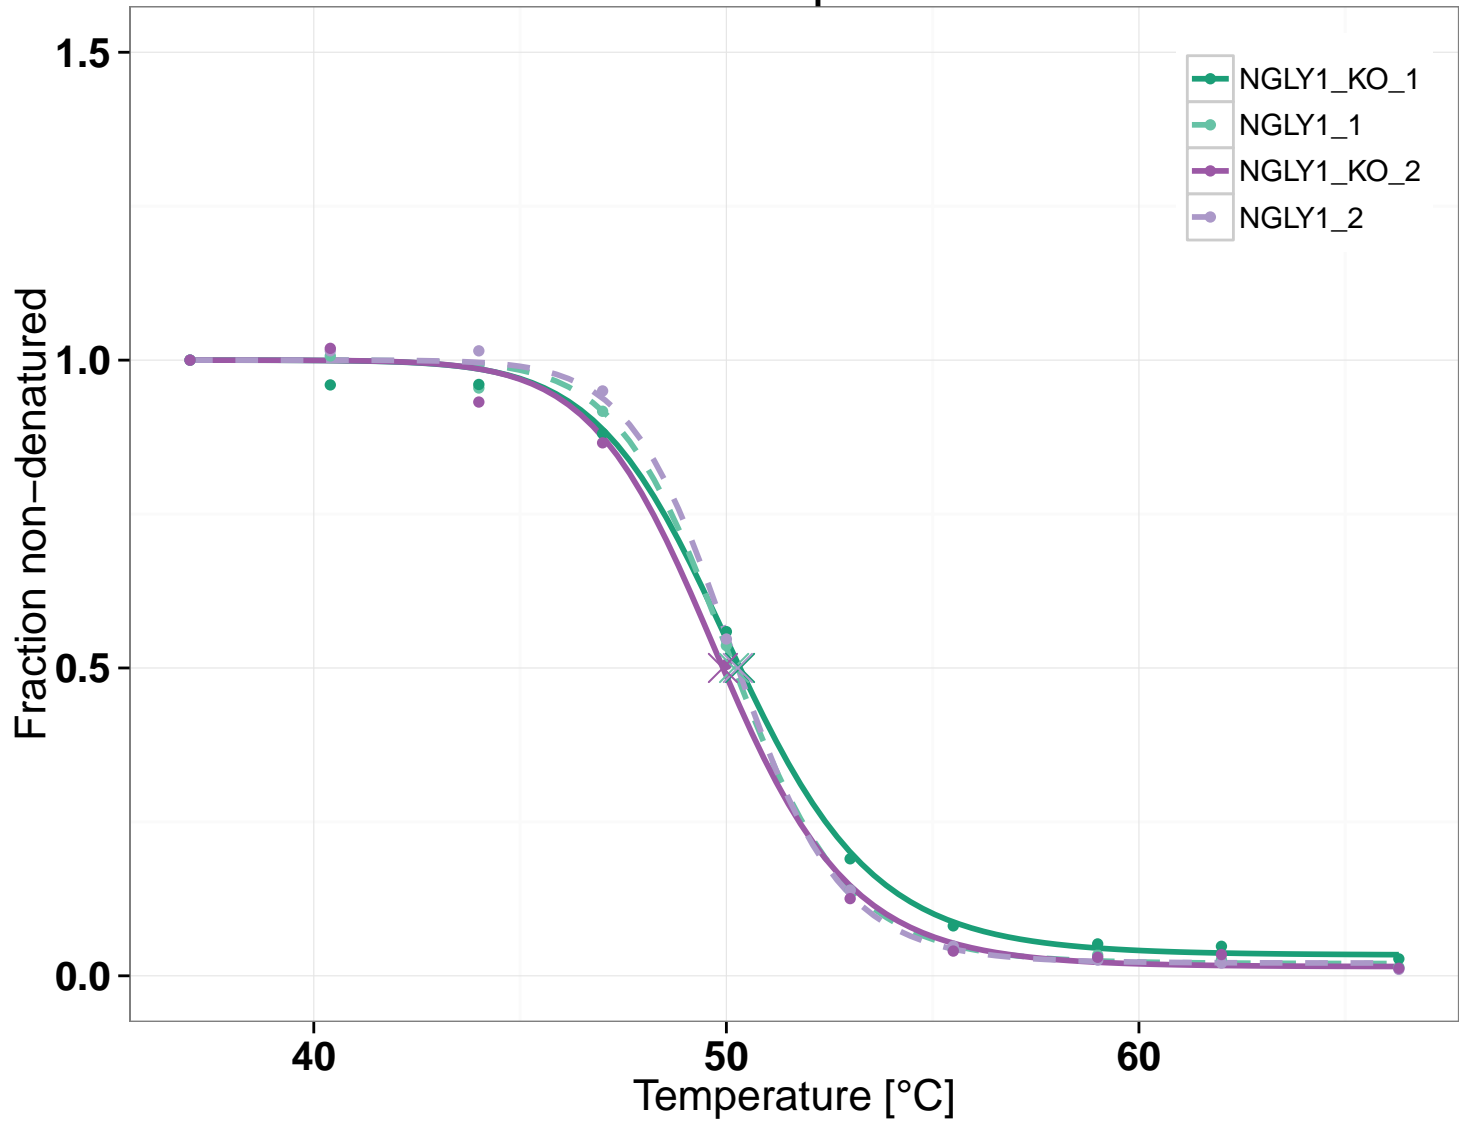

|            | meltPoint | slope | plateau | R2 |
|------------|-----------|-------|---------|----|
| NGLY1_KO_1 | 50.33     | -0.14 | 0.03    | 1  |
| NGLY1_1    | 50.19     | -0.18 | 0.02    | 1  |
| NGLY1_KO_2 | 49.92     | -0.16 | 0.01    | 1  |
| NGLY1_2    | 50.28     | -0.19 | 0.02    | 1  |

Supplement: Supplementary file 7949 [file 1]

IPI00010365.4|USP22

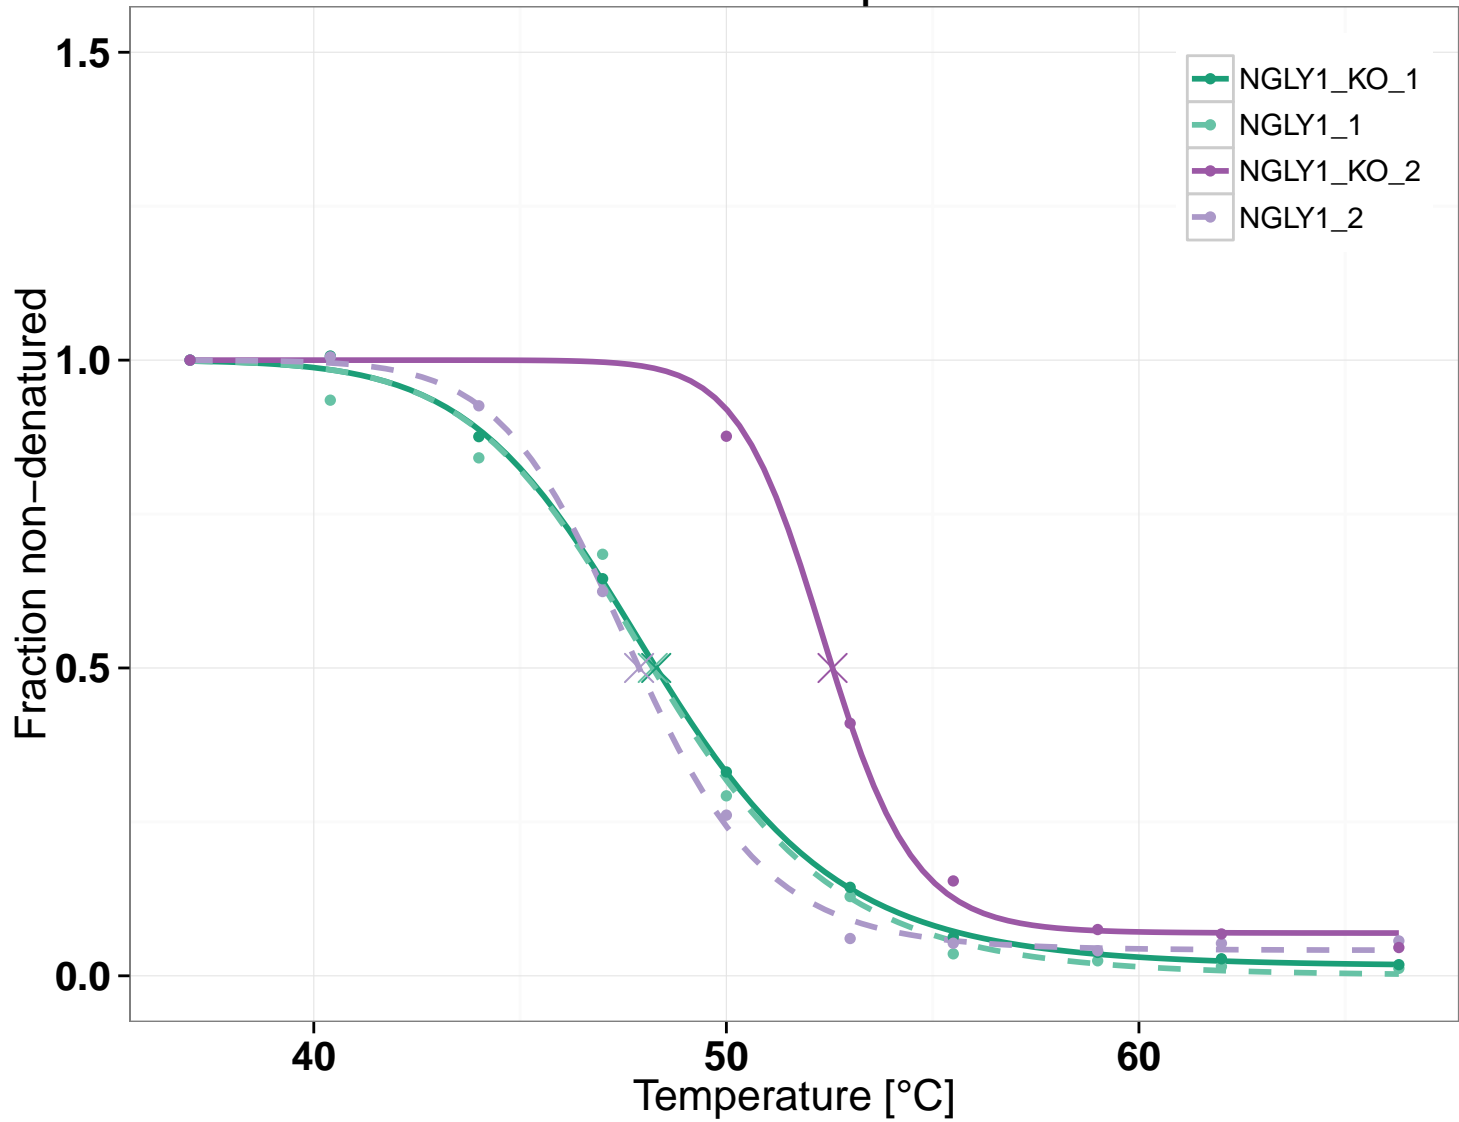

|            | meltPoint | slope | plateau | R2   |
|------------|-----------|-------|---------|------|
| NGLY1_KO_1 | 48.3      | -0.11 | 0.02    | 1    |
| NGLY1_1    | 48.22     | -0.11 | 0       | 0.99 |
| NGLY1_KO_2 | 52.57     | -0.22 | 0.07    | 0.47 |
| NGLY1_2    | 47.89     | -0.15 | 0.04    | 1    |

Supplement: Supplementary file 7950 [file 1]

# IPI00003217.3|PSMB7

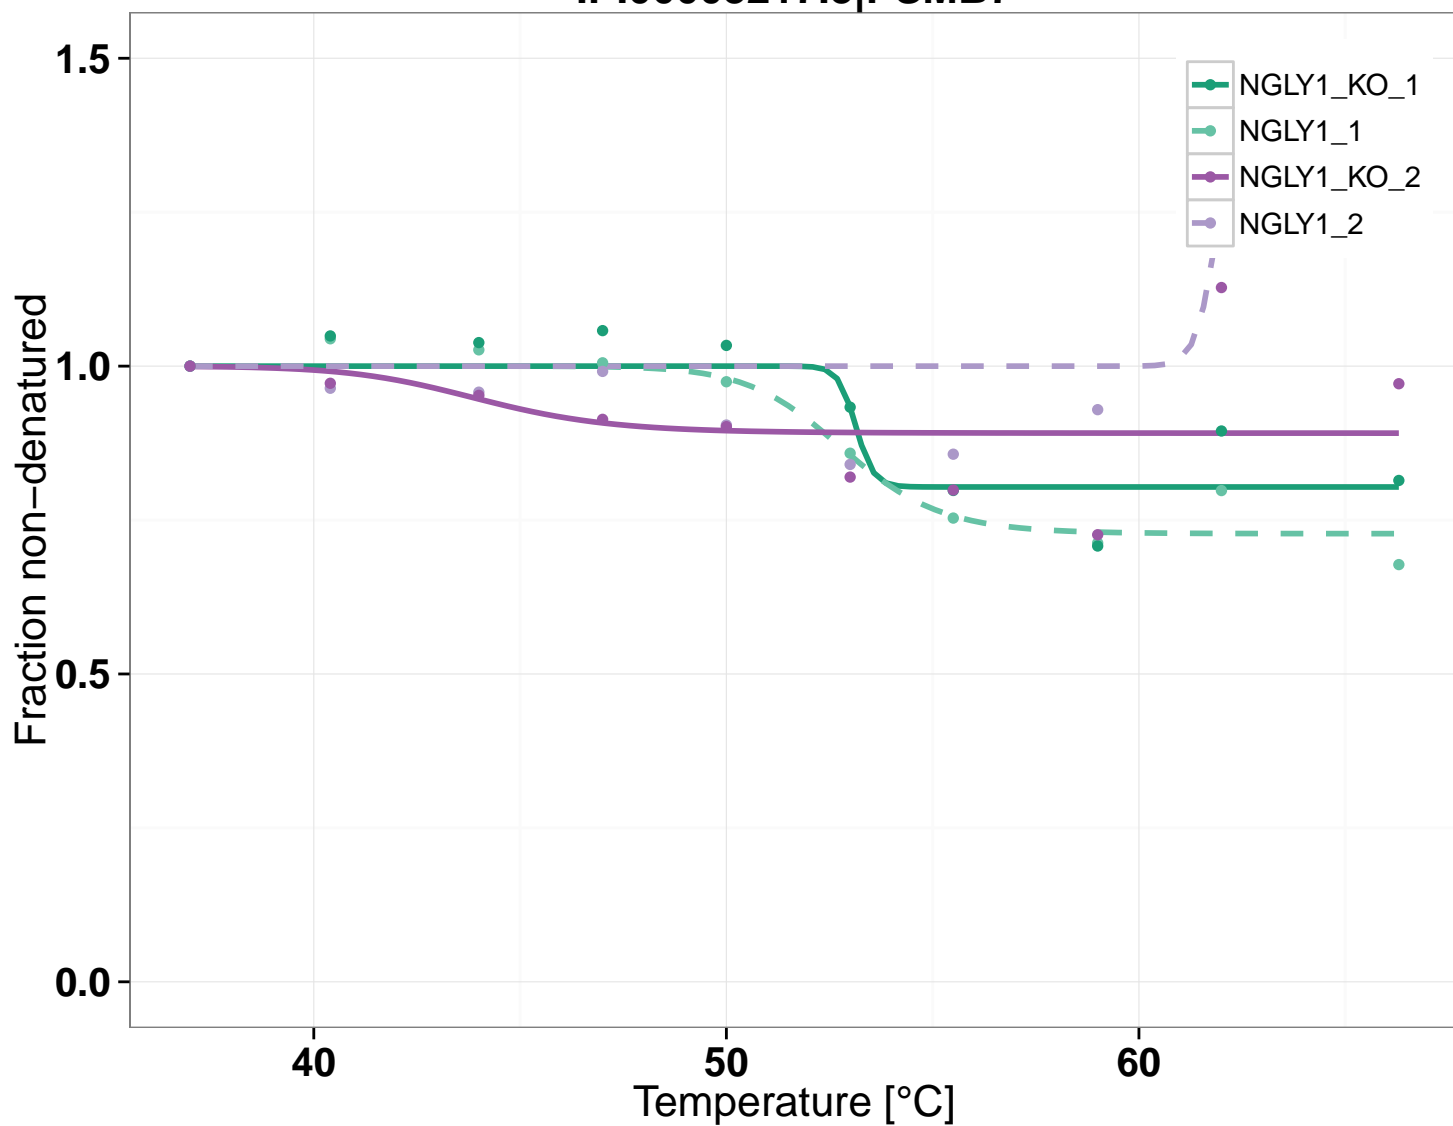

|            | meltPoint | slope  | plateau | R2   |
|------------|-----------|--------|---------|------|
| NGLY1_KO_1 | —         | −0.23  | 0.8     | 0.81 |
| NGLY1_1    | —         | −0.058 | 0.73    | 0.94 |
| NGLY1_KO_2 | —         | −0.017 | 0.89    | 0.12 |
| NGLY1_2    | —         | 0.41   | 1.42    | 0.8  |

Supplement: Supplementary file 7951 [file 1]

IPI00005154.1|SSRP1

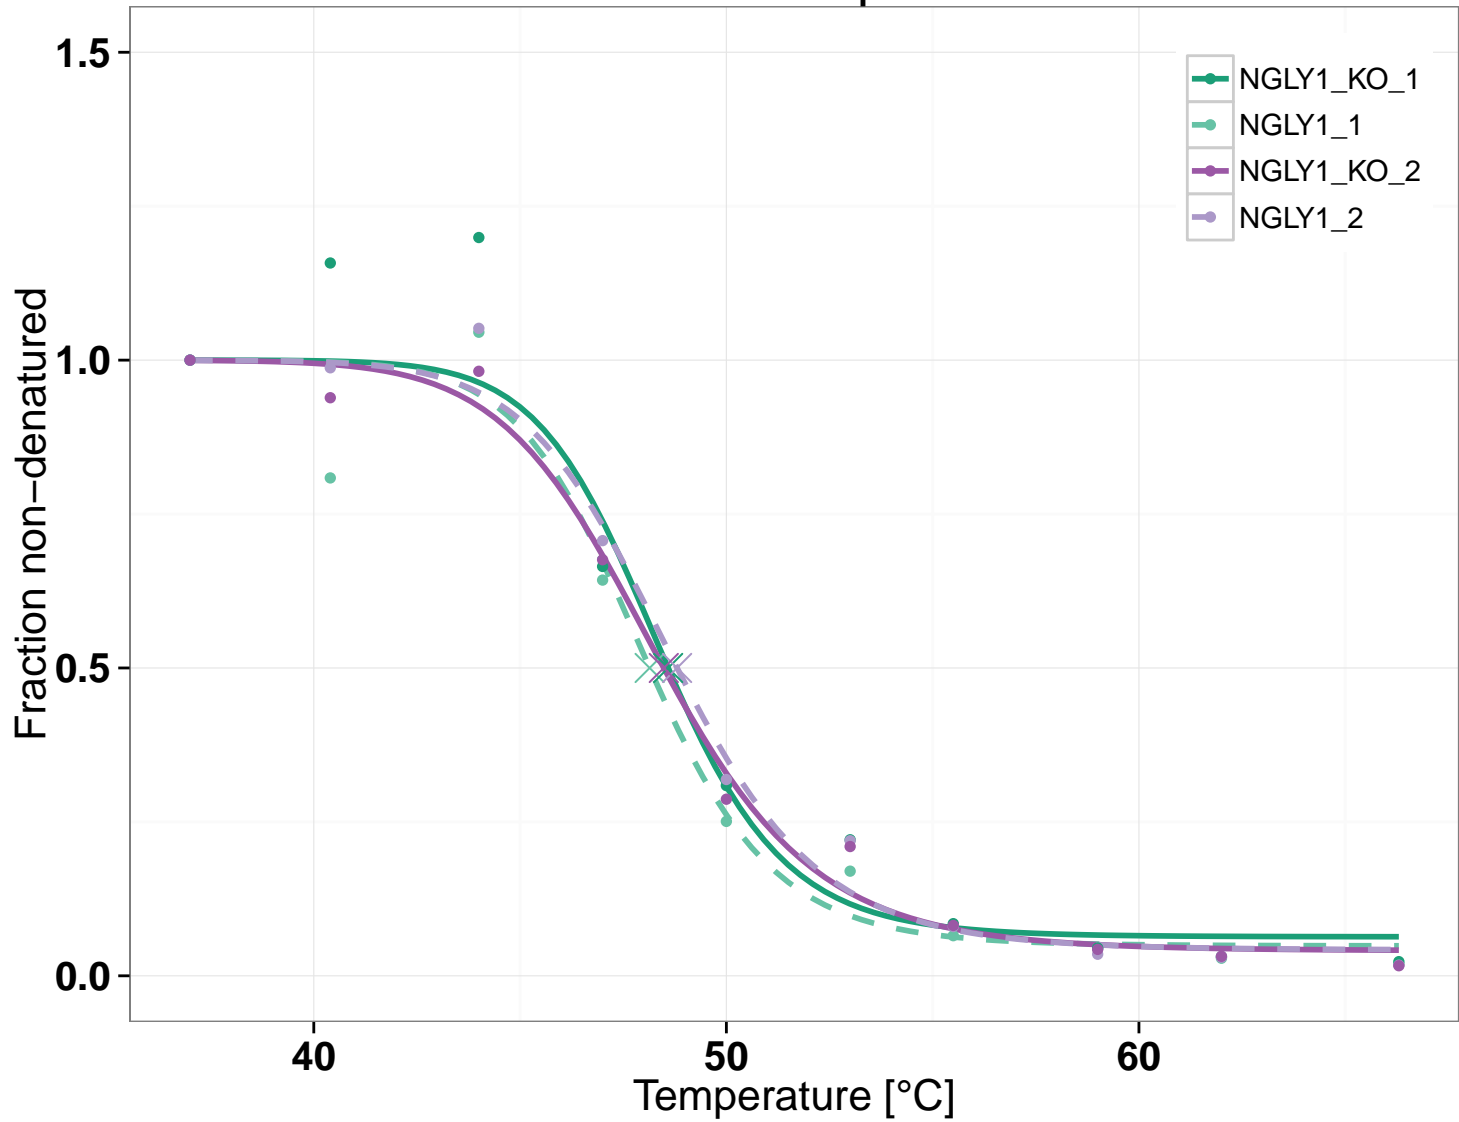

|            | meltPoint | slope | plateau | R2   |
|------------|-----------|-------|---------|------|
| NGLY1_KO_1 | 48.59     | -0.16 | 0.06    | 0.95 |
| NGLY1_1    | 48.14     | -0.15 | 0.05    | 0.97 |
| NGLY1_KO_2 | 48.48     | -0.13 | 0.04    | 0.99 |
| NGLY1_2    | 48.81     | -0.13 | 0.04    | 0.99 |

Supplement: Supplementary file 7952 [file 1]

# IPI00410714.5|HBA1

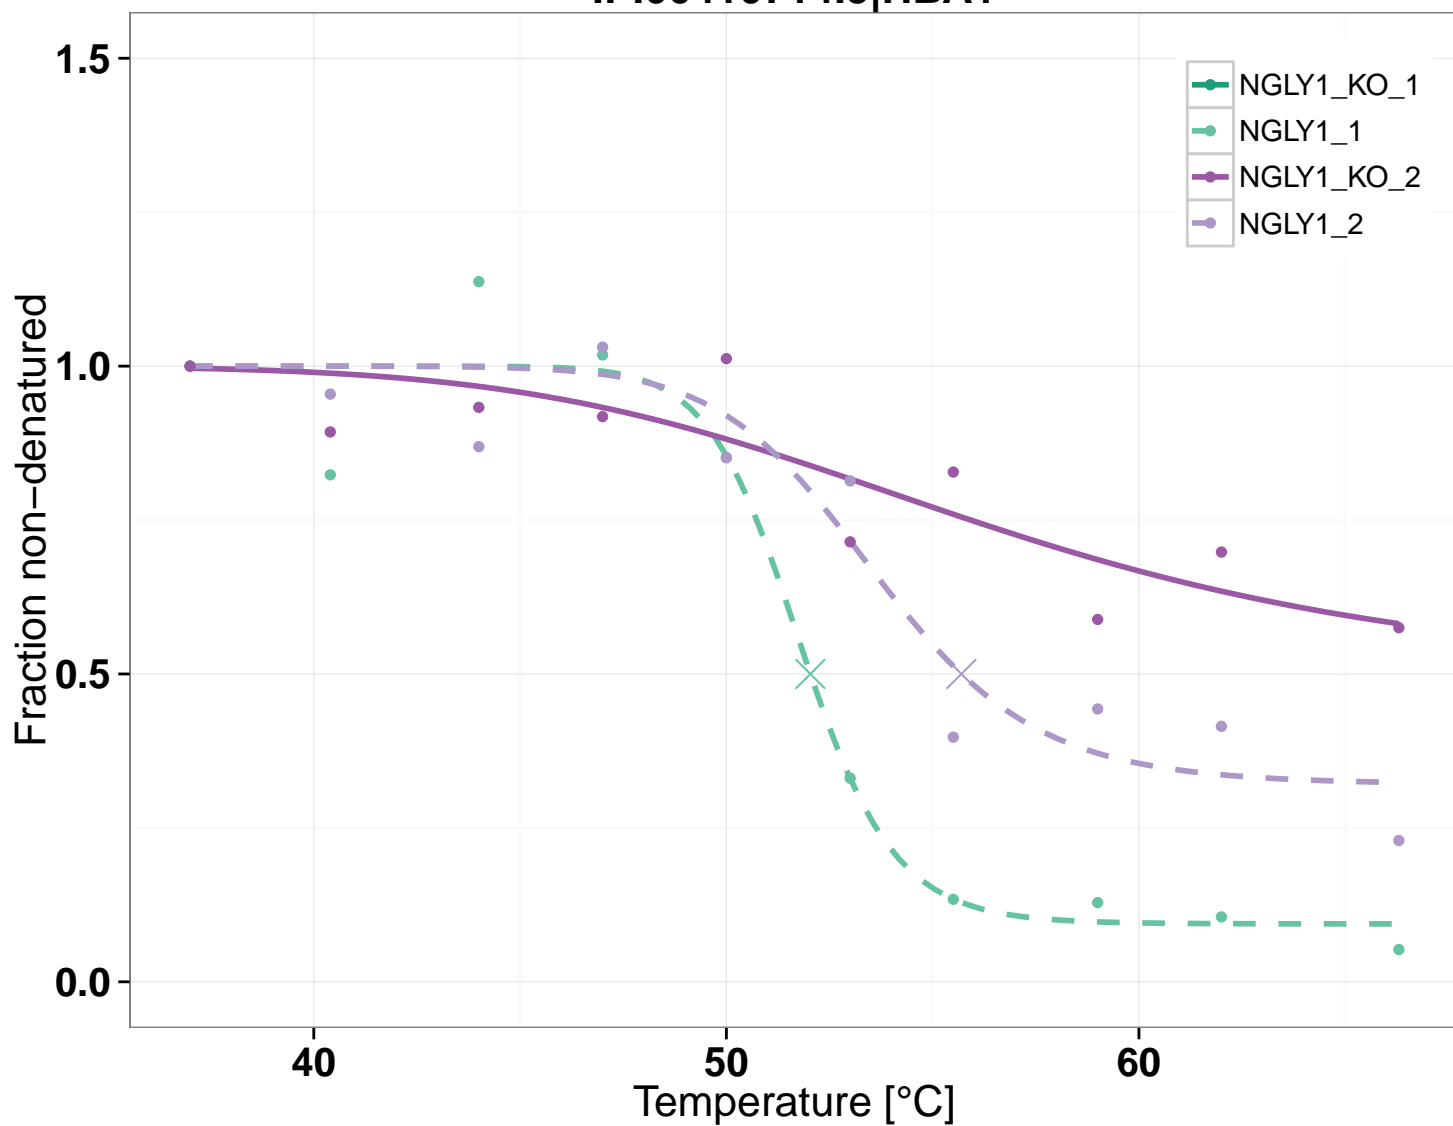

|            | meltPoint | slope  | plateau | R2   |
|------------|-----------|--------|---------|------|
| NGLY1_KO_1 | –         | –      | –       | –    |
| NGLY1_1    | 52.04     | –0.2   | 0.09    | 0.97 |
| NGLY1_KO_2 | –         | –0.023 | 0.48    | 0.76 |
| NGLY1_2    | 55.7      | –0.088 | 0.32    | 0.91 |

Supplement: Supplementary file 7953 [file 1]

# IPI00020513.2|ZYX

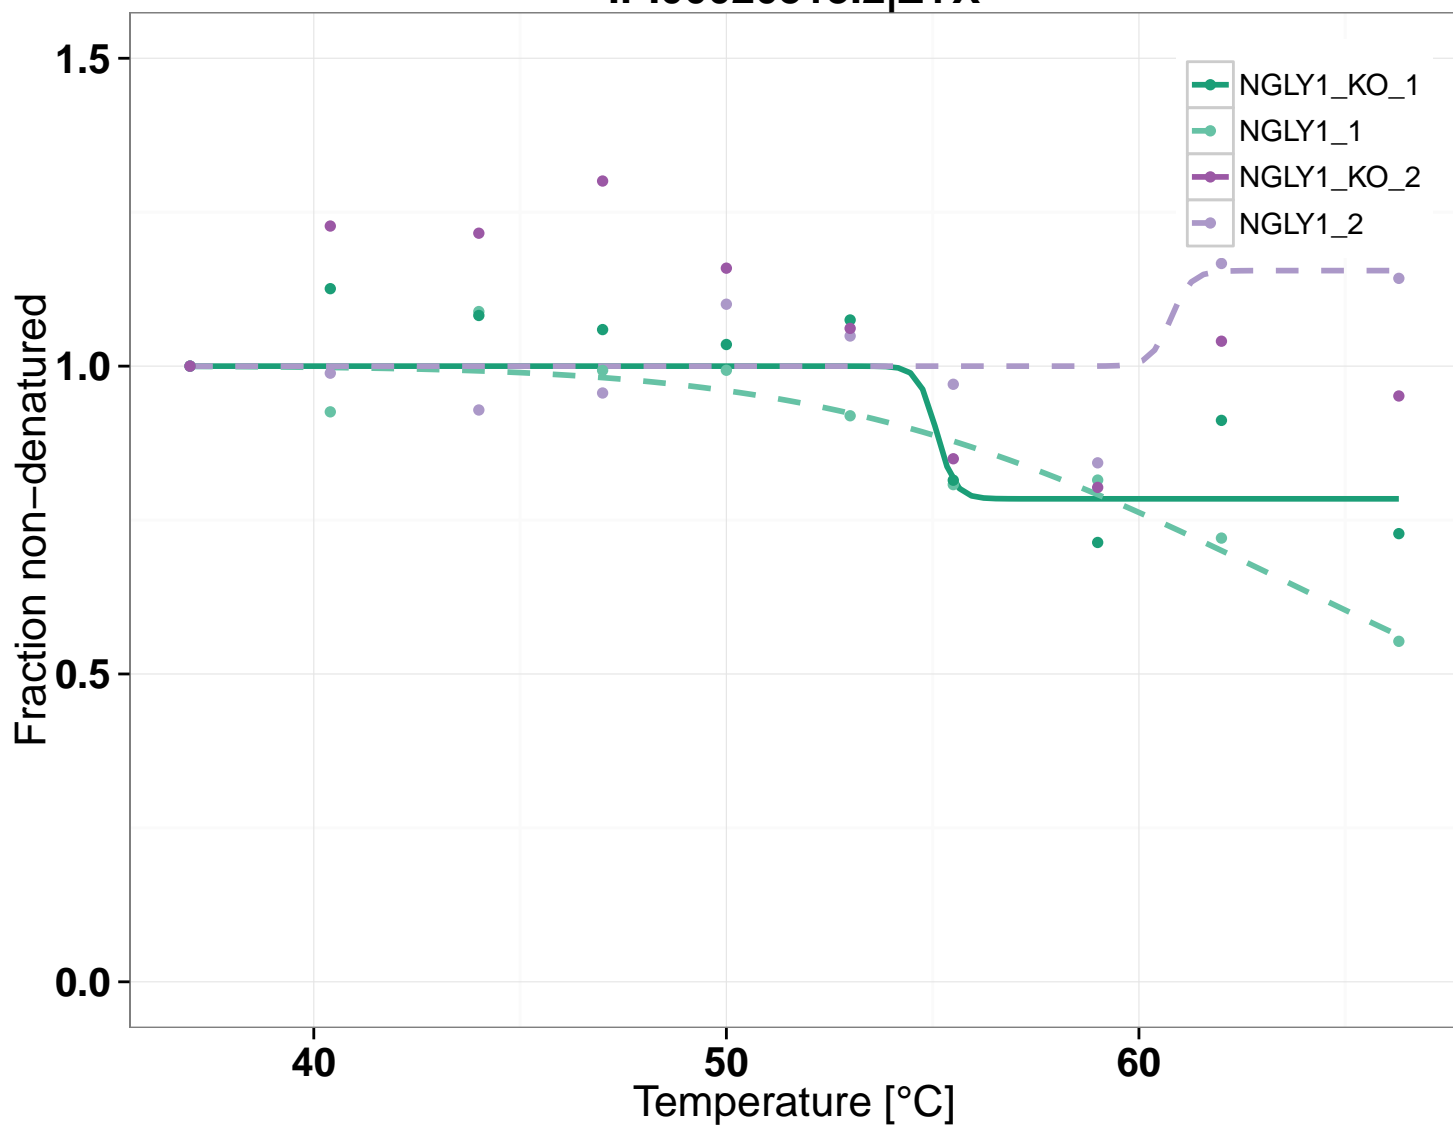

|            | meltPoint | slope  | plateau | R2   |
|------------|-----------|--------|---------|------|
| NGLY1_KO_1 | —         | -0.24  | 0.78    | 0.73 |
| NGLY1_1    | —         | -0.032 | 0.11    | 0.9  |
| NGLY1_KO_2 | —         | —      | —       | —    |
| NGLY1_2    | —         | 0.16   | 1.16    | 0.5  |

Supplement: Supplementary file 7954 [file 1]

# IPI00639841.2|PECI

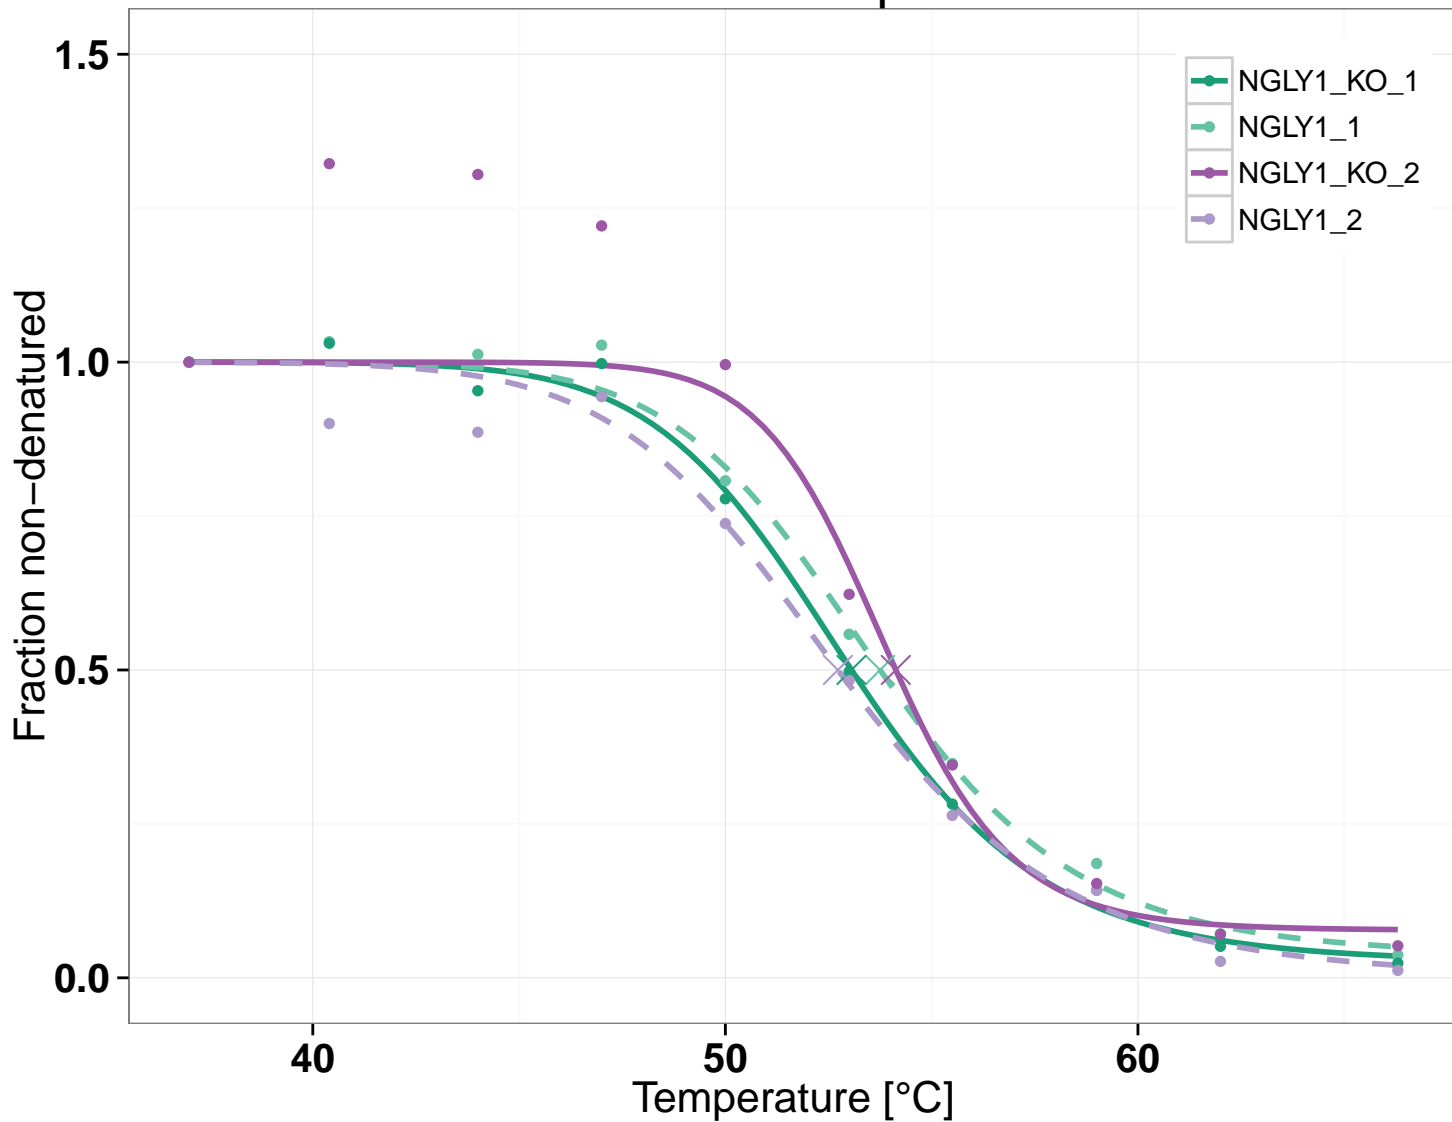

|            | meltPoint | slope  | plateau | R2   |
|------------|-----------|--------|---------|------|
| NGLY1_KO_1 | 53.06     | -0.1   | 0.02    | 1    |
| NGLY1_1    | 53.75     | -0.098 | 0.04    | 0.99 |
| NGLY1_KO_2 | 54.13     | -0.15  | 0.08    | 0.9  |
| NGLY1_2    | 52.73     | -0.091 | 0       | 0.99 |

Supplement: Supplementary file 7955 [file 1]

IPI00031064.1|TMEM126A

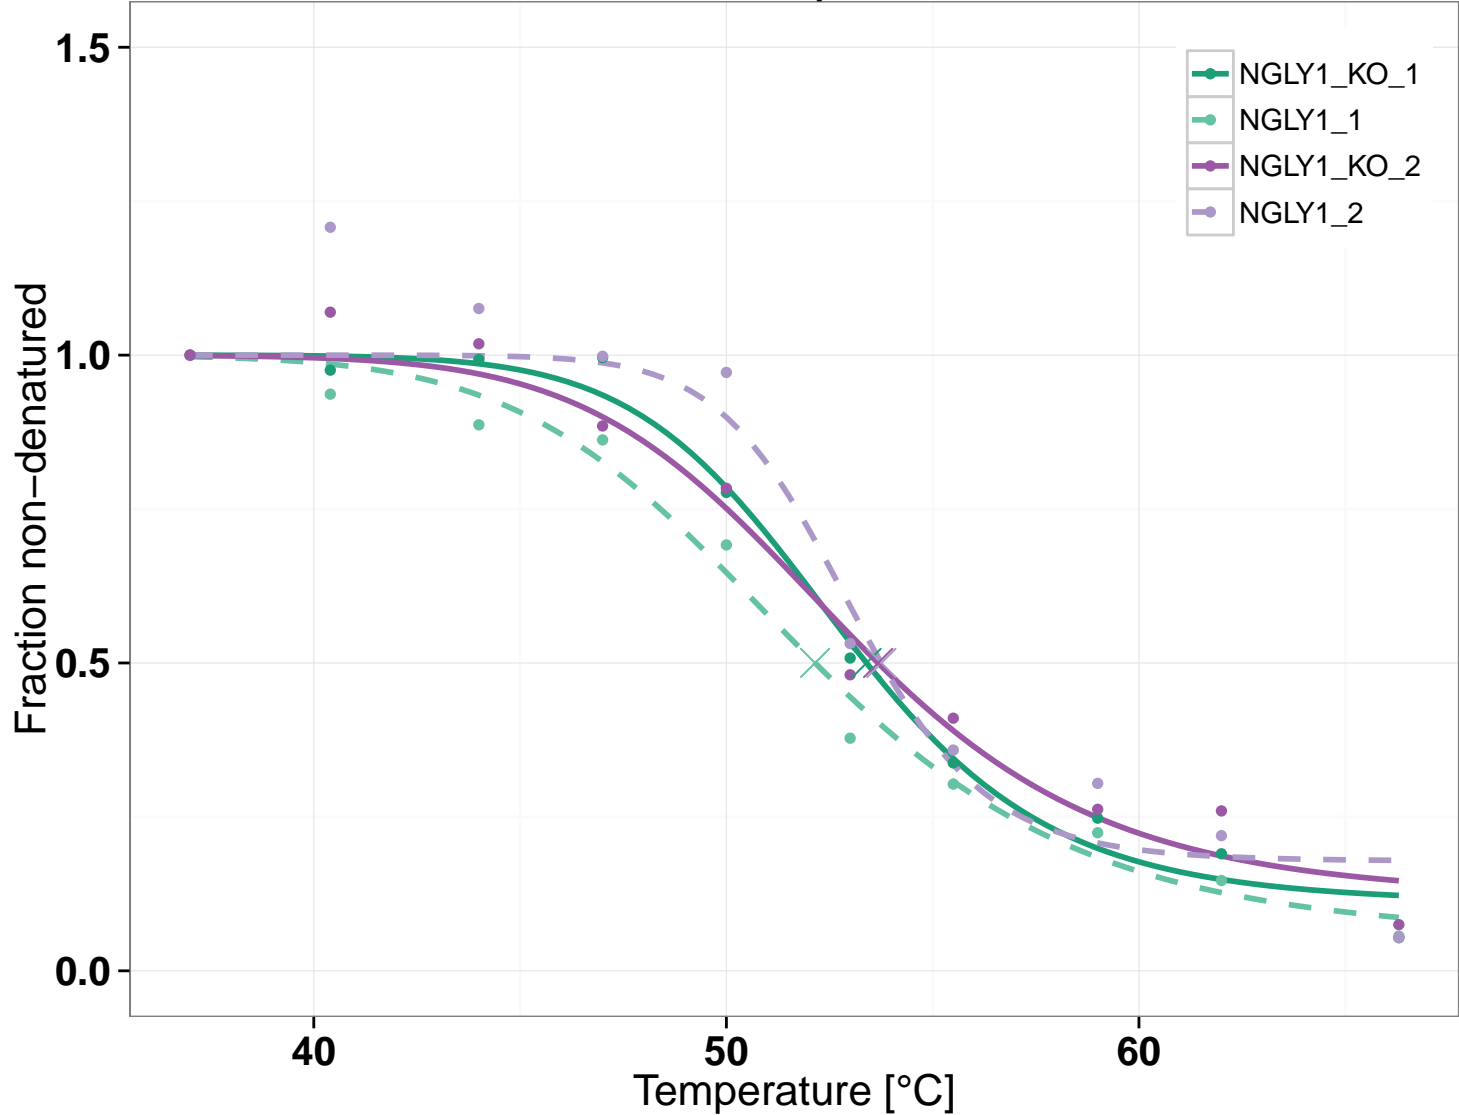

|            | meltPoint | slope  | plateau | R2   |
|------------|-----------|--------|---------|------|
| NGLY1_KO_1 | 53.4      | -0.088 | 0.11    | 0.99 |
| NGLY1_1    | 52.15     | -0.069 | 0.05    | 0.99 |
| NGLY1_KO_2 | 53.68     | -0.07  | 0.12    | 0.98 |
| NGLY1_2    | 53.76     | -0.13  | 0.18    | 0.95 |

Supplement: Supplementary file 7956 [file 1]

IPI00302283.3|SEPSECS

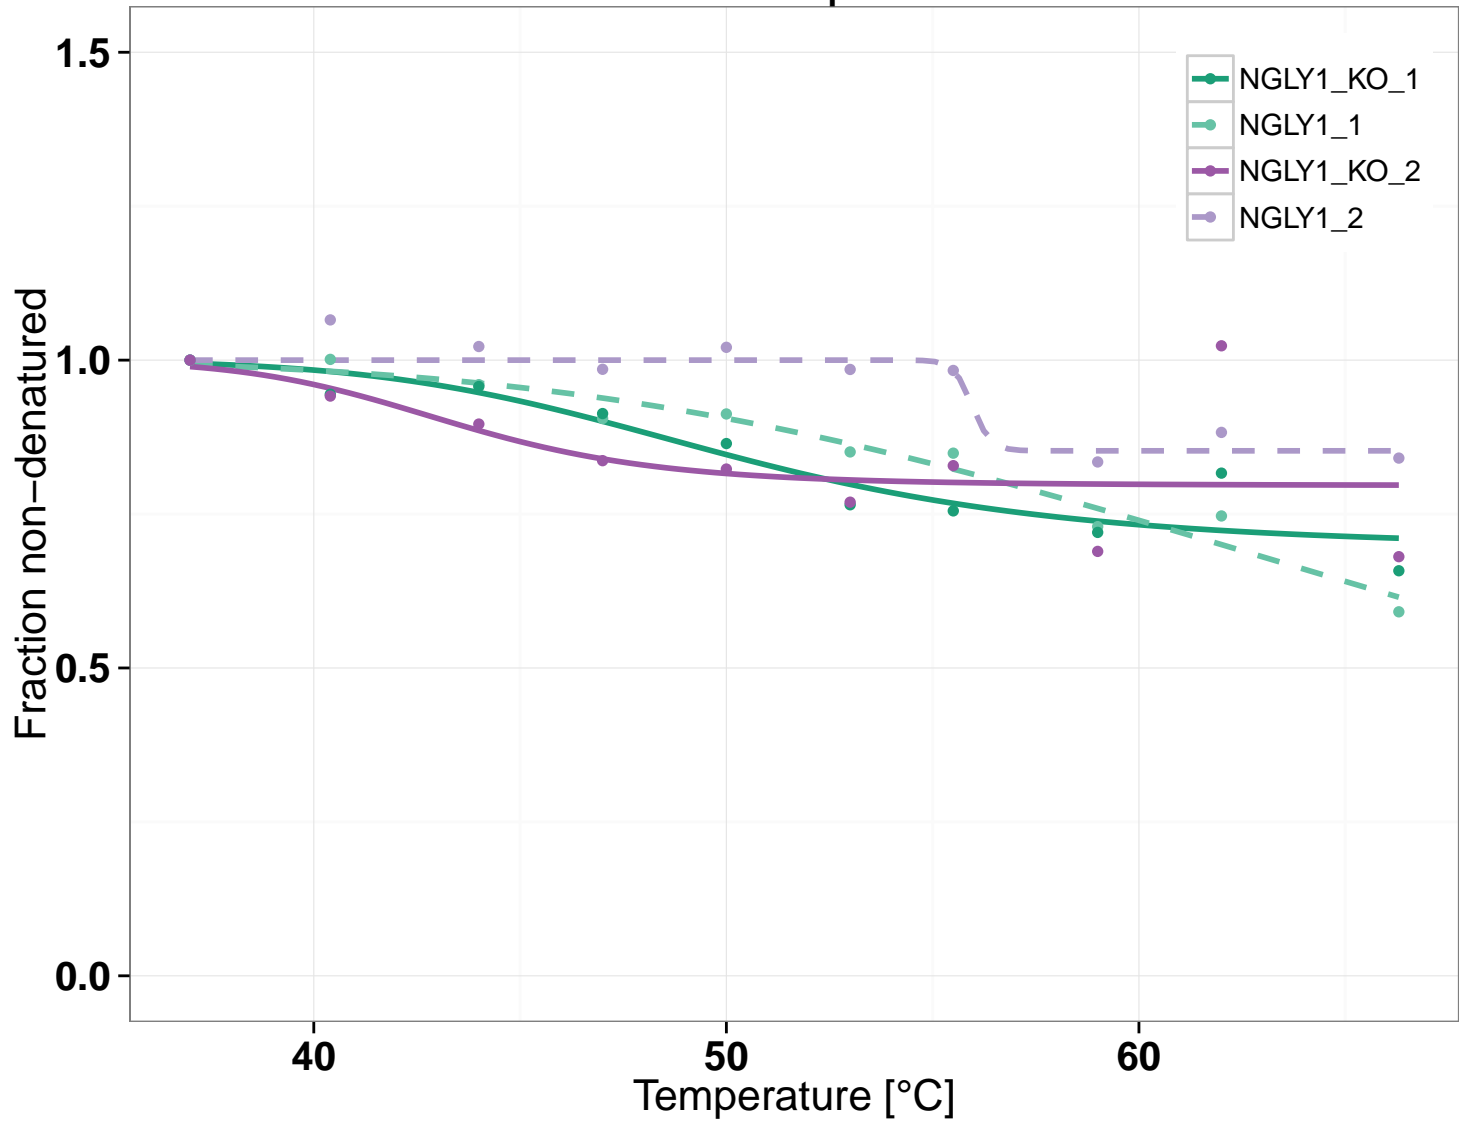

|            | meltPoint | slope  | plateau | R2   |
|------------|-----------|--------|---------|------|
| NGLY1_KO_1 | -         | -0.018 | 0.69    | 0.87 |
| NGLY1_1    | -         | -0.02  | 0       | 0.96 |
| NGLY1_KO_2 | -         | -0.02  | 0.8     | 0.37 |
| NGLY1_2    | -         | -0.16  | 0.85    | 0.88 |

Supplement: Supplementary file 7957 [file 1]

IPI00216992.4|RC3H1

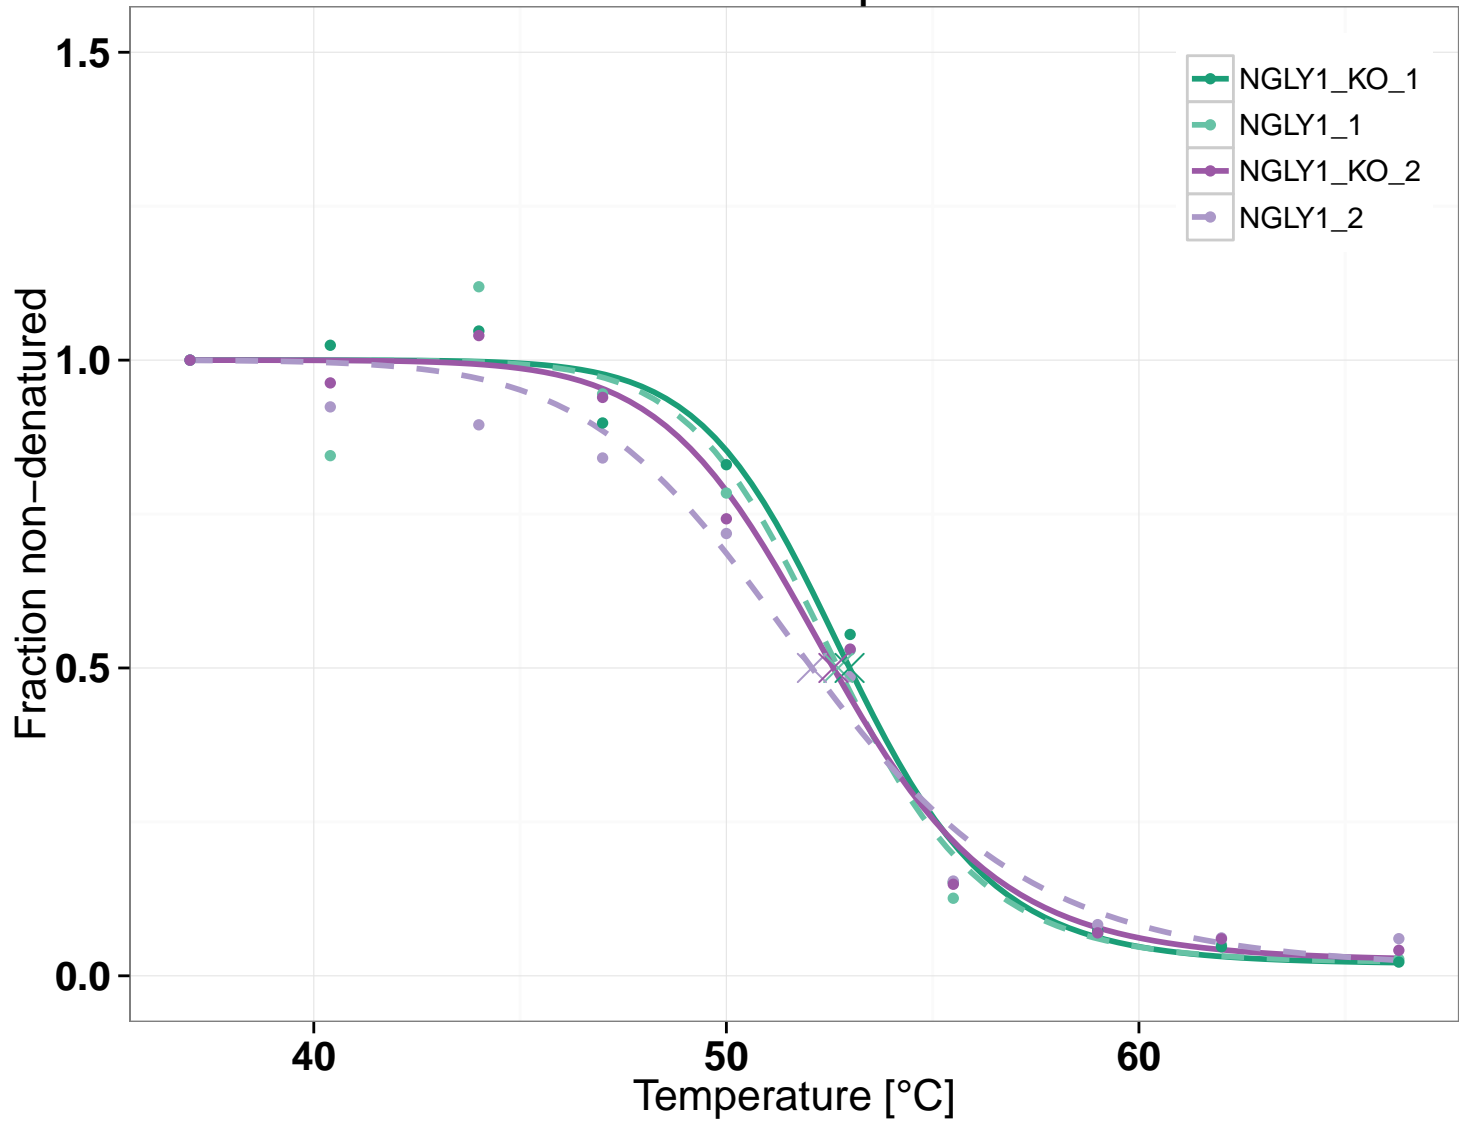

|            | meltPoint | slope  | plateau | R2   |
|------------|-----------|--------|---------|------|
| NGLY1_KO_1 | 52.99     | -0.14  | 0.02    | 0.99 |
| NGLY1_1    | 52.71     | -0.14  | 0.02    | 0.97 |
| NGLY1_KO_2 | 52.59     | -0.12  | 0.02    | 0.99 |
| NGLY1_2    | 52.07     | -0.092 | 0.01    | 0.98 |

Supplement: Supplementary file 7958 [file 1]

IPI00056329.1|TMEM219

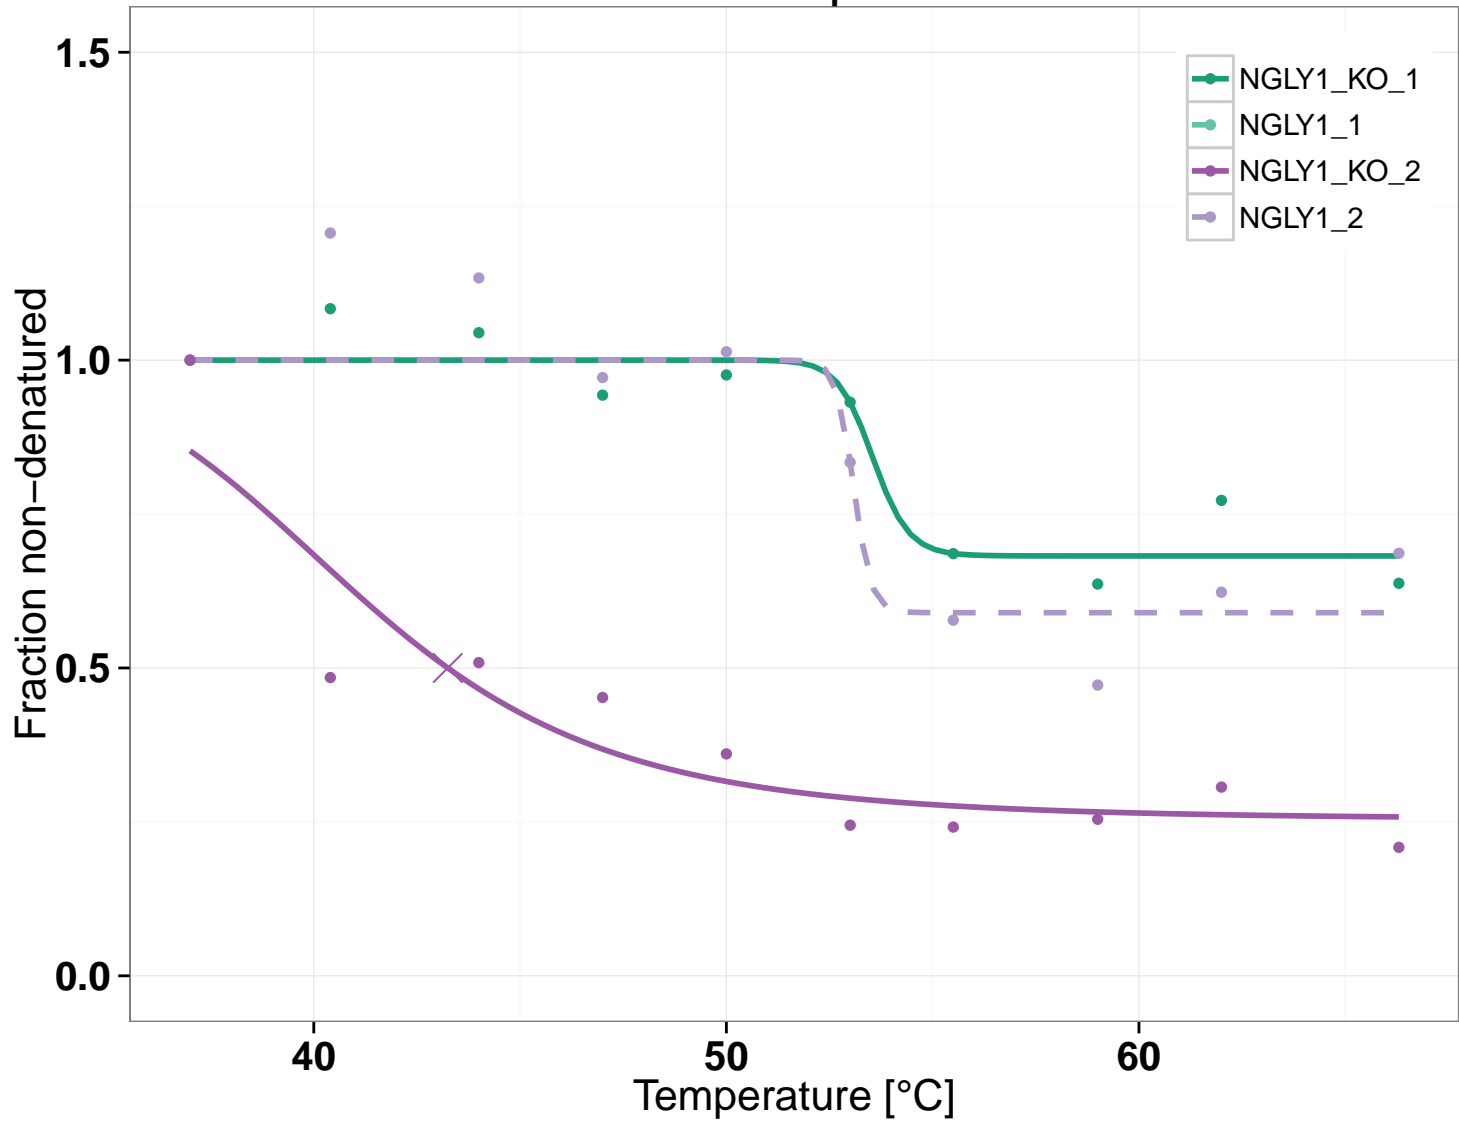

|            | meltPoint | slope  | plateau | R2   |
|------------|-----------|--------|---------|------|
| NGLY1_KO_1 | –         | –0.18  | 0.68    | 0.91 |
| NGLY1_1    | –         | –      | –       | –    |
| NGLY1_KO_2 | 43.25     | –0.062 | 0.25    | 0.86 |
| NGLY1_2    | –         | –0.48  | 0.59    | 0.85 |

Supplement: Supplementary file 7959 [file 1]

# IPI00001661.3|RCC1

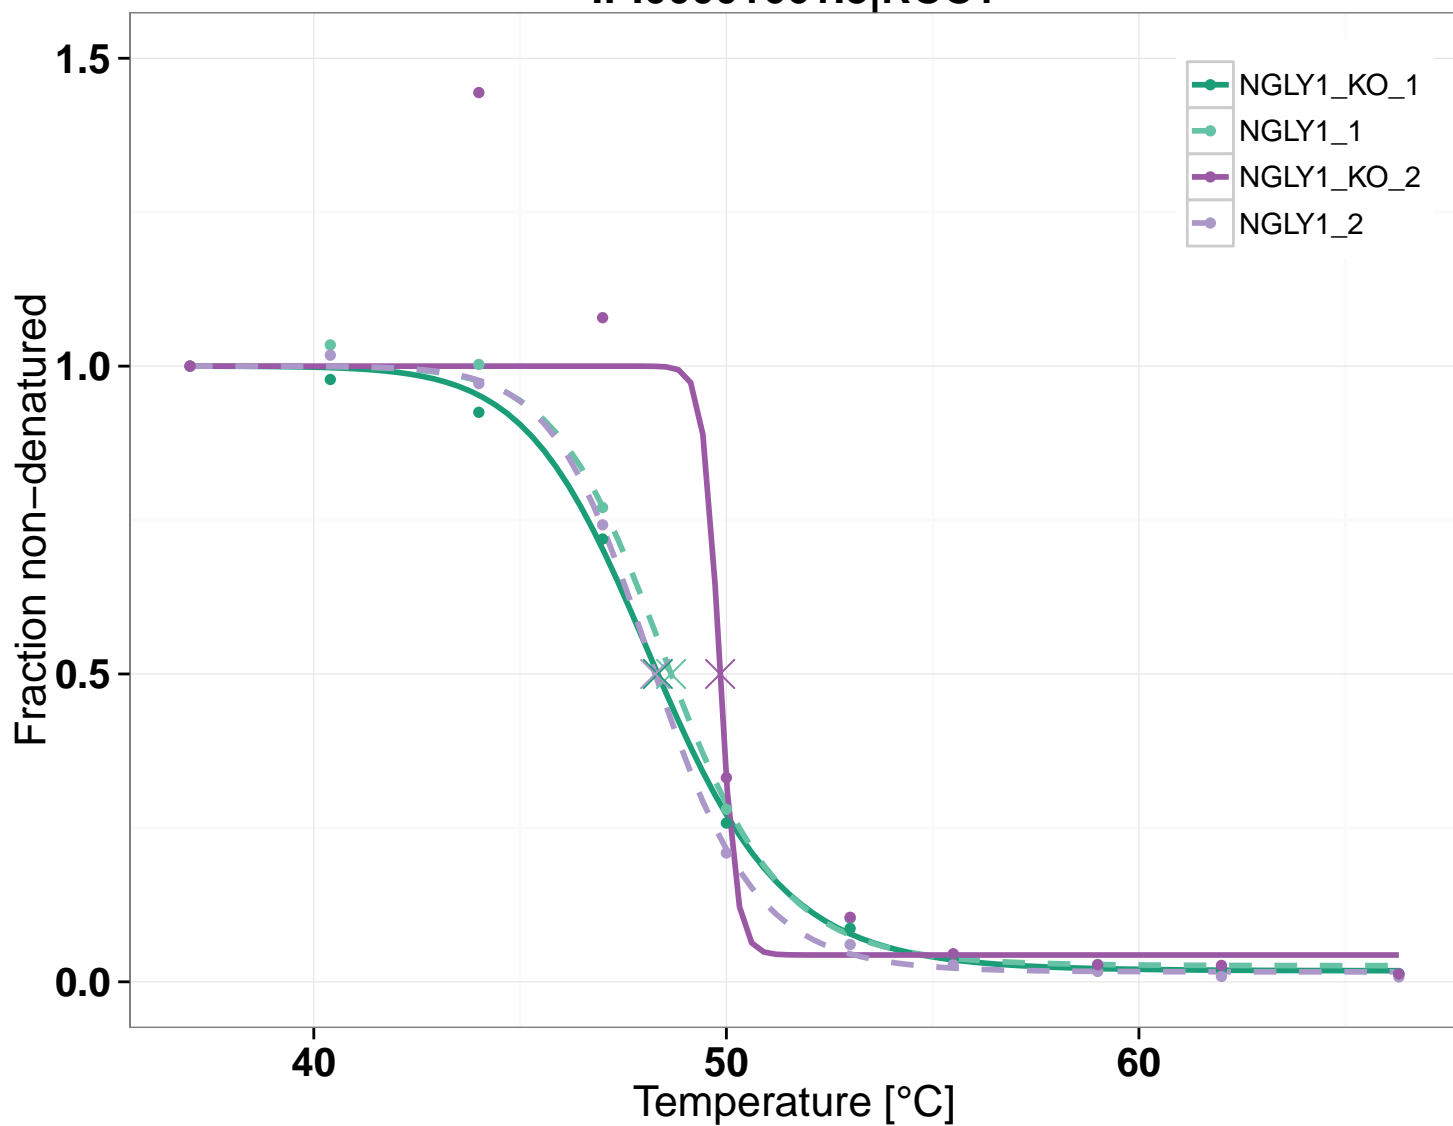

|            | meltPoint | slope | plateau | R2   |
|------------|-----------|-------|---------|------|
| NGLY1_KO_1 | 48.34     | -0.16 | 0.02    | 1    |
| NGLY1_1    | 48.66     | -0.18 | 0.03    | 1    |
| NGLY1_KO_2 | 49.85     | -1.2  | 0.04    | 0.85 |
| NGLY1_2    | 48.27     | -0.2  | 0.02    | 1    |

Supplement: Supplementary file 7960 [file 1]

IPI00294682.2|MED26

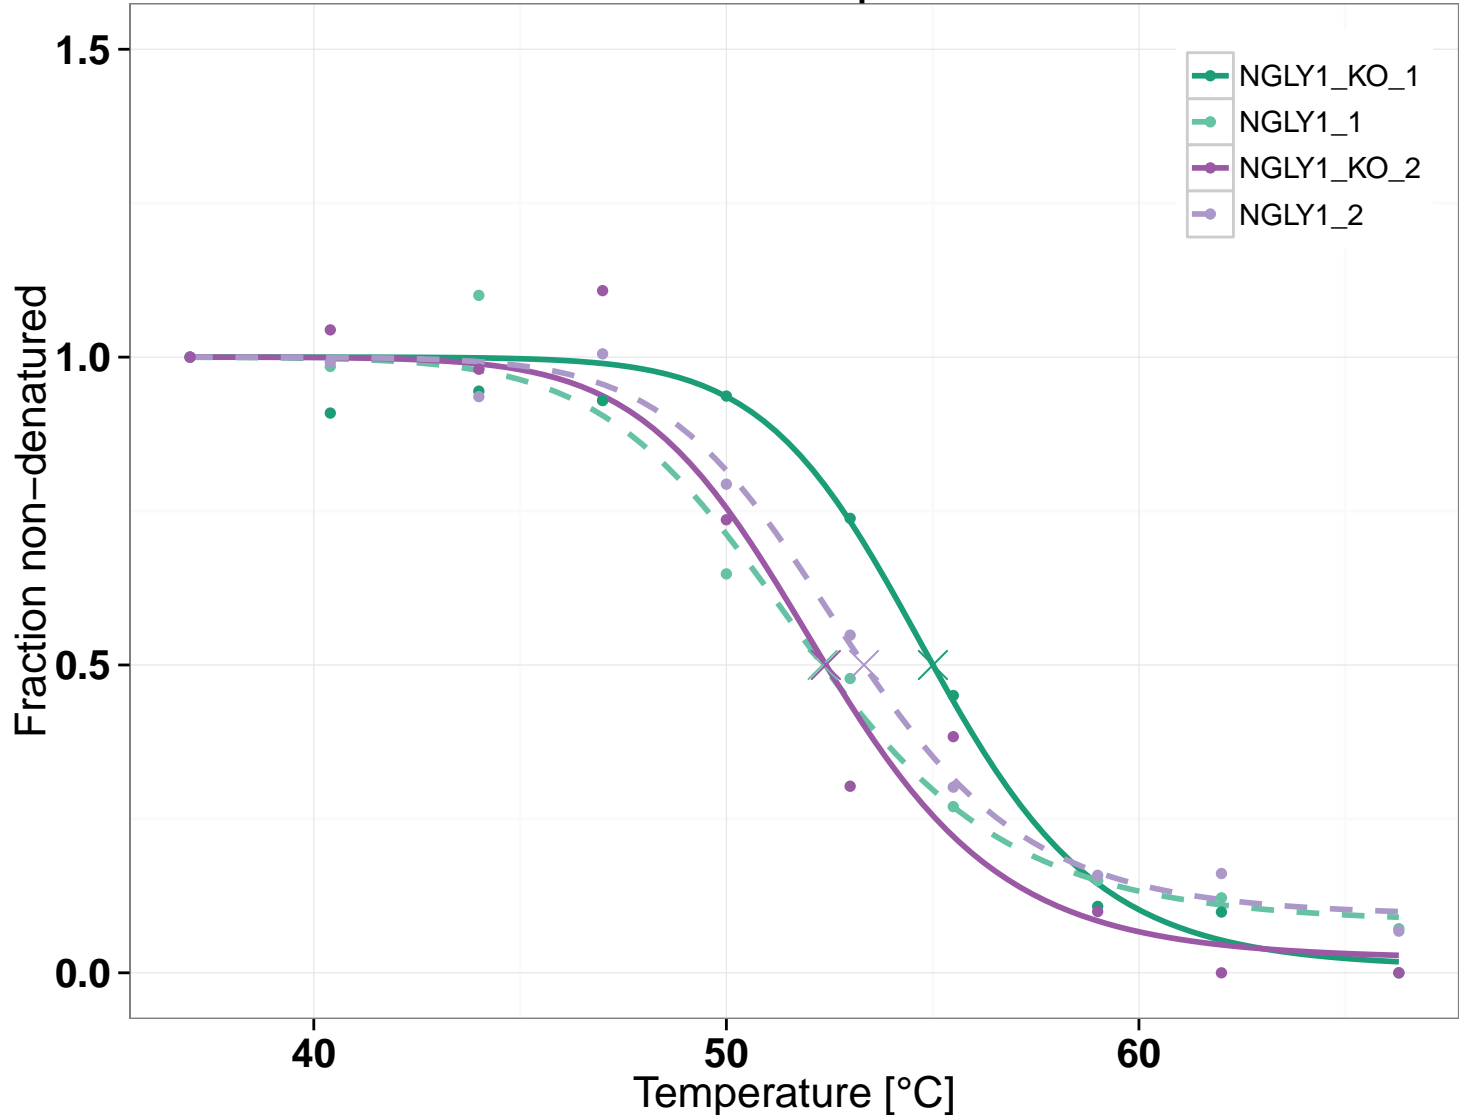

|            | meltPoint | slope  | plateau | R2   |
|------------|-----------|--------|---------|------|
| NGLY1_KO_1 | 55.01     | -0.12  | 0.01    | 0.99 |
| NGLY1_1    | 52.33     | -0.093 | 0.08    | 0.99 |
| NGLY1_KO_2 | 52.41     | -0.11  | 0.02    | 0.96 |
| NGLY1_2    | 53.34     | -0.1   | 0.09    | 0.99 |

Supplement: Supplementary file 7961 [file 1]

IPI00784258.1|LTBP1

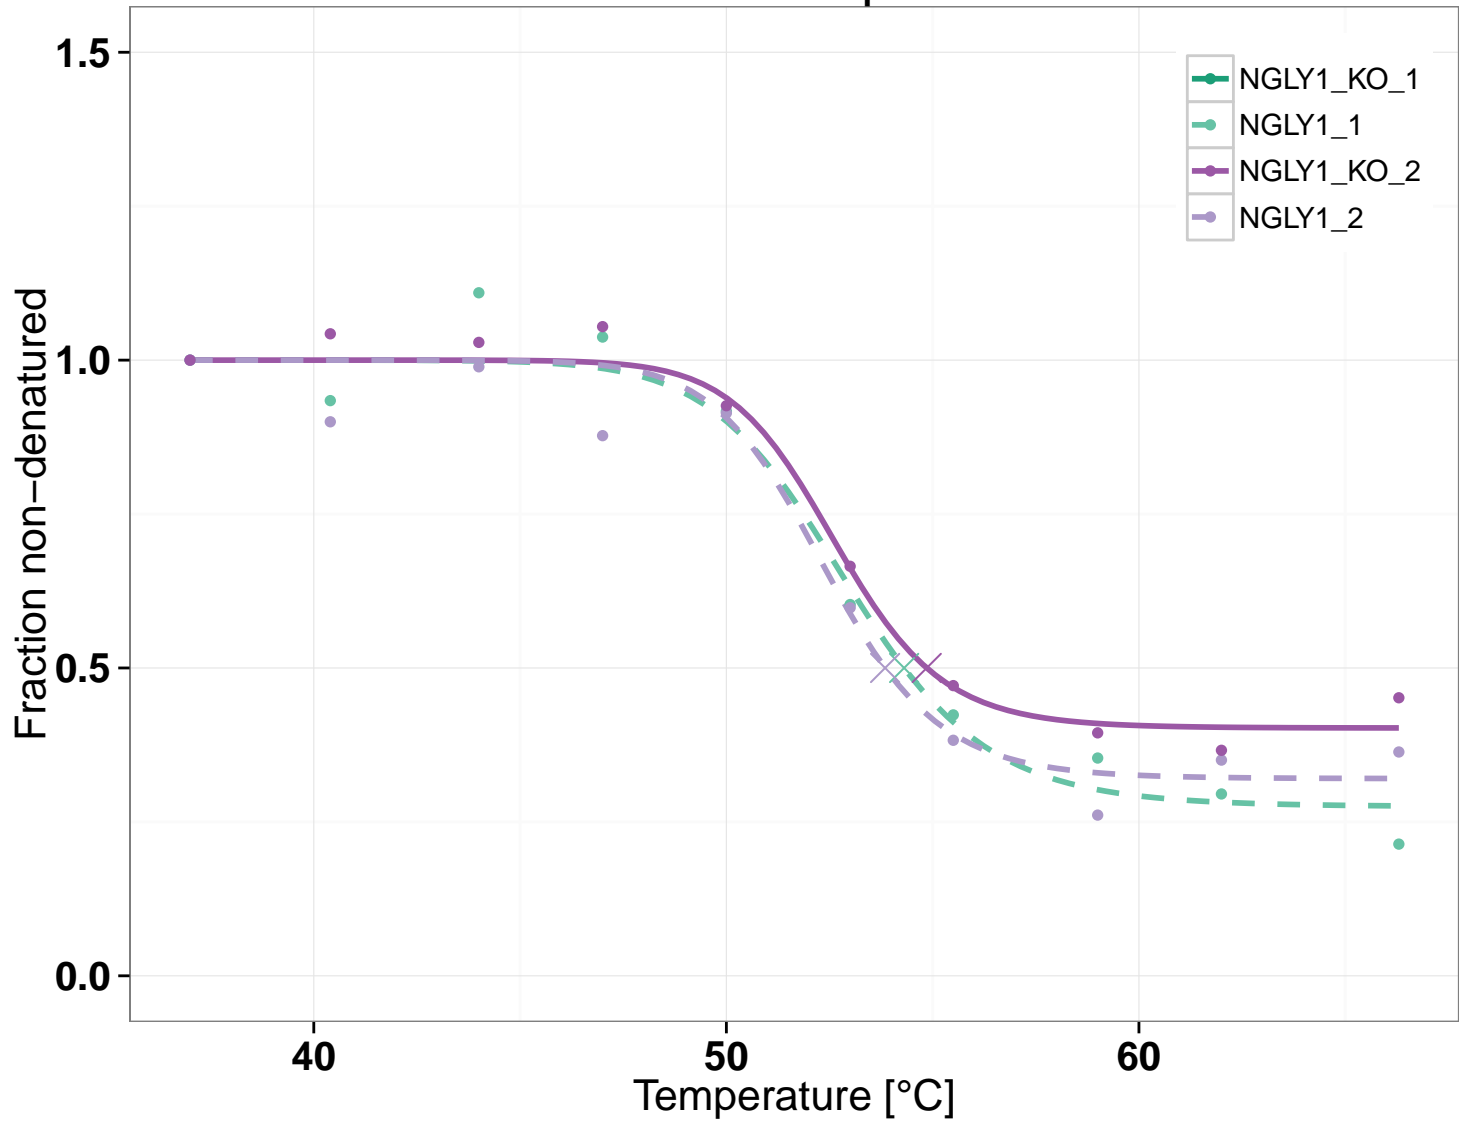

|            | meltPoint | slope | plateau | R2   |
|------------|-----------|-------|---------|------|
| NGLY1_KO_1 | -         | -     | -       | -    |
| NGLY1_1    | 54.31     | -0.11 | 0.27    | 0.97 |
| NGLY1_KO_2 | 54.86     | -0.12 | 0.4     | 0.99 |
| NGLY1_2    | 53.85     | -0.12 | 0.32    | 0.96 |

Supplement: Supplementary file 7962 [file 1]

IPI00027808.1|POLR2B

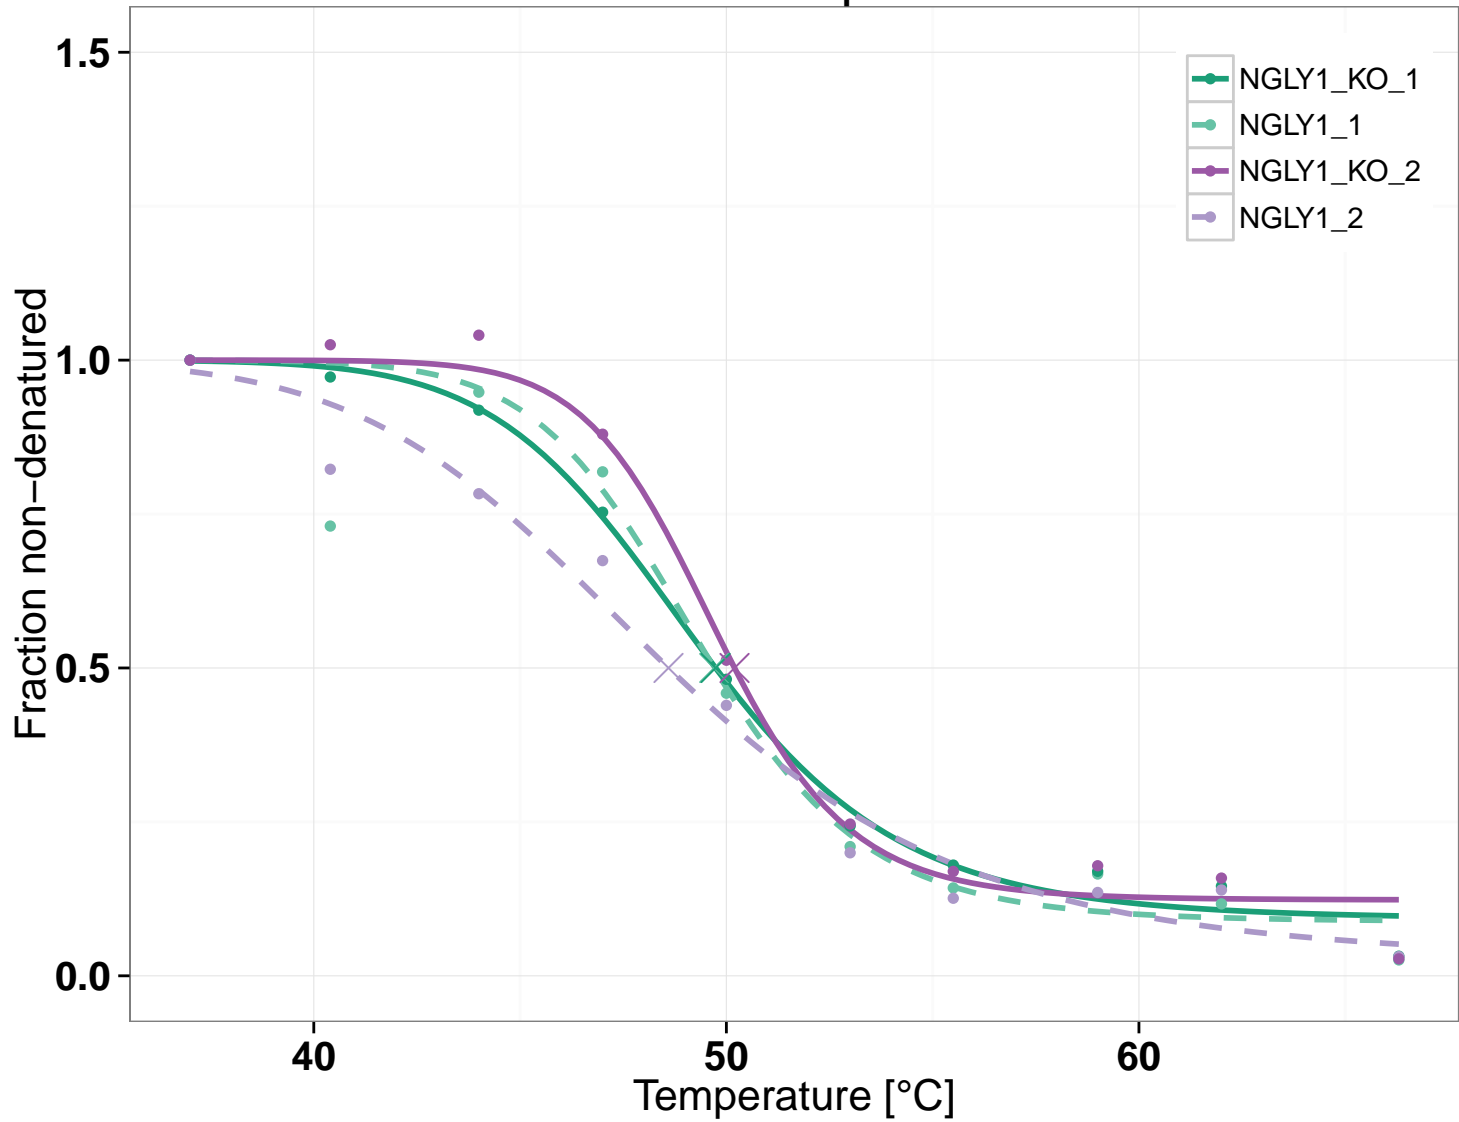

|            | meltPoint | slope  | plateau | R2   |
|------------|-----------|--------|---------|------|
| NGLY1_KO_1 | 49.74     | -0.092 | 0.09    | 0.99 |
| NGLY1_1    | 49.71     | -0.11  | 0.09    | 0.94 |
| NGLY1_KO_2 | 50.2      | -0.14  | 0.12    | 0.99 |
| NGLY1_2    | 48.6      | -0.066 | 0.02    | 0.97 |

Supplement: Supplementary file 7963 [file 1]

IPI00384643.2|TP53I3

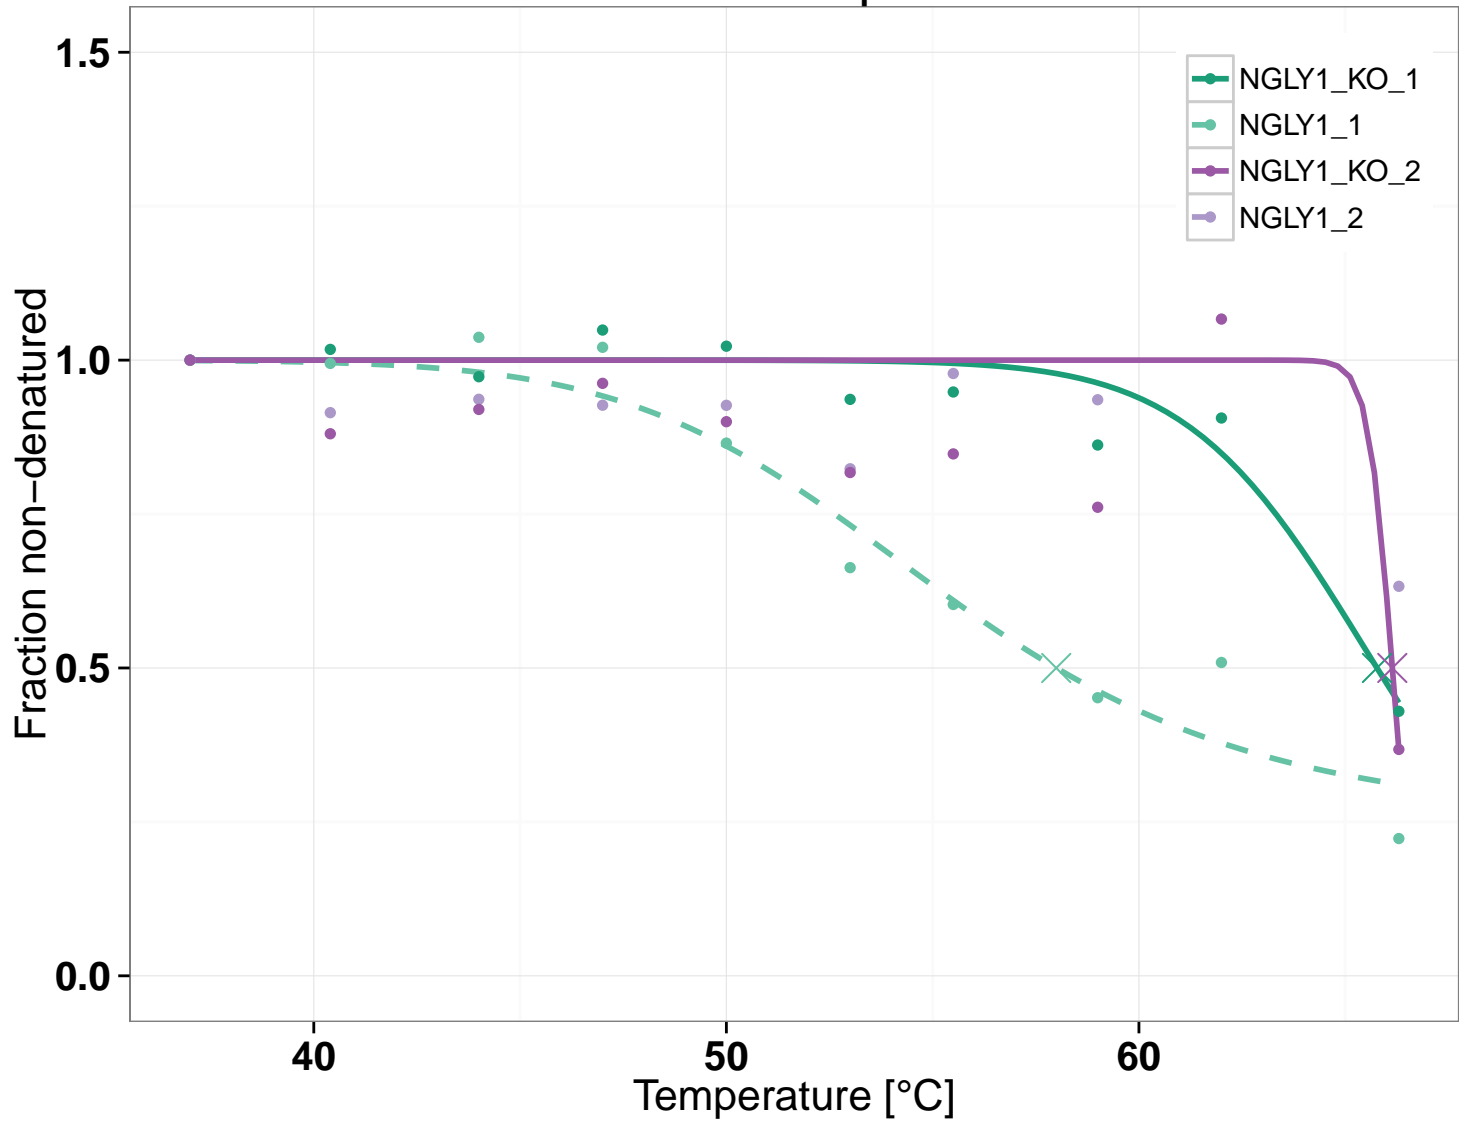

|            | meltPoint | slope  | plateau | R2   |
|------------|-----------|--------|---------|------|
| NGLY1_KO_1 | 65.77     | -0.11  | 0       | 0.92 |
| NGLY1_1    | 58        | -0.049 | 0.25    | 0.95 |
| NGLY1_KO_2 | 66.14     | -0.86  | 0       | 0.55 |
| NGLY1_2    | -         | -      | -       | -    |

Supplement: Supplementary file 7964 [file 1]

# IPI00021634.3|KLC2

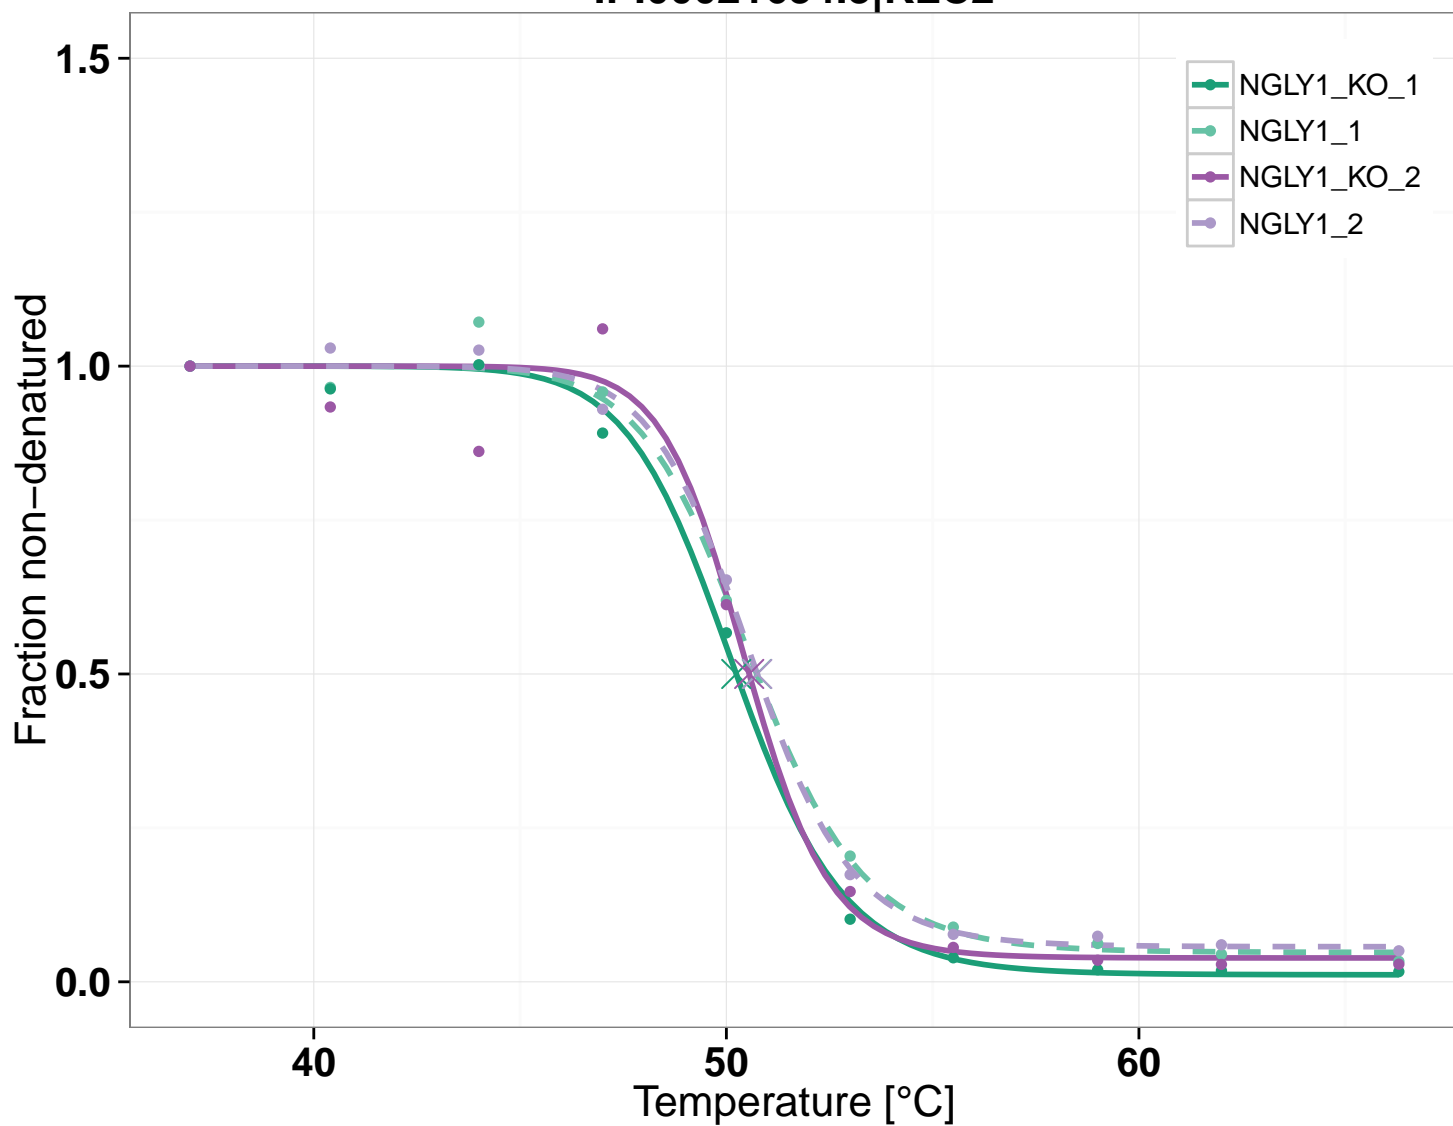

|            | meltPoint | slope | plateau | R2   |
|------------|-----------|-------|---------|------|
| NGLY1_KO_1 | 50.24     | -0.19 | 0.01    | 1    |
| NGLY1_1    | 50.74     | -0.17 | 0.05    | 1    |
| NGLY1_KO_2 | 50.55     | -0.24 | 0.04    | 0.98 |
| NGLY1_2    | 50.75     | -0.19 | 0.06    | 1    |

Supplement: Supplementary file 7965 [file 1]

# IPI00305289.2|KIF11

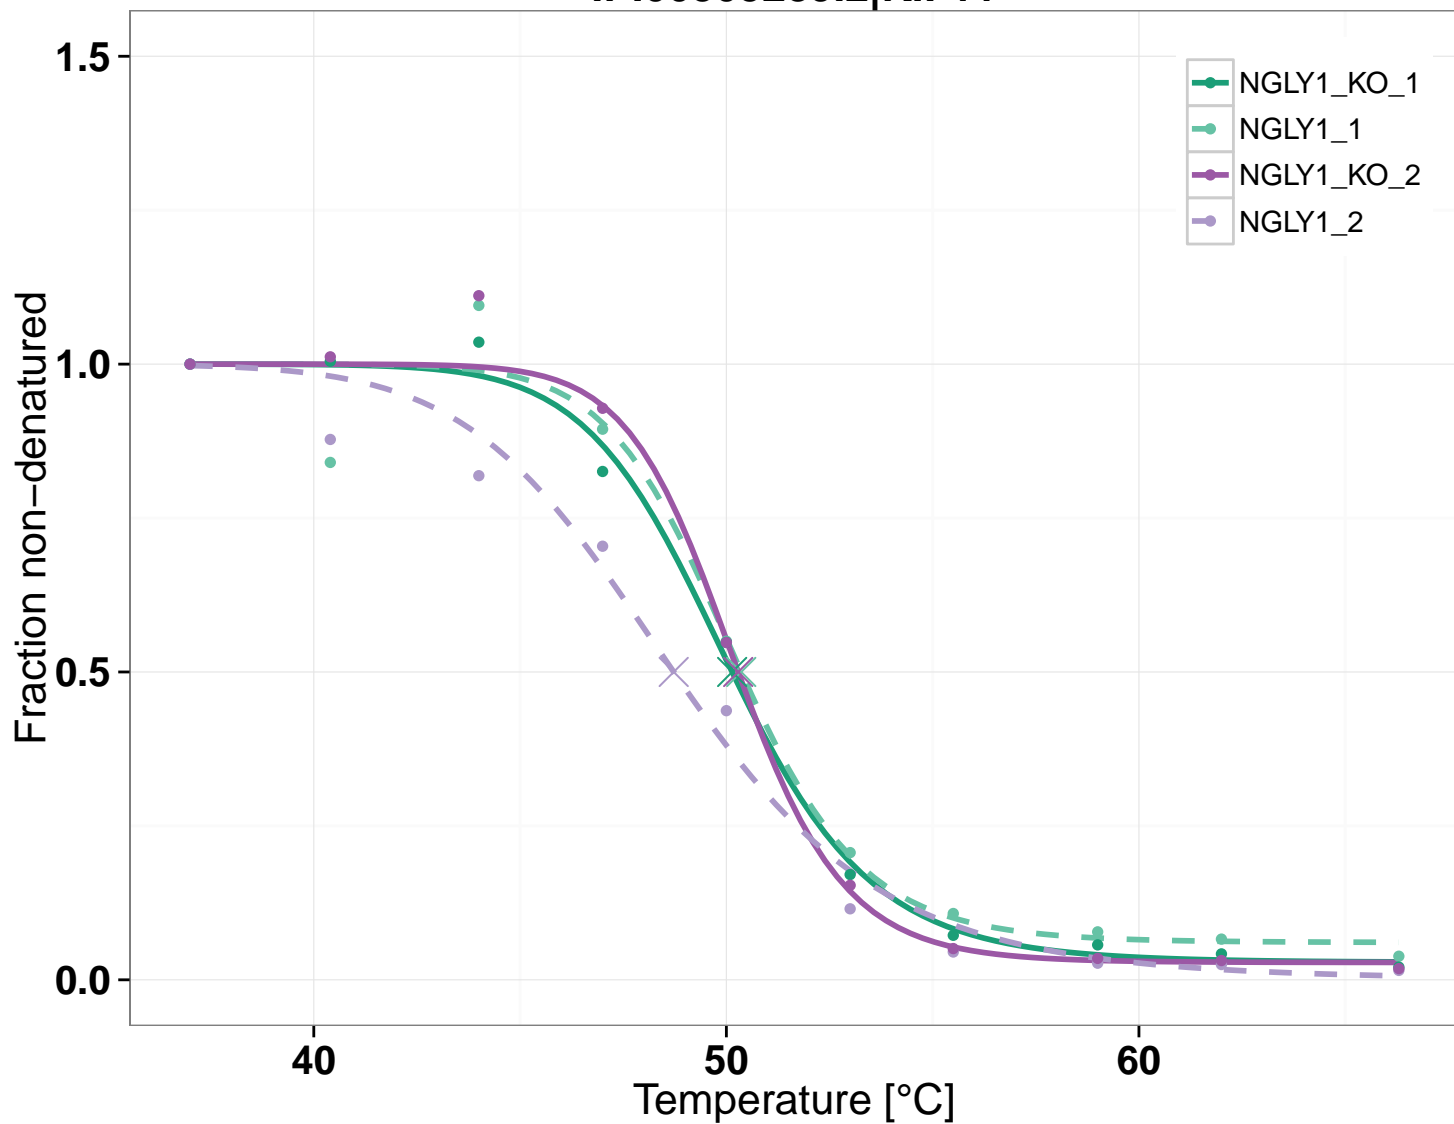

|            | meltPoint | slope  | plateau | R2   |
|------------|-----------|--------|---------|------|
| NGLY1_KO_1 | 50.14     | -0.14  | 0.03    | 1    |
| NGLY1_1    | 50.36     | -0.15  | 0.06    | 0.98 |
| NGLY1_KO_2 | 50.29     | -0.18  | 0.03    | 0.99 |
| NGLY1_2    | 48.72     | -0.099 | 0       | 0.98 |

Supplement: Supplementary file 7966 [file 1]

IPI00016725.2|GTF3C4

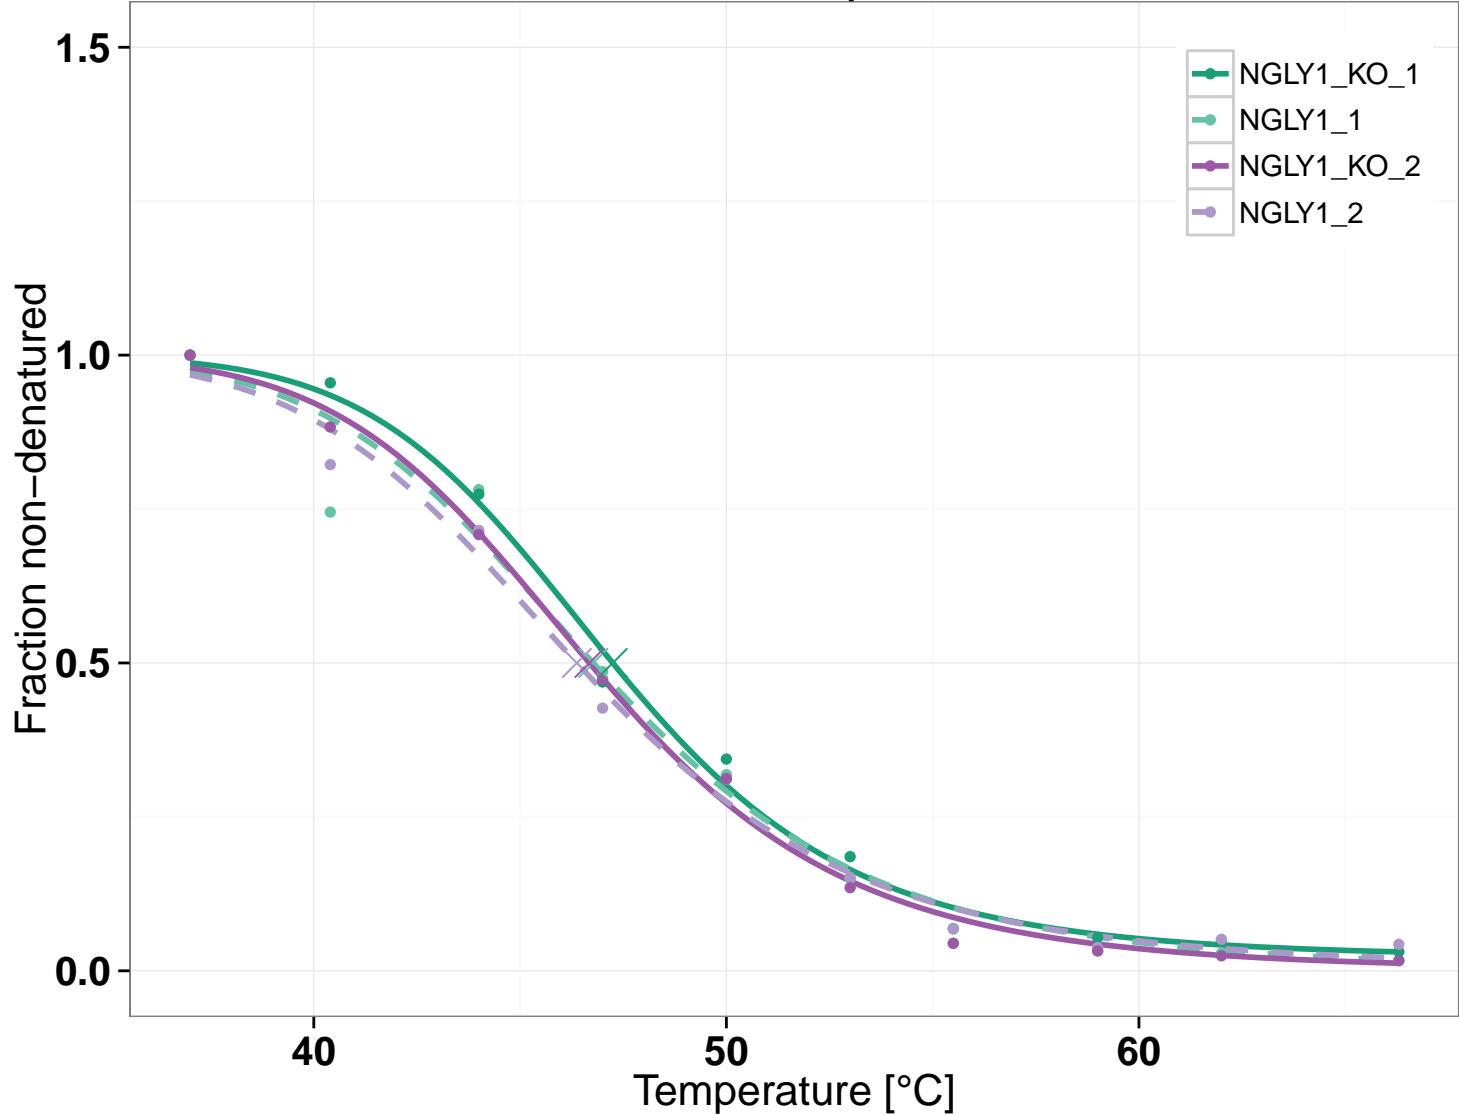

|            | meltPoint | slope  | plateau | R2   |
|------------|-----------|--------|---------|------|
| NGLY1_KO_1 | 47.25     | -0.084 | 0.02    | 0.99 |
| NGLY1_1    | 46.77     | -0.075 | 0       | 0.97 |
| NGLY1_KO_2 | 46.68     | -0.081 | 0       | 1    |
| NGLY1_2    | 46.38     | -0.074 | 0       | 0.99 |

Supplement: Supplementary file 7967 [file 1]

IPI00154590.6|MKI67IP

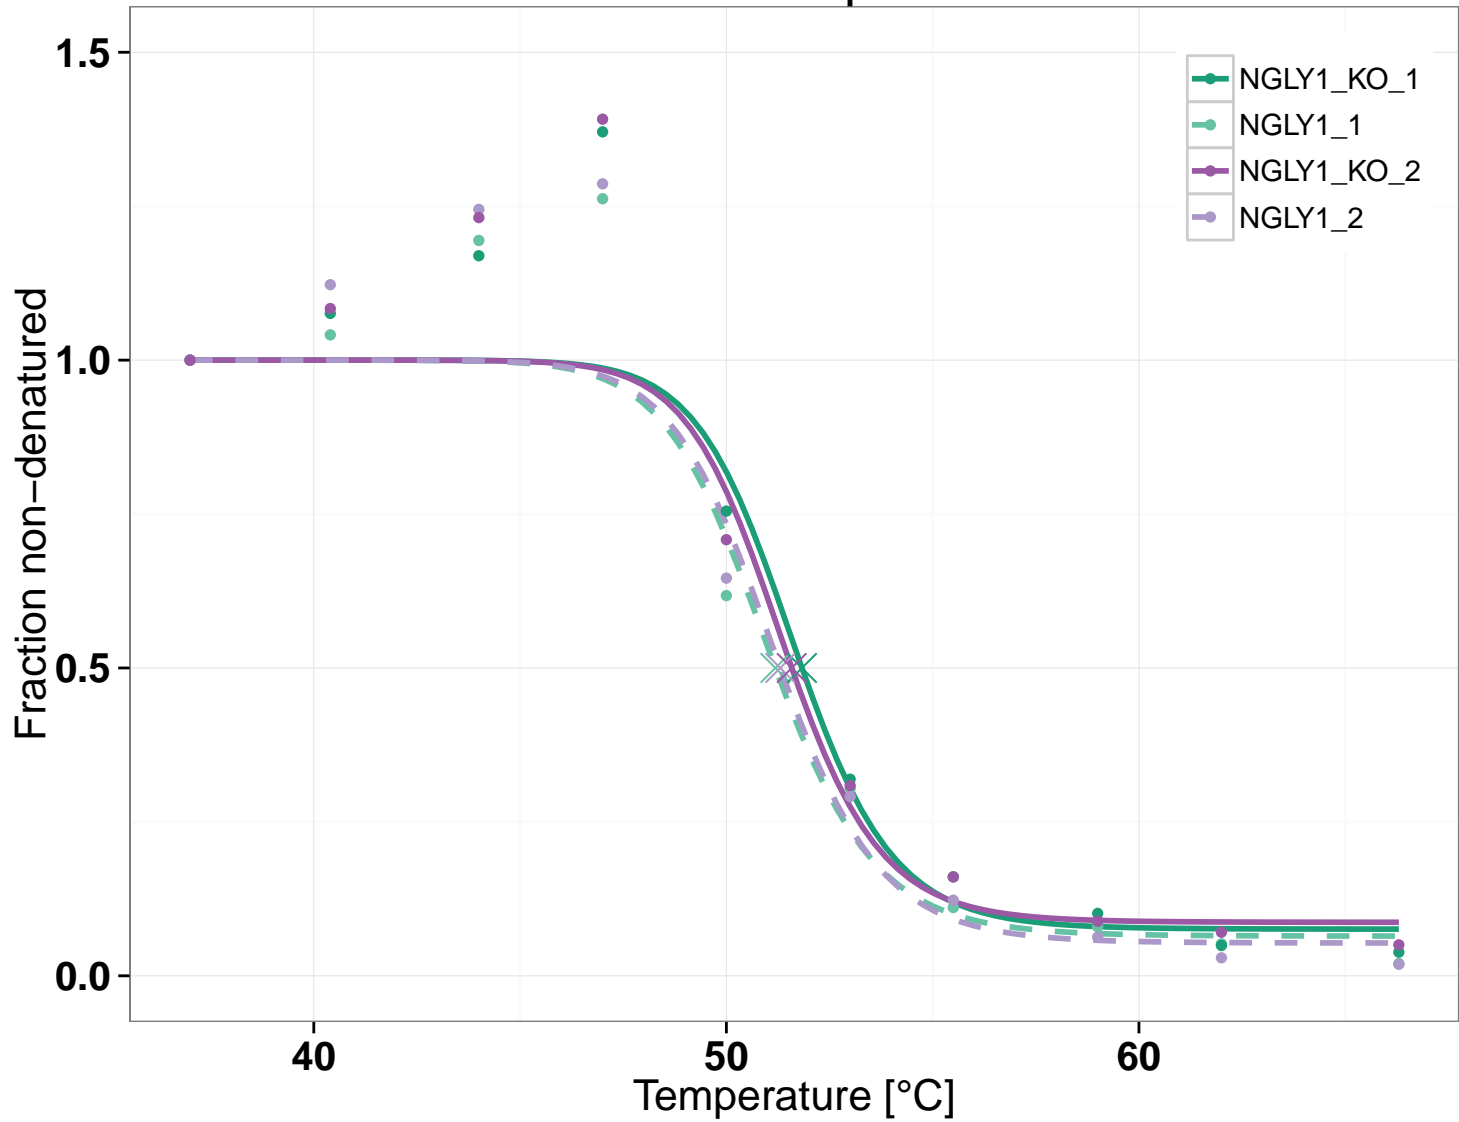

|            | meltPoint | slope | plateau | R2   |
|------------|-----------|-------|---------|------|
| NGLY1_KO_1 | 51.83     | -0.19 | 0.08    | 0.92 |
| NGLY1_1    | 51.19     | -0.18 | 0.06    | 0.94 |
| NGLY1_KO_2 | 51.59     | -0.19 | 0.09    | 0.91 |
| NGLY1_2    | 51.31     | -0.19 | 0.05    | 0.93 |

Supplement: Supplementary file 7968 [file 1]

IPI00056386.2|LOH12CR1

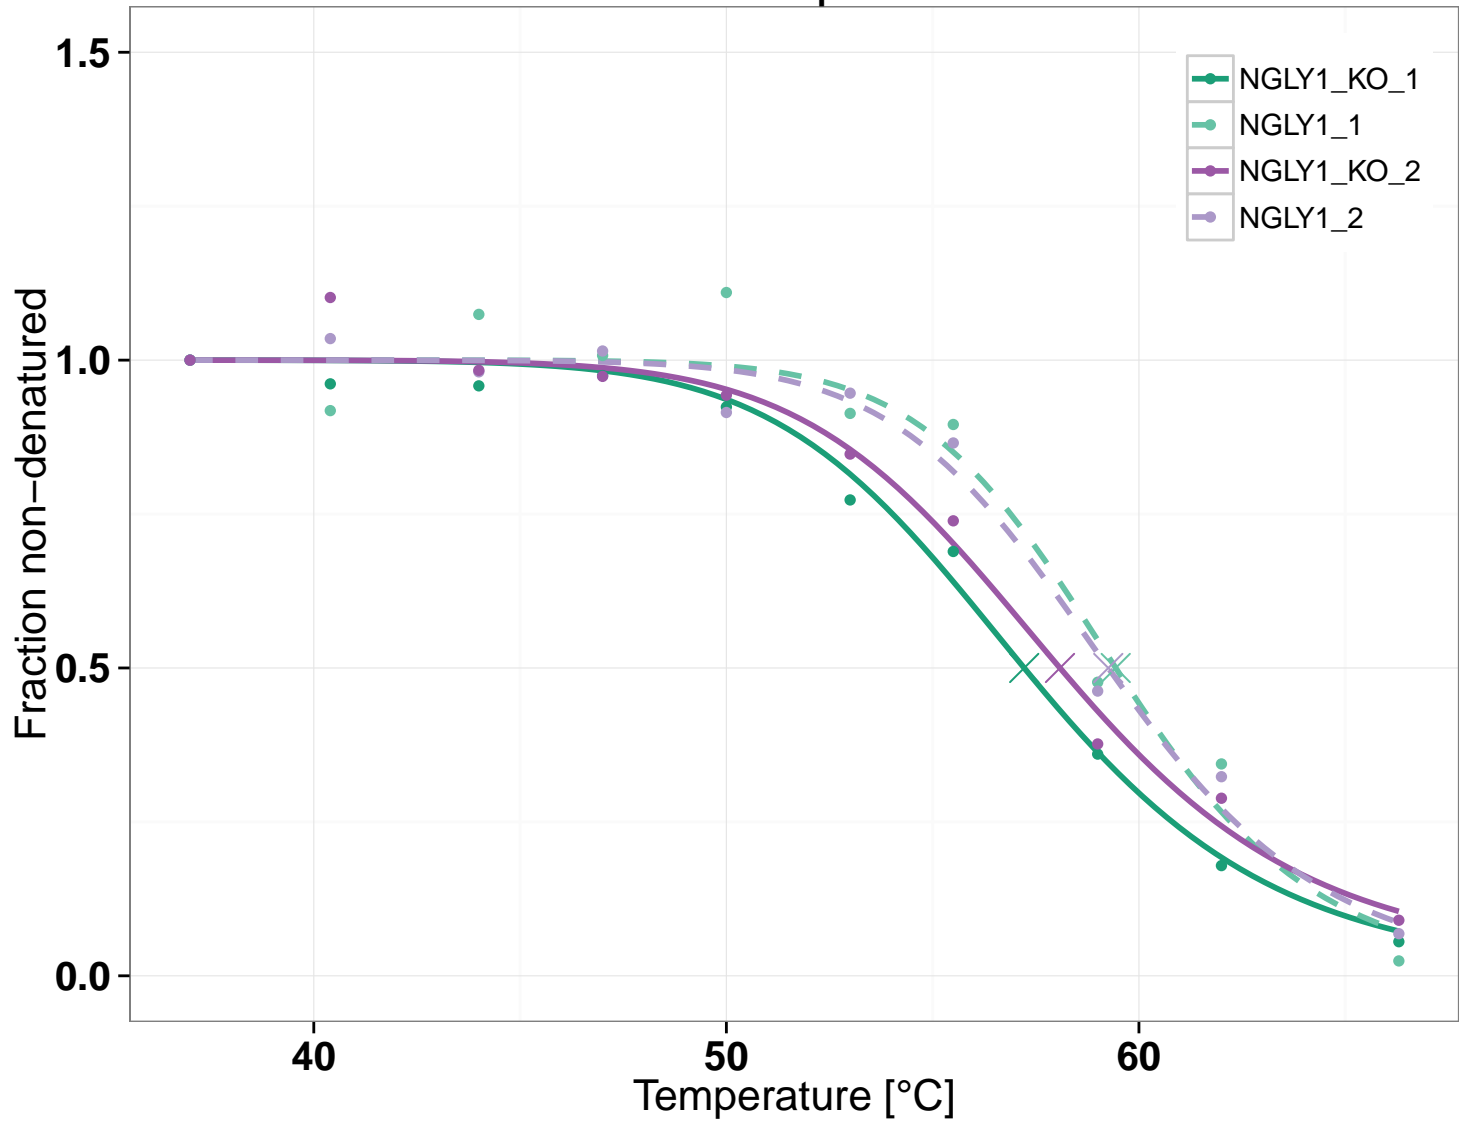

|            | meltPoint | slope  | plateau | R2   |
|------------|-----------|--------|---------|------|
| NGLY1_KO_1 | 57.22     | -0.082 | 0       | 0.99 |
| NGLY1_1    | 59.44     | -0.1   | 0       | 0.96 |
| NGLY1_KO_2 | 58.09     | -0.08  | 0.02    | 0.98 |
| NGLY1_2    | 59.26     | -0.095 | 0       | 0.99 |

Supplement: Supplementary file 7969 [file 1]

# IPI00005492.2|WDR5

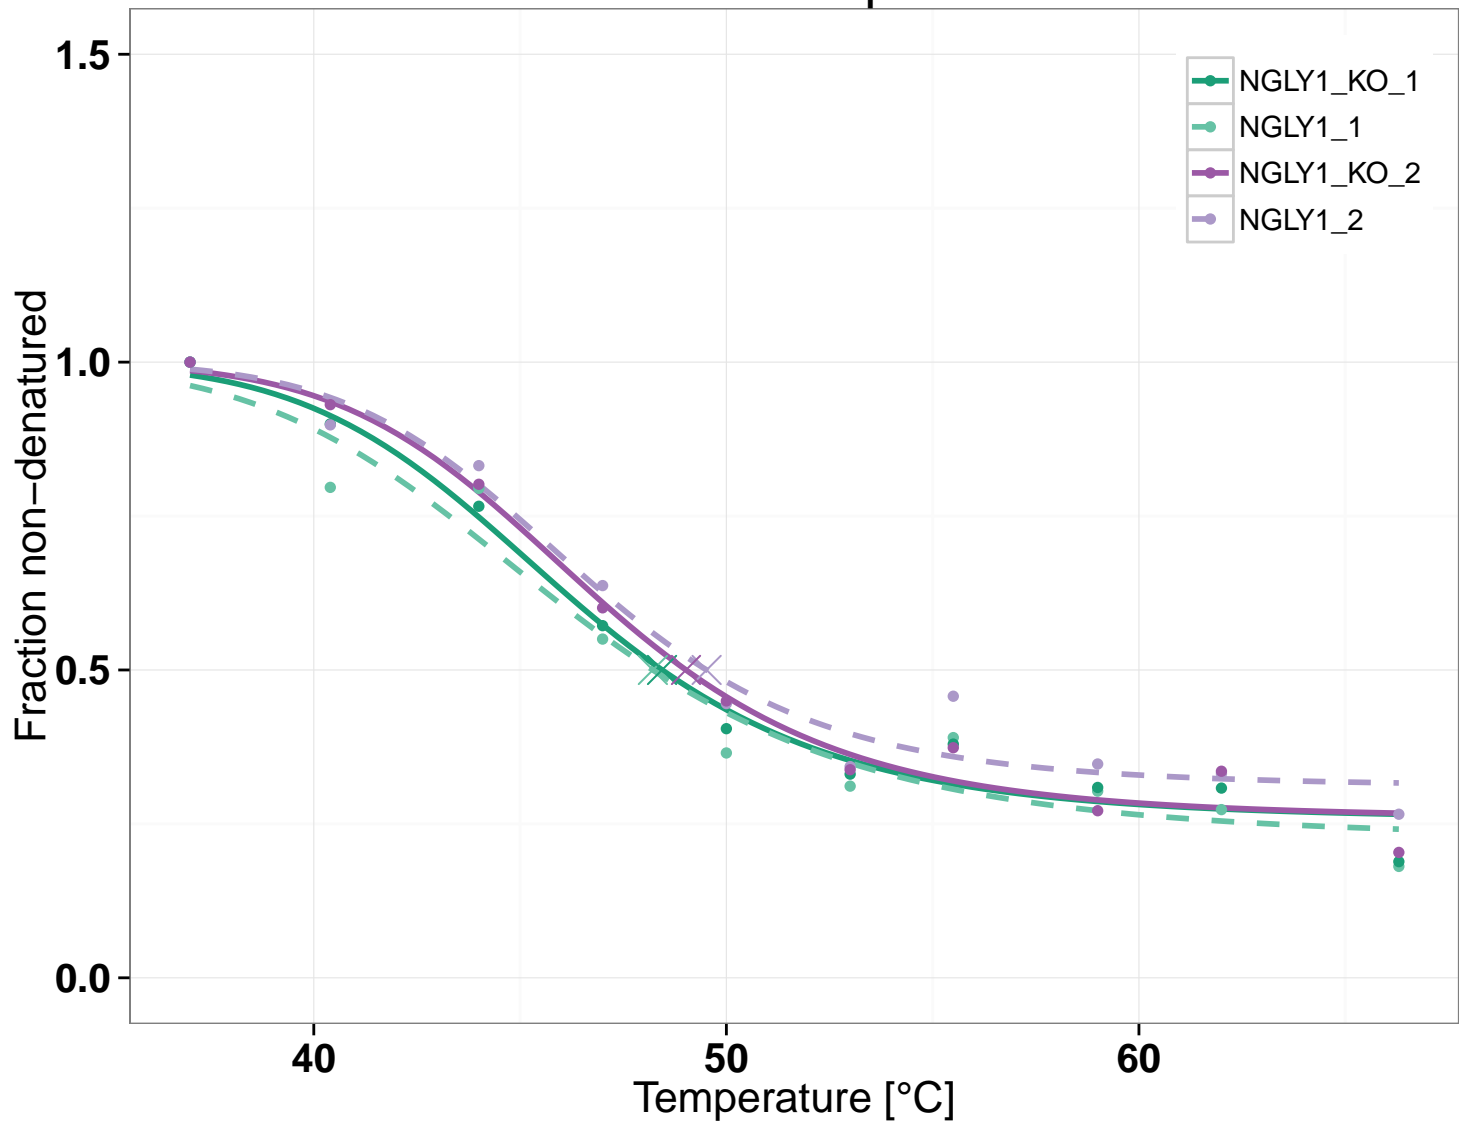

|            | meltPoint | slope  | plateau | R2   |
|------------|-----------|--------|---------|------|
| NGLY1_KO_1 | 48.44     | -0.06  | 0.26    | 0.98 |
| NGLY1_1    | 48.22     | -0.053 | 0.22    | 0.95 |
| NGLY1_KO_2 | 49.02     | -0.061 | 0.26    | 0.98 |
| NGLY1_2    | 49.52     | -0.06  | 0.31    | 0.97 |

Supplement: Supplementary file 7970 [file 1]

# IPI00012007.6|AHCY

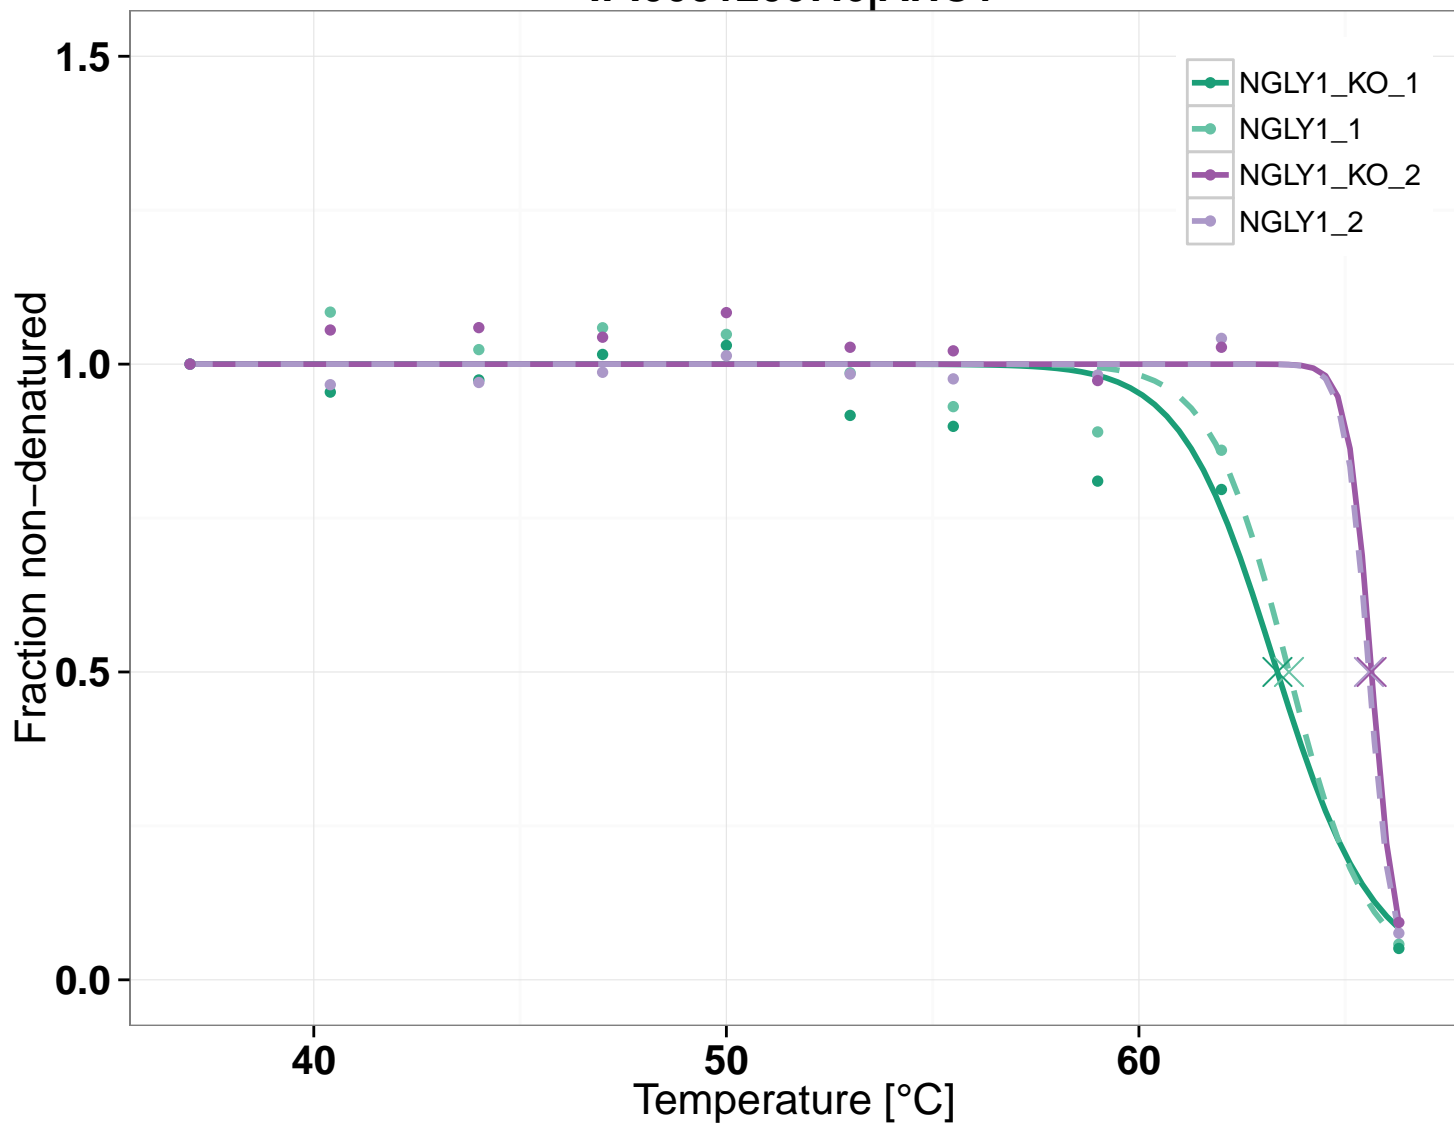

|            | meltPoint | slope | plateau | R2   |
|------------|-----------|-------|---------|------|
| NGLY1_KO_1 | 63.36     | -0.21 | 0       | 0.93 |
| NGLY1_1    | 63.64     | -0.26 | 0       | 0.96 |
| NGLY1_KO_2 | 65.64     | -0.87 | 0       | 0.98 |
| NGLY1_2    | 65.58     | -0.87 | 0       | 0.99 |

Supplement: Supplementary file 7971 [file 1]

IPI00152510.4|DDX54

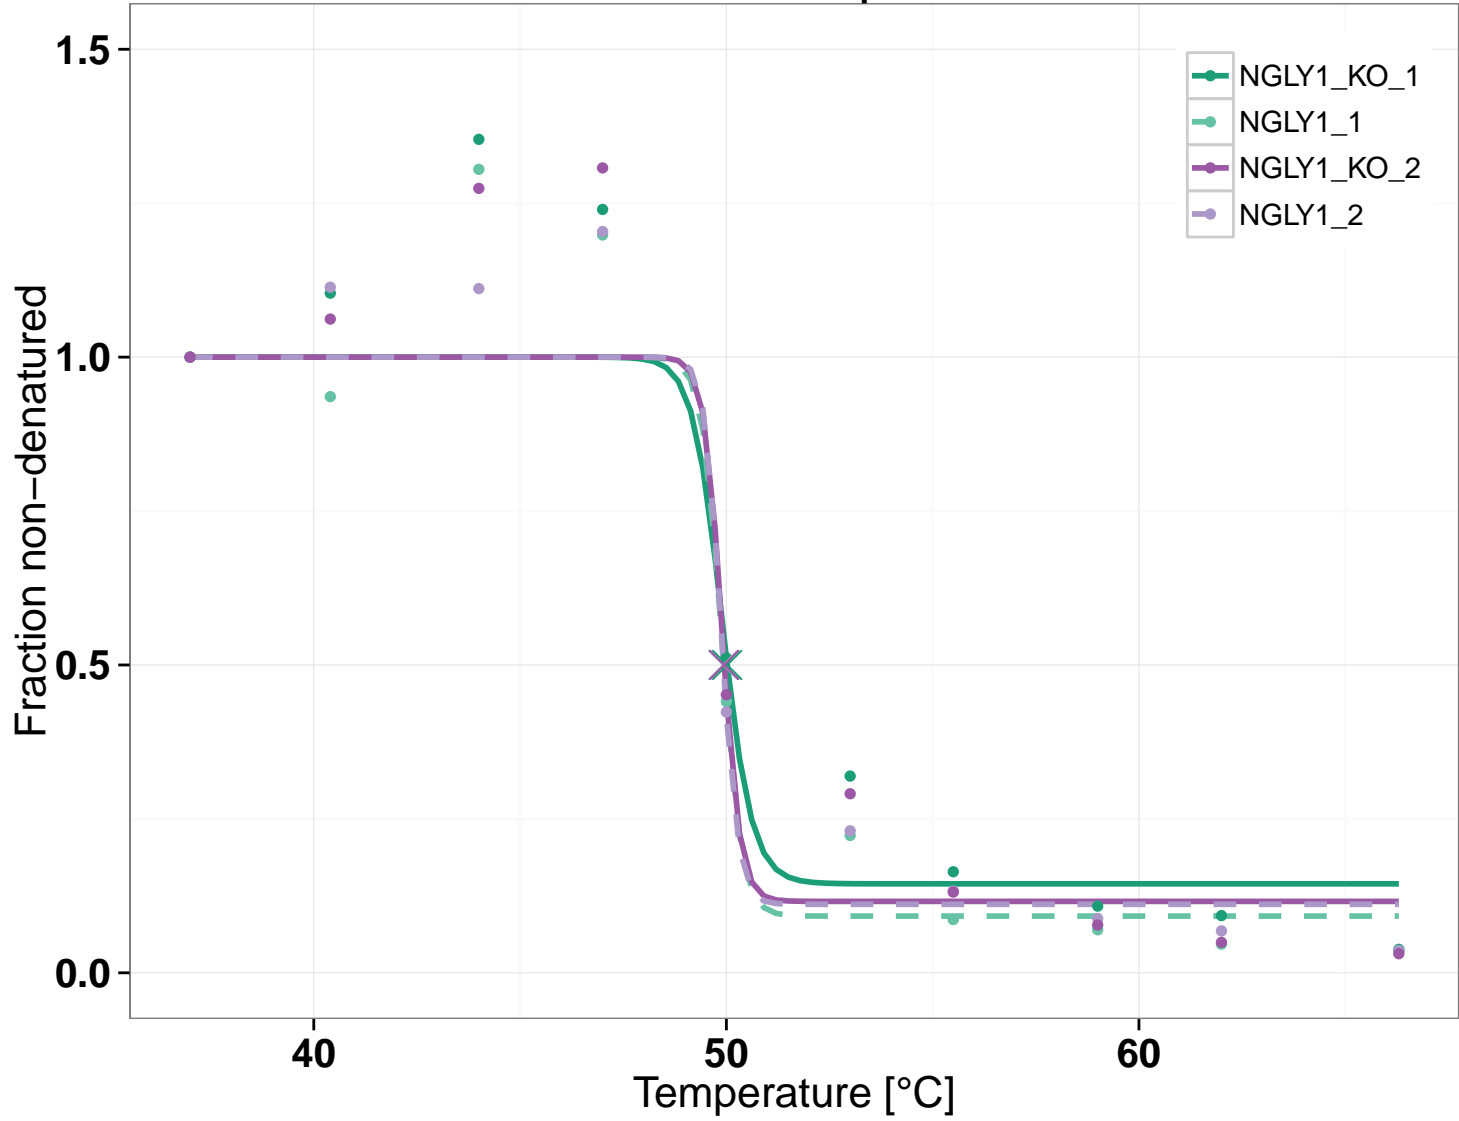

|            | meltPoint | slope | plateau | R2   |
|------------|-----------|-------|---------|------|
| NGLY1_KO_1 | 50.02     | -0.6  | 0.14    | 0.9  |
| NGLY1_1    | 49.93     | -0.94 | 0.09    | 0.93 |
| NGLY1_KO_2 | 49.95     | -1    | 0.12    | 0.91 |
| NGLY1_2    | 49.93     | -1.1  | 0.11    | 0.96 |

Supplement: Supplementary file 7972 [file 1]

IPI00296776.2|CCDC82

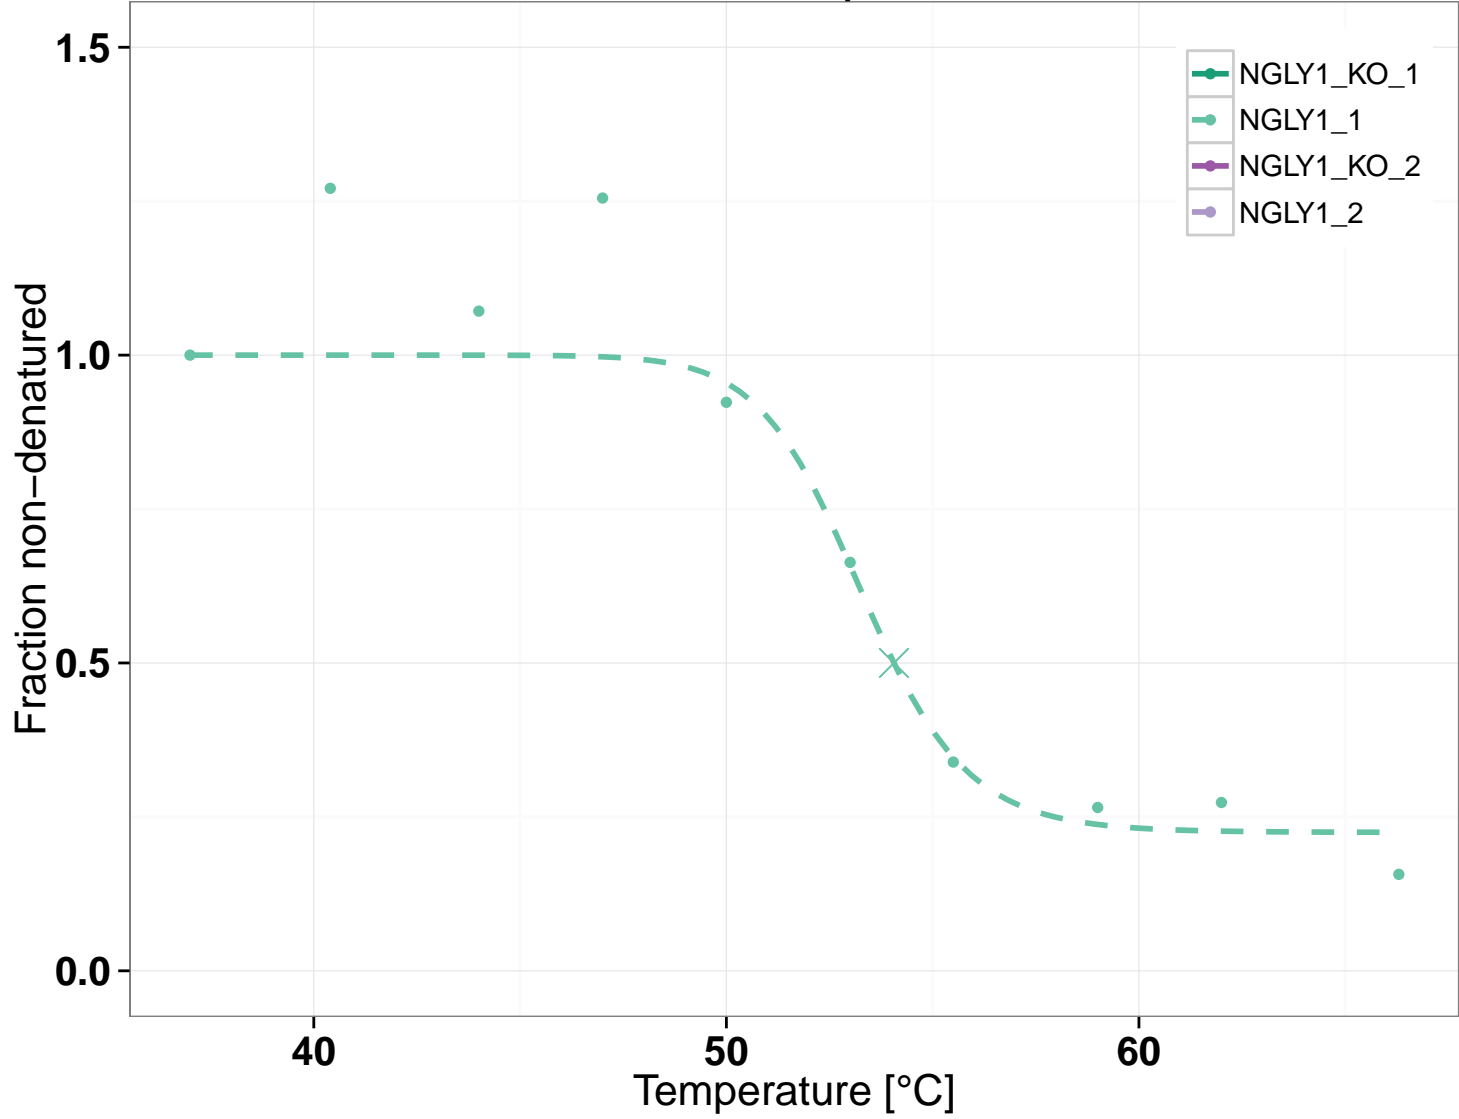

|            | meltPoint | slope | plateau | R2   |
|------------|-----------|-------|---------|------|
| NGLY1_KO_1 | -         | -     | -       | -    |
| NGLY1_1    | 54.06     | -0.15 | 0.22    | 0.91 |
| NGLY1_KO_2 | -         | -     | -       | -    |
| NGLY1_2    | -         | -     | -       | -    |

Supplement: Supplementary file 7973 [file 1]

IPI00792993.1|ZNF385A

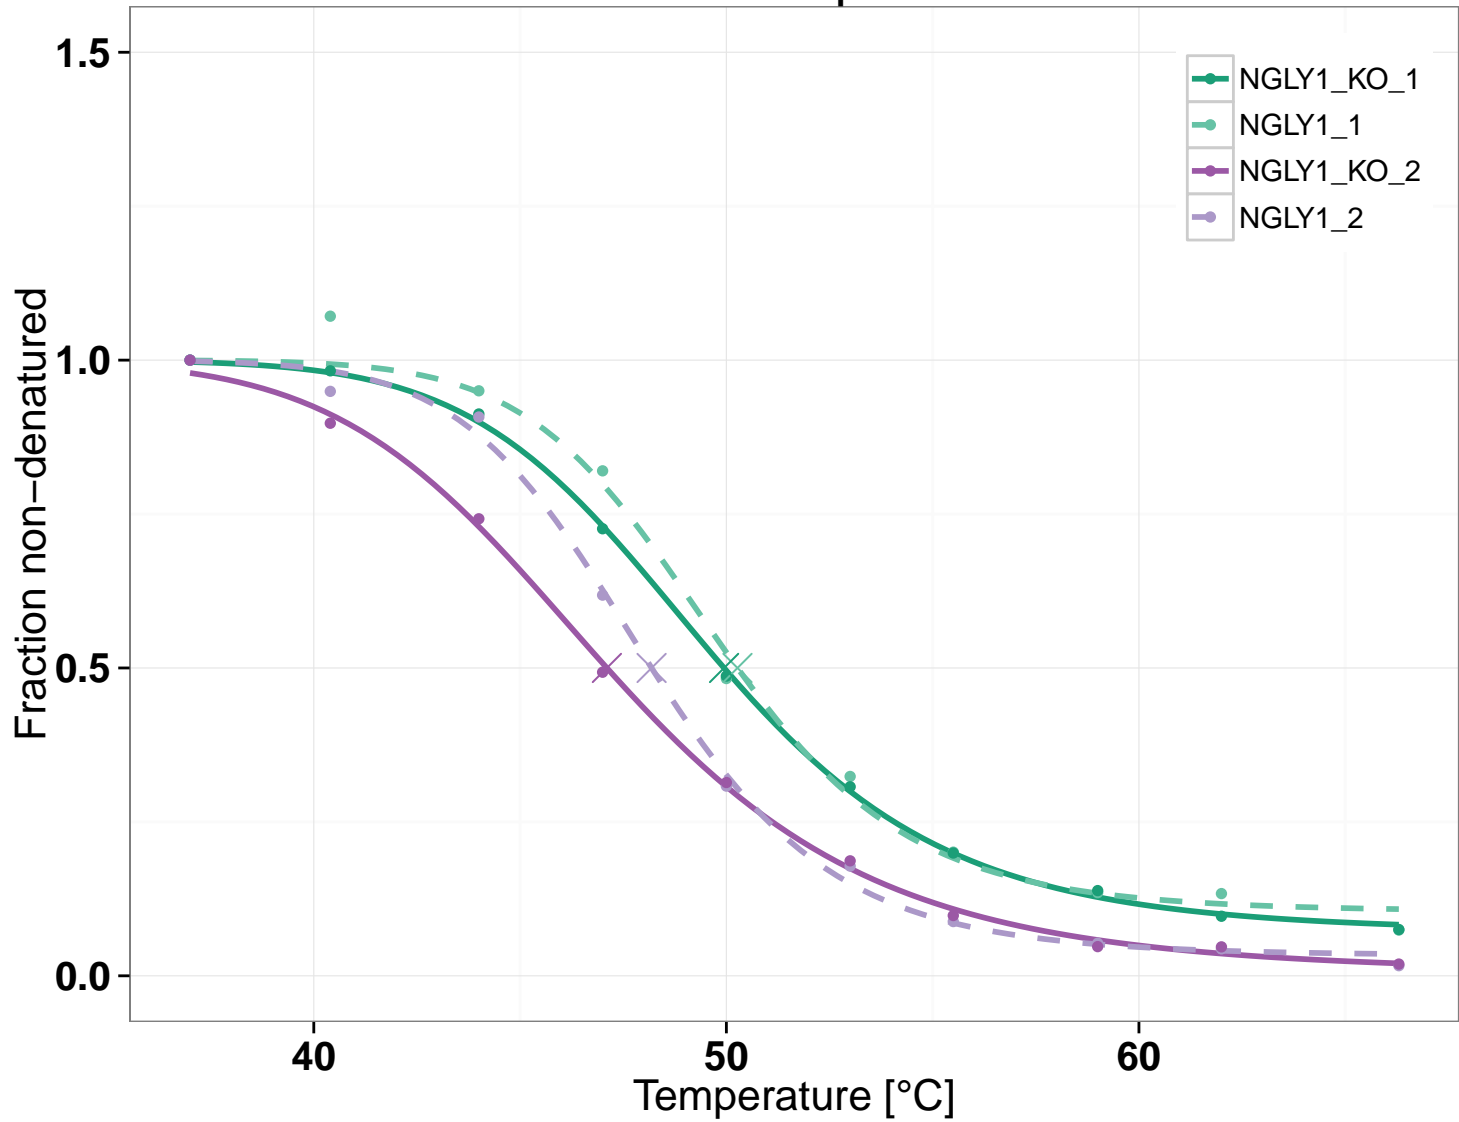

|            | meltPoint | slope  | plateau | R2   |
|------------|-----------|--------|---------|------|
| NGLY1_KO_1 | 49.94     | -0.08  | 0.07    | 1    |
| NGLY1_1    | 50.27     | -0.097 | 0.1     | 0.99 |
| NGLY1_KO_2 | 47.1      | -0.076 | 0       | 1    |
| NGLY1_2    | 48.19     | -0.11  | 0.03    | 1    |

Supplement: Supplementary file 7974 [file 1]

# IPI00012773.1|MTA1

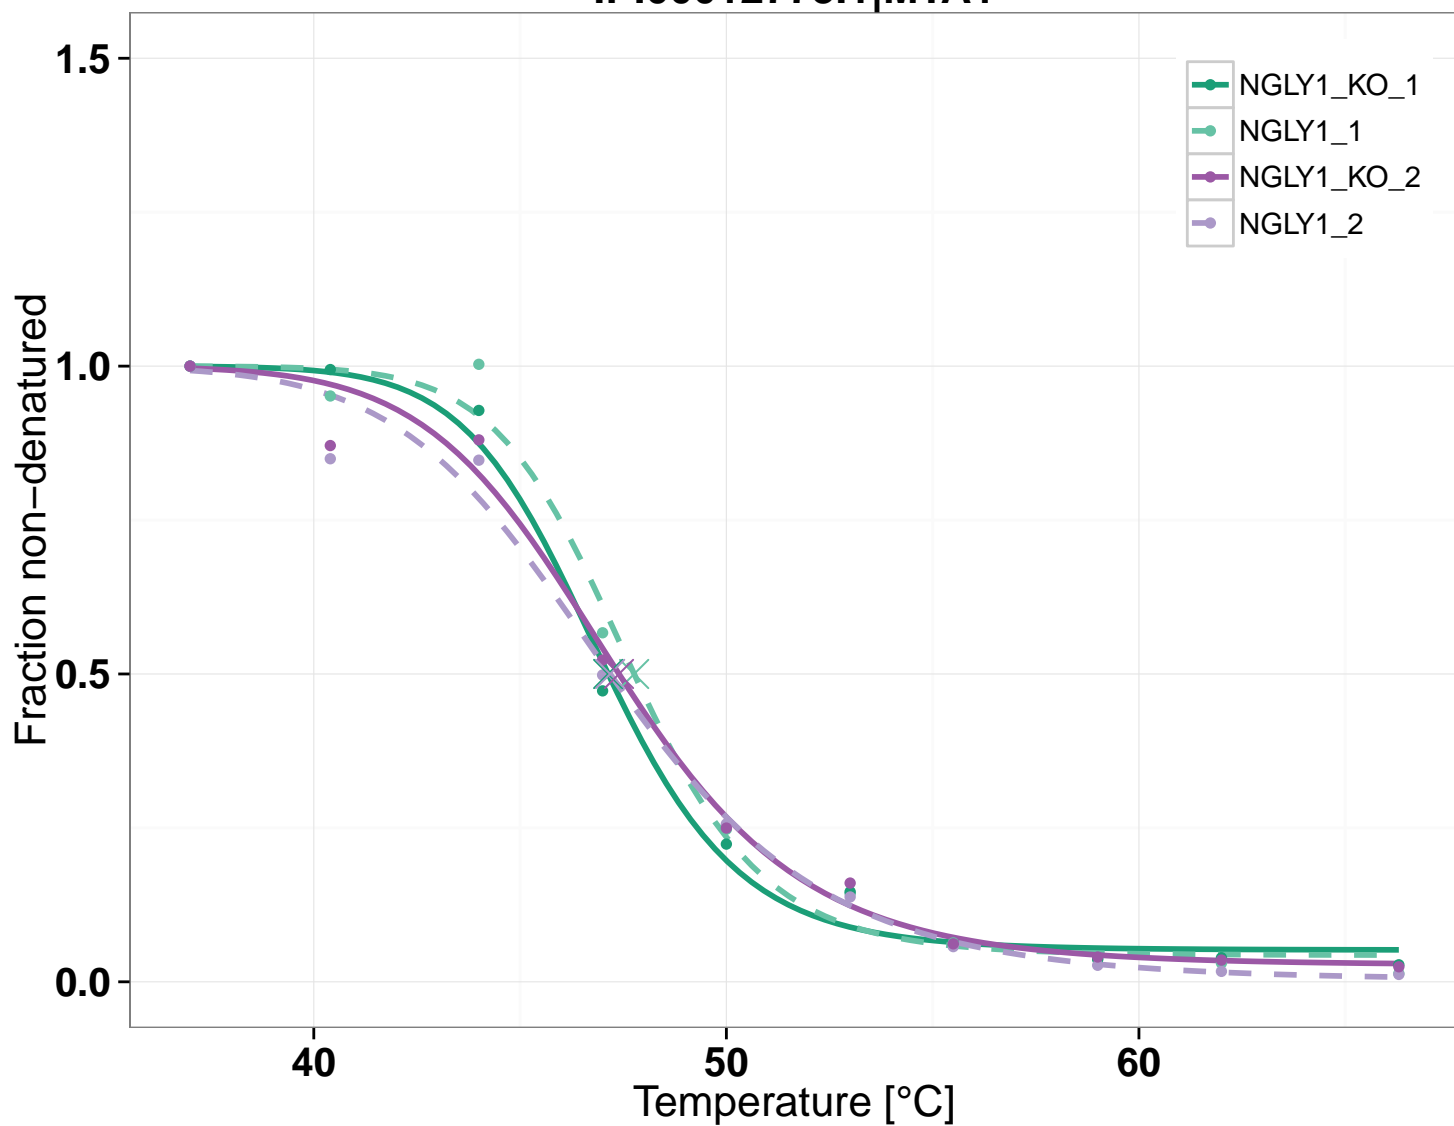

|            | meltPoint | slope  | plateau | R2   |
|------------|-----------|--------|---------|------|
| NGLY1_KO_1 | 47.14     | -0.14  | 0.05    | 0.99 |
| NGLY1_1    | 47.76     | -0.15  | 0.04    | 0.99 |
| NGLY1_KO_2 | 47.4      | -0.11  | 0.03    | 0.99 |
| NGLY1_2    | 47.18     | -0.096 | 0       | 0.99 |

Supplement: Supplementary file 7975 [file 1]

# IPI00007311.1|MAFG

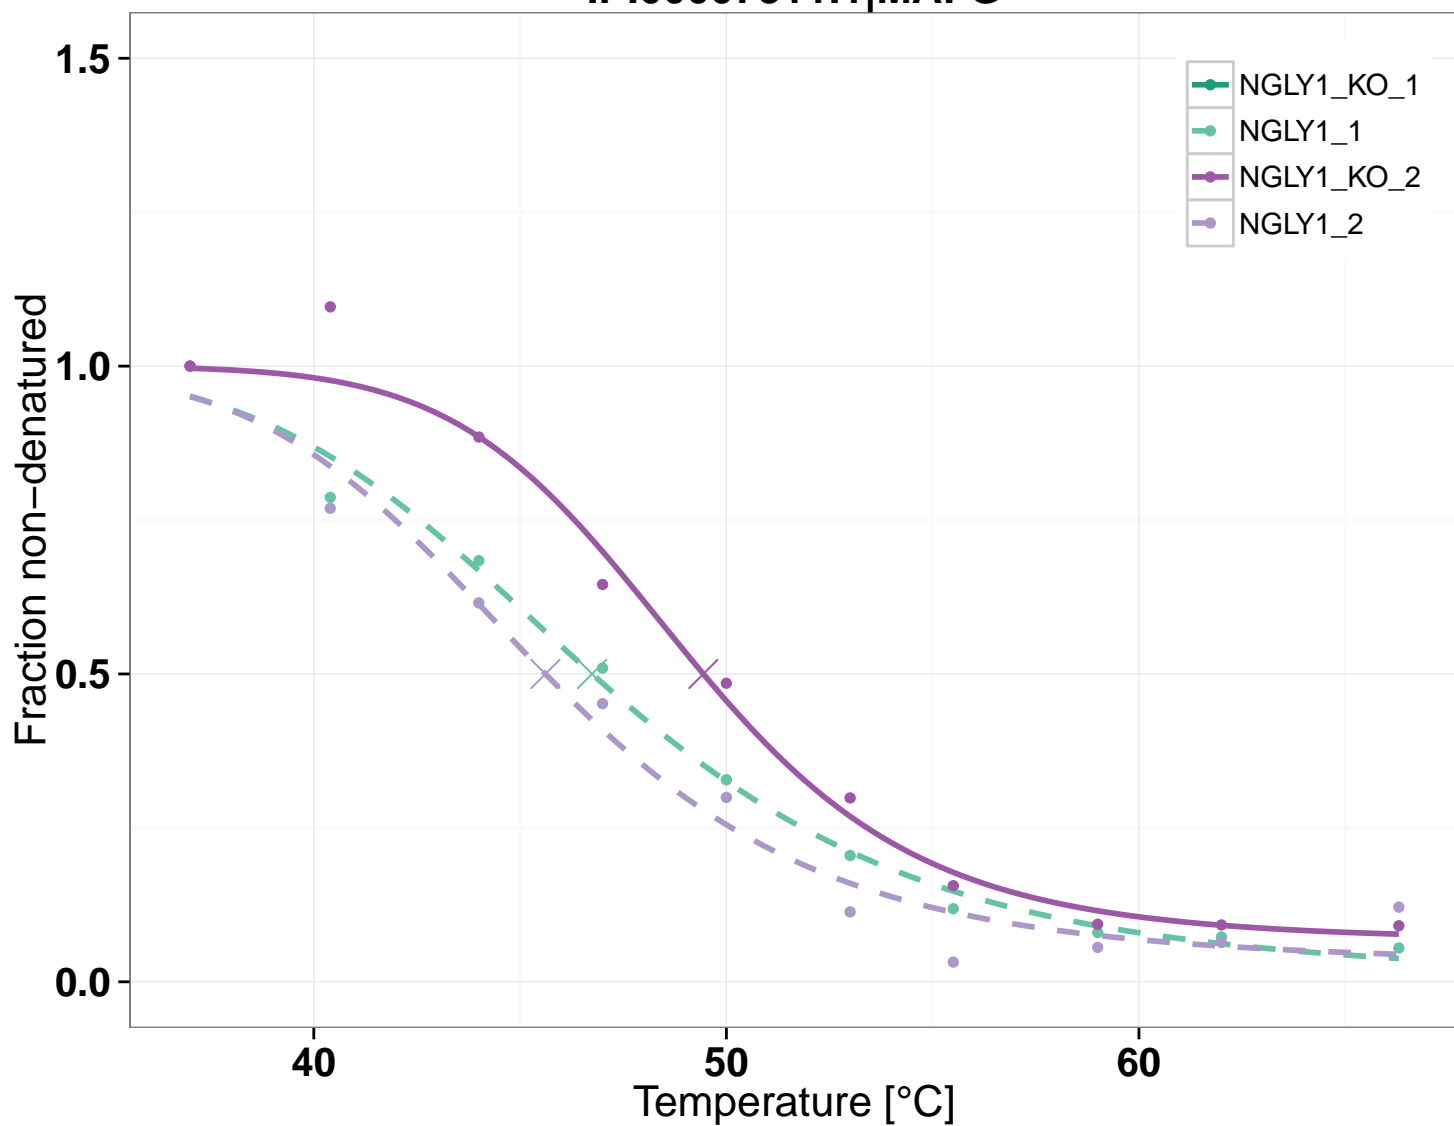

|            | meltPoint | slope  | plateau | R2   |
|------------|-----------|--------|---------|------|
| NGLY1_KO_1 | -         | -      | -       | -    |
| NGLY1_1    | 46.75     | -0.062 | 0       | 0.99 |
| NGLY1_KO_2 | 49.44     | -0.083 | 0.07    | 0.99 |
| NGLY1_2    | 45.61     | -0.071 | 0.03    | 0.98 |

Supplement: Supplementary file 7976 [file 1]

IPI00844510.2|VPS72

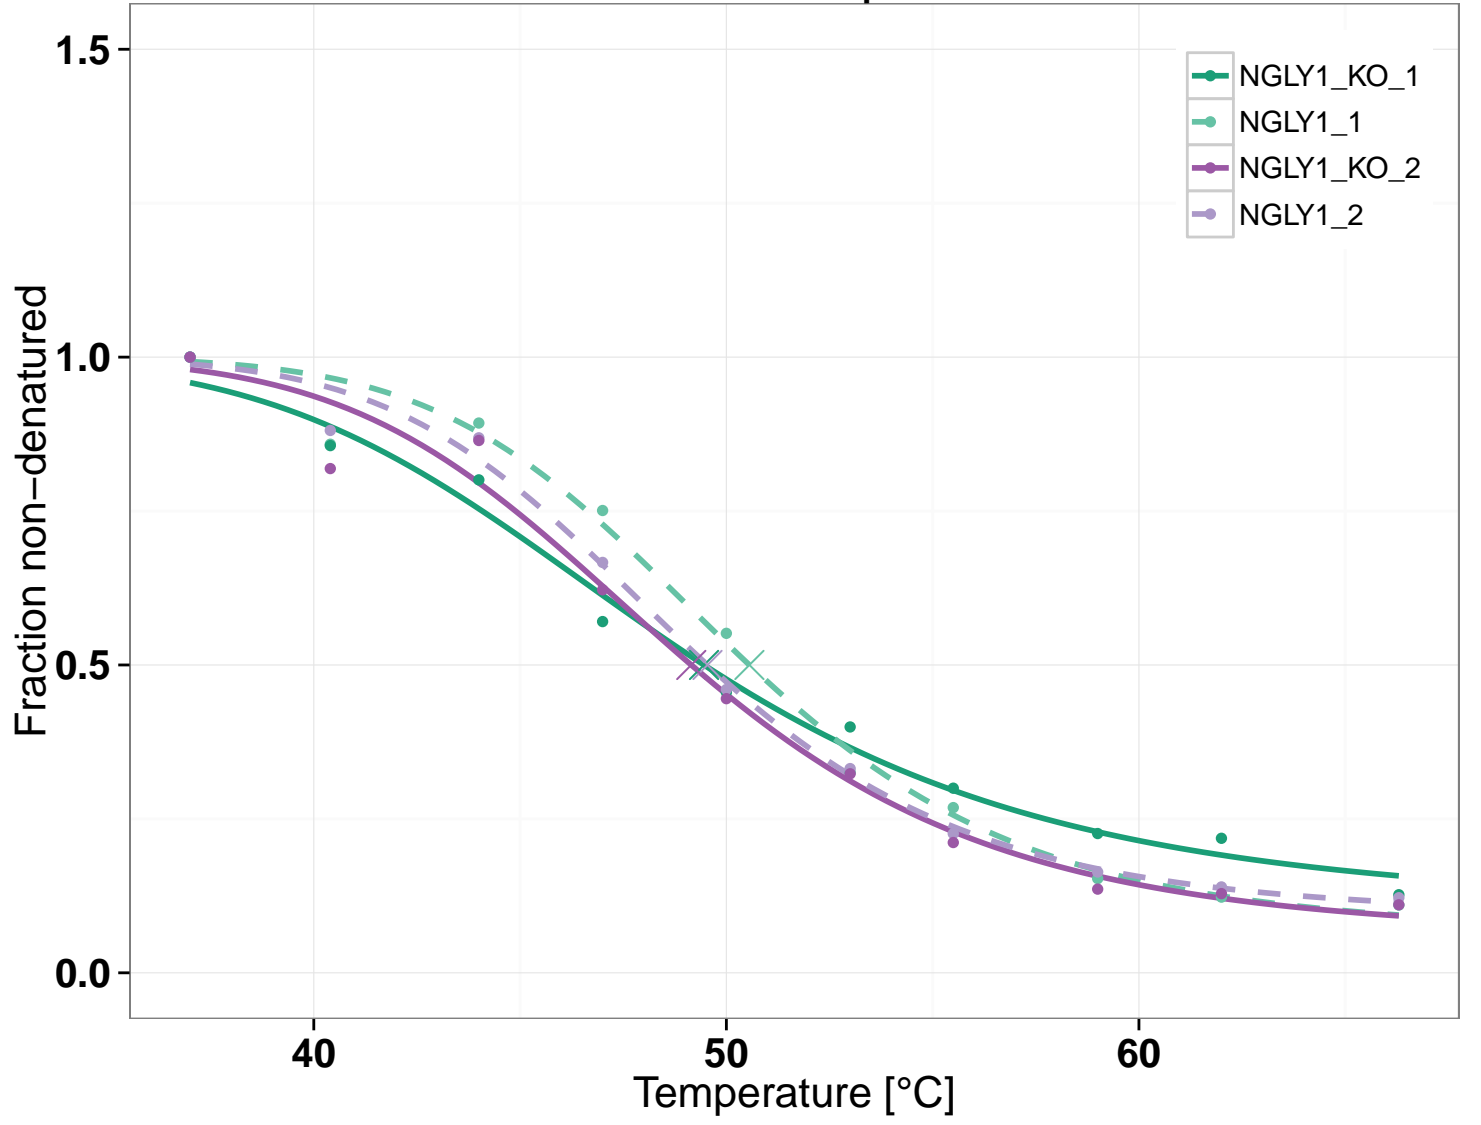

|            | meltPoint | slope  | plateau | R2   |
|------------|-----------|--------|---------|------|
| NGLY1_KO_1 | 49.46     | -0.048 | 0.1     | 0.99 |
| NGLY1_1    | 50.56     | -0.066 | 0.06    | 0.99 |
| NGLY1_KO_2 | 49.15     | -0.06  | 0.06    | 0.98 |
| NGLY1_2    | 49.54     | -0.065 | 0.09    | 0.99 |

Supplement: Supplementary file 7977 [file 1]

# IPI00304435.3|NIPSNAP1

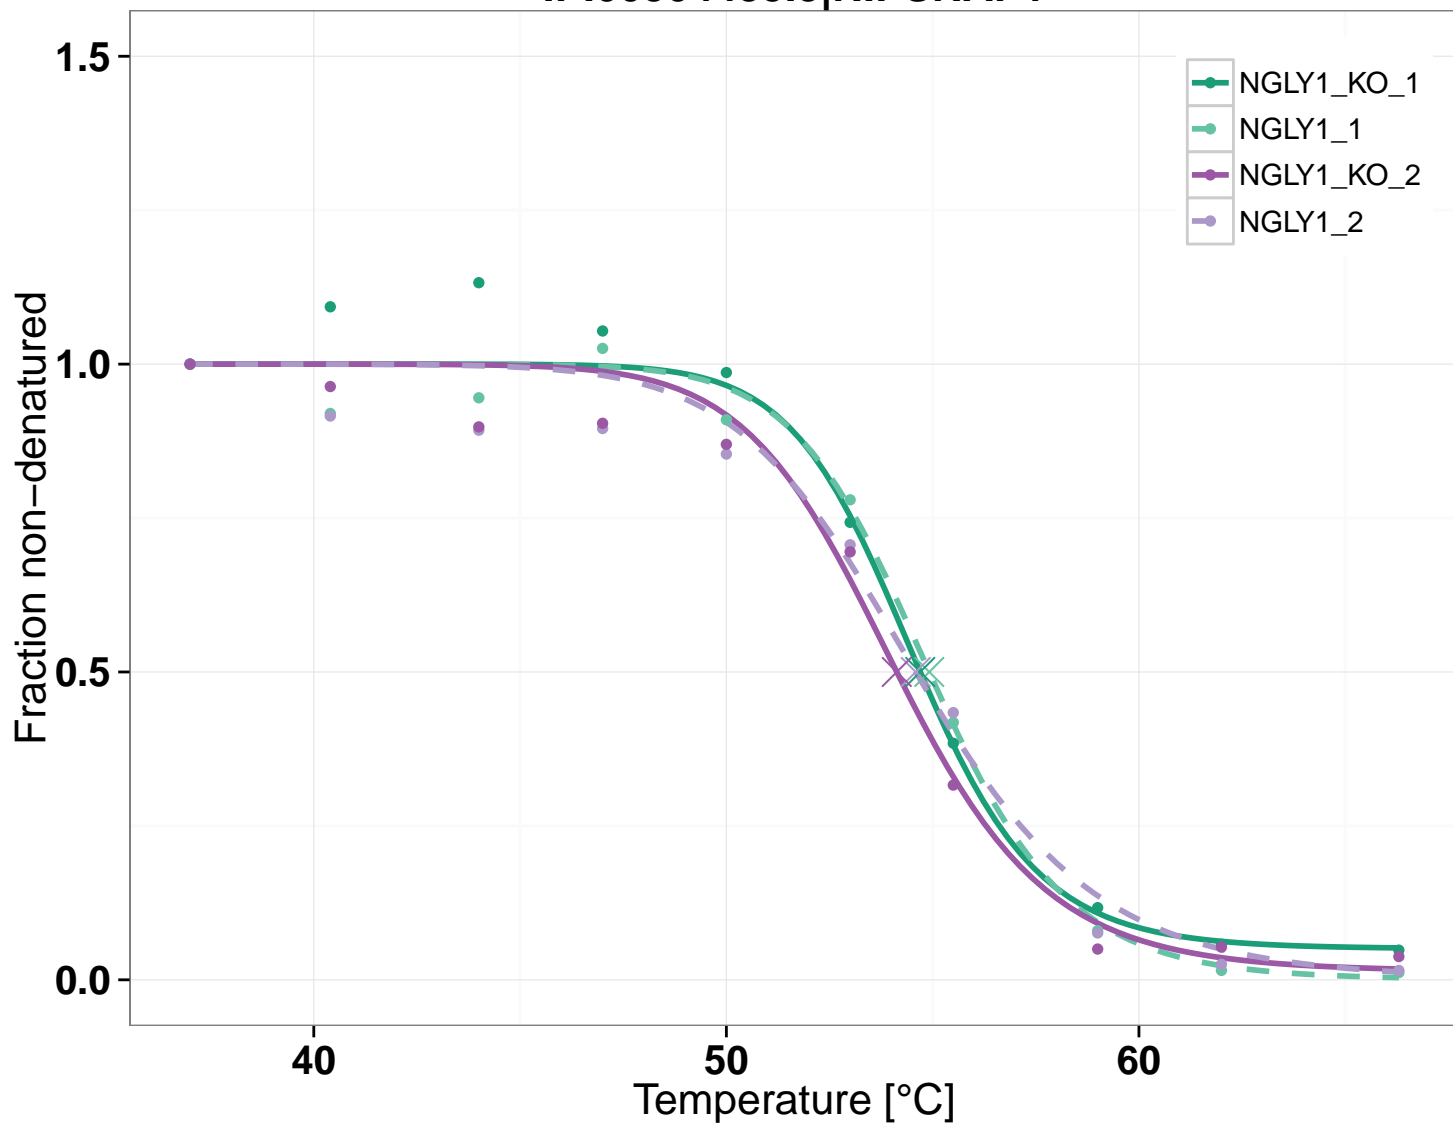

|            | meltPoint | slope | plateau | R2   |
|------------|-----------|-------|---------|------|
| NGLY1_KO_1 | 54.7      | -0.16 | 0.05    | 0.98 |
| NGLY1_1    | 54.92     | -0.15 | 0       | 0.99 |
| NGLY1_KO_2 | 54.13     | -0.13 | 0.01    | 0.98 |
| NGLY1_2    | 54.59     | -0.11 | 0       | 0.98 |

Supplement: Supplementary file 7978 [file 1]

# IPI00334159.6|VBP1

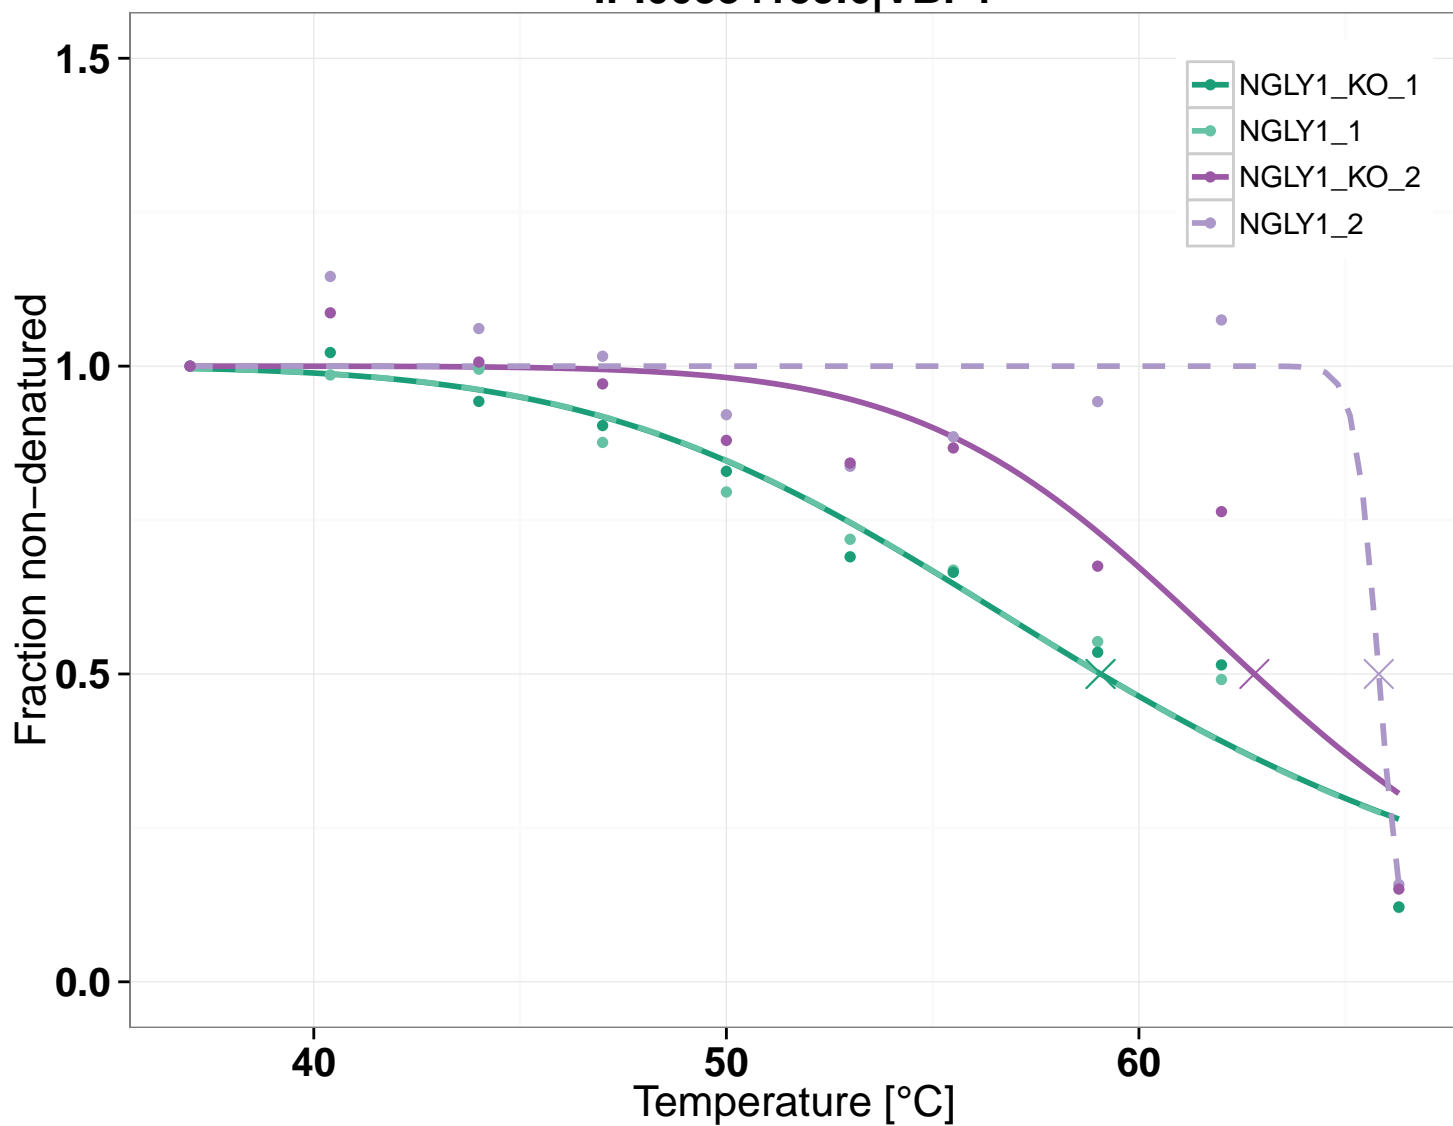

|            | meltPoint | slope  | plateau | R2   |
|------------|-----------|--------|---------|------|
| NGLY1_KO_1 | 59.07     | -0.042 | 0       | 0.94 |
| NGLY1_1    | 59.06     | -0.042 | 0       | 0.94 |
| NGLY1_KO_2 | 62.8      | -0.063 | 0       | 0.84 |
| NGLY1_2    | 65.81     | -0.87  | 0       | 0.89 |

Supplement: Supplementary file 7979 [file 1]

# IPI00003833.3|MTCH2

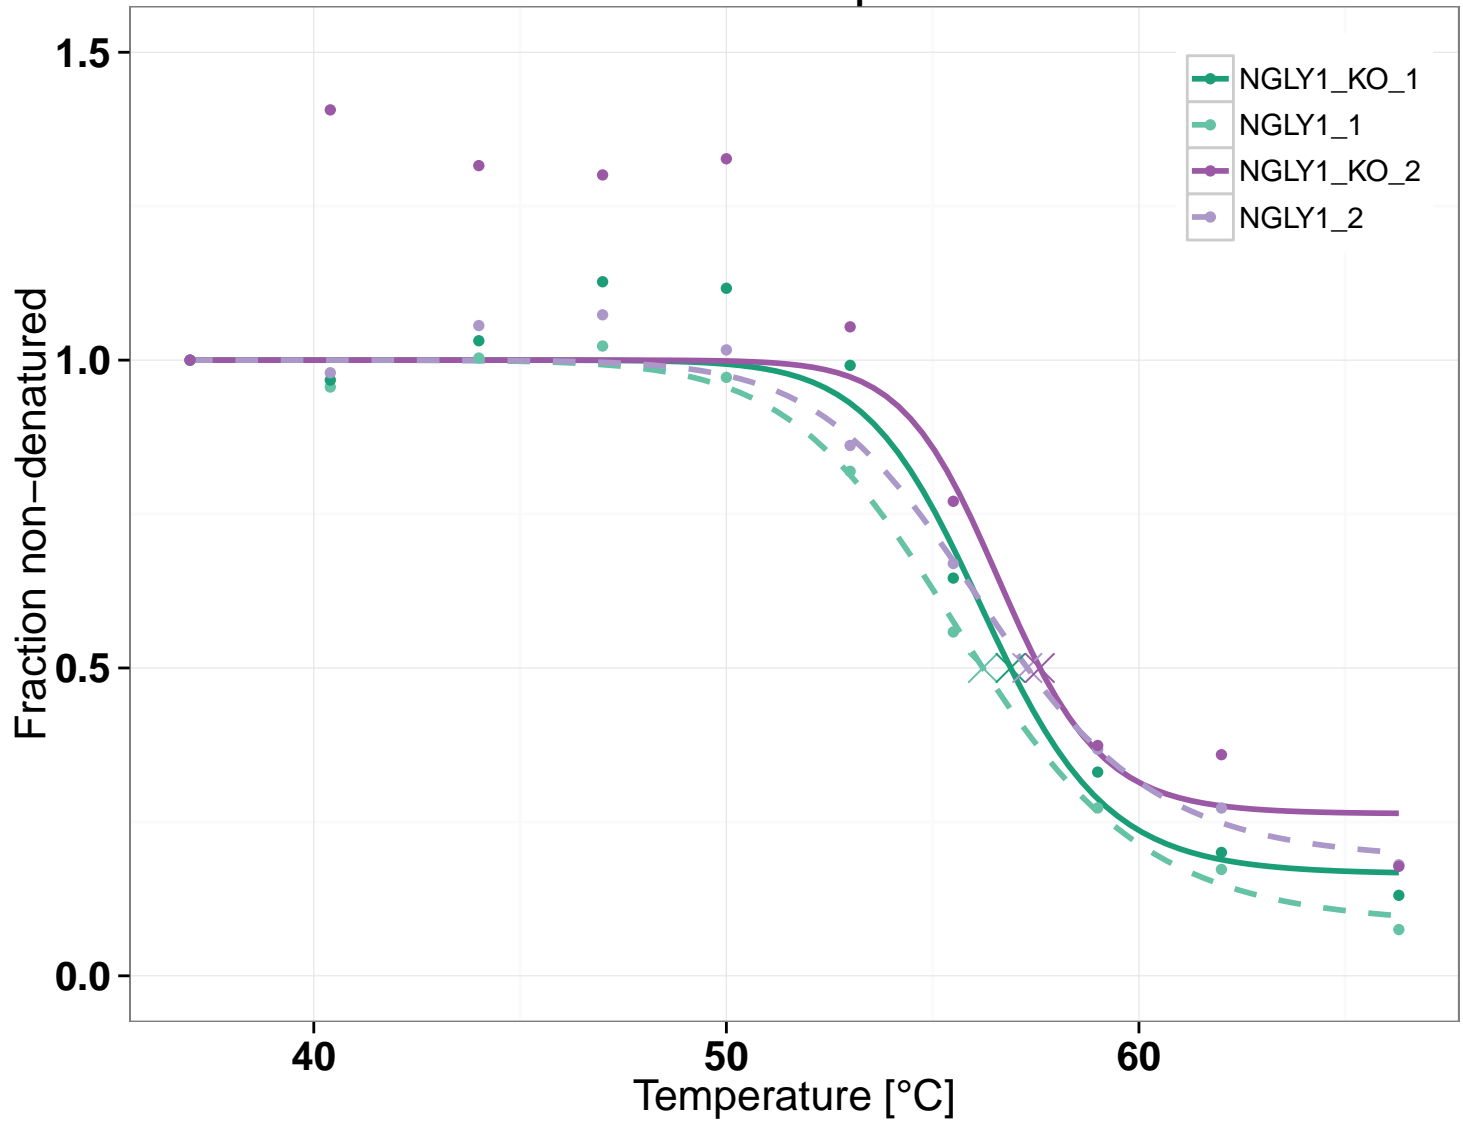

|            | meltPoint | slope  | plateau | R2   |
|------------|-----------|--------|---------|------|
| NGLY1_KO_1 | 56.89     | -0.14  | 0.17    | 0.97 |
| NGLY1_1    | 56.22     | -0.11  | 0.08    | 1    |
| NGLY1_KO_2 | 57.6      | -0.15  | 0.26    | 0.75 |
| NGLY1_2    | 57.29     | -0.099 | 0.19    | 0.99 |

Supplement: Supplementary file 7980 [file 1]

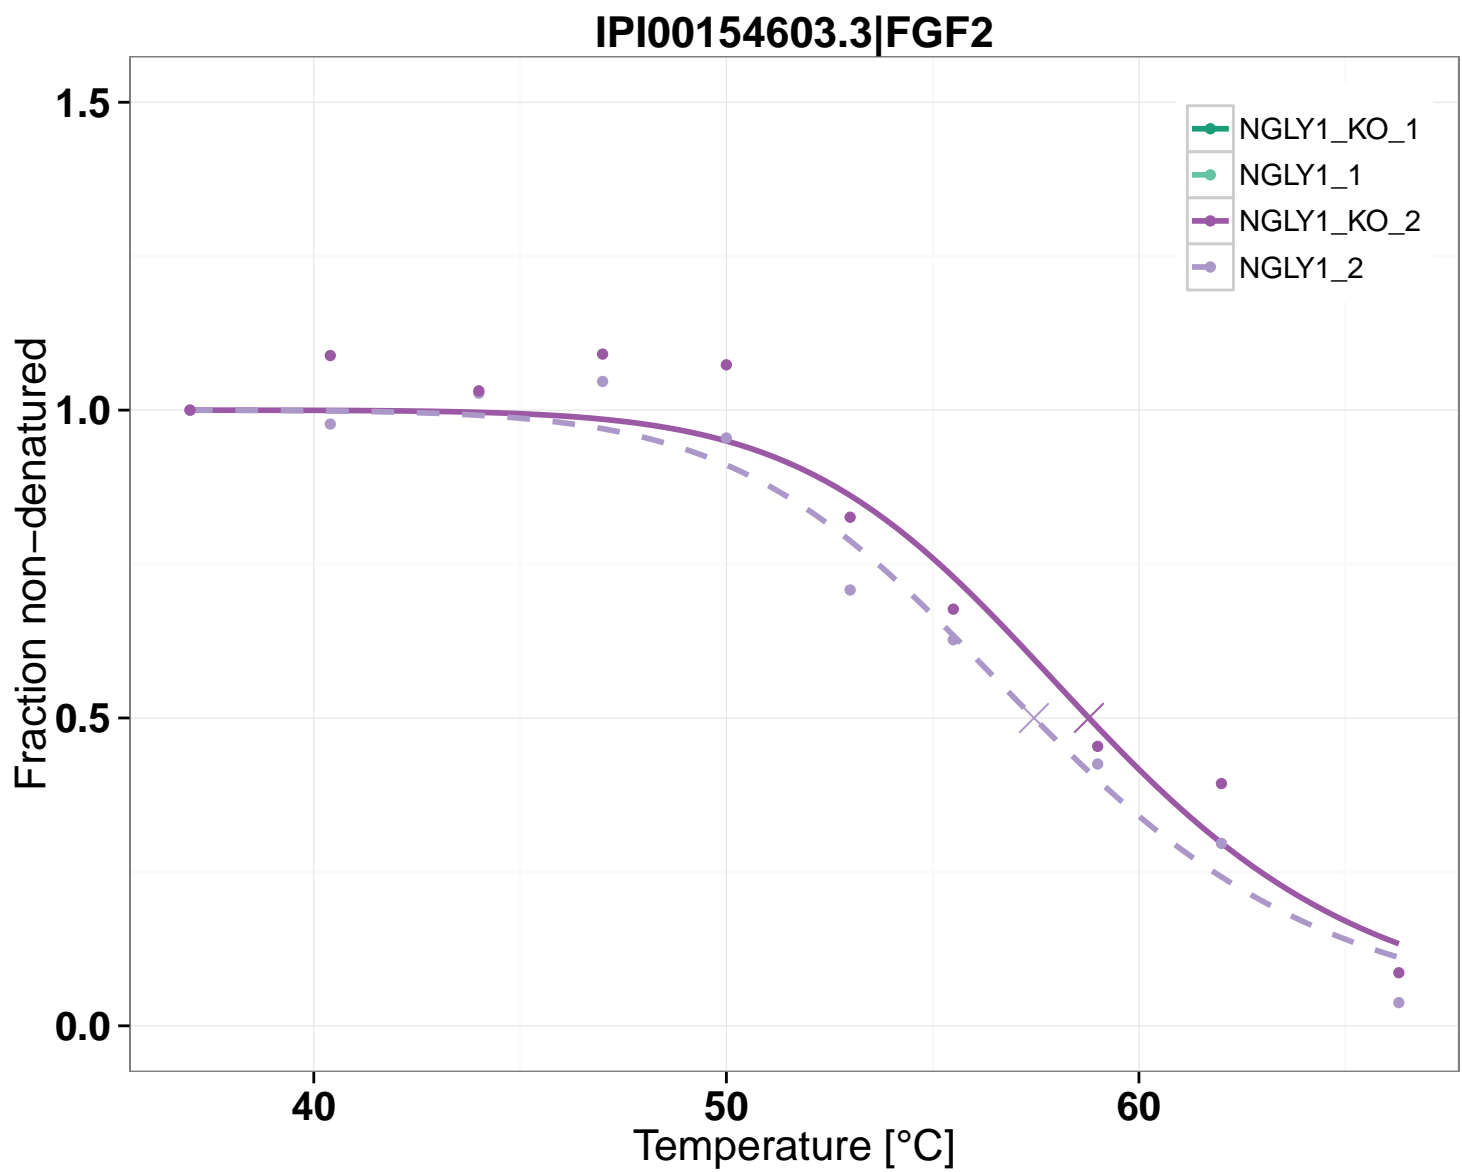

|            | meltPoint | slope  | plateau | R2   |
|------------|-----------|--------|---------|------|
| NGLY1_KO_1 | —         | —      | —       | —    |
| NGLY1_1    | —         | —      | —       | —    |
| NGLY1_KO_2 | 58.79     | −0.072 | 0       | 0.95 |
| NGLY1_2    | 57.46     | −0.069 | 0       | 0.98 |

Supplement: Supplementary file 7981 [file 1]

IPI00015947.5|DNAJB1

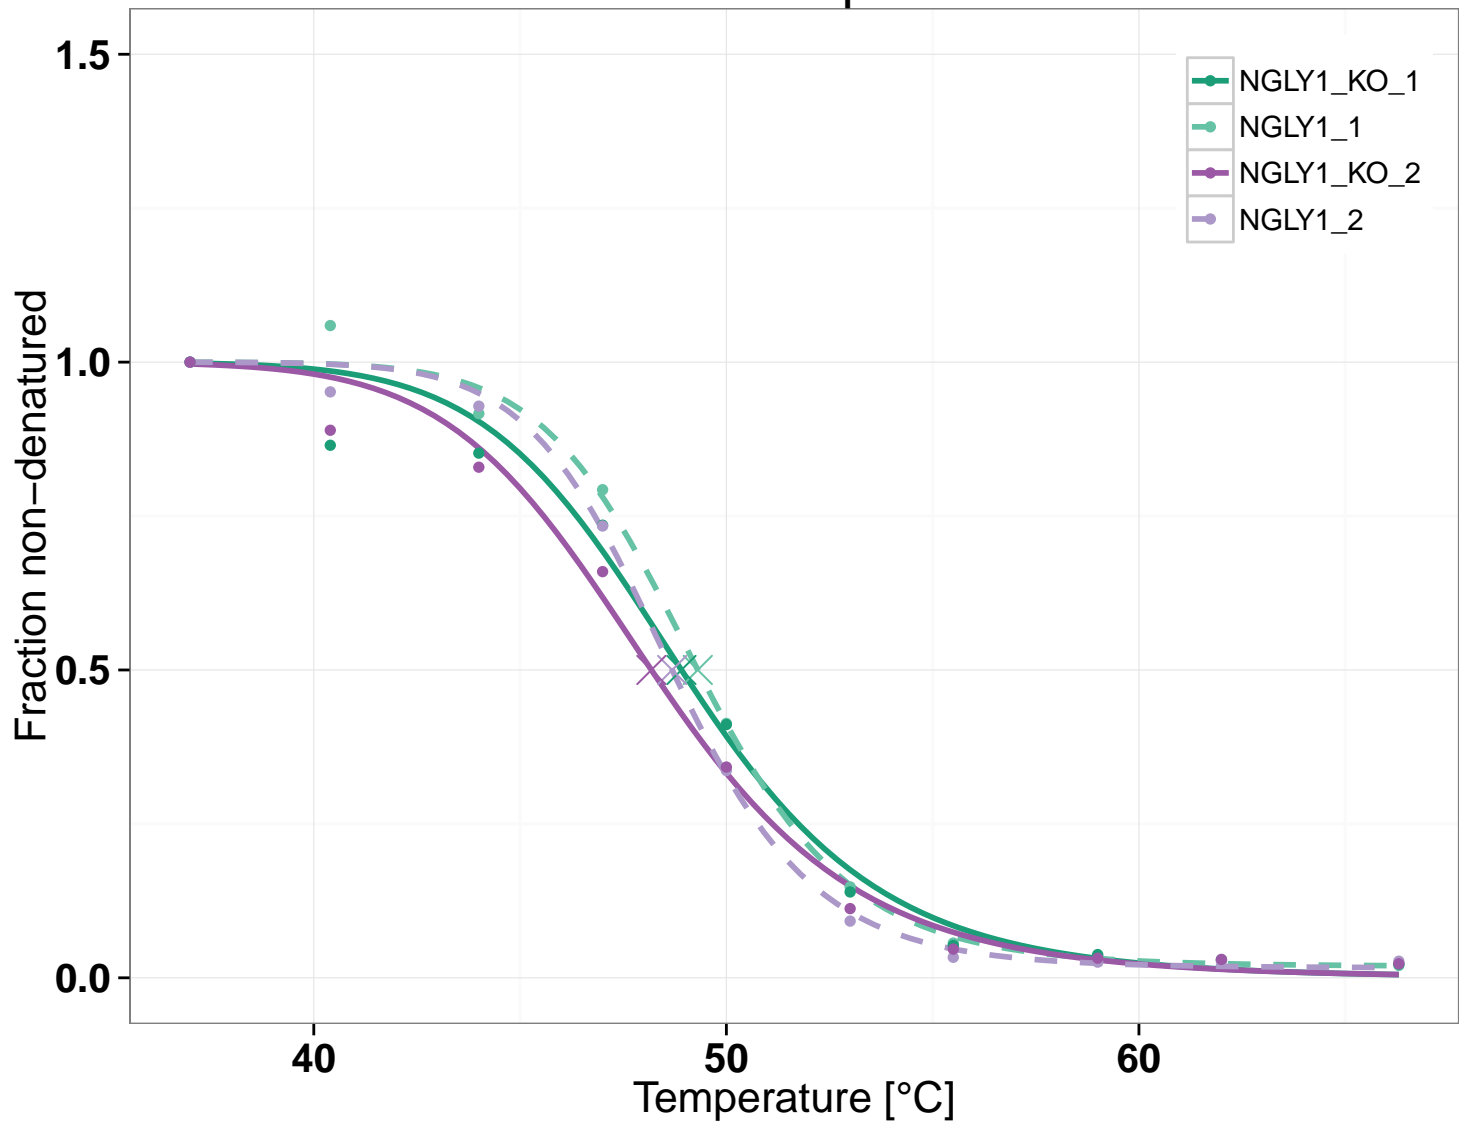

|            | meltPoint | slope | plateau | R2   |
|------------|-----------|-------|---------|------|
| NGLY1_KO_1 | 48.91     | -0.1  | 0       | 0.99 |
| NGLY1_1    | 49.31     | -0.13 | 0.02    | 1    |
| NGLY1_KO_2 | 48.18     | -0.1  | 0       | 0.99 |
| NGLY1_2    | 48.69     | -0.14 | 0.02    | 1    |

Supplement: Supplementary file 7982 [file 1]

IPI00004988.1|MANBAL

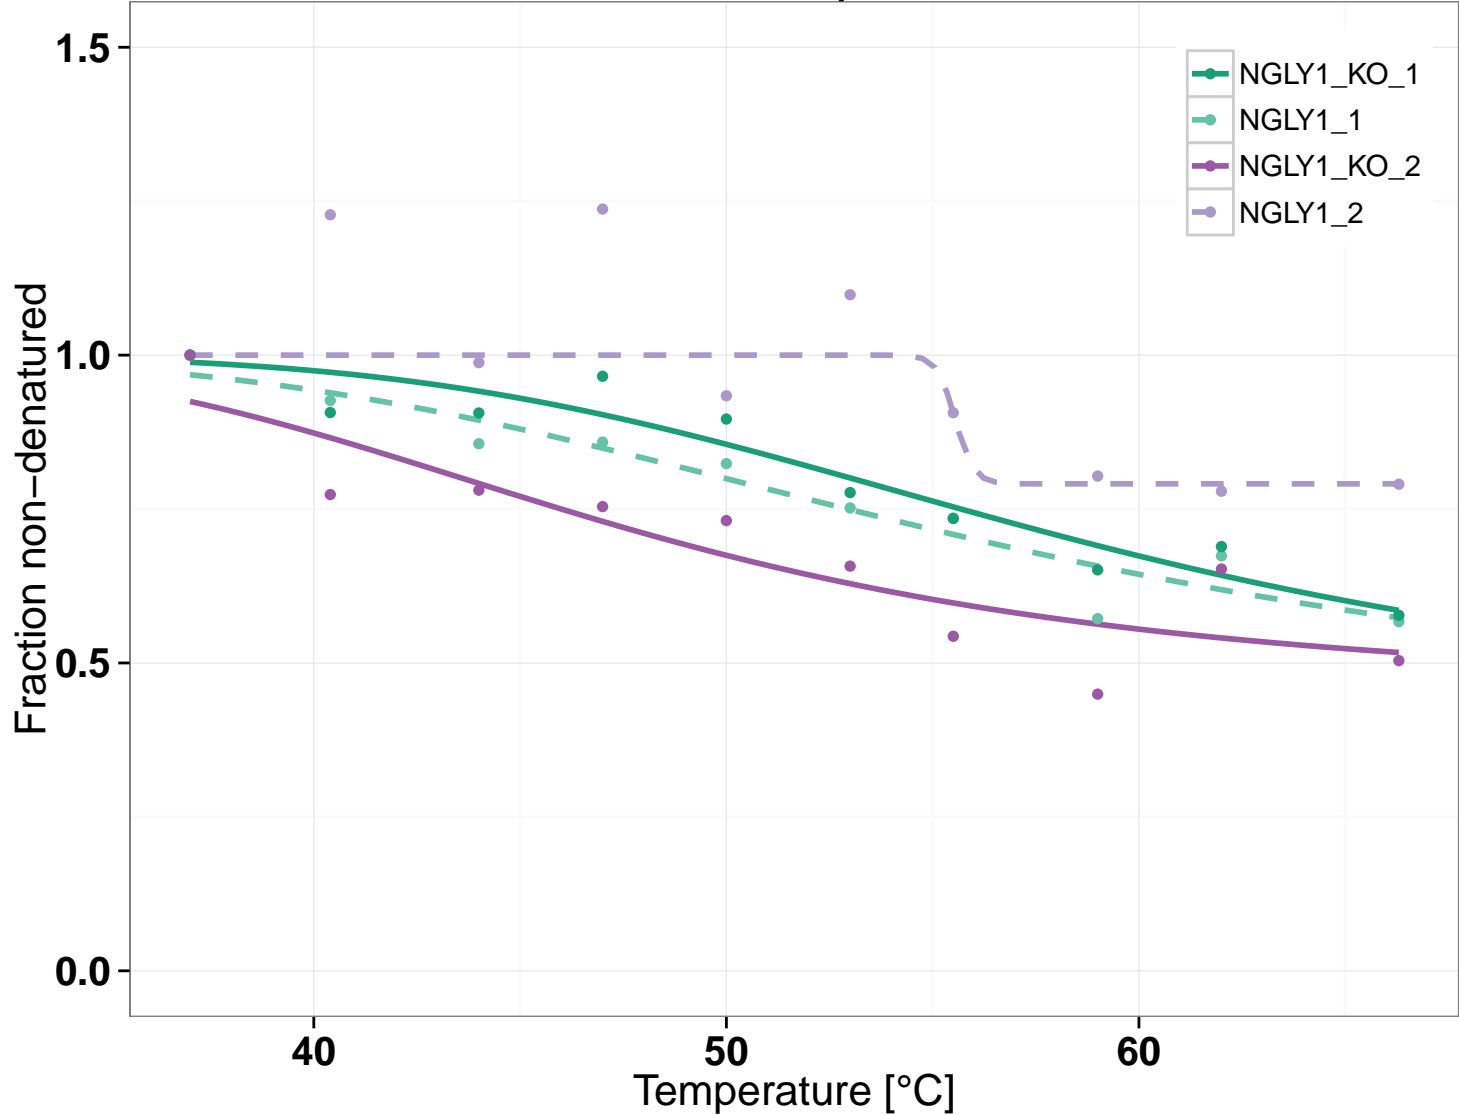

|            | meltPoint | slope  | plateau | R2   |
|------------|-----------|--------|---------|------|
| NGLY1_KO_1 | -         | -0.019 | 0.4     | 0.91 |
| NGLY1_1    | -         | -0.017 | 0.38    | 0.92 |
| NGLY1_KO_2 | -         | -0.021 | 0.44    | 0.8  |
| NGLY1_2    | -         | -0.24  | 0.79    | 0.52 |

Supplement: Supplementary file 7983 [file 1]

# IPI00465044.2|RCC2

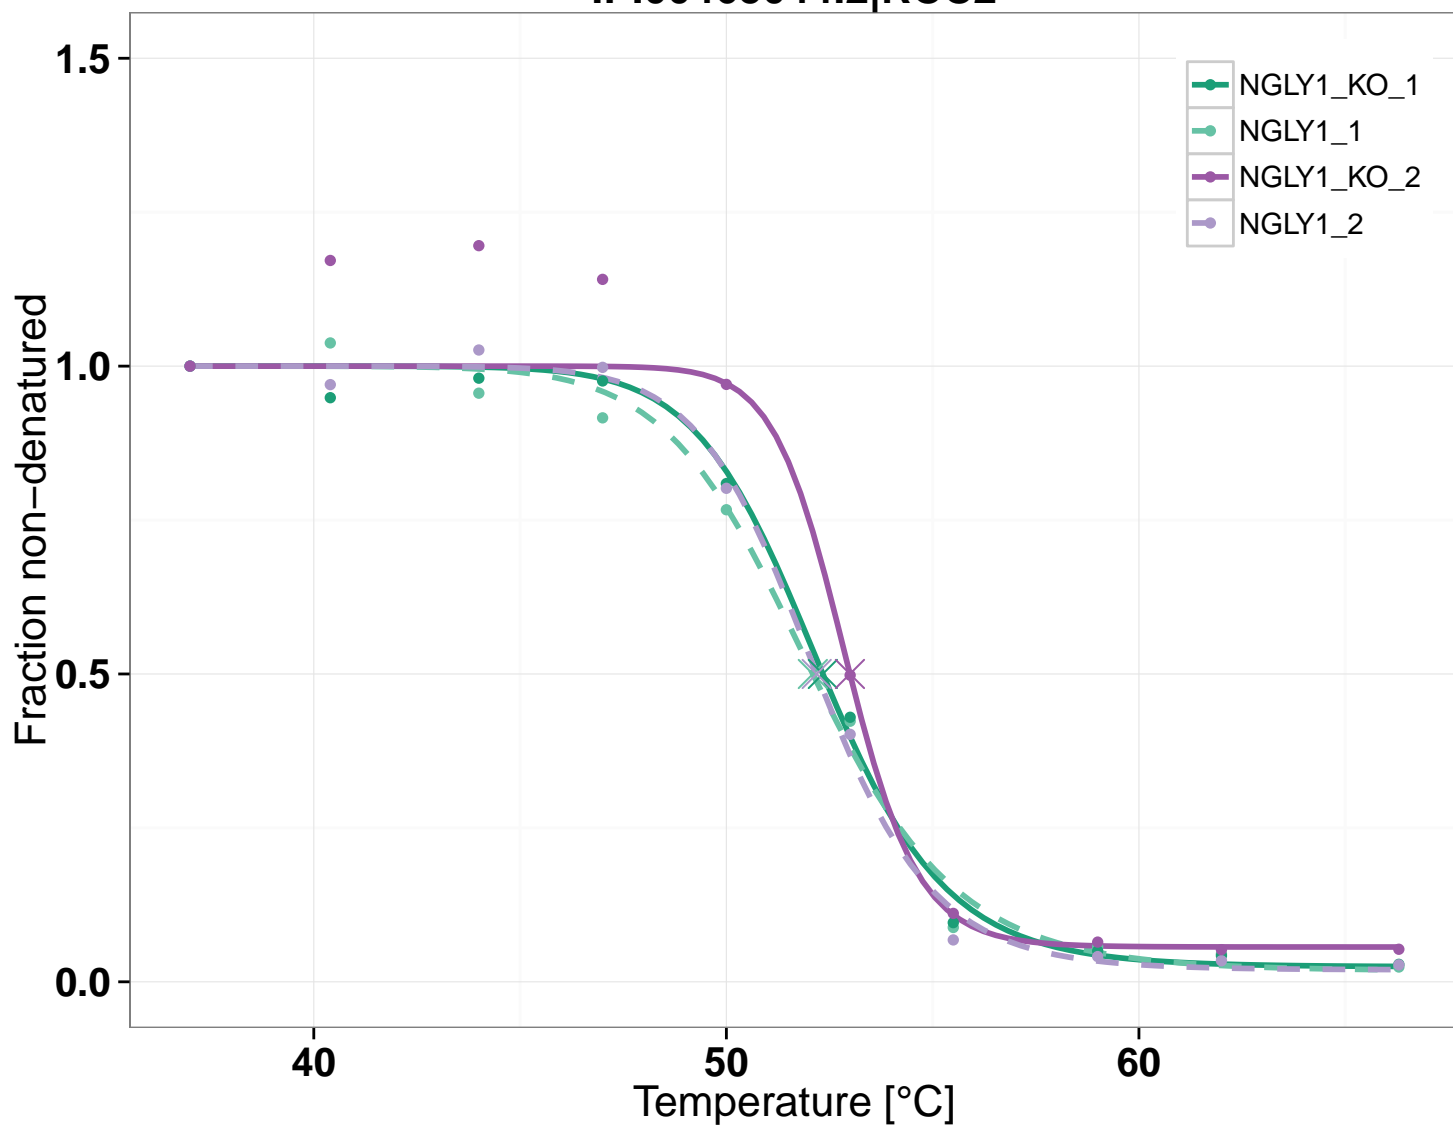

|            | meltPoint | slope | plateau | R2   |
|------------|-----------|-------|---------|------|
| NGLY1_KO_1 | 52.34     | -0.16 | 0.02    | 1    |
| NGLY1_1    | 52.1      | -0.14 | 0.02    | 0.99 |
| NGLY1_KO_2 | 52.99     | -0.27 | 0.06    | 0.96 |
| NGLY1_2    | 52.19     | -0.17 | 0.02    | 1    |

Supplement: Supplementary file 7984 [file 1]

IPI00293260.5|DNAJC10

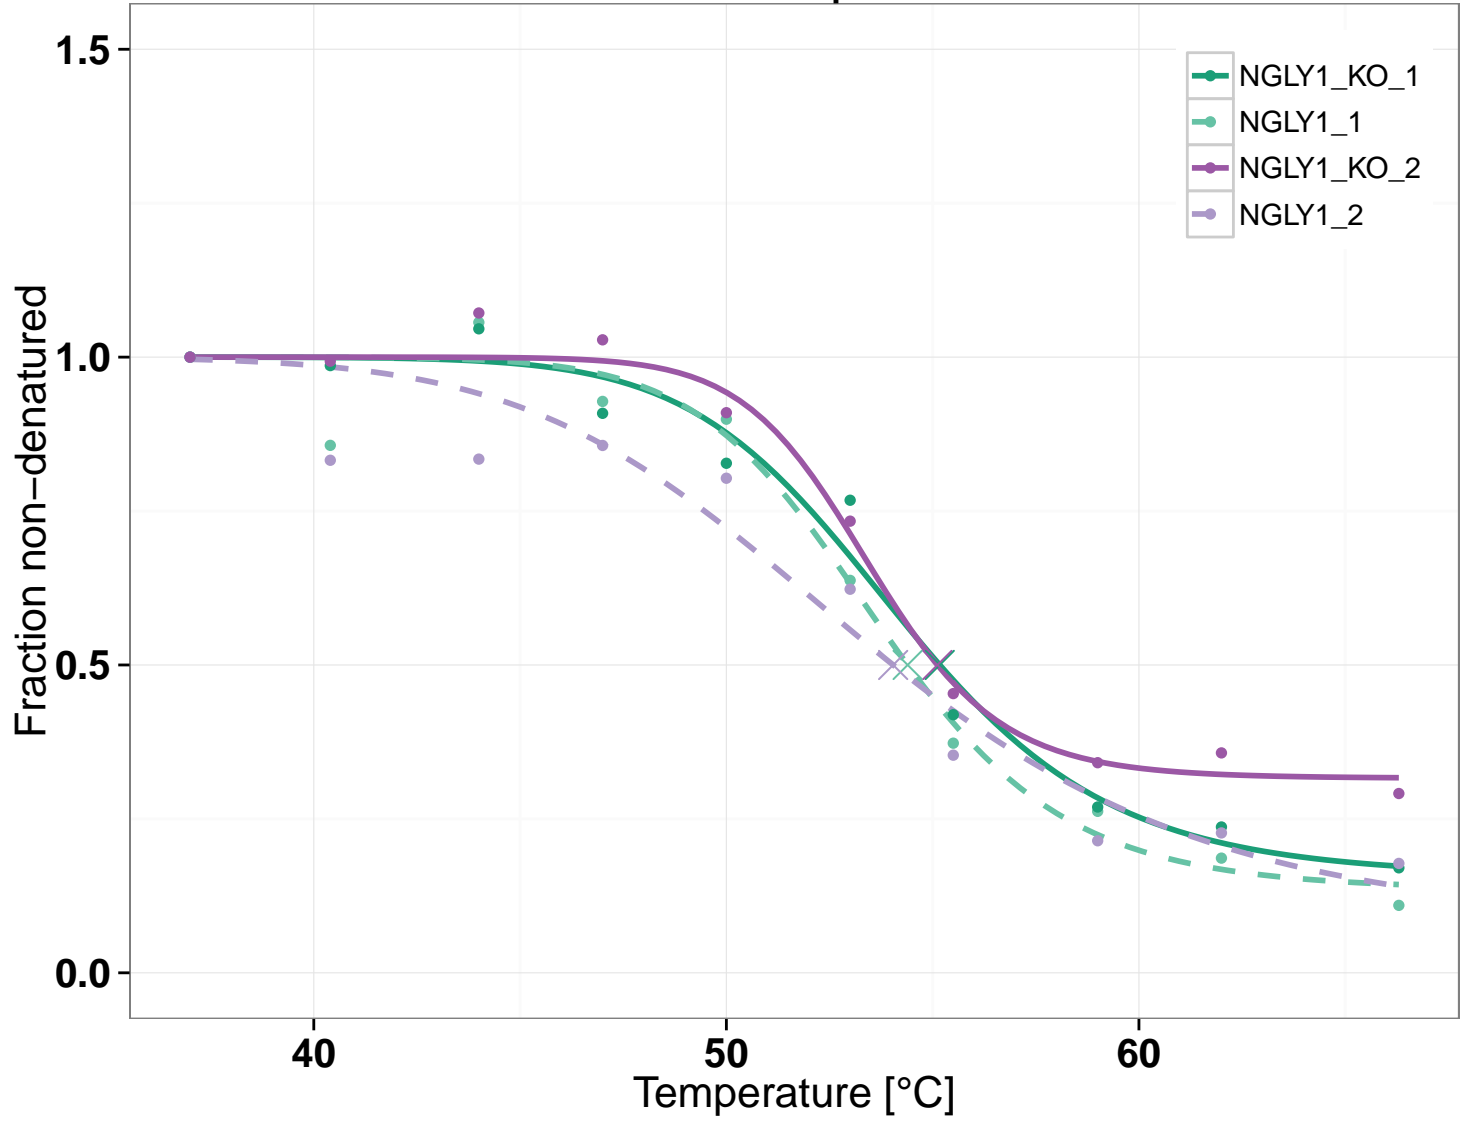

|            | meltPoint | slope  | plateau | R2   |
|------------|-----------|--------|---------|------|
| NGLY1_KO_1 | 55.17     | -0.083 | 0.16    | 0.98 |
| NGLY1_1    | 54.39     | -0.097 | 0.13    | 0.97 |
| NGLY1_KO_2 | 55.12     | -0.11  | 0.32    | 0.99 |
| NGLY1_2    | 54.04     | -0.056 | 0.07    | 0.94 |

Supplement: Supplementary file 7985 [file 1]

# IPI00328706.6|ZNF329

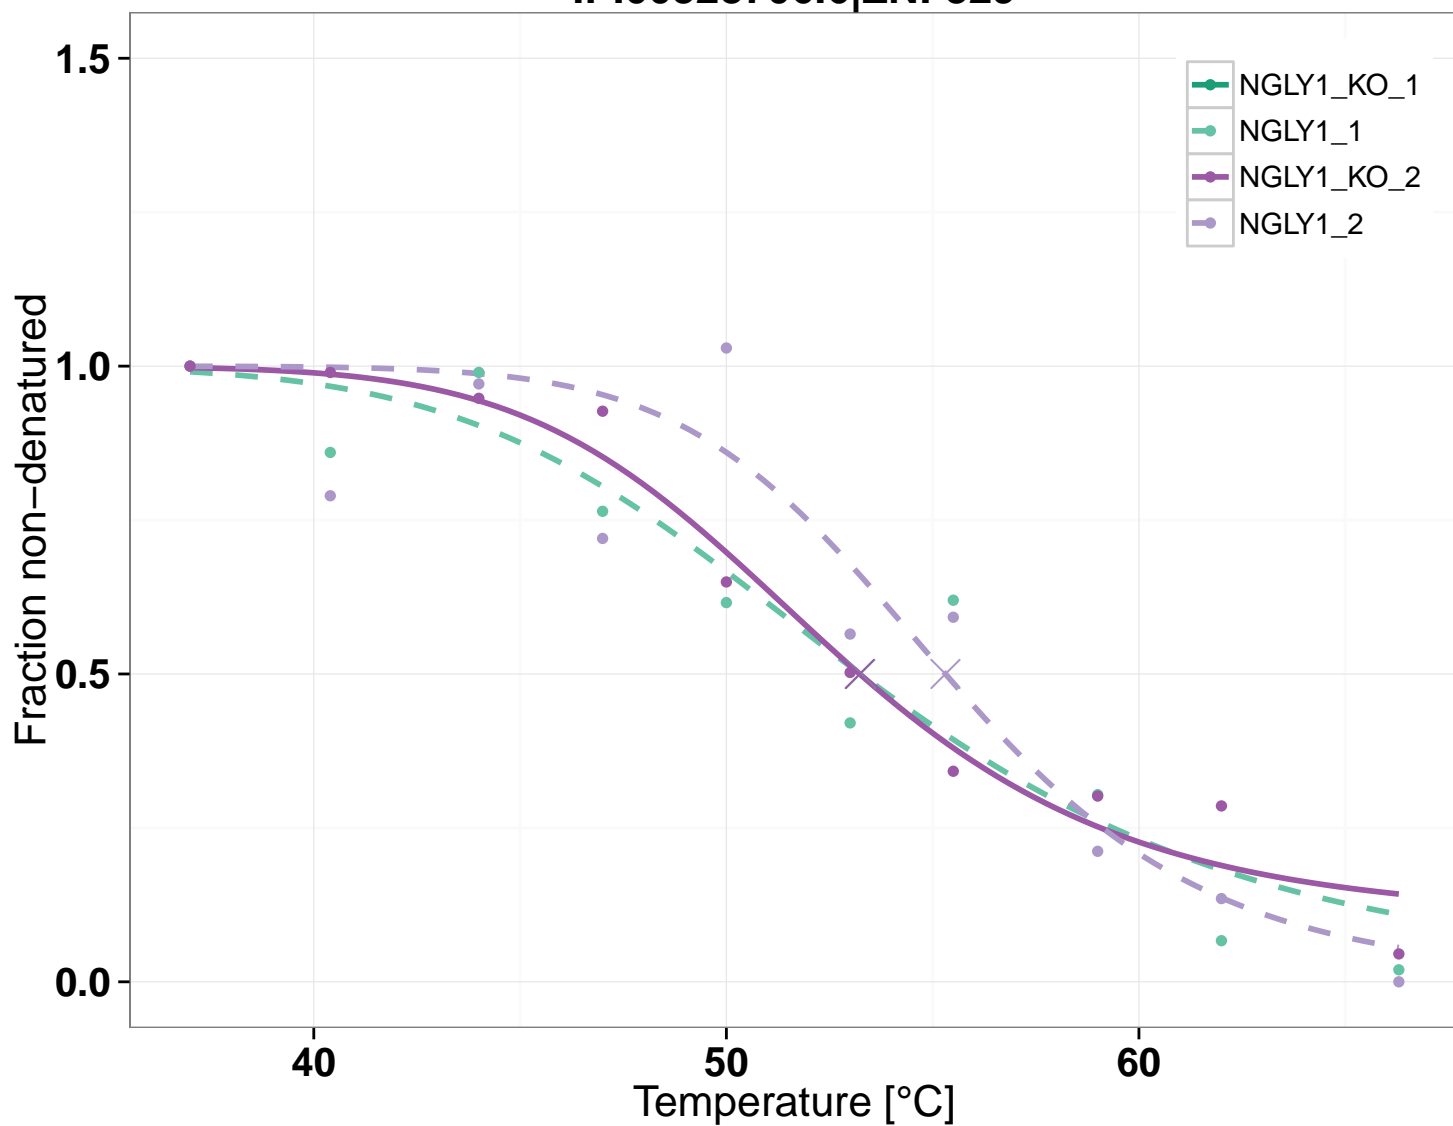

|            | meltPoint | slope  | plateau | R2   |
|------------|-----------|--------|---------|------|
| NGLY1_KO_1 | –         | –      | –       | –    |
| NGLY1_1    | 53.25     | –0.052 | 0       | 0.91 |
| NGLY1_KO_2 | 53.23     | –0.062 | 0.1     | 0.97 |
| NGLY1_2    | 55.31     | –0.078 | 0       | 0.88 |

Supplement: Supplementary file 7986 [file 1]

IPI00336008.1|ALDH5A1

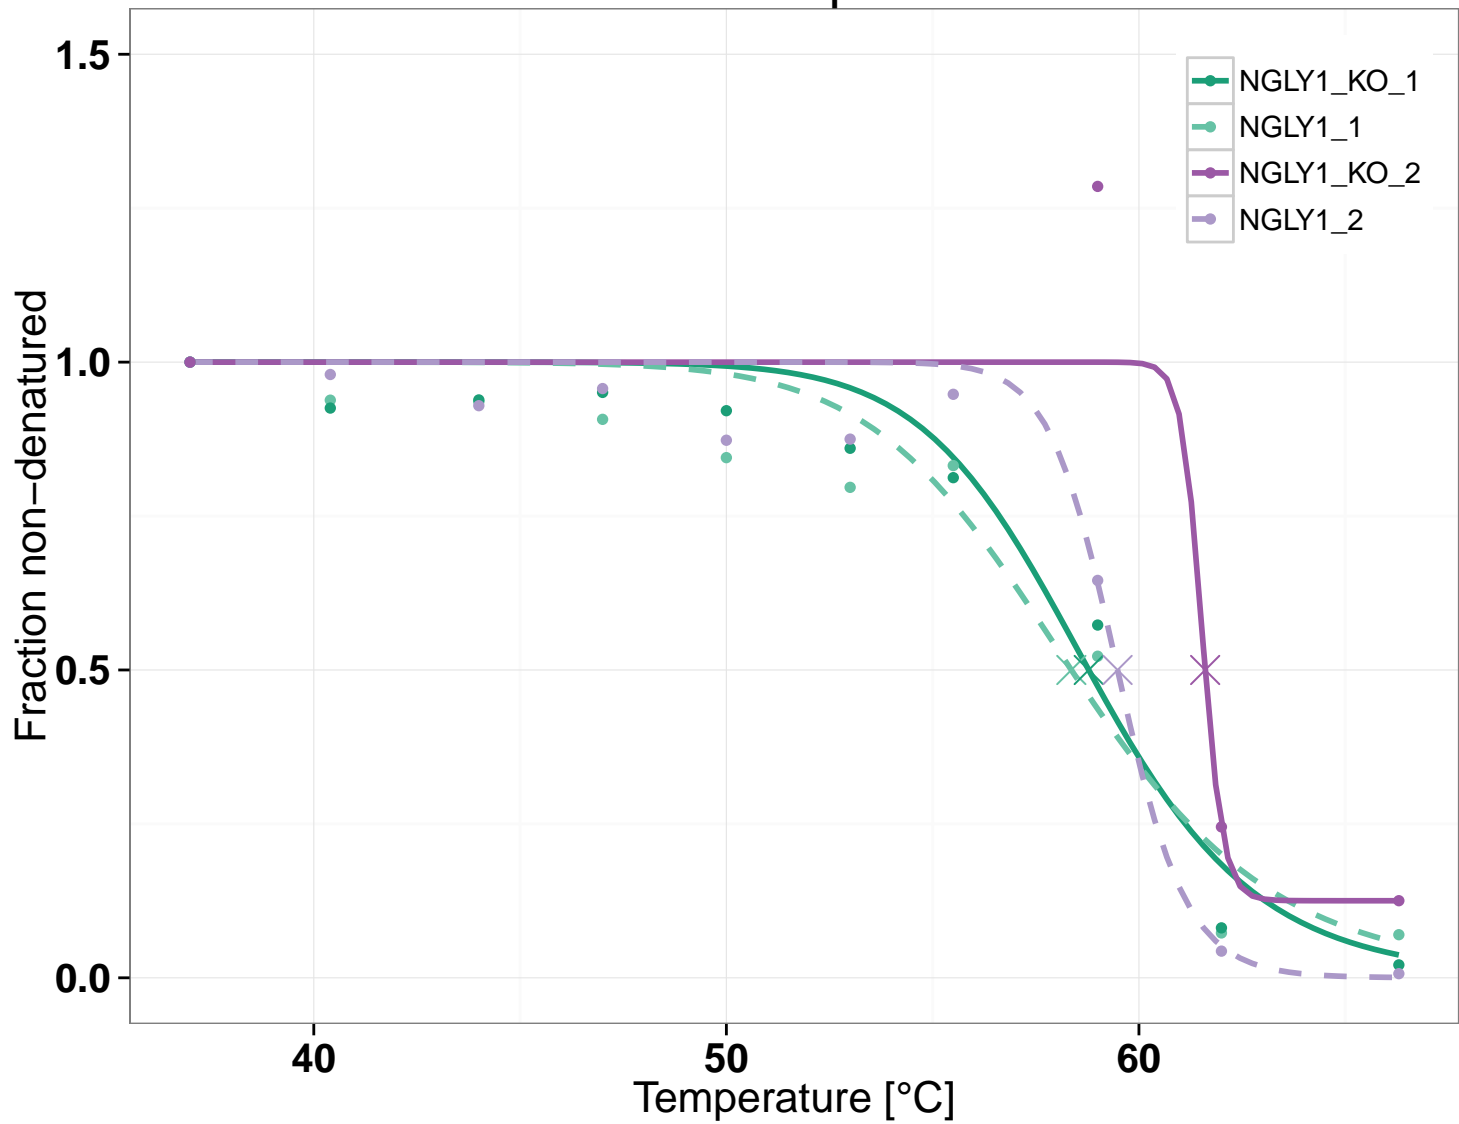

|            | meltPoint | slope | plateau | R2    |
|------------|-----------|-------|---------|-------|
| NGLY1_KO_1 | 58.78     | -0.12 | 0       | 0.96  |
| NGLY1_1    | 58.36     | -0.1  | 0       | 0.93  |
| NGLY1_KO_2 | 61.61     | -0.87 | 0.13    | -0.27 |
| NGLY1_2    | 59.48     | -0.3  | 0       | 0.97  |

Supplement: Supplementary file 7987 [file 1]

# IPI00021076.1|PKP4

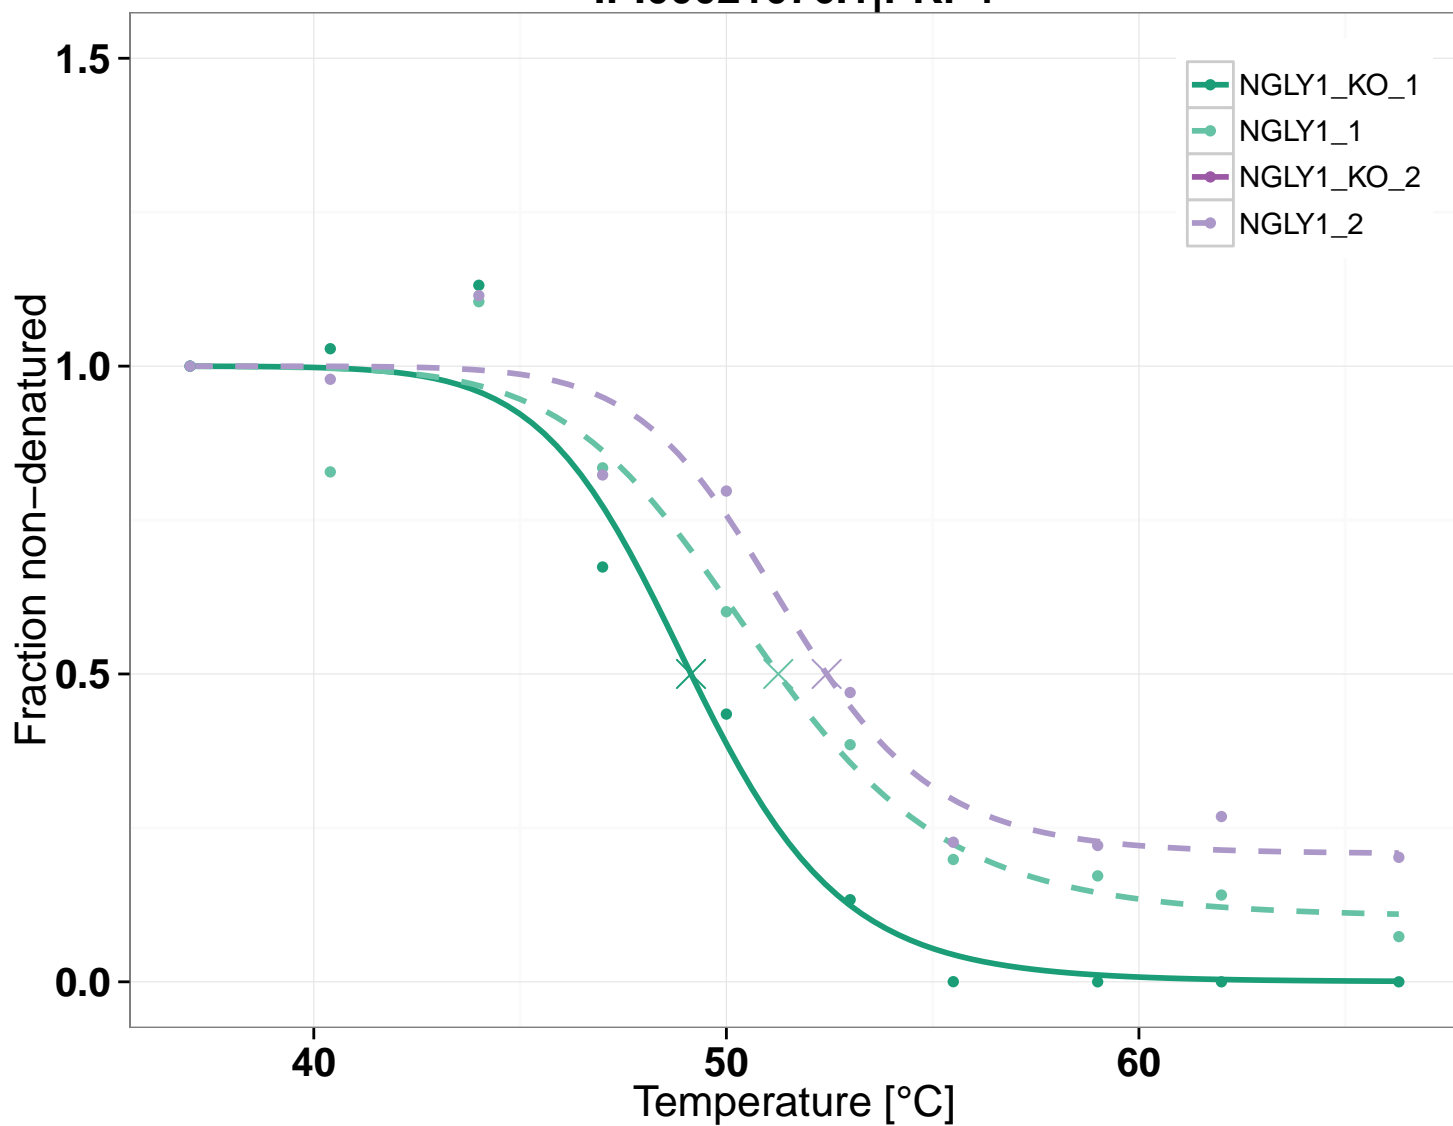

|            | meltPoint | slope  | plateau | R2   |
|------------|-----------|--------|---------|------|
| NGLY1_KO_1 | 49.14     | -0.14  | 0       | 0.98 |
| NGLY1_1    | 51.26     | -0.097 | 0.1     | 0.96 |
| NGLY1_KO_2 | -         | -      | -       | -    |
| NGLY1_2    | 52.43     | -0.11  | 0.21    | 0.97 |

Supplement: Supplementary file 7988 [file 1]

# IPI00216951.2|DARS

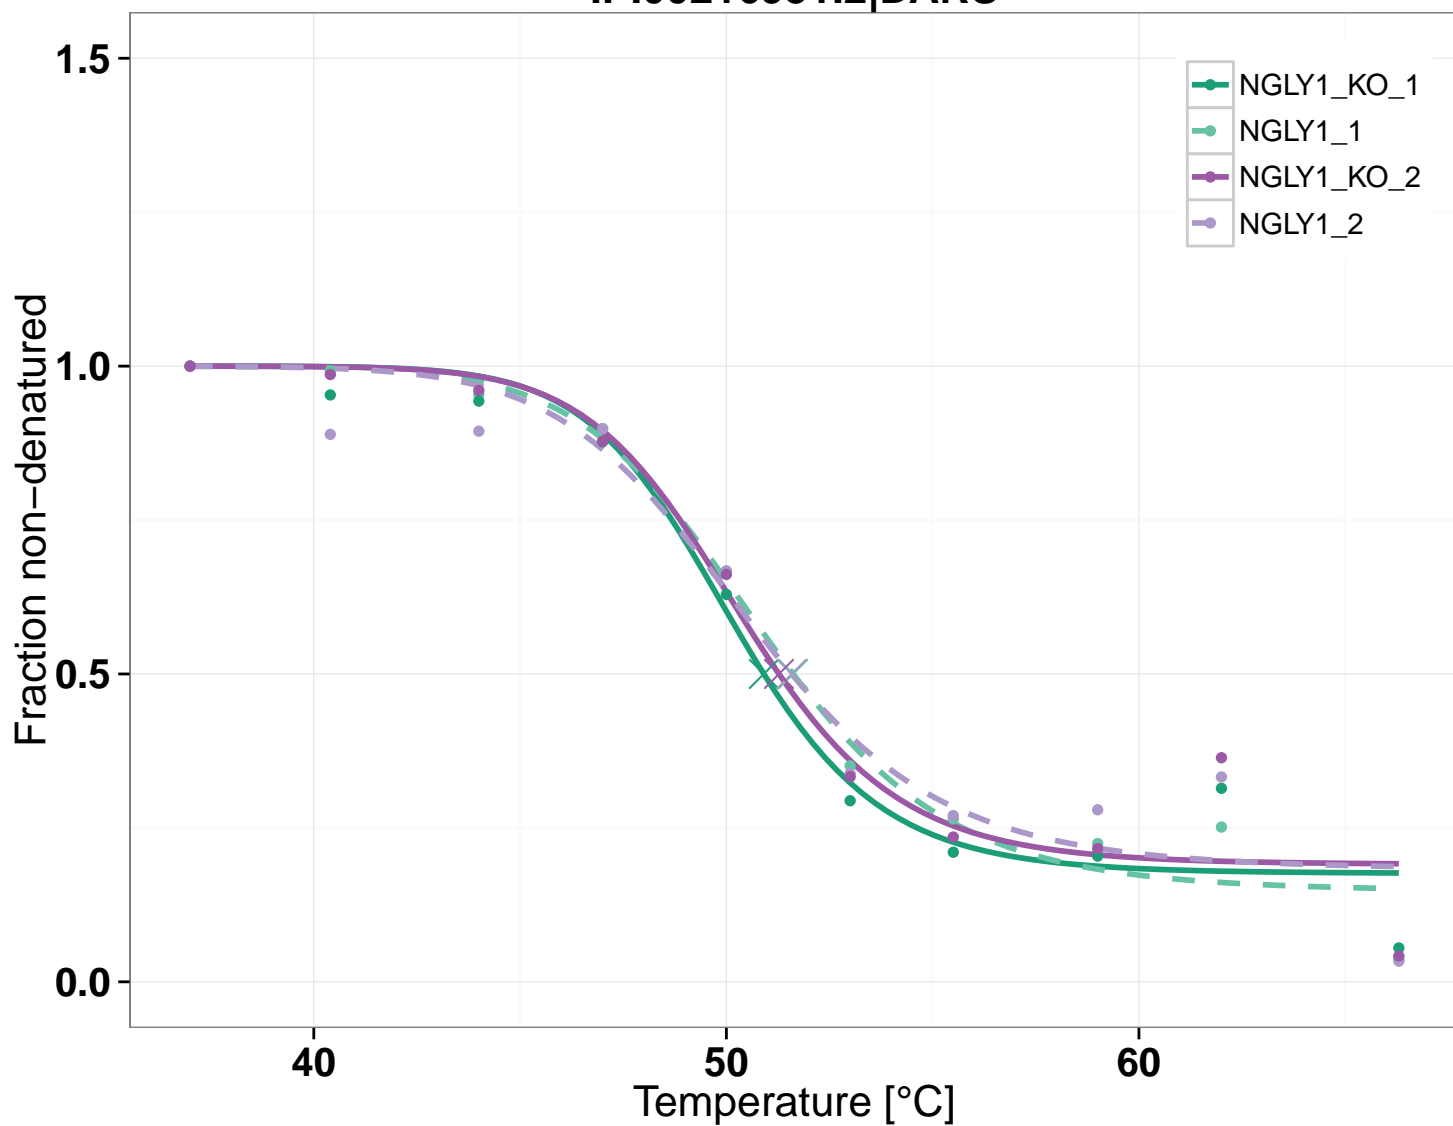

|            | meltPoint | slope  | plateau | R2   |
|------------|-----------|--------|---------|------|
| NGLY1_KO_1 | 50.91     | -0.12  | 0.18    | 0.97 |
| NGLY1_1    | 51.62     | -0.095 | 0.15    | 0.98 |
| NGLY1_KO_2 | 51.27     | -0.11  | 0.19    | 0.96 |
| NGLY1_2    | 51.58     | -0.089 | 0.18    | 0.94 |

Supplement: Supplementary file 7989 [file 1]

# IPI00010154.3|GDI1

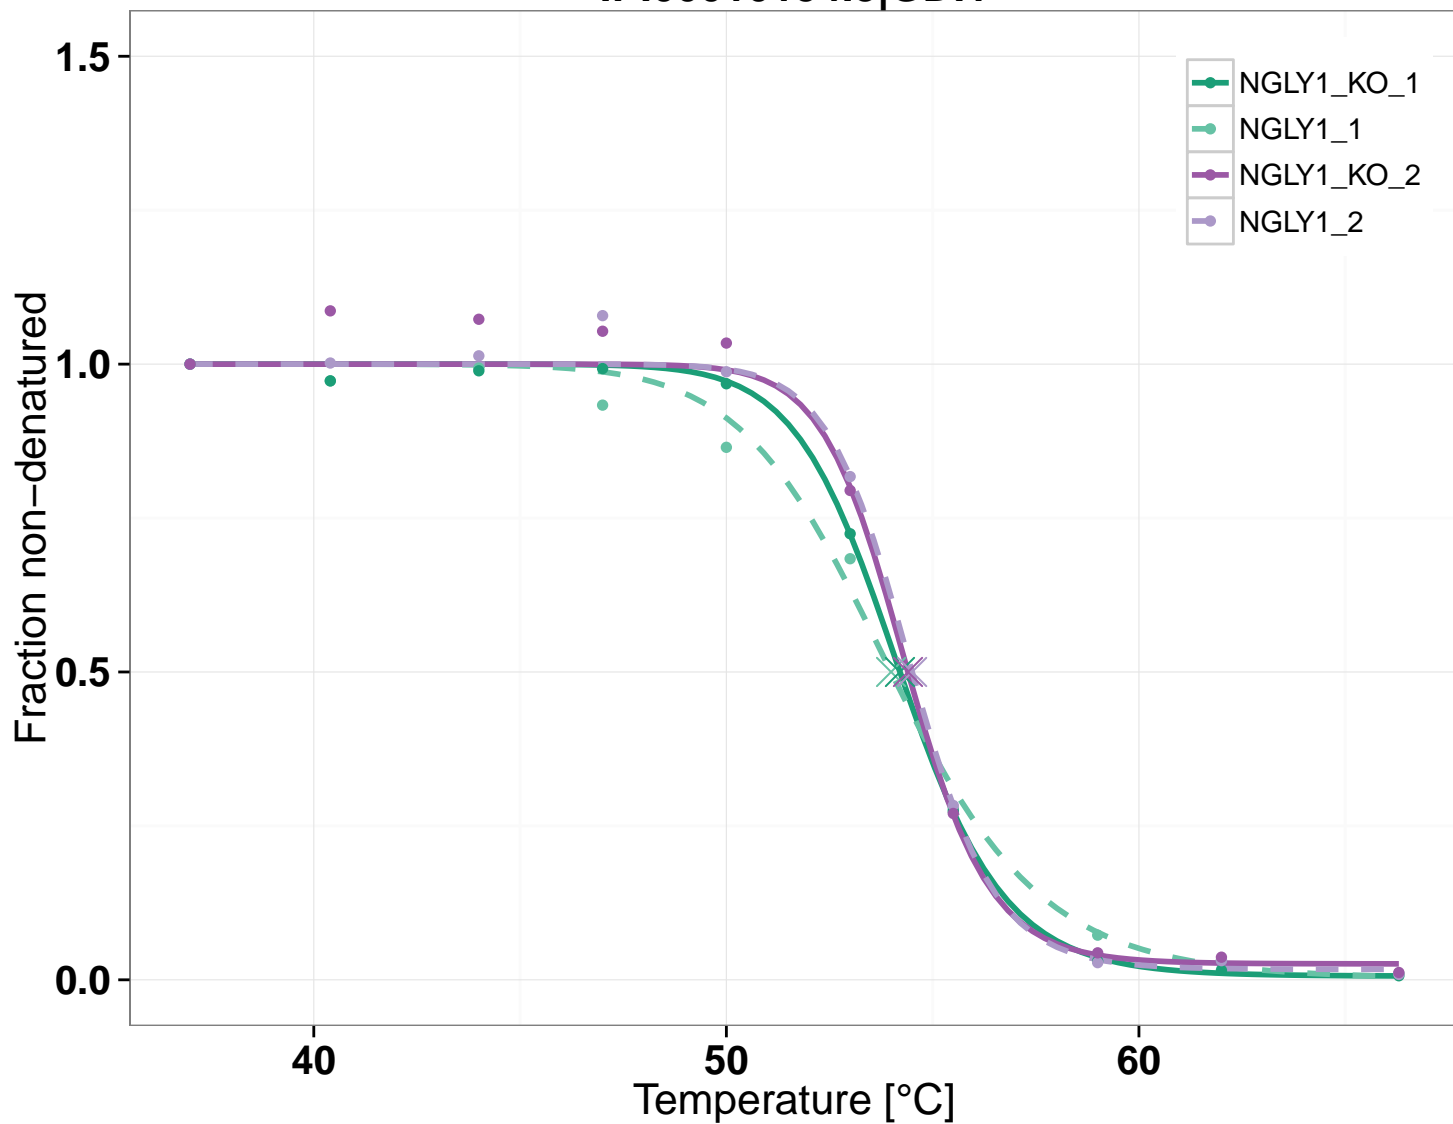

|            | meltPoint | slope | plateau | R2   |
|------------|-----------|-------|---------|------|
| NGLY1_KO_1 | 54.21     | -0.2  | 0.01    | 1    |
| NGLY1_1    | 53.99     | -0.14 | 0       | 0.99 |
| NGLY1_KO_2 | 54.4      | -0.24 | 0.03    | 0.99 |
| NGLY1_2    | 54.5      | -0.24 | 0.02    | 1    |

Supplement: Supplementary file 7990 [file 1]

IPI00156689.3|VAT1

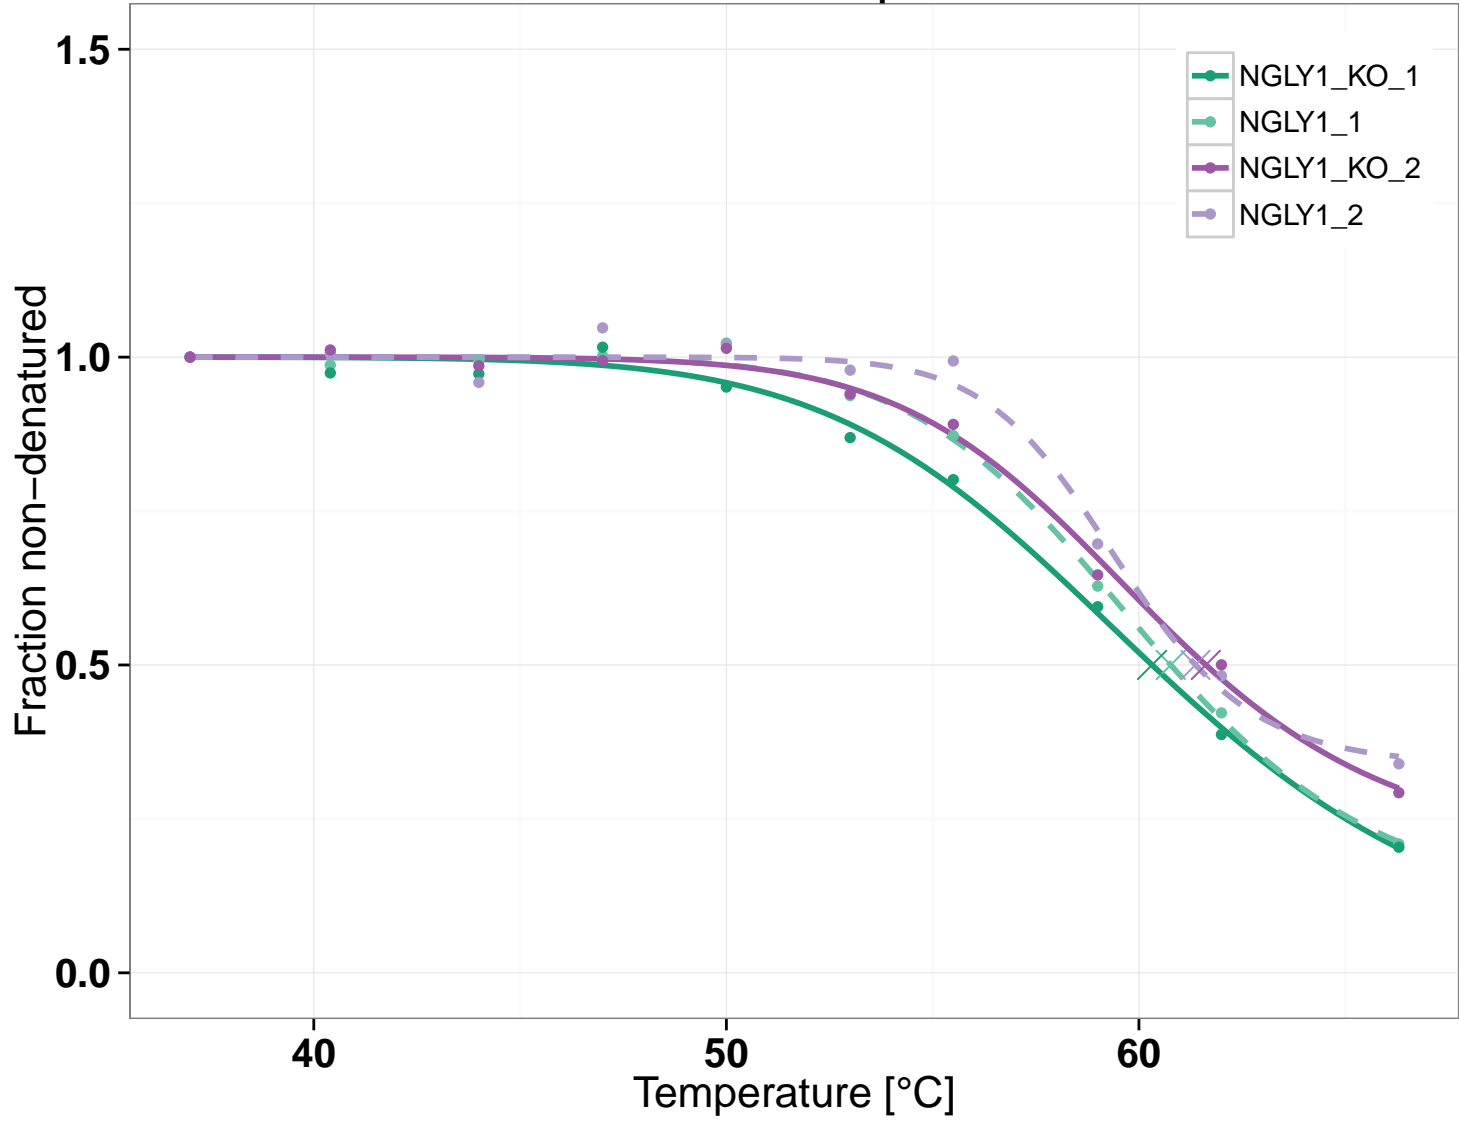

|            | meltPoint | slope  | plateau | R2   |
|------------|-----------|--------|---------|------|
| NGLY1_KO_1 | 60.32     | -0.064 | 0       | 1    |
| NGLY1_1    | 60.77     | -0.079 | 0.1     | 1    |
| NGLY1_KO_2 | 61.62     | -0.068 | 0.19    | 1    |
| NGLY1_2    | 61.37     | -0.1   | 0.34    | 0.99 |

Supplement: Supplementary file 7991 [file 1]

# IPI00376394.4|QSOX2

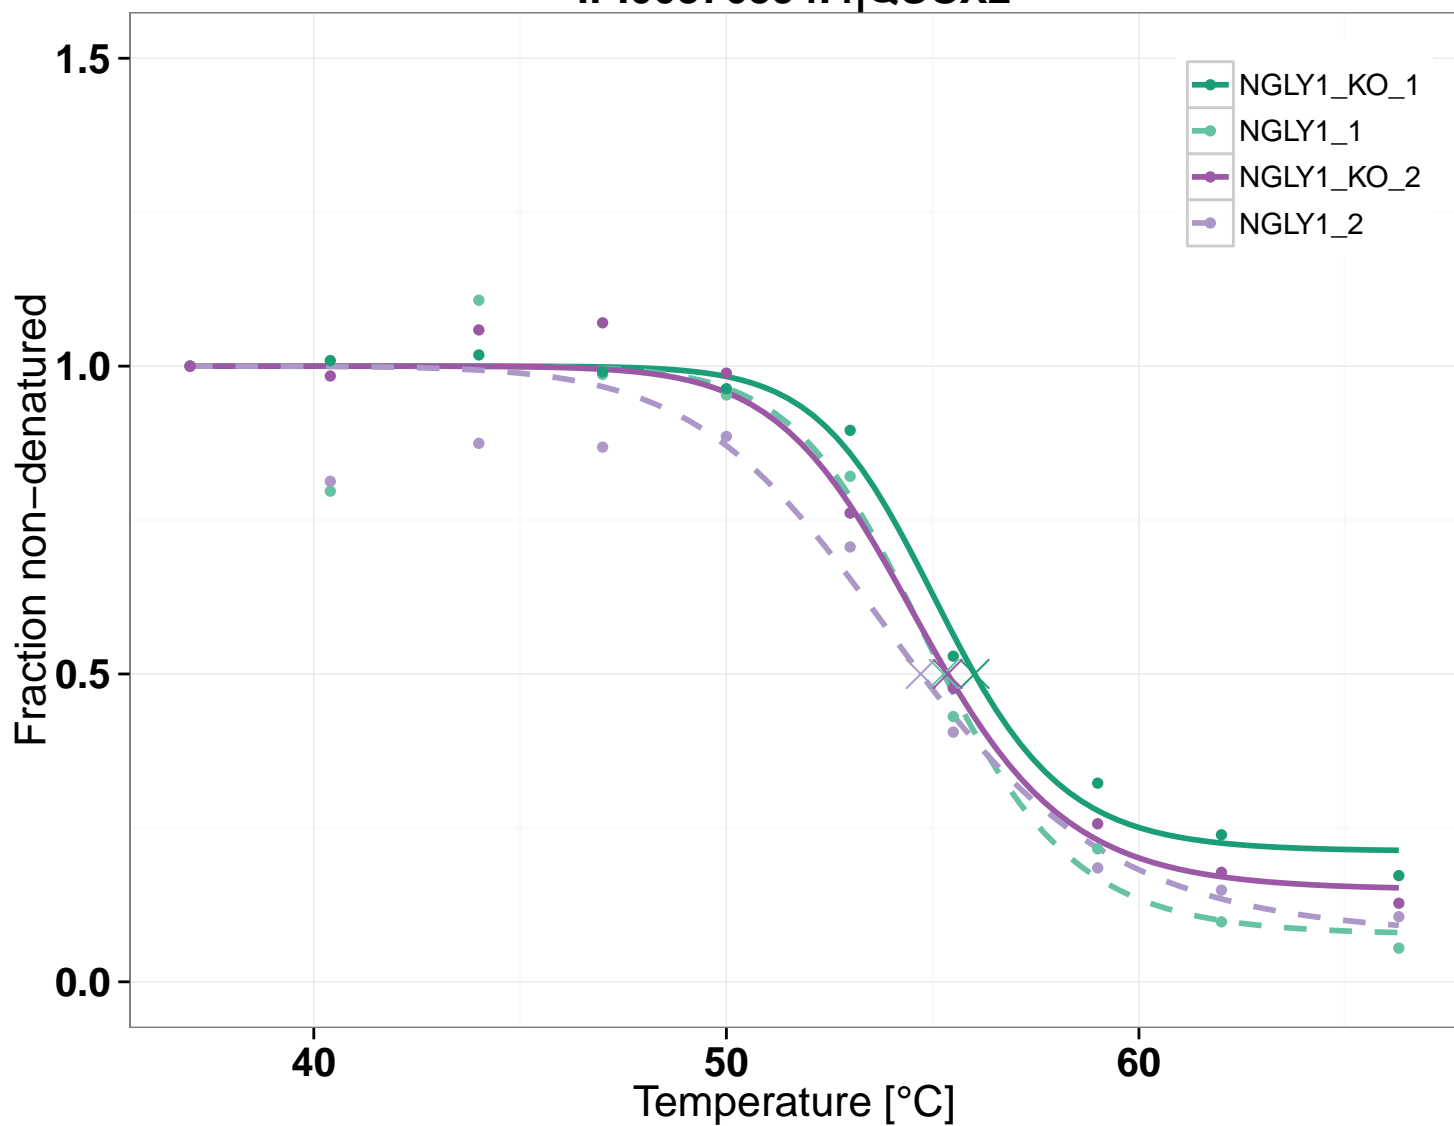

|            | meltPoint | slope  | plateau | R2   |
|------------|-----------|--------|---------|------|
| NGLY1_KO_1 | 56.01     | -0.13  | 0.21    | 0.99 |
| NGLY1_1    | 55.27     | -0.14  | 0.08    | 0.96 |
| NGLY1_KO_2 | 55.36     | -0.12  | 0.15    | 0.99 |
| NGLY1_2    | 54.71     | -0.091 | 0.07    | 0.94 |

Supplement: Supplementary file 7992 [file 1]

IPI00854724.1|SAC3D1

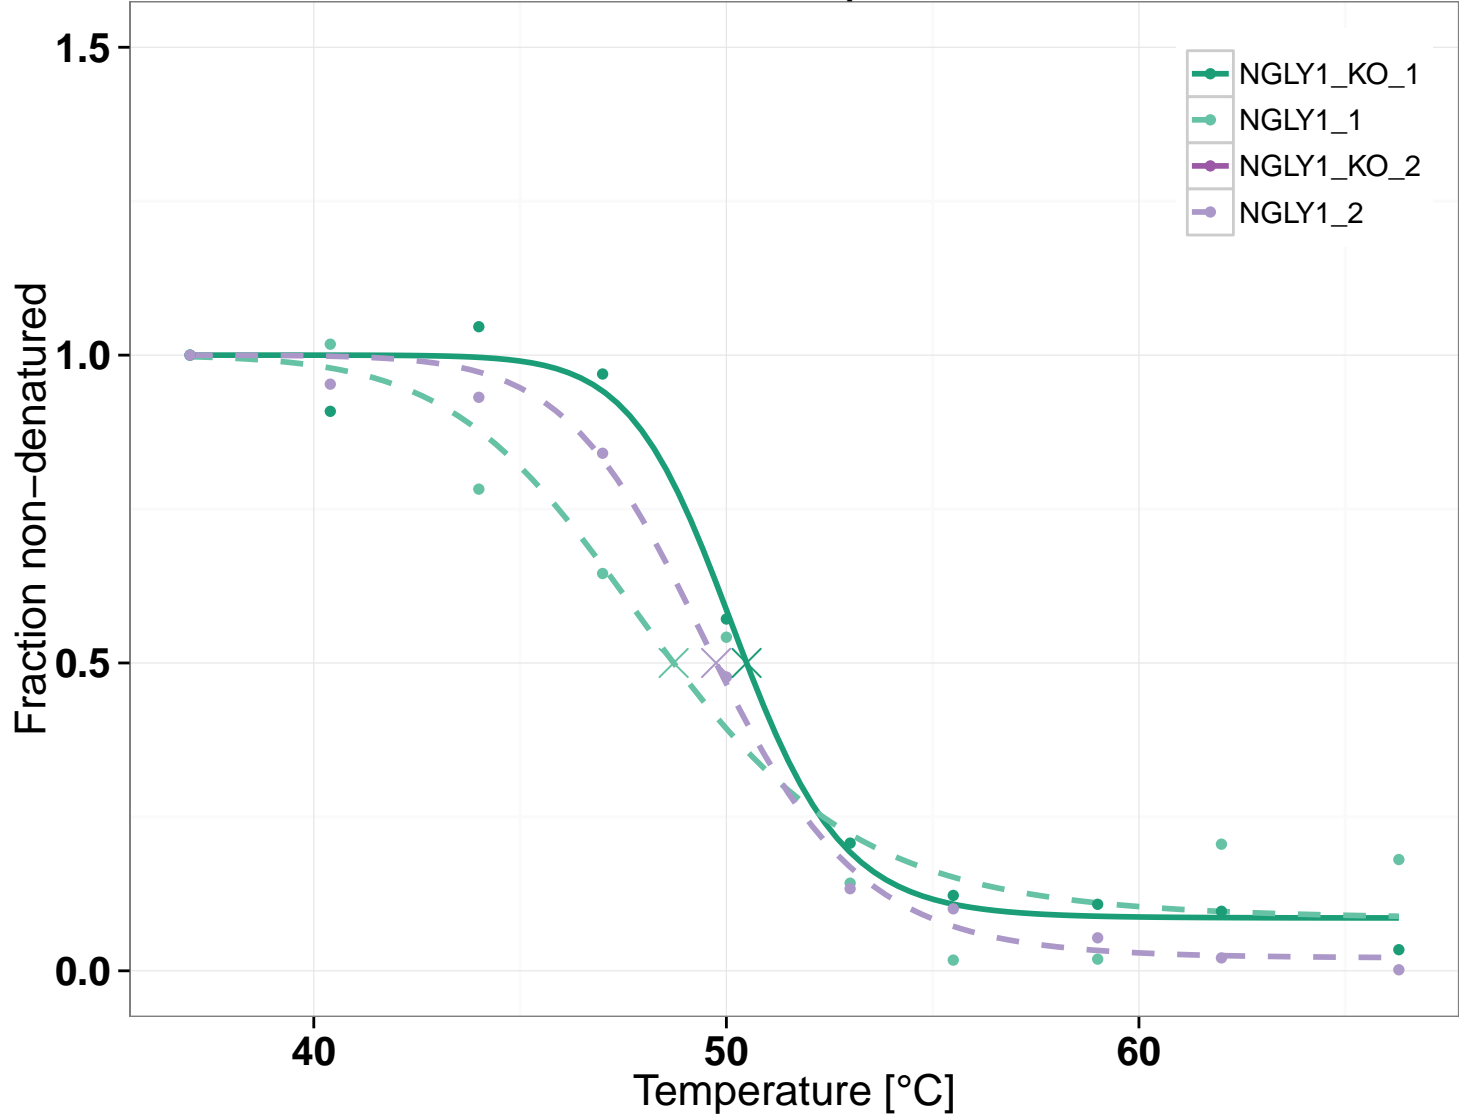

|            | meltPoint | slope  | plateau | R2   |
|------------|-----------|--------|---------|------|
| NGLY1_KO_1 | 50.49     | -0.18  | 0.09    | 0.99 |
| NGLY1_1    | 48.72     | -0.093 | 0.08    | 0.94 |
| NGLY1_KO_2 | -         | -      | -       | -    |
| NGLY1_2    | 49.75     | -0.14  | 0.02    | 1    |

Supplement: Supplementary file 7993 [file 1]

IPI00853221.1|C15ORF42

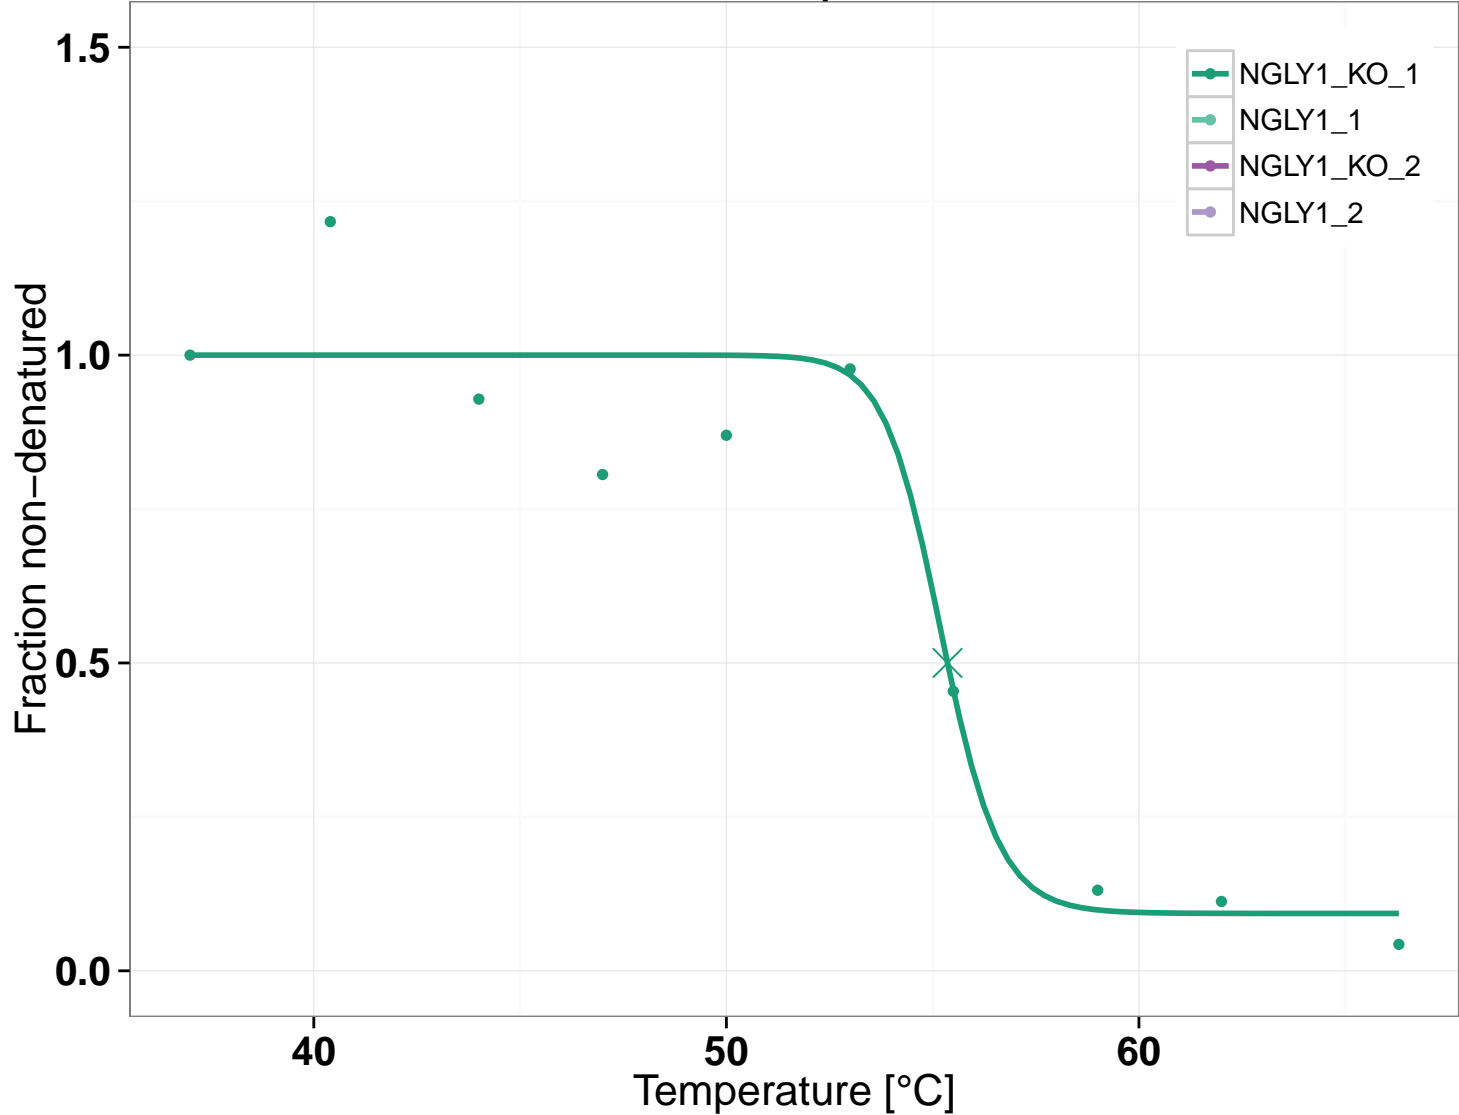

|            | meltPoint | slope | plateau | R2   |
|------------|-----------|-------|---------|------|
| NGLY1_KO_1 | 55.36     | -0.32 | 0.09    | 0.93 |
| NGLY1_1    | -         | -     | -       | -    |
| NGLY1_KO_2 | -         | -     | -       | -    |
| NGLY1_2    | -         | -     | -       | -    |

Supplement: Supplementary file 7994 [file 1]

IPI00000821.2|MRPL16

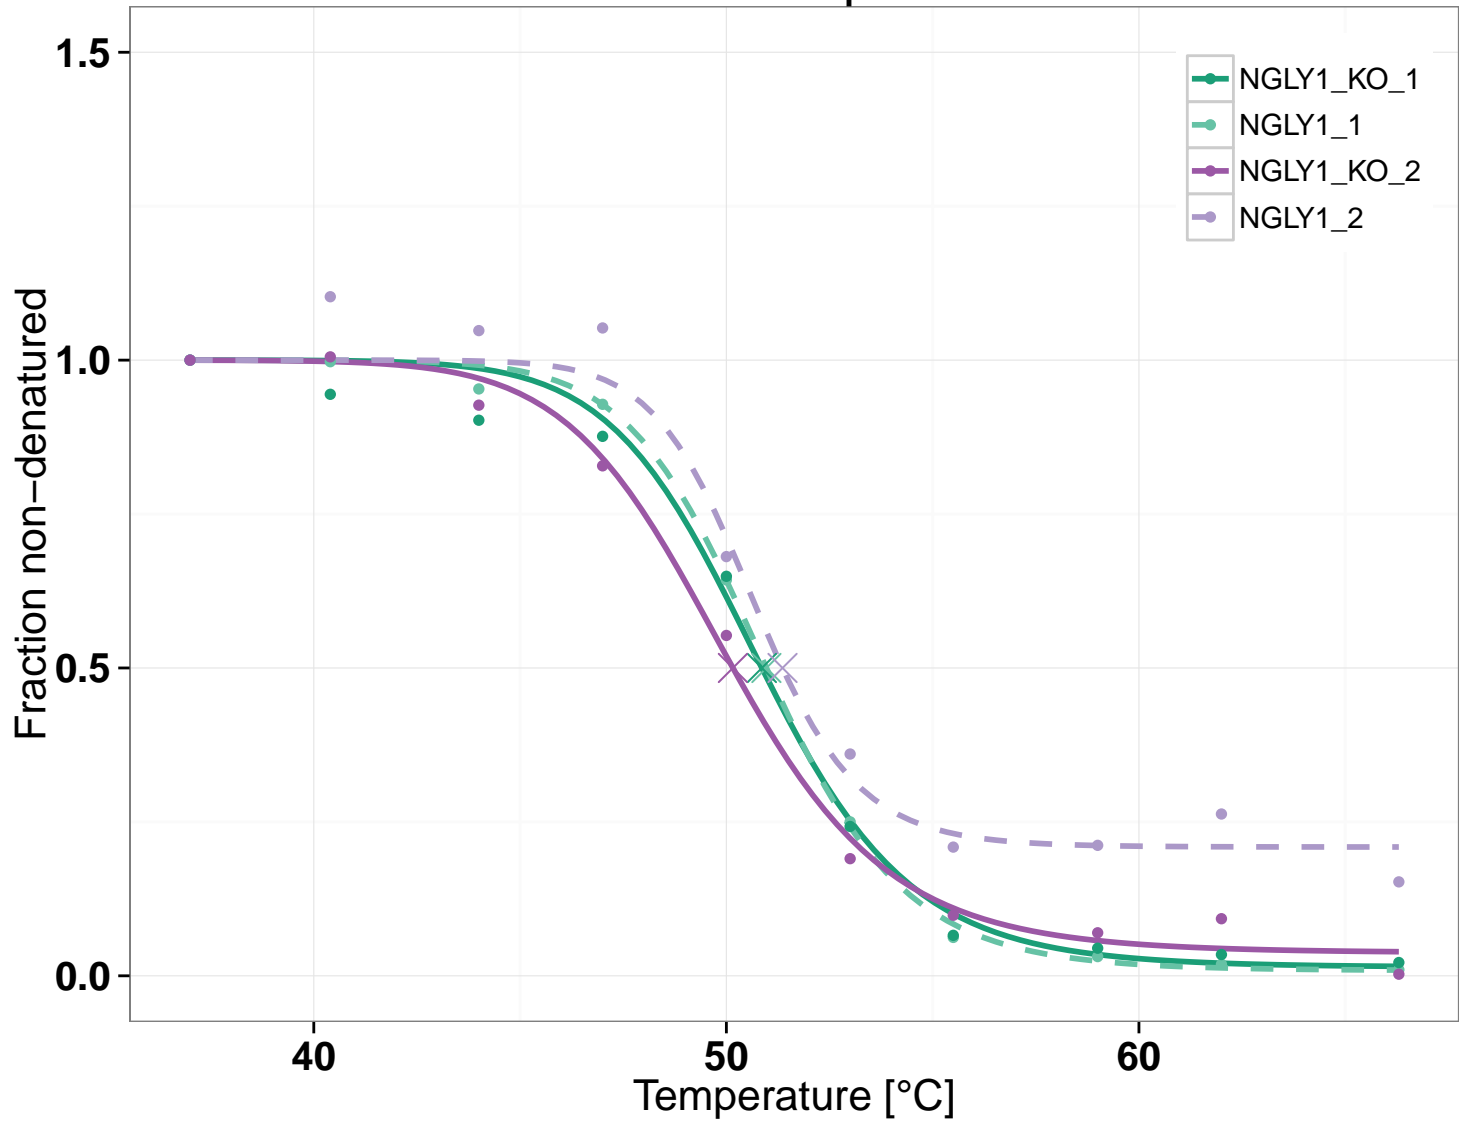

|            | meltPoint | slope | plateau | R2   |
|------------|-----------|-------|---------|------|
| NGLY1_KO_1 | 50.86     | -0.13 | 0.01    | 0.99 |
| NGLY1_1    | 50.97     | -0.15 | 0.01    | 1    |
| NGLY1_KO_2 | 50.16     | -0.12 | 0.04    | 0.99 |
| NGLY1_2    | 51.36     | -0.16 | 0.21    | 0.98 |

Supplement: Supplementary file 7995 [file 1]

IPI00291665.5|MGC16169

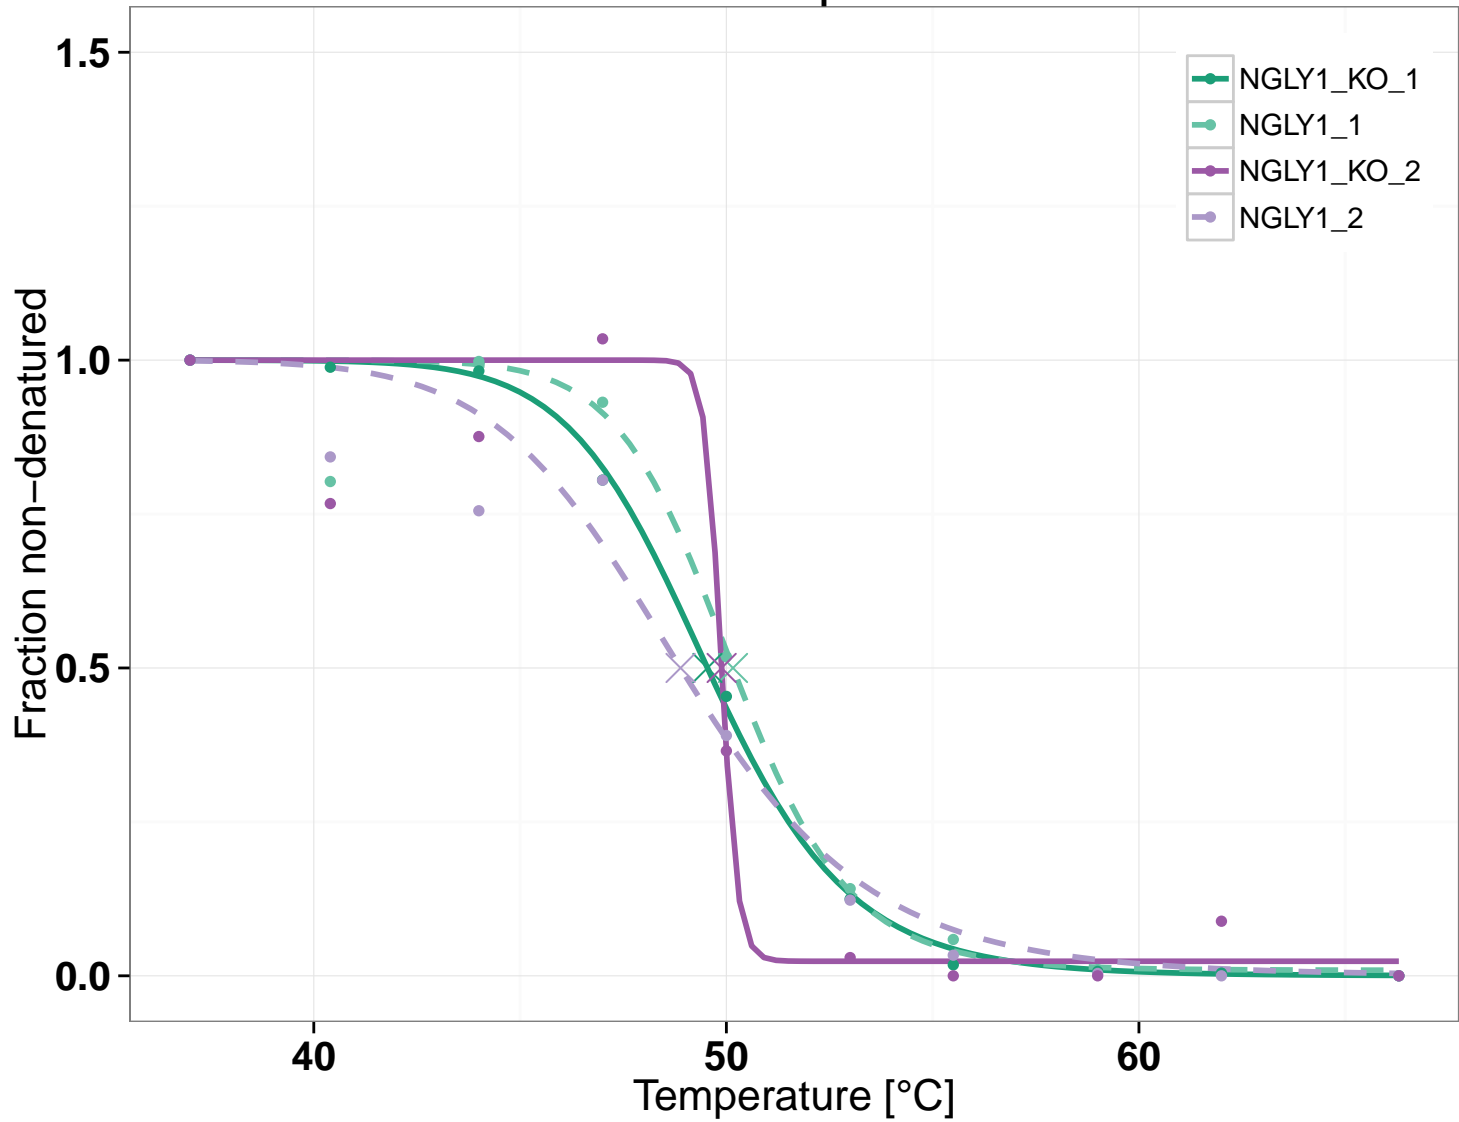

|            | meltPoint | slope | plateau | R2   |
|------------|-----------|-------|---------|------|
| NGLY1_KO_1 | 49.54     | -0.15 | 0       | 1    |
| NGLY1_1    | 50.16     | -0.18 | 0.01    | 0.98 |
| NGLY1_KO_2 | 49.89     | -1.2  | 0.02    | 0.96 |
| NGLY1_2    | 48.89     | -0.11 | 0       | 0.96 |

Supplement: Supplementary file 7996 [file 1]

# IPI00477949.1|ZMYM4

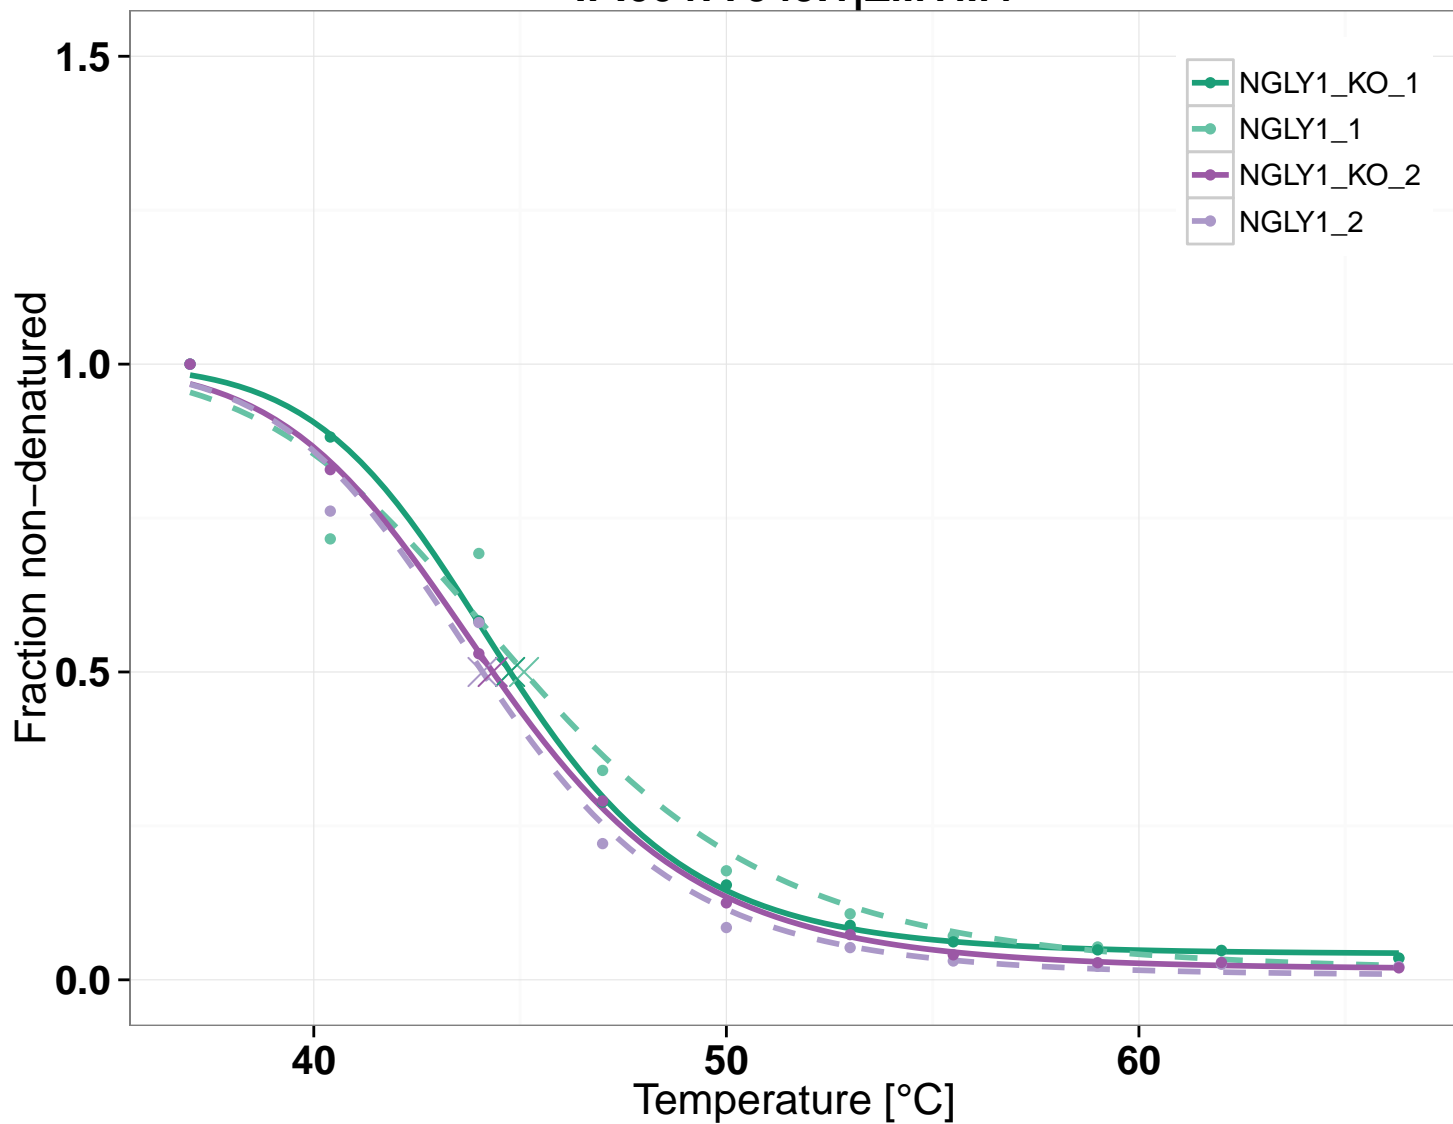

|            | meltPoint | slope  | plateau | R2   |
|------------|-----------|--------|---------|------|
| NGLY1_KO_1 | 44.76     | -0.11  | 0.04    | 1    |
| NGLY1_1    | 45.1      | -0.078 | 0.01    | 0.97 |
| NGLY1_KO_2 | 44.34     | -0.097 | 0.02    | 1    |
| NGLY1_2    | 44.09     | -0.1   | 0.01    | 0.99 |

Supplement: Supplementary file 7997 [file 1]

IPI00022471.7|HMHA1

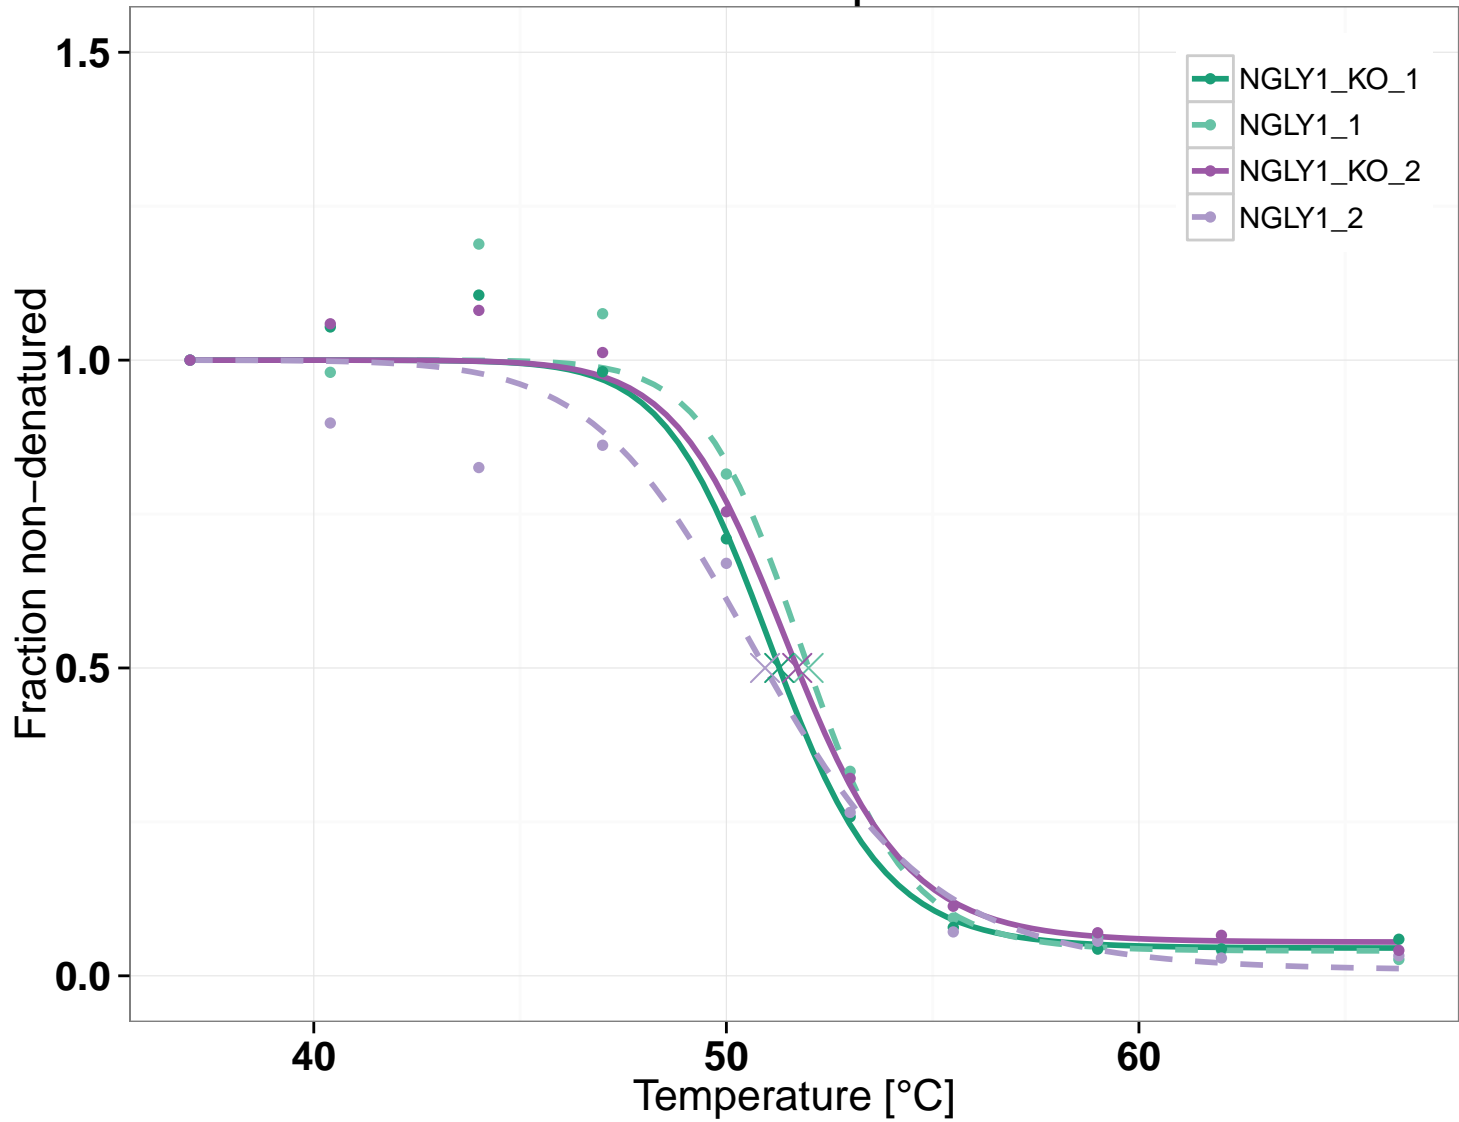

|            | meltPoint | slope | plateau | R2   |
|------------|-----------|-------|---------|------|
| NGLY1_KO_1 | 51.28     | -0.18 | 0.05    | 0.99 |
| NGLY1_1    | 51.99     | -0.19 | 0.04    | 0.98 |
| NGLY1_KO_2 | 51.72     | -0.17 | 0.05    | 0.99 |
| NGLY1_2    | 50.94     | -0.12 | 0.01    | 0.97 |

Supplement: Supplementary file 7998 [file 1]

IPI00022654.4|TM2D3

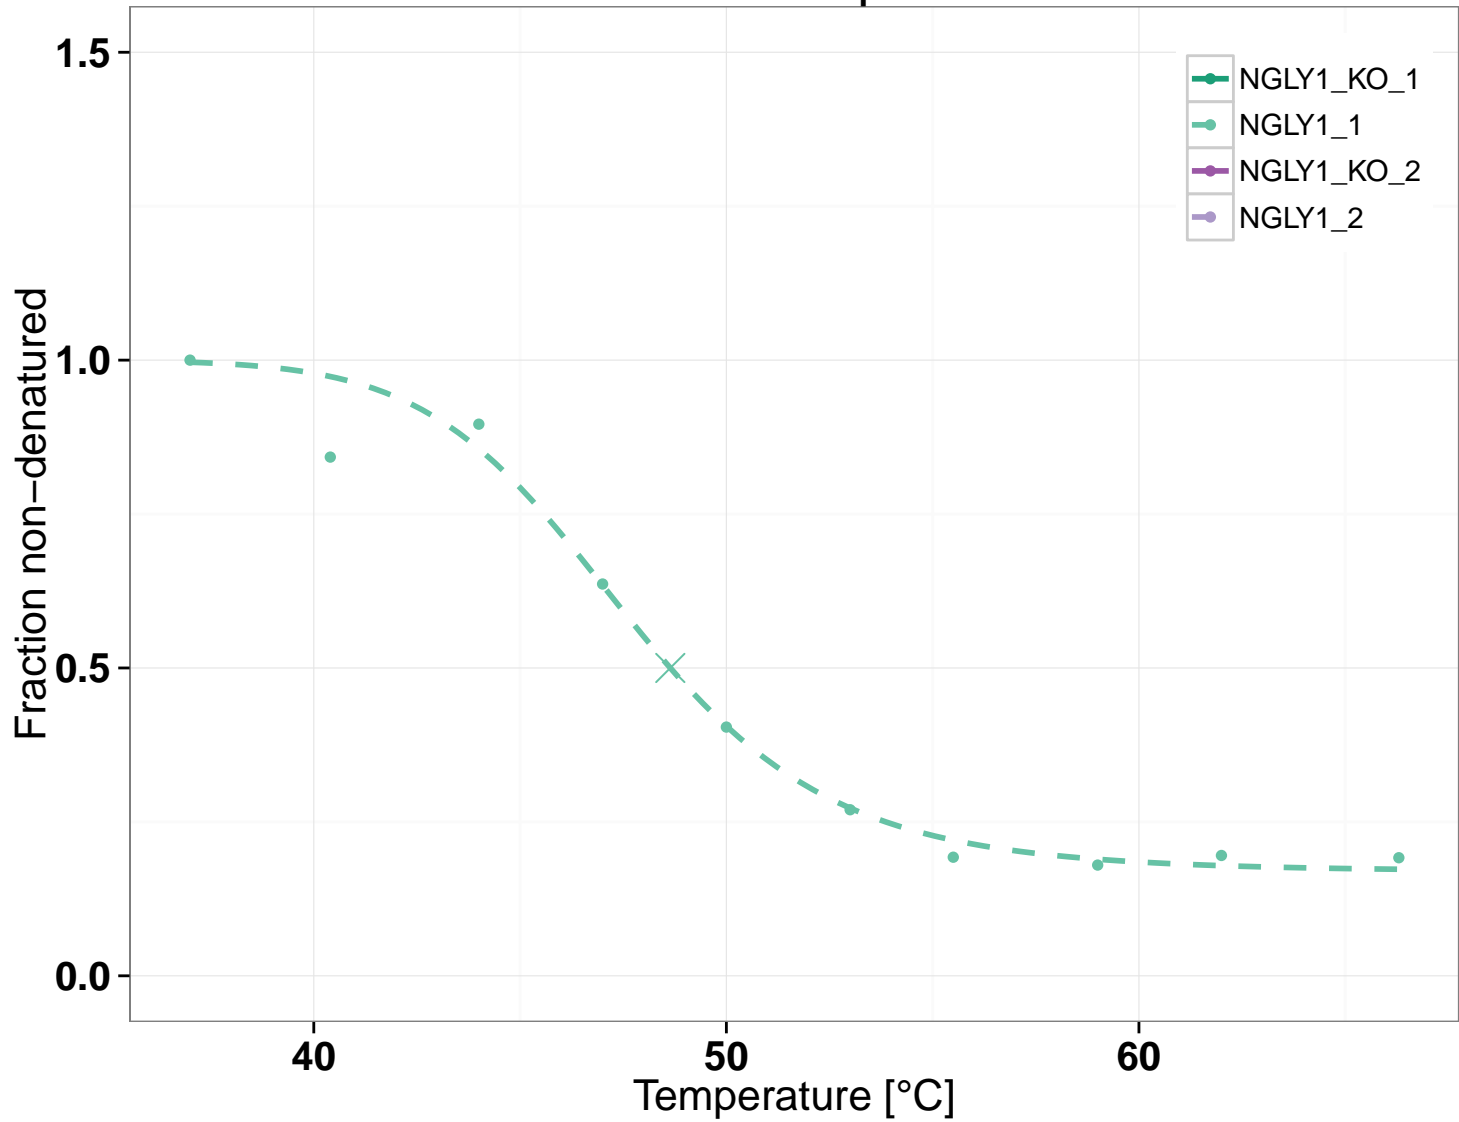

|            | meltPoint | slope  | plateau | R2   |
|------------|-----------|--------|---------|------|
| NGLY1_KO_1 | -         | -      | -       | -    |
| NGLY1_1    | 48.64     | -0.084 | 0.17    | 0.98 |
| NGLY1_KO_2 | -         | -      | -       | -    |
| NGLY1_2    | -         | -      | -       | -    |

Supplement: Supplementary file 7999 [file 1]

IPI00029468.1|ACTR1A

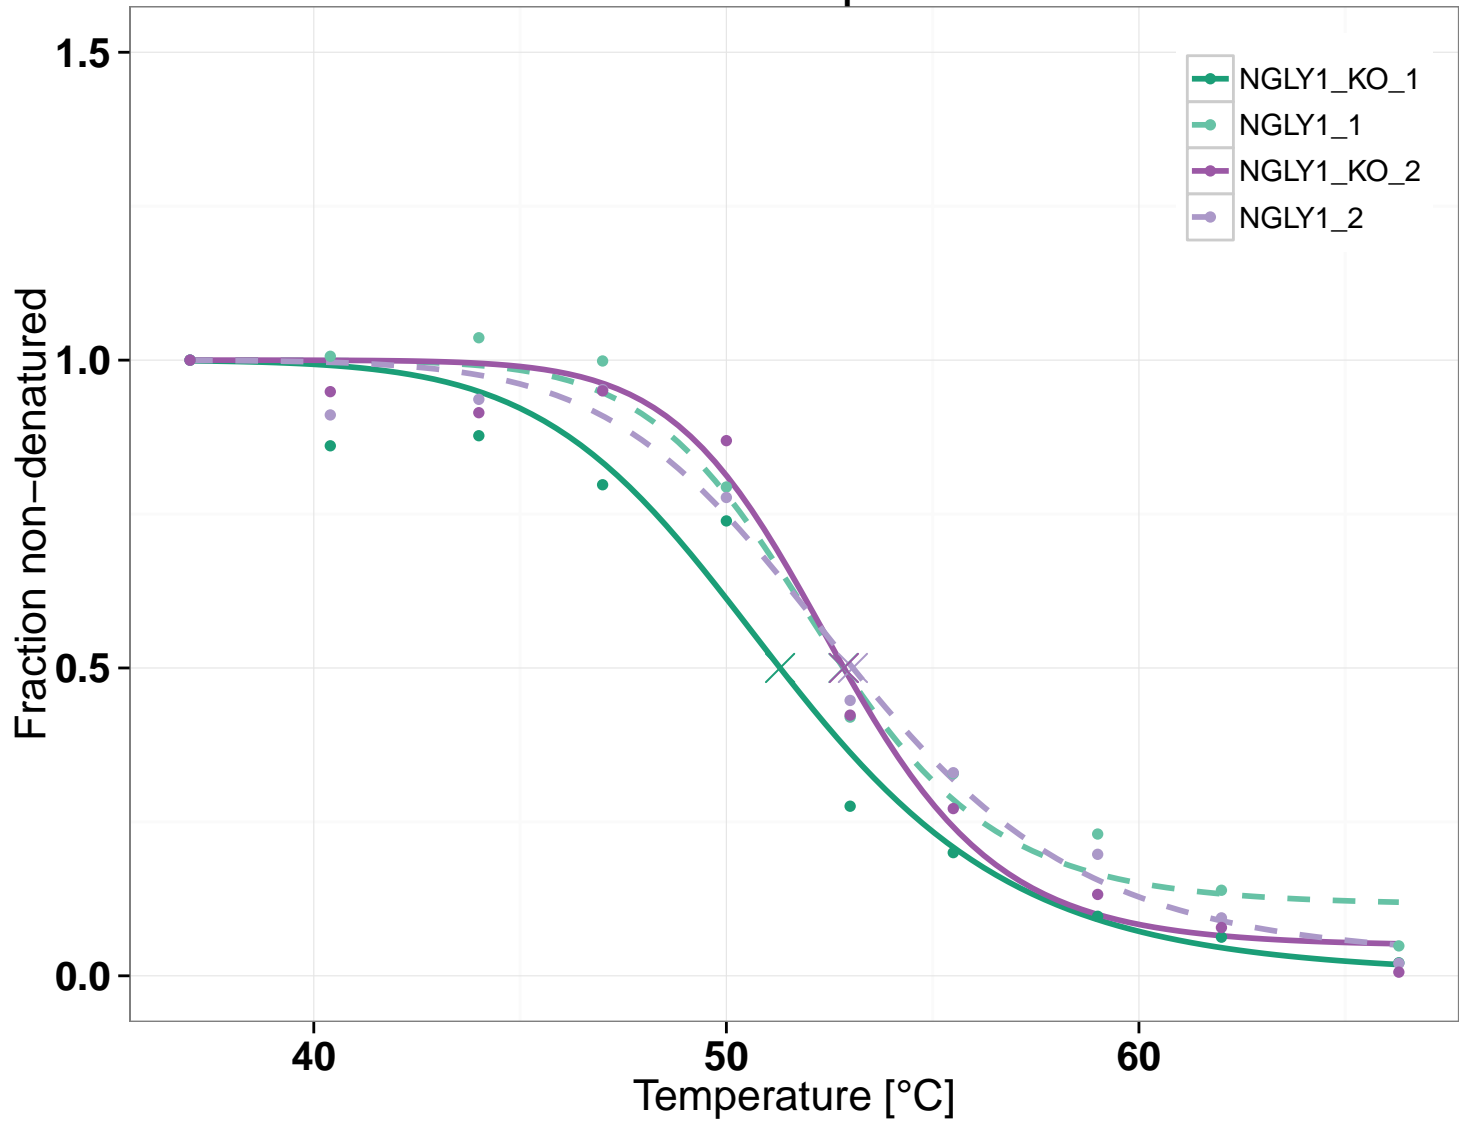

|            | meltPoint | slope  | plateau | R2   |
|------------|-----------|--------|---------|------|
| NGLY1_KO_1 | 51.3      | -0.087 | 0       | 0.97 |
| NGLY1_1    | 52.83     | -0.1   | 0.11    | 0.99 |
| NGLY1_KO_2 | 52.85     | -0.12  | 0.05    | 0.99 |
| NGLY1_2    | 53.07     | -0.084 | 0.03    | 0.99 |

Supplement: Supplementary file 8000 [file 1]

# IPI00477539.3|C14ORF102

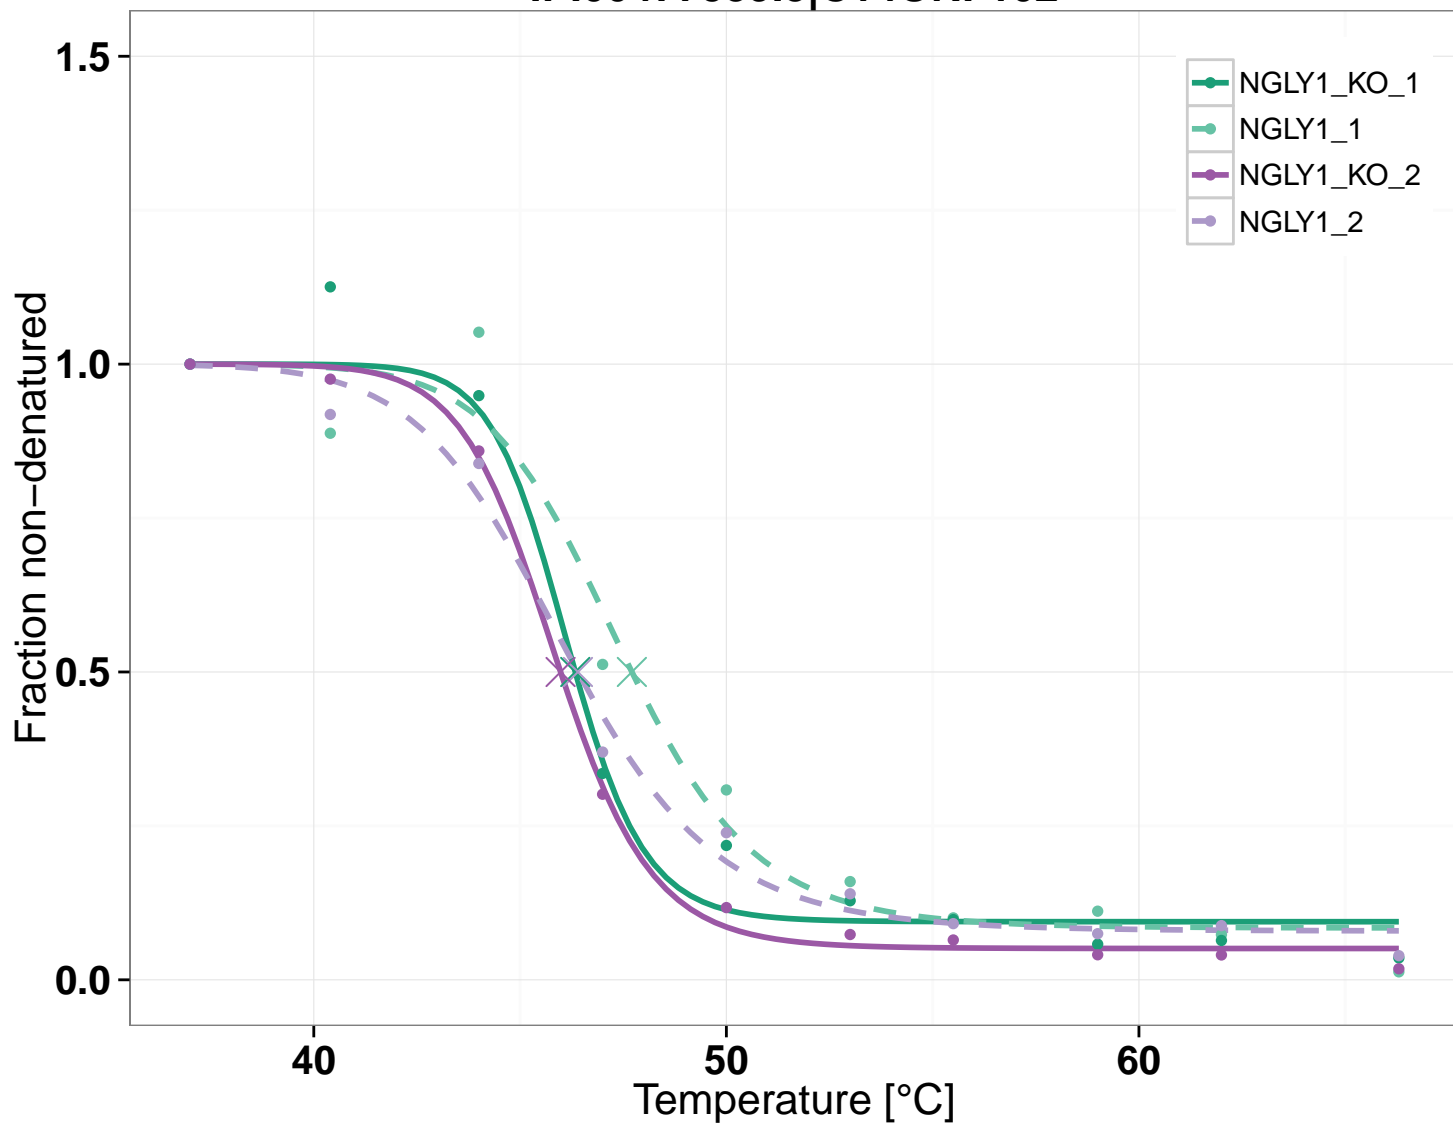

|            | meltPoint | slope | plateau | R2   |
|------------|-----------|-------|---------|------|
| NGLY1_KO_1 | 46.34     | -0.24 | 0.09    | 0.98 |
| NGLY1_1    | 47.71     | -0.14 | 0.08    | 0.97 |
| NGLY1_KO_2 | 45.98     | -0.2  | 0.05    | 1    |
| NGLY1_2    | 46.4      | -0.13 | 0.08    | 0.99 |

Supplement: Supplementary file 8001 [file 1]

IPI00418221.3|MAP3K6

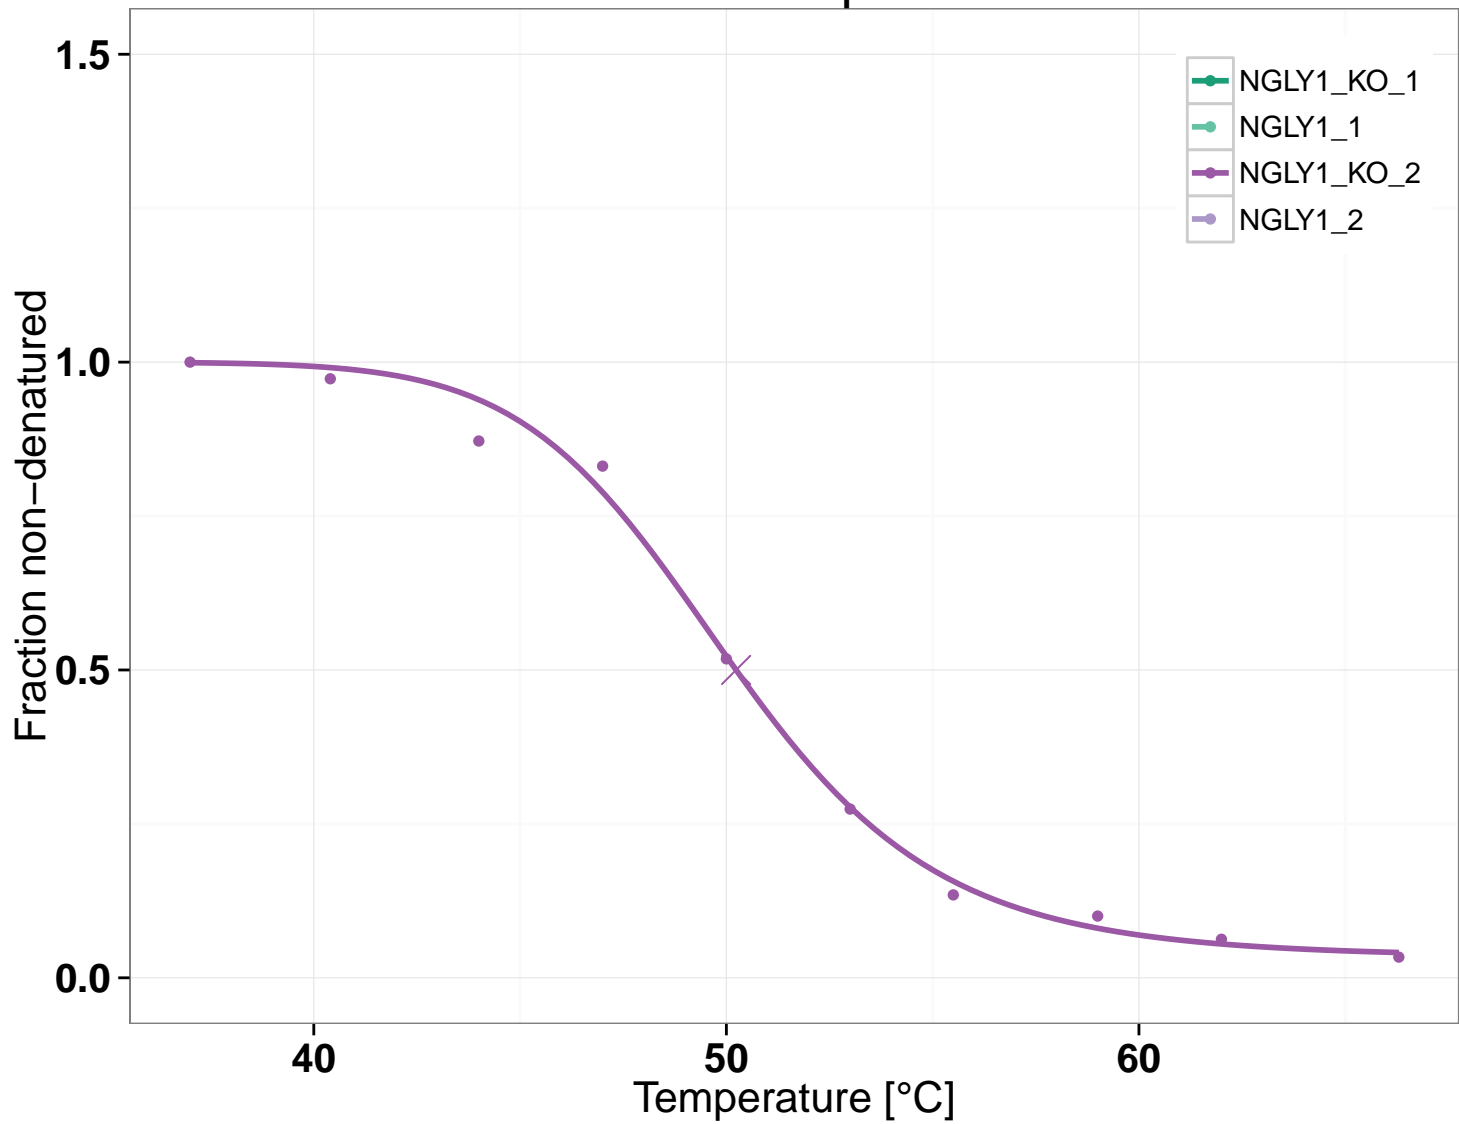

|            | meltPoint | slope  | plateau | R2   |
|------------|-----------|--------|---------|------|
| NGLY1_KO_1 | —         | —      | —       | —    |
| NGLY1_1    | —         | —      | —       | —    |
| NGLY1_KO_2 | 50.24     | -0.096 | 0.03    | 0.99 |
| NGLY1_2    | —         | —      | —       | —    |

Supplement: Supplementary file 8002 [file 1]

IPI00440693.4|FDX1L

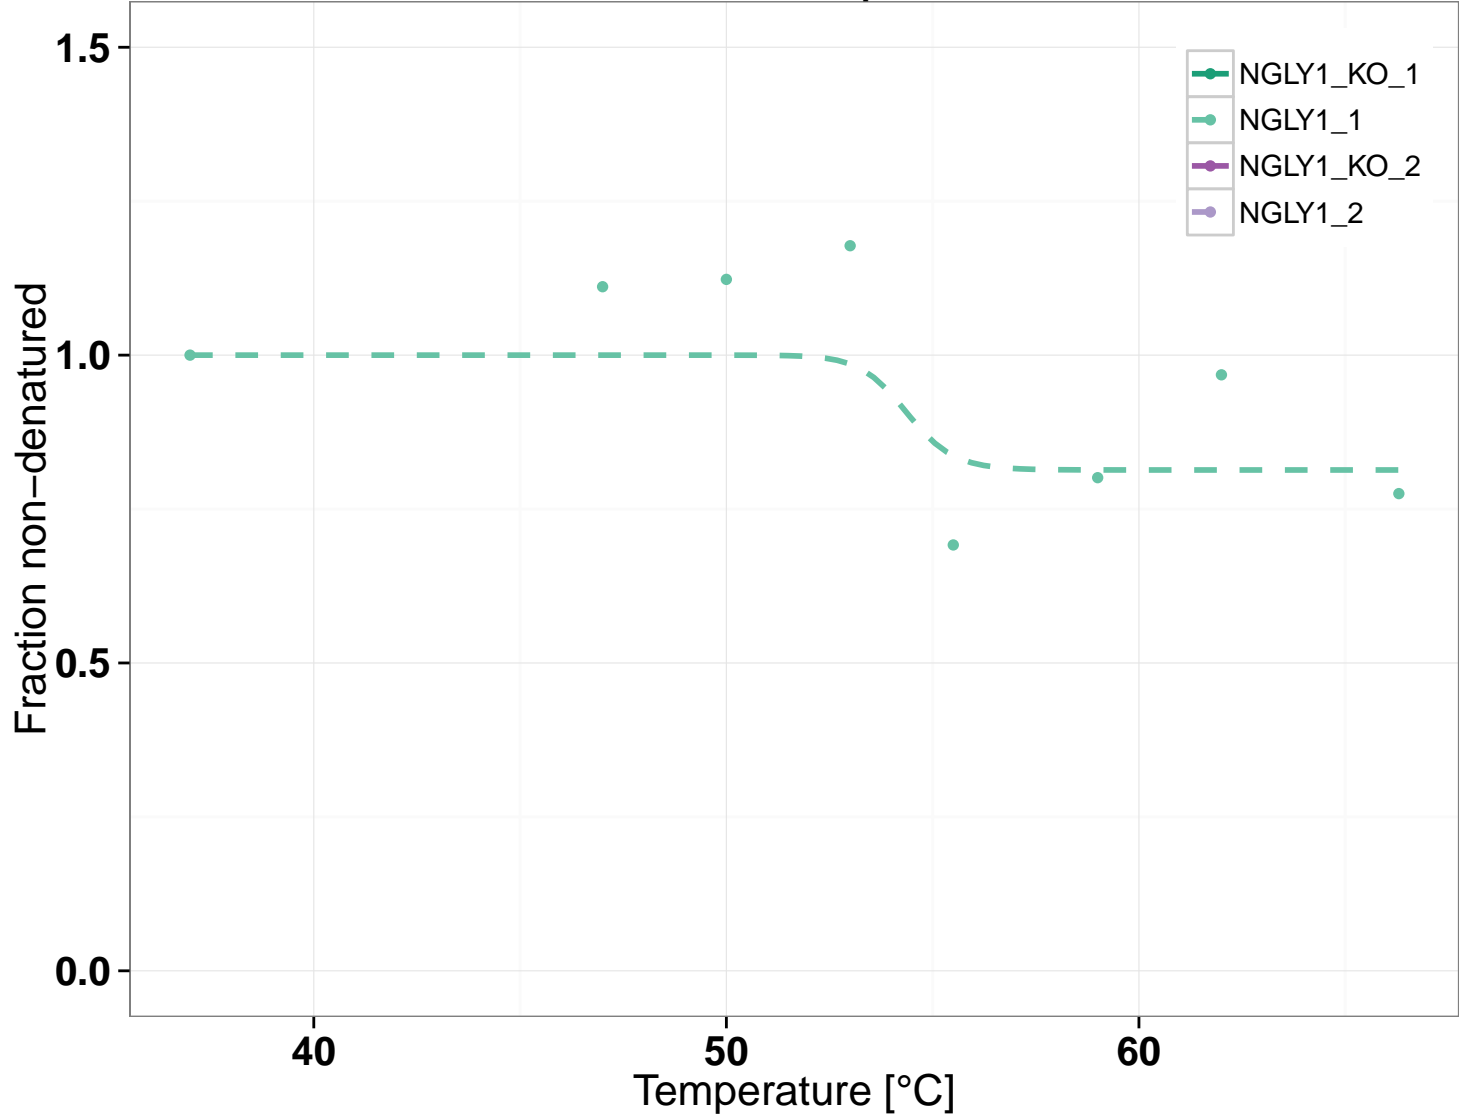

|            | meltPoint | slope  | plateau | R2    |
|------------|-----------|--------|---------|-------|
| NGLY1_KO_1 | -         | -      | -       | -     |
| NGLY1_1    | -         | -0.082 | 0.81    | -0.11 |
| NGLY1_KO_2 | -         | -      | -       | -     |
| NGLY1_2    | -         | -      | -       | -     |

Supplement: Supplementary file 8003 [file 1]

IPI00012750.3|RPS25

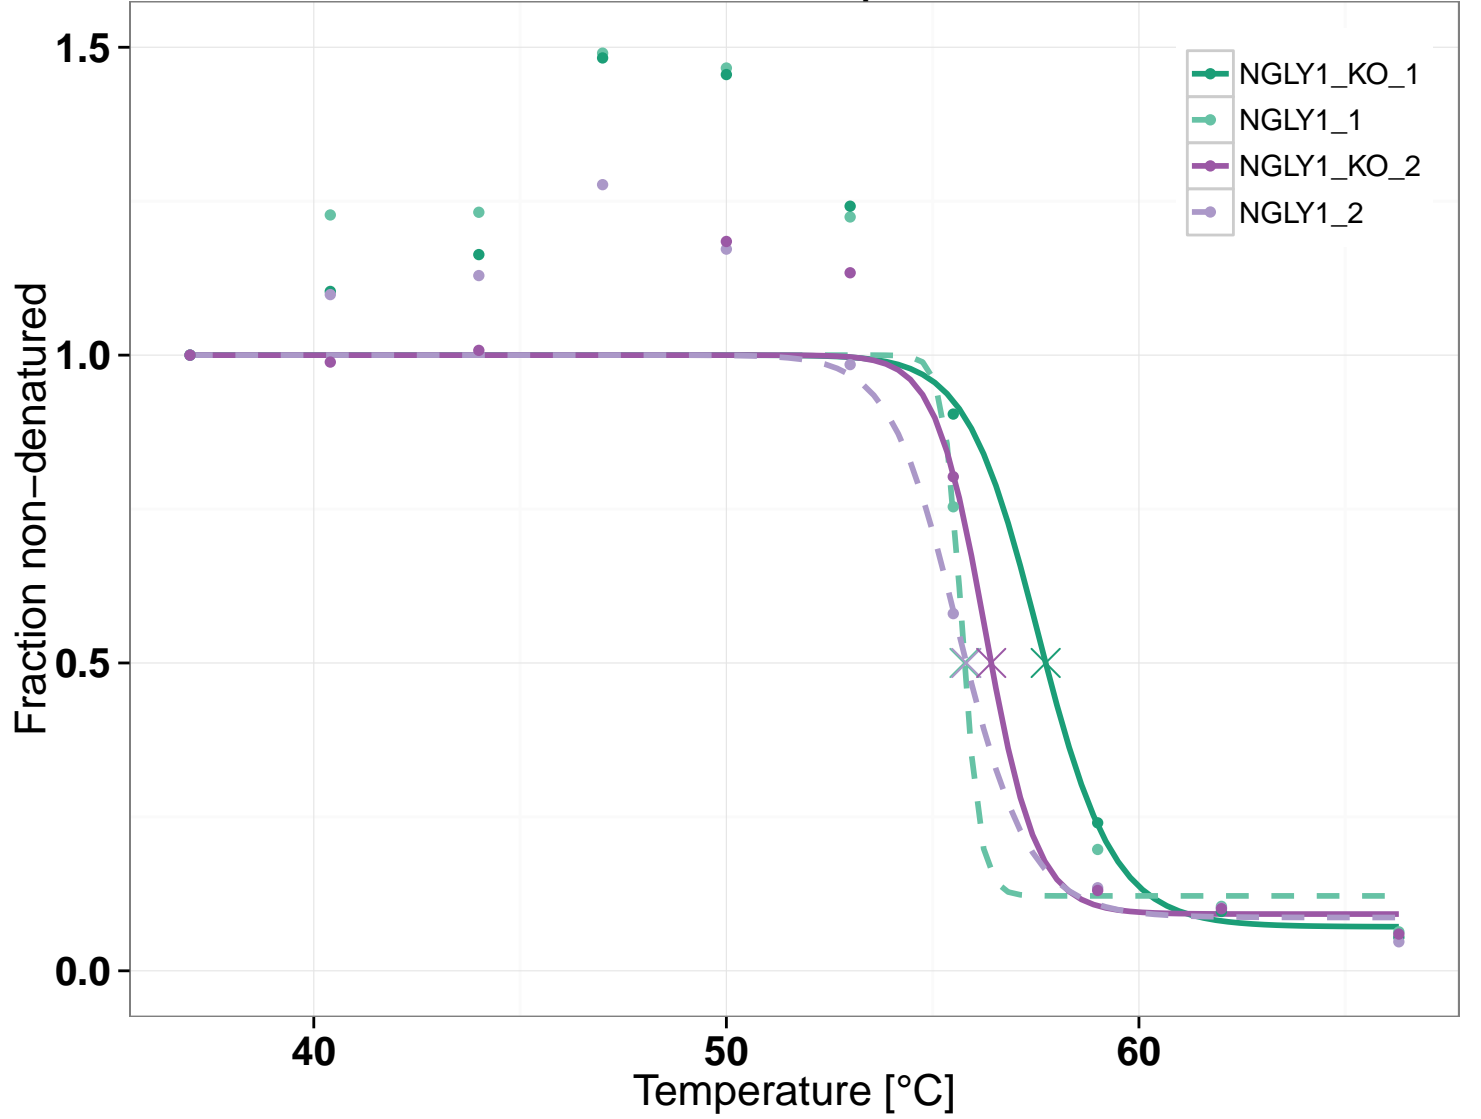

|            | meltPoint | slope | plateau | R2   |
|------------|-----------|-------|---------|------|
| NGLY1_KO_1 | 57.74     | -0.26 | 0.07    | 0.8  |
| NGLY1_1    | 55.77     | -0.99 | 0.12    | 0.78 |
| NGLY1_KO_2 | 56.42     | -0.37 | 0.09    | 0.86 |
| NGLY1_2    | 55.82     | -0.27 | 0.09    | 0.94 |

Supplement: Supplementary file 8004 [file 1]

IPI00299417.3|THOC5

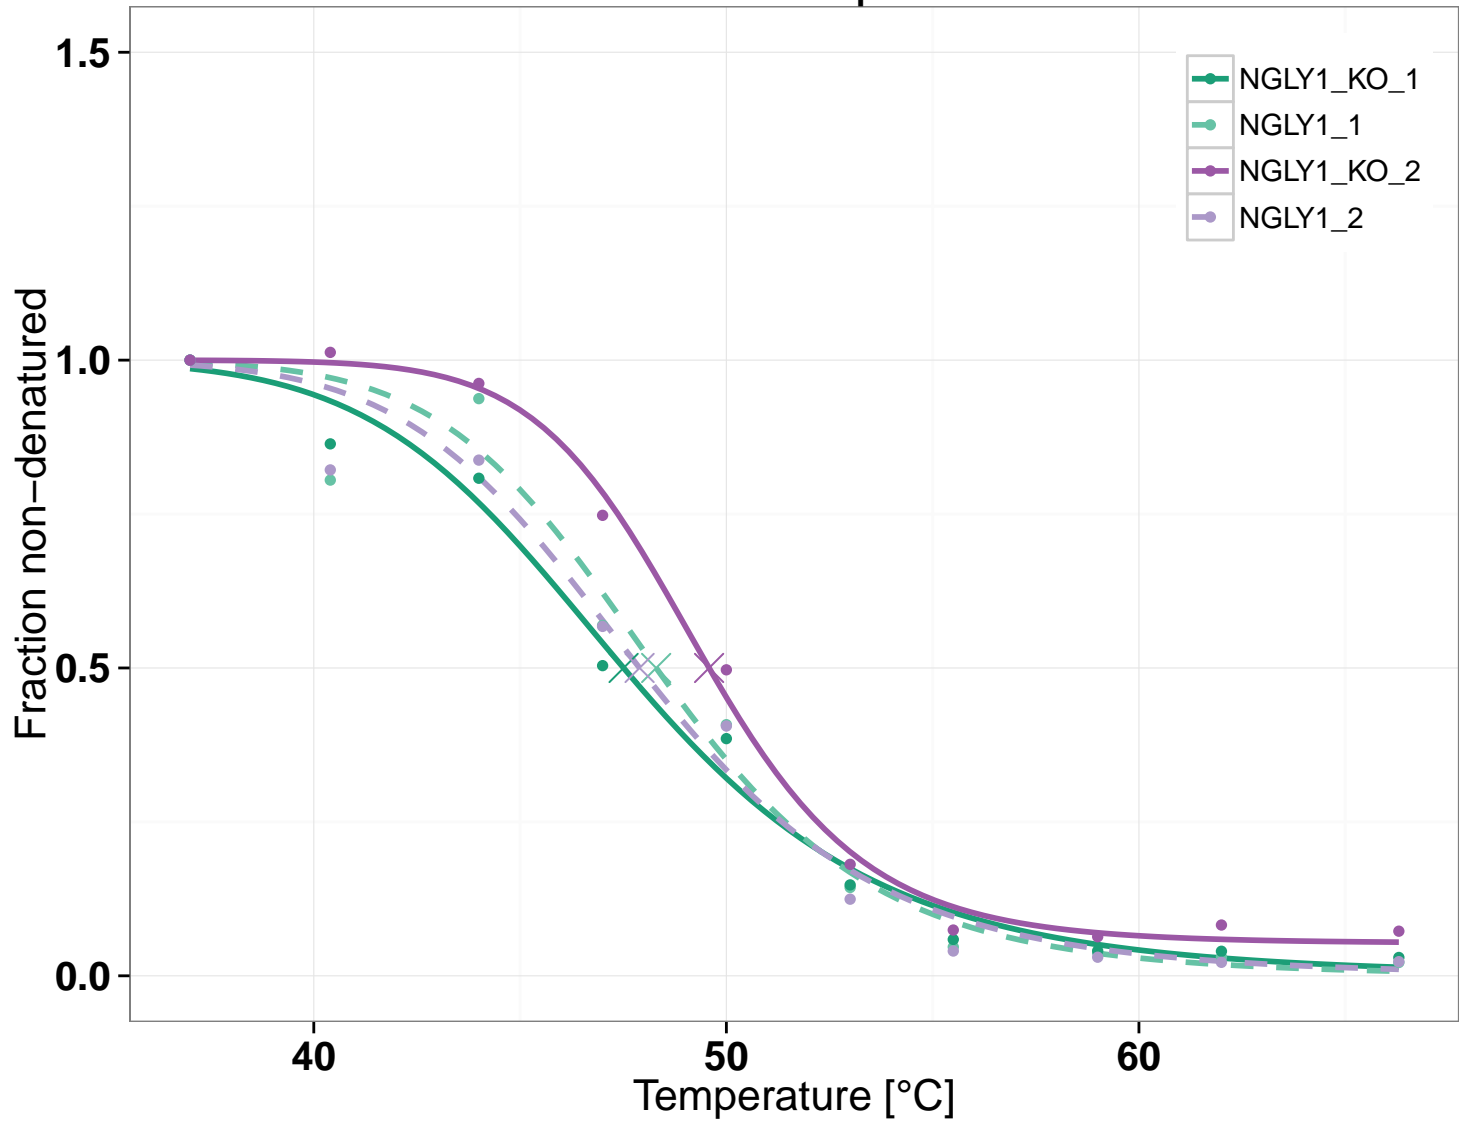

|            | meltPoint | slope  | plateau | R2   |
|------------|-----------|--------|---------|------|
| NGLY1_KO_1 | 47.51     | -0.08  | 0       | 0.99 |
| NGLY1_1    | 48.3      | -0.094 | 0       | 0.97 |
| NGLY1_KO_2 | 49.58     | -0.12  | 0.05    | 1    |
| NGLY1_2    | 47.9      | -0.087 | 0       | 0.98 |

Supplement: Supplementary file 8005 [file 1]

# IPI00853505.1|TESC

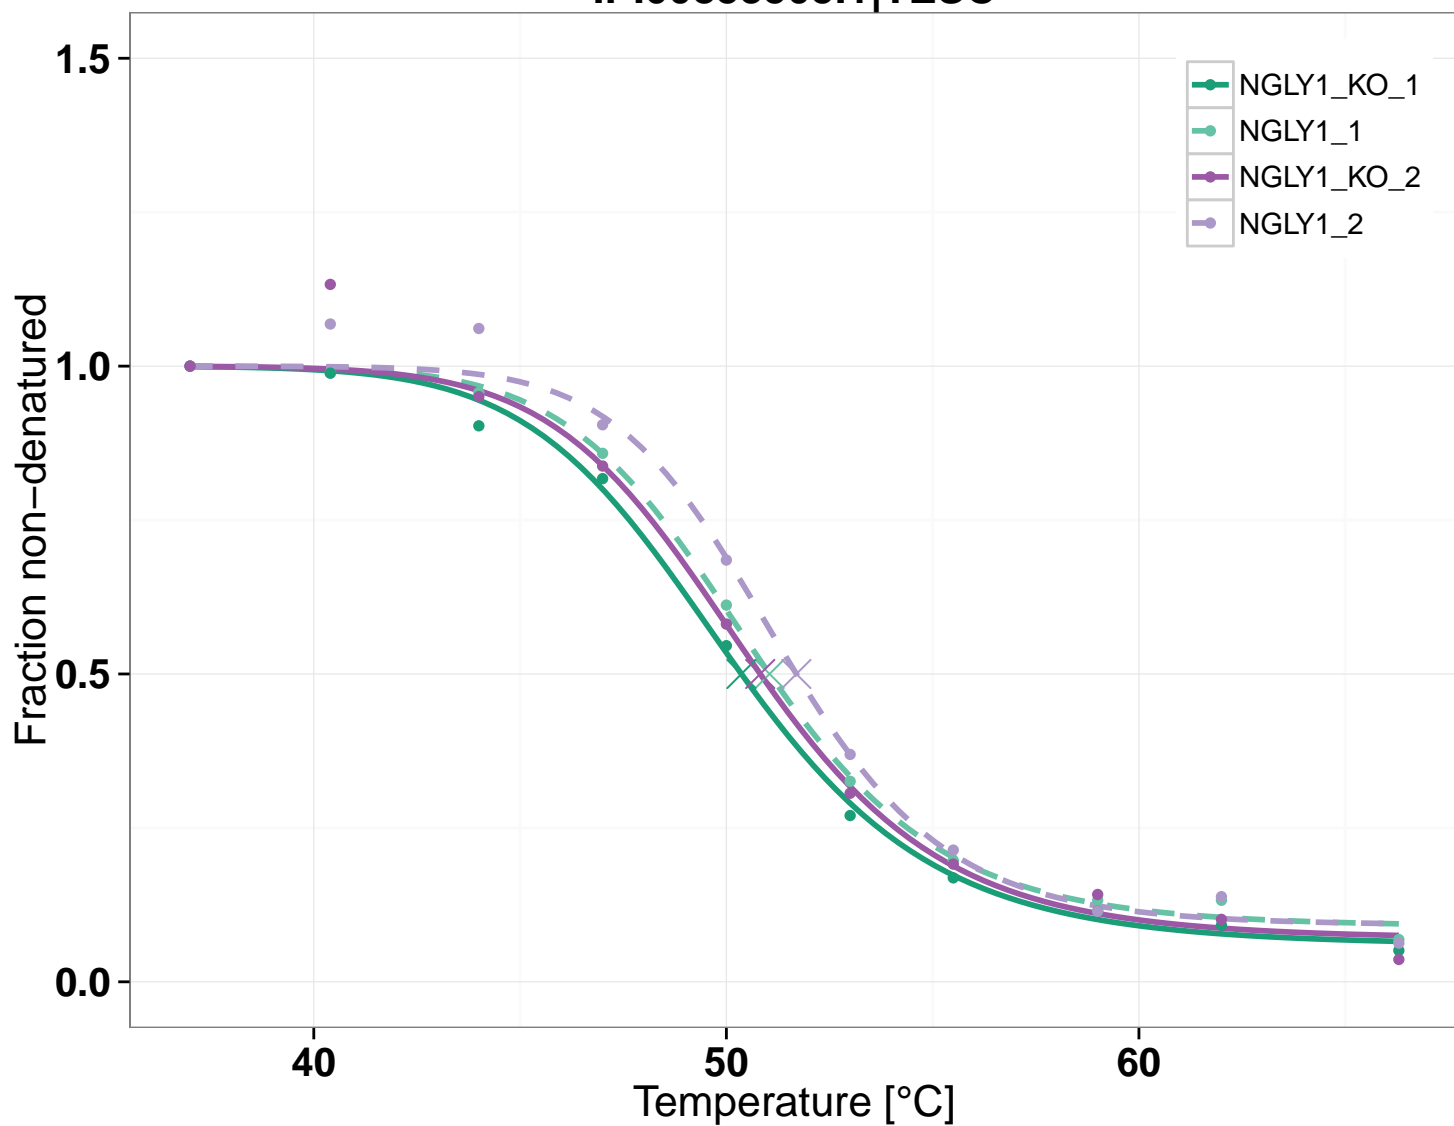

|            | meltPoint | slope  | plateau | R2   |
|------------|-----------|--------|---------|------|
| NGLY1_KO_1 | 50.37     | -0.096 | 0.06    | 1    |
| NGLY1_1    | 51.05     | -0.1   | 0.09    | 1    |
| NGLY1_KO_2 | 50.82     | -0.098 | 0.07    | 0.99 |
| NGLY1_2    | 51.7      | -0.11  | 0.09    | 0.99 |

Supplement: Supplementary file 8006 [file 1]

# IPI00022810.1|CTSC

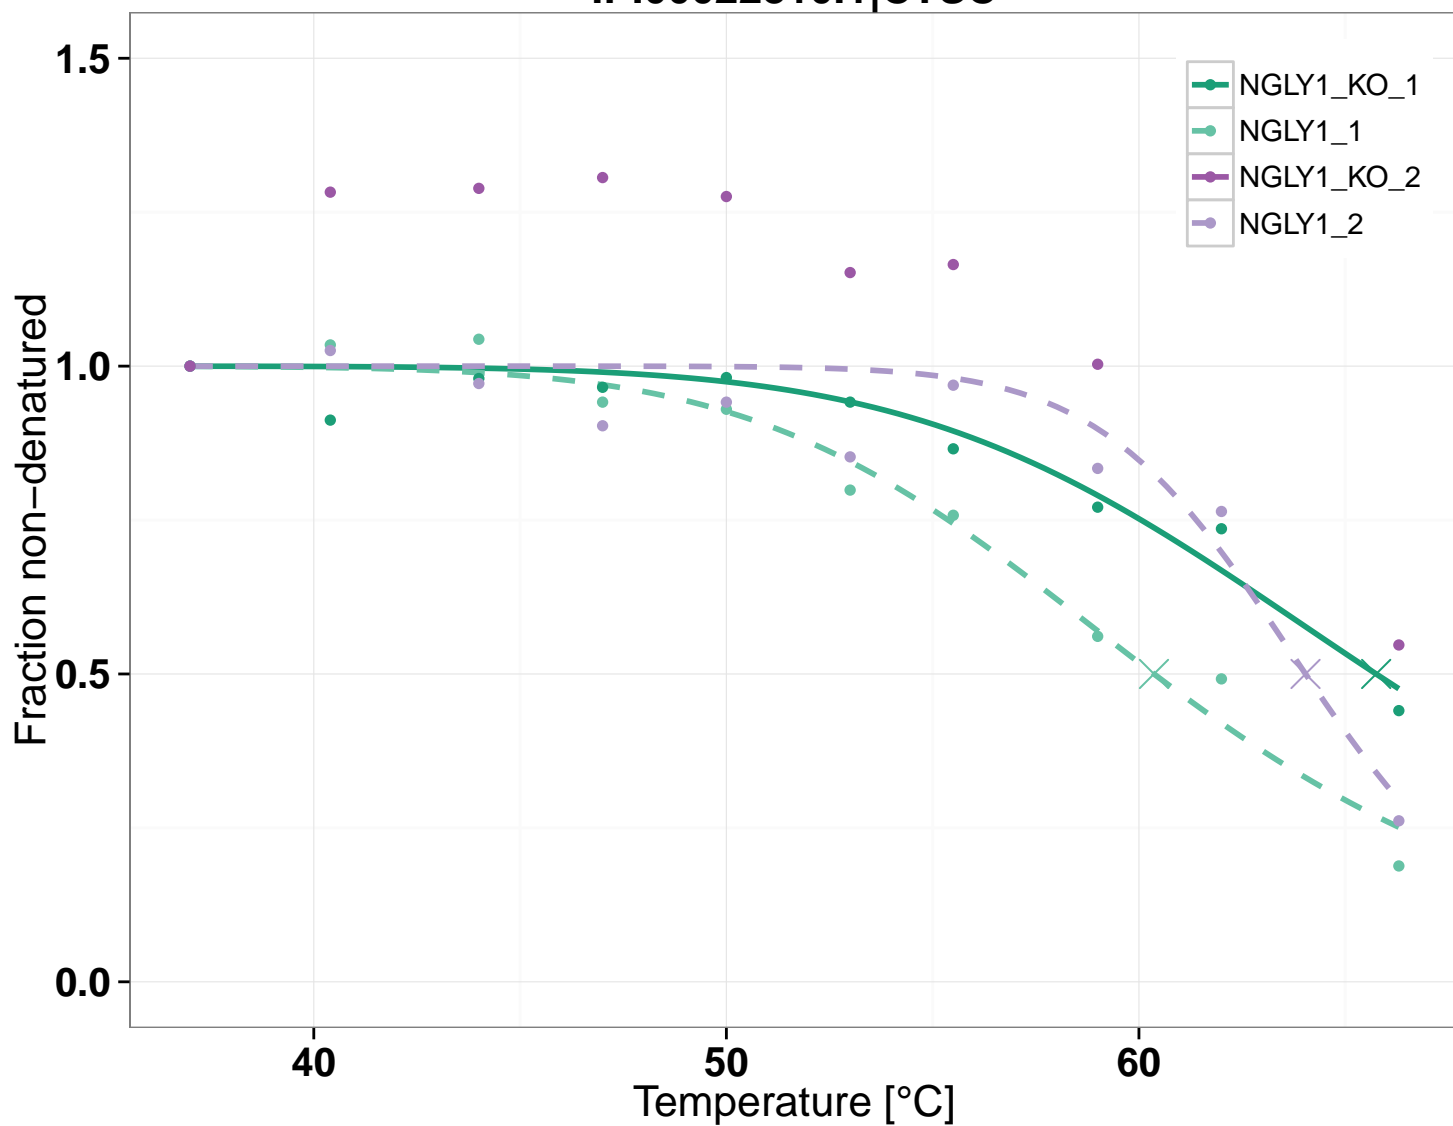

|            | meltPoint | slope  | plateau | R2   |
|------------|-----------|--------|---------|------|
| NGLY1_KO_1 | 65.75     | -0.045 | 0       | 0.94 |
| NGLY1_1    | 60.36     | -0.052 | 0       | 0.98 |
| NGLY1_KO_2 | -         | -      | -       | -    |
| NGLY1_2    | 64.04     | -0.1   | 0       | 0.9  |

Supplement: Supplementary file 8007 [file 1]

IPI00657821.1|SMG7

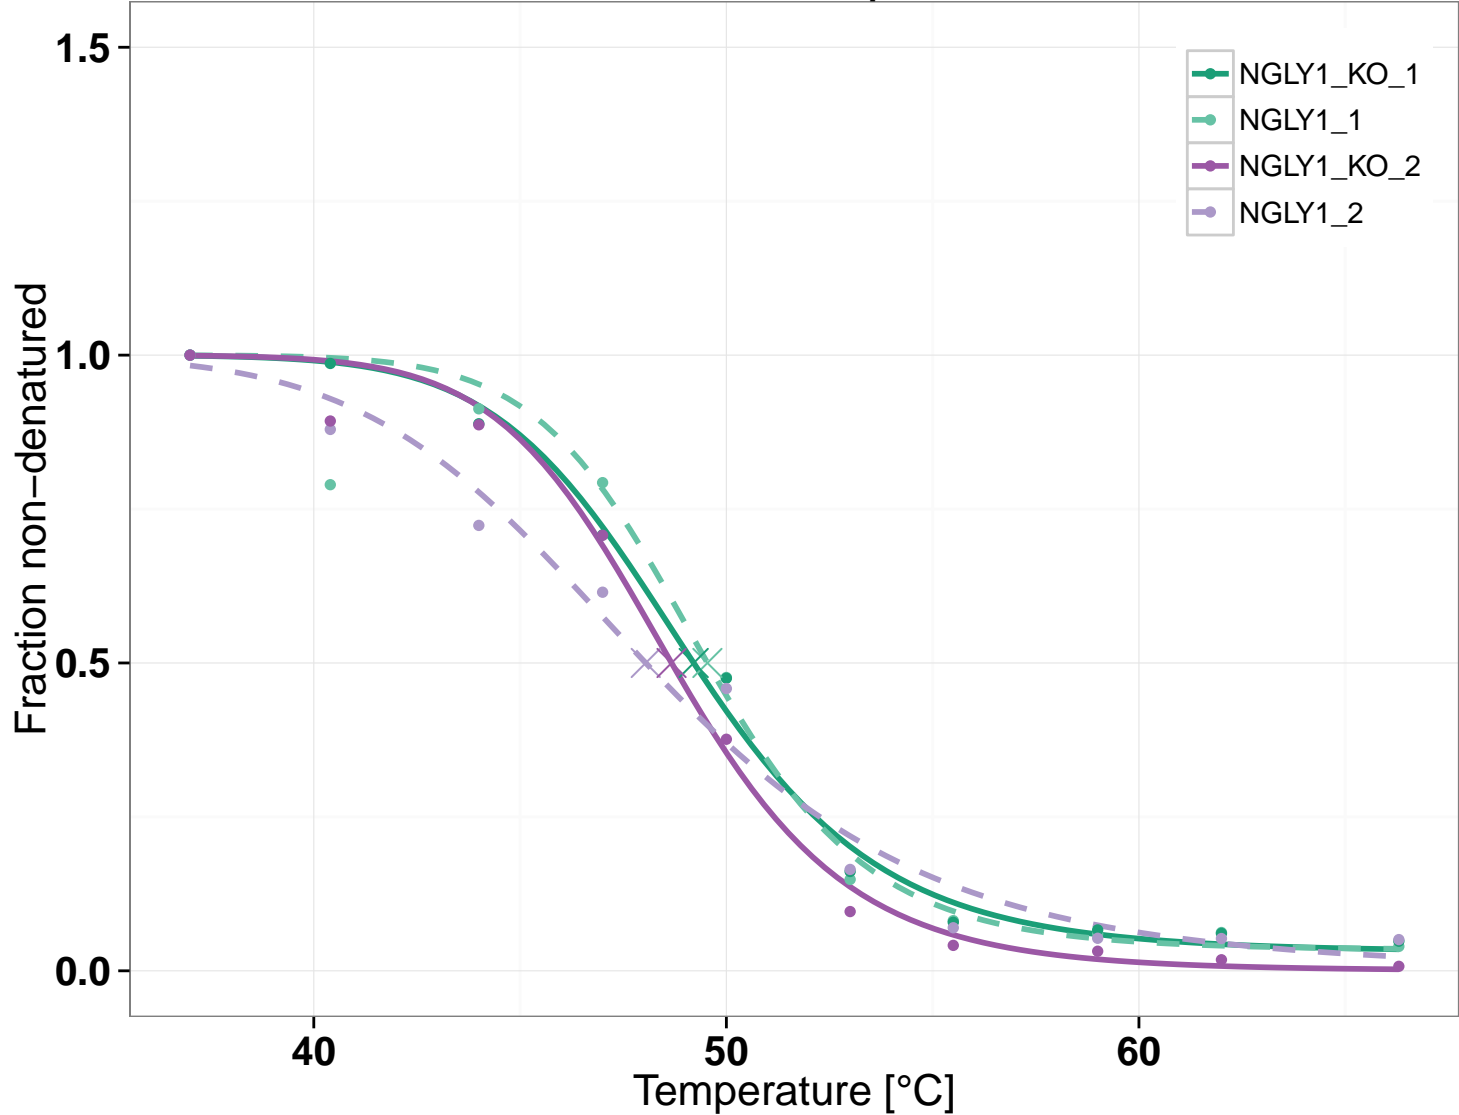

|            | meltPoint | slope  | plateau | R2   |
|------------|-----------|--------|---------|------|
| NGLY1_KO_1 | 49.21     | -0.1   | 0.03    | 1    |
| NGLY1_1    | 49.54     | -0.12  | 0.03    | 0.97 |
| NGLY1_KO_2 | 48.67     | -0.12  | 0       | 0.99 |
| NGLY1_2    | 48.05     | -0.072 | 0       | 0.98 |

Supplement: Supplementary file 8008 [file 1]

IPI00386876.2|FBXO11

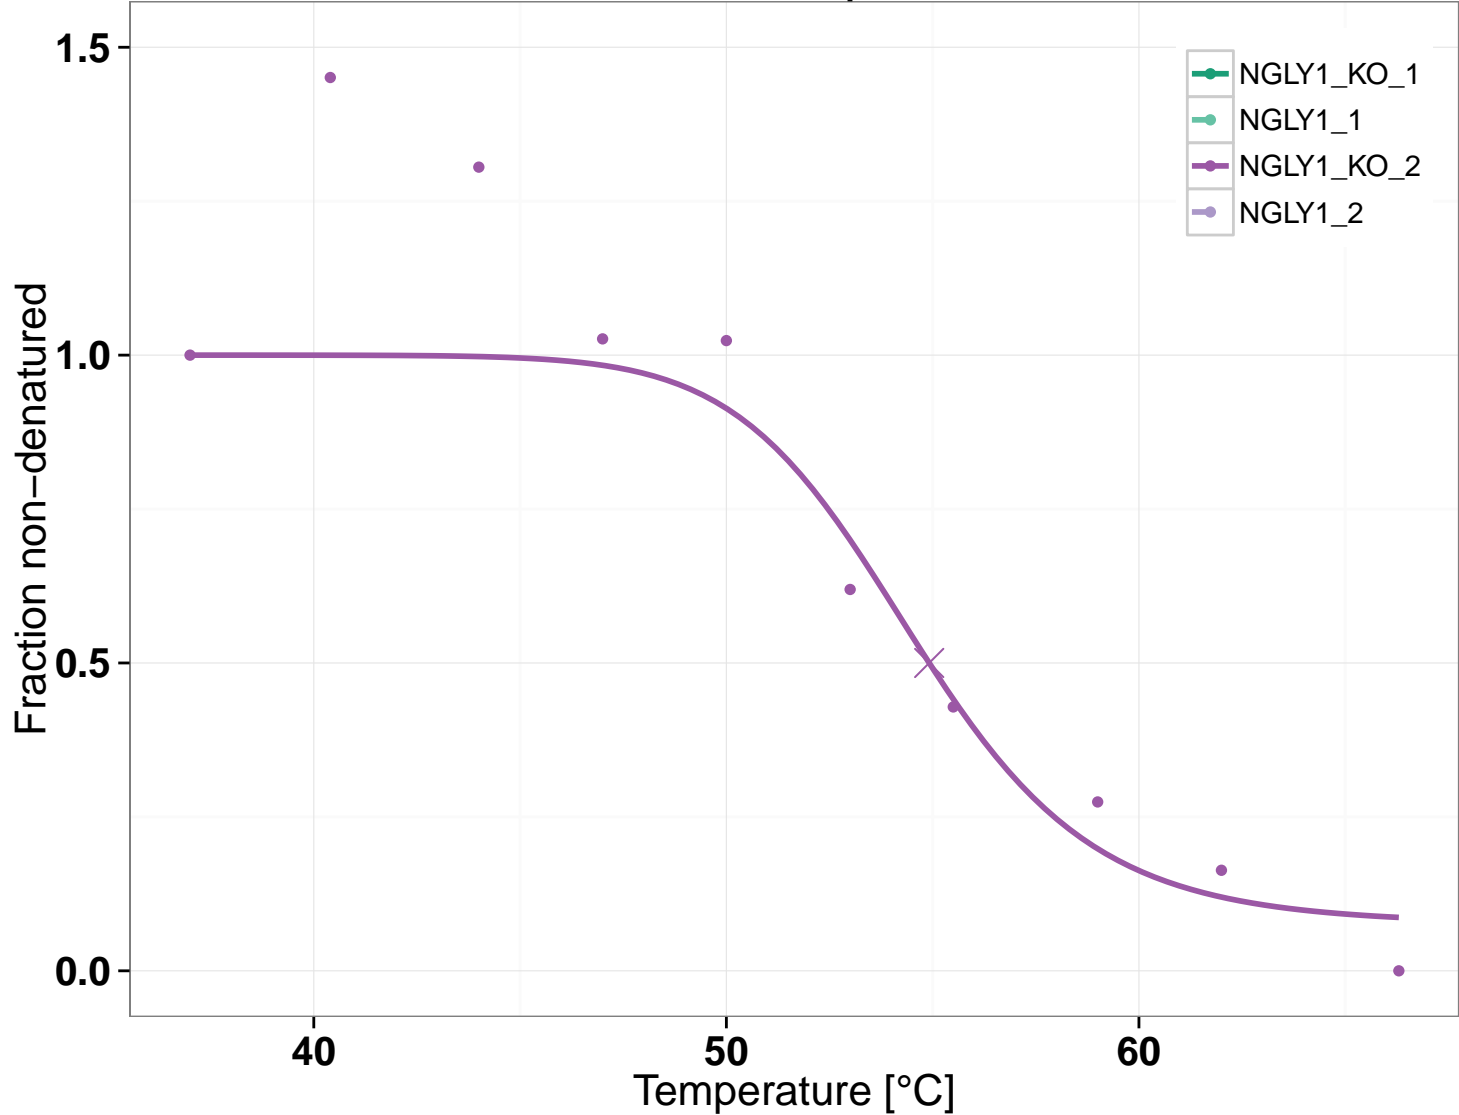

|            | meltPoint | slope | plateau | R2   |
|------------|-----------|-------|---------|------|
| NGLY1_KO_1 | —         | —     | —       | —    |
| NGLY1_1    | —         | —     | —       | —    |
| NGLY1_KO_2 | 54.92     | -0.11 | 0.08    | 0.85 |
| NGLY1_2    | —         | —     | —       | —    |

Supplement: Supplementary file 8009 [file 1]

# IPI00879463.1|77 KDA PROTEIN.

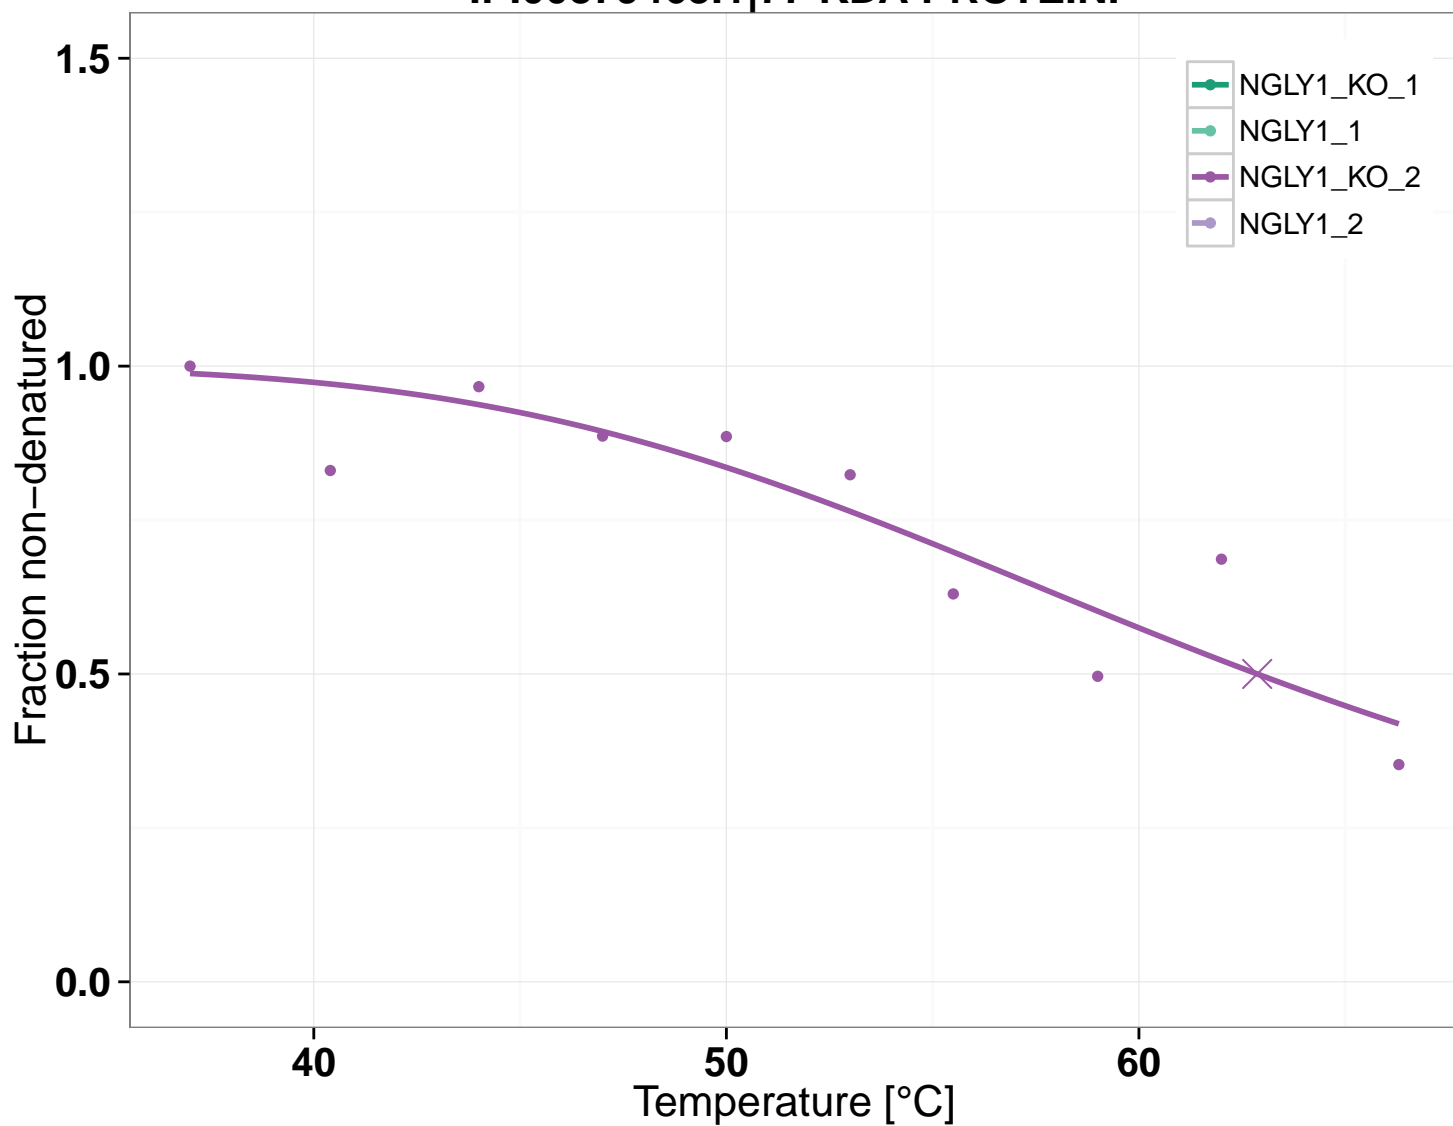

|            | meltPoint | slope  | plateau | R2   |
|------------|-----------|--------|---------|------|
| NGLY1_KO_1 | —         | —      | —       | —    |
| NGLY1_1    | —         | —      | —       | —    |
| NGLY1_KO_2 | 62.87     | -0.028 | 0       | 0.81 |
| NGLY1_2    | —         | —      | —       | —    |

Supplement: Supplementary file 8010 [file 1]

IPI00783565.1|SLC6A6

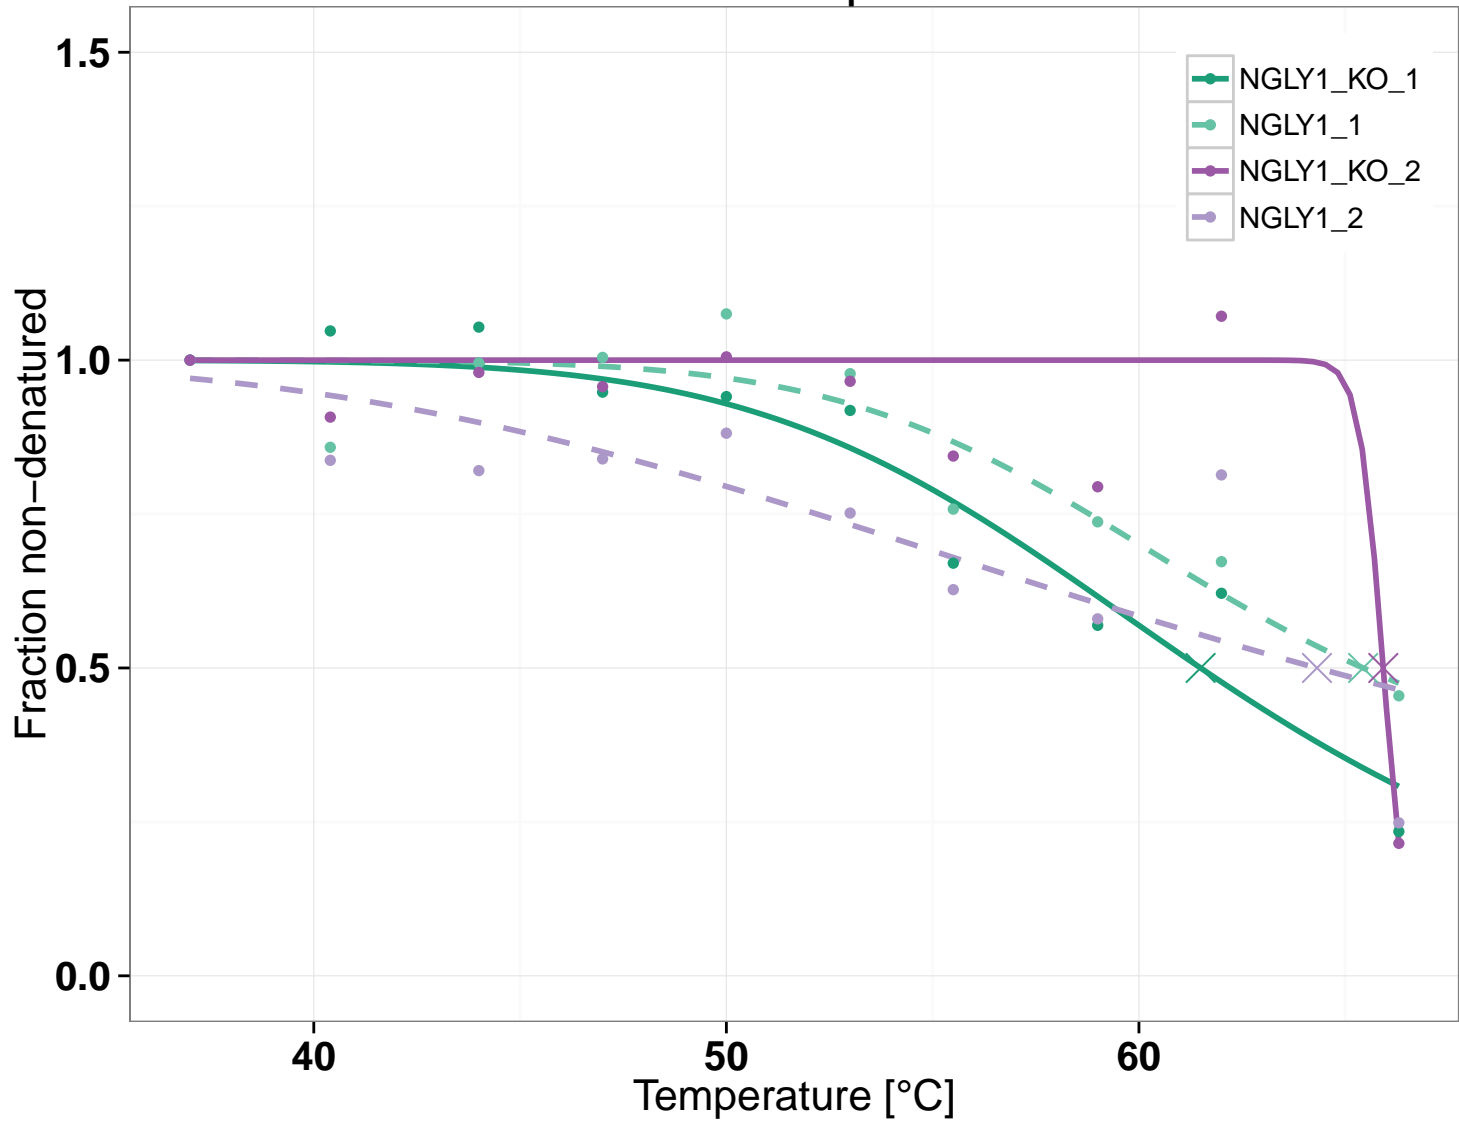

|            | meltPoint | slope  | plateau | R2   |
|------------|-----------|--------|---------|------|
| NGLY1_KO_1 | 61.5      | -0.047 | 0       | 0.92 |
| NGLY1_1    | 65.43     | -0.041 | 0.29    | 0.86 |
| NGLY1_KO_2 | 65.92     | -0.86  | 0       | 0.85 |
| NGLY1_2    | 64.32     | -0.022 | 0       | 0.63 |

Supplement: Supplementary file 8011 [file 1]

IPI00654654.13|MRPS33

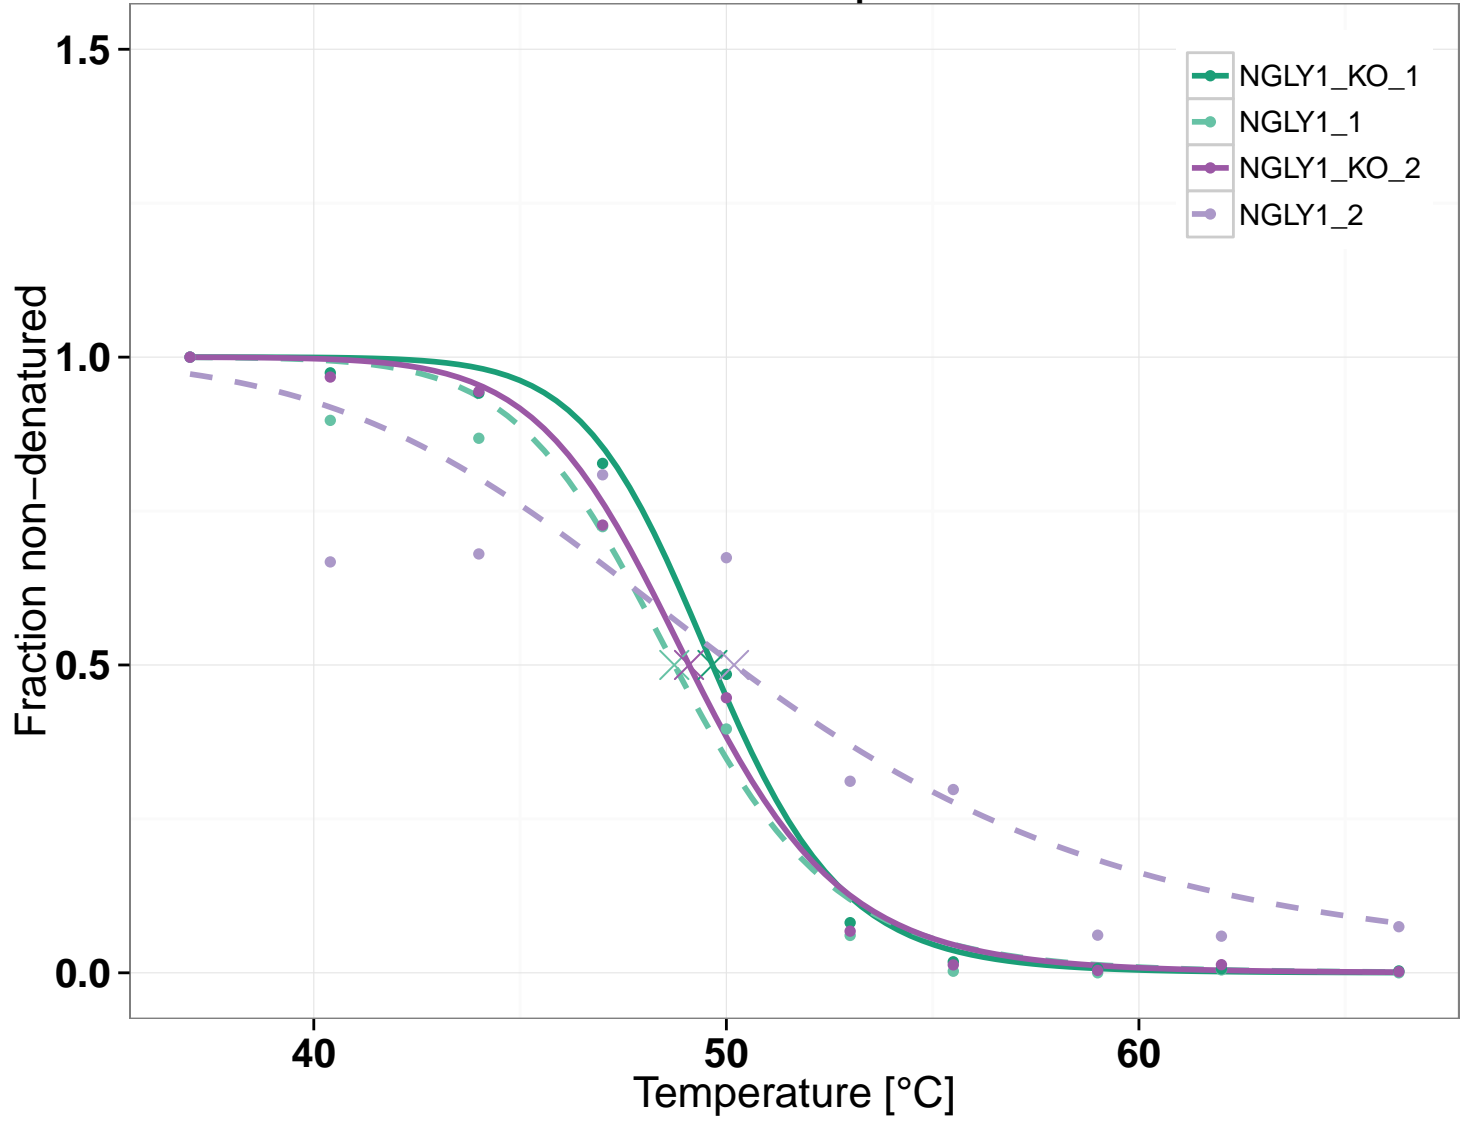

|            | meltPoint | slope  | plateau | R2   |
|------------|-----------|--------|---------|------|
| NGLY1_KO_1 | 49.66     | -0.16  | 0       | 1    |
| NGLY1_1    | 48.74     | -0.13  | 0       | 0.99 |
| NGLY1_KO_2 | 49.1      | -0.13  | 0       | 0.99 |
| NGLY1_2    | 50.19     | -0.052 | 0       | 0.86 |

Supplement: Supplementary file 8012 [file 1]

IPI00019994.4|CXORF15

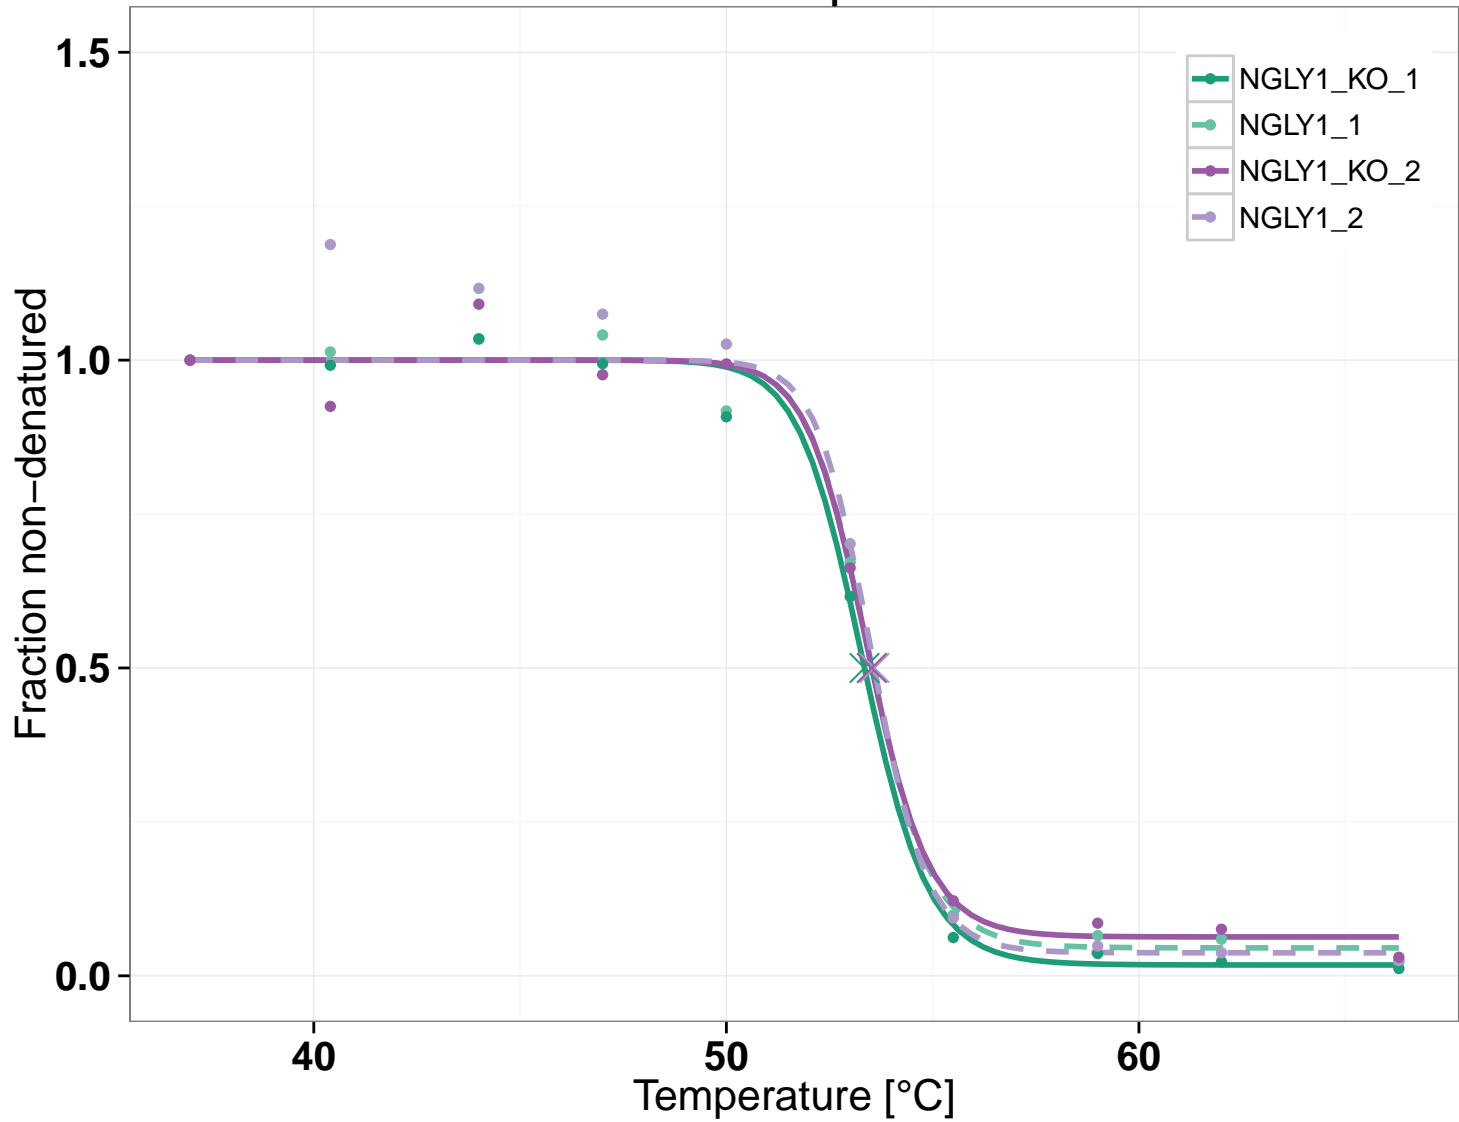

|            | meltPoint | slope | plateau | R2   |
|------------|-----------|-------|---------|------|
| NGLY1_KO_1 | 53.35     | -0.31 | 0.02    | 1    |
| NGLY1_1    | 53.53     | -0.32 | 0.05    | 0.99 |
| NGLY1_KO_2 | 53.52     | -0.32 | 0.06    | 0.99 |
| NGLY1_2    | 53.59     | -0.36 | 0.04    | 0.98 |

Supplement: Supplementary file 8013 [file 1]

IPI00456970.1|CDC2L5

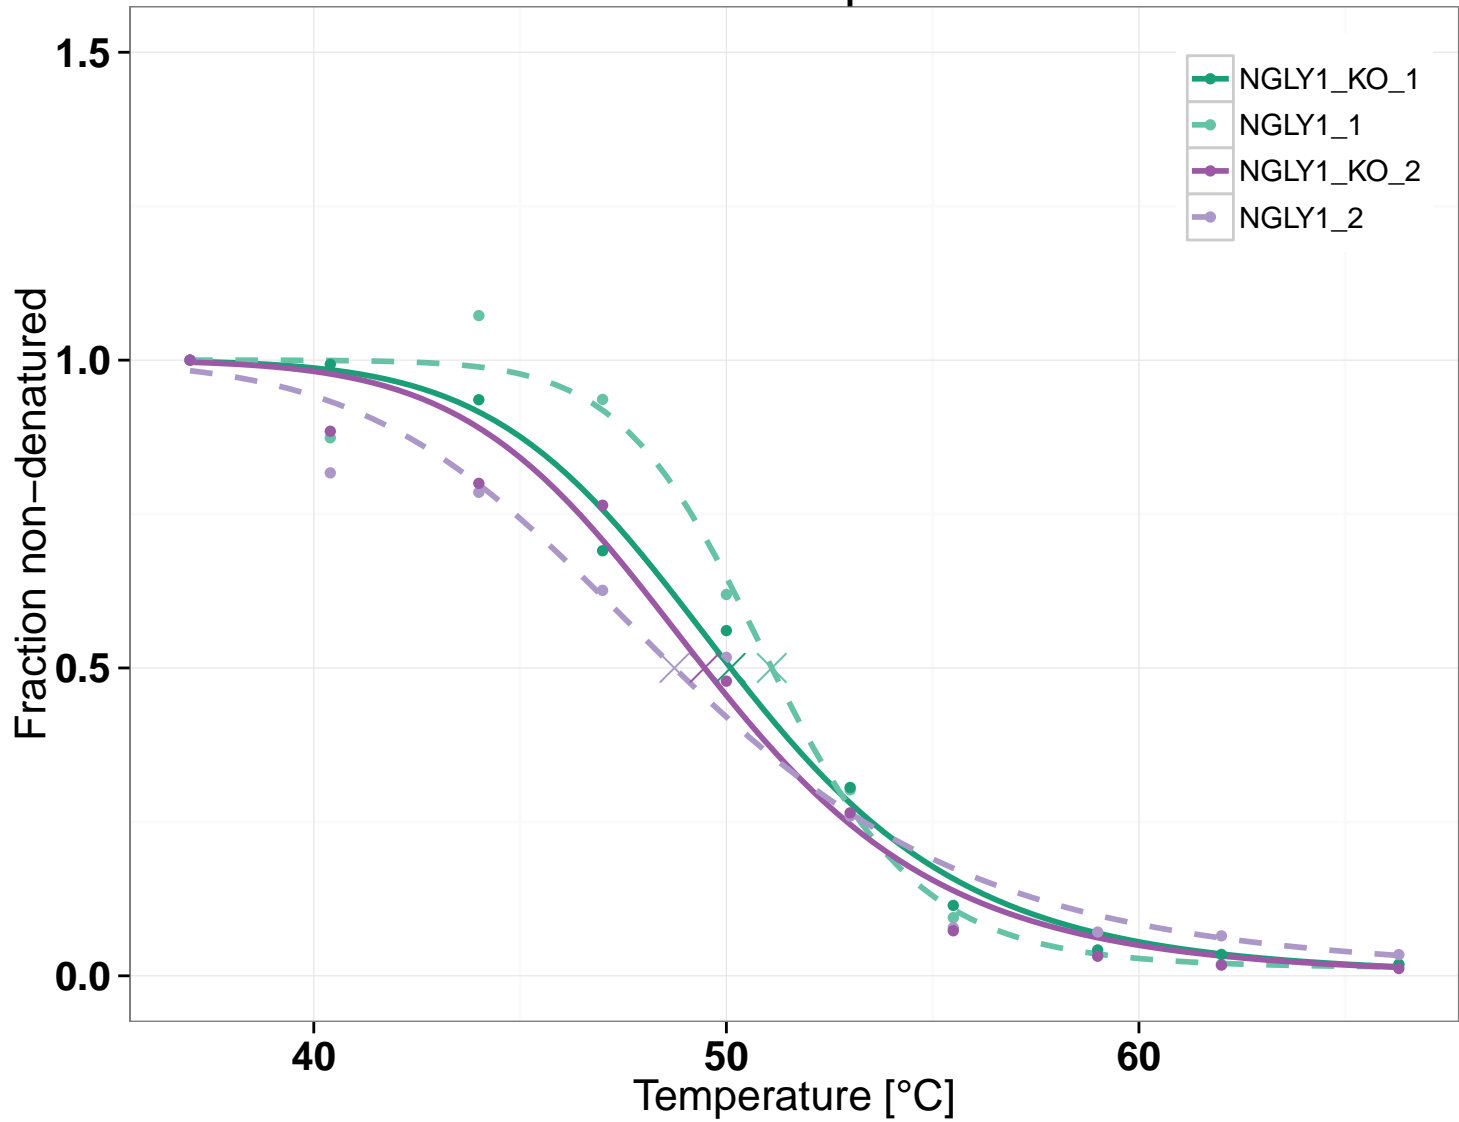

|            | meltPoint | slope  | plateau | R2   |
|------------|-----------|--------|---------|------|
| NGLY1_KO_1 | 50.1      | -0.087 | 0       | 0.99 |
| NGLY1_1    | 51.1      | -0.14  | 0.01    | 0.99 |
| NGLY1_KO_2 | 49.47     | -0.086 | 0       | 0.98 |
| NGLY1_2    | 48.74     | -0.067 | 0       | 0.97 |

Supplement: Supplementary file 8014 [file 1]

IPI00644037.1|GPSN2

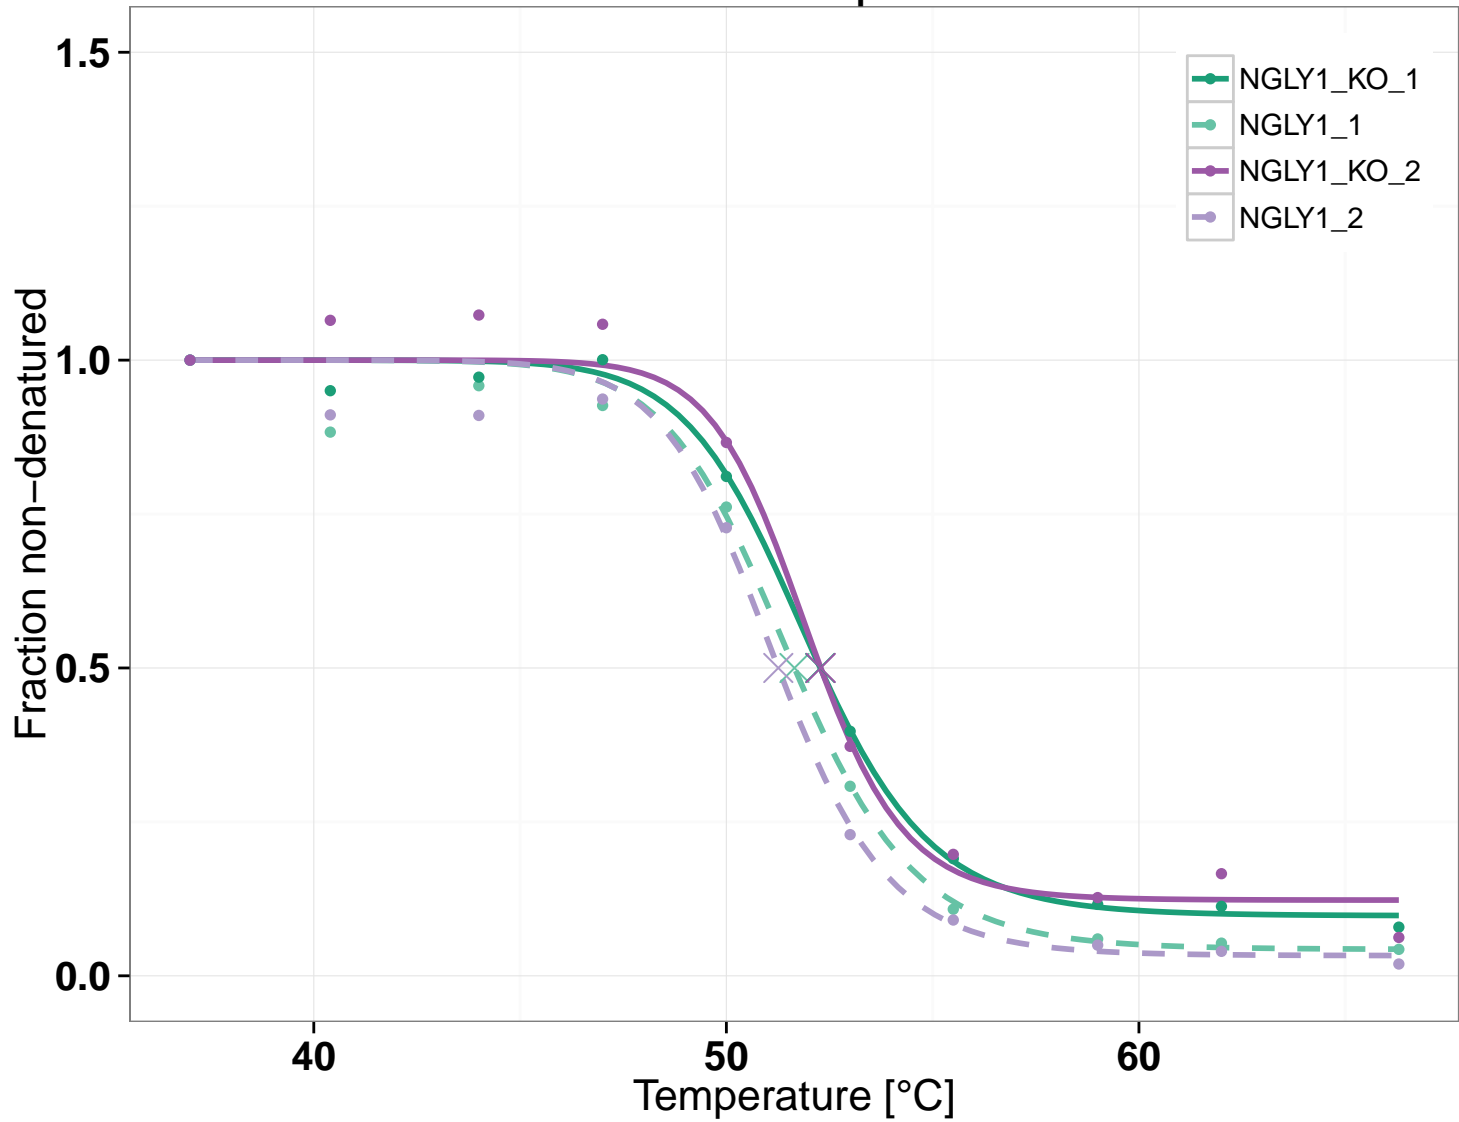

|            | meltPoint | slope | plateau | R2   |
|------------|-----------|-------|---------|------|
| NGLY1_KO_1 | 52.28     | -0.15 | 0.1     | 1    |
| NGLY1_1    | 51.65     | -0.16 | 0.04    | 0.99 |
| NGLY1_KO_2 | 52.29     | -0.19 | 0.12    | 0.99 |
| NGLY1_2    | 51.26     | -0.17 | 0.03    | 0.99 |

Supplement: Supplementary file 8015 [file 1]

# IPI00289031.5|FAM160B1

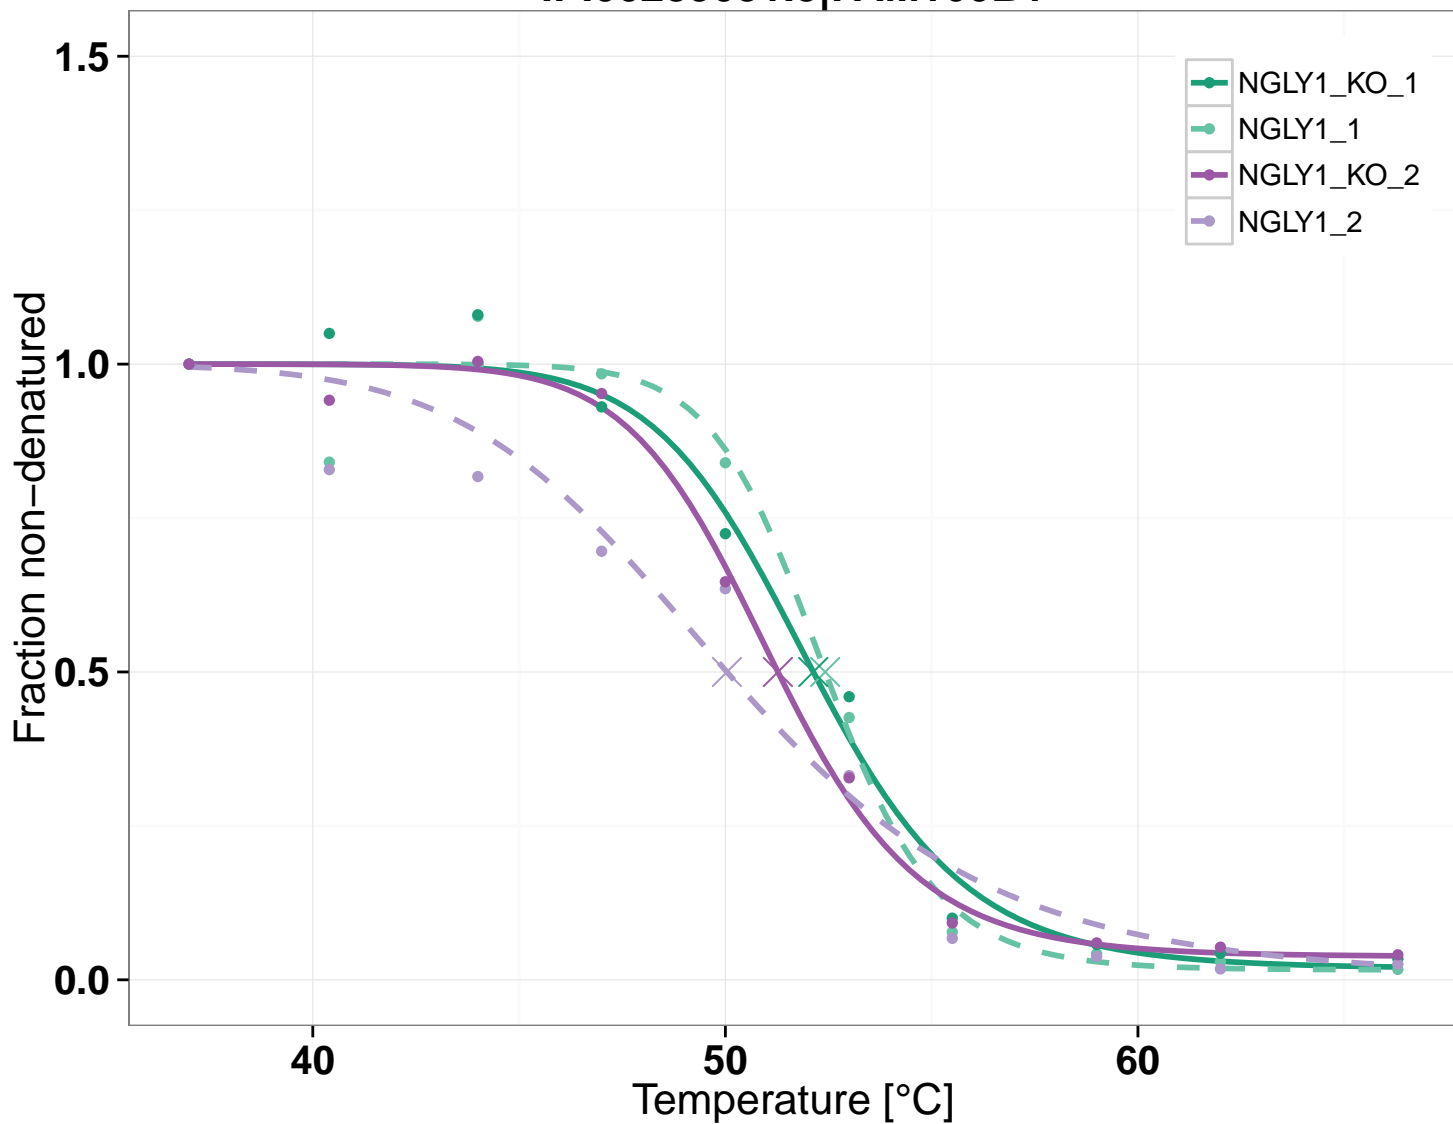

|            | meltPoint | slope  | plateau | R2   |
|------------|-----------|--------|---------|------|
| NGLY1_KO_1 | 52.13     | -0.13  | 0.02    | 0.99 |
| NGLY1_1    | 52.42     | -0.18  | 0.02    | 0.98 |
| NGLY1_KO_2 | 51.27     | -0.14  | 0.04    | 1    |
| NGLY1_2    | 50.04     | -0.078 | 0       | 0.95 |

Supplement: Supplementary file 8016 [file 1]

# IPI00018108.1|TAF13

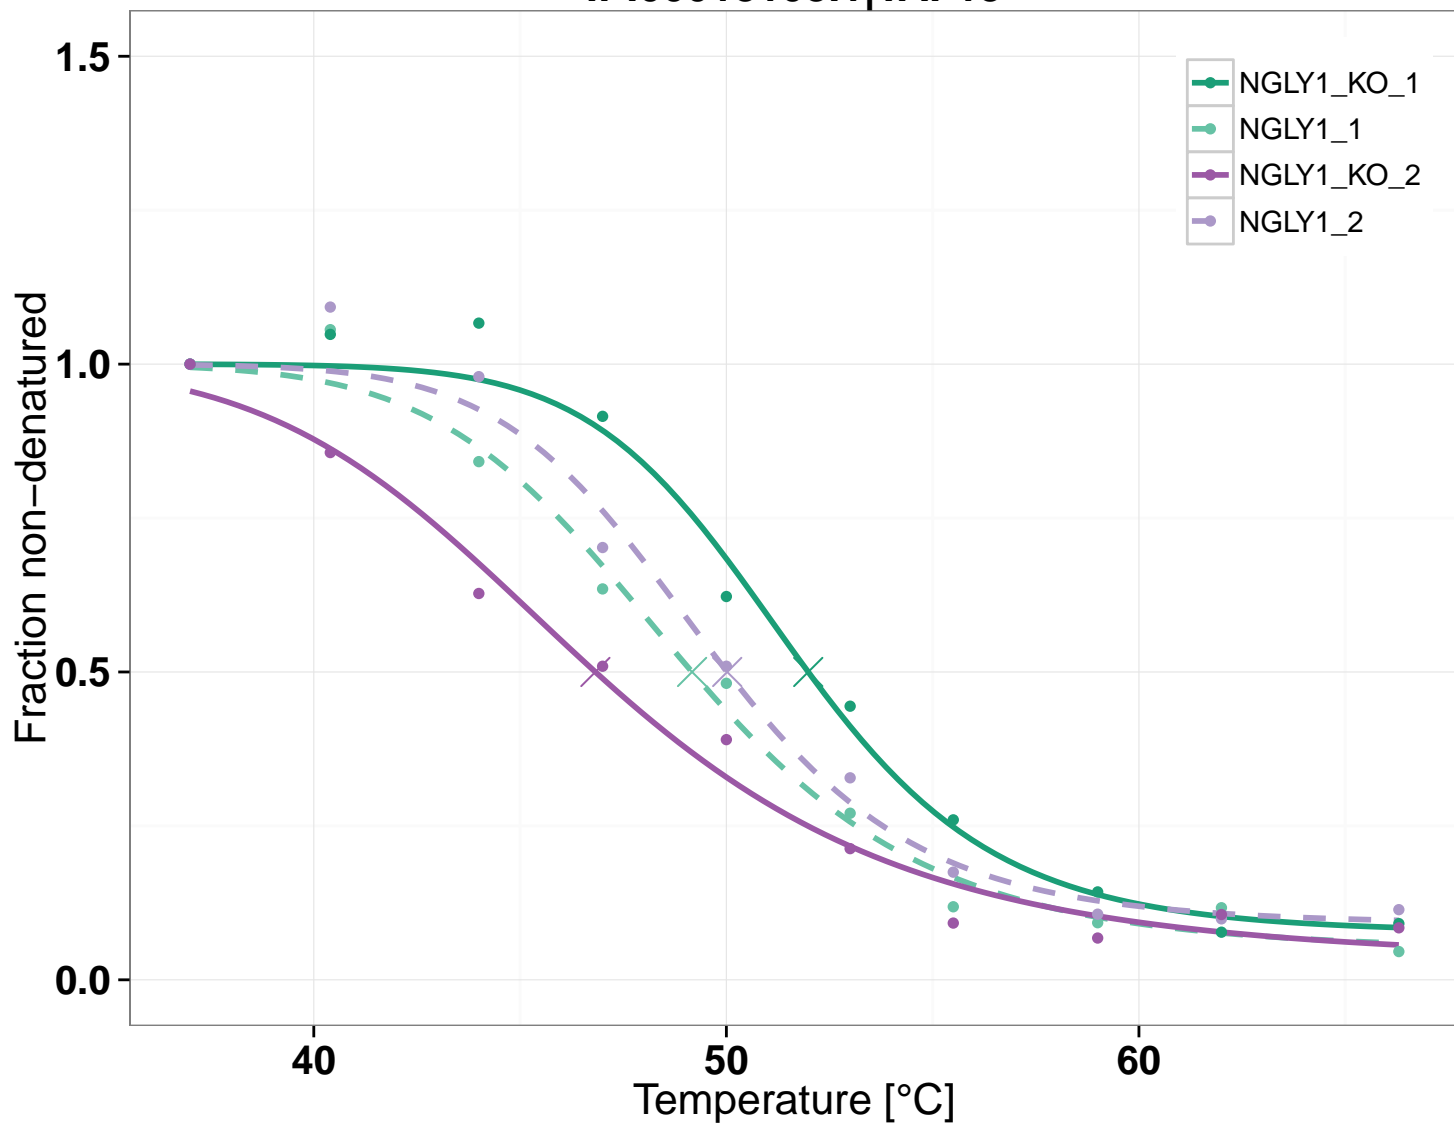

|            | meltPoint | slope  | plateau | R2   |
|------------|-----------|--------|---------|------|
| NGLY1_KO_1 | 51.98     | -0.094 | 0.08    | 0.99 |
| NGLY1_1    | 49.17     | -0.08  | 0.05    | 0.99 |
| NGLY1_KO_2 | 46.83     | -0.063 | 0.03    | 0.99 |
| NGLY1_2    | 50.02     | -0.09  | 0.09    | 0.99 |

Supplement: Supplementary file 8017 [file 1]

# IPI00742682.2|TPR

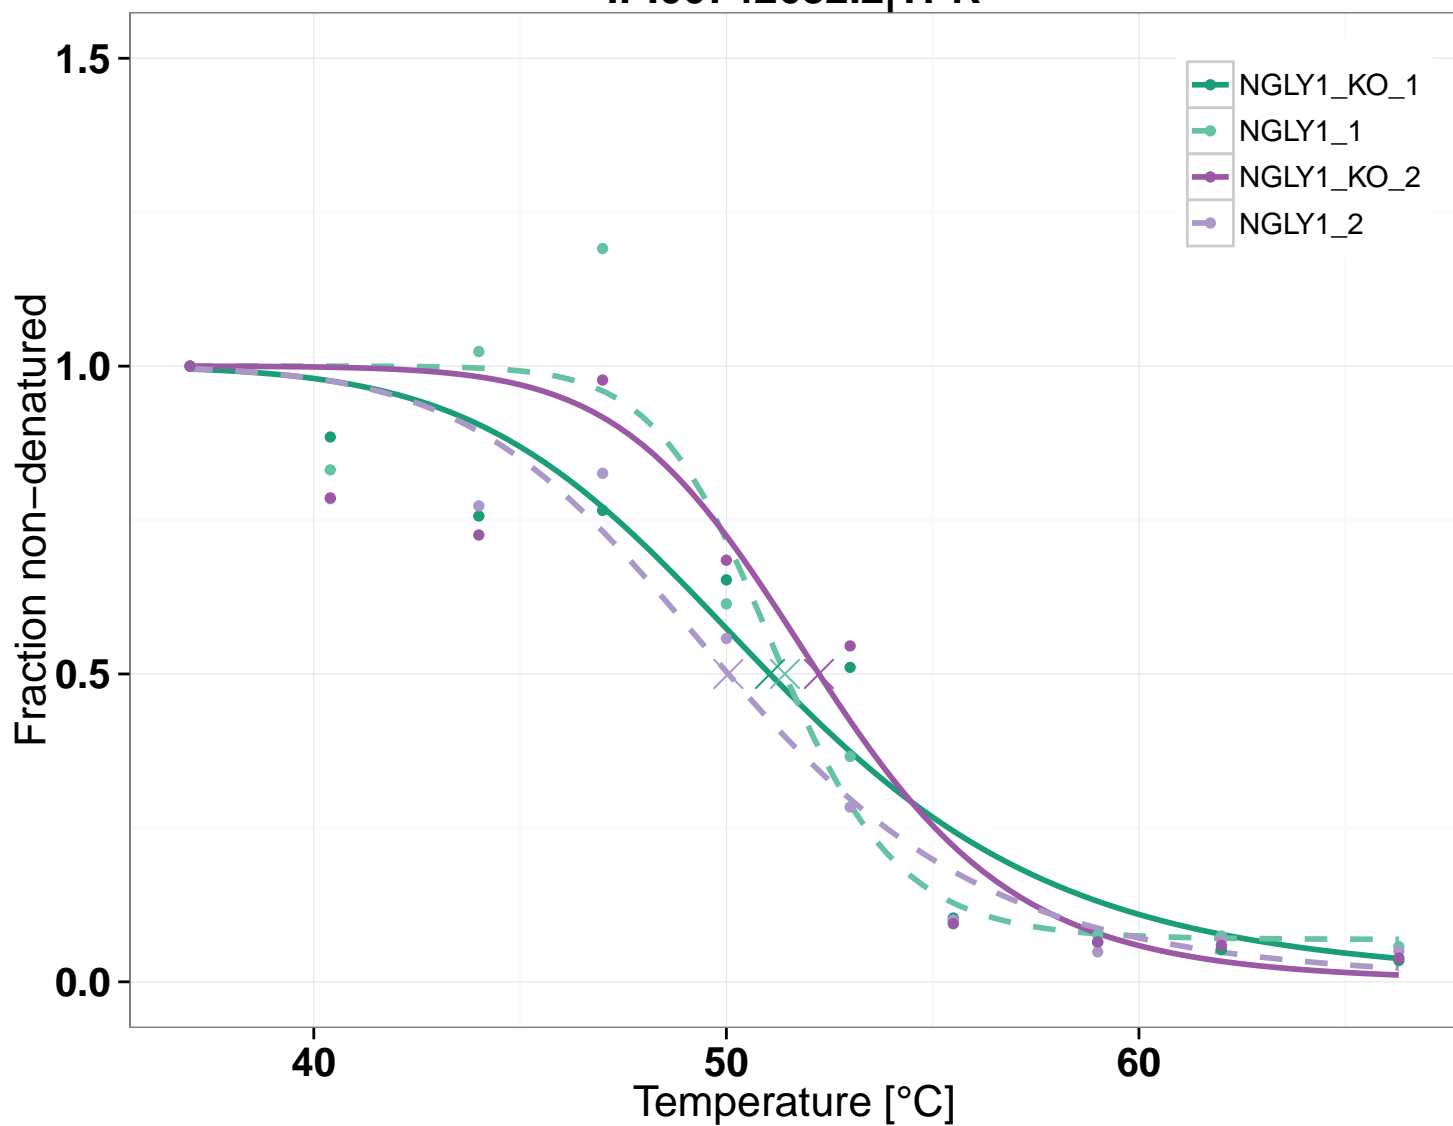

|            | meltPoint | slope  | plateau | R2   |
|------------|-----------|--------|---------|------|
| NGLY1_KO_1 | 51.06     | -0.07  | 0       | 0.94 |
| NGLY1_1    | 51.42     | -0.16  | 0.07    | 0.95 |
| NGLY1_KO_2 | 52.24     | -0.1   | 0       | 0.89 |
| NGLY1_2    | 50.05     | -0.079 | 0       | 0.94 |

Supplement: Supplementary file 8018 [file 1]

IPI00044683.1|ALS2CR4

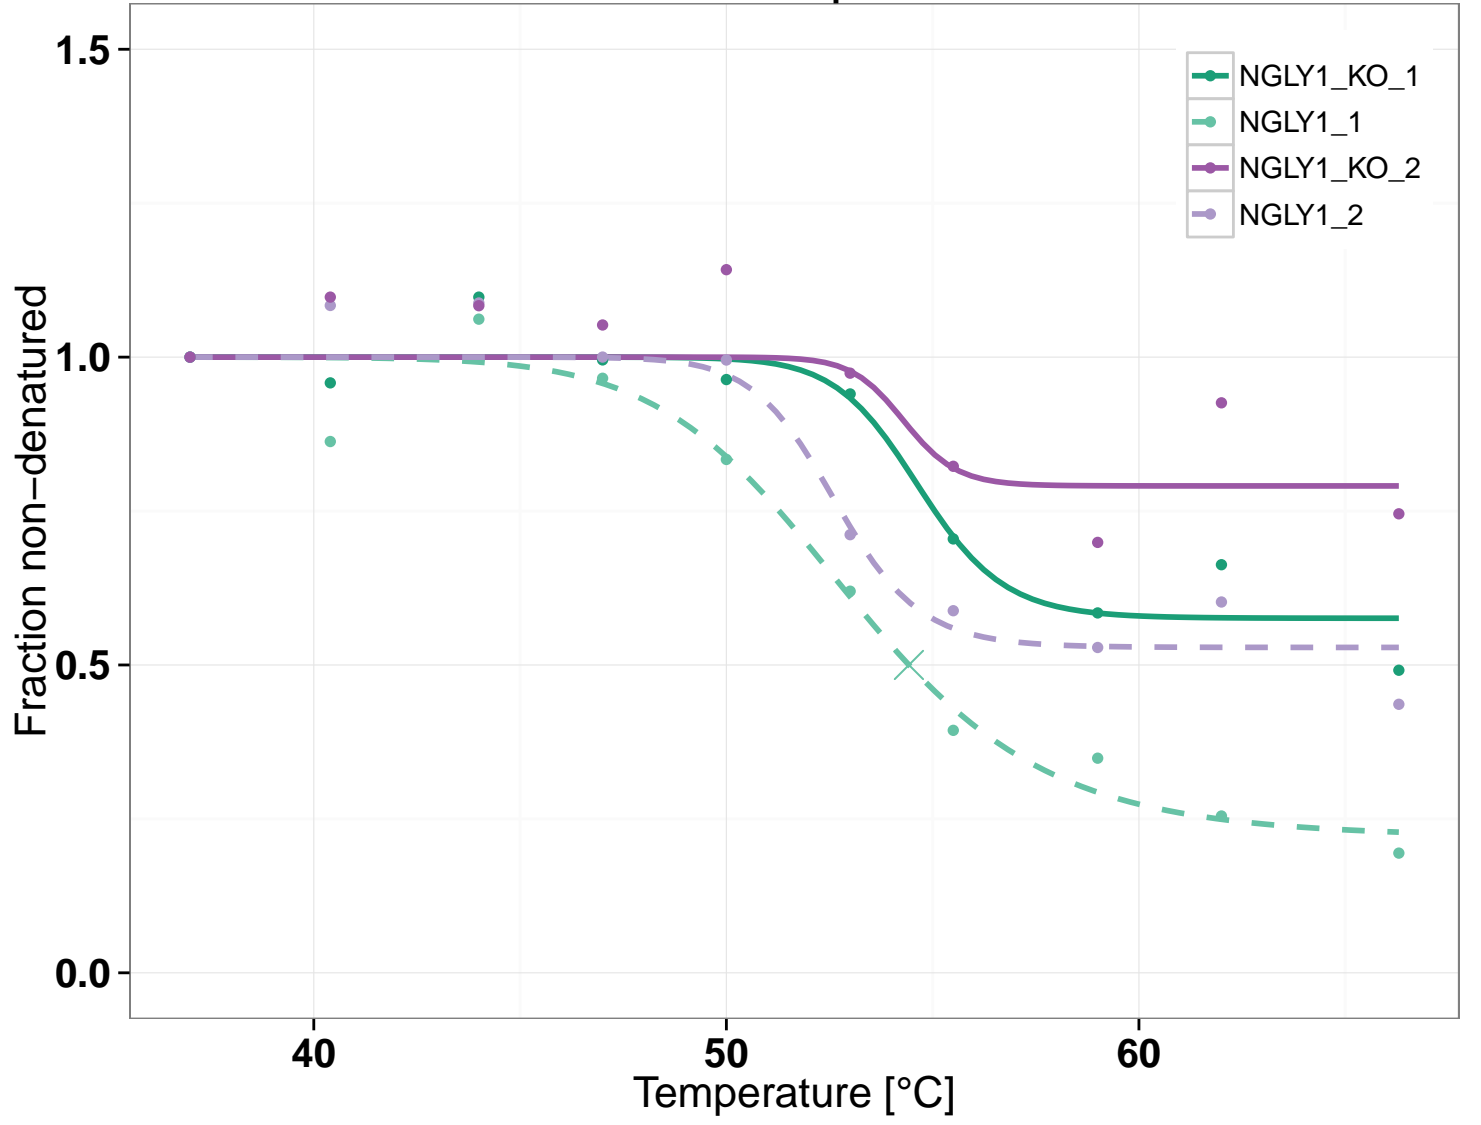

|            | meltPoint | slope  | plateau | R2   |
|------------|-----------|--------|---------|------|
| NGLY1_KO_1 | -         | -0.1   | 0.58    | 0.93 |
| NGLY1_1    | 54.43     | -0.083 | 0.22    | 0.97 |
| NGLY1_KO_2 | -         | -0.082 | 0.79    | 0.68 |
| NGLY1_2    | -         | -0.12  | 0.53    | 0.95 |

Supplement: Supplementary file 8019 [file 1]

# IPI00061229.1|OMA1

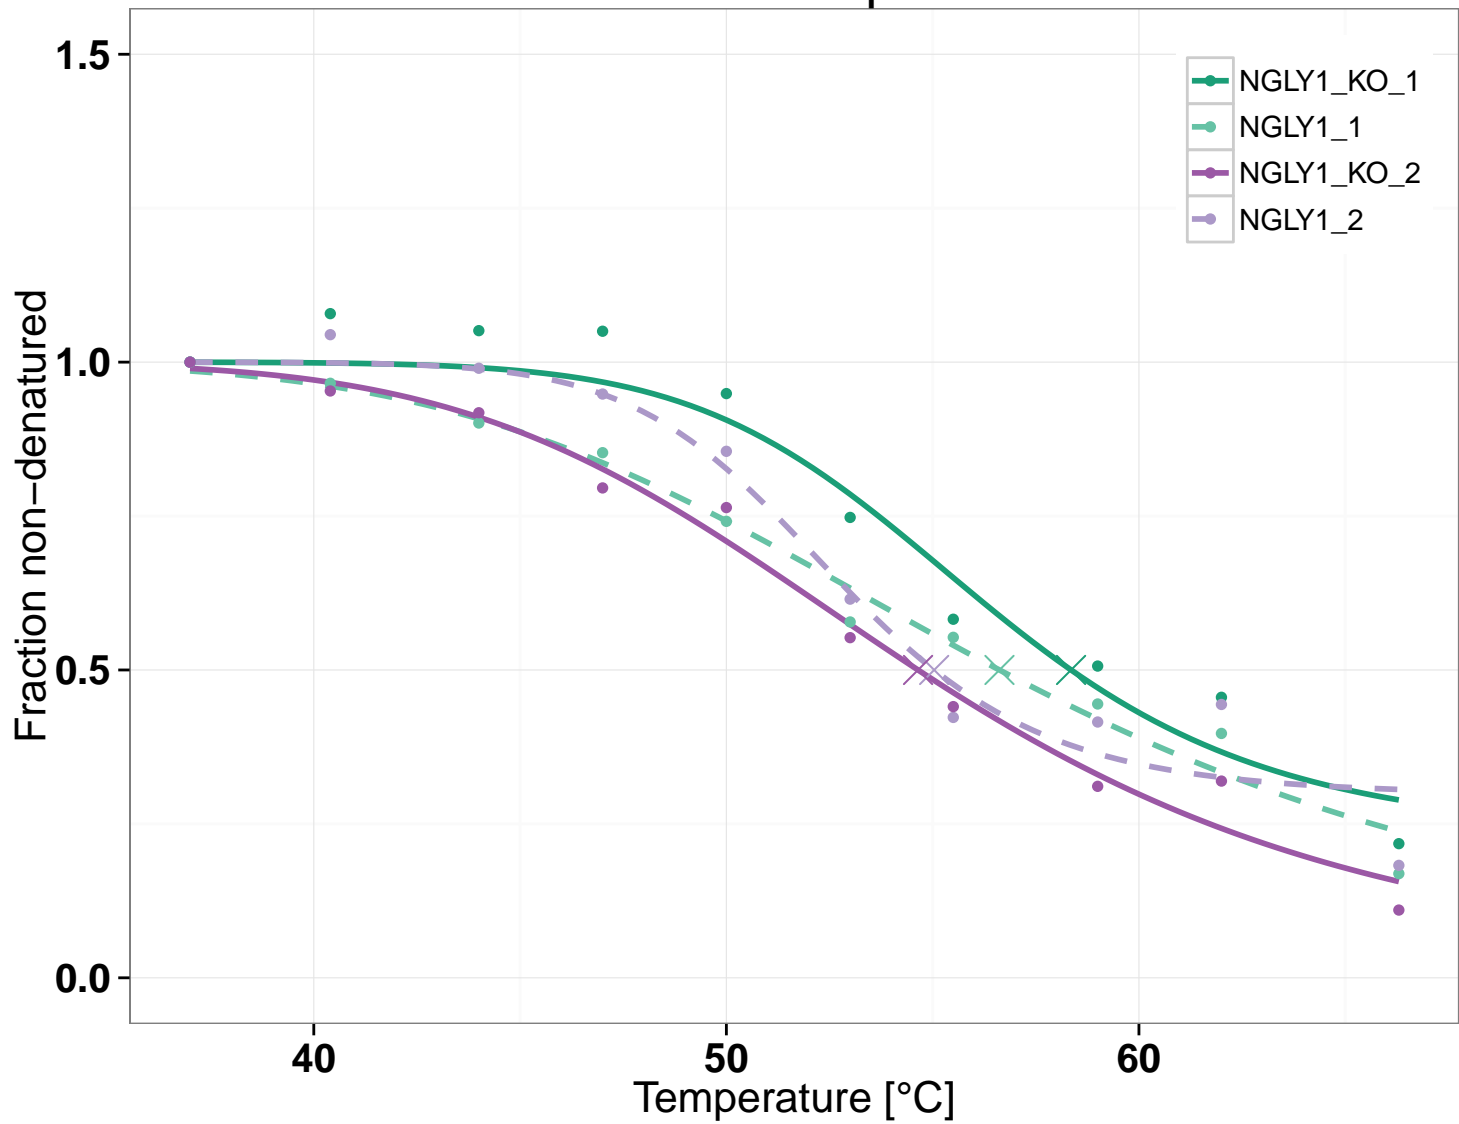

|            | meltPoint | slope  | plateau | R2   |
|------------|-----------|--------|---------|------|
| NGLY1_KO_1 | 58.36     | -0.056 | 0.23    | 0.95 |
| NGLY1_1    | 56.62     | -0.037 | 0       | 0.98 |
| NGLY1_KO_2 | 54.65     | -0.046 | 0       | 0.98 |
| NGLY1_2    | 55.04     | -0.071 | 0.3     | 0.96 |

Supplement: Supplementary file 8020 [file 1]

# IPI00018971.8|TRIM21

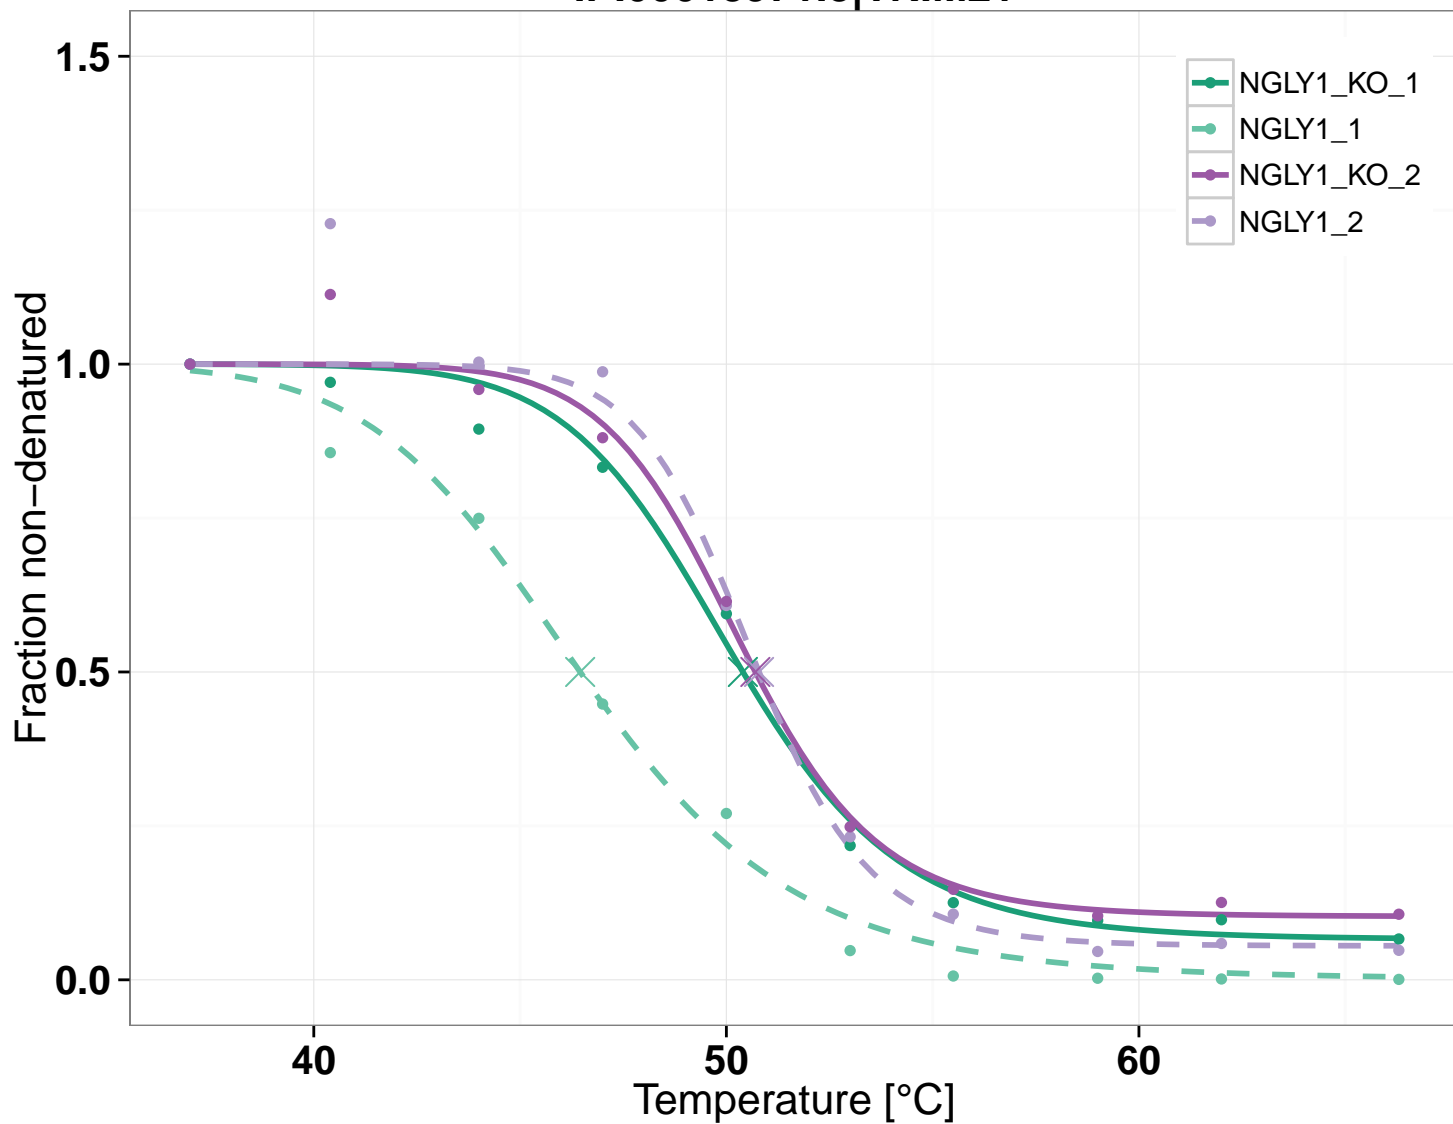

|            | meltPoint | slope  | plateau | R2   |
|------------|-----------|--------|---------|------|
| NGLY1_KO_1 | 50.4      | -0.12  | 0.07    | 0.99 |
| NGLY1_1    | 46.46     | -0.097 | 0       | 0.99 |
| NGLY1_KO_2 | 50.7      | -0.13  | 0.1     | 0.99 |
| NGLY1_2    | 50.79     | -0.17  | 0.06    | 0.97 |

Supplement: Supplementary file 8021 [file 1]

# IPI00895781.1|GPBP1

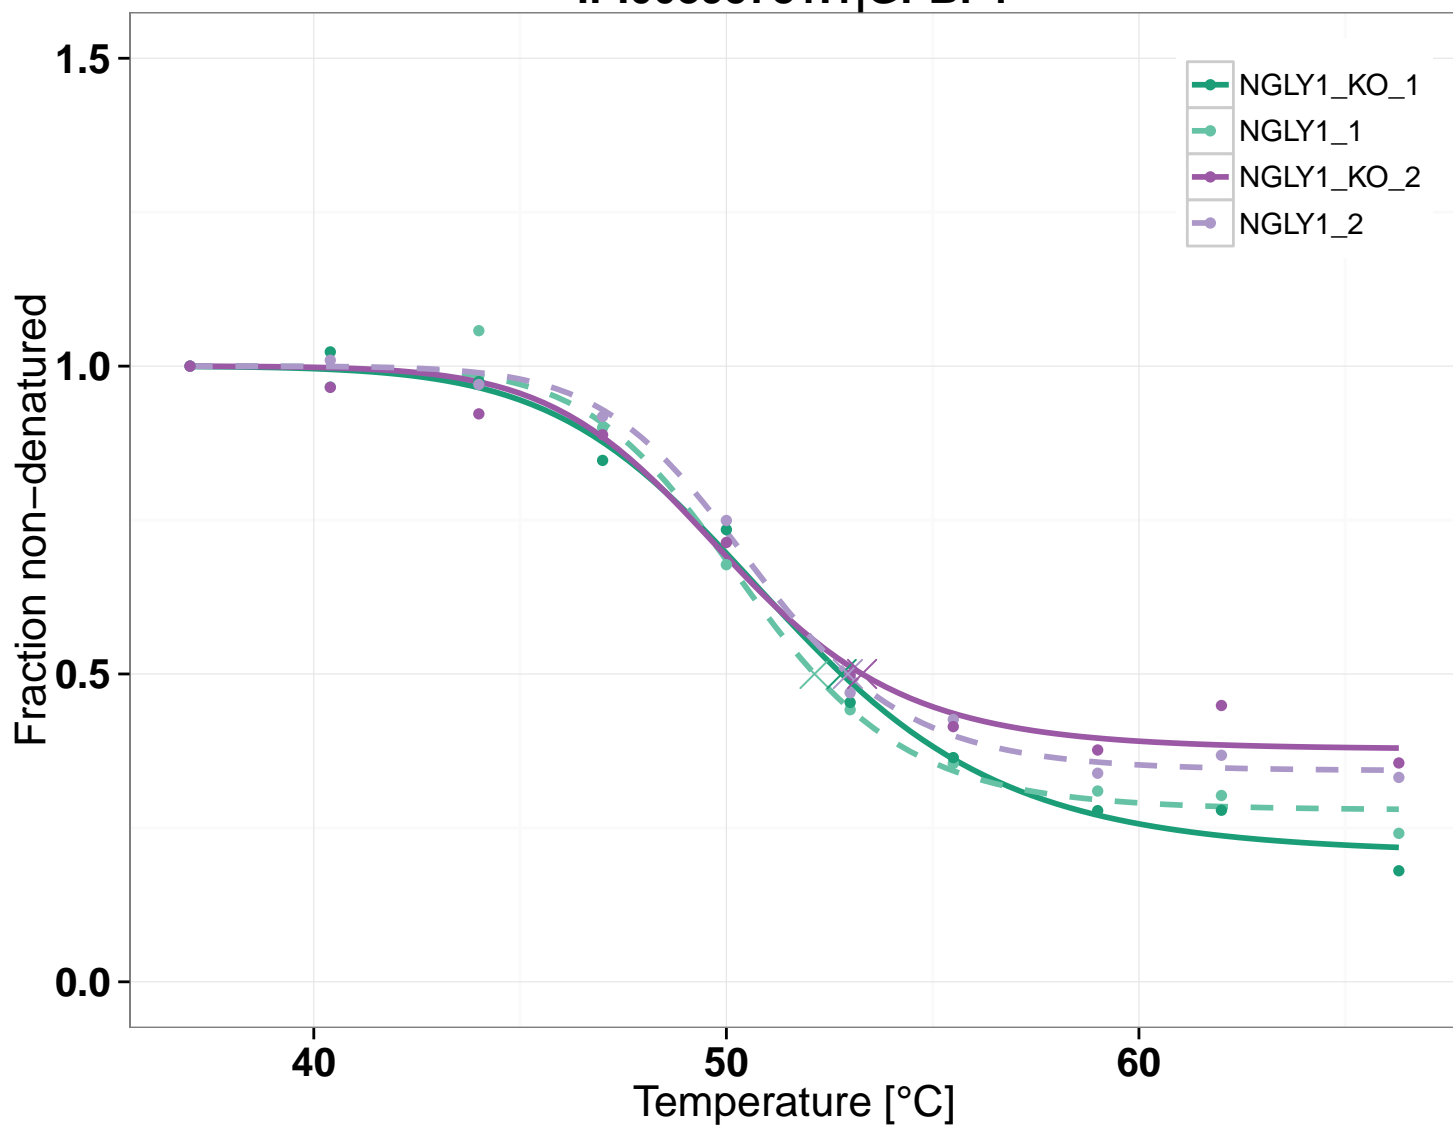

|            | meltPoint | slope  | plateau | R2   |
|------------|-----------|--------|---------|------|
| NGLY1_KO_1 | 52.79     | -0.073 | 0.21    | 0.99 |
| NGLY1_1    | 52.14     | -0.093 | 0.28    | 0.99 |
| NGLY1_KO_2 | 53.29     | -0.072 | 0.38    | 0.98 |
| NGLY1_2    | 52.95     | -0.088 | 0.34    | 1    |

Supplement: Supplementary file 8022 [file 1]

# IPI00304379.1|USP1

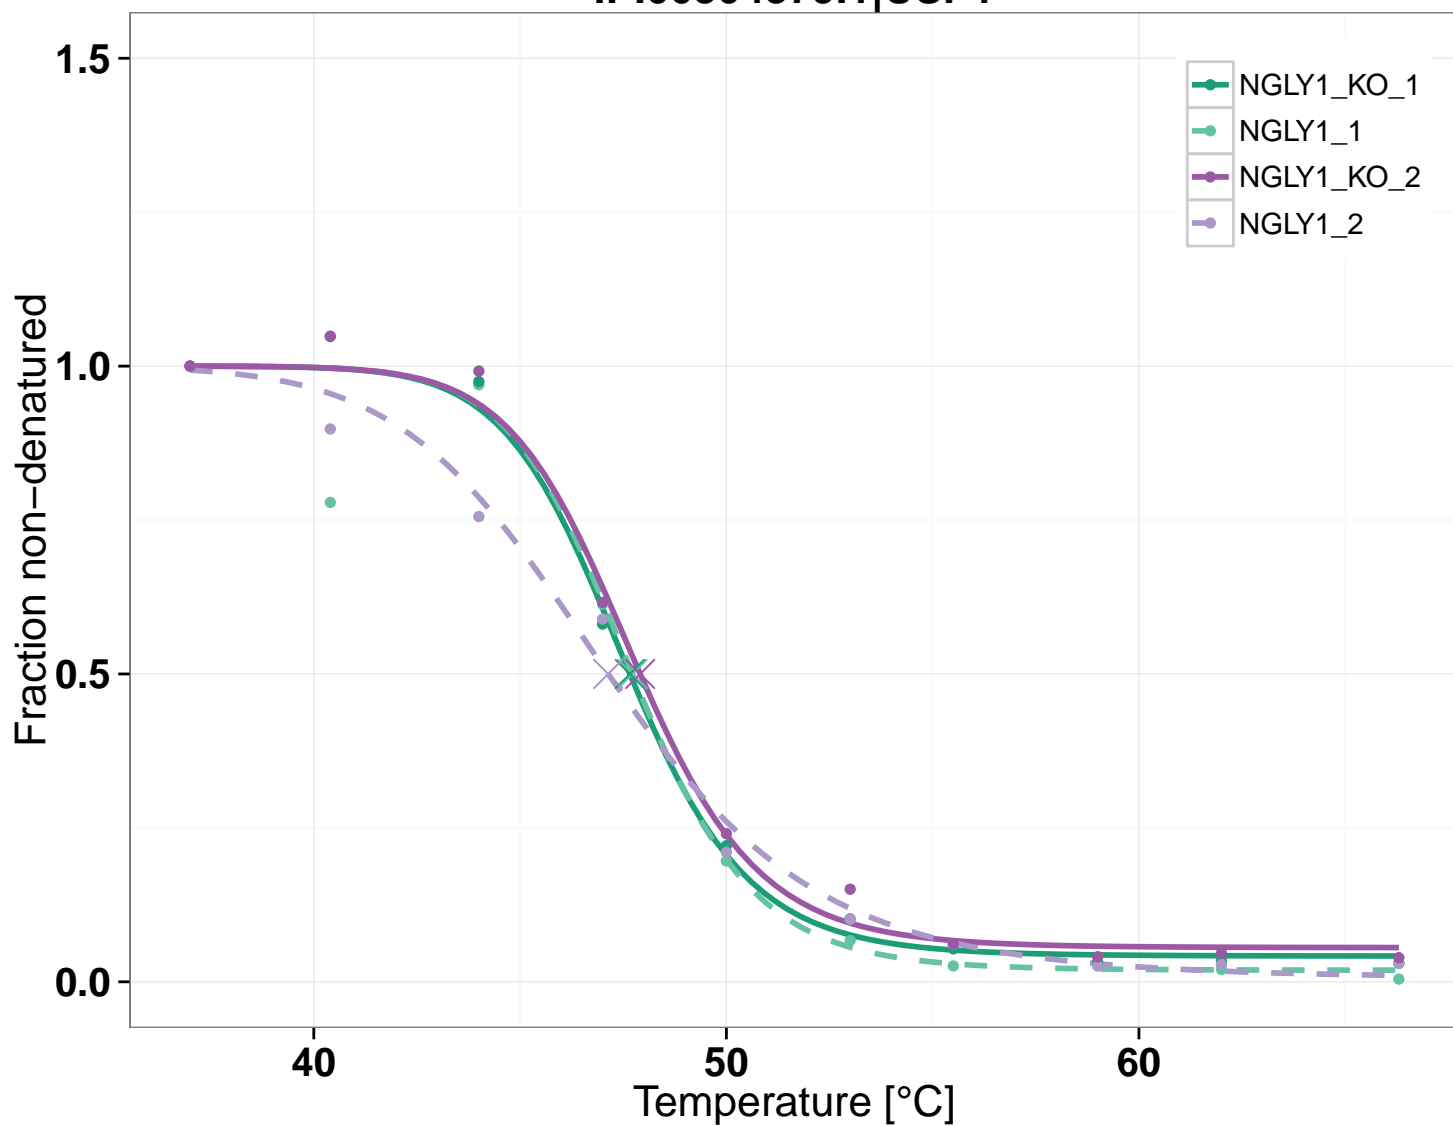

|            | meltPoint | slope  | plateau | R2   |
|------------|-----------|--------|---------|------|
| NGLY1_KO_1 | 47.66     | -0.16  | 0.04    | 1    |
| NGLY1_1    | 47.72     | -0.17  | 0.02    | 0.97 |
| NGLY1_KO_2 | 47.91     | -0.16  | 0.06    | 0.99 |
| NGLY1_2    | 47.14     | -0.098 | 0.01    | 0.99 |

Supplement: Supplementary file 8023 [file 1]

IPI00410162.1|TCEB2

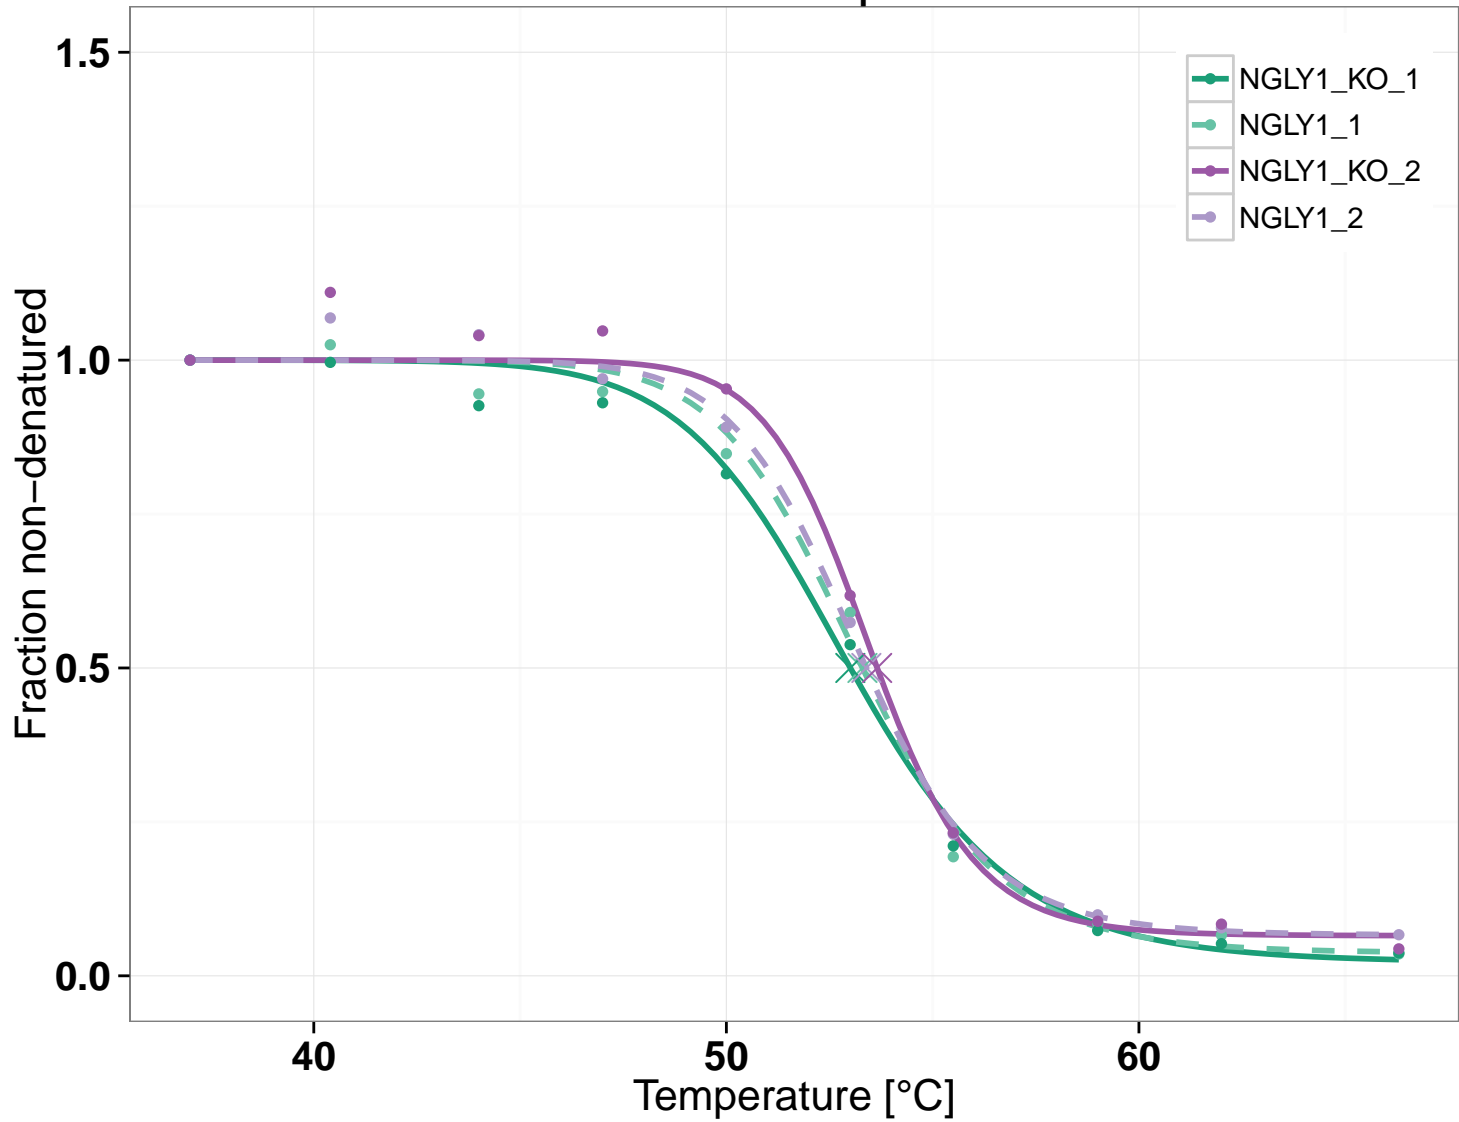

|            | meltPoint | slope | plateau | R2   |
|------------|-----------|-------|---------|------|
| NGLY1_KO_1 | 53.01     | -0.12 | 0.02    | 0.99 |
| NGLY1_1    | 53.3      | -0.14 | 0.04    | 0.99 |
| NGLY1_KO_2 | 53.65     | -0.18 | 0.07    | 0.99 |
| NGLY1_2    | 53.39     | -0.15 | 0.07    | 1    |

Supplement: Supplementary file 8024 [file 1]

# IPI00305337.1|RFX1

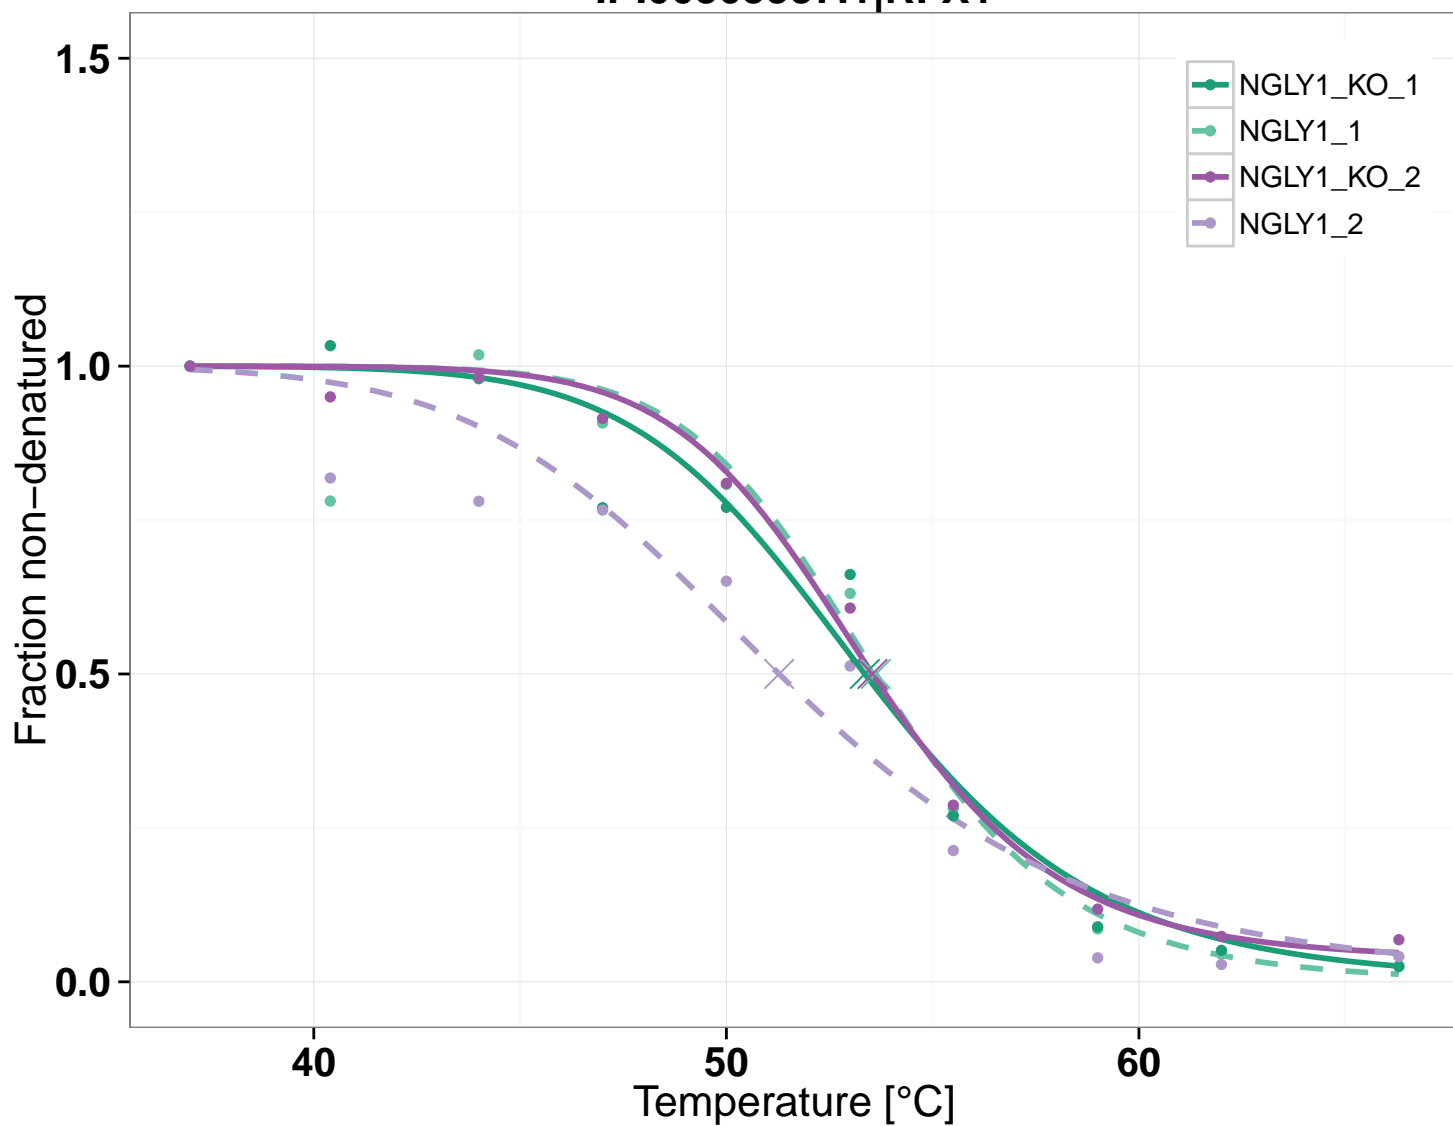

|            | meltPoint | slope  | plateau | R2   |
|------------|-----------|--------|---------|------|
| NGLY1_KO_1 | 53.36     | -0.088 | 0       | 0.97 |
| NGLY1_1    | 53.62     | -0.11  | 0       | 0.96 |
| NGLY1_KO_2 | 53.54     | -0.1   | 0.04    | 0.99 |
| NGLY1_2    | 51.28     | -0.067 | 0       | 0.94 |

Supplement: Supplementary file 8025 [file 1]

IPI00744637.2|RUFY1

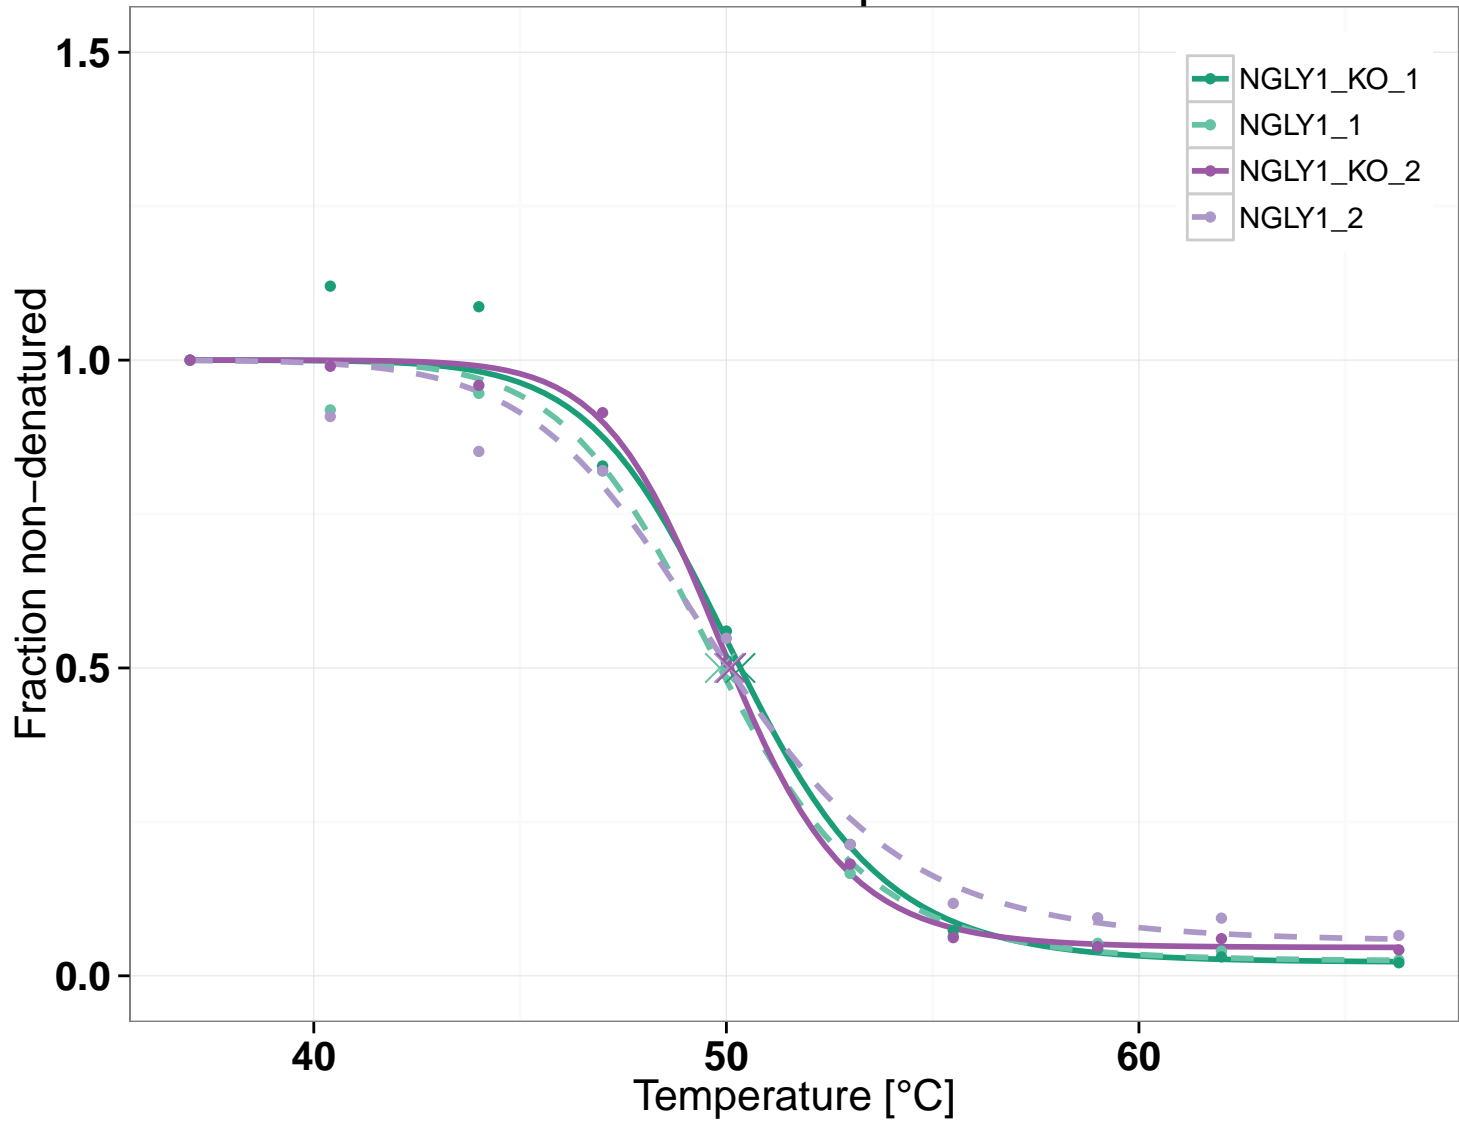

|            | meltPoint | slope | plateau | R2   |
|------------|-----------|-------|---------|------|
| NGLY1_KO_1 | 50.34     | -0.14 | 0.02    | 0.99 |
| NGLY1_1    | 49.84     | -0.13 | 0.02    | 0.99 |
| NGLY1_KO_2 | 50.11     | -0.16 | 0.05    | 1    |
| NGLY1_2    | 50.06     | -0.1  | 0.06    | 0.98 |

Supplement: Supplementary file 8026 [file 1]

IPI00001786.5|USP36

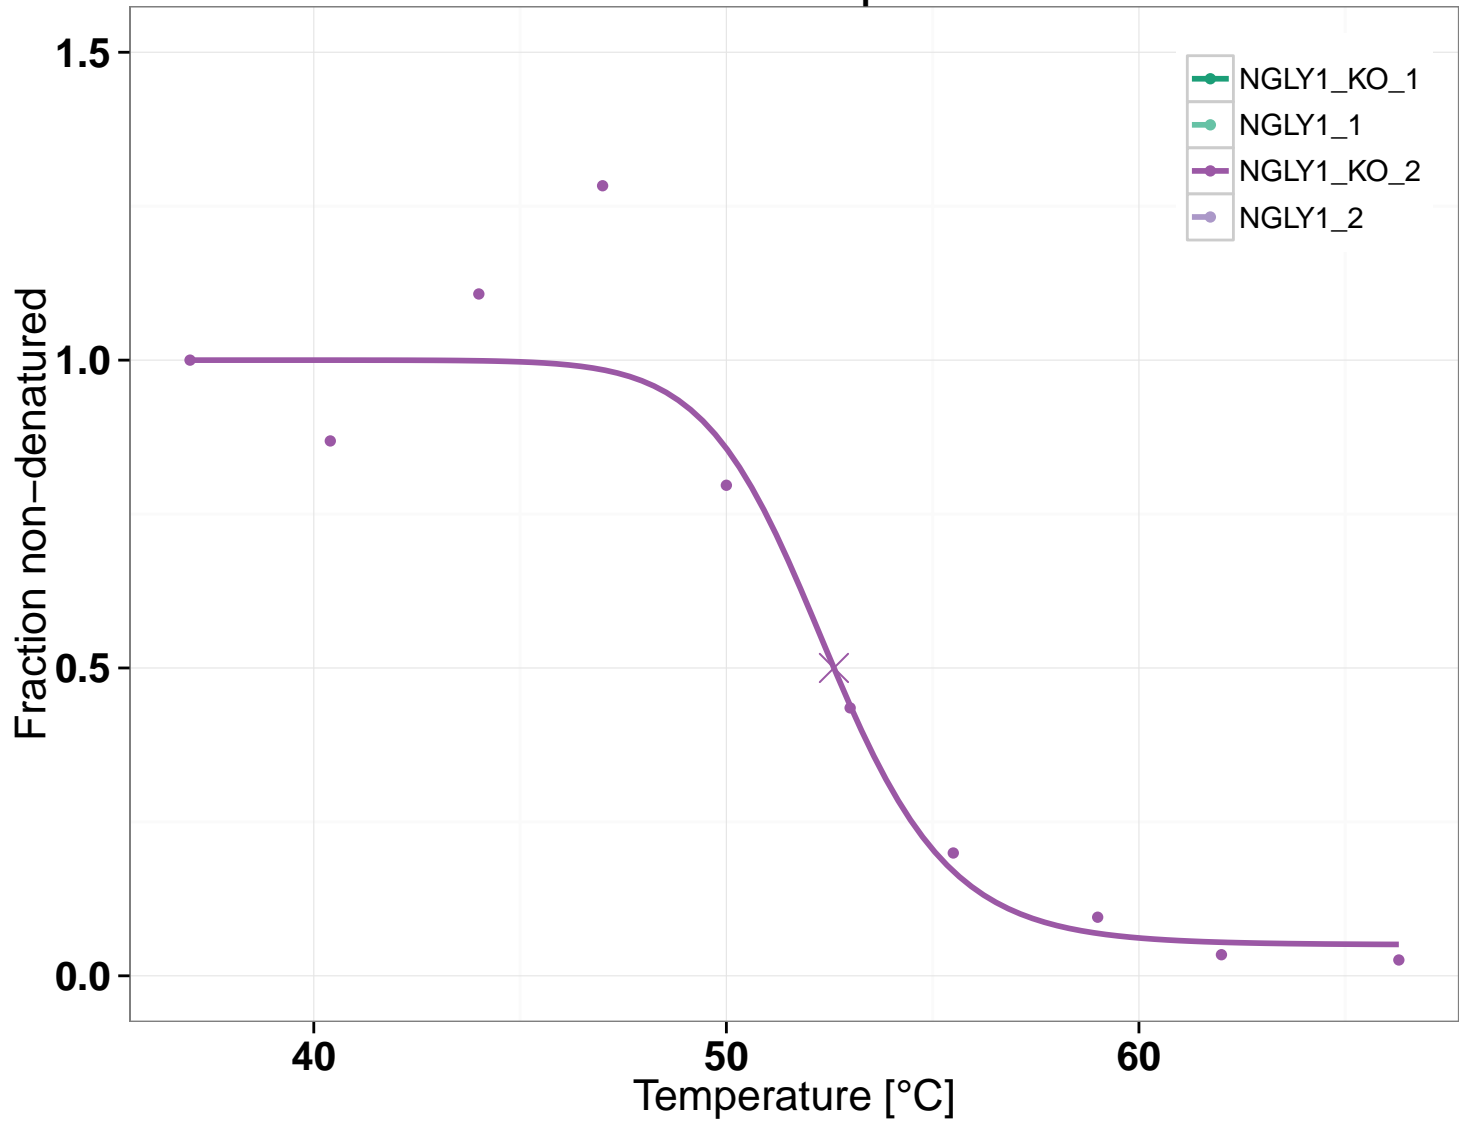

|            | meltPoint | slope | plateau | R2   |
|------------|-----------|-------|---------|------|
| NGLY1_KO_1 | —         | —     | —       | —    |
| NGLY1_1    | —         | —     | —       | —    |
| NGLY1_KO_2 | 52.61     | -0.16 | 0.05    | 0.94 |
| NGLY1_2    | —         | —     | —       | —    |

Supplement: Supplementary file 8027 [file 1]

IPI00291643.3|SPRYD4

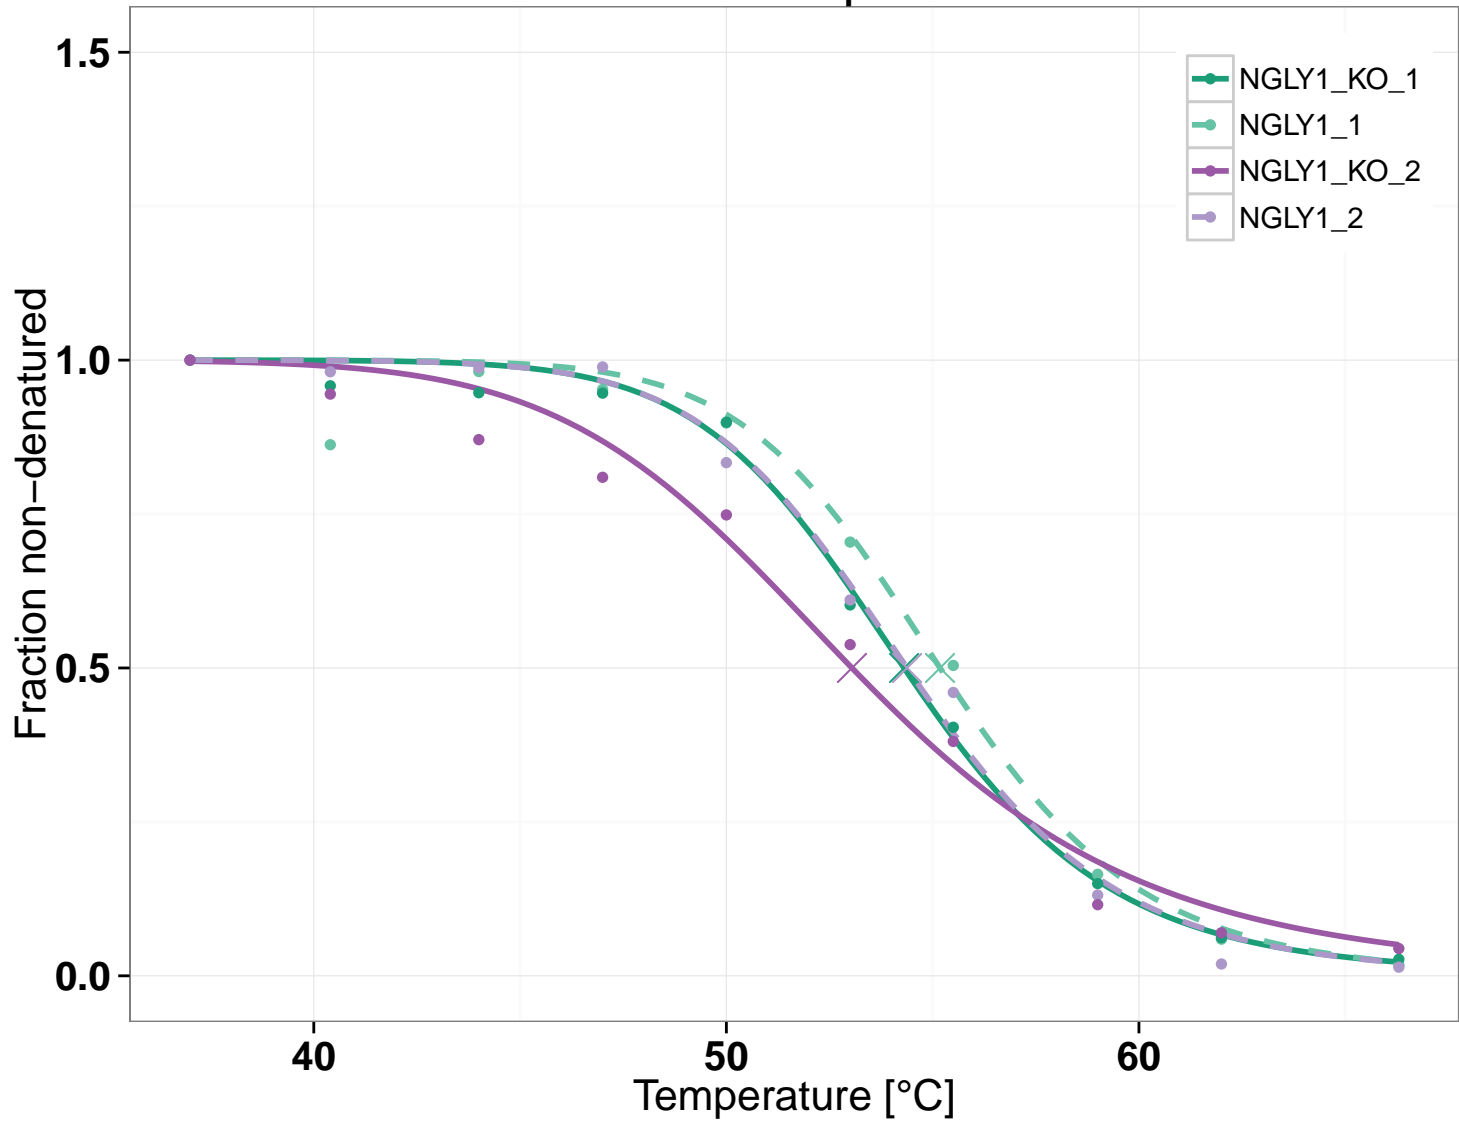

|            | meltPoint | slope  | plateau | R2   |
|------------|-----------|--------|---------|------|
| NGLY1_KO_1 | 54.31     | -0.1   | 0       | 1    |
| NGLY1_1    | 55.18     | -0.1   | 0       | 0.98 |
| NGLY1_KO_2 | 53.04     | -0.07  | 0       | 0.98 |
| NGLY1_2    | 54.38     | -0.099 | 0       | 0.99 |

Supplement: Supplementary file 8028 [file 1]

# IPI00009771.6|LMNB2

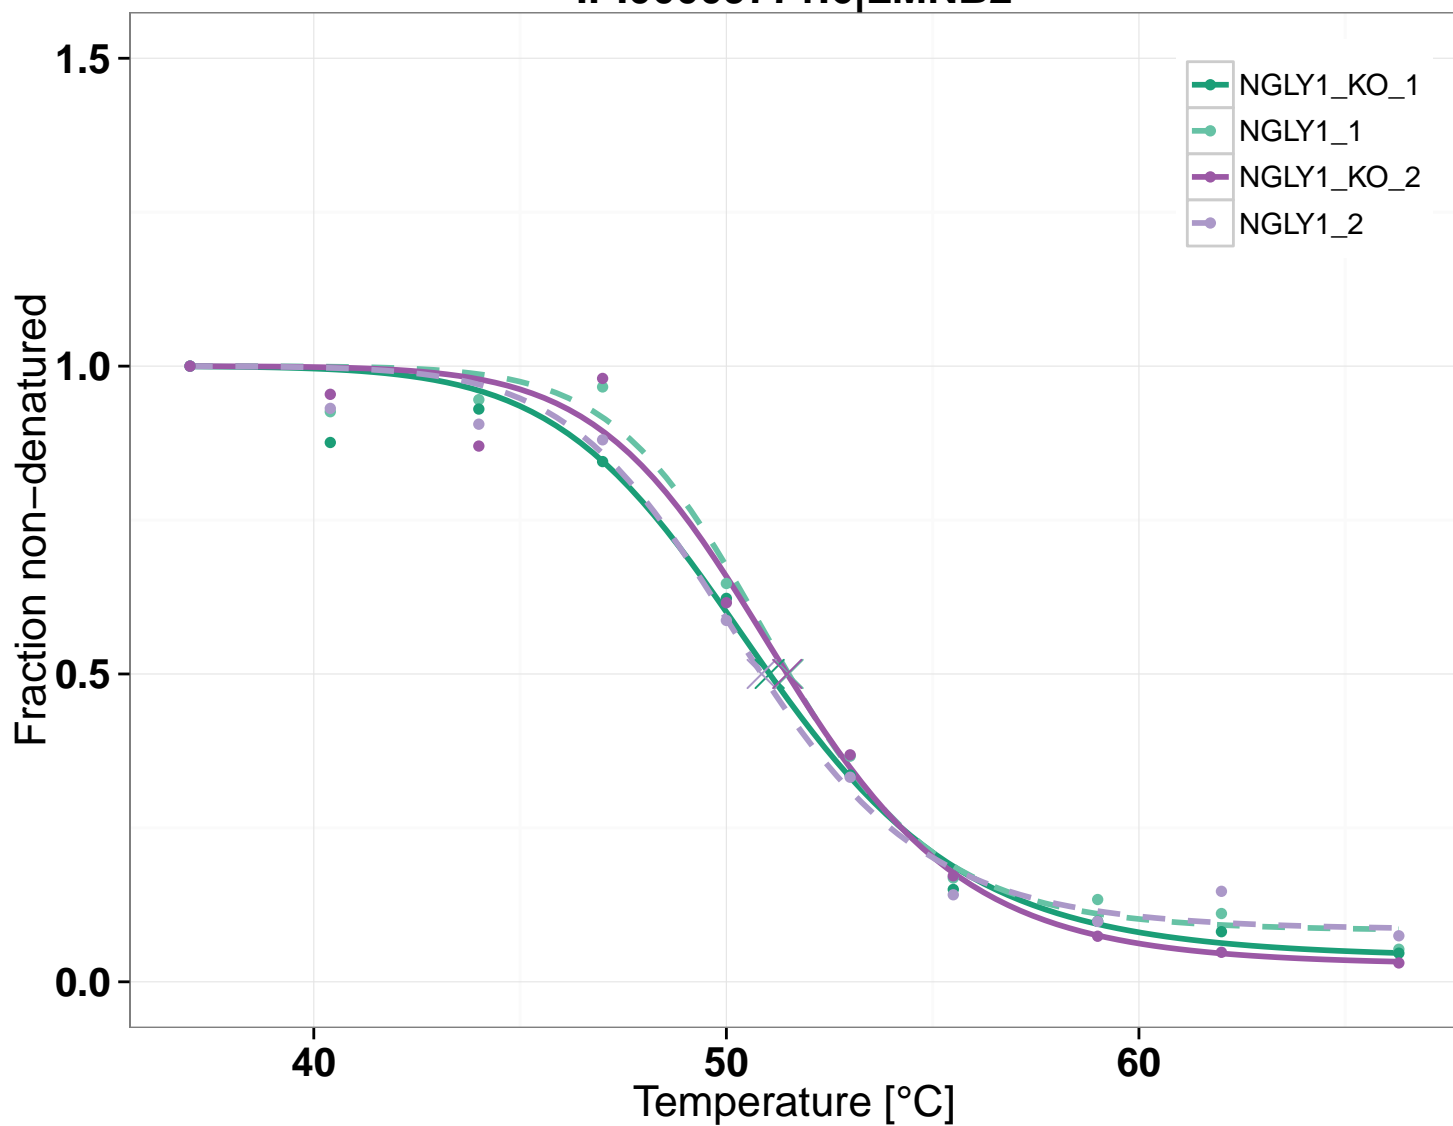

|            | meltPoint | slope  | plateau | R2   |
|------------|-----------|--------|---------|------|
| NGLY1_KO_1 | 51.05     | -0.096 | 0.04    | 0.99 |
| NGLY1_1    | 51.51     | -0.12  | 0.08    | 0.99 |
| NGLY1_KO_2 | 51.48     | -0.11  | 0.03    | 0.99 |
| NGLY1_2    | 50.86     | -0.11  | 0.08    | 0.99 |

Supplement: Supplementary file 8029 [file 1]

# IPI00006171.2|NFRKB

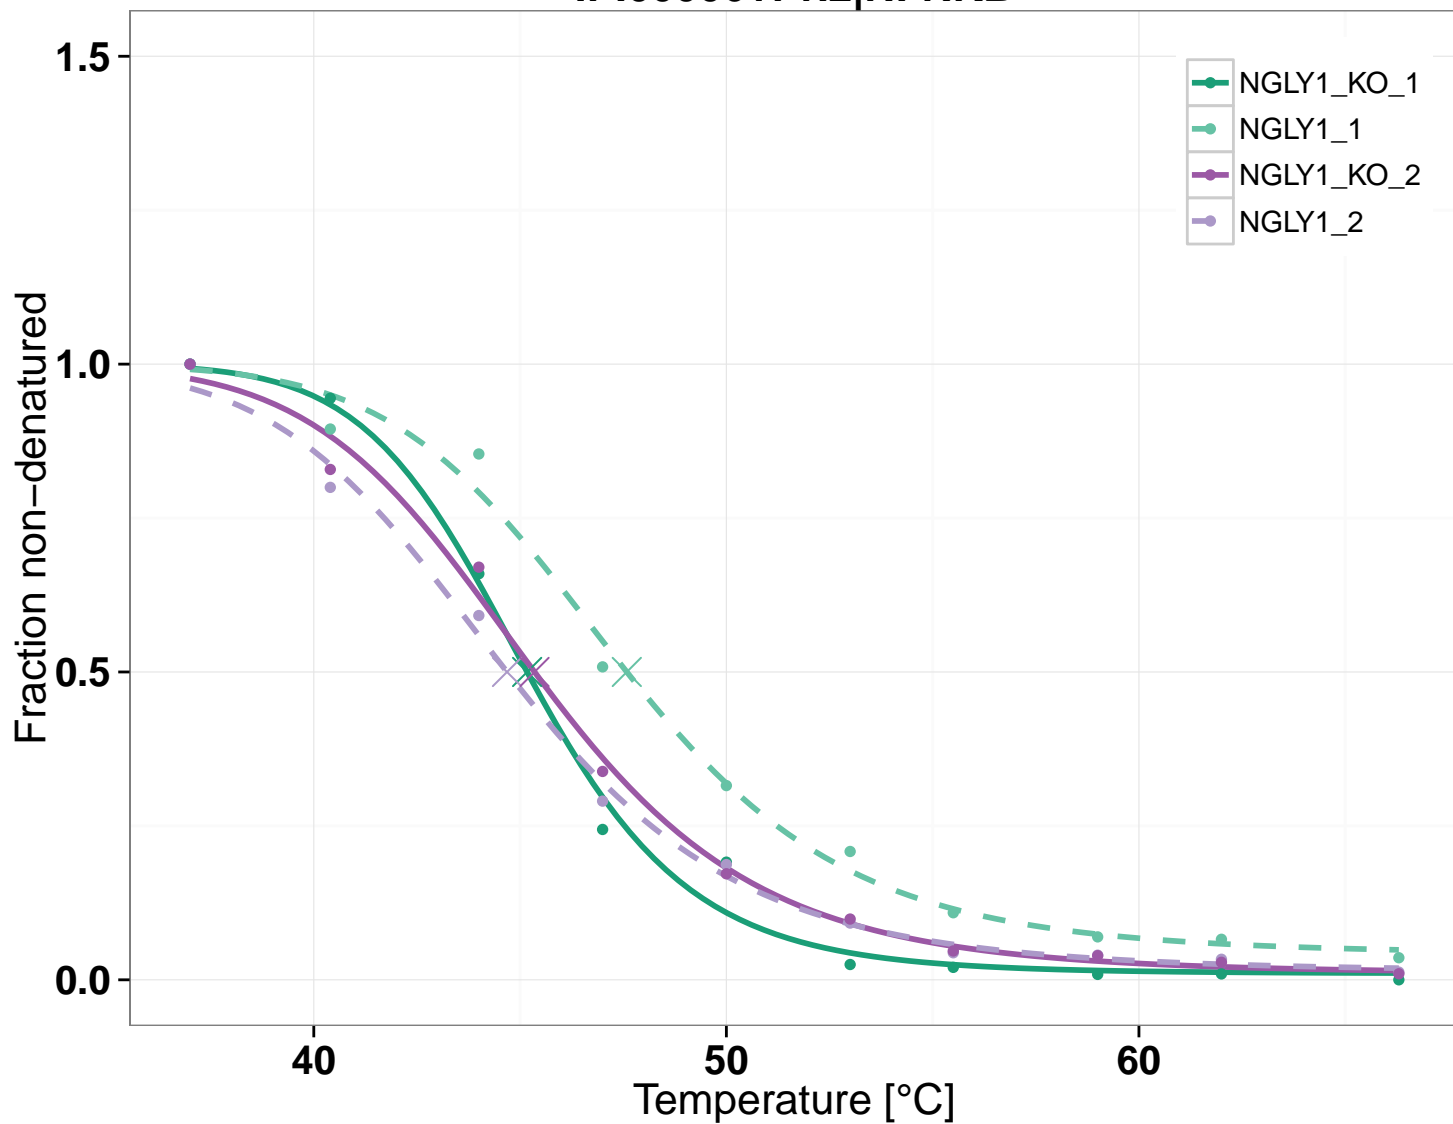

|            | meltPoint | slope  | plateau | R2   |
|------------|-----------|--------|---------|------|
| NGLY1_KO_1 | 45.17     | -0.12  | 0.01    | 0.99 |
| NGLY1_1    | 47.59     | -0.087 | 0.04    | 0.99 |
| NGLY1_KO_2 | 45.35     | -0.092 | 0.01    | 0.99 |
| NGLY1_2    | 44.68     | -0.087 | 0.01    | 1    |

Supplement: Supplementary file 8030 [file 1]

IPI00008219.1|RAD23A

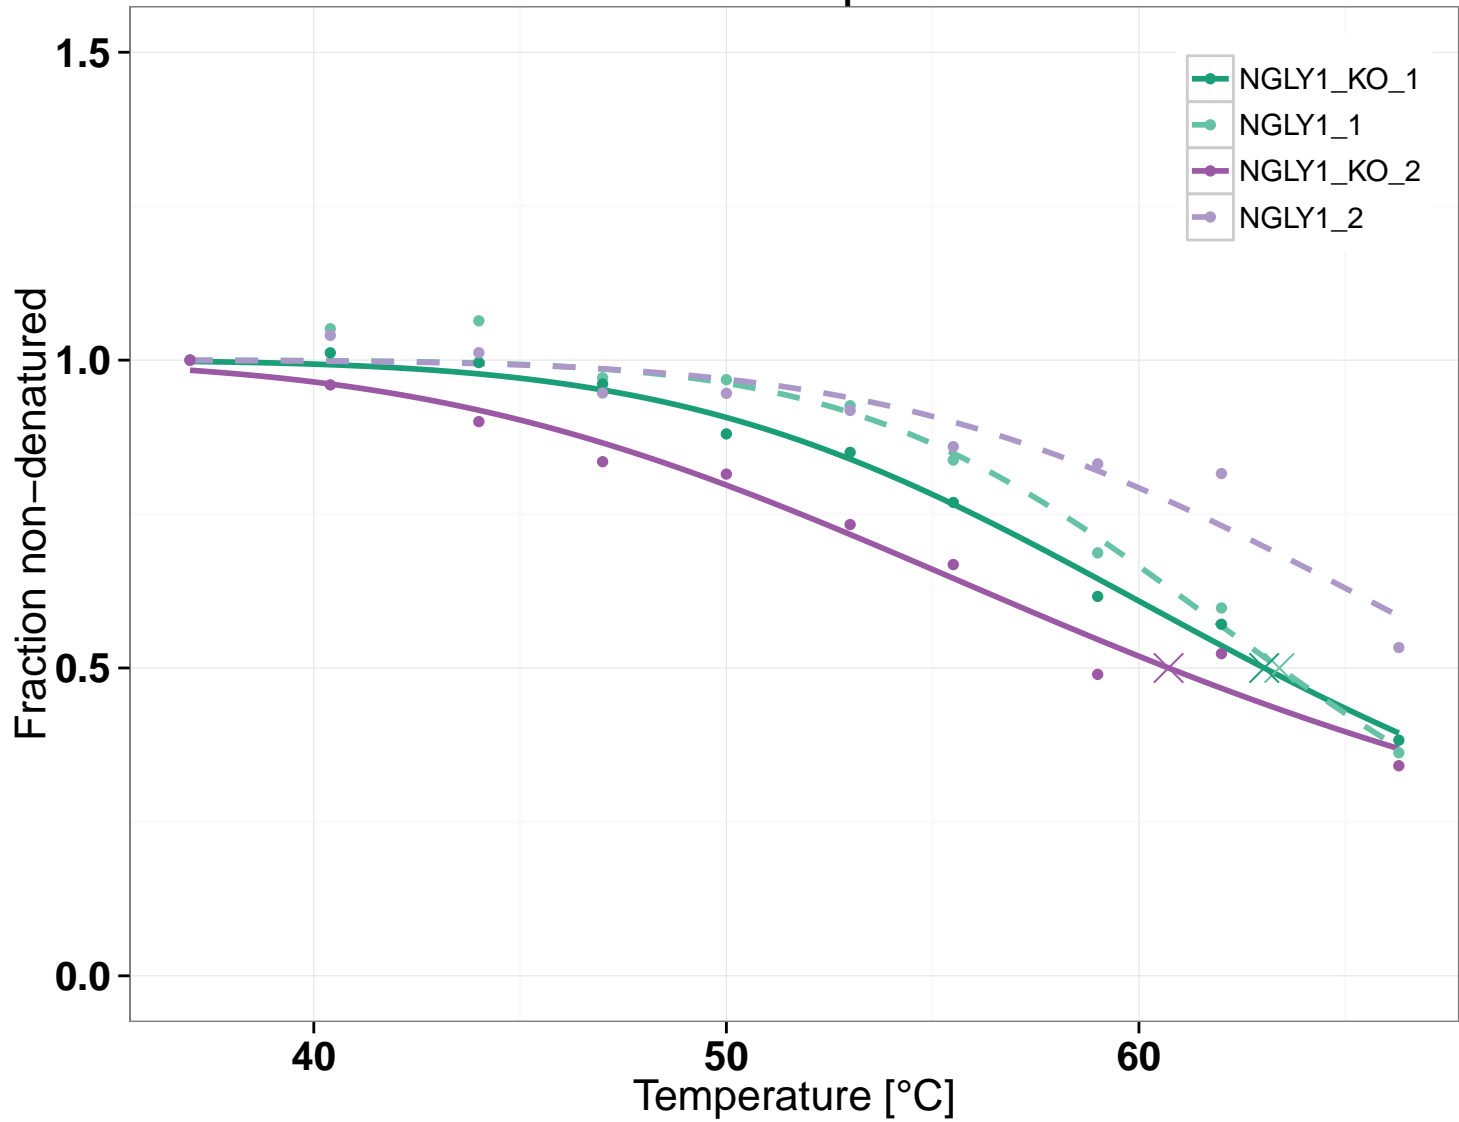

|            | meltPoint | slope  | plateau | R2   |
|------------|-----------|--------|---------|------|
| NGLY1_KO_1 | 63.04     | -0.036 | 0       | 0.99 |
| NGLY1_1    | 63.4      | -0.049 | 0       | 0.98 |
| NGLY1_KO_2 | 60.72     | -0.029 | 0       | 0.98 |
| NGLY1_2    | -         | -0.035 | 0       | 0.92 |

Supplement: Supplementary file 8031 [file 1]

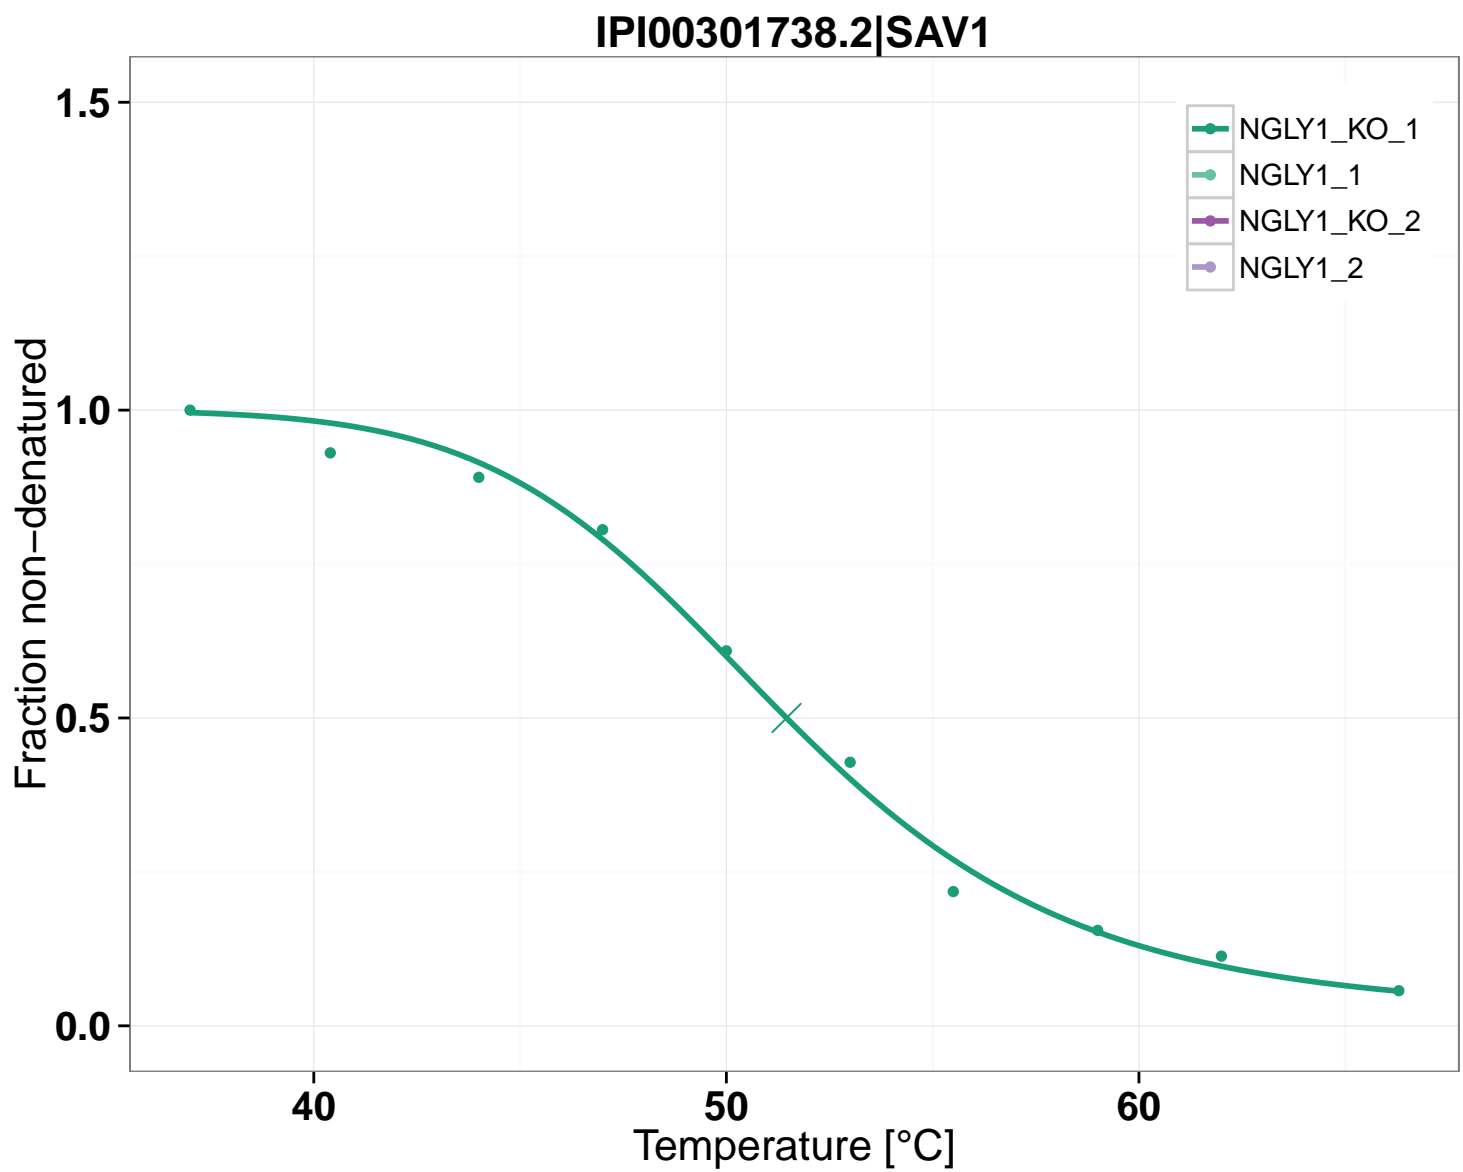

|            | meltPoint | slope  | plateau | R2   |
|------------|-----------|--------|---------|------|
| NGLY1_KO_1 | 51.46     | -0.069 | 0.02    | 0.99 |
| NGLY1_1    | -         | -      | -       | -    |
| NGLY1_KO_2 | -         | -      | -       | -    |
| NGLY1_2    | -         | -      | -       | -    |

Supplement: Supplementary file 8032 [file 1]

# IPI00788907.2|PGAM5

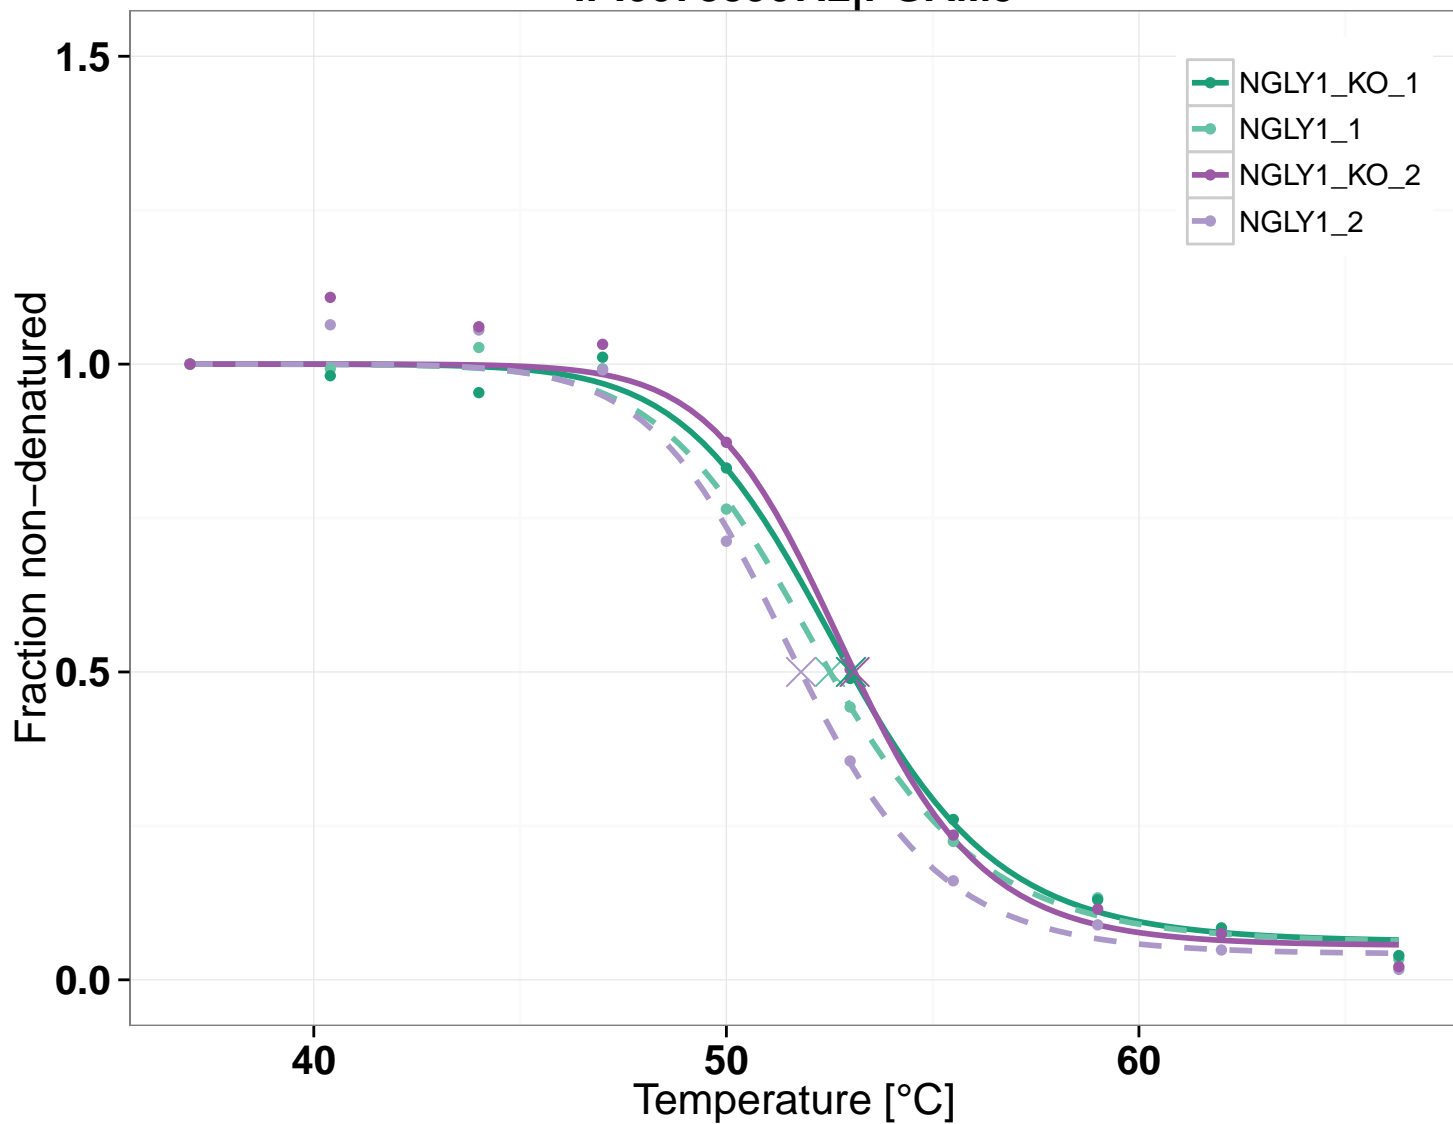

|            | meltPoint | slope | plateau | R2   |
|------------|-----------|-------|---------|------|
| NGLY1_KO_1 | 53.02     | -0.12 | 0.06    | 1    |
| NGLY1_1    | 52.51     | -0.12 | 0.06    | 1    |
| NGLY1_KO_2 | 53.11     | -0.14 | 0.06    | 0.99 |
| NGLY1_2    | 51.81     | -0.14 | 0.04    | 0.99 |

Supplement: Supplementary file 8033 [file 1]

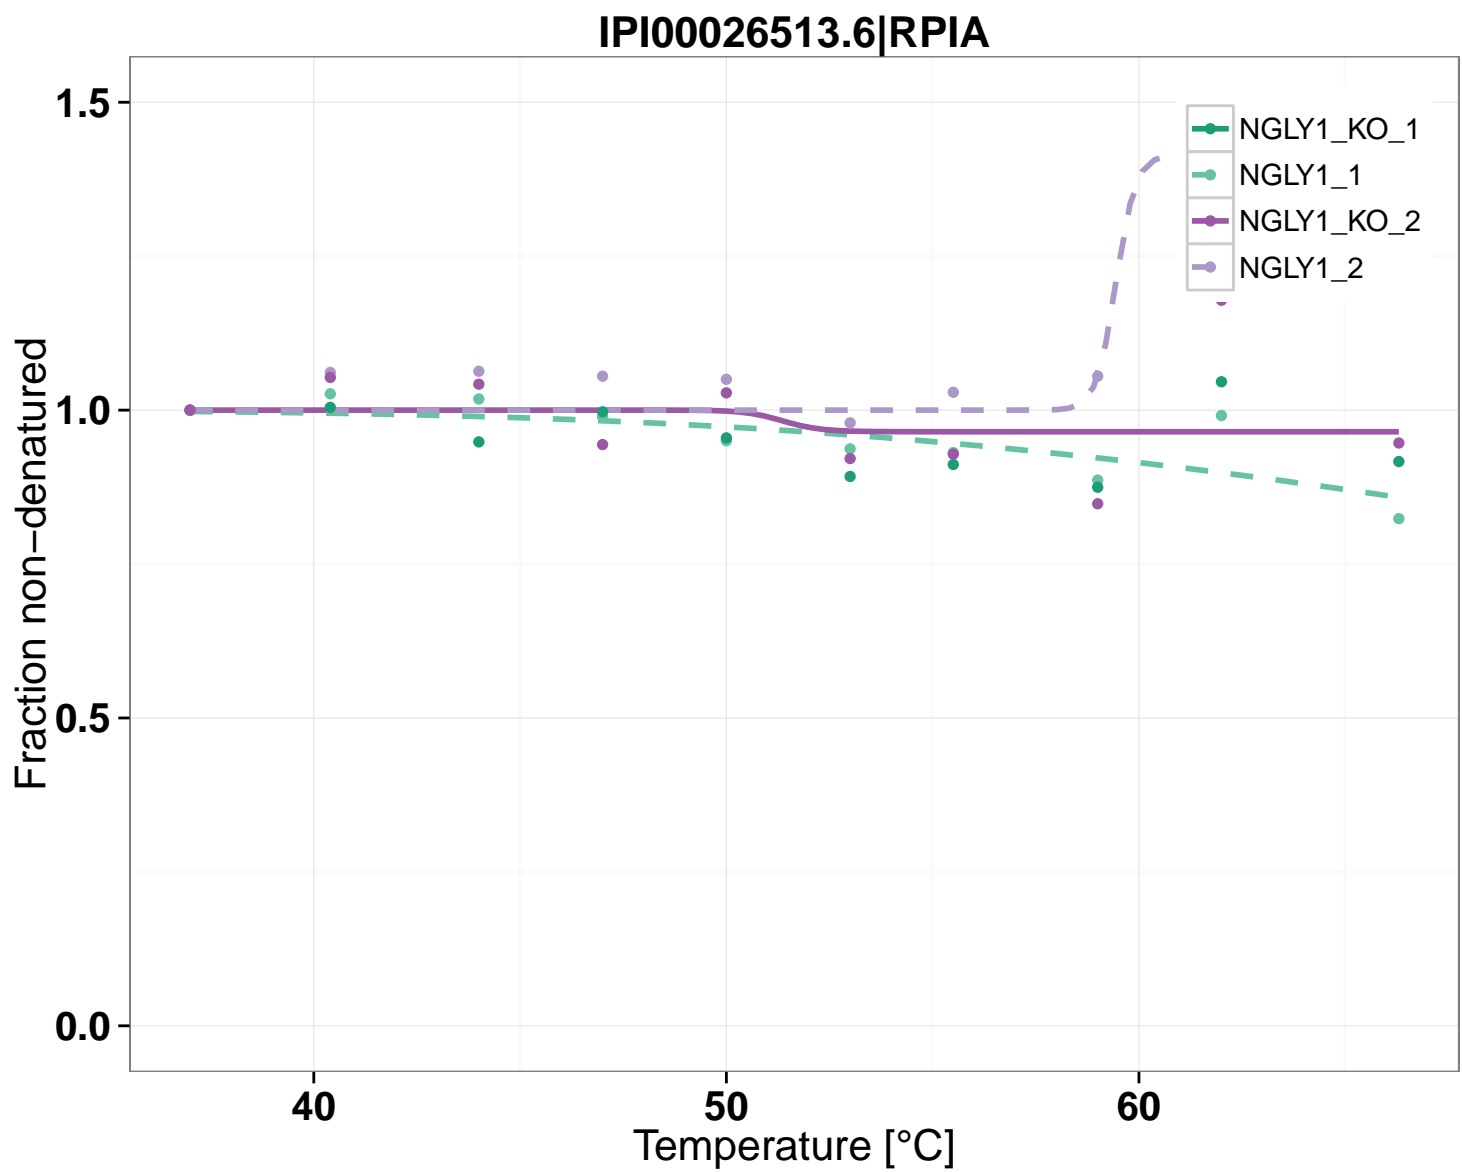

|            | meltPoint | slope  | plateau | R2   |
|------------|-----------|--------|---------|------|
| NGLY1_KO_1 | –         | –      | –       | –    |
| NGLY1_1    | –         | –      | 0       | 0.61 |
| NGLY1_KO_2 | –         | –0.019 | 0.96    | 0.06 |
| NGLY1_2    | –         | 0.44   | 1.41    | 0.94 |

Supplement: Supplementary file 8034 [file 1]
