# Supplementary material (part 81 of 85)
Source: publisher figshare collection journal article supplement (https://gsajournals.figshare.com/articles/dataset/_/12014913)

IPI00914926.1|ACAD10

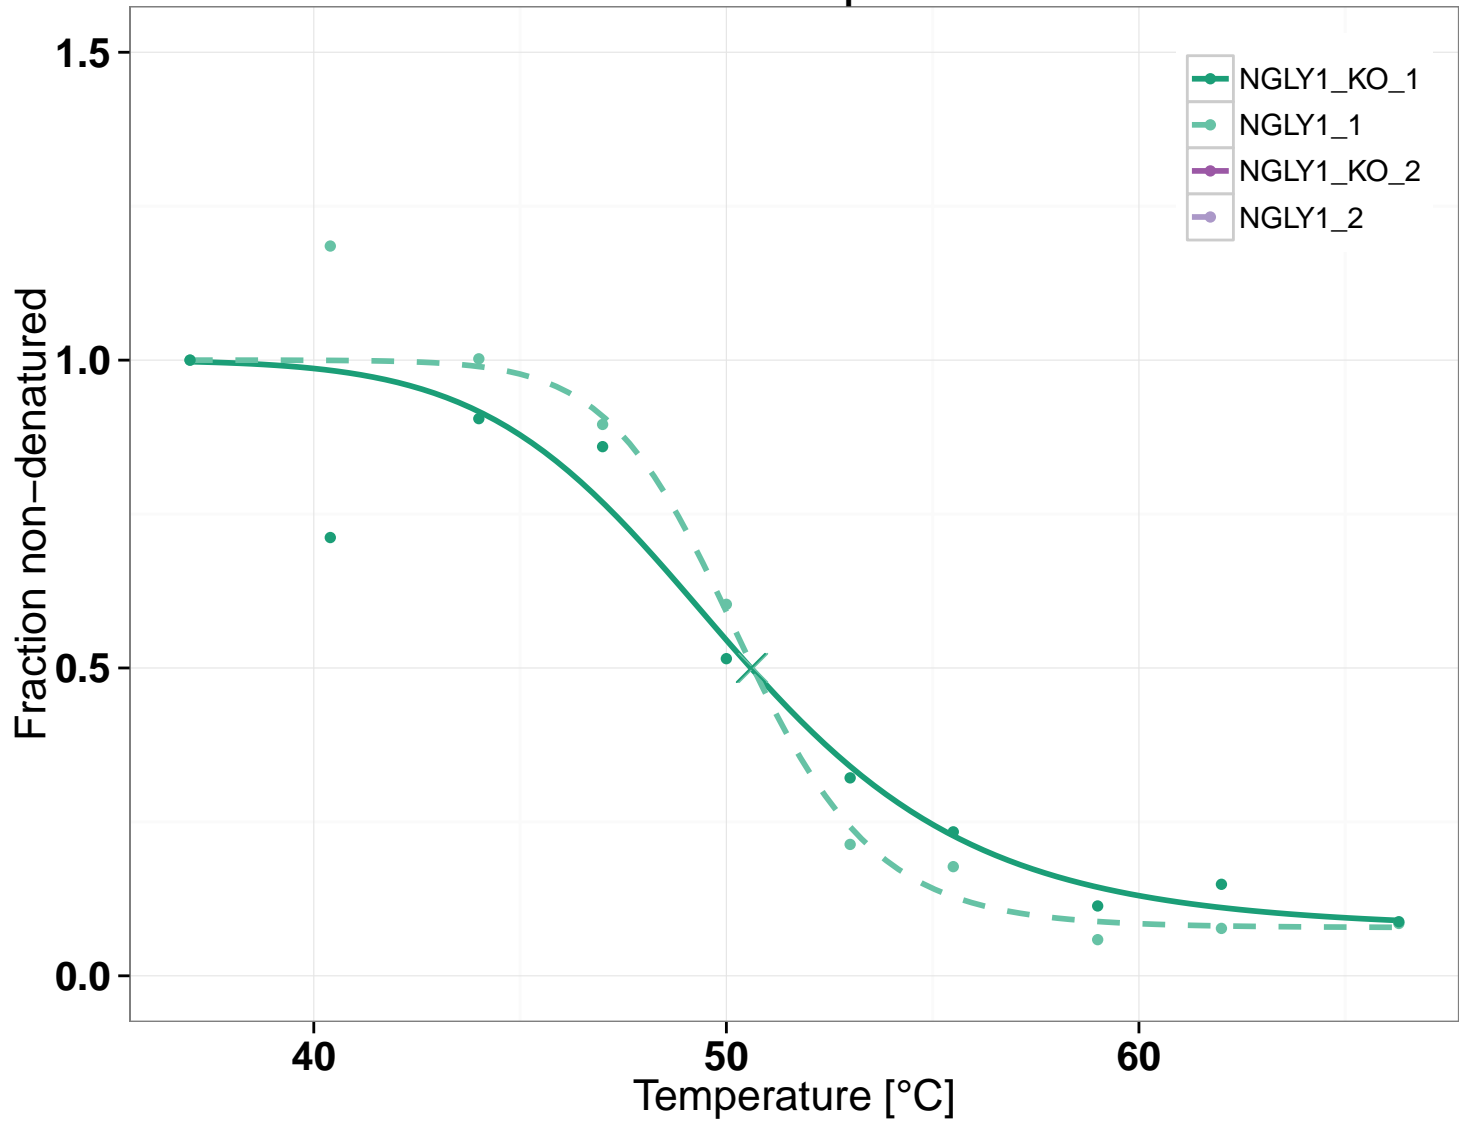

|            | meltPoint | slope  | plateau | R2   |
|------------|-----------|--------|---------|------|
| NGLY1_KO_1 | 50.6      | -0.078 | 0.07    | 0.92 |
| NGLY1_1    | 50.65     | -0.14  | 0.08    | 0.98 |
| NGLY1_KO_2 | -         | -      | -       | -    |
| NGLY1_2    | -         | -      | -       | -    |

Supplement: Supplementary file 8035 [file 1]

# IPI00009303.1|RFX5

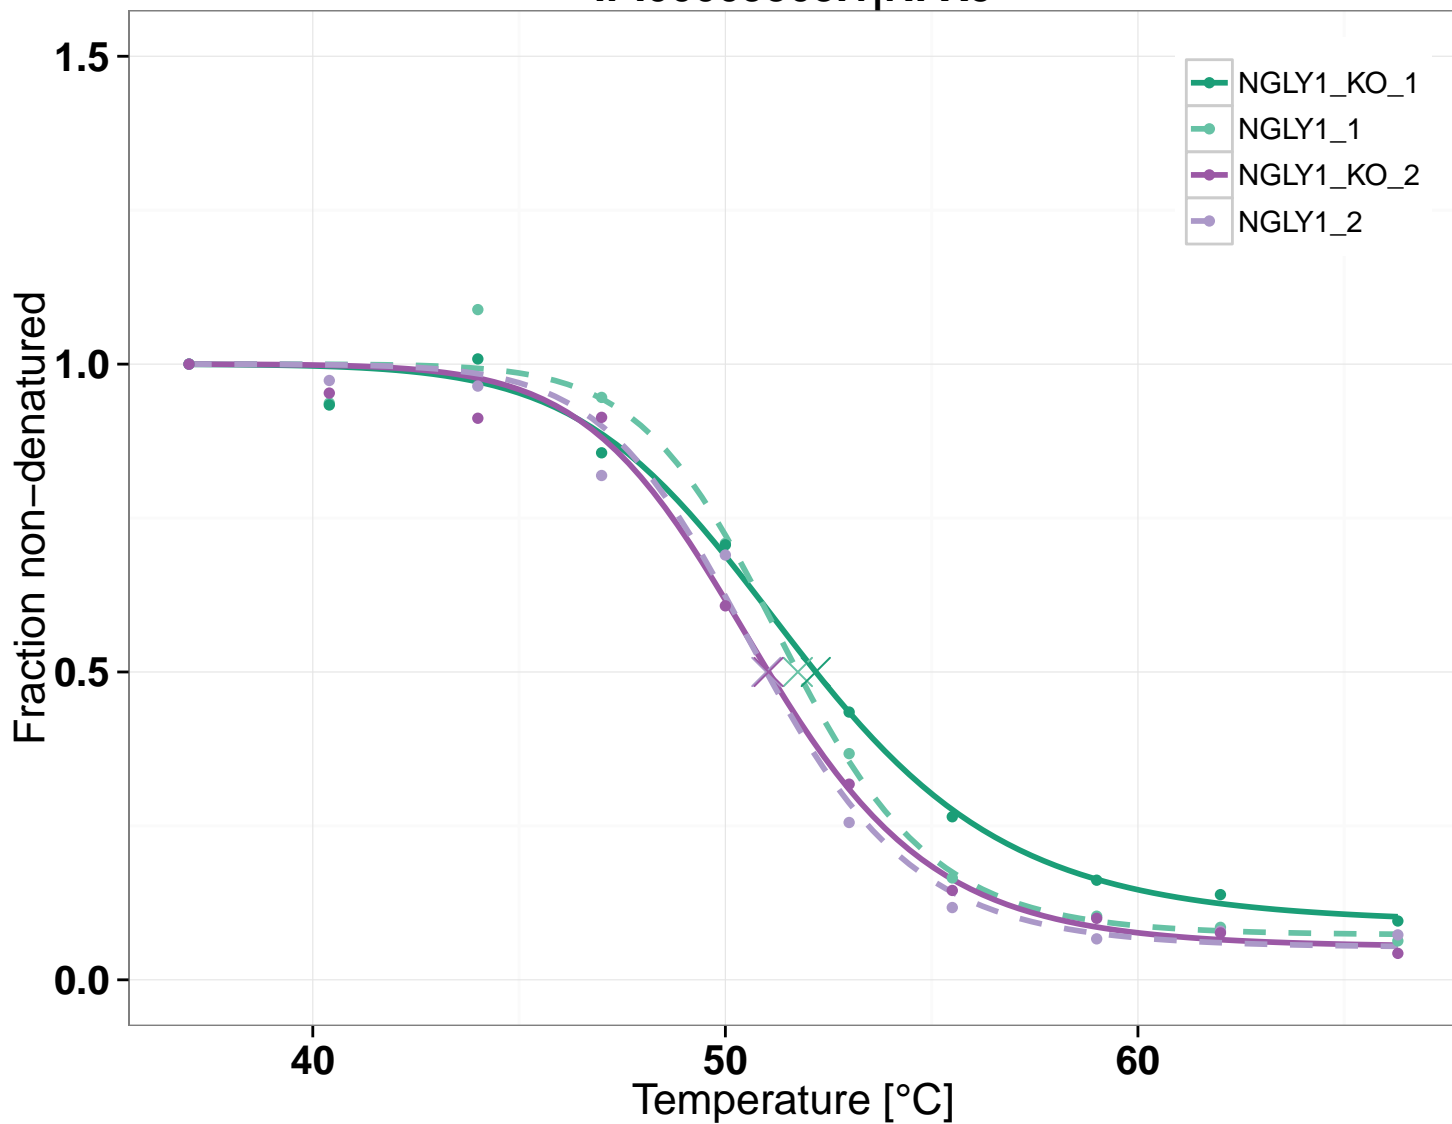

|            | meltPoint | slope  | plateau | R2   |
|------------|-----------|--------|---------|------|
| NGLY1_KO_1 | 52.19     | -0.087 | 0.09    | 0.99 |
| NGLY1_1    | 51.76     | -0.13  | 0.07    | 0.99 |
| NGLY1_KO_2 | 51.05     | -0.11  | 0.05    | 0.99 |
| NGLY1_2    | 50.99     | -0.12  | 0.05    | 0.99 |

Supplement: Supplementary file 8036 [file 1]

# IPI00029473.5|C17ORF75

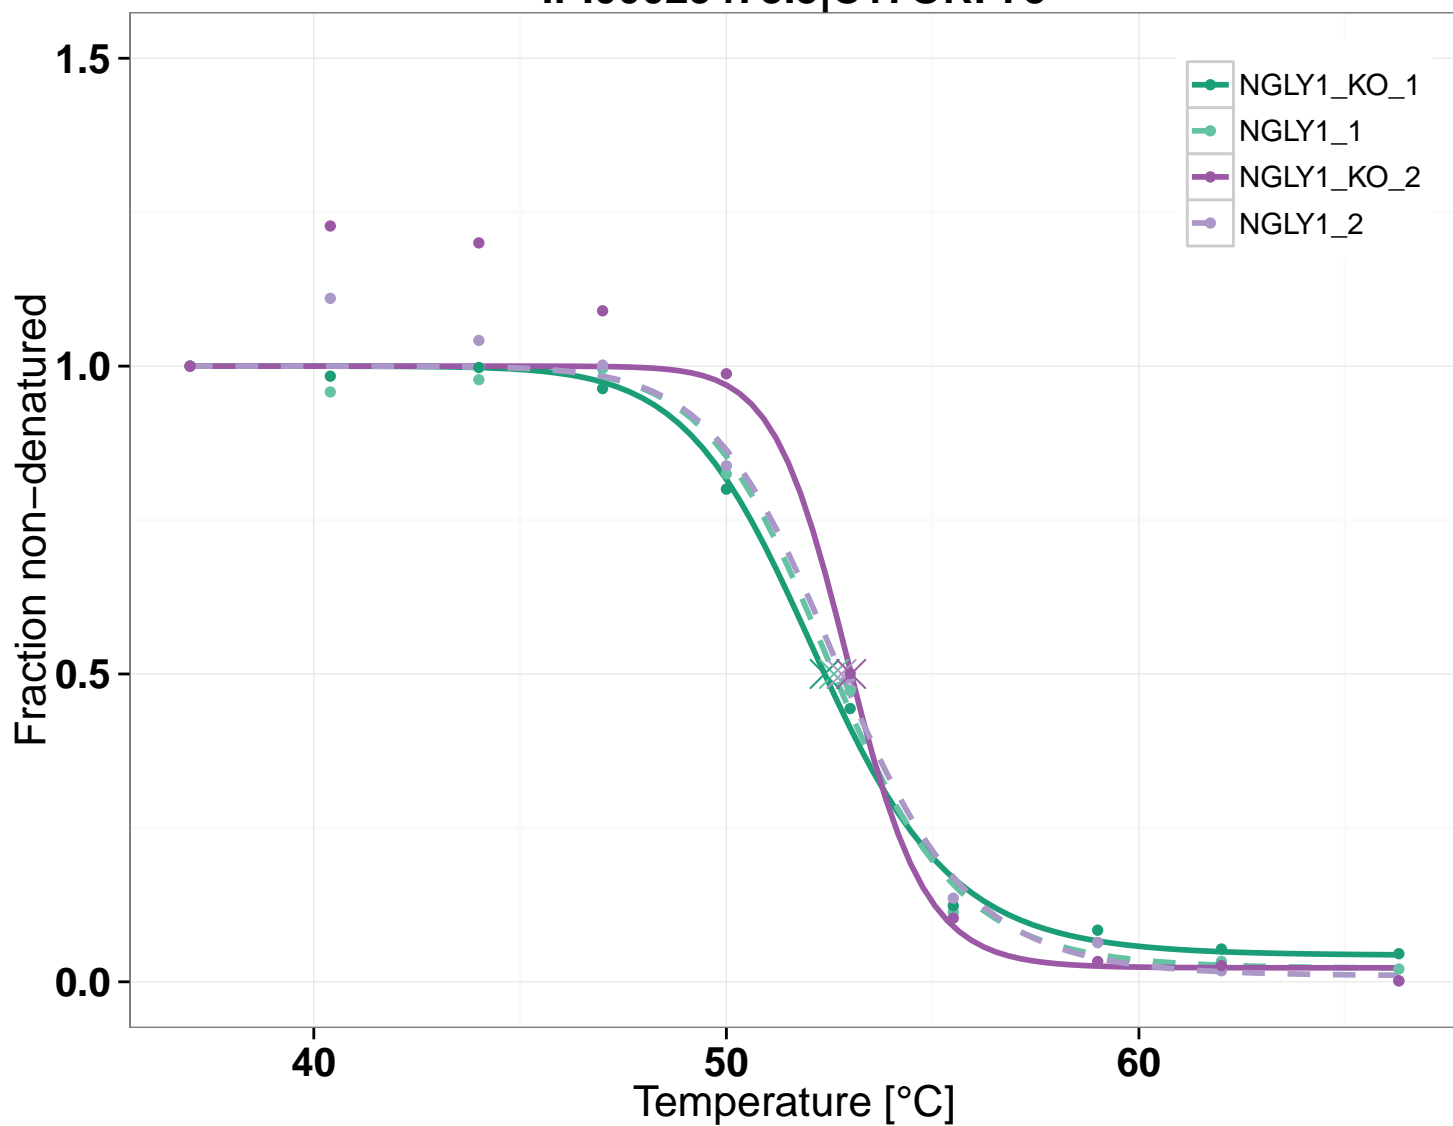

|            | meltPoint | slope | plateau | R2   |
|------------|-----------|-------|---------|------|
| NGLY1_KO_1 | 52.38     | -0.15 | 0.04    | 1    |
| NGLY1_1    | 52.61     | -0.16 | 0.02    | 1    |
| NGLY1_KO_2 | 53.03     | -0.27 | 0.02    | 0.96 |
| NGLY1_2    | 52.79     | -0.16 | 0.01    | 0.99 |

Supplement: Supplementary file 8037 [file 1]

IPI00845386.1|KIAA1310

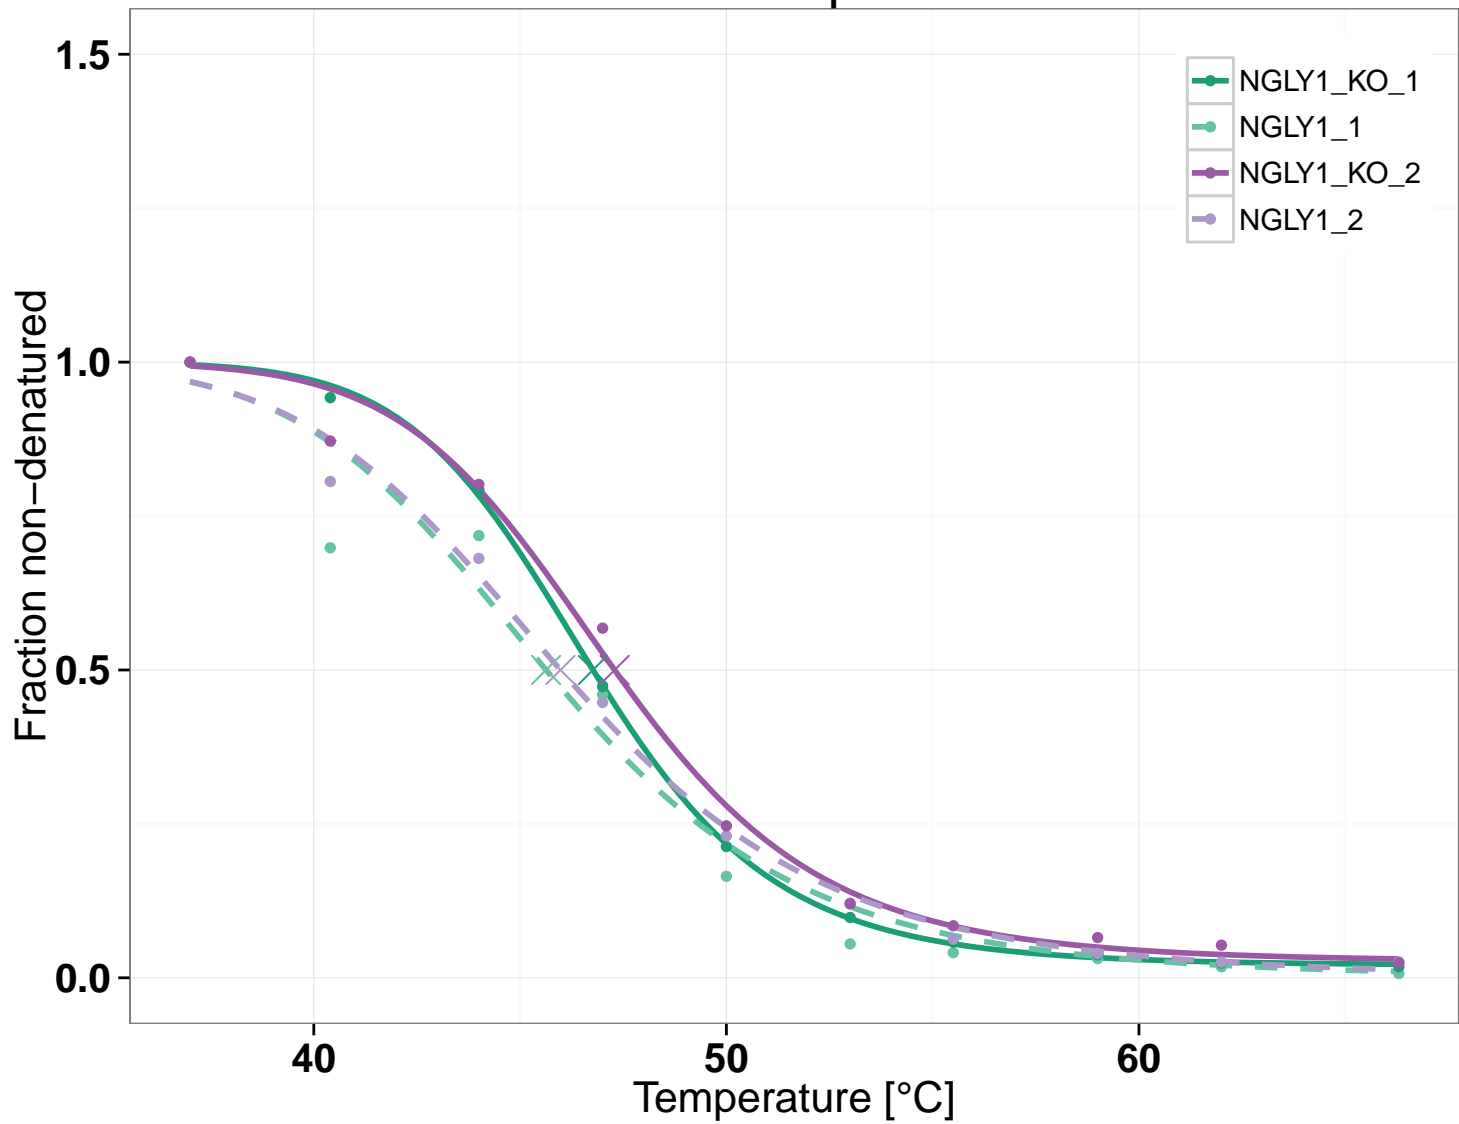

|            | meltPoint | slope  | plateau | R2   |
|------------|-----------|--------|---------|------|
| NGLY1_KO_1 | 46.77     | -0.11  | 0.02    | 1    |
| NGLY1_1    | 45.63     | -0.082 | 0       | 0.96 |
| NGLY1_KO_2 | 47.29     | -0.096 | 0.03    | 0.99 |
| NGLY1_2    | 45.98     | -0.078 | 0       | 0.99 |

Supplement: Supplementary file 8038 [file 1]

# IPI00796978.3|PCCA

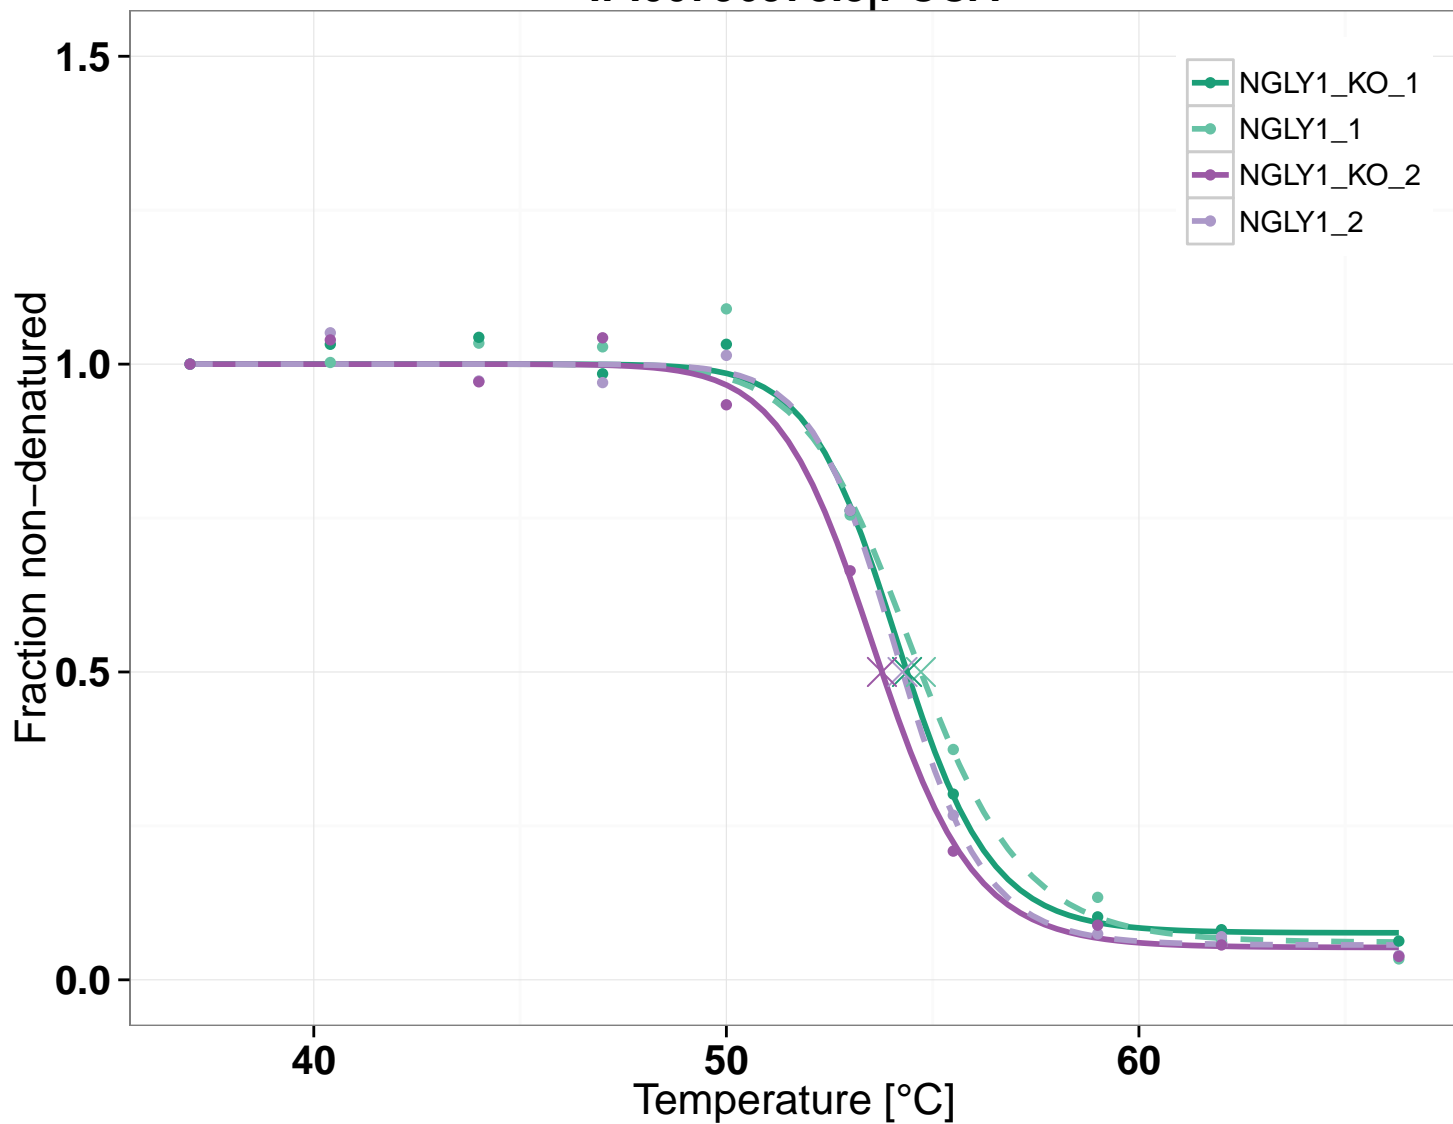

|            | meltPoint | slope | plateau | R2   |
|------------|-----------|-------|---------|------|
| NGLY1_KO_1 | 54.38     | -0.21 | 0.08    | 1    |
| NGLY1_1    | 54.71     | -0.18 | 0.06    | 0.99 |
| NGLY1_KO_2 | 53.77     | -0.2  | 0.05    | 1    |
| NGLY1_2    | 54.27     | -0.22 | 0.06    | 1    |

Supplement: Supplementary file 8039 [file 1]

# IPI00159969.3|REST

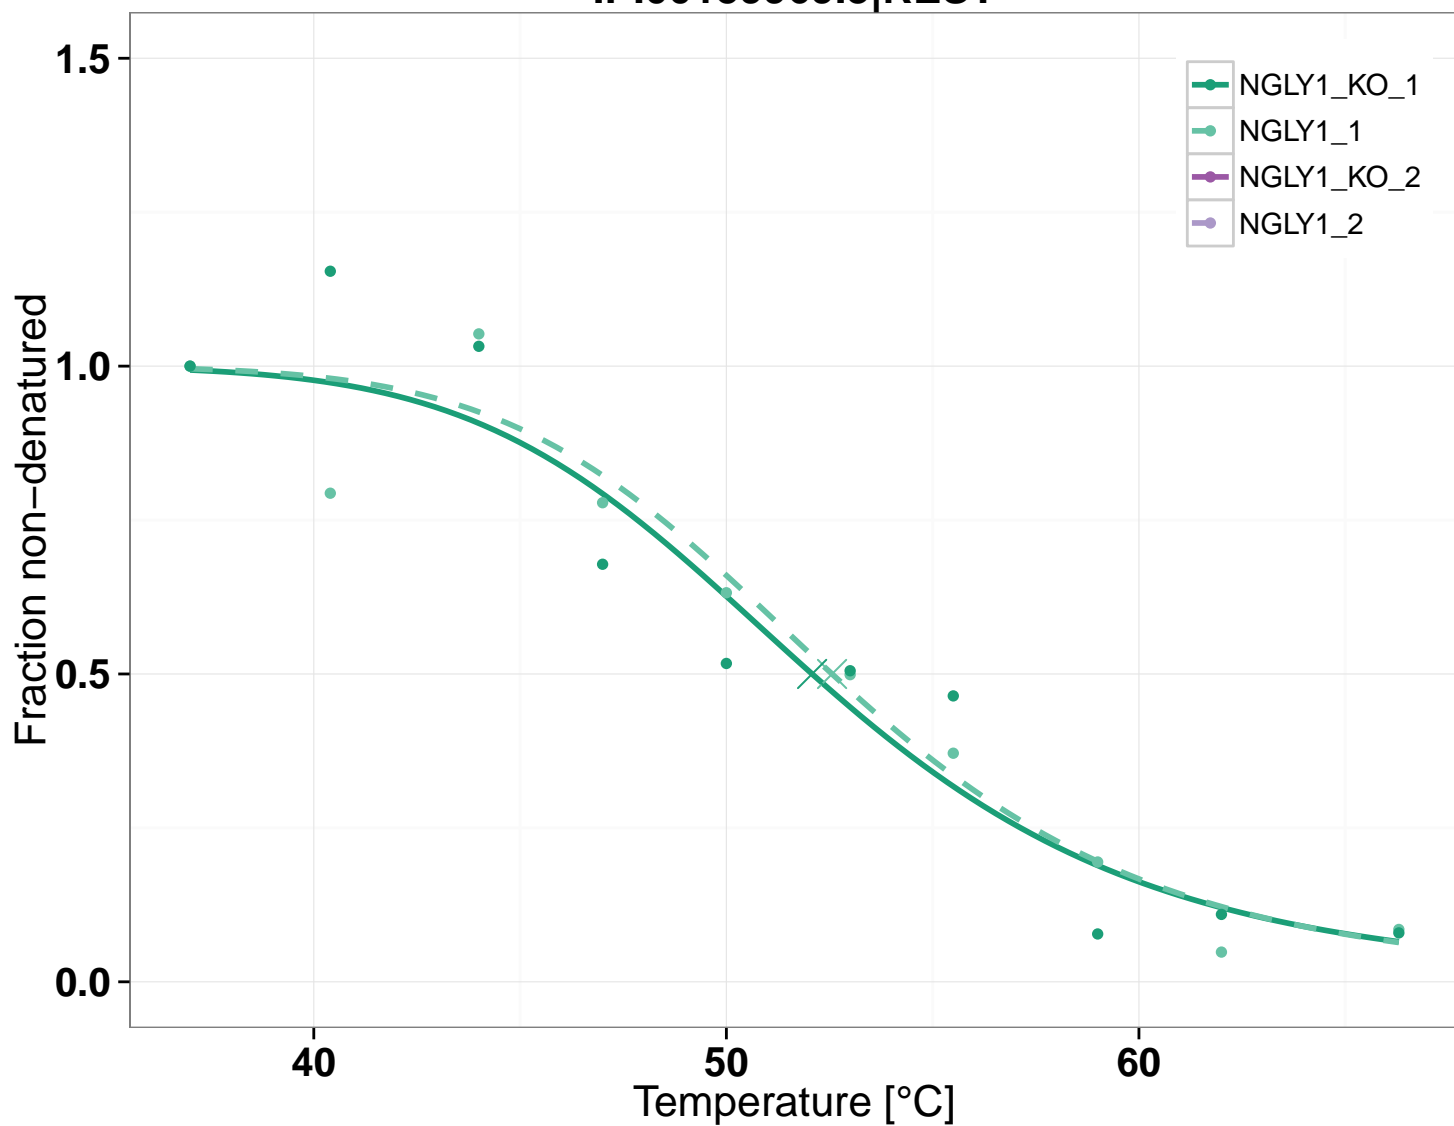

|            | meltPoint | slope  | plateau | R2   |
|------------|-----------|--------|---------|------|
| NGLY1_KO_1 | 52.08     | -0.061 | 0       | 0.92 |
| NGLY1_1    | 52.56     | -0.063 | 0       | 0.95 |
| NGLY1_KO_2 | -         | -      | -       | -    |
| NGLY1_2    | -         | -      | -       | -    |

Supplement: Supplementary file 8040 [file 1]

IPI00013271.1|DERL1

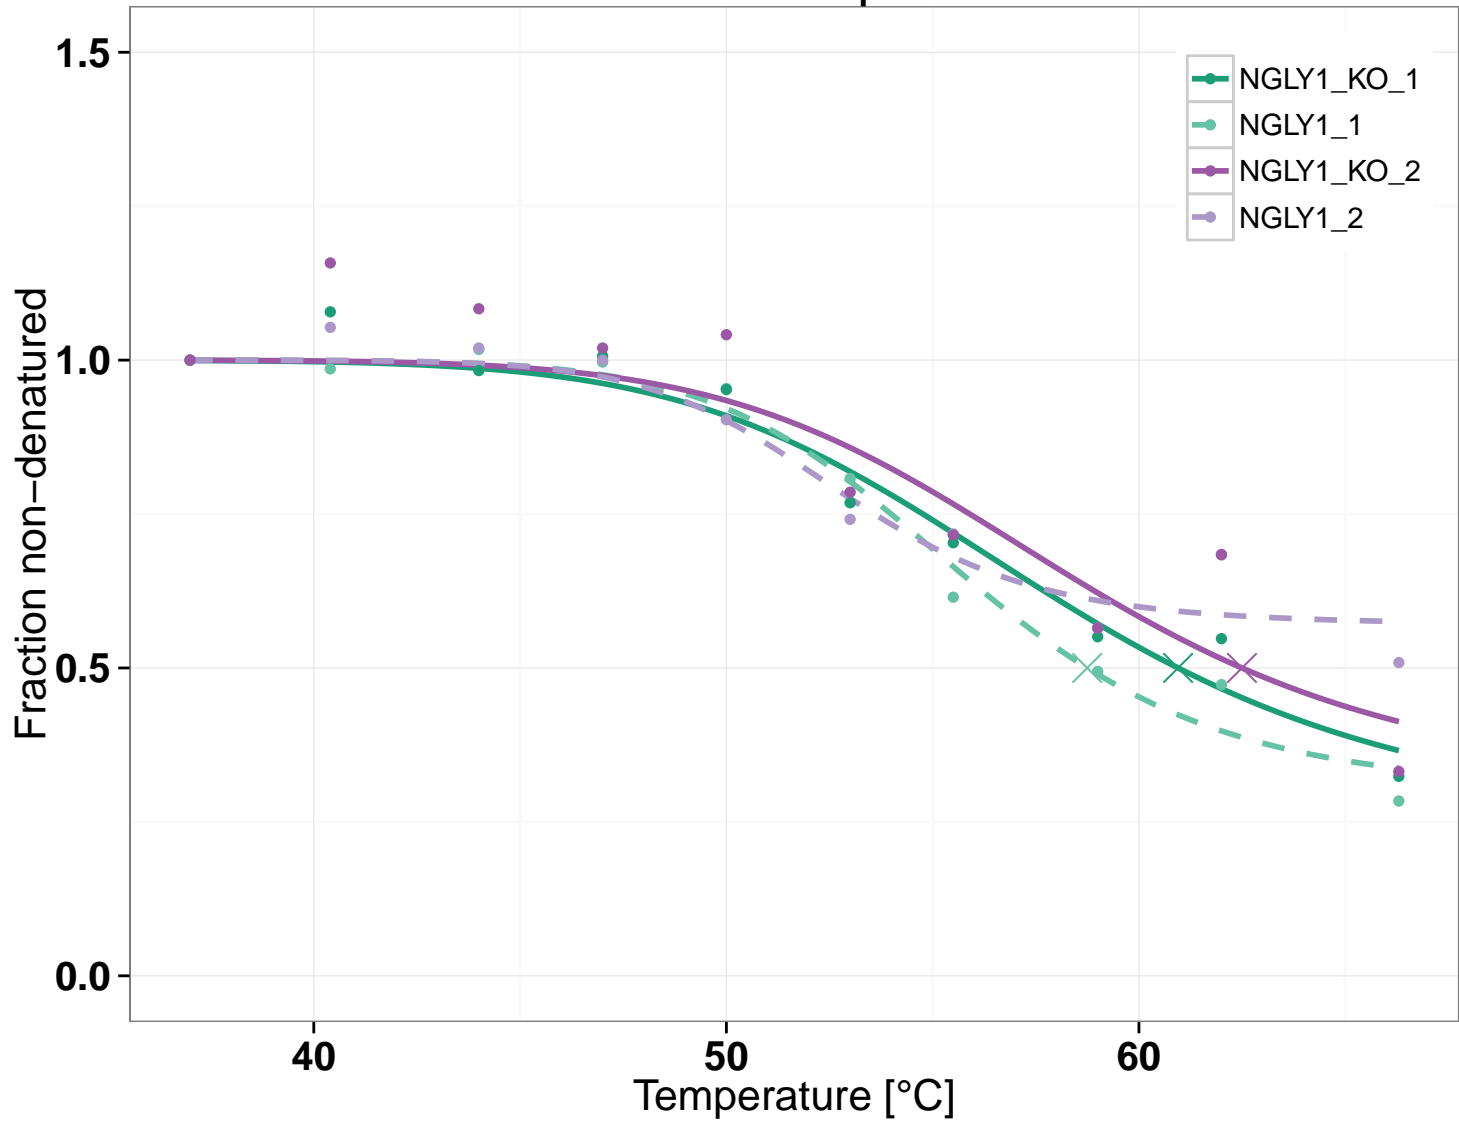

|            | meltPoint | slope  | plateau | R2   |
|------------|-----------|--------|---------|------|
| NGLY1_KO_1 | 60.95     | -0.043 | 0.24    | 0.96 |
| NGLY1_1    | 58.75     | -0.057 | 0.3     | 0.98 |
| NGLY1_KO_2 | 62.5      | -0.042 | 0.3     | 0.85 |
| NGLY1_2    | -         | -0.045 | 0.57    | 0.94 |

Supplement: Supplementary file 8041 [file 1]

IPI00470637.3|SLC27A6

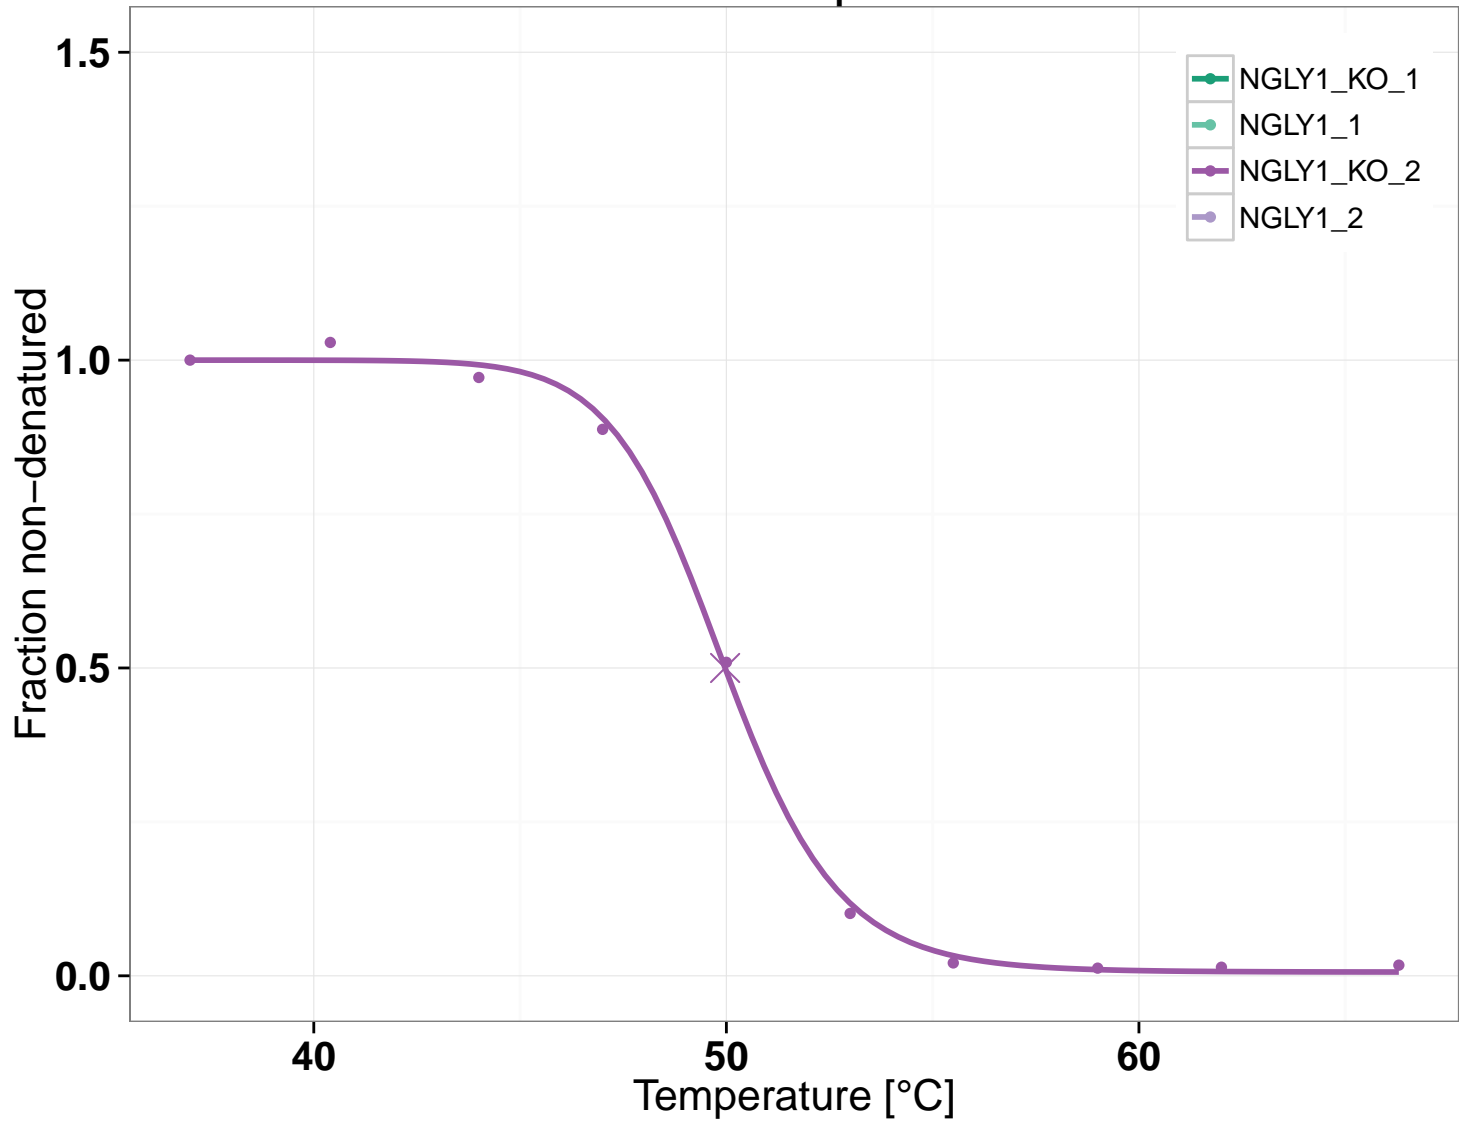

|            | meltPoint | slope | plateau | R2 |
|------------|-----------|-------|---------|----|
| NGLY1_KO_1 | —         | —     | —       | —  |
| NGLY1_1    | —         | —     | —       | —  |
| NGLY1_KO_2 | 49.97     | -0.18 | 0.01    | 1  |
| NGLY1_2    | —         | —     | —       | —  |

Supplement: Supplementary file 8042 [file 1]

# IPI00783313.2|PYGL

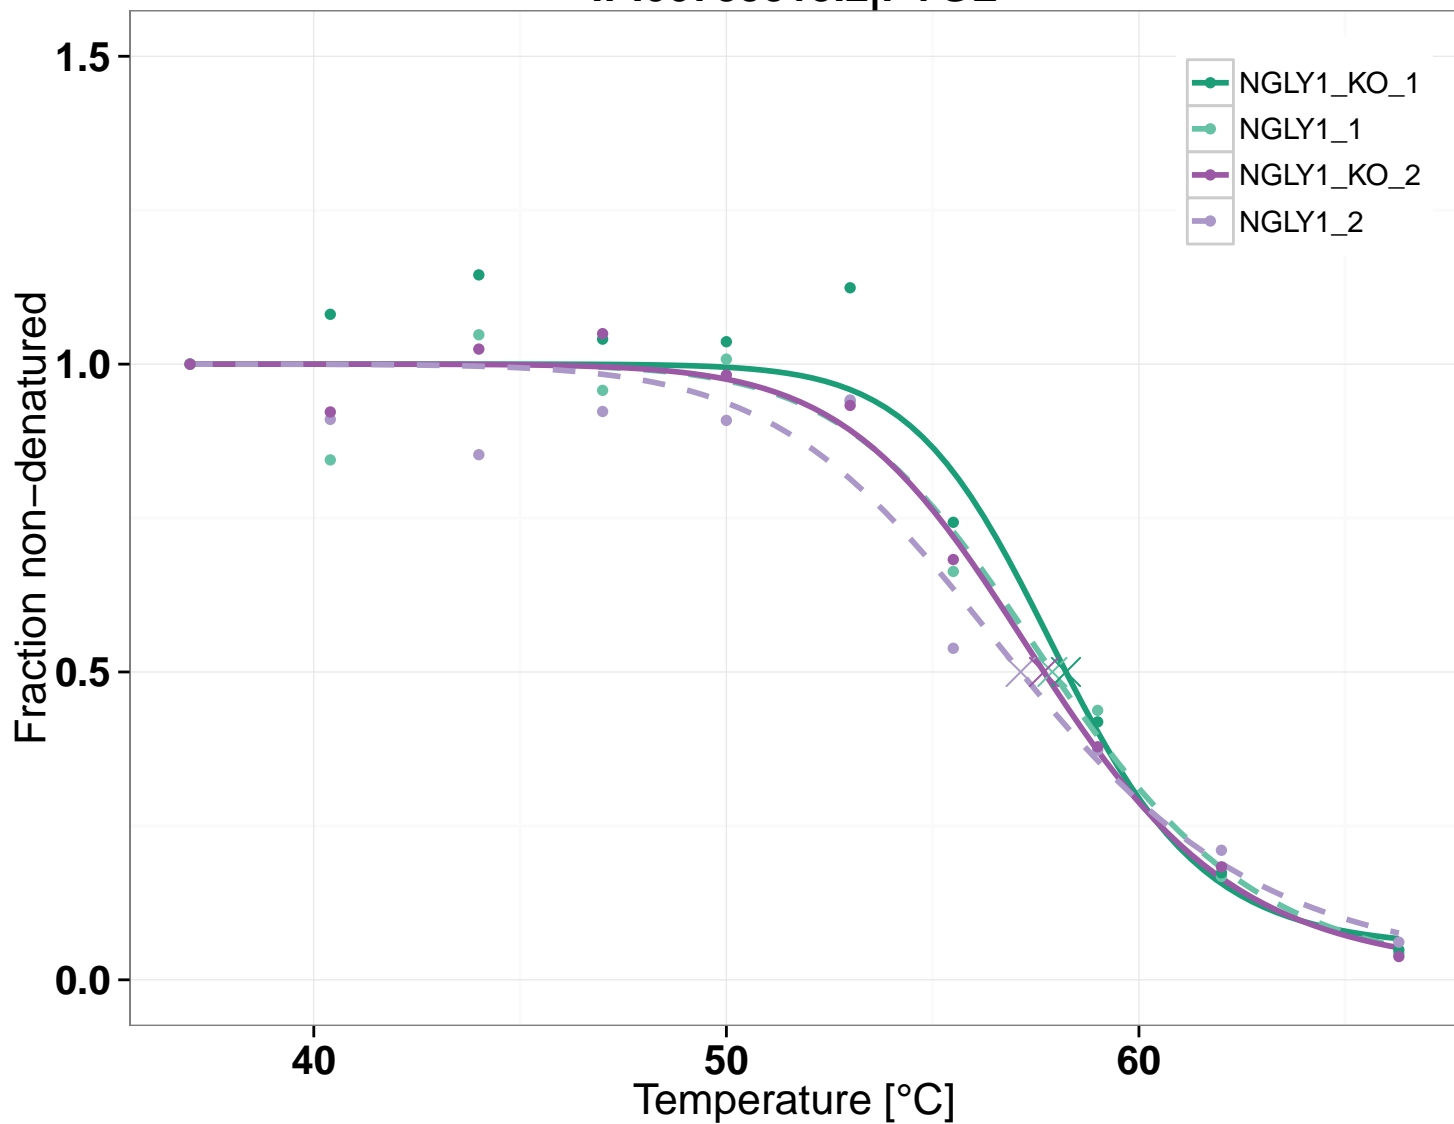

|            | meltPoint | slope  | plateau | R2   |
|------------|-----------|--------|---------|------|
| NGLY1_KO_1 | 58.23     | -0.13  | 0.05    | 0.96 |
| NGLY1_1    | 57.9      | -0.099 | 0       | 0.97 |
| NGLY1_KO_2 | 57.7      | -0.1   | 0.01    | 0.99 |
| NGLY1_2    | 57.13     | -0.083 | 0.01    | 0.94 |

Supplement: Supplementary file 8043 [file 1]

IPI00643342.1|PEA15

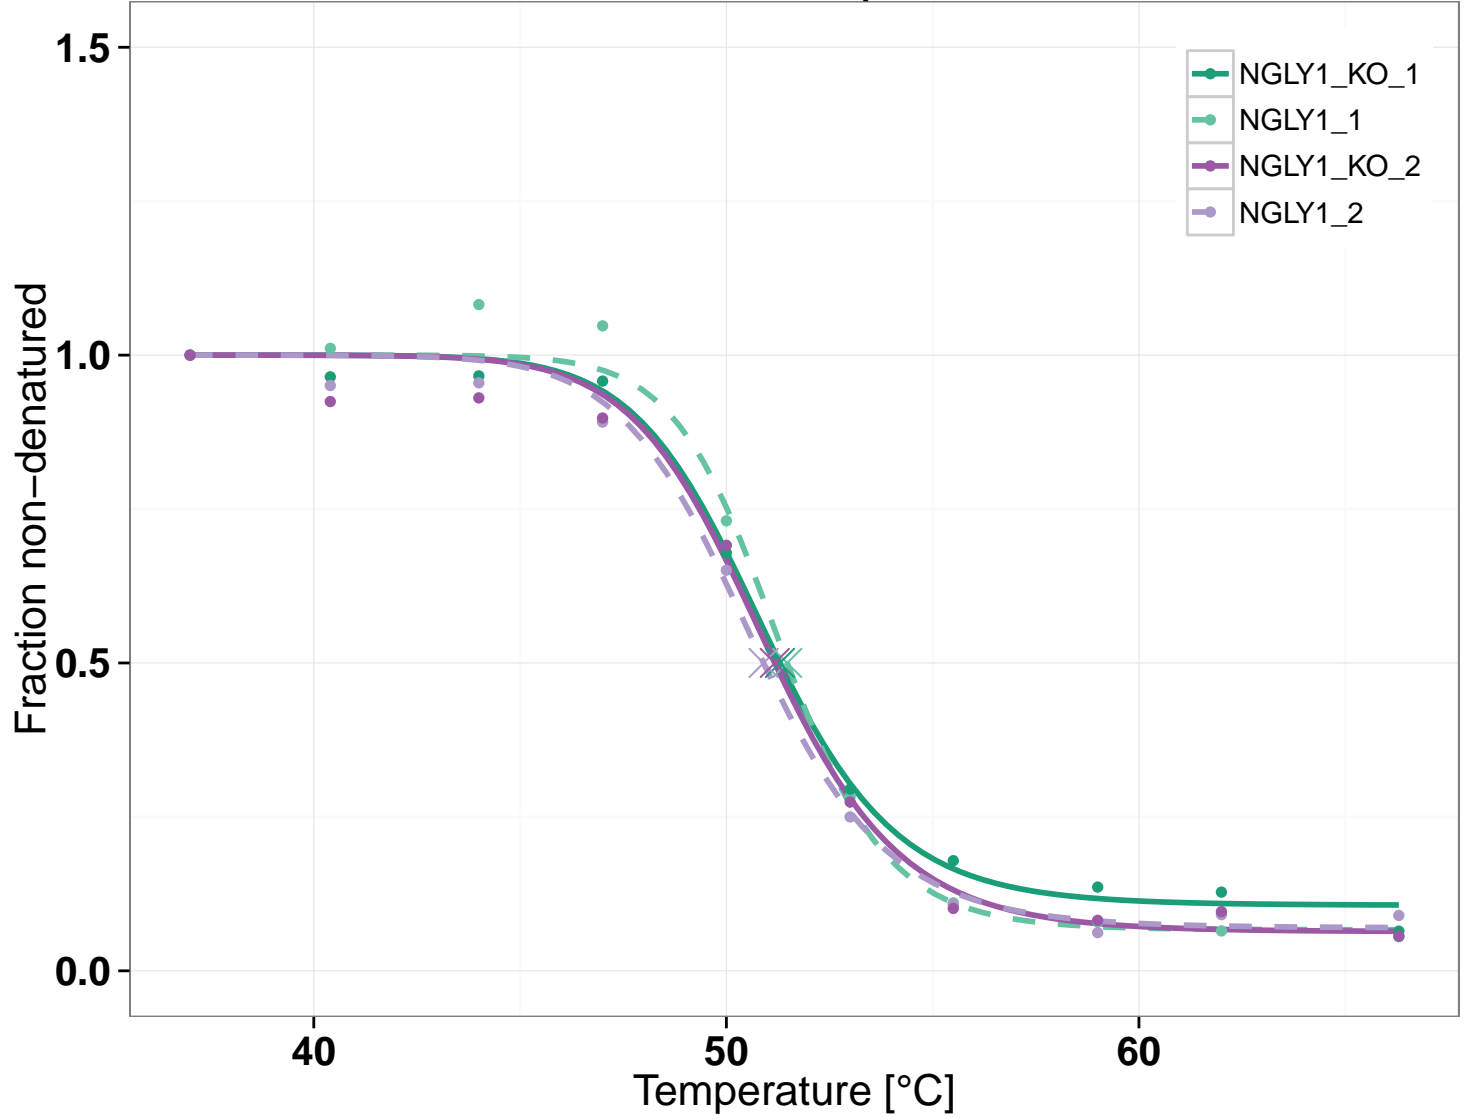

|            | meltPoint | slope | plateau | R2   |
|------------|-----------|-------|---------|------|
| NGLY1_KO_1 | 51.3      | -0.14 | 0.11    | 1    |
| NGLY1_1    | 51.47     | -0.18 | 0.07    | 0.99 |
| NGLY1_KO_2 | 51.17     | -0.14 | 0.06    | 0.99 |
| NGLY1_2    | 50.9      | -0.14 | 0.07    | 1    |

Supplement: Supplementary file 8044 [file 1]

IPI00027729.1|CSNK1E

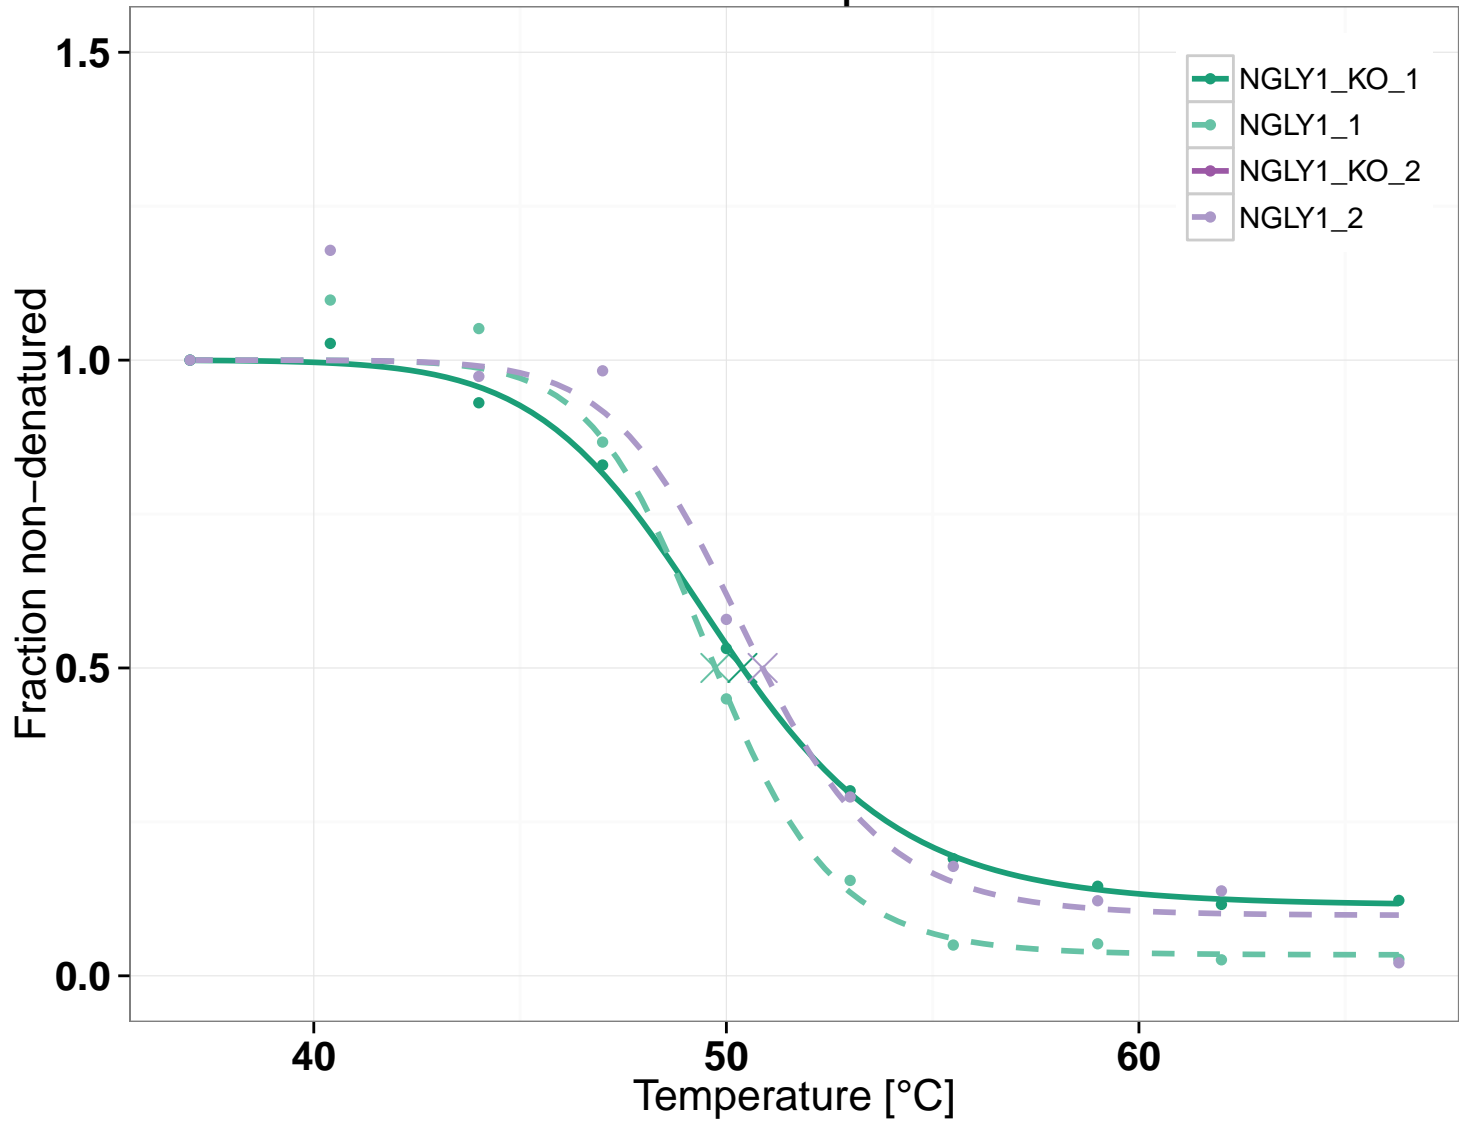

|            | meltPoint | slope | plateau | R2   |
|------------|-----------|-------|---------|------|
| NGLY1_KO_1 | 50.39     | -0.1  | 0.11    | 1    |
| NGLY1_1    | 49.73     | -0.16 | 0.03    | 0.99 |
| NGLY1_KO_2 | -         | -     | -       | -    |
| NGLY1_2    | 50.88     | -0.14 | 0.1     | 0.97 |

Supplement: Supplementary file 8045 [file 1]

# IPI00296485.6|MAP1S

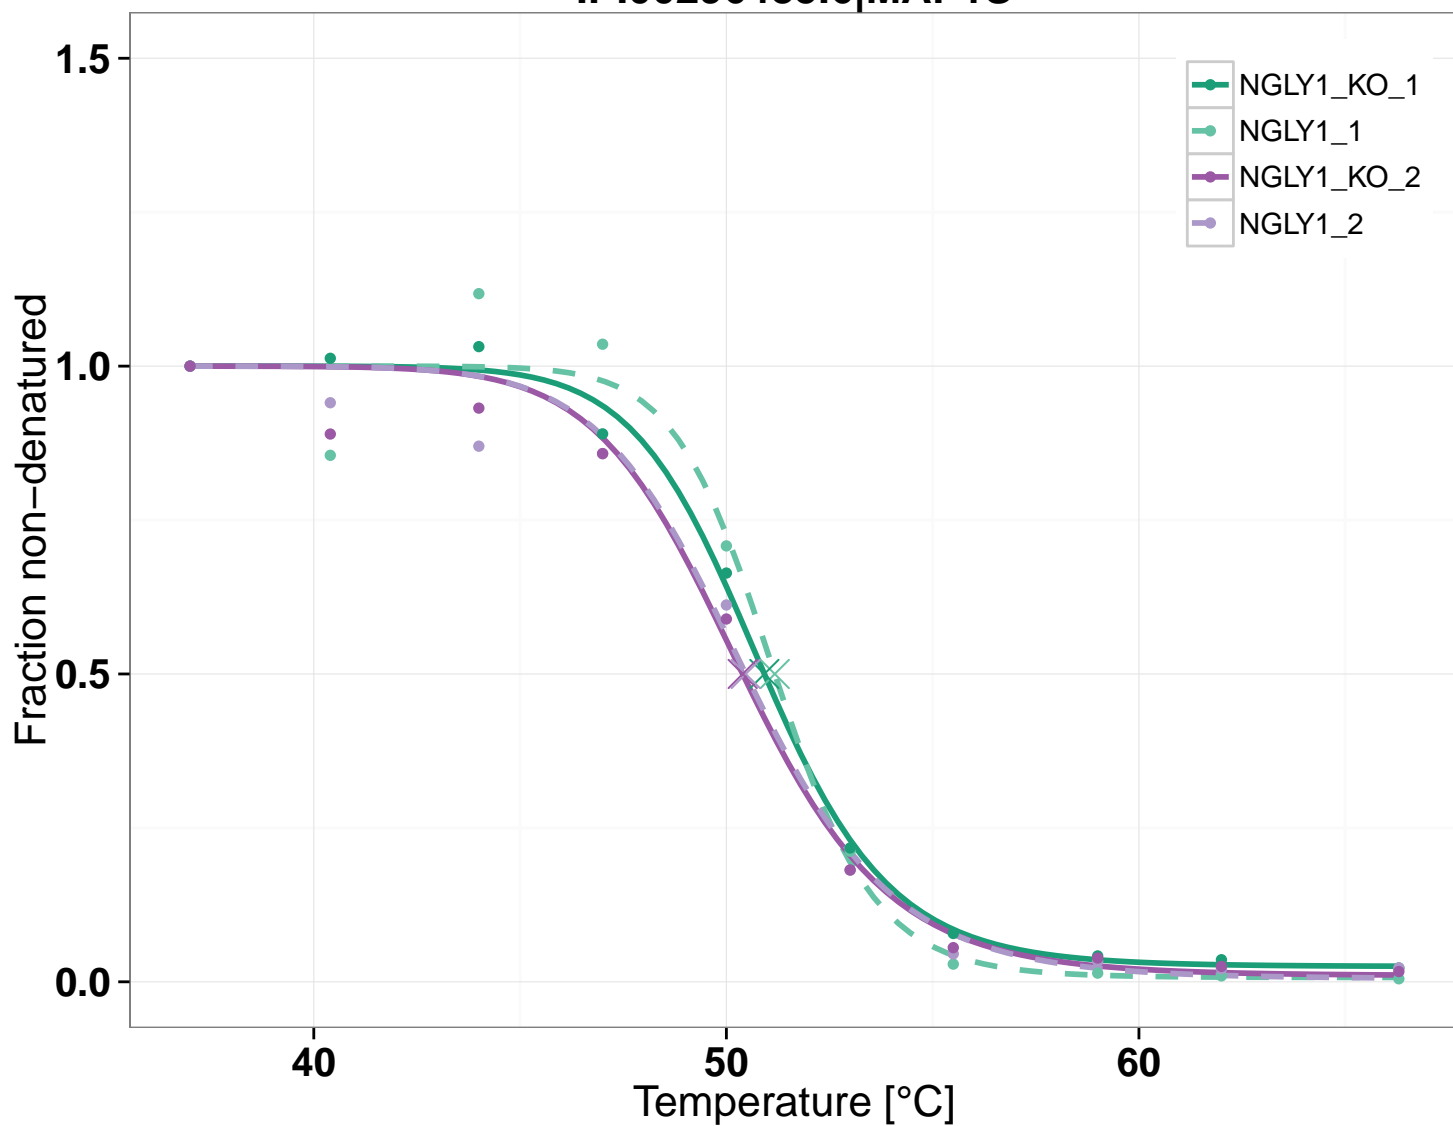

|            | meltPoint | slope | plateau | R2   |
|------------|-----------|-------|---------|------|
| NGLY1_KO_1 | 50.92     | -0.16 | 0.02    | 1    |
| NGLY1_1    | 51.17     | -0.2  | 0.01    | 0.98 |
| NGLY1_KO_2 | 50.4      | -0.14 | 0.01    | 0.99 |
| NGLY1_2    | 50.47     | -0.14 | 0       | 0.99 |

Supplement: Supplementary file 8046 [file 1]

# IPI00025717.1|MTX2

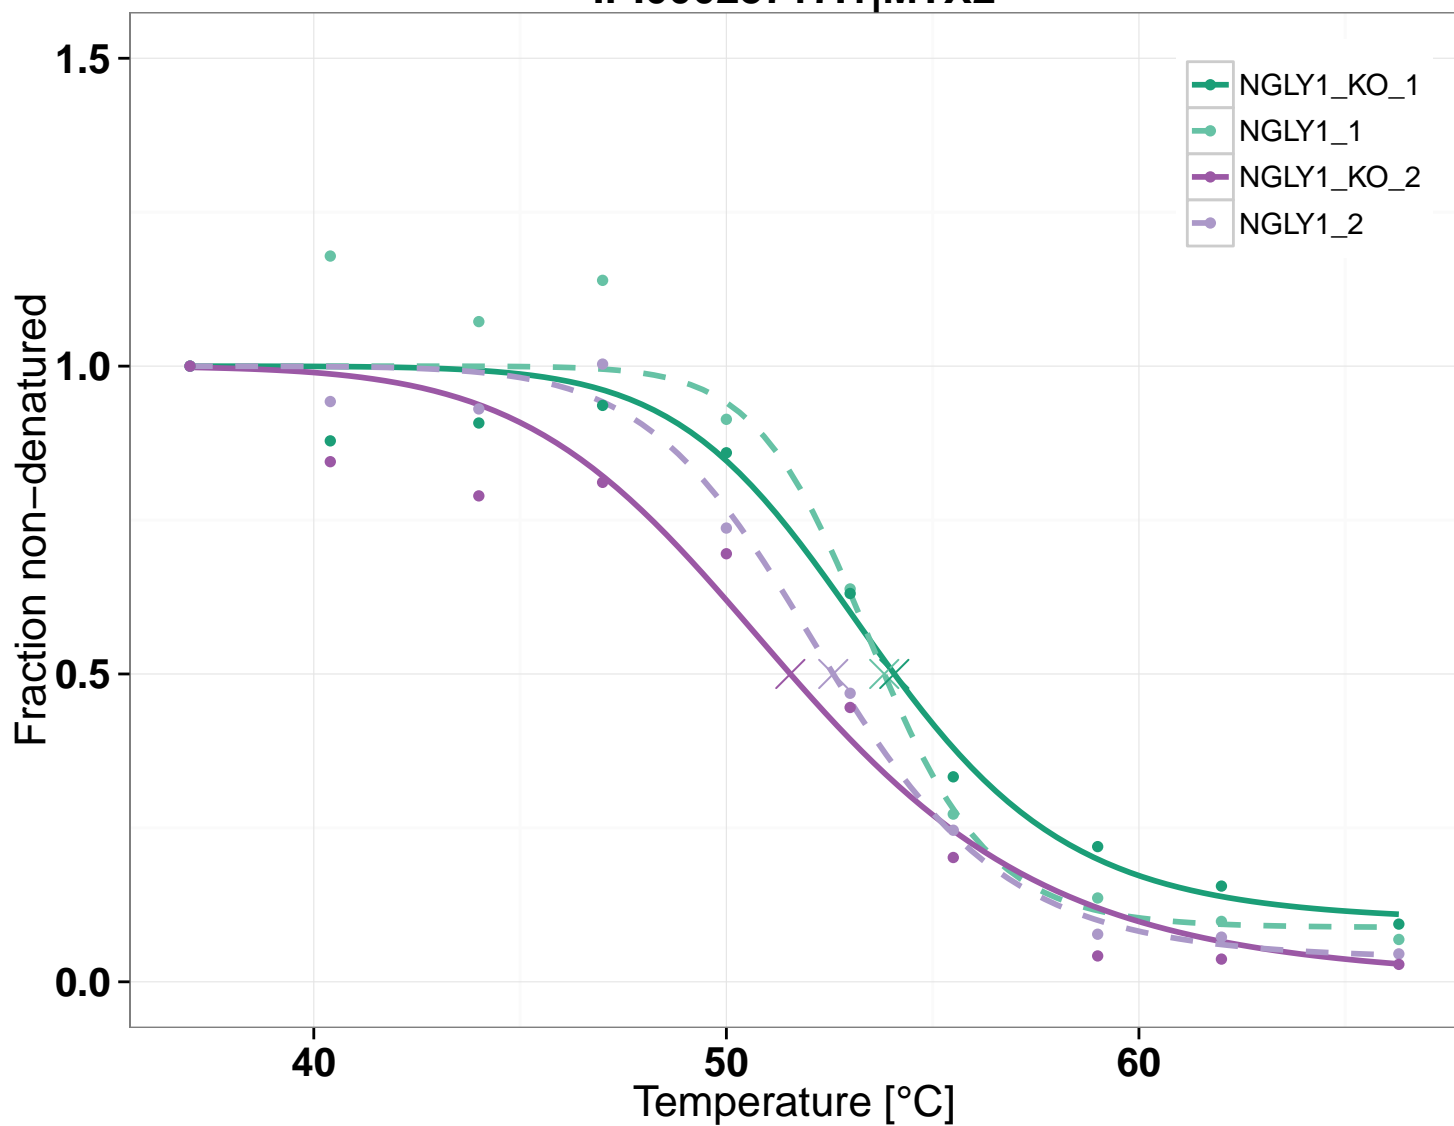

|            | meltPoint | slope  | plateau | R2   |
|------------|-----------|--------|---------|------|
| NGLY1_KO_1 | 54.07     | -0.095 | 0.1     | 0.98 |
| NGLY1_1    | 53.83     | -0.16  | 0.09    | 0.97 |
| NGLY1_KO_2 | 51.55     | -0.078 | 0       | 0.96 |
| NGLY1_2    | 52.59     | -0.11  | 0.04    | 0.99 |

Supplement: Supplementary file 8047 [file 1]

# IPI00878669.1|CBX1

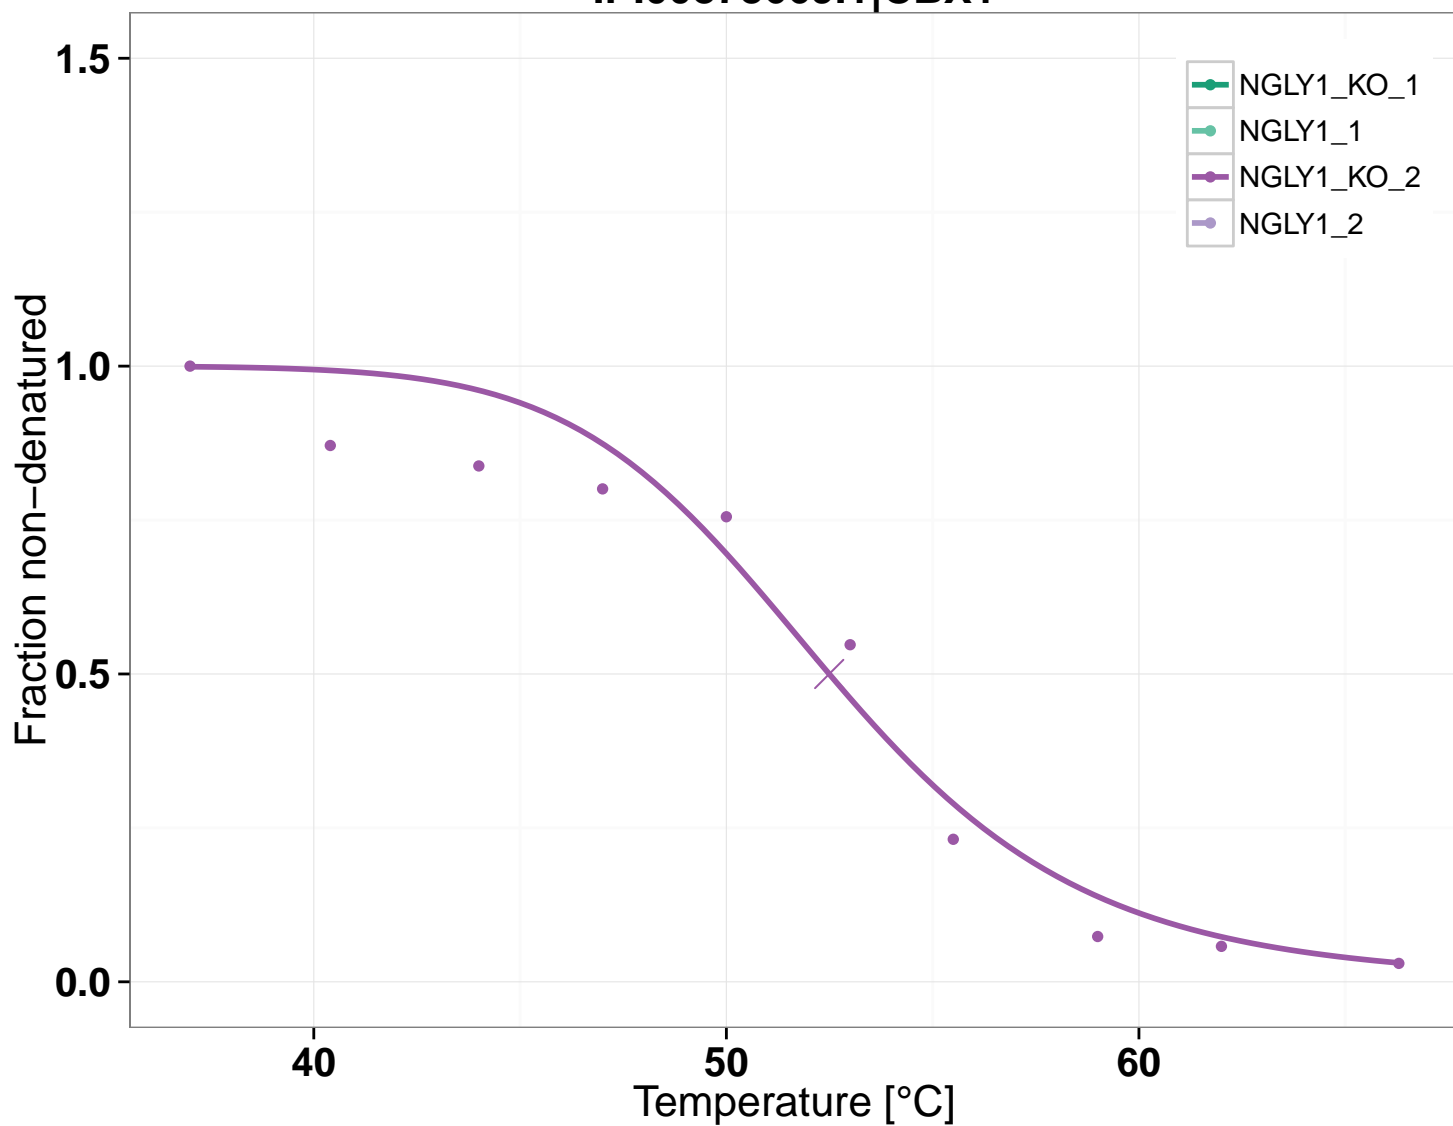

|            | meltPoint | slope | plateau | R2   |
|------------|-----------|-------|---------|------|
| NGLY1_KO_1 | —         | —     | —       | —    |
| NGLY1_1    | —         | —     | —       | —    |
| NGLY1_KO_2 | 52.49     | -0.08 | 0       | 0.96 |
| NGLY1_2    | —         | —     | —       | —    |

Supplement: Supplementary file 8048 [file 1]

# IPI00654744.2|SYNGR2

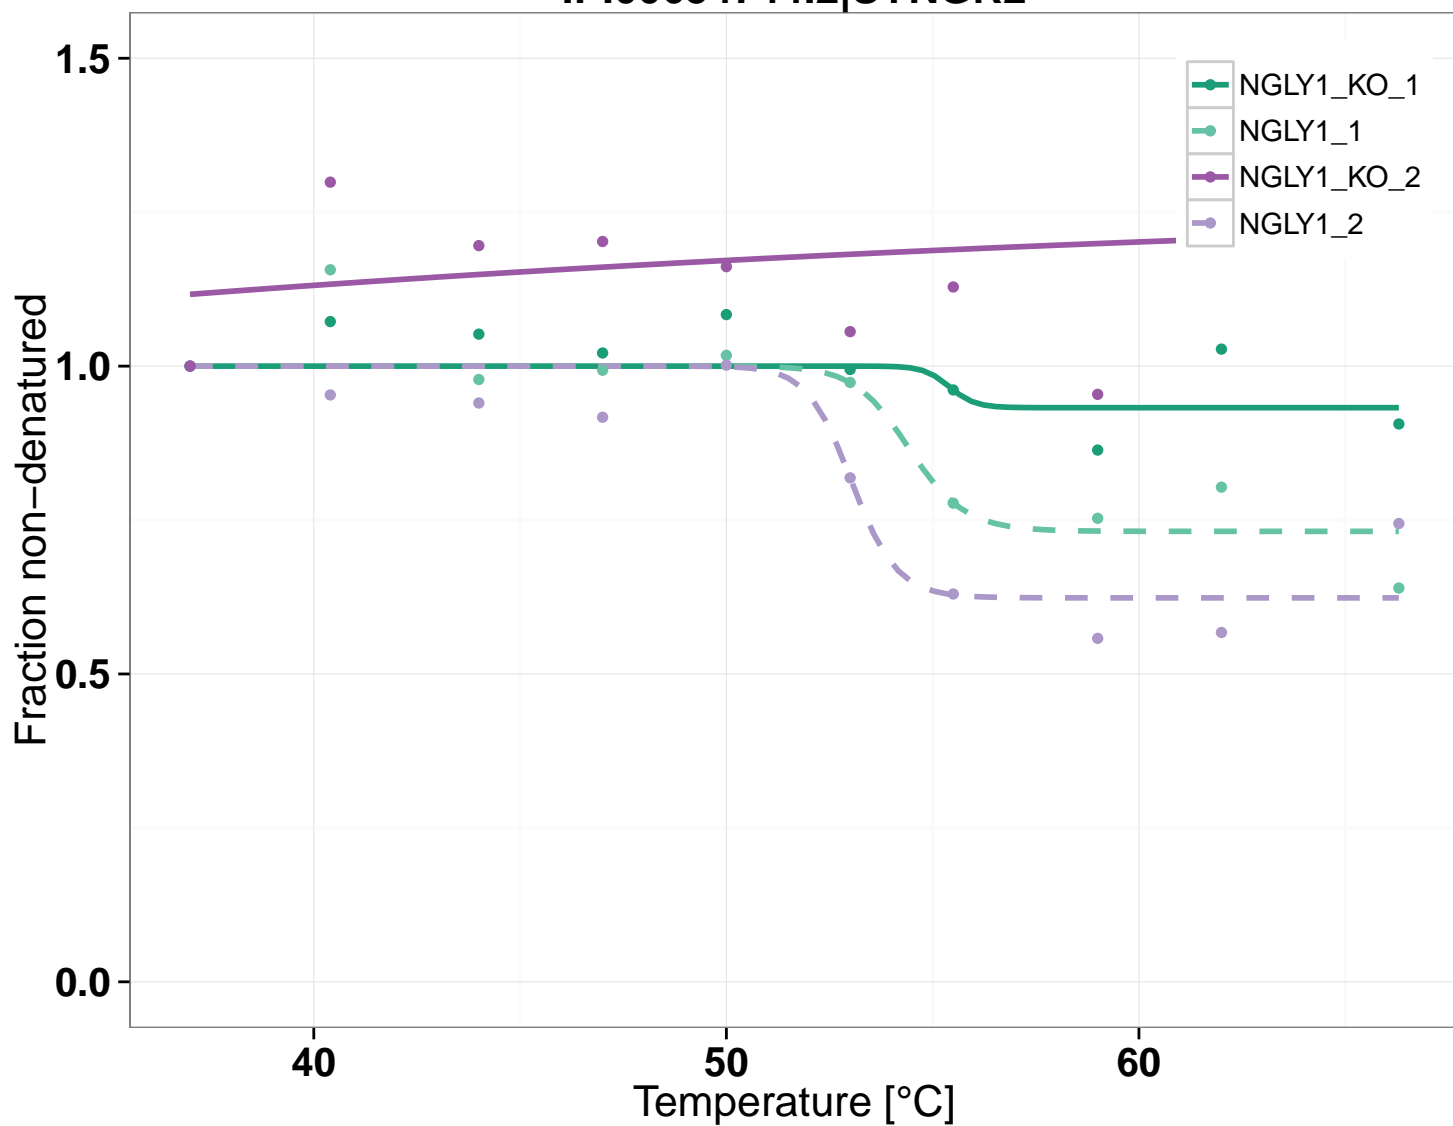

|            | meltPoint | slope  | plateau | R2   |
|------------|-----------|--------|---------|------|
| NGLY1_KO_1 | –         | –0.055 | 0.93    | 0.34 |
| NGLY1_1    | –         | –0.1   | 0.73    | 0.82 |
| NGLY1_KO_2 | –         | –      | 1.5     | 0.04 |
| NGLY1_2    | –         | –0.17  | 0.62    | 0.88 |

Supplement: Supplementary file 8049 [file 1]

IPI00012728.1|ACSL1

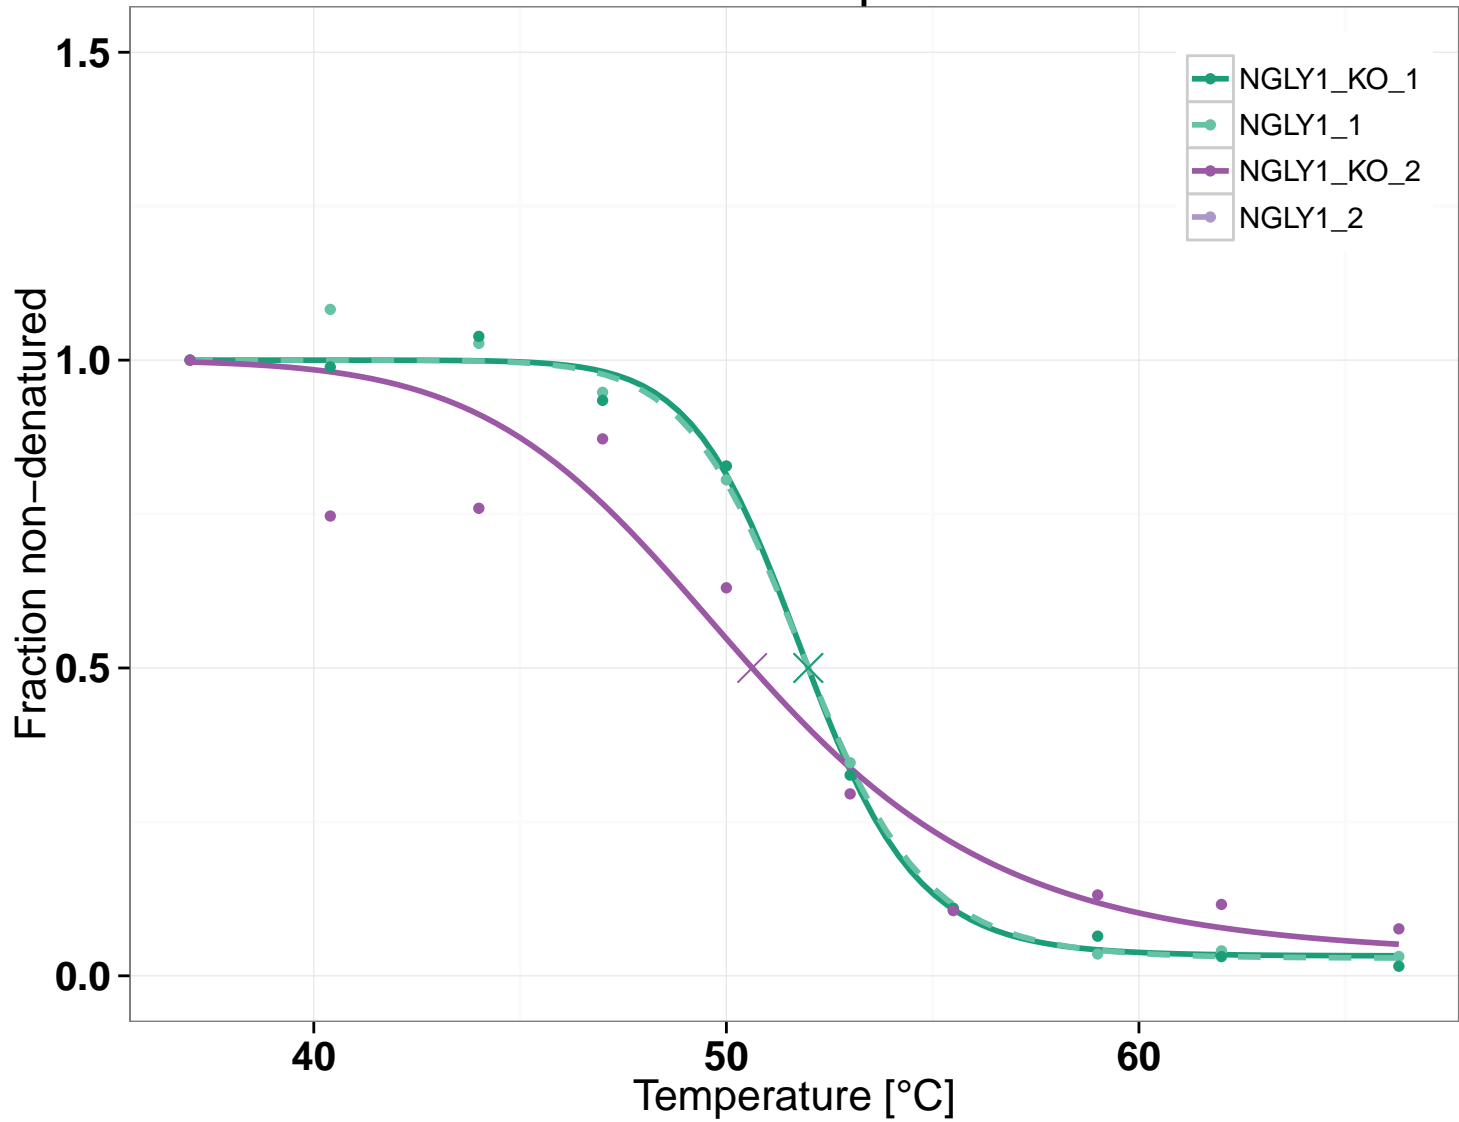

|            | meltPoint | slope  | plateau | R2   |
|------------|-----------|--------|---------|------|
| NGLY1_KO_1 | 51.98     | -0.18  | 0.03    | 1    |
| NGLY1_1    | 51.99     | -0.17  | 0.03    | 1    |
| NGLY1_KO_2 | 50.63     | -0.077 | 0.03    | 0.91 |
| NGLY1_2    | -         | -      | -       | -    |

Supplement: Supplementary file 8050 [file 1]

IPI00030364.1|TAF10

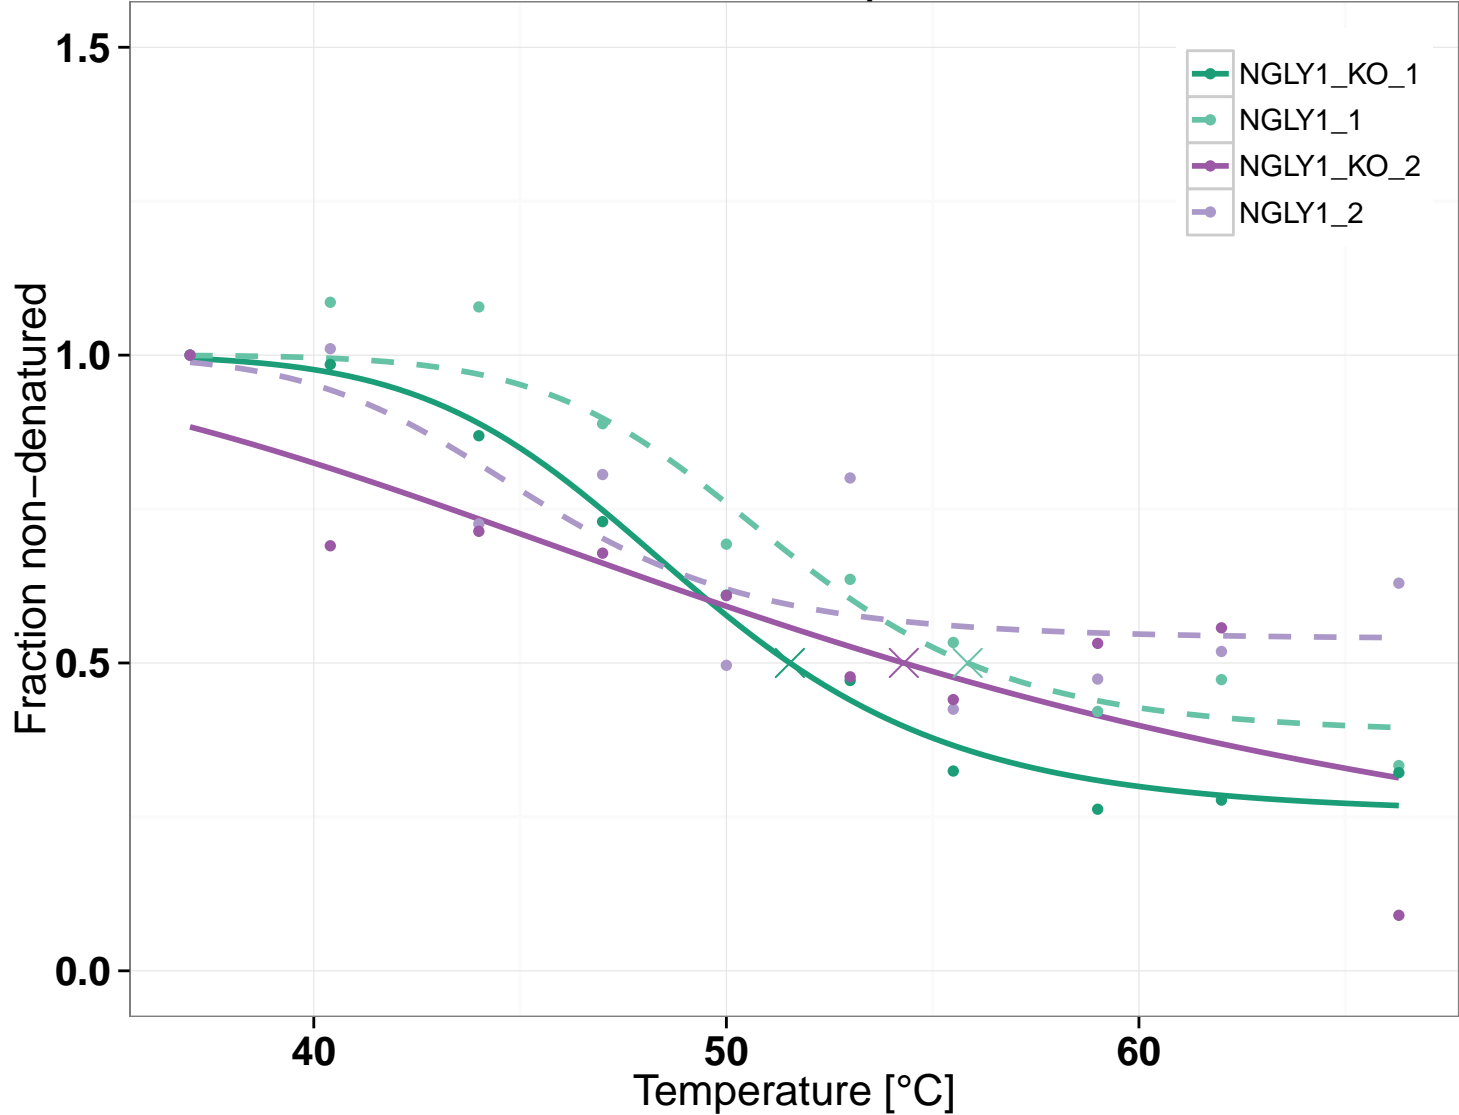

|            | meltPoint | slope  | plateau | R2   |
|------------|-----------|--------|---------|------|
| NGLY1_KO_1 | 51.54     | -0.058 | 0.25    | 0.99 |
| NGLY1_1    | 55.85     | -0.054 | 0.38    | 0.95 |
| NGLY1_KO_2 | 54.3      | -0.024 | 0       | 0.73 |
| NGLY1_2    | -         | -0.042 | 0.54    | 0.7  |

Supplement: Supplementary file 8051 [file 1]

IPI00177819.5|RC3H2

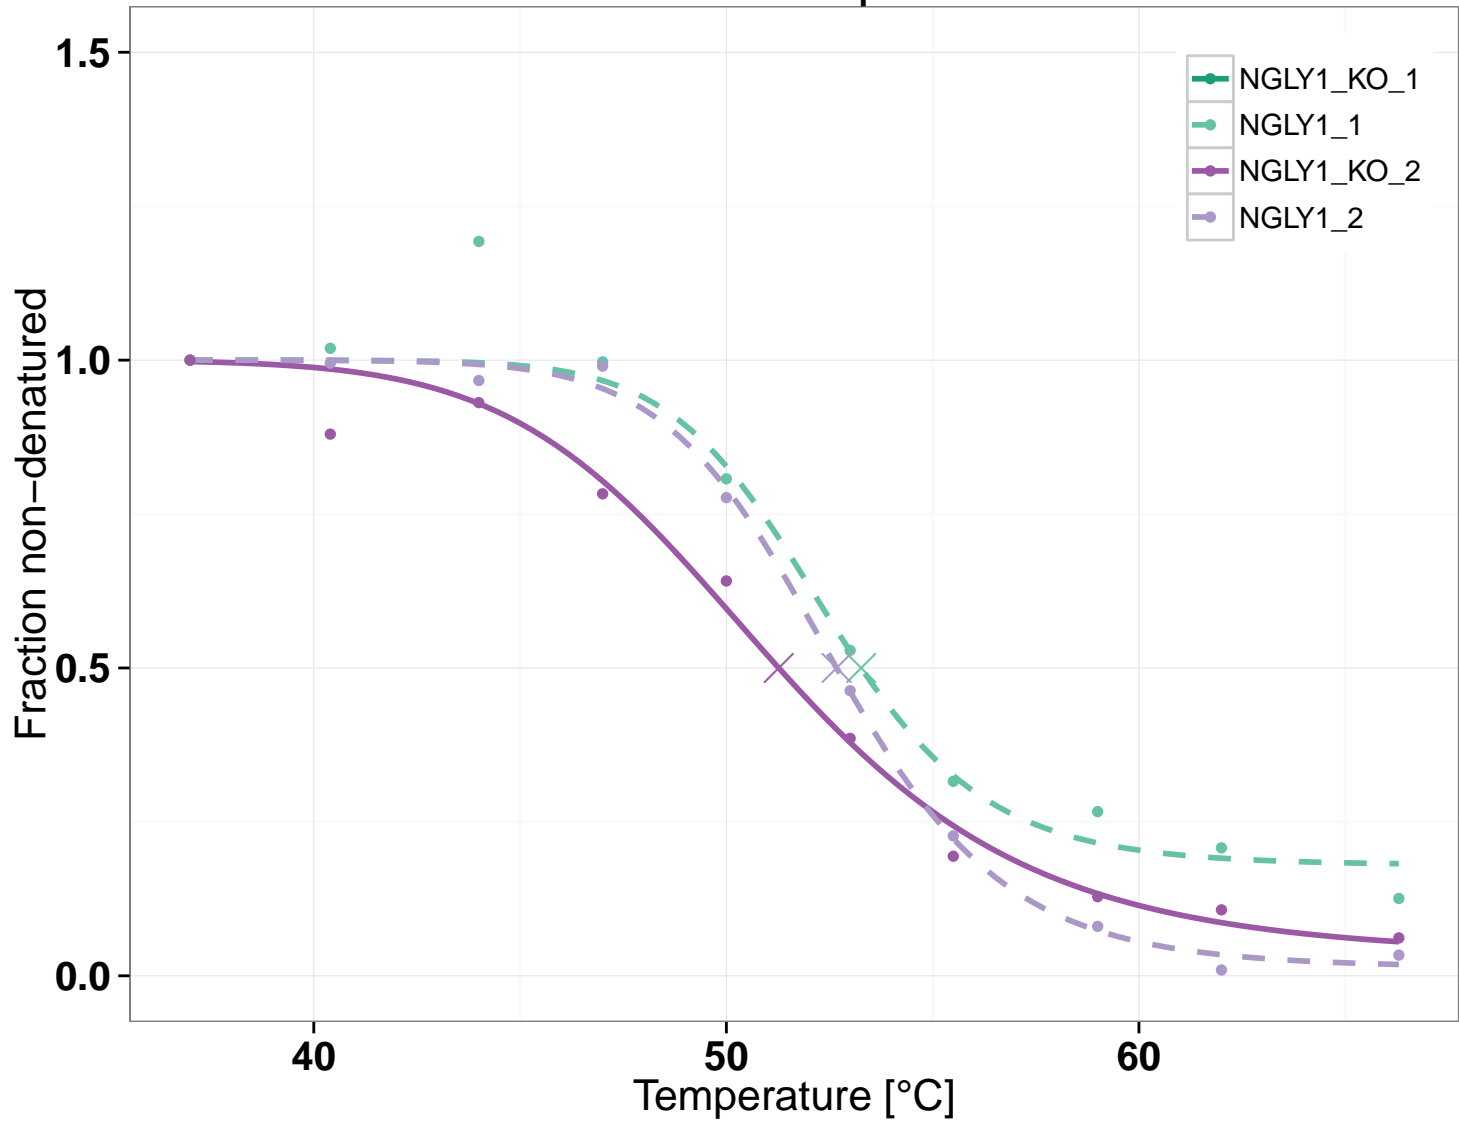

|            | meltPoint | slope  | plateau | R2   |
|------------|-----------|--------|---------|------|
| NGLY1_KO_1 | -         | -      | -       | -    |
| NGLY1_1    | 53.27     | -0.11  | 0.18    | 0.97 |
| NGLY1_KO_2 | 51.27     | -0.076 | 0.03    | 0.99 |
| NGLY1_2    | 52.67     | -0.12  | 0.01    | 1    |

Supplement: Supplementary file 8052 [file 1]

IPI00220301.5|PRDX6

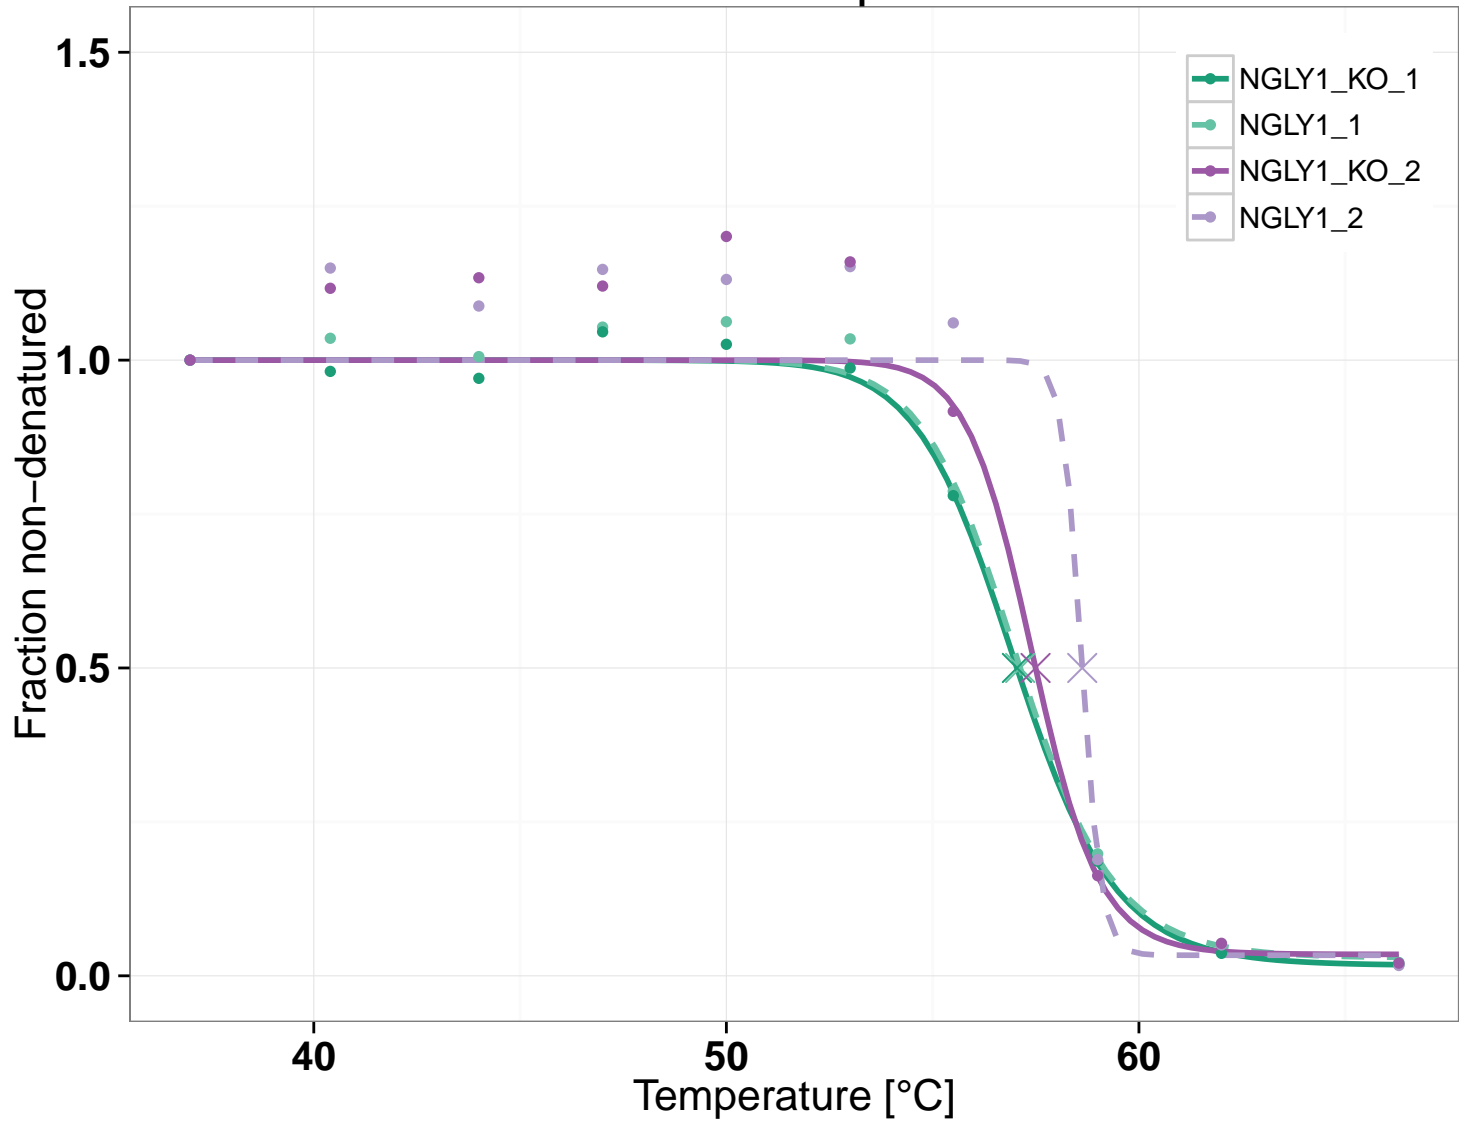

|            | meltPoint | slope | plateau | R2   |
|------------|-----------|-------|---------|------|
| NGLY1_KO_1 | 57.04     | -0.2  | 0.02    | 1    |
| NGLY1_1    | 57.12     | -0.21 | 0.03    | 0.99 |
| NGLY1_KO_2 | 57.49     | -0.3  | 0.03    | 0.95 |
| NGLY1_2    | 58.63     | -1    | 0.03    | 0.96 |

Supplement: Supplementary file 8053 [file 1]

IPI00553006.1|PARS2

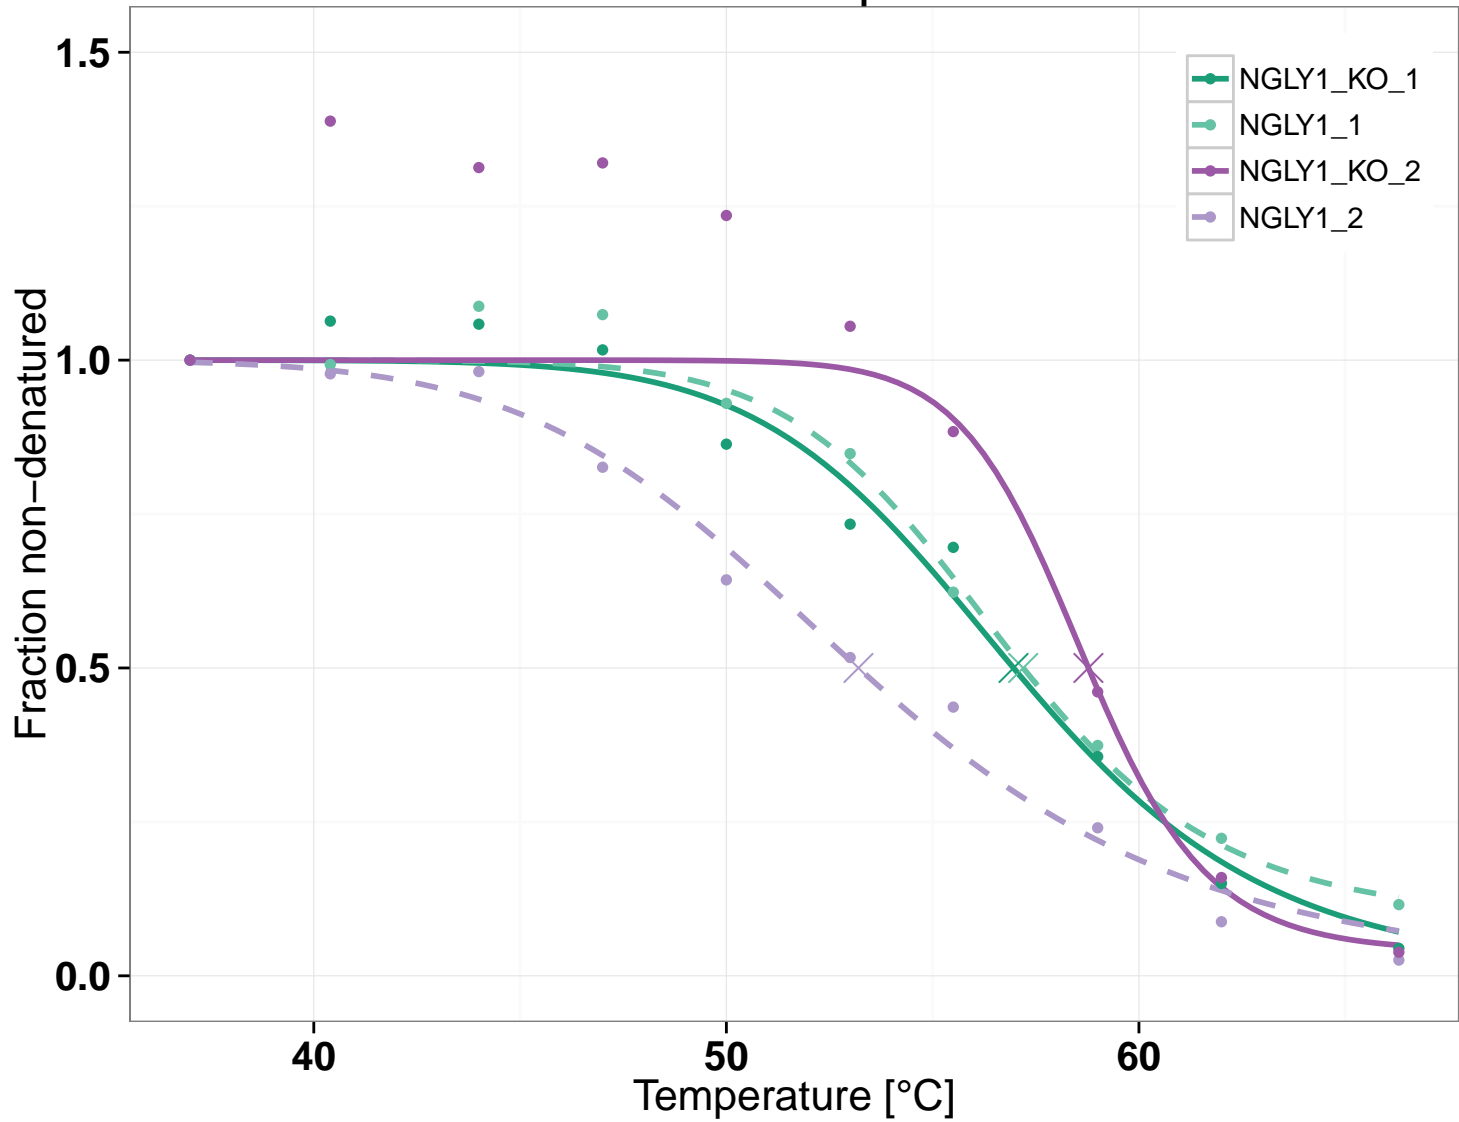

|            | meltPoint | slope  | plateau | R2   |
|------------|-----------|--------|---------|------|
| NGLY1_KO_1 | 56.96     | -0.081 | 0       | 0.98 |
| NGLY1_1    | 57.2      | -0.087 | 0.09    | 0.99 |
| NGLY1_KO_2 | 58.78     | -0.16  | 0.04    | 0.81 |
| NGLY1_2    | 53.2      | -0.062 | 0       | 0.99 |

Supplement: Supplementary file 8054 [file 1]

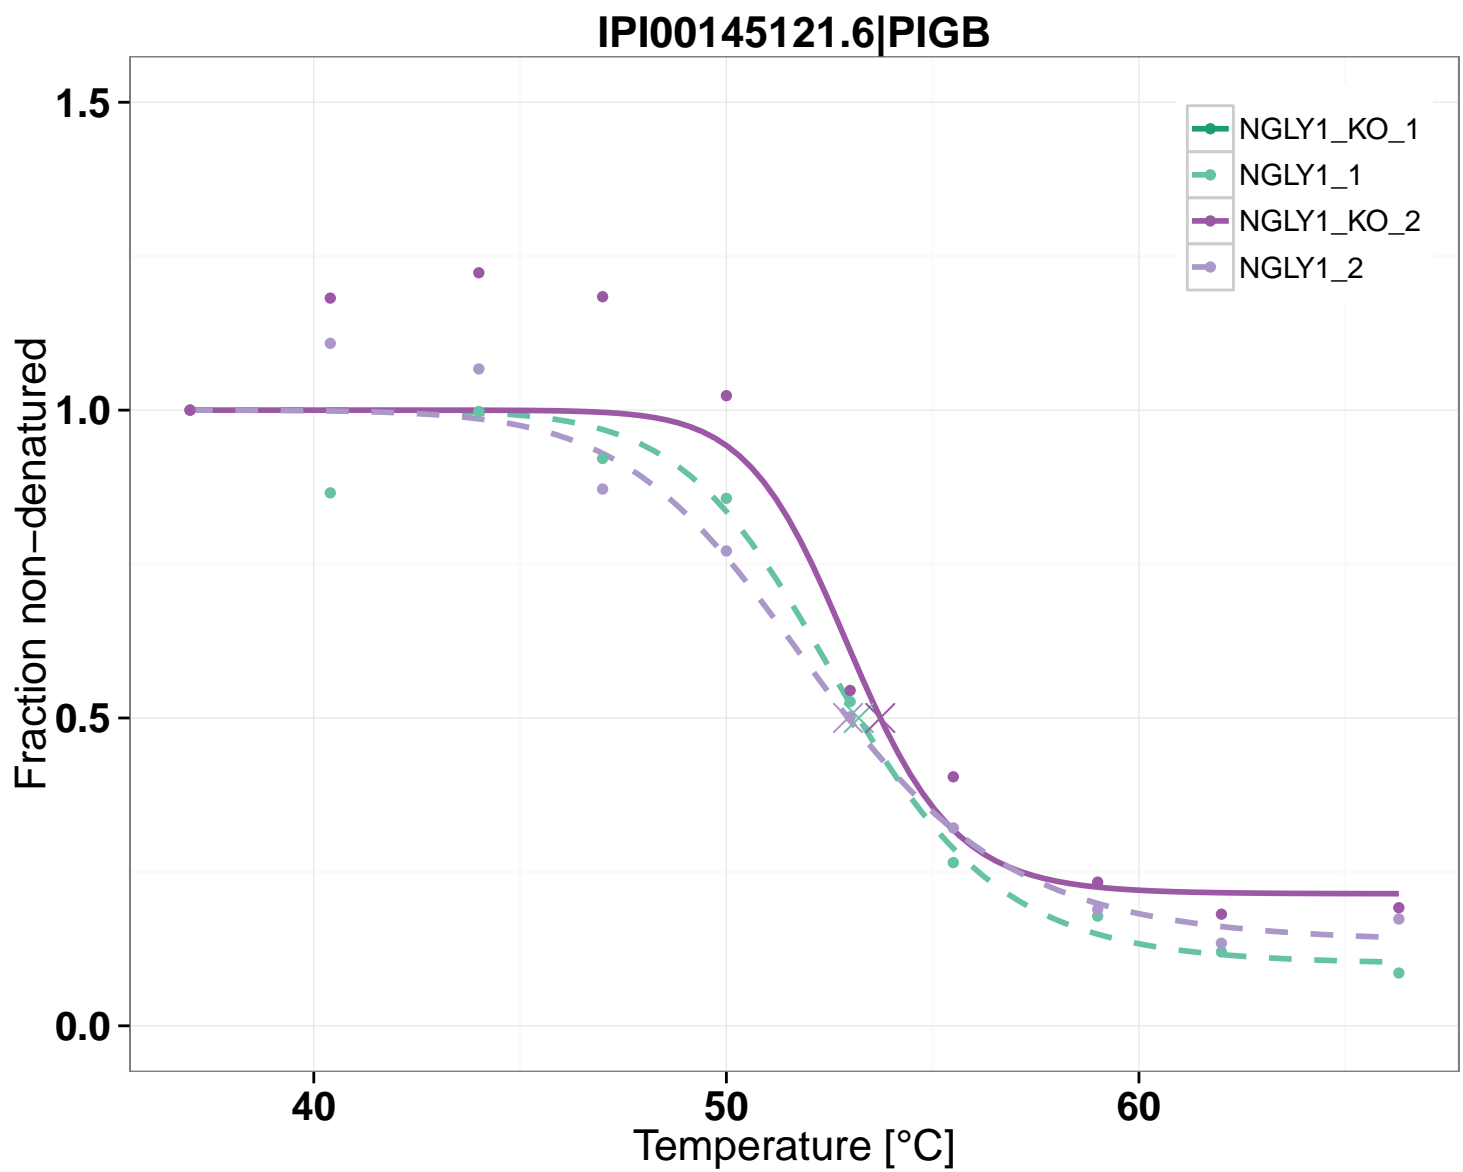

|            | meltPoint | slope  | plateau | R2   |
|------------|-----------|--------|---------|------|
| NGLY1_KO_1 | –         | –      | –       | –    |
| NGLY1_1    | 53.21     | –0.12  | 0.1     | 0.98 |
| NGLY1_KO_2 | 53.73     | –0.16  | 0.21    | 0.92 |
| NGLY1_2    | 52.95     | –0.092 | 0.14    | 0.98 |

Supplement: Supplementary file 8055 [file 1]

IPI00003128.1|P4HA2

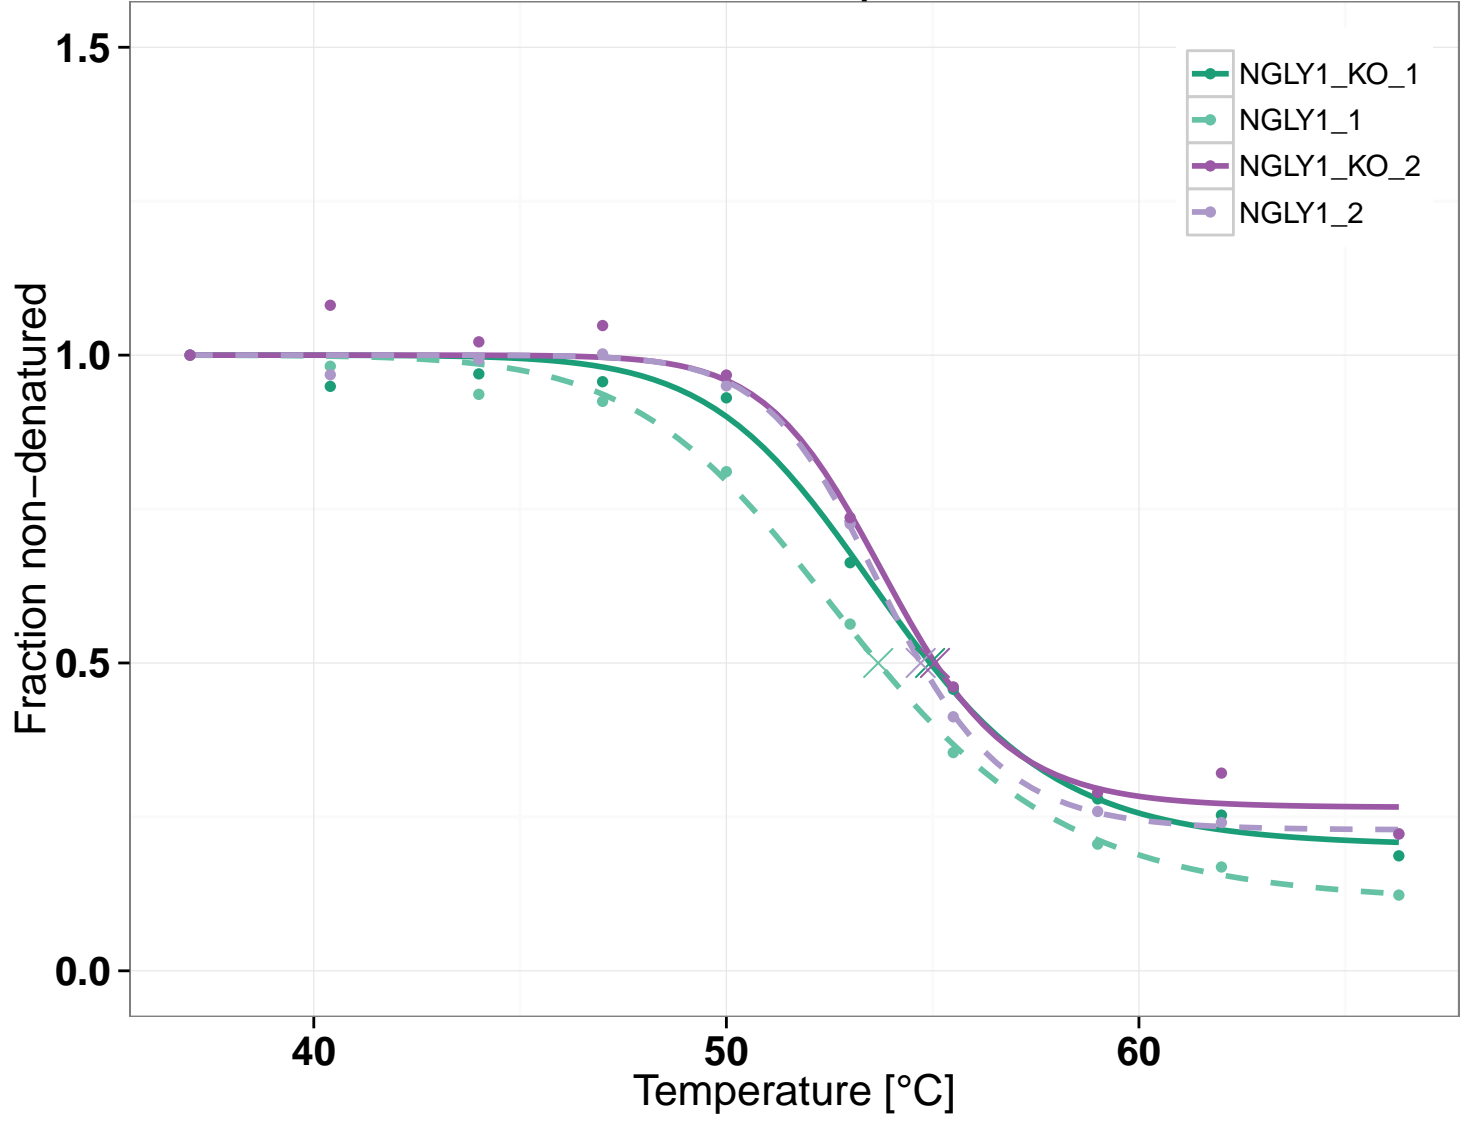

|            | meltPoint | slope  | plateau | R2   |
|------------|-----------|--------|---------|------|
| NGLY1_KO_1 | 54.94     | -0.095 | 0.2     | 0.99 |
| NGLY1_1    | 53.68     | -0.085 | 0.11    | 1    |
| NGLY1_KO_2 | 55.06     | -0.12  | 0.27    | 0.99 |
| NGLY1_2    | 54.71     | -0.13  | 0.23    | 1    |

Supplement: Supplementary file 8056 [file 1]

# IPI00005018.3|UBP1

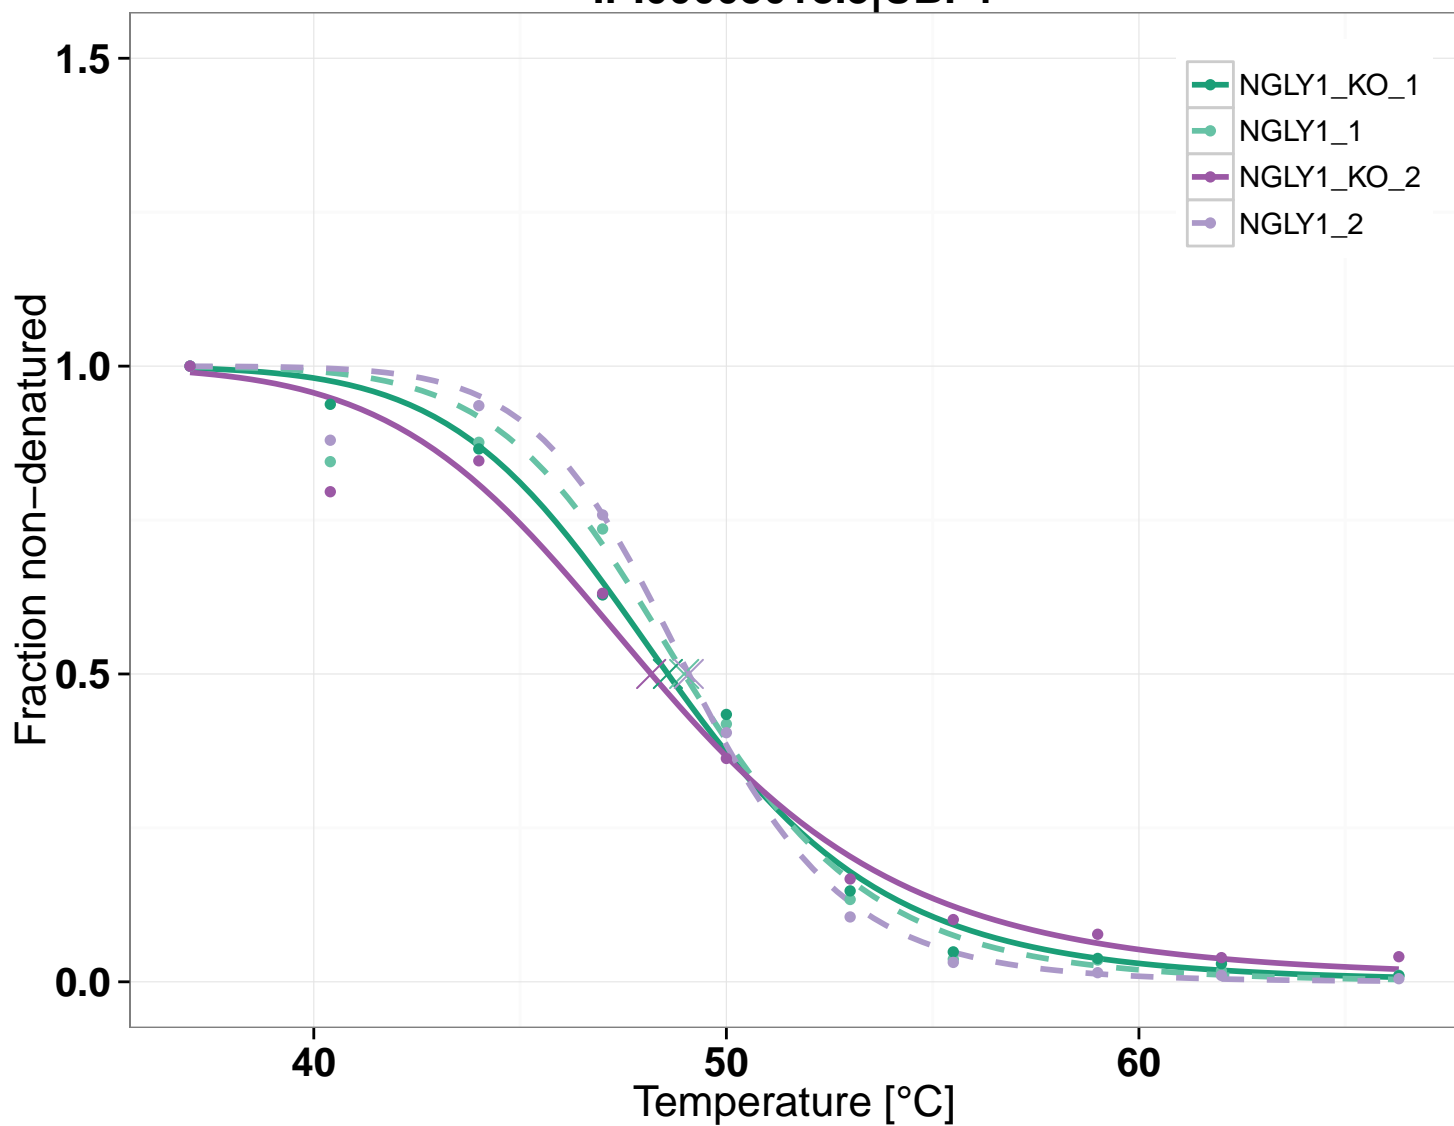

|            | meltPoint | slope  | plateau | R2   |
|------------|-----------|--------|---------|------|
| NGLY1_KO_1 | 48.58     | -0.095 | 0       | 0.99 |
| NGLY1_1    | 48.98     | -0.11  | 0       | 0.98 |
| NGLY1_KO_2 | 48.18     | -0.08  | 0.01    | 0.98 |
| NGLY1_2    | 49.09     | -0.13  | 0       | 0.99 |

Supplement: Supplementary file 8057 [file 1]

IPI00300333.4|PAF1

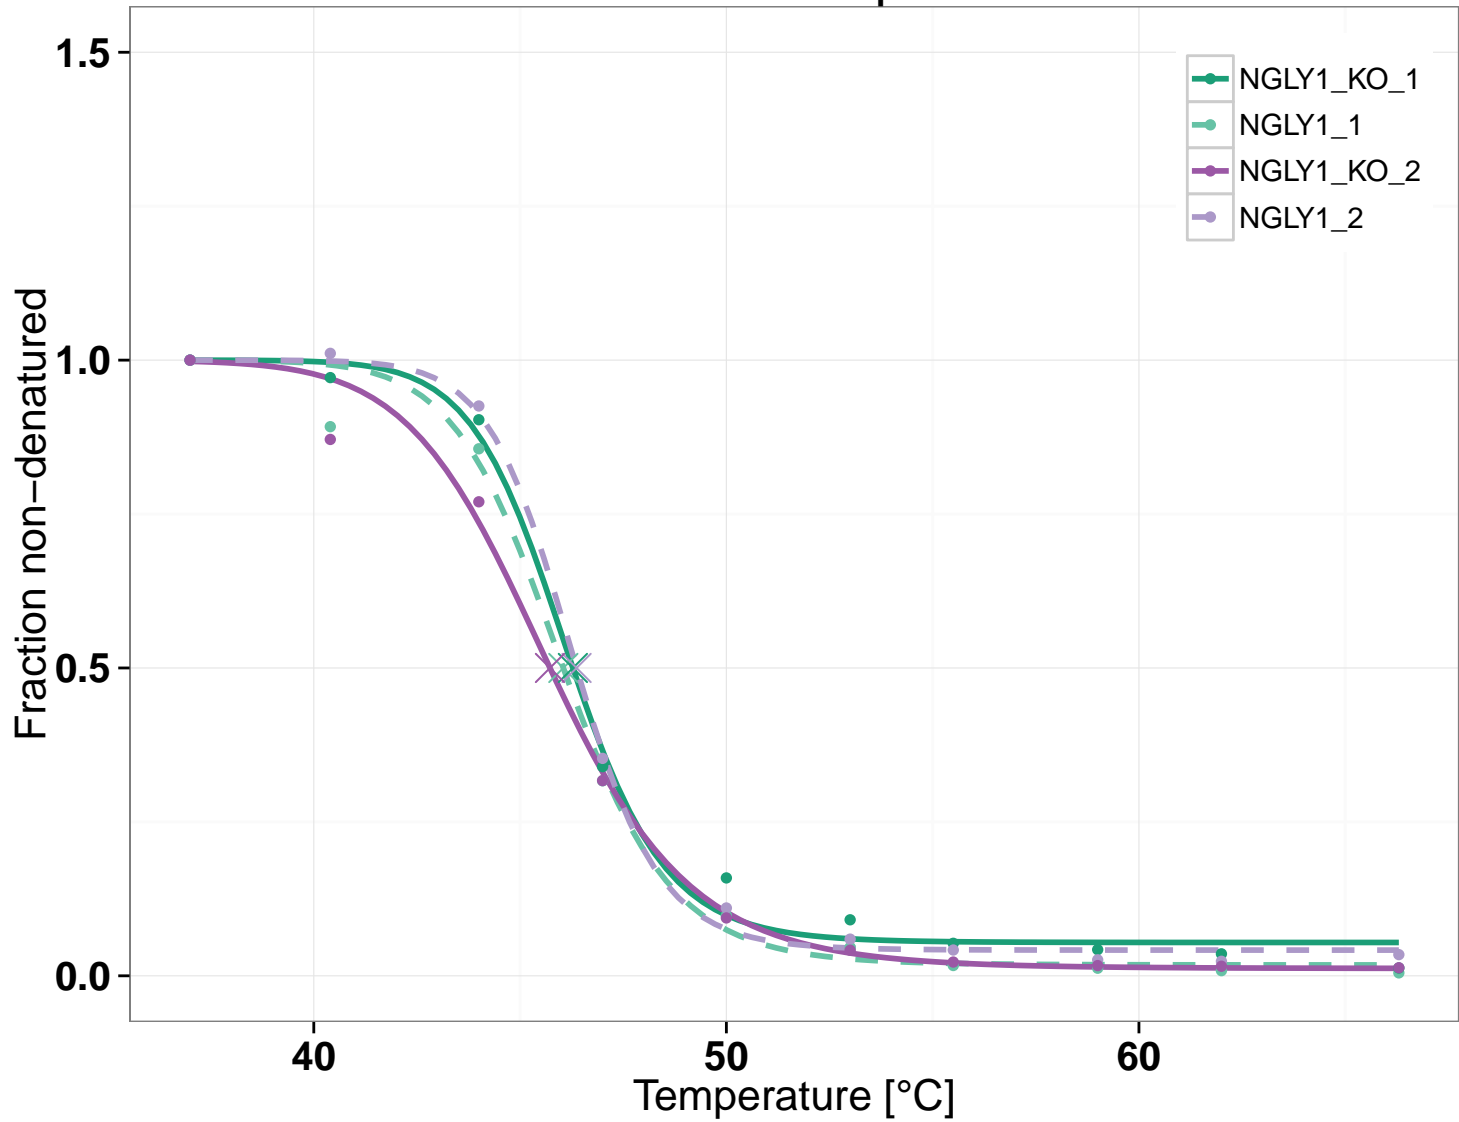

|            | meltPoint | slope | plateau | R2   |
|------------|-----------|-------|---------|------|
| NGLY1_KO_1 | 46.28     | -0.2  | 0.05    | 0.99 |
| NGLY1_1    | 46.05     | -0.19 | 0.02    | 0.99 |
| NGLY1_KO_2 | 45.72     | -0.14 | 0.01    | 0.99 |
| NGLY1_2    | 46.37     | -0.23 | 0.04    | 1    |

Supplement: Supplementary file 8058 [file 1]

# IPI00289535.6|PMPCB

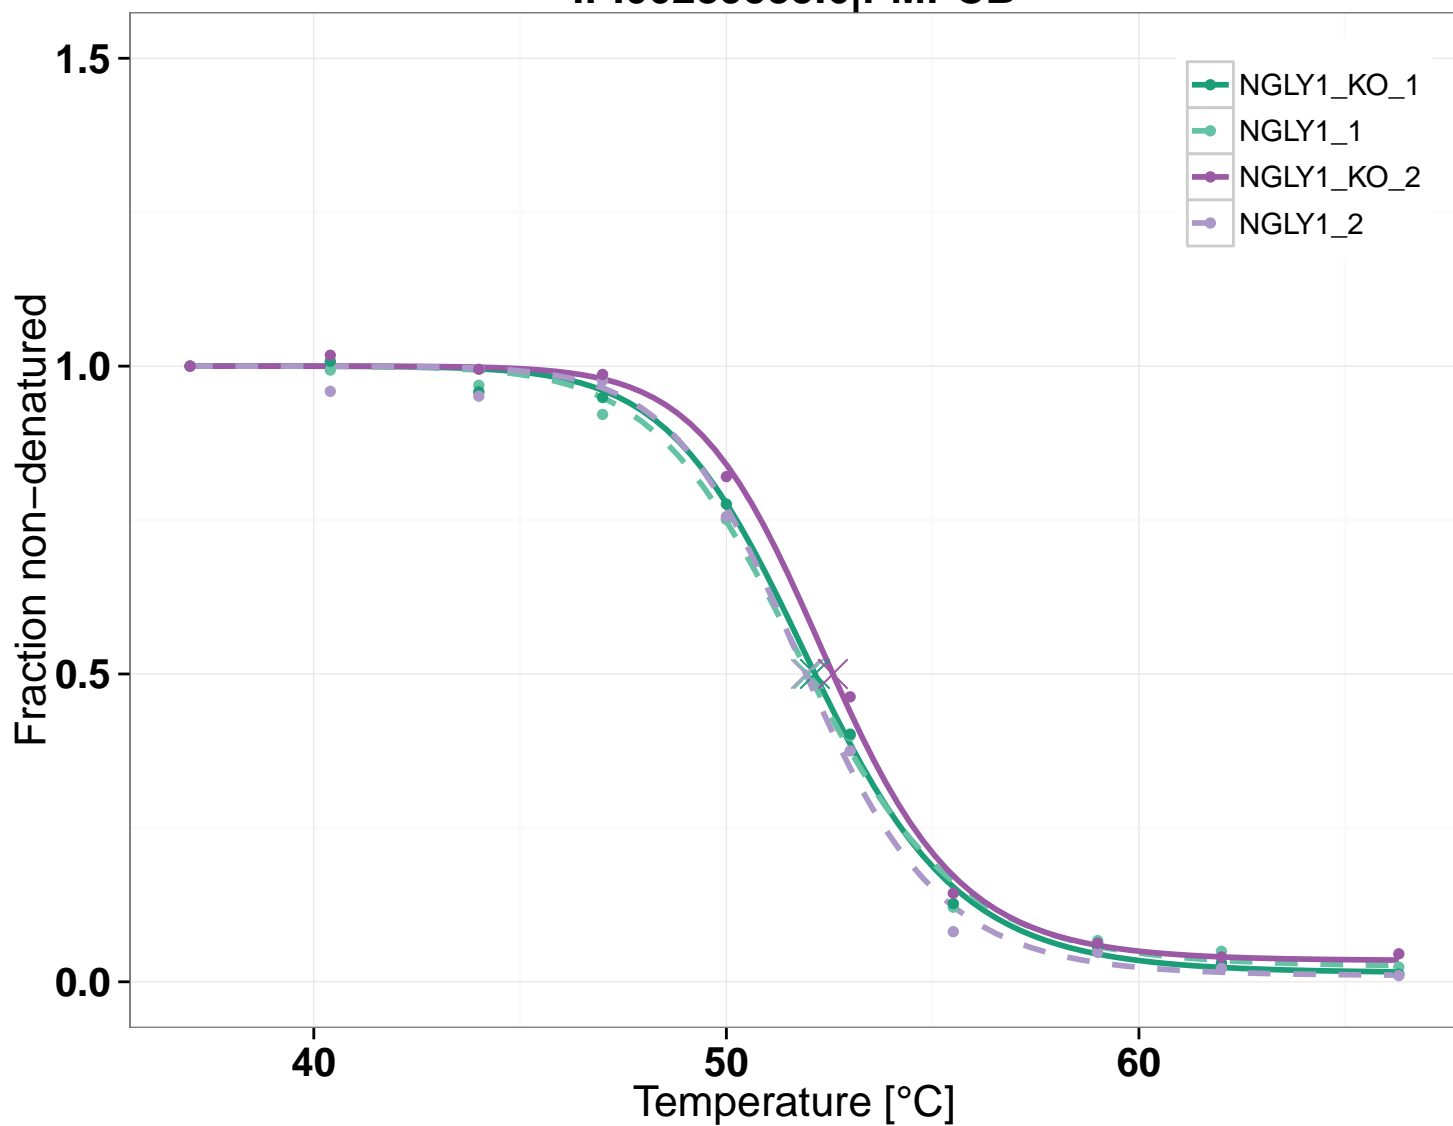

|            | meltPoint | slope | plateau | R2 |
|------------|-----------|-------|---------|----|
| NGLY1_KO_1 | 52.15     | -0.14 | 0.01    | 1  |
| NGLY1_1    | 51.99     | -0.13 | 0.02    | 1  |
| NGLY1_KO_2 | 52.58     | -0.15 | 0.03    | 1  |
| NGLY1_2    | 51.93     | -0.15 | 0.01    | 1  |

Supplement: Supplementary file 8059 [file 1]

IPI00046828.4|CCDC58

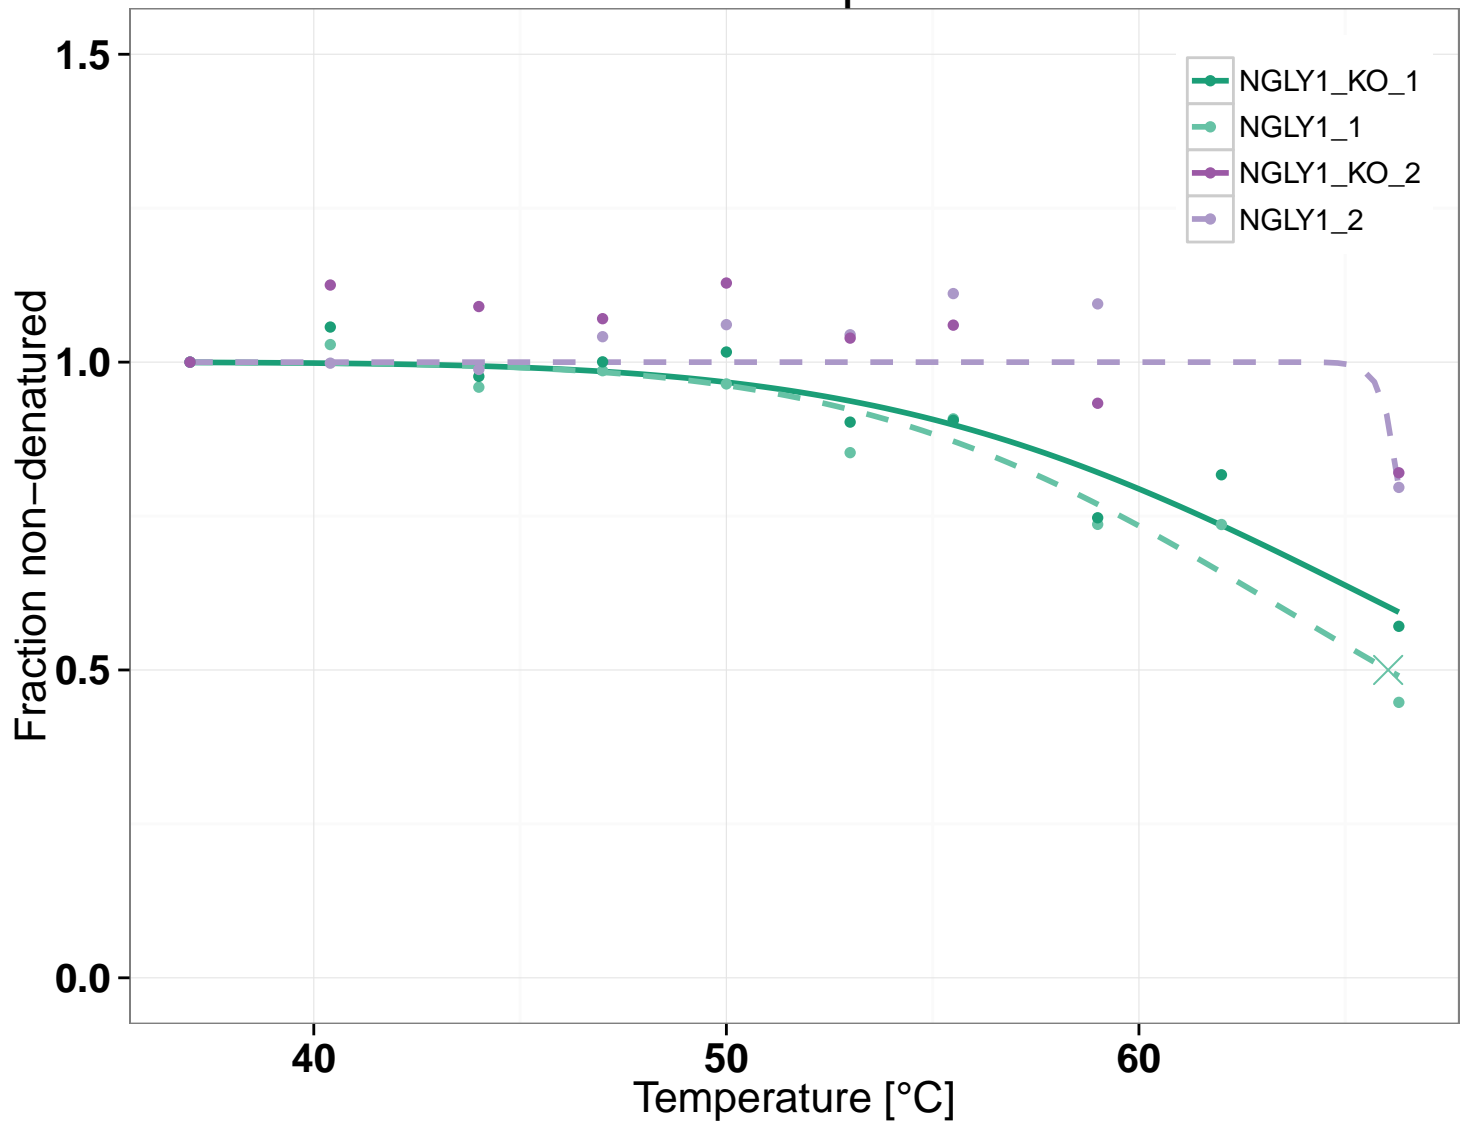

|            | meltPoint | slope  | plateau | R2   |
|------------|-----------|--------|---------|------|
| NGLY1_KO_1 | -         | -0.034 | 0       | 0.9  |
| NGLY1_1    | 66.04     | -0.04  | 0       | 0.94 |
| NGLY1_KO_2 | -         | -      | -       | -    |
| NGLY1_2    | -         | -      | 0       | 0.26 |

Supplement: Supplementary file 8060 [file 1]

IPI00384333.2|TCF12

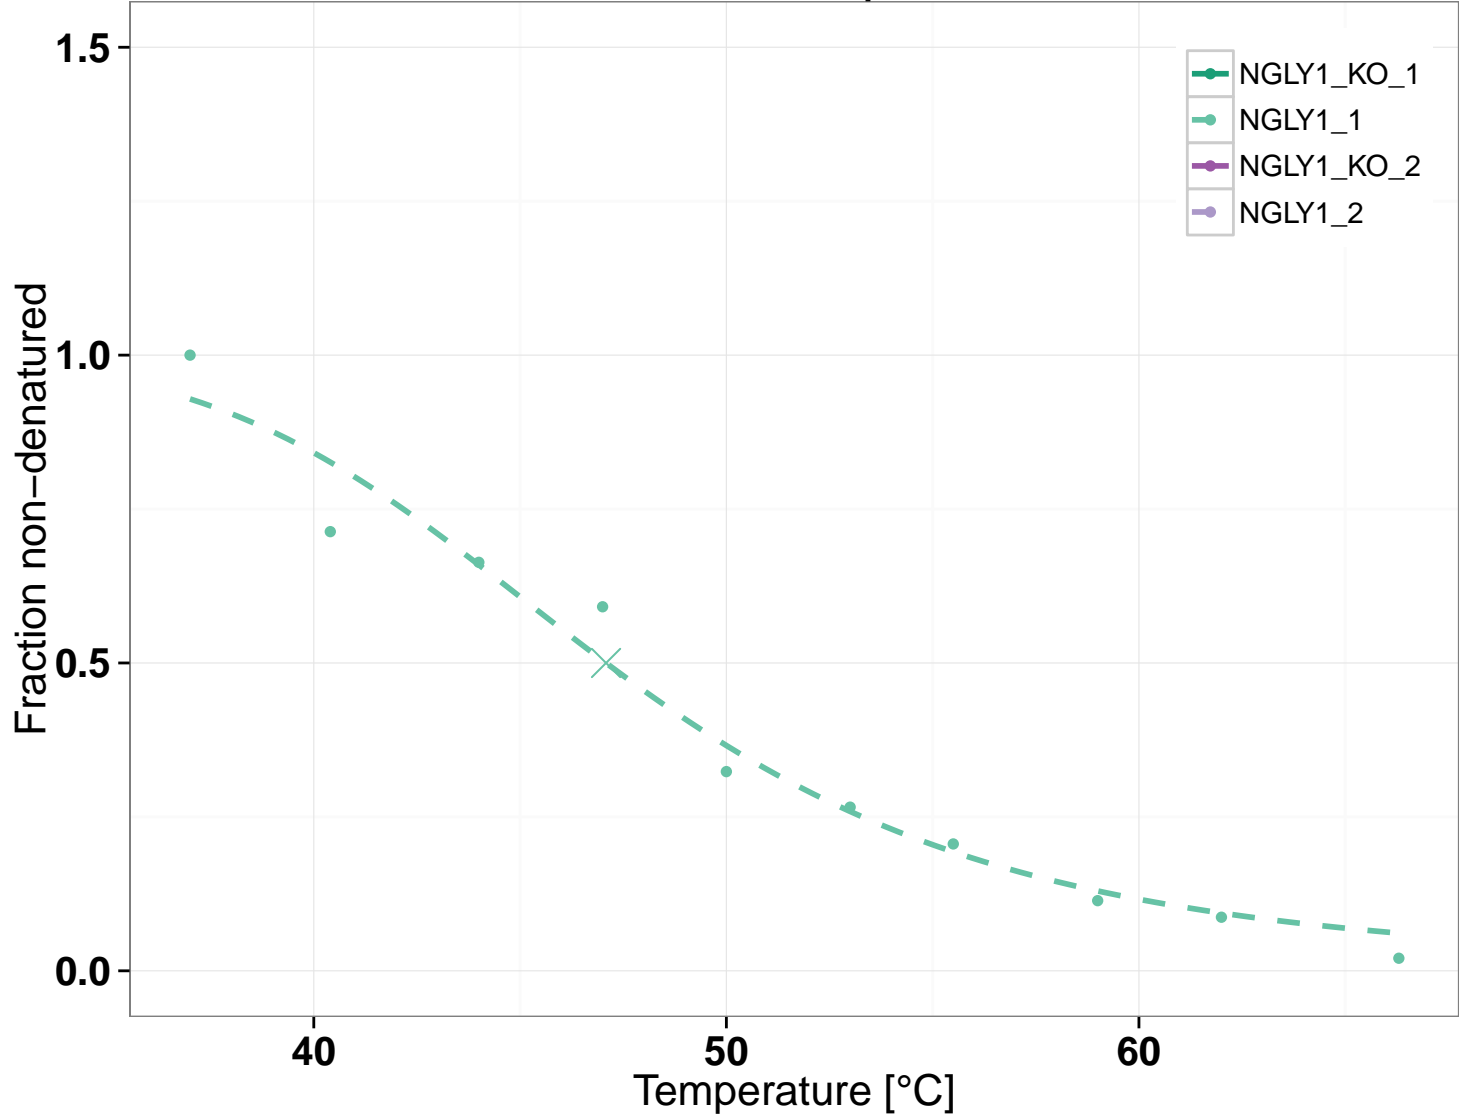

|            | meltPoint | slope  | plateau | R2   |
|------------|-----------|--------|---------|------|
| NGLY1_KO_1 | -         | -      | -       | -    |
| NGLY1_1    | 47.08     | -0.052 | 0       | 0.97 |
| NGLY1_KO_2 | -         | -      | -       | -    |
| NGLY1_2    | -         | -      | -       | -    |

Supplement: Supplementary file 8061 [file 1]

# IPI00010586.2|TMF1

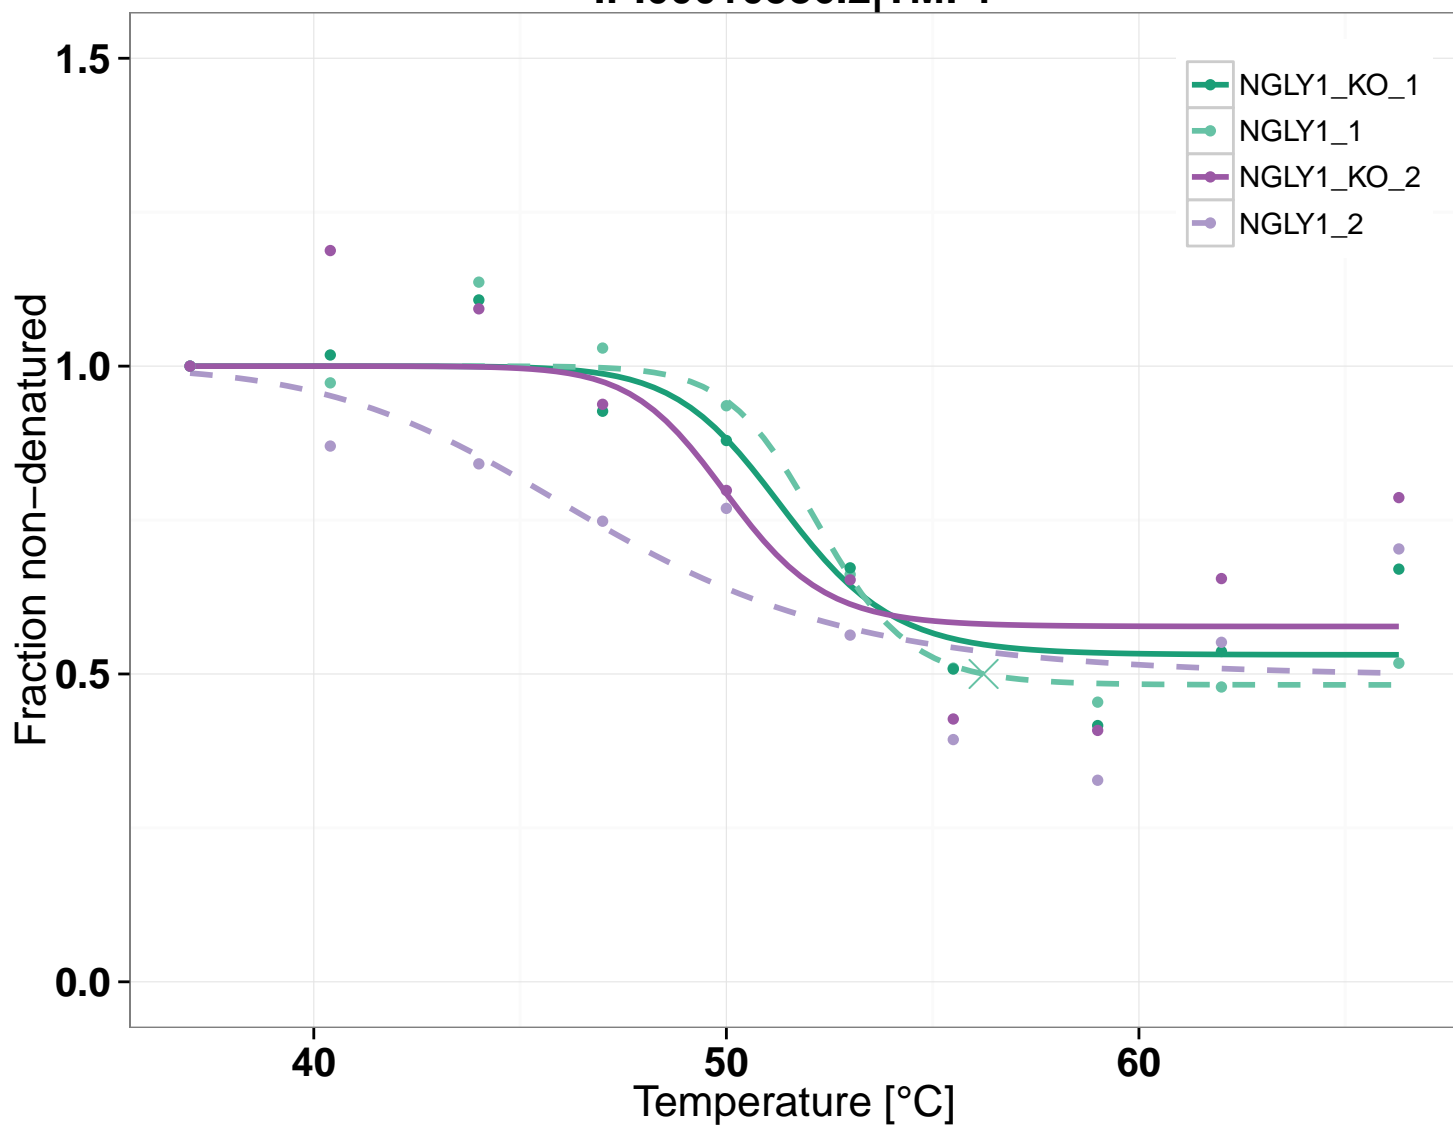

|            | meltPoint | slope  | plateau | R2   |
|------------|-----------|--------|---------|------|
| NGLY1_KO_1 | –         | –0.088 | 0.53    | 0.9  |
| NGLY1_1    | 56.23     | –0.12  | 0.48    | 0.97 |
| NGLY1_KO_2 | –         | –0.09  | 0.58    | 0.76 |
| NGLY1_2    | –         | –0.039 | 0.49    | 0.7  |

Supplement: Supplementary file 8063 [file 1]

IPI00063121.5|ATPBD4

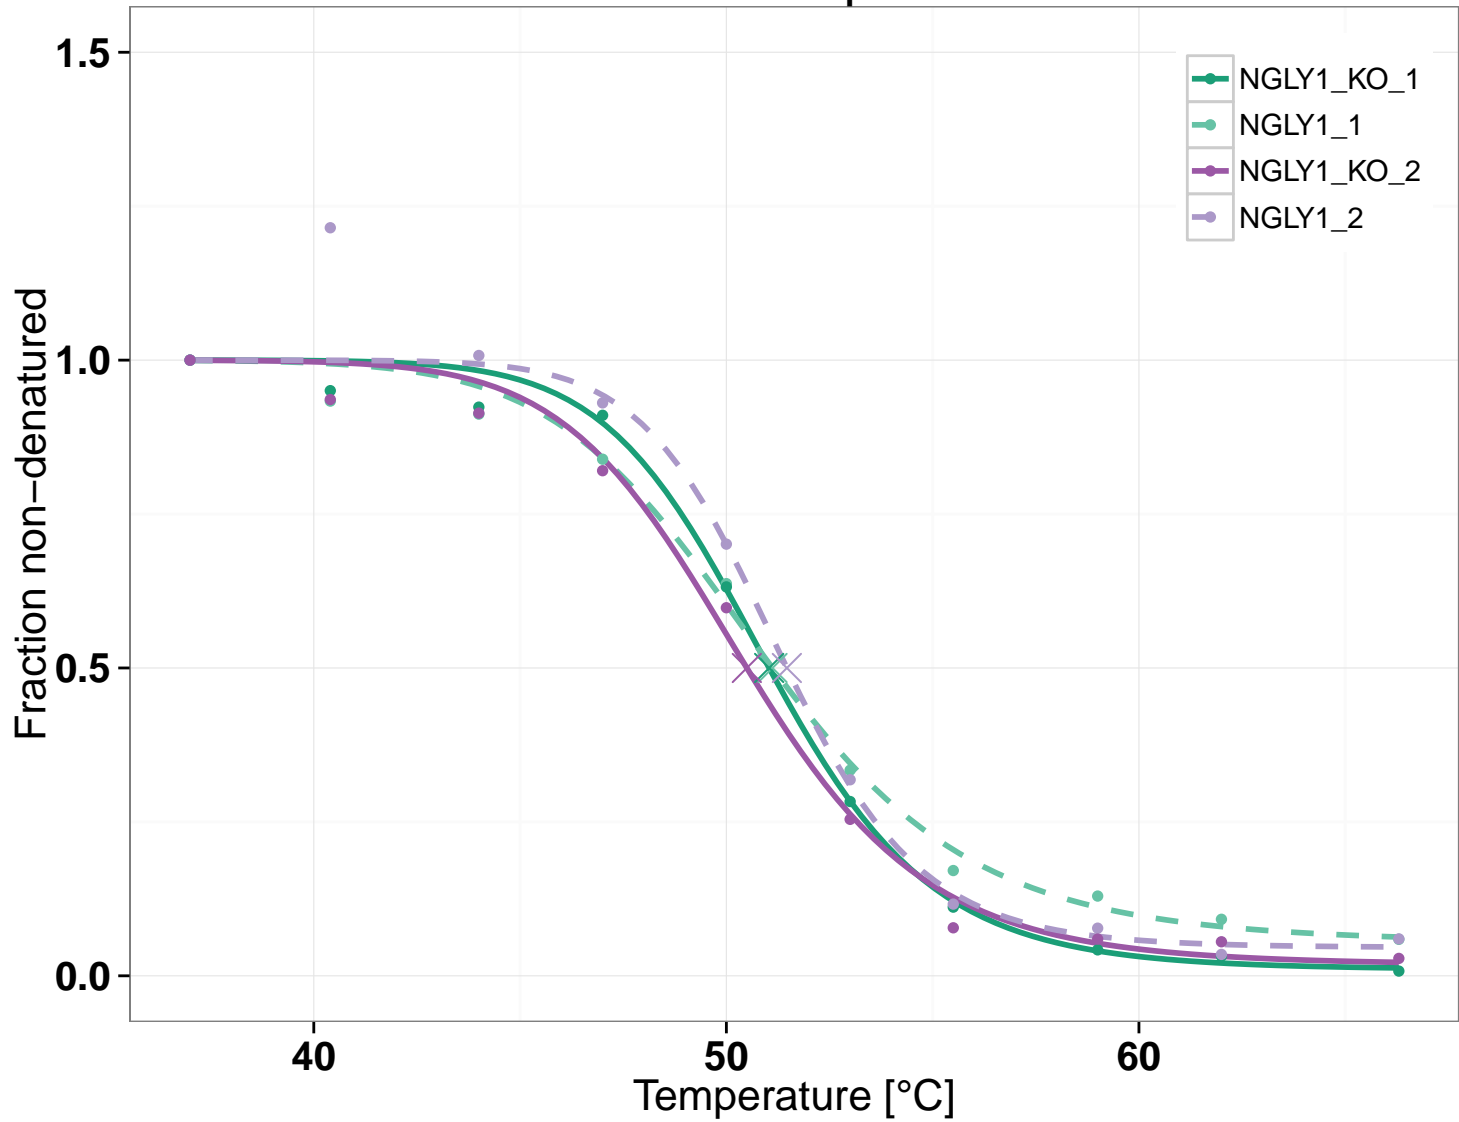

|            | meltPoint | slope  | plateau | R2   |
|------------|-----------|--------|---------|------|
| NGLY1_KO_1 | 51.04     | -0.12  | 0.01    | 1    |
| NGLY1_1    | 51.12     | -0.093 | 0.05    | 0.99 |
| NGLY1_KO_2 | 50.5      | -0.11  | 0.02    | 0.99 |
| NGLY1_2    | 51.47     | -0.14  | 0.05    | 0.98 |

Supplement: Supplementary file 8064 [file 1]

IPI00550986.4|C12ORF11

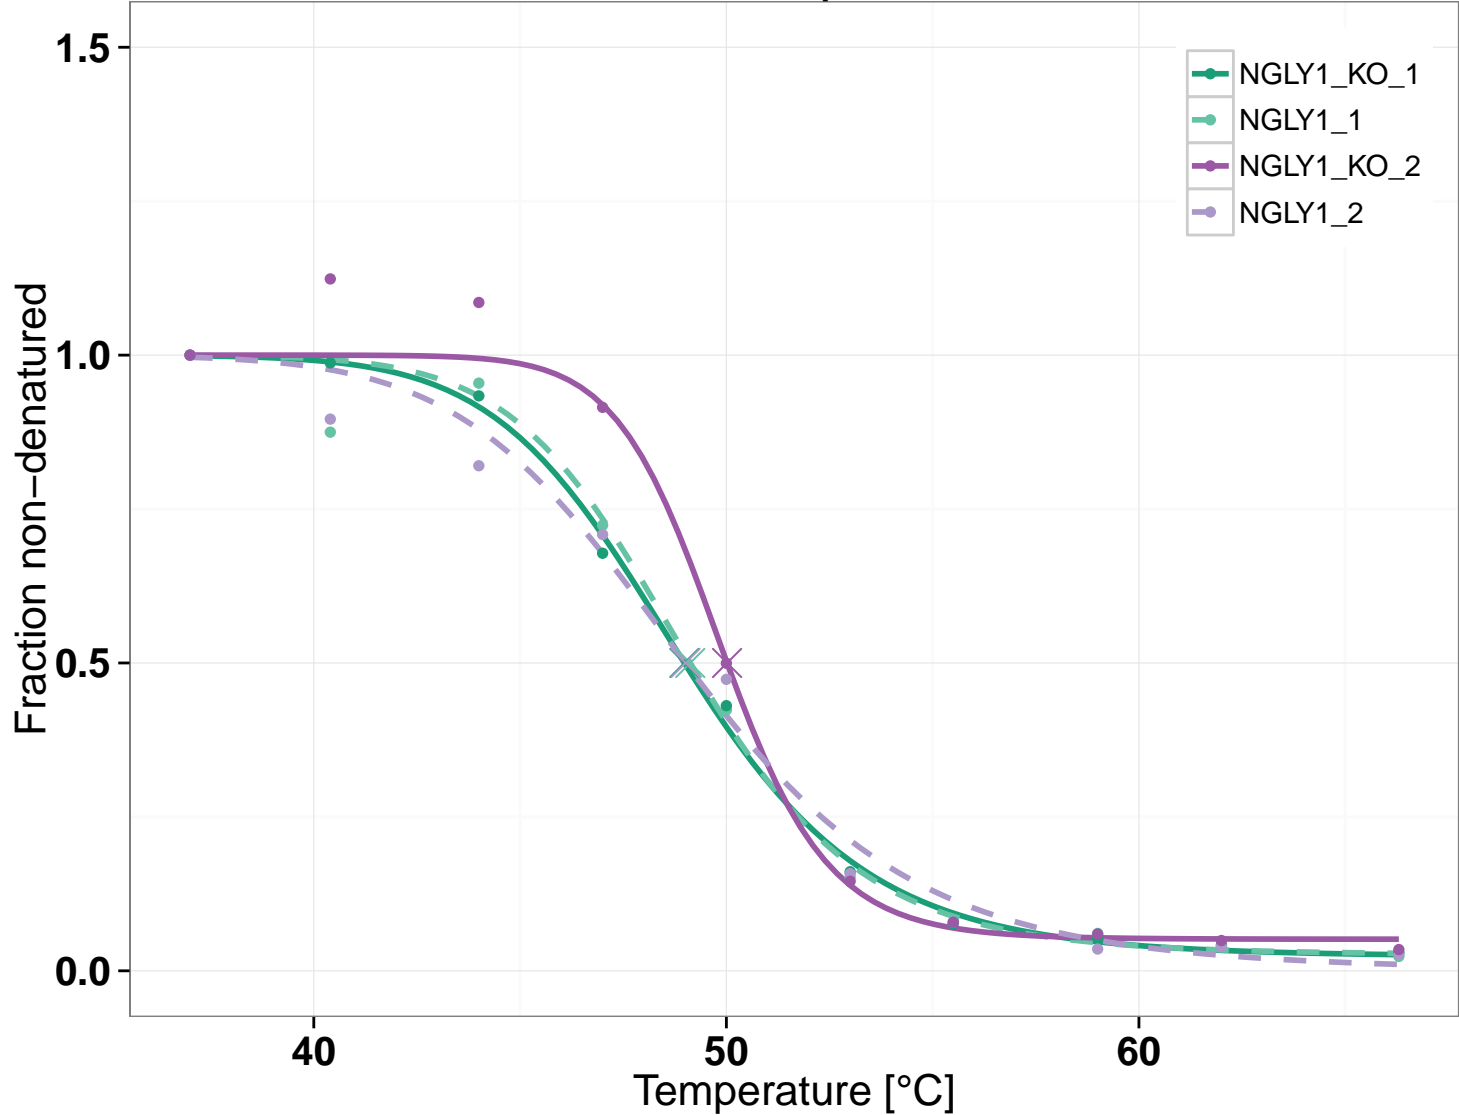

|            | meltPoint | slope | plateau | R2   |
|------------|-----------|-------|---------|------|
| NGLY1_KO_1 | 48.98     | -0.11 | 0.02    | 1    |
| NGLY1_1    | 49.12     | -0.11 | 0.03    | 0.99 |
| NGLY1_KO_2 | 50.02     | -0.19 | 0.05    | 0.99 |
| NGLY1_2    | 49.01     | -0.09 | 0       | 0.99 |

Supplement: Supplementary file 8065 [file 1]

# IPI00303053.6|EIF2AK3

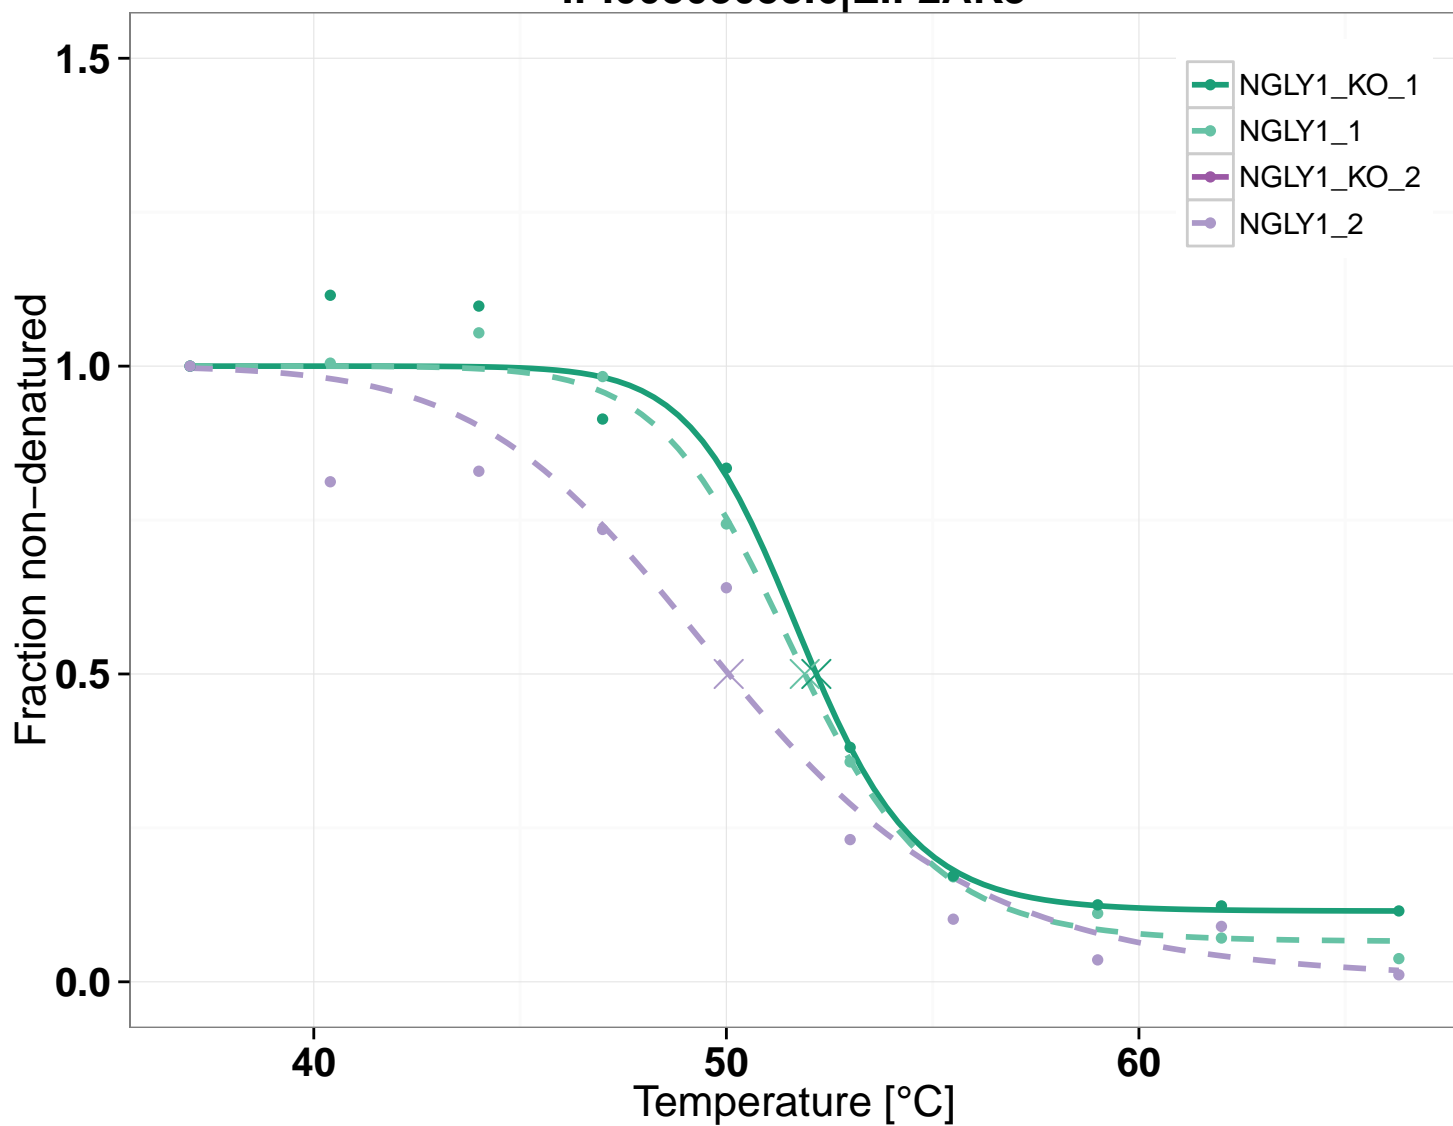

|            | meltPoint | slope  | plateau | R2   |
|------------|-----------|--------|---------|------|
| NGLY1_KO_1 | 52.18     | -0.16  | 0.11    | 0.98 |
| NGLY1_1    | 51.9      | -0.14  | 0.07    | 1    |
| NGLY1_KO_2 | -         | -      | -       | -    |
| NGLY1_2    | 50.06     | -0.082 | 0       | 0.95 |

Supplement: Supplementary file 8066 [file 1]

IPI00008542.3|FBXO28

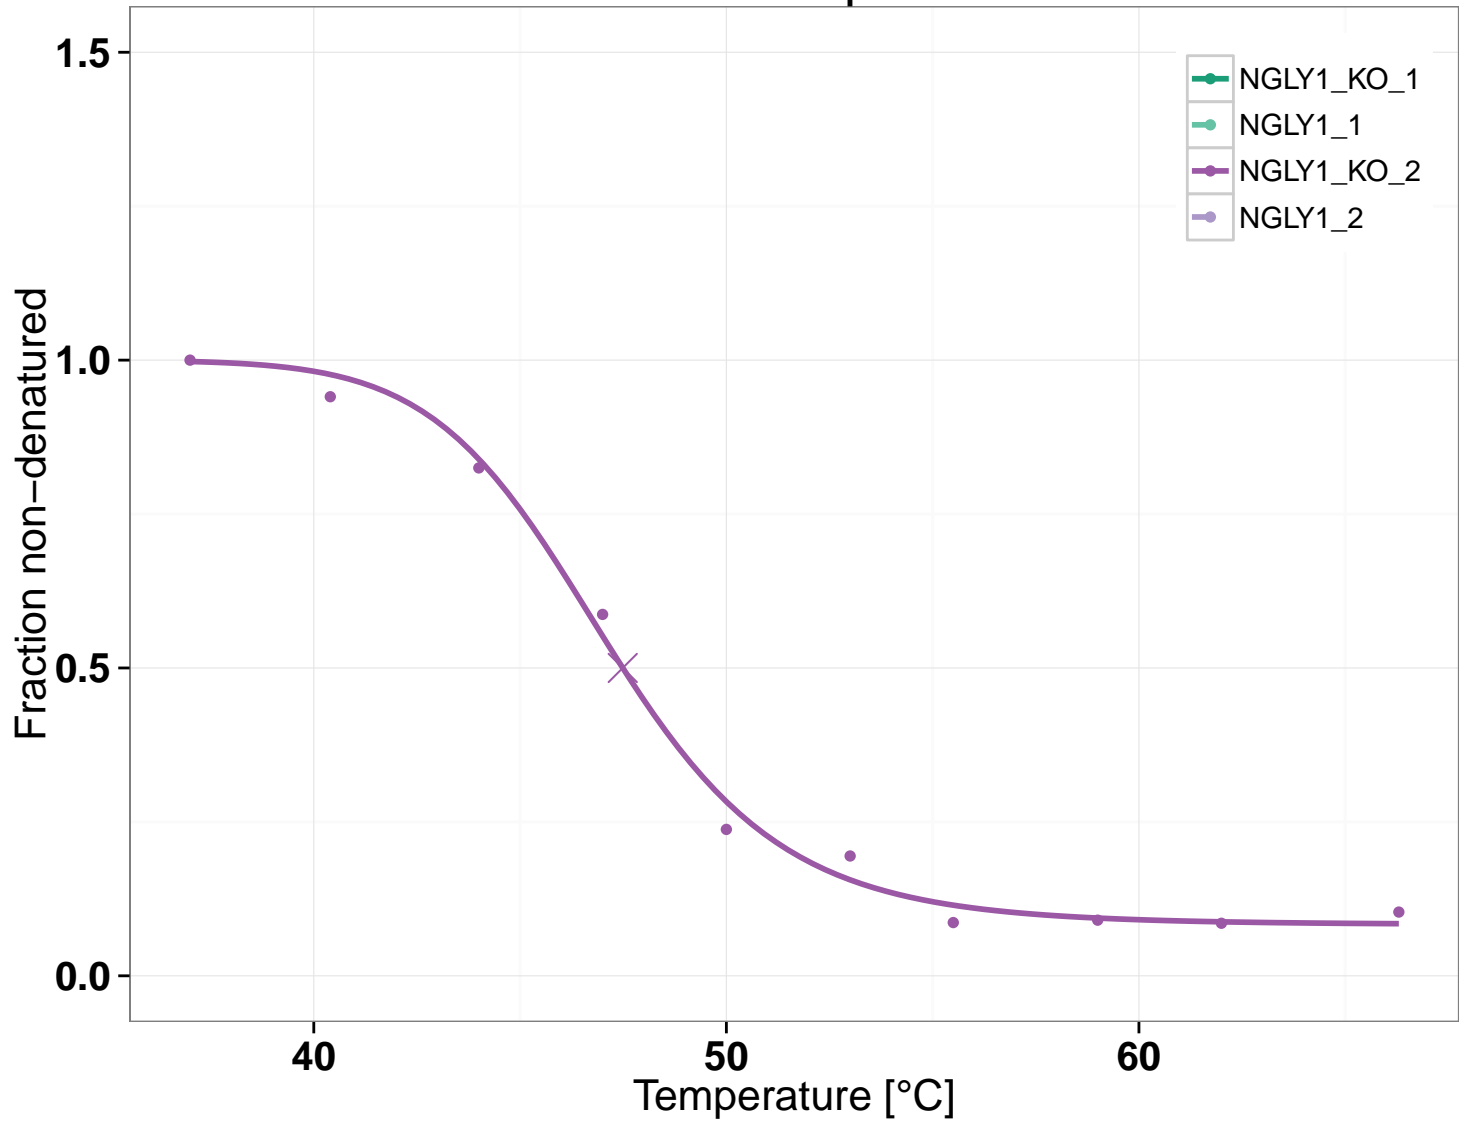

|            | meltPoint | slope | plateau | R2   |
|------------|-----------|-------|---------|------|
| NGLY1_KO_1 | —         | —     | —       | —    |
| NGLY1_1    | —         | —     | —       | —    |
| NGLY1_KO_2 | 47.49     | -0.11 | 0.08    | 0.99 |
| NGLY1_2    | —         | —     | —       | —    |

Supplement: Supplementary file 8067 [file 1]

# IPI00455599.4|HSP90AB2P

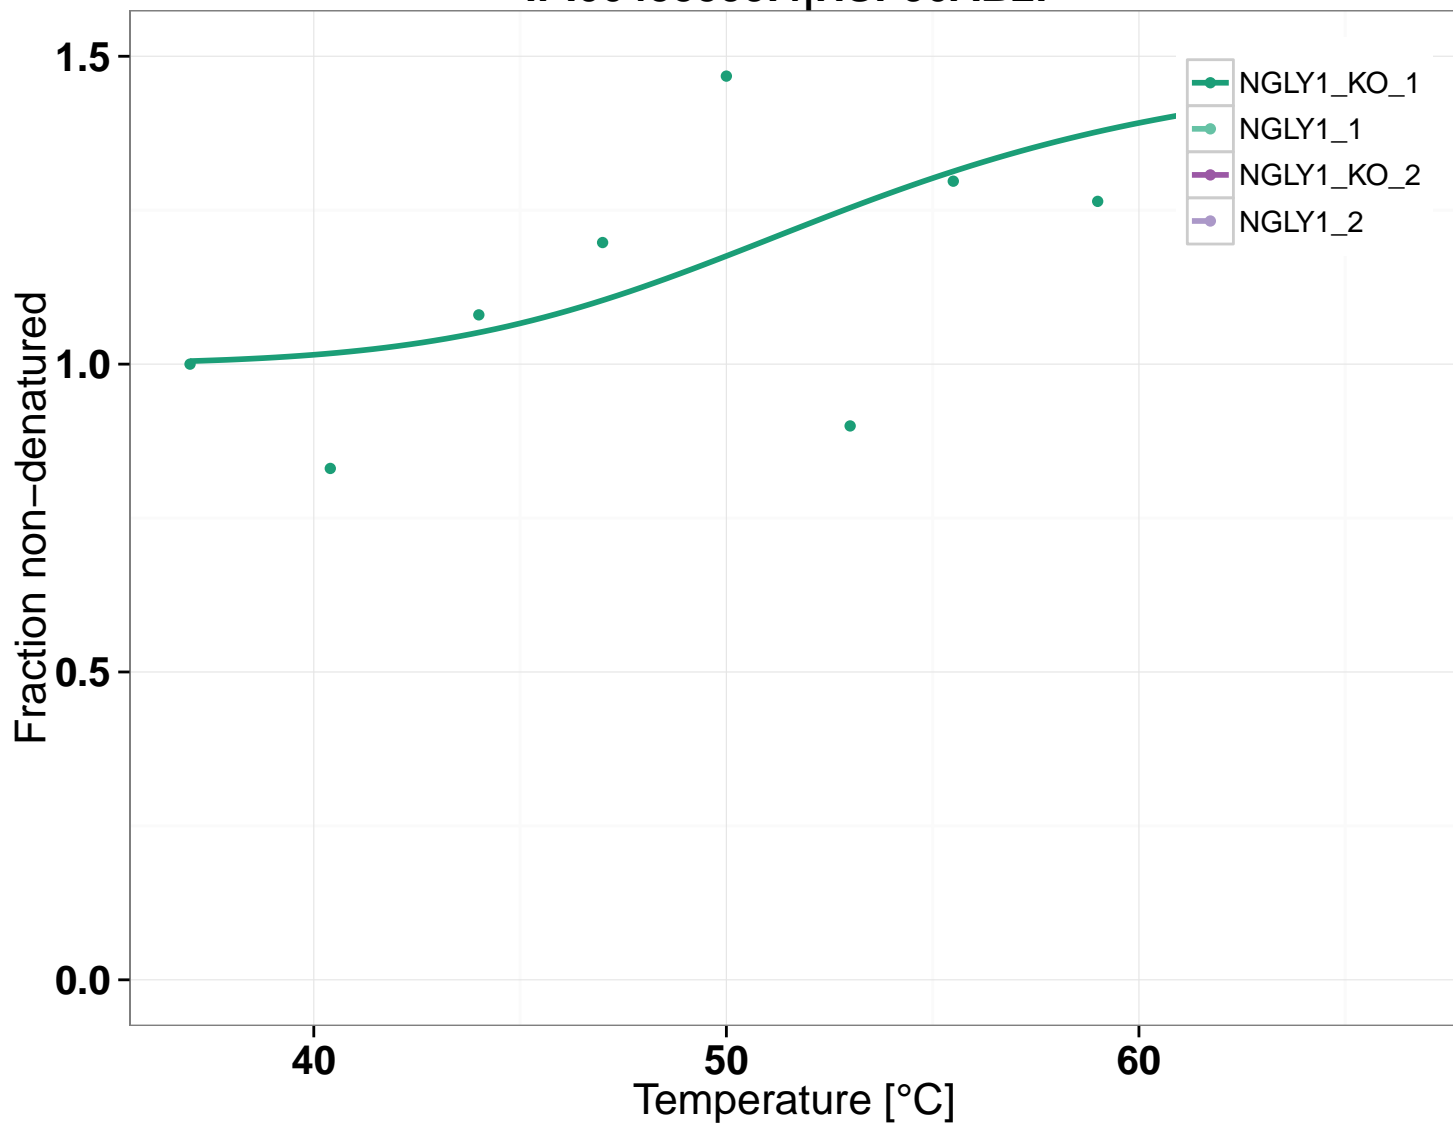

|            | meltPoint | slope | plateau | R2  |
|------------|-----------|-------|---------|-----|
| NGLY1_KO_1 | —         | 0.026 | 1.5     | 0.5 |
| NGLY1_1    | —         | —     | —       | —   |
| NGLY1_KO_2 | —         | —     | —       | —   |
| NGLY1_2    | —         | —     | —       | —   |

Supplement: Supplementary file 8068 [file 1]

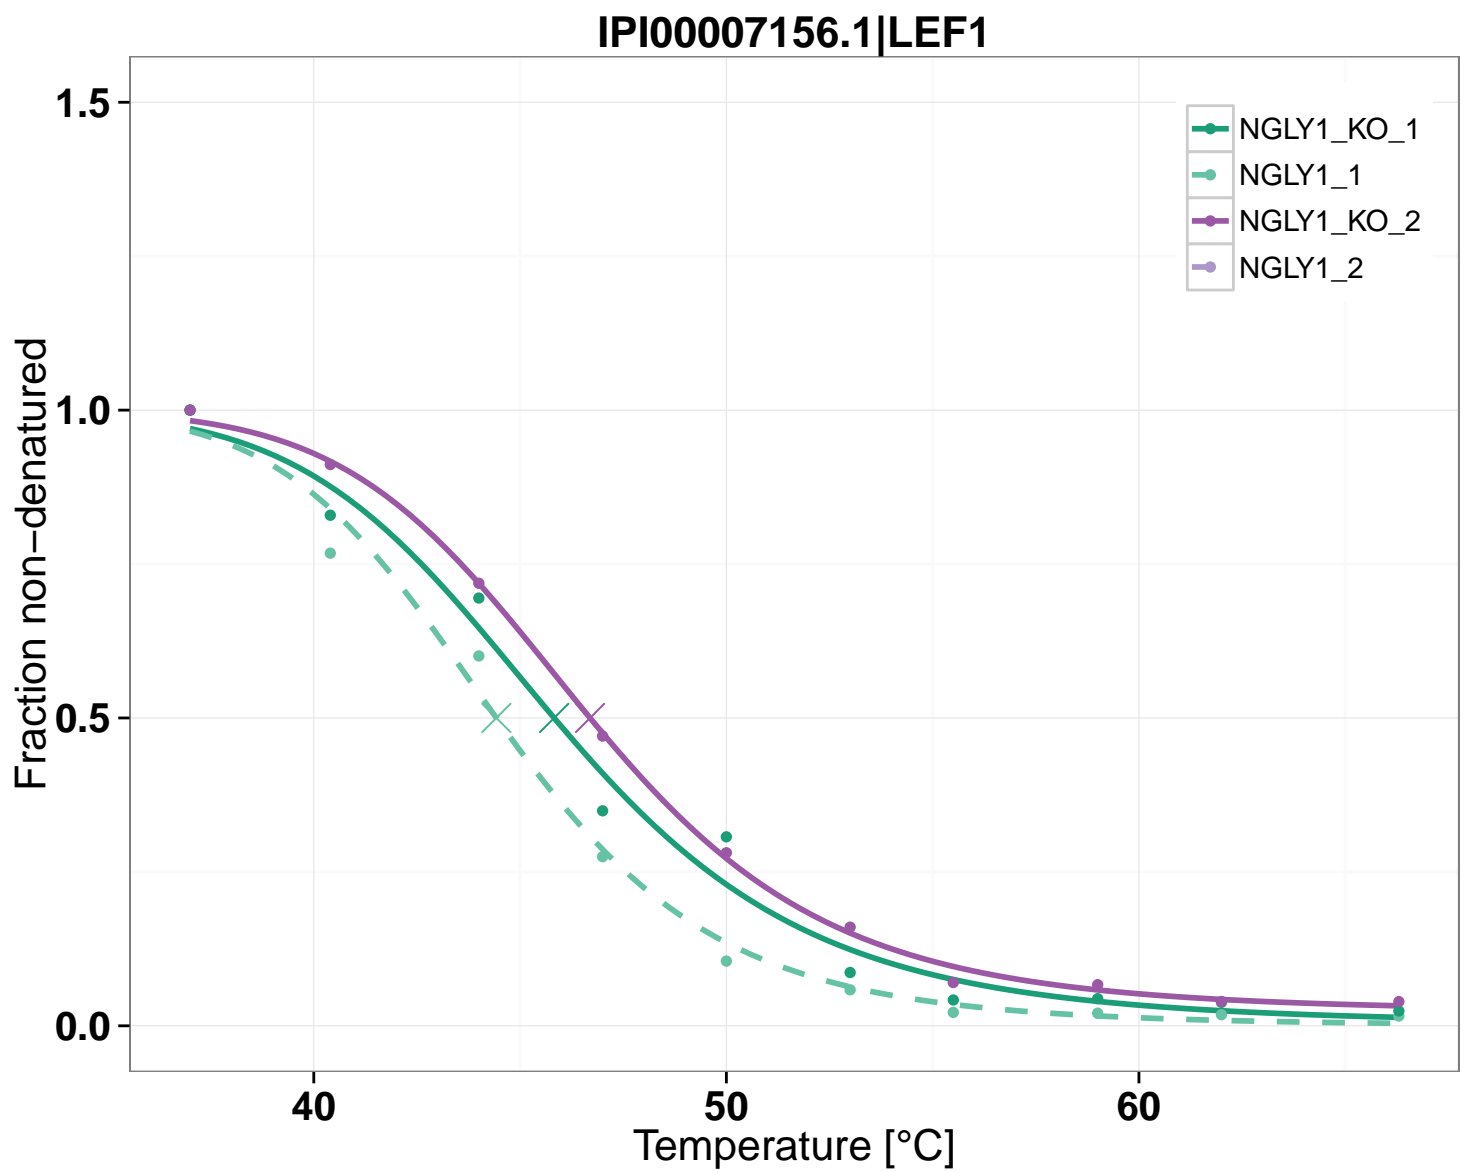

|            | meltPoint | slope  | plateau | R2   |
|------------|-----------|--------|---------|------|
| NGLY1_KO_1 | 45.83     | -0.081 | 0       | 0.99 |
| NGLY1_1    | 44.43     | -0.095 | 0       | 0.99 |
| NGLY1_KO_2 | 46.7      | -0.083 | 0.02    | 1    |
| NGLY1_2    | -         | -      | -       | -    |

Supplement: Supplementary file 8069 [file 1]

# IPI00333338.4|LBH

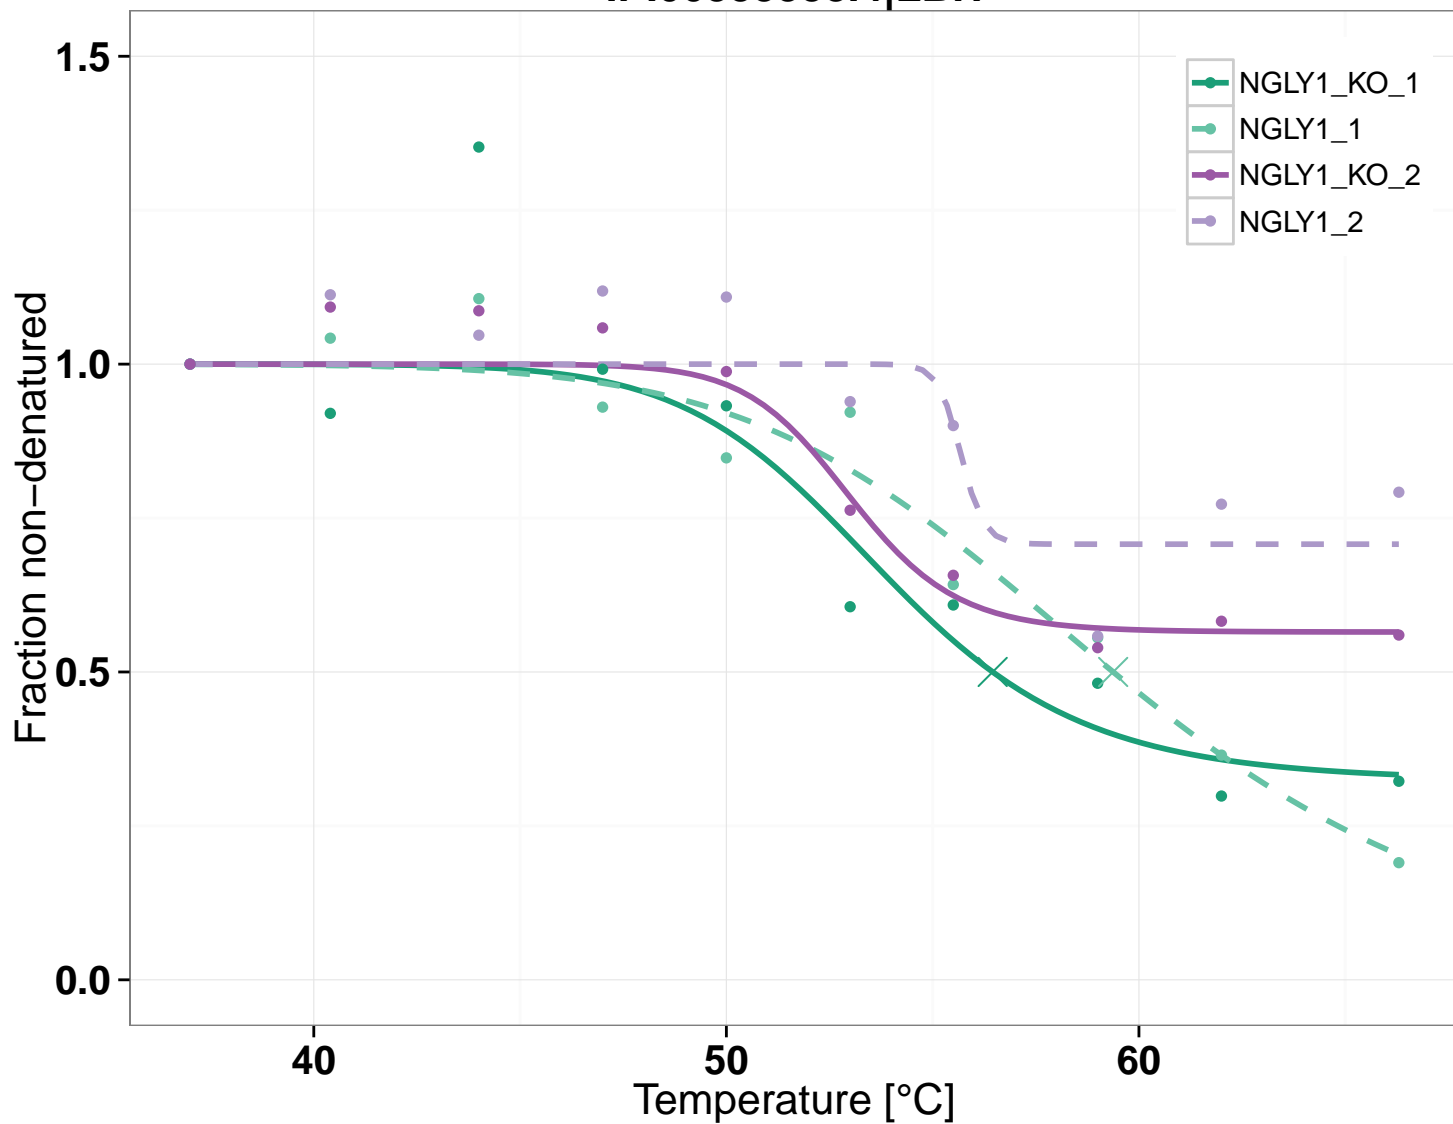

|            | meltPoint | slope  | plateau | R2   |
|------------|-----------|--------|---------|------|
| NGLY1_KO_1 | 56.46     | -0.07  | 0.32    | 0.85 |
| NGLY1_1    | 59.38     | -0.056 | 0       | 0.96 |
| NGLY1_KO_2 | -         | -0.085 | 0.56    | 0.95 |
| NGLY1_2    | -         | -0.26  | 0.71    | 0.74 |

Supplement: Supplementary file 8070 [file 1]

IPI00171844.3|COPS4

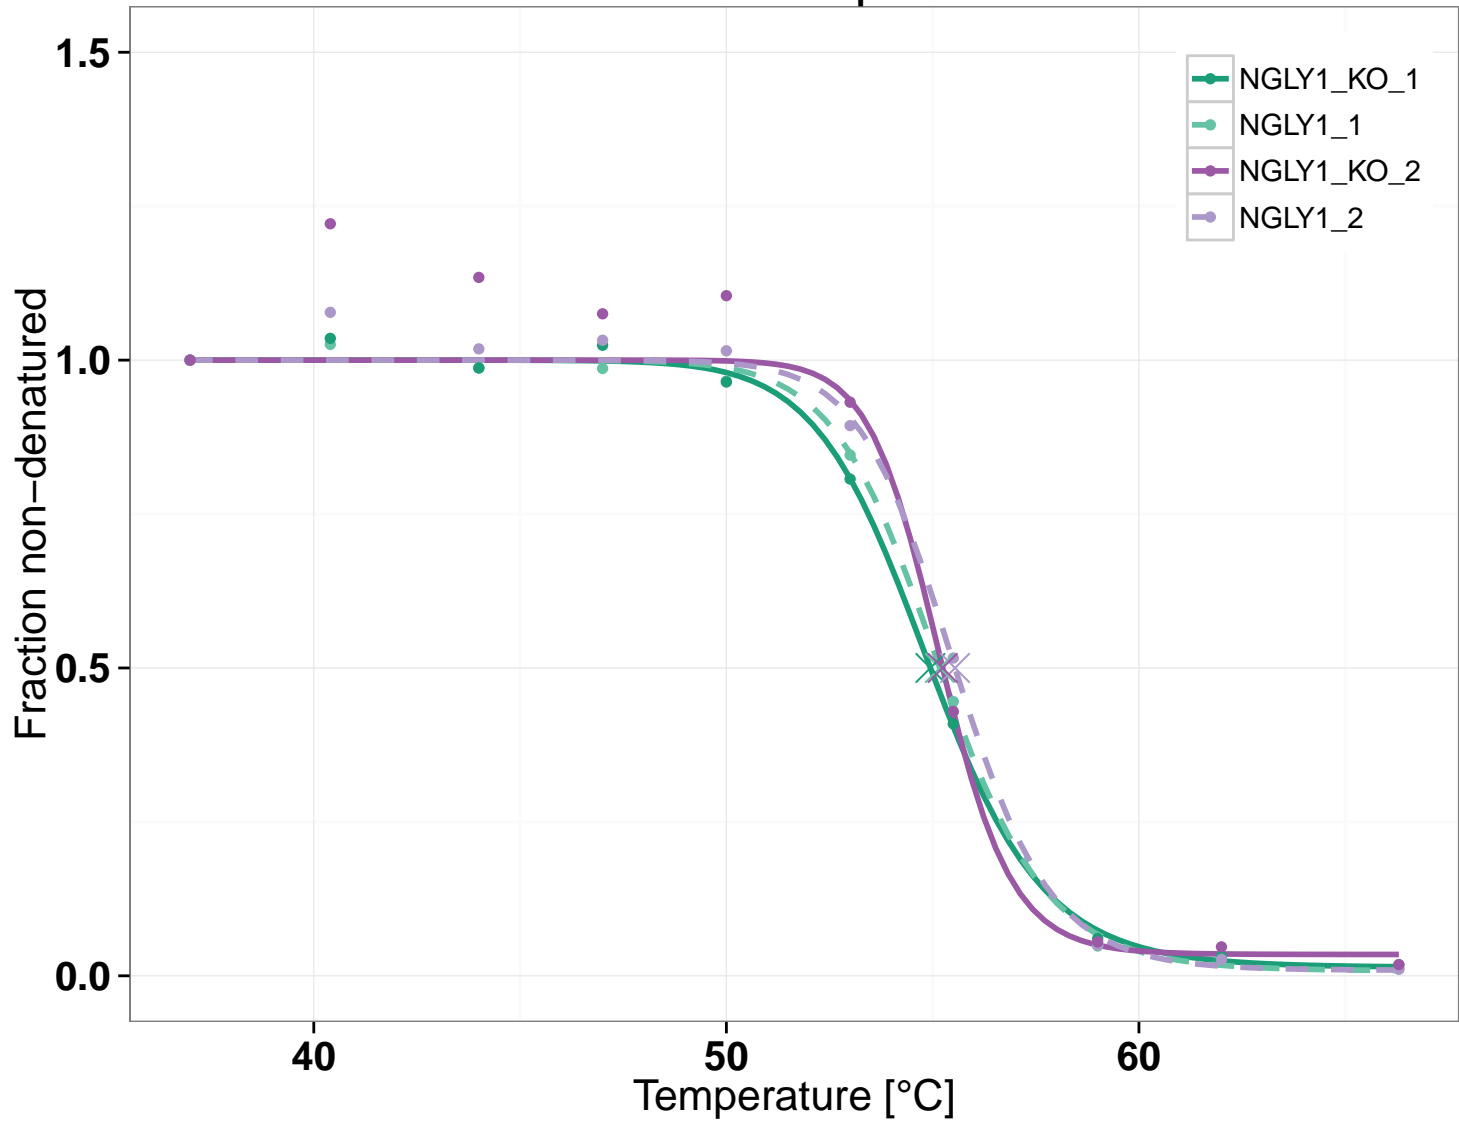

|            | meltPoint | slope | plateau | R2   |
|------------|-----------|-------|---------|------|
| NGLY1_KO_1 | 54.95     | -0.18 | 0.01    | 1    |
| NGLY1_1    | 55.17     | -0.19 | 0.01    | 1    |
| NGLY1_KO_2 | 55.24     | -0.28 | 0.03    | 0.96 |
| NGLY1_2    | 55.54     | -0.21 | 0.01    | 1    |

Supplement: Supplementary file 8071 [file 1]

IPI00220152.2|BCCIP

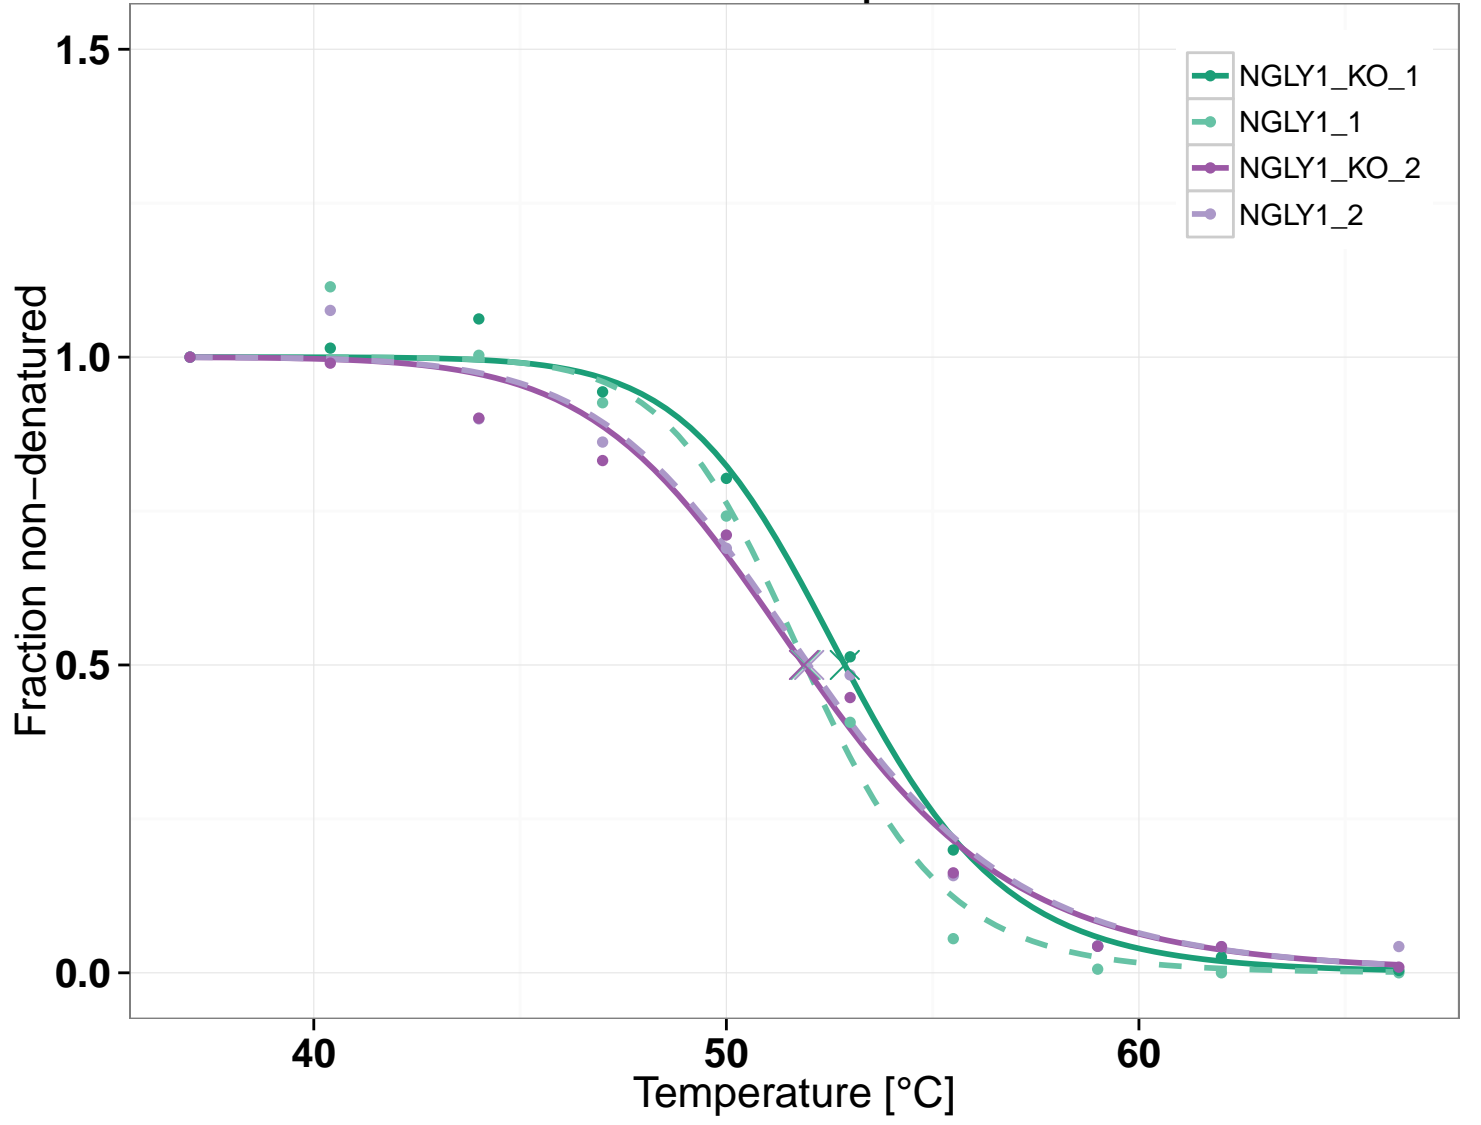

|            | meltPoint | slope  | plateau | R2   |
|------------|-----------|--------|---------|------|
| NGLY1_KO_1 | 52.87     | -0.13  | 0       | 1    |
| NGLY1_1    | 51.92     | -0.15  | 0       | 0.99 |
| NGLY1_KO_2 | 51.88     | -0.097 | 0       | 0.99 |
| NGLY1_2    | 52.01     | -0.097 | 0       | 0.98 |

Supplement: Supplementary file 8072 [file 1]

IPI00102530.4|FLJ10404

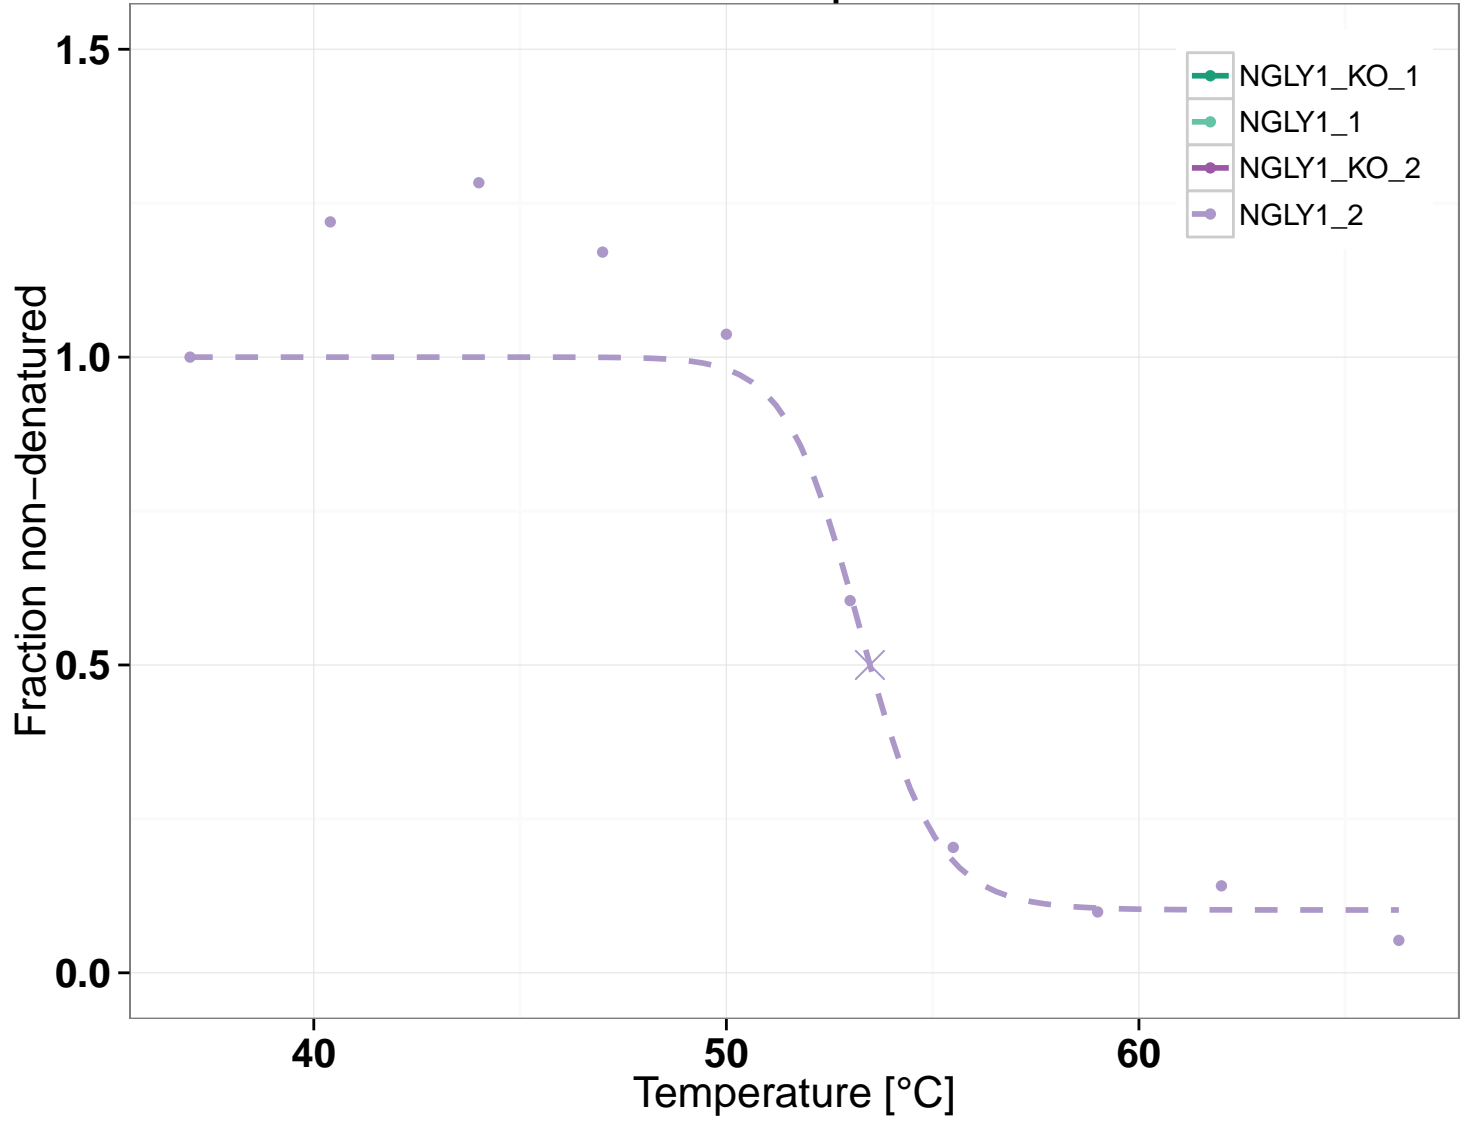

|            | meltPoint | slope | plateau | R2   |
|------------|-----------|-------|---------|------|
| NGLY1_KO_1 | -         | -     | -       | -    |
| NGLY1_1    | -         | -     | -       | -    |
| NGLY1_KO_2 | -         | -     | -       | -    |
| NGLY1_2    | 53.48     | -0.25 | 0.1     | 0.93 |

Supplement: Supplementary file 8073 [file 1]

# IPI00289188.3|RILP

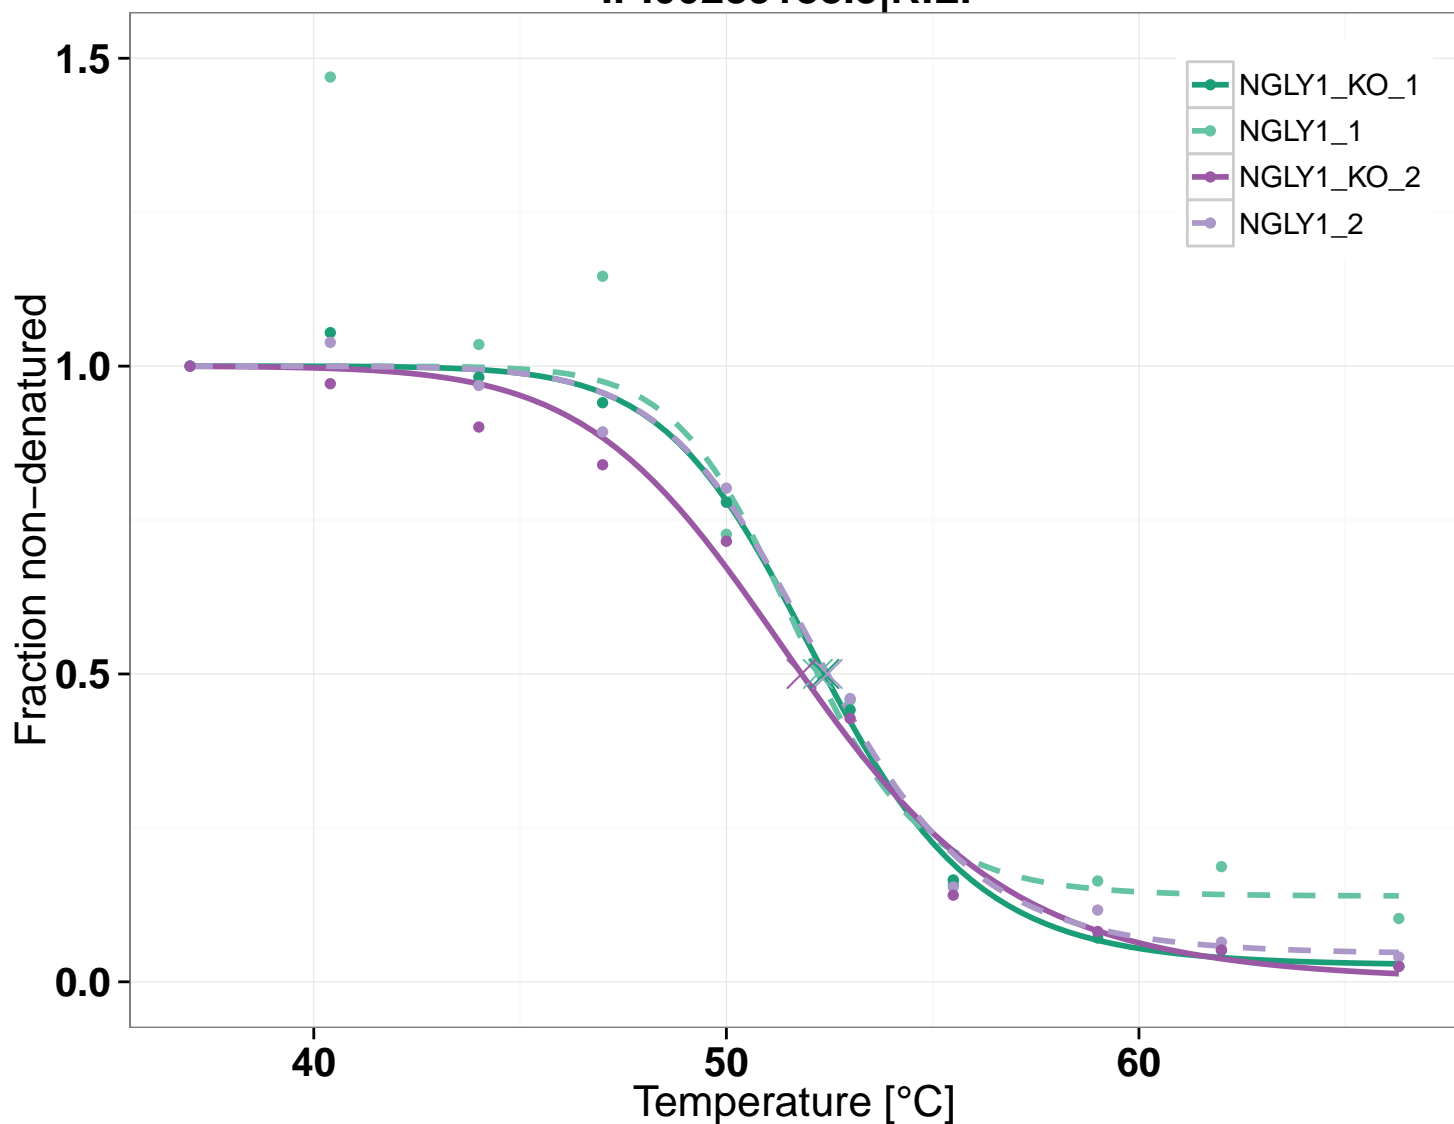

|            | meltPoint | slope  | plateau | R2   |
|------------|-----------|--------|---------|------|
| NGLY1_KO_1 | 52.37     | -0.13  | 0.03    | 1    |
| NGLY1_1    | 52.22     | -0.15  | 0.14    | 0.88 |
| NGLY1_KO_2 | 51.82     | -0.096 | 0       | 0.99 |
| NGLY1_2    | 52.45     | -0.13  | 0.04    | 0.99 |

Supplement: Supplementary file 8074 [file 1]

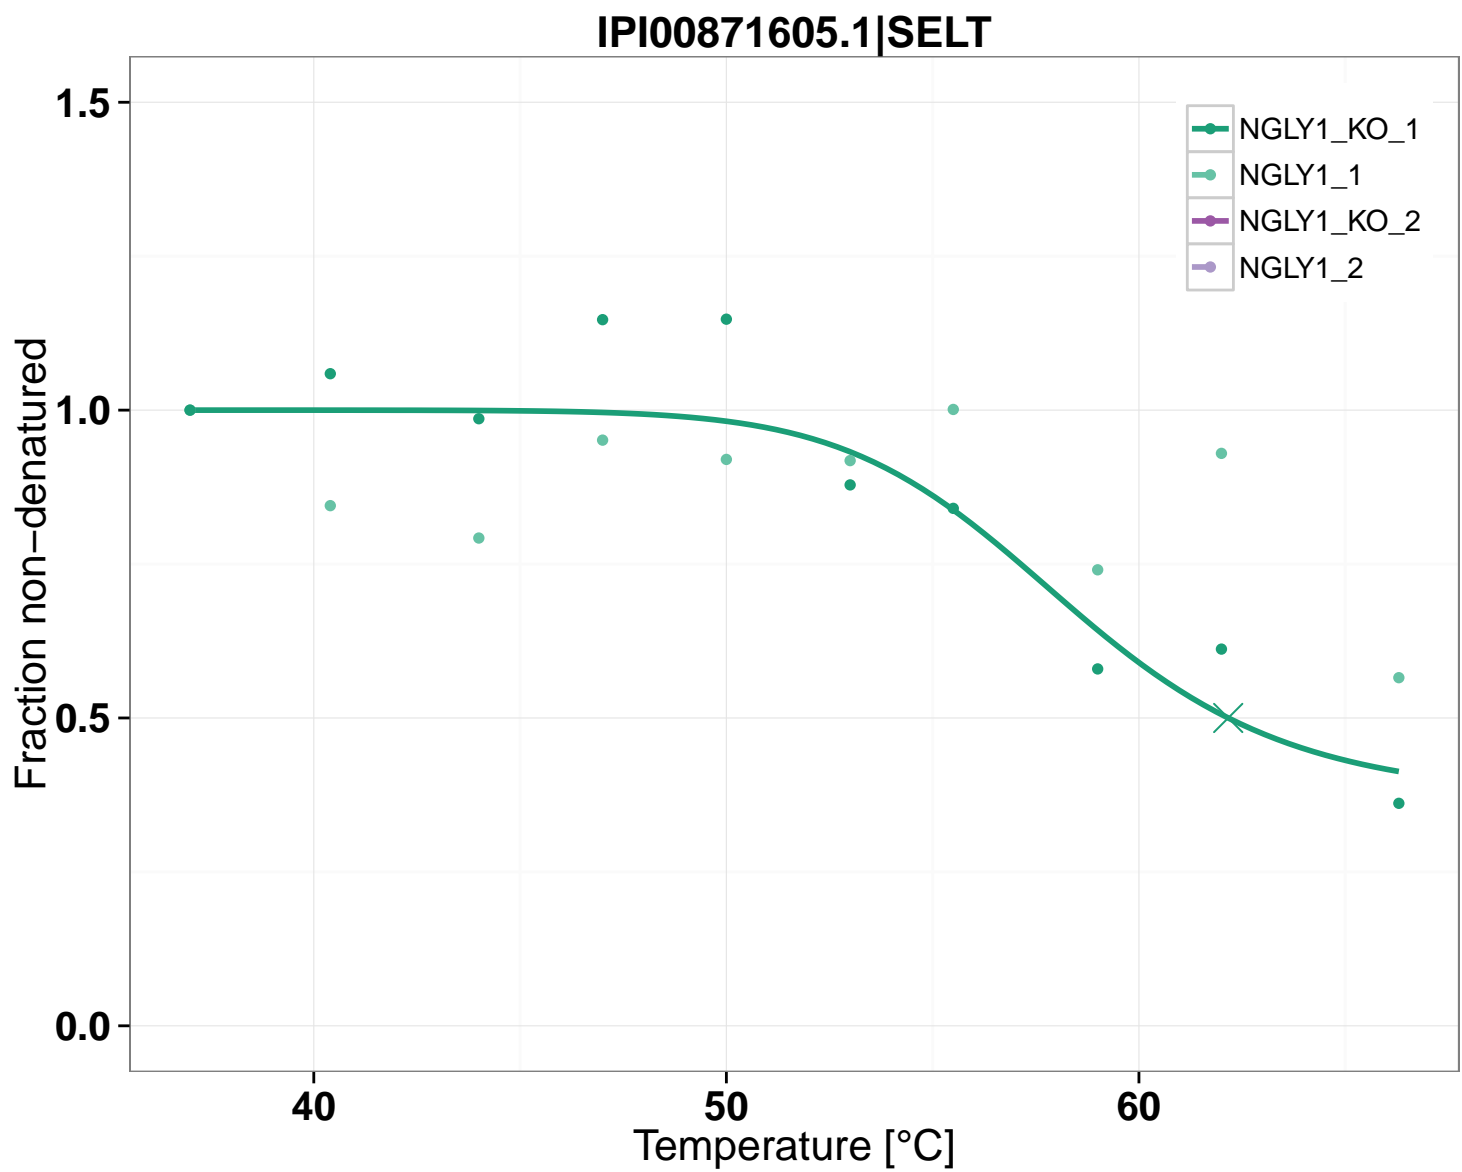

|            | meltPoint | slope  | plateau | R2   |
|------------|-----------|--------|---------|------|
| NGLY1_KO_1 | 62.16     | -0.058 | 0.37    | 0.88 |
| NGLY1_1    | -         | -      | -       | -    |
| NGLY1_KO_2 | -         | -      | -       | -    |
| NGLY1_2    | -         | -      | -       | -    |

Supplement: Supplementary file 8075 [file 1]

IPI00029107.1|WRN

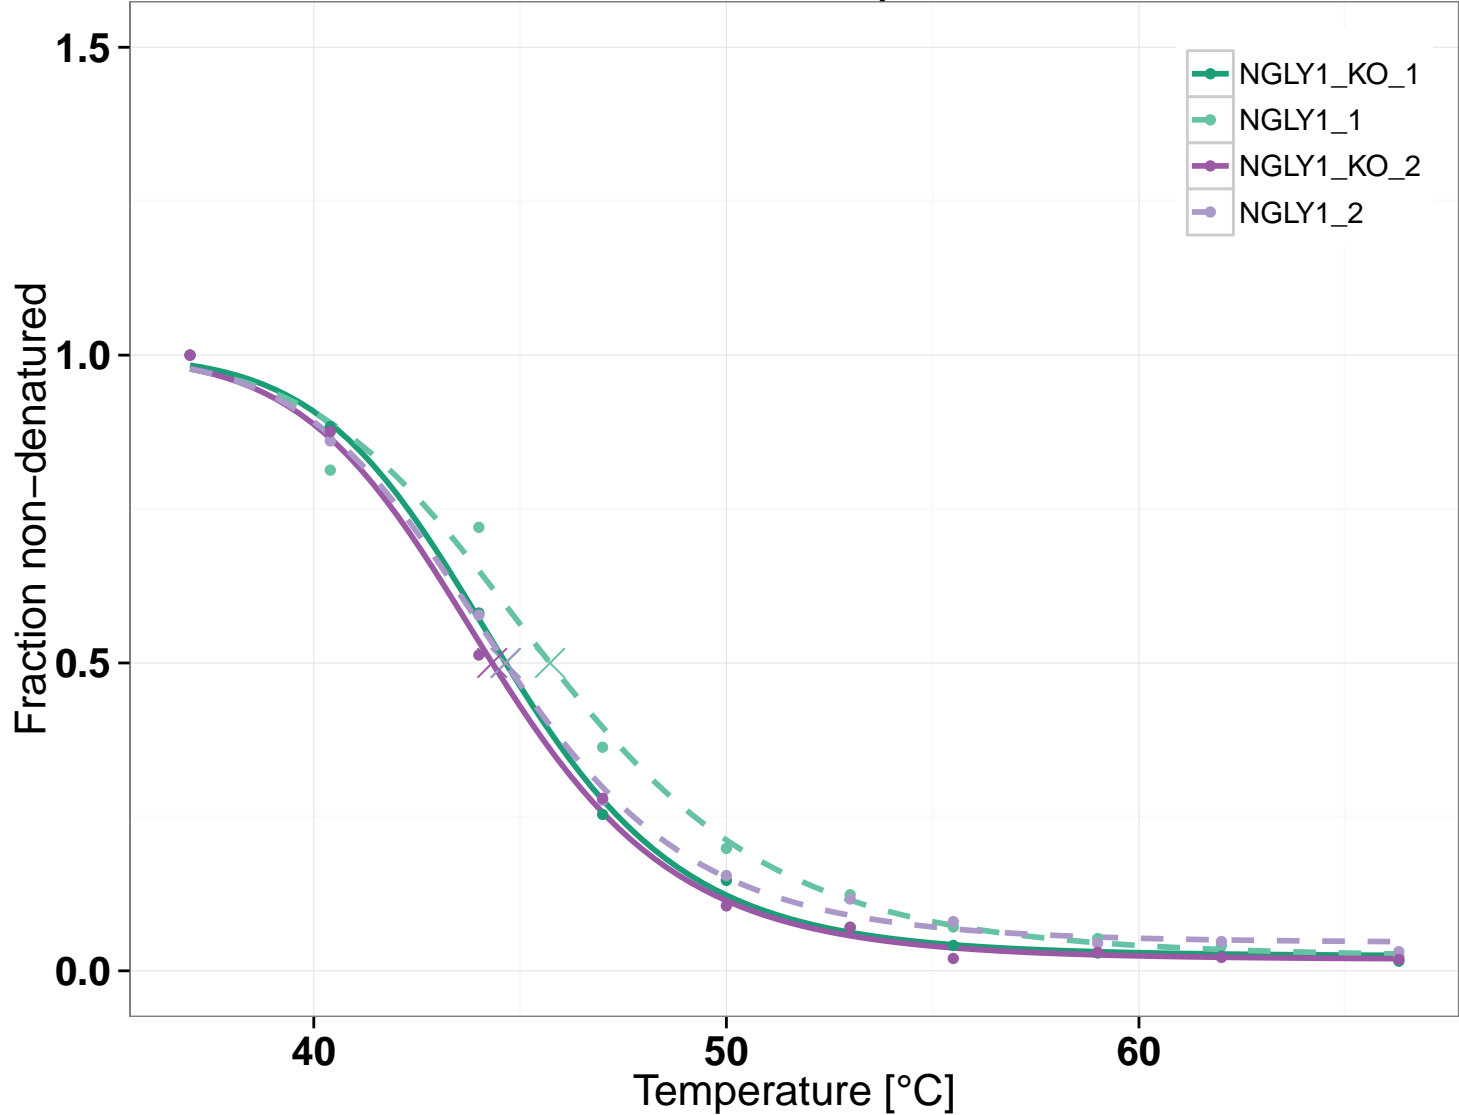

|            | meltPoint | slope  | plateau | R2   |
|------------|-----------|--------|---------|------|
| NGLY1_KO_1 | 44.65     | -0.11  | 0.02    | 1    |
| NGLY1_1    | 45.73     | -0.088 | 0.02    | 0.99 |
| NGLY1_KO_2 | 44.32     | -0.11  | 0.02    | 1    |
| NGLY1_2    | 44.65     | -0.1   | 0.05    | 1    |

Supplement: Supplementary file 8076 [file 1]

IPI00376221.2|EPB41L5

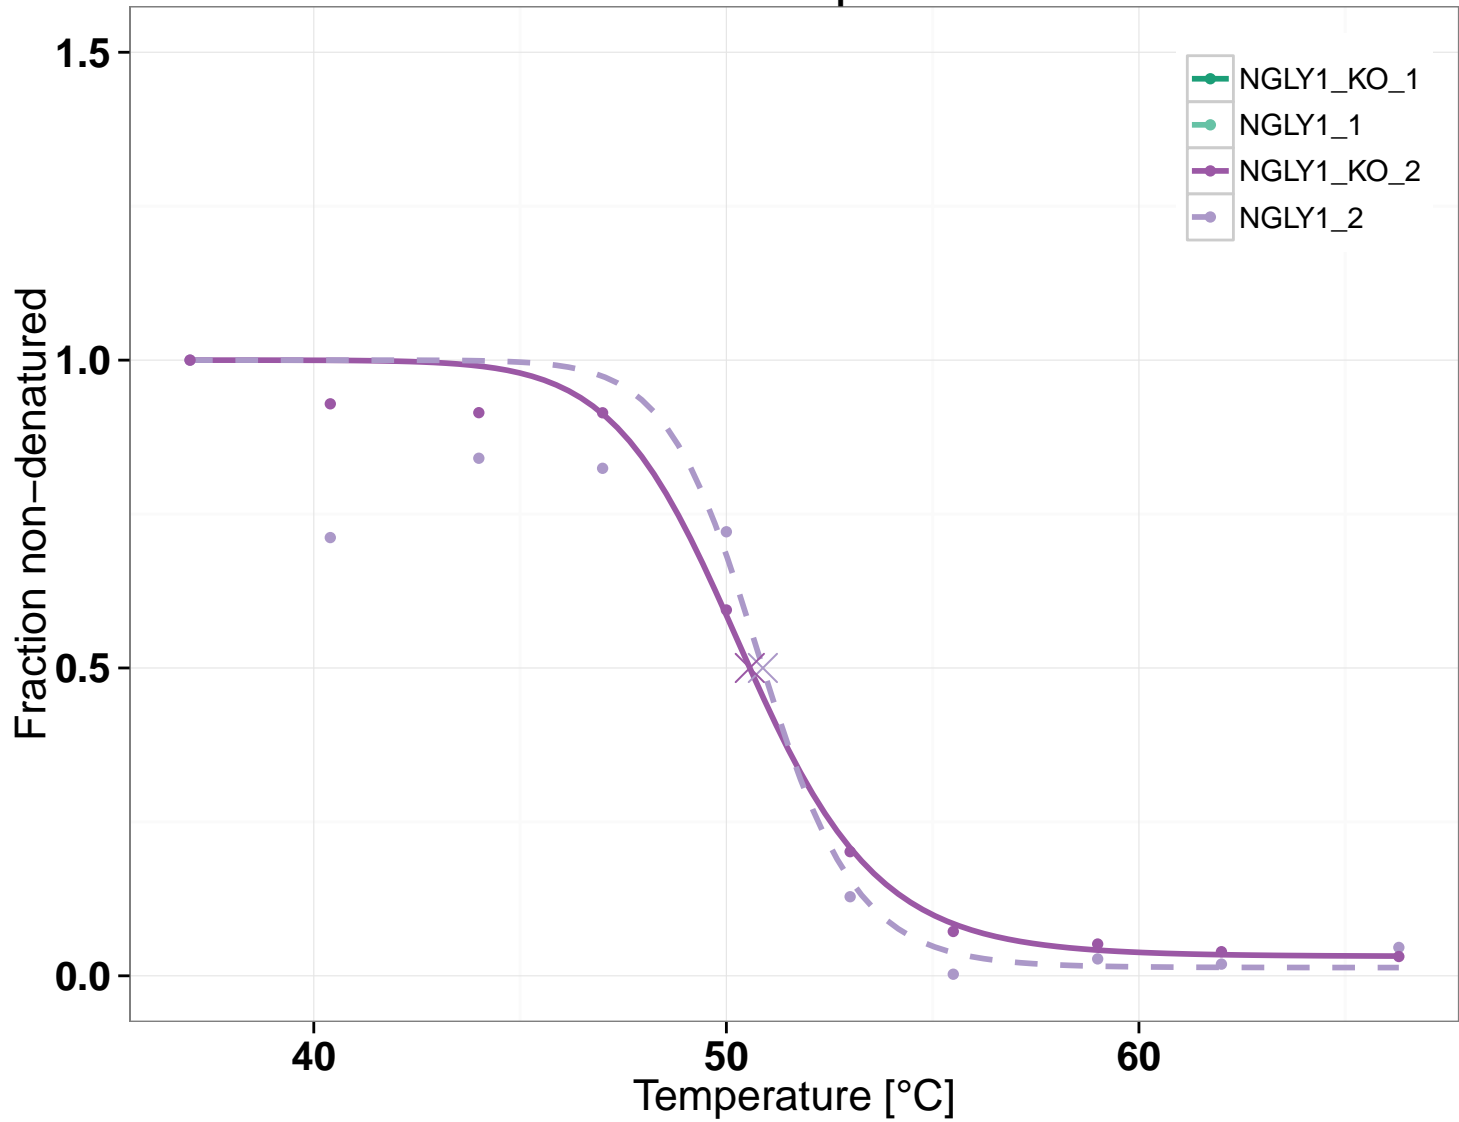

|            | meltPoint | slope | plateau | R2   |
|------------|-----------|-------|---------|------|
| NGLY1_KO_1 | —         | —     | —       | —    |
| NGLY1_1    | —         | —     | —       | —    |
| NGLY1_KO_2 | 50.57     | -0.15 | 0.03    | 0.99 |
| NGLY1_2    | 50.88     | -0.21 | 0.01    | 0.91 |

Supplement: Supplementary file 8077 [file 1]

IPI00216552.2|TERF2

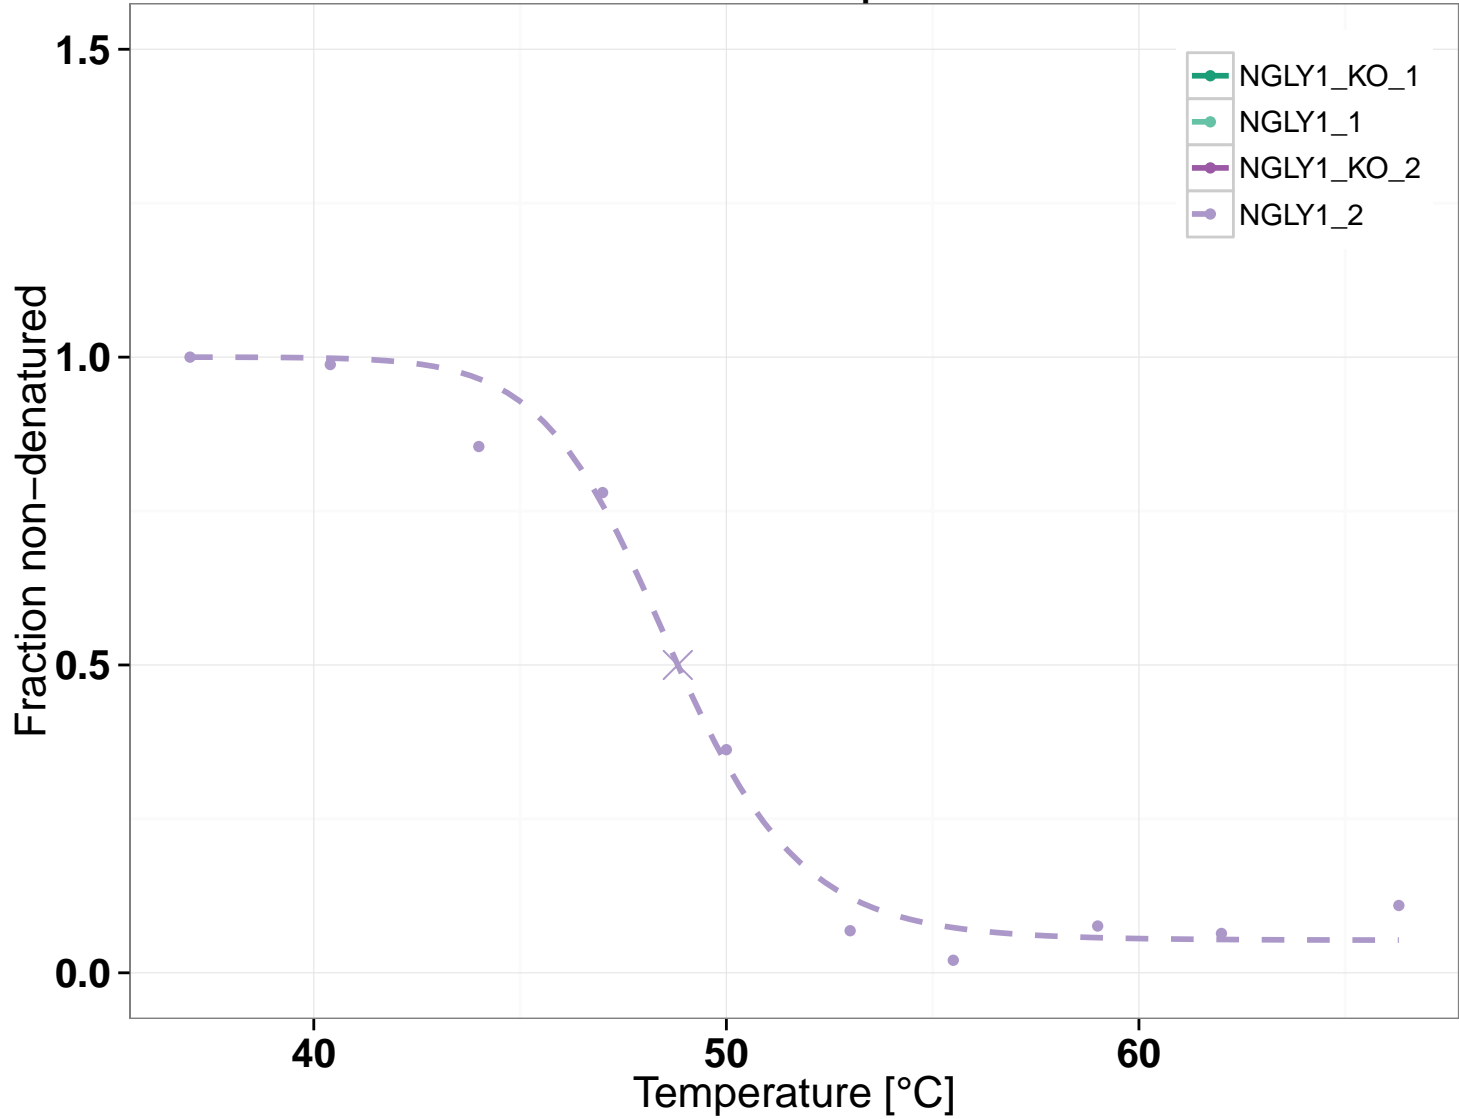

|            | meltPoint | slope | plateau | R2   |
|------------|-----------|-------|---------|------|
| NGLY1_KO_1 | -         | -     | -       | -    |
| NGLY1_1    | -         | -     | -       | -    |
| NGLY1_KO_2 | -         | -     | -       | -    |
| NGLY1_2    | 48.82     | -0.15 | 0.05    | 0.99 |

Supplement: Supplementary file 8078 [file 1]

# IPI00012870.1|AKT2

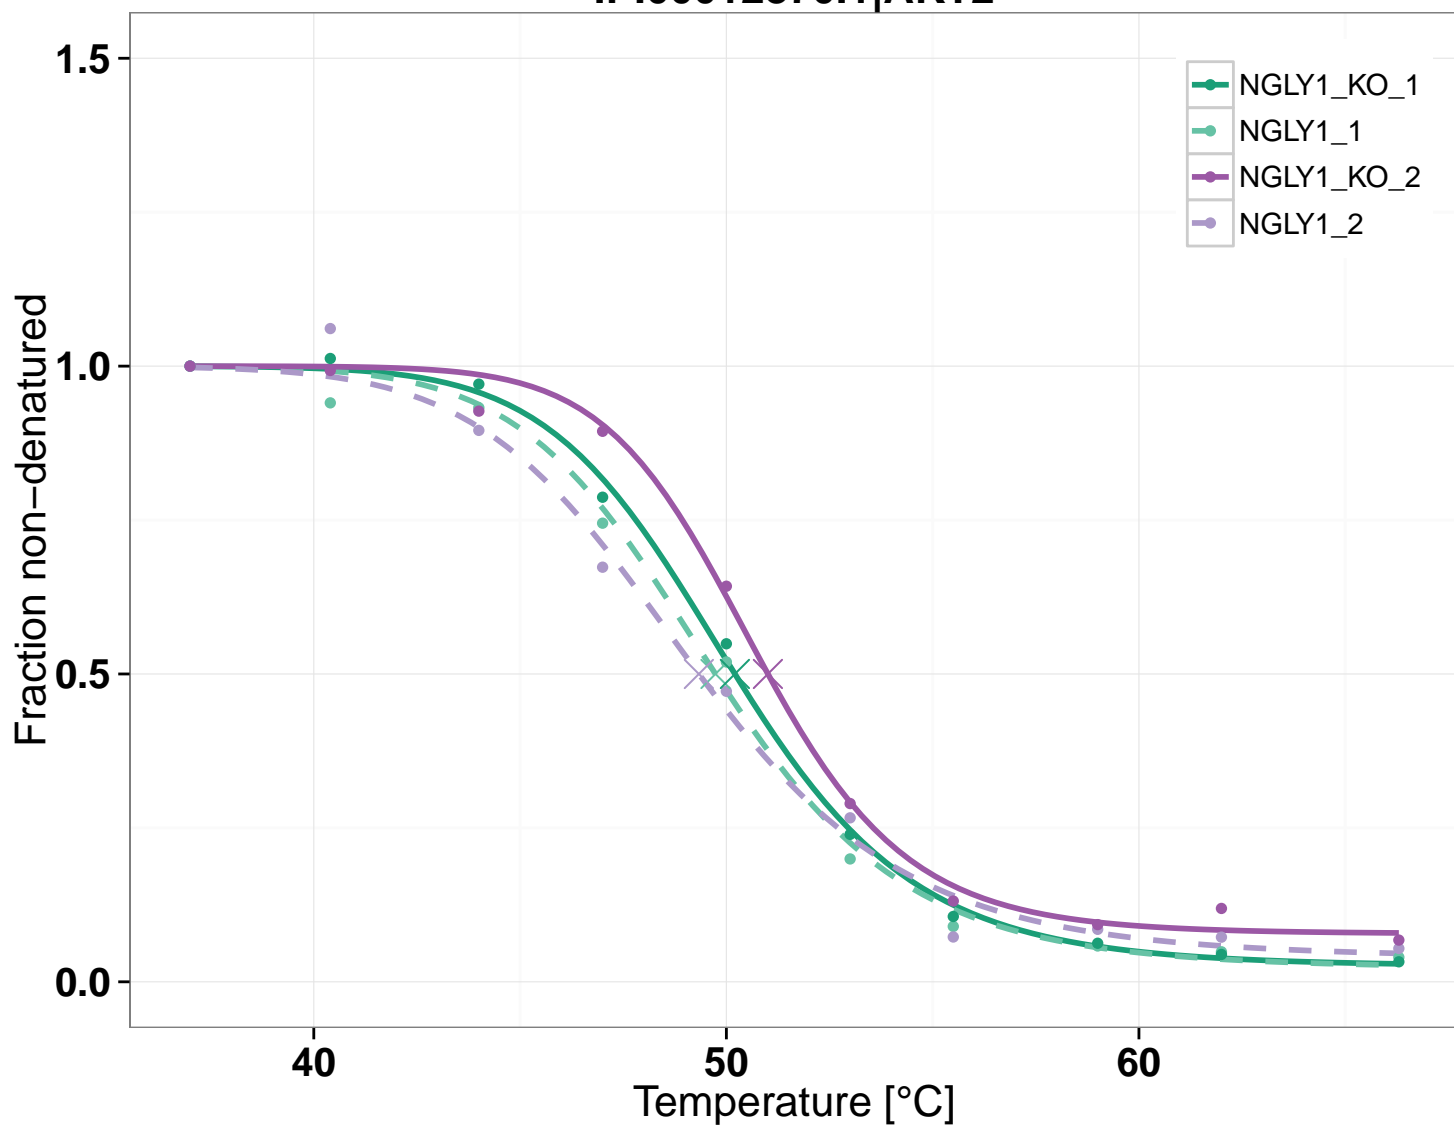

|            | meltPoint | slope  | plateau | R2   |
|------------|-----------|--------|---------|------|
| NGLY1_KO_1 | 50.21     | -0.11  | 0.03    | 1    |
| NGLY1_1    | 49.74     | -0.1   | 0.02    | 1    |
| NGLY1_KO_2 | 51.01     | -0.13  | 0.08    | 1    |
| NGLY1_2    | 49.33     | -0.092 | 0.04    | 0.99 |

Supplement: Supplementary file 8079 [file 1]

IPI00334683.1|GAMT

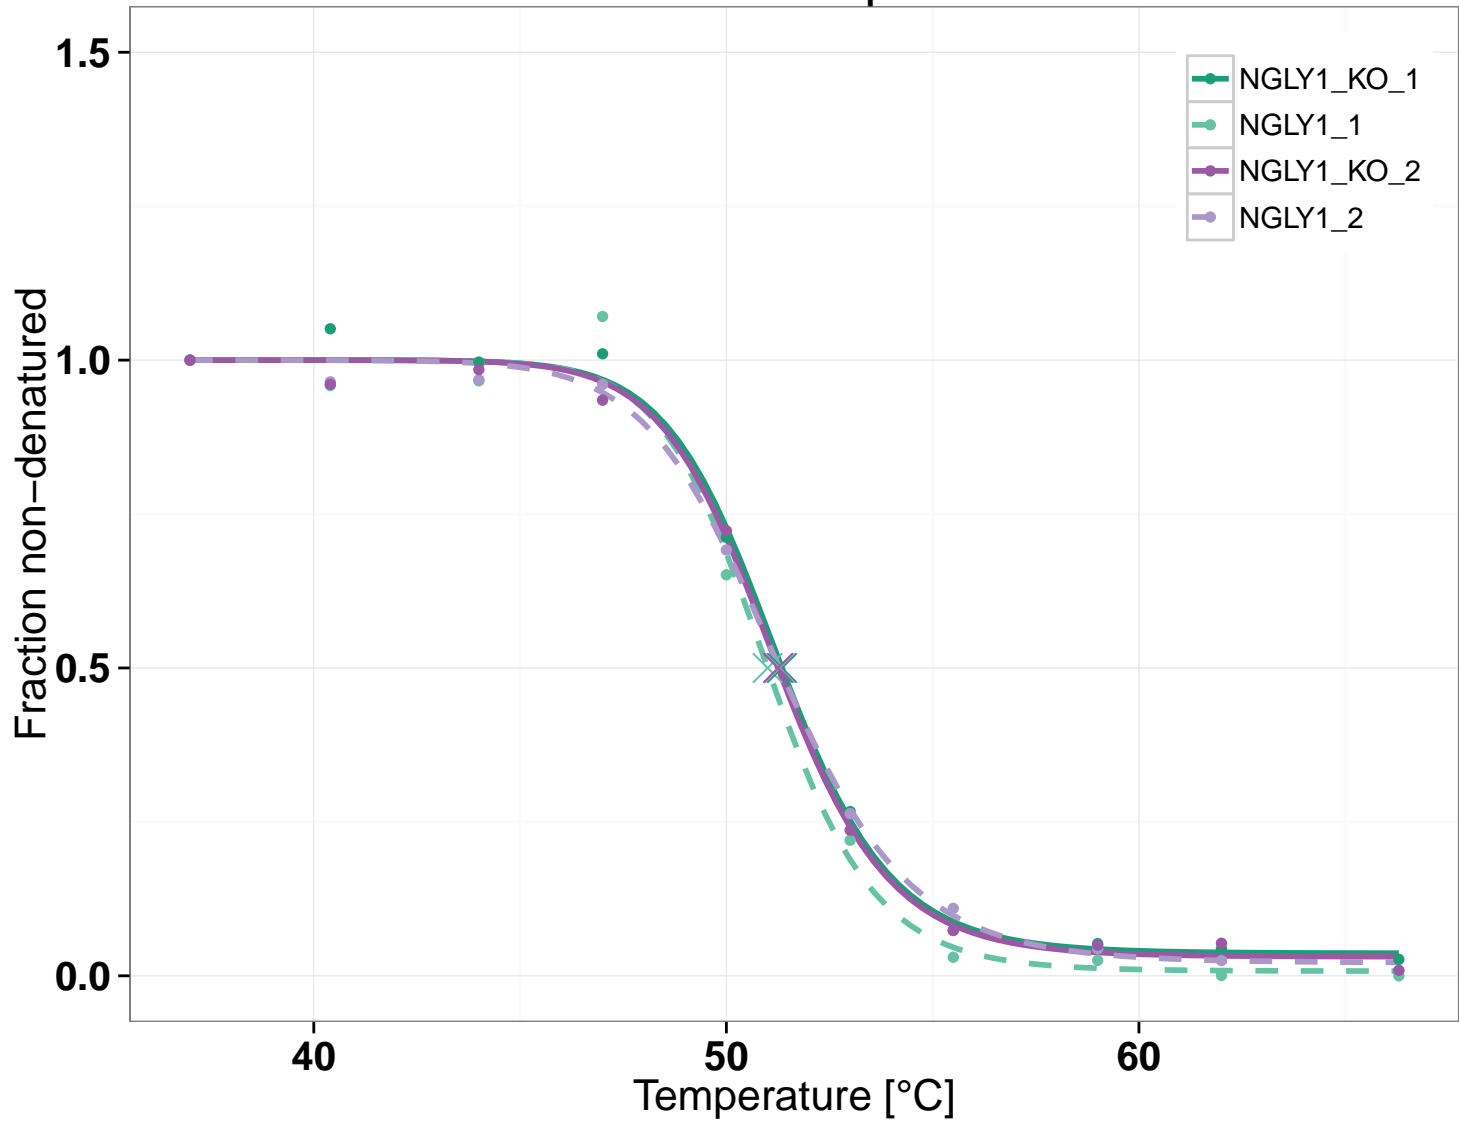

|            | meltPoint | slope | plateau | R2   |
|------------|-----------|-------|---------|------|
| NGLY1_KO_1 | 51.35     | -0.18 | 0.04    | 1    |
| NGLY1_1    | 51        | -0.19 | 0.01    | 0.99 |
| NGLY1_KO_2 | 51.25     | -0.18 | 0.03    | 1    |
| NGLY1_2    | 51.29     | -0.15 | 0.02    | 1    |

Supplement: Supplementary file 8080 [file 1]

# IPI00376787.4|EZH2

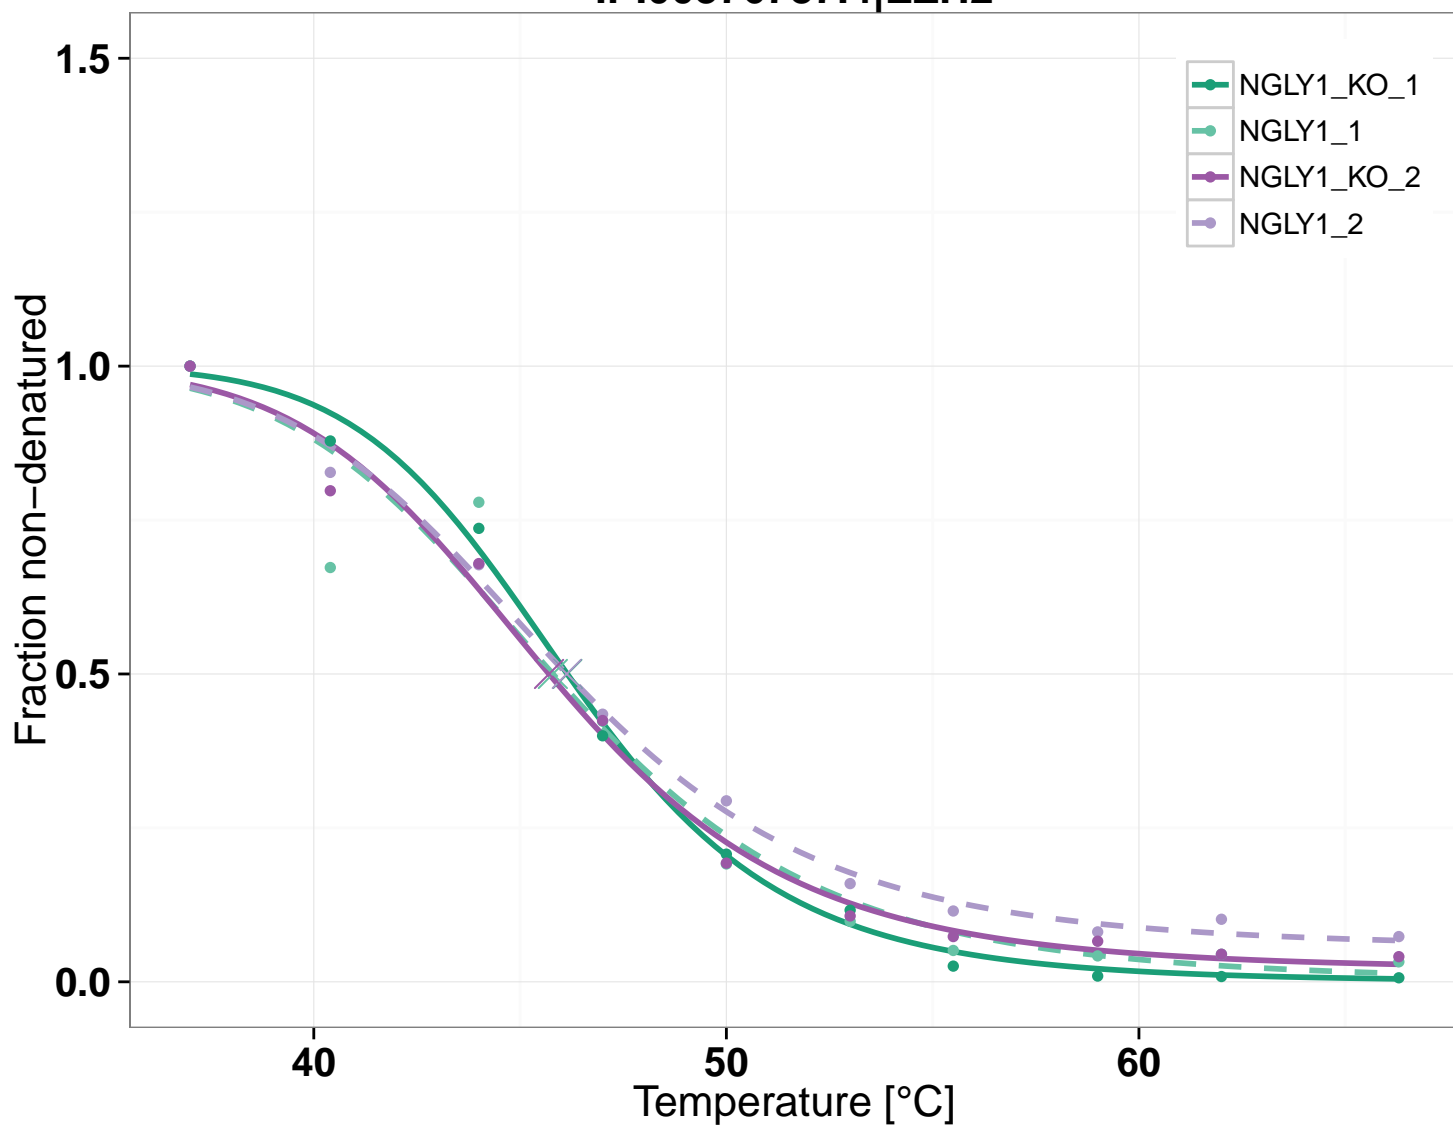

|            | meltPoint | slope  | plateau | R2   |
|------------|-----------|--------|---------|------|
| NGLY1_KO_1 | 46.14     | -0.096 | 0       | 1    |
| NGLY1_1    | 45.79     | -0.077 | 0       | 0.95 |
| NGLY1_KO_2 | 45.7      | -0.082 | 0.02    | 0.99 |
| NGLY1_2    | 46.13     | -0.073 | 0.05    | 1    |

Supplement: Supplementary file 8081 [file 1]

IPI00005104.1|CHUK

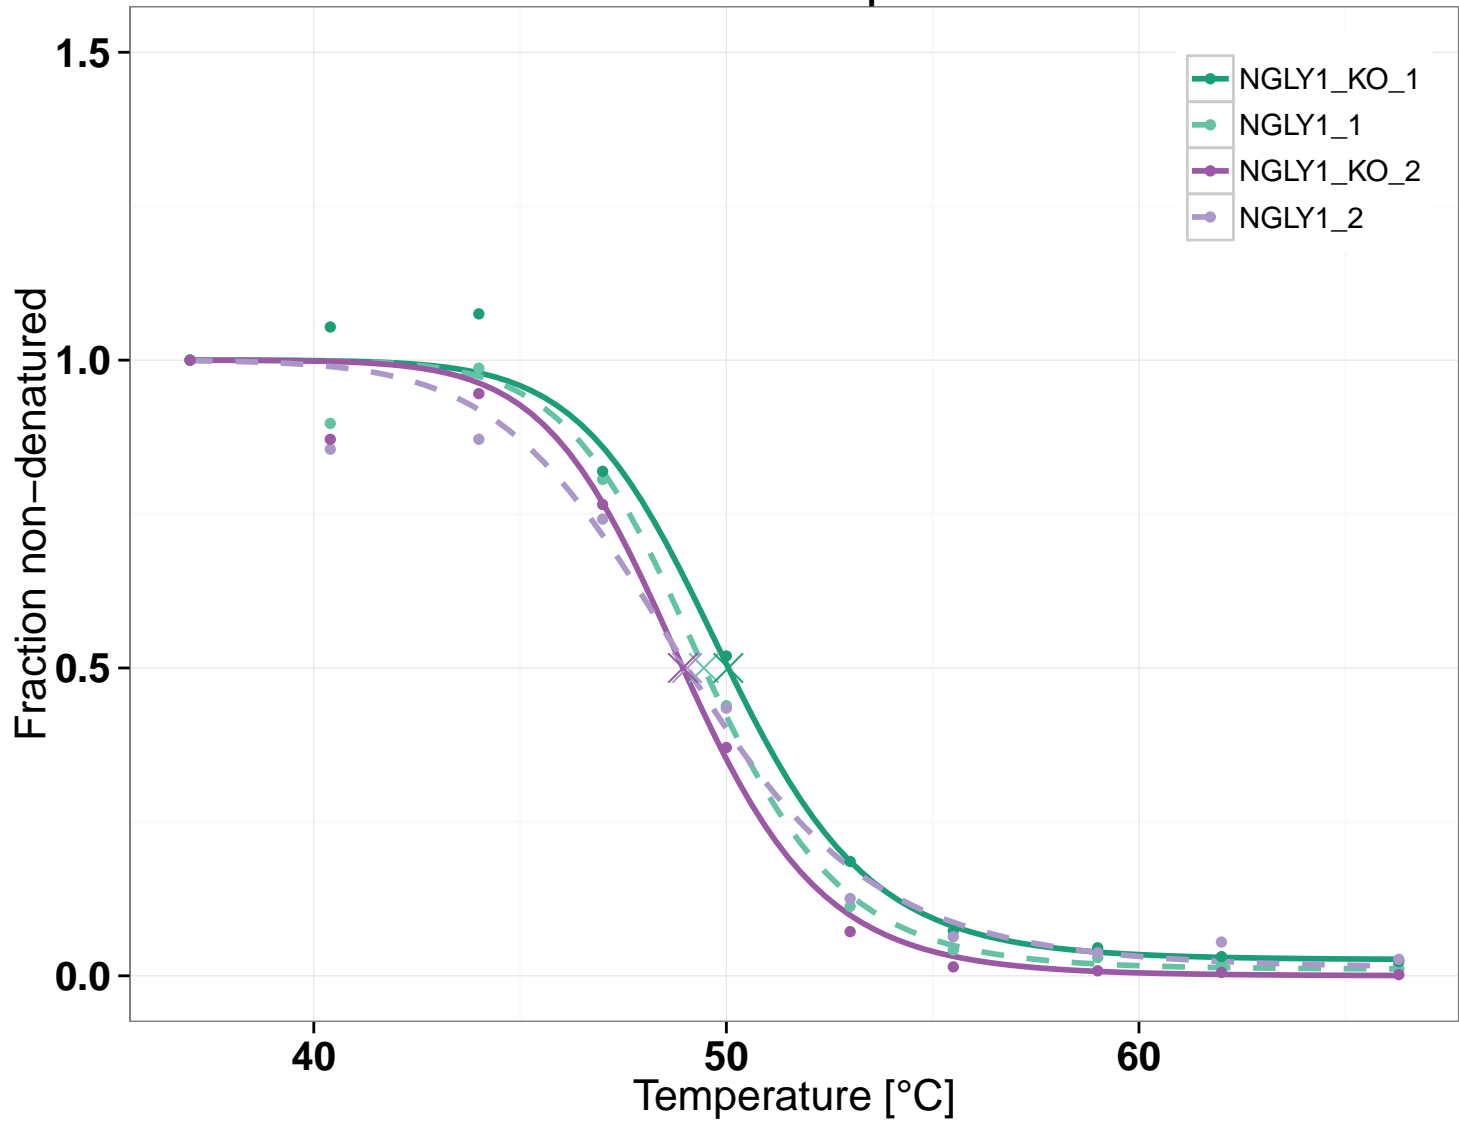

|            | meltPoint | slope | plateau | R2   |
|------------|-----------|-------|---------|------|
| NGLY1_KO_1 | 50.05     | -0.14 | 0.03    | 0.99 |
| NGLY1_1    | 49.45     | -0.15 | 0.01    | 0.99 |
| NGLY1_KO_2 | 48.95     | -0.15 | 0       | 0.99 |
| NGLY1_2    | 49.05     | -0.11 | 0.01    | 0.98 |

Supplement: Supplementary file 8082 [file 1]

IPI00397834.1|FERMT3

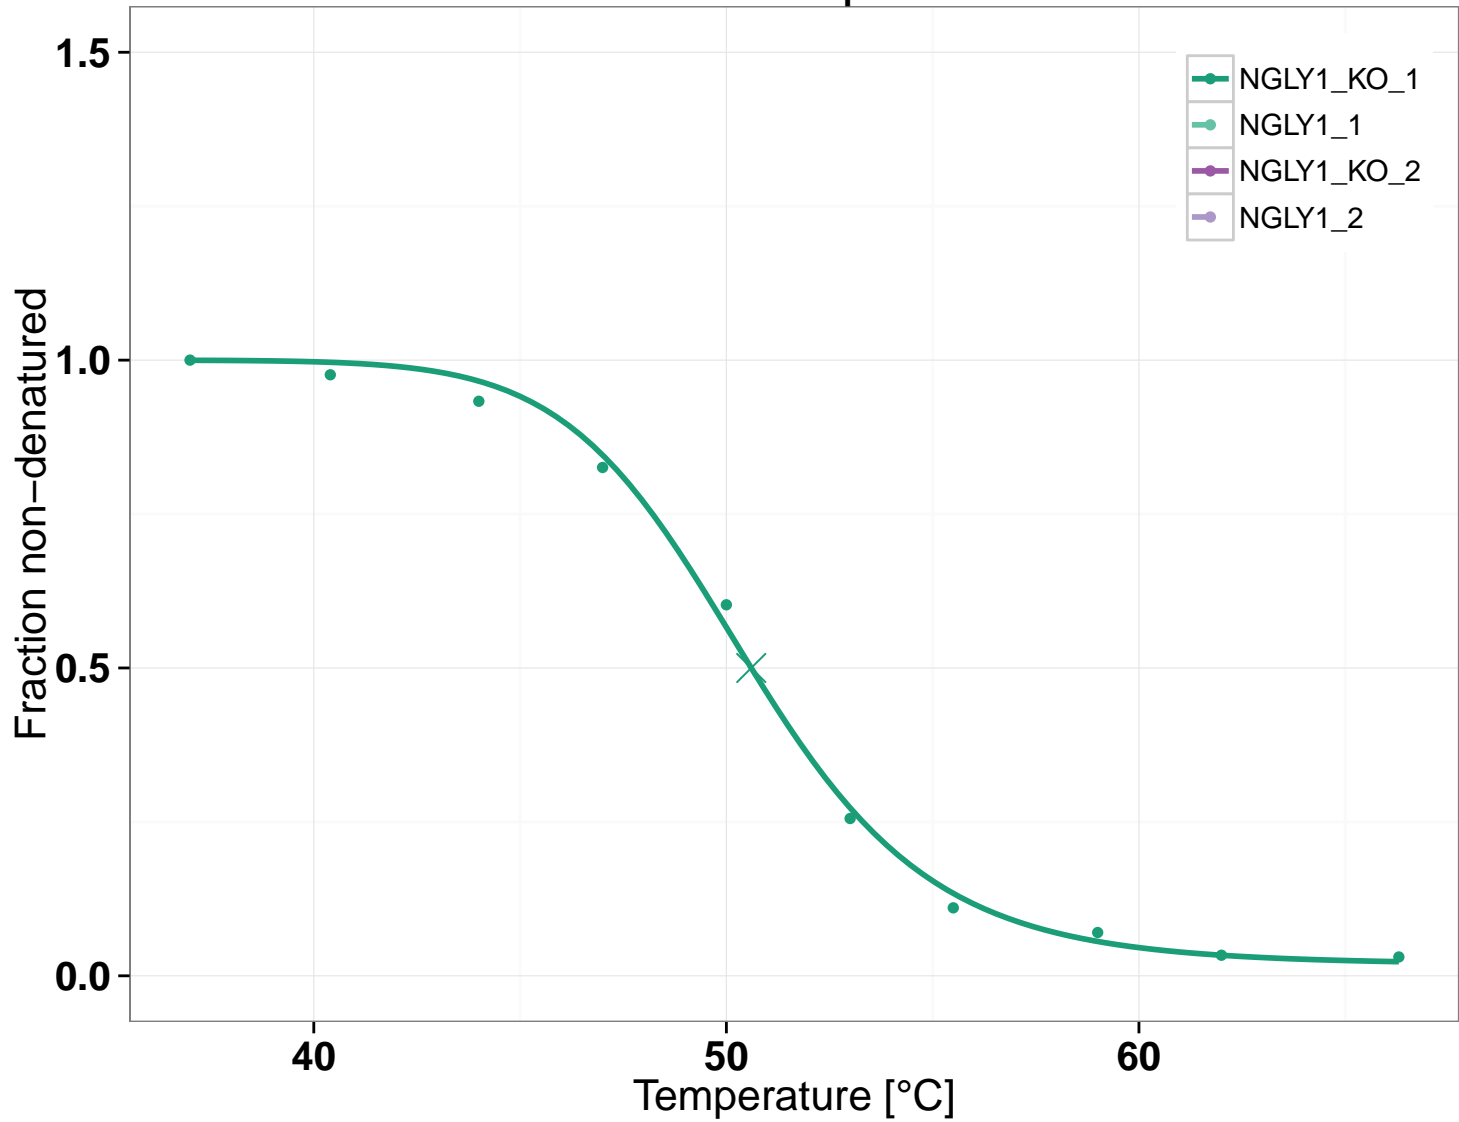

|            | meltPoint | slope | plateau | R2 |
|------------|-----------|-------|---------|----|
| NGLY1_KO_1 | 50.6      | -0.11 | 0.02    | 1  |
| NGLY1_1    | -         | -     | -       | -  |
| NGLY1_KO_2 | -         | -     | -       | -  |
| NGLY1_2    | -         | -     | -       | -  |

Supplement: Supplementary file 8083 [file 1]

IPI00024024.4|SFRS17A

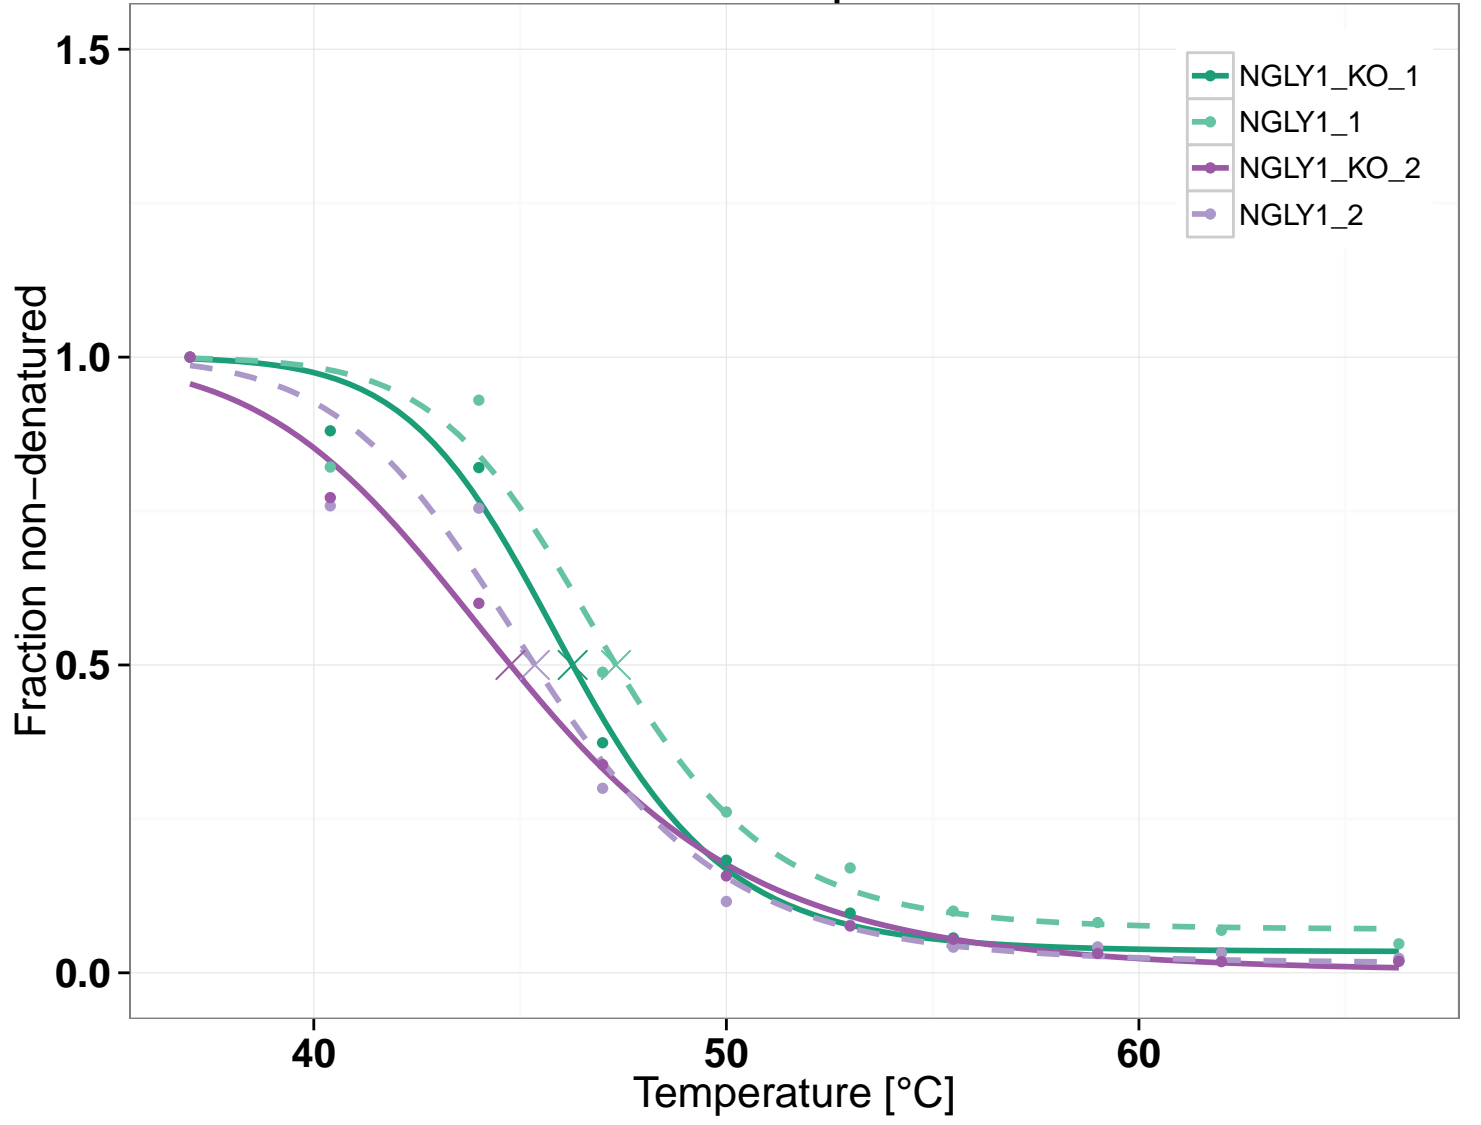

|            | meltPoint | slope  | plateau | R2   |
|------------|-----------|--------|---------|------|
| NGLY1_KO_1 | 46.27     | -0.12  | 0.03    | 0.99 |
| NGLY1_1    | 47.32     | -0.11  | 0.07    | 0.97 |
| NGLY1_KO_2 | 44.77     | -0.084 | 0       | 0.99 |
| NGLY1_2    | 45.36     | -0.1   | 0.02    | 0.97 |

Supplement: Supplementary file 8084 [file 1]

IPI00019520.2|ZNF192

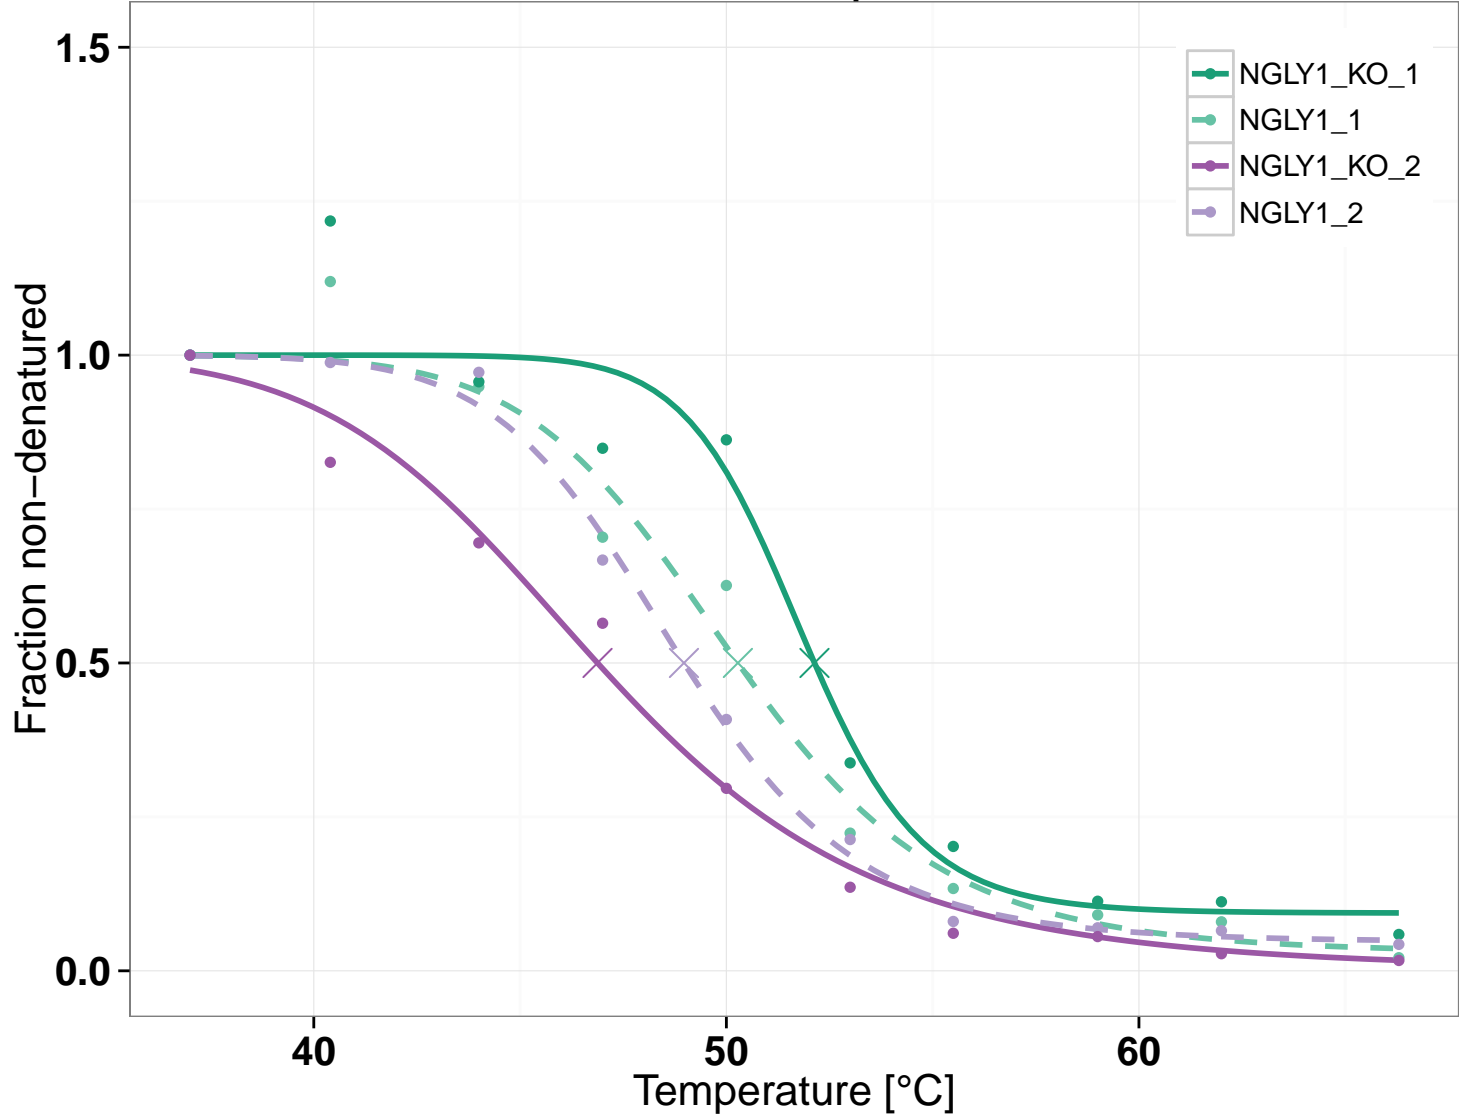

|            | meltPoint | slope  | plateau | R2   |
|------------|-----------|--------|---------|------|
| NGLY1_KO_1 | 52.14     | -0.16  | 0.09    | 0.96 |
| NGLY1_1    | 50.28     | -0.096 | 0.03    | 0.98 |
| NGLY1_KO_2 | 46.88     | -0.075 | 0       | 0.99 |
| NGLY1_2    | 48.97     | -0.11  | 0.05    | 1    |

Supplement: Supplementary file 8085 [file 1]

IPI00021146.1|PRPF18

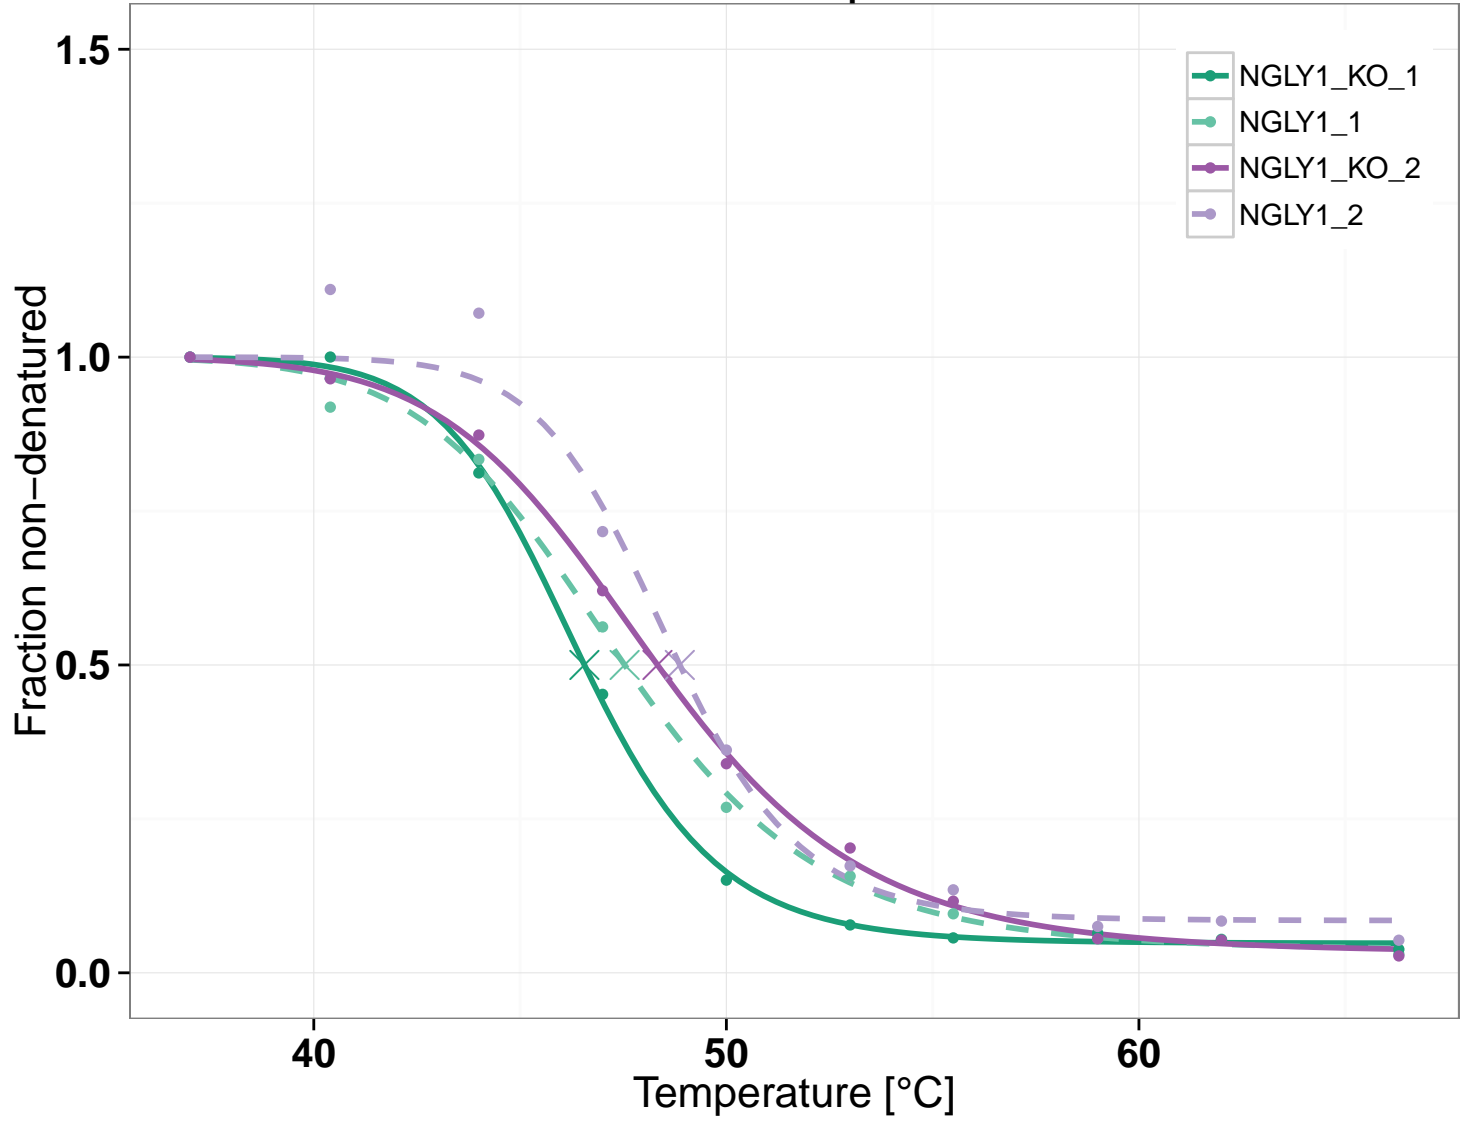

|            | meltPoint | slope  | plateau | R2   |
|------------|-----------|--------|---------|------|
| NGLY1_KO_1 | 46.56     | -0.14  | 0.05    | 1    |
| NGLY1_1    | 47.53     | -0.099 | 0.04    | 1    |
| NGLY1_KO_2 | 48.33     | -0.094 | 0.03    | 1    |
| NGLY1_2    | 48.87     | -0.14  | 0.08    | 0.98 |

Supplement: Supplementary file 8086 [file 1]

IPI00045478.1|RAB40C

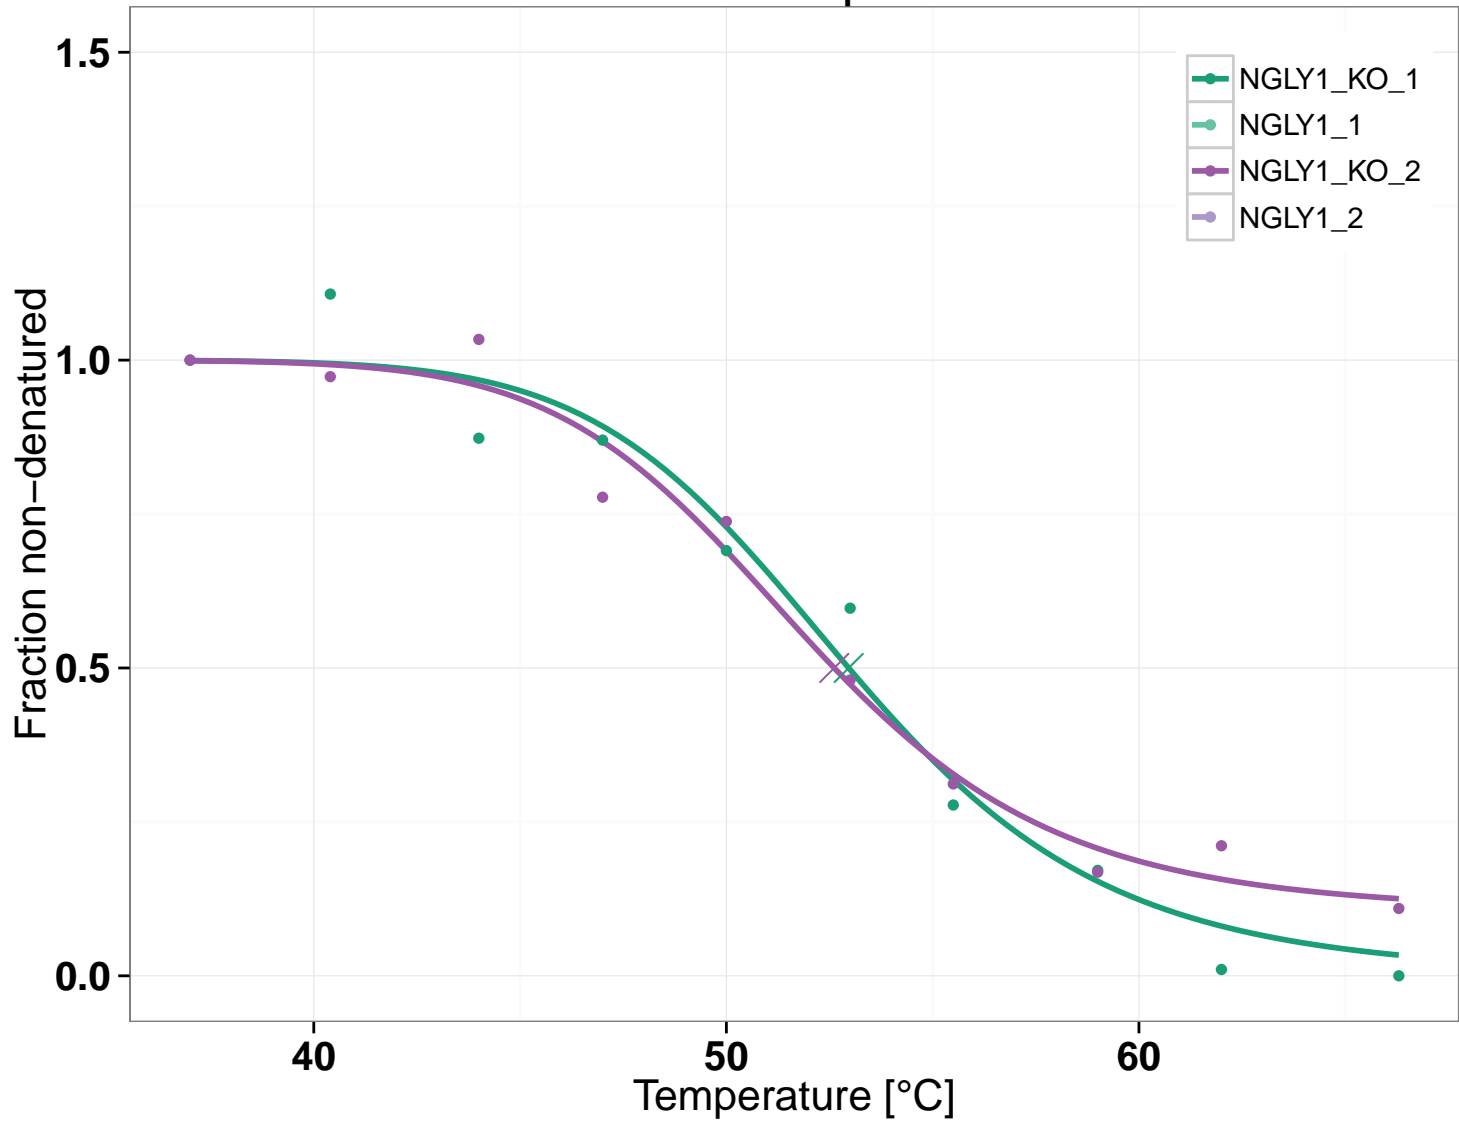

|            | meltPoint | slope  | plateau | R2   |
|------------|-----------|--------|---------|------|
| NGLY1_KO_1 | 52.97     | -0.08  | 0       | 0.97 |
| NGLY1_1    | -         | -      | -       | -    |
| NGLY1_KO_2 | 52.61     | -0.074 | 0.1     | 0.98 |
| NGLY1_2    | -         | -      | -       | -    |

Supplement: Supplementary file 8087 [file 1]

# IPI00300060.4|WDR70

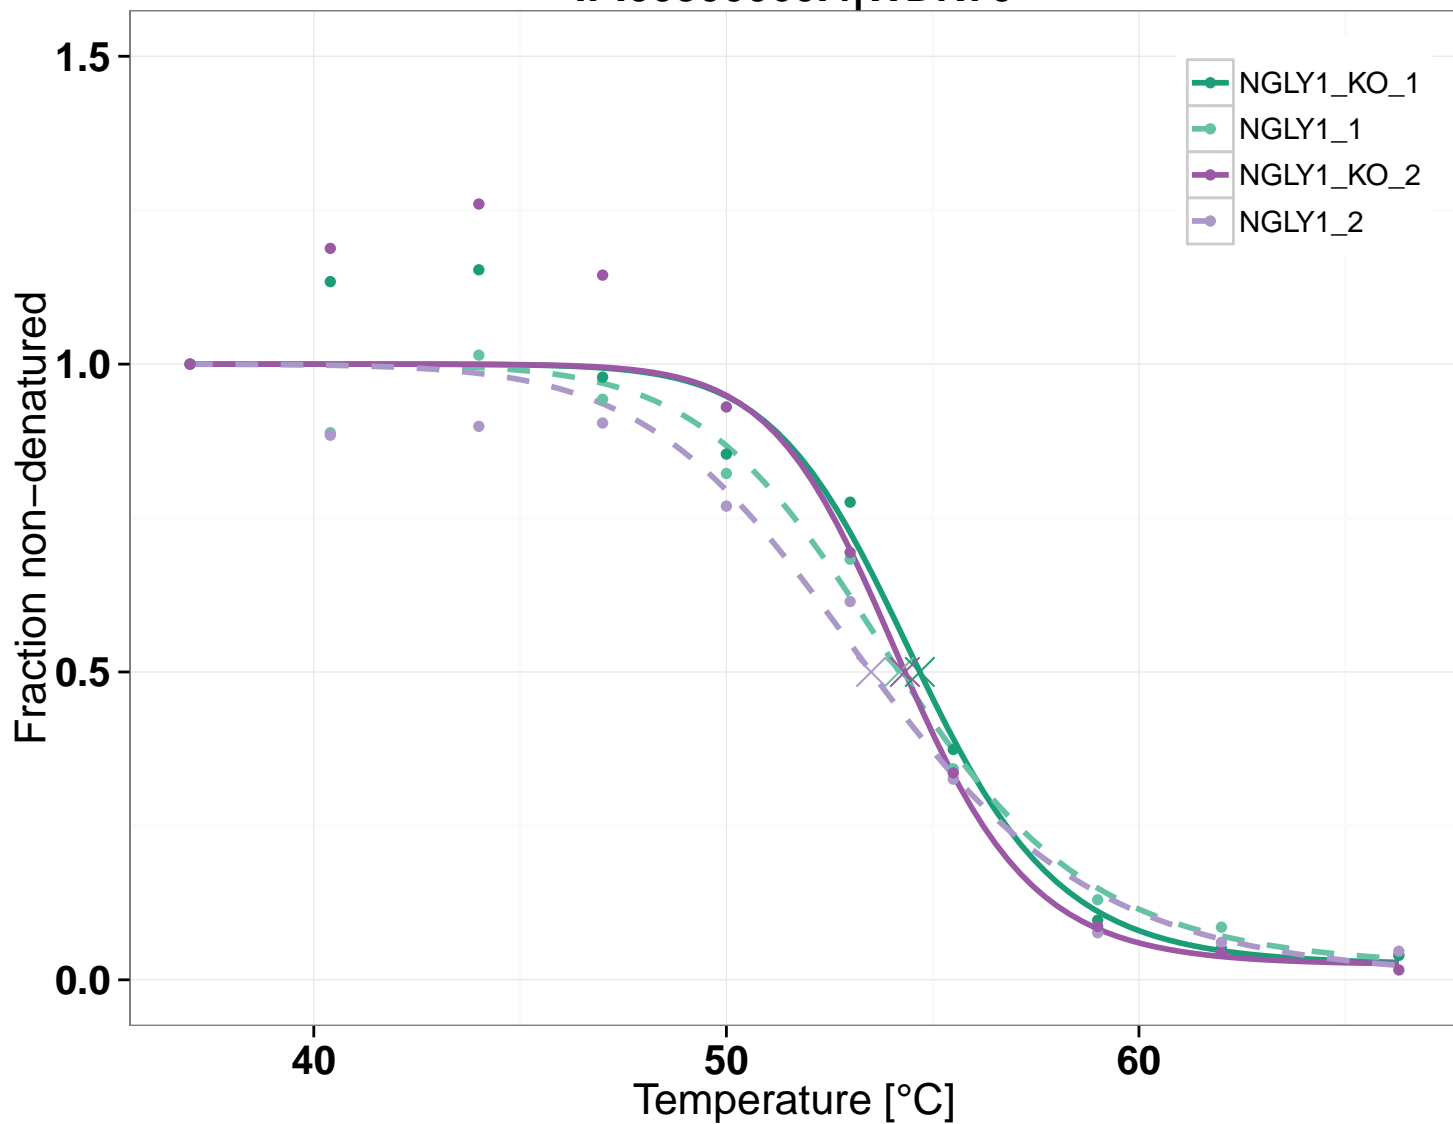

|            | meltPoint | slope  | plateau | R2   |
|------------|-----------|--------|---------|------|
| NGLY1_KO_1 | 54.69     | -0.14  | 0.02    | 0.97 |
| NGLY1_1    | 54.19     | -0.1   | 0.02    | 0.99 |
| NGLY1_KO_2 | 54.33     | -0.15  | 0.02    | 0.94 |
| NGLY1_2    | 53.51     | -0.091 | 0       | 0.98 |

Supplement: Supplementary file 8088 [file 1]

IPI00292693.3|MTMR4

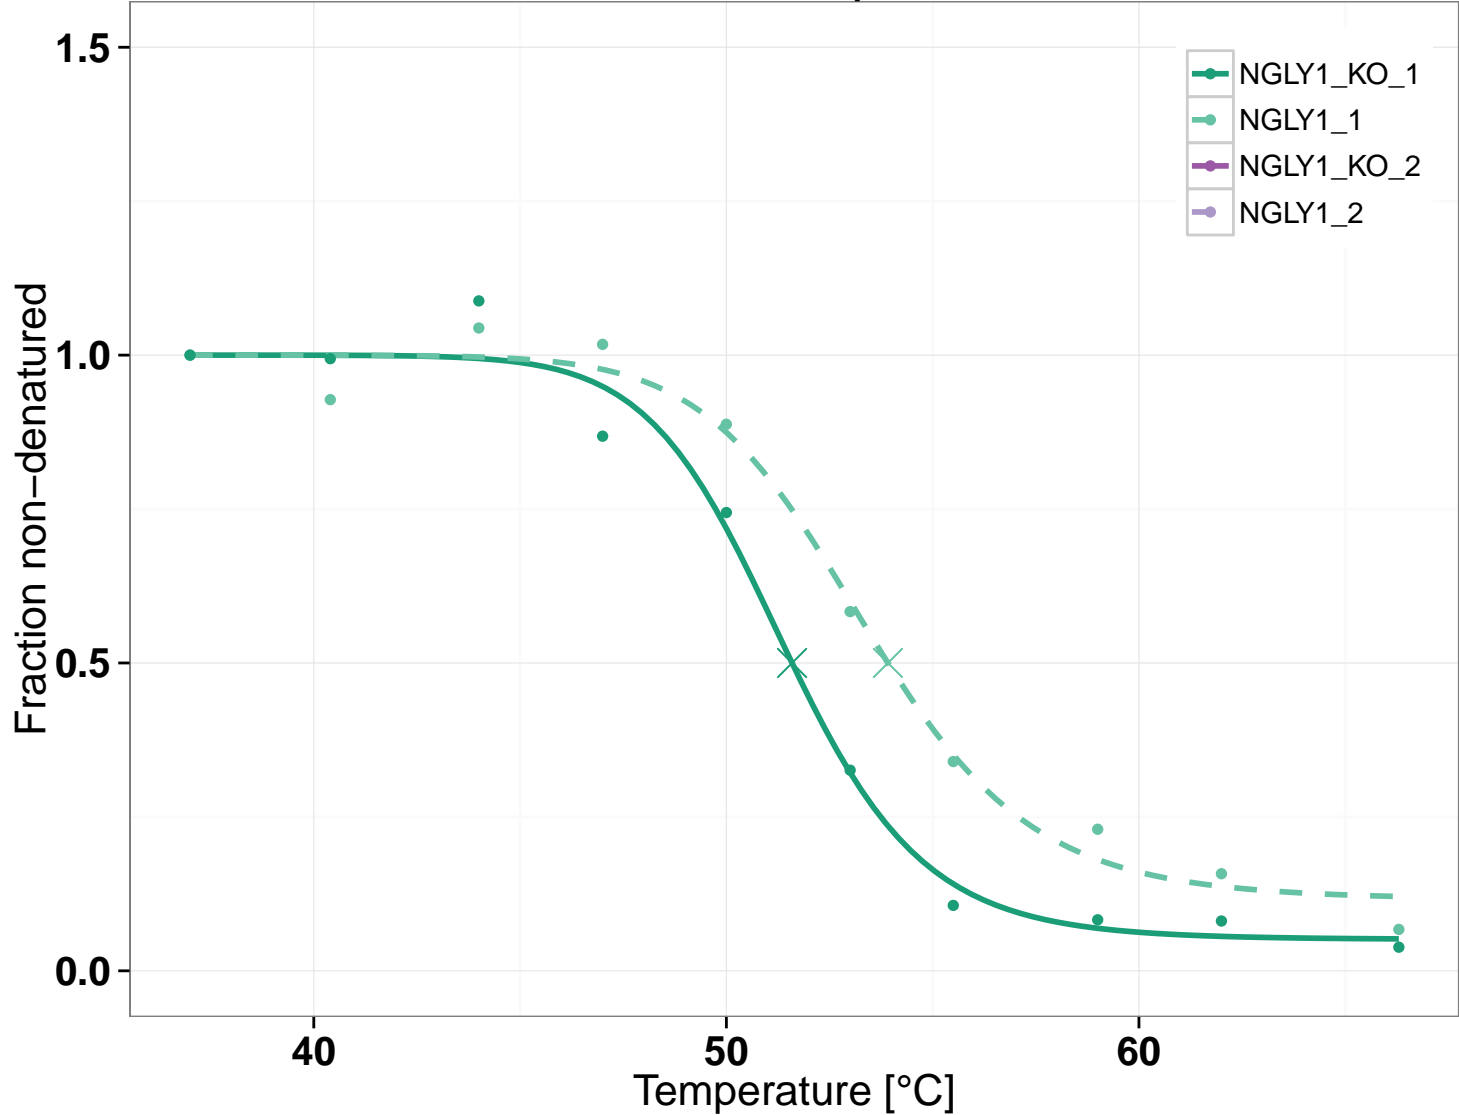

|            | meltPoint | slope | plateau | R2   |
|------------|-----------|-------|---------|------|
| NGLY1_KO_1 | 51.59     | -0.14 | 0.05    | 0.99 |
| NGLY1_1    | 53.92     | -0.11 | 0.12    | 0.99 |
| NGLY1_KO_2 | -         | -     | -       | -    |
| NGLY1_2    | -         | -     | -       | -    |

Supplement: Supplementary file 8089 [file 1]

# IPI00102096.3|SMAP1

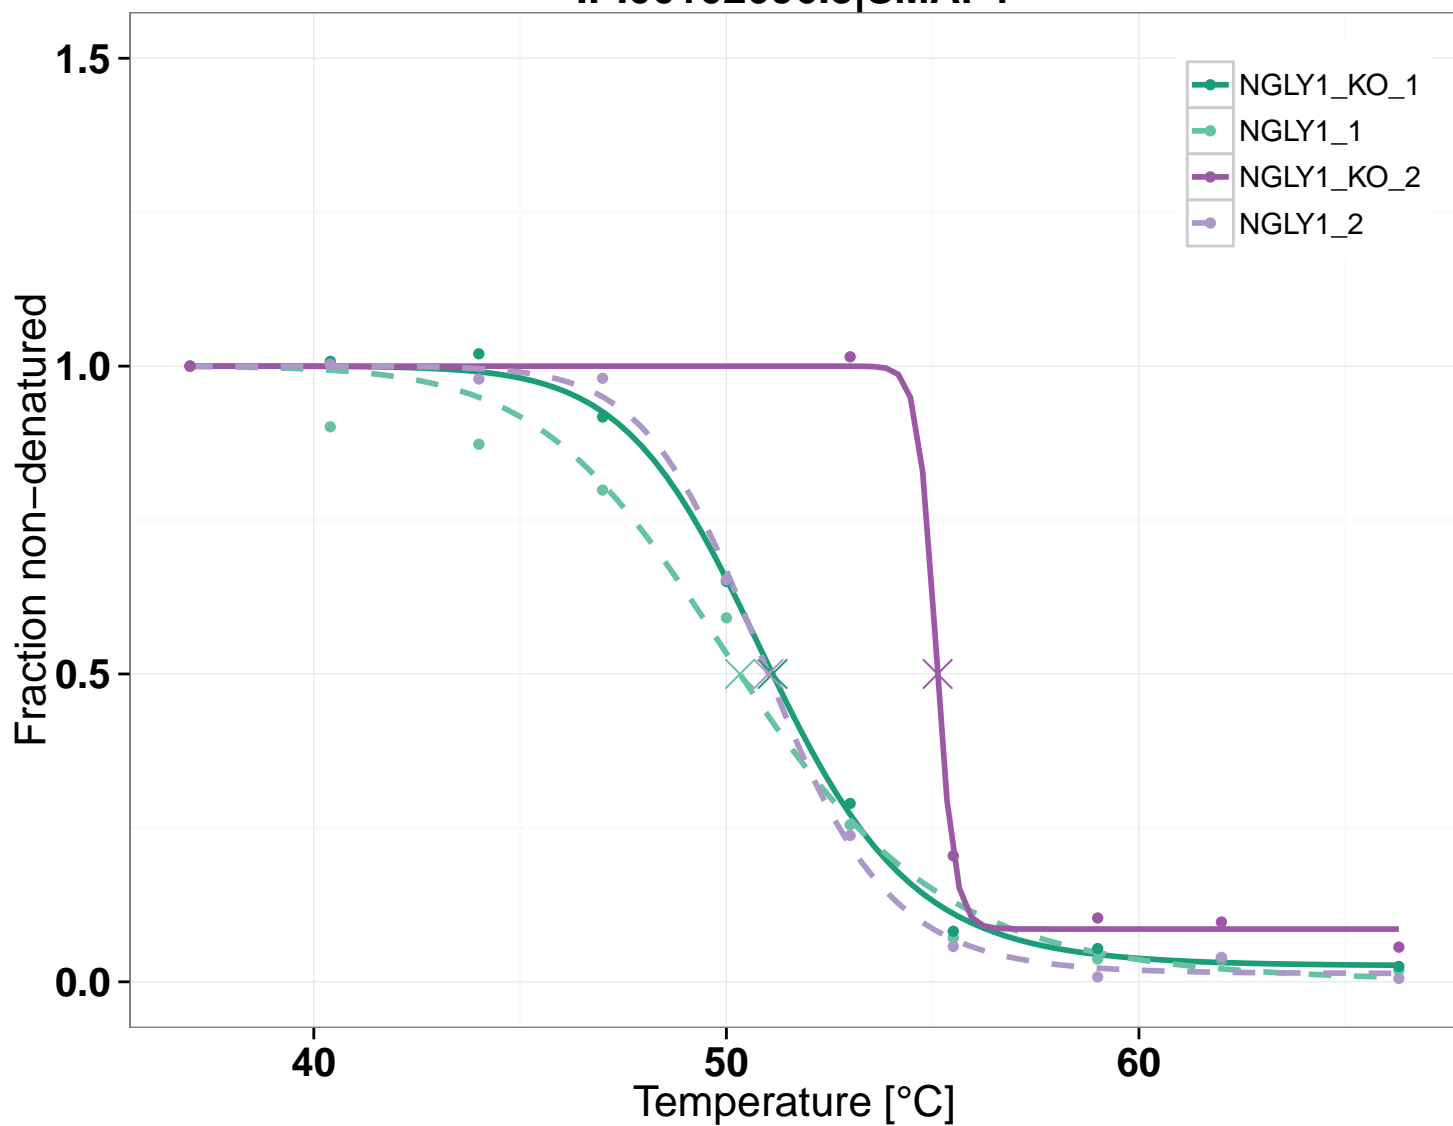

|            | meltPoint | slope | plateau | R2   |
|------------|-----------|-------|---------|------|
| NGLY1_KO_1 | 51.12     | -0.14 | 0.03    | 1    |
| NGLY1_1    | 50.33     | -0.1  | 0       | 0.99 |
| NGLY1_KO_2 | 55.12     | -1    | 0.09    | 0.04 |
| NGLY1_2    | 51.02     | -0.17 | 0.01    | 1    |

Supplement: Supplementary file 8090 [file 1]

# IPI00409761.1|CHKA

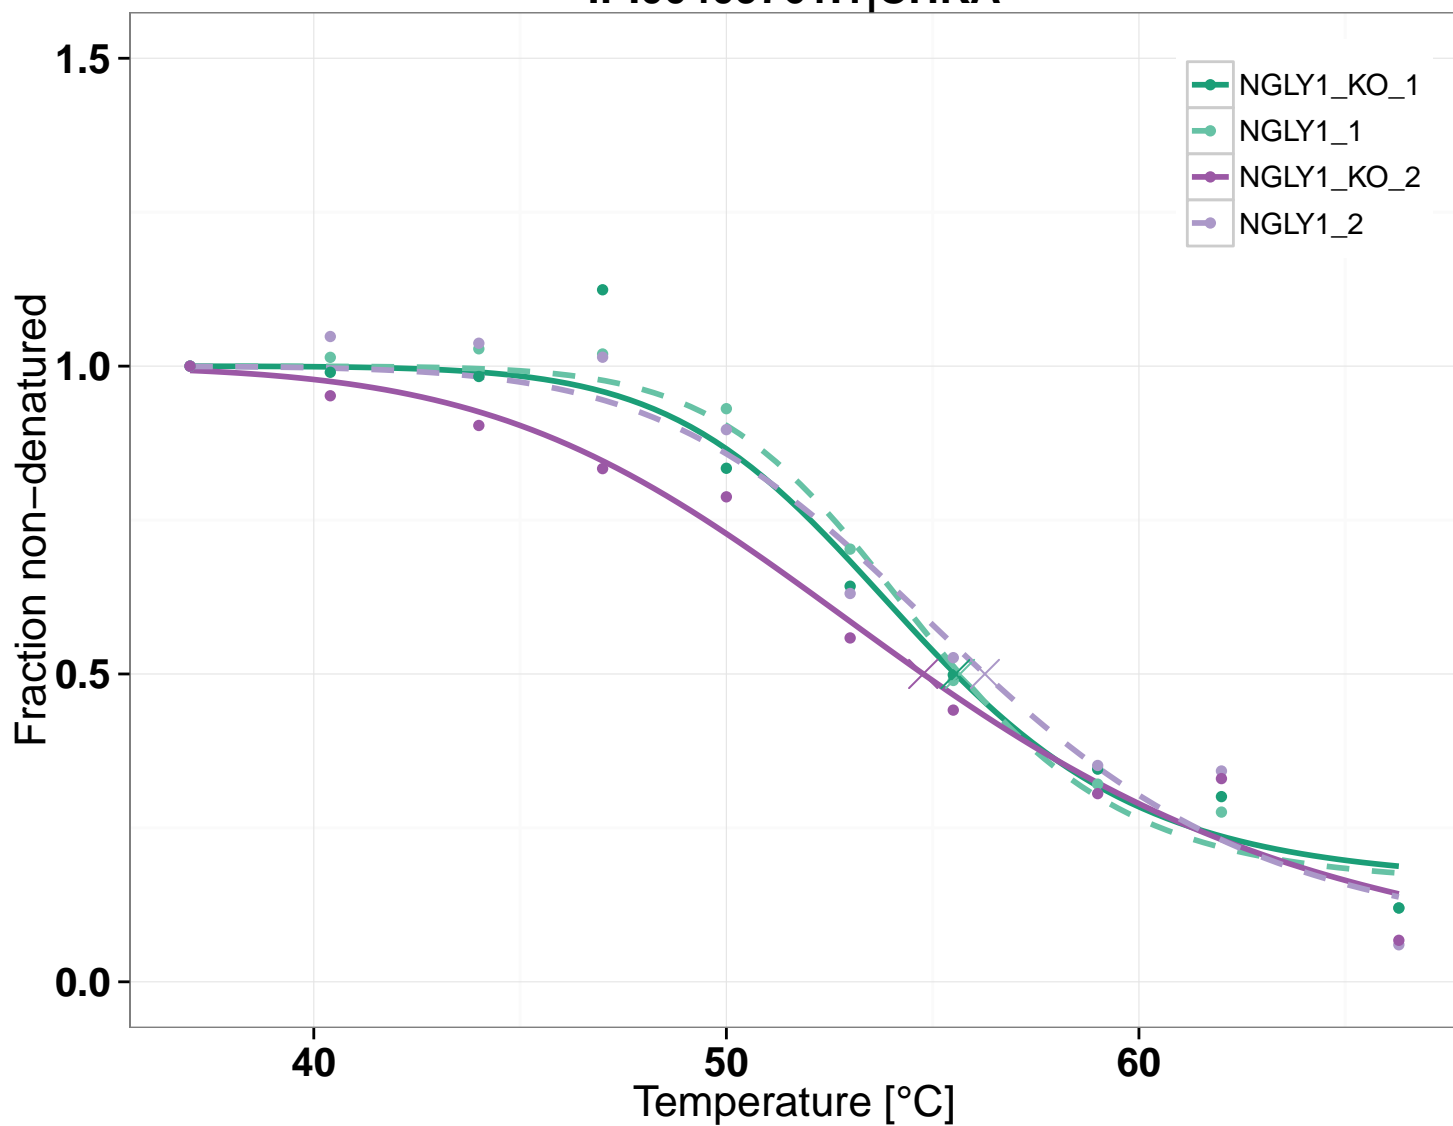

|            | meltPoint | slope  | plateau | R2   |
|------------|-----------|--------|---------|------|
| NGLY1_KO_1 | 55.55     | -0.073 | 0.16    | 0.96 |
| NGLY1_1    | 55.66     | -0.085 | 0.16    | 0.99 |
| NGLY1_KO_2 | 54.77     | -0.049 | 0       | 0.98 |
| NGLY1_2    | 56.27     | -0.064 | 0.06    | 0.97 |

Supplement: Supplementary file 8091 [file 1]

IPI00219171.3|POU2F1

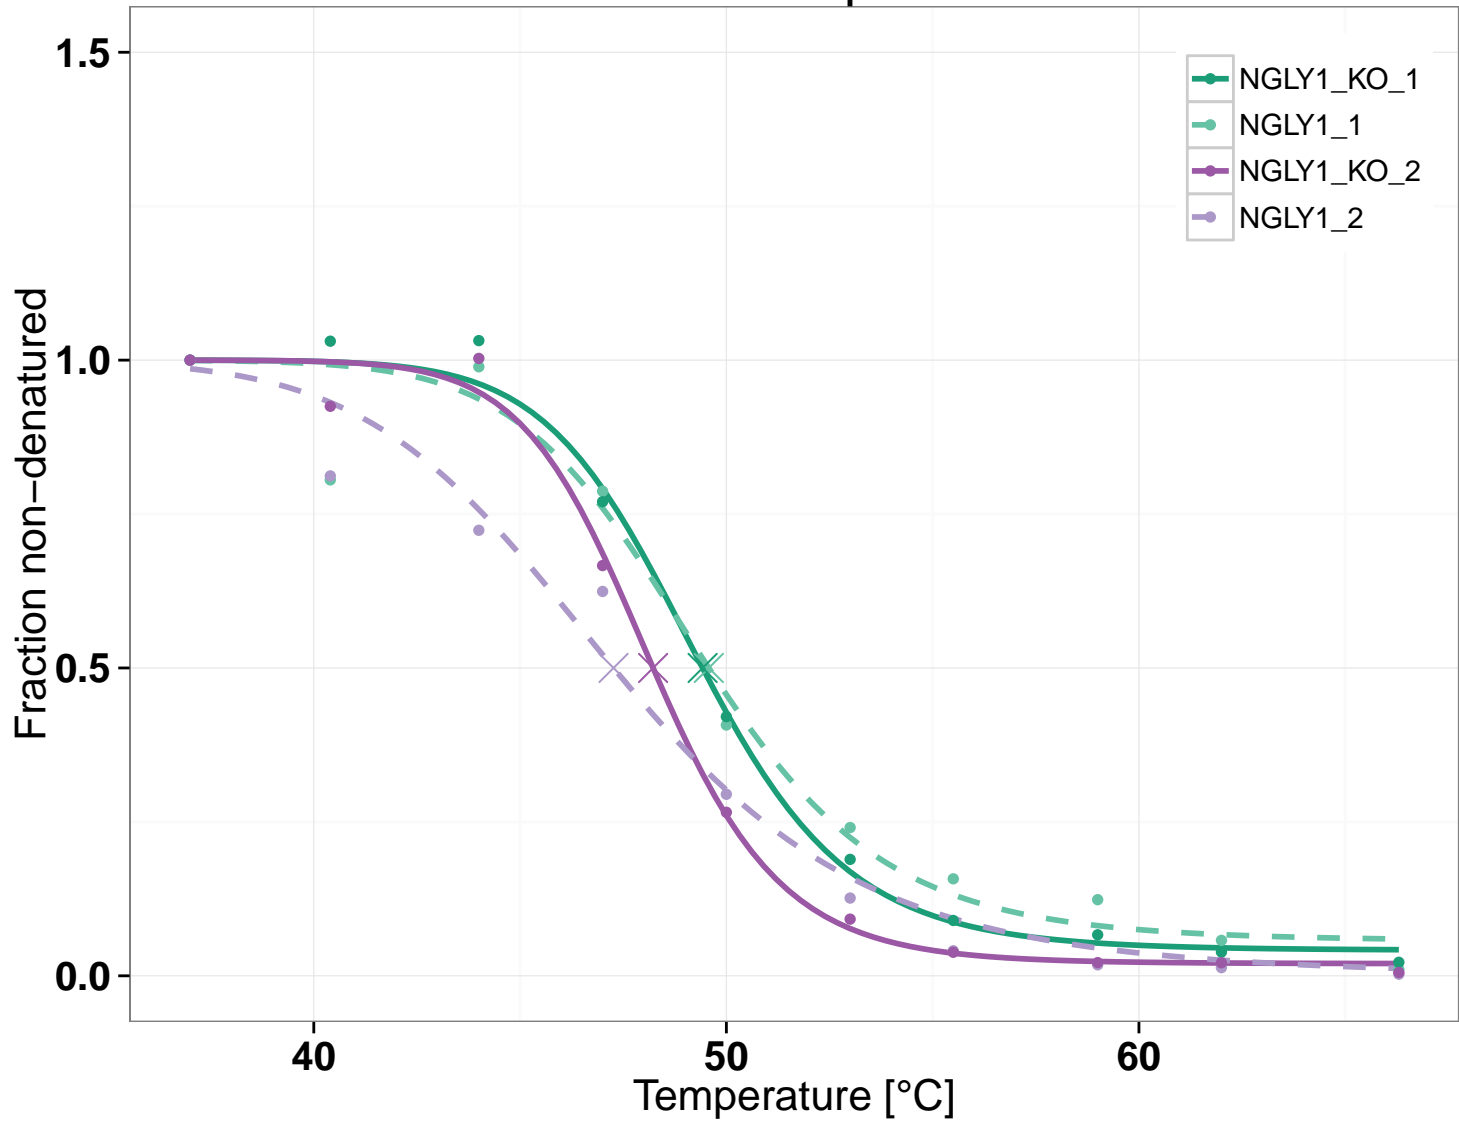

|            | meltPoint | slope  | plateau | R2   |
|------------|-----------|--------|---------|------|
| NGLY1_KO_1 | 49.42     | -0.13  | 0.04    | 1    |
| NGLY1_1    | 49.57     | -0.11  | 0.06    | 0.97 |
| NGLY1_KO_2 | 48.22     | -0.16  | 0.02    | 0.99 |
| NGLY1_2    | 47.27     | -0.083 | 0       | 0.98 |

Supplement: Supplementary file 8092 [file 1]

# IPI00163403.7|SHKBP1

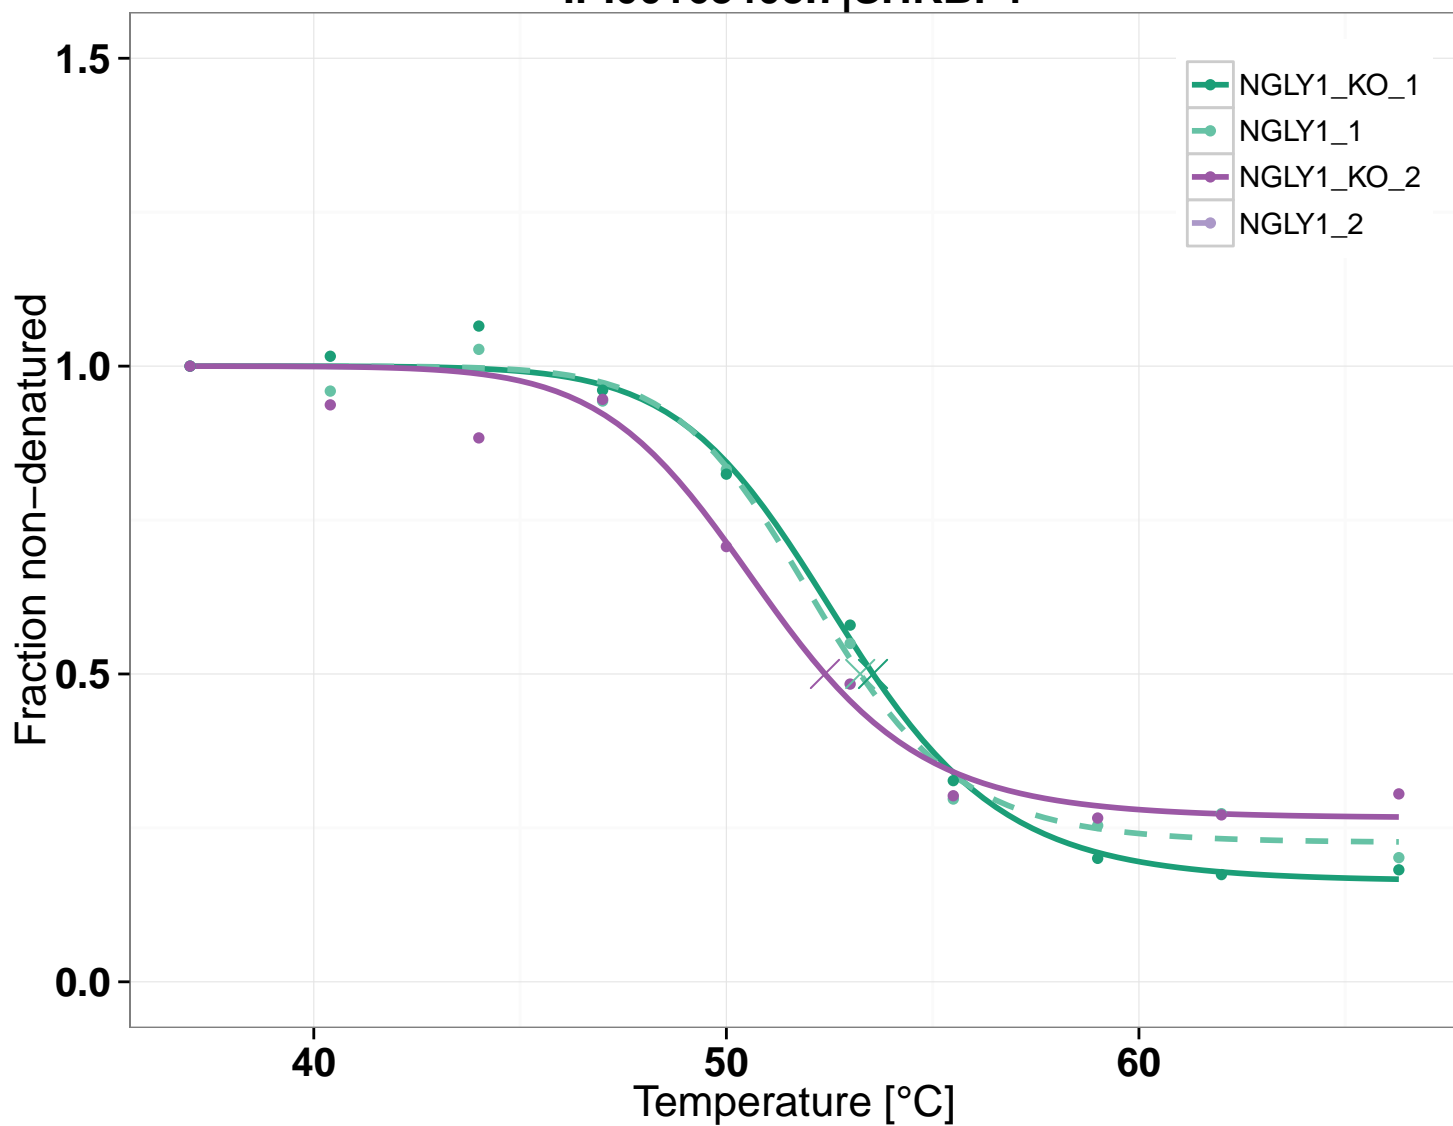

|            | meltPoint | slope  | plateau | R2   |
|------------|-----------|--------|---------|------|
| NGLY1_KO_1 | 53.55     | -0.11  | 0.16    | 1    |
| NGLY1_1    | 53.24     | -0.11  | 0.23    | 0.99 |
| NGLY1_KO_2 | 52.39     | -0.094 | 0.27    | 0.98 |
| NGLY1_2    | -         | -      | -       | -    |

Supplement: Supplementary file 8093 [file 1]

IPI00157837.5|PHF19

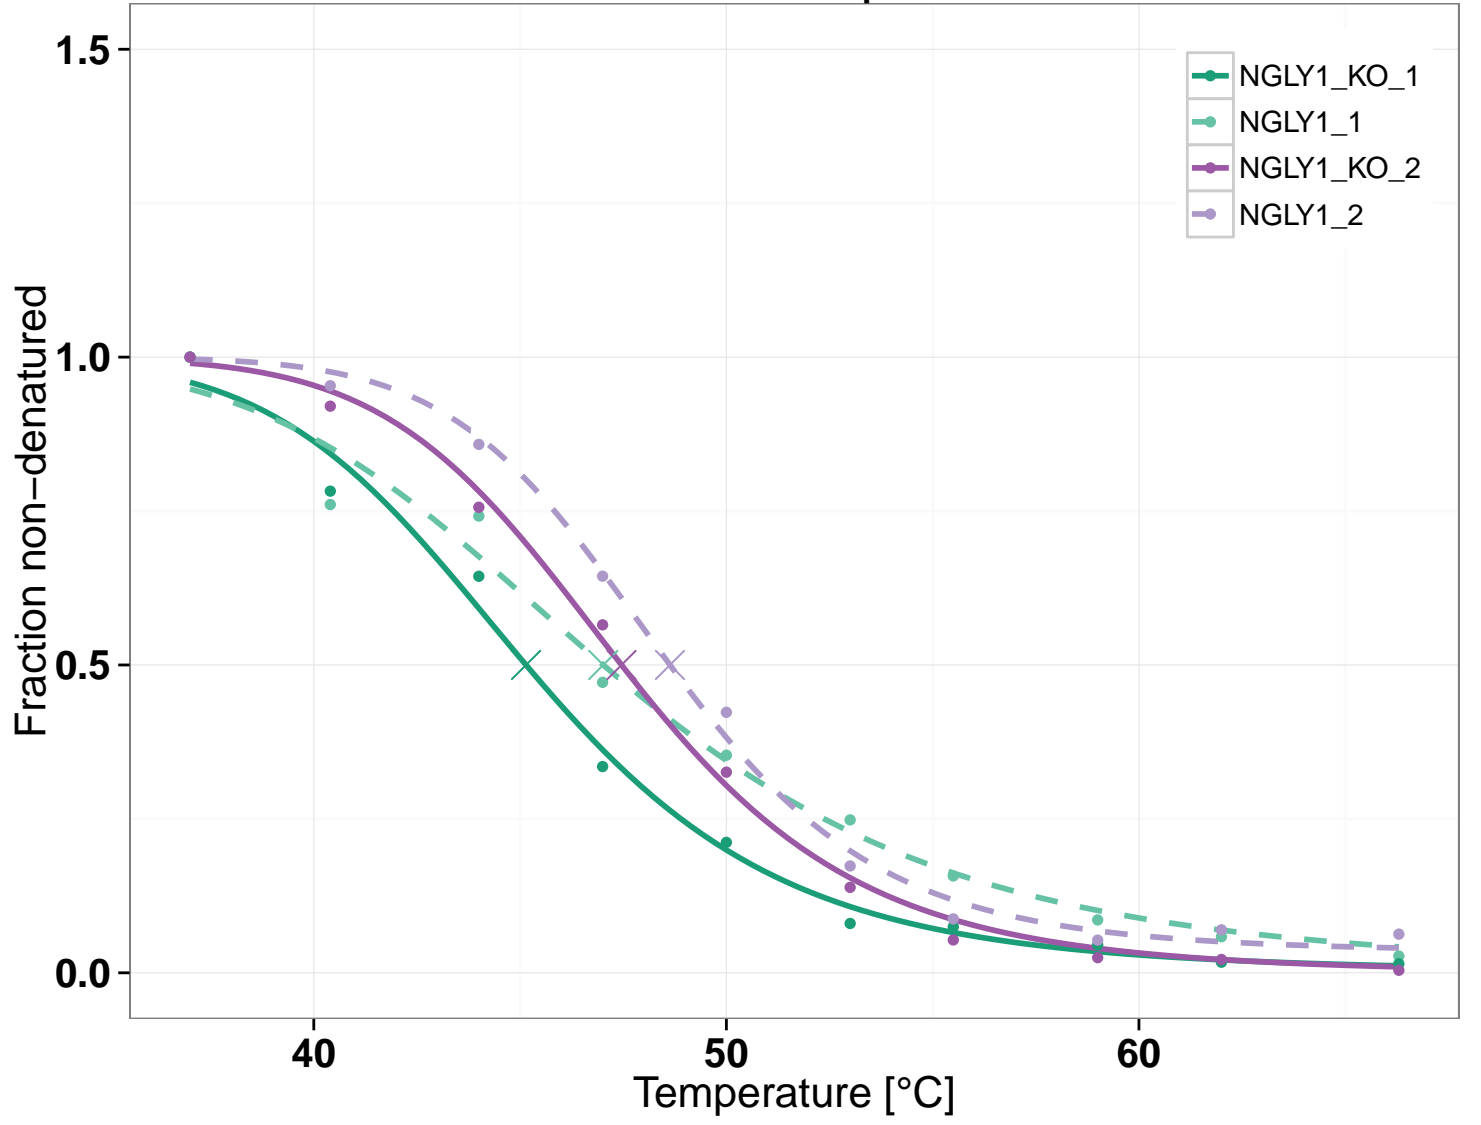

|            | meltPoint | slope  | plateau | R2   |
|------------|-----------|--------|---------|------|
| NGLY1_KO_1 | 45.14     | -0.081 | 0       | 0.99 |
| NGLY1_1    | 47.02     | -0.059 | 0       | 0.98 |
| NGLY1_KO_2 | 47.46     | -0.087 | 0       | 1    |
| NGLY1_2    | 48.63     | -0.093 | 0.03    | 1    |

Supplement: Supplementary file 8094 [file 1]

IPI00783698.4|TMEM87A

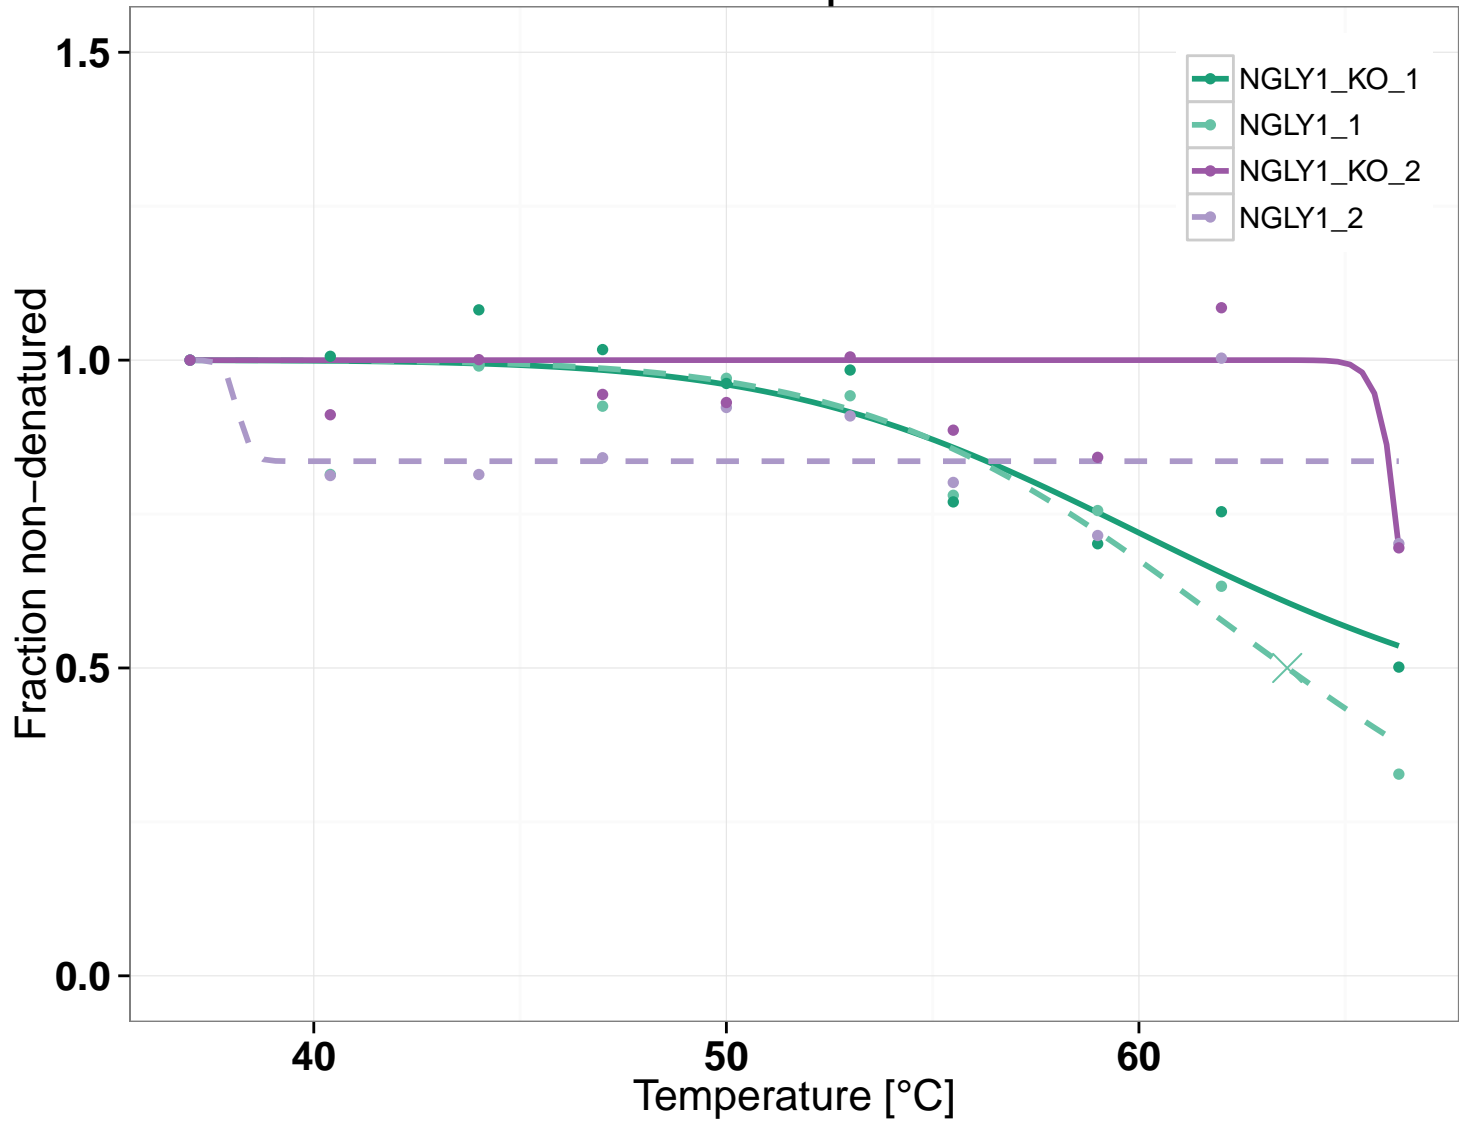

|            | meltPoint | slope  | plateau | R2   |
|------------|-----------|--------|---------|------|
| NGLY1_KO_1 | -         | -0.033 | 0.34    | 0.89 |
| NGLY1_1    | 63.59     | -0.049 | 0       | 0.87 |
| NGLY1_KO_2 | -         | -      | 0       | 0.42 |
| NGLY1_2    | -         | -0.27  | 0.84    | 0.24 |

Supplement: Supplementary file 8095 [file 1]

IPI00305551.3|GNA11

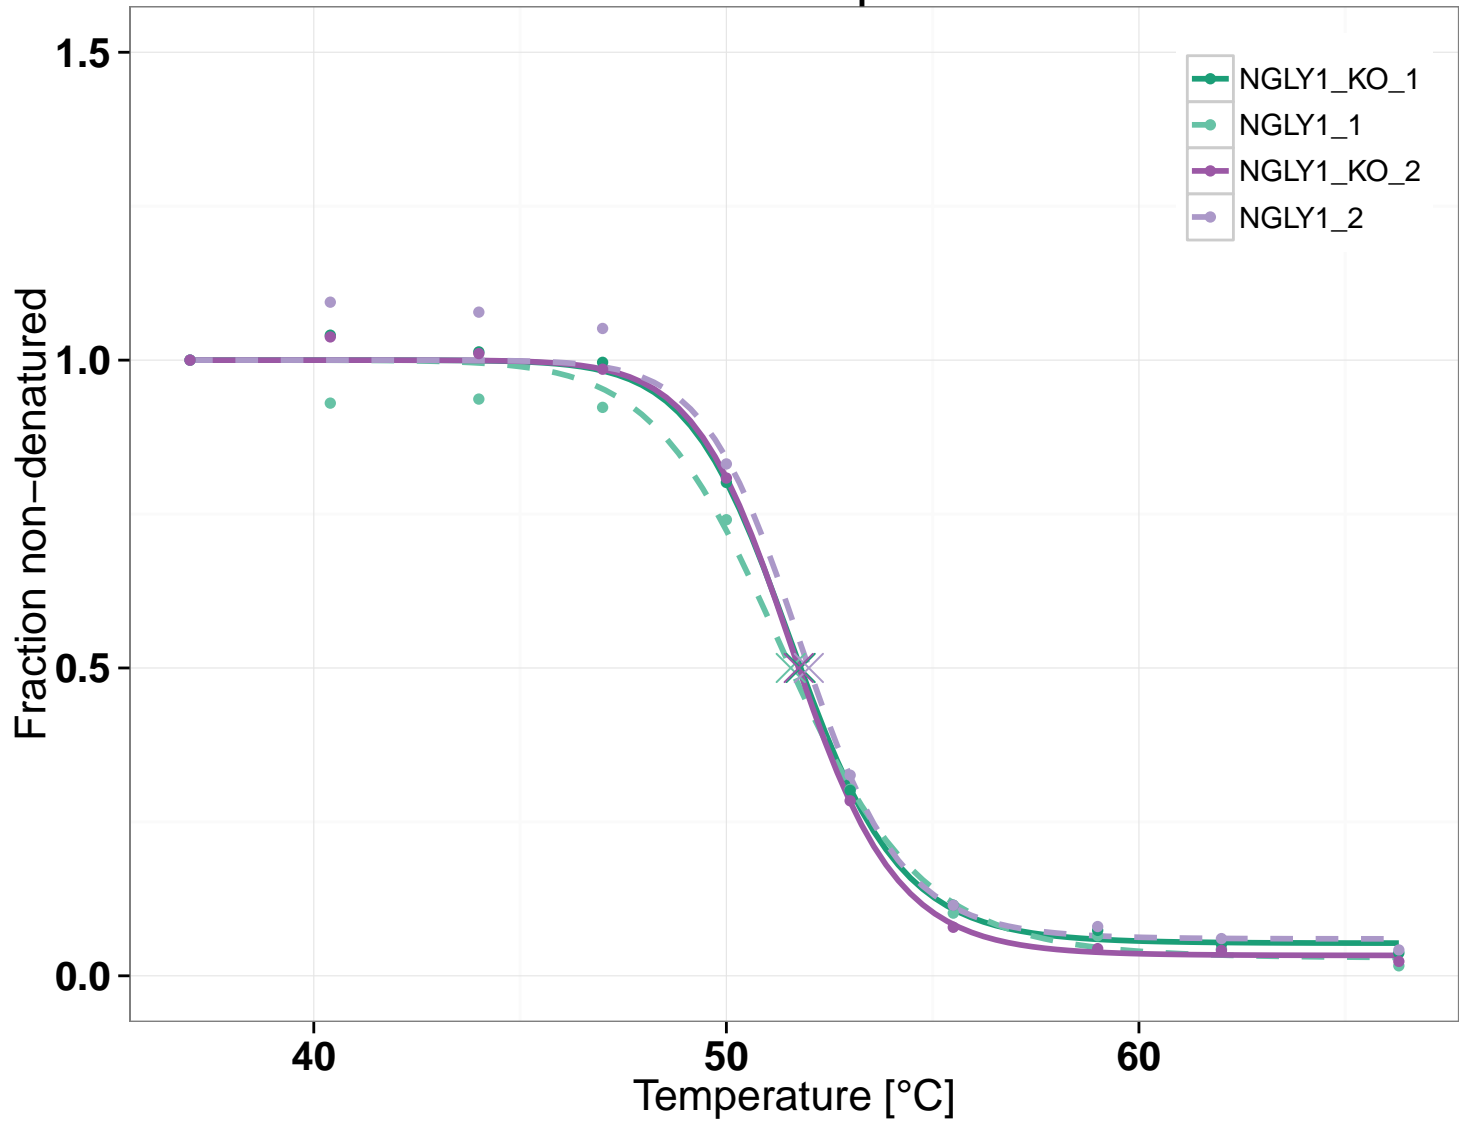

|            | meltPoint | slope | plateau | R2   |
|------------|-----------|-------|---------|------|
| NGLY1_KO_1 | 51.8      | -0.18 | 0.05    | 1    |
| NGLY1_1    | 51.56     | -0.15 | 0.03    | 0.99 |
| NGLY1_KO_2 | 51.75     | -0.2  | 0.03    | 1    |
| NGLY1_2    | 52        | -0.2  | 0.06    | 0.99 |

Supplement: Supplementary file 8096 [file 1]

# IPI00893743.1|NRBP1

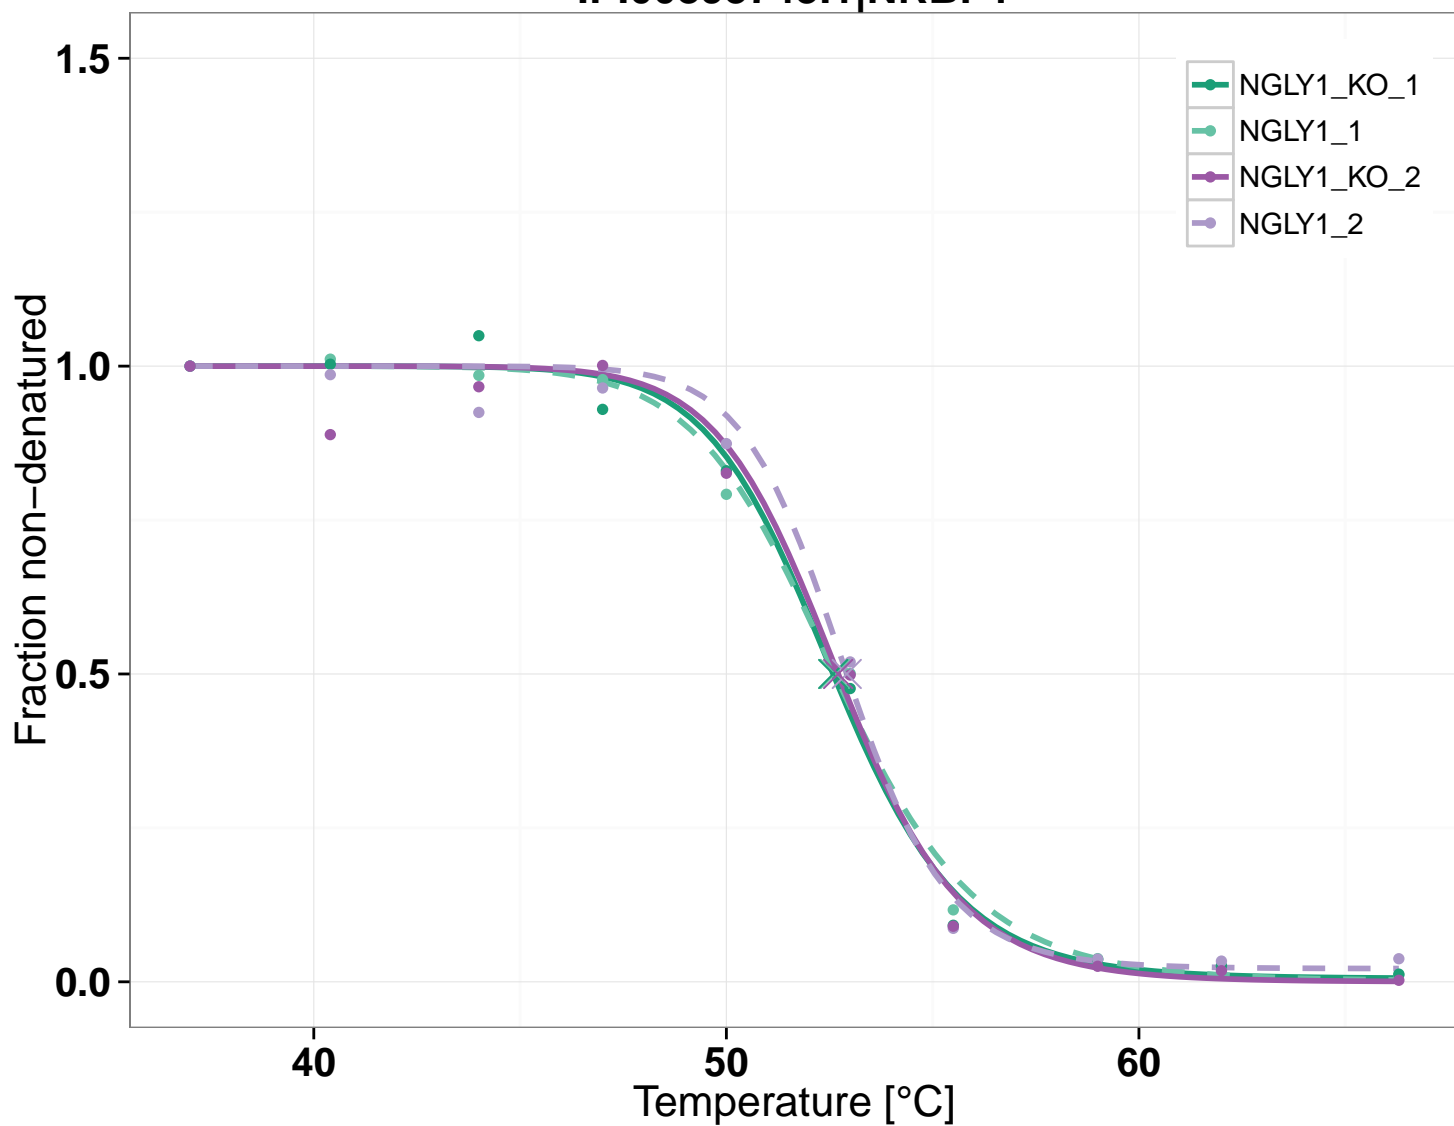

|            | meltPoint | slope | plateau | R2   |
|------------|-----------|-------|---------|------|
| NGLY1_KO_1 | 52.59     | -0.16 | 0.01    | 0.99 |
| NGLY1_1    | 52.63     | -0.14 | 0       | 1    |
| NGLY1_KO_2 | 52.71     | -0.17 | 0       | 0.99 |
| NGLY1_2    | 52.92     | -0.2  | 0.02    | 0.99 |

Supplement: Supplementary file 8097 [file 1]

IPI00002288.4|XRCC6BP1

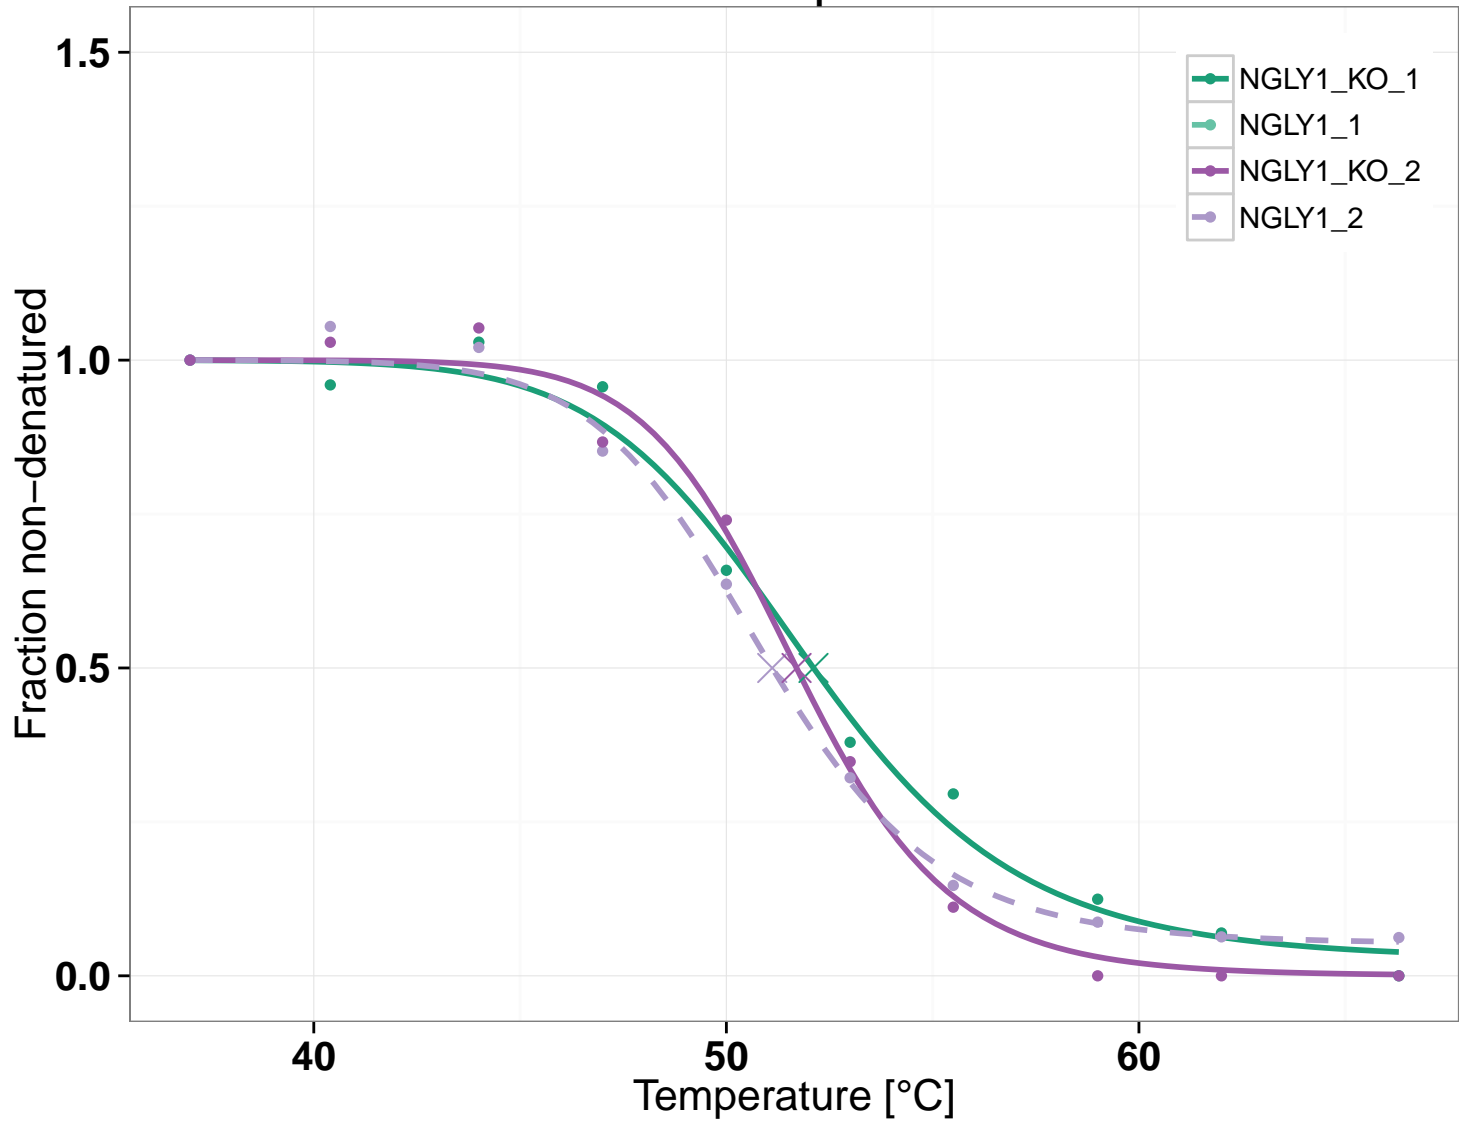

|            | meltPoint | slope  | plateau | R2   |
|------------|-----------|--------|---------|------|
| NGLY1_KO_1 | 52.11     | -0.095 | 0.03    | 0.99 |
| NGLY1_1    | -         | -      | -       | -    |
| NGLY1_KO_2 | 51.7      | -0.14  | 0       | 0.99 |
| NGLY1_2    | 51.11     | -0.11  | 0.05    | 1    |

Supplement: Supplementary file 8098 [file 1]

# IPI00025874.2|RPN1

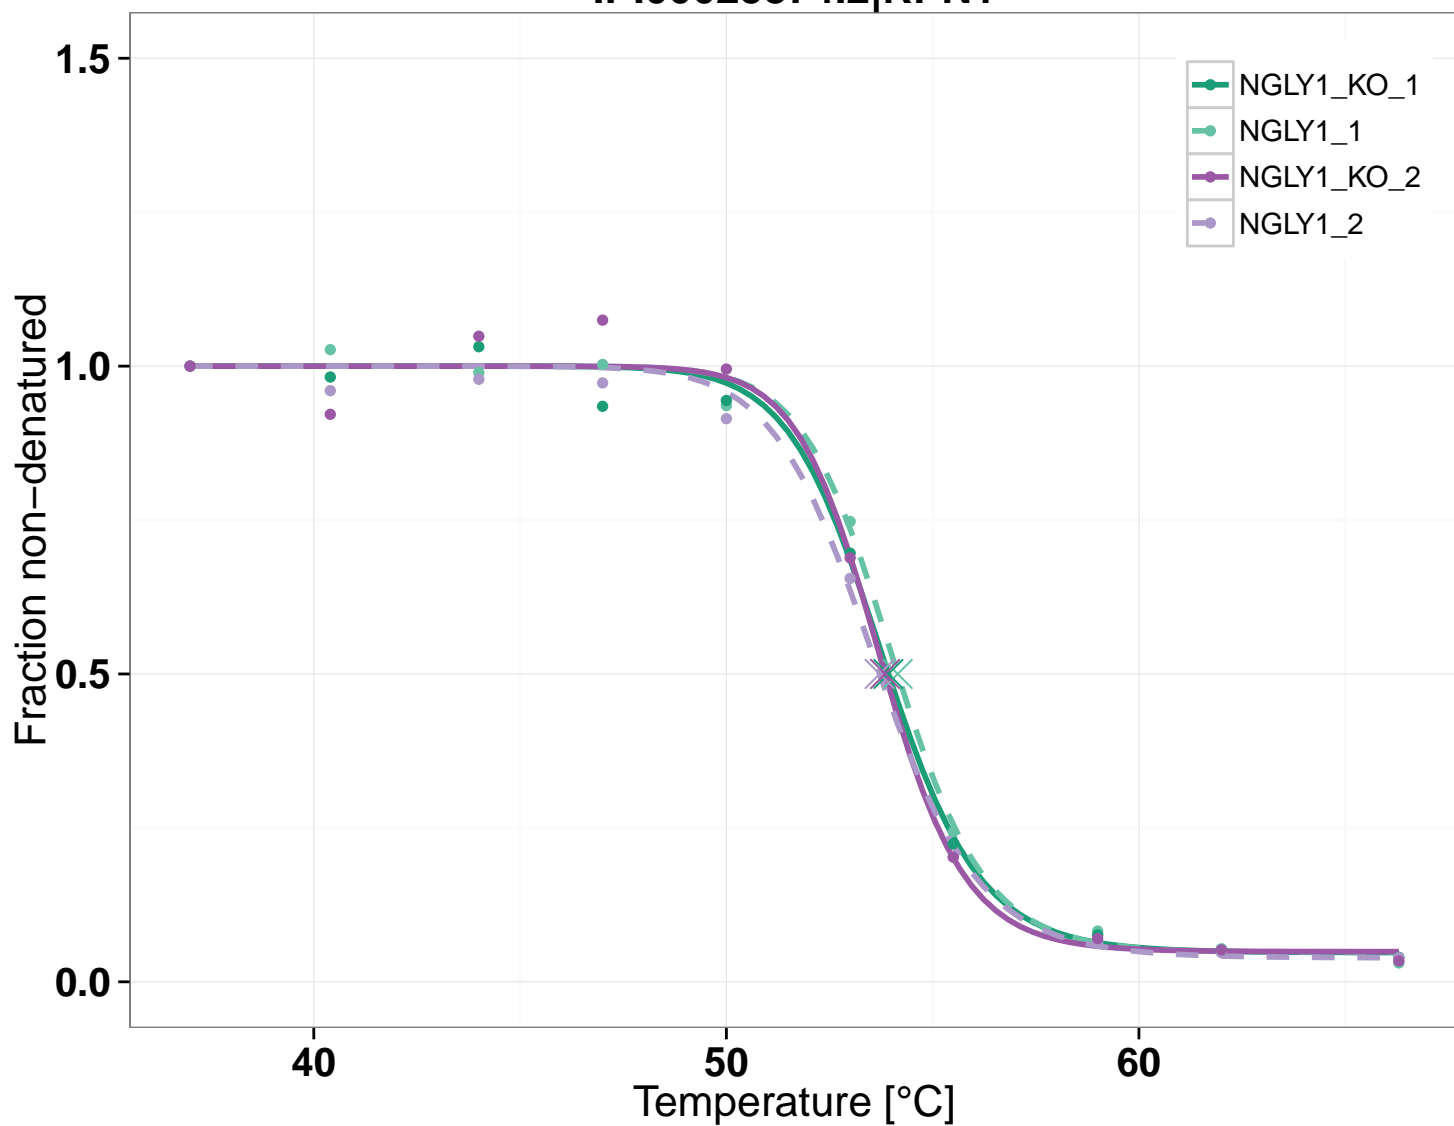

|            | meltPoint | slope | plateau | R2   |
|------------|-----------|-------|---------|------|
| NGLY1_KO_1 | 53.93     | -0.2  | 0.05    | 1    |
| NGLY1_1    | 54.15     | -0.21 | 0.05    | 1    |
| NGLY1_KO_2 | 53.85     | -0.23 | 0.05    | 0.99 |
| NGLY1_2    | 53.72     | -0.19 | 0.04    | 1    |

Supplement: Supplementary file 8099 [file 1]

IPI00307572.1|TMEM165

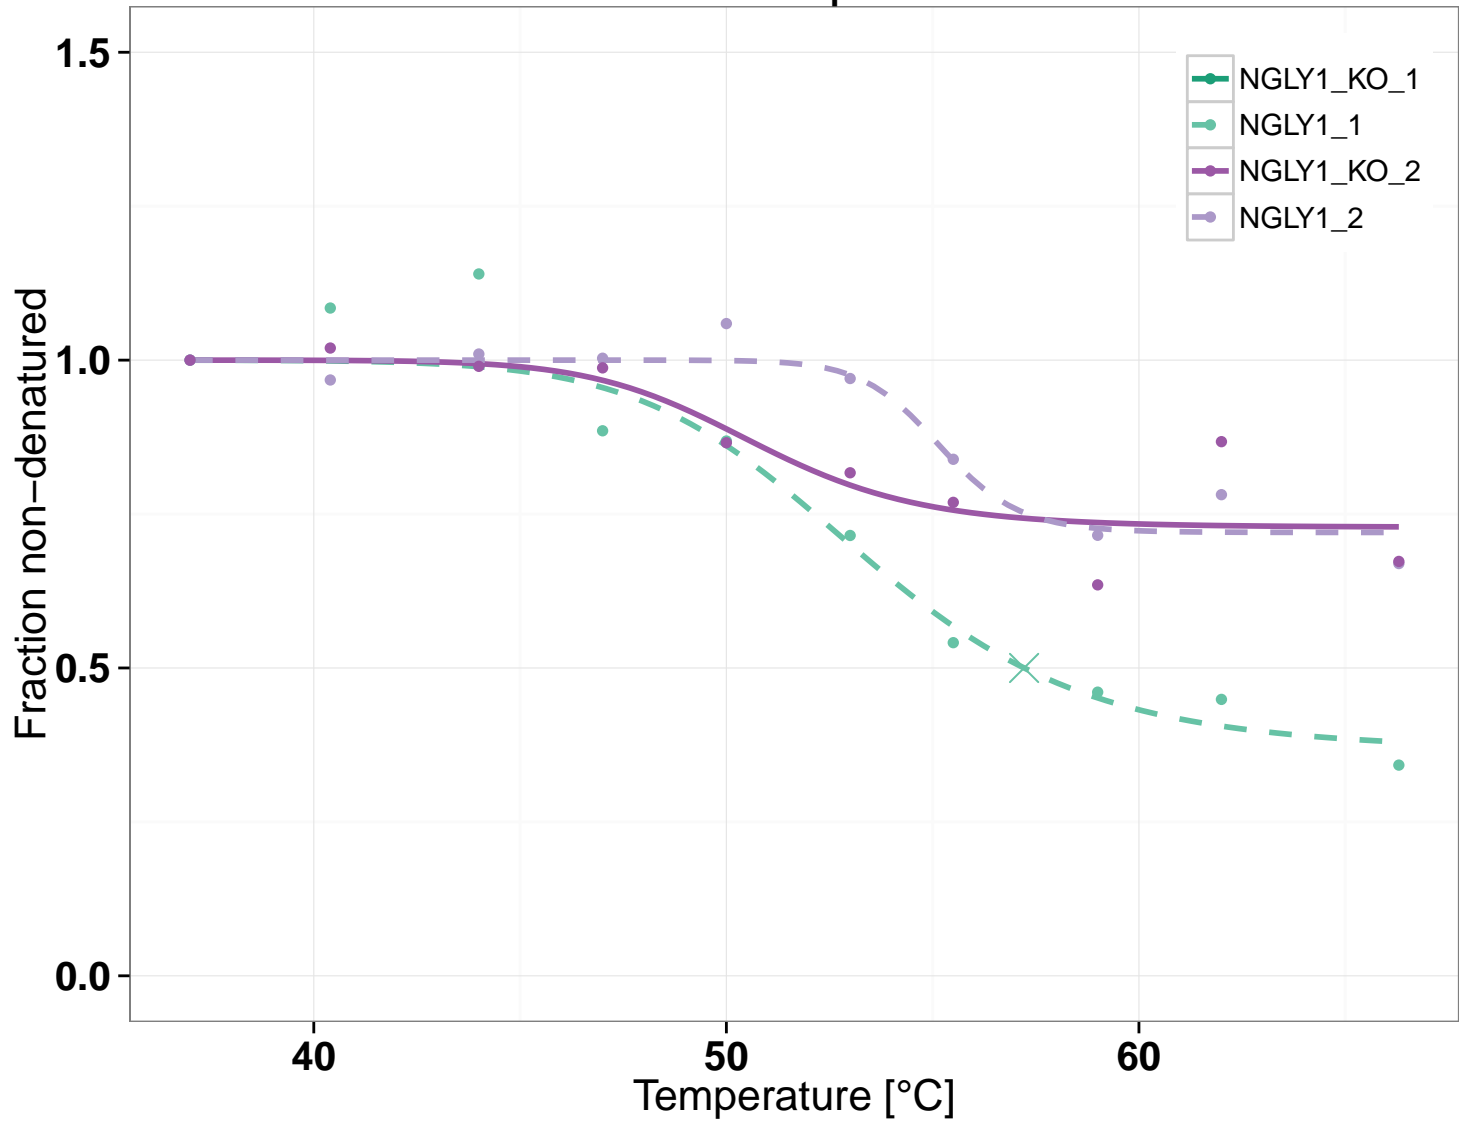

|            | meltPoint | slope  | plateau | R2   |
|------------|-----------|--------|---------|------|
| NGLY1_KO_1 | –         | –      | –       | –    |
| NGLY1_1    | 57.22     | –0.058 | 0.37    | 0.95 |
| NGLY1_KO_2 | –         | –0.034 | 0.73    | 0.81 |
| NGLY1_2    | –         | –0.073 | 0.72    | 0.94 |

Supplement: Supplementary file 8100 [file 1]

IPI00010970.3|SFMBT2

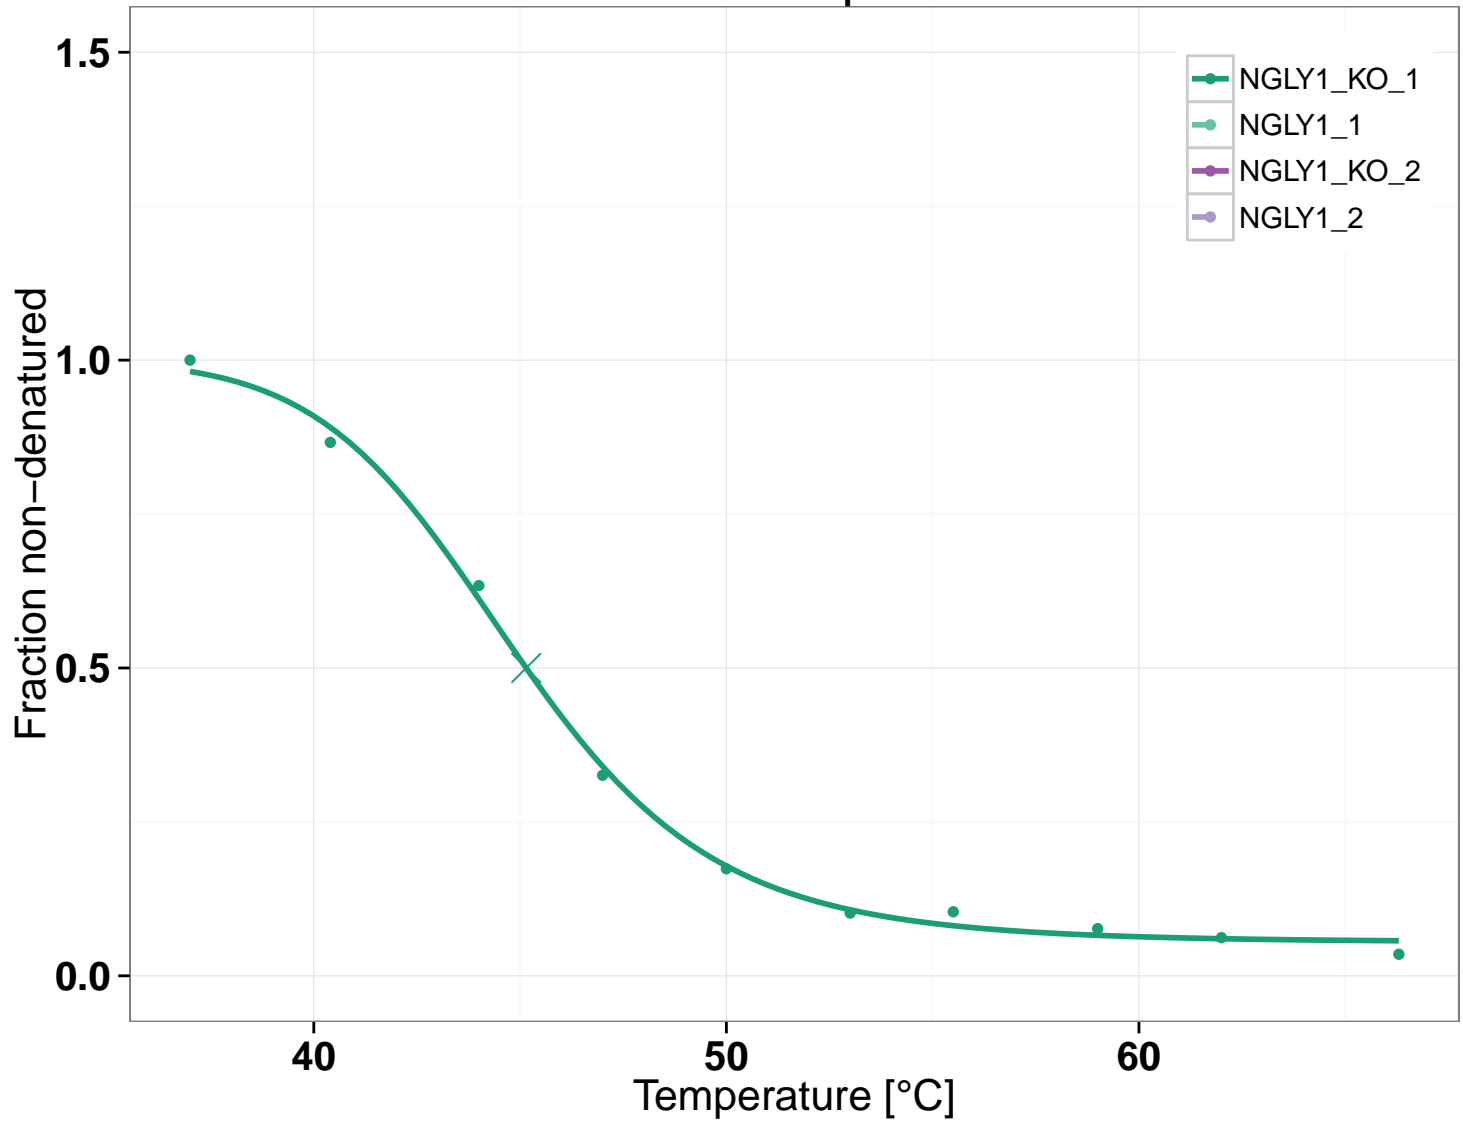

|            | meltPoint | slope  | plateau | R2 |
|------------|-----------|--------|---------|----|
| NGLY1_KO_1 | 45.15     | -0.098 | 0.05    | 1  |
| NGLY1_1    | -         | -      | -       | -  |
| NGLY1_KO_2 | -         | -      | -       | -  |
| NGLY1_2    | -         | -      | -       | -  |

Supplement: Supplementary file 8101 [file 1]

IPI00745708.3|GTPBP8

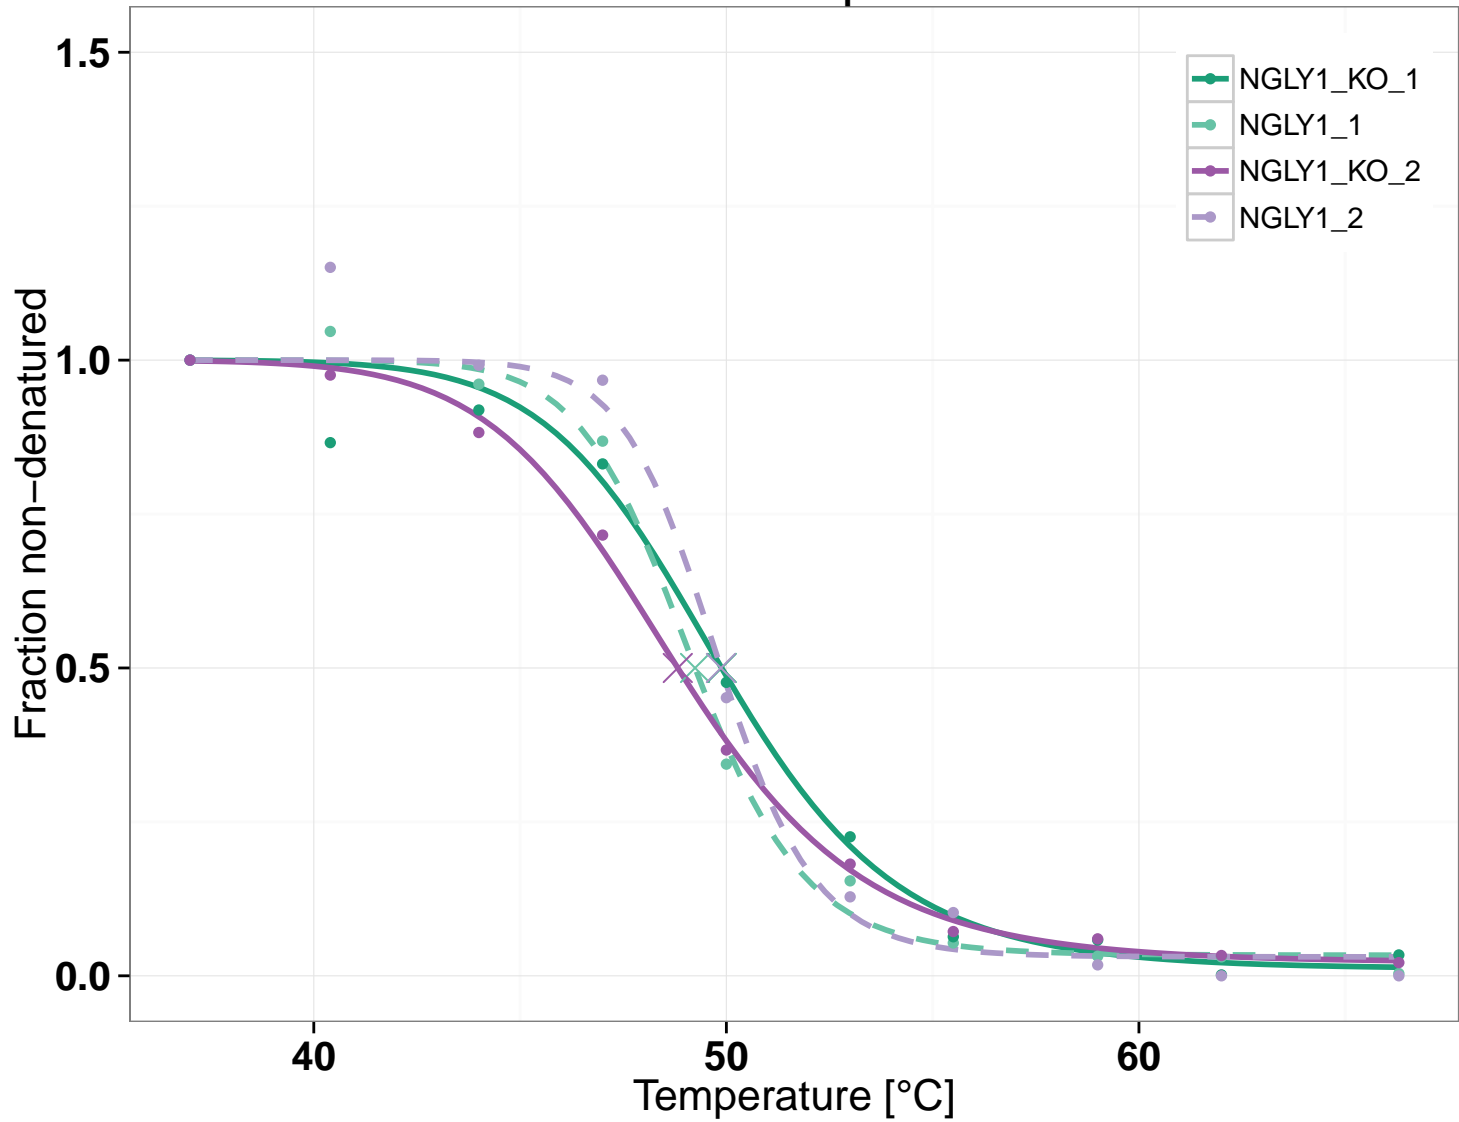

|            | meltPoint | slope | plateau | R2   |
|------------|-----------|-------|---------|------|
| NGLY1_KO_1 | 49.89     | -0.12 | 0.01    | 0.99 |
| NGLY1_1    | 49.24     | -0.18 | 0.03    | 1    |
| NGLY1_KO_2 | 48.82     | -0.11 | 0.02    | 1    |
| NGLY1_2    | 49.87     | -0.21 | 0.03    | 0.99 |

Supplement: Supplementary file 8102 [file 1]

IPI00333908.1|CCDC91

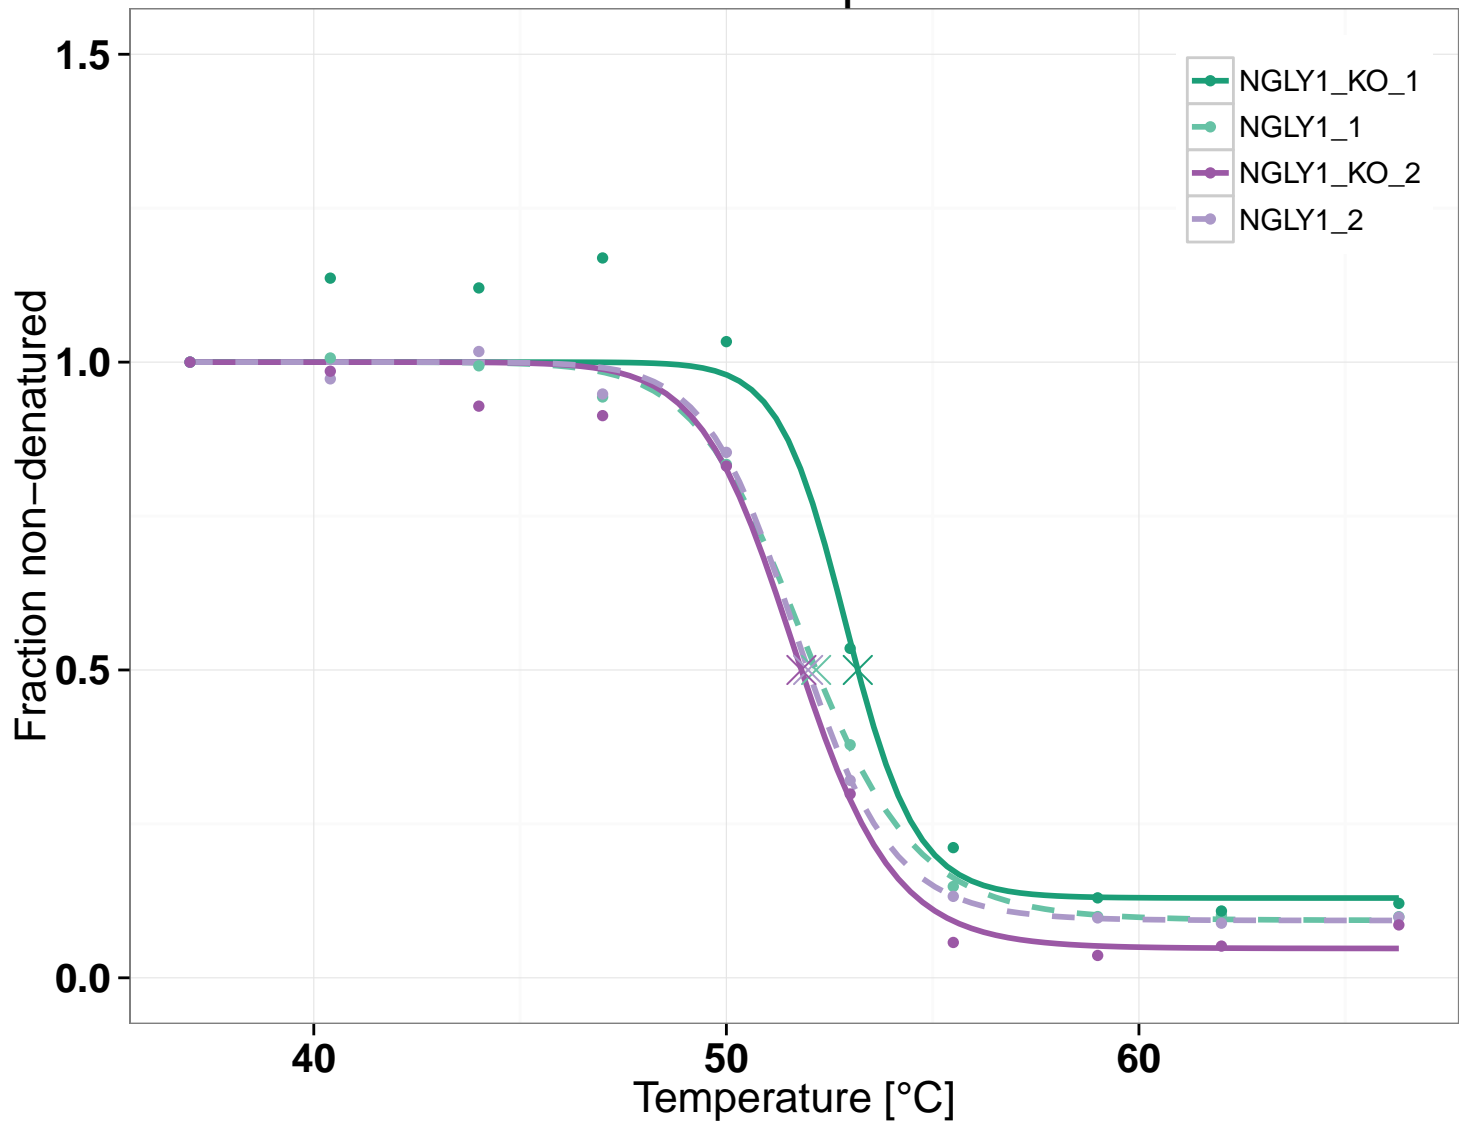

|            | meltPoint | slope | plateau | R2   |
|------------|-----------|-------|---------|------|
| NGLY1_KO_1 | 53.19     | -0.26 | 0.13    | 0.97 |
| NGLY1_1    | 52.18     | -0.17 | 0.09    | 1    |
| NGLY1_KO_2 | 51.82     | -0.2  | 0.05    | 0.99 |
| NGLY1_2    | 51.98     | -0.2  | 0.09    | 1    |

Supplement: Supplementary file 8103 [file 1]

IPI00022405.1|KLF15

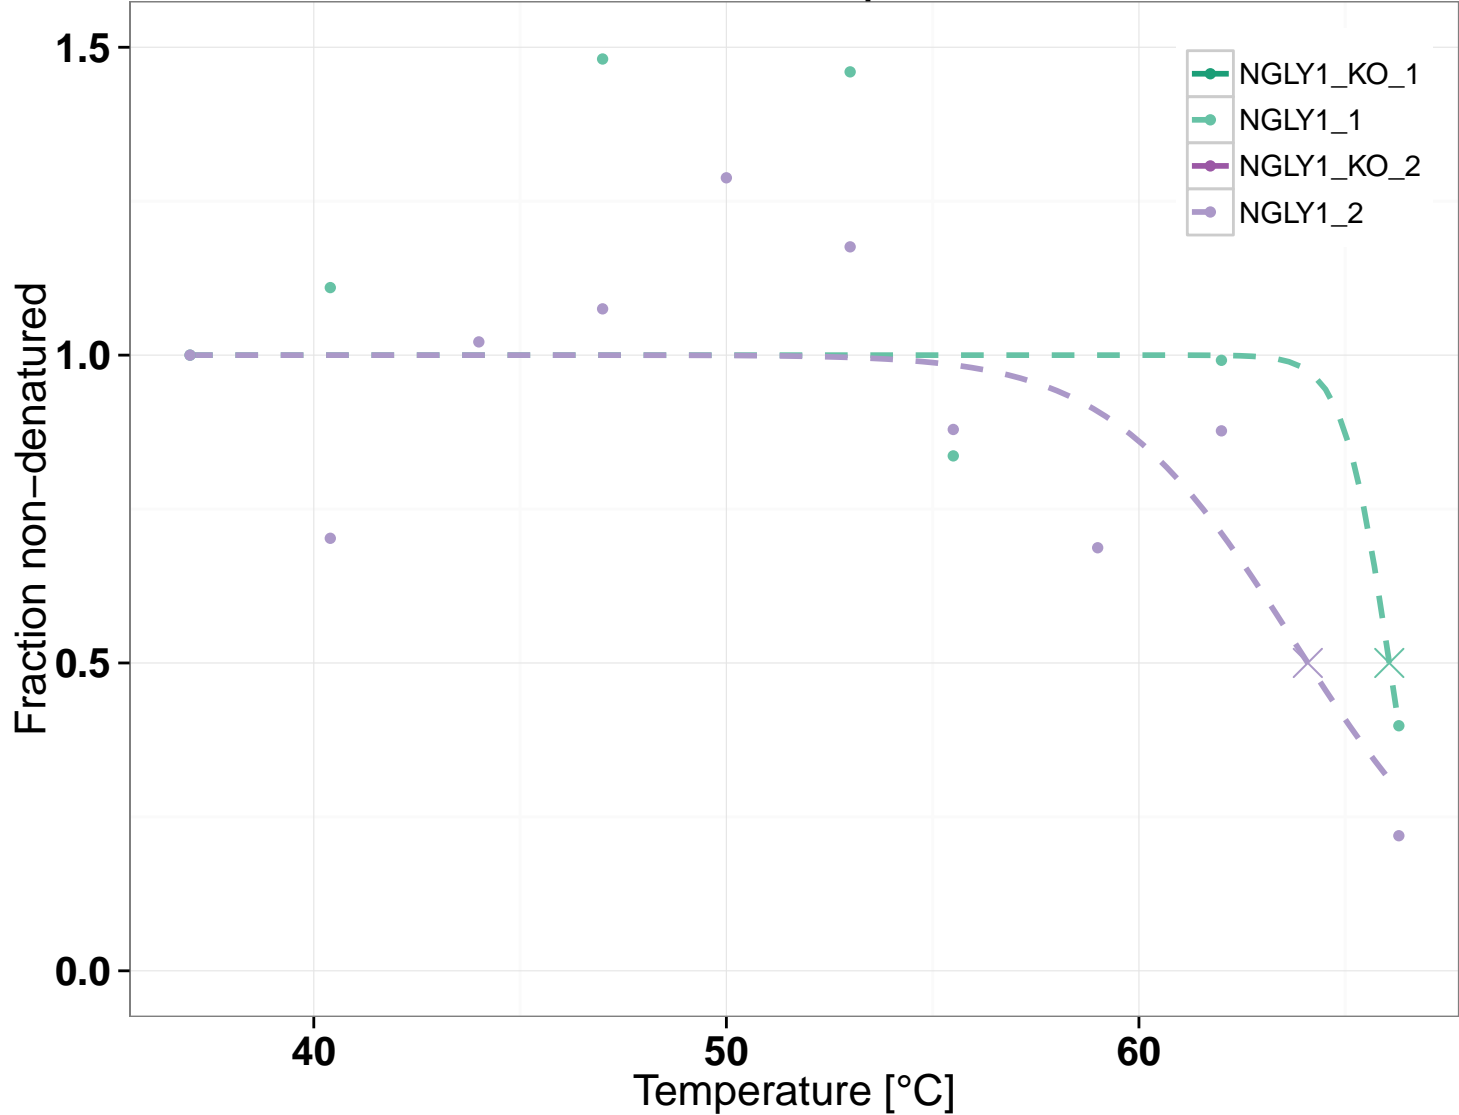

|            | meltPoint | slope | plateau | R2    |
|------------|-----------|-------|---------|-------|
| NGLY1_KO_1 | -         | -     | -       | -     |
| NGLY1_1    | 66.07     | -0.45 | 0       | -0.18 |
| NGLY1_KO_2 | -         | -     | -       | -     |
| NGLY1_2    | 64.09     | -0.1  | 0       | 0.63  |

Supplement: Supplementary file 8104 [file 1]

IPI00294469.5|COQ4

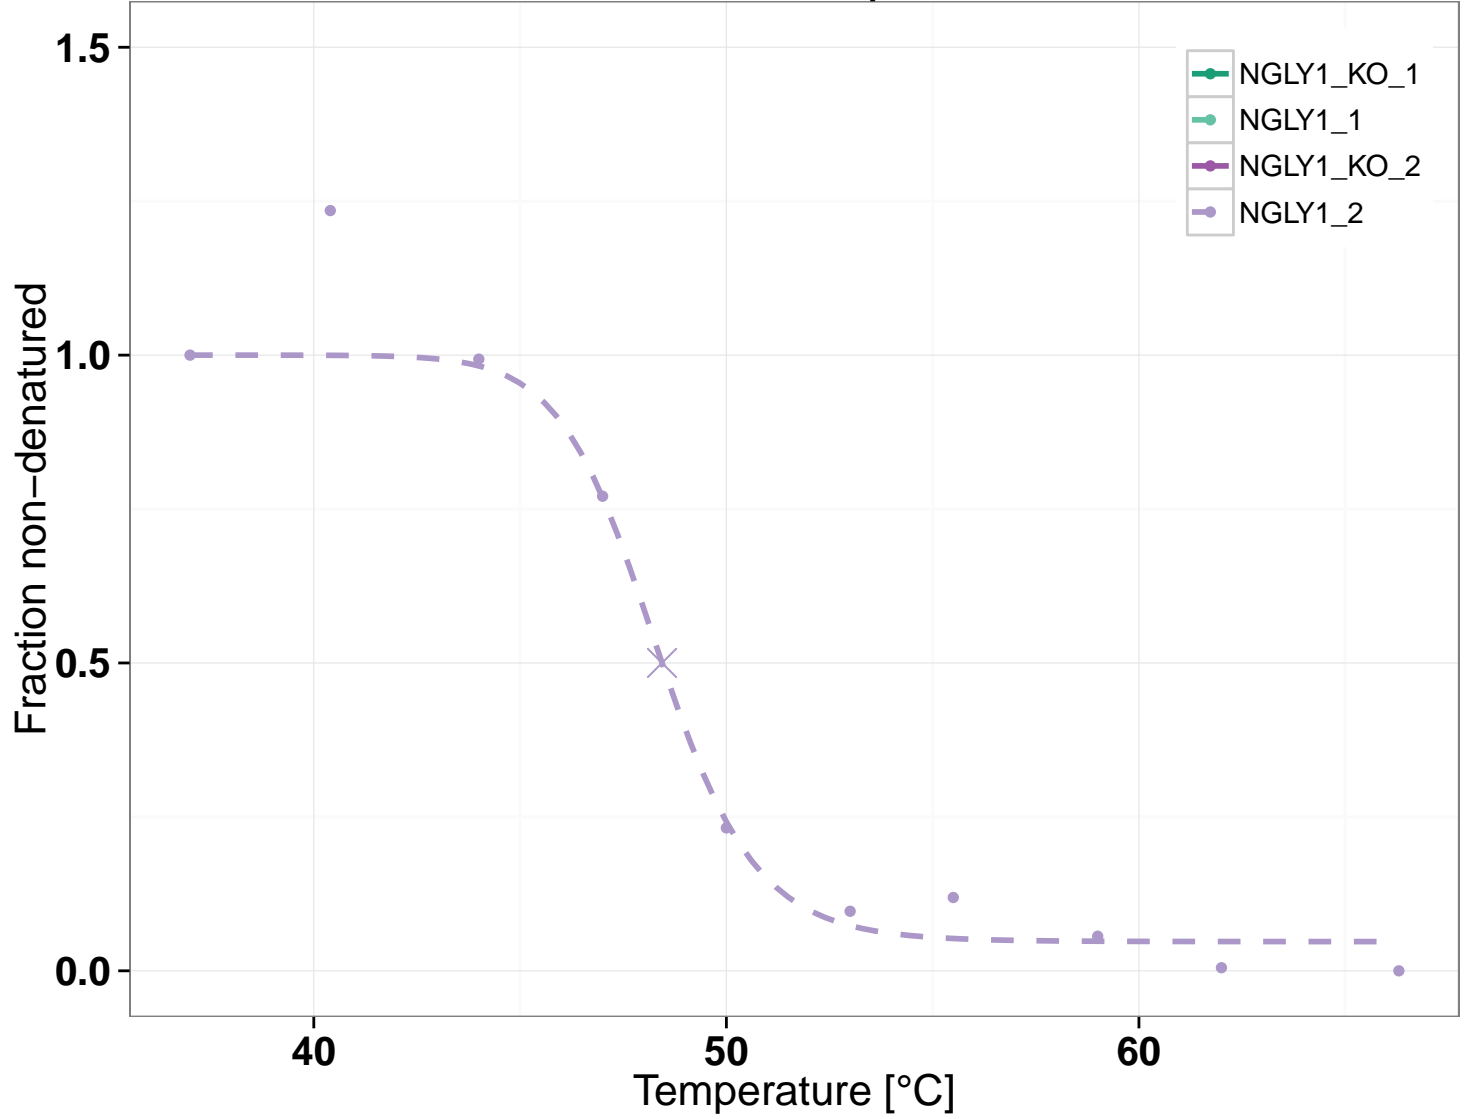

|            | meltPoint | slope | plateau | R2   |
|------------|-----------|-------|---------|------|
| NGLY1_KO_1 | -         | -     | -       | -    |
| NGLY1_1    | -         | -     | -       | -    |
| NGLY1_KO_2 | -         | -     | -       | -    |
| NGLY1_2    | 48.44     | -0.2  | 0.05    | 0.97 |

Supplement: Supplementary file 8105 [file 1]

IPI00185146.5|IPO9

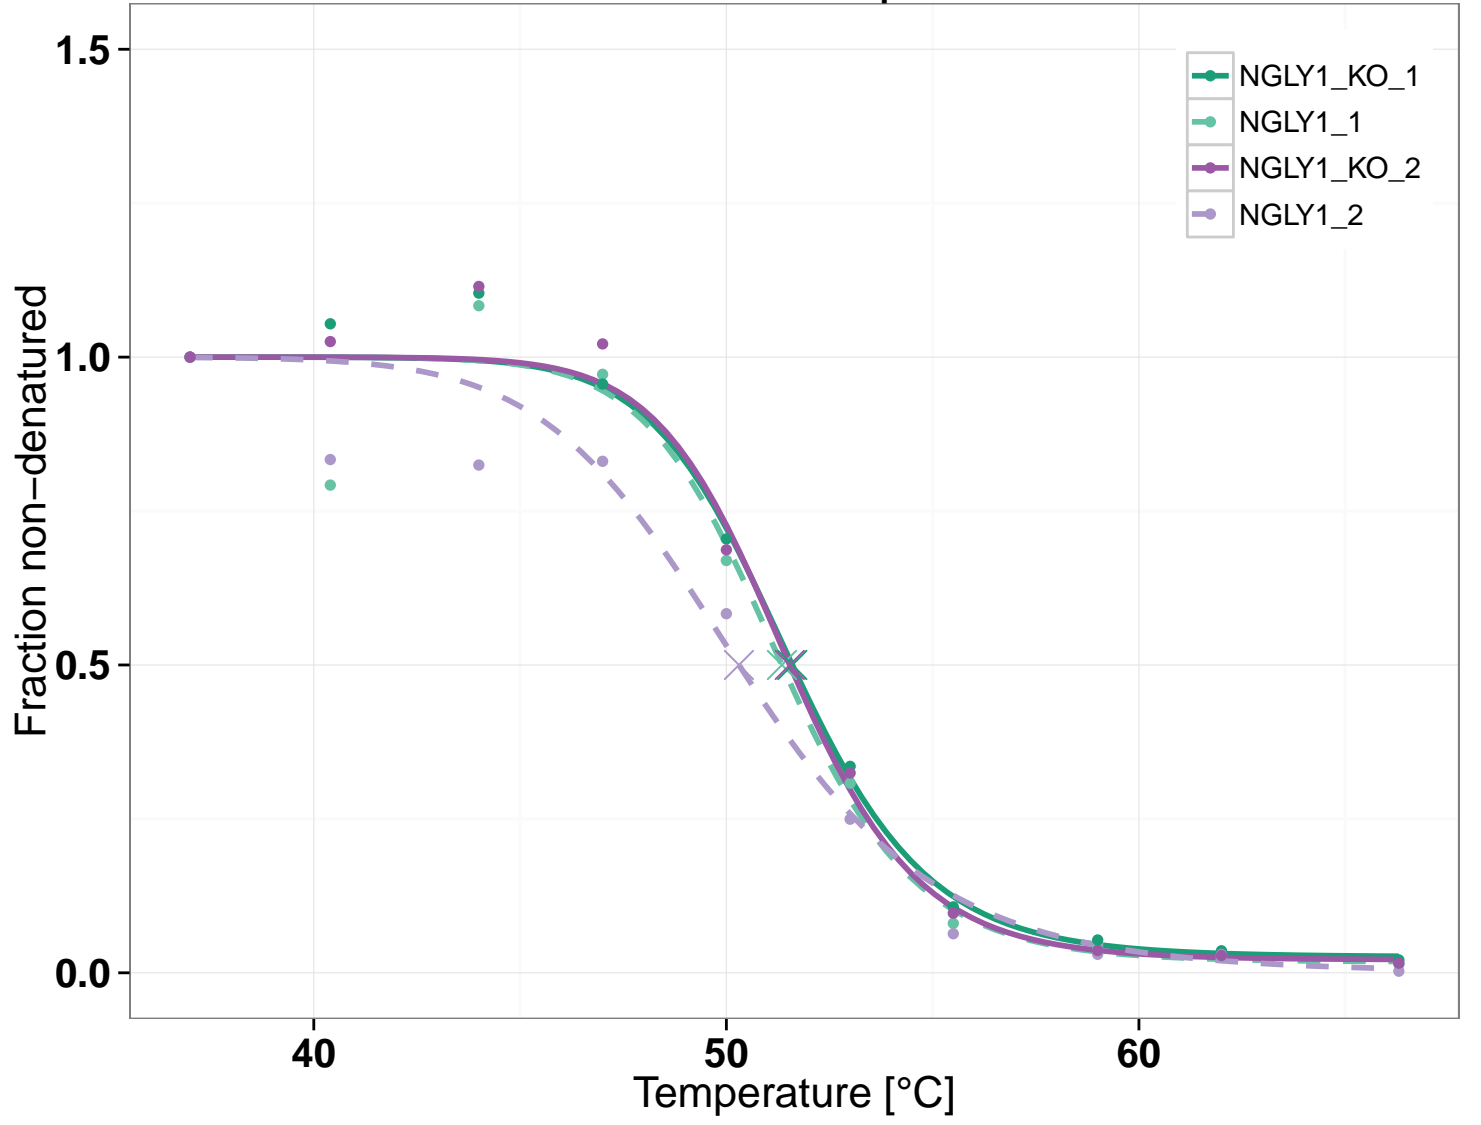

|            | meltPoint | slope | plateau | R2   |
|------------|-----------|-------|---------|------|
| NGLY1_KO_1 | 51.6      | -0.14 | 0.03    | 0.99 |
| NGLY1_1    | 51.35     | -0.15 | 0.02    | 0.97 |
| NGLY1_KO_2 | 51.54     | -0.15 | 0.02    | 0.99 |
| NGLY1_2    | 50.31     | -0.1  | 0       | 0.97 |

Supplement: Supplementary file 8106 [file 1]

IPI00031678.2|CCDC77

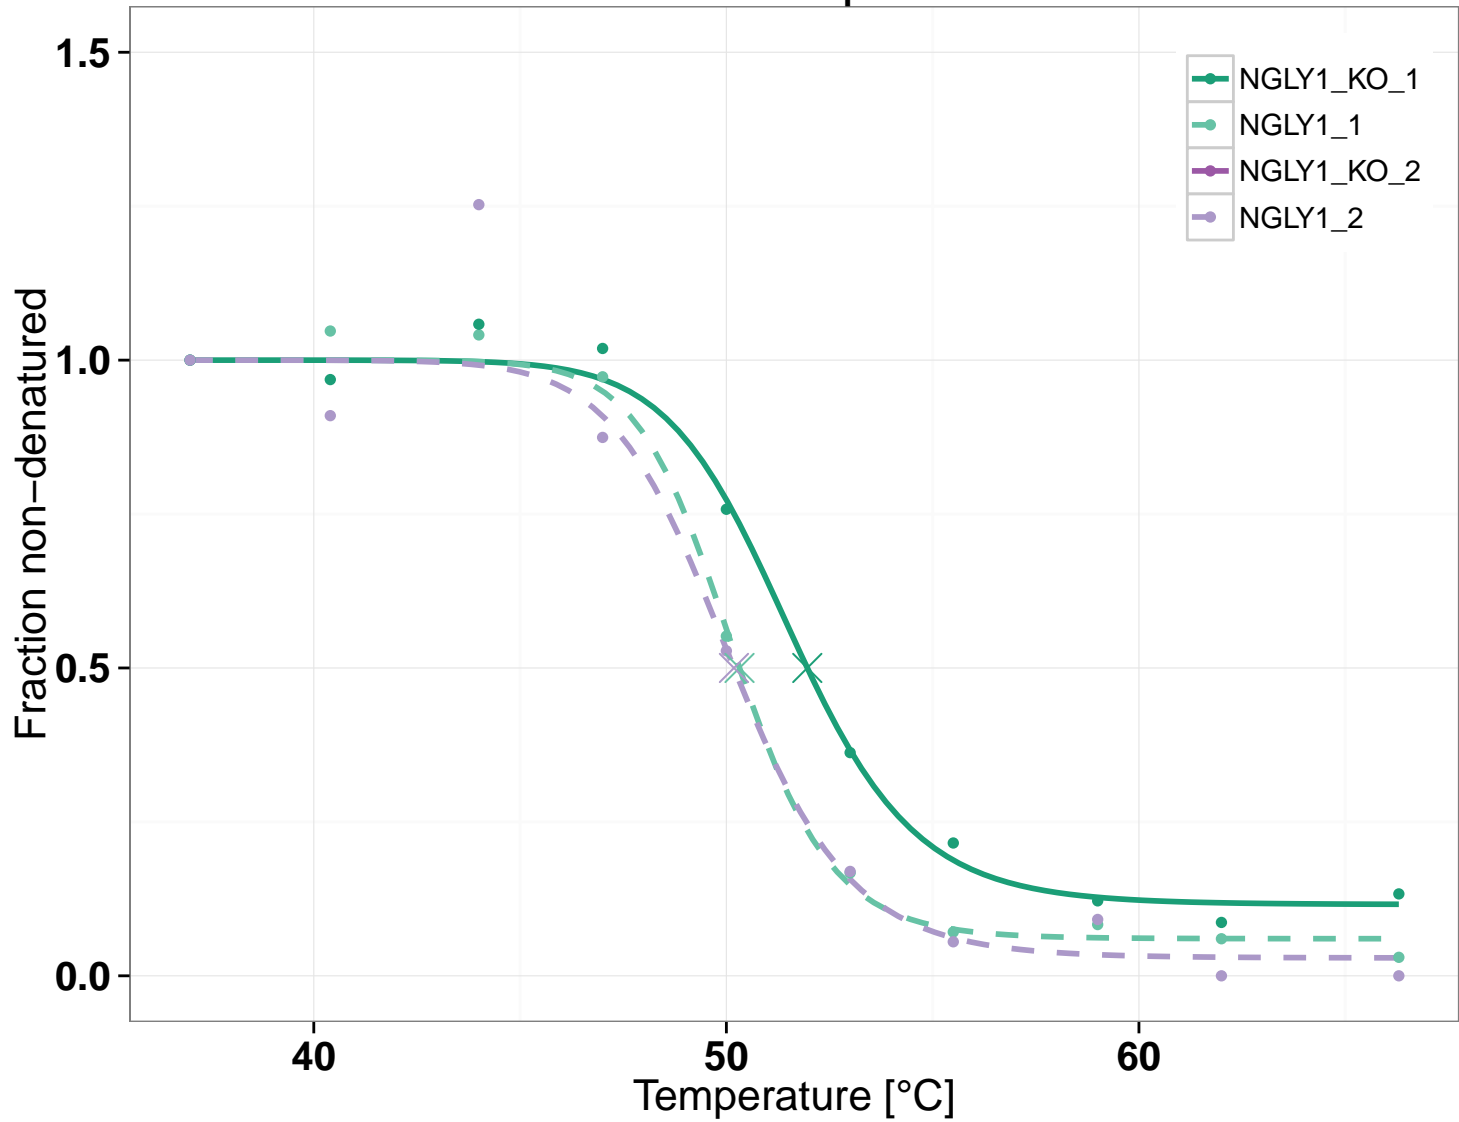

|            | meltPoint | slope | plateau | R2   |
|------------|-----------|-------|---------|------|
| NGLY1_KO_1 | 51.96     | -0.15 | 0.12    | 0.99 |
| NGLY1_1    | 50.32     | -0.2  | 0.06    | 1    |
| NGLY1_KO_2 | -         | -     | -       | -    |
| NGLY1_2    | 50.18     | -0.17 | 0.03    | 0.96 |

Supplement: Supplementary file 8107 [file 1]

# IPI00012512.1|RRAS2

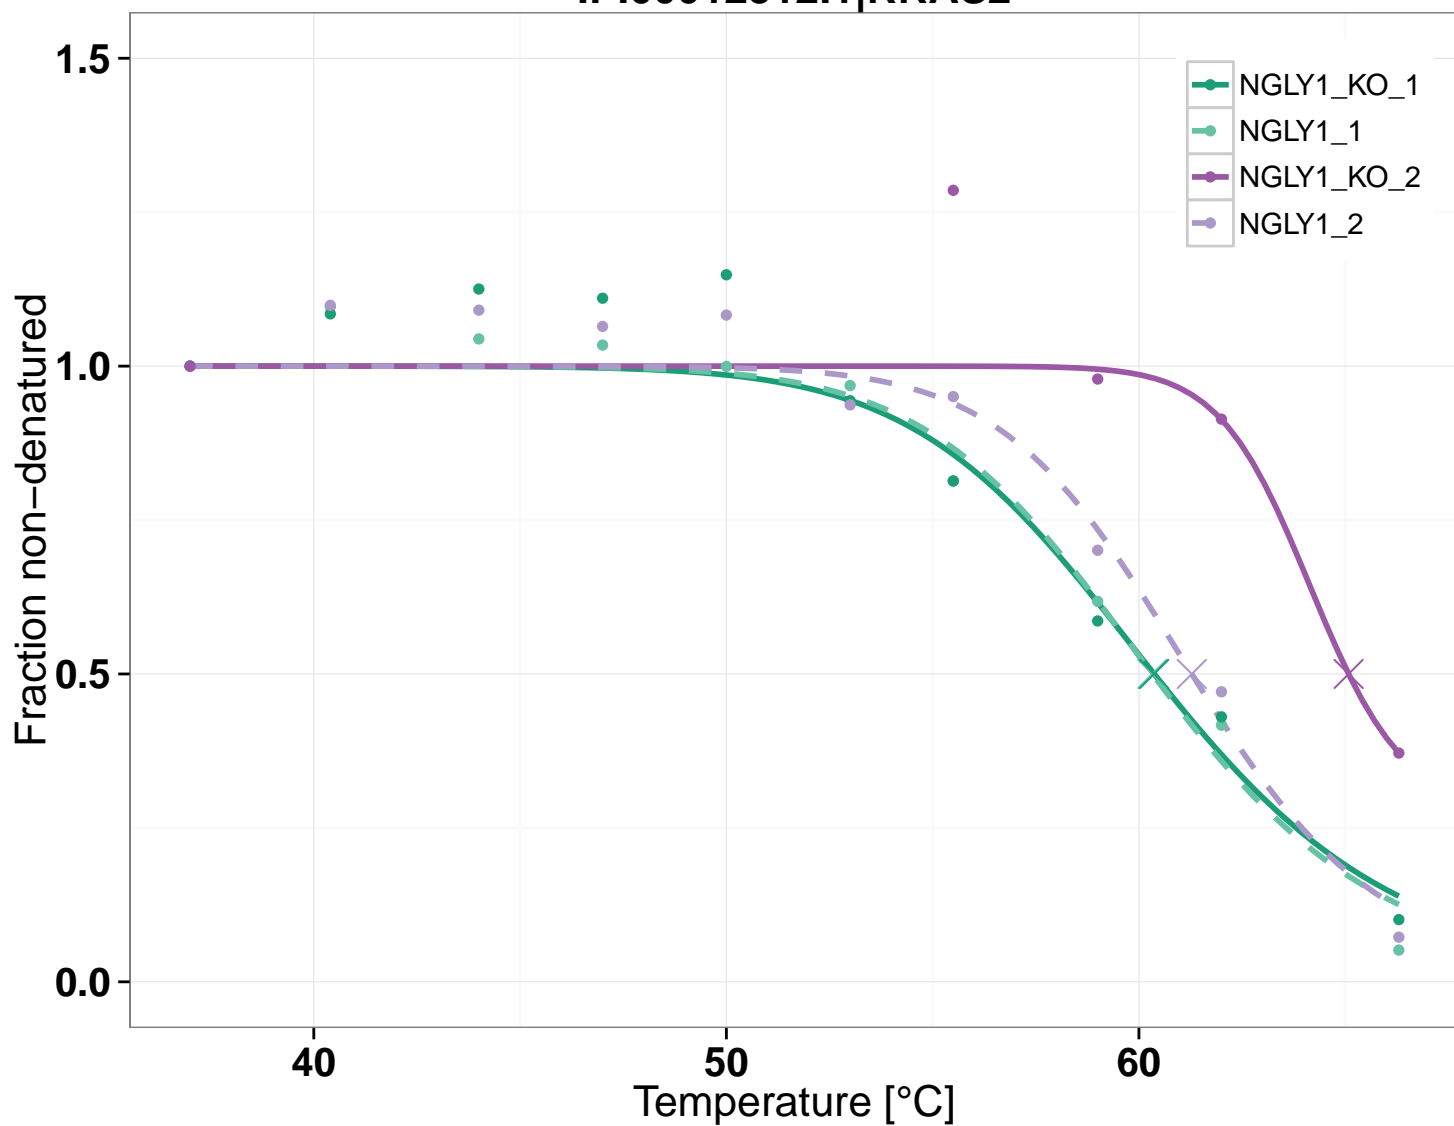

|            | meltPoint | slope  | plateau | R2    |
|------------|-----------|--------|---------|-------|
| NGLY1_KO_1 | 60.37     | -0.085 | 0       | 0.94  |
| NGLY1_1    | 60.33     | -0.09  | 0       | 0.98  |
| NGLY1_KO_2 | 65.08     | -0.16  | 0.27    | -0.33 |
| NGLY1_2    | 61.28     | -0.11  | 0       | 0.96  |

Supplement: Supplementary file 8108 [file 1]

IPI00335101.1|RPS6KA5

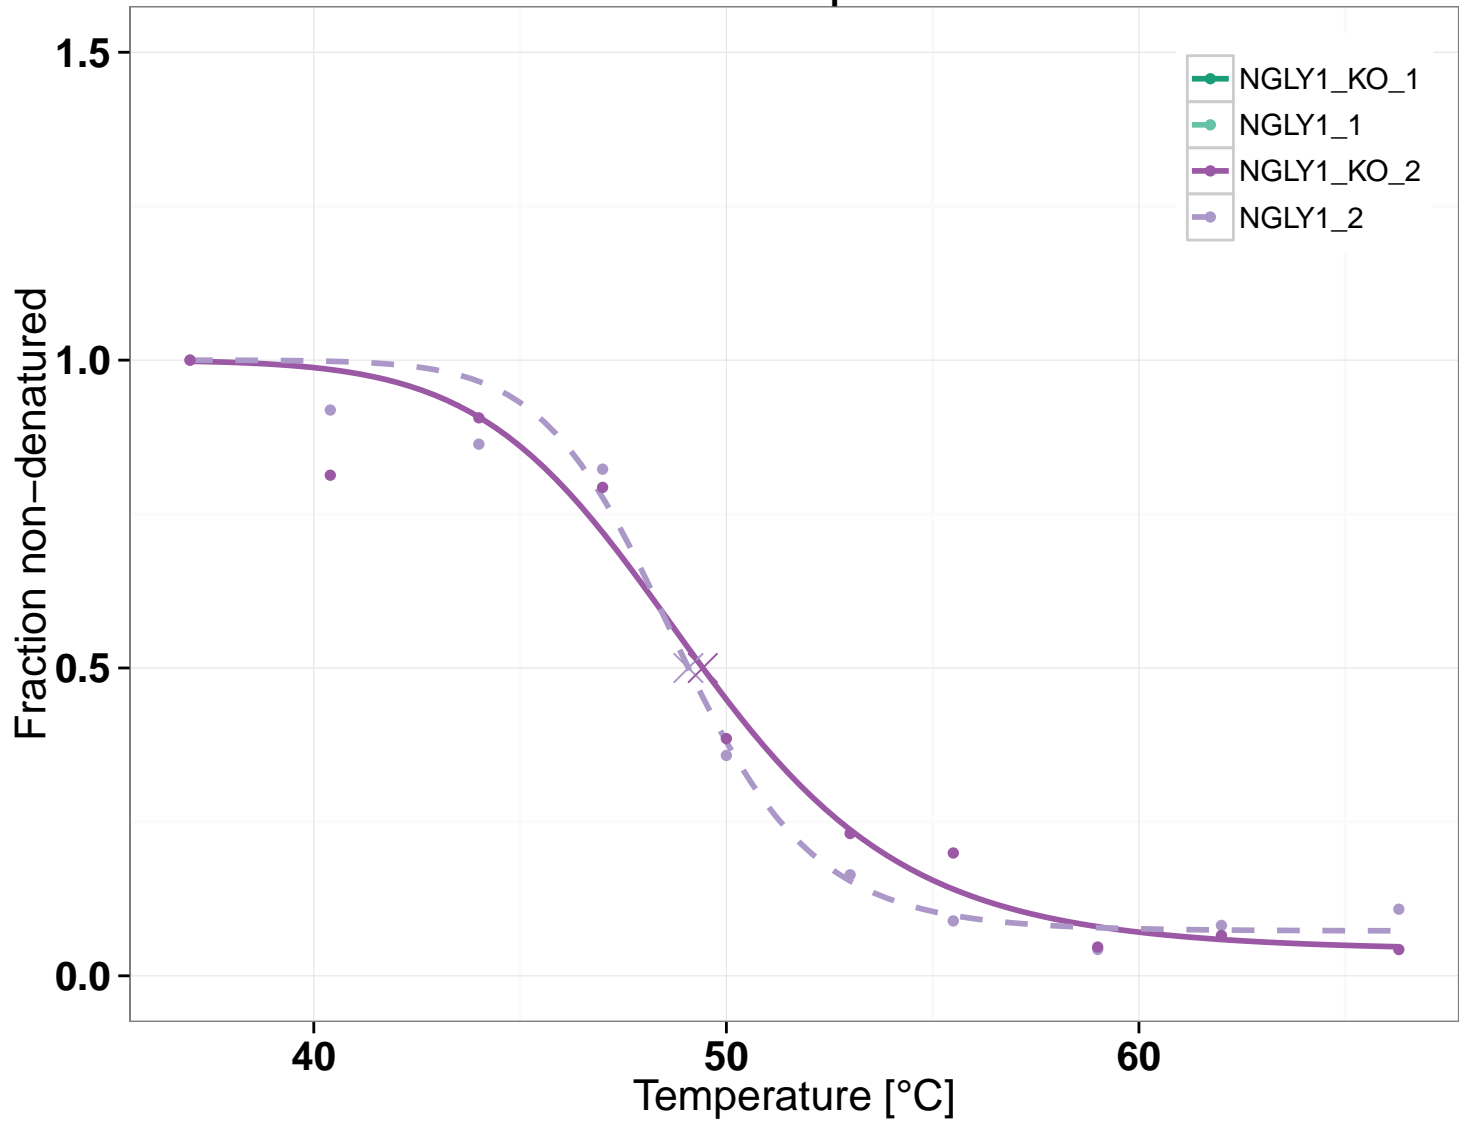

|            | meltPoint | slope  | plateau | R2   |
|------------|-----------|--------|---------|------|
| NGLY1_KO_1 | —         | —      | —       | —    |
| NGLY1_1    | —         | —      | —       | —    |
| NGLY1_KO_2 | 49.43     | -0.093 | 0.04    | 0.97 |
| NGLY1_2    | 49.08     | -0.14  | 0.07    | 0.99 |

Supplement: Supplementary file 8109 [file 1]

# IPI00790653.1|TRAM1

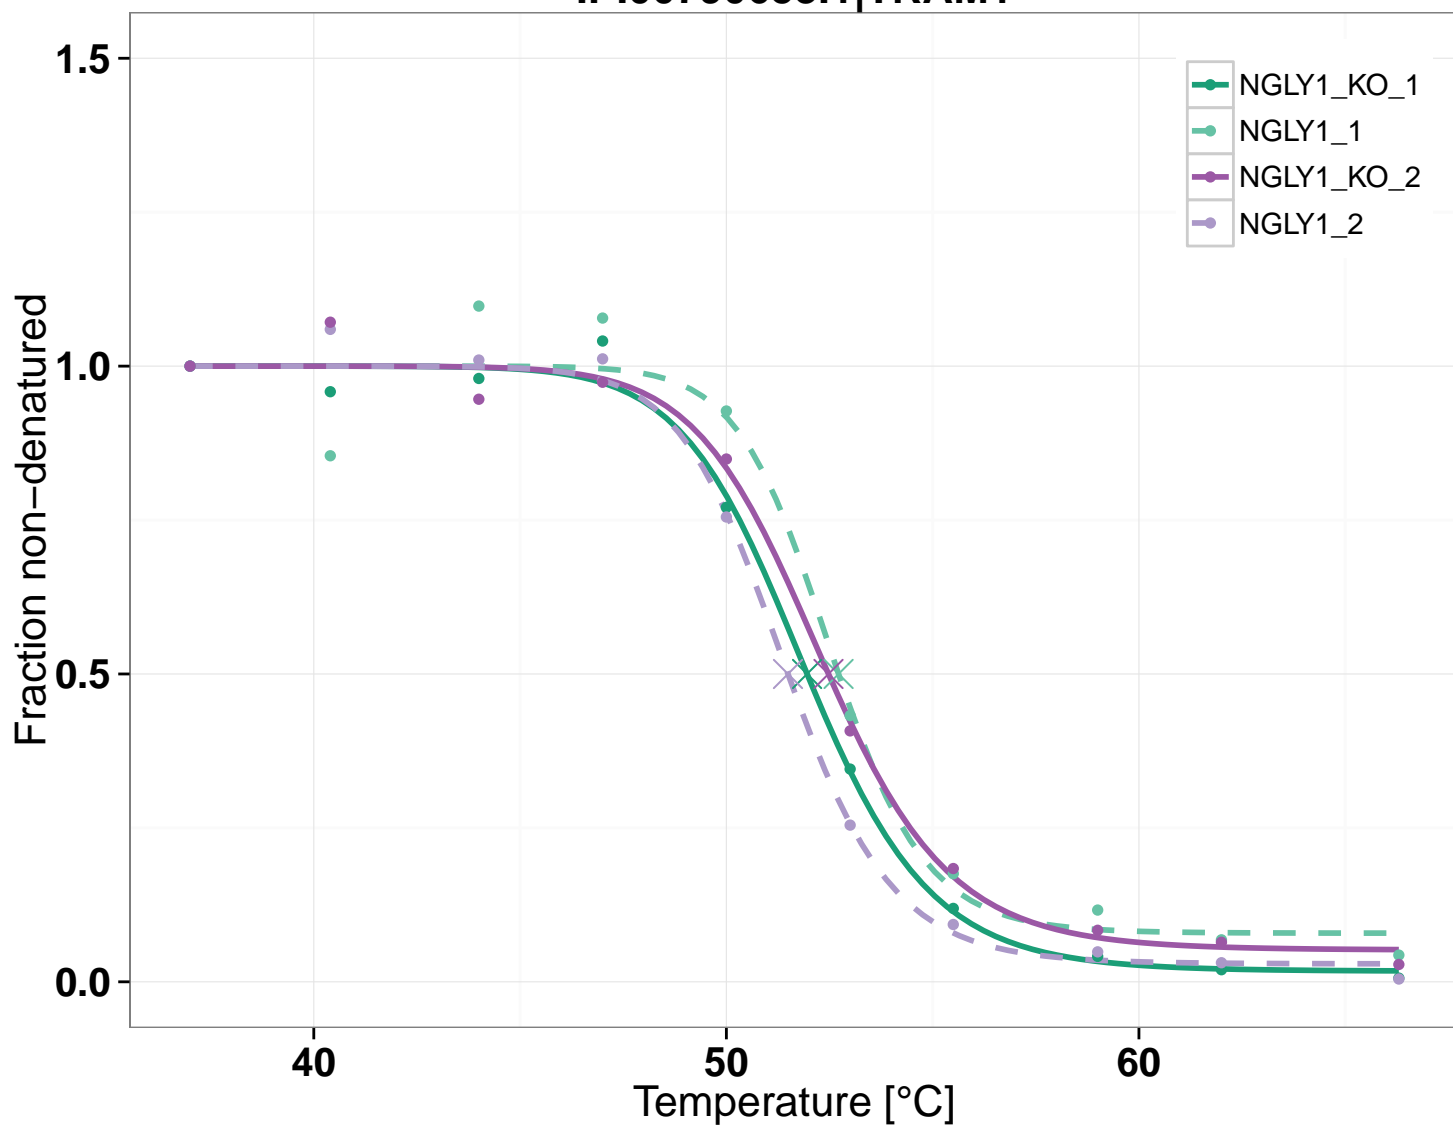

|            | meltPoint | slope | plateau | R2   |
|------------|-----------|-------|---------|------|
| NGLY1_KO_1 | 51.96     | -0.16 | 0.02    | 1    |
| NGLY1_1    | 52.72     | -0.2  | 0.08    | 0.98 |
| NGLY1_KO_2 | 52.48     | -0.15 | 0.05    | 0.99 |
| NGLY1_2    | 51.49     | -0.19 | 0.03    | 1    |

Supplement: Supplementary file 8110 [file 1]

# IPI00375144.5|ARS2

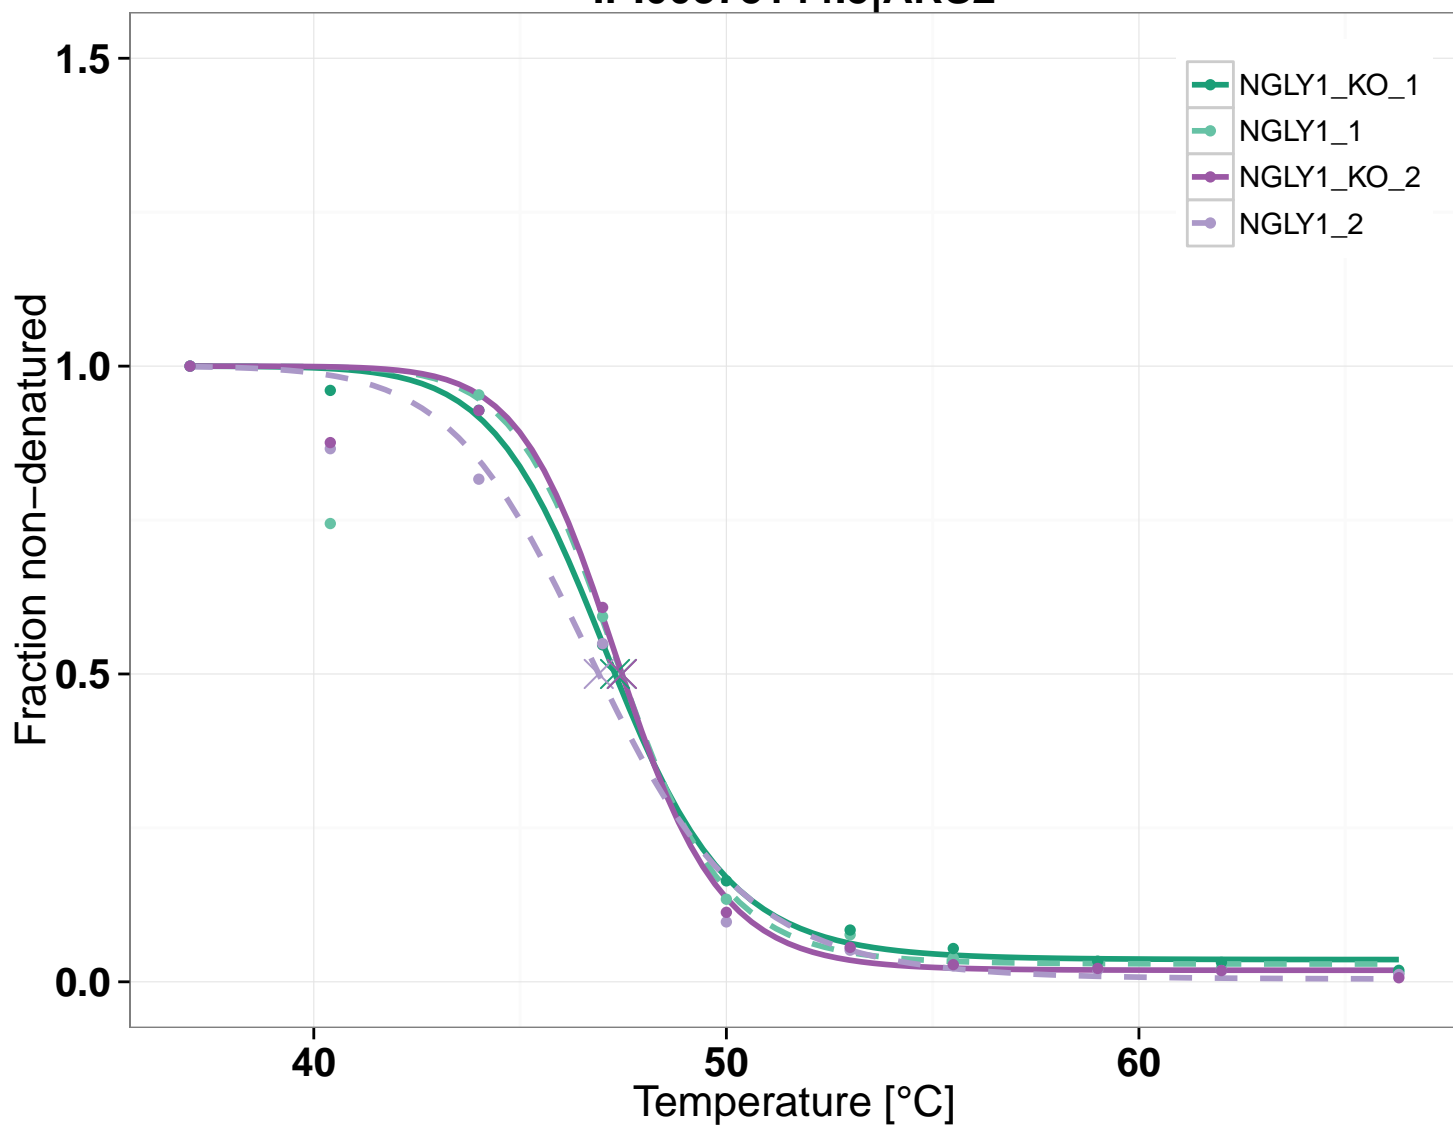

|            | meltPoint | slope | plateau | R2   |
|------------|-----------|-------|---------|------|
| NGLY1_KO_1 | 47.3      | -0.17 | 0.04    | 1    |
| NGLY1_1    | 47.46     | -0.19 | 0.03    | 0.96 |
| NGLY1_KO_2 | 47.47     | -0.2  | 0.02    | 0.99 |
| NGLY1_2    | 46.91     | -0.14 | 0       | 0.98 |

Supplement: Supplementary file 8111 [file 1]

# IPI00030634.2|GGT7

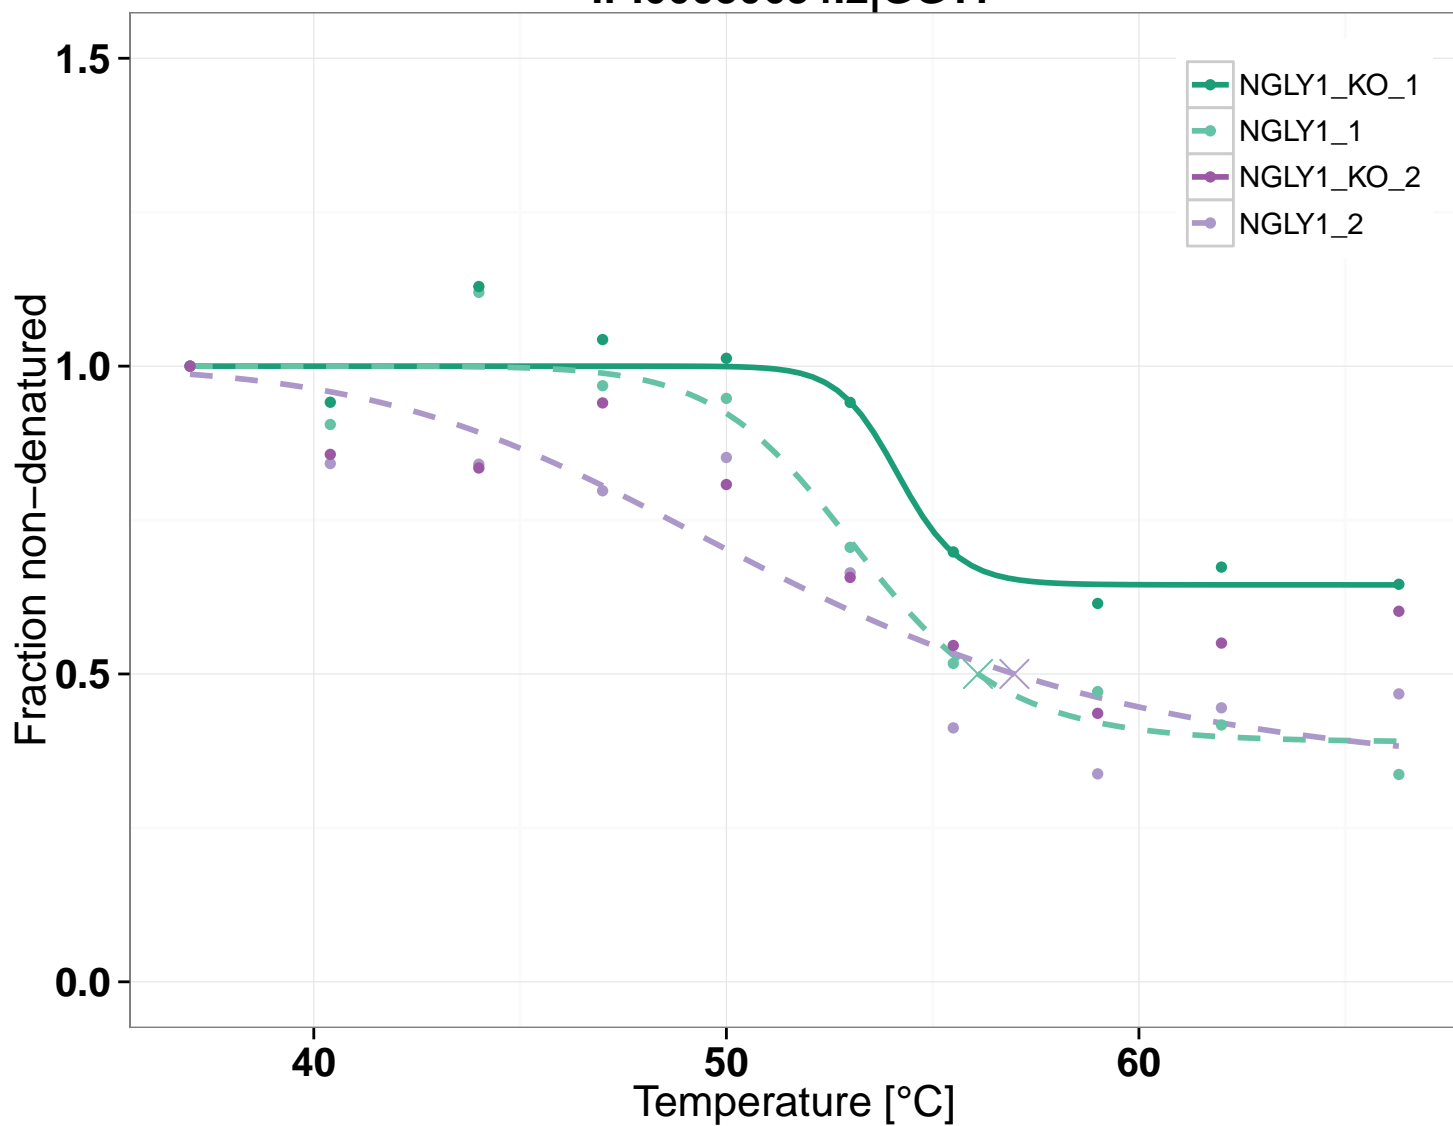

|            | meltPoint | slope  | plateau | R2   |
|------------|-----------|--------|---------|------|
| NGLY1_KO_1 | –         | –0.12  | 0.64    | 0.93 |
| NGLY1_1    | 56.1      | –0.086 | 0.39    | 0.96 |
| NGLY1_KO_2 | –         | –      | –       | –    |
| NGLY1_2    | 56.98     | –0.035 | 0.32    | 0.83 |

Supplement: Supplementary file 8112 [file 1]

IPI00015891.1|PFDN4

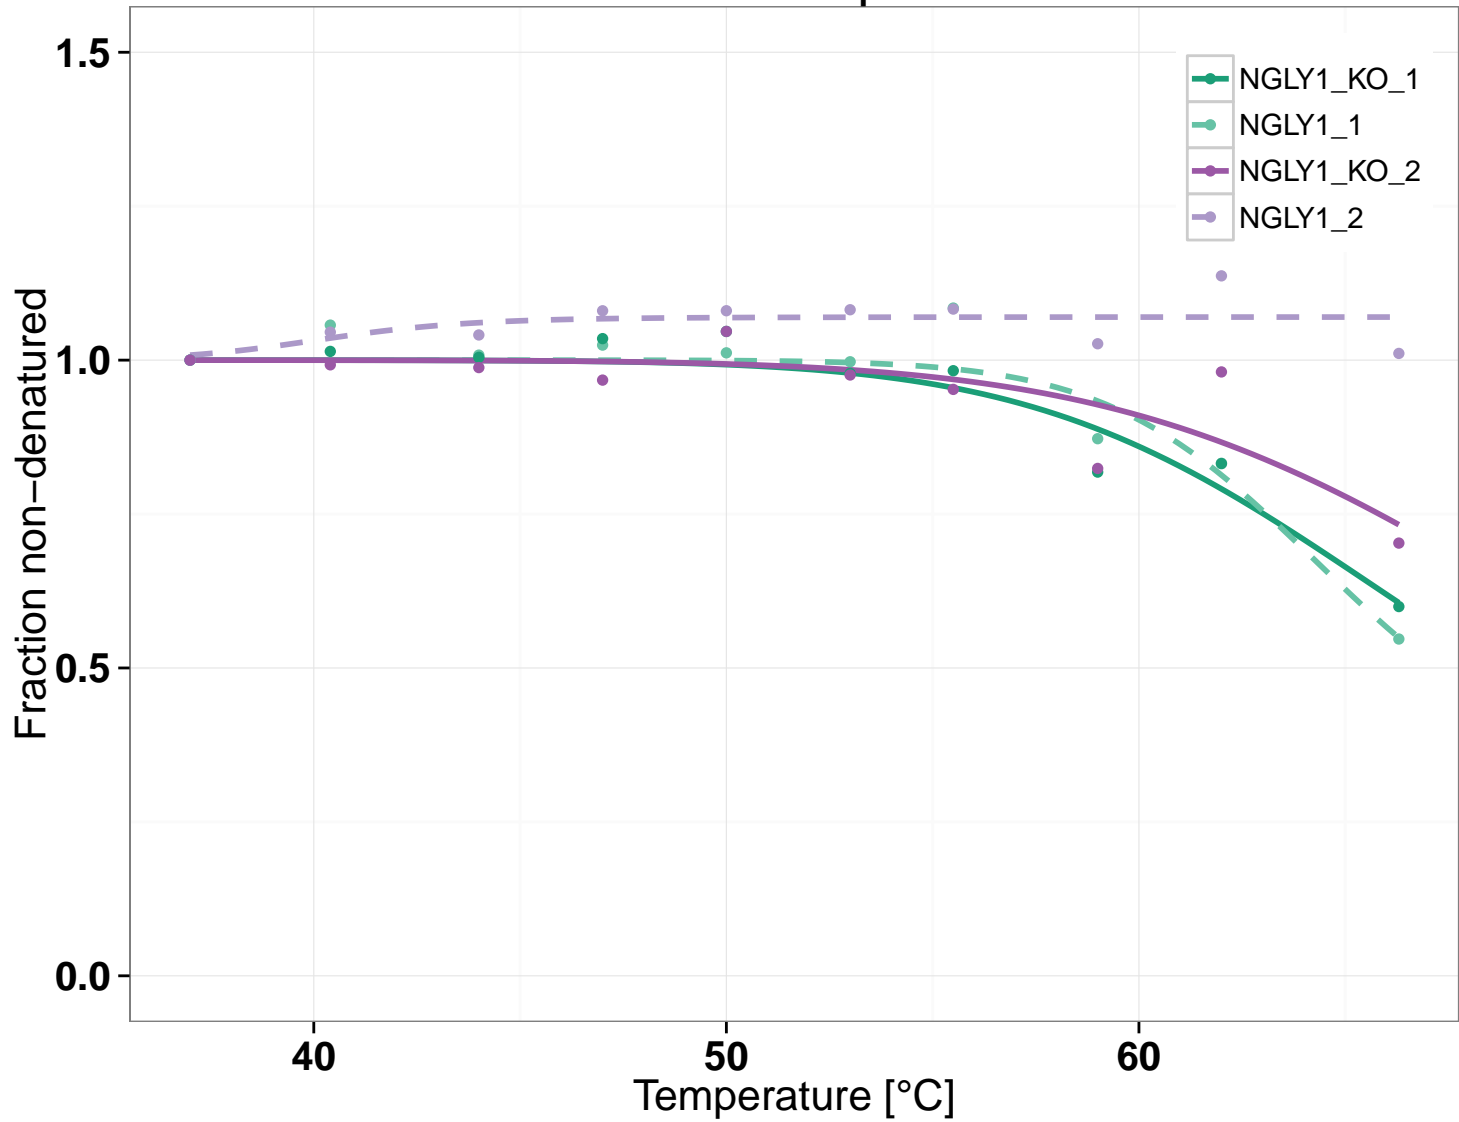

|            | meltPoint | slope  | plateau | R2   |
|------------|-----------|--------|---------|------|
| NGLY1_KO_1 | -         | -0.045 | 0.16    | 0.93 |
| NGLY1_1    | -         | -0.065 | 0.29    | 0.92 |
| NGLY1_KO_2 | -         | -      | 0       | 0.69 |
| NGLY1_2    | -         | 0.0099 | 1.07    | 0.29 |

Supplement: Supplementary file 8113 [file 1]

IPI00470422.1|ANKMY2

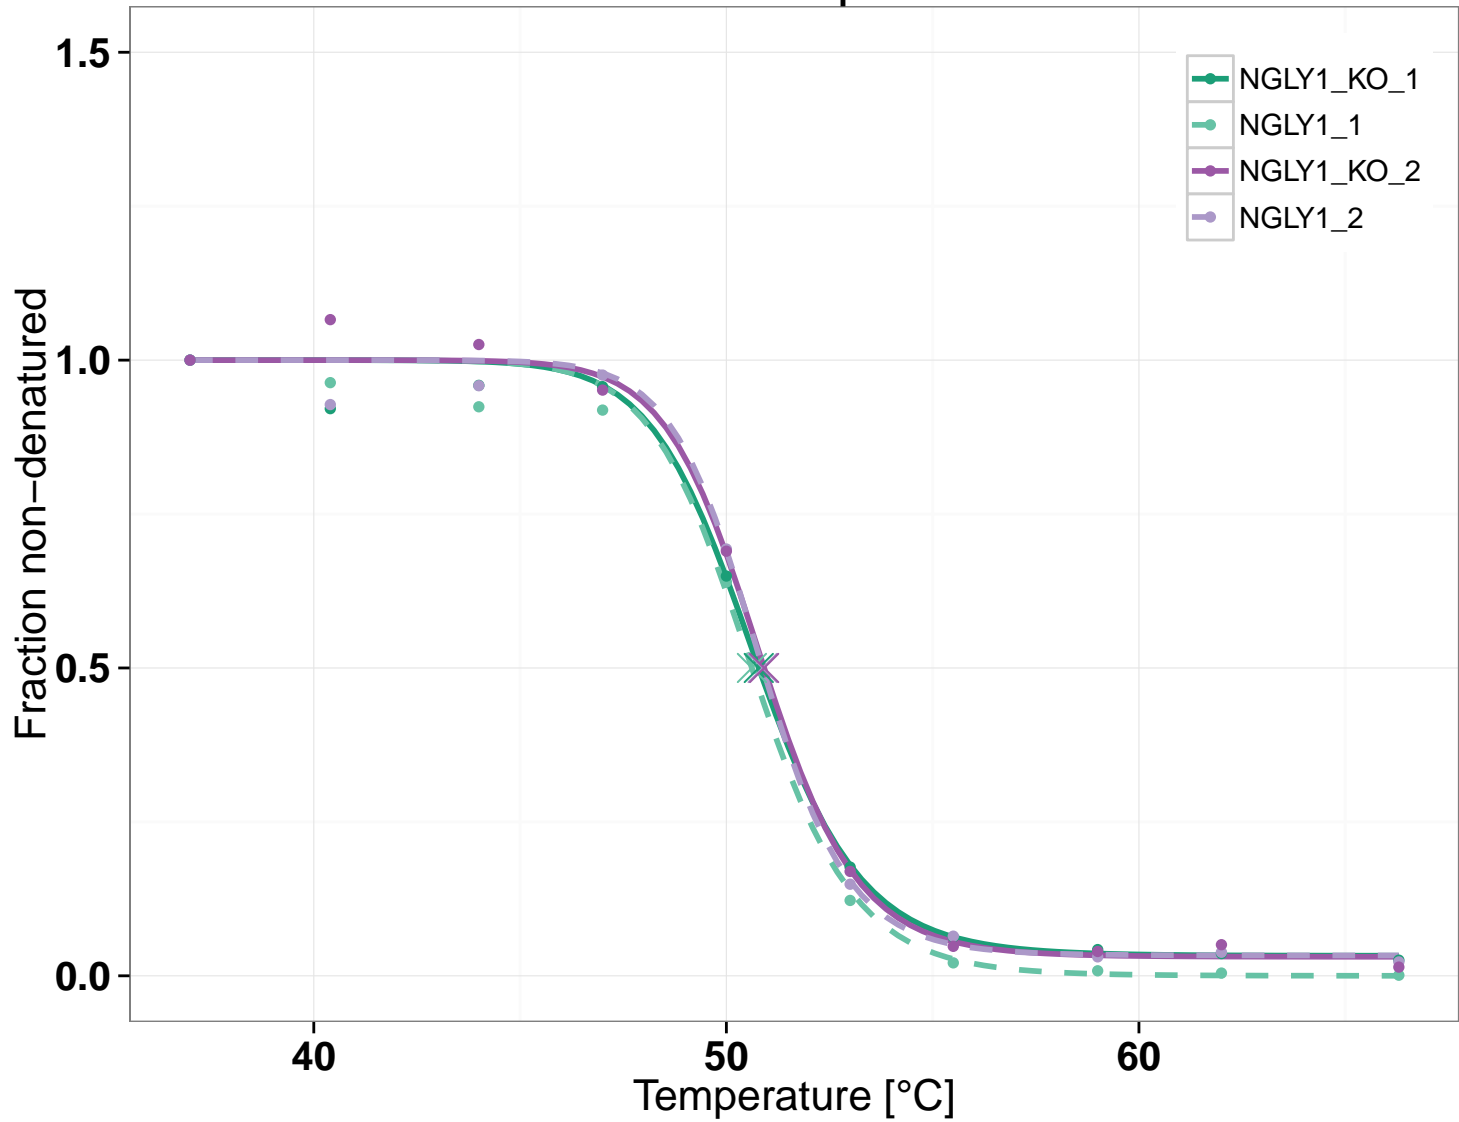

|            | meltPoint | slope | plateau | R2 |
|------------|-----------|-------|---------|----|
| NGLY1_KO_1 | 50.79     | -0.19 | 0.03    | 1  |
| NGLY1_1    | 50.62     | -0.2  | 0       | 1  |
| NGLY1_KO_2 | 50.92     | -0.21 | 0.03    | 1  |
| NGLY1_2    | 50.88     | -0.22 | 0.03    | 1  |

Supplement: Supplementary file 8114 [file 1]

# IPI00218433.5|CYBA

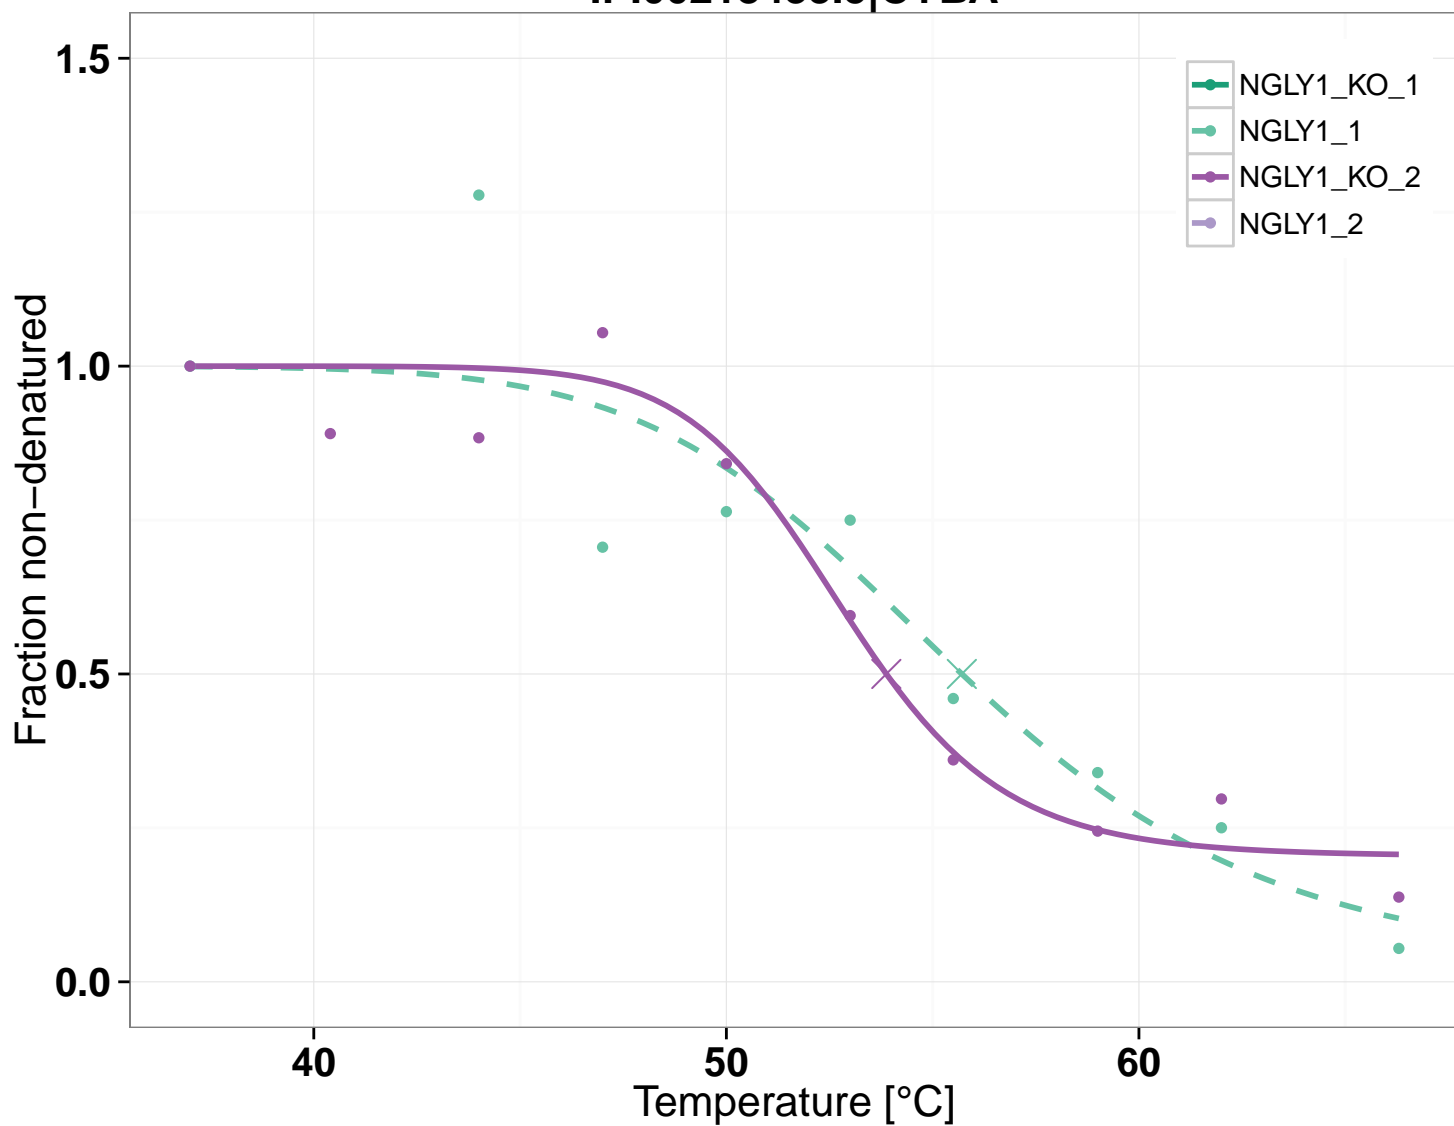

|            | meltPoint | slope  | plateau | R2   |
|------------|-----------|--------|---------|------|
| NGLY1_KO_1 | –         | –      | –       | –    |
| NGLY1_1    | 55.71     | –0.065 | 0.01    | 0.6  |
| NGLY1_KO_2 | 53.88     | –0.1   | 0.2     | 0.96 |
| NGLY1_2    | –         | –      | –       | –    |

Supplement: Supplementary file 8115 [file 1]

# IPI00011511.1|CECR5

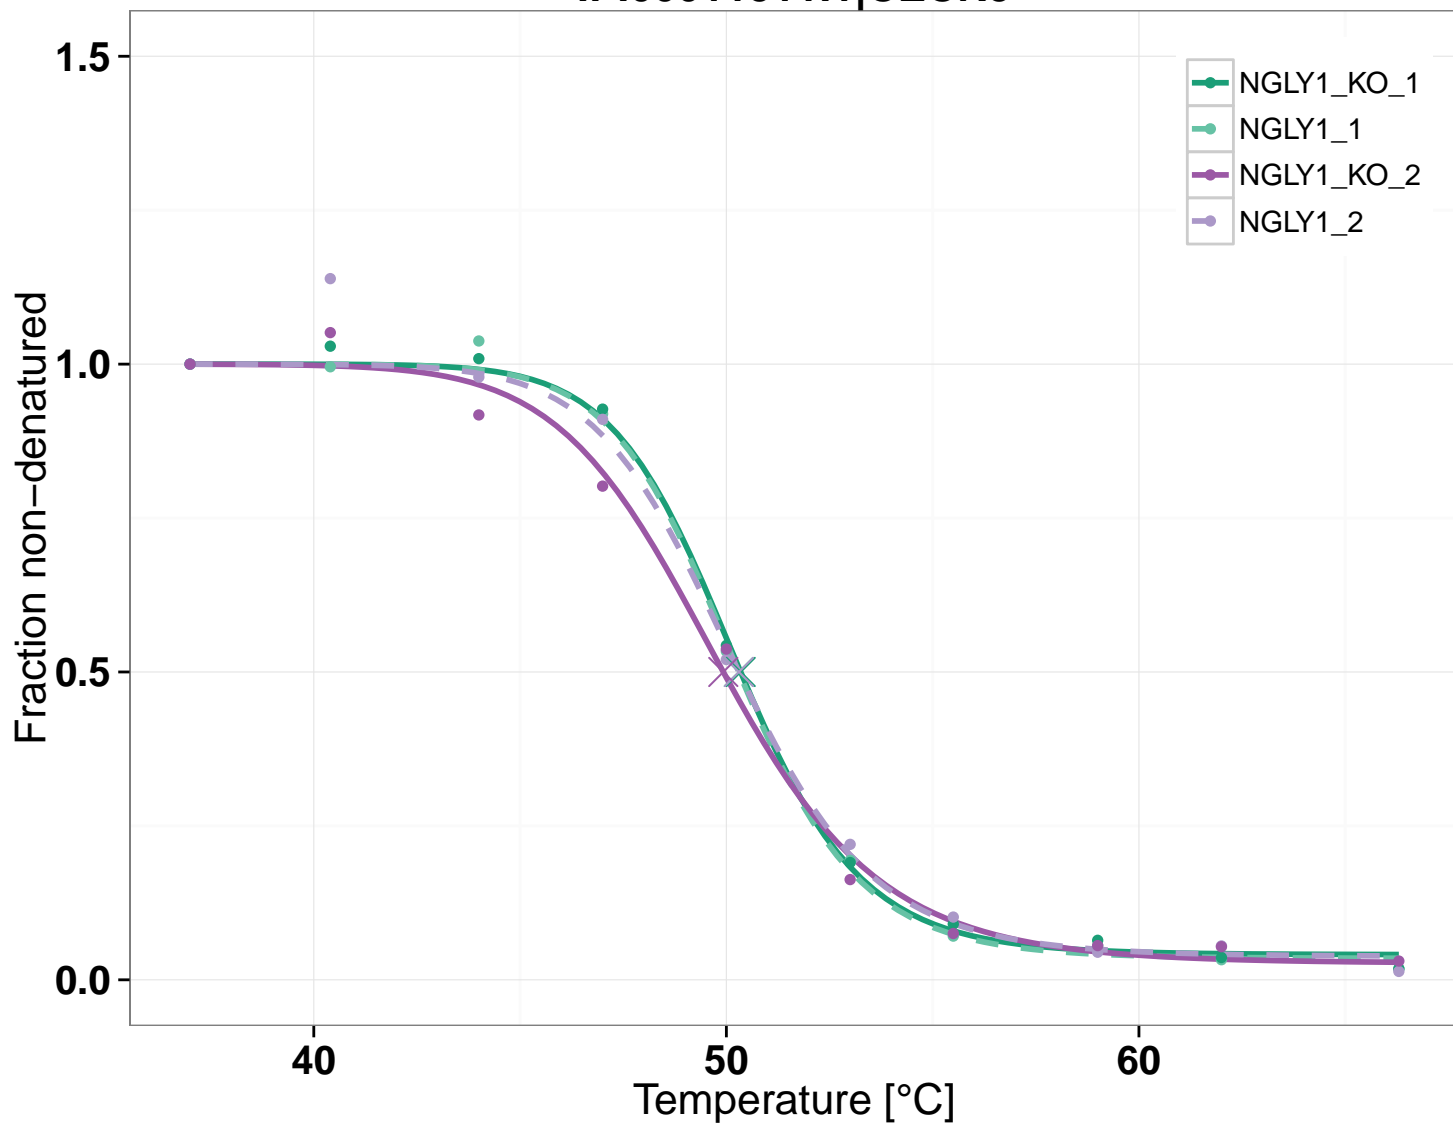

|            | meltPoint | slope | plateau | R2   |
|------------|-----------|-------|---------|------|
| NGLY1_KO_1 | 50.35     | -0.16 | 0.04    | 1    |
| NGLY1_1    | 50.3      | -0.16 | 0.03    | 1    |
| NGLY1_KO_2 | 49.93     | -0.12 | 0.03    | 0.99 |
| NGLY1_2    | 50.3      | -0.14 | 0.04    | 0.99 |

Supplement: Supplementary file 8116 [file 1]

IPI00005036.1|RBM5

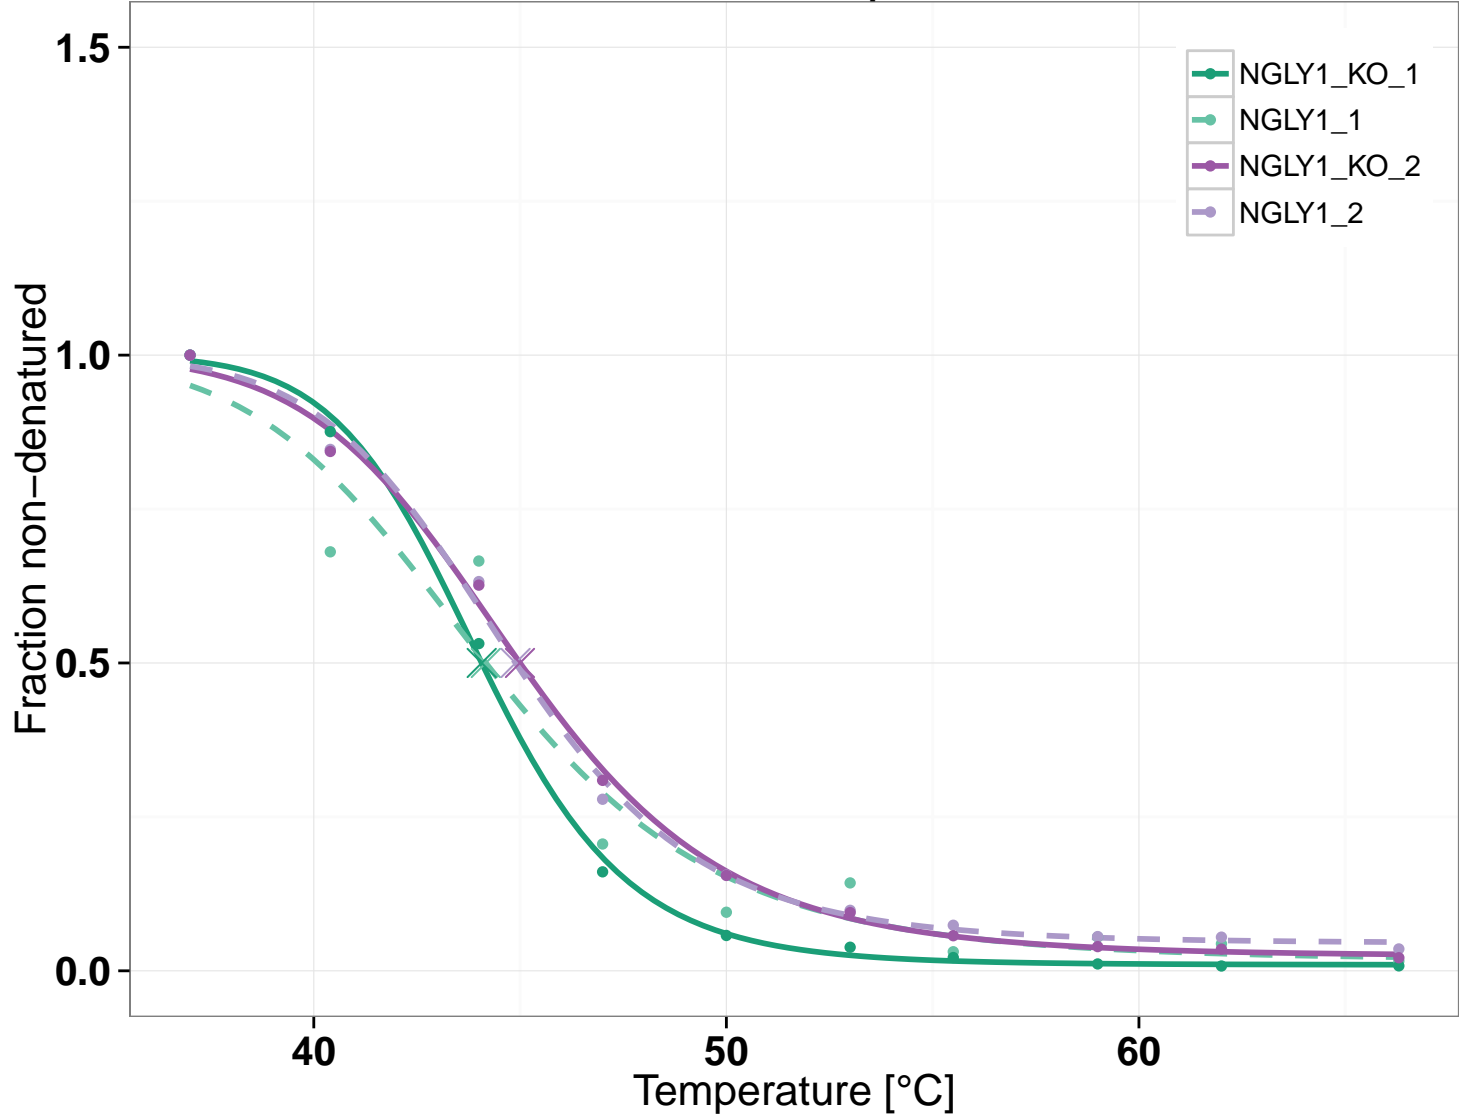

|            | meltPoint | slope  | plateau | R2   |
|------------|-----------|--------|---------|------|
| NGLY1_KO_1 | 44.07     | -0.14  | 0.01    | 1    |
| NGLY1_1    | 44.17     | -0.087 | 0.02    | 0.95 |
| NGLY1_KO_2 | 45        | -0.097 | 0.02    | 1    |
| NGLY1_2    | 44.89     | -0.1   | 0.04    | 1    |

Supplement: Supplementary file 8117 [file 1]

IPI00012442.1|G3BP1

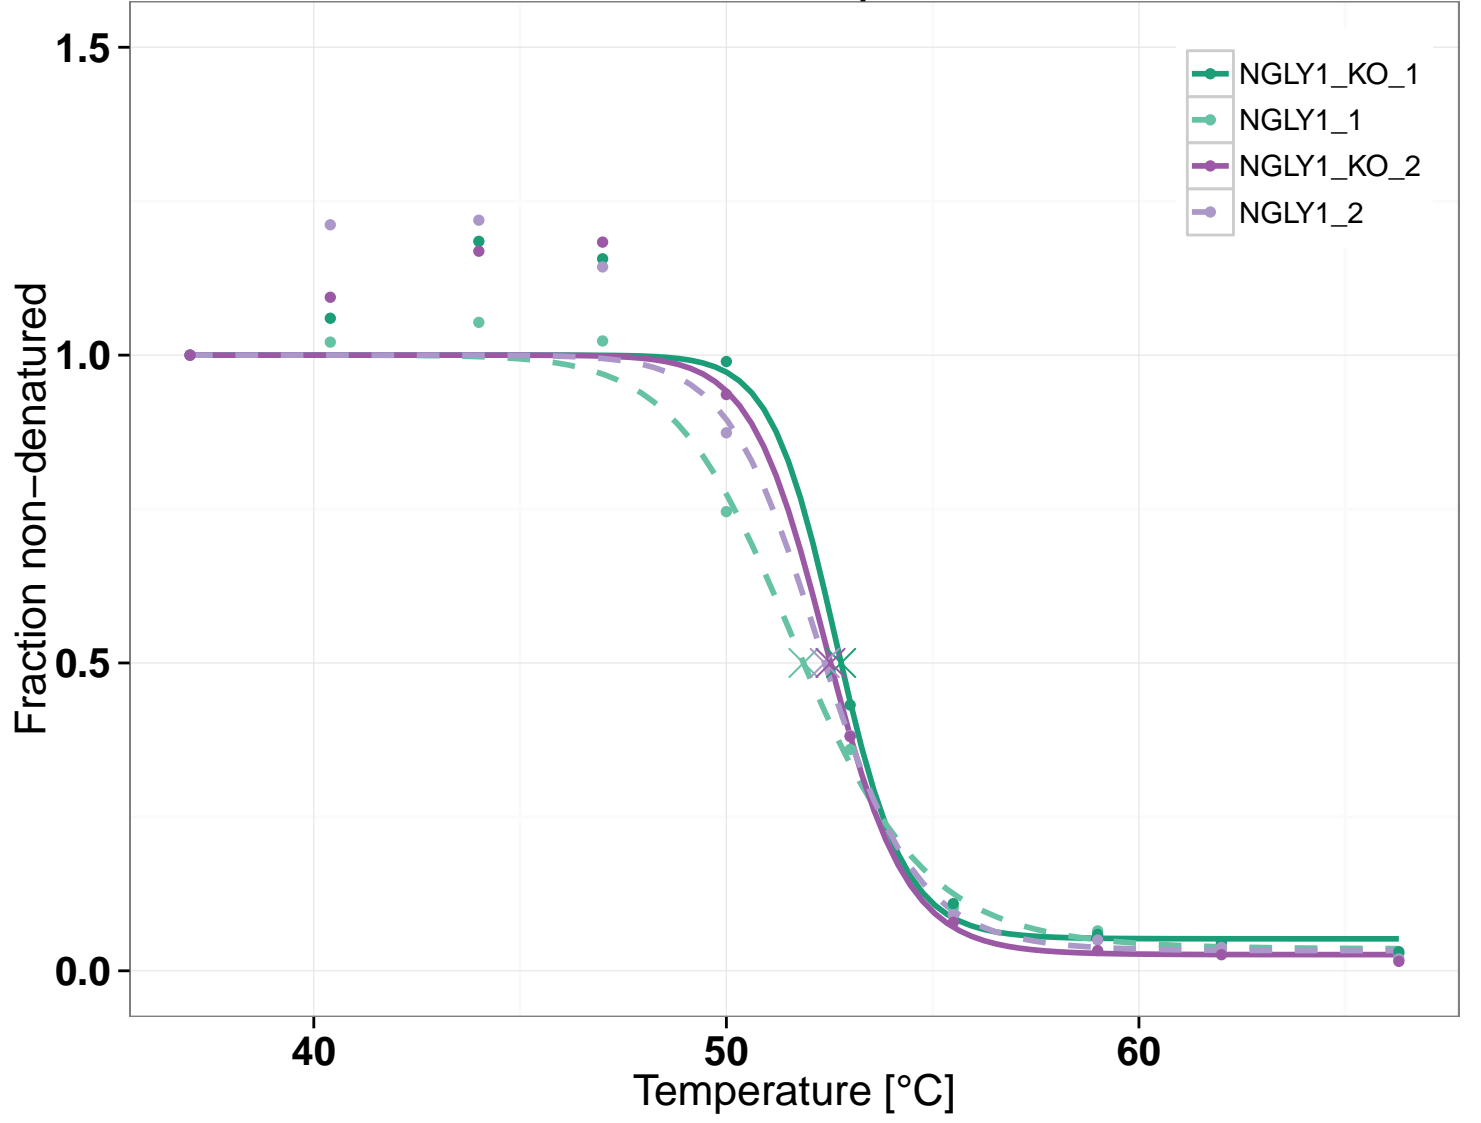

|            | meltPoint | slope | plateau | R2   |
|------------|-----------|-------|---------|------|
| NGLY1_KO_1 | 52.78     | -0.29 | 0.05    | 0.97 |
| NGLY1_1    | 51.87     | -0.16 | 0.04    | 1    |
| NGLY1_KO_2 | 52.53     | -0.26 | 0.03    | 0.97 |
| NGLY1_2    | 52.38     | -0.21 | 0.03    | 0.95 |

Supplement: Supplementary file 8118 [file 1]

IPI00003921.2|EPB41

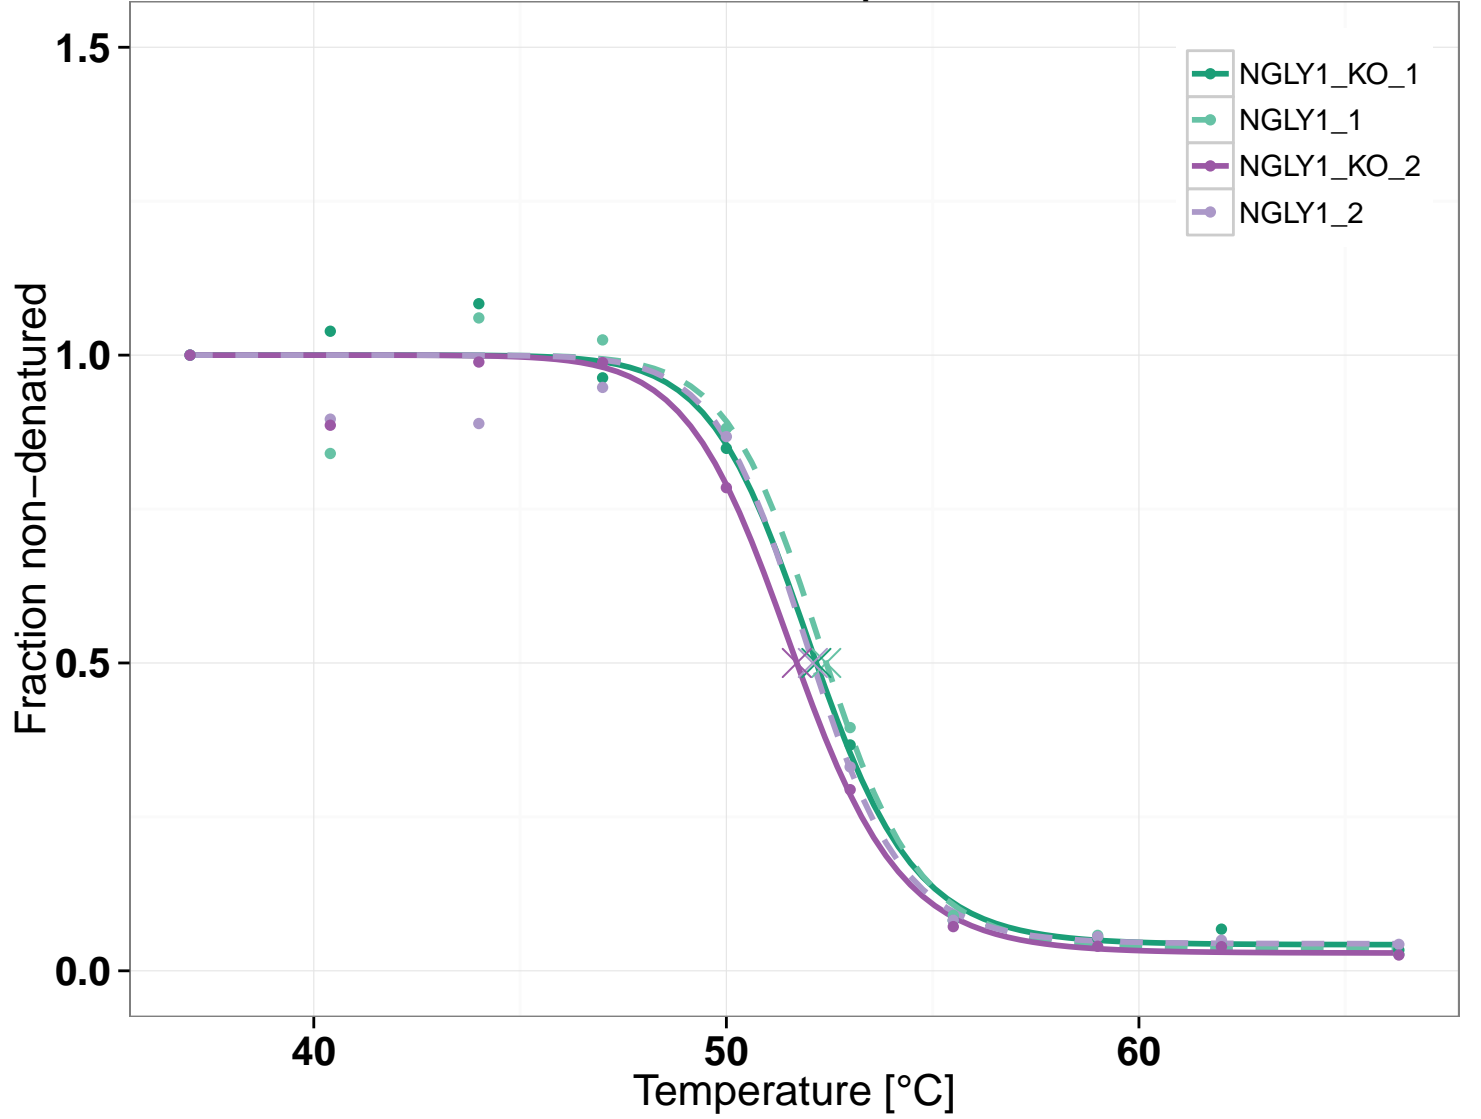

|            | meltPoint | slope | plateau | R2   |
|------------|-----------|-------|---------|------|
| NGLY1_KO_1 | 52.18     | -0.19 | 0.04    | 0.99 |
| NGLY1_1    | 52.42     | -0.21 | 0.04    | 0.98 |
| NGLY1_KO_2 | 51.71     | -0.19 | 0.03    | 0.99 |
| NGLY1_2    | 52.1      | -0.21 | 0.04    | 0.99 |

Supplement: Supplementary file 8119 [file 1]

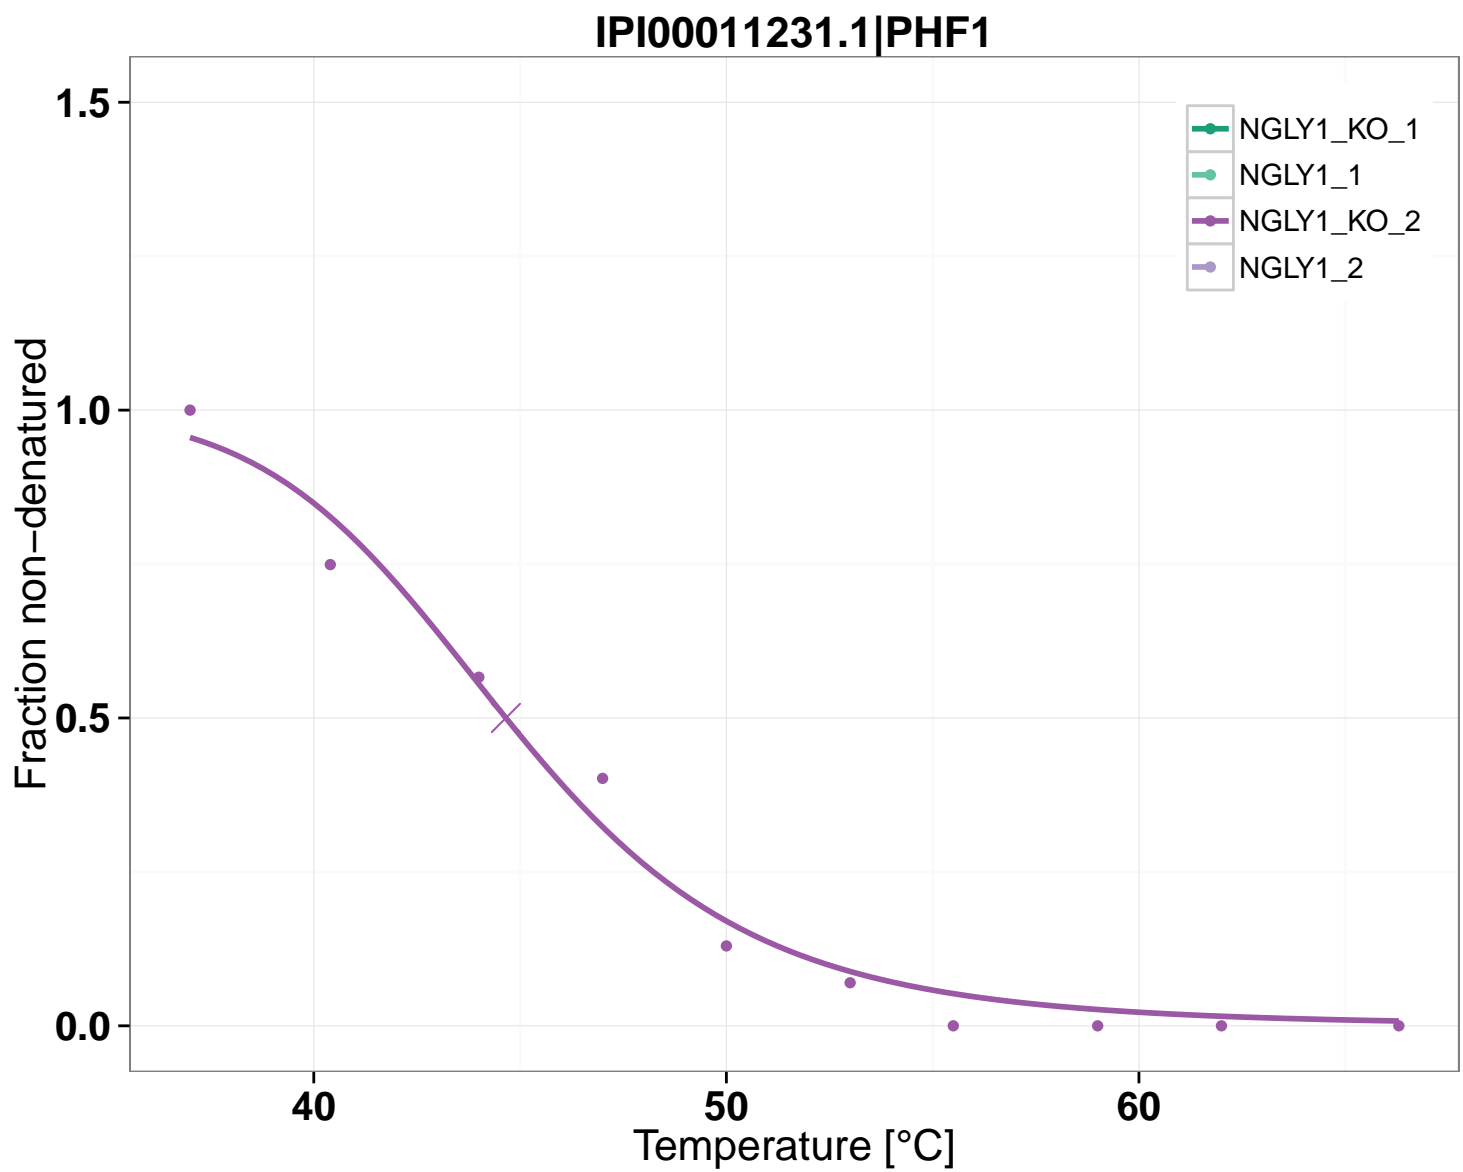

|            | meltPoint | slope  | plateau | R2   |
|------------|-----------|--------|---------|------|
| NGLY1_KO_1 | —         | —      | —       | —    |
| NGLY1_1    | —         | —      | —       | —    |
| NGLY1_KO_2 | 44.66     | -0.085 | 0       | 0.98 |
| NGLY1_2    | —         | —      | —       | —    |

Supplement: Supplementary file 8120 [file 1]

# IPI00465387.2|CDCA2

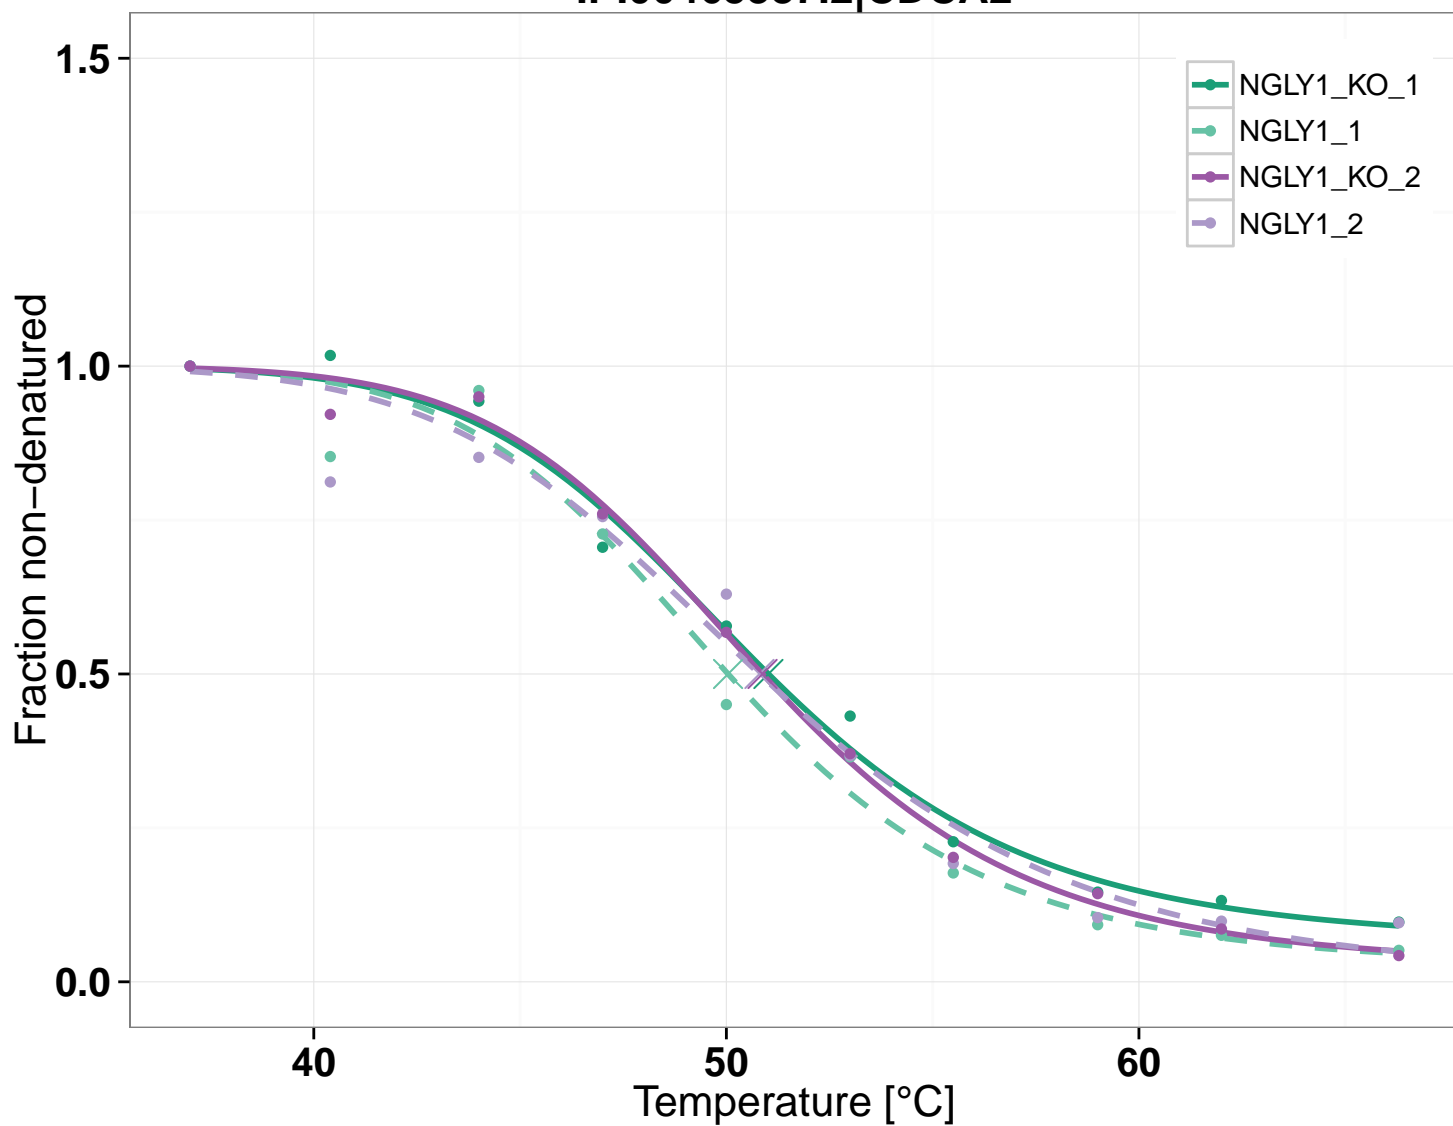

|            | meltPoint | slope  | plateau | R2   |
|------------|-----------|--------|---------|------|
| NGLY1_KO_1 | 51.02     | -0.069 | 0.06    | 0.99 |
| NGLY1_1    | 50.04     | -0.076 | 0.02    | 0.98 |
| NGLY1_KO_2 | 50.88     | -0.075 | 0.02    | 1    |
| NGLY1_2    | 50.8      | -0.064 | 0       | 0.97 |

Supplement: Supplementary file 8121 [file 1]

IPI00872343.1|SLC2A3

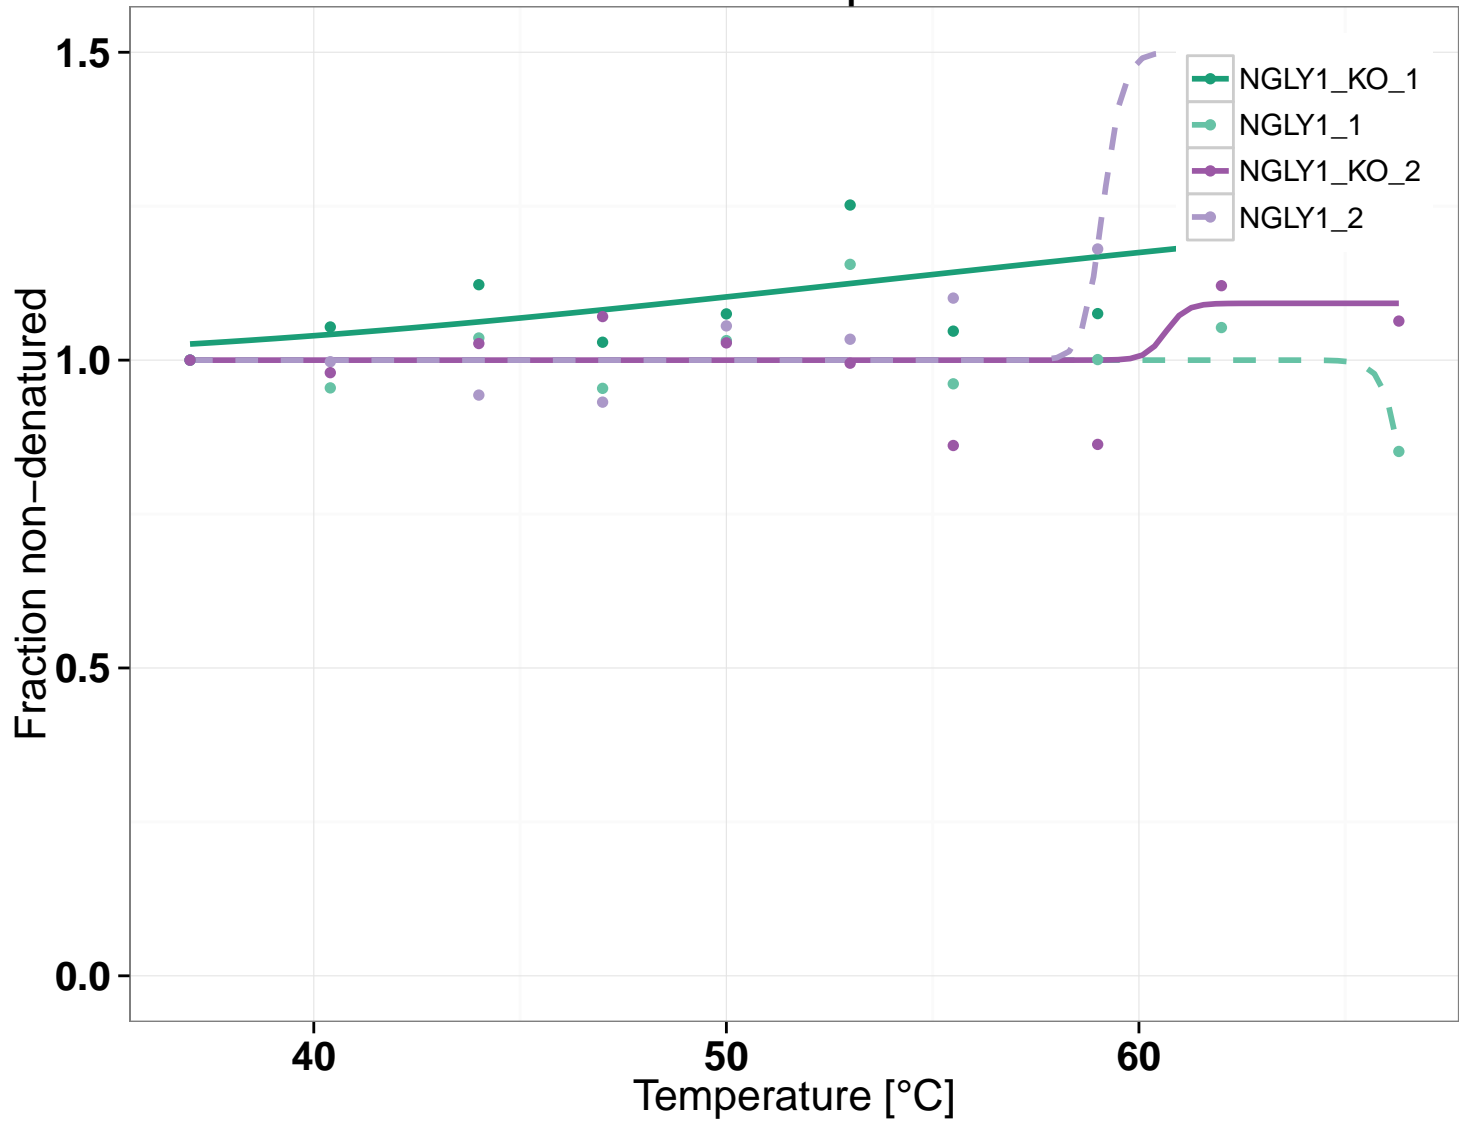

|            | meltPoint | slope  | plateau | R2   |
|------------|-----------|--------|---------|------|
| NGLY1_KO_1 | -         | 0.0073 | 1.5     | 0.4  |
| NGLY1_1    | -         | -      | 0       | 0.39 |
| NGLY1_KO_2 | -         | 0.094  | 1.09    | 0.27 |
| NGLY1_2    | -         | 0.53   | 1.5     | 0.87 |

Supplement: Supplementary file 8122 [file 1]

IPI00784119.1|ATP6AP1

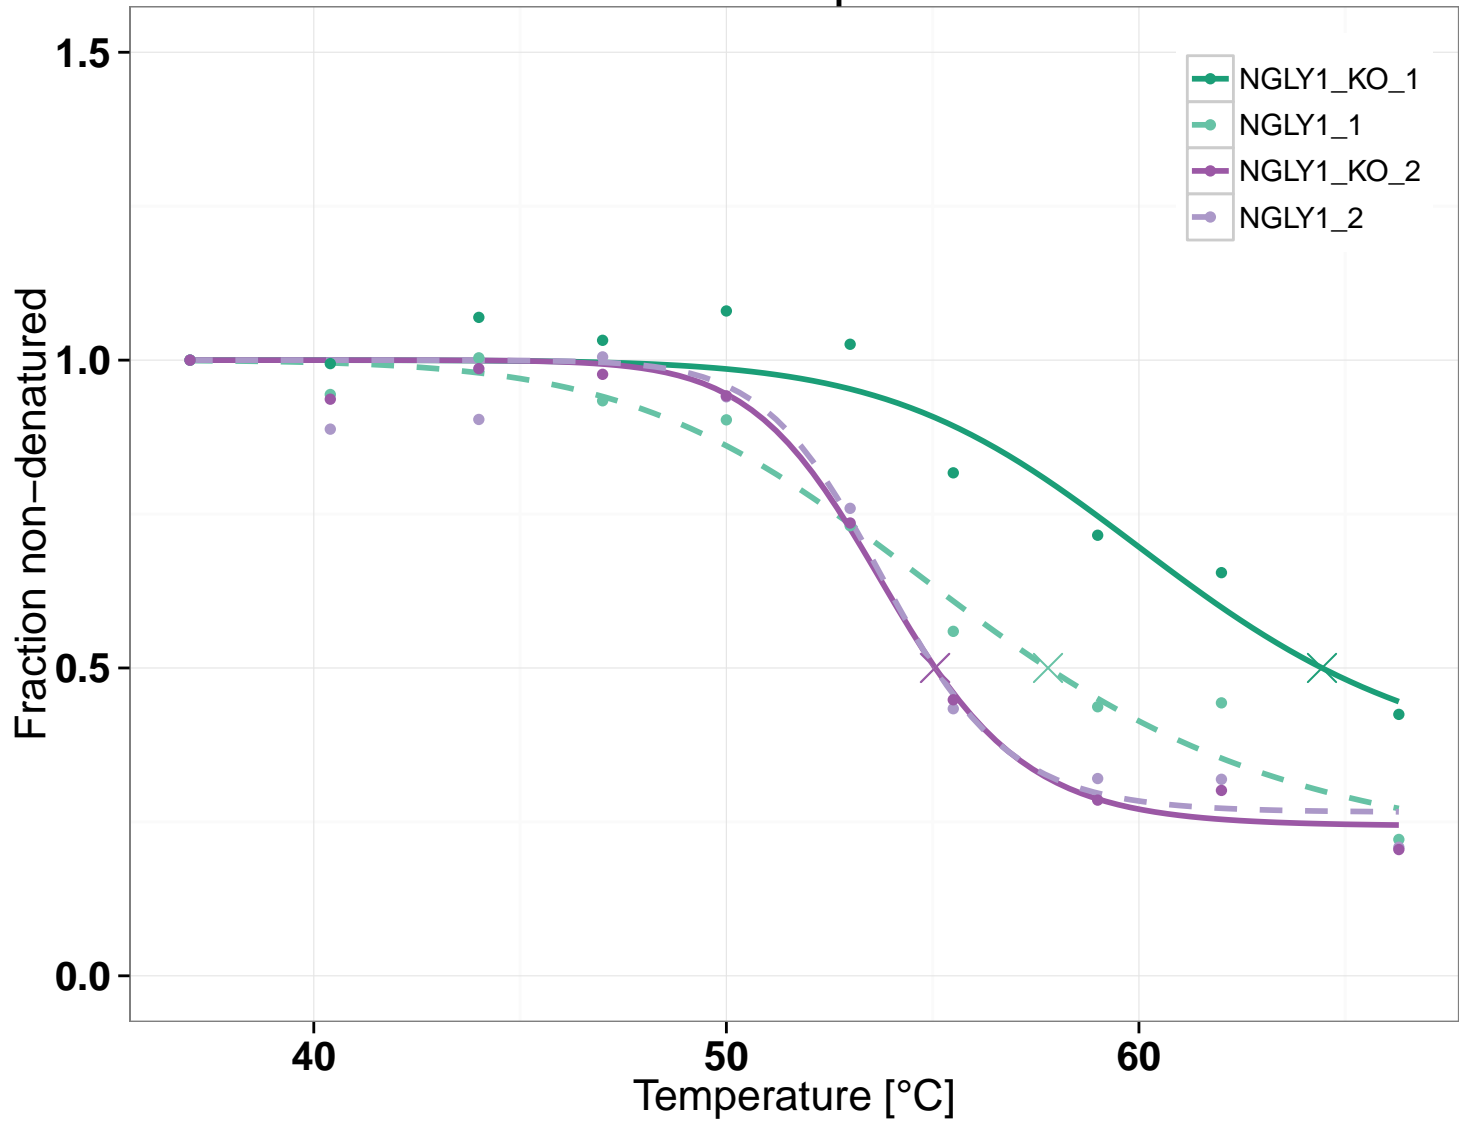

|            | meltPoint | slope  | plateau | R2   |
|------------|-----------|--------|---------|------|
| NGLY1_KO_1 | 64.44     | -0.051 | 0.32    | 0.93 |
| NGLY1_1    | 57.8      | -0.051 | 0.19    | 0.97 |
| NGLY1_KO_2 | 55.06     | -0.11  | 0.24    | 0.99 |
| NGLY1_2    | 55.05     | -0.12  | 0.27    | 0.97 |

Supplement: Supplementary file 8123 [file 1]

IPI00328911.2|HECTD1

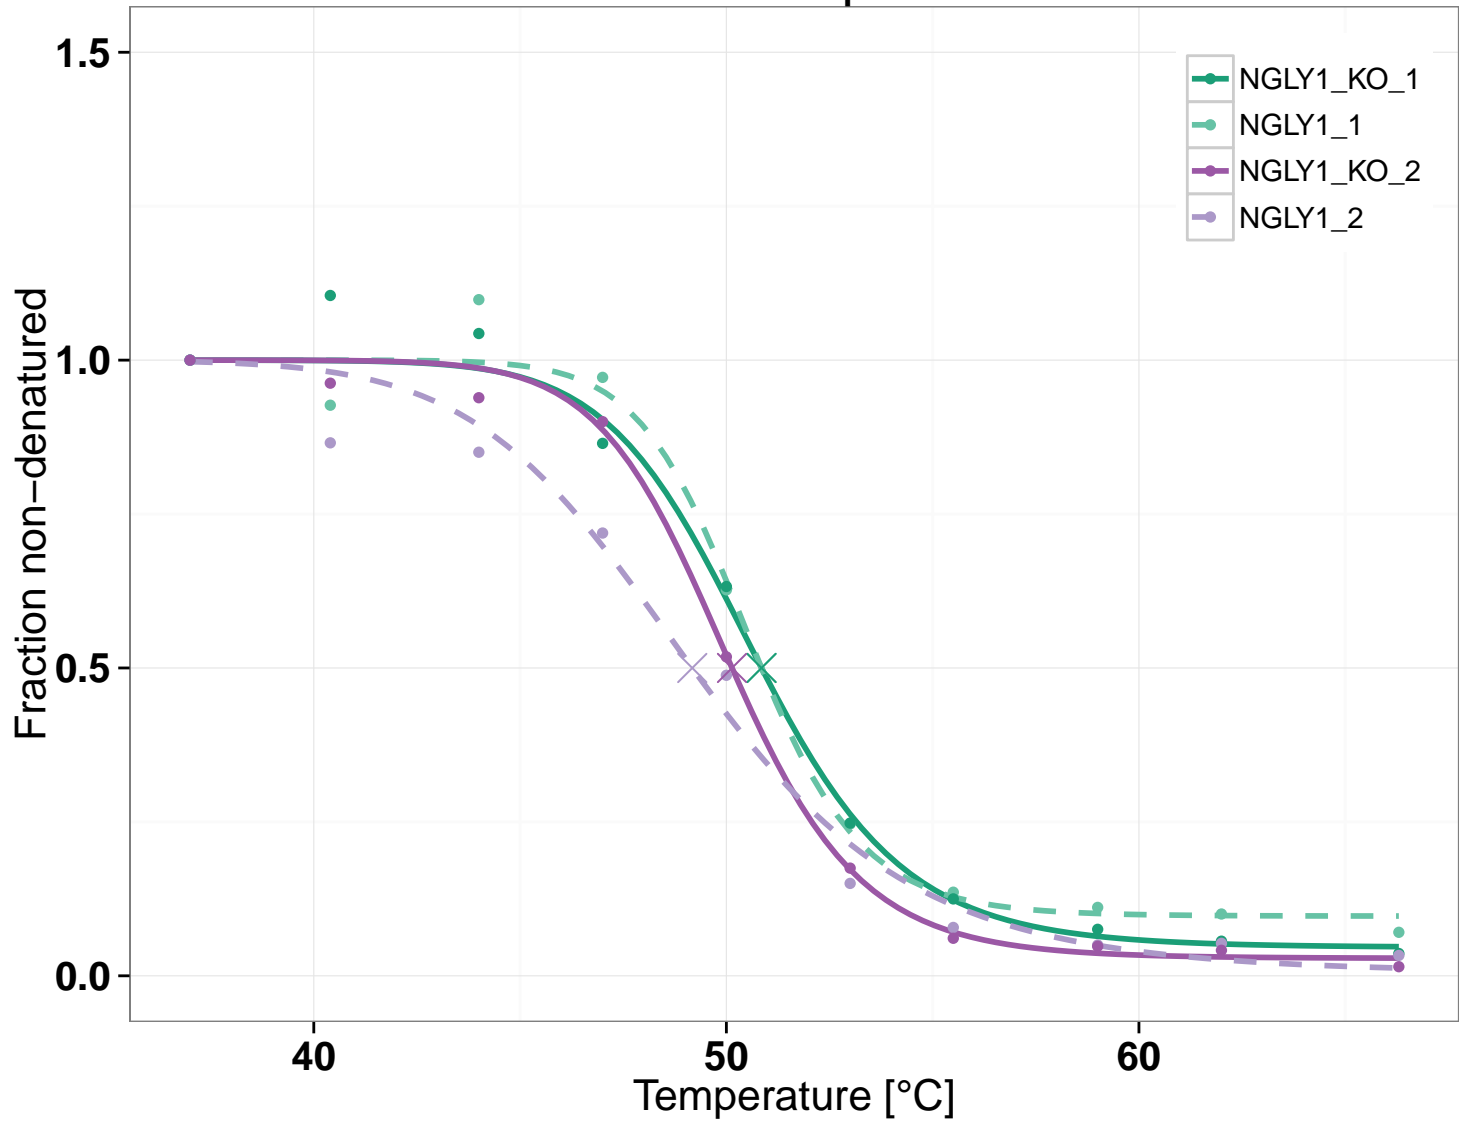

|            | meltPoint | slope  | plateau | R2   |
|------------|-----------|--------|---------|------|
| NGLY1_KO_1 | 50.85     | -0.13  | 0.05    | 0.99 |
| NGLY1_1    | 50.85     | -0.17  | 0.1     | 0.99 |
| NGLY1_KO_2 | 50.14     | -0.15  | 0.03    | 1    |
| NGLY1_2    | 49.17     | -0.093 | 0       | 0.98 |

Supplement: Supplementary file 8124 [file 1]

IPI00554656.1|DGCR2

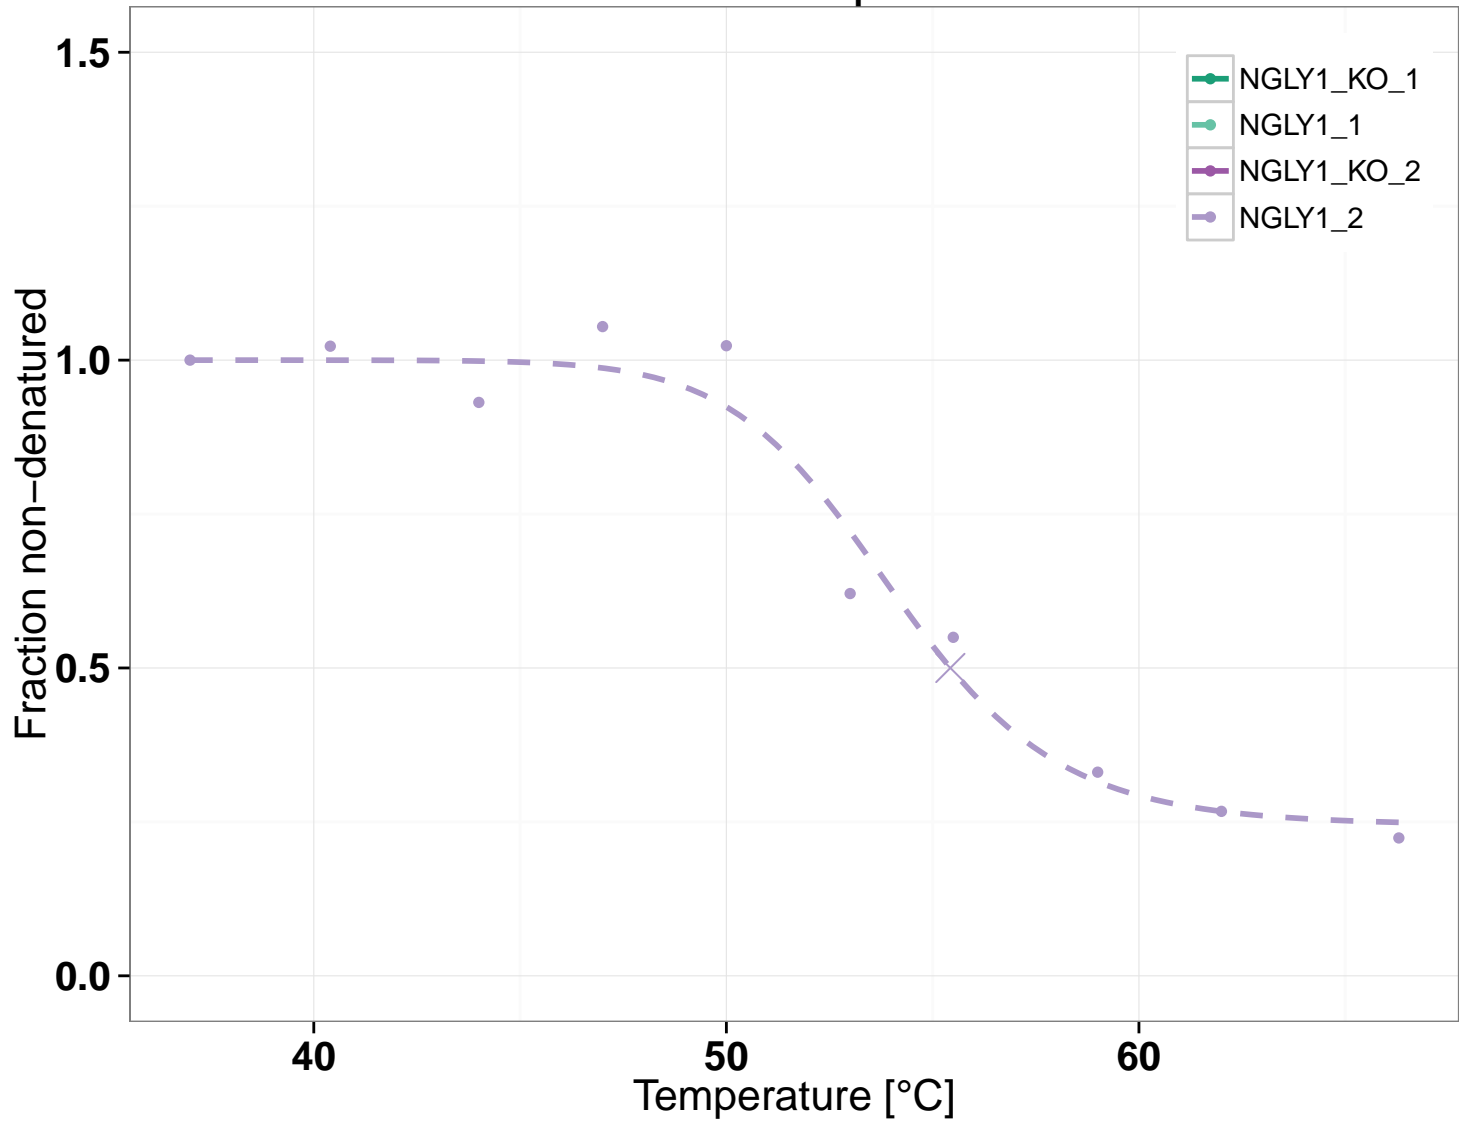

|            | meltPoint | slope  | plateau | R2   |
|------------|-----------|--------|---------|------|
| NGLY1_KO_1 | -         | -      | -       | -    |
| NGLY1_1    | -         | -      | -       | -    |
| NGLY1_KO_2 | -         | -      | -       | -    |
| NGLY1_2    | 55.43     | -0.095 | 0.24    | 0.97 |

Supplement: Supplementary file 8125 [file 1]

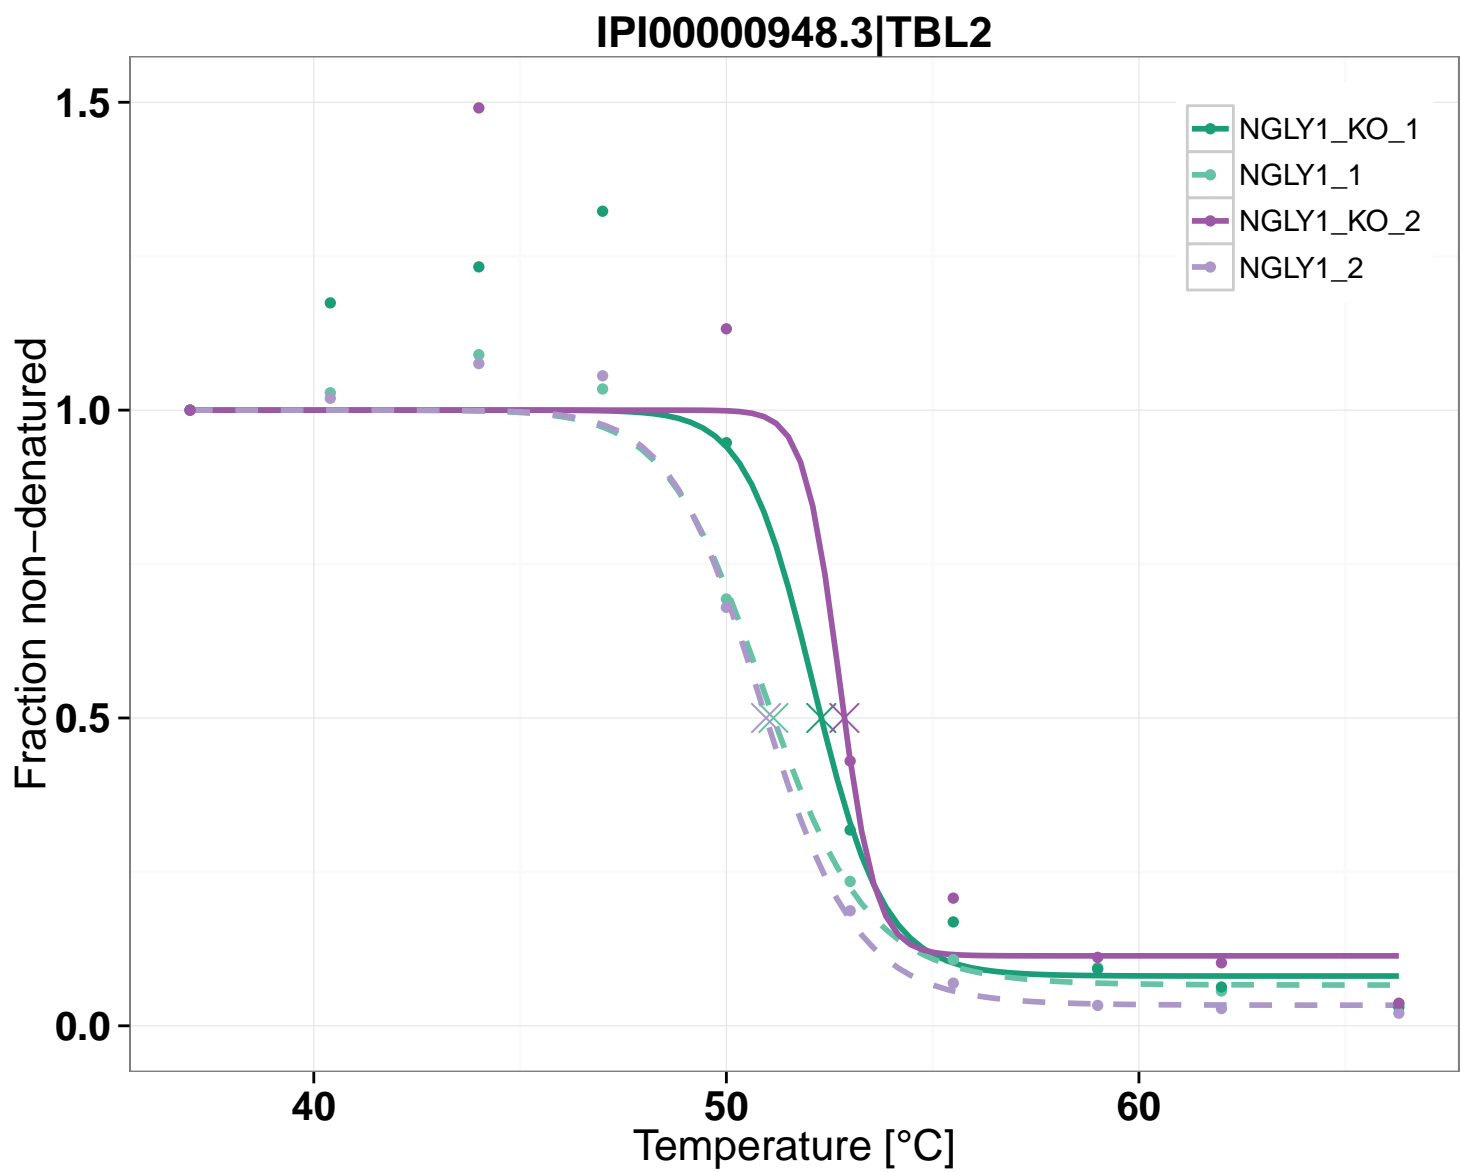

|            | meltPoint | slope | plateau | R2   |
|------------|-----------|-------|---------|------|
| NGLY1_KO_1 | 52.3      | -0.27 | 0.08    | 0.93 |
| NGLY1_1    | 51.14     | -0.19 | 0.07    | 0.99 |
| NGLY1_KO_2 | 52.86     | -0.52 | 0.11    | 0.75 |
| NGLY1_2    | 50.96     | -0.21 | 0.03    | 0.99 |

Supplement: Supplementary file 8126 [file 1]

IPI00023540.2|TMEM98

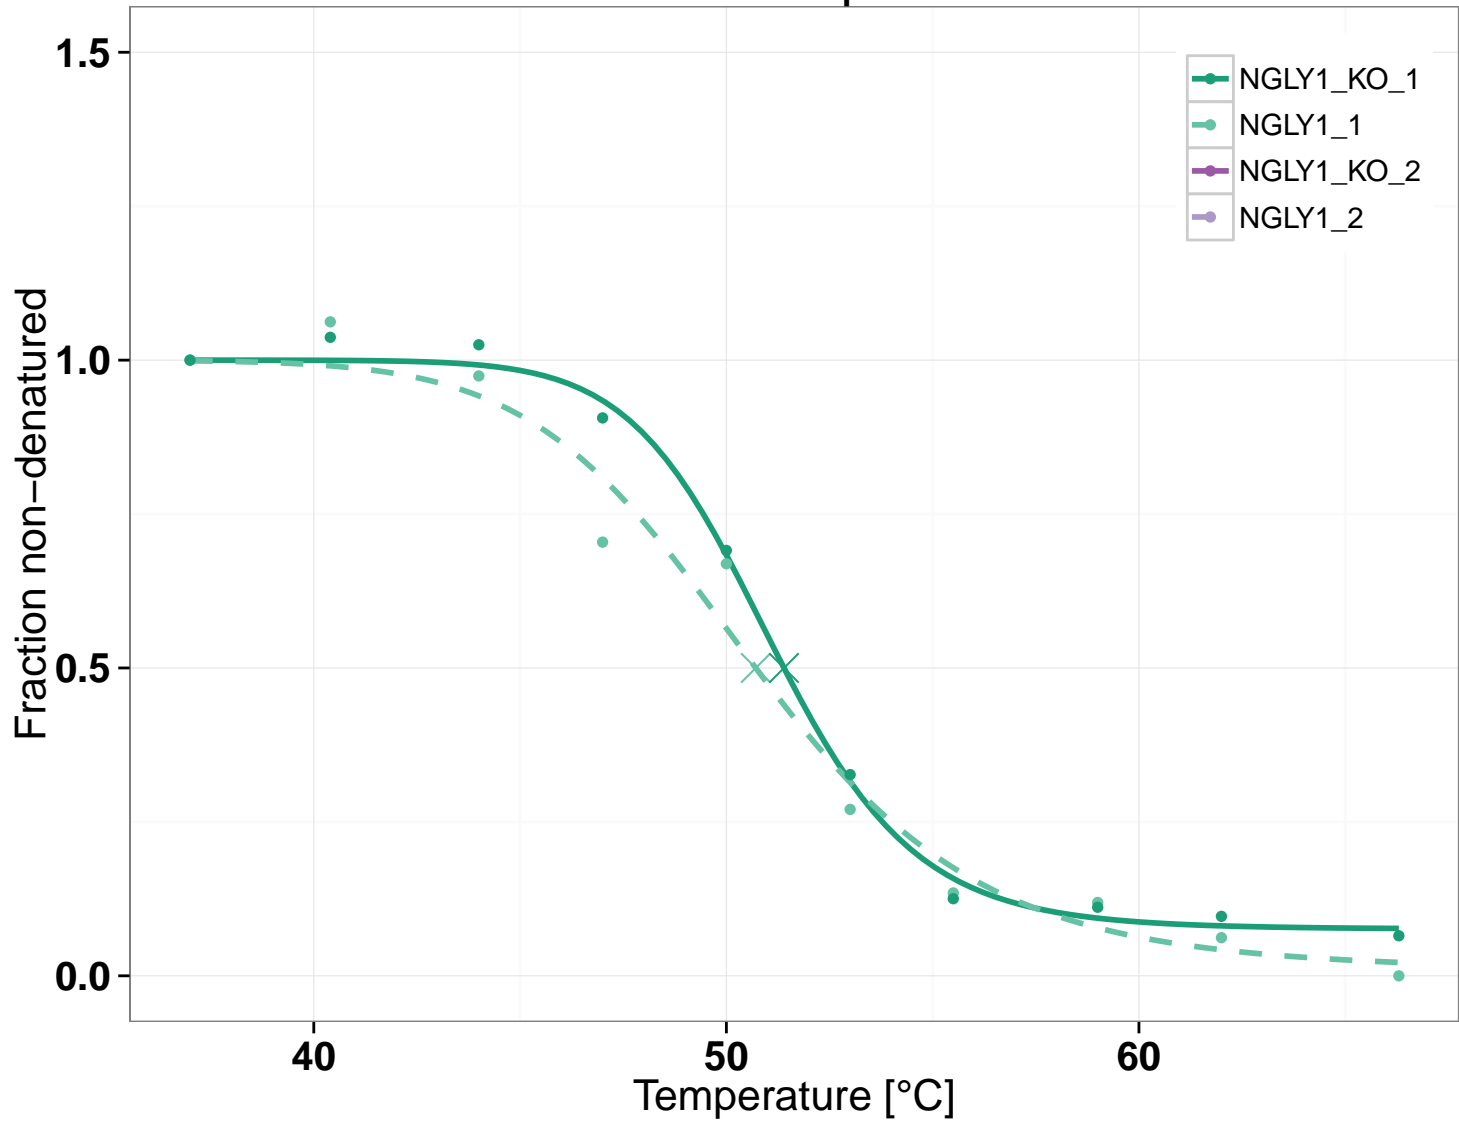

|            | meltPoint | slope  | plateau | R2   |
|------------|-----------|--------|---------|------|
| NGLY1_KO_1 | 51.4      | -0.13  | 0.08    | 1    |
| NGLY1_1    | 50.71     | -0.091 | 0.01    | 0.98 |
| NGLY1_KO_2 | -         | -      | -       | -    |
| NGLY1_2    | -         | -      | -       | -    |

Supplement: Supplementary file 8127 [file 1]

IPI00013624.4|TTPAL

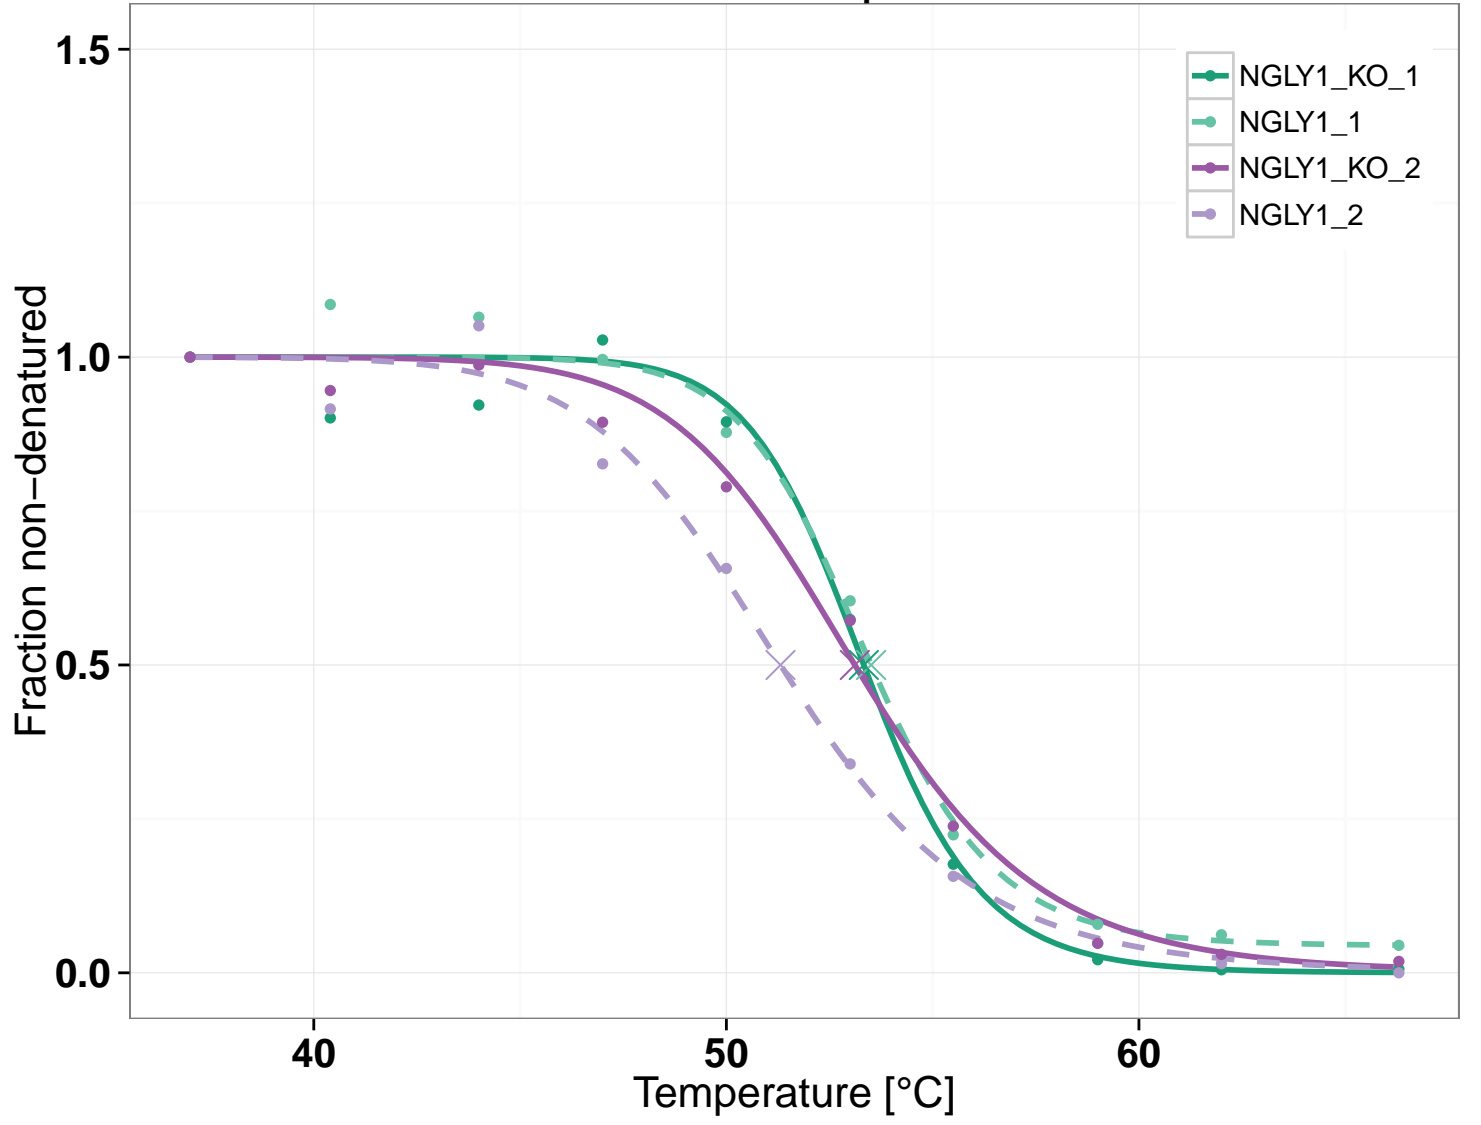

|            | meltPoint | slope | plateau | R2   |
|------------|-----------|-------|---------|------|
| NGLY1_KO_1 | 53.33     | -0.18 | 0       | 0.99 |
| NGLY1_1    | 53.51     | -0.15 | 0.04    | 0.99 |
| NGLY1_KO_2 | 53.11     | -0.11 | 0       | 0.99 |
| NGLY1_2    | 51.31     | -0.11 | 0       | 0.99 |

Supplement: Supplementary file 8128 [file 1]

IPI00061356.3|CCDC99

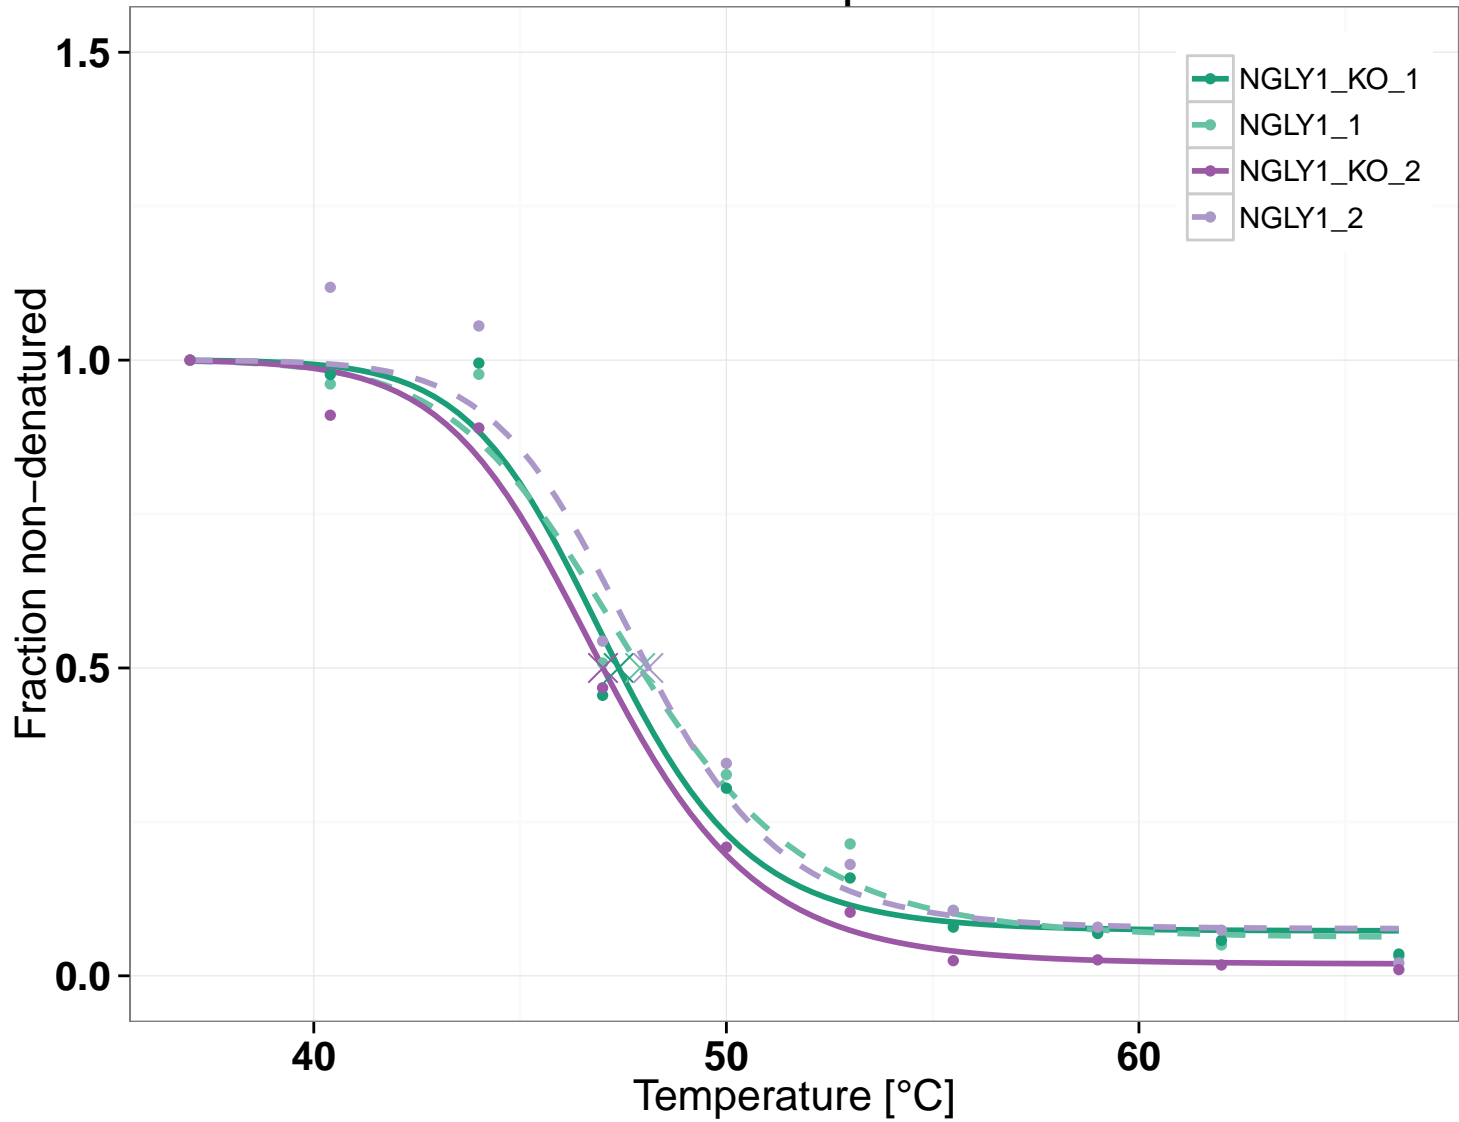

|            | meltPoint | slope | plateau | R2   |
|------------|-----------|-------|---------|------|
| NGLY1_KO_1 | 47.39     | -0.14 | 0.07    | 0.98 |
| NGLY1_1    | 47.91     | -0.11 | 0.06    | 0.98 |
| NGLY1_KO_2 | 47.01     | -0.13 | 0.02    | 0.99 |
| NGLY1_2    | 48.11     | -0.13 | 0.08    | 0.97 |

Supplement: Supplementary file 8129 [file 1]

IPI00887241.1|RPS28

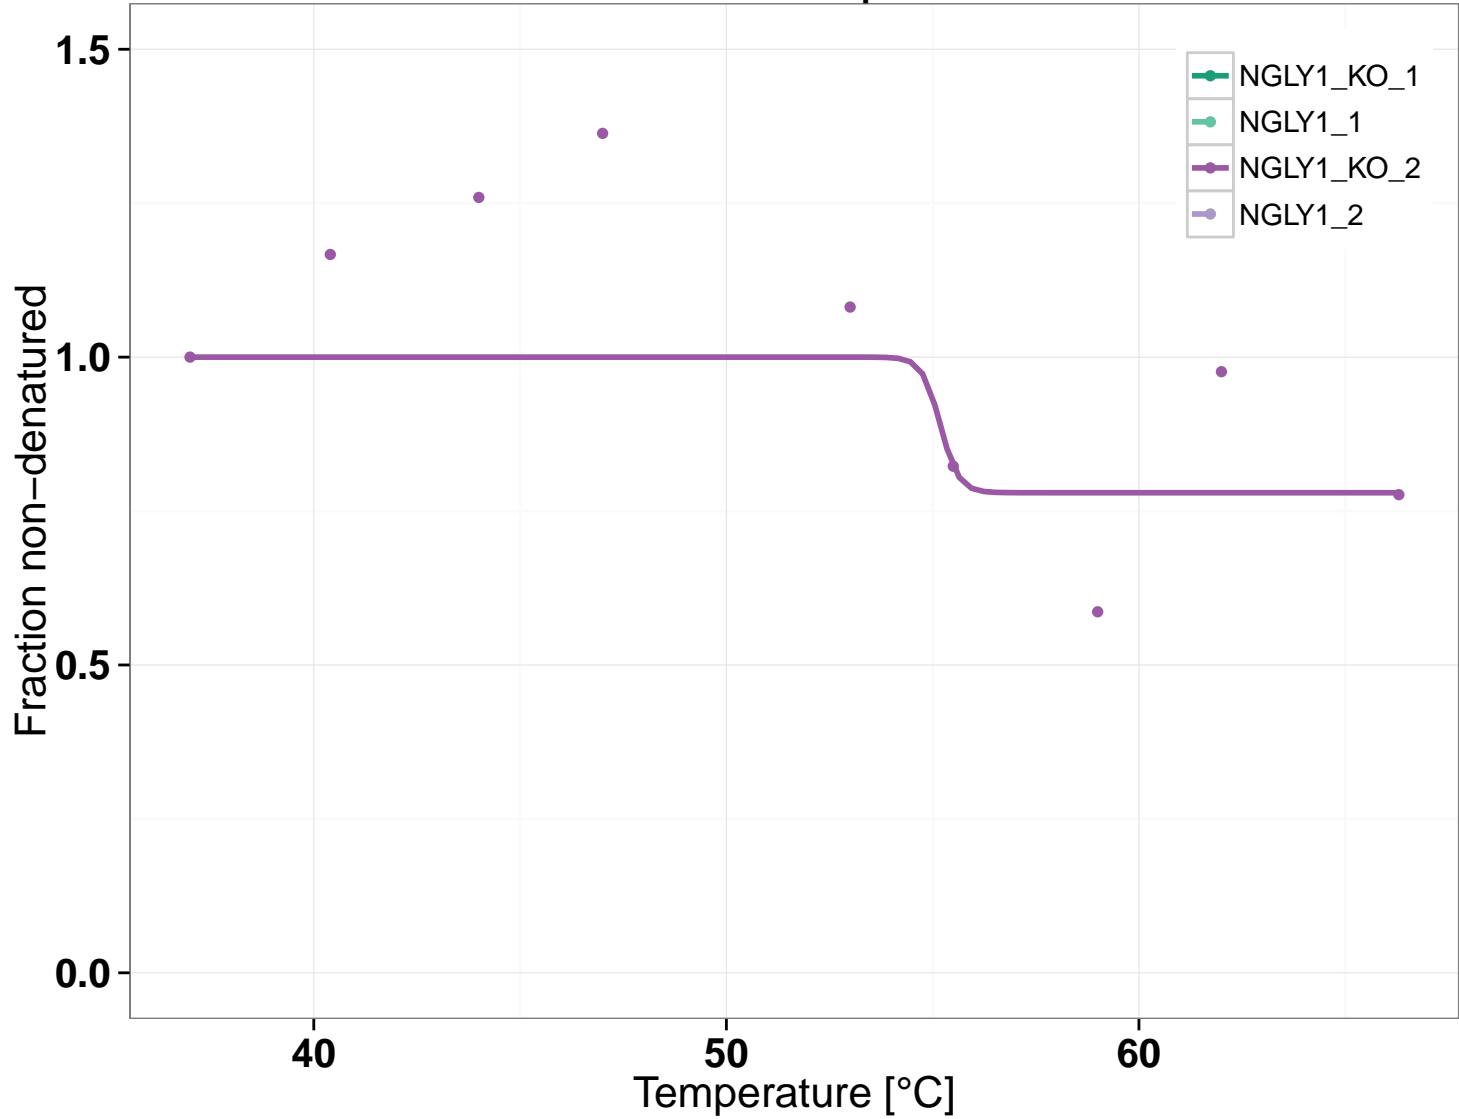

|            | meltPoint | slope | plateau | R2   |
|------------|-----------|-------|---------|------|
| NGLY1_KO_1 | -         | -     | -       | -    |
| NGLY1_1    | -         | -     | -       | -    |
| NGLY1_KO_2 | -         | -0.25 | 0.78    | 0.18 |
| NGLY1_2    | -         | -     | -       | -    |

Supplement: Supplementary file 8130 [file 1]

IPI00328361.6|SARS2

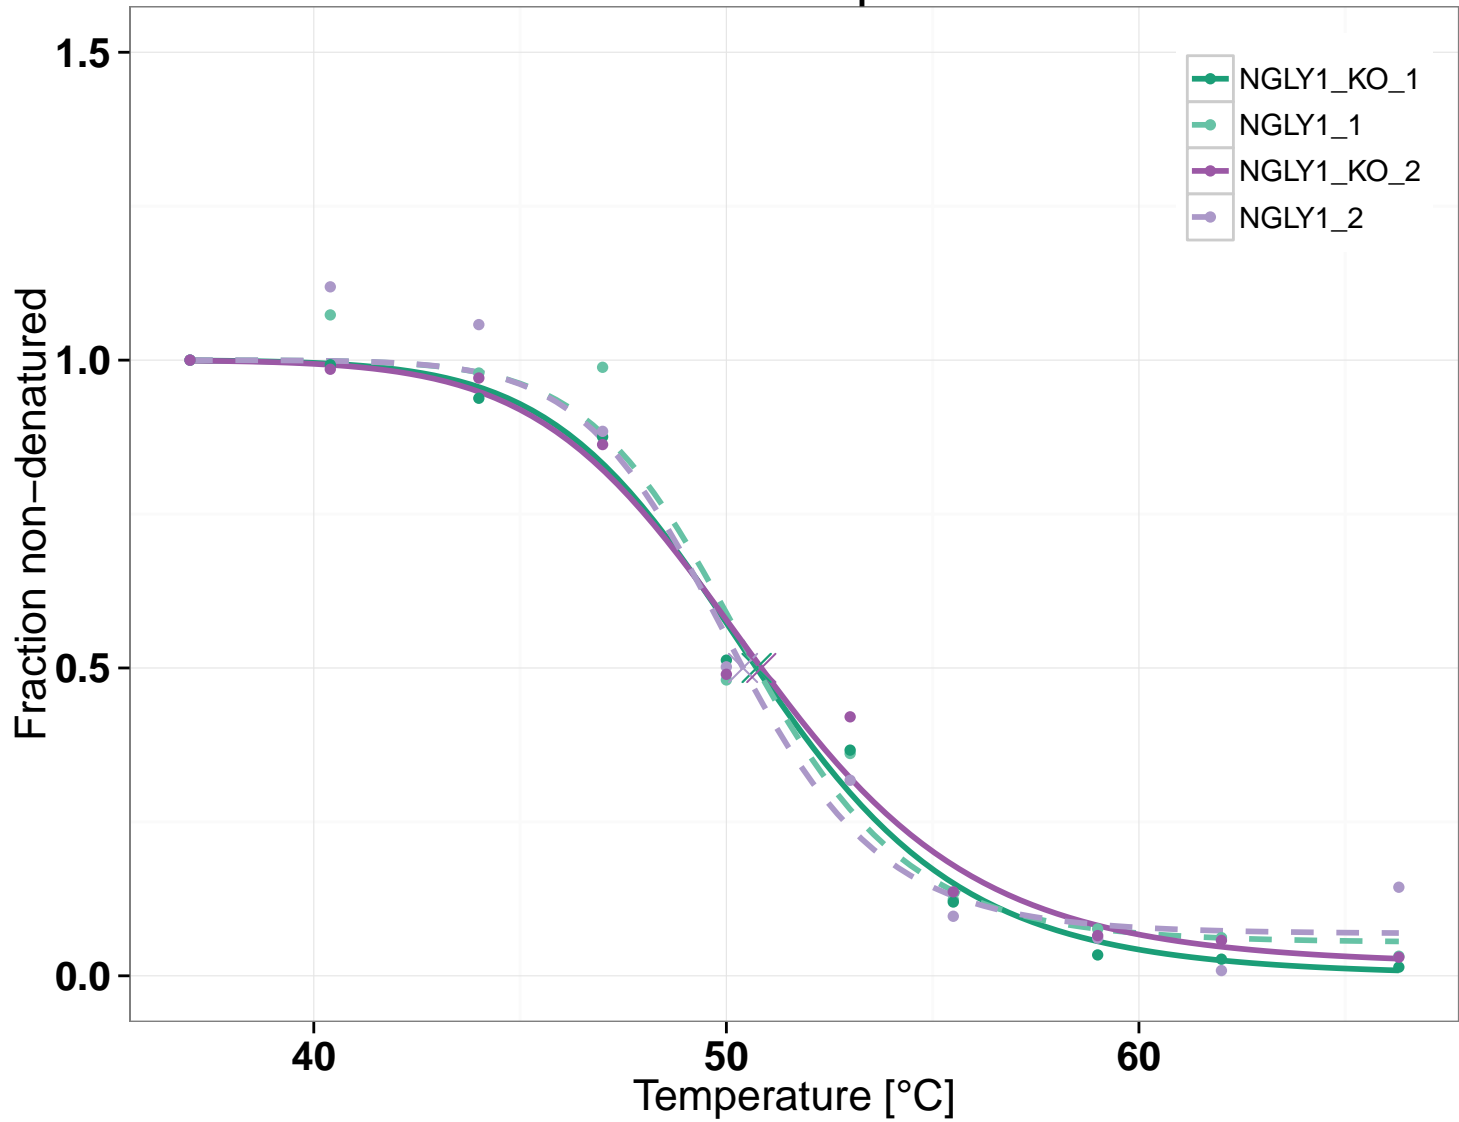

|            | meltPoint | slope  | plateau | R2   |
|------------|-----------|--------|---------|------|
| NGLY1_KO_1 | 50.73     | -0.1   | 0       | 0.99 |
| NGLY1_1    | 50.74     | -0.12  | 0.05    | 0.98 |
| NGLY1_KO_2 | 50.85     | -0.093 | 0.02    | 0.99 |
| NGLY1_2    | 50.4      | -0.13  | 0.07    | 0.98 |

Supplement: Supplementary file 8131 [file 1]

IPI00456628.5|RLTPR

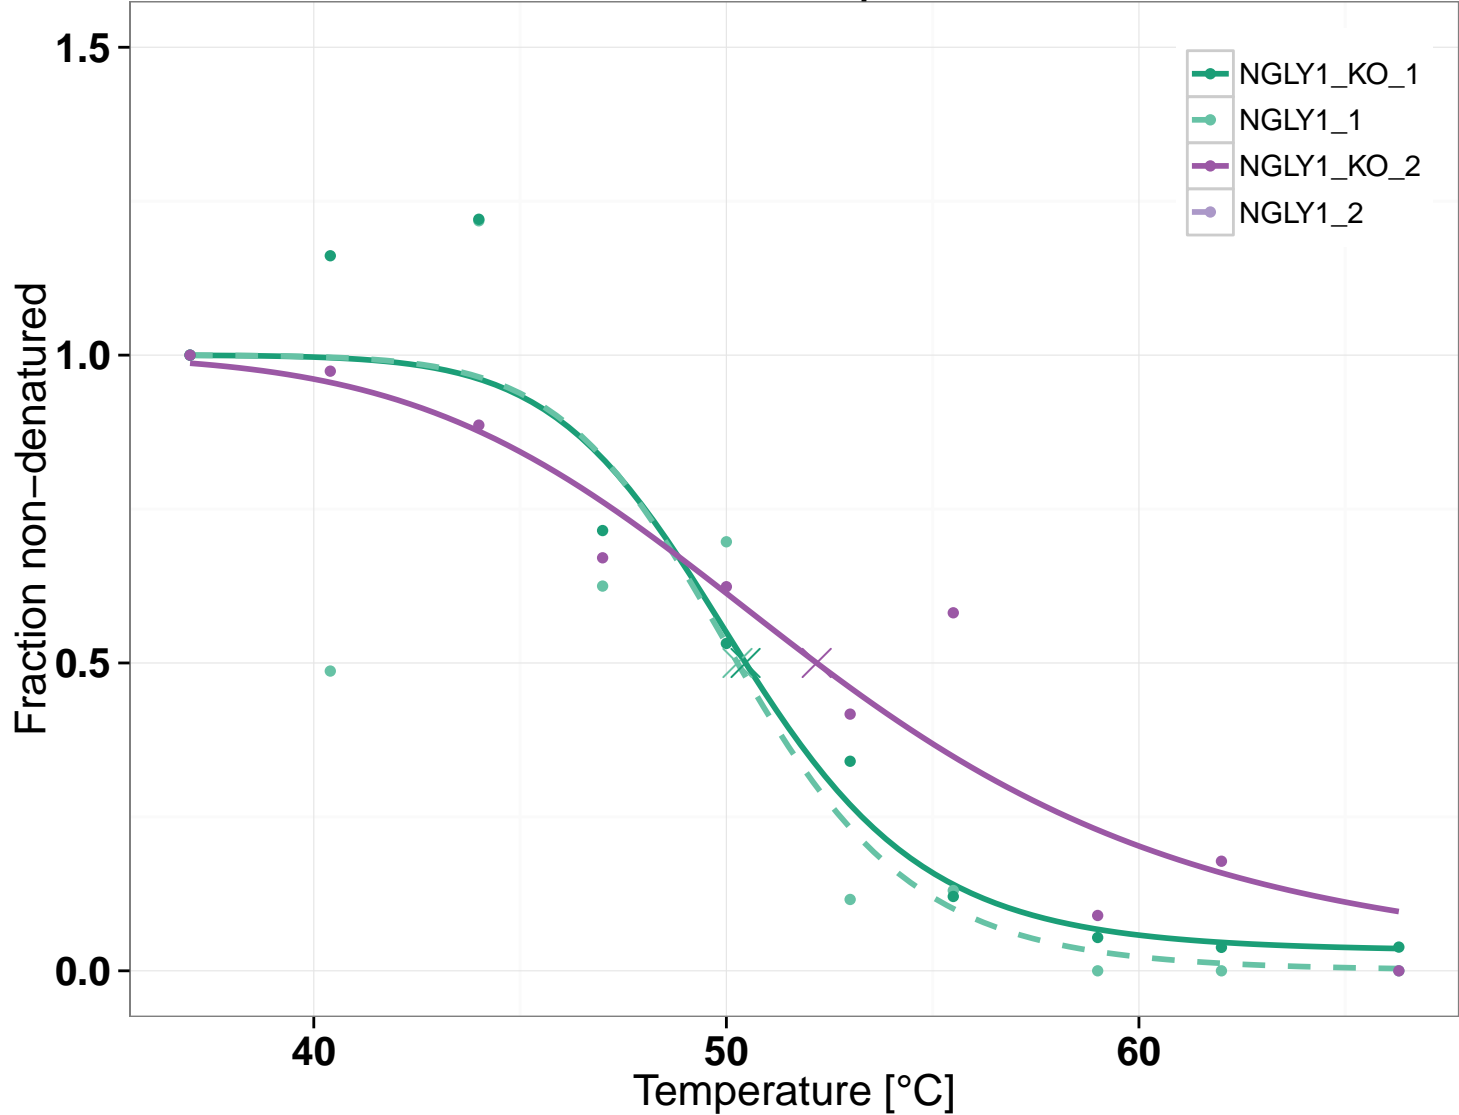

|            | meltPoint | slope  | plateau | R2   |
|------------|-----------|--------|---------|------|
| NGLY1_KO_1 | 50.47     | -0.11  | 0.03    | 0.94 |
| NGLY1_1    | 50.27     | -0.12  | 0       | 0.77 |
| NGLY1_KO_2 | 52.19     | -0.052 | 0       | 0.92 |
| NGLY1_2    | -         | -      | -       | -    |

Supplement: Supplementary file 8132 [file 1]

IPI00028040.1|FADS3

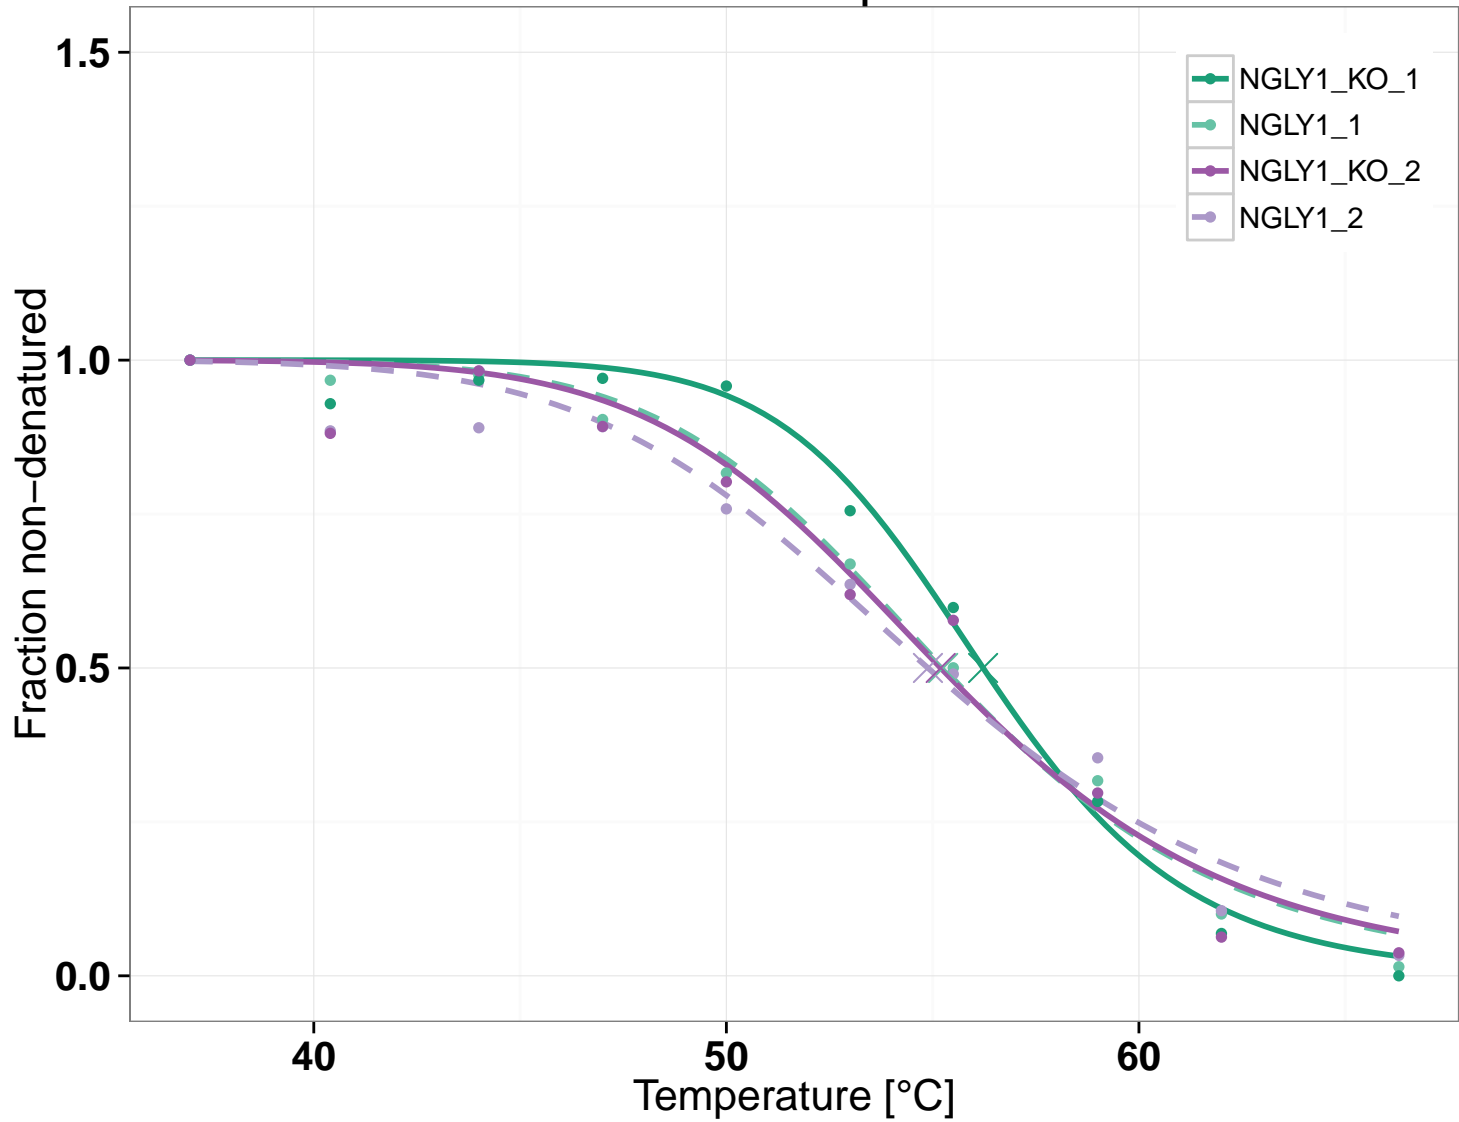

|            | meltPoint | slope  | plateau | R2   |
|------------|-----------|--------|---------|------|
| NGLY1_KO_1 | 56.22     | -0.1   | 0       | 0.99 |
| NGLY1_1    | 55.25     | -0.072 | 0       | 0.99 |
| NGLY1_KO_2 | 55.2      | -0.07  | 0       | 0.97 |
| NGLY1_2    | 54.89     | -0.061 | 0       | 0.97 |

Supplement: Supplementary file 8133 [file 1]

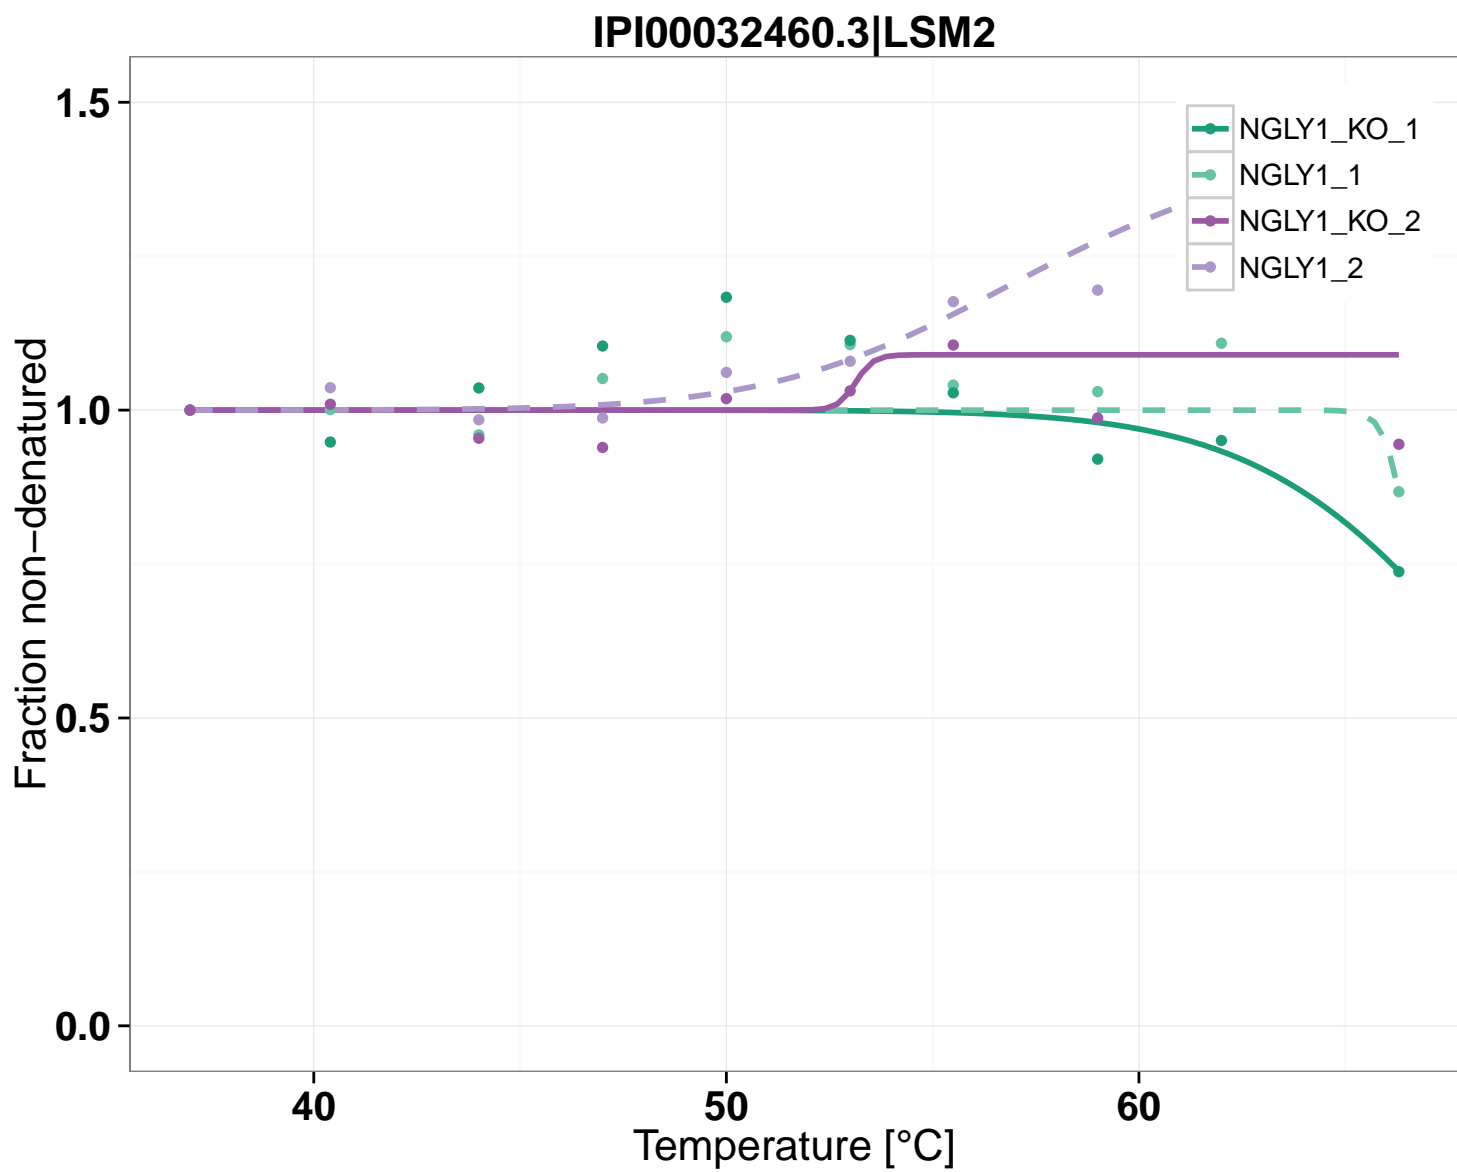

|            | meltPoint | slope | plateau | R2   |
|------------|-----------|-------|---------|------|
| NGLY1_KO_1 | —         | —     | 0       | 0.52 |
| NGLY1_1    | —         | —     | 0       | 0.18 |
| NGLY1_KO_2 | —         | 0.11  | 1.09    | 0.2  |
| NGLY1_2    | —         | 0.035 | 1.46    | 0.92 |

Supplement: Supplementary file 8134 [file 1]

# IPI00916658.1|BNIP2

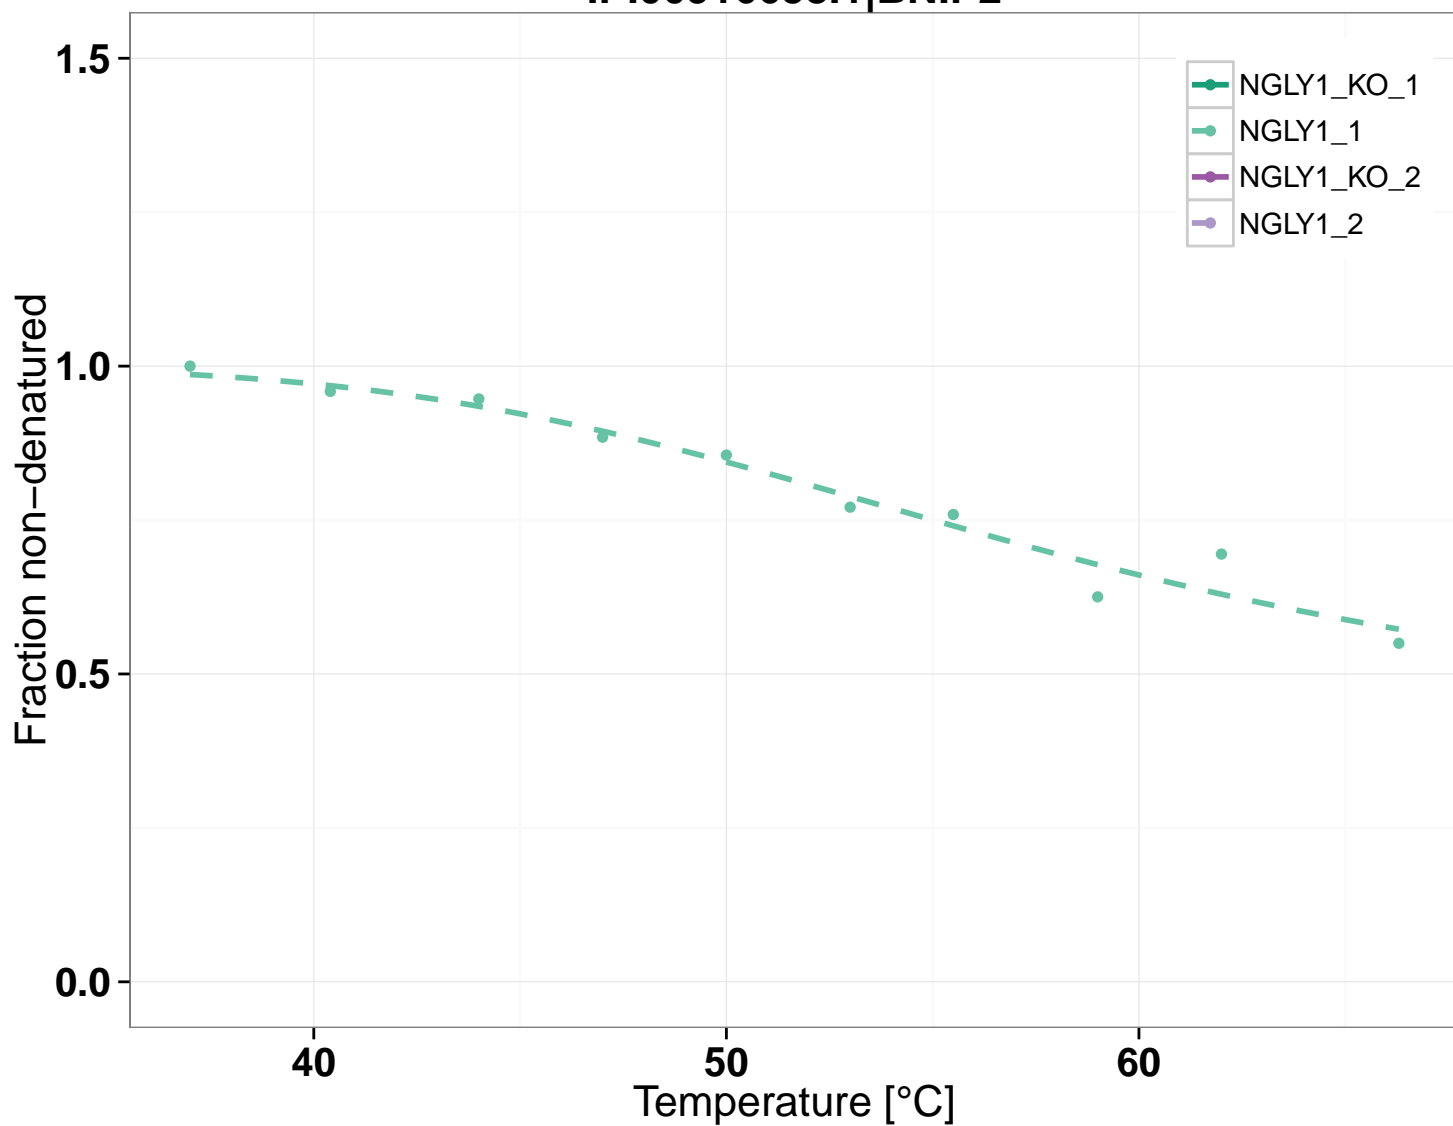

|            | meltPoint | slope  | plateau | R2   |
|------------|-----------|--------|---------|------|
| NGLY1_KO_1 | —         | —      | —       | —    |
| NGLY1_1    | —         | −0.019 | 0.38    | 0.96 |
| NGLY1_KO_2 | —         | —      | —       | —    |
| NGLY1_2    | —         | —      | —       | —    |

Supplement: Supplementary file 8135 [file 1]
