# Supplementary material (part 82 of 85)
Source: publisher figshare collection journal article supplement (https://gsajournals.figshare.com/articles/dataset/_/12014913)

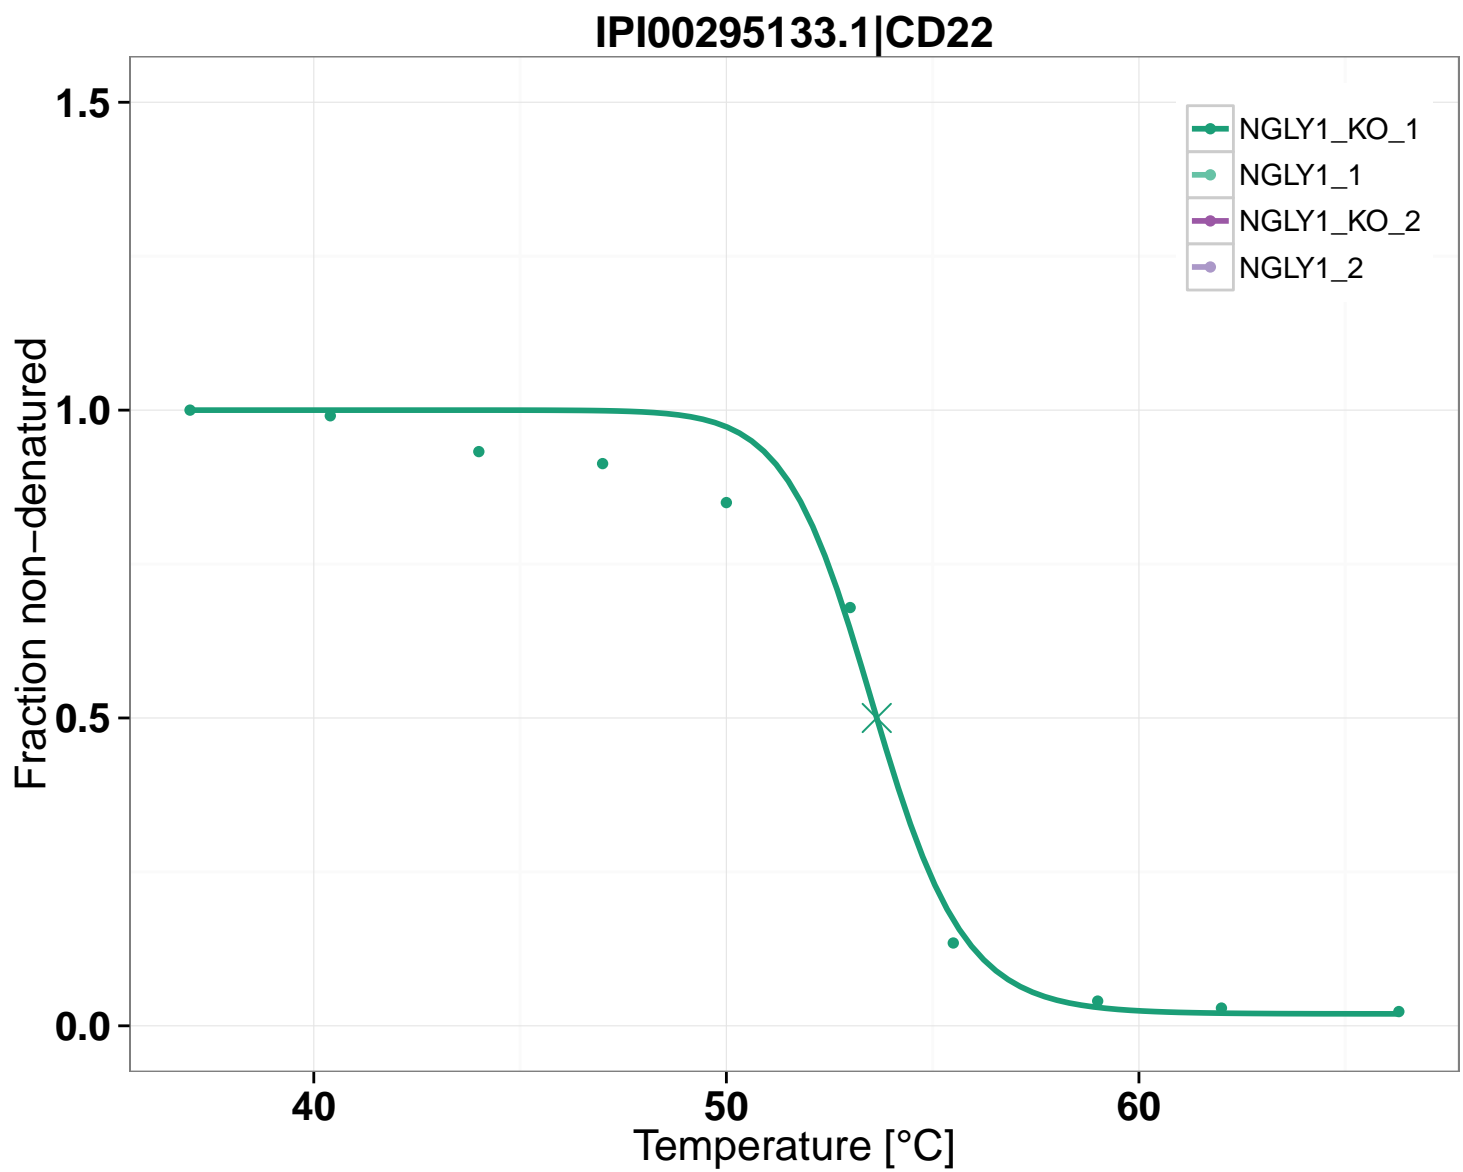

|            | meltPoint | slope | plateau | R2   |
|------------|-----------|-------|---------|------|
| NGLY1_KO_1 | 53.65     | -0.23 | 0.02    | 0.98 |
| NGLY1_1    | -         | -     | -       | -    |
| NGLY1_KO_2 | -         | -     | -       | -    |
| NGLY1_2    | -         | -     | -       | -    |

Supplement: Supplementary file 8136 [file 1]

# IPI00019999.2|RSBN1

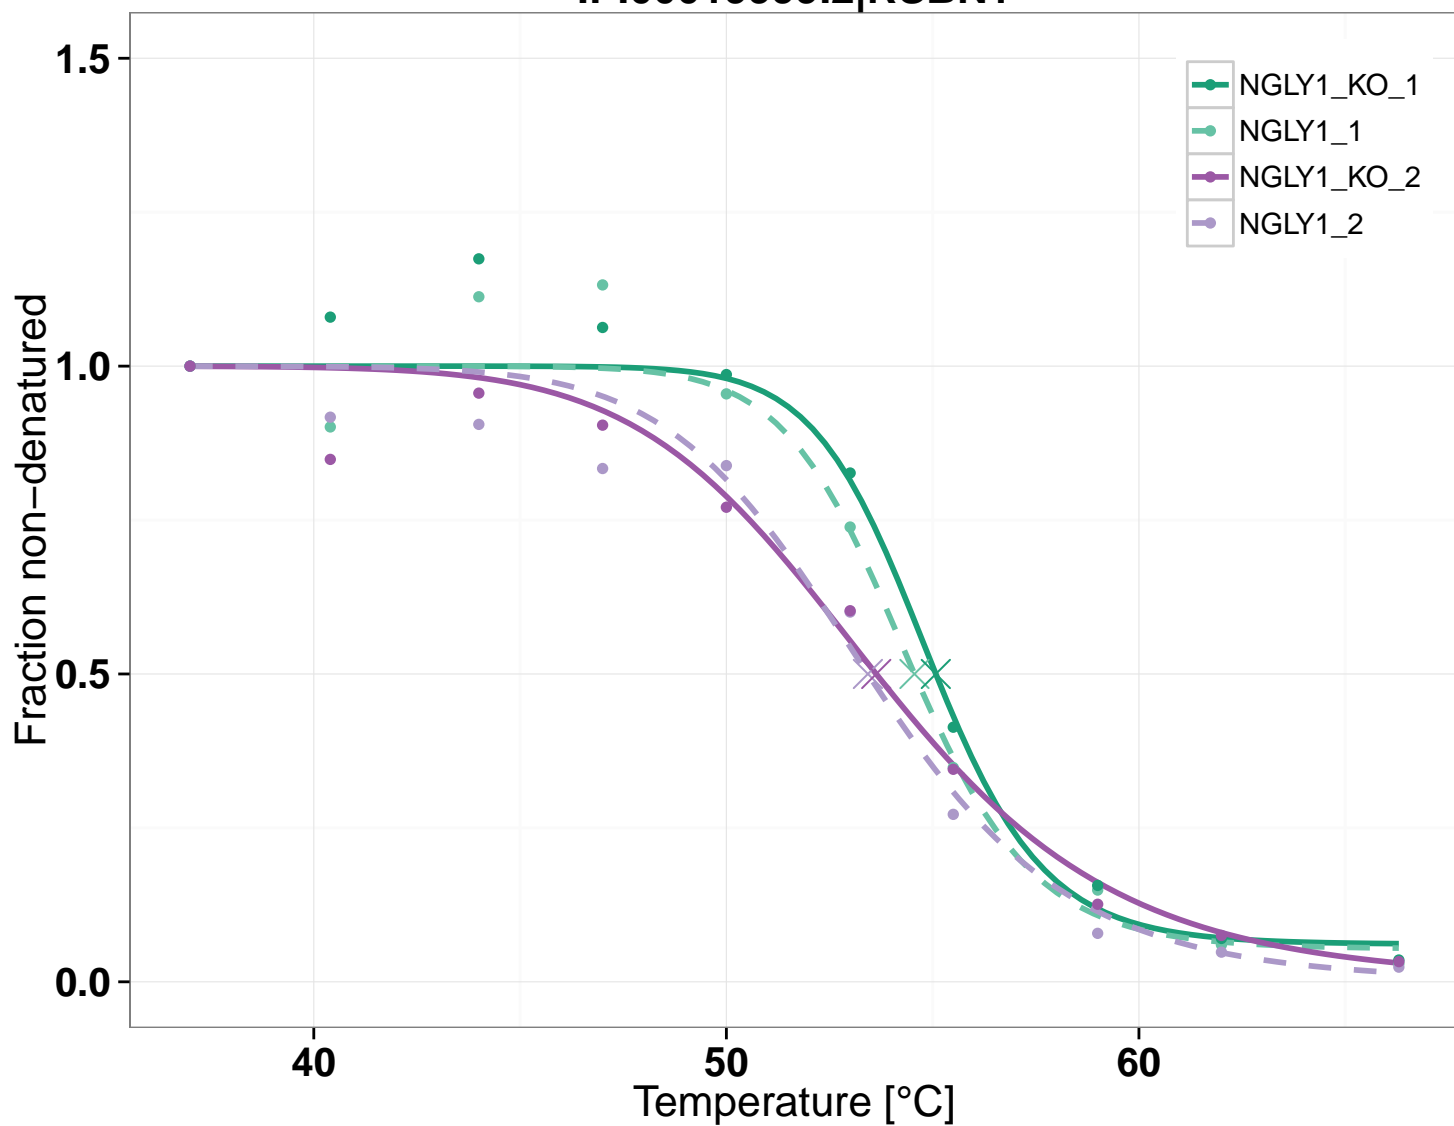

|            | meltPoint | slope  | plateau | R2   |
|------------|-----------|--------|---------|------|
| NGLY1_KO_1 | 55.08     | -0.17  | 0.06    | 0.98 |
| NGLY1_1    | 54.56     | -0.16  | 0.05    | 0.98 |
| NGLY1_KO_2 | 53.63     | -0.085 | 0       | 0.98 |
| NGLY1_2    | 53.43     | -0.1   | 0       | 0.98 |

Supplement: Supplementary file 8137 [file 1]

# IPI00060545.5|PARL

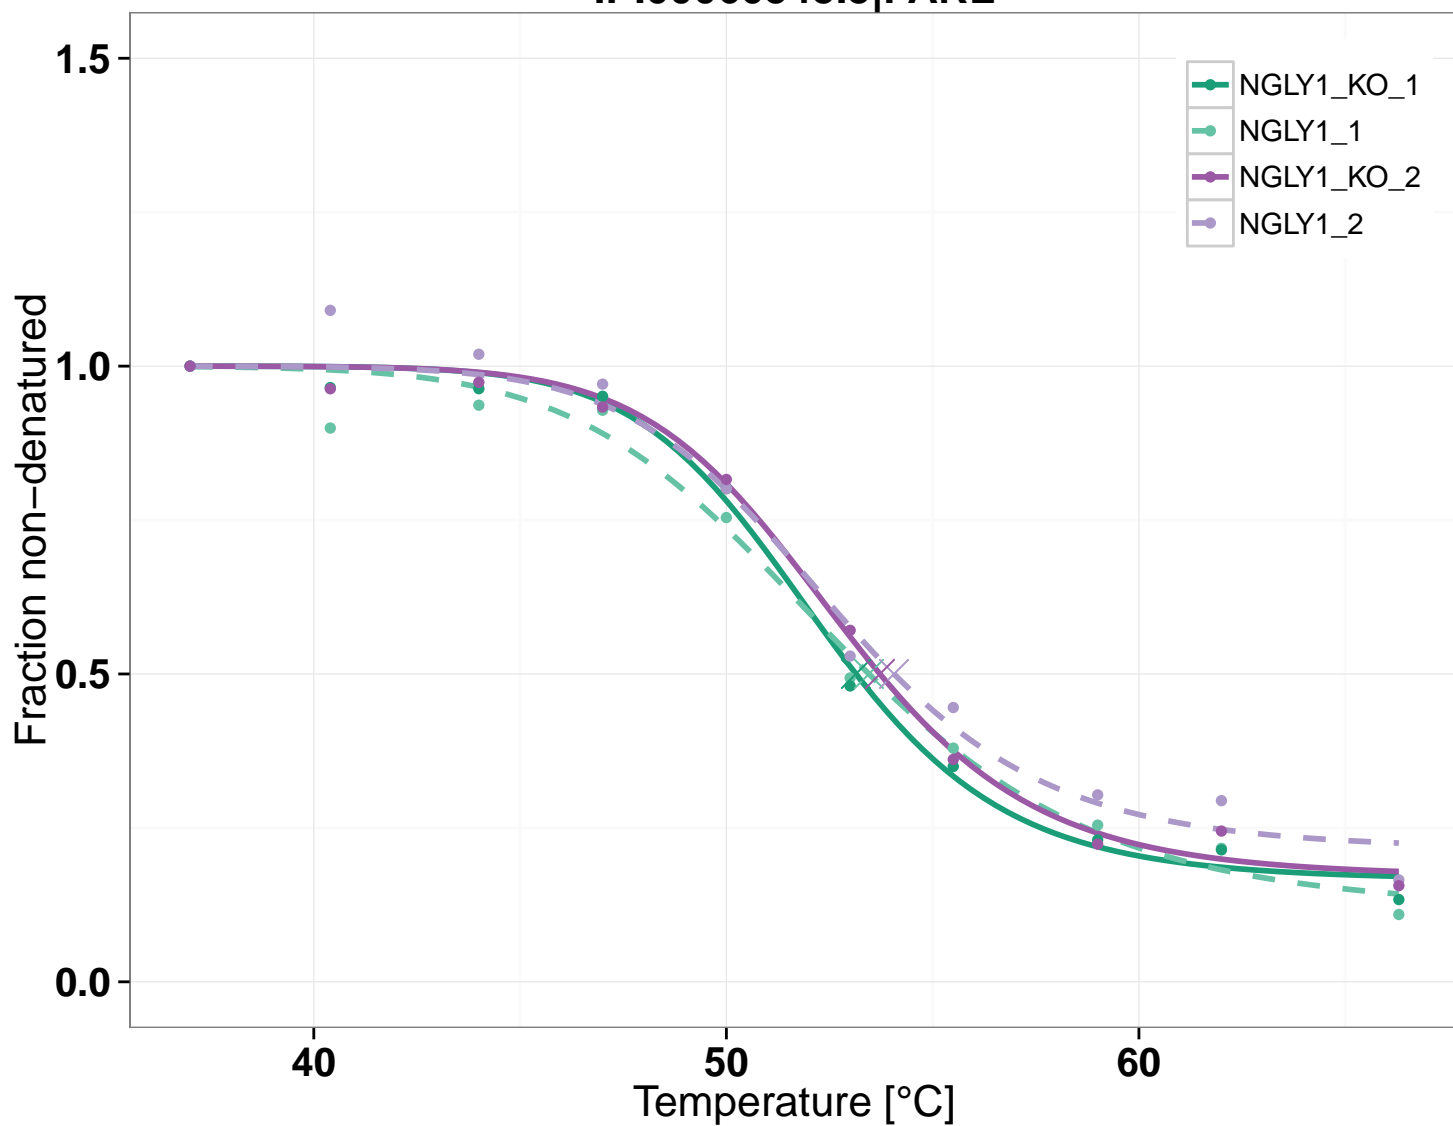

|            | meltPoint | slope  | plateau | R2   |
|------------|-----------|--------|---------|------|
| NGLY1_KO_1 | 53.14     | -0.094 | 0.17    | 0.99 |
| NGLY1_1    | 53.46     | -0.07  | 0.11    | 0.99 |
| NGLY1_KO_2 | 53.72     | -0.088 | 0.17    | 1    |
| NGLY1_2    | 54.06     | -0.078 | 0.21    | 0.98 |

Supplement: Supplementary file 8138 [file 1]

IPI00873472.1|SEC24A

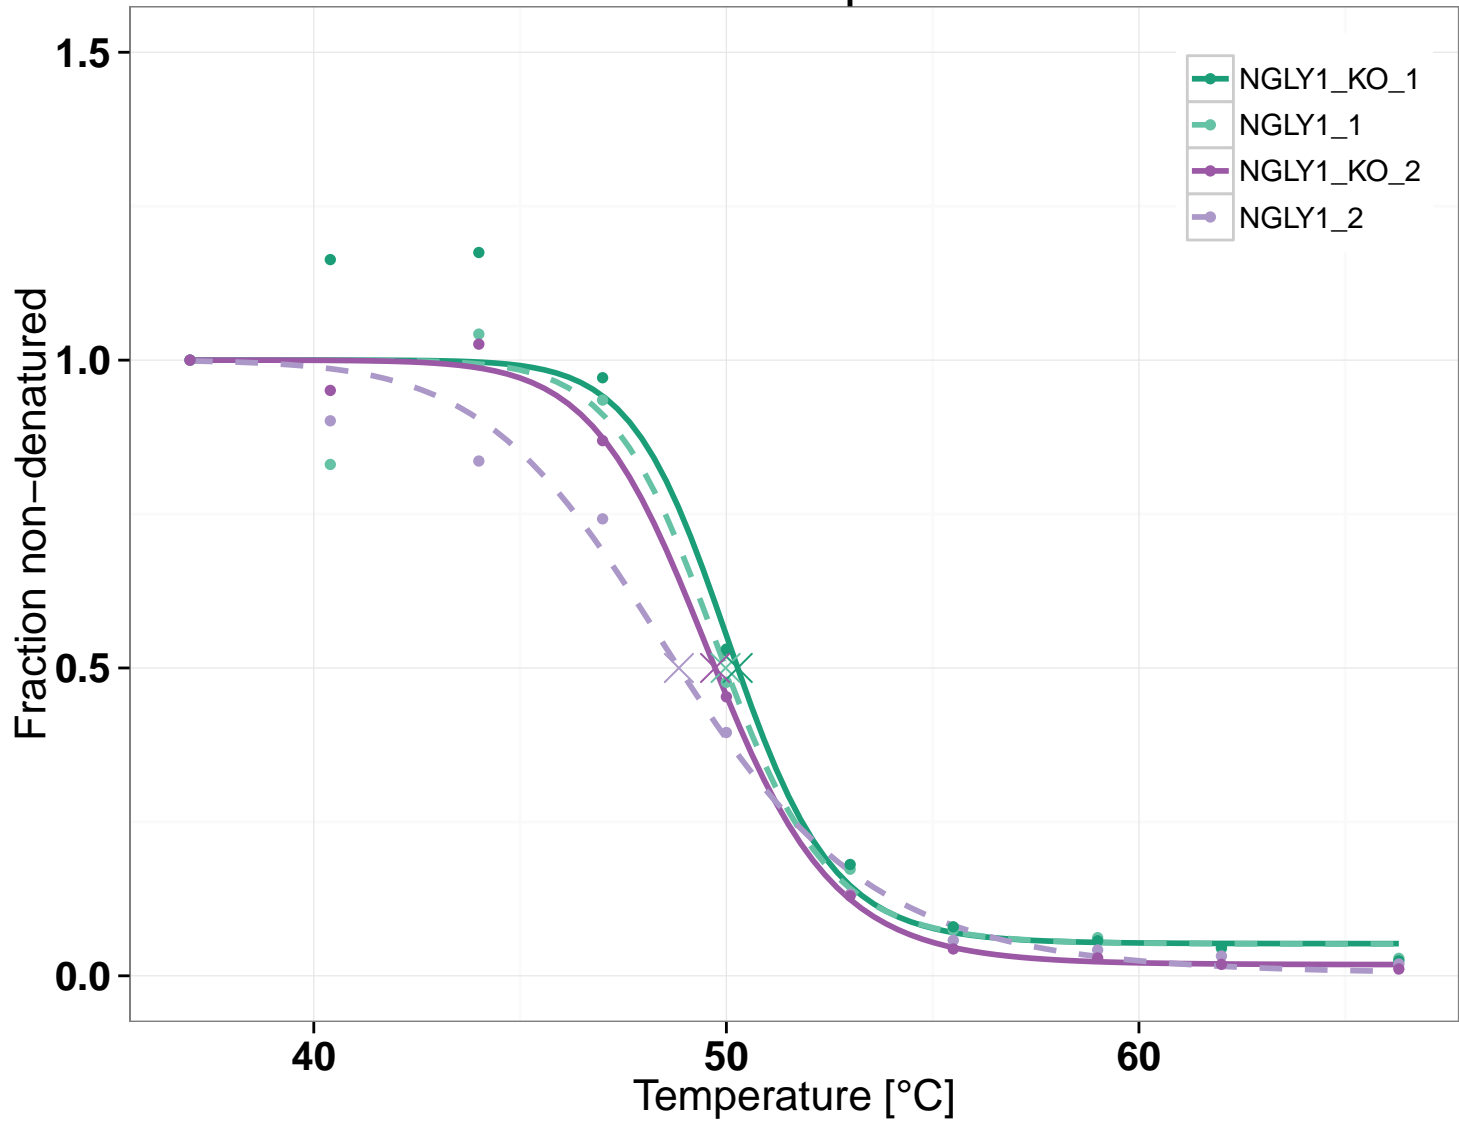

|            | meltPoint | slope | plateau | R2   |
|------------|-----------|-------|---------|------|
| NGLY1_KO_1 | 50.27     | -0.19 | 0.05    | 0.97 |
| NGLY1_1    | 49.98     | -0.18 | 0.05    | 0.98 |
| NGLY1_KO_2 | 49.73     | -0.17 | 0.02    | 1    |
| NGLY1_2    | 48.85     | -0.11 | 0       | 0.99 |

Supplement: Supplementary file 8139 [file 1]

IPI00400834.1|MED13L

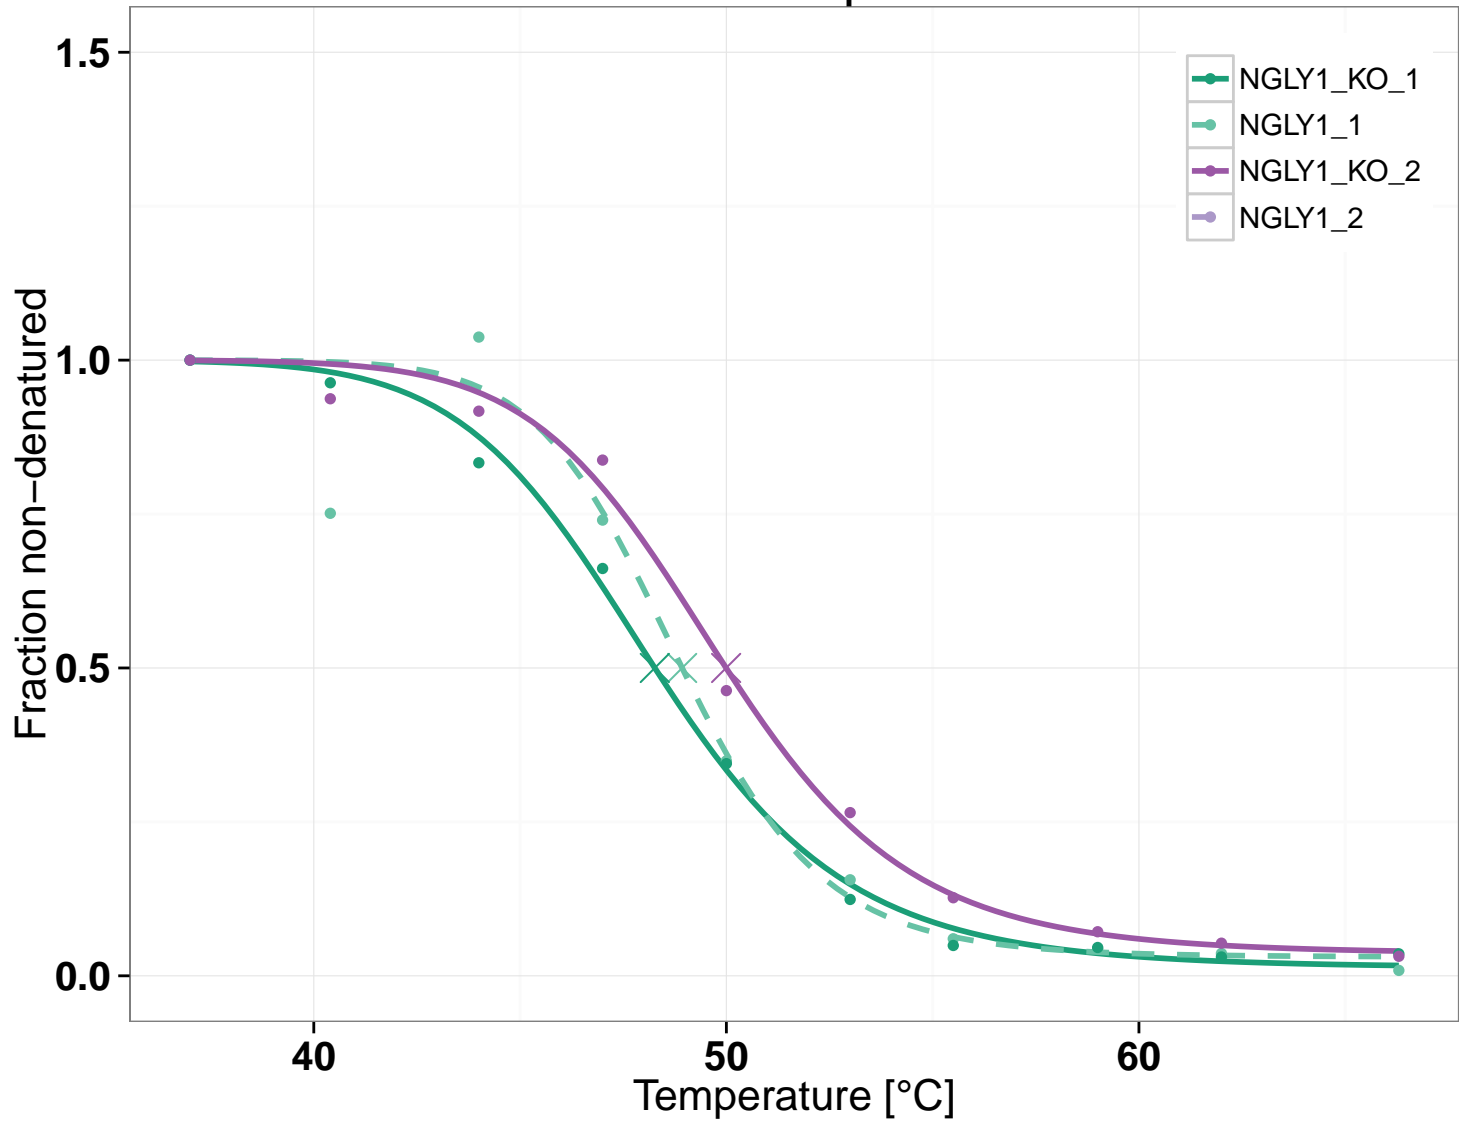

|            | meltPoint | slope | plateau | R2   |
|------------|-----------|-------|---------|------|
| NGLY1_KO_1 | 48.27     | -0.1  | 0.01    | 1    |
| NGLY1_1    | 48.93     | -0.14 | 0.03    | 0.96 |
| NGLY1_KO_2 | 49.99     | -0.11 | 0.04    | 0.99 |
| NGLY1_2    | -         | -     | -       | -    |

Supplement: Supplementary file 8140 [file 1]

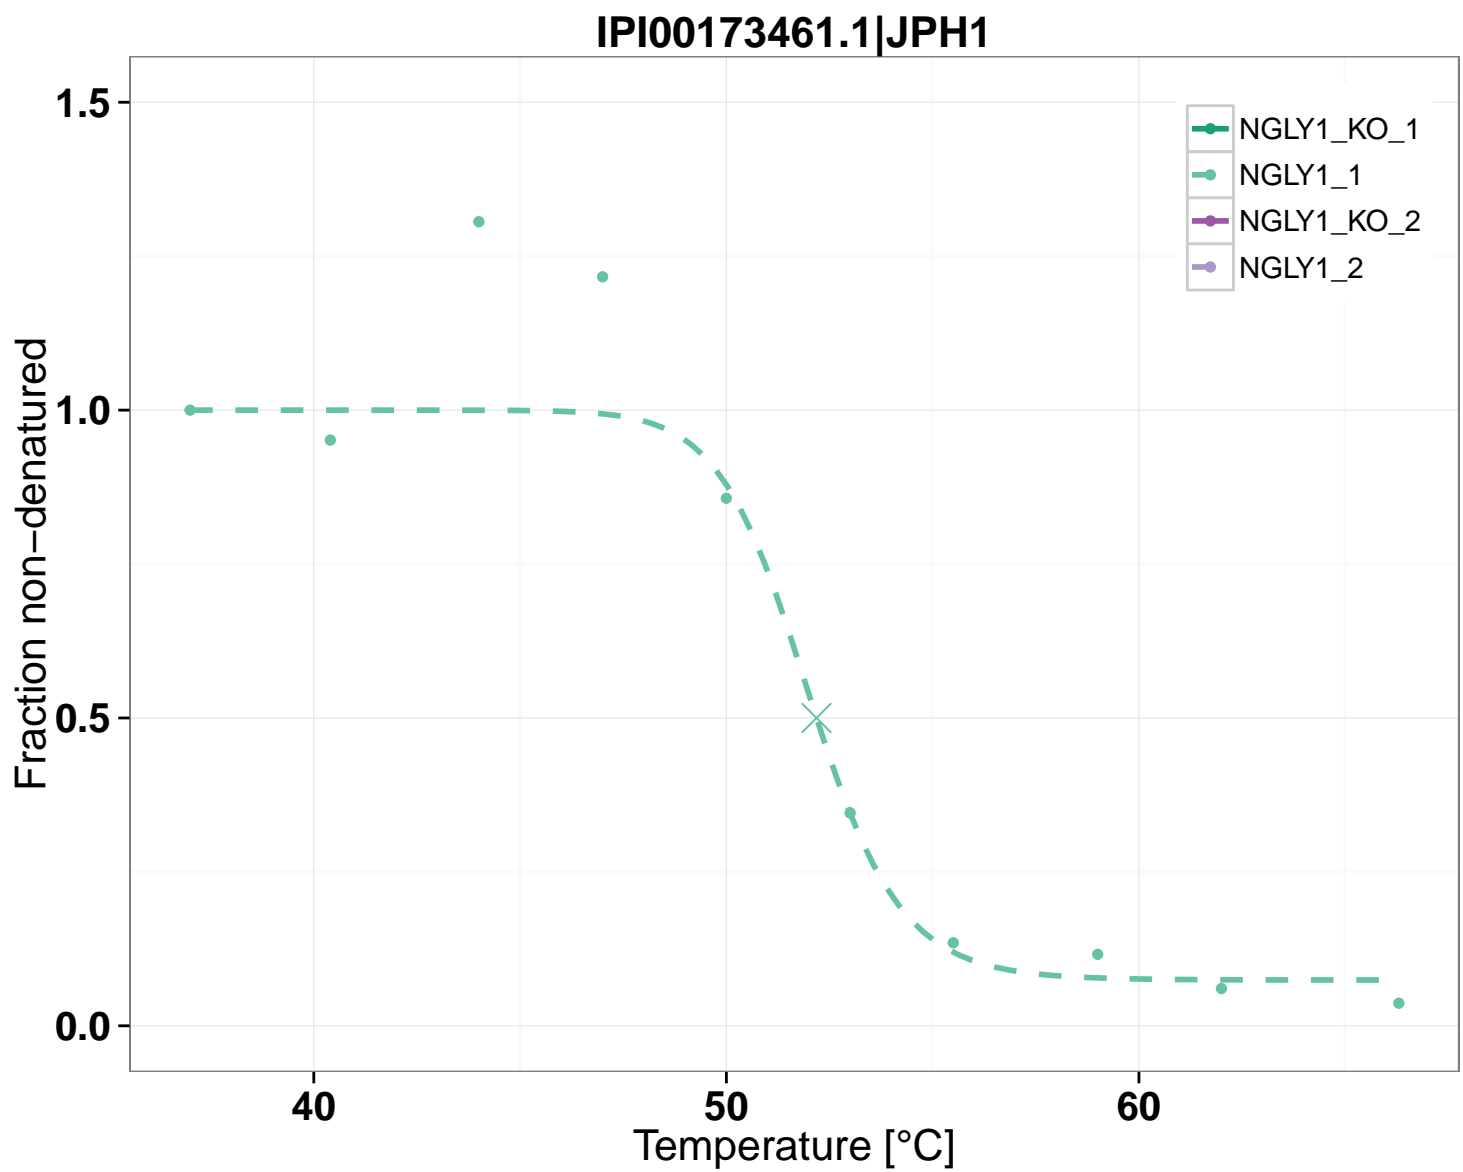

|            | meltPoint | slope | plateau | R2   |
|------------|-----------|-------|---------|------|
| NGLY1_KO_1 | —         | —     | —       | —    |
| NGLY1_1    | 52.18     | -0.21 | 0.07    | 0.94 |
| NGLY1_KO_2 | —         | —     | —       | —    |
| NGLY1_2    | —         | —     | —       | —    |

Supplement: Supplementary file 8141 [file 1]

# IPI00440493.2|ATP5A1

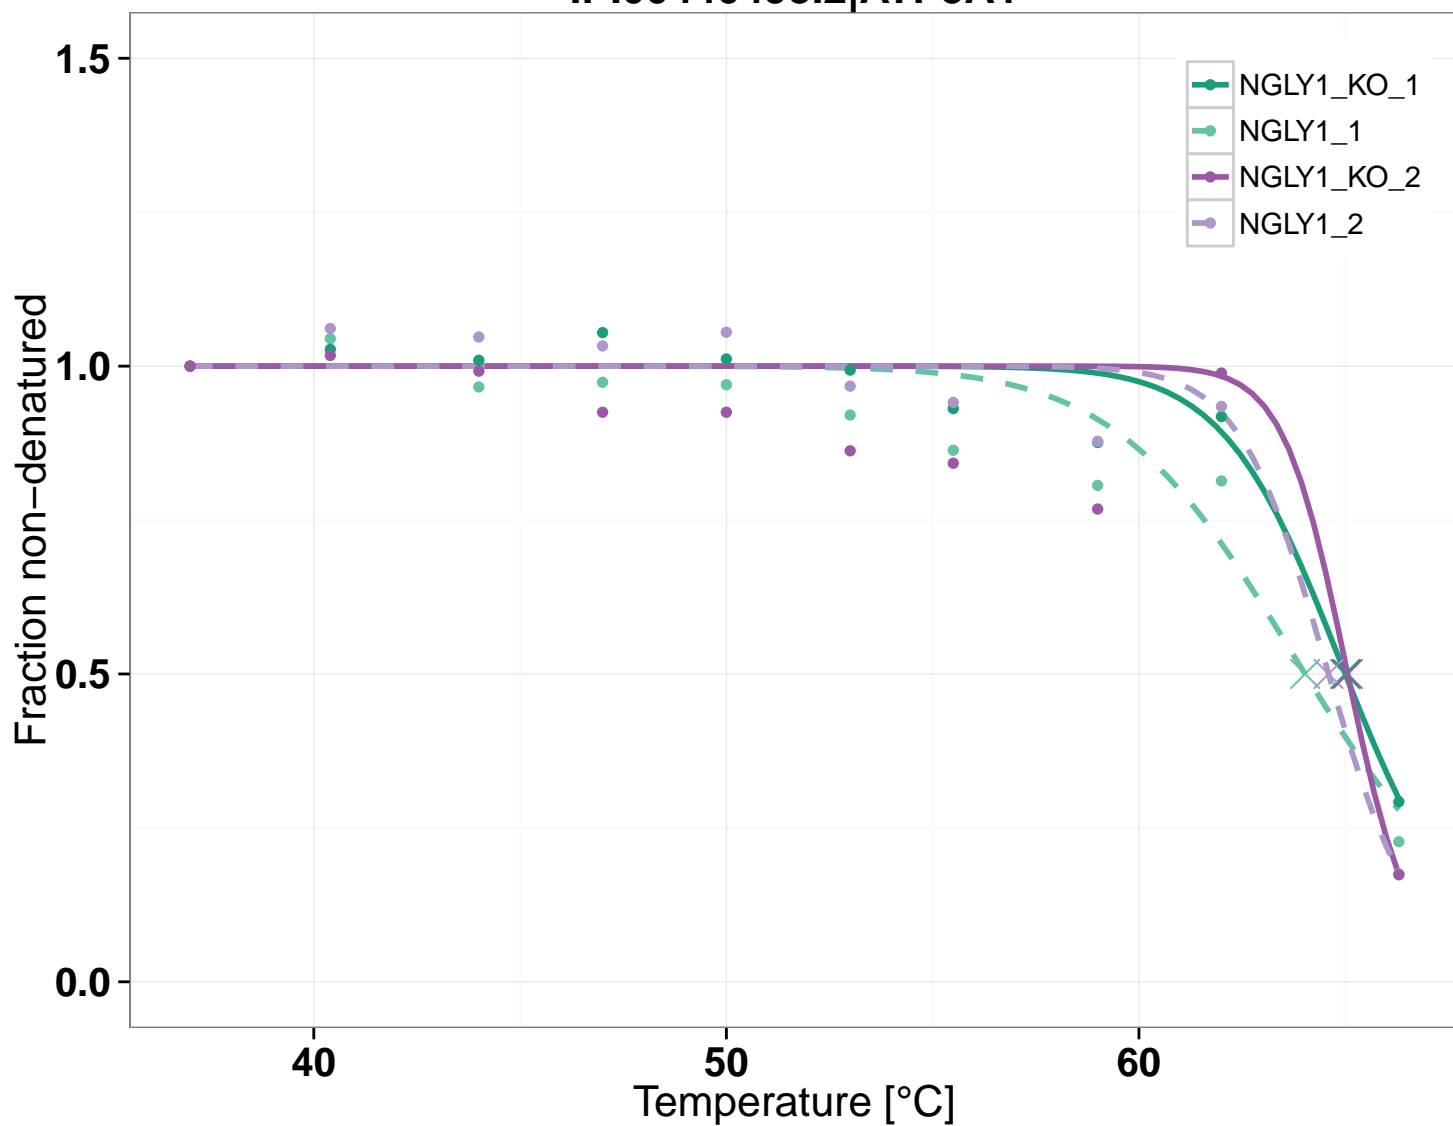

|            | meltPoint | slope | plateau | R2   |
|------------|-----------|-------|---------|------|
| NGLY1_KO_1 | 65        | -0.17 | 0       | 0.95 |
| NGLY1_1    | 64.03     | -0.11 | 0       | 0.9  |
| NGLY1_KO_2 | 65.06     | -0.32 | 0       | 0.81 |
| NGLY1_2    | 64.6      | -0.23 | 0       | 0.95 |

Supplement: Supplementary file 8142 [file 1]

IPI00023939.1|RABIF

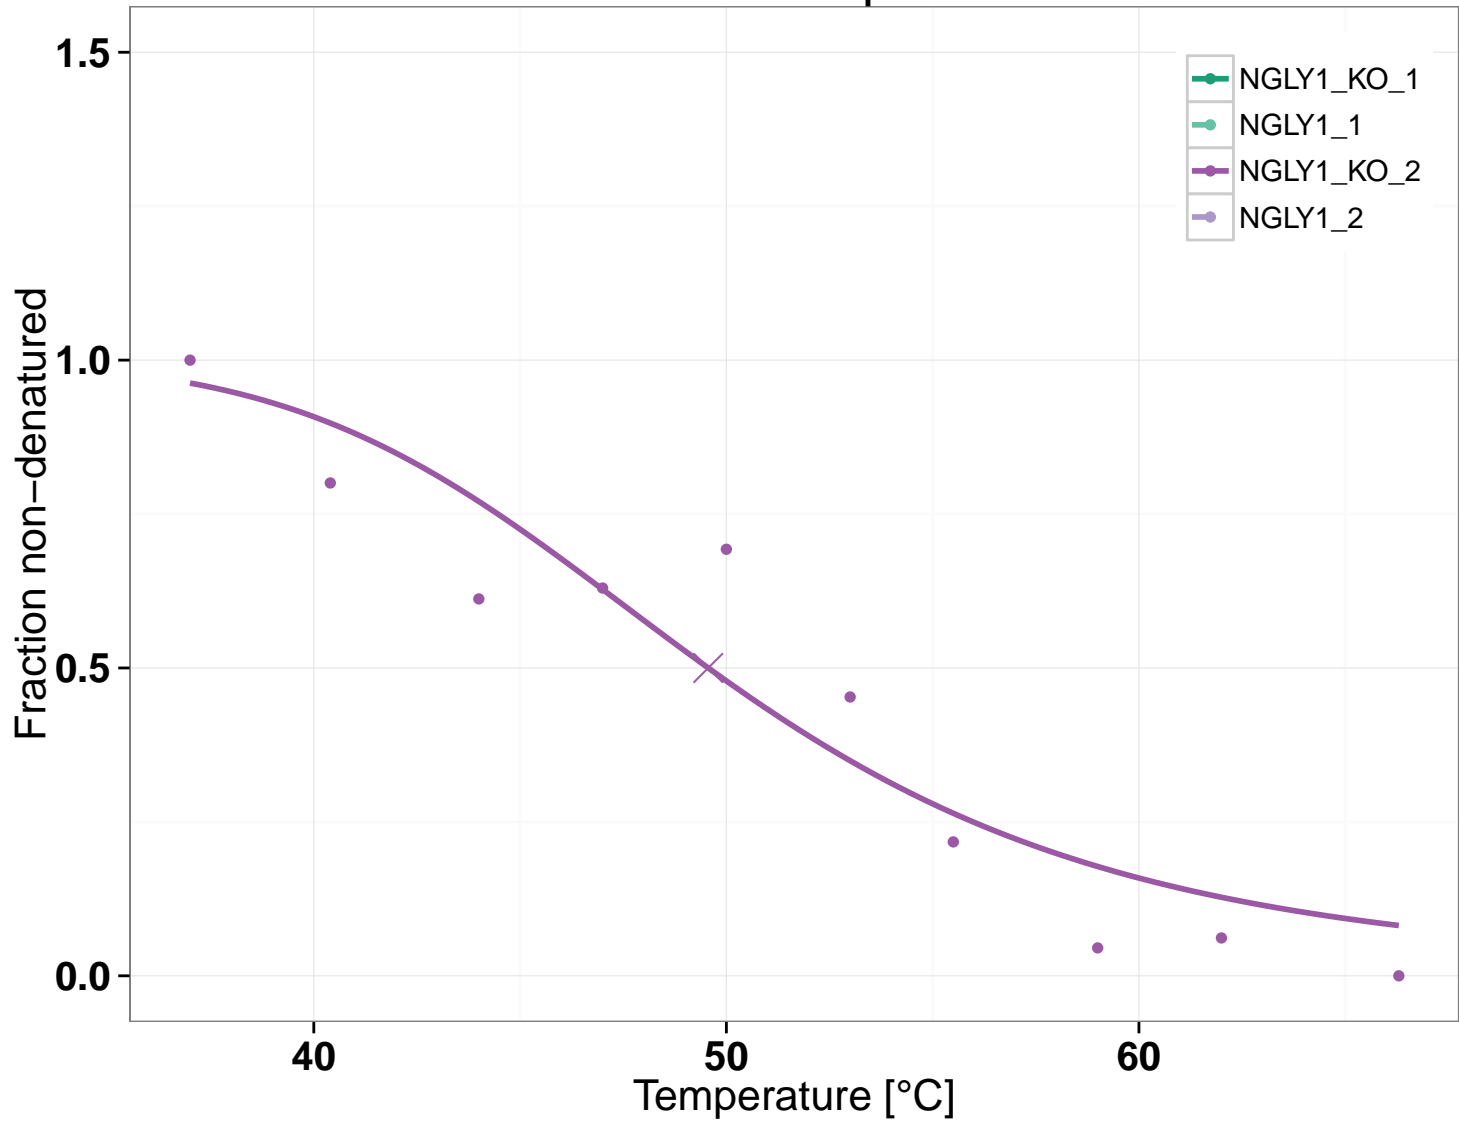

|            | meltPoint | slope | plateau | R2   |
|------------|-----------|-------|---------|------|
| NGLY1_KO_1 | —         | —     | —       | —    |
| NGLY1_1    | —         | —     | —       | —    |
| NGLY1_KO_2 | 49.56     | -0.05 | 0       | 0.89 |
| NGLY1_2    | —         | —     | —       | —    |

Supplement: Supplementary file 8143 [file 1]

# IPI00010860.1|PSMD9

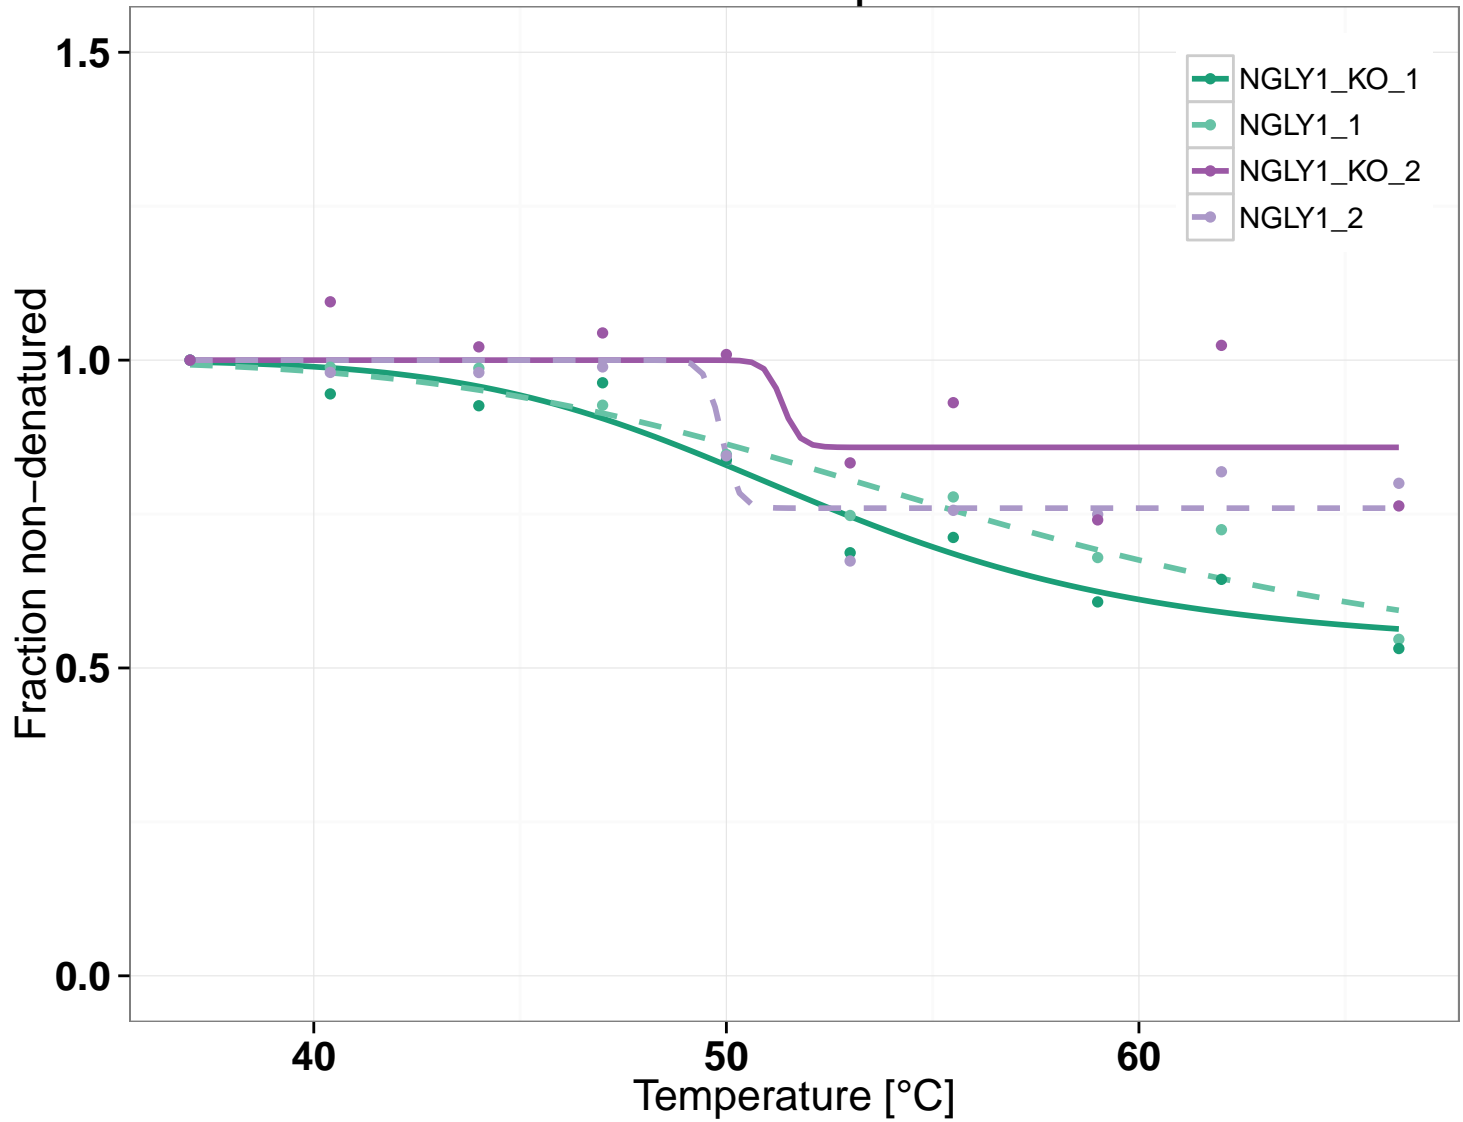

|            | meltPoint | slope  | plateau | R2   |
|------------|-----------|--------|---------|------|
| NGLY1_KO_1 | –         | –0.028 | 0.53    | 0.94 |
| NGLY1_1    | –         | –0.02  | 0.46    | 0.93 |
| NGLY1_KO_2 | –         | –0.17  | 0.86    | 0.51 |
| NGLY1_2    | –         | –0.3   | 0.76    | 0.89 |

Supplement: Supplementary file 8144 [file 1]

IPI00794485.1|CYB561

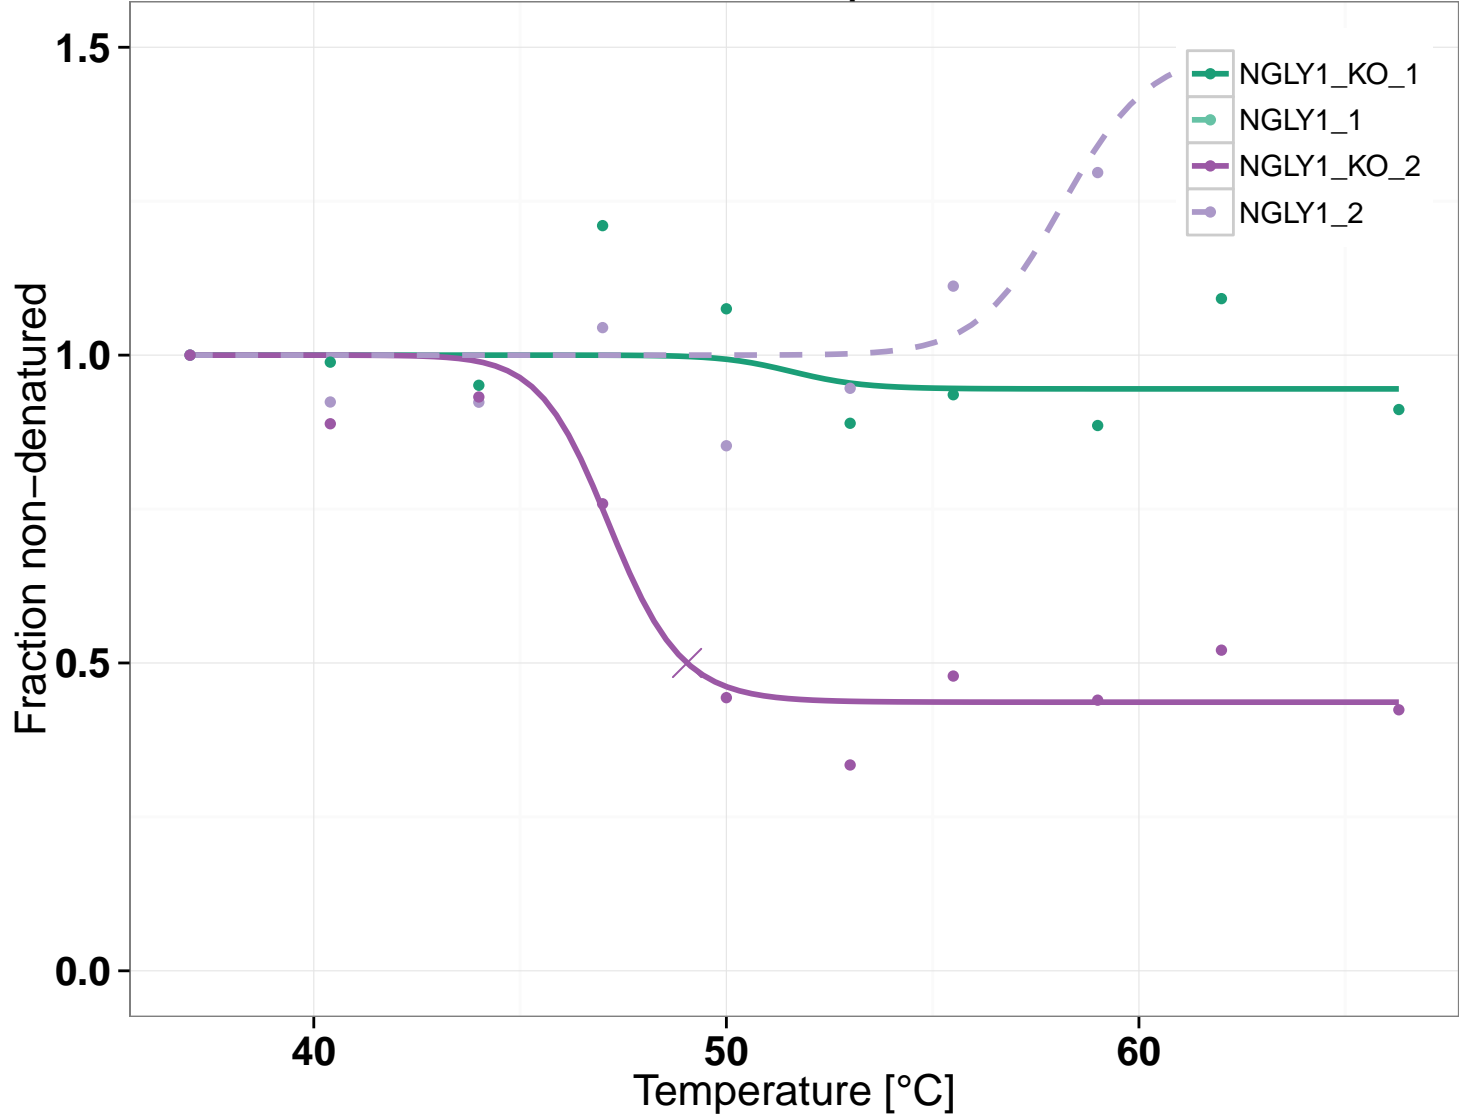

|            | meltPoint | slope  | plateau | R2   |
|------------|-----------|--------|---------|------|
| NGLY1_KO_1 | -         | -0.016 | 0.95    | 0.14 |
| NGLY1_1    | -         | -      | -       | -    |
| NGLY1_KO_2 | 49.05     | -0.16  | 0.44    | 0.93 |
| NGLY1_2    | -         | 0.12   | 1.5     | 0.77 |

Supplement: Supplementary file 8145 [file 1]

IPI00607584.1|MYBBP1A

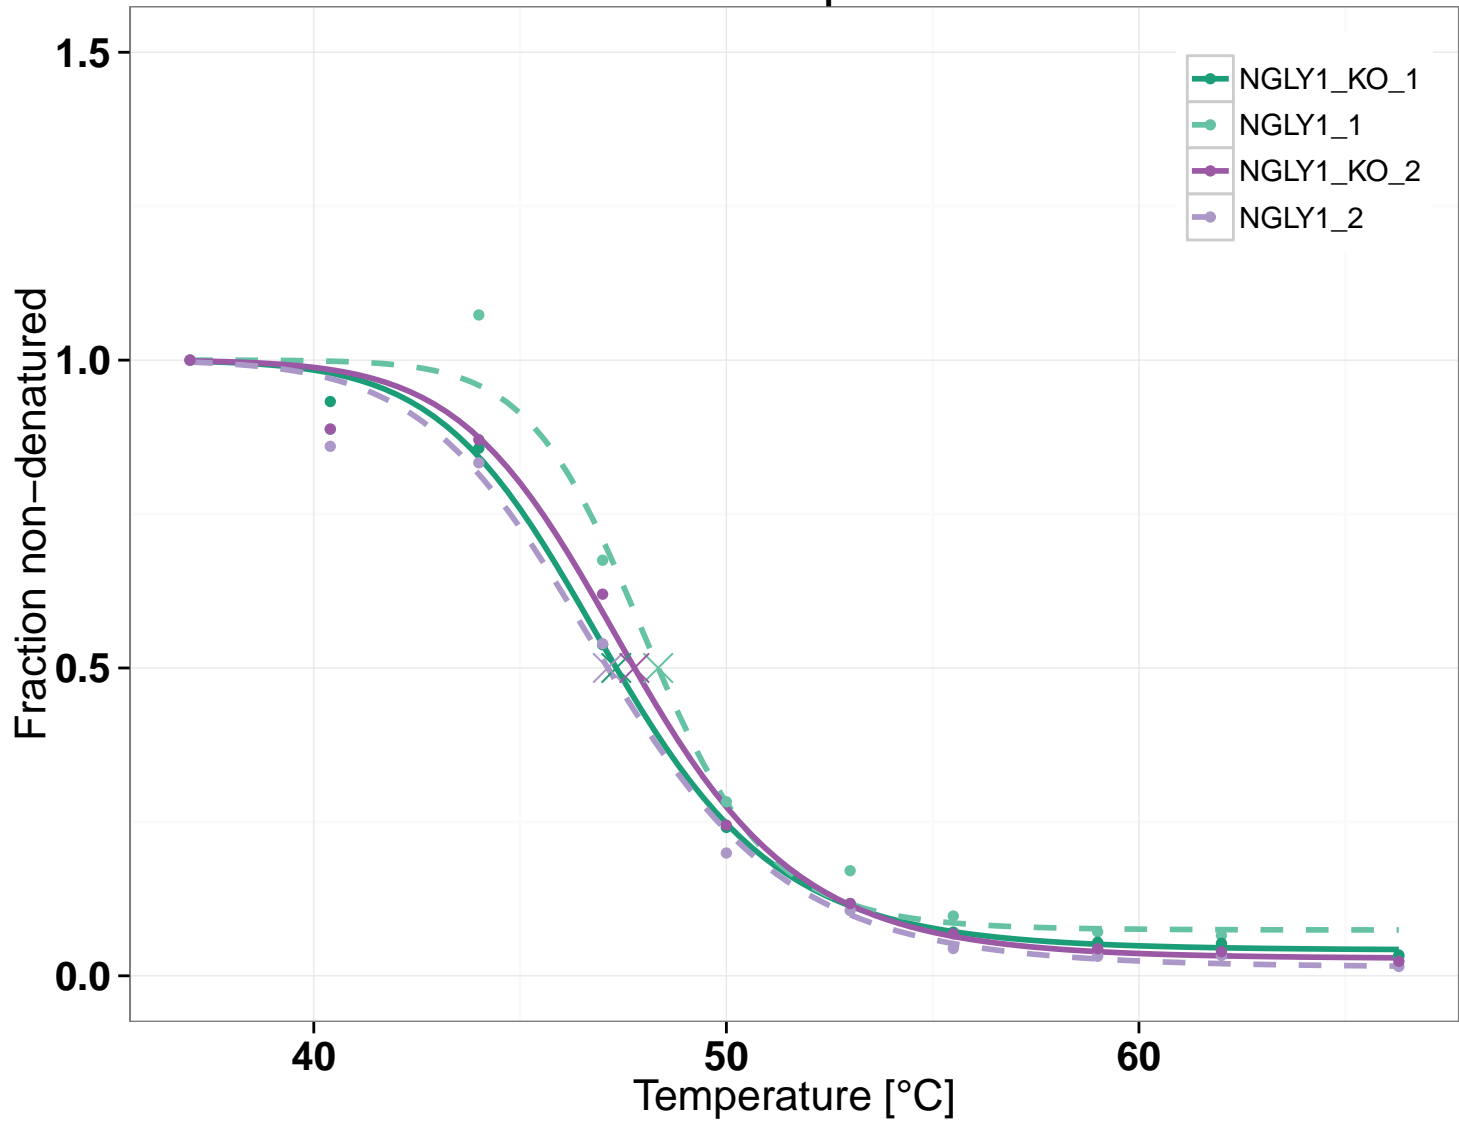

|            | meltPoint | slope | plateau | R2   |
|------------|-----------|-------|---------|------|
| NGLY1_KO_1 | 47.33     | -0.12 | 0.04    | 1    |
| NGLY1_1    | 48.35     | -0.16 | 0.07    | 0.98 |
| NGLY1_KO_2 | 47.77     | -0.12 | 0.03    | 0.99 |
| NGLY1_2    | 47.13     | -0.11 | 0.01    | 0.99 |

Supplement: Supplementary file 8146 [file 1]

# IPI00465054.2|THUMPD1

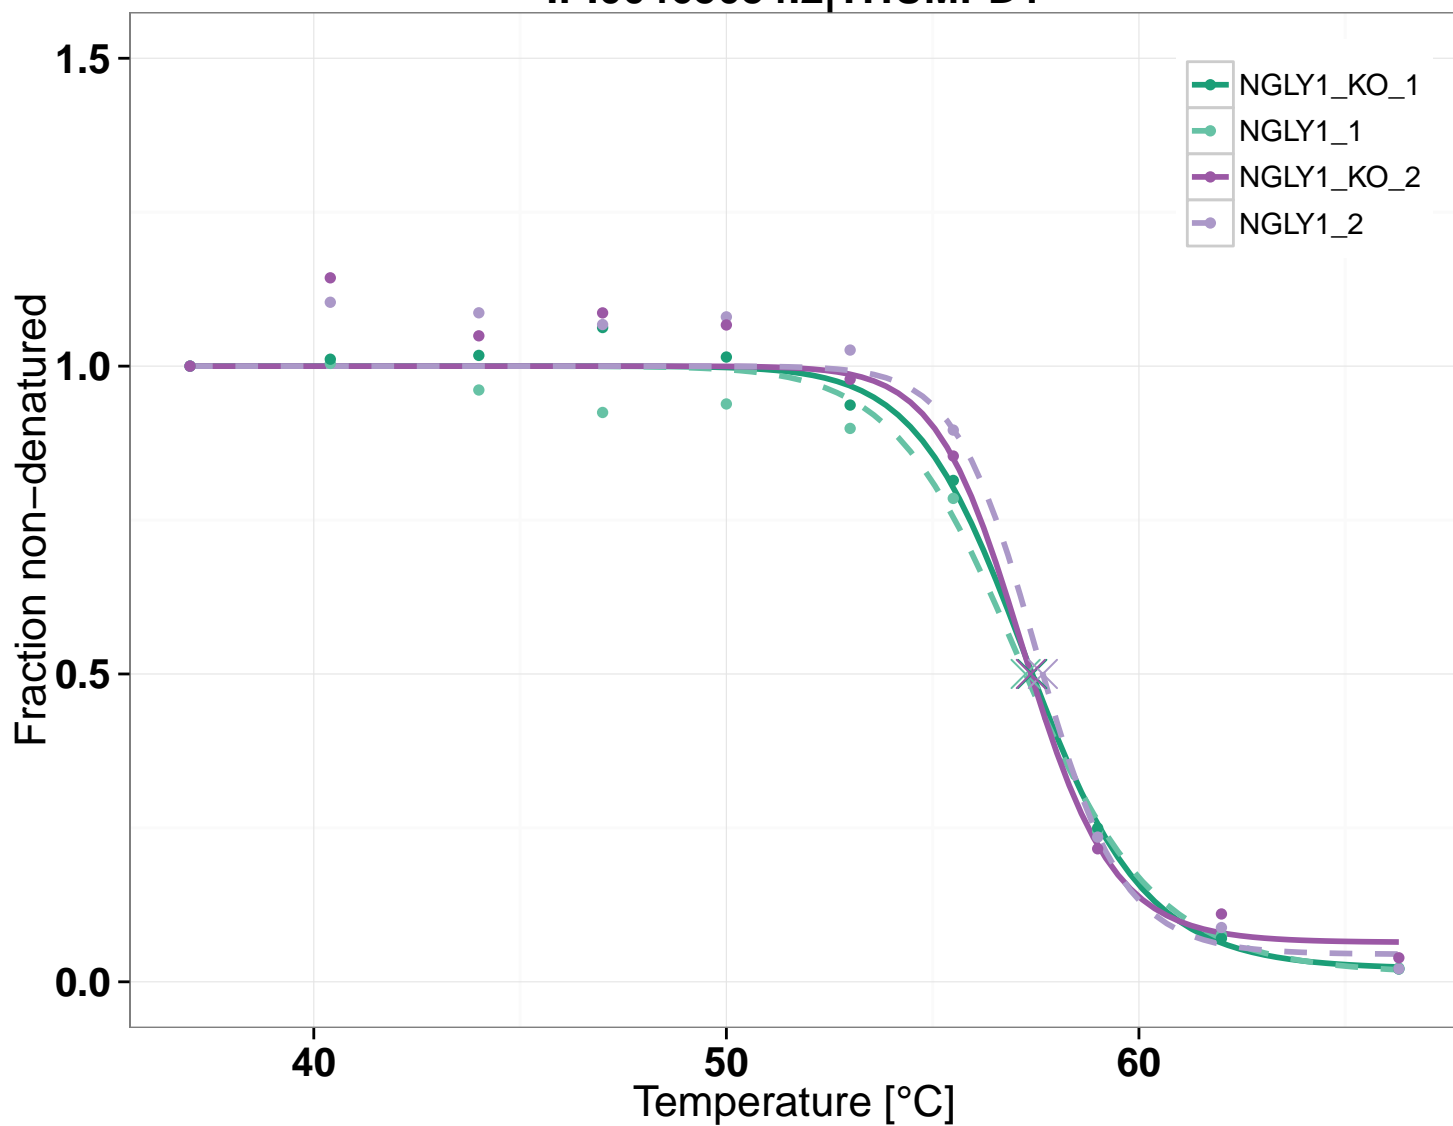

|            | meltPoint | slope | plateau | R2   |
|------------|-----------|-------|---------|------|
| NGLY1_KO_1 | 57.41     | -0.18 | 0.02    | 1    |
| NGLY1_1    | 57.25     | -0.16 | 0.01    | 0.99 |
| NGLY1_KO_2 | 57.38     | -0.22 | 0.06    | 0.98 |
| NGLY1_2    | 57.67     | -0.24 | 0.04    | 0.98 |

Supplement: Supplementary file 8147 [file 1]

# IPI00156032.6|KRR1

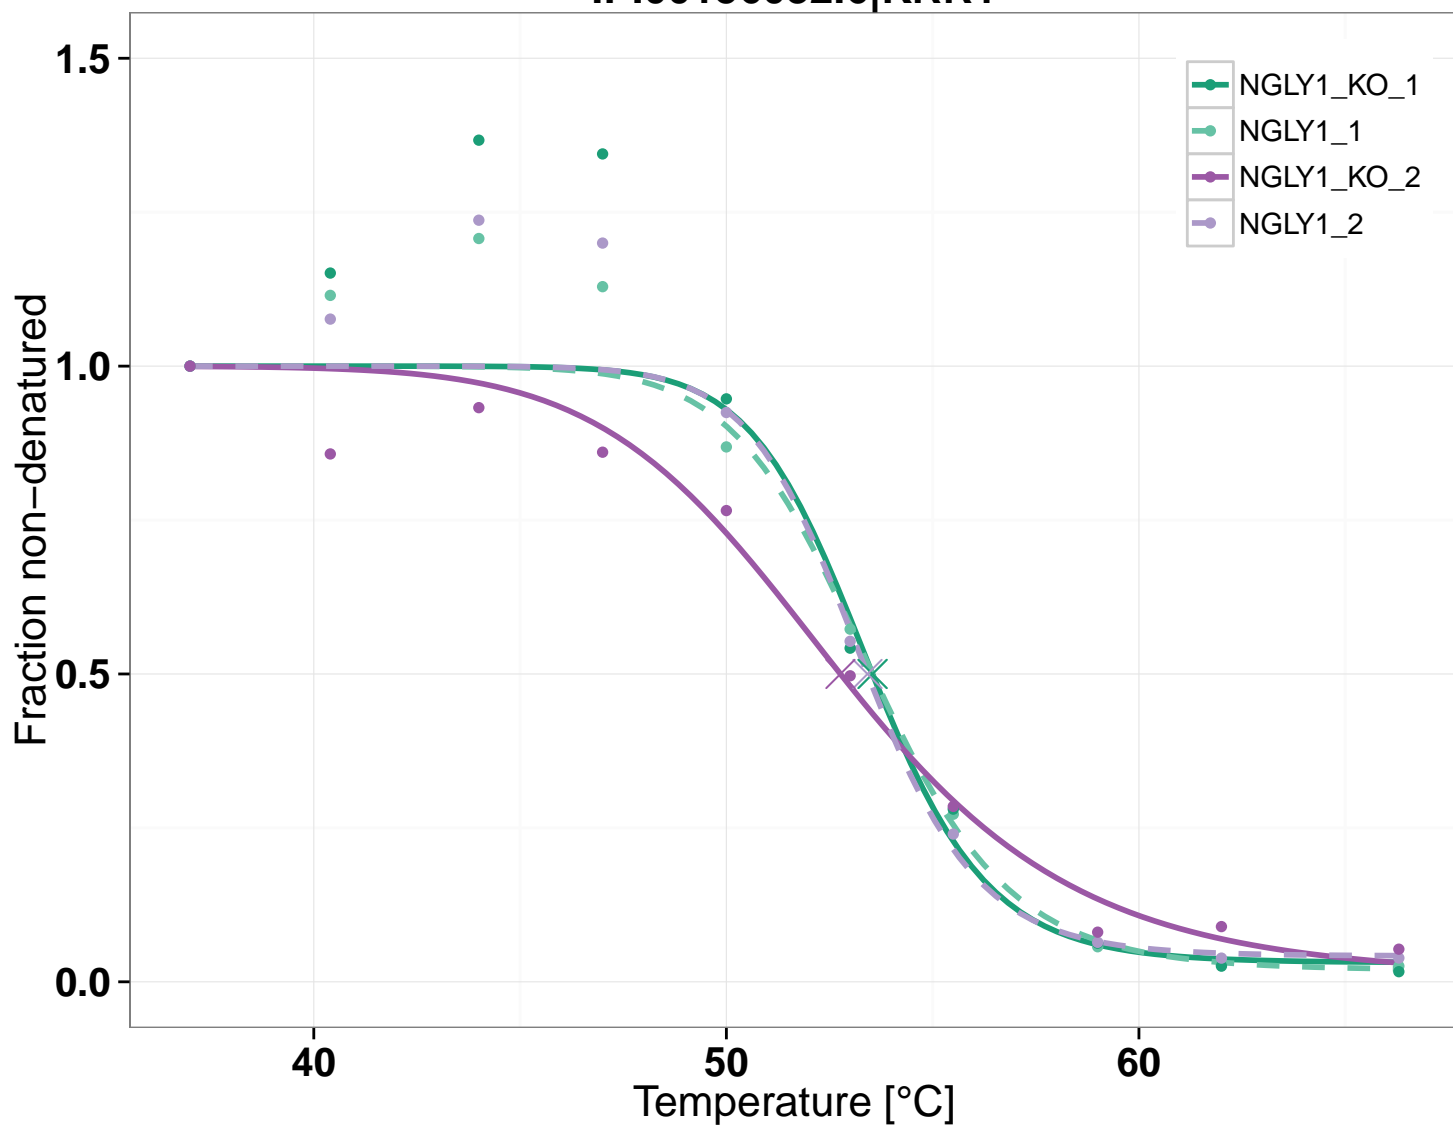

|            | meltPoint | slope  | plateau | R2   |
|------------|-----------|--------|---------|------|
| NGLY1_KO_1 | 53.54     | -0.17  | 0.03    | 0.9  |
| NGLY1_1    | 53.55     | -0.15  | 0.02    | 0.96 |
| NGLY1_KO_2 | 52.76     | -0.086 | 0.01    | 0.98 |
| NGLY1_2    | 53.42     | -0.17  | 0.04    | 0.95 |

Supplement: Supplementary file 8148 [file 1]

IPI00746600.1|B4GALT3

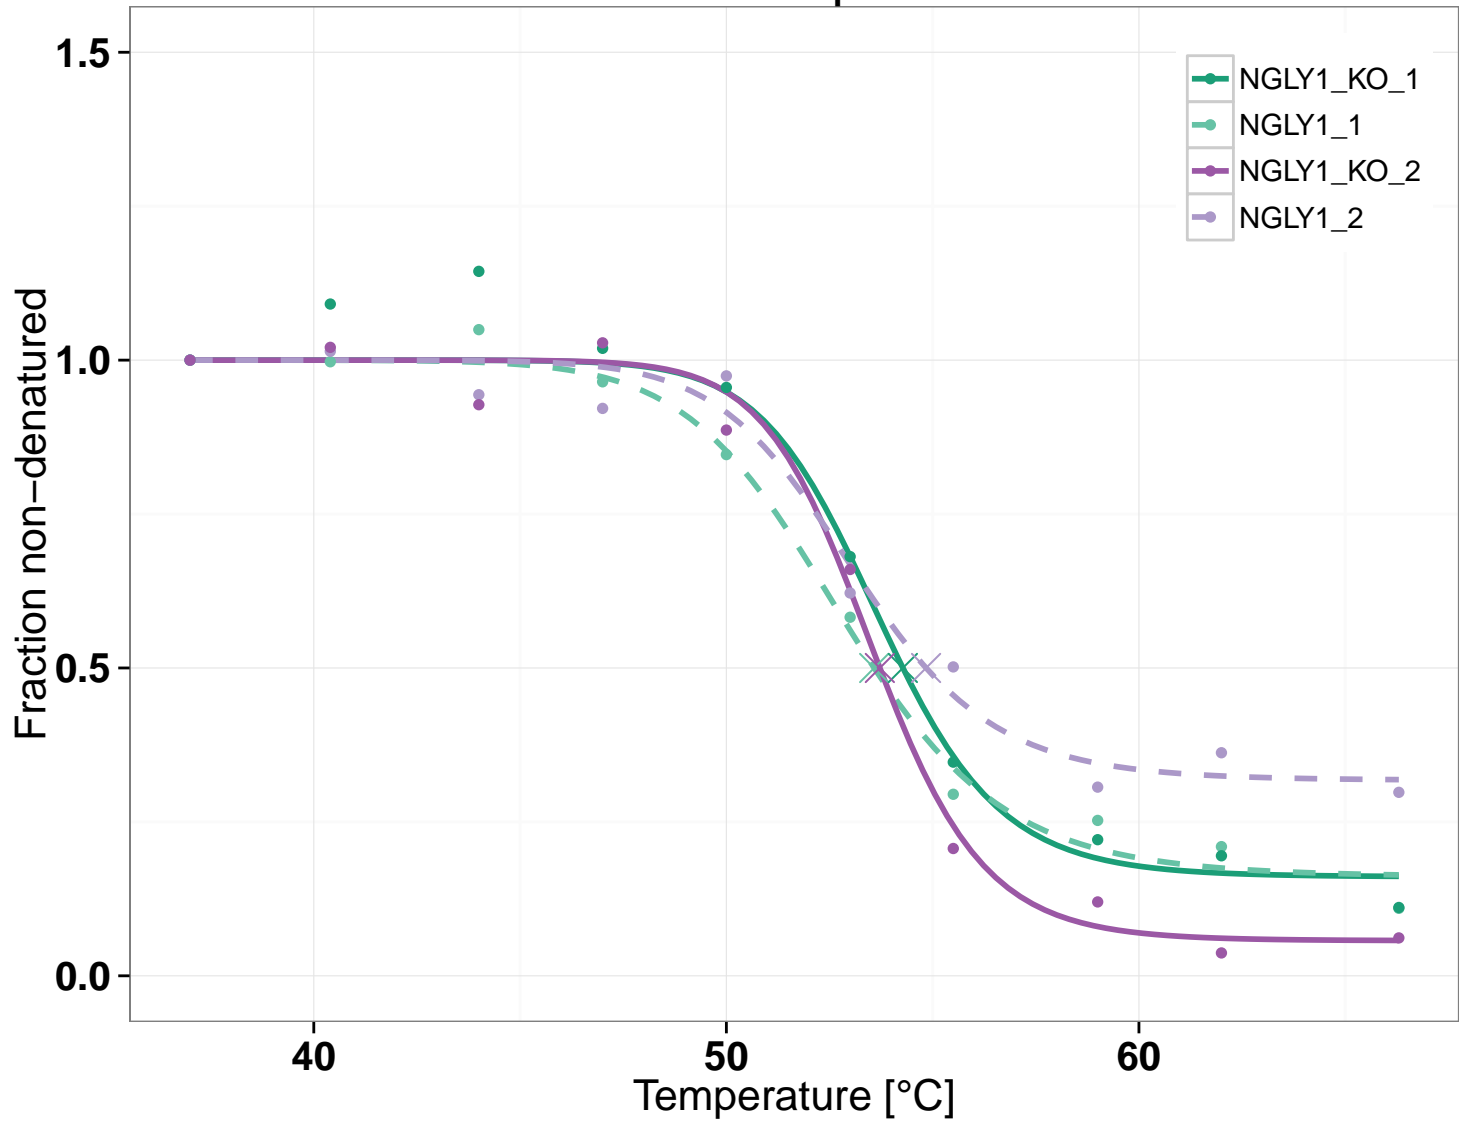

|            | meltPoint | slope | plateau | R2   |
|------------|-----------|-------|---------|------|
| NGLY1_KO_1 | 54.28     | -0.14 | 0.16    | 0.98 |
| NGLY1_1    | 53.58     | -0.11 | 0.16    | 0.99 |
| NGLY1_KO_2 | 53.72     | -0.18 | 0.06    | 0.99 |
| NGLY1_2    | 54.84     | -0.1  | 0.32    | 0.98 |

Supplement: Supplementary file 8149 [file 1]

IPI00418972.3|SLC9A6

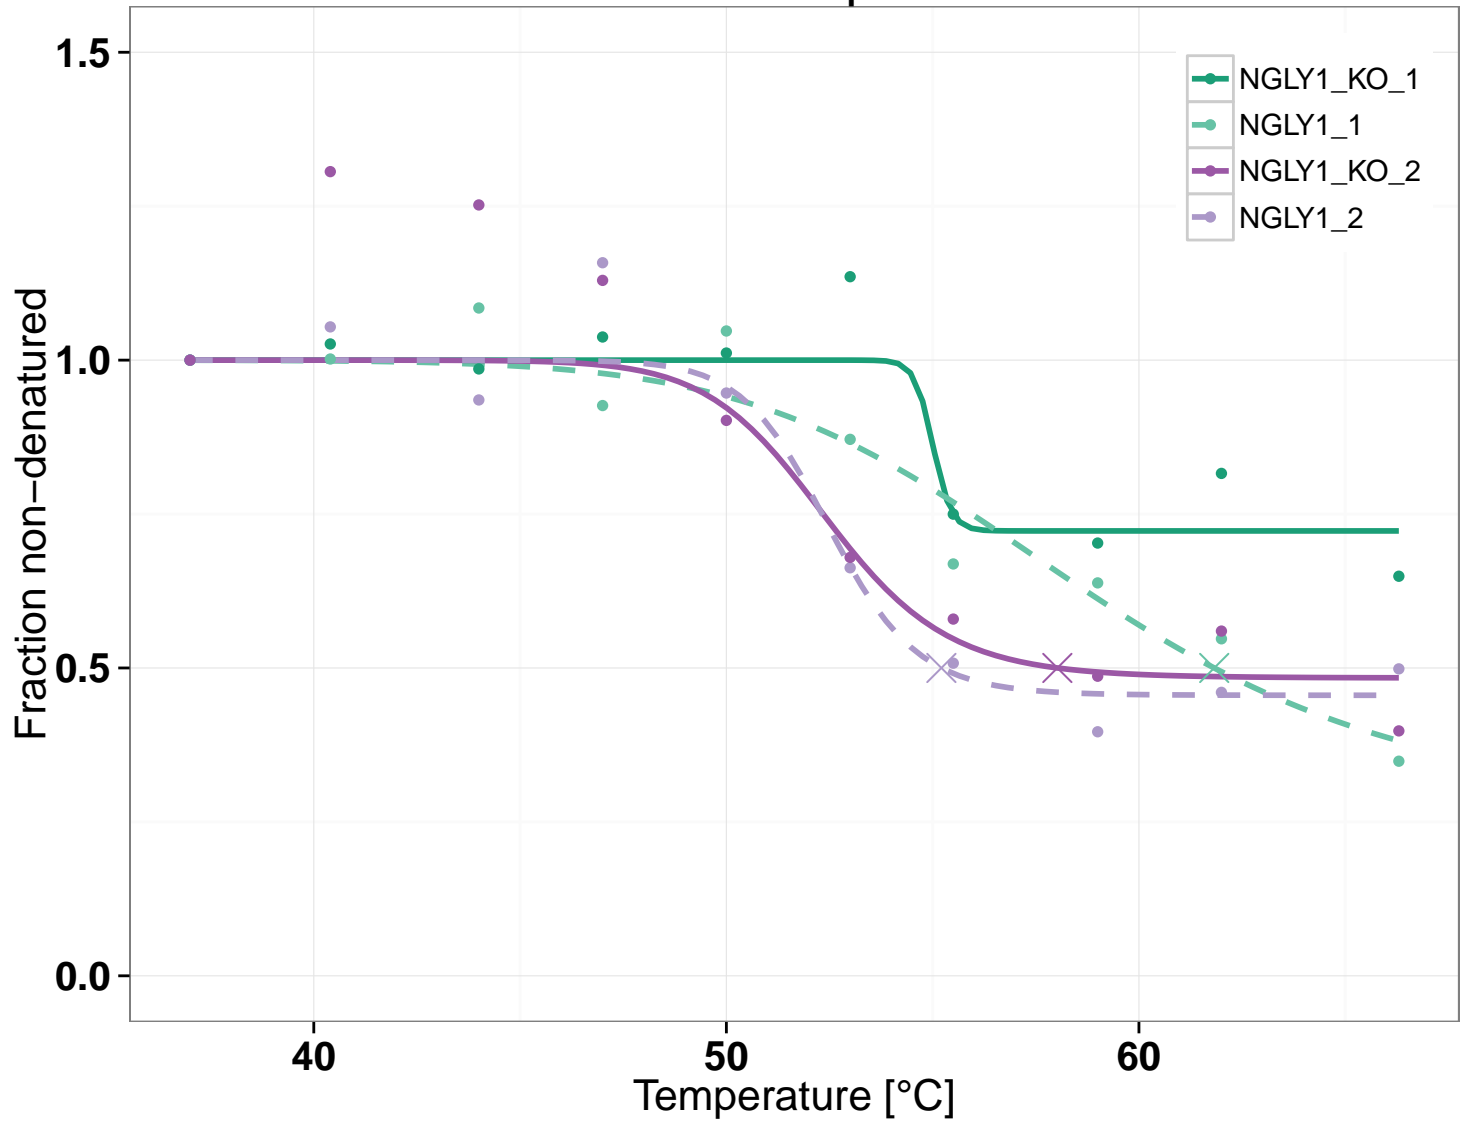

|            | meltPoint | slope  | plateau | R2   |
|------------|-----------|--------|---------|------|
| NGLY1_KO_1 | –         | –0.32  | 0.72    | 0.86 |
| NGLY1_1    | 61.82     | –0.046 | 0.26    | 0.93 |
| NGLY1_KO_2 | 58.02     | –0.088 | 0.48    | 0.81 |
| NGLY1_2    | 55.21     | –0.13  | 0.46    | 0.95 |

Supplement: Supplementary file 8150 [file 1]

IPI00790605.1|KIAA0999

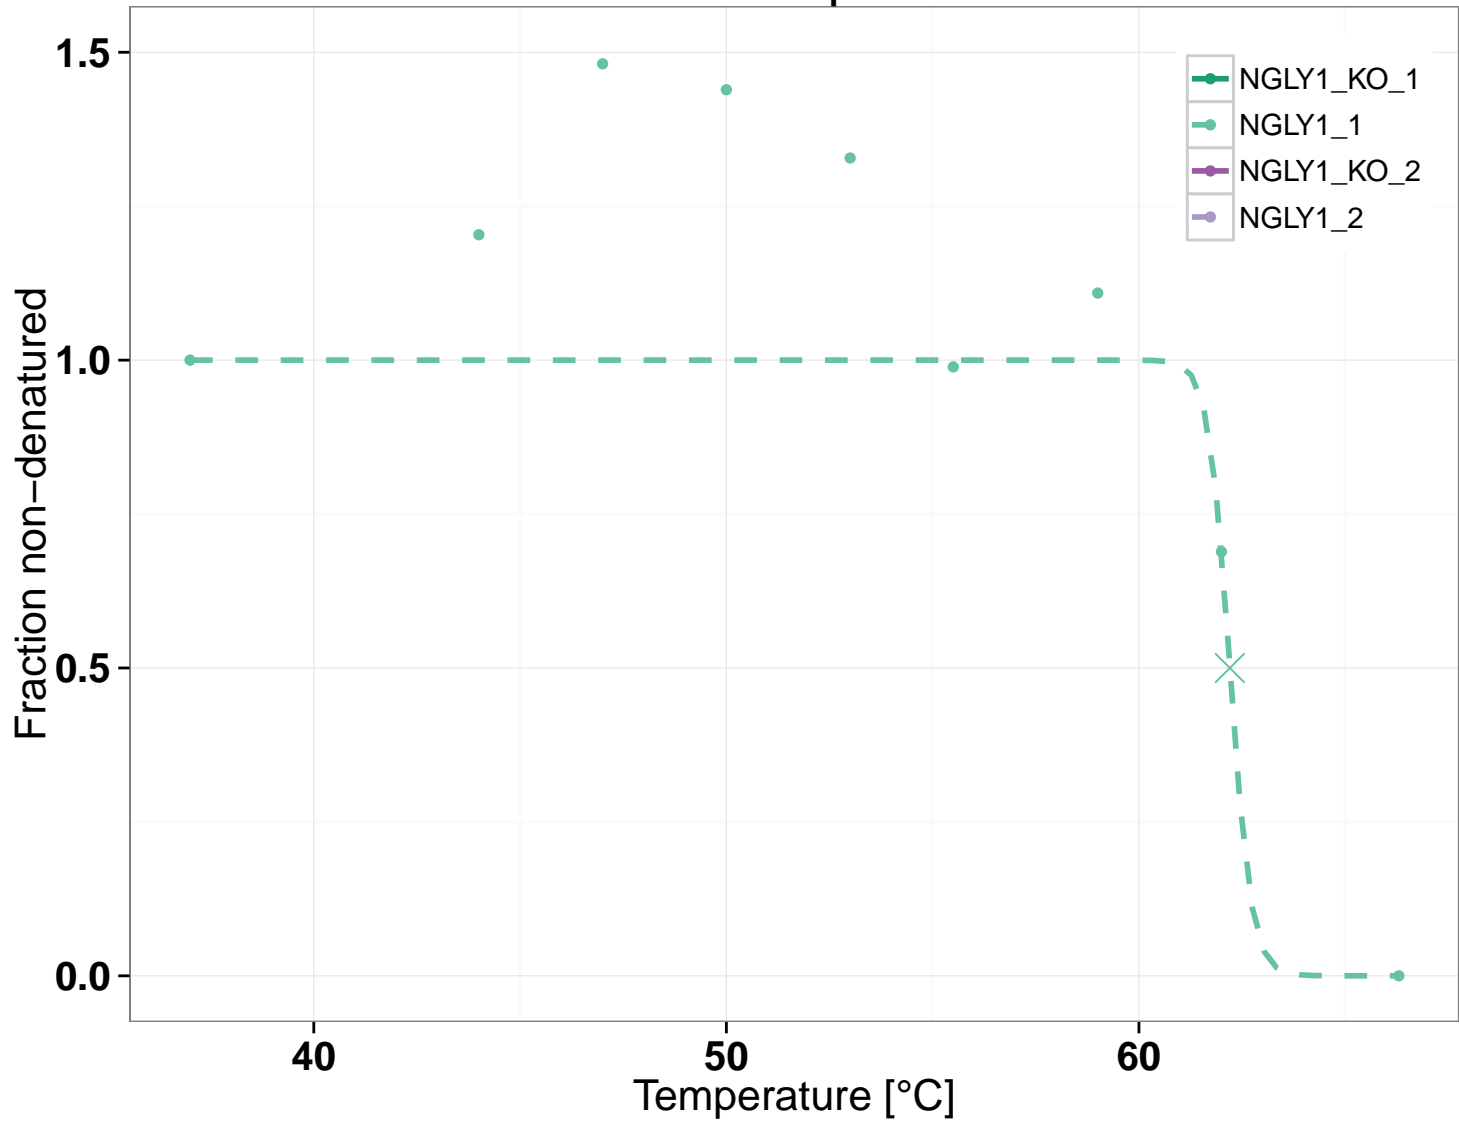

|            | meltPoint | slope | plateau | R2  |
|------------|-----------|-------|---------|-----|
| NGLY1_KO_1 | -         | -     | -       | -   |
| NGLY1_1    | 62.2      | -0.97 | 0       | 0.5 |
| NGLY1_KO_2 | -         | -     | -       | -   |
| NGLY1_2    | -         | -     | -       | -   |

Supplement: Supplementary file 8151 [file 1]

IPI00289601.10|HDAC2

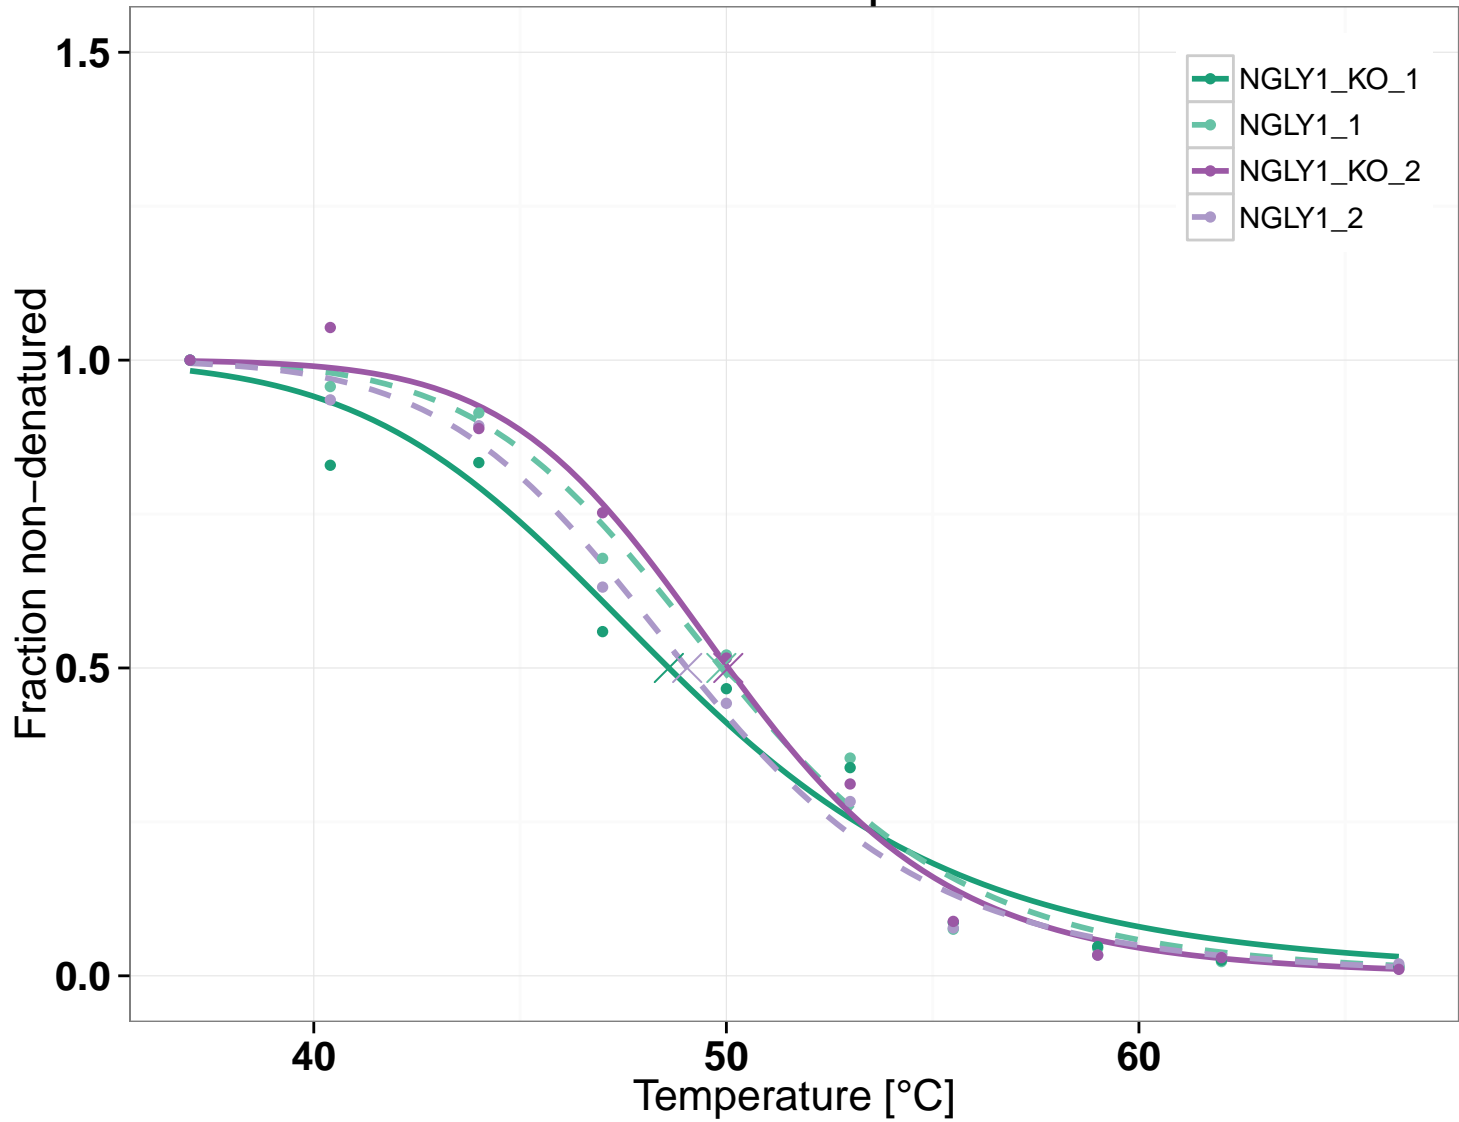

|            | meltPoint | slope  | plateau | R2   |
|------------|-----------|--------|---------|------|
| NGLY1_KO_1 | 48.61     | -0.068 | 0       | 0.97 |
| NGLY1_1    | 49.88     | -0.084 | 0       | 0.99 |
| NGLY1_KO_2 | 50.05     | -0.093 | 0       | 0.99 |
| NGLY1_2    | 49.05     | -0.084 | 0       | 0.99 |

Supplement: Supplementary file 8152 [file 1]

# IPI00553131.2|GALE

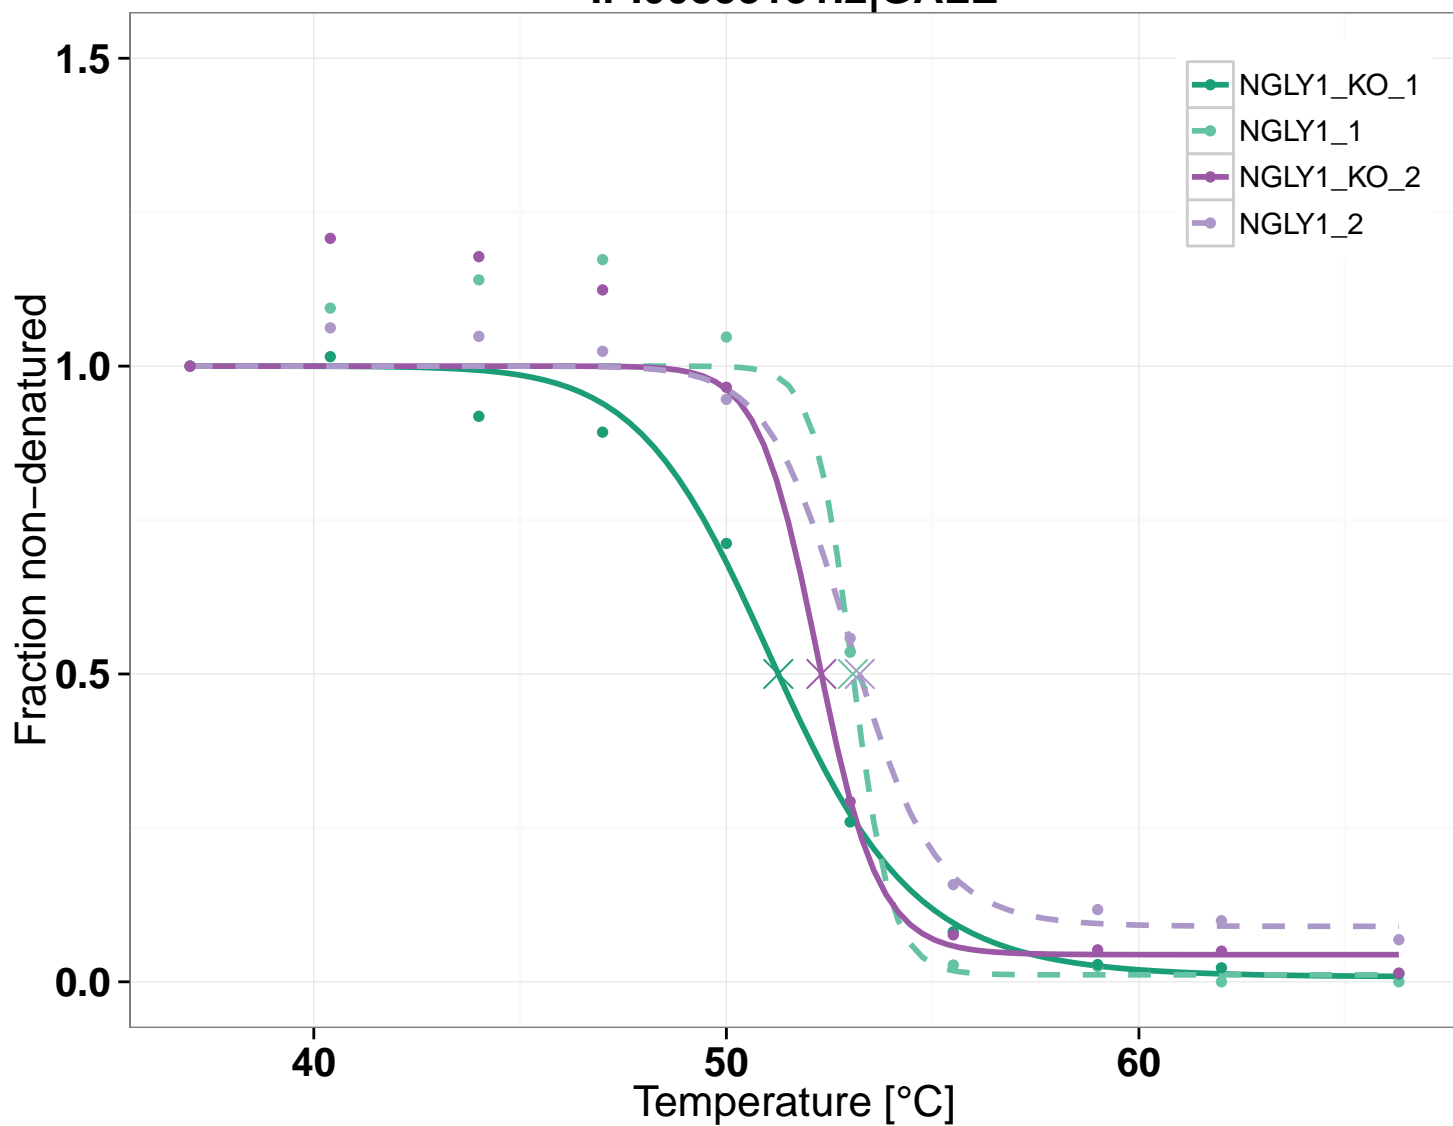

|            | meltPoint | slope | plateau | R2   |
|------------|-----------|-------|---------|------|
| NGLY1_KO_1 | 51.26     | -0.15 | 0.01    | 0.99 |
| NGLY1_1    | 53.07     | -0.53 | 0.01    | 0.98 |
| NGLY1_KO_2 | 52.3      | -0.33 | 0.04    | 0.96 |
| NGLY1_2    | 53.23     | -0.22 | 0.09    | 1    |

Supplement: Supplementary file 8153 [file 1]

# IPI00432040.1|EED

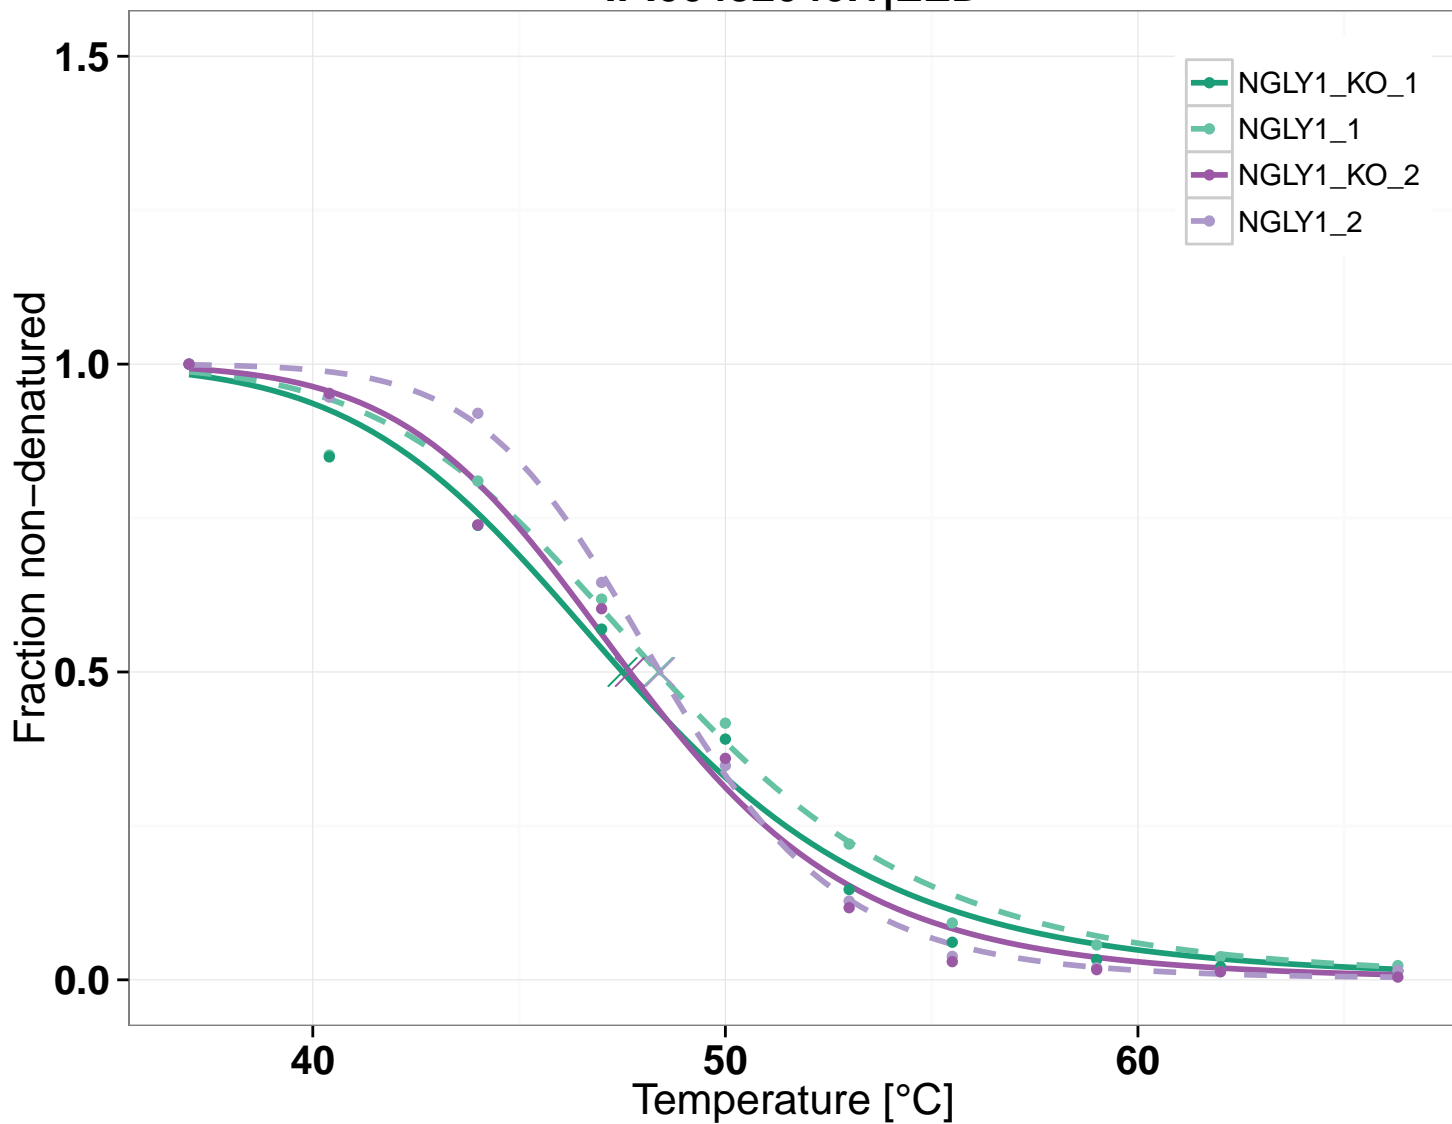

|            | meltPoint | slope  | plateau | R2   |
|------------|-----------|--------|---------|------|
| NGLY1_KO_1 | 47.51     | -0.077 | 0       | 0.99 |
| NGLY1_1    | 48.37     | -0.075 | 0       | 0.99 |
| NGLY1_KO_2 | 47.68     | -0.091 | 0       | 0.99 |
| NGLY1_2    | 48.42     | -0.11  | 0       | 1    |

Supplement: Supplementary file 8154 [file 1]

IPI00083708.3|BAT2D1

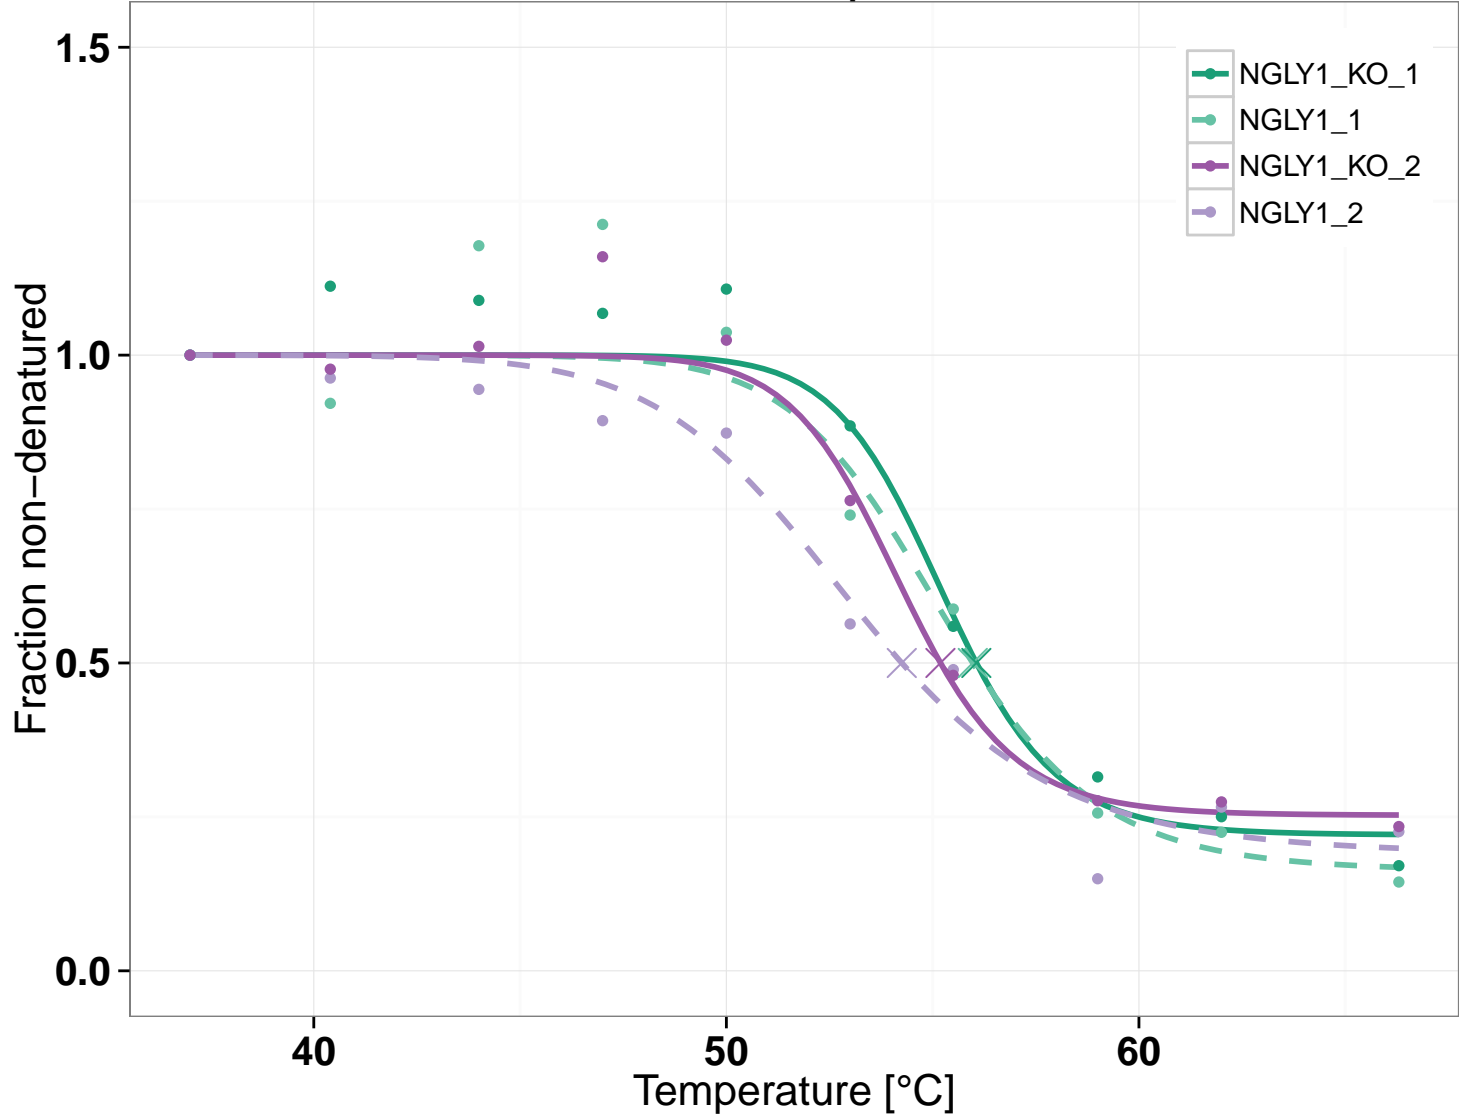

|            | meltPoint | slope  | plateau | R2   |
|------------|-----------|--------|---------|------|
| NGLY1_KO_1 | 56.06     | -0.15  | 0.22    | 0.97 |
| NGLY1_1    | 55.97     | -0.11  | 0.16    | 0.93 |
| NGLY1_KO_2 | 55.19     | -0.14  | 0.25    | 0.97 |
| NGLY1_2    | 54.25     | -0.084 | 0.19    | 0.97 |

Supplement: Supplementary file 8155 [file 1]

IPI00639880.1|C10ORF11

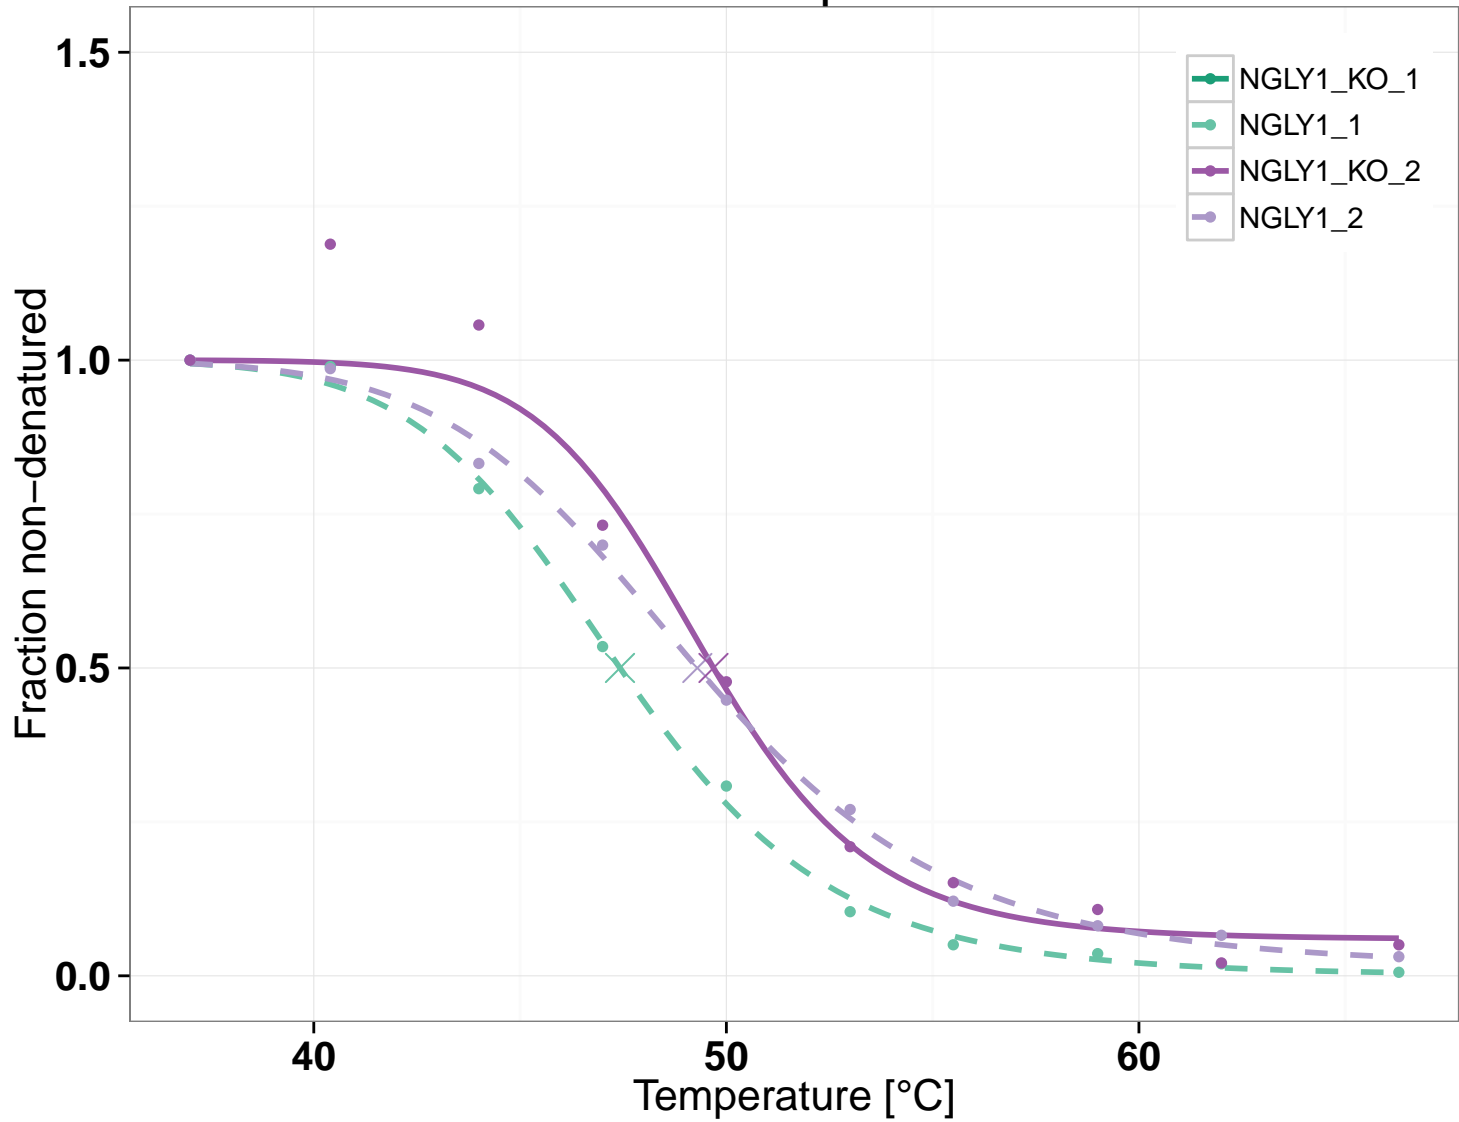

|            | meltPoint | slope  | plateau | R2   |
|------------|-----------|--------|---------|------|
| NGLY1_KO_1 | -         | -      | -       | -    |
| NGLY1_1    | 47.42     | -0.098 | 0       | 1    |
| NGLY1_KO_2 | 49.69     | -0.12  | 0.06    | 0.97 |
| NGLY1_2    | 49.3      | -0.08  | 0.01    | 1    |

Supplement: Supplementary file 8156 [file 1]

IPI00871979.1|CCDC50

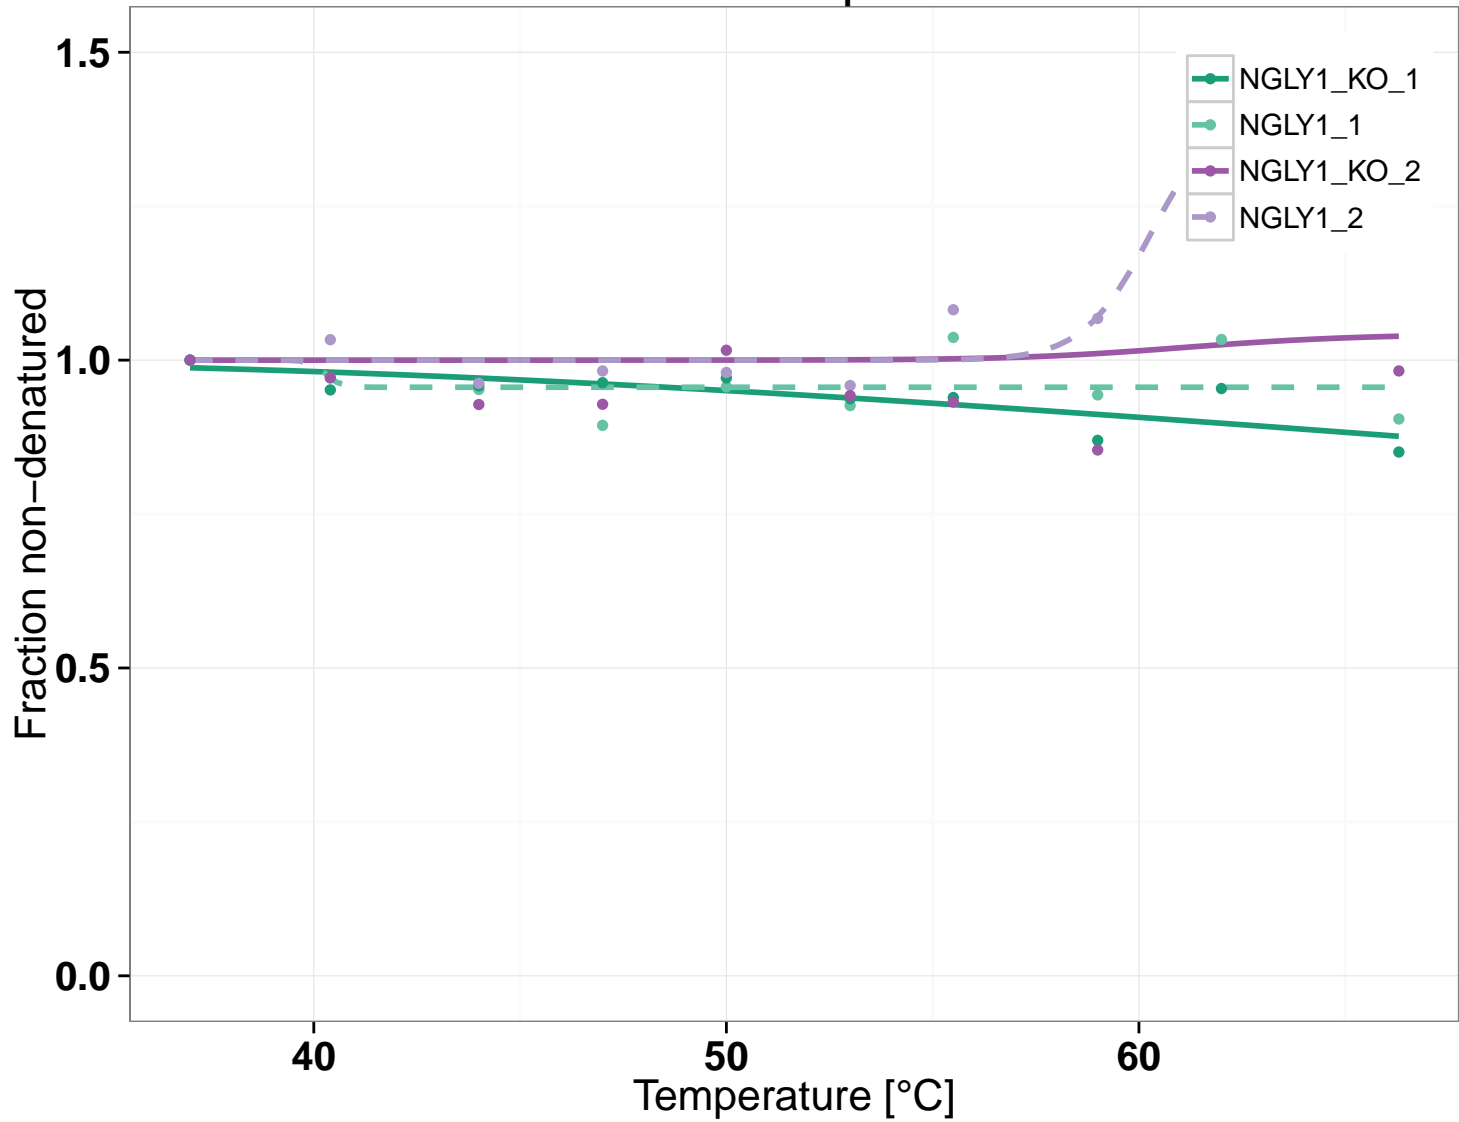

|            | meltPoint | slope  | plateau | R2    |
|------------|-----------|--------|---------|-------|
| NGLY1_KO_1 | -         | -      | 0       | 0.61  |
| NGLY1_1    | -         | -0.061 | 0.96    | 0.08  |
| NGLY1_KO_2 | -         | 0.005  | 1.04    | -0.06 |
| NGLY1_2    | -         | 0.13   | 1.43    | 0.96  |

Supplement: Supplementary file 8157 [file 1]

IPI00514173.1|PPIE

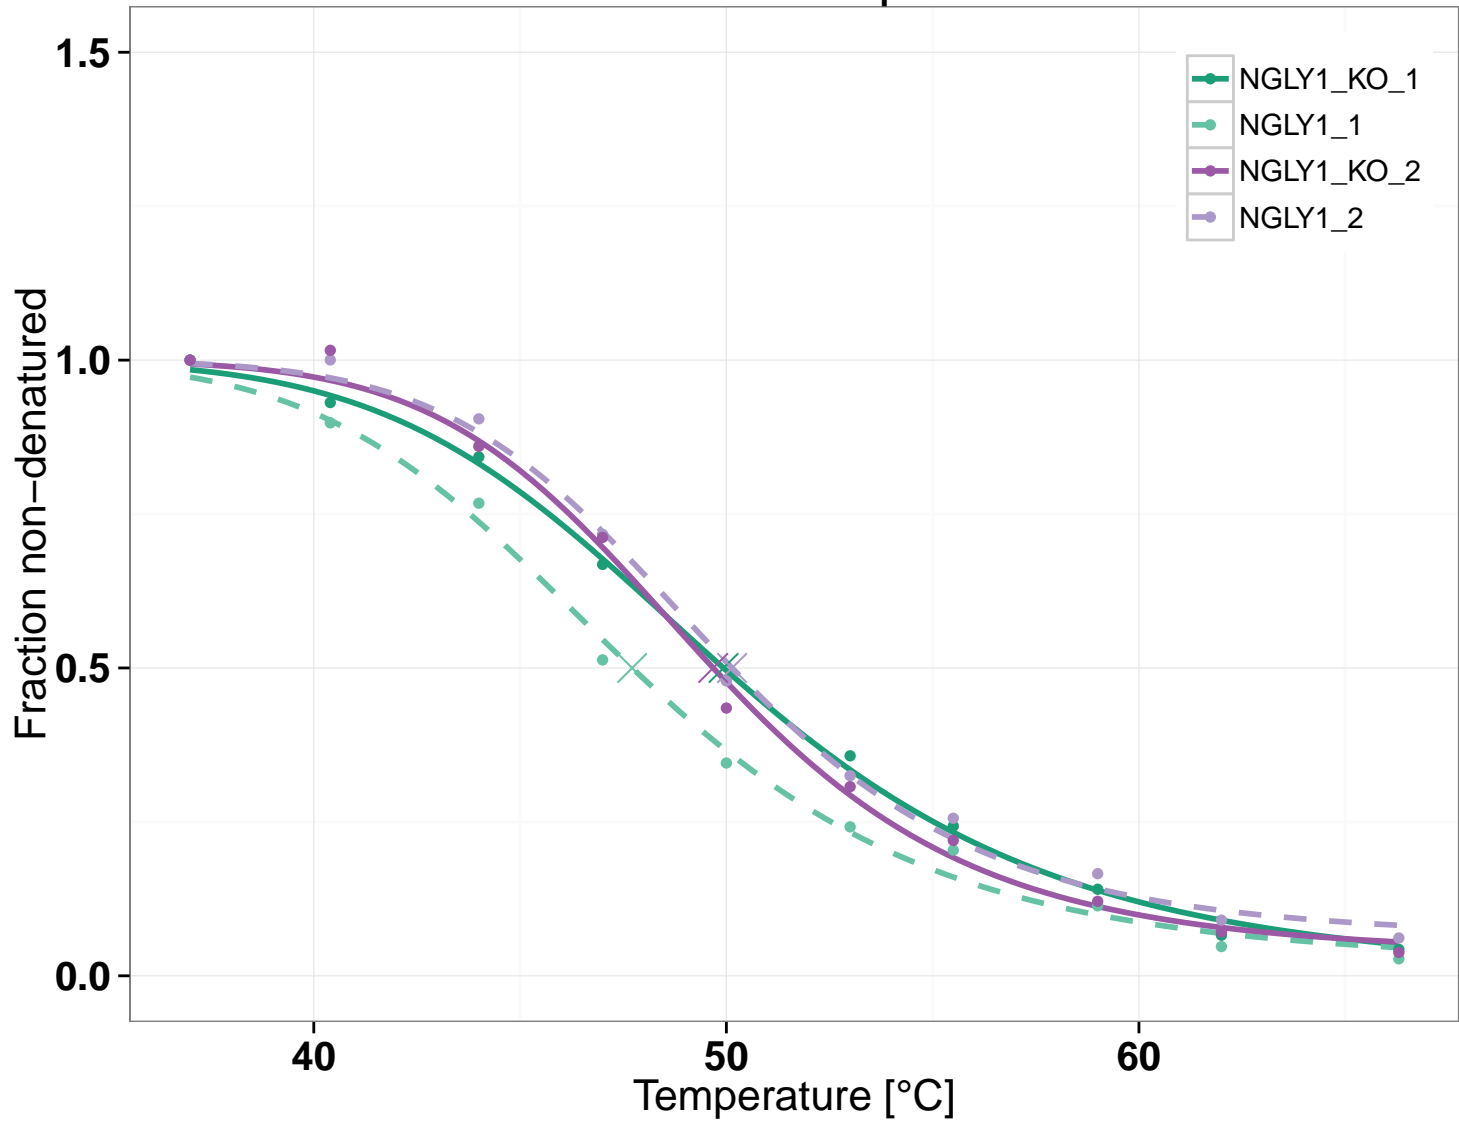

|            | meltPoint | slope  | plateau | R2   |
|------------|-----------|--------|---------|------|
| NGLY1_KO_1 | 49.93     | -0.061 | 0       | 1    |
| NGLY1_1    | 47.72     | -0.066 | 0.02    | 0.99 |
| NGLY1_KO_2 | 49.68     | -0.074 | 0.03    | 1    |
| NGLY1_2    | 50.14     | -0.072 | 0.06    | 1    |

Supplement: Supplementary file 8158 [file 1]

IPI00887241.1|LOC650788

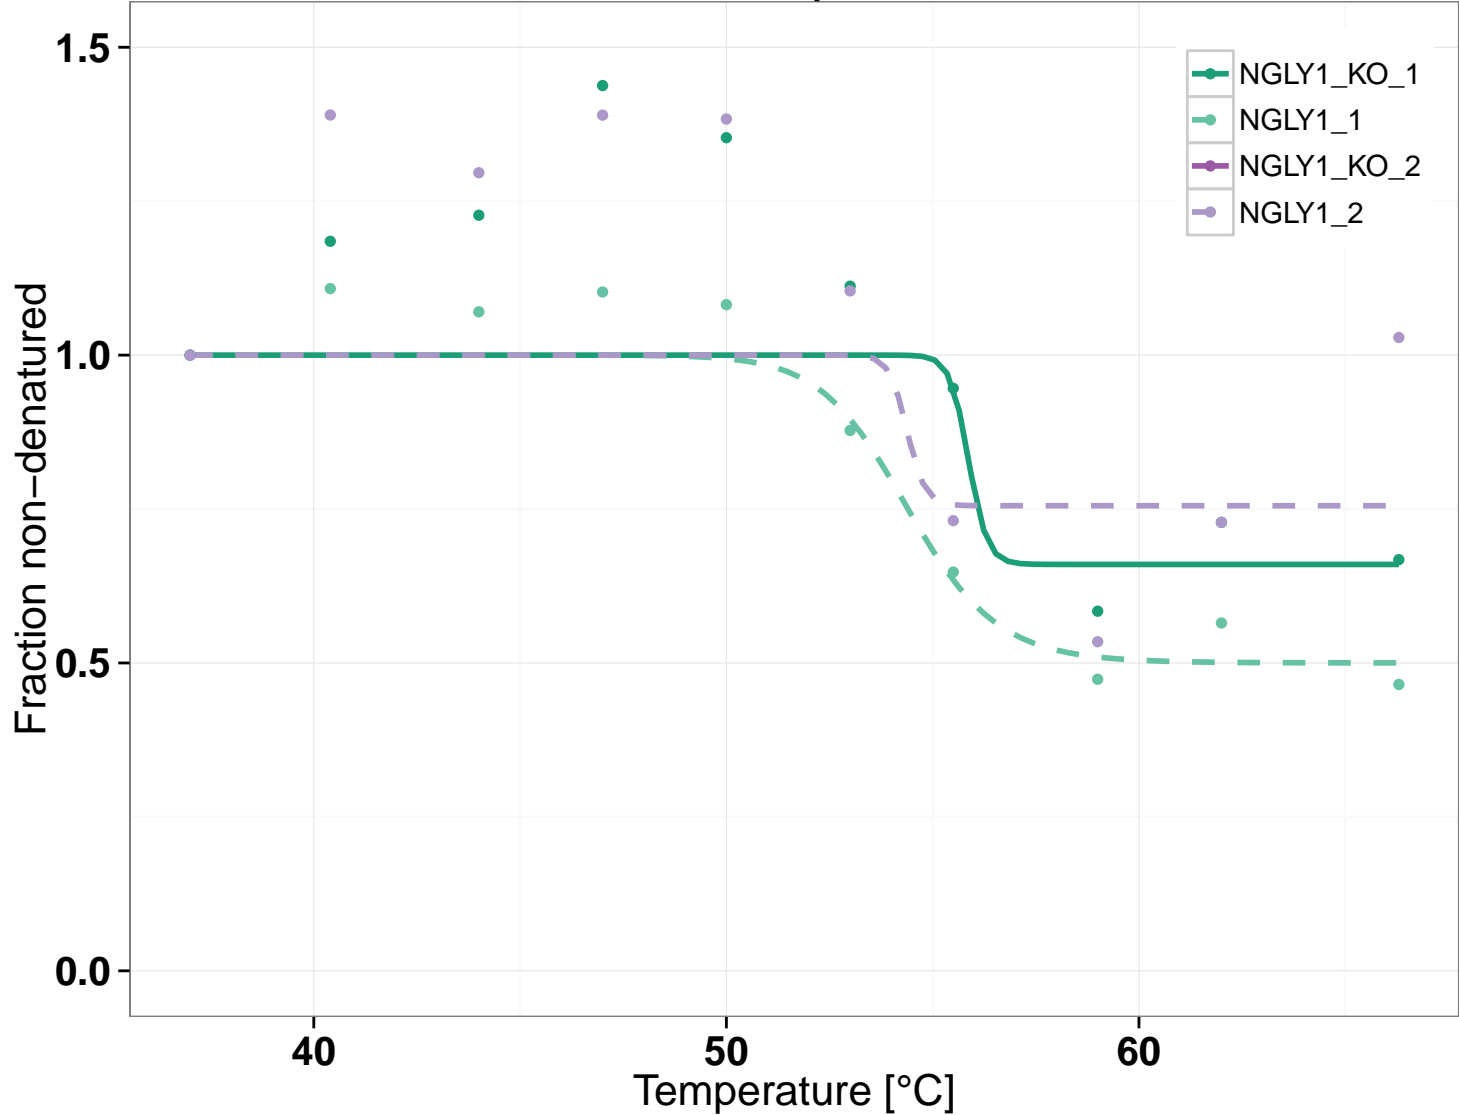

|            | meltPoint | slope | plateau | R2   |
|------------|-----------|-------|---------|------|
| NGLY1_KO_1 | —         | -0.38 | 0.66    | 0.45 |
| NGLY1_1    | —         | -0.12 | 0.5     | 0.94 |
| NGLY1_KO_2 | —         | —     | —       | —    |
| NGLY1_2    | —         | -0.28 | 0.76    | 0.23 |

Supplement: Supplementary file 8159 [file 1]

IPI00103516.1|CASKIN2

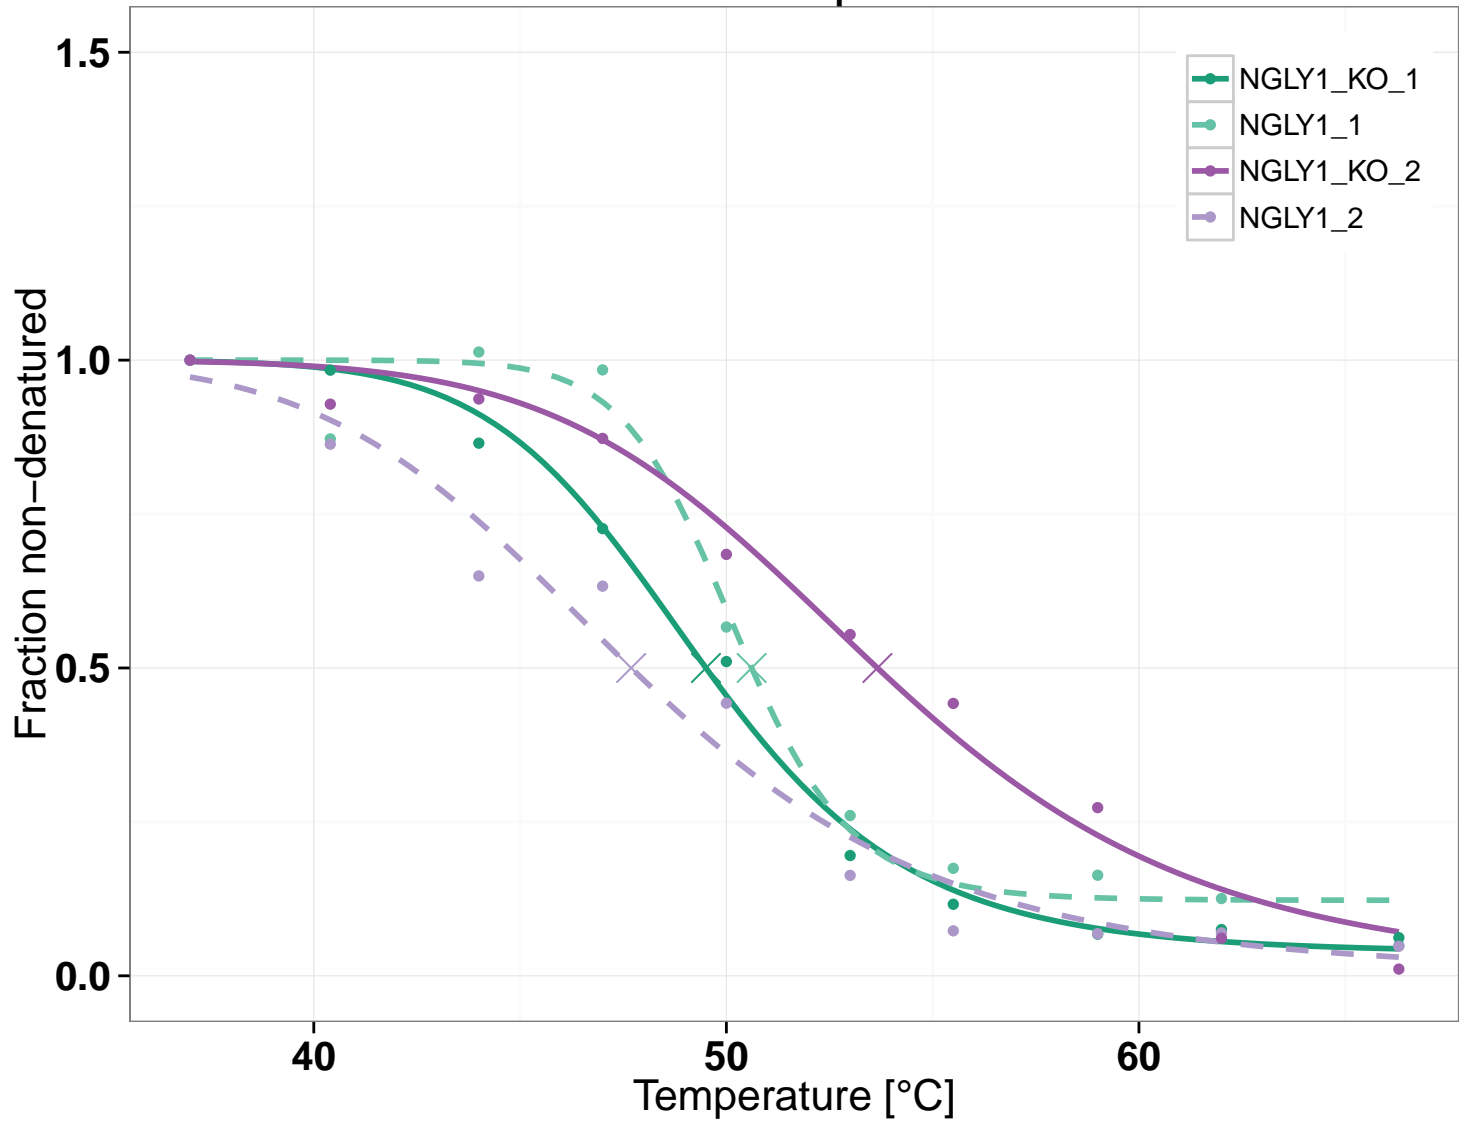

|            | meltPoint | slope  | plateau | R2   |
|------------|-----------|--------|---------|------|
| NGLY1_KO_1 | 49.51     | -0.094 | 0.04    | 0.99 |
| NGLY1_1    | 50.61     | -0.16  | 0.12    | 0.98 |
| NGLY1_KO_2 | 53.66     | -0.064 | 0       | 0.98 |
| NGLY1_2    | 47.69     | -0.066 | 0       | 0.97 |

Supplement: Supplementary file 8160 [file 1]

IPI00012620.1|ST3GAL2

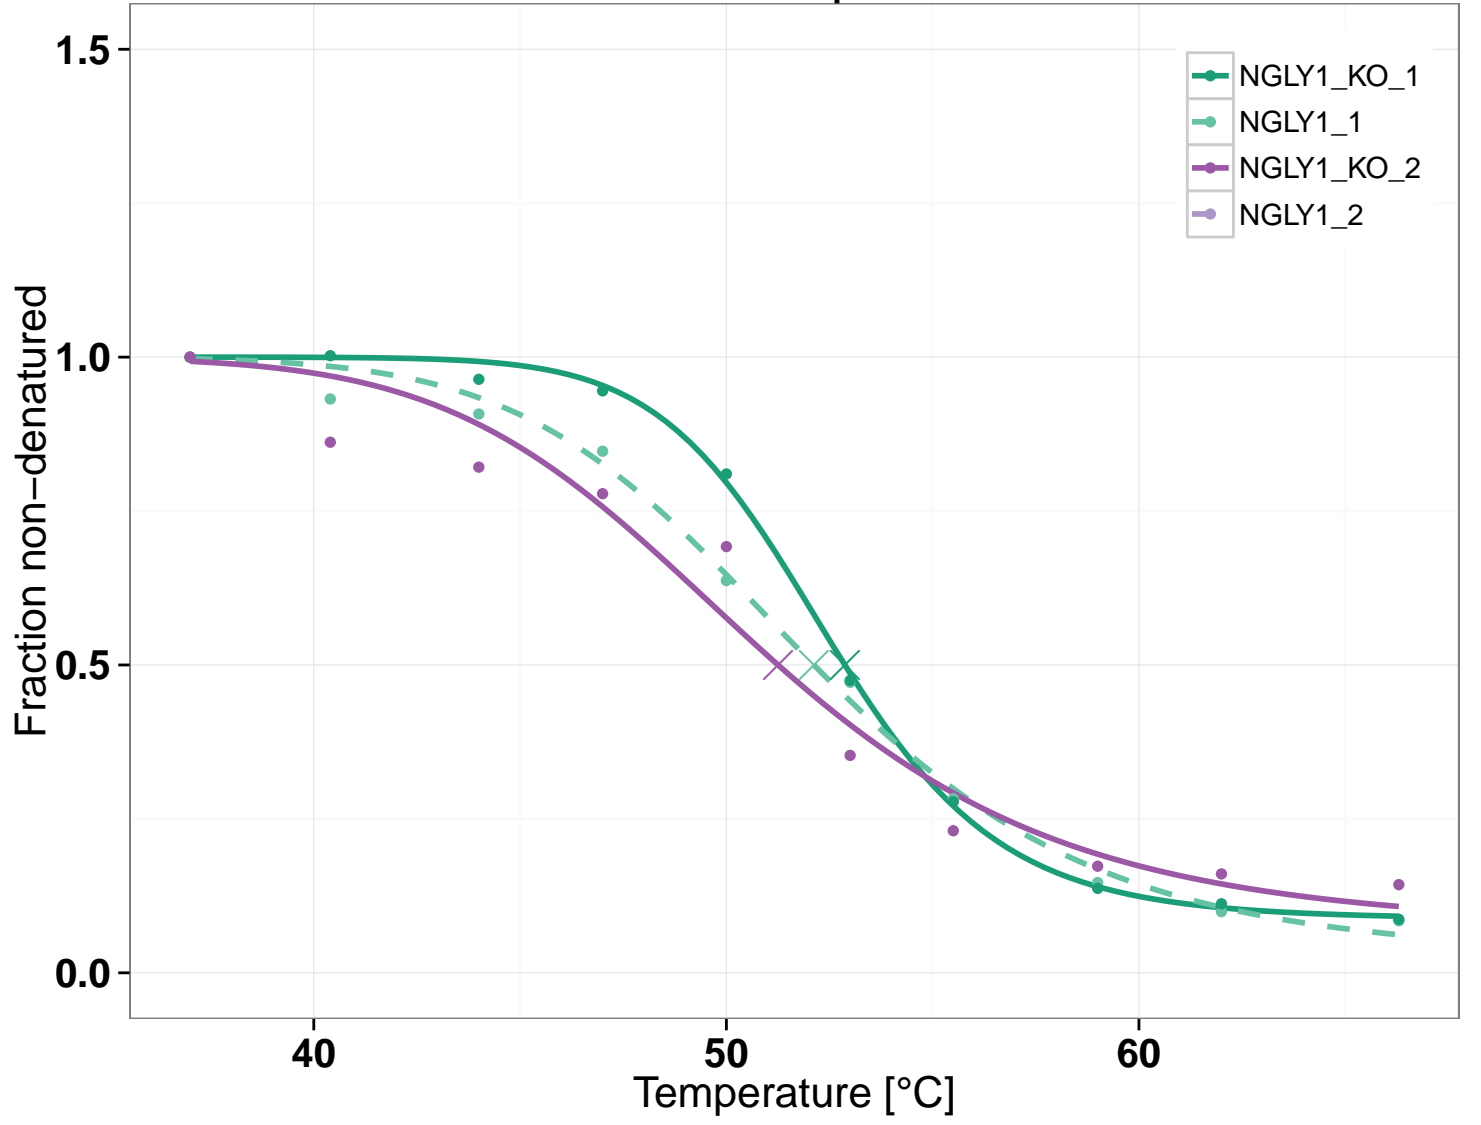

|            | meltPoint | slope  | plateau | R2   |
|------------|-----------|--------|---------|------|
| NGLY1_KO_1 | 52.87     | -0.11  | 0.09    | 1    |
| NGLY1_1    | 52.12     | -0.07  | 0.02    | 0.99 |
| NGLY1_KO_2 | 51.25     | -0.062 | 0.07    | 0.96 |
| NGLY1_2    | -         | -      | -       | -    |

Supplement: Supplementary file 8161 [file 1]

IPI00016207.1|TIMM17A

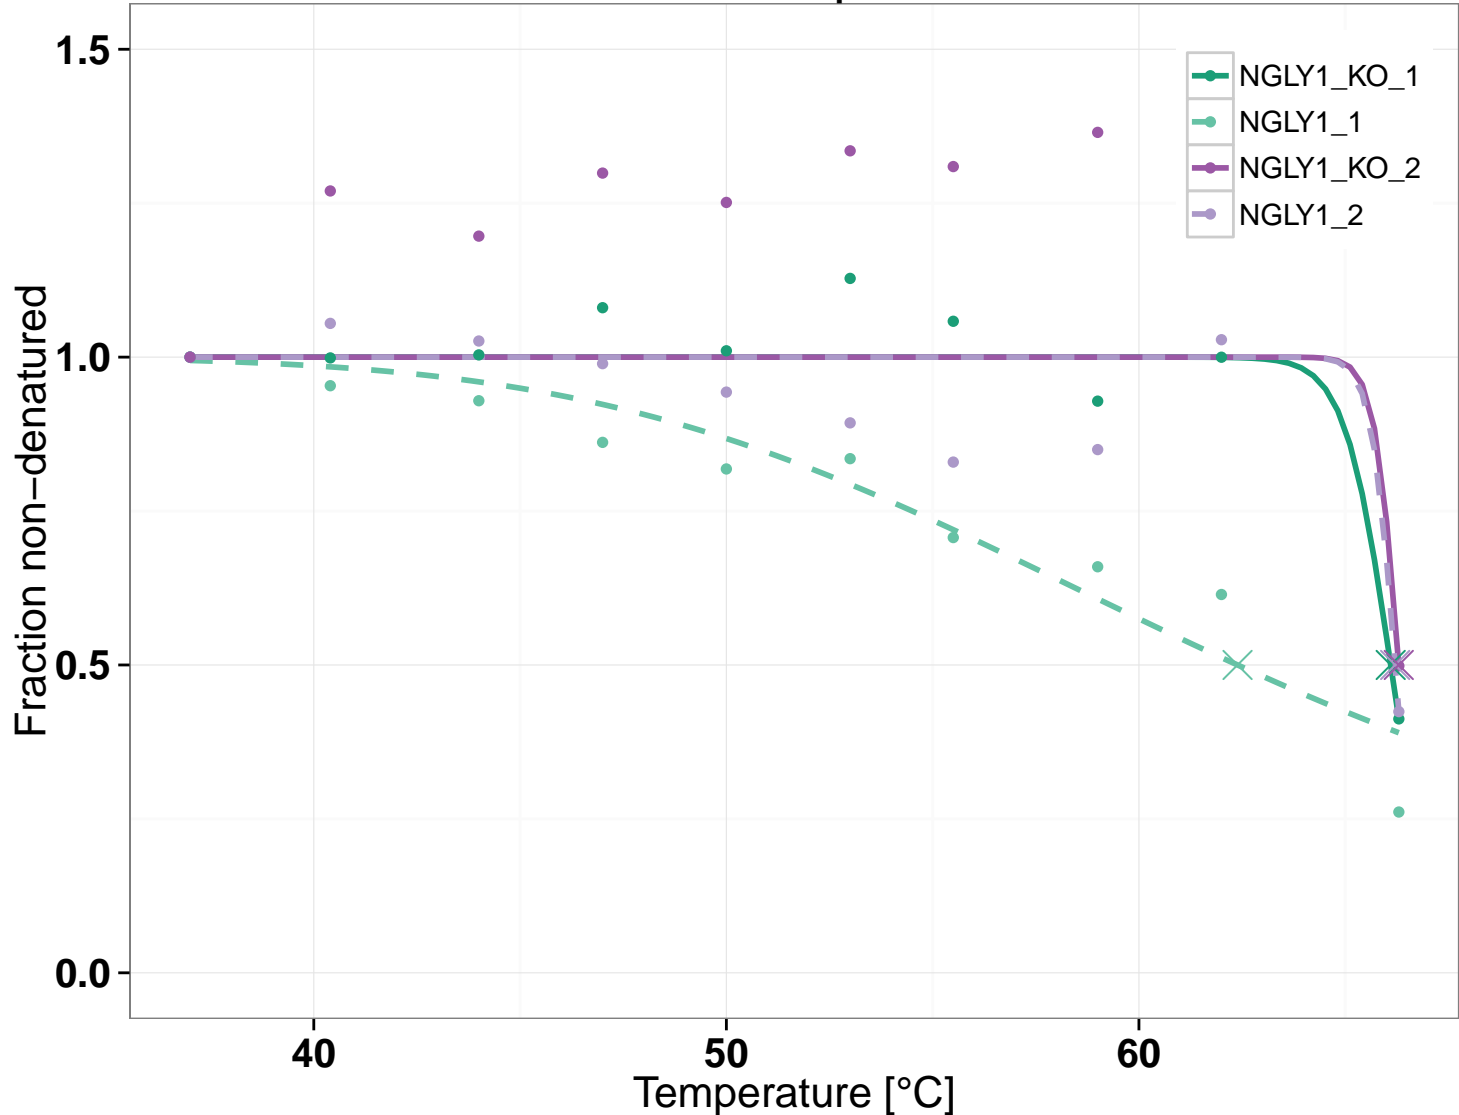

|            | meltPoint | slope  | plateau | R2   |
|------------|-----------|--------|---------|------|
| NGLY1_KO_1 | 66.1      | -0.45  | 0       | 0.91 |
| NGLY1_1    | 62.39     | -0.032 | 0       | 0.91 |
| NGLY1_KO_2 | 66.3      | -0.85  | 0       | -0.3 |
| NGLY1_2    | 66.21     | -0.86  | 0       | 0.77 |

Supplement: Supplementary file 8162 [file 1]

# IPI00641635.1|FTO

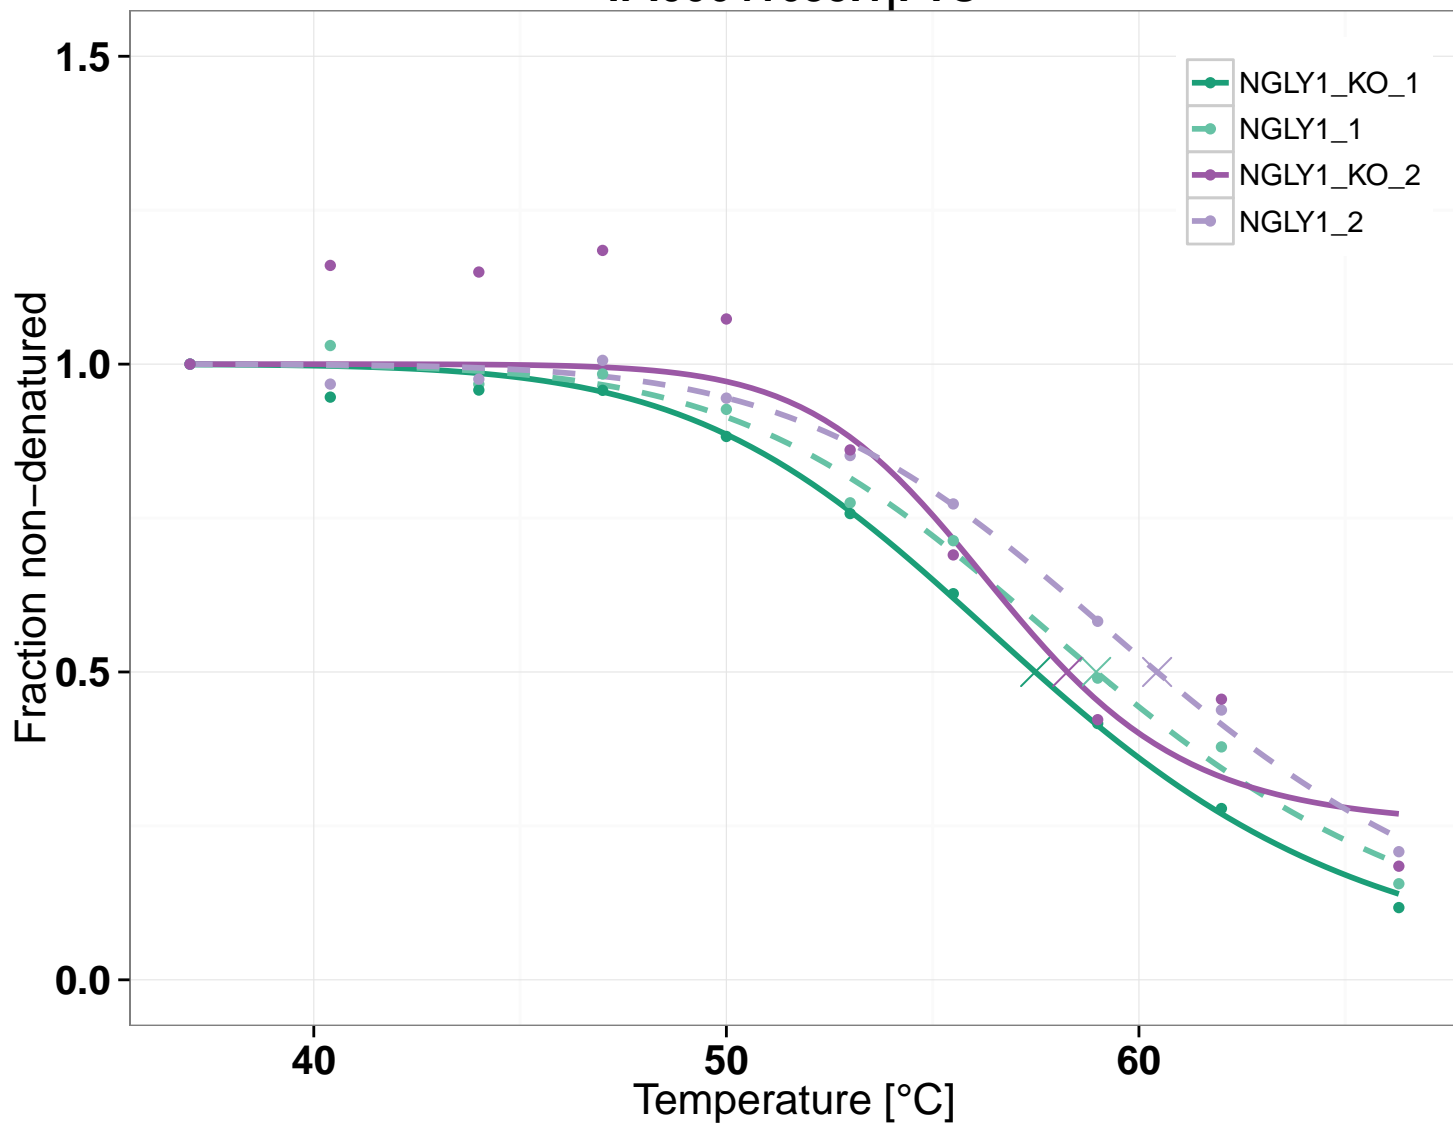

|            | meltPoint | slope  | plateau | R2   |
|------------|-----------|--------|---------|------|
| NGLY1_KO_1 | 57.49     | -0.061 | 0       | 1    |
| NGLY1_1    | 58.96     | -0.057 | 0       | 0.99 |
| NGLY1_KO_2 | 58.27     | -0.082 | 0.25    | 0.9  |
| NGLY1_2    | 60.44     | -0.058 | 0       | 1    |

Supplement: Supplementary file 8163 [file 1]

IPI00737869.2|LOC643446

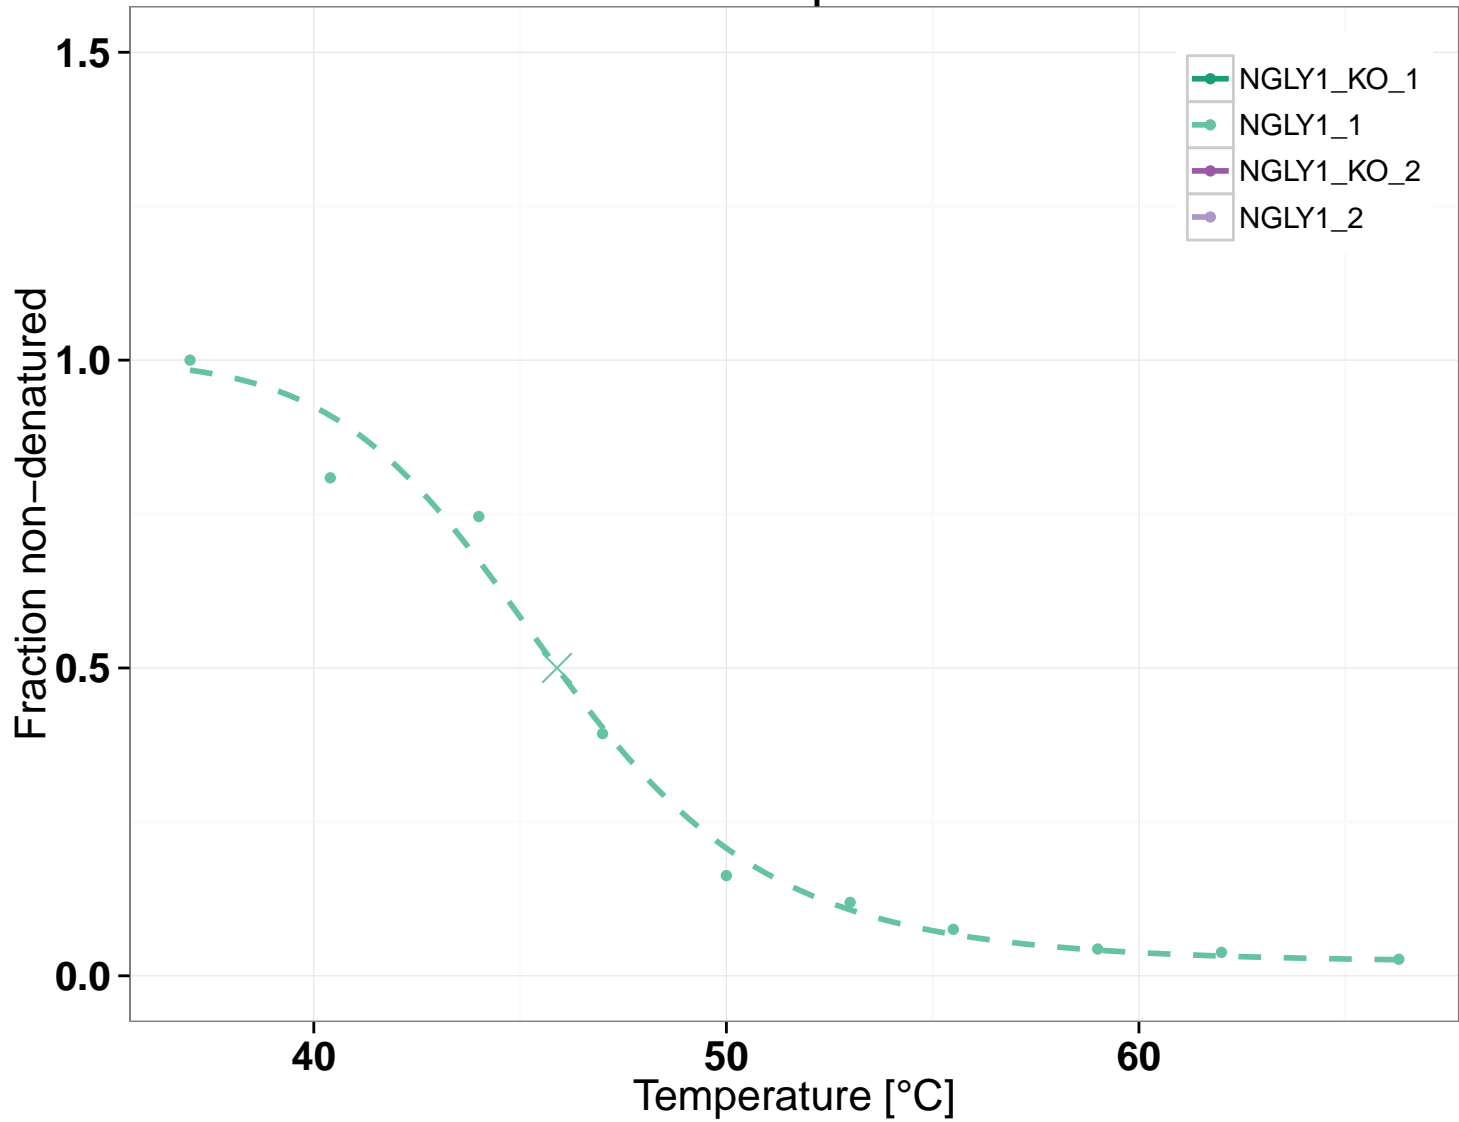

|            | meltPoint | slope  | plateau | R2   |
|------------|-----------|--------|---------|------|
| NGLY1_KO_1 | -         | -      | -       | -    |
| NGLY1_1    | 45.9      | -0.093 | 0.02    | 0.99 |
| NGLY1_KO_2 | -         | -      | -       | -    |
| NGLY1_2    | -         | -      | -       | -    |

Supplement: Supplementary file 8164 [file 1]

IPI00157757.6|MICAL1

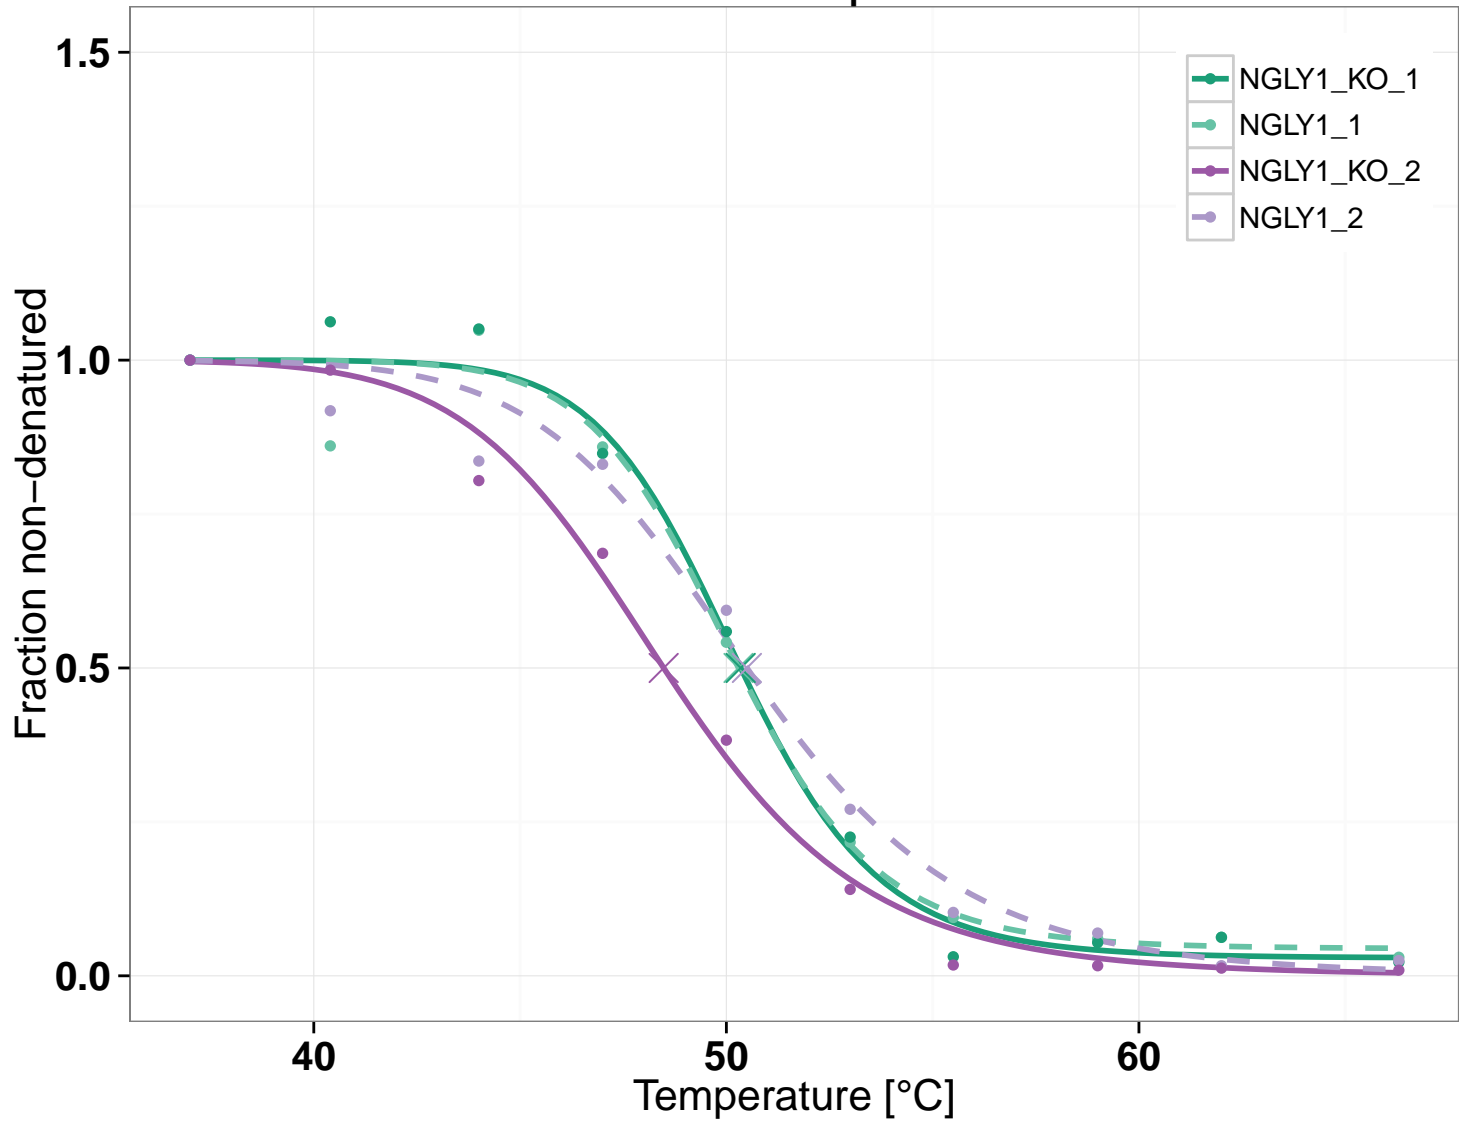

|            | meltPoint | slope  | plateau | R2   |
|------------|-----------|--------|---------|------|
| NGLY1_KO_1 | 50.35     | -0.14  | 0.03    | 0.99 |
| NGLY1_1    | 50.29     | -0.14  | 0.04    | 0.99 |
| NGLY1_KO_2 | 48.48     | -0.1   | 0       | 0.99 |
| NGLY1_2    | 50.5      | -0.097 | 0       | 0.98 |

Supplement: Supplementary file 8165 [file 1]

# IPI00003420.1|MAPRE2

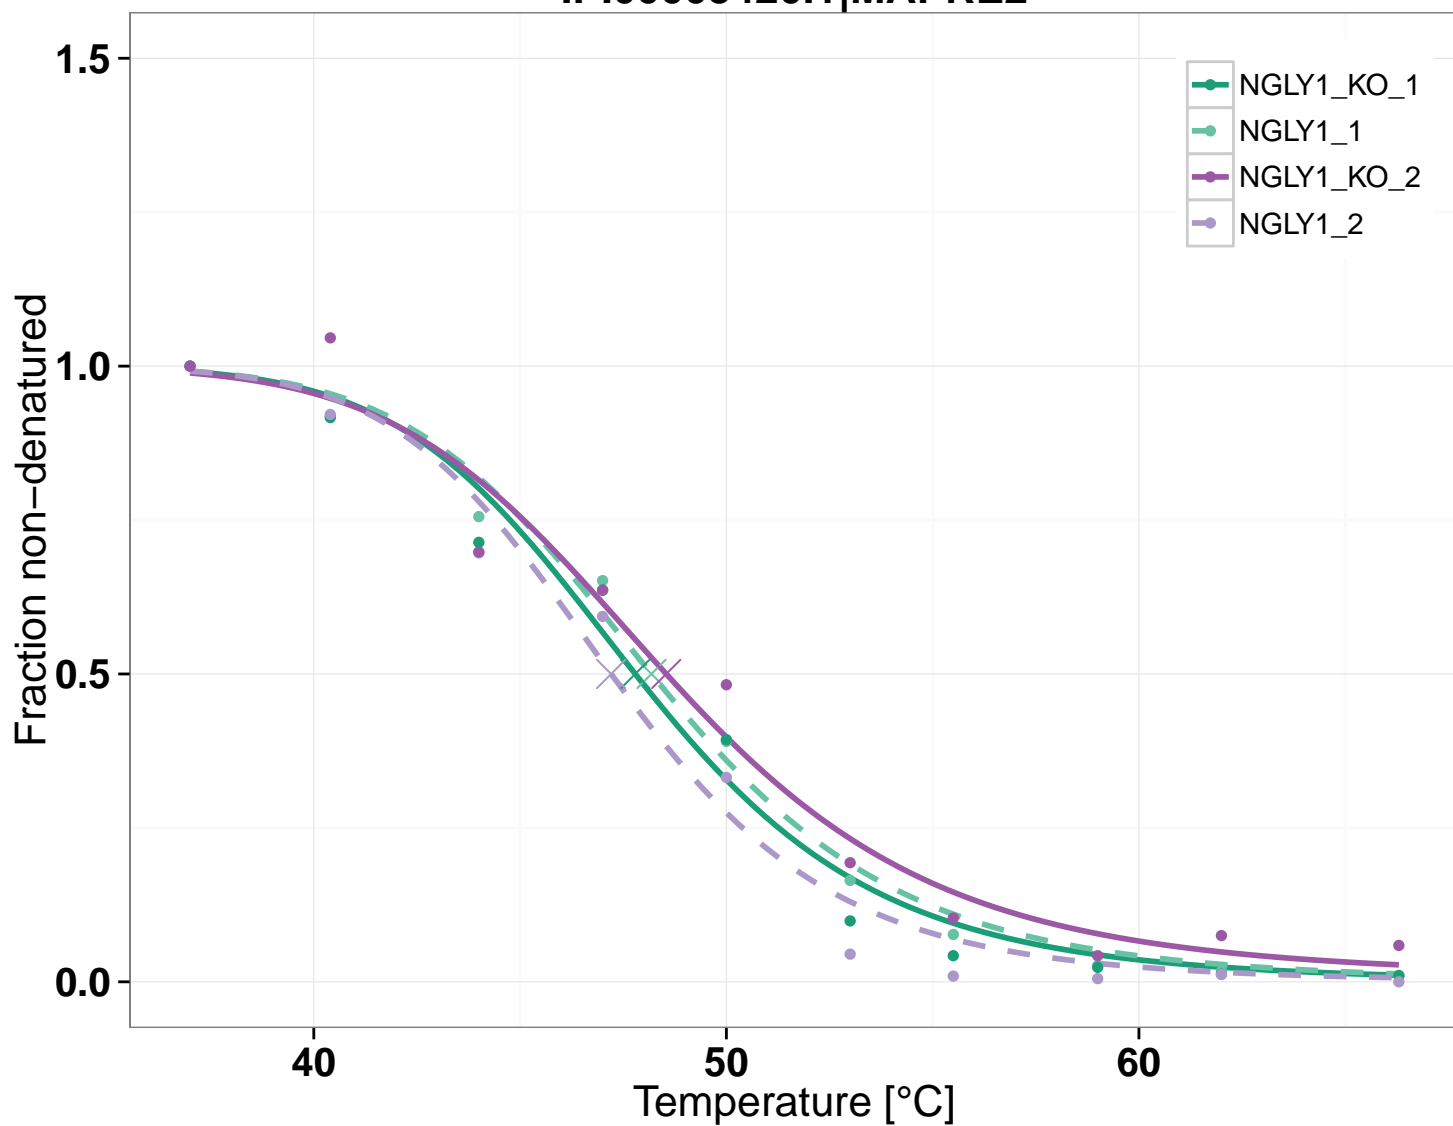

|            | meltPoint | slope  | plateau | R2   |
|------------|-----------|--------|---------|------|
| NGLY1_KO_1 | 47.79     | -0.086 | 0       | 0.98 |
| NGLY1_1    | 48.18     | -0.084 | 0       | 0.99 |
| NGLY1_KO_2 | 48.54     | -0.075 | 0.01    | 0.97 |
| NGLY1_2    | 47.21     | -0.093 | 0       | 0.98 |

Supplement: Supplementary file 8166 [file 1]

IPI00307334.3|MTRR

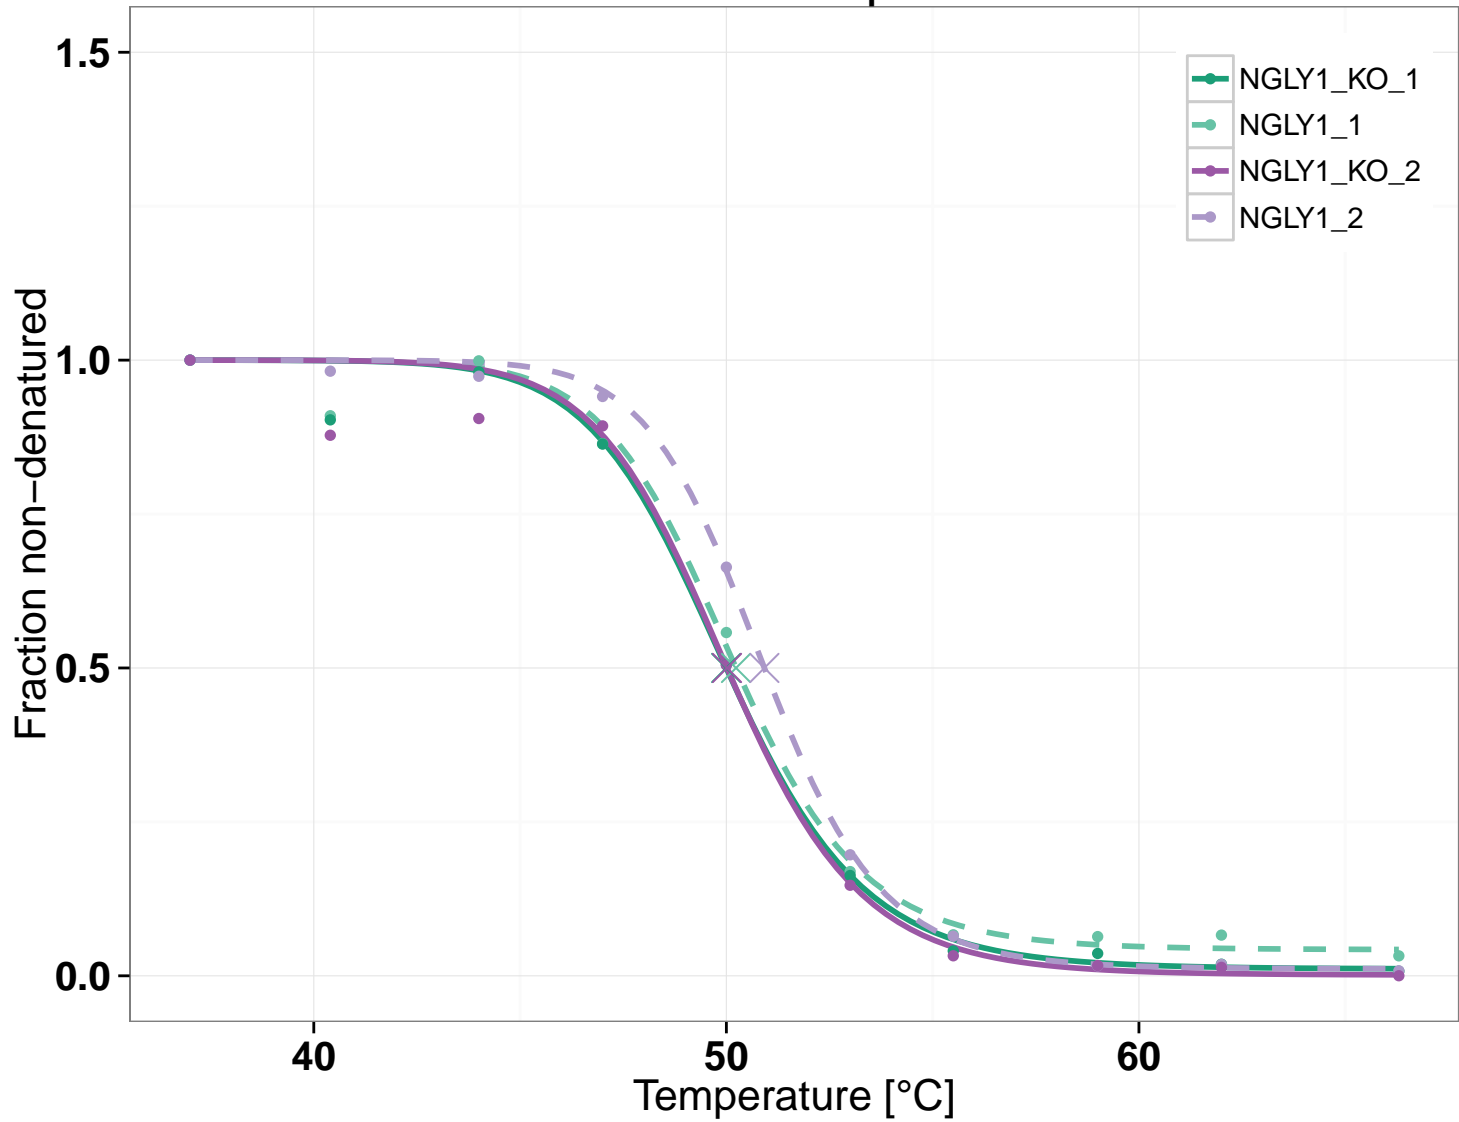

|            | meltPoint | slope | plateau | R2   |
|------------|-----------|-------|---------|------|
| NGLY1_KO_1 | 50        | -0.15 | 0.01    | 0.99 |
| NGLY1_1    | 50.23     | -0.15 | 0.04    | 0.99 |
| NGLY1_KO_2 | 50.02     | -0.15 | 0       | 0.99 |
| NGLY1_2    | 50.92     | -0.17 | 0.01    | 1    |

Supplement: Supplementary file 8167 [file 1]

IPI00394668.2|ADAR

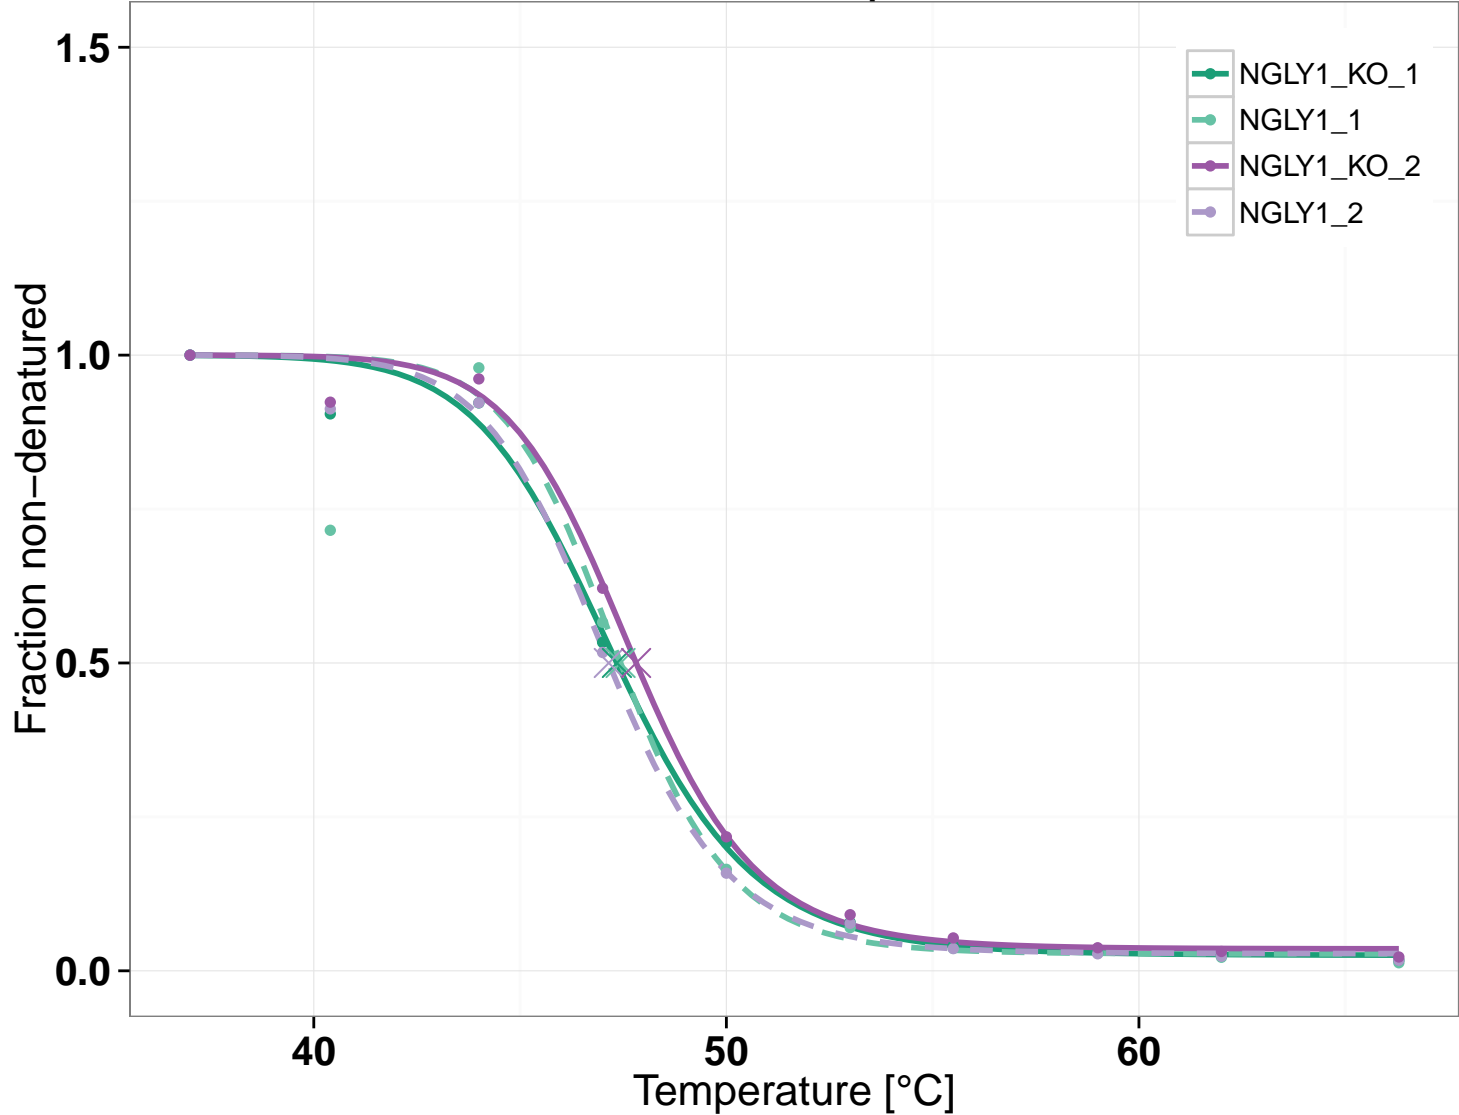

|            | meltPoint | slope | plateau | R2   |
|------------|-----------|-------|---------|------|
| NGLY1_KO_1 | 47.35     | -0.14 | 0.03    | 0.99 |
| NGLY1_1    | 47.44     | -0.18 | 0.03    | 0.95 |
| NGLY1_KO_2 | 47.81     | -0.16 | 0.04    | 1    |
| NGLY1_2    | 47.15     | -0.16 | 0.03    | 1    |

Supplement: Supplementary file 8168 [file 1]

# IPI00014253.4|RRS1

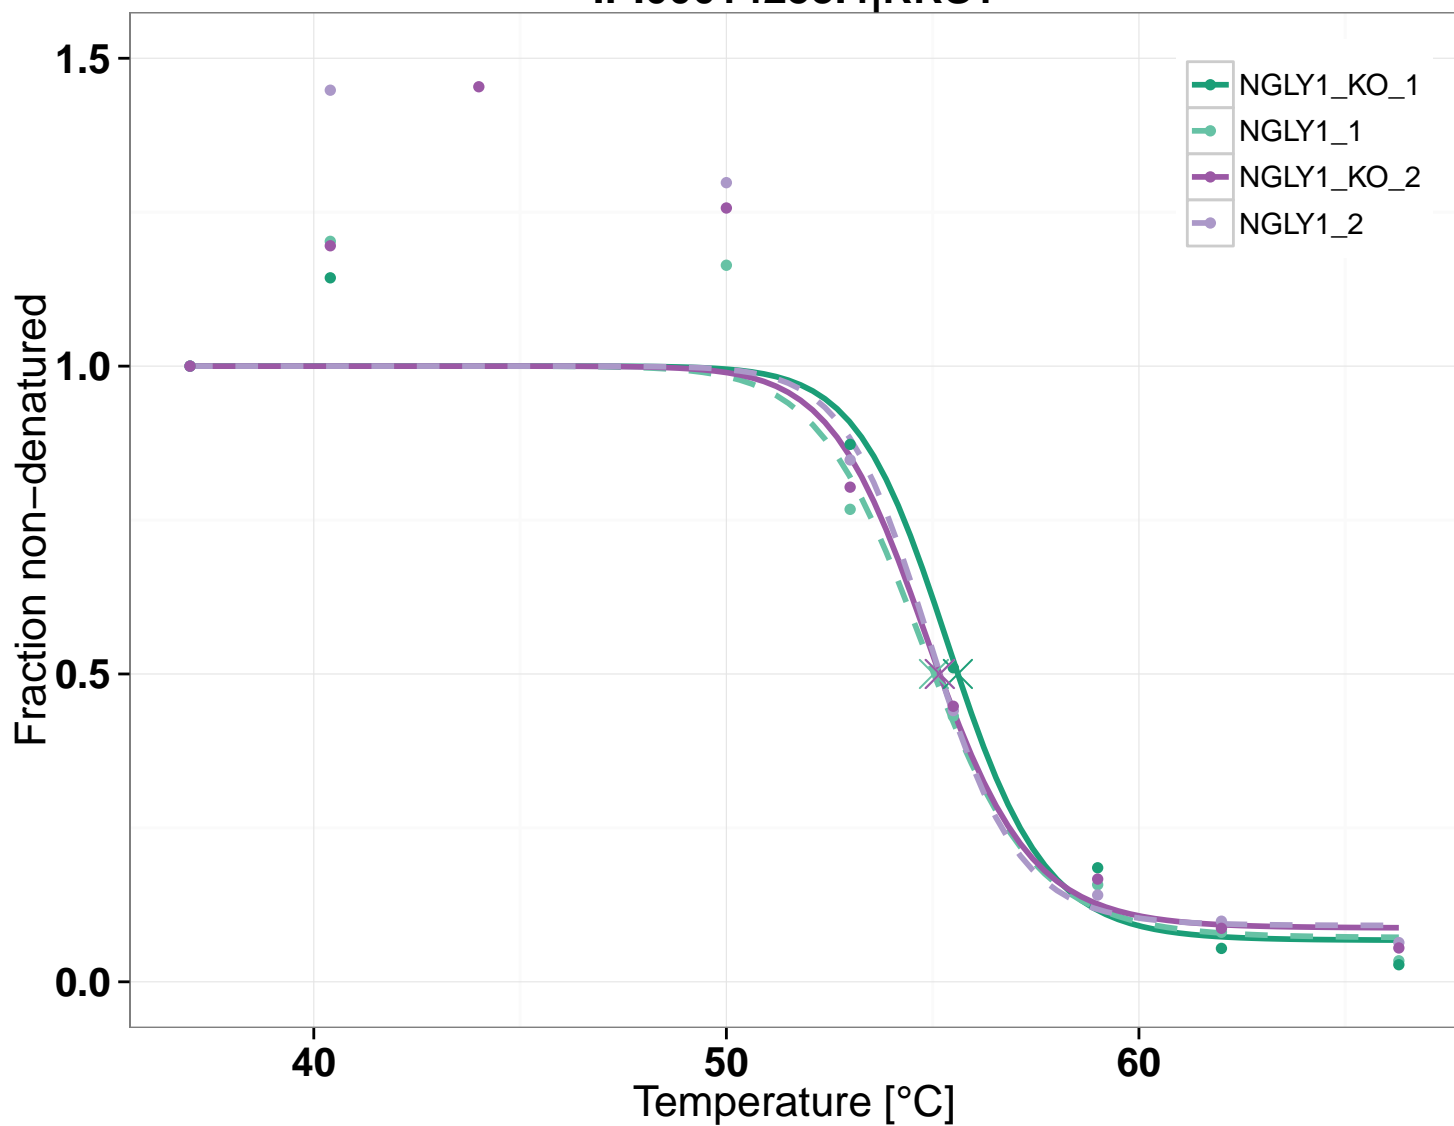

|            | meltPoint | slope | plateau | R2   |
|------------|-----------|-------|---------|------|
| NGLY1_KO_1 | 55.61     | -0.2  | 0.07    | 0.63 |
| NGLY1_1    | 55.03     | -0.18 | 0.07    | 0.71 |
| NGLY1_KO_2 | 55.17     | -0.19 | 0.09    | 0.7  |
| NGLY1_2    | 55.18     | -0.21 | 0.09    | 0.63 |

Supplement: Supplementary file 8169 [file 1]

IPI00783945.2|GTPBP3

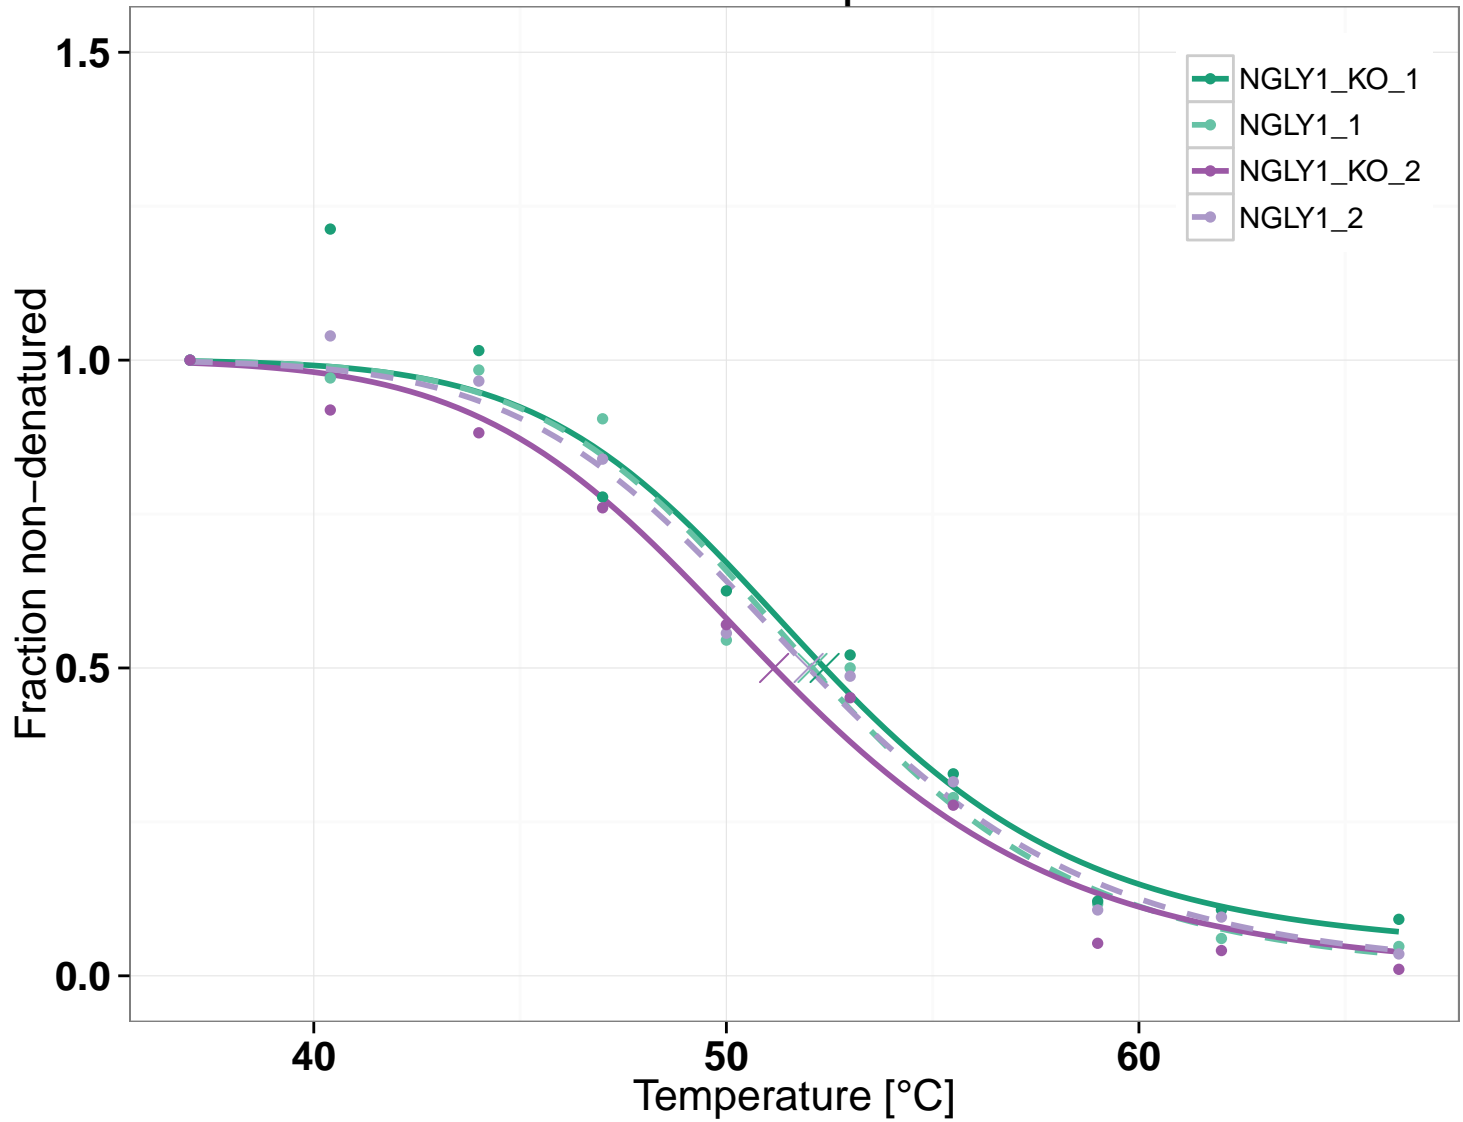

|            | meltPoint | slope  | plateau | R2   |
|------------|-----------|--------|---------|------|
| NGLY1_KO_1 | 52.38     | -0.073 | 0.04    | 0.96 |
| NGLY1_1    | 52.09     | -0.076 | 0       | 0.98 |
| NGLY1_KO_2 | 51.16     | -0.07  | 0       | 0.99 |
| NGLY1_2    | 51.99     | -0.071 | 0       | 0.99 |

Supplement: Supplementary file 8170 [file 1]

IPI00513732.3|TLE4

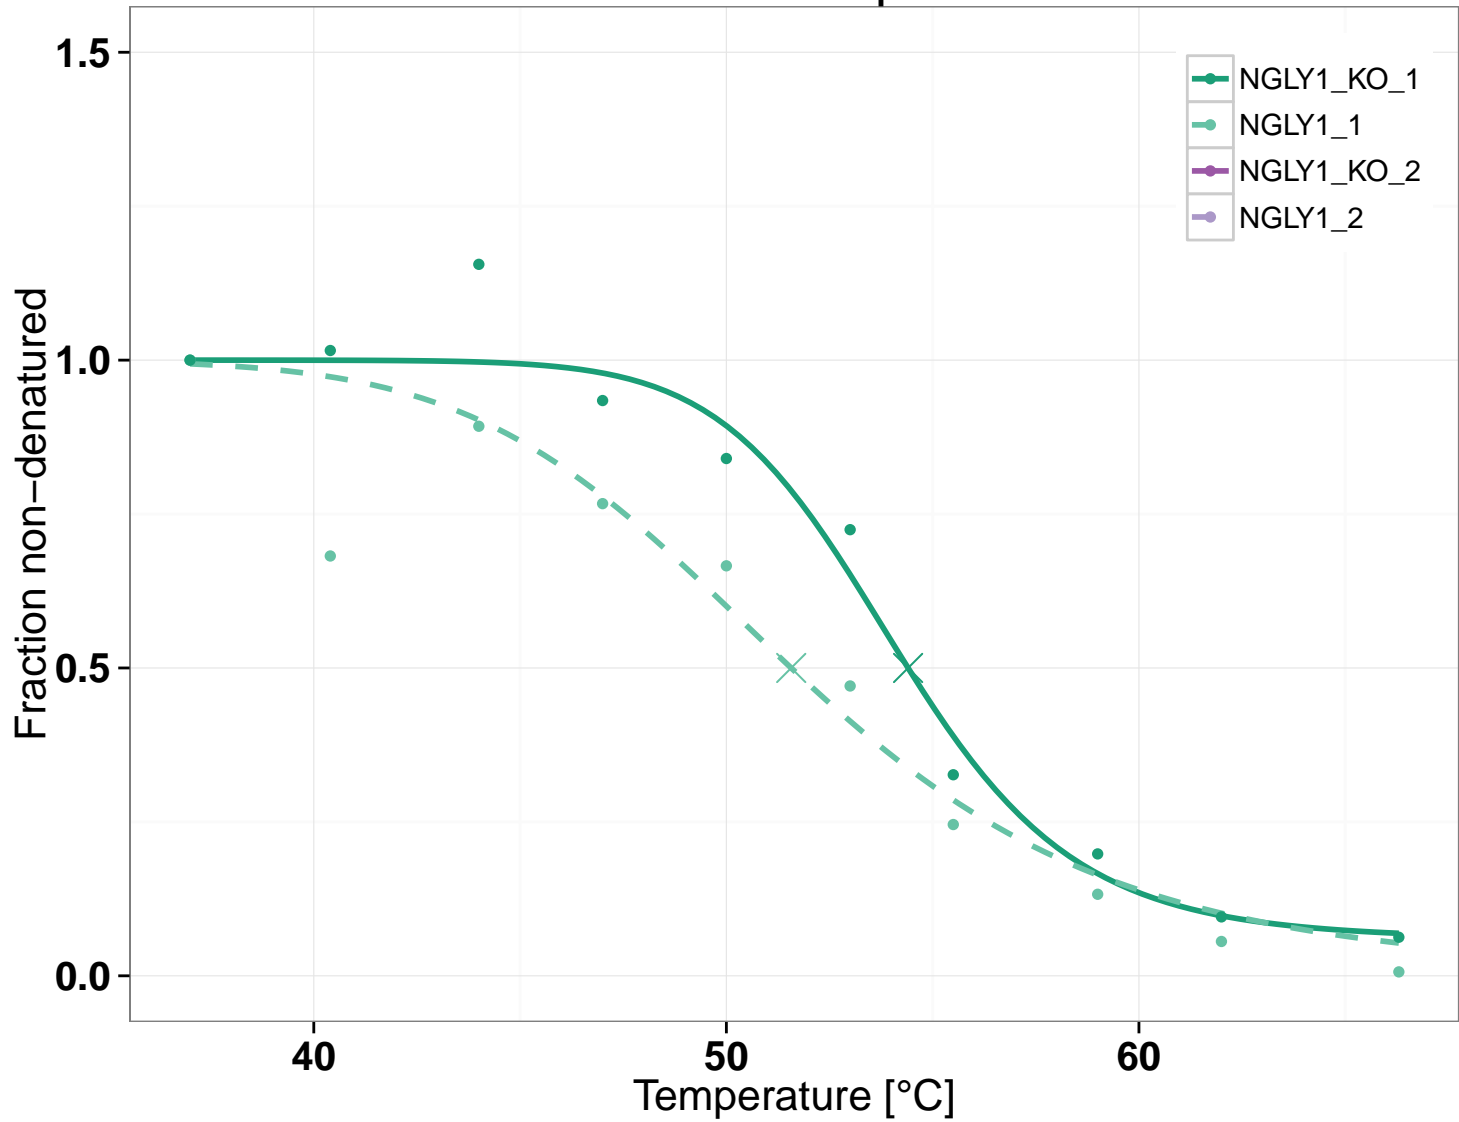

|            | meltPoint | slope  | plateau | R2   |
|------------|-----------|--------|---------|------|
| NGLY1_KO_1 | 54.4      | -0.11  | 0.06    | 0.97 |
| NGLY1_1    | 51.57     | -0.064 | 0       | 0.92 |
| NGLY1_KO_2 | -         | -      | -       | -    |
| NGLY1_2    | -         | -      | -       | -    |

Supplement: Supplementary file 8171 [file 1]

IPI00010426.8|FOXJ3

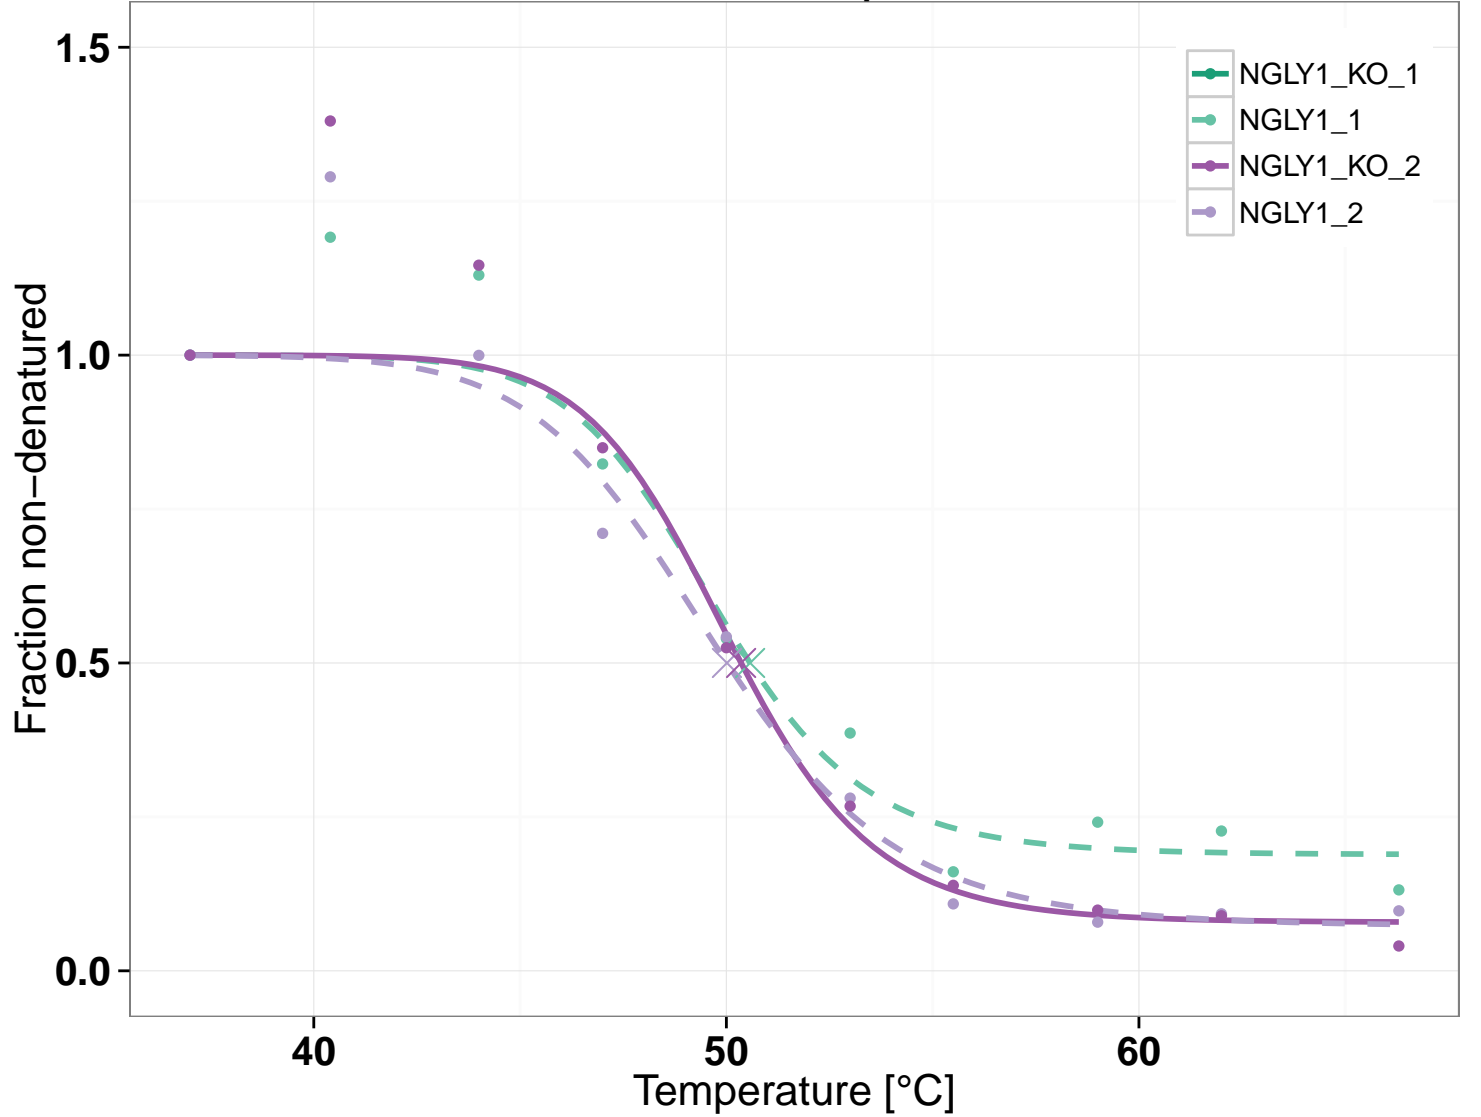

|            | meltPoint | slope | plateau | R2   |
|------------|-----------|-------|---------|------|
| NGLY1_KO_1 | -         | -     | -       | -    |
| NGLY1_1    | 50.58     | -0.11 | 0.19    | 0.95 |
| NGLY1_KO_2 | 50.36     | -0.13 | 0.08    | 0.92 |
| NGLY1_2    | 50.01     | -0.1  | 0.07    | 0.95 |

Supplement: Supplementary file 8172 [file 1]

IPI00000051.4|PFDN1

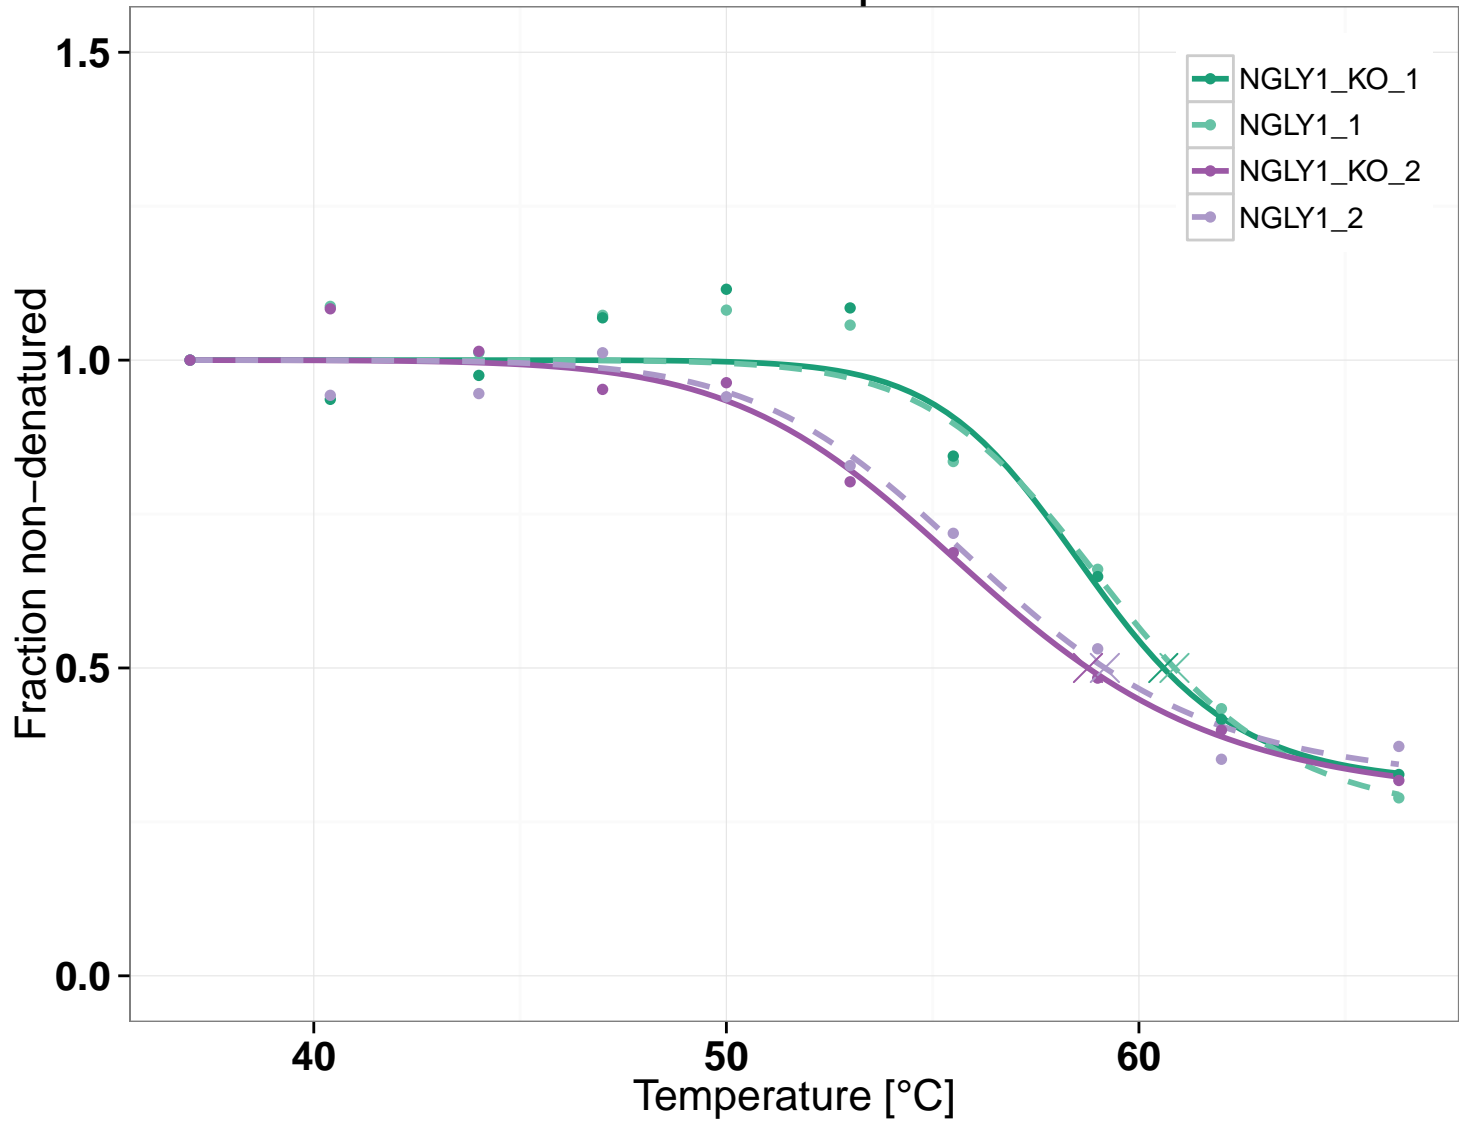

|            | meltPoint | slope  | plateau | R2   |
|------------|-----------|--------|---------|------|
| NGLY1_KO_1 | 60.59     | -0.094 | 0.31    | 0.95 |
| NGLY1_1    | 60.86     | -0.086 | 0.25    | 0.96 |
| NGLY1_KO_2 | 58.77     | -0.06  | 0.28    | 0.99 |
| NGLY1_2    | 59.17     | -0.062 | 0.31    | 0.98 |

Supplement: Supplementary file 8173 [file 1]

IPI00643465.2|TACC2

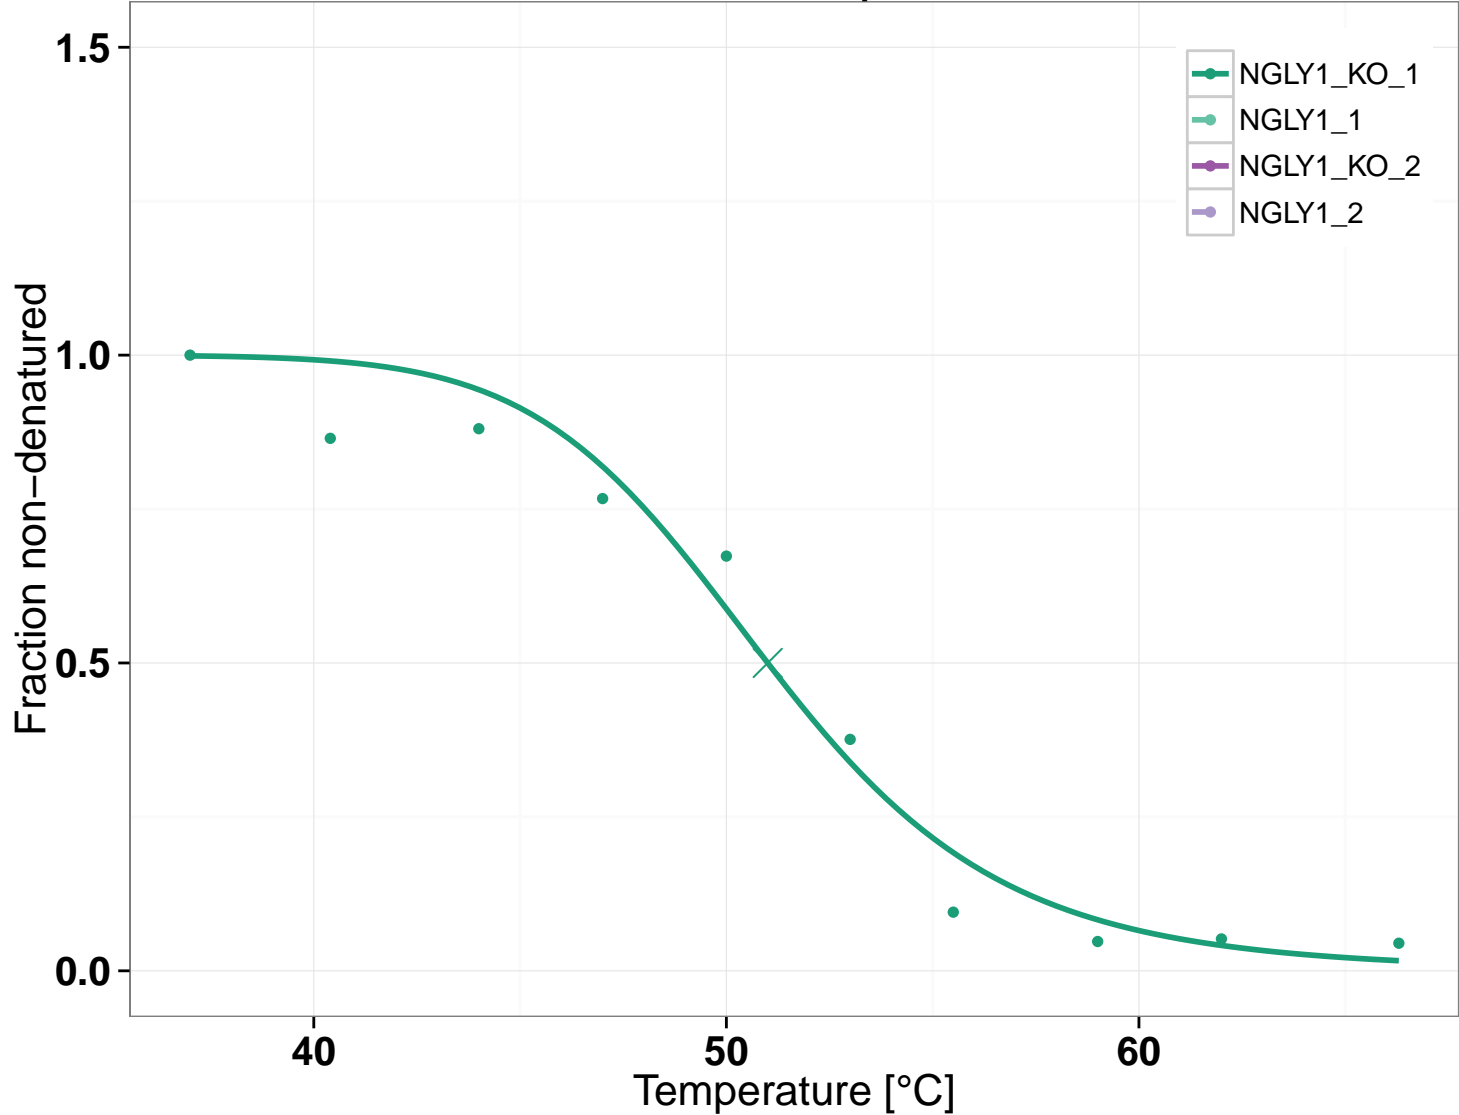

|            | meltPoint | slope  | plateau | R2   |
|------------|-----------|--------|---------|------|
| NGLY1_KO_1 | 51        | -0.088 | 0       | 0.97 |
| NGLY1_1    | -         | -      | -       | -    |
| NGLY1_KO_2 | -         | -      | -       | -    |
| NGLY1_2    | -         | -      | -       | -    |

Supplement: Supplementary file 8174 [file 1]

# IPI00174757.3|FBXL20

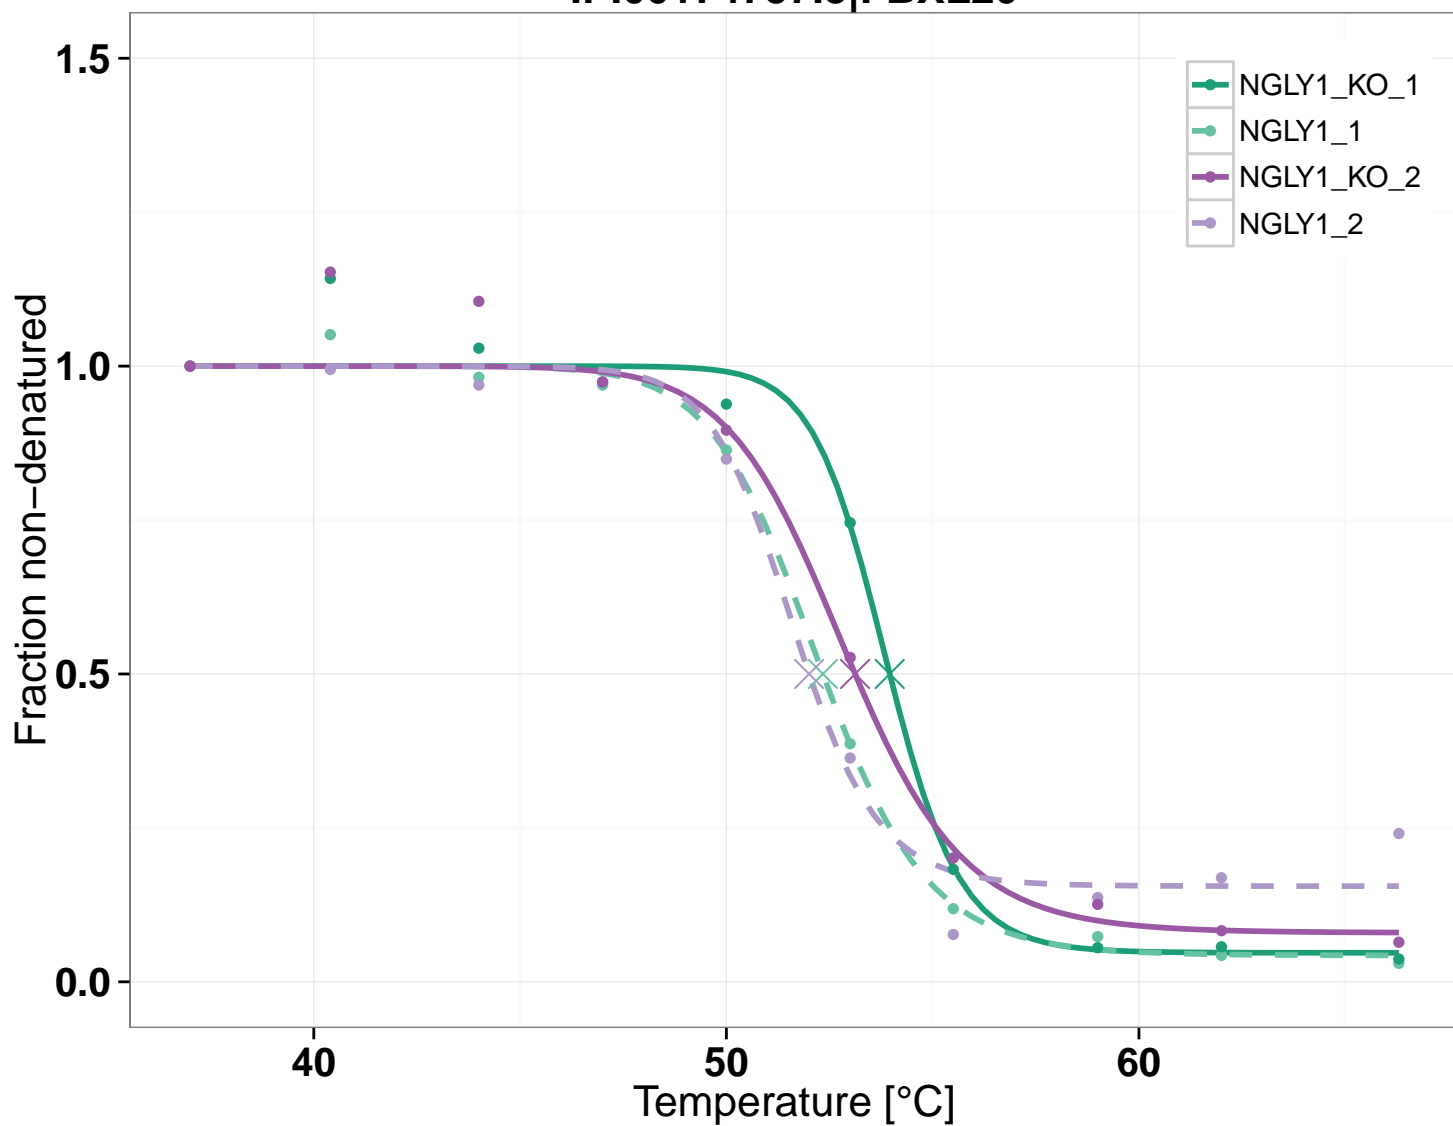

|            | meltPoint | slope | plateau | R2   |
|------------|-----------|-------|---------|------|
| NGLY1_KO_1 | 53.96     | -0.27 | 0.05    | 0.85 |
| NGLY1_1    | 52.34     | -0.18 | 0.04    | 1    |
| NGLY1_KO_2 | 53.12     | -0.16 | 0.08    | 0.98 |
| NGLY1_2    | 52.01     | -0.21 | 0.16    | 0.99 |

Supplement: Supplementary file 8175 [file 1]

IPI00304171.6|H2AFY

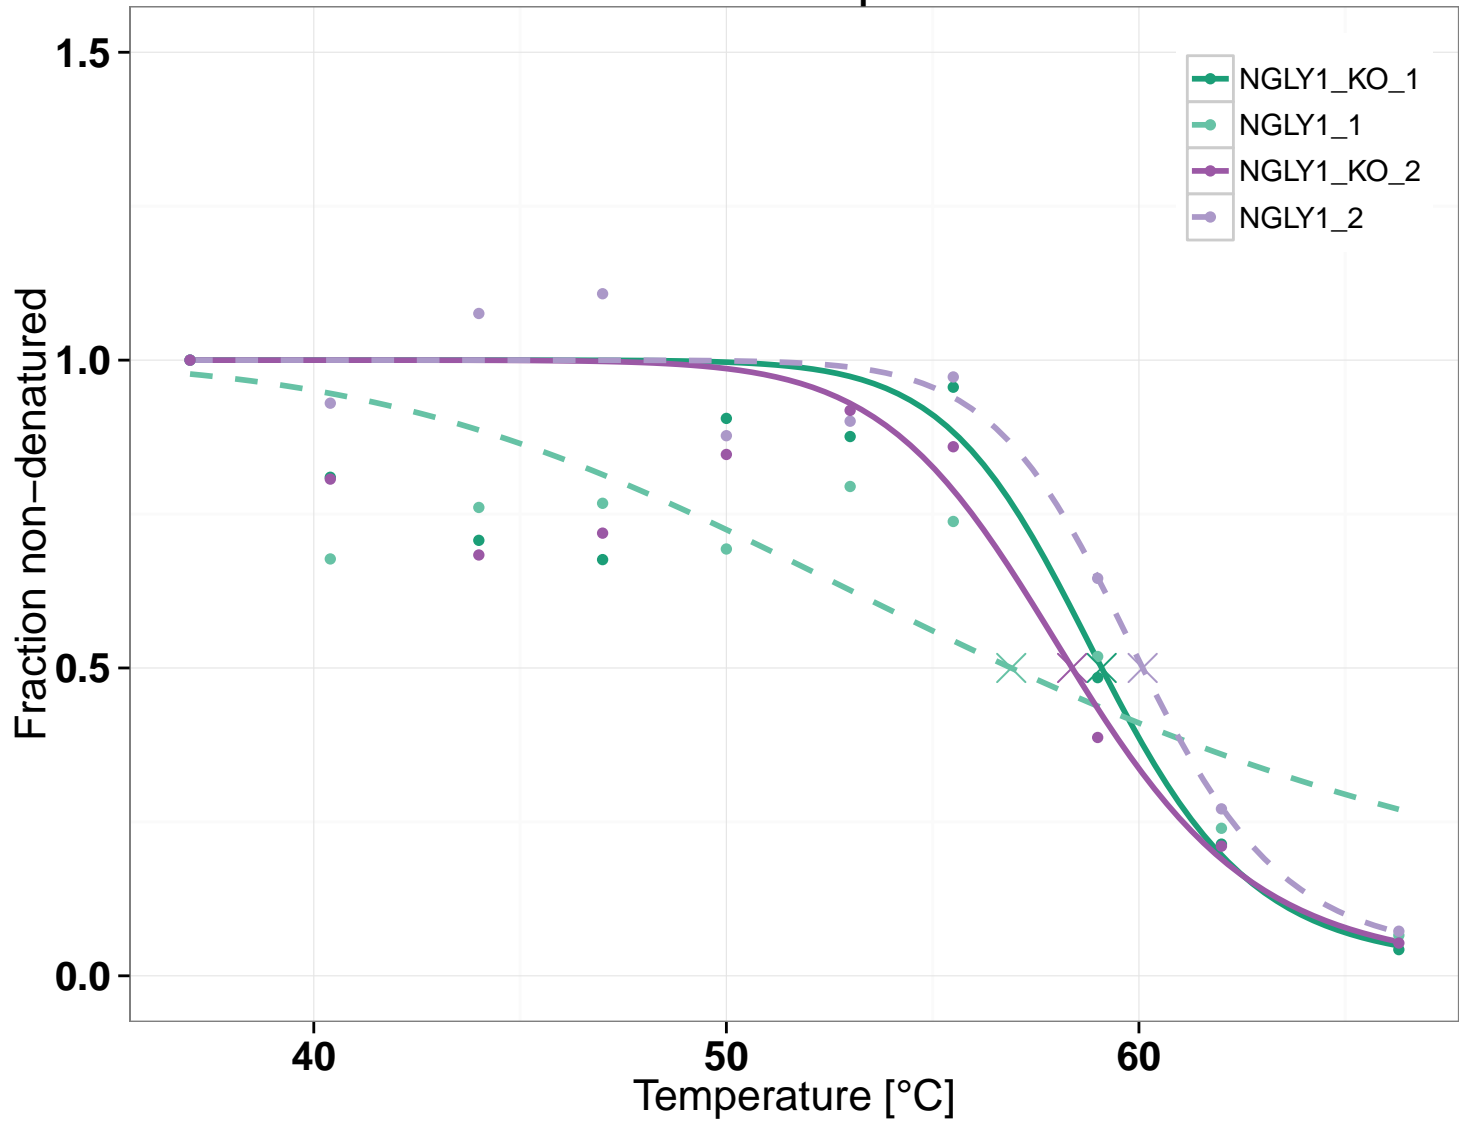

|            | meltPoint | slope  | plateau | R2   |
|------------|-----------|--------|---------|------|
| NGLY1_KO_1 | 59.1      | -0.13  | 0.02    | 0.73 |
| NGLY1_1    | 56.91     | -0.033 | 0       | 0.69 |
| NGLY1_KO_2 | 58.38     | -0.11  | 0.01    | 0.74 |
| NGLY1_2    | 60.09     | -0.14  | 0.03    | 0.96 |

Supplement: Supplementary file 8176 [file 1]

IPI00551053.3|KIAA1191

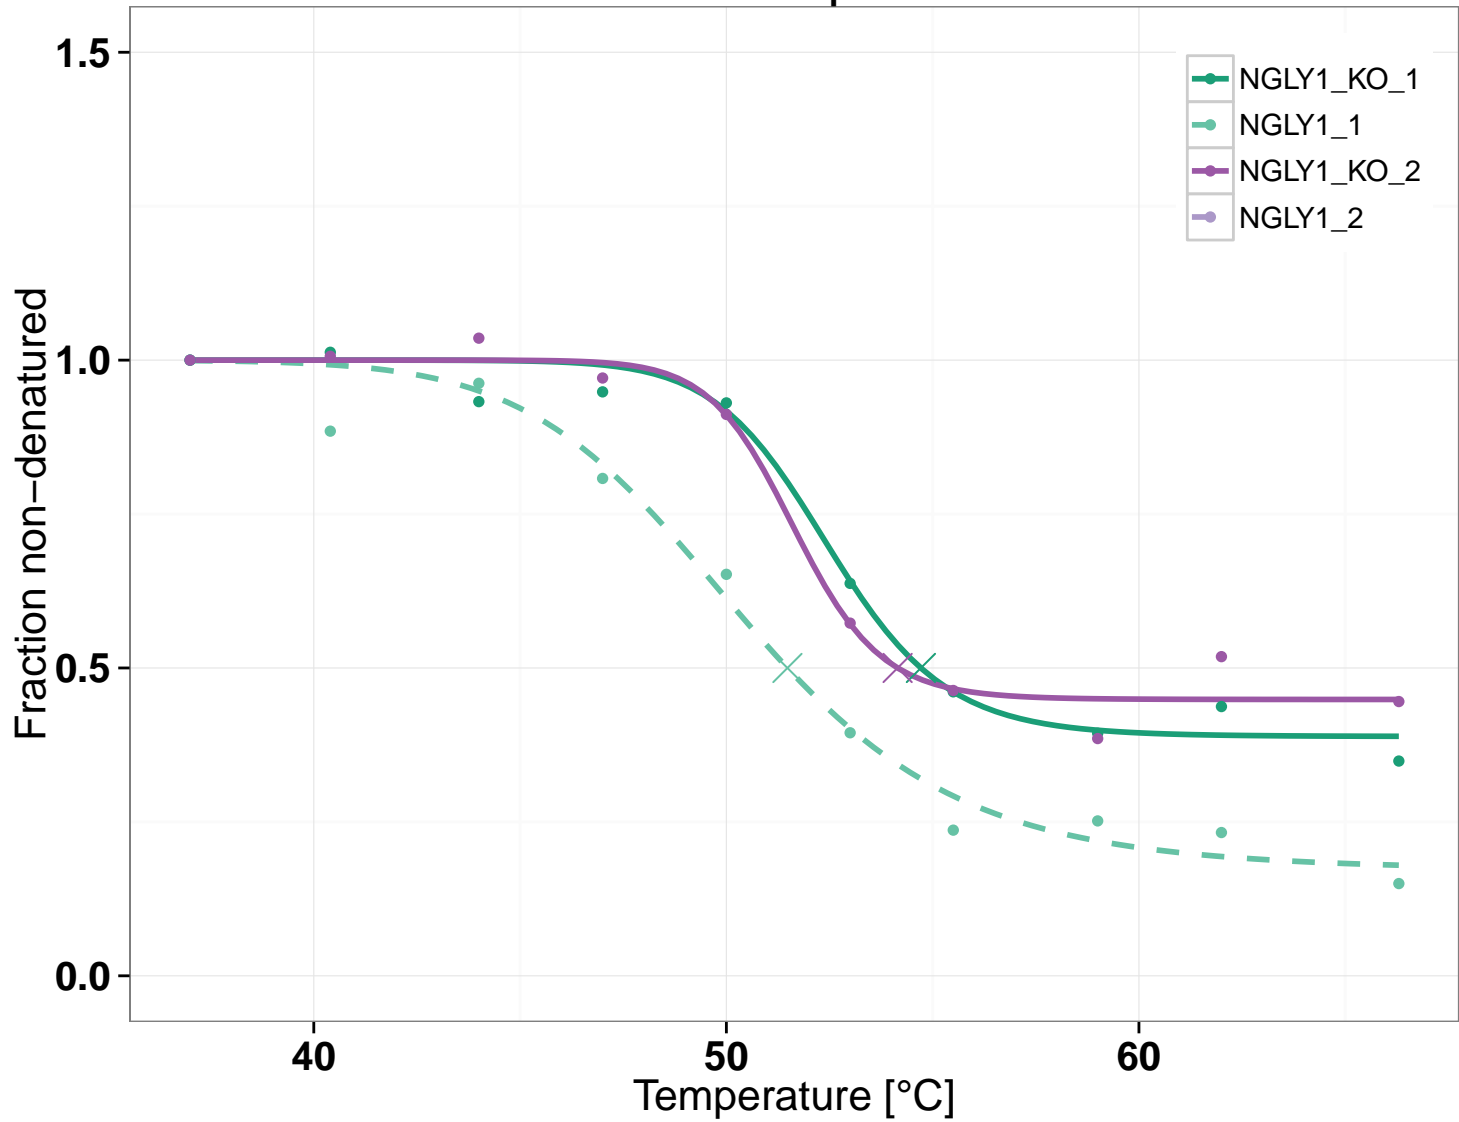

|            | meltPoint | slope  | plateau | R2   |
|------------|-----------|--------|---------|------|
| NGLY1_KO_1 | 54.72     | -0.11  | 0.39    | 0.98 |
| NGLY1_1    | 51.48     | -0.079 | 0.17    | 0.98 |
| NGLY1_KO_2 | 54.15     | -0.13  | 0.45    | 0.98 |
| NGLY1_2    | -         | -      | -       | -    |

Supplement: Supplementary file 8177 [file 1]

IPI00413959.2|CLSTN1

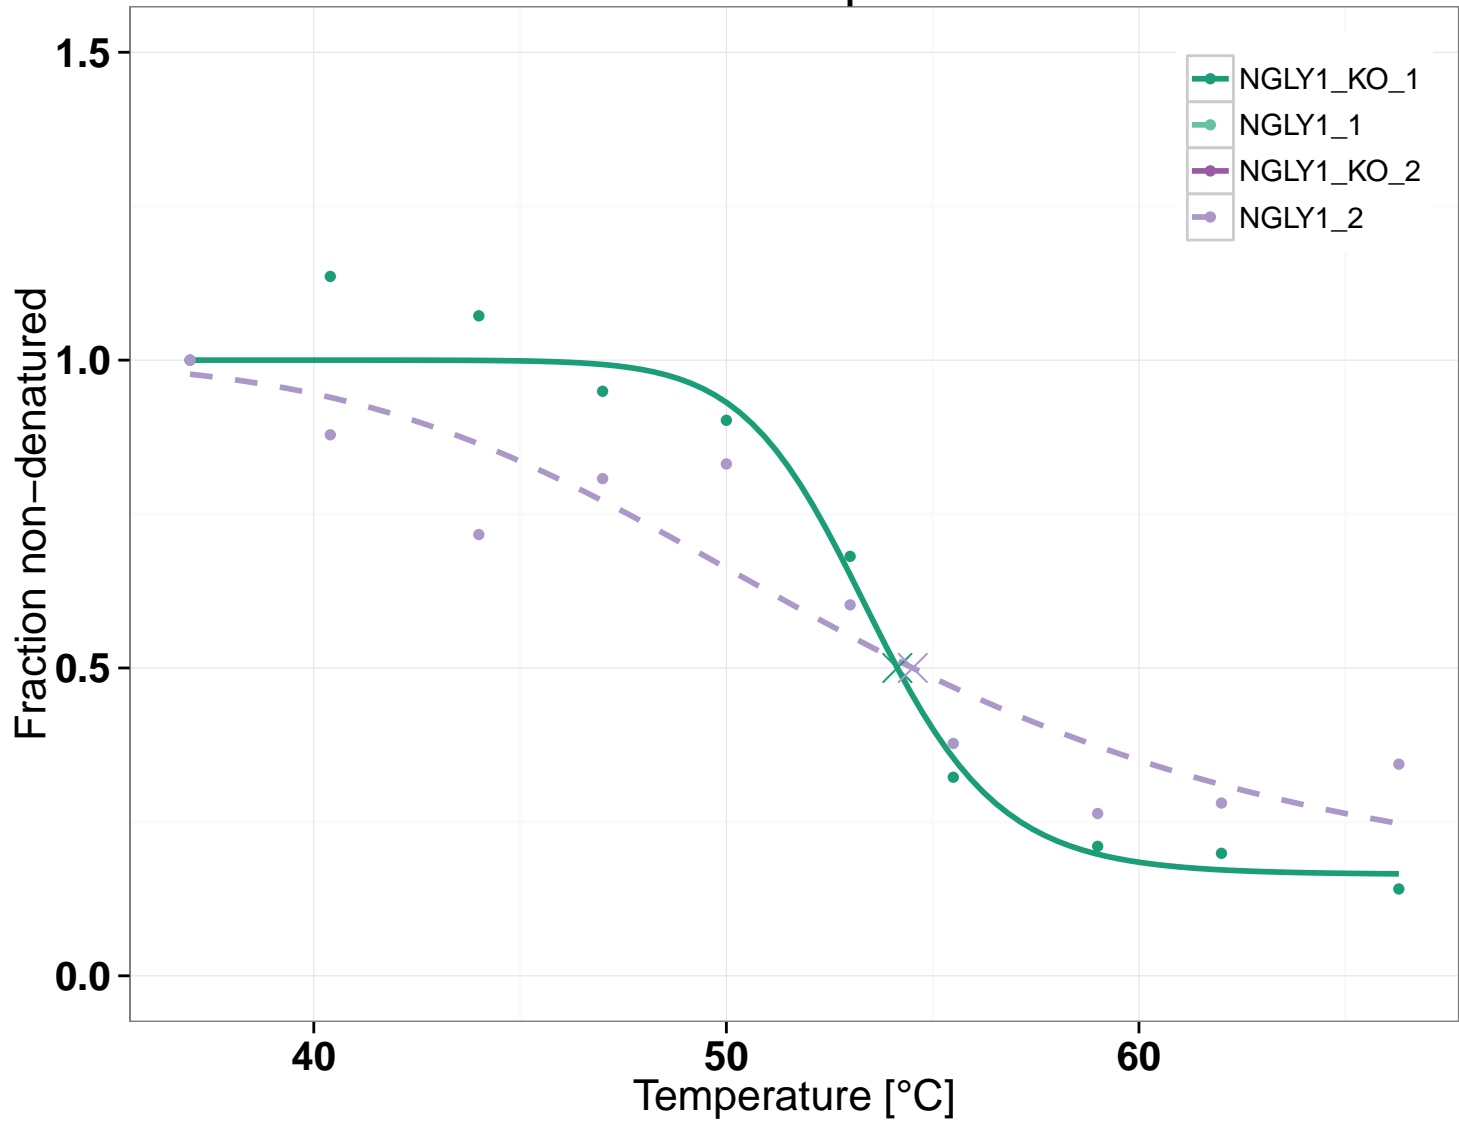

|            | meltPoint | slope  | plateau | R2   |
|------------|-----------|--------|---------|------|
| NGLY1_KO_1 | 54.14     | -0.13  | 0.16    | 0.98 |
| NGLY1_1    | -         | -      | -       | -    |
| NGLY1_KO_2 | -         | -      | -       | -    |
| NGLY1_2    | 54.52     | -0.037 | 0.11    | 0.87 |

Supplement: Supplementary file 8178 [file 1]

IPI00888592.1|LOC100133224

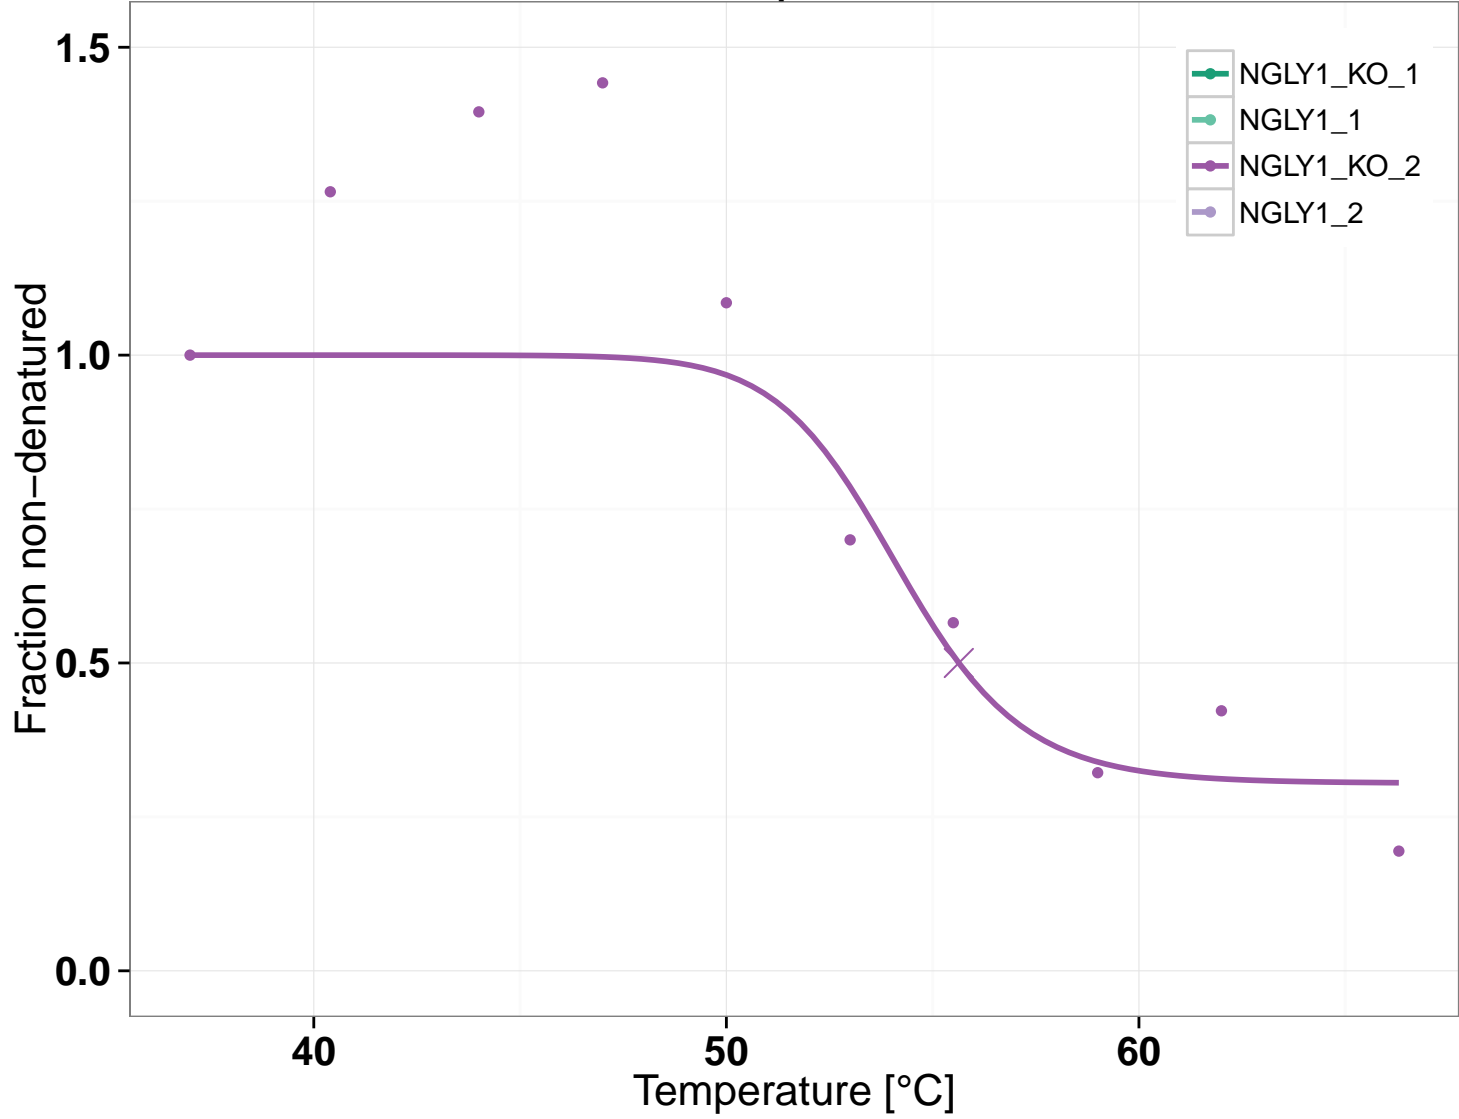

|            | meltPoint | slope | plateau | R2   |
|------------|-----------|-------|---------|------|
| NGLY1_KO_1 | —         | —     | —       | —    |
| NGLY1_1    | —         | —     | —       | —    |
| NGLY1_KO_2 | 55.63     | -0.12 | 0.3     | 0.75 |
| NGLY1_2    | —         | —     | —       | —    |

Supplement: Supplementary file 8179 [file 1]

IPI00549540.3|PAK1IP1

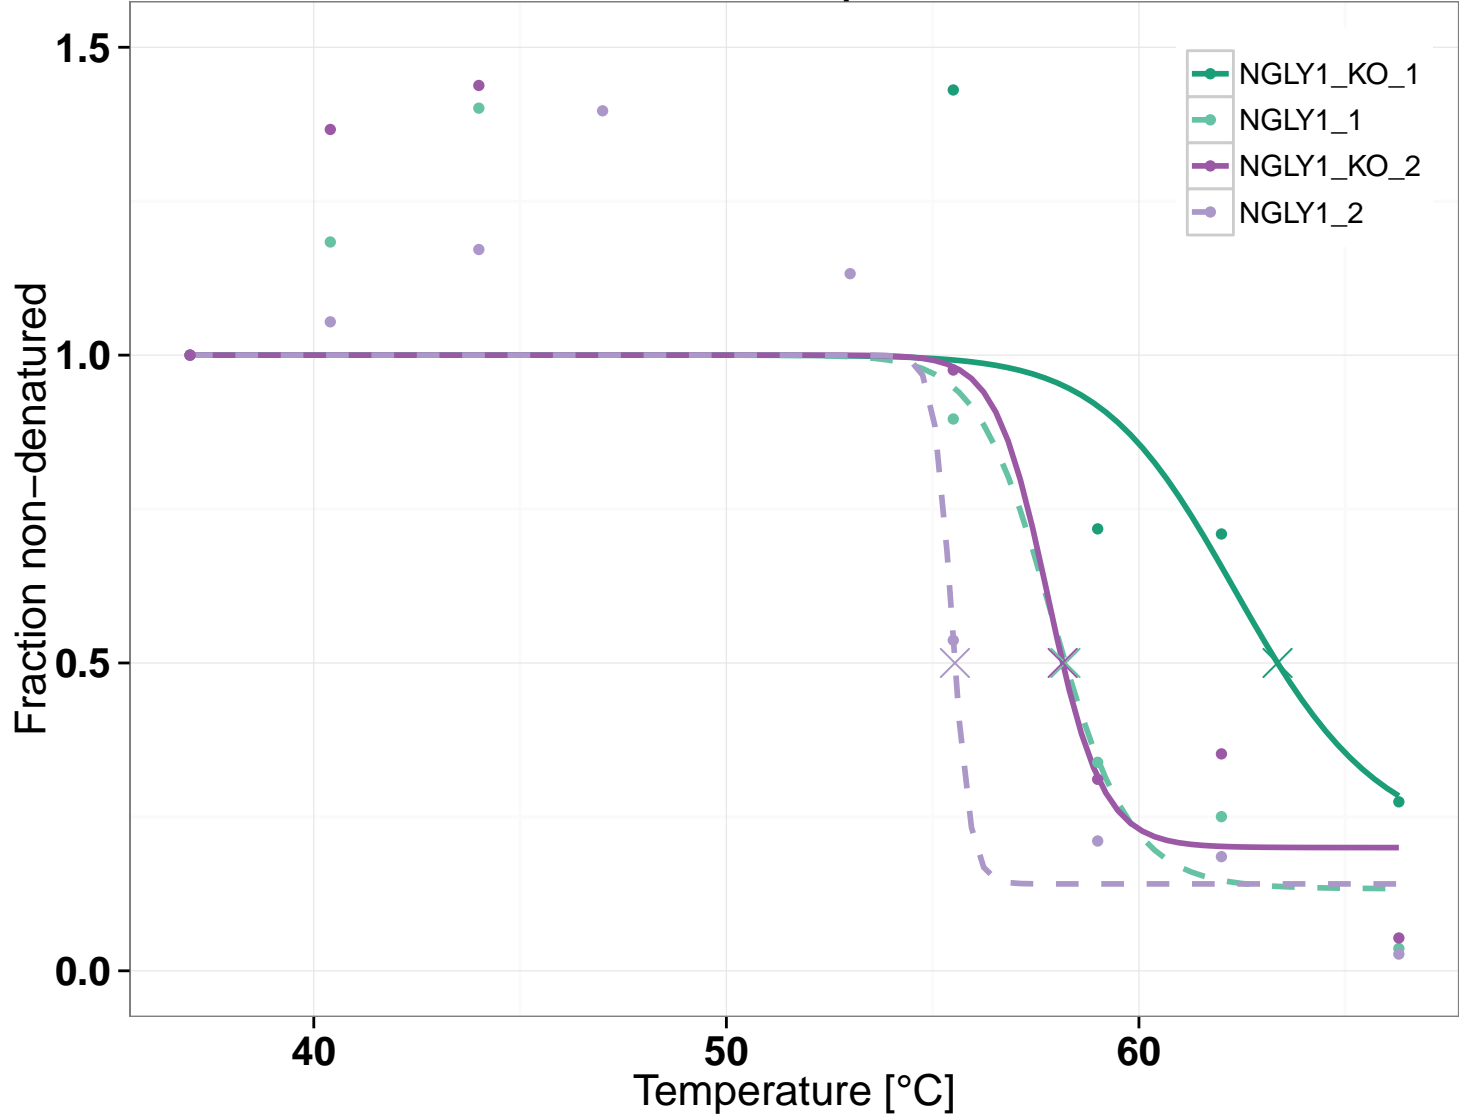

|            | meltPoint | slope | plateau | R2    |
|------------|-----------|-------|---------|-------|
| NGLY1_KO_1 | 63.36     | -0.12 | 0.2     | -0.26 |
| NGLY1_1    | 58.22     | -0.24 | 0.13    | 0.35  |
| NGLY1_KO_2 | 58.15     | -0.31 | 0.2     | 0.29  |
| NGLY1_2    | 55.54     | -0.97 | 0.14    | 0.8   |

Supplement: Supplementary file 8180 [file 1]

IPI00005014.2|PIM1

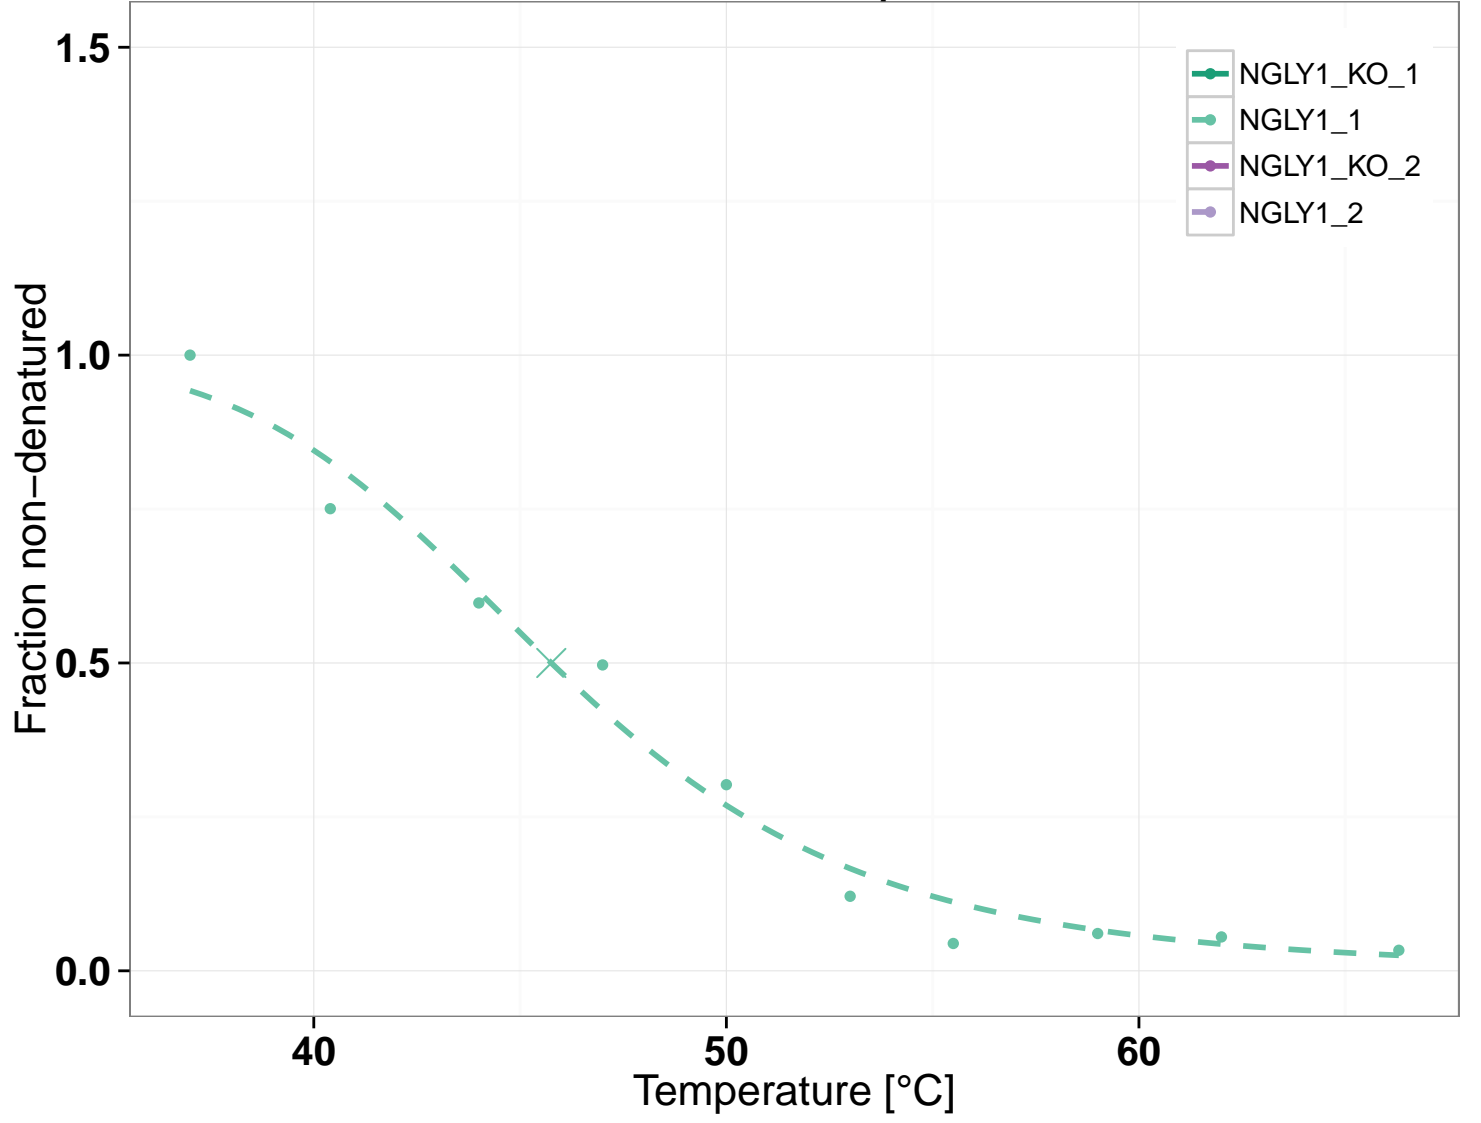

|            | meltPoint | slope  | plateau | R2   |
|------------|-----------|--------|---------|------|
| NGLY1_KO_1 | –         | –      | –       | –    |
| NGLY1_1    | 45.76     | –0.066 | 0       | 0.98 |
| NGLY1_KO_2 | –         | –      | –       | –    |
| NGLY1_2    | –         | –      | –       | –    |

Supplement: Supplementary file 8181 [file 1]

# IPI00004436.1|LSM1

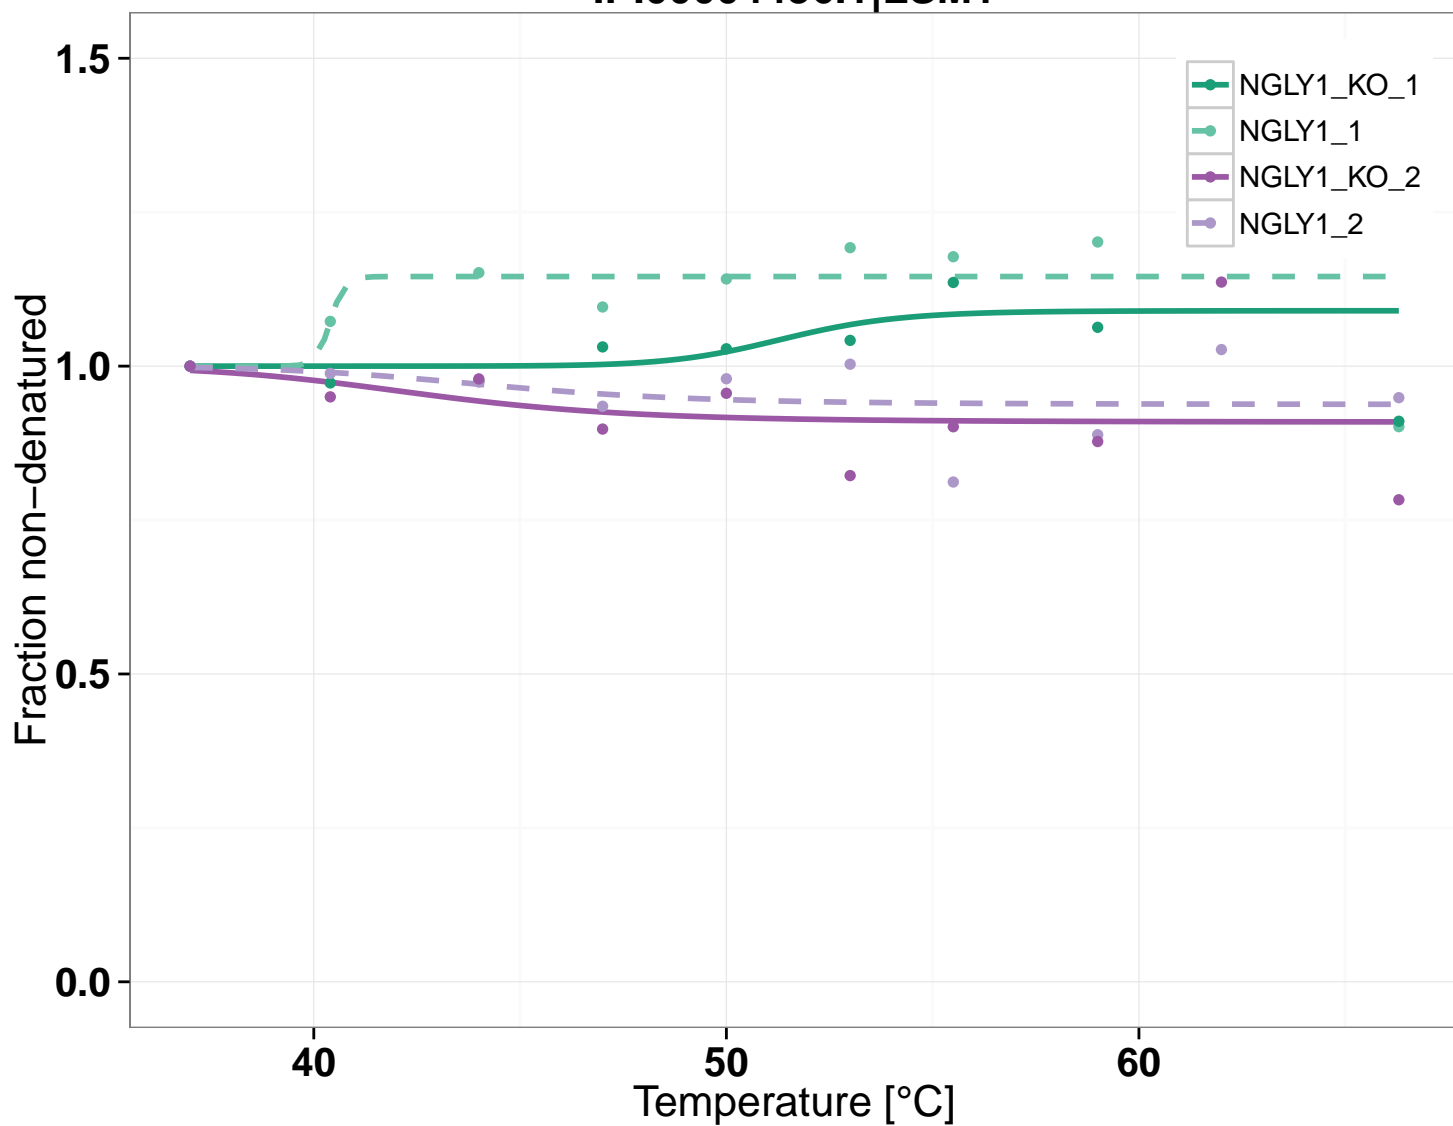

|            | meltPoint | slope   | plateau | R2   |
|------------|-----------|---------|---------|------|
| NGLY1_KO_1 | —         | 0.016   | 1.09    | 0.21 |
| NGLY1_1    | —         | 0.22    | 1.15    | 0.19 |
| NGLY1_KO_2 | —         | -0.0089 | 0.91    | 0.09 |
| NGLY1_2    | —         | -0.0061 | 0.94    | 0.13 |

Supplement: Supplementary file 8182 [file 1]

# IPI00293086.2|ZHX1

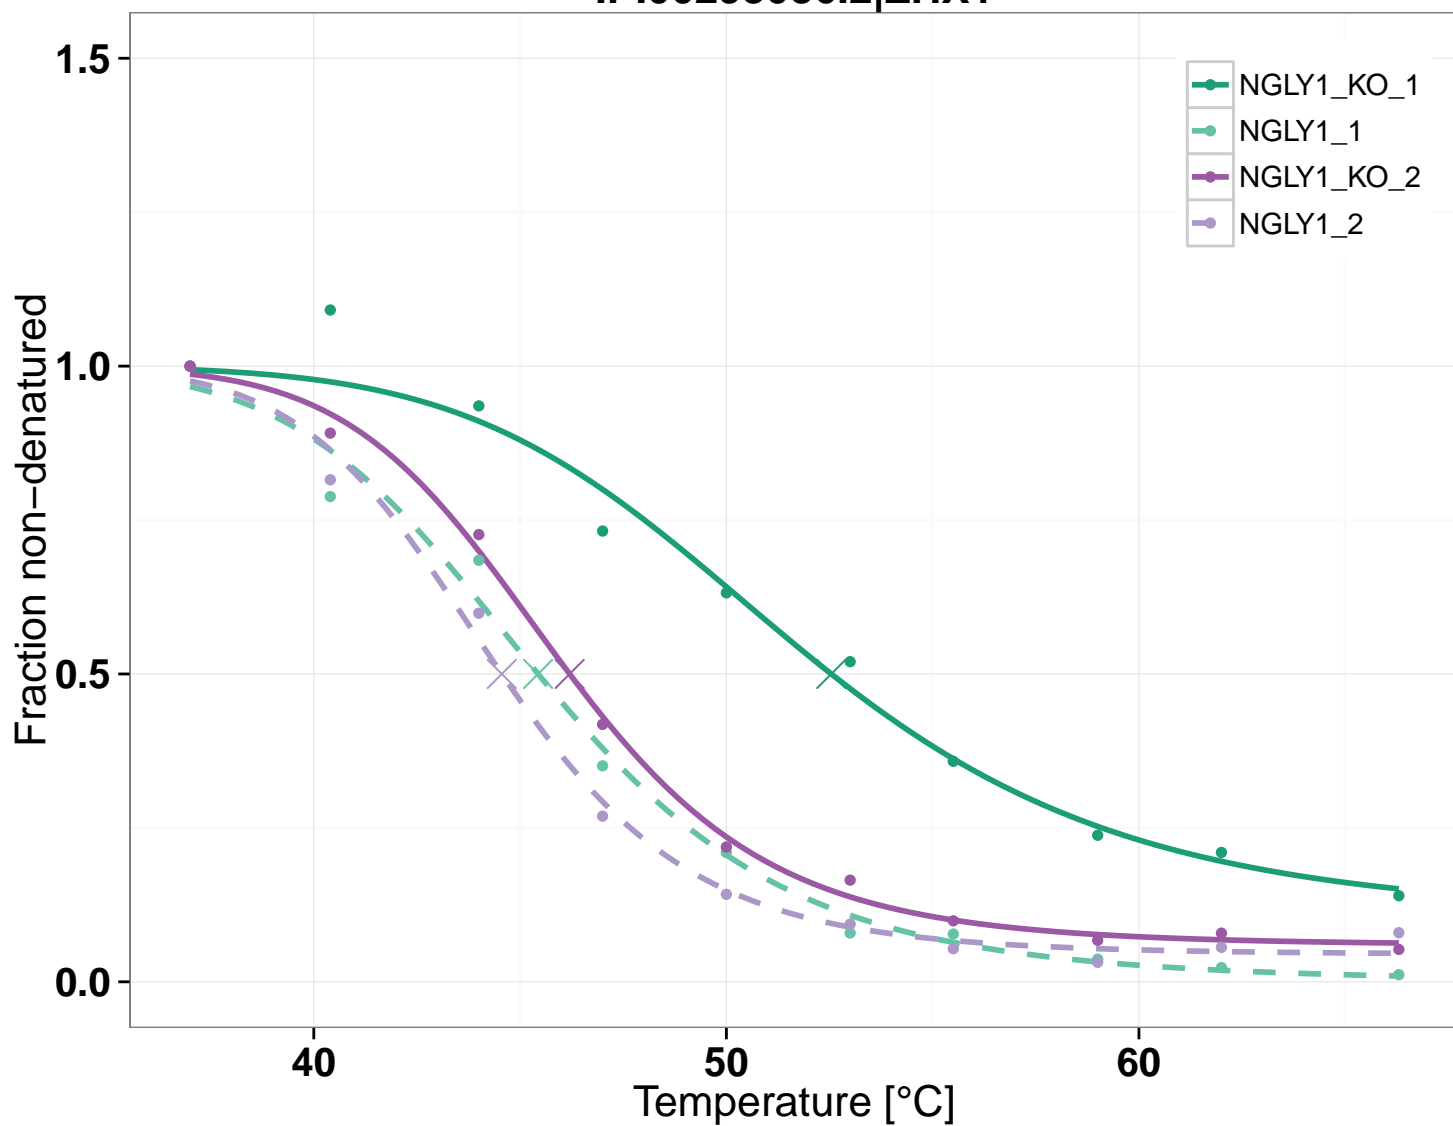

|            | meltPoint | slope  | plateau | R2   |
|------------|-----------|--------|---------|------|
| NGLY1_KO_1 | 52.54     | -0.057 | 0.1     | 0.98 |
| NGLY1_1    | 45.44     | -0.083 | 0       | 0.99 |
| NGLY1_KO_2 | 46.2      | -0.092 | 0.06    | 1    |
| NGLY1_2    | 44.56     | -0.1   | 0.04    | 0.99 |

Supplement: Supplementary file 8183 [file 1]

IPI00291800.1|EIF4ENIF1

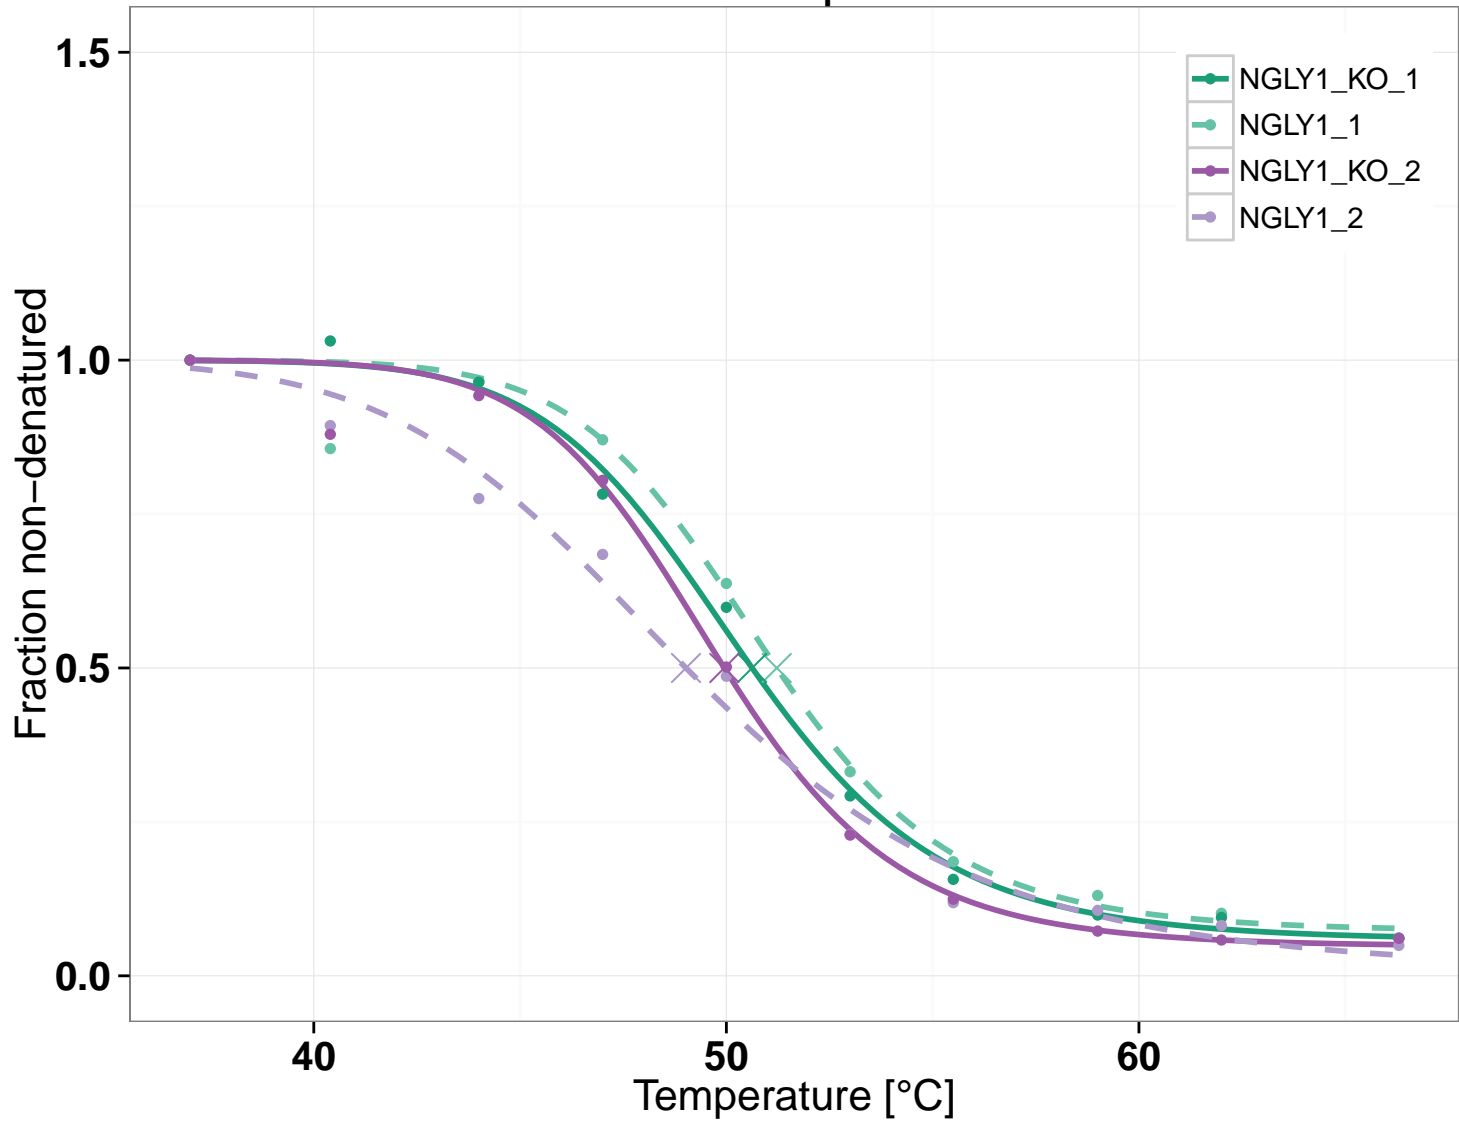

|            | meltPoint | slope  | plateau | R2   |
|------------|-----------|--------|---------|------|
| NGLY1_KO_1 | 50.62     | -0.098 | 0.06    | 1    |
| NGLY1_1    | 51.22     | -0.1   | 0.07    | 0.98 |
| NGLY1_KO_2 | 49.95     | -0.11  | 0.05    | 0.99 |
| NGLY1_2    | 49.02     | -0.069 | 0       | 0.99 |

Supplement: Supplementary file 8184 [file 1]

IPI00295387.5|CRLF3

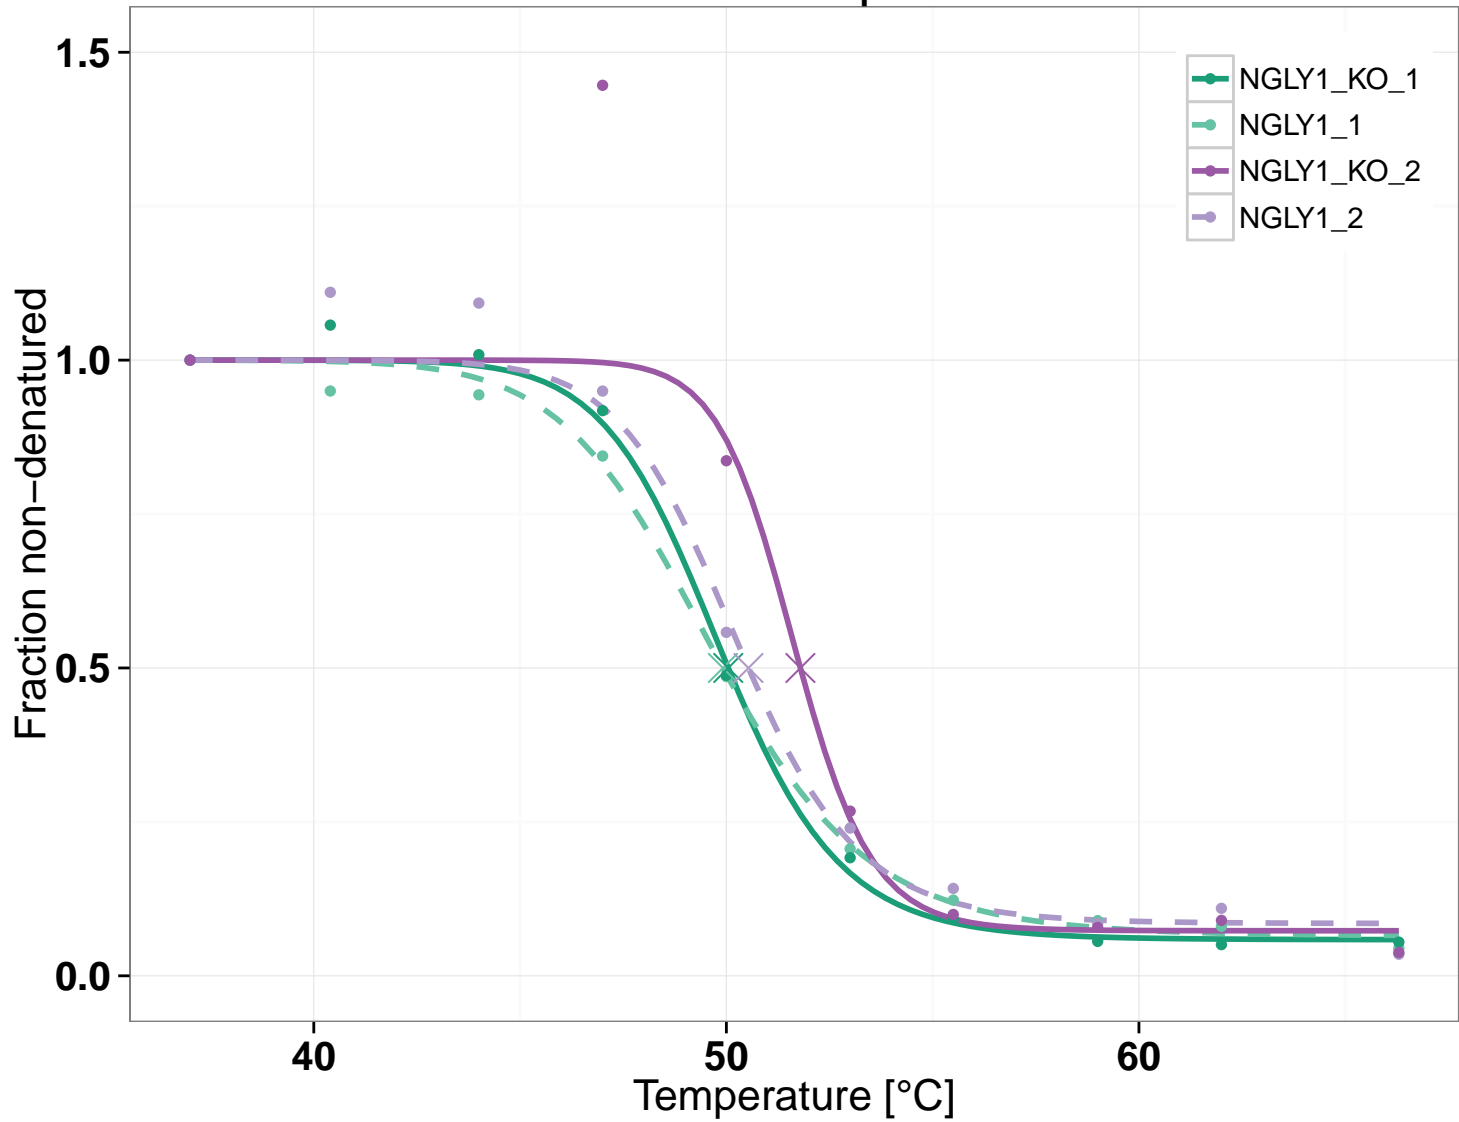

|            | meltPoint | slope | plateau | R2   |
|------------|-----------|-------|---------|------|
| NGLY1_KO_1 | 50.05     | -0.16 | 0.06    | 1    |
| NGLY1_1    | 49.92     | -0.13 | 0.06    | 1    |
| NGLY1_KO_2 | 51.79     | -0.25 | 0.07    | 0.72 |
| NGLY1_2    | 50.54     | -0.16 | 0.08    | 0.99 |

Supplement: Supplementary file 8185 [file 1]

IPI00607627.3|MRPL51

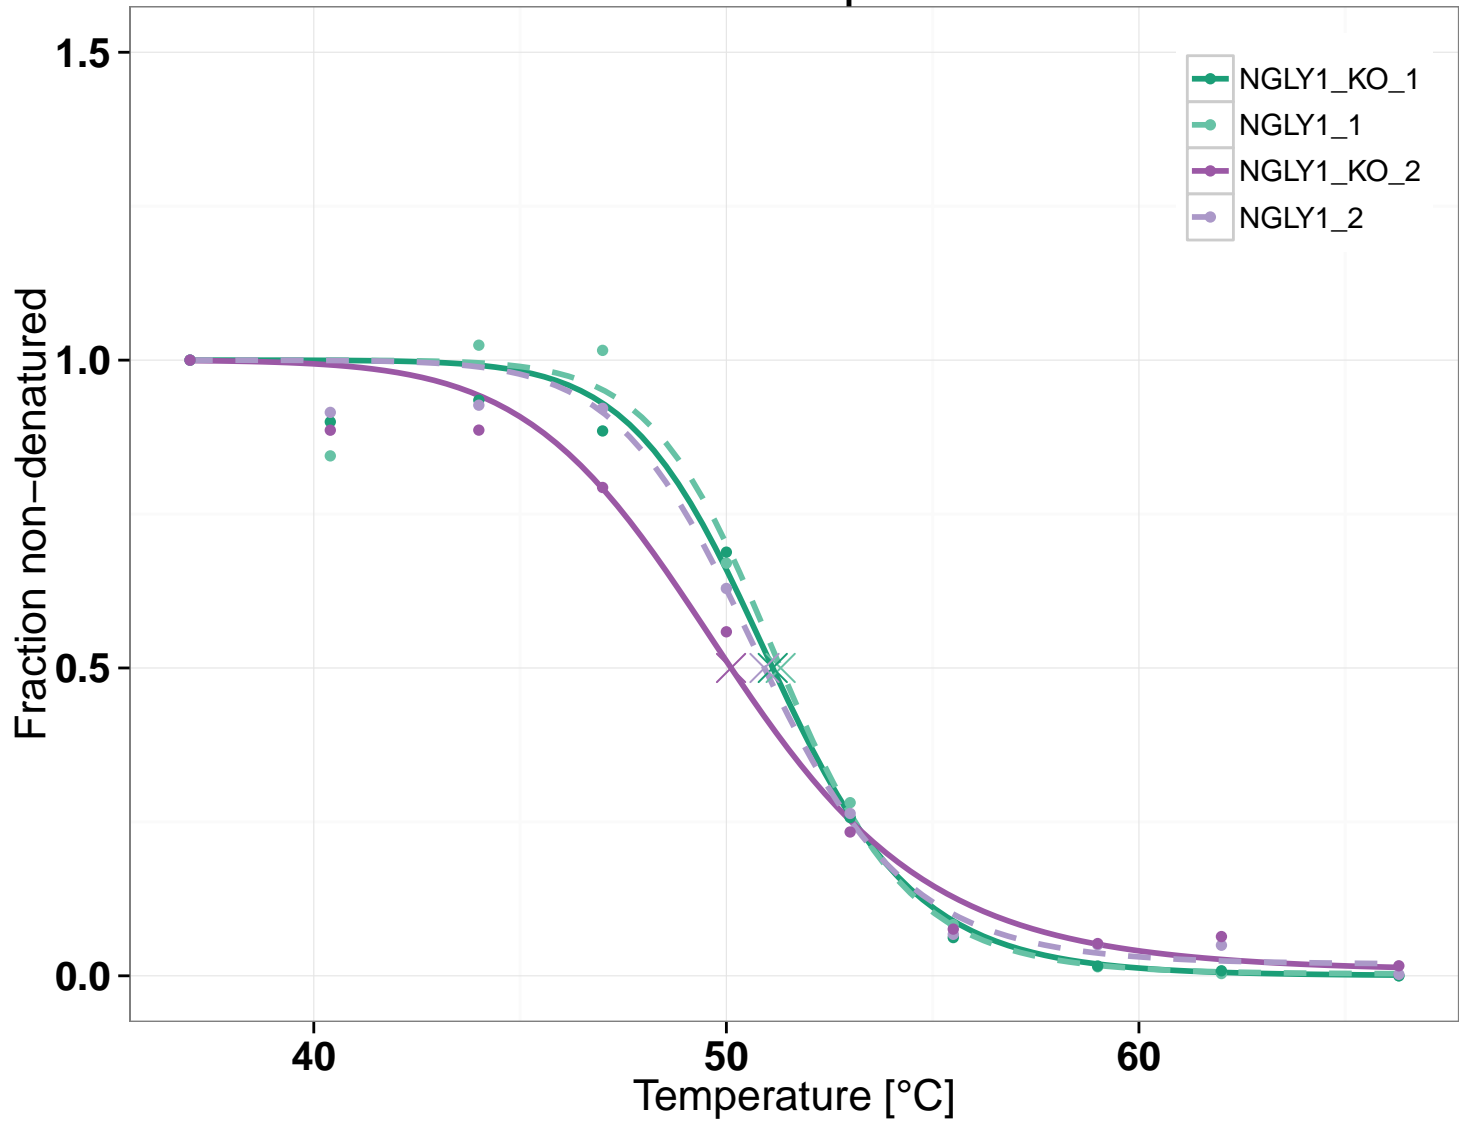

|            | meltPoint | slope | plateau | R2   |
|------------|-----------|-------|---------|------|
| NGLY1_KO_1 | 51.12     | -0.14 | 0       | 0.99 |
| NGLY1_1    | 51.32     | -0.16 | 0       | 0.98 |
| NGLY1_KO_2 | 50.11     | -0.1  | 0.01    | 0.99 |
| NGLY1_2    | 50.92     | -0.14 | 0.02    | 0.99 |

Supplement: Supplementary file 8186 [file 1]

IPI00061802.5|ADAT3

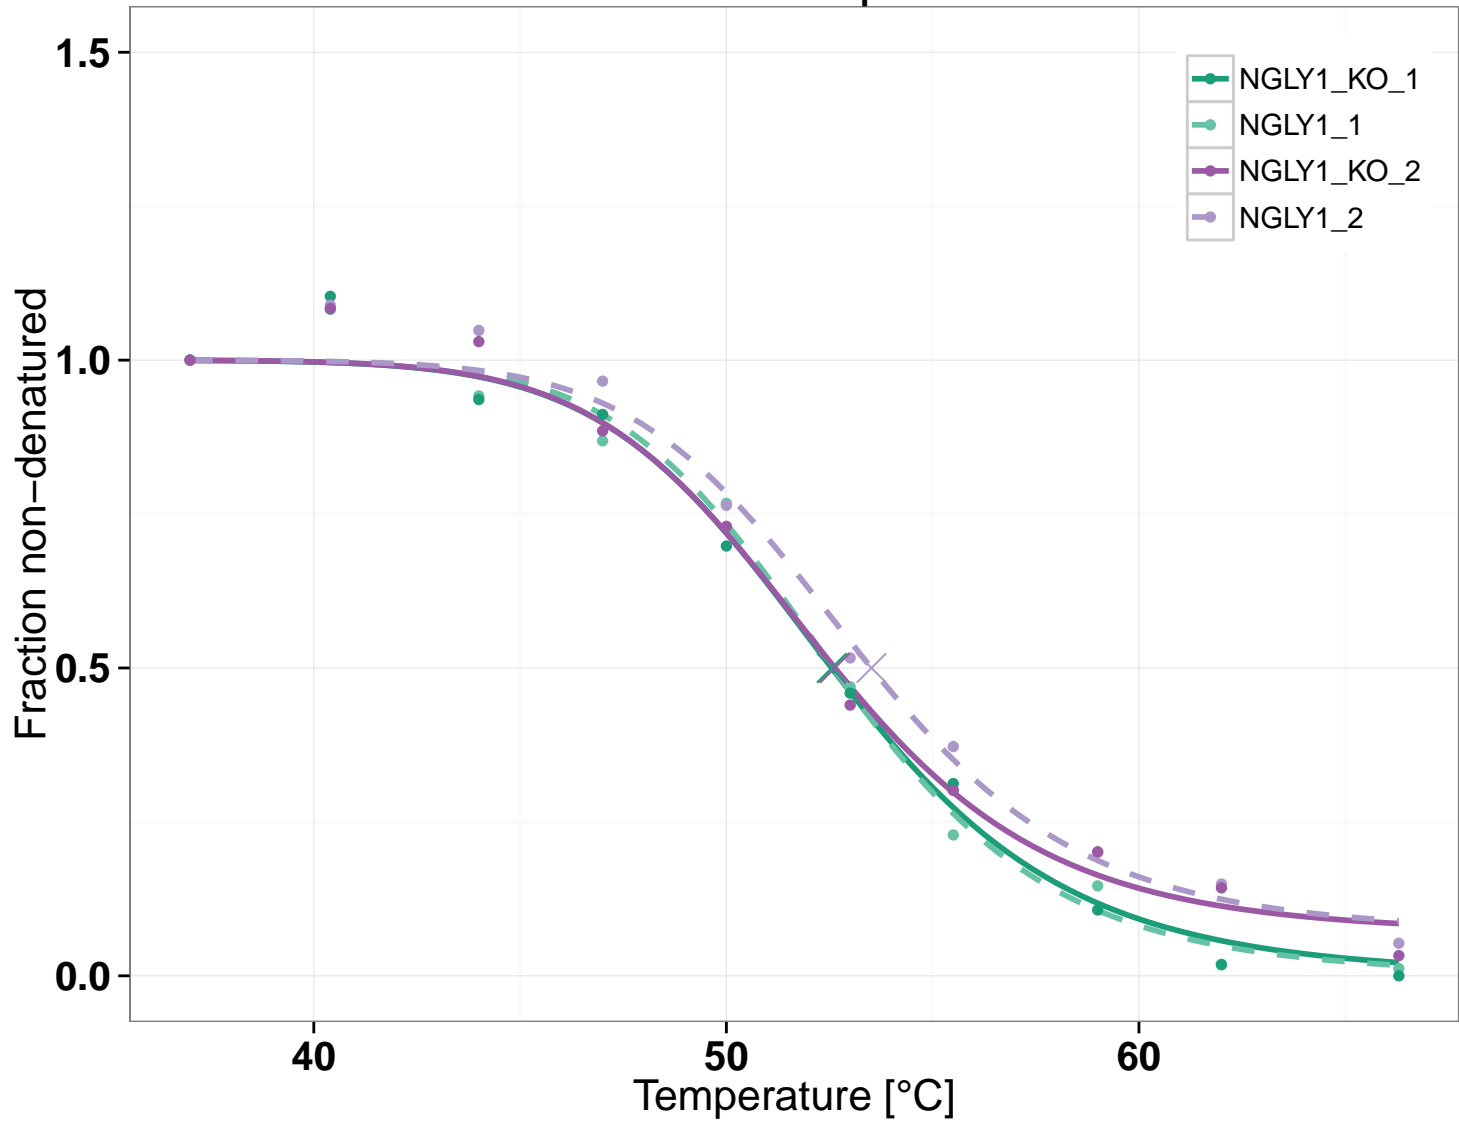

|            | meltPoint | slope  | plateau | R2   |
|------------|-----------|--------|---------|------|
| NGLY1_KO_1 | 52.55     | -0.089 | 0       | 0.99 |
| NGLY1_1    | 52.59     | -0.094 | 0       | 0.99 |
| NGLY1_KO_2 | 52.63     | -0.085 | 0.07    | 0.99 |
| NGLY1_2    | 53.52     | -0.086 | 0.07    | 0.99 |

Supplement: Supplementary file 8187 [file 1]

IPI00291930.5|CLINT1

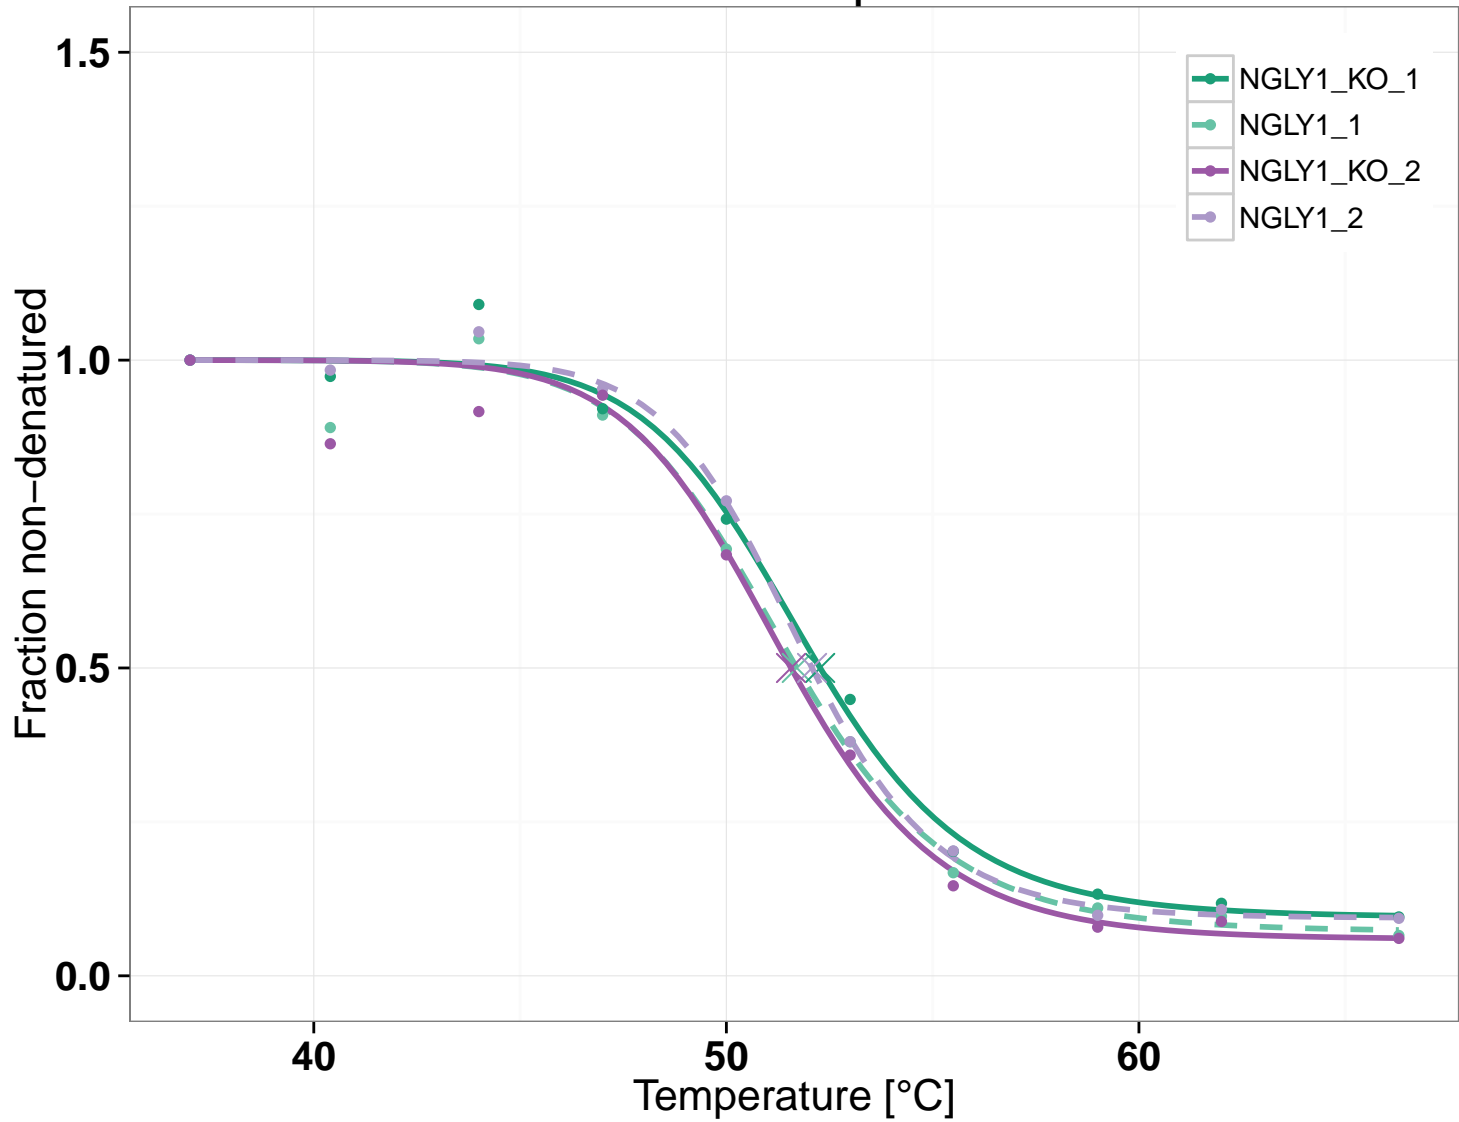

|            | meltPoint | slope | plateau | R2   |
|------------|-----------|-------|---------|------|
| NGLY1_KO_1 | 52.27     | -0.12 | 0.09    | 0.99 |
| NGLY1_1    | 51.71     | -0.12 | 0.07    | 0.99 |
| NGLY1_KO_2 | 51.57     | -0.12 | 0.06    | 0.98 |
| NGLY1_2    | 52.08     | -0.14 | 0.09    | 1    |

Supplement: Supplementary file 8188 [file 1]

IPI00902739.1|TOM1L2

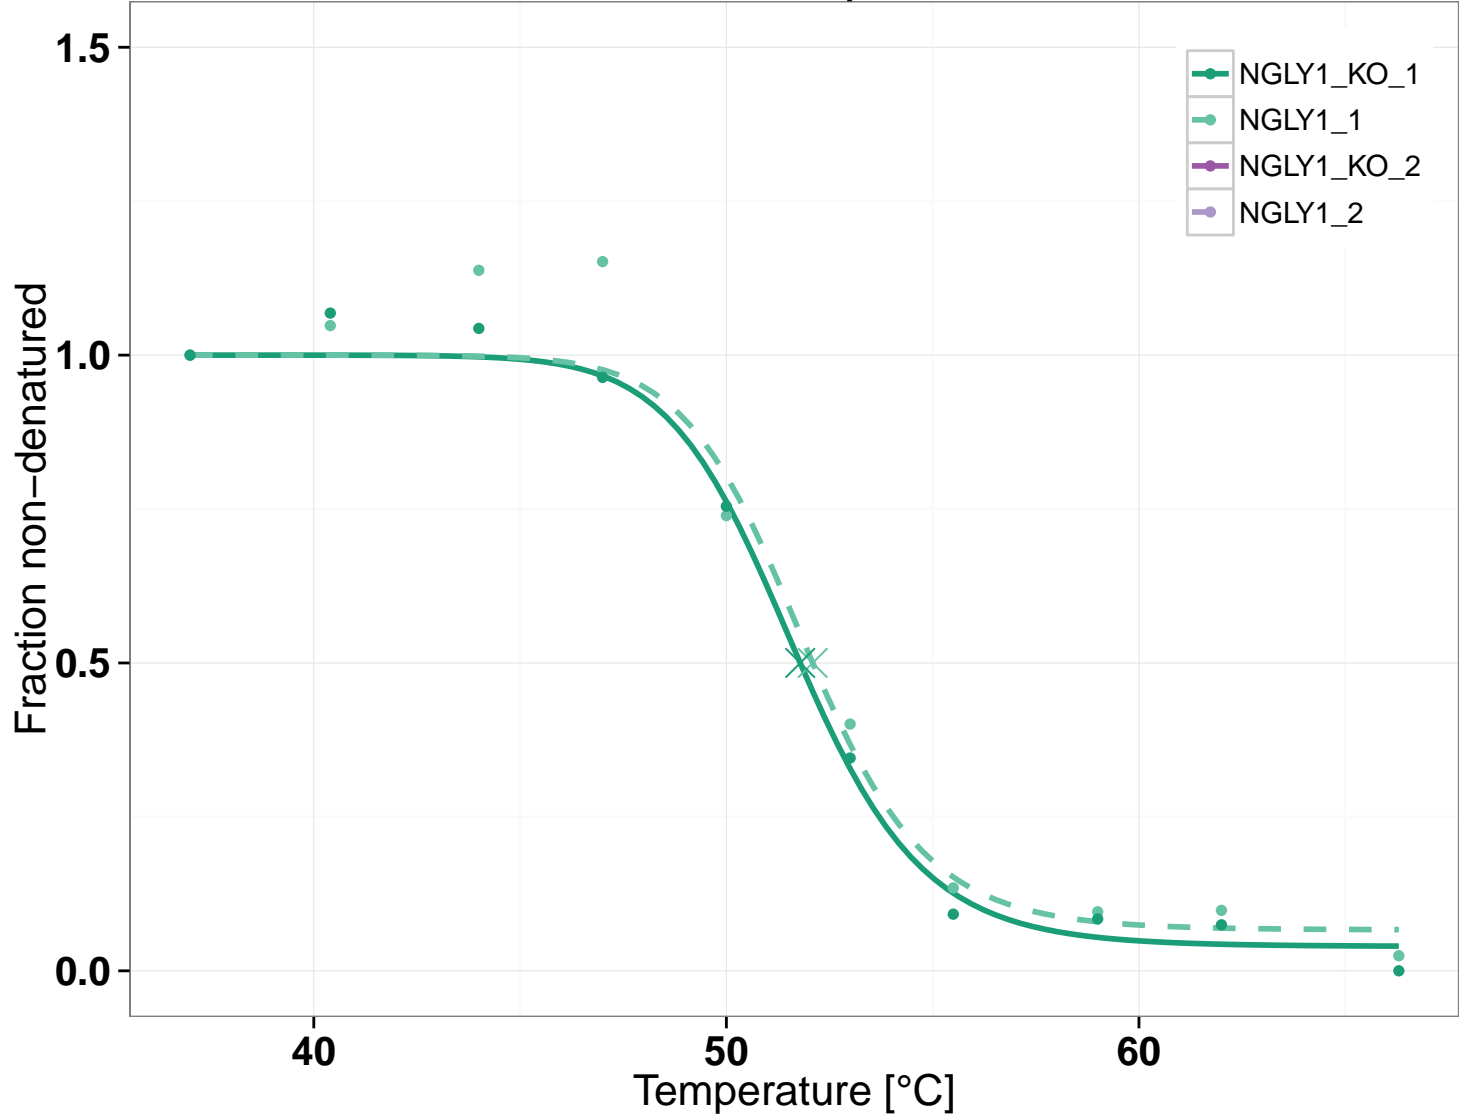

|            | meltPoint | slope | plateau | R2   |
|------------|-----------|-------|---------|------|
| NGLY1_KO_1 | 51.79     | -0.16 | 0.04    | 0.99 |
| NGLY1_1    | 52.09     | -0.16 | 0.07    | 0.97 |
| NGLY1_KO_2 | -         | -     | -       | -    |
| NGLY1_2    | -         | -     | -       | -    |

Supplement: Supplementary file 8189 [file 1]

# IPI00171798.1|MTA2

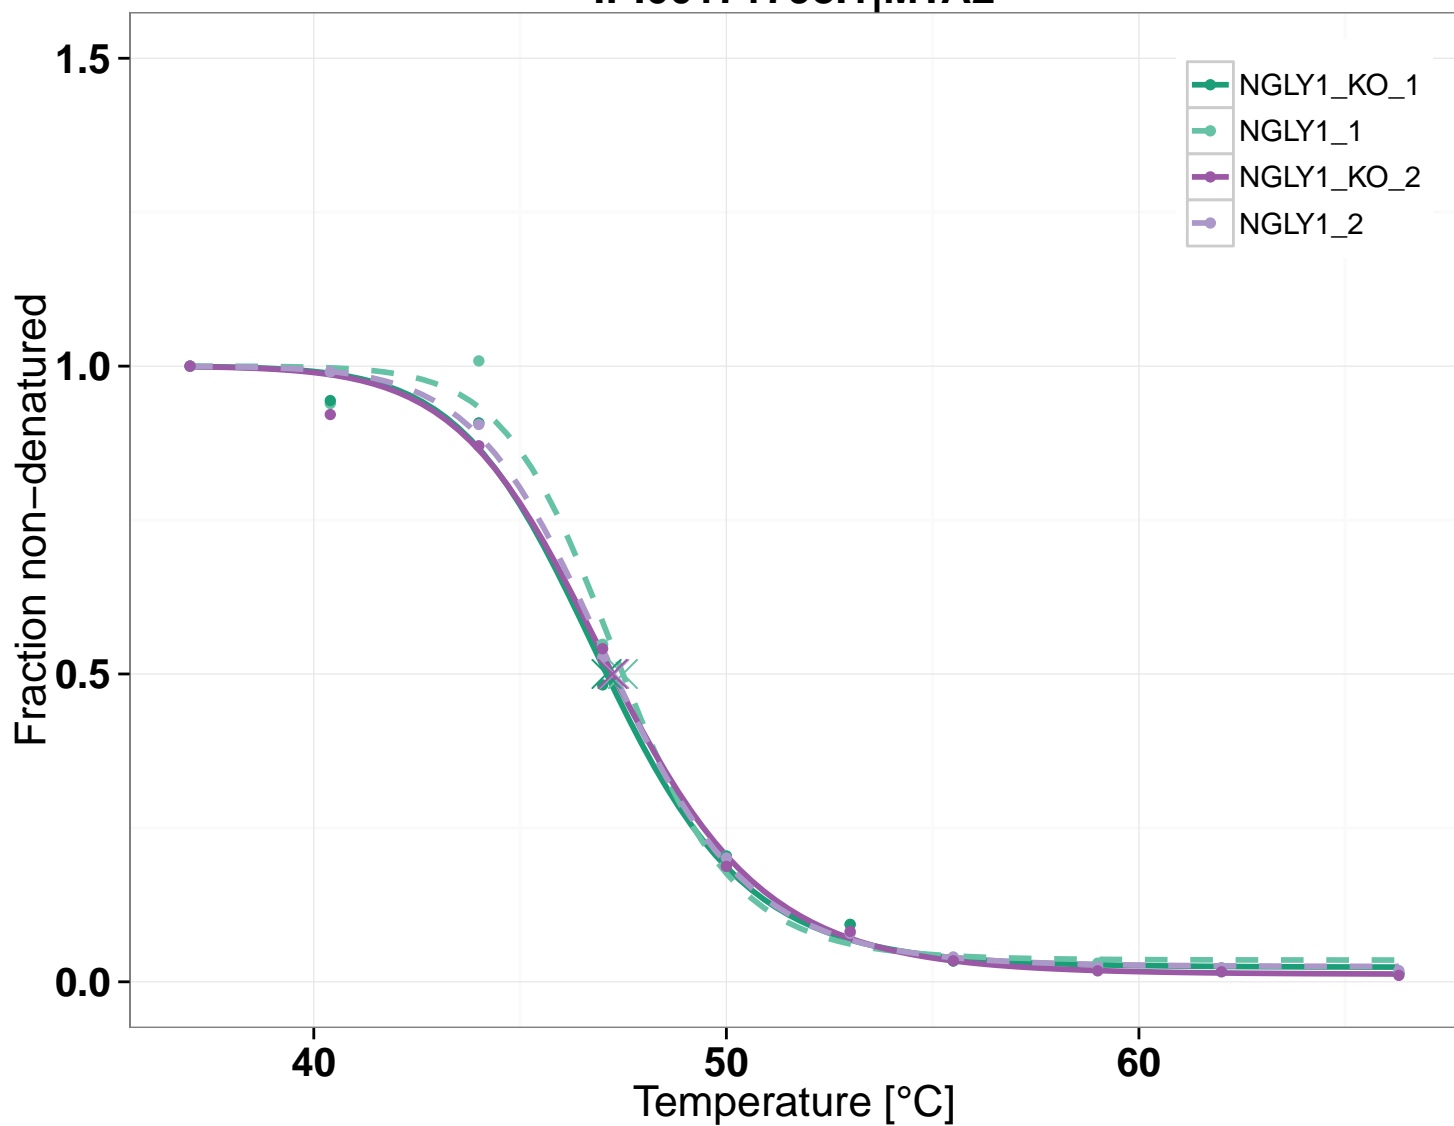

|            | meltPoint | slope | plateau | R2   |
|------------|-----------|-------|---------|------|
| NGLY1_KO_1 | 47.1      | -0.14 | 0.02    | 1    |
| NGLY1_1    | 47.49     | -0.17 | 0.04    | 0.99 |
| NGLY1_KO_2 | 47.24     | -0.13 | 0.01    | 1    |
| NGLY1_2    | 47.28     | -0.15 | 0.02    | 1    |

Supplement: Supplementary file 8190 [file 1]

IPI00003765.1|CAPN7

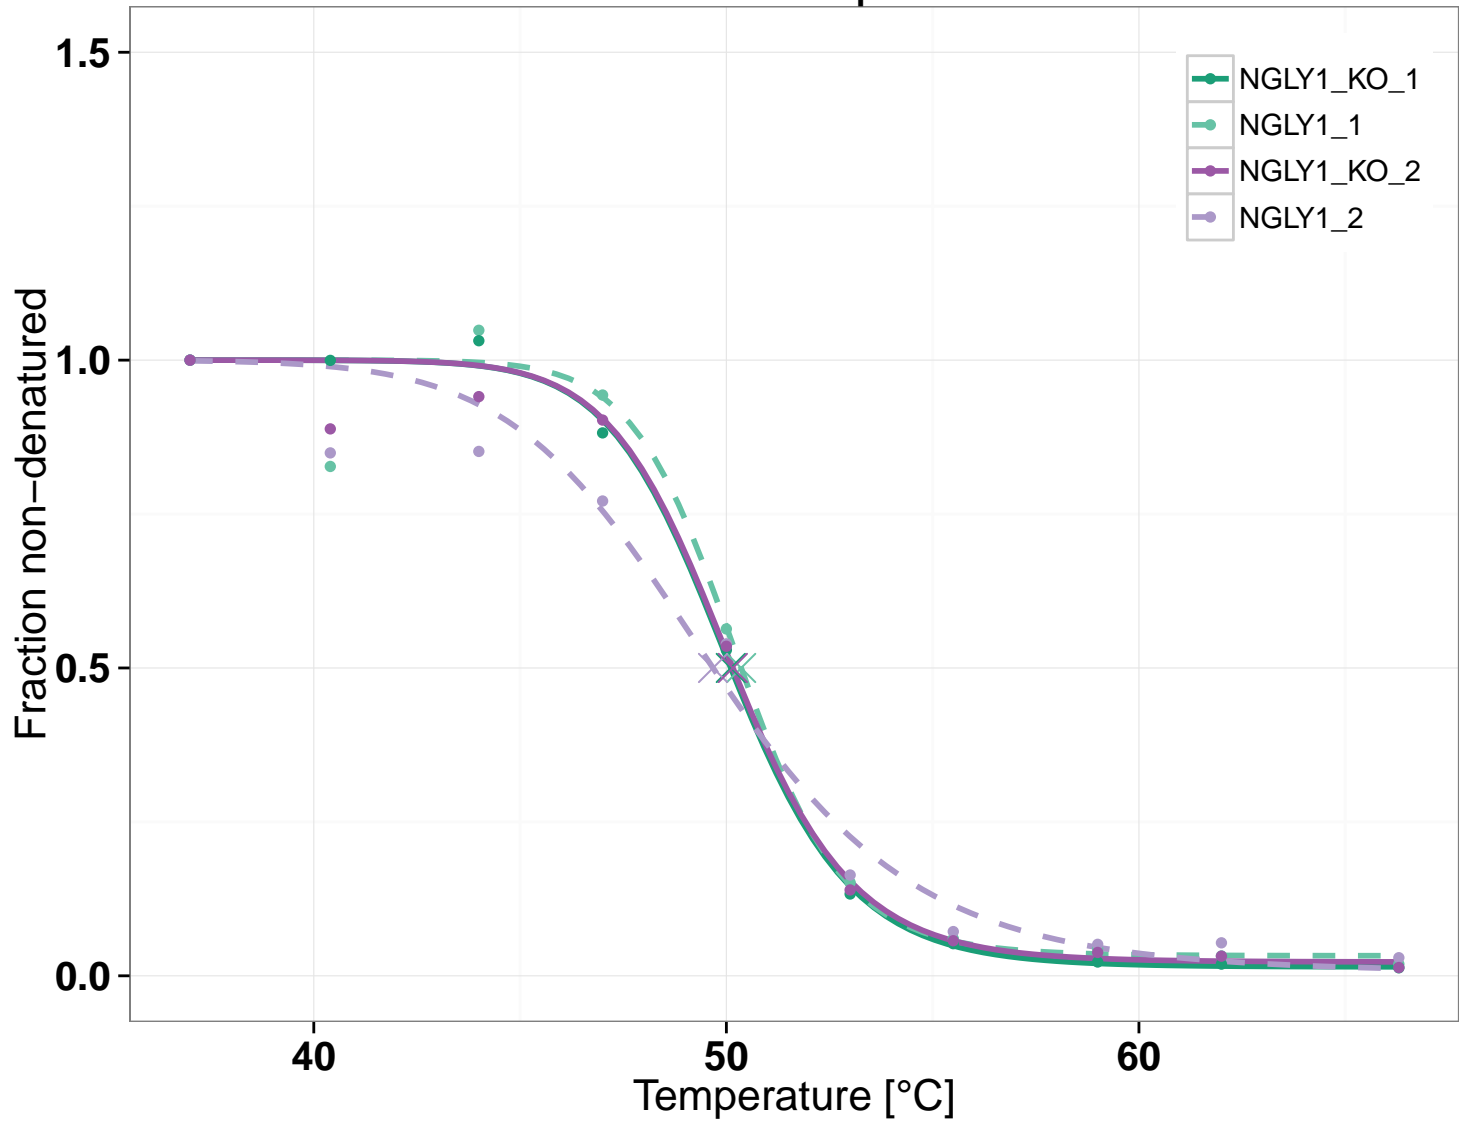

|            | meltPoint | slope | plateau | R2   |
|------------|-----------|-------|---------|------|
| NGLY1_KO_1 | 50.11     | -0.17 | 0.01    | 1    |
| NGLY1_1    | 50.36     | -0.19 | 0.03    | 0.98 |
| NGLY1_KO_2 | 50.16     | -0.17 | 0.02    | 0.99 |
| NGLY1_2    | 49.68     | -0.1  | 0.01    | 0.97 |

Supplement: Supplementary file 8191 [file 1]

# IPI00018628.3|COQ10B

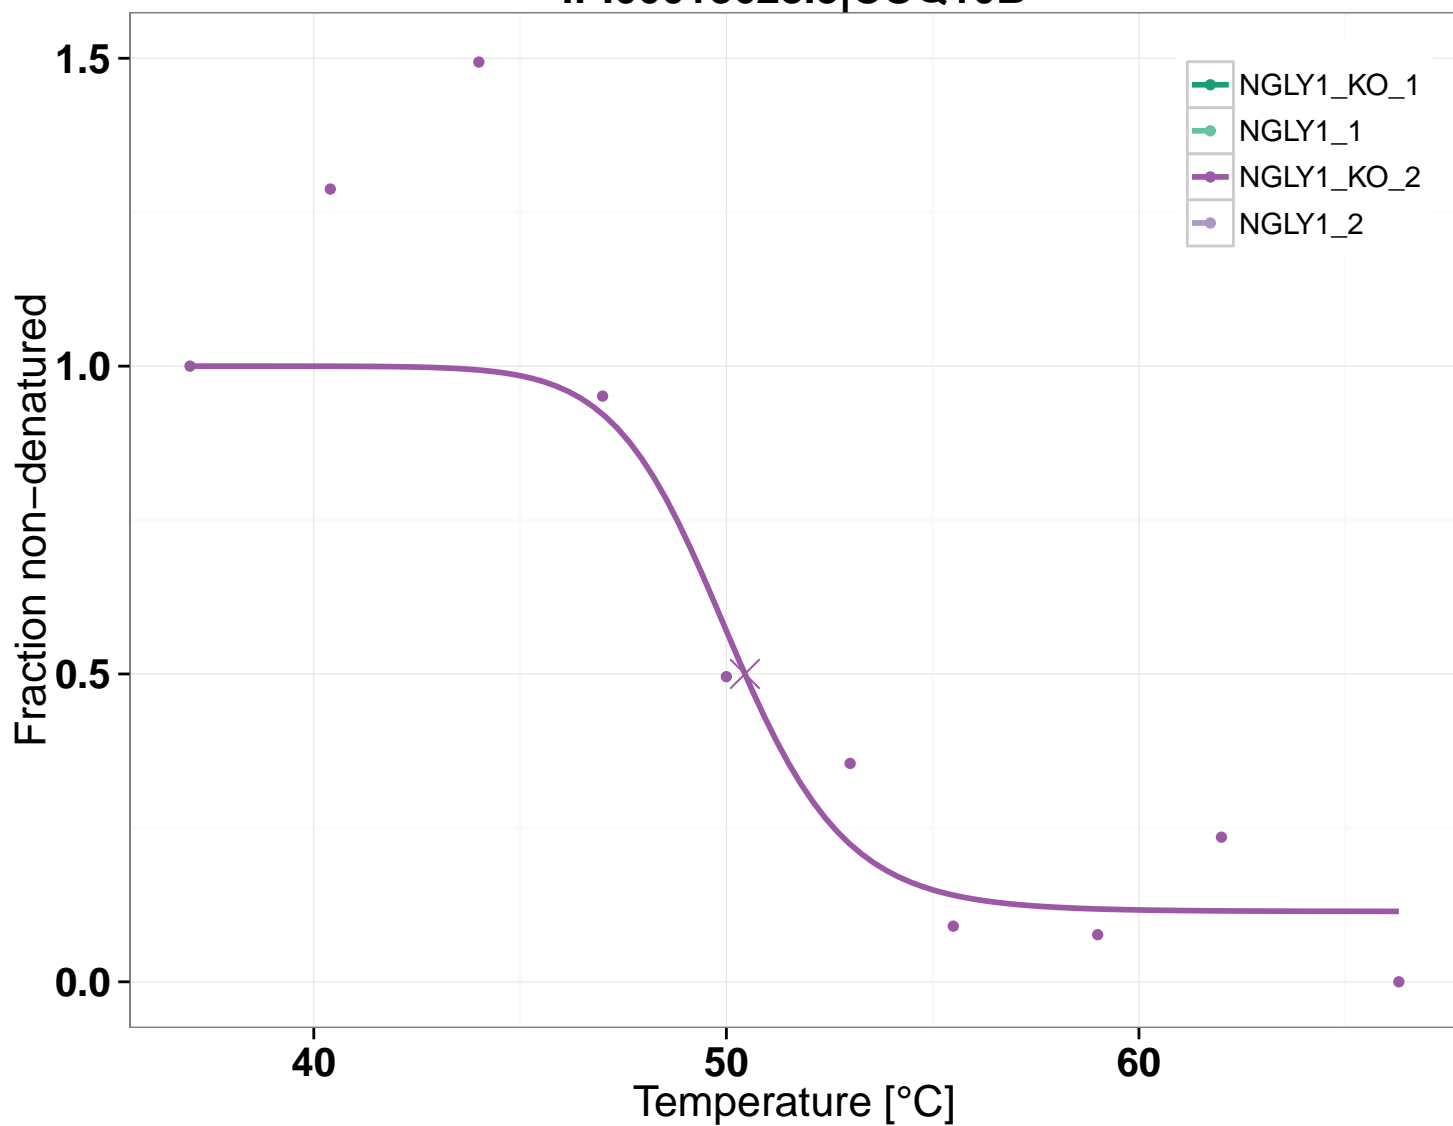

|            | meltPoint | slope | plateau | R2   |
|------------|-----------|-------|---------|------|
| NGLY1_KO_1 | —         | —     | —       | —    |
| NGLY1_1    | —         | —     | —       | —    |
| NGLY1_KO_2 | 50.45     | -0.16 | 0.11    | 0.85 |
| NGLY1_2    | —         | —     | —       | —    |

Supplement: Supplementary file 8192 [file 1]

IPI00747623.2|AMN1

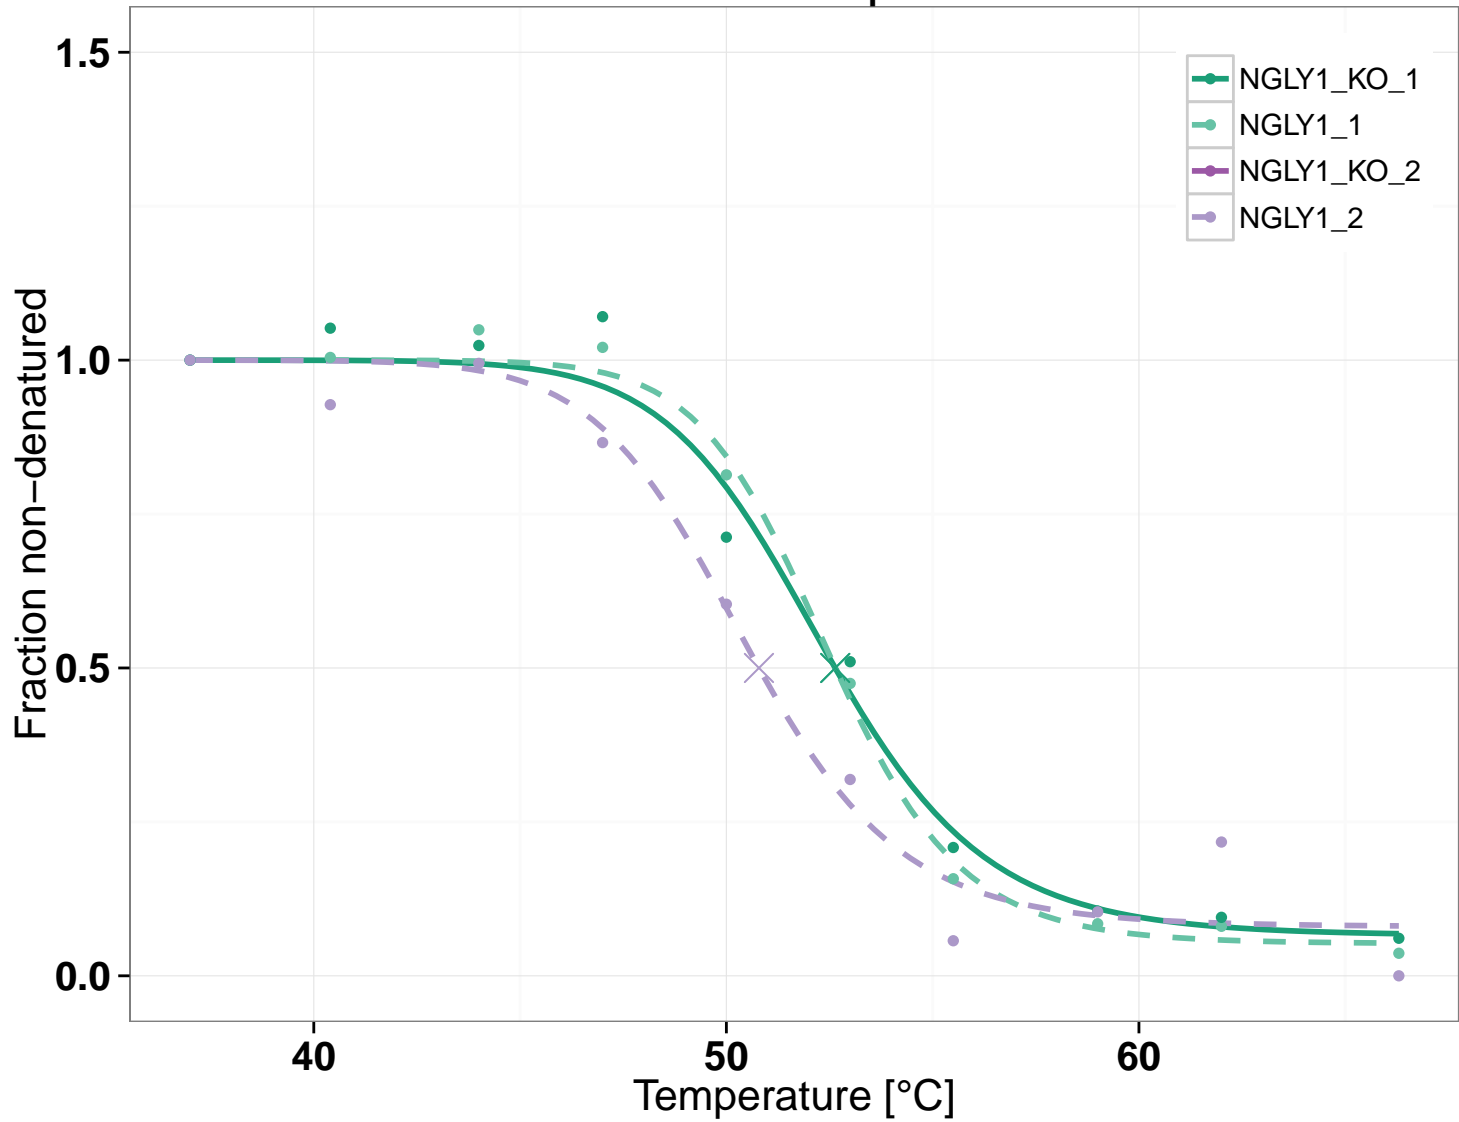

|            | meltPoint | slope | plateau | R2   |
|------------|-----------|-------|---------|------|
| NGLY1_KO_1 | 52.64     | -0.12 | 0.07    | 0.98 |
| NGLY1_1    | 52.64     | -0.15 | 0.05    | 1    |
| NGLY1_KO_2 | -         | -     | -       | -    |
| NGLY1_2    | 50.79     | -0.12 | 0.08    | 0.97 |

Supplement: Supplementary file 8193 [file 1]

# IPI00744015.1|DYNC1I2

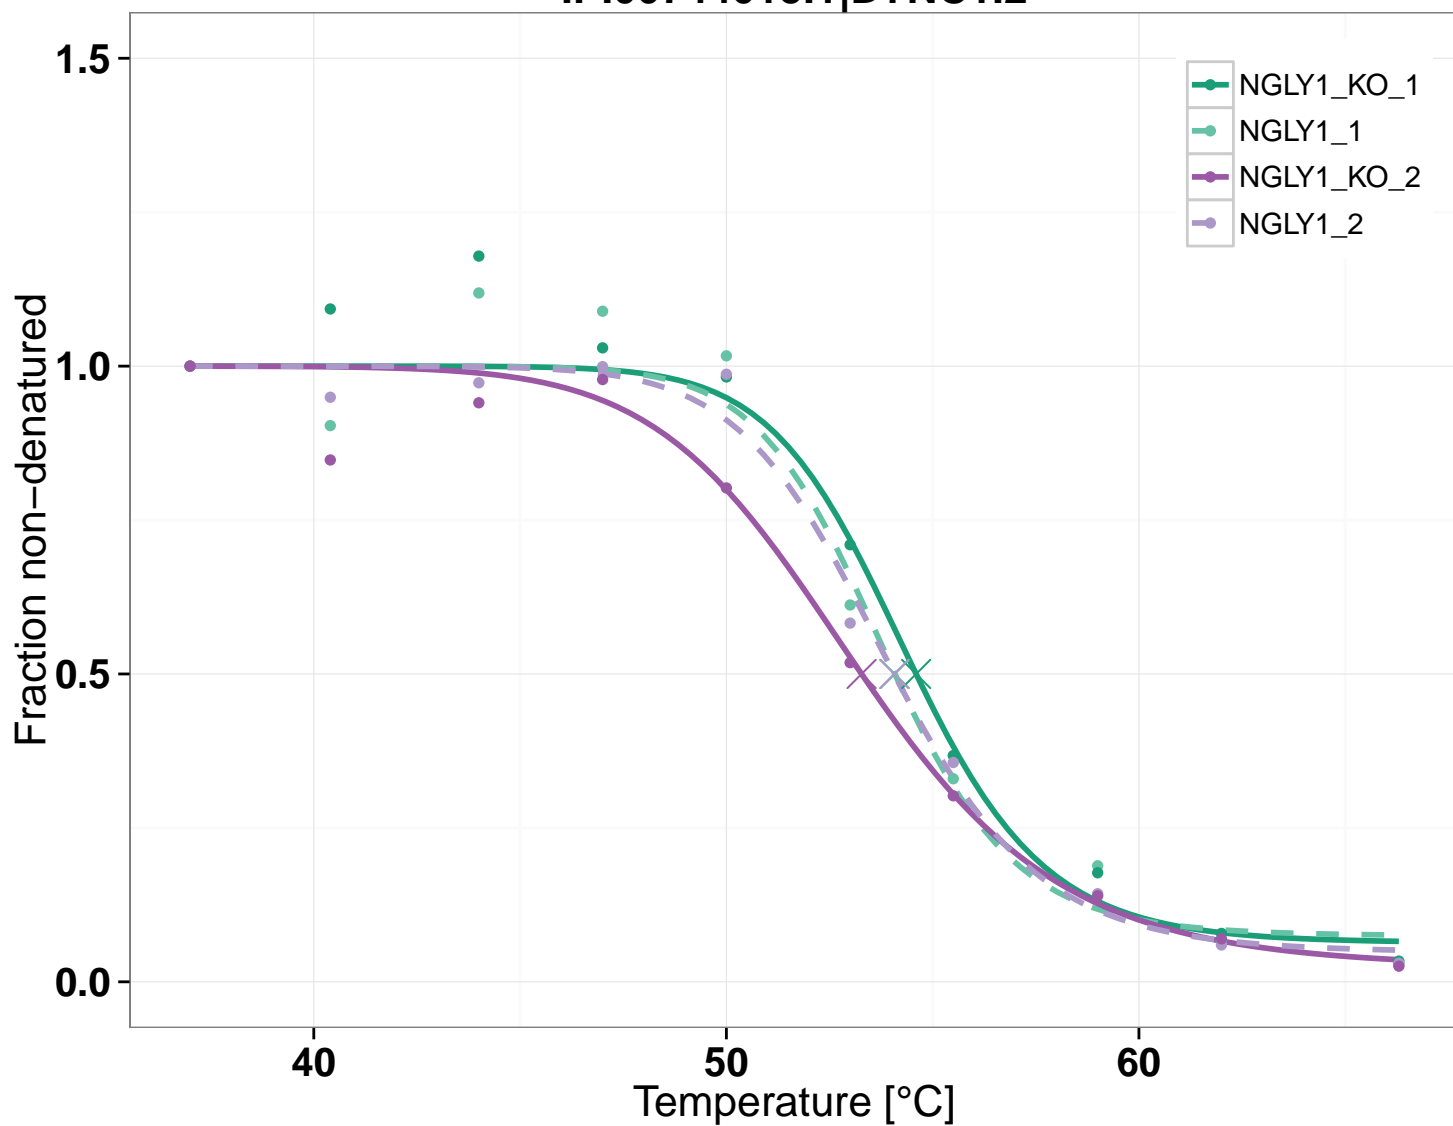

|            | meltPoint | slope  | plateau | R2   |
|------------|-----------|--------|---------|------|
| NGLY1_KO_1 | 54.6      | -0.14  | 0.06    | 0.98 |
| NGLY1_1    | 54.08     | -0.15  | 0.07    | 0.97 |
| NGLY1_KO_2 | 53.28     | -0.099 | 0.02    | 0.98 |
| NGLY1_2    | 54.07     | -0.13  | 0.05    | 0.99 |

Supplement: Supplementary file 8194 [file 1]

# IPI00335641.4|MKL2

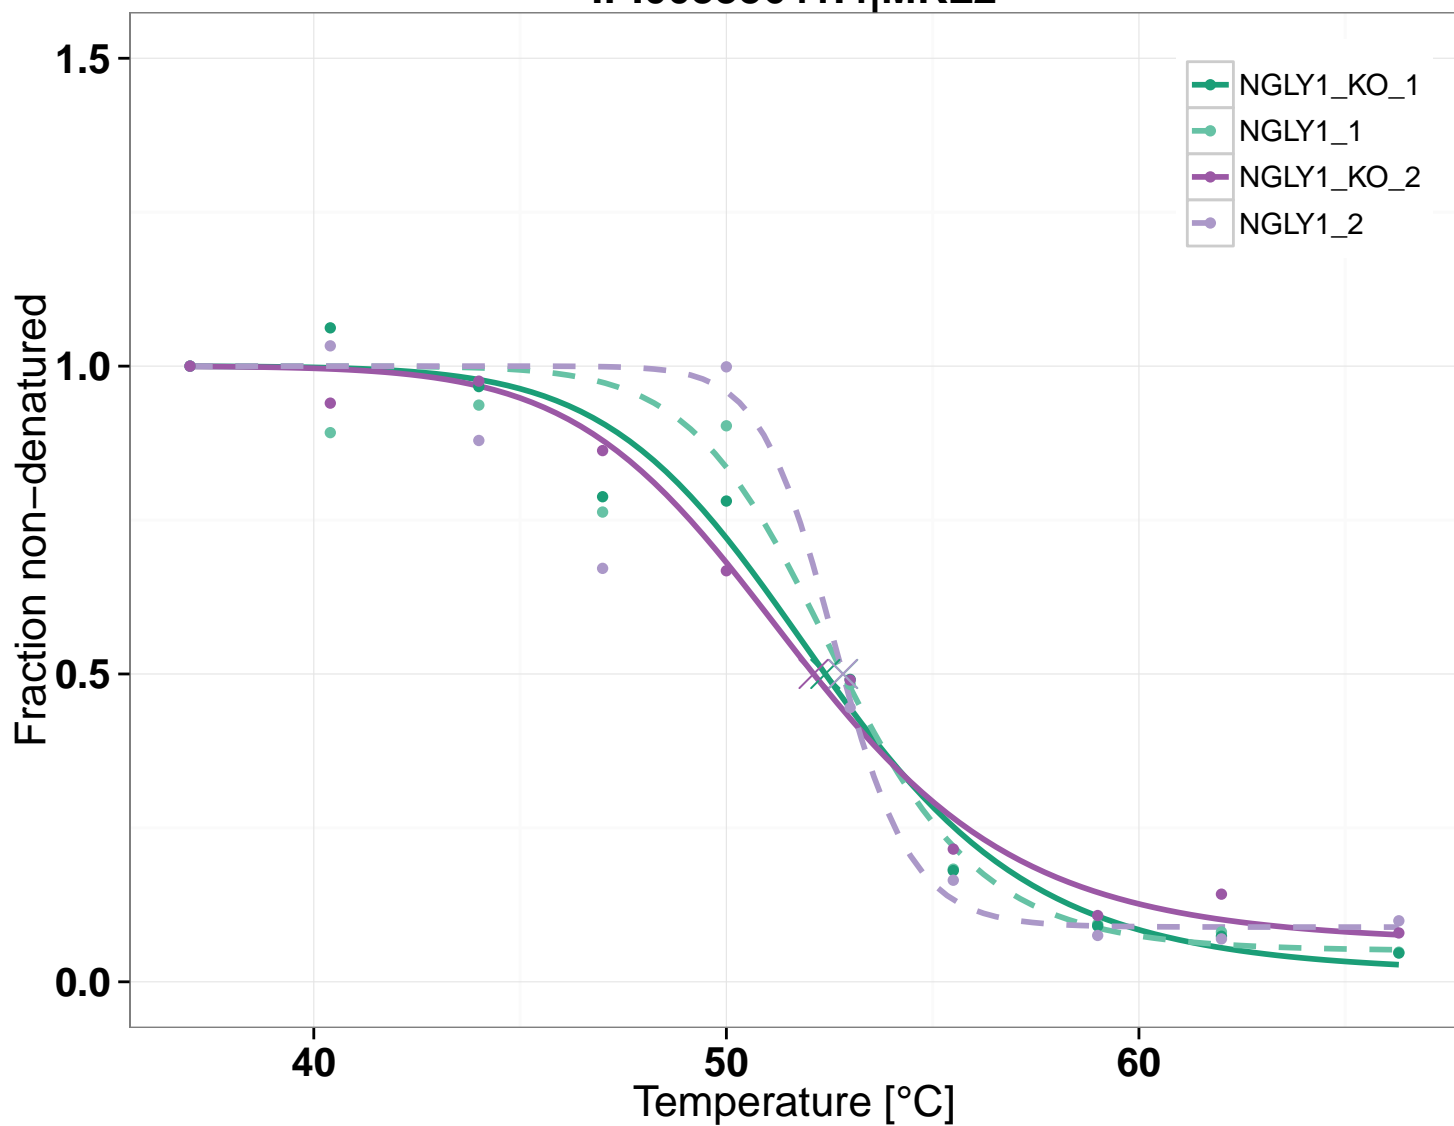

|            | meltPoint | slope  | plateau | R2   |
|------------|-----------|--------|---------|------|
| NGLY1_KO_1 | 52.4      | -0.095 | 0.01    | 0.98 |
| NGLY1_1    | 52.83     | -0.13  | 0.05    | 0.95 |
| NGLY1_KO_2 | 52.11     | -0.087 | 0.06    | 0.99 |
| NGLY1_2    | 52.82     | -0.25  | 0.09    | 0.92 |

Supplement: Supplementary file 8195 [file 1]

IPI00409698.1|TNPO2

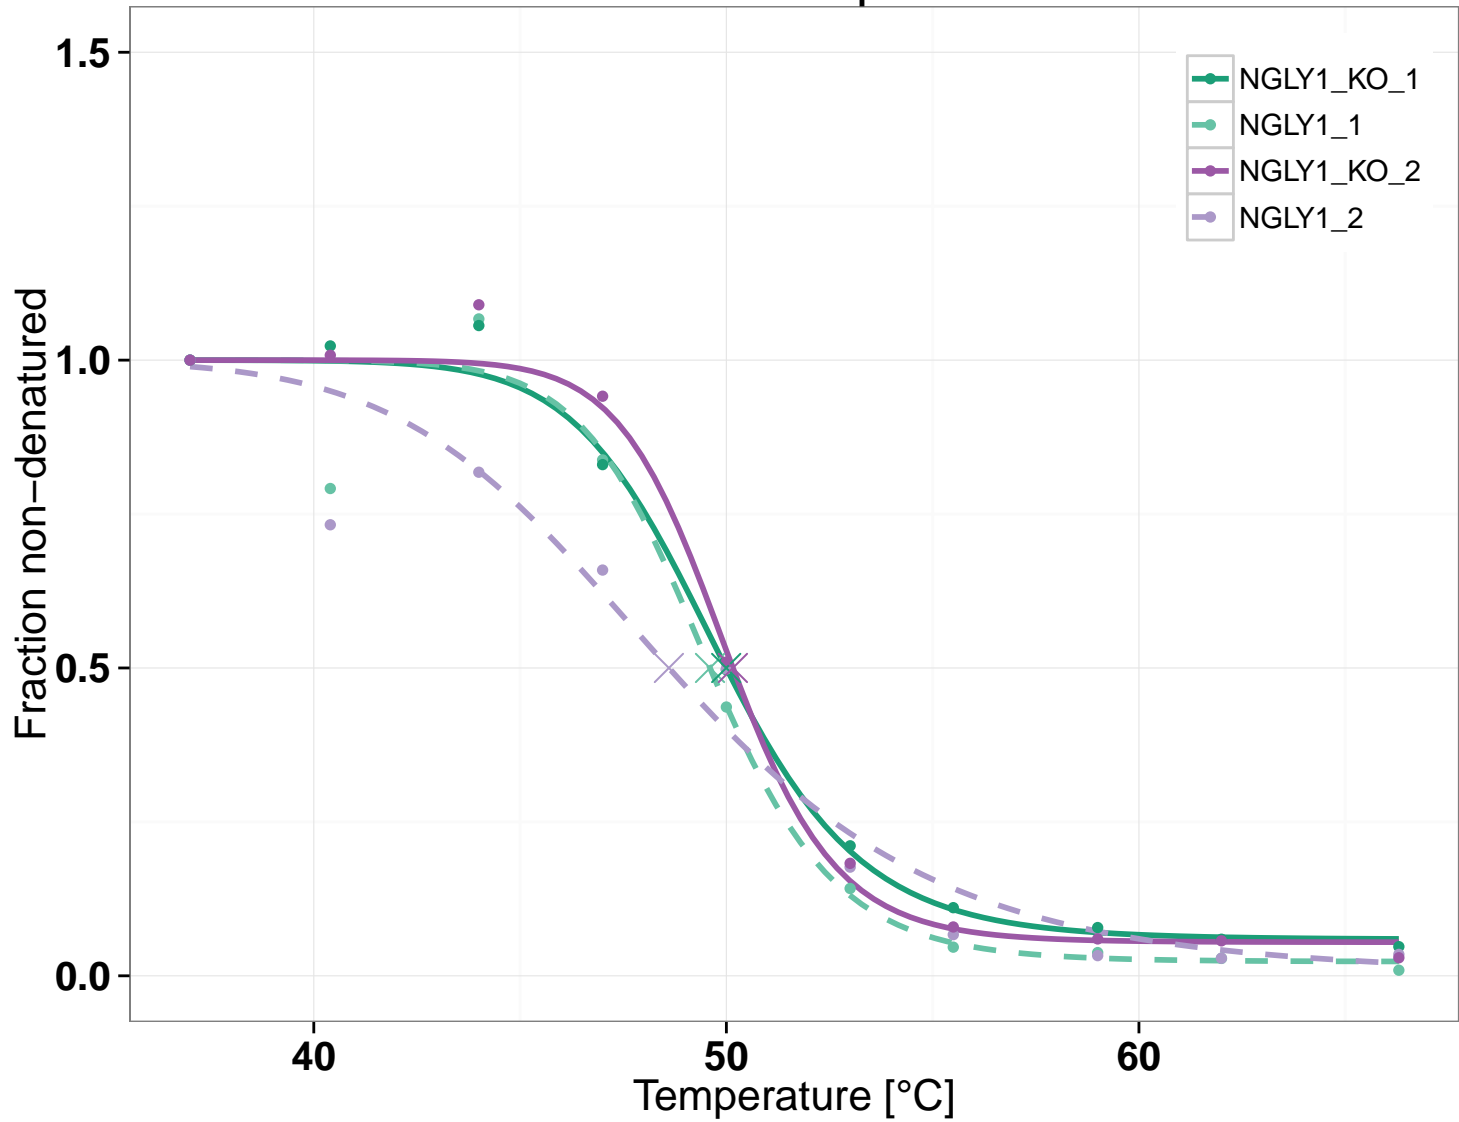

|            | meltPoint | slope  | plateau | R2   |
|------------|-----------|--------|---------|------|
| NGLY1_KO_1 | 50        | -0.13  | 0.06    | 1    |
| NGLY1_1    | 49.6      | -0.16  | 0.02    | 0.97 |
| NGLY1_KO_2 | 50.16     | -0.18  | 0.05    | 0.99 |
| NGLY1_2    | 48.61     | -0.076 | 0       | 0.95 |

Supplement: Supplementary file 8196 [file 1]

IPI00296283.3|MAPK12

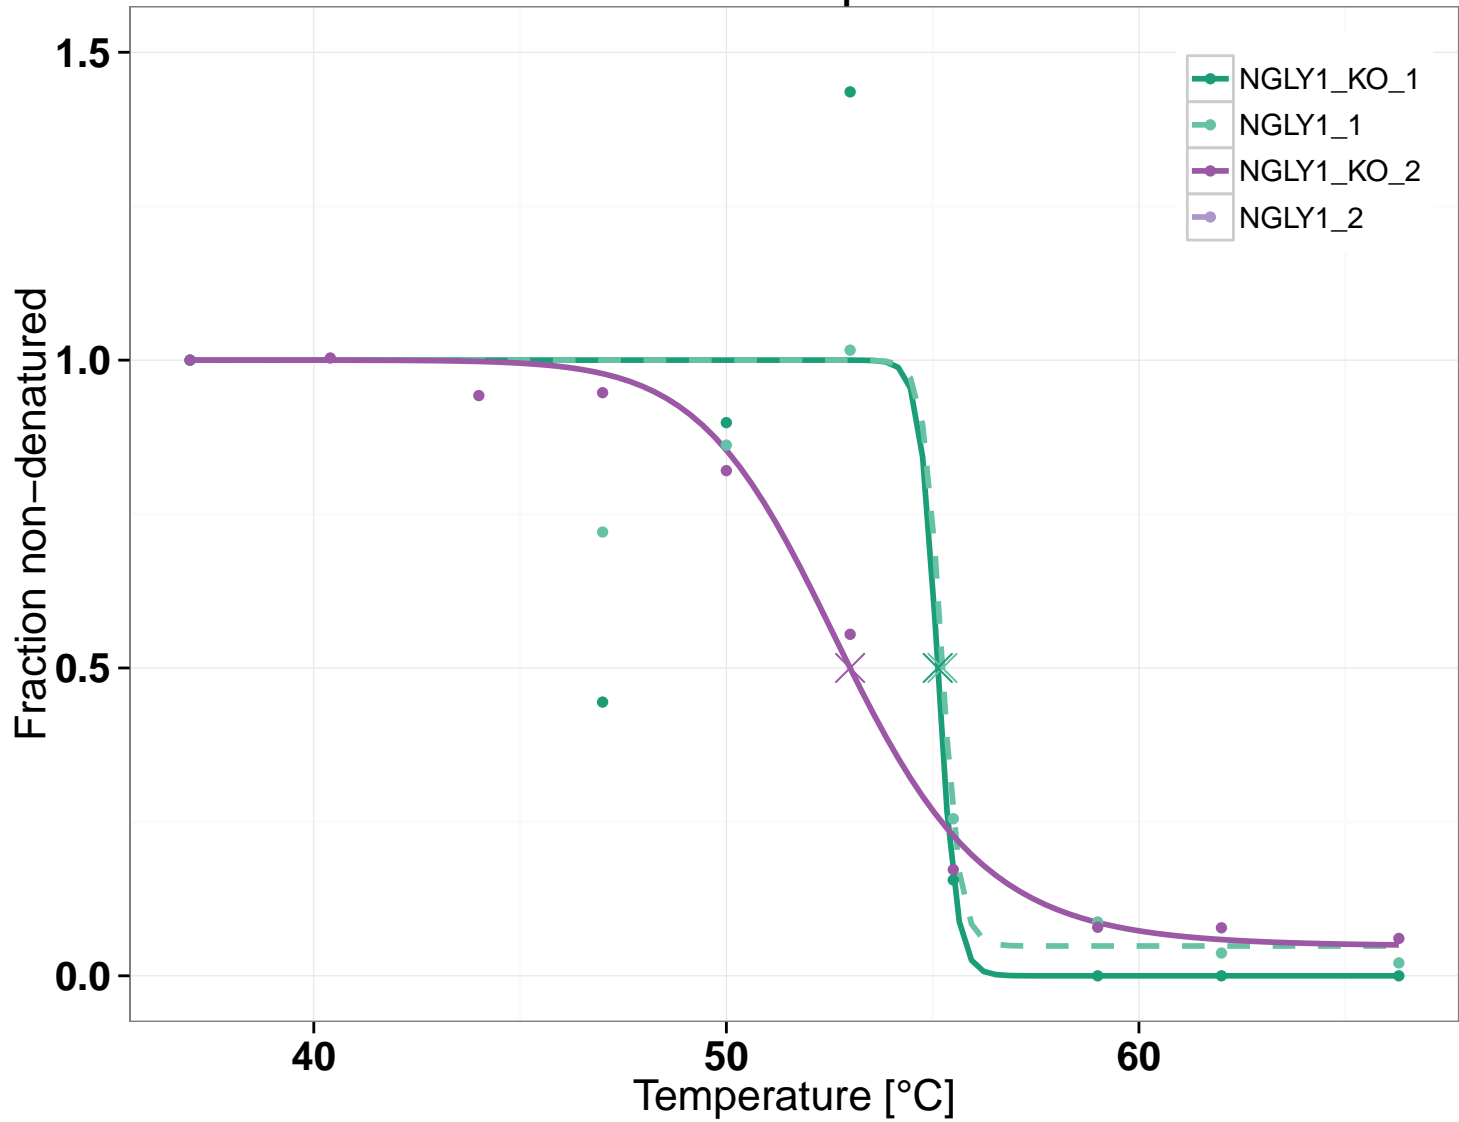

|            | meltPoint | slope | plateau | R2   |
|------------|-----------|-------|---------|------|
| NGLY1_KO_1 | 55.12     | -1.1  | 0       | 0.03 |
| NGLY1_1    | 55.24     | -1.1  | 0.05    | 0.54 |
| NGLY1_KO_2 | 53        | -0.14 | 0.05    | 0.99 |
| NGLY1_2    | -         | -     | -       | -    |

Supplement: Supplementary file 8197 [file 1]

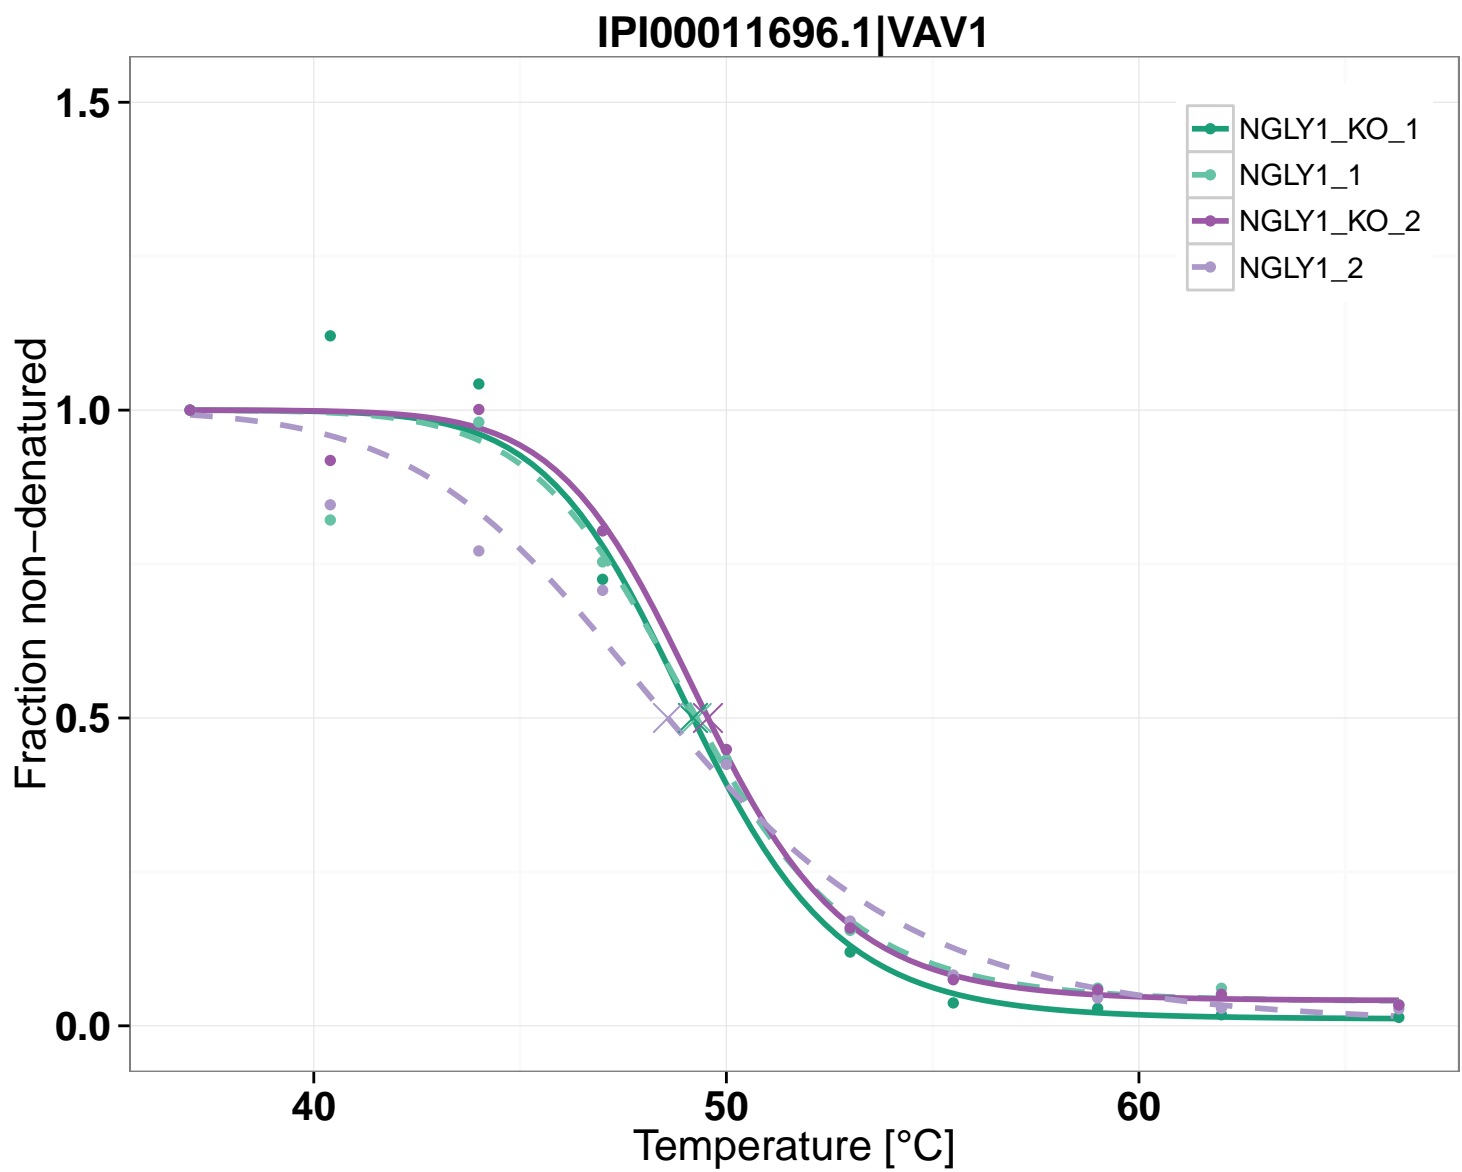

|            | meltPoint | slope  | plateau | R2   |
|------------|-----------|--------|---------|------|
| NGLY1_KO_1 | 49.19     | -0.14  | 0.01    | 0.99 |
| NGLY1_1    | 49.28     | -0.12  | 0.04    | 0.98 |
| NGLY1_KO_2 | 49.55     | -0.14  | 0.04    | 1    |
| NGLY1_2    | 48.58     | -0.081 | 0       | 0.98 |

Supplement: Supplementary file 8198 [file 1]

IPI00005822.2|CDC23

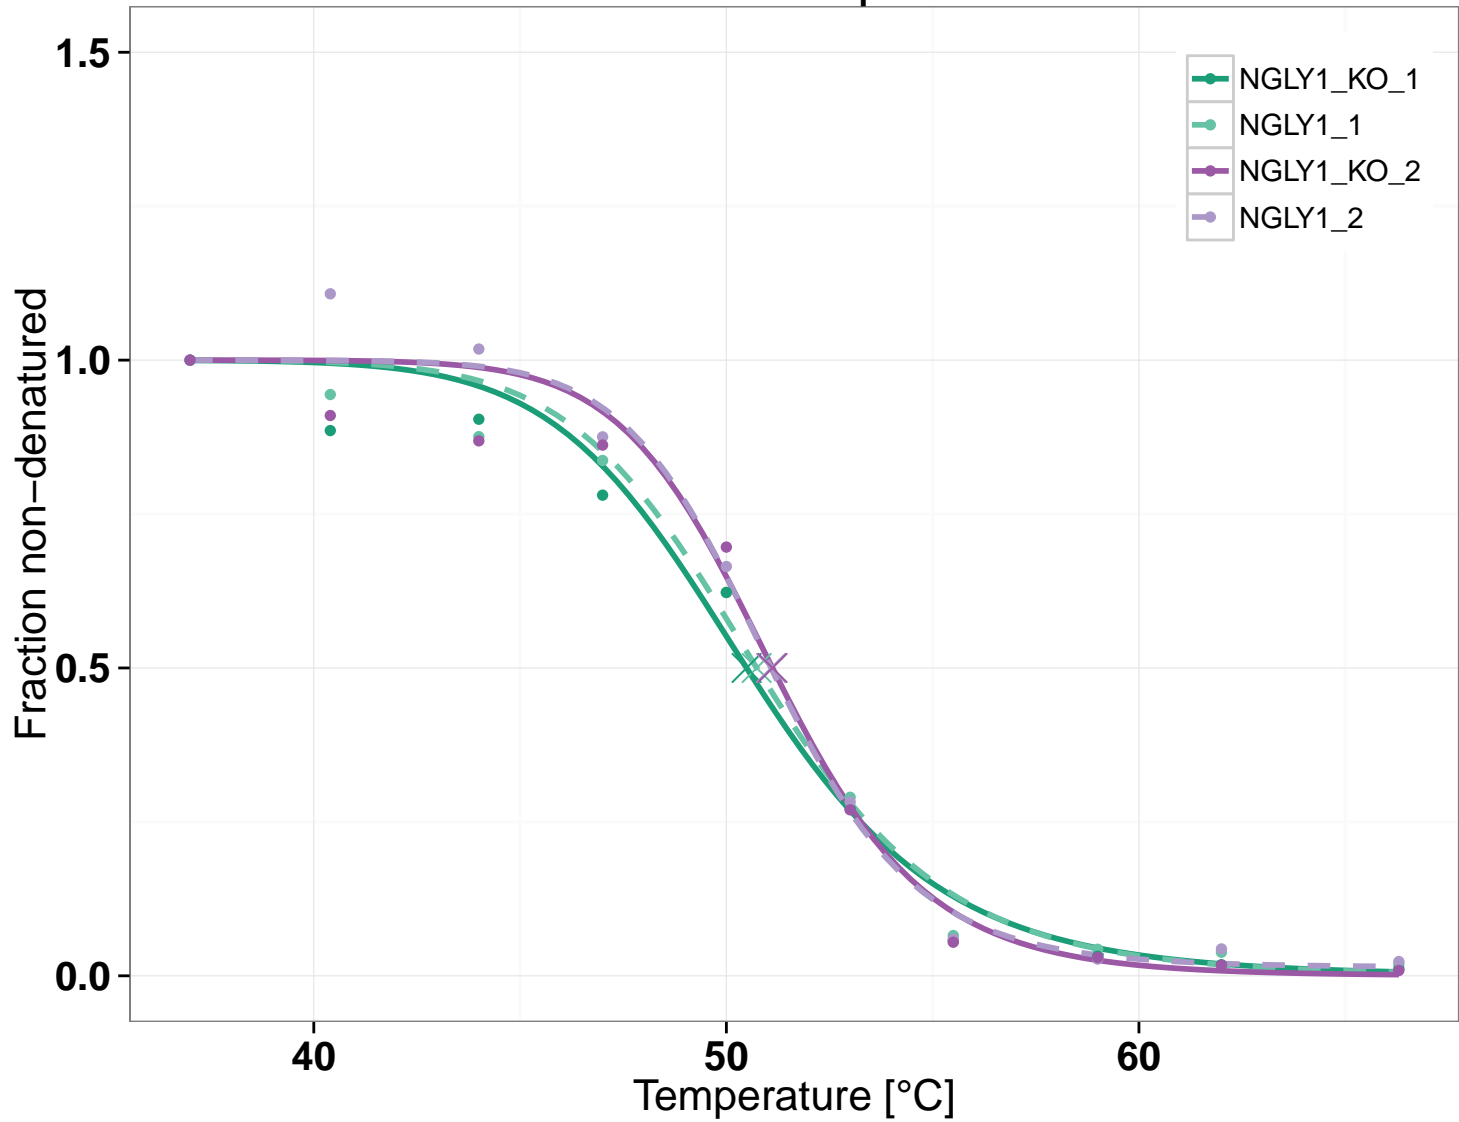

|            | meltPoint | slope | plateau | R2   |
|------------|-----------|-------|---------|------|
| NGLY1_KO_1 | 50.49     | -0.11 | 0       | 0.98 |
| NGLY1_1    | 50.74     | -0.11 | 0       | 0.99 |
| NGLY1_KO_2 | 51.12     | -0.13 | 0       | 0.98 |
| NGLY1_2    | 51.08     | -0.14 | 0.01    | 0.99 |

Supplement: Supplementary file 8199 [file 1]

# IPI00656136.1|ND2

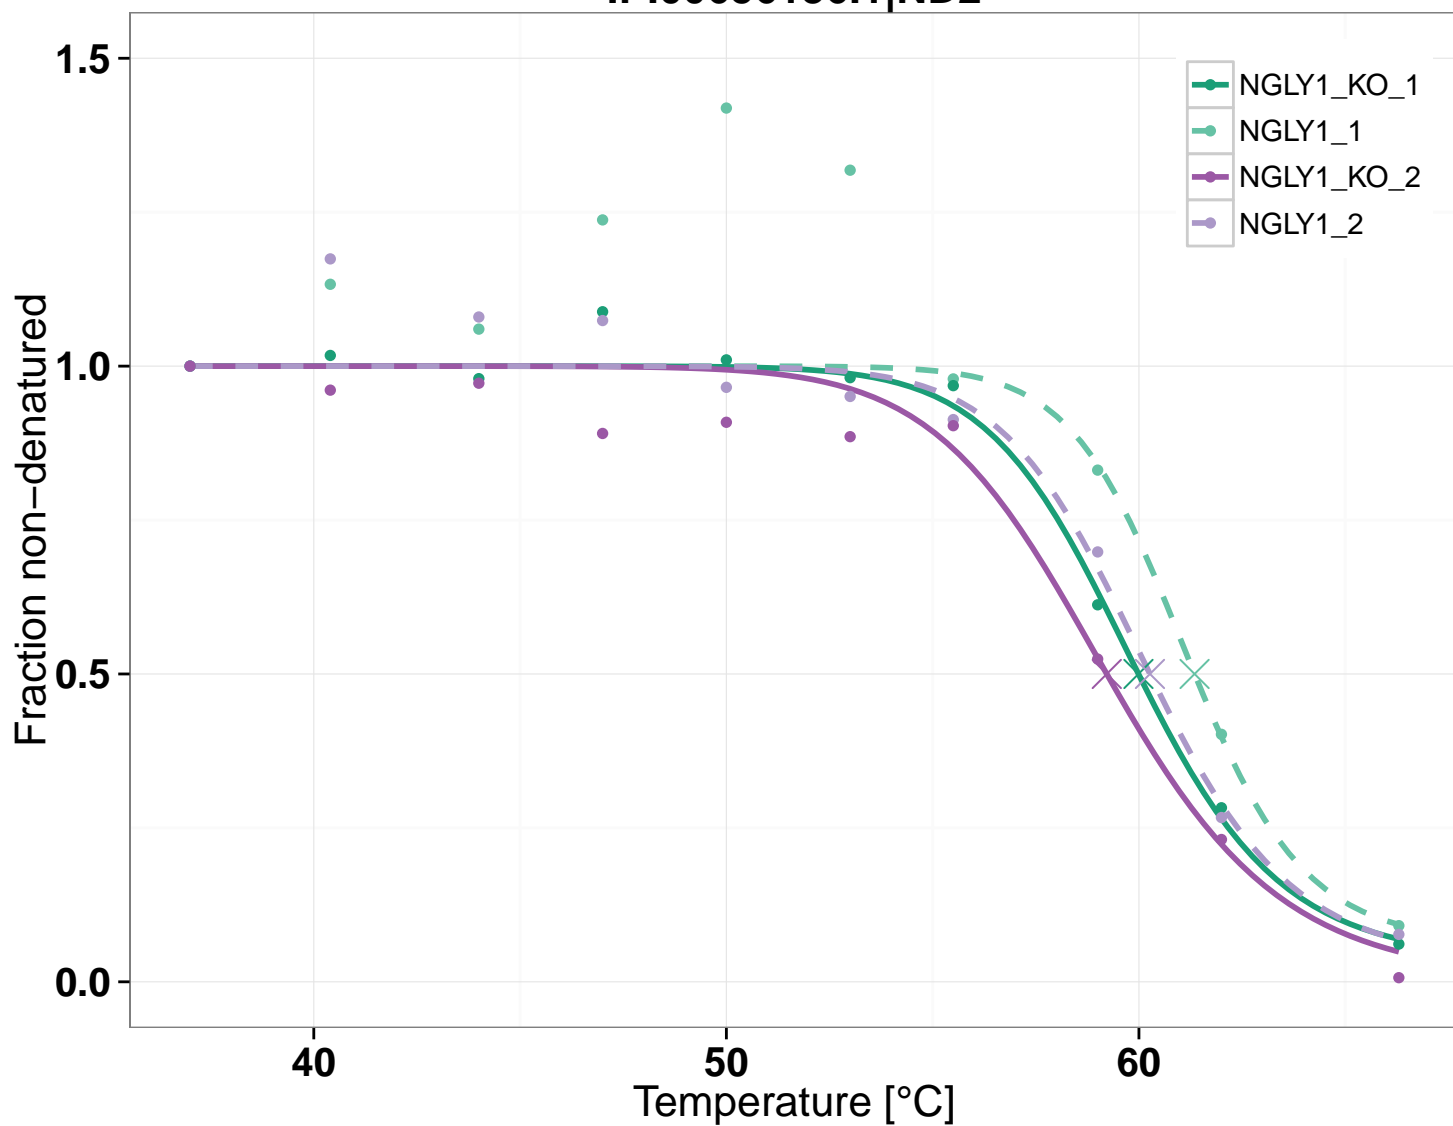

|            | meltPoint | slope | plateau | R2   |
|------------|-----------|-------|---------|------|
| NGLY1_KO_1 | 59.99     | -0.14 | 0.03    | 0.99 |
| NGLY1_1    | 61.35     | -0.17 | 0.06    | 0.77 |
| NGLY1_KO_2 | 59.22     | -0.12 | 0       | 0.97 |
| NGLY1_2    | 60.27     | -0.14 | 0.03    | 0.96 |

Supplement: Supplementary file 8200 [file 1]

IPI00856051.1|PHACTR2

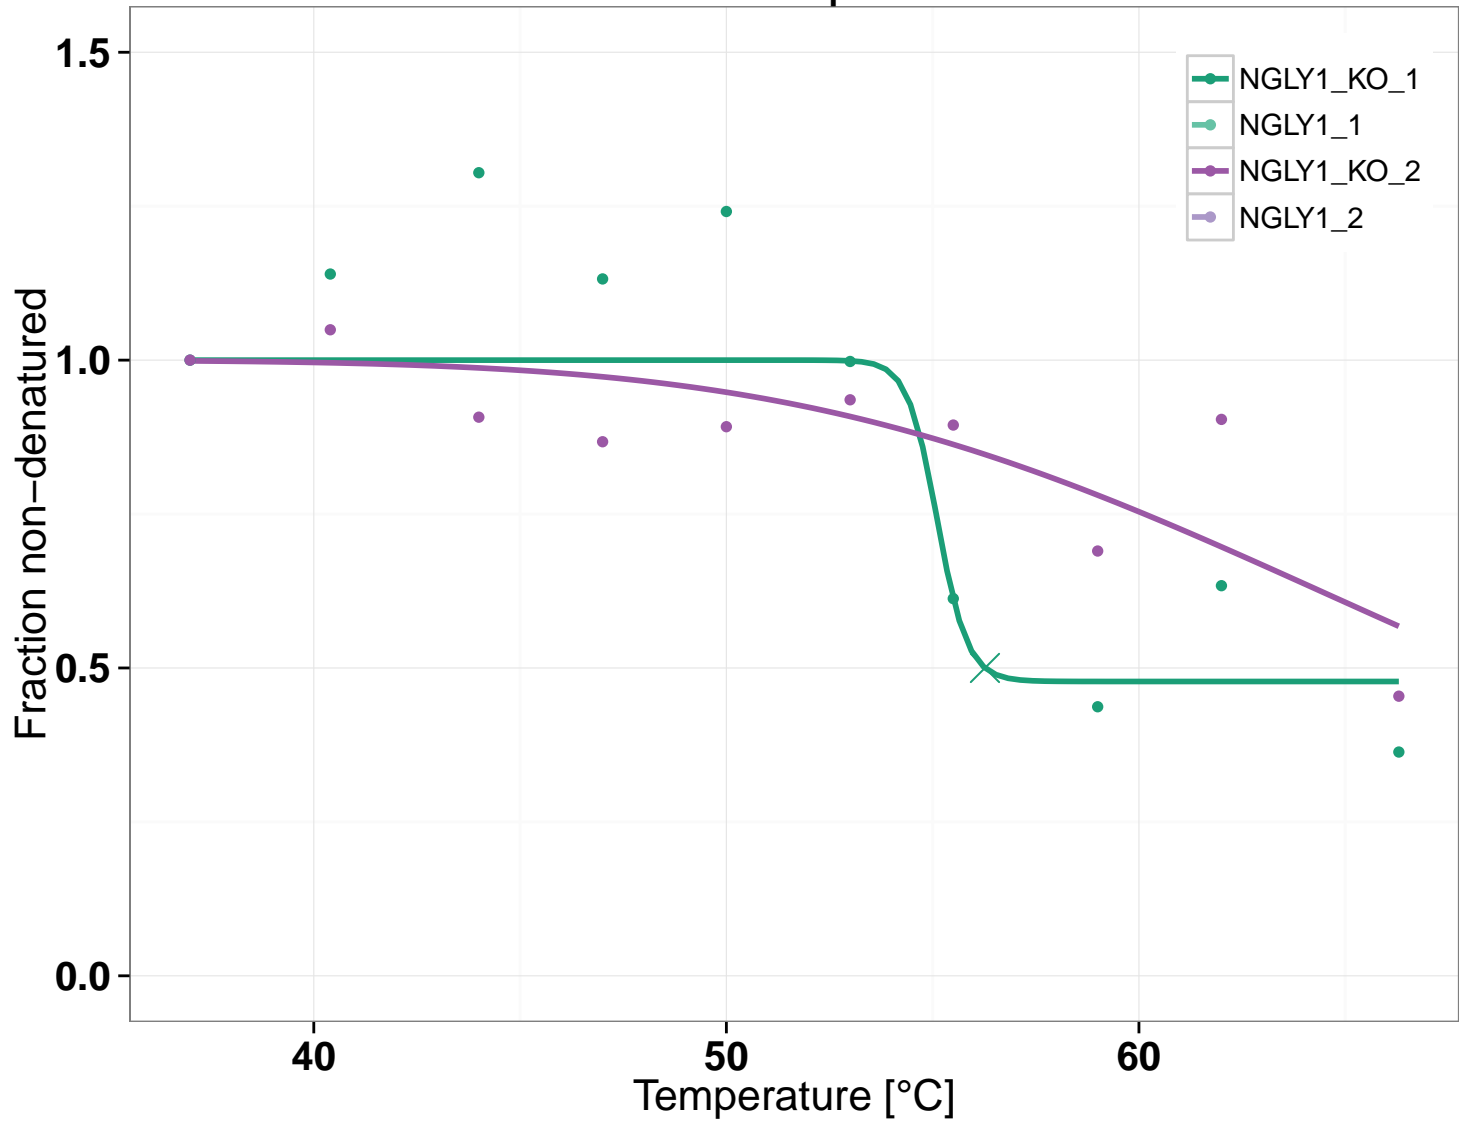

|            | meltPoint | slope | plateau | R2   |
|------------|-----------|-------|---------|------|
| NGLY1_KO_1 | 56.27     | -0.36 | 0.48    | 0.79 |
| NGLY1_1    | -         | -     | -       | -    |
| NGLY1_KO_2 | -         | -0.03 | 0       | 0.66 |
| NGLY1_2    | -         | -     | -       | -    |

Supplement: Supplementary file 8201 [file 1]

IPI00789184.1|OSBPL6

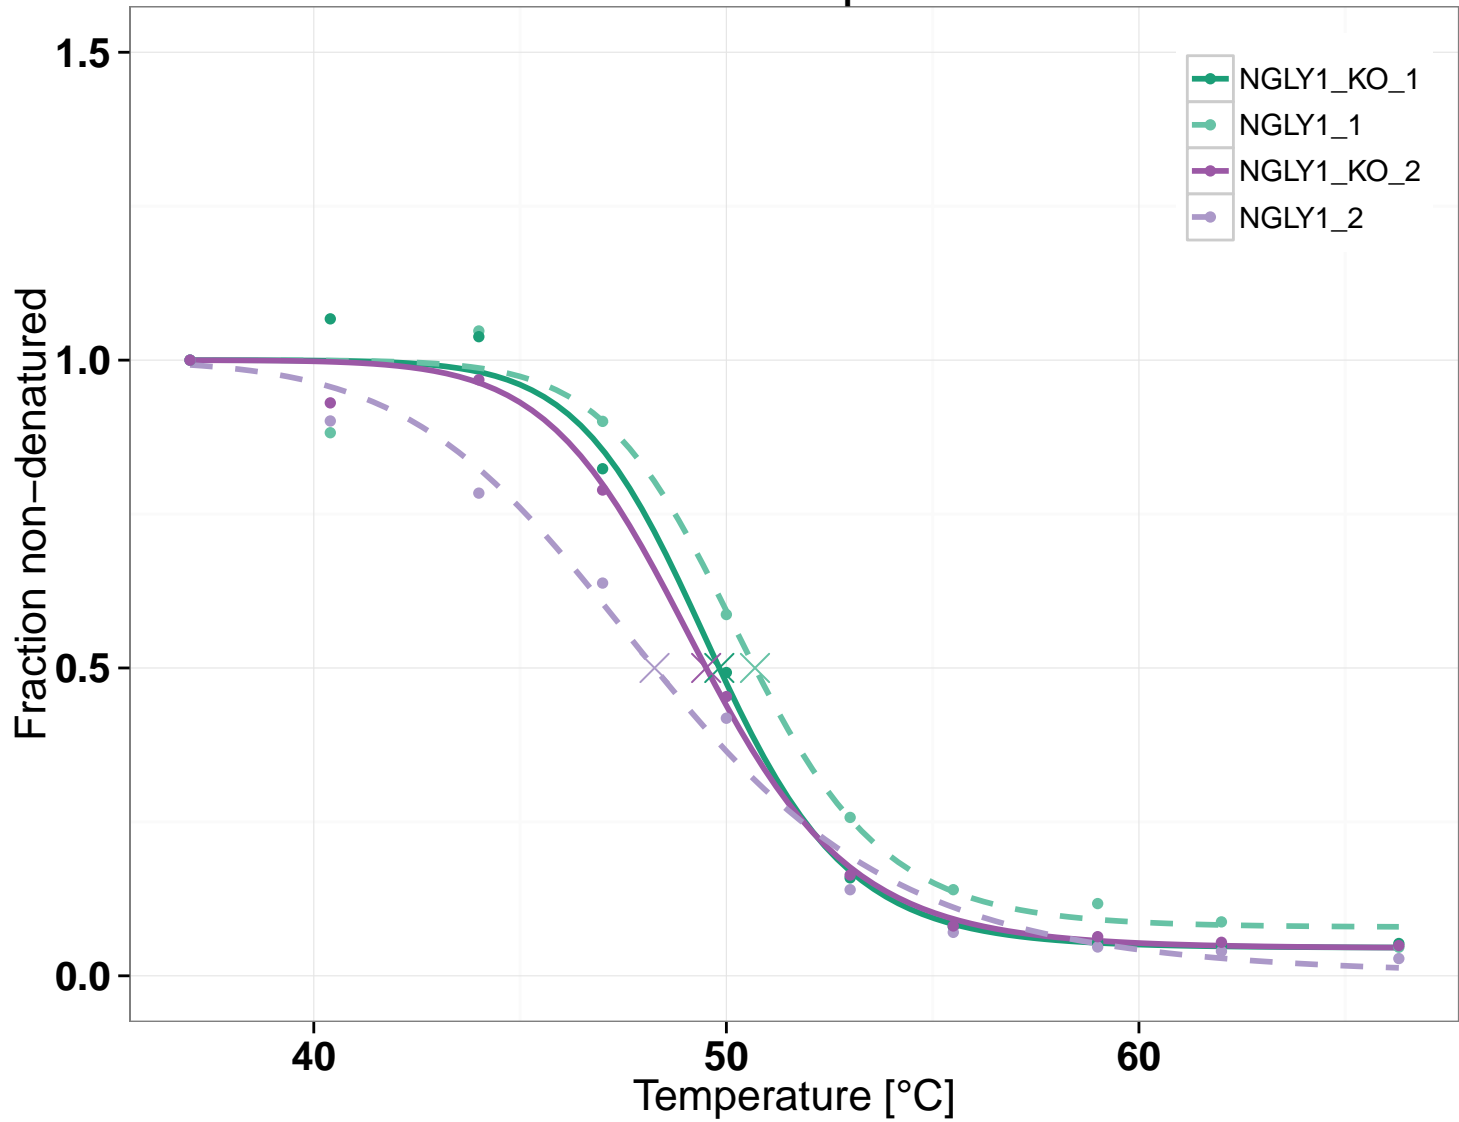

|            | meltPoint | slope  | plateau | R2   |
|------------|-----------|--------|---------|------|
| NGLY1_KO_1 | 49.83     | -0.15  | 0.05    | 0.99 |
| NGLY1_1    | 50.69     | -0.13  | 0.08    | 0.99 |
| NGLY1_KO_2 | 49.51     | -0.13  | 0.04    | 1    |
| NGLY1_2    | 48.26     | -0.084 | 0       | 0.99 |

Supplement: Supplementary file 8203 [file 1]

# IPI00031461.2|GDI2

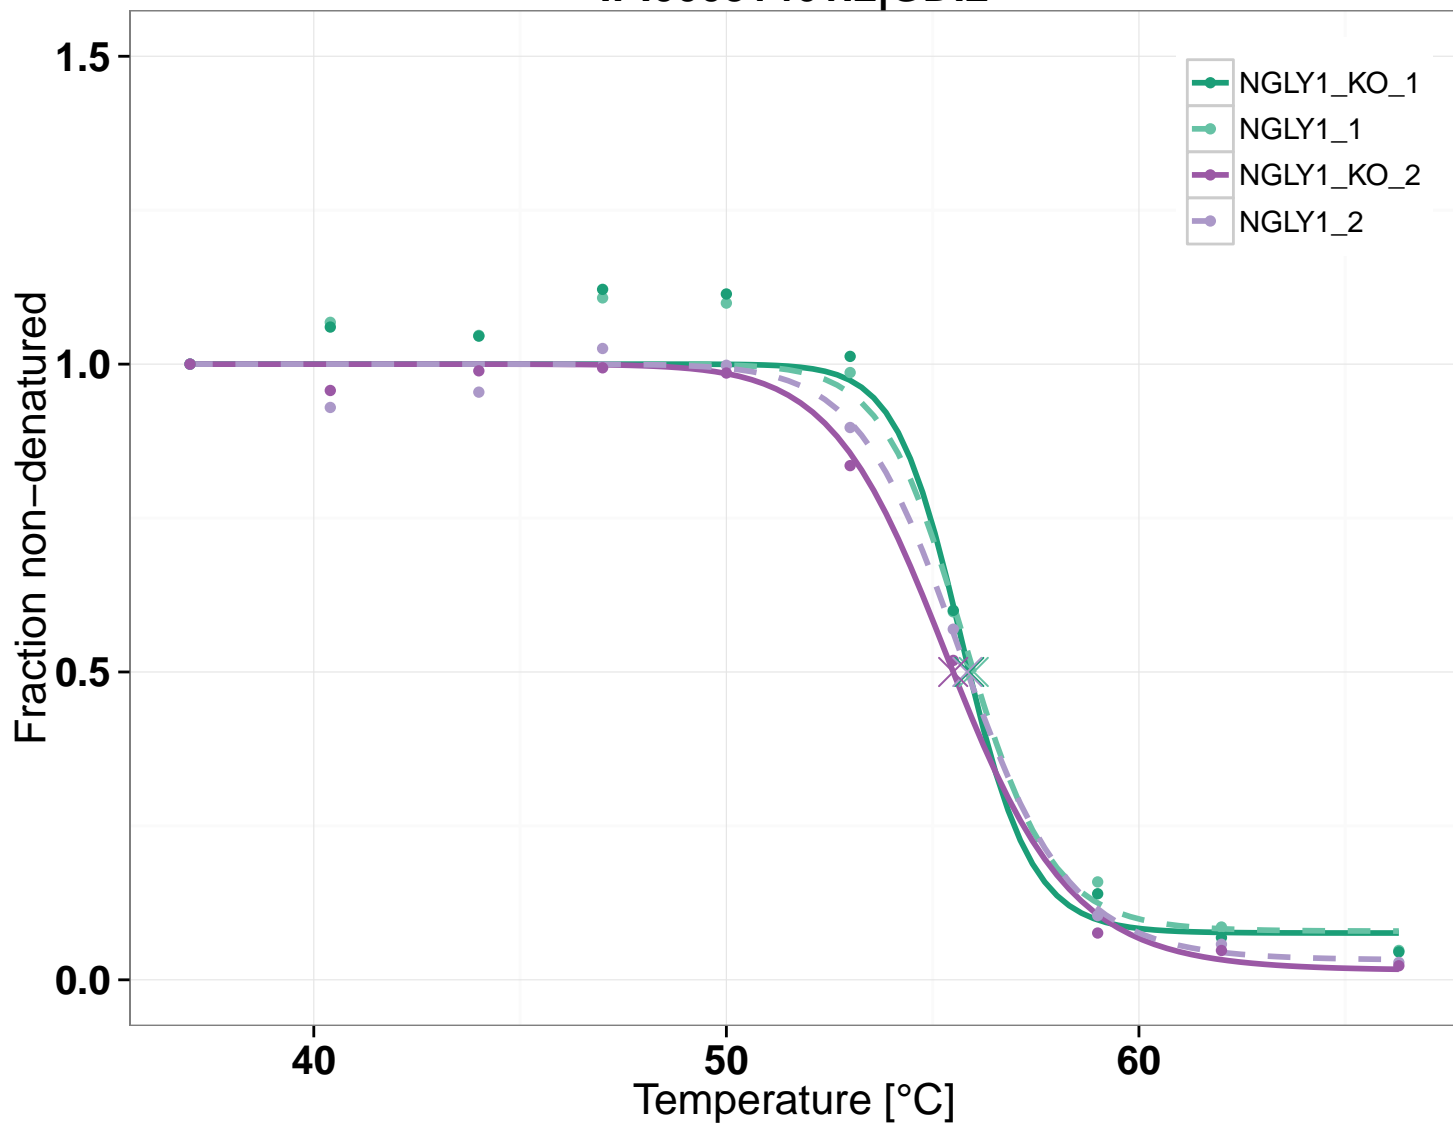

|            | meltPoint | slope | plateau | R2   |
|------------|-----------|-------|---------|------|
| NGLY1_KO_1 | 55.89     | -0.28 | 0.08    | 0.98 |
| NGLY1_1    | 56        | -0.23 | 0.08    | 0.98 |
| NGLY1_KO_2 | 55.5      | -0.17 | 0.02    | 1    |
| NGLY1_2    | 55.84     | -0.19 | 0.03    | 1    |

Supplement: Supplementary file 8204 [file 1]

# IPI00790342.1|RPL6

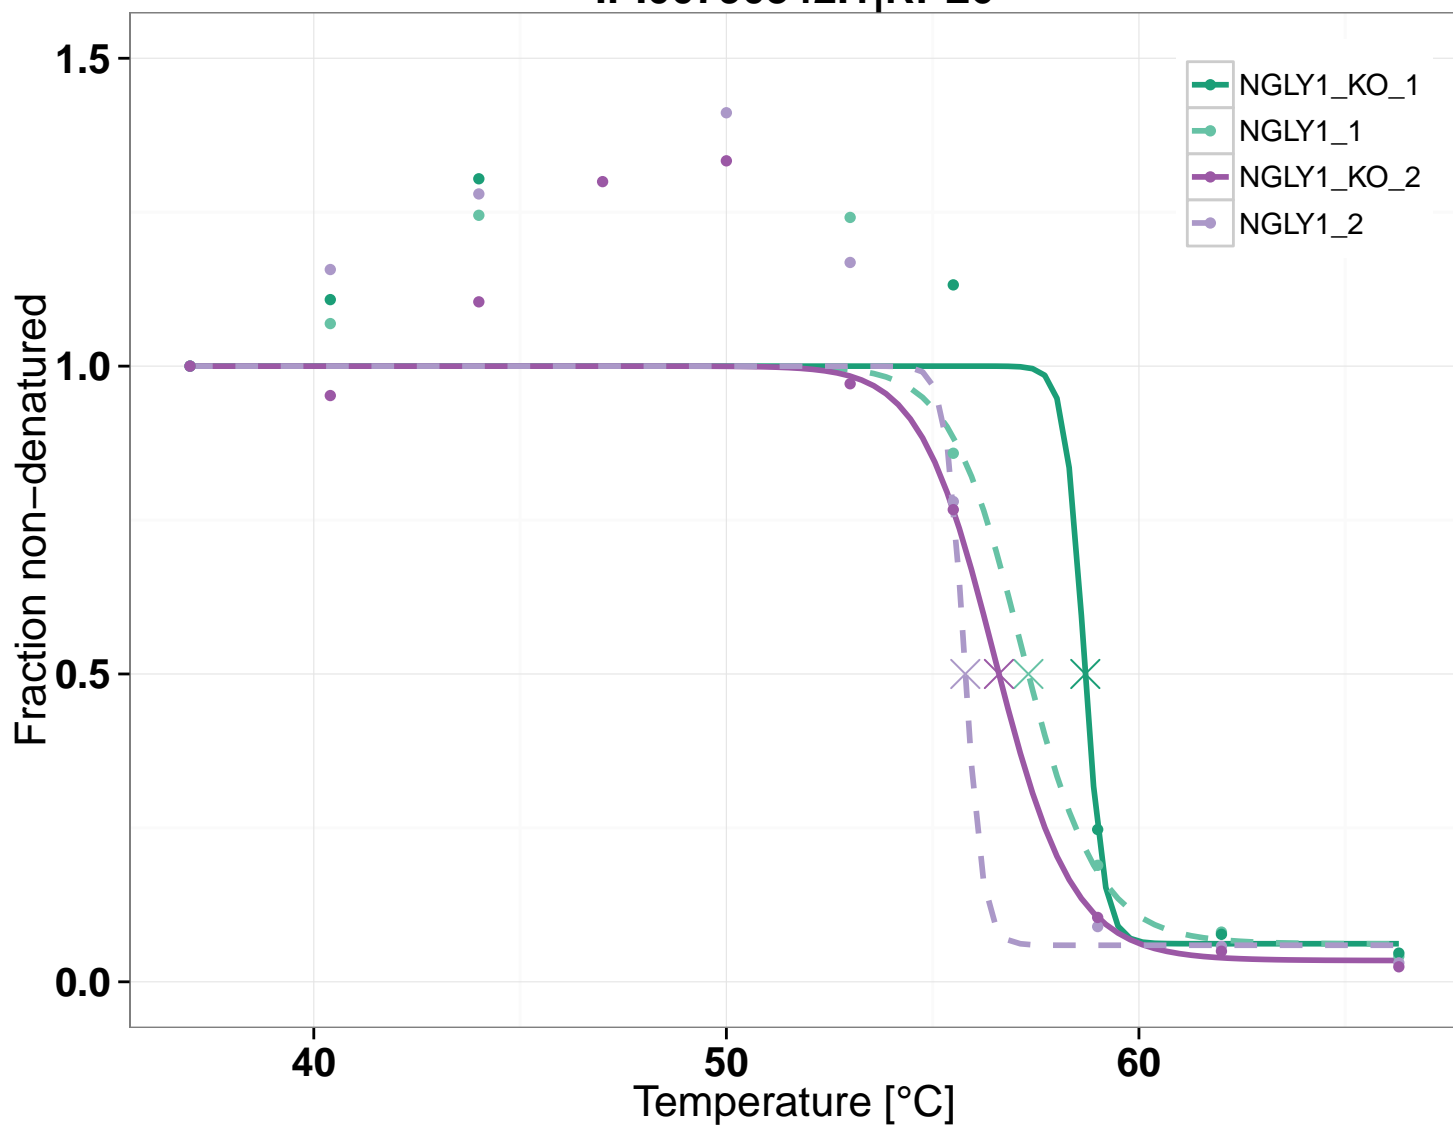

|            | meltPoint | slope | plateau | R2   |
|------------|-----------|-------|---------|------|
| NGLY1_KO_1 | 58.7      | -1    | 0.06    | 0.58 |
| NGLY1_1    | 57.32     | -0.26 | 0.06    | 0.77 |
| NGLY1_KO_2 | 56.61     | -0.26 | 0.03    | 0.91 |
| NGLY1_2    | 55.79     | -1.1  | 0.06    | 0.8  |

Supplement: Supplementary file 8205 [file 1]

IPI00026271.5|RPS14

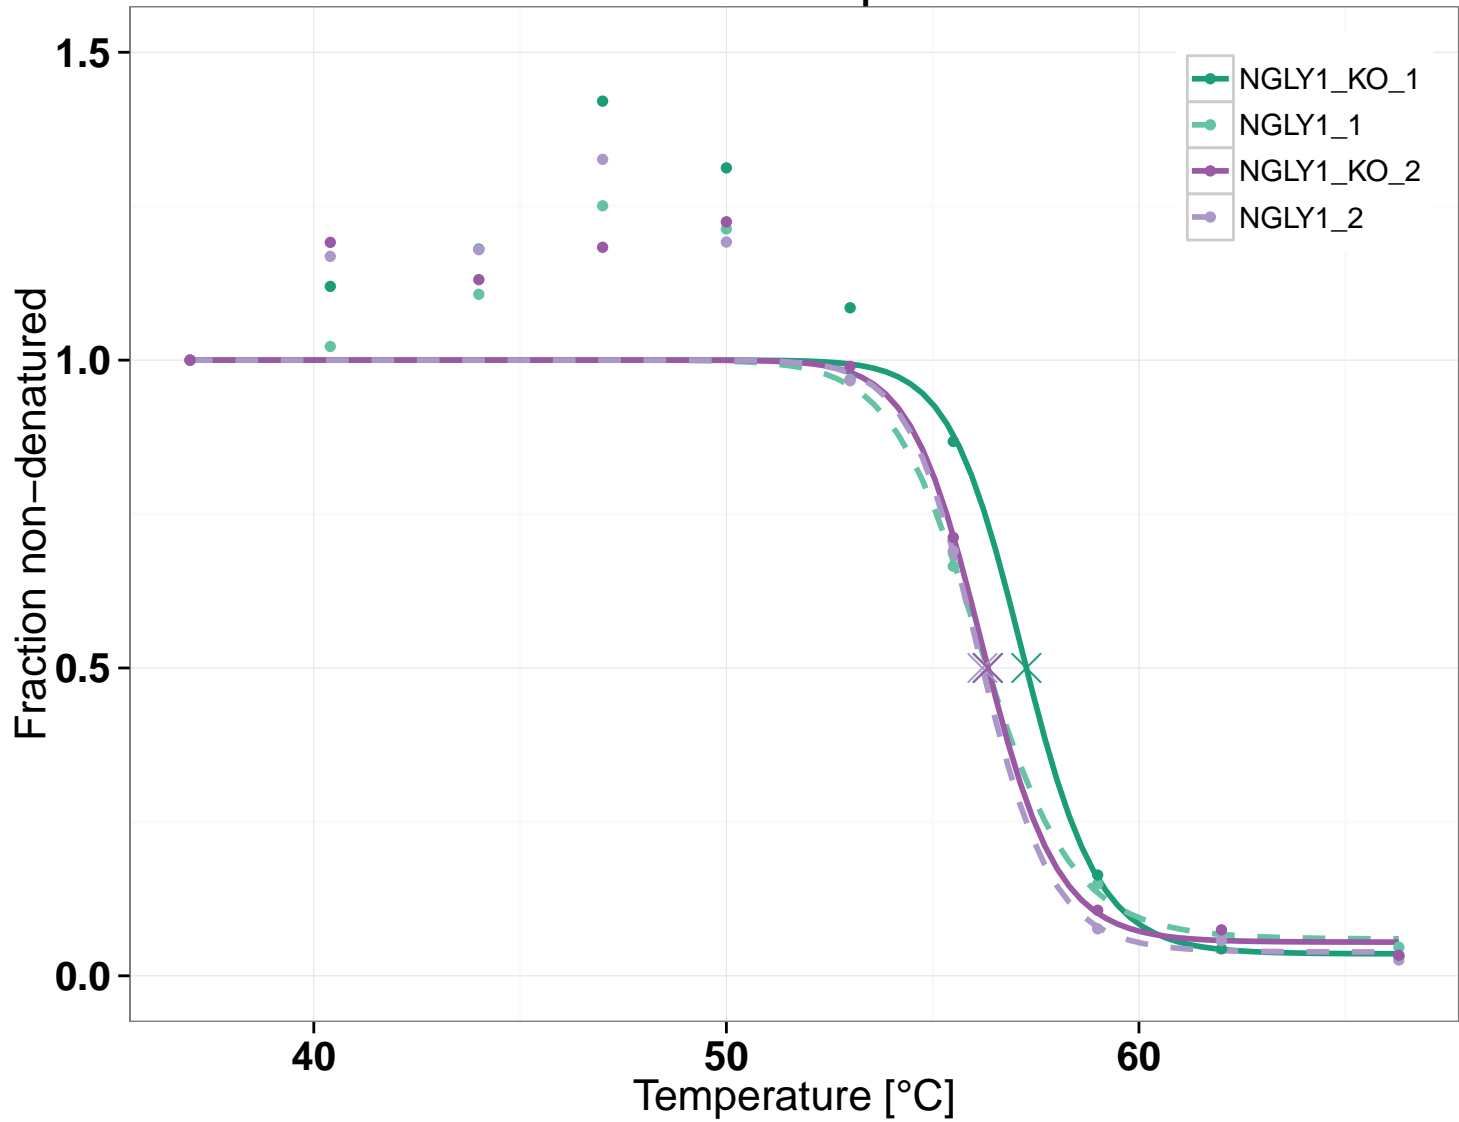

|            | meltPoint | slope | plateau | R2   |
|------------|-----------|-------|---------|------|
| NGLY1_KO_1 | 57.27     | -0.27 | 0.04    | 0.87 |
| NGLY1_1    | 56.32     | -0.21 | 0.06    | 0.94 |
| NGLY1_KO_2 | 56.34     | -0.27 | 0.05    | 0.94 |
| NGLY1_2    | 56.21     | -0.27 | 0.04    | 0.92 |

Supplement: Supplementary file 8206 [file 1]

# IPI00385652.1|TLK2

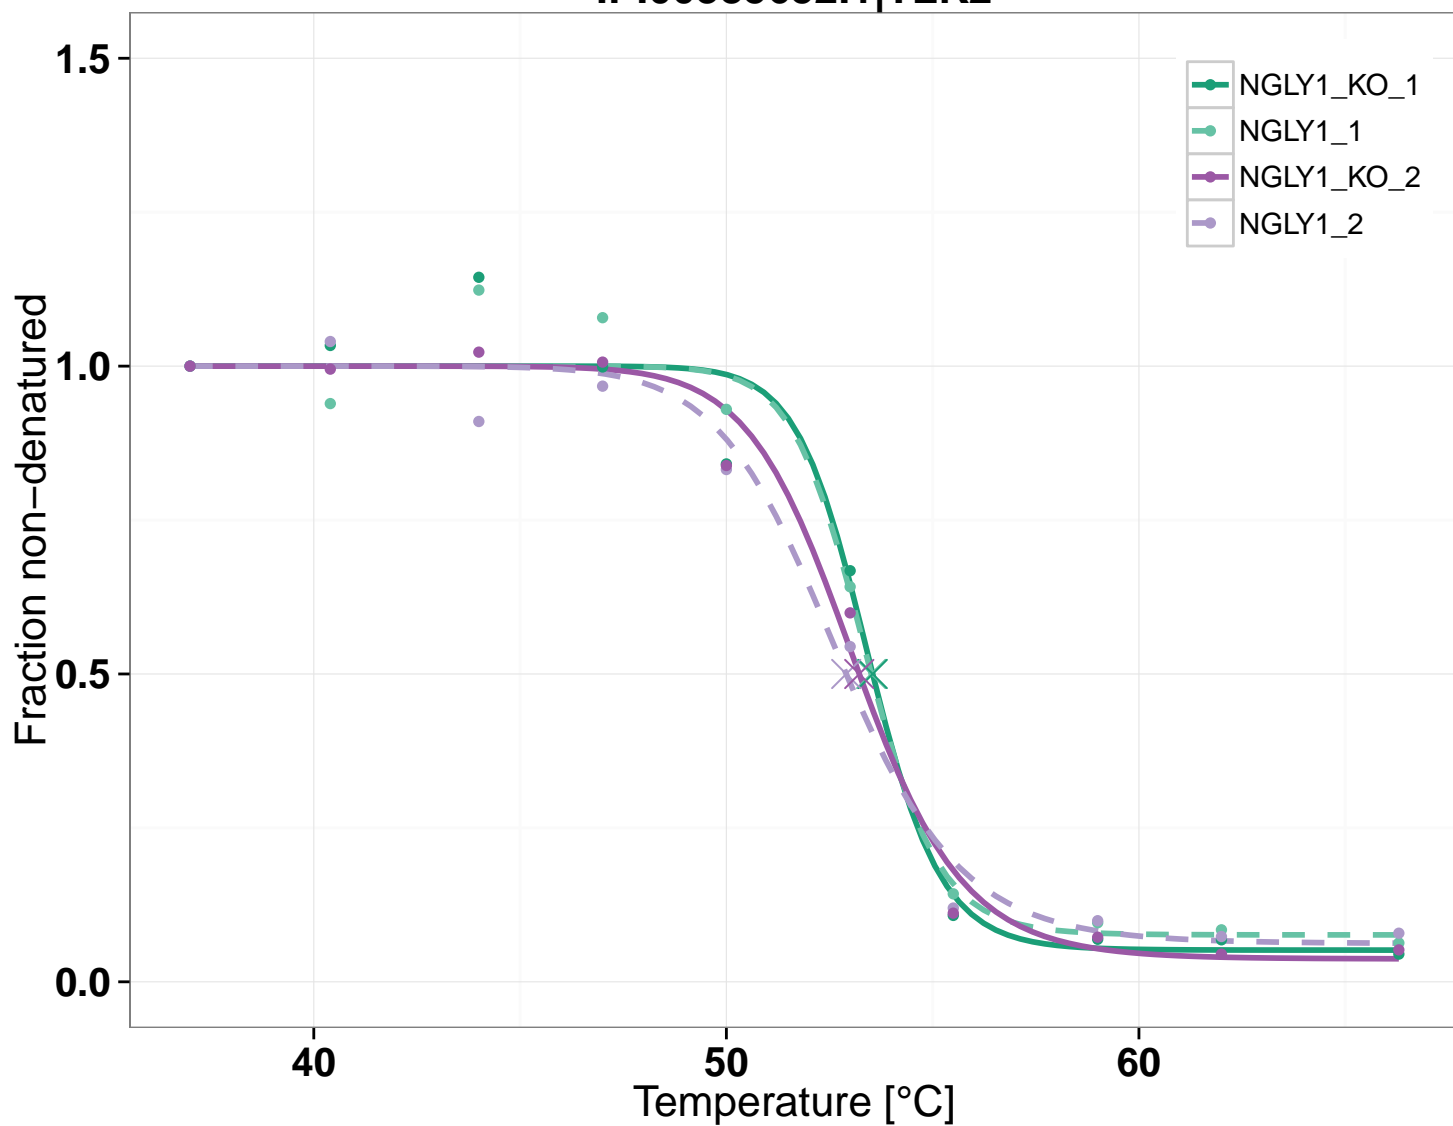

|            | meltPoint | slope | plateau | R2   |
|------------|-----------|-------|---------|------|
| NGLY1_KO_1 | 53.55     | -0.27 | 0.05    | 0.98 |
| NGLY1_1    | 53.51     | -0.26 | 0.08    | 0.98 |
| NGLY1_KO_2 | 53.22     | -0.18 | 0.04    | 0.99 |
| NGLY1_2    | 52.91     | -0.16 | 0.06    | 0.99 |

Supplement: Supplementary file 8207 [file 1]

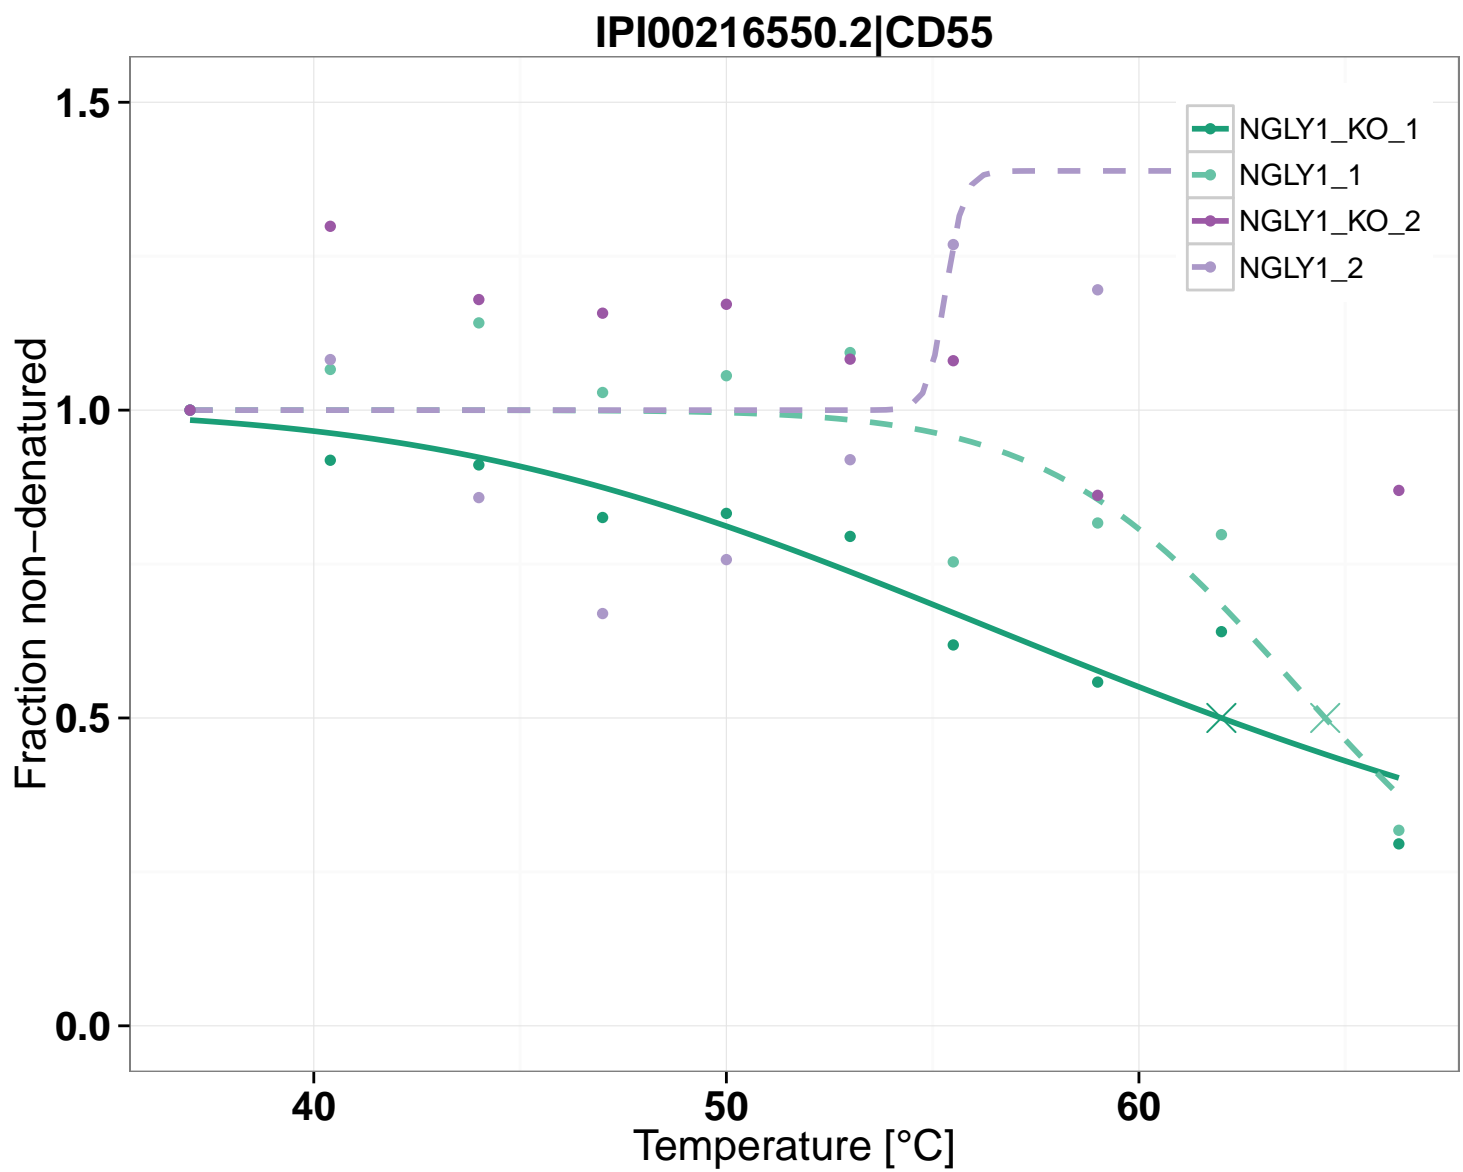

|            | meltPoint | slope  | plateau | R2   |
|------------|-----------|--------|---------|------|
| NGLY1_KO_1 | 62        | -0.027 | 0       | 0.89 |
| NGLY1_1    | 64.52     | -0.074 | 0       | 0.82 |
| NGLY1_KO_2 | -         | -      | -       | -    |
| NGLY1_2    | -         | 0.44   | 1.39    | 0.59 |

Supplement: Supplementary file 8208 [file 1]

IPI00784366.1|AP2B1

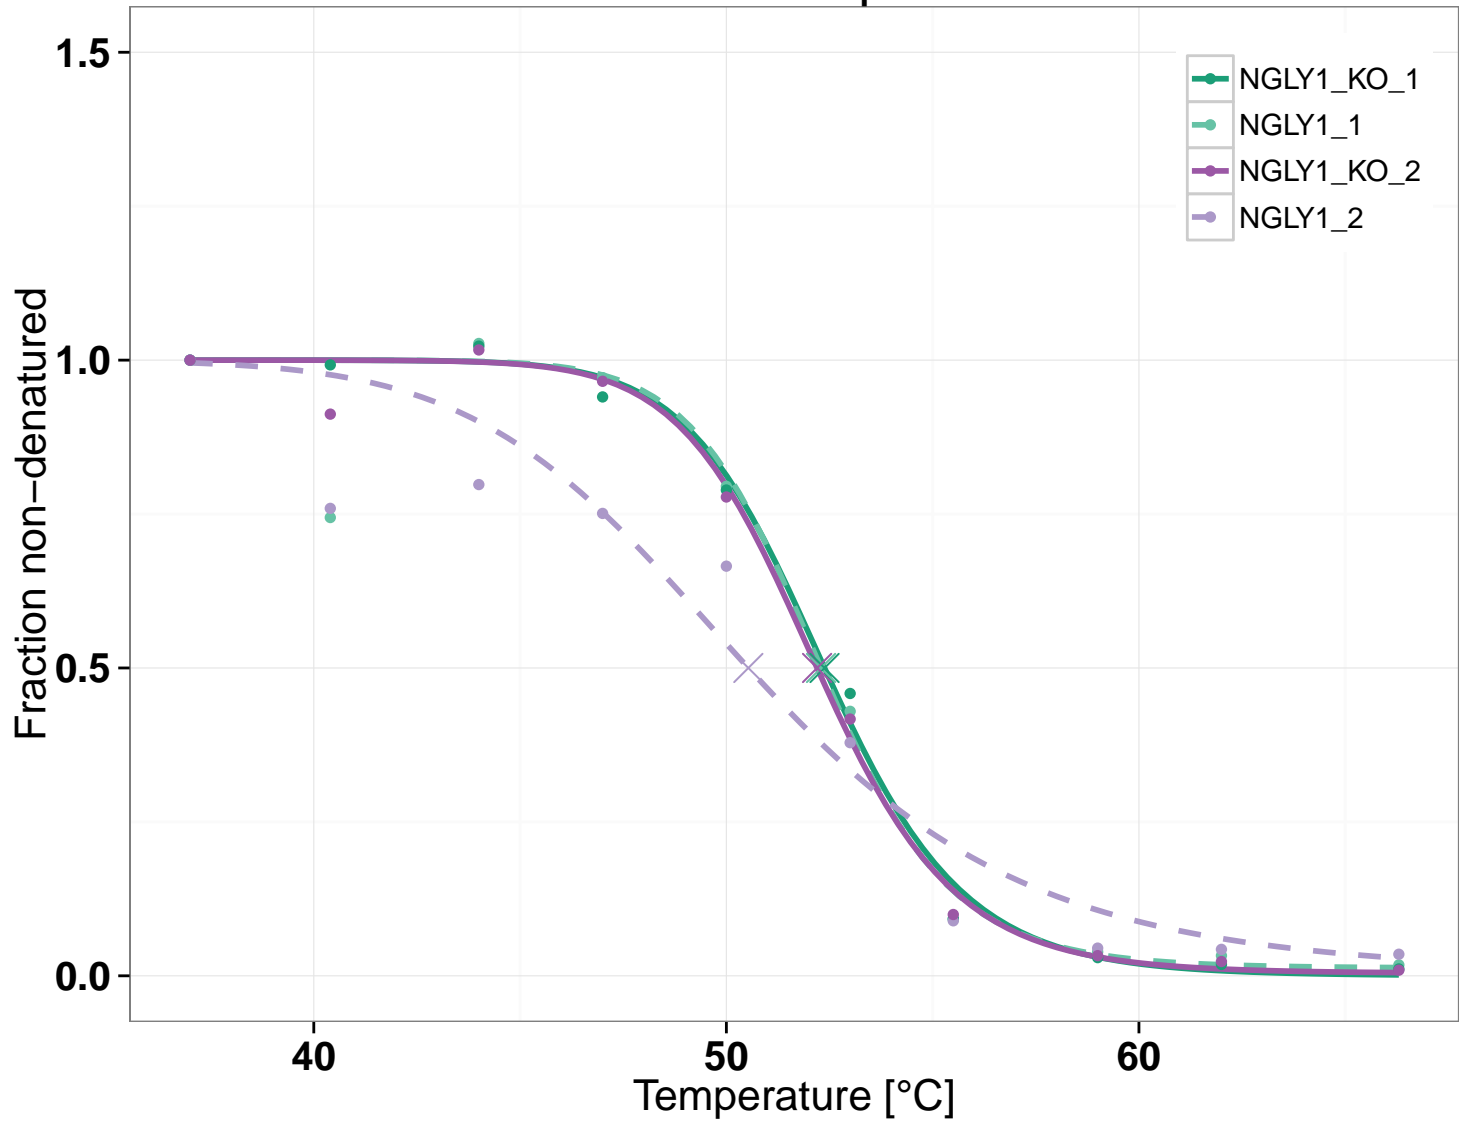

|            | meltPoint | slope  | plateau | R2   |
|------------|-----------|--------|---------|------|
| NGLY1_KO_1 | 52.38     | -0.15  | 0       | 1    |
| NGLY1_1    | 52.29     | -0.16  | 0.01    | 0.96 |
| NGLY1_KO_2 | 52.2      | -0.15  | 0       | 0.99 |
| NGLY1_2    | 50.53     | -0.075 | 0       | 0.93 |

Supplement: Supplementary file 8209 [file 1]

# IPI00019755.3|GSTO1

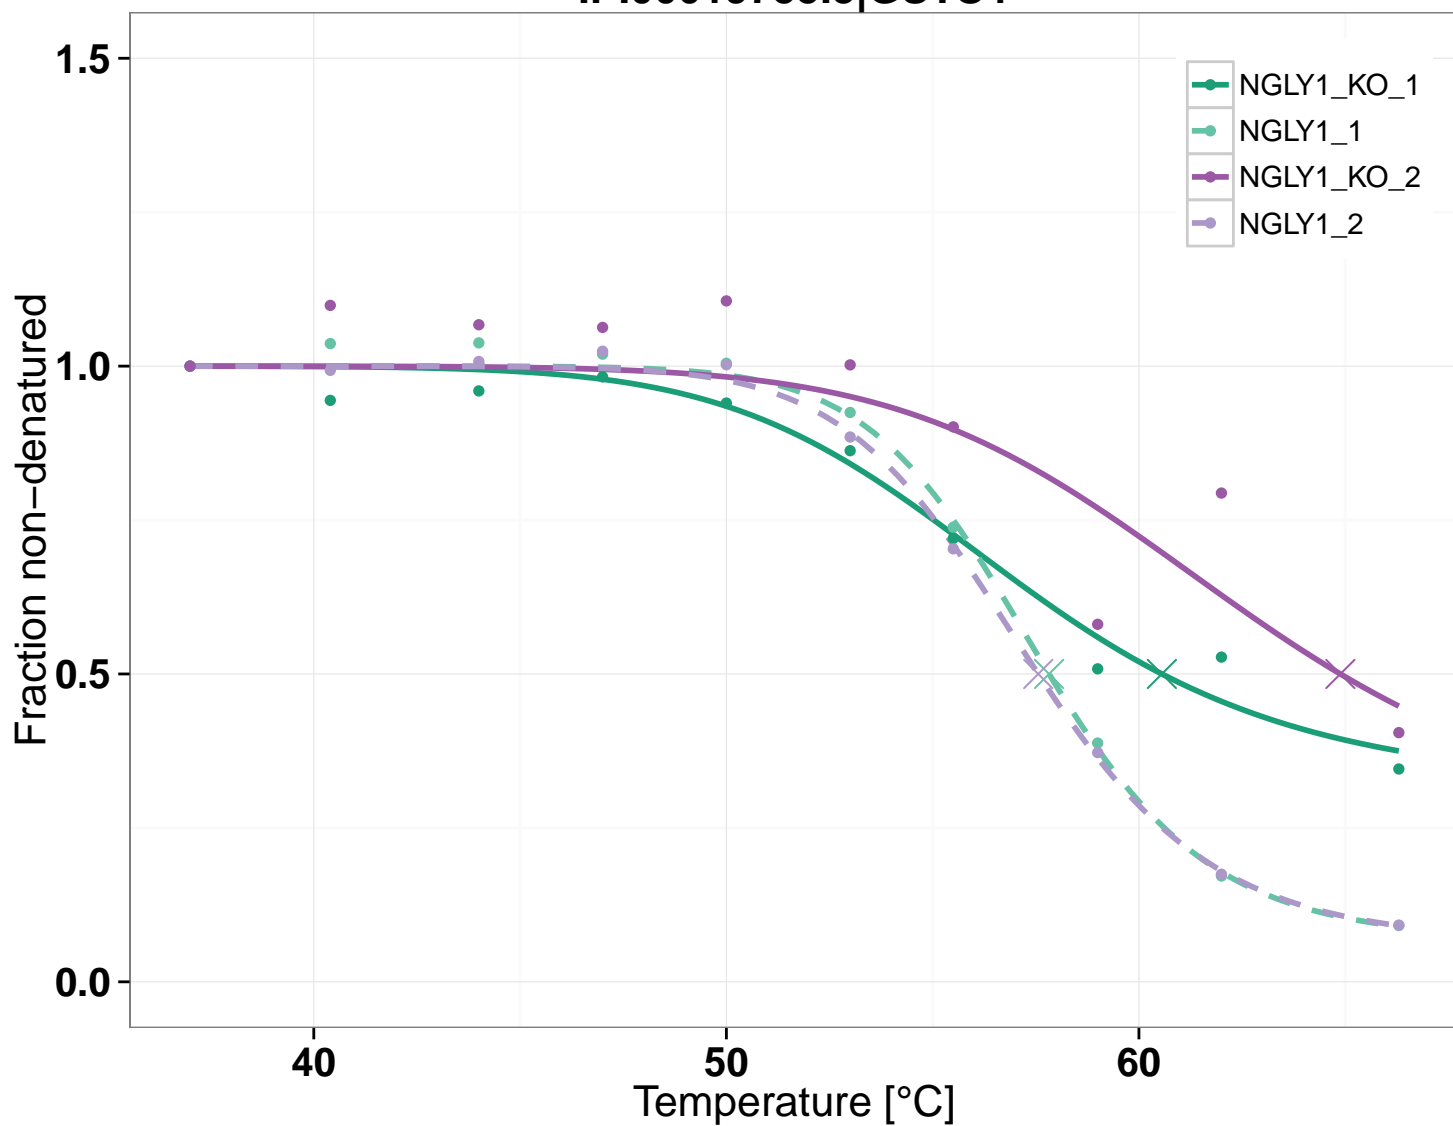

|            | meltPoint | slope  | plateau | R2   |
|------------|-----------|--------|---------|------|
| NGLY1_KO_1 | 60.56     | -0.05  | 0.31    | 0.97 |
| NGLY1_1    | 57.82     | -0.11  | 0.07    | 1    |
| NGLY1_KO_2 | 64.88     | -0.048 | 0.23    | 0.8  |
| NGLY1_2    | 57.56     | -0.1   | 0.06    | 1    |

Supplement: Supplementary file 8210 [file 1]

IPI00293362.3|SLC35F2

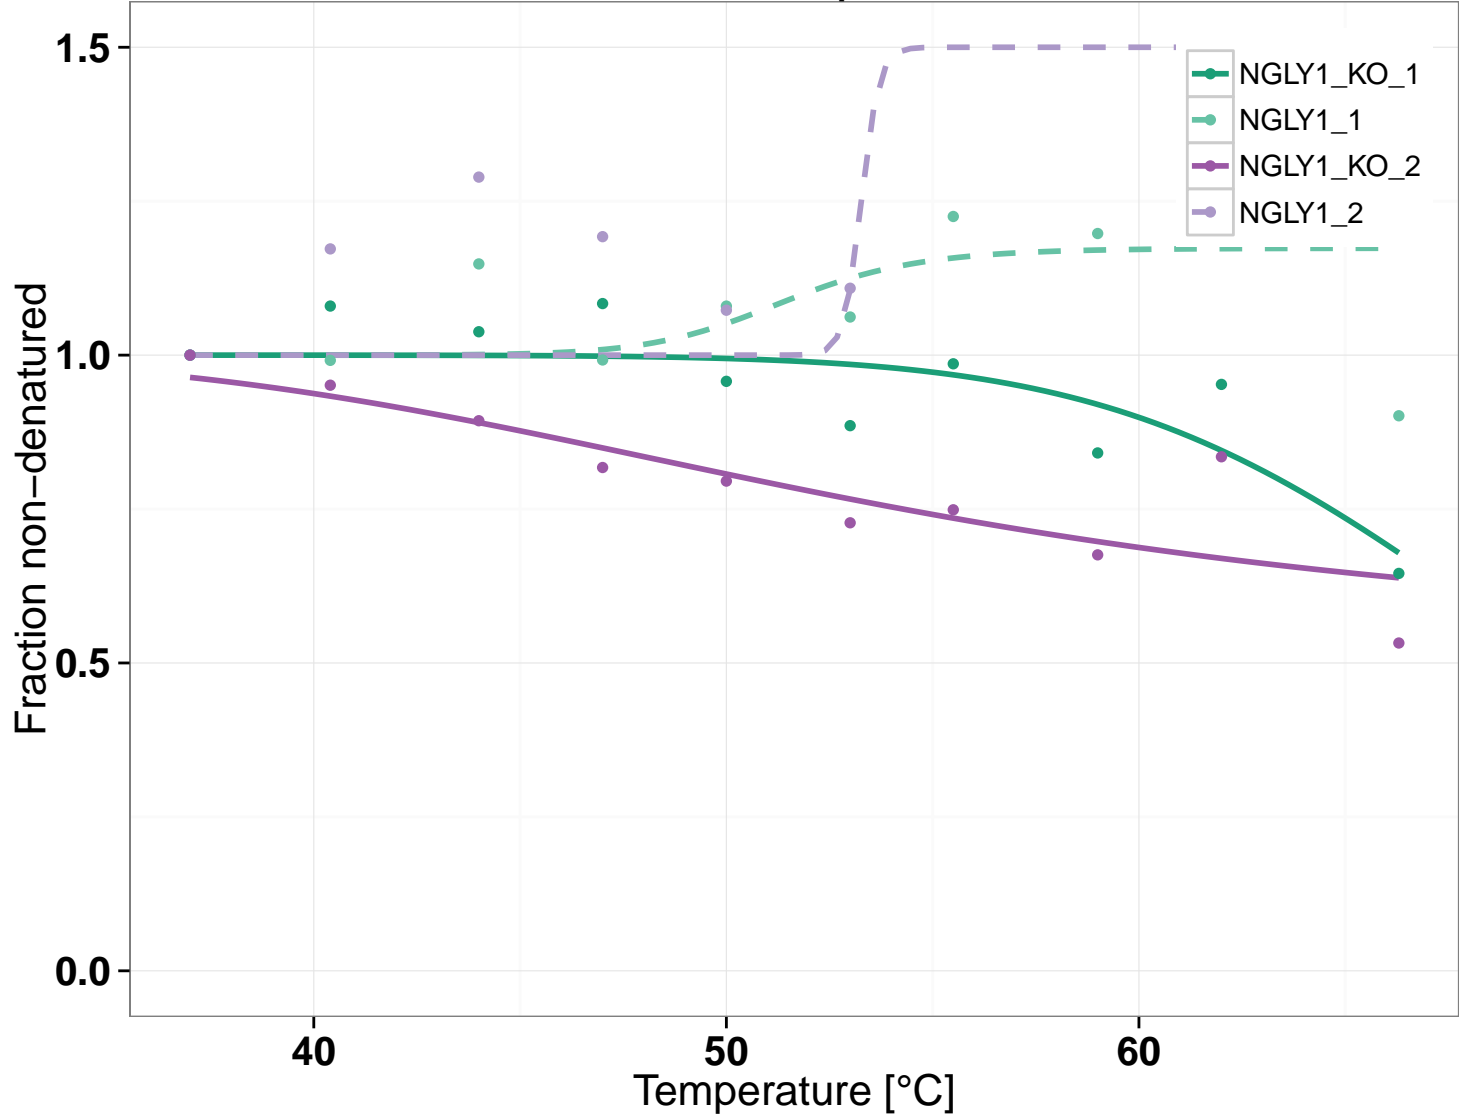

|            | meltPoint | slope  | plateau | R2   |
|------------|-----------|--------|---------|------|
| NGLY1_KO_1 | -         | -      | 0       | 0.71 |
| NGLY1_1    | -         | 0.026  | 1.17    | 0.18 |
| NGLY1_KO_2 | -         | -0.014 | 0.51    | 0.74 |
| NGLY1_2    | -         | 0.59   | 1.5     | 0.29 |

Supplement: Supplementary file 8211 [file 1]

# IPI00303402.7|PHAX

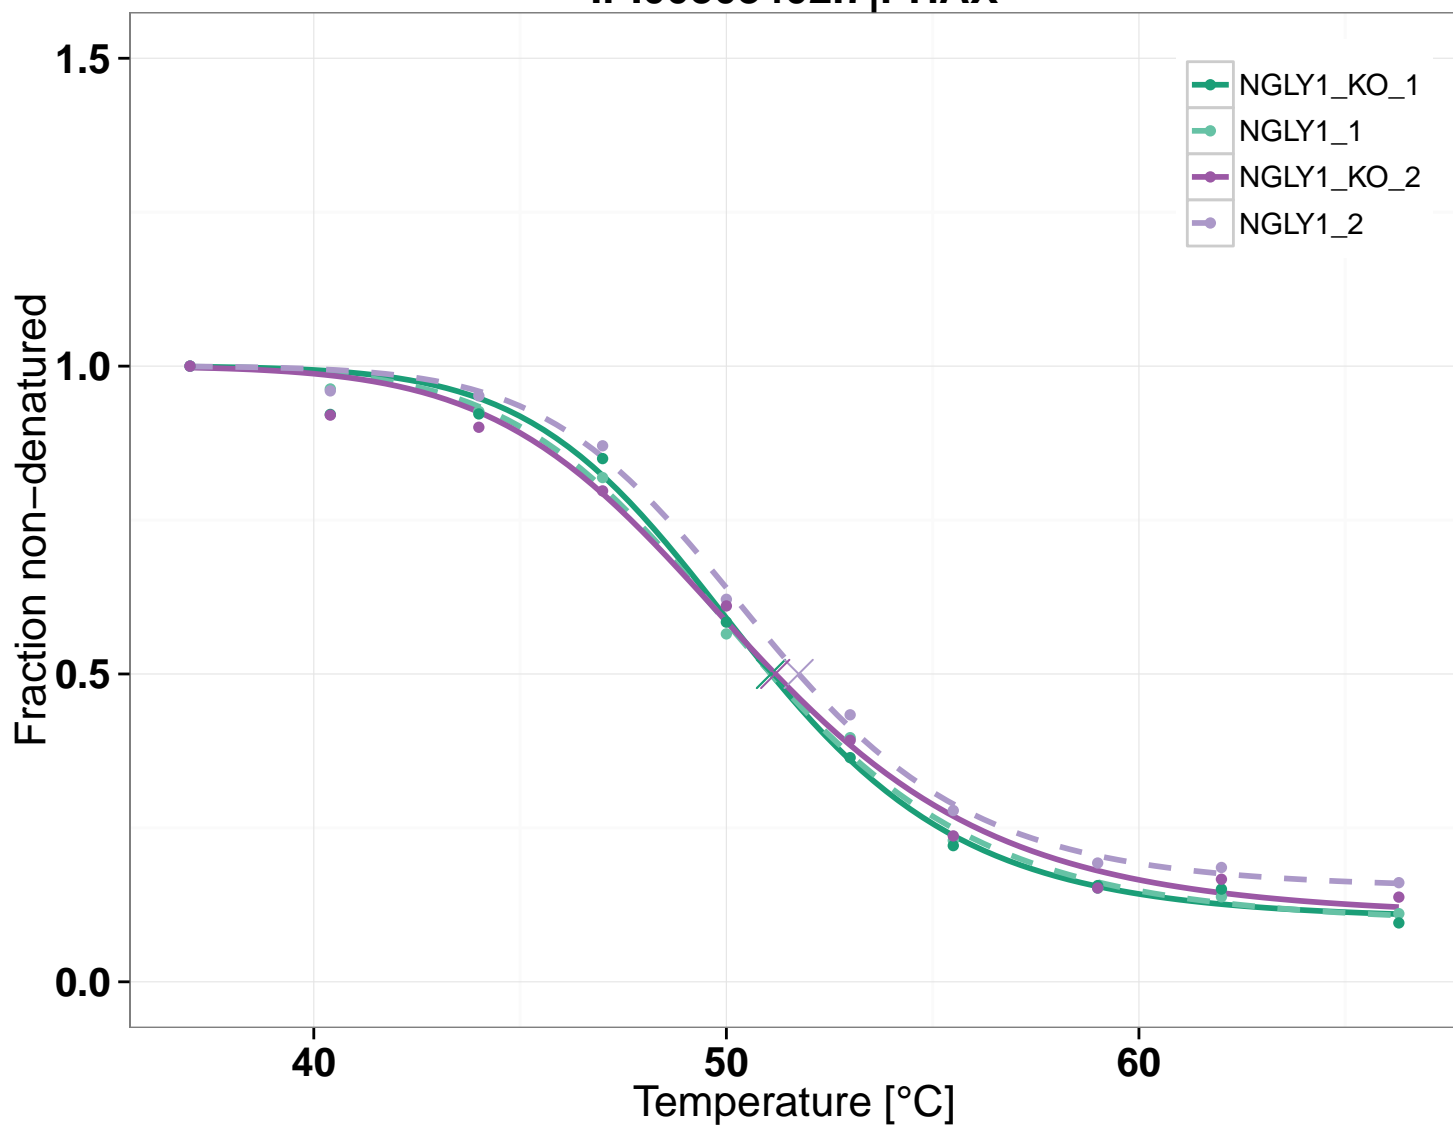

|            | meltPoint | slope  | plateau | R2   |
|------------|-----------|--------|---------|------|
| NGLY1_KO_1 | 51.08     | -0.085 | 0.1     | 0.99 |
| NGLY1_1    | 51.08     | -0.079 | 0.09    | 1    |
| NGLY1_KO_2 | 51.18     | -0.074 | 0.1     | 0.99 |
| NGLY1_2    | 51.75     | -0.082 | 0.15    | 1    |

Supplement: Supplementary file 8212 [file 1]

IPI00019451.3|C20ORF20

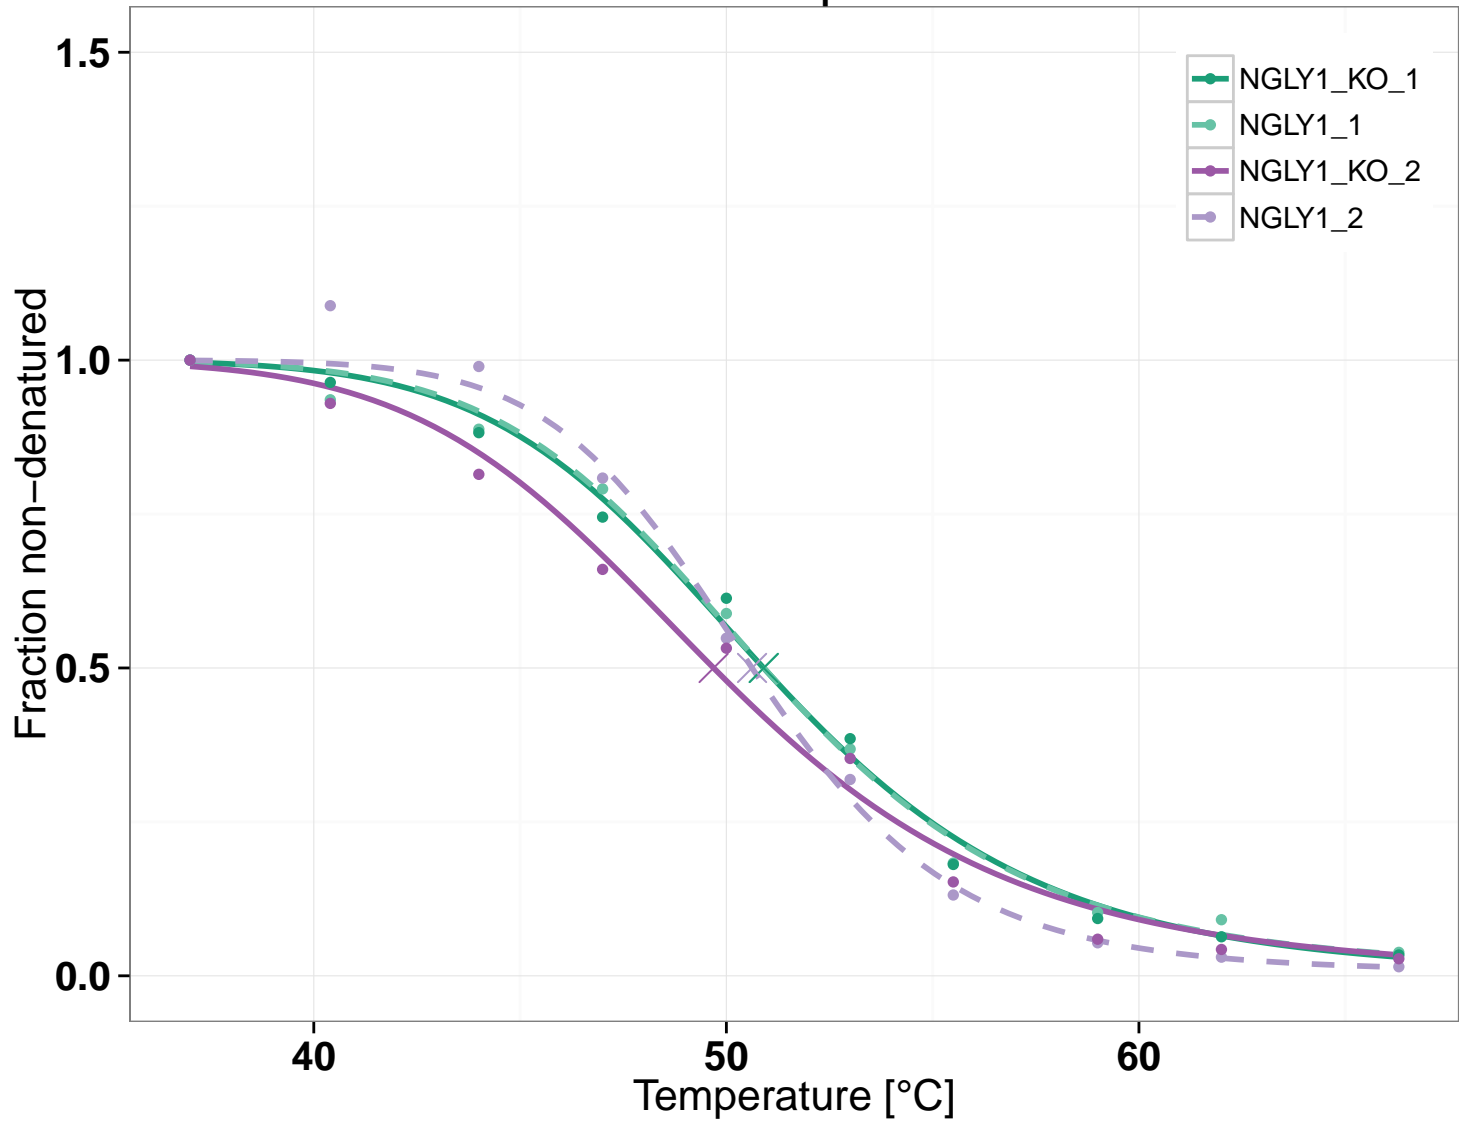

|            | meltPoint | slope  | plateau | R2   |
|------------|-----------|--------|---------|------|
| NGLY1_KO_1 | 50.9      | -0.074 | 0       | 0.99 |
| NGLY1_1    | 50.91     | -0.076 | 0.01    | 1    |
| NGLY1_KO_2 | 49.69     | -0.069 | 0       | 0.99 |
| NGLY1_2    | 50.62     | -0.1   | 0.01    | 0.99 |

Supplement: Supplementary file 8213 [file 1]

# IPI00219217.3|LDHB

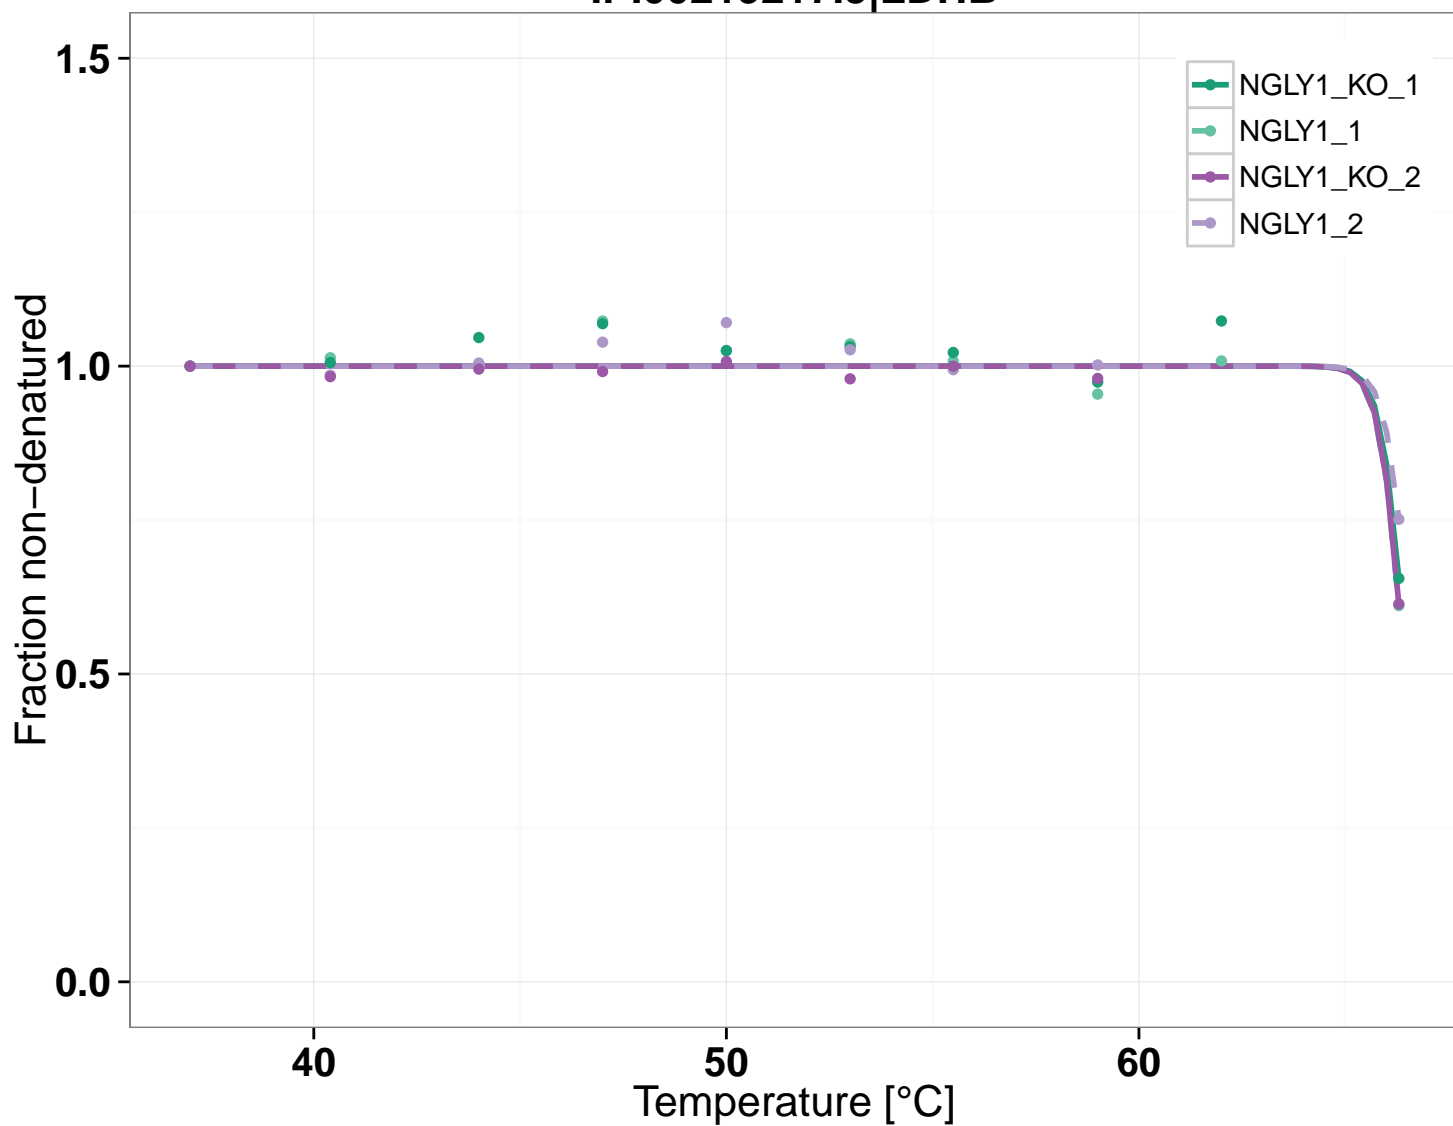

|            | meltPoint | slope | plateau | R2   |
|------------|-----------|-------|---------|------|
| NGLY1_KO_1 | -         | -     | 0       | 0.89 |
| NGLY1_1    | -         | -     | 0       | 0.94 |
| NGLY1_KO_2 | -         | -     | 0       | 0.71 |
| NGLY1_2    | -         | -     | 0       | 0.53 |

Supplement: Supplementary file 8214 [file 1]

IPI00784414.1|STAT3

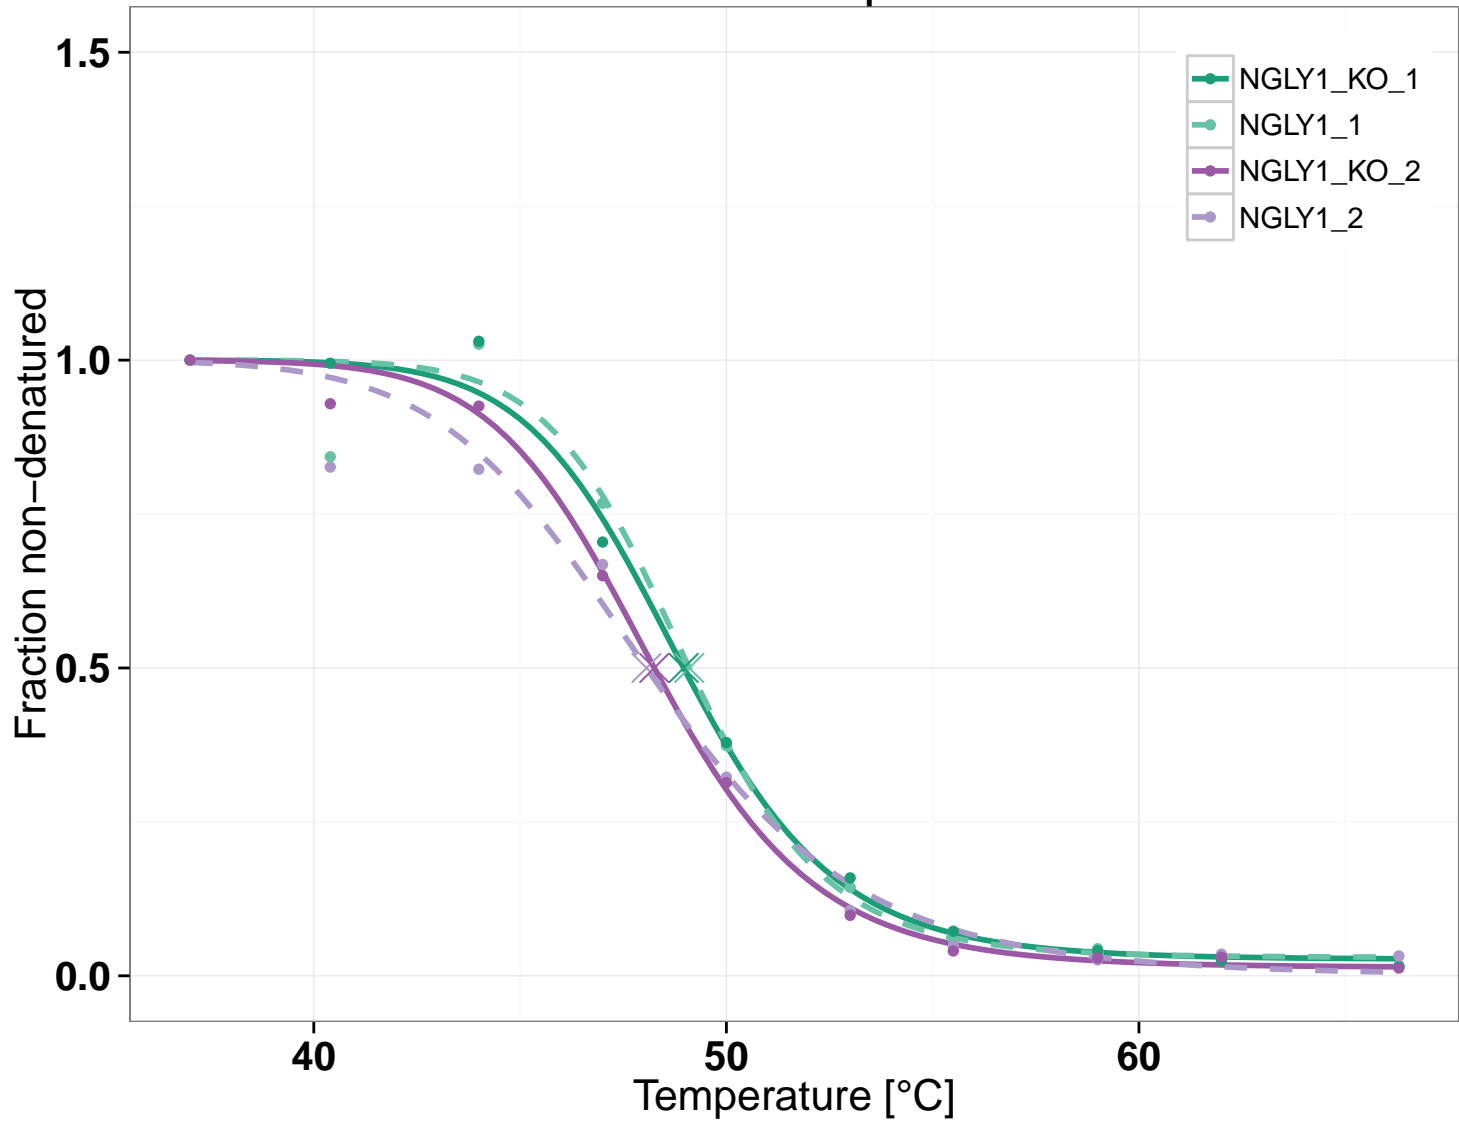

|            | meltPoint | slope  | plateau | R2   |
|------------|-----------|--------|---------|------|
| NGLY1_KO_1 | 48.96     | -0.13  | 0.03    | 0.99 |
| NGLY1_1    | 49.1      | -0.14  | 0.03    | 0.98 |
| NGLY1_KO_2 | 48.25     | -0.13  | 0.01    | 1    |
| NGLY1_2    | 48.06     | -0.098 | 0       | 0.98 |

Supplement: Supplementary file 8215 [file 1]

IPI00303476.1|ATP5B

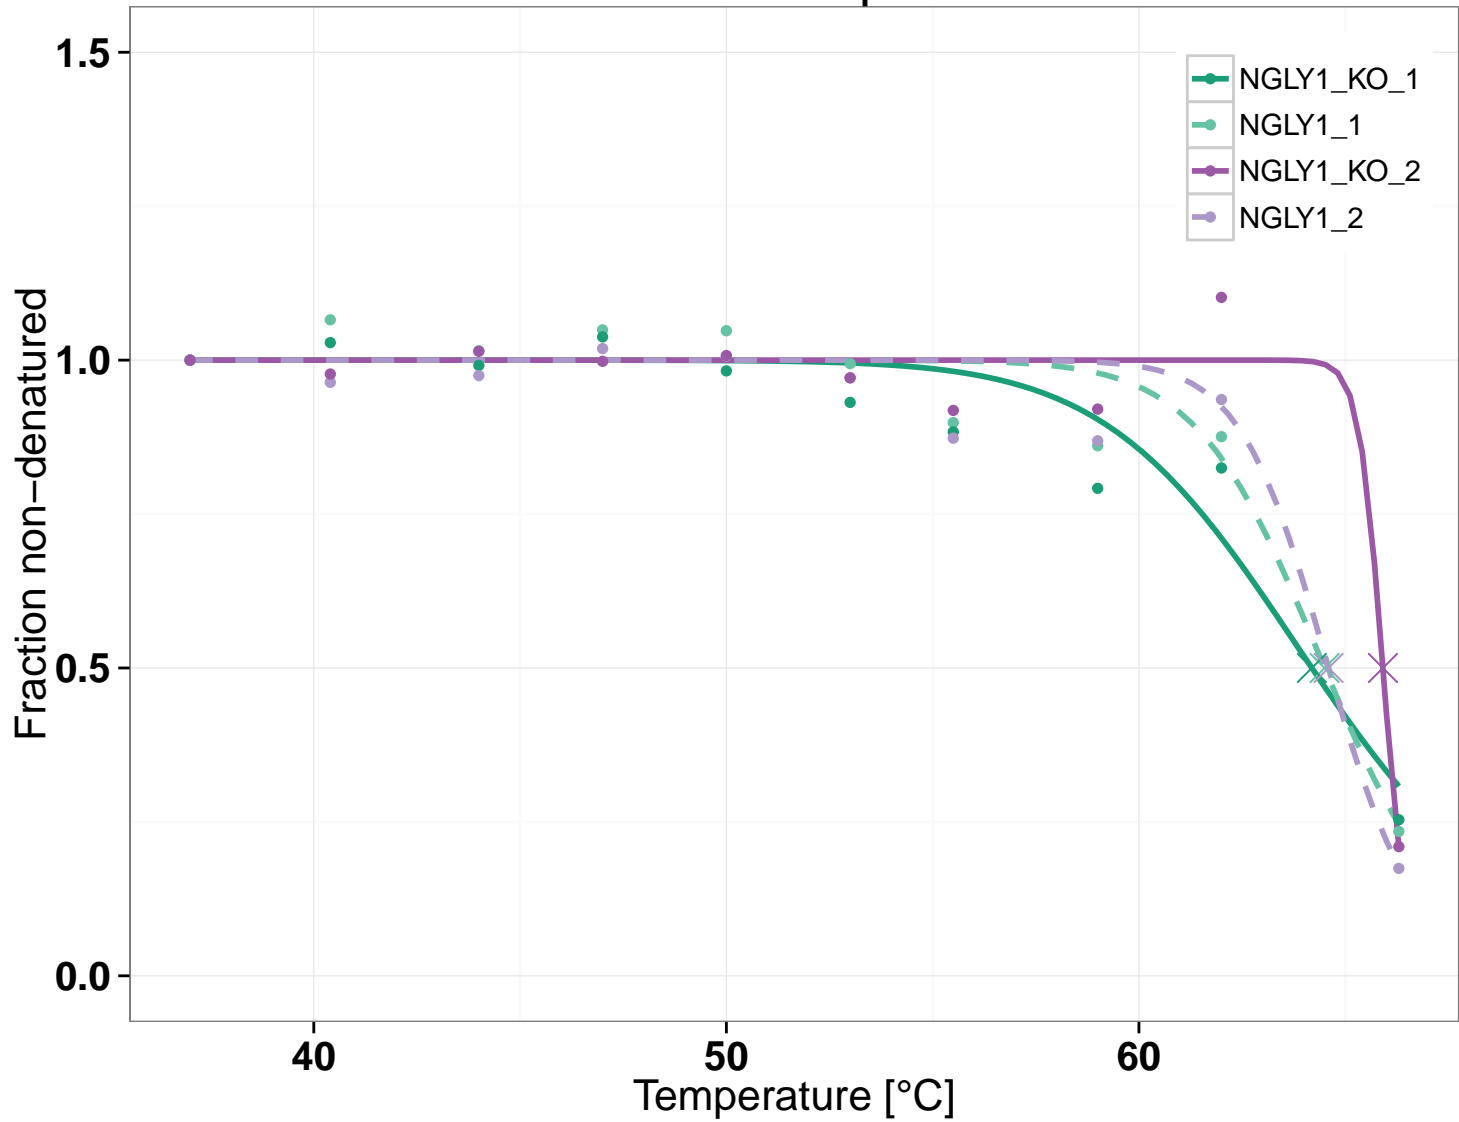

|            | meltPoint | slope | plateau | R2   |
|------------|-----------|-------|---------|------|
| NGLY1_KO_1 | 64.19     | -0.1  | 0       | 0.91 |
| NGLY1_1    | 64.5      | -0.16 | 0       | 0.94 |
| NGLY1_KO_2 | 65.91     | -0.86 | 0       | 0.96 |
| NGLY1_2    | 64.6      | -0.23 | 0       | 0.94 |

Supplement: Supplementary file 8216 [file 1]

IPI00007119.3|TUBE1

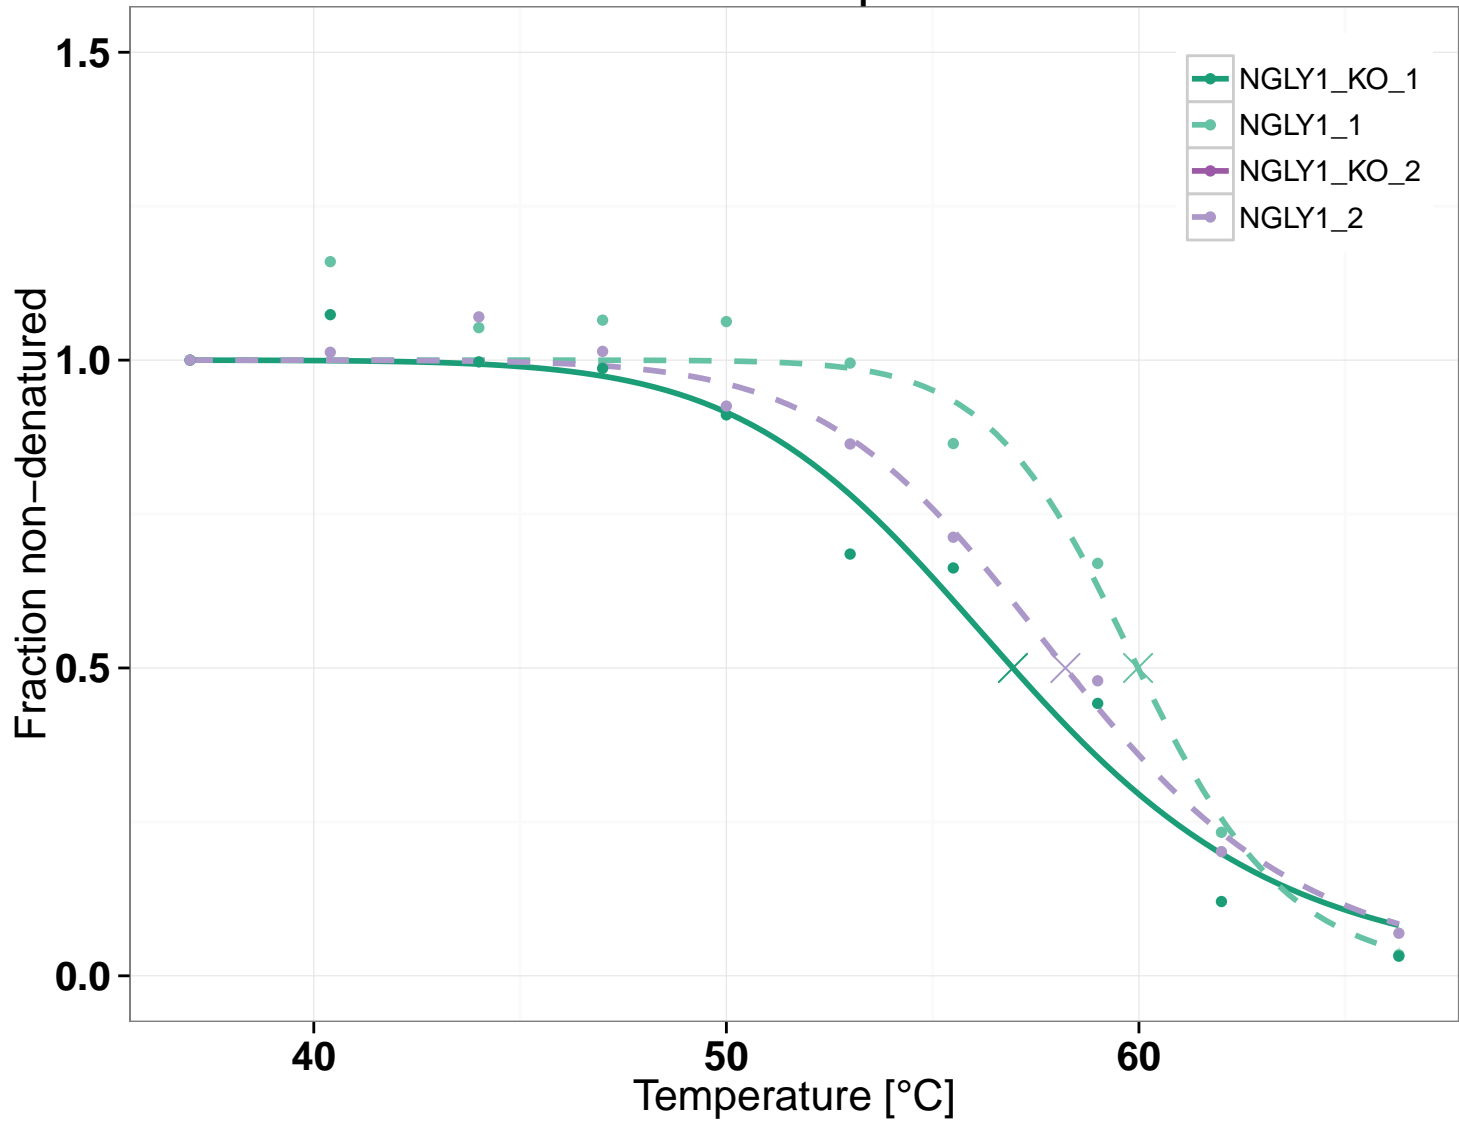

|            | meltPoint | slope  | plateau | R2   |
|------------|-----------|--------|---------|------|
| NGLY1_KO_1 | 56.95     | -0.076 | 0       | 0.97 |
| NGLY1_1    | 59.98     | -0.14  | 0       | 0.97 |
| NGLY1_KO_2 | -         | -      | -       | -    |
| NGLY1_2    | 58.22     | -0.085 | 0       | 0.99 |

Supplement: Supplementary file 8217 [file 1]

# IPI00514071.2|MAST2

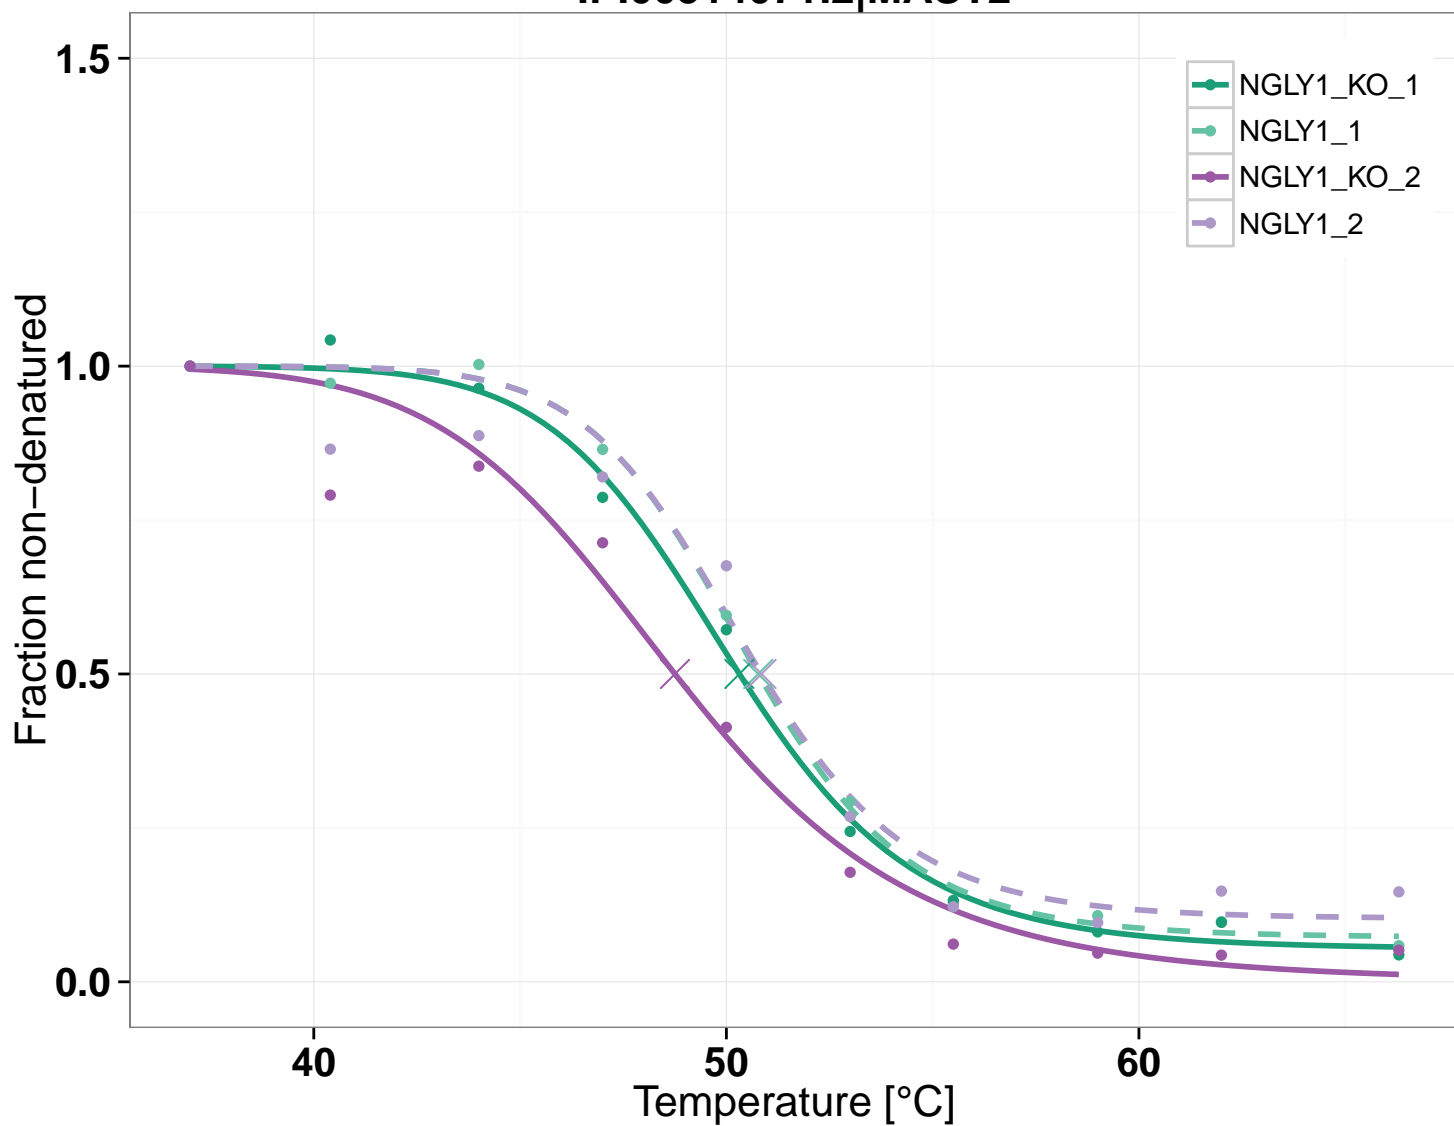

|            | meltPoint | slope  | plateau | R2   |
|------------|-----------|--------|---------|------|
| NGLY1_KO_1 | 50.32     | -0.11  | 0.05    | 1    |
| NGLY1_1    | 50.77     | -0.12  | 0.07    | 1    |
| NGLY1_KO_2 | 48.75     | -0.087 | 0       | 0.97 |
| NGLY1_2    | 50.85     | -0.12  | 0.1     | 0.97 |

Supplement: Supplementary file 8218 [file 1]

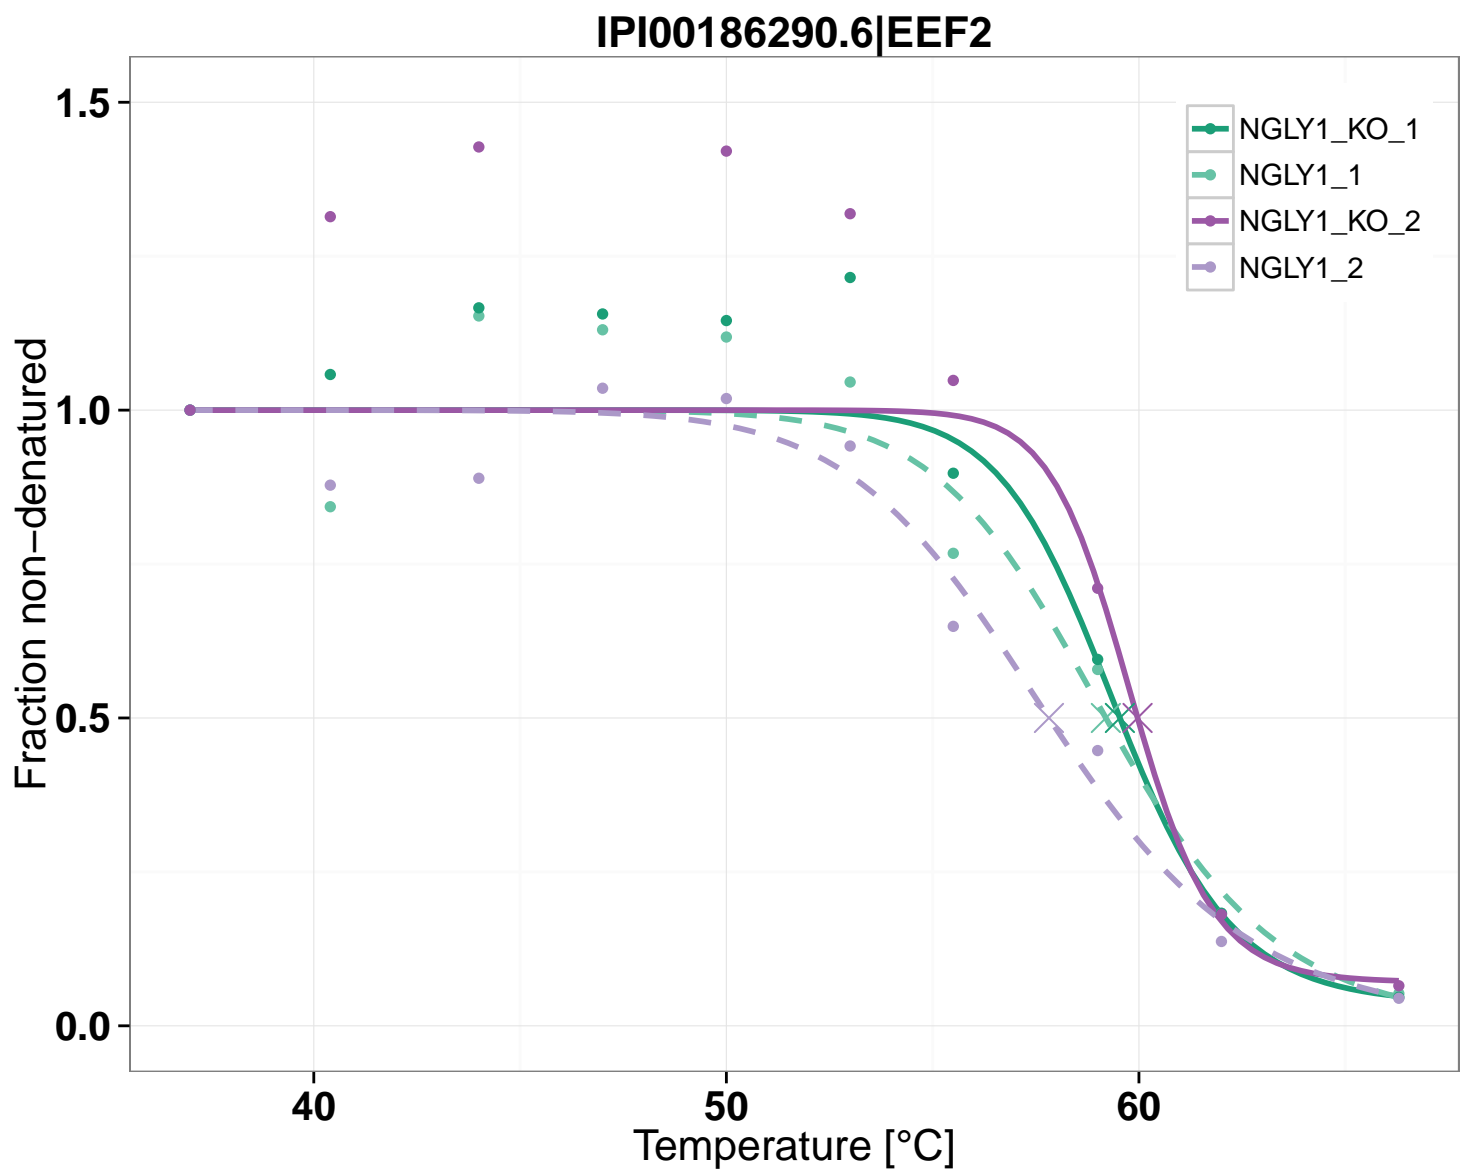

|            | meltPoint | slope | plateau | R2   |
|------------|-----------|-------|---------|------|
| NGLY1_KO_1 | 59.54     | -0.17 | 0.04    | 0.92 |
| NGLY1_1    | 59.2      | -0.12 | 0       | 0.93 |
| NGLY1_KO_2 | 59.97     | -0.23 | 0.07    | 0.65 |
| NGLY1_2    | 57.82     | -0.1  | 0       | 0.96 |

Supplement: Supplementary file 8219 [file 1]

IPI00300439.1|USP25

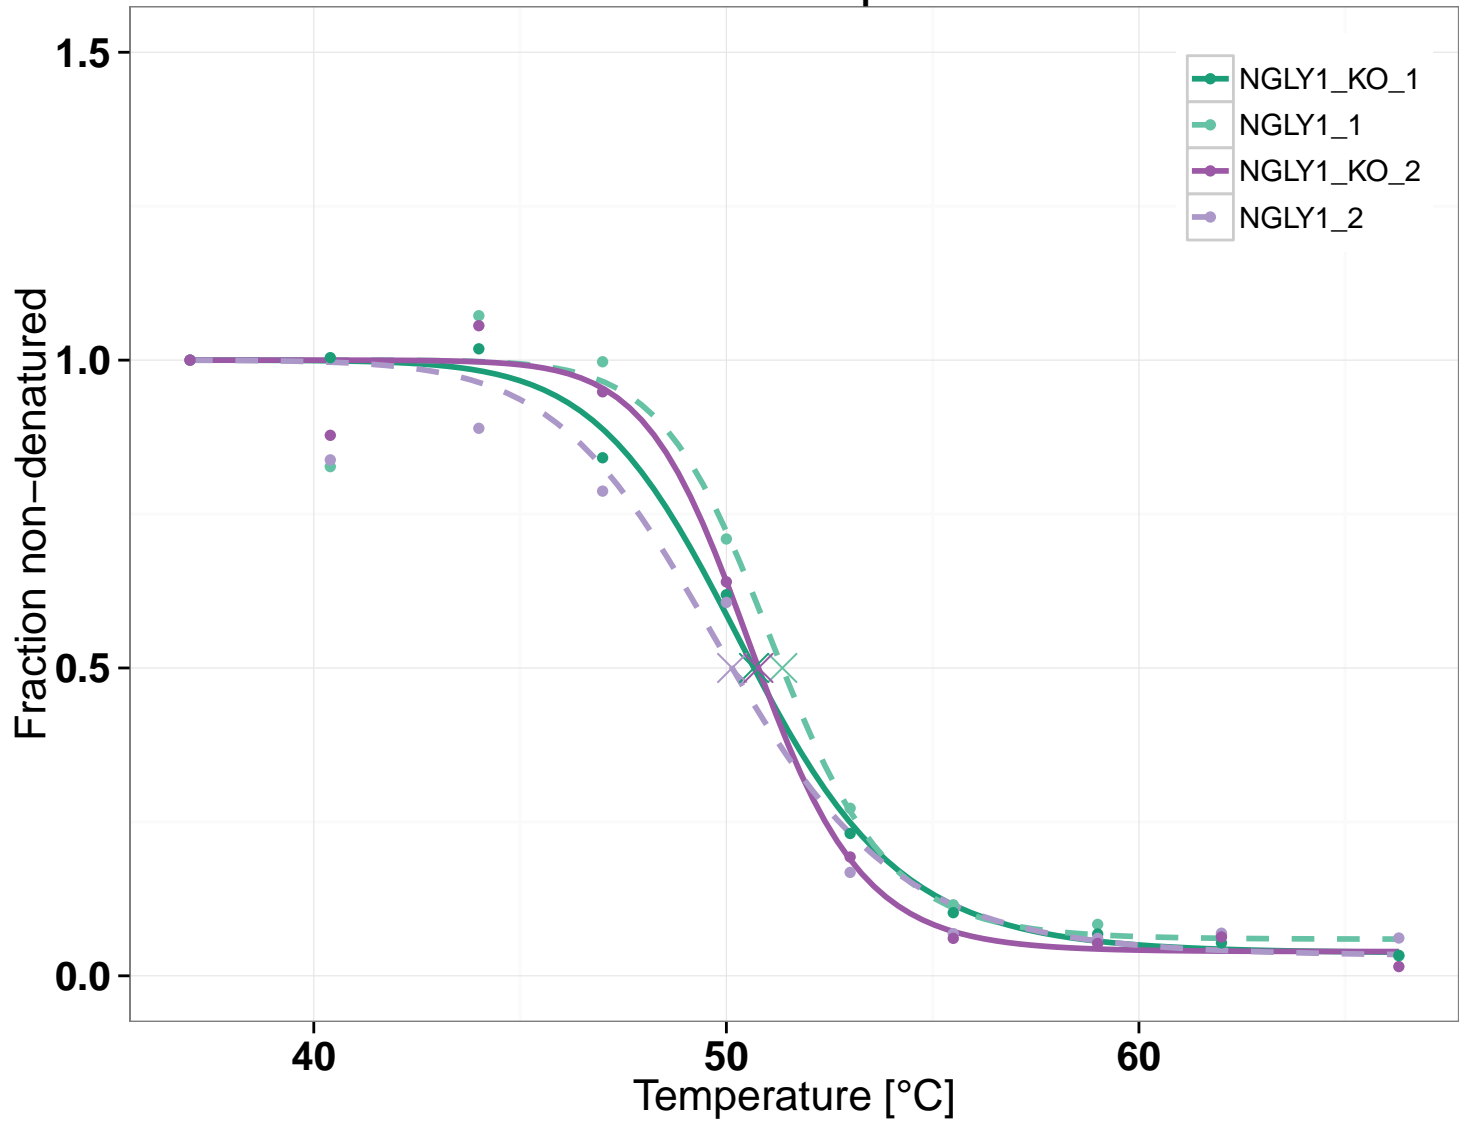

|            | meltPoint | slope | plateau | R2   |
|------------|-----------|-------|---------|------|
| NGLY1_KO_1 | 50.67     | -0.13 | 0.04    | 1    |
| NGLY1_1    | 51.36     | -0.17 | 0.06    | 0.98 |
| NGLY1_KO_2 | 50.78     | -0.18 | 0.04    | 0.99 |
| NGLY1_2    | 50.14     | -0.12 | 0.03    | 0.97 |

Supplement: Supplementary file 8220 [file 1]

IPI00444793.5|CSPP1

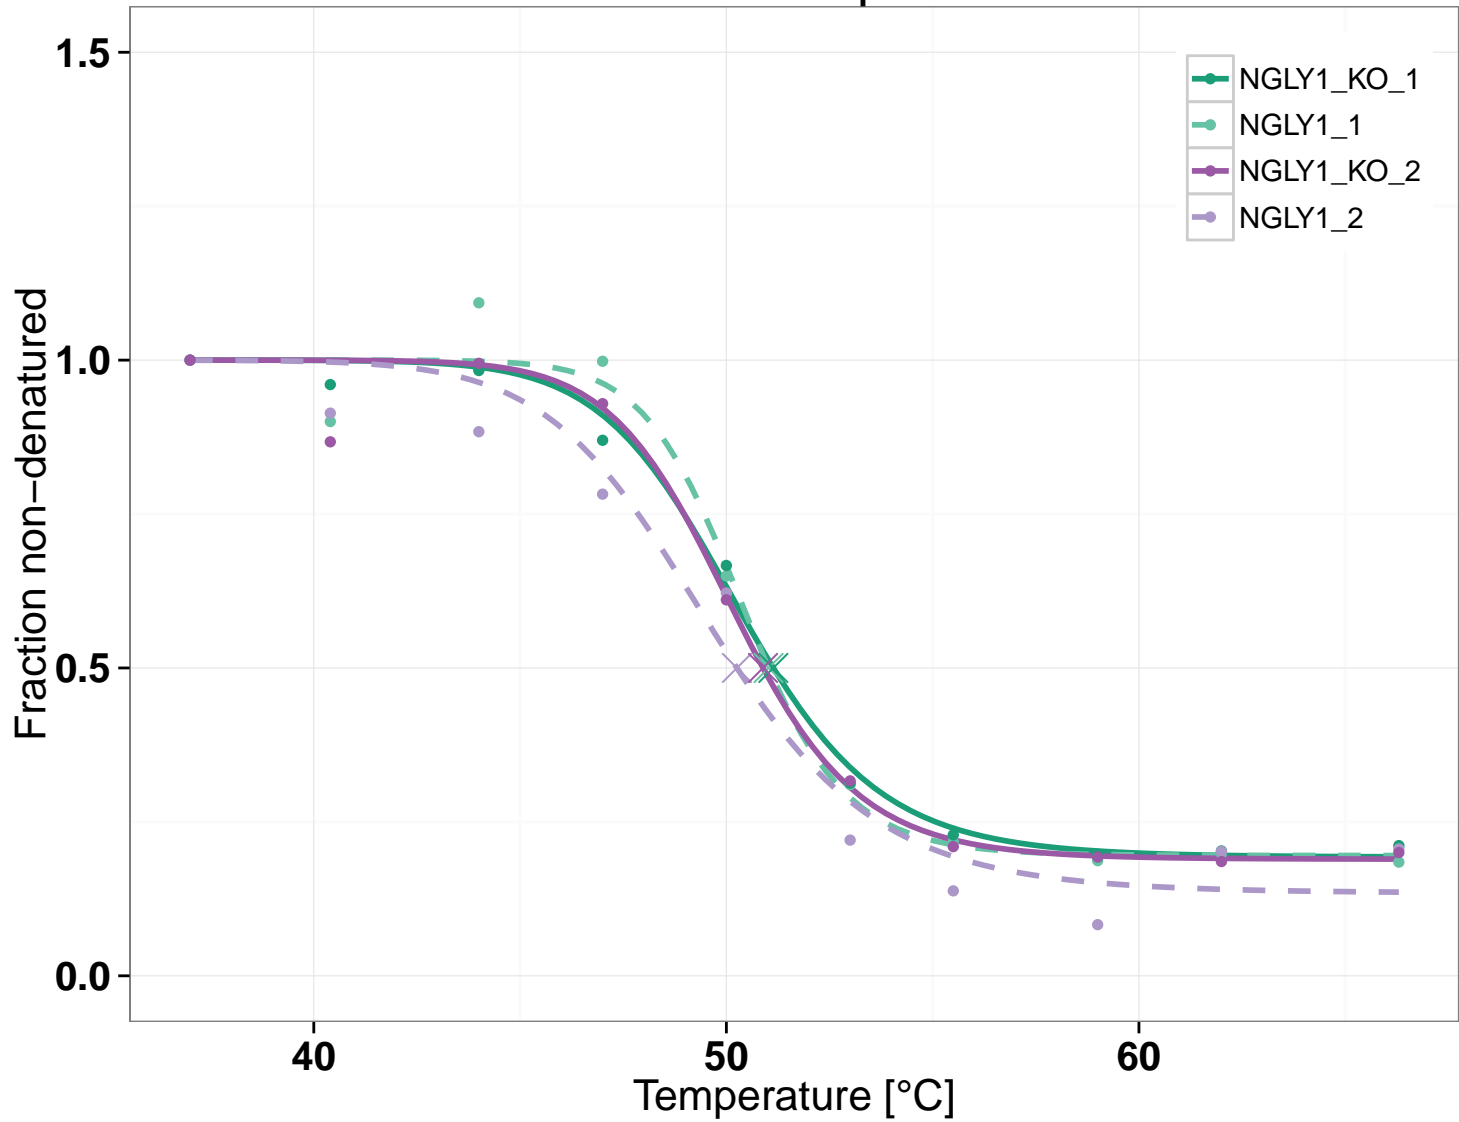

|            | meltPoint | slope | plateau | R2   |
|------------|-----------|-------|---------|------|
| NGLY1_KO_1 | 51.14     | -0.12 | 0.19    | 1    |
| NGLY1_1    | 51.02     | -0.17 | 0.2     | 0.98 |
| NGLY1_KO_2 | 50.89     | -0.14 | 0.19    | 0.99 |
| NGLY1_2    | 50.26     | -0.11 | 0.13    | 0.96 |

Supplement: Supplementary file 8221 [file 1]

IPI00434390.1|ASCC1

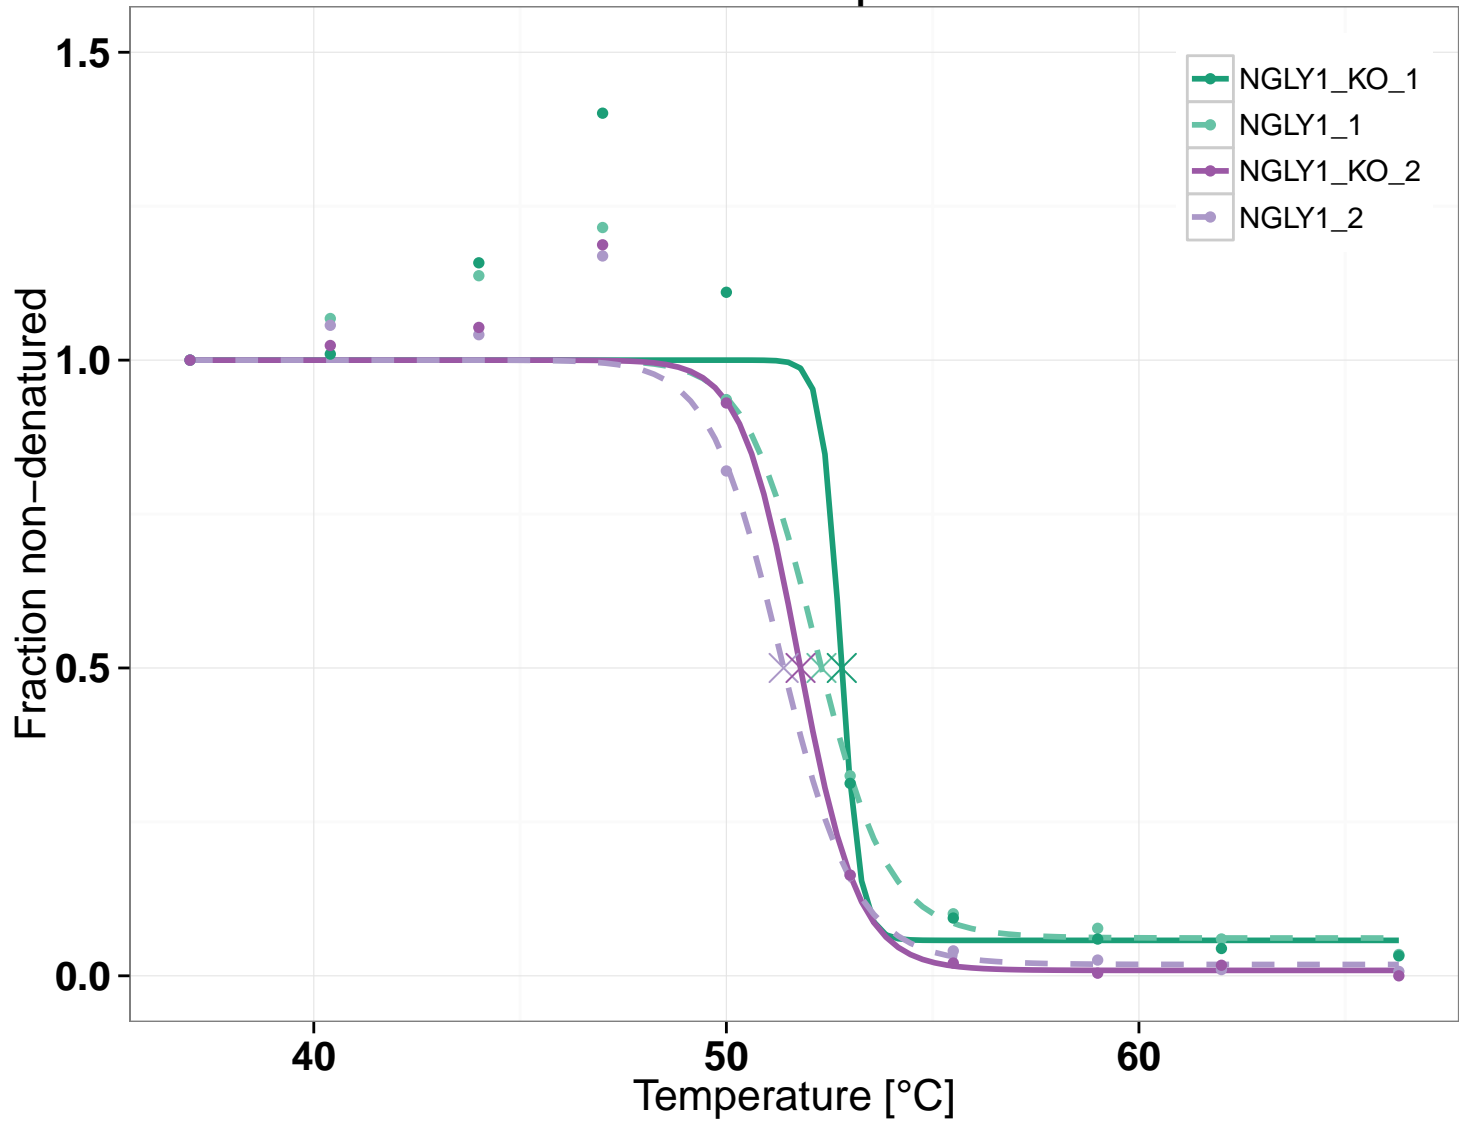

|            | meltPoint | slope | plateau | R2   |
|------------|-----------|-------|---------|------|
| NGLY1_KO_1 | 52.8      | -1    | 0.06    | 0.93 |
| NGLY1_1    | 52.31     | -0.27 | 0.06    | 0.97 |
| NGLY1_KO_2 | 51.8      | -0.35 | 0.01    | 0.98 |
| NGLY1_2    | 51.39     | -0.28 | 0.02    | 0.99 |

Supplement: Supplementary file 8222 [file 1]

IPI00657791.2|CDCA7L

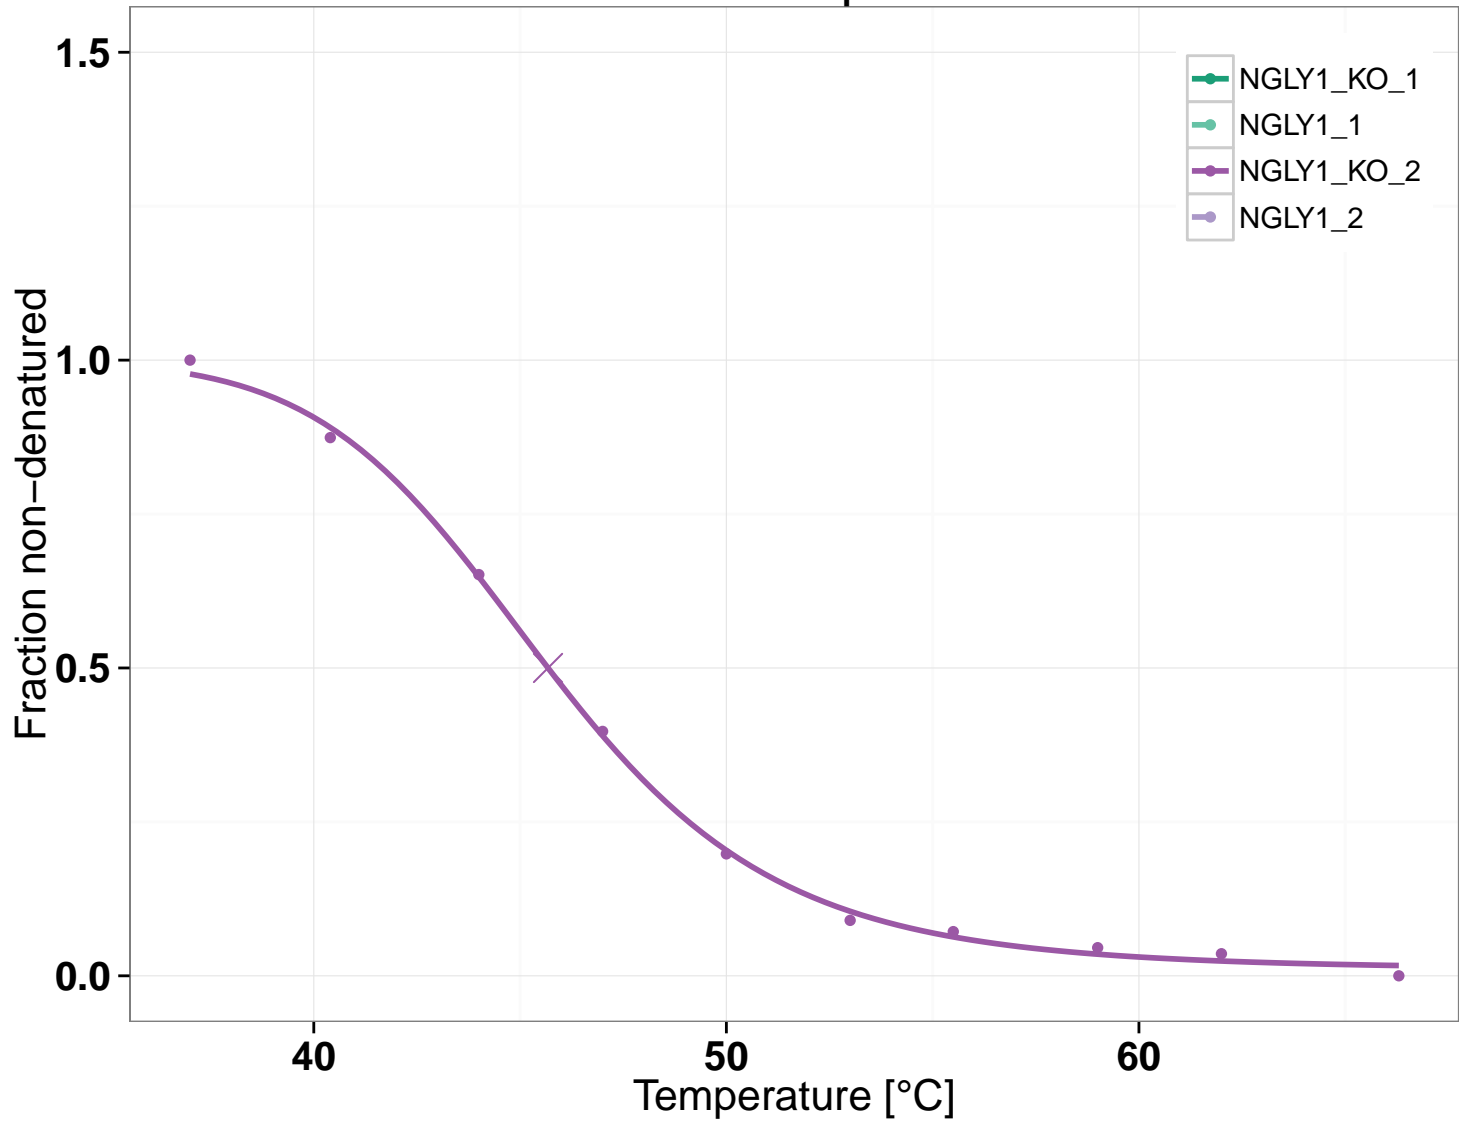

|            | meltPoint | slope  | plateau | R2 |
|------------|-----------|--------|---------|----|
| NGLY1_KO_1 | —         | —      | —       | —  |
| NGLY1_1    | —         | —      | —       | —  |
| NGLY1_KO_2 | 45.68     | −0.089 | 0.01    | 1  |
| NGLY1_2    | —         | —      | —       | —  |

Supplement: Supplementary file 8223 [file 1]

IPI00005792.2|PABPN1

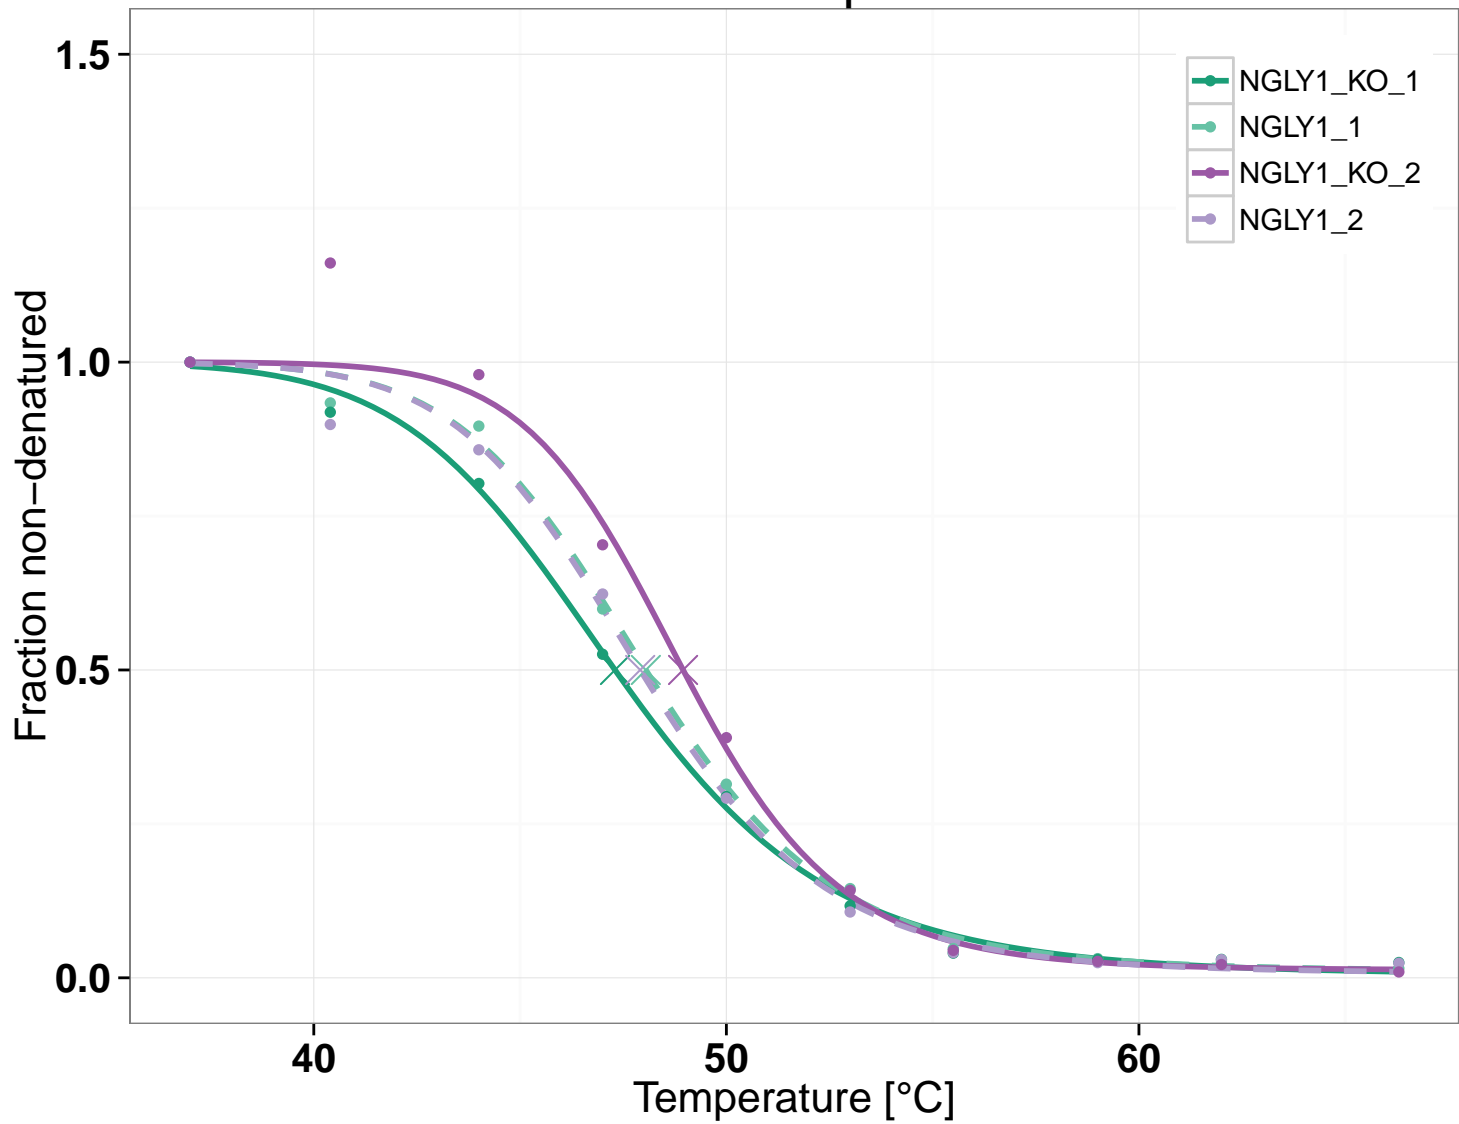

|            | meltPoint | slope  | plateau | R2   |
|------------|-----------|--------|---------|------|
| NGLY1_KO_1 | 47.3      | -0.096 | 0       | 1    |
| NGLY1_1    | 48.05     | -0.11  | 0.01    | 1    |
| NGLY1_KO_2 | 48.95     | -0.13  | 0.01    | 0.98 |
| NGLY1_2    | 47.91     | -0.11  | 0.01    | 0.99 |

Supplement: Supplementary file 8224 [file 1]

# IPI00023649.3|SBNO1

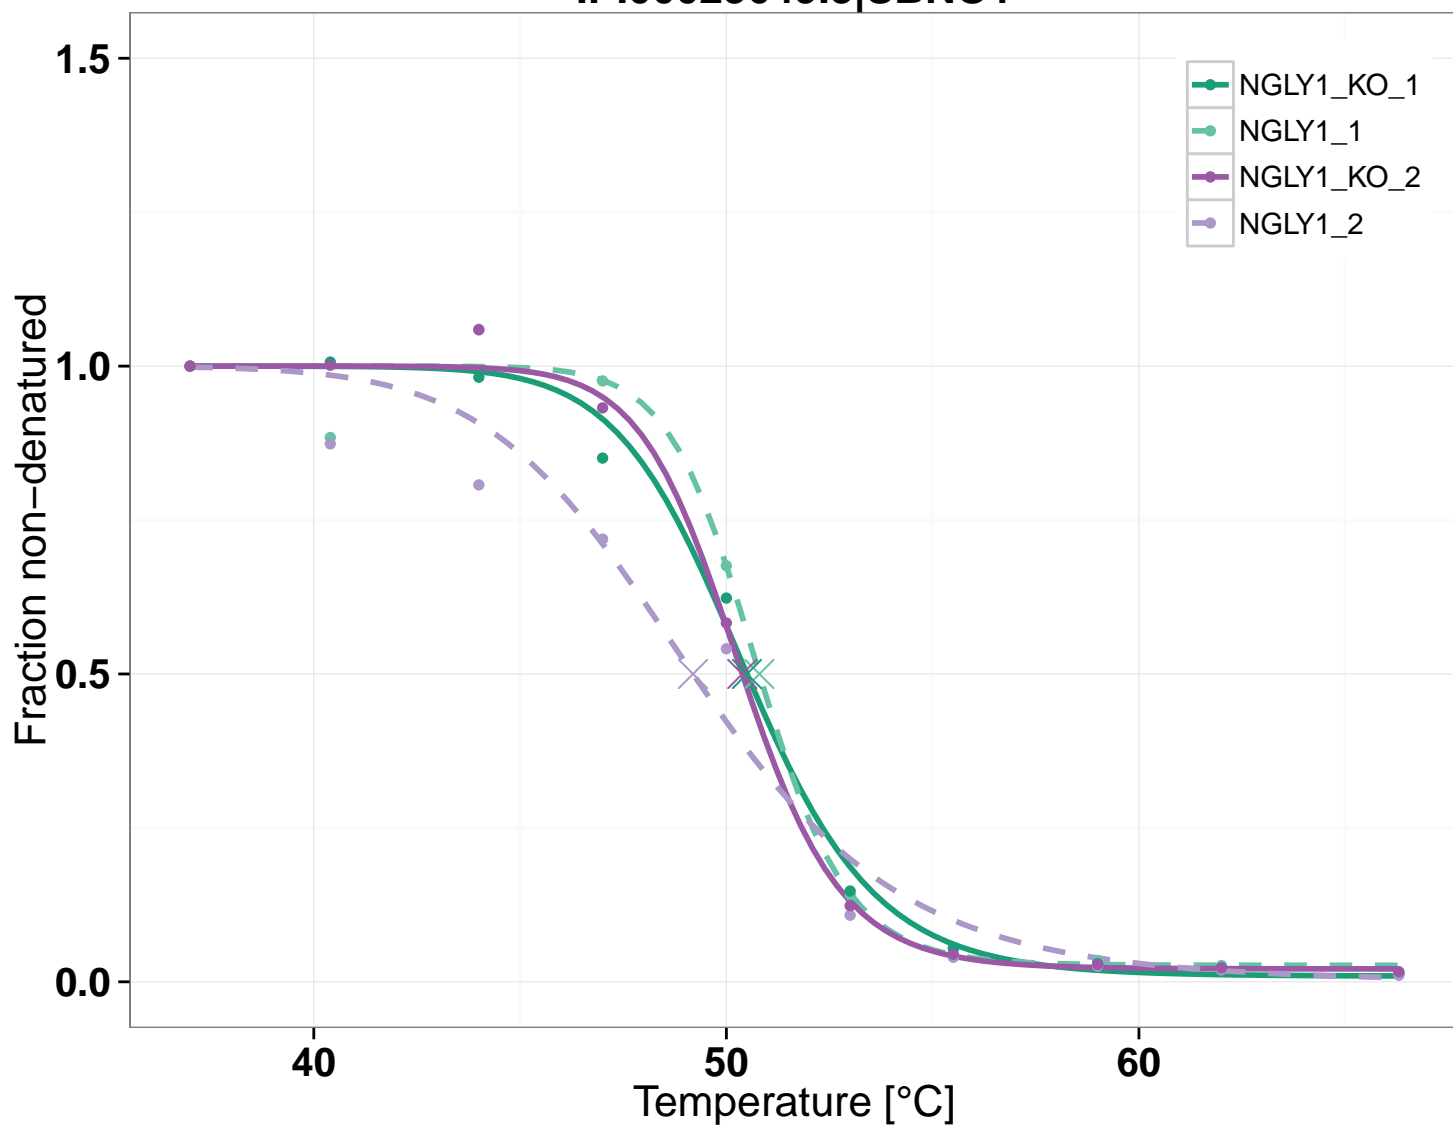

|            | meltPoint | slope  | plateau | R2   |
|------------|-----------|--------|---------|------|
| NGLY1_KO_1 | 50.5      | -0.16  | 0.01    | 1    |
| NGLY1_1    | 50.8      | -0.22  | 0.03    | 0.99 |
| NGLY1_KO_2 | 50.39     | -0.2   | 0.02    | 1    |
| NGLY1_2    | 49.19     | -0.099 | 0       | 0.97 |

Supplement: Supplementary file 8225 [file 1]

IPI00183465.1|CD164

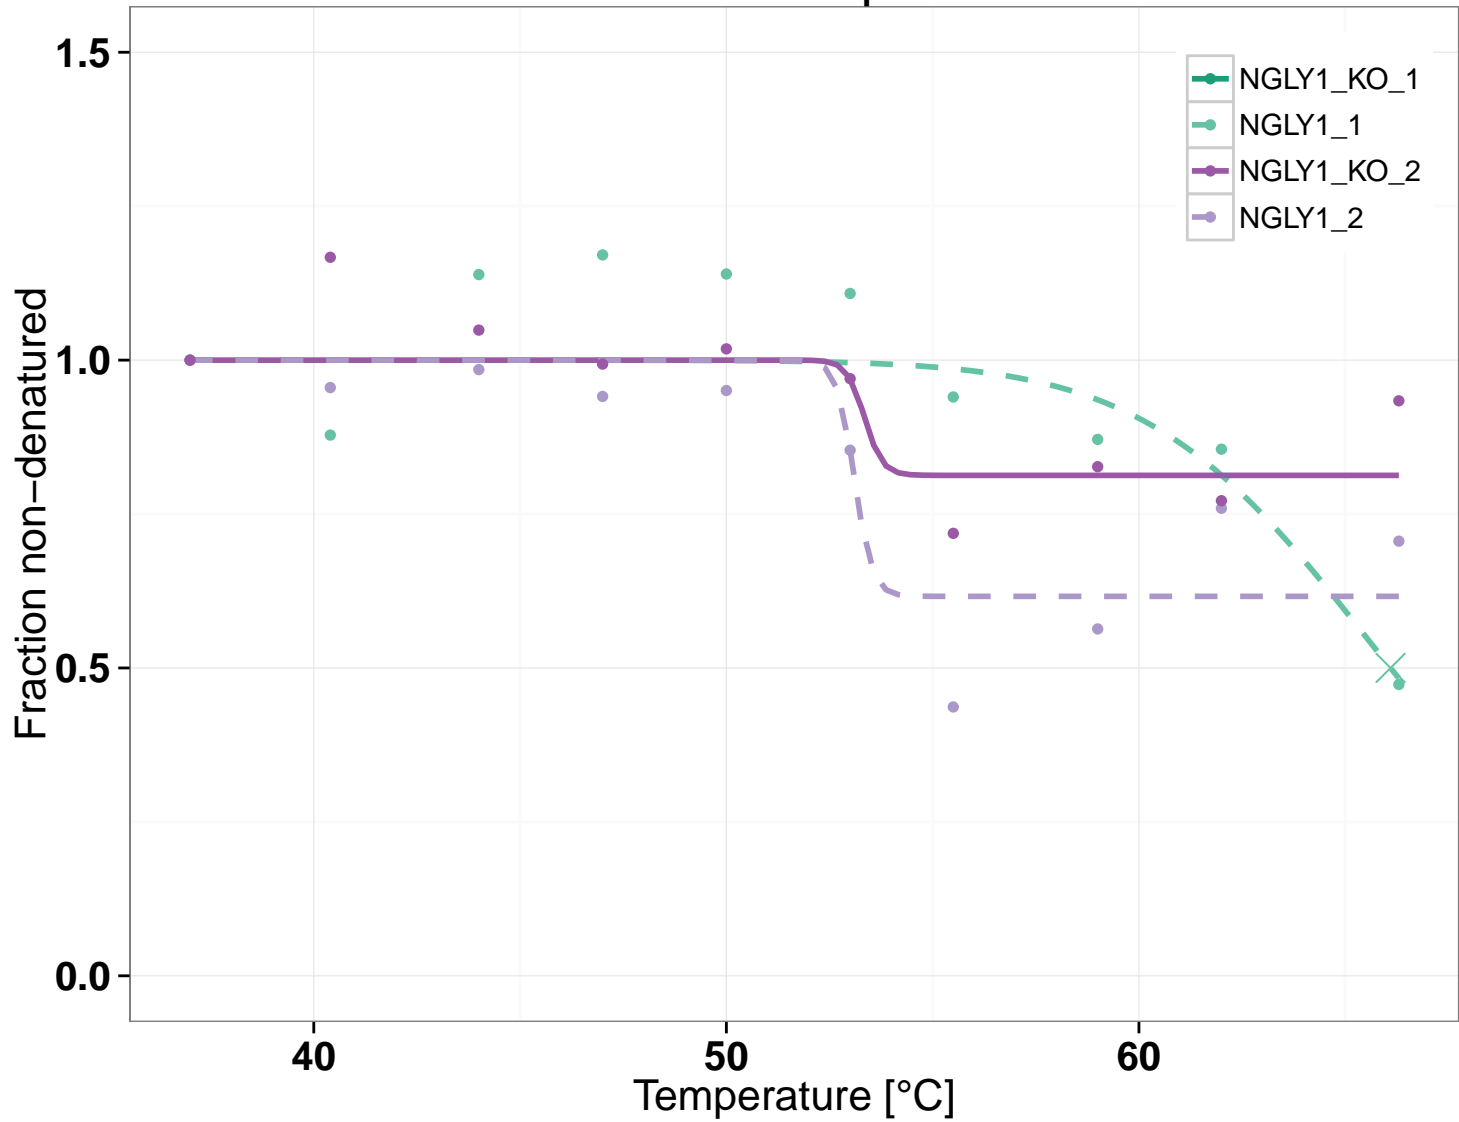

|            | meltPoint | slope  | plateau | R2   |
|------------|-----------|--------|---------|------|
| NGLY1_KO_1 | -         | -      | -       | -    |
| NGLY1_1    | 66.1      | -0.085 | 0       | 0.74 |
| NGLY1_KO_2 | -         | -0.22  | 0.81    | 0.66 |
| NGLY1_2    | -         | -0.45  | 0.62    | 0.79 |

Supplement: Supplementary file 8226 [file 1]

IPI00013389.5|PCGF1

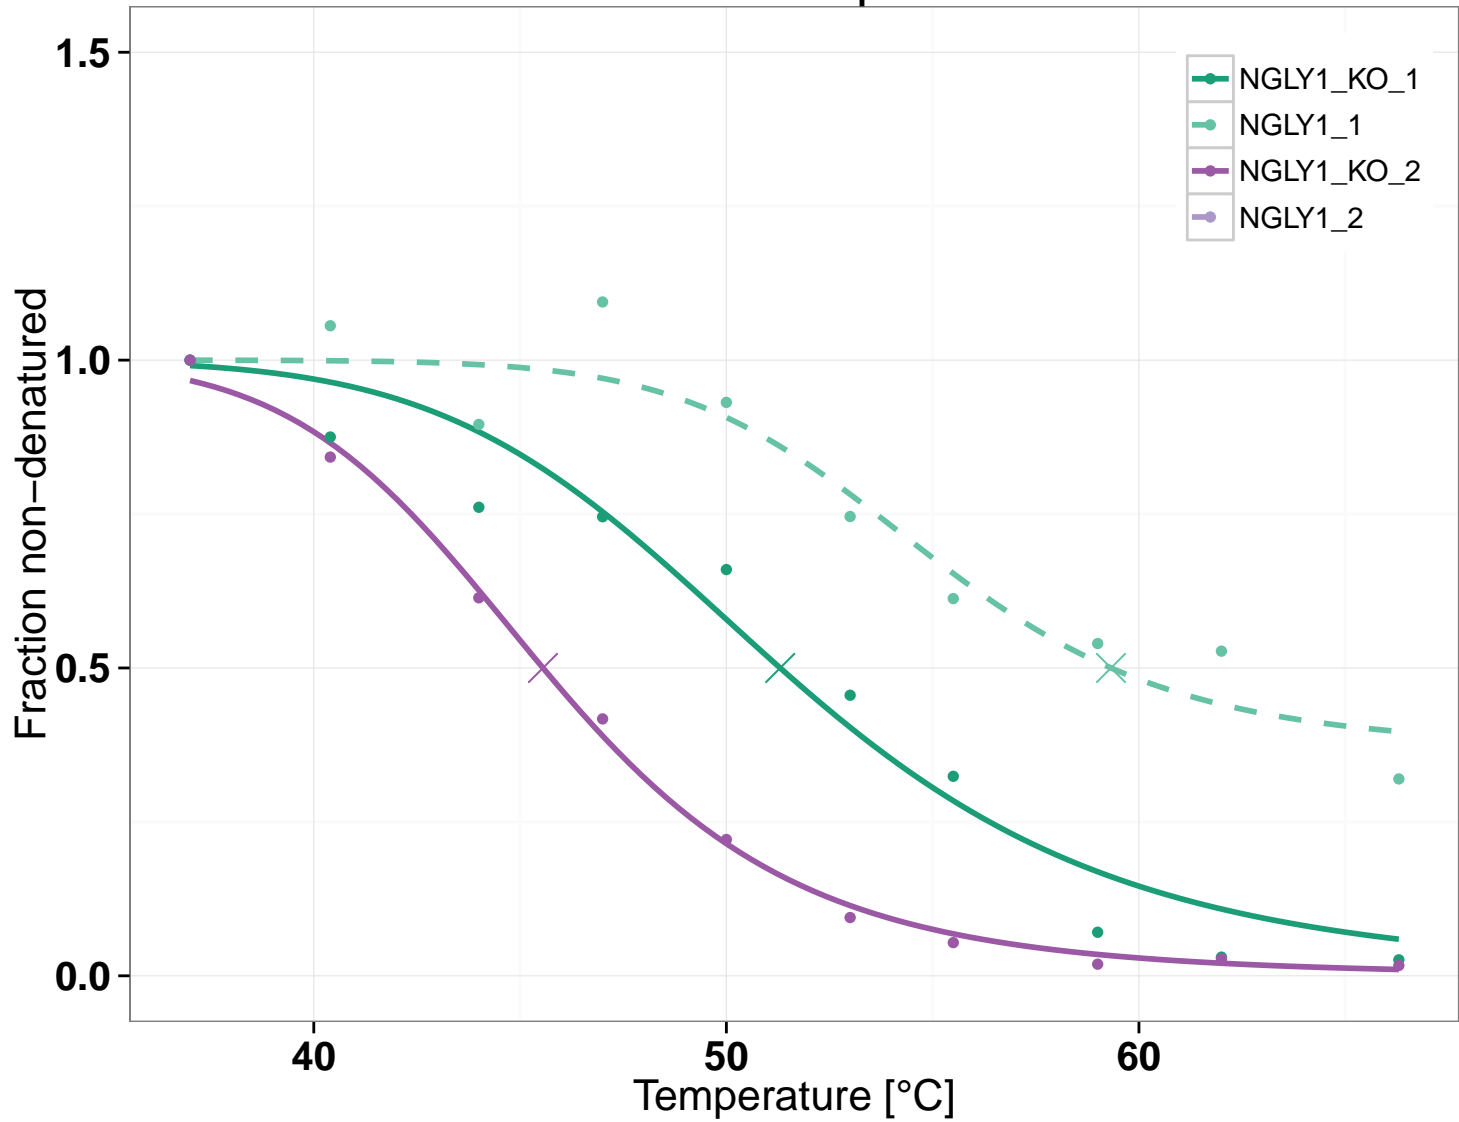

|            | meltPoint | slope  | plateau | R2   |
|------------|-----------|--------|---------|------|
| NGLY1_KO_1 | 51.3      | -0.061 | 0       | 0.96 |
| NGLY1_1    | 59.32     | -0.052 | 0.37    | 0.93 |
| NGLY1_KO_2 | 45.56     | -0.082 | 0       | 1    |
| NGLY1_2    | -         | -      | -       | -    |

Supplement: Supplementary file 8227 [file 1]

IPI00009680.3|MRPL44

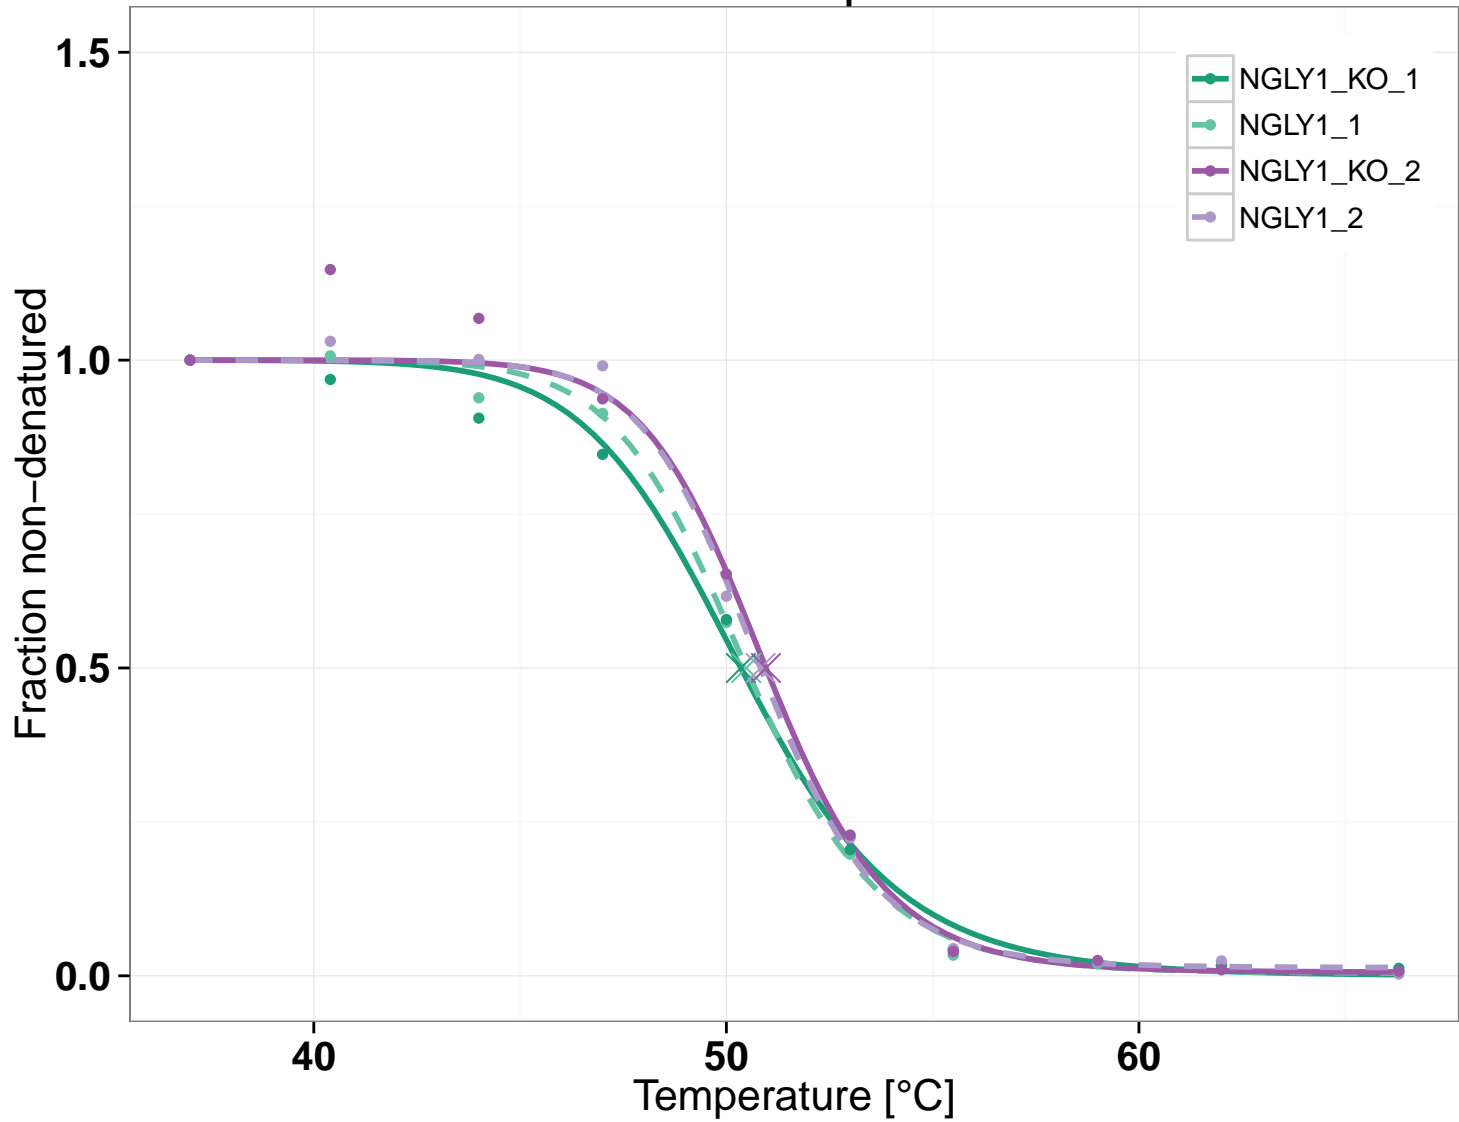

|            | meltPoint | slope | plateau | R2   |
|------------|-----------|-------|---------|------|
| NGLY1_KO_1 | 50.35     | -0.13 | 0       | 0.99 |
| NGLY1_1    | 50.48     | -0.15 | 0       | 1    |
| NGLY1_KO_2 | 50.96     | -0.17 | 0.01    | 0.99 |
| NGLY1_2    | 50.83     | -0.17 | 0.01    | 1    |

Supplement: Supplementary file 8228 [file 1]

# IPI00552413.2|CDK9

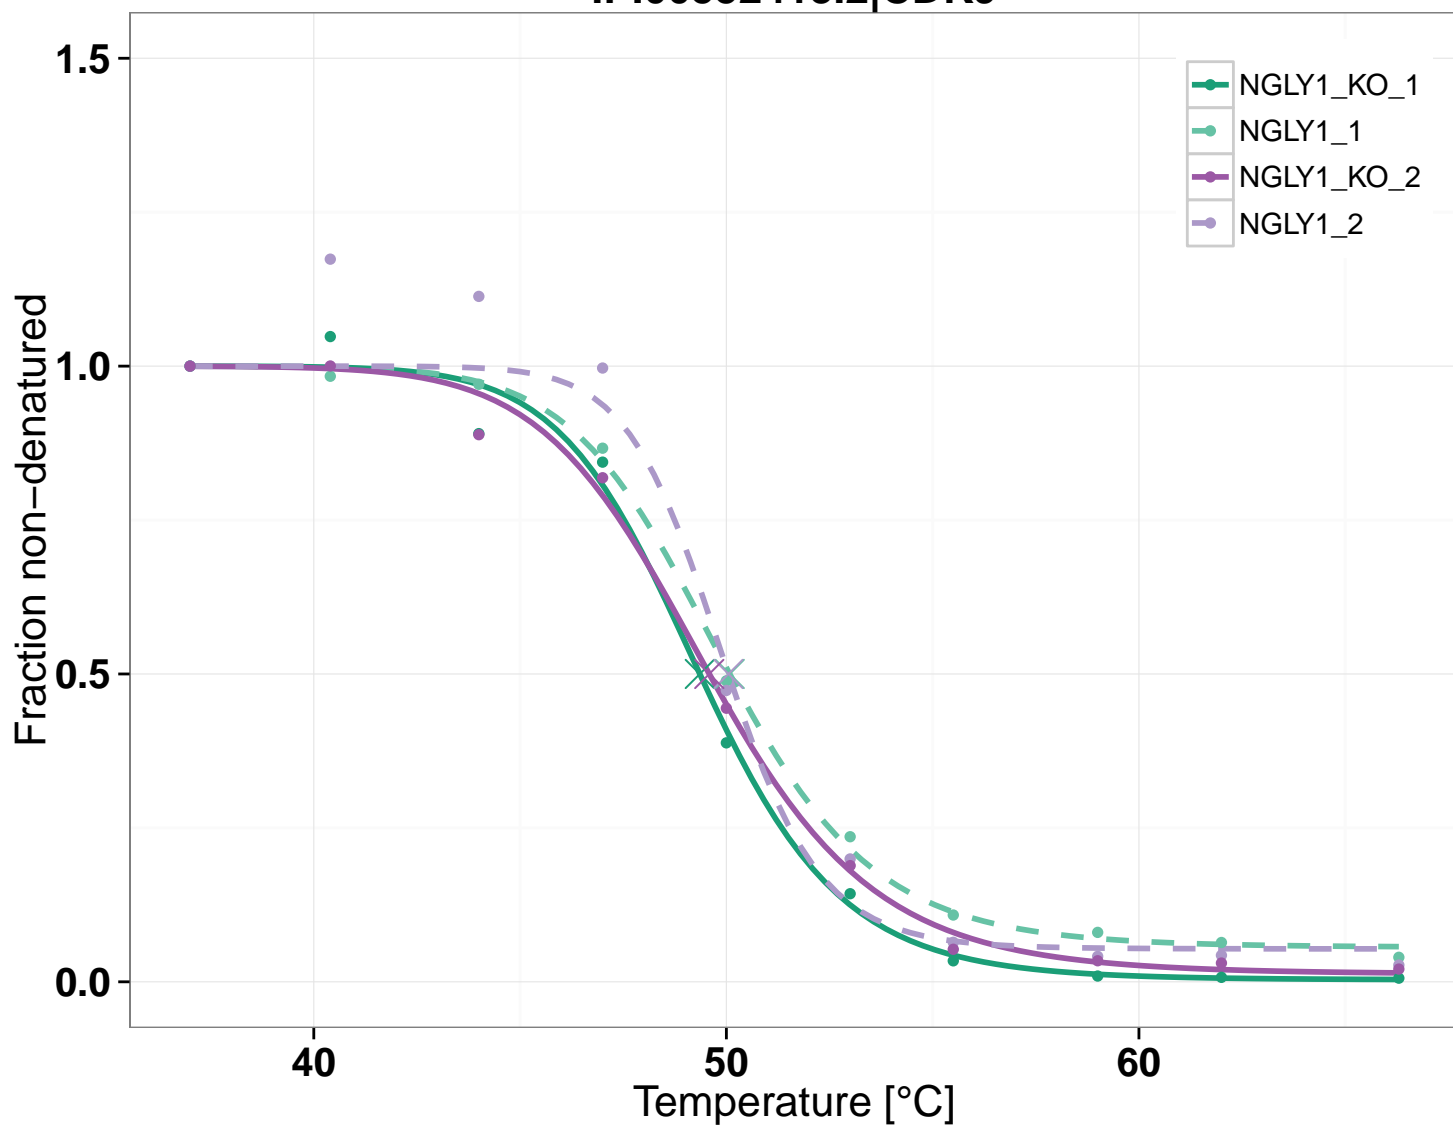

|            | meltPoint | slope | plateau | R2   |
|------------|-----------|-------|---------|------|
| NGLY1_KO_1 | 49.36     | -0.15 | 0       | 0.99 |
| NGLY1_1    | 50.08     | -0.13 | 0.06    | 1    |
| NGLY1_KO_2 | 49.59     | -0.12 | 0.01    | 1    |
| NGLY1_2    | 50.05     | -0.2  | 0.05    | 0.98 |

Supplement: Supplementary file 8229 [file 1]

IPI00410693.3|SERBP1

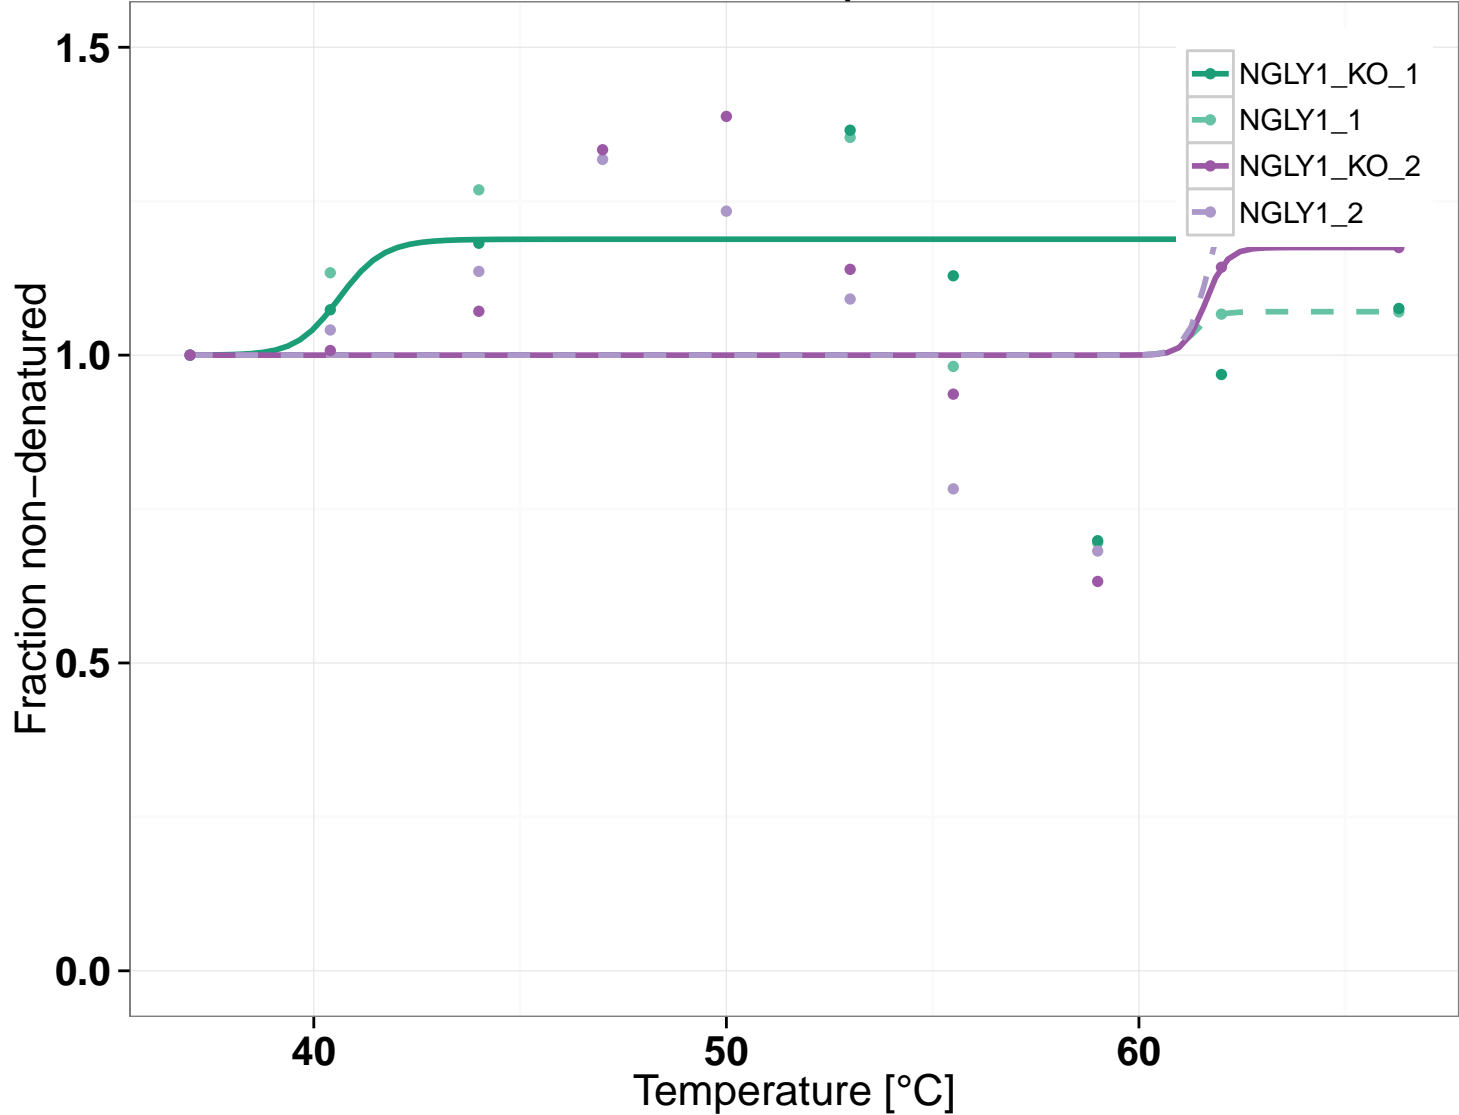

|            | meltPoint | slope | plateau | R2    |
|------------|-----------|-------|---------|-------|
| NGLY1_KO_1 | –         | 0.09  | 1.19    | 0.06  |
| NGLY1_1    | –         | 0.07  | 1.07    | –0.42 |
| NGLY1_KO_2 | –         | 0.17  | 1.17    | –0.04 |
| NGLY1_2    | –         | 0.27  | 1.28    | 0.16  |

Supplement: Supplementary file 8230 [file 1]

# IPI00020332.1|ARG2

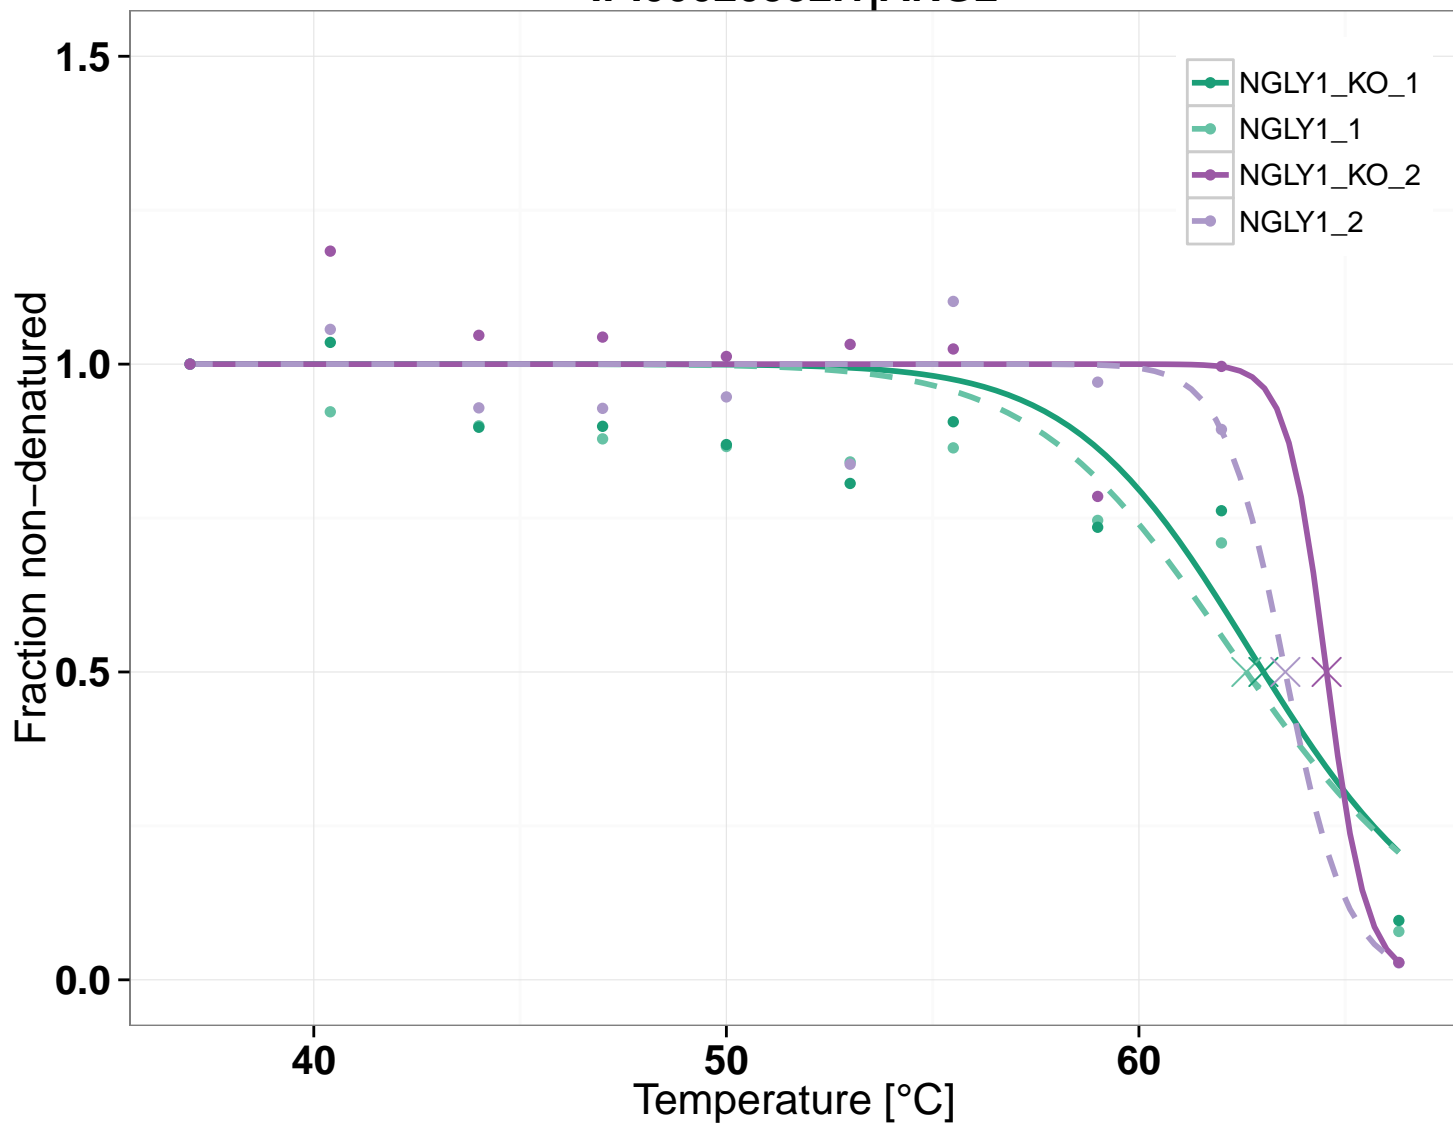

|            | meltPoint | slope  | plateau | R2   |
|------------|-----------|--------|---------|------|
| NGLY1_KO_1 | 63.02     | -0.11  | 0       | 0.79 |
| NGLY1_1    | 62.6      | -0.097 | 0       | 0.8  |
| NGLY1_KO_2 | 64.55     | -0.52  | 0       | 0.91 |
| NGLY1_2    | 63.55     | -0.33  | 0       | 0.94 |

Supplement: Supplementary file 8231 [file 1]

IPI00029722.4|KIF5A

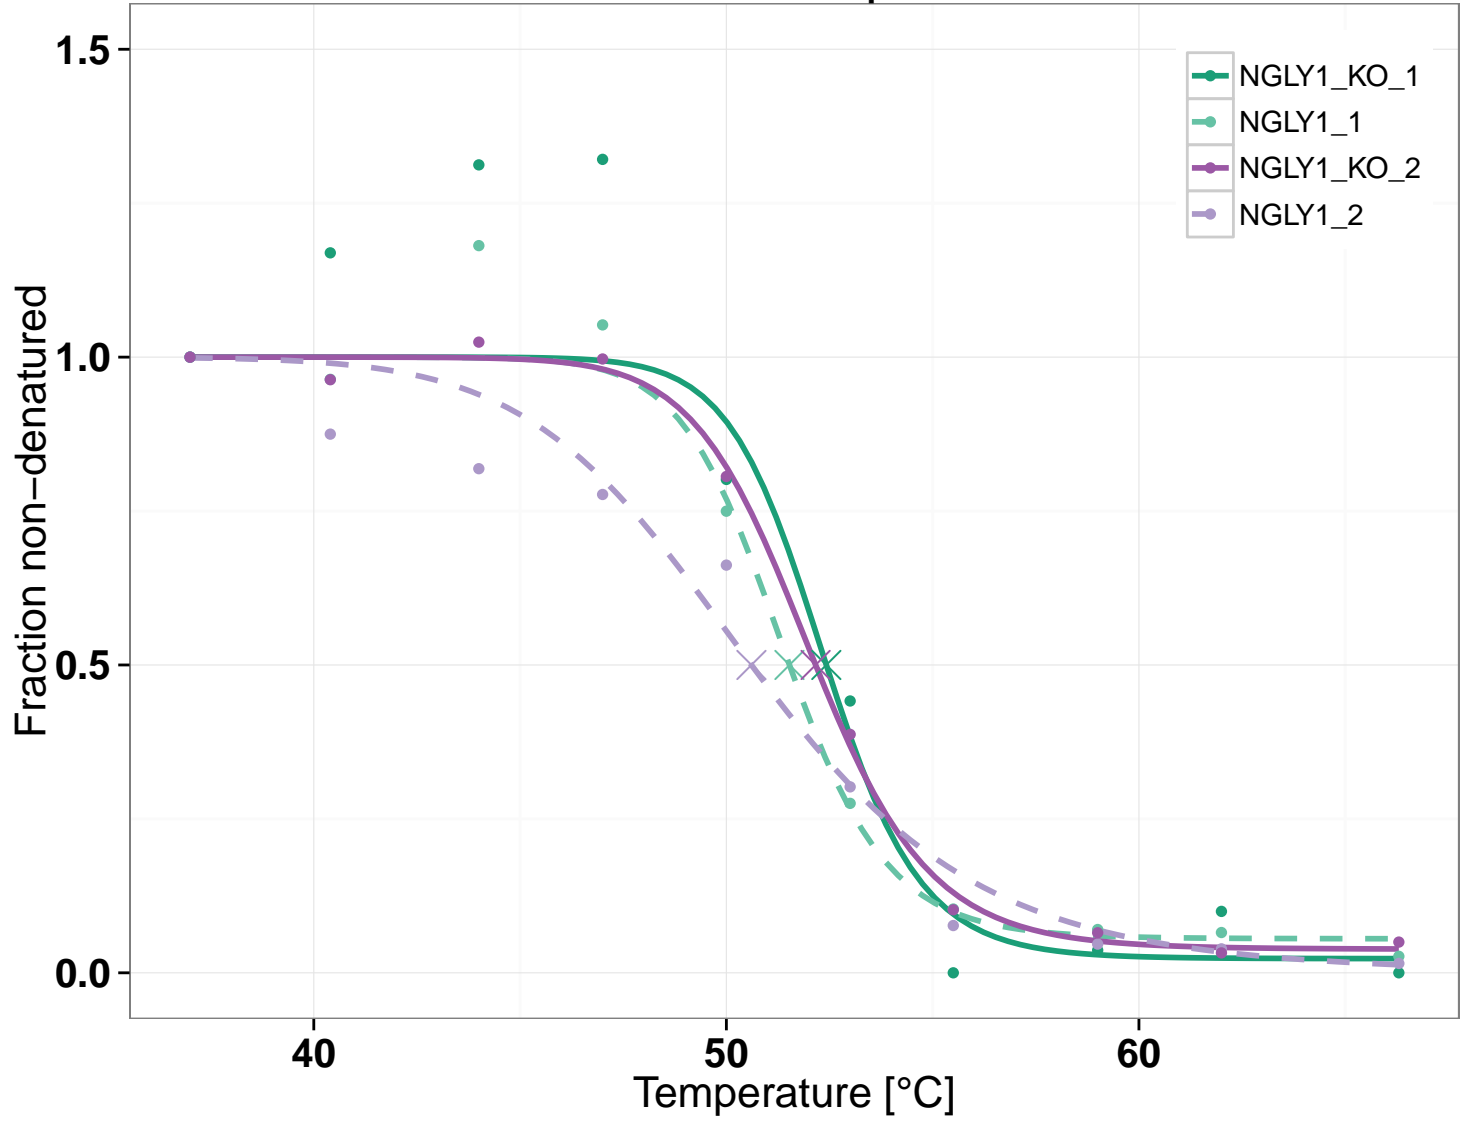

|            | meltPoint | slope  | plateau | R2   |
|------------|-----------|--------|---------|------|
| NGLY1_KO_1 | 52.42     | -0.21  | 0.02    | 0.91 |
| NGLY1_1    | 51.53     | -0.19  | 0.06    | 0.98 |
| NGLY1_KO_2 | 52.16     | -0.17  | 0.04    | 1    |
| NGLY1_2    | 50.61     | -0.091 | 0       | 0.97 |

Supplement: Supplementary file 8232 [file 1]

IPI00329572.4|PAC SIN3

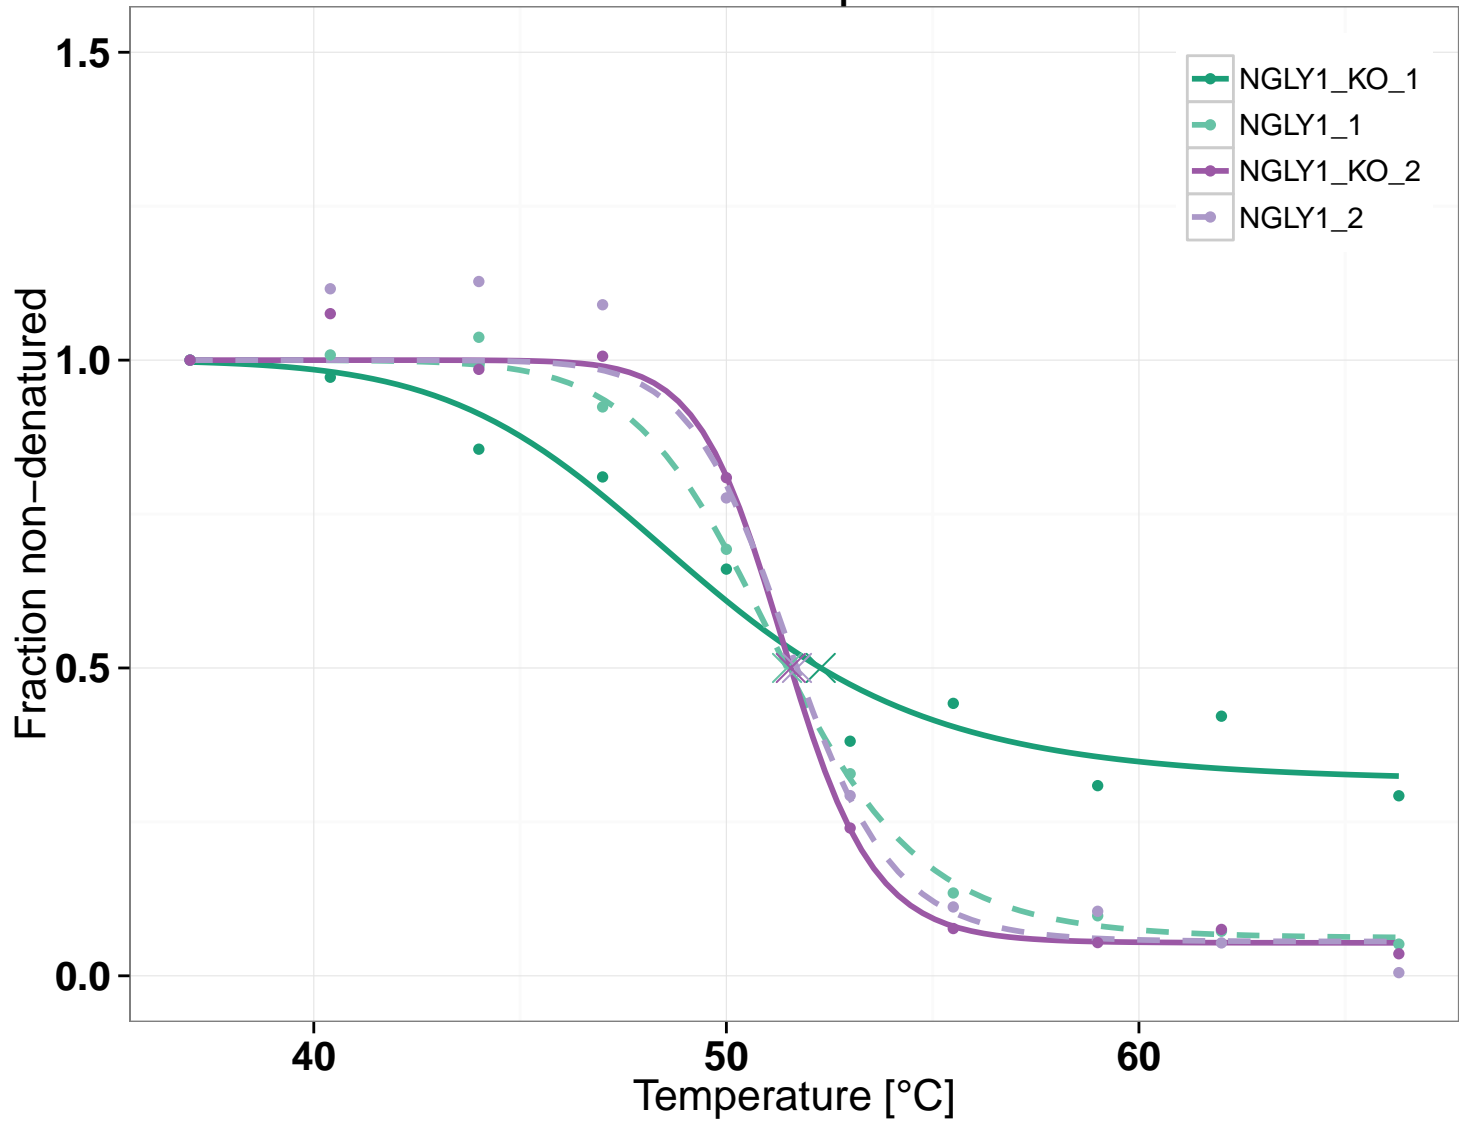

|            | meltPoint | slope  | plateau | R2   |
|------------|-----------|--------|---------|------|
| NGLY1_KO_1 | 52.29     | -0.058 | 0.31    | 0.96 |
| NGLY1_1    | 51.47     | -0.13  | 0.06    | 1    |
| NGLY1_KO_2 | 51.56     | -0.22  | 0.05    | 1    |
| NGLY1_2    | 51.71     | -0.19  | 0.06    | 0.98 |

Supplement: Supplementary file 8233 [file 1]

IPI00873470.1|KPNA5

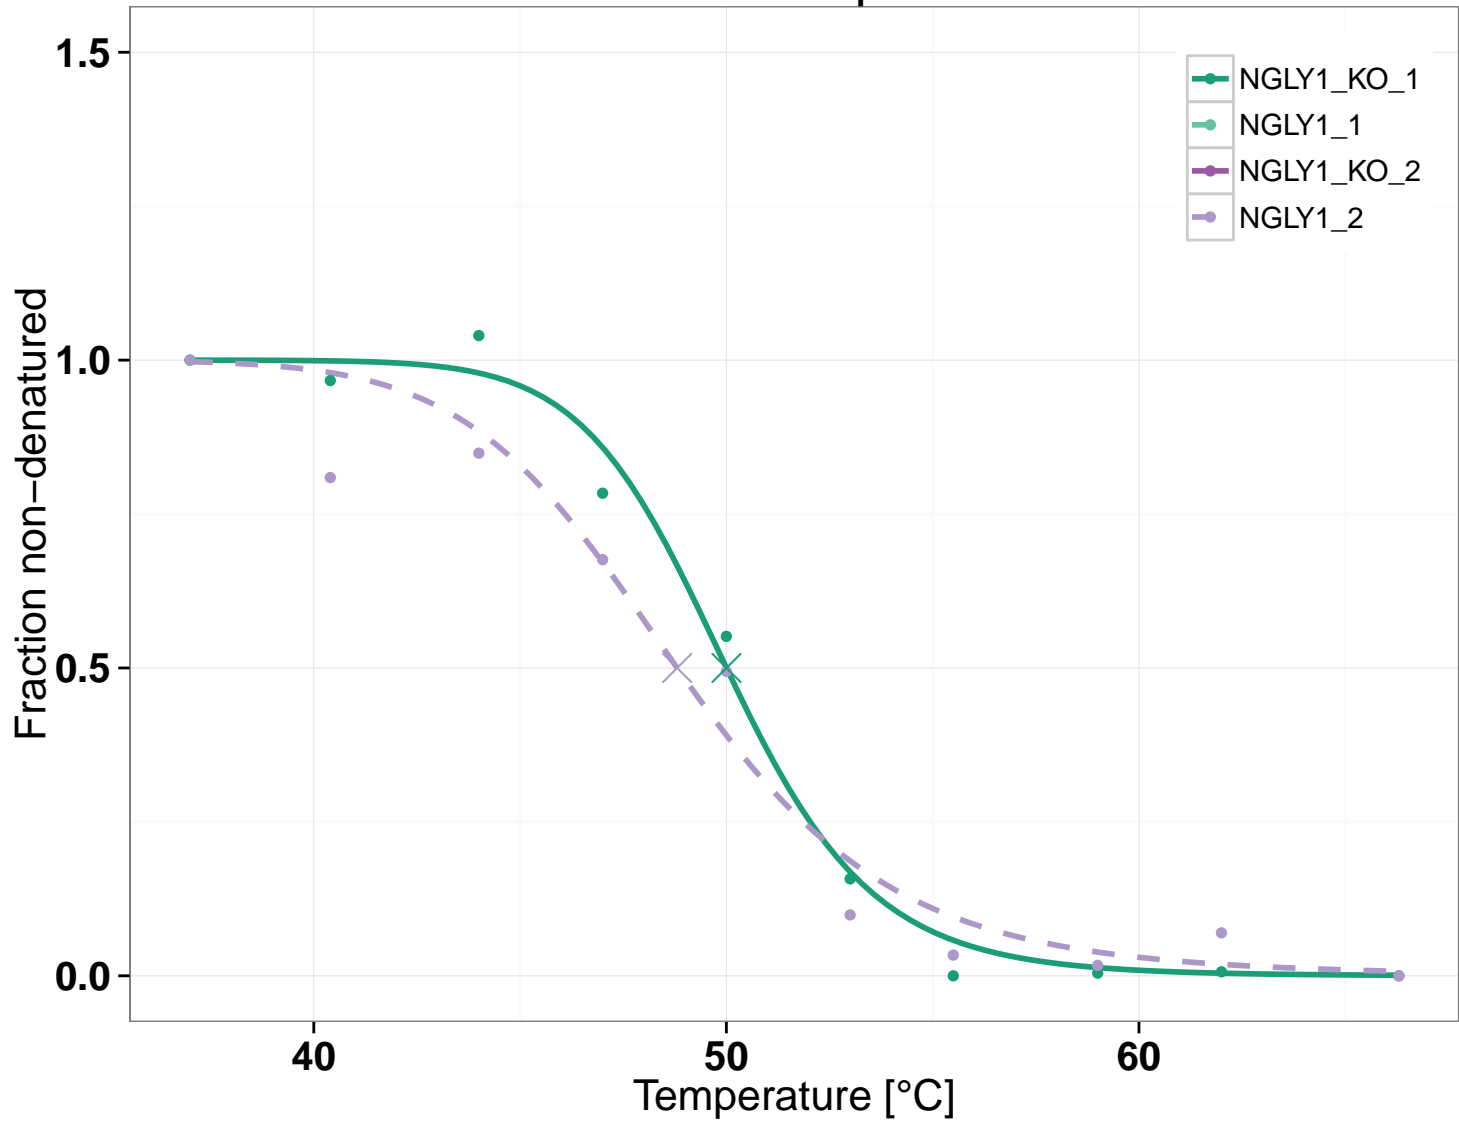

|            | meltPoint | slope  | plateau | R2   |
|------------|-----------|--------|---------|------|
| NGLY1_KO_1 | 50        | -0.14  | 0       | 0.99 |
| NGLY1_1    | -         | -      | -       | -    |
| NGLY1_KO_2 | -         | -      | -       | -    |
| NGLY1_2    | 48.81     | -0.096 | 0       | 0.96 |

Supplement: Supplementary file 8234 [file 1]

IPI00009322.2|NEDD4

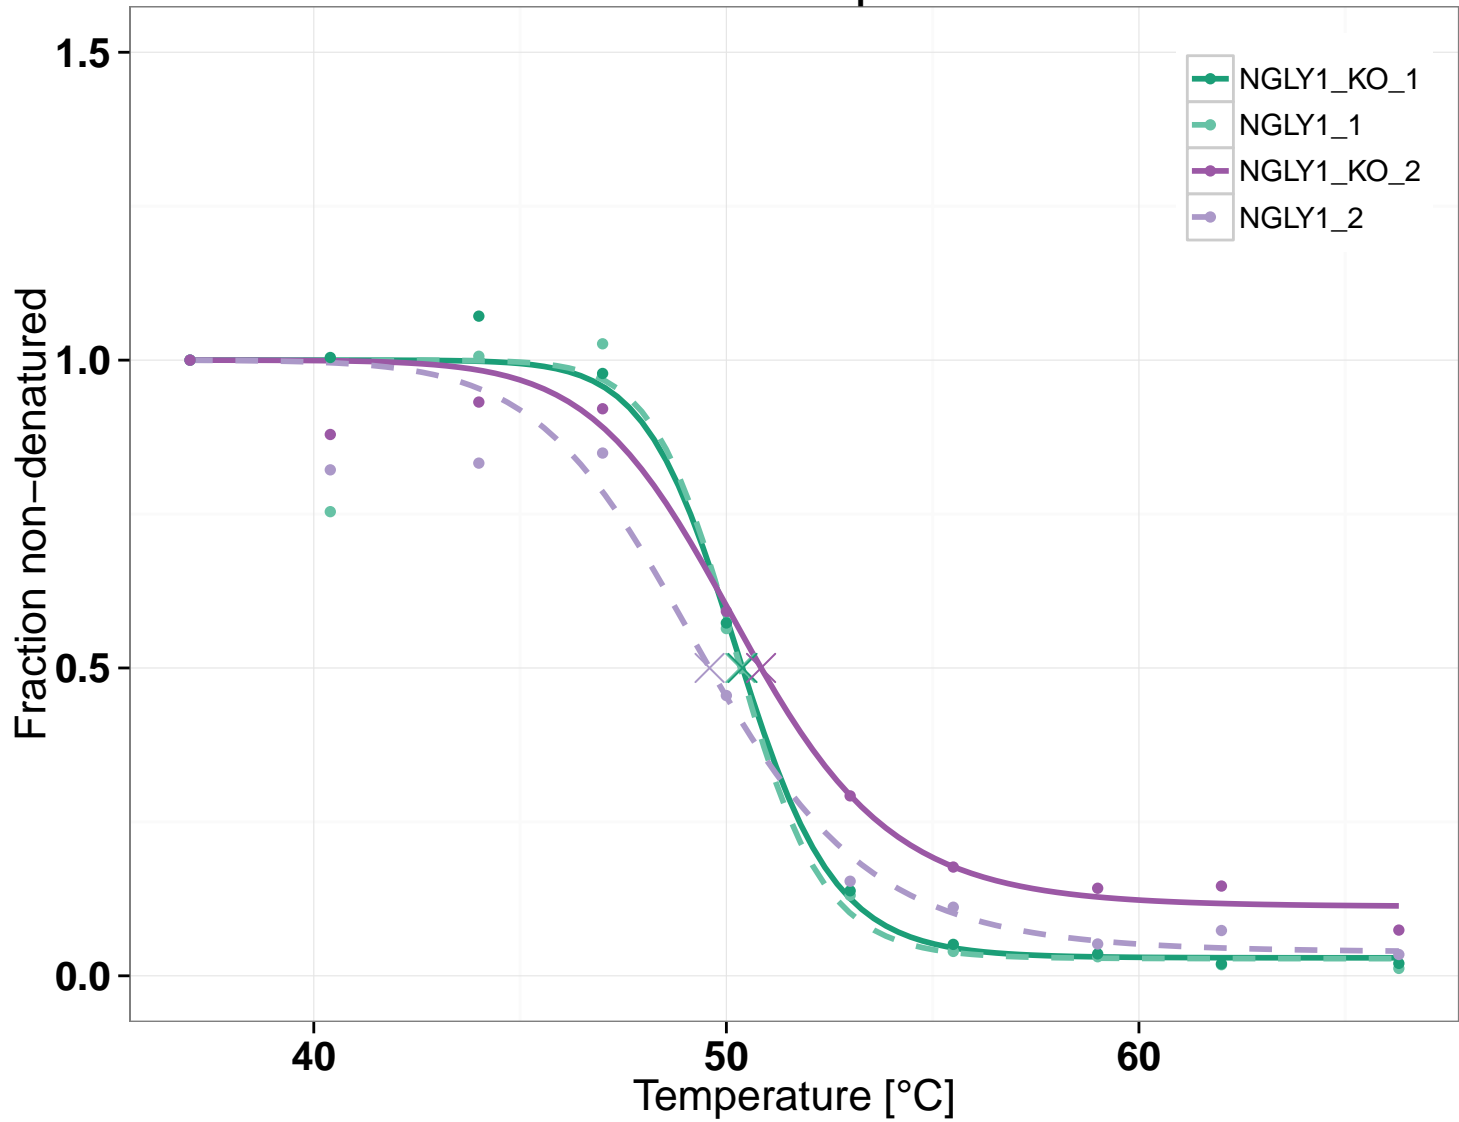

|            | meltPoint | slope | plateau | R2   |
|------------|-----------|-------|---------|------|
| NGLY1_KO_1 | 50.39     | -0.21 | 0.03    | 1    |
| NGLY1_1    | 50.34     | -0.24 | 0.03    | 0.97 |
| NGLY1_KO_2 | 50.84     | -0.12 | 0.11    | 0.98 |
| NGLY1_2    | 49.59     | -0.12 | 0.04    | 0.96 |

Supplement: Supplementary file 8235 [file 1]

# IPI00028004.2|PSMB3

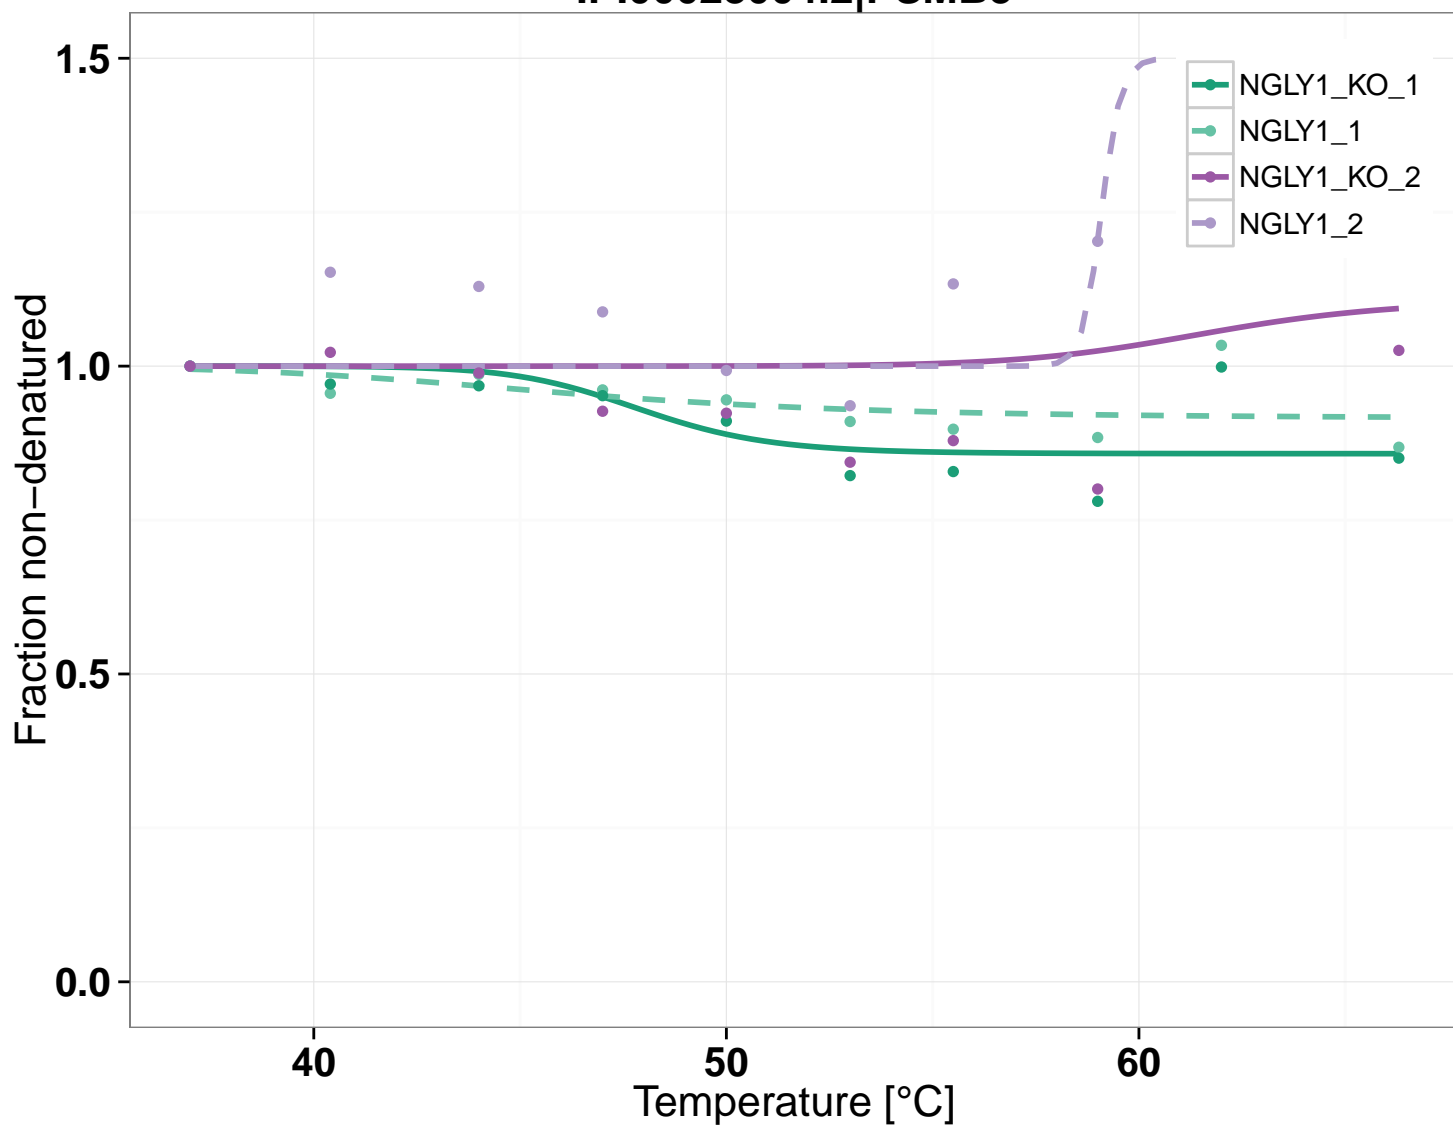

|            | meltPoint | slope   | plateau | R2   |
|------------|-----------|---------|---------|------|
| NGLY1_KO_1 | –         | –0.023  | 0.86    | 0.49 |
| NGLY1_1    | –         | –0.0055 | 0.91    | 0.25 |
| NGLY1_KO_2 | –         | 0.012   | 1.11    | 0.02 |
| NGLY1_2    | –         | 0.53    | 1.5     | 0.76 |

Supplement: Supplementary file 8236 [file 1]
