# Supplementary material (part 83 of 85)
Source: publisher figshare collection journal article supplement (https://gsajournals.figshare.com/articles/dataset/_/12014913)

IPI00010290.2|FABP1

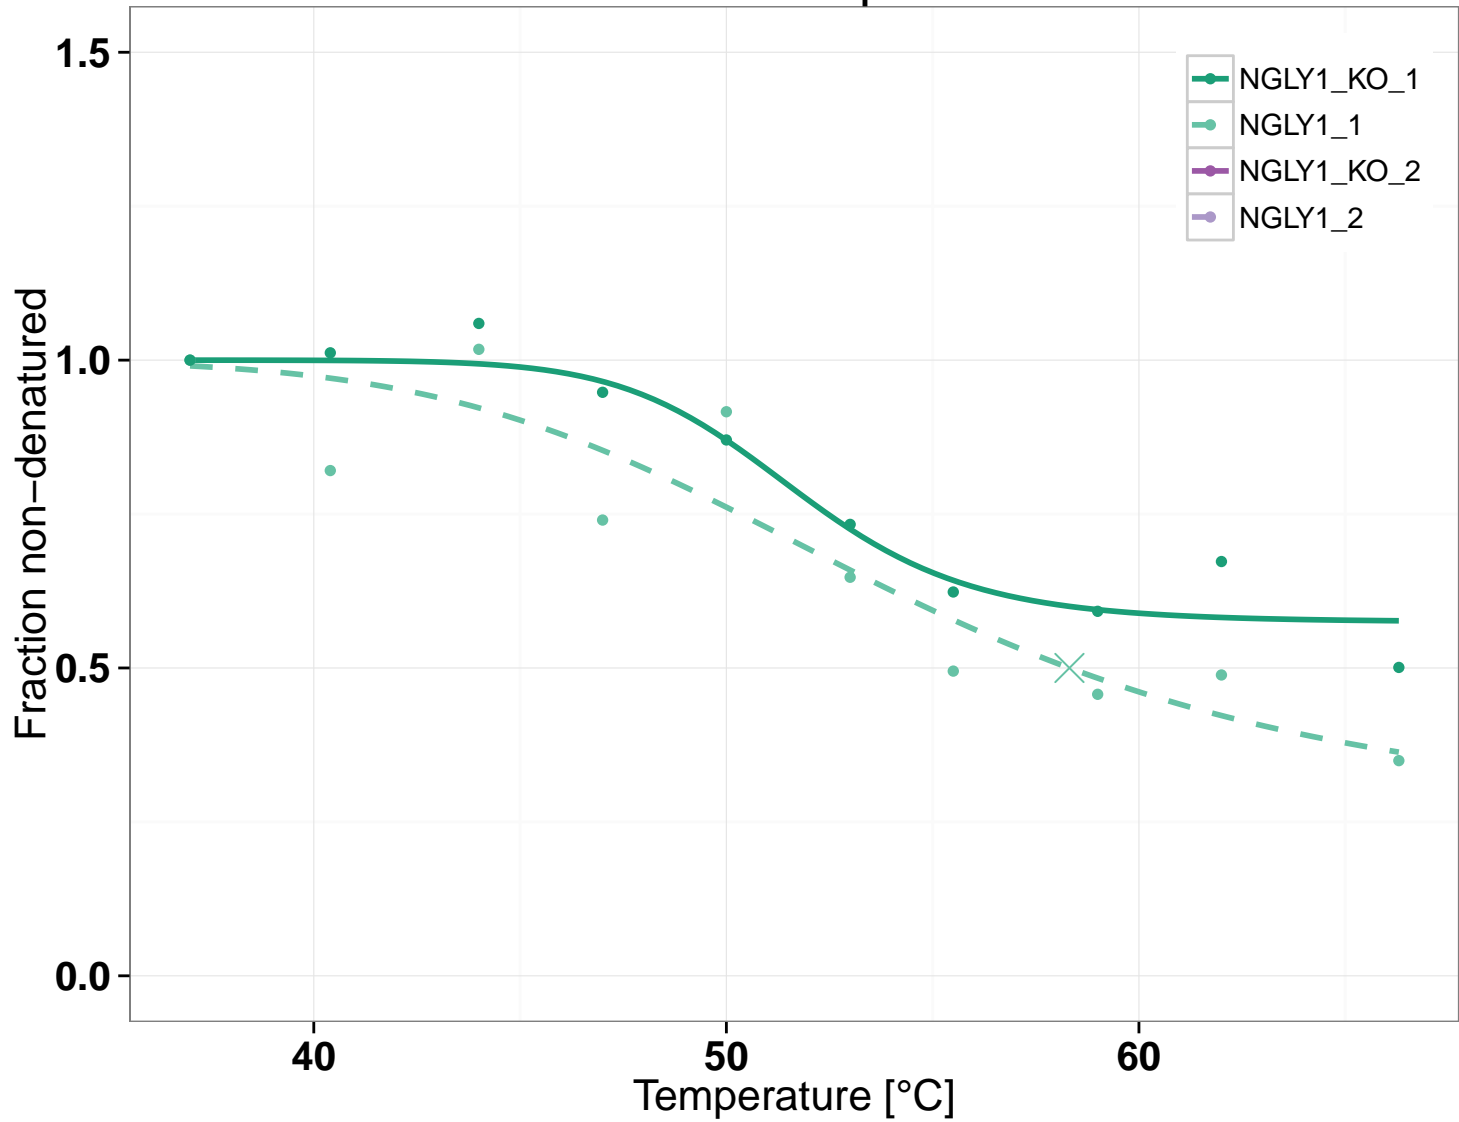

|            | meltPoint | slope  | plateau | R2   |
|------------|-----------|--------|---------|------|
| NGLY1_KO_1 | -         | -0.05  | 0.57    | 0.95 |
| NGLY1_1    | 58.32     | -0.034 | 0.26    | 0.85 |
| NGLY1_KO_2 | -         | -      | -       | -    |
| NGLY1_2    | -         | -      | -       | -    |

Supplement: Supplementary file 8237 [file 1]

IPI00449361.1|DOK3

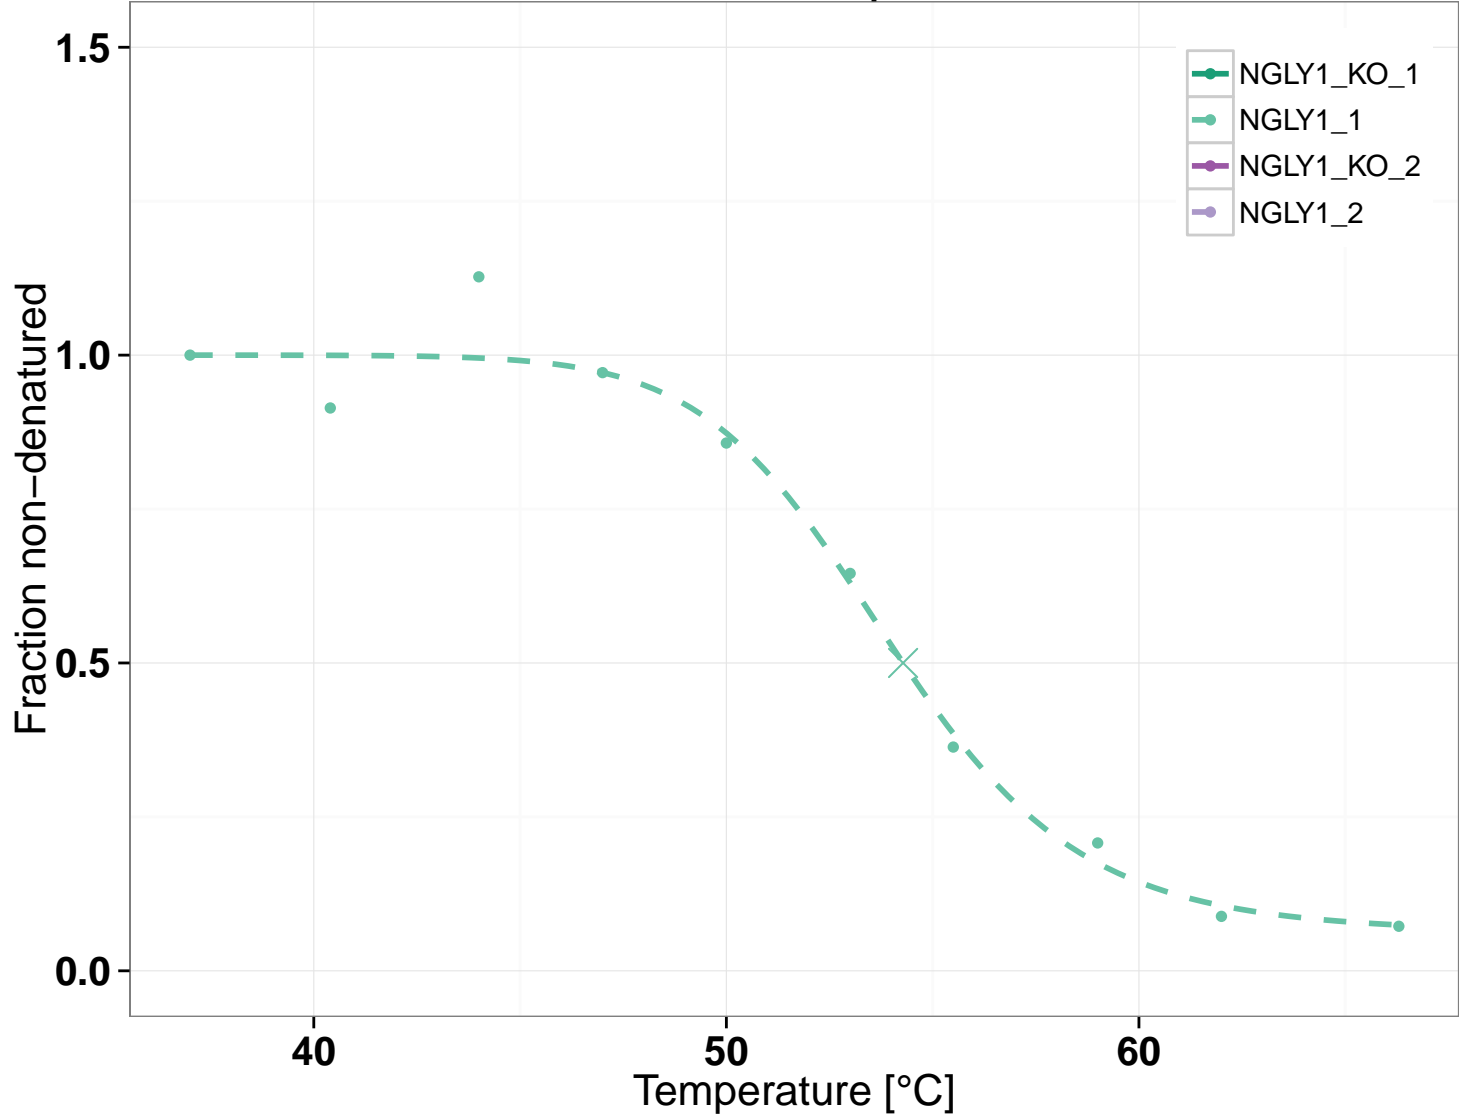

|            | meltPoint | slope | plateau | R2   |
|------------|-----------|-------|---------|------|
| NGLY1_KO_1 | —         | —     | —       | —    |
| NGLY1_1    | 54.28     | −0.1  | 0.06    | 0.98 |
| NGLY1_KO_2 | —         | —     | —       | —    |
| NGLY1_2    | —         | —     | —       | —    |

Supplement: Supplementary file 8238 [file 1]

# IPI00382985.2|RNASEH2C

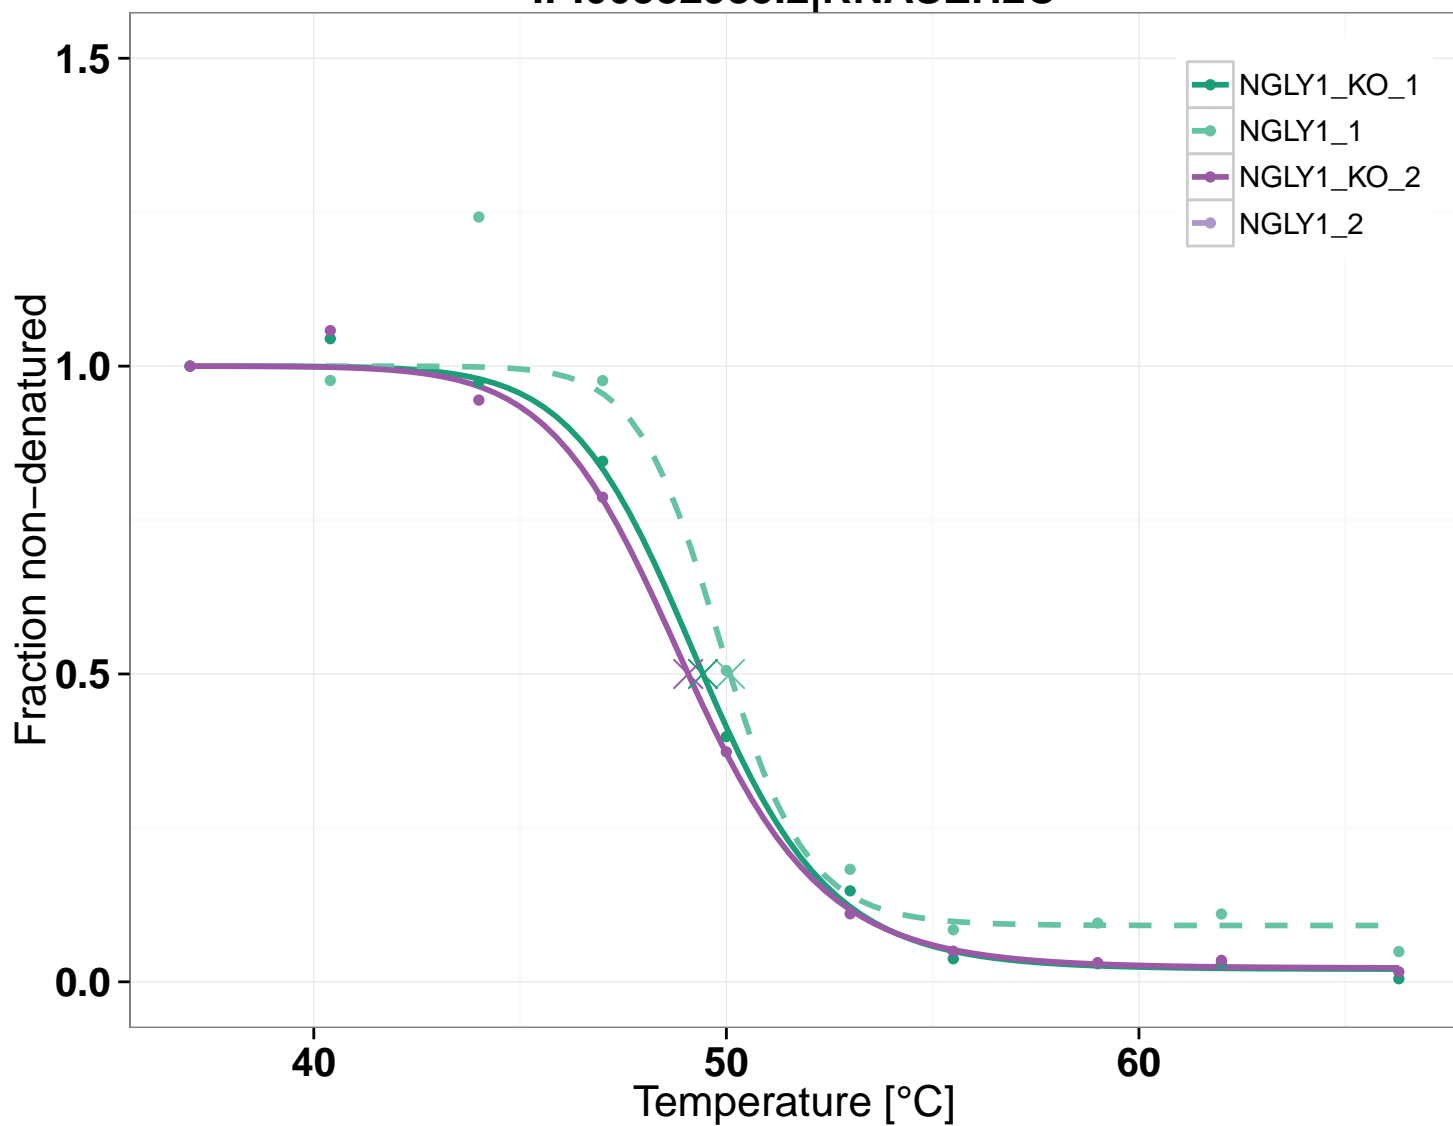

|            | meltPoint | slope | plateau | R2   |
|------------|-----------|-------|---------|------|
| NGLY1_KO_1 | 49.43     | -0.16 | 0.02    | 1    |
| NGLY1_1    | 50.09     | -0.22 | 0.09    | 0.97 |
| NGLY1_KO_2 | 49.08     | -0.15 | 0.02    | 1    |
| NGLY1_2    | -         | -     | -       | -    |

Supplement: Supplementary file 8239 [file 1]

IPI00004067.2|KIAA0256

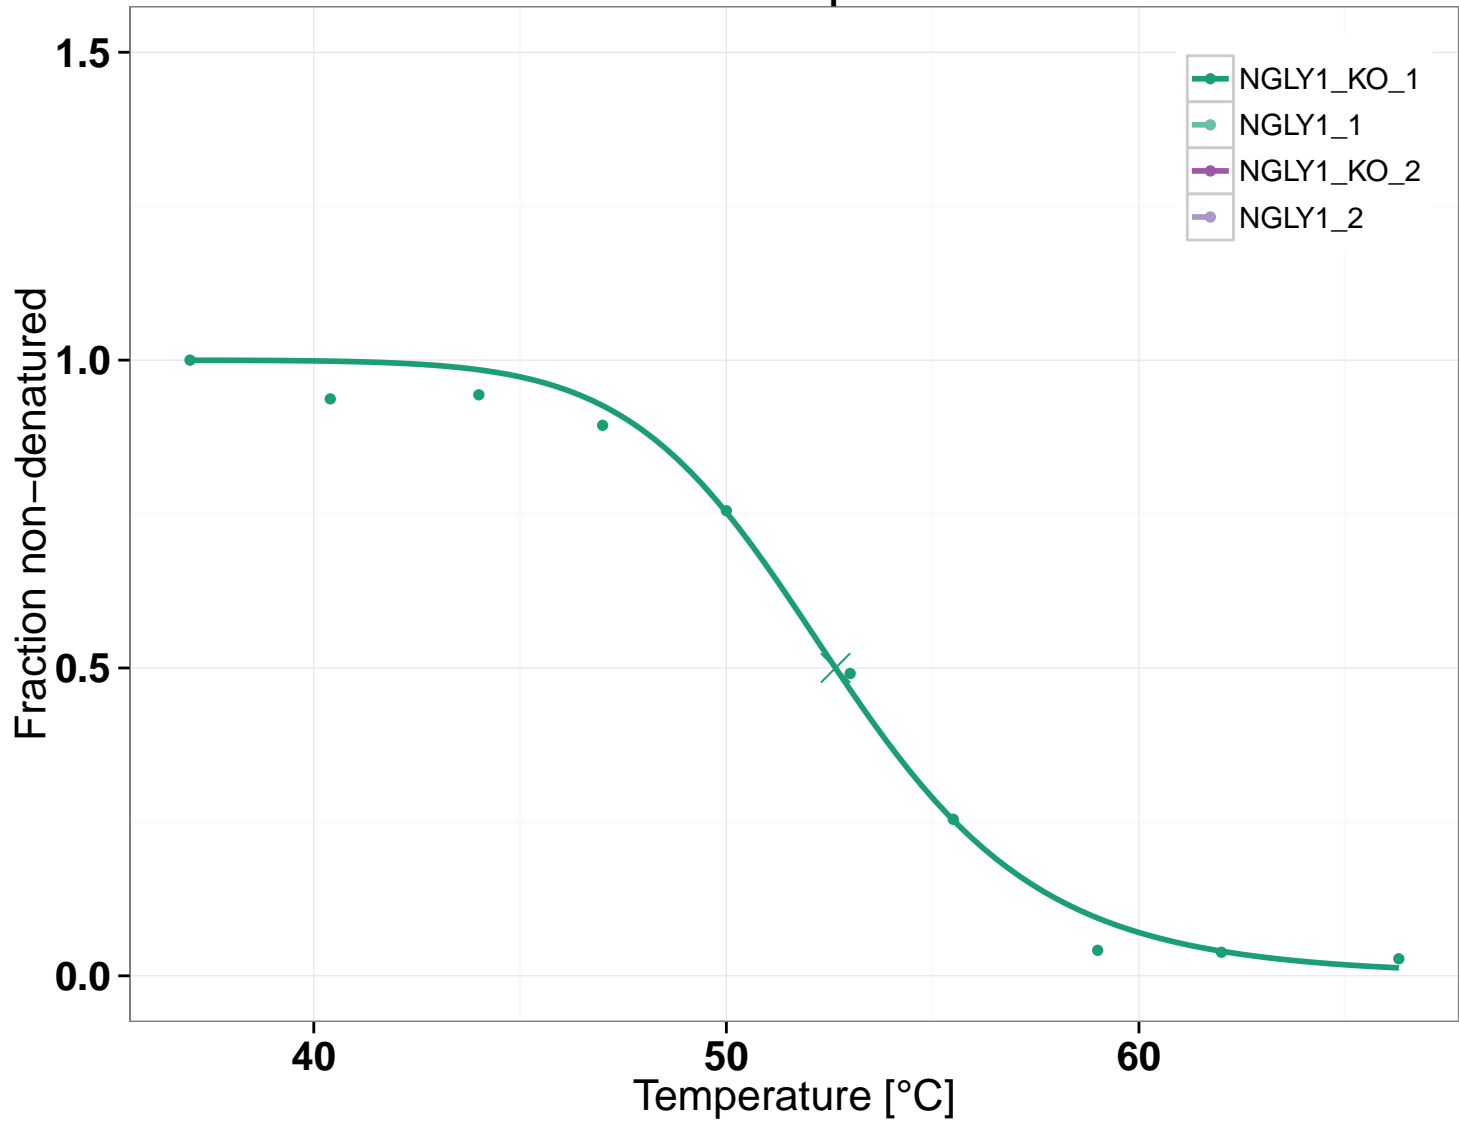

|            | meltPoint | slope | plateau | R2   |
|------------|-----------|-------|---------|------|
| NGLY1_KO_1 | 52.64     | -0.1  | 0       | 0.99 |
| NGLY1_1    | -         | -     | -       | -    |
| NGLY1_KO_2 | -         | -     | -       | -    |
| NGLY1_2    | -         | -     | -       | -    |

Supplement: Supplementary file 8240 [file 1]

IPI00016481.3|TXNL4B

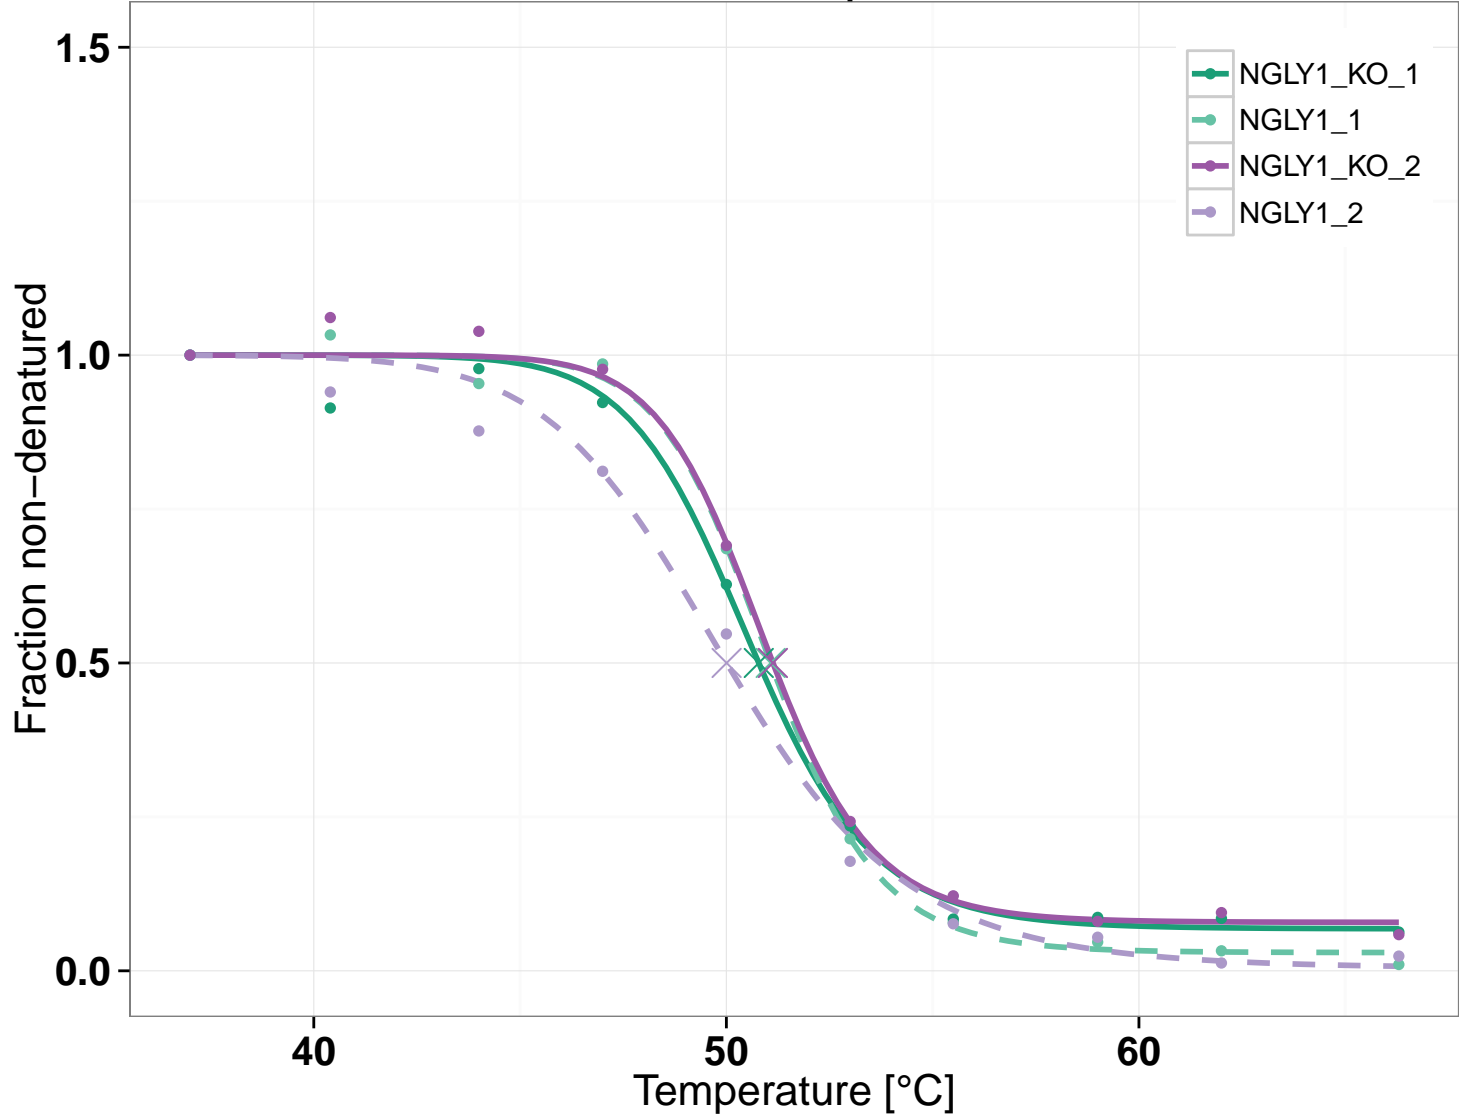

|            | meltPoint | slope | plateau | R2   |
|------------|-----------|-------|---------|------|
| NGLY1_KO_1 | 50.79     | -0.16 | 0.07    | 0.99 |
| NGLY1_1    | 51.07     | -0.18 | 0.03    | 1    |
| NGLY1_KO_2 | 51.13     | -0.18 | 0.08    | 1    |
| NGLY1_2    | 50.01     | -0.11 | 0       | 0.99 |

Supplement: Supplementary file 8241 [file 1]

IPI00395554.4|FOXP4

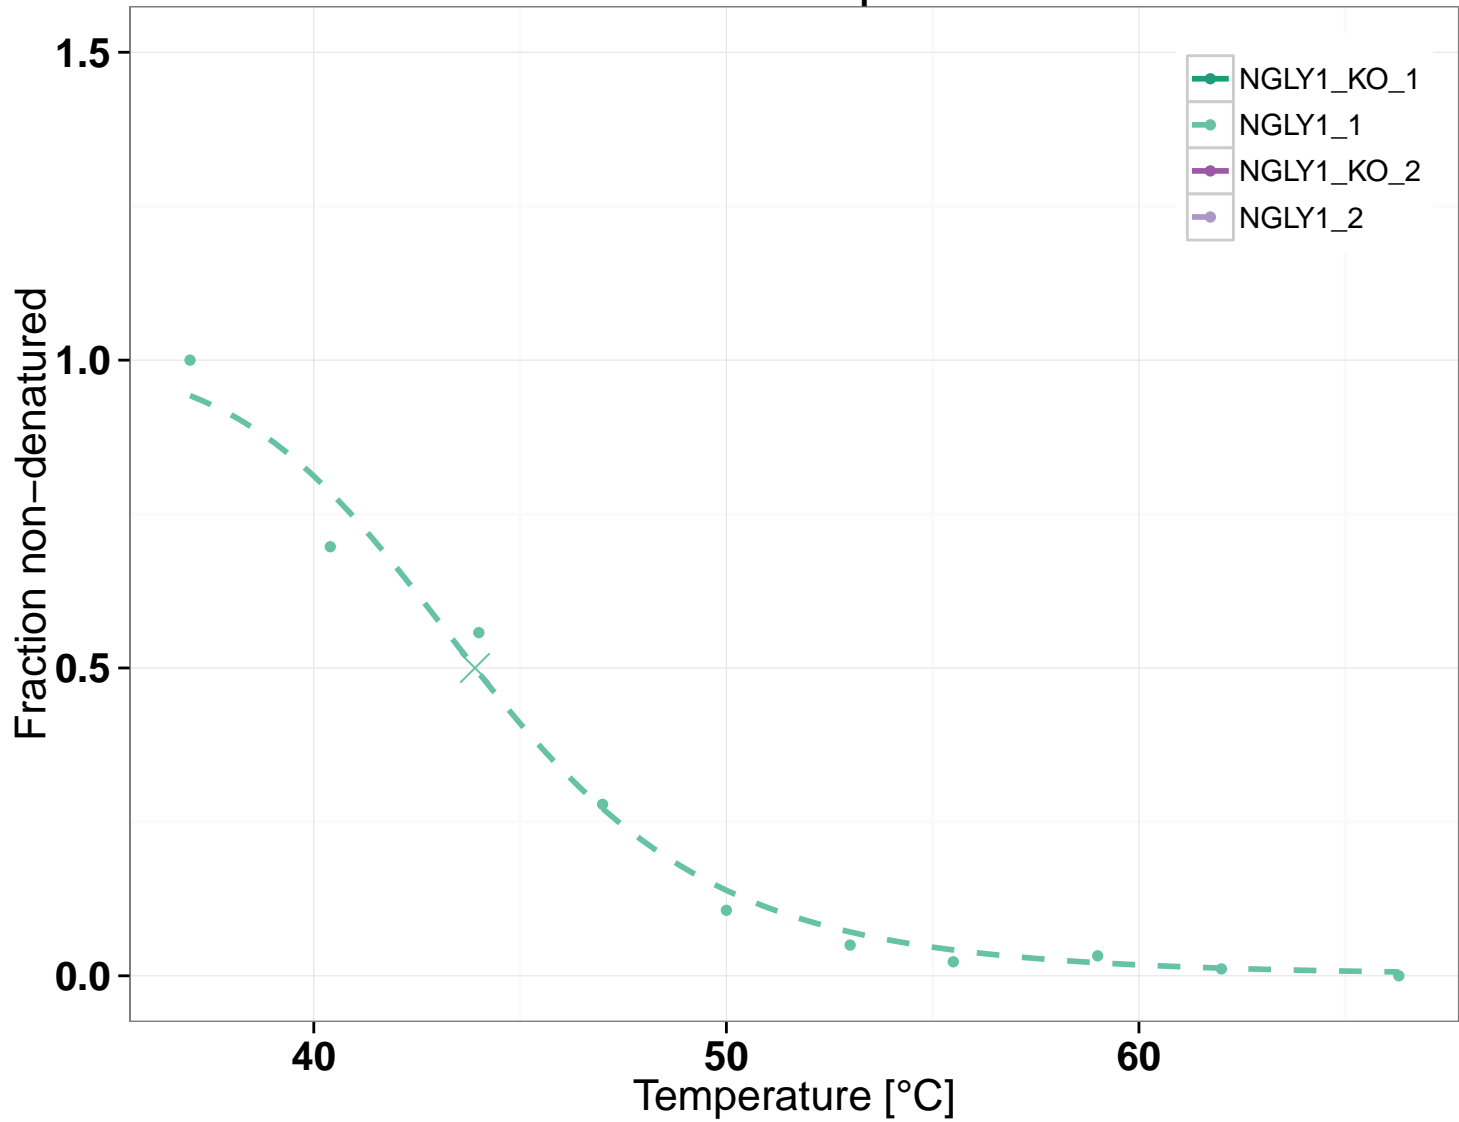

|            | meltPoint | slope  | plateau | R2   |
|------------|-----------|--------|---------|------|
| NGLY1_KO_1 | -         | -      | -       | -    |
| NGLY1_1    | 43.91     | -0.087 | 0       | 0.98 |
| NGLY1_KO_2 | -         | -      | -       | -    |
| NGLY1_2    | -         | -      | -       | -    |

Supplement: Supplementary file 8242 [file 1]

# IPI00295240.6|NFS1

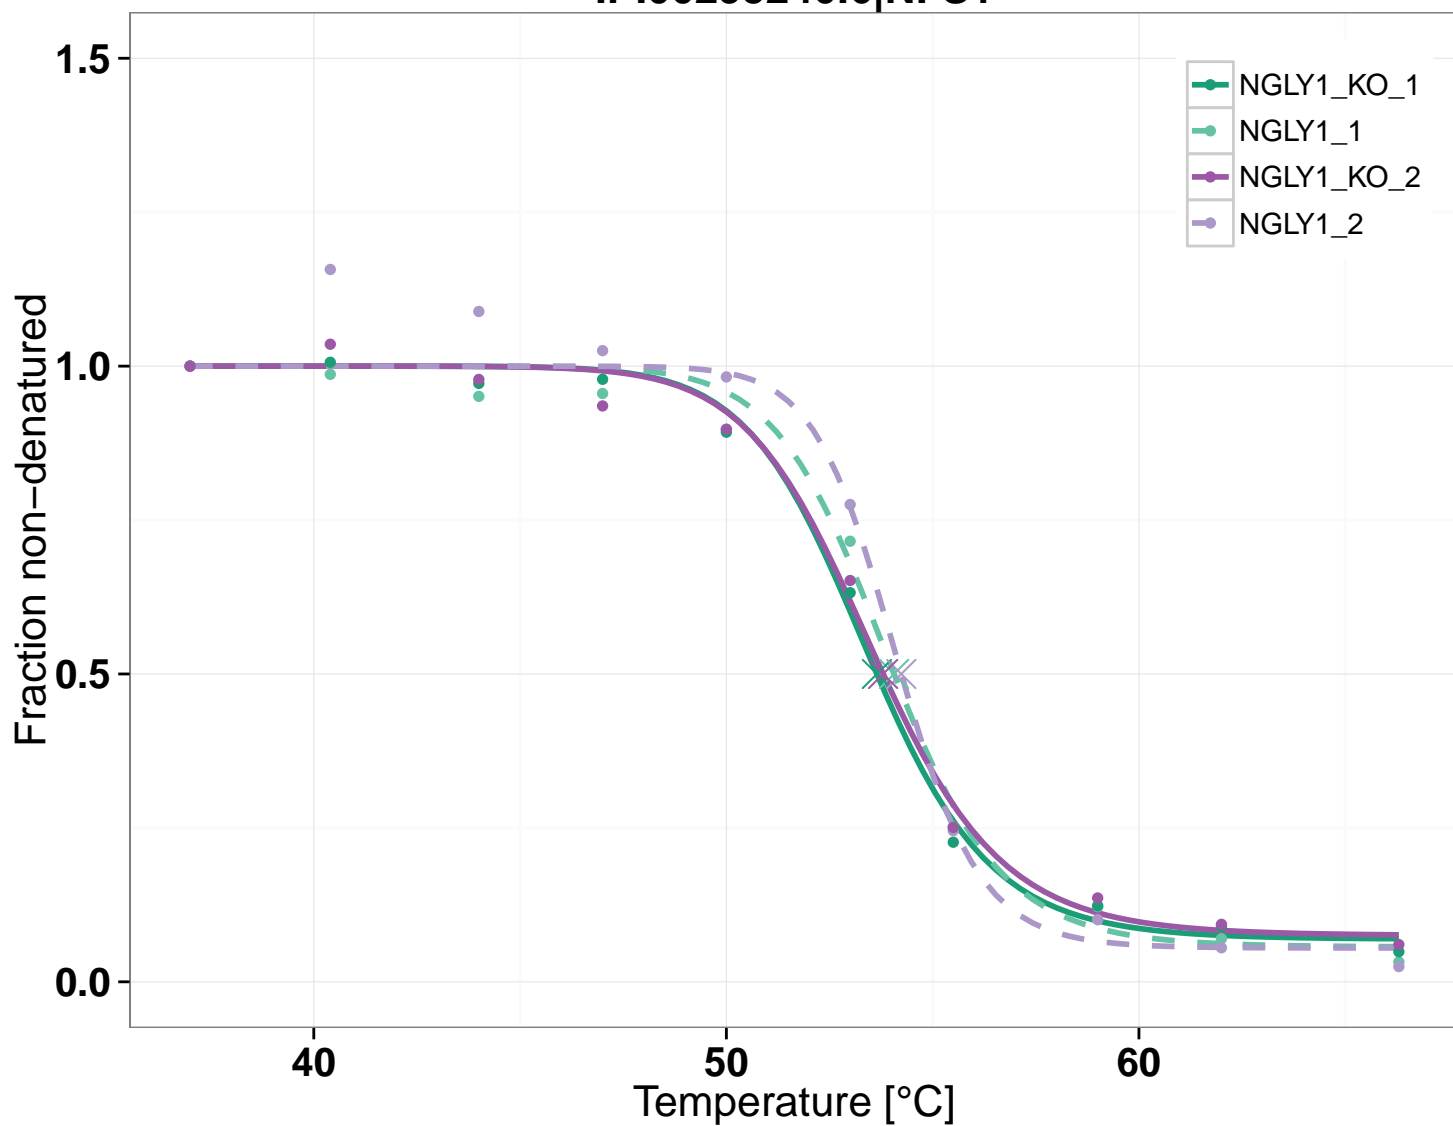

|            | meltPoint | slope | plateau | R2   |
|------------|-----------|-------|---------|------|
| NGLY1_KO_1 | 53.65     | -0.16 | 0.07    | 1    |
| NGLY1_1    | 54.06     | -0.17 | 0.06    | 0.99 |
| NGLY1_KO_2 | 53.8      | -0.15 | 0.08    | 0.99 |
| NGLY1_2    | 54.24     | -0.24 | 0.05    | 0.98 |

Supplement: Supplementary file 8243 [file 1]

IPI00741635.1|ANKRD34C

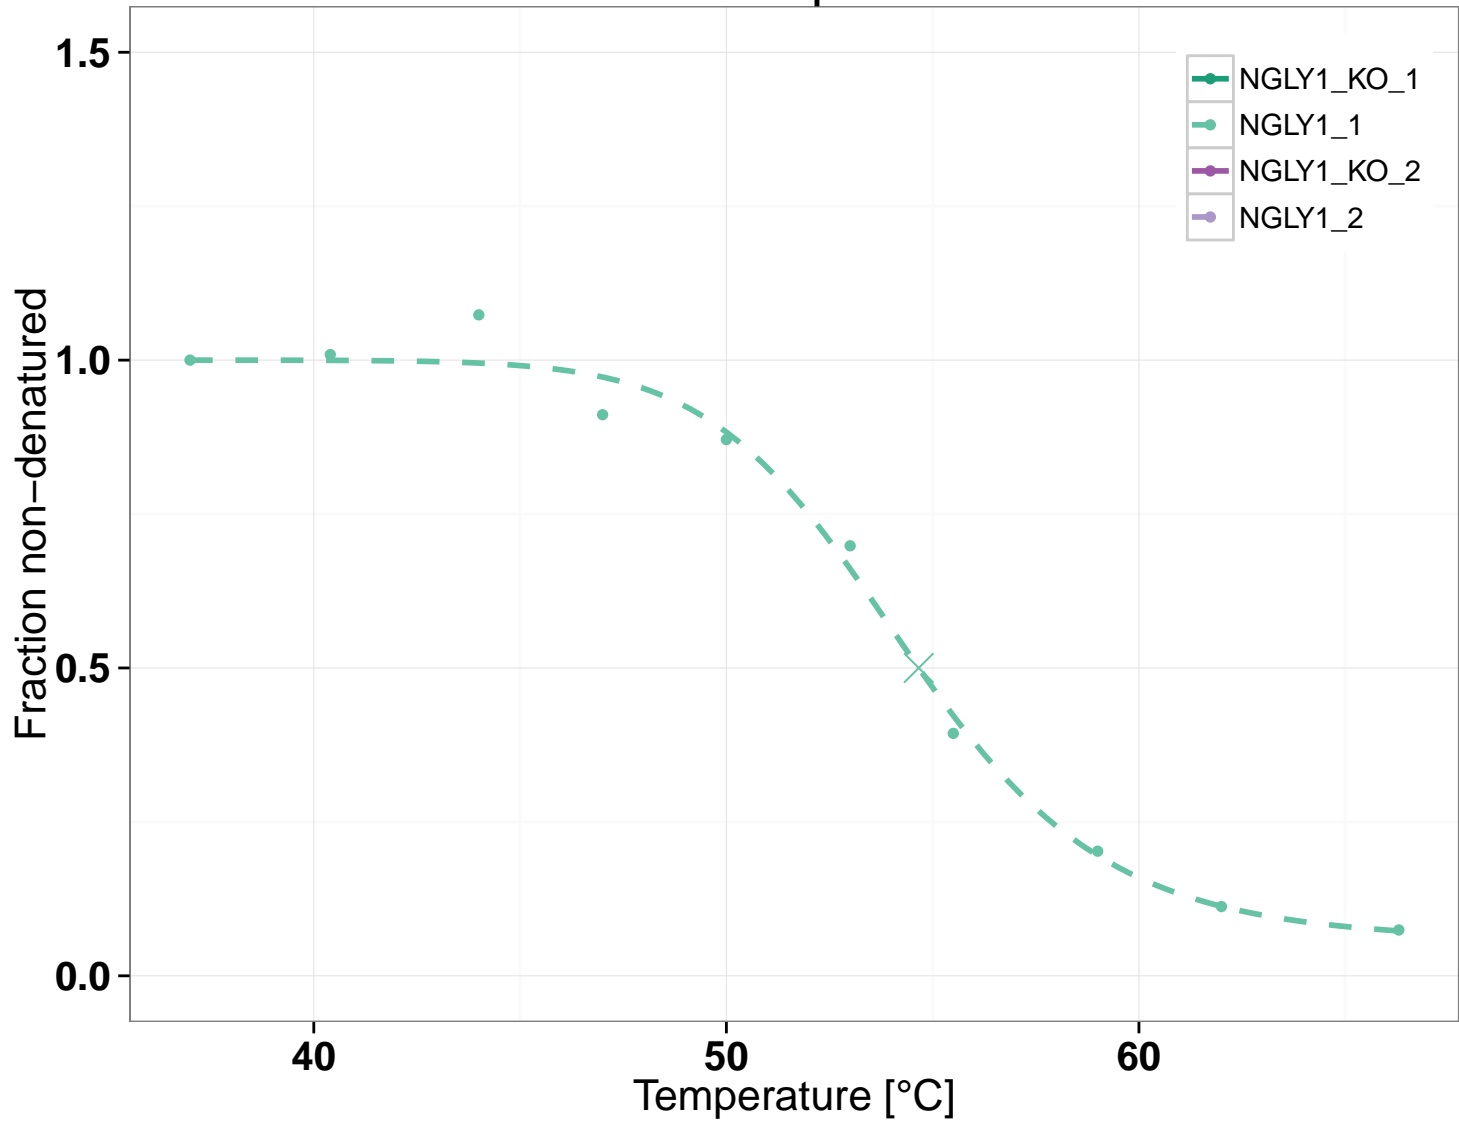

|            | meltPoint | slope  | plateau | R2   |
|------------|-----------|--------|---------|------|
| NGLY1_KO_1 | -         | -      | -       | -    |
| NGLY1_1    | 54.66     | -0.098 | 0.06    | 0.99 |
| NGLY1_KO_2 | -         | -      | -       | -    |
| NGLY1_2    | -         | -      | -       | -    |

Supplement: Supplementary file 8244 [file 1]

# IPI00915761.1|CLK1

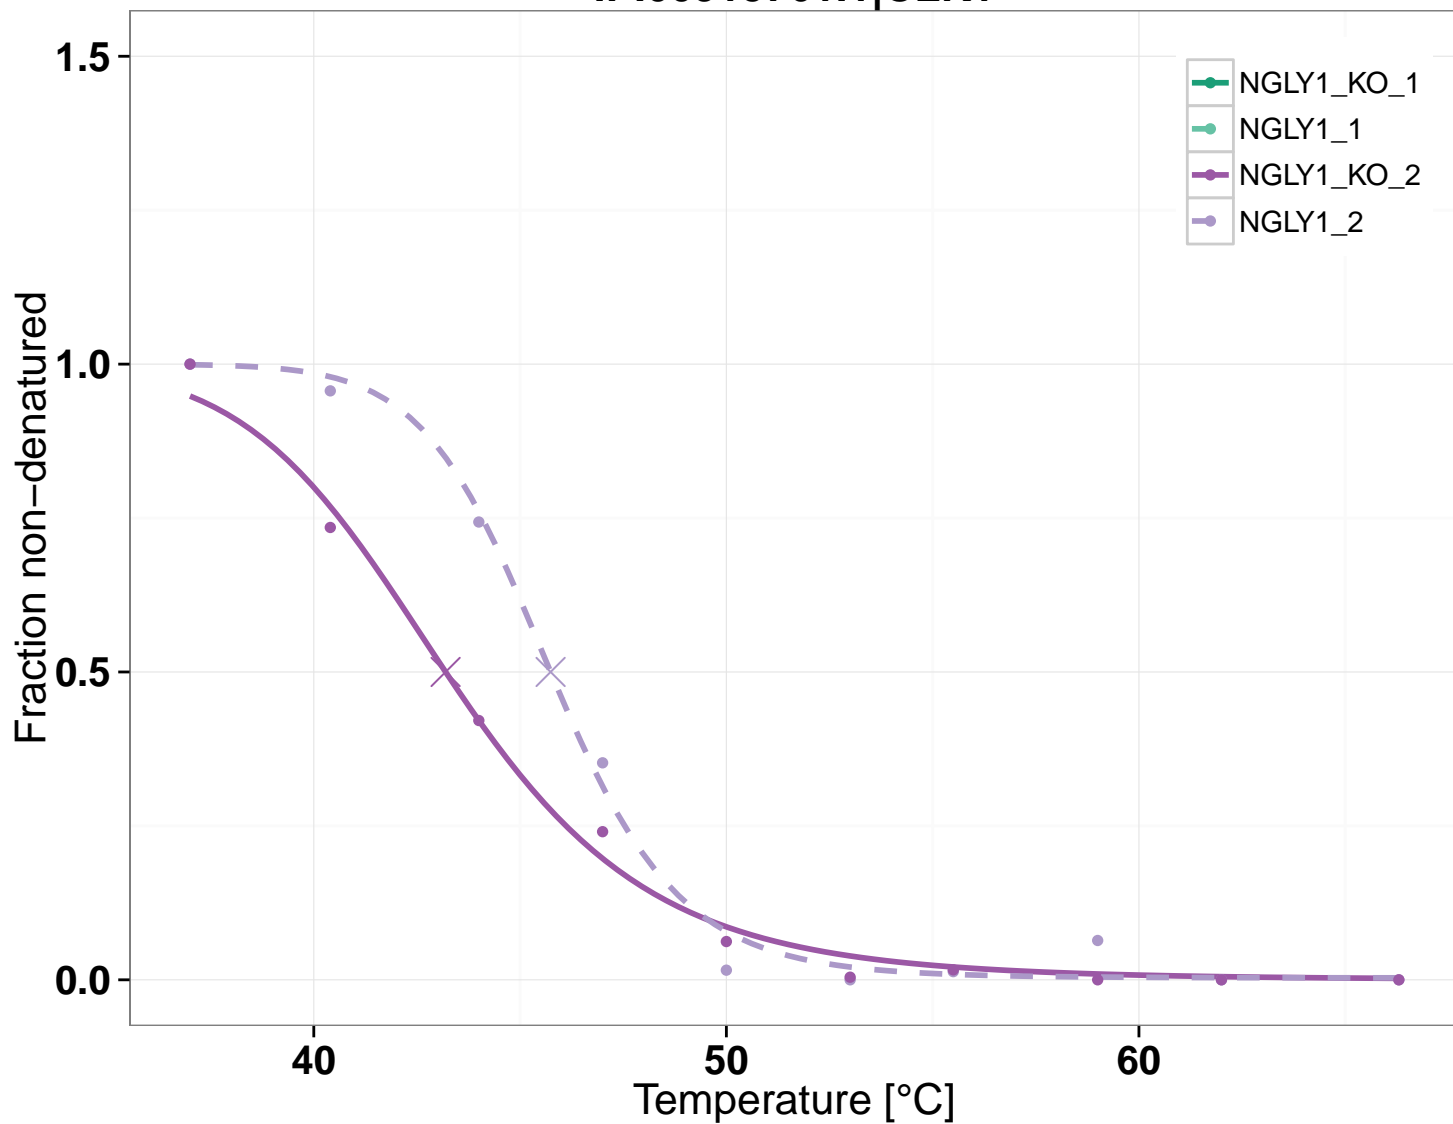

|            | meltPoint | slope | plateau | R2   |
|------------|-----------|-------|---------|------|
| NGLY1_KO_1 | —         | —     | —       | —    |
| NGLY1_1    | —         | —     | —       | —    |
| NGLY1_KO_2 | 43.19     | -0.1  | 0       | 0.99 |
| NGLY1_2    | 45.74     | -0.16 | 0       | 0.99 |

Supplement: Supplementary file 8245 [file 1]

IPI00017258.1|NR6A1

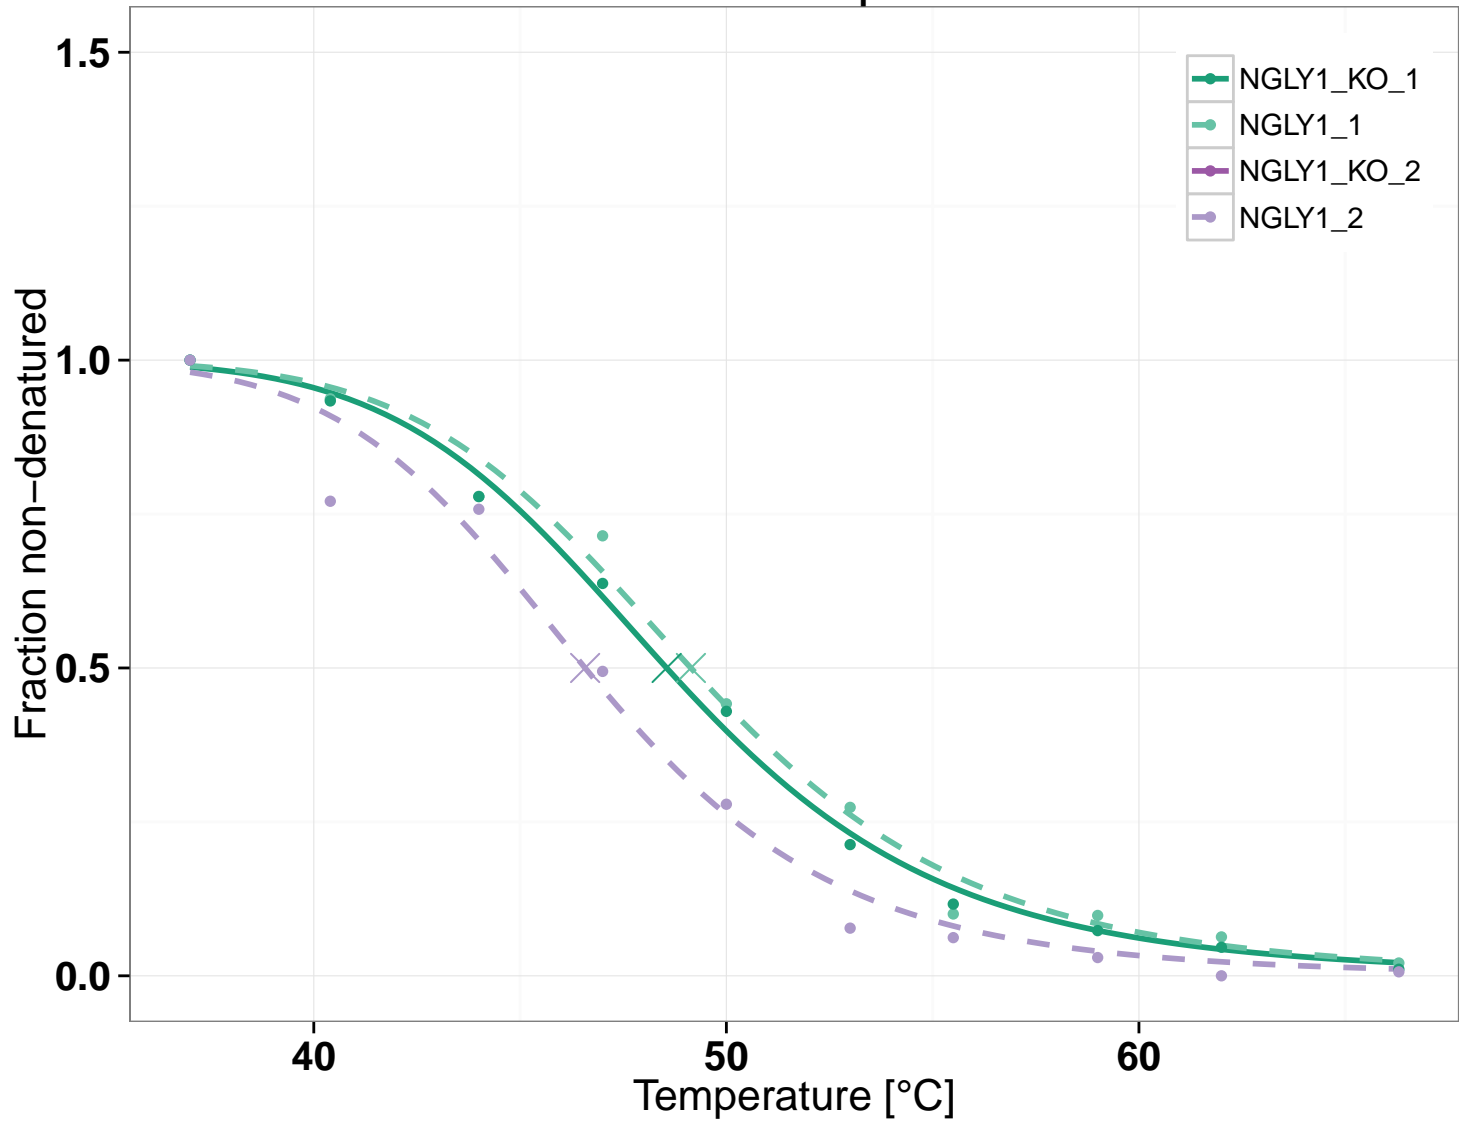

|            | meltPoint | slope  | plateau | R2   |
|------------|-----------|--------|---------|------|
| NGLY1_KO_1 | 48.55     | -0.075 | 0       | 1    |
| NGLY1_1    | 49.14     | -0.074 | 0       | 0.99 |
| NGLY1_KO_2 | -         | -      | -       | -    |
| NGLY1_2    | 46.58     | -0.083 | 0       | 0.98 |

Supplement: Supplementary file 8246 [file 1]

IPI00024320.1|RBM3

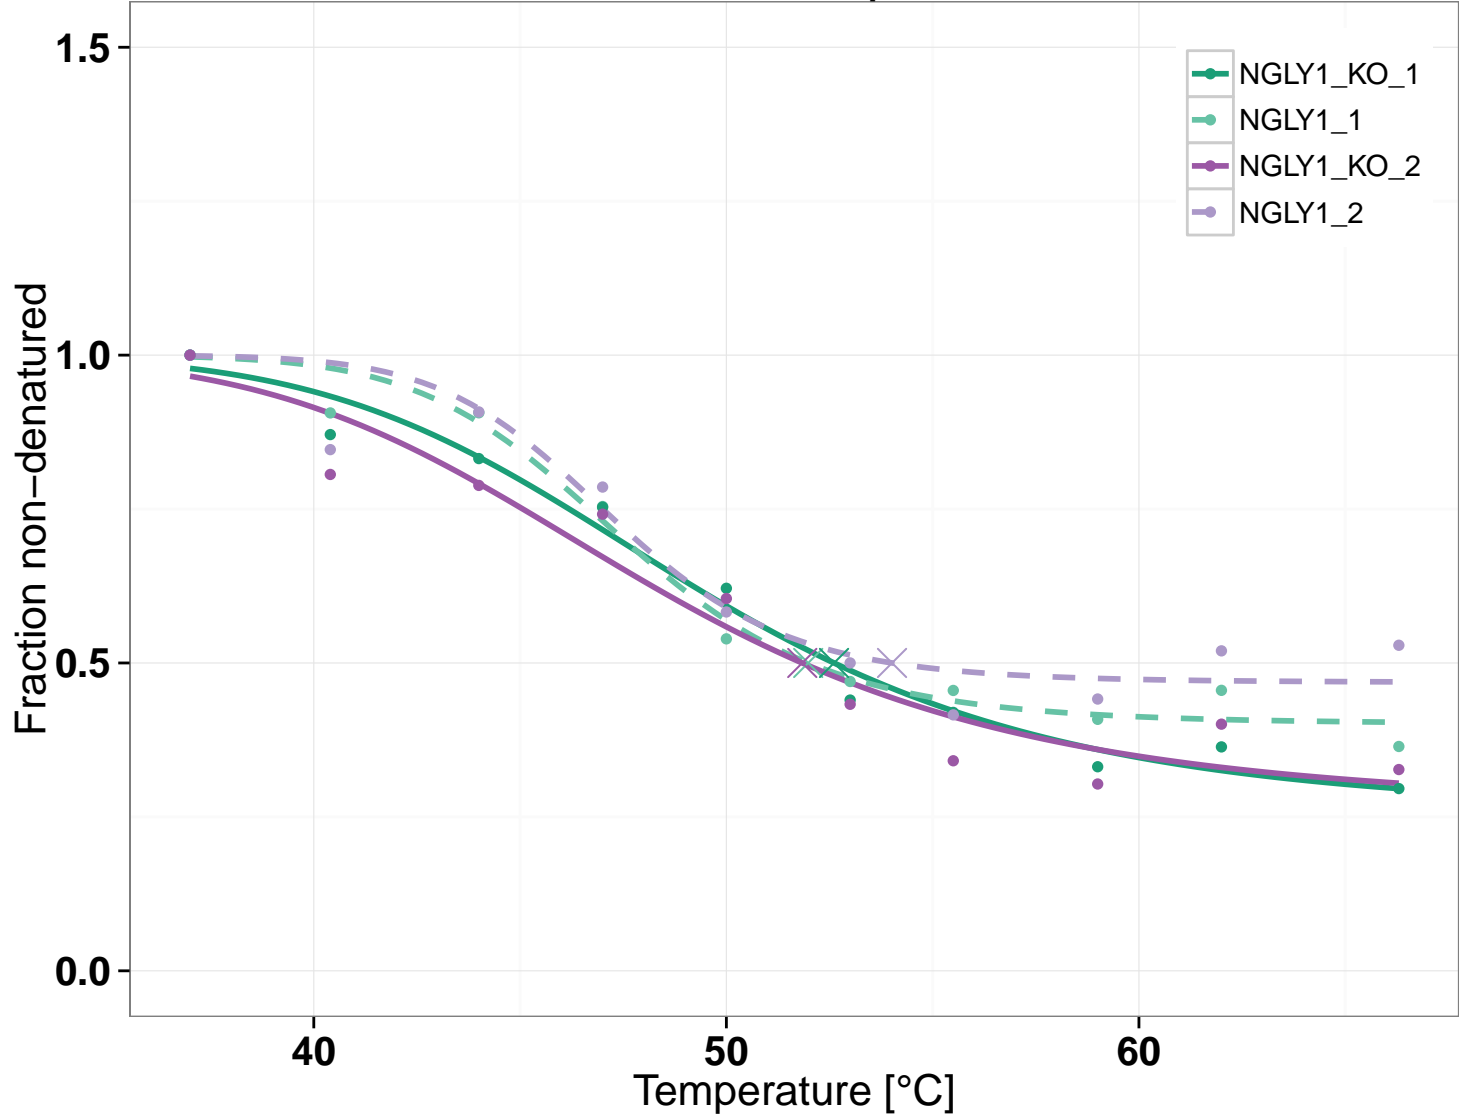

|            | meltPoint | slope  | plateau | R2   |
|------------|-----------|--------|---------|------|
| NGLY1_KO_1 | 52.61     | -0.042 | 0.25    | 0.98 |
| NGLY1_1    | 51.98     | -0.06  | 0.4     | 0.98 |
| NGLY1_KO_2 | 51.84     | -0.04  | 0.26    | 0.94 |
| NGLY1_2    | 54.02     | -0.063 | 0.47    | 0.92 |

Supplement: Supplementary file 8247 [file 1]

IPI00402657.4|RPAP1

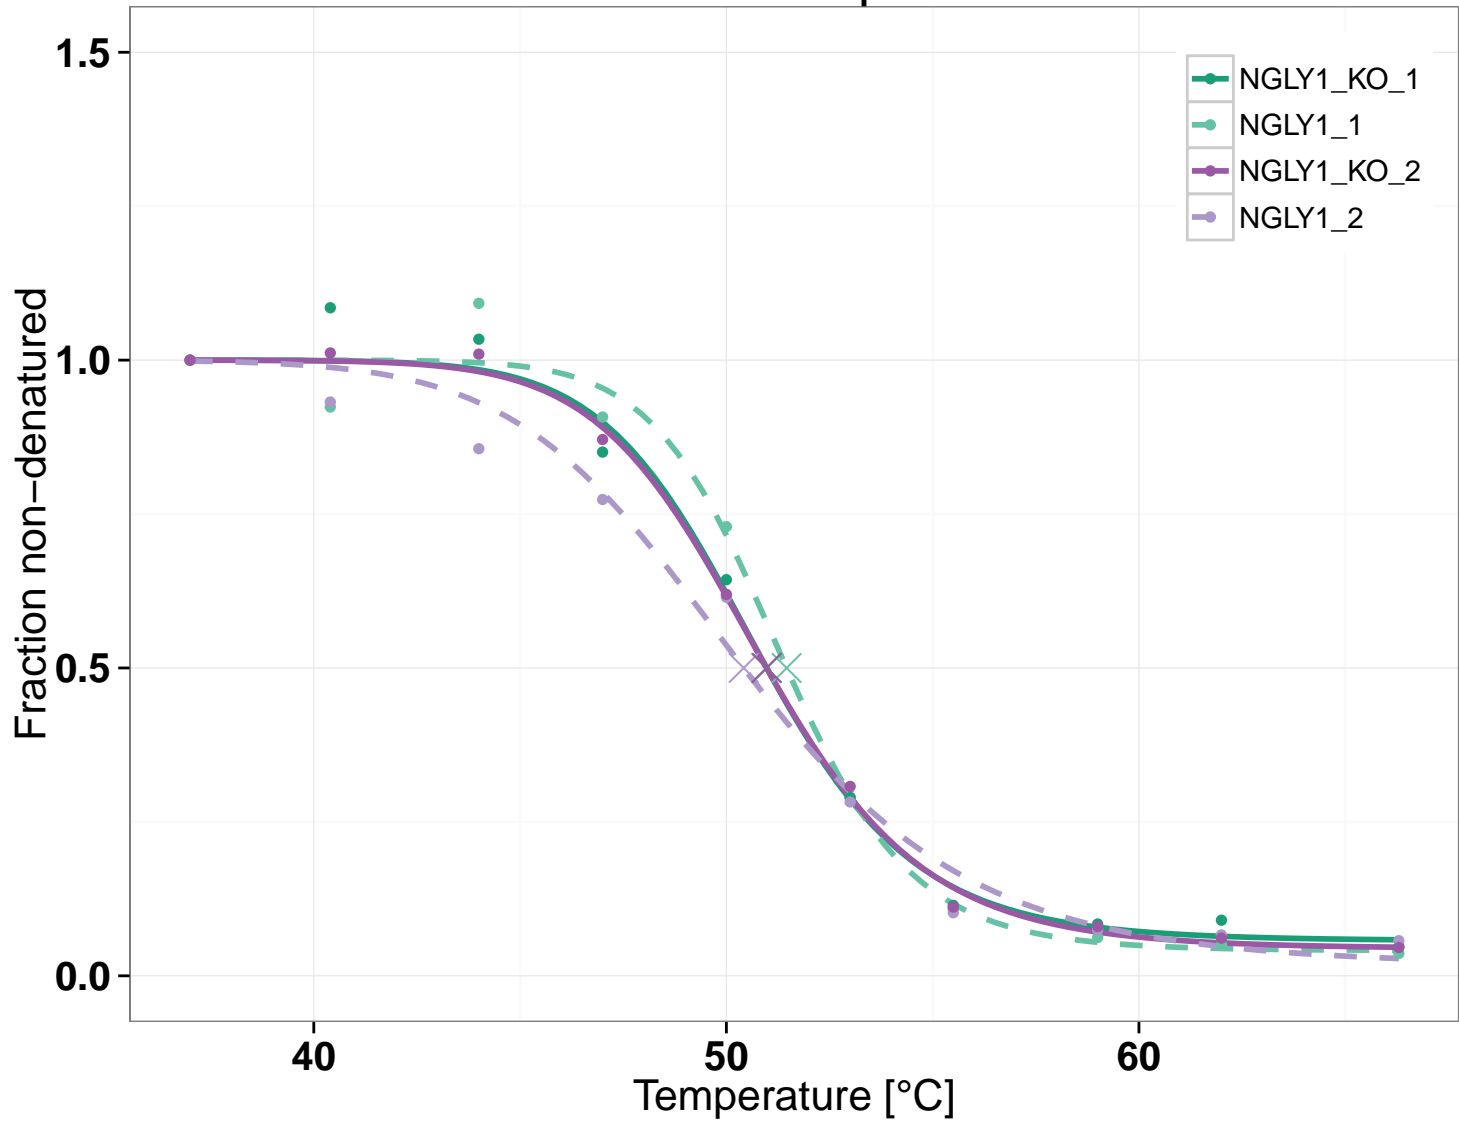

|            | meltPoint | slope  | plateau | R2   |
|------------|-----------|--------|---------|------|
| NGLY1_KO_1 | 50.98     | -0.12  | 0.06    | 0.99 |
| NGLY1_1    | 51.46     | -0.15  | 0.04    | 0.99 |
| NGLY1_KO_2 | 50.97     | -0.12  | 0.04    | 1    |
| NGLY1_2    | 50.42     | -0.089 | 0.02    | 0.99 |

Supplement: Supplementary file 8248 [file 1]

IPI00220609.3|SEH1L

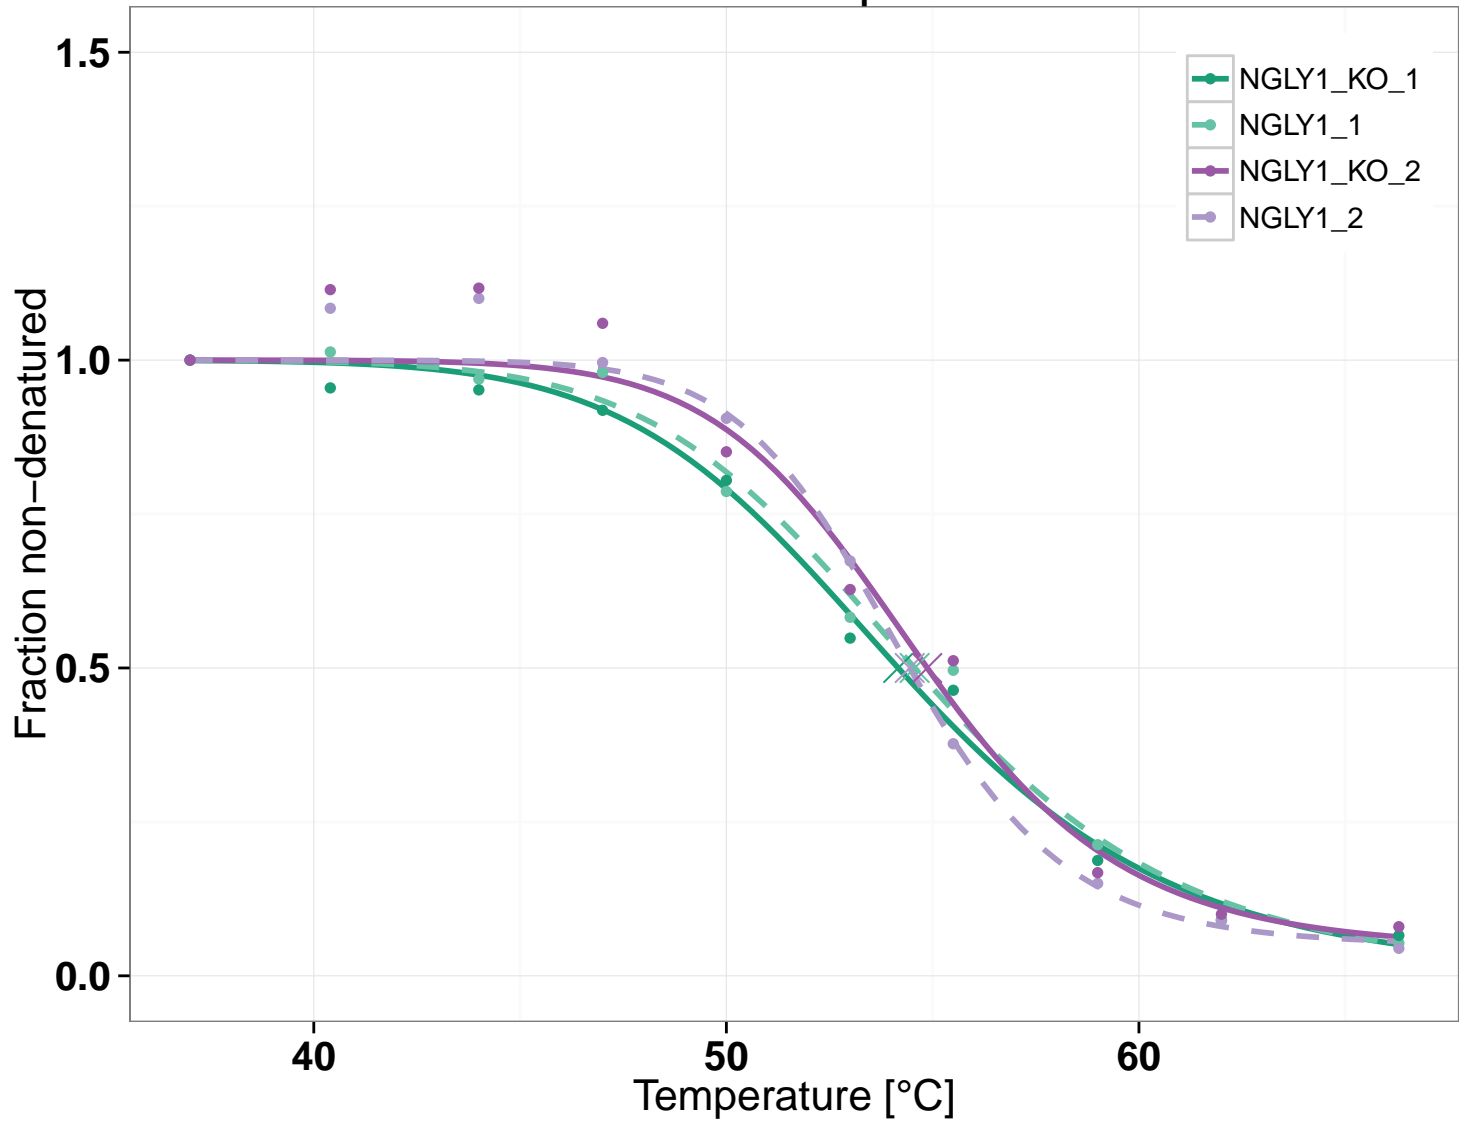

|            | meltPoint | slope  | plateau | R2   |
|------------|-----------|--------|---------|------|
| NGLY1_KO_1 | 54.17     | -0.075 | 0       | 0.99 |
| NGLY1_1    | 54.56     | -0.077 | 0       | 0.99 |
| NGLY1_KO_2 | 54.87     | -0.096 | 0.04    | 0.97 |
| NGLY1_2    | 54.44     | -0.12  | 0.05    | 0.99 |

Supplement: Supplementary file 8249 [file 1]

# IPI00012585.1|HEXB

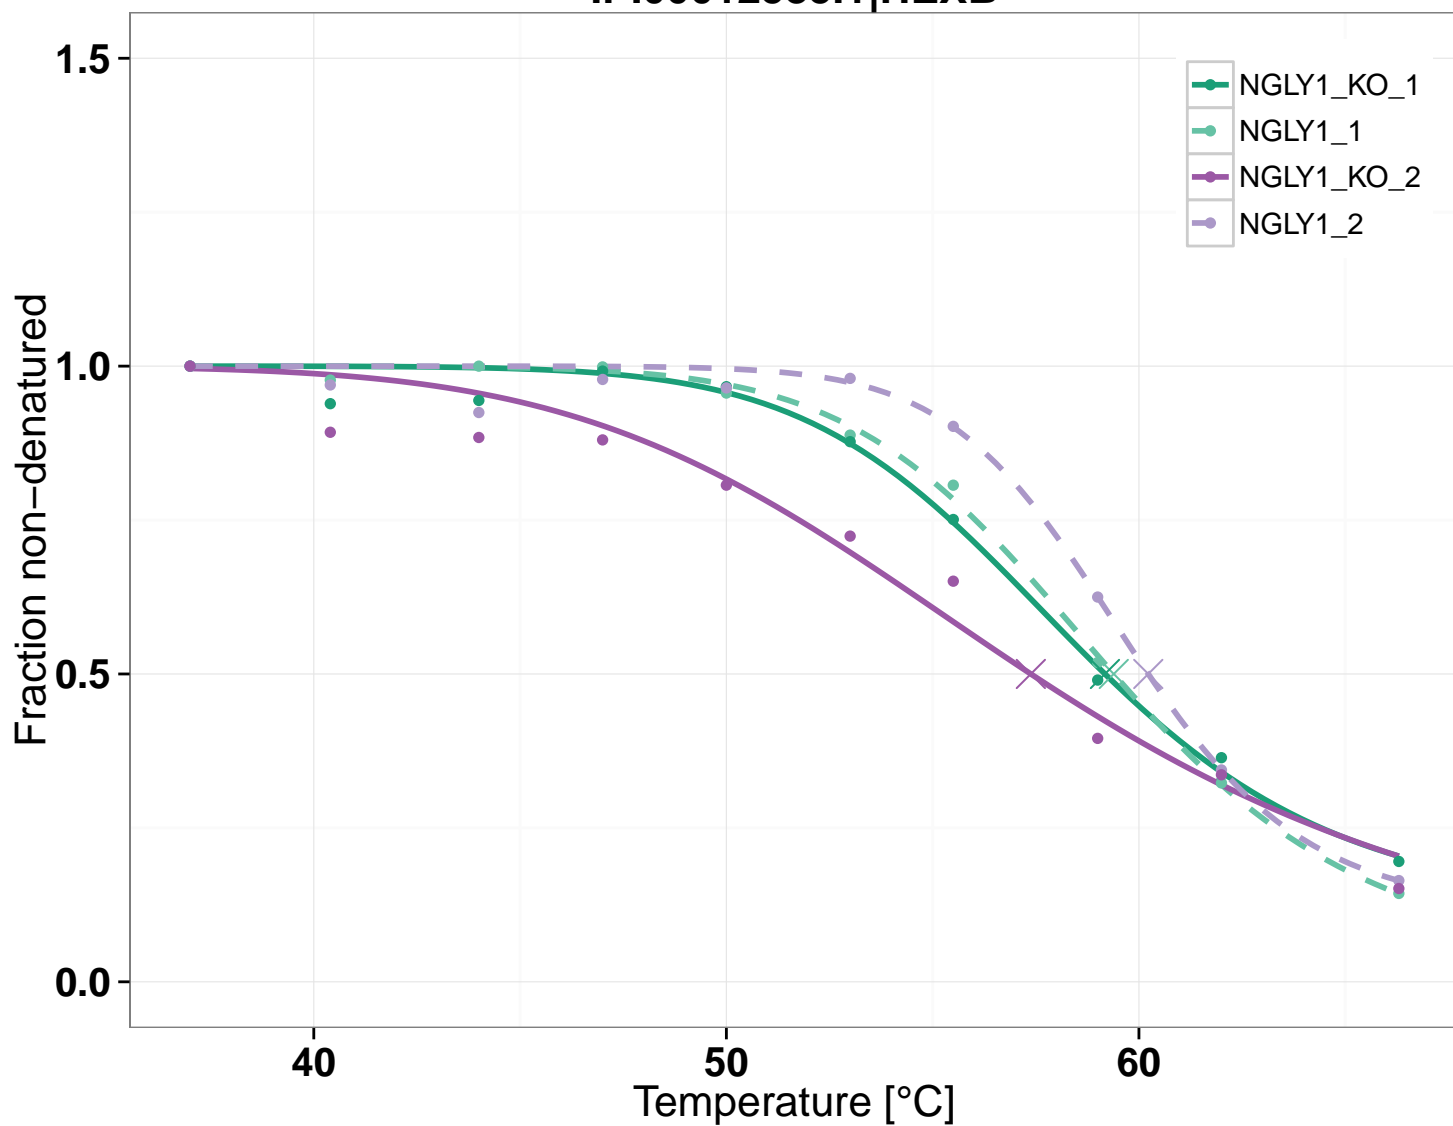

|            | meltPoint | slope  | plateau | R2   |
|------------|-----------|--------|---------|------|
| NGLY1_KO_1 | 59.18     | -0.069 | 0.11    | 0.99 |
| NGLY1_1    | 59.39     | -0.078 | 0.03    | 1    |
| NGLY1_KO_2 | 57.38     | -0.046 | 0       | 0.97 |
| NGLY1_2    | 60.23     | -0.1   | 0.11    | 0.99 |

Supplement: Supplementary file 8250 [file 1]

IPI00026087.1|BANF1

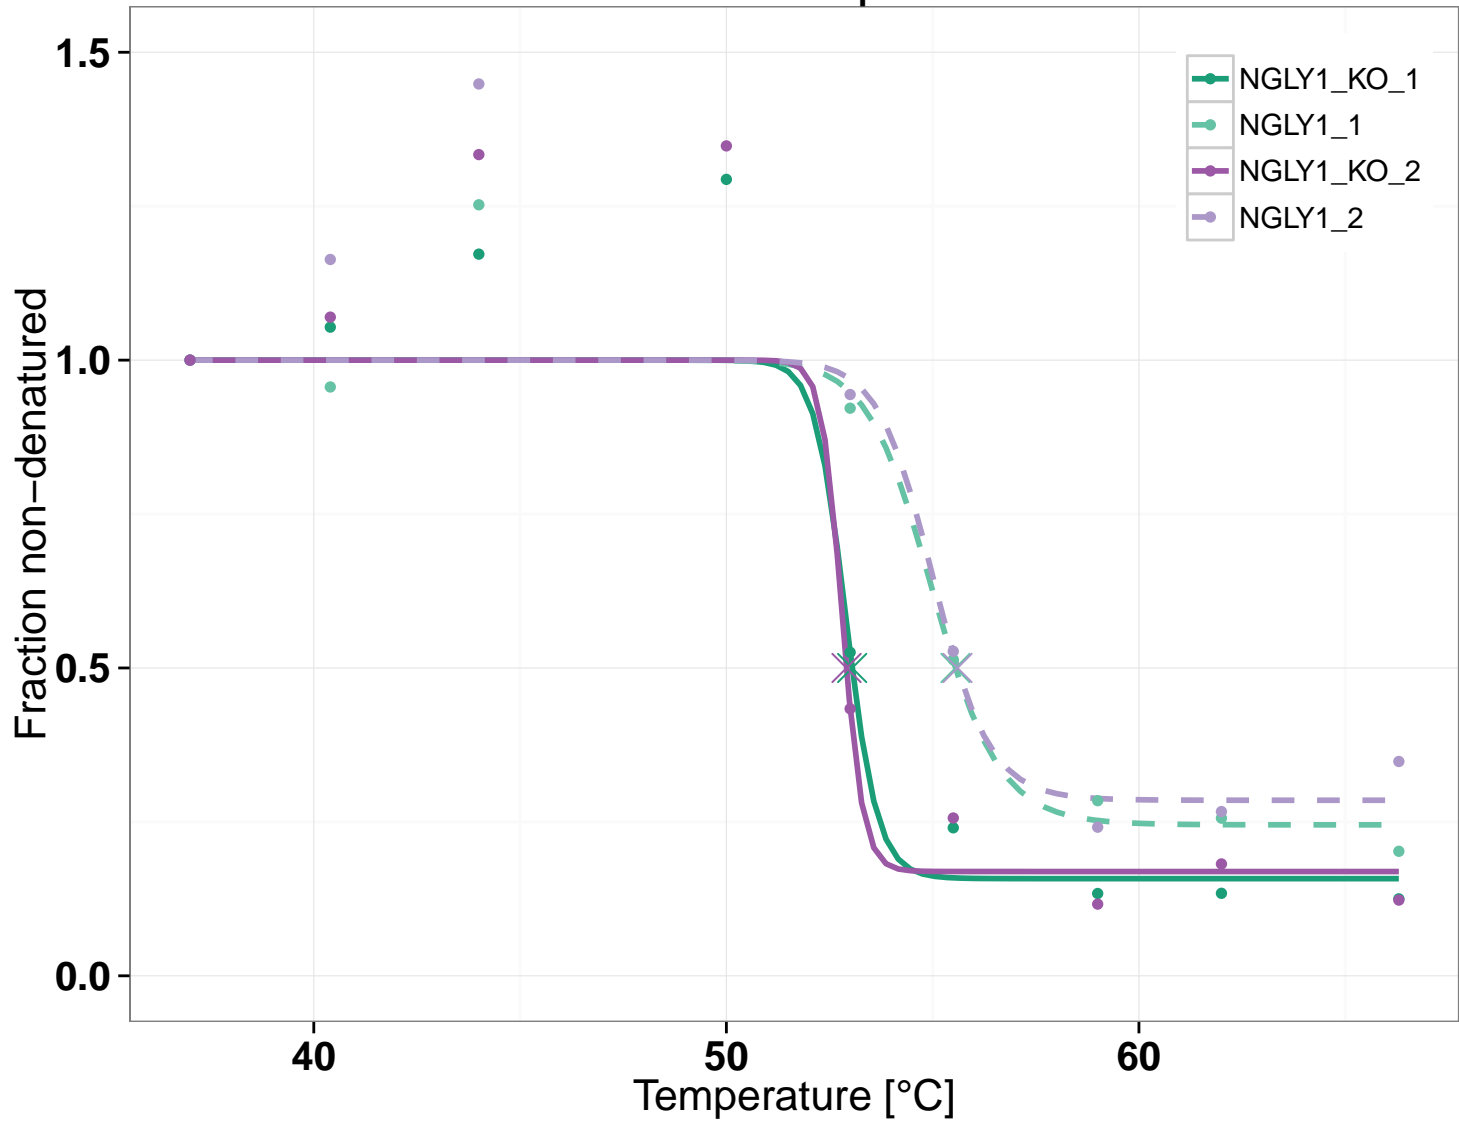

|            | meltPoint | slope | plateau | R2   |
|------------|-----------|-------|---------|------|
| NGLY1_KO_1 | 53.05     | -0.55 | 0.16    | 0.8  |
| NGLY1_1    | 55.55     | -0.24 | 0.25    | 0.42 |
| NGLY1_KO_2 | 52.91     | -0.83 | 0.17    | 0.7  |
| NGLY1_2    | 55.6      | -0.26 | 0.29    | 0.22 |

Supplement: Supplementary file 8251 [file 1]

# IPI00180704.4|WDR73

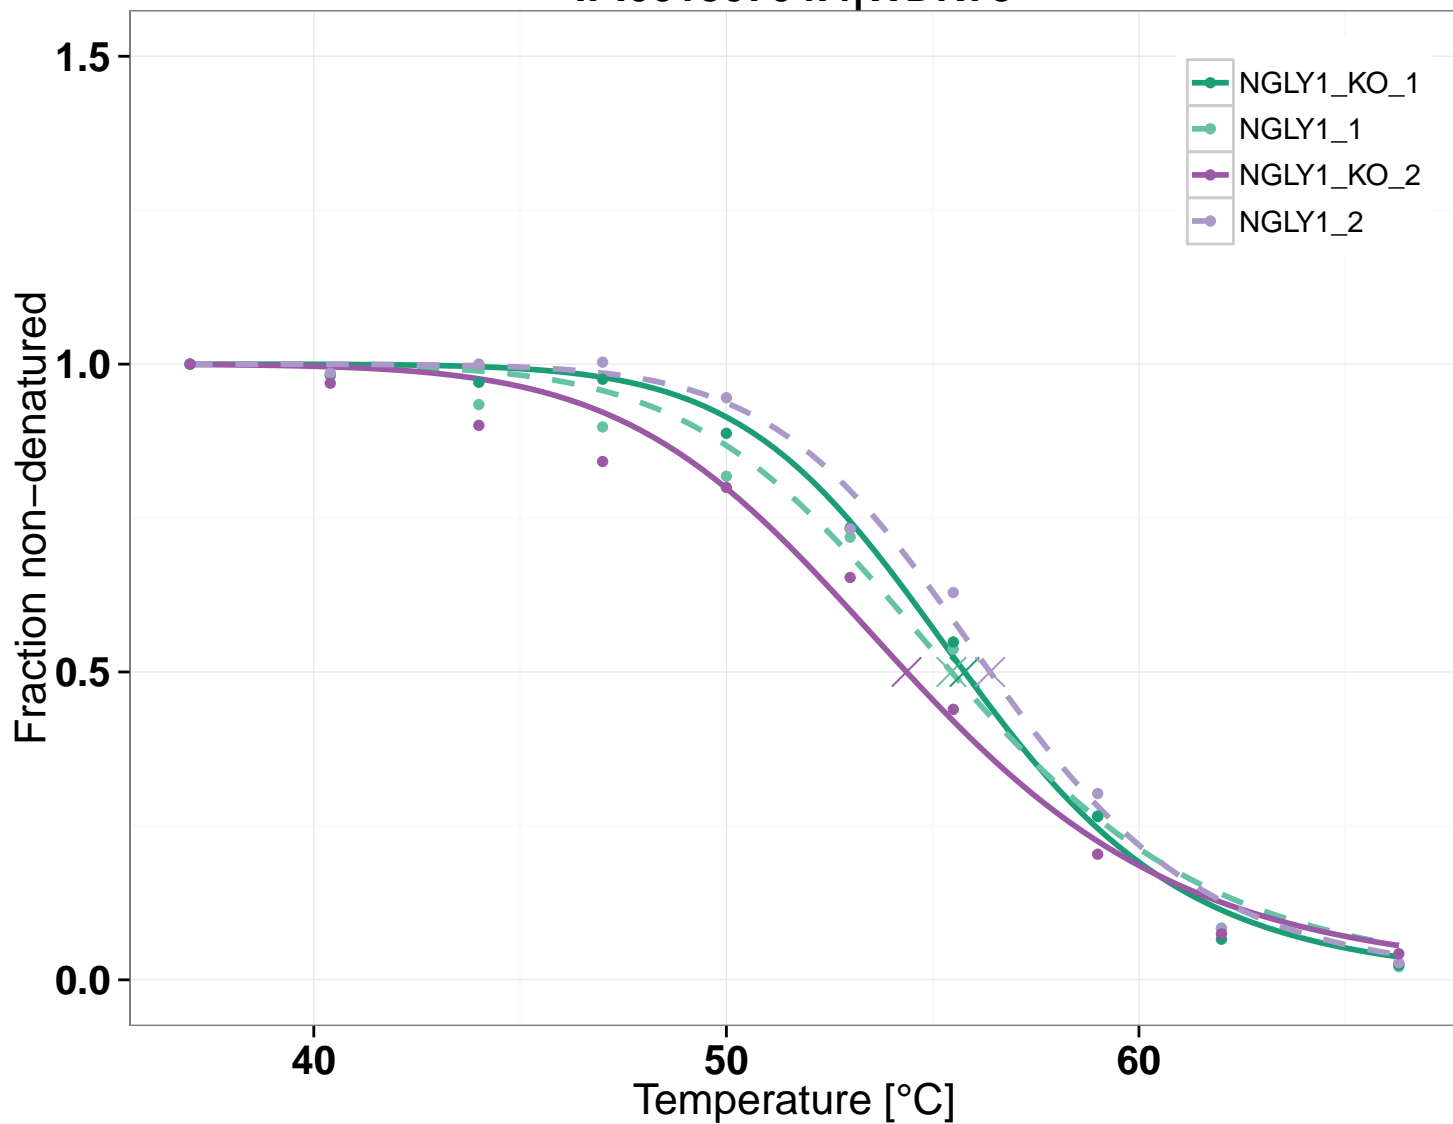

|            | meltPoint | slope  | plateau | R2   |
|------------|-----------|--------|---------|------|
| NGLY1_KO_1 | 55.77     | -0.093 | 0       | 1    |
| NGLY1_1    | 55.45     | -0.079 | 0       | 0.99 |
| NGLY1_KO_2 | 54.37     | -0.074 | 0       | 0.98 |
| NGLY1_2    | 56.39     | -0.095 | 0       | 0.99 |

Supplement: Supplementary file 8252 [file 1]

IPI00878209.1|GTPBP5

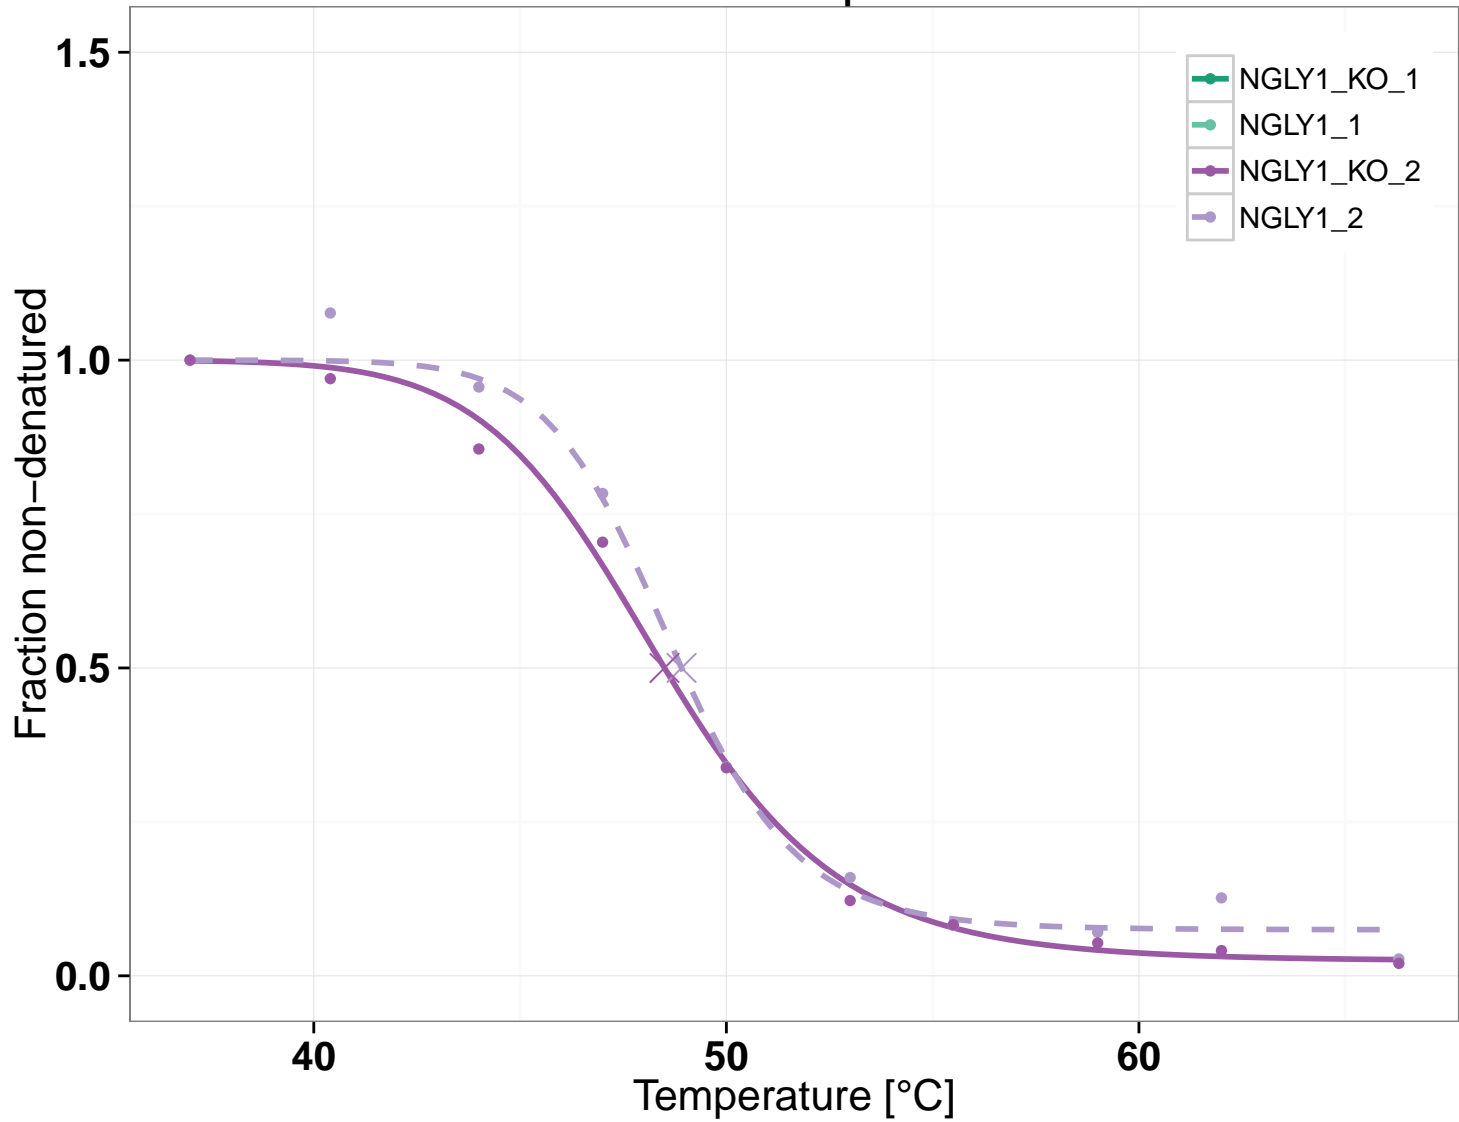

|            | meltPoint | slope | plateau | R2   |
|------------|-----------|-------|---------|------|
| NGLY1_KO_1 | —         | —     | —       | —    |
| NGLY1_1    | —         | —     | —       | —    |
| NGLY1_KO_2 | 48.5      | -0.11 | 0.02    | 1    |
| NGLY1_2    | 48.91     | -0.15 | 0.07    | 0.99 |

Supplement: Supplementary file 8253 [file 1]

IPI00788903.1|OBFC2B

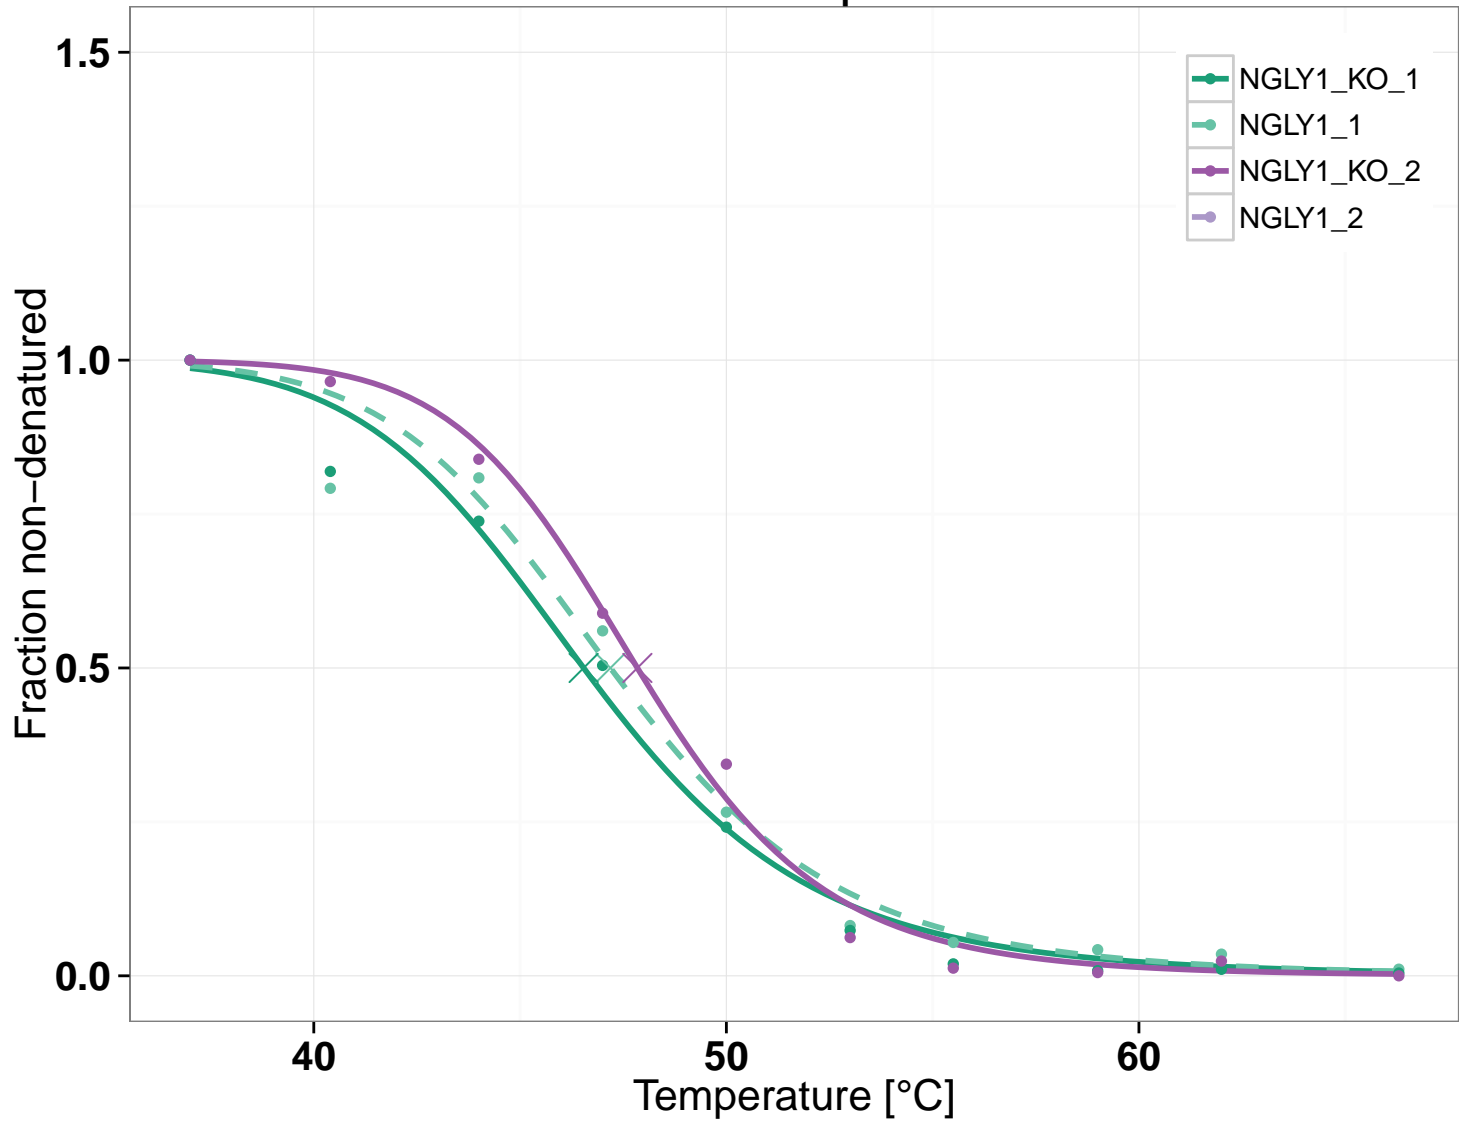

|            | meltPoint | slope  | plateau | R2   |
|------------|-----------|--------|---------|------|
| NGLY1_KO_1 | 46.54     | -0.091 | 0       | 0.99 |
| NGLY1_1    | 47.19     | -0.092 | 0       | 0.98 |
| NGLY1_KO_2 | 47.84     | -0.11  | 0       | 0.99 |
| NGLY1_2    | -         | -      | -       | -    |

Supplement: Supplementary file 8254 [file 1]

# IPI00064377.2|RELT

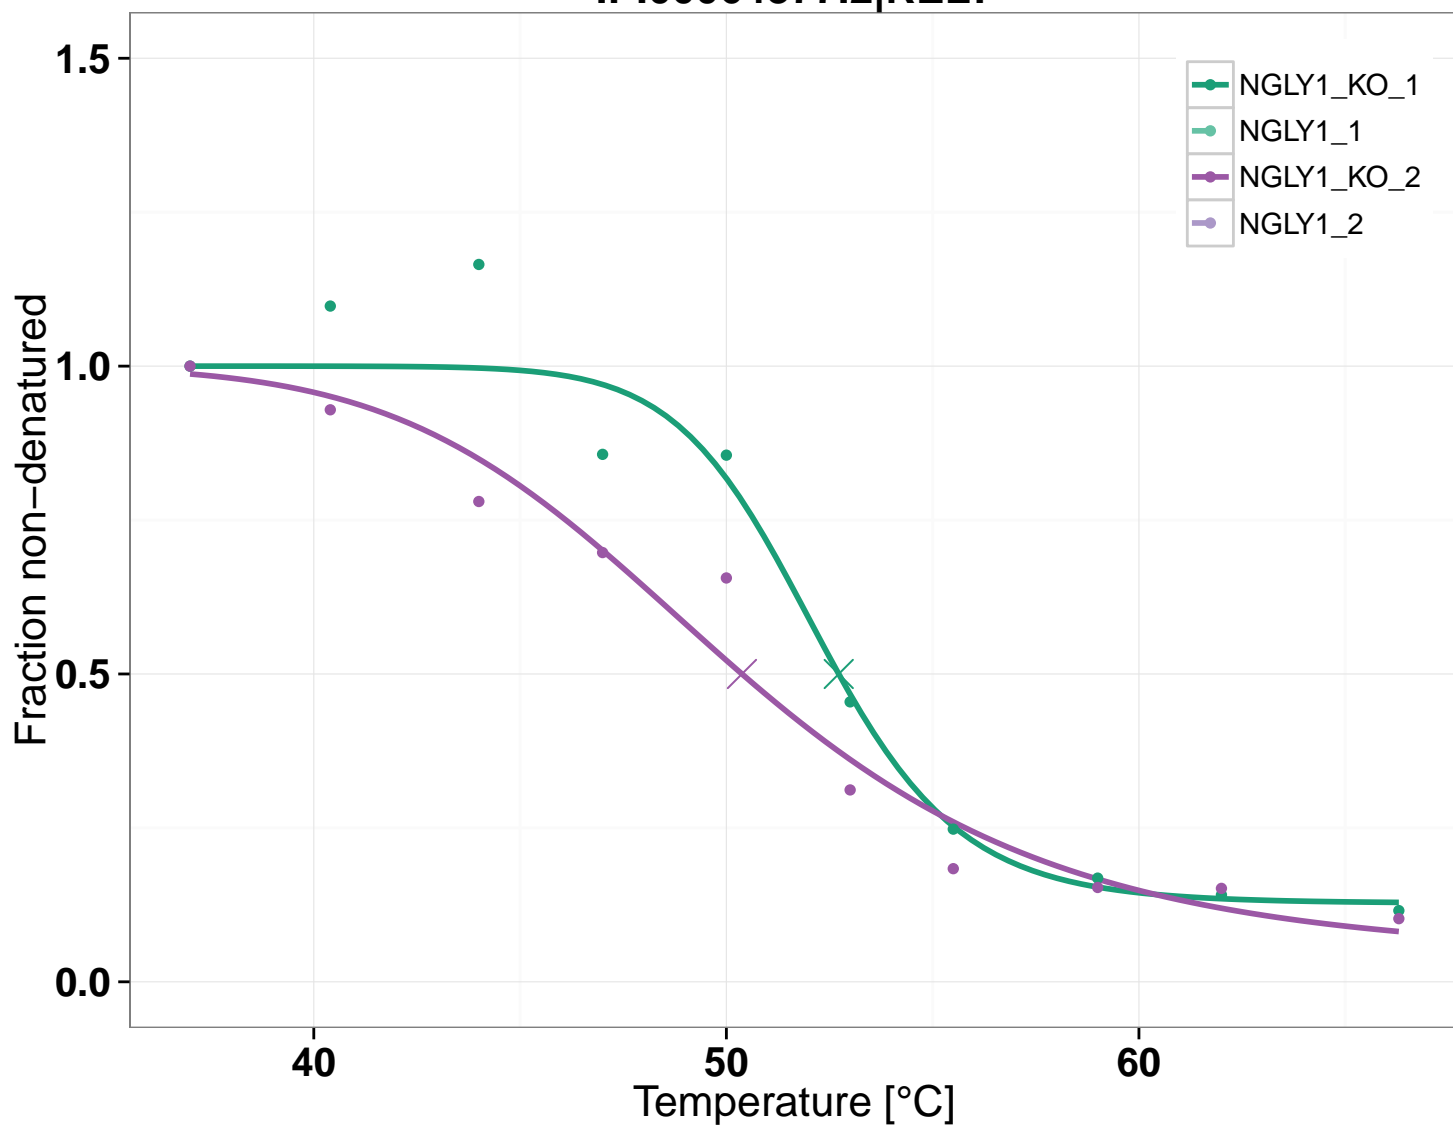

|            | meltPoint | slope | plateau | R2   |
|------------|-----------|-------|---------|------|
| NGLY1_KO_1 | 52.72     | -0.13 | 0.13    | 0.97 |
| NGLY1_1    | -         | -     | -       | -    |
| NGLY1_KO_2 | 50.38     | -0.06 | 0.04    | 0.97 |
| NGLY1_2    | -         | -     | -       | -    |

Supplement: Supplementary file 8255 [file 1]

# IPI00102495.5|MED6

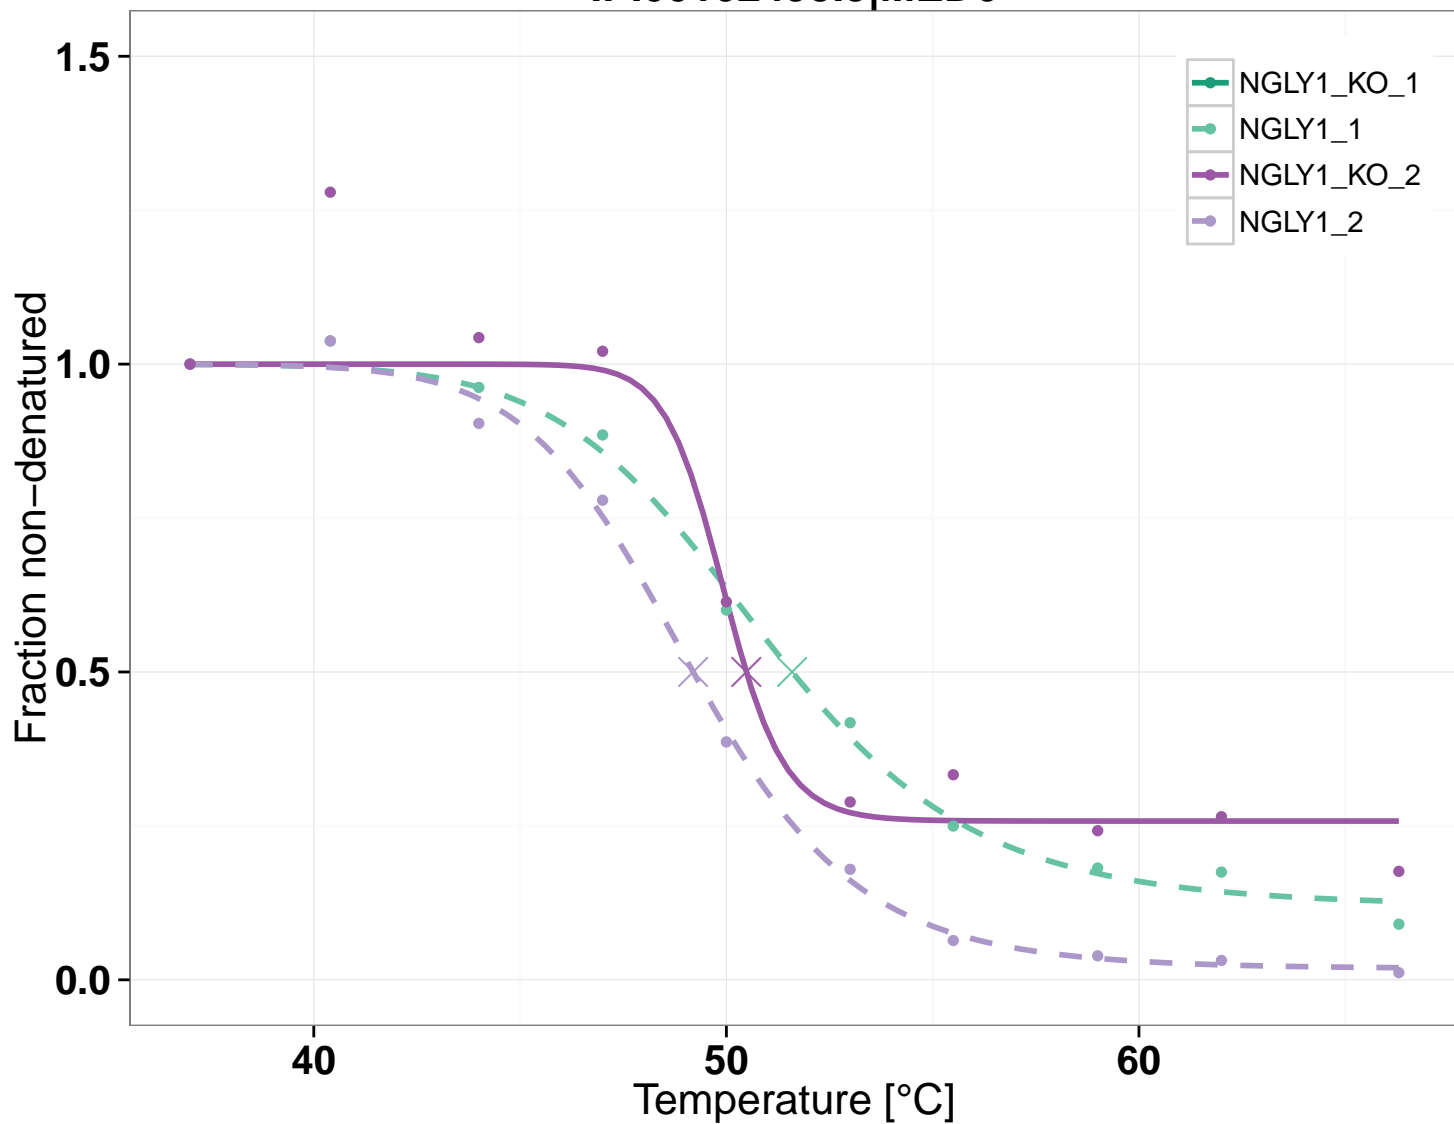

|            | meltPoint | slope  | plateau | R2   |
|------------|-----------|--------|---------|------|
| NGLY1_KO_1 | —         | —      | —       | —    |
| NGLY1_1    | 51.59     | -0.087 | 0.12    | 0.99 |
| NGLY1_KO_2 | 50.48     | -0.26  | 0.26    | 0.94 |
| NGLY1_2    | 49.19     | -0.12  | 0.02    | 1    |

Supplement: Supplementary file 8256 [file 1]

IPI00440688.4|POLDIP3

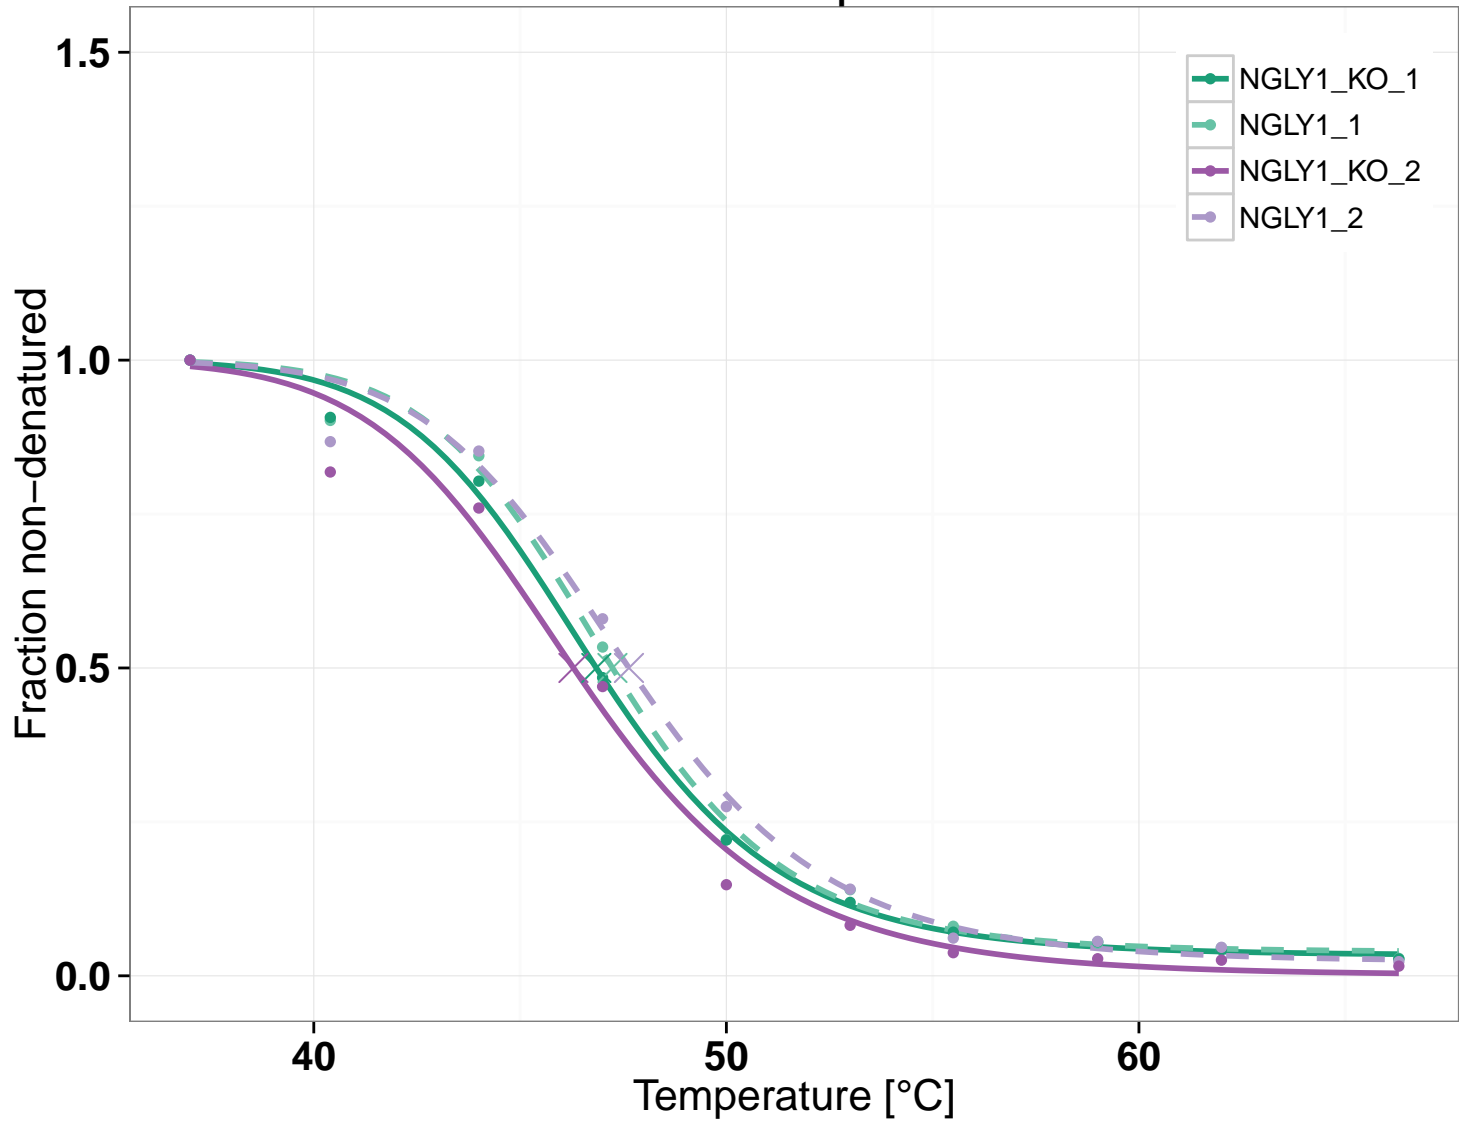

|            | meltPoint | slope | plateau | R2   |
|------------|-----------|-------|---------|------|
| NGLY1_KO_1 | 46.85     | -0.11 | 0.03    | 1    |
| NGLY1_1    | 47.24     | -0.11 | 0.04    | 0.99 |
| NGLY1_KO_2 | 46.29     | -0.1  | 0       | 0.98 |
| NGLY1_2    | 47.64     | -0.1  | 0.02    | 0.99 |

Supplement: Supplementary file 8257 [file 1]

IPI00217976.4|MAPT

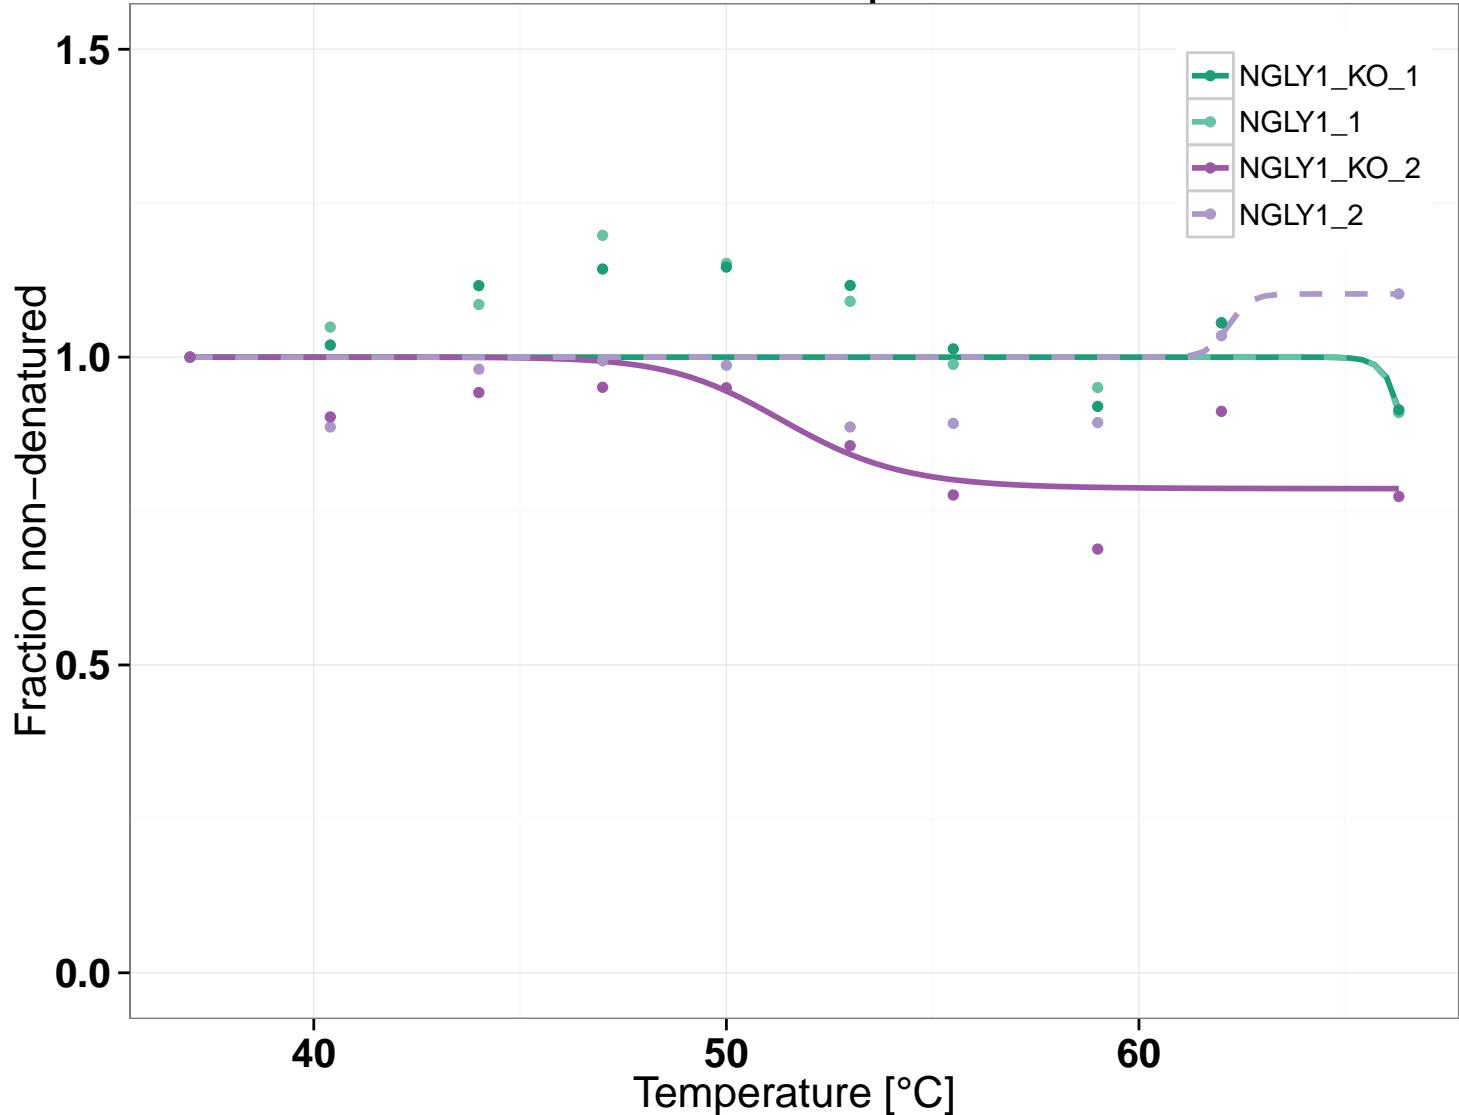

|            | meltPoint | slope  | plateau | R2    |
|------------|-----------|--------|---------|-------|
| NGLY1_KO_1 | -         | -      | 0       | -0.19 |
| NGLY1_1    | -         | -      | 0       | -0.21 |
| NGLY1_KO_2 | -         | -0.038 | 0.79    | 0.54  |
| NGLY1_2    | -         | 0.1    | 1.1     | 0     |

Supplement: Supplementary file 8258 [file 1]

# IPI00257882.7|PEPD

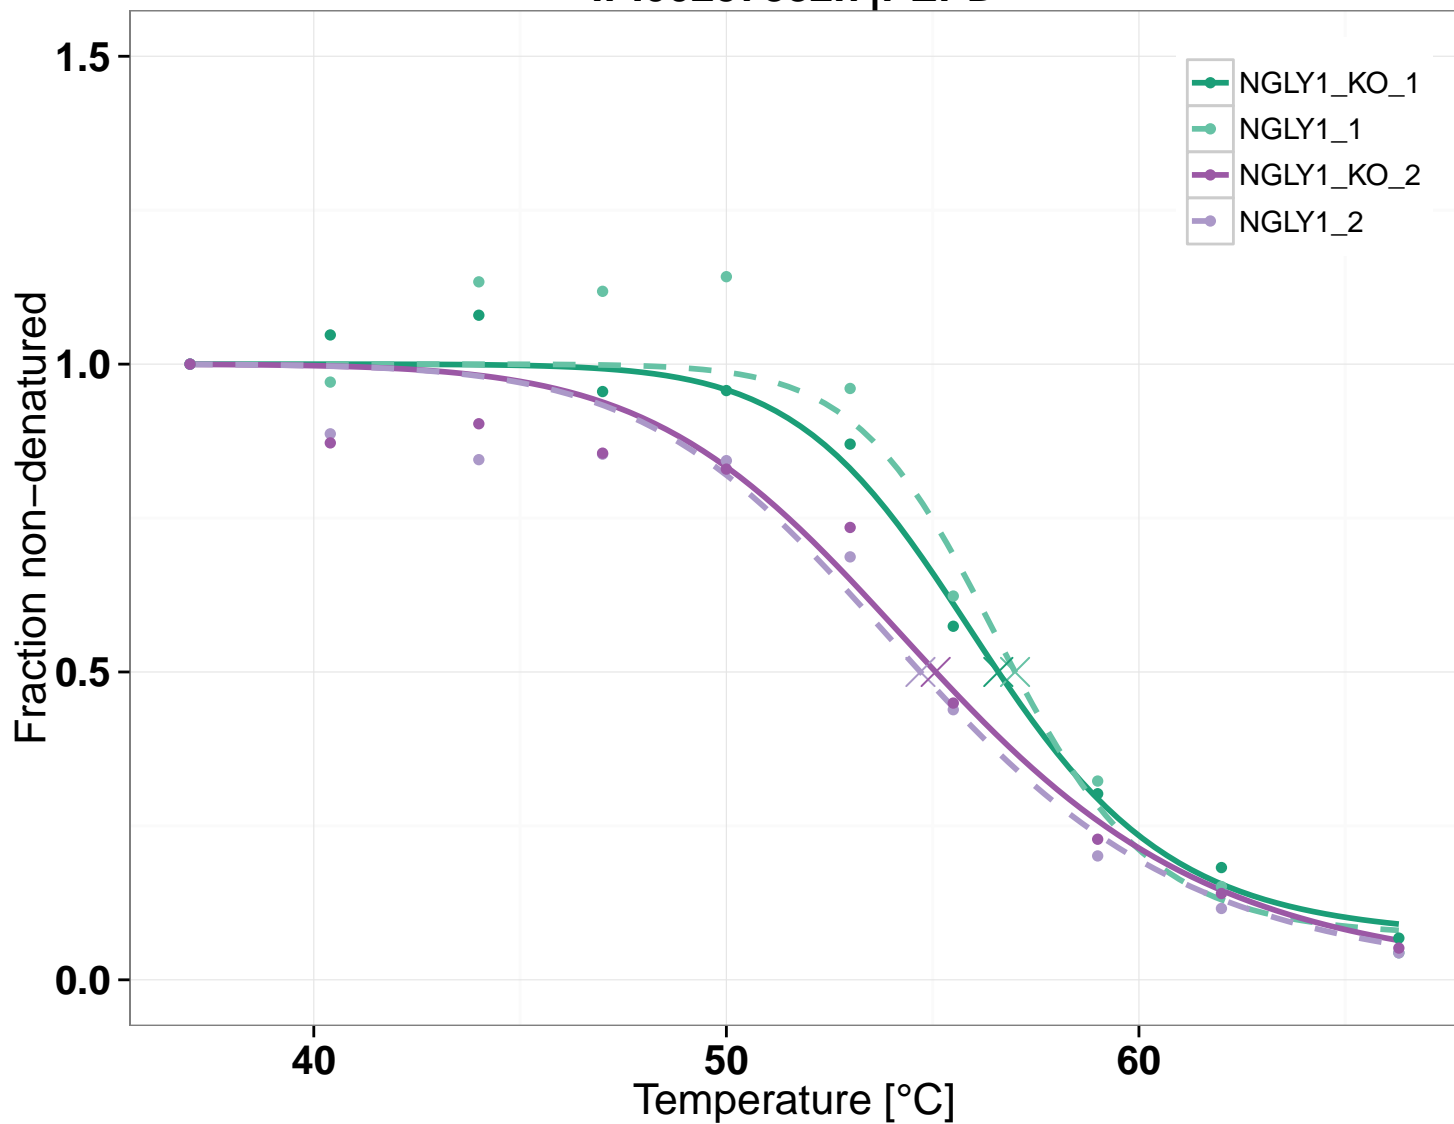

|            | meltPoint | slope  | plateau | R2   |
|------------|-----------|--------|---------|------|
| NGLY1_KO_1 | 56.59     | -0.1   | 0.07    | 0.99 |
| NGLY1_1    | 57        | -0.13  | 0.07    | 0.96 |
| NGLY1_KO_2 | 55.07     | -0.073 | 0       | 0.97 |
| NGLY1_2    | 54.7      | -0.075 | 0       | 0.96 |

Supplement: Supplementary file 8259 [file 1]

IPI00030059.1|DNAJC25

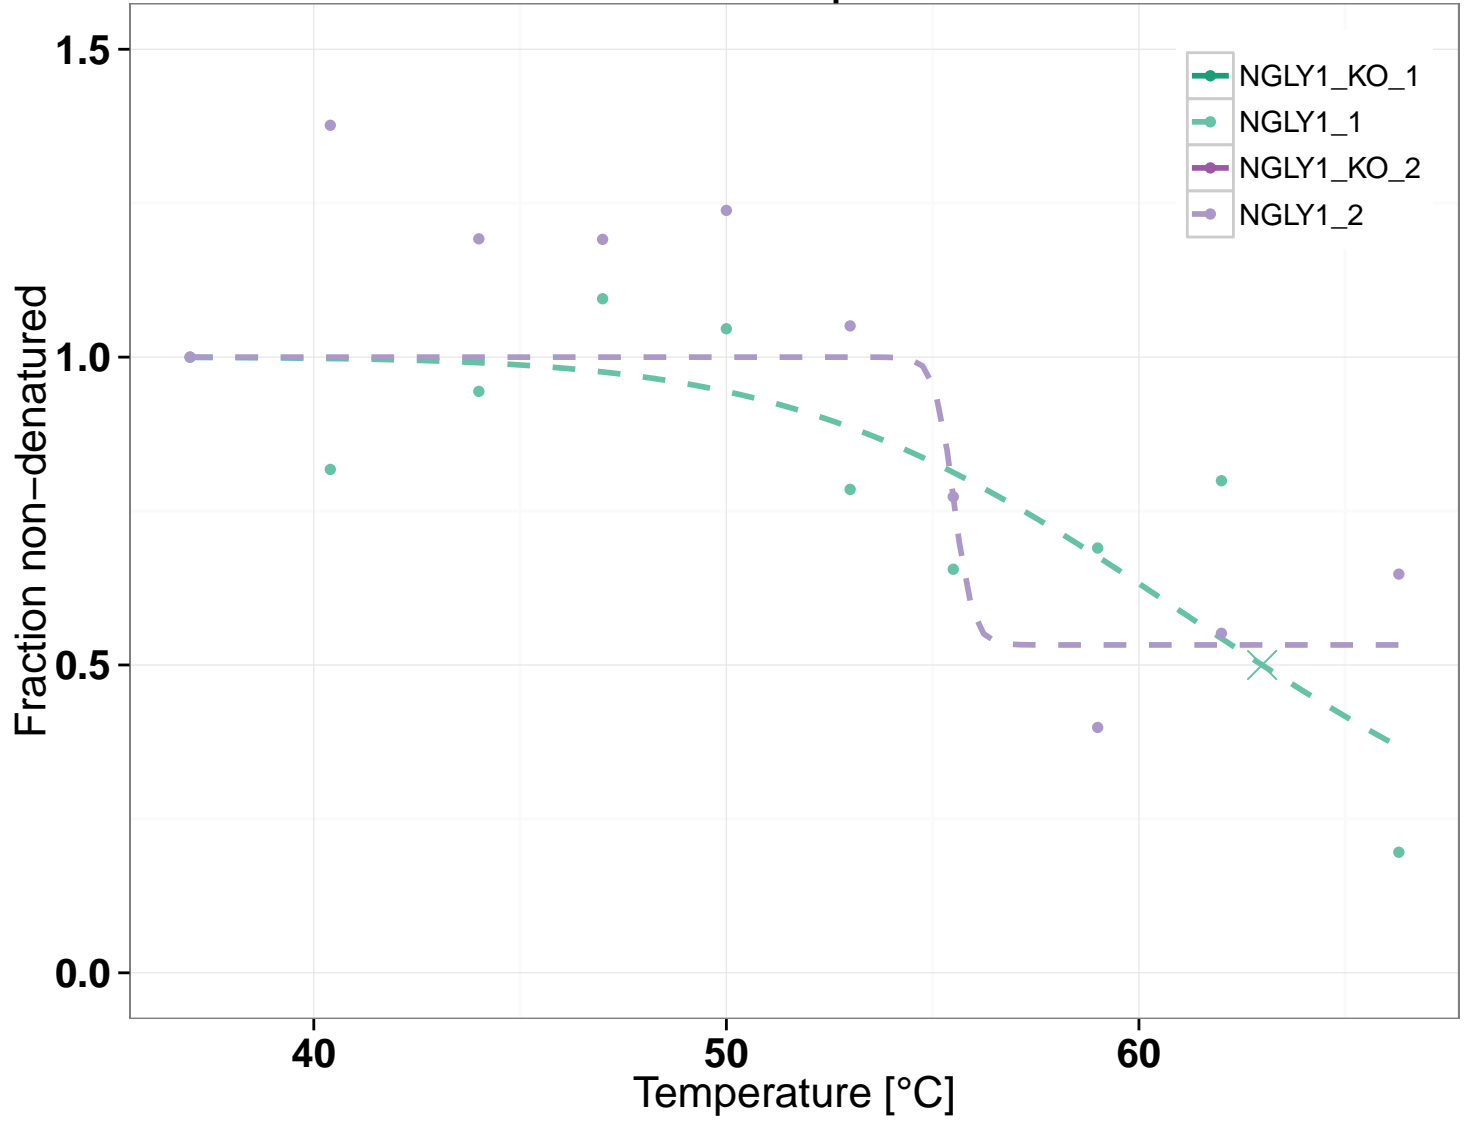

|            | meltPoint | slope  | plateau | R2   |
|------------|-----------|--------|---------|------|
| NGLY1_KO_1 | —         | —      | —       | —    |
| NGLY1_1    | 62.99     | -0.045 | 0       | 0.69 |
| NGLY1_KO_2 | —         | —      | —       | —    |
| NGLY1_2    | —         | -0.53  | 0.53    | 0.69 |

Supplement: Supplementary file 8260 [file 1]

# IPI00550382.2|SLC29A1

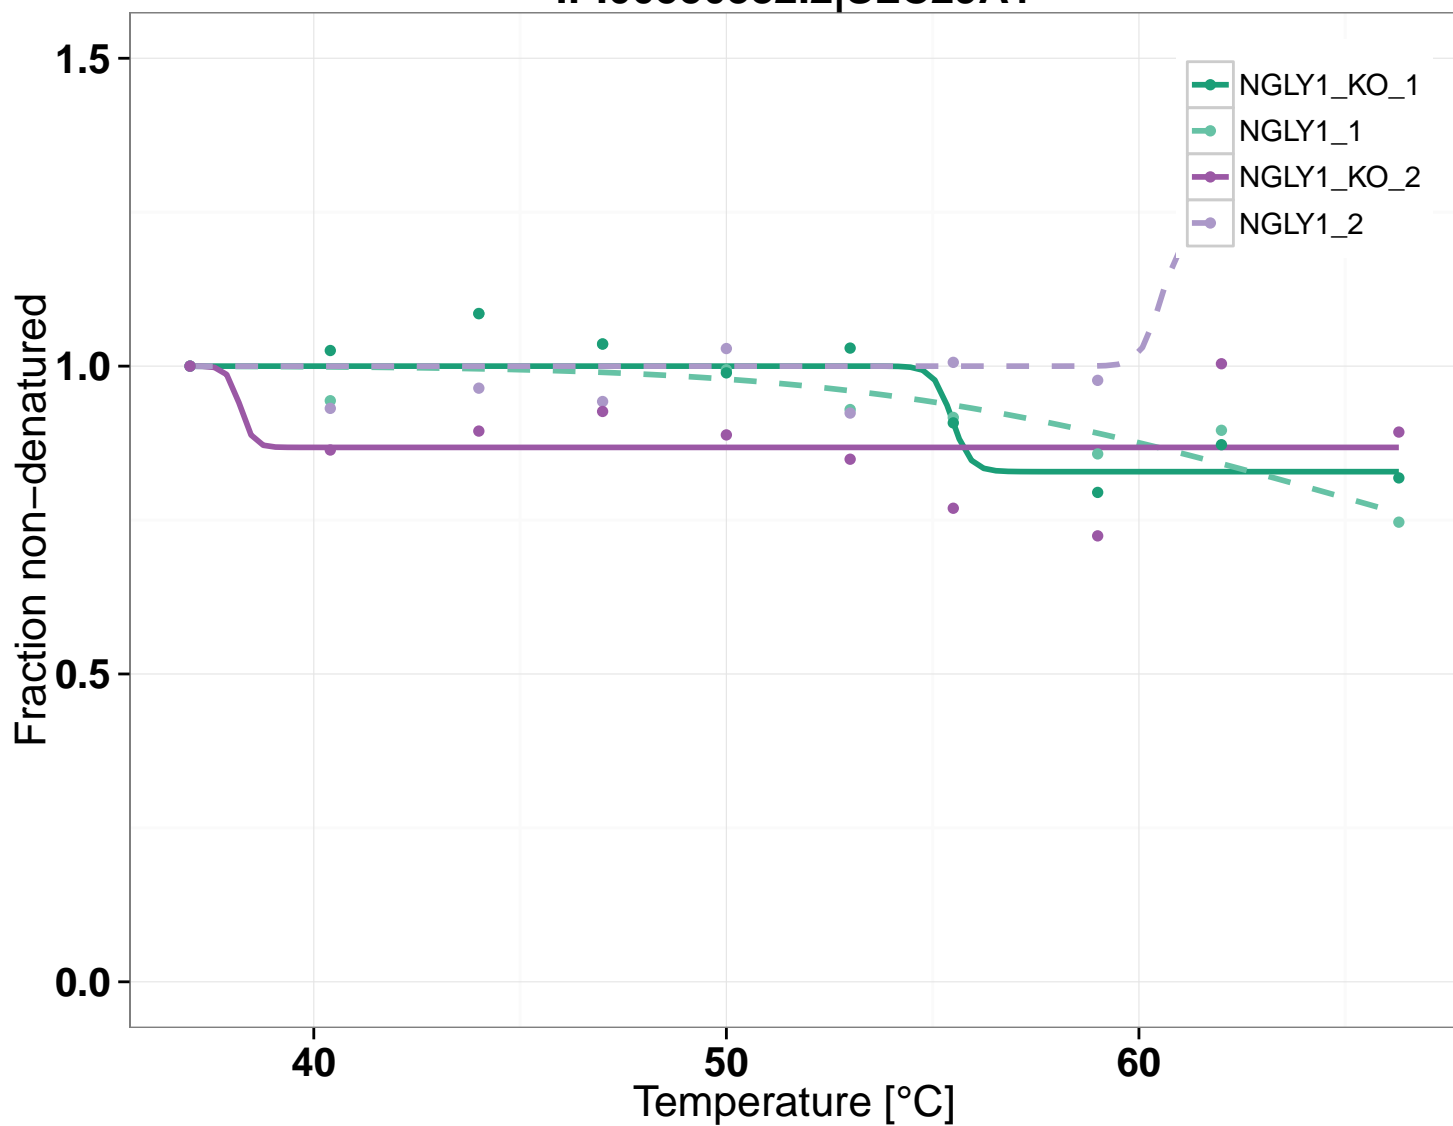

|            | meltPoint | slope  | plateau | R2   |
|------------|-----------|--------|---------|------|
| NGLY1_KO_1 | —         | -0.19  | 0.83    | 0.85 |
| NGLY1_1    | —         | -0.019 | 0.42    | 0.77 |
| NGLY1_KO_2 | —         | -0.22  | 0.87    | 0.22 |
| NGLY1_2    | —         | 0.22   | 1.22    | 0.84 |

Supplement: Supplementary file 8261 [file 1]

IPI00005648.1|SAFB2

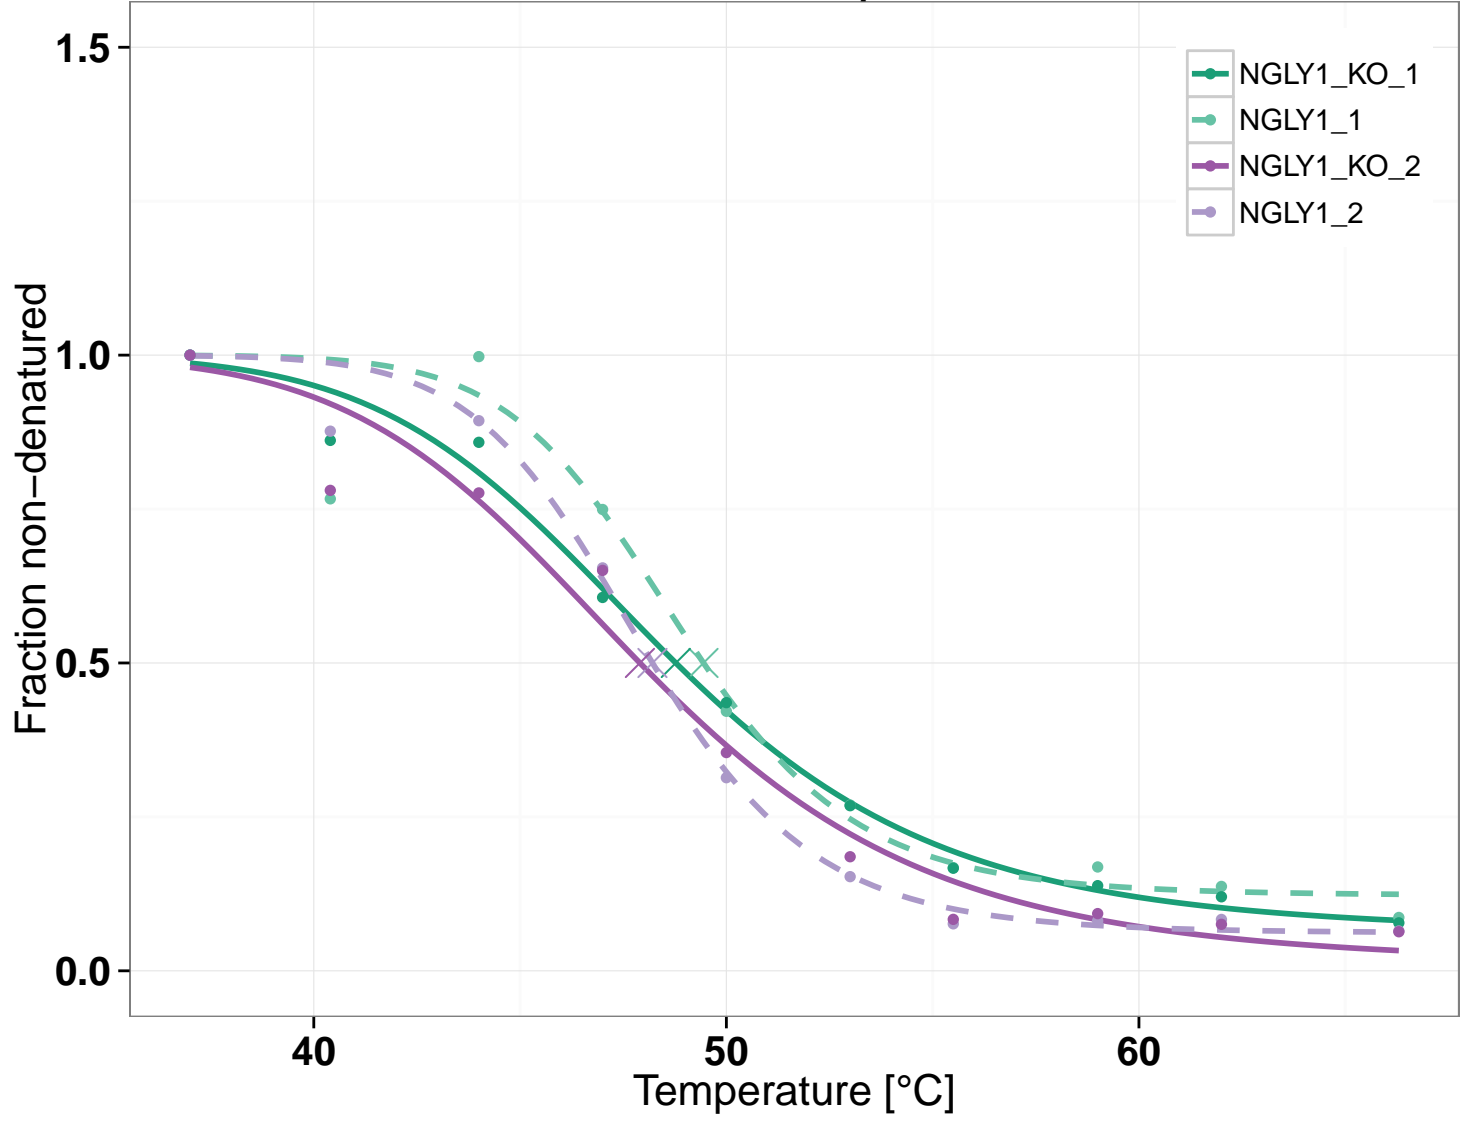

|            | meltPoint | slope  | plateau | R2   |
|------------|-----------|--------|---------|------|
| NGLY1_KO_1 | 48.77     | -0.069 | 0.06    | 0.99 |
| NGLY1_1    | 49.45     | -0.1   | 0.12    | 0.95 |
| NGLY1_KO_2 | 47.9      | -0.07  | 0.01    | 0.97 |
| NGLY1_2    | 48.21     | -0.11  | 0.06    | 0.99 |

Supplement: Supplementary file 8262 [file 1]

IPI00157304.1|SSBP3

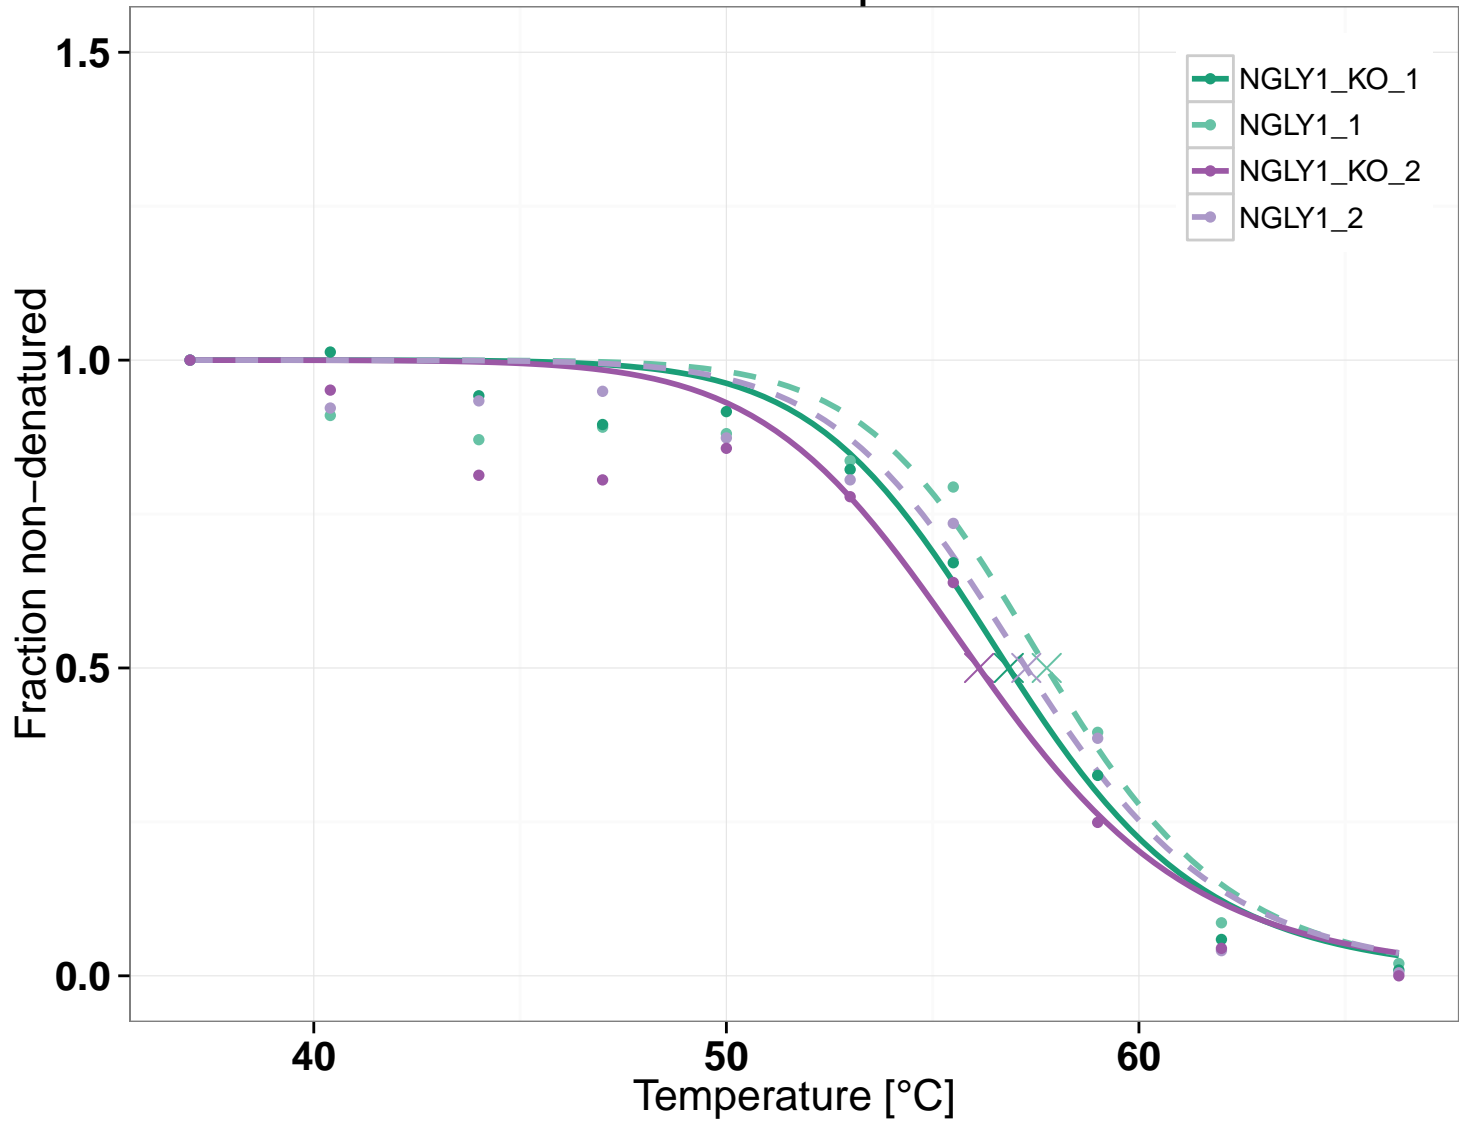

|            | meltPoint | slope  | plateau | R2   |
|------------|-----------|--------|---------|------|
| NGLY1_KO_1 | 56.85     | -0.1   | 0       | 0.98 |
| NGLY1_1    | 57.77     | -0.11  | 0       | 0.95 |
| NGLY1_KO_2 | 56.13     | -0.095 | 0       | 0.93 |
| NGLY1_2    | 57.27     | -0.1   | 0       | 0.97 |

Supplement: Supplementary file 8263 [file 1]

# IPI00006099.1|BMS1

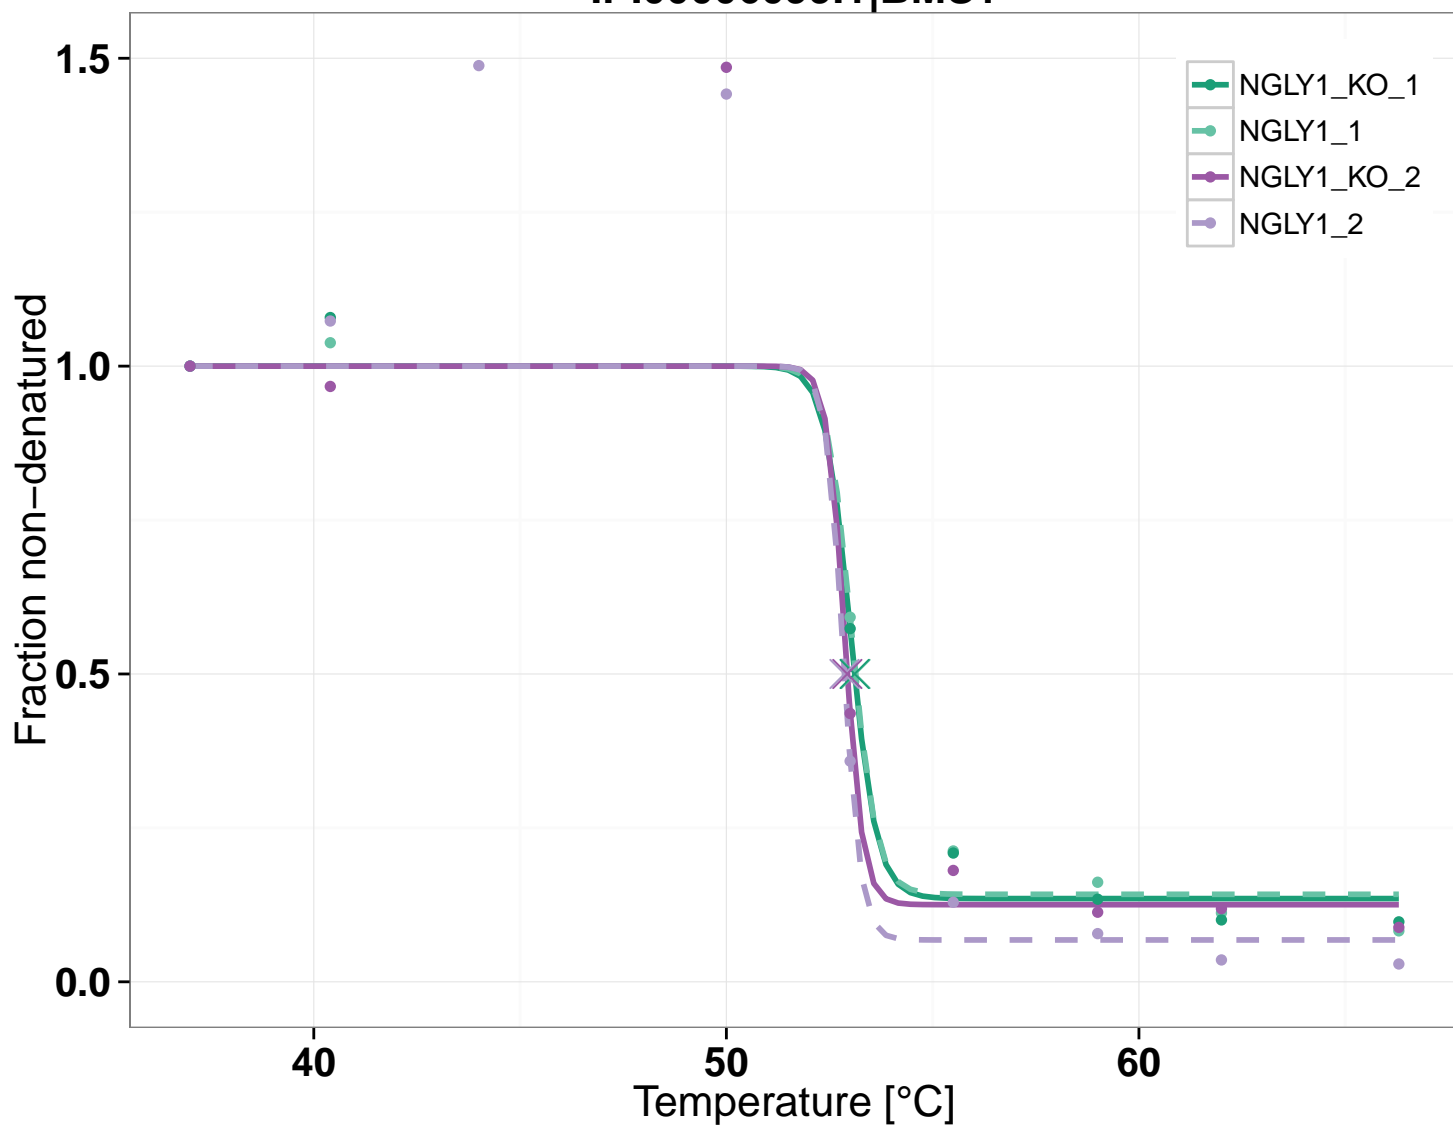

|            | meltPoint | slope | plateau | R2   |
|------------|-----------|-------|---------|------|
| NGLY1_KO_1 | 53.11     | -0.69 | 0.14    | 0.44 |
| NGLY1_1    | 53.13     | -0.72 | 0.14    | 0.26 |
| NGLY1_KO_2 | 52.93     | -1    | 0.13    | 0.41 |
| NGLY1_2    | 52.86     | -1.1  | 0.07    | 0.53 |

Supplement: Supplementary file 8264 [file 1]

IPI00023161.1|MRPL46

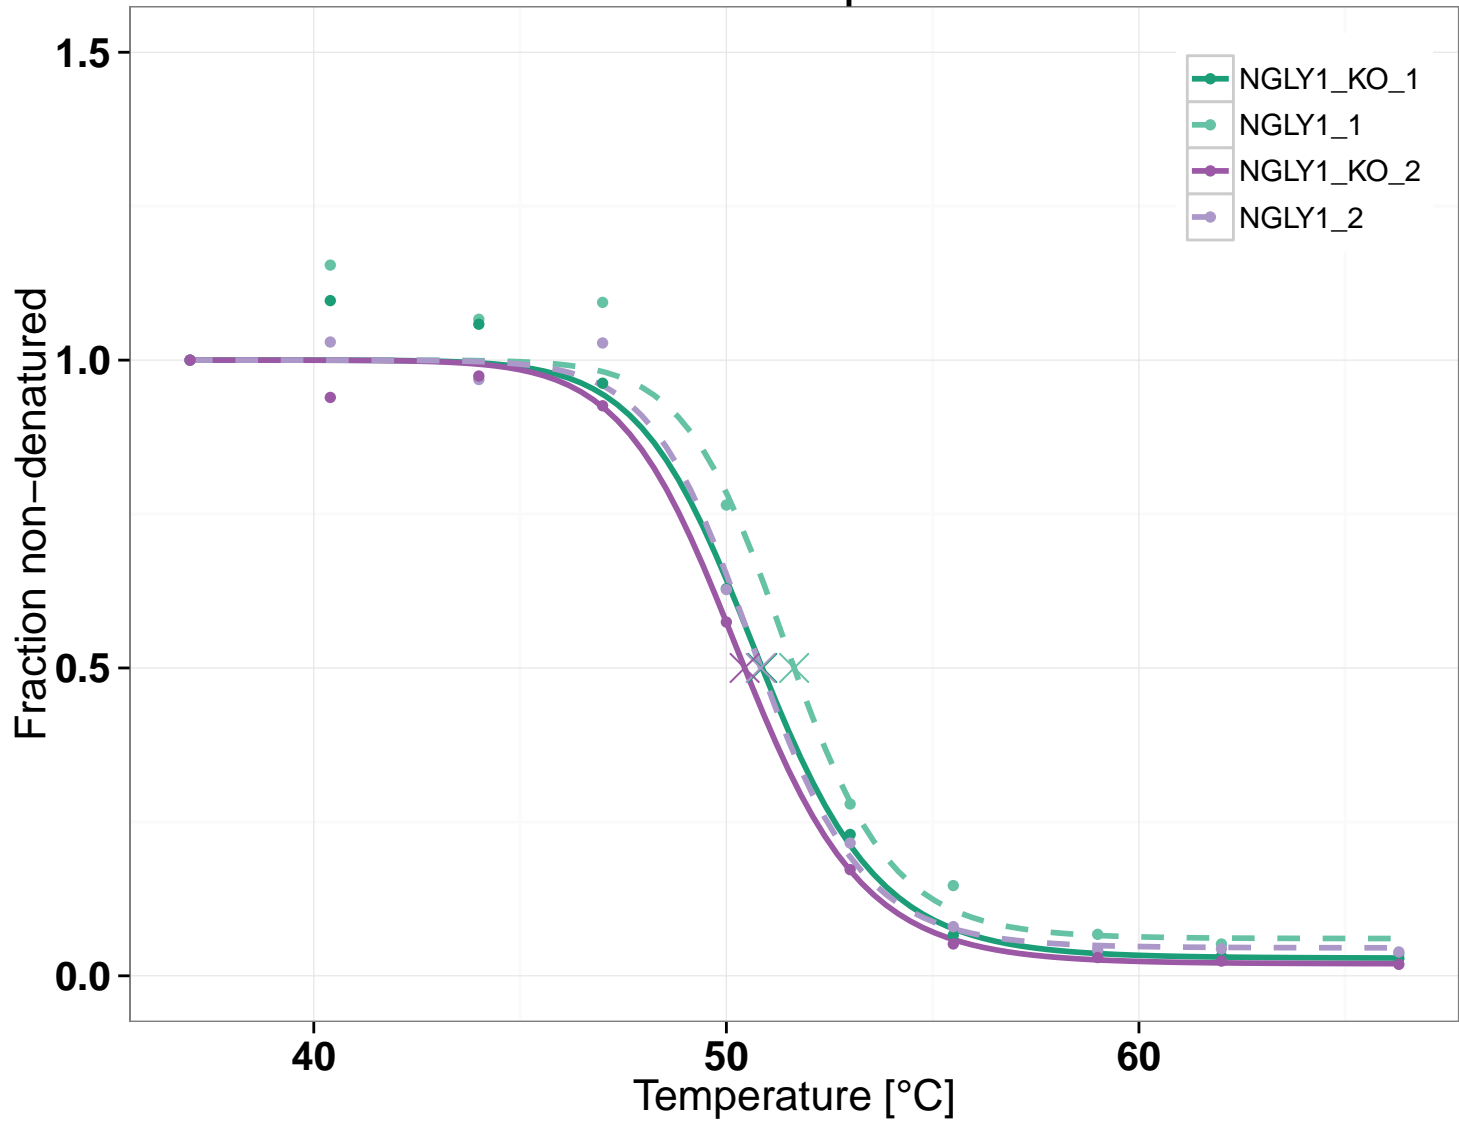

|            | meltPoint | slope | plateau | R2   |
|------------|-----------|-------|---------|------|
| NGLY1_KO_1 | 50.87     | -0.17 | 0.03    | 0.99 |
| NGLY1_1    | 51.64     | -0.19 | 0.06    | 0.98 |
| NGLY1_KO_2 | 50.44     | -0.17 | 0.02    | 1    |
| NGLY1_2    | 50.83     | -0.19 | 0.05    | 1    |

Supplement: Supplementary file 8265 [file 1]

# IPI00328170.9|GCS1

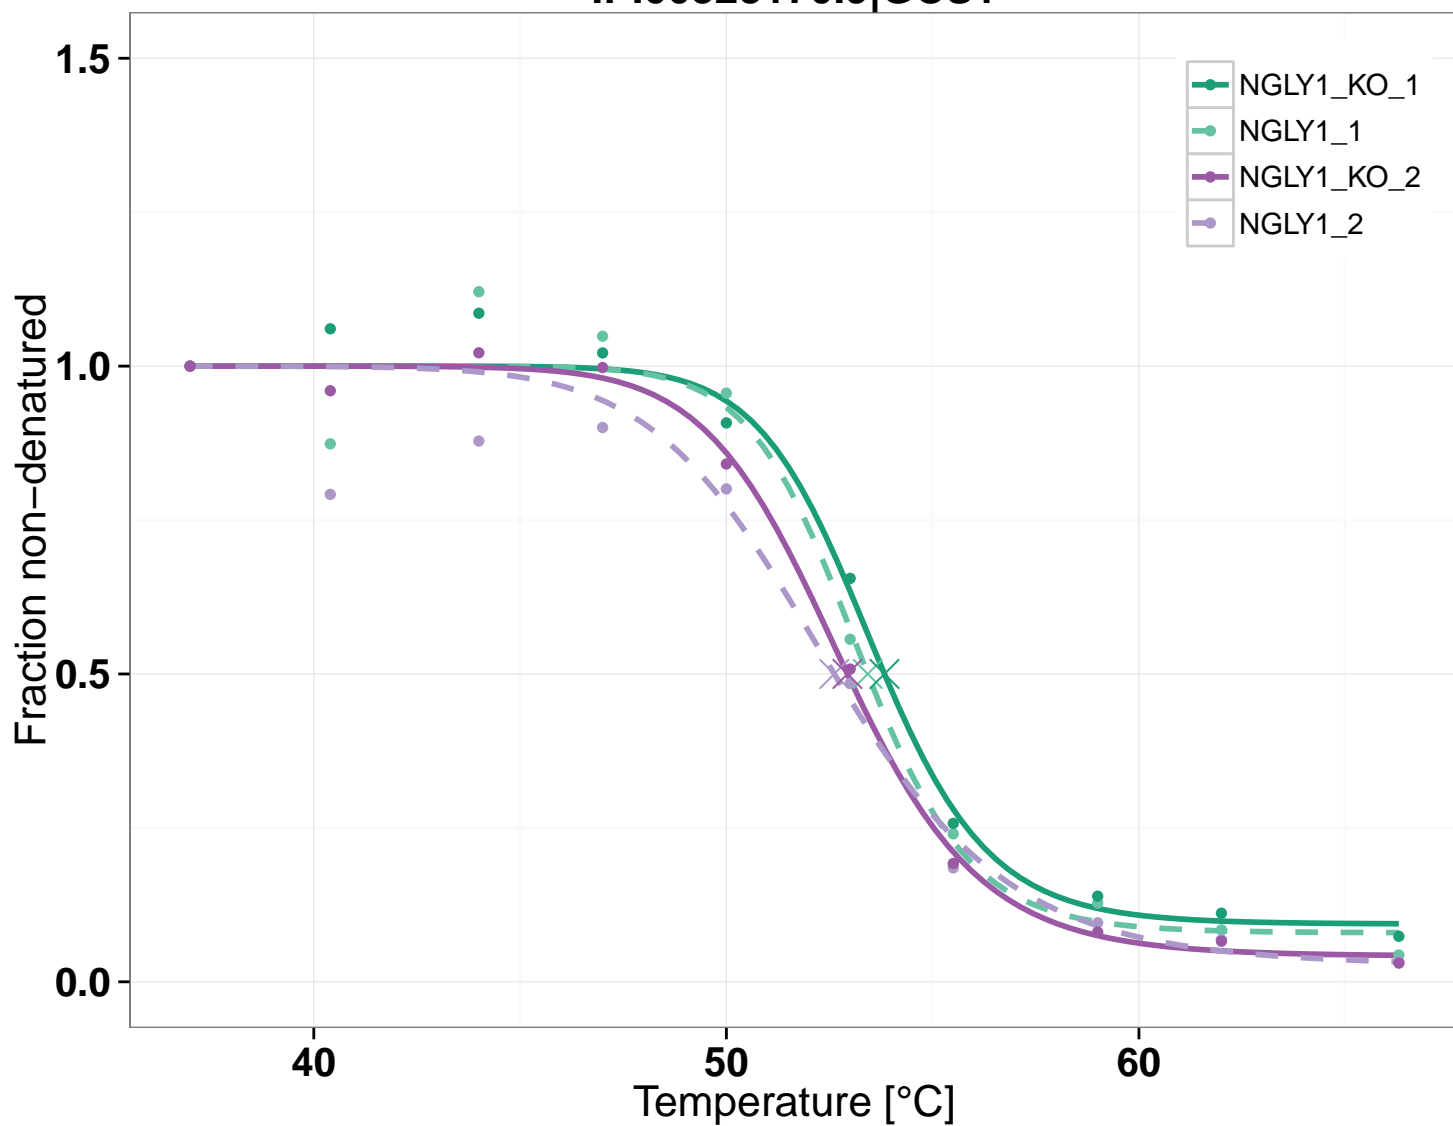

|            | meltPoint | slope | plateau | R2   |
|------------|-----------|-------|---------|------|
| NGLY1_KO_1 | 53.83     | -0.16 | 0.09    | 0.99 |
| NGLY1_1    | 53.43     | -0.17 | 0.08    | 0.98 |
| NGLY1_KO_2 | 52.93     | -0.14 | 0.04    | 1    |
| NGLY1_2    | 52.62     | -0.11 | 0.03    | 0.96 |

Supplement: Supplementary file 8266 [file 1]

# IPI00015145.2|NCOA4

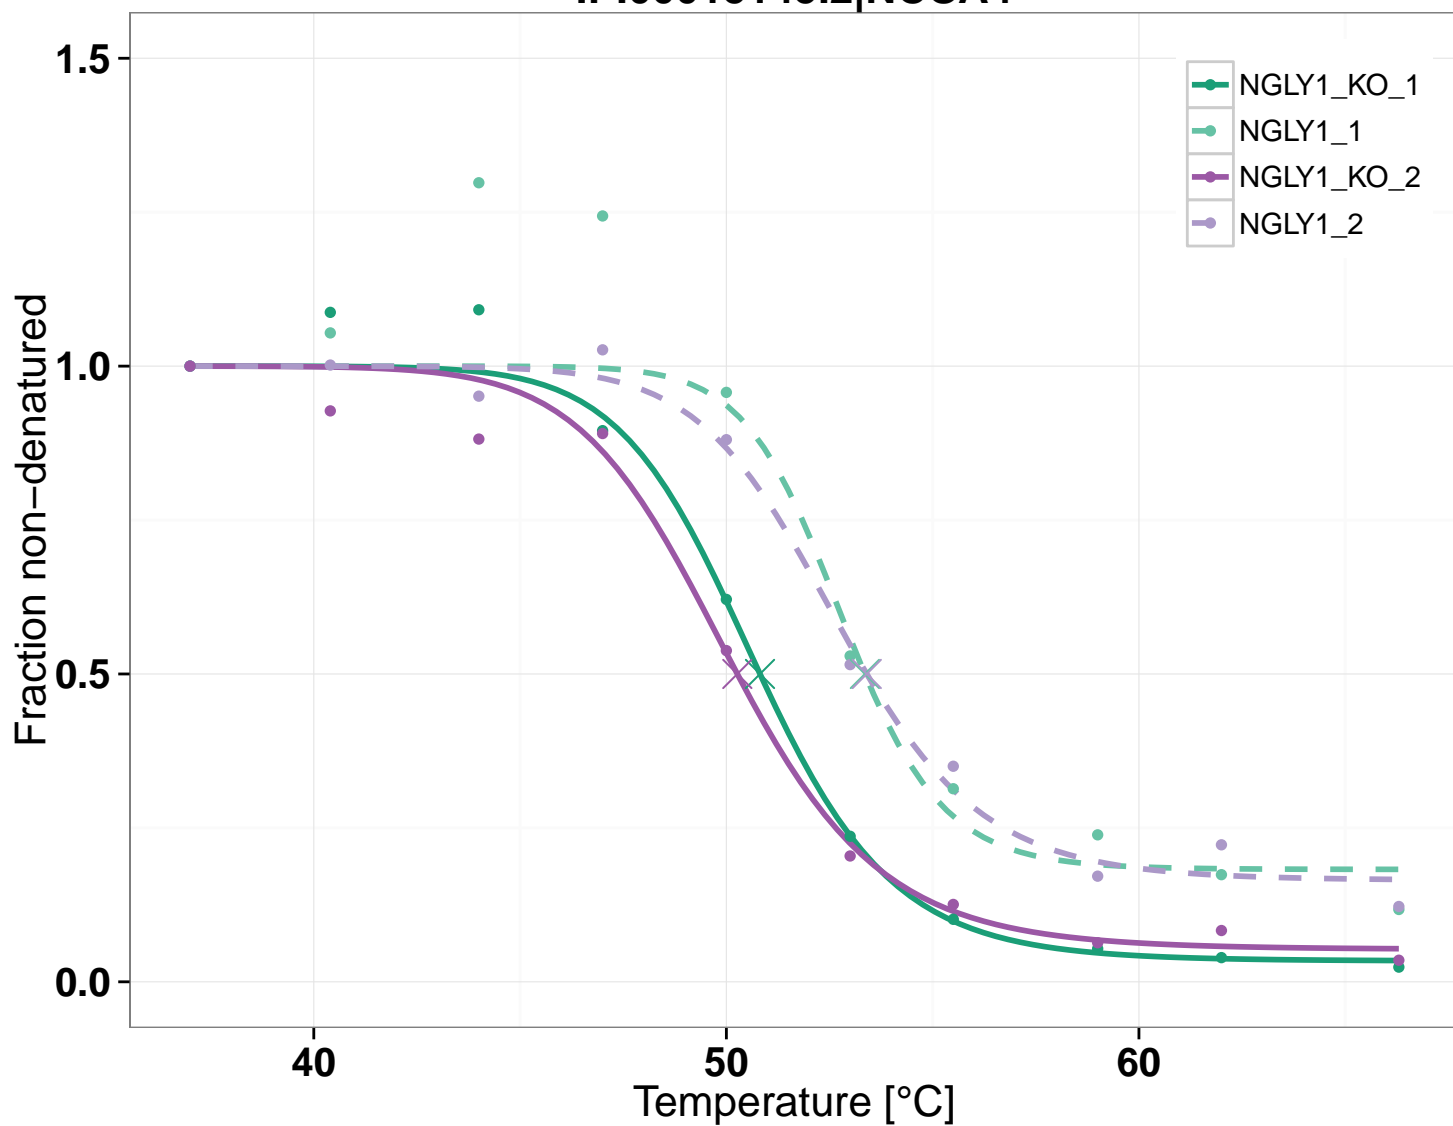

|            | meltPoint | slope | plateau | R2   |
|------------|-----------|-------|---------|------|
| NGLY1_KO_1 | 50.82     | -0.15 | 0.03    | 0.99 |
| NGLY1_1    | 53.36     | -0.17 | 0.18    | 0.92 |
| NGLY1_KO_2 | 50.27     | -0.13 | 0.05    | 0.99 |
| NGLY1_2    | 53.4      | -0.12 | 0.16    | 0.99 |

Supplement: Supplementary file 8267 [file 1]

# IPI00002968.1|MOCS2

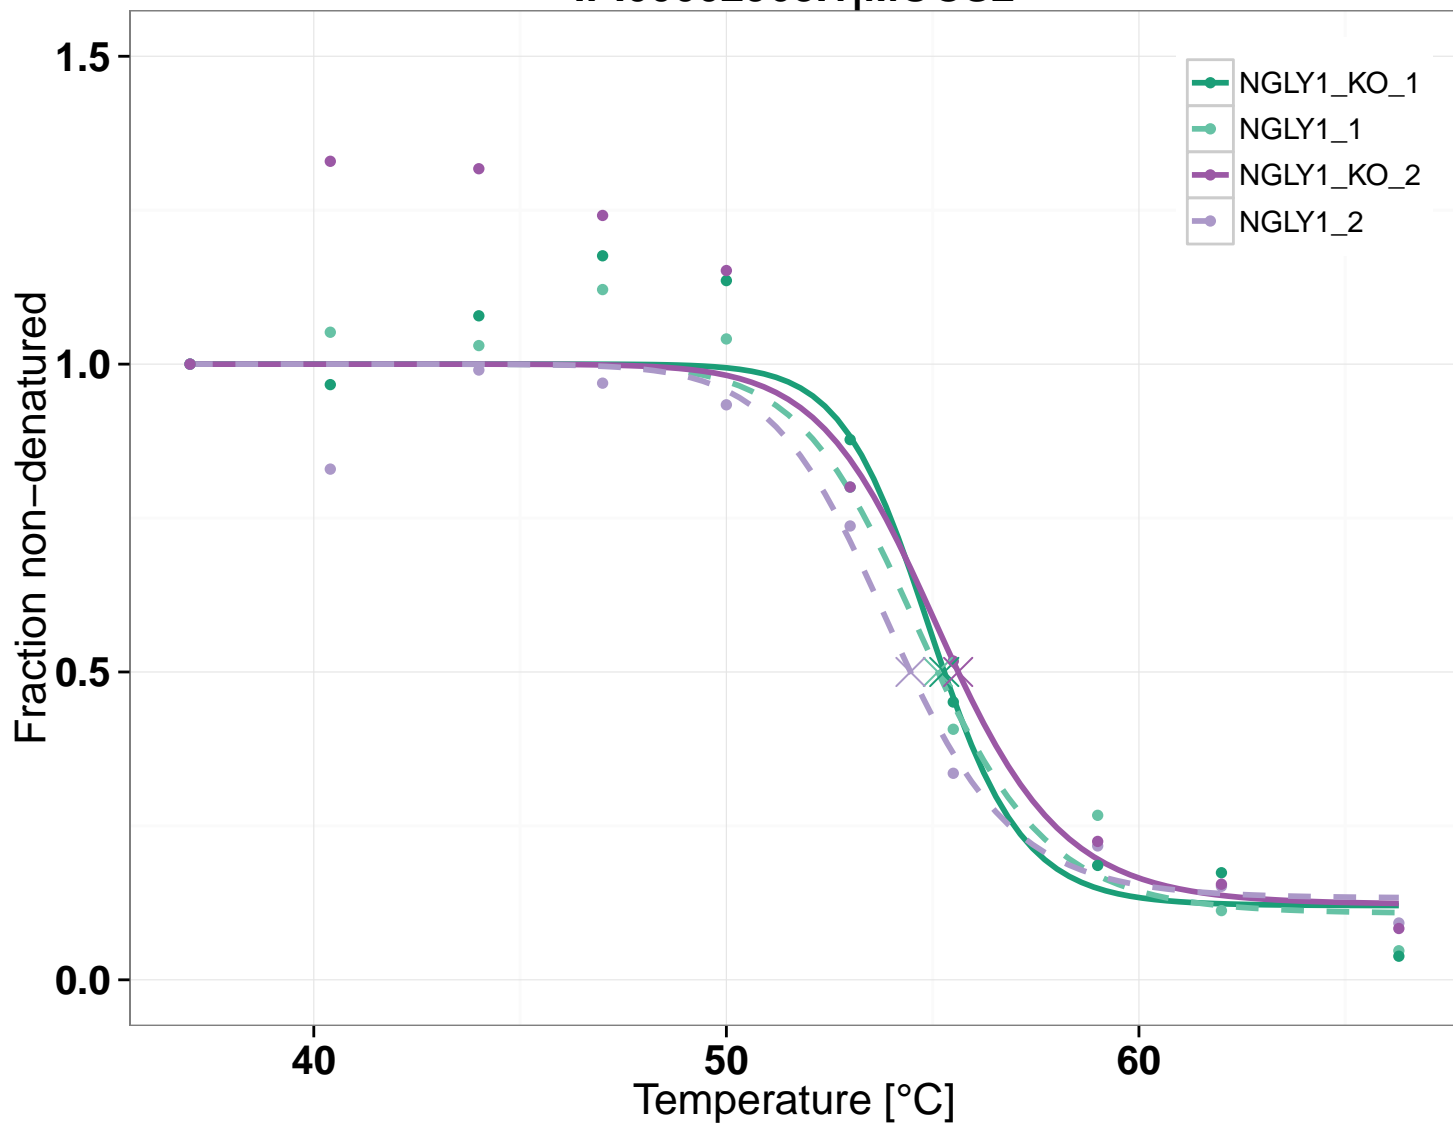

|            | meltPoint | slope | plateau | R2   |
|------------|-----------|-------|---------|------|
| NGLY1_KO_1 | 55.28     | -0.2  | 0.12    | 0.96 |
| NGLY1_1    | 55.13     | -0.15 | 0.11    | 0.98 |
| NGLY1_KO_2 | 55.62     | -0.15 | 0.12    | 0.87 |
| NGLY1_2    | 54.46     | -0.15 | 0.13    | 0.97 |

Supplement: Supplementary file 8268 [file 1]

IPI00747797.2|TRMT2B

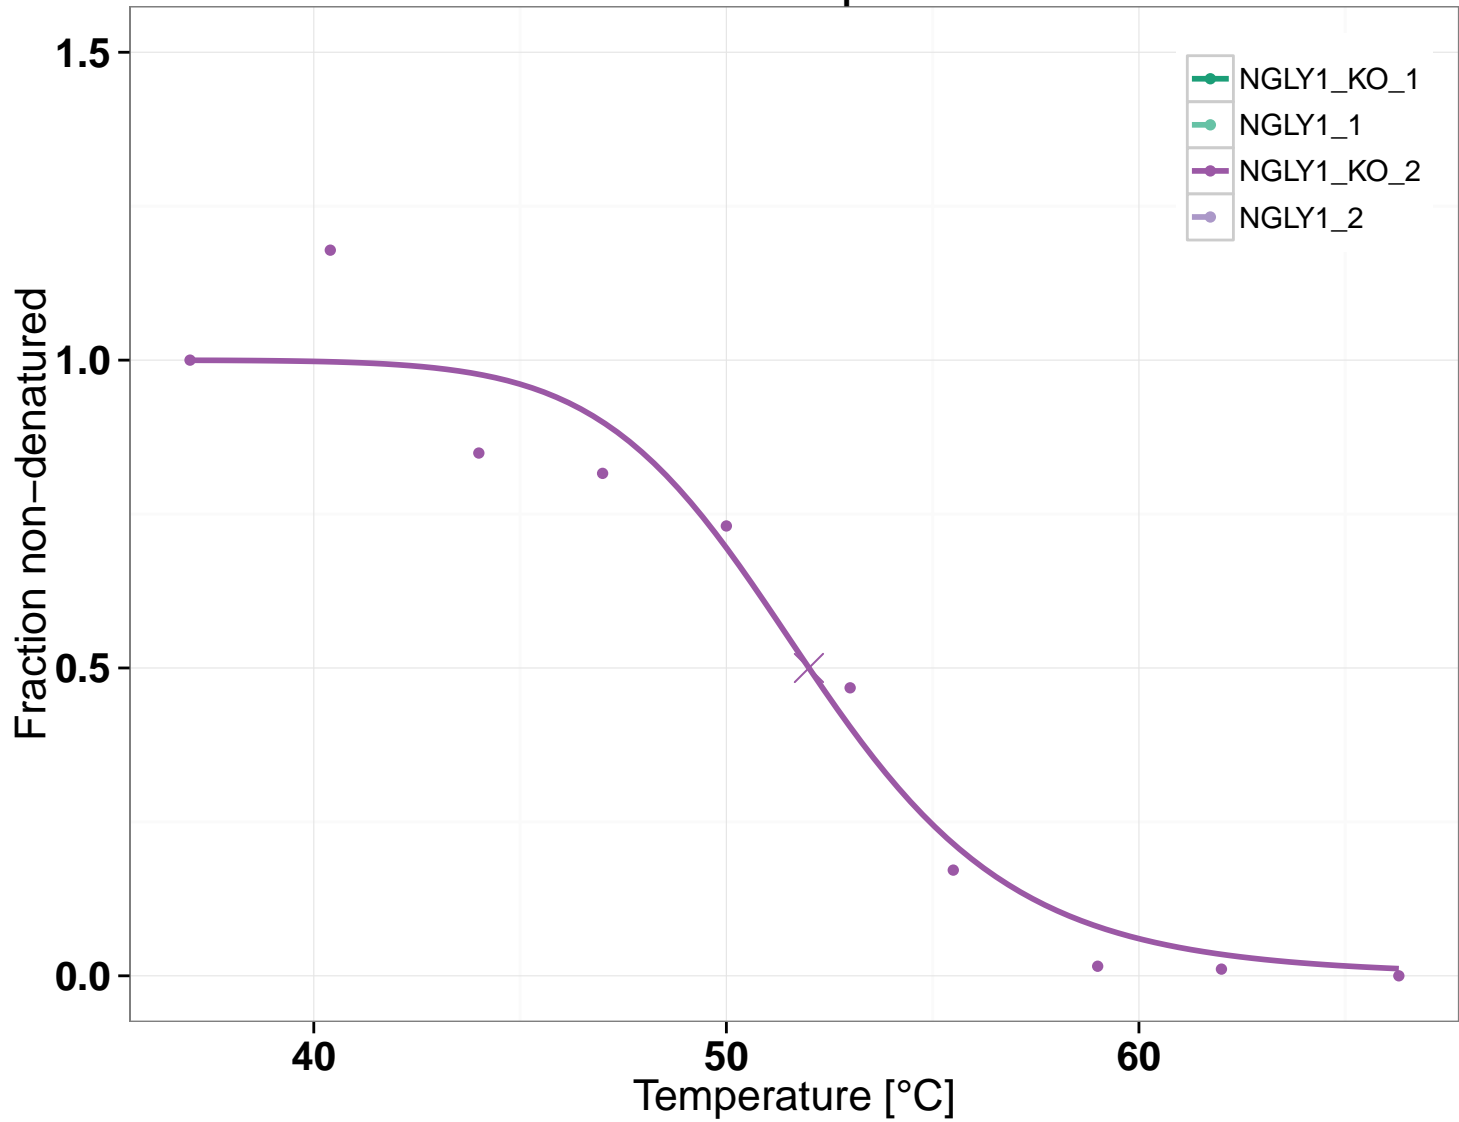

|            | meltPoint | slope | plateau | R2   |
|------------|-----------|-------|---------|------|
| NGLY1_KO_1 | —         | —     | —       | —    |
| NGLY1_1    | —         | —     | —       | —    |
| NGLY1_KO_2 | 52        | -0.1  | 0       | 0.96 |
| NGLY1_2    | —         | —     | —       | —    |

Supplement: Supplementary file 8269 [file 1]

# IPI00010948.2|TRIM26

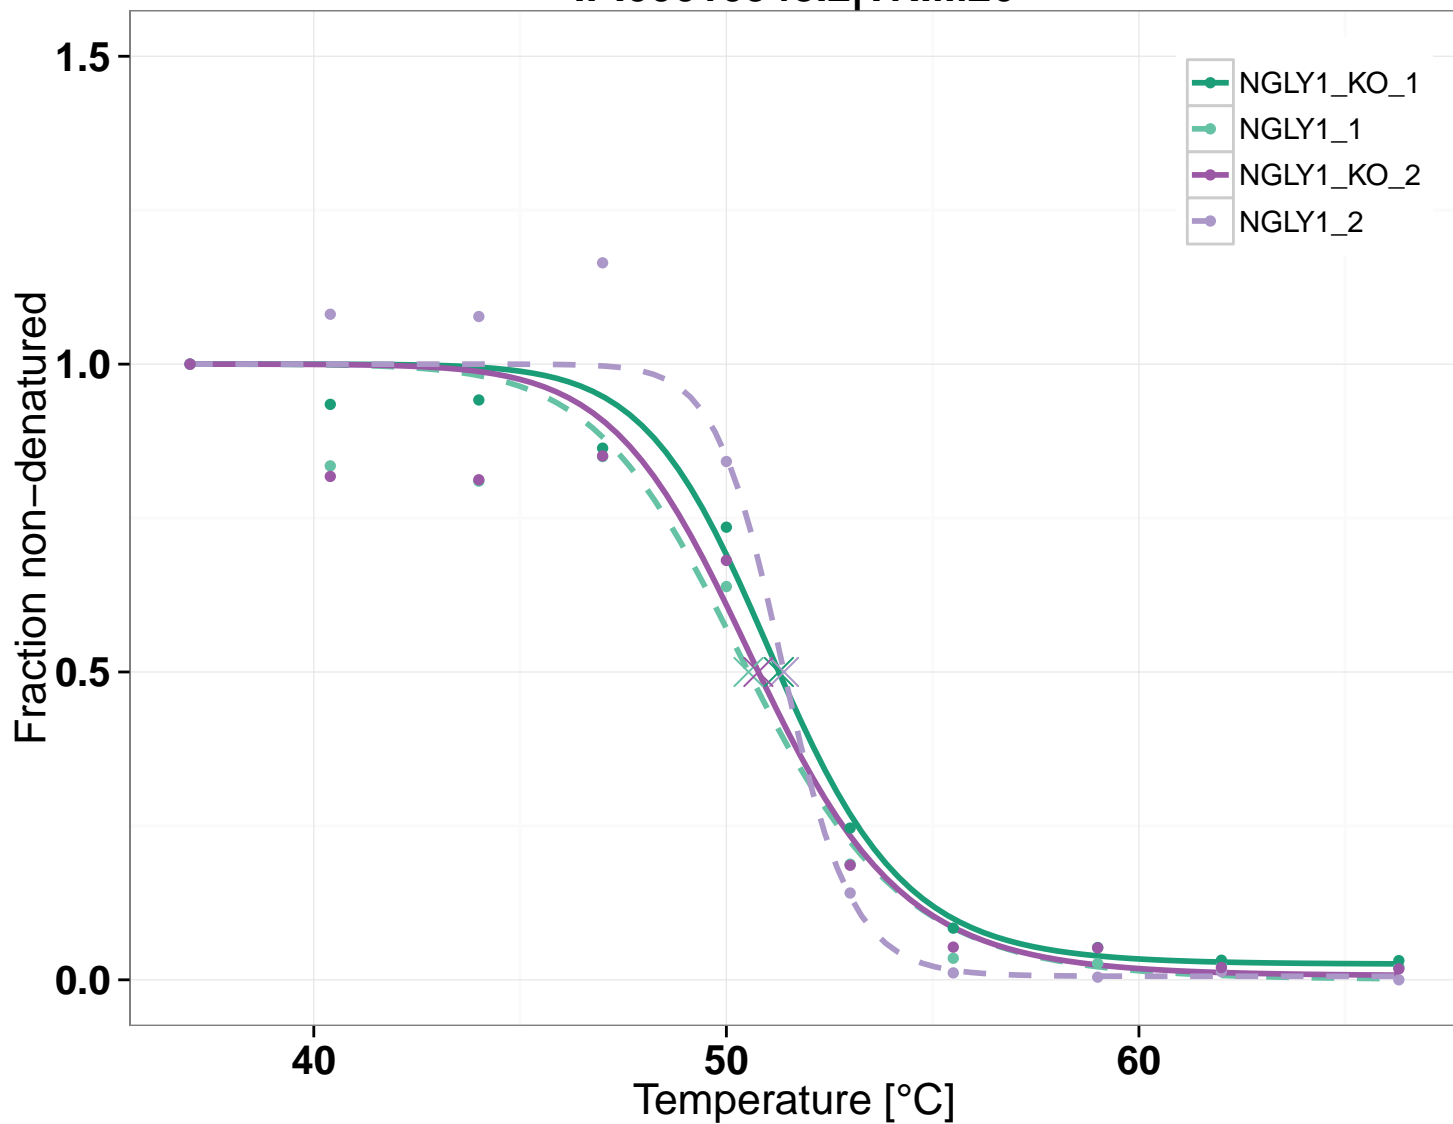

|            | meltPoint | slope | plateau | R2   |
|------------|-----------|-------|---------|------|
| NGLY1_KO_1 | 51.27     | -0.15 | 0.03    | 0.99 |
| NGLY1_1    | 50.54     | -0.13 | 0       | 0.96 |
| NGLY1_KO_2 | 50.78     | -0.14 | 0.01    | 0.95 |
| NGLY1_2    | 51.4      | -0.3  | 0.01    | 0.98 |

Supplement: Supplementary file 8270 [file 1]

# IPI00385495.5|LMF2

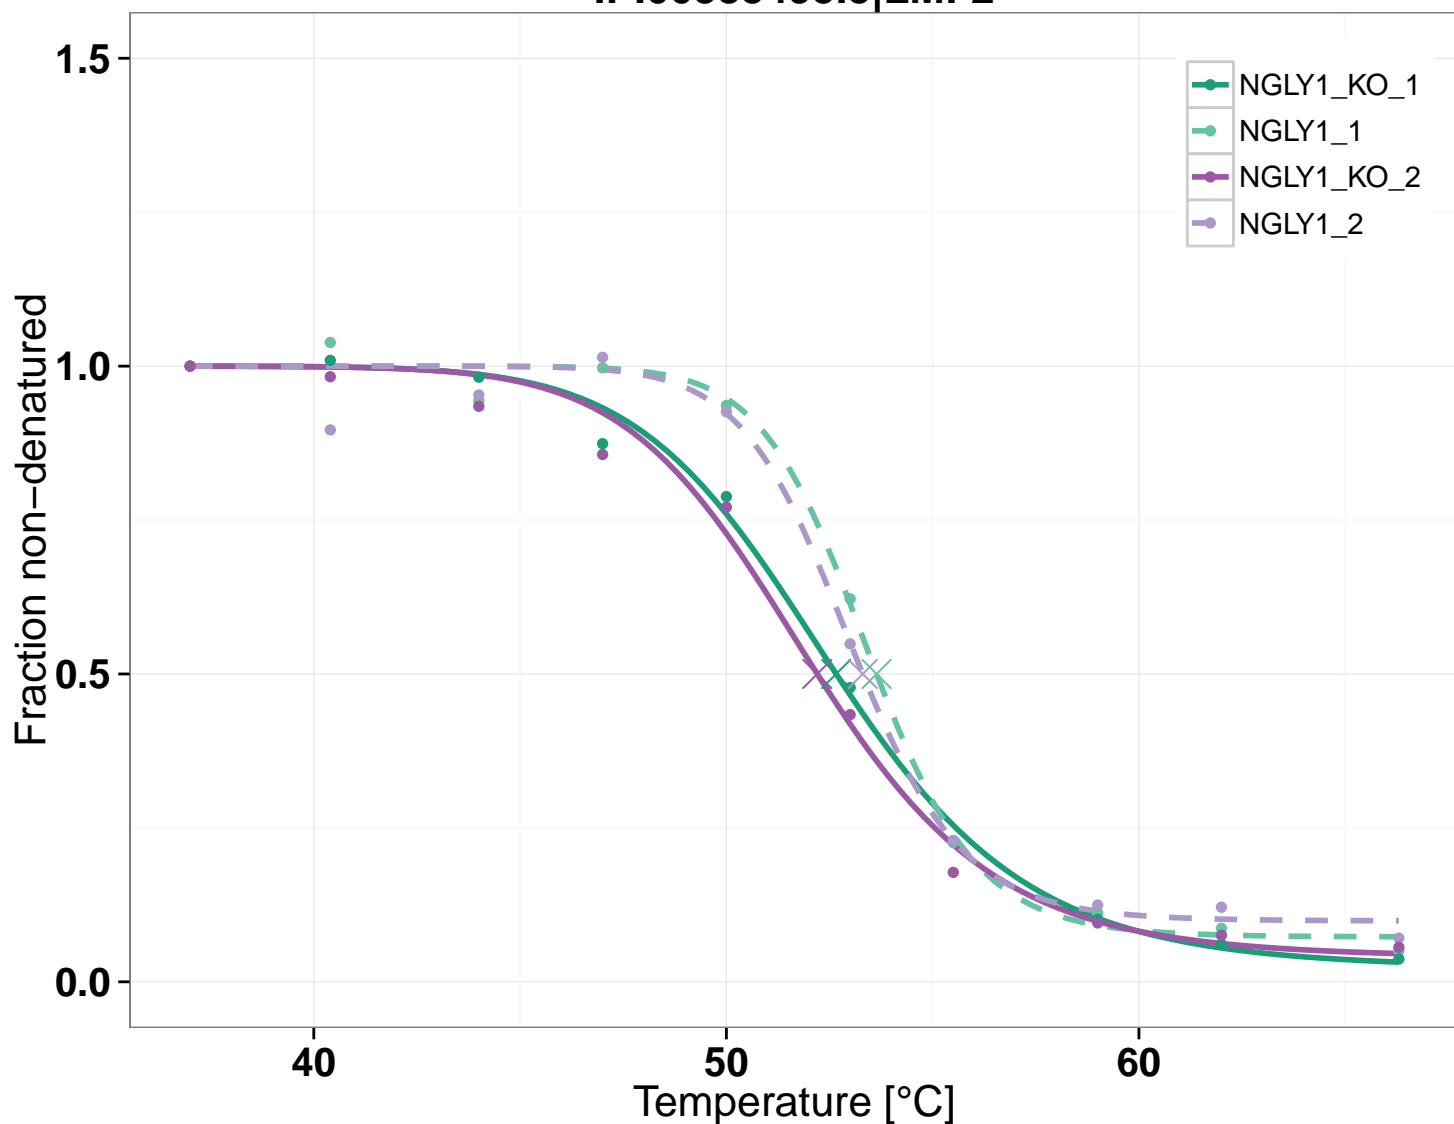

|            | meltPoint | slope | plateau | R2   |
|------------|-----------|-------|---------|------|
| NGLY1_KO_1 | 52.66     | -0.1  | 0.02    | 1    |
| NGLY1_1    | 53.64     | -0.18 | 0.07    | 1    |
| NGLY1_KO_2 | 52.2      | -0.11 | 0.04    | 0.99 |
| NGLY1_2    | 53.31     | -0.17 | 0.1     | 0.99 |

Supplement: Supplementary file 8271 [file 1]

IPI00291783.3|GEMIN5

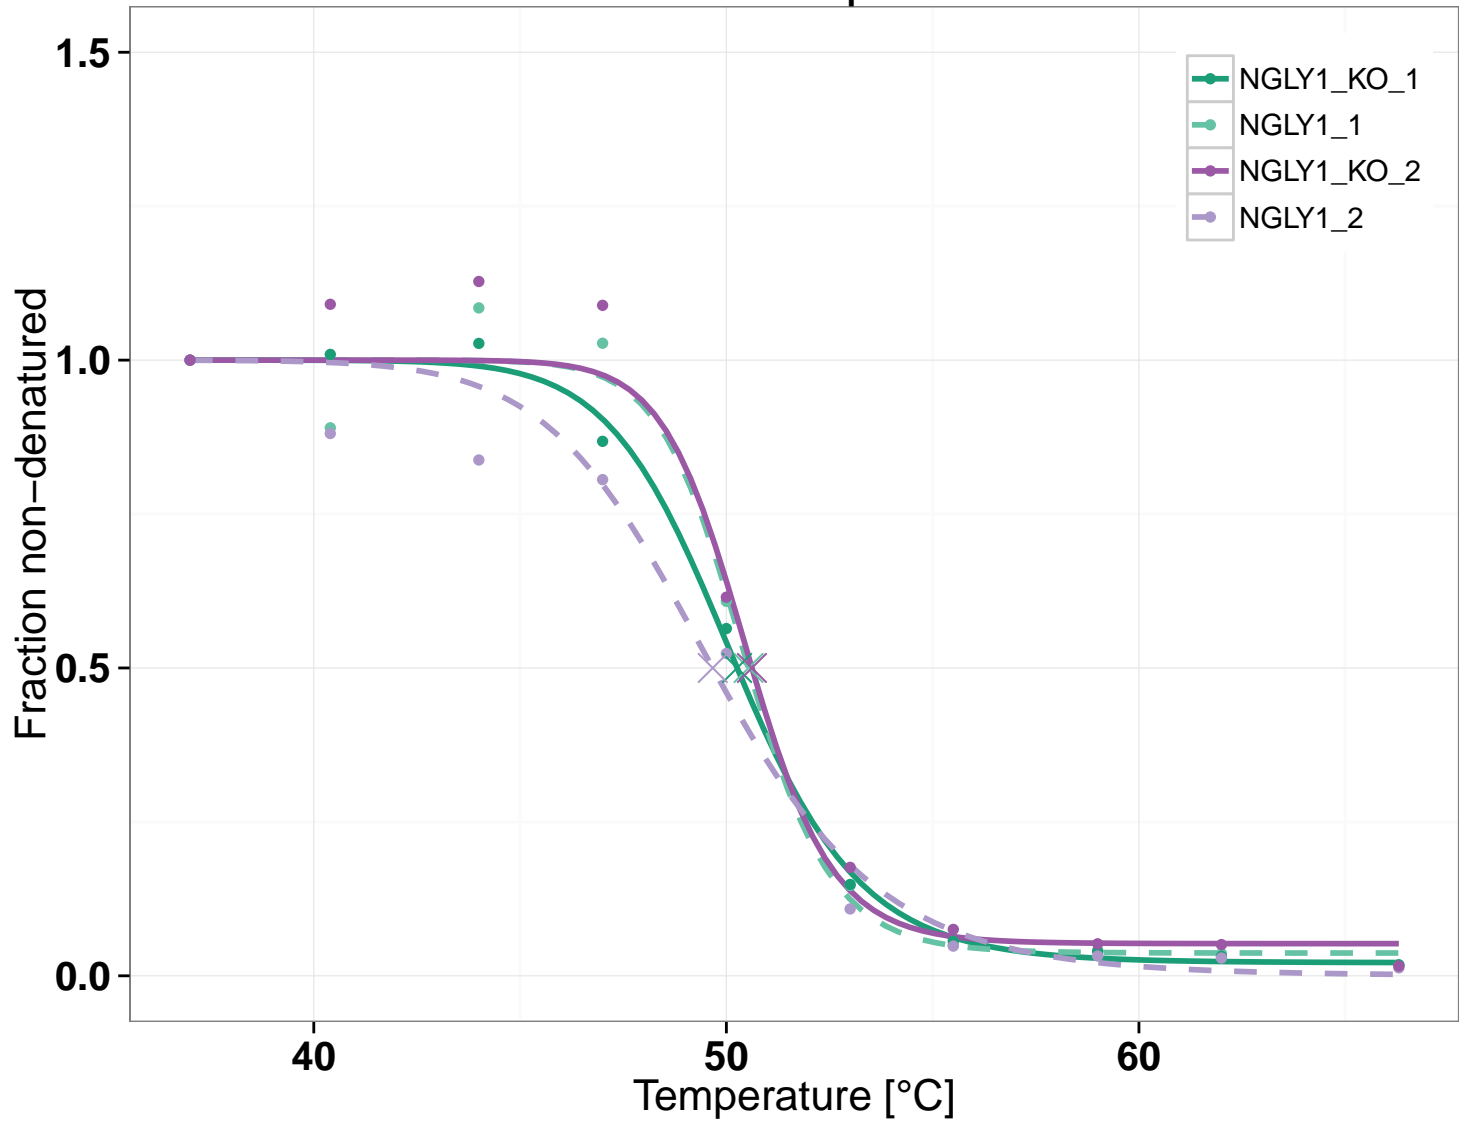

|            | meltPoint | slope | plateau | R2   |
|------------|-----------|-------|---------|------|
| NGLY1_KO_1 | 50.26     | -0.16 | 0.02    | 1    |
| NGLY1_1    | 50.54     | -0.23 | 0.04    | 0.99 |
| NGLY1_KO_2 | 50.62     | -0.23 | 0.05    | 0.98 |
| NGLY1_2    | 49.67     | -0.12 | 0       | 0.98 |

Supplement: Supplementary file 8272 [file 1]

# IPI00029012.1|EIF3A

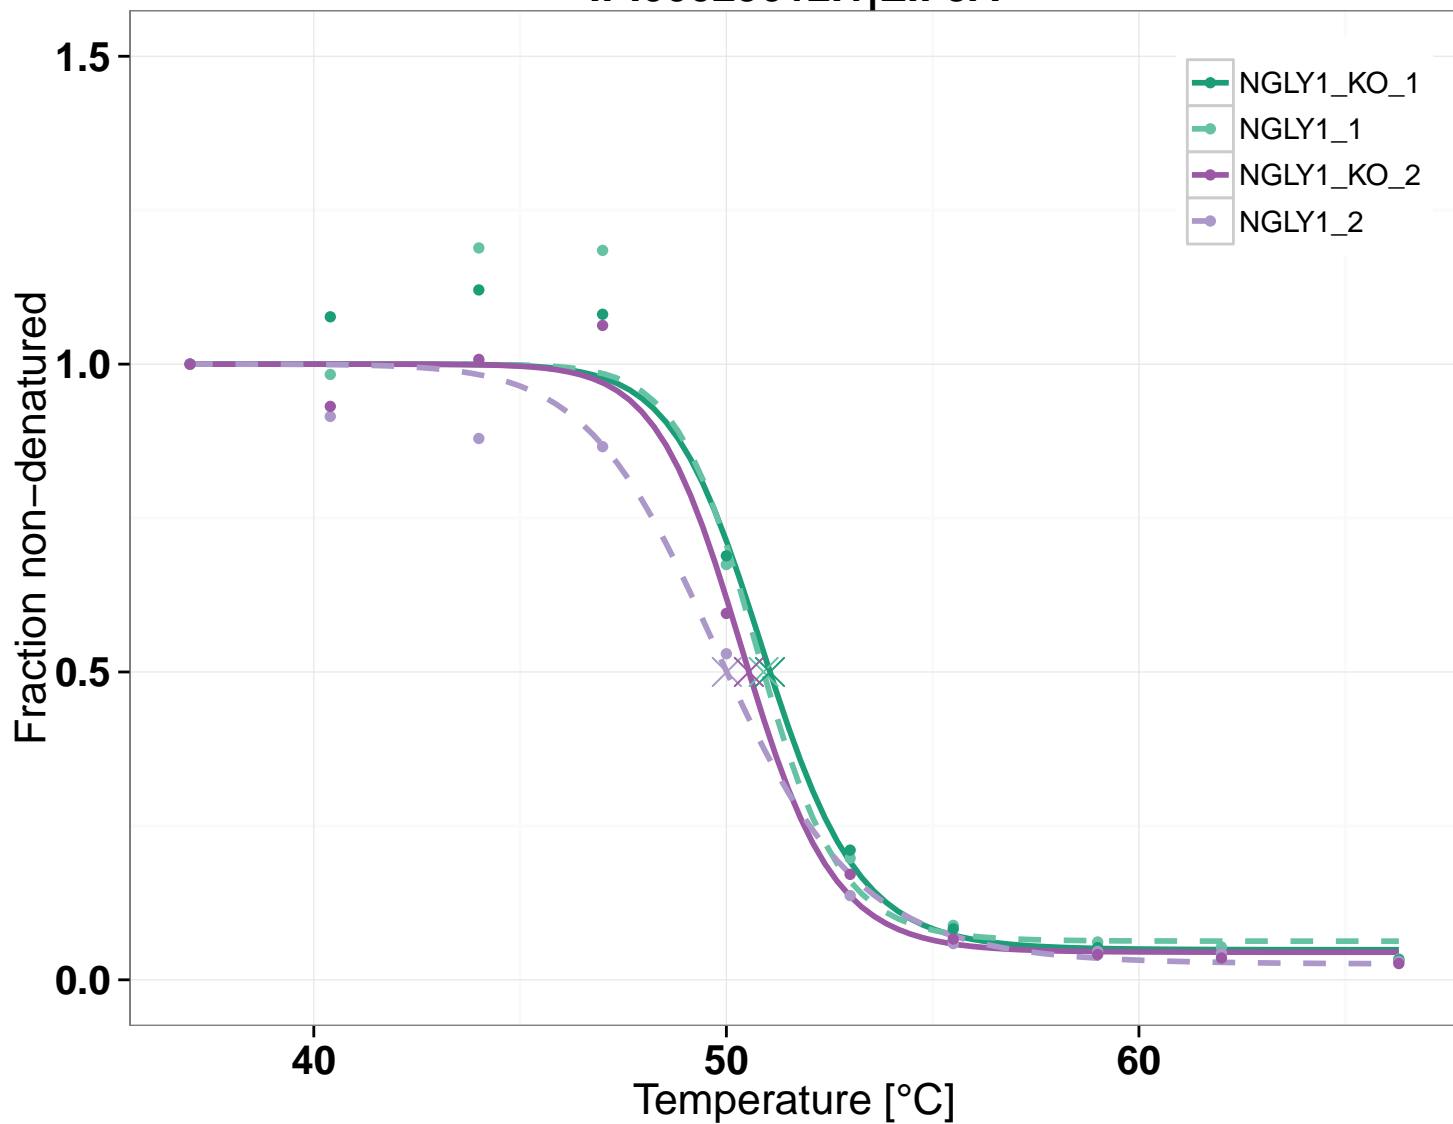

|            | meltPoint | slope | plateau | R2   |
|------------|-----------|-------|---------|------|
| NGLY1_KO_1 | 51.06     | -0.21 | 0.05    | 0.99 |
| NGLY1_1    | 50.9      | -0.24 | 0.06    | 0.97 |
| NGLY1_KO_2 | 50.55     | -0.22 | 0.04    | 0.99 |
| NGLY1_2    | 50.01     | -0.15 | 0.03    | 0.99 |

Supplement: Supplementary file 8273 [file 1]

IPI00219896.2|ITGAL

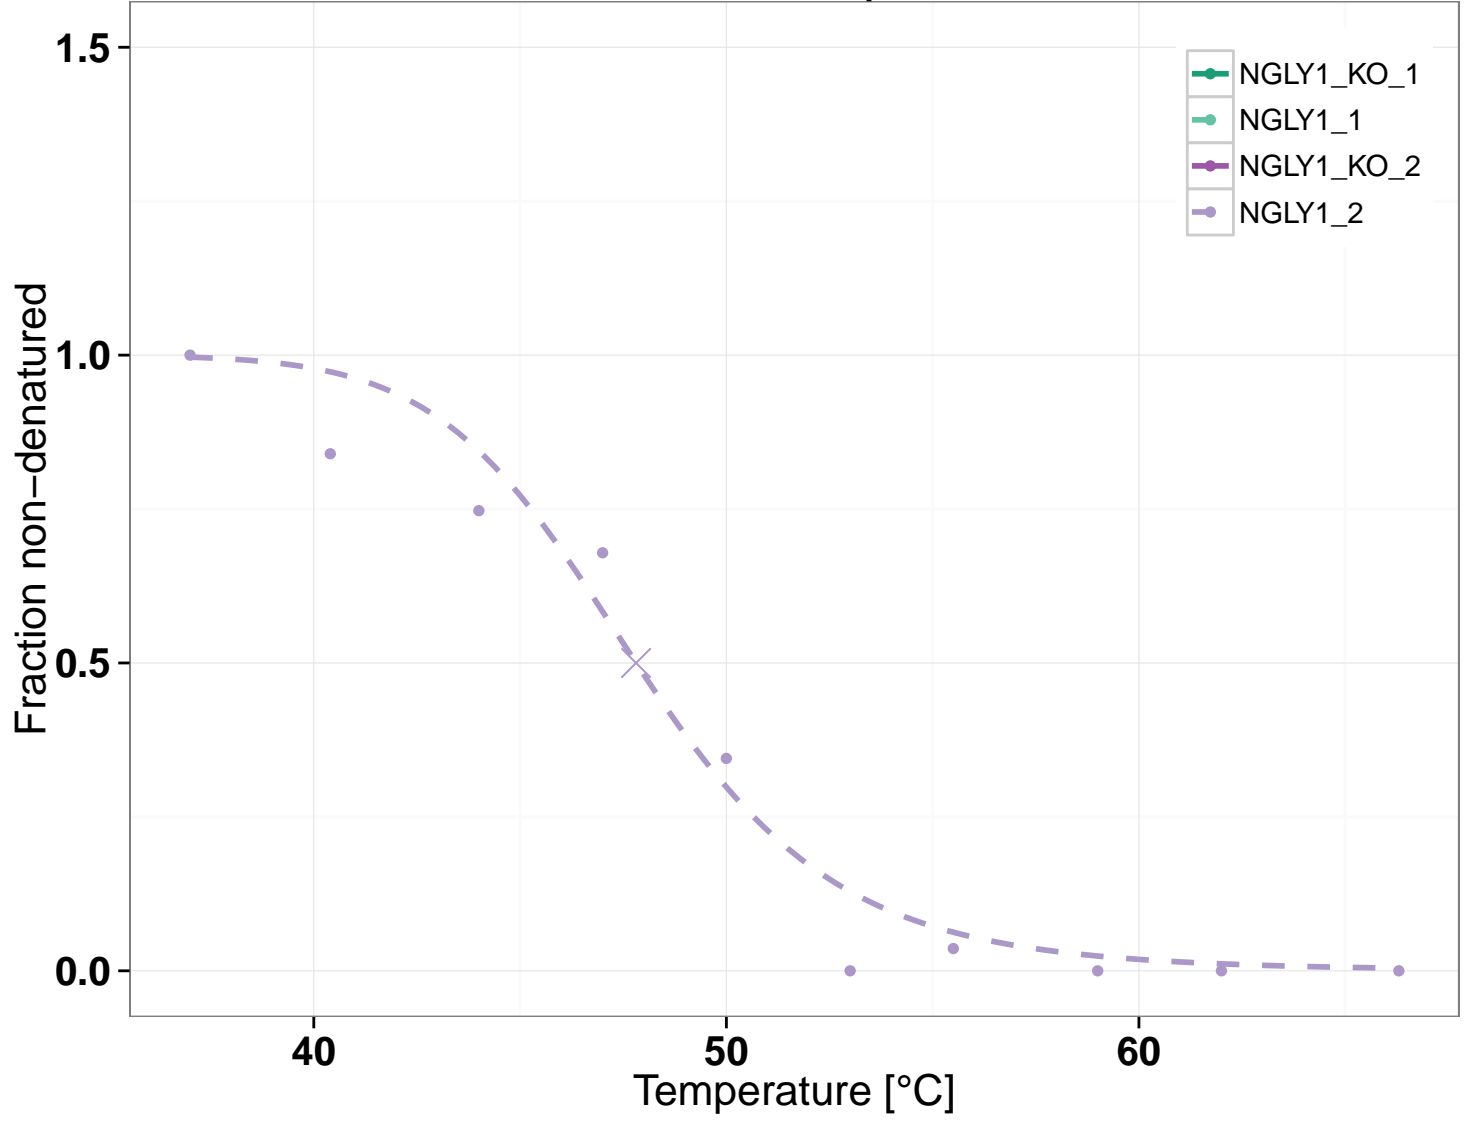

|            | meltPoint | slope | plateau | R2   |
|------------|-----------|-------|---------|------|
| NGLY1_KO_1 | -         | -     | -       | -    |
| NGLY1_1    | -         | -     | -       | -    |
| NGLY1_KO_2 | -         | -     | -       | -    |
| NGLY1_2    | 47.81     | -0.1  | 0       | 0.96 |

Supplement: Supplementary file 8274 [file 1]

IPI00908985.1|B4DQK8\_HUMAN

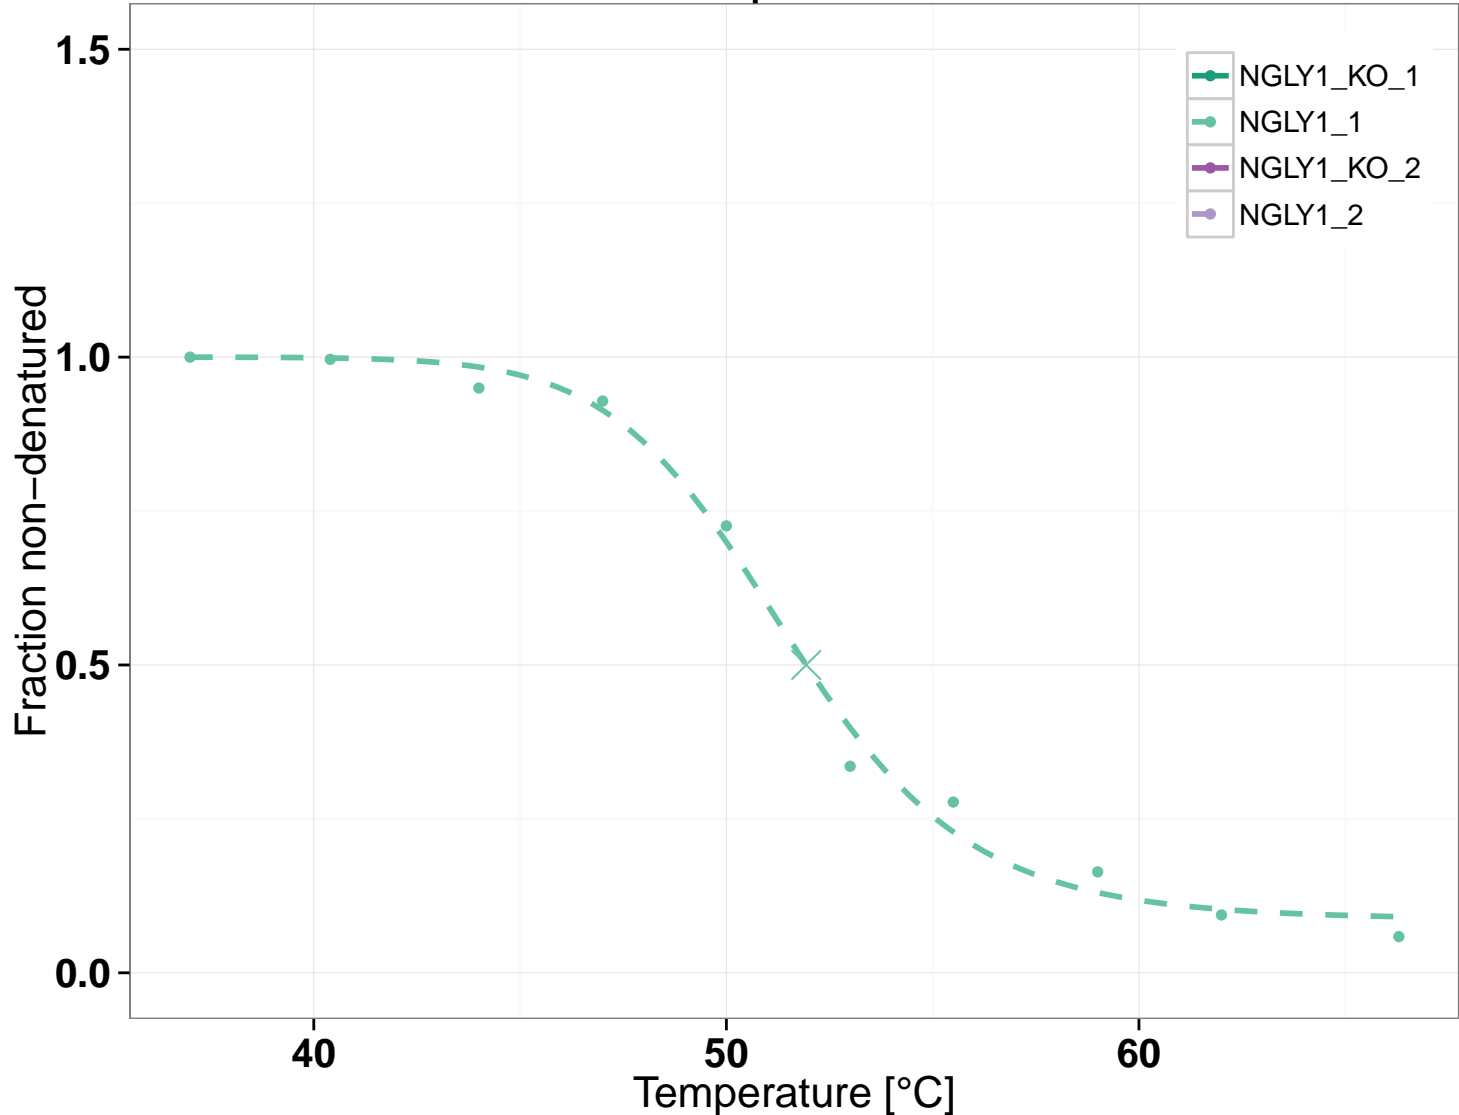

|            | meltPoint | slope | plateau | R2   |
|------------|-----------|-------|---------|------|
| NGLY1_KO_1 | -         | -     | -       | -    |
| NGLY1_1    | 51.94     | -0.11 | 0.09    | 0.99 |
| NGLY1_KO_2 | -         | -     | -       | -    |
| NGLY1_2    | -         | -     | -       | -    |

Supplement: Supplementary file 8275 [file 1]

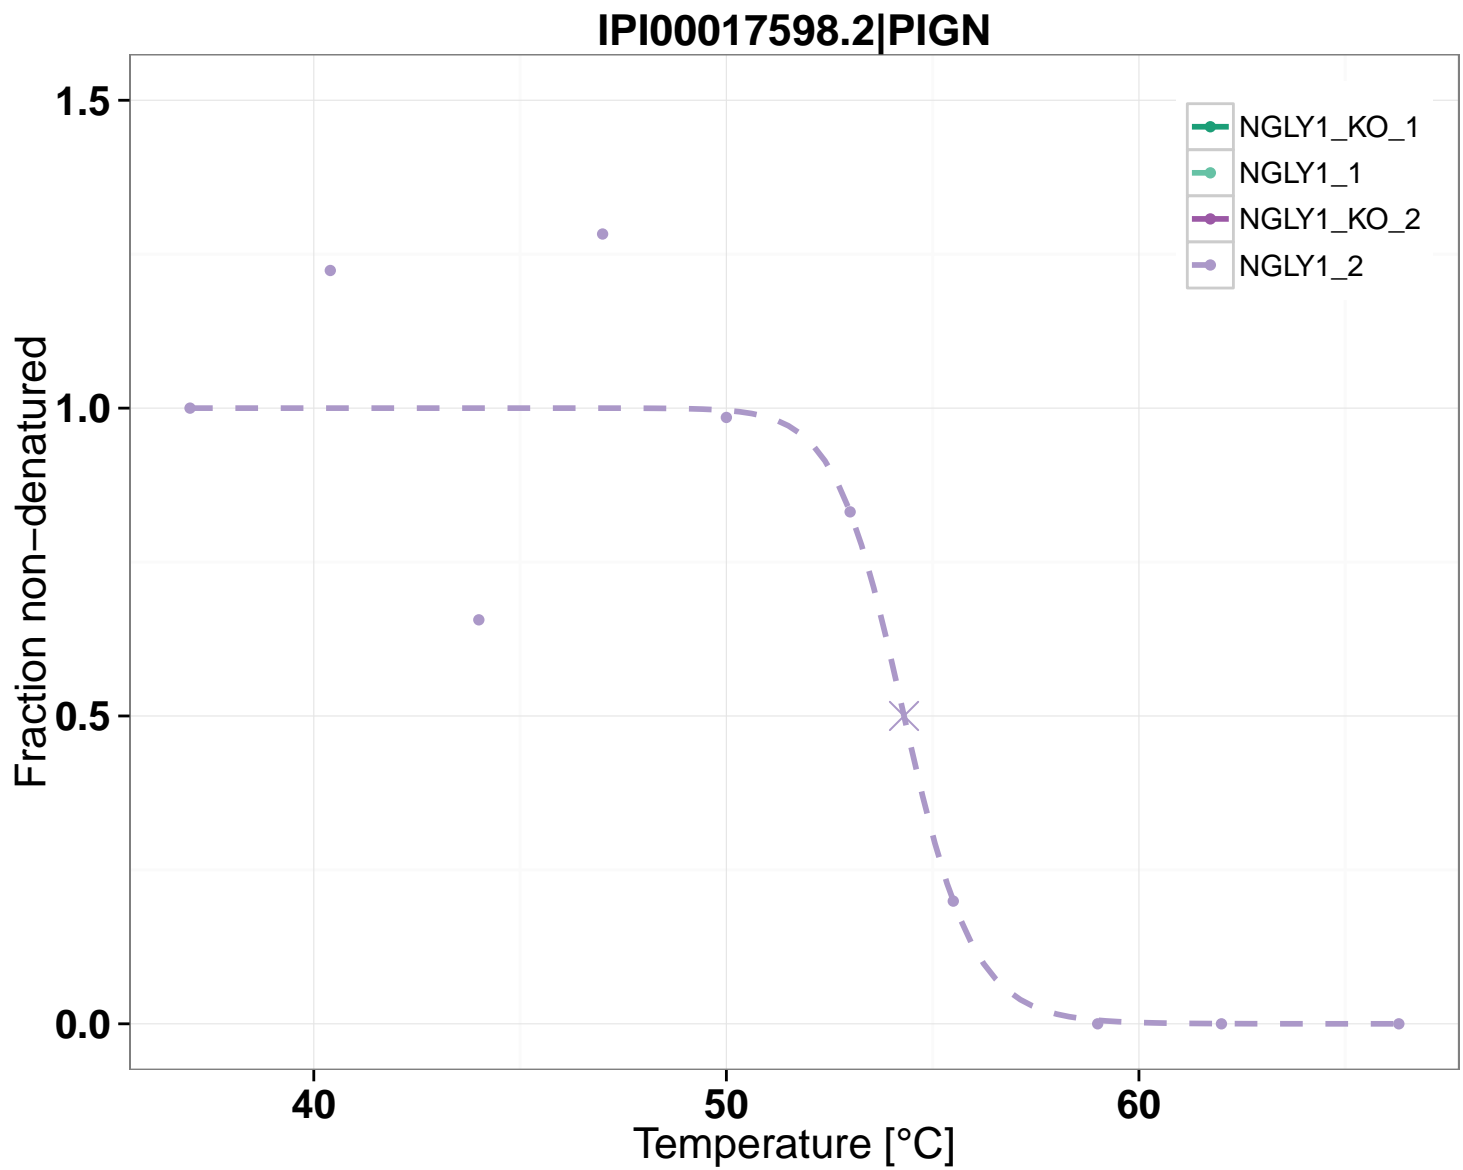

|            | meltPoint | slope | plateau | R2  |
|------------|-----------|-------|---------|-----|
| NGLY1_KO_1 | -         | -     | -       | -   |
| NGLY1_1    | -         | -     | -       | -   |
| NGLY1_KO_2 | -         | -     | -       | -   |
| NGLY1_2    | 54.31     | -0.3  | 0       | 0.9 |

Supplement: Supplementary file 8276 [file 1]

# IPI00783374.2|RNF123

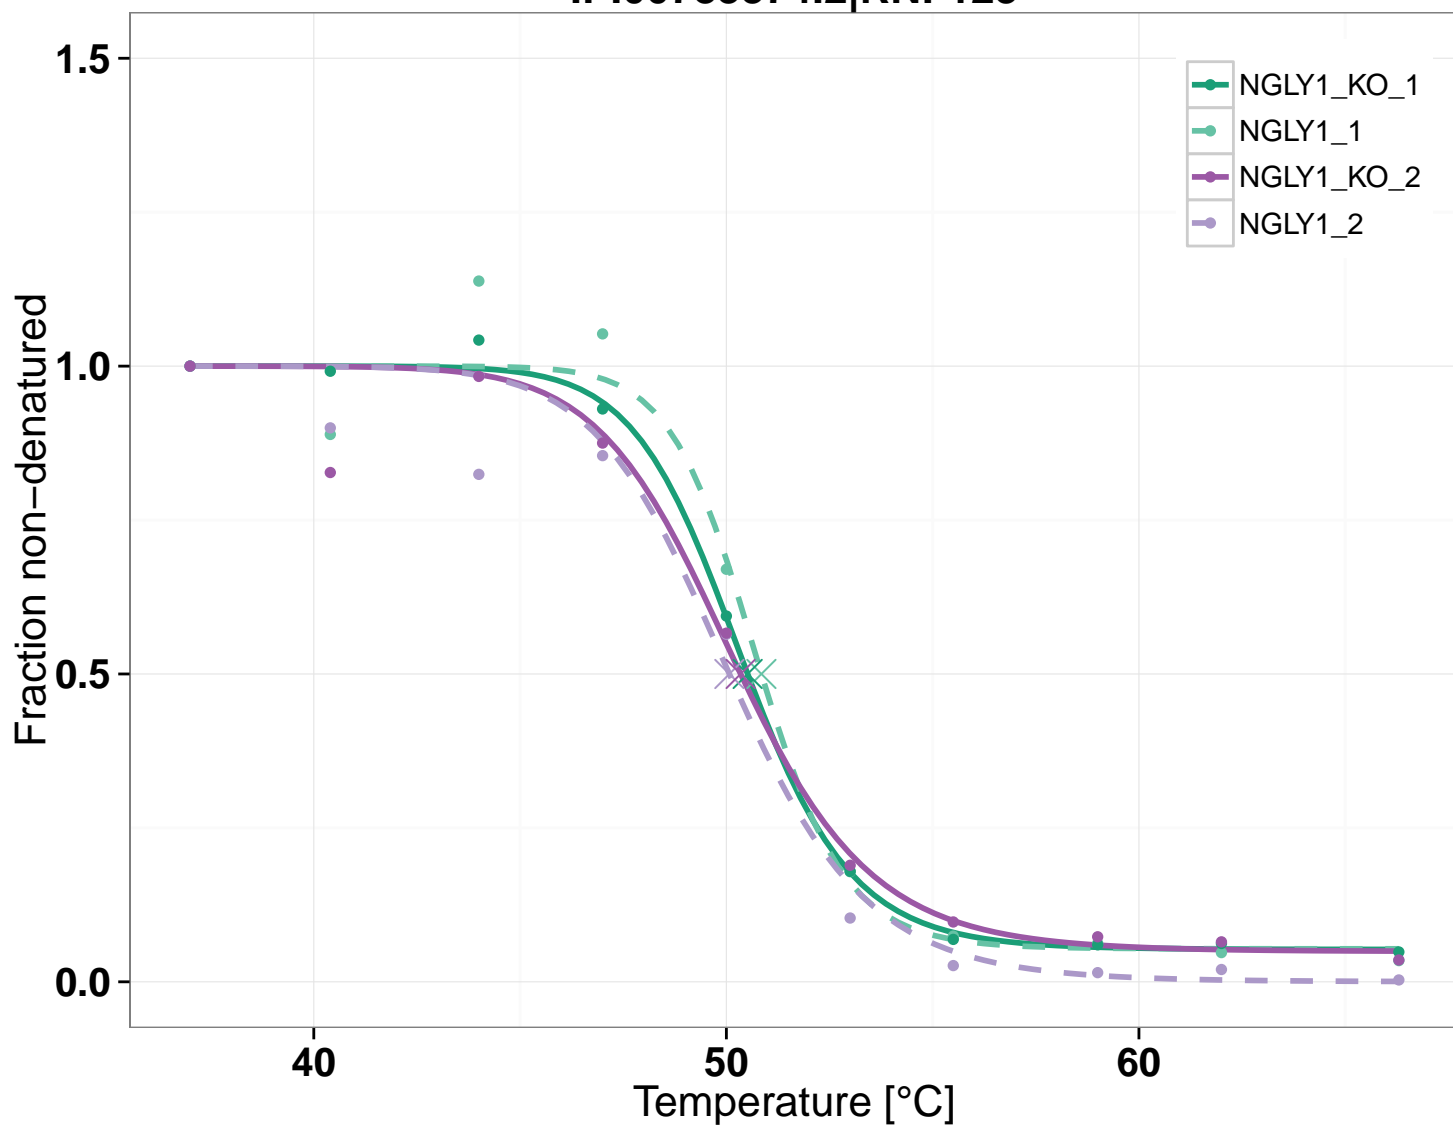

|            | meltPoint | slope | plateau | R2   |
|------------|-----------|-------|---------|------|
| NGLY1_KO_1 | 50.52     | -0.18 | 0.05    | 1    |
| NGLY1_1    | 50.85     | -0.22 | 0.05    | 0.98 |
| NGLY1_KO_2 | 50.35     | -0.14 | 0.05    | 0.98 |
| NGLY1_2    | 50.07     | -0.15 | 0       | 0.97 |

Supplement: Supplementary file 8277 [file 1]

IPI00168609.1|HBS1L

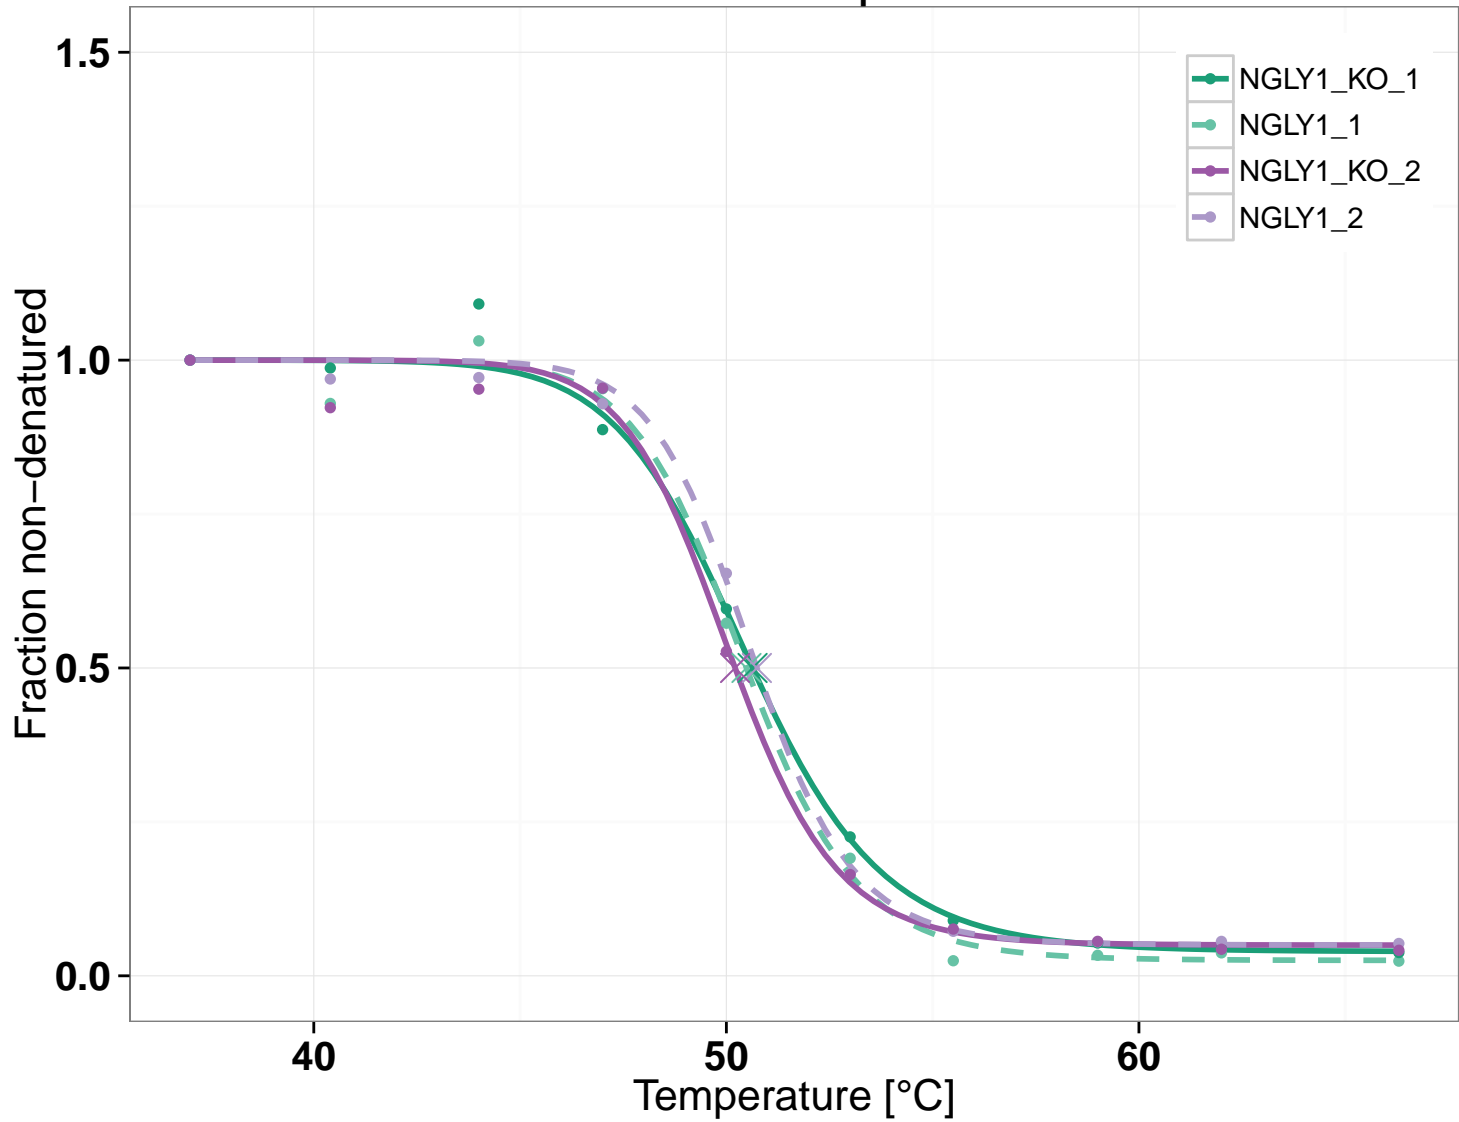

|            | meltPoint | slope | plateau | R2   |
|------------|-----------|-------|---------|------|
| NGLY1_KO_1 | 50.64     | -0.15 | 0.04    | 0.99 |
| NGLY1_1    | 50.49     | -0.18 | 0.03    | 1    |
| NGLY1_KO_2 | 50.21     | -0.18 | 0.05    | 0.99 |
| NGLY1_2    | 50.74     | -0.19 | 0.05    | 1    |

Supplement: Supplementary file 8278 [file 1]

IPI00027778.3|NUDT12

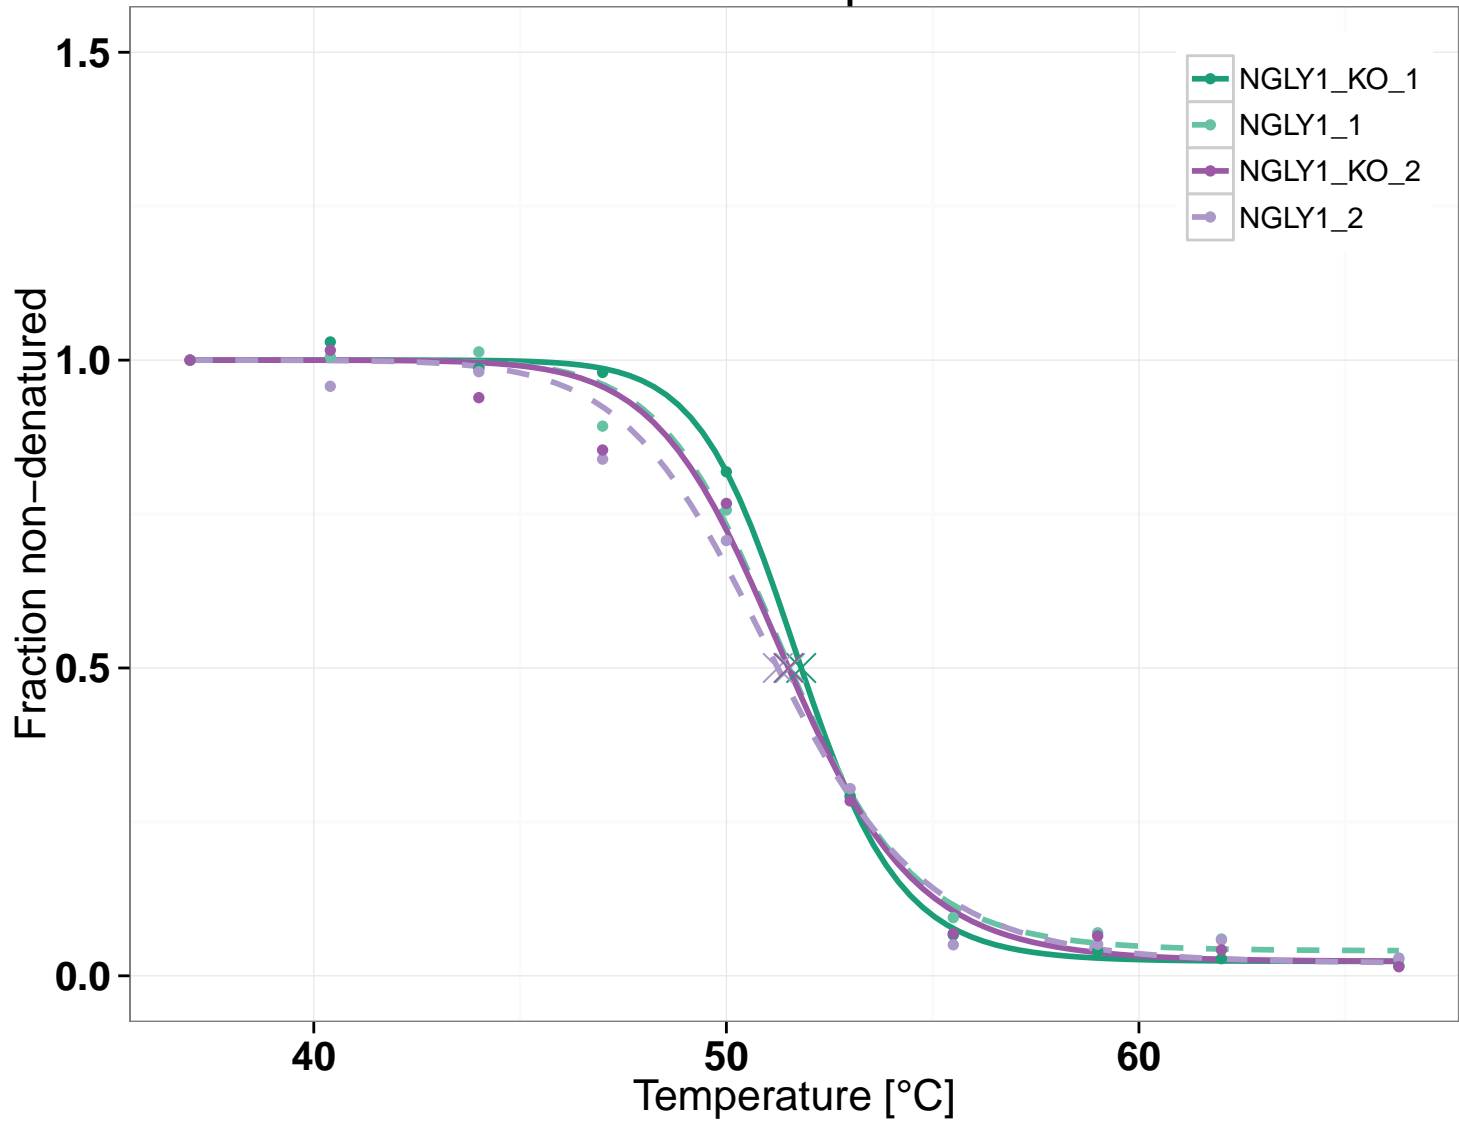

|            | meltPoint | slope | plateau | R2   |
|------------|-----------|-------|---------|------|
| NGLY1_KO_1 | 51.81     | -0.2  | 0.02    | 1    |
| NGLY1_1    | 51.54     | -0.16 | 0.04    | 1    |
| NGLY1_KO_2 | 51.51     | -0.16 | 0.02    | 0.99 |
| NGLY1_2    | 51.25     | -0.13 | 0.02    | 0.99 |

Supplement: Supplementary file 8279 [file 1]

IPI00401002.6|ZNF740

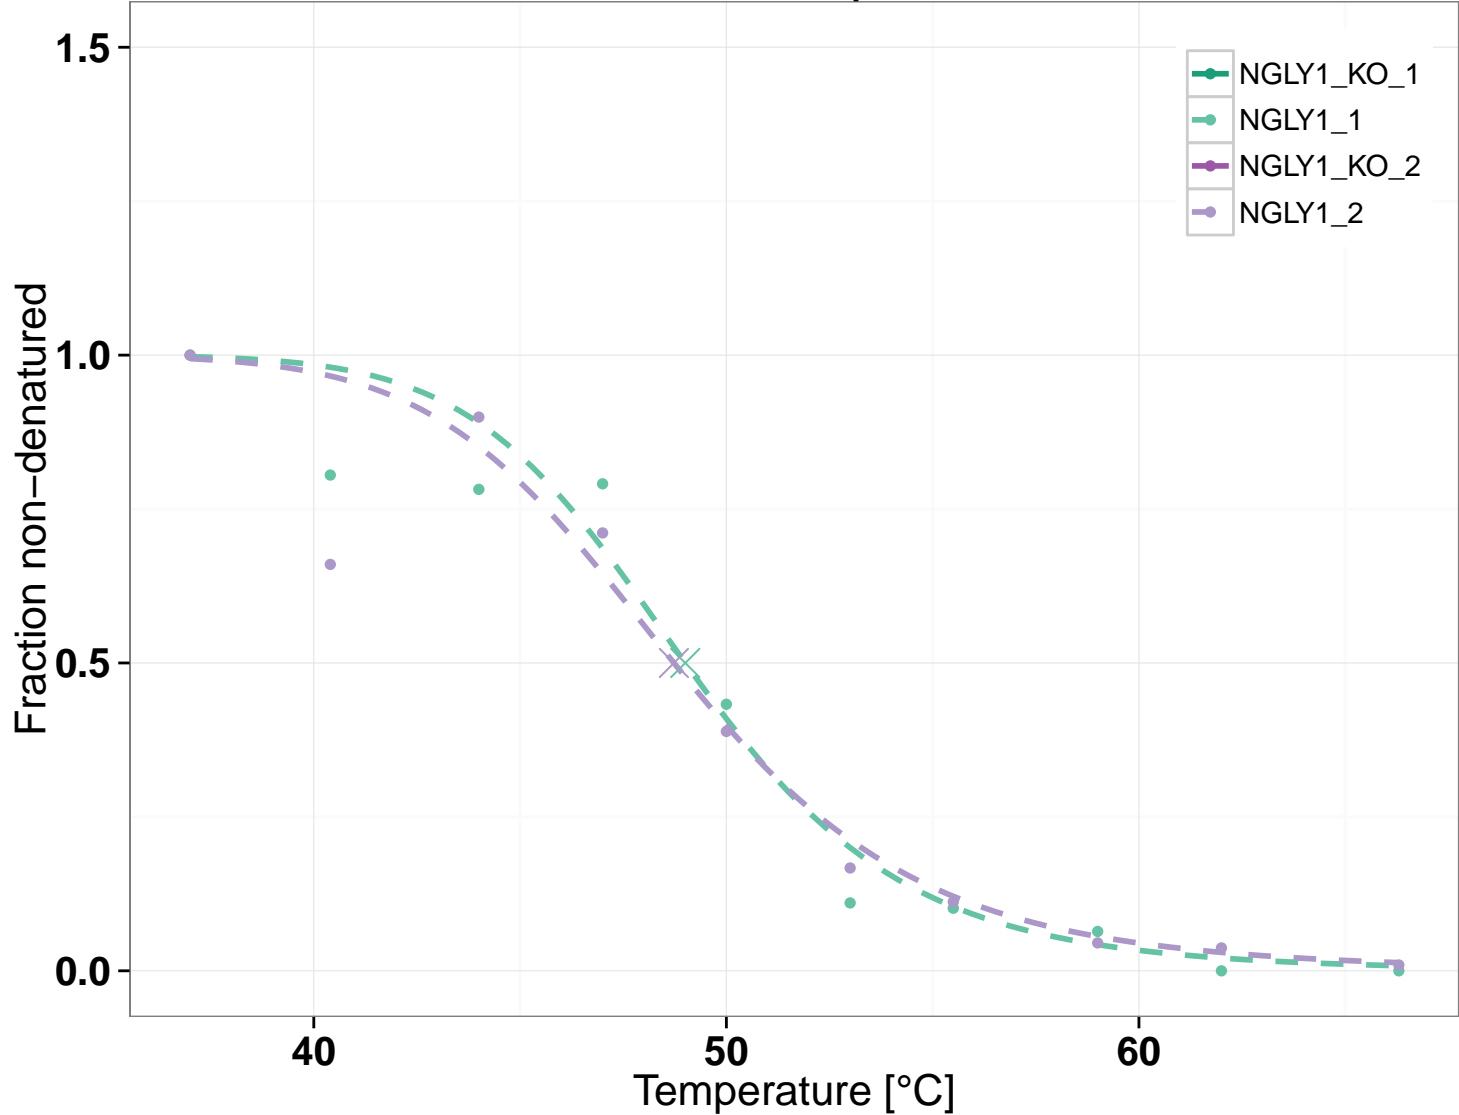

|            | meltPoint | slope  | plateau | R2   |
|------------|-----------|--------|---------|------|
| NGLY1_KO_1 | –         | –      | –       | –    |
| NGLY1_1    | 49        | –0.095 | 0       | 0.96 |
| NGLY1_KO_2 | –         | –      | –       | –    |
| NGLY1_2    | 48.73     | –0.085 | 0       | 0.92 |

Supplement: Supplementary file 8280 [file 1]

IPI00384202.3|JMJD1C

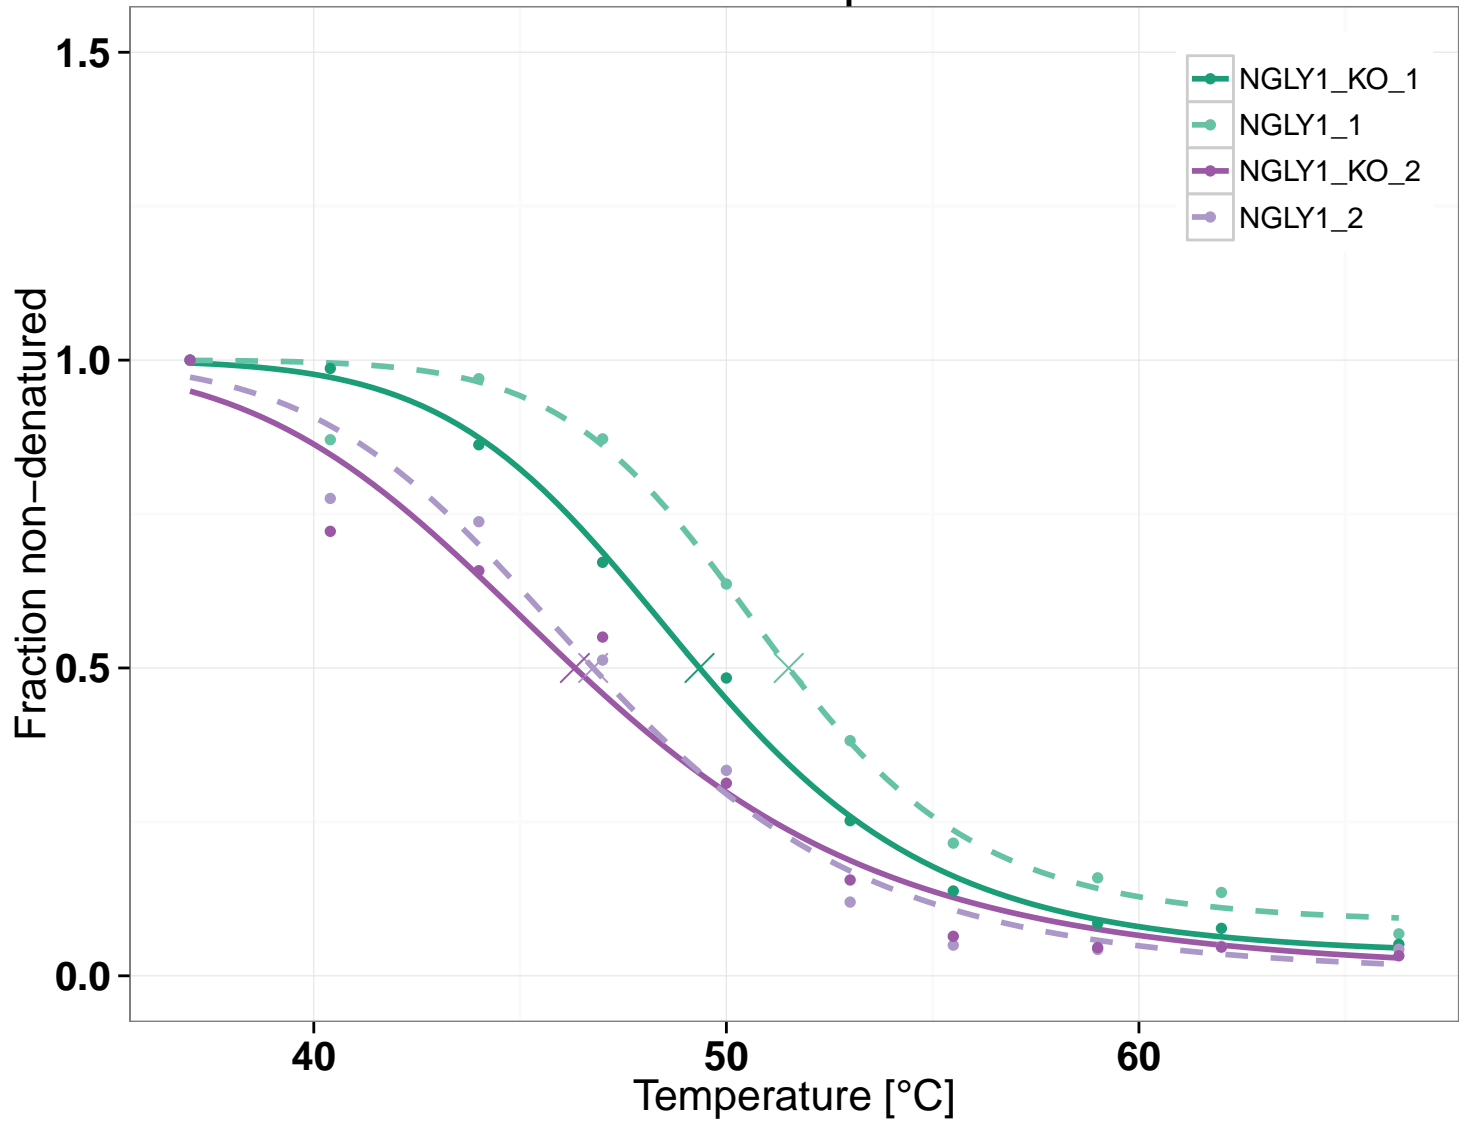

|            | meltPoint | slope  | plateau | R2   |
|------------|-----------|--------|---------|------|
| NGLY1_KO_1 | 49.35     | -0.081 | 0.03    | 1    |
| NGLY1_1    | 51.51     | -0.091 | 0.09    | 0.99 |
| NGLY1_KO_2 | 46.33     | -0.065 | 0       | 0.97 |
| NGLY1_2    | 46.77     | -0.074 | 0       | 0.98 |

Supplement: Supplementary file 8281 [file 1]

IPI00154668.5|CCDC93

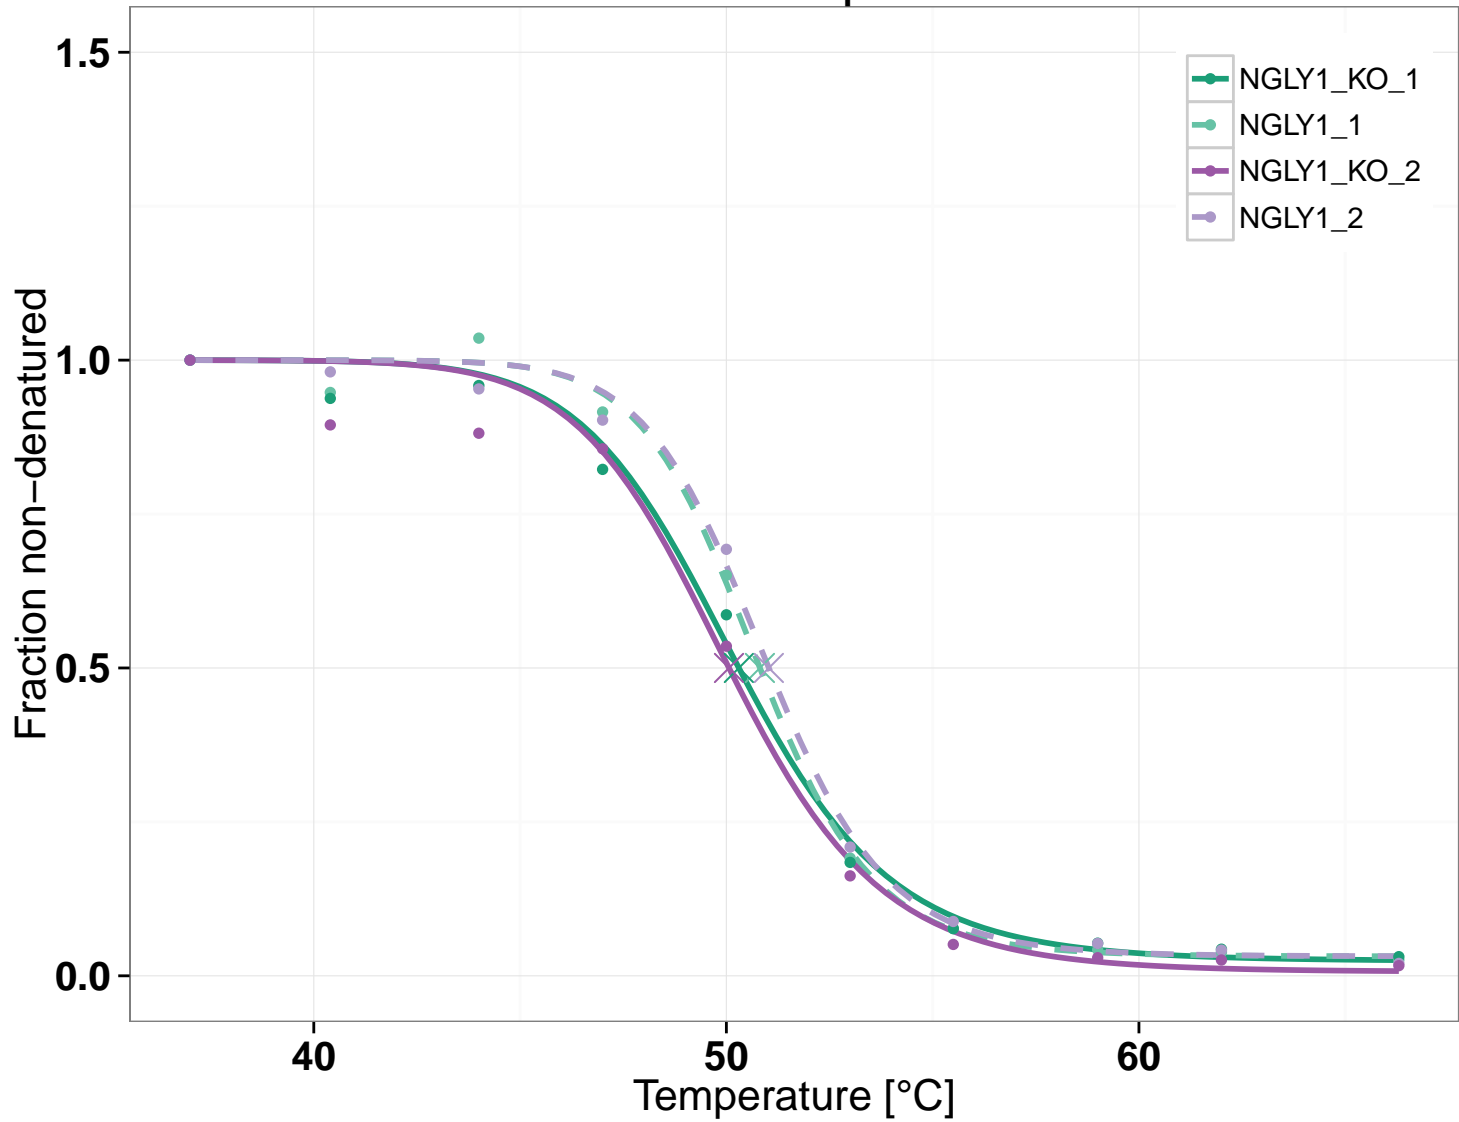

|            | meltPoint | slope | plateau | R2   |
|------------|-----------|-------|---------|------|
| NGLY1_KO_1 | 50.3      | -0.13 | 0.02    | 0.99 |
| NGLY1_1    | 50.81     | -0.17 | 0.03    | 1    |
| NGLY1_KO_2 | 50.06     | -0.13 | 0.01    | 0.99 |
| NGLY1_2    | 51.03     | -0.16 | 0.03    | 1    |

Supplement: Supplementary file 8282 [file 1]

# IPI00184546.4|C12ORF23

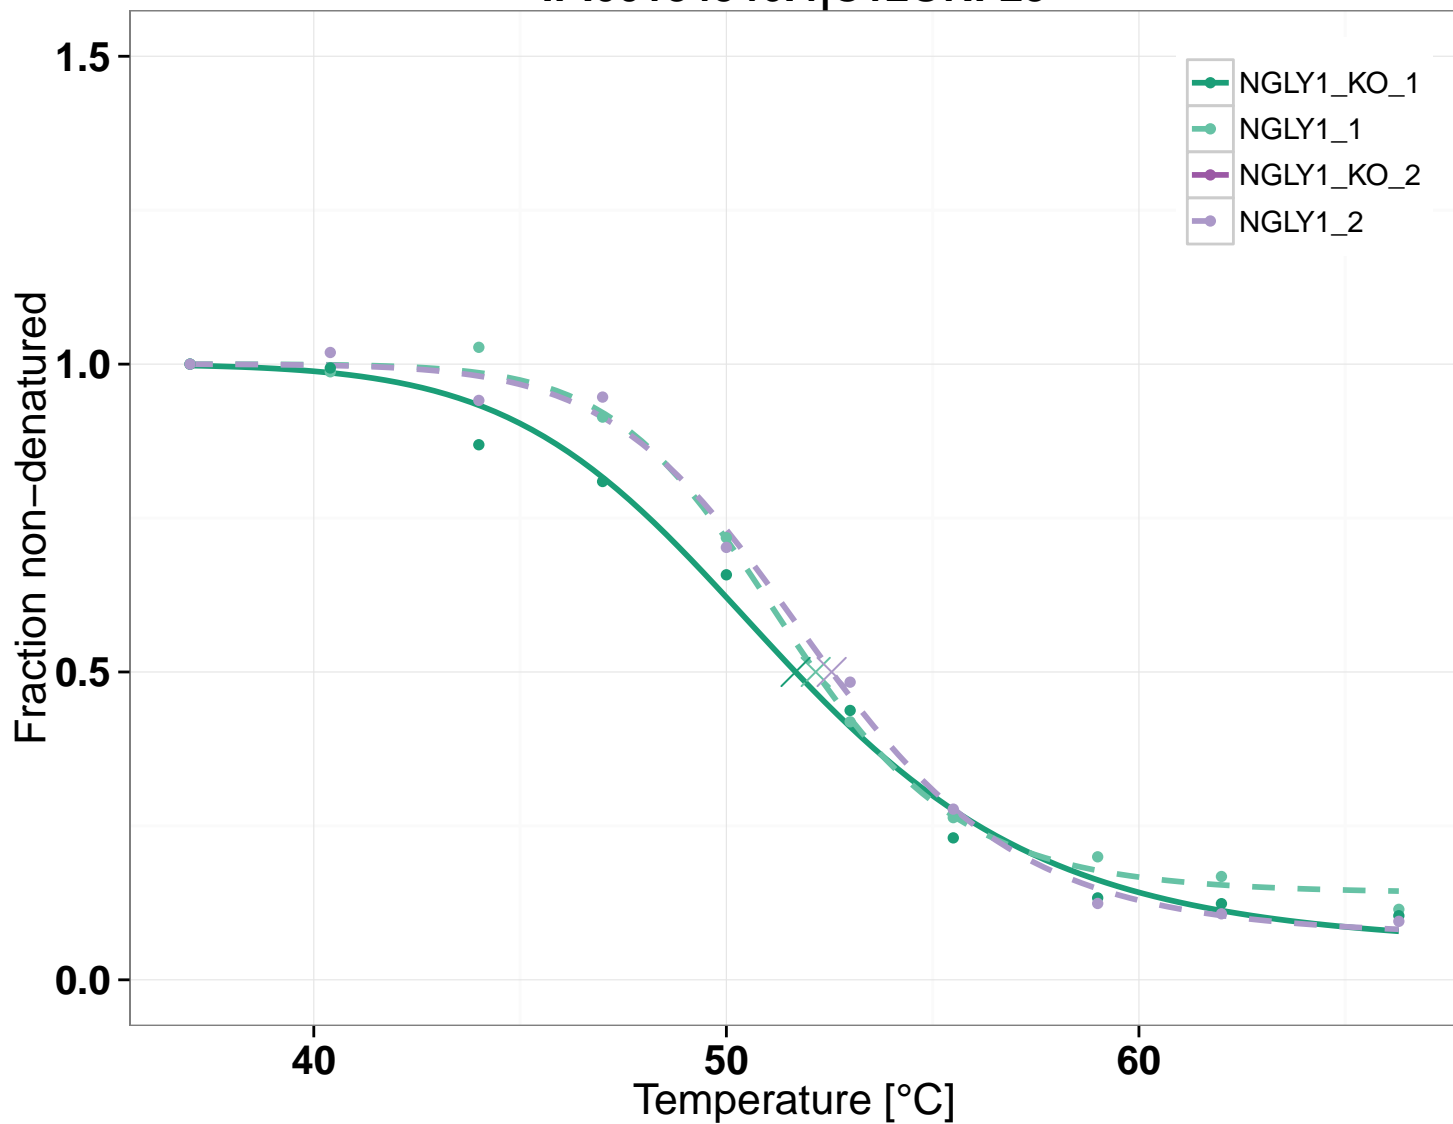

|            | meltPoint | slope  | plateau | R2   |
|------------|-----------|--------|---------|------|
| NGLY1_KO_1 | 51.68     | -0.073 | 0.05    | 0.99 |
| NGLY1_1    | 52.17     | -0.1   | 0.14    | 1    |
| NGLY1_KO_2 | -         | -      | -       | -    |
| NGLY1_2    | 52.55     | -0.093 | 0.07    | 1    |

Supplement: Supplementary file 8283 [file 1]

# IPI00427330.3|SBDS

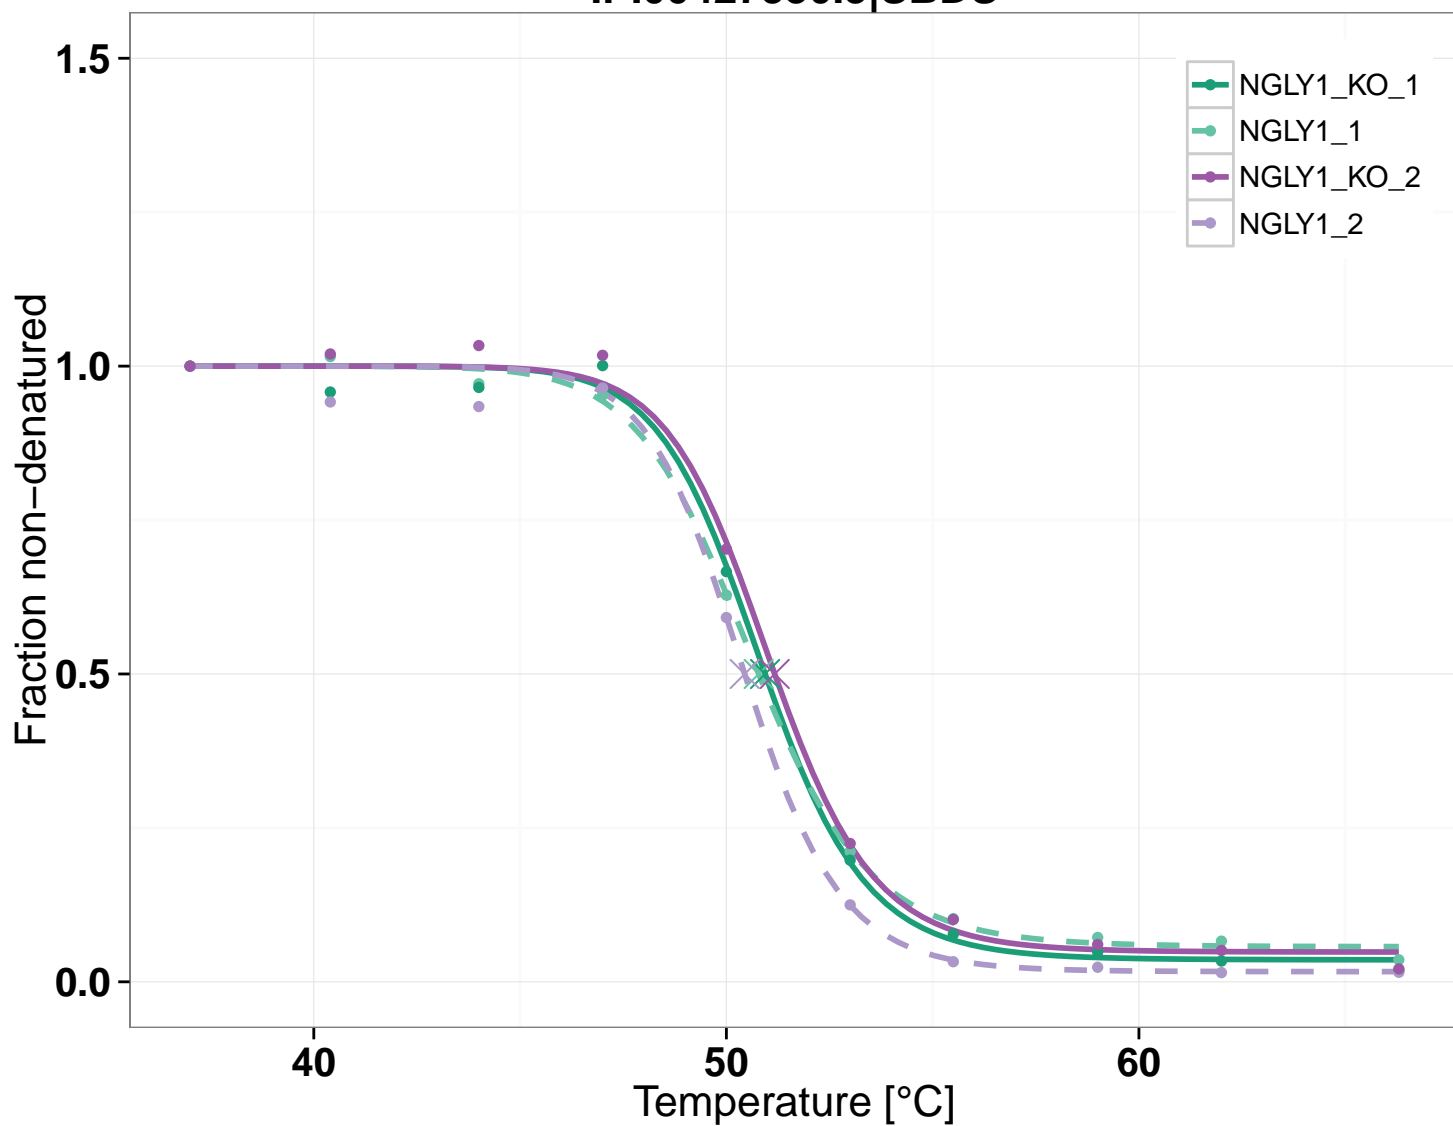

|            | meltPoint | slope | plateau | R2 |
|------------|-----------|-------|---------|----|
| NGLY1_KO_1 | 50.94     | -0.19 | 0.04    | 1  |
| NGLY1_1    | 50.78     | -0.17 | 0.06    | 1  |
| NGLY1_KO_2 | 51.17     | -0.19 | 0.05    | 1  |
| NGLY1_2    | 50.44     | -0.21 | 0.02    | 1  |

Supplement: Supplementary file 8284 [file 1]

# IPI00856115.1|REPIN1

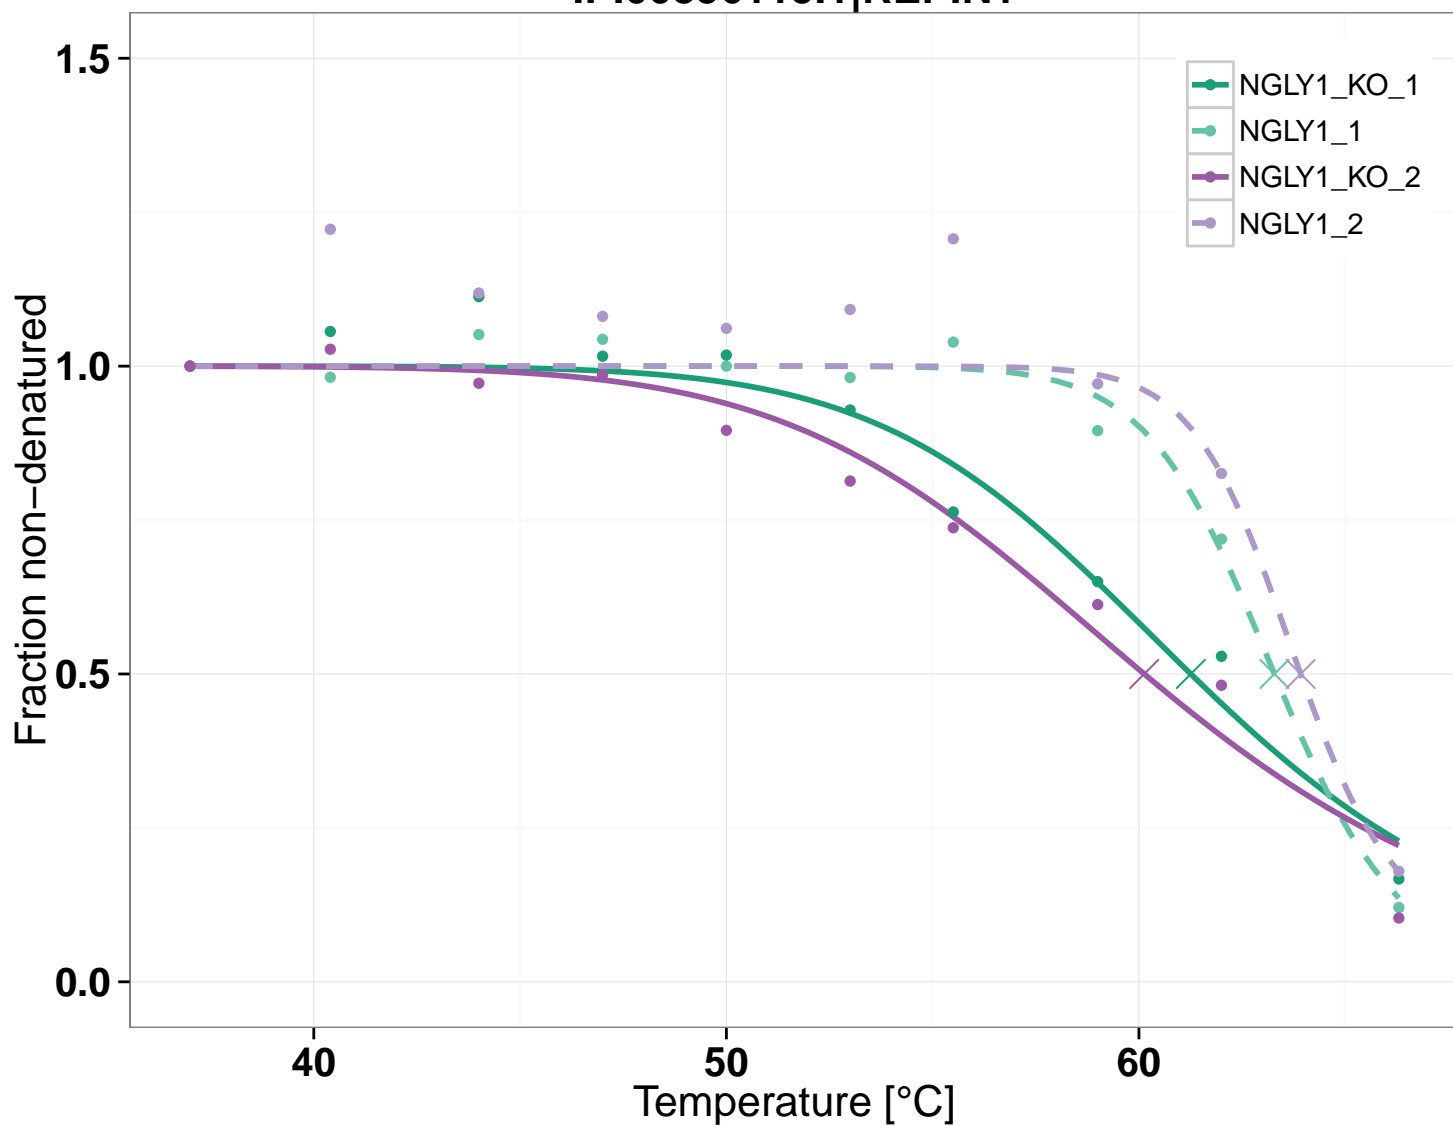

|            | meltPoint | slope  | plateau | R2   |
|------------|-----------|--------|---------|------|
| NGLY1_KO_1 | 61.26     | -0.066 | 0       | 0.96 |
| NGLY1_1    | 63.28     | -0.16  | 0       | 0.99 |
| NGLY1_KO_2 | 60.13     | -0.057 | 0       | 0.96 |
| NGLY1_2    | 63.92     | -0.19  | 0.07    | 0.85 |

Supplement: Supplementary file 8285 [file 1]

# IPI00016046.1|ROMO1

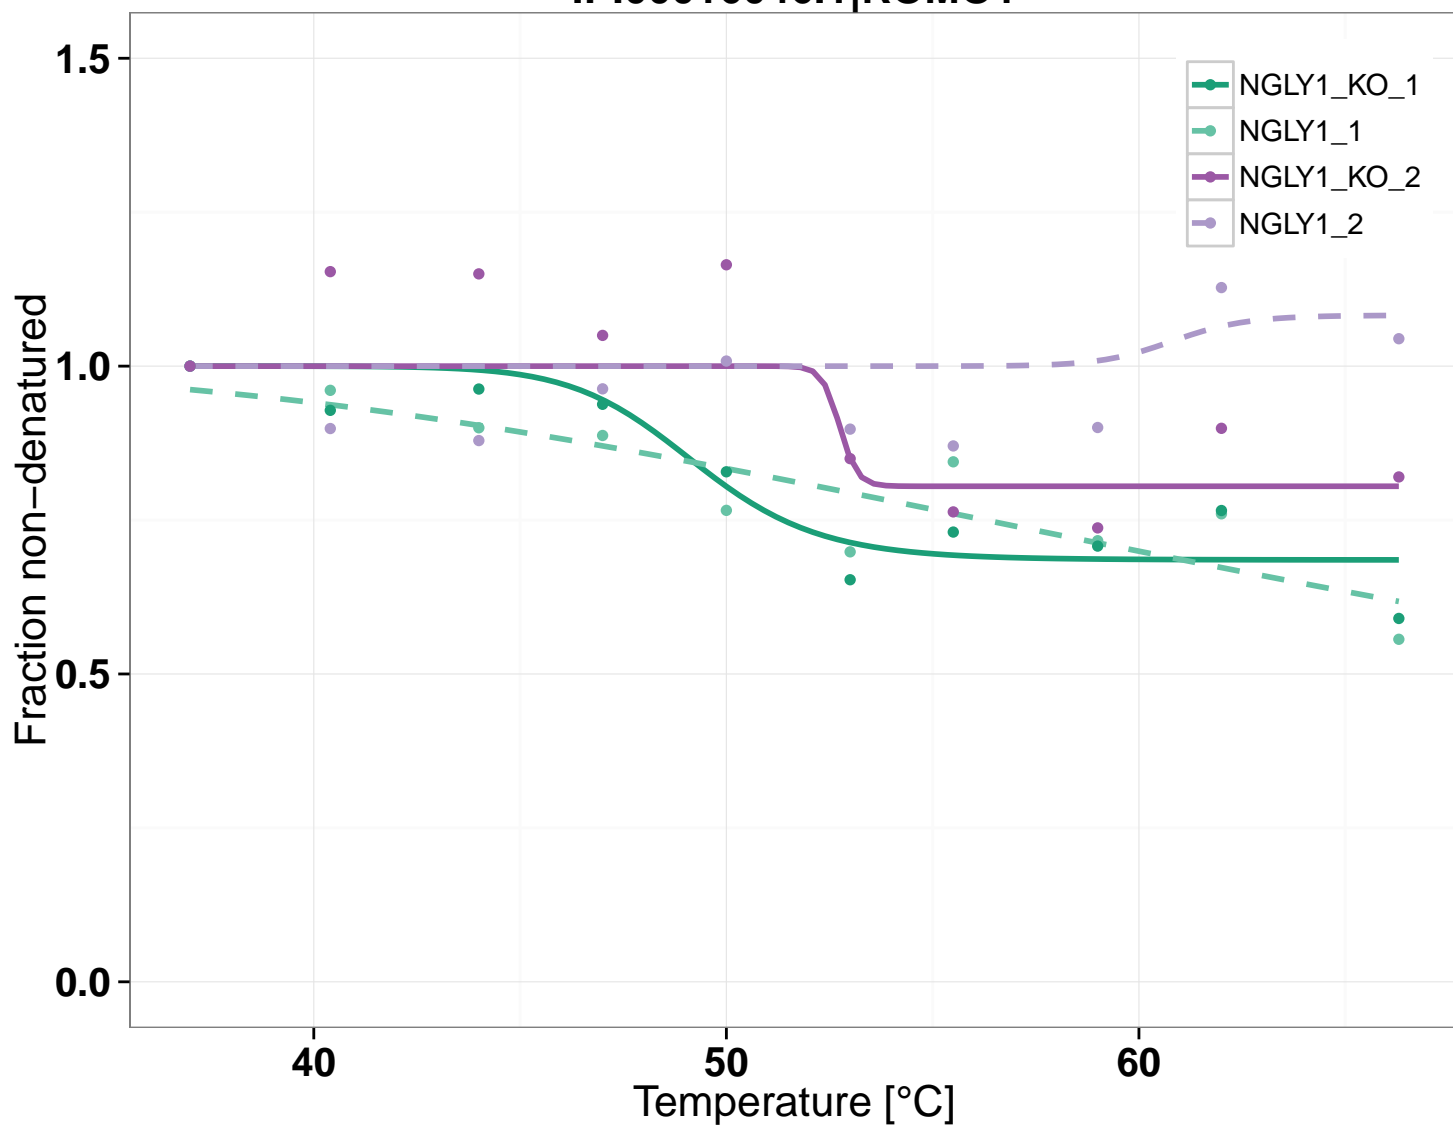

|            | meltPoint | slope  | plateau | R2    |
|------------|-----------|--------|---------|-------|
| NGLY1_KO_1 | –         | –0.052 | 0.69    | 0.85  |
| NGLY1_1    | –         | –0.014 | 0       | 0.79  |
| NGLY1_KO_2 | –         | –0.23  | 0.8     | 0.63  |
| NGLY1_2    | –         | 0.023  | 1.08    | –0.09 |

Supplement: Supplementary file 8286 [file 1]

# IPI00168407.3|PDPR

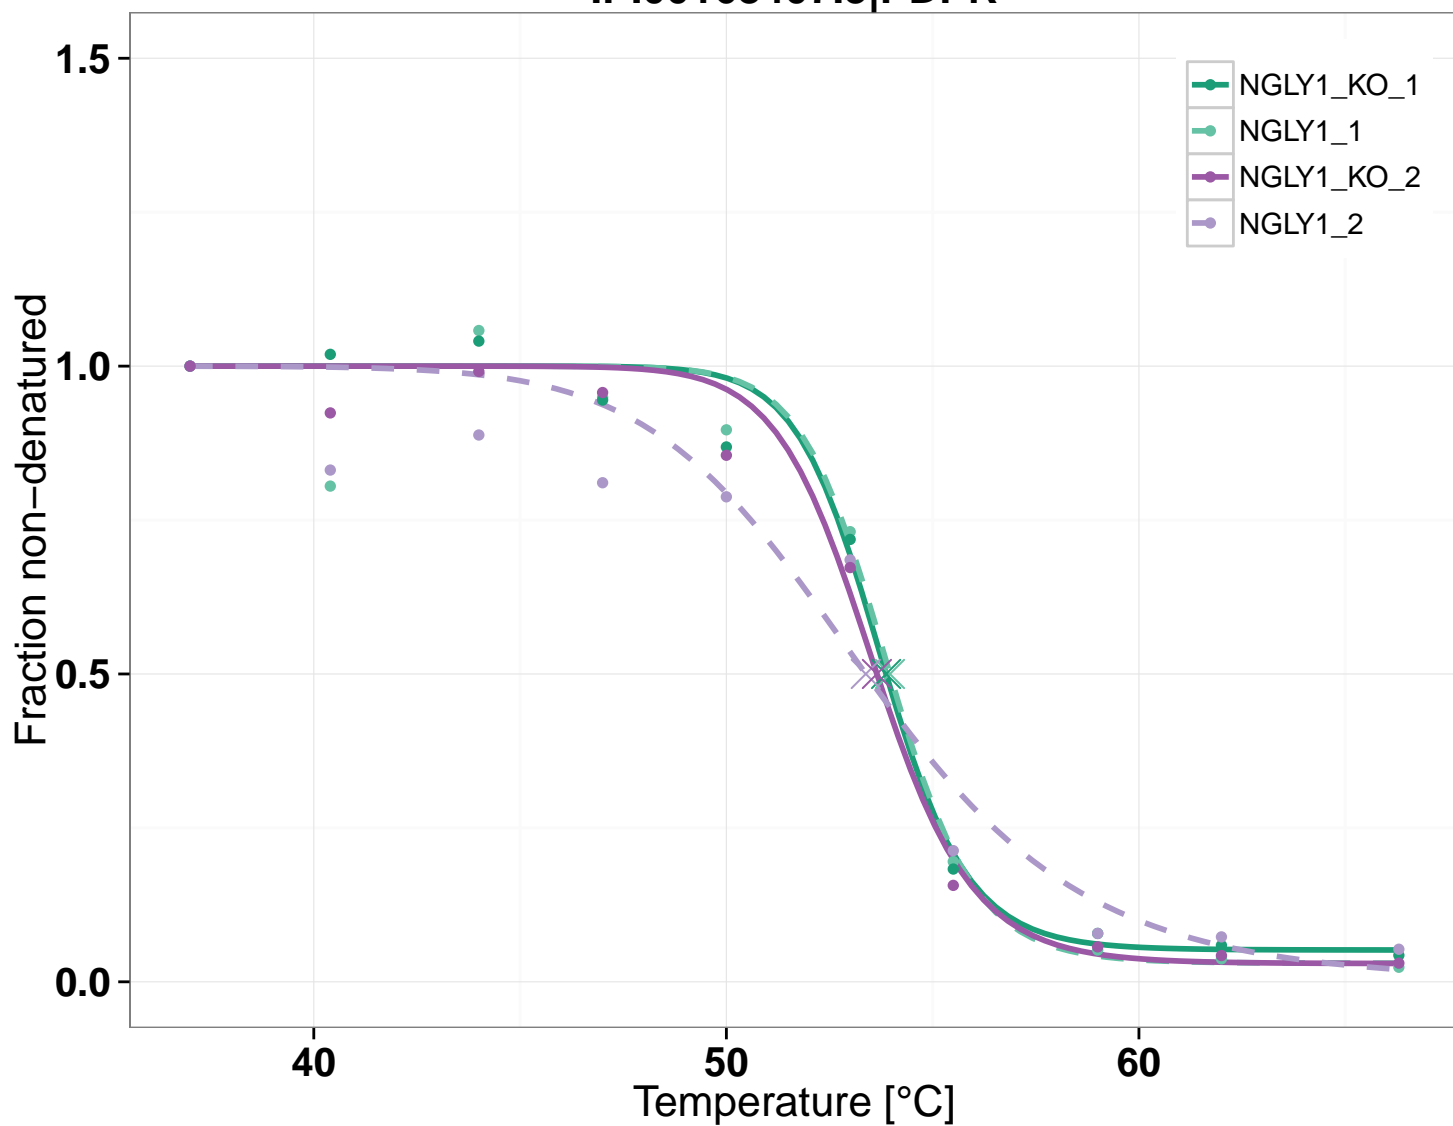

|            | meltPoint | slope  | plateau | R2   |
|------------|-----------|--------|---------|------|
| NGLY1_KO_1 | 53.87     | -0.23  | 0.05    | 0.99 |
| NGLY1_1    | 53.96     | -0.23  | 0.03    | 0.97 |
| NGLY1_KO_2 | 53.65     | -0.2   | 0.03    | 0.99 |
| NGLY1_2    | 53.38     | -0.094 | 0       | 0.93 |

Supplement: Supplementary file 8287 [file 1]

IPI00008234.3|CYB5R2

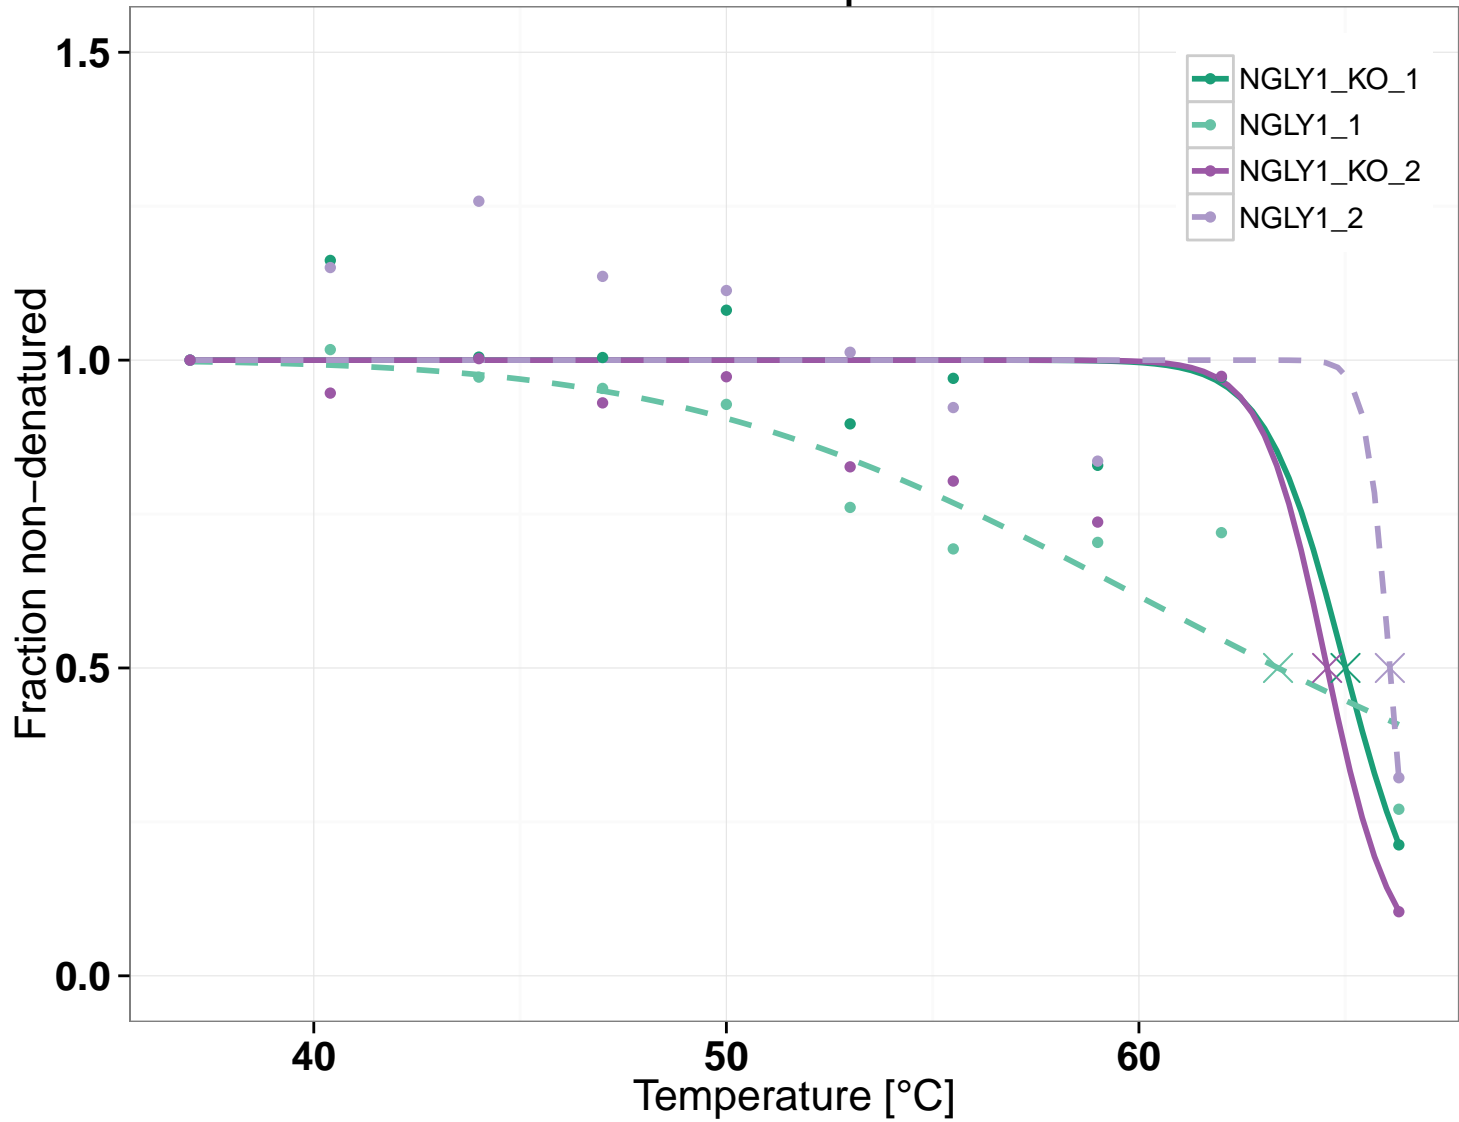

|            | meltPoint | slope  | plateau | R2   |
|------------|-----------|--------|---------|------|
| NGLY1_KO_1 | 65.01     | -0.26  | 0       | 0.88 |
| NGLY1_1    | 63.37     | -0.035 | 0       | 0.86 |
| NGLY1_KO_2 | 64.56     | -0.32  | 0       | 0.78 |
| NGLY1_2    | 66.08     | -0.86  | 0       | 0.68 |

Supplement: Supplementary file 8288 [file 1]

# IPI00217766.3|SCARB2

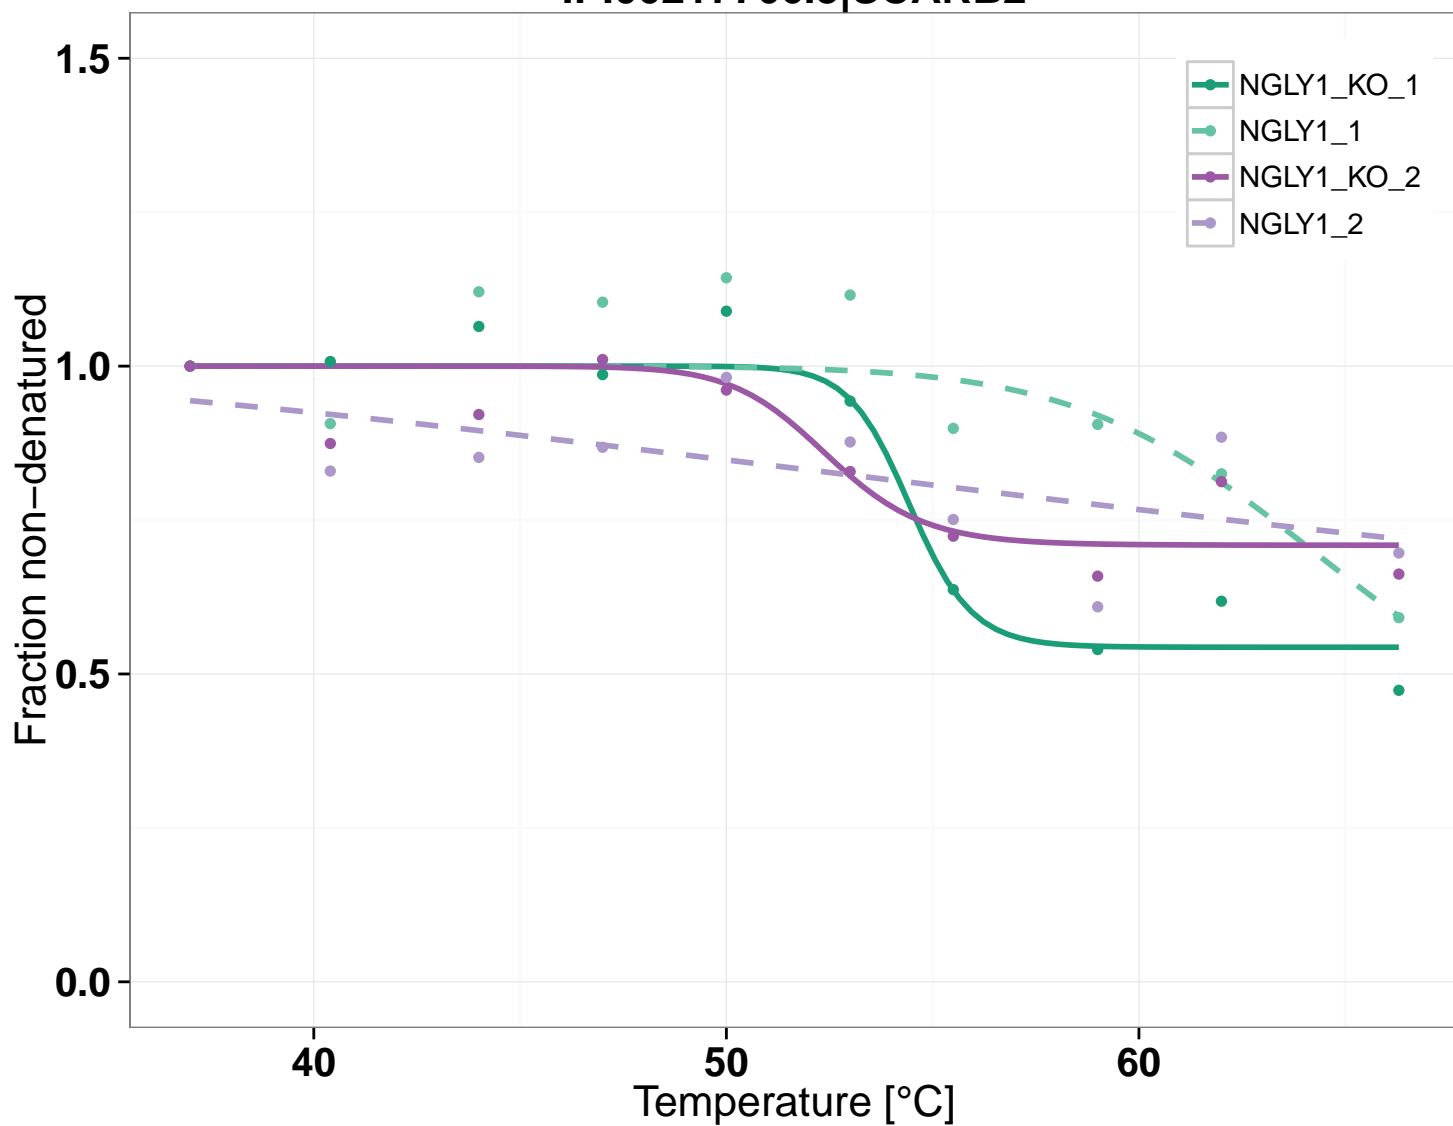

|            | meltPoint | slope   | plateau | R2   |
|------------|-----------|---------|---------|------|
| NGLY1_KO_1 | —         | -0.15   | 0.54    | 0.96 |
| NGLY1_1    | —         | -0.052  | 0.32    | 0.71 |
| NGLY1_KO_2 | —         | -0.062  | 0.71    | 0.76 |
| NGLY1_2    | —         | -0.0082 | 0       | 0.37 |

Supplement: Supplementary file 8289 [file 1]

IPI00848133.2|ISCU

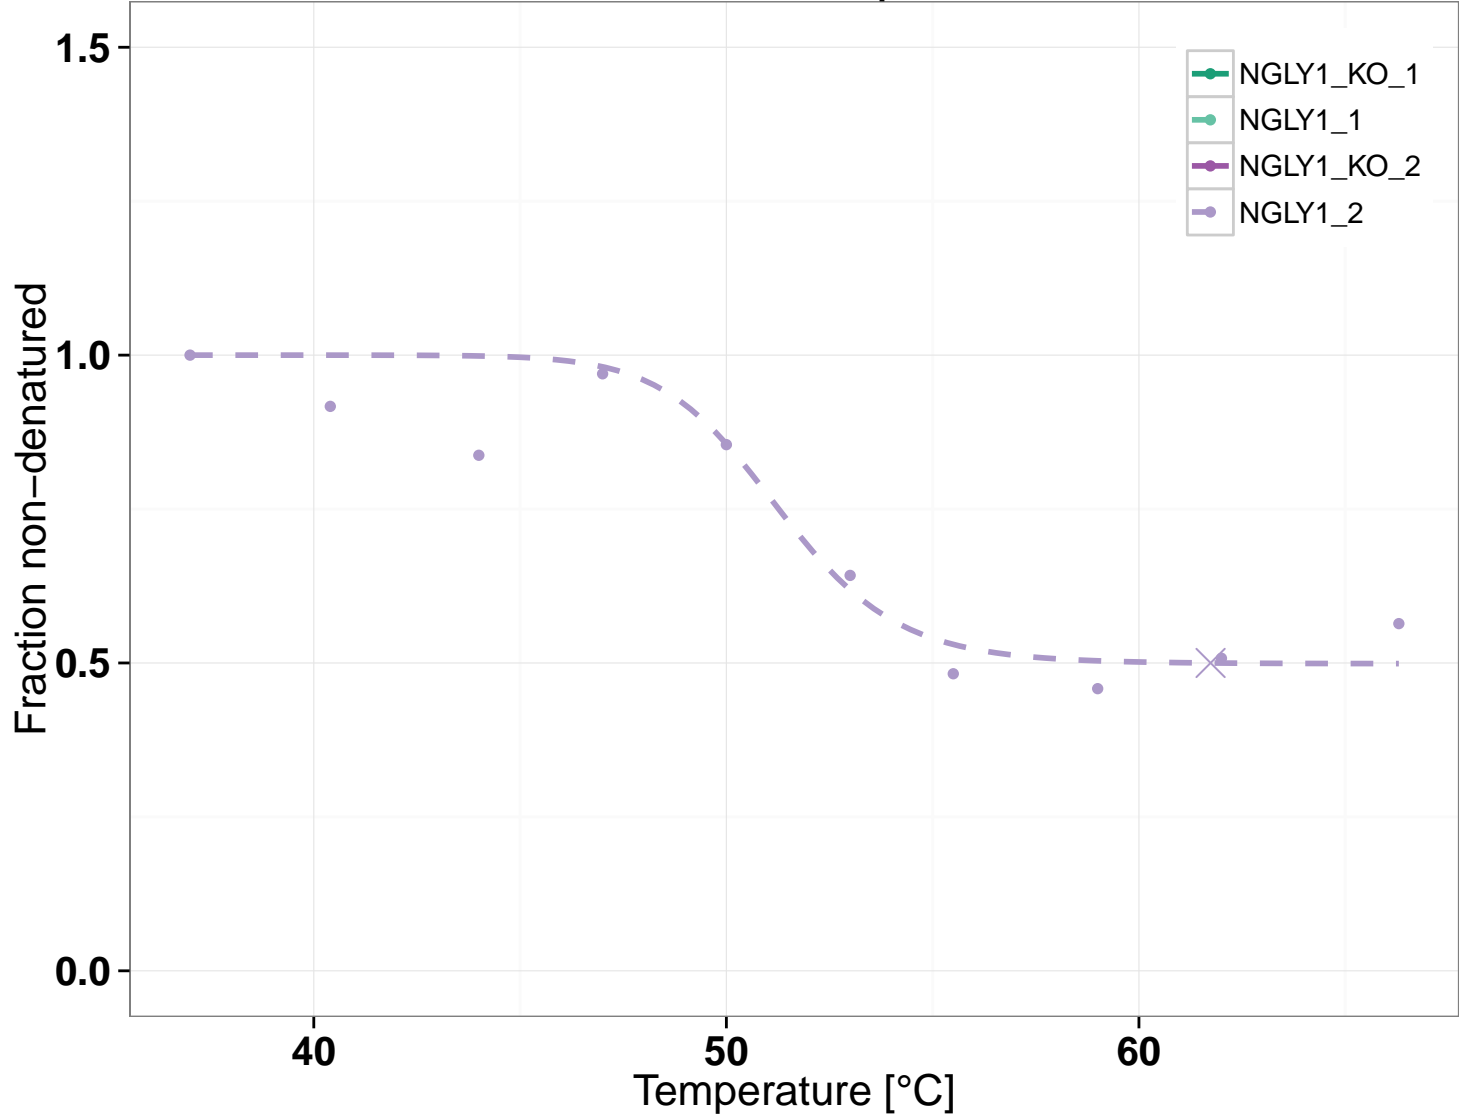

|            | meltPoint | slope  | plateau | R2  |
|------------|-----------|--------|---------|-----|
| NGLY1_KO_1 | —         | —      | —       | —   |
| NGLY1_1    | —         | —      | —       | —   |
| NGLY1_KO_2 | —         | —      | —       | —   |
| NGLY1_2    | 61.74     | -0.087 | 0.5     | 0.9 |

Supplement: Supplementary file 8290 [file 1]

IPI00915825.1|SFRS5

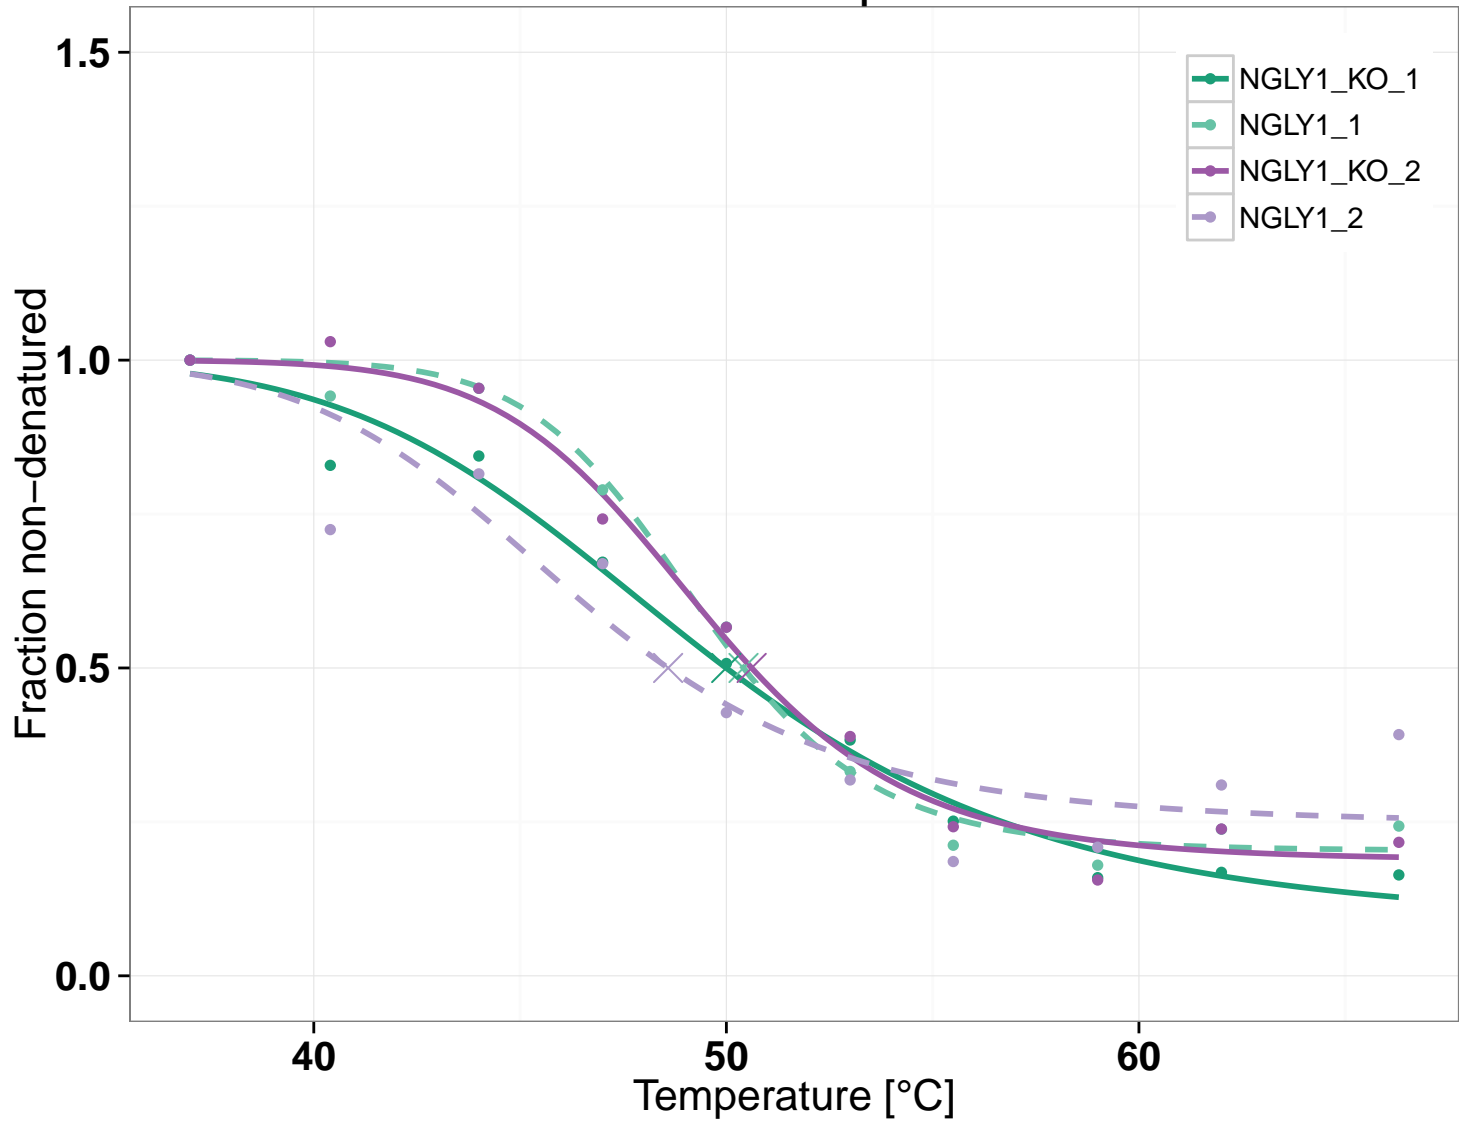

|            | meltPoint | slope  | plateau | R2   |
|------------|-----------|--------|---------|------|
| NGLY1_KO_1 | 50        | -0.054 | 0.08    | 0.98 |
| NGLY1_1    | 50.42     | -0.096 | 0.2     | 0.99 |
| NGLY1_KO_2 | 50.61     | -0.082 | 0.19    | 0.99 |
| NGLY1_2    | 48.59     | -0.058 | 0.25    | 0.87 |

Supplement: Supplementary file 8291 [file 1]

IPI00478496.1|RPP40

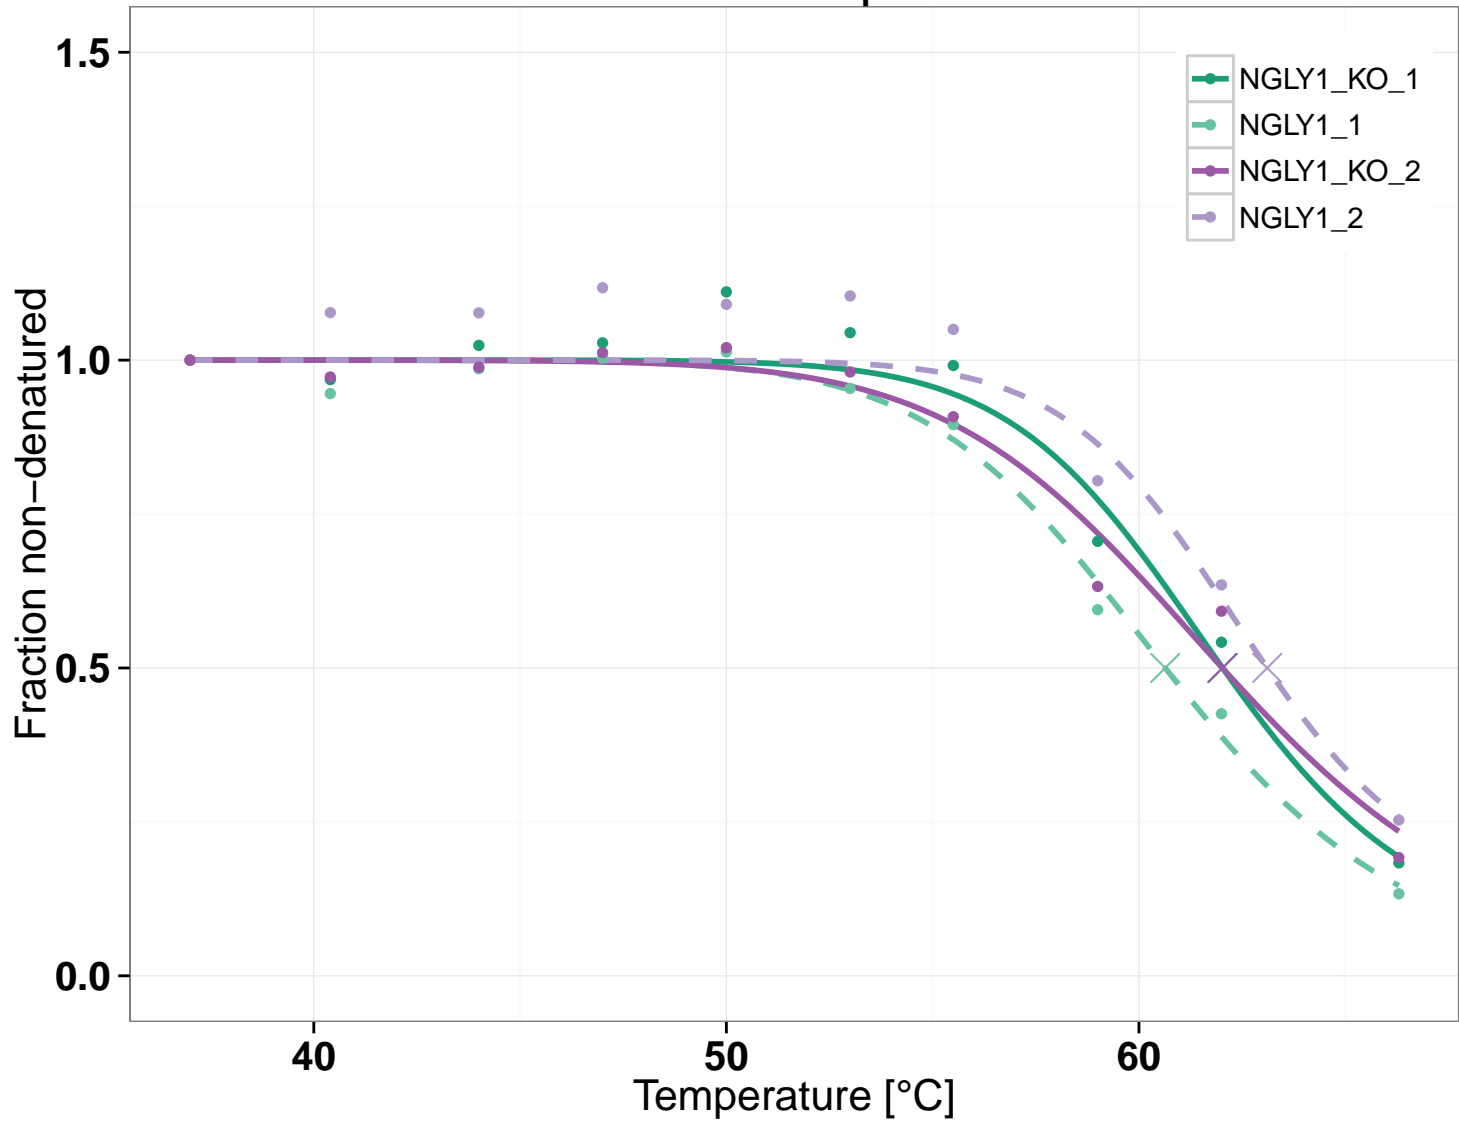

|            | meltPoint | slope  | plateau | R2   |
|------------|-----------|--------|---------|------|
| NGLY1_KO_1 | 62.03     | -0.096 | 0.04    | 0.97 |
| NGLY1_1    | 60.64     | -0.086 | 0       | 0.99 |
| NGLY1_KO_2 | 62.02     | -0.075 | 0       | 0.97 |
| NGLY1_2    | 63.11     | -0.1   | 0.11    | 0.92 |

Supplement: Supplementary file 8292 [file 1]

IPI00383573.1|SEPT5

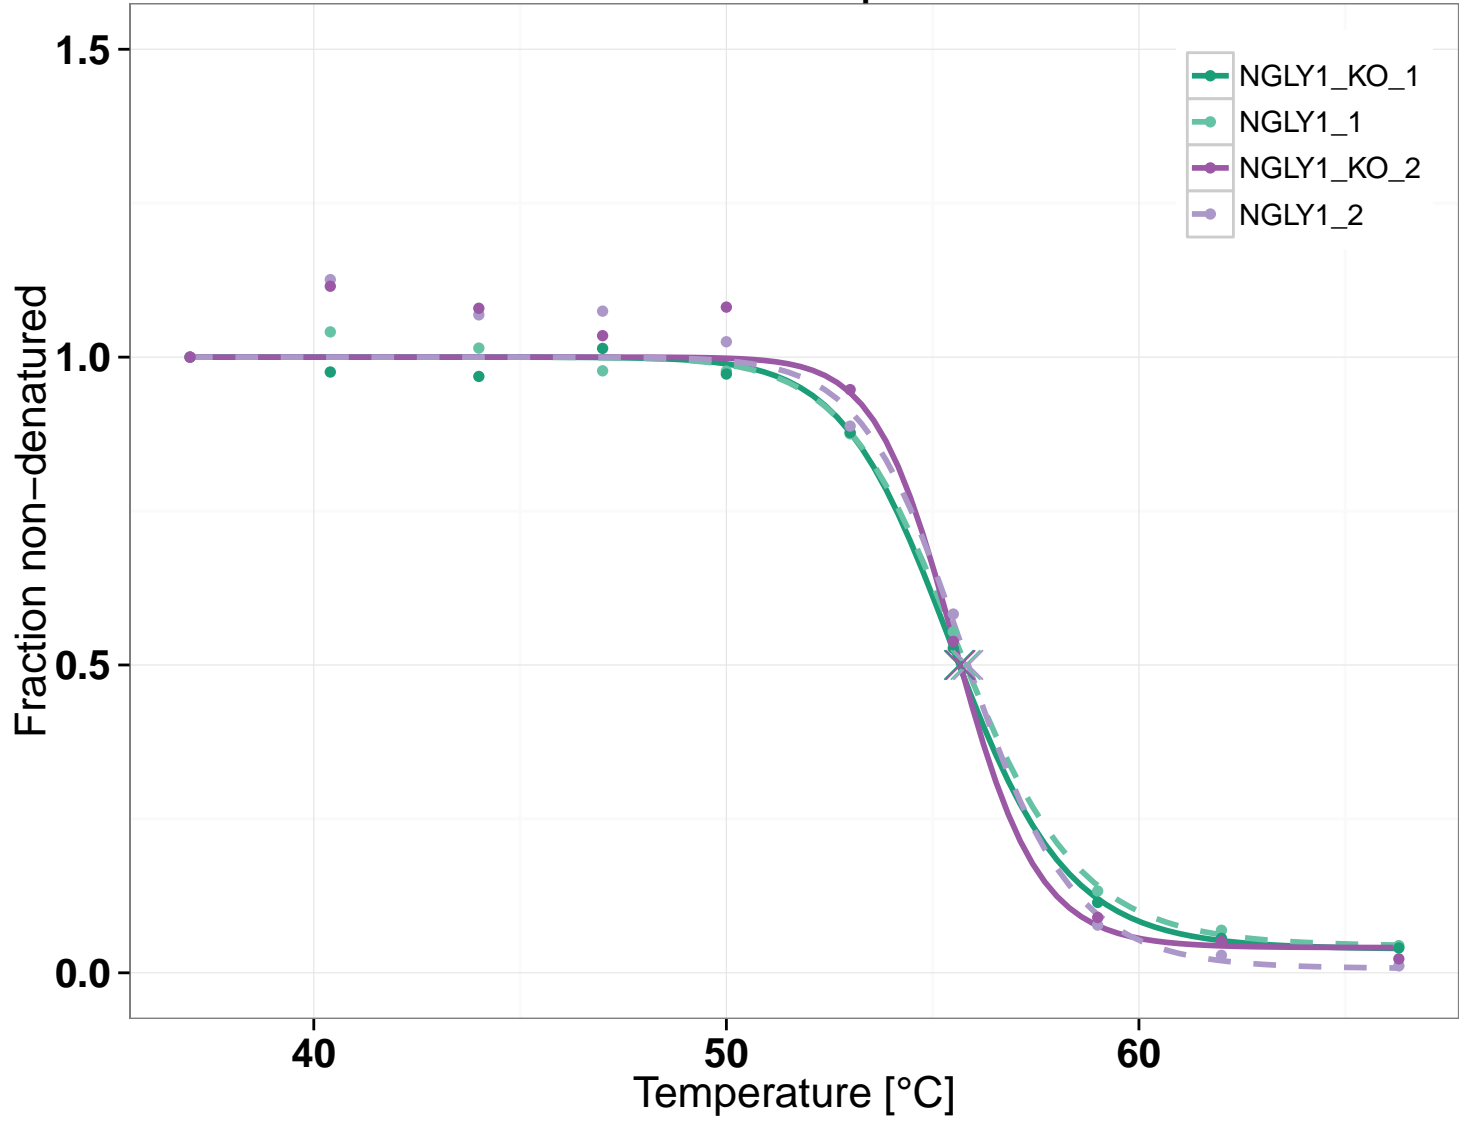

|            | meltPoint | slope | plateau | R2   |
|------------|-----------|-------|---------|------|
| NGLY1_KO_1 | 55.64     | -0.18 | 0.04    | 1    |
| NGLY1_1    | 55.8      | -0.17 | 0.04    | 1    |
| NGLY1_KO_2 | 55.67     | -0.24 | 0.04    | 0.99 |
| NGLY1_2    | 55.86     | -0.19 | 0.01    | 0.99 |

Supplement: Supplementary file 8293 [file 1]

IPI00478208.2|HCG\_2004593

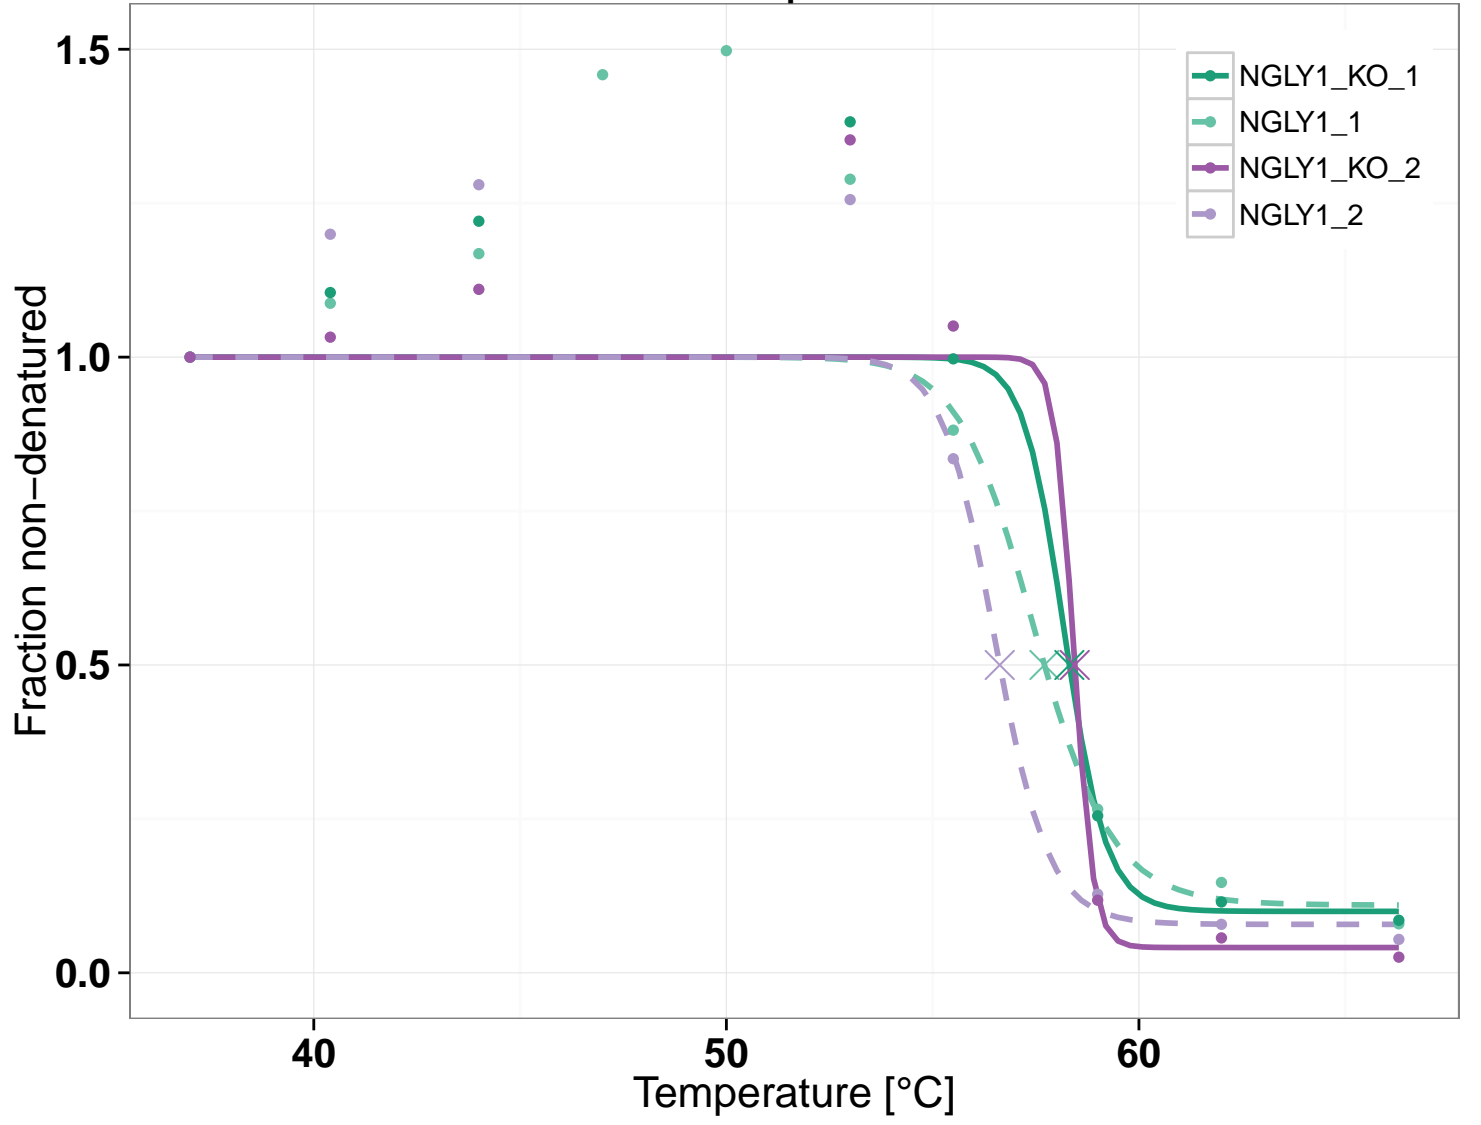

|            | meltPoint | slope | plateau | R2   |
|------------|-----------|-------|---------|------|
| NGLY1_KO_1 | 58.31     | -0.45 | 0.1     | 0.72 |
| NGLY1_1    | 57.71     | -0.24 | 0.11    | 0.77 |
| NGLY1_KO_2 | 58.44     | -1    | 0.04    | 0.78 |
| NGLY1_2    | 56.63     | -0.36 | 0.08    | 0.76 |

Supplement: Supplementary file 8294 [file 1]

IPI00013654.1|DCTN3

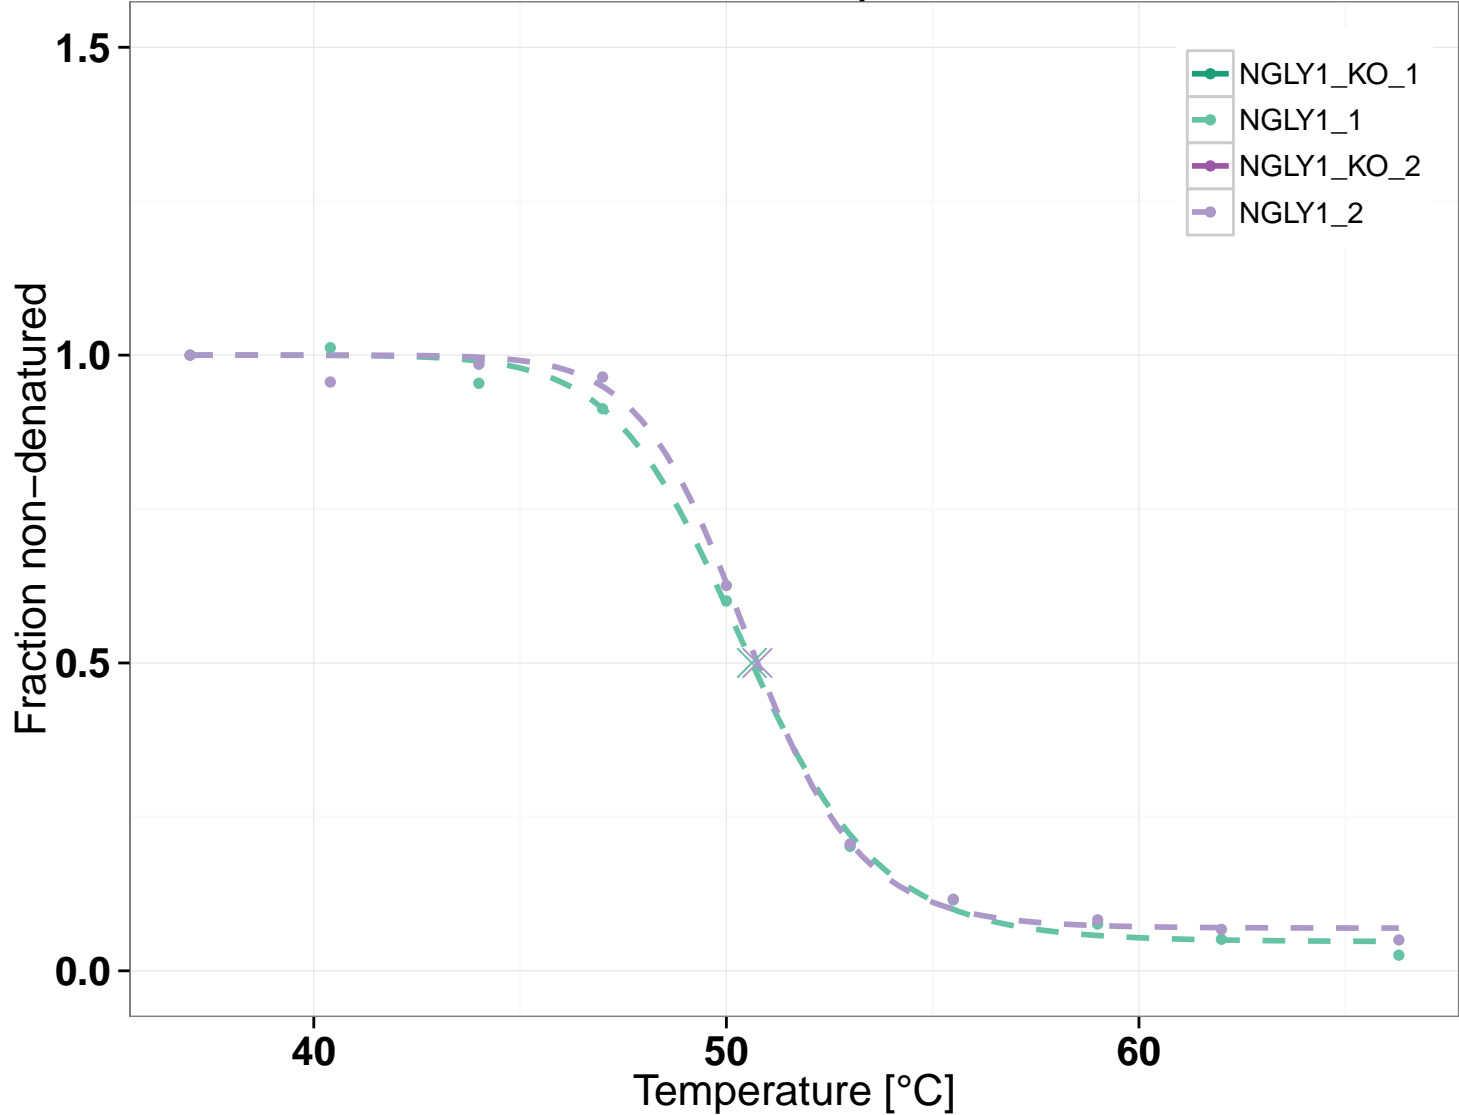

|            | meltPoint | slope | plateau | R2 |
|------------|-----------|-------|---------|----|
| NGLY1_KO_1 | -         | -     | -       | -  |
| NGLY1_1    | 50.62     | -0.15 | 0.05    | 1  |
| NGLY1_KO_2 | -         | -     | -       | -  |
| NGLY1_2    | 50.75     | -0.17 | 0.07    | 1  |

Supplement: Supplementary file 8295 [file 1]

IPI00329036.2|MRPL50

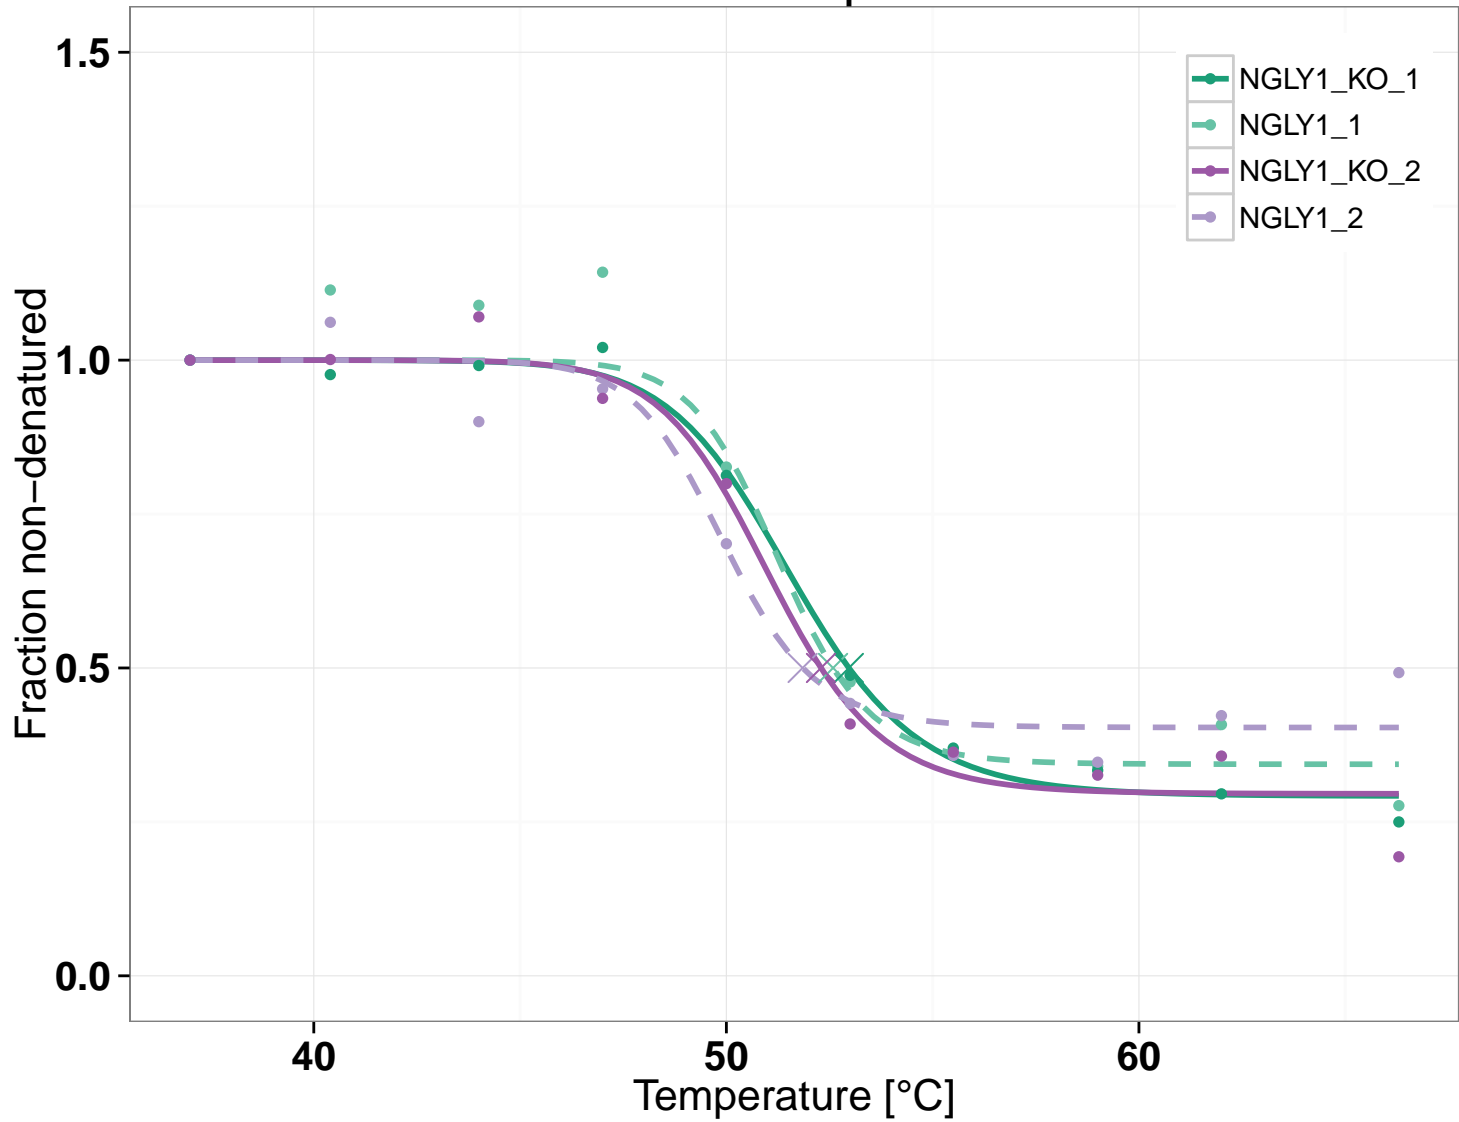

|            | meltPoint | slope | plateau | R2   |
|------------|-----------|-------|---------|------|
| NGLY1_KO_1 | 52.97     | -0.12 | 0.29    | 0.99 |
| NGLY1_1    | 52.59     | -0.15 | 0.34    | 0.95 |
| NGLY1_KO_2 | 52.29     | -0.13 | 0.3     | 0.98 |
| NGLY1_2    | 51.85     | -0.13 | 0.4     | 0.96 |

Supplement: Supplementary file 8296 [file 1]

IPI00061277.2|MTBP

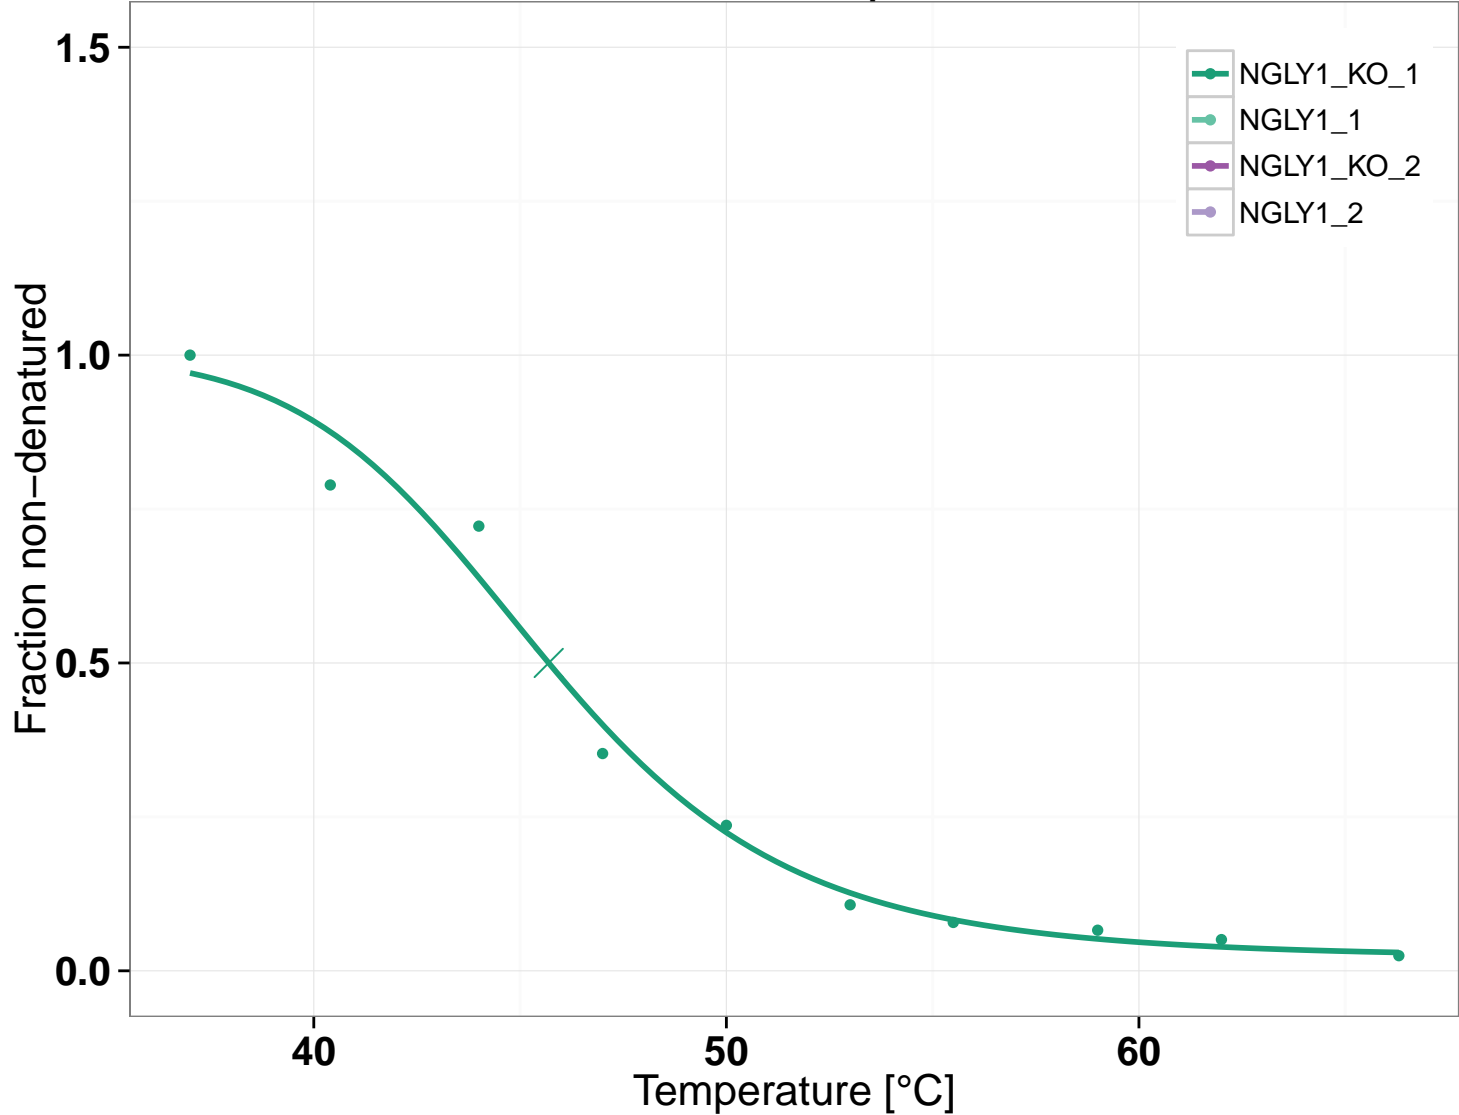

|            | meltPoint | slope  | plateau | R2   |
|------------|-----------|--------|---------|------|
| NGLY1_KO_1 | 45.69     | -0.082 | 0.02    | 0.98 |
| NGLY1_1    | —         | —      | —       | —    |
| NGLY1_KO_2 | —         | —      | —       | —    |
| NGLY1_2    | —         | —      | —       | —    |

Supplement: Supplementary file 8297 [file 1]

# IPI00290799.4|C18ORF19

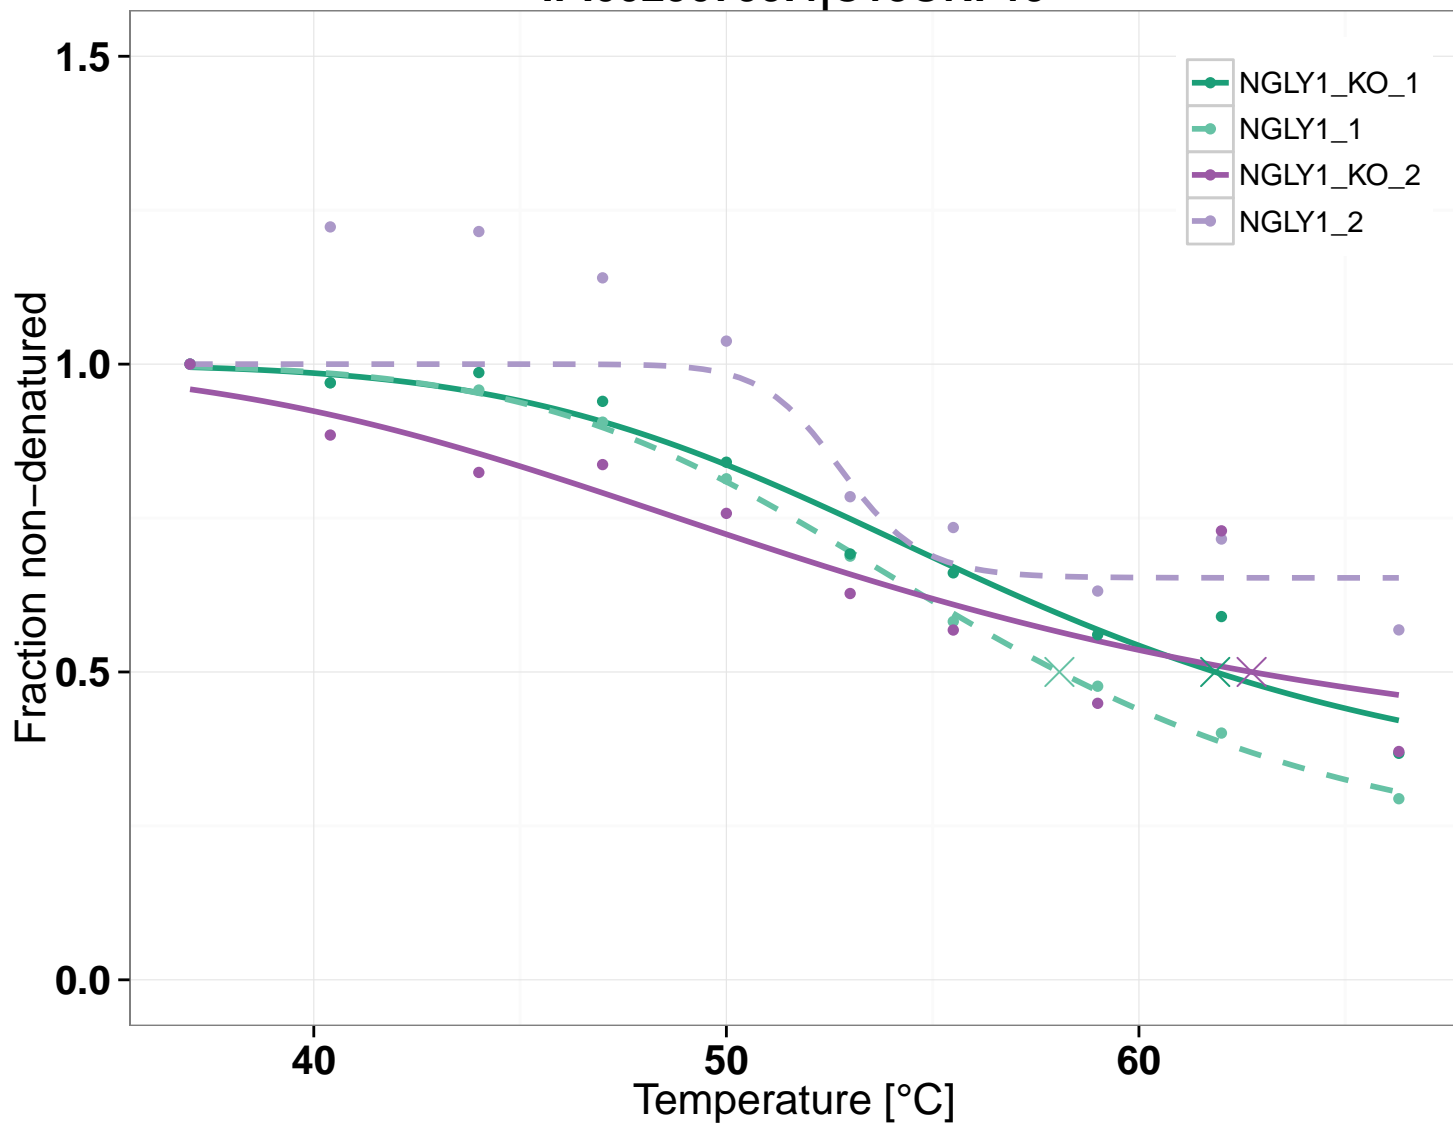

|            | meltPoint | slope  | plateau | R2   |
|------------|-----------|--------|---------|------|
| NGLY1_KO_1 | 61.85     | -0.031 | 0.27    | 0.96 |
| NGLY1_1    | 58.07     | -0.04  | 0.18    | 1    |
| NGLY1_KO_2 | 62.73     | -0.023 | 0.31    | 0.78 |
| NGLY1_2    | –         | -0.09  | 0.65    | 0.75 |

Supplement: Supplementary file 8298 [file 1]

# IPI00299468.3|SCD

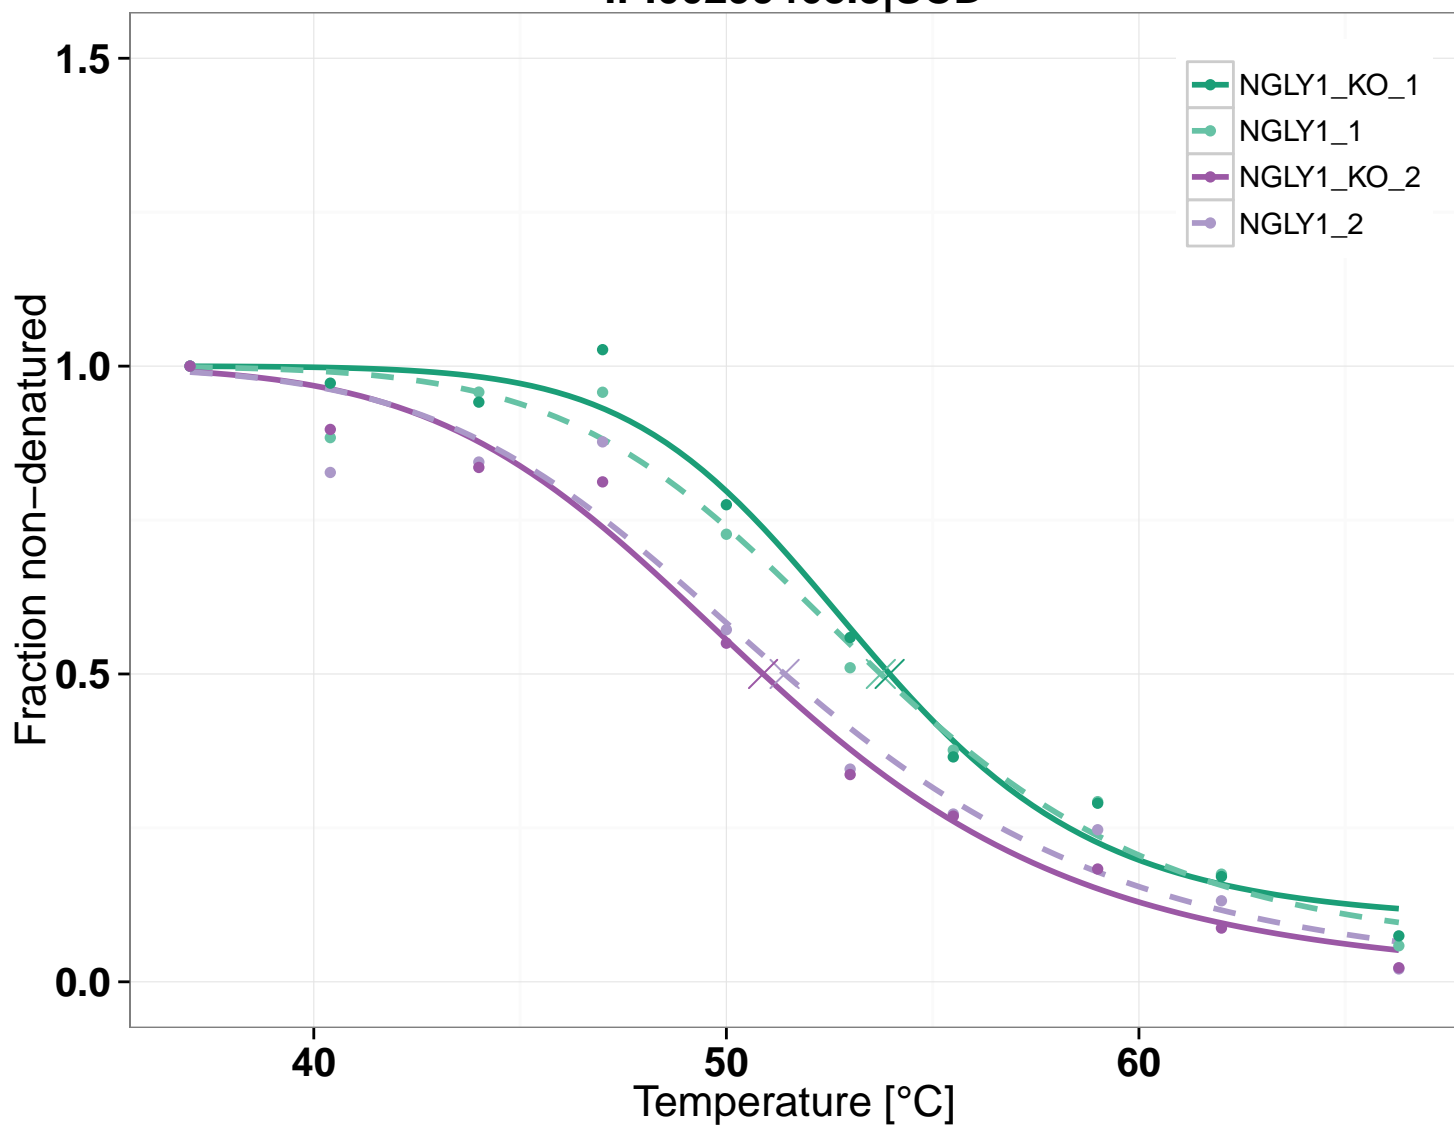

|            | meltPoint | slope  | plateau | R2   |
|------------|-----------|--------|---------|------|
| NGLY1_KO_1 | 53.96     | -0.08  | 0.1     | 0.98 |
| NGLY1_1    | 53.74     | -0.066 | 0.04    | 0.98 |
| NGLY1_KO_2 | 50.89     | -0.063 | 0       | 0.99 |
| NGLY1_2    | 51.41     | -0.059 | 0       | 0.96 |

Supplement: Supplementary file 8299 [file 1]

# IPI00026952.1|PKP3

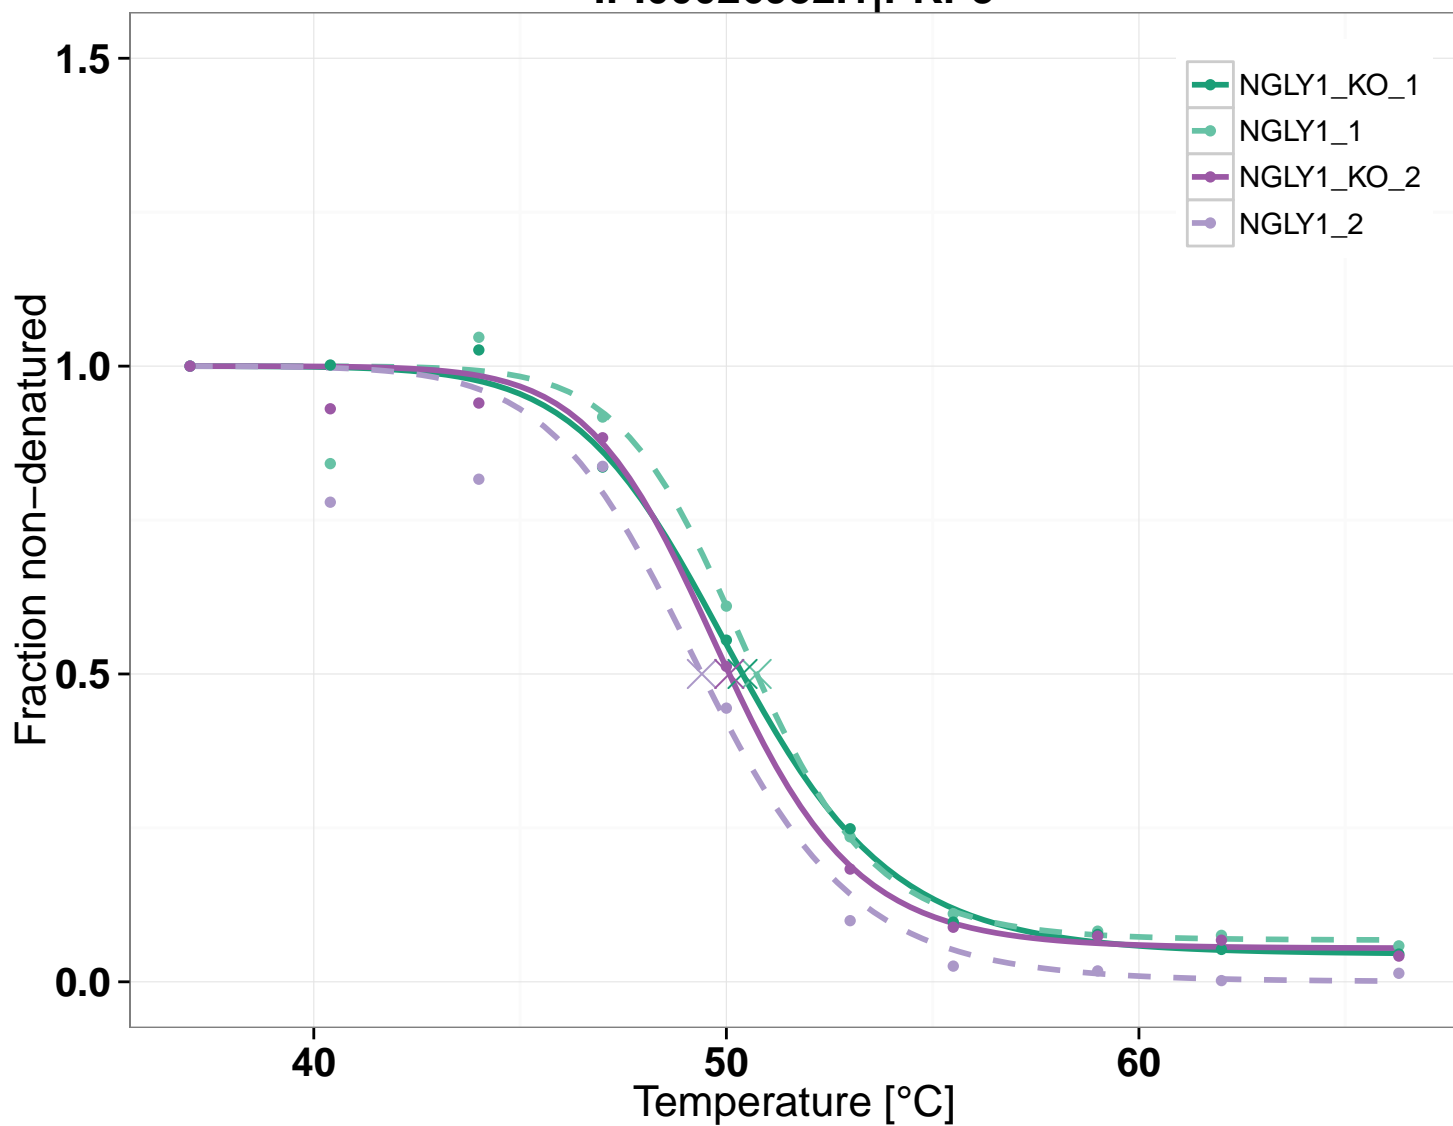

|            | meltPoint | slope | plateau | R2   |
|------------|-----------|-------|---------|------|
| NGLY1_KO_1 | 50.39     | -0.12 | 0.04    | 1    |
| NGLY1_1    | 50.73     | -0.15 | 0.07    | 0.98 |
| NGLY1_KO_2 | 50.07     | -0.15 | 0.05    | 1    |
| NGLY1_2    | 49.41     | -0.13 | 0       | 0.95 |

Supplement: Supplementary file 8300 [file 1]

IPI00307733.5|SETD2

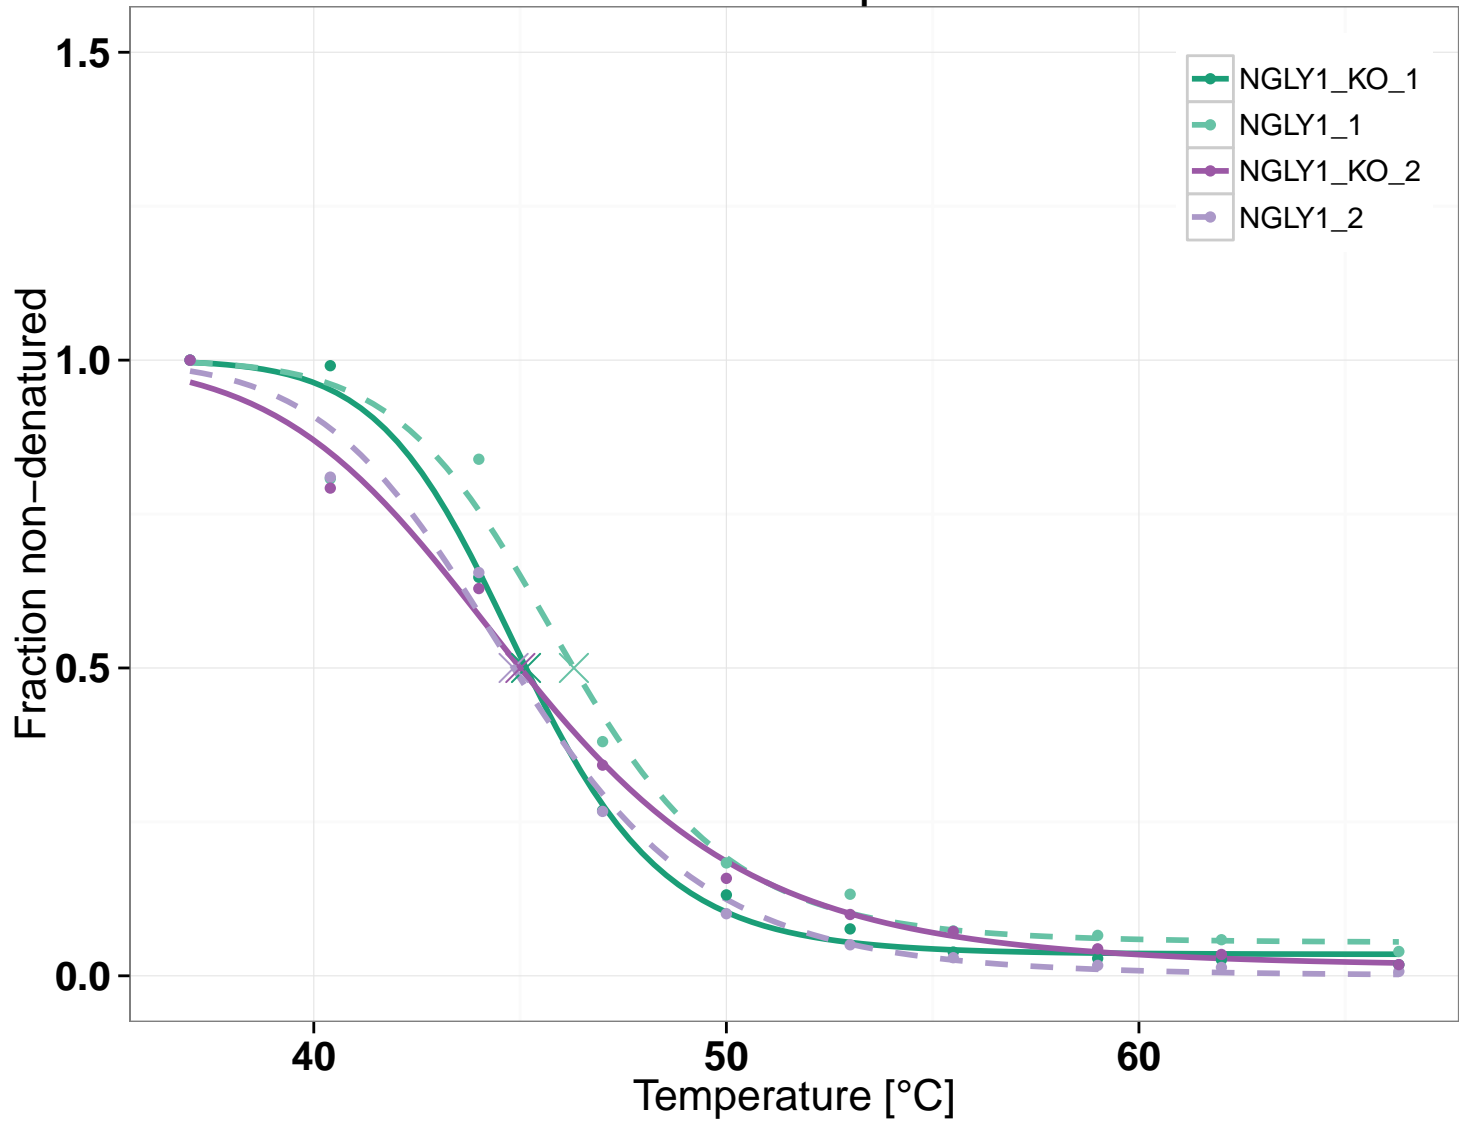

|            | meltPoint | slope  | plateau | R2   |
|------------|-----------|--------|---------|------|
| NGLY1_KO_1 | 45.14     | -0.14  | 0.03    | 1    |
| NGLY1_1    | 46.3      | -0.12  | 0.05    | 0.97 |
| NGLY1_KO_2 | 45.01     | -0.085 | 0.01    | 0.99 |
| NGLY1_2    | 44.84     | -0.11  | 0       | 0.99 |

Supplement: Supplementary file 8301 [file 1]

IPI00473136.3|CTNNA1

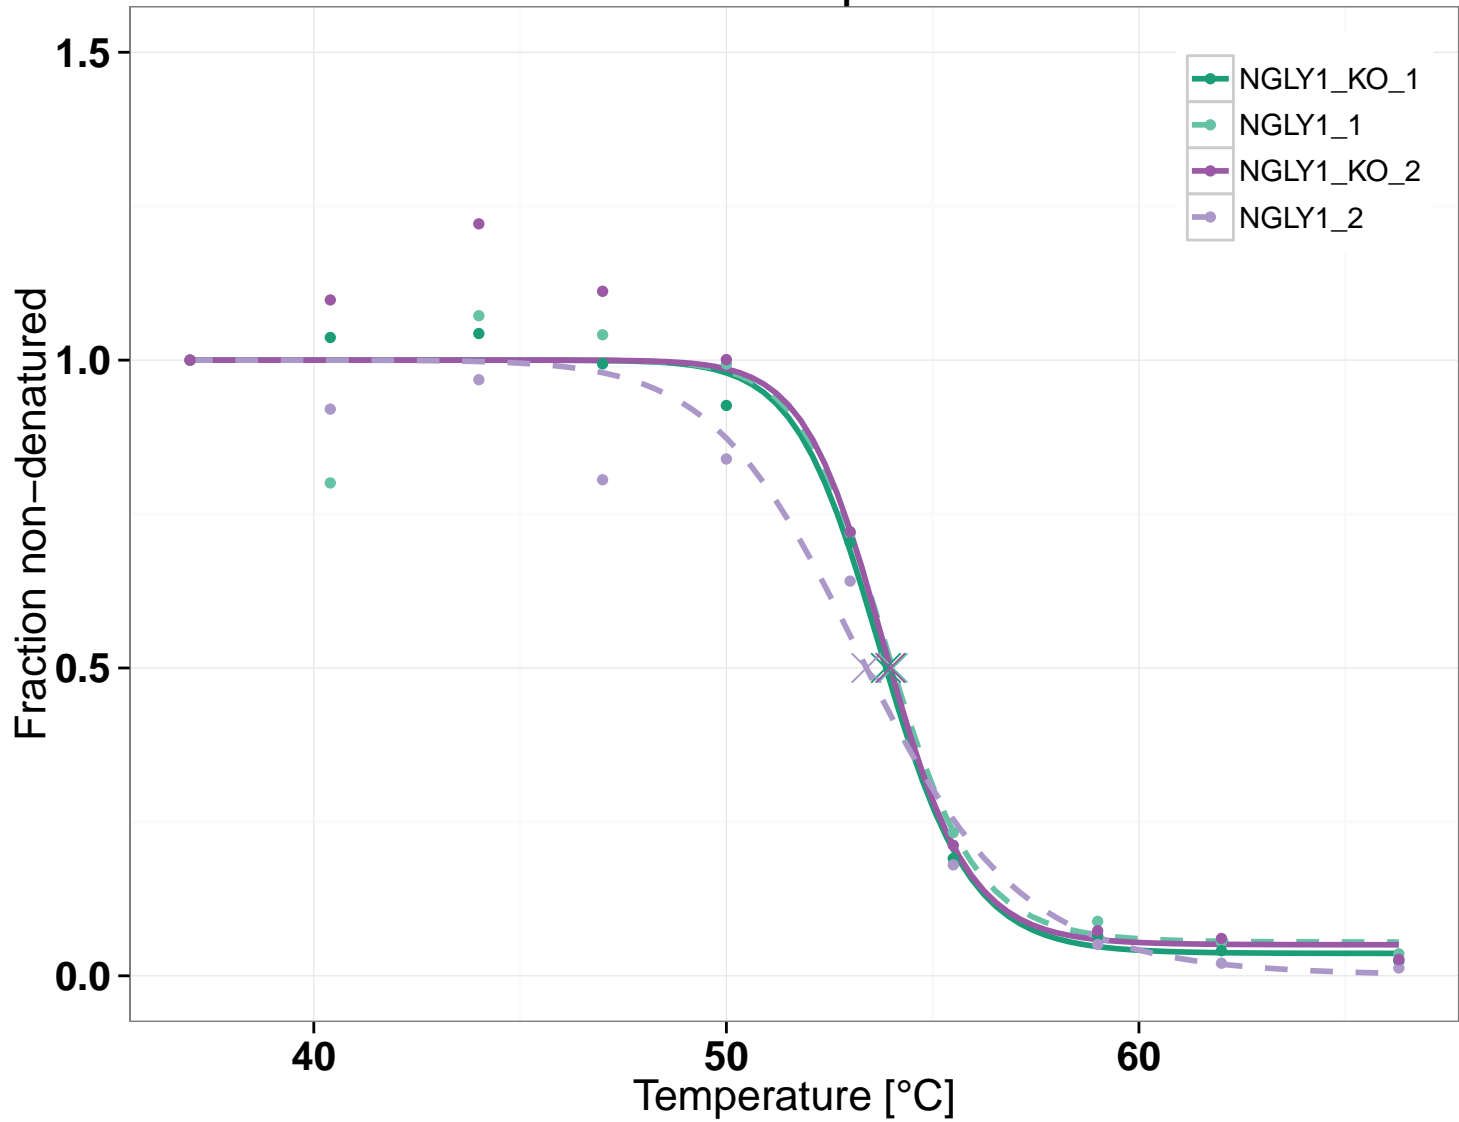

|            | meltPoint | slope | plateau | R2   |
|------------|-----------|-------|---------|------|
| NGLY1_KO_1 | 53.87     | -0.23 | 0.04    | 1    |
| NGLY1_1    | 54.03     | -0.22 | 0.05    | 0.97 |
| NGLY1_KO_2 | 53.98     | -0.24 | 0.05    | 0.97 |
| NGLY1_2    | 53.39     | -0.13 | 0       | 0.97 |

Supplement: Supplementary file 8302 [file 1]

IPI00414255.1|FAM48A

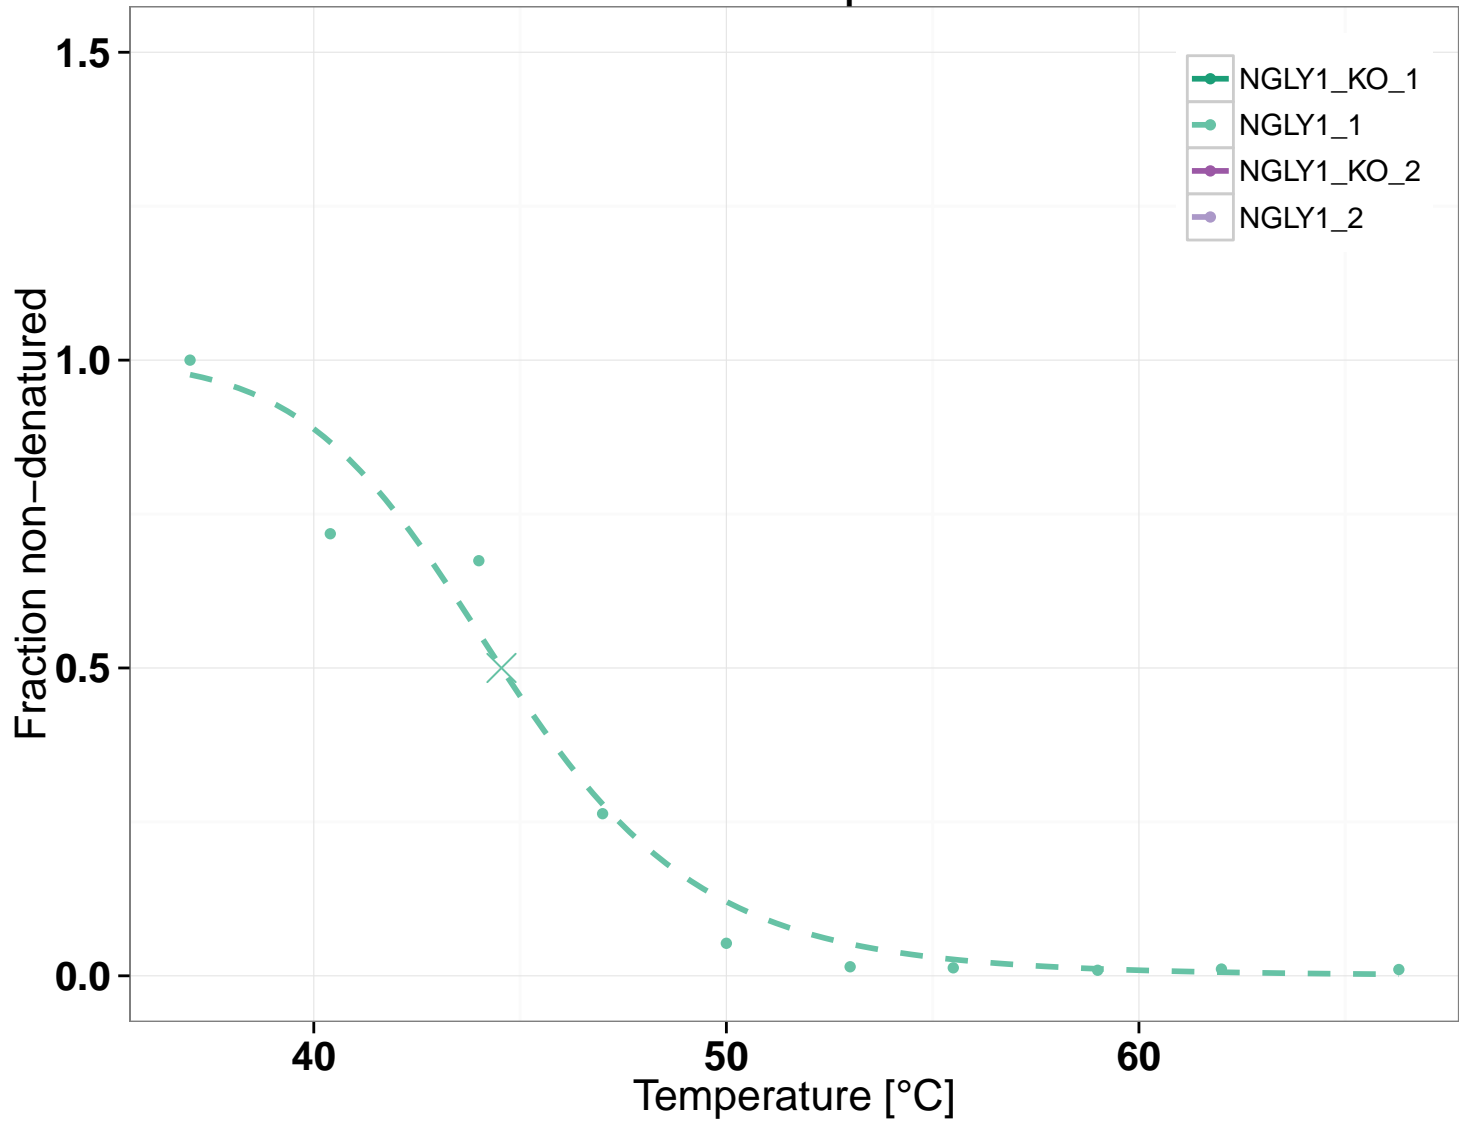

|            | meltPoint | slope | plateau | R2   |
|------------|-----------|-------|---------|------|
| NGLY1_KO_1 | -         | -     | -       | -    |
| NGLY1_1    | 44.55     | -0.1  | 0       | 0.97 |
| NGLY1_KO_2 | -         | -     | -       | -    |
| NGLY1_2    | -         | -     | -       | -    |

Supplement: Supplementary file 8303 [file 1]

IPI00217622.1|MICALL2

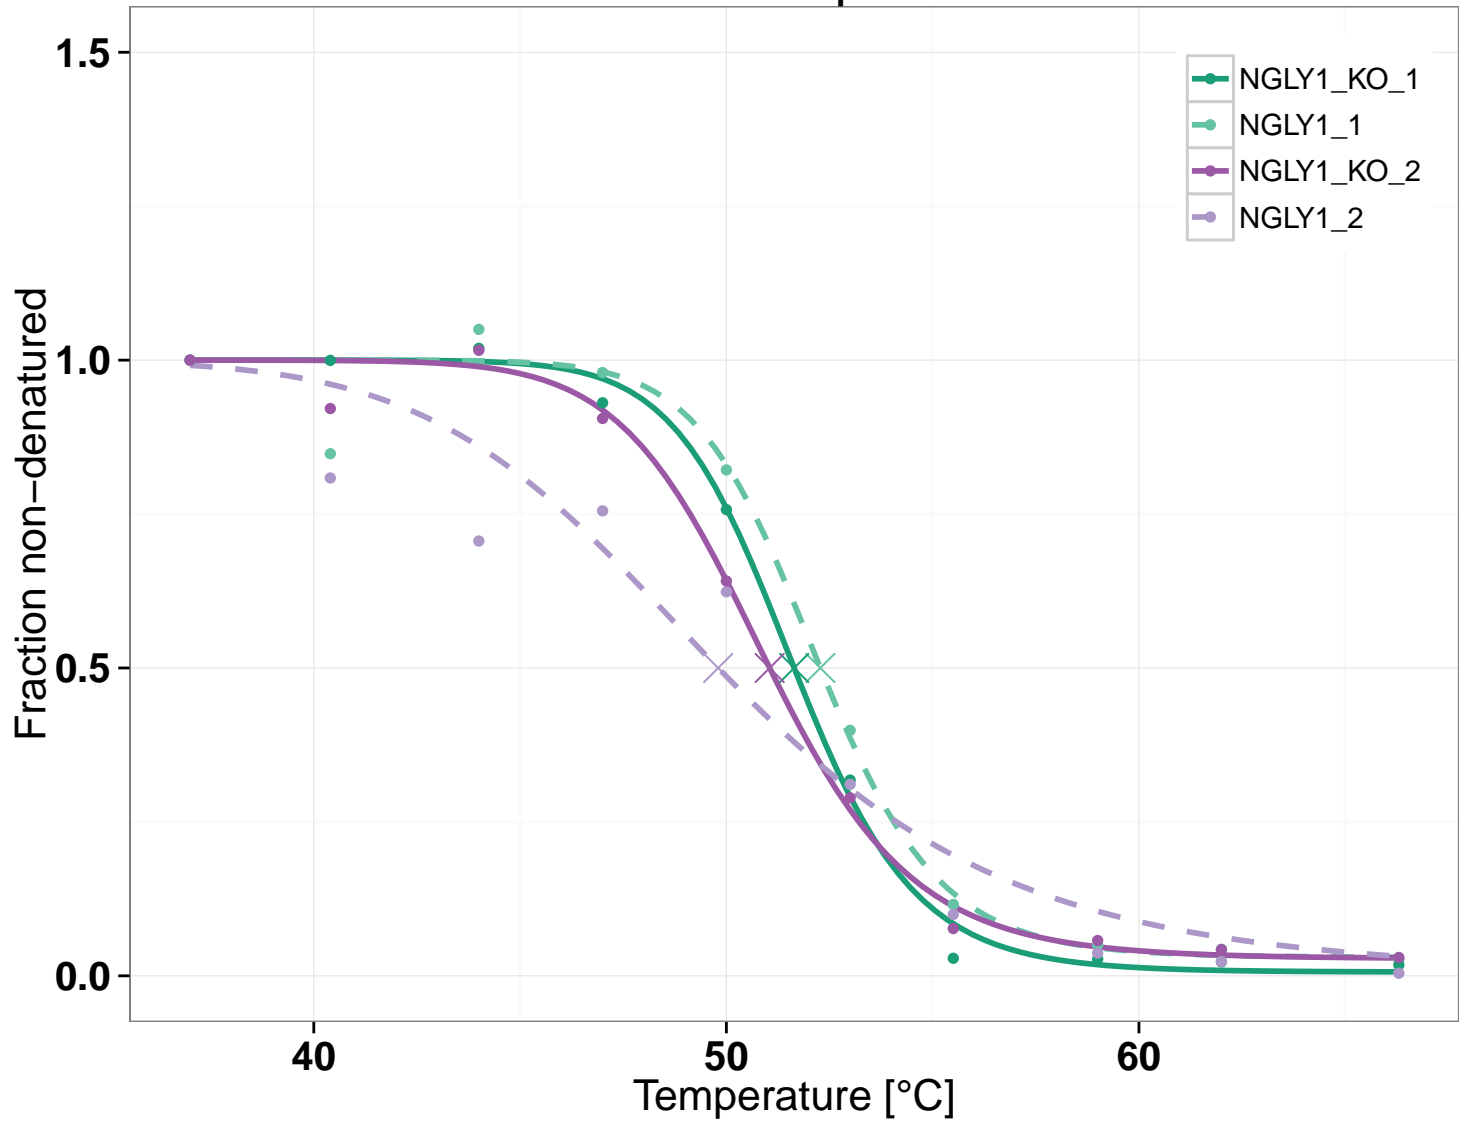

|            | meltPoint | slope  | plateau | R2   |
|------------|-----------|--------|---------|------|
| NGLY1_KO_1 | 51.64     | -0.17  | 0.01    | 1    |
| NGLY1_1    | 52.28     | -0.17  | 0.03    | 0.99 |
| NGLY1_KO_2 | 51.05     | -0.14  | 0.03    | 0.99 |
| NGLY1_2    | 49.8      | -0.071 | 0       | 0.93 |

Supplement: Supplementary file 8304 [file 1]

# IPI00549972.3|LIMD2

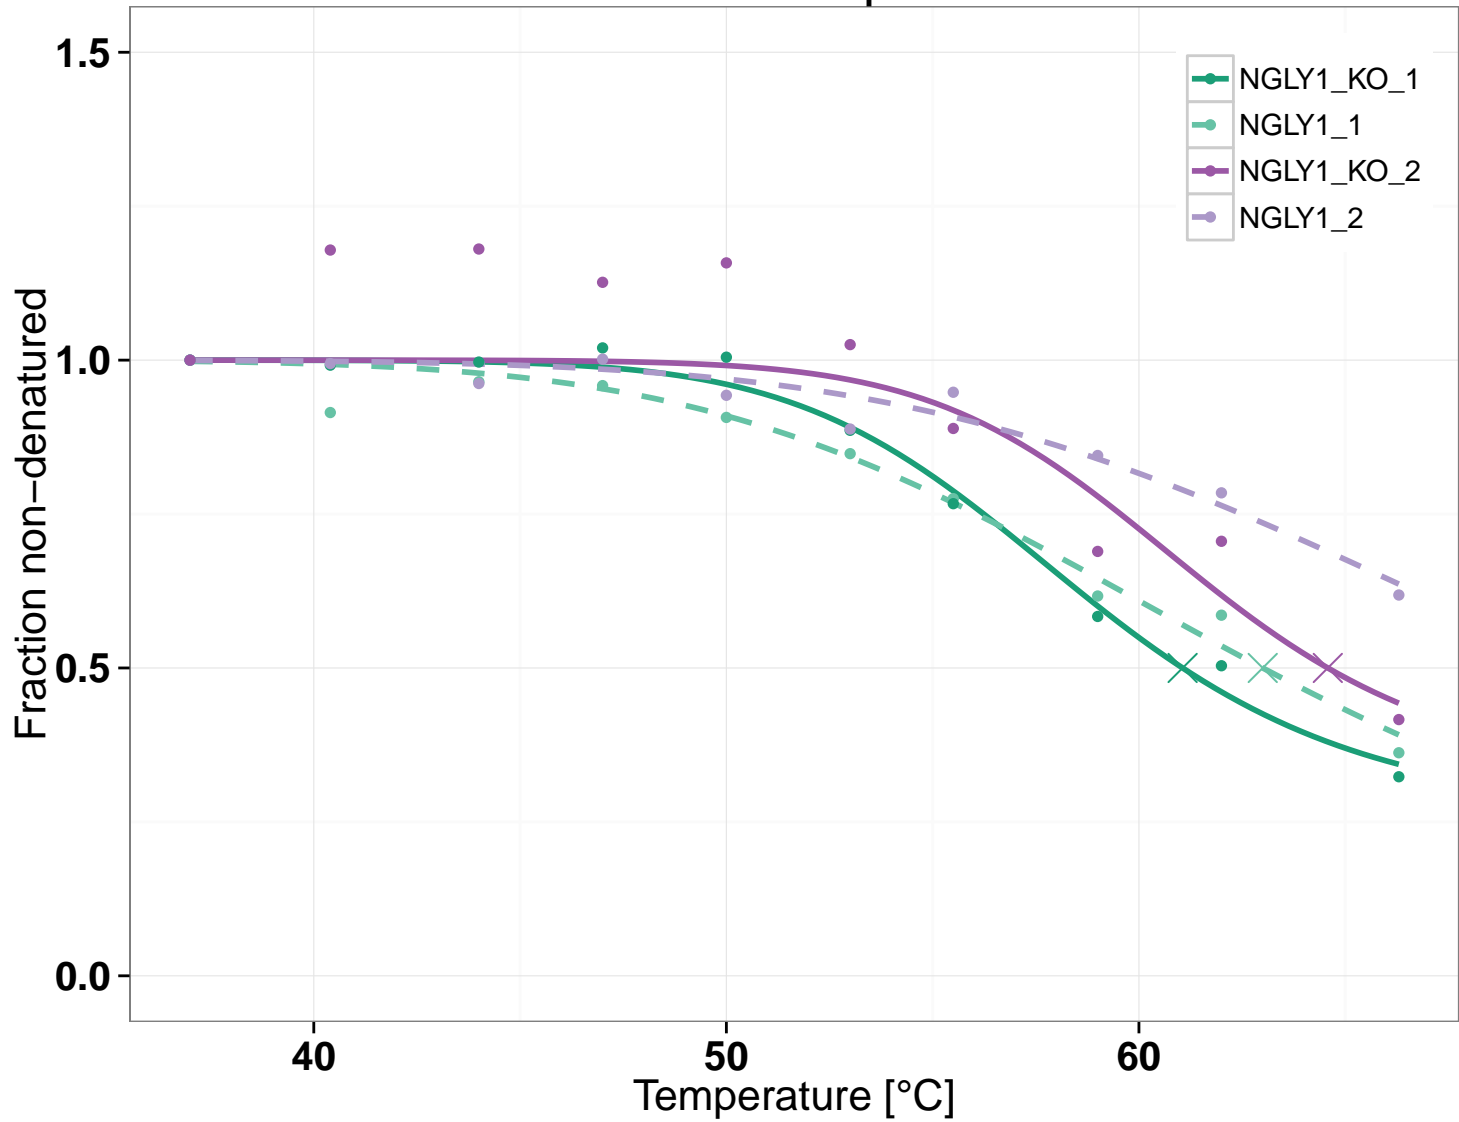

|            | meltPoint | slope  | plateau | R2   |
|------------|-----------|--------|---------|------|
| NGLY1_KO_1 | 61.06     | -0.055 | 0.25    | 0.99 |
| NGLY1_1    | 63        | -0.037 | 0       | 0.97 |
| NGLY1_KO_2 | 64.58     | -0.055 | 0.31    | 0.79 |
| NGLY1_2    | -         | -      | 0       | 0.95 |

Supplement: Supplementary file 8305 [file 1]

IPI00030783.1|STAT5A

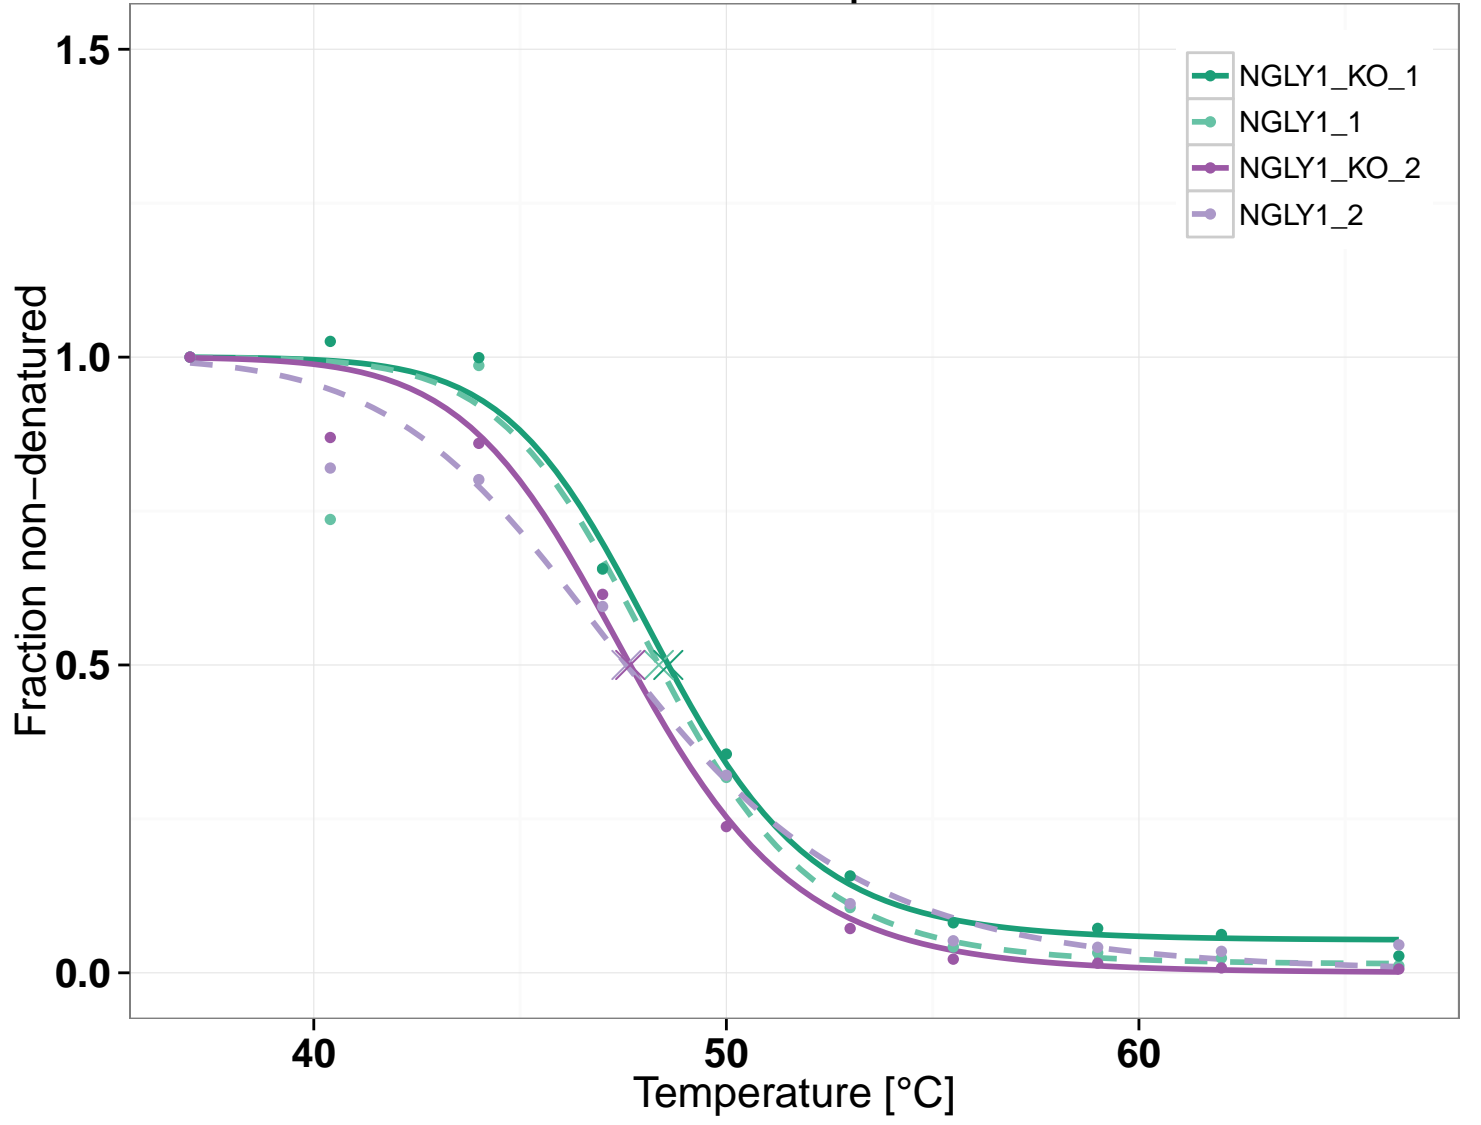

|            | meltPoint | slope  | plateau | R2   |
|------------|-----------|--------|---------|------|
| NGLY1_KO_1 | 48.59     | -0.13  | 0.05    | 0.99 |
| NGLY1_1    | 48.36     | -0.13  | 0.01    | 0.95 |
| NGLY1_KO_2 | 47.67     | -0.12  | 0       | 0.99 |
| NGLY1_2    | 47.58     | -0.087 | 0       | 0.98 |

Supplement: Supplementary file 8306 [file 1]

IPI00217871.4|ALDH4A1

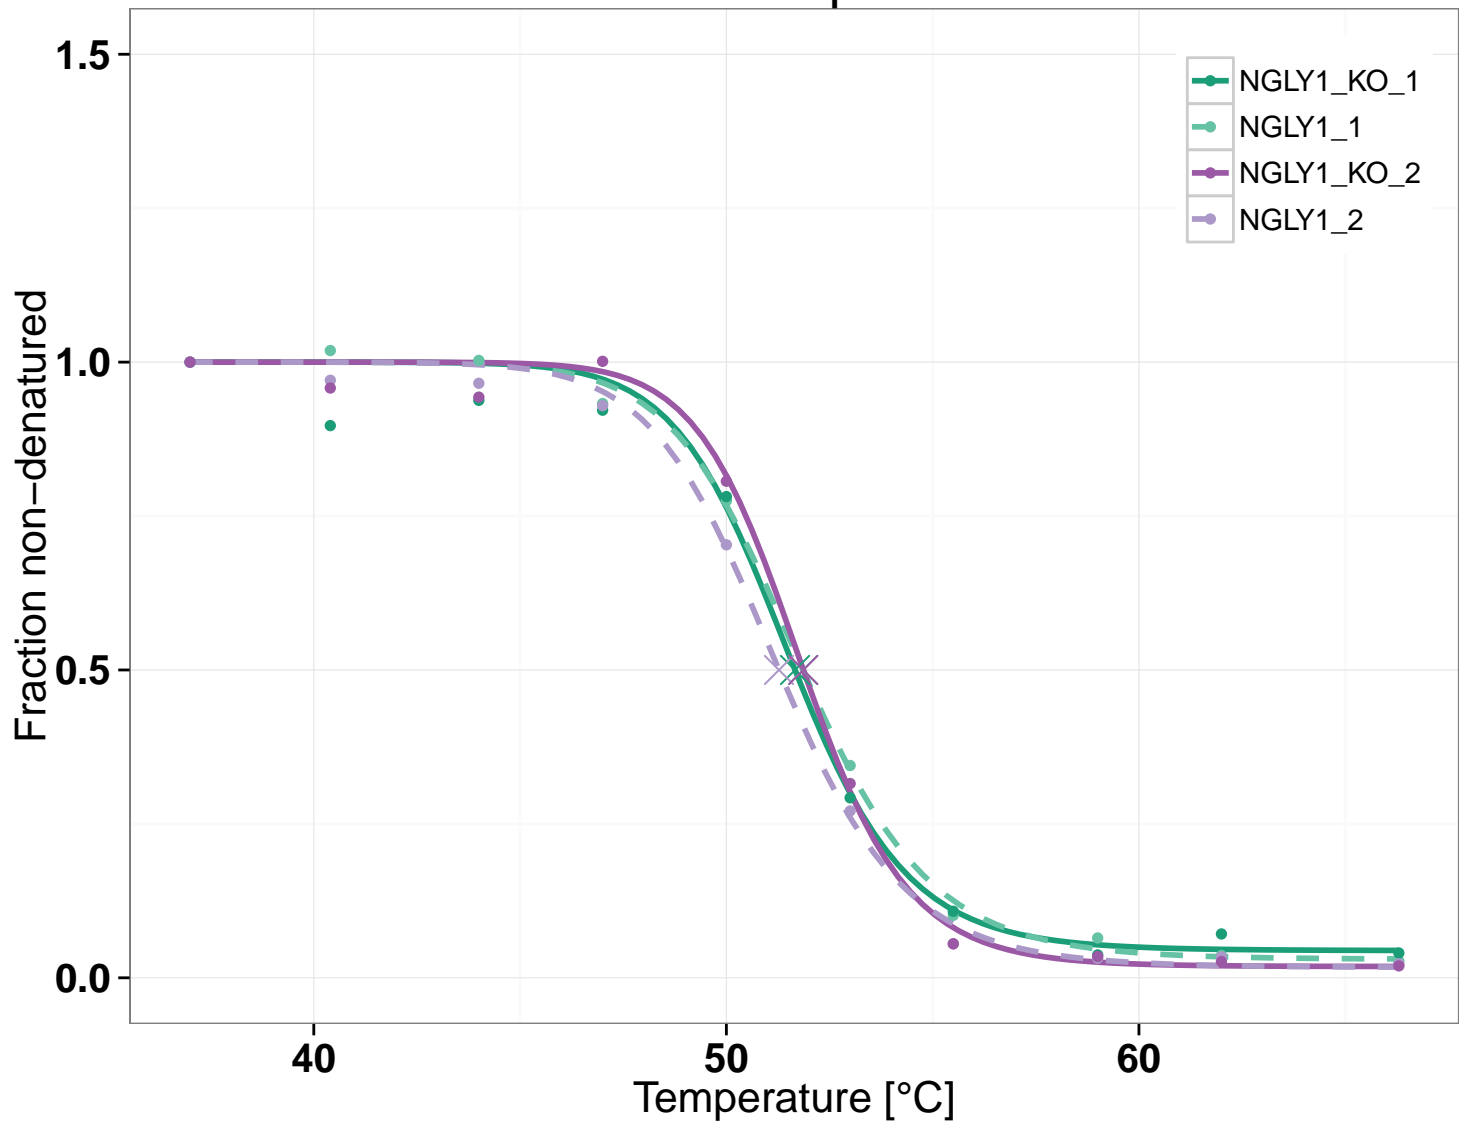

|            | meltPoint | slope | plateau | R2   |
|------------|-----------|-------|---------|------|
| NGLY1_KO_1 | 51.66     | -0.17 | 0.04    | 0.99 |
| NGLY1_1    | 51.86     | -0.15 | 0.03    | 1    |
| NGLY1_KO_2 | 51.87     | -0.19 | 0.02    | 1    |
| NGLY1_2    | 51.28     | -0.16 | 0.02    | 1    |

Supplement: Supplementary file 8307 [file 1]

IPI00642645.1|MTHFR

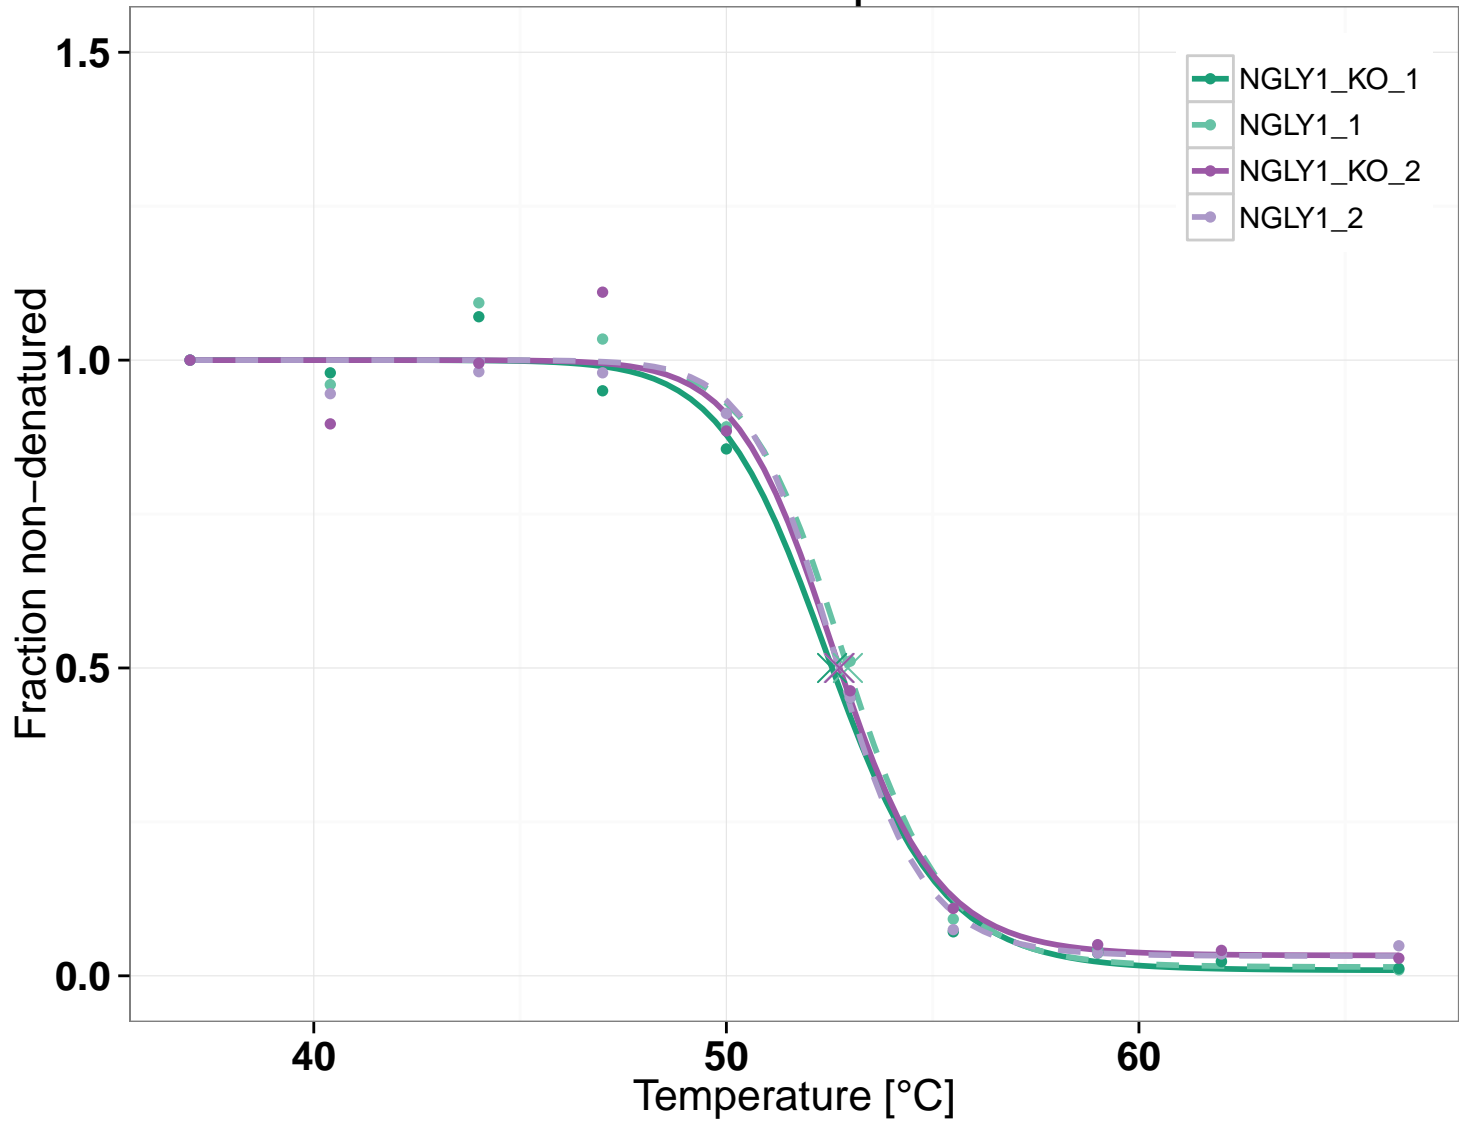

|            | meltPoint | slope | plateau | R2   |
|------------|-----------|-------|---------|------|
| NGLY1_KO_1 | 52.56     | -0.18 | 0.01    | 0.99 |
| NGLY1_1    | 52.95     | -0.21 | 0.01    | 0.99 |
| NGLY1_KO_2 | 52.75     | -0.2  | 0.03    | 0.99 |
| NGLY1_2    | 52.72     | -0.23 | 0.03    | 1    |

Supplement: Supplementary file 8308 [file 1]

# IPI00175136.3|RBM15B

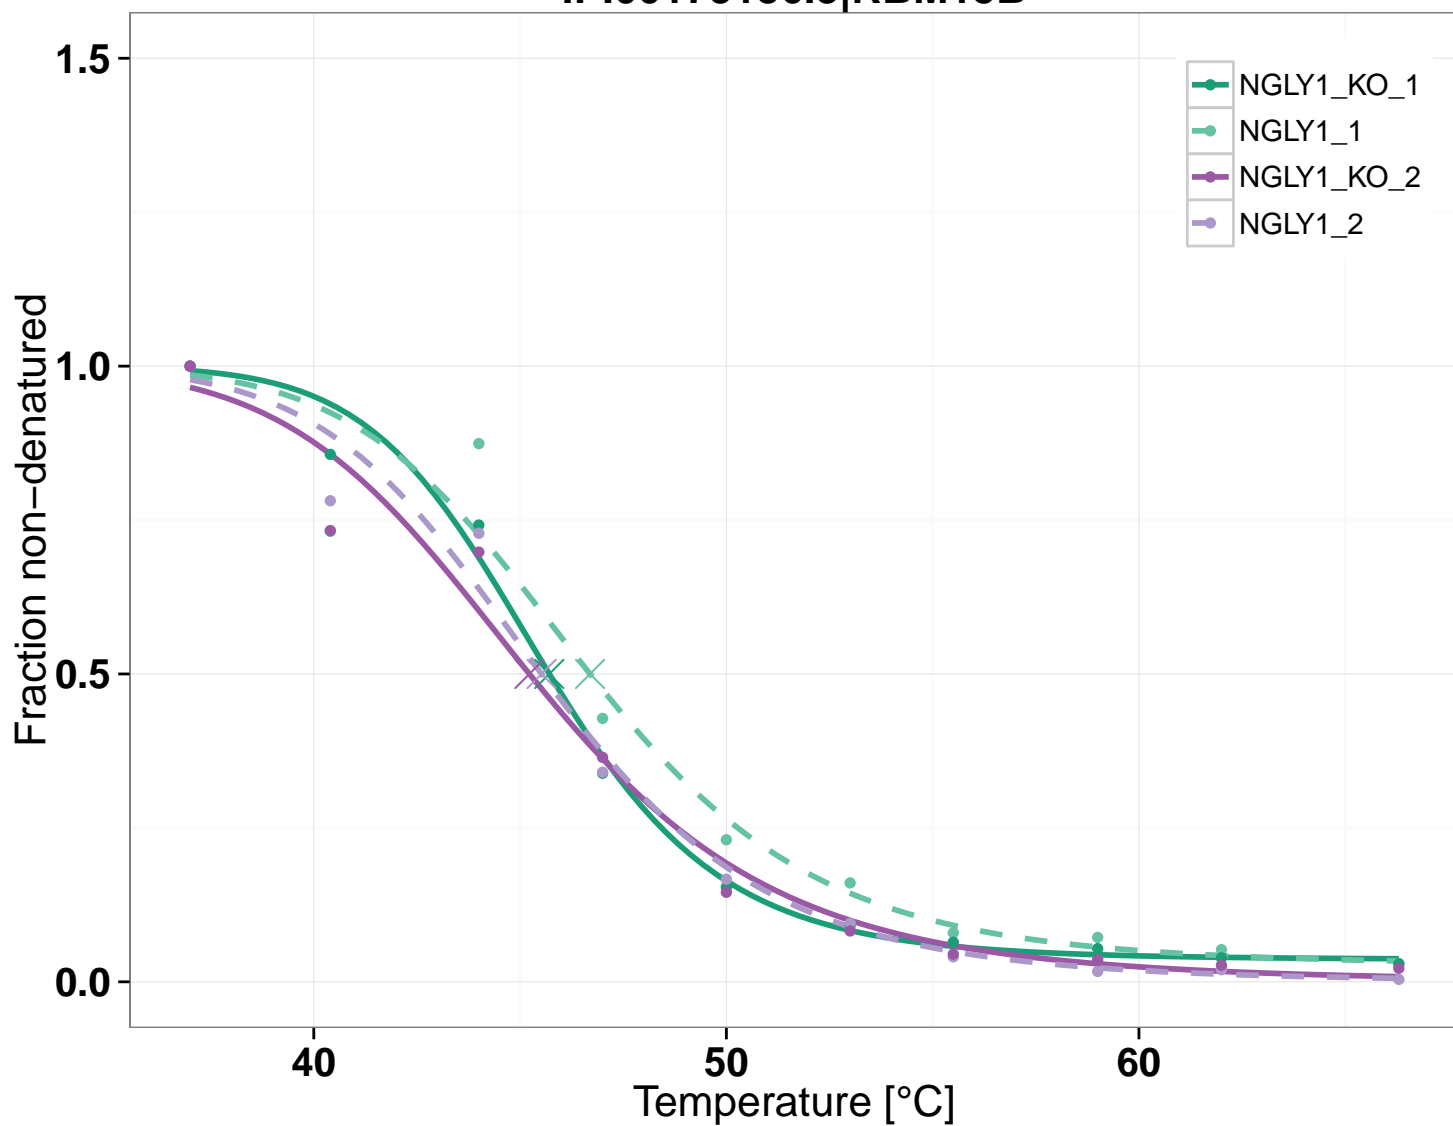

|            | meltPoint | slope  | plateau | R2   |
|------------|-----------|--------|---------|------|
| NGLY1_KO_1 | 45.71     | -0.11  | 0.04    | 0.99 |
| NGLY1_1    | 46.7      | -0.086 | 0.03    | 0.95 |
| NGLY1_KO_2 | 45.23     | -0.084 | 0       | 0.98 |
| NGLY1_2    | 45.52     | -0.092 | 0       | 0.98 |

Supplement: Supplementary file 8309 [file 1]

# IPI00302990.3|WDR55

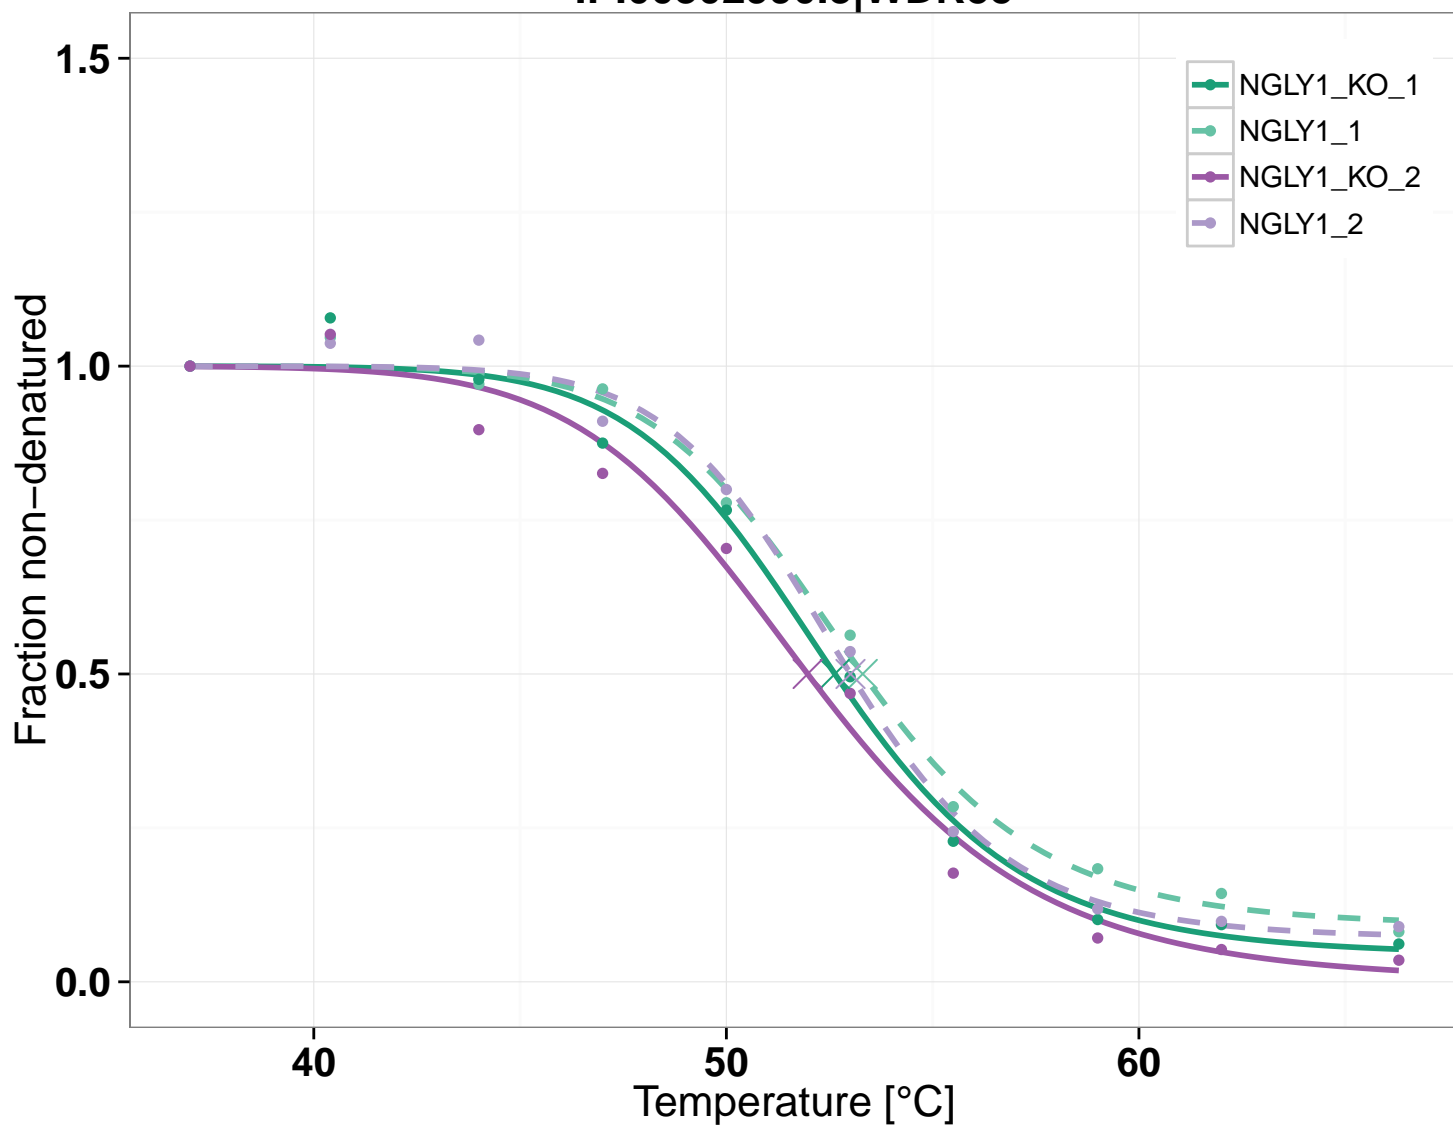

|            | meltPoint | slope  | plateau | R2   |
|------------|-----------|--------|---------|------|
| NGLY1_KO_1 | 52.63     | -0.1   | 0.04    | 0.99 |
| NGLY1_1    | 53.31     | -0.097 | 0.09    | 1    |
| NGLY1_KO_2 | 51.97     | -0.09  | 0       | 0.99 |
| NGLY1_2    | 53.01     | -0.11  | 0.07    | 0.99 |

Supplement: Supplementary file 8310 [file 1]

# IPI00151141.1|WNK4

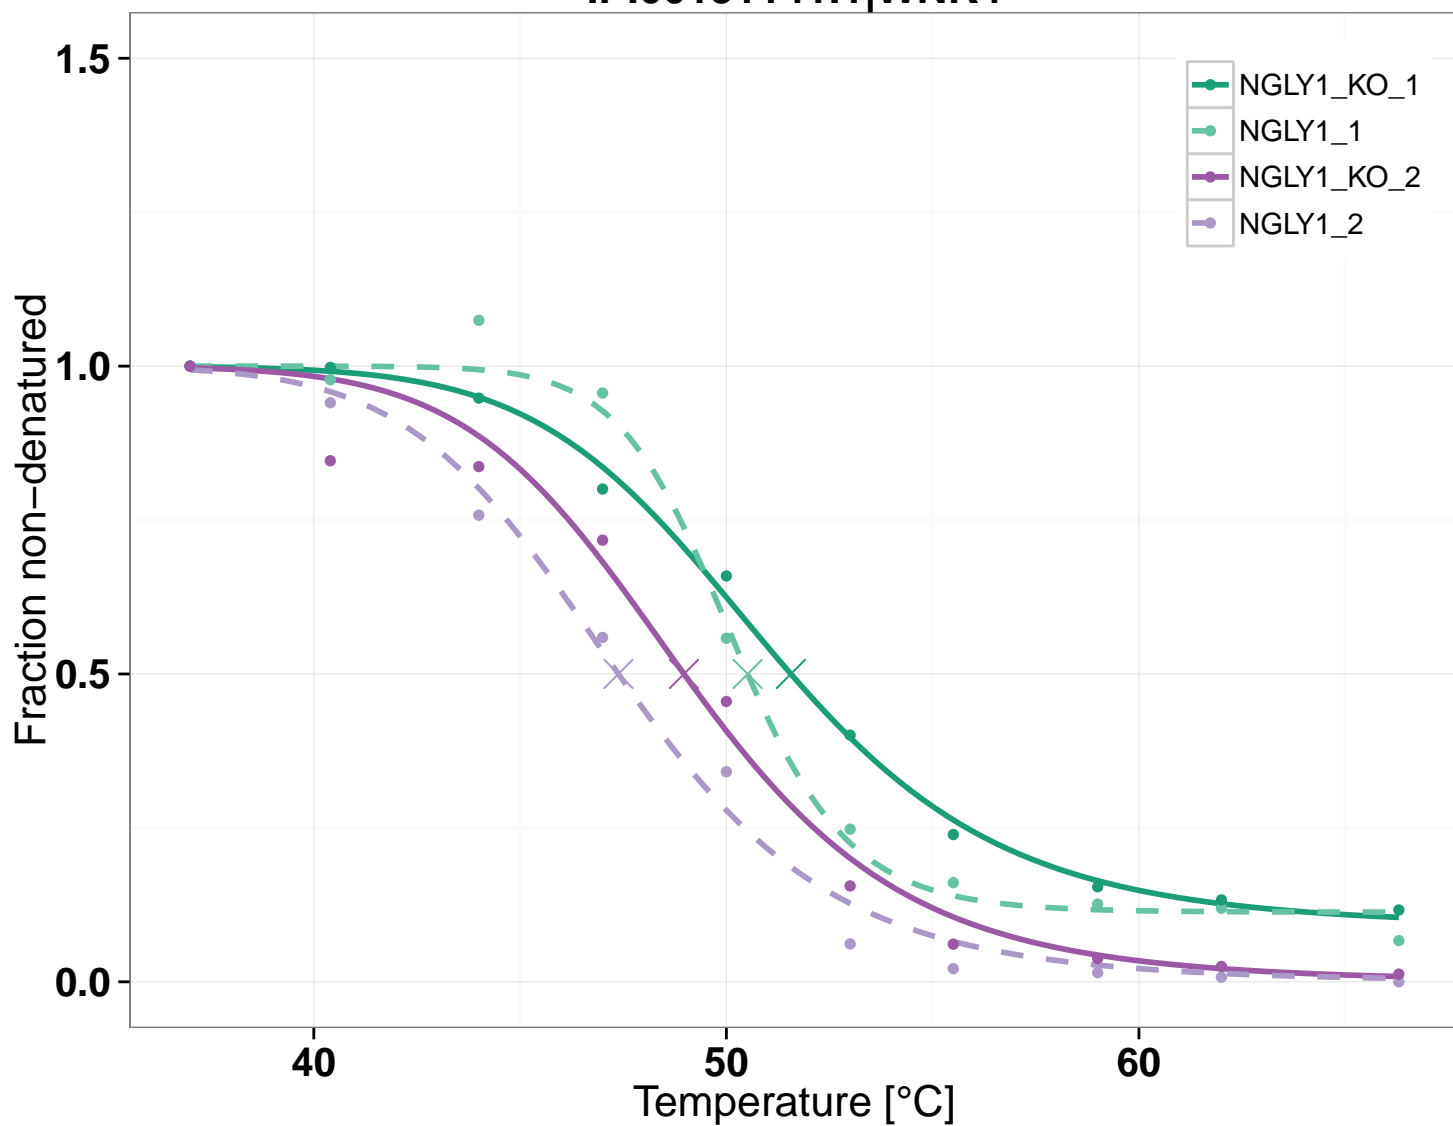

|            | meltPoint | slope  | plateau | R2   |
|------------|-----------|--------|---------|------|
| NGLY1_KO_1 | 51.56     | -0.081 | 0.09    | 1    |
| NGLY1_1    | 50.52     | -0.16  | 0.11    | 0.99 |
| NGLY1_KO_2 | 48.97     | -0.094 | 0       | 0.98 |
| NGLY1_2    | 47.38     | -0.097 | 0       | 0.99 |

Supplement: Supplementary file 8311 [file 1]

IPI00012510.2|EMILIN2

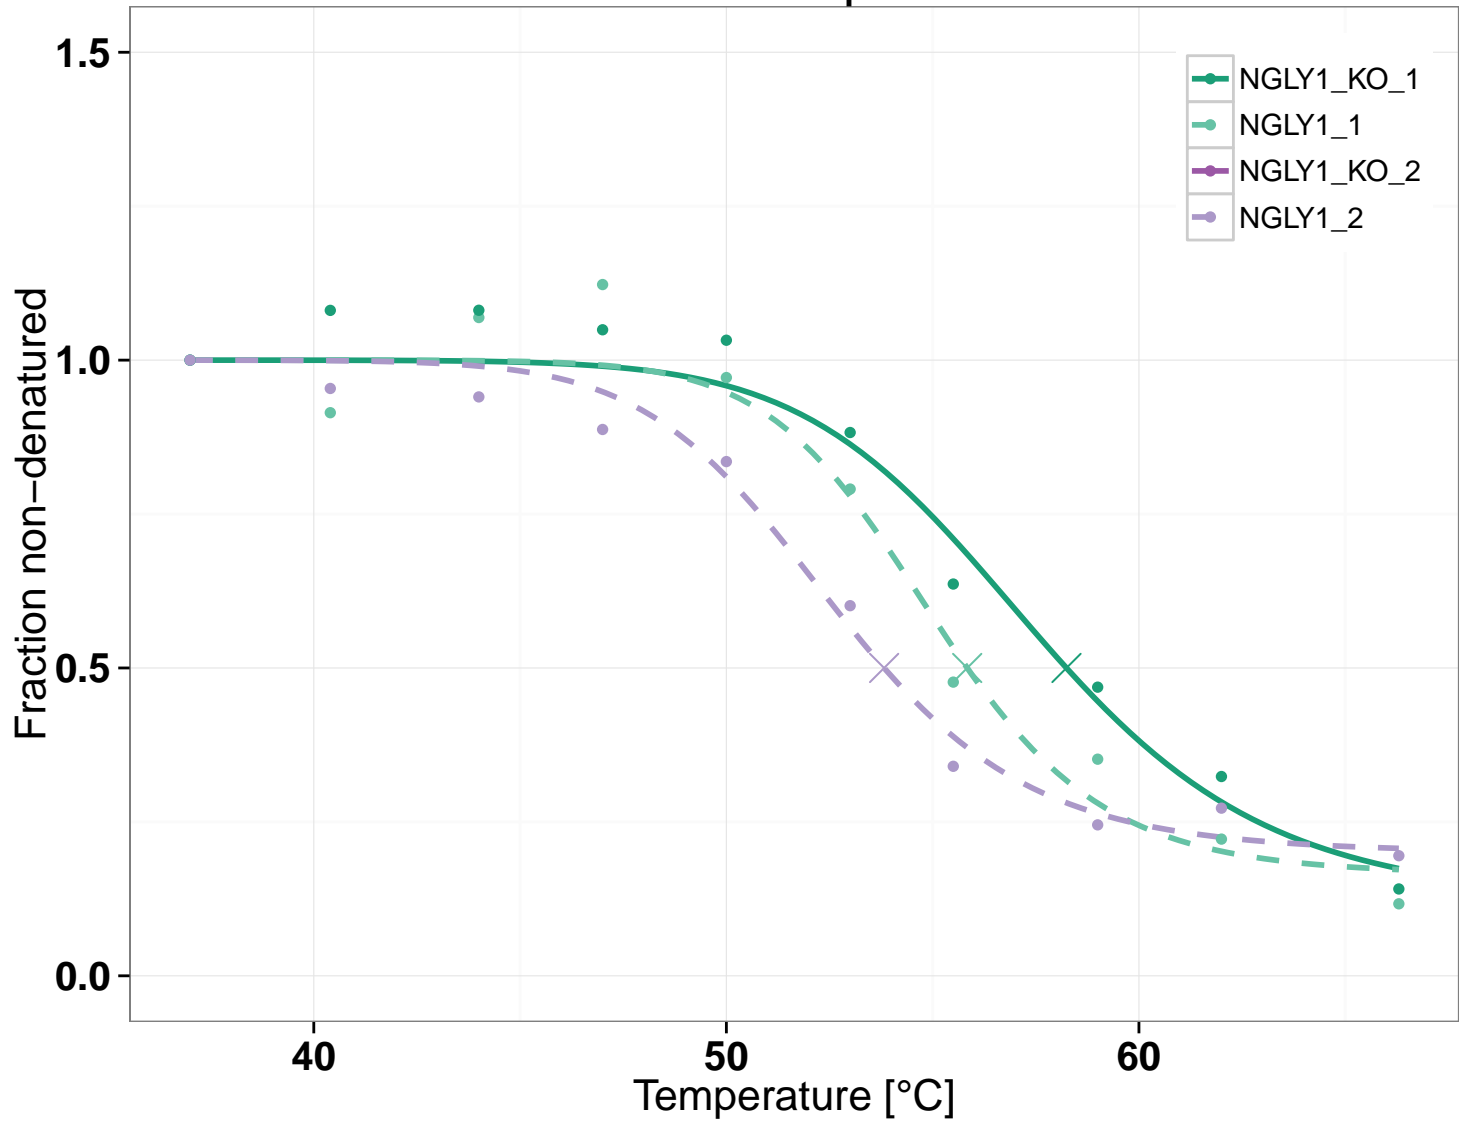

|            | meltPoint | slope  | plateau | R2   |
|------------|-----------|--------|---------|------|
| NGLY1_KO_1 | 58.24     | -0.078 | 0.12    | 0.97 |
| NGLY1_1    | 55.84     | -0.1   | 0.16    | 0.97 |
| NGLY1_KO_2 | -         | -      | -       | -    |
| NGLY1_2    | 53.82     | -0.086 | 0.2     | 0.98 |

Supplement: Supplementary file 8312 [file 1]

IPI00257059.2|TMEM173

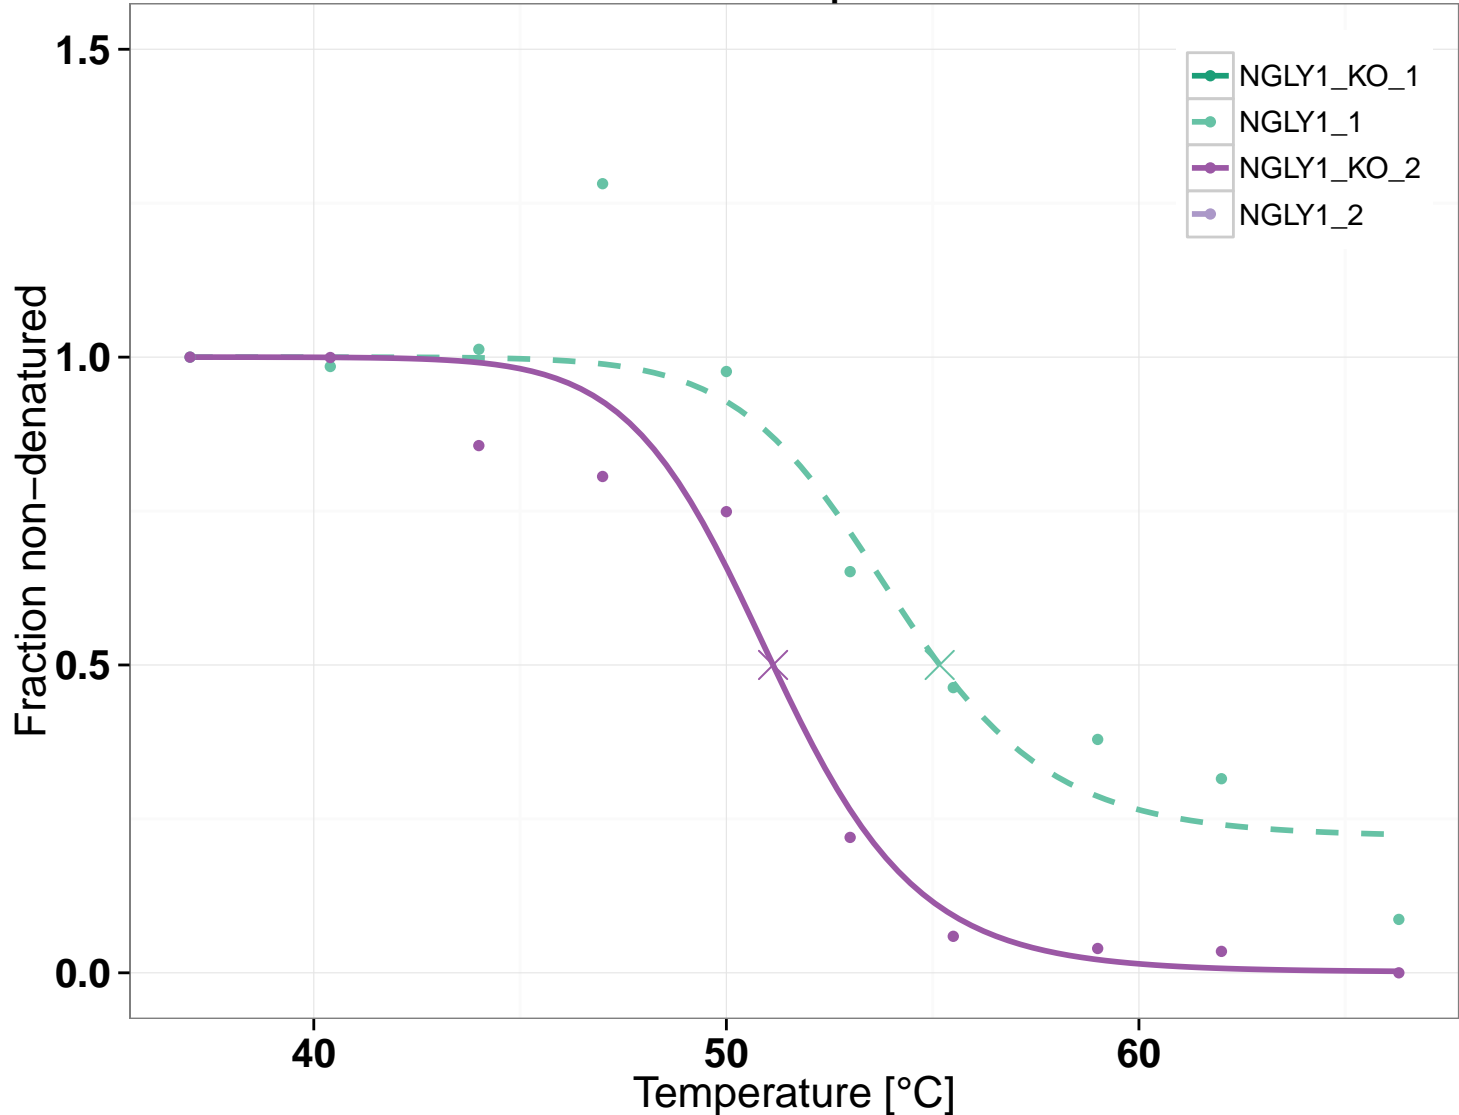

|            | meltPoint | slope | plateau | R2   |
|------------|-----------|-------|---------|------|
| NGLY1_KO_1 | -         | -     | -       | -    |
| NGLY1_1    | 55.17     | -0.1  | 0.22    | 0.91 |
| NGLY1_KO_2 | 51.13     | -0.14 | 0       | 0.97 |
| NGLY1_2    | -         | -     | -       | -    |

Supplement: Supplementary file 8313 [file 1]

# IPI00305887.1|NUF2

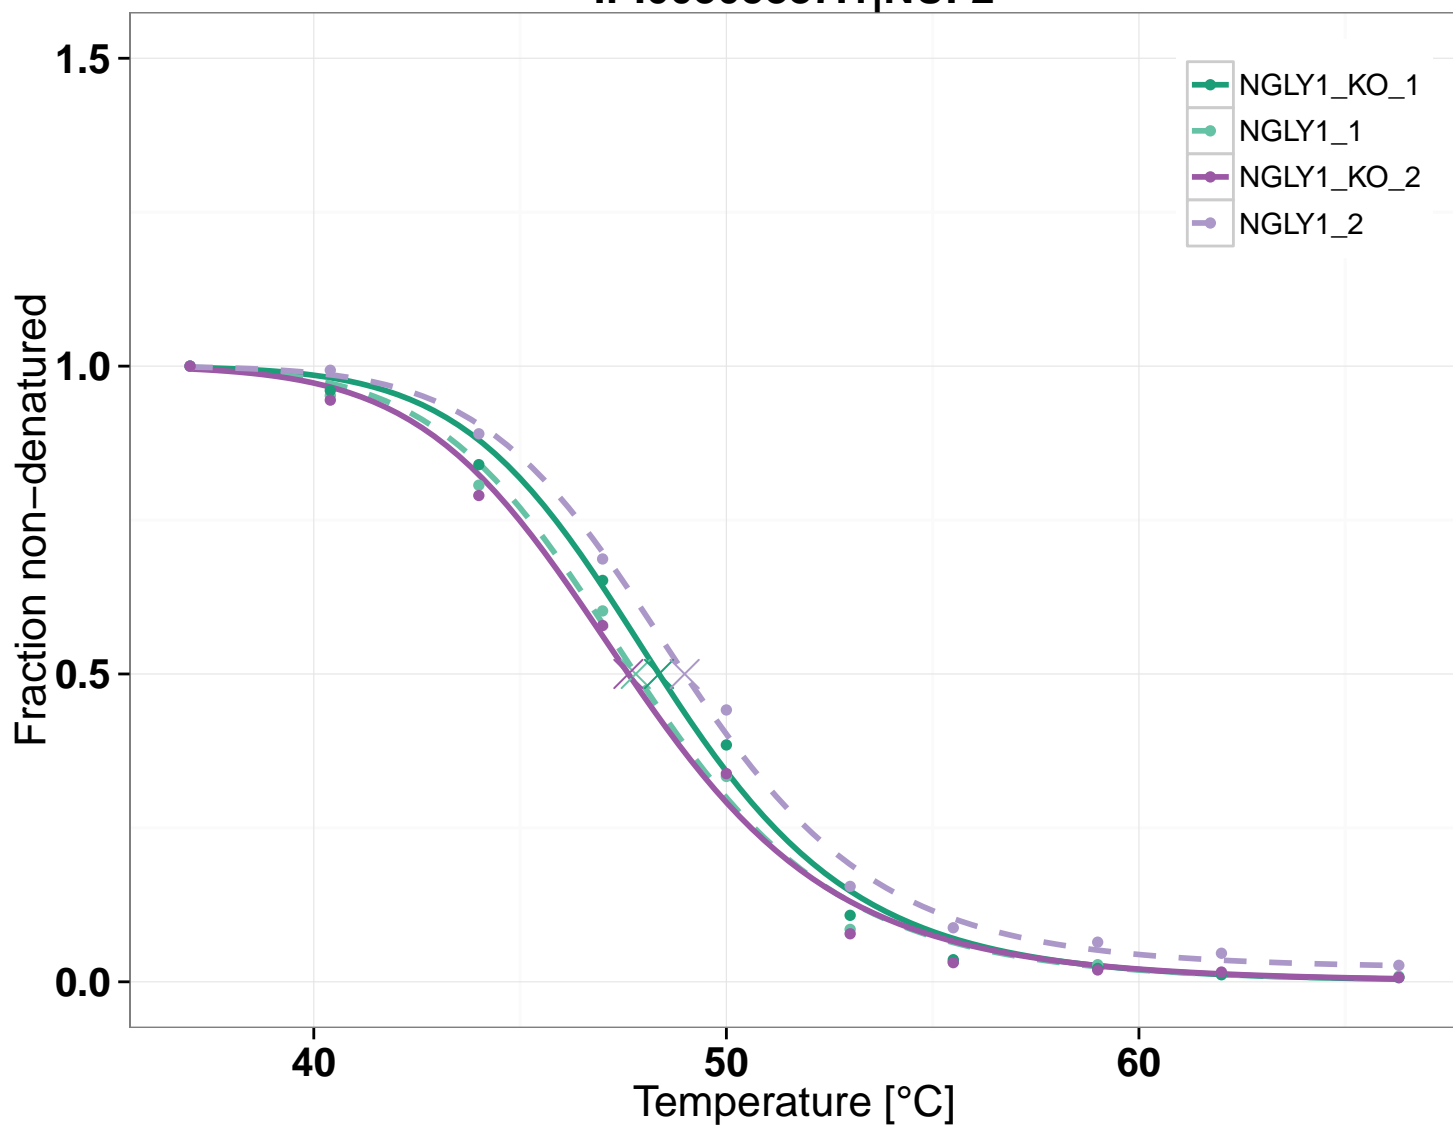

|            | meltPoint | slope  | plateau | R2   |
|------------|-----------|--------|---------|------|
| NGLY1_KO_1 | 48.37     | -0.1   | 0       | 1    |
| NGLY1_1    | 47.8      | -0.1   | 0       | 1    |
| NGLY1_KO_2 | 47.63     | -0.099 | 0       | 0.99 |
| NGLY1_2    | 48.99     | -0.1   | 0.02    | 1    |

Supplement: Supplementary file 8314 [file 1]

# IPI00022228.2|HDLBP

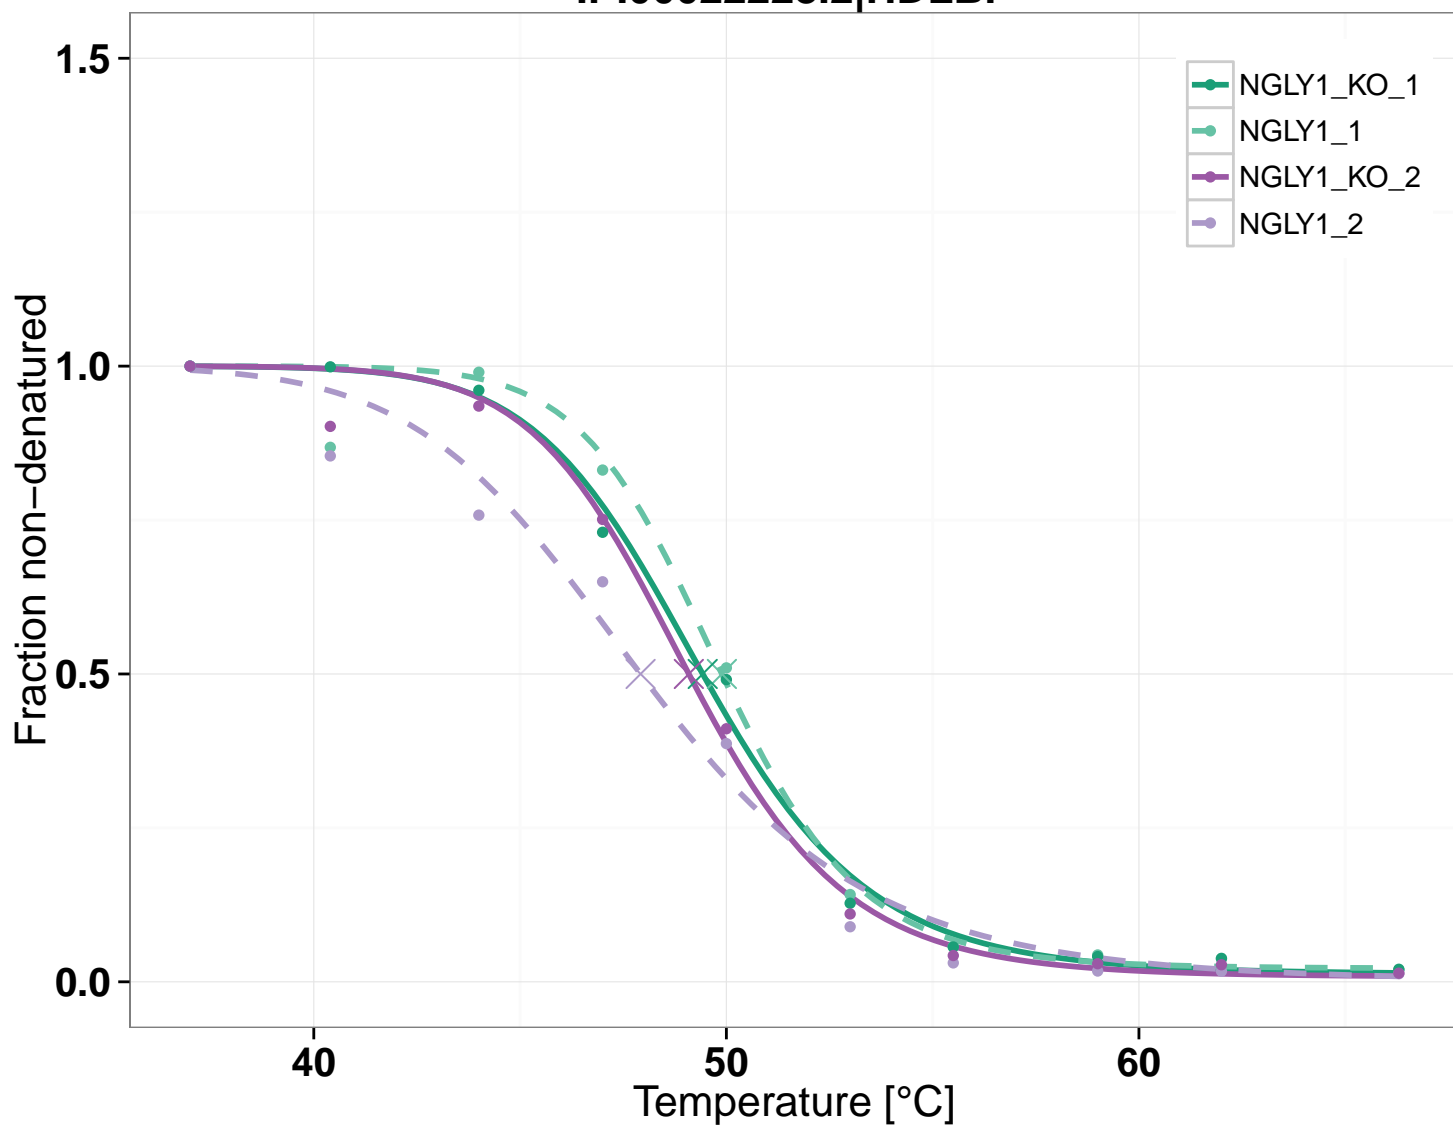

|            | meltPoint | slope | plateau | R2   |
|------------|-----------|-------|---------|------|
| NGLY1_KO_1 | 49.43     | -0.12 | 0.01    | 1    |
| NGLY1_1    | 49.89     | -0.14 | 0.02    | 0.99 |
| NGLY1_KO_2 | 49.09     | -0.13 | 0.01    | 0.99 |
| NGLY1_2    | 47.92     | -0.09 | 0       | 0.98 |

Supplement: Supplementary file 8315 [file 1]

IPI00783497.2|NUDT16

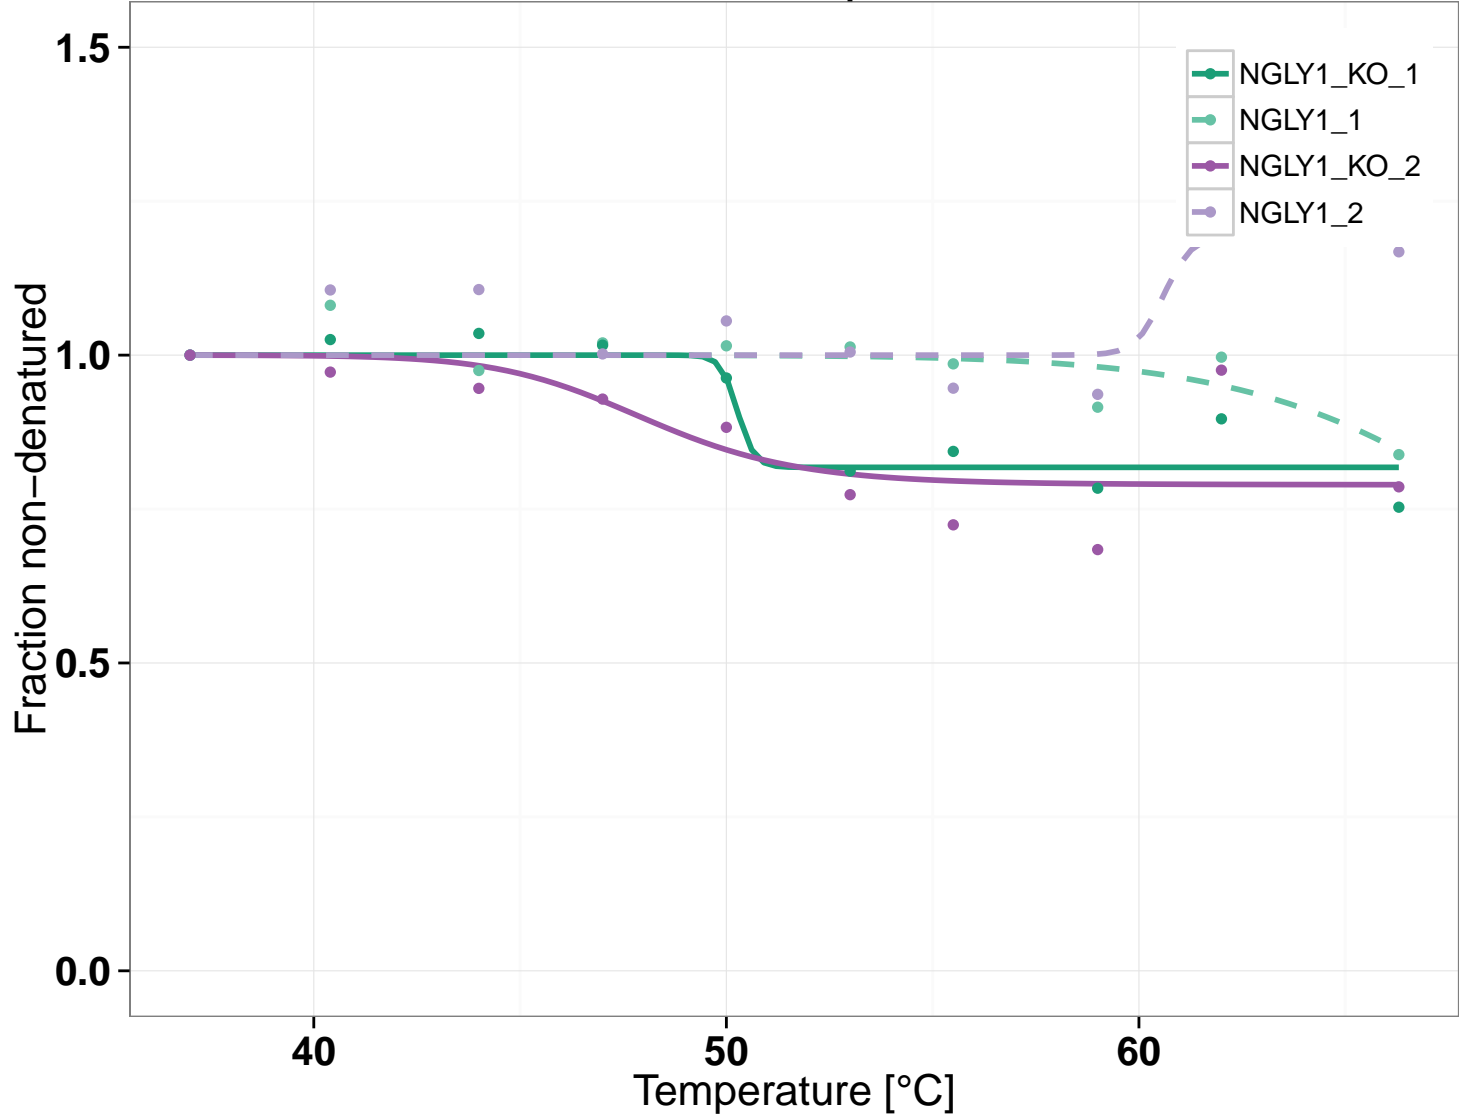

|            | meltPoint | slope  | plateau | R2   |
|------------|-----------|--------|---------|------|
| NGLY1_KO_1 | -         | -0.23  | 0.82    | 0.86 |
| NGLY1_1    | -         | -      | 0       | 0.62 |
| NGLY1_KO_2 | -         | -0.029 | 0.79    | 0.54 |
| NGLY1_2    | -         | 0.14   | 1.2     | 0.57 |

Supplement: Supplementary file 8316 [file 1]

IPI00027444.1|SERPINB1

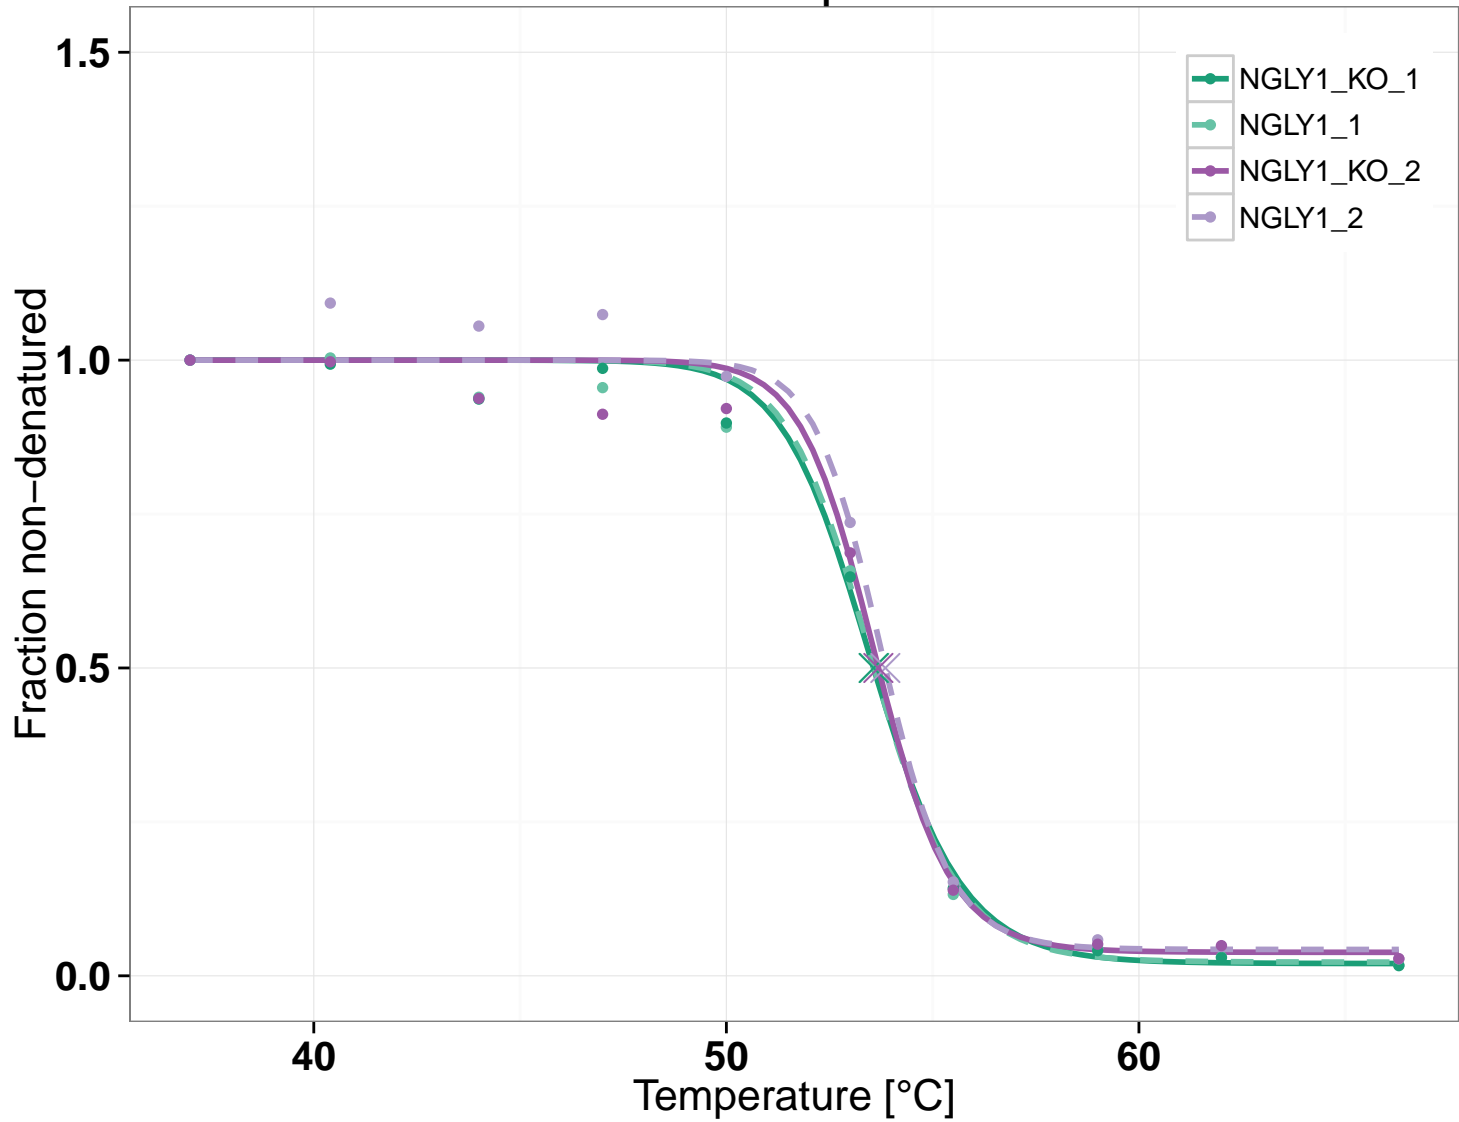

|            | meltPoint | slope | plateau | R2   |
|------------|-----------|-------|---------|------|
| NGLY1_KO_1 | 53.57     | -0.22 | 0.02    | 0.99 |
| NGLY1_1    | 53.58     | -0.24 | 0.02    | 0.99 |
| NGLY1_KO_2 | 53.68     | -0.27 | 0.04    | 0.99 |
| NGLY1_2    | 53.85     | -0.29 | 0.04    | 0.99 |

Supplement: Supplementary file 8317 [file 1]

IPI00166790.1|TMEM181

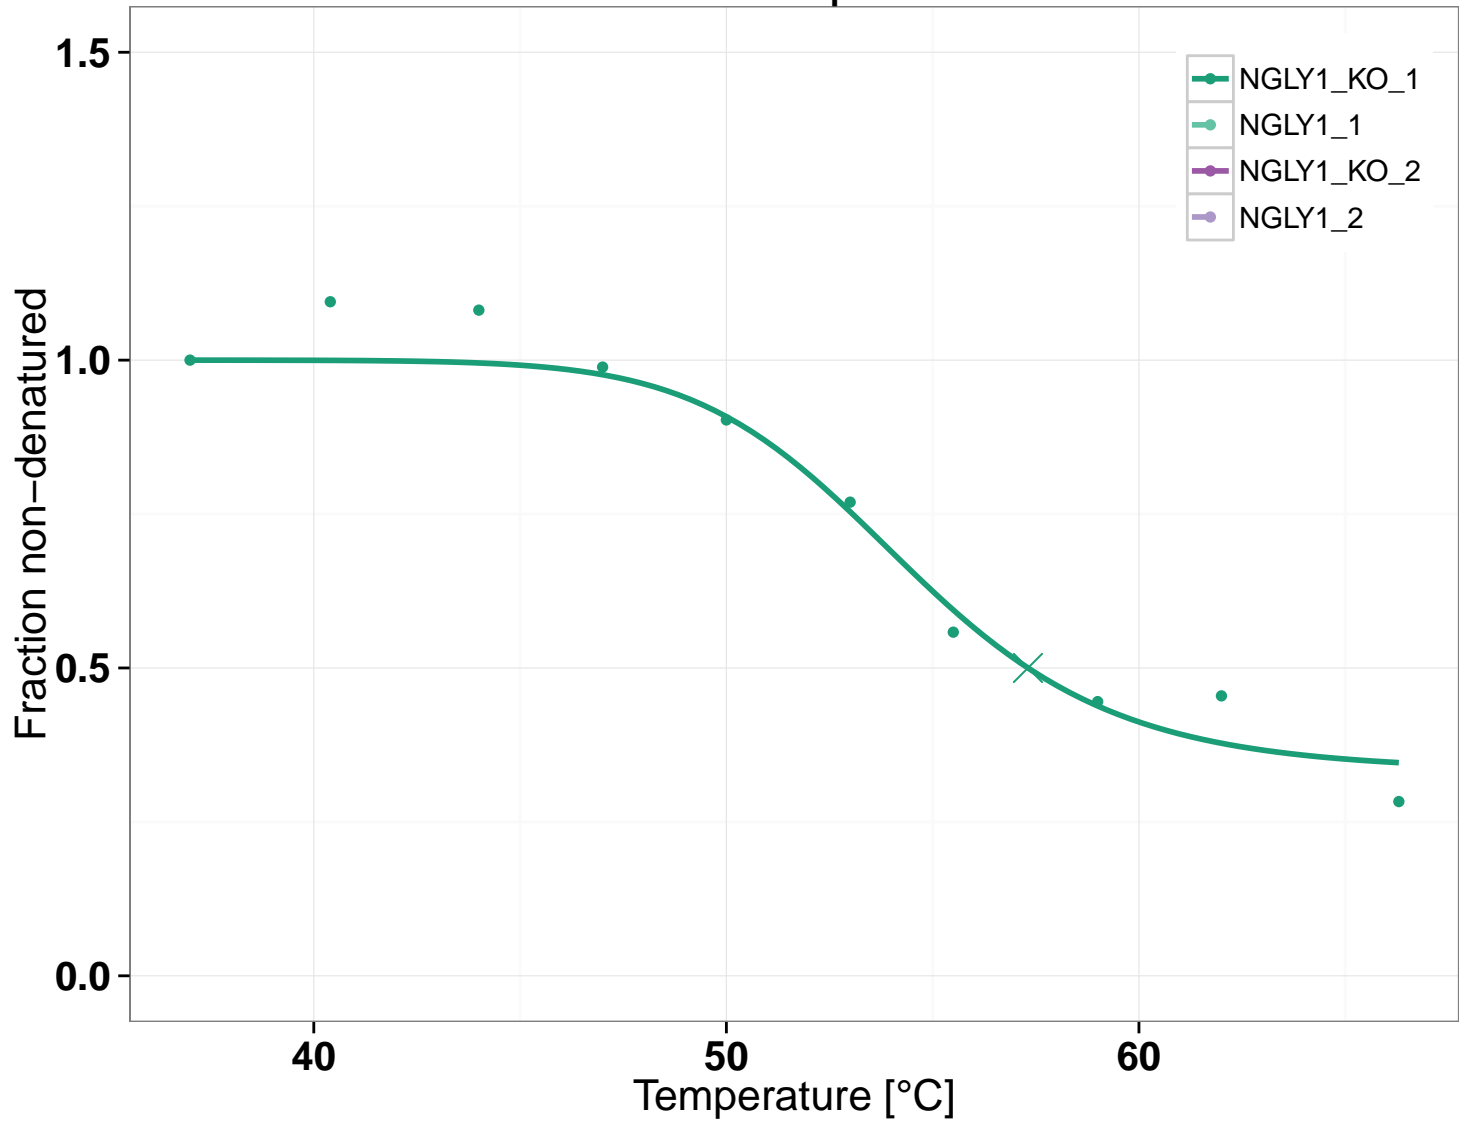

|            | meltPoint | slope  | plateau | R2   |
|------------|-----------|--------|---------|------|
| NGLY1_KO_1 | 57.31     | -0.065 | 0.33    | 0.97 |
| NGLY1_1    | -         | -      | -       | -    |
| NGLY1_KO_2 | -         | -      | -       | -    |
| NGLY1_2    | -         | -      | -       | -    |

Supplement: Supplementary file 8318 [file 1]

IPI00218019.1|BSG

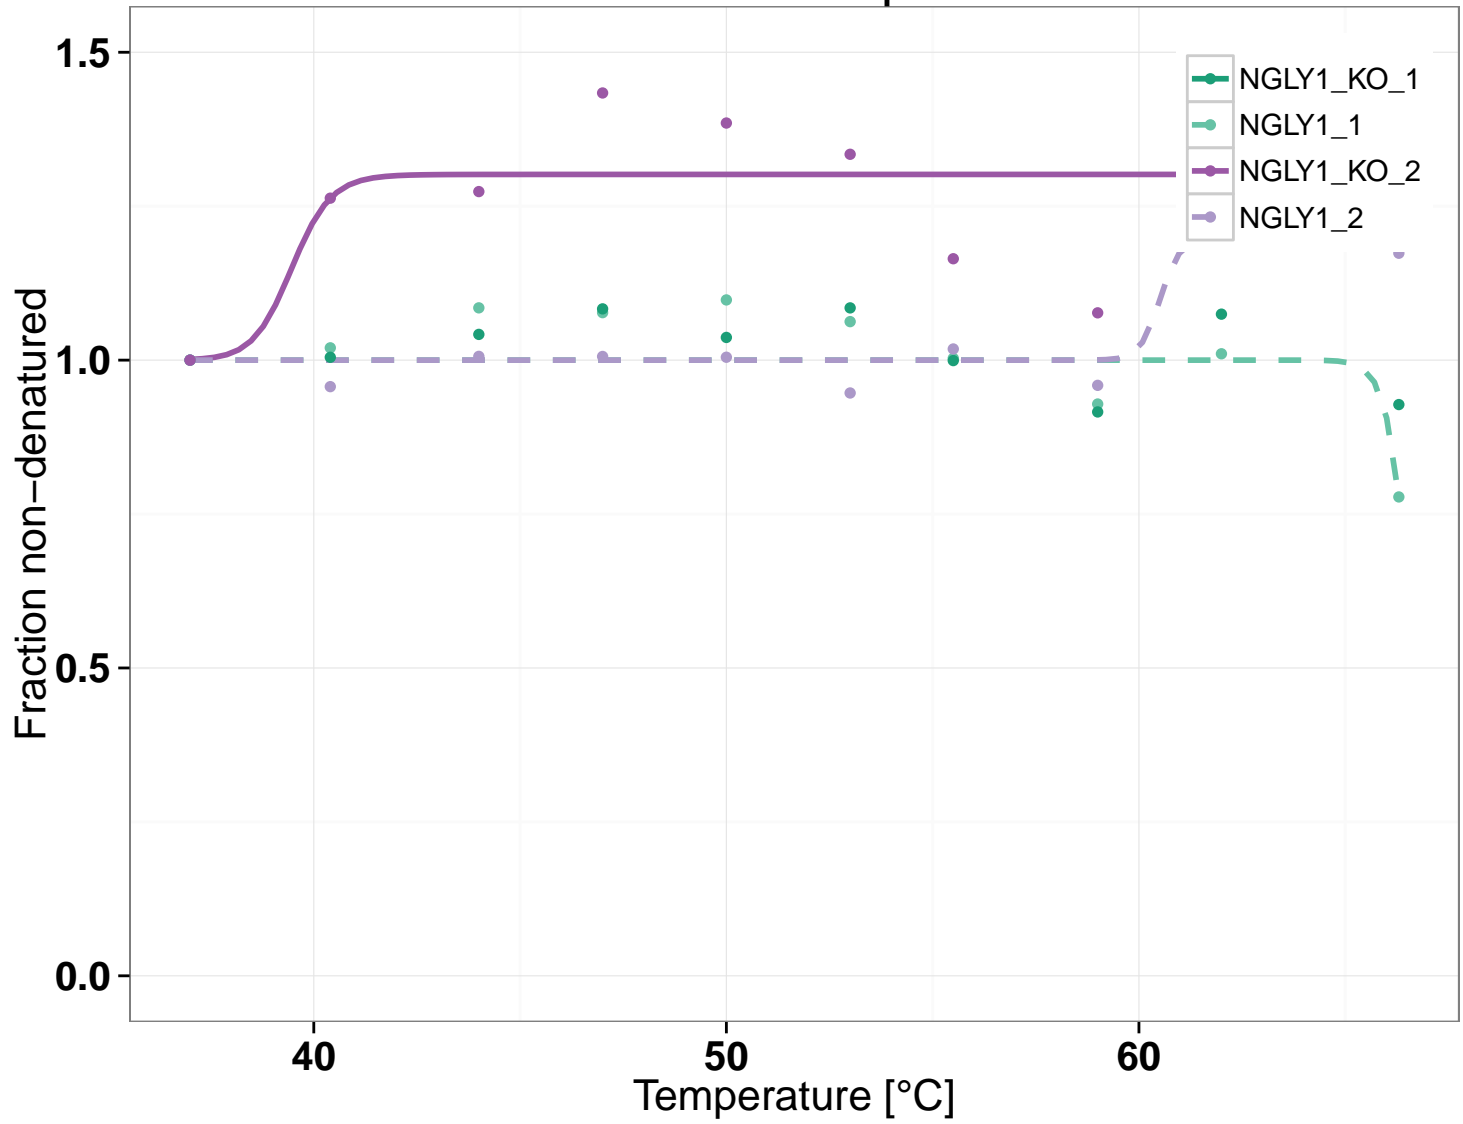

|            | meltPoint | slope | plateau | R2   |
|------------|-----------|-------|---------|------|
| NGLY1_KO_1 | -         | -     | -       | -    |
| NGLY1_1    | -         | -     | 0       | 0.6  |
| NGLY1_KO_2 | -         | 0.16  | 1.3     | 0.43 |
| NGLY1_2    | -         | 0.2   | 1.2     | 0.9  |

Supplement: Supplementary file 8319 [file 1]

IPI00289084.6|METT11D1

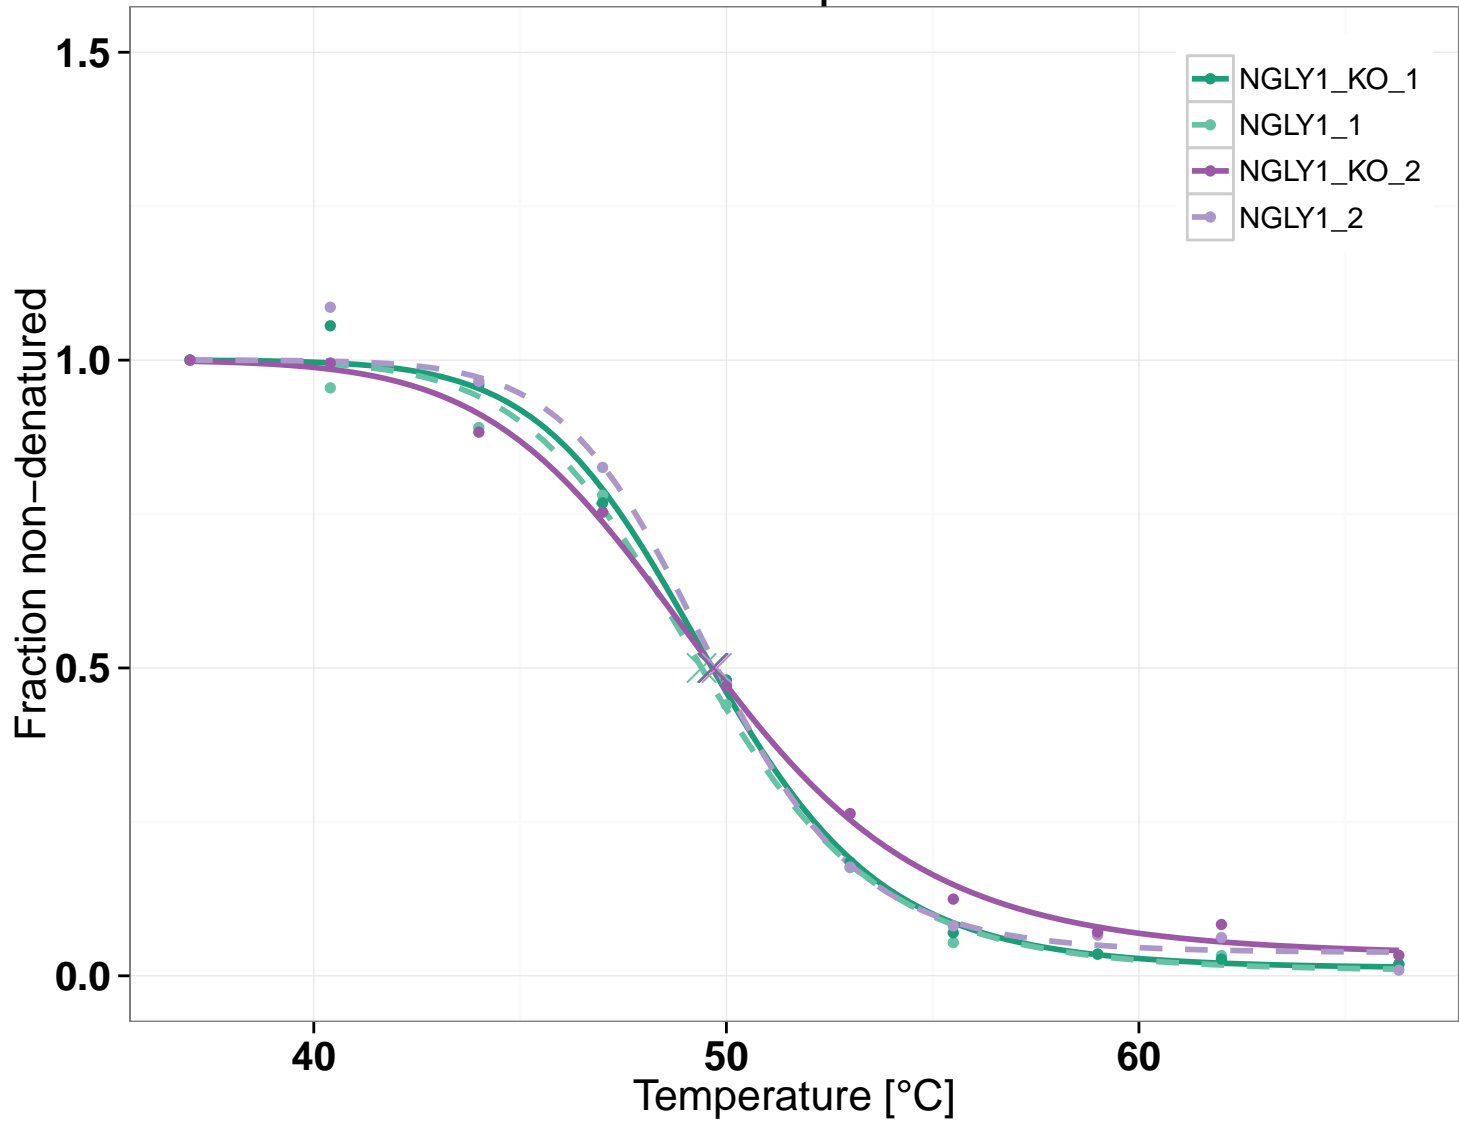

|            | meltPoint | slope  | plateau | R2   |
|------------|-----------|--------|---------|------|
| NGLY1_KO_1 | 49.66     | -0.12  | 0.01    | 1    |
| NGLY1_1    | 49.4      | -0.11  | 0.01    | 1    |
| NGLY1_KO_2 | 49.69     | -0.091 | 0.03    | 1    |
| NGLY1_2    | 49.77     | -0.13  | 0.04    | 0.99 |

Supplement: Supplementary file 8320 [file 1]

# IPI00215997.5|CD9

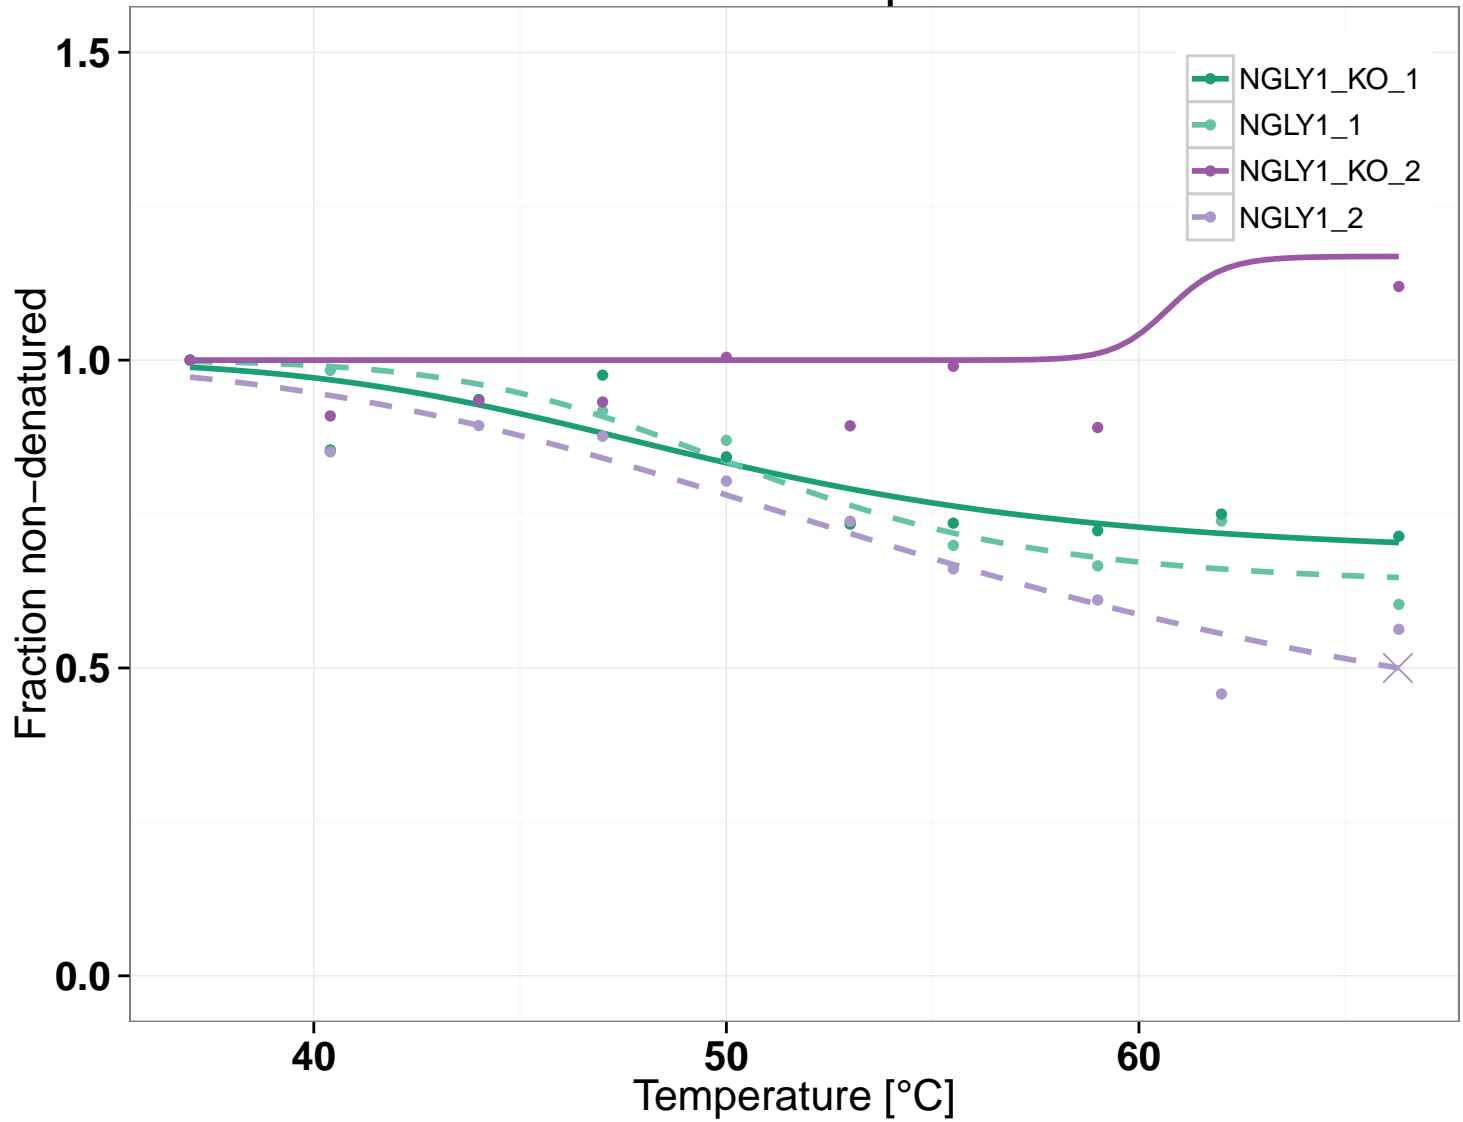

|            | meltPoint | slope  | plateau | R2   |
|------------|-----------|--------|---------|------|
| NGLY1_KO_1 | -         | -0.016 | 0.68    | 0.75 |
| NGLY1_1    | -         | -0.026 | 0.63    | 0.94 |
| NGLY1_KO_2 | -         | 0.064  | 1.17    | 0.49 |
| NGLY1_2    | 66.28     | -0.021 | 0.29    | 0.9  |

Supplement: Supplementary file 8321 [file 1]

IPI00061531.4|MRPL53

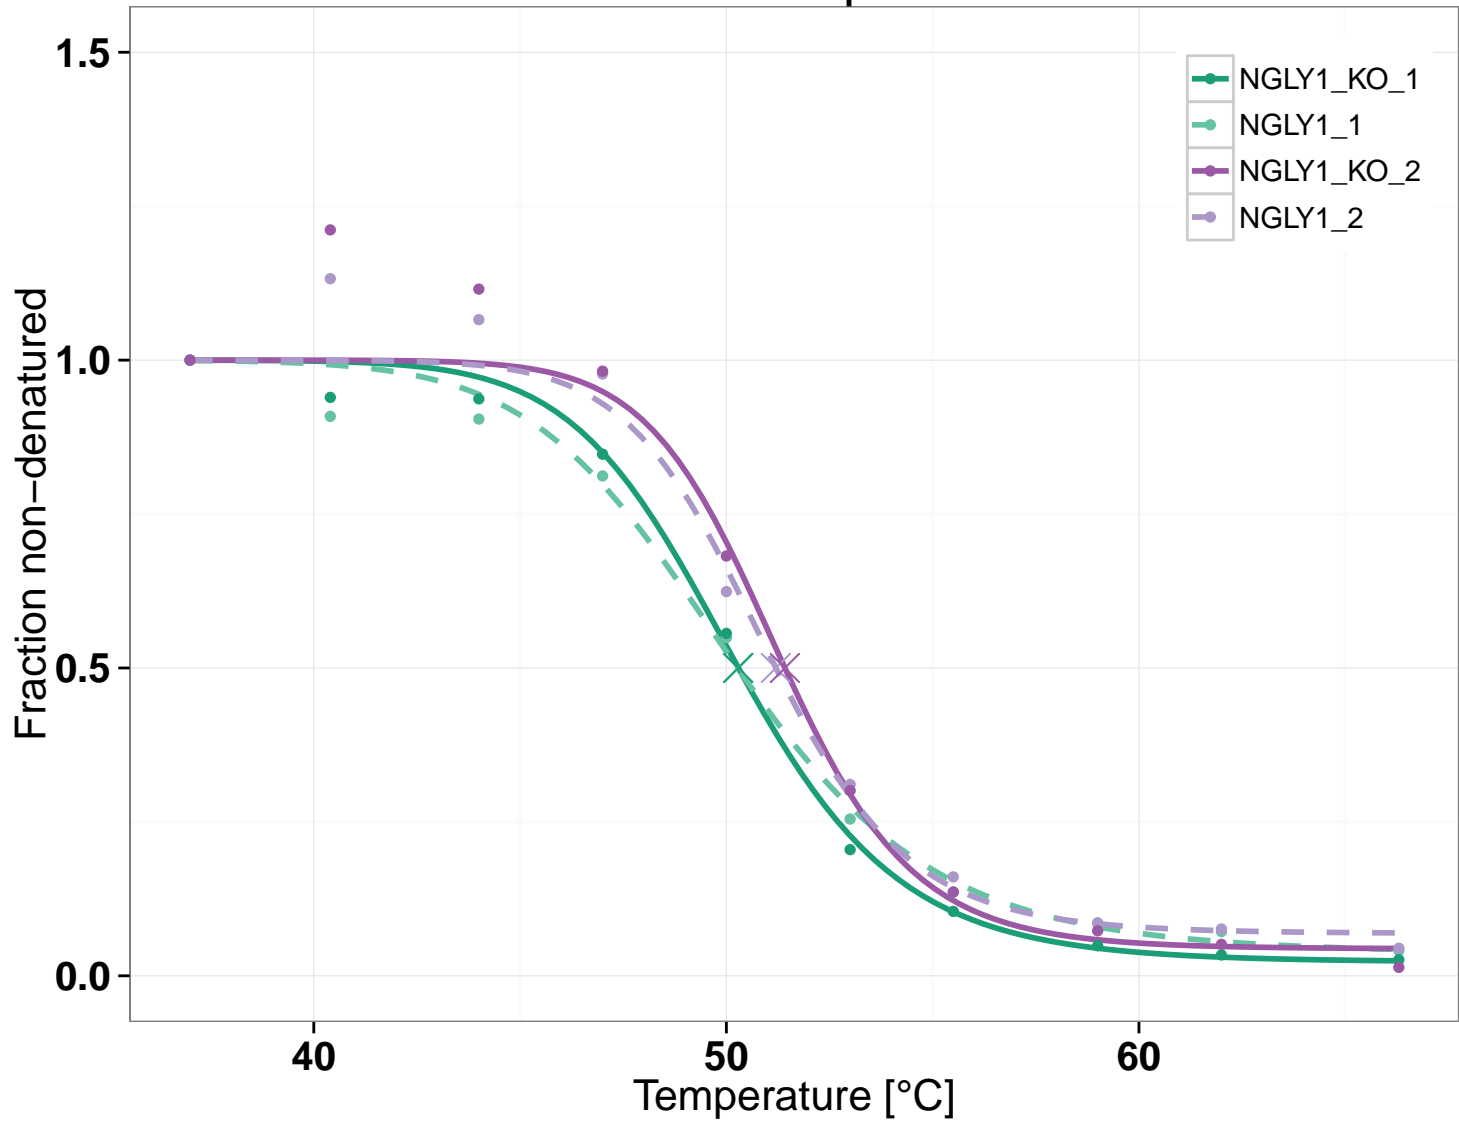

|            | meltPoint | slope  | plateau | R2   |
|------------|-----------|--------|---------|------|
| NGLY1_KO_1 | 50.29     | -0.12  | 0.02    | 1    |
| NGLY1_1    | 50.27     | -0.098 | 0.04    | 0.99 |
| NGLY1_KO_2 | 51.42     | -0.15  | 0.04    | 0.97 |
| NGLY1_2    | 51.2      | -0.14  | 0.07    | 0.99 |

Supplement: Supplementary file 8322 [file 1]

IPI00090720.4|QRSL1

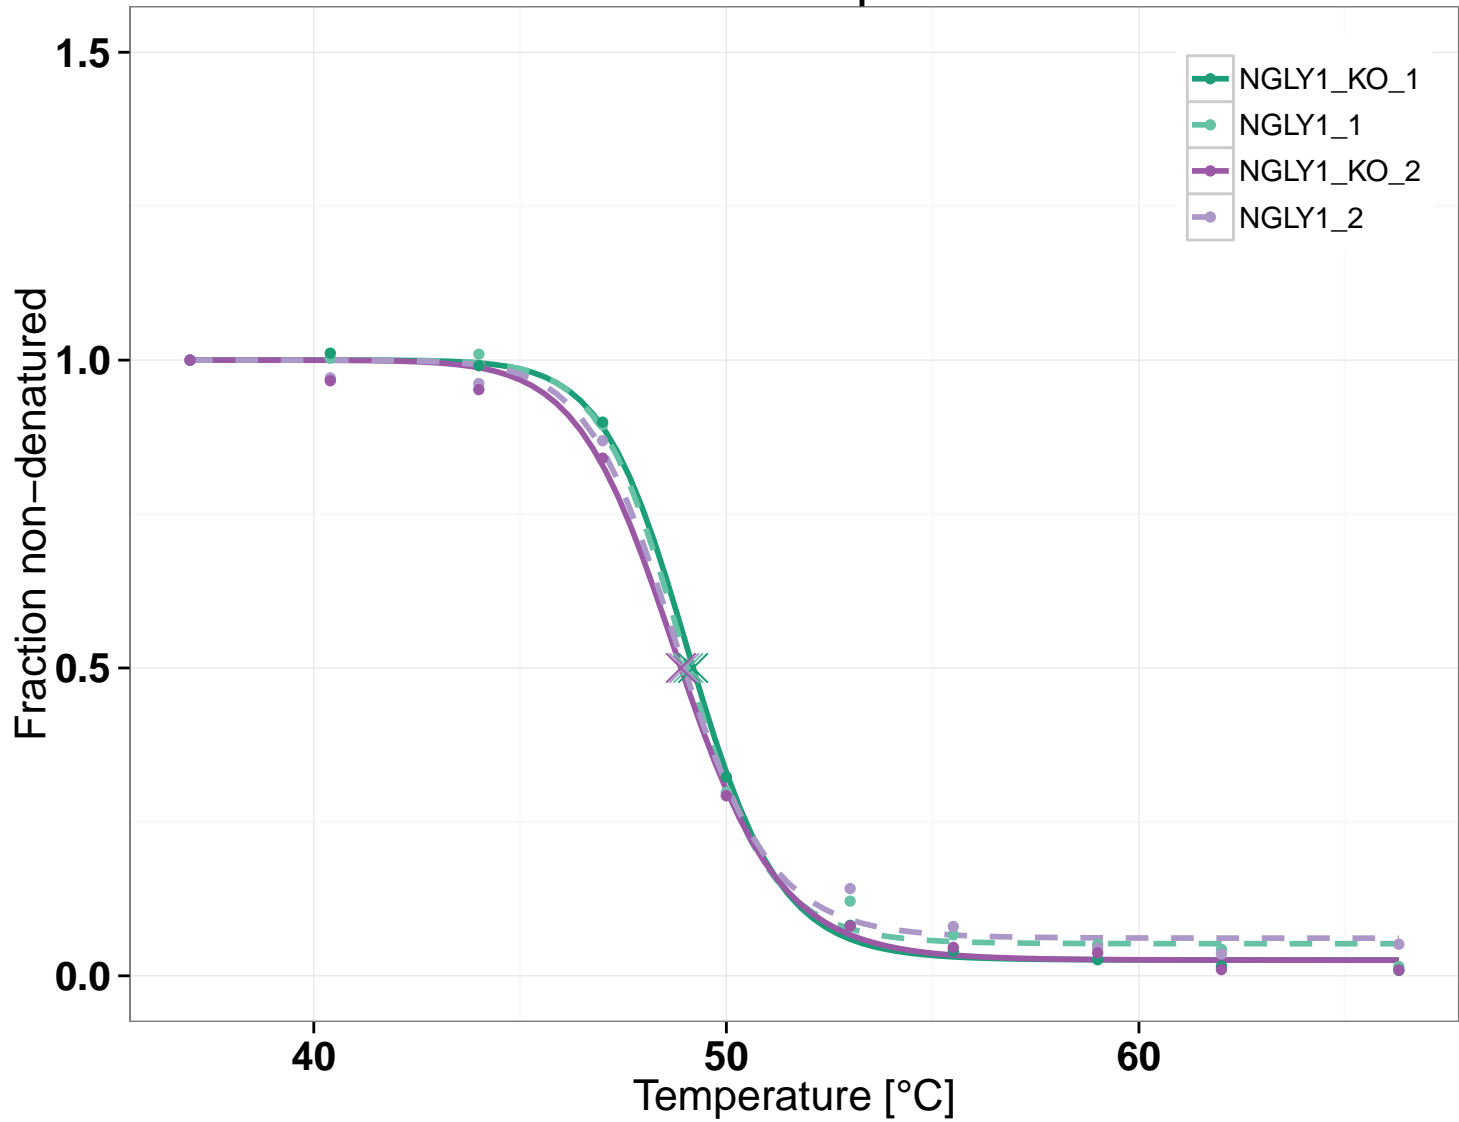

|            | meltPoint | slope | plateau | R2 |
|------------|-----------|-------|---------|----|
| NGLY1_KO_1 | 49.19     | -0.23 | 0.03    | 1  |
| NGLY1_1    | 49.08     | -0.23 | 0.05    | 1  |
| NGLY1_KO_2 | 48.9      | -0.2  | 0.03    | 1  |
| NGLY1_2    | 48.98     | -0.21 | 0.06    | 1  |

Supplement: Supplementary file 8323 [file 1]

IPI00004489.1|MOCS3

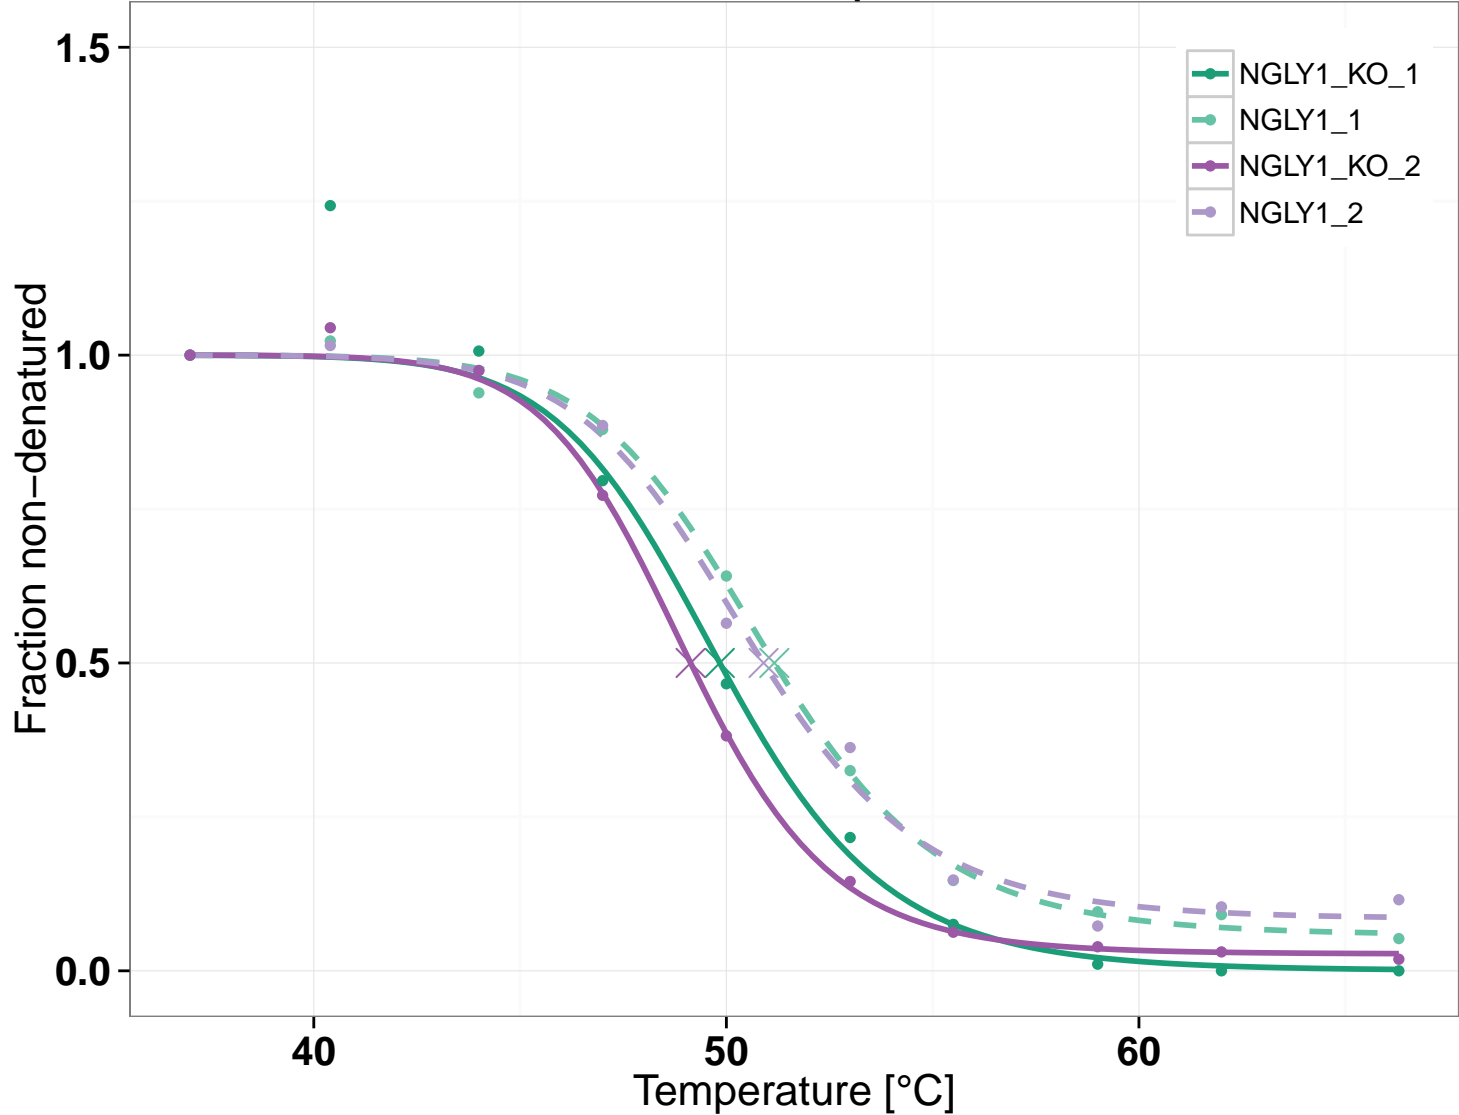

|            | meltPoint | slope | plateau | R2   |
|------------|-----------|-------|---------|------|
| NGLY1_KO_1 | 49.84     | -0.12 | 0       | 0.97 |
| NGLY1_1    | 51.16     | -0.11 | 0.06    | 1    |
| NGLY1_KO_2 | 49.13     | -0.14 | 0.03    | 1    |
| NGLY1_2    | 50.9      | -0.11 | 0.08    | 0.99 |

Supplement: Supplementary file 8324 [file 1]

IPI00002224.2|ADIPOR2

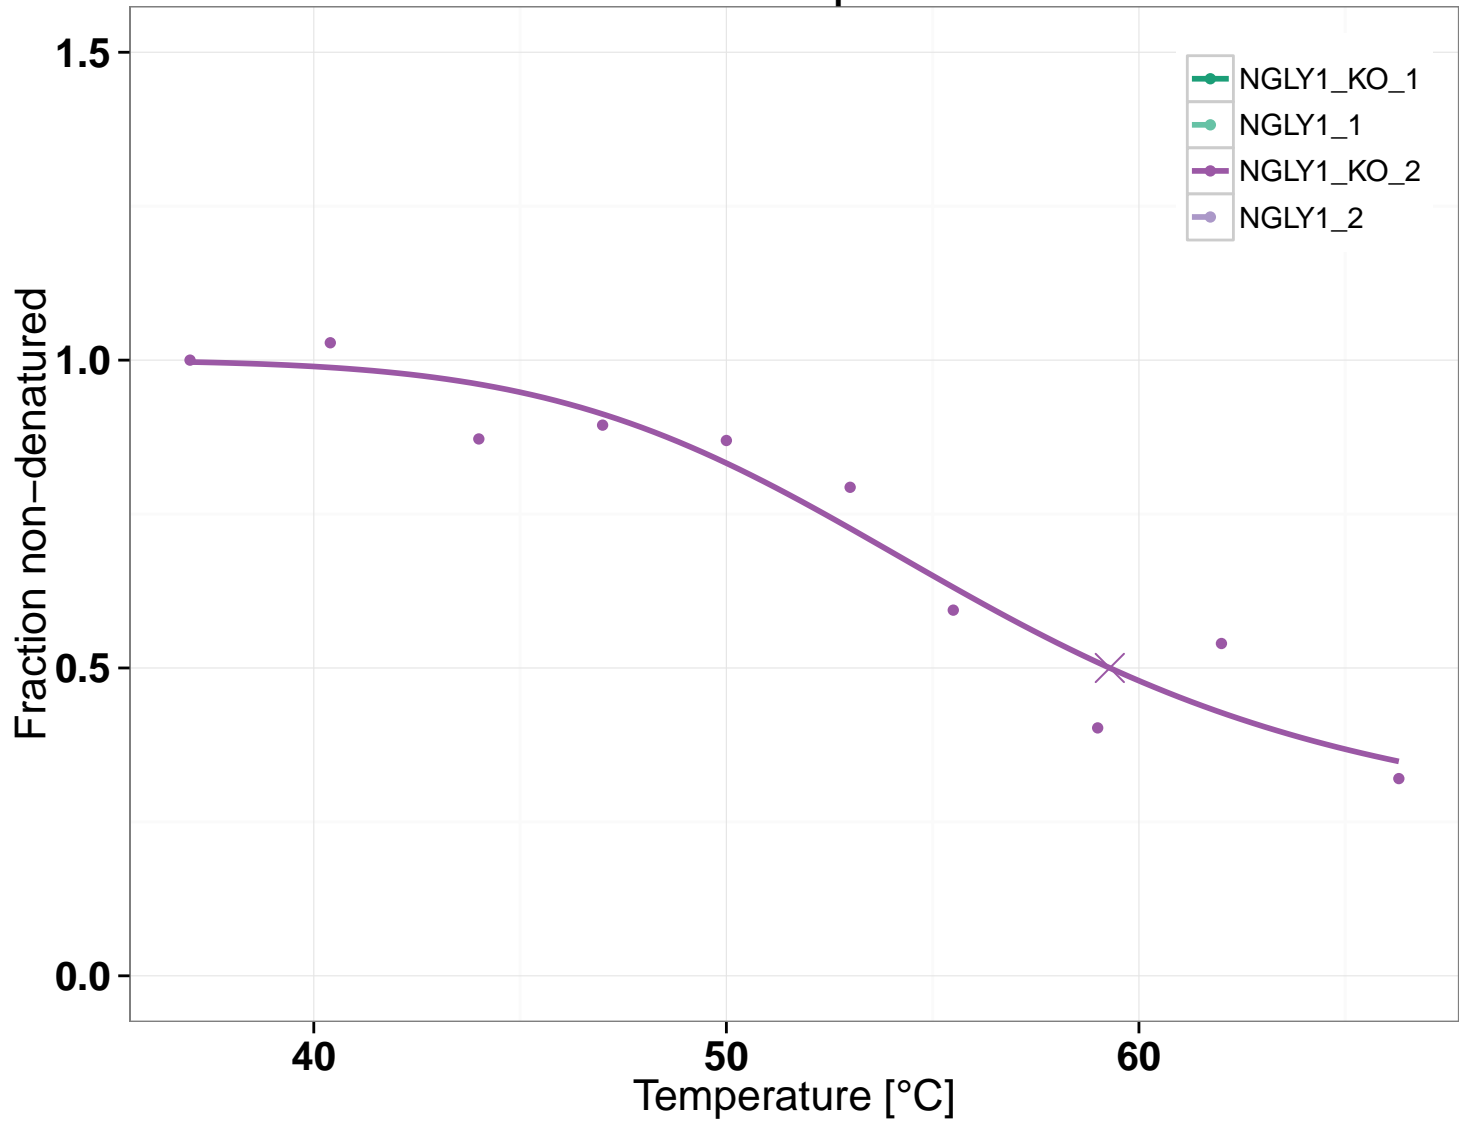

|            | meltPoint | slope  | plateau | R2   |
|------------|-----------|--------|---------|------|
| NGLY1_KO_1 | —         | —      | —       | —    |
| NGLY1_1    | —         | —      | —       | —    |
| NGLY1_KO_2 | 59.29     | -0.038 | 0.23    | 0.93 |
| NGLY1_2    | —         | —      | —       | —    |

Supplement: Supplementary file 8325 [file 1]

IPI00023006.1|ACTC1

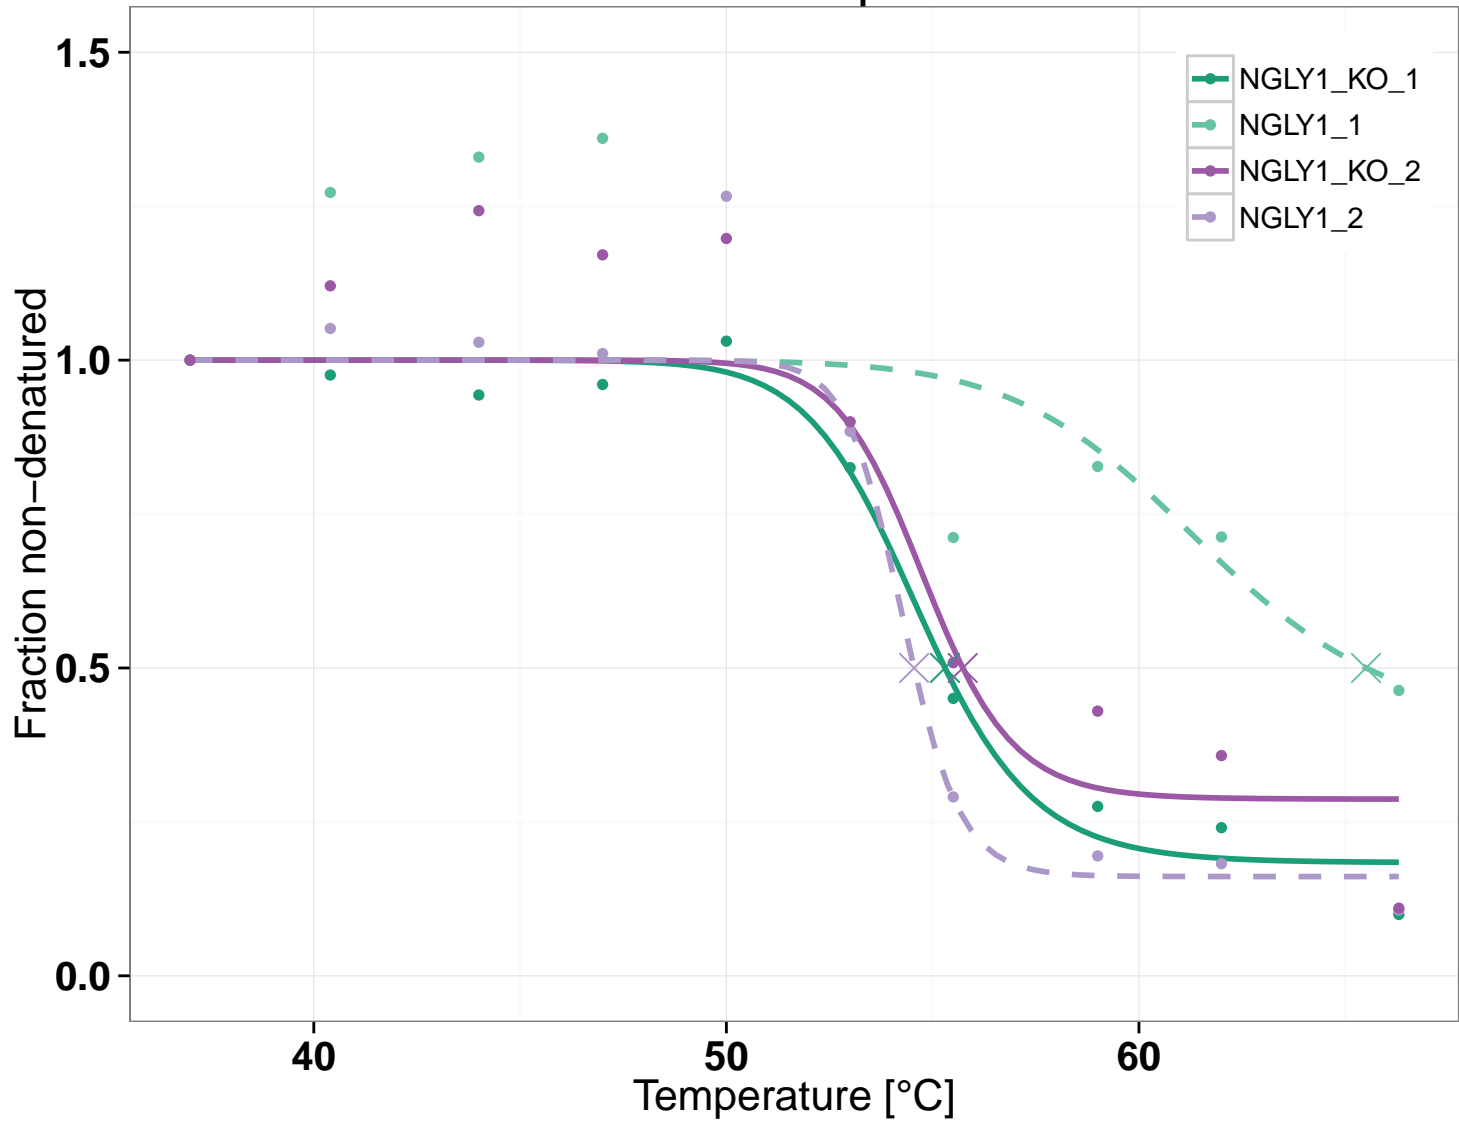

|            | meltPoint | slope  | plateau | R2   |
|------------|-----------|--------|---------|------|
| NGLY1_KO_1 | 55.3      | -0.15  | 0.18    | 0.98 |
| NGLY1_1    | 65.5      | -0.065 | 0.4     | 0.25 |
| NGLY1_KO_2 | 55.73     | -0.17  | 0.29    | 0.87 |
| NGLY1_2    | 54.55     | -0.3   | 0.16    | 0.96 |

Supplement: Supplementary file 8326 [file 1]

# IPI00550232.2|XIRP2

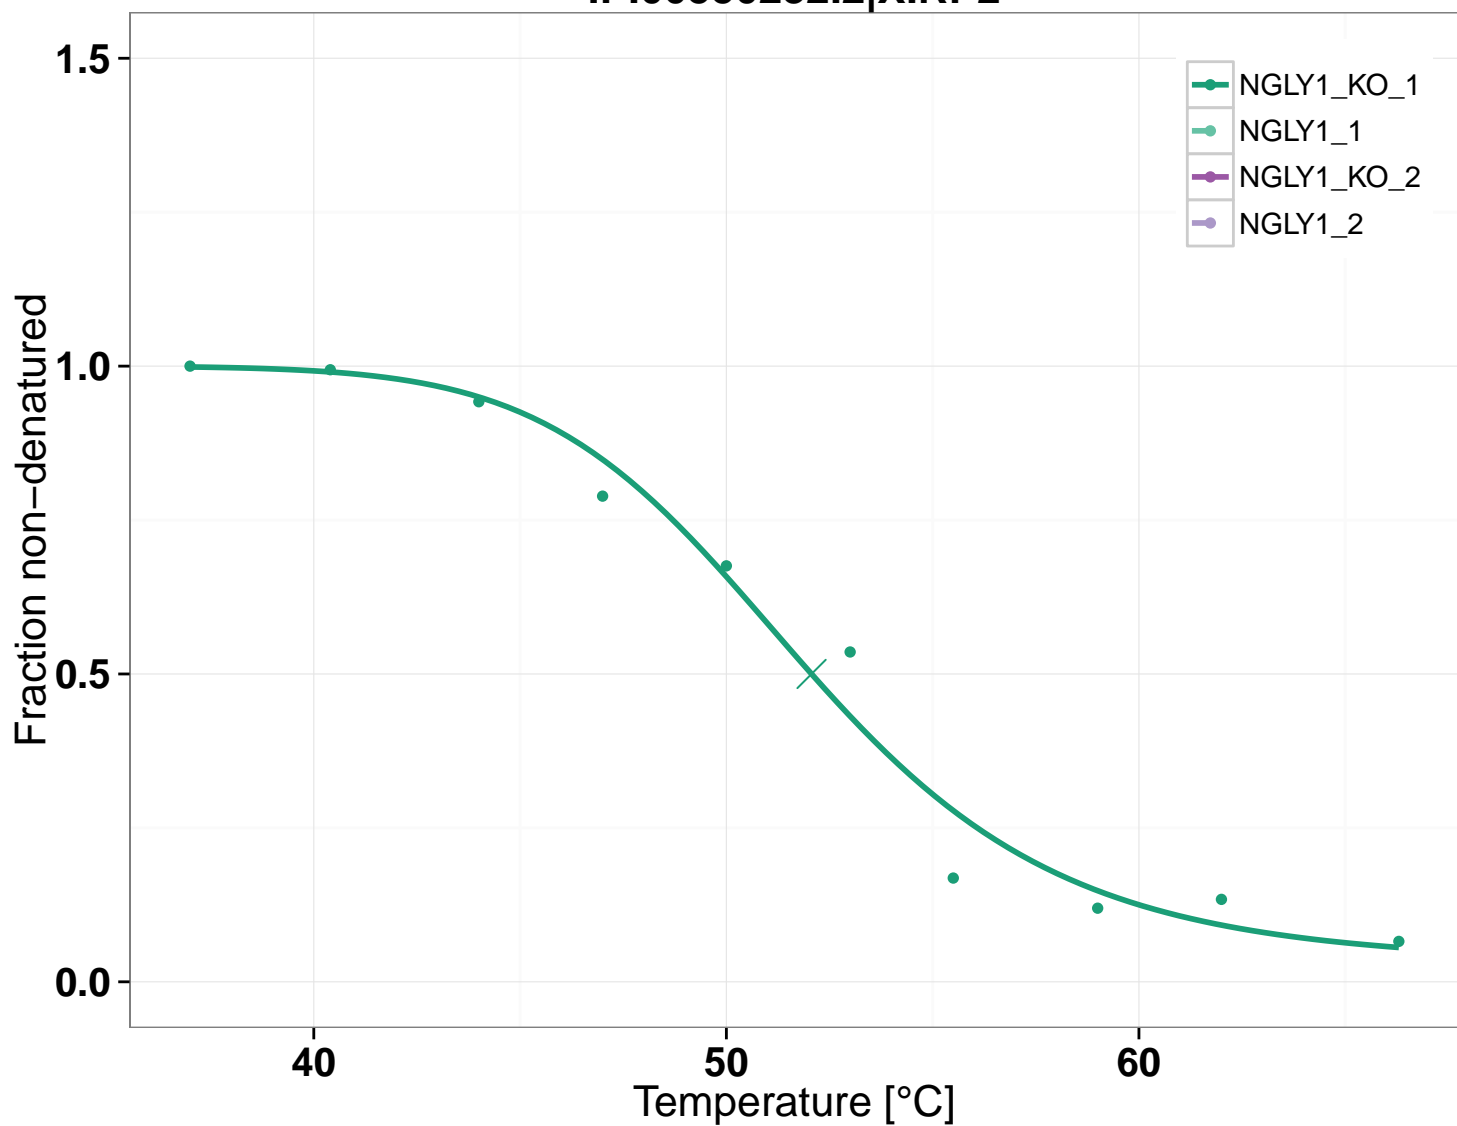

|            | meltPoint | slope  | plateau | R2   |
|------------|-----------|--------|---------|------|
| NGLY1_KO_1 | 52.06     | -0.077 | 0.03    | 0.98 |
| NGLY1_1    | -         | -      | -       | -    |
| NGLY1_KO_2 | -         | -      | -       | -    |
| NGLY1_2    | -         | -      | -       | -    |

Supplement: Supplementary file 8327 [file 1]

# IPI00008167.1|ATP1B3

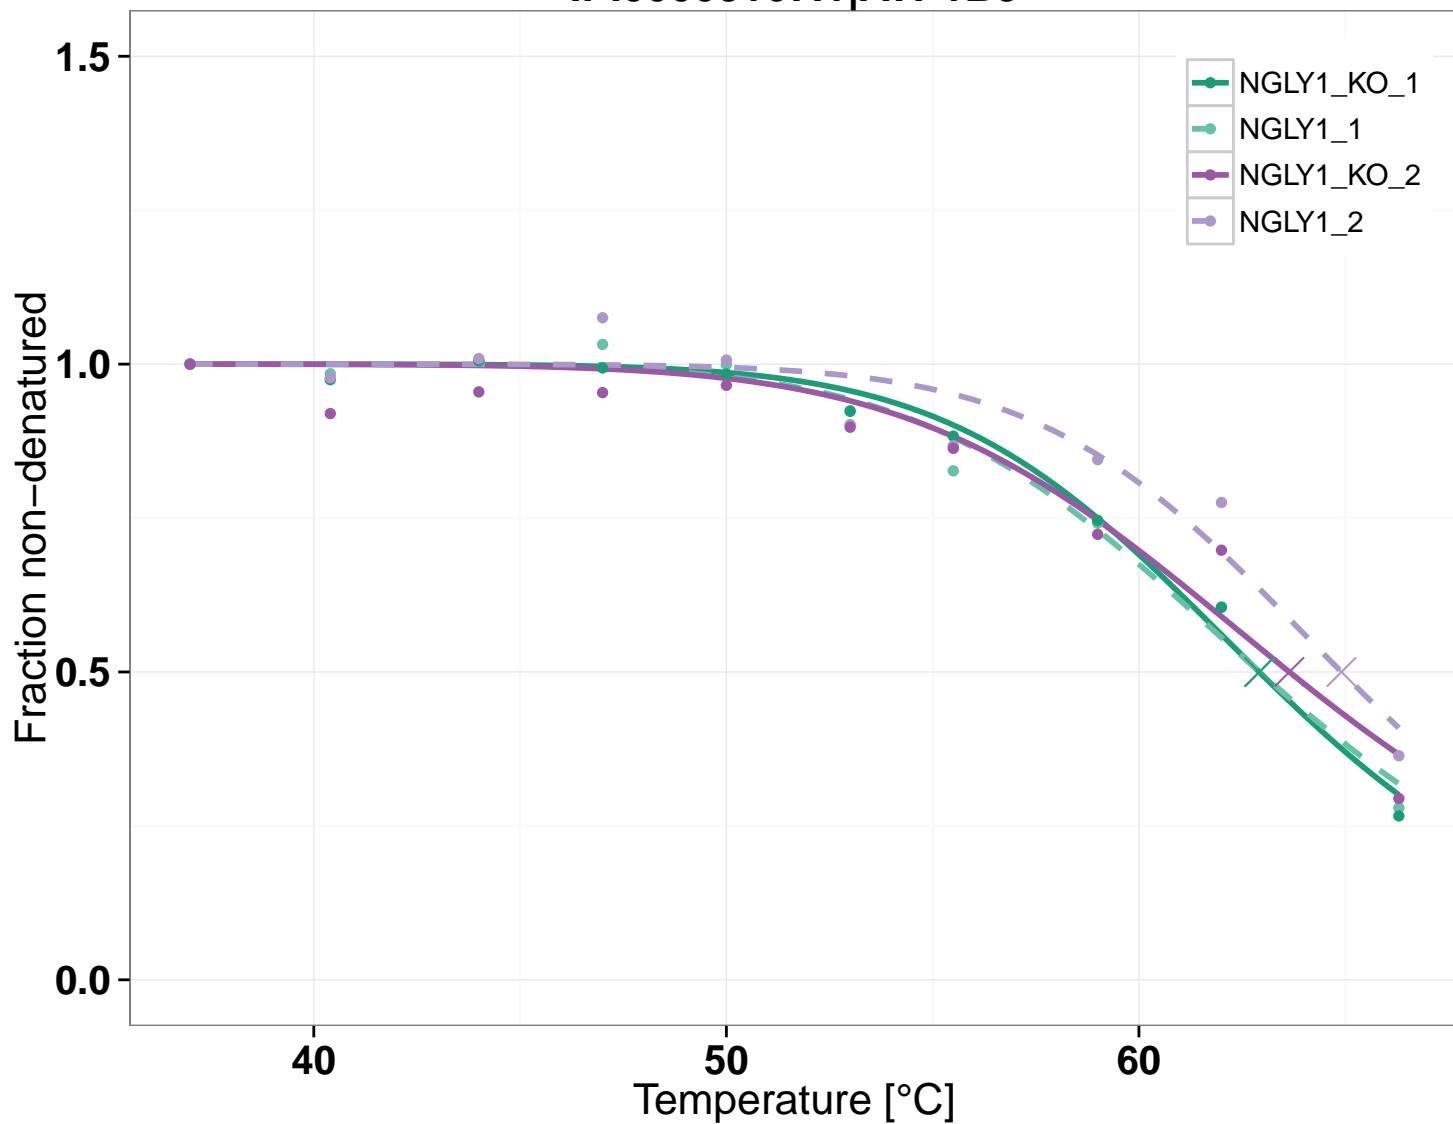

|            | meltPoint | slope  | plateau | R2   |
|------------|-----------|--------|---------|------|
| NGLY1_KO_1 | 62.91     | -0.067 | 0       | 0.99 |
| NGLY1_1    | 62.93     | -0.061 | 0       | 0.98 |
| NGLY1_KO_2 | 63.65     | -0.055 | 0       | 0.93 |
| NGLY1_2    | 64.91     | -0.068 | 0       | 0.92 |

Supplement: Supplementary file 8328 [file 1]

IPI00640818.2|PNPLA6

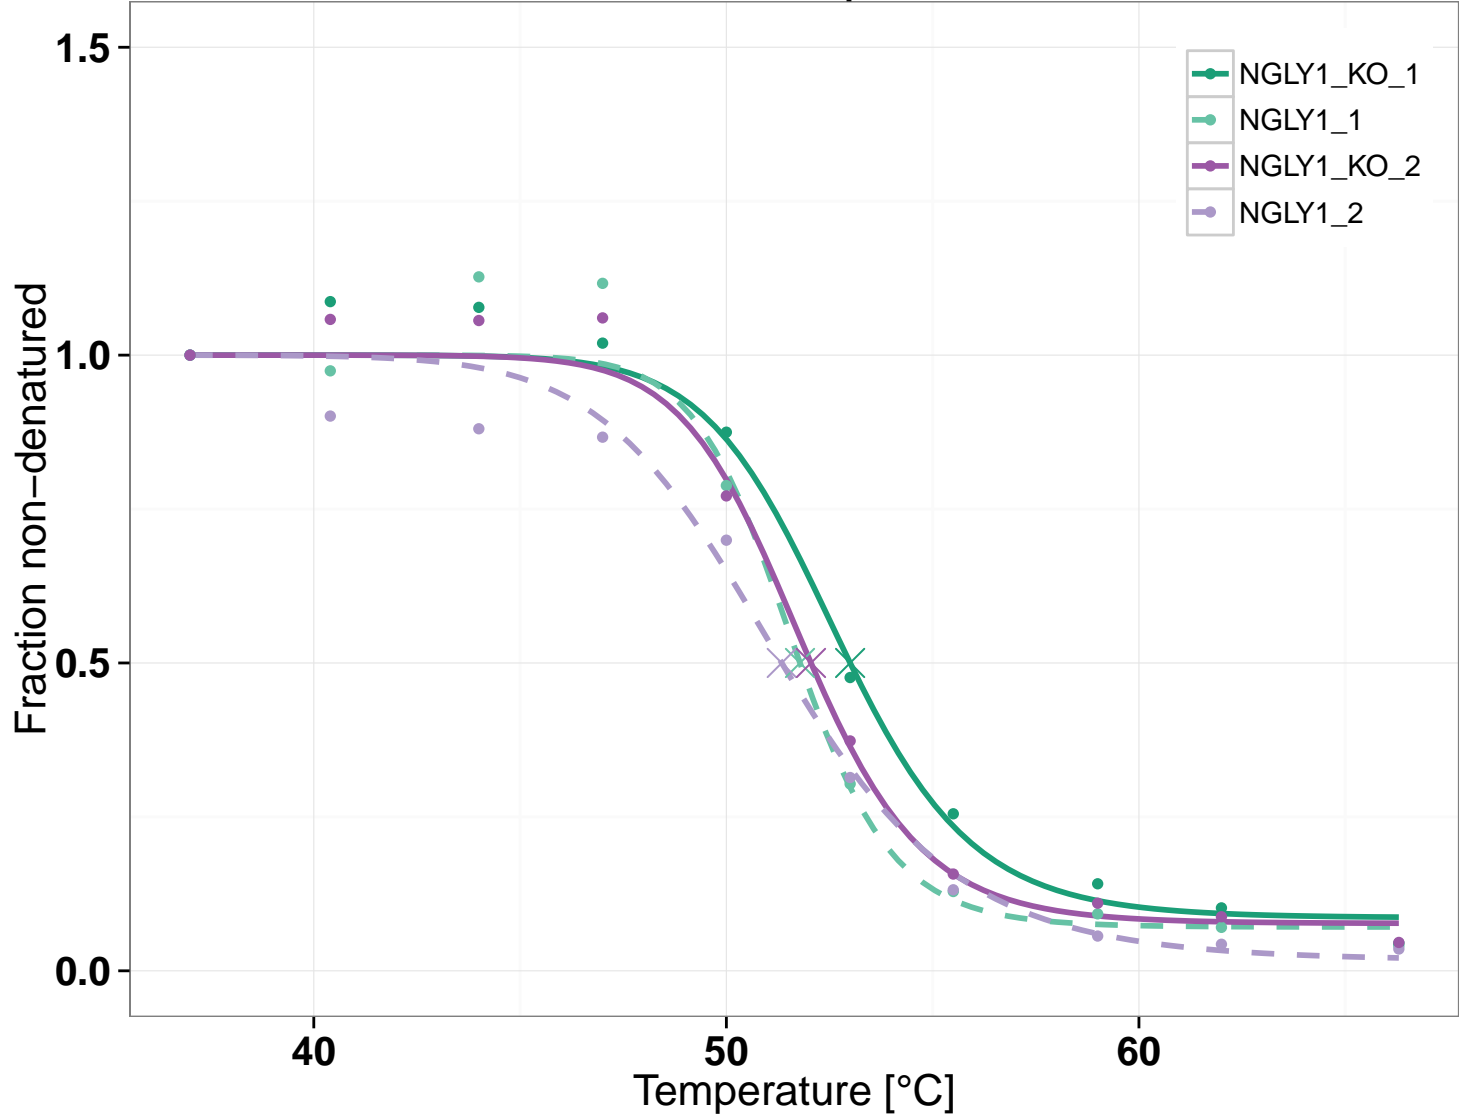

|            | meltPoint | slope | plateau | R2   |
|------------|-----------|-------|---------|------|
| NGLY1_KO_1 | 53        | -0.14 | 0.09    | 0.99 |
| NGLY1_1    | 51.78     | -0.19 | 0.07    | 0.98 |
| NGLY1_KO_2 | 52.05     | -0.16 | 0.08    | 0.99 |
| NGLY1_2    | 51.34     | -0.11 | 0.02    | 0.98 |

Supplement: Supplementary file 8329 [file 1]

# IPI00007879.1|SRF

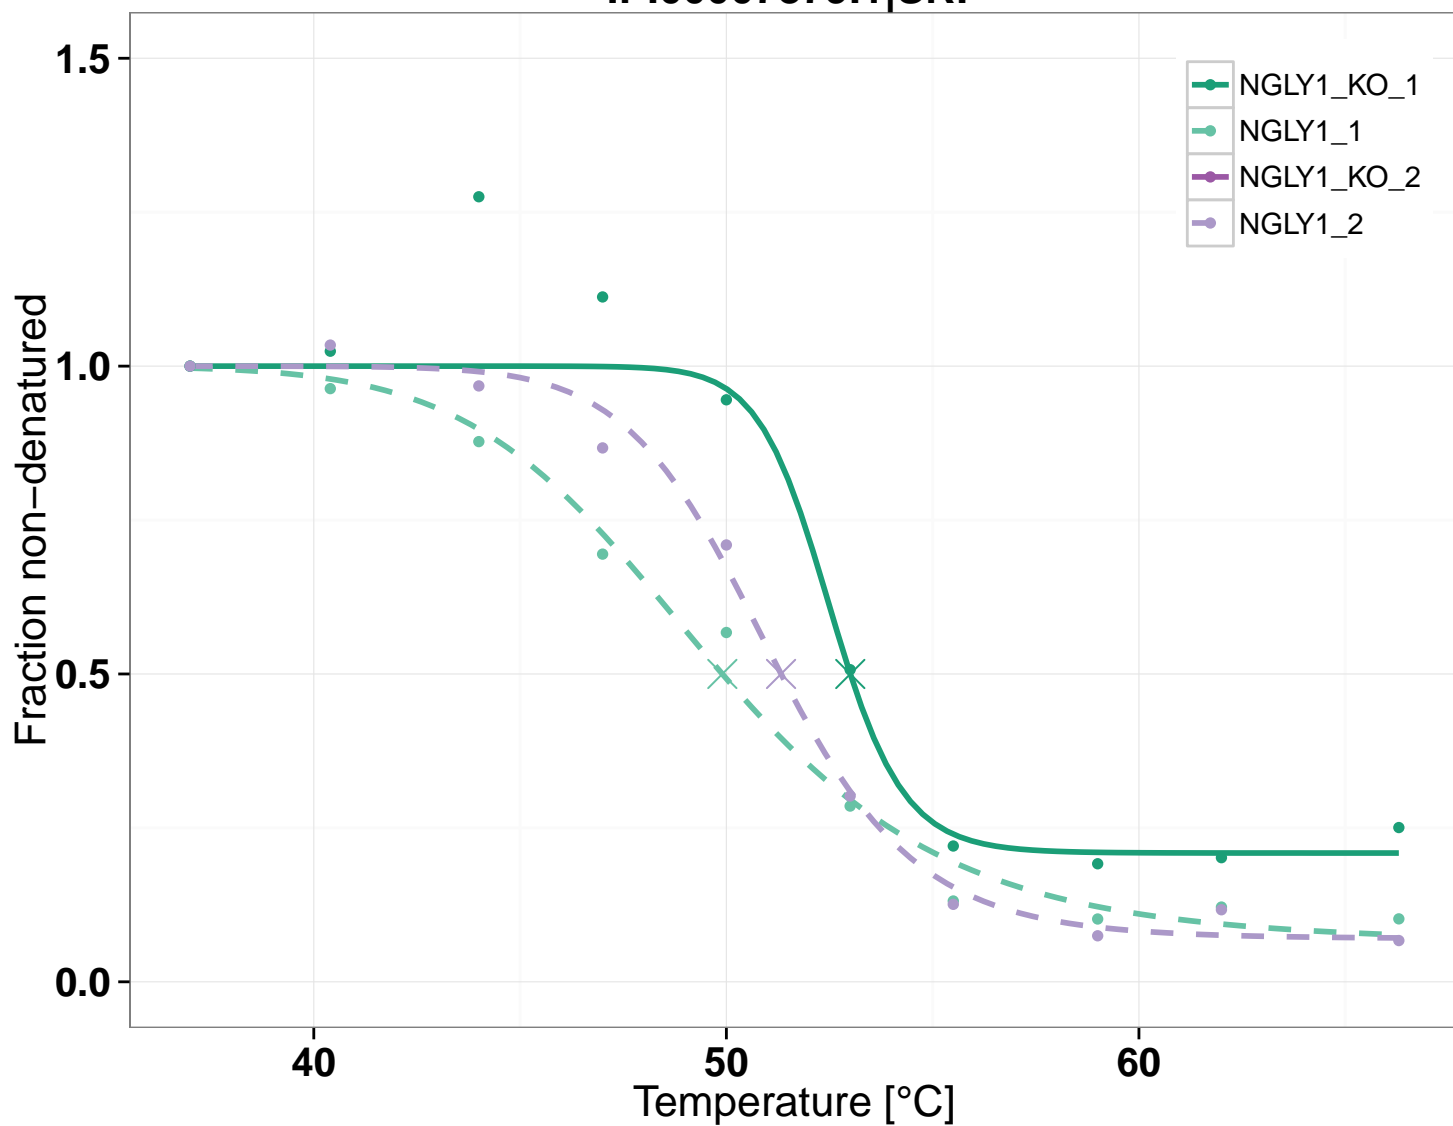

|            | meltPoint | slope  | plateau | R2   |
|------------|-----------|--------|---------|------|
| NGLY1_KO_1 | 53        | -0.23  | 0.21    | 0.95 |
| NGLY1_1    | 49.9      | -0.081 | 0.06    | 0.99 |
| NGLY1_KO_2 | -         | -      | -       | -    |
| NGLY1_2    | 51.33     | -0.13  | 0.07    | 0.99 |

Supplement: Supplementary file 8330 [file 1]

IPI00170508.1|CAMK1D

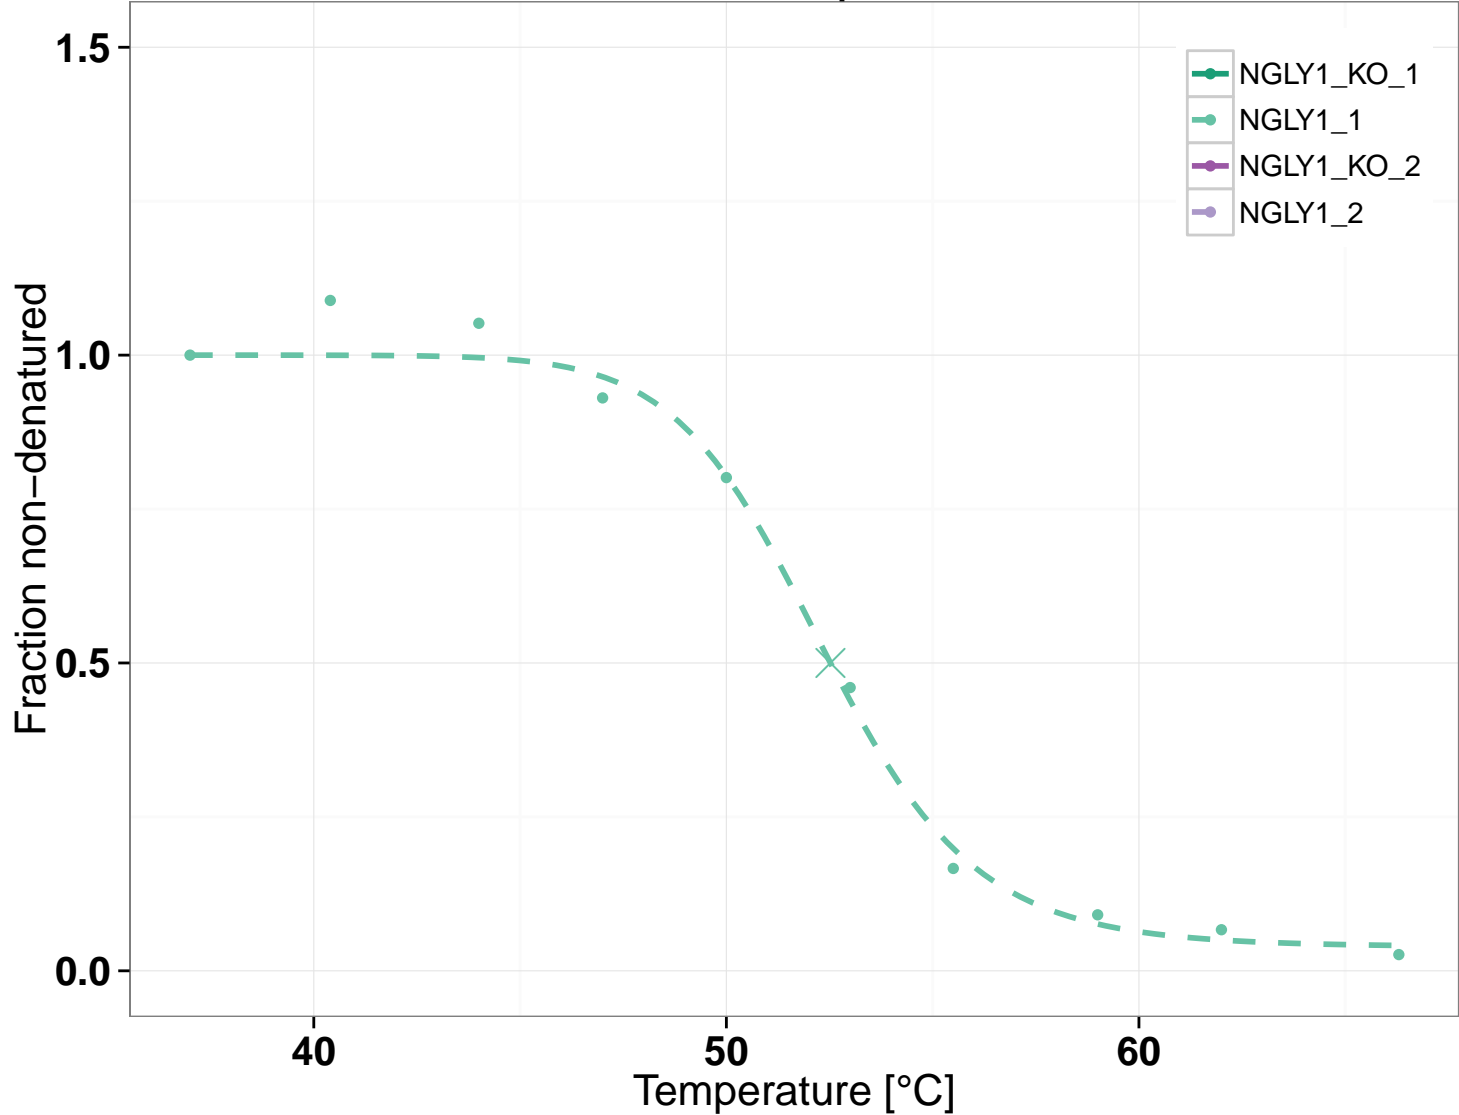

|            | meltPoint | slope | plateau | R2   |
|------------|-----------|-------|---------|------|
| NGLY1_KO_1 | –         | –     | –       | –    |
| NGLY1_1    | 52.52     | –0.13 | 0.04    | 0.99 |
| NGLY1_KO_2 | –         | –     | –       | –    |
| NGLY1_2    | –         | –     | –       | –    |

Supplement: Supplementary file 8331 [file 1]

# IPI00003004.1|SLC25A22

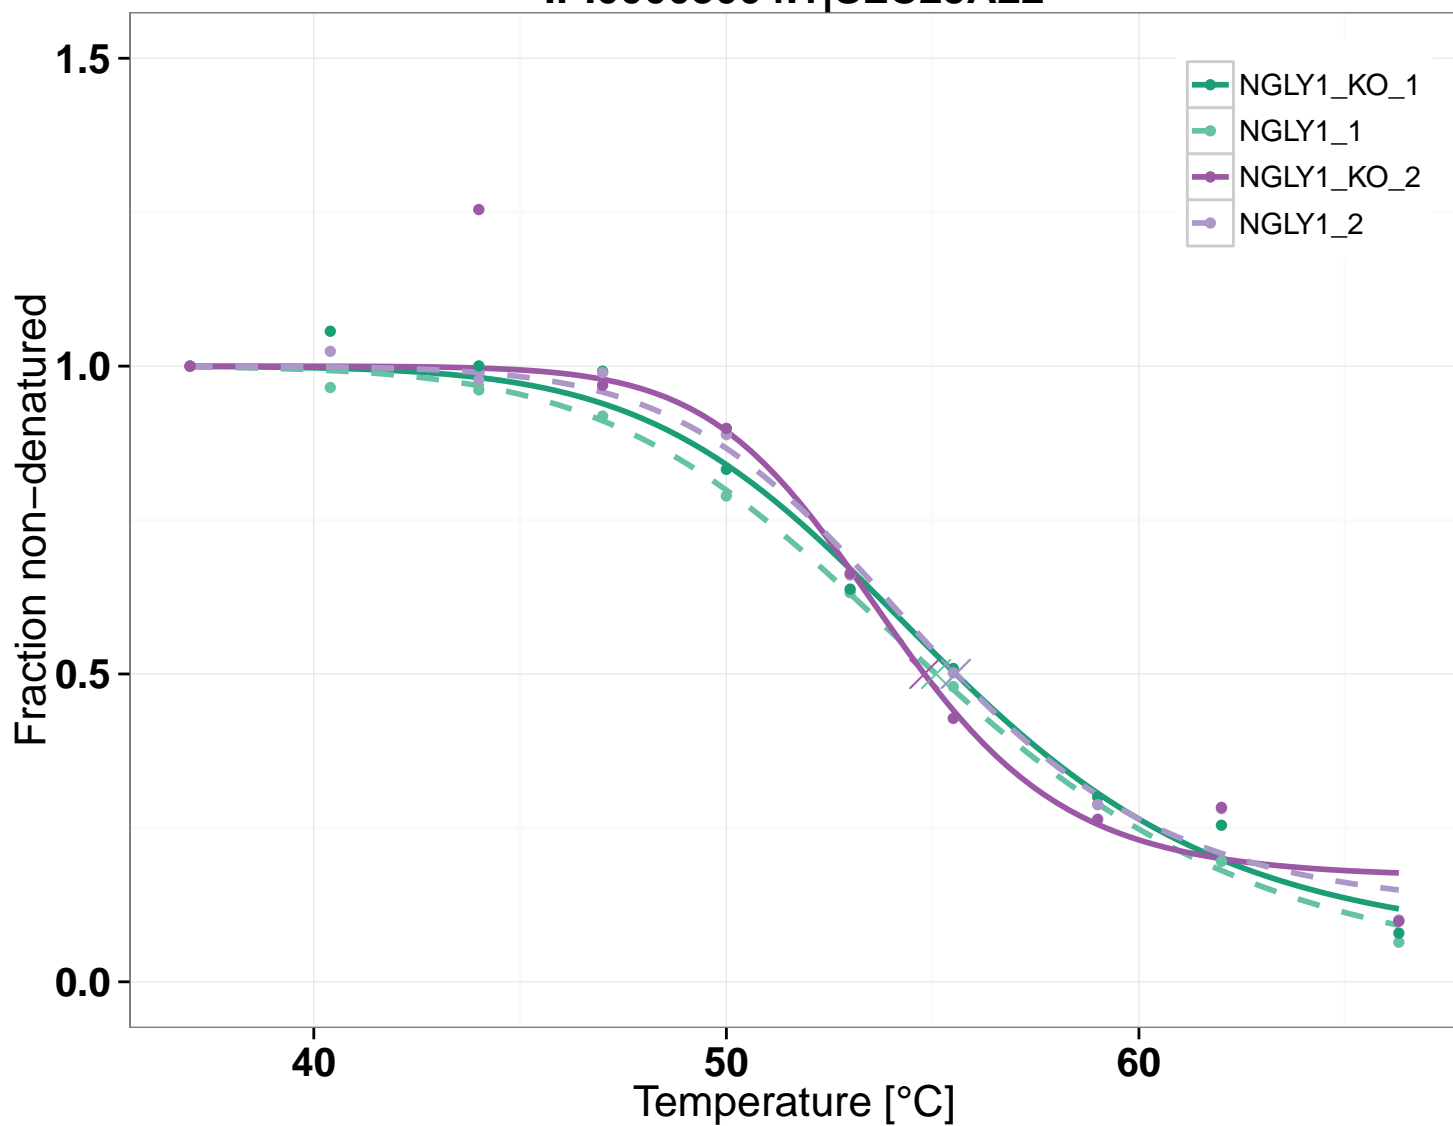

|            | meltPoint | slope  | plateau | R2   |
|------------|-----------|--------|---------|------|
| NGLY1_KO_1 | 55.56     | -0.067 | 0.05    | 0.99 |
| NGLY1_1    | 55.08     | -0.063 | 0       | 1    |
| NGLY1_KO_2 | 54.8      | -0.096 | 0.17    | 0.82 |
| NGLY1_2    | 55.56     | -0.074 | 0.11    | 0.99 |

Supplement: Supplementary file 8332 [file 1]

# IPI00045051.3|PURB

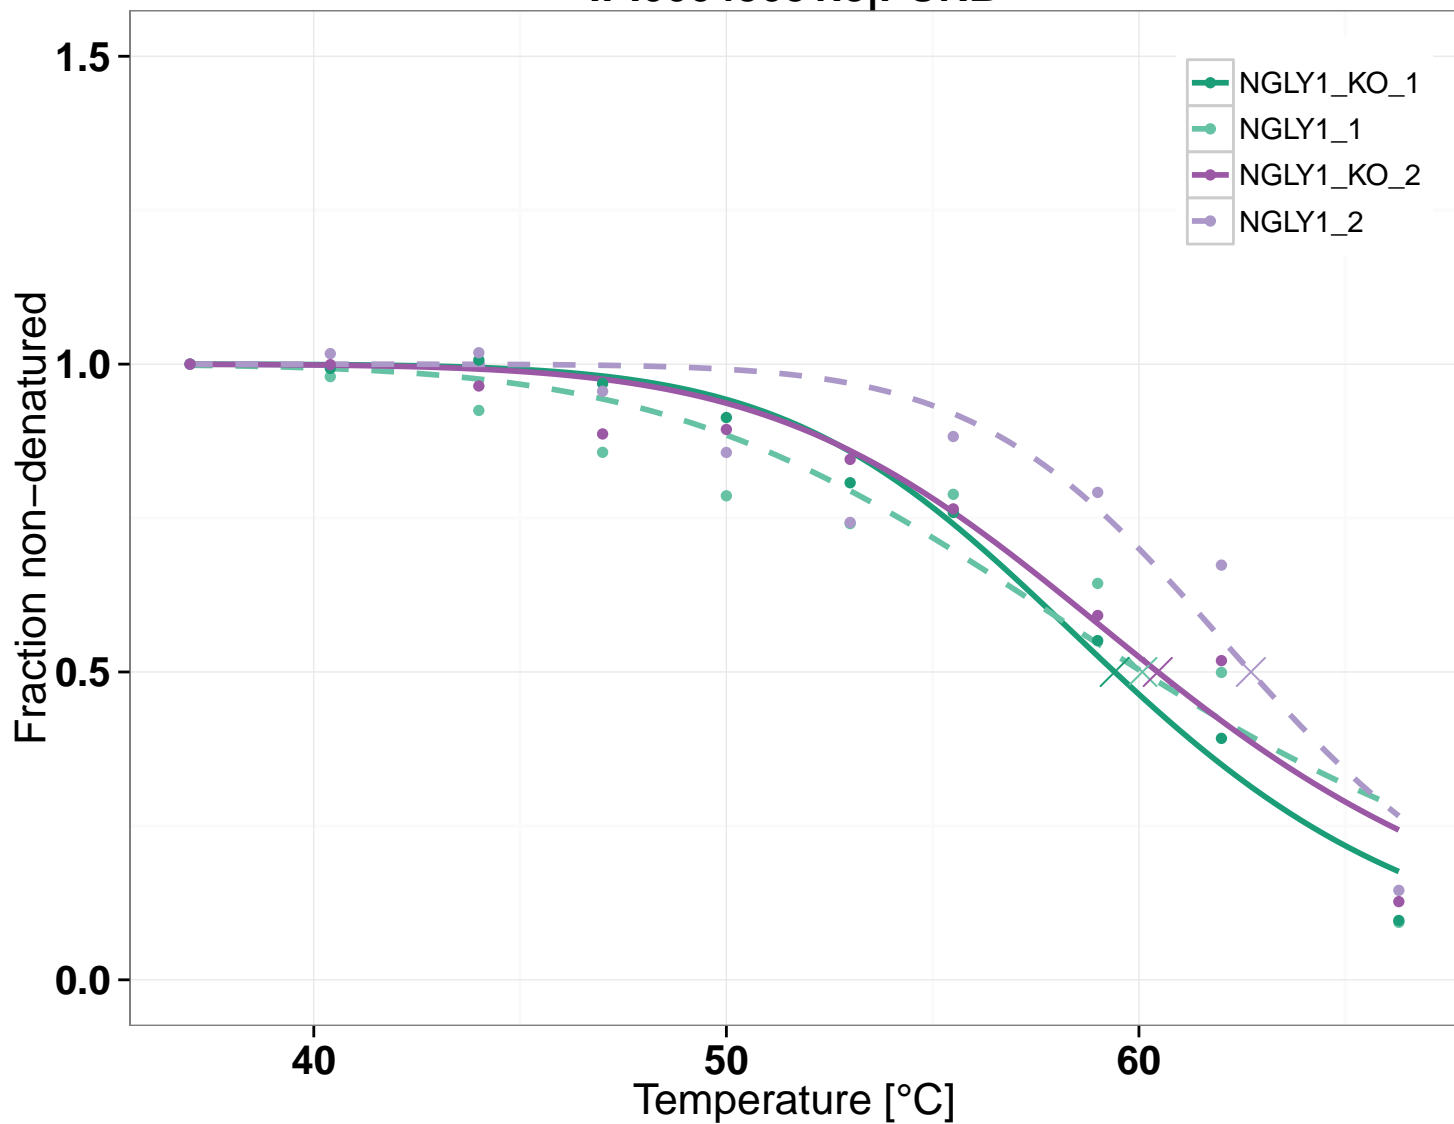

|            | meltPoint | slope  | plateau | R2   |
|------------|-----------|--------|---------|------|
| NGLY1_KO_1 | 59.41     | -0.064 | 0       | 0.99 |
| NGLY1_1    | 60.08     | -0.044 | 0       | 0.88 |
| NGLY1_KO_2 | 60.46     | -0.055 | 0       | 0.95 |
| NGLY1_2    | 62.71     | -0.076 | 0       | 0.83 |

Supplement: Supplementary file 8333 [file 1]

IPI00012835.1|CTBP1

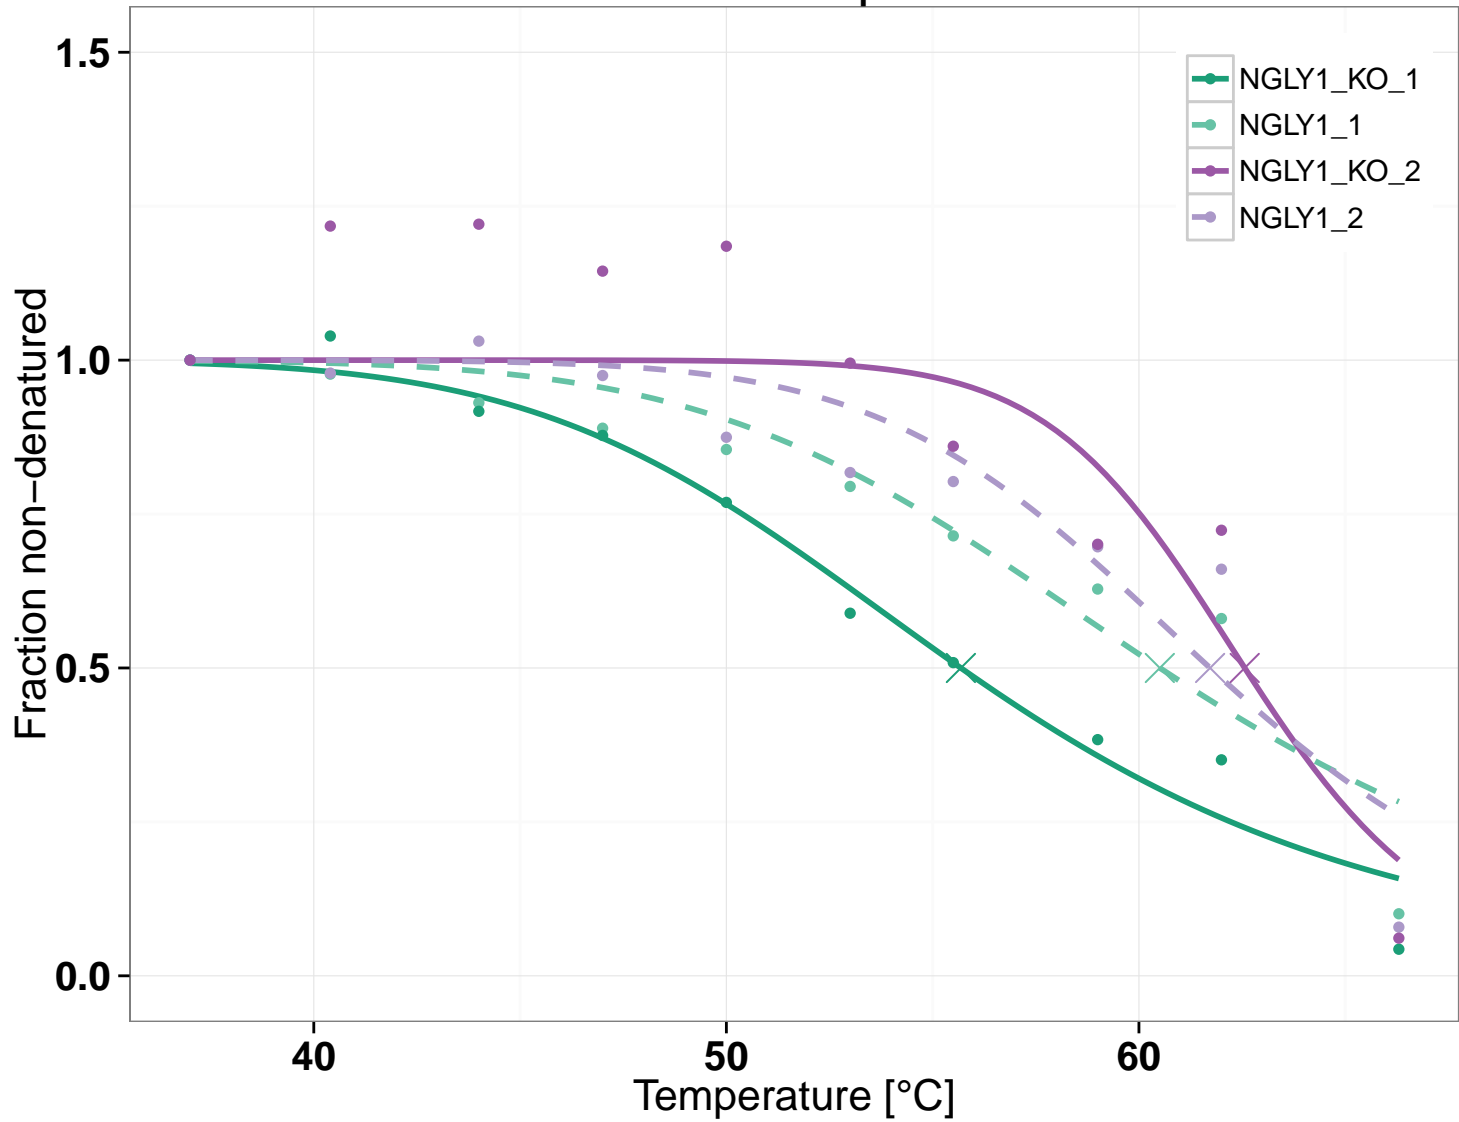

|            | meltPoint | slope  | plateau | R2   |
|------------|-----------|--------|---------|------|
| NGLY1_KO_1 | 55.68     | -0.049 | 0       | 0.97 |
| NGLY1_1    | 60.51     | -0.046 | 0       | 0.89 |
| NGLY1_KO_2 | 62.56     | -0.1   | 0       | 0.8  |
| NGLY1_2    | 61.72     | -0.062 | 0       | 0.87 |

Supplement: Supplementary file 8334 [file 1]

IPI00012669.2|C19ORF61

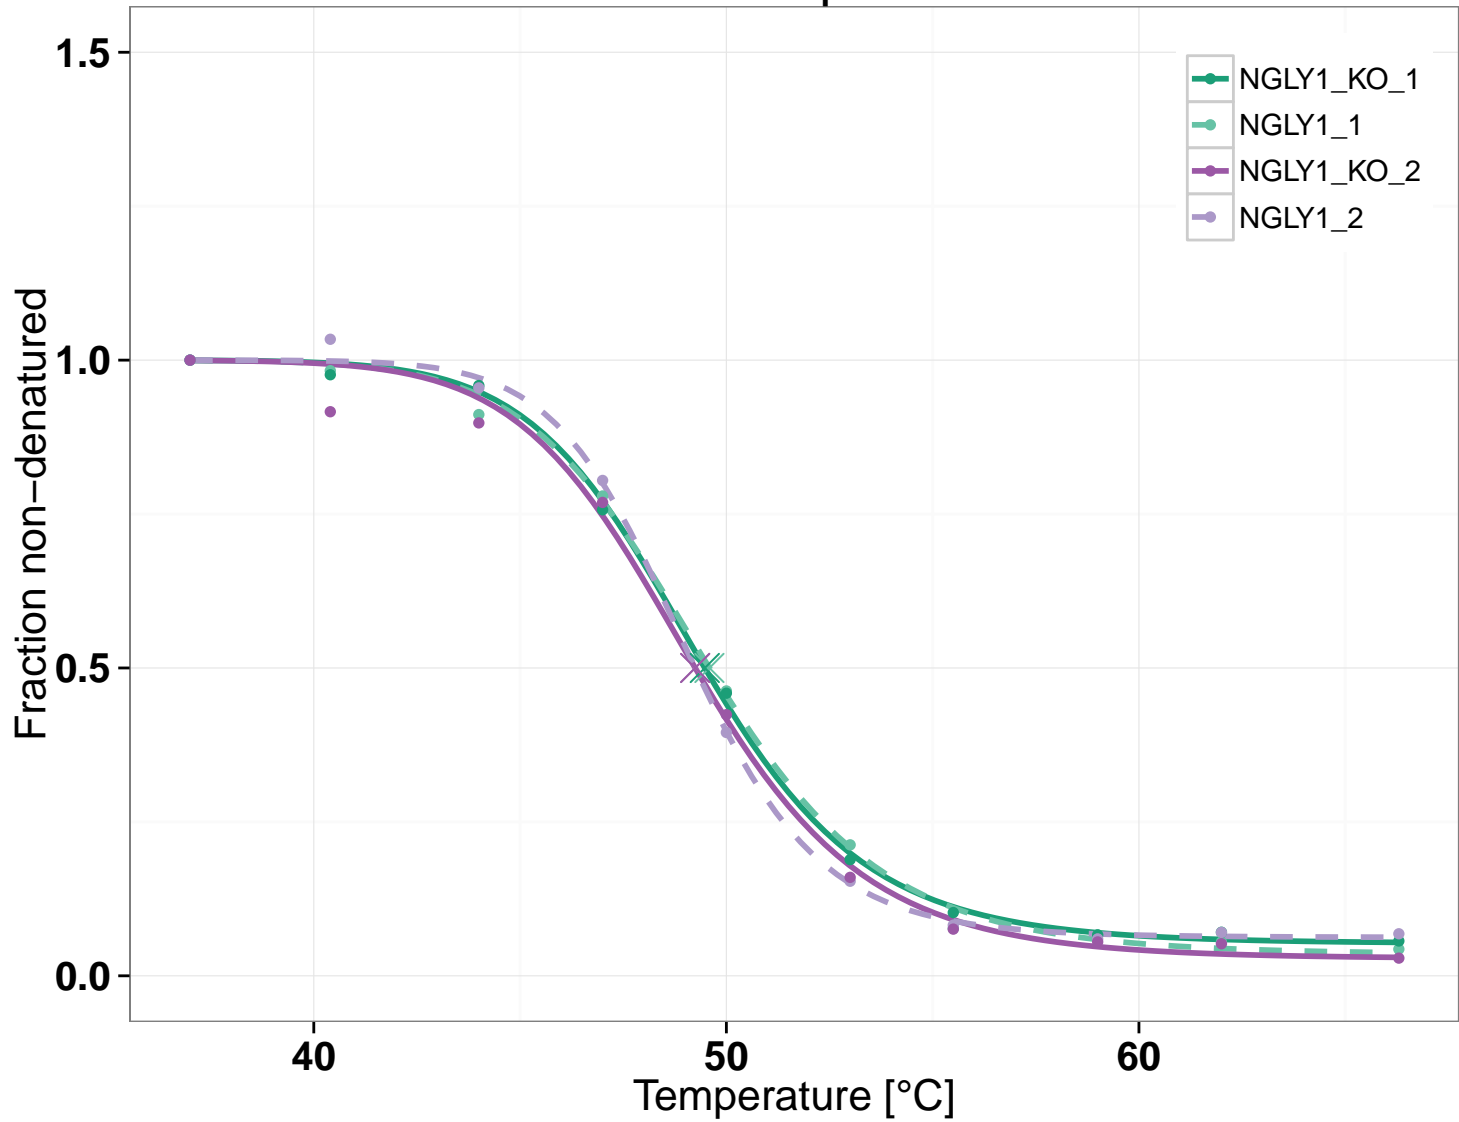

|            | meltPoint | slope | plateau | R2   |
|------------|-----------|-------|---------|------|
| NGLY1_KO_1 | 49.48     | -0.12 | 0.05    | 1    |
| NGLY1_1    | 49.59     | -0.11 | 0.03    | 1    |
| NGLY1_KO_2 | 49.24     | -0.12 | 0.03    | 0.99 |
| NGLY1_2    | 49.24     | -0.15 | 0.06    | 1    |

Supplement: Supplementary file 8335 [file 1]

# IPI00157365.2|NUB1

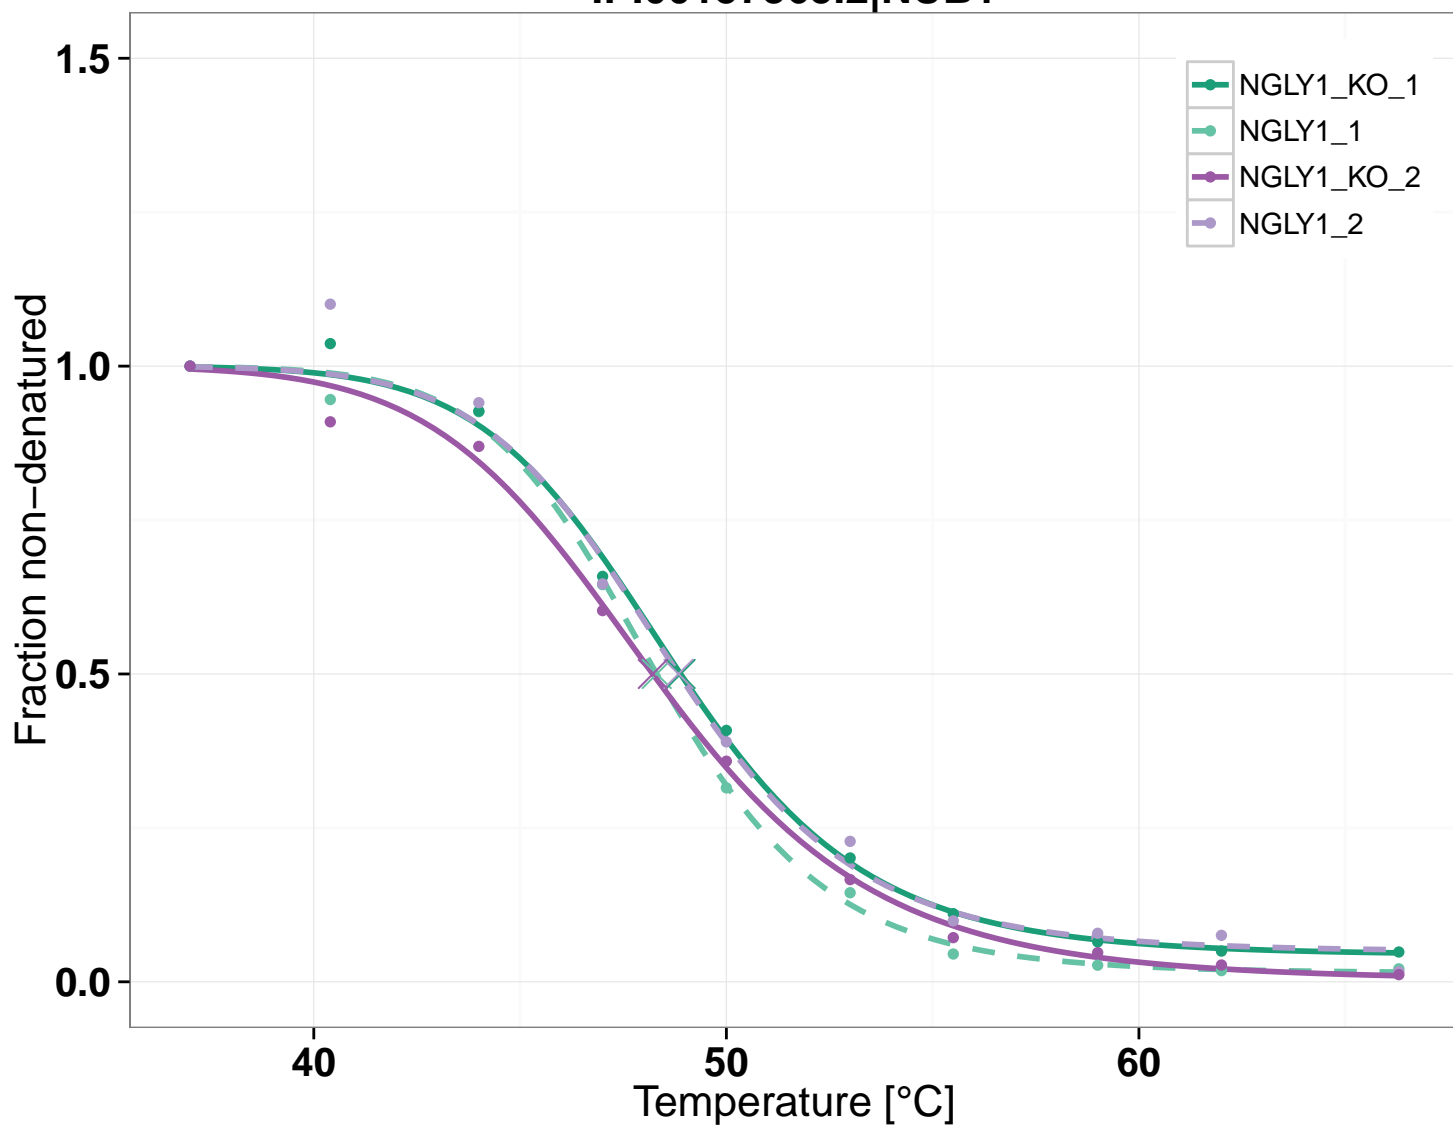

|            | meltPoint | slope  | plateau | R2   |
|------------|-----------|--------|---------|------|
| NGLY1_KO_1 | 48.89     | -0.1   | 0.04    | 1    |
| NGLY1_1    | 48.31     | -0.12  | 0.01    | 1    |
| NGLY1_KO_2 | 48.22     | -0.093 | 0       | 1    |
| NGLY1_2    | 48.84     | -0.1   | 0.05    | 0.99 |

Supplement: Supplementary file 8336 [file 1]
