# Supplementary material (part 84 of 85)
Source: publisher figshare collection journal article supplement (https://gsajournals.figshare.com/articles/dataset/_/12014913)

IPI00479058.2|RPS15

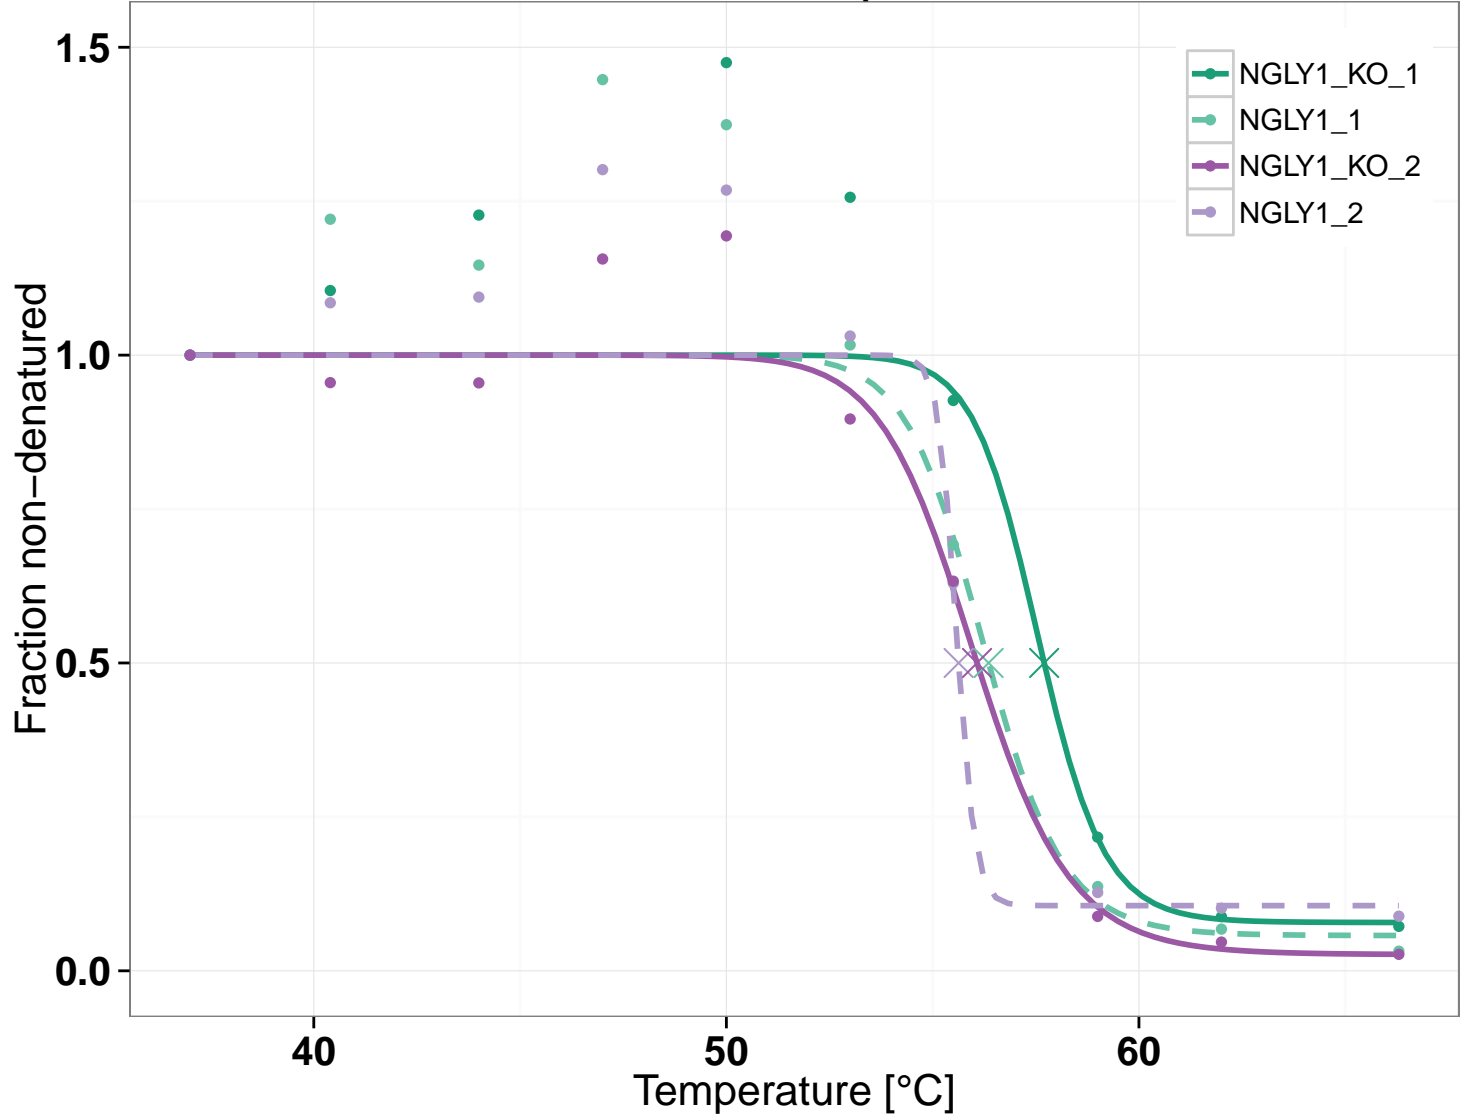

|            | meltPoint | slope | plateau | R2   |
|------------|-----------|-------|---------|------|
| NGLY1_KO_1 | 57.7      | -0.29 | 0.08    | 0.76 |
| NGLY1_1    | 56.36     | -0.25 | 0.06    | 0.85 |
| NGLY1_KO_2 | 56.08     | -0.21 | 0.03    | 0.96 |
| NGLY1_2    | 55.63     | -1    | 0.11    | 0.92 |

Supplement: Supplementary file 8337 [file 1]

# IPI00604502.2|PER3

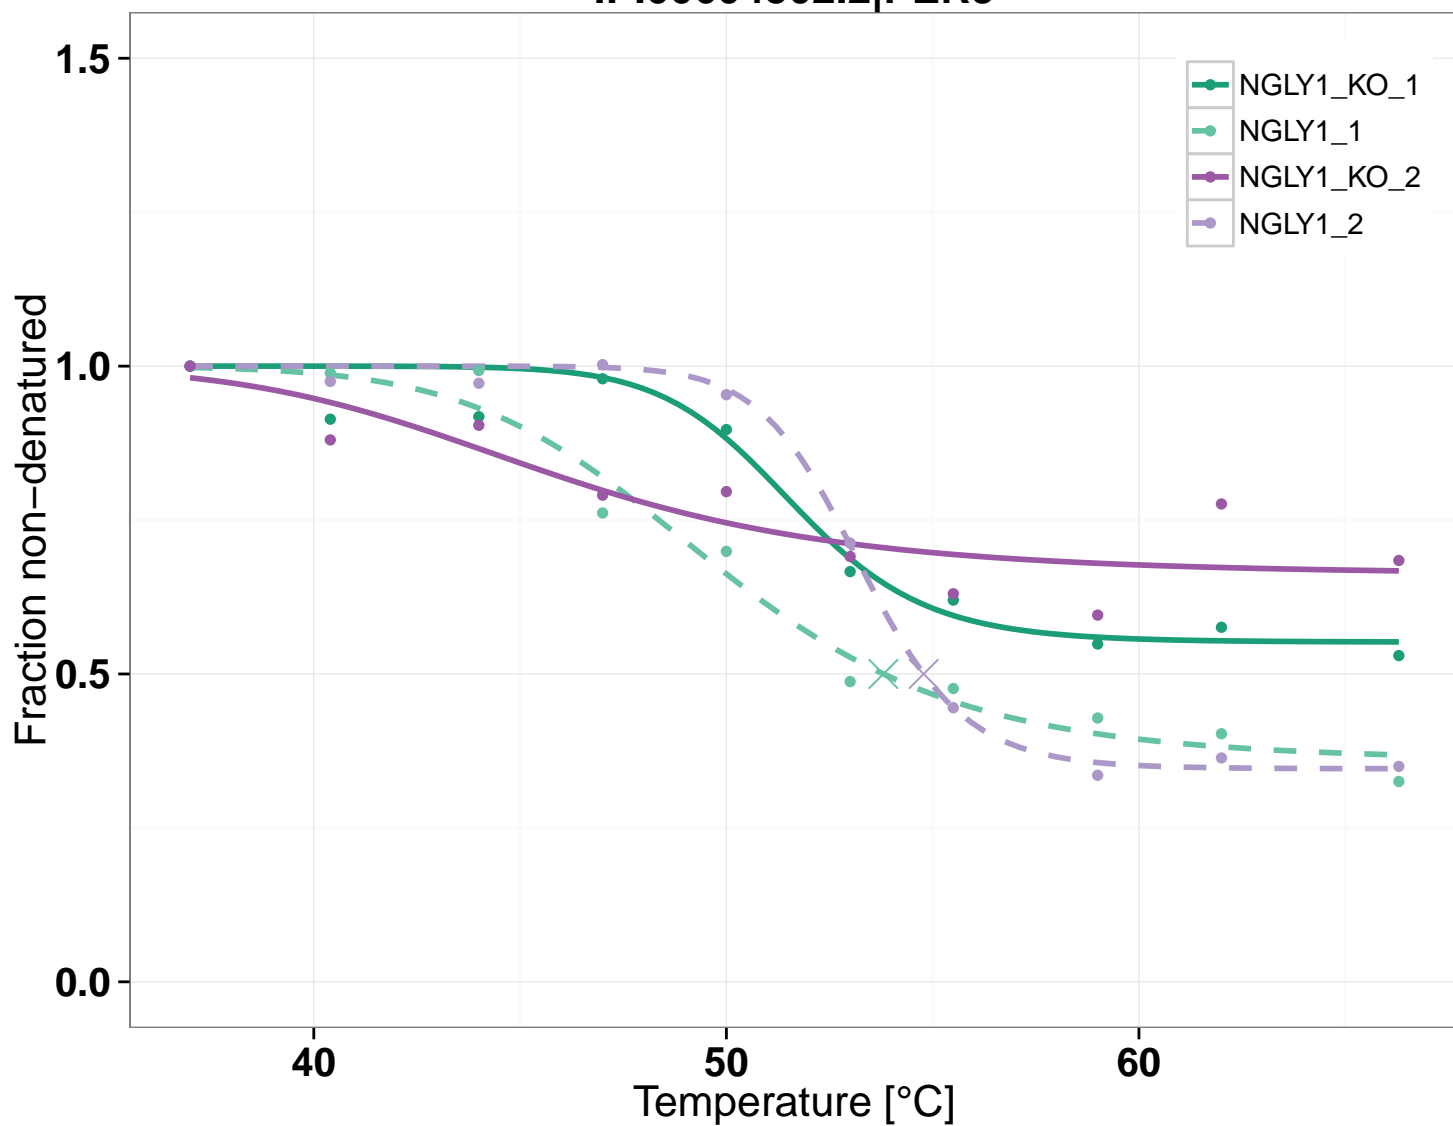

|            | meltPoint | slope  | plateau | R2   |
|------------|-----------|--------|---------|------|
| NGLY1_KO_1 | –         | –0.07  | 0.55    | 0.95 |
| NGLY1_1    | 53.81     | –0.054 | 0.36    | 0.98 |
| NGLY1_KO_2 | –         | –0.023 | 0.66    | 0.79 |
| NGLY1_2    | 54.78     | –0.13  | 0.35    | 1    |

Supplement: Supplementary file 8338 [file 1]

# IPI00219229.3|LSM3

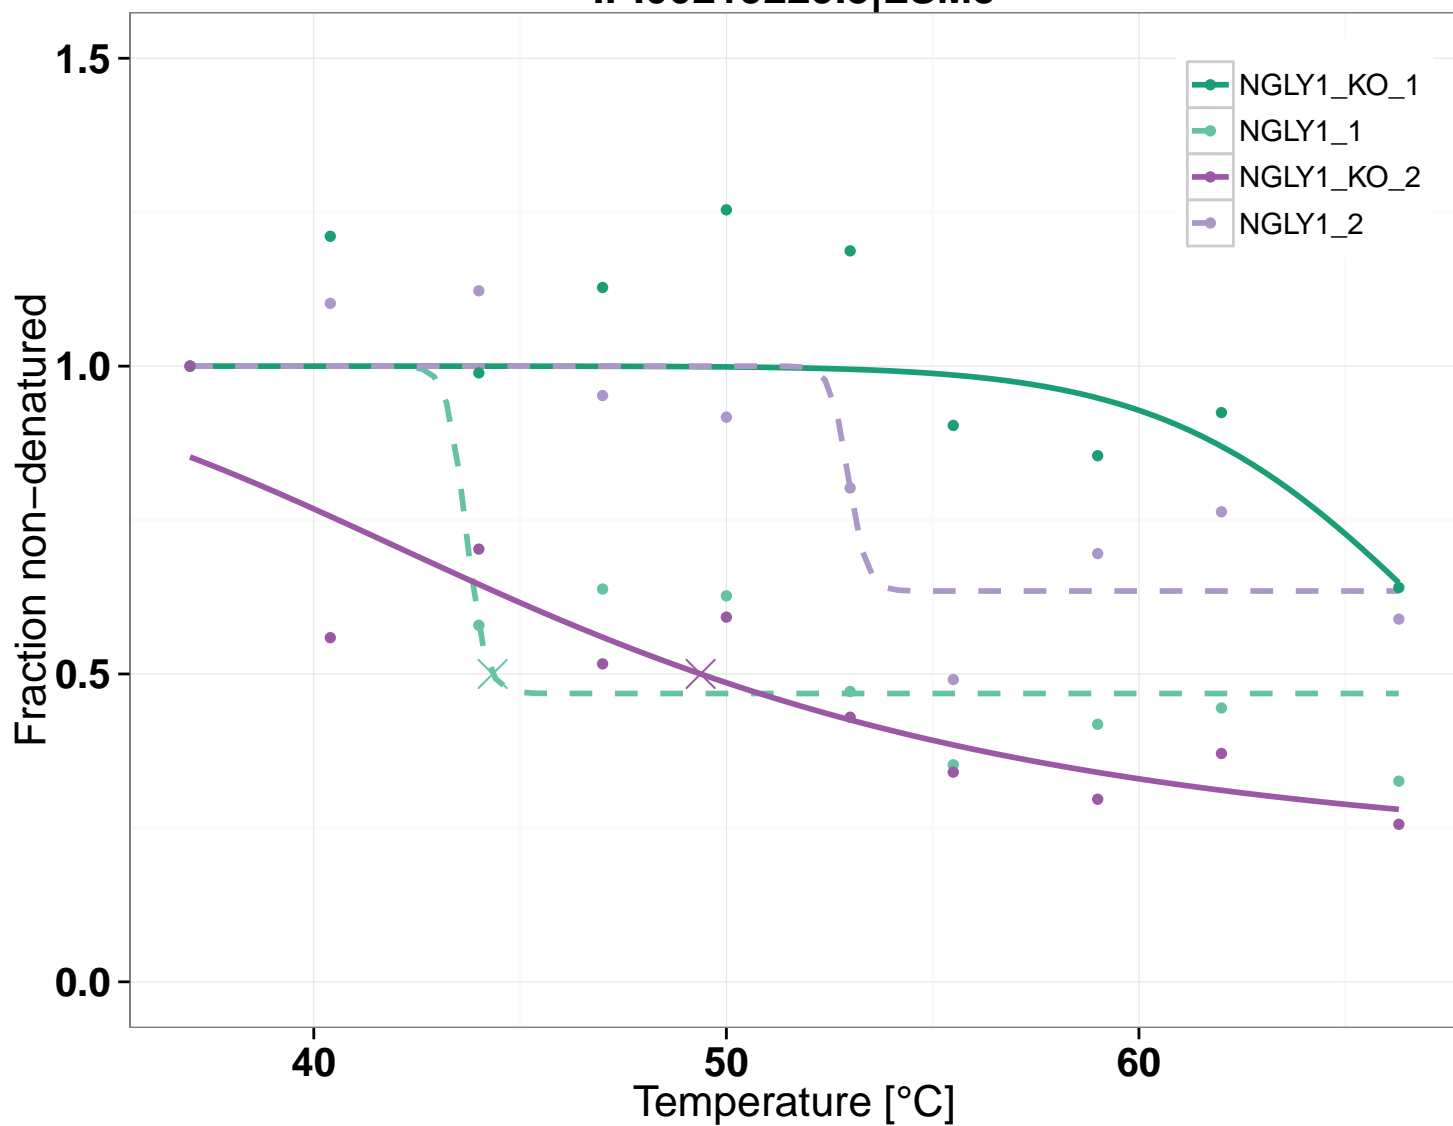

|            | meltPoint | slope  | plateau | R2   |
|------------|-----------|--------|---------|------|
| NGLY1_KO_1 | -         | -      | 0       | 0.44 |
| NGLY1_1    | 44.34     | -0.58  | 0.47    | 0.61 |
| NGLY1_KO_2 | 49.38     | -0.031 | 0.17    | 0.81 |
| NGLY1_2    | -         | -0.43  | 0.63    | 0.81 |

Supplement: Supplementary file 8339 [file 1]

IPI00424460.3|ZFYVE16

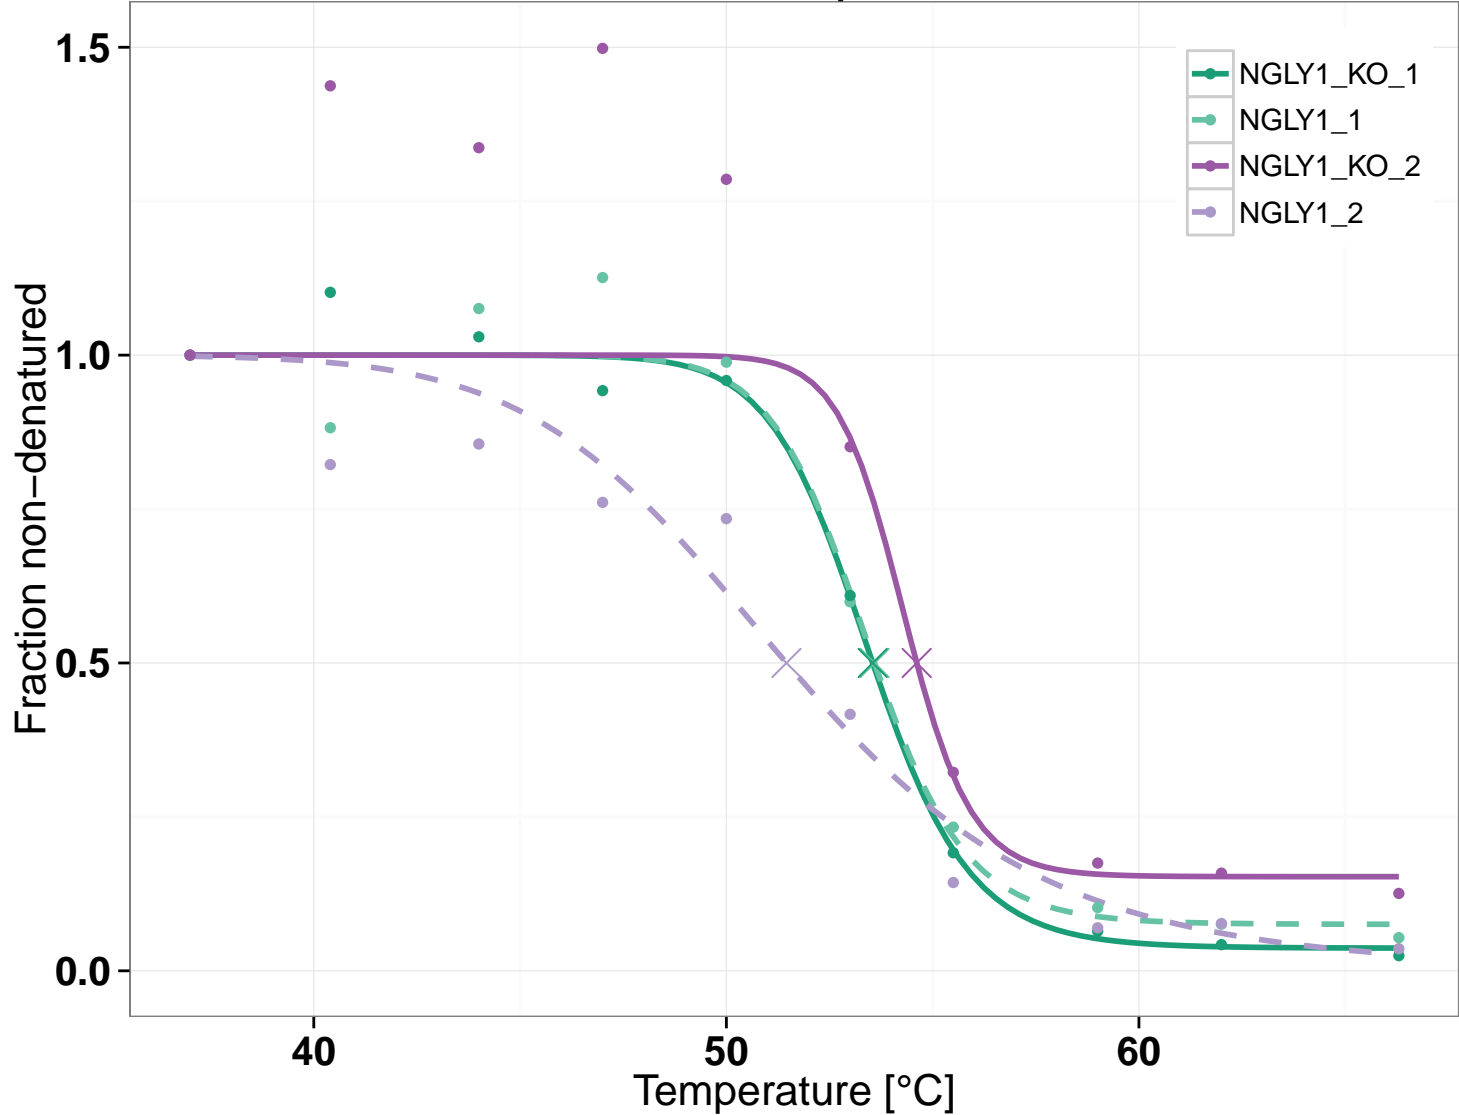

|            | meltPoint | slope  | plateau | R2   |
|------------|-----------|--------|---------|------|
| NGLY1_KO_1 | 53.55     | -0.2   | 0.04    | 0.99 |
| NGLY1_1    | 53.59     | -0.2   | 0.08    | 0.98 |
| NGLY1_KO_2 | 54.61     | -0.26  | 0.15    | 0.78 |
| NGLY1_2    | 51.46     | -0.079 | 0       | 0.95 |

Supplement: Supplementary file 8340 [file 1]

# IPI00002336.1|ARMC7

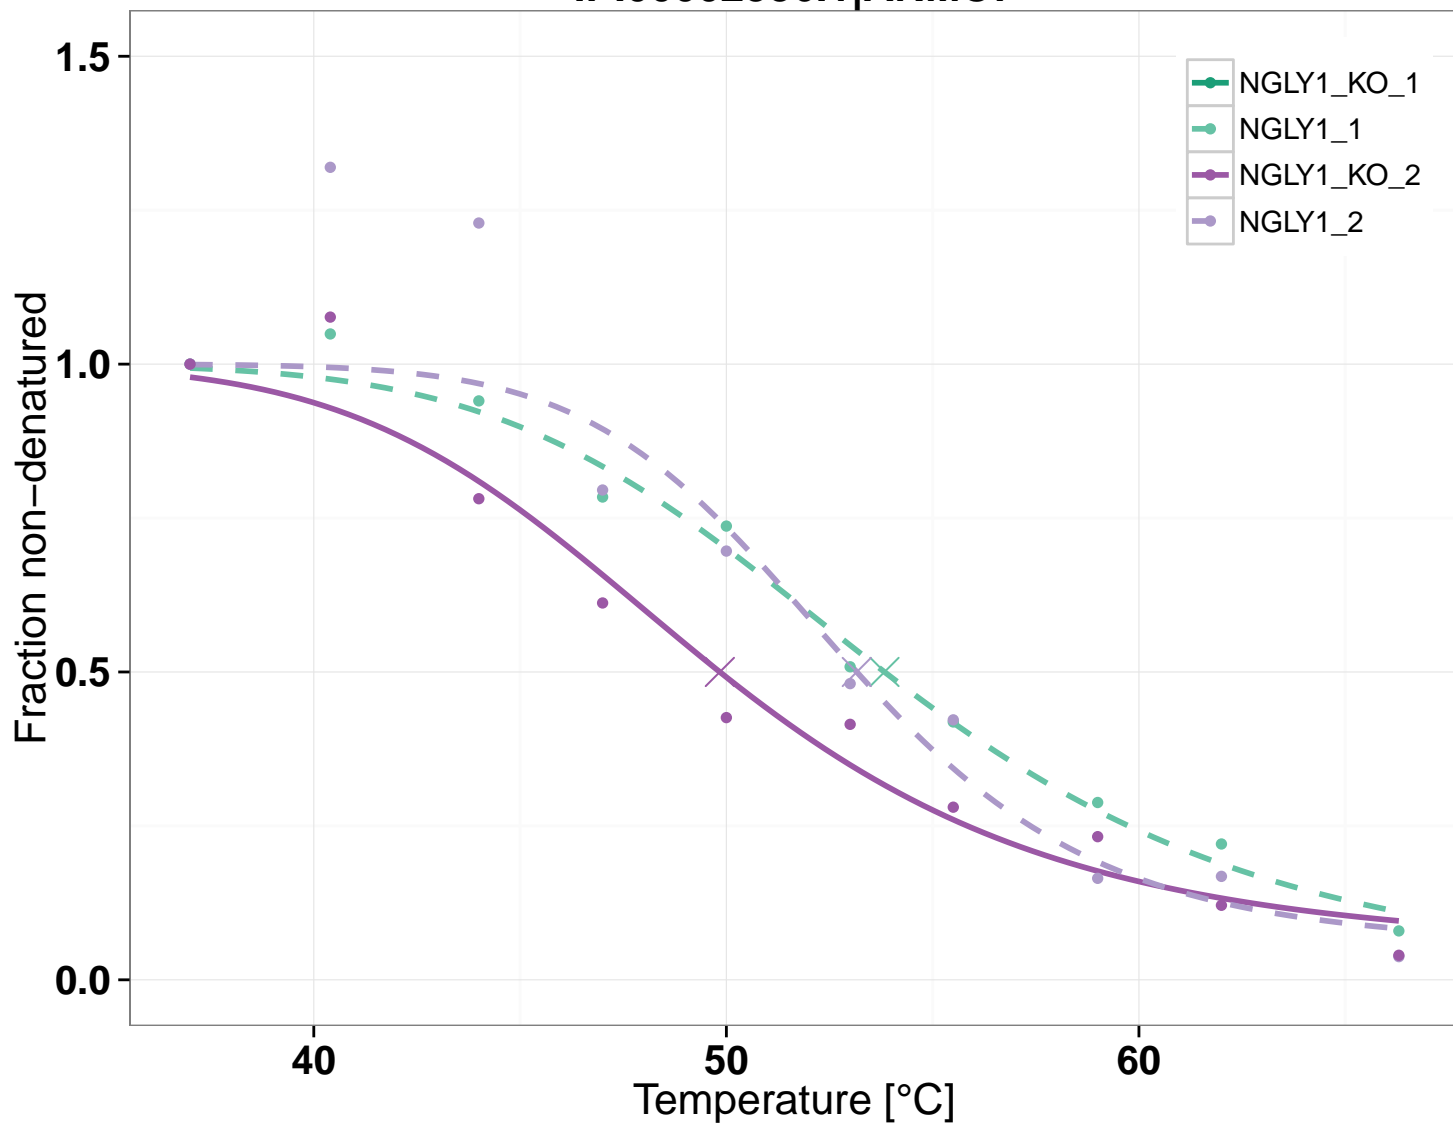

|            | meltPoint | slope  | plateau | R2   |
|------------|-----------|--------|---------|------|
| NGLY1_KO_1 | –         | –      | –       | –    |
| NGLY1_1    | 53.83     | −0.053 | 0       | 0.99 |
| NGLY1_KO_2 | 49.84     | −0.056 | 0.04    | 0.97 |
| NGLY1_2    | 53.16     | −0.076 | 0.05    | 0.89 |

Supplement: Supplementary file 8341 [file 1]

IPI00807364.1|FNBP1L

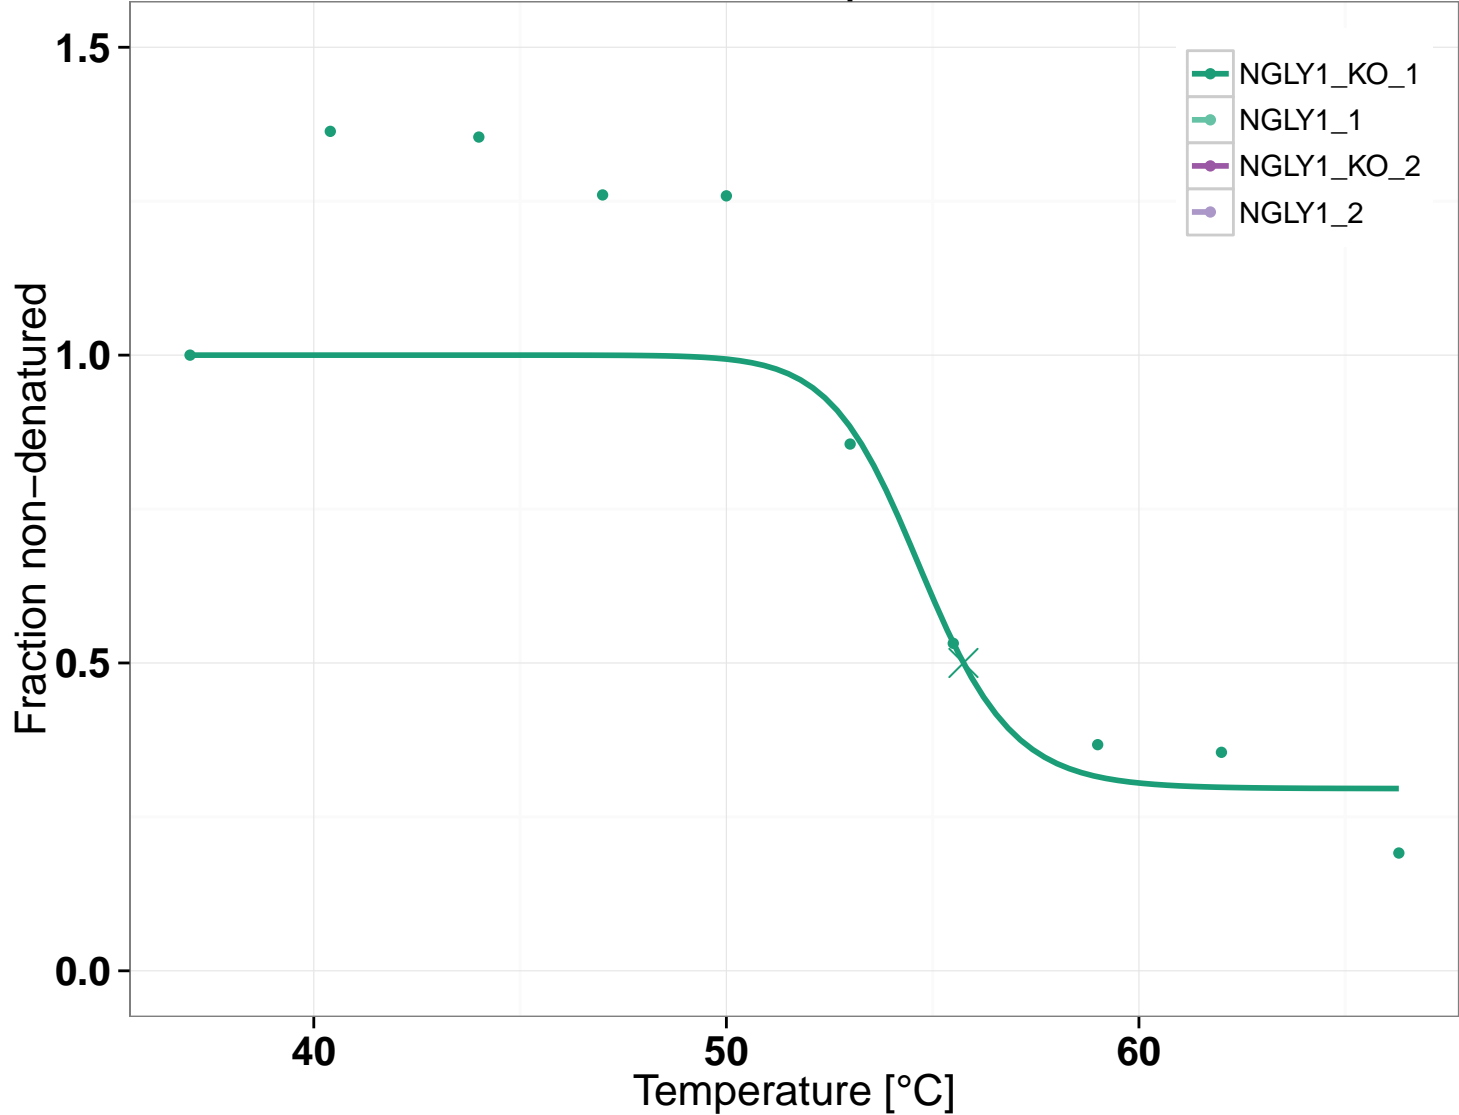

|            | meltPoint | slope | plateau | R2   |
|------------|-----------|-------|---------|------|
| NGLY1_KO_1 | 55.75     | -0.16 | 0.3     | 0.78 |
| NGLY1_1    | -         | -     | -       | -    |
| NGLY1_KO_2 | -         | -     | -       | -    |
| NGLY1_2    | -         | -     | -       | -    |

Supplement: Supplementary file 8342 [file 1]

IPI00414231.3|LRP10

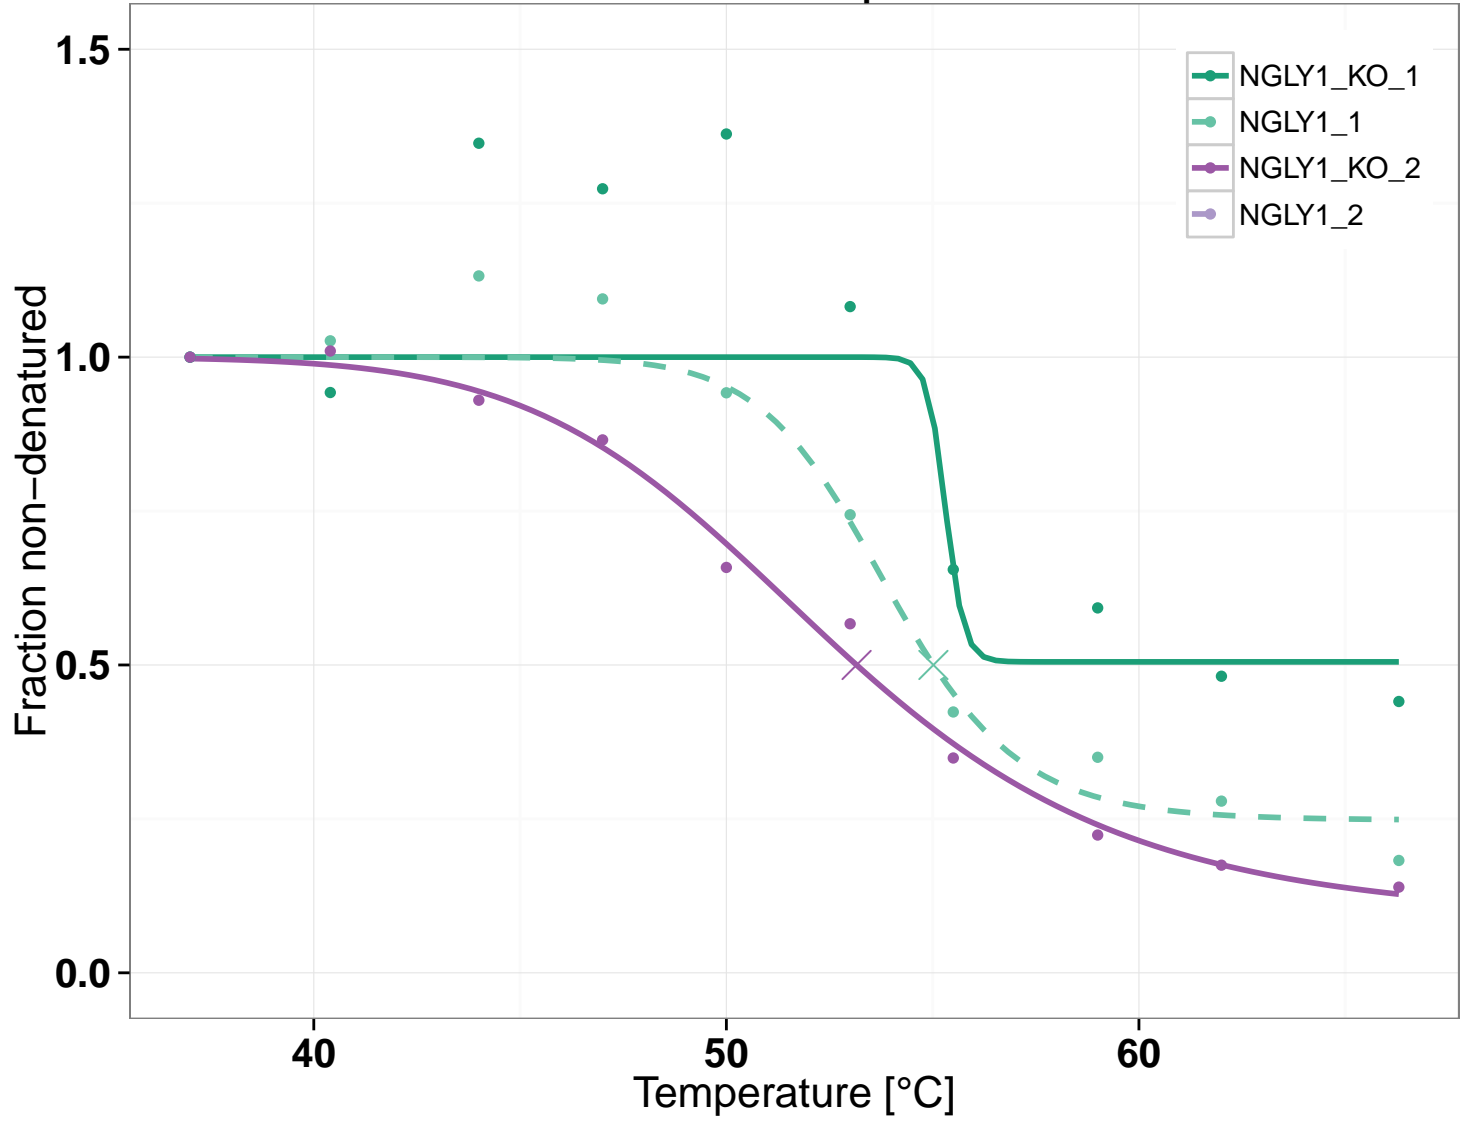

|            | meltPoint | slope  | plateau | R2   |
|------------|-----------|--------|---------|------|
| NGLY1_KO_1 | –         | –0.56  | 0.51    | 0.69 |
| NGLY1_1    | 55.02     | –0.12  | 0.25    | 0.97 |
| NGLY1_KO_2 | 53.16     | –0.063 | 0.08    | 0.99 |
| NGLY1_2    | –         | –      | –       | –    |

Supplement: Supplementary file 8343 [file 1]

# IPI00398009.2|IPO4

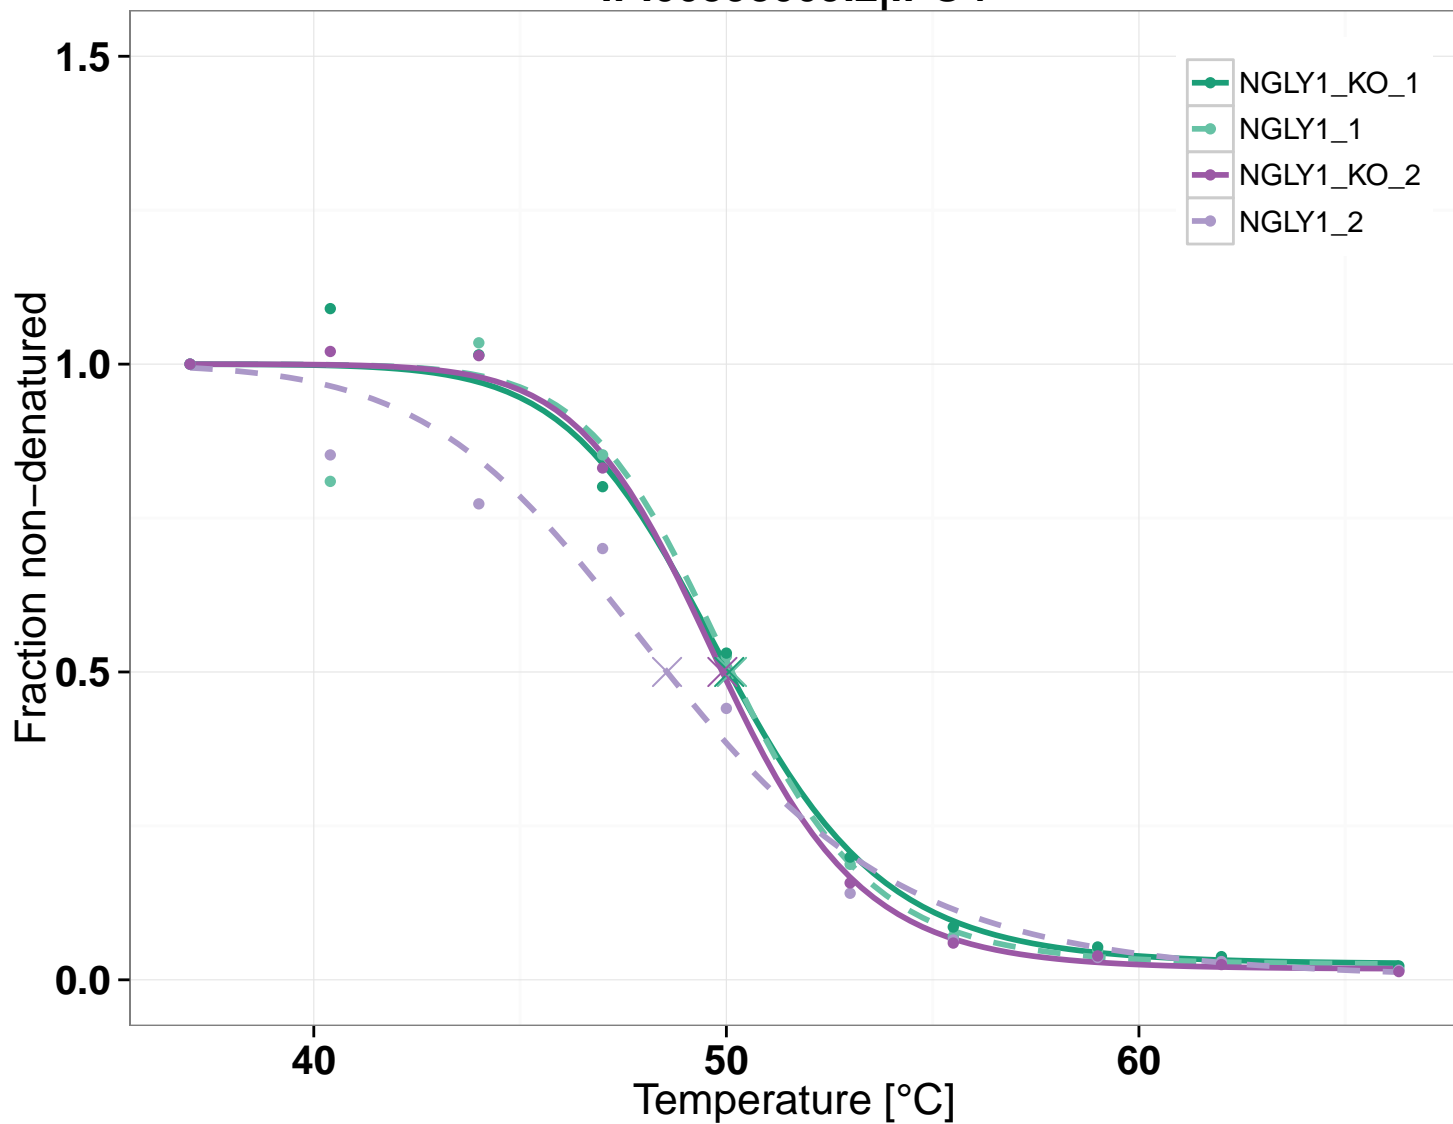

|            | meltPoint | slope  | plateau | R2   |
|------------|-----------|--------|---------|------|
| NGLY1_KO_1 | 50.07     | -0.13  | 0.03    | 0.99 |
| NGLY1_1    | 50.14     | -0.14  | 0.03    | 0.98 |
| NGLY1_KO_2 | 49.9      | -0.14  | 0.02    | 1    |
| NGLY1_2    | 48.56     | -0.085 | 0       | 0.98 |

Supplement: Supplementary file 8344 [file 1]

IPI00478989.3|SUSD1

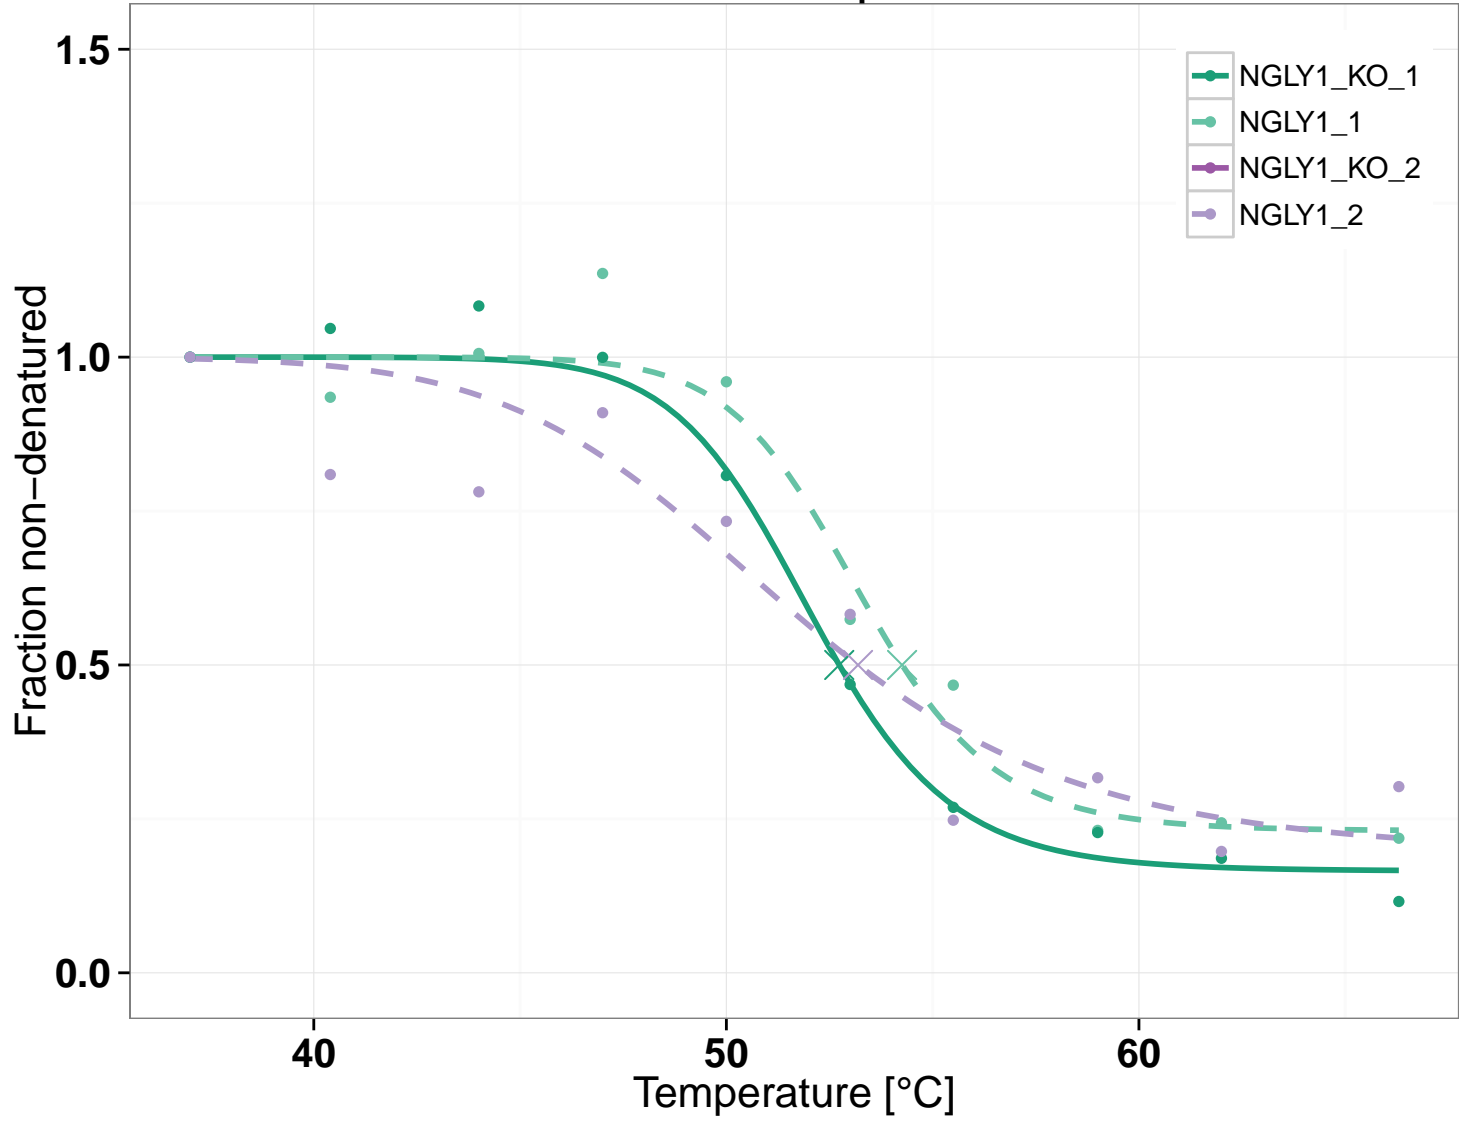

|            | meltPoint | slope  | plateau | R2   |
|------------|-----------|--------|---------|------|
| NGLY1_KO_1 | 52.74     | -0.12  | 0.17    | 0.99 |
| NGLY1_1    | 54.26     | -0.12  | 0.23    | 0.97 |
| NGLY1_KO_2 | -         | -      | -       | -    |
| NGLY1_2    | 53.19     | -0.059 | 0.19    | 0.87 |

Supplement: Supplementary file 8345 [file 1]

IPI00398808.5|WNK2

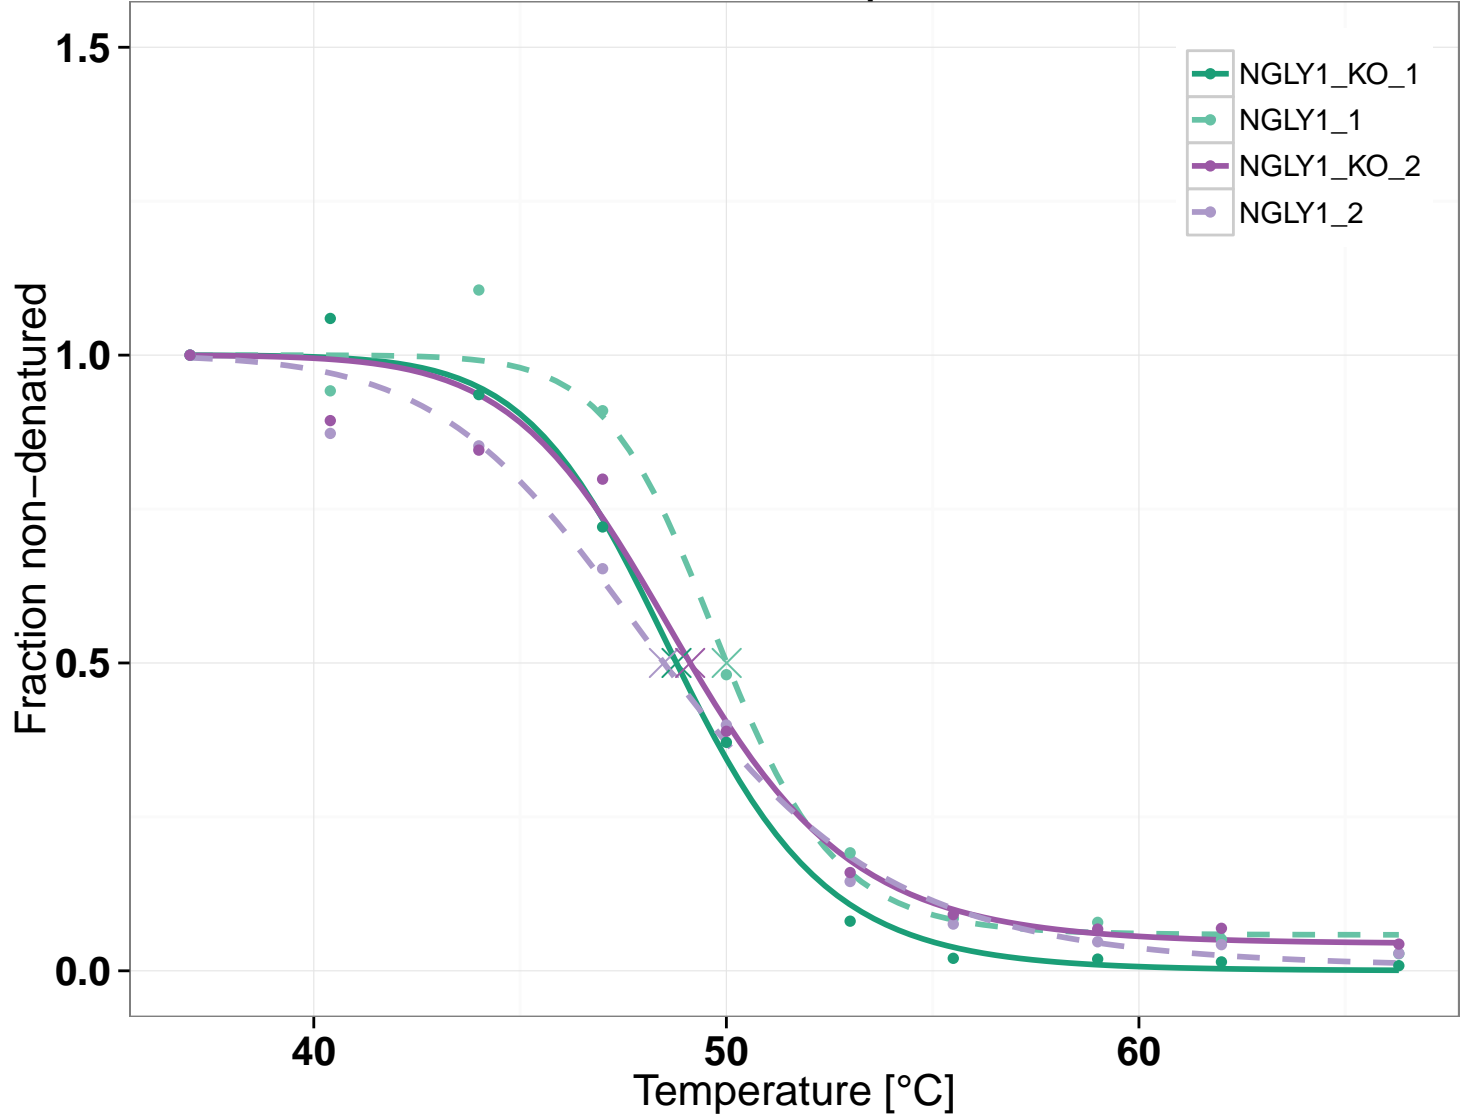

|            | meltPoint | slope  | plateau | R2   |
|------------|-----------|--------|---------|------|
| NGLY1_KO_1 | 48.79     | -0.14  | 0       | 1    |
| NGLY1_1    | 50.01     | -0.17  | 0.06    | 0.99 |
| NGLY1_KO_2 | 49.12     | -0.12  | 0.04    | 0.98 |
| NGLY1_2    | 48.49     | -0.091 | 0       | 0.99 |

Supplement: Supplementary file 8346 [file 1]

IPI00431263.3|KIAA0195

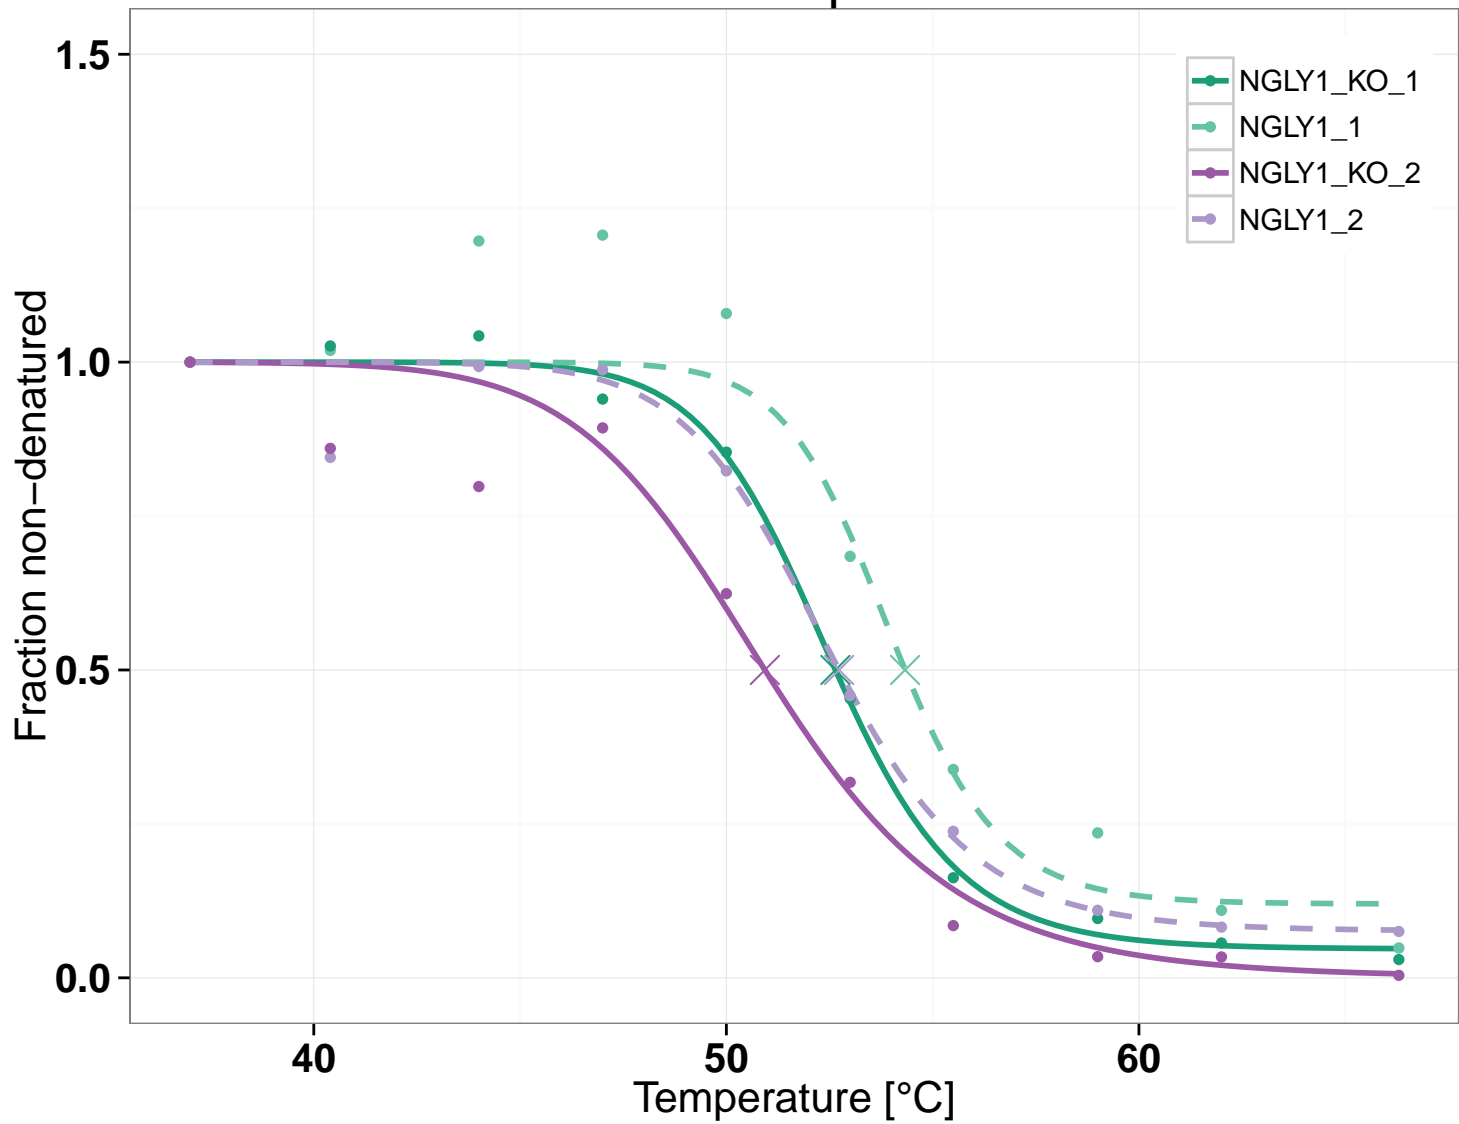

|            | meltPoint | slope | plateau | R2   |
|------------|-----------|-------|---------|------|
| NGLY1_KO_1 | 52.64     | -0.15 | 0.05    | 1    |
| NGLY1_1    | 54.33     | -0.17 | 0.12    | 0.94 |
| NGLY1_KO_2 | 50.93     | -0.11 | 0       | 0.96 |
| NGLY1_2    | 52.73     | -0.13 | 0.08    | 0.98 |

Supplement: Supplementary file 8347 [file 1]

# IPI00785110.2|BPTF

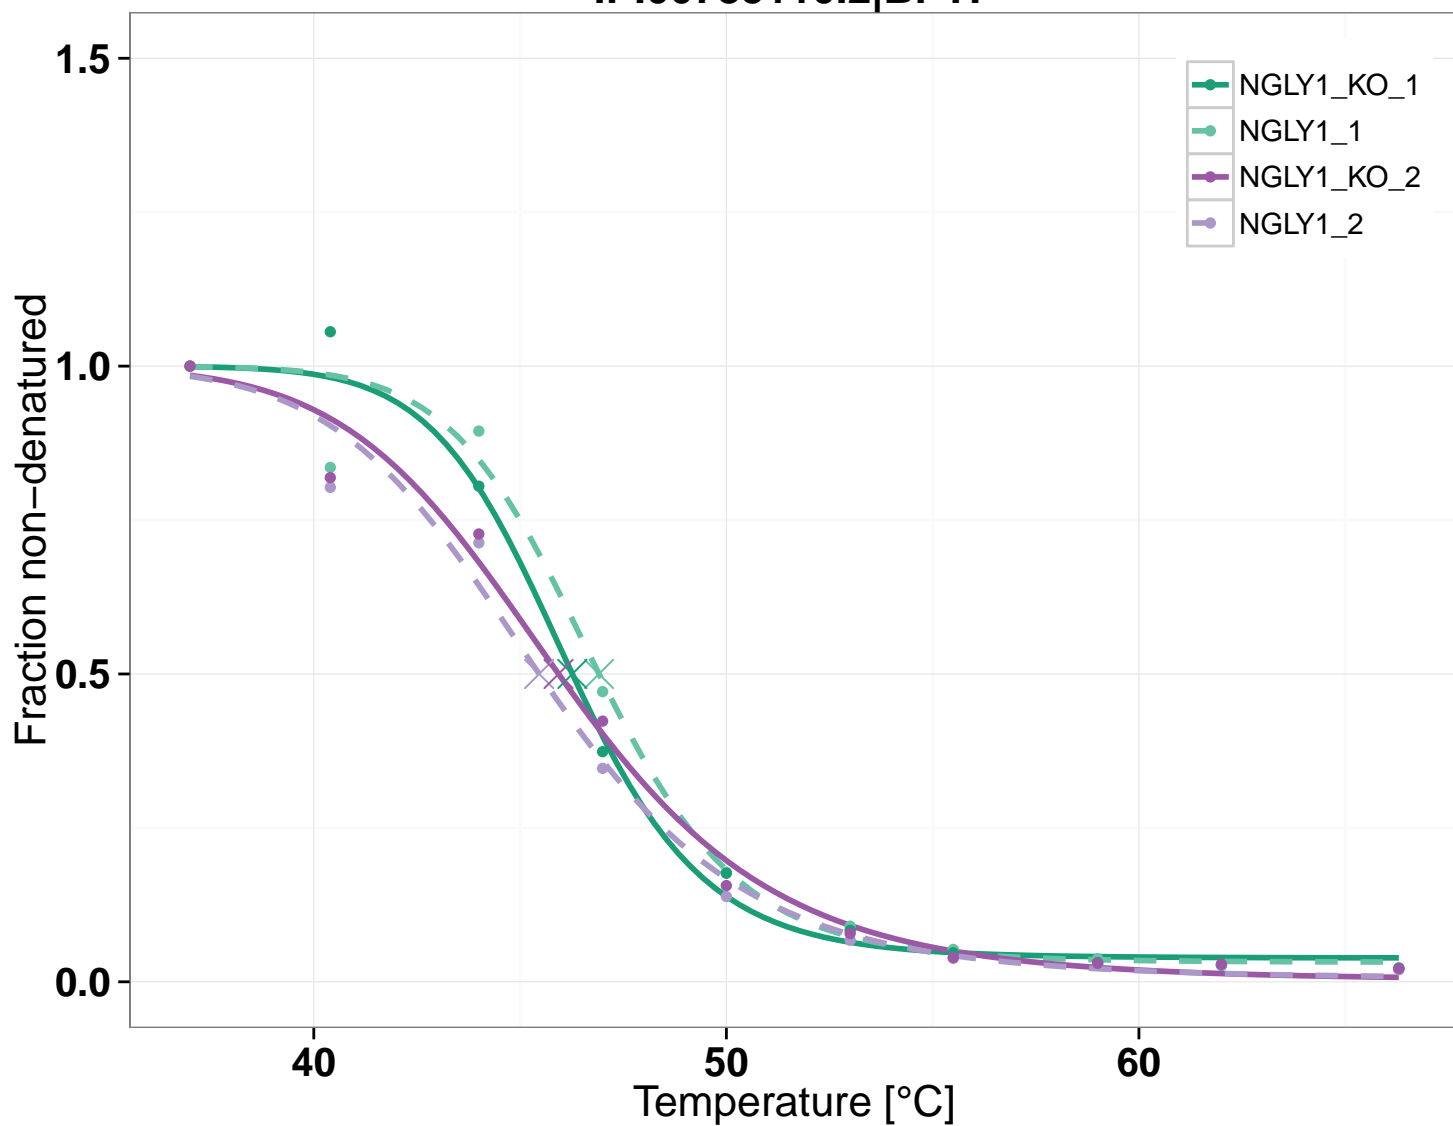

|            | meltPoint | slope  | plateau | R2   |
|------------|-----------|--------|---------|------|
| NGLY1_KO_1 | 46.27     | -0.15  | 0.04    | 0.99 |
| NGLY1_1    | 46.91     | -0.14  | 0.03    | 0.98 |
| NGLY1_KO_2 | 45.93     | -0.096 | 0       | 0.99 |
| NGLY1_2    | 45.46     | -0.099 | 0.01    | 0.99 |

Supplement: Supplementary file 8349 [file 1]

IPI00549993.3|C10ORF97

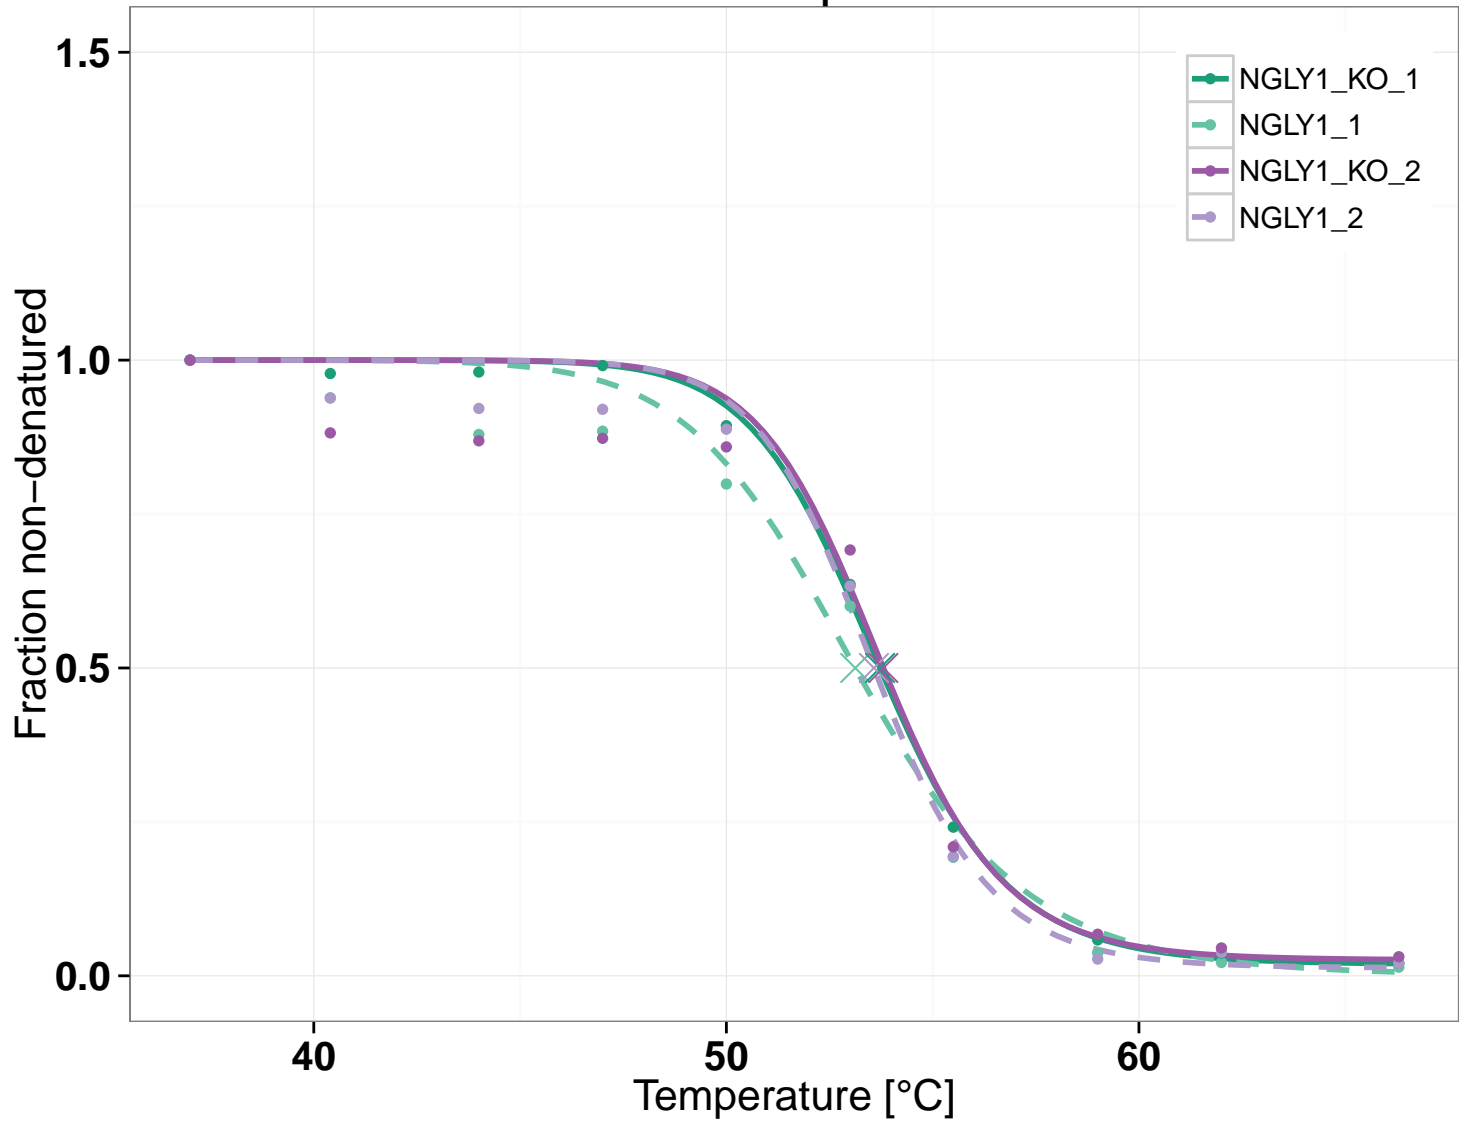

|            | meltPoint | slope | plateau | R2   |
|------------|-----------|-------|---------|------|
| NGLY1_KO_1 | 53.72     | -0.16 | 0.02    | 1    |
| NGLY1_1    | 53.12     | -0.12 | 0       | 0.98 |
| NGLY1_KO_2 | 53.8      | -0.16 | 0.03    | 0.96 |
| NGLY1_2    | 53.58     | -0.17 | 0.01    | 0.99 |

Supplement: Supplementary file 8350 [file 1]

# IPI00021329.3|WDR45L

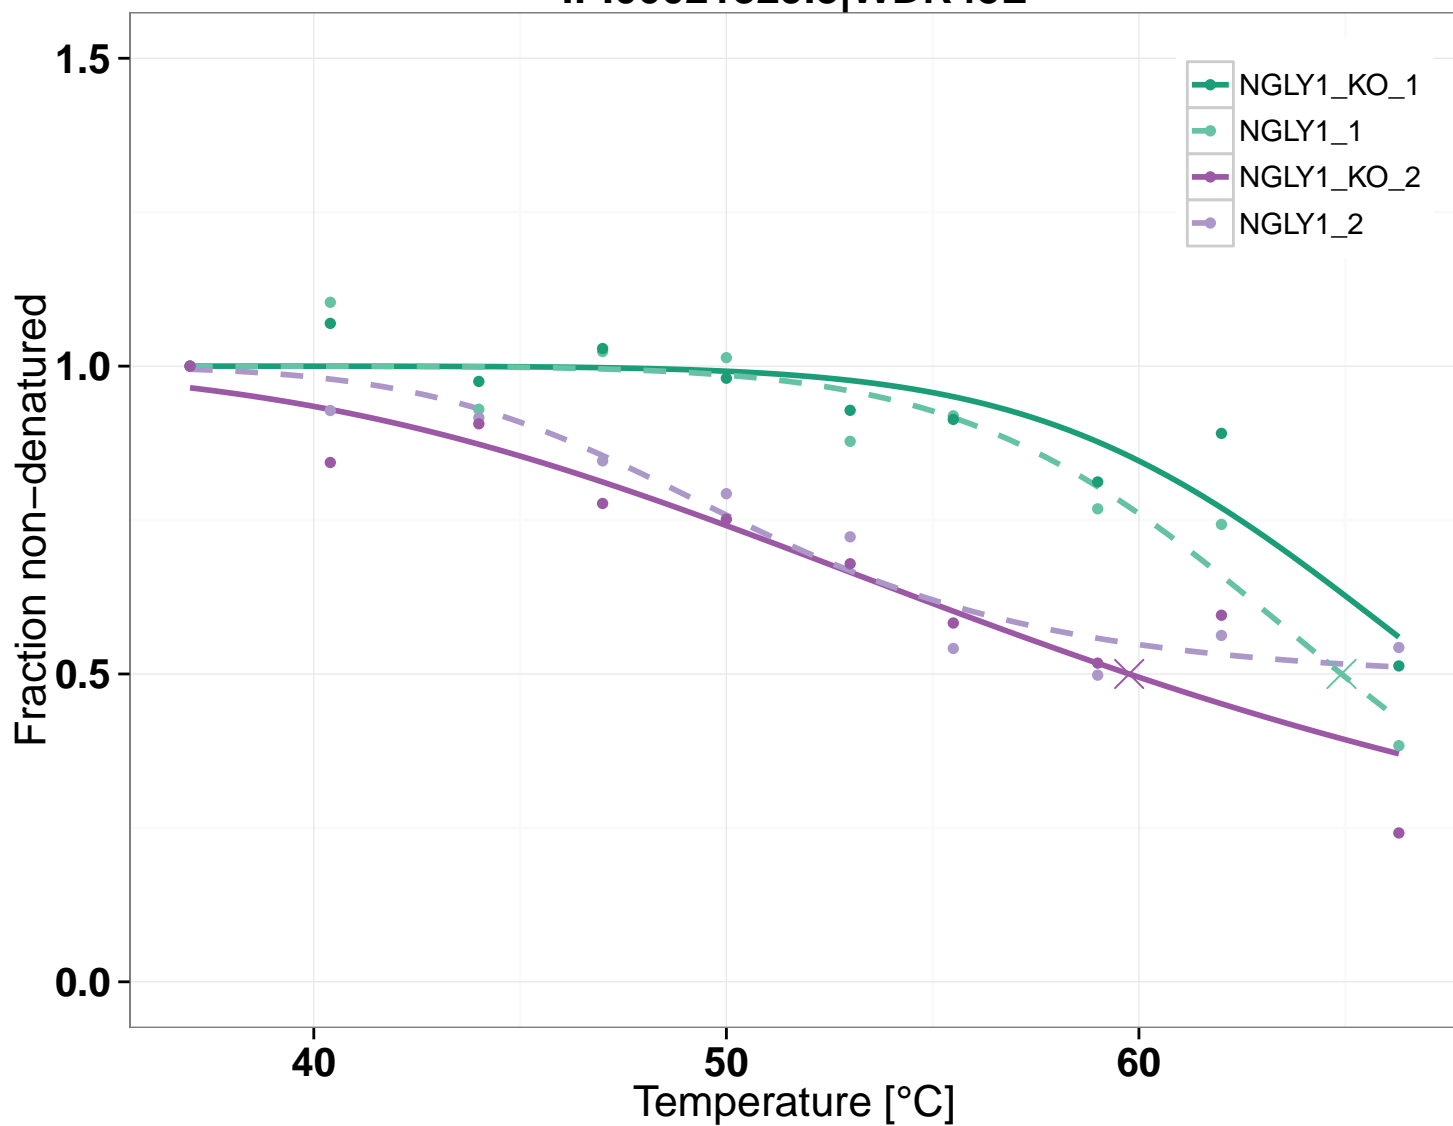

|            | meltPoint | slope  | plateau | R2   |
|------------|-----------|--------|---------|------|
| NGLY1_KO_1 | –         | –0.052 | 0       | 0.86 |
| NGLY1_1    | 64.91     | –0.055 | 0       | 0.91 |
| NGLY1_KO_2 | 59.76     | –0.026 | 0       | 0.89 |
| NGLY1_2    | –         | –0.033 | 0.49    | 0.94 |

Supplement: Supplementary file 8351 [file 1]

# IPI00003392.1|TMEM5

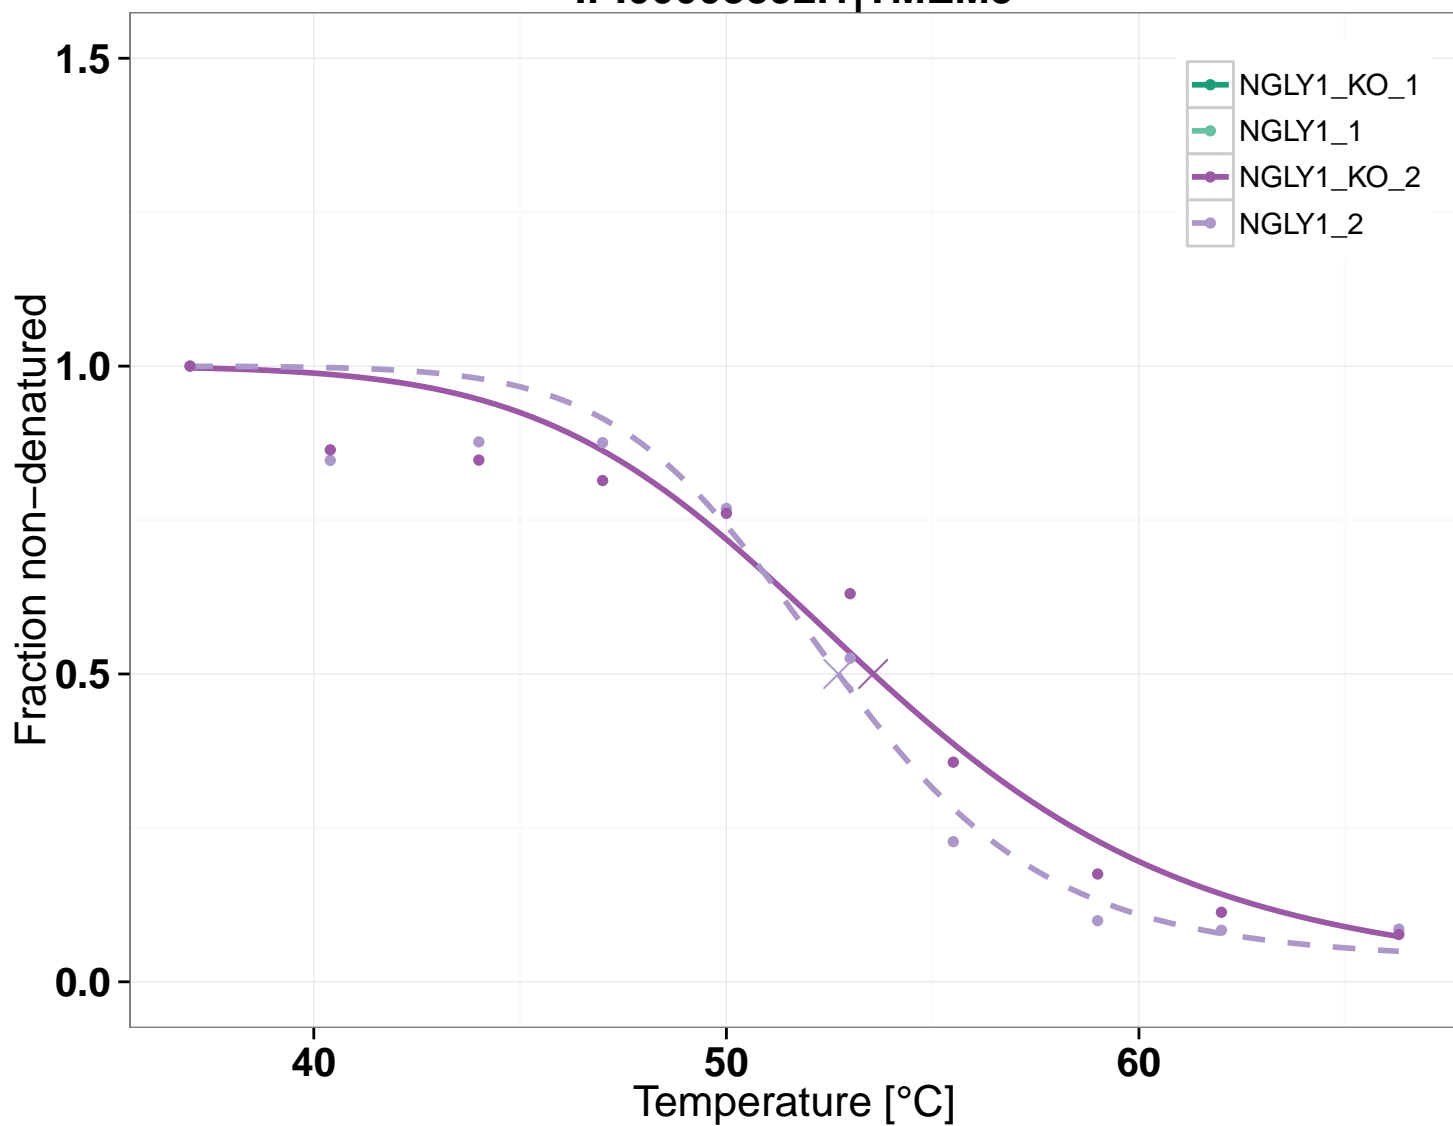

|            | meltPoint | slope  | plateau | R2   |
|------------|-----------|--------|---------|------|
| NGLY1_KO_1 | —         | —      | —       | —    |
| NGLY1_1    | —         | —      | —       | —    |
| NGLY1_KO_2 | 53.56     | -0.063 | 0       | 0.96 |
| NGLY1_2    | 52.71     | -0.092 | 0.03    | 0.97 |

Supplement: Supplementary file 8352 [file 1]

IPI00292567.4|POMGNT1

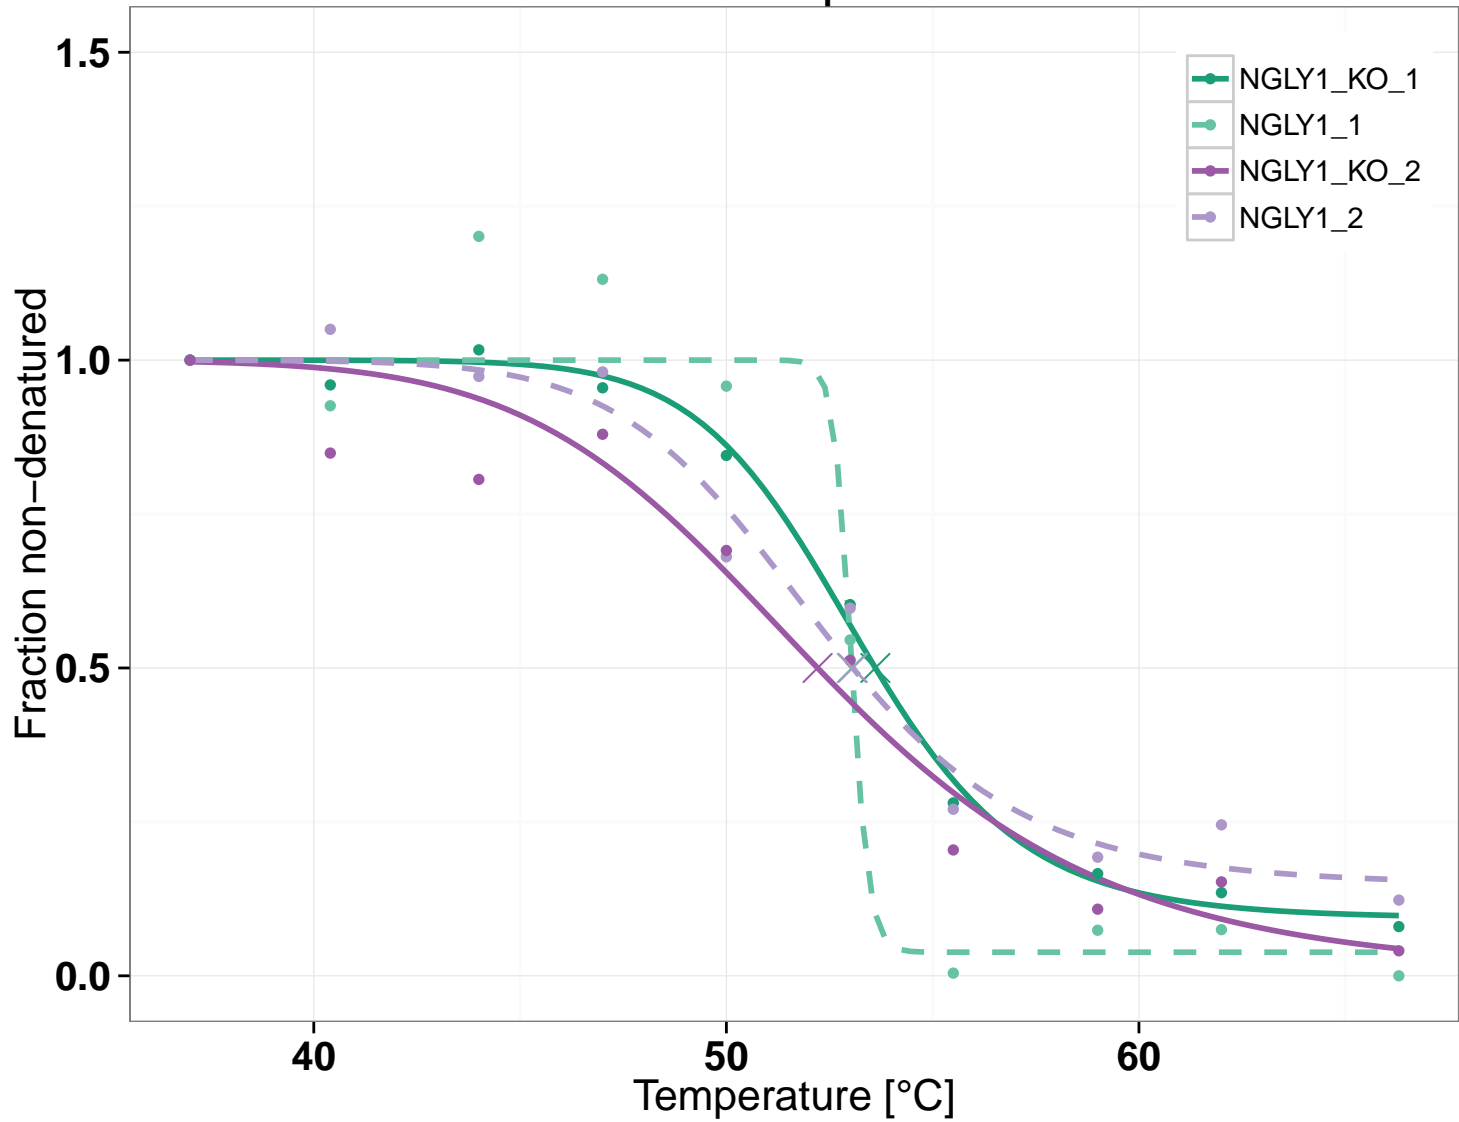

|            | meltPoint | slope  | plateau | R2   |
|------------|-----------|--------|---------|------|
| NGLY1_KO_1 | 53.61     | -0.11  | 0.09    | 1    |
| NGLY1_1    | 53.04     | -1.1   | 0.04    | 0.97 |
| NGLY1_KO_2 | 52.21     | -0.071 | 0       | 0.95 |
| NGLY1_2    | 53.06     | -0.088 | 0.15    | 0.98 |

Supplement: Supplementary file 8353 [file 1]

IPI00151358.2|CLPTM1L

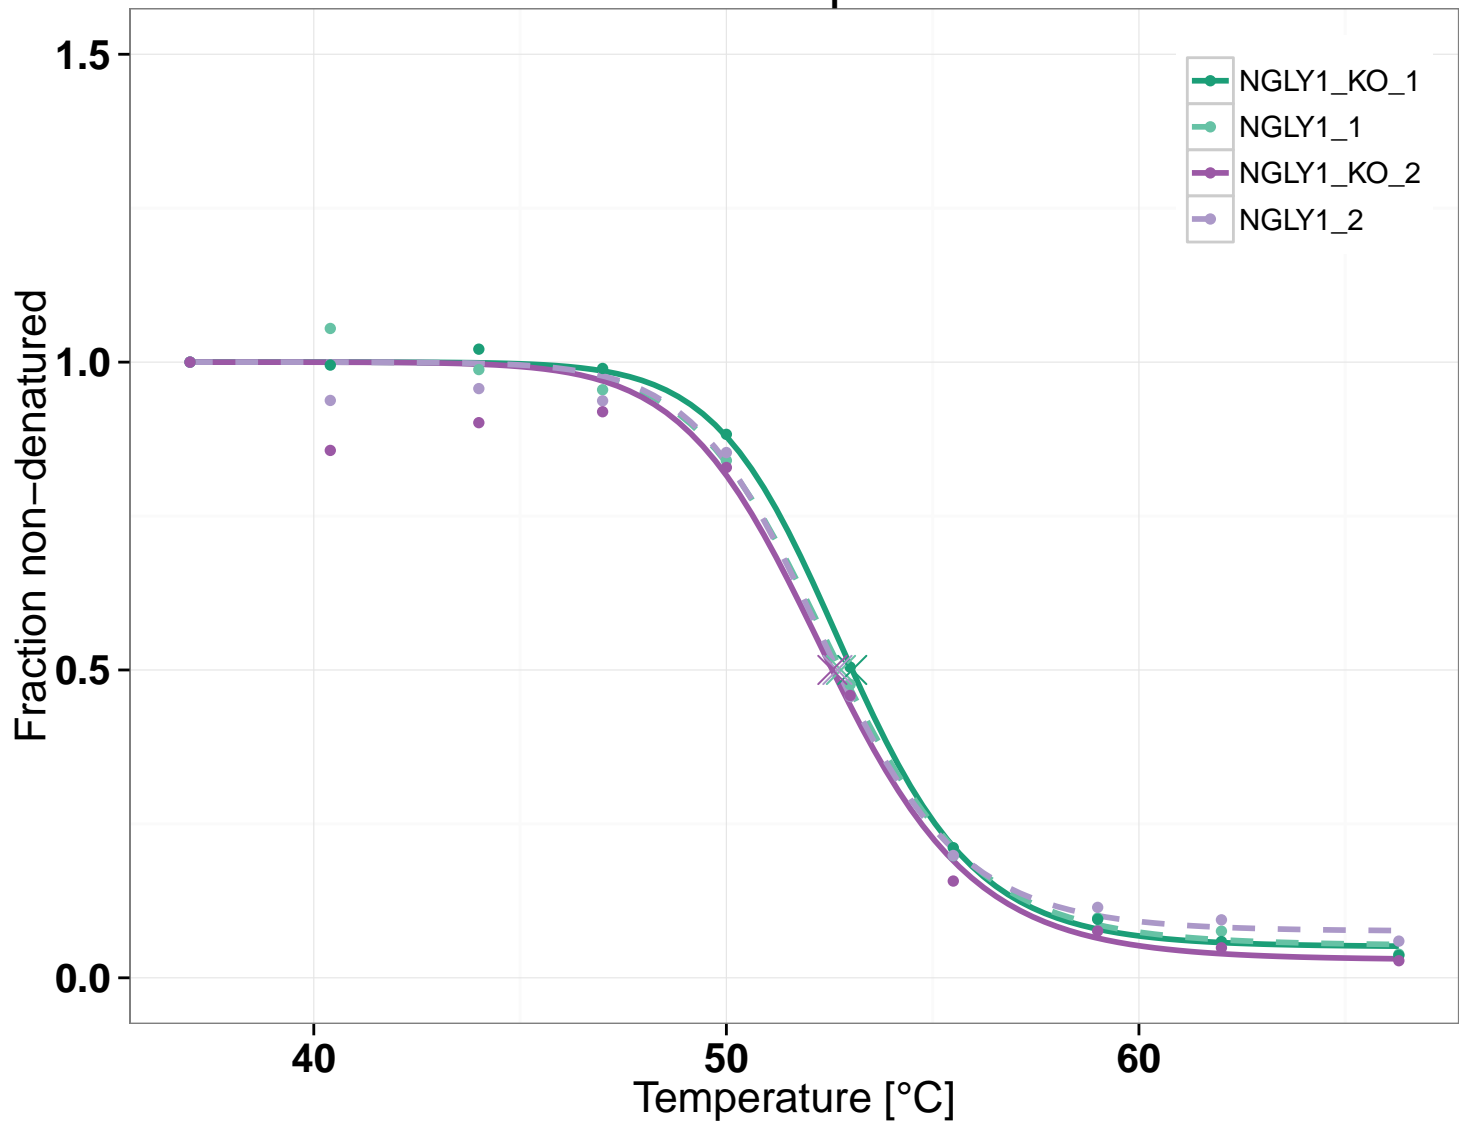

|            | meltPoint | slope | plateau | R2   |
|------------|-----------|-------|---------|------|
| NGLY1_KO_1 | 53.05     | -0.15 | 0.05    | 1    |
| NGLY1_1    | 52.78     | -0.14 | 0.05    | 1    |
| NGLY1_KO_2 | 52.57     | -0.14 | 0.03    | 0.98 |
| NGLY1_2    | 52.69     | -0.14 | 0.08    | 0.99 |

Supplement: Supplementary file 8354 [file 1]

IPI00012893.3|RGS14

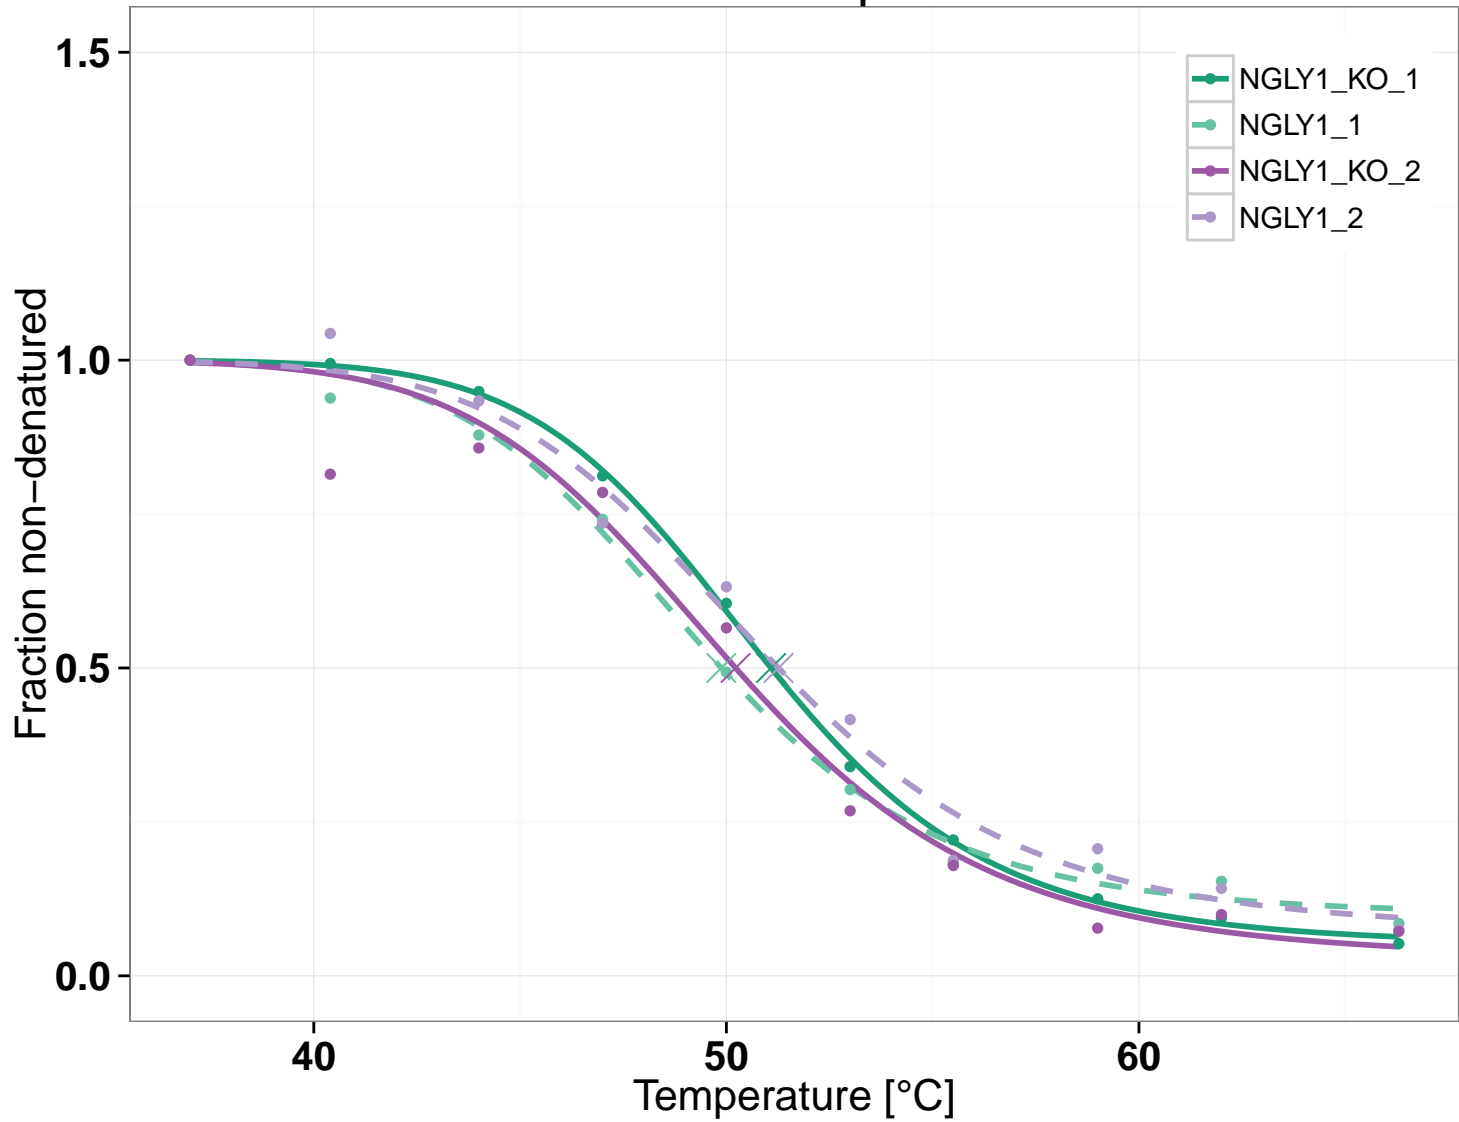

|            | meltPoint | slope  | plateau | R2   |
|------------|-----------|--------|---------|------|
| NGLY1_KO_1 | 51.08     | -0.086 | 0.05    | 1    |
| NGLY1_1    | 49.88     | -0.078 | 0.1     | 1    |
| NGLY1_KO_2 | 50.22     | -0.077 | 0.03    | 0.97 |
| NGLY1_2    | 51.26     | -0.073 | 0.07    | 0.99 |

Supplement: Supplementary file 8355 [file 1]

# IPI00396329.1|BXDC1

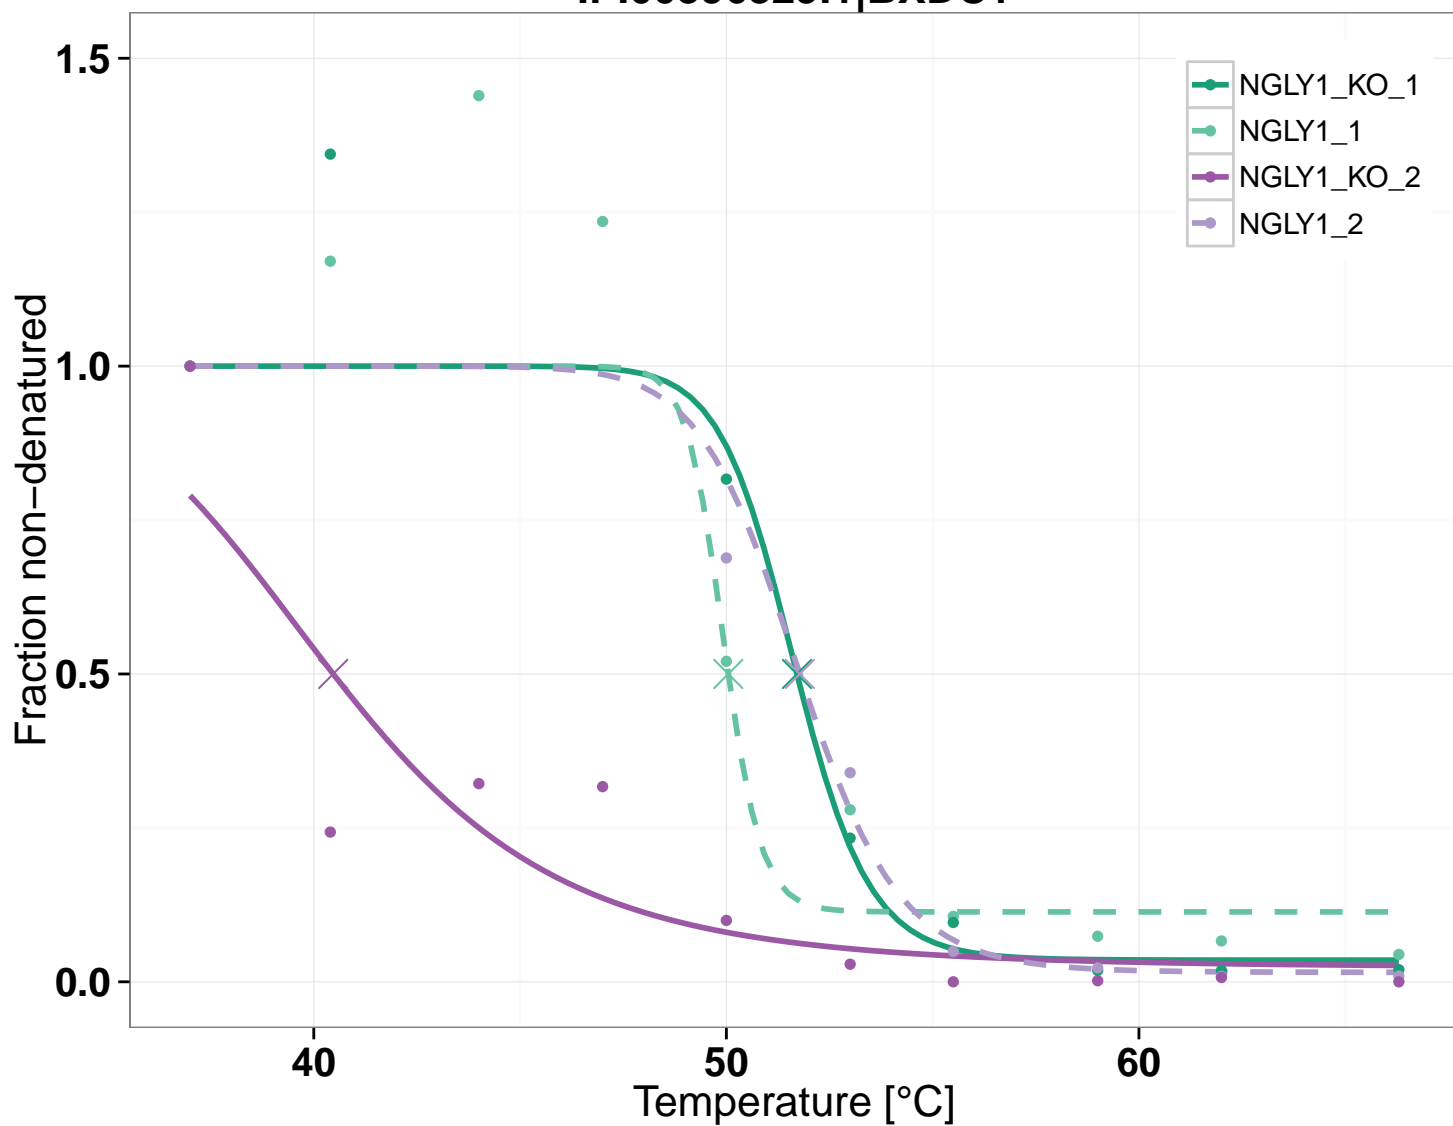

|            | meltPoint | slope  | plateau | R2   |
|------------|-----------|--------|---------|------|
| NGLY1_KO_1 | 51.71     | -0.27  | 0.04    | 0.72 |
| NGLY1_1    | 50.05     | -0.49  | 0.11    | 0.89 |
| NGLY1_KO_2 | 40.47     | -0.089 | 0.02    | 0.82 |
| NGLY1_2    | 51.78     | -0.2   | 0.02    | 0.66 |

Supplement: Supplementary file 8356 [file 1]

IPI00166036.3|LRRC8B

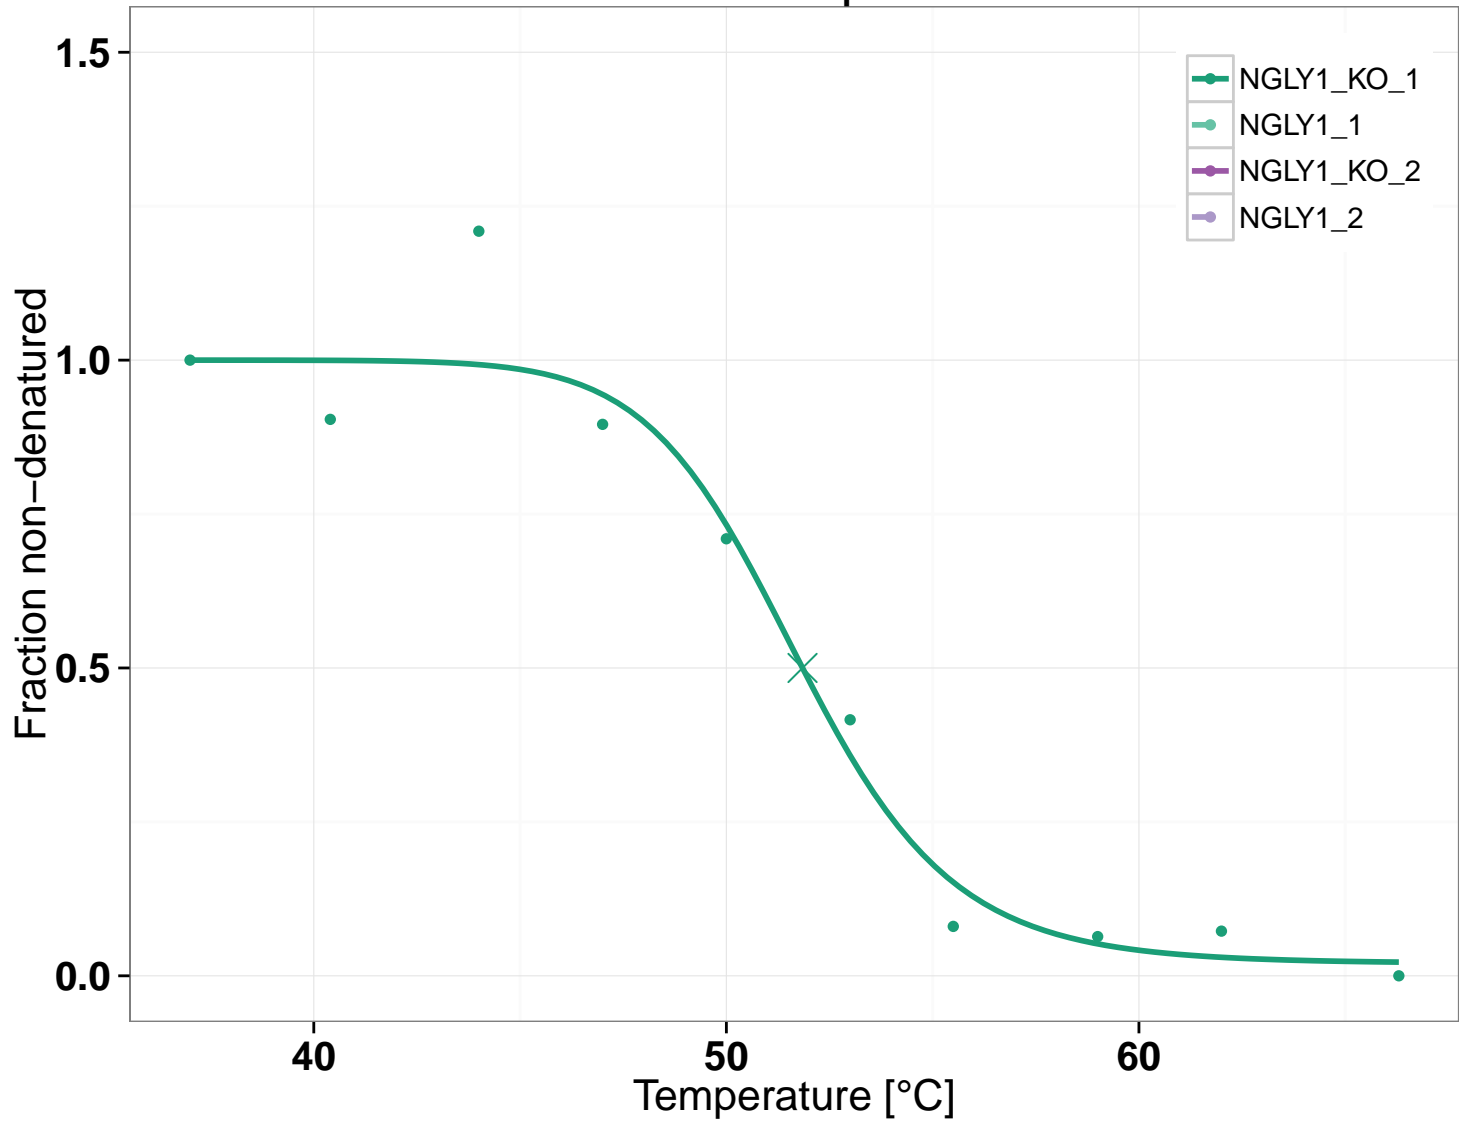

|            | meltPoint | slope | plateau | R2   |
|------------|-----------|-------|---------|------|
| NGLY1_KO_1 | 51.85     | -0.13 | 0.02    | 0.96 |
| NGLY1_1    | -         | -     | -       | -    |
| NGLY1_KO_2 | -         | -     | -       | -    |
| NGLY1_2    | -         | -     | -       | -    |

Supplement: Supplementary file 8357 [file 1]

IPI00024658.3|OTUD7B

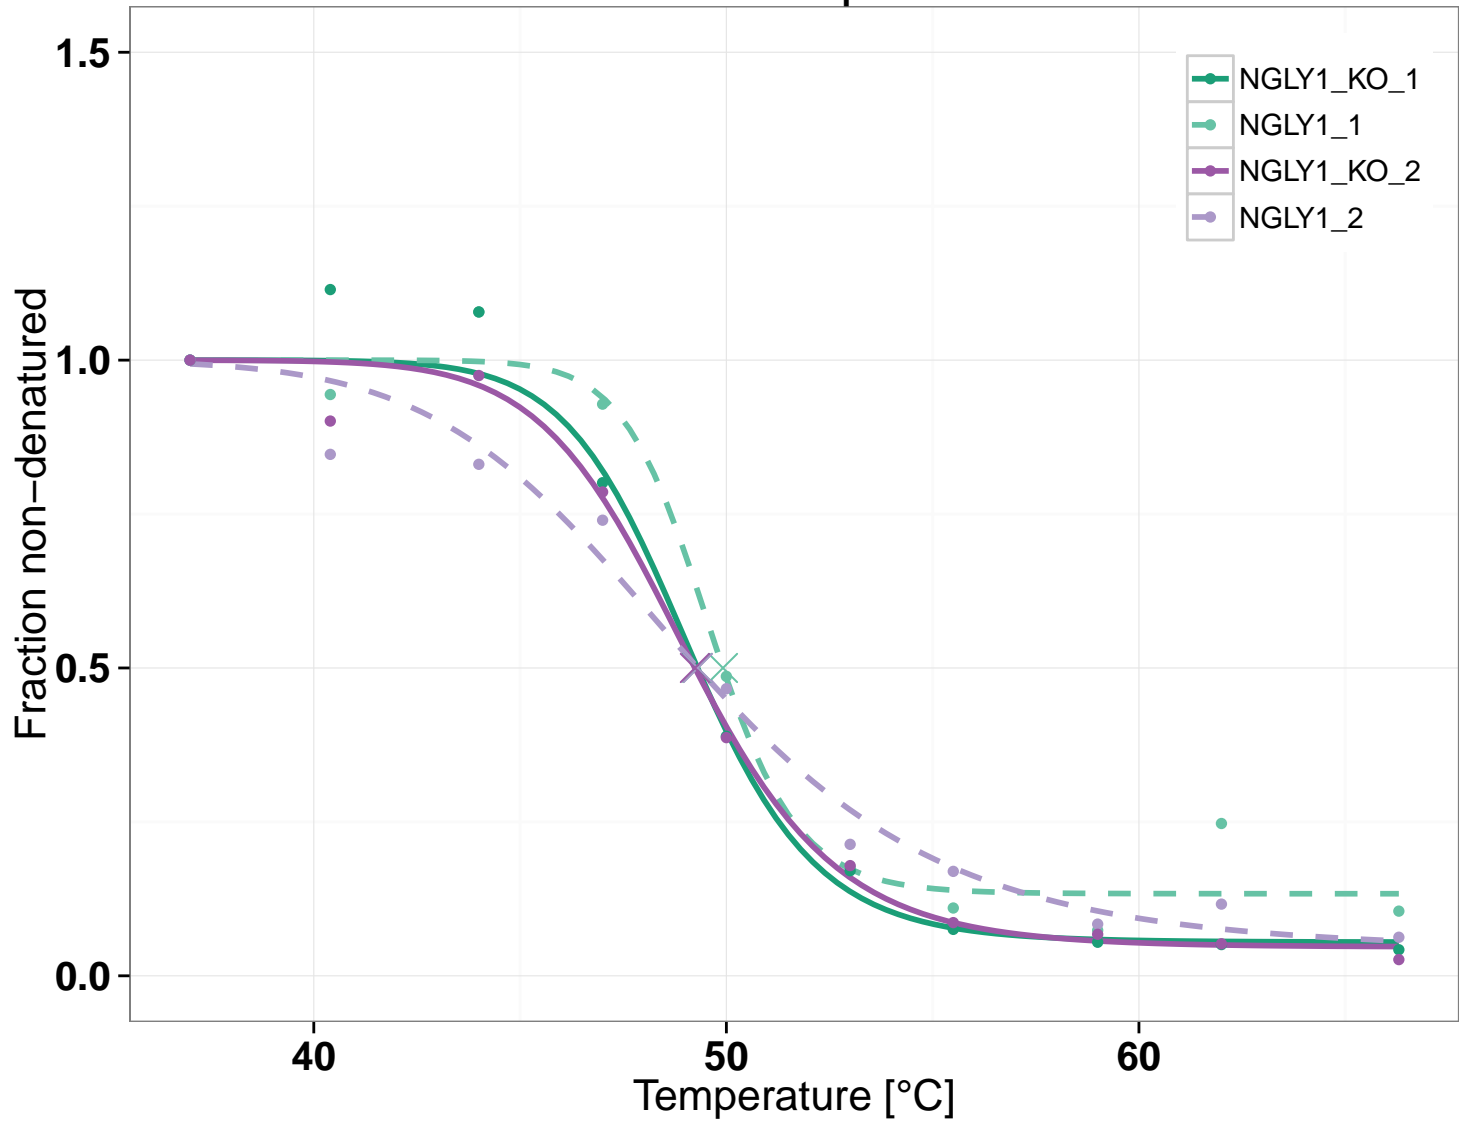

|            | meltPoint | slope  | plateau | R2   |
|------------|-----------|--------|---------|------|
| NGLY1_KO_1 | 49.3      | -0.16  | 0.05    | 0.99 |
| NGLY1_1    | 49.92     | -0.21  | 0.13    | 0.98 |
| NGLY1_KO_2 | 49.24     | -0.13  | 0.05    | 0.99 |
| NGLY1_2    | 49.31     | -0.077 | 0.04    | 0.98 |

Supplement: Supplementary file 8358 [file 1]

IPI00787501.3|ATG4B

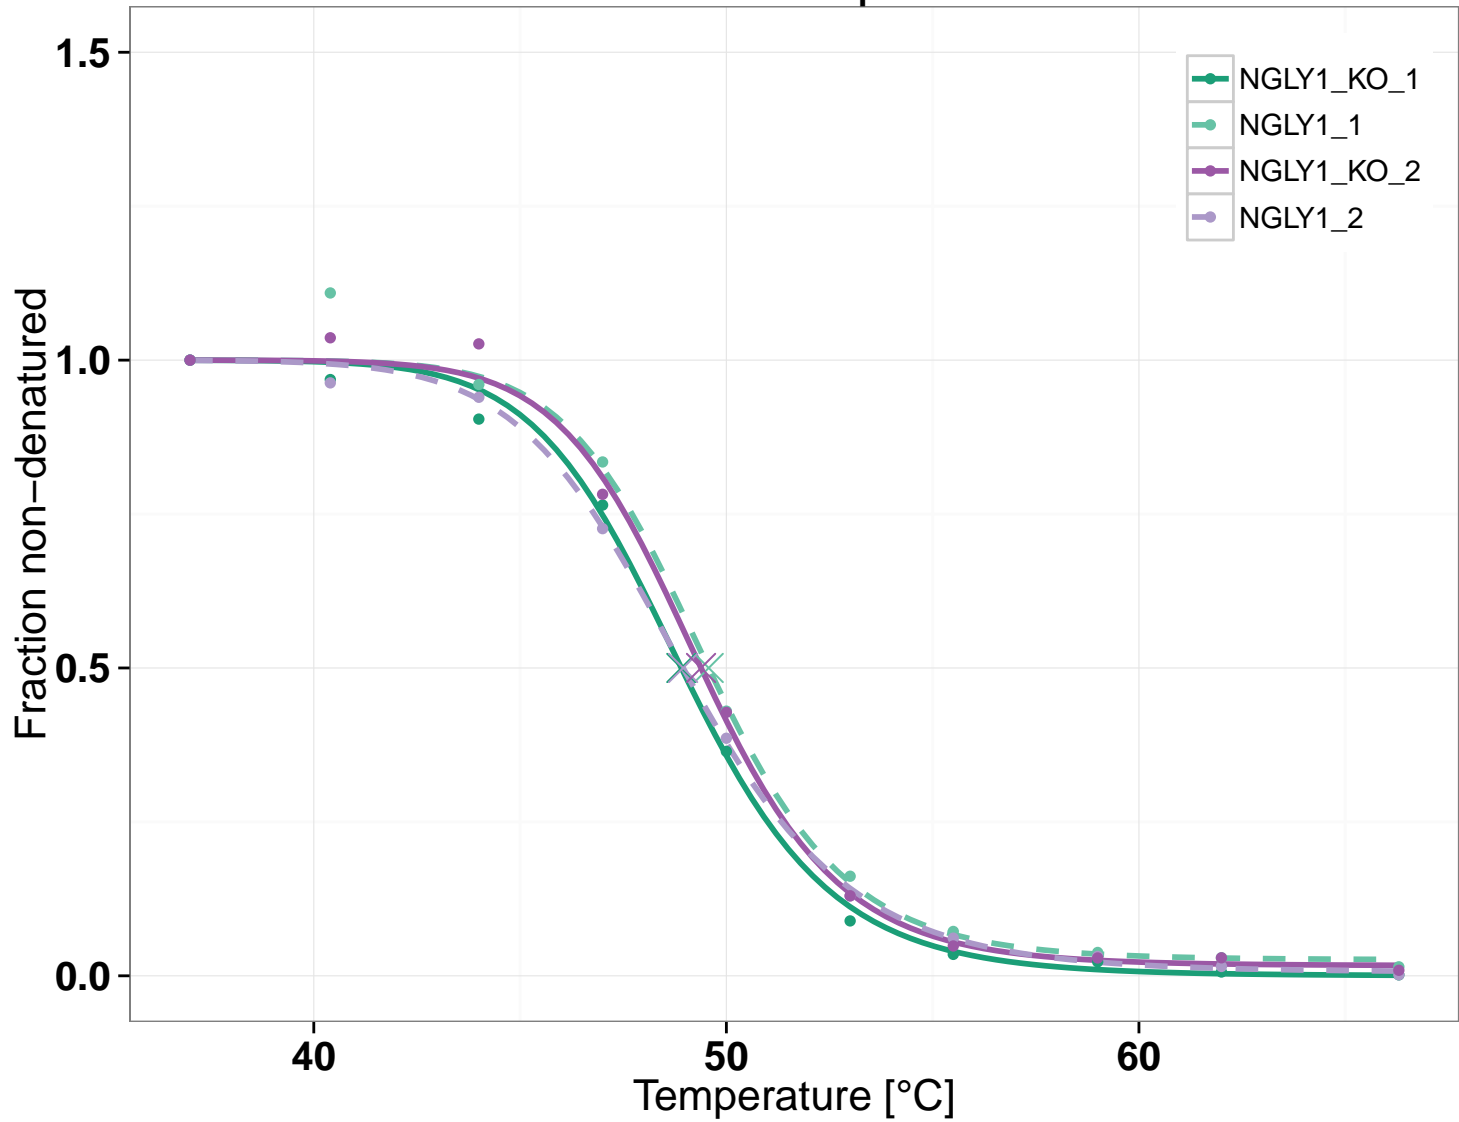

|            | meltPoint | slope | plateau | R2   |
|------------|-----------|-------|---------|------|
| NGLY1_KO_1 | 48.91     | -0.14 | 0       | 1    |
| NGLY1_1    | 49.57     | -0.14 | 0.03    | 0.99 |
| NGLY1_KO_2 | 49.39     | -0.14 | 0.02    | 1    |
| NGLY1_2    | 48.95     | -0.12 | 0.01    | 1    |

Supplement: Supplementary file 8359 [file 1]

IPI00550808.2|C1ORF63

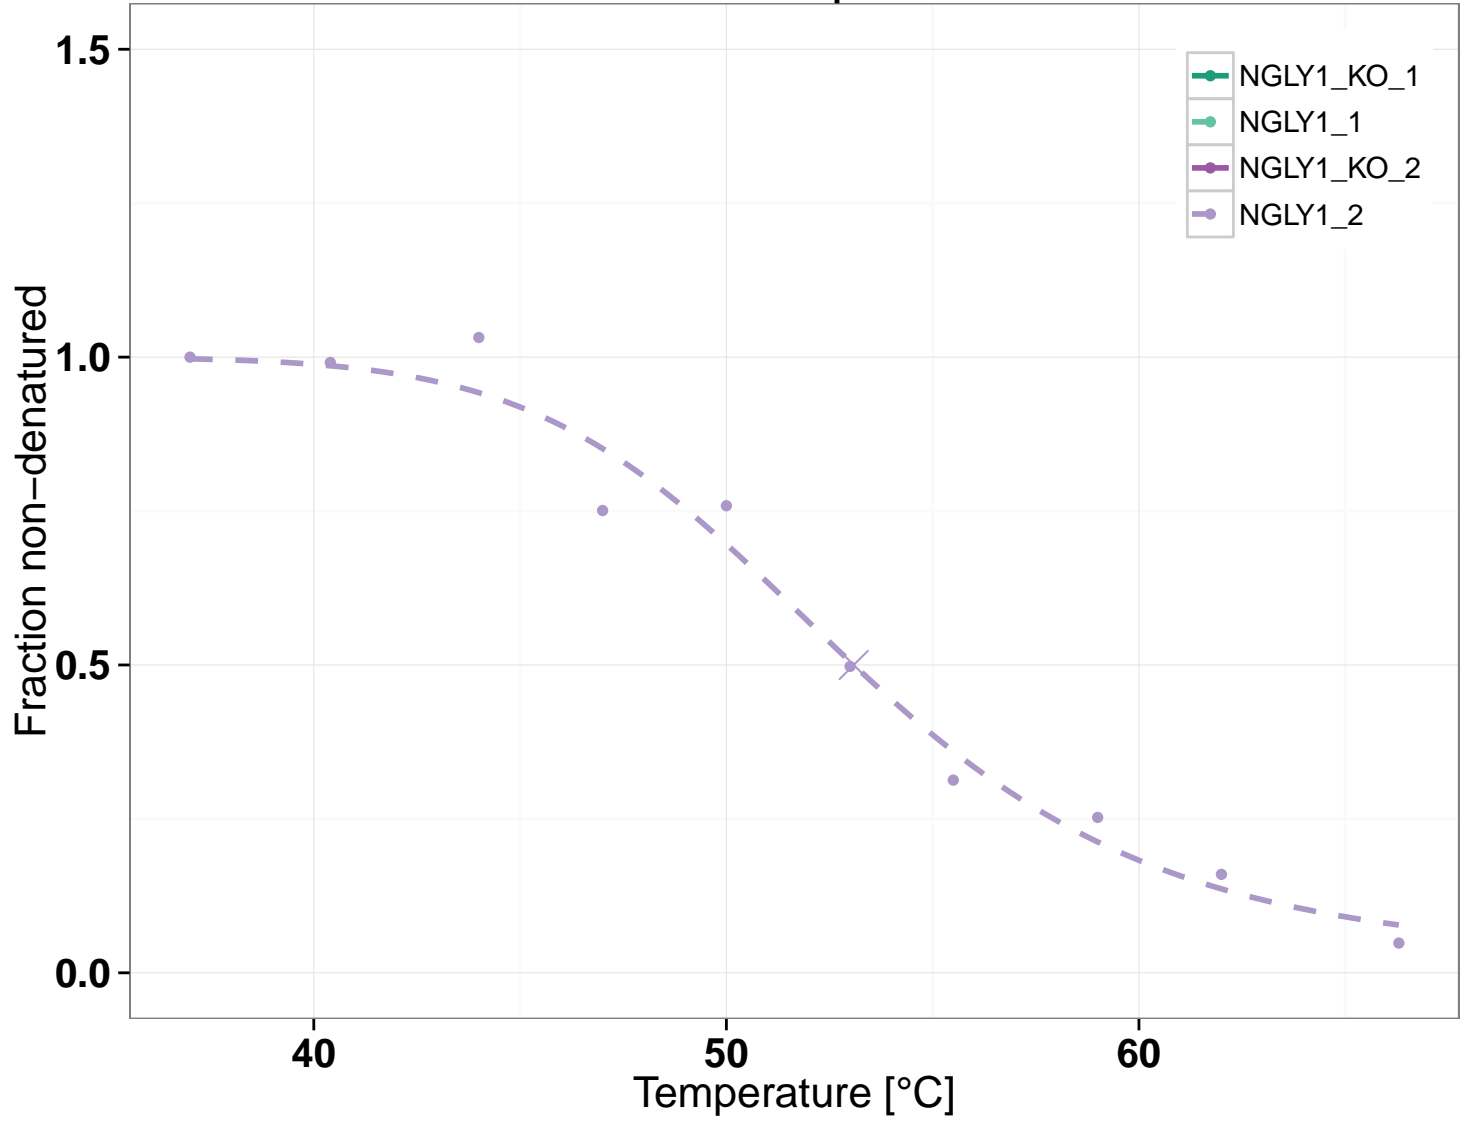

|            | meltPoint | slope  | plateau | R2   |
|------------|-----------|--------|---------|------|
| NGLY1_KO_1 | —         | —      | —       | —    |
| NGLY1_1    | —         | —      | —       | —    |
| NGLY1_KO_2 | —         | —      | —       | —    |
| NGLY1_2    | 53.09     | −0.065 | 0.02    | 0.98 |

Supplement: Supplementary file 8360 [file 1]

IPI00007927.4|SMC2

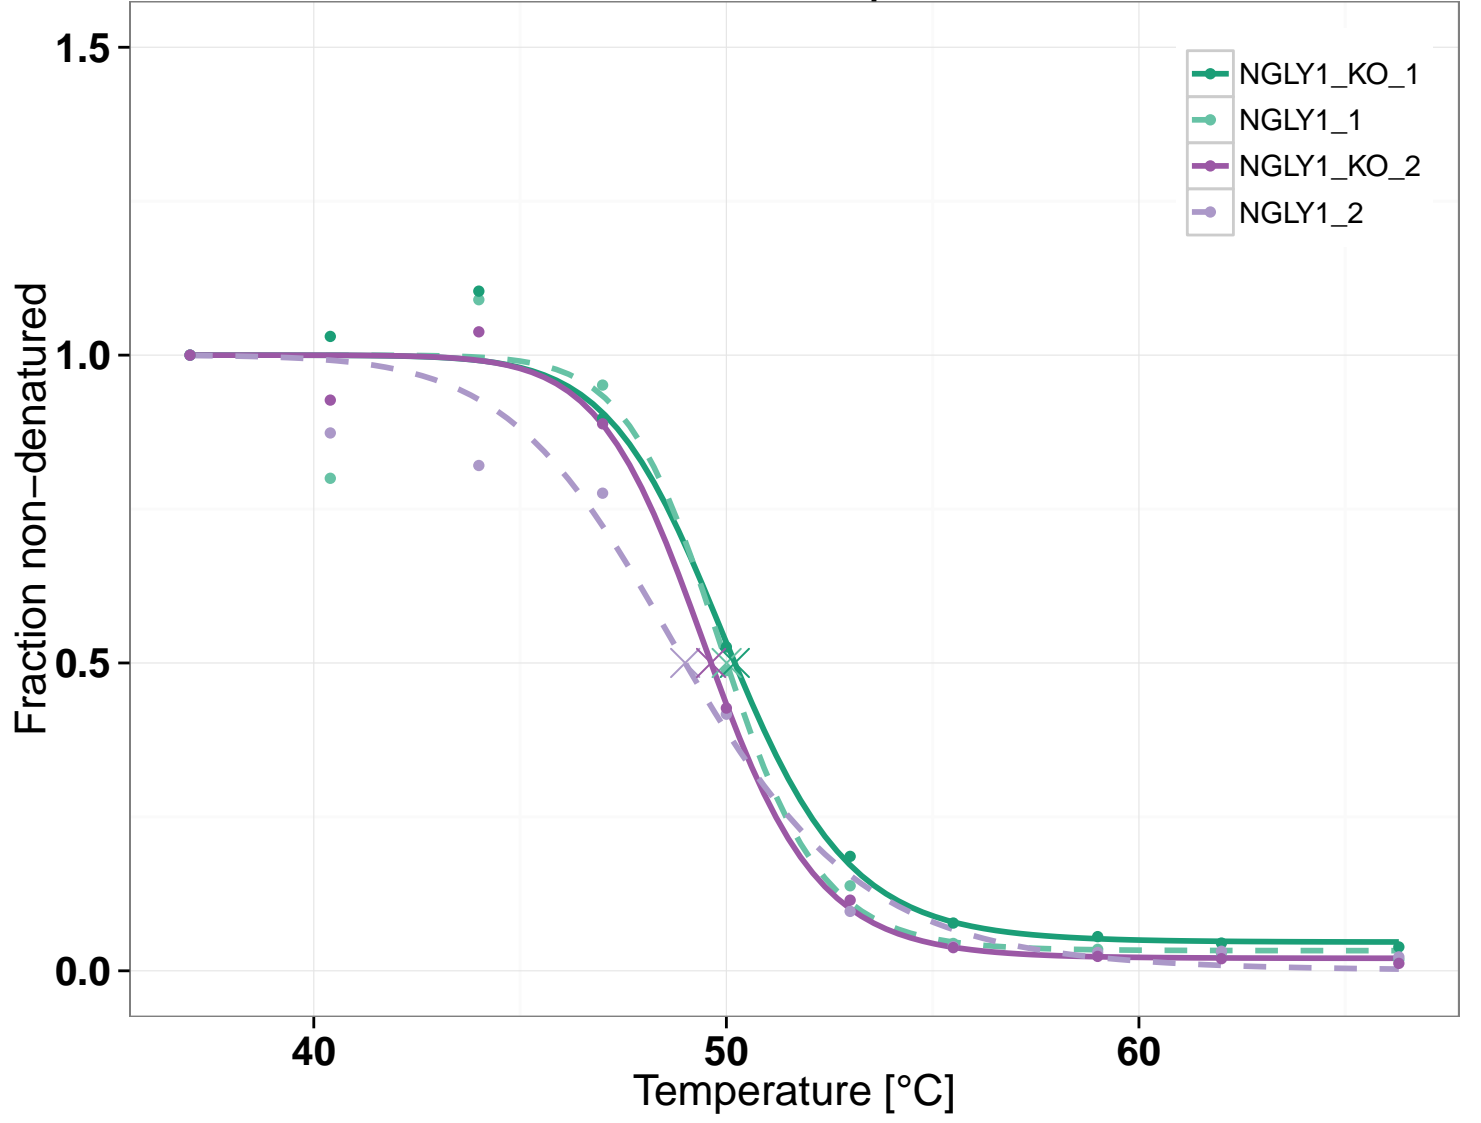

|            | meltPoint | slope | plateau | R2   |
|------------|-----------|-------|---------|------|
| NGLY1_KO_1 | 50.2      | -0.16 | 0.05    | 0.99 |
| NGLY1_1    | 50.01     | -0.2  | 0.03    | 0.97 |
| NGLY1_KO_2 | 49.63     | -0.18 | 0.02    | 1    |
| NGLY1_2    | 49        | -0.12 | 0       | 0.98 |

Supplement: Supplementary file 8361 [file 1]

IPI00017231.3|NRSN2

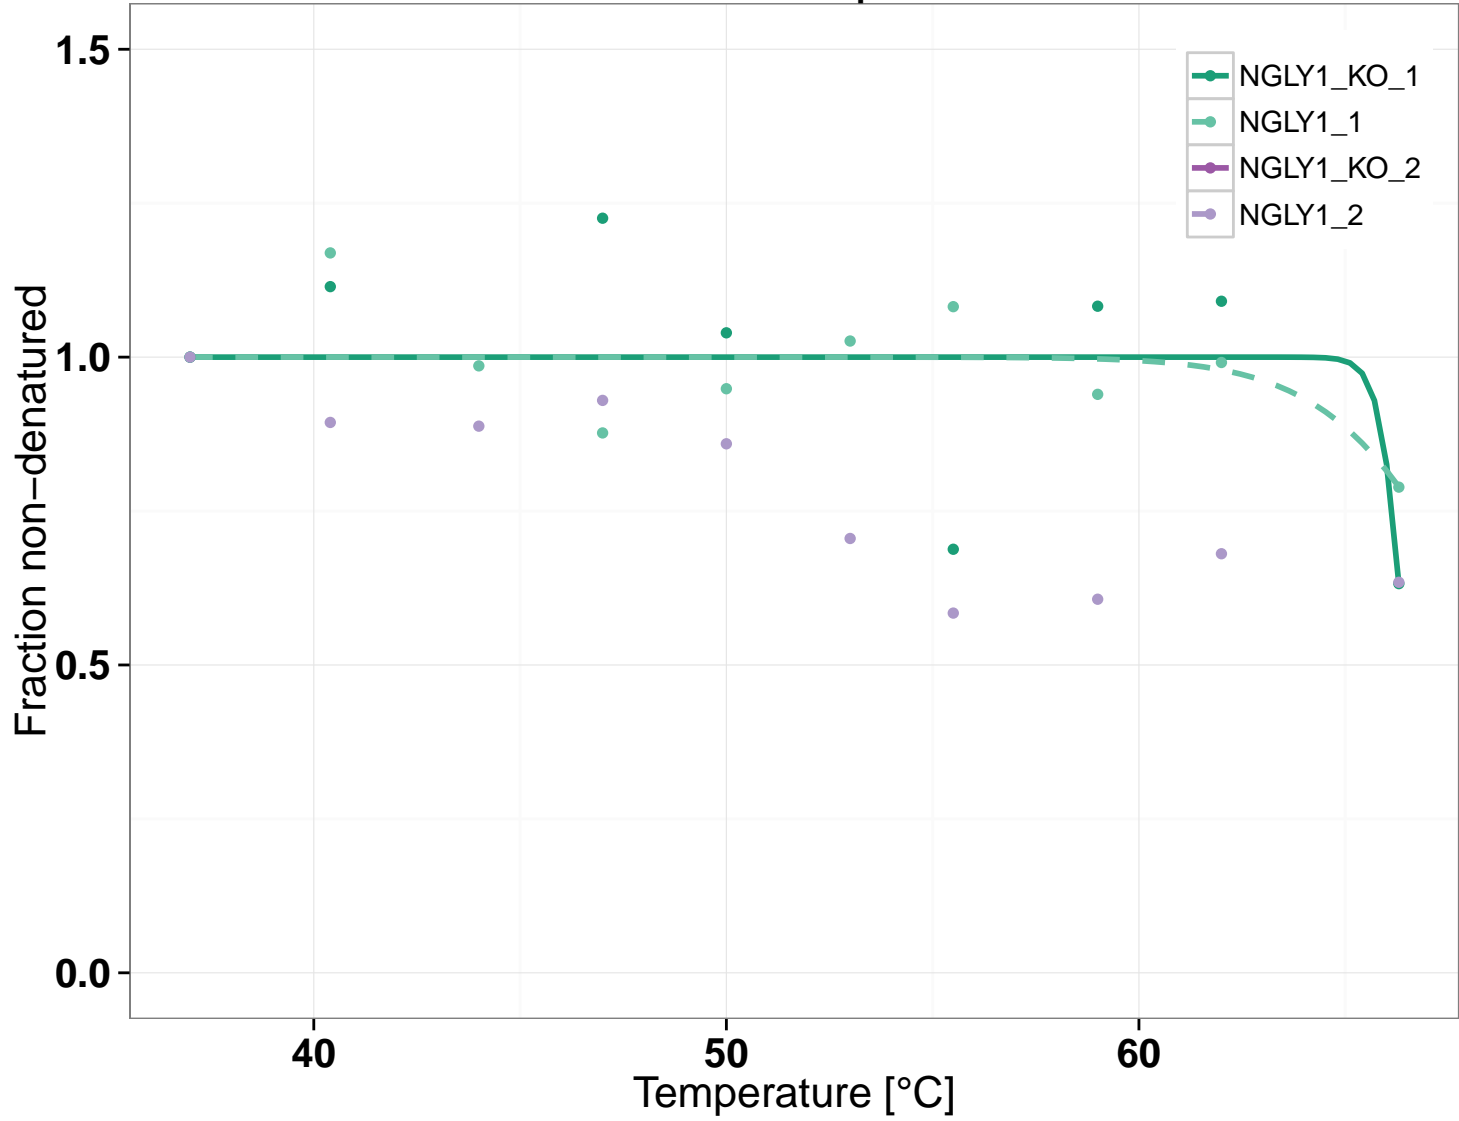

|            | meltPoint | slope | plateau | R2    |
|------------|-----------|-------|---------|-------|
| NGLY1_KO_1 | -         | -     | 0       | -0.15 |
| NGLY1_1    | -         | -     | 0       | 0.42  |
| NGLY1_KO_2 | -         | -     | -       | -     |
| NGLY1_2    | -         | -     | -       | -     |

Supplement: Supplementary file 8362 [file 1]

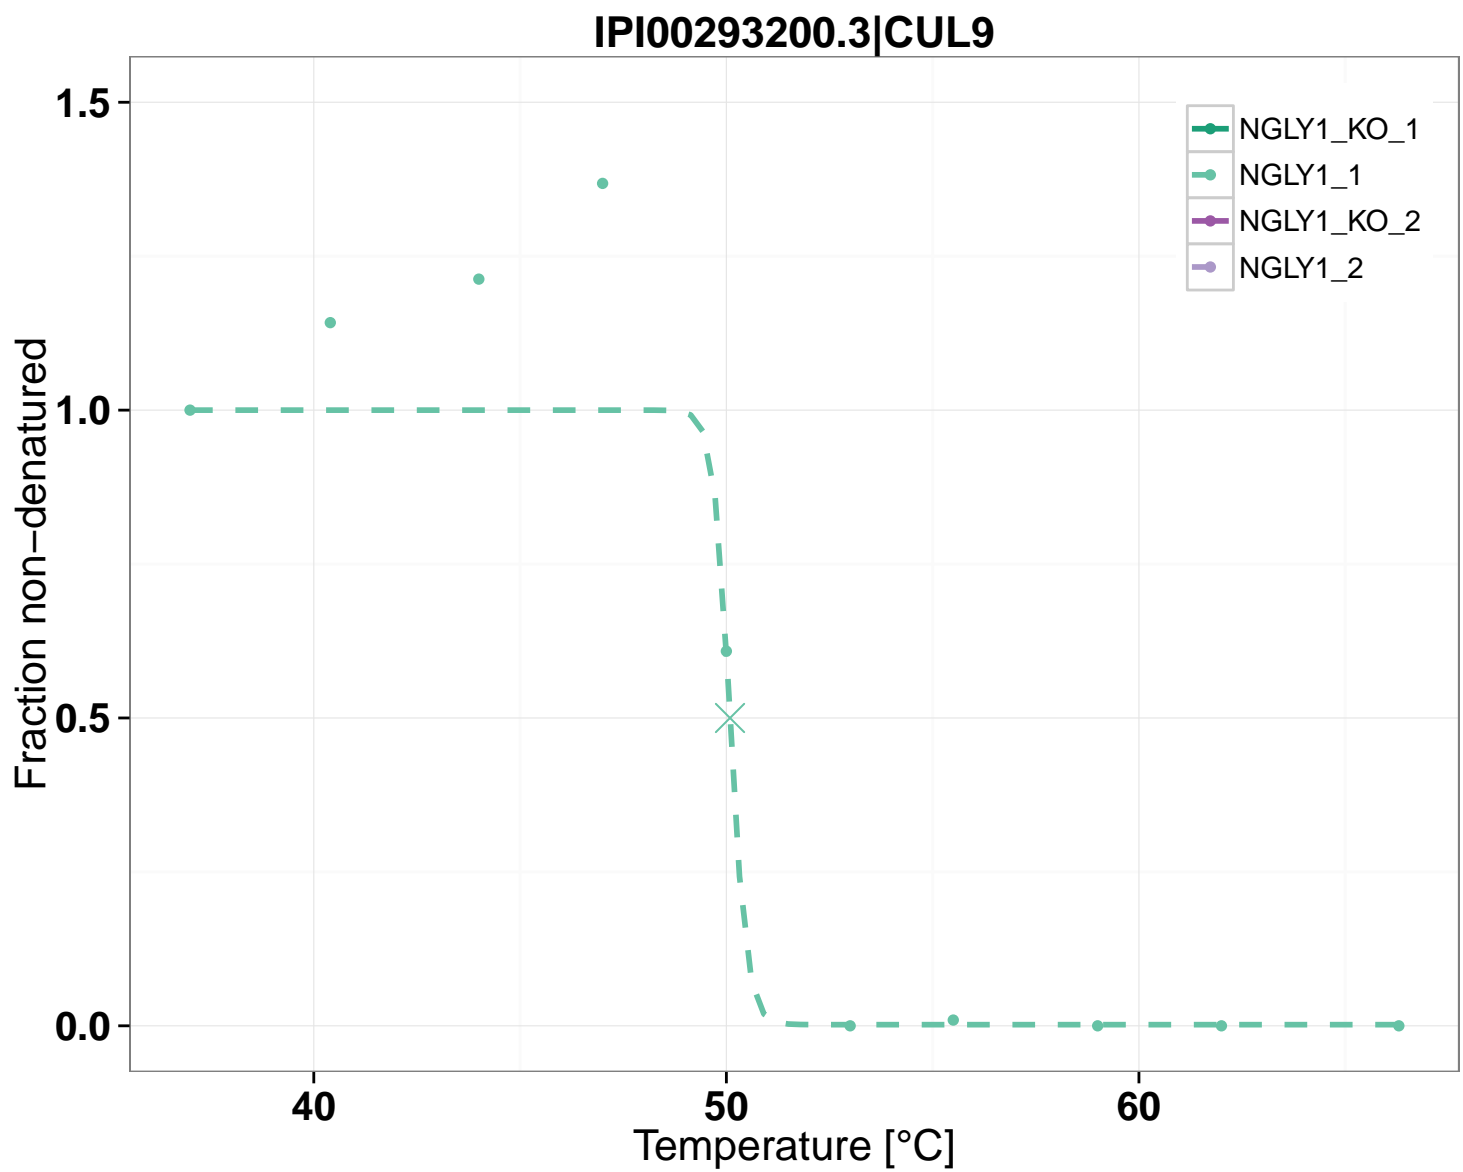

|            | meltPoint | slope | plateau | R2   |
|------------|-----------|-------|---------|------|
| NGLY1_KO_1 | -         | -     | -       | -    |
| NGLY1_1    | 50.09     | -1.2  | 0       | 0.94 |
| NGLY1_KO_2 | -         | -     | -       | -    |
| NGLY1_2    | -         | -     | -       | -    |

Supplement: Supplementary file 8363 [file 1]

IPI00064428.3|ZBTB45

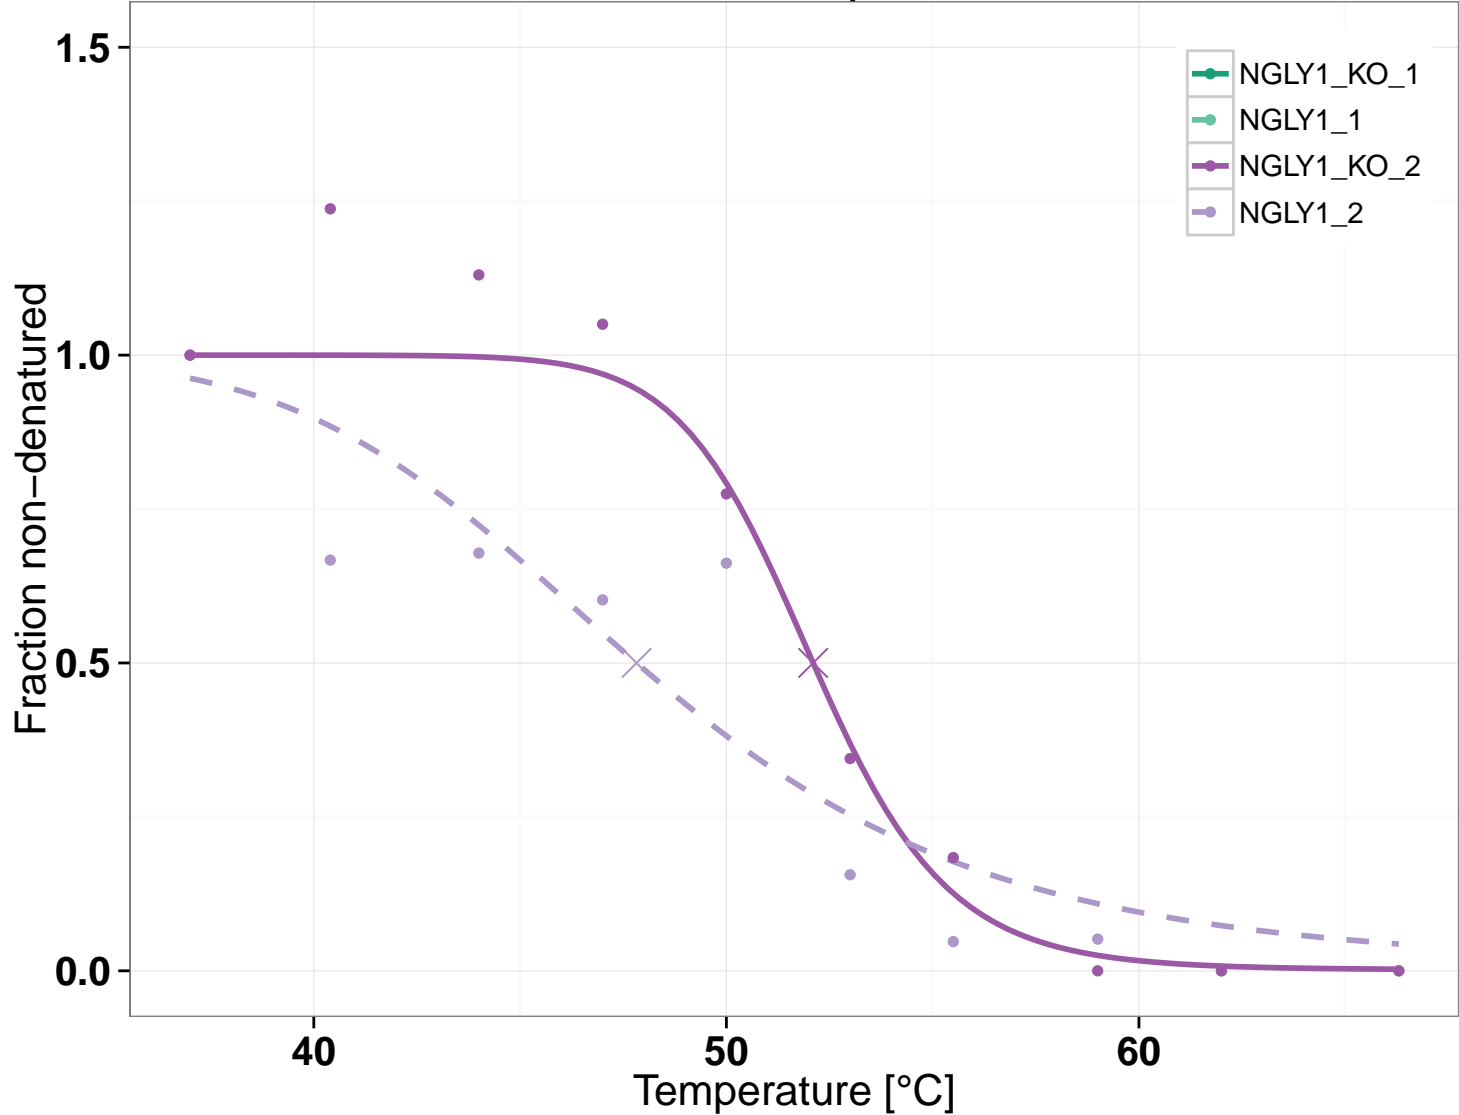

|            | meltPoint | slope | plateau | R2   |
|------------|-----------|-------|---------|------|
| NGLY1_KO_1 | —         | —     | —       | —    |
| NGLY1_1    | —         | —     | —       | —    |
| NGLY1_KO_2 | 52.1      | -0.15 | 0       | 0.96 |
| NGLY1_2    | 47.82     | -0.06 | 0       | 0.86 |

Supplement: Supplementary file 8364 [file 1]

IPI00744772.1|MRPS17

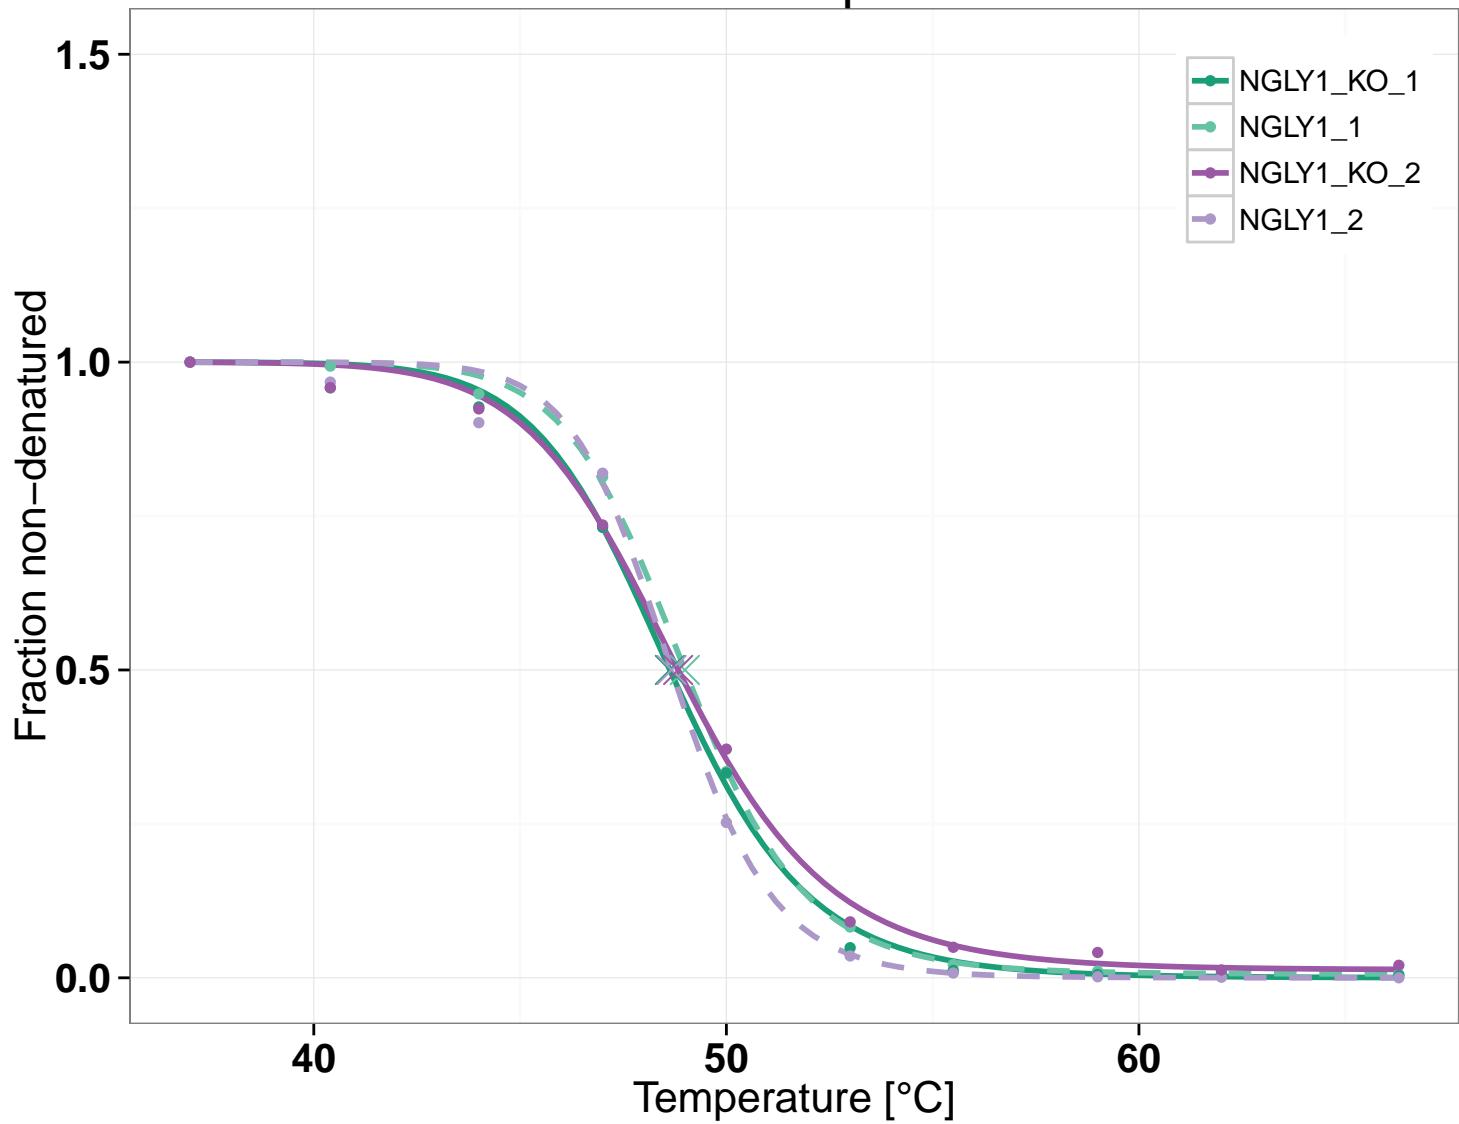

|            | meltPoint | slope | plateau | R2 |
|------------|-----------|-------|---------|----|
| NGLY1_KO_1 | 48.63     | -0.15 | 0       | 1  |
| NGLY1_1    | 48.99     | -0.17 | 0.01    | 1  |
| NGLY1_KO_2 | 48.83     | -0.13 | 0.01    | 1  |
| NGLY1_2    | 48.67     | -0.2  | 0       | 1  |

Supplement: Supplementary file 8365 [file 1]

# IPI00030770.1|PSMG1

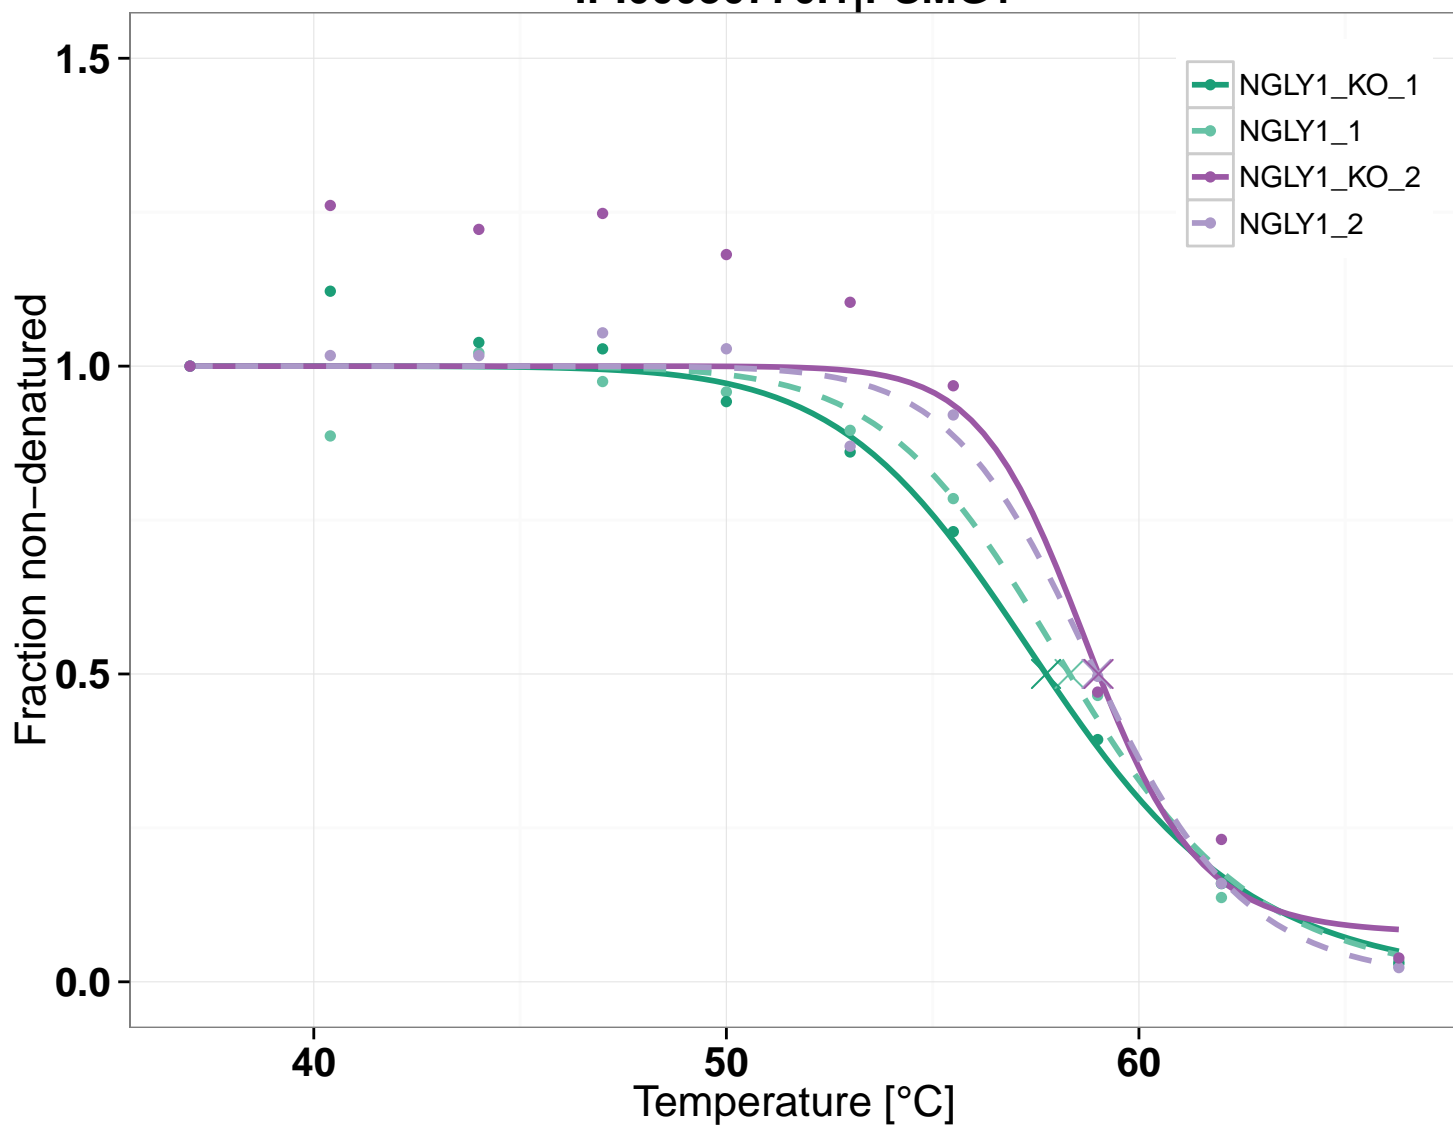

|            | meltPoint | slope | plateau | R2   |
|------------|-----------|-------|---------|------|
| NGLY1_KO_1 | 57.75     | -0.1  | 0       | 0.99 |
| NGLY1_1    | 58.32     | -0.11 | 0       | 0.98 |
| NGLY1_KO_2 | 59.02     | -0.17 | 0.08    | 0.87 |
| NGLY1_2    | 58.97     | -0.14 | 0       | 0.99 |

Supplement: Supplementary file 8366 [file 1]

IPI00295066.4|MRPL48

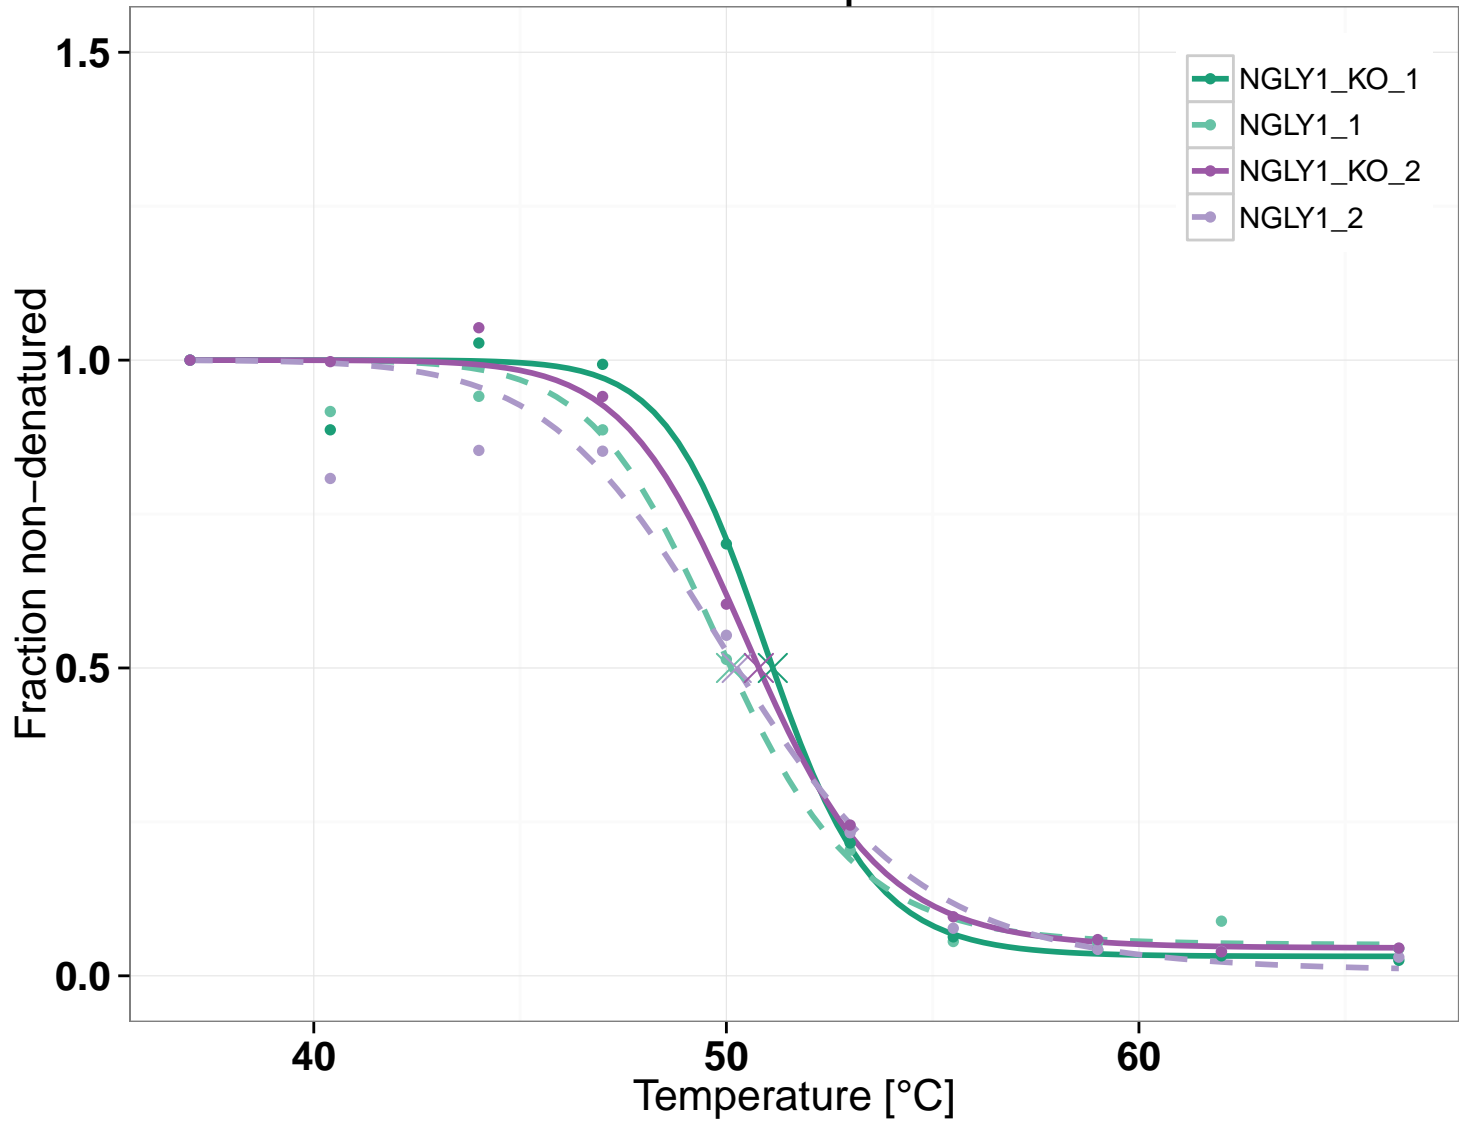

|            | meltPoint | slope | plateau | R2   |
|------------|-----------|-------|---------|------|
| NGLY1_KO_1 | 51.13     | -0.19 | 0.03    | 0.99 |
| NGLY1_1    | 50.11     | -0.15 | 0.05    | 0.99 |
| NGLY1_KO_2 | 50.79     | -0.15 | 0.05    | 1    |
| NGLY1_2    | 50.25     | -0.11 | 0.01    | 0.97 |

Supplement: Supplementary file 8367 [file 1]

IPI00798215.1|UNC119

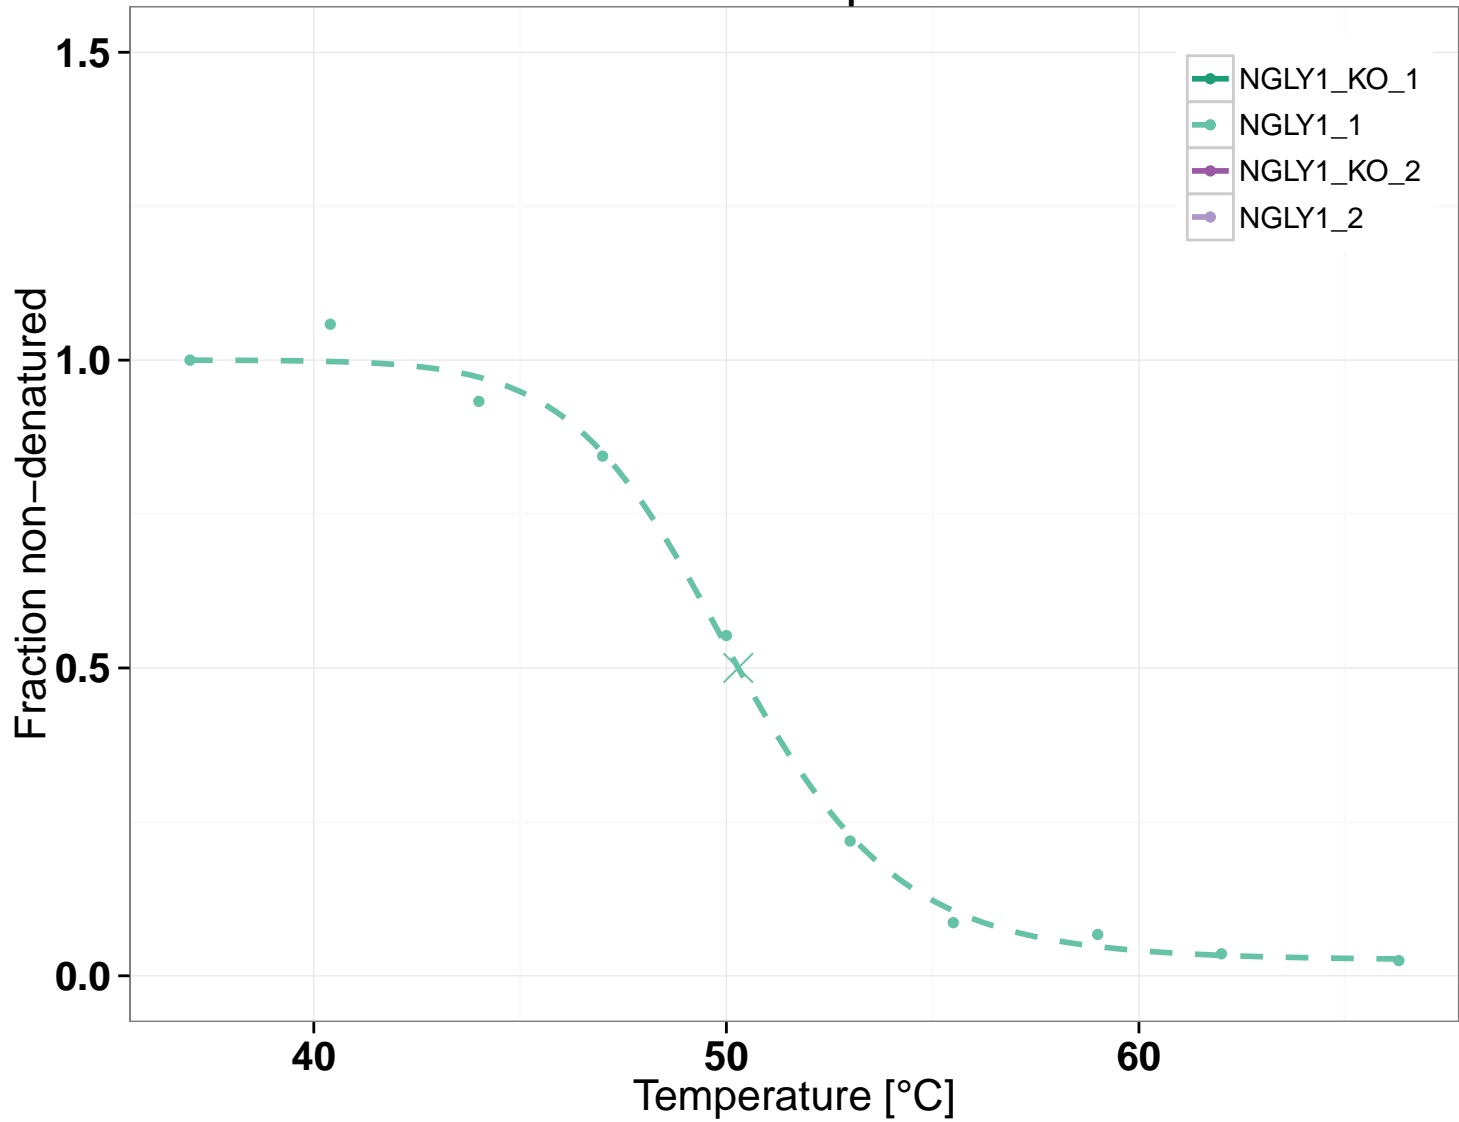

|            | meltPoint | slope | plateau | R2 |
|------------|-----------|-------|---------|----|
| NGLY1_KO_1 | -         | -     | -       | -  |
| NGLY1_1    | 50.29     | -0.12 | 0.03    | 1  |
| NGLY1_KO_2 | -         | -     | -       | -  |
| NGLY1_2    | -         | -     | -       | -  |

Supplement: Supplementary file 8368 [file 1]

# IPI00303962.3|PPCDC

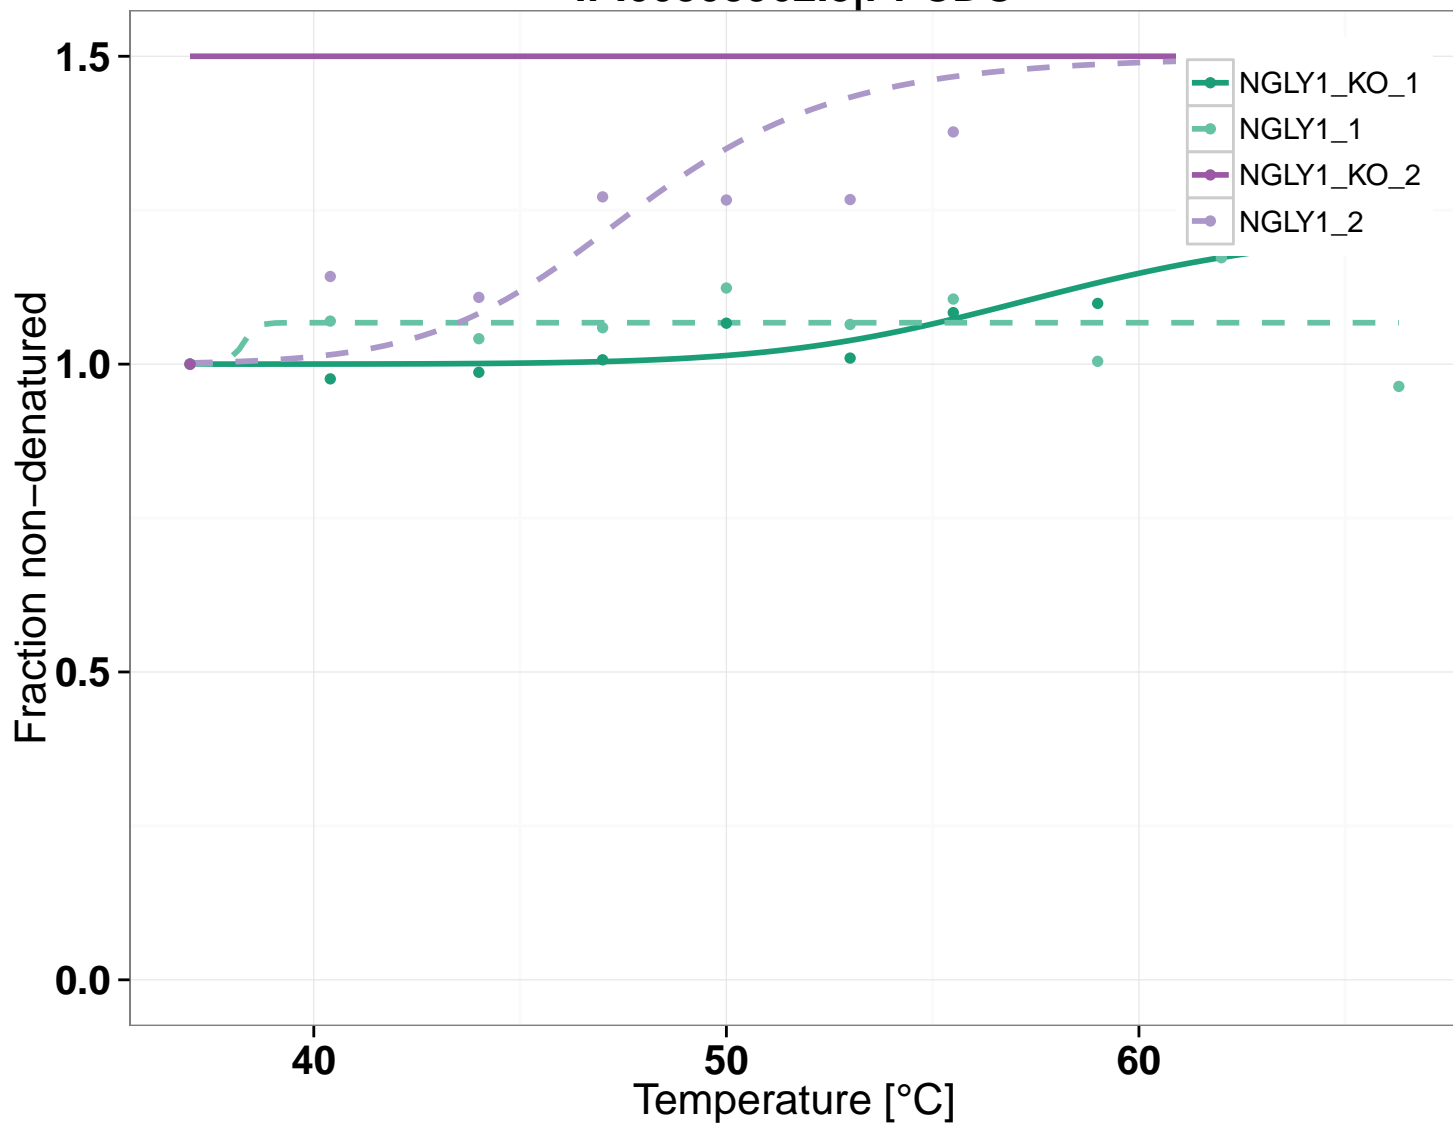

|            | meltPoint | slope | plateau | R2    |
|------------|-----------|-------|---------|-------|
| NGLY1_KO_1 | —         | 0.017 | 1.23    | 0.87  |
| NGLY1_1    | —         | 0.11  | 1.07    | 0.12  |
| NGLY1_KO_2 | —         | —     | 1.5     | −6.17 |
| NGLY1_2    | —         | 0.05  | 1.5     | 0.26  |

Supplement: Supplementary file 8369 [file 1]

IPI00023556.3|SSU72

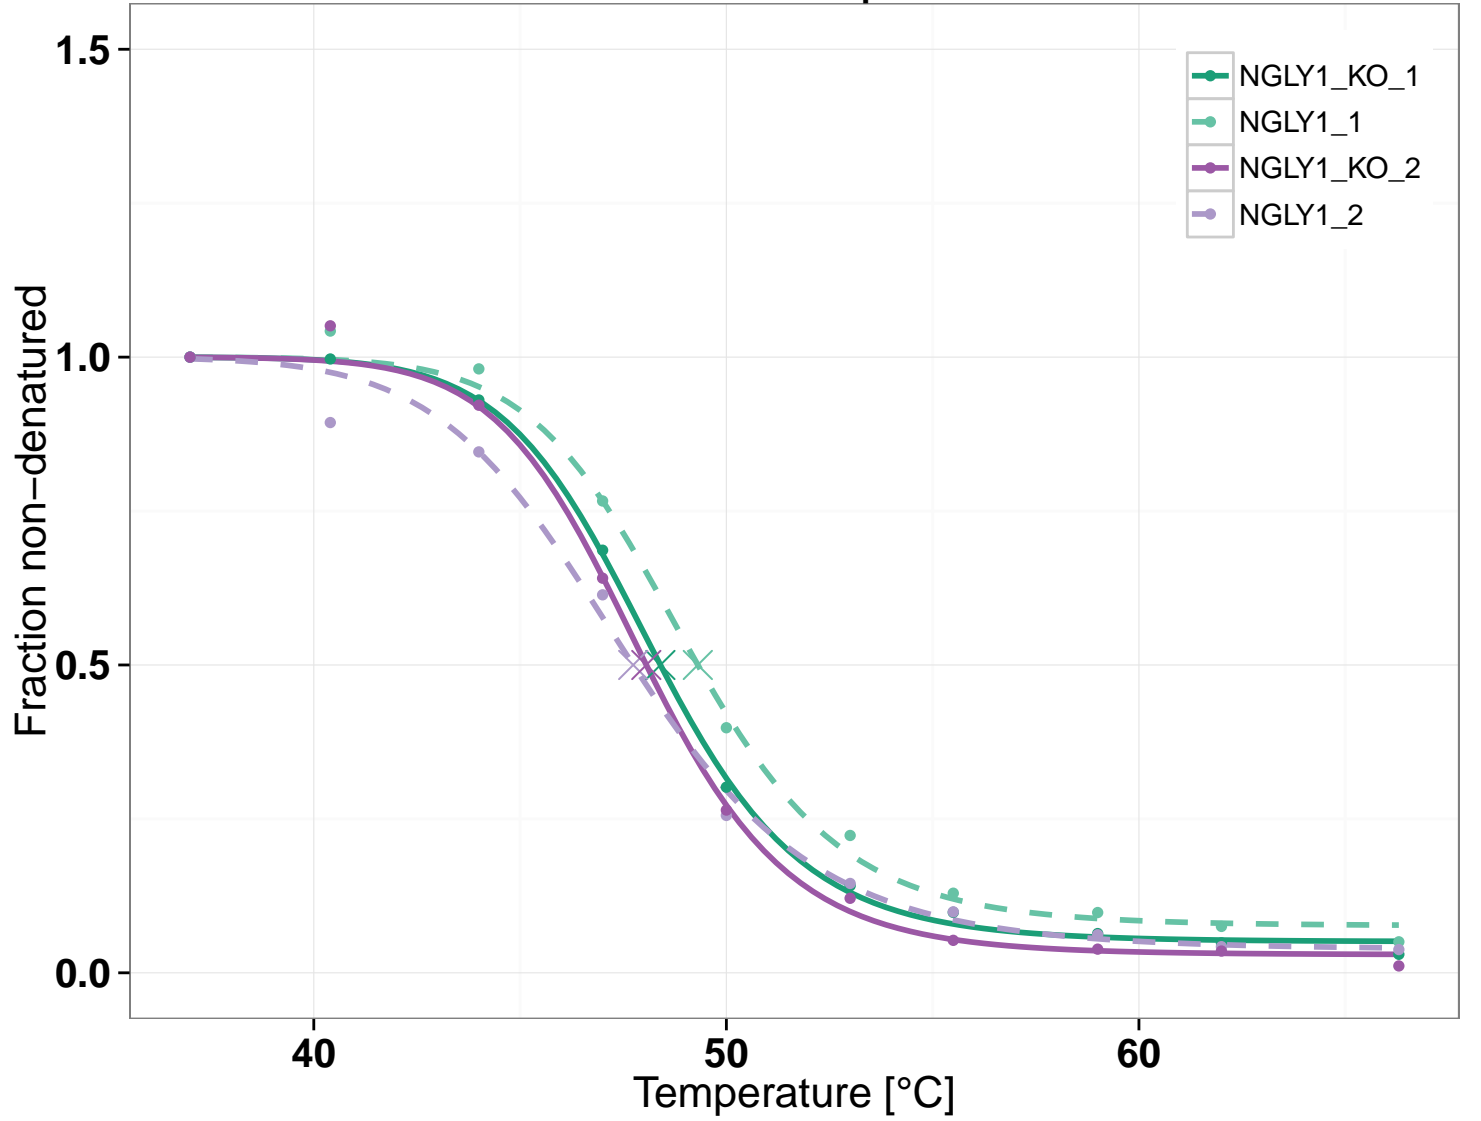

|            | meltPoint | slope | plateau | R2   |
|------------|-----------|-------|---------|------|
| NGLY1_KO_1 | 48.4      | -0.13 | 0.05    | 1    |
| NGLY1_1    | 49.31     | -0.12 | 0.08    | 1    |
| NGLY1_KO_2 | 48.06     | -0.14 | 0.03    | 1    |
| NGLY1_2    | 47.74     | -0.1  | 0.04    | 0.99 |

Supplement: Supplementary file 8370 [file 1]

IPI00024661.4|SEC24C

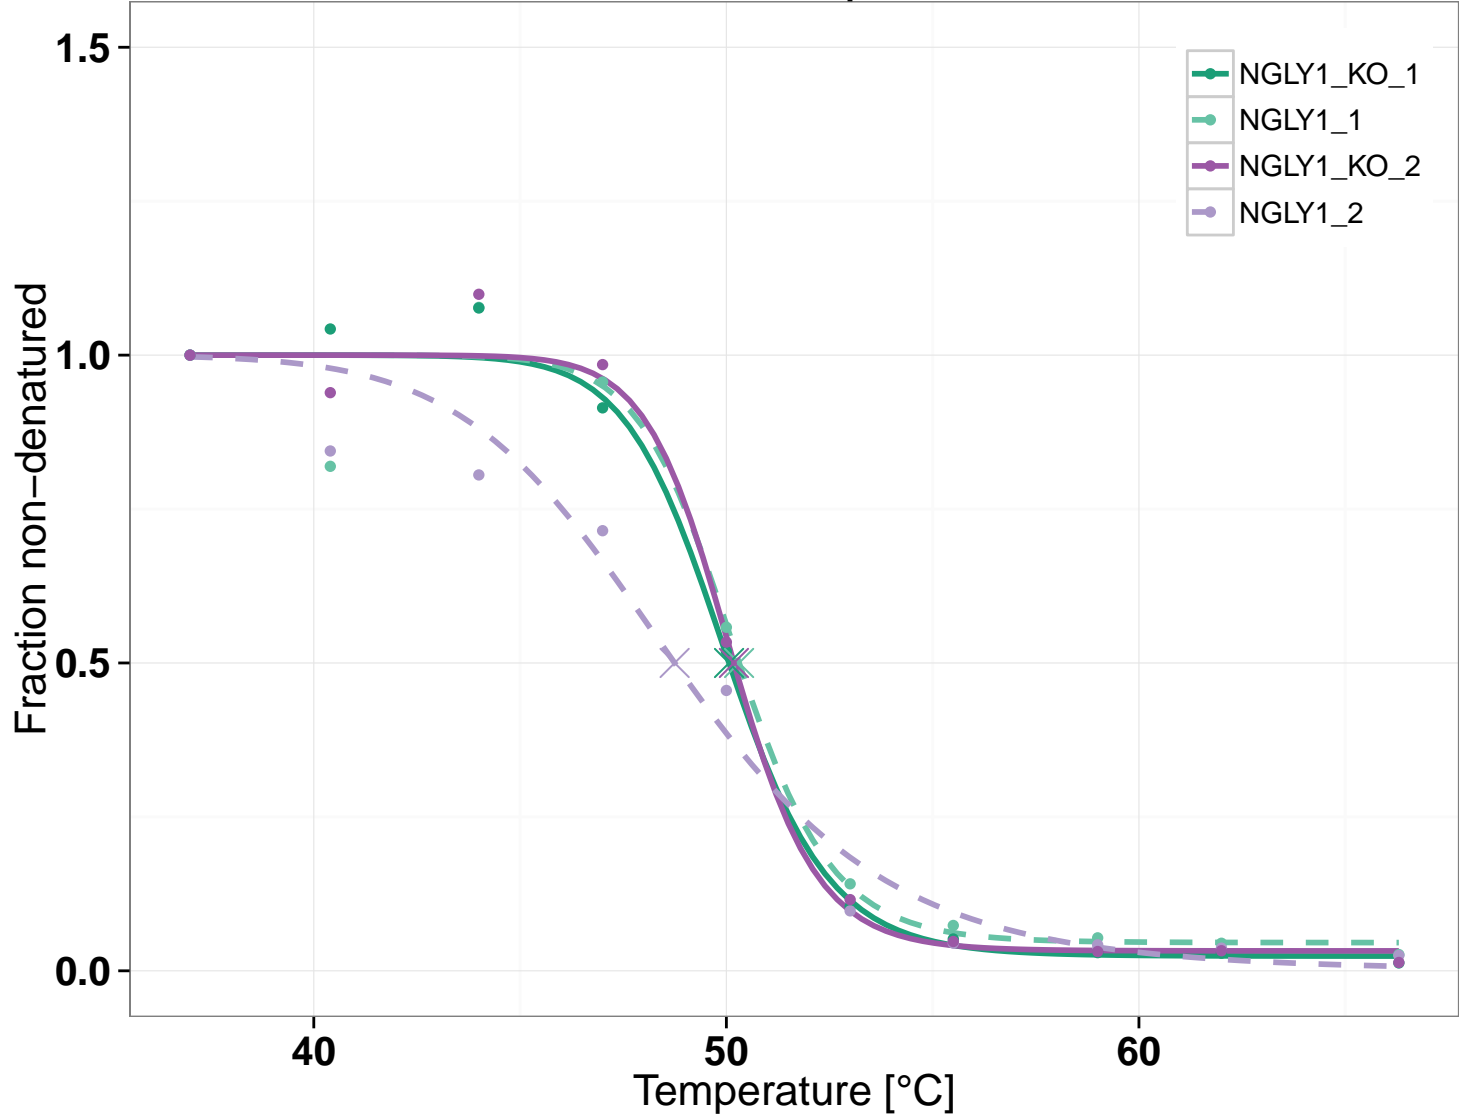

|            | meltPoint | slope  | plateau | R2   |
|------------|-----------|--------|---------|------|
| NGLY1_KO_1 | 50.07     | -0.2   | 0.02    | 1    |
| NGLY1_1    | 50.31     | -0.2   | 0.05    | 0.98 |
| NGLY1_KO_2 | 50.18     | -0.23  | 0.03    | 0.99 |
| NGLY1_2    | 48.75     | -0.096 | 0       | 0.97 |

Supplement: Supplementary file 8371 [file 1]

IPI00328616.3|MRPL52

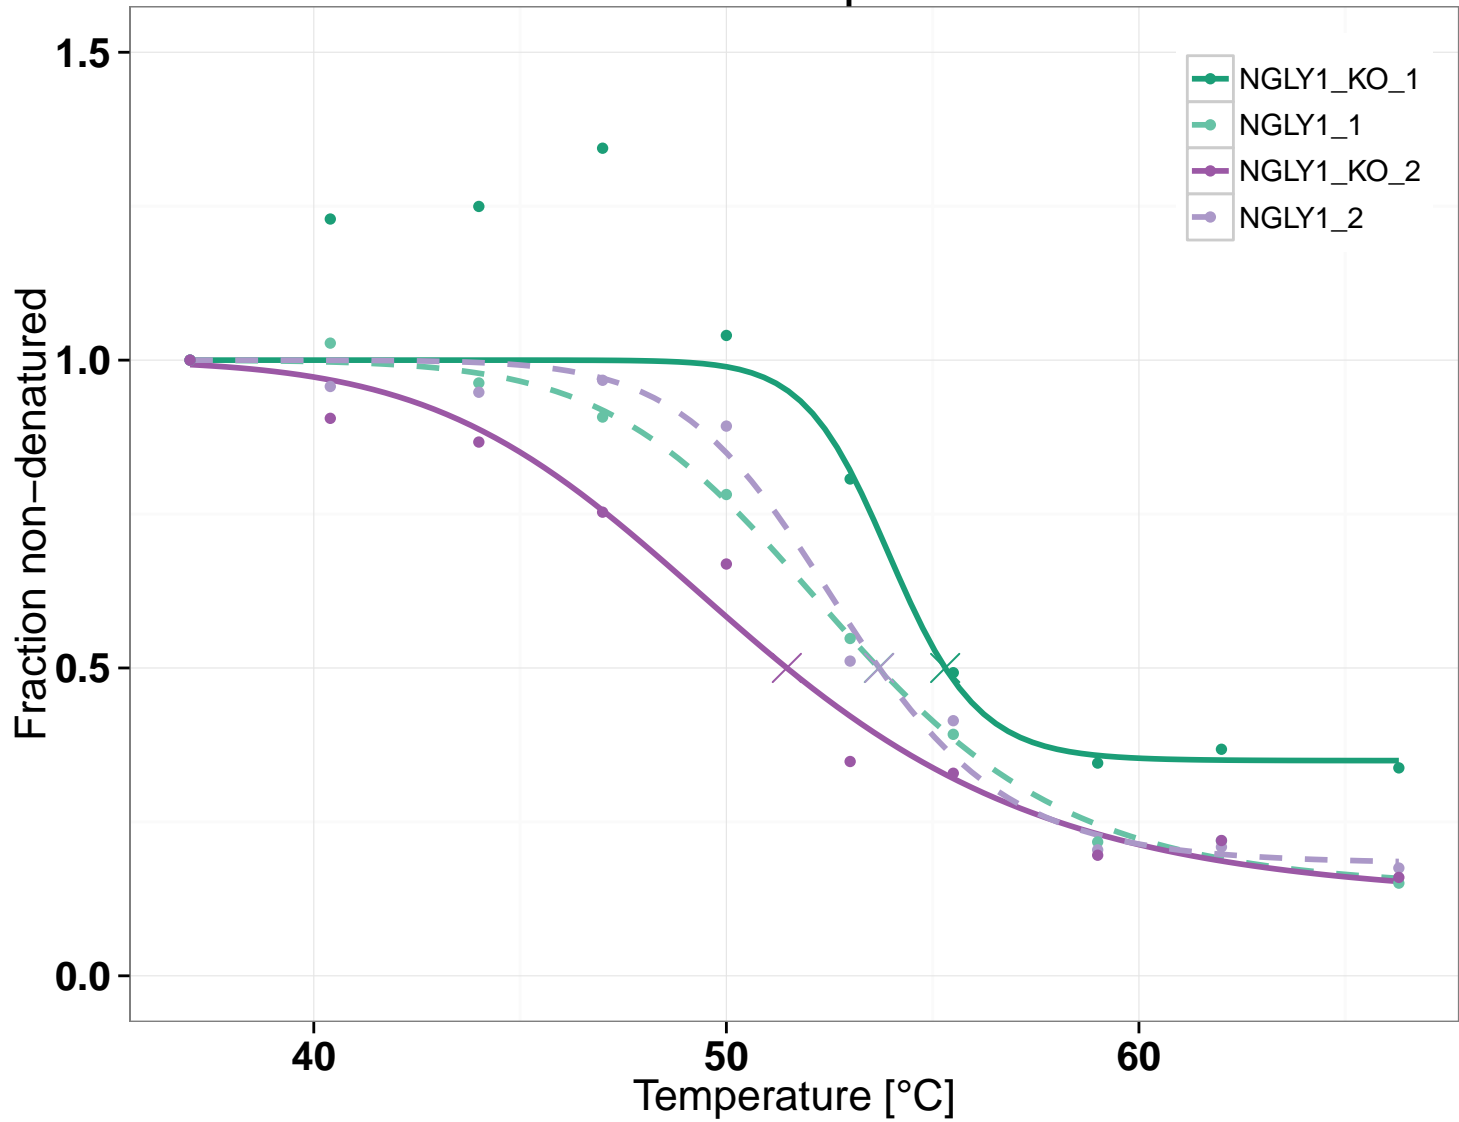

|            | meltPoint | slope  | plateau | R2   |
|------------|-----------|--------|---------|------|
| NGLY1_KO_1 | 55.3      | -0.15  | 0.35    | 0.84 |
| NGLY1_1    | 53.7      | -0.076 | 0.14    | 1    |
| NGLY1_KO_2 | 51.47     | -0.059 | 0.12    | 0.98 |
| NGLY1_2    | 53.71     | -0.1   | 0.18    | 0.99 |

Supplement: Supplementary file 8372 [file 1]

IPI00029079.5|GMPS

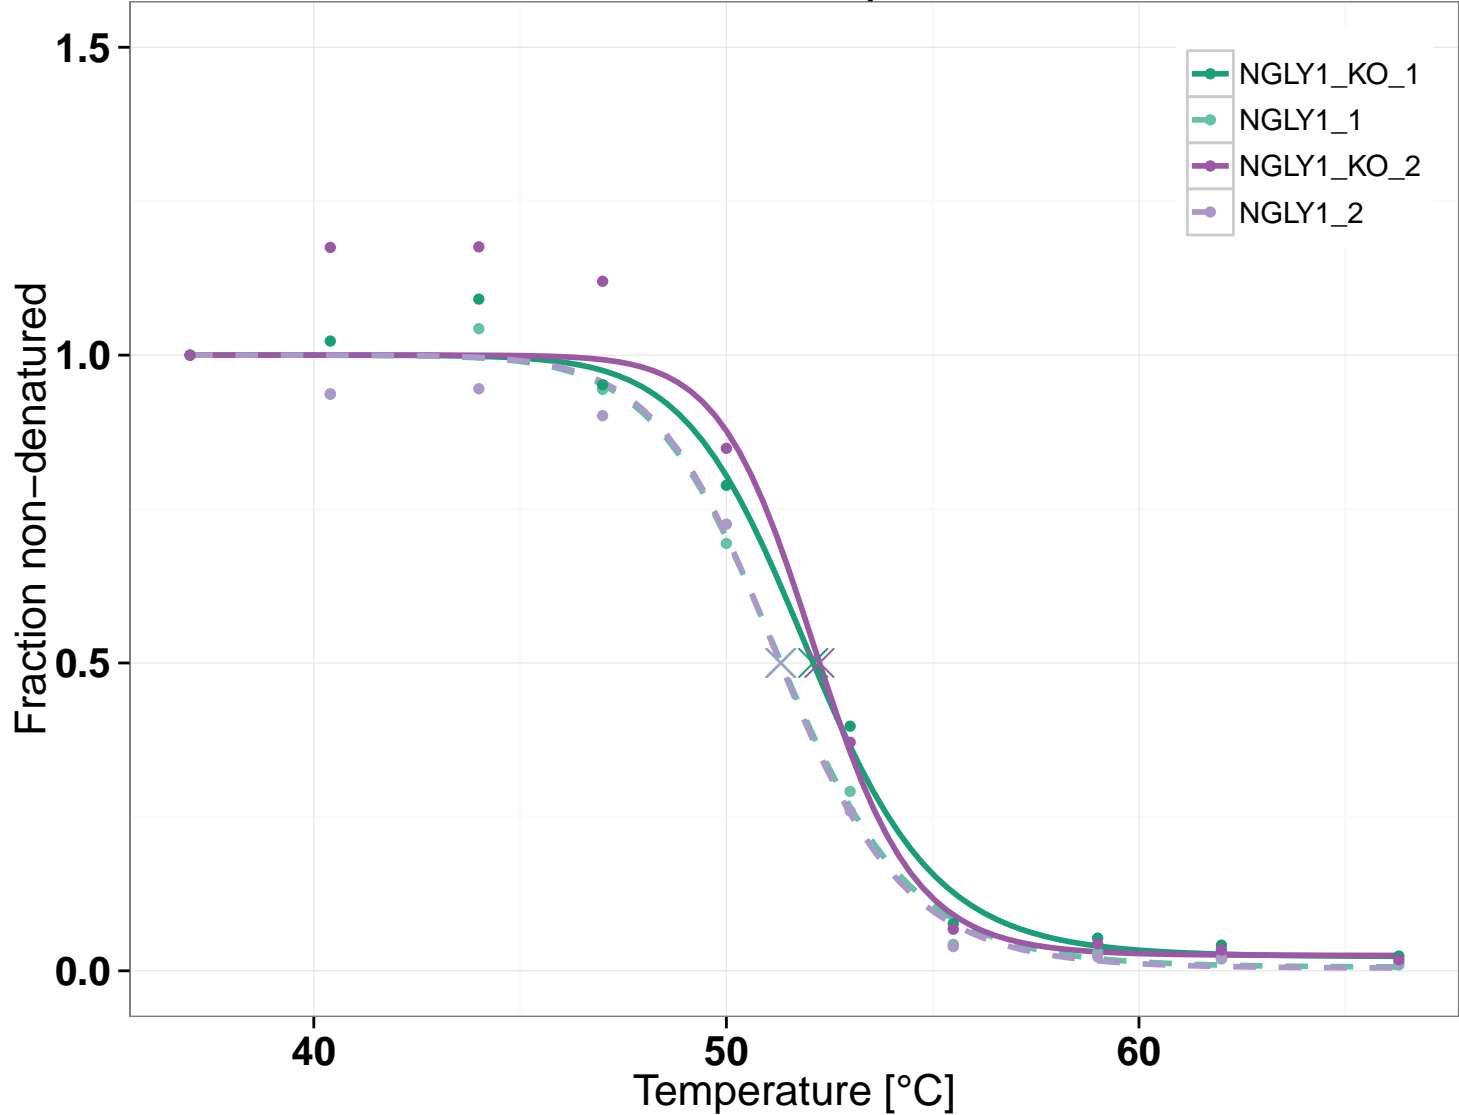

|            | meltPoint | slope | plateau | R2   |
|------------|-----------|-------|---------|------|
| NGLY1_KO_1 | 52.11     | -0.16 | 0.02    | 0.99 |
| NGLY1_1    | 51.33     | -0.16 | 0.01    | 1    |
| NGLY1_KO_2 | 52.26     | -0.21 | 0.02    | 0.97 |
| NGLY1_2    | 51.3      | -0.16 | 0       | 0.99 |

Supplement: Supplementary file 8373 [file 1]

IPI00414872.4|SAPS2

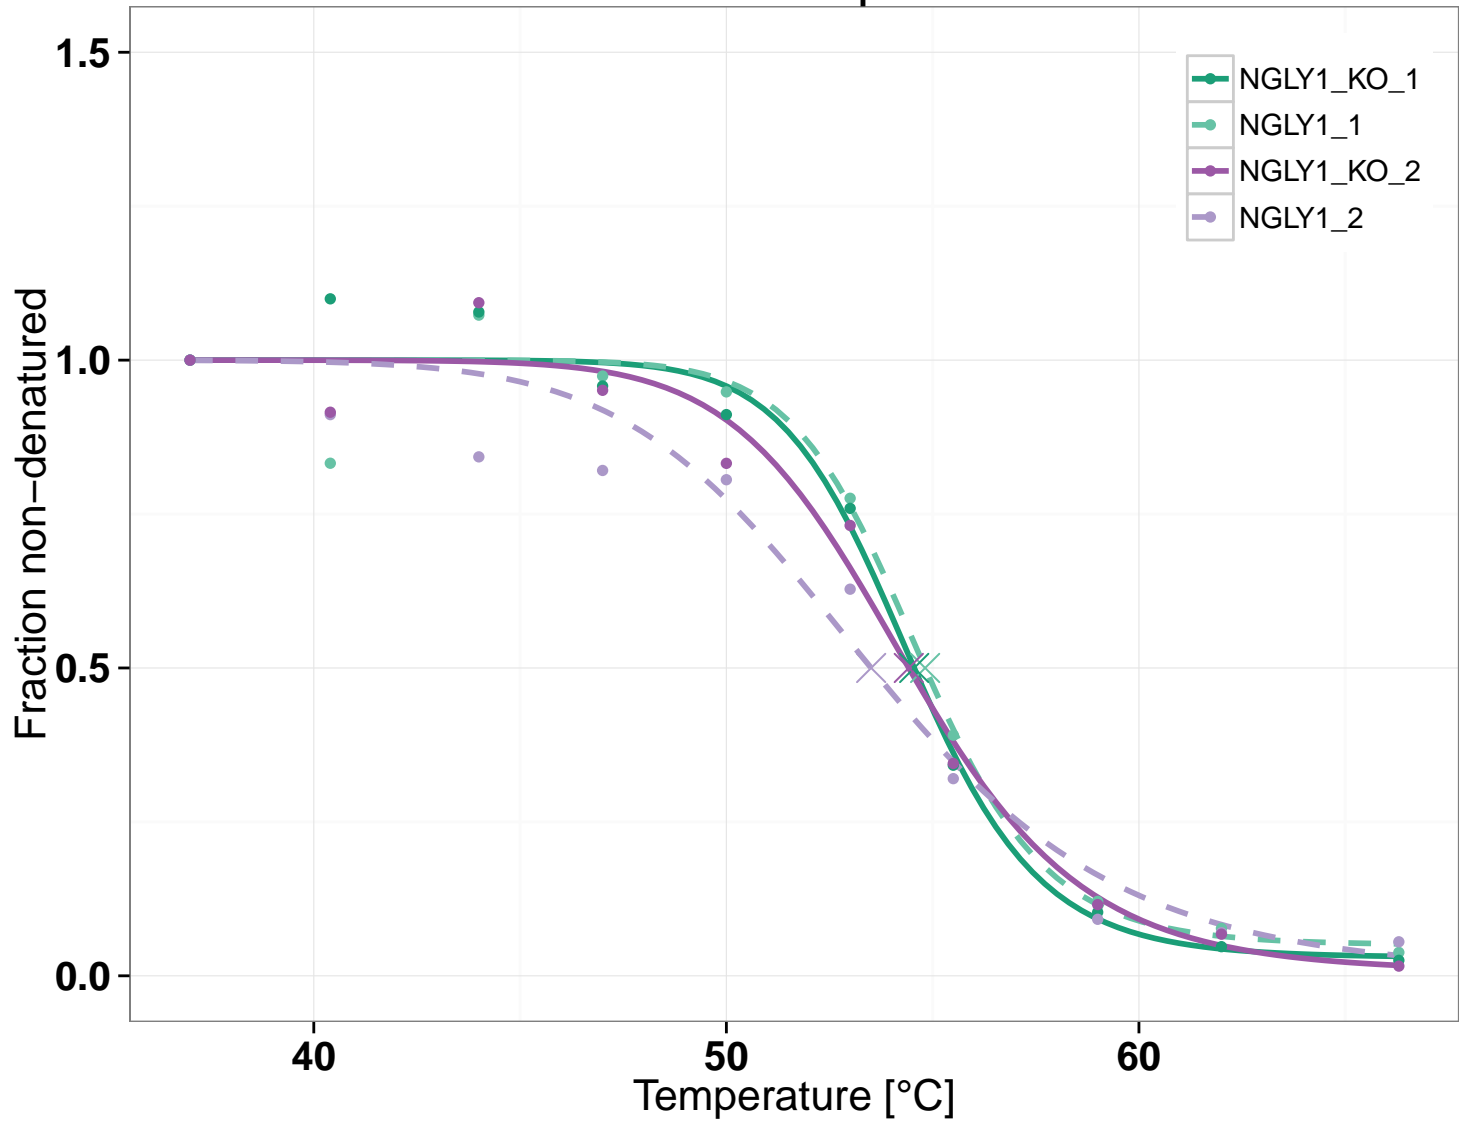

|            | meltPoint | slope  | plateau | R2   |
|------------|-----------|--------|---------|------|
| NGLY1_KO_1 | 54.55     | -0.16  | 0.03    | 0.99 |
| NGLY1_1    | 54.82     | -0.15  | 0.05    | 0.98 |
| NGLY1_KO_2 | 54.42     | -0.12  | 0.01    | 0.98 |
| NGLY1_2    | 53.51     | -0.083 | 0       | 0.96 |

Supplement: Supplementary file 8374 [file 1]

IPI00035167.9|LOC137107

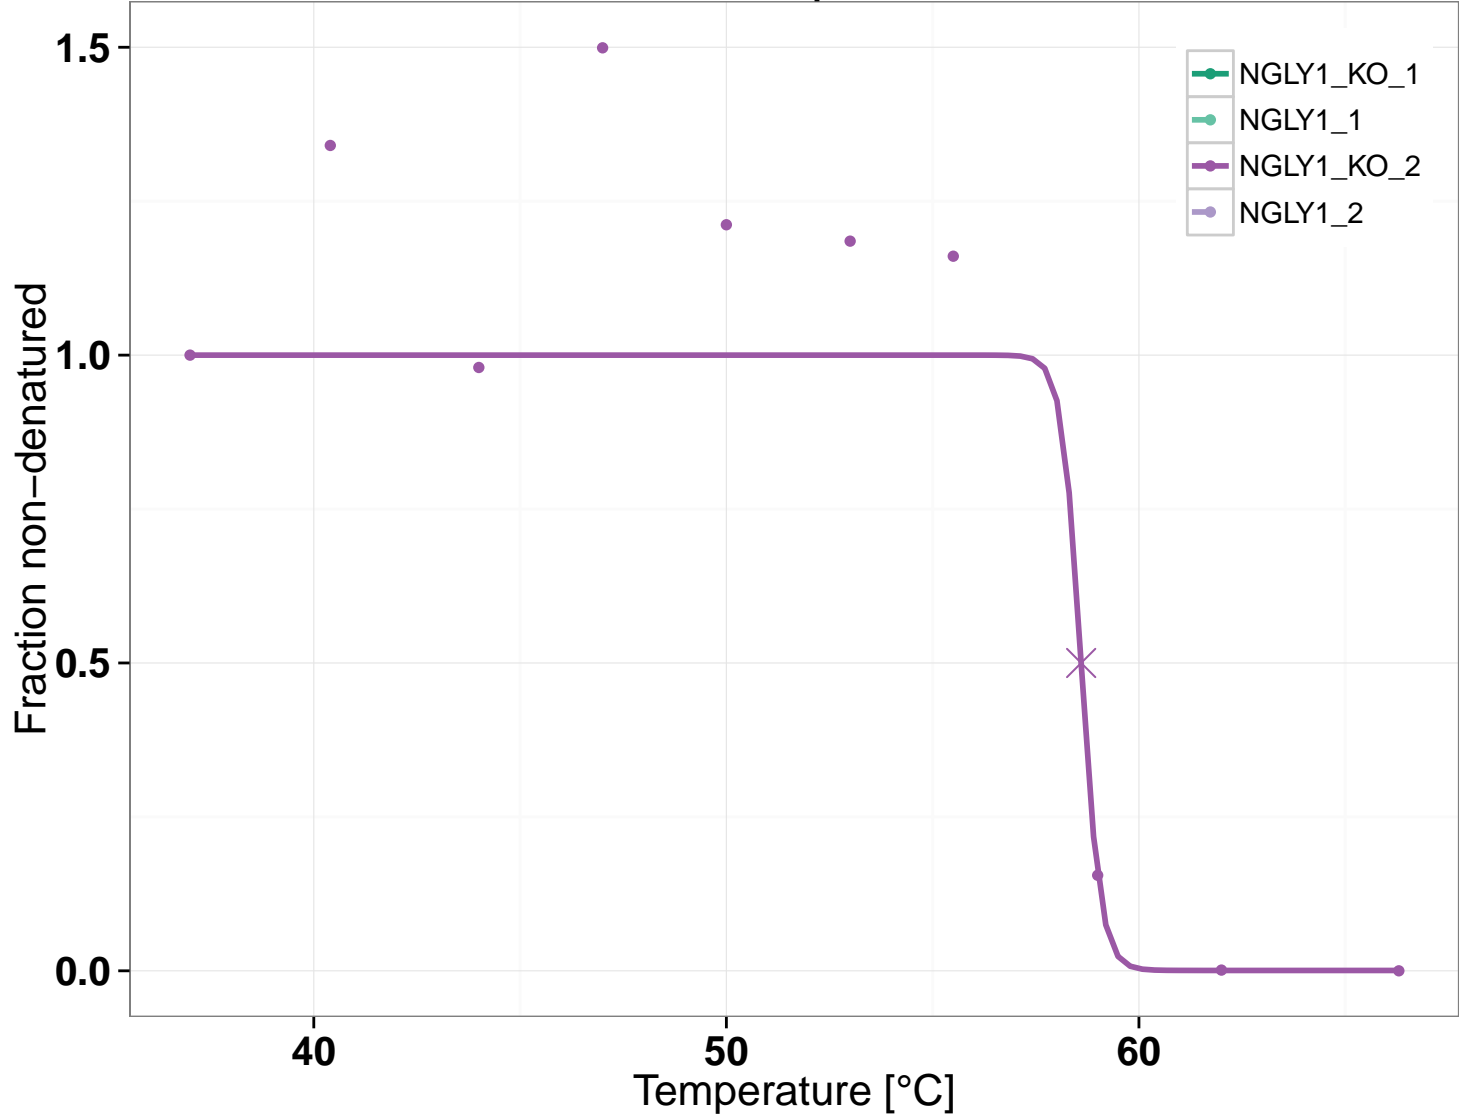

|            | meltPoint | slope | plateau | R2   |
|------------|-----------|-------|---------|------|
| NGLY1_KO_1 | —         | —     | —       | —    |
| NGLY1_1    | —         | —     | —       | —    |
| NGLY1_KO_2 | 58.6      | -1.1  | 0       | 0.84 |
| NGLY1_2    | —         | —     | —       | —    |

Supplement: Supplementary file 8375 [file 1]

IPI00020887.3|VAMP7

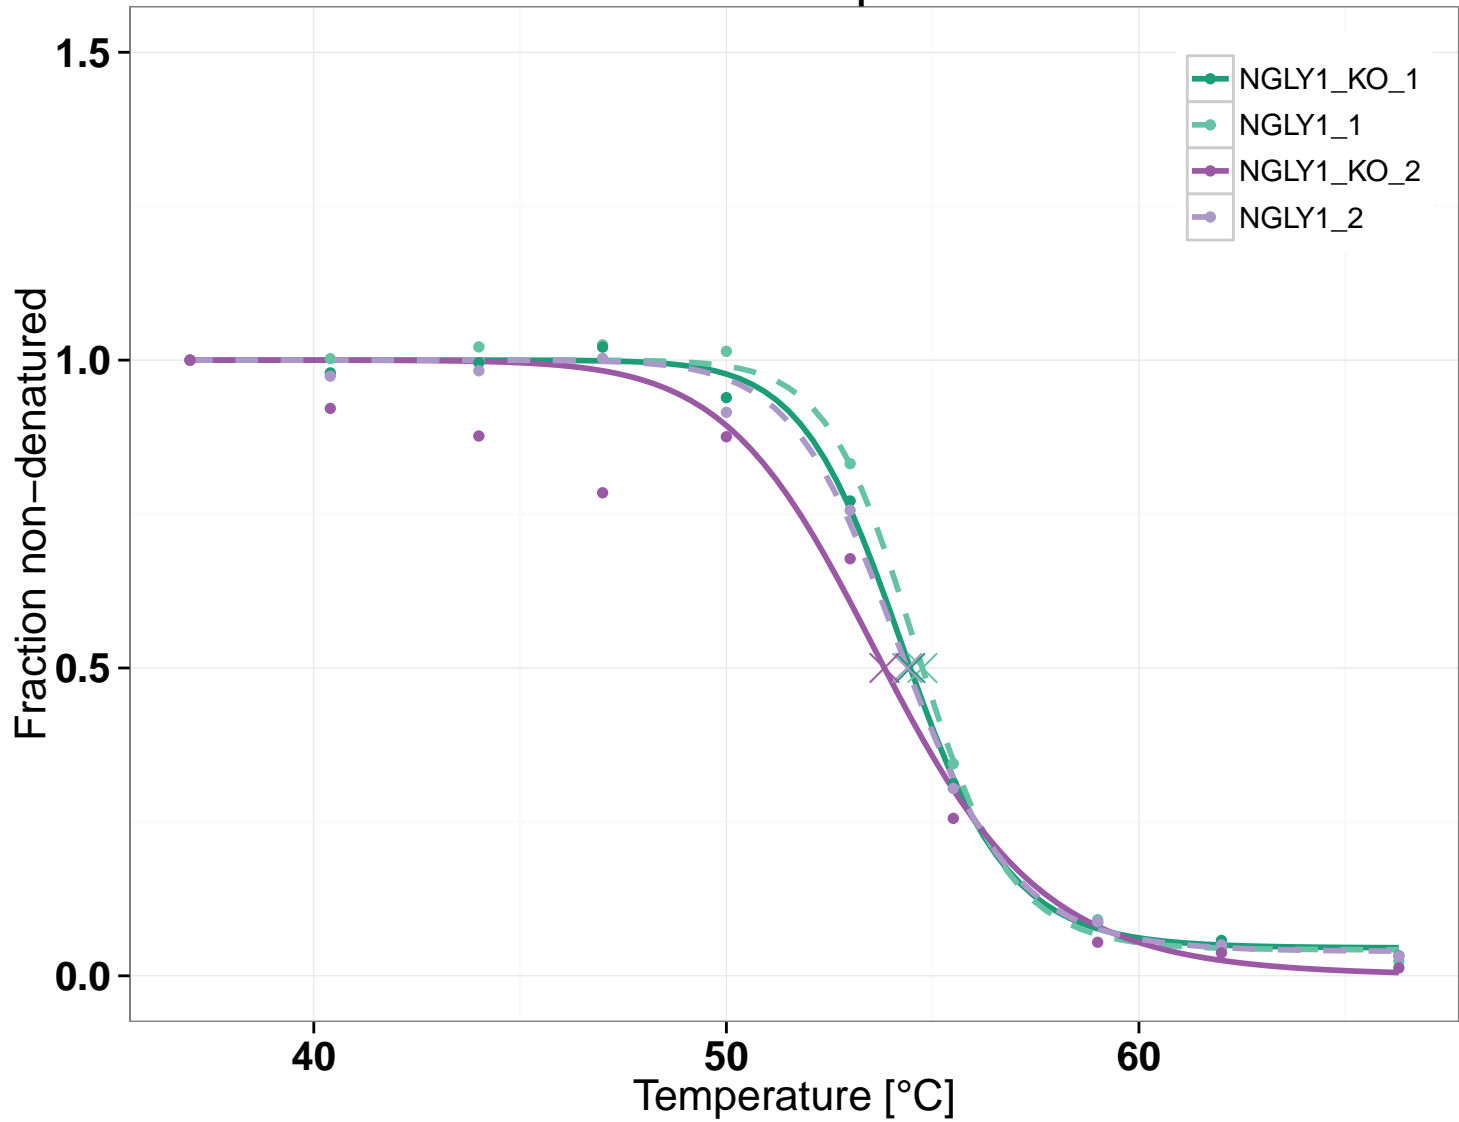

|            | meltPoint | slope | plateau | R2   |
|------------|-----------|-------|---------|------|
| NGLY1_KO_1 | 54.46     | -0.19 | 0.05    | 1    |
| NGLY1_1    | 54.75     | -0.22 | 0.04    | 1    |
| NGLY1_KO_2 | 53.83     | -0.13 | 0       | 0.95 |
| NGLY1_2    | 54.38     | -0.18 | 0.04    | 1    |

Supplement: Supplementary file 8376 [file 1]

# IPI00514622.2|RANBP6

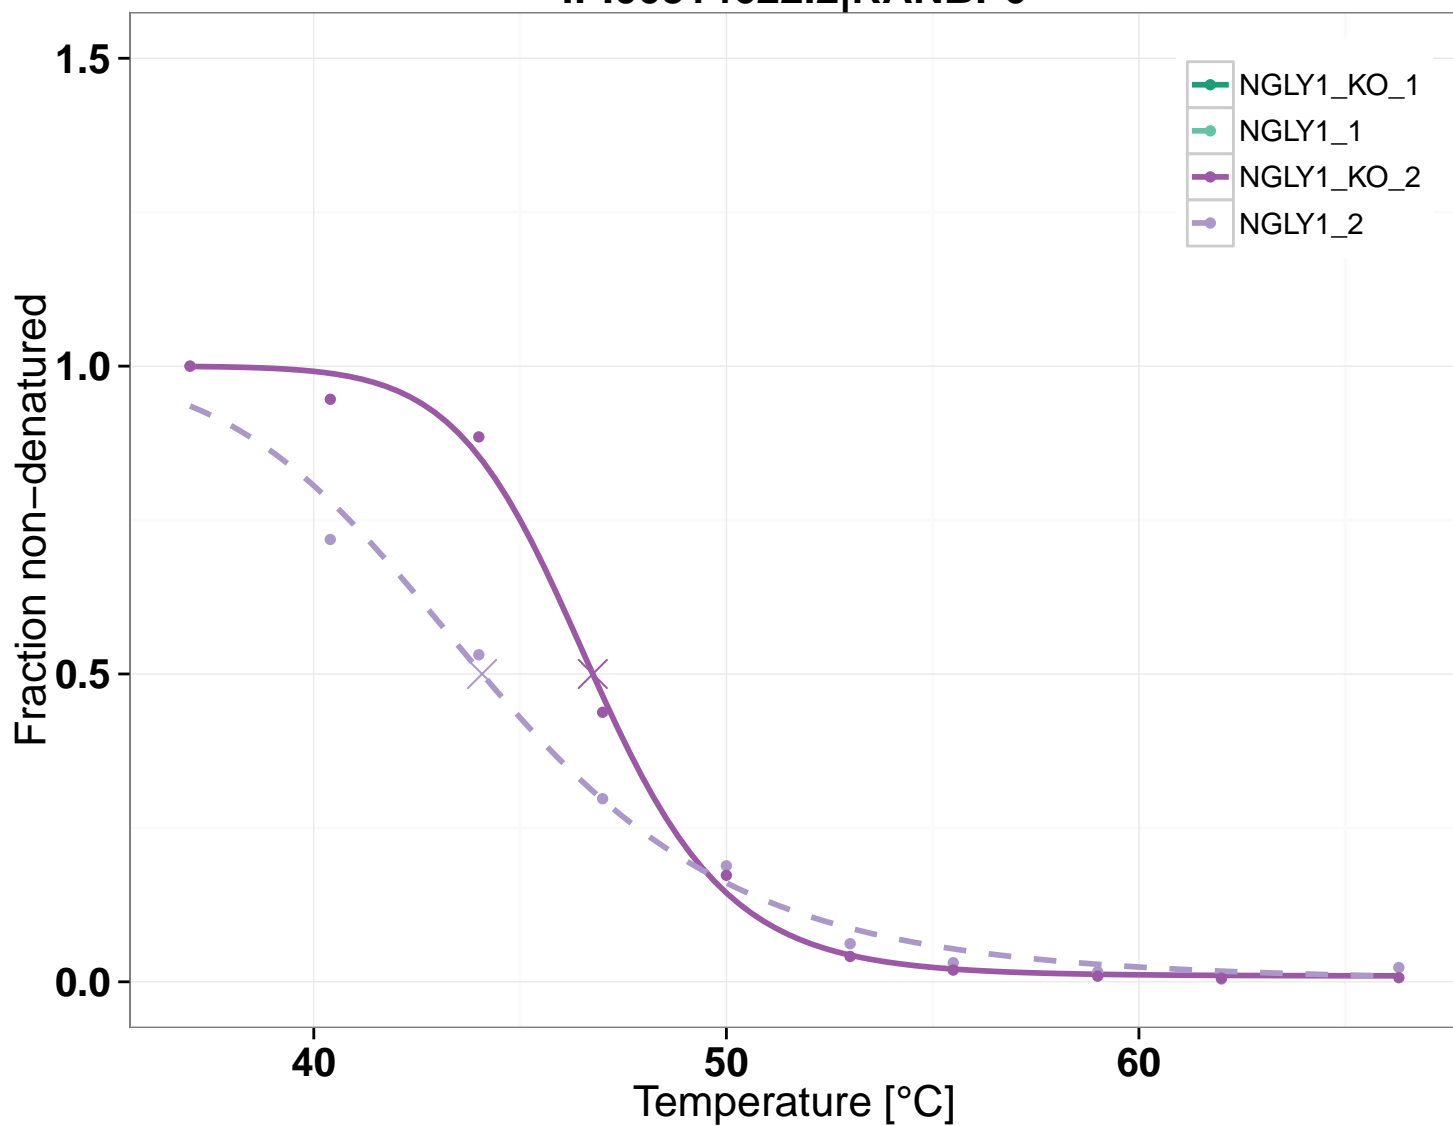

|            | meltPoint | slope  | plateau | R2   |
|------------|-----------|--------|---------|------|
| NGLY1_KO_1 | —         | —      | —       | —    |
| NGLY1_1    | —         | —      | —       | —    |
| NGLY1_KO_2 | 46.76     | -0.15  | 0.01    | 1    |
| NGLY1_2    | 44.08     | -0.081 | 0       | 0.99 |

Supplement: Supplementary file 8377 [file 1]

IPI00844311.1|UCKL1

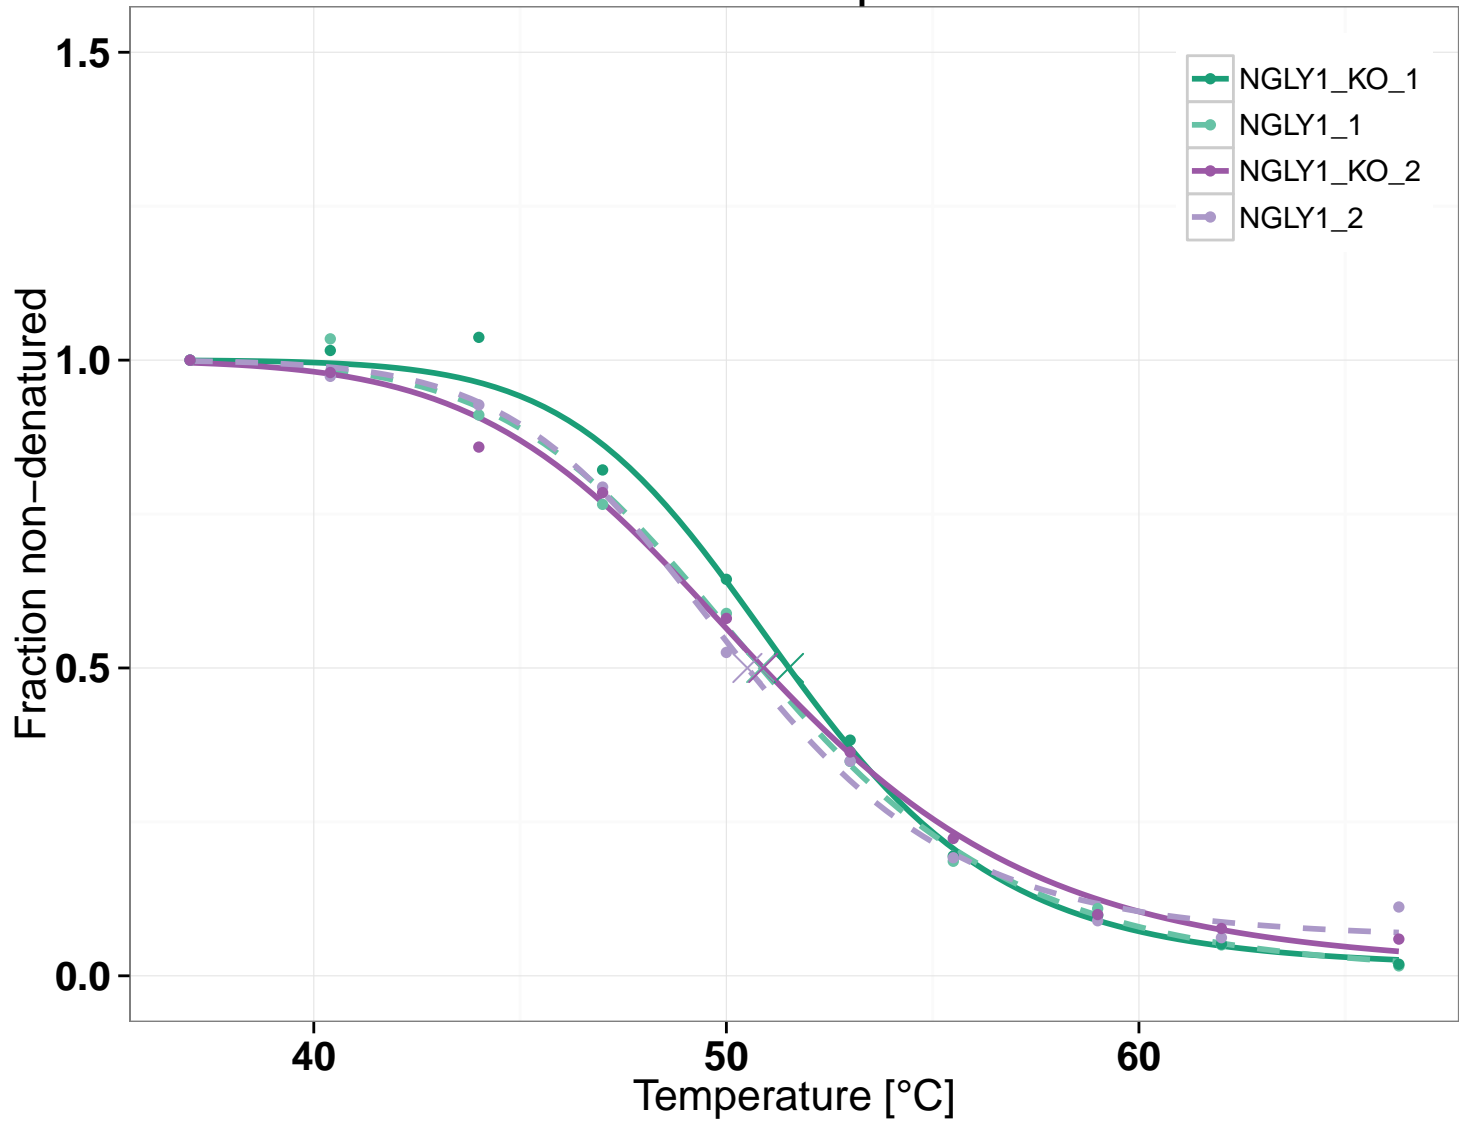

|            | meltPoint | slope  | plateau | R2 |
|------------|-----------|--------|---------|----|
| NGLY1_KO_1 | 51.52     | -0.094 | 0.01    | 1  |
| NGLY1_1    | 50.84     | -0.08  | 0       | 1  |
| NGLY1_KO_2 | 50.89     | -0.072 | 0.01    | 1  |
| NGLY1_2    | 50.51     | -0.086 | 0.06    | 1  |

Supplement: Supplementary file 8378 [file 1]

IPI00032338.5|KLHL20

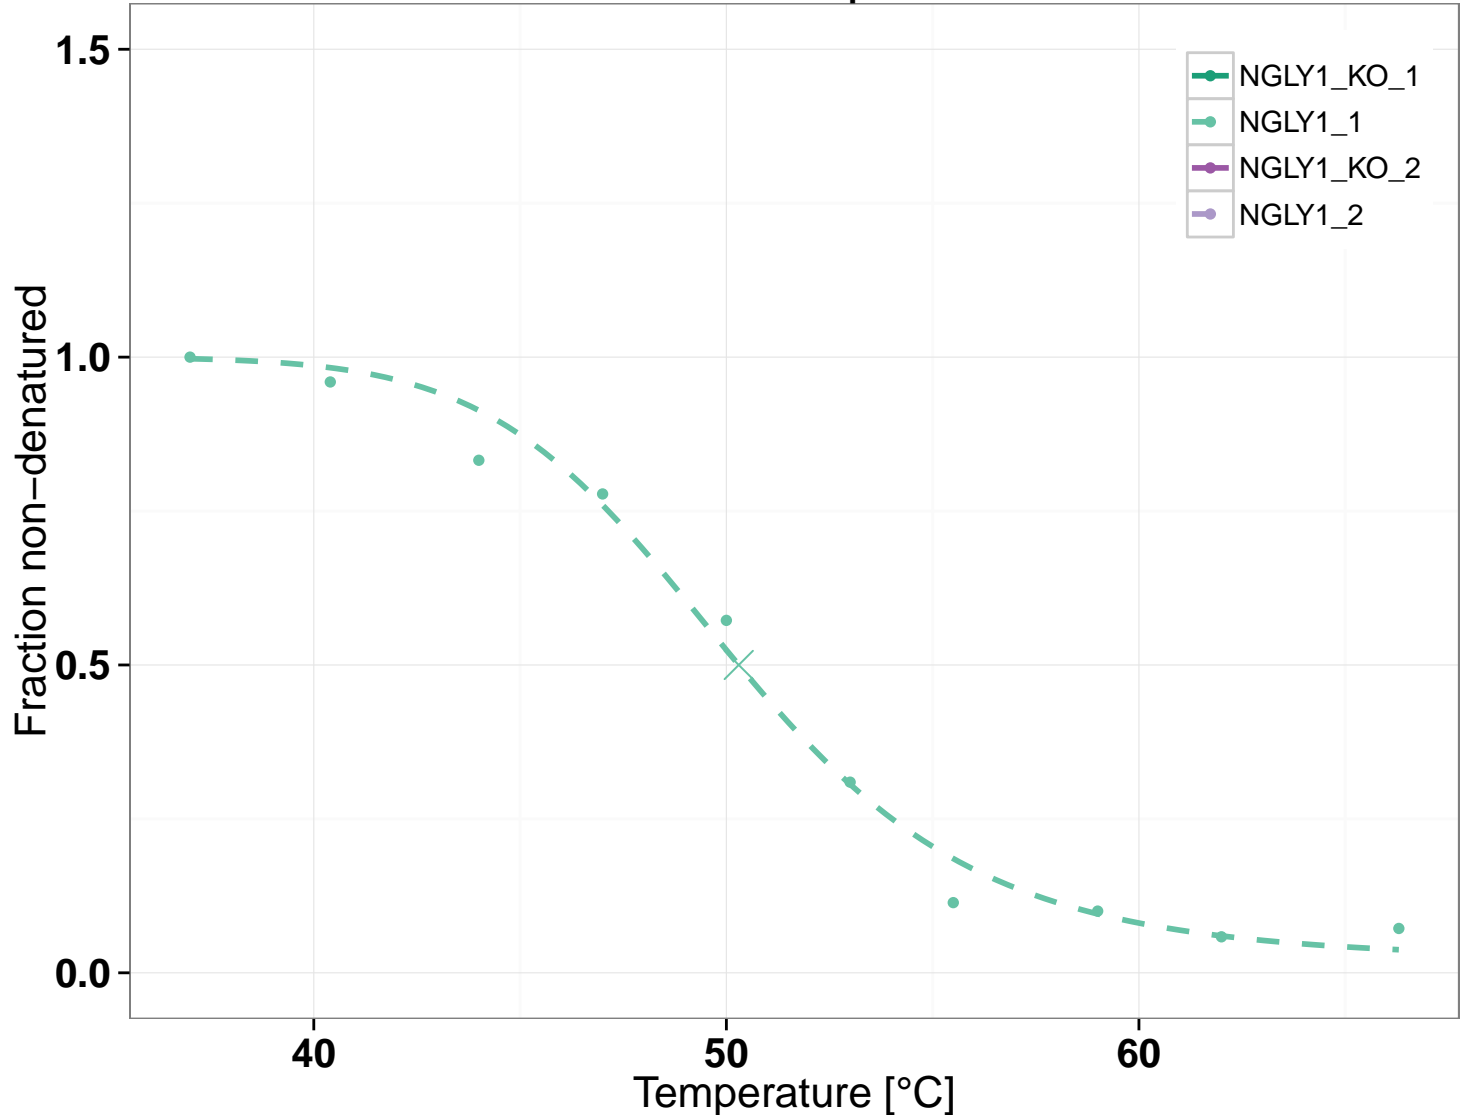

|            | meltPoint | slope  | plateau | R2   |
|------------|-----------|--------|---------|------|
| NGLY1_KO_1 | -         | -      | -       | -    |
| NGLY1_1    | 50.3      | -0.082 | 0.02    | 0.99 |
| NGLY1_KO_2 | -         | -      | -       | -    |
| NGLY1_2    | -         | -      | -       | -    |

Supplement: Supplementary file 8379 [file 1]

IPI00873093.1|OCRL

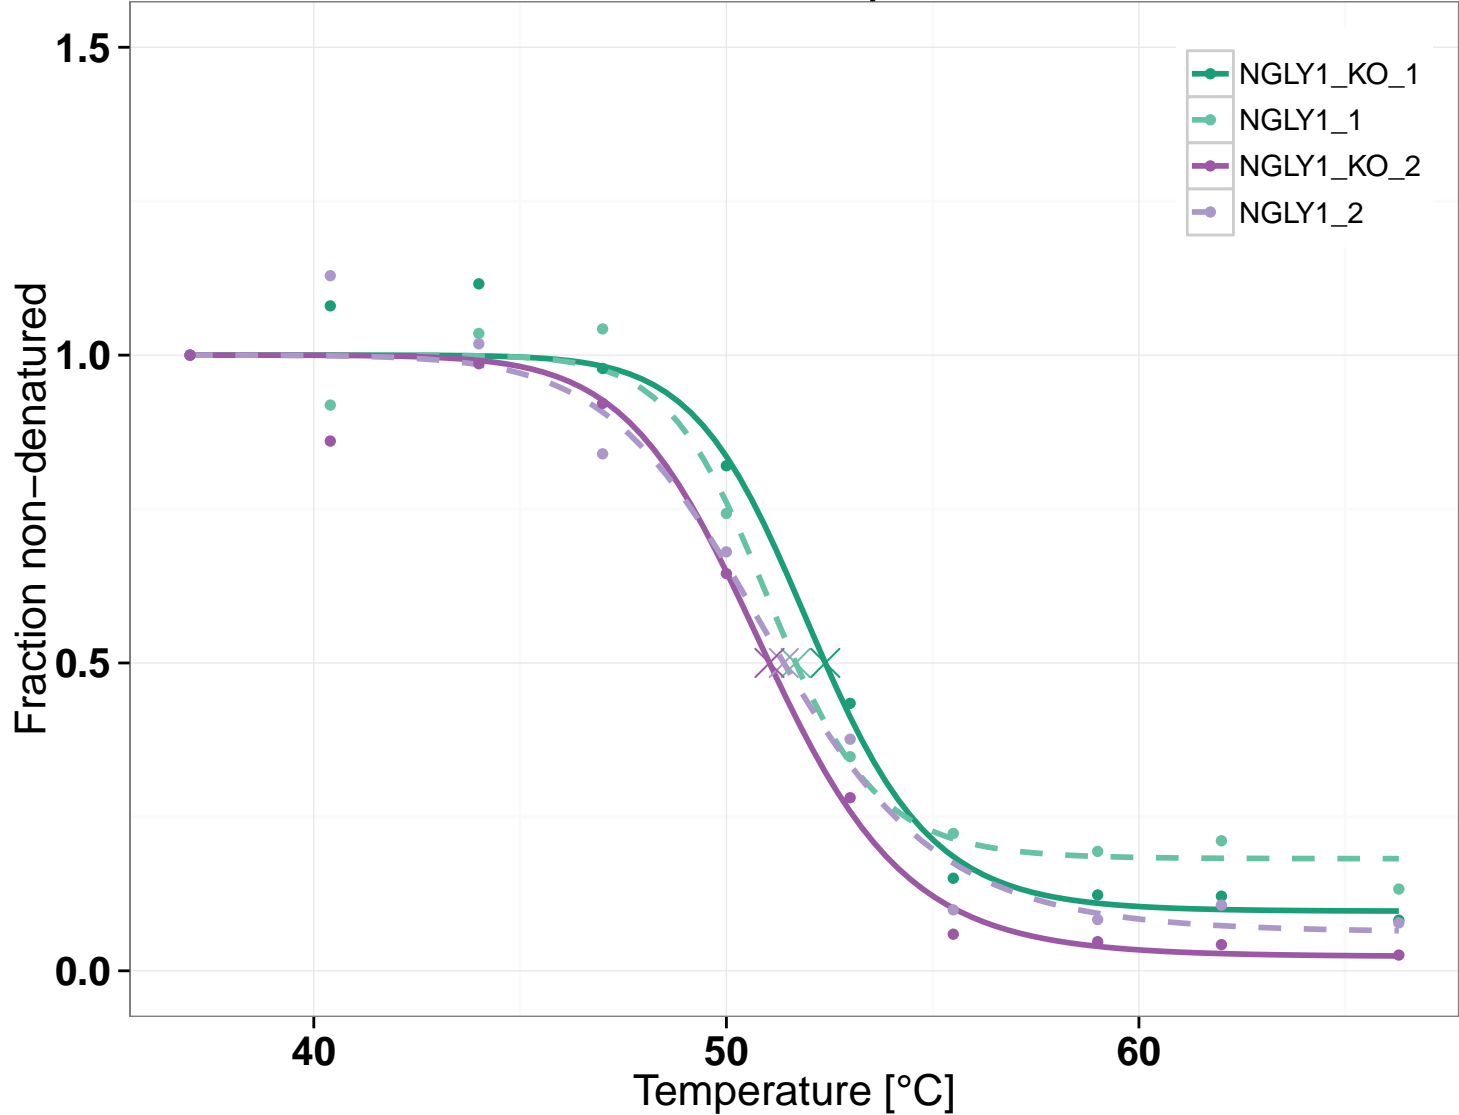

|            | meltPoint | slope | plateau | R2   |
|------------|-----------|-------|---------|------|
| NGLY1_KO_1 | 52.4      | -0.16 | 0.1     | 0.99 |
| NGLY1_1    | 51.68     | -0.16 | 0.18    | 0.99 |
| NGLY1_KO_2 | 51.04     | -0.14 | 0.02    | 0.99 |
| NGLY1_2    | 51.39     | -0.12 | 0.06    | 0.98 |

Supplement: Supplementary file 8380 [file 1]

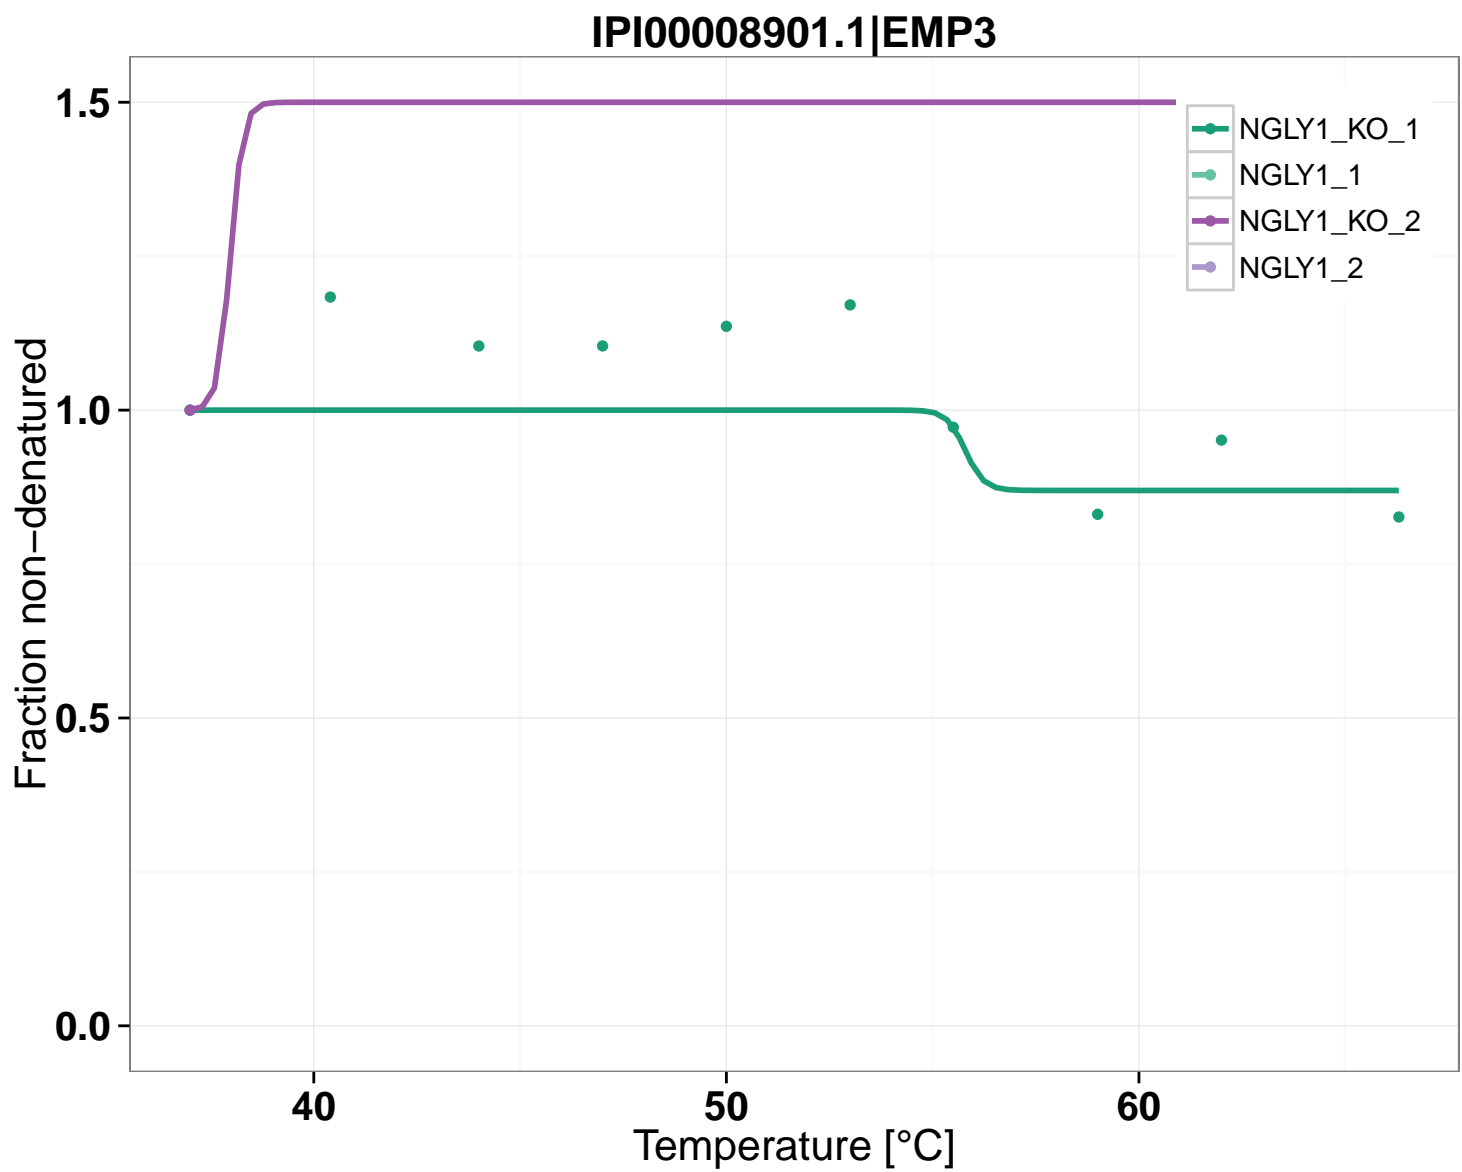

|            | meltPoint | slope | plateau | R2    |
|------------|-----------|-------|---------|-------|
| NGLY1_KO_1 | —         | -0.15 | 0.87    | 0.28  |
| NGLY1_1    | —         | —     | —       | —     |
| NGLY1_KO_2 | —         | 0.82  | 1.5     | -5.13 |
| NGLY1_2    | —         | —     | —       | —     |

Supplement: Supplementary file 8381 [file 1]

# IPI00910890.1|ORAOV1

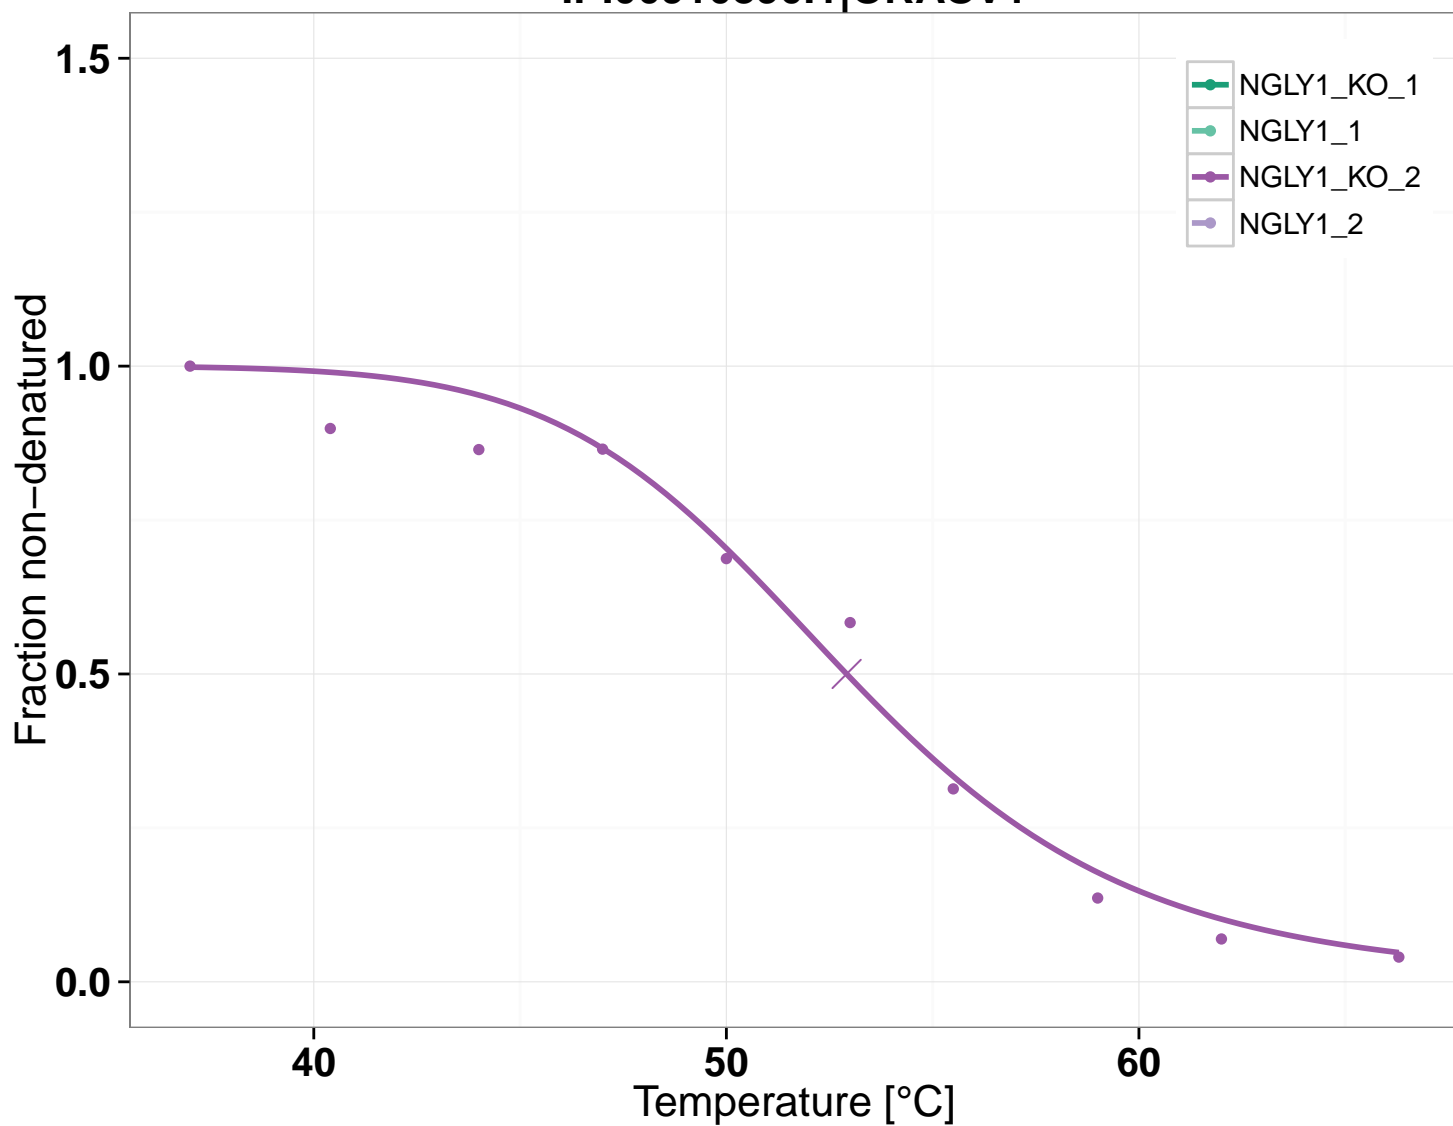

|            | meltPoint | slope  | plateau | R2   |
|------------|-----------|--------|---------|------|
| NGLY1_KO_1 | —         | —      | —       | —    |
| NGLY1_1    | —         | —      | —       | —    |
| NGLY1_KO_2 | 52.92     | -0.071 | 0       | 0.98 |
| NGLY1_2    | —         | —      | —       | —    |

Supplement: Supplementary file 8382 [file 1]

# IPI00030774.2|TBCD

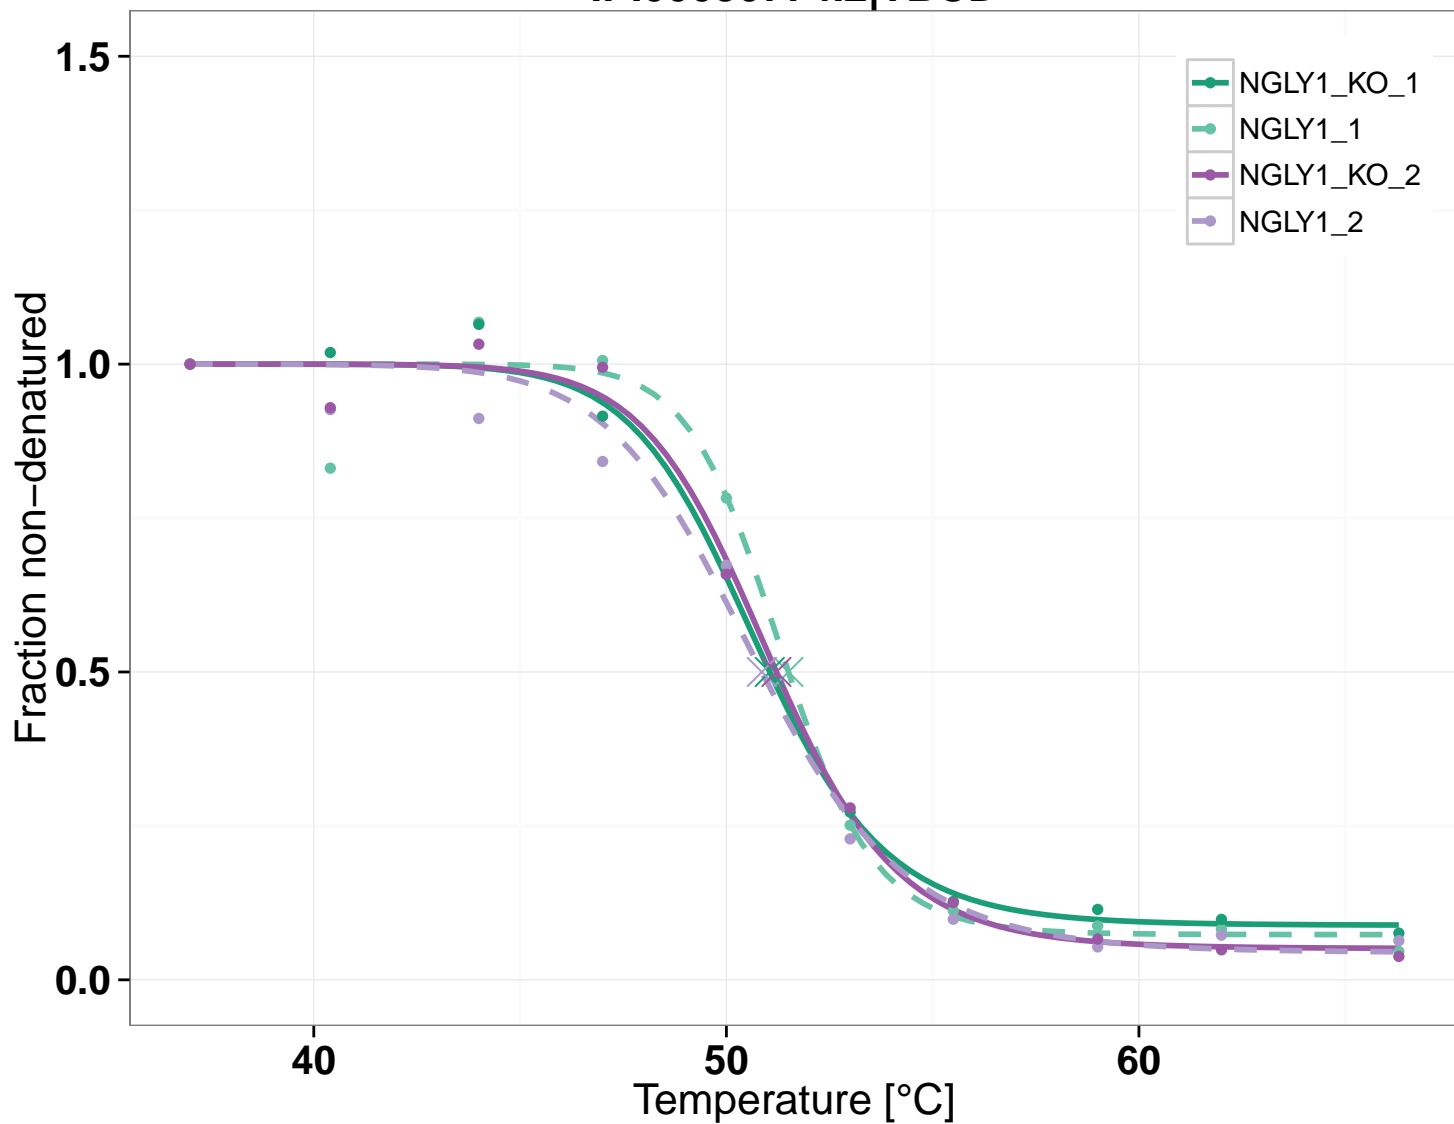

|            | meltPoint | slope | plateau | R2   |
|------------|-----------|-------|---------|------|
| NGLY1_KO_1 | 51.05     | -0.15 | 0.09    | 1    |
| NGLY1_1    | 51.5      | -0.2  | 0.07    | 0.98 |
| NGLY1_KO_2 | 51.21     | -0.15 | 0.05    | 0.99 |
| NGLY1_2    | 50.86     | -0.13 | 0.04    | 0.99 |

Supplement: Supplementary file 8383 [file 1]

IPI00375380.4|PSMD13

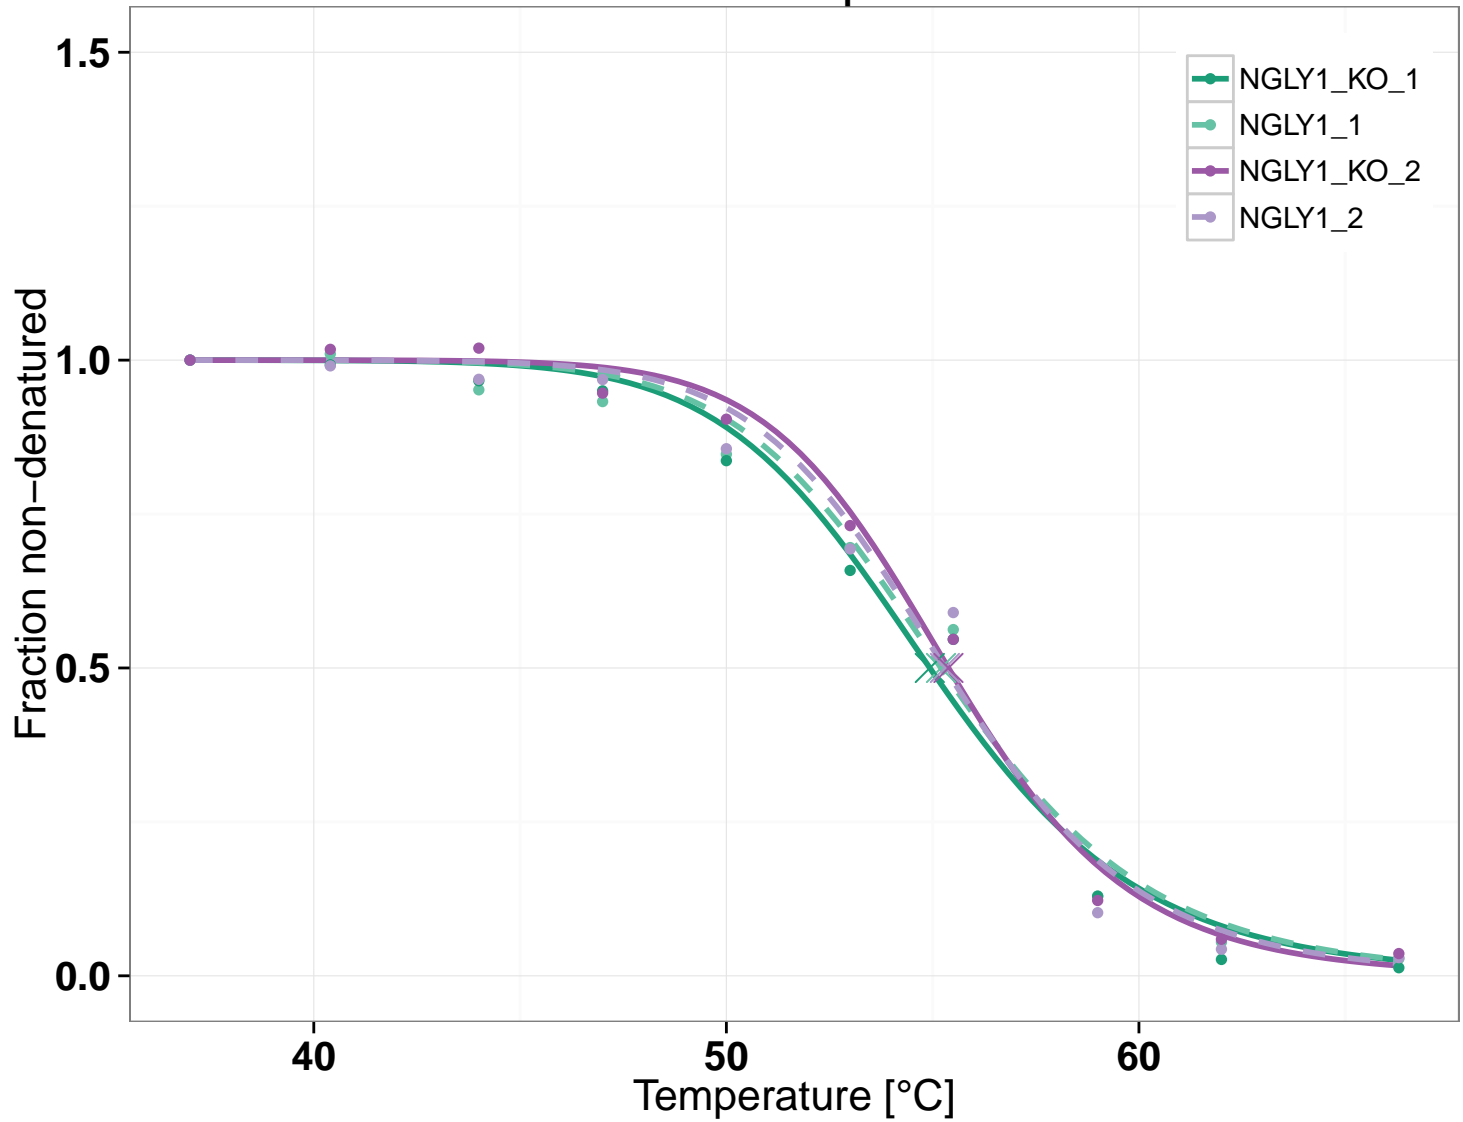

|            | meltPoint | slope  | plateau | R2   |
|------------|-----------|--------|---------|------|
| NGLY1_KO_1 | 54.93     | -0.098 | 0       | 0.99 |
| NGLY1_1    | 55.2      | -0.099 | 0       | 0.99 |
| NGLY1_KO_2 | 55.38     | -0.11  | 0       | 0.99 |
| NGLY1_2    | 55.3      | -0.11  | 0       | 0.98 |

Supplement: Supplementary file 8384 [file 1]

IPI00101258.1|MRPS24

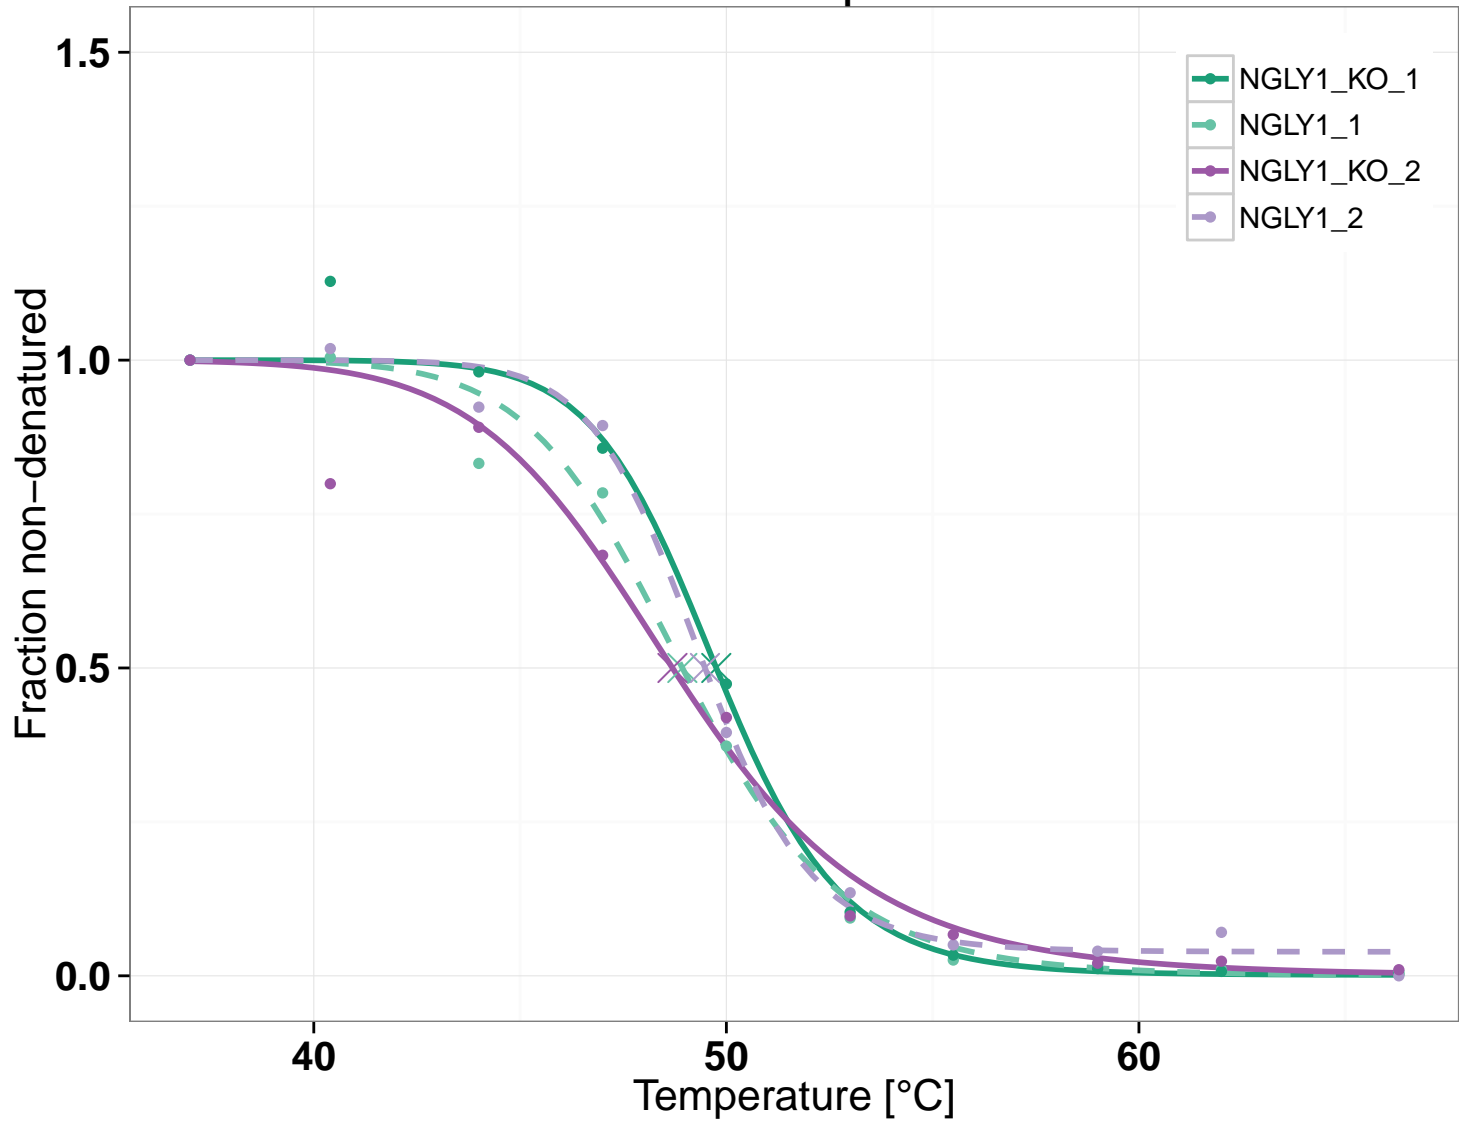

|            | meltPoint | slope | plateau | R2   |
|------------|-----------|-------|---------|------|
| NGLY1_KO_1 | 49.76     | -0.16 | 0       | 0.99 |
| NGLY1_1    | 48.93     | -0.13 | 0       | 0.99 |
| NGLY1_KO_2 | 48.69     | -0.1  | 0       | 0.97 |
| NGLY1_2    | 49.48     | -0.18 | 0.04    | 1    |

Supplement: Supplementary file 8385 [file 1]

# IPI00019733.1|RAE1

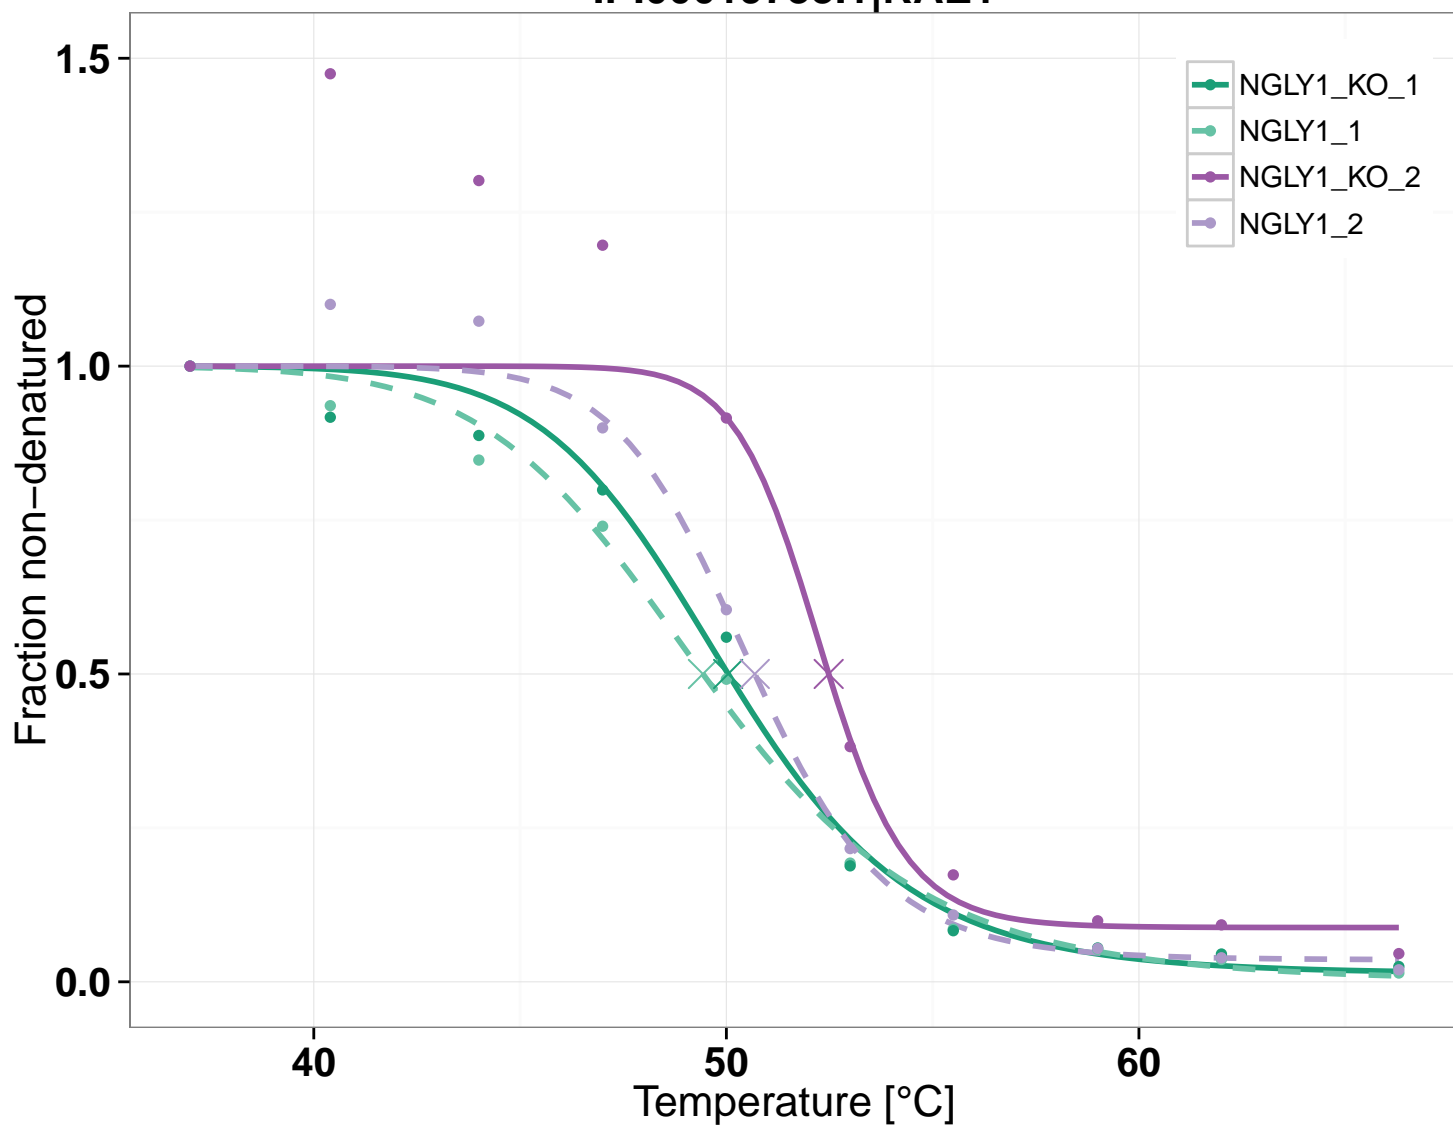

|            | meltPoint | slope  | plateau | R2   |
|------------|-----------|--------|---------|------|
| NGLY1_KO_1 | 50.04     | -0.11  | 0.01    | 0.99 |
| NGLY1_1    | 49.43     | -0.093 | 0       | 0.99 |
| NGLY1_KO_2 | 52.48     | -0.22  | 0.09    | 0.87 |
| NGLY1_2    | 50.69     | -0.15  | 0.04    | 0.99 |

Supplement: Supplementary file 8386 [file 1]

IPI00007208.4|DDX41

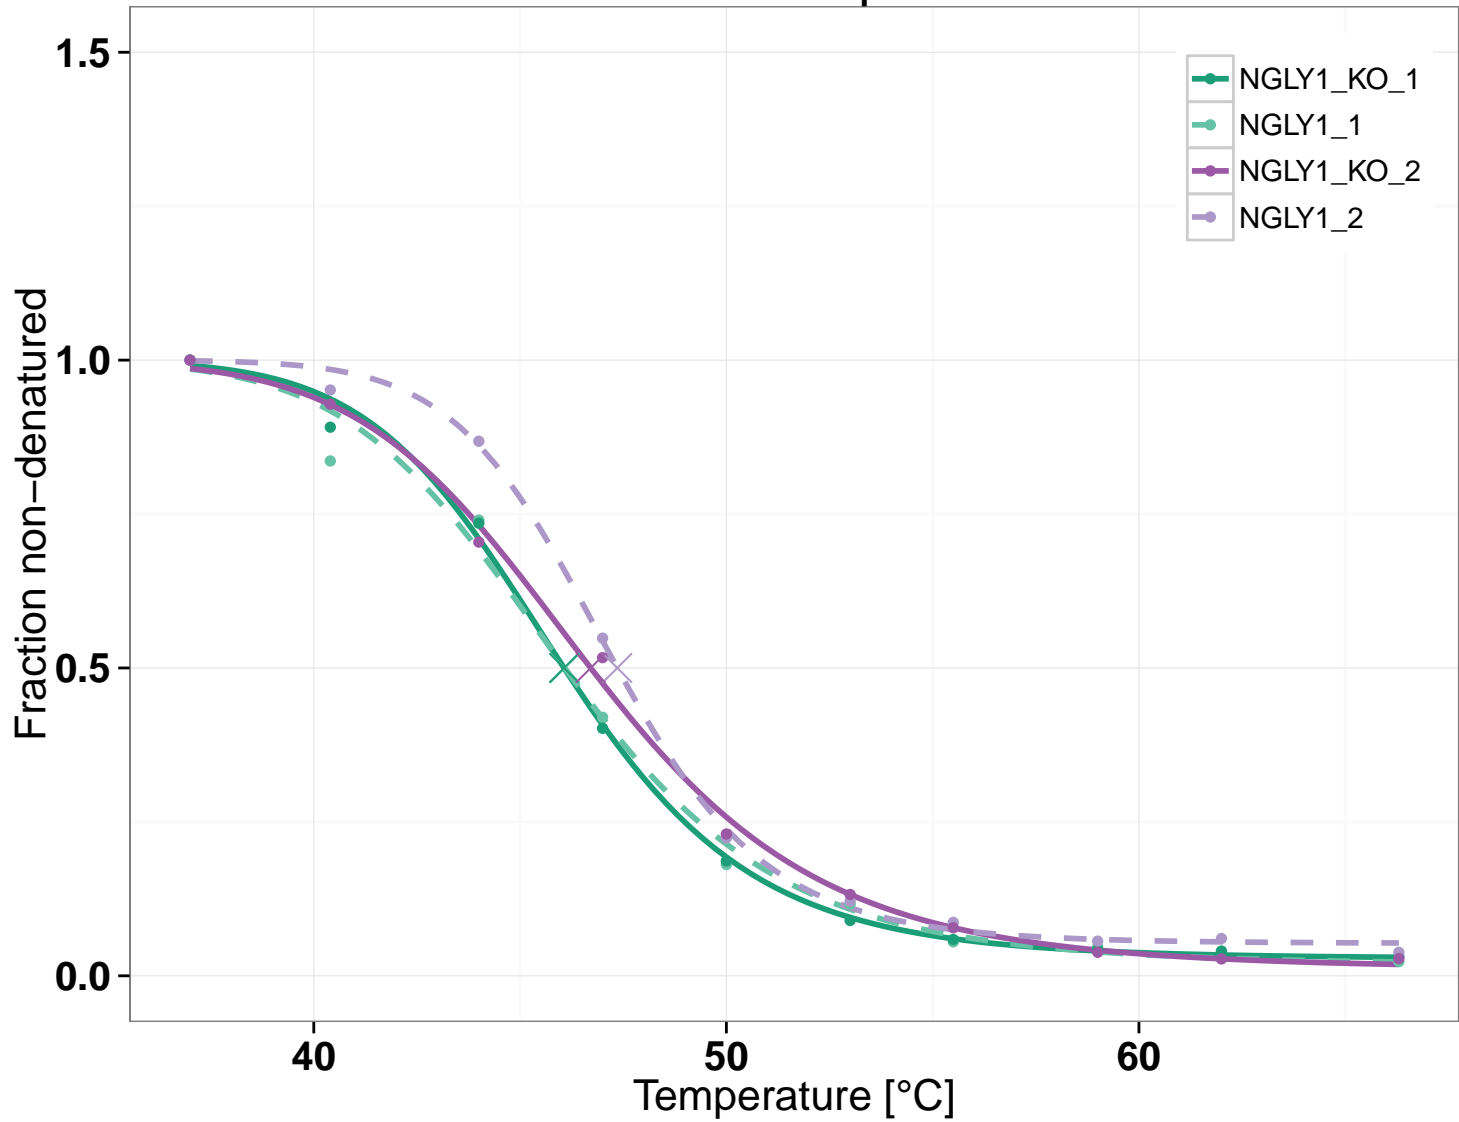

|            | meltPoint | slope  | plateau | R2   |
|------------|-----------|--------|---------|------|
| NGLY1_KO_1 | 46.07     | -0.1   | 0.03    | 1    |
| NGLY1_1    | 46.08     | -0.094 | 0.02    | 0.99 |
| NGLY1_KO_2 | 46.71     | -0.088 | 0.01    | 1    |
| NGLY1_2    | 47.36     | -0.12  | 0.05    | 1    |

Supplement: Supplementary file 8387 [file 1]

IPI00374294.5|MBOAT1

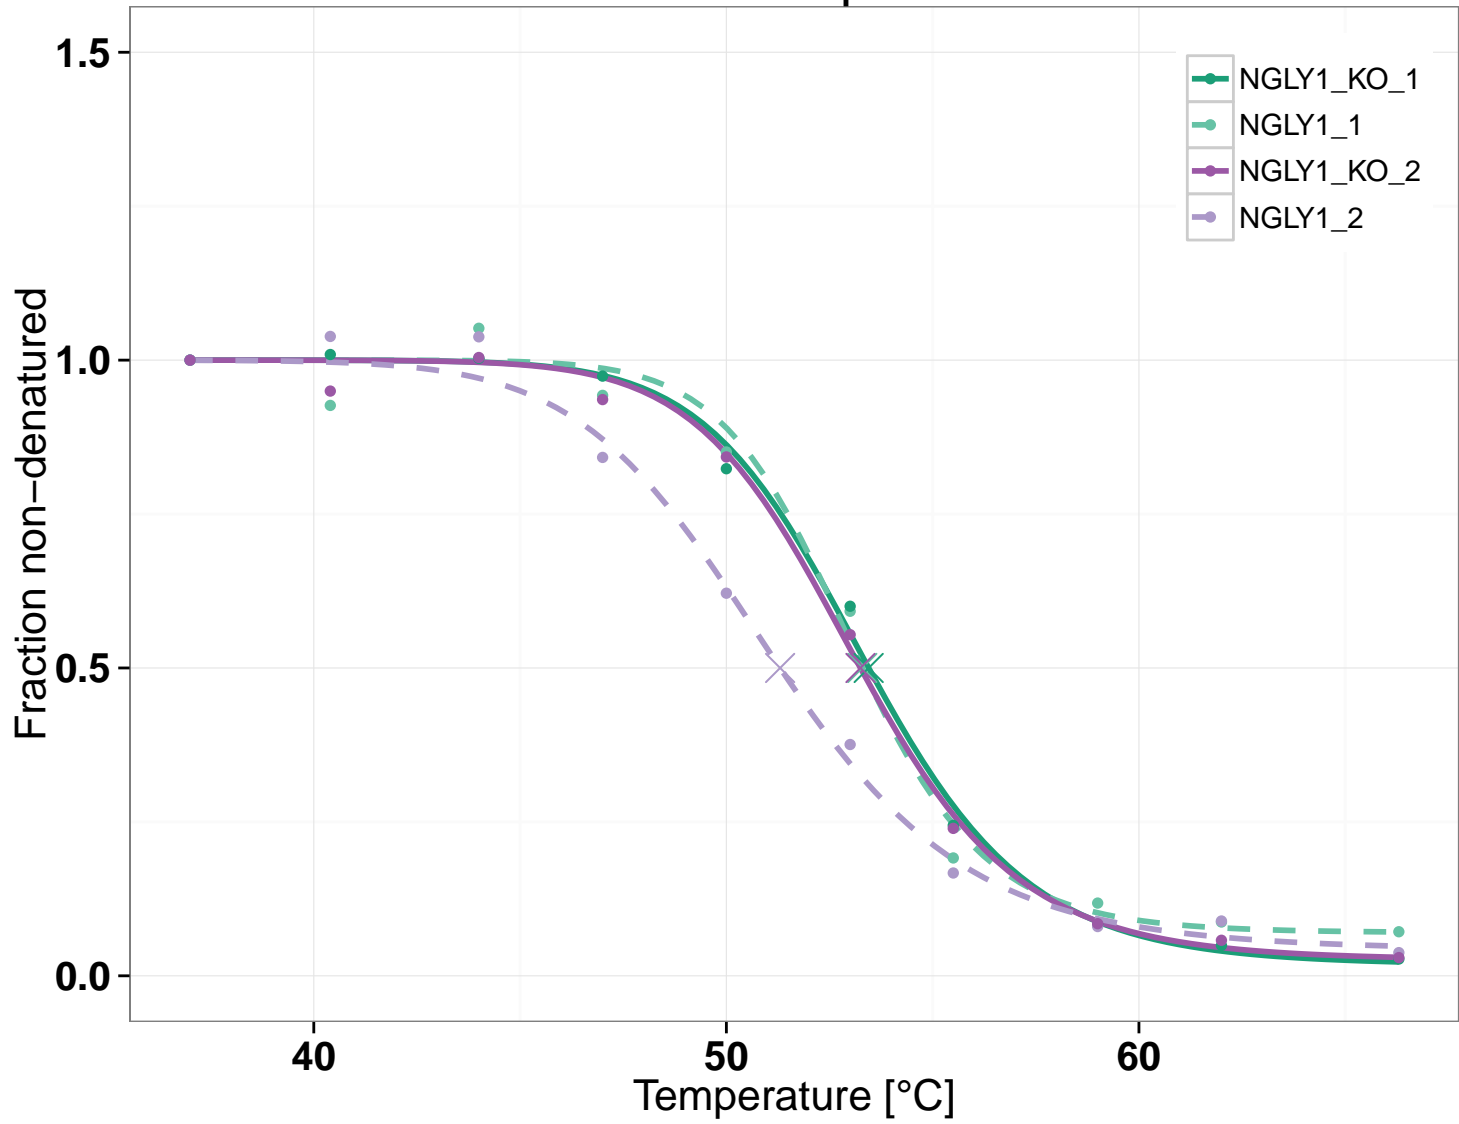

|            | meltPoint | slope | plateau | R2   |
|------------|-----------|-------|---------|------|
| NGLY1_KO_1 | 53.45     | -0.12 | 0.02    | 1    |
| NGLY1_1    | 53.29     | -0.14 | 0.07    | 0.99 |
| NGLY1_KO_2 | 53.25     | -0.12 | 0.03    | 1    |
| NGLY1_2    | 51.3      | -0.1  | 0.04    | 0.99 |

Supplement: Supplementary file 8388 [file 1]

IPI00006079.1|BCLAF1

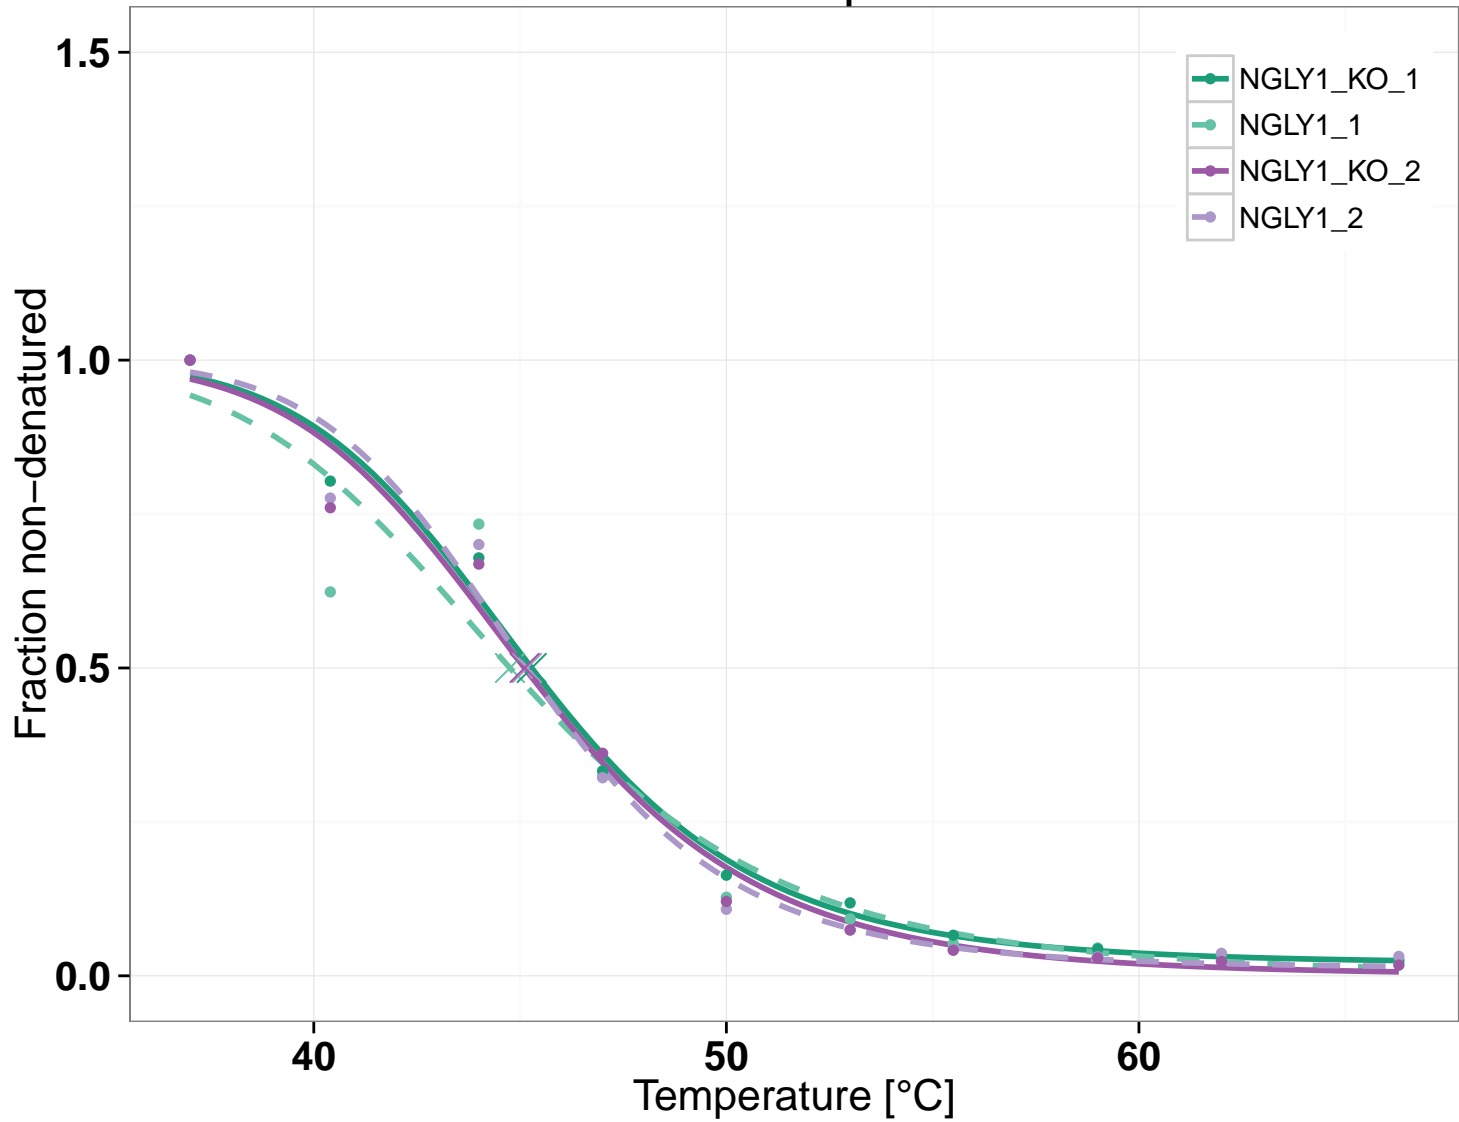

|            | meltPoint | slope  | plateau | R2   |
|------------|-----------|--------|---------|------|
| NGLY1_KO_1 | 45.28     | -0.089 | 0.02    | 0.99 |
| NGLY1_1    | 44.75     | -0.076 | 0       | 0.93 |
| NGLY1_KO_2 | 45.11     | -0.089 | 0       | 0.98 |
| NGLY1_2    | 45.17     | -0.099 | 0.01    | 0.98 |

Supplement: Supplementary file 8389 [file 1]

IPI00170548.1|ATAD2

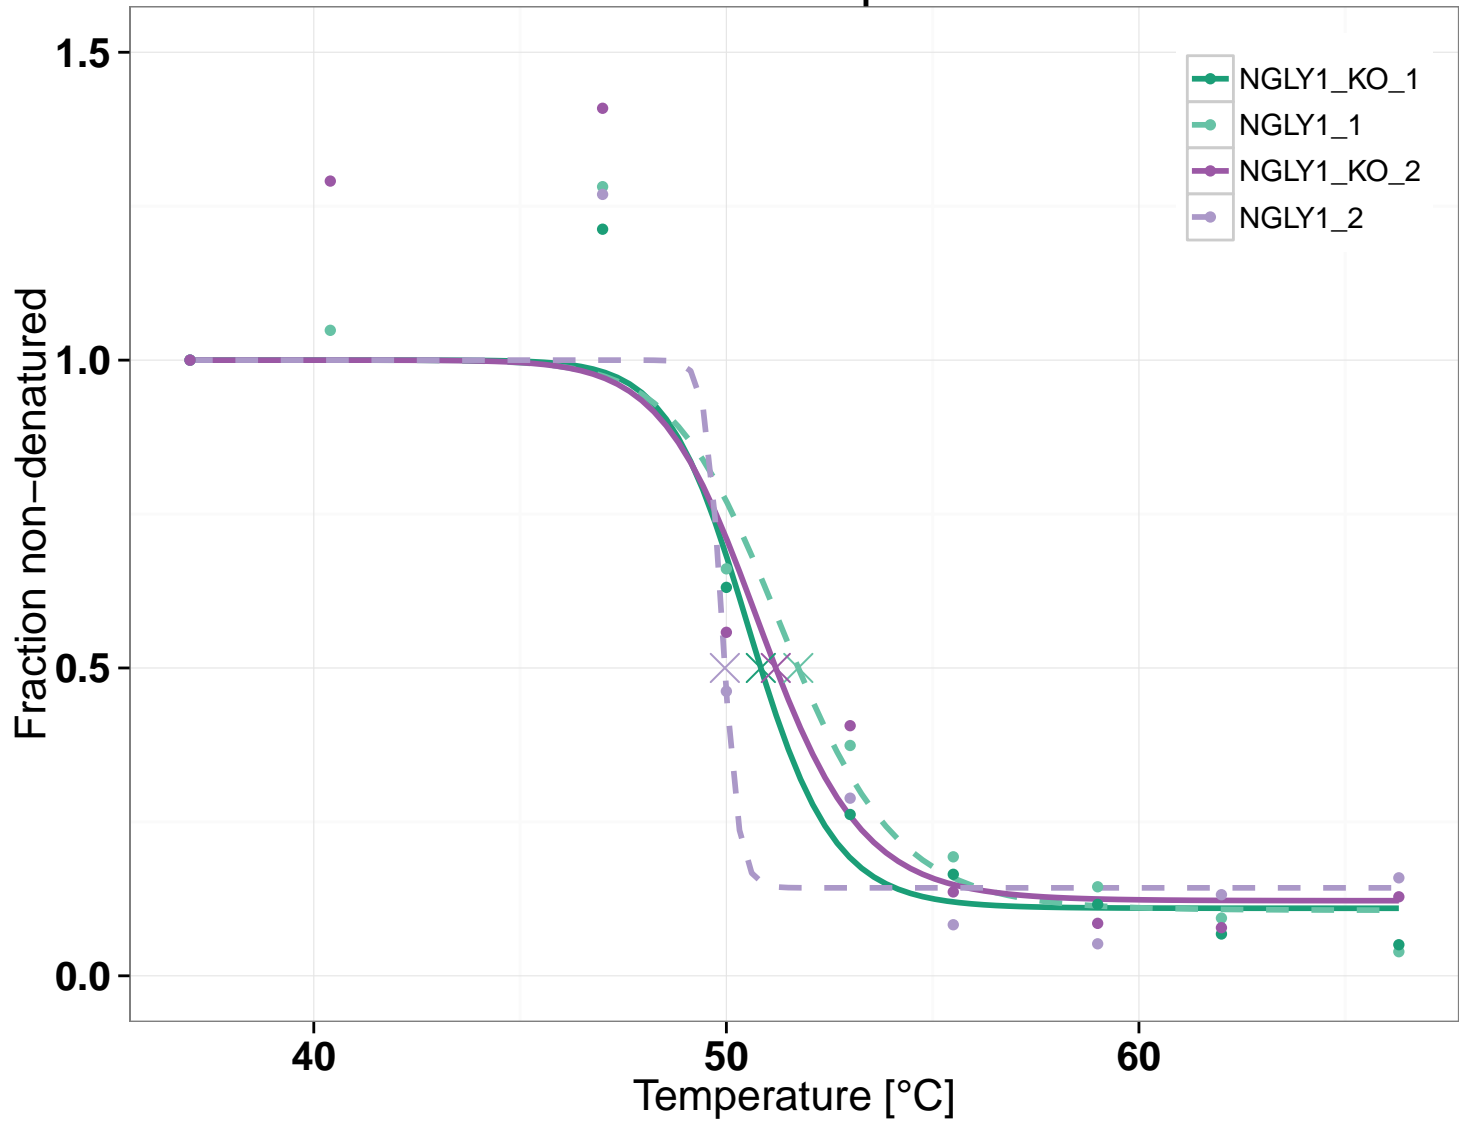

|            | meltPoint | slope | plateau | R2   |
|------------|-----------|-------|---------|------|
| NGLY1_KO_1 | 50.84     | -0.22 | 0.11    | 0.66 |
| NGLY1_1    | 51.74     | -0.16 | 0.11    | 0.77 |
| NGLY1_KO_2 | 51.2      | -0.18 | 0.12    | 0.73 |
| NGLY1_2    | 49.96     | -1.1  | 0.14    | 0.64 |

Supplement: Supplementary file 8390 [file 1]

IPI00217911.2|NUDT18

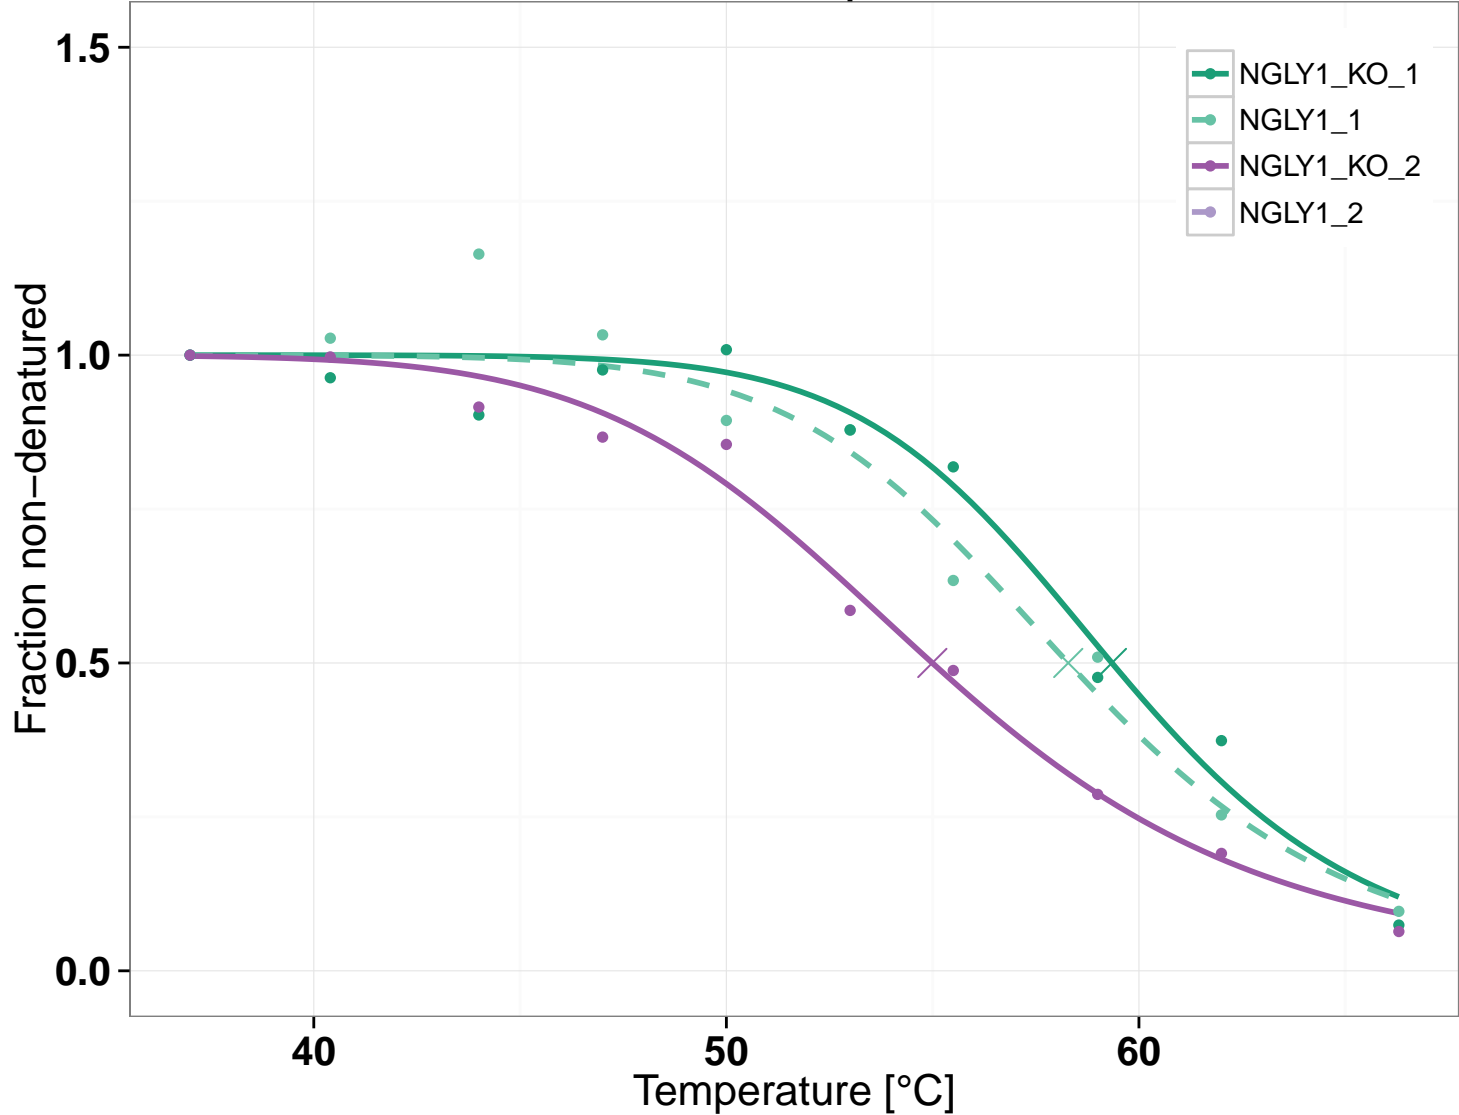

|            | meltPoint | slope  | plateau | R2   |
|------------|-----------|--------|---------|------|
| NGLY1_KO_1 | 59.34     | -0.081 | 0       | 0.98 |
| NGLY1_1    | 58.29     | -0.073 | 0       | 0.96 |
| NGLY1_KO_2 | 54.99     | -0.062 | 0       | 0.99 |
| NGLY1_2    | -         | -      | -       | -    |

Supplement: Supplementary file 8391 [file 1]

# IPI00215979.3|BPGM

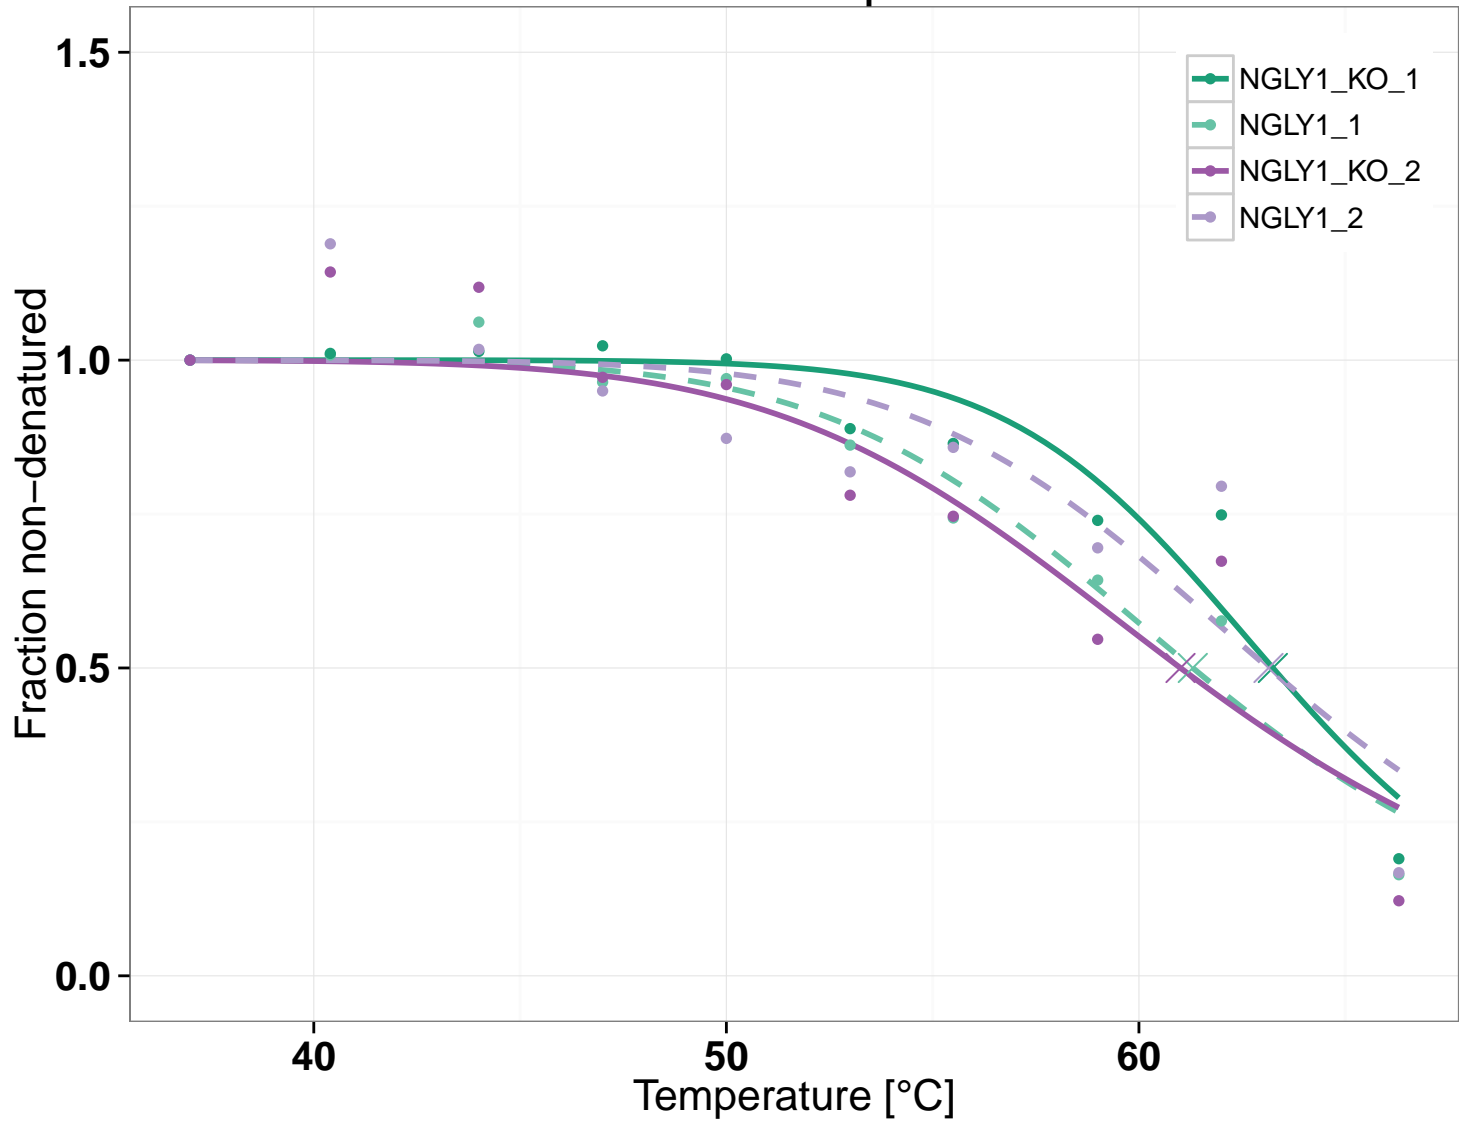

|            | meltPoint | slope  | plateau | R2   |
|------------|-----------|--------|---------|------|
| NGLY1_KO_1 | 63.25     | -0.078 | 0       | 0.91 |
| NGLY1_1    | 61.31     | -0.056 | 0       | 0.95 |
| NGLY1_KO_2 | 61.01     | -0.052 | 0       | 0.86 |
| NGLY1_2    | 63.14     | -0.058 | 0       | 0.78 |

Supplement: Supplementary file 8392 [file 1]

# IPI00478834.3|ARGLU1

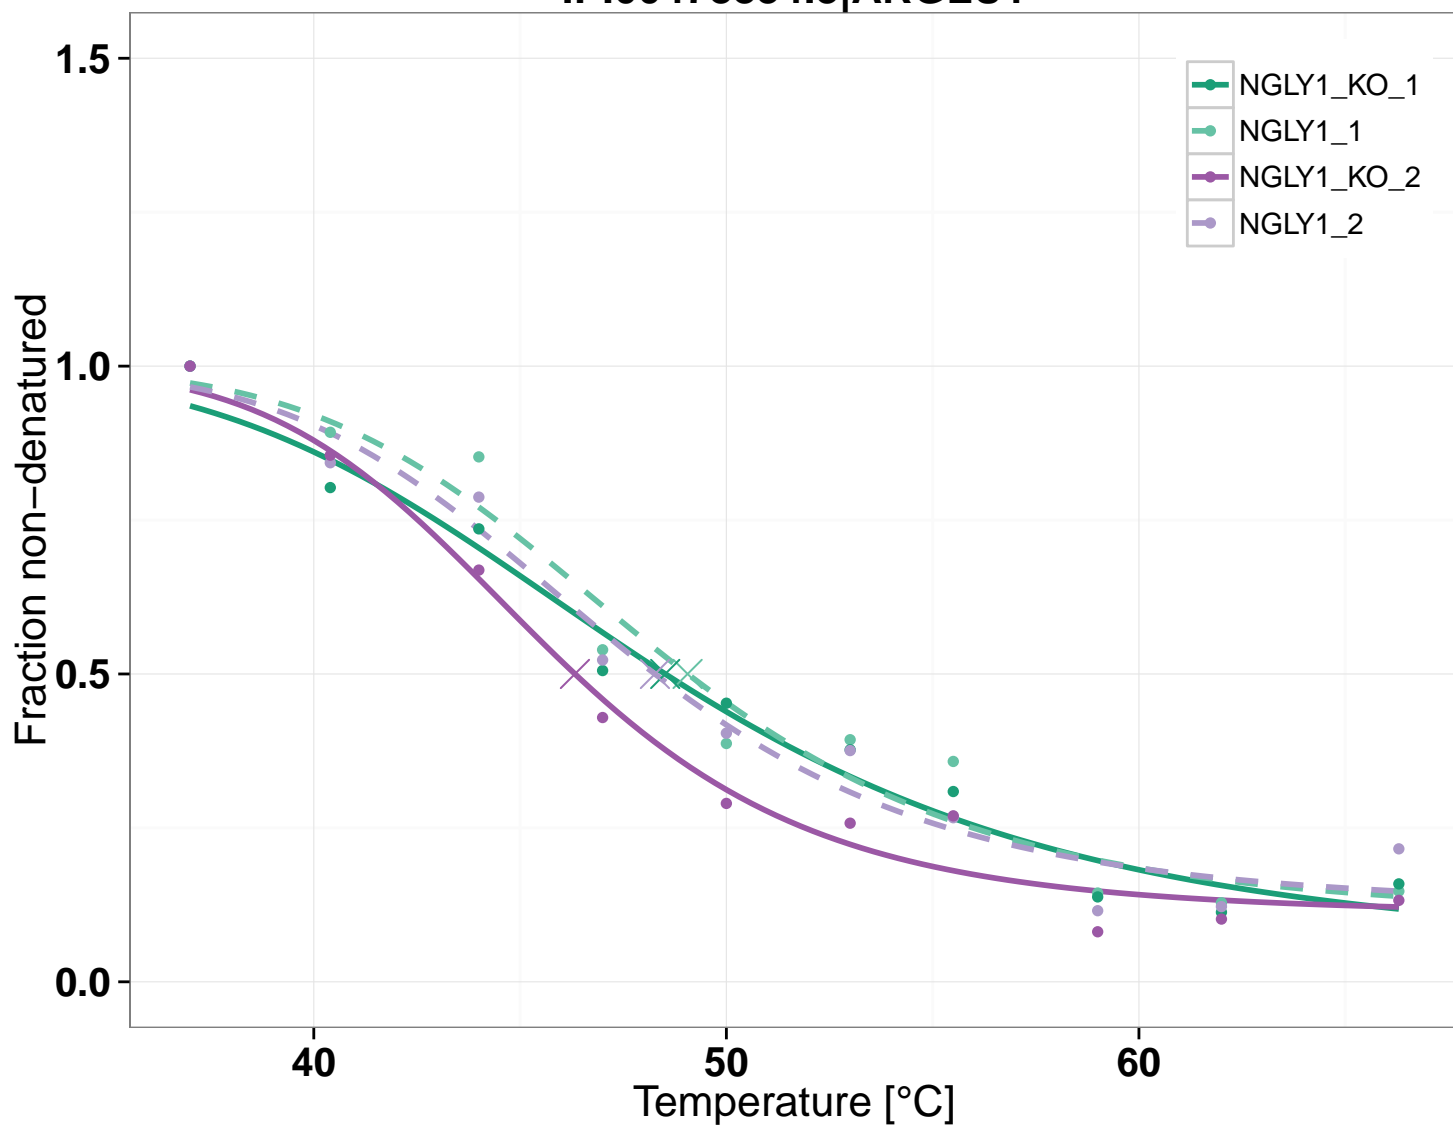

|            | meltPoint | slope  | plateau | R2   |
|------------|-----------|--------|---------|------|
| NGLY1_KO_1 | 48.52     | -0.046 | 0.04    | 0.97 |
| NGLY1_1    | 49.06     | -0.055 | 0.1     | 0.96 |
| NGLY1_KO_2 | 46.33     | -0.068 | 0.11    | 0.98 |
| NGLY1_2    | 48.27     | -0.056 | 0.12    | 0.97 |

Supplement: Supplementary file 8393 [file 1]

IPI00032823.1|EXOSC1

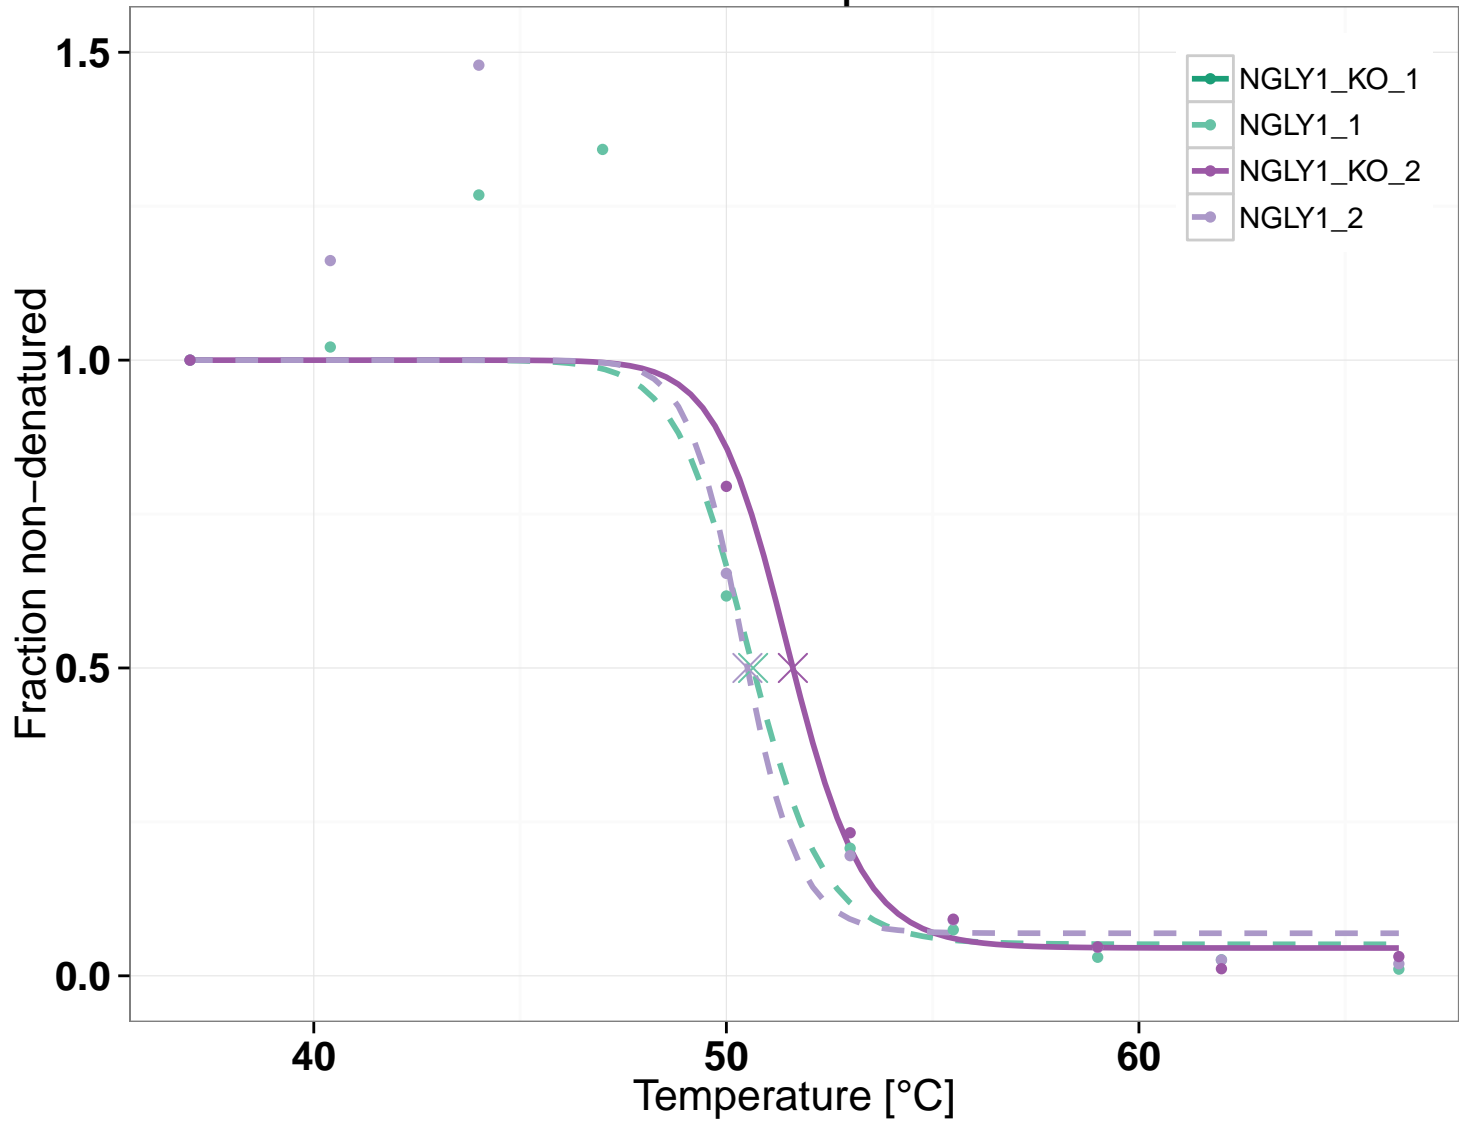

|            | meltPoint | slope | plateau | R2   |
|------------|-----------|-------|---------|------|
| NGLY1_KO_1 | -         | -     | -       | -    |
| NGLY1_1    | 50.65     | -0.26 | 0.05    | 0.92 |
| NGLY1_KO_2 | 51.61     | -0.27 | 0.05    | 0.65 |
| NGLY1_2    | 50.51     | -0.35 | 0.07    | 0.84 |

Supplement: Supplementary file 8394 [file 1]

IPI00807348.2|FAM128A

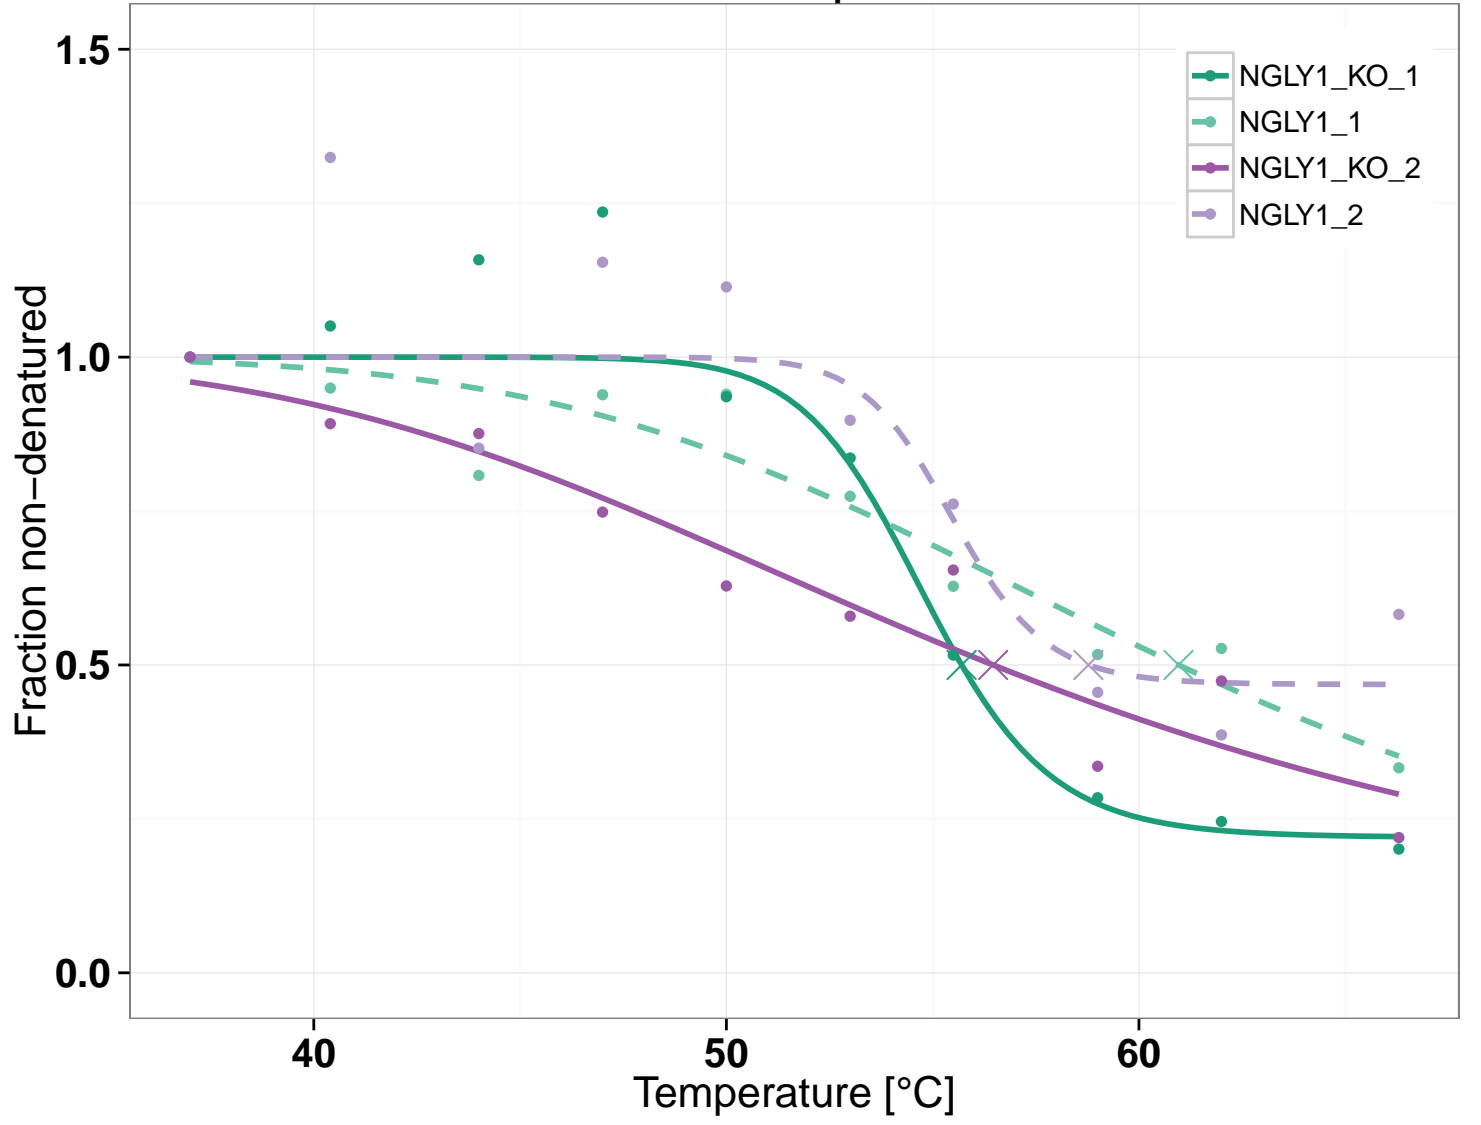

|            | meltPoint | slope  | plateau | R2   |
|------------|-----------|--------|---------|------|
| NGLY1_KO_1 | 55.7      | -0.13  | 0.22    | 0.94 |
| NGLY1_1    | 60.96     | -0.033 | 0       | 0.91 |
| NGLY1_KO_2 | 56.47     | -0.03  | 0       | 0.91 |
| NGLY1_2    | 58.78     | -0.12  | 0.47    | 0.78 |

Supplement: Supplementary file 8395 [file 1]

IPI00022904.5|PPP4R2

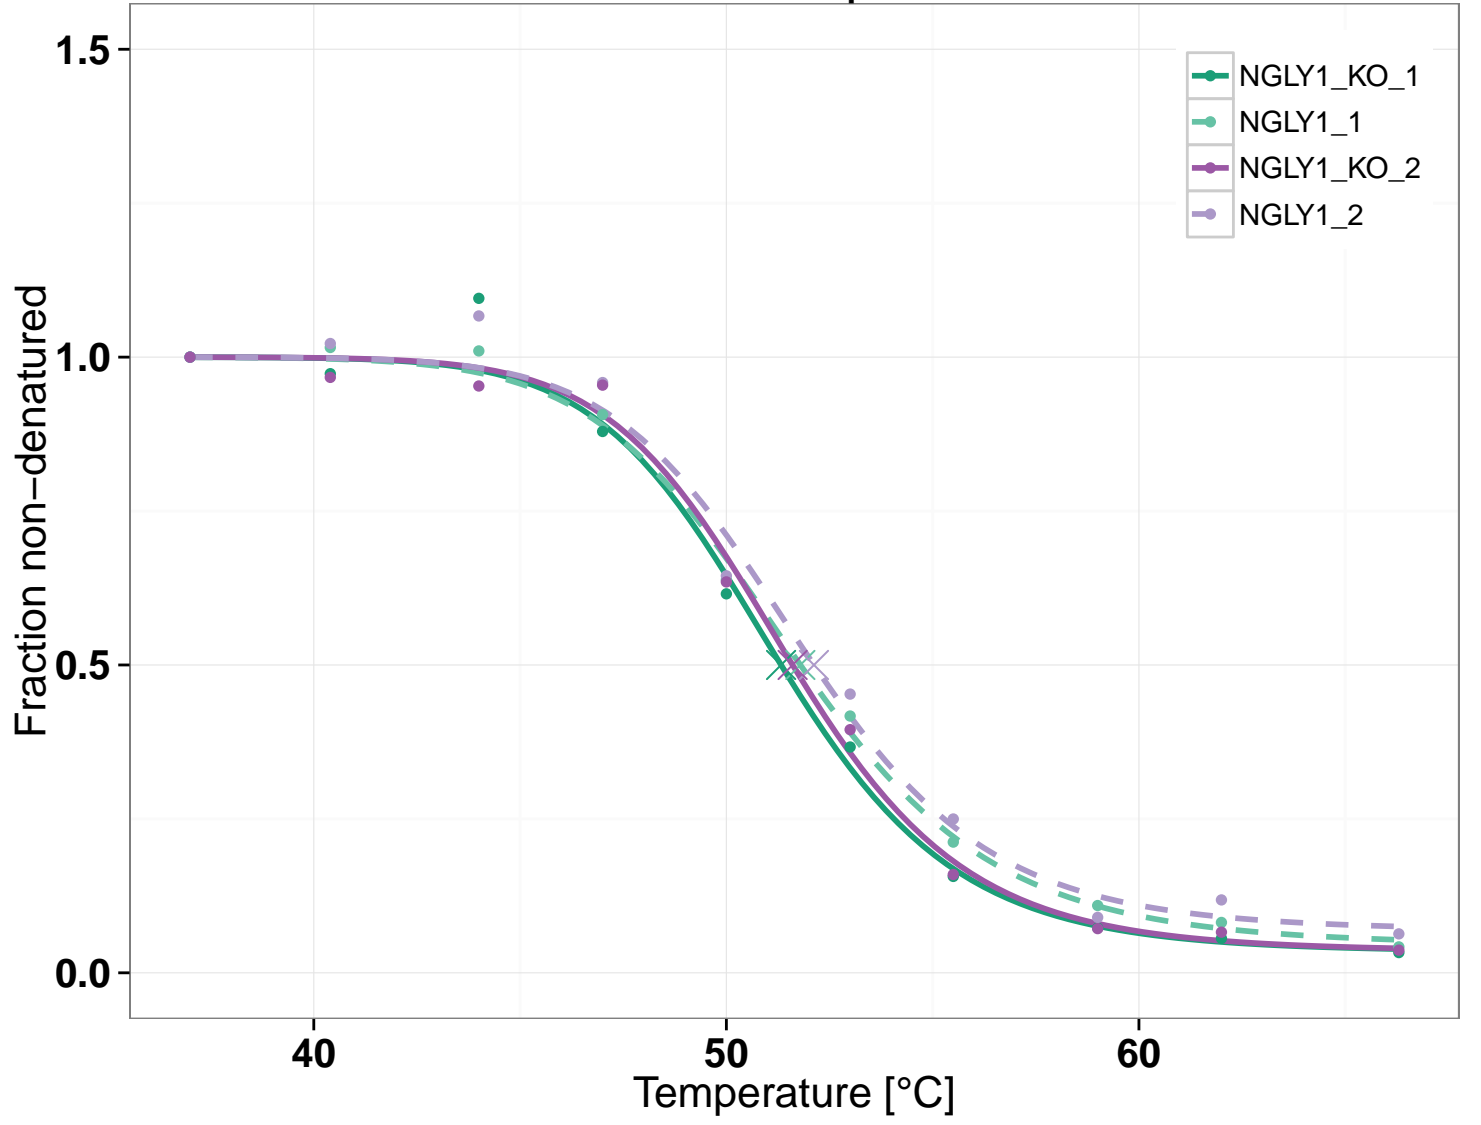

|            | meltPoint | slope  | plateau | R2   |
|------------|-----------|--------|---------|------|
| NGLY1_KO_1 | 51.33     | -0.11  | 0.03    | 0.99 |
| NGLY1_1    | 51.79     | -0.098 | 0.04    | 1    |
| NGLY1_KO_2 | 51.61     | -0.11  | 0.03    | 1    |
| NGLY1_2    | 52.12     | -0.1   | 0.07    | 0.99 |

Supplement: Supplementary file 8396 [file 1]

# IPI00297251.3|MGRN1

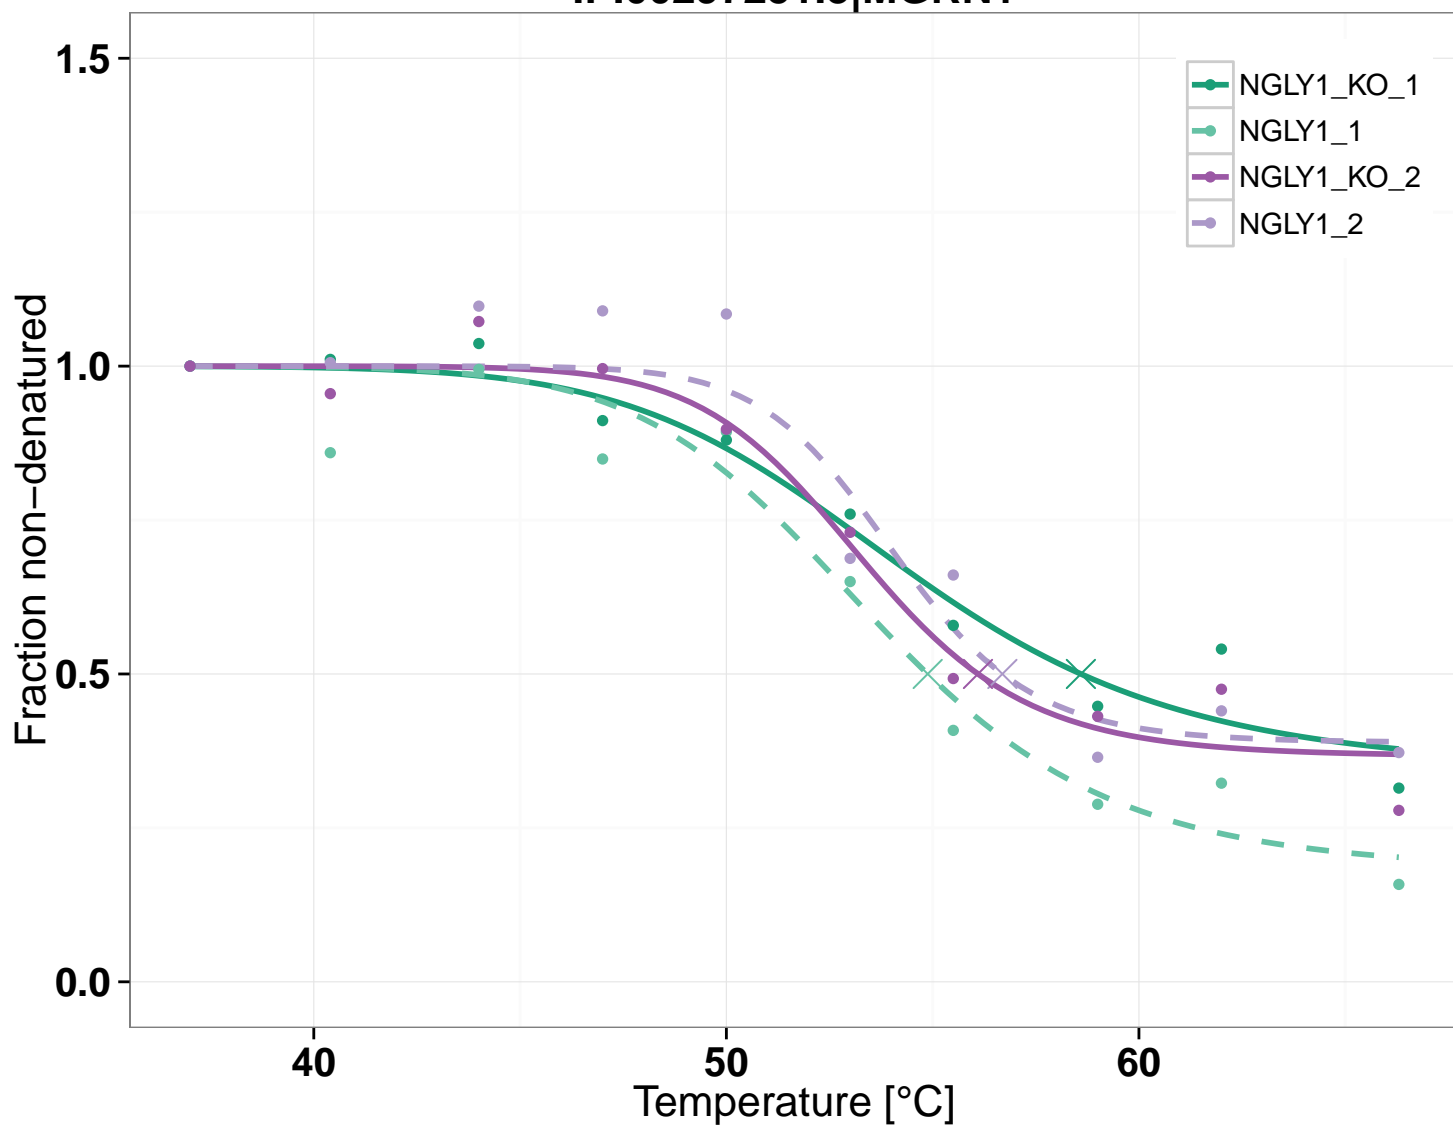

|            | meltPoint | slope  | plateau | R2   |
|------------|-----------|--------|---------|------|
| NGLY1_KO_1 | 58.59     | -0.049 | 0.34    | 0.96 |
| NGLY1_1    | 54.88     | -0.072 | 0.18    | 0.95 |
| NGLY1_KO_2 | 56.1      | -0.08  | 0.37    | 0.96 |
| NGLY1_2    | 56.69     | -0.093 | 0.39    | 0.93 |

Supplement: Supplementary file 8397 [file 1]

# IPI00026524.5|ZNF700

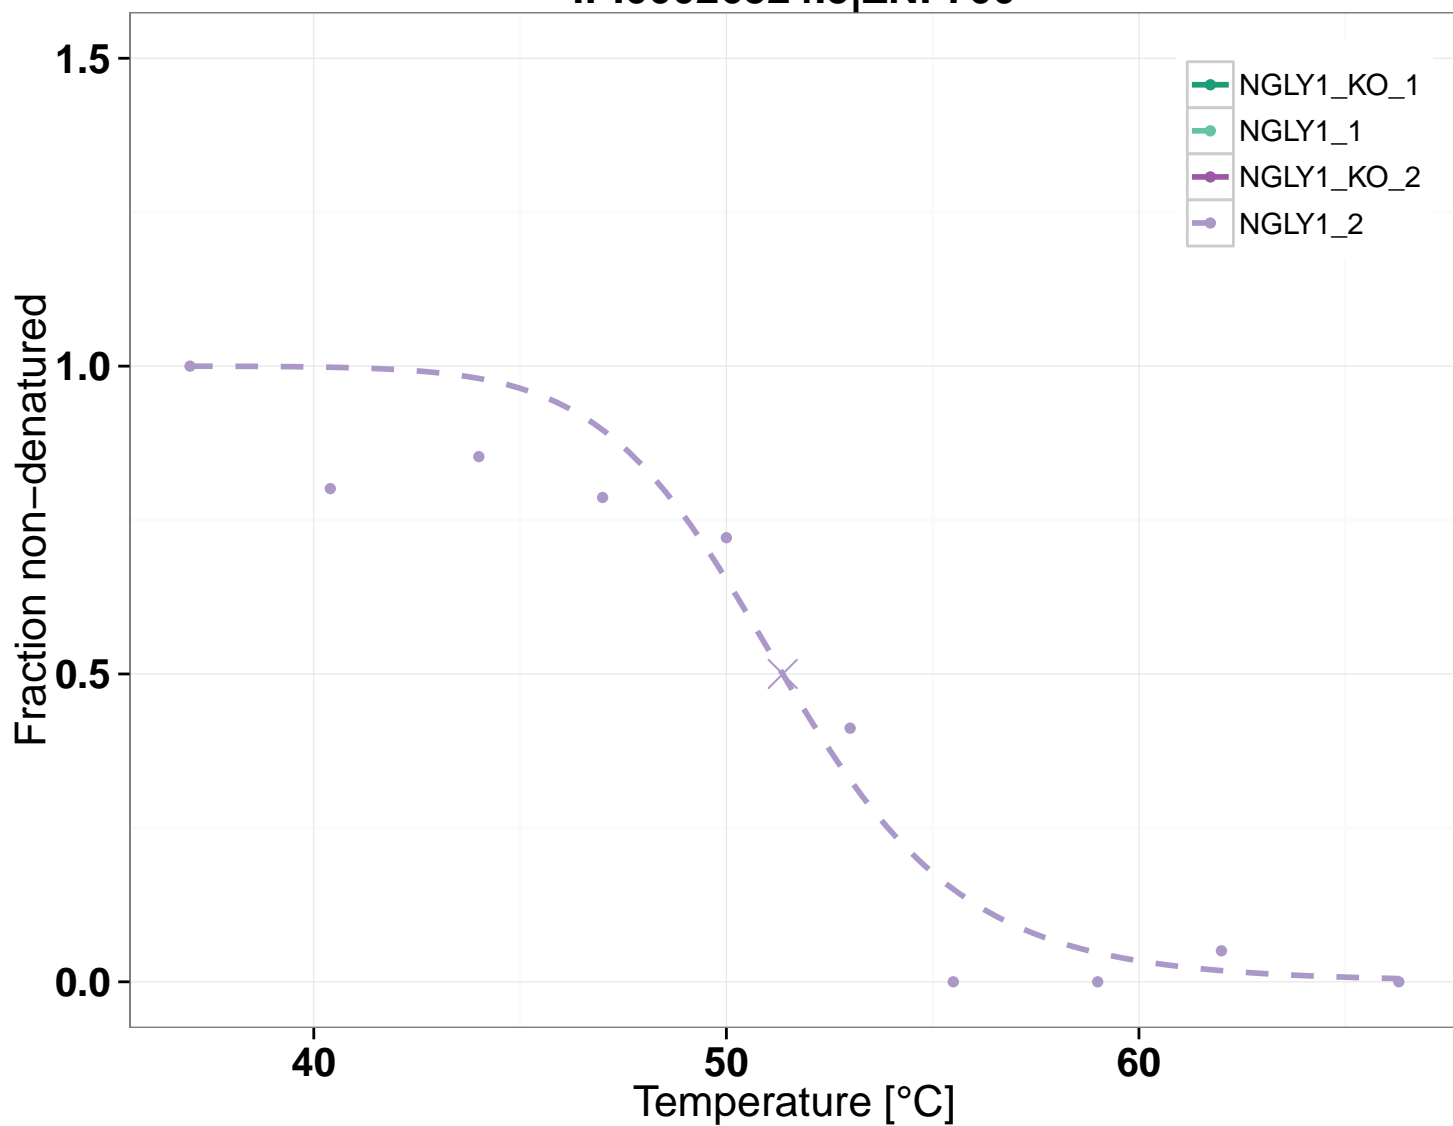

|            | meltPoint | slope | plateau | R2   |
|------------|-----------|-------|---------|------|
| NGLY1_KO_1 | -         | -     | -       | -    |
| NGLY1_1    | -         | -     | -       | -    |
| NGLY1_KO_2 | -         | -     | -       | -    |
| NGLY1_2    | 51.37     | -0.11 | 0       | 0.93 |

Supplement: Supplementary file 8398 [file 1]

# IPI00009906.5|ARMCX3

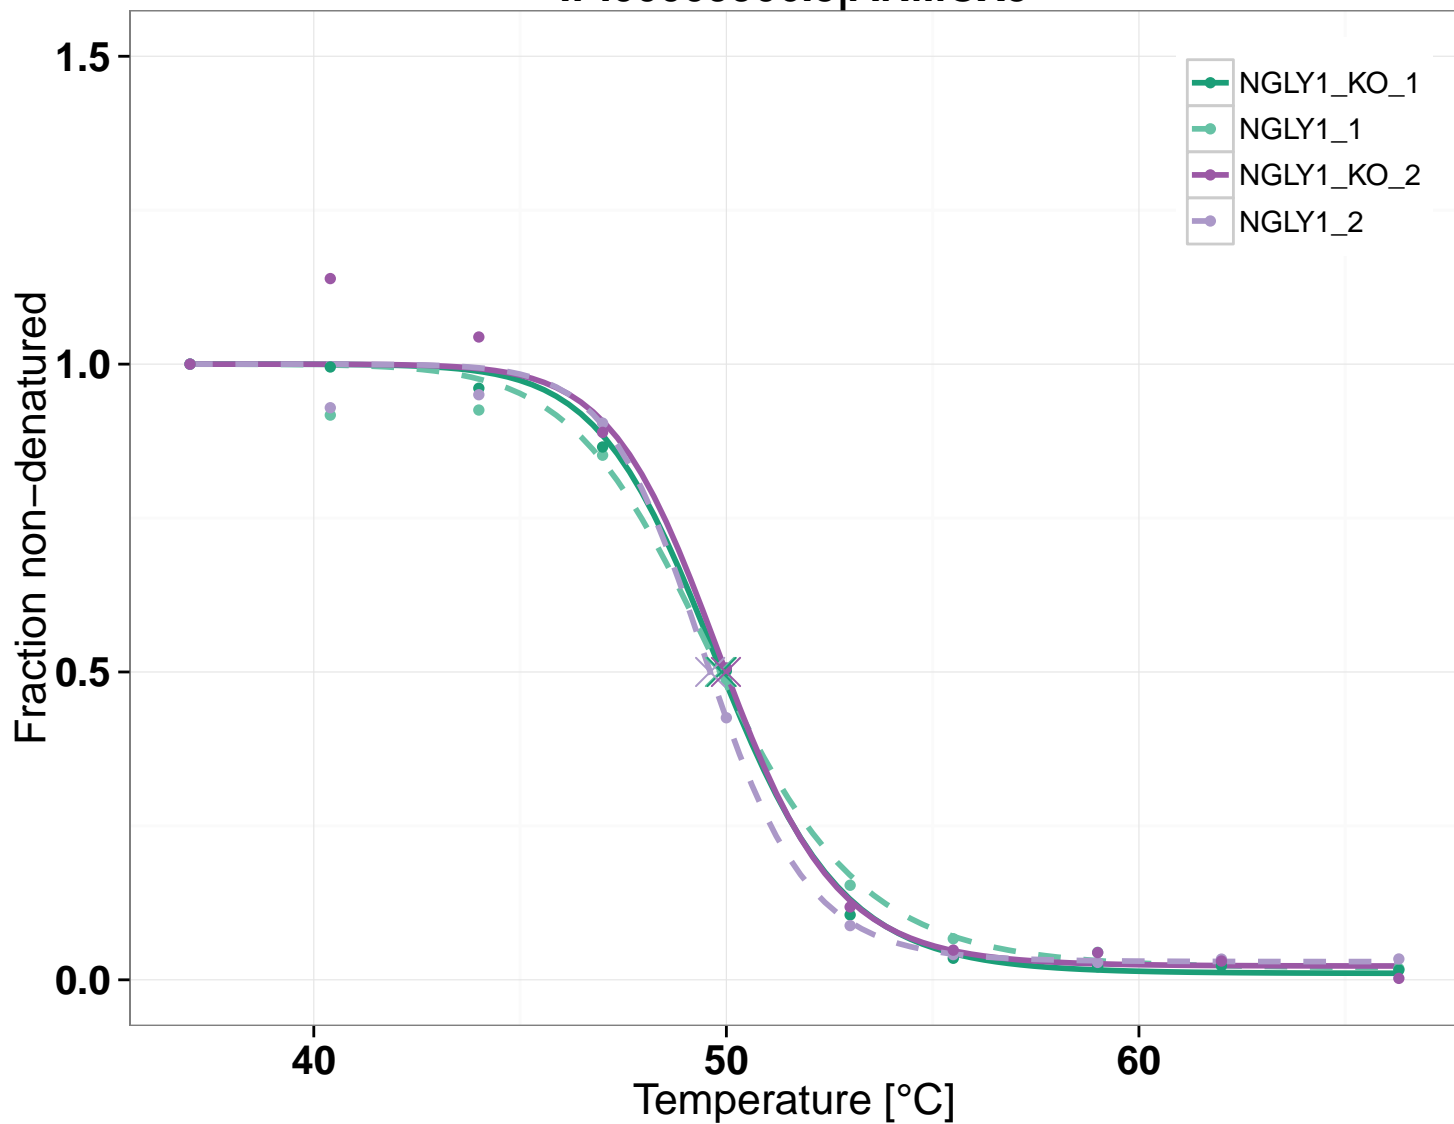

|            | meltPoint | slope | plateau | R2   |
|------------|-----------|-------|---------|------|
| NGLY1_KO_1 | 49.88     | -0.17 | 0.01    | 1    |
| NGLY1_1    | 49.84     | -0.14 | 0.02    | 0.99 |
| NGLY1_KO_2 | 49.99     | -0.18 | 0.02    | 0.99 |
| NGLY1_2    | 49.61     | -0.2  | 0.03    | 1    |

Supplement: Supplementary file 8399 [file 1]

IPI00174390.3|PDE12

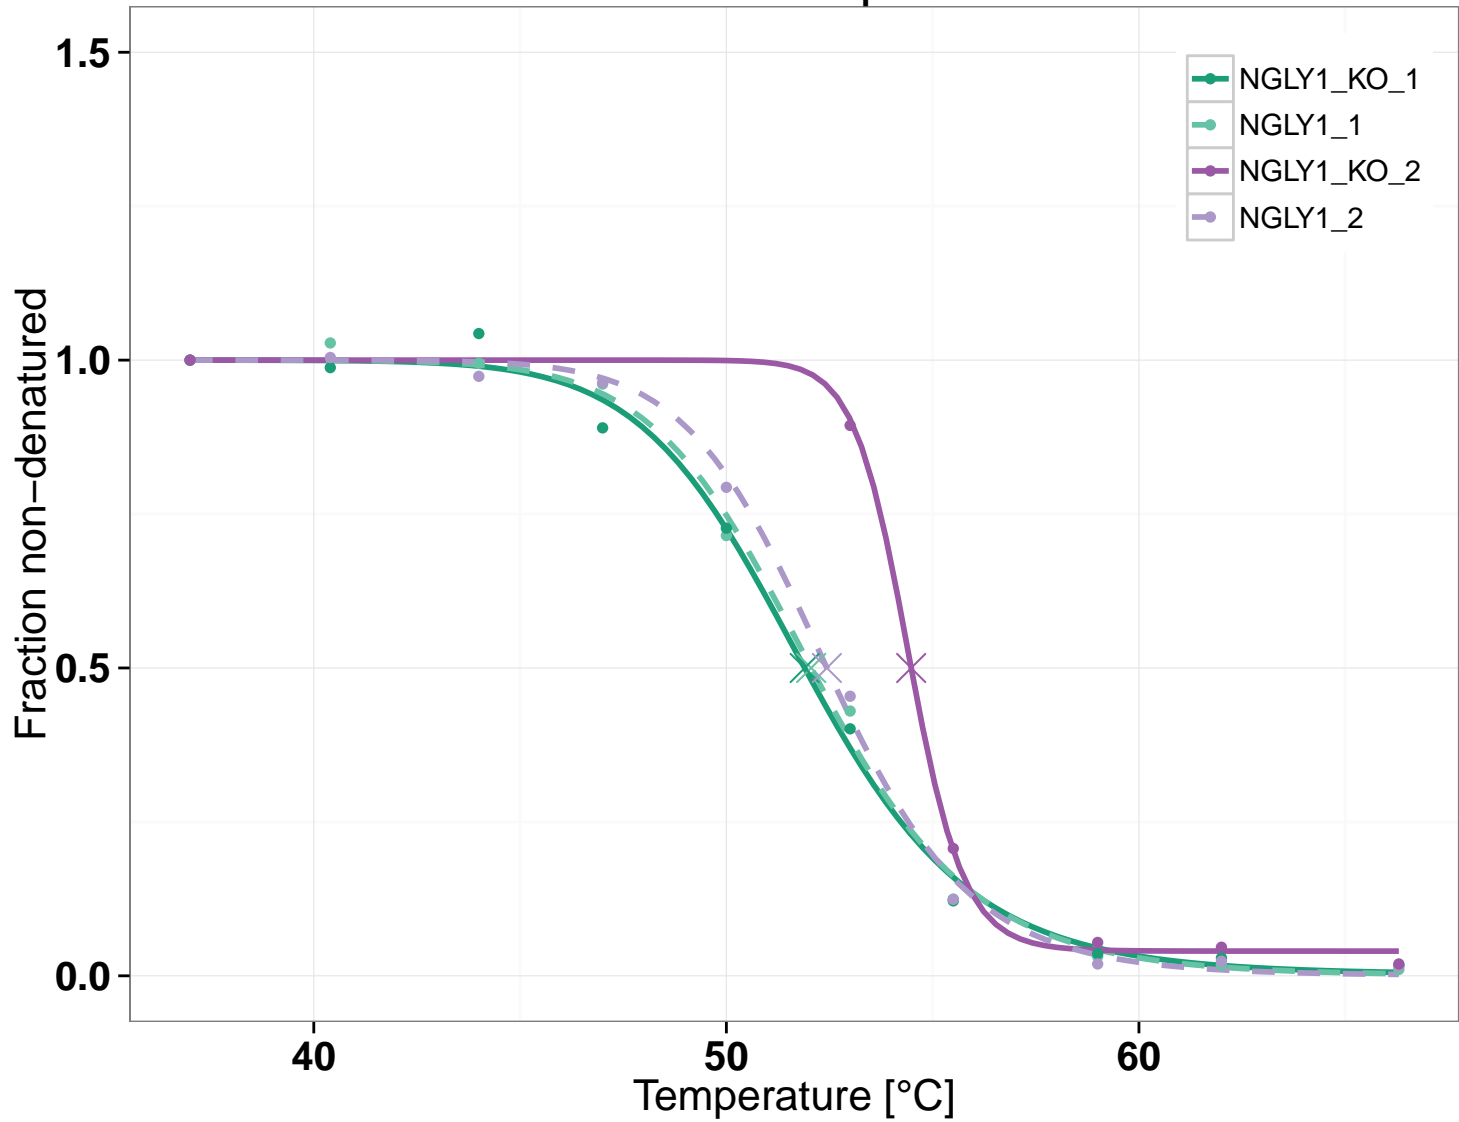

|            | meltPoint | slope | plateau | R2   |
|------------|-----------|-------|---------|------|
| NGLY1_KO_1 | 51.9      | -0.12 | 0       | 1    |
| NGLY1_1    | 52.06     | -0.13 | 0       | 1    |
| NGLY1_KO_2 | 54.48     | -0.36 | 0.04    | 0.55 |
| NGLY1_2    | 52.44     | -0.15 | 0       | 1    |

Supplement: Supplementary file 8400 [file 1]

IPI00401962.2|CCDC137

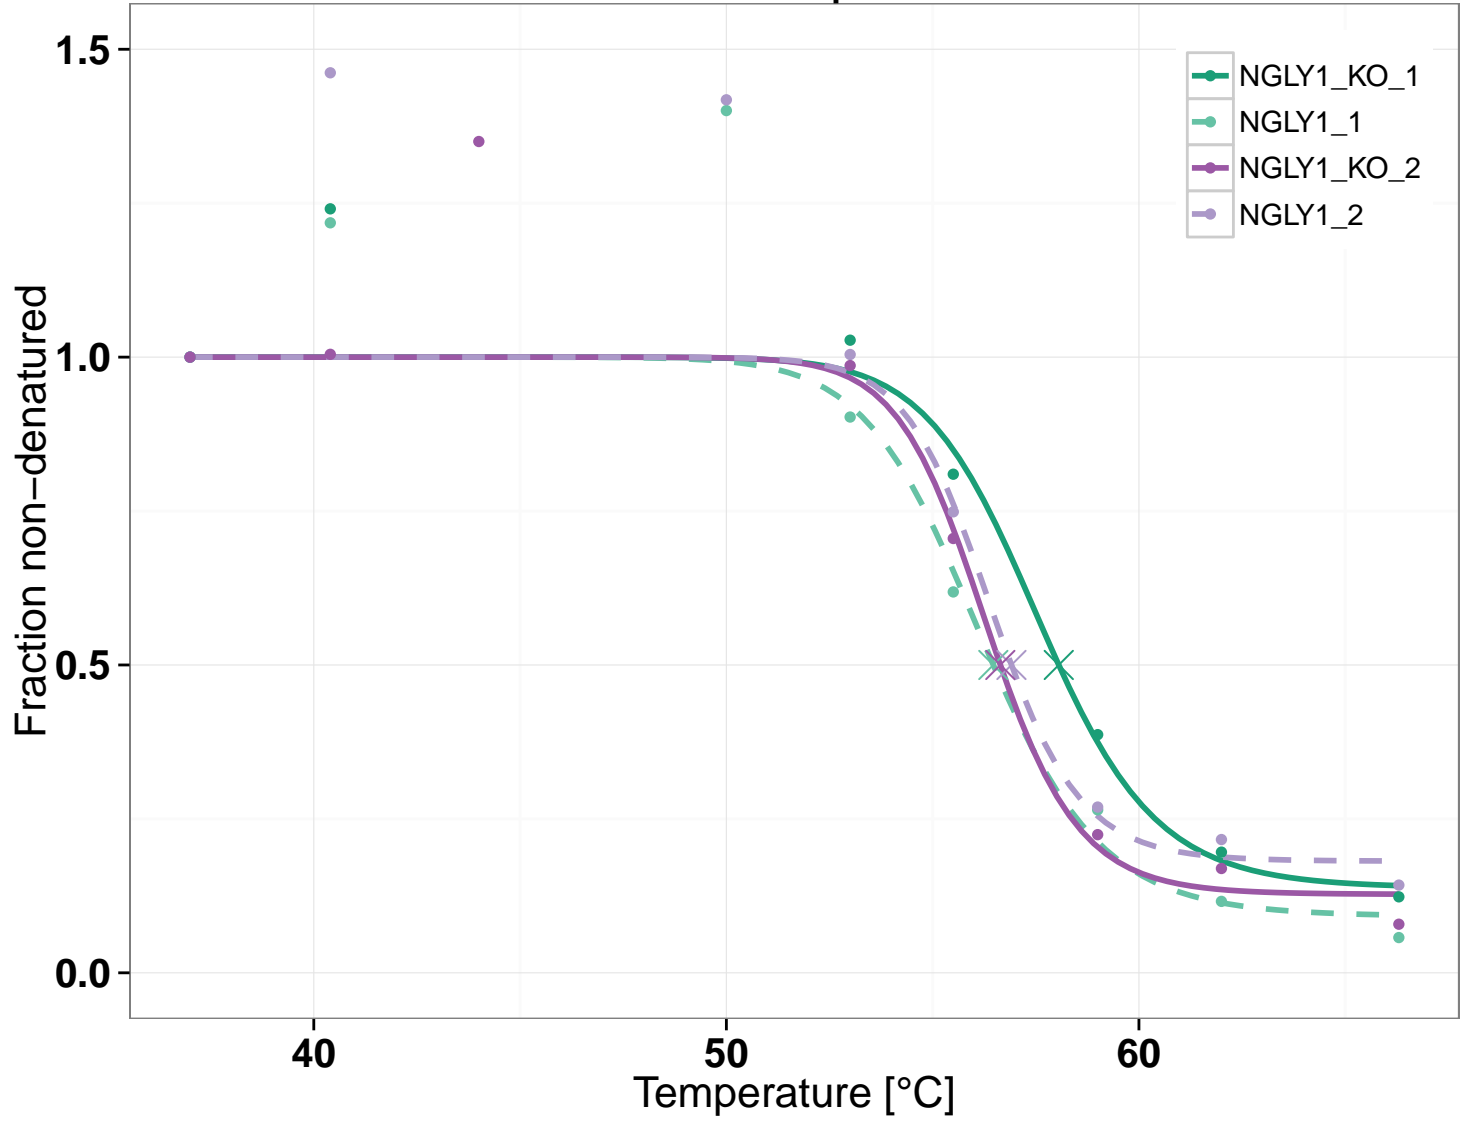

|            | meltPoint | slope | plateau | R2   |
|------------|-----------|-------|---------|------|
| NGLY1_KO_1 | 58.06     | -0.15 | 0.14    | 0.52 |
| NGLY1_1    | 56.47     | -0.16 | 0.09    | 0.65 |
| NGLY1_KO_2 | 56.64     | -0.2  | 0.13    | 0.75 |
| NGLY1_2    | 56.91     | -0.19 | 0.18    | 0.53 |

Supplement: Supplementary file 8401 [file 1]

IPI00002240.1|FAM118B

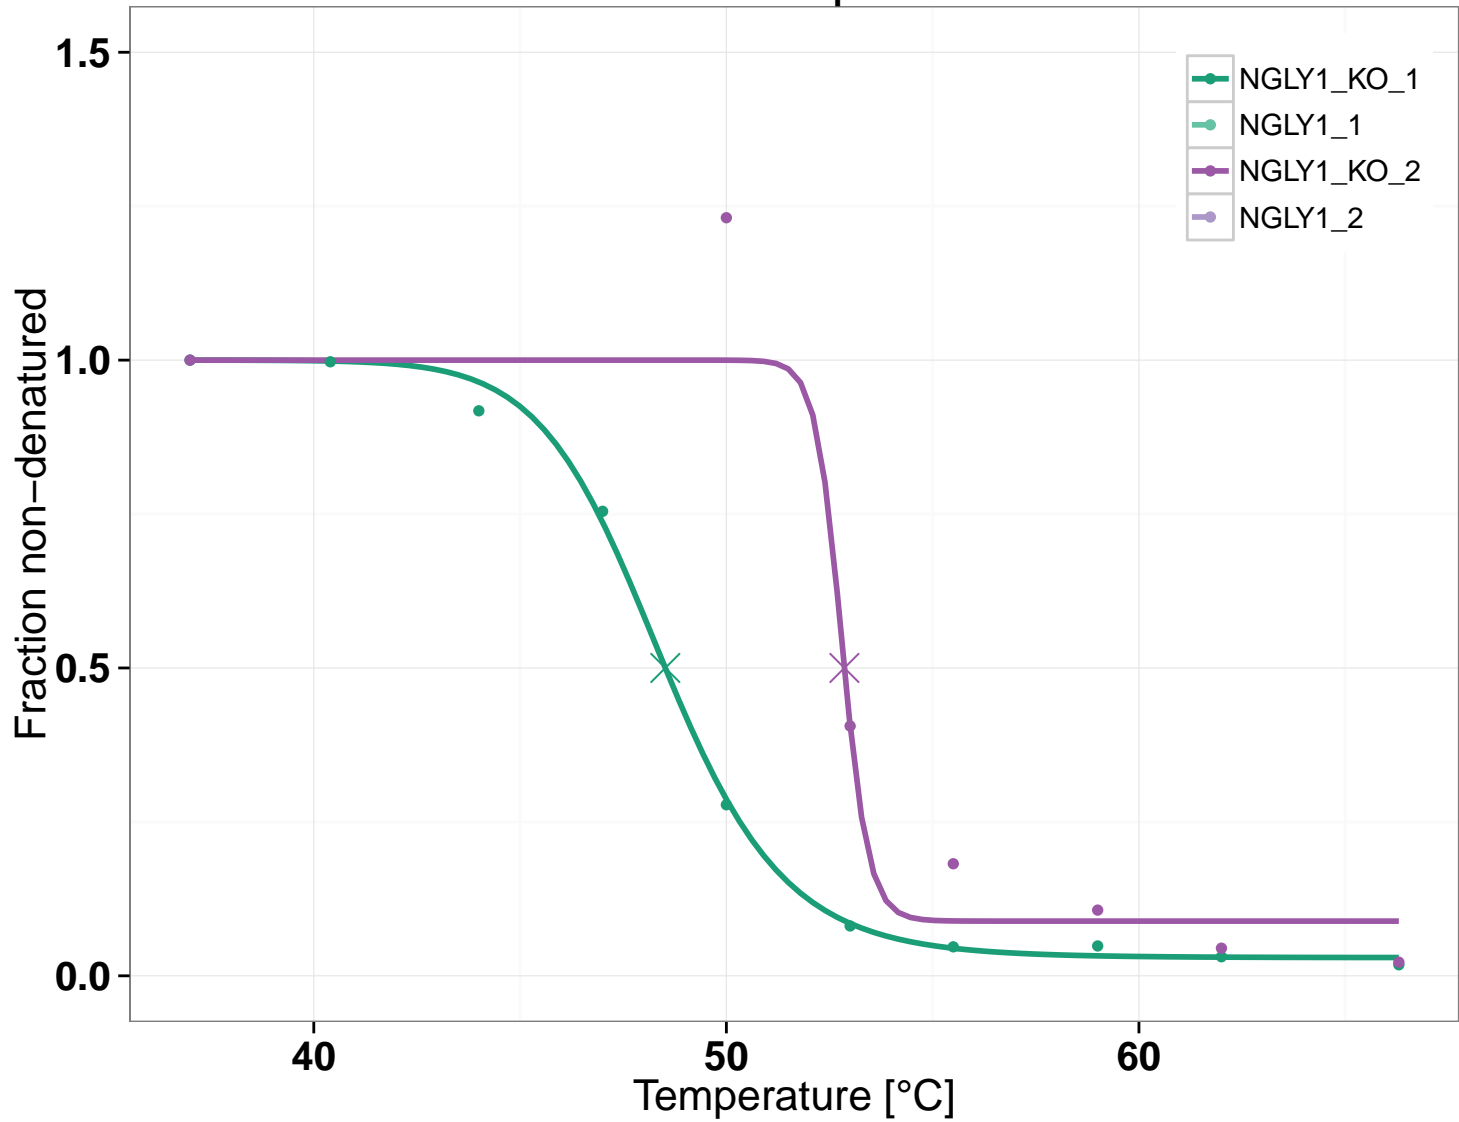

|            | meltPoint | slope | plateau | R2   |
|------------|-----------|-------|---------|------|
| NGLY1_KO_1 | 48.52     | -0.16 | 0.03    | 1    |
| NGLY1_1    | -         | -     | -       | -    |
| NGLY1_KO_2 | 52.86     | -0.71 | 0.09    | 0.13 |
| NGLY1_2    | -         | -     | -       | -    |

Supplement: Supplementary file 8402 [file 1]

# IPI00642369.2|ELP2

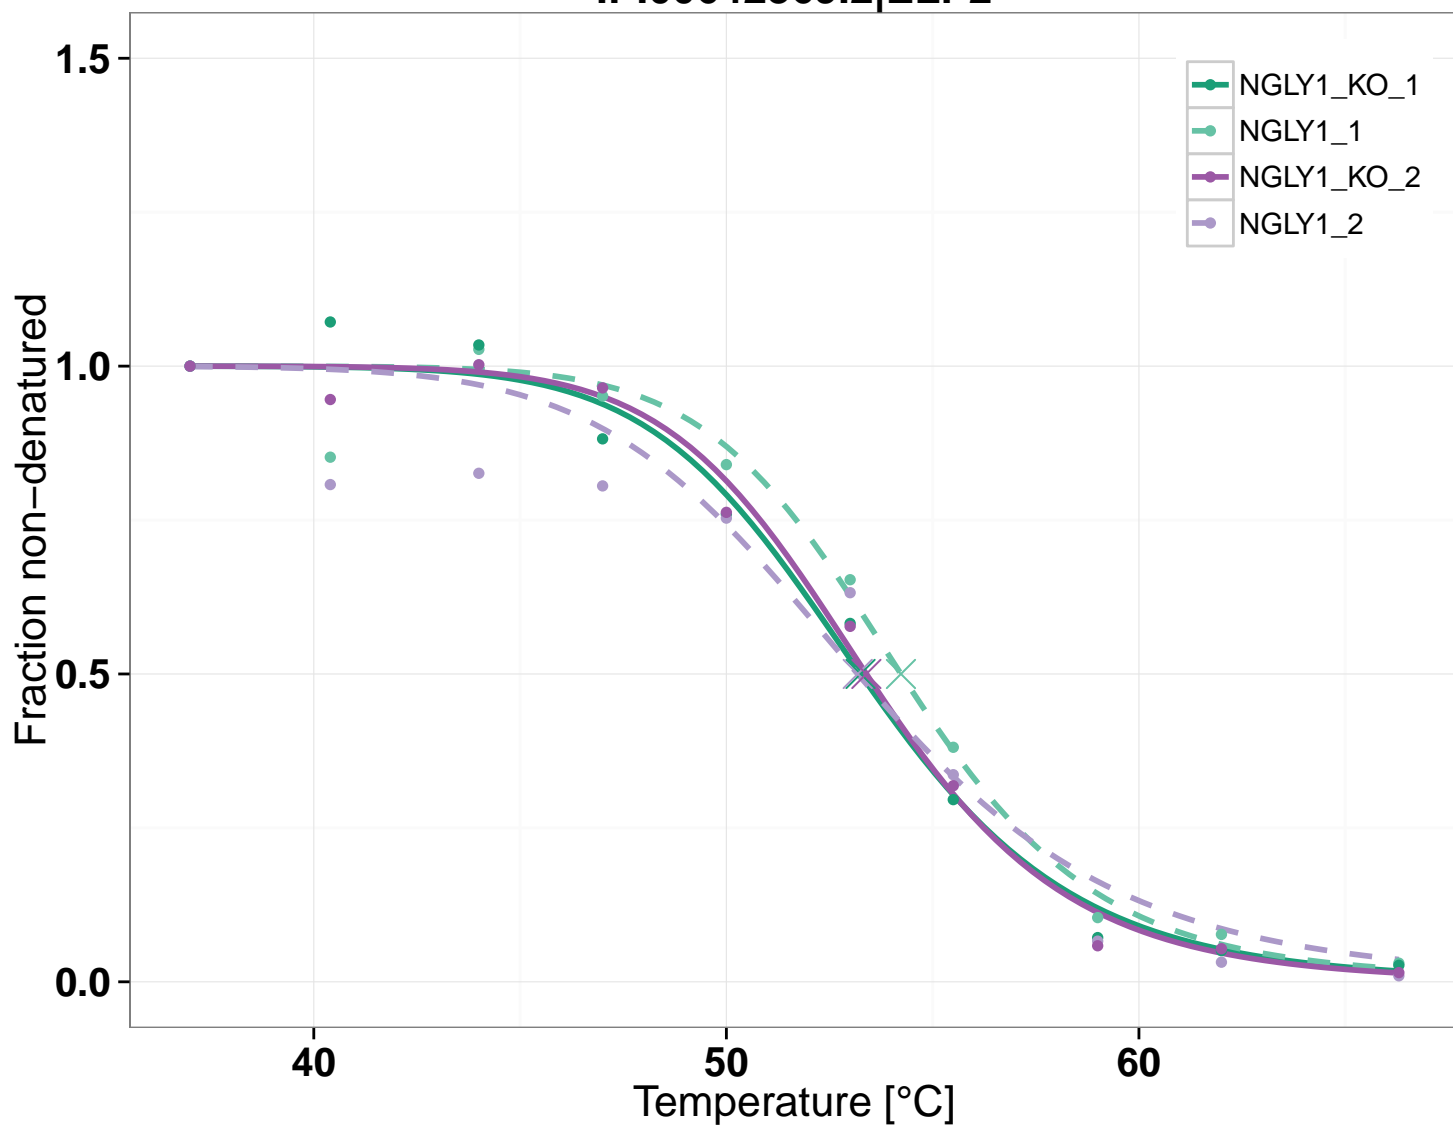

|            | meltPoint | slope  | plateau | R2   |
|------------|-----------|--------|---------|------|
| NGLY1_KO_1 | 53.25     | -0.097 | 0       | 0.99 |
| NGLY1_1    | 54.23     | -0.1   | 0       | 0.98 |
| NGLY1_KO_2 | 53.39     | -0.1   | 0       | 0.99 |
| NGLY1_2    | 53.18     | -0.079 | 0       | 0.93 |

Supplement: Supplementary file 8403 [file 1]

IPI00001753.1|MYH4

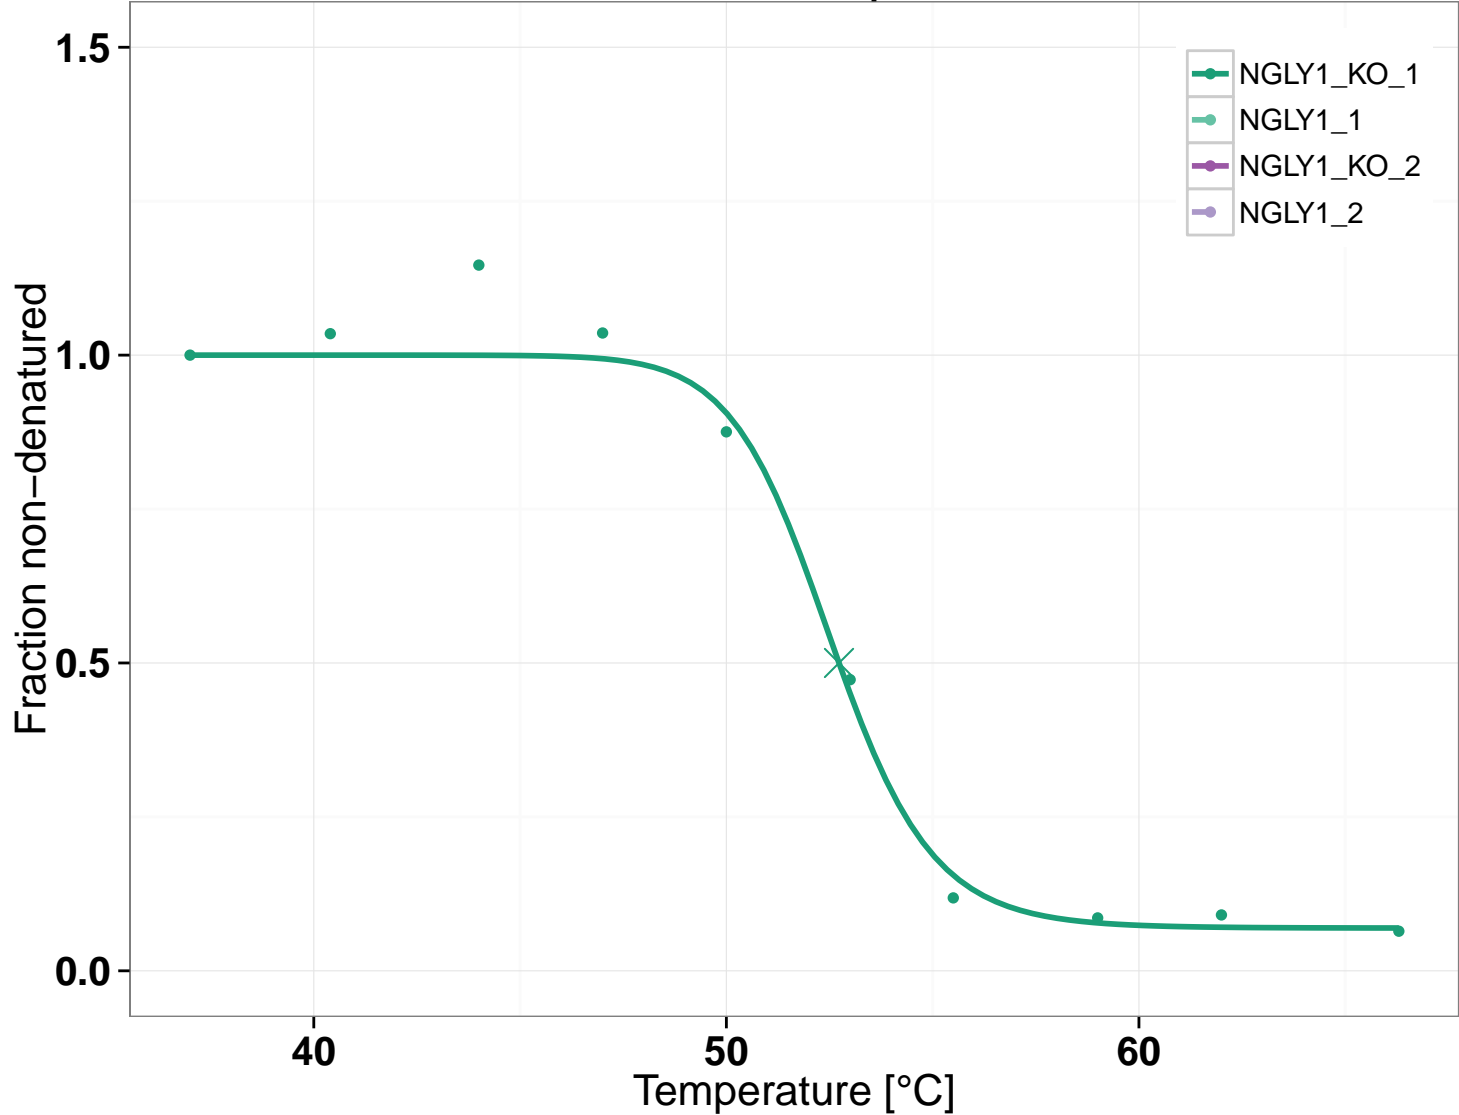

|            | meltPoint | slope | plateau | R2   |
|------------|-----------|-------|---------|------|
| NGLY1_KO_1 | 52.73     | -0.19 | 0.07    | 0.99 |
| NGLY1_1    | -         | -     | -       | -    |
| NGLY1_KO_2 | -         | -     | -       | -    |
| NGLY1_2    | -         | -     | -       | -    |

Supplement: Supplementary file 8404 [file 1]

# IPI00153049.3|MXRA8

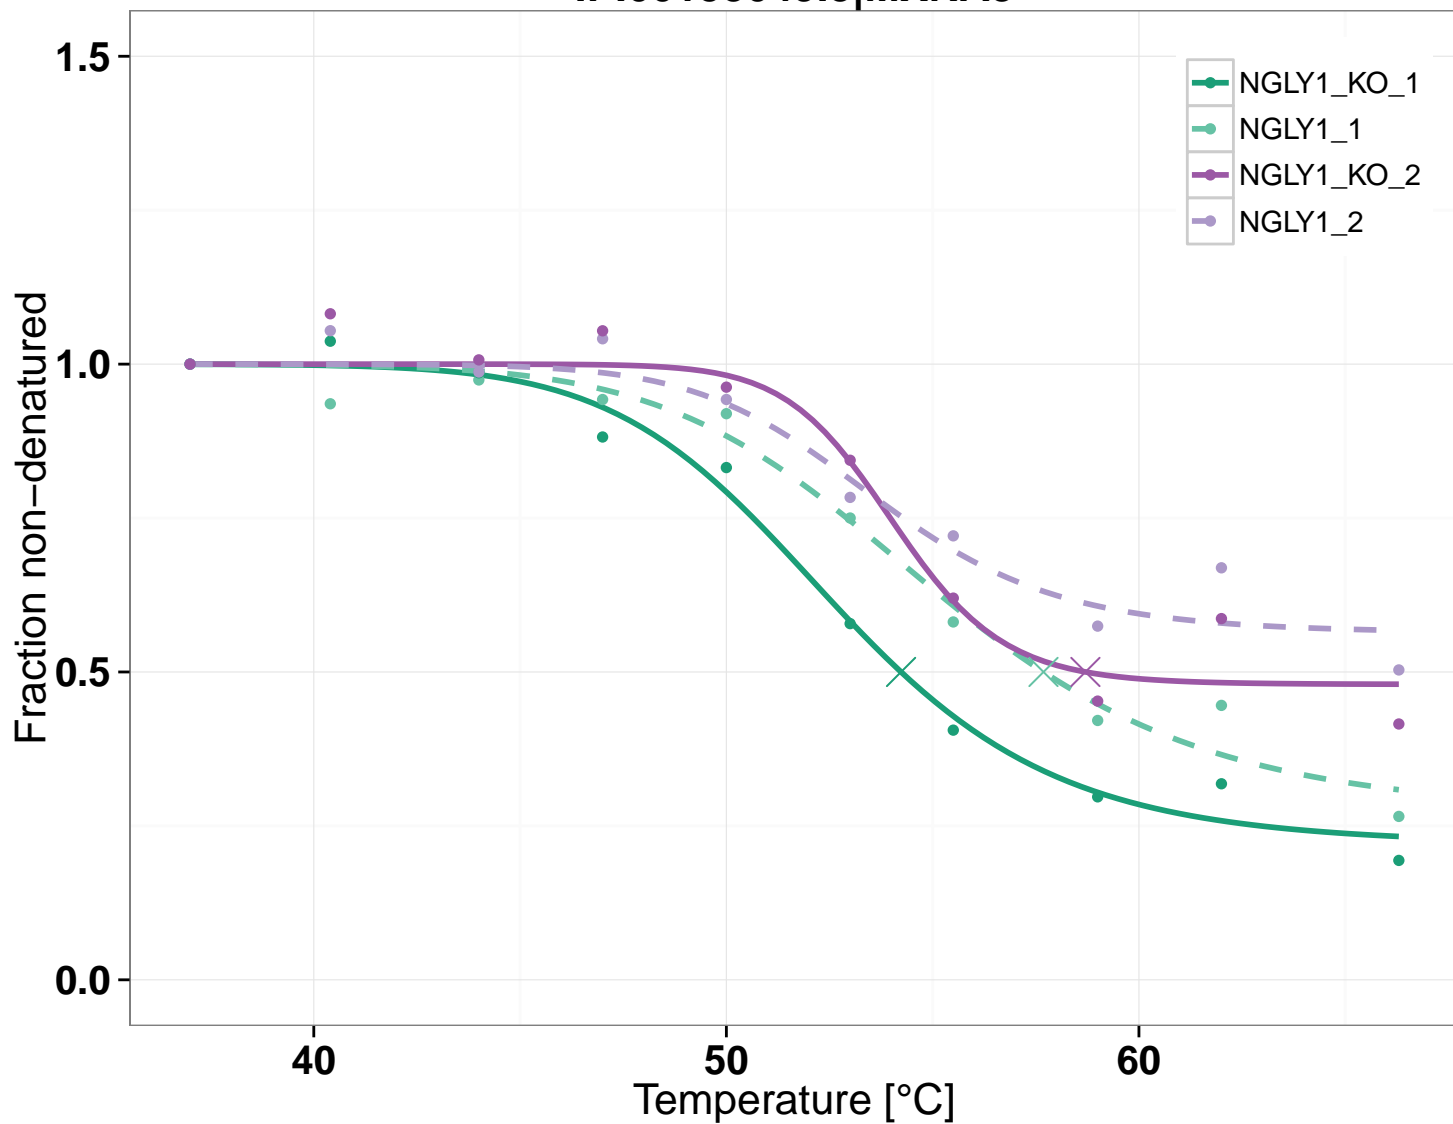

|            | meltPoint | slope  | plateau | R2   |
|------------|-----------|--------|---------|------|
| NGLY1_KO_1 | 54.23     | -0.073 | 0.22    | 0.99 |
| NGLY1_1    | 57.69     | -0.056 | 0.27    | 0.98 |
| NGLY1_KO_2 | 58.7      | -0.098 | 0.48    | 0.95 |
| NGLY1_2    | -         | -0.049 | 0.56    | 0.94 |

Supplement: Supplementary file 8405 [file 1]

IPI00029275.1|MFI2

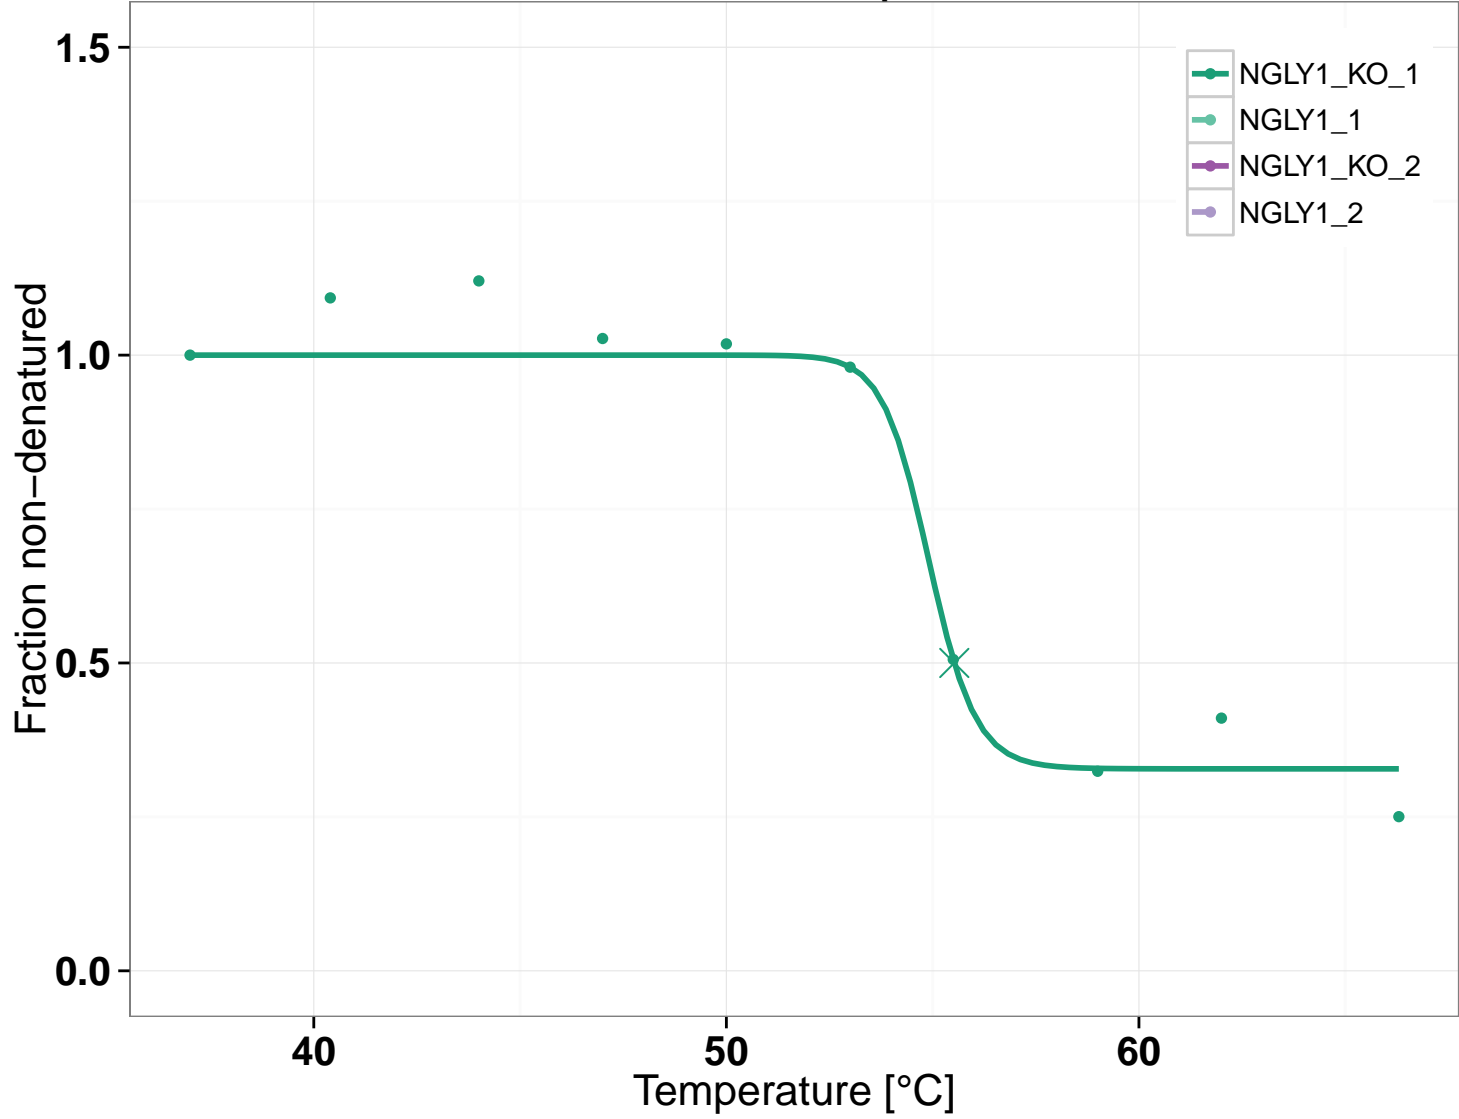

|            | meltPoint | slope | plateau | R2   |
|------------|-----------|-------|---------|------|
| NGLY1_KO_1 | 55.52     | -0.3  | 0.33    | 0.97 |
| NGLY1_1    | -         | -     | -       | -    |
| NGLY1_KO_2 | -         | -     | -       | -    |
| NGLY1_2    | -         | -     | -       | -    |

Supplement: Supplementary file 8406 [file 1]

IPI00164005.1|COG7

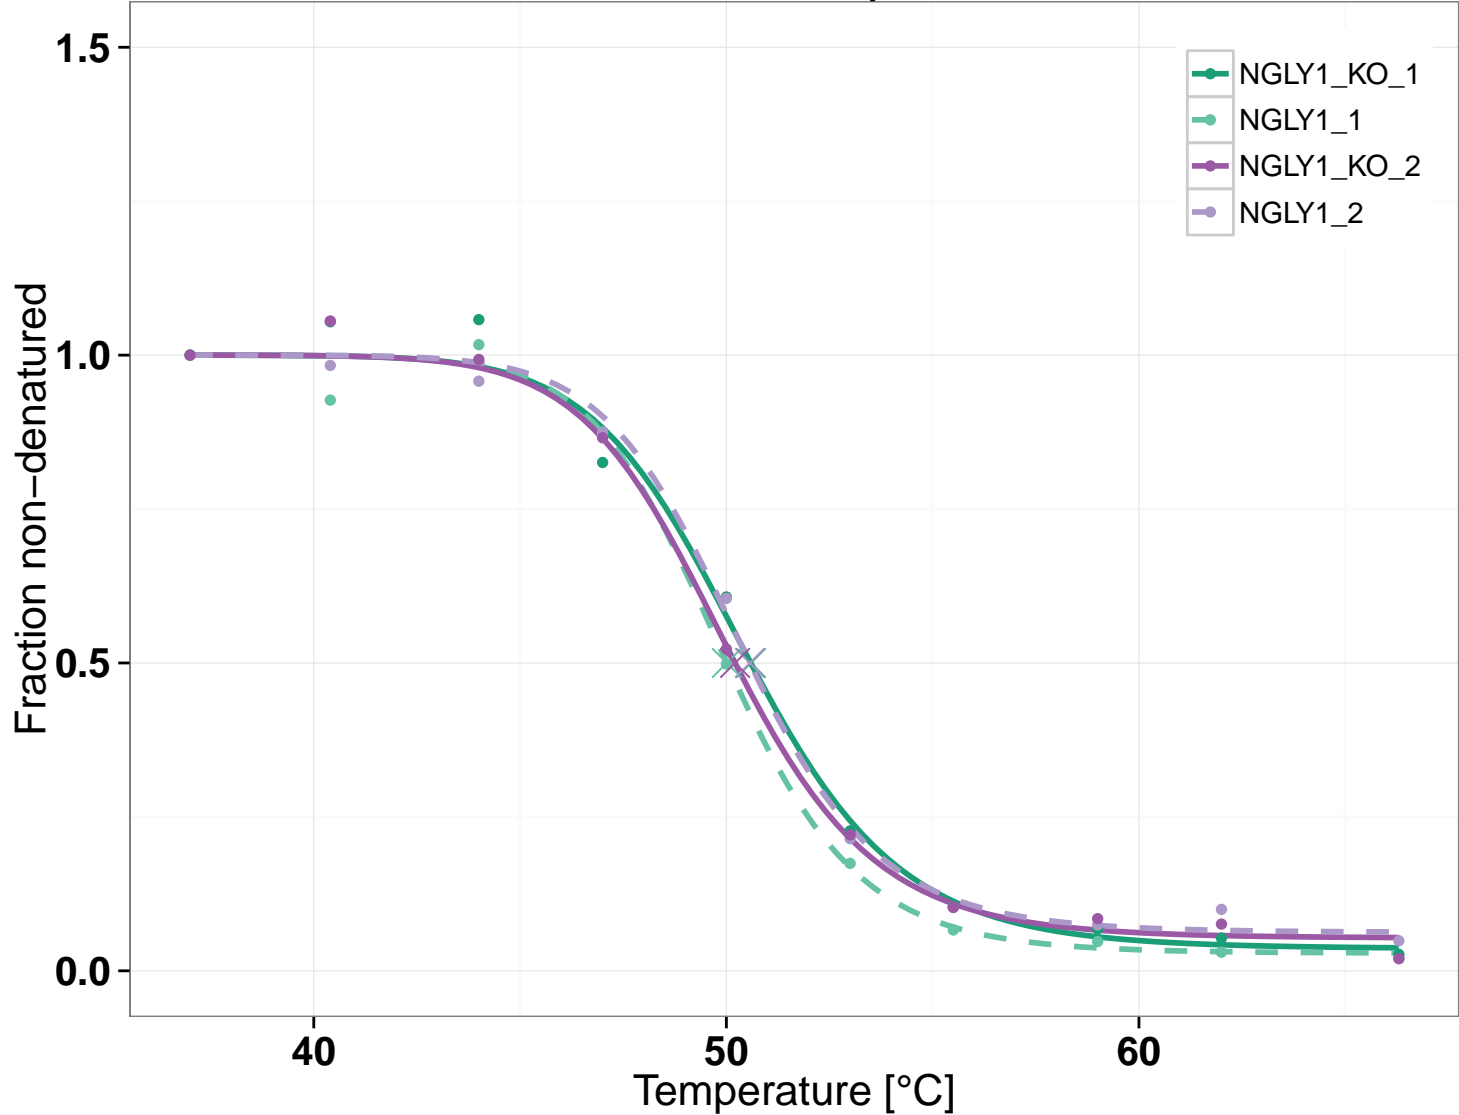

|            | meltPoint | slope | plateau | R2   |
|------------|-----------|-------|---------|------|
| NGLY1_KO_1 | 50.59     | -0.13 | 0.04    | 0.99 |
| NGLY1_1    | 50.01     | -0.15 | 0.03    | 1    |
| NGLY1_KO_2 | 50.21     | -0.13 | 0.05    | 1    |
| NGLY1_2    | 50.57     | -0.14 | 0.06    | 1    |

Supplement: Supplementary file 8407 [file 1]

# IPI00061280.7|PIP3AP

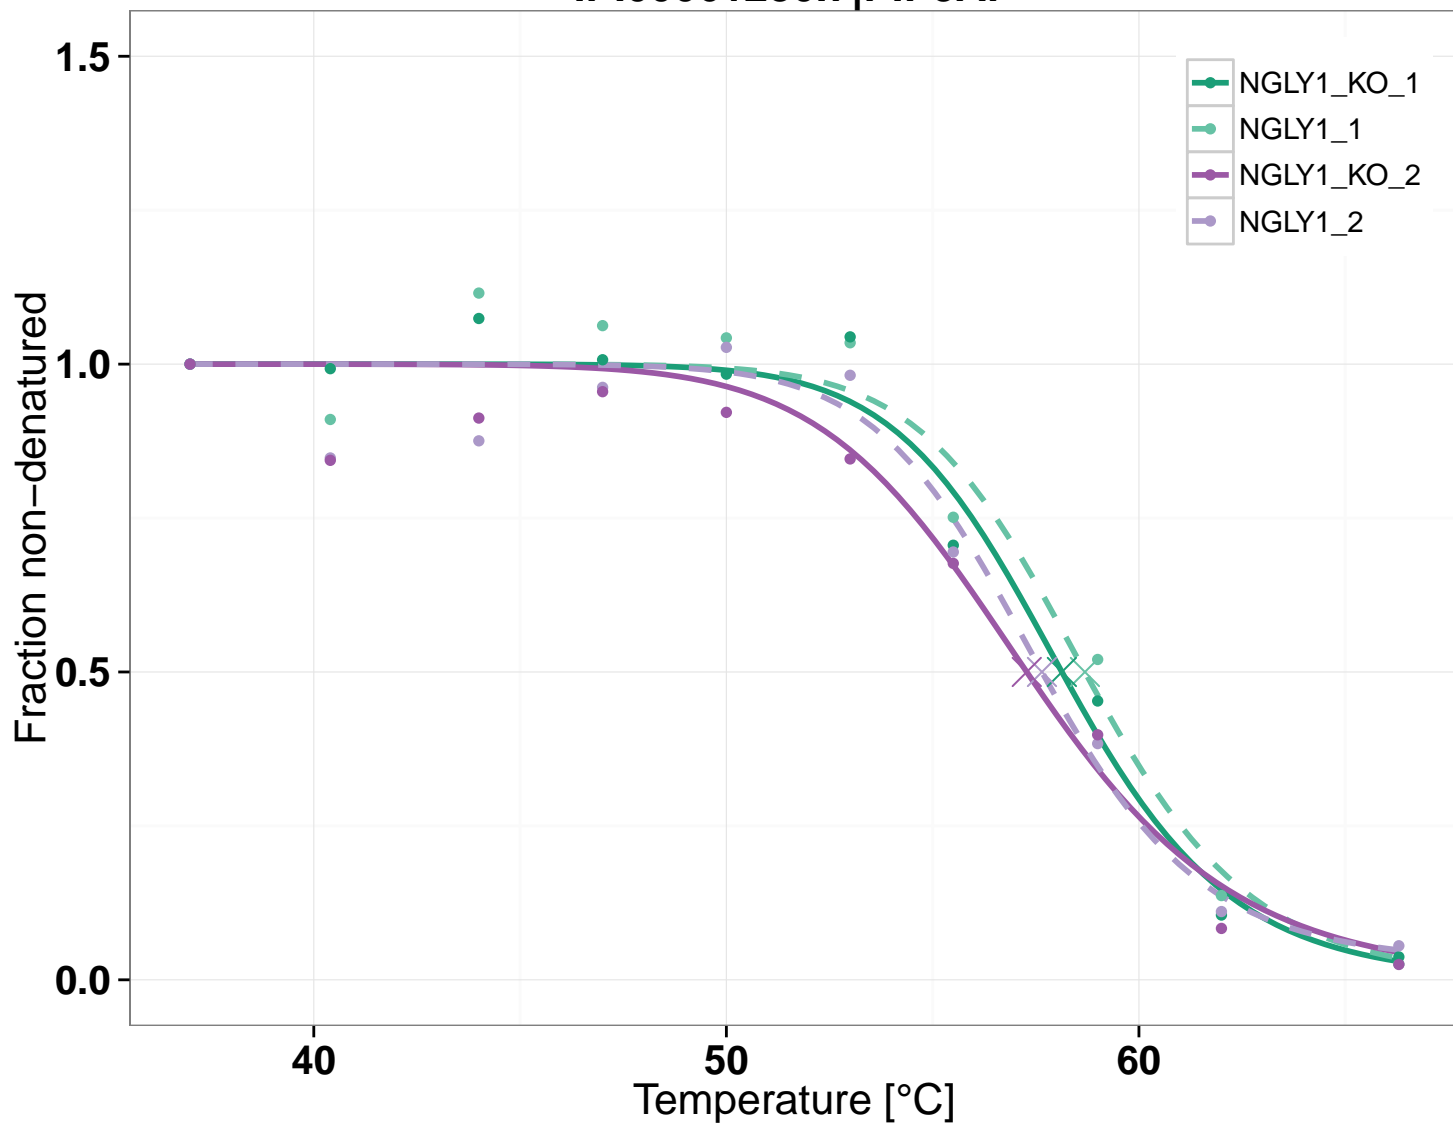

|            | meltPoint | slope  | plateau | R2   |
|------------|-----------|--------|---------|------|
| NGLY1_KO_1 | 58.13     | -0.12  | 0       | 0.98 |
| NGLY1_1    | 58.69     | -0.12  | 0       | 0.97 |
| NGLY1_KO_2 | 57.28     | -0.099 | 0       | 0.96 |
| NGLY1_2    | 57.65     | -0.12  | 0.03    | 0.96 |

Supplement: Supplementary file 8408 [file 1]

# IPI00294911.1|SDHB

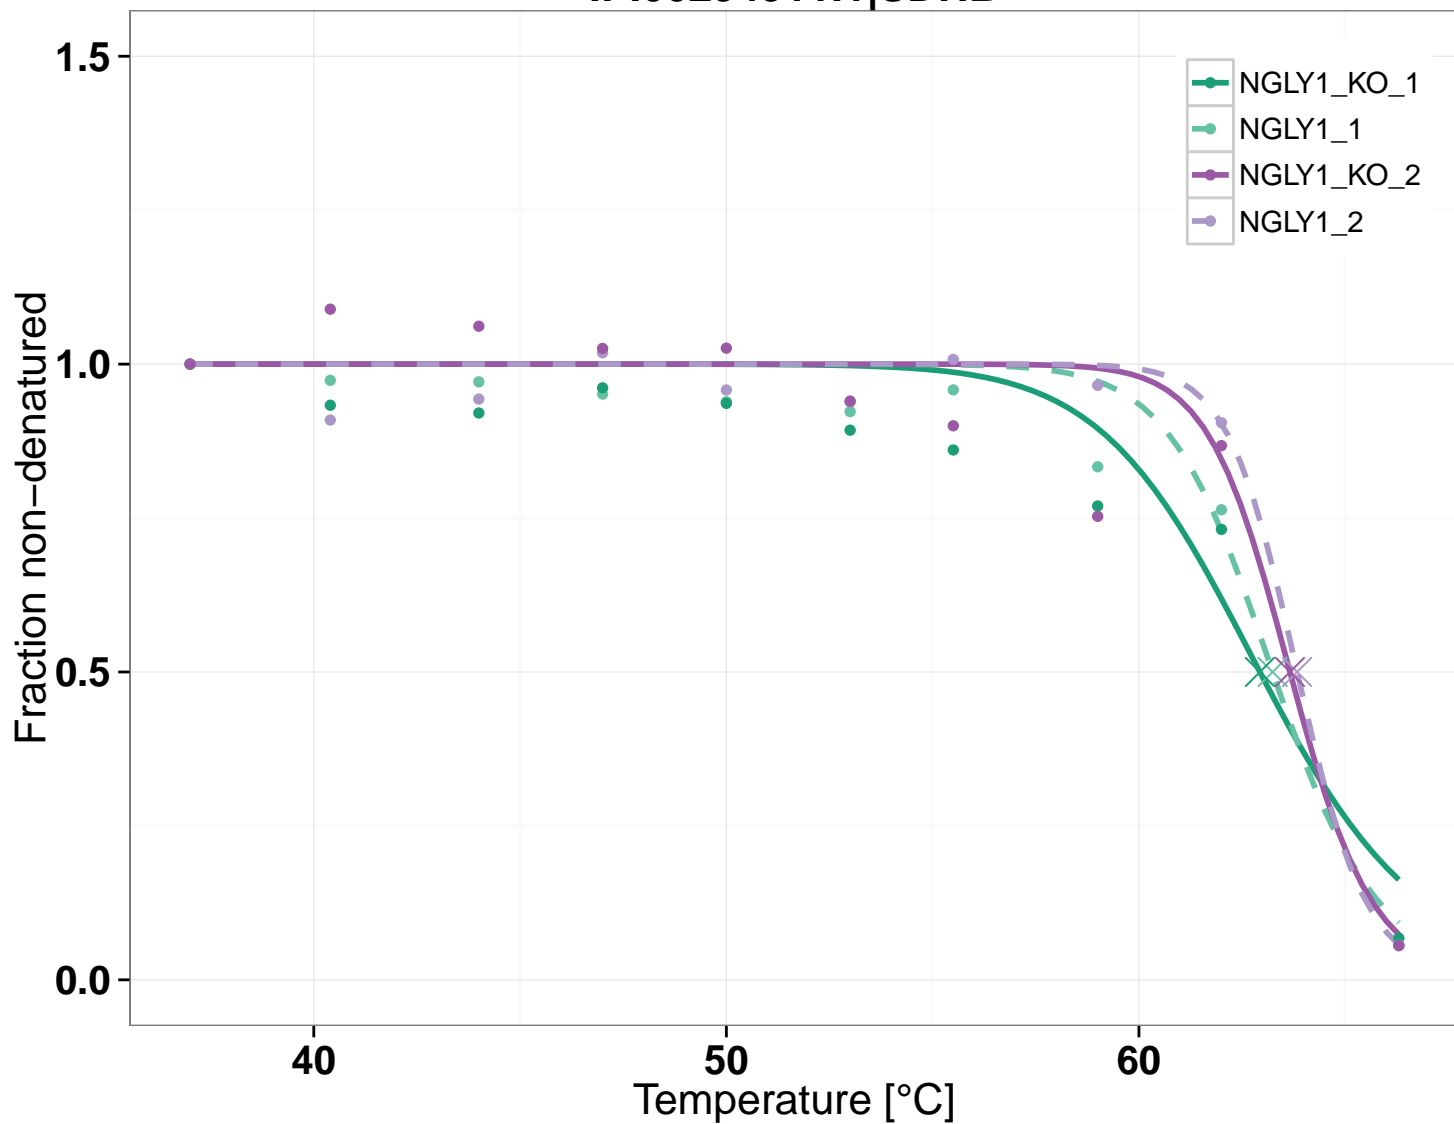

|            | meltPoint | slope | plateau | R2   |
|------------|-----------|-------|---------|------|
| NGLY1_KO_1 | 62.93     | -0.13 | 0       | 0.88 |
| NGLY1_1    | 63.24     | -0.2  | 0       | 0.95 |
| NGLY1_KO_2 | 63.66     | -0.25 | 0       | 0.9  |
| NGLY1_2    | 63.84     | -0.3  | 0       | 0.98 |

Supplement: Supplementary file 8409 [file 1]

# IPI00022774.3|VCP

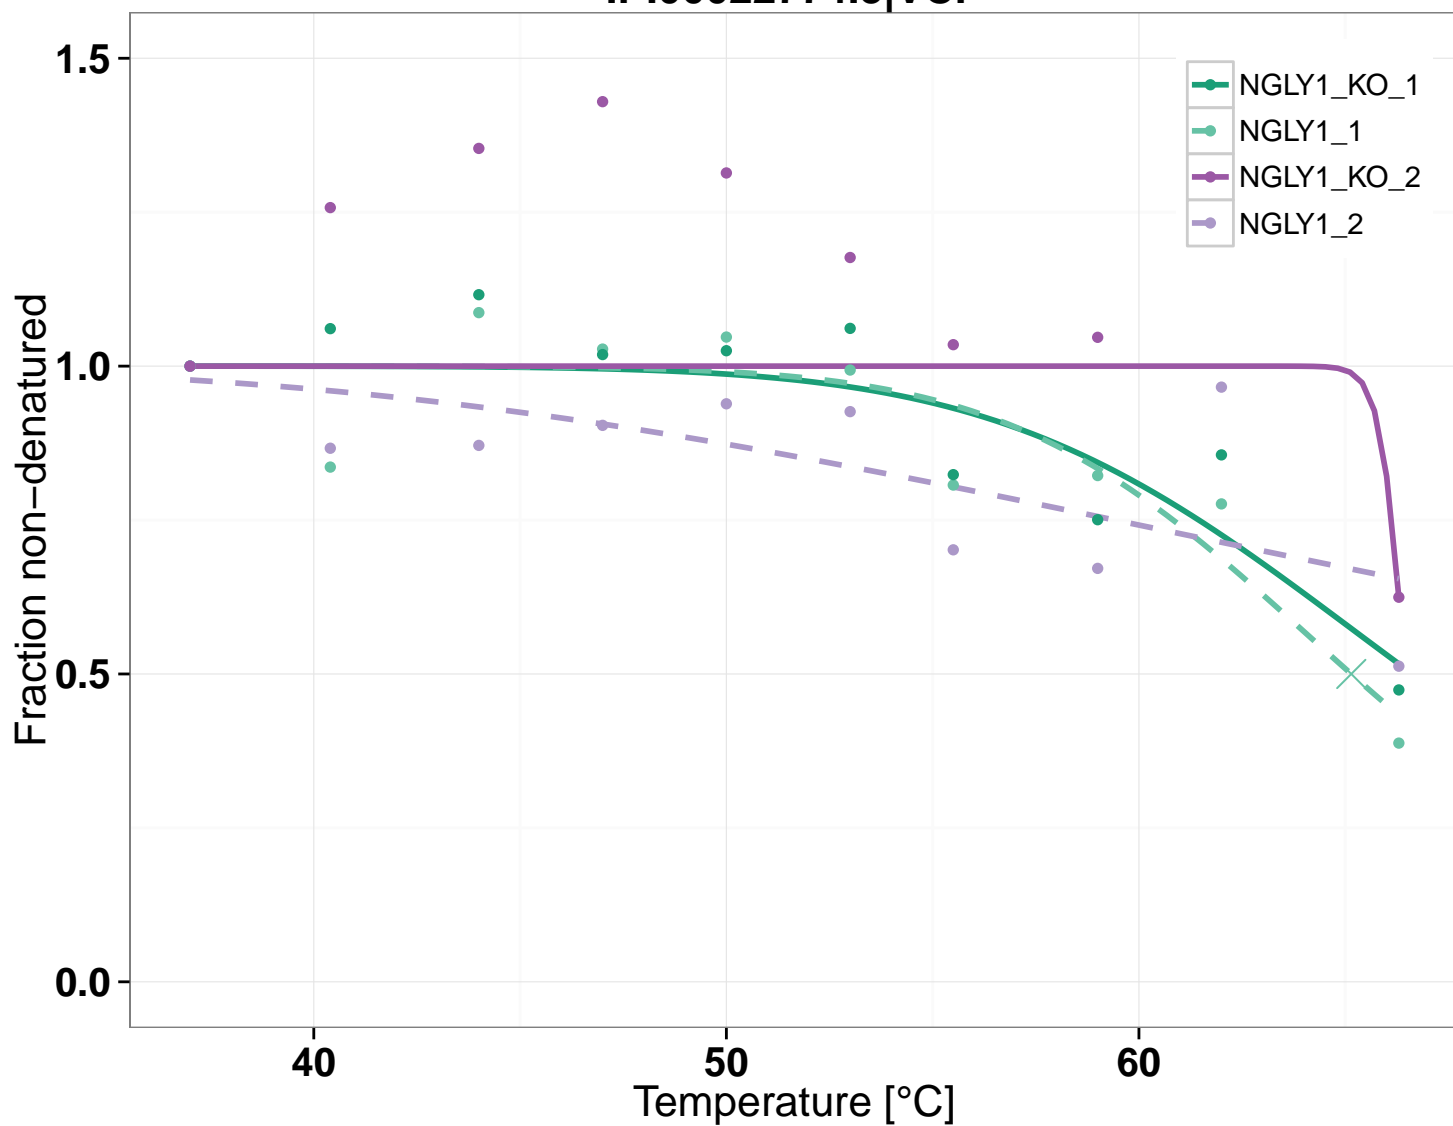

|            | meltPoint | slope  | plateau | R2   |
|------------|-----------|--------|---------|------|
| NGLY1_KO_1 | -         | -0.05  | 0       | 0.81 |
| NGLY1_1    | 65.15     | -0.06  | 0       | 0.83 |
| NGLY1_KO_2 | -         | -      | 0       | -0.2 |
| NGLY1_2    | -         | -0.014 | 0       | 0.42 |

Supplement: Supplementary file 8410 [file 1]

IPI00300969.6|ZNF701

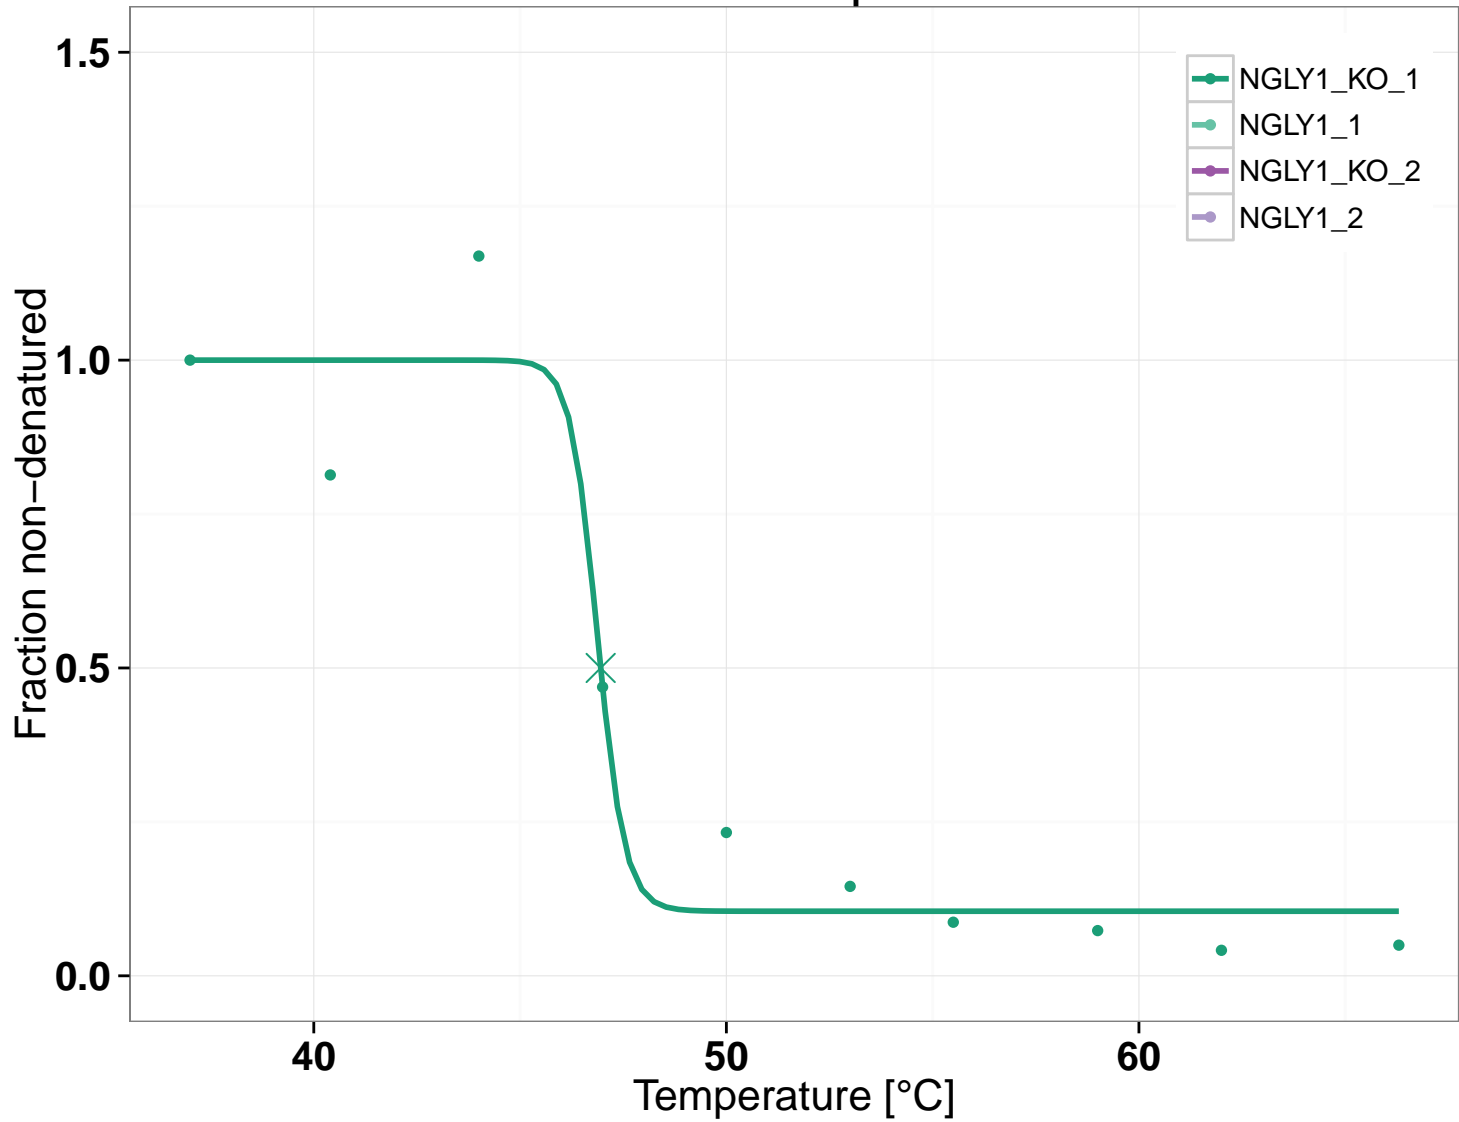

|            | meltPoint | slope | plateau | R2   |
|------------|-----------|-------|---------|------|
| NGLY1_KO_1 | 46.95     | -0.68 | 0.1     | 0.95 |
| NGLY1_1    | -         | -     | -       | -    |
| NGLY1_KO_2 | -         | -     | -       | -    |
| NGLY1_2    | -         | -     | -       | -    |

Supplement: Supplementary file 8411 [file 1]

IPI00514115.3|NFAT5

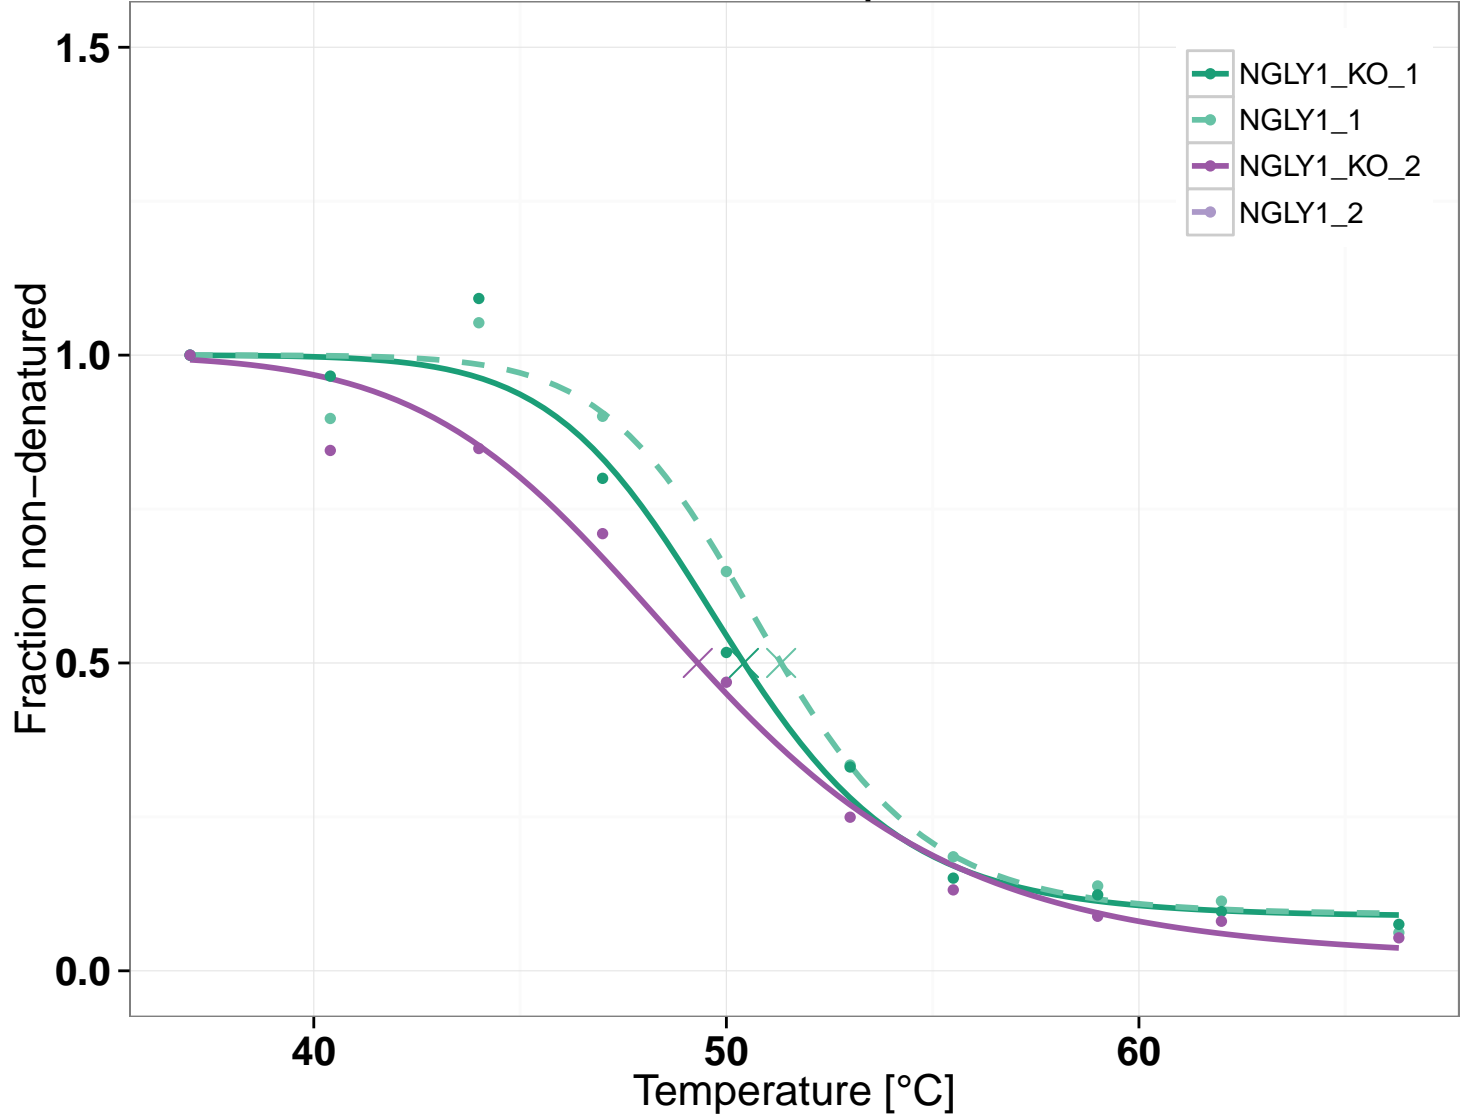

|            | meltPoint | slope  | plateau | R2   |
|------------|-----------|--------|---------|------|
| NGLY1_KO_1 | 50.43     | -0.11  | 0.09    | 0.99 |
| NGLY1_1    | 51.33     | -0.12  | 0.09    | 0.99 |
| NGLY1_KO_2 | 49.31     | -0.075 | 0.02    | 0.99 |
| NGLY1_2    | -         | -      | -       | -    |

Supplement: Supplementary file 8412 [file 1]

# IPI00328154.4|UBA3

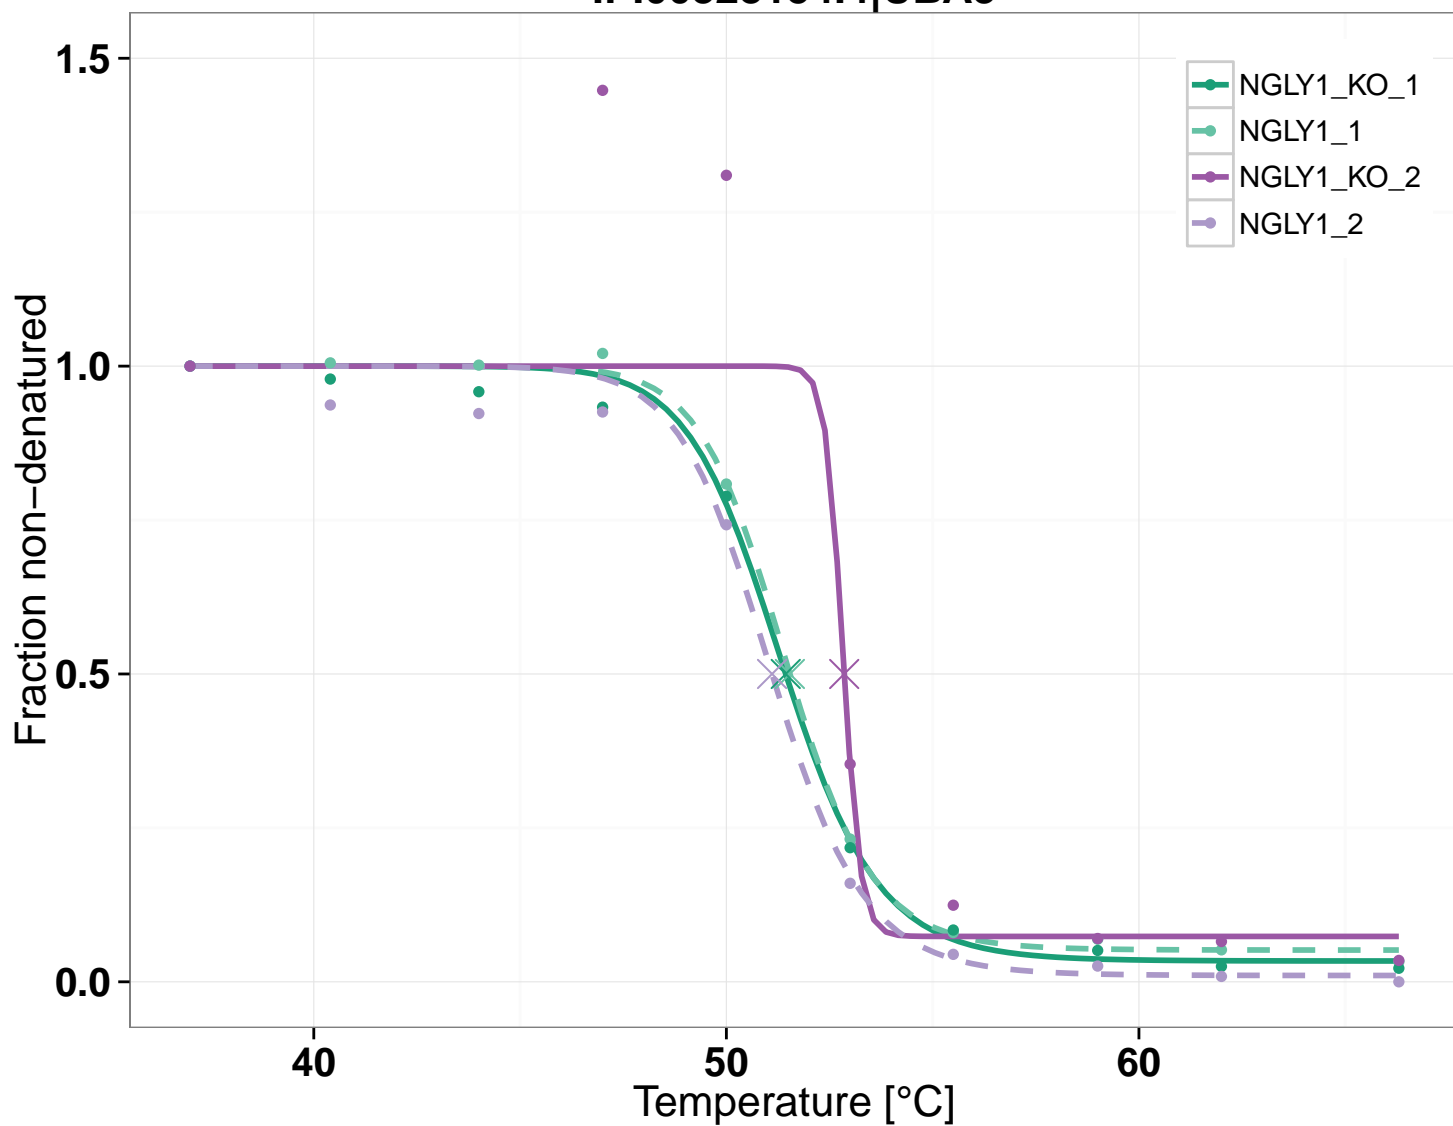

|            | meltPoint | slope | plateau | R2   |
|------------|-----------|-------|---------|------|
| NGLY1_KO_1 | 51.44     | -0.21 | 0.03    | 1    |
| NGLY1_1    | 51.54     | -0.23 | 0.05    | 1    |
| NGLY1_KO_2 | 52.86     | -1.1  | 0.07    | 0.77 |
| NGLY1_2    | 51.11     | -0.22 | 0.01    | 0.99 |

Supplement: Supplementary file 8413 [file 1]

IPI00455146.3|USP30

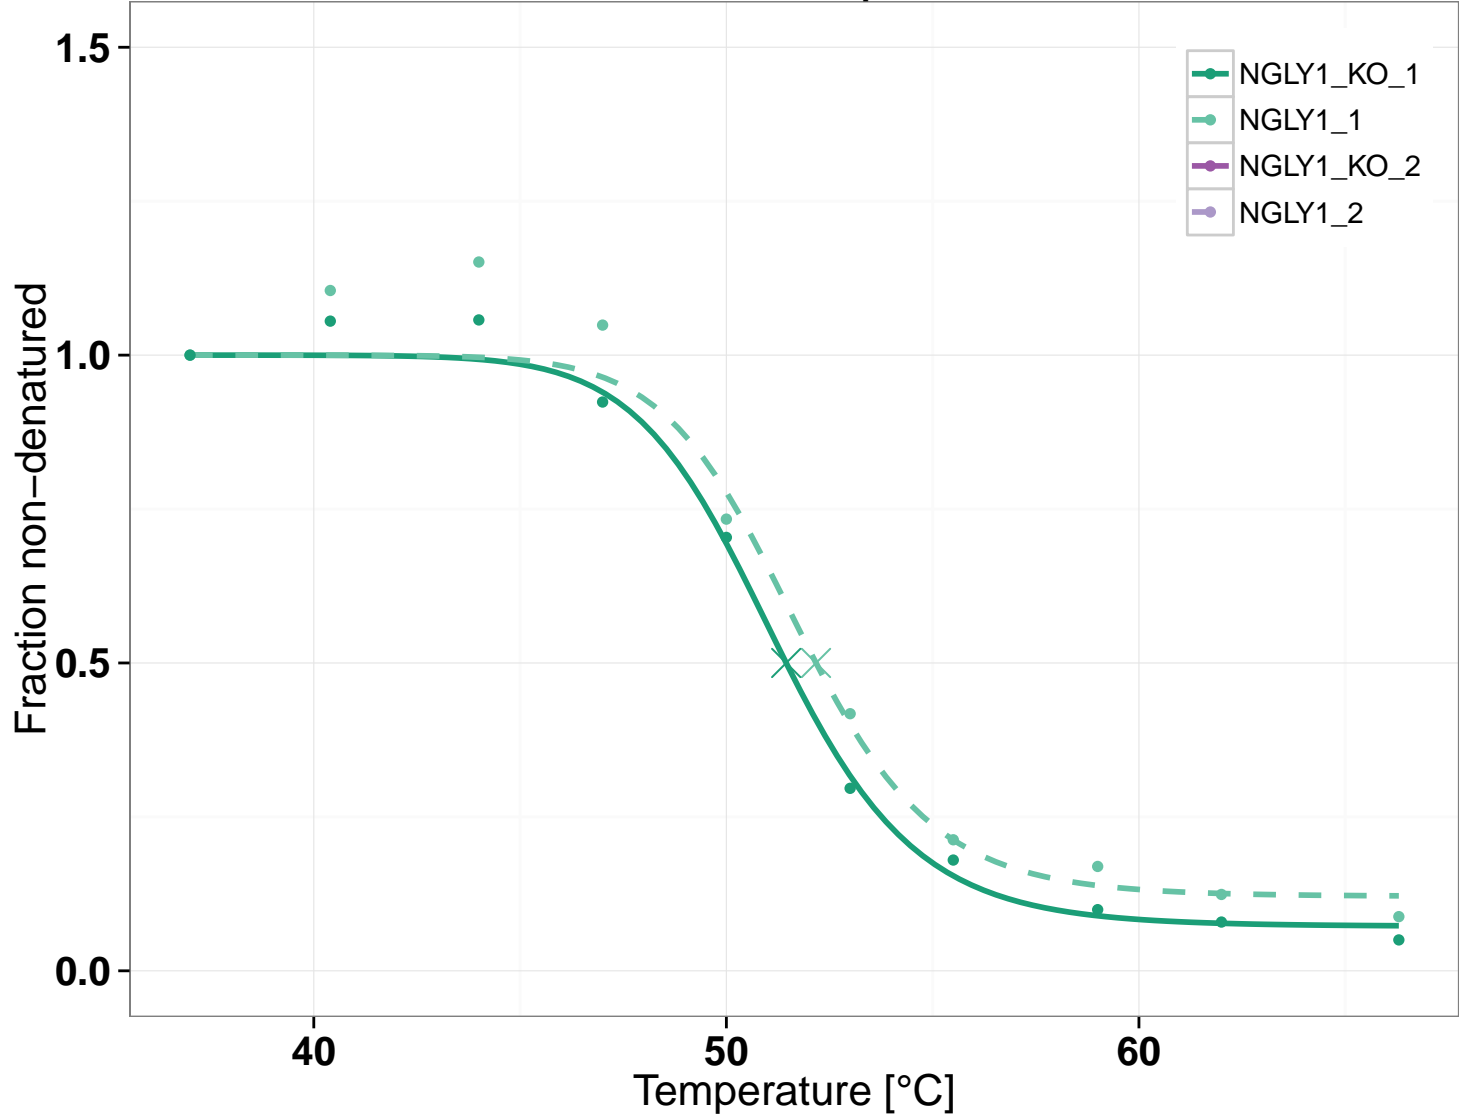

|            | meltPoint | slope | plateau | R2   |
|------------|-----------|-------|---------|------|
| NGLY1_KO_1 | 51.45     | -0.14 | 0.07    | 0.99 |
| NGLY1_1    | 52.17     | -0.13 | 0.12    | 0.97 |
| NGLY1_KO_2 | -         | -     | -       | -    |
| NGLY1_2    | -         | -     | -       | -    |

Supplement: Supplementary file 8414 [file 1]

# IPI00745921.2|RNF126

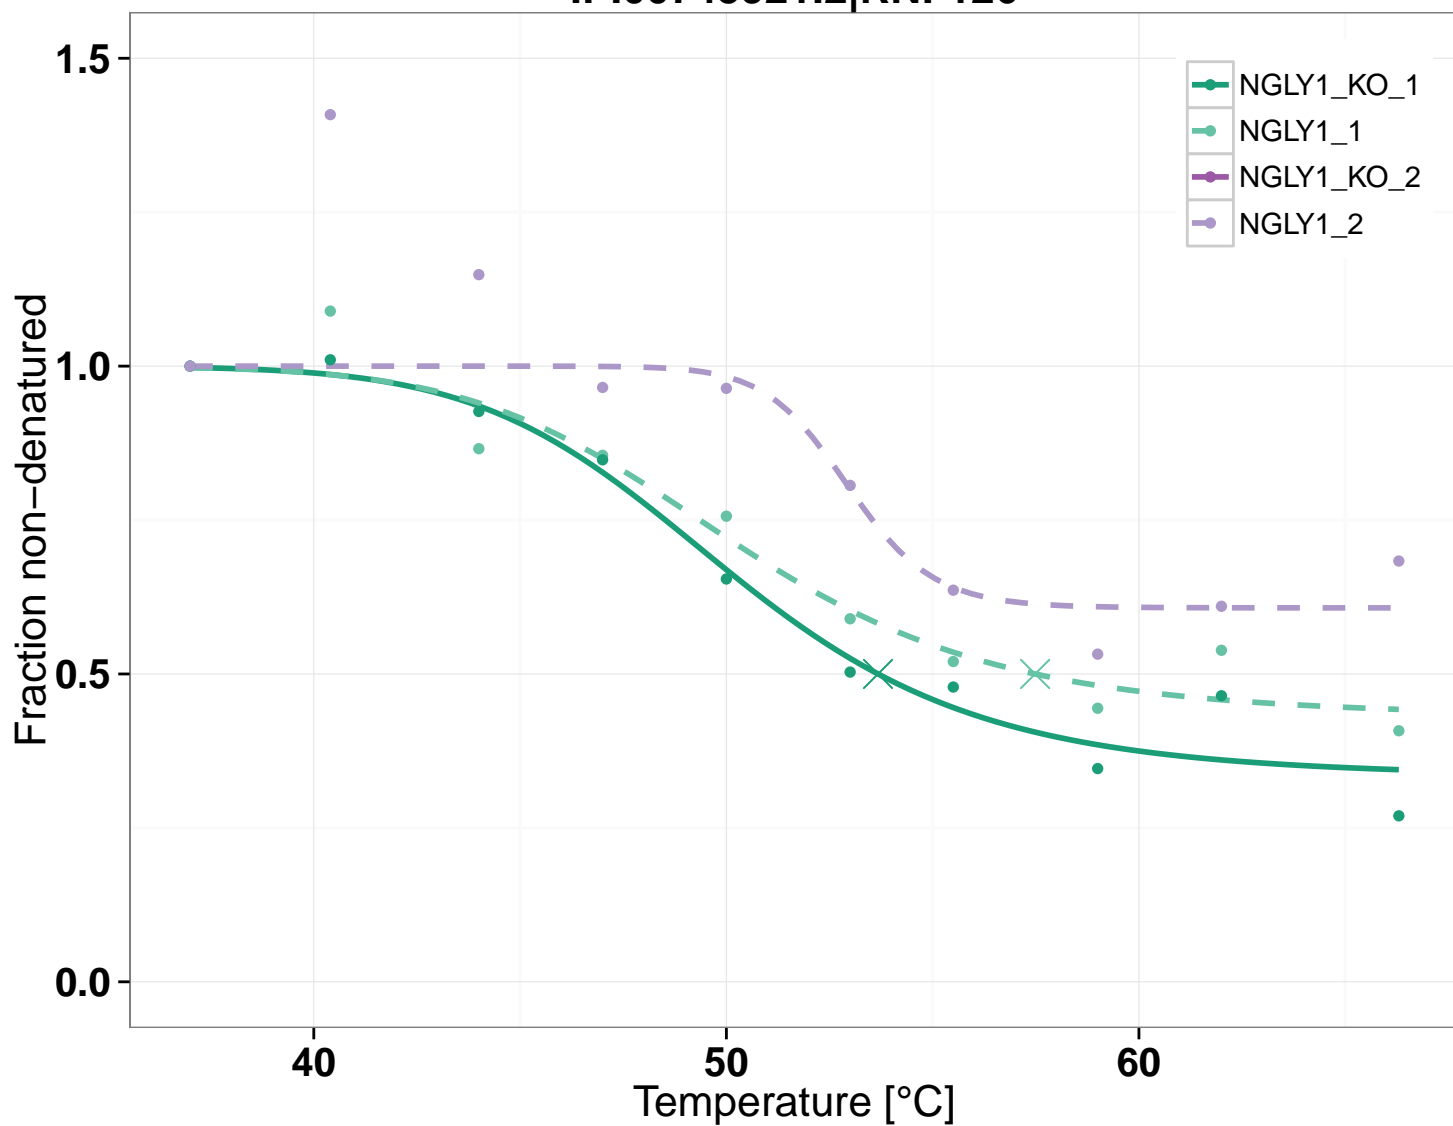

|            | meltPoint | slope  | plateau | R2   |
|------------|-----------|--------|---------|------|
| NGLY1_KO_1 | 53.68     | -0.055 | 0.33    | 0.97 |
| NGLY1_1    | 57.48     | -0.044 | 0.43    | 0.95 |
| NGLY1_KO_2 | -         | -      | -       | -    |
| NGLY1_2    | -         | -0.097 | 0.61    | 0.7  |

Supplement: Supplementary file 8415 [file 1]

IPI00456983.3|ATP11A

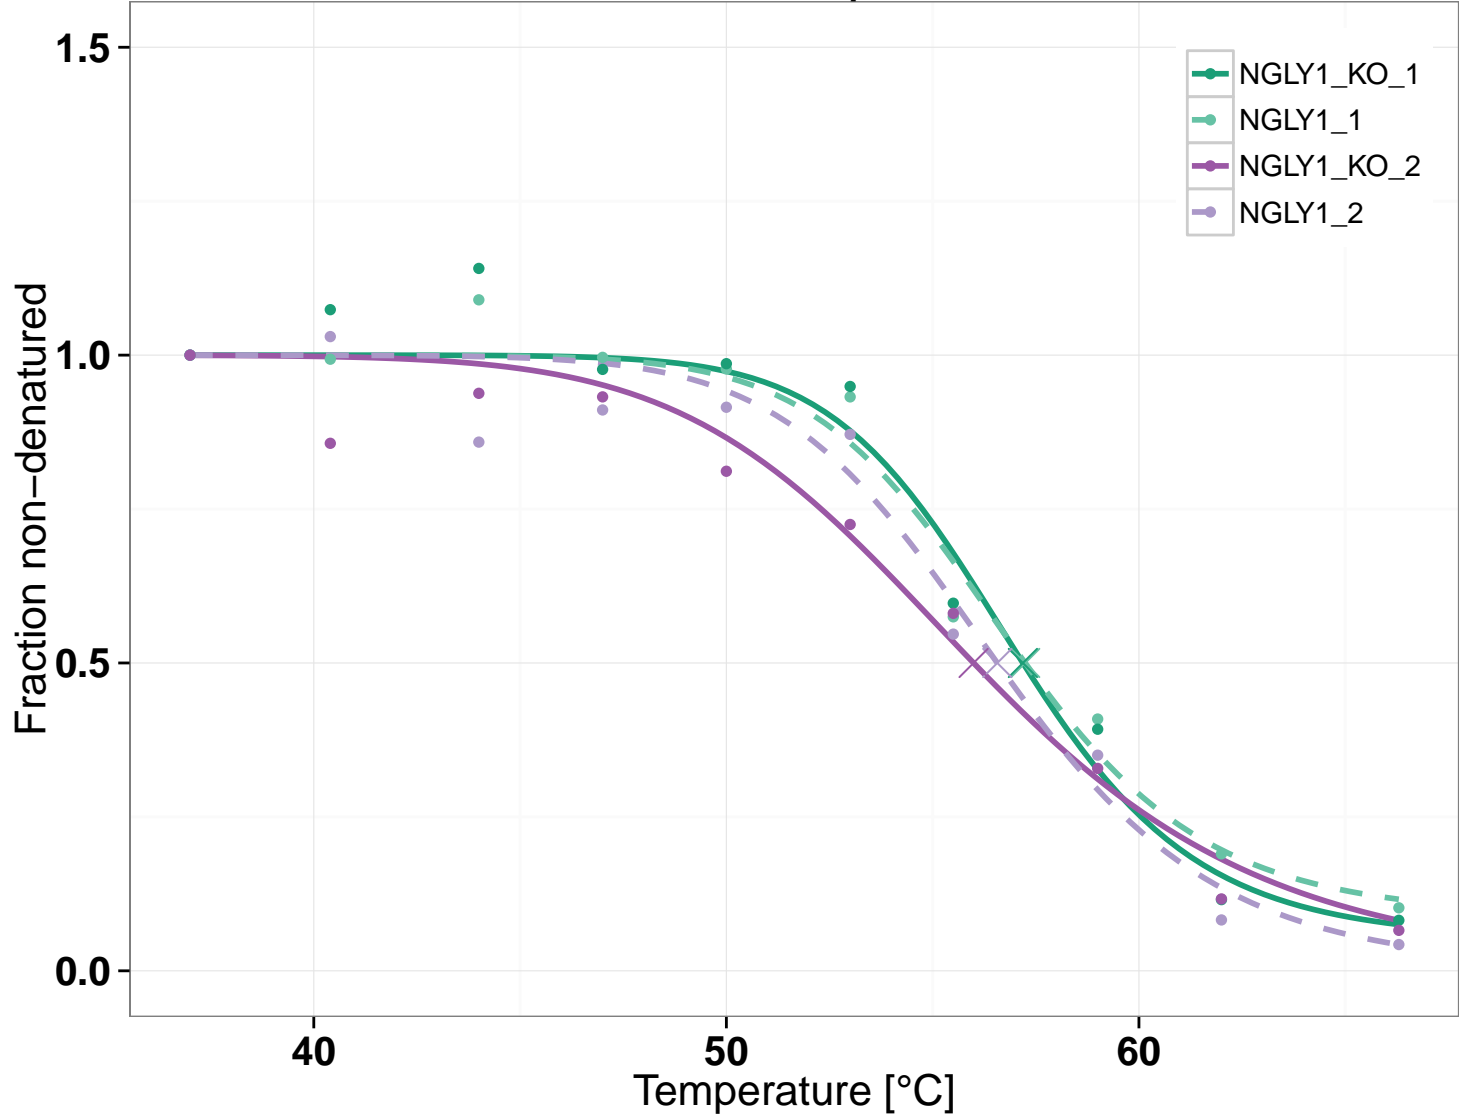

|            | meltPoint | slope  | plateau | R2   |
|------------|-----------|--------|---------|------|
| NGLY1_KO_1 | 57.19     | -0.11  | 0.05    | 0.97 |
| NGLY1_1    | 57.24     | -0.096 | 0.09    | 0.98 |
| NGLY1_KO_2 | 55.99     | -0.071 | 0       | 0.97 |
| NGLY1_2    | 56.57     | -0.095 | 0       | 0.97 |

Supplement: Supplementary file 8416 [file 1]

IPI00299884.4|DSCC1

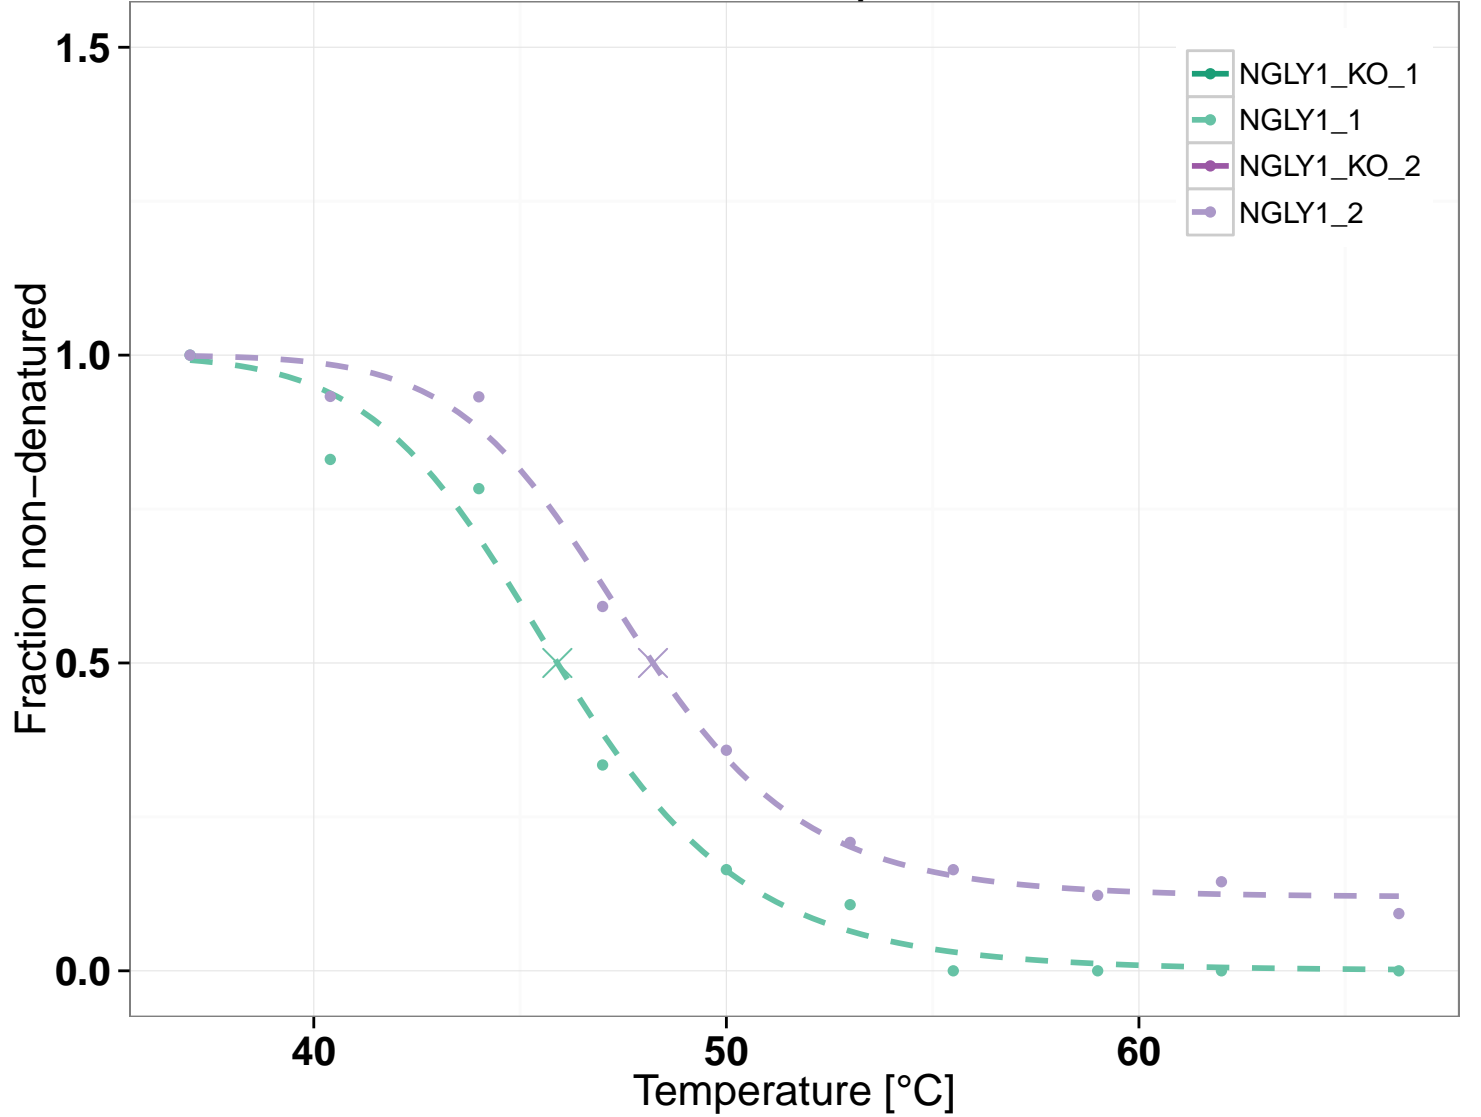

|            | meltPoint | slope | plateau | R2   |
|------------|-----------|-------|---------|------|
| NGLY1_KO_1 | -         | -     | -       | -    |
| NGLY1_1    | 45.9      | -0.11 | 0       | 0.98 |
| NGLY1_KO_2 | -         | -     | -       | -    |
| NGLY1_2    | 48.22     | -0.1  | 0.12    | 0.99 |

Supplement: Supplementary file 8417 [file 1]

# IPI00031614.2|GINS4

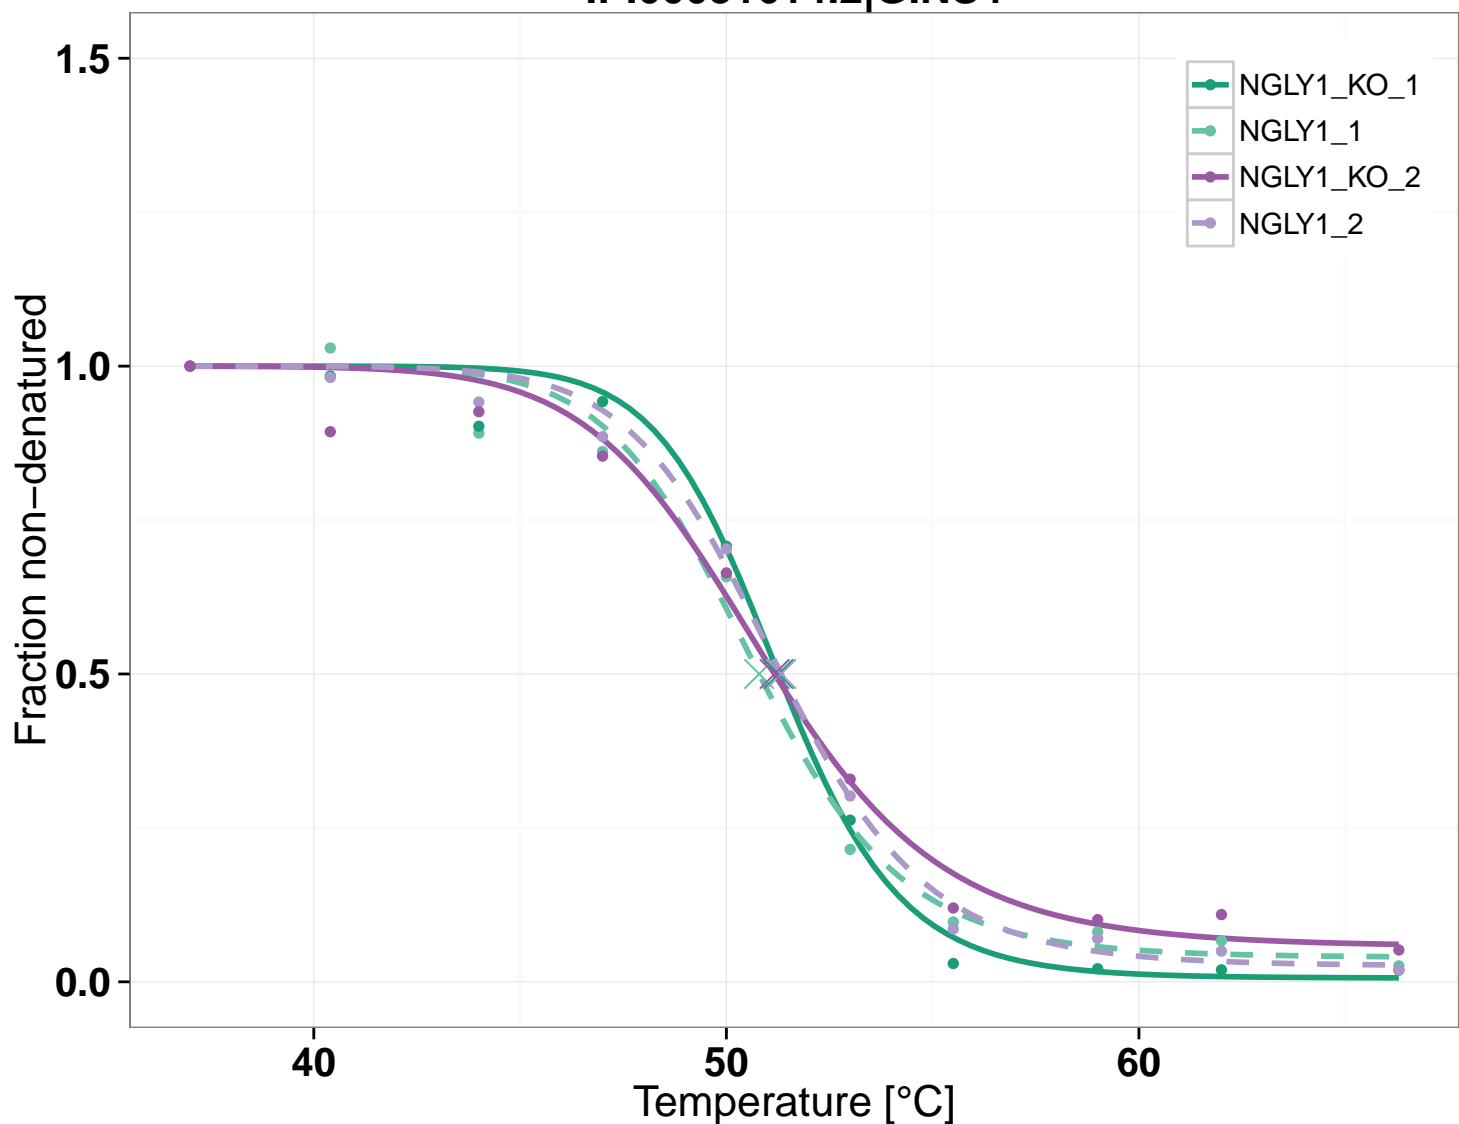

|            | meltPoint | slope | plateau | R2   |
|------------|-----------|-------|---------|------|
| NGLY1_KO_1 | 51.27     | -0.17 | 0.01    | 0.99 |
| NGLY1_1    | 50.8      | -0.13 | 0.04    | 0.99 |
| NGLY1_KO_2 | 51.17     | -0.11 | 0.06    | 0.99 |
| NGLY1_2    | 51.33     | -0.13 | 0.03    | 1    |

Supplement: Supplementary file 8418 [file 1]

IPI00470949.2|MTMR7

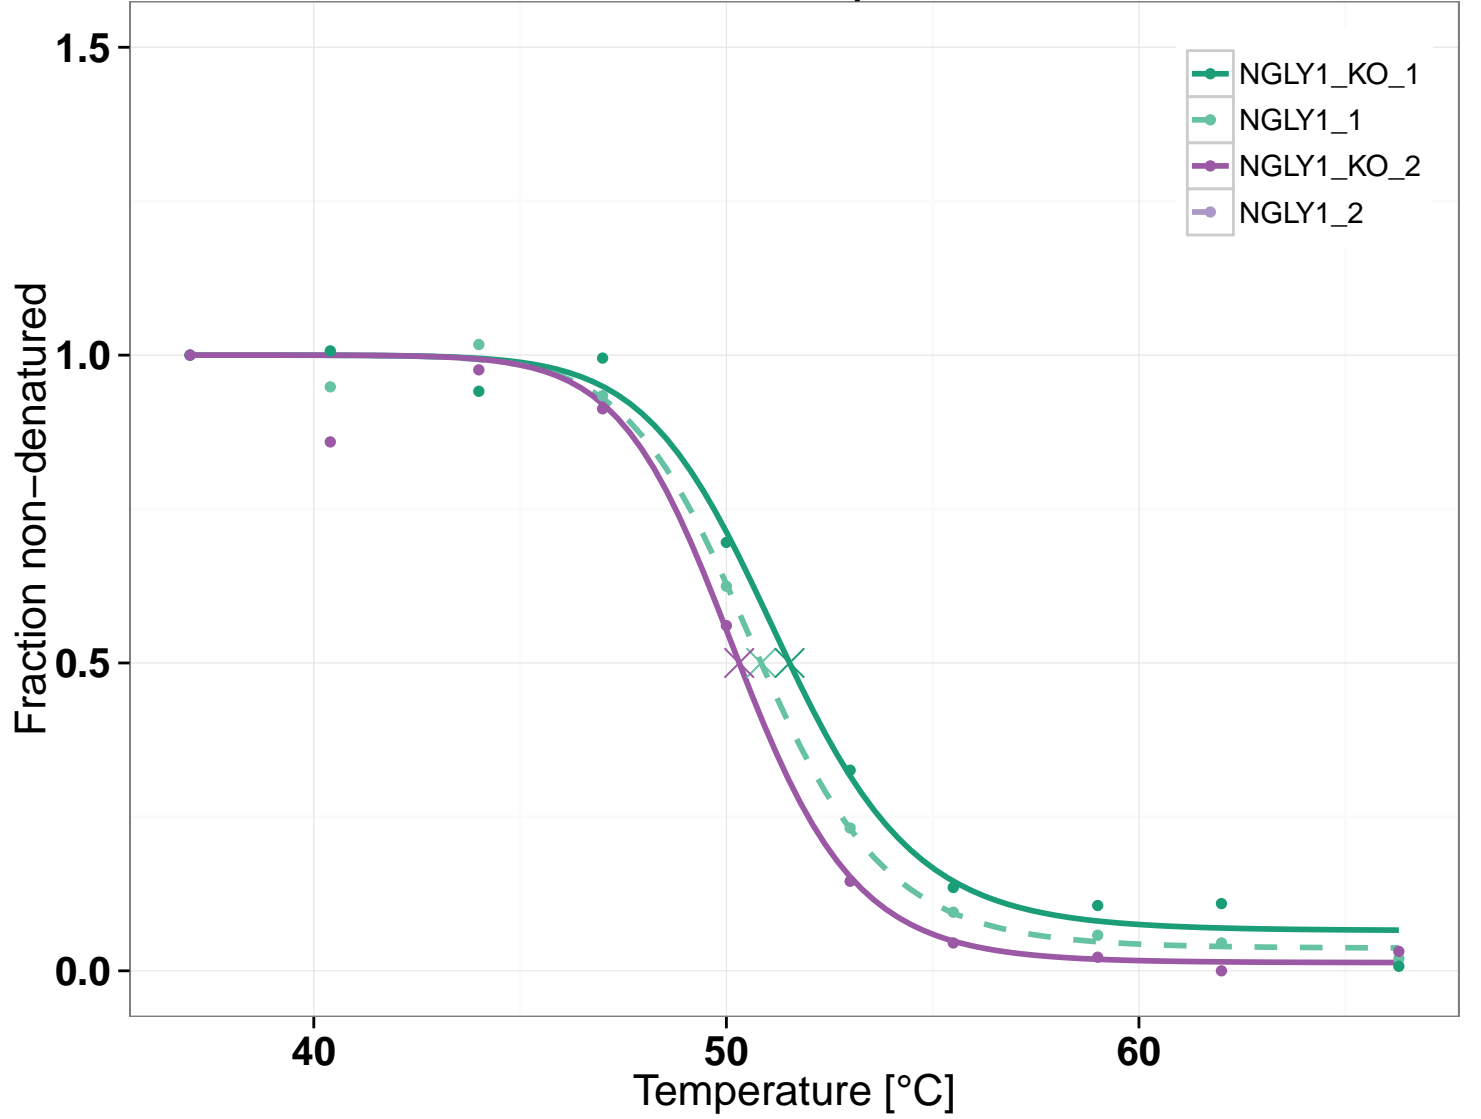

|            | meltPoint | slope | plateau | R2   |
|------------|-----------|-------|---------|------|
| NGLY1_KO_1 | 51.53     | -0.14 | 0.07    | 0.99 |
| NGLY1_1    | 50.84     | -0.15 | 0.04    | 1    |
| NGLY1_KO_2 | 50.31     | -0.17 | 0.01    | 0.99 |
| NGLY1_2    | -         | -     | -       | -    |

Supplement: Supplementary file 8419 [file 1]

IPI00023586.6|SENP6

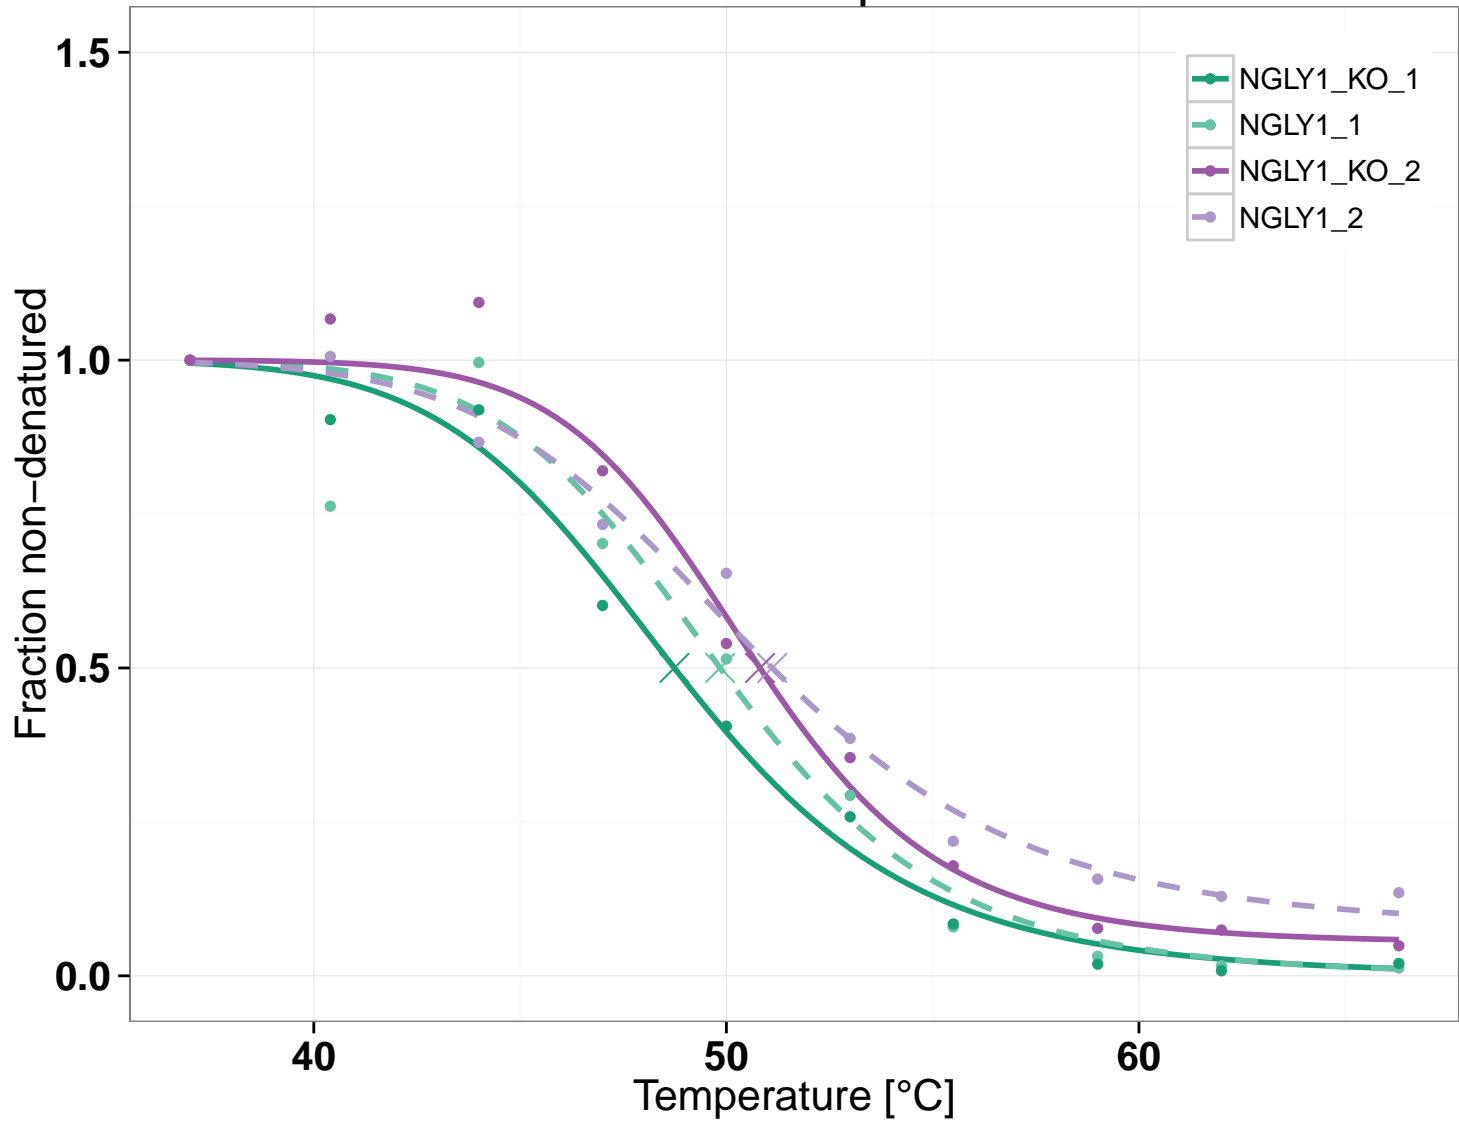

|            | meltPoint | slope  | plateau | R2   |
|------------|-----------|--------|---------|------|
| NGLY1_KO_1 | 48.74     | -0.087 | 0       | 0.99 |
| NGLY1_1    | 49.85     | -0.092 | 0       | 0.96 |
| NGLY1_KO_2 | 50.82     | -0.1   | 0.05    | 0.98 |
| NGLY1_2    | 51.11     | -0.069 | 0.08    | 0.99 |

Supplement: Supplementary file 8420 [file 1]

# IPI00030397.2|BNIP1

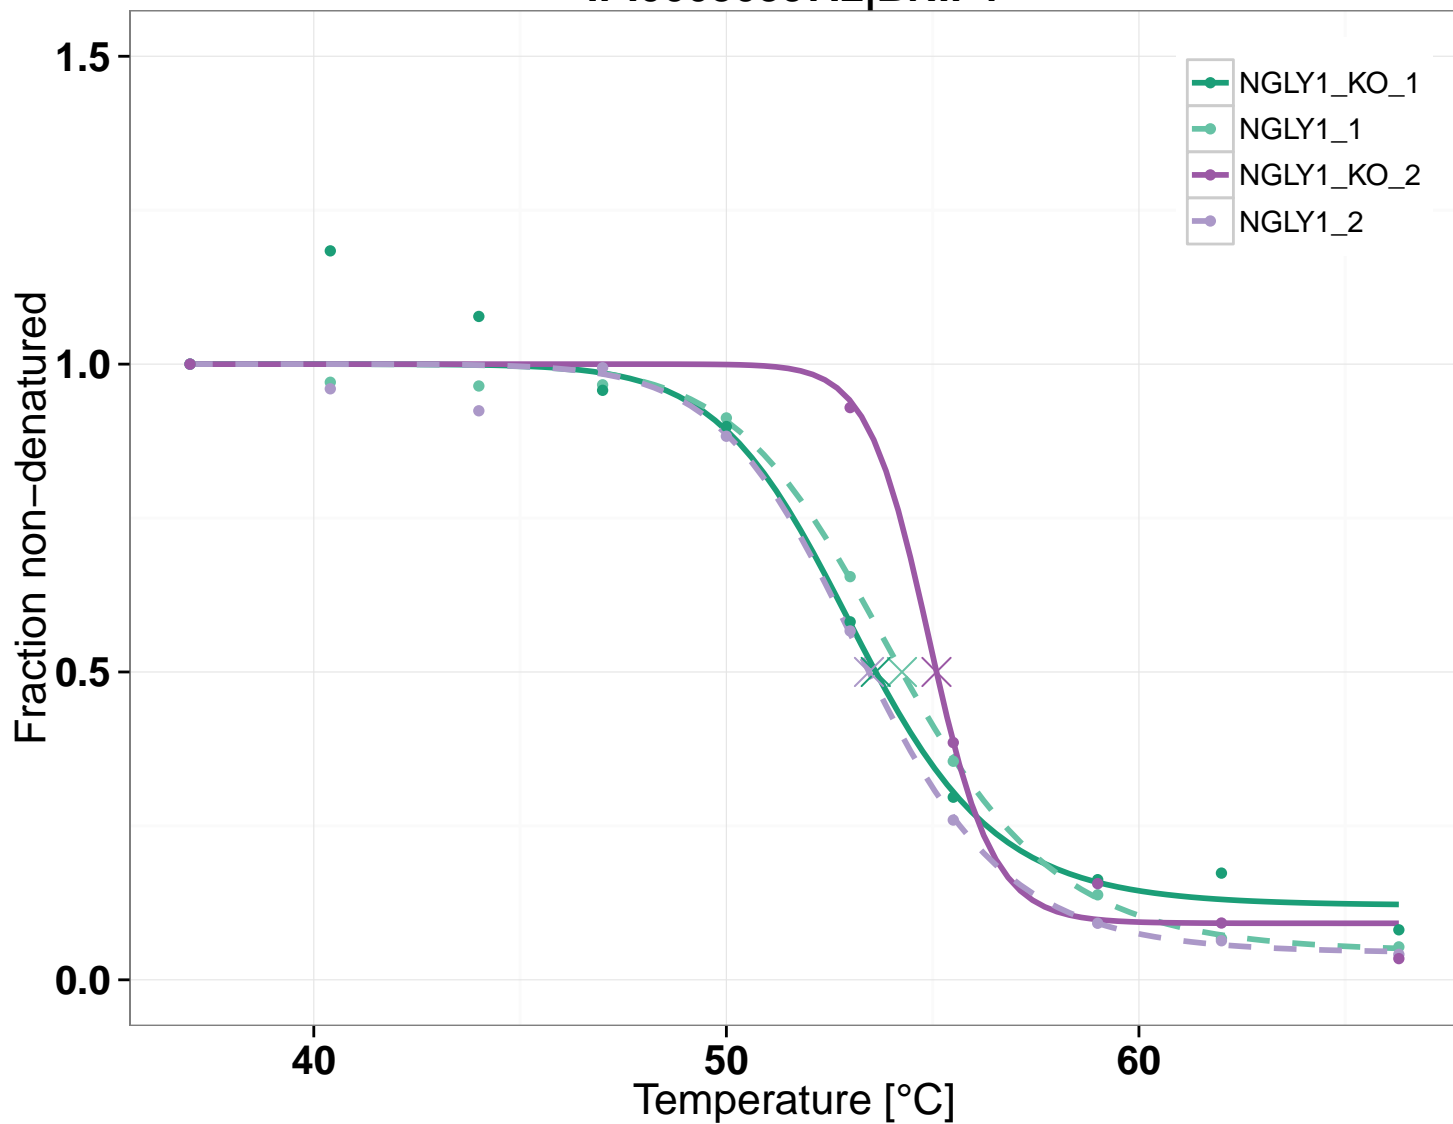

|            | meltPoint | slope | plateau | R2   |
|------------|-----------|-------|---------|------|
| NGLY1_KO_1 | 53.62     | -0.13 | 0.12    | 0.97 |
| NGLY1_1    | 54.26     | -0.12 | 0.05    | 1    |
| NGLY1_KO_2 | 55.09     | -0.3  | 0.09    | 0.55 |
| NGLY1_2    | 53.46     | -0.14 | 0.04    | 1    |

Supplement: Supplementary file 8421 [file 1]

IPI00011689.1|EEF2K

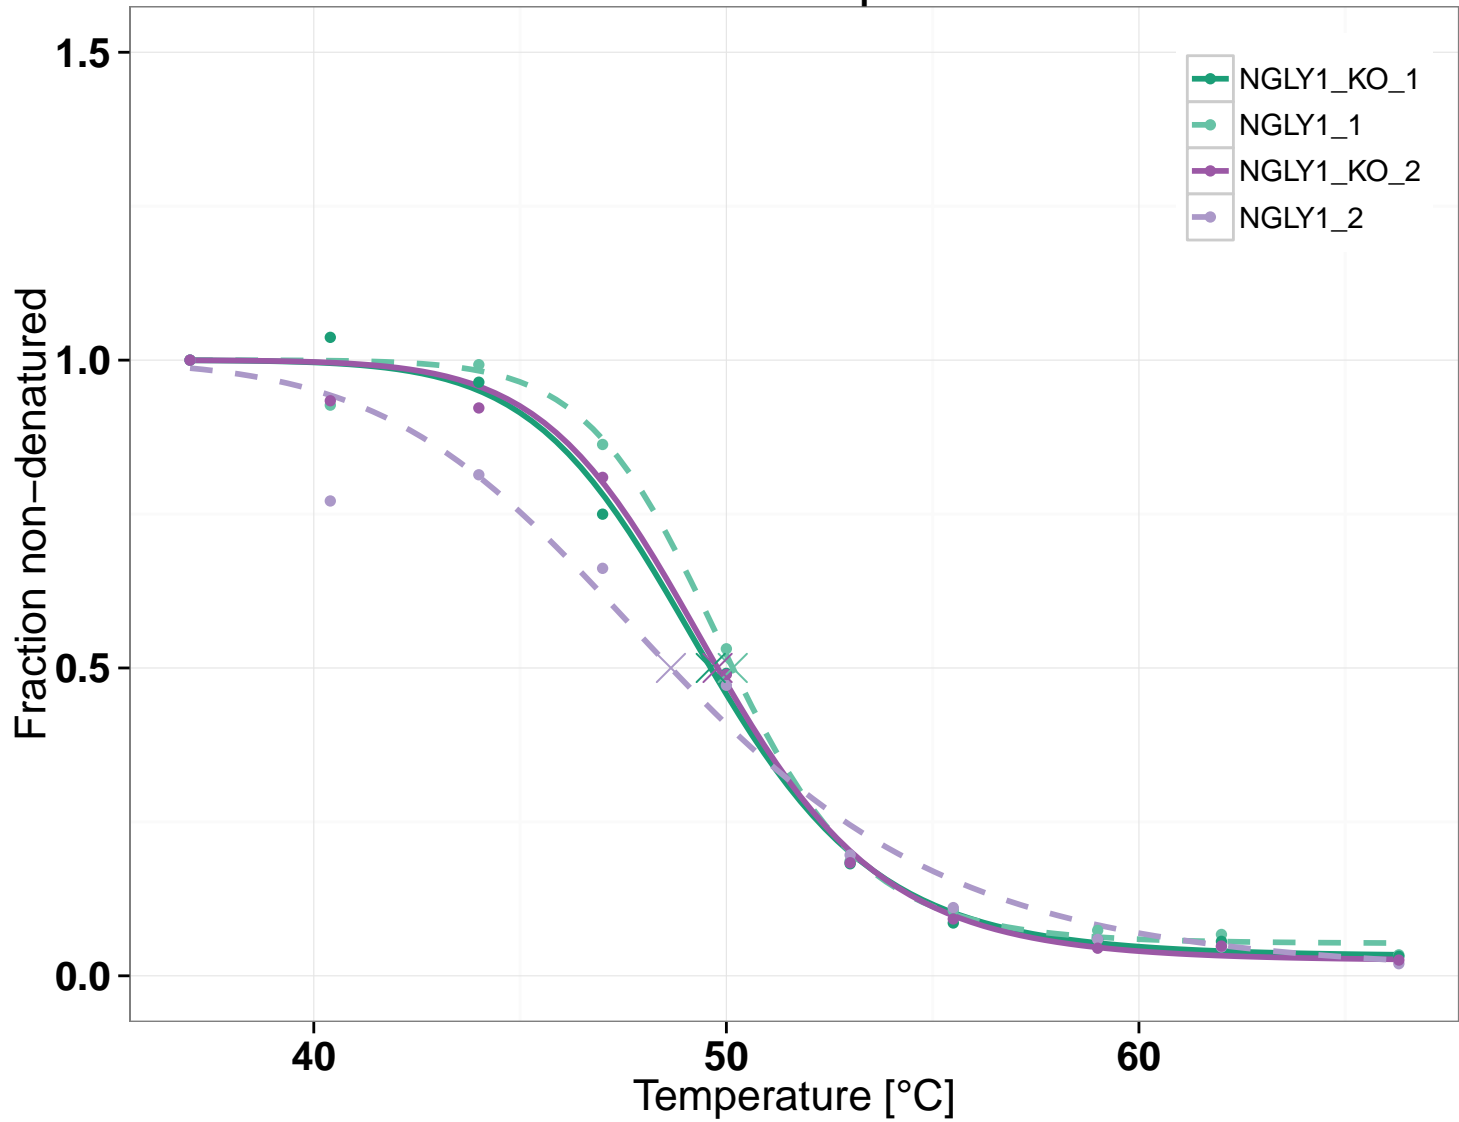

|            | meltPoint | slope  | plateau | R2   |
|------------|-----------|--------|---------|------|
| NGLY1_KO_1 | 49.62     | -0.12  | 0.03    | 1    |
| NGLY1_1    | 50.15     | -0.14  | 0.05    | 1    |
| NGLY1_KO_2 | 49.79     | -0.12  | 0.02    | 1    |
| NGLY1_2    | 48.66     | -0.072 | 0       | 0.97 |

Supplement: Supplementary file 8422 [file 1]

IPI00293327.4|P2RX4

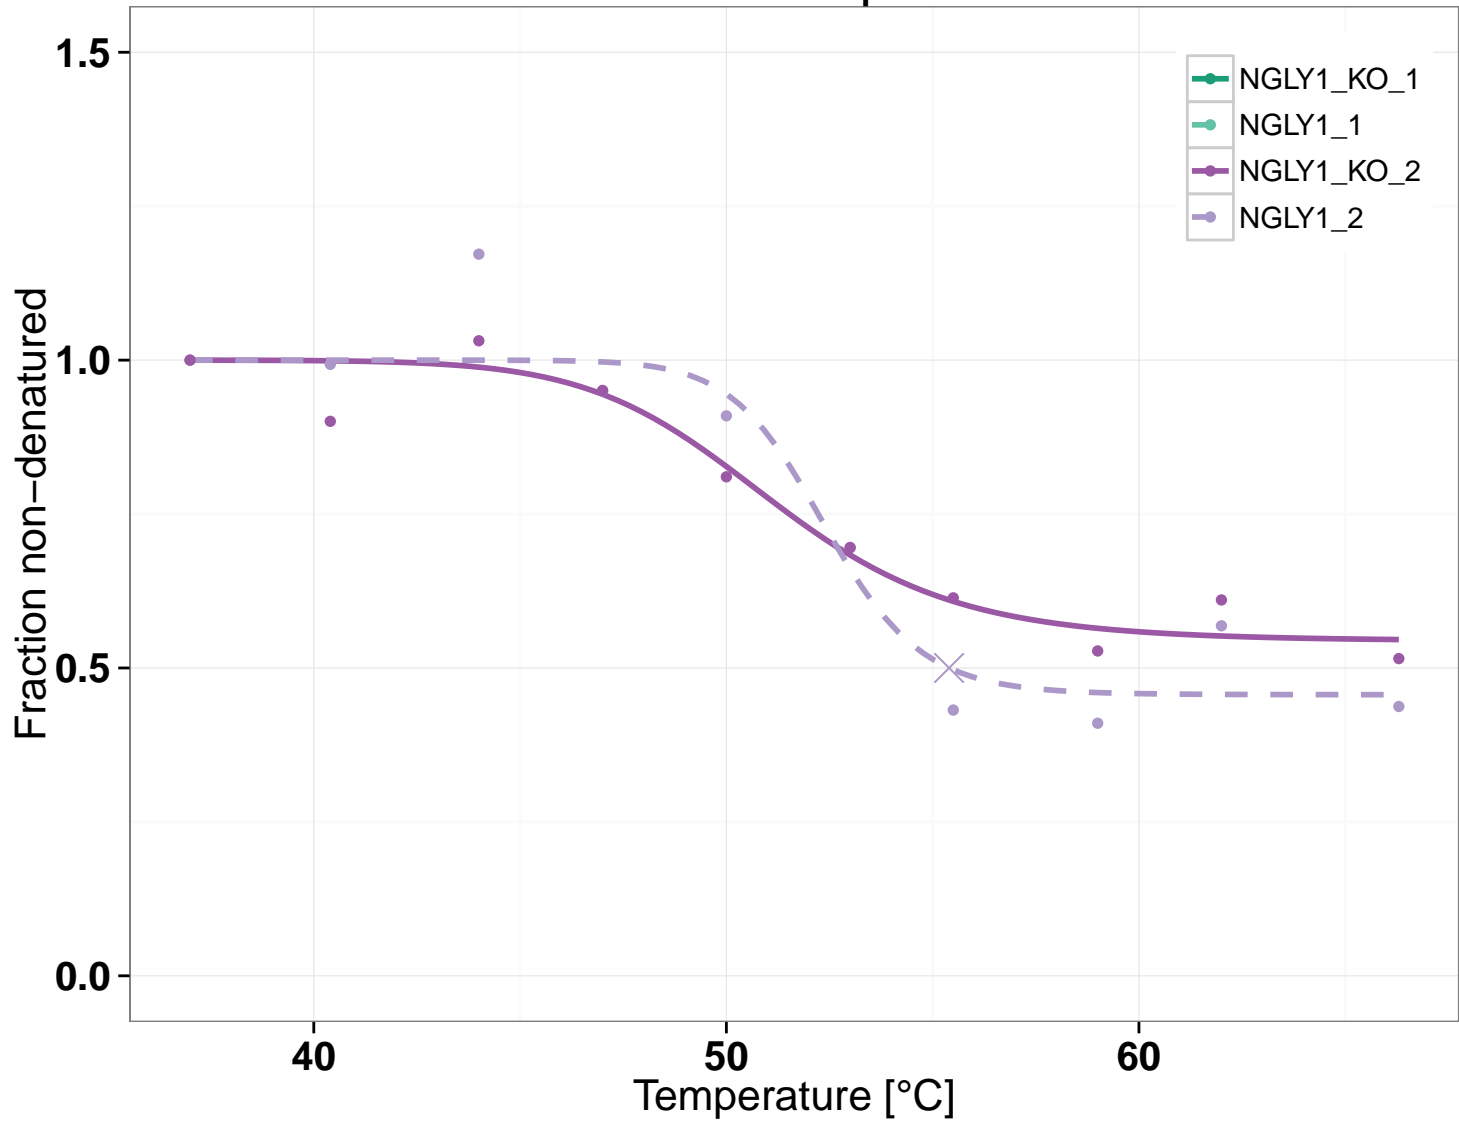

|            | meltPoint | slope  | plateau | R2   |
|------------|-----------|--------|---------|------|
| NGLY1_KO_1 | -         | -      | -       | -    |
| NGLY1_1    | -         | -      | -       | -    |
| NGLY1_KO_2 | -         | -0.051 | 0.54    | 0.95 |
| NGLY1_2    | 55.4      | -0.12  | 0.46    | 0.92 |

Supplement: Supplementary file 8423 [file 1]

# IPI00010158.3|CHRA1

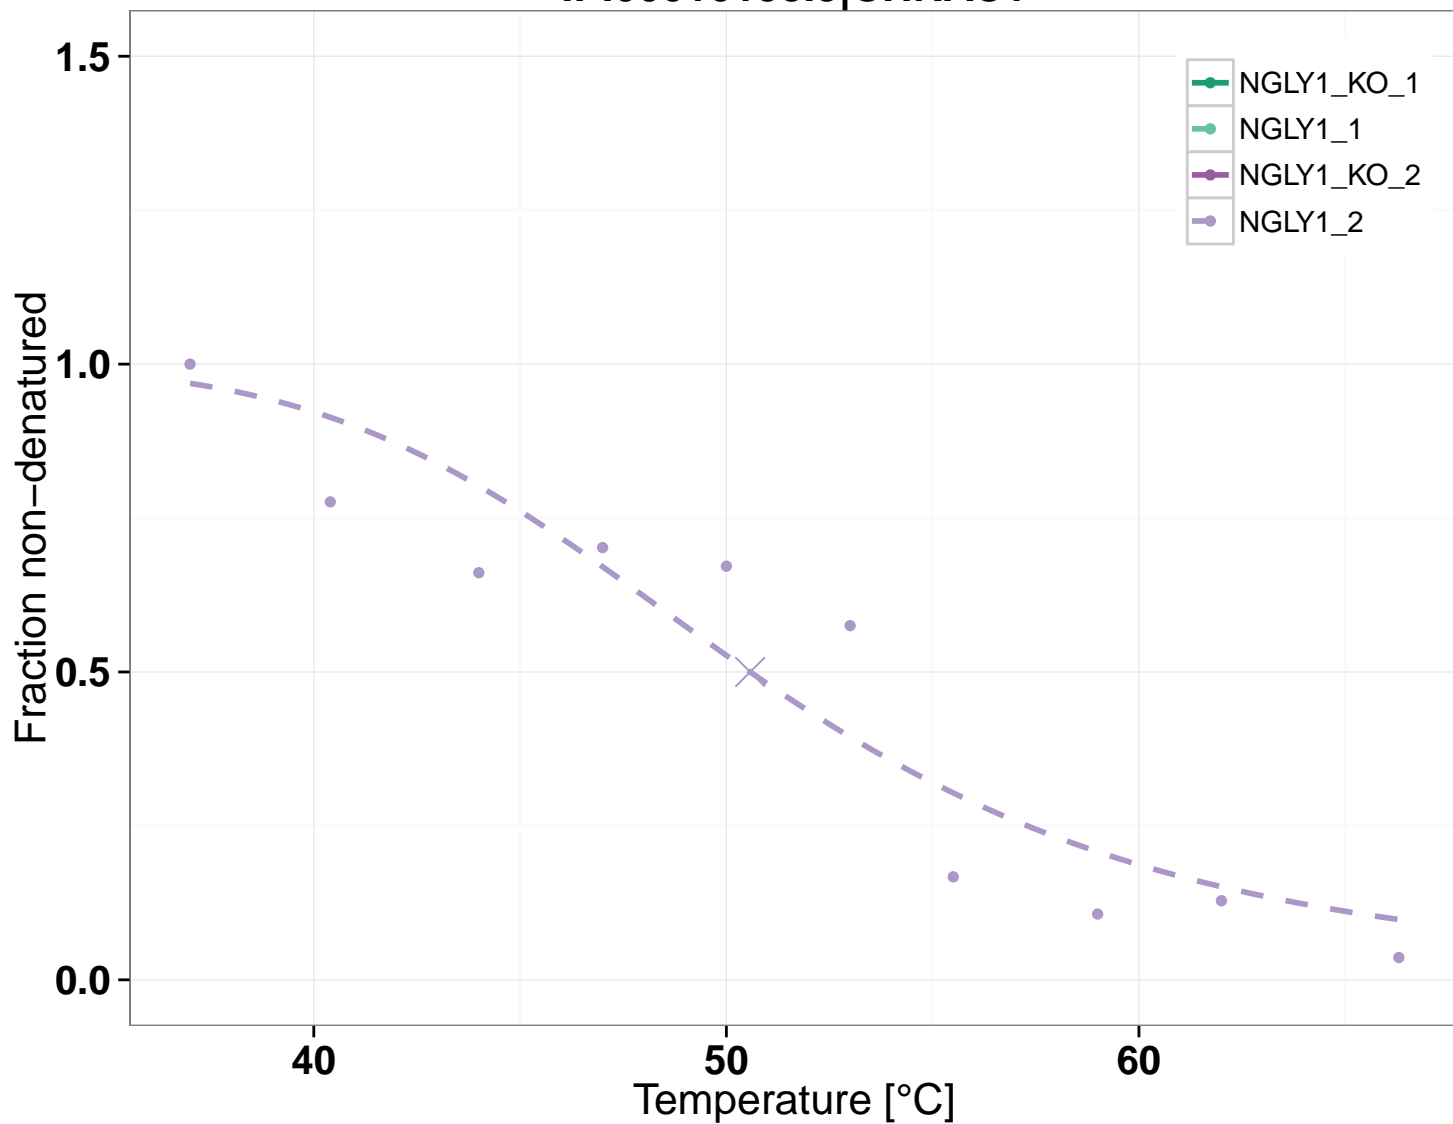

|            | meltPoint | slope  | plateau | R2   |
|------------|-----------|--------|---------|------|
| NGLY1_KO_1 | —         | —      | —       | —    |
| NGLY1_1    | —         | —      | —       | —    |
| NGLY1_KO_2 | —         | —      | —       | —    |
| NGLY1_2    | 50.58     | -0.048 | 0       | 0.88 |

Supplement: Supplementary file 8424 [file 1]

# IPI00030227.1|EGR1

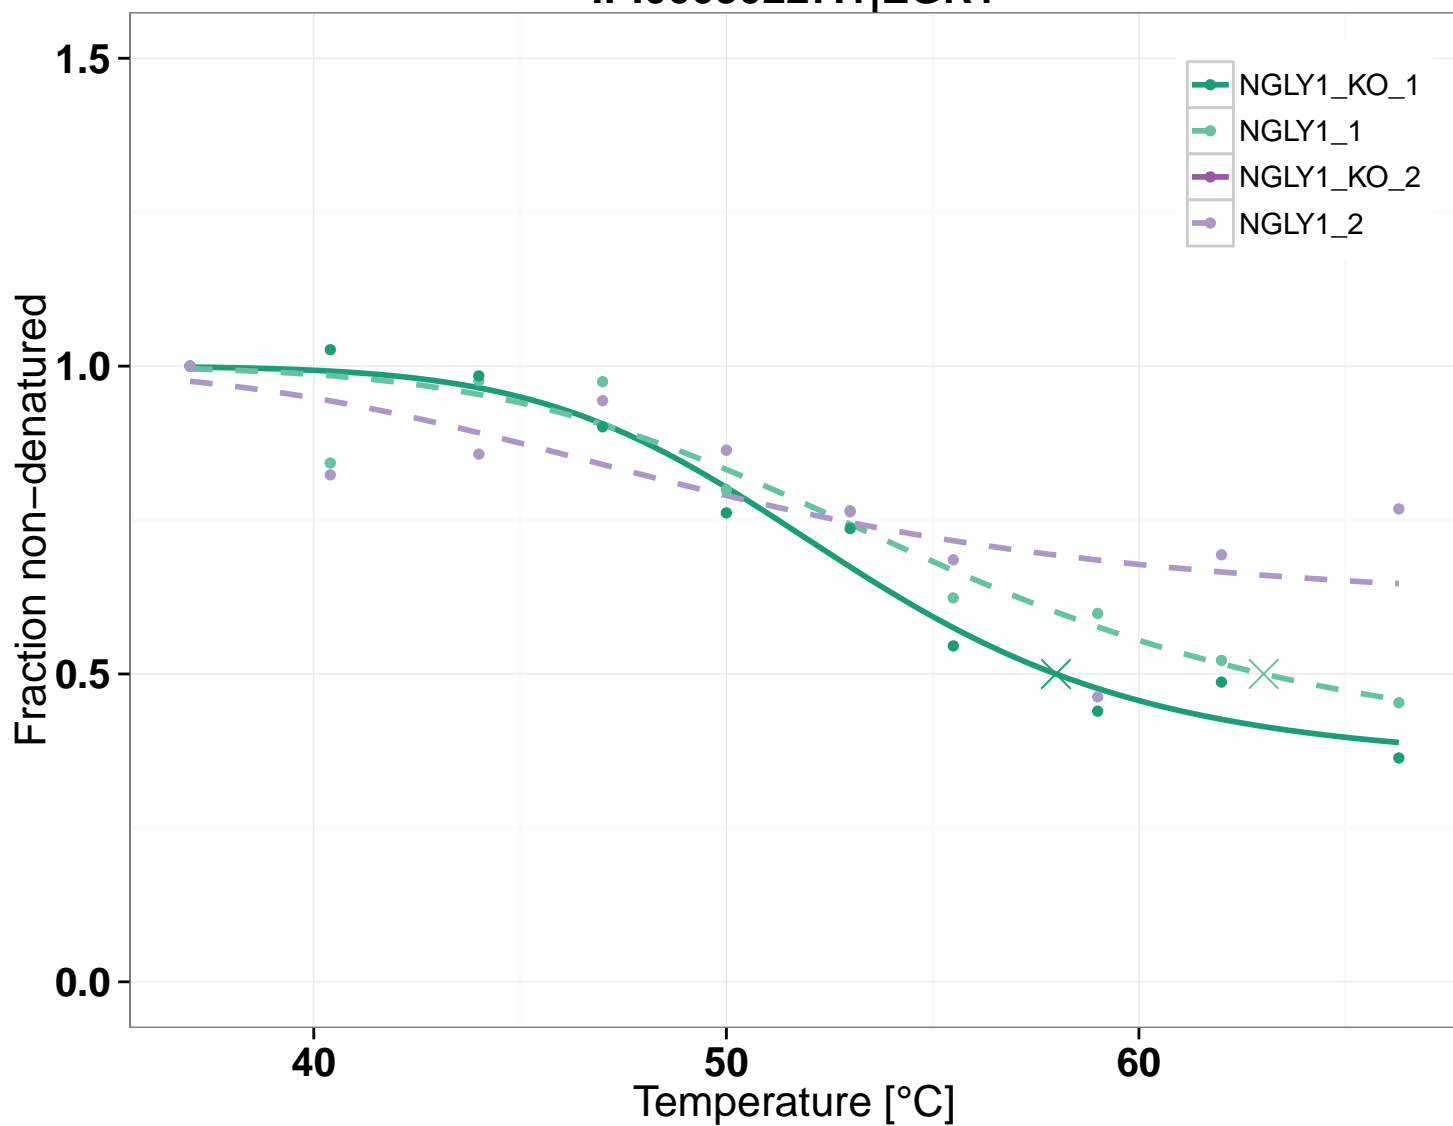

|            | meltPoint | slope  | plateau | R2   |
|------------|-----------|--------|---------|------|
| NGLY1_KO_1 | 57.99     | -0.044 | 0.35    | 0.98 |
| NGLY1_1    | 63.02     | -0.031 | 0.36    | 0.92 |
| NGLY1_KO_2 | -         | -      | -       | -    |
| NGLY1_2    | -         | -0.017 | 0.6     | 0.52 |

Supplement: Supplementary file 8425 [file 1]

IPI00103554.1|GATAD2B

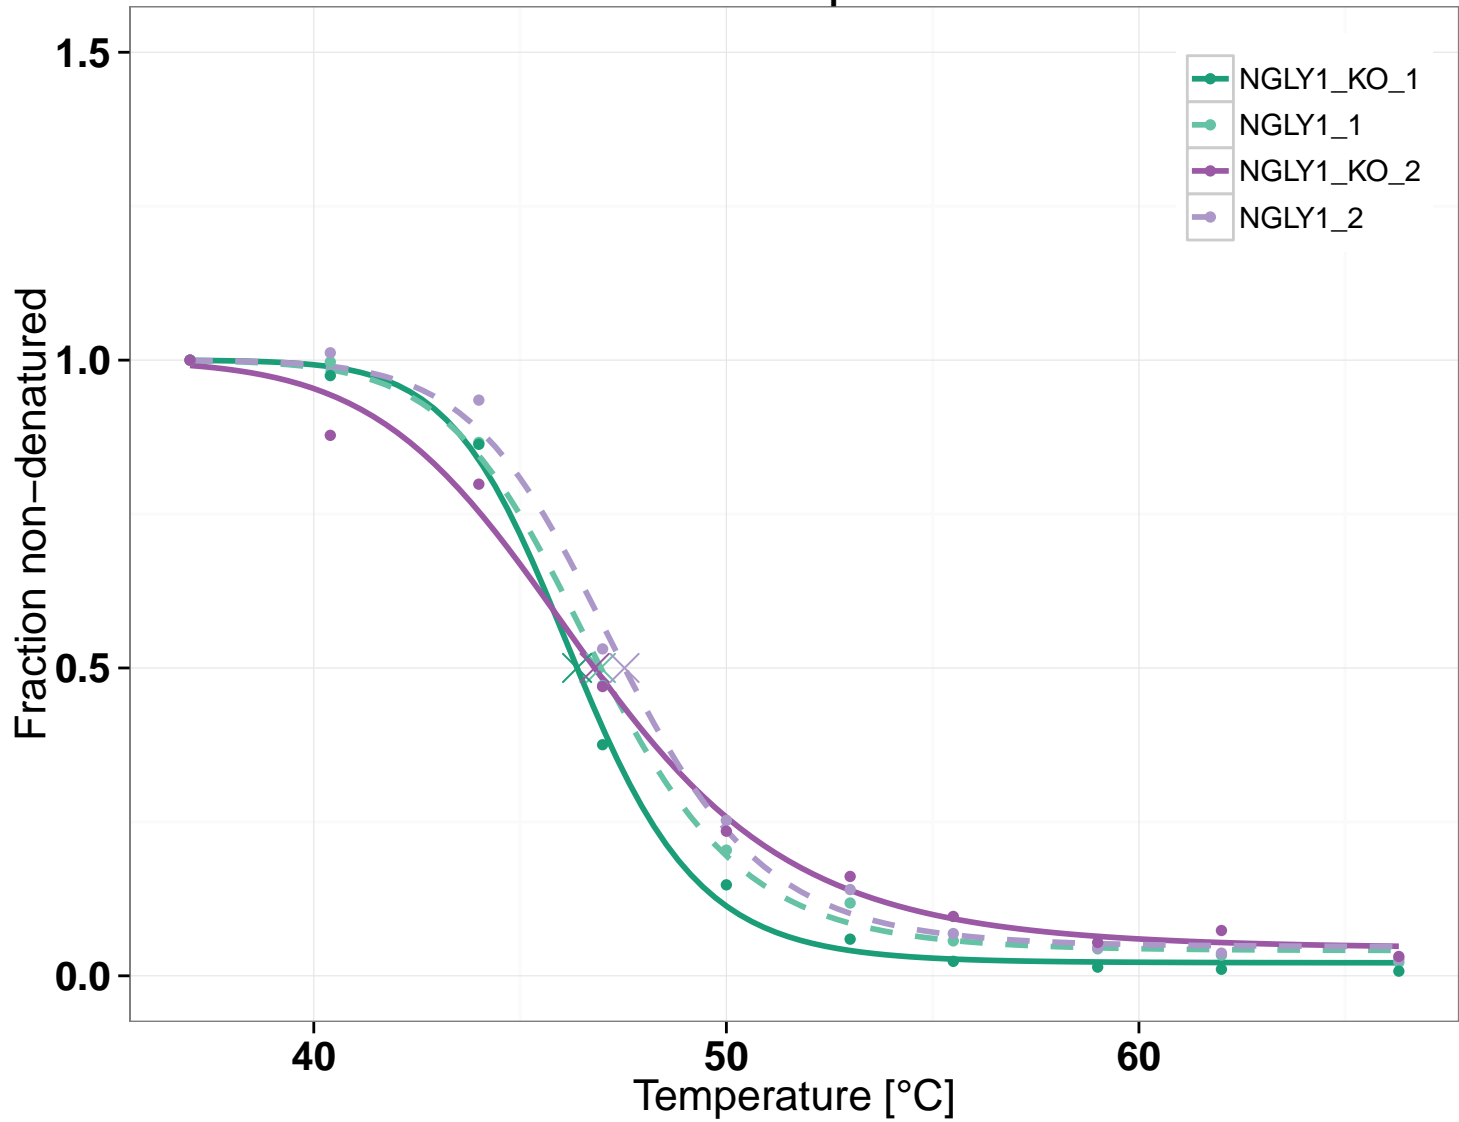

|            | meltPoint | slope  | plateau | R2   |
|------------|-----------|--------|---------|------|
| NGLY1_KO_1 | 46.38     | -0.16  | 0.02    | 1    |
| NGLY1_1    | 46.96     | -0.13  | 0.04    | 1    |
| NGLY1_KO_2 | 46.81     | -0.094 | 0.04    | 0.99 |
| NGLY1_2    | 47.53     | -0.13  | 0.05    | 1    |

Supplement: Supplementary file 8426 [file 1]

IPI00003495.4|MFHAS1

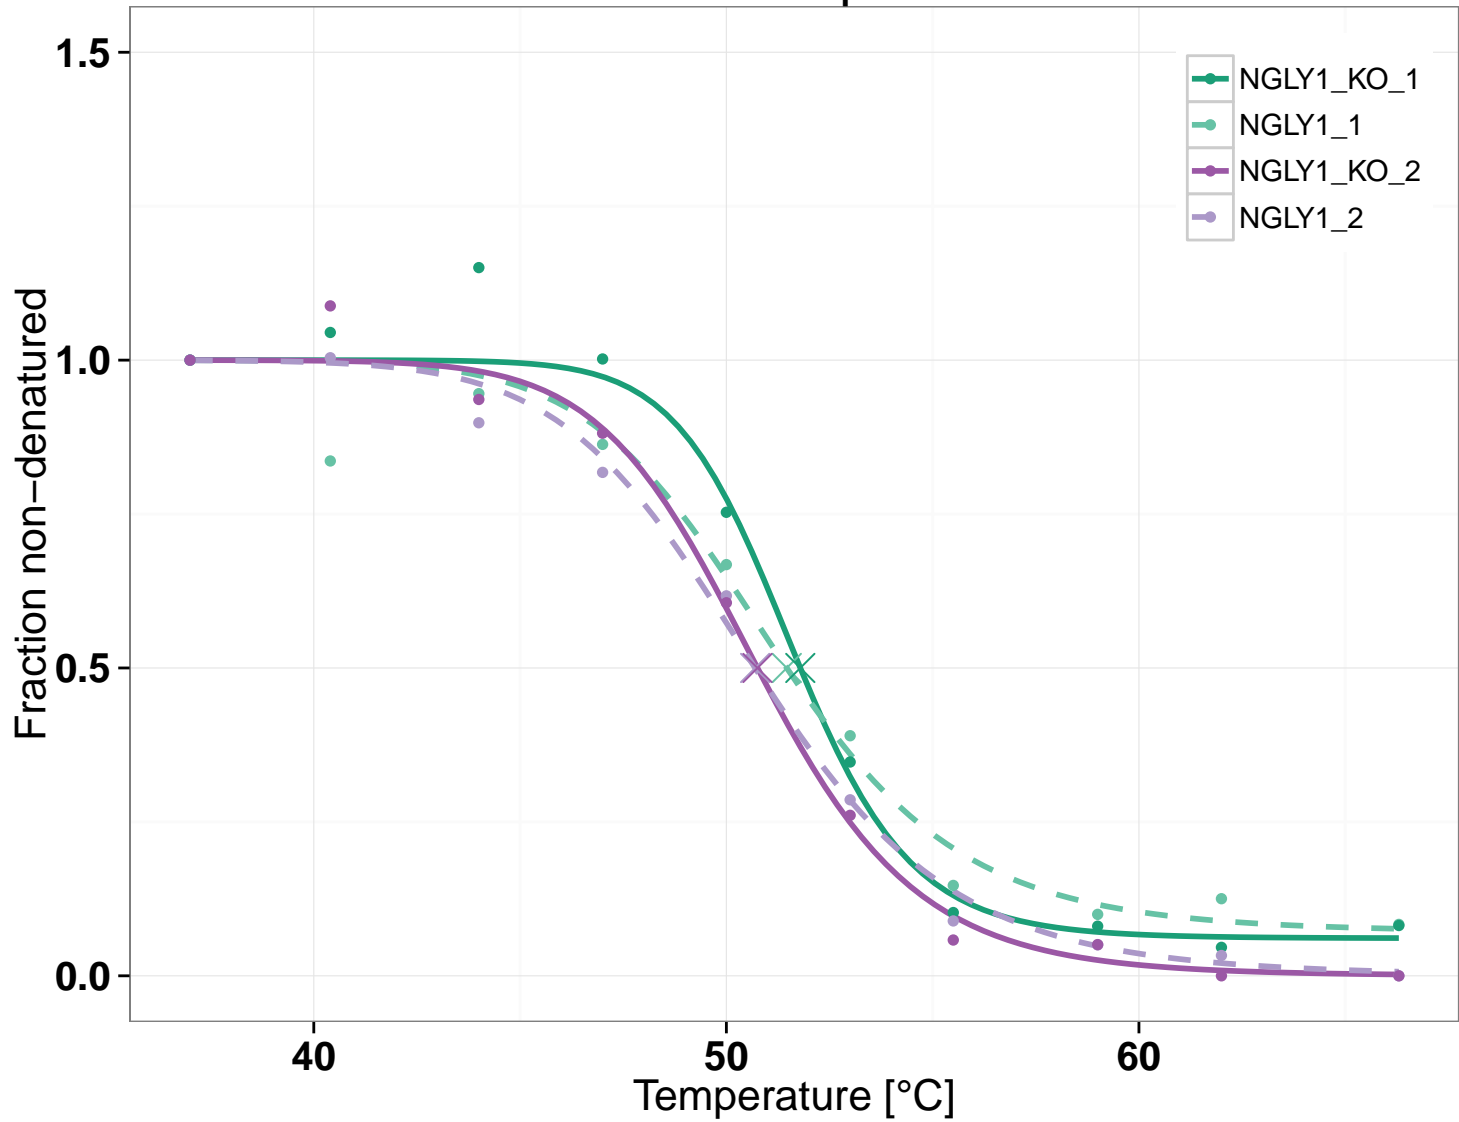

|            | meltPoint | slope | plateau | R2   |
|------------|-----------|-------|---------|------|
| NGLY1_KO_1 | 51.79     | -0.16 | 0.06    | 0.99 |
| NGLY1_1    | 51.46     | -0.1  | 0.07    | 0.97 |
| NGLY1_KO_2 | 50.75     | -0.13 | 0       | 0.99 |
| NGLY1_2    | 50.7      | -0.11 | 0       | 0.99 |

Supplement: Supplementary file 8427 [file 1]

IPI00855954.1|INO80C

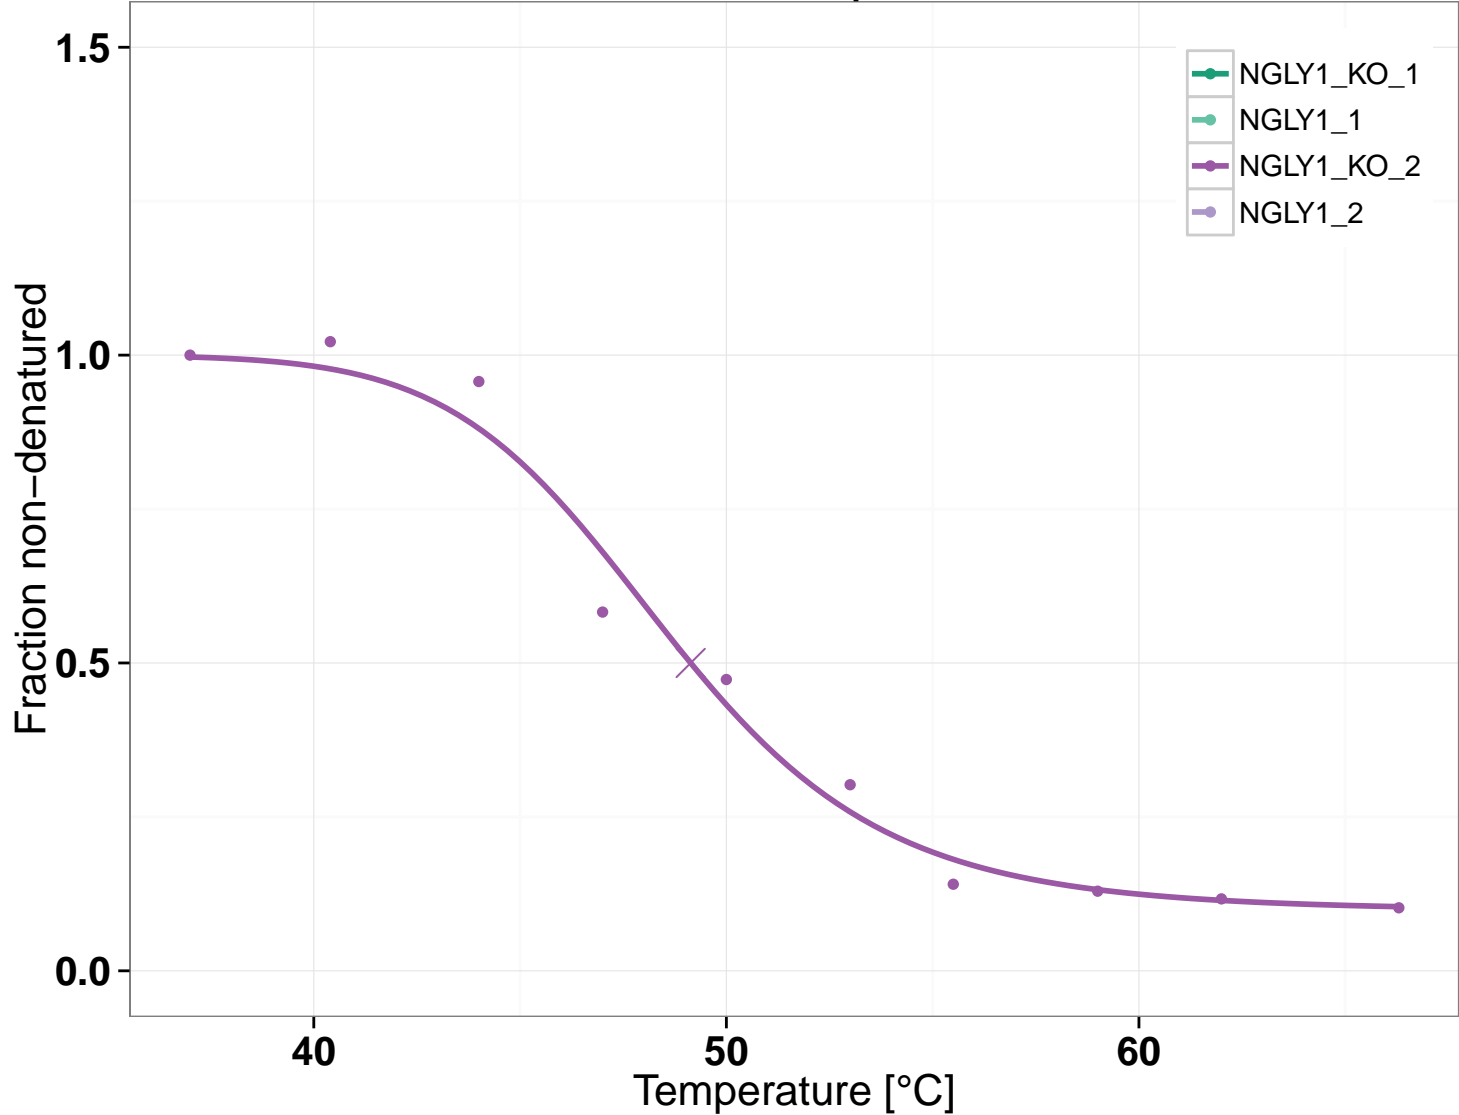

|            | meltPoint | slope  | plateau | R2   |
|------------|-----------|--------|---------|------|
| NGLY1_KO_1 | -         | -      | -       | -    |
| NGLY1_1    | -         | -      | -       | -    |
| NGLY1_KO_2 | 49.13     | -0.086 | 0.1     | 0.98 |
| NGLY1_2    | -         | -      | -       | -    |

Supplement: Supplementary file 8428 [file 1]

IPI00025114.4|SLC35B1

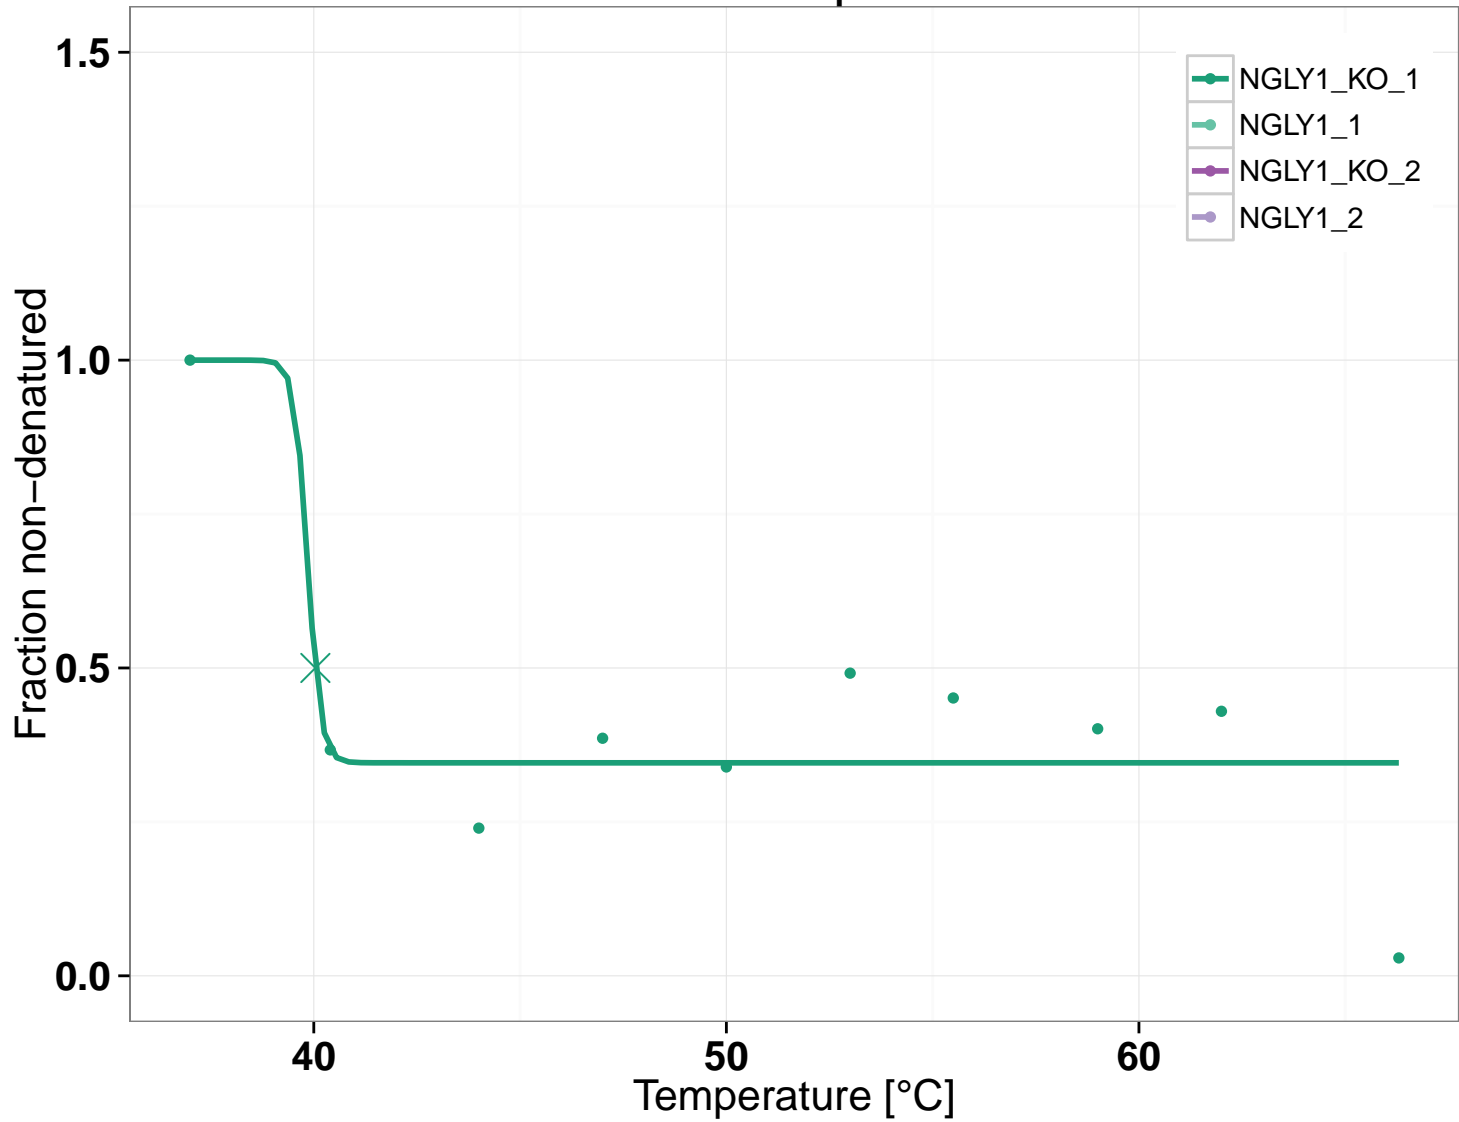

|            | meltPoint | slope | plateau | R2   |
|------------|-----------|-------|---------|------|
| NGLY1_KO_1 | 40.04     | -1    | 0.35    | 0.71 |
| NGLY1_1    | -         | -     | -       | -    |
| NGLY1_KO_2 | -         | -     | -       | -    |
| NGLY1_2    | -         | -     | -       | -    |

Supplement: Supplementary file 8429 [file 1]

IPI00412607.6|RPL35

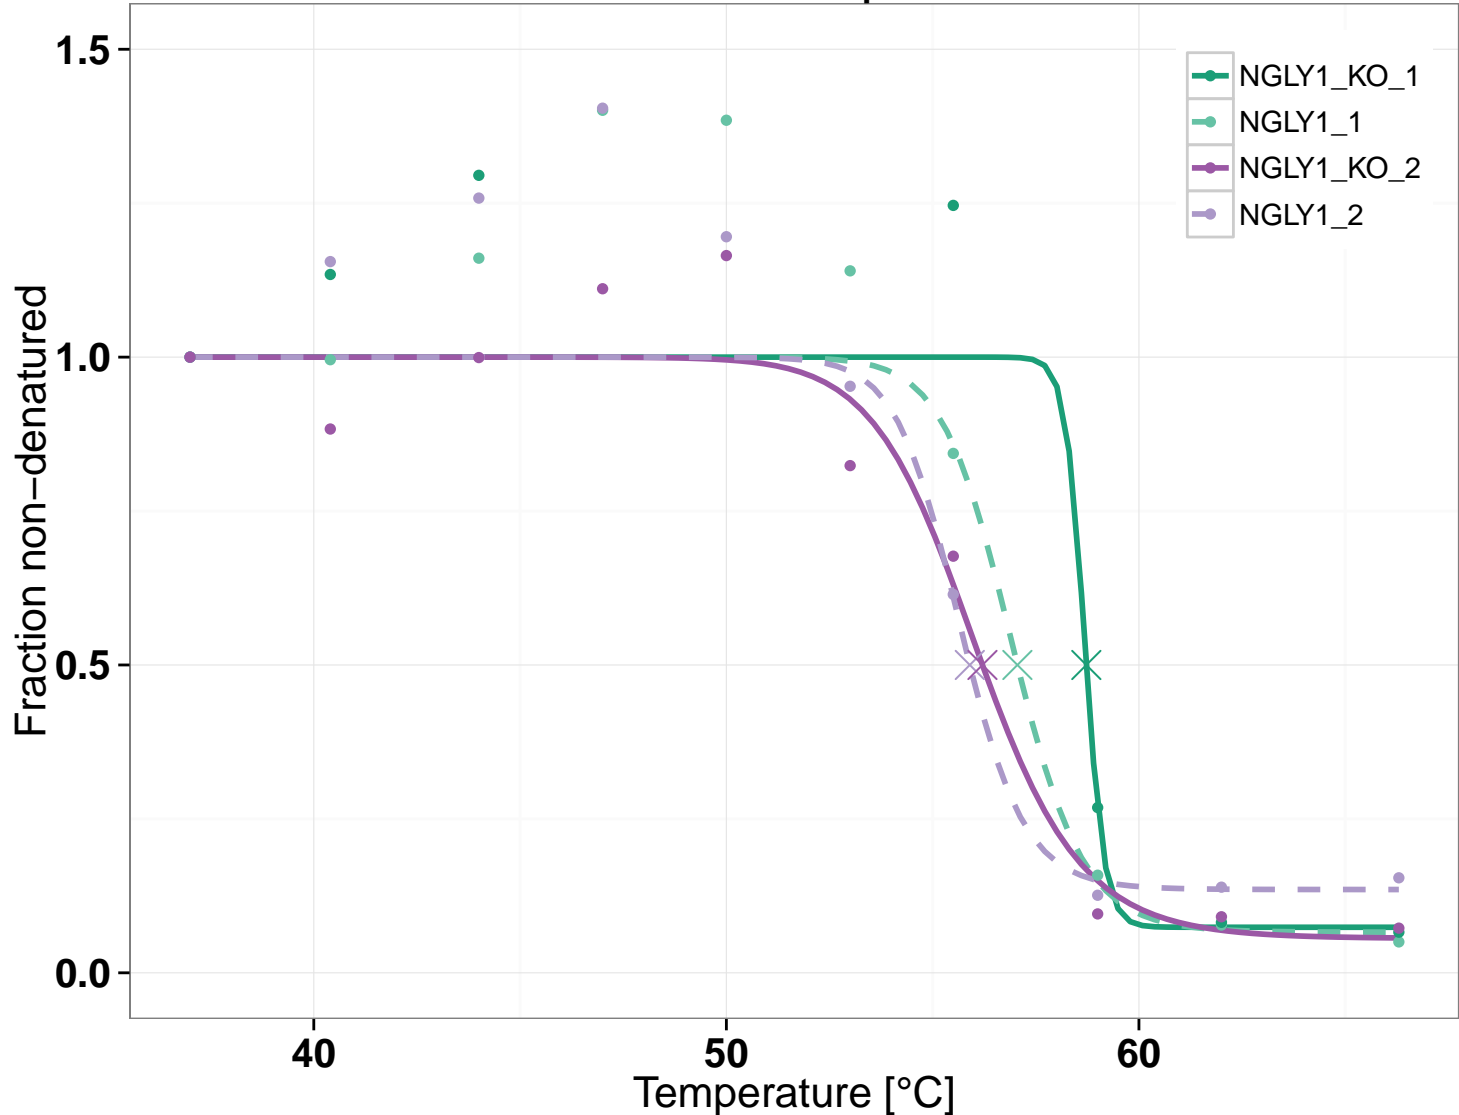

|            | meltPoint | slope | plateau | R2   |
|------------|-----------|-------|---------|------|
| NGLY1_KO_1 | 58.72     | -0.99 | 0.07    | 0.51 |
| NGLY1_1    | 57.05     | -0.27 | 0.07    | 0.86 |
| NGLY1_KO_2 | 56.21     | -0.19 | 0.06    | 0.96 |
| NGLY1_2    | 55.9      | -0.28 | 0.14    | 0.87 |

Supplement: Supplementary file 8430 [file 1]

IPI00647082.1|TBC1D13

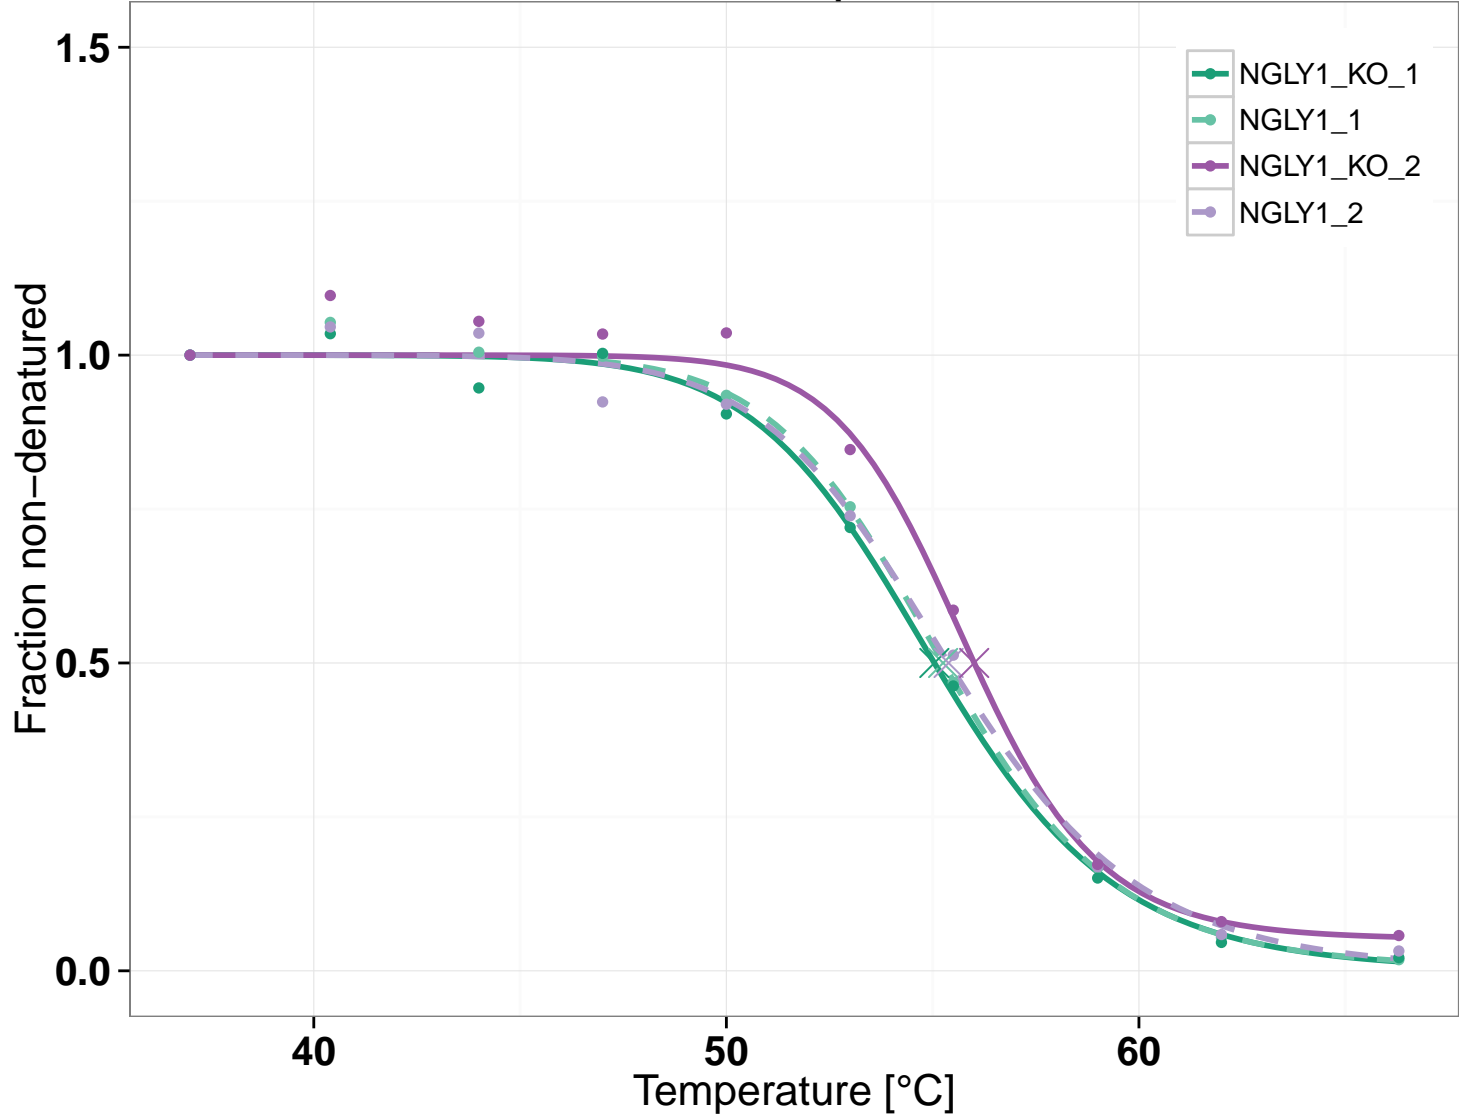

|            | meltPoint | slope | plateau | R2   |
|------------|-----------|-------|---------|------|
| NGLY1_KO_1 | 55.04     | -0.11 | 0       | 1    |
| NGLY1_1    | 55.25     | -0.12 | 0       | 1    |
| NGLY1_KO_2 | 56.01     | -0.15 | 0.05    | 0.99 |
| NGLY1_2    | 55.39     | -0.11 | 0       | 0.99 |

Supplement: Supplementary file 8431 [file 1]

# IPI00103090.2|LEO1

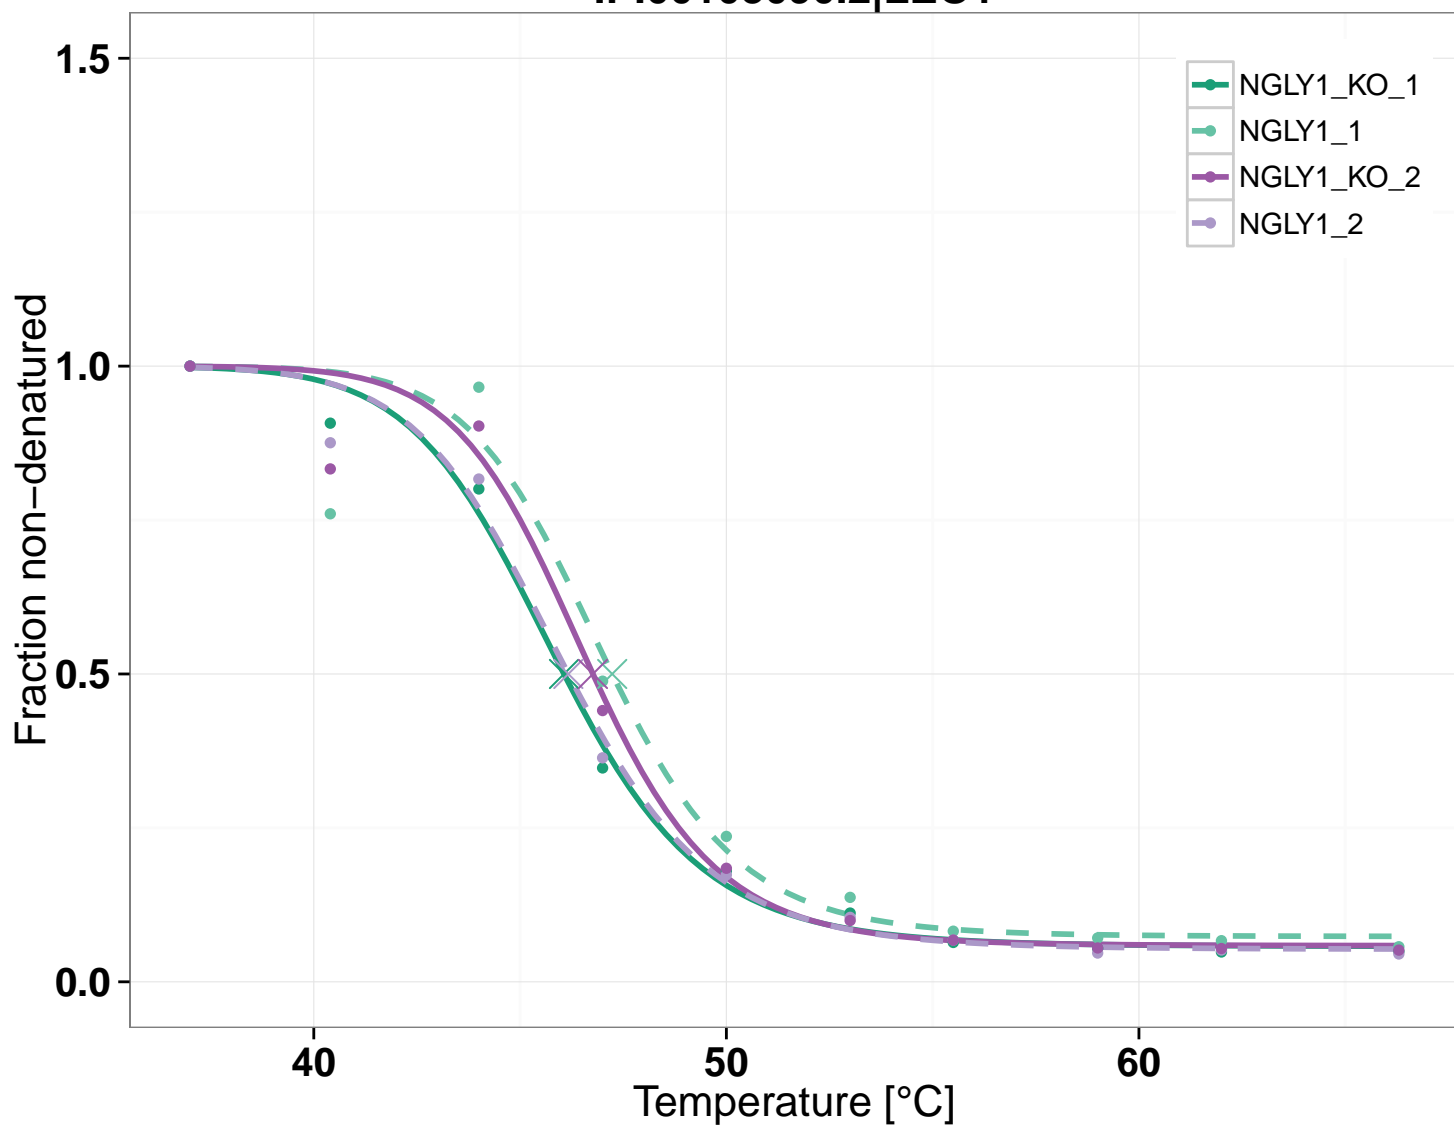

|            | meltPoint | slope | plateau | R2   |
|------------|-----------|-------|---------|------|
| NGLY1_KO_1 | 46.06     | -0.13 | 0.06    | 0.99 |
| NGLY1_1    | 47.23     | -0.14 | 0.07    | 0.95 |
| NGLY1_KO_2 | 46.77     | -0.15 | 0.06    | 0.98 |
| NGLY1_2    | 46.17     | -0.13 | 0.05    | 0.99 |

Supplement: Supplementary file 8432 [file 1]

IPI00059764.4|ZNF428

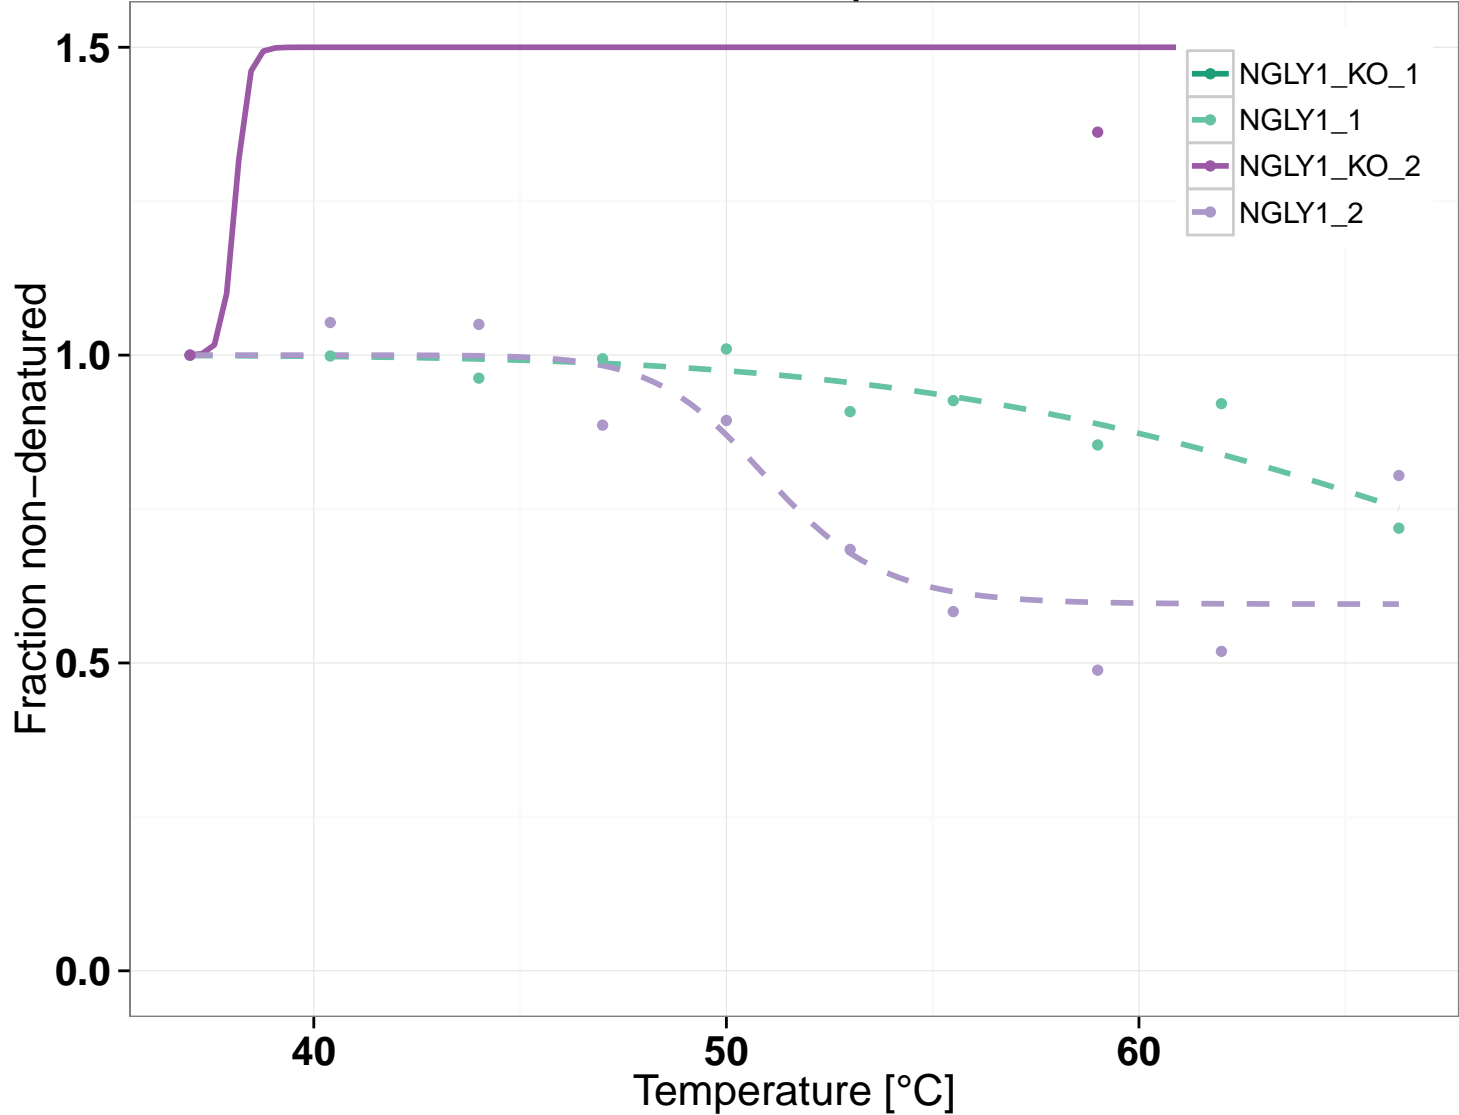

|            | meltPoint | slope  | plateau | R2   |
|------------|-----------|--------|---------|------|
| NGLY1_KO_1 | -         | -      | -       | -    |
| NGLY1_1    | -         | -      | 0       | 0.81 |
| NGLY1_KO_2 | -         | 0.82   | 1.5     | 0.25 |
| NGLY1_2    | -         | -0.073 | 0.6     | 0.81 |

Supplement: Supplementary file 8433 [file 1]

IPI00303602.1|AIDA

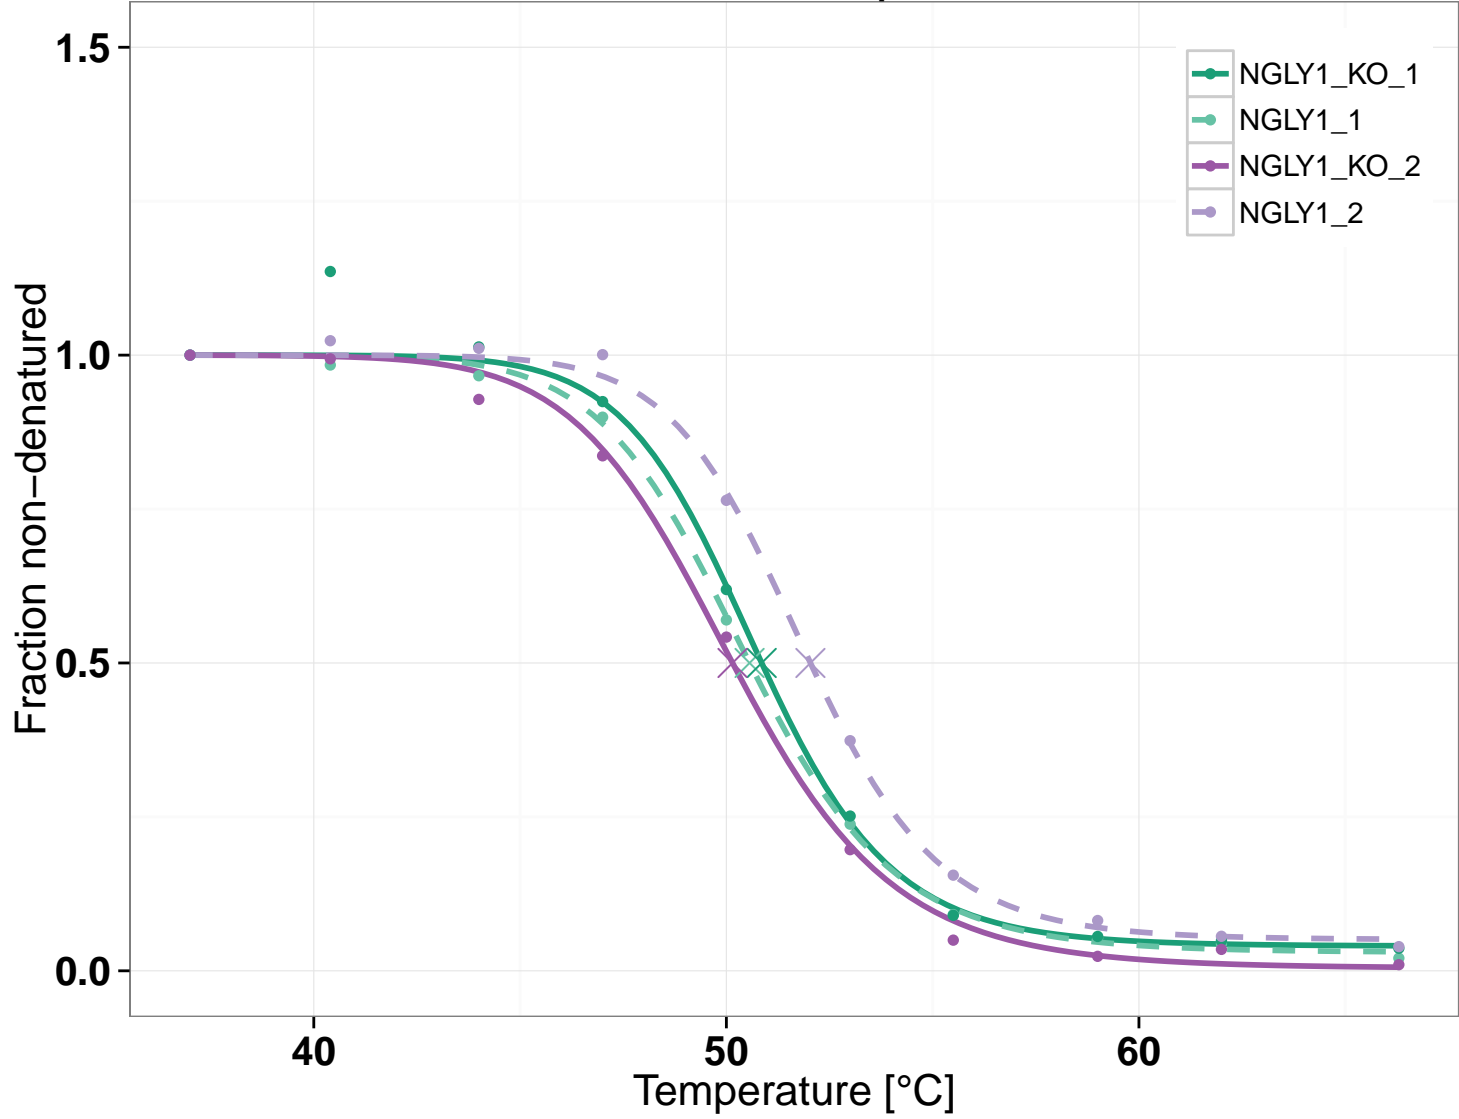

|            | meltPoint | slope | plateau | R2   |
|------------|-----------|-------|---------|------|
| NGLY1_KO_1 | 50.86     | -0.15 | 0.04    | 0.99 |
| NGLY1_1    | 50.56     | -0.13 | 0.03    | 1    |
| NGLY1_KO_2 | 50.15     | -0.13 | 0       | 1    |
| NGLY1_2    | 52.04     | -0.15 | 0.05    | 1    |

Supplement: Supplementary file 8434 [file 1]

IPI00009368.4|SFXN1

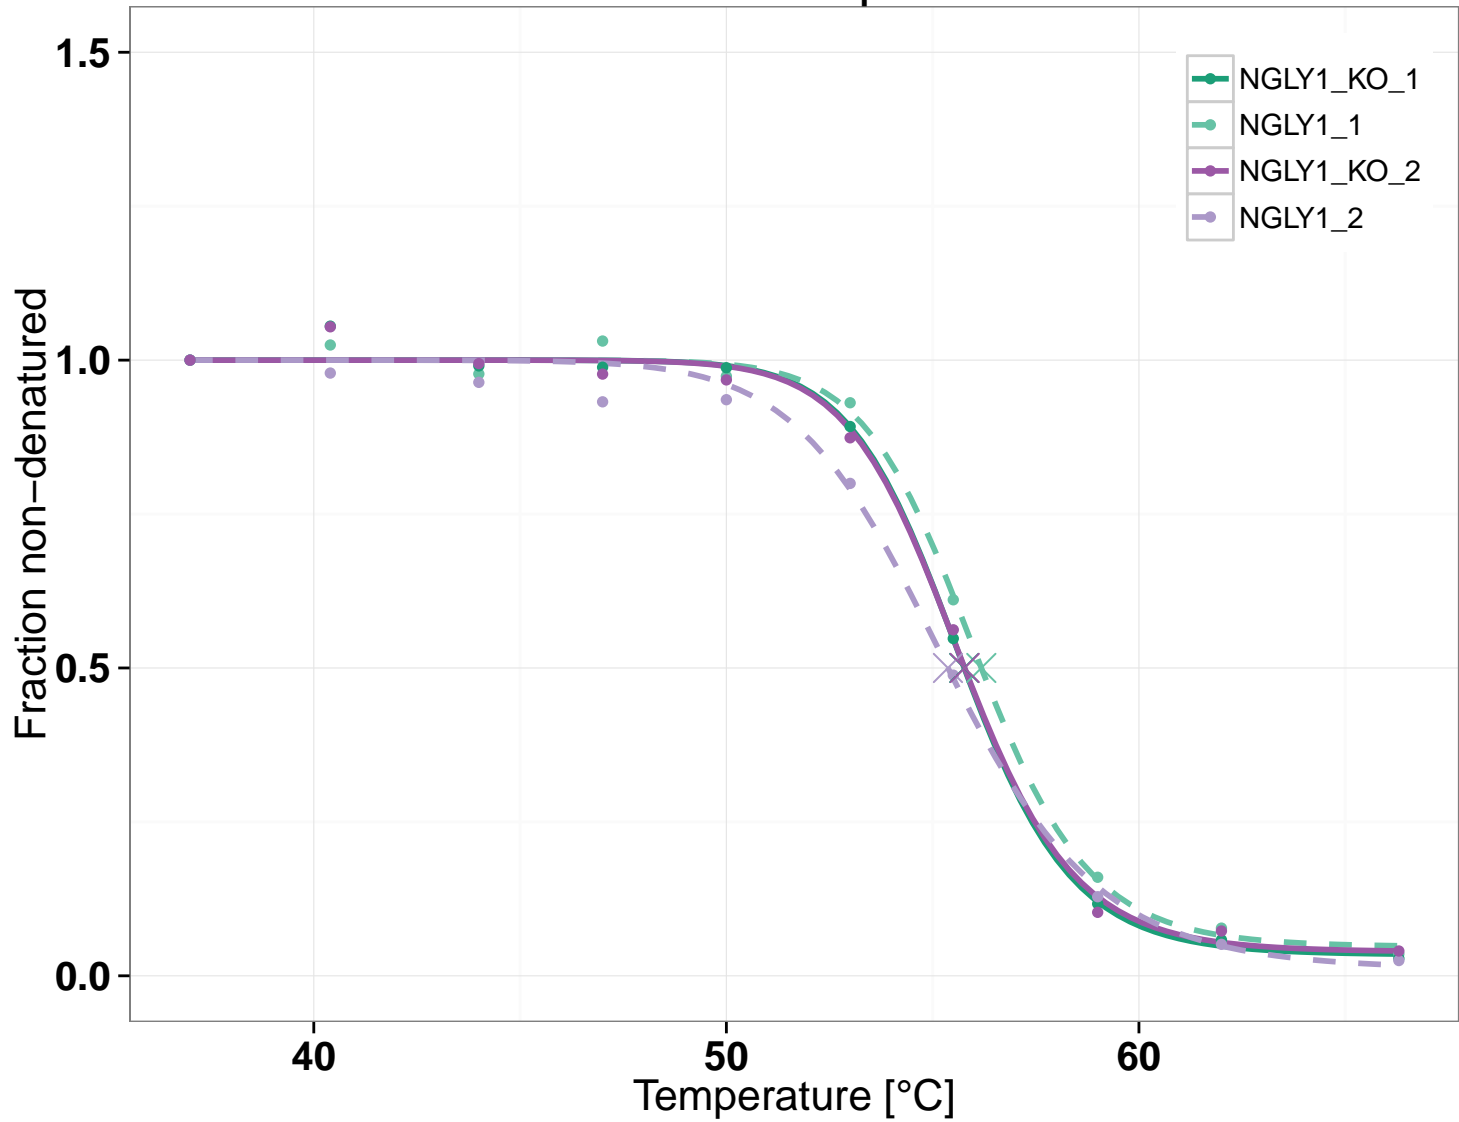

|            | meltPoint | slope | plateau | R2 |
|------------|-----------|-------|---------|----|
| NGLY1_KO_1 | 55.76     | -0.18 | 0.03    | 1  |
| NGLY1_1    | 56.18     | -0.17 | 0.05    | 1  |
| NGLY1_KO_2 | 55.78     | -0.17 | 0.04    | 1  |
| NGLY1_2    | 55.37     | -0.13 | 0.01    | 1  |

Supplement: Supplementary file 8435 [file 1]

# IPI00000685.1|CDK7

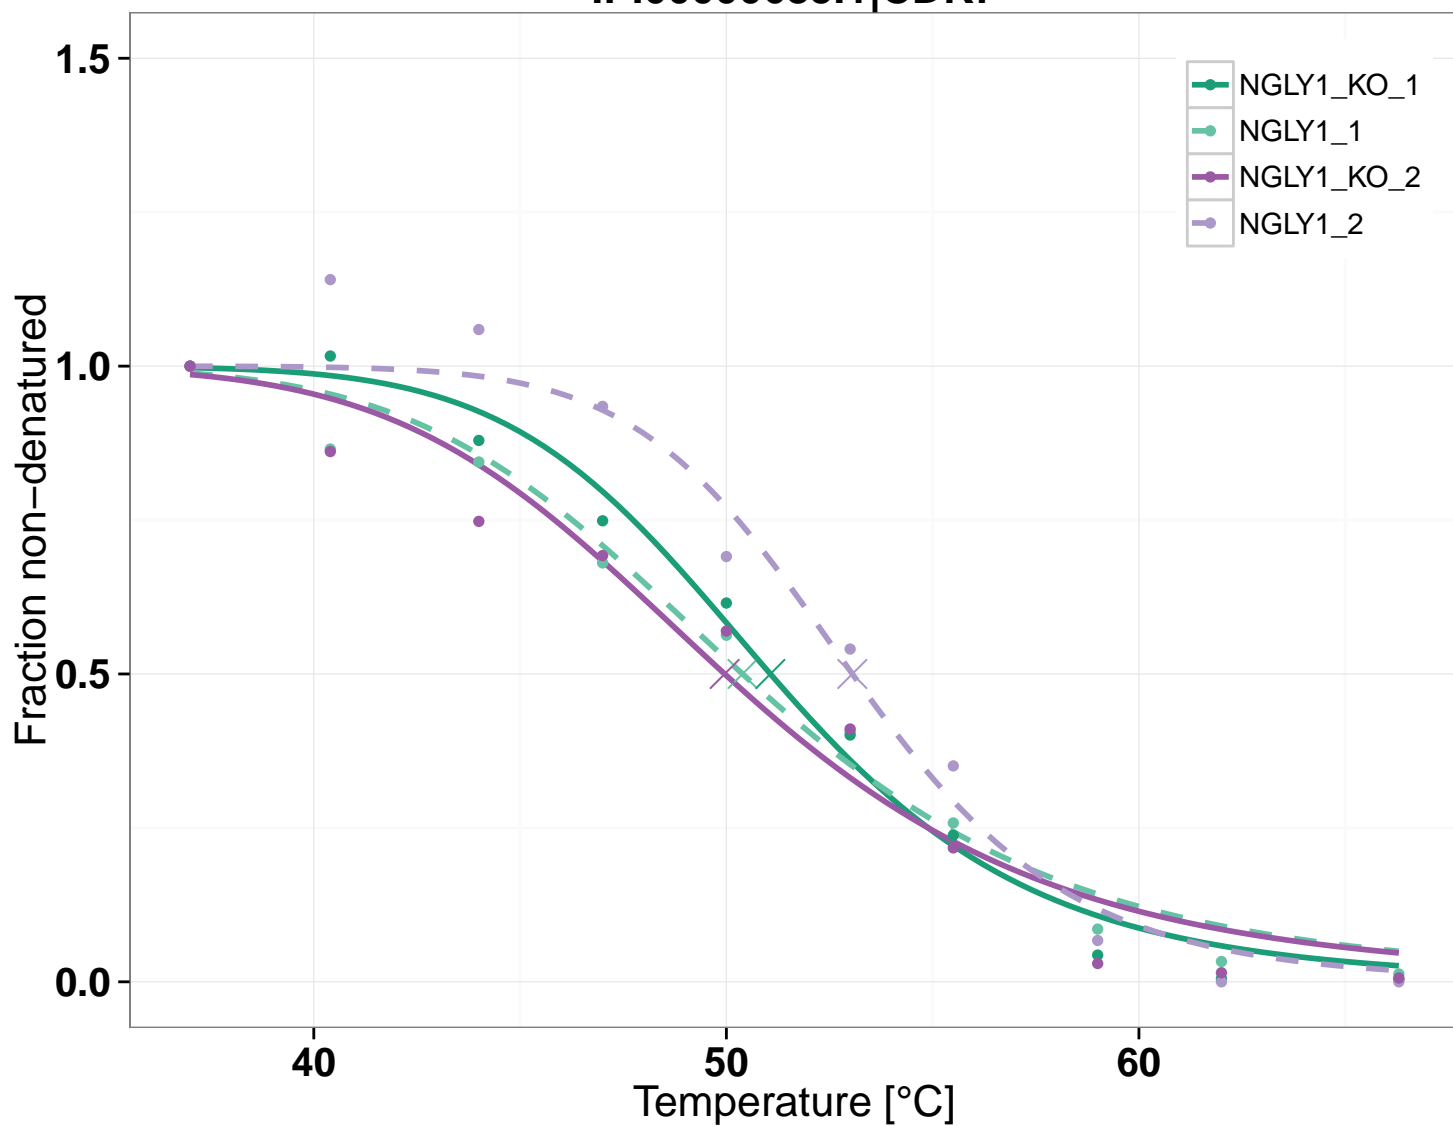

|            | meltPoint | slope  | plateau | R2   |
|------------|-----------|--------|---------|------|
| NGLY1_KO_1 | 51.07     | -0.078 | 0       | 0.99 |
| NGLY1_1    | 50.39     | -0.063 | 0       | 0.98 |
| NGLY1_KO_2 | 49.96     | -0.063 | 0       | 0.96 |
| NGLY1_2    | 53.05     | -0.095 | 0       | 0.98 |

Supplement: Supplementary file 8436 [file 1]

IPI00554590.1|RAB3GAP2

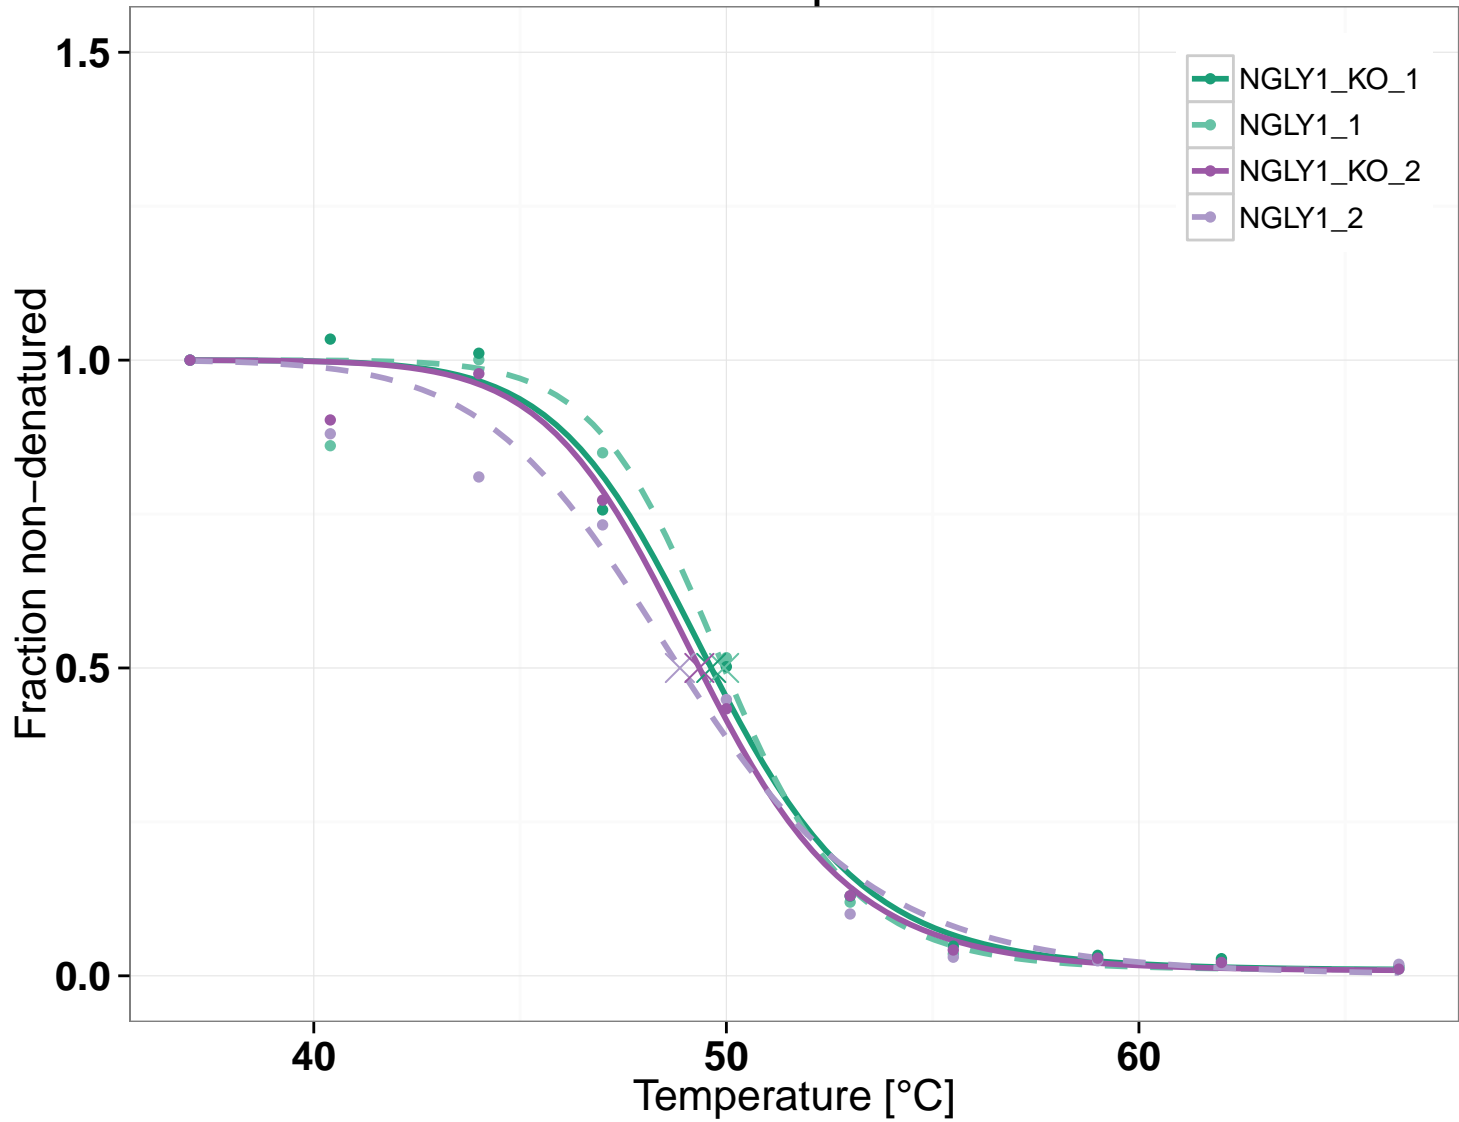

|            | meltPoint | slope | plateau | R2   |
|------------|-----------|-------|---------|------|
| NGLY1_KO_1 | 49.63     | -0.13 | 0.01    | 0.99 |
| NGLY1_1    | 49.95     | -0.16 | 0.01    | 0.99 |
| NGLY1_KO_2 | 49.35     | -0.13 | 0.01    | 0.99 |
| NGLY1_2    | 48.87     | -0.11 | 0       | 0.98 |

Supplement: Supplementary file 8437 [file 1]
