# Supplementary material (part 85 of 85)
Source: publisher figshare collection journal article supplement (https://gsajournals.figshare.com/articles/dataset/_/12014913)

IPI00171407.4|STXBP5

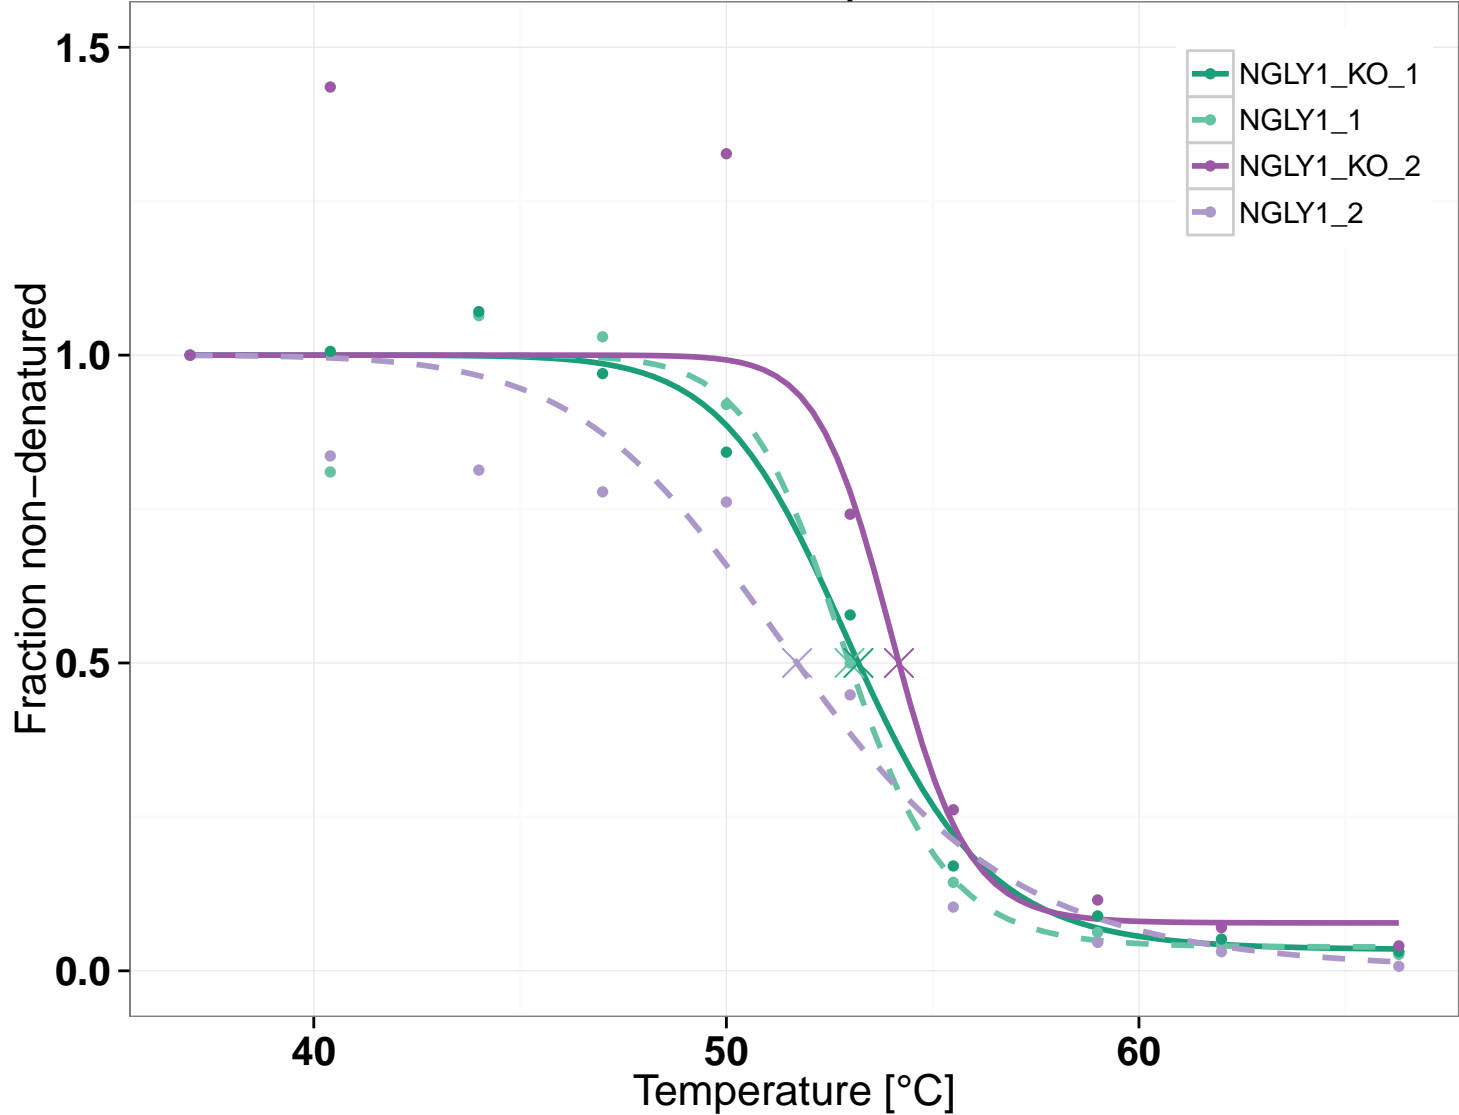

|            | meltPoint | slope  | plateau | R2   |
|------------|-----------|--------|---------|------|
| NGLY1_KO_1 | 53.2      | -0.15  | 0.03    | 0.99 |
| NGLY1_1    | 52.98     | -0.2   | 0.04    | 0.98 |
| NGLY1_KO_2 | 54.18     | -0.25  | 0.08    | 0.72 |
| NGLY1_2    | 51.71     | -0.094 | 0       | 0.94 |

Supplement: Supplementary file 8438 [file 1]

# IPI00141118.6|EPC2

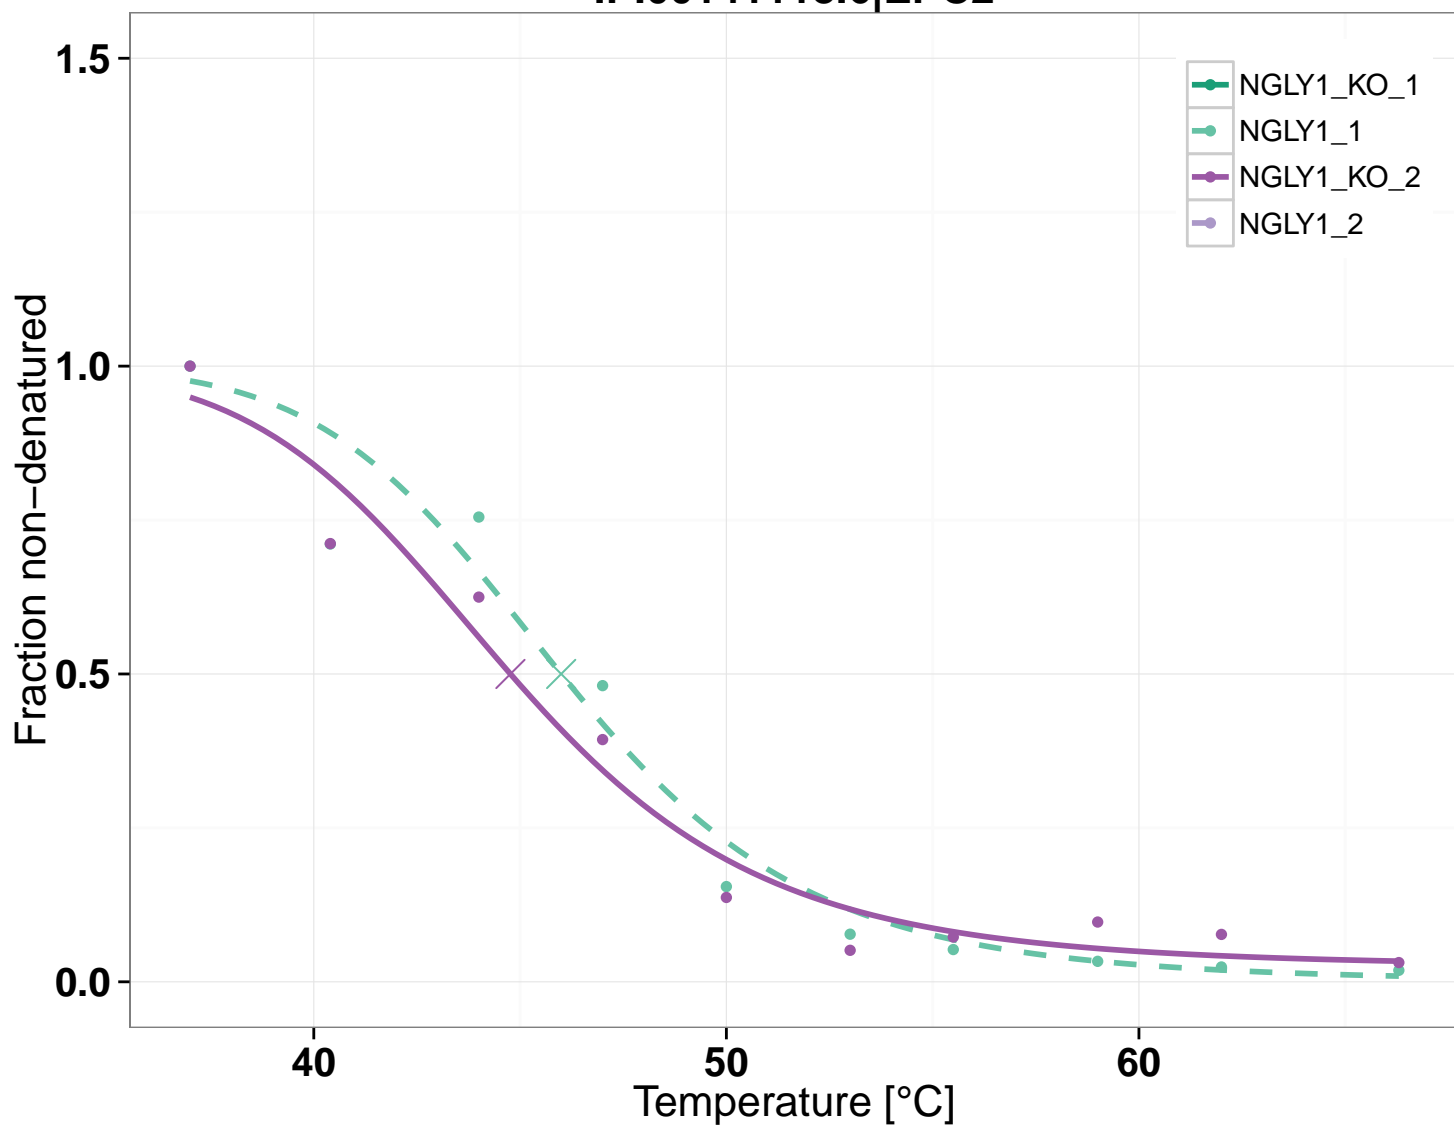

|            | meltPoint | slope  | plateau | R2   |
|------------|-----------|--------|---------|------|
| NGLY1_KO_1 | —         | —      | —       | —    |
| NGLY1_1    | 46        | -0.084 | 0       | 0.96 |
| NGLY1_KO_2 | 44.77     | -0.079 | 0.02    | 0.97 |
| NGLY1_2    | —         | —      | —       | —    |

Supplement: Supplementary file 8439 [file 1]

# IPI00001022.5|PNKD

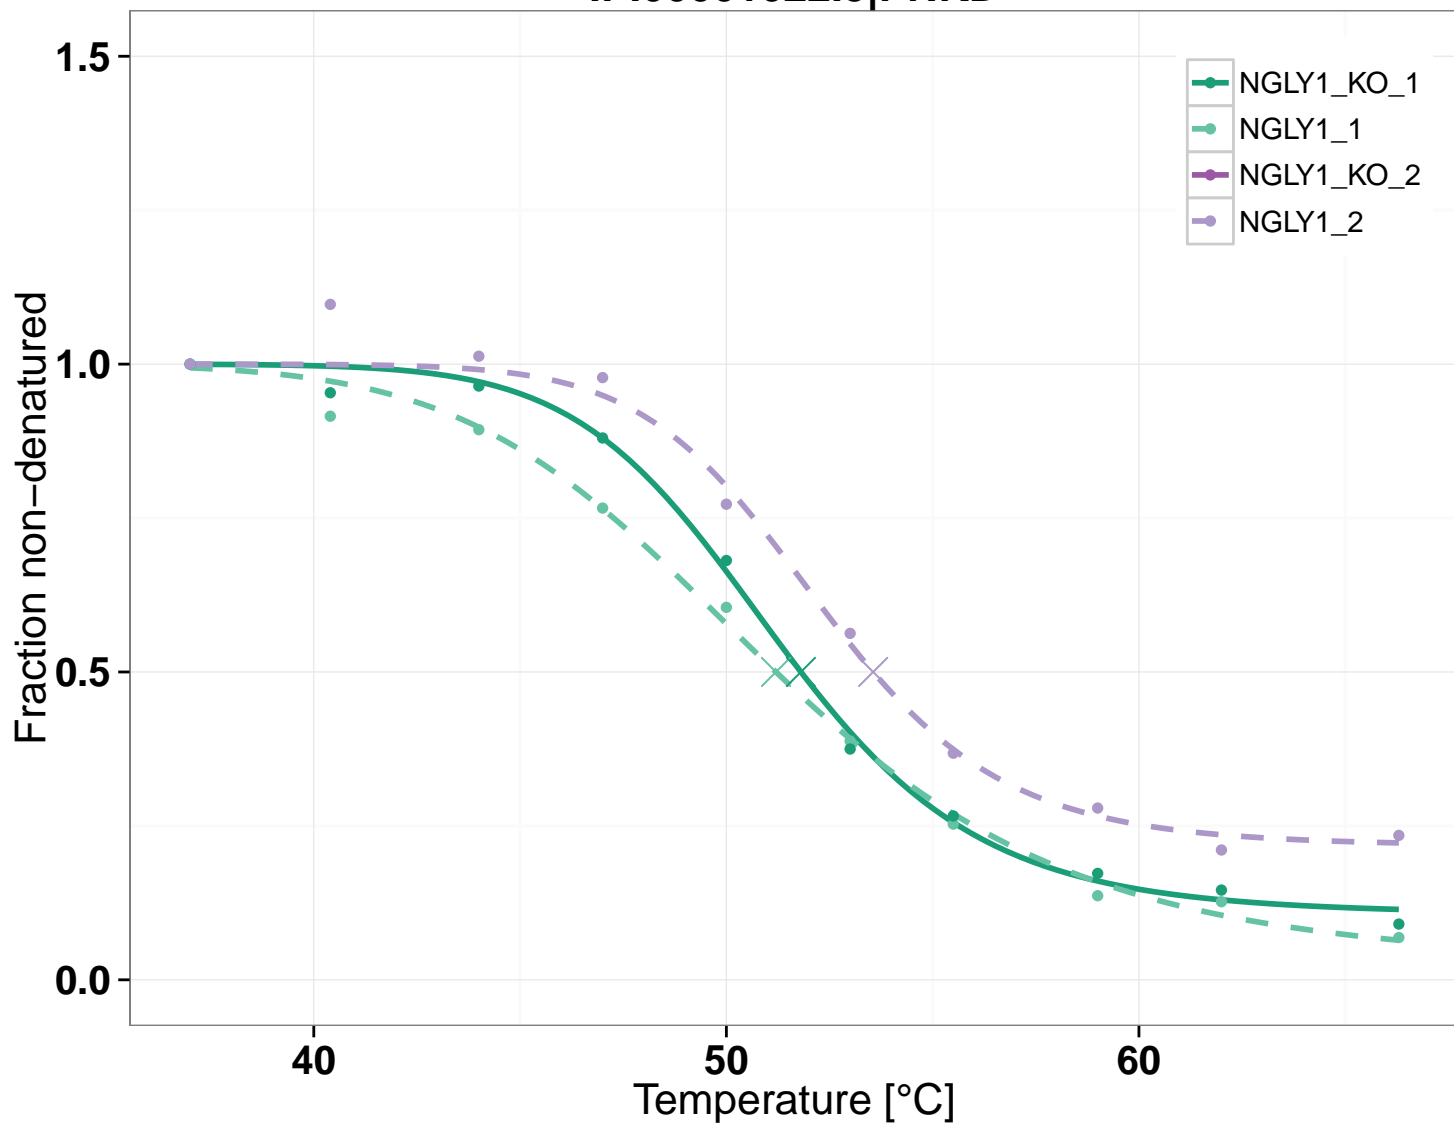

|            | meltPoint | slope  | plateau | R2   |
|------------|-----------|--------|---------|------|
| NGLY1_KO_1 | 51.81     | -0.092 | 0.11    | 1    |
| NGLY1_1    | 51.2      | -0.066 | 0.02    | 1    |
| NGLY1_KO_2 | -         | -      | -       | -    |
| NGLY1_2    | 53.56     | -0.09  | 0.22    | 0.99 |

Supplement: Supplementary file 8440 [file 1]

# IPI00014263.1|EIF4H

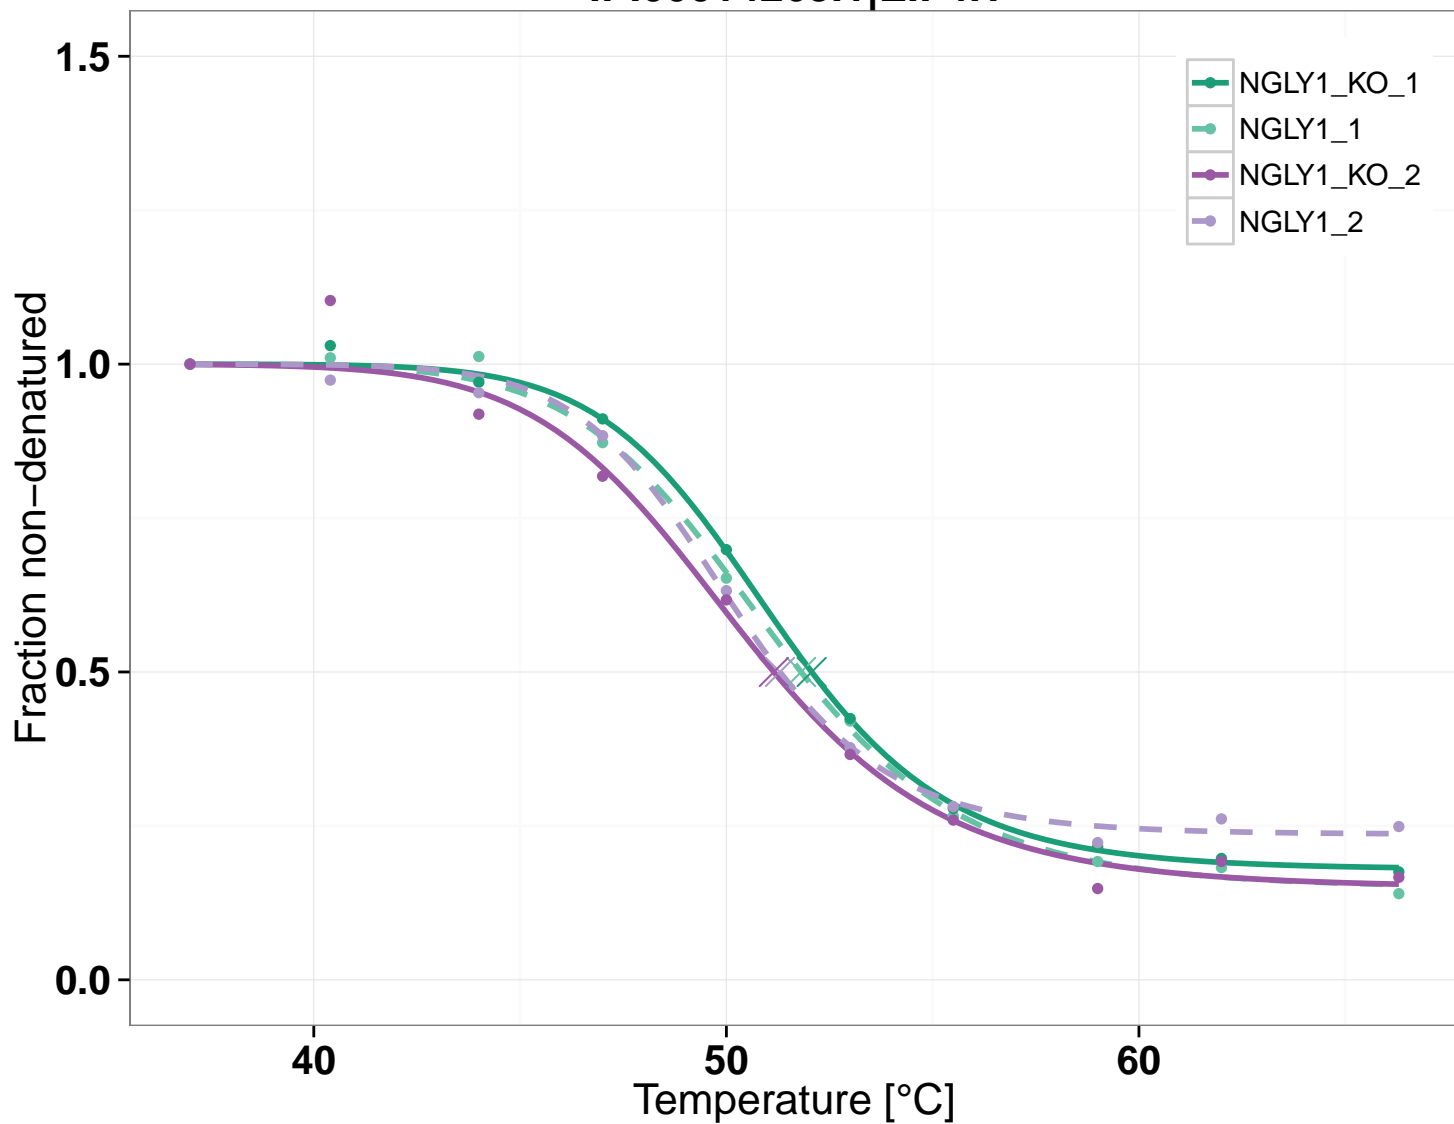

|            | meltPoint | slope  | plateau | R2   |
|------------|-----------|--------|---------|------|
| NGLY1_KO_1 | 52.07     | -0.097 | 0.18    | 1    |
| NGLY1_1    | 51.81     | -0.091 | 0.15    | 1    |
| NGLY1_KO_2 | 51.15     | -0.086 | 0.15    | 0.99 |
| NGLY1_2    | 51.3      | -0.1   | 0.24    | 1    |

Supplement: Supplementary file 8441 [file 1]

IPI00012877.3|IFNAR1

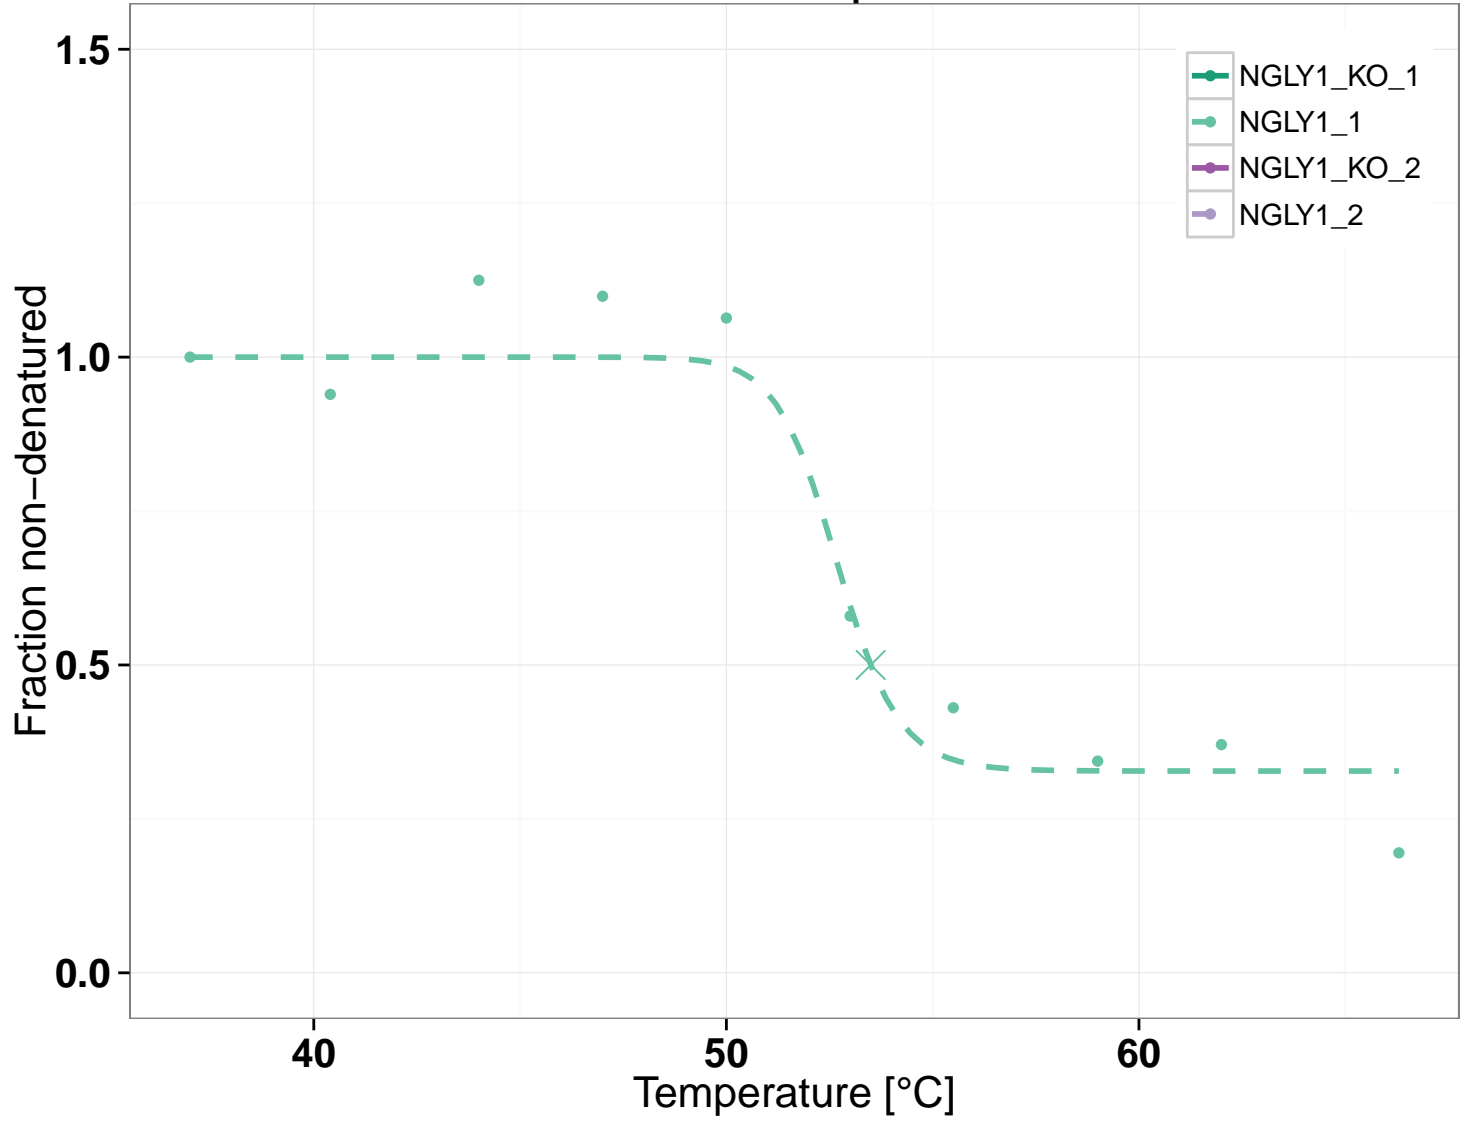

|            | meltPoint | slope | plateau | R2   |
|------------|-----------|-------|---------|------|
| NGLY1_KO_1 | -         | -     | -       | -    |
| NGLY1_1    | 53.5      | -0.23 | 0.33    | 0.95 |
| NGLY1_KO_2 | -         | -     | -       | -    |
| NGLY1_2    | -         | -     | -       | -    |

Supplement: Supplementary file 8442 [file 1]

IPI00304306.5|DNAJC19

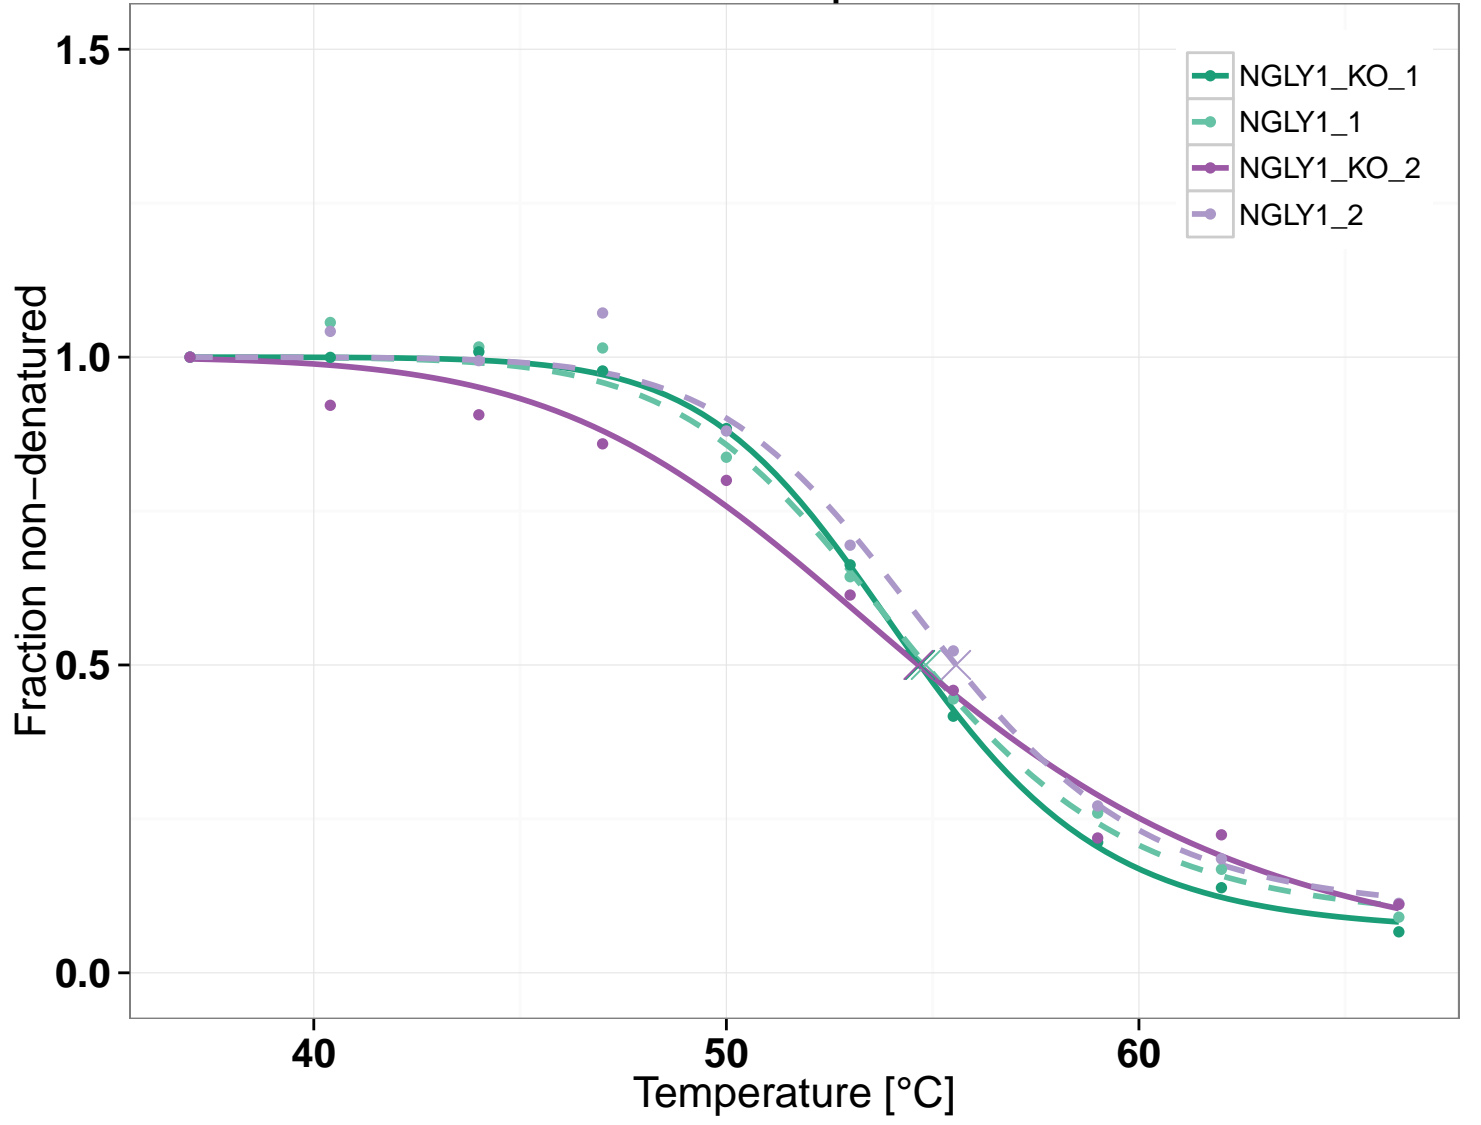

|            | meltPoint | slope  | plateau | R2   |
|------------|-----------|--------|---------|------|
| NGLY1_KO_1 | 54.7      | -0.096 | 0.07    | 1    |
| NGLY1_1    | 54.83     | -0.084 | 0.08    | 0.99 |
| NGLY1_KO_2 | 54.66     | -0.058 | 0       | 0.99 |
| NGLY1_2    | 55.57     | -0.087 | 0.1     | 0.99 |

Supplement: Supplementary file 8443 [file 1]

IPI00023785.6|DDX17

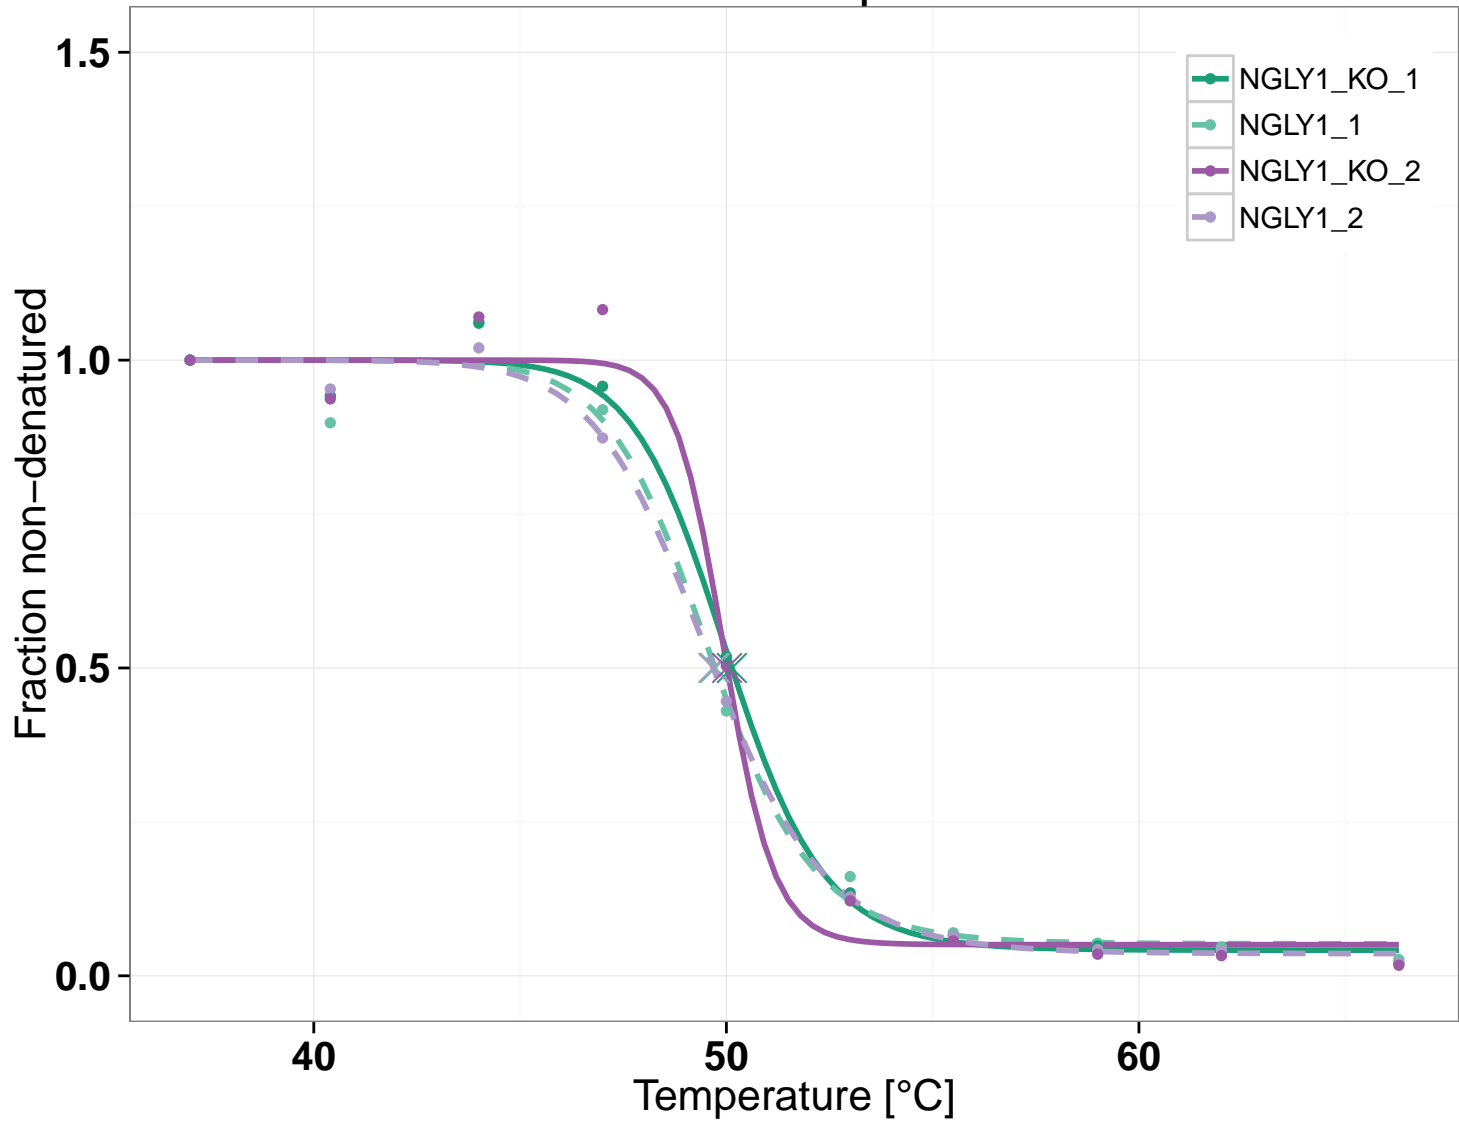

|            | meltPoint | slope | plateau | R2   |
|------------|-----------|-------|---------|------|
| NGLY1_KO_1 | 50.13     | -0.21 | 0.04    | 1    |
| NGLY1_1    | 49.73     | -0.19 | 0.05    | 0.99 |
| NGLY1_KO_2 | 50.02     | -0.39 | 0.05    | 0.99 |
| NGLY1_2    | 49.68     | -0.17 | 0.04    | 1    |

Supplement: Supplementary file 8444 [file 1]

# IPI00004655.1|FRG1

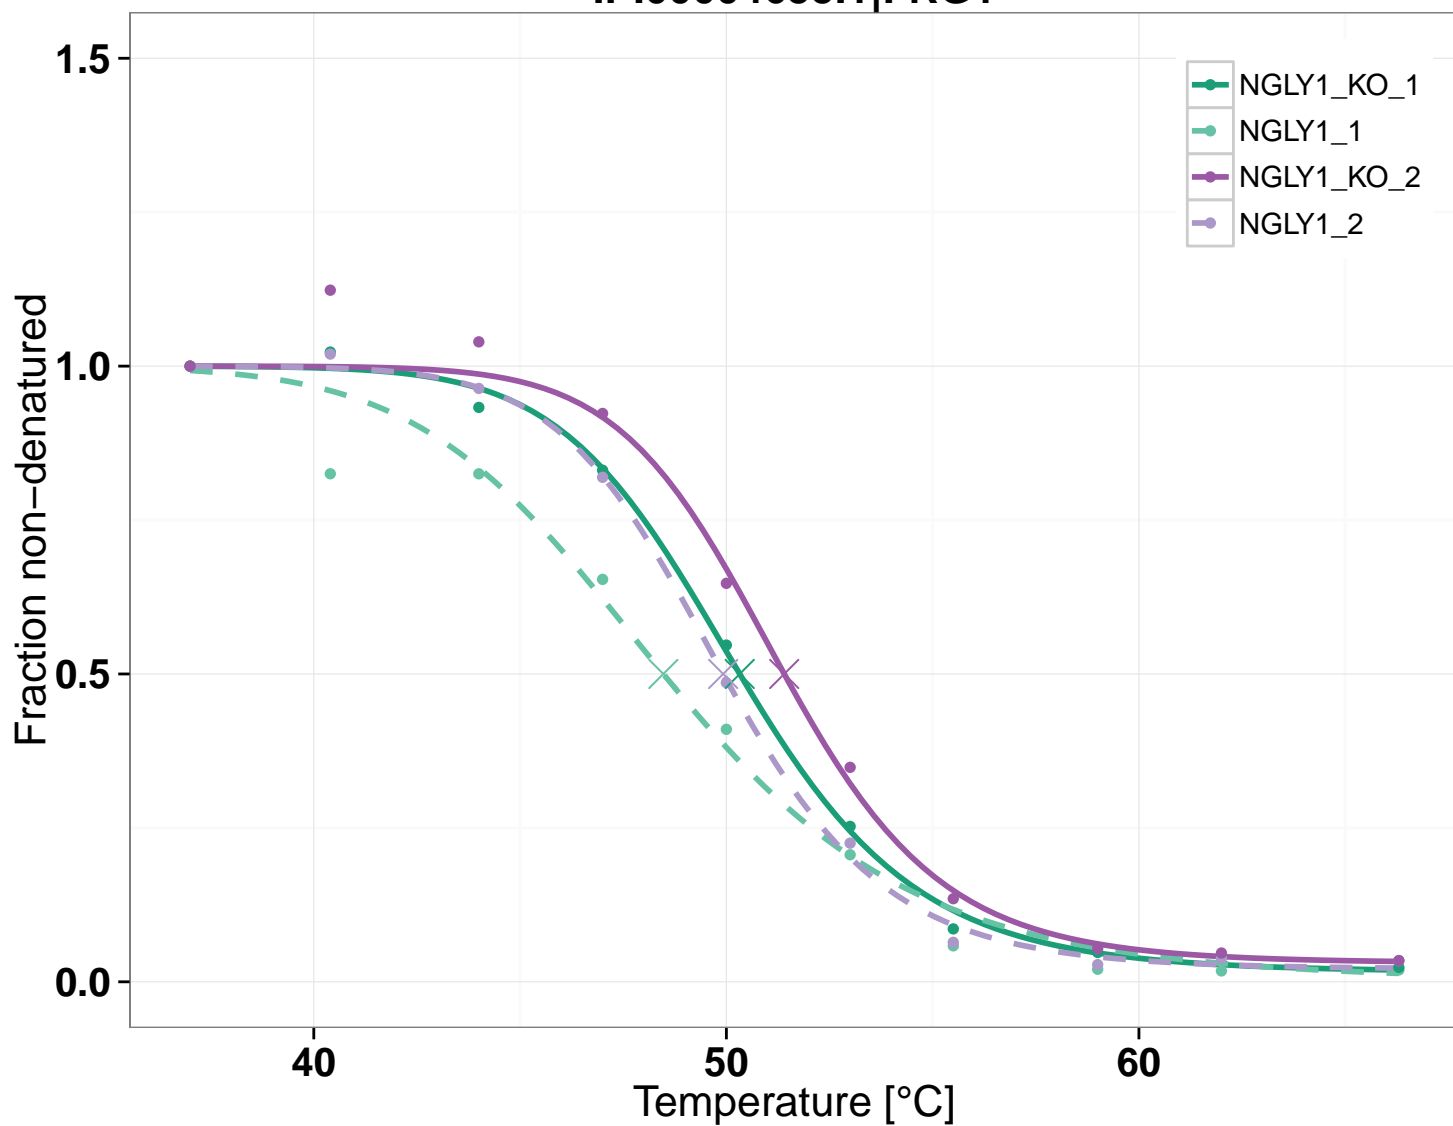

|            | meltPoint | slope  | plateau | R2   |
|------------|-----------|--------|---------|------|
| NGLY1_KO_1 | 50.32     | -0.11  | 0.02    | 1    |
| NGLY1_1    | 48.47     | -0.083 | 0       | 0.98 |
| NGLY1_KO_2 | 51.4      | -0.12  | 0.03    | 0.99 |
| NGLY1_2    | 49.92     | -0.12  | 0.02    | 1    |

Supplement: Supplementary file 8445 [file 1]

IPI00788625.1|ATXN2

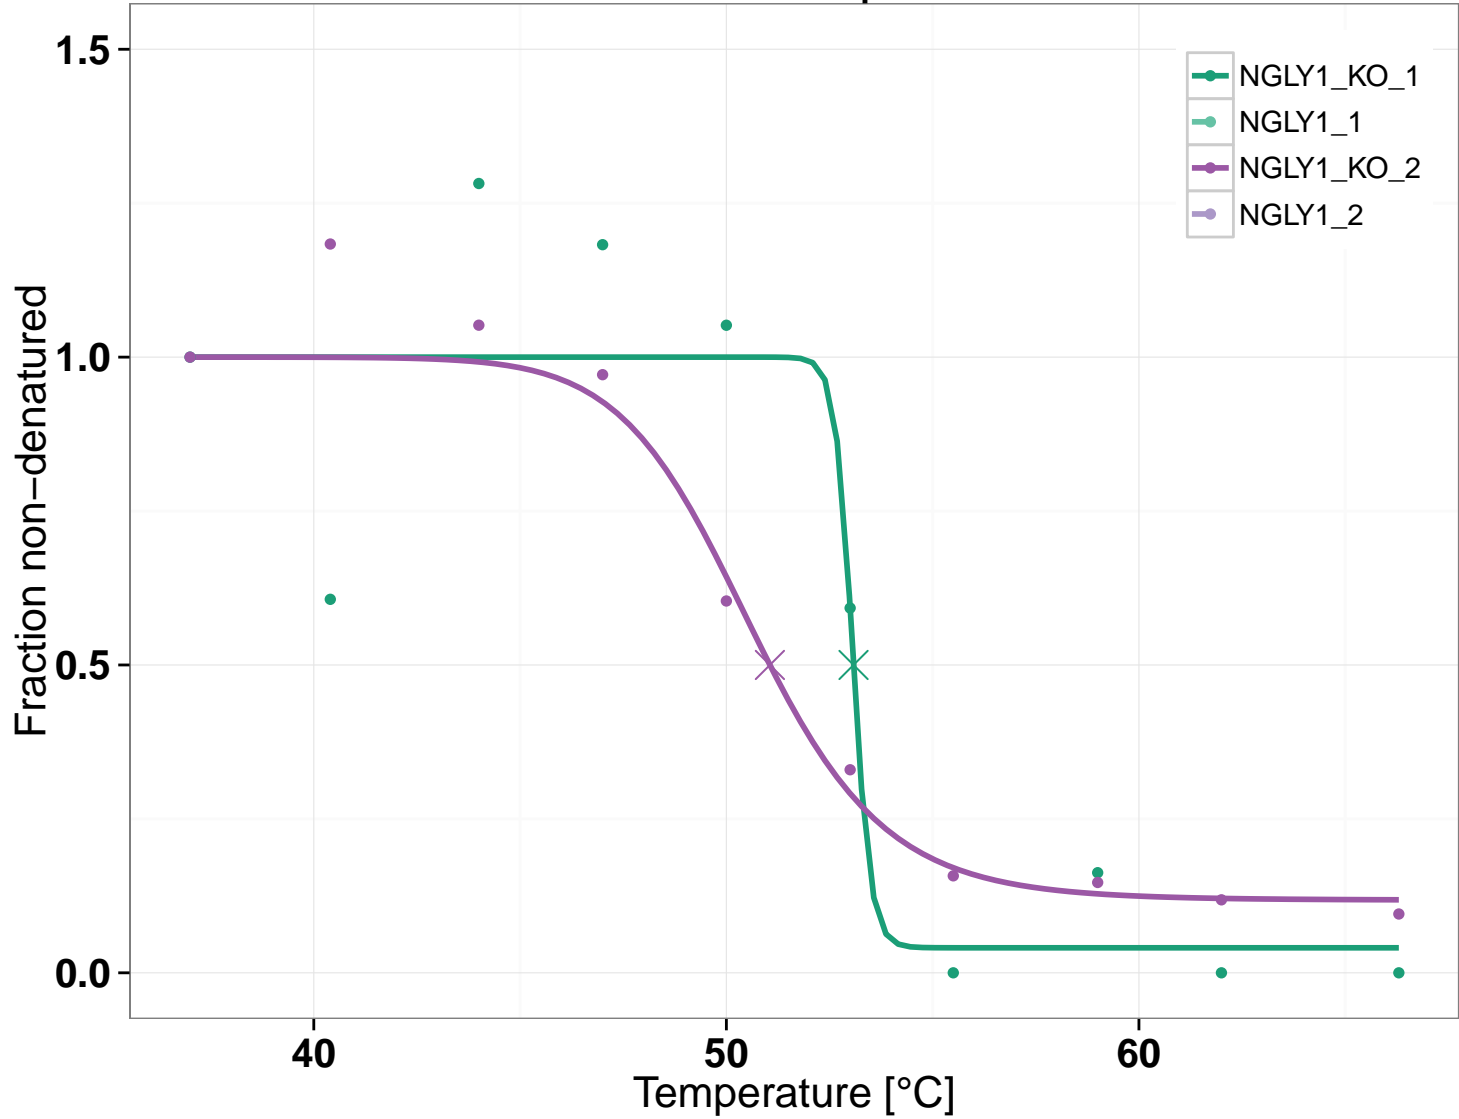

|            | meltPoint | slope | plateau | R2   |
|------------|-----------|-------|---------|------|
| NGLY1_KO_1 | 53.08     | -1.1  | 0.04    | 0.88 |
| NGLY1_1    | -         | -     | -       | -    |
| NGLY1_KO_2 | 51.06     | -0.14 | 0.12    | 0.98 |
| NGLY1_2    | -         | -     | -       | -    |

Supplement: Supplementary file 8446 [file 1]

IPI00215878.6|ATP5E

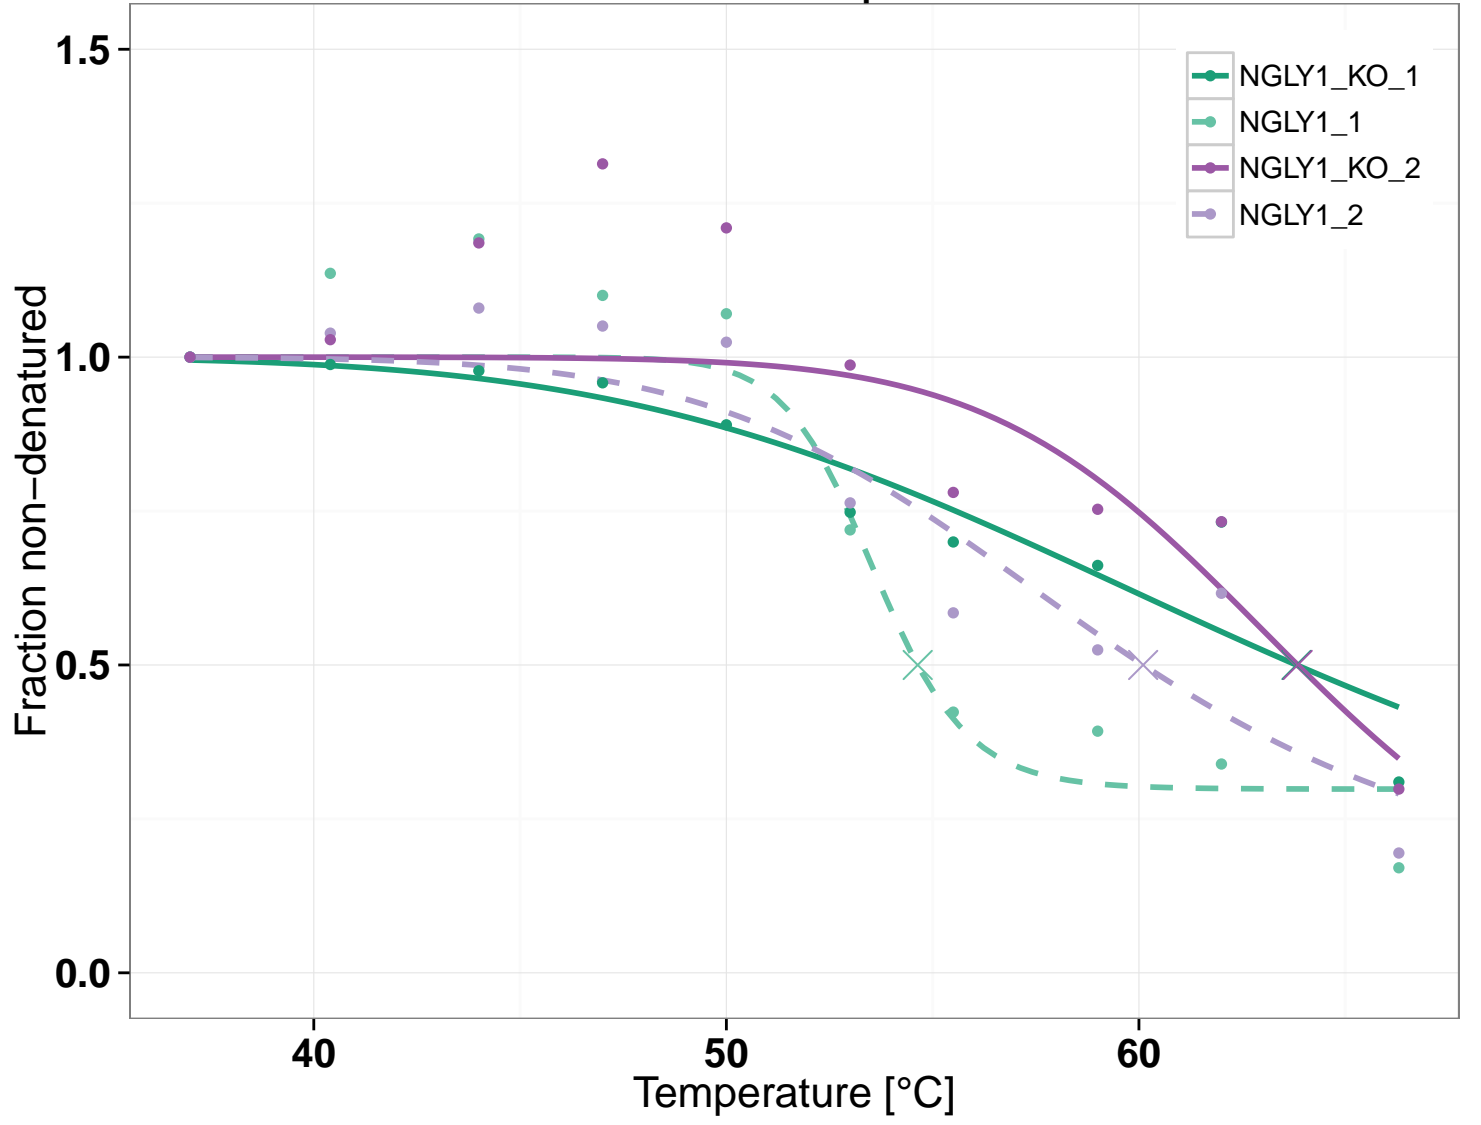

|            | meltPoint | slope  | plateau | R2   |
|------------|-----------|--------|---------|------|
| NGLY1_KO_1 | 63.82     | -0.031 | 0       | 0.87 |
| NGLY1_1    | 54.64     | -0.16  | 0.3     | 0.93 |
| NGLY1_KO_2 | 63.85     | -0.067 | 0       | 0.72 |
| NGLY1_2    | 60.1      | -0.048 | 0.12    | 0.88 |

Supplement: Supplementary file 8447 [file 1]

IPI00647217.2|SKIV2L2

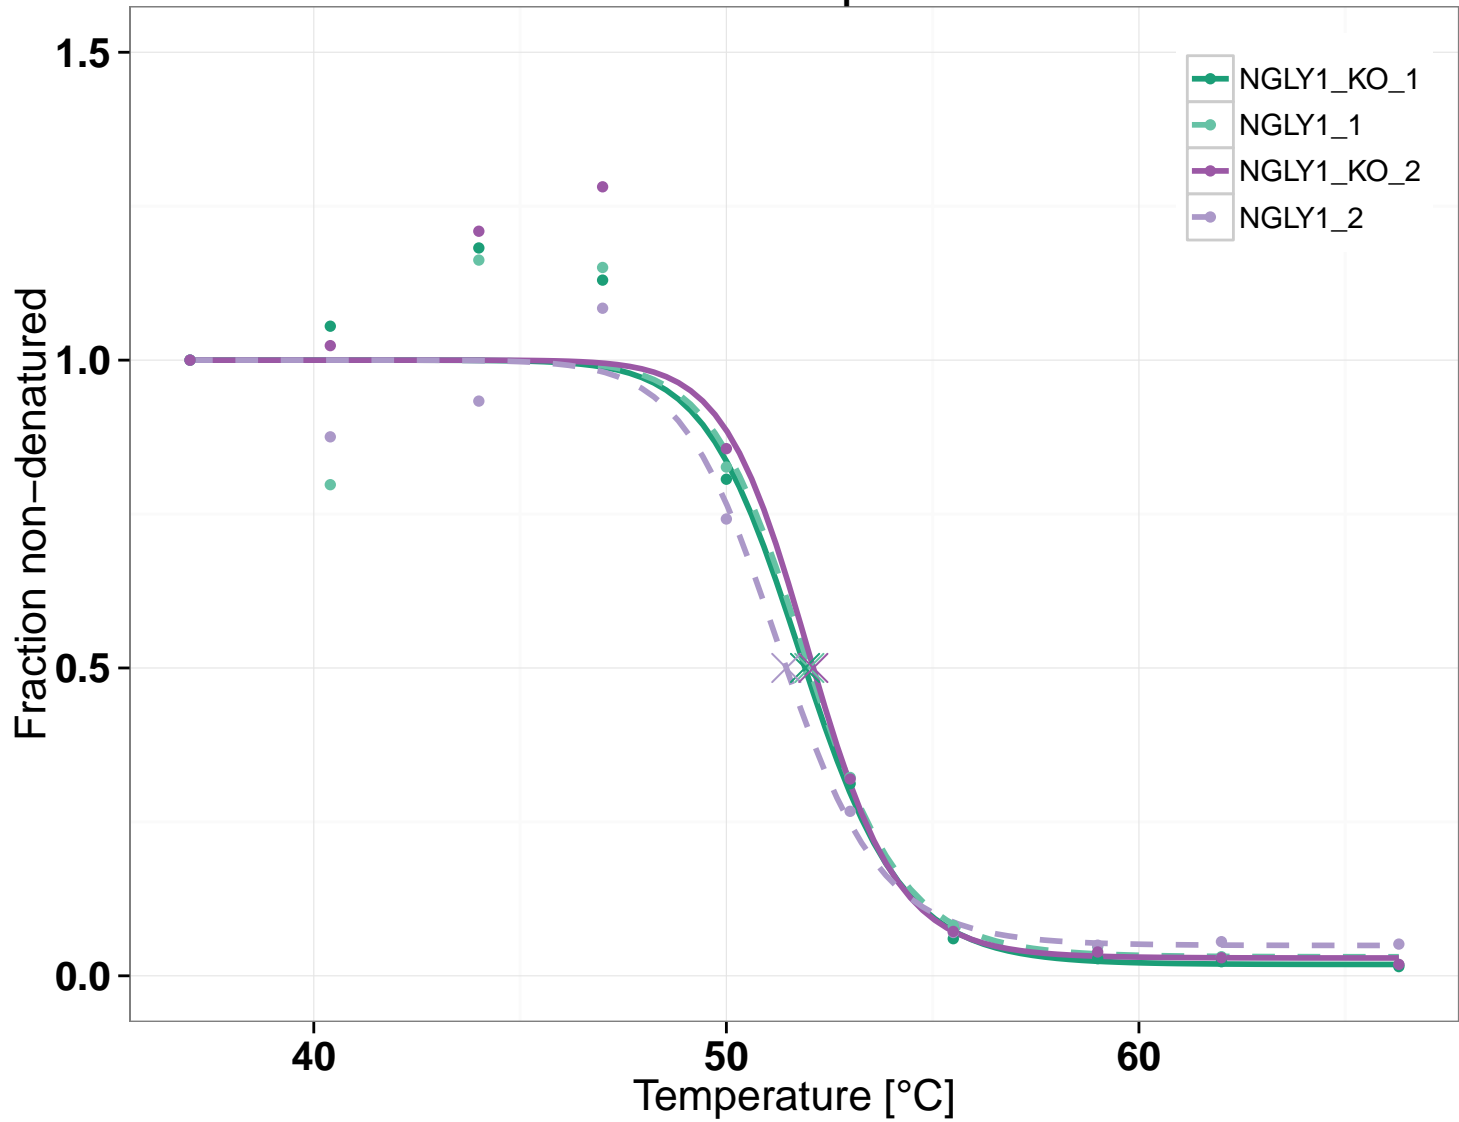

|            | meltPoint | slope | plateau | R2   |
|------------|-----------|-------|---------|------|
| NGLY1_KO_1 | 51.91     | -0.2  | 0.02    | 0.98 |
| NGLY1_1    | 52.01     | -0.21 | 0.03    | 0.96 |
| NGLY1_KO_2 | 52.11     | -0.23 | 0.03    | 0.95 |
| NGLY1_2    | 51.45     | -0.2  | 0.05    | 0.98 |

Supplement: Supplementary file 8448 [file 1]

# IPI00016932.3|INPPL1

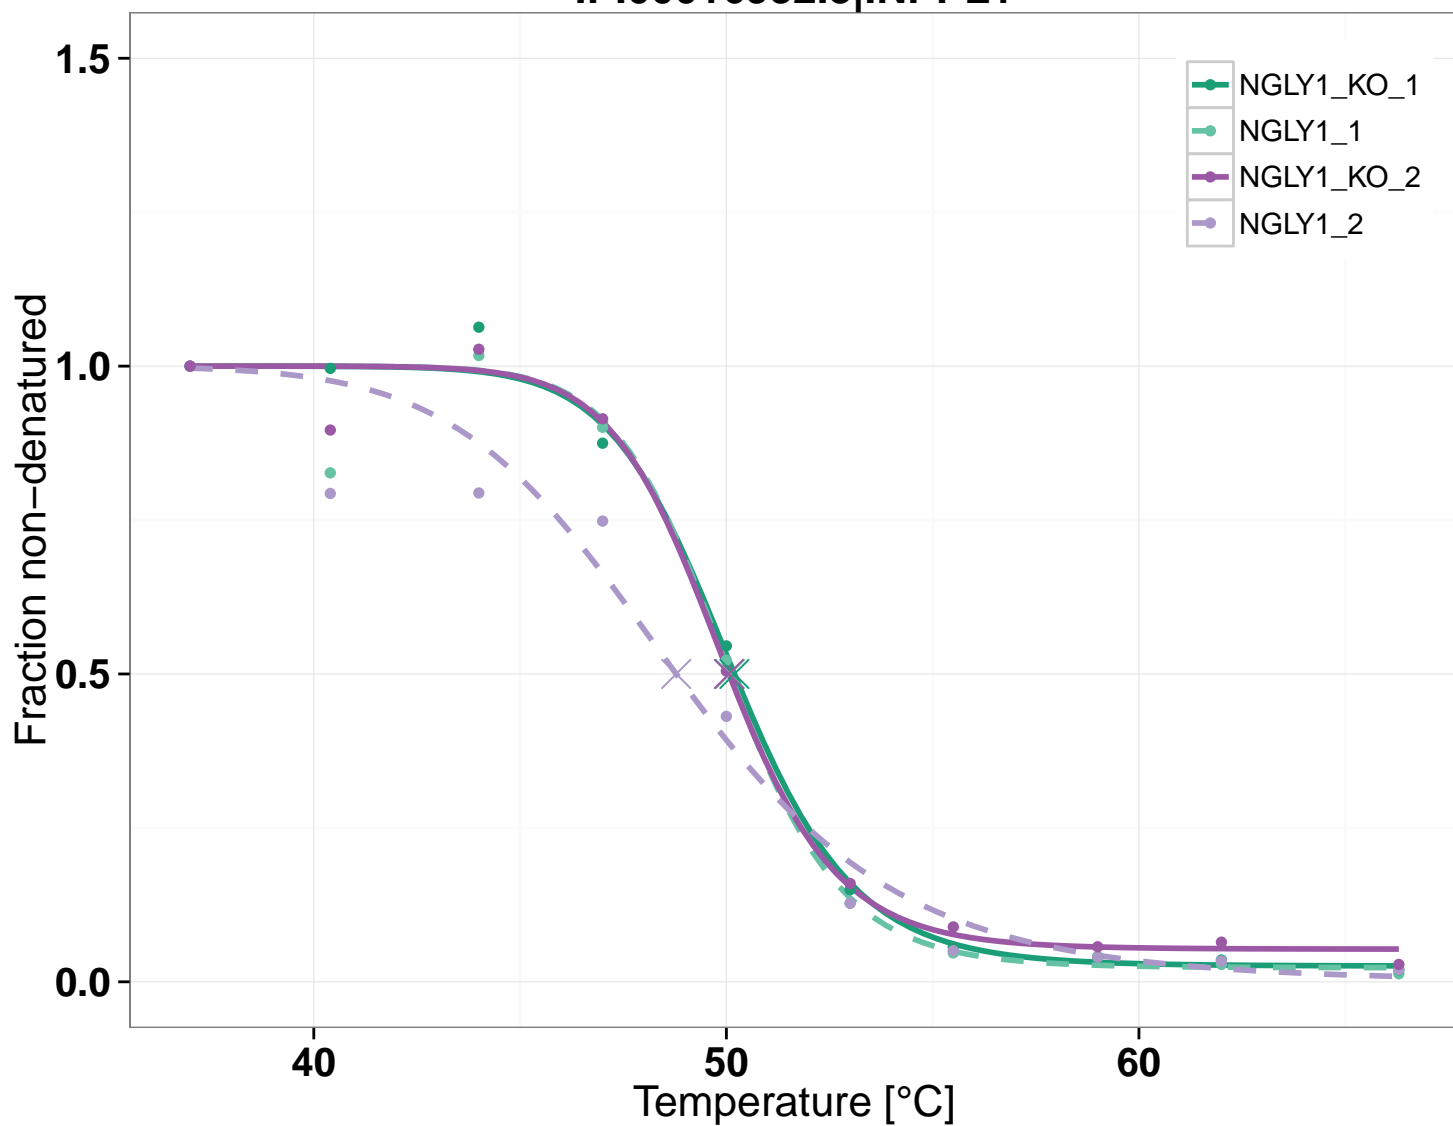

|            | meltPoint | slope  | plateau | R2   |
|------------|-----------|--------|---------|------|
| NGLY1_KO_1 | 50.2      | -0.16  | 0.03    | 1    |
| NGLY1_1    | 50.09     | -0.18  | 0.02    | 0.98 |
| NGLY1_KO_2 | 50.06     | -0.17  | 0.05    | 0.99 |
| NGLY1_2    | 48.78     | -0.093 | 0       | 0.96 |

Supplement: Supplementary file 8449 [file 1]

IPI00064212.2|ZNF828

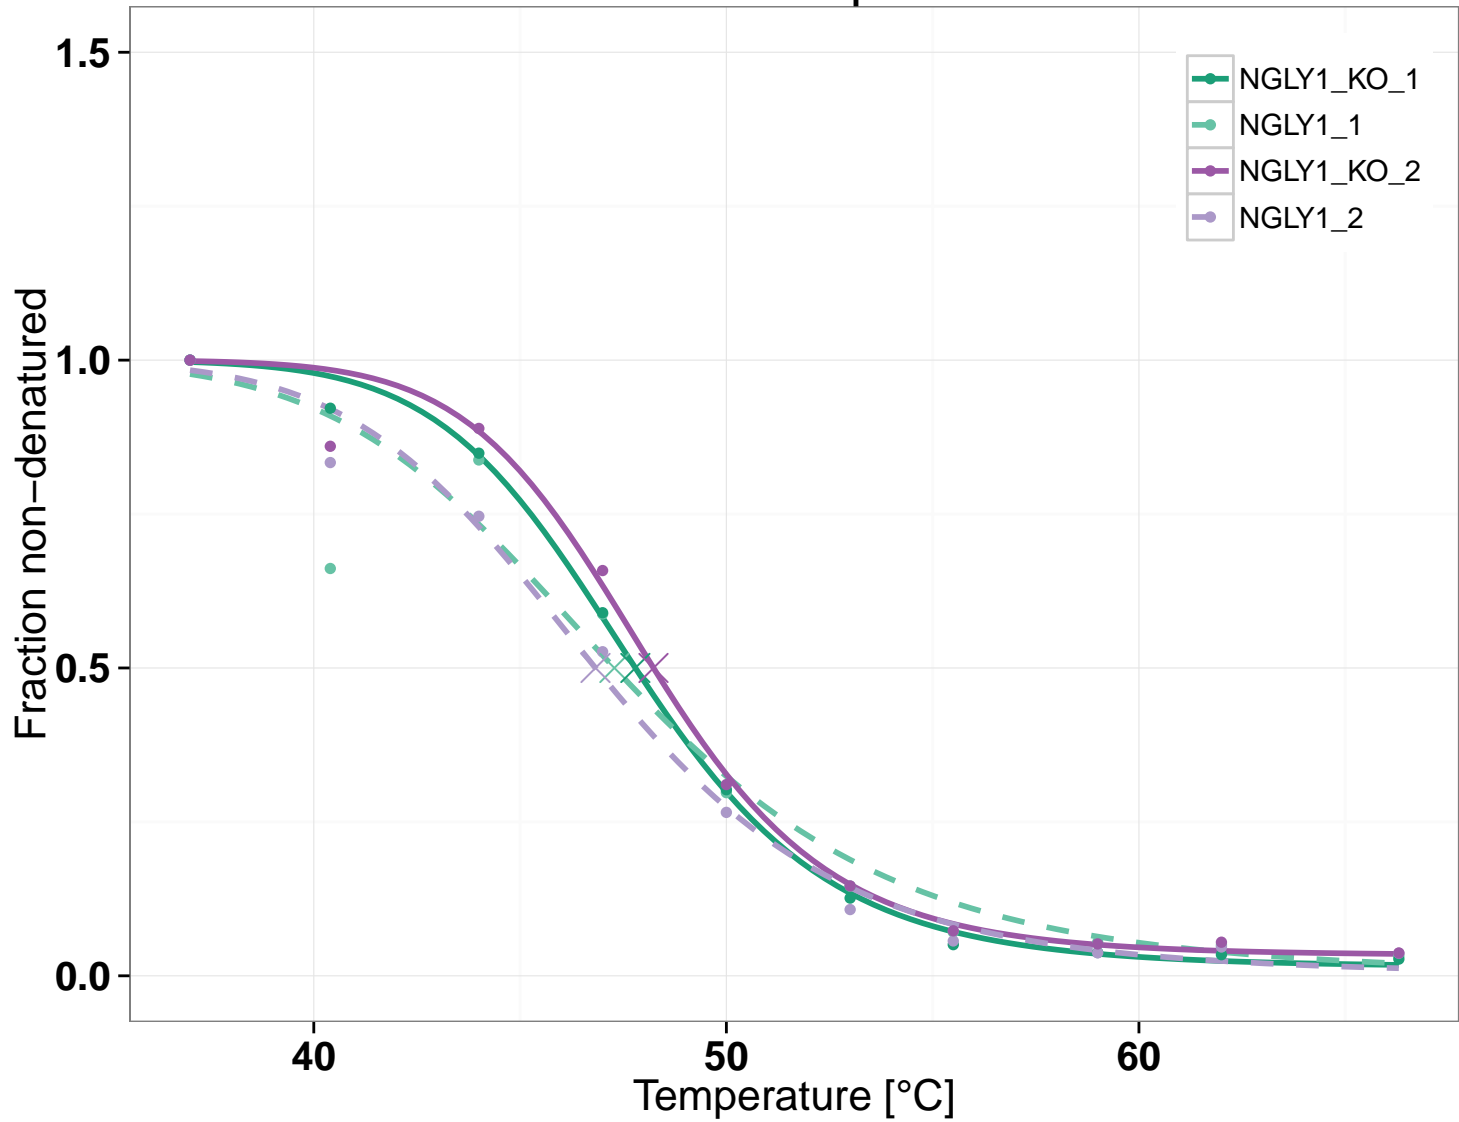

|            | meltPoint | slope  | plateau | R2   |
|------------|-----------|--------|---------|------|
| NGLY1_KO_1 | 47.79     | -0.1   | 0.01    | 1    |
| NGLY1_1    | 47.29     | -0.073 | 0       | 0.93 |
| NGLY1_KO_2 | 48.23     | -0.11  | 0.03    | 0.99 |
| NGLY1_2    | 46.83     | -0.084 | 0       | 0.99 |

Supplement: Supplementary file 8450 [file 1]

IPI00293159.3|PCSK6

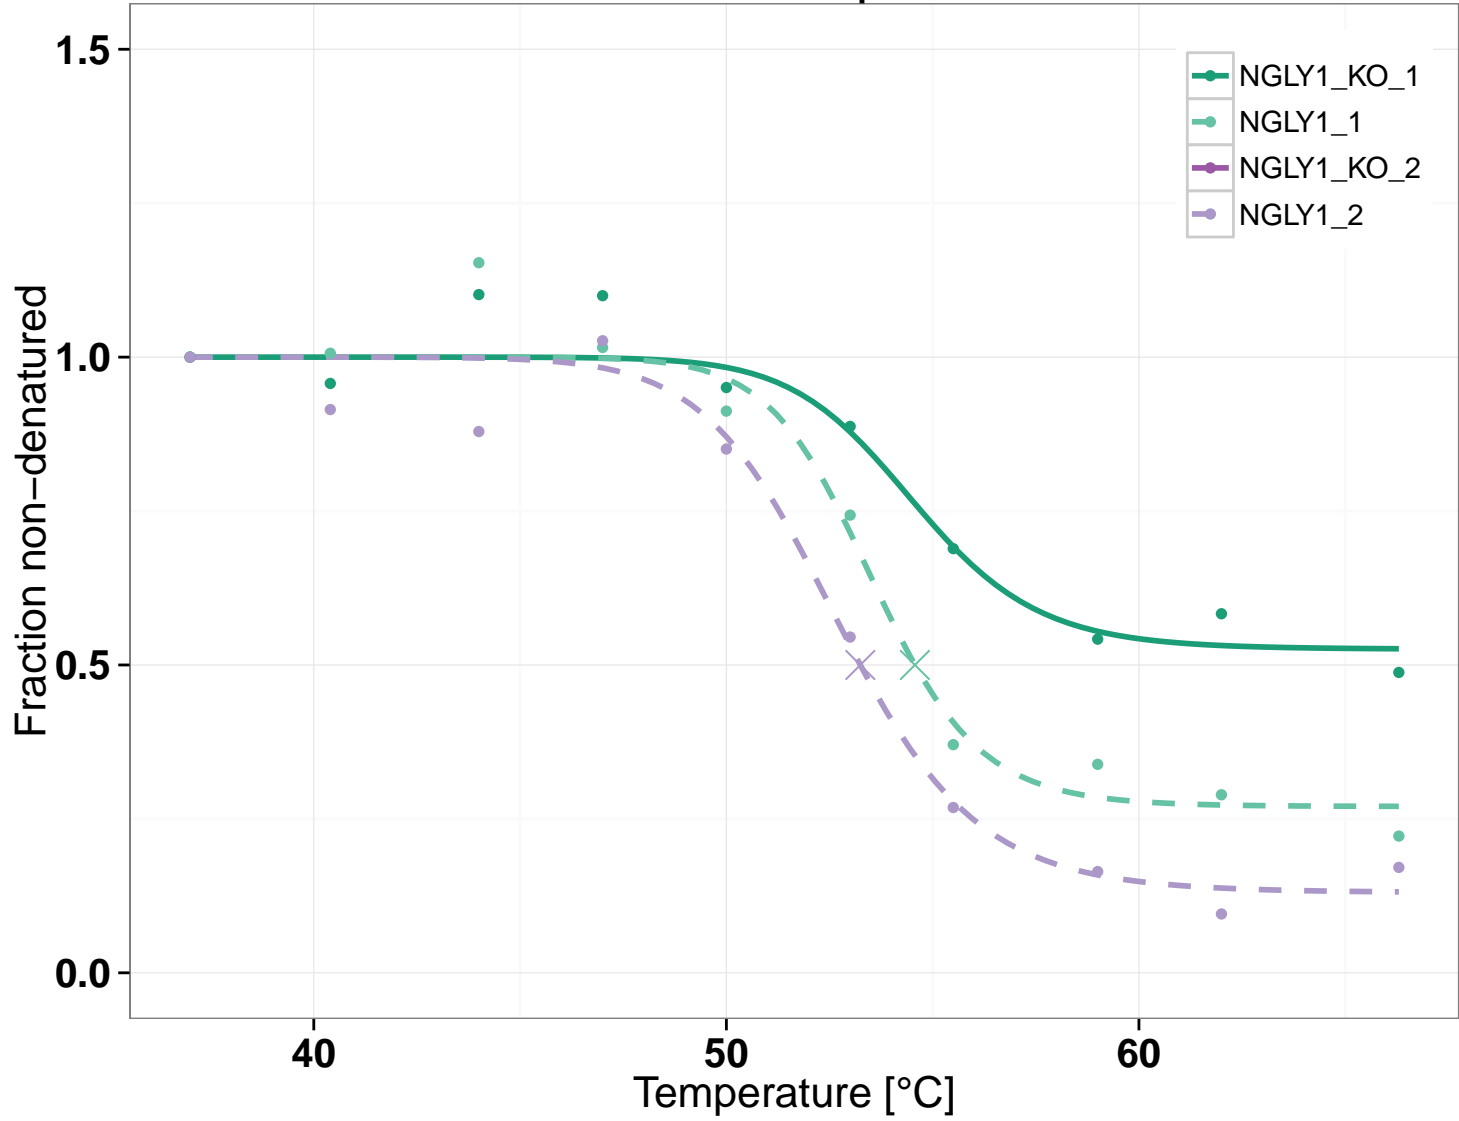

|            | meltPoint | slope  | plateau | R2   |
|------------|-----------|--------|---------|------|
| NGLY1_KO_1 | -         | -0.079 | 0.53    | 0.94 |
| NGLY1_1    | 54.57     | -0.14  | 0.27    | 0.97 |
| NGLY1_KO_2 | -         | -      | -       | -    |
| NGLY1_2    | 53.25     | -0.13  | 0.13    | 0.98 |

Supplement: Supplementary file 8451 [file 1]

# IPI00171768.5|KIF18A

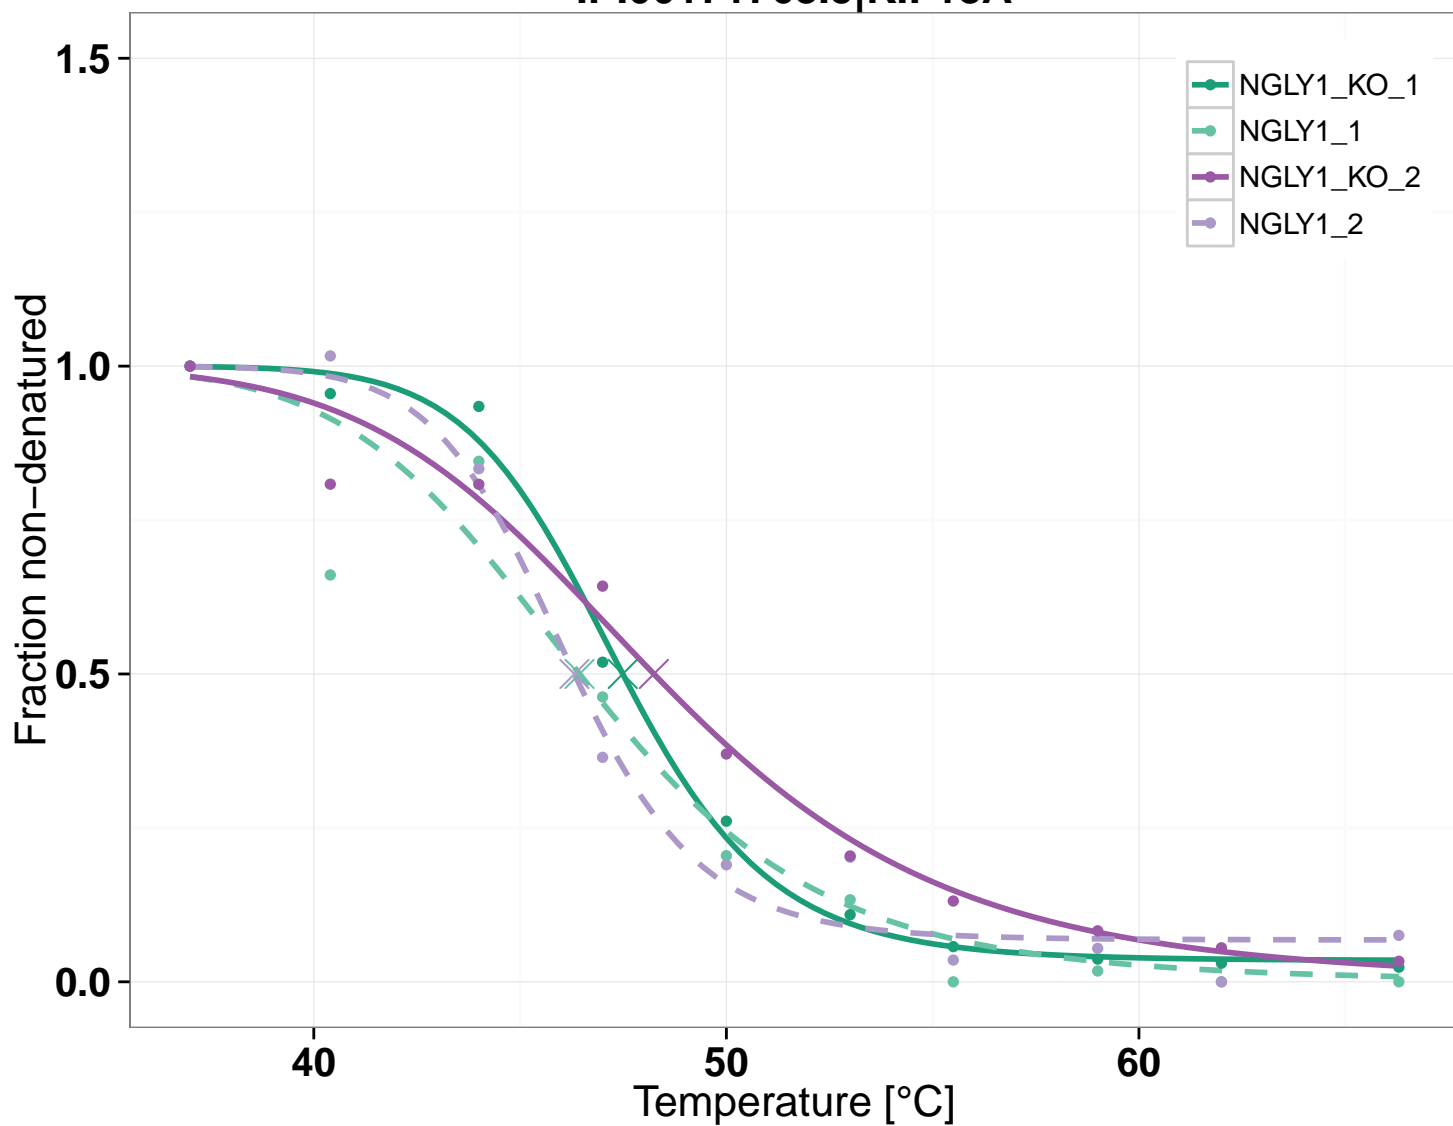

|            | meltPoint | slope  | plateau | R2   |
|------------|-----------|--------|---------|------|
| NGLY1_KO_1 | 47.49     | -0.13  | 0.03    | 1    |
| NGLY1_1    | 46.44     | -0.087 | 0       | 0.93 |
| NGLY1_KO_2 | 48.24     | -0.071 | 0       | 0.98 |
| NGLY1_2    | 46.32     | -0.14  | 0.07    | 0.98 |

Supplement: Supplementary file 8452 [file 1]

IPI00401195.2|C12ORF66

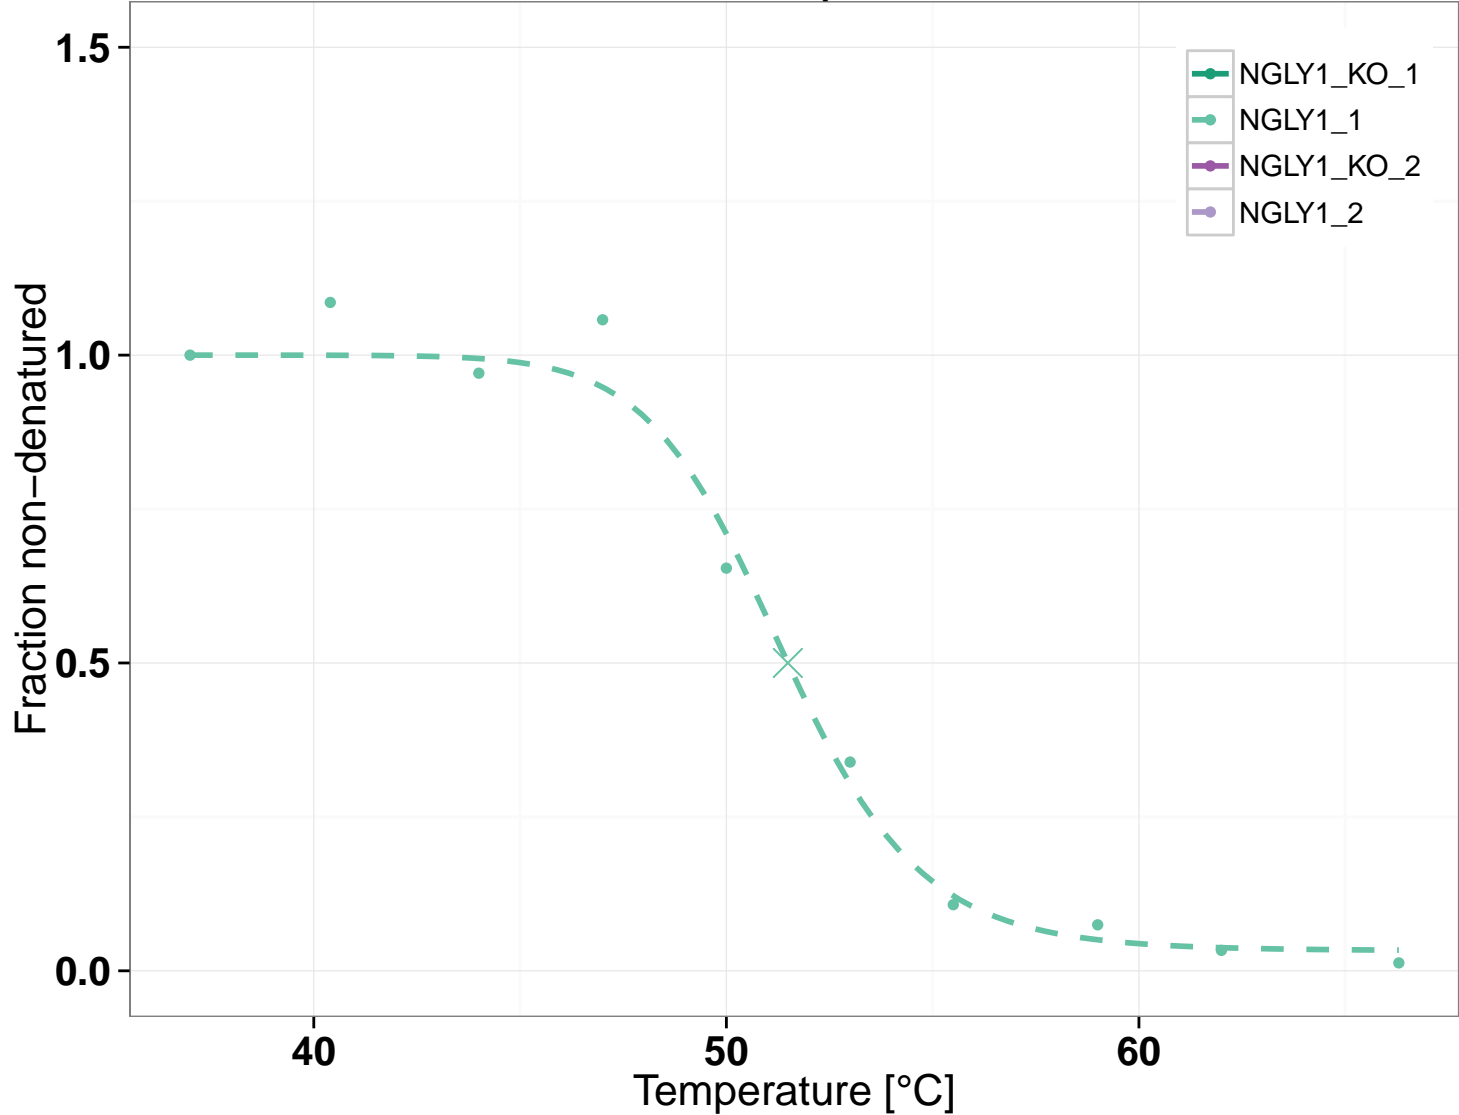

|            | meltPoint | slope | plateau | R2   |
|------------|-----------|-------|---------|------|
| NGLY1_KO_1 | -         | -     | -       | -    |
| NGLY1_1    | 51.49     | -0.15 | 0.03    | 0.99 |
| NGLY1_KO_2 | -         | -     | -       | -    |
| NGLY1_2    | -         | -     | -       | -    |

Supplement: Supplementary file 8453 [file 1]

IPI00297322.3|ARFGAP2

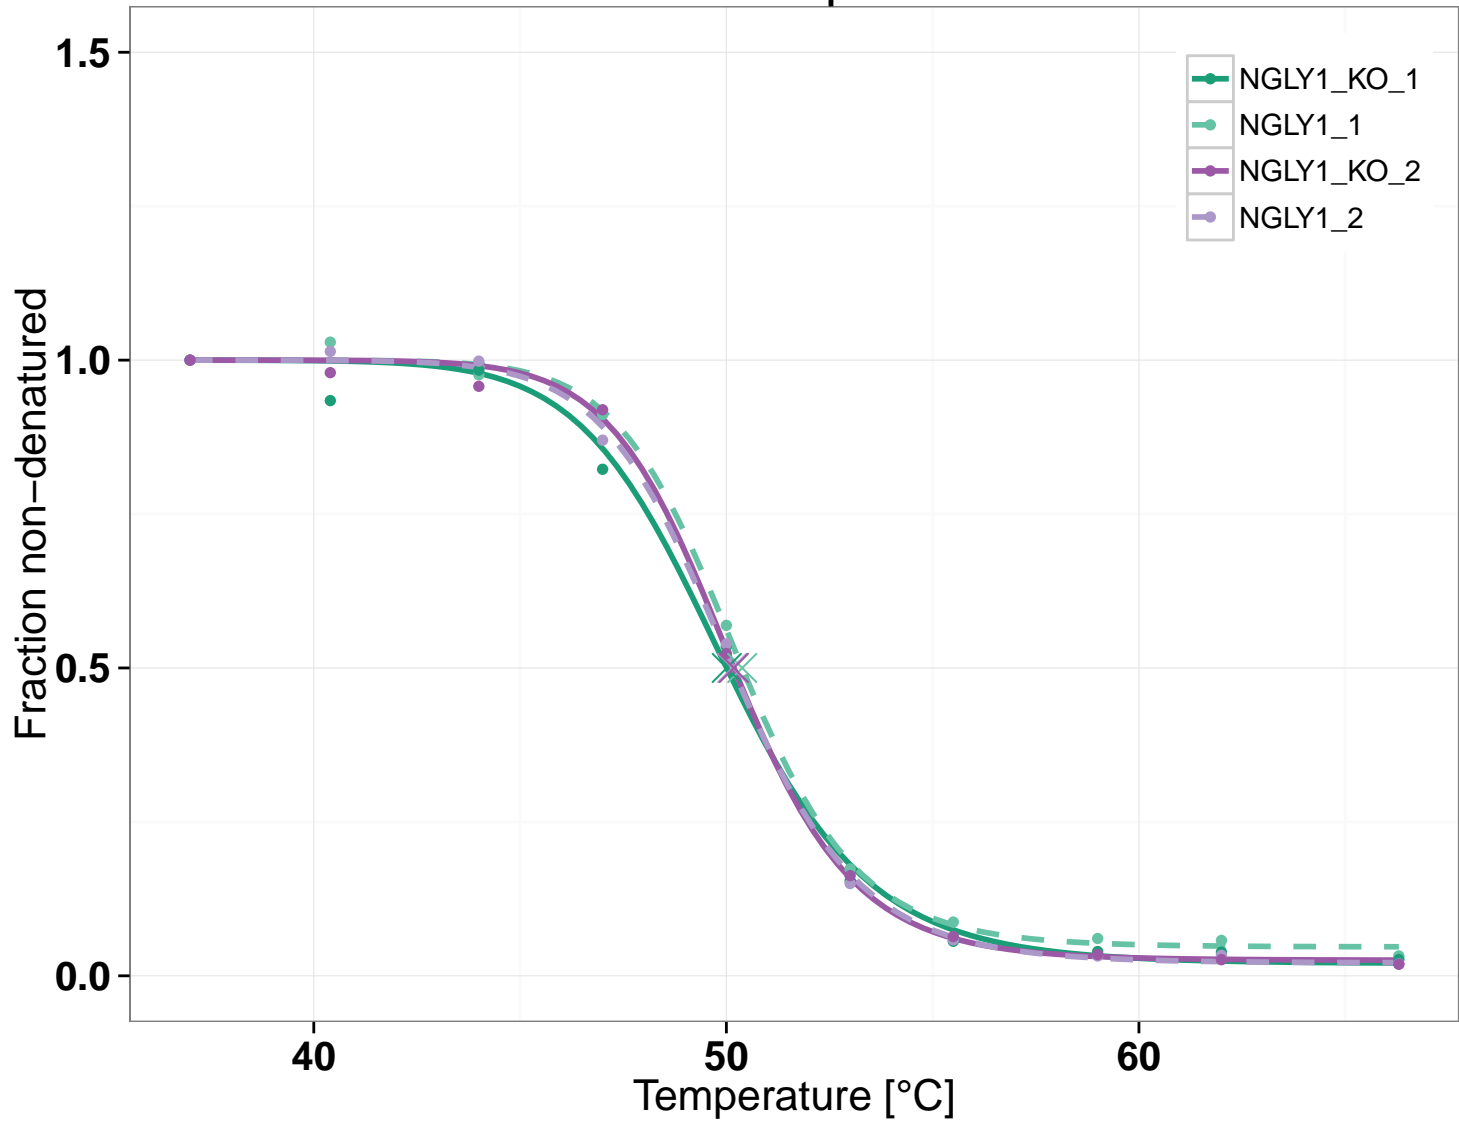

|            | meltPoint | slope | plateau | R2 |
|------------|-----------|-------|---------|----|
| NGLY1_KO_1 | 50.01     | -0.14 | 0.02    | 1  |
| NGLY1_1    | 50.38     | -0.16 | 0.05    | 1  |
| NGLY1_KO_2 | 50.18     | -0.16 | 0.03    | 1  |
| NGLY1_2    | 50.15     | -0.16 | 0.02    | 1  |

Supplement: Supplementary file 8454 [file 1]

IPI00221091.9|RPS15A

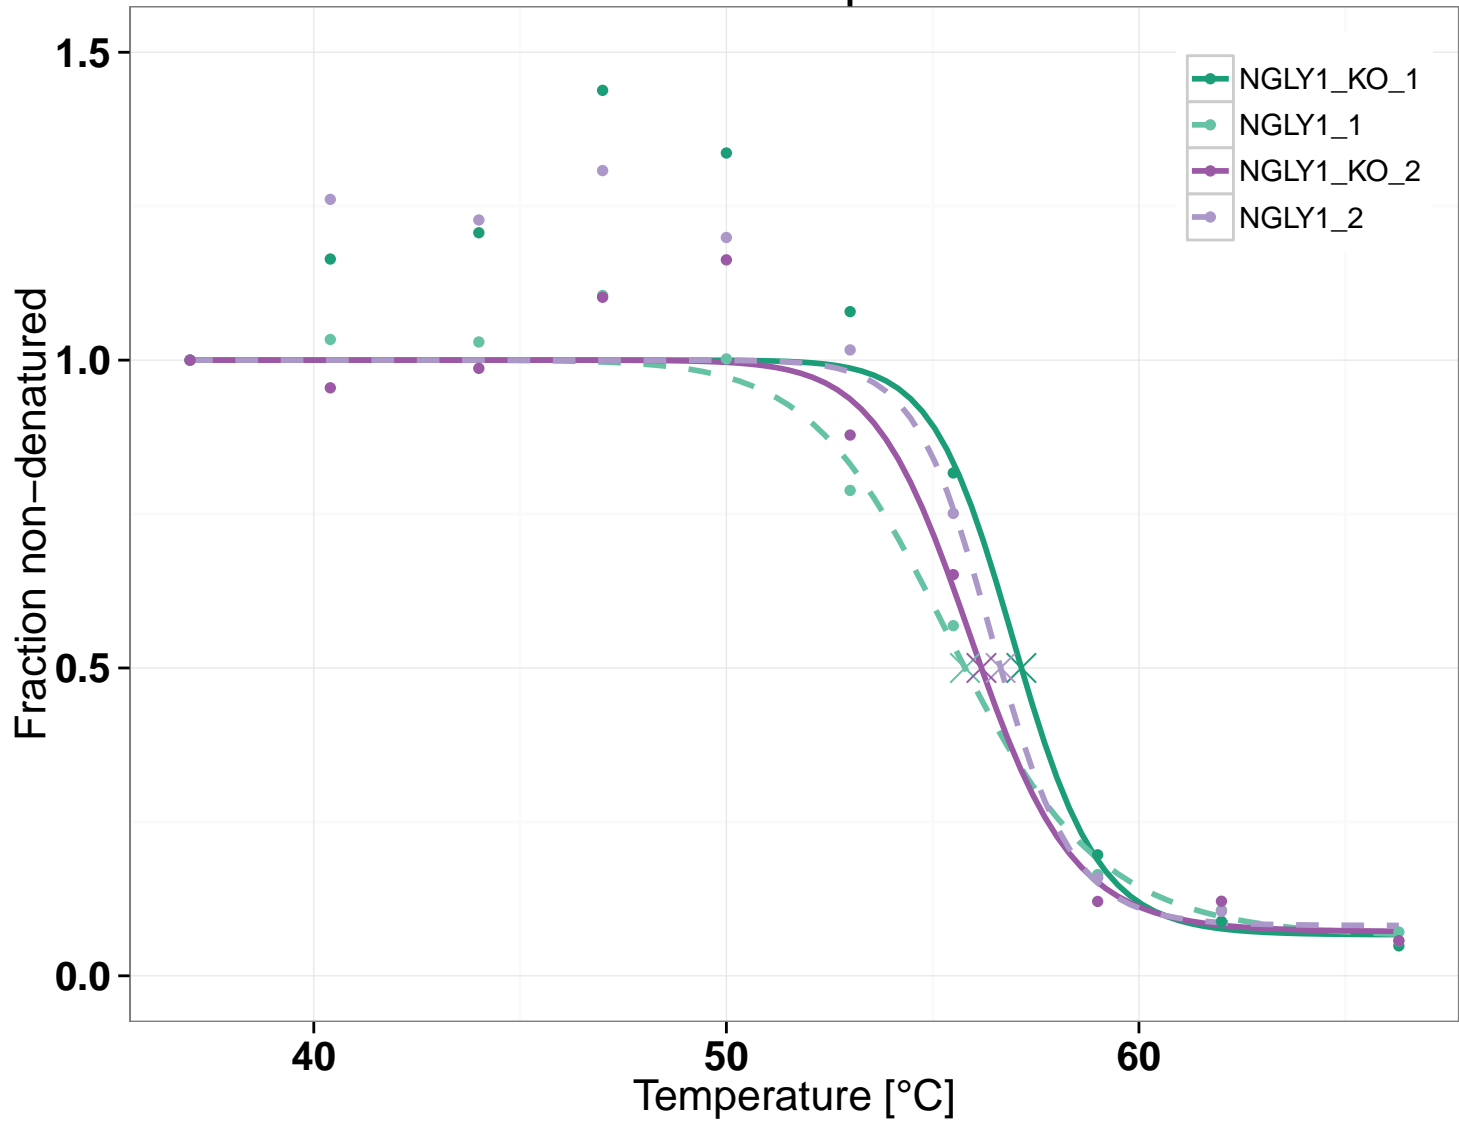

|            | meltPoint | slope | plateau | R2   |
|------------|-----------|-------|---------|------|
| NGLY1_KO_1 | 57.15     | -0.23 | 0.07    | 0.85 |
| NGLY1_1    | 55.78     | -0.13 | 0.06    | 0.99 |
| NGLY1_KO_2 | 56.18     | -0.19 | 0.07    | 0.97 |
| NGLY1_2    | 56.65     | -0.24 | 0.08    | 0.89 |

Supplement: Supplementary file 8455 [file 1]

IPI00014213.1|LARS2

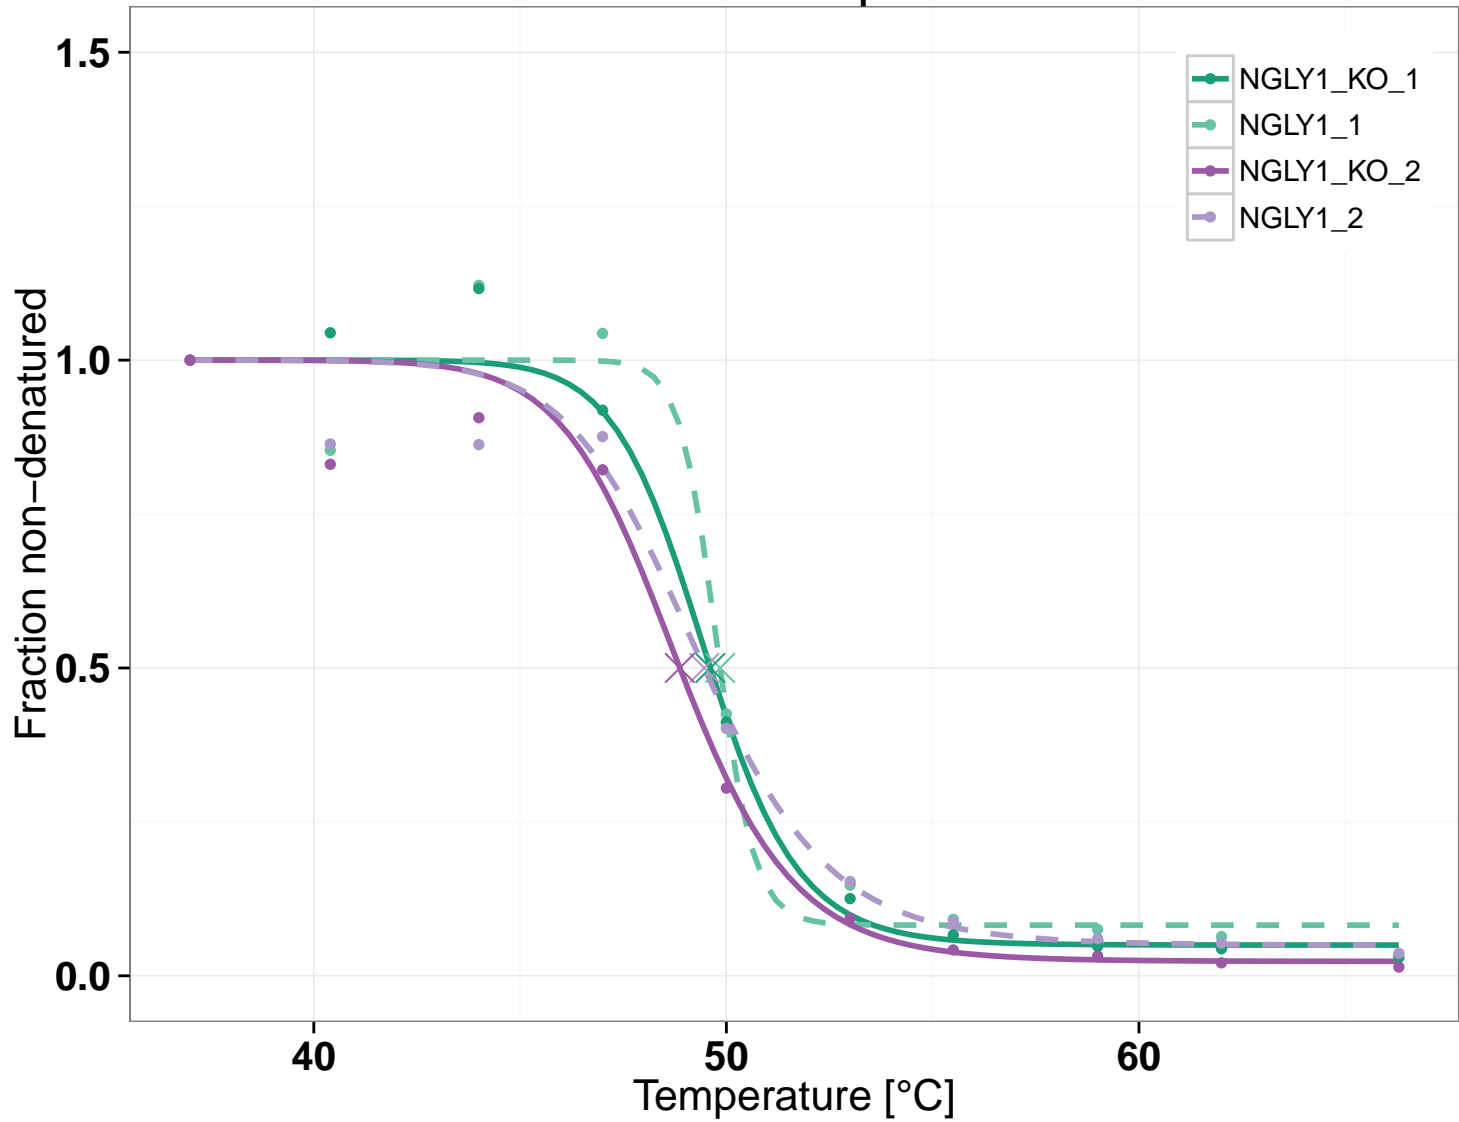

|            | meltPoint | slope | plateau | R2   |
|------------|-----------|-------|---------|------|
| NGLY1_KO_1 | 49.61     | -0.21 | 0.05    | 0.99 |
| NGLY1_1    | 49.85     | -0.51 | 0.08    | 0.98 |
| NGLY1_KO_2 | 48.87     | -0.17 | 0.02    | 0.98 |
| NGLY1_2    | 49.46     | -0.15 | 0.05    | 0.98 |

Supplement: Supplementary file 8456 [file 1]

IPI00001344.4|ZSCAN21

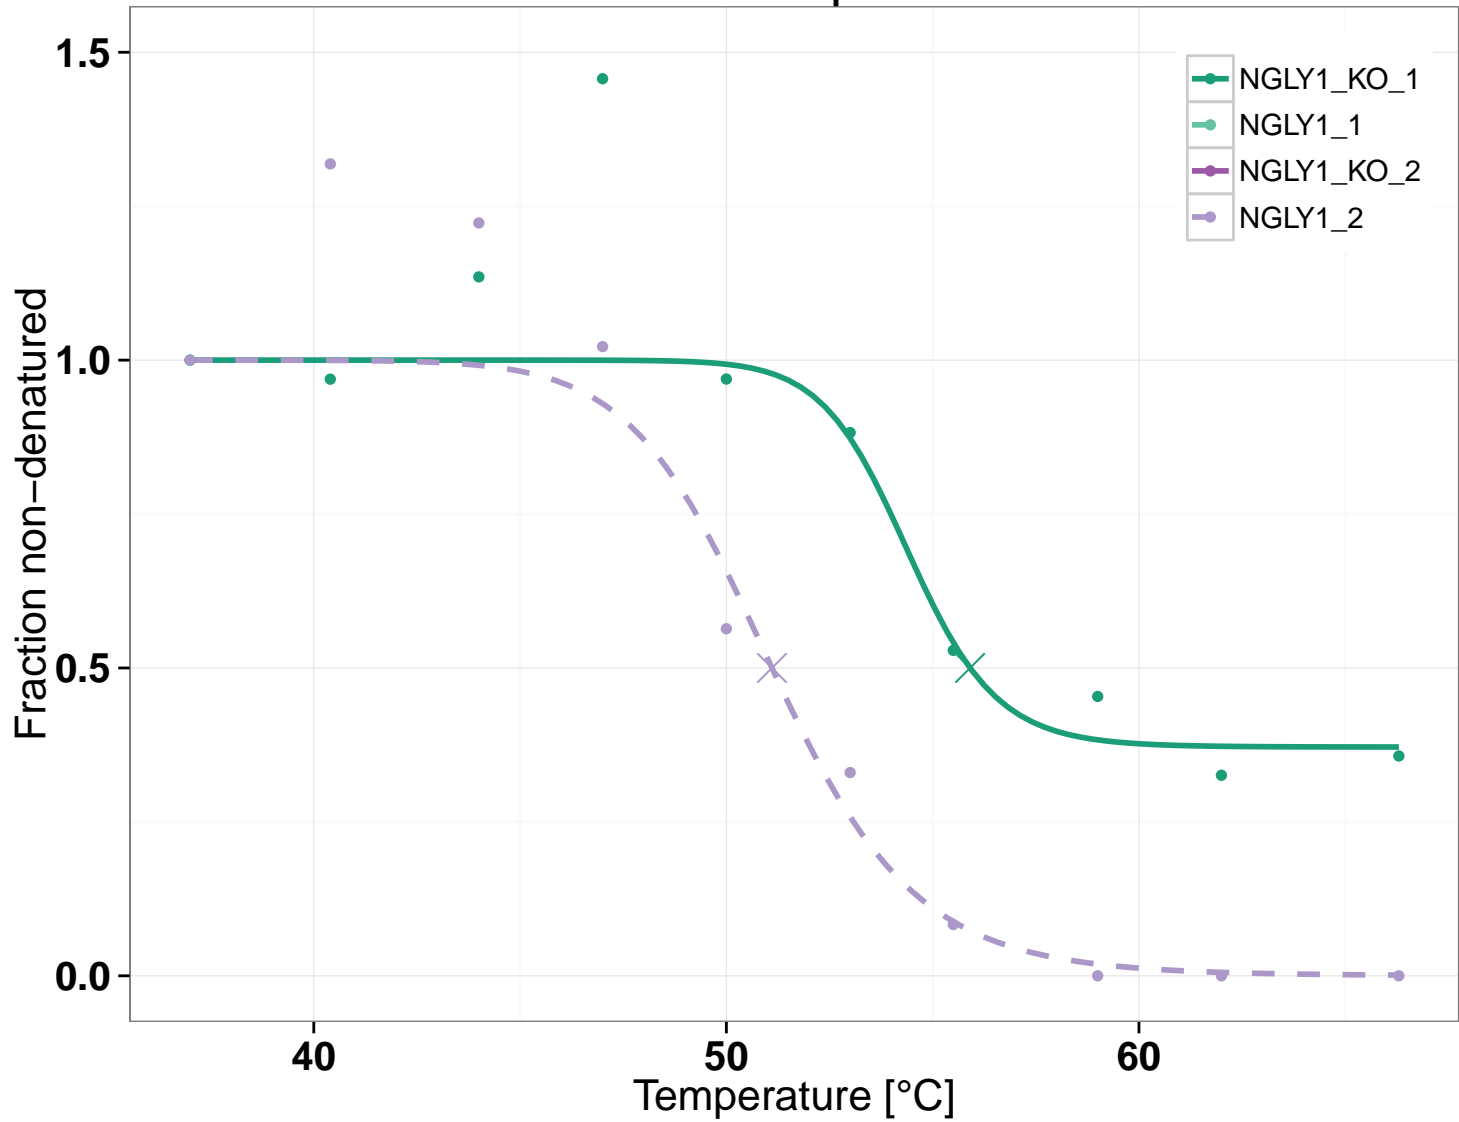

|            | meltPoint | slope | plateau | R2   |
|------------|-----------|-------|---------|------|
| NGLY1_KO_1 | 55.91     | -0.15 | 0.37    | 0.81 |
| NGLY1_1    | -         | -     | -       | -    |
| NGLY1_KO_2 | -         | -     | -       | -    |
| NGLY1_2    | 51.1      | -0.15 | 0       | 0.93 |

Supplement: Supplementary file 8457 [file 1]

# IPI00007722.2|AMPD2

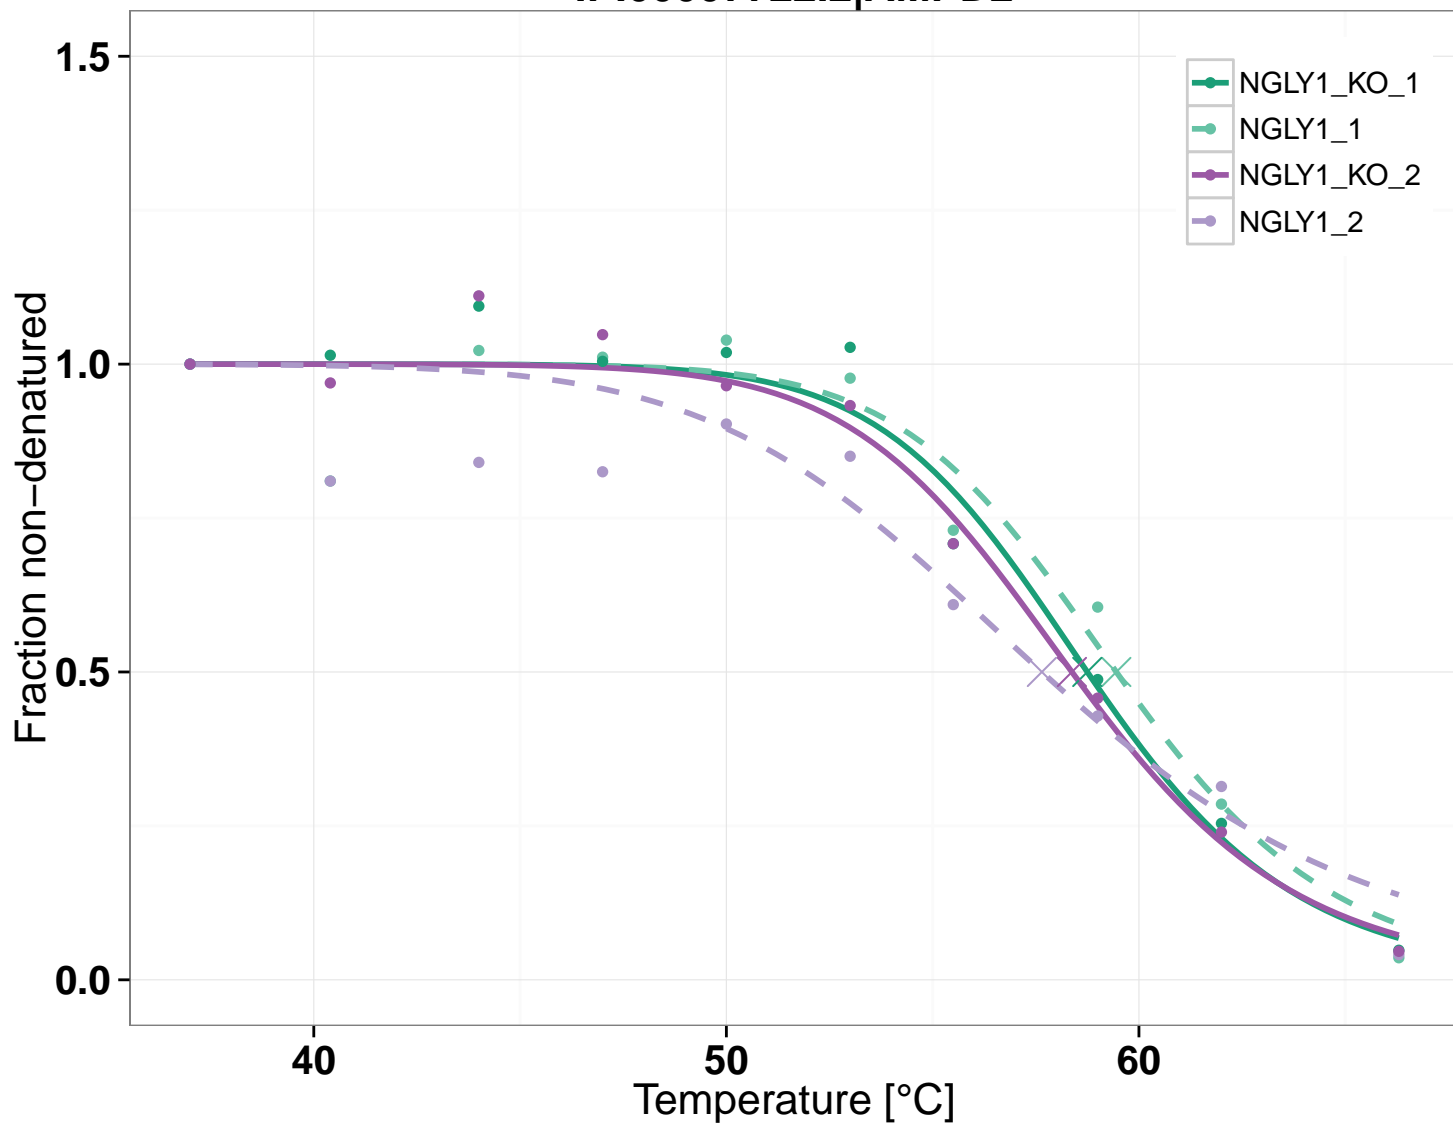

|            | meltPoint | slope  | plateau | R2   |
|------------|-----------|--------|---------|------|
| NGLY1_KO_1 | 58.75     | -0.099 | 0       | 0.98 |
| NGLY1_1    | 59.45     | -0.095 | 0       | 0.95 |
| NGLY1_KO_2 | 58.38     | -0.092 | 0       | 0.98 |
| NGLY1_2    | 57.65     | -0.062 | 0       | 0.89 |

Supplement: Supplementary file 8458 [file 1]

# IPI00513827.3|ACADM

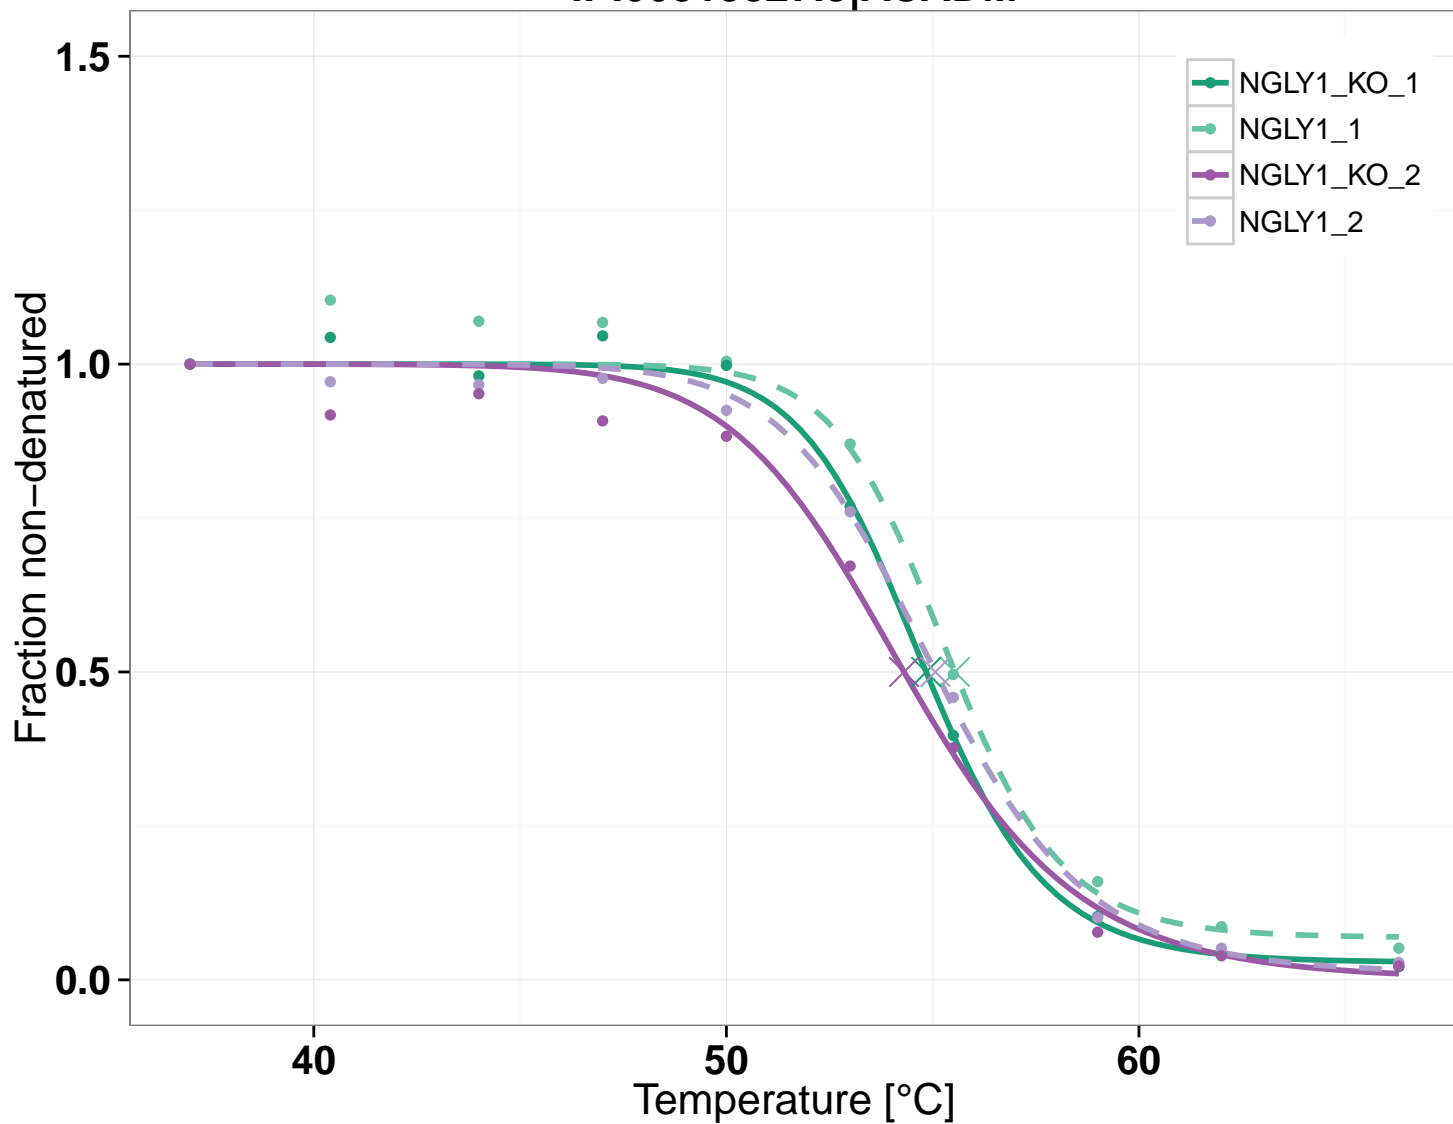

|            | meltPoint | slope | plateau | R2   |
|------------|-----------|-------|---------|------|
| NGLY1_KO_1 | 54.84     | -0.16 | 0.03    | 1    |
| NGLY1_1    | 55.54     | -0.17 | 0.07    | 0.99 |
| NGLY1_KO_2 | 54.31     | -0.12 | 0       | 0.99 |
| NGLY1_2    | 55.07     | -0.13 | 0.01    | 1    |

Supplement: Supplementary file 8459 [file 1]

IPI00246058.9|PDCD6IP

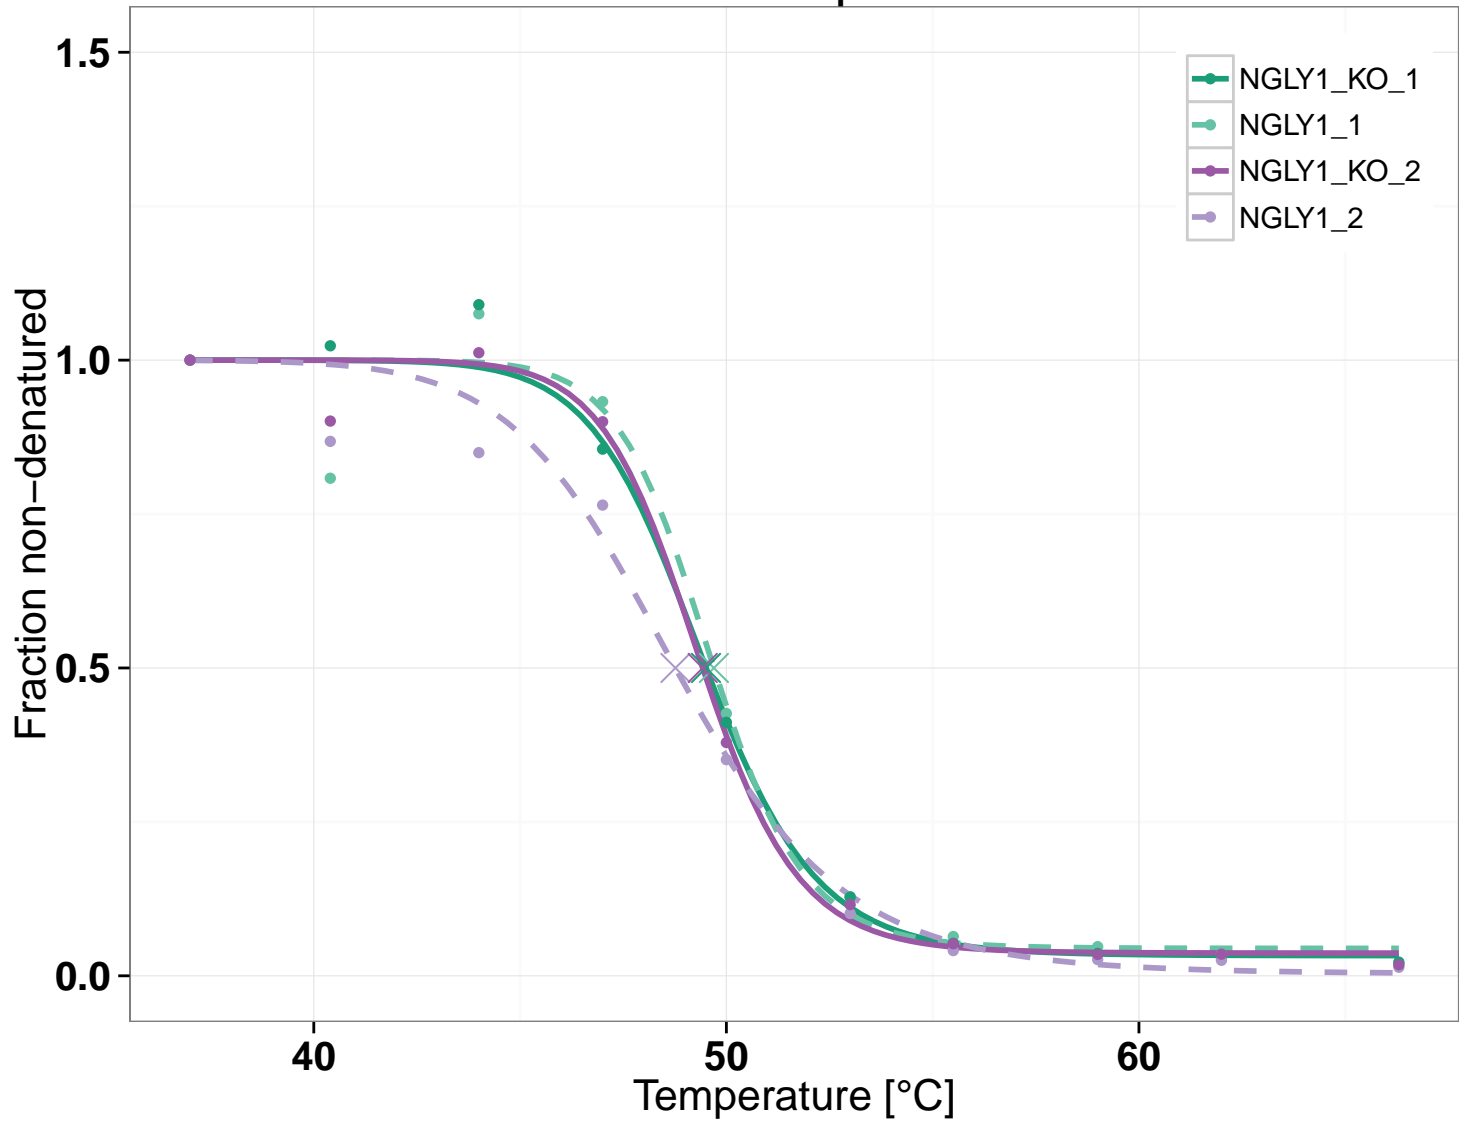

|            | meltPoint | slope | plateau | R2   |
|------------|-----------|-------|---------|------|
| NGLY1_KO_1 | 49.51     | -0.18 | 0.03    | 0.99 |
| NGLY1_1    | 49.7      | -0.21 | 0.04    | 0.98 |
| NGLY1_KO_2 | 49.43     | -0.2  | 0.04    | 0.99 |
| NGLY1_2    | 48.77     | -0.12 | 0       | 0.98 |

Supplement: Supplementary file 8460 [file 1]

IPI00100239.1|METTL9

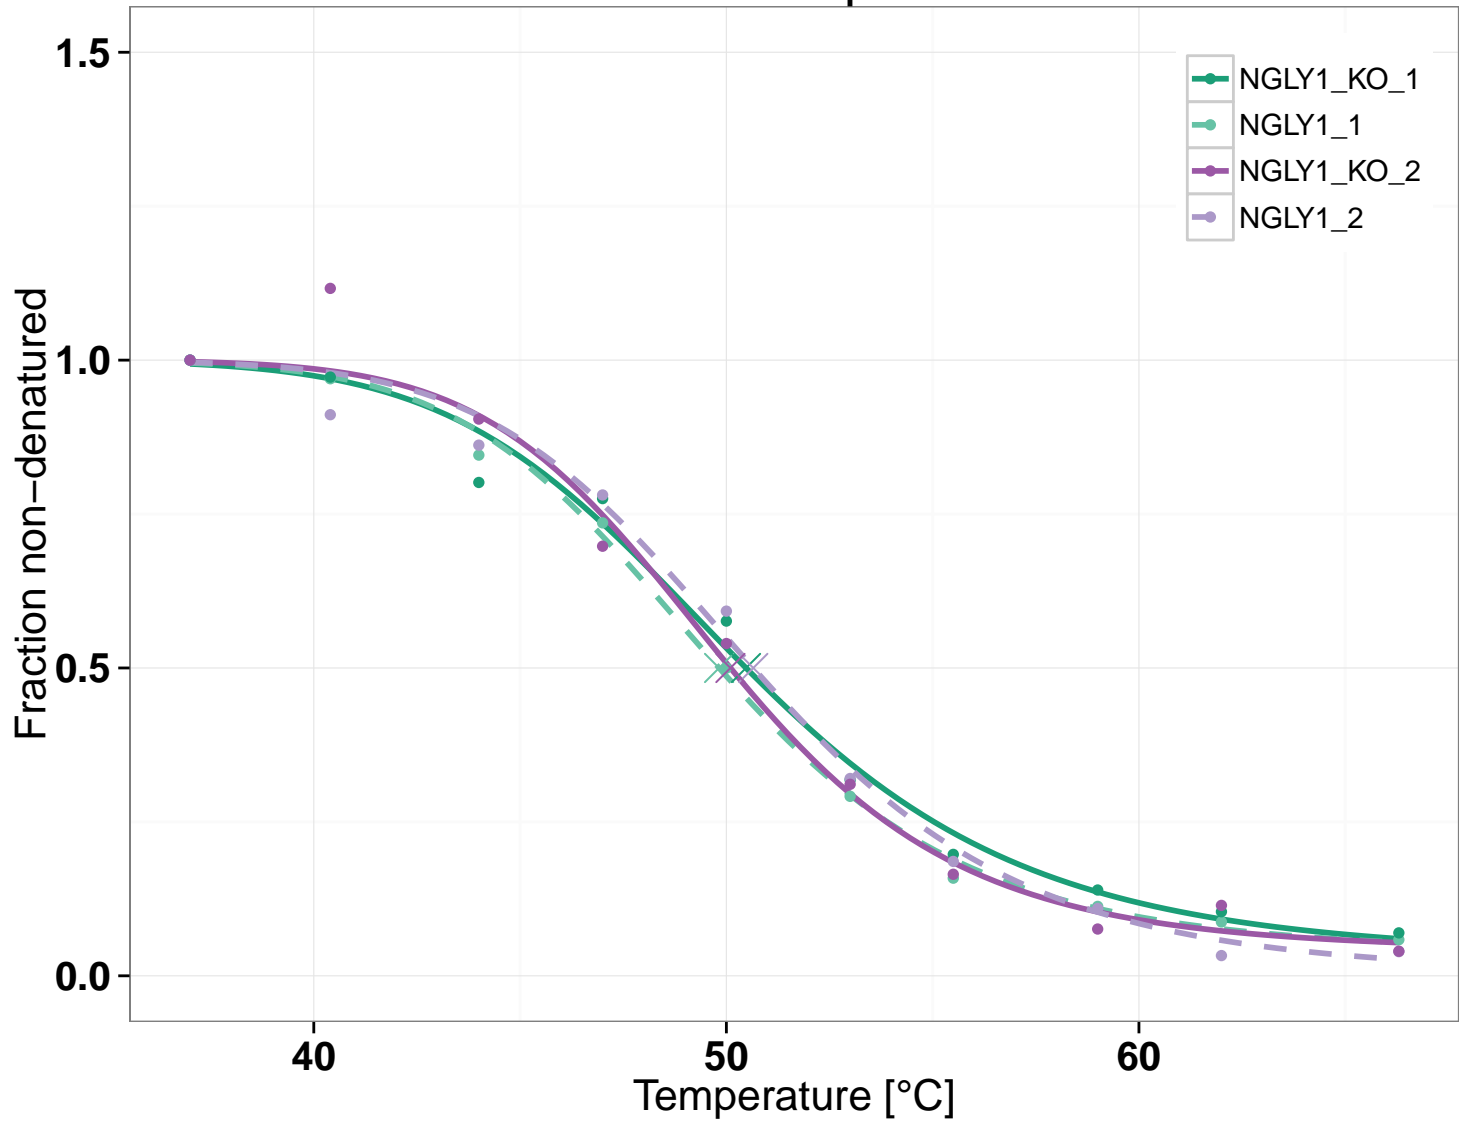

|            | meltPoint | slope  | plateau | R2   |
|------------|-----------|--------|---------|------|
| NGLY1_KO_1 | 50.48     | -0.069 | 0.03    | 0.99 |
| NGLY1_1    | 49.82     | -0.077 | 0.04    | 1    |
| NGLY1_KO_2 | 50.1      | -0.083 | 0.04    | 0.98 |
| NGLY1_2    | 50.65     | -0.077 | 0       | 0.99 |

Supplement: Supplementary file 8461 [file 1]

IPI00395476.3|PRMT10

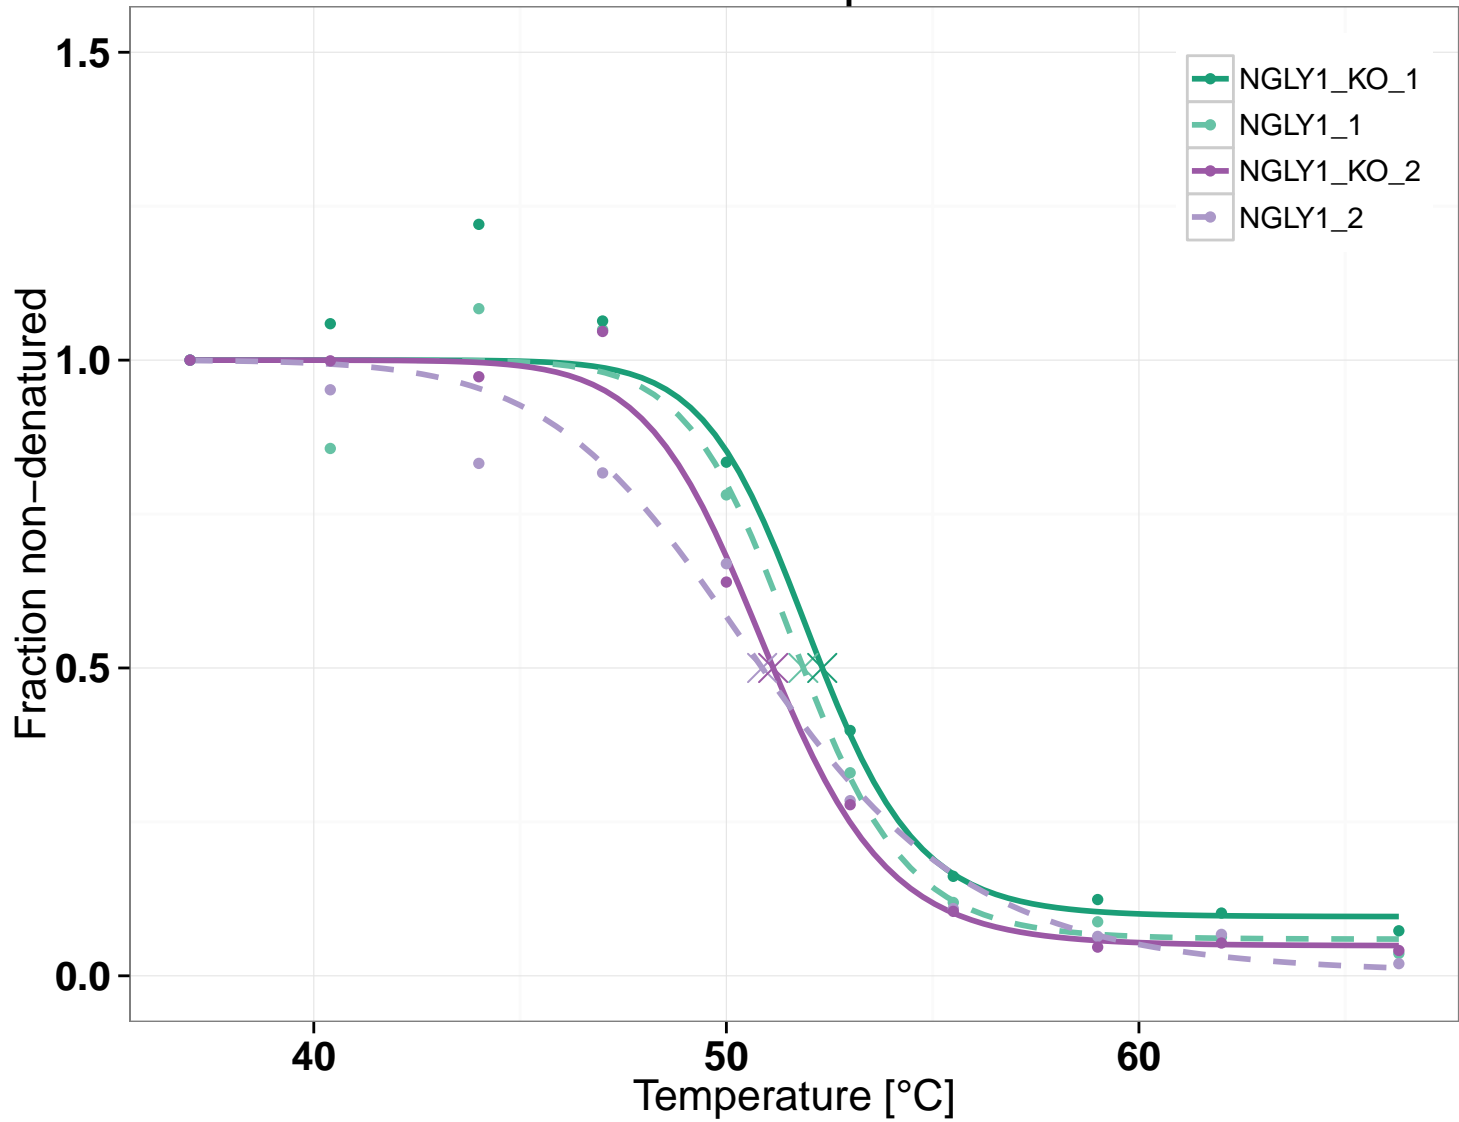

|            | meltPoint | slope  | plateau | R2   |
|------------|-----------|--------|---------|------|
| NGLY1_KO_1 | 52.32     | -0.17  | 0.1     | 0.97 |
| NGLY1_1    | 51.86     | -0.18  | 0.06    | 0.98 |
| NGLY1_KO_2 | 51.13     | -0.16  | 0.05    | 0.99 |
| NGLY1_2    | 50.87     | -0.097 | 0       | 0.98 |

Supplement: Supplementary file 8462 [file 1]

# IPI00384297.2|CBR4

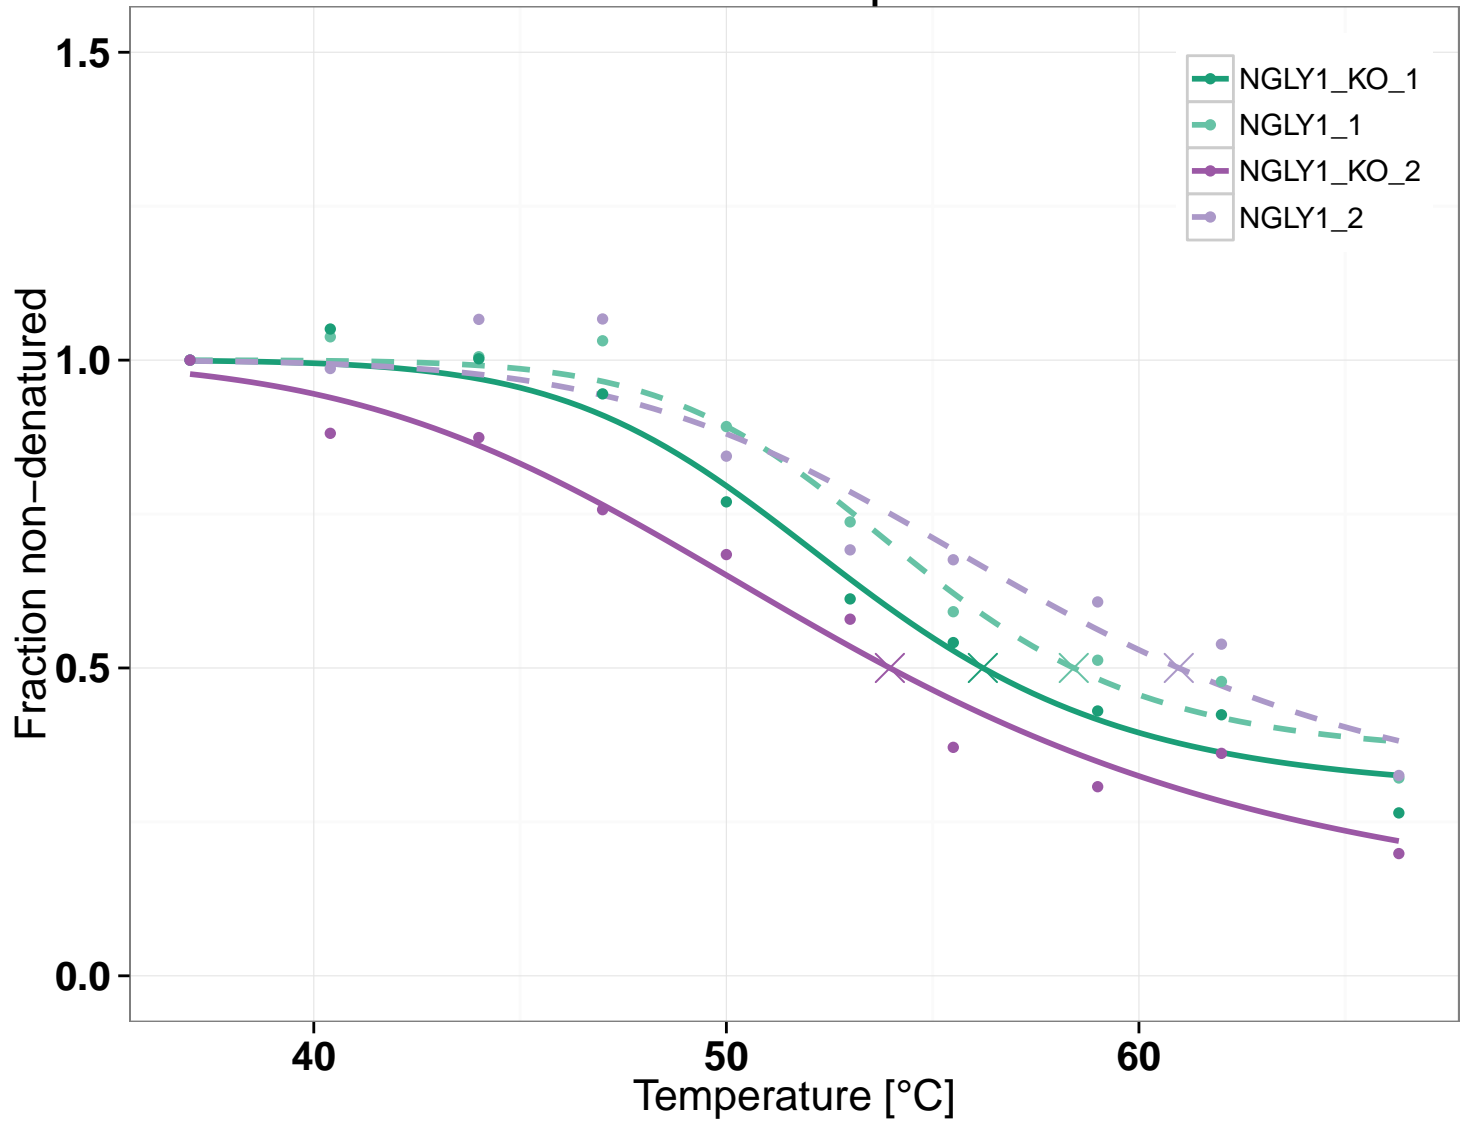

|            | meltPoint | slope  | plateau | R2   |
|------------|-----------|--------|---------|------|
| NGLY1_KO_1 | 56.22     | -0.052 | 0.29    | 0.98 |
| NGLY1_1    | 58.42     | -0.054 | 0.36    | 0.98 |
| NGLY1_KO_2 | 53.96     | -0.039 | 0.08    | 0.97 |
| NGLY1_2    | 60.97     | -0.039 | 0.25    | 0.92 |

Supplement: Supplementary file 8463 [file 1]

IPI00028338.3|SELI

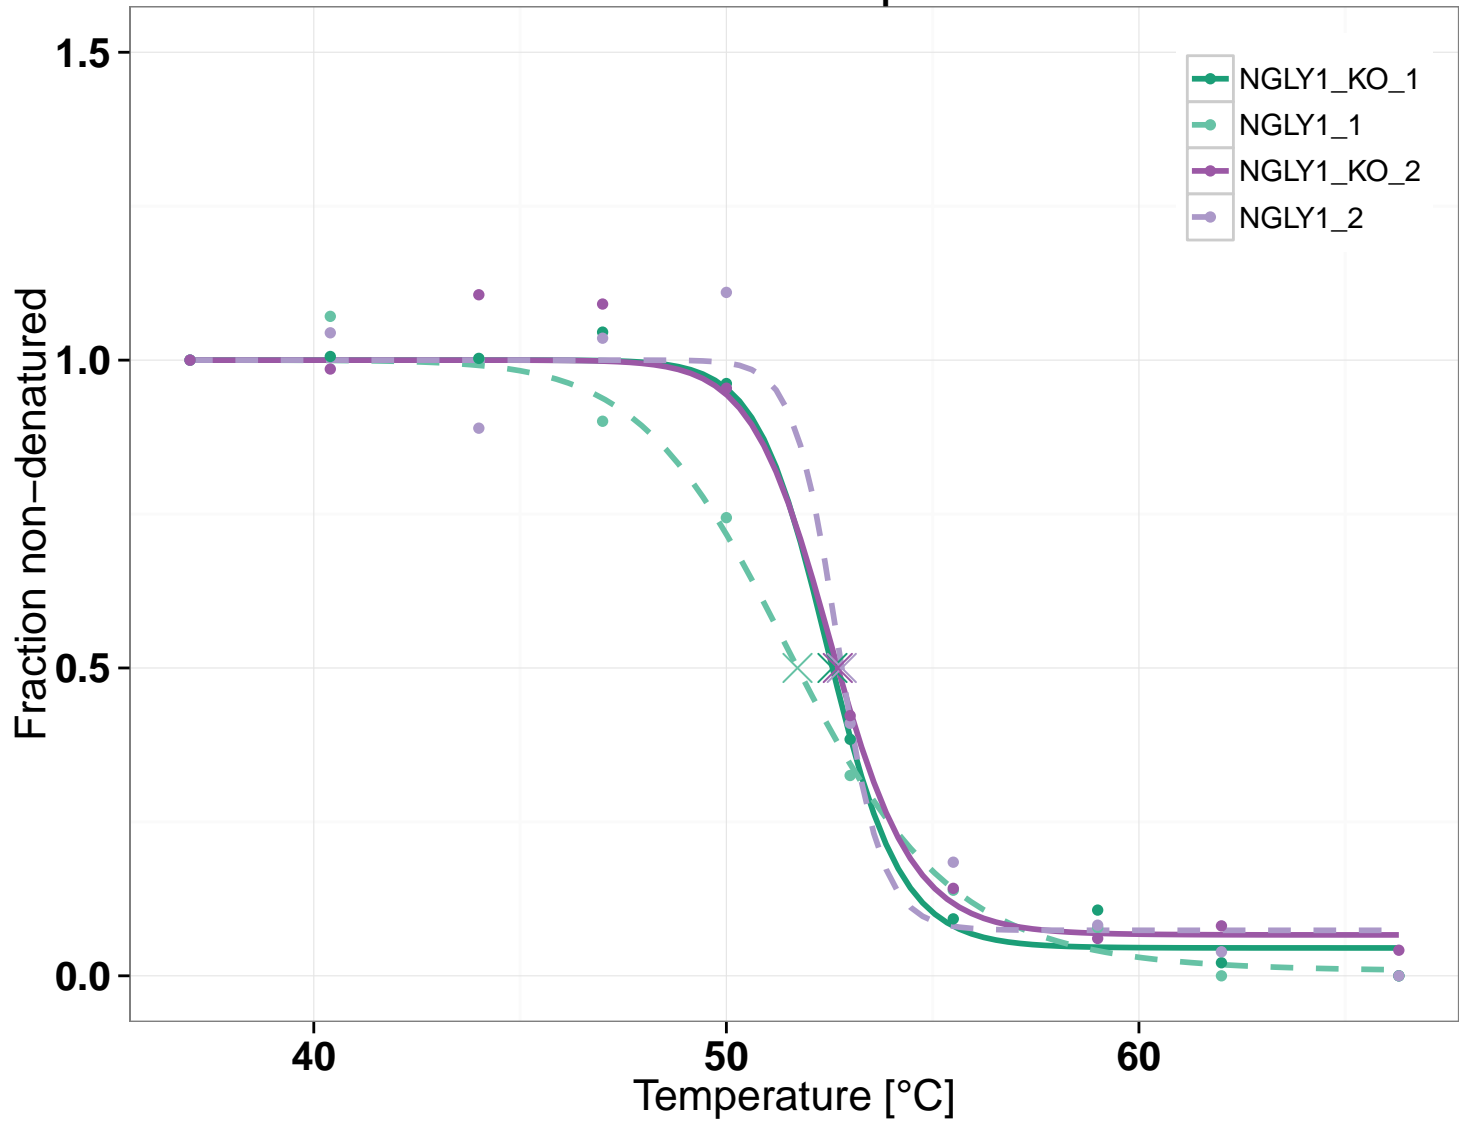

|            | meltPoint | slope | plateau | R2   |
|------------|-----------|-------|---------|------|
| NGLY1_KO_1 | 52.57     | -0.27 | 0.05    | 1    |
| NGLY1_1    | 51.72     | -0.13 | 0.01    | 0.99 |
| NGLY1_KO_2 | 52.7      | -0.24 | 0.07    | 0.99 |
| NGLY1_2    | 52.8      | -0.43 | 0.07    | 0.98 |

Supplement: Supplementary file 8464 [file 1]

IPI00025796.3|NDUFS3

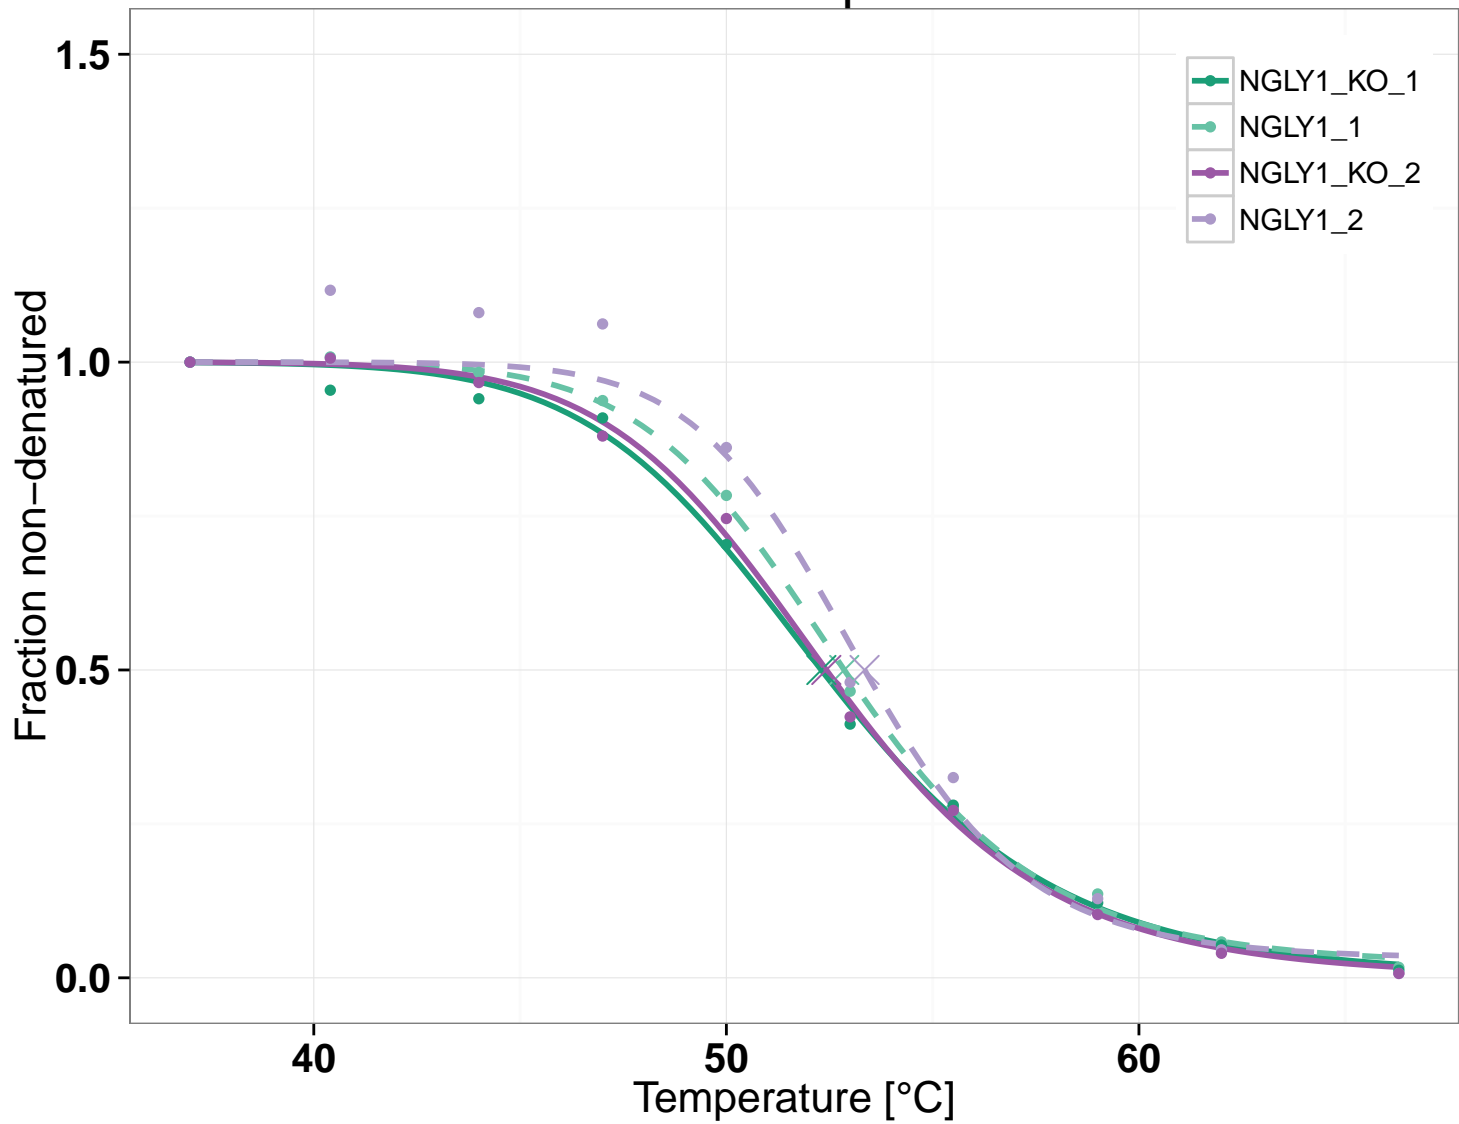

|            | meltPoint | slope  | plateau | R2   |
|------------|-----------|--------|---------|------|
| NGLY1_KO_1 | 52.3      | -0.087 | 0       | 1    |
| NGLY1_1    | 52.86     | -0.1   | 0.02    | 1    |
| NGLY1_KO_2 | 52.42     | -0.093 | 0       | 1    |
| NGLY1_2    | 53.35     | -0.12  | 0.03    | 0.98 |

Supplement: Supplementary file 8465 [file 1]

# IPI00302966.5|TTC17

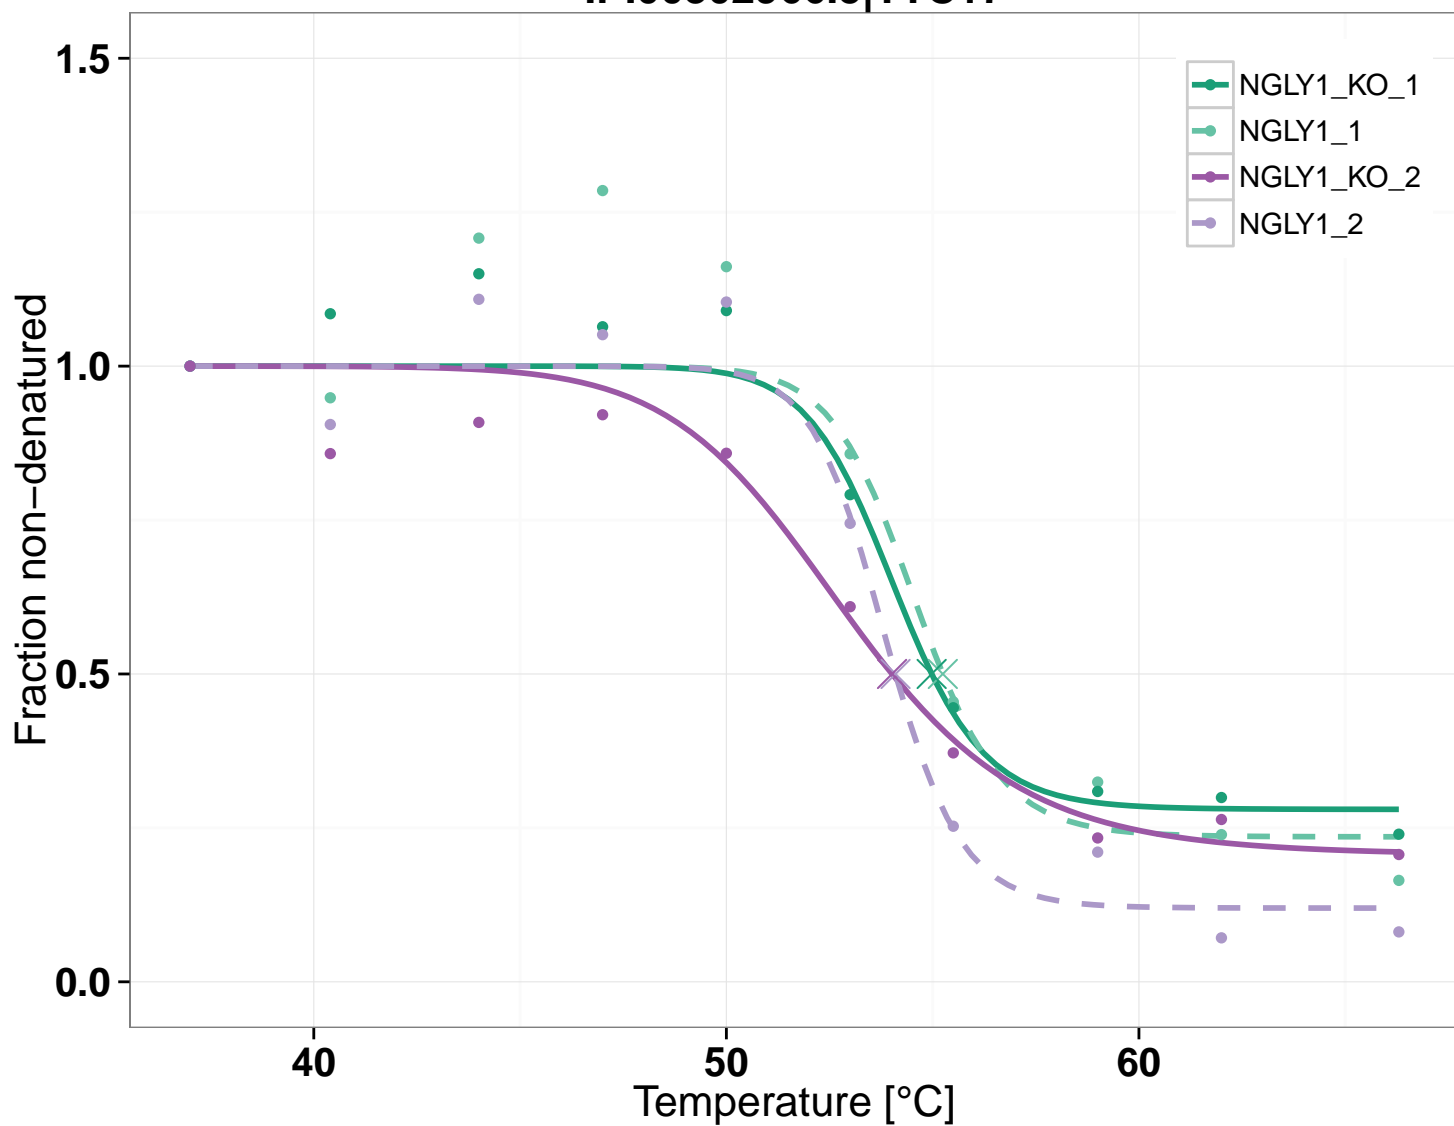

|            | meltPoint | slope  | plateau | R2   |
|------------|-----------|--------|---------|------|
| NGLY1_KO_1 | 54.98     | -0.17  | 0.28    | 0.96 |
| NGLY1_1    | 55.25     | -0.19  | 0.24    | 0.9  |
| NGLY1_KO_2 | 54.02     | -0.093 | 0.21    | 0.97 |
| NGLY1_2    | 54.1      | -0.24  | 0.12    | 0.97 |

Supplement: Supplementary file 8466 [file 1]

IPI00021475.1|RAB33B

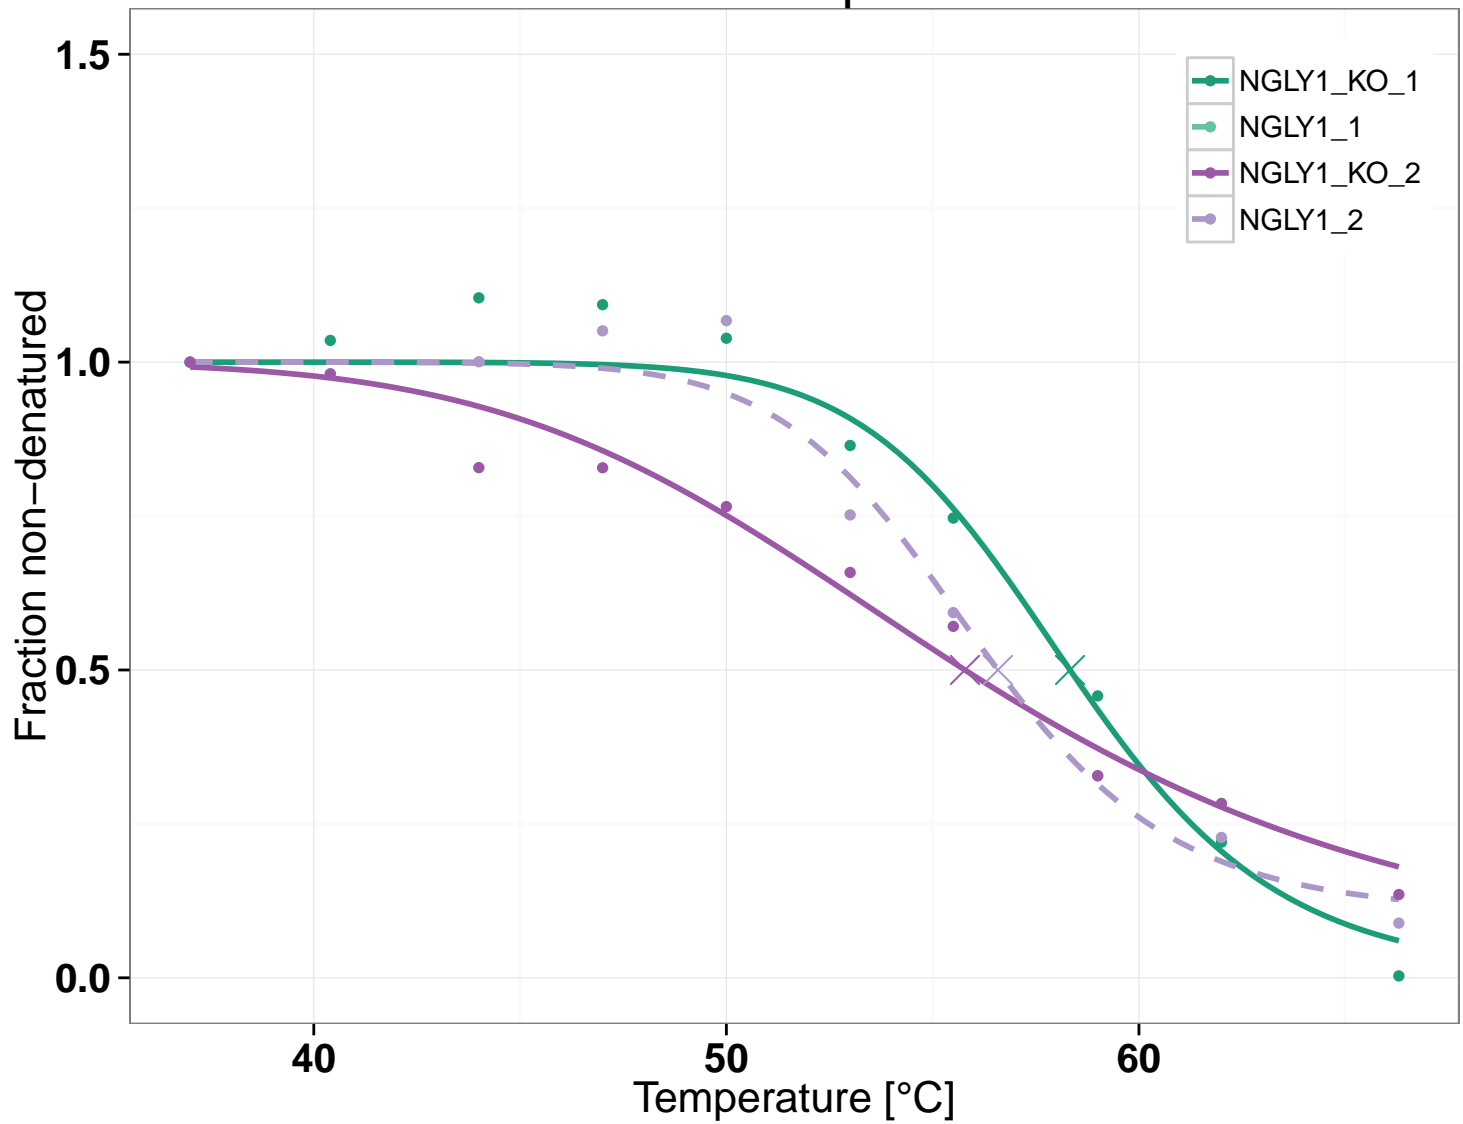

|            | meltPoint | slope  | plateau | R2   |
|------------|-----------|--------|---------|------|
| NGLY1_KO_1 | 58.33     | -0.099 | 0       | 0.98 |
| NGLY1_1    | -         | -      | -       | -    |
| NGLY1_KO_2 | 55.78     | -0.045 | 0       | 0.98 |
| NGLY1_2    | 56.58     | -0.094 | 0.1     | 0.98 |

Supplement: Supplementary file 8467 [file 1]

IPI00784376.2|MTP18

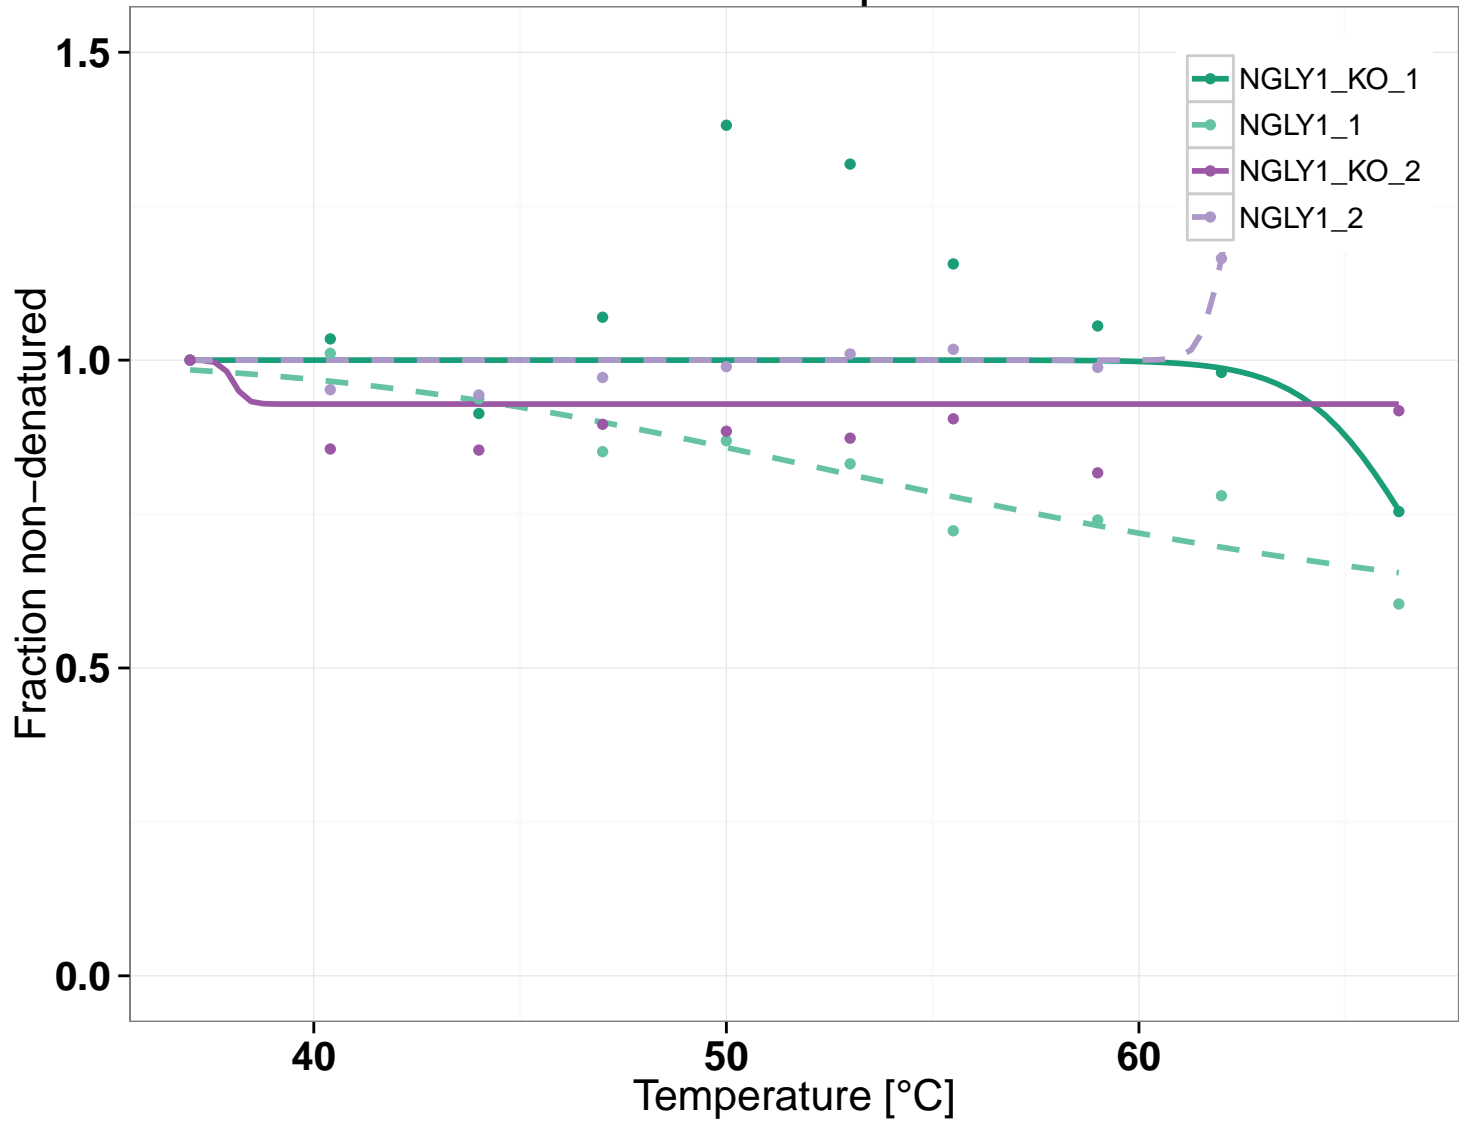

|            | meltPoint | slope  | plateau | R2   |
|------------|-----------|--------|---------|------|
| NGLY1_KO_1 | -         | -      | 0.42    | 0.06 |
| NGLY1_1    | -         | -0.015 | 0.5     | 0.88 |
| NGLY1_KO_2 | -         | -0.12  | 0.93    | 0.02 |
| NGLY1_2    | -         | 0.34   | 1.35    | 0.95 |

Supplement: Supplementary file 8468 [file 1]

# IPI00328838.4|MEN1

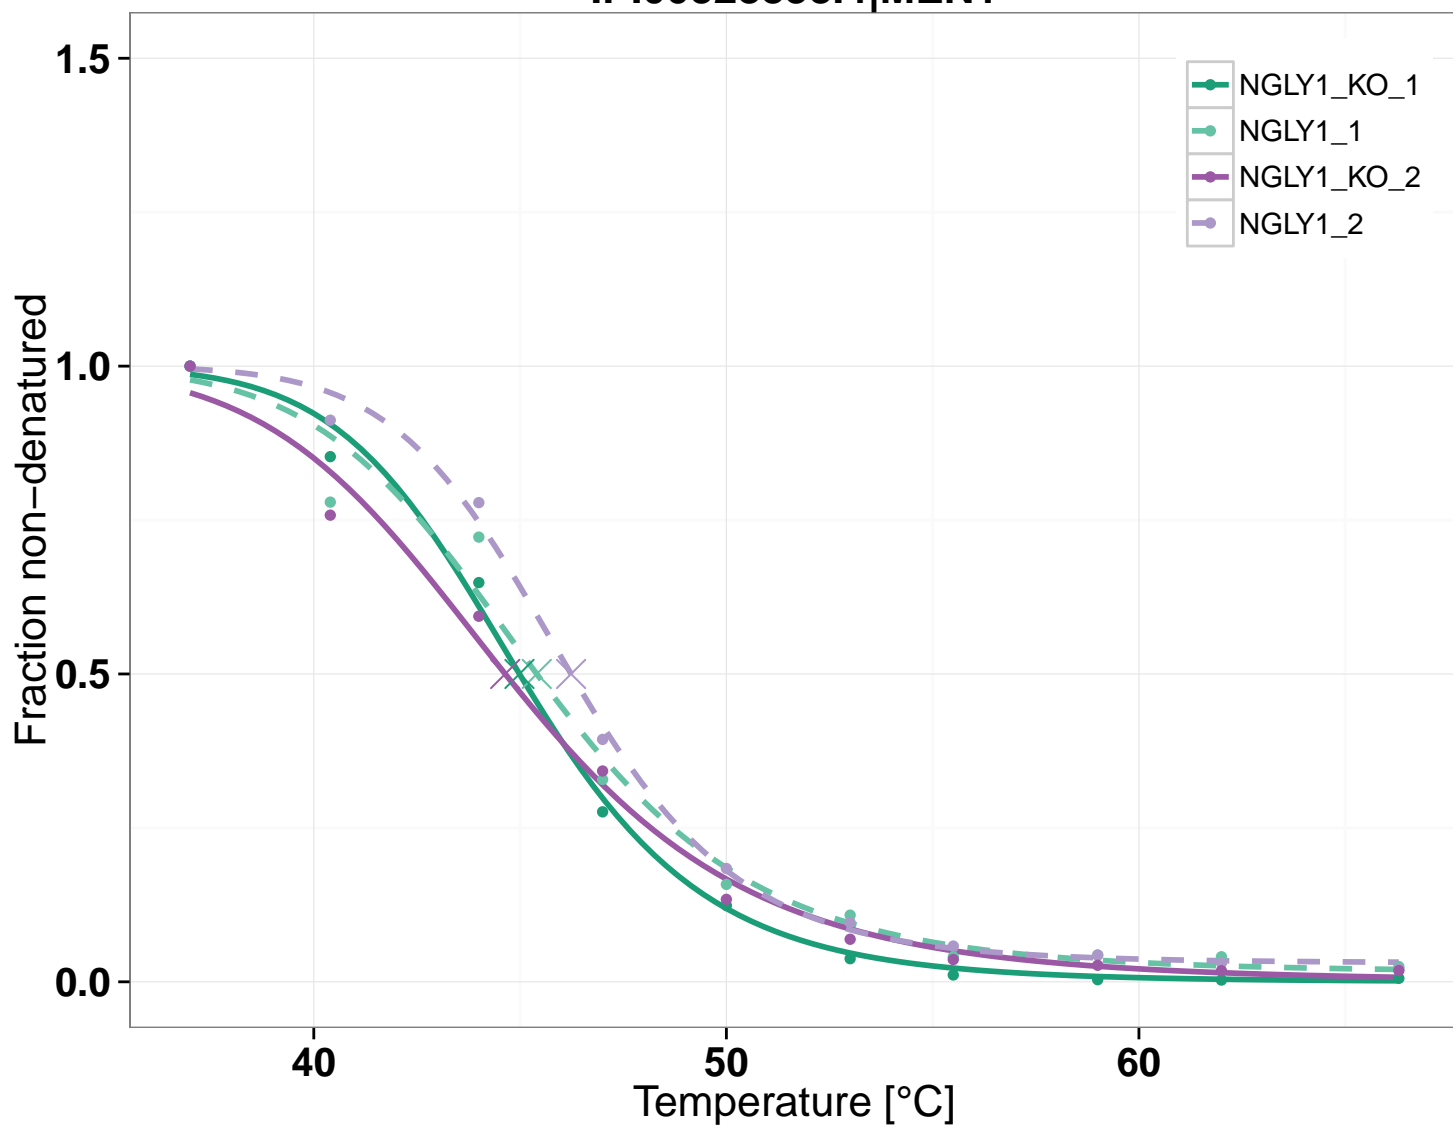

|            | meltPoint | slope  | plateau | R2   |
|------------|-----------|--------|---------|------|
| NGLY1_KO_1 | 44.98     | -0.11  | 0       | 1    |
| NGLY1_1    | 45.4      | -0.092 | 0.02    | 0.98 |
| NGLY1_KO_2 | 44.64     | -0.085 | 0       | 0.99 |
| NGLY1_2    | 46.24     | -0.12  | 0.03    | 1    |

Supplement: Supplementary file 8469 [file 1]

IPI00418344.6|TMEM53

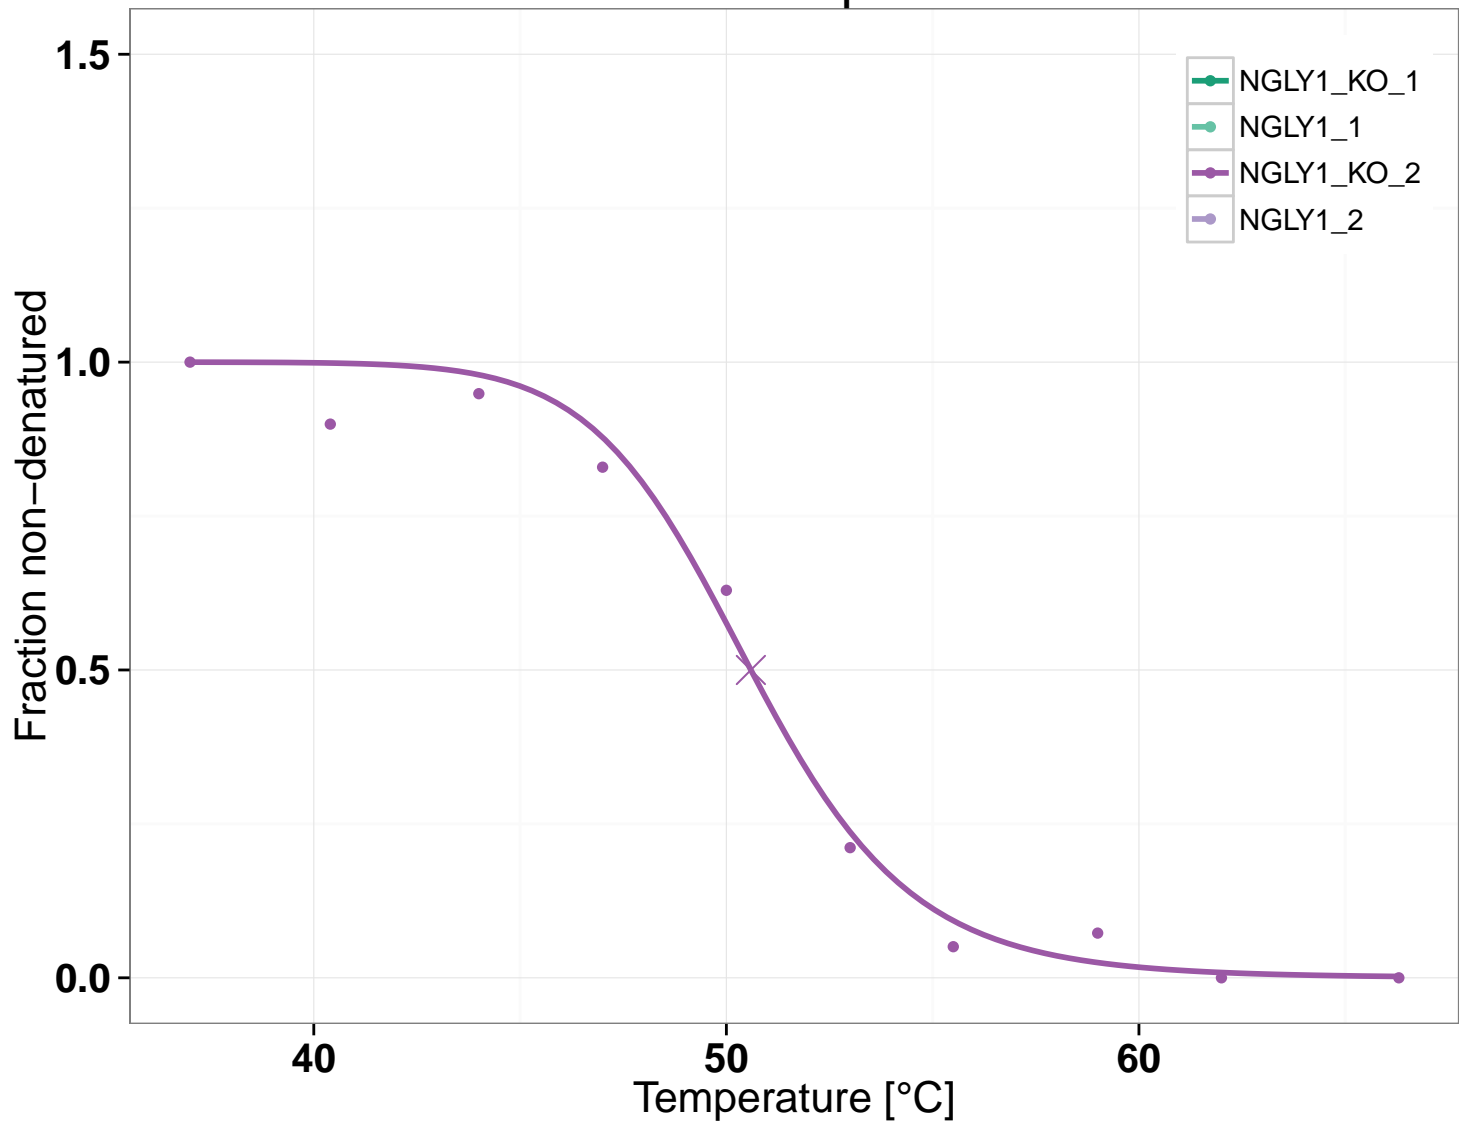

|            | meltPoint | slope | plateau | R2   |
|------------|-----------|-------|---------|------|
| NGLY1_KO_1 | —         | —     | —       | —    |
| NGLY1_1    | —         | —     | —       | —    |
| NGLY1_KO_2 | 50.59     | -0.13 | 0       | 0.99 |
| NGLY1_2    | —         | —     | —       | —    |

Supplement: Supplementary file 8470 [file 1]

IPI00872651.1|ZNF782

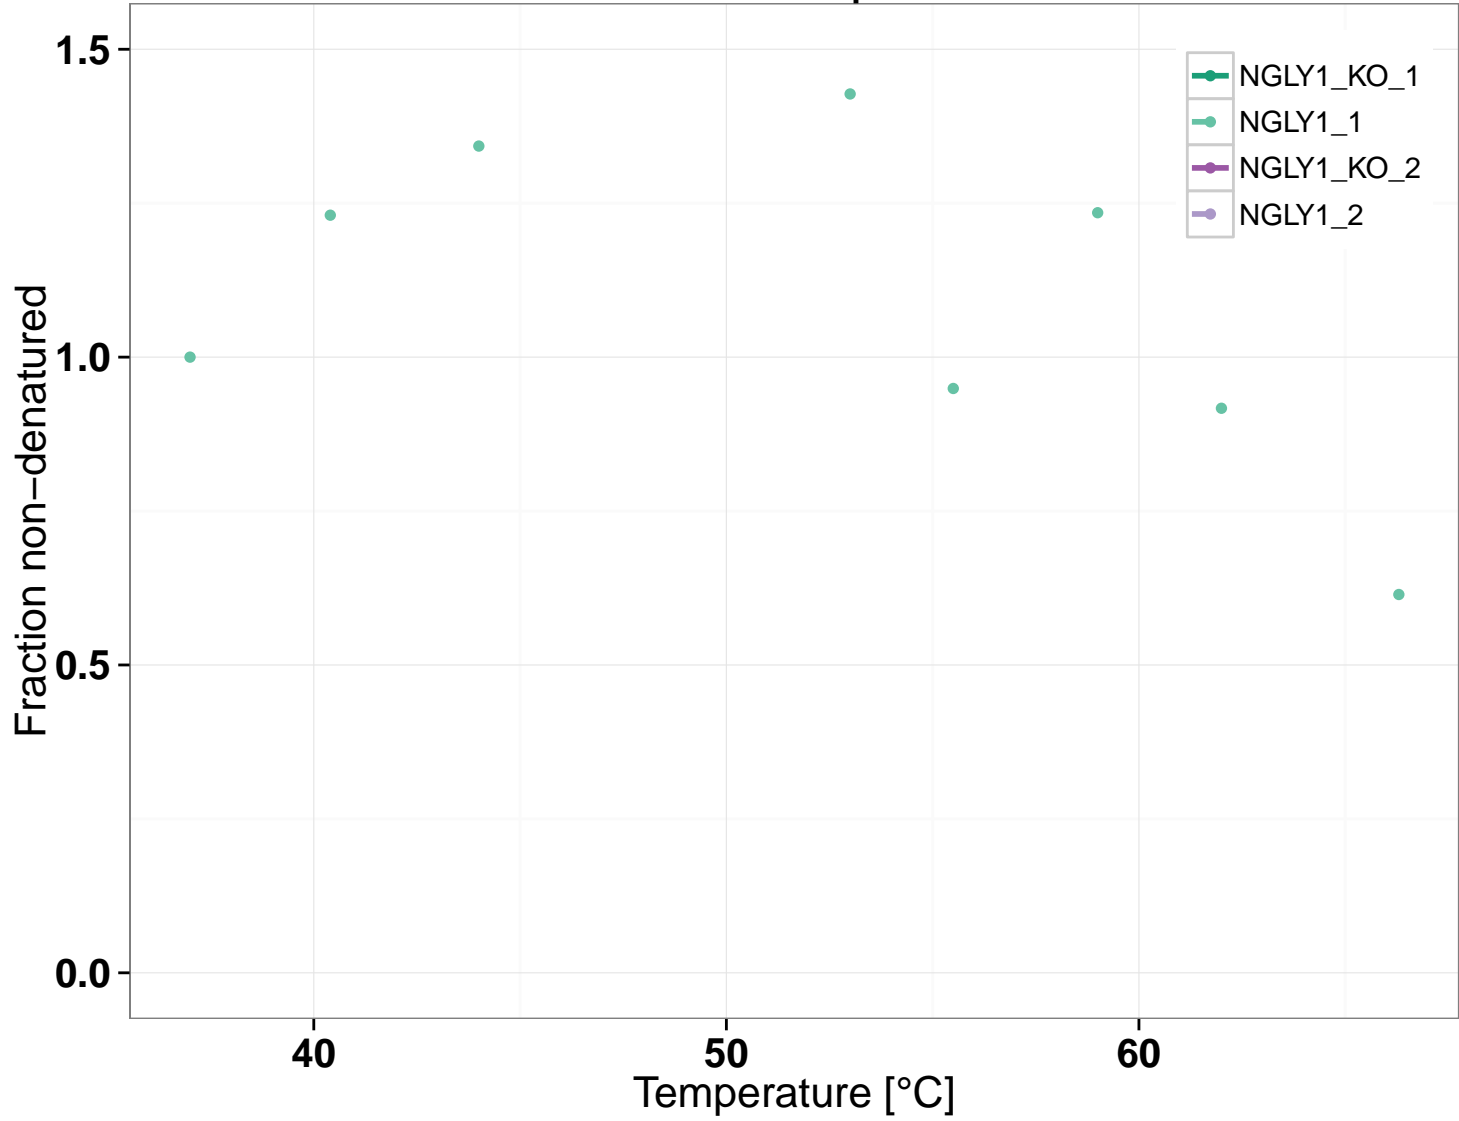

|            | meltPoint | slope | plateau | R2 |
|------------|-----------|-------|---------|----|
| NGLY1_KO_1 | -         | -     | -       | -  |
| NGLY1_1    | -         | -     | -       | -  |
| NGLY1_KO_2 | -         | -     | -       | -  |
| NGLY1_2    | -         | -     | -       | -  |

Supplement: Supplementary file 8471 [file 1]

IPI00410631.4|FAM45A

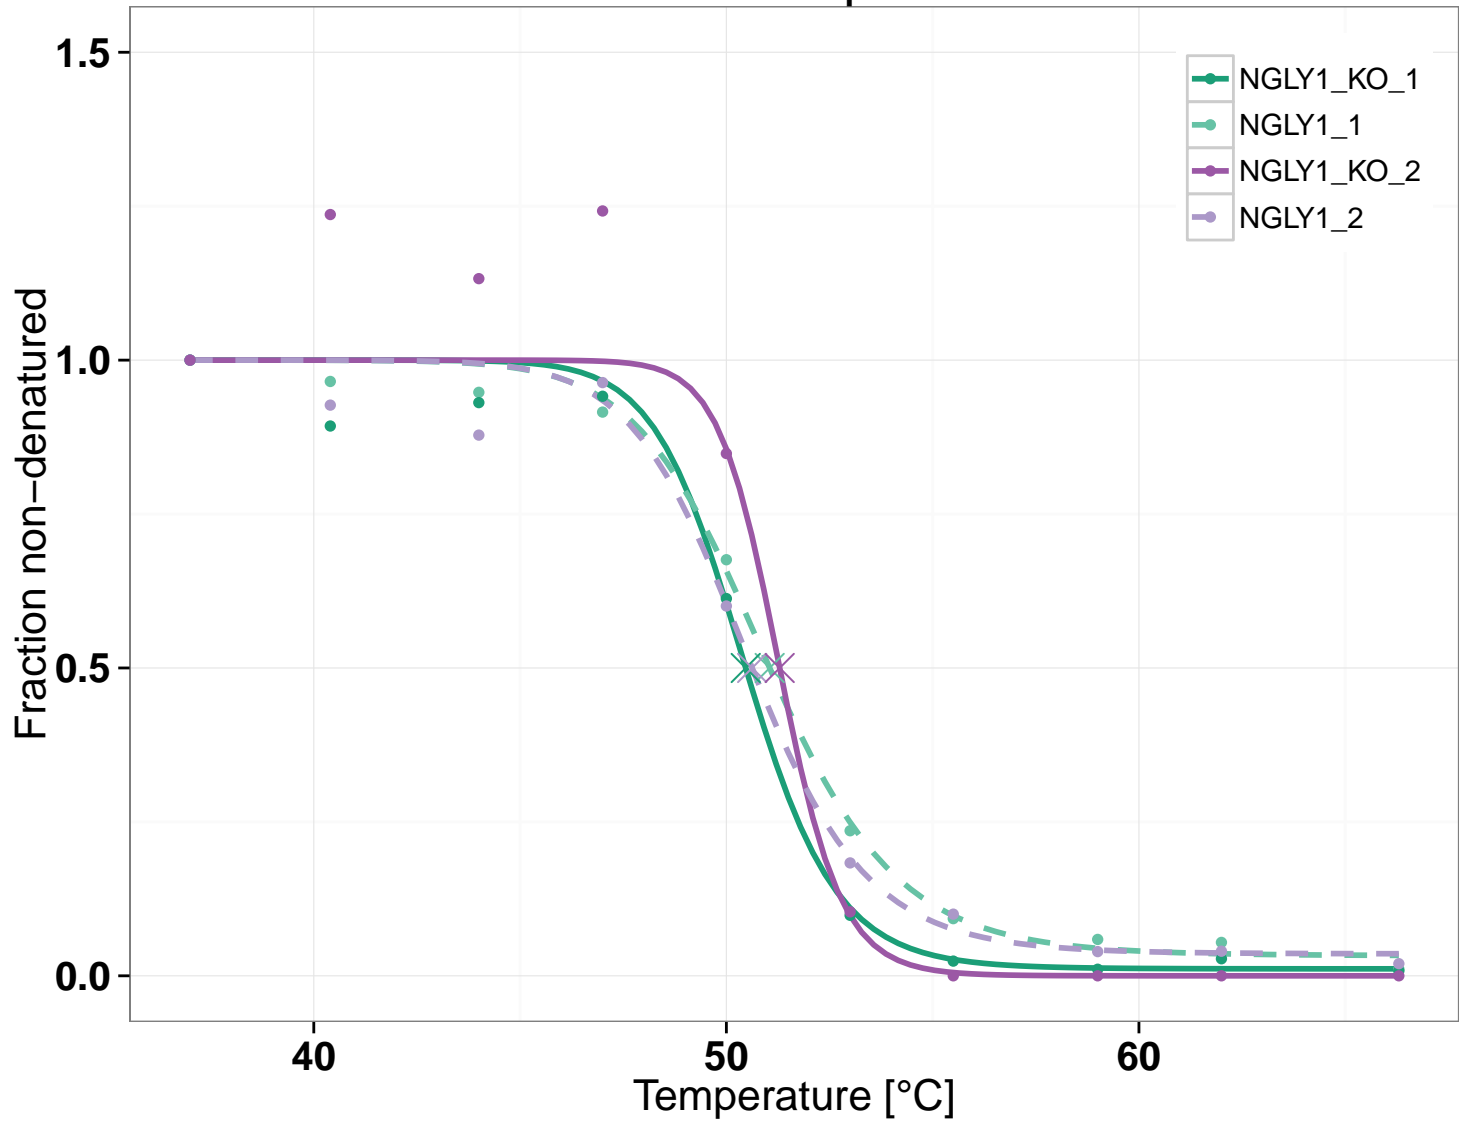

|            | meltPoint | slope | plateau | R2   |
|------------|-----------|-------|---------|------|
| NGLY1_KO_1 | 50.47     | -0.22 | 0.01    | 0.99 |
| NGLY1_1    | 51.05     | -0.15 | 0.03    | 1    |
| NGLY1_KO_2 | 51.29     | -0.34 | 0       | 0.96 |
| NGLY1_2    | 50.63     | -0.17 | 0.04    | 0.99 |

Supplement: Supplementary file 8472 [file 1]

IPI00016480.3|NLRP2

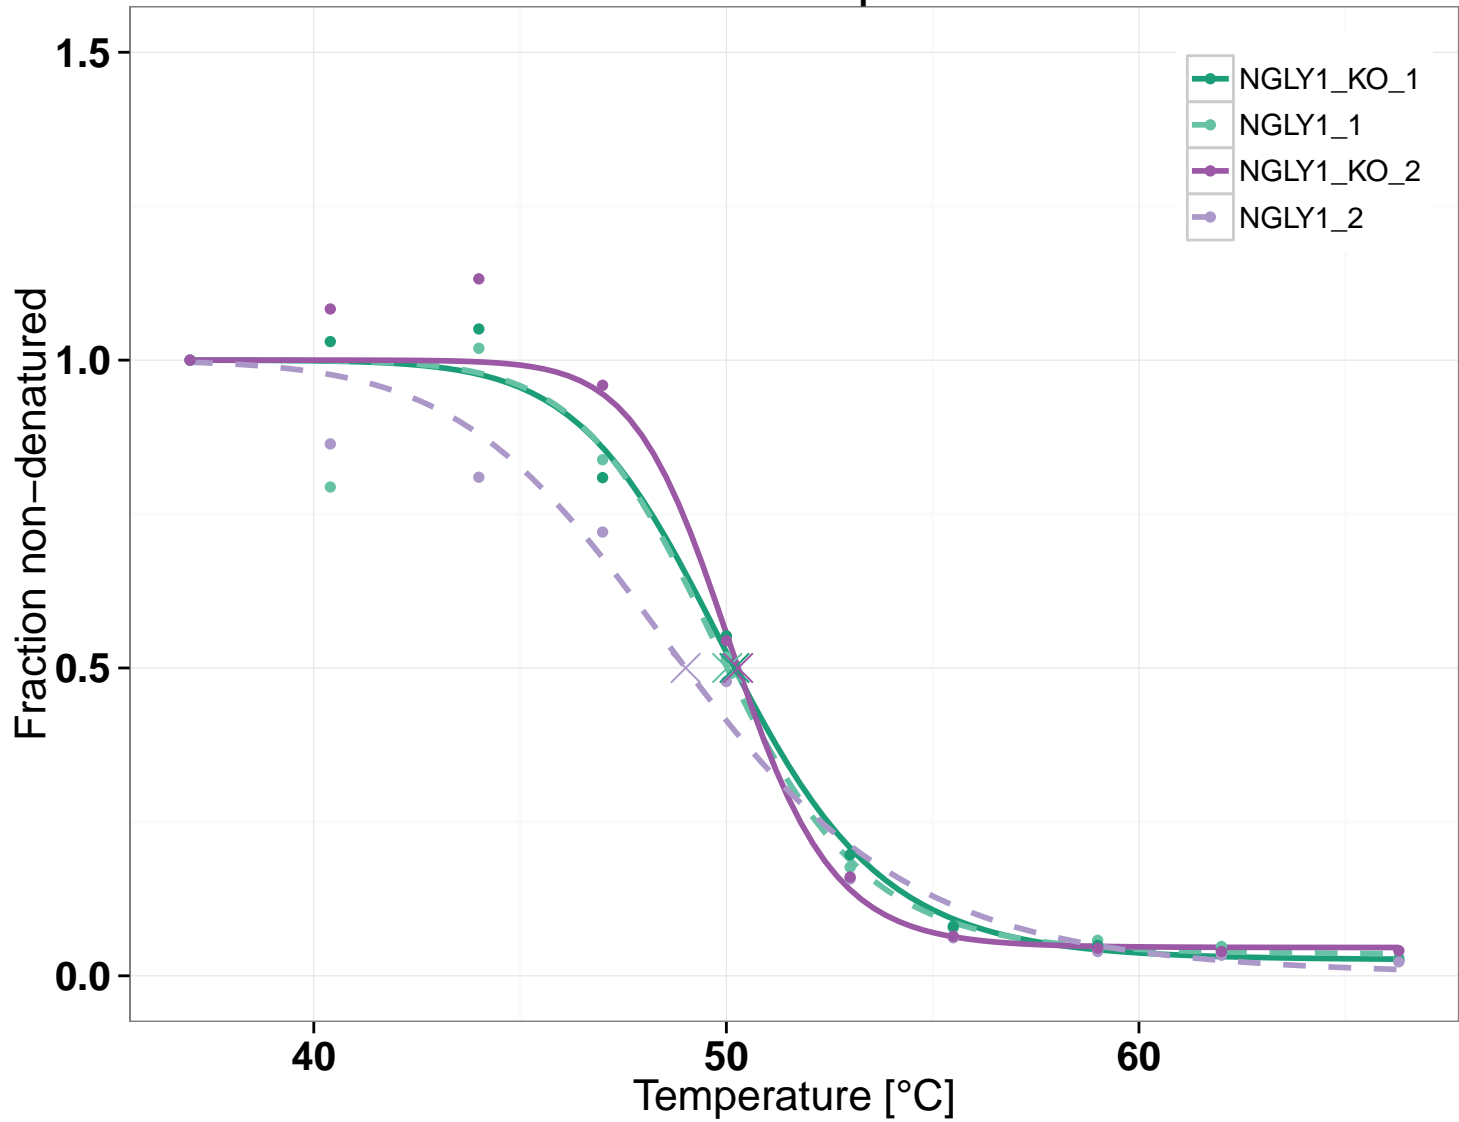

|            | meltPoint | slope | plateau | R2   |
|------------|-----------|-------|---------|------|
| NGLY1_KO_1 | 50.2      | -0.13 | 0.03    | 0.99 |
| NGLY1_1    | 50.02     | -0.14 | 0.04    | 0.97 |
| NGLY1_KO_2 | 50.29     | -0.2  | 0.05    | 0.99 |
| NGLY1_2    | 49.01     | -0.09 | 0       | 0.98 |

Supplement: Supplementary file 8473 [file 1]
